# Supplementary material for: Ribosome profiling reveals the rhythmic liver translatome and circadian clock regulation by upstream open reading frames
Source: HighWire-hosted journal article supplement (doi:10.1101/gr.195404.115), 2015-10-20
Supplement: Supp_Table_S1.xlsx [file Supp_Table_S1.xlsx]

## Sheet: raw reads
	time	replicate	library type	number of sequenced reads
1	ZT00	1	RNA-seq	39787824
2	ZT02	1	RNA-seq	36868128
3	ZT04	1	RNA-seq	43751422
4	ZT06	1	RNA-seq	35498282
5	ZT08	1	RNA-seq	44997616
6	ZT10	1	RNA-seq	36763103
7	ZT12	1	RNA-seq	29303791
8	ZT14	1	RNA-seq	29716199
9	ZT16	1	RNA-seq	29197233
10	ZT18	1	RNA-seq	54522105
11	ZT20	1	RNA-seq	55121964
12	ZT22	1	RNA-seq	37406331
13	ZT00	2	RNA-seq	35510081
14	ZT02	2	RNA-seq	22475680
15	ZT04	2	RNA-seq	42117140
16	ZT06	2	RNA-seq	44322284
17	ZT08	2	RNA-seq	48269089
18	ZT10	2	RNA-seq	54582905
19	ZT12	2	RNA-seq	35836019
20	ZT14	2	RNA-seq	44377290
21	ZT16	2	RNA-seq	34400945
22	ZT18	2	RNA-seq	30648135
23	ZT20	2	RNA-seq	30380219
24	ZT22	2	RNA-seq	44817753
25	ZT00	1	RPF-seq	27677458
26	ZT02	1	RPF-seq	40058888
27	ZT04	1	RPF-seq	28816856
28	ZT06	1	RPF-seq	34509314
29	ZT08	1	RPF-seq	31170931
30	ZT10	1	RPF-seq	35902647
31	ZT12	1	RPF-seq	24590105
32	ZT14	1	RPF-seq	30830424
33	ZT16	1	RPF-seq	34197452
34	ZT18	1	RPF-seq	33441125
35	ZT20	1	RPF-seq	30561331
36	ZT22	1	RPF-seq	36676887
37	ZT00	2	RPF-seq	31588850
38	ZT02	2	RPF-seq	25417252
39	ZT04	2	RPF-seq	38276954
40	ZT06	2	RPF-seq	34240530
41	ZT08	2	RPF-seq	30110385
42	ZT10	2	RPF-seq	63408983
43	ZT12	2	RPF-seq	27614712
44	ZT14	2	RPF-seq	23901006
45	ZT16	2	RPF-seq	36085053
46	ZT18	2	RPF-seq	32550270
47	ZT20	2	RPF-seq	27070909
48	ZT22	2	RPF-seq	31568669

## Sheet: Mapping_summary_RNA-seq
	time	replicate	map_type	read counts	percentage
1	ZT00	1	cDNA	25734849	64.6802
2	ZT02	1	cDNA	22843986	61.9613
3	ZT04	1	cDNA	27817819	63.5815
4	ZT06	1	cDNA	20881788	58.8248
5	ZT08	1	cDNA	28290607	62.8713
6	ZT10	1	cDNA	22970668	62.4829
7	ZT12	1	cDNA	15778308	53.8439
8	ZT14	1	cDNA	14142272	47.5911
9	ZT16	1	cDNA	16018142	54.8618
10	ZT18	1	cDNA	16221672	29.7525
11	ZT20	1	cDNA	22054963	40.0112
12	ZT22	1	cDNA	23169394	61.9398
13	ZT00	2	cDNA	20686957	58.2566
14	ZT02	2	cDNA	13381270	59.5367
15	ZT04	2	cDNA	26263751	62.3588
16	ZT06	2	cDNA	25444316	57.4075
17	ZT08	2	cDNA	31075587	64.3799
18	ZT10	2	cDNA	42689010	78.2095
19	ZT12	2	cDNA	19728682	55.0527
20	ZT14	2	cDNA	23230365	52.3474
21	ZT16	2	cDNA	20079980	58.3704
22	ZT18	2	cDNA	10357727	33.7956
23	ZT20	2	cDNA	19116693	62.9248
24	ZT22	2	cDNA	25373529	56.6149
25	ZT00	1	Genome	1899086	4.77303
26	ZT02	1	Genome	2462569	6.6794
27	ZT04	1	Genome	2930469	6.698
28	ZT06	1	Genome	2617067	7.37238
29	ZT08	1	Genome	2368411	5.26341
30	ZT10	1	Genome	1875806	5.10241
31	ZT12	1	Genome	1906107	6.50464
32	ZT14	1	Genome	2119621	7.13288
33	ZT16	1	Genome	2231522	7.64292
34	ZT18	1	Genome	5219769	9.57367
35	ZT20	1	Genome	5461656	9.90831
36	ZT22	1	Genome	1379681	3.68836
37	ZT00	2	Genome	1674092	4.71441
38	ZT02	2	Genome	1198044	5.3304
39	ZT04	2	Genome	2727237	6.47536
40	ZT06	2	Genome	2233033	5.03817
41	ZT08	2	Genome	2557025	5.29744
42	ZT10	2	Genome	3890210	7.12716
43	ZT12	2	Genome	2849209	7.95069
44	ZT14	2	Genome	3627840	8.17499
45	ZT16	2	Genome	2328938	6.76998
46	ZT18	2	Genome	2607362	8.50741
47	ZT20	2	Genome	1639193	5.39559
48	ZT22	2	Genome	1743006	3.8891
49	ZT00	1	mt-tRNA	660735	1.66065
50	ZT02	1	mt-tRNA	864316	2.34434
51	ZT04	1	mt-tRNA	566798	1.2955
52	ZT06	1	mt-tRNA	1079710	3.04158
53	ZT08	1	mt-tRNA	1009822	2.24417
54	ZT10	1	mt-tRNA	653928	1.77876
55	ZT12	1	mt-tRNA	1143462	3.9021
56	ZT14	1	mt-tRNA	2292579	7.71491
57	ZT16	1	mt-tRNA	2153375	7.37527
58	ZT18	1	mt-tRNA	8202984	15.0452
59	ZT20	1	mt-tRNA	9111379	16.5295
60	ZT22	1	mt-tRNA	295477	0.789912
61	ZT00	2	mt-tRNA	578244	1.62839
62	ZT02	2	mt-tRNA	330245	1.46934
63	ZT04	2	mt-tRNA	1319606	3.13318
64	ZT06	2	mt-tRNA	825577	1.86267
65	ZT08	2	mt-tRNA	799203	1.65572
66	ZT10	2	mt-tRNA	1198543	2.19582
67	ZT12	2	mt-tRNA	2201138	6.14225
68	ZT14	2	mt-tRNA	3618783	8.15458
69	ZT16	2	mt-tRNA	1887905	5.48795
70	ZT18	2	mt-tRNA	4169778	13.6053
71	ZT20	2	mt-tRNA	1073453	3.53339
72	ZT22	2	mt-tRNA	221619	0.494489
73	ZT00	1	tRNA	678090	1.70427
74	ZT02	1	tRNA	842847	2.28611
75	ZT04	1	tRNA	550070	1.25726
76	ZT06	1	tRNA	1082629	3.04981
77	ZT08	1	tRNA	845700	1.87943
78	ZT10	1	tRNA	496159	1.34961
79	ZT12	1	tRNA	1107842	3.78054
80	ZT14	1	tRNA	1715311	5.77231
81	ZT16	1	tRNA	1589792	5.44501
82	ZT18	1	tRNA	4690062	8.60213
83	ZT20	1	tRNA	5185806	9.40788
84	ZT22	1	tRNA	426882	1.1412
85	ZT00	2	tRNA	635115	1.78855
86	ZT02	2	tRNA	448051	1.99349
87	ZT04	2	tRNA	1402038	3.3289
88	ZT06	2	tRNA	771897	1.74156
89	ZT08	2	tRNA	546257	1.13169
90	ZT10	2	tRNA	646576	1.18458
91	ZT12	2	tRNA	1876852	5.23733
92	ZT14	2	tRNA	2698221	6.08018
93	ZT16	2	tRNA	1755055	5.10176
94	ZT18	2	tRNA	2458607	8.02204
95	ZT20	2	tRNA	1254651	4.12983
96	ZT22	2	tRNA	316511	0.706218
97	ZT00	1	rRNA	9441985	23.7308
98	ZT02	1	rRNA	8132288	22.0578
99	ZT04	1	rRNA	10355123	23.6681
100	ZT06	1	rRNA	8122018	22.88
101	ZT08	1	rRNA	10545706	23.4361
102	ZT10	1	rRNA	9372882	25.4954
103	ZT12	1	rRNA	5746721	19.6108
104	ZT14	1	rRNA	4358552	14.6673
105	ZT16	1	rRNA	4316108	14.7826
106	ZT18	1	rRNA	5778420	10.5983
107	ZT20	1	rRNA	5331859	9.67284
108	ZT22	1	rRNA	10334296	27.6271
109	ZT00	2	rRNA	10525814	29.6418
110	ZT02	2	rRNA	6245964	27.7899
111	ZT04	2	rRNA	8176781	19.4144
112	ZT06	2	rRNA	13198824	29.7792
113	ZT08	2	rRNA	11312642	23.4366
114	ZT10	2	rRNA	4743385	8.69024
115	ZT12	2	rRNA	6342030	17.6974
116	ZT14	2	rRNA	7172663	16.1629
117	ZT16	2	rRNA	4913110	14.2819
118	ZT18	2	rRNA	2738813	8.93631
119	ZT20	2	rRNA	6210234	20.4417
120	ZT22	2	rRNA	15452022	34.4775
121	ZT00	1	None	1373079	3.451
122	ZT02	1	None	1722122	4.67103
123	ZT04	1	None	1531143	3.49964
124	ZT06	1	None	1715070	4.83142
125	ZT08	1	None	1937370	4.30549
126	ZT10	1	None	1393660	3.79092
127	ZT12	1	None	3621351	12.358
128	ZT14	1	None	5087864	17.1215
129	ZT16	1	None	2888294	9.89236
130	ZT18	1	None	14409198	26.4282
131	ZT20	1	None	7976301	14.4703
132	ZT22	1	None	1800601	4.81363
133	ZT00	2	None	1409859	3.97031
134	ZT02	2	None	872106	3.88022
135	ZT04	2	None	2227727	5.28936
136	ZT06	2	None	1848637	4.1709
137	ZT08	2	None	1978375	4.09864
138	ZT10	2	None	1415181	2.59272
139	ZT12	2	None	2838108	7.91971
140	ZT14	2	None	4029418	9.07991
141	ZT16	2	None	3435957	9.98797
142	ZT18	2	None	8315848	27.1333
143	ZT20	2	None	1085995	3.57468
144	ZT22	2	None	1711066	3.81783

## Sheet: Mapping_summary_RPF-seq
	time	replicate	map_type	read counts	percentage
1	ZT00	1	cDNA	21185765	76.5452
2	ZT02	1	cDNA	26399250	65.9011
3	ZT04	1	cDNA	21192404	73.5417
4	ZT06	1	cDNA	21359432	61.8947
5	ZT08	1	cDNA	22487938	72.1439
6	ZT10	1	cDNA	29431230	81.9751
7	ZT12	1	cDNA	17992242	73.1686
8	ZT14	1	cDNA	22965462	74.4896
9	ZT16	1	cDNA	24470126	71.5554
10	ZT18	1	cDNA	23878797	71.4055
11	ZT20	1	cDNA	21860459	71.5298
12	ZT22	1	cDNA	26584527	72.4831
13	ZT00	2	cDNA	22625854	71.6261
14	ZT02	2	cDNA	18263455	71.8546
15	ZT04	2	cDNA	26426787	69.041
16	ZT06	2	cDNA	23472746	68.5525
17	ZT08	2	cDNA	25103097	83.3702
18	ZT10	2	cDNA	49062035	77.374
19	ZT12	2	cDNA	20106962	72.8125
20	ZT14	2	cDNA	17285291	72.3203
21	ZT16	2	cDNA	26023416	72.1169
22	ZT18	2	cDNA	21717133	66.7187
23	ZT20	2	cDNA	19145126	70.7221
24	ZT22	2	cDNA	21043264	66.6587
25	ZT00	1	Genome	96613	0.349067
26	ZT02	1	Genome	148380	0.370405
27	ZT04	1	Genome	125972	0.437147
28	ZT06	1	Genome	139186	0.403329
29	ZT08	1	Genome	110665	0.355026
30	ZT10	1	Genome	120047	0.334368
31	ZT12	1	Genome	101151	0.411348
32	ZT14	1	Genome	119835	0.388691
33	ZT16	1	Genome	125205	0.366124
34	ZT18	1	Genome	124017	0.370852
35	ZT20	1	Genome	107969	0.353286
36	ZT22	1	Genome	128405	0.350098
37	ZT00	2	Genome	106111	0.335913
38	ZT02	2	Genome	92779	0.365024
39	ZT04	2	Genome	144772	0.378222
40	ZT06	2	Genome	105360	0.307706
41	ZT08	2	Genome	118137	0.392346
42	ZT10	2	Genome	266878	0.420884
43	ZT12	2	Genome	111795	0.404839
44	ZT14	2	Genome	83775	0.350508
45	ZT16	2	Genome	129806	0.359722
46	ZT18	2	Genome	112137	0.344504
47	ZT20	2	Genome	93642	0.345914
48	ZT22	2	Genome	124922	0.395715
49	ZT00	1	mt-tRNA	40631	0.146802
50	ZT02	1	mt-tRNA	37748	0.0942313
51	ZT04	1	mt-tRNA	30813	0.106927
52	ZT06	1	mt-tRNA	29072	0.0842439
53	ZT08	1	mt-tRNA	34427	0.110446
54	ZT10	1	mt-tRNA	69748	0.19427
55	ZT12	1	mt-tRNA	44772	0.182073
56	ZT14	1	mt-tRNA	50345	0.163296
57	ZT16	1	mt-tRNA	34263	0.100192
58	ZT18	1	mt-tRNA	43483	0.130029
59	ZT20	1	mt-tRNA	39246	0.128417
60	ZT22	1	mt-tRNA	41205	0.112346
61	ZT00	2	mt-tRNA	31249	0.0989241
62	ZT02	2	mt-tRNA	26576	0.104559
63	ZT04	2	mt-tRNA	41956	0.109612
64	ZT06	2	mt-tRNA	25053	0.0731677
65	ZT08	2	mt-tRNA	69946	0.232299
66	ZT10	2	mt-tRNA	91460	0.144238
67	ZT12	2	mt-tRNA	53939	0.195327
68	ZT14	2	mt-tRNA	35196	0.147257
69	ZT16	2	mt-tRNA	43113	0.119476
70	ZT18	2	mt-tRNA	30431	0.0934892
71	ZT20	2	mt-tRNA	32683	0.120731
72	ZT22	2	mt-tRNA	35615	0.112818
73	ZT00	1	tRNA	173127	0.625516
74	ZT02	1	tRNA	586506	1.46411
75	ZT04	1	tRNA	380596	1.32074
76	ZT06	1	tRNA	440767	1.27724
77	ZT08	1	tRNA	269162	0.863503
78	ZT10	1	tRNA	116669	0.324959
79	ZT12	1	tRNA	272567	1.10844
80	ZT14	1	tRNA	339114	1.09993
81	ZT16	1	tRNA	381403	1.1153
82	ZT18	1	tRNA	217621	0.650759
83	ZT20	1	tRNA	281429	0.920866
84	ZT22	1	tRNA	218561	0.595909
85	ZT00	2	tRNA	285765	0.904639
86	ZT02	2	tRNA	306526	1.20598
87	ZT04	2	tRNA	381046	0.995497
88	ZT06	2	tRNA	291049	0.850013
89	ZT08	2	tRNA	165566	0.549863
90	ZT10	2	tRNA	817158	1.28871
91	ZT12	2	tRNA	319288	1.15622
92	ZT14	2	tRNA	233092	0.975239
93	ZT16	2	tRNA	515190	1.42771
94	ZT18	2	tRNA	341216	1.04827
95	ZT20	2	tRNA	352043	1.30045
96	ZT22	2	tRNA	272200	0.862247
97	ZT00	1	rRNA	5685973	20.5437
98	ZT02	1	rRNA	11927183	29.7741
99	ZT04	1	rRNA	6604685	22.9195
100	ZT06	1	rRNA	12139134	35.1764
101	ZT08	1	rRNA	7827062	25.1101
102	ZT10	1	rRNA	5236251	14.5846
103	ZT12	1	rRNA	5317705	21.6254
104	ZT14	1	rRNA	6284193	20.3831
105	ZT16	1	rRNA	7862940	22.9928
106	ZT18	1	rRNA	7334126	21.9315
107	ZT20	1	rRNA	5945463	19.4542
108	ZT22	1	rRNA	9200066	25.0841
109	ZT00	2	rRNA	8089091	25.6074
110	ZT02	2	rRNA	6322957	24.8766
111	ZT04	2	rRNA	10448866	27.2981
112	ZT06	2	rRNA	10058990	29.3774
113	ZT08	2	rRNA	3948442	13.1132
114	ZT10	2	rRNA	12114534	19.1054
115	ZT12	2	rRNA	6051978	21.9158
116	ZT14	2	rRNA	5061109	21.1753
117	ZT16	2	rRNA	7521764	20.8445
118	ZT18	2	rRNA	9594118	29.4748
119	ZT20	2	rRNA	6483780	23.9511
120	ZT22	2	rRNA	9679406	30.6614
121	ZT00	1	None	495349	1.78972
122	ZT02	1	None	959821	2.39603
123	ZT04	1	None	482386	1.67397
124	ZT06	1	None	401723	1.1641
125	ZT08	1	None	441677	1.41695
126	ZT10	1	None	928702	2.58672
127	ZT12	1	None	861668	3.50412
128	ZT14	1	None	1071475	3.47538
129	ZT16	1	None	1323515	3.87022
130	ZT18	1	None	1843081	5.51142
131	ZT20	1	None	2326765	7.61343
132	ZT22	1	None	504123	1.3745
133	ZT00	2	None	450780	1.42702
134	ZT02	2	None	404959	1.59324
135	ZT04	2	None	833527	2.17762
136	ZT06	2	None	287332	0.839158
137	ZT08	2	None	705197	2.34204
138	ZT10	2	None	1056918	1.66683
139	ZT12	2	None	970750	3.51534
140	ZT14	2	None	1202543	5.03135
141	ZT16	2	None	1851764	5.13166
142	ZT18	2	None	755235	2.32021
143	ZT20	2	None	963635	3.55967
144	ZT22	2	None	413262	1.30909
