# Supplementary material for: Ribosome profiling reveals the rhythmic liver translatome and circadian clock regulation by upstream open reading frames
Source: HighWire-hosted journal article supplement (doi:10.1101/gr.195404.115), 2015-10-20
Supplement: Supp_Table_S2.xlsx [file Supp_Table_S2.xlsx]

## Sheet: cyclic_sets_BCD_amp_phase
ensbl gene ID	gene name	set	cyclic.rpf	cyclic fit.rpf	amplitude.rpf	phase.rpf	cyclic.rna	cyclic fit.rna	amplitude.rna	phase.rna
ENSMUSG00000000253	Gmpr	B	FALSE	null	1	NA	TRUE	sinusoidal	1.74548	3.2582
ENSMUSG00000000532	Acvr1b	B	FALSE	null	1	NA	TRUE	sigmoid	2.16461	18.29
ENSMUSG00000000568	Hnrnpd	B	FALSE	null	1	NA	TRUE	sinusoidal	1.70293	9.19934
ENSMUSG00000000753	Serpinf1	B	FALSE	sinusoidal	1.1802	22.9686	TRUE	sigmoid	1.58464	21.765
ENSMUSG00000001053	N4bp3	B	FALSE	null	1	NA	TRUE	sinusoidal	1.52303	22.3483
ENSMUSG00000001313	Rnd2	B	FALSE	null	1	NA	TRUE	sinusoidal	1.7821	18.2519
ENSMUSG00000001473	Tubb6	B	FALSE	null	1	NA	TRUE	sinusoidal	1.68361	1.58884
ENSMUSG00000001507	Itga3	B	FALSE	sinusoidal	1.4168	22.863	TRUE	sinusoidal	1.58222	22.8019
ENSMUSG00000001524	Gtf2h4	B	FALSE	sinusoidal	1.40768	3.51786	TRUE	sinusoidal	1.61138	1.75823
ENSMUSG00000001525	Tubb5	B	FALSE	null	1	NA	TRUE	sinusoidal	1.52059	1.62479
ENSMUSG00000001576	Ergic1	B	FALSE	sinusoidal	1.32609	22.7809	TRUE	sigmoid	1.52161	18.05
ENSMUSG00000001666	Ddt	B	FALSE	null	1	NA	TRUE	sigmoid	1.60585	20.7
ENSMUSG00000001870	Ltbp1	B	FALSE	null	1	NA	TRUE	sigmoid	1.73649	17.465
ENSMUSG00000002031	Ift46	B	FALSE	sinusoidal	1.48883	6.38661	TRUE	sinusoidal	1.57855	5.94333
ENSMUSG00000002032	Tmem25	B	FALSE	null	1	NA	TRUE	sigmoid	1.70209	22.115
ENSMUSG00000002055	Spag5	B	FALSE	null	1	NA	TRUE	sigmoid	2.75096	18.32
ENSMUSG00000002343	Armc6	B	FALSE	sinusoidal	1.48714	22.4174	TRUE	sinusoidal	1.66603	21.6342
ENSMUSG00000002489	Tiam1	B	FALSE	null	1	NA	TRUE	sigmoid	3.48959	18.34
ENSMUSG00000002635	Pdcd2l	B	FALSE	null	1	NA	TRUE	sinusoidal	1.66003	5.10195
ENSMUSG00000002831	Plin4	B	FALSE	null	1	NA	TRUE	sigmoid	1.80785	15.215
ENSMUSG00000002870	Mcm2	B	FALSE	null	1	NA	TRUE	sinusoidal	1.5952	19.5153
ENSMUSG00000002871	Tpra1	B	FALSE	sinusoidal	1.49238	2.25151	TRUE	sinusoidal	1.54487	1.30502
ENSMUSG00000003299	Mrpl4	B	FALSE	sinusoidal	1.35551	22.9134	TRUE	sinusoidal	1.50177	23.7205
ENSMUSG00000003355	Fkbp11	B	FALSE	null	1	NA	TRUE	sinusoidal	1.55388	11.7594
ENSMUSG00000003477	Inmt	B	FALSE	null	1	NA	TRUE	sinusoidal	1.6443	17.3696
ENSMUSG00000003518	Dusp3	B	FALSE	null	1	NA	TRUE	sigmoid	1.91355	18.305
ENSMUSG00000003531	Dgcr6	B	FALSE	null	1	NA	TRUE	sigmoid	1.5141	21.335
ENSMUSG00000003555	Cyp17a1	B	FALSE	null	1	NA	TRUE	sigmoid	4.0287	16.085
ENSMUSG00000003559	As3mt	B	FALSE	sinusoidal	1.42115	17.4117	TRUE	sinusoidal	1.50411	18.2065
ENSMUSG00000003585	Sec14l2	B	FALSE	sigmoid	1.38661	19.815	TRUE	sigmoid	1.52208	20.105
ENSMUSG00000004018	Fancl	B	FALSE	null	1	NA	TRUE	sinusoidal	1.65531	9.24302
ENSMUSG00000004032	Gstm5	B	FALSE	null	1	NA	TRUE	sigmoid	1.5281	16.44
ENSMUSG00000004071	Cdip1	B	FALSE	null	1	NA	TRUE	sinusoidal	1.82957	17.1998
ENSMUSG00000004891	Nes	B	FALSE	null	1	NA	TRUE	sinusoidal	1.60433	21.0709
ENSMUSG00000005354	Txn2	B	FALSE	null	1	NA	TRUE	sigmoid	1.58362	19.195
ENSMUSG00000005378	Wbscr22	B	FALSE	null	1	NA	TRUE	sigmoid	1.52524	21.47
ENSMUSG00000005611	Mrvi1	B	FALSE	null	1	NA	TRUE	sigmoid	2.83504	17.73
ENSMUSG00000005674	Tomm40l	B	FALSE	null	1	NA	TRUE	sigmoid	1.61233	21.655
ENSMUSG00000005699	Pard6a	B	FALSE	null	1	NA	TRUE	sinusoidal	1.97751	20.5907
ENSMUSG00000005873	Reep5	B	FALSE	null	1	NA	TRUE	sinusoidal	1.56387	18.5365
ENSMUSG00000005882	Uqcc1	B	FALSE	sinusoidal	1.28097	11.9754	TRUE	sinusoidal	1.5041	15.5073
ENSMUSG00000006057	Atp5g1	B	FALSE	null	1	NA	TRUE	sigmoid	1.57237	19.775
ENSMUSG00000006134	Crkl	B	FALSE	sinusoidal	1.29473	17.2166	TRUE	sigmoid	18.9035	18.12
ENSMUSG00000006342	Susd2	B	FALSE	null	1	NA	TRUE	sigmoid	1.87504	17.455
ENSMUSG00000006344	Ggt5	B	FALSE	null	1	NA	TRUE	sinusoidal	1.80322	17.8571
ENSMUSG00000006378	Gcat	B	FALSE	sinusoidal	1.36064	23.8678	TRUE	sinusoidal	1.63928	23.9229
ENSMUSG00000006931	Leprel4	B	FALSE	null	1	NA	TRUE	sigmoid	2.14151	18.715
ENSMUSG00000007655	Cav1	B	FALSE	null	1	NA	TRUE	sinusoidal	2.23404	18.599
ENSMUSG00000007817	Zmiz1	B	FALSE	null	1	NA	TRUE	sigmoid	1.58496	20.7
ENSMUSG00000007892	Rplp1	B	FALSE	null	1	NA	TRUE	sigmoid	1.51554	21.295
ENSMUSG00000008348	Ubc	B	FALSE	null	1	NA	TRUE	sinusoidal	1.66737	20.8914
ENSMUSG00000008398	Elk3	B	FALSE	sinusoidal	1.36938	1.71832	TRUE	sinusoidal	1.54465	23.1302
ENSMUSG00000008604	Ubqln4	B	FALSE	sinusoidal	1.26139	19.2576	TRUE	sinusoidal	1.60041	18.409
ENSMUSG00000009013	Dynll1	B	FALSE	null	1	NA	TRUE	sigmoid	2.08415	14.96
ENSMUSG00000009145	Dqx1	B	FALSE	null	1	NA	TRUE	sigmoid	2.17197	21.75
ENSMUSG00000009569	Mkl2	B	FALSE	sinusoidal	1.38903	0.338325	TRUE	sinusoidal	1.70923	21.1371
ENSMUSG00000009640	Dmap1	B	FALSE	sinusoidal	1.47164	2.94198	TRUE	sinusoidal	1.52995	1.15411
ENSMUSG00000009654	Oit3	B	FALSE	sinusoidal	1.27391	1.65937	TRUE	sigmoid	1.61655	21.945
ENSMUSG00000010663	Fads1	B	FALSE	null	1	NA	TRUE	sigmoid	1.55131	21.6
ENSMUSG00000011958	Bnip2	B	FALSE	null	1	NA	TRUE	sigmoid	1.55	16.38
ENSMUSG00000013629	Cad	B	FALSE	null	1	NA	TRUE	sigmoid	1.89498	18.51
ENSMUSG00000013822	Elof1	B	FALSE	sinusoidal	1.31051	9.39977	TRUE	sigmoid	1.56816	18.83
ENSMUSG00000014164	Klhl3	B	FALSE	null	1	NA	TRUE	sigmoid	1.53198	22.45
ENSMUSG00000014232	Cluap1	B	FALSE	null	1	NA	TRUE	sinusoidal	1.50602	18.3852
ENSMUSG00000014353	Tmem87b	B	FALSE	sigmoid	1.42729	14.97	TRUE	sinusoidal	1.49809	11.6066
ENSMUSG00000014504	Srp19	B	FALSE	null	1	NA	TRUE	sinusoidal	1.65684	15.7637
ENSMUSG00000014592	Camta1	B	FALSE	null	1	NA	TRUE	sigmoid	3.21812	18.17
ENSMUSG00000014873	Surf2	B	FALSE	null	1	NA	TRUE	sinusoidal	1.55715	15.1042
ENSMUSG00000015176	Nolc1	B	FALSE	null	1	NA	TRUE	sinusoidal	1.85125	16.7721
ENSMUSG00000015217	Hmgb3	B	FALSE	null	1	NA	TRUE	sinusoidal	1.50973	8.83693
ENSMUSG00000015405	Ace2	B	FALSE	null	1	NA	TRUE	sigmoid	2.05902	16.735
ENSMUSG00000015711	Prune	B	FALSE	null	1	NA	TRUE	sigmoid	1.53182	17.72
ENSMUSG00000015749	Anp32e	B	FALSE	sinusoidal	1.35442	20.0415	TRUE	sigmoid	1.64031	18.01
ENSMUSG00000015837	Sqstm1	B	FALSE	sinusoidal	1.43898	2.68629	TRUE	sinusoidal	1.57323	2.83419
ENSMUSG00000015882	Lcorl	B	FALSE	null	1	NA	TRUE	sinusoidal	1.52628	11.8757
ENSMUSG00000016252	Atp5e	B	FALSE	null	1	NA	TRUE	sigmoid	1.63196	19.84
ENSMUSG00000016257	Slmo2	B	FALSE	null	1	NA	TRUE	sinusoidal	1.52882	15.7892
ENSMUSG00000016757	Ttll12	B	FALSE	sinusoidal	1.46844	21.6577	TRUE	sinusoidal	1.57291	22.8988
ENSMUSG00000016918	Sulf1	B	FALSE	null	1	NA	TRUE	sinusoidal	2.25614	16.0273
ENSMUSG00000017002	Slpi	B	FALSE	null	1	NA	TRUE	sigmoid	2.63549	18.07
ENSMUSG00000017299	Dnttip1	B	FALSE	null	1	NA	TRUE	sinusoidal	1.53684	5.26073
ENSMUSG00000017417	Plxdc1	B	FALSE	null	1	NA	TRUE	sigmoid	6.51705	18.2
ENSMUSG00000017418	Arl5b	B	FALSE	null	1	NA	TRUE	sinusoidal	1.61004	11.9519
ENSMUSG00000017677	Wsb1	B	FALSE	null	1	NA	TRUE	sinusoidal	2.02536	4.15688
ENSMUSG00000017723	Wfdc2	B	FALSE	null	1	NA	TRUE	sigmoid	2.91251	15.89
ENSMUSG00000017754	Pltp	B	FALSE	null	1	NA	TRUE	sigmoid	1.81103	21.77
ENSMUSG00000017801	Mlx	B	FALSE	null	1	NA	TRUE	sinusoidal	1.51799	16.7811
ENSMUSG00000017837	Nkiras2	B	FALSE	null	1	NA	TRUE	sinusoidal	1.53	23.6848
ENSMUSG00000017969	Ptgis	B	FALSE	null	1	NA	TRUE	sinusoidal	1.91692	13.2879
ENSMUSG00000018102	Hist1h2bc	B	FALSE	null	1	NA	TRUE	sinusoidal	1.69374	20.1355
ENSMUSG00000018199	Trove2	B	FALSE	null	1	NA	TRUE	sigmoid	1.66119	18.02
ENSMUSG00000018339	Gpx3	B	FALSE	null	1	NA	TRUE	sigmoid	3.6339	17.65
ENSMUSG00000018585	Atox1	B	FALSE	null	1	NA	TRUE	sigmoid	1.58027	20.1
ENSMUSG00000018651	Tada2a	B	FALSE	null	1	NA	TRUE	sigmoid	1.51065	19.005
ENSMUSG00000018820	Zfyve27	B	FALSE	null	1	NA	TRUE	sinusoidal	1.65747	5.58752
ENSMUSG00000018861	Fdxr	B	FALSE	sinusoidal	1.45372	3.37825	TRUE	sinusoidal	1.50343	3.19522
ENSMUSG00000018927	Ccl6	B	FALSE	null	1	NA	TRUE	sigmoid	1.77756	16.65
ENSMUSG00000019564	Arid3a	B	FALSE	null	1	NA	TRUE	sigmoid	2.36503	17.11
ENSMUSG00000019796	Lrp11	B	FALSE	null	1	NA	TRUE	sinusoidal	2.01419	22.7378
ENSMUSG00000019874	Fabp7	B	FALSE	null	1	NA	TRUE	sinusoidal	1.75527	2.69189
ENSMUSG00000019929	Dcn	B	FALSE	sinusoidal	1.11348	16.3724	TRUE	sigmoid	1.50528	18.845
ENSMUSG00000019966	Kitl	B	FALSE	null	1	NA	TRUE	sigmoid	2.05026	17.96
ENSMUSG00000019986	Ahi1	B	FALSE	null	1	NA	TRUE	sigmoid	2.0931	18.49
ENSMUSG00000019989	Enpp3	B	FALSE	sinusoidal	1.34625	1.57264	TRUE	sinusoidal	1.76119	2.1009
ENSMUSG00000020000	Moxd1	B	FALSE	null	1	NA	TRUE	sigmoid	6.88422	14.35
ENSMUSG00000020032	Nuak1	B	FALSE	null	1	NA	TRUE	sinusoidal	1.99762	20.2532
ENSMUSG00000020092	Pald1	B	FALSE	sinusoidal	1.34892	2.29621	TRUE	sinusoidal	1.55465	2.83779
ENSMUSG00000020098	Pcbd1	B	FALSE	sinusoidal	1.39404	23.5758	TRUE	sigmoid	1.51937	18.805
ENSMUSG00000020100	Slc29a3	B	FALSE	null	1	NA	TRUE	sigmoid	5.79633	18.34
ENSMUSG00000020130	Tbc1d15	B	FALSE	sinusoidal	1.48897	8.10877	TRUE	sinusoidal	1.57499	9.03078
ENSMUSG00000020153	Ndufs7	B	FALSE	sinusoidal	1.38327	21.0492	TRUE	sigmoid	1.56606	21.745
ENSMUSG00000020173	Cobl	B	FALSE	null	1	NA	TRUE	sigmoid	1.53609	15.68
ENSMUSG00000020183	Cpm	B	FALSE	null	1	NA	TRUE	sigmoid	2.92952	18.055
ENSMUSG00000020212	Mdm1	B	FALSE	null	1	NA	TRUE	sinusoidal	2.71734	23.2891
ENSMUSG00000020263	Appl2	B	FALSE	sinusoidal	1.3335	5.86444	TRUE	sinusoidal	1.50004	5.60761
ENSMUSG00000020268	Lyrm7	B	FALSE	null	1	NA	TRUE	sigmoid	3.67381	18.305
ENSMUSG00000020275	Rel	B	FALSE	null	1	NA	TRUE	sigmoid	1.74723	16.84
ENSMUSG00000020311	Erlec1	B	FALSE	sigmoid	1.29605	14.355	TRUE	sigmoid	1.55642	16.205
ENSMUSG00000020335	Zfp354b	B	FALSE	null	1	NA	TRUE	sigmoid	2.76016	17.815
ENSMUSG00000020400	Tnip1	B	FALSE	null	1	NA	TRUE	sinusoidal	1.52045	1.01242
ENSMUSG00000020413	Hus1	B	FALSE	null	1	NA	TRUE	sigmoid	1.69267	19.415
ENSMUSG00000020473	Aebp1	B	FALSE	sinusoidal	1.36778	0.0240002	TRUE	sigmoid	2.26943	19.035
ENSMUSG00000020513	Tubd1	B	FALSE	null	1	NA	TRUE	sinusoidal	1.58837	16.6246
ENSMUSG00000020520	Galnt10	B	FALSE	null	1	NA	TRUE	sinusoidal	1.75738	0.458334
ENSMUSG00000020546	Stxbp4	B	FALSE	null	1	NA	TRUE	sinusoidal	1.8329	19.7501
ENSMUSG00000020580	Rock2	B	FALSE	sinusoidal	1.38444	12.9572	TRUE	sinusoidal	1.67183	12.0757
ENSMUSG00000020607	Fam84a	B	FALSE	null	1	NA	TRUE	sinusoidal	2.66249	22.32
ENSMUSG00000020608	Smc6	B	FALSE	null	1	NA	TRUE	sinusoidal	1.5436	9.98425
ENSMUSG00000020807	4933427D14Rik	B	FALSE	null	1	NA	TRUE	sigmoid	1.81977	18.18
ENSMUSG00000020830	Vmo1	B	FALSE	null	1	NA	TRUE	sinusoidal	1.64782	20.6263
ENSMUSG00000020878	Lrrc46	B	FALSE	null	1	NA	TRUE	sigmoid	5.06404	17.77
ENSMUSG00000020898	Ctc1	B	FALSE	sinusoidal	1.45002	2.58581	TRUE	sinusoidal	1.87115	2.47858
ENSMUSG00000020935	Dcakd	B	FALSE	sinusoidal	1.44347	0.787185	TRUE	sigmoid	1.65096	19.195
ENSMUSG00000020961	Ston2	B	FALSE	null	1	NA	TRUE	sigmoid	1.90451	18.165
ENSMUSG00000021040	Slirp	B	FALSE	sinusoidal	1.31776	16.8298	TRUE	sigmoid	1.50391	18.115
ENSMUSG00000021044	Adck1	B	FALSE	sinusoidal	1.49322	2.02639	TRUE	sinusoidal	1.63832	1.26782
ENSMUSG00000021079	Timm9	B	FALSE	null	1	NA	TRUE	sinusoidal	1.54762	13.0996
ENSMUSG00000021217	Tshz3	B	FALSE	null	1	NA	TRUE	sigmoid	2.74615	18.49
ENSMUSG00000021240	Abcd4	B	FALSE	sinusoidal	1.34639	18.9391	TRUE	sigmoid	1.57116	21.435
ENSMUSG00000021245	Mlh3	B	FALSE	sinusoidal	1.47723	20.3845	TRUE	sigmoid	1.53672	18.07
ENSMUSG00000021275	Tecpr2	B	FALSE	sinusoidal	1.46688	0.157946	TRUE	sinusoidal	1.63673	23.6965
ENSMUSG00000021390	Ogn	B	FALSE	null	1	NA	TRUE	sigmoid	10.3411	18.28
ENSMUSG00000021451	Sema4d	B	FALSE	null	1	NA	TRUE	sigmoid	2.74475	18.355
ENSMUSG00000021504	B4galt7	B	FALSE	null	1	NA	TRUE	sinusoidal	1.51722	19.0666
ENSMUSG00000021510	A530054K11Rik	B	FALSE	null	1	NA	TRUE	sigmoid	1.53347	18.43
ENSMUSG00000021552	Gkap1	B	FALSE	sinusoidal	1.32913	9.94182	TRUE	sigmoid	1.61127	12.635
ENSMUSG00000021607	Mrpl36	B	FALSE	sinusoidal	1.47677	23.3539	TRUE	sigmoid	1.63404	19.585
ENSMUSG00000021707	Dhfr	B	FALSE	sinusoidal	1.44081	8.95221	TRUE	sinusoidal	1.5944	11.5254
ENSMUSG00000021716	Srek1ip1	B	FALSE	null	1	NA	TRUE	sigmoid	1.71453	18.41
ENSMUSG00000021751	Acox2	B	FALSE	sinusoidal	1.48275	1.1613	TRUE	sinusoidal	1.49682	23.8745
ENSMUSG00000021754	Map3k1	B	FALSE	null	1	NA	TRUE	sinusoidal	1.52618	1.4063
ENSMUSG00000021774	Ube2e1	B	FALSE	null	1	NA	TRUE	sigmoid	1.54242	18.32
ENSMUSG00000021806	Nid2	B	FALSE	null	1	NA	TRUE	sinusoidal	1.91413	23.0865
ENSMUSG00000021843	Ktn1	B	FALSE	sinusoidal	1.42745	7.31462	TRUE	sinusoidal	1.50491	8.98204
ENSMUSG00000021905	Dph3	B	FALSE	null	1	NA	TRUE	sigmoid	1.60214	14.98
ENSMUSG00000022003	Slc25a30	B	FALSE	null	1	NA	TRUE	sinusoidal	3.27186	4.86121
ENSMUSG00000022020	Naa16	B	FALSE	sinusoidal	1.44946	14.8784	TRUE	sinusoidal	1.70492	14.3109
ENSMUSG00000022048	Dpysl2	B	FALSE	null	1	NA	TRUE	sinusoidal	1.53848	21.2542
ENSMUSG00000022102	Dok2	B	FALSE	null	1	NA	TRUE	sinusoidal	1.54773	20.0197
ENSMUSG00000022122	Ednrb	B	FALSE	sinusoidal	1.43892	17.0952	TRUE	sigmoid	1.76326	18.63
ENSMUSG00000022139	Mbnl2	B	FALSE	sigmoid	1.46257	13.22	TRUE	sigmoid	1.59026	13.47
ENSMUSG00000022175	Lrp10	B	FALSE	null	1	NA	TRUE	sinusoidal	1.51307	4.65826
ENSMUSG00000022178	Ajuba	B	FALSE	null	1	NA	TRUE	sigmoid	1.80621	0.205
ENSMUSG00000022206	Npr3	B	FALSE	null	1	NA	TRUE	sinusoidal	1.97629	17.4078
ENSMUSG00000022244	Amacr	B	FALSE	sinusoidal	1.44339	5.48101	TRUE	sinusoidal	1.52618	4.71291
ENSMUSG00000022295	Atp6v1c1	B	FALSE	sigmoid	1.39741	11.35	TRUE	sinusoidal	1.51558	10.1184
ENSMUSG00000022325	Pop1	B	FALSE	sinusoidal	1.36395	21.3512	TRUE	sinusoidal	1.51717	21.1275
ENSMUSG00000022335	Zfat	B	FALSE	null	1	NA	TRUE	sigmoid	1.53958	20.42
ENSMUSG00000022338	Eny2	B	FALSE	null	1	NA	TRUE	sinusoidal	1.50921	12.6521
ENSMUSG00000022453	Naga	B	FALSE	sinusoidal	1.38075	9.27312	TRUE	sinusoidal	1.55586	4.83936
ENSMUSG00000022500	Litaf	B	FALSE	null	1	NA	TRUE	sinusoidal	1.76128	22.1142
ENSMUSG00000022556	Hsf1	B	FALSE	sinusoidal	1.30862	0.000209263	TRUE	sigmoid	1.57184	21.93
ENSMUSG00000022614	Lmf2	B	FALSE	null	1	NA	TRUE	sinusoidal	1.53189	20.7326
ENSMUSG00000022620	Arsa	B	FALSE	sinusoidal	1.40971	5.3681	TRUE	sigmoid	1.58401	9.54
ENSMUSG00000022677	Fopnl	B	FALSE	null	1	NA	TRUE	sigmoid	1.60437	18.575
ENSMUSG00000022698	Naa50	B	FALSE	sigmoid	1.48137	12.475	TRUE	sinusoidal	1.71035	12.81
ENSMUSG00000022747	St3gal6	B	FALSE	null	1	NA	TRUE	sigmoid	2.91052	18.215
ENSMUSG00000022770	Dlg1	B	FALSE	sinusoidal	1.34438	5.24947	TRUE	sinusoidal	1.51772	7.15216
ENSMUSG00000022817	Itgb5	B	FALSE	sinusoidal	1.33565	22.1266	TRUE	sigmoid	1.608	21.8
ENSMUSG00000022840	Adcy5	B	FALSE	null	1	NA	TRUE	sinusoidal	2.03991	21.041
ENSMUSG00000022849	Hspbap1	B	FALSE	null	1	NA	TRUE	sinusoidal	1.83083	0.131893
ENSMUSG00000022876	Samsn1	B	FALSE	null	1	NA	TRUE	sigmoid	2.18799	15.96
ENSMUSG00000023020	Cox14	B	FALSE	null	1	NA	TRUE	sigmoid	1.65914	22.045
ENSMUSG00000023043	Krt18	B	FALSE	sinusoidal	1.3975	3.65012	TRUE	sinusoidal	1.55124	3.12018
ENSMUSG00000023048	Prr13	B	FALSE	sinusoidal	1.3458	1.48003	TRUE	sinusoidal	1.73855	20.2696
ENSMUSG00000023092	Fhl1	B	FALSE	sigmoid	1.39783	18.17	TRUE	sinusoidal	1.62336	19.001
ENSMUSG00000023122	Sult1c2	B	FALSE	null	1	NA	TRUE	sinusoidal	2.16206	9.19555
ENSMUSG00000023345	Poc1a	B	FALSE	null	1	NA	TRUE	sinusoidal	2.31016	17.2217
ENSMUSG00000023904	Hcfc1r1	B	FALSE	sinusoidal	1.34623	0.2427	TRUE	sigmoid	1.78853	20.67
ENSMUSG00000023947	Nfkbie	B	FALSE	null	1	NA	TRUE	sinusoidal	1.90065	20.9928
ENSMUSG00000023952	Gtpbp2	B	FALSE	sigmoid	1.4532	10.4	TRUE	sinusoidal	1.54281	7.35845
ENSMUSG00000024019	Cmtr1	B	FALSE	null	1	NA	TRUE	sinusoidal	1.7794	2.56863
ENSMUSG00000024053	Emilin2	B	FALSE	null	1	NA	TRUE	sigmoid	2.15952	17.98
ENSMUSG00000024065	Ehd3	B	FALSE	sinusoidal	1.34475	0.435747	TRUE	sinusoidal	1.54942	22.4321
ENSMUSG00000024137	E4f1	B	FALSE	null	1	NA	TRUE	sinusoidal	1.58706	22.204
ENSMUSG00000024142	Mlst8	B	FALSE	null	1	NA	TRUE	sinusoidal	1.70532	18.8929
ENSMUSG00000024150	Mcfd2	B	FALSE	sinusoidal	1.39715	22.0747	TRUE	sinusoidal	1.6585	19.5004
ENSMUSG00000024181	Mrpl28	B	FALSE	null	1	NA	TRUE	sigmoid	1.50922	18.71
ENSMUSG00000024232	Bambi	B	FALSE	null	1	NA	TRUE	sigmoid	1.71893	20.175
ENSMUSG00000024242	Map4k3	B	FALSE	null	1	NA	TRUE	sigmoid	1.59822	17.41
ENSMUSG00000024269	Tpgs2	B	FALSE	null	1	NA	TRUE	sinusoidal	1.50056	23.3531
ENSMUSG00000024446	Rpp21	B	FALSE	null	1	NA	TRUE	sinusoidal	1.60644	18.8214
ENSMUSG00000024580	Grpel2	B	FALSE	null	1	NA	TRUE	sigmoid	1.51707	9.255
ENSMUSG00000024805	Pcgf5	B	FALSE	null	1	NA	TRUE	sinusoidal	1.52184	11.5901
ENSMUSG00000024889	Rce1	B	FALSE	sinusoidal	1.4463	20.5313	TRUE	sinusoidal	1.64341	23.6937
ENSMUSG00000024940	Ltbp3	B	FALSE	null	1	NA	TRUE	sigmoid	1.60363	20.885
ENSMUSG00000024958	Gpr137	B	FALSE	null	1	NA	TRUE	sinusoidal	1.71197	1.23854
ENSMUSG00000024975	Pdcd4	B	FALSE	null	1	NA	TRUE	sinusoidal	1.60286	3.78901
ENSMUSG00000024987	Cyp26a1	B	FALSE	null	1	NA	TRUE	sinusoidal	2.08026	1.69048
ENSMUSG00000025001	Hells	B	FALSE	null	1	NA	TRUE	sinusoidal	1.68088	16.6728
ENSMUSG00000025003	Cyp2c39	B	FALSE	null	1	NA	TRUE	sigmoid	3.06871	15.855
ENSMUSG00000025008	Tctn3	B	FALSE	null	1	NA	TRUE	sigmoid	3.66963	18.005
ENSMUSG00000025092	Hspa12a	B	FALSE	null	1	NA	TRUE	sinusoidal	1.83994	17.8929
ENSMUSG00000025135	Anapc11	B	FALSE	sinusoidal	1.23942	1.20841	TRUE	sigmoid	1.56681	21.52
ENSMUSG00000025144	Stra13	B	FALSE	null	1	NA	TRUE	sigmoid	1.62238	19.355
ENSMUSG00000025158	Rfng	B	FALSE	null	1	NA	TRUE	sinusoidal	1.55199	19.704
ENSMUSG00000025199	Chuk	B	FALSE	sigmoid	1.36353	11.86	TRUE	sinusoidal	1.52195	9.12961
ENSMUSG00000025220	Mgea5	B	FALSE	sinusoidal	1.47428	6.98408	TRUE	sinusoidal	1.55526	7.29968
ENSMUSG00000025225	Nfkb2	B	FALSE	null	1	NA	TRUE	sinusoidal	2.01913	1.52629
ENSMUSG00000025262	Fam120c	B	FALSE	sinusoidal	1.45955	22.7837	TRUE	sinusoidal	1.60635	22.2449
ENSMUSG00000025351	Cd63	B	FALSE	null	1	NA	TRUE	sigmoid	1.71736	16.145
ENSMUSG00000025353	Ormdl2	B	FALSE	null	1	NA	TRUE	sigmoid	1.59522	19.83
ENSMUSG00000025362	Rps26	B	FALSE	null	1	NA	TRUE	sigmoid	1.63881	18.805
ENSMUSG00000025429	Pstpip2	B	FALSE	null	1	NA	TRUE	sigmoid	1.61548	21.16
ENSMUSG00000025436	Xrcc6bp1	B	FALSE	null	1	NA	TRUE	sinusoidal	1.66599	12.566
ENSMUSG00000025484	Bet1l	B	FALSE	null	1	NA	TRUE	sigmoid	1.78352	13.405
ENSMUSG00000025491	Ifitm1	B	FALSE	null	1	NA	TRUE	sinusoidal	2.03401	18.1034
ENSMUSG00000025494	Sigirr	B	FALSE	sinusoidal	1.42868	19.8045	TRUE	sinusoidal	1.51117	22.5825
ENSMUSG00000025616	Usp16	B	FALSE	sinusoidal	1.32891	10.7418	TRUE	sinusoidal	1.54609	10.6451
ENSMUSG00000026064	Ptp4a1	B	FALSE	null	1	NA	TRUE	sigmoid	2.01842	15.825
ENSMUSG00000026123	Plekhb2	B	FALSE	sinusoidal	1.32192	1.71979	TRUE	sigmoid	1.56559	21.61
ENSMUSG00000026154	1110058L19Rik	B	FALSE	null	1	NA	TRUE	sigmoid	1.59441	18.74
ENSMUSG00000026176	Ctdsp1	B	FALSE	sinusoidal	1.45657	4.37593	TRUE	sinusoidal	1.60105	2.4457
ENSMUSG00000026185	Igfbp5	B	FALSE	null	1	NA	TRUE	sinusoidal	3.32231	17.514
ENSMUSG00000026227	2810459M11Rik	B	FALSE	sinusoidal	1.32727	22.601	TRUE	sinusoidal	1.8039	3.92824
ENSMUSG00000026377	Nifk	B	FALSE	null	1	NA	TRUE	sigmoid	1.49963	13.63
ENSMUSG00000026411	Tmem9	B	FALSE	null	1	NA	TRUE	sinusoidal	1.7105	14.8899
ENSMUSG00000026434	Nucks1	B	FALSE	sigmoid	1.3987	15.025	TRUE	sigmoid	1.57705	15.03
ENSMUSG00000026456	Cyb5r1	B	FALSE	null	1	NA	TRUE	sinusoidal	1.58774	7.89067
ENSMUSG00000026471	Mr1	B	FALSE	null	1	NA	TRUE	sigmoid	1.52087	17.825
ENSMUSG00000026480	Ncf2	B	FALSE	null	1	NA	TRUE	sigmoid	1.79255	16.57
ENSMUSG00000026494	Kif26b	B	FALSE	null	1	NA	TRUE	sinusoidal	2.12478	14.0146
ENSMUSG00000026594	Ralgps2	B	FALSE	null	1	NA	TRUE	sinusoidal	1.51679	7.99341
ENSMUSG00000026622	Nek2	B	FALSE	null	1	NA	TRUE	sinusoidal	2.11819	3.32115
ENSMUSG00000026628	Atf3	B	FALSE	null	1	NA	TRUE	sigmoid	3.31965	14.255
ENSMUSG00000026674	Ddr2	B	FALSE	null	1	NA	TRUE	sigmoid	1.69585	18.71
ENSMUSG00000026688	Mgst3	B	FALSE	null	1	NA	TRUE	sigmoid	1.91979	18.625
ENSMUSG00000026708	Cenpl	B	FALSE	null	1	NA	TRUE	sinusoidal	1.59041	7.48105
ENSMUSG00000026796	Fam129b	B	FALSE	null	1	NA	TRUE	sinusoidal	1.81161	0.704553
ENSMUSG00000026799	Med27	B	FALSE	sinusoidal	1.39989	21.915	TRUE	sigmoid	1.5165	18.515
ENSMUSG00000026923	Notch1	B	FALSE	sinusoidal	1.41603	0.890019	TRUE	sinusoidal	1.59313	0.656925
ENSMUSG00000026925	Inpp5e	B	FALSE	null	1	NA	TRUE	sinusoidal	1.91368	22.2688
ENSMUSG00000026944	Abca2	B	FALSE	sinusoidal	1.47466	3.79821	TRUE	sinusoidal	1.58614	3.01627
ENSMUSG00000026986	Hnmt	B	FALSE	sinusoidal	1.2666	13.8103	TRUE	sinusoidal	1.67103	13.8602
ENSMUSG00000026999	Nup35	B	FALSE	null	1	NA	TRUE	sinusoidal	2.14271	17.4353
ENSMUSG00000027001	Dusp19	B	FALSE	null	1	NA	TRUE	sinusoidal	1.51405	21.6477
ENSMUSG00000027075	Slc43a1	B	FALSE	null	1	NA	TRUE	sinusoidal	1.60217	17.5313
ENSMUSG00000027133	Nop10	B	FALSE	null	1	NA	TRUE	sigmoid	1.74815	19.07
ENSMUSG00000027176	Cstf3	B	FALSE	null	1	NA	TRUE	sigmoid	1.72076	16.165
ENSMUSG00000027188	Pamr1	B	FALSE	null	1	NA	TRUE	sinusoidal	1.73116	16.7973
ENSMUSG00000027189	Trim44	B	FALSE	null	1	NA	TRUE	sinusoidal	1.49891	3.67316
ENSMUSG00000027236	Eif3j1	B	FALSE	sinusoidal	1.31274	14.9603	TRUE	sinusoidal	1.5027	13.6491
ENSMUSG00000027365	Trpm7	B	FALSE	sinusoidal	1.47751	10.1153	TRUE	sinusoidal	1.54623	10.3205
ENSMUSG00000027394	Ttl	B	FALSE	null	1	NA	TRUE	sinusoidal	2.13687	16.0809
ENSMUSG00000027405	Nop56	B	FALSE	null	1	NA	TRUE	sigmoid	1.92268	13.815
ENSMUSG00000027428	Rbbp9	B	FALSE	null	1	NA	TRUE	sinusoidal	1.50635	19.3578
ENSMUSG00000027490	E2f1	B	FALSE	null	1	NA	TRUE	sinusoidal	2.25874	19.2184
ENSMUSG00000027533	Fabp5	B	FALSE	null	1	NA	TRUE	sinusoidal	2.10693	3.9586
ENSMUSG00000027556	Car1	B	FALSE	null	1	NA	TRUE	sigmoid	1.9984	18.65
ENSMUSG00000027602	Map1lc3a	B	FALSE	null	1	NA	TRUE	sigmoid	1.63148	20.54
ENSMUSG00000027796	Smad9	B	FALSE	null	1	NA	TRUE	sigmoid	2.01543	10.005
ENSMUSG00000027800	Tm4sf1	B	FALSE	null	1	NA	TRUE	sinusoidal	1.85297	4.0815
ENSMUSG00000027808	Serp1	B	FALSE	null	1	NA	TRUE	sigmoid	1.51941	13.895
ENSMUSG00000027858	Tspan2	B	FALSE	null	1	NA	TRUE	sinusoidal	2.06797	1.38523
ENSMUSG00000027953	Slc50a1	B	FALSE	null	1	NA	TRUE	sigmoid	2.15725	18.455
ENSMUSG00000027954	Efna1	B	FALSE	null	1	NA	TRUE	sinusoidal	2.15774	21.7828
ENSMUSG00000027956	Tmem144	B	FALSE	null	1	NA	TRUE	sinusoidal	1.58774	4.96833
ENSMUSG00000028018	Gstcd	B	FALSE	null	1	NA	TRUE	sinusoidal	1.54762	20.7305
ENSMUSG00000028019	Pdgfc	B	FALSE	null	1	NA	TRUE	sinusoidal	2.52595	23.7207
ENSMUSG00000028037	Ifi44	B	FALSE	null	1	NA	TRUE	sinusoidal	1.85658	5.70563
ENSMUSG00000028049	Scamp3	B	FALSE	null	1	NA	TRUE	sigmoid	1.5395	19.055
ENSMUSG00000028069	Gpatch4	B	FALSE	null	1	NA	TRUE	sinusoidal	1.50177	16.8549
ENSMUSG00000028108	Ecm1	B	FALSE	null	1	NA	TRUE	sigmoid	1.64437	21.085
ENSMUSG00000028185	Dnase2b	B	FALSE	sinusoidal	1.42372	18.9658	TRUE	sinusoidal	1.58278	17.7419
ENSMUSG00000028232	Tmem68	B	FALSE	null	1	NA	TRUE	sinusoidal	1.55251	10.248
ENSMUSG00000028312	Smc2	B	FALSE	sinusoidal	1.37559	22.5811	TRUE	sigmoid	1.65967	16.915
ENSMUSG00000028339	Col15a1	B	FALSE	null	1	NA	TRUE	sinusoidal	1.85777	21.9547
ENSMUSG00000028369	Svep1	B	FALSE	null	1	NA	TRUE	sigmoid	2.27449	18.315
ENSMUSG00000028385	Snx30	B	FALSE	null	1	NA	TRUE	sinusoidal	1.65093	6.62626
ENSMUSG00000028411	Aptx	B	FALSE	null	1	NA	TRUE	sinusoidal	1.5015	8.07505
ENSMUSG00000028469	Npr2	B	FALSE	null	1	NA	TRUE	sinusoidal	1.58951	10.7168
ENSMUSG00000028521	Slc35d1	B	FALSE	sinusoidal	1.39007	11.8185	TRUE	sinusoidal	1.53617	12.124
ENSMUSG00000028525	Pde4b	B	FALSE	null	1	NA	TRUE	sinusoidal	1.98926	3.91903
ENSMUSG00000028550	Atg4c	B	FALSE	null	1	NA	TRUE	sigmoid	1.55764	15.39
ENSMUSG00000028572	Hook1	B	FALSE	sigmoid	1.27539	13.395	TRUE	sinusoidal	1.55208	13.6544
ENSMUSG00000028617	Lrrc42	B	FALSE	null	1	NA	TRUE	sigmoid	1.54033	9.945
ENSMUSG00000028630	Dyrk2	B	FALSE	null	1	NA	TRUE	sinusoidal	1.67864	2.91234
ENSMUSG00000028645	Slc2a1	B	FALSE	null	1	NA	TRUE	sinusoidal	1.49619	0.655812
ENSMUSG00000028647	Mycbp	B	FALSE	sinusoidal	1.33059	14.3424	TRUE	sinusoidal	1.78814	15.2117
ENSMUSG00000028693	Nasp	B	FALSE	sinusoidal	1.37718	11.6772	TRUE	sinusoidal	1.68451	12.3267
ENSMUSG00000028698	Pik3r3	B	FALSE	null	1	NA	TRUE	sigmoid	2.25469	16.225
ENSMUSG00000028741	Mrto4	B	FALSE	sinusoidal	1.25827	14.5286	TRUE	sinusoidal	1.5169	15.3816
ENSMUSG00000028763	Hspg2	B	FALSE	sinusoidal	1.29651	3.58887	TRUE	sigmoid	1.55478	21.825
ENSMUSG00000028793	Rnf19b	B	FALSE	sinusoidal	1.33084	10.3155	TRUE	sigmoid	1.58737	10.04
ENSMUSG00000028832	Stmn1	B	FALSE	null	1	NA	TRUE	sinusoidal	1.58347	2.42049
ENSMUSG00000028958	Tmub1	B	FALSE	null	1	NA	TRUE	sigmoid	1.85783	18.375
ENSMUSG00000028961	Pgd	B	FALSE	sinusoidal	1.40234	21.2995	TRUE	sinusoidal	1.60725	20.4593
ENSMUSG00000029060	Mib2	B	FALSE	sinusoidal	1.382	1.56069	TRUE	sinusoidal	1.56605	3.07825
ENSMUSG00000029073	Cptp	B	FALSE	null	1	NA	TRUE	sigmoid	1.59349	18.065
ENSMUSG00000029096	Htra3	B	FALSE	null	1	NA	TRUE	sigmoid	2.51071	17.81
ENSMUSG00000029108	Pcdh7	B	FALSE	null	1	NA	TRUE	sinusoidal	1.60087	16.9171
ENSMUSG00000029190	D5Ertd579e	B	FALSE	null	1	NA	TRUE	sigmoid	1.51922	14.365
ENSMUSG00000029229	Chic2	B	FALSE	null	1	NA	TRUE	sinusoidal	1.57257	7.77827
ENSMUSG00000029231	Pdgfra	B	FALSE	null	1	NA	TRUE	sigmoid	1.69603	17.93
ENSMUSG00000029403	Cdkl2	B	FALSE	null	1	NA	TRUE	sinusoidal	1.53063	17.9753
ENSMUSG00000029413	Naaa	B	FALSE	null	1	NA	TRUE	sigmoid	1.7525	22.49
ENSMUSG00000029471	Camkk2	B	FALSE	null	1	NA	TRUE	sigmoid	1.73254	21.24
ENSMUSG00000029561	Oasl2	B	FALSE	null	1	NA	TRUE	sinusoidal	1.57355	7.14089
ENSMUSG00000029575	Mmab	B	FALSE	sinusoidal	1.48094	22.1438	TRUE	sinusoidal	1.56417	23.6378
ENSMUSG00000029629	Phf14	B	FALSE	sinusoidal	1.38074	11.1667	TRUE	sinusoidal	1.60981	11.4127
ENSMUSG00000029714	Gigyf1	B	FALSE	null	1	NA	TRUE	sinusoidal	1.60928	4.59011
ENSMUSG00000029725	Ppp1r35	B	FALSE	sinusoidal	1.46947	3.37973	TRUE	sinusoidal	1.69756	3.78118
ENSMUSG00000029729	Zkscan1	B	FALSE	sinusoidal	1.30586	0.412621	TRUE	sigmoid	1.70439	18.23
ENSMUSG00000030083	Abtb1	B	FALSE	sinusoidal	1.44729	5.78716	TRUE	sinusoidal	1.64349	5.42168
ENSMUSG00000030281	Il17rc	B	FALSE	null	1	NA	TRUE	sigmoid	1.50001	21.54
ENSMUSG00000030323	Ift122	B	FALSE	null	1	NA	TRUE	sinusoidal	1.50469	0.33679
ENSMUSG00000030521	Mphosph10	B	FALSE	null	1	NA	TRUE	sinusoidal	1.68254	14.4091
ENSMUSG00000030528	Blm	B	FALSE	null	1	NA	TRUE	sigmoid	2.05822	18.46
ENSMUSG00000030595	Nfkbib	B	FALSE	null	1	NA	TRUE	sinusoidal	1.60831	1.6611
ENSMUSG00000030653	Pde2a	B	FALSE	sinusoidal	1.4647	4.11524	TRUE	sinusoidal	1.53912	2.96635
ENSMUSG00000030674	Qprt	B	FALSE	null	1	NA	TRUE	sinusoidal	1.50853	2.8973
ENSMUSG00000030737	Slco2b1	B	FALSE	sinusoidal	1.24849	21.91	TRUE	sigmoid	1.52946	21.895
ENSMUSG00000030811	Fbxl19	B	FALSE	null	1	NA	TRUE	sinusoidal	1.57685	21.8847
ENSMUSG00000030827	Fgf21	B	FALSE	null	1	NA	TRUE	sinusoidal	13.6263	6.62274
ENSMUSG00000030842	Lamtor1	B	FALSE	sinusoidal	1.41579	0.774639	TRUE	sigmoid	1.76334	20.305
ENSMUSG00000030847	Bag3	B	FALSE	null	1	NA	TRUE	sigmoid	2.27084	14.15
ENSMUSG00000030909	Anks4b	B	FALSE	sinusoidal	1.4846	12.1386	TRUE	sinusoidal	1.57931	13.0104
ENSMUSG00000030956	Fam53b	B	FALSE	null	1	NA	TRUE	sinusoidal	1.62409	19.4634
ENSMUSG00000030970	Ctbp2	B	FALSE	null	1	NA	TRUE	sigmoid	1.59366	21.605
ENSMUSG00000030972	Acsm5	B	FALSE	sigmoid	1.3863	12.1	TRUE	sigmoid	1.50968	11.685
ENSMUSG00000031101	Sash3	B	FALSE	null	1	NA	TRUE	sigmoid	2.5509	17.72
ENSMUSG00000031171	Ftsj1	B	FALSE	null	1	NA	TRUE	sinusoidal	1.53859	21.2879
ENSMUSG00000031198	Fundc2	B	FALSE	null	1	NA	TRUE	sinusoidal	1.62301	9.24498
ENSMUSG00000031216	Stard8	B	FALSE	null	1	NA	TRUE	sigmoid	1.67184	21.785
ENSMUSG00000031245	Hmgn5	B	FALSE	null	1	NA	TRUE	sigmoid	1.62764	17.725
ENSMUSG00000031360	Ctps2	B	FALSE	sinusoidal	1.4414	6.83732	TRUE	sinusoidal	1.51368	5.51483
ENSMUSG00000031373	Car5b	B	FALSE	null	1	NA	TRUE	sinusoidal	1.71792	6.14233
ENSMUSG00000031375	Bgn	B	FALSE	sinusoidal	1.30193	1.71179	TRUE	sigmoid	1.63615	18.85
ENSMUSG00000031434	Morc4	B	FALSE	null	1	NA	TRUE	sigmoid	2.37304	15.67
ENSMUSG00000031513	Leprotl1	B	FALSE	sinusoidal	1.42135	1.48945	TRUE	sinusoidal	1.5989	0.0678601
ENSMUSG00000031523	Dlc1	B	FALSE	sinusoidal	1.38239	0.765179	TRUE	sinusoidal	1.58475	0.822028
ENSMUSG00000031585	Gtf2e2	B	FALSE	null	1	NA	TRUE	sinusoidal	1.57584	14.8294
ENSMUSG00000031785	Gpr56	B	FALSE	null	1	NA	TRUE	sigmoid	2.24711	18.115
ENSMUSG00000031787	Katnb1	B	FALSE	null	1	NA	TRUE	sigmoid	1.98204	20.505
ENSMUSG00000031792	Usb1	B	FALSE	null	1	NA	TRUE	sinusoidal	1.61415	3.5606
ENSMUSG00000031827	Cotl1	B	FALSE	sinusoidal	1.38668	3.39356	TRUE	sinusoidal	1.62055	1.63349
ENSMUSG00000031990	Jam3	B	FALSE	null	1	NA	TRUE	sinusoidal	2.62559	17.876
ENSMUSG00000032081	Apoc3	B	FALSE	null	1	NA	TRUE	sigmoid	1.70267	18.06
ENSMUSG00000032175	Tyk2	B	FALSE	sinusoidal	1.38174	4.6105	TRUE	sinusoidal	1.64117	3.57339
ENSMUSG00000032177	Pde4a	B	FALSE	null	1	NA	TRUE	sinusoidal	1.83976	20.5839
ENSMUSG00000032185	Carm1	B	FALSE	sinusoidal	1.28254	18.517	TRUE	sigmoid	1.54413	18.27
ENSMUSG00000032204	Aqp9	B	FALSE	sigmoid	1.44412	11.11	TRUE	sinusoidal	1.525	7.28183
ENSMUSG00000032251	Irak1bp1	B	FALSE	null	1	NA	TRUE	sigmoid	3.62872	17.895
ENSMUSG00000032374	Plod2	B	FALSE	null	1	NA	TRUE	sigmoid	2.41013	16.7
ENSMUSG00000032434	Cmtm6	B	FALSE	sinusoidal	1.43114	1.24256	TRUE	sinusoidal	1.62335	2.42645
ENSMUSG00000032485	Scap	B	FALSE	sinusoidal	1.37279	3.52447	TRUE	sinusoidal	1.57708	3.25576
ENSMUSG00000032519	Slc25a38	B	FALSE	sinusoidal	1.34305	17.9834	TRUE	sigmoid	1.52372	18.205
ENSMUSG00000032528	Vipr1	B	FALSE	null	1	NA	TRUE	sigmoid	1.51314	21.05
ENSMUSG00000032531	Amotl2	B	FALSE	null	1	NA	TRUE	sigmoid	1.62998	22.035
ENSMUSG00000032649	Colgalt2	B	FALSE	null	1	NA	TRUE	sigmoid	3.84981	17.815
ENSMUSG00000032679	Cd59a	B	FALSE	null	1	NA	TRUE	sigmoid	1.61581	18.6
ENSMUSG00000032712	2810474O19Rik	B	FALSE	null	1	NA	TRUE	sinusoidal	1.66544	9.53125
ENSMUSG00000032733	Snx33	B	FALSE	sinusoidal	1.42962	22.8483	TRUE	sinusoidal	1.58446	22.8648
ENSMUSG00000032782	Cntrob	B	FALSE	null	1	NA	TRUE	sinusoidal	1.81548	22.7325
ENSMUSG00000032802	Srxn1	B	FALSE	sinusoidal	1.33139	1.58524	TRUE	sinusoidal	1.82039	0.828462
ENSMUSG00000032803	Cdv3	B	FALSE	sinusoidal	1.41885	14.3488	TRUE	sinusoidal	1.59197	13.0971
ENSMUSG00000032812	Arap1	B	FALSE	sinusoidal	1.41517	0.240602	TRUE	sinusoidal	1.6249	2.14396
ENSMUSG00000032905	Atg12	B	FALSE	null	1	NA	TRUE	sigmoid	1.67051	18.395
ENSMUSG00000033159	Cnppd1	B	FALSE	null	1	NA	TRUE	sinusoidal	1.53941	5.49113
ENSMUSG00000033186	Mzt1	B	FALSE	null	1	NA	TRUE	sinusoidal	1.59735	9.18651
ENSMUSG00000033307	Mif	B	FALSE	null	1	NA	TRUE	sigmoid	1.56963	21.28
ENSMUSG00000033326	Kdm4a	B	FALSE	sinusoidal	1.23261	0.315733	TRUE	sinusoidal	1.53044	1.19503
ENSMUSG00000033416	Gucd1	B	FALSE	sinusoidal	1.4048	22.6448	TRUE	sinusoidal	1.55031	22.9225
ENSMUSG00000033420	Antxr1	B	FALSE	null	1	NA	TRUE	sinusoidal	1.76575	18.1878
ENSMUSG00000033540	Idua	B	FALSE	sinusoidal	1.39376	5.02783	TRUE	sinusoidal	1.66264	4.90317
ENSMUSG00000033589	Reep4	B	FALSE	sinusoidal	1.49413	1.23802	TRUE	sinusoidal	1.96488	1.13625
ENSMUSG00000033938	Ndufb7	B	FALSE	null	1	NA	TRUE	sigmoid	1.50927	21.82
ENSMUSG00000034157	Cipc	B	FALSE	sigmoid	1.41364	14.135	TRUE	sinusoidal	1.65728	17.5766
ENSMUSG00000034175	Rhbdd3	B	FALSE	null	1	NA	TRUE	sinusoidal	1.5864	2.98396
ENSMUSG00000034192	Lsm3	B	FALSE	null	1	NA	TRUE	sigmoid	1.78199	15.23
ENSMUSG00000034194	R3hcc1	B	FALSE	null	1	NA	TRUE	sinusoidal	1.55947	4.79216
ENSMUSG00000034265	Zdhhc14	B	FALSE	null	1	NA	TRUE	sigmoid	1.94709	17.745
ENSMUSG00000034295	Fhod3	B	FALSE	null	1	NA	TRUE	sigmoid	1.98041	18.005
ENSMUSG00000034311	Kif4	B	FALSE	null	1	NA	TRUE	sigmoid	2.2811	17.25
ENSMUSG00000034341	Wbp2	B	FALSE	null	1	NA	TRUE	sinusoidal	1.53899	17.926
ENSMUSG00000034379	Wdr5b	B	FALSE	null	1	NA	TRUE	sigmoid	2.59853	18.665
ENSMUSG00000034382	AI661453	B	FALSE	sinusoidal	1.46096	22.3392	TRUE	sinusoidal	1.59296	20.9057
ENSMUSG00000034445	Cyb561a3	B	FALSE	null	1	NA	TRUE	sinusoidal	1.74827	1.58173
ENSMUSG00000034487	Kdelc2	B	FALSE	sinusoidal	1.37459	19.0025	TRUE	sigmoid	1.51285	19.2
ENSMUSG00000034573	Ptpn13	B	FALSE	null	1	NA	TRUE	sinusoidal	1.97871	17.8654
ENSMUSG00000034641	Cd300ld	B	FALSE	null	1	NA	TRUE	sinusoidal	1.5306	20.0183
ENSMUSG00000034687	Fras1	B	FALSE	null	1	NA	TRUE	sigmoid	2.10735	22.045
ENSMUSG00000034751	Mast4	B	FALSE	null	1	NA	TRUE	sinusoidal	1.62966	22.7511
ENSMUSG00000034795	Ccdc122	B	FALSE	null	1	NA	TRUE	sinusoidal	1.79149	11.7616
ENSMUSG00000035198	Tubg1	B	FALSE	null	1	NA	TRUE	sinusoidal	1.60827	20.2091
ENSMUSG00000035199	Arl6ip5	B	FALSE	null	1	NA	TRUE	sigmoid	1.51431	18.39
ENSMUSG00000035206	Sppl2b	B	FALSE	sinusoidal	1.44107	23.2481	TRUE	sinusoidal	1.5525	21.8703
ENSMUSG00000035235	Trim13	B	FALSE	null	1	NA	TRUE	sigmoid	1.81446	2.685
ENSMUSG00000035342	Lzts2	B	FALSE	null	1	NA	TRUE	sinusoidal	1.50784	22.8269
ENSMUSG00000035349	Mia2	B	FALSE	sinusoidal	1.37807	11.9553	TRUE	sinusoidal	1.49733	11.7205
ENSMUSG00000035413	Tmem98	B	FALSE	null	1	NA	TRUE	sigmoid	1.88326	21.855
ENSMUSG00000035671	Zswim4	B	FALSE	null	1	NA	TRUE	sinusoidal	1.52584	2.44259
ENSMUSG00000035898	Uba6	B	FALSE	sinusoidal	1.37122	19.7872	TRUE	sigmoid	1.56939	17.86
ENSMUSG00000035914	Cd276	B	FALSE	null	1	NA	TRUE	sinusoidal	1.72297	10.5238
ENSMUSG00000035919	Bbs9	B	FALSE	null	1	NA	TRUE	sigmoid	1.76428	16.49
ENSMUSG00000035969	Rusc2	B	FALSE	sinusoidal	1.37915	17.7912	TRUE	sinusoidal	1.66629	21.1211
ENSMUSG00000036114	Rpp25l	B	FALSE	sinusoidal	1.38201	22.9511	TRUE	sigmoid	1.554	19.115
ENSMUSG00000036155	Mgat5	B	FALSE	null	1	NA	TRUE	sigmoid	1.9931	15.77
ENSMUSG00000036225	Kctd1	B	FALSE	null	1	NA	TRUE	sigmoid	2.82292	18.975
ENSMUSG00000036353	P2ry12	B	FALSE	null	1	NA	TRUE	sinusoidal	1.70536	19.7931
ENSMUSG00000036362	P2ry13	B	FALSE	null	1	NA	TRUE	sigmoid	1.80345	17.635
ENSMUSG00000036435	Exoc1	B	FALSE	null	1	NA	TRUE	sigmoid	1.53928	18.455
ENSMUSG00000036446	Lum	B	FALSE	sigmoid	1.3119	15.965	TRUE	sigmoid	1.6408	18.18
ENSMUSG00000036570	Fxyd1	B	FALSE	null	1	NA	TRUE	sigmoid	1.59701	18.645
ENSMUSG00000036639	Nudt1	B	FALSE	sinusoidal	1.36577	1.15156	TRUE	sinusoidal	1.71572	1.36564
ENSMUSG00000036854	Hspb6	B	FALSE	null	1	NA	TRUE	sigmoid	2.1443	20.545
ENSMUSG00000036934	4921524J17Rik	B	FALSE	sinusoidal	1.43995	13.9902	TRUE	sinusoidal	2.00566	14.4067
ENSMUSG00000036941	Elac1	B	FALSE	sinusoidal	1.4436	23.9739	TRUE	sinusoidal	1.65307	1.77289
ENSMUSG00000036975	Tmem177	B	FALSE	sinusoidal	1.49496	0.650524	TRUE	sigmoid	1.95183	18.675
ENSMUSG00000037071	Scd1	B	FALSE	null	1	NA	TRUE	sigmoid	2.62723	22.005
ENSMUSG00000037148	Arhgap10	B	FALSE	null	1	NA	TRUE	sigmoid	2.0321	17.875
ENSMUSG00000037211	Spry1	B	FALSE	null	1	NA	TRUE	sinusoidal	2.2067	22.061
ENSMUSG00000037214	Thap1	B	FALSE	null	1	NA	TRUE	sinusoidal	1.84556	17.1292
ENSMUSG00000037242	Clic4	B	FALSE	sinusoidal	1.35371	21.5677	TRUE	sinusoidal	1.53537	21.3977
ENSMUSG00000037251	Pomk	B	FALSE	null	1	NA	TRUE	sinusoidal	1.55079	0.0887381
ENSMUSG00000037262	Kin	B	FALSE	null	1	NA	TRUE	sigmoid	1.68813	13.085
ENSMUSG00000037321	Tap1	B	FALSE	sigmoid	1.48487	2.06	TRUE	sinusoidal	1.74571	3.38522
ENSMUSG00000037344	Slc12a9	B	FALSE	null	1	NA	TRUE	sinusoidal	1.57488	4.07536
ENSMUSG00000037419	Endod1	B	FALSE	null	1	NA	TRUE	sinusoidal	1.63889	19.33
ENSMUSG00000037523	Mavs	B	FALSE	sinusoidal	1.41681	16.9878	TRUE	sinusoidal	1.56587	17.93
ENSMUSG00000037536	Fbxo34	B	FALSE	sinusoidal	1.40666	12.4313	TRUE	sinusoidal	1.70633	11.6878
ENSMUSG00000037572	Wdhd1	B	FALSE	null	1	NA	TRUE	sigmoid	1.5073	19.14
ENSMUSG00000037669	1110057K04Rik	B	FALSE	sinusoidal	1.26997	17.431	TRUE	sigmoid	1.65149	18.445
ENSMUSG00000037692	Ahdc1	B	FALSE	null	1	NA	TRUE	sinusoidal	1.6231	22.8733
ENSMUSG00000037752	Xkr8	B	FALSE	null	1	NA	TRUE	sinusoidal	1.73519	22.9399
ENSMUSG00000037797	Adh4	B	FALSE	sinusoidal	1.34599	2.40621	TRUE	sinusoidal	1.53402	2.49919
ENSMUSG00000037820	Tgm2	B	FALSE	sinusoidal	1.48284	0.102064	TRUE	sinusoidal	1.53808	23.9884
ENSMUSG00000037885	Stk35	B	FALSE	null	1	NA	TRUE	sinusoidal	1.63417	12.7856
ENSMUSG00000037942	Crp	B	FALSE	sigmoid	1.48096	16.32	TRUE	sigmoid	1.59869	16.355
ENSMUSG00000037946	Fgd3	B	FALSE	null	1	NA	TRUE	sinusoidal	2.09635	17.9317
ENSMUSG00000037966	Ninj1	B	FALSE	sinusoidal	1.28427	23.4952	TRUE	sigmoid	1.60639	19.685
ENSMUSG00000038116	Phf20	B	FALSE	sinusoidal	1.46748	15.2493	TRUE	sinusoidal	1.51572	16.9836
ENSMUSG00000038173	Enpp6	B	FALSE	null	1	NA	TRUE	sinusoidal	1.74624	19.1309
ENSMUSG00000038195	Rilp	B	FALSE	sinusoidal	1.34934	23.701	TRUE	sigmoid	1.6303	22.02
ENSMUSG00000038372	Gmds	B	FALSE	null	1	NA	TRUE	sinusoidal	1.66927	0.83809
ENSMUSG00000038587	Akap12	B	FALSE	null	1	NA	TRUE	sigmoid	1.57143	22.06
ENSMUSG00000038618	Rassf7	B	FALSE	null	1	NA	TRUE	sigmoid	1.52886	20.56
ENSMUSG00000038628	Polr3k	B	FALSE	sinusoidal	1.45481	23.8474	TRUE	sinusoidal	1.5029	21.1412
ENSMUSG00000038679	Trps1	B	FALSE	null	1	NA	TRUE	sigmoid	2.40883	17.55
ENSMUSG00000038695	Josd2	B	FALSE	null	1	NA	TRUE	sinusoidal	1.56597	1.29272
ENSMUSG00000038803	Ost4	B	FALSE	sinusoidal	1.46172	16.4039	TRUE	sigmoid	1.55315	19.035
ENSMUSG00000038975	Rabggtb	B	FALSE	null	1	NA	TRUE	sinusoidal	1.54293	5.11848
ENSMUSG00000039004	Bmp6	B	FALSE	null	1	NA	TRUE	sigmoid	1.96363	22.03
ENSMUSG00000039105	Atp6v1g1	B	FALSE	null	1	NA	TRUE	sigmoid	1.56387	21.83
ENSMUSG00000039168	Dap	B	FALSE	null	1	NA	TRUE	sinusoidal	1.58581	20.0168
ENSMUSG00000039220	Ppp1r10	B	FALSE	null	1	NA	TRUE	sinusoidal	1.6949	17.5429
ENSMUSG00000039286	Fndc3b	B	FALSE	null	1	NA	TRUE	sigmoid	1.93946	15.91
ENSMUSG00000039601	Rcan2	B	FALSE	null	1	NA	TRUE	sinusoidal	2.06964	19.1887
ENSMUSG00000039648	Ccbl1	B	FALSE	null	1	NA	TRUE	sigmoid	1.50243	21.315
ENSMUSG00000039835	Nhsl1	B	FALSE	sinusoidal	1.36824	3.39606	TRUE	sinusoidal	1.59181	0.593873
ENSMUSG00000039849	Pcif1	B	FALSE	sinusoidal	1.41053	0.927826	TRUE	sigmoid	1.55113	22.09
ENSMUSG00000039850	Endov	B	FALSE	null	1	NA	TRUE	sinusoidal	1.55967	5.65009
ENSMUSG00000040061	Plcb2	B	FALSE	null	1	NA	TRUE	sigmoid	6.59021	18.465
ENSMUSG00000040105	Ppapdc2	B	FALSE	null	1	NA	TRUE	sinusoidal	1.71382	2.542
ENSMUSG00000040195	Tmem194	B	FALSE	null	1	NA	TRUE	sinusoidal	2.04006	3.74504
ENSMUSG00000040322	Slc25a24	B	FALSE	null	1	NA	TRUE	sigmoid	2.06499	11.765
ENSMUSG00000040451	Sgms1	B	FALSE	sinusoidal	1.45934	9.87957	TRUE	sinusoidal	1.68549	9.22032
ENSMUSG00000040455	Usp45	B	FALSE	null	1	NA	TRUE	sigmoid	1.60844	18.1
ENSMUSG00000040488	Ltbp4	B	FALSE	null	1	NA	TRUE	sigmoid	1.82466	21.855
ENSMUSG00000040852	Plekhh2	B	FALSE	null	1	NA	TRUE	sigmoid	2.18897	17.99
ENSMUSG00000040891	Foxa3	B	FALSE	null	1	NA	TRUE	sinusoidal	1.54055	13.8837
ENSMUSG00000040918	Slc19a2	B	FALSE	sinusoidal	1.29583	0.552333	TRUE	sinusoidal	1.60718	2.14531
ENSMUSG00000041044	Lrit1	B	FALSE	null	1	NA	TRUE	sinusoidal	1.87068	3.60285
ENSMUSG00000041084	Ostc	B	FALSE	sigmoid	1.36535	14.82	TRUE	sigmoid	1.72101	18.76
ENSMUSG00000041117	Ccdc8	B	FALSE	null	1	NA	TRUE	sigmoid	2.20186	17.015
ENSMUSG00000041147	Brca2	B	FALSE	null	1	NA	TRUE	sinusoidal	2.1362	13.6703
ENSMUSG00000041238	Rbbp8	B	FALSE	sigmoid	1.47538	13.945	TRUE	sigmoid	1.54809	16.835
ENSMUSG00000041319	Thoc6	B	FALSE	null	1	NA	TRUE	sinusoidal	1.60824	23.2129
ENSMUSG00000041378	Cldn5	B	FALSE	sinusoidal	1.43457	21.952	TRUE	sinusoidal	1.82821	0.946776
ENSMUSG00000041390	Mdfic	B	FALSE	sinusoidal	1.48088	3.95915	TRUE	sinusoidal	1.51298	2.46968
ENSMUSG00000041559	Fmod	B	FALSE	null	1	NA	TRUE	sigmoid	2.7077	18.575
ENSMUSG00000041560	Gltscr2	B	FALSE	sigmoid	1.57462	10.29	TRUE	sinusoidal	1.59087	6.63501
ENSMUSG00000041577	Prelp	B	FALSE	sinusoidal	1.22202	0.0660872	TRUE	sigmoid	1.94142	19.045
ENSMUSG00000041594	Tmtc4	B	FALSE	null	1	NA	TRUE	sinusoidal	1.60711	16.1889
ENSMUSG00000041625	Ggact	B	FALSE	sinusoidal	1.3752	1.64257	TRUE	sigmoid	1.61691	21.865
ENSMUSG00000041697	Cox6a1	B	FALSE	null	1	NA	TRUE	sigmoid	1.70731	19.38
ENSMUSG00000041734	Kirrel	B	FALSE	null	1	NA	TRUE	sigmoid	2.05669	18.745
ENSMUSG00000041836	Ptpre	B	FALSE	null	1	NA	TRUE	sinusoidal	2.25516	4.41771
ENSMUSG00000041881	Ndufa7	B	FALSE	null	1	NA	TRUE	sigmoid	1.71586	19.265
ENSMUSG00000041961	Znrf3	B	FALSE	null	1	NA	TRUE	sinusoidal	1.57349	8.14614
ENSMUSG00000042015	Wdr41	B	FALSE	null	1	NA	TRUE	sinusoidal	1.54147	5.44751
ENSMUSG00000042208	0610010F05Rik	B	FALSE	null	1	NA	TRUE	sinusoidal	1.53734	11.7612
ENSMUSG00000042275	Pelo	B	FALSE	null	1	NA	TRUE	sigmoid	1.50863	14.485
ENSMUSG00000042419	Nfkbil1	B	FALSE	null	1	NA	TRUE	sinusoidal	1.57592	1.43485
ENSMUSG00000042485	Mustn1	B	FALSE	null	1	NA	TRUE	sinusoidal	3.32844	1.05716
ENSMUSG00000042500	Ago4	B	FALSE	null	1	NA	TRUE	sinusoidal	1.59245	2.94427
ENSMUSG00000042675	Ypel3	B	FALSE	null	1	NA	TRUE	sinusoidal	1.6088	6.38628
ENSMUSG00000042699	Dhx9	B	FALSE	sinusoidal	1.4641	11.9533	TRUE	sinusoidal	1.51916	12.0572
ENSMUSG00000042742	B630005N14Rik	B	FALSE	null	1	NA	TRUE	sigmoid	2.00597	17.875
ENSMUSG00000043099	Hic1	B	FALSE	null	1	NA	TRUE	sinusoidal	1.85503	19.4577
ENSMUSG00000043279	Trim56	B	FALSE	sinusoidal	1.41908	2.03608	TRUE	sinusoidal	1.51012	2.97949
ENSMUSG00000044465	Fam160a2	B	FALSE	null	1	NA	TRUE	sigmoid	1.49753	18.345
ENSMUSG00000044709	Gemin7	B	FALSE	null	1	NA	TRUE	sigmoid	1.81003	18.945
ENSMUSG00000044876	Zfp444	B	FALSE	null	1	NA	TRUE	sinusoidal	1.77344	0.954305
ENSMUSG00000045128	Rpl18a	B	FALSE	null	1	NA	TRUE	sigmoid	1.4972	21.39
ENSMUSG00000045435	Tmem60	B	FALSE	null	1	NA	TRUE	sinusoidal	1.56392	6.3899
ENSMUSG00000045822	Zswim3	B	FALSE	null	1	NA	TRUE	sigmoid	2.2848	20.385
ENSMUSG00000045854	Lyrm2	B	FALSE	null	1	NA	TRUE	sigmoid	1.78897	18.45
ENSMUSG00000045867	Cradd	B	FALSE	null	1	NA	TRUE	sinusoidal	1.64839	23.2012
ENSMUSG00000046020	Pofut1	B	FALSE	sinusoidal	1.38473	22.4913	TRUE	sigmoid	1.56207	21.635
ENSMUSG00000046070	Igfals	B	FALSE	sinusoidal	1.3438	18.4877	TRUE	sigmoid	1.55675	20.65
ENSMUSG00000046318	Ccbe1	B	FALSE	null	1	NA	TRUE	sinusoidal	1.4958	15.7703
ENSMUSG00000046330	Rpl37a	B	FALSE	null	1	NA	TRUE	sigmoid	1.50402	19.09
ENSMUSG00000046711	Hmga1	B	FALSE	sinusoidal	1.45484	8.87047	TRUE	sinusoidal	3.3661	7.82144
ENSMUSG00000046814	Gchfr	B	FALSE	null	1	NA	TRUE	sigmoid	1.77066	20.115
ENSMUSG00000046879	Irgm1	B	FALSE	sinusoidal	1.46034	1.8553	TRUE	sigmoid	1.50477	1.505
ENSMUSG00000047037	Nipa1	B	FALSE	null	1	NA	TRUE	sinusoidal	1.97483	19.3926
ENSMUSG00000047141	Zfp654	B	FALSE	sinusoidal	1.38681	16.3653	TRUE	sinusoidal	1.77447	14.5739
ENSMUSG00000047246	Hist1h2be	B	FALSE	null	1	NA	TRUE	sinusoidal	1.75279	16.1554
ENSMUSG00000047613	A430005L14Rik	B	FALSE	null	1	NA	TRUE	sinusoidal	1.56202	17.8823
ENSMUSG00000047728	BC025446	B	FALSE	sinusoidal	1.35592	17.2299	TRUE	sigmoid	1.60538	18.305
ENSMUSG00000047757	Fancb	B	FALSE	null	1	NA	TRUE	sigmoid	2.13988	18.565
ENSMUSG00000048007	Timm8a1	B	FALSE	sigmoid	1.43276	12.905	TRUE	sinusoidal	1.61315	15.8207
ENSMUSG00000048232	Fbxo10	B	FALSE	null	1	NA	TRUE	sigmoid	2.05822	17.905
ENSMUSG00000048368	Omd	B	FALSE	null	1	NA	TRUE	sigmoid	5.21824	18.025
ENSMUSG00000048379	Socs4	B	FALSE	null	1	NA	TRUE	sigmoid	1.51915	17.91
ENSMUSG00000048647	Exd1	B	FALSE	null	1	NA	TRUE	sigmoid	2.00432	11.41
ENSMUSG00000048758	Rpl29	B	FALSE	null	1	NA	TRUE	sigmoid	1.51192	20.765
ENSMUSG00000048787	Dcun1d3	B	FALSE	null	1	NA	TRUE	sinusoidal	1.75356	14.8074
ENSMUSG00000048796	Cyb561d1	B	FALSE	null	1	NA	TRUE	sinusoidal	2.59725	3.85322
ENSMUSG00000049115	Agtr1a	B	FALSE	sinusoidal	1.47835	3.53782	TRUE	sinusoidal	1.60423	2.80189
ENSMUSG00000049225	Pdp1	B	FALSE	null	1	NA	TRUE	sigmoid	2.15184	16.48
ENSMUSG00000049287	Iba57	B	FALSE	null	1	NA	TRUE	sinusoidal	1.49834	1.63291
ENSMUSG00000049305	Ccdc71	B	FALSE	null	1	NA	TRUE	sinusoidal	1.52419	2.33459
ENSMUSG00000049493	Pls1	B	FALSE	null	1	NA	TRUE	sigmoid	5.42865	16.145
ENSMUSG00000049600	Zbtb45	B	FALSE	null	1	NA	TRUE	sigmoid	3.02619	18.01
ENSMUSG00000049775	Tmsb4x	B	FALSE	null	1	NA	TRUE	sigmoid	1.68286	18.495
ENSMUSG00000050106	Tmc8	B	FALSE	null	1	NA	TRUE	sinusoidal	2.23046	22.1519
ENSMUSG00000050144	Slc25a44	B	FALSE	null	1	NA	TRUE	sinusoidal	1.59693	17.1723
ENSMUSG00000050188	Lsm10	B	FALSE	null	1	NA	TRUE	sinusoidal	1.53506	21.4772
ENSMUSG00000050195	Scd4	B	FALSE	null	1	NA	TRUE	sigmoid	2.48468	16.93
ENSMUSG00000050373	Snx21	B	FALSE	null	1	NA	TRUE	sinusoidal	1.83548	0.831984
ENSMUSG00000050440	Hamp	B	FALSE	null	1	NA	TRUE	sigmoid	3.49312	18.475
ENSMUSG00000050545	Fam228b	B	FALSE	null	1	NA	TRUE	sigmoid	2.27386	18
ENSMUSG00000051390	Zbtb22	B	FALSE	null	1	NA	TRUE	sinusoidal	1.59058	4.04151
ENSMUSG00000051483	Cbr1	B	FALSE	sinusoidal	1.48151	16.2084	TRUE	sigmoid	1.6064	20.065
ENSMUSG00000051748	Wfdc21	B	FALSE	null	1	NA	TRUE	sigmoid	1.60618	16.03
ENSMUSG00000051768	Xrcc1	B	FALSE	sinusoidal	1.37748	23.5854	TRUE	sinusoidal	1.54968	0.766579
ENSMUSG00000051853	Arf3	B	FALSE	sinusoidal	1.27672	10.0554	TRUE	sinusoidal	1.57316	6.76407
ENSMUSG00000052407	Ccdc171	B	FALSE	null	1	NA	TRUE	sinusoidal	1.66951	6.38631
ENSMUSG00000052565	Hist1h1d	B	FALSE	null	1	NA	TRUE	sinusoidal	1.58452	20.1248
ENSMUSG00000052681	Rap1b	B	FALSE	null	1	NA	TRUE	sigmoid	1.50482	16.185
ENSMUSG00000052727	Map1b	B	FALSE	null	1	NA	TRUE	sigmoid	2.34747	18
ENSMUSG00000052748	Swt1	B	FALSE	sigmoid	1.4931	13.68	TRUE	sigmoid	1.64784	14.8
ENSMUSG00000053334	Ficd	B	FALSE	null	1	NA	TRUE	sigmoid	1.86189	14.6
ENSMUSG00000053716	Dusp7	B	FALSE	null	1	NA	TRUE	sinusoidal	1.5603	16.3363
ENSMUSG00000053916	Nanp	B	FALSE	sinusoidal	1.40645	10.7695	TRUE	sinusoidal	1.59125	11.8596
ENSMUSG00000054115	Skp2	B	FALSE	null	1	NA	TRUE	sinusoidal	2.24218	17.2642
ENSMUSG00000054435	Gimap4	B	FALSE	null	1	NA	TRUE	sigmoid	1.50159	16.91
ENSMUSG00000054499	Dedd2	B	FALSE	null	1	NA	TRUE	sigmoid	1.85678	9.595
ENSMUSG00000054641	Mmrn1	B	FALSE	null	1	NA	TRUE	sigmoid	2.55855	18.025
ENSMUSG00000055150	Zfp78	B	FALSE	null	1	NA	TRUE	sinusoidal	2.76901	17.6524
ENSMUSG00000055612	Cdca7	B	FALSE	null	1	NA	TRUE	sinusoidal	2.01809	16.2124
ENSMUSG00000055653	Gpc3	B	FALSE	null	1	NA	TRUE	sigmoid	2.55191	18.47
ENSMUSG00000055839	Tceb2	B	FALSE	null	1	NA	TRUE	sigmoid	1.51068	21.705
ENSMUSG00000055900	Tmem69	B	FALSE	null	1	NA	TRUE	sigmoid	1.57324	17.71
ENSMUSG00000055923	Aasdh	B	FALSE	null	1	NA	TRUE	sinusoidal	1.54433	23.5476
ENSMUSG00000056133	Gm9992	B	FALSE	null	1	NA	TRUE	sinusoidal	8.68219	5.7678
ENSMUSG00000056185	Snx32	B	FALSE	null	1	NA	TRUE	sinusoidal	2.1441	0.810474
ENSMUSG00000056501	Cebpb	B	FALSE	null	1	NA	TRUE	sinusoidal	1.75589	10.9192
ENSMUSG00000056666	Retsat	B	FALSE	null	1	NA	TRUE	sigmoid	1.64568	19.565
ENSMUSG00000056698	Elmod3	B	FALSE	sinusoidal	1.44509	20.3844	TRUE	sigmoid	1.71186	19.4
ENSMUSG00000056917	Sipa1	B	FALSE	null	1	NA	TRUE	sigmoid	1.78329	21.64
ENSMUSG00000057614	Gnai1	B	FALSE	null	1	NA	TRUE	sinusoidal	1.99319	14.2466
ENSMUSG00000057836	Xlr3a	B	FALSE	null	1	NA	TRUE	sinusoidal	2.13273	1.24876
ENSMUSG00000057858	Fam204a	B	FALSE	null	1	NA	TRUE	sinusoidal	1.71381	5.89467
ENSMUSG00000058099	Nfam1	B	FALSE	null	1	NA	TRUE	sinusoidal	1.58005	16.6753
ENSMUSG00000058392	Rrp1b	B	FALSE	null	1	NA	TRUE	sinusoidal	1.54332	19.8588
ENSMUSG00000058523	Mup5	B	FALSE	null	1	NA	TRUE	sigmoid	10.2349	19.655
ENSMUSG00000058773	Hist1h1b	B	FALSE	null	1	NA	TRUE	sigmoid	2.51065	16.025
ENSMUSG00000058979	Cecr5	B	FALSE	sinusoidal	1.45412	23.16	TRUE	sinusoidal	1.57975	23.8322
ENSMUSG00000059013	Sh2d3c	B	FALSE	sinusoidal	1.41655	21.7194	TRUE	sigmoid	1.68287	20.49
ENSMUSG00000059278	Naa38	B	FALSE	sinusoidal	1.33676	21.0662	TRUE	sigmoid	1.5136	17.87
ENSMUSG00000059309		B	FALSE	null	1	NA	TRUE	sigmoid	2.16306	15.78
ENSMUSG00000059436	Max	B	FALSE	null	1	NA	TRUE	sigmoid	2.35352	17.995
ENSMUSG00000059498	Fcgr3	B	FALSE	null	1	NA	TRUE	sigmoid	1.99868	16.39
ENSMUSG00000059534	Uqcr10	B	FALSE	null	1	NA	TRUE	sinusoidal	1.54889	17.384
ENSMUSG00000059555	Tor4a	B	FALSE	null	1	NA	TRUE	sinusoidal	1.79643	22.1767
ENSMUSG00000059820	AU019823	B	FALSE	null	1	NA	TRUE	sinusoidal	1.69534	16.0114
ENSMUSG00000059839	Zfp874b	B	FALSE	null	1	NA	TRUE	sigmoid	2.06122	17.75
ENSMUSG00000059866	Tnip2	B	FALSE	null	1	NA	TRUE	sinusoidal	1.62425	5.20742
ENSMUSG00000059897	Zfp930	B	FALSE	null	1	NA	TRUE	sigmoid	1.73857	13.765
ENSMUSG00000060093	Hist1h4a	B	FALSE	null	1	NA	TRUE	sinusoidal	3.57095	18.6748
ENSMUSG00000060459	Kng2	B	FALSE	sinusoidal	1.46413	16.1184	TRUE	sigmoid	1.50257	15.975
ENSMUSG00000060678	Hist1h4c	B	FALSE	null	1	NA	TRUE	sigmoid	2.38639	19.65
ENSMUSG00000061046	Haghl	B	FALSE	null	1	NA	TRUE	sinusoidal	1.86828	1.47826
ENSMUSG00000061273	Mmgt1	B	FALSE	sinusoidal	1.30268	15.6168	TRUE	sigmoid	1.74885	18.66
ENSMUSG00000061374	Fiz1	B	FALSE	null	1	NA	TRUE	sinusoidal	1.62591	5.37556
ENSMUSG00000061474	Mrps36	B	FALSE	null	1	NA	TRUE	sigmoid	1.93736	15.92
ENSMUSG00000061479	Snrpa	B	FALSE	sinusoidal	1.41721	21.1755	TRUE	sigmoid	1.61397	18.43
ENSMUSG00000061482	Hist1h4d	B	FALSE	null	1	NA	TRUE	sigmoid	1.77341	18.565
ENSMUSG00000062116	Zfp954	B	FALSE	null	1	NA	TRUE	sinusoidal	1.56859	16.1343
ENSMUSG00000062397	Zfp706	B	FALSE	sinusoidal	1.25248	0.966761	TRUE	sigmoid	1.52626	18.885
ENSMUSG00000062619	2310039H08Rik	B	FALSE	sinusoidal	1.42917	0.973143	TRUE	sigmoid	1.75871	21.42
ENSMUSG00000062727	Hist1h2bk	B	FALSE	null	1	NA	TRUE	sigmoid	4.81161	16.015
ENSMUSG00000062729	Ppox	B	FALSE	sinusoidal	1.42623	6.4165	TRUE	sinusoidal	1.54839	2.82536
ENSMUSG00000062825	Actg1	B	FALSE	null	1	NA	TRUE	sinusoidal	1.63834	18.8044
ENSMUSG00000062949	Atp11c	B	FALSE	sinusoidal	1.39262	9.67862	TRUE	sinusoidal	1.49825	9.69633
ENSMUSG00000063011	Msln	B	FALSE	null	1	NA	TRUE	sigmoid	2.78667	19.33
ENSMUSG00000063268	Parp10	B	FALSE	sinusoidal	1.41036	7.01369	TRUE	sinusoidal	1.74172	6.0605
ENSMUSG00000063802	Hspbp1	B	FALSE	sinusoidal	1.32768	22.0367	TRUE	sigmoid	1.55378	22.035
ENSMUSG00000063838	Cdc42ep5	B	FALSE	null	1	NA	TRUE	sigmoid	5.48544	21.96
ENSMUSG00000063889	Crem	B	FALSE	null	1	NA	TRUE	sinusoidal	1.58373	23.983
ENSMUSG00000066235	Pomgnt2	B	FALSE	null	1	NA	TRUE	sinusoidal	1.98741	21.278
ENSMUSG00000066258	Trim12a	B	FALSE	null	1	NA	TRUE	sinusoidal	1.79767	3.8675
ENSMUSG00000066361	Serpina3c	B	FALSE	null	1	NA	TRUE	sigmoid	2.33111	18.405
ENSMUSG00000066442	Mthfs	B	FALSE	null	1	NA	TRUE	sigmoid	1.79588	15.965
ENSMUSG00000066551	Hmgb1	B	FALSE	null	1	NA	TRUE	sinusoidal	1.55852	13.2373
ENSMUSG00000066944	4921513D11Rik	B	FALSE	null	1	NA	TRUE	sigmoid	2.2458	18.97
ENSMUSG00000067225	Cyp2c54	B	FALSE	sinusoidal	1.44762	19.4449	TRUE	sigmoid	1.78899	18.655
ENSMUSG00000067931	Zfp948	B	FALSE	null	1	NA	TRUE	sinusoidal	1.57522	14.9415
ENSMUSG00000068085	Cyp2d11	B	FALSE	null	1	NA	TRUE	sinusoidal	2.45534	16.6622
ENSMUSG00000068270	Shroom4	B	FALSE	null	1	NA	TRUE	sinusoidal	2.00103	17.4238
ENSMUSG00000069094	Pde7a	B	FALSE	null	1	NA	TRUE	sigmoid	1.71121	17.765
ENSMUSG00000069266	Hist1h4b	B	FALSE	null	1	NA	TRUE	sigmoid	1.68595	17.56
ENSMUSG00000069305	Hist1h4n	B	FALSE	null	1	NA	TRUE	sinusoidal	1.6978	18.326
ENSMUSG00000069310	Hist1h3c	B	FALSE	null	1	NA	TRUE	sigmoid	3.41033	15.985
ENSMUSG00000069662	Marcks	B	FALSE	null	1	NA	TRUE	sinusoidal	1.76736	2.29586
ENSMUSG00000069769	Msi2	B	FALSE	null	1	NA	TRUE	sinusoidal	1.56074	5.70507
ENSMUSG00000069792	Wfdc17	B	FALSE	null	1	NA	TRUE	sigmoid	1.69146	18.615
ENSMUSG00000070394	Tmem256	B	FALSE	null	1	NA	TRUE	sigmoid	1.51839	21.435
ENSMUSG00000070699	Sars2	B	FALSE	null	1	NA	TRUE	sinusoidal	1.7254	2.4093
ENSMUSG00000070709	1700049G17Rik	B	FALSE	null	1	NA	TRUE	sigmoid	3.62763	18.14
ENSMUSG00000071037	Camkmt	B	FALSE	null	1	NA	TRUE	sinusoidal	2.08456	4.79444
ENSMUSG00000071176	Arhgef10	B	FALSE	null	1	NA	TRUE	sinusoidal	1.65249	1.46305
ENSMUSG00000071335	G630090E17Rik	B	FALSE	sinusoidal	1.46382	0.245218	TRUE	sinusoidal	1.65206	1.51591
ENSMUSG00000071528	Usmg5	B	FALSE	null	1	NA	TRUE	sigmoid	1.62285	18.43
ENSMUSG00000071711	Mpst	B	FALSE	sinusoidal	1.37872	22.7177	TRUE	sinusoidal	1.7501	22.9306
ENSMUSG00000071715	Ncf4	B	FALSE	null	1	NA	TRUE	sigmoid	2.10978	15.89
ENSMUSG00000072625	Gdf2	B	FALSE	sinusoidal	1.26199	16.8289	TRUE	sigmoid	1.4996	19.89
ENSMUSG00000072964	Bhlhb9	B	FALSE	null	1	NA	TRUE	sinusoidal	2.42823	11.219
ENSMUSG00000073542	Cep76	B	FALSE	null	1	NA	TRUE	sigmoid	1.49855	14.075
ENSMUSG00000073633	Fbxo36	B	FALSE	sinusoidal	1.42975	13.963	TRUE	sinusoidal	1.57169	16.1219
ENSMUSG00000073755	5730409E04Rik	B	FALSE	null	1	NA	TRUE	sigmoid	1.7544	20.245
ENSMUSG00000074207	Adh1	B	FALSE	sinusoidal	1.4695	15.5319	TRUE	sinusoidal	1.52772	17.5057
ENSMUSG00000074283	Zfp109	B	FALSE	null	1	NA	TRUE	sigmoid	1.71827	18.2
ENSMUSG00000074743	Thbd	B	FALSE	null	1	NA	TRUE	sigmoid	2.20248	15.405
ENSMUSG00000075031	Hist1h2bb	B	FALSE	null	1	NA	TRUE	sinusoidal	2.60029	17.5074
ENSMUSG00000075590	Nrbp2	B	FALSE	null	1	NA	TRUE	sigmoid	1.61167	21.485
ENSMUSG00000078350	Smim1	B	FALSE	null	1	NA	TRUE	sigmoid	2.34496	19.165
ENSMUSG00000078429	Ctdsp2	B	FALSE	null	1	NA	TRUE	sinusoidal	1.70263	5.15291
ENSMUSG00000078435	AU041133	B	FALSE	null	1	NA	TRUE	sigmoid	2.3667	18.17
ENSMUSG00000078908	Mon1b	B	FALSE	null	1	NA	TRUE	sinusoidal	1.80747	23.9924
ENSMUSG00000078974	Sec61g	B	FALSE	null	1	NA	TRUE	sigmoid	2.31014	18.625
ENSMUSG00000079003	Samd1	B	FALSE	null	1	NA	TRUE	sigmoid	2.02807	17.825
ENSMUSG00000079037	Prnp	B	FALSE	sinusoidal	1.2988	18.7175	TRUE	sinusoidal	1.71986	18.4239
ENSMUSG00000079043	Fastkd5	B	FALSE	null	1	NA	TRUE	sinusoidal	1.57328	15.2541
ENSMUSG00000079555	Haus3	B	FALSE	null	1	NA	TRUE	sinusoidal	1.50538	11.0412
ENSMUSG00000082361	Btc	B	FALSE	null	1	NA	TRUE	sinusoidal	2.89029	4.25558
ENSMUSG00000085793	Lin52	B	FALSE	null	1	NA	TRUE	sinusoidal	2.15882	14.8394
ENSMUSG00000086784	Isoc2a	B	FALSE	sinusoidal	1.31954	22.6787	TRUE	sigmoid	1.63719	22.025
ENSMUSG00000089715	Cbx6	B	FALSE	null	1	NA	TRUE	sigmoid	1.86152	18.835
ENSMUSG00000089832	Shkbp1	B	FALSE	sinusoidal	1.4372	2.06914	TRUE	sinusoidal	1.50718	2.05303
ENSMUSG00000089873	Mup13	B	FALSE	null	1	NA	TRUE	sinusoidal	6.3207	16.5368
ENSMUSG00000090124	Ugt1a7c	B	FALSE	null	1	NA	TRUE	sinusoidal	2.70485	14.2834
ENSMUSG00000090231	Cfb	B	FALSE	sinusoidal	1.22981	19.4976	TRUE	sigmoid	1.54815	19.505
ENSMUSG00000091337	Eid1	B	FALSE	null	1	NA	TRUE	sinusoidal	1.80646	4.99431
ENSMUSG00000096145	Vkorc1	B	FALSE	sinusoidal	1.36815	3.11954	TRUE	sigmoid	1.86555	20.35
ENSMUSG00000000295	Hddc2	C	TRUE	sigmoid	1.49853	14.92	FALSE	null	1	NA
ENSMUSG00000000538	Tom1l2	C	TRUE	sigmoid	1.6168	9.705	FALSE	sinusoidal	1.48621	7.96542
ENSMUSG00000000552	Zfp385a	C	TRUE	sinusoidal	1.93259	23.8837	FALSE	null	1	NA
ENSMUSG00000000791	Il12rb1	C	TRUE	sigmoid	4.21057	13.72	FALSE	null	1	NA
ENSMUSG00000001506	Col1a1	C	TRUE	sigmoid	1.99827	5.83	FALSE	null	1	NA
ENSMUSG00000002227	Mov10	C	TRUE	sinusoidal	1.5917	6.29099	FALSE	sinusoidal	1.46308	6.00798
ENSMUSG00000002325	Irf9	C	TRUE	sinusoidal	1.53012	3.22389	FALSE	sinusoidal	1.39077	2.03678
ENSMUSG00000002897	Il17ra	C	TRUE	sigmoid	1.82801	15.77	FALSE	null	1	NA
ENSMUSG00000003190	Bcl2l12	C	TRUE	sinusoidal	1.60662	1.27677	FALSE	null	1	NA
ENSMUSG00000003421	Nosip	C	TRUE	sinusoidal	1.52854	6.21775	FALSE	null	1	NA
ENSMUSG00000003429	Rps11	C	TRUE	sinusoidal	1.70155	14.5195	FALSE	sigmoid	1.37833	18.085
ENSMUSG00000003526	Prodh	C	TRUE	sinusoidal	1.61468	18.3172	FALSE	sinusoidal	1.43173	18.9076
ENSMUSG00000003549	Ercc1	C	TRUE	sinusoidal	1.5044	2.62707	FALSE	null	1	NA
ENSMUSG00000004105	Angptl2	C	TRUE	sinusoidal	1.55039	10.7641	FALSE	null	1	NA
ENSMUSG00000004127	Trmt10a	C	TRUE	sigmoid	2.17978	15.135	FALSE	null	1	NA
ENSMUSG00000004568	Arhgef18	C	TRUE	sinusoidal	1.50198	21.5021	FALSE	sinusoidal	1.48484	22.1972
ENSMUSG00000004665	Cnn2	C	TRUE	sinusoidal	1.61241	2.42835	FALSE	null	1	NA
ENSMUSG00000005107	Slc2a9	C	TRUE	sigmoid	1.54702	10.105	FALSE	sinusoidal	1.39892	9.57433
ENSMUSG00000005251	Ripk4	C	TRUE	sinusoidal	1.66284	14.7359	FALSE	sinusoidal	1.42643	15.633
ENSMUSG00000005373	Mlxipl	C	TRUE	sinusoidal	1.78651	3.14773	FALSE	sinusoidal	1.48112	1.68558
ENSMUSG00000005802	Slc30a4	C	TRUE	sinusoidal	1.54157	13.3874	FALSE	null	1	NA
ENSMUSG00000006127	Inpp5k	C	TRUE	sinusoidal	1.54753	6.57636	FALSE	null	1	NA
ENSMUSG00000006288	Ttc5	C	TRUE	sinusoidal	1.50903	3.41424	FALSE	sinusoidal	1.44429	1.36573
ENSMUSG00000006456	Rbm14	C	TRUE	sigmoid	1.54335	13.31	FALSE	null	1	NA
ENSMUSG00000007594	Hapln4	C	TRUE	sinusoidal	1.79869	20.9167	FALSE	null	1	NA
ENSMUSG00000008668	Rps18	C	TRUE	sinusoidal	1.991	13.169	FALSE	sigmoid	1.3933	20.3
ENSMUSG00000008682	Rpl10	C	TRUE	sinusoidal	1.6336	13.4332	FALSE	sinusoidal	1.12307	18.4012
ENSMUSG00000009293	Ube2g2	C	TRUE	sigmoid	1.58623	15.69	FALSE	null	1	NA
ENSMUSG00000009927	Rps25	C	TRUE	sigmoid	1.66752	11.07	FALSE	sigmoid	1.33281	18.535
ENSMUSG00000011257	Pabpc4	C	TRUE	sinusoidal	1.94706	12.8568	FALSE	null	1	NA
ENSMUSG00000011831	Evi5	C	TRUE	sinusoidal	1.98201	1.77542	FALSE	sinusoidal	1.36589	2.18165
ENSMUSG00000012848	Rps5	C	TRUE	sinusoidal	1.92443	14.1323	FALSE	sigmoid	1.39107	21.845
ENSMUSG00000013275	Slc41a1	C	TRUE	sinusoidal	2.20203	10.2317	FALSE	null	1	NA
ENSMUSG00000013701	Timm23	C	TRUE	sinusoidal	1.87012	1.7436	FALSE	null	1	NA
ENSMUSG00000014077	Chp1	C	TRUE	sigmoid	1.84913	10.08	FALSE	sinusoidal	1.31163	14.7277
ENSMUSG00000014361	Mertk	C	TRUE	sinusoidal	1.51062	14.3343	FALSE	sinusoidal	1.24803	11.4163
ENSMUSG00000014791	Elmo3	C	TRUE	sinusoidal	1.53798	6.72471	FALSE	sinusoidal	1.36162	5.66114
ENSMUSG00000015165	Hnrnpl	C	TRUE	sinusoidal	1.56111	5.94533	FALSE	sinusoidal	1.38651	5.33188
ENSMUSG00000015337	Endog	C	TRUE	sinusoidal	1.503	18.9589	FALSE	sinusoidal	1.38025	19.4344
ENSMUSG00000015806	Qdpr	C	TRUE	sinusoidal	1.50883	1.30312	FALSE	sinusoidal	1.43387	0.947142
ENSMUSG00000016933	Plcg1	C	TRUE	sinusoidal	1.51499	11.762	FALSE	sinusoidal	1.34898	12.5659
ENSMUSG00000017667	Zfp334	C	TRUE	sinusoidal	1.88015	19.584	FALSE	null	1	NA
ENSMUSG00000017679	Ttpal	C	TRUE	sigmoid	1.78893	14.135	FALSE	null	1	NA
ENSMUSG00000017707	Serinc3	C	TRUE	sinusoidal	1.60722	15.6803	FALSE	sigmoid	1.41505	17.565
ENSMUSG00000018143	Mafk	C	TRUE	sigmoid	1.79328	9.055	FALSE	null	1	NA
ENSMUSG00000018395	Kif3a	C	TRUE	sinusoidal	1.54428	0.302808	FALSE	null	1	NA
ENSMUSG00000018446	C1qbp	C	TRUE	sinusoidal	1.50449	17.4107	FALSE	sinusoidal	1.26204	17.5998
ENSMUSG00000018678	Sp2	C	TRUE	sinusoidal	1.51295	4.36738	FALSE	null	1	NA
ENSMUSG00000018900	Slc22a5	C	TRUE	sinusoidal	1.52231	12.5721	FALSE	sinusoidal	1.43752	10.6058
ENSMUSG00000018999	Slc35b4	C	TRUE	sinusoidal	1.55182	16.9546	FALSE	sinusoidal	1.45601	18.9437
ENSMUSG00000019132	BC005537	C	TRUE	sinusoidal	1.6338	15.594	FALSE	sigmoid	1.35751	12.395
ENSMUSG00000019732	Calr3	C	TRUE	sinusoidal	1.50722	20.4271	FALSE	null	1	NA
ENSMUSG00000019813	Cep57l1	C	TRUE	sinusoidal	1.50321	22.6269	FALSE	null	1	NA
ENSMUSG00000019820	Utrn	C	TRUE	sinusoidal	1.54095	9.70225	FALSE	sinusoidal	1.30001	8.8509
ENSMUSG00000019832	Rab32	C	TRUE	sinusoidal	1.65622	0.616999	FALSE	sinusoidal	1.42308	22.9922
ENSMUSG00000019891	Dcbld1	C	TRUE	sinusoidal	1.61913	9.95047	FALSE	null	1	NA
ENSMUSG00000019945	1700040L02Rik	C	TRUE	sigmoid	2.32742	9.565	FALSE	null	1	NA
ENSMUSG00000019987	Arg1	C	TRUE	sinusoidal	1.53035	15.2264	FALSE	null	1	NA
ENSMUSG00000020019	Ntn4	C	TRUE	sinusoidal	1.94693	4.92437	FALSE	null	1	NA
ENSMUSG00000020044	Timp3	C	TRUE	sinusoidal	1.58809	13.1555	FALSE	null	1	NA
ENSMUSG00000020074	Ccar1	C	TRUE	sigmoid	1.50059	16.03	FALSE	sigmoid	1.42692	16.525
ENSMUSG00000020101	4632428N05Rik	C	TRUE	sigmoid	1.59956	15.635	FALSE	null	1	NA
ENSMUSG00000020196	Cabin1	C	TRUE	sinusoidal	1.49922	8.67801	FALSE	null	1	NA
ENSMUSG00000020287	Mpg	C	TRUE	sigmoid	1.58539	5.59	FALSE	null	1	NA
ENSMUSG00000020364	Zfp354a	C	TRUE	sinusoidal	1.97126	15.9181	FALSE	null	1	NA
ENSMUSG00000020372	Gnb2l1	C	TRUE	sinusoidal	2.09586	14.2995	FALSE	sigmoid	1.28129	20.895
ENSMUSG00000020385	Clk4	C	TRUE	sinusoidal	1.65775	13.933	FALSE	sinusoidal	1.49099	11.8592
ENSMUSG00000020388	Pdlim4	C	TRUE	sigmoid	2.00793	22.505	FALSE	null	1	NA
ENSMUSG00000020435	Osbp2	C	TRUE	sinusoidal	3.06502	4.03774	FALSE	null	1	NA
ENSMUSG00000020453	Patz1	C	TRUE	sinusoidal	1.75682	6.78507	FALSE	null	1	NA
ENSMUSG00000020460	Rps27a	C	TRUE	sigmoid	1.92335	10.96	FALSE	null	1	NA
ENSMUSG00000020527	Myo19	C	TRUE	sinusoidal	1.71562	14.4738	FALSE	null	1	NA
ENSMUSG00000020547	Bzw2	C	TRUE	sinusoidal	1.61591	16.7745	FALSE	sinusoidal	1.41964	16.1821
ENSMUSG00000020605	Hs1bp3	C	TRUE	sinusoidal	1.63433	3.66796	FALSE	null	1	NA
ENSMUSG00000020681	Ace	C	TRUE	sigmoid	2.09728	15.765	FALSE	null	1	NA
ENSMUSG00000020821	Kif1c	C	TRUE	sinusoidal	1.56408	21.9797	FALSE	sinusoidal	1.25094	2.49711
ENSMUSG00000020844	Nxn	C	TRUE	sigmoid	2.17238	15.285	FALSE	null	1	NA
ENSMUSG00000020888	Dvl2	C	TRUE	sigmoid	1.58225	18.75	FALSE	null	1	NA
ENSMUSG00000020911	Krt19	C	TRUE	sinusoidal	2.15181	22.9108	FALSE	null	1	NA
ENSMUSG00000020941	Map3k14	C	TRUE	sigmoid	2.28771	15.535	FALSE	null	1	NA
ENSMUSG00000020994	Pnn	C	TRUE	sigmoid	1.64766	14.94	FALSE	null	1	NA
ENSMUSG00000021037	Ahsa1	C	TRUE	sinusoidal	1.552	19.2367	FALSE	sinusoidal	1.39456	19.278
ENSMUSG00000021102	Glrx5	C	TRUE	sinusoidal	1.74212	17.2771	FALSE	sinusoidal	1.34803	15.4721
ENSMUSG00000021133	4933426M11Rik	C	TRUE	sigmoid	1.6889	15.75	FALSE	sinusoidal	1.46349	12.5423
ENSMUSG00000021149	Gtpbp4	C	TRUE	sigmoid	1.58661	11.725	FALSE	sinusoidal	1.42327	12.9302
ENSMUSG00000021180	Rps6ka5	C	TRUE	sigmoid	1.81899	20.705	FALSE	null	1	NA
ENSMUSG00000021203	Otub2	C	TRUE	sinusoidal	2.03474	19.7829	FALSE	null	1	NA
ENSMUSG00000021257	Angel1	C	TRUE	sinusoidal	1.73409	2.31768	FALSE	null	1	NA
ENSMUSG00000021265	Slc25a29	C	TRUE	sigmoid	1.64635	14.96	FALSE	null	1	NA
ENSMUSG00000021280	Exoc3l4	C	TRUE	sinusoidal	2.59601	2.37862	FALSE	null	1	NA
ENSMUSG00000021302	Ggps1	C	TRUE	sigmoid	1.57002	12.335	FALSE	null	1	NA
ENSMUSG00000021327	Zkscan3	C	TRUE	sinusoidal	1.59237	23.623	FALSE	sinusoidal	1.38829	22.8947
ENSMUSG00000021360	Gcnt2	C	TRUE	sinusoidal	1.94963	12.1118	FALSE	sinusoidal	1.48886	11.5879
ENSMUSG00000021385	Ippk	C	TRUE	sigmoid	1.5671	14.24	FALSE	sinusoidal	1.44863	14.55
ENSMUSG00000021557	Agtpbp1	C	TRUE	sinusoidal	1.54586	18.5074	FALSE	sinusoidal	1.30449	18.9126
ENSMUSG00000021608	Lpcat1	C	TRUE	sinusoidal	1.49578	18.2935	FALSE	null	1	NA
ENSMUSG00000021620	Acot12	C	TRUE	sigmoid	1.60992	11.525	FALSE	sigmoid	1.46674	11.55
ENSMUSG00000021624	Cd180	C	TRUE	sinusoidal	2.0801	5.65533	FALSE	null	1	NA
ENSMUSG00000021629	Slc30a5	C	TRUE	sigmoid	1.58103	14.785	FALSE	null	1	NA
ENSMUSG00000021715	Cwc27	C	TRUE	sinusoidal	1.5614	3.35622	FALSE	null	1	NA
ENSMUSG00000021738	Atxn7	C	TRUE	sigmoid	1.4978	12.005	FALSE	null	1	NA
ENSMUSG00000021752	Kctd6	C	TRUE	sinusoidal	1.59678	14.0494	FALSE	null	1	NA
ENSMUSG00000021822	Plau	C	TRUE	sinusoidal	2.01495	4.76055	FALSE	null	1	NA
ENSMUSG00000021918	Nek4	C	TRUE	sinusoidal	1.86522	23.8553	FALSE	sinusoidal	1.43197	0.183664
ENSMUSG00000021981	Cab39l	C	TRUE	sinusoidal	1.5715	17.4684	FALSE	null	1	NA
ENSMUSG00000022034	Esco2	C	TRUE	sinusoidal	2.48645	4.53755	FALSE	null	1	NA
ENSMUSG00000022064	Pibf1	C	TRUE	sinusoidal	1.51418	5.29228	FALSE	null	1	NA
ENSMUSG00000022091	Sorbs3	C	TRUE	sinusoidal	1.67758	4.63455	FALSE	null	1	NA
ENSMUSG00000022125	Cln5	C	TRUE	sinusoidal	1.54906	17.0259	FALSE	sigmoid	1.31859	15.9
ENSMUSG00000022201	Zfr	C	TRUE	sinusoidal	1.67566	19.3428	FALSE	sinusoidal	1.43103	19.3078
ENSMUSG00000022246	Rai14	C	TRUE	sinusoidal	1.54647	23.1073	FALSE	sinusoidal	1.45347	23.442
ENSMUSG00000022283	Pabpc1	C	TRUE	sigmoid	2.83349	10.535	FALSE	sinusoidal	1.32027	10.2553
ENSMUSG00000022305	Lrp12	C	TRUE	sinusoidal	1.49811	15.0901	FALSE	sigmoid	1.48991	18.355
ENSMUSG00000022312	Eif3h	C	TRUE	sinusoidal	1.58054	14.5284	FALSE	null	1	NA
ENSMUSG00000022351	Sqle	C	TRUE	sigmoid	1.76033	16.06	FALSE	sinusoidal	1.41178	18.3883
ENSMUSG00000022383	Ppara	C	TRUE	sigmoid	1.60265	8.82	FALSE	sigmoid	1.47873	8.525
ENSMUSG00000022464	Slc38a4	C	TRUE	sigmoid	1.53303	10.5	FALSE	sigmoid	1.35377	10.52
ENSMUSG00000022469	Rapgef3	C	TRUE	sinusoidal	1.59633	20.592	FALSE	null	1	NA
ENSMUSG00000022474	Pmm1	C	TRUE	sinusoidal	1.73681	19.6163	FALSE	null	1	NA
ENSMUSG00000022498	Txndc11	C	TRUE	sigmoid	1.70747	12.445	FALSE	null	1	NA
ENSMUSG00000022528	Hes1	C	TRUE	sinusoidal	1.9095	2.99702	FALSE	null	1	NA
ENSMUSG00000022604	Cep97	C	TRUE	sinusoidal	1.7105	17.8258	FALSE	null	1	NA
ENSMUSG00000022749	Tbc1d23	C	TRUE	sinusoidal	1.5642	8.1335	FALSE	sinusoidal	1.47591	9.76606
ENSMUSG00000022802	Lmln	C	TRUE	sinusoidal	2.15449	16.4277	FALSE	null	1	NA
ENSMUSG00000022842	Ece2	C	TRUE	sinusoidal	1.58552	18.5554	FALSE	null	1	NA
ENSMUSG00000022871	Fetub	C	TRUE	sigmoid	1.51931	15.91	FALSE	null	1	NA
ENSMUSG00000022893	Adamts1	C	TRUE	sinusoidal	1.50746	19.0966	FALSE	sinusoidal	1.45303	19.1924
ENSMUSG00000022960	Donson	C	TRUE	sigmoid	1.7378	11.965	FALSE	null	1	NA
ENSMUSG00000023078	Cxcl13	C	TRUE	sinusoidal	2.47194	22.2135	FALSE	null	1	NA
ENSMUSG00000023156	Rpp14	C	TRUE	sigmoid	1.63419	12.685	FALSE	null	1	NA
ENSMUSG00000023224	Serping1	C	TRUE	sigmoid	1.50024	15.875	FALSE	null	1	NA
ENSMUSG00000023249	Parp3	C	TRUE	sinusoidal	1.51962	2.12803	FALSE	sinusoidal	1.30982	1.90093
ENSMUSG00000023259	Slc26a6	C	TRUE	sinusoidal	2.52532	21.7338	FALSE	null	1	NA
ENSMUSG00000023367	Tmem176a	C	TRUE	sigmoid	1.78199	15.78	FALSE	null	1	NA
ENSMUSG00000023393	Slc17a9	C	TRUE	sigmoid	1.9555	18.485	FALSE	null	1	NA
ENSMUSG00000023826	Park2	C	TRUE	sinusoidal	3.82449	9.57657	FALSE	null	1	NA
ENSMUSG00000023882	Zfp54	C	TRUE	sigmoid	1.53703	13.945	FALSE	null	1	NA
ENSMUSG00000023959	Clic5	C	TRUE	sigmoid	2.29416	20.045	FALSE	null	1	NA
ENSMUSG00000023977	Ubr2	C	TRUE	sinusoidal	1.60261	14.0473	FALSE	sigmoid	1.42874	12.765
ENSMUSG00000024026	Glo1	C	TRUE	sinusoidal	1.54772	2.14211	FALSE	sinusoidal	1.39862	1.62224
ENSMUSG00000024145	Pigf	C	TRUE	sinusoidal	1.65172	16.4123	FALSE	null	1	NA
ENSMUSG00000024165	Hn1l	C	TRUE	sinusoidal	1.51293	1.03059	FALSE	null	1	NA
ENSMUSG00000024168	Tmem204	C	TRUE	sinusoidal	1.79995	14.833	FALSE	null	1	NA
ENSMUSG00000024177	Nme4	C	TRUE	sinusoidal	2.16186	7.16507	FALSE	null	1	NA
ENSMUSG00000024188	Luc7l	C	TRUE	sinusoidal	1.82985	16.8384	FALSE	null	1	NA
ENSMUSG00000024270	Slc39a6	C	TRUE	sigmoid	1.74791	13.735	FALSE	null	1	NA
ENSMUSG00000024421	Lama3	C	TRUE	sigmoid	1.98744	13.825	FALSE	null	1	NA
ENSMUSG00000024535	Snx24	C	TRUE	sinusoidal	1.55671	1.98252	FALSE	null	1	NA
ENSMUSG00000024579	Pcyox1l	C	TRUE	sinusoidal	2.07663	22.1507	FALSE	null	1	NA
ENSMUSG00000024640	Psat1	C	TRUE	sigmoid	5.31997	14.01	FALSE	null	1	NA
ENSMUSG00000024654	Asrgl1	C	TRUE	sinusoidal	1.55483	17.2278	FALSE	null	1	NA
ENSMUSG00000024661	Fth1	C	TRUE	sinusoidal	2.38268	0.366496	FALSE	null	1	NA
ENSMUSG00000024730	Ms4a8a	C	TRUE	sigmoid	2.83538	15.89	FALSE	null	1	NA
ENSMUSG00000024754	Tmem2	C	TRUE	sigmoid	1.52341	15.585	FALSE	sinusoidal	1.20677	15.9831
ENSMUSG00000024773	Atg2a	C	TRUE	sigmoid	1.61459	10.85	FALSE	sinusoidal	1.4748	6.10096
ENSMUSG00000024911	Fibp	C	TRUE	sigmoid	1.55292	10.41	FALSE	null	1	NA
ENSMUSG00000024921	Smarca2	C	TRUE	sinusoidal	1.57651	15.0147	FALSE	sigmoid	1.46592	12.235
ENSMUSG00000024955	Esrra	C	TRUE	sinusoidal	1.58122	17.1714	FALSE	null	1	NA
ENSMUSG00000025007	Aldh18a1	C	TRUE	sinusoidal	2.19727	4.89819	FALSE	null	1	NA
ENSMUSG00000025025	Mxi1	C	TRUE	sinusoidal	1.77266	19.3638	FALSE	null	1	NA
ENSMUSG00000025077	Dclre1a	C	TRUE	sinusoidal	1.77721	14.1593	FALSE	null	1	NA
ENSMUSG00000025083	Afap1l2	C	TRUE	sinusoidal	2.4729	0.251286	FALSE	null	1	NA
ENSMUSG00000025173	Wdr45b	C	TRUE	sigmoid	1.80193	10.185	FALSE	null	1	NA
ENSMUSG00000025176	Hoga1	C	TRUE	sigmoid	1.52549	8.95	FALSE	null	1	NA
ENSMUSG00000025178	Pi4k2a	C	TRUE	sinusoidal	1.64778	1.27984	FALSE	sinusoidal	1.39797	23.8319
ENSMUSG00000025192	Entpd7	C	TRUE	sigmoid	2.17212	13.335	FALSE	null	1	NA
ENSMUSG00000025223	Ldb1	C	TRUE	sinusoidal	1.51513	11.5188	FALSE	null	1	NA
ENSMUSG00000025226	Fbxl15	C	TRUE	sinusoidal	1.64183	20.7171	FALSE	null	1	NA
ENSMUSG00000025268	Maged2	C	TRUE	sinusoidal	1.73319	4.43808	FALSE	null	1	NA
ENSMUSG00000025270	Alas2	C	TRUE	sinusoidal	1.82907	1.01841	FALSE	sinusoidal	1.24232	22.6567
ENSMUSG00000025290	Rps24	C	TRUE	sigmoid	1.58876	11.065	FALSE	sigmoid	1.3123	18.66
ENSMUSG00000025358	Cdk2	C	TRUE	sigmoid	1.60881	10.095	FALSE	null	1	NA
ENSMUSG00000025371	Chmp6	C	TRUE	sinusoidal	1.55749	4.62659	FALSE	null	1	NA
ENSMUSG00000025498	Irf7	C	TRUE	sinusoidal	1.80441	4.94926	FALSE	null	1	NA
ENSMUSG00000025508	Rplp2	C	TRUE	sinusoidal	2.00029	15.0014	FALSE	null	1	NA
ENSMUSG00000025648	Pfkfb4	C	TRUE	sinusoidal	2.28116	18.7981	FALSE	null	1	NA
ENSMUSG00000025759	Mfsd8	C	TRUE	sinusoidal	1.72052	23.4267	FALSE	null	1	NA
ENSMUSG00000025795	Rassf3	C	TRUE	sinusoidal	1.6985	6.21203	FALSE	sinusoidal	1.36322	8.95963
ENSMUSG00000025815	Dhtkd1	C	TRUE	sinusoidal	1.62577	11.0732	FALSE	sinusoidal	1.30732	11.4818
ENSMUSG00000025823	Pdia4	C	TRUE	sinusoidal	1.56074	21.5927	FALSE	sinusoidal	1.4487	22.1356
ENSMUSG00000025933	Tmem14a	C	TRUE	sinusoidal	1.60977	20.8087	FALSE	null	1	NA
ENSMUSG00000025964	Adam23	C	TRUE	sinusoidal	1.51527	20.0294	FALSE	null	1	NA
ENSMUSG00000025967	Eef1b2	C	TRUE	sinusoidal	2.29204	14.2515	FALSE	null	1	NA
ENSMUSG00000026019	Wdr12	C	TRUE	sigmoid	1.6376	13.96	FALSE	sinusoidal	1.37253	14.0003
ENSMUSG00000026031	Cflar	C	TRUE	sigmoid	1.87181	13.91	FALSE	sinusoidal	1.46852	13.8378
ENSMUSG00000026042	Col5a2	C	TRUE	sinusoidal	1.52265	3.27552	FALSE	null	1	NA
ENSMUSG00000026043	Col3a1	C	TRUE	sinusoidal	1.60265	4.09833	FALSE	sinusoidal	1.45828	2.95307
ENSMUSG00000026162	Nhej1	C	TRUE	sinusoidal	1.73537	20.1997	FALSE	null	1	NA
ENSMUSG00000026203	Dnajb2	C	TRUE	sinusoidal	1.49832	20.7817	FALSE	sinusoidal	1.42966	21.9276
ENSMUSG00000026315	Serpinb8	C	TRUE	sigmoid	1.96477	8.905	FALSE	null	1	NA
ENSMUSG00000026317	Cln8	C	TRUE	sinusoidal	1.53421	10.3326	FALSE	null	1	NA
ENSMUSG00000026343	Gpr39	C	TRUE	sinusoidal	1.51048	2.27632	FALSE	null	1	NA
ENSMUSG00000026585	Kifap3	C	TRUE	sinusoidal	1.73967	23.8995	FALSE	sinusoidal	1.43995	21.4021
ENSMUSG00000026603	Smyd2	C	TRUE	sinusoidal	1.56163	18.667	FALSE	sigmoid	1.4744	18.525
ENSMUSG00000026627	Tmem206	C	TRUE	sinusoidal	1.53233	19.1141	FALSE	sinusoidal	1.49312	20.7689
ENSMUSG00000026648	Dclre1c	C	TRUE	sigmoid	1.86371	9.955	FALSE	null	1	NA
ENSMUSG00000026694	Mettl13	C	TRUE	sigmoid	1.56255	9.84	FALSE	null	1	NA
ENSMUSG00000026754	Golga1	C	TRUE	sigmoid	1.50145	13.52	FALSE	sigmoid	1.45477	13.725
ENSMUSG00000026784	Pdss1	C	TRUE	sinusoidal	1.58771	16.8888	FALSE	null	1	NA
ENSMUSG00000026816	Gtf3c5	C	TRUE	sinusoidal	1.51312	0.0781865	FALSE	null	1	NA
ENSMUSG00000026870	Cutal	C	TRUE	sinusoidal	1.62487	22.4396	FALSE	sinusoidal	1.47306	21.3017
ENSMUSG00000026874	Hc	C	TRUE	sigmoid	1.52697	15.695	FALSE	null	1	NA
ENSMUSG00000026880	Stom	C	TRUE	sinusoidal	1.73557	3.32249	FALSE	sinusoidal	1.45122	2.03257
ENSMUSG00000026888	Grb14	C	TRUE	sinusoidal	1.5011	4.39105	FALSE	sinusoidal	1.45487	5.18659
ENSMUSG00000026896	Ifih1	C	TRUE	sinusoidal	1.49782	5.85021	FALSE	sinusoidal	1.46627	7.19368
ENSMUSG00000027004	Frzb	C	TRUE	sinusoidal	1.73761	3.34325	FALSE	null	1	NA
ENSMUSG00000027016	Zfp385b	C	TRUE	sinusoidal	1.70534	11.3157	FALSE	null	1	NA
ENSMUSG00000027070	Lrp2	C	TRUE	sinusoidal	1.69124	23.7441	FALSE	null	1	NA
ENSMUSG00000027079	Clp1	C	TRUE	sigmoid	1.5736	15.65	FALSE	null	1	NA
ENSMUSG00000027204	Fbn1	C	TRUE	sinusoidal	1.52976	5.552	FALSE	null	1	NA
ENSMUSG00000027217	Tspan18	C	TRUE	sinusoidal	2.54501	2.1449	FALSE	null	1	NA
ENSMUSG00000027227	Sord	C	TRUE	sinusoidal	1.72391	14.8723	FALSE	sinusoidal	1.43983	15.8004
ENSMUSG00000027281	Slx4ip	C	TRUE	sinusoidal	2.04577	19.719	FALSE	null	1	NA
ENSMUSG00000027306	Nusap1	C	TRUE	sigmoid	2.68441	0.735	FALSE	null	1	NA
ENSMUSG00000027333	Smox	C	TRUE	sinusoidal	1.539	19.4346	FALSE	null	1	NA
ENSMUSG00000027351	Spred1	C	TRUE	sigmoid	1.50671	14.905	FALSE	null	1	NA
ENSMUSG00000027360	Hdc	C	TRUE	sigmoid	1.82248	15.915	FALSE	null	1	NA
ENSMUSG00000027361	Gabpb1	C	TRUE	sinusoidal	1.52821	5.0445	FALSE	sinusoidal	1.38651	5.40251
ENSMUSG00000027412	Lpin3	C	TRUE	sinusoidal	2.10291	4.5824	FALSE	null	1	NA
ENSMUSG00000027514	Zbp1	C	TRUE	sinusoidal	1.64126	5.69662	FALSE	null	1	NA
ENSMUSG00000027540	Ptpn1	C	TRUE	sigmoid	1.52672	15.885	FALSE	null	1	NA
ENSMUSG00000027550	Lrrcc1	C	TRUE	sinusoidal	1.83263	0.823329	FALSE	null	1	NA
ENSMUSG00000027559	Car3	C	TRUE	sinusoidal	1.6226	0.45636	FALSE	null	1	NA
ENSMUSG00000027562	Car2	C	TRUE	sigmoid	2.4684	16.005	FALSE	null	1	NA
ENSMUSG00000027624	Epb4.1l1	C	TRUE	sinusoidal	1.69569	4.71807	FALSE	null	1	NA
ENSMUSG00000027752	Exosc8	C	TRUE	sinusoidal	1.51415	6.4206	FALSE	null	1	NA
ENSMUSG00000027883	Gpsm2	C	TRUE	sinusoidal	1.52222	22.8483	FALSE	sinusoidal	1.43093	23.4652
ENSMUSG00000027983	Cyp2u1	C	TRUE	sinusoidal	1.75732	6.26755	FALSE	sinusoidal	1.47372	5.57927
ENSMUSG00000028044	Cks1b	C	TRUE	sinusoidal	2.23642	9.87278	FALSE	null	1	NA
ENSMUSG00000028057	Rit1	C	TRUE	sinusoidal	1.50238	1.64618	FALSE	null	1	NA
ENSMUSG00000028066	Pmf1	C	TRUE	sinusoidal	1.55032	1.34729	FALSE	sinusoidal	1.47411	23.3301
ENSMUSG00000028081	Rps3a1	C	TRUE	sigmoid	2.25201	10.62	FALSE	sinusoidal	1.14336	17.4829
ENSMUSG00000028134	Ptbp2	C	TRUE	sinusoidal	1.8074	7.54554	FALSE	null	1	NA
ENSMUSG00000028234	Rps20	C	TRUE	sigmoid	2.45652	10.545	FALSE	null	1	NA
ENSMUSG00000028343	Erp44	C	TRUE	sigmoid	1.51707	14.375	FALSE	sigmoid	1.35415	17.74
ENSMUSG00000028413	B4galt1	C	TRUE	sigmoid	1.68257	15.97	FALSE	null	1	NA
ENSMUSG00000028444	Cntfr	C	TRUE	sinusoidal	1.7825	18.1239	FALSE	null	1	NA
ENSMUSG00000028445	Enho	C	TRUE	sinusoidal	2.284	0.806221	FALSE	null	1	NA
ENSMUSG00000028495	Rps6	C	TRUE	sigmoid	1.76442	10.815	FALSE	sinusoidal	1.15812	17.1242
ENSMUSG00000028643	Ccdc23	C	TRUE	sinusoidal	1.54508	2.87439	FALSE	null	1	NA
ENSMUSG00000028670	Lypla2	C	TRUE	sinusoidal	1.53551	4.33066	FALSE	null	1	NA
ENSMUSG00000028683	Eif2b3	C	TRUE	sinusoidal	1.67968	12.9352	FALSE	sinusoidal	1.46252	14.3135
ENSMUSG00000028744	Pqlc2	C	TRUE	sinusoidal	1.5055	4.74174	FALSE	null	1	NA
ENSMUSG00000028755	Cda	C	TRUE	sinusoidal	2.50261	23.556	FALSE	null	1	NA
ENSMUSG00000028803	Nipal3	C	TRUE	sinusoidal	1.73315	1.12432	FALSE	null	1	NA
ENSMUSG00000028842	Ago3	C	TRUE	sinusoidal	1.49869	15.773	FALSE	sinusoidal	1.41401	16.0277
ENSMUSG00000028901	Gmeb1	C	TRUE	sinusoidal	1.76581	21.9861	FALSE	null	1	NA
ENSMUSG00000028936	Rpl22	C	TRUE	sigmoid	1.78174	11.065	FALSE	null	1	NA
ENSMUSG00000029022	Miip	C	TRUE	sinusoidal	2.00198	10.0258	FALSE	null	1	NA
ENSMUSG00000029050	Ski	C	TRUE	sinusoidal	1.58324	20.3124	FALSE	null	1	NA
ENSMUSG00000029089	Pacrgl	C	TRUE	sinusoidal	1.65536	3.24671	FALSE	null	1	NA
ENSMUSG00000029090	Gpr125	C	TRUE	sinusoidal	1.56467	18.2285	FALSE	sinusoidal	1.30013	19.7706
ENSMUSG00000029094	Afap1	C	TRUE	sinusoidal	1.61342	0.625898	FALSE	null	1	NA
ENSMUSG00000029186	Pi4k2b	C	TRUE	sigmoid	1.76708	16.845	FALSE	sinusoidal	1.40013	14.1647
ENSMUSG00000029260	Ugt2b34	C	TRUE	sinusoidal	1.50026	15.6433	FALSE	sinusoidal	1.36499	15.8416
ENSMUSG00000029279	Brdt	C	TRUE	sinusoidal	2.8989	2.19781	FALSE	null	1	NA
ENSMUSG00000029287	Tgfbr3	C	TRUE	sinusoidal	1.67061	10.6731	FALSE	sigmoid	1.47065	10.495
ENSMUSG00000029290	Zfp326	C	TRUE	sinusoidal	1.60461	18.6662	FALSE	sinusoidal	1.41798	17.1222
ENSMUSG00000029333	Rasgef1b	C	TRUE	sigmoid	1.89149	11.24	FALSE	null	1	NA
ENSMUSG00000029352	Crybb3	C	TRUE	sigmoid	4.84702	15.96	FALSE	null	1	NA
ENSMUSG00000029446	Psph	C	TRUE	sinusoidal	1.58433	19.7634	FALSE	null	1	NA
ENSMUSG00000029469	Ift81	C	TRUE	sinusoidal	1.83242	23.6947	FALSE	null	1	NA
ENSMUSG00000029560	Snx8	C	TRUE	sinusoidal	1.58633	18.4872	FALSE	sinusoidal	1.43059	19.1512
ENSMUSG00000029614	Rpl6	C	TRUE	sinusoidal	1.642	14.0191	FALSE	sinusoidal	1.17224	16.4308
ENSMUSG00000029638	Glcci1	C	TRUE	sigmoid	2.75439	15.45	FALSE	null	1	NA
ENSMUSG00000029669	Tspan12	C	TRUE	sigmoid	1.60391	9.6	FALSE	sinusoidal	1.45079	9.4539
ENSMUSG00000029675	Eln	C	TRUE	sigmoid	3.35744	5.58	FALSE	null	1	NA
ENSMUSG00000029708	Gcc1	C	TRUE	sigmoid	1.83012	13.49	FALSE	null	1	NA
ENSMUSG00000029772	Ahcyl2	C	TRUE	sinusoidal	1.63136	21.8073	FALSE	null	1	NA
ENSMUSG00000029826	Zc3hav1	C	TRUE	sinusoidal	1.63217	4.13947	FALSE	sinusoidal	1.42231	2.79021
ENSMUSG00000030042	Pole4	C	TRUE	sigmoid	1.69132	15.69	FALSE	null	1	NA
ENSMUSG00000030046	Bmp10	C	TRUE	sinusoidal	1.78853	12.2387	FALSE	null	1	NA
ENSMUSG00000030102	Itpr1	C	TRUE	sigmoid	1.55848	15.165	FALSE	sigmoid	1.48631	14.945
ENSMUSG00000030111	A2m	C	TRUE	sigmoid	6.84342	15.76	FALSE	null	1	NA
ENSMUSG00000030189	Ybx3	C	TRUE	sinusoidal	1.57232	19.9339	FALSE	null	1	NA
ENSMUSG00000030228	Pik3c2g	C	TRUE	sigmoid	2.14865	5.945	FALSE	null	1	NA
ENSMUSG00000030245	Golt1b	C	TRUE	sigmoid	1.8359	14.78	FALSE	null	1	NA
ENSMUSG00000030271	Ogg1	C	TRUE	sinusoidal	1.58024	3.10265	FALSE	null	1	NA
ENSMUSG00000030330	Ing4	C	TRUE	sinusoidal	1.56839	2.60238	FALSE	sinusoidal	1.43287	1.22989
ENSMUSG00000030378	2810007J24Rik	C	TRUE	sinusoidal	1.64203	10.7184	FALSE	null	1	NA
ENSMUSG00000030432	Rpl28	C	TRUE	sinusoidal	1.9375	13.5716	FALSE	sigmoid	1.47372	21.6
ENSMUSG00000030527	Crtc3	C	TRUE	sinusoidal	1.67042	0.712822	FALSE	null	1	NA
ENSMUSG00000030551	Nr2f2	C	TRUE	sigmoid	1.56921	9.87	FALSE	null	1	NA
ENSMUSG00000030613	Ccdc90b	C	TRUE	sinusoidal	1.5067	1.95889	FALSE	null	1	NA
ENSMUSG00000030662	Ipo5	C	TRUE	sigmoid	1.65247	11.515	FALSE	sinusoidal	1.36811	12.5481
ENSMUSG00000030739	Myh14	C	TRUE	sinusoidal	1.63431	1.67541	FALSE	sinusoidal	1.49343	0.241366
ENSMUSG00000030759	Far1	C	TRUE	sigmoid	1.65772	2.64	FALSE	null	1	NA
ENSMUSG00000030788	Rnf141	C	TRUE	sinusoidal	1.69181	2.27531	FALSE	sinusoidal	1.46335	2.4684
ENSMUSG00000030815	Phkg2	C	TRUE	sigmoid	1.64052	8.605	FALSE	null	1	NA
ENSMUSG00000030881	Arfip2	C	TRUE	sigmoid	1.9545	13.975	FALSE	null	1	NA
ENSMUSG00000030966	Trim21	C	TRUE	sinusoidal	1.50391	2.11183	FALSE	sinusoidal	1.40788	3.73054
ENSMUSG00000031029	Eif3f	C	TRUE	sinusoidal	1.79786	13.0679	FALSE	null	1	NA
ENSMUSG00000031107	Rbmx2	C	TRUE	sinusoidal	2.03568	1.31666	FALSE	null	1	NA
ENSMUSG00000031169	Porcn	C	TRUE	sinusoidal	1.55619	22.6944	FALSE	null	1	NA
ENSMUSG00000031255	Sytl4	C	TRUE	sinusoidal	1.58564	22.6655	FALSE	null	1	NA
ENSMUSG00000031320	Rps4x	C	TRUE	sinusoidal	1.93296	14.0119	FALSE	null	1	NA
ENSMUSG00000031402	Mpp1	C	TRUE	sinusoidal	1.50718	12.9773	FALSE	sinusoidal	1.3645	14.8619
ENSMUSG00000031508	Ankrd10	C	TRUE	sigmoid	2.10756	14.01	FALSE	null	1	NA
ENSMUSG00000031545	Agpat6	C	TRUE	sinusoidal	1.61557	15.6301	FALSE	sinusoidal	1.42997	14.3773
ENSMUSG00000031586	Rbpms	C	TRUE	sigmoid	1.71885	5.775	FALSE	sinusoidal	1.37595	2.20763
ENSMUSG00000031732	Phlpp2	C	TRUE	sigmoid	1.73192	13.815	FALSE	null	1	NA
ENSMUSG00000031776	Arl2bp	C	TRUE	sinusoidal	2.43578	5.12191	FALSE	null	1	NA
ENSMUSG00000031845	Bco1	C	TRUE	sinusoidal	1.54996	5.9034	FALSE	null	1	NA
ENSMUSG00000032009	Sesn3	C	TRUE	sinusoidal	1.7642	0.929948	FALSE	sinusoidal	1.4375	0.342333
ENSMUSG00000032026	Rexo2	C	TRUE	sinusoidal	1.53053	18.9161	FALSE	null	1	NA
ENSMUSG00000032044	Rpusd4	C	TRUE	sinusoidal	1.52193	23.9961	FALSE	sinusoidal	1.49403	22.3003
ENSMUSG00000032064	Dixdc1	C	TRUE	sinusoidal	1.66708	3.50367	FALSE	null	1	NA
ENSMUSG00000032092	Mpzl2	C	TRUE	sinusoidal	1.59861	14.5686	FALSE	null	1	NA
ENSMUSG00000032098	Treh	C	TRUE	sigmoid	2.61792	15.77	FALSE	null	1	NA
ENSMUSG00000032120	C2cd2l	C	TRUE	sinusoidal	1.50988	11.6	FALSE	sigmoid	1.48248	13.44
ENSMUSG00000032121	Tmem218	C	TRUE	sinusoidal	2.85481	1.3755	FALSE	null	1	NA
ENSMUSG00000032122	Slc37a2	C	TRUE	sinusoidal	1.68642	21.7521	FALSE	null	1	NA
ENSMUSG00000032125	Robo4	C	TRUE	sinusoidal	1.51146	2.99418	FALSE	null	1	NA
ENSMUSG00000032285	Dnaja4	C	TRUE	sigmoid	2.00118	16.37	FALSE	null	1	NA
ENSMUSG00000032298	Neil1	C	TRUE	sinusoidal	2.01273	1.02702	FALSE	null	1	NA
ENSMUSG00000032333	Stoml1	C	TRUE	sigmoid	1.91242	6.785	FALSE	null	1	NA
ENSMUSG00000032348	Gsta4	C	TRUE	sigmoid	1.55362	21.235	FALSE	null	1	NA
ENSMUSG00000032377	Plscr4	C	TRUE	sinusoidal	1.53903	13.6526	FALSE	null	1	NA
ENSMUSG00000032388	Spg21	C	TRUE	sinusoidal	1.71263	3.51224	FALSE	sinusoidal	1.2827	5.40467
ENSMUSG00000032392	Parp16	C	TRUE	sinusoidal	1.57148	19.366	FALSE	sinusoidal	1.44458	20.6014
ENSMUSG00000032399	Rpl4	C	TRUE	sinusoidal	1.54558	13.4934	FALSE	null	1	NA
ENSMUSG00000032477	Cdc25a	C	TRUE	sigmoid	1.61144	12.265	FALSE	null	1	NA
ENSMUSG00000032500	Dclk3	C	TRUE	sinusoidal	1.59417	14.1951	FALSE	null	1	NA
ENSMUSG00000032536	Trak1	C	TRUE	sinusoidal	1.85029	11.4281	FALSE	sinusoidal	1.41899	12.0672
ENSMUSG00000032565	Nudt16	C	TRUE	sinusoidal	1.53503	1.8021	FALSE	null	1	NA
ENSMUSG00000032567	Aste1	C	TRUE	sigmoid	1.82744	13.845	FALSE	null	1	NA
ENSMUSG00000032601	Prkar2a	C	TRUE	sinusoidal	1.68415	19.9588	FALSE	sinusoidal	1.3759	19.7631
ENSMUSG00000032606	Nicn1	C	TRUE	sinusoidal	1.94332	0.428557	FALSE	null	1	NA
ENSMUSG00000032621	Srek1	C	TRUE	sinusoidal	1.52919	20.1443	FALSE	null	1	NA
ENSMUSG00000032744	Heyl	C	TRUE	sinusoidal	2.3136	1.39655	FALSE	null	1	NA
ENSMUSG00000032766	Gng11	C	TRUE	sinusoidal	1.64422	21.0518	FALSE	null	1	NA
ENSMUSG00000032892	Rangrf	C	TRUE	sigmoid	1.84912	18.905	FALSE	null	1	NA
ENSMUSG00000033055	Ankrd54	C	TRUE	sinusoidal	1.70906	21.6508	FALSE	null	1	NA
ENSMUSG00000033102	Cdc14b	C	TRUE	sinusoidal	1.50467	2.44597	FALSE	sinusoidal	1.48895	4.57368
ENSMUSG00000033207	Mamdc2	C	TRUE	sigmoid	1.67908	10.835	FALSE	sinusoidal	1.48074	14.2317
ENSMUSG00000033257	Ttll4	C	TRUE	sigmoid	1.52937	15.12	FALSE	sigmoid	1.43201	16.29
ENSMUSG00000033318	Gstt2	C	TRUE	sinusoidal	1.59403	13.2361	FALSE	null	1	NA
ENSMUSG00000033356	Pus7l	C	TRUE	sinusoidal	1.99657	16.9845	FALSE	sinusoidal	1.46029	18.1293
ENSMUSG00000033373	Fntb	C	TRUE	sinusoidal	1.64689	5.27425	FALSE	null	1	NA
ENSMUSG00000033705	Stard9	C	TRUE	sinusoidal	1.90513	14.6343	FALSE	null	1	NA
ENSMUSG00000033955	Tnks1bp1	C	TRUE	sinusoidal	1.50831	13.7857	FALSE	null	1	NA
ENSMUSG00000033970	Rfc3	C	TRUE	sinusoidal	1.5857	5.68791	FALSE	null	1	NA
ENSMUSG00000034118	Tpst1	C	TRUE	sinusoidal	1.72449	17.603	FALSE	sinusoidal	1.33735	17.4895
ENSMUSG00000034121	Mks1	C	TRUE	sinusoidal	1.72362	0.833268	FALSE	null	1	NA
ENSMUSG00000034158	Lrrc58	C	TRUE	sinusoidal	1.723	19.5196	FALSE	sinusoidal	1.37608	19.6935
ENSMUSG00000034160	Ogt	C	TRUE	sinusoidal	1.8443	21.1569	FALSE	sigmoid	1.38137	19.365
ENSMUSG00000034205	Loxl2	C	TRUE	sigmoid	1.5144	5.91	FALSE	null	1	NA
ENSMUSG00000034220	Gpc1	C	TRUE	sinusoidal	1.71811	16.0694	FALSE	null	1	NA
ENSMUSG00000034254	Agpat1	C	TRUE	sinusoidal	2.06878	15.1817	FALSE	null	1	NA
ENSMUSG00000034334	Fam151b	C	TRUE	sinusoidal	1.52668	4.43111	FALSE	null	1	NA
ENSMUSG00000034361	Cpne2	C	TRUE	sinusoidal	1.59392	9.1037	FALSE	null	1	NA
ENSMUSG00000034438	Gbp8	C	TRUE	sinusoidal	1.74368	17.6354	FALSE	null	1	NA
ENSMUSG00000034471	Caskin2	C	TRUE	sigmoid	1.83913	15.89	FALSE	sinusoidal	1.46489	18.1302
ENSMUSG00000034518	Hmgxb4	C	TRUE	sinusoidal	1.65031	0.858883	FALSE	null	1	NA
ENSMUSG00000034708	Grn	C	TRUE	sigmoid	1.59772	16.035	FALSE	null	1	NA
ENSMUSG00000034731	Dgkh	C	TRUE	sigmoid	2.2685	10.69	FALSE	null	1	NA
ENSMUSG00000034785	Dio1	C	TRUE	sinusoidal	1.84646	14.0792	FALSE	null	1	NA
ENSMUSG00000034800	Zfp661	C	TRUE	sinusoidal	1.67503	15.6434	FALSE	null	1	NA
ENSMUSG00000034837	Gnat1	C	TRUE	sinusoidal	5.70997	9.47319	FALSE	null	1	NA
ENSMUSG00000034848	Ttc21b	C	TRUE	sinusoidal	1.53559	20.8077	FALSE	null	1	NA
ENSMUSG00000034853	Acot11	C	TRUE	sinusoidal	2.27898	15.2959	FALSE	null	1	NA
ENSMUSG00000034855	Cxcl10	C	TRUE	sinusoidal	2.06959	4.58071	FALSE	null	1	NA
ENSMUSG00000034947	Tmem106a	C	TRUE	sinusoidal	1.5214	3.79094	FALSE	null	1	NA
ENSMUSG00000034994	Eef2	C	TRUE	sinusoidal	2.30229	13.7922	FALSE	sigmoid	1.33691	22.04
ENSMUSG00000035064	Eef2k	C	TRUE	sinusoidal	1.51508	12.7075	FALSE	null	1	NA
ENSMUSG00000035208	Slfn8	C	TRUE	sinusoidal	1.83462	5.36128	FALSE	null	1	NA
ENSMUSG00000035239	Neu3	C	TRUE	sinusoidal	2.43608	21.1168	FALSE	null	1	NA
ENSMUSG00000035293	G2e3	C	TRUE	sigmoid	1.54997	10.15	FALSE	null	1	NA
ENSMUSG00000035356	Nfkbiz	C	TRUE	sigmoid	2.14544	15.89	FALSE	null	1	NA
ENSMUSG00000035357	Pdzrn3	C	TRUE	sigmoid	2.11332	16	FALSE	null	1	NA
ENSMUSG00000035847	Ids	C	TRUE	sinusoidal	1.60617	19.1334	FALSE	null	1	NA
ENSMUSG00000035910	Dcdc2a	C	TRUE	sinusoidal	2.29519	23.6267	FALSE	null	1	NA
ENSMUSG00000036006	Fam65b	C	TRUE	sigmoid	2.51815	20.83	FALSE	null	1	NA
ENSMUSG00000036023	Parp2	C	TRUE	sinusoidal	1.52759	2.87376	FALSE	null	1	NA
ENSMUSG00000036046	5031439G07Rik	C	TRUE	sigmoid	1.54582	9.755	FALSE	null	1	NA
ENSMUSG00000036138	Acaa1a	C	TRUE	sinusoidal	1.54863	12.5071	FALSE	null	1	NA
ENSMUSG00000036249	Rbm43	C	TRUE	sinusoidal	1.64394	2.36221	FALSE	sinusoidal	1.41399	1.05334
ENSMUSG00000036452	Arhgap26	C	TRUE	sinusoidal	1.52443	1.60151	FALSE	sinusoidal	1.43582	1.84585
ENSMUSG00000036473	Tbc1d24	C	TRUE	sinusoidal	1.86655	11.8169	FALSE	sinusoidal	1.46534	11.2265
ENSMUSG00000036528	Ppfibp2	C	TRUE	sinusoidal	1.54063	23.7533	FALSE	sinusoidal	1.4374	0.11066
ENSMUSG00000036687	Tmem184a	C	TRUE	sinusoidal	1.49898	4.84448	FALSE	sinusoidal	1.45734	2.5311
ENSMUSG00000036775	Decr2	C	TRUE	sinusoidal	1.49805	12.2227	FALSE	sinusoidal	1.27213	12.1546
ENSMUSG00000036918	Ttc7	C	TRUE	sigmoid	1.67478	8.54	FALSE	sigmoid	1.41522	10.12
ENSMUSG00000037098	Rab11fip3	C	TRUE	sinusoidal	1.54093	22.467	FALSE	null	1	NA
ENSMUSG00000037103	Dcaf15	C	TRUE	sinusoidal	1.62361	4.80831	FALSE	null	1	NA
ENSMUSG00000037108	Zcwpw1	C	TRUE	sinusoidal	2.11644	0.970117	FALSE	null	1	NA
ENSMUSG00000037110	Ralgapa2	C	TRUE	sinusoidal	1.61378	10.8141	FALSE	sinusoidal	1.46055	10.6392
ENSMUSG00000037243	Zfp692	C	TRUE	sinusoidal	2.04296	2.40474	FALSE	null	1	NA
ENSMUSG00000037280	Galnt6	C	TRUE	sinusoidal	2.56545	20.049	FALSE	null	1	NA
ENSMUSG00000037343	Taf2	C	TRUE	sigmoid	1.7	11.595	FALSE	sinusoidal	1.37555	12.7391
ENSMUSG00000037370	Enpp1	C	TRUE	sinusoidal	1.7322	13.609	FALSE	sinusoidal	1.40374	13.3796
ENSMUSG00000037415	Ranbp10	C	TRUE	sinusoidal	1.60647	4.40205	FALSE	null	1	NA
ENSMUSG00000037434	Slc30a1	C	TRUE	sinusoidal	1.5935	15.2087	FALSE	null	1	NA
ENSMUSG00000037563	Rps16	C	TRUE	sinusoidal	1.83304	13.2745	FALSE	sigmoid	1.30988	21.38
ENSMUSG00000037621	Atoh8	C	TRUE	sinusoidal	1.6843	0.290856	FALSE	null	1	NA
ENSMUSG00000037622	Wdtc1	C	TRUE	sinusoidal	1.69118	4.80282	FALSE	sinusoidal	1.40561	4.96325
ENSMUSG00000037720	Tmem33	C	TRUE	sinusoidal	1.50867	19.4301	FALSE	sinusoidal	1.34071	20.03
ENSMUSG00000037742	Eef1a1	C	TRUE	sinusoidal	2.42084	12.8575	FALSE	null	1	NA
ENSMUSG00000037808	Fam76b	C	TRUE	sigmoid	1.74001	10.11	FALSE	null	1	NA
ENSMUSG00000038034	Igsf8	C	TRUE	sinusoidal	1.50875	9.45946	FALSE	null	1	NA
ENSMUSG00000038072	Galnt11	C	TRUE	sinusoidal	1.5468	15.7108	FALSE	sigmoid	1.35602	15.11
ENSMUSG00000038074	Fkbp14	C	TRUE	sinusoidal	1.58703	16.1341	FALSE	null	1	NA
ENSMUSG00000038145	Snrk	C	TRUE	sigmoid	1.58926	15.2	FALSE	sinusoidal	1.35019	16.3905
ENSMUSG00000038156	Spon1	C	TRUE	sinusoidal	1.72805	15.4997	FALSE	null	1	NA
ENSMUSG00000038178	Slc43a2	C	TRUE	sinusoidal	1.52008	5.80367	FALSE	null	1	NA
ENSMUSG00000038451	Spsb2	C	TRUE	sinusoidal	1.64352	2.63374	FALSE	null	1	NA
ENSMUSG00000038506	Dcun1d2	C	TRUE	sinusoidal	1.55929	16.0519	FALSE	null	1	NA
ENSMUSG00000038517	Tbkbp1	C	TRUE	sigmoid	1.79286	18.535	FALSE	null	1	NA
ENSMUSG00000038578	Susd1	C	TRUE	sinusoidal	2.02672	14.7523	FALSE	sinusoidal	1.47147	15.1304
ENSMUSG00000038582	Pptc7	C	TRUE	sinusoidal	1.55906	12.0269	FALSE	null	1	NA
ENSMUSG00000038685	Rtel1	C	TRUE	sigmoid	1.6699	9.91	FALSE	null	1	NA
ENSMUSG00000038827	Fam206a	C	TRUE	sinusoidal	1.87523	0.102485	FALSE	null	1	NA
ENSMUSG00000038831	Ralgps1	C	TRUE	sigmoid	1.83288	21.55	FALSE	null	1	NA
ENSMUSG00000039031	Arhgap18	C	TRUE	sinusoidal	1.82157	3.8353	FALSE	null	1	NA
ENSMUSG00000039117	Taf4a	C	TRUE	sigmoid	1.95826	12.765	FALSE	null	1	NA
ENSMUSG00000039205	Ciz1	C	TRUE	sinusoidal	1.55613	1.35858	FALSE	null	1	NA
ENSMUSG00000039270	Megf9	C	TRUE	sigmoid	1.5437	15.635	FALSE	null	1	NA
ENSMUSG00000039298	Cdk5rap2	C	TRUE	sinusoidal	2.07302	4.17496	FALSE	null	1	NA
ENSMUSG00000039646	Vasn	C	TRUE	sigmoid	1.90896	14.115	FALSE	null	1	NA
ENSMUSG00000039865	Slc44a3	C	TRUE	sinusoidal	1.54393	13.9205	FALSE	null	1	NA
ENSMUSG00000039934	Gsap	C	TRUE	sinusoidal	1.53606	7.47005	FALSE	sinusoidal	1.41425	7.38988
ENSMUSG00000039987	Phtf2	C	TRUE	sinusoidal	1.55865	13.7577	FALSE	null	1	NA
ENSMUSG00000040035	Disp2	C	TRUE	sinusoidal	1.57308	10.1058	FALSE	null	1	NA
ENSMUSG00000040272	Accs	C	TRUE	sinusoidal	2.07565	5.57144	FALSE	null	1	NA
ENSMUSG00000040282	BC052040	C	TRUE	sinusoidal	2.09918	2.59346	FALSE	null	1	NA
ENSMUSG00000040297	Suco	C	TRUE	sigmoid	1.62764	13.395	FALSE	sigmoid	1.47366	13.825
ENSMUSG00000040312	Cchcr1	C	TRUE	sinusoidal	1.81248	0.655463	FALSE	null	1	NA
ENSMUSG00000040350	Trim7	C	TRUE	sinusoidal	2.14913	17.9237	FALSE	null	1	NA
ENSMUSG00000040365	Trim41	C	TRUE	sinusoidal	1.66662	16.8847	FALSE	null	1	NA
ENSMUSG00000040441	Slc26a10	C	TRUE	sinusoidal	2.22211	13.5956	FALSE	null	1	NA
ENSMUSG00000040511	Pvr	C	TRUE	sinusoidal	2.30129	7.88371	FALSE	null	1	NA
ENSMUSG00000040522	Tlr8	C	TRUE	sigmoid	1.68389	15.73	FALSE	null	1	NA
ENSMUSG00000040620	Dhx33	C	TRUE	sinusoidal	1.5895	11.5488	FALSE	sinusoidal	1.46195	10.6922
ENSMUSG00000040624	Plekhg1	C	TRUE	sinusoidal	1.50127	4.62914	FALSE	sinusoidal	1.48381	2.74844
ENSMUSG00000040811	Eml2	C	TRUE	sinusoidal	1.53374	3.93806	FALSE	null	1	NA
ENSMUSG00000040929	Rfx3	C	TRUE	sinusoidal	1.62836	2.86036	FALSE	null	1	NA
ENSMUSG00000040952	Rps19	C	TRUE	sinusoidal	2.17397	13.5907	FALSE	sigmoid	1.21532	21.63
ENSMUSG00000041025	Iffo2	C	TRUE	sinusoidal	1.71968	12.122	FALSE	null	1	NA
ENSMUSG00000041037	Irgq	C	TRUE	sinusoidal	1.82799	19.5393	FALSE	null	1	NA
ENSMUSG00000041096	Tspyl2	C	TRUE	sigmoid	1.85705	2.965	FALSE	null	1	NA
ENSMUSG00000041477	Dcp1b	C	TRUE	sinusoidal	1.91463	2.67341	FALSE	null	1	NA
ENSMUSG00000041506	Rrp9	C	TRUE	sigmoid	1.83727	9.34	FALSE	null	1	NA
ENSMUSG00000041540	Sox5	C	TRUE	sinusoidal	1.70195	3.27177	FALSE	sinusoidal	1.48516	2.35266
ENSMUSG00000041769	Ppp2r2d	C	TRUE	sinusoidal	1.56953	7.69614	FALSE	sinusoidal	1.459	8.52149
ENSMUSG00000041773	Enc1	C	TRUE	sinusoidal	1.67975	0.811418	FALSE	null	1	NA
ENSMUSG00000041775	Mapk1ip1	C	TRUE	sinusoidal	1.80585	2.41513	FALSE	null	1	NA
ENSMUSG00000041777	Cir1	C	TRUE	sinusoidal	1.5245	6.26969	FALSE	null	1	NA
ENSMUSG00000041841	Rpl37	C	TRUE	sigmoid	1.74434	10.84	FALSE	sinusoidal	1.34645	18.3059
ENSMUSG00000041912	Tdrkh	C	TRUE	sigmoid	1.72287	19.645	FALSE	null	1	NA
ENSMUSG00000041974	Spidr	C	TRUE	sinusoidal	1.51772	21.9758	FALSE	null	1	NA
ENSMUSG00000042063	Zfp386	C	TRUE	sinusoidal	1.5751	3.97862	FALSE	sigmoid	1.47542	4.715
ENSMUSG00000042203	Tbc1d22b	C	TRUE	sinusoidal	1.8927	2.07206	FALSE	null	1	NA
ENSMUSG00000042293	Gm5617	C	TRUE	sinusoidal	1.66849	23.6127	FALSE	null	1	NA
ENSMUSG00000042312	S100a13	C	TRUE	sigmoid	1.52312	21.04	FALSE	sigmoid	1.35045	21.185
ENSMUSG00000042340	Ctf1	C	TRUE	sigmoid	1.64529	21.175	FALSE	null	1	NA
ENSMUSG00000042429	Adora1	C	TRUE	sinusoidal	1.97284	9.0889	FALSE	null	1	NA
ENSMUSG00000042476	Abcb4	C	TRUE	sinusoidal	1.58791	8.12272	FALSE	sinusoidal	1.48246	8.52615
ENSMUSG00000042700	Sipa1l1	C	TRUE	sinusoidal	1.59937	2.33333	FALSE	sinusoidal	1.34696	2.39749
ENSMUSG00000043019	Edem3	C	TRUE	sigmoid	1.50468	13.78	FALSE	sigmoid	1.46736	13.9
ENSMUSG00000043065	Spice1	C	TRUE	sinusoidal	2.01777	1.51903	FALSE	null	1	NA
ENSMUSG00000043067	Dpy19l1	C	TRUE	sinusoidal	1.57571	18.1787	FALSE	sinusoidal	1.34025	18.9749
ENSMUSG00000043252	Tmem64	C	TRUE	sinusoidal	1.50076	20.1686	FALSE	null	1	NA
ENSMUSG00000043384	Gprasp1	C	TRUE	sigmoid	1.79523	4.065	FALSE	sinusoidal	1.44021	2.29721
ENSMUSG00000043432	Leng9	C	TRUE	sigmoid	1.59617	1.01	FALSE	null	1	NA
ENSMUSG00000043716	Rpl7	C	TRUE	sigmoid	1.72092	10.64	FALSE	sigmoid	1.19651	18.635
ENSMUSG00000044098	Rsbn1	C	TRUE	sinusoidal	1.73242	5.94929	FALSE	null	1	NA
ENSMUSG00000044155	Lsm8	C	TRUE	sigmoid	1.71602	9.18	FALSE	null	1	NA
ENSMUSG00000044345	Marveld1	C	TRUE	sinusoidal	2.19394	16.1508	FALSE	null	1	NA
ENSMUSG00000044442	N6amt1	C	TRUE	sinusoidal	1.55931	7.78658	FALSE	sinusoidal	1.58507	4.91453
ENSMUSG00000044583	Tlr7	C	TRUE	sigmoid	1.54417	14.42	FALSE	null	1	NA
ENSMUSG00000044715	Gskip	C	TRUE	sigmoid	1.52156	15.665	FALSE	null	1	NA
ENSMUSG00000044768	D1Ertd622e	C	TRUE	sinusoidal	2.03642	13.4432	FALSE	null	1	NA
ENSMUSG00000044881	Coa4	C	TRUE	sinusoidal	1.60363	23.1454	FALSE	null	1	NA
ENSMUSG00000044968	Napepld	C	TRUE	sinusoidal	3.00335	18.607	FALSE	null	1	NA
ENSMUSG00000045160	Bola3	C	TRUE	sinusoidal	1.51377	22.4799	FALSE	null	1	NA
ENSMUSG00000045211	Nudt18	C	TRUE	sinusoidal	1.59747	21.2512	FALSE	null	1	NA
ENSMUSG00000045294	Insig1	C	TRUE	sigmoid	1.64396	19.755	FALSE	null	1	NA
ENSMUSG00000045328	Cenpe	C	TRUE	sigmoid	3.29573	15.565	FALSE	null	1	NA
ENSMUSG00000045414	1190002N15Rik	C	TRUE	sinusoidal	1.59738	16.7109	FALSE	null	1	NA
ENSMUSG00000045639	Zfp629	C	TRUE	sinusoidal	1.51937	4.87392	FALSE	null	1	NA
ENSMUSG00000045752	Tssc4	C	TRUE	sinusoidal	1.53645	19.4582	FALSE	sinusoidal	1.45876	22.3686
ENSMUSG00000045932	Ifit2	C	TRUE	sinusoidal	1.55189	6.21403	FALSE	null	1	NA
ENSMUSG00000045969	Ing1	C	TRUE	sigmoid	1.60523	13.055	FALSE	null	1	NA
ENSMUSG00000045973	Slc25a51	C	TRUE	sigmoid	1.81175	13.215	FALSE	null	1	NA
ENSMUSG00000046027	Stard5	C	TRUE	sinusoidal	1.57528	14.3941	FALSE	null	1	NA
ENSMUSG00000046031	Fam26f	C	TRUE	sinusoidal	1.69551	3.03671	FALSE	null	1	NA
ENSMUSG00000046364	Rpl27a	C	TRUE	sinusoidal	1.90082	13.7554	FALSE	sinusoidal	1.14457	21.4237
ENSMUSG00000046519	Golph3l	C	TRUE	sigmoid	1.73612	13.085	FALSE	null	1	NA
ENSMUSG00000046567	4930430F08Rik	C	TRUE	sinusoidal	1.60648	18.9978	FALSE	sigmoid	1.49228	14.655
ENSMUSG00000046598	Bdh1	C	TRUE	sinusoidal	1.85138	8.08495	FALSE	sinusoidal	1.48508	8.00644
ENSMUSG00000046753	Ccdc66	C	TRUE	sinusoidal	1.9297	1.34017	FALSE	null	1	NA
ENSMUSG00000047215	Rpl9	C	TRUE	sinusoidal	2.07396	14.1029	FALSE	sigmoid	1.21275	19.995
ENSMUSG00000047554	Tmem41b	C	TRUE	sigmoid	1.51488	14.02	FALSE	null	1	NA
ENSMUSG00000047675	Rps8	C	TRUE	sinusoidal	1.71858	13.6745	FALSE	sinusoidal	1.29318	18.1611
ENSMUSG00000047735	Samd9l	C	TRUE	sinusoidal	1.73256	2.99437	FALSE	null	1	NA
ENSMUSG00000047843	Bri3	C	TRUE	sigmoid	1.52588	12.65	FALSE	sigmoid	1.48539	10.215
ENSMUSG00000047875	Gpr157	C	TRUE	sigmoid	2.07092	8.095	FALSE	null	1	NA
ENSMUSG00000047907	Tshz2	C	TRUE	sinusoidal	1.77401	4.36287	FALSE	null	1	NA
ENSMUSG00000047909	Ankrd16	C	TRUE	sinusoidal	2.15387	14.6116	FALSE	null	1	NA
ENSMUSG00000048126	Col6a3	C	TRUE	sinusoidal	1.51487	5.32522	FALSE	sinusoidal	1.33478	2.51394
ENSMUSG00000048218	Amigo2	C	TRUE	sinusoidal	2.32339	13.1897	FALSE	null	1	NA
ENSMUSG00000048424	Ranbp3l	C	TRUE	sinusoidal	3.00527	8.87433	FALSE	null	1	NA
ENSMUSG00000048482	Bdnf	C	TRUE	sinusoidal	2.74247	14.825	FALSE	null	1	NA
ENSMUSG00000048581	E130311K13Rik	C	TRUE	sinusoidal	1.85754	1.96508	FALSE	null	1	NA
ENSMUSG00000048732	Klhl11	C	TRUE	sigmoid	1.50636	11.55	FALSE	sigmoid	1.34244	12.765
ENSMUSG00000048856	Slc25a47	C	TRUE	sinusoidal	2.02579	9.41752	FALSE	null	1	NA
ENSMUSG00000048878	Hexim1	C	TRUE	sinusoidal	1.62939	19.9143	FALSE	sinusoidal	1.48645	20.6537
ENSMUSG00000048938	Nr1h5	C	TRUE	sinusoidal	1.87919	12.7139	FALSE	null	1	NA
ENSMUSG00000049130	C5ar1	C	TRUE	sigmoid	2.14704	16.255	FALSE	null	1	NA
ENSMUSG00000049232	Tigd2	C	TRUE	sinusoidal	1.64631	7.52004	FALSE	null	1	NA
ENSMUSG00000049285	Mblac1	C	TRUE	sinusoidal	2.23228	20.5551	FALSE	null	1	NA
ENSMUSG00000049488	Tmem67	C	TRUE	sinusoidal	1.69741	23.9906	FALSE	null	1	NA
ENSMUSG00000049553	Polr1a	C	TRUE	sigmoid	1.50034	13.175	FALSE	sigmoid	1.48732	13.29
ENSMUSG00000049717	Lig4	C	TRUE	sinusoidal	1.58861	13.6374	FALSE	null	1	NA
ENSMUSG00000049907	Rasl11b	C	TRUE	sinusoidal	1.87931	22.3681	FALSE	null	1	NA
ENSMUSG00000049922	Slc35c1	C	TRUE	sigmoid	1.71373	15.42	FALSE	null	1	NA
ENSMUSG00000049950	Rpp38	C	TRUE	sinusoidal	1.84989	16.0635	FALSE	null	1	NA
ENSMUSG00000049971	Glt1d1	C	TRUE	sigmoid	1.96927	15.865	FALSE	null	1	NA
ENSMUSG00000050234	Gja4	C	TRUE	sinusoidal	1.93057	12.8581	FALSE	null	1	NA
ENSMUSG00000050310	Rictor	C	TRUE	sinusoidal	1.52644	6.27007	FALSE	sinusoidal	1.47955	5.84921
ENSMUSG00000050628	Ubald2	C	TRUE	sinusoidal	1.68738	4.93836	FALSE	null	1	NA
ENSMUSG00000050708	Ftl1	C	TRUE	sinusoidal	2.571	0.866657	FALSE	null	1	NA
ENSMUSG00000050786	Ccdc126	C	TRUE	sinusoidal	1.88635	19.6727	FALSE	null	1	NA
ENSMUSG00000050936	Hist2h2bb	C	TRUE	sinusoidal	1.60718	13.7287	FALSE	null	1	NA
ENSMUSG00000050947	Amigo1	C	TRUE	sinusoidal	1.76337	4.47199	FALSE	null	1	NA
ENSMUSG00000051495	Irf2bp2	C	TRUE	sinusoidal	2.50203	23.3881	FALSE	null	1	NA
ENSMUSG00000051497	Kcnj16	C	TRUE	sinusoidal	1.74856	11.7073	FALSE	null	1	NA
ENSMUSG00000051855	Mest	C	TRUE	sinusoidal	1.86528	2.11017	FALSE	null	1	NA
ENSMUSG00000052137	Rbm12b2	C	TRUE	sinusoidal	3.16198	18.7942	FALSE	null	1	NA
ENSMUSG00000052146	Rps10	C	TRUE	sinusoidal	1.7519	14.1466	FALSE	sigmoid	1.33129	20.89
ENSMUSG00000052151	Ppap2c	C	TRUE	sigmoid	1.65797	10.09	FALSE	null	1	NA
ENSMUSG00000052423	B4galt3	C	TRUE	sinusoidal	1.51443	16.8543	FALSE	null	1	NA
ENSMUSG00000052435	Cebpe	C	TRUE	sinusoidal	2.14234	4.00375	FALSE	null	1	NA
ENSMUSG00000052544	St6galnac3	C	TRUE	sinusoidal	3.65366	3.73641	FALSE	null	1	NA
ENSMUSG00000052605	Isoc2b	C	TRUE	sinusoidal	1.69273	1.94174	FALSE	sinusoidal	1.47326	1.02074
ENSMUSG00000052957	Gas1	C	TRUE	sinusoidal	2.78161	20.5707	FALSE	null	1	NA
ENSMUSG00000053286	Trmt1l	C	TRUE	sinusoidal	1.517	19.1828	FALSE	null	1	NA
ENSMUSG00000053333	Dis3l2	C	TRUE	sinusoidal	1.49525	8.33046	FALSE	sinusoidal	1.42727	8.67093
ENSMUSG00000053414	Hunk	C	TRUE	sinusoidal	2.00562	0.521065	FALSE	null	1	NA
ENSMUSG00000053436	Mapk14	C	TRUE	sinusoidal	1.75567	16.76	FALSE	sinusoidal	1.46538	17.2119
ENSMUSG00000053965	Pde5a	C	TRUE	sinusoidal	1.74938	17.19	FALSE	null	1	NA
ENSMUSG00000054079	Utp18	C	TRUE	sinusoidal	1.49757	16.103	FALSE	null	1	NA
ENSMUSG00000054321	Taf4b	C	TRUE	sinusoidal	2.04498	12.0215	FALSE	null	1	NA
ENSMUSG00000054717	Hmgb2	C	TRUE	sinusoidal	1.5807	4.373	FALSE	null	1	NA
ENSMUSG00000054793	Cadm4	C	TRUE	sinusoidal	1.95299	16.8403	FALSE	null	1	NA
ENSMUSG00000054836	Elp6	C	TRUE	sinusoidal	1.55766	21.414	FALSE	null	1	NA
ENSMUSG00000055053	Nfic	C	TRUE	sinusoidal	1.52282	17.1535	FALSE	sinusoidal	1.46303	18.674
ENSMUSG00000055128	Cgrrf1	C	TRUE	sigmoid	1.49985	13.09	FALSE	sinusoidal	1.3443	14.32
ENSMUSG00000055240	Zfp101	C	TRUE	sinusoidal	2.0813	0.708074	FALSE	null	1	NA
ENSMUSG00000055531	Cpsf6	C	TRUE	sigmoid	1.54194	15.84	FALSE	sinusoidal	1.48131	11.2332
ENSMUSG00000055760	Gemin6	C	TRUE	sinusoidal	1.53704	18.0979	FALSE	null	1	NA
ENSMUSG00000055762	Eef1d	C	TRUE	sinusoidal	1.58084	14.8586	FALSE	sigmoid	1.24682	22.015
ENSMUSG00000056144	Trim34a	C	TRUE	sinusoidal	2.04641	2.30706	FALSE	sinusoidal	1.49361	3.77884
ENSMUSG00000056429	Tgoln1	C	TRUE	sinusoidal	1.50988	1.55275	FALSE	sinusoidal	1.29995	0.912826
ENSMUSG00000056665	Them6	C	TRUE	sinusoidal	1.7948	20.0584	FALSE	null	1	NA
ENSMUSG00000056938	Acbd4	C	TRUE	sinusoidal	1.76435	23.6767	FALSE	null	1	NA
ENSMUSG00000057113	Npm1	C	TRUE	sigmoid	1.67623	10.62	FALSE	sinusoidal	1.47976	11.3252
ENSMUSG00000057409	Zfp53	C	TRUE	sinusoidal	1.57565	17.5409	FALSE	null	1	NA
ENSMUSG00000057594	Arl16	C	TRUE	sigmoid	1.67961	9.005	FALSE	null	1	NA
ENSMUSG00000057649	Brd9	C	TRUE	sigmoid	1.66961	8.865	FALSE	null	1	NA
ENSMUSG00000057841	Rpl32	C	TRUE	sigmoid	2.1013	10.755	FALSE	sinusoidal	1.43284	18.4186
ENSMUSG00000057894	Zfp329	C	TRUE	sinusoidal	2.24806	19.988	FALSE	null	1	NA
ENSMUSG00000058173	Smco4	C	TRUE	sinusoidal	1.66589	0.071105	FALSE	null	1	NA
ENSMUSG00000058546	Rpl23a	C	TRUE	sigmoid	1.57236	10.855	FALSE	sigmoid	1.23153	20.15
ENSMUSG00000058558	Rpl5	C	TRUE	sigmoid	1.82136	10.805	FALSE	sinusoidal	1.2393	13.9555
ENSMUSG00000058600	Rpl30	C	TRUE	sigmoid	2.15528	10.755	FALSE	sinusoidal	1.19796	14.9812
ENSMUSG00000058886	Deaf1	C	TRUE	sinusoidal	1.85014	15.9008	FALSE	null	1	NA
ENSMUSG00000058952	Cfi	C	TRUE	sigmoid	1.49565	15.87	FALSE	sigmoid	1.42874	15.855
ENSMUSG00000059291	Rpl11	C	TRUE	sinusoidal	1.81237	14.5393	FALSE	null	1	NA
ENSMUSG00000059439	Bcas3	C	TRUE	sinusoidal	1.6048	9.33389	FALSE	sinusoidal	1.33416	10.4612
ENSMUSG00000059586	Nsmce2	C	TRUE	sinusoidal	2.00229	7.82956	FALSE	sinusoidal	1.45349	8.53558
ENSMUSG00000059878	Zfp422	C	TRUE	sinusoidal	1.55847	1.45756	FALSE	sinusoidal	1.47792	23.6001
ENSMUSG00000059975	Zfp74	C	TRUE	sinusoidal	1.56567	17.6337	FALSE	null	1	NA
ENSMUSG00000060126	Tpt1	C	TRUE	sinusoidal	2.04461	13.0649	FALSE	null	1	NA
ENSMUSG00000060131	Atp8b4	C	TRUE	sinusoidal	2.58708	2.46197	FALSE	null	1	NA
ENSMUSG00000060166	Zdhhc8	C	TRUE	sinusoidal	1.53043	18.7933	FALSE	null	1	NA
ENSMUSG00000060600	Eno3	C	TRUE	sinusoidal	1.70517	22.757	FALSE	null	1	NA
ENSMUSG00000060798	Intu	C	TRUE	sigmoid	1.73174	7.67	FALSE	null	1	NA
ENSMUSG00000060923	Acyp2	C	TRUE	sinusoidal	1.79653	10.6447	FALSE	null	1	NA
ENSMUSG00000060938	Rpl26	C	TRUE	sigmoid	1.84972	10.68	FALSE	sinusoidal	1.31274	17.7219
ENSMUSG00000060950	Trmt61a	C	TRUE	sigmoid	1.75312	13.525	FALSE	null	1	NA
ENSMUSG00000061111	Fam195b	C	TRUE	sinusoidal	1.61322	3.1504	FALSE	null	1	NA
ENSMUSG00000061315	Naca	C	TRUE	sigmoid	1.52324	10.2	FALSE	null	1	NA
ENSMUSG00000061536	Sec22c	C	TRUE	sinusoidal	1.60558	10.5322	FALSE	null	1	NA
ENSMUSG00000061601	Pclo	C	TRUE	sinusoidal	2.60005	22.591	FALSE	null	1	NA
ENSMUSG00000061650	Med9	C	TRUE	sinusoidal	1.73841	5.51014	FALSE	null	1	NA
ENSMUSG00000061787	Rps17	C	TRUE	sinusoidal	1.69775	12.5796	FALSE	sinusoidal	1.16975	18.919
ENSMUSG00000061983	Rps12	C	TRUE	sigmoid	2.58272	10.655	FALSE	sinusoidal	1.27575	18.1575
ENSMUSG00000062075	Lmnb2	C	TRUE	sinusoidal	1.694	15.9691	FALSE	null	1	NA
ENSMUSG00000062563	Cys1	C	TRUE	sinusoidal	3.1479	15.7159	FALSE	null	1	NA
ENSMUSG00000062580	Timm17a	C	TRUE	sinusoidal	1.51378	9.2336	FALSE	null	1	NA
ENSMUSG00000062647	Rpl7a	C	TRUE	sinusoidal	1.60936	15.1348	FALSE	sinusoidal	1.20728	18.5606
ENSMUSG00000062761	Zfp512	C	TRUE	sinusoidal	1.59398	1.76005	FALSE	null	1	NA
ENSMUSG00000062797	l7Rn6	C	TRUE	sinusoidal	1.77572	20.0654	FALSE	sinusoidal	1.48859	20.7104
ENSMUSG00000063015	Ccni	C	TRUE	sinusoidal	1.6172	0.177268	FALSE	sinusoidal	1.23227	3.22777
ENSMUSG00000063019	Manbal	C	TRUE	sinusoidal	1.67947	4.43158	FALSE	null	1	NA
ENSMUSG00000063108	Zfp26	C	TRUE	sinusoidal	1.5281	19.9365	FALSE	null	1	NA
ENSMUSG00000063172	Hspb11	C	TRUE	sinusoidal	1.5487	5.93999	FALSE	null	1	NA
ENSMUSG00000063275	Ptpla	C	TRUE	sinusoidal	1.64087	17.3985	FALSE	null	1	NA
ENSMUSG00000063450	Syne2	C	TRUE	sigmoid	1.71839	12.405	FALSE	null	1	NA
ENSMUSG00000063727	Tnfrsf11b	C	TRUE	sigmoid	1.90149	15.6	FALSE	sigmoid	1.47867	19.235
ENSMUSG00000063810	Alms1	C	TRUE	sinusoidal	1.50655	20.9164	FALSE	sinusoidal	1.35244	23.3732
ENSMUSG00000063849	Ppcdc	C	TRUE	sinusoidal	2.4573	20.621	FALSE	null	1	NA
ENSMUSG00000064262	Gimap8	C	TRUE	sigmoid	1.59708	21.345	FALSE	null	1	NA
ENSMUSG00000064264	Zfp428	C	TRUE	sigmoid	2.23124	16.865	FALSE	null	1	NA
ENSMUSG00000064326	Siva1	C	TRUE	sigmoid	1.58558	22.06	FALSE	null	1	NA
ENSMUSG00000064341	mt-Nd1	C	TRUE	sigmoid	2.25616	12.175	FALSE	null	1	NA
ENSMUSG00000064345	mt-Nd2	C	TRUE	sigmoid	2.85403	12.105	FALSE	null	1	NA
ENSMUSG00000064351	mt-Co1	C	TRUE	sigmoid	2.4021	12.2	FALSE	null	1	NA
ENSMUSG00000064354	mt-Co2	C	TRUE	sigmoid	2.26254	12.195	FALSE	null	1	NA
ENSMUSG00000064357	mt-Atp6	C	TRUE	sigmoid	2.91031	12.185	FALSE	null	1	NA
ENSMUSG00000064358	mt-Co3	C	TRUE	sigmoid	2.65257	12.195	FALSE	sigmoid	1.31839	19.21
ENSMUSG00000064360	mt-Nd3	C	TRUE	sigmoid	2.58496	12.165	FALSE	null	1	NA
ENSMUSG00000064363	mt-Nd4	C	TRUE	sigmoid	2.52563	12.175	FALSE	sigmoid	1.48999	18.72
ENSMUSG00000064368	mt-Nd6	C	TRUE	sigmoid	2.14068	12.45	FALSE	null	1	NA
ENSMUSG00000066595	Mfsd7b	C	TRUE	sigmoid	1.64452	15.41	FALSE	null	1	NA
ENSMUSG00000066677	Pydc3	C	TRUE	sinusoidal	1.95266	3.00998	FALSE	null	1	NA
ENSMUSG00000066682	Pilrb2	C	TRUE	sinusoidal	1.70191	2.71428	FALSE	null	1	NA
ENSMUSG00000067071	Hes6	C	TRUE	sinusoidal	1.87253	17.3557	FALSE	null	1	NA
ENSMUSG00000067288	Rps28	C	TRUE	sigmoid	2.29958	10.225	FALSE	null	1	NA
ENSMUSG00000067367	Lyar	C	TRUE	sigmoid	1.51345	13.46	FALSE	null	1	NA
ENSMUSG00000067586	S1pr3	C	TRUE	sinusoidal	2.17241	3.69554	FALSE	null	1	NA
ENSMUSG00000067787	Blcap	C	TRUE	sinusoidal	1.79189	23.0102	FALSE	null	1	NA
ENSMUSG00000067813	Xkr9	C	TRUE	sinusoidal	1.65494	11.7271	FALSE	sinusoidal	1.47918	10.3117
ENSMUSG00000067818	Myl9	C	TRUE	sinusoidal	1.67711	1.95927	FALSE	null	1	NA
ENSMUSG00000067825	Pex26	C	TRUE	sinusoidal	1.74571	13.5948	FALSE	null	1	NA
ENSMUSG00000067889	Sptbn2	C	TRUE	sinusoidal	1.52743	4.93941	FALSE	sinusoidal	1.46343	4.71397
ENSMUSG00000068039	Tcp1	C	TRUE	sigmoid	1.54654	14.705	FALSE	sigmoid	1.47677	15.61
ENSMUSG00000068245	Phf11d	C	TRUE	sinusoidal	1.77053	6.68379	FALSE	null	1	NA
ENSMUSG00000068299	1700019G17Rik	C	TRUE	sigmoid	2.47876	20.14	FALSE	null	1	NA
ENSMUSG00000069267	Hist1h3b	C	TRUE	sigmoid	2.99824	15.72	FALSE	null	1	NA
ENSMUSG00000069312		C	TRUE	sigmoid	2.8049	15.865	FALSE	null	1	NA
ENSMUSG00000069601	Ank3	C	TRUE	sigmoid	2.09722	9.89	FALSE	null	1	NA
ENSMUSG00000069917	Hba-a2	C	TRUE	sigmoid	2.61367	15.71	FALSE	null	1	NA
ENSMUSG00000069919	Hba-a1	C	TRUE	sigmoid	2.92555	15.655	FALSE	null	1	NA
ENSMUSG00000070284	Gmppb	C	TRUE	sigmoid	1.92112	13.655	FALSE	null	1	NA
ENSMUSG00000070327	Rnf213	C	TRUE	sinusoidal	1.53503	4.83071	FALSE	sinusoidal	1.48319	3.72054
ENSMUSG00000070348	Ccnd1	C	TRUE	sinusoidal	2.69166	9.42977	FALSE	null	1	NA
ENSMUSG00000070544	Top1	C	TRUE	sigmoid	1.49867	14.015	FALSE	sigmoid	1.4567	14.54
ENSMUSG00000070576	Mn1	C	TRUE	sinusoidal	1.75328	4.22143	FALSE	null	1	NA
ENSMUSG00000070583	Fv1	C	TRUE	sinusoidal	1.58063	0.0174128	FALSE	null	1	NA
ENSMUSG00000070720	Tmem200b	C	TRUE	sinusoidal	2.48044	15.8573	FALSE	null	1	NA
ENSMUSG00000070737	Gm12942	C	TRUE	sinusoidal	1.6844	2.6944	FALSE	null	1	NA
ENSMUSG00000071076	Jund	C	TRUE	sinusoidal	1.52289	23.1265	FALSE	null	1	NA
ENSMUSG00000071107		C	TRUE	sinusoidal	1.90594	23.8759	FALSE	null	1	NA
ENSMUSG00000071415	Rpl23	C	TRUE	sigmoid	1.94475	10.795	FALSE	null	1	NA
ENSMUSG00000071478	Hist1h2ad	C	TRUE	sigmoid	3.30892	15.76	FALSE	null	1	NA
ENSMUSG00000071632	2510002D24Rik	C	TRUE	sinusoidal	1.55616	4.20844	FALSE	null	1	NA
ENSMUSG00000071644	Eef1g	C	TRUE	sinusoidal	1.64037	15.0664	FALSE	sinusoidal	1.1698	20.7078
ENSMUSG00000071713	Csf2rb	C	TRUE	sinusoidal	1.56082	2.33753	FALSE	null	1	NA
ENSMUSG00000072115	Ang	C	TRUE	sinusoidal	1.6003	10.0628	FALSE	null	1	NA
ENSMUSG00000072235	Tuba1a	C	TRUE	sinusoidal	2.55987	3.72457	FALSE	null	1	NA
ENSMUSG00000072294	Klf12	C	TRUE	sinusoidal	1.50319	3.0498	FALSE	null	1	NA
ENSMUSG00000072494	Ppp1r3e	C	TRUE	sinusoidal	2.42364	16.5132	FALSE	null	1	NA
ENSMUSG00000073096	Lrrc61	C	TRUE	sinusoidal	1.83035	2.34627	FALSE	null	1	NA
ENSMUSG00000073434	Wdr90	C	TRUE	sinusoidal	1.79099	2.33486	FALSE	null	1	NA
ENSMUSG00000073702	Rpl31	C	TRUE	sinusoidal	1.7069	12.9181	FALSE	sigmoid	1.25831	21.75
ENSMUSG00000074170	Plekhf1	C	TRUE	sinusoidal	1.60899	8.02855	FALSE	null	1	NA
ENSMUSG00000074358	Ccdc61	C	TRUE	sinusoidal	1.62888	1.41257	FALSE	null	1	NA
ENSMUSG00000075470	Alg10b	C	TRUE	sinusoidal	1.64317	22.5887	FALSE	sinusoidal	1.3503	3.04619
ENSMUSG00000075702	Selm	C	TRUE	sinusoidal	1.97669	3.48975	FALSE	null	1	NA
ENSMUSG00000078349	AW011738	C	TRUE	sigmoid	2.5588	1.93	FALSE	null	1	NA
ENSMUSG00000078762	Haus5	C	TRUE	sinusoidal	1.66424	2.56523	FALSE	null	1	NA
ENSMUSG00000078771	Evi2a	C	TRUE	sinusoidal	2.46676	6.57962	FALSE	null	1	NA
ENSMUSG00000078922	Tgtp1	C	TRUE	sigmoid	3.11883	5.345	FALSE	null	1	NA
ENSMUSG00000078963	Hsbp1l1	C	TRUE	sinusoidal	2.07133	7.22818	FALSE	null	1	NA
ENSMUSG00000079110	Capn3	C	TRUE	sinusoidal	2.07281	9.50067	FALSE	null	1	NA
ENSMUSG00000079435	Rpl36a	C	TRUE	sinusoidal	1.73317	13.9841	FALSE	null	1	NA
ENSMUSG00000079659	Tmem243	C	TRUE	sinusoidal	1.59236	19.4309	FALSE	null	1	NA
ENSMUSG00000086040	Wipf3	C	TRUE	sinusoidal	2.12349	10.6747	FALSE	null	1	NA
ENSMUSG00000090019	Gimap1	C	TRUE	sinusoidal	2.24453	23.8882	FALSE	null	1	NA
ENSMUSG00000090306	Adh6-ps1	C	TRUE	sinusoidal	1.73697	23.7529	FALSE	null	1	NA
ENSMUSG00000090623	Cfhr3	C	TRUE	sinusoidal	1.77686	14.8423	FALSE	null	1	NA
ENSMUSG00000090659	Zfp493	C	TRUE	sinusoidal	2.10476	19.7909	FALSE	null	1	NA
ENSMUSG00000090663		C	TRUE	sinusoidal	1.57589	4.94082	FALSE	null	1	NA
ENSMUSG00000093904	Tomm20	C	TRUE	sinusoidal	1.50455	14.9327	FALSE	sinusoidal	1.42126	14.5818
ENSMUSG00000093916	Gm379	C	TRUE	sinusoidal	8.26401	3.55389	FALSE	null	1	NA
ENSMUSG00000094777	Hist1h2ap	C	TRUE	sigmoid	2.93515	15.97	FALSE	null	1	NA
ENSMUSG00000094870	Zfp131	C	TRUE	sinusoidal	1.54077	12.4985	FALSE	null	1	NA
ENSMUSG00000096603		C	TRUE	sigmoid	4.12285	16.015	FALSE	null	1	NA
ENSMUSG00000096727	Psmb9	C	TRUE	sinusoidal	1.50433	4.59938	FALSE	null	1	NA
ENSMUSG00000096852	Cyp2d12	C	TRUE	sinusoidal	1.75798	14.4071	FALSE	null	1	NA
ENSMUSG00000098274	Rpl24	C	TRUE	sinusoidal	1.68349	13.402	FALSE	sigmoid	1.31979	19.635
ENSMUSG00000000056	Narf	D	TRUE	sigmoid	2.00642	9.655	TRUE	sigmoid	1.94101	8.46
ENSMUSG00000000120	Ngfr	D	TRUE	sinusoidal	3.15172	1.92336	TRUE	sinusoidal	2.87585	0.976305
ENSMUSG00000000303	Cdh1	D	TRUE	sinusoidal	1.67926	0.750116	TRUE	sinusoidal	1.80377	0.354989
ENSMUSG00000000555	Itga5	D	TRUE	sinusoidal	2.20807	21.7988	TRUE	sinusoidal	2.43796	21.1537
ENSMUSG00000000567	Sox9	D	TRUE	sinusoidal	3.2778	23.3347	TRUE	sinusoidal	3.56131	22.4418
ENSMUSG00000000811	Txnrd3	D	TRUE	sigmoid	1.58859	10.725	TRUE	sinusoidal	1.57938	8.99146
ENSMUSG00000000876	Pxmp4	D	TRUE	sinusoidal	2.34537	23.4744	TRUE	sinusoidal	2.74614	22.8703
ENSMUSG00000001095	Slc13a2	D	TRUE	sinusoidal	2.96544	22.6758	TRUE	sigmoid	2.29663	21.85
ENSMUSG00000001123	Lgals9	D	TRUE	sinusoidal	1.85792	3.41794	TRUE	sinusoidal	1.80748	2.87725
ENSMUSG00000001138	Cnnm3	D	TRUE	sinusoidal	1.92139	0.096865	TRUE	sinusoidal	1.67267	23.6778
ENSMUSG00000001229	Dpp9	D	TRUE	sinusoidal	1.87604	0.446401	TRUE	sinusoidal	2.01193	0.757652
ENSMUSG00000001247	Lsr	D	TRUE	sigmoid	1.58305	17.09	TRUE	sinusoidal	1.59133	20.5459
ENSMUSG00000001270	Ckb	D	TRUE	sinusoidal	1.75552	3.04644	TRUE	sinusoidal	1.55403	0.52891
ENSMUSG00000001379		D	TRUE	sinusoidal	1.65401	12.5306	TRUE	sinusoidal	1.54536	12.9289
ENSMUSG00000001436	Slc19a1	D	TRUE	sinusoidal	2.7786	12.4939	TRUE	sinusoidal	2.58298	13.716
ENSMUSG00000001627	Ifrd1	D	TRUE	sigmoid	2.31636	13.84	TRUE	sinusoidal	1.98703	11.4896
ENSMUSG00000001630	Stk38l	D	TRUE	sigmoid	1.5087	16.315	TRUE	sinusoidal	1.53468	15.9236
ENSMUSG00000001670	Tat	D	TRUE	sinusoidal	1.96946	17.5711	TRUE	sinusoidal	1.86165	17.8395
ENSMUSG00000001761	Smo	D	TRUE	sinusoidal	1.95411	1.08034	TRUE	sinusoidal	1.77814	1.57381
ENSMUSG00000001763	Tspan33	D	TRUE	sinusoidal	1.5856	22.7289	TRUE	sinusoidal	1.60001	23.9589
ENSMUSG00000001774	Chordc1	D	TRUE	sigmoid	2.08855	14.93	TRUE	sigmoid	2.35123	15.235
ENSMUSG00000001891	Ugp2	D	TRUE	sinusoidal	1.76155	10.9867	TRUE	sinusoidal	1.74738	11.112
ENSMUSG00000002068	Ccne1	D	TRUE	sigmoid	6.19318	11.095	TRUE	sinusoidal	7.26154	11.934
ENSMUSG00000002250	Ppard	D	TRUE	sigmoid	6.9221	0.2	TRUE	sigmoid	6.68566	0.72
ENSMUSG00000002297	Dbf4	D	TRUE	sinusoidal	1.73511	8.06679	TRUE	sinusoidal	1.81442	13.0297
ENSMUSG00000002346	Slc25a42	D	TRUE	sinusoidal	1.55721	2.81393	TRUE	sinusoidal	1.57713	1.55456
ENSMUSG00000002393	Nr2f6	D	TRUE	sinusoidal	2.05058	0.919257	TRUE	sinusoidal	1.83663	2.19895
ENSMUSG00000002409	Dyrk1b	D	TRUE	sinusoidal	2.21618	5.56248	TRUE	sinusoidal	2.31792	4.62116
ENSMUSG00000002661	Alkbh7	D	TRUE	sinusoidal	1.85256	0.262787	TRUE	sinusoidal	1.82164	1.68193
ENSMUSG00000002699	Lcp2	D	TRUE	sinusoidal	1.65156	2.7042	TRUE	sigmoid	2.00033	18.065
ENSMUSG00000002748	Baz1b	D	TRUE	sinusoidal	1.6049	15.5269	TRUE	sinusoidal	1.57448	14.8705
ENSMUSG00000002797	Ggct	D	TRUE	sinusoidal	1.7594	22.6906	TRUE	sinusoidal	1.71302	1.26869
ENSMUSG00000002844	Adprh	D	TRUE	sinusoidal	2.23264	0.0198711	TRUE	sinusoidal	2.06687	0.564129
ENSMUSG00000002957	Ap2a2	D	TRUE	sinusoidal	1.60577	22.0976	TRUE	sigmoid	1.57145	23.03
ENSMUSG00000002963	Pnkp	D	TRUE	sinusoidal	1.85442	1.58965	TRUE	sinusoidal	1.69713	0.373606
ENSMUSG00000003228	Grk5	D	TRUE	sigmoid	6.74526	2.235	TRUE	sigmoid	4.34371	1.53
ENSMUSG00000003617	Cp	D	TRUE	sigmoid	1.84256	15.865	TRUE	sigmoid	1.84266	15.915
ENSMUSG00000003623	Crot	D	TRUE	sinusoidal	3.40357	2.95478	TRUE	sinusoidal	3.27605	3.51326
ENSMUSG00000003721	Insig2	D	TRUE	sinusoidal	5.95675	0.845191	TRUE	sinusoidal	5.94723	1.00761
ENSMUSG00000003865	Gys1	D	TRUE	sinusoidal	1.62364	18.0881	TRUE	sigmoid	9.08735	18.28
ENSMUSG00000003949	Hlf	D	TRUE	sinusoidal	1.93864	13.1867	TRUE	sinusoidal	2.29319	14.9272
ENSMUSG00000004043	Stat5a	D	TRUE	sinusoidal	2.0129	0.432157	TRUE	sinusoidal	1.85451	23.0627
ENSMUSG00000004044	Ptrf	D	TRUE	sinusoidal	1.61659	2.22623	TRUE	sinusoidal	1.59866	1.68378
ENSMUSG00000004098	Col5a3	D	TRUE	sinusoidal	2.37194	3.52186	TRUE	sinusoidal	2.62564	2.56441
ENSMUSG00000004951	Hspb1	D	TRUE	sigmoid	3.3233	18.355	TRUE	sinusoidal	3.85031	20.43
ENSMUSG00000005089	Slc1a2	D	TRUE	sinusoidal	1.7311	13.143	TRUE	sinusoidal	1.71962	14.1642
ENSMUSG00000005125	Ndrg1	D	TRUE	sinusoidal	5.06544	2.48653	TRUE	sinusoidal	5.31638	1.77396
ENSMUSG00000005225	Plekha8	D	TRUE	sigmoid	2.12479	13.205	TRUE	sinusoidal	1.53898	15.2718
ENSMUSG00000005233	Spc25	D	TRUE	sigmoid	1.82957	11.025	TRUE	sinusoidal	2.50287	11.7382
ENSMUSG00000005483	Dnajb1	D	TRUE	sigmoid	2.14523	14.115	TRUE	sigmoid	1.98006	14.225
ENSMUSG00000005514	Por	D	TRUE	sigmoid	3.24058	13.24	TRUE	sigmoid	3.15985	12.72
ENSMUSG00000005547	Cyp2a5	D	TRUE	sinusoidal	5.22299	14.3651	TRUE	sinusoidal	3.79032	14.6832
ENSMUSG00000005677	Nr1i3	D	TRUE	sinusoidal	1.62022	15.2898	TRUE	sinusoidal	1.67694	15.3302
ENSMUSG00000005774	Rfx5	D	TRUE	sinusoidal	1.70309	1.85803	TRUE	sinusoidal	1.5915	3.18306
ENSMUSG00000005982	Naa60	D	TRUE	sinusoidal	1.59443	15.3711	TRUE	sinusoidal	1.71781	16.1192
ENSMUSG00000006014	Prg4	D	TRUE	sigmoid	4.75579	15.875	TRUE	sigmoid	4.51223	15.96
ENSMUSG00000006019	Dhx34	D	TRUE	sinusoidal	1.7078	1.94487	TRUE	sinusoidal	1.83942	1.57016
ENSMUSG00000006356	Crip2	D	TRUE	sinusoidal	2.24879	0.161698	TRUE	sinusoidal	2.53498	22.9475
ENSMUSG00000006390	Elovl1	D	TRUE	sinusoidal	1.51755	21.3822	TRUE	sinusoidal	1.61348	21.1768
ENSMUSG00000006442	Srm	D	TRUE	sigmoid	1.98079	13.8	TRUE	sinusoidal	2.00655	15.4995
ENSMUSG00000006494	Pdk1	D	TRUE	sinusoidal	1.75817	18.2709	TRUE	sinusoidal	1.52968	17.6149
ENSMUSG00000006522	Itih3	D	TRUE	sigmoid	3.47265	15.865	TRUE	sigmoid	3.26338	15.885
ENSMUSG00000006641	Slc5a6	D	TRUE	sigmoid	3.70796	11.99	TRUE	sigmoid	3.64054	11.855
ENSMUSG00000006715	Gmnn	D	TRUE	sigmoid	1.92634	12.32	TRUE	sigmoid	1.7745	9.575
ENSMUSG00000006782	Cnp	D	TRUE	sinusoidal	1.49606	0.687069	TRUE	sinusoidal	1.61625	1.2114
ENSMUSG00000006850	Tmco6	D	TRUE	sinusoidal	1.53883	0.813755	TRUE	sinusoidal	1.87892	2.25987
ENSMUSG00000007610	Gtpbp3	D	TRUE	sinusoidal	1.62906	21.584	TRUE	sinusoidal	1.67486	0.40871
ENSMUSG00000007613	Tgfbr1	D	TRUE	sinusoidal	1.59656	11.2874	TRUE	sinusoidal	1.67768	12.316
ENSMUSG00000007646	Rad51c	D	TRUE	sinusoidal	5.57046	18.0021	TRUE	sinusoidal	3.36242	19.9642
ENSMUSG00000007950	Abhd8	D	TRUE	sigmoid	2.01557	18.835	TRUE	sinusoidal	2.81696	20.2928
ENSMUSG00000008035	Mid1ip1	D	TRUE	sinusoidal	1.95062	14.713	TRUE	sinusoidal	1.934	14.3824
ENSMUSG00000008090	Fgfrl1	D	TRUE	sigmoid	1.75165	10.525	TRUE	sigmoid	1.85735	10.105
ENSMUSG00000008153	Clstn3	D	TRUE	sigmoid	2.6711	19.85	TRUE	sigmoid	3.09127	20.1
ENSMUSG00000008435	Rdh13	D	TRUE	sinusoidal	1.89983	14.6145	TRUE	sigmoid	1.94249	14.285
ENSMUSG00000008683	Rps15a	D	TRUE	sigmoid	1.67856	10.755	TRUE	sigmoid	1.53528	18.42
ENSMUSG00000008845	Cd163	D	TRUE	sigmoid	1.85793	15.82	TRUE	sigmoid	1.6823	15.42
ENSMUSG00000008855	Hdac5	D	TRUE	sinusoidal	2.59211	22.58	TRUE	sinusoidal	1.83516	23.4383
ENSMUSG00000009092	Derl3	D	TRUE	sigmoid	5.28618	19.965	TRUE	sigmoid	5.18029	19.91
ENSMUSG00000009378	Slc16a12	D	TRUE	sinusoidal	3.51603	13.8788	TRUE	sinusoidal	2.5802	14.1593
ENSMUSG00000009566	Fpgs	D	TRUE	sinusoidal	2.51688	23.7279	TRUE	sinusoidal	2.81807	23.4853
ENSMUSG00000009633	G0s2	D	TRUE	sinusoidal	3.42665	21.0263	TRUE	sigmoid	3.78046	22.18
ENSMUSG00000009646	Pla2g12b	D	TRUE	sinusoidal	1.76818	1.06918	TRUE	sinusoidal	1.72655	1.42273
ENSMUSG00000009647	Mcu	D	TRUE	sinusoidal	1.82688	3.02155	TRUE	sinusoidal	2.04731	1.94954
ENSMUSG00000010051	Hyal1	D	TRUE	sinusoidal	1.50409	20.4348	TRUE	sinusoidal	1.71131	20.8083
ENSMUSG00000010064	Slc38a3	D	TRUE	sinusoidal	2.25385	9.48385	TRUE	sigmoid	1.79638	10.49
ENSMUSG00000010307	Tmem86a	D	TRUE	sinusoidal	1.57849	7.32877	TRUE	sinusoidal	1.85711	5.90854
ENSMUSG00000010608	Rbm25	D	TRUE	sinusoidal	1.67473	14.531	TRUE	sinusoidal	1.70141	14.6919
ENSMUSG00000010609	Psen2	D	TRUE	sigmoid	2.58552	0.52	TRUE	sinusoidal	2.49486	23.1492
ENSMUSG00000010755	Cars	D	TRUE	sinusoidal	1.80408	5.81453	TRUE	sinusoidal	1.61271	5.53462
ENSMUSG00000010936	Vac14	D	TRUE	sinusoidal	1.59056	16.6477	TRUE	sinusoidal	1.50613	17.1213
ENSMUSG00000011179	Odc1	D	TRUE	sinusoidal	1.91218	18.3135	TRUE	sinusoidal	1.80654	18.3101
ENSMUSG00000011305	Plin5	D	TRUE	sinusoidal	1.97168	19.7145	TRUE	sinusoidal	1.71493	21.0059
ENSMUSG00000012428	Steap4	D	TRUE	sigmoid	3.02763	15.74	TRUE	sigmoid	2.74317	15.765
ENSMUSG00000012519	Mlkl	D	TRUE	sigmoid	1.63874	4.505	TRUE	sinusoidal	1.74612	5.59457
ENSMUSG00000013150	Gfod2	D	TRUE	sinusoidal	2.27012	22.3751	TRUE	sinusoidal	2.976	22.9733
ENSMUSG00000013698	Pea15a	D	TRUE	sinusoidal	1.83954	2.80615	TRUE	sinusoidal	1.68771	0.0857792
ENSMUSG00000013846	St3gal1	D	TRUE	sinusoidal	1.90283	0.315767	TRUE	sinusoidal	1.82249	23.3314
ENSMUSG00000014226	Cacybp	D	TRUE	sigmoid	1.67436	15.395	TRUE	sigmoid	1.79411	16.68
ENSMUSG00000014599	Csf1	D	TRUE	sigmoid	1.83385	15.895	TRUE	sigmoid	1.70662	15.625
ENSMUSG00000014905	Dnajb9	D	TRUE	sigmoid	2.58236	13.58	TRUE	sigmoid	2.64003	13.495
ENSMUSG00000015143	Actn1	D	TRUE	sinusoidal	1.79092	10.0265	TRUE	sinusoidal	1.57912	9.46498
ENSMUSG00000015202	Cnksr3	D	TRUE	sinusoidal	1.6907	23.746	TRUE	sinusoidal	1.60303	22.5297
ENSMUSG00000015357	Clpx	D	TRUE	sinusoidal	7.2193	0.172529	TRUE	sinusoidal	5.78534	0.411098
ENSMUSG00000015461	Atf6b	D	TRUE	sinusoidal	1.57593	23.3737	TRUE	sinusoidal	1.66502	23.1473
ENSMUSG00000015568	Lpl	D	TRUE	sinusoidal	2.94857	3.5598	TRUE	sinusoidal	2.59671	3.37885
ENSMUSG00000015656	Hspa8	D	TRUE	sigmoid	3.04544	15.675	TRUE	sigmoid	2.70272	15.875
ENSMUSG00000015755	Tab2	D	TRUE	sinusoidal	1.67493	0.669289	TRUE	sinusoidal	1.71203	1.15777
ENSMUSG00000015850	Adamtsl4	D	TRUE	sinusoidal	1.98629	14.5236	TRUE	sinusoidal	1.73054	16.5475
ENSMUSG00000015890	Amdhd1	D	TRUE	sinusoidal	2.38052	4.24863	TRUE	sinusoidal	2.67419	3.73666
ENSMUSG00000015942	Gtf2ird2	D	TRUE	sinusoidal	1.60799	11.8814	TRUE	sinusoidal	1.51683	13.0667
ENSMUSG00000016028	Celsr1	D	TRUE	sinusoidal	2.80614	20.305	TRUE	sinusoidal	3.50065	21.3967
ENSMUSG00000016128	Stard13	D	TRUE	sinusoidal	1.54988	0.269187	TRUE	sigmoid	2.49478	18.005
ENSMUSG00000016344	Ppdpf	D	TRUE	sinusoidal	1.80455	0.645903	TRUE	sinusoidal	1.74568	23.1908
ENSMUSG00000016487	Ppfibp1	D	TRUE	sigmoid	1.65109	7.485	TRUE	sinusoidal	1.96392	5.62576
ENSMUSG00000016520	Lnx2	D	TRUE	sinusoidal	2.16271	22.4057	TRUE	sinusoidal	2.10907	22.7707
ENSMUSG00000017132	Cyth1	D	TRUE	sigmoid	1.51617	9.845	TRUE	sigmoid	1.54815	10.54
ENSMUSG00000017146	Brca1	D	TRUE	sinusoidal	2.81203	15.2911	TRUE	sigmoid	2.85005	16.07
ENSMUSG00000017639	Rab11fip4	D	TRUE	sinusoidal	2.58624	0.893961	TRUE	sinusoidal	2.26378	0.616805
ENSMUSG00000017713	Tha1	D	TRUE	sinusoidal	1.52931	18.7432	TRUE	sigmoid	1.95616	22.155
ENSMUSG00000017718	Afmid	D	TRUE	sinusoidal	1.69129	22.5604	TRUE	sigmoid	1.88387	21.76
ENSMUSG00000017830	Dhx58	D	TRUE	sinusoidal	2.12165	2.88369	TRUE	sinusoidal	2.05161	2.634
ENSMUSG00000017868	Sgk2	D	TRUE	sinusoidal	2.01982	4.41568	TRUE	sinusoidal	2.18083	3.94106
ENSMUSG00000017929	B4galt5	D	TRUE	sigmoid	2.14668	16.045	TRUE	sigmoid	1.81759	15.715
ENSMUSG00000018068	Ints2	D	TRUE	sigmoid	1.85237	13.955	TRUE	sigmoid	1.75551	14.07
ENSMUSG00000018166	Erbb3	D	TRUE	sinusoidal	1.55402	2.11531	TRUE	sinusoidal	1.76212	2.33393
ENSMUSG00000018427	Ypel2	D	TRUE	sinusoidal	4.30823	0.135766	TRUE	sinusoidal	3.39293	23.5794
ENSMUSG00000018459	Slc13a3	D	TRUE	sigmoid	2.50829	15.87	TRUE	sigmoid	2.60723	15.795
ENSMUSG00000018736	Ndel1	D	TRUE	sinusoidal	1.71727	13.9494	TRUE	sigmoid	1.68789	15.16
ENSMUSG00000018906	P4ha2	D	TRUE	sigmoid	2.06664	17.945	TRUE	sinusoidal	1.99565	17.0604
ENSMUSG00000018932	Map2k3	D	TRUE	sigmoid	1.53583	12.02	TRUE	sinusoidal	1.58854	15.4521
ENSMUSG00000019082	Slc25a22	D	TRUE	sinusoidal	1.83706	5.5942	TRUE	sinusoidal	1.99402	5.13478
ENSMUSG00000019139	Isyna1	D	TRUE	sigmoid	6.55325	15.84	TRUE	sigmoid	5.44995	15.83
ENSMUSG00000019189	Rnf145	D	TRUE	sigmoid	2.16677	13.29	TRUE	sinusoidal	2.06738	10.9207
ENSMUSG00000019312	Grb7	D	TRUE	sinusoidal	1.51972	0.603084	TRUE	sinusoidal	1.51733	23.5653
ENSMUSG00000019577	Pdk4	D	TRUE	sinusoidal	9.91772	22.9859	TRUE	sigmoid	5.27225	21.74
ENSMUSG00000019590	Cyb561	D	TRUE	sigmoid	4.1392	15.905	TRUE	sigmoid	3.12195	15.625
ENSMUSG00000019659	Ccdc12	D	TRUE	sinusoidal	1.83853	2.36499	TRUE	sinusoidal	1.54552	4.76659
ENSMUSG00000019737	Syne4	D	TRUE	sigmoid	3.61771	16.21	TRUE	sigmoid	2.99342	16.05
ENSMUSG00000019768	Esr1	D	TRUE	sinusoidal	1.79704	17.7994	TRUE	sinusoidal	1.94182	18.3165
ENSMUSG00000019769		D	TRUE	sinusoidal	3.71746	1.31136	TRUE	sinusoidal	3.65364	1.35407
ENSMUSG00000019831	Wasf1	D	TRUE	sinusoidal	2.50775	17.4297	TRUE	sinusoidal	2.1217	18.5672
ENSMUSG00000019842	Traf3ip2	D	TRUE	sinusoidal	1.9321	0.58494	TRUE	sinusoidal	1.6642	22.9732
ENSMUSG00000019916	P4ha1	D	TRUE	sigmoid	2.19343	14.615	TRUE	sigmoid	2.3651	14.505
ENSMUSG00000019935	Slc17a8	D	TRUE	sinusoidal	2.95018	20.1942	TRUE	sinusoidal	3.19193	20.1825
ENSMUSG00000019948	Actr6	D	TRUE	sinusoidal	1.64572	15.8221	TRUE	sigmoid	1.55186	14.88
ENSMUSG00000020017	Hal	D	TRUE	sinusoidal	1.98429	2.64259	TRUE	sinusoidal	2.19976	2.57096
ENSMUSG00000020034	Tcp11l2	D	TRUE	sinusoidal	2.57549	4.6933	TRUE	sinusoidal	2.51056	4.88365
ENSMUSG00000020037	Rfx4	D	TRUE	sinusoidal	5.24179	2.34417	TRUE	sinusoidal	5.25681	2.07804
ENSMUSG00000020038	Cry1	D	TRUE	sinusoidal	8.2822	20.2987	TRUE	sinusoidal	8.3918	20.6137
ENSMUSG00000020069	Hnrnph3	D	TRUE	sinusoidal	1.52144	23.6616	TRUE	sinusoidal	1.89572	2.80083
ENSMUSG00000020085	Aifm2	D	TRUE	sinusoidal	1.97343	14.9586	TRUE	sinusoidal	1.61296	15.1276
ENSMUSG00000020097	Sgpl1	D	TRUE	sinusoidal	1.66351	23.2371	TRUE	sinusoidal	1.54949	23.616
ENSMUSG00000020102	Slc16a7	D	TRUE	sinusoidal	1.66257	15.3389	TRUE	sinusoidal	1.84523	15.2388
ENSMUSG00000020108	Ddit4	D	TRUE	sinusoidal	3.19137	18.3437	TRUE	sinusoidal	3.49762	18.474
ENSMUSG00000020123	Avpr1a	D	TRUE	sinusoidal	3.94606	0.0323238	TRUE	sinusoidal	3.89156	23.996
ENSMUSG00000020140	Lgr5	D	TRUE	sinusoidal	1.84851	4.36809	TRUE	sinusoidal	2.06392	3.72816
ENSMUSG00000020182	Ddc	D	TRUE	sinusoidal	3.03845	22.9208	TRUE	sinusoidal	3.04506	23.2537
ENSMUSG00000020190	Mknk2	D	TRUE	sinusoidal	2.00091	14.2693	TRUE	sinusoidal	2.13822	13.7931
ENSMUSG00000020262	Adarb1	D	TRUE	sinusoidal	2.4479	12.823	TRUE	sinusoidal	1.73682	13.4304
ENSMUSG00000020277	Pfkl	D	TRUE	sinusoidal	1.50137	20.1163	TRUE	sigmoid	1.5402	22.055
ENSMUSG00000020288	Ahsa2	D	TRUE	sigmoid	1.73929	15.665	TRUE	sigmoid	1.73266	15.435
ENSMUSG00000020300	Cpeb4	D	TRUE	sinusoidal	1.73951	3.44447	TRUE	sinusoidal	1.60714	2.23187
ENSMUSG00000020381	3010026O09Rik	D	TRUE	sinusoidal	5.06775	3.66875	TRUE	sinusoidal	3.89887	3.62514
ENSMUSG00000020424	Gatsl3	D	TRUE	sinusoidal	1.87419	14.1327	TRUE	sigmoid	2.71924	17.64
ENSMUSG00000020472	Zkscan17	D	TRUE	sinusoidal	1.56511	8.0188	TRUE	sinusoidal	1.81004	5.89399
ENSMUSG00000020532	Acaca	D	TRUE	sigmoid	1.74876	14.05	TRUE	sinusoidal	1.87407	14.6167
ENSMUSG00000020538	Srebf1	D	TRUE	sinusoidal	2.19783	14.7834	TRUE	sinusoidal	1.96336	14.7795
ENSMUSG00000020572	Nampt	D	TRUE	sigmoid	3.79546	12.575	TRUE	sigmoid	3.46785	12.875
ENSMUSG00000020592	Sdc1	D	TRUE	sinusoidal	1.54362	21.3427	TRUE	sinusoidal	1.58397	21.8179
ENSMUSG00000020593	Lpin1	D	TRUE	sigmoid	6.80086	13.135	TRUE	sigmoid	6.04137	12.725
ENSMUSG00000020604	Arsg	D	TRUE	sinusoidal	2.70579	2.60311	TRUE	sinusoidal	2.33276	2.53676
ENSMUSG00000020614	Fam20a	D	TRUE	sinusoidal	1.65591	2.19739	TRUE	sinusoidal	1.61063	2.67253
ENSMUSG00000020620	Abca8b	D	TRUE	sinusoidal	1.7351	5.26924	TRUE	sinusoidal	1.78346	4.53814
ENSMUSG00000020623	Map2k6	D	TRUE	sinusoidal	2.11836	15.4782	TRUE	sinusoidal	2.11049	13.5235
ENSMUSG00000020638	Cmpk2	D	TRUE	sinusoidal	3.53839	2.10494	TRUE	sinusoidal	3.94002	2.25943
ENSMUSG00000020641	Rsad2	D	TRUE	sinusoidal	3.78169	2.73031	TRUE	sinusoidal	3.05798	2.80947
ENSMUSG00000020642	Rnf144a	D	TRUE	sinusoidal	3.05813	0.617875	TRUE	sinusoidal	3.72616	0.792662
ENSMUSG00000020644	Id2	D	TRUE	sinusoidal	1.94654	3.06939	TRUE	sinusoidal	1.63554	0.337381
ENSMUSG00000020649	Rrm2	D	TRUE	sigmoid	3.30309	13.195	TRUE	sigmoid	2.80615	13.115
ENSMUSG00000020674	Pxdn	D	TRUE	sinusoidal	1.99423	2.07226	TRUE	sinusoidal	1.78456	0.5753
ENSMUSG00000020679	Hnf1b	D	TRUE	sinusoidal	1.60569	0.434103	TRUE	sinusoidal	1.65103	21.9949
ENSMUSG00000020695	Mrc2	D	TRUE	sinusoidal	1.62154	18.571	TRUE	sigmoid	1.90052	19.585
ENSMUSG00000020741	Cluh	D	TRUE	sinusoidal	1.59556	1.81345	TRUE	sinusoidal	1.65212	1.72129
ENSMUSG00000020743	Mif4gd	D	TRUE	sinusoidal	1.7185	20.2894	TRUE	sinusoidal	1.52577	22.913
ENSMUSG00000020744	Slc25a19	D	TRUE	sinusoidal	1.66749	14.0782	TRUE	sinusoidal	1.58338	15.8414
ENSMUSG00000020774	Aspa	D	TRUE	sinusoidal	1.6213	18.1591	TRUE	sigmoid	1.57159	18.615
ENSMUSG00000020782	Llgl2	D	TRUE	sinusoidal	1.57692	23.3013	TRUE	sinusoidal	1.73192	0.870701
ENSMUSG00000020805	Slc13a5	D	TRUE	sigmoid	11.4562	15.68	TRUE	sigmoid	8.06518	15.83
ENSMUSG00000020823	Sec14l1	D	TRUE	sigmoid	1.56909	14.675	TRUE	sinusoidal	1.55254	17.6325
ENSMUSG00000020883	Fbxl20	D	TRUE	sinusoidal	1.57671	6.38848	TRUE	sinusoidal	1.61357	7.0568
ENSMUSG00000020889	Nr1d1	D	TRUE	sigmoid	22.5739	6.665	TRUE	sigmoid	25.4113	6.465
ENSMUSG00000020893	Per1	D	TRUE	sigmoid	10.0198	11.115	TRUE	sigmoid	10.0528	10.235
ENSMUSG00000020917	Acly	D	TRUE	sinusoidal	2.26591	20.4254	TRUE	sigmoid	2.23716	21.76
ENSMUSG00000020919	Stat5b	D	TRUE	sinusoidal	2.1885	1.34109	TRUE	sinusoidal	2.13893	1.06059
ENSMUSG00000020921	Tmem101	D	TRUE	sinusoidal	1.55543	20.6122	TRUE	sinusoidal	1.77729	21.81
ENSMUSG00000021018	Polr2h	D	TRUE	sinusoidal	1.68858	14.1912	TRUE	sinusoidal	1.50094	16.6487
ENSMUSG00000021036	Sptlc2	D	TRUE	sigmoid	1.53066	15.775	TRUE	sigmoid	1.58515	15.755
ENSMUSG00000021051	Ppp2r5e	D	TRUE	sinusoidal	1.54651	13.5944	TRUE	sinusoidal	1.70494	13.4393
ENSMUSG00000021091	Serpina3n	D	TRUE	sigmoid	4.2393	15.895	TRUE	sigmoid	5.18661	15.91
ENSMUSG00000021097	Clmn	D	TRUE	sigmoid	1.92565	9.735	TRUE	sigmoid	1.53484	10.925
ENSMUSG00000021114	Atp6v1d	D	TRUE	sinusoidal	1.52453	15.4291	TRUE	sigmoid	1.59566	15.7
ENSMUSG00000021127	Zfp36l1	D	TRUE	sinusoidal	1.94142	23.5383	TRUE	sinusoidal	2.28999	22.6527
ENSMUSG00000021134	Srsf5	D	TRUE	sinusoidal	2.22734	3.86933	TRUE	sinusoidal	2.2488	4.79969
ENSMUSG00000021196	Pfkp	D	TRUE	sinusoidal	1.95092	3.33917	TRUE	sinusoidal	2.36465	2.99226
ENSMUSG00000021215	Net1	D	TRUE	sinusoidal	1.8061	22.8544	TRUE	sinusoidal	1.75246	22.4863
ENSMUSG00000021270	Hsp90aa1	D	TRUE	sigmoid	2.47716	15.775	TRUE	sigmoid	2.67238	15.69
ENSMUSG00000021281	Tnfaip2	D	TRUE	sinusoidal	2.73479	1.18282	TRUE	sinusoidal	2.80251	0.54094
ENSMUSG00000021336	Slc17a4	D	TRUE	sinusoidal	1.88803	1.82184	TRUE	sinusoidal	1.98052	1.35807
ENSMUSG00000021392	Nol8	D	TRUE	sinusoidal	1.50159	12.1787	TRUE	sinusoidal	1.62746	12.7334
ENSMUSG00000021400	Wrnip1	D	TRUE	sinusoidal	2.46845	0.0560537	TRUE	sinusoidal	2.33461	0.315124
ENSMUSG00000021411	Pxdc1	D	TRUE	sinusoidal	1.94167	22.4543	TRUE	sinusoidal	1.85303	22.9408
ENSMUSG00000021417	Eci2	D	TRUE	sinusoidal	1.8589	11.2055	TRUE	sinusoidal	1.94222	11.2929
ENSMUSG00000021483	Cdk20	D	TRUE	sinusoidal	1.75927	19.8426	TRUE	sinusoidal	2.45819	21.5296
ENSMUSG00000021500	Ddx46	D	TRUE	sigmoid	1.89271	10.15	TRUE	sinusoidal	1.89624	8.93311
ENSMUSG00000021508	Cxcl14	D	TRUE	sigmoid	7.97235	15.885	TRUE	sigmoid	7.86926	15.83
ENSMUSG00000021559	Dapk1	D	TRUE	sinusoidal	2.28758	23.0089	TRUE	sinusoidal	2.58874	23.0943
ENSMUSG00000021573	Tppp	D	TRUE	sinusoidal	1.70369	16.1683	TRUE	sinusoidal	1.91708	17.0464
ENSMUSG00000021591	Glrx	D	TRUE	sigmoid	1.8876	15.76	TRUE	sigmoid	2.10175	17.775
ENSMUSG00000021638	Ocln	D	TRUE	sinusoidal	1.70006	4.03847	TRUE	sinusoidal	1.58679	3.91365
ENSMUSG00000021670	Hmgcr	D	TRUE	sinusoidal	2.04342	14.8071	TRUE	sinusoidal	1.9585	14.9797
ENSMUSG00000021687	Scamp1	D	TRUE	sinusoidal	1.52527	9.50042	TRUE	sinusoidal	1.7755	10.0097
ENSMUSG00000021704	Mtx3	D	TRUE	sinusoidal	1.8179	6.95697	TRUE	sinusoidal	1.90837	5.68173
ENSMUSG00000021748	Pdhb	D	TRUE	sinusoidal	1.56914	13.5517	TRUE	sigmoid	1.61195	14.06
ENSMUSG00000021775	Nr1d2	D	TRUE	sinusoidal	8.48467	10.4799	TRUE	sinusoidal	9.02211	10.3538
ENSMUSG00000021814	Anxa7	D	TRUE	sinusoidal	1.65724	11.896	TRUE	sigmoid	1.55901	13.285
ENSMUSG00000021824	Ap3m1	D	TRUE	sigmoid	1.6992	12.905	TRUE	sinusoidal	1.86663	12.2521
ENSMUSG00000021831	Ero1l	D	TRUE	sigmoid	1.65451	14.83	TRUE	sigmoid	1.50051	16.16
ENSMUSG00000021868	Ppif	D	TRUE	sinusoidal	1.61943	15.1969	TRUE	sinusoidal	1.56512	15.0492
ENSMUSG00000021871	Pnp	D	TRUE	sinusoidal	2.0628	22.6617	TRUE	sinusoidal	2.40492	23.7213
ENSMUSG00000021876	Rnase4	D	TRUE	sinusoidal	1.98287	10.3259	TRUE	sinusoidal	1.67714	11.3661
ENSMUSG00000021884	Hacl1	D	TRUE	sinusoidal	2.63757	22.7834	TRUE	sinusoidal	2.56147	23.2206
ENSMUSG00000021922	Itih4	D	TRUE	sigmoid	2.70607	15.88	TRUE	sigmoid	2.67519	15.905
ENSMUSG00000021932	Rnaseh2b	D	TRUE	sinusoidal	1.82742	15.8856	TRUE	sinusoidal	2.09275	15.2872
ENSMUSG00000021943	Gdf10	D	TRUE	sigmoid	1.66863	16.235	TRUE	sinusoidal	1.84728	19.2792
ENSMUSG00000021944	Gata4	D	TRUE	sinusoidal	1.67203	22.9894	TRUE	sigmoid	1.82782	21.12
ENSMUSG00000021951	N6amt2	D	TRUE	sinusoidal	1.59081	22.6304	TRUE	sinusoidal	1.52956	22.7991
ENSMUSG00000021990	Spata13	D	TRUE	sinusoidal	1.55506	5.64201	TRUE	sinusoidal	1.52477	4.60334
ENSMUSG00000021999	Cpb2	D	TRUE	sigmoid	1.81215	15.87	TRUE	sigmoid	1.82519	15.87
ENSMUSG00000022025	Lect1	D	TRUE	sinusoidal	1.93771	13.3759	TRUE	sinusoidal	2.27637	14.5767
ENSMUSG00000022032	Scara5	D	TRUE	sigmoid	3.18397	15.84	TRUE	sigmoid	3.31485	15.66
ENSMUSG00000022094	Slc39a14	D	TRUE	sigmoid	1.68969	15.505	TRUE	sigmoid	1.87772	15.83
ENSMUSG00000022146	Osmr	D	TRUE	sigmoid	3.003	15.98	TRUE	sigmoid	3.10073	16.115
ENSMUSG00000022179	4931414P19Rik	D	TRUE	sinusoidal	1.93886	19.9857	TRUE	sinusoidal	2.09856	21.5573
ENSMUSG00000022180	Slc7a8	D	TRUE	sinusoidal	1.82473	3.46906	TRUE	sinusoidal	2.37537	3.37987
ENSMUSG00000022218	Tgm1	D	TRUE	sinusoidal	2.2897	15.0271	TRUE	sinusoidal	1.76287	14.9607
ENSMUSG00000022241	Tars	D	TRUE	sigmoid	2.10681	1.74	TRUE	sinusoidal	2.08198	23.9264
ENSMUSG00000022297	Fzd6	D	TRUE	sinusoidal	2.67732	6.33026	TRUE	sinusoidal	2.47163	5.57199
ENSMUSG00000022299	Slc25a32	D	TRUE	sigmoid	1.52699	12.205	TRUE	sigmoid	1.69072	12.035
ENSMUSG00000022353	Mtss1	D	TRUE	sinusoidal	2.05572	12.378	TRUE	sinusoidal	2.0062	13.1847
ENSMUSG00000022358	Fbxo32	D	TRUE	sinusoidal	2.01435	5.26566	TRUE	sinusoidal	2.67439	6.85767
ENSMUSG00000022360	Atad2	D	TRUE	sigmoid	1.67734	15.13	TRUE	sigmoid	1.80805	13.79
ENSMUSG00000022389	Tef	D	TRUE	sigmoid	6.58441	10.12	TRUE	sigmoid	5.62317	10.485
ENSMUSG00000022408	Fam83f	D	TRUE	sinusoidal	4.12051	21.778	TRUE	sinusoidal	3.84021	21.5964
ENSMUSG00000022414	Tab1	D	TRUE	sinusoidal	1.70369	2.83326	TRUE	sinusoidal	1.9096	1.52148
ENSMUSG00000022425	Enpp2	D	TRUE	sinusoidal	1.95015	13.565	TRUE	sinusoidal	1.78169	13.3394
ENSMUSG00000022462	Slc38a2	D	TRUE	sinusoidal	2.43343	10.4737	TRUE	sinusoidal	2.20686	10.0905
ENSMUSG00000022512	Cldn1	D	TRUE	sinusoidal	4.3206	23.9167	TRUE	sinusoidal	5.43288	0.217135
ENSMUSG00000022550	Adck5	D	TRUE	sinusoidal	2.25404	2.54116	TRUE	sinusoidal	2.40435	2.72304
ENSMUSG00000022615	Tymp	D	TRUE	sinusoidal	5.22402	2.91493	TRUE	sinusoidal	5.66157	2.85463
ENSMUSG00000022617	Chkb	D	TRUE	sinusoidal	1.50984	4.44625	TRUE	sinusoidal	1.6571	5.03641
ENSMUSG00000022621	Rabl2	D	TRUE	sinusoidal	1.75056	22.2672	TRUE	sinusoidal	1.94584	1.23518
ENSMUSG00000022682	Rrn3	D	TRUE	sinusoidal	1.69382	12.2287	TRUE	sinusoidal	1.54754	11.426
ENSMUSG00000022707	Gbe1	D	TRUE	sinusoidal	1.61838	15.1874	TRUE	sinusoidal	1.57828	14.8031
ENSMUSG00000022723	Crybg3	D	TRUE	sinusoidal	2.05658	19.3053	TRUE	sinusoidal	1.62544	19.0948
ENSMUSG00000022769	Sdf2l1	D	TRUE	sinusoidal	2.02176	23.4398	TRUE	sinusoidal	2.01032	23.507
ENSMUSG00000022791	Tnk2	D	TRUE	sinusoidal	1.65658	0.168473	TRUE	sinusoidal	1.63905	1.70004
ENSMUSG00000022797	Tfrc	D	TRUE	sigmoid	2.48552	13.915	TRUE	sigmoid	2.36816	14.055
ENSMUSG00000022847	Thpo	D	TRUE	sinusoidal	1.75946	22.9942	TRUE	sinusoidal	1.69185	22.1774
ENSMUSG00000022848	Dirc2	D	TRUE	sinusoidal	1.6791	1.49909	TRUE	sinusoidal	1.96693	1.55072
ENSMUSG00000022858	Tra2b	D	TRUE	sinusoidal	1.77333	20.4192	TRUE	sinusoidal	1.55733	20.8806
ENSMUSG00000022863	Btg3	D	TRUE	sigmoid	2.54837	15.865	TRUE	sigmoid	2.32373	15.73
ENSMUSG00000022865	Cxadr	D	TRUE	sinusoidal	1.52675	22.2645	TRUE	sinusoidal	1.57974	22.5313
ENSMUSG00000022875	Kng1	D	TRUE	sigmoid	1.63727	15.95	TRUE	sigmoid	1.59973	16.01
ENSMUSG00000022877	Hrg	D	TRUE	sigmoid	1.58956	16.01	TRUE	sigmoid	1.72019	16.07
ENSMUSG00000022883	Robo1	D	TRUE	sinusoidal	1.56626	2.38113	TRUE	sigmoid	1.82238	21.695
ENSMUSG00000022885	St6gal1	D	TRUE	sinusoidal	1.88407	4.9375	TRUE	sinusoidal	1.60334	5.07217
ENSMUSG00000022912	Pros1	D	TRUE	sigmoid	1.65567	15.705	TRUE	sigmoid	1.67766	15.815
ENSMUSG00000022946	Dopey2	D	TRUE	sinusoidal	1.6443	19.35	TRUE	sinusoidal	1.90345	19.3925
ENSMUSG00000022951	Rcan1	D	TRUE	sigmoid	4.42242	13.85	TRUE	sigmoid	3.38295	13.87
ENSMUSG00000022994	Adcy6	D	TRUE	sigmoid	1.79047	10.53	TRUE	sigmoid	1.68628	10.35
ENSMUSG00000023018	Smarcd1	D	TRUE	sinusoidal	1.76218	23.7133	TRUE	sinusoidal	1.85347	23.8287
ENSMUSG00000023044	Csad	D	TRUE	sinusoidal	1.73372	1.36447	TRUE	sinusoidal	2.13132	1.79975
ENSMUSG00000023045	Soat2	D	TRUE	sinusoidal	1.9269	8.29613	TRUE	sinusoidal	1.7485	6.27803
ENSMUSG00000023055	Calcoco1	D	TRUE	sinusoidal	1.67207	6.27088	TRUE	sinusoidal	1.69923	5.51928
ENSMUSG00000023067	Cdkn1a	D	TRUE	sinusoidal	22.8404	22.8235	TRUE	sinusoidal	112.373	22.2518
ENSMUSG00000023073	Slc10a2	D	TRUE	sigmoid	3.04965	15.92	TRUE	sigmoid	2.88469	15.925
ENSMUSG00000023079	Gtf2ird1	D	TRUE	sinusoidal	2.01806	1.65298	TRUE	sinusoidal	1.80449	0.955498
ENSMUSG00000023087	Ccrn4l	D	TRUE	sigmoid	8.86234	11.94	TRUE	sigmoid	6.71131	11.785
ENSMUSG00000023150	Ivns1abp	D	TRUE	sigmoid	1.96661	13.485	TRUE	sigmoid	1.82072	14.995
ENSMUSG00000023206	Il15ra	D	TRUE	sinusoidal	2.9191	9.76154	TRUE	sinusoidal	1.8915	12.2661
ENSMUSG00000023243	Kcnk5	D	TRUE	sinusoidal	2.67963	13.6402	TRUE	sinusoidal	2.43029	13.8938
ENSMUSG00000023274	Cd4	D	TRUE	sinusoidal	2.54533	21.6955	TRUE	sinusoidal	3.40248	21.2394
ENSMUSG00000023341	Mx2	D	TRUE	sigmoid	1.84859	2.55	TRUE	sigmoid	1.83105	2.135
ENSMUSG00000023495	Pcbp4	D	TRUE	sigmoid	3.02388	8.735	TRUE	sigmoid	2.29311	9.51
ENSMUSG00000023805	Synj2	D	TRUE	sigmoid	2.74208	9.3	TRUE	sinusoidal	2.00236	11.5517
ENSMUSG00000023846		D	TRUE	sinusoidal	1.70724	13.7656	TRUE	sinusoidal	1.65707	13.5294
ENSMUSG00000023913	Pla2g7	D	TRUE	sigmoid	2.40693	15.675	TRUE	sigmoid	2.35089	15.805
ENSMUSG00000023942	Slc29a1	D	TRUE	sinusoidal	1.54592	20.2674	TRUE	sinusoidal	1.60102	21.3787
ENSMUSG00000023944	Hsp90ab1	D	TRUE	sinusoidal	1.8184	18.6496	TRUE	sinusoidal	1.70252	19.5095
ENSMUSG00000023963	Cyp39a1	D	TRUE	sigmoid	1.9869	15.575	TRUE	sigmoid	2.12653	15.85
ENSMUSG00000024007	Ppil1	D	TRUE	sinusoidal	1.61491	20.3457	TRUE	sinusoidal	1.59038	22.1256
ENSMUSG00000024014	Pim1	D	TRUE	sigmoid	2.79718	6.05	TRUE	sinusoidal	2.59209	4.19694
ENSMUSG00000024039	Cbs	D	TRUE	sinusoidal	2.54075	3.82261	TRUE	sinusoidal	2.49456	3.38796
ENSMUSG00000024052	Lpin2	D	TRUE	sigmoid	2.11483	9.84	TRUE	sigmoid	2.01874	9.85
ENSMUSG00000024070	Prkd3	D	TRUE	sinusoidal	1.57232	5.67194	TRUE	sinusoidal	1.57658	5.56299
ENSMUSG00000024085	Man2a1	D	TRUE	sigmoid	1.6885	14.425	TRUE	sigmoid	1.61553	16.08
ENSMUSG00000024101	Wash	D	TRUE	sinusoidal	1.53909	4.38165	TRUE	sigmoid	3.94255	18.42
ENSMUSG00000024118	1600002H07Rik	D	TRUE	sinusoidal	2.30828	16.8403	TRUE	sinusoidal	2.10726	17.1446
ENSMUSG00000024131	Slc3a1	D	TRUE	sigmoid	2.92963	15.92	TRUE	sigmoid	2.89789	15.935
ENSMUSG00000024155	Meiob	D	TRUE	sinusoidal	3.05822	6.44181	TRUE	sinusoidal	2.0348	6.02508
ENSMUSG00000024160	Spsb3	D	TRUE	sinusoidal	2.01052	0.506313	TRUE	sinusoidal	2.07559	23.7718
ENSMUSG00000024164	C3	D	TRUE	sigmoid	1.75547	15.985	TRUE	sigmoid	1.70292	16.05
ENSMUSG00000024222	Fkbp5	D	TRUE	sigmoid	5.96503	15.92	TRUE	sigmoid	5.16767	15.92
ENSMUSG00000024254	Abcg8	D	TRUE	sinusoidal	3.15459	8.42076	TRUE	sinusoidal	2.56666	8.67049
ENSMUSG00000024277	Mapre2	D	TRUE	sinusoidal	1.80454	14.5512	TRUE	sinusoidal	1.98151	15.5719
ENSMUSG00000024325	Ring1	D	TRUE	sinusoidal	1.65486	3.71343	TRUE	sinusoidal	1.78924	3.35748
ENSMUSG00000024378	Stard4	D	TRUE	sigmoid	1.63435	9.6	TRUE	sigmoid	1.76432	9.825
ENSMUSG00000024413	Npc1	D	TRUE	sigmoid	1.55103	10.225	TRUE	sigmoid	1.60734	9.385
ENSMUSG00000024479	Mal2	D	TRUE	sinusoidal	1.72663	21.078	TRUE	sinusoidal	2.02563	21.4196
ENSMUSG00000024544	Ldlrad4	D	TRUE	sinusoidal	2.1476	5.9985	TRUE	sinusoidal	1.82492	6.46174
ENSMUSG00000024561	Mbd1	D	TRUE	sigmoid	1.49651	10.51	TRUE	sigmoid	1.61049	9.945
ENSMUSG00000024589	Nedd4l	D	TRUE	sinusoidal	2.28296	22.4358	TRUE	sinusoidal	2.24635	22.3457
ENSMUSG00000024597	Slc12a2	D	TRUE	sinusoidal	1.53812	17.8118	TRUE	sigmoid	1.58945	18.01
ENSMUSG00000024620	Pdgfrb	D	TRUE	sinusoidal	1.59778	2.5803	TRUE	sinusoidal	1.6457	23.9095
ENSMUSG00000024664	Fads3	D	TRUE	sinusoidal	1.73449	20.4084	TRUE	sinusoidal	2.28831	19.2234
ENSMUSG00000024665	Fads2	D	TRUE	sigmoid	2.02221	10.01	TRUE	sigmoid	1.84459	10.01
ENSMUSG00000024737	Slc15a3	D	TRUE	sinusoidal	1.93478	3.19283	TRUE	sinusoidal	2.23384	2.73026
ENSMUSG00000024778	Fas	D	TRUE	sinusoidal	1.50475	20.1542	TRUE	sigmoid	1.86737	16.165
ENSMUSG00000024781	Lipa	D	TRUE	sinusoidal	1.66188	21.8996	TRUE	sinusoidal	1.60567	21.929
ENSMUSG00000024785	Rcl1	D	TRUE	sigmoid	1.81353	7.485	TRUE	sinusoidal	1.96491	6.56706
ENSMUSG00000024812	Tjp2	D	TRUE	sinusoidal	1.91669	23.9953	TRUE	sigmoid	2.09052	0.075
ENSMUSG00000024827	Gldc	D	TRUE	sinusoidal	2.33992	23.8188	TRUE	sigmoid	2.49561	23.45
ENSMUSG00000024843	Chka	D	TRUE	sinusoidal	9.50239	0.461354	TRUE	sinusoidal	8.60404	0.36327
ENSMUSG00000024900	Cpt1a	D	TRUE	sigmoid	2.14049	11.365	TRUE	sigmoid	1.84525	11.62
ENSMUSG00000024913	Lrp5	D	TRUE	sinusoidal	1.89403	0.716515	TRUE	sinusoidal	2.33268	1.18922
ENSMUSG00000024966	Stip1	D	TRUE	sigmoid	1.78596	15.805	TRUE	sinusoidal	1.94304	18.6988
ENSMUSG00000024978	Gpam	D	TRUE	sigmoid	1.54534	20.385	TRUE	sigmoid	1.60768	20.855
ENSMUSG00000024998	Plce1	D	TRUE	sigmoid	1.49801	15.675	TRUE	sigmoid	1.551	16.095
ENSMUSG00000025006	Sorbs1	D	TRUE	sigmoid	1.54044	10.105	TRUE	sigmoid	1.55625	10.34
ENSMUSG00000025017	Pik3ap1	D	TRUE	sigmoid	2.00251	9.995	TRUE	sigmoid	1.93283	9.8
ENSMUSG00000025078	Nhlrc2	D	TRUE	sinusoidal	1.73459	13.8911	TRUE	sigmoid	1.60556	11.56
ENSMUSG00000025085	Ablim1	D	TRUE	sinusoidal	1.86607	0.193623	TRUE	sinusoidal	1.87695	23.5019
ENSMUSG00000025089	Gfra1	D	TRUE	sigmoid	1.61379	16.07	TRUE	sigmoid	1.67525	16.12
ENSMUSG00000025153	Fasn	D	TRUE	sigmoid	2.44397	14.055	TRUE	sinusoidal	2.95113	16.3964
ENSMUSG00000025185	Loxl4	D	TRUE	sigmoid	9.29496	1.935	TRUE	sigmoid	9.68616	0.855
ENSMUSG00000025188	Hps1	D	TRUE	sinusoidal	1.94005	4.1487	TRUE	sinusoidal	1.71884	2.90697
ENSMUSG00000025194	Abcc2	D	TRUE	sigmoid	2.06733	11.115	TRUE	sigmoid	1.72048	11.55
ENSMUSG00000025209	Peo1	D	TRUE	sinusoidal	1.60396	17.7576	TRUE	sinusoidal	1.52238	18.4462
ENSMUSG00000025218	Poll	D	TRUE	sinusoidal	1.50022	3.79758	TRUE	sinusoidal	1.52245	1.4454
ENSMUSG00000025227	Tmem180	D	TRUE	sinusoidal	2.3569	22.8636	TRUE	sinusoidal	2.09538	23.9141
ENSMUSG00000025271	Pfkfb1	D	TRUE	sinusoidal	2.58922	18.205	TRUE	sinusoidal	2.44326	17.8945
ENSMUSG00000025277	Abhd6	D	TRUE	sinusoidal	1.62688	15.9484	TRUE	sinusoidal	1.75655	17.1241
ENSMUSG00000025372	Baiap2	D	TRUE	sinusoidal	1.71328	20.9635	TRUE	sinusoidal	1.78929	20.0049
ENSMUSG00000025395	Prim1	D	TRUE	sinusoidal	1.69204	23.9391	TRUE	sinusoidal	1.69533	23.2001
ENSMUSG00000025396	Hsd17b6	D	TRUE	sinusoidal	1.82172	10.4771	TRUE	sinusoidal	1.74581	10.3305
ENSMUSG00000025402	Nab2	D	TRUE	sigmoid	2.22322	5.91	TRUE	sinusoidal	2.70952	4.98751
ENSMUSG00000025422	Agap2	D	TRUE	sinusoidal	2.06916	18.4039	TRUE	sinusoidal	2.29005	17.3727
ENSMUSG00000025474	Tubgcp2	D	TRUE	sinusoidal	1.527	7.01097	TRUE	sigmoid	2.78994	18.015
ENSMUSG00000025479	Cyp2e1	D	TRUE	sinusoidal	1.84515	13.497	TRUE	sinusoidal	1.503	12.8676
ENSMUSG00000025504	Eps8l2	D	TRUE	sigmoid	3.8059	3.705	TRUE	sinusoidal	3.98344	1.74729
ENSMUSG00000025509	Pnpla2	D	TRUE	sigmoid	1.88516	10.31	TRUE	sigmoid	1.74275	10.64
ENSMUSG00000025511	Tspan4	D	TRUE	sinusoidal	3.80227	15.8029	TRUE	sinusoidal	2.64505	16.126
ENSMUSG00000025532	Crcp	D	TRUE	sinusoidal	1.59555	14.1363	TRUE	sinusoidal	1.65193	14.6213
ENSMUSG00000025533	Asl	D	TRUE	sinusoidal	2.1599	17.365	TRUE	sinusoidal	2.01274	17.8063
ENSMUSG00000025534	Gusb	D	TRUE	sinusoidal	1.51629	17.5205	TRUE	sinusoidal	1.49772	18.0643
ENSMUSG00000025612	Bach1	D	TRUE	sigmoid	2.09903	10.075	TRUE	sigmoid	2.02437	10.09
ENSMUSG00000025732	Fam195a	D	TRUE	sinusoidal	1.79683	18.1873	TRUE	sinusoidal	1.5189	18.9848
ENSMUSG00000025757	Hspa4l	D	TRUE	sigmoid	2.32651	16.06	TRUE	sigmoid	2.25535	16.01
ENSMUSG00000025764	Jade1	D	TRUE	sigmoid	2.14887	9.02	TRUE	sigmoid	2.10056	10.025
ENSMUSG00000025813	Homer2	D	TRUE	sinusoidal	2.73712	14.2815	TRUE	sinusoidal	2.42511	14.459
ENSMUSG00000025869	Nop16	D	TRUE	sinusoidal	1.52787	19.2819	TRUE	sinusoidal	1.67885	19.0742
ENSMUSG00000025871	4833439L19Rik	D	TRUE	sinusoidal	1.90305	18.2567	TRUE	sinusoidal	1.51883	16.8062
ENSMUSG00000025889	Snca	D	TRUE	sigmoid	3.76037	15.415	TRUE	sigmoid	2.8639	15.445
ENSMUSG00000025934	Gsta3	D	TRUE	sigmoid	1.56202	19.205	TRUE	sinusoidal	1.70432	20.103
ENSMUSG00000025981	Coq10b	D	TRUE	sigmoid	4.60998	10.57	TRUE	sigmoid	4.40913	9.75
ENSMUSG00000025986	Slc39a10	D	TRUE	sinusoidal	2.20067	22.2687	TRUE	sigmoid	2.39965	19.185
ENSMUSG00000026014	Raph1	D	TRUE	sigmoid	1.77194	16.105	TRUE	sigmoid	1.904	16.125
ENSMUSG00000026072	Il1r1	D	TRUE	sigmoid	2.43249	15.785	TRUE	sigmoid	2.48616	15.795
ENSMUSG00000026074	Map4k4	D	TRUE	sinusoidal	1.64832	1.34395	TRUE	sinusoidal	1.76535	1.8488
ENSMUSG00000026077	Npas2	D	TRUE	sigmoid	11.4092	1.565	TRUE	sigmoid	14.5472	1.925
ENSMUSG00000026082	Rev1	D	TRUE	sigmoid	1.87776	9.735	TRUE	sinusoidal	1.65926	11.7615
ENSMUSG00000026104	Stat1	D	TRUE	sinusoidal	1.75903	4.79772	TRUE	sinusoidal	1.503	4.62535
ENSMUSG00000026107	Nabp1	D	TRUE	sinusoidal	2.10811	11.6487	TRUE	sigmoid	2.14332	13.175
ENSMUSG00000026131	Dst	D	TRUE	sinusoidal	1.72956	14.7675	TRUE	sinusoidal	1.5131	14.9555
ENSMUSG00000026179	Pnkd	D	TRUE	sinusoidal	2.62192	22.9592	TRUE	sinusoidal	3.20843	22.8534
ENSMUSG00000026193	Fn1	D	TRUE	sigmoid	1.6612	15.77	TRUE	sigmoid	1.64402	15.89
ENSMUSG00000026202	Tuba4a	D	TRUE	sinusoidal	1.77652	0.804369	TRUE	sigmoid	1.9427	20.685
ENSMUSG00000026234	Ncl	D	TRUE	sigmoid	1.50472	12.135	TRUE	sigmoid	1.51255	12.62
ENSMUSG00000026249	Serpine2	D	TRUE	sigmoid	2.88839	18.375	TRUE	sigmoid	2.7704	19.27
ENSMUSG00000026259	Ngef	D	TRUE	sigmoid	1.95579	11.485	TRUE	sigmoid	1.72398	9.9
ENSMUSG00000026272	Agxt	D	TRUE	sinusoidal	2.19966	4.99631	TRUE	sinusoidal	2.31471	4.64801
ENSMUSG00000026278	Bok	D	TRUE	sinusoidal	3.51987	0.827926	TRUE	sinusoidal	2.92454	1.76463
ENSMUSG00000026304	Rab17	D	TRUE	sinusoidal	1.56596	2.99974	TRUE	sinusoidal	1.63441	3.20676
ENSMUSG00000026348	Acmsd	D	TRUE	sinusoidal	2.94803	21.0127	TRUE	sinusoidal	3.03214	21.0255
ENSMUSG00000026360	Rgs2	D	TRUE	sinusoidal	2.02544	2.88626	TRUE	sinusoidal	2.03896	3.55195
ENSMUSG00000026365	Cfh	D	TRUE	sigmoid	2.03778	15.785	TRUE	sigmoid	2.18256	15.9
ENSMUSG00000026389	Steap3	D	TRUE	sinusoidal	1.88182	0.103652	TRUE	sigmoid	2.00885	21.535
ENSMUSG00000026405	C4bp	D	TRUE	sigmoid	1.8637	15.805	TRUE	sigmoid	1.76505	15.825
ENSMUSG00000026409	Pfkfb2	D	TRUE	sigmoid	1.84287	14.315	TRUE	sigmoid	1.752	14.7
ENSMUSG00000026435	Slc45a3	D	TRUE	sinusoidal	2.81529	21.2846	TRUE	sinusoidal	3.89918	22.7307
ENSMUSG00000026437	Cdk18	D	TRUE	sinusoidal	1.52356	14.0283	TRUE	sinusoidal	1.53391	15.0793
ENSMUSG00000026475	Rgs16	D	TRUE	sigmoid	31.498	8.63	TRUE	sigmoid	36.4834	8.565
ENSMUSG00000026489	Adck3	D	TRUE	sinusoidal	4.94968	0.251237	TRUE	sinusoidal	5.11205	0.208972
ENSMUSG00000026491	Ahctf1	D	TRUE	sinusoidal	1.70561	20.8128	TRUE	sinusoidal	1.63398	20.4633
ENSMUSG00000026502	Desi2	D	TRUE	sinusoidal	2.39556	20.7967	TRUE	sinusoidal	1.88746	20.7499
ENSMUSG00000026509	Capn2	D	TRUE	sinusoidal	1.52603	23.7875	TRUE	sinusoidal	1.60508	0.178462
ENSMUSG00000026525	Opn3	D	TRUE	sigmoid	4.07273	15.2	TRUE	sigmoid	2.49382	16.81
ENSMUSG00000026542	Apcs	D	TRUE	sigmoid	9.34848	15.86	TRUE	sigmoid	9.67897	15.865
ENSMUSG00000026566	Mpzl1	D	TRUE	sinusoidal	5.30925	0.987654	TRUE	sinusoidal	5.71625	1.59249
ENSMUSG00000026571	Dcaf6	D	TRUE	sinusoidal	1.66981	8.471	TRUE	sinusoidal	1.7019	8.5748
ENSMUSG00000026614	Slc30a10	D	TRUE	sinusoidal	3.1393	23.7724	TRUE	sinusoidal	3.53506	23.9589
ENSMUSG00000026623	Lpgat1	D	TRUE	sinusoidal	2.13656	16.9562	TRUE	sigmoid	1.6797	15.745
ENSMUSG00000026638	Irf6	D	TRUE	sigmoid	2.13079	23.945	TRUE	sinusoidal	1.89713	0.0926477
ENSMUSG00000026640	Plxna2	D	TRUE	sinusoidal	2.17812	1.35354	TRUE	sinusoidal	2.38122	0.961162
ENSMUSG00000026669	Mcm10	D	TRUE	sigmoid	2.83722	9.93	TRUE	sigmoid	2.53191	10.145
ENSMUSG00000026670	Uap1	D	TRUE	sigmoid	1.97852	13.715	TRUE	sigmoid	1.65887	14.385
ENSMUSG00000026768	Itga8	D	TRUE	sinusoidal	2.30621	5.48602	TRUE	sinusoidal	1.81154	5.05836
ENSMUSG00000026773	Pfkfb3	D	TRUE	sigmoid	6.26868	10.165	TRUE	sigmoid	5.84864	10.27
ENSMUSG00000026798	Coq4	D	TRUE	sinusoidal	1.57281	1.18456	TRUE	sigmoid	1.71699	21.675
ENSMUSG00000026811	St6galnac6	D	TRUE	sinusoidal	1.78196	23.5024	TRUE	sinusoidal	1.89202	23.1467
ENSMUSG00000026822	Lcn2	D	TRUE	sigmoid	964.063	15.93	TRUE	sigmoid	192.798	15.935
ENSMUSG00000026827	Gpd2	D	TRUE	sinusoidal	1.57207	10.3526	TRUE	sinusoidal	1.6012	10.0125
ENSMUSG00000026837	Col5a1	D	TRUE	sinusoidal	1.54196	3.00419	TRUE	sinusoidal	1.79192	1.43737
ENSMUSG00000026839	Upp2	D	TRUE	sigmoid	4.12395	10.285	TRUE	sigmoid	3.85608	11.055
ENSMUSG00000026853	Crat	D	TRUE	sinusoidal	1.66516	22.3801	TRUE	sigmoid	2.1928	21.955
ENSMUSG00000026866	Kynu	D	TRUE	sinusoidal	1.5973	3.37379	TRUE	sinusoidal	1.57618	3.60149
ENSMUSG00000026922	Agpat2	D	TRUE	sinusoidal	1.94042	21.1749	TRUE	sinusoidal	2.02699	21.0051
ENSMUSG00000026970	Rbms1	D	TRUE	sinusoidal	1.99062	7.33034	TRUE	sinusoidal	1.76511	6.28719
ENSMUSG00000026977	2015-03-07	D	TRUE	sinusoidal	1.71261	6.33859	TRUE	sigmoid	1.68305	7.3
ENSMUSG00000026980	Ly75	D	TRUE	sigmoid	1.93426	15.125	TRUE	sigmoid	2.1995	15.625
ENSMUSG00000027035	Cers6	D	TRUE	sigmoid	2.62159	15.9	TRUE	sigmoid	2.95921	15.87
ENSMUSG00000027048	Abcb11	D	TRUE	sinusoidal	2.11818	3.58111	TRUE	sinusoidal	1.99335	2.92257
ENSMUSG00000027068	Dhrs9	D	TRUE	sinusoidal	6.75277	0.768248	TRUE	sinusoidal	6.54922	0.269782
ENSMUSG00000027167	Elp4	D	TRUE	sinusoidal	1.61499	2.55217	TRUE	sinusoidal	1.67366	2.92075
ENSMUSG00000027184	Caprin1	D	TRUE	sinusoidal	2.2499	23.188	TRUE	sinusoidal	1.89188	23.5185
ENSMUSG00000027253	Lrp4	D	TRUE	sinusoidal	2.33603	14.5362	TRUE	sinusoidal	1.92265	14.9224
ENSMUSG00000027340	Slc23a2	D	TRUE	sigmoid	1.88385	9.885	TRUE	sigmoid	1.76012	9.615
ENSMUSG00000027346	Gpcpd1	D	TRUE	sigmoid	4.74356	12.13	TRUE	sigmoid	4.97528	12.125
ENSMUSG00000027387	Zc3h8	D	TRUE	sinusoidal	2.03101	13.8654	TRUE	sinusoidal	3.44886	13.7546
ENSMUSG00000027397	Slc20a1	D	TRUE	sinusoidal	3.08169	13.7347	TRUE	sigmoid	2.27773	12.93
ENSMUSG00000027408	Cpxm1	D	TRUE	sinusoidal	1.58588	21.4636	TRUE	sigmoid	2.46669	18.49
ENSMUSG00000027459	Fam110a	D	TRUE	sinusoidal	1.90981	22.8107	TRUE	sinusoidal	2.3369	23.0914
ENSMUSG00000027488	Snta1	D	TRUE	sinusoidal	1.54146	18.181	TRUE	sinusoidal	1.63649	18.6546
ENSMUSG00000027513	Pck1	D	TRUE	sinusoidal	2.50754	9.5587	TRUE	sinusoidal	2.00983	9.58807
ENSMUSG00000027577	Chrna4	D	TRUE	sigmoid	6.49798	20.18	TRUE	sigmoid	4.50313	20.44
ENSMUSG00000027579	Srms	D	TRUE	sinusoidal	4.58695	20.3431	TRUE	sinusoidal	5.98831	20.0773
ENSMUSG00000027580	Helz2	D	TRUE	sinusoidal	1.78912	1.22321	TRUE	sinusoidal	1.89079	0.406793
ENSMUSG00000027597	Ahcy	D	TRUE	sinusoidal	1.87301	16.7681	TRUE	sinusoidal	1.68624	18.6892
ENSMUSG00000027605	Acss2	D	TRUE	sinusoidal	2.14676	23.7326	TRUE	sinusoidal	2.37063	23.7062
ENSMUSG00000027610	Gss	D	TRUE	sinusoidal	1.68299	9.94026	TRUE	sinusoidal	1.5594	9.50393
ENSMUSG00000027660	Skil	D	TRUE	sinusoidal	1.81428	18.6532	TRUE	sinusoidal	1.58618	18.5521
ENSMUSG00000027690	Slc2a2	D	TRUE	sinusoidal	2.60463	12.531	TRUE	sinusoidal	2.04376	12.422
ENSMUSG00000027695	Pld1	D	TRUE	sinusoidal	1.8399	1.29219	TRUE	sinusoidal	2.12602	1.28037
ENSMUSG00000027765	P2ry1	D	TRUE	sinusoidal	1.86505	12.6547	TRUE	sinusoidal	1.82042	14.2584
ENSMUSG00000027810	Eif2a	D	TRUE	sigmoid	1.69822	10.265	TRUE	sinusoidal	1.5752	10.2467
ENSMUSG00000027820	Mme	D	TRUE	sinusoidal	2.01989	19.7833	TRUE	sinusoidal	1.86816	19.3038
ENSMUSG00000027890	Gstm4	D	TRUE	sinusoidal	2.31633	5.60546	TRUE	sinusoidal	1.85969	3.99471
ENSMUSG00000027947	Il6ra	D	TRUE	sigmoid	2.22361	12.48	TRUE	sigmoid	2.07524	12.155
ENSMUSG00000027951	Adar	D	TRUE	sinusoidal	1.53774	3.99606	TRUE	sinusoidal	1.5036	3.27459
ENSMUSG00000027952	Pmvk	D	TRUE	sigmoid	2.69056	21.895	TRUE	sigmoid	2.75708	21.62
ENSMUSG00000027962	Vcam1	D	TRUE	sinusoidal	1.89603	13.0059	TRUE	sinusoidal	1.73072	14.2166
ENSMUSG00000027993	Trim2	D	TRUE	sinusoidal	2.69178	23.7285	TRUE	sinusoidal	2.47703	23.7971
ENSMUSG00000027997	Casp6	D	TRUE	sinusoidal	2.97702	6.08397	TRUE	sinusoidal	2.67113	6.17385
ENSMUSG00000027999	Pla2g12a	D	TRUE	sinusoidal	2.07346	7.85958	TRUE	sigmoid	2.02755	10.04
ENSMUSG00000028028	Alpk1	D	TRUE	sigmoid	3.35273	15.78	TRUE	sigmoid	3.02703	15.82
ENSMUSG00000028032	Papss1	D	TRUE	sinusoidal	1.54816	20.2374	TRUE	sinusoidal	1.52422	20.9353
ENSMUSG00000028035	Dnajb4	D	TRUE	sigmoid	2.19171	14.055	TRUE	sigmoid	2.02474	14.185
ENSMUSG00000028042	Zbtb7b	D	TRUE	sinusoidal	1.64009	3.3141	TRUE	sinusoidal	1.72704	2.26727
ENSMUSG00000028088	Fmo5	D	TRUE	sigmoid	2.49426	16.54	TRUE	sigmoid	2.44468	16.865
ENSMUSG00000028128	F3	D	TRUE	sinusoidal	2.3625	8.07793	TRUE	sinusoidal	2.6699	7.77749
ENSMUSG00000028150	Rorc	D	TRUE	sigmoid	5.00509	19.535	TRUE	sigmoid	4.55716	20.105
ENSMUSG00000028179	Cth	D	TRUE	sinusoidal	1.76651	0.916342	TRUE	sinusoidal	1.68079	0.838446
ENSMUSG00000028186	Uox	D	TRUE	sinusoidal	1.67488	10.938	TRUE	sinusoidal	1.49571	12.6109
ENSMUSG00000028194	Ddah1	D	TRUE	sinusoidal	1.6404	3.6698	TRUE	sinusoidal	1.55822	3.93984
ENSMUSG00000028212	Ccne2	D	TRUE	sigmoid	4.31002	13.47	TRUE	sinusoidal	7.32805	14.5958
ENSMUSG00000028240	Cyp7a1	D	TRUE	sinusoidal	3.14075	15.0889	TRUE	sinusoidal	3.48977	15.5705
ENSMUSG00000028261	Ndufaf4	D	TRUE	sinusoidal	1.80206	14.7177	TRUE	sigmoid	2.00052	17.7
ENSMUSG00000028268	Gbp3	D	TRUE	sinusoidal	1.53932	6.53492	TRUE	sinusoidal	1.53611	8.30859
ENSMUSG00000028271	Gtf2b	D	TRUE	sinusoidal	1.63837	7.15357	TRUE	sinusoidal	1.65094	8.24901
ENSMUSG00000028307	Aldob	D	TRUE	sinusoidal	1.50458	15.2494	TRUE	sigmoid	1.58795	13.895
ENSMUSG00000028327	Stra6l	D	TRUE	sinusoidal	2.13933	2.26687	TRUE	sinusoidal	2.18354	1.39379
ENSMUSG00000028344	Invs	D	TRUE	sinusoidal	1.74789	19.7182	TRUE	sinusoidal	1.85595	19.7319
ENSMUSG00000028356	Ambp	D	TRUE	sigmoid	1.61963	15.91	TRUE	sigmoid	1.55325	15.815
ENSMUSG00000028359	Orm3	D	TRUE	sigmoid	18.8233	15.765	TRUE	sigmoid	18.2883	15.89
ENSMUSG00000028410	Dnaja1	D	TRUE	sigmoid	2.08336	14.3	TRUE	sigmoid	2.2361	14.955
ENSMUSG00000028412	Slc44a1	D	TRUE	sinusoidal	2.06407	23.2541	TRUE	sinusoidal	1.92345	0.0608846
ENSMUSG00000028423	Nfx1	D	TRUE	sigmoid	1.58808	10.05	TRUE	sinusoidal	1.64191	8.00129
ENSMUSG00000028453	Fancg	D	TRUE	sinusoidal	1.60257	22.7055	TRUE	sigmoid	3.38522	18.17
ENSMUSG00000028467	Gba2	D	TRUE	sinusoidal	1.80771	11.2842	TRUE	sigmoid	1.69037	12.515
ENSMUSG00000028476	Reck	D	TRUE	sinusoidal	1.53613	17.5823	TRUE	sigmoid	1.64534	19.895
ENSMUSG00000028479	Gne	D	TRUE	sinusoidal	1.98402	10.7837	TRUE	sinusoidal	1.76045	10.8912
ENSMUSG00000028480	Glipr2	D	TRUE	sinusoidal	4.42226	2.64806	TRUE	sinusoidal	6.70183	2.05678
ENSMUSG00000028494	Plin2	D	TRUE	sinusoidal	2.09442	1.93773	TRUE	sinusoidal	2.43857	1.99519
ENSMUSG00000028527	Ak4	D	TRUE	sinusoidal	2.72234	14.7752	TRUE	sinusoidal	2.21903	13.9816
ENSMUSG00000028536	2610528J11Rik	D	TRUE	sinusoidal	2.12619	2.55252	TRUE	sinusoidal	2.80995	1.24736
ENSMUSG00000028542	Slc6a9	D	TRUE	sinusoidal	2.24751	13.0449	TRUE	sinusoidal	1.81864	12.2758
ENSMUSG00000028555	Ttc39a	D	TRUE	sigmoid	4.2141	15.69	TRUE	sigmoid	3.91454	15.775
ENSMUSG00000028600	Podn	D	TRUE	sinusoidal	1.56649	15.692	TRUE	sinusoidal	1.95808	15.0395
ENSMUSG00000028633	Ctps	D	TRUE	sinusoidal	1.91254	15.3546	TRUE	sinusoidal	1.72619	14.1602
ENSMUSG00000028655	Mfsd2a	D	TRUE	sigmoid	8.83445	13.345	TRUE	sigmoid	7.91035	11.31
ENSMUSG00000028669	Pithd1	D	TRUE	sinusoidal	1.52308	23.5734	TRUE	sinusoidal	1.49849	1.94654
ENSMUSG00000028671	Gale	D	TRUE	sinusoidal	2.82886	22.3249	TRUE	sinusoidal	2.9843	21.1769
ENSMUSG00000028716	Pdzk1ip1	D	TRUE	sigmoid	2.4297	21.865	TRUE	sinusoidal	2.75134	23.0001
ENSMUSG00000028766	Alpl	D	TRUE	sigmoid	2.2799	18.73	TRUE	sinusoidal	2.13301	16.8698
ENSMUSG00000028792	Ak2	D	TRUE	sigmoid	1.58695	12.535	TRUE	sigmoid	1.64243	11.355
ENSMUSG00000028820	Sfpq	D	TRUE	sigmoid	1.50087	14.09	TRUE	sigmoid	1.56018	13.63
ENSMUSG00000028826	Tmem57	D	TRUE	sigmoid	1.51751	12.025	TRUE	sigmoid	1.72728	14.76
ENSMUSG00000028862	Map3k6	D	TRUE	sigmoid	2.85792	15.105	TRUE	sinusoidal	2.54024	14.7196
ENSMUSG00000028878	Fam76a	D	TRUE	sigmoid	1.96943	9.935	TRUE	sigmoid	1.80601	9.705
ENSMUSG00000028919	Arhgef19	D	TRUE	sinusoidal	1.87378	23.5888	TRUE	sinusoidal	2.23138	0.112684
ENSMUSG00000028952	Zbtb48	D	TRUE	sinusoidal	1.69871	7.31268	TRUE	sinusoidal	1.56285	6.65541
ENSMUSG00000028957	Per3	D	TRUE	sigmoid	16.4501	10.55	TRUE	sigmoid	10.8386	9.795
ENSMUSG00000028967	Errfi1	D	TRUE	sinusoidal	1.63045	12.2949	TRUE	sinusoidal	1.71765	12.657
ENSMUSG00000028976	Slc2a5	D	TRUE	sigmoid	2.6236	10.49	TRUE	sigmoid	2.16593	9.97
ENSMUSG00000028980	H6pd	D	TRUE	sinusoidal	1.64439	2.0891	TRUE	sinusoidal	1.65439	2.27781
ENSMUSG00000028991	Mtor	D	TRUE	sinusoidal	1.71766	7.83241	TRUE	sigmoid	1.59571	9.965
ENSMUSG00000028995	Fam126a	D	TRUE	sinusoidal	1.57669	18.0899	TRUE	sigmoid	1.65699	16.1
ENSMUSG00000029001	Fbxo44	D	TRUE	sinusoidal	1.96484	23.2881	TRUE	sigmoid	2.11616	21.535
ENSMUSG00000029003	Mad2l2	D	TRUE	sinusoidal	2.95987	0.618314	TRUE	sinusoidal	2.85244	0.903659
ENSMUSG00000029009	Mthfr	D	TRUE	sinusoidal	6.56273	23.1721	TRUE	sinusoidal	6.86841	23.131
ENSMUSG00000029016	Clcn6	D	TRUE	sinusoidal	2.5981	23.0772	TRUE	sinusoidal	1.96981	0.0795733
ENSMUSG00000029029	Wrap73	D	TRUE	sinusoidal	1.52076	23.6986	TRUE	sinusoidal	1.70777	23.8408
ENSMUSG00000029059	Fam213b	D	TRUE	sinusoidal	1.82899	19.8635	TRUE	sinusoidal	1.50463	21.4712
ENSMUSG00000029111	Nelfa	D	TRUE	sinusoidal	1.63227	23.1716	TRUE	sinusoidal	1.90426	23.3531
ENSMUSG00000029131	Dnajb6	D	TRUE	sigmoid	1.58641	12.195	TRUE	sigmoid	1.70189	13.355
ENSMUSG00000029162	Khk	D	TRUE	sinusoidal	1.78435	17.4503	TRUE	sinusoidal	1.55664	18.8889
ENSMUSG00000029188	Slc34a2	D	TRUE	sinusoidal	32.2084	23.4205	TRUE	sinusoidal	36.826	22.8131
ENSMUSG00000029195	Klb	D	TRUE	sigmoid	1.5925	8.58	TRUE	sigmoid	1.53898	8.75
ENSMUSG00000029209	Gnpda2	D	TRUE	sinusoidal	2.04178	5.691	TRUE	sinusoidal	1.95347	5.4107
ENSMUSG00000029238	Clock	D	TRUE	sinusoidal	2.14805	0.198323	TRUE	sinusoidal	1.9831	0.241335
ENSMUSG00000029246	Ppat	D	TRUE	sigmoid	2.41233	9.665	TRUE	sigmoid	1.91212	12.24
ENSMUSG00000029273	Sult1d1	D	TRUE	sigmoid	2.2932	16.465	TRUE	sigmoid	2.46988	16.395
ENSMUSG00000029298	Gbp9	D	TRUE	sinusoidal	1.6954	5.32923	TRUE	sinusoidal	1.93472	4.07028
ENSMUSG00000029312	Klhl8	D	TRUE	sinusoidal	1.70936	23.9458	TRUE	sinusoidal	1.7058	0.883809
ENSMUSG00000029328	Hnrnpdl	D	TRUE	sinusoidal	2.21316	9.46041	TRUE	sinusoidal	2.00867	9.10916
ENSMUSG00000029344	Tpst2	D	TRUE	sinusoidal	1.59367	20.5492	TRUE	sinusoidal	1.59209	22.7862
ENSMUSG00000029370	Rassf6	D	TRUE	sigmoid	1.85397	18.86	TRUE	sigmoid	1.83784	18.88
ENSMUSG00000029385	Ccng2	D	TRUE	sinusoidal	3.253	22.8671	TRUE	sinusoidal	2.98682	23.872
ENSMUSG00000029428	Stx2	D	TRUE	sinusoidal	2.07056	18.6226	TRUE	sinusoidal	1.71286	19.599
ENSMUSG00000029470	P2rx4	D	TRUE	sinusoidal	1.60341	8.15325	TRUE	sinusoidal	1.60331	8.32976
ENSMUSG00000029482	Aacs	D	TRUE	sinusoidal	3.01479	16.0336	TRUE	sinusoidal	2.75053	15.8529
ENSMUSG00000029512	Ulk1	D	TRUE	sinusoidal	2.14594	8.85963	TRUE	sinusoidal	2.04084	9.40911
ENSMUSG00000029591	Ung	D	TRUE	sinusoidal	2.58763	10.6783	TRUE	sinusoidal	3.27575	11.2198
ENSMUSG00000029650	Slc46a3	D	TRUE	sinusoidal	2.07012	15.9151	TRUE	sinusoidal	1.81697	15.7996
ENSMUSG00000029657	Hsph1	D	TRUE	sigmoid	2.93217	14.73	TRUE	sigmoid	2.99835	14.78
ENSMUSG00000029664	Tfpi2	D	TRUE	sinusoidal	2.31667	23.5989	TRUE	sinusoidal	1.92349	23.648
ENSMUSG00000029727	Cyp3a13	D	TRUE	sigmoid	1.86351	15.935	TRUE	sigmoid	1.99901	16.05
ENSMUSG00000029771	Irf5	D	TRUE	sinusoidal	1.63162	2.47709	TRUE	sinusoidal	1.75685	3.07086
ENSMUSG00000029804	Herc3	D	TRUE	sigmoid	2.35269	10.26	TRUE	sinusoidal	2.09191	7.59258
ENSMUSG00000029810	Tmem176b	D	TRUE	sigmoid	1.77303	15.82	TRUE	sigmoid	1.71353	15.88
ENSMUSG00000029817	Tra2a	D	TRUE	sigmoid	3.13551	20.19	TRUE	sigmoid	2.49913	18.17
ENSMUSG00000029833	Trim24	D	TRUE	sigmoid	2.18361	14.06	TRUE	sigmoid	2.12171	14.375
ENSMUSG00000030004	Nat8	D	TRUE	sinusoidal	2.48475	19.6497	TRUE	sinusoidal	3.36418	19.2689
ENSMUSG00000030031	Kbtbd8	D	TRUE	sinusoidal	3.48067	15.9847	TRUE	sigmoid	2.6557	14.08
ENSMUSG00000030067	Foxp1	D	TRUE	sinusoidal	1.97707	4.43037	TRUE	sinusoidal	1.75784	3.2123
ENSMUSG00000030089	Slc41a3	D	TRUE	sigmoid	2.42103	15.02	TRUE	sinusoidal	2.56726	11.4758
ENSMUSG00000030103	Bhlhe40	D	TRUE	sinusoidal	3.07335	13.7042	TRUE	sinusoidal	2.82949	13.5635
ENSMUSG00000030107	Usp18	D	TRUE	sinusoidal	2.98297	6.08586	TRUE	sinusoidal	3.11655	5.51383
ENSMUSG00000030124	Lag3	D	TRUE	sinusoidal	3.50038	19.6032	TRUE	sinusoidal	4.81653	20.8651
ENSMUSG00000030126	Tmcc1	D	TRUE	sinusoidal	1.89985	15.8258	TRUE	sinusoidal	1.66243	16.6465
ENSMUSG00000030161	Gabarapl1	D	TRUE	sigmoid	2.36644	8.97	TRUE	sinusoidal	2.03063	5.70122
ENSMUSG00000030170	Wnt5b	D	TRUE	sinusoidal	4.22386	17.1959	TRUE	sinusoidal	3.11422	17.5631
ENSMUSG00000030207	8430419L09Rik	D	TRUE	sigmoid	1.7209	16.07	TRUE	sigmoid	1.56839	16.16
ENSMUSG00000030236	Slco1b2	D	TRUE	sinusoidal	1.52712	10.2702	TRUE	sinusoidal	1.56935	11.1143
ENSMUSG00000030244	Gys2	D	TRUE	sigmoid	3.12275	10.095	TRUE	sigmoid	3.05062	10.77
ENSMUSG00000030256	Bhlhe41	D	TRUE	sigmoid	8.87986	9.915	TRUE	sigmoid	8.62644	9.225
ENSMUSG00000030257	Srgap3	D	TRUE	sinusoidal	6.50889	23.1223	TRUE	sinusoidal	7.23757	22.9795
ENSMUSG00000030302	Atp2b2	D	TRUE	sinusoidal	2.86234	22.6956	TRUE	sinusoidal	4.58708	22.5305
ENSMUSG00000030342	Cd9	D	TRUE	sinusoidal	1.72508	3.75737	TRUE	sinusoidal	1.52565	3.02715
ENSMUSG00000030357	Fkbp4	D	TRUE	sinusoidal	1.95187	19.923	TRUE	sinusoidal	1.87637	20.1874
ENSMUSG00000030364	Clec2h	D	TRUE	sigmoid	5.64495	10.075	TRUE	sigmoid	4.77041	9.935
ENSMUSG00000030421	Uri1	D	TRUE	sigmoid	1.58863	12.74	TRUE	sigmoid	1.73944	12.175
ENSMUSG00000030470	Csrp3	D	TRUE	sinusoidal	1.58011	3.54615	TRUE	sinusoidal	1.73003	2.5786
ENSMUSG00000030483	Cyp2b10	D	TRUE	sigmoid	3.61257	16.275	TRUE	sigmoid	4.08582	16.23
ENSMUSG00000030545	Pex11a	D	TRUE	sinusoidal	1.70237	15.0502	TRUE	sinusoidal	2.32028	15.8876
ENSMUSG00000030555	Ttc23	D	TRUE	sigmoid	2.26433	12.67	TRUE	sinusoidal	2.03071	16.2533
ENSMUSG00000030556	Lrrc28	D	TRUE	sigmoid	2.58702	13.335	TRUE	sinusoidal	3.35733	15.3777
ENSMUSG00000030562	Nox4	D	TRUE	sinusoidal	1.8285	11.3606	TRUE	sinusoidal	1.63563	10.9761
ENSMUSG00000030610	Det1	D	TRUE	sinusoidal	1.68123	0.0363295	TRUE	sinusoidal	1.65054	23.6694
ENSMUSG00000030711	Sult1a1	D	TRUE	sinusoidal	1.51984	18.5636	TRUE	sinusoidal	1.69441	18.8233
ENSMUSG00000030729	Pgm2l1	D	TRUE	sinusoidal	1.82853	15.7024	TRUE	sinusoidal	1.84137	15.4404
ENSMUSG00000030731	Syt3	D	TRUE	sinusoidal	1.95255	23.7024	TRUE	sinusoidal	2.03185	23.6684
ENSMUSG00000030748	Il4ra	D	TRUE	sinusoidal	1.64553	23.8931	TRUE	sinusoidal	1.92473	0.10676
ENSMUSG00000030762	Aqp8	D	TRUE	sigmoid	5.11271	20.11	TRUE	sigmoid	5.75873	20.225
ENSMUSG00000030768	Disp1	D	TRUE	sinusoidal	1.73981	23.4291	TRUE	sigmoid	1.91521	19.68
ENSMUSG00000030795	Fus	D	TRUE	sinusoidal	2.59357	6.15953	TRUE	sinusoidal	1.71519	7.61682
ENSMUSG00000030805	Stx4a	D	TRUE	sinusoidal	1.71095	1.66764	TRUE	sinusoidal	1.90661	1.92009
ENSMUSG00000030814	Bcl7c	D	TRUE	sinusoidal	1.80731	23.1489	TRUE	sinusoidal	1.72764	22.7545
ENSMUSG00000030849	Fgfr2	D	TRUE	sigmoid	1.66034	9.925	TRUE	sinusoidal	1.51325	6.05808
ENSMUSG00000030852	Tacc2	D	TRUE	sigmoid	3.37134	16.035	TRUE	sigmoid	3.18957	16.01
ENSMUSG00000030872	Gga2	D	TRUE	sinusoidal	2.16244	19.5775	TRUE	sinusoidal	1.95125	20.4249
ENSMUSG00000030895	Hpx	D	TRUE	sigmoid	3.10163	15.845	TRUE	sigmoid	2.7045	15.85
ENSMUSG00000030946	Lhpp	D	TRUE	sigmoid	1.65592	7.51	TRUE	sinusoidal	1.75625	7.50885
ENSMUSG00000031016	Wee1	D	TRUE	sinusoidal	15.2206	13.4551	TRUE	sinusoidal	11.1369	13.1569
ENSMUSG00000031024	St5	D	TRUE	sinusoidal	5.07218	23.4306	TRUE	sinusoidal	7.86616	0.149827
ENSMUSG00000031147	Magix	D	TRUE	sinusoidal	1.77574	0.657979	TRUE	sinusoidal	2.01747	1.51175
ENSMUSG00000031167	Rbm3	D	TRUE	sinusoidal	3.74183	12.6256	TRUE	sinusoidal	2.7688	12.5959
ENSMUSG00000031217	Efnb1	D	TRUE	sinusoidal	1.74024	22.4738	TRUE	sinusoidal	2.14898	23.423
ENSMUSG00000031327	Chic1	D	TRUE	sinusoidal	2.80988	0.655238	TRUE	sinusoidal	2.67037	0.652173
ENSMUSG00000031337	Mtm1	D	TRUE	sinusoidal	1.49718	8.65302	TRUE	sinusoidal	1.66657	8.13454
ENSMUSG00000031381	Piga	D	TRUE	sigmoid	2.20675	14.1	TRUE	sigmoid	2.08281	14.845
ENSMUSG00000031400	G6pdx	D	TRUE	sinusoidal	1.59806	23.2898	TRUE	sinusoidal	1.90478	23.1598
ENSMUSG00000031431	Tsc22d3	D	TRUE	sinusoidal	5.14524	16.7998	TRUE	sinusoidal	3.75726	16.5488
ENSMUSG00000031451	Gas6	D	TRUE	sigmoid	2.66942	16	TRUE	sigmoid	2.33962	16.015
ENSMUSG00000031502	Col4a1	D	TRUE	sinusoidal	1.82081	3.03162	TRUE	sinusoidal	2.13309	3.36379
ENSMUSG00000031503	Col4a2	D	TRUE	sinusoidal	1.6092	5.0325	TRUE	sinusoidal	1.94649	4.23379
ENSMUSG00000031549	Ido2	D	TRUE	sinusoidal	1.73564	21.5192	TRUE	sigmoid	1.75941	19.025
ENSMUSG00000031561	Tenm3	D	TRUE	sinusoidal	1.53969	9.77289	TRUE	sigmoid	1.49995	10.61
ENSMUSG00000031565	Fgfr1	D	TRUE	sinusoidal	1.79387	11.4785	TRUE	sinusoidal	1.87189	11.756
ENSMUSG00000031594	Fgl1	D	TRUE	sigmoid	5.08944	15.75	TRUE	sigmoid	5.3745	15.81
ENSMUSG00000031596	Slc7a2	D	TRUE	sigmoid	2.44097	10.465	TRUE	sinusoidal	2.41139	8.17592
ENSMUSG00000031601	Cnot7	D	TRUE	sinusoidal	1.76392	7.56549	TRUE	sinusoidal	1.78602	8.05602
ENSMUSG00000031618	Nr3c2	D	TRUE	sigmoid	2.31341	10.18	TRUE	sigmoid	1.98771	10.07
ENSMUSG00000031626	Sorbs2	D	TRUE	sinusoidal	1.68829	1.40053	TRUE	sinusoidal	1.50966	0.415963
ENSMUSG00000031665	Sall1	D	TRUE	sigmoid	1.64126	15.955	TRUE	sinusoidal	1.54196	15.9985
ENSMUSG00000031700	Gpt2	D	TRUE	sinusoidal	1.75673	14.7461	TRUE	sinusoidal	1.56664	15.5968
ENSMUSG00000031722	Hp	D	TRUE	sigmoid	3.59936	15.9	TRUE	sigmoid	3.50199	15.89
ENSMUSG00000031740	Mmp2	D	TRUE	sinusoidal	1.5148	4.51231	TRUE	sinusoidal	1.61698	0.139572
ENSMUSG00000031762	Mt2	D	TRUE	sigmoid	964.064	15.925	TRUE	sigmoid	159.941	15.94
ENSMUSG00000031765	Mt1	D	TRUE	sigmoid	76.7333	15.875	TRUE	sigmoid	95.2117	15.895
ENSMUSG00000031770	Herpud1	D	TRUE	sigmoid	2.4375	14.06	TRUE	sigmoid	2.35211	14.025
ENSMUSG00000031788	Kifc3	D	TRUE	sinusoidal	2.56162	22.037	TRUE	sinusoidal	2.01923	23.1441
ENSMUSG00000031832	Taf1c	D	TRUE	sinusoidal	2.10238	18.6337	TRUE	sinusoidal	2.39783	19.8111
ENSMUSG00000031842	Pde4c	D	TRUE	sinusoidal	1.85122	5.8753	TRUE	sinusoidal	1.7758	4.42481
ENSMUSG00000031844	Hsd17b2	D	TRUE	sinusoidal	1.65577	4.58255	TRUE	sinusoidal	1.70041	4.11111
ENSMUSG00000031851	Ntpcr	D	TRUE	sinusoidal	1.63859	20.9932	TRUE	sigmoid	1.99288	21.075
ENSMUSG00000031901	Dus2	D	TRUE	sinusoidal	1.77509	23.2085	TRUE	sinusoidal	1.92342	23.2775
ENSMUSG00000031924	Cyb5b	D	TRUE	sinusoidal	1.67251	22.779	TRUE	sigmoid	1.54248	21.295
ENSMUSG00000031939	Taf1d	D	TRUE	sigmoid	2.31658	10.425	TRUE	sinusoidal	1.8098	11.6156
ENSMUSG00000032010	Usp2	D	TRUE	sigmoid	17.0419	10.11	TRUE	sigmoid	16.9601	10.46
ENSMUSG00000032012	Pvrl1	D	TRUE	sinusoidal	1.80562	23.0066	TRUE	sinusoidal	2.31874	21.9028
ENSMUSG00000032066	Bco2	D	TRUE	sinusoidal	1.75969	1.27609	TRUE	sinusoidal	1.79887	2.50147
ENSMUSG00000032114	Slc37a4	D	TRUE	sigmoid	2.31982	13.41	TRUE	sinusoidal	2.37586	14.2319
ENSMUSG00000032198	Dock6	D	TRUE	sinusoidal	1.80622	22.4856	TRUE	sigmoid	1.9408	21.67
ENSMUSG00000032249	Anp32a	D	TRUE	sinusoidal	1.77869	23.6406	TRUE	sinusoidal	1.84756	23.8096
ENSMUSG00000032261	Sh3bgrl2	D	TRUE	sigmoid	1.61495	9.7	TRUE	sinusoidal	1.50421	8.19289
ENSMUSG00000032265	Fam46a	D	TRUE	sigmoid	1.67162	15.2	TRUE	sigmoid	1.64332	15.15
ENSMUSG00000032271	Nnmt	D	TRUE	sigmoid	3.28735	15.93	TRUE	sigmoid	2.6716	15.925
[truncated: 554 more rows]
