# Supplementary material for: Ribosome profiling reveals the rhythmic liver translatome and circadian clock regulation by upstream open reading frames
Source: HighWire-hosted journal article supplement (doi:10.1101/gr.195404.115), 2015-10-20
Supplement: Supp_Table_S3.xlsx [file Supp_Table_S3.xlsx]

## Sheet: babel.cyclic.sets.csv
ensembl gene ID	gene name	set	between	within
ENSMUSG00000000088	Cox5a	A	FALSE	TRUE
ENSMUSG00000000154	Slc22a18	A	FALSE	TRUE
ENSMUSG00000000301	Pemt	A	FALSE	TRUE
ENSMUSG00000000346	Dazap2	A	FALSE	TRUE
ENSMUSG00000000374	Trappc10	A	FALSE	TRUE
ENSMUSG00000000378	Ccm2	A	FALSE	TRUE
ENSMUSG00000000594	Gm2a	A	FALSE	TRUE
ENSMUSG00000001366	Fbxo9	A	FALSE	TRUE
ENSMUSG00000001552	Jup	A	FALSE	TRUE
ENSMUSG00000001665	Gstt3	A	FALSE	TRUE
ENSMUSG00000001729	Akt1	A	FALSE	TRUE
ENSMUSG00000001802	Lrp3	A	FALSE	TRUE
ENSMUSG00000001844	Zdhhc4	A	FALSE	TRUE
ENSMUSG00000001847	Rac1	A	FALSE	TRUE
ENSMUSG00000002103	Acp2	A	FALSE	TRUE
ENSMUSG00000002477	Snrpd1	A	FALSE	TRUE
ENSMUSG00000002733	Plekha3	A	FALSE	TRUE
ENSMUSG00000002778	Kdelr1	A	FALSE	TRUE
ENSMUSG00000002820	Atg4d	A	FALSE	TRUE
ENSMUSG00000002881	Nab1	A	FALSE	TRUE
ENSMUSG00000003068	Stk11	A	FALSE	TRUE
ENSMUSG00000003345	Csnk1g2	A	FALSE	TRUE
ENSMUSG00000003346	Abhd17a	A	FALSE	TRUE
ENSMUSG00000003363	Pld3	A	FALSE	TRUE
ENSMUSG00000003810	Mast2	A	FALSE	TRUE
ENSMUSG00000004054	Map3k11	A	FALSE	TRUE
ENSMUSG00000004383	Large	A	FALSE	TRUE
ENSMUSG00000004655	Aqp1	A	FALSE	TRUE
ENSMUSG00000004771	Rab11a	A	FALSE	TRUE
ENSMUSG00000004798	Ulk2	A	FALSE	TRUE
ENSMUSG00000005087	Cd44	A	FALSE	TRUE
ENSMUSG00000005413	Hmox1	A	FALSE	TRUE
ENSMUSG00000005417	Mprip	A	FALSE	TRUE
ENSMUSG00000005871	Apc	A	FALSE	TRUE
ENSMUSG00000006262	Mob1b	A	FALSE	TRUE
ENSMUSG00000006476	Nsmf	A	FALSE	TRUE
ENSMUSG00000006498	Ptbp1	A	FALSE	TRUE
ENSMUSG00000006717	Acot13	A	FALSE	TRUE
ENSMUSG00000007415	Gatad1	A	FALSE	TRUE
ENSMUSG00000007872	Id3	A	FALSE	TRUE
ENSMUSG00000009073	Nf2	A	FALSE	TRUE
ENSMUSG00000010095	Slc3a2	A	FALSE	TRUE
ENSMUSG00000010277	2610507B11Rik	A	FALSE	TRUE
ENSMUSG00000010406	Mrpl52	A	FALSE	TRUE
ENSMUSG00000010721	Lmbr1	A	FALSE	TRUE
ENSMUSG00000011427	Zfp790	A	FALSE	TRUE
ENSMUSG00000011752	Pgam1	A	FALSE	TRUE
ENSMUSG00000012609	Ttll5	A	FALSE	TRUE
ENSMUSG00000013663	Pten	A	FALSE	TRUE
ENSMUSG00000014313	Cox6c	A	FALSE	TRUE
ENSMUSG00000014668	Chfr	A	FALSE	TRUE
ENSMUSG00000015224	Cyp2j9	A	FALSE	TRUE
ENSMUSG00000015474	Ppt2	A	FALSE	TRUE
ENSMUSG00000016308	Ube2a	A	FALSE	TRUE
ENSMUSG00000016427	Ndufa1	A	FALSE	TRUE
ENSMUSG00000016534	Lamp2	A	FALSE	TRUE
ENSMUSG00000016984	Etaa1	A	FALSE	TRUE
ENSMUSG00000017760	Ctsa	A	FALSE	TRUE
ENSMUSG00000018076	Med13l	A	FALSE	TRUE
ENSMUSG00000018293	Pfn1	A	FALSE	TRUE
ENSMUSG00000018326	Ywhab	A	FALSE	TRUE
ENSMUSG00000018363	Smurf2	A	FALSE	TRUE
ENSMUSG00000018474	Chd3	A	FALSE	TRUE
ENSMUSG00000018548	Trim37	A	FALSE	TRUE
ENSMUSG00000018567	Gabarap	A	FALSE	TRUE
ENSMUSG00000018770	Atp5g3	A	FALSE	TRUE
ENSMUSG00000018849	Wwc1	A	FALSE	TRUE
ENSMUSG00000019179	Mdh2	A	FALSE	TRUE
ENSMUSG00000019505	Ubb	A	FALSE	TRUE
ENSMUSG00000019804	Snx3	A	FALSE	TRUE
ENSMUSG00000019818	Cd164	A	FALSE	TRUE
ENSMUSG00000019841	Rev3l	A	FALSE	TRUE
ENSMUSG00000019851	Perp	A	FALSE	TRUE
ENSMUSG00000020053	Igf1	A	FALSE	TRUE
ENSMUSG00000020076	Ddx50	A	FALSE	TRUE
ENSMUSG00000020128	Vps54	A	FALSE	TRUE
ENSMUSG00000020149	Rab1	A	FALSE	TRUE
ENSMUSG00000020180	Snrpd3	A	FALSE	TRUE
ENSMUSG00000020253	Ppm1m	A	FALSE	TRUE
ENSMUSG00000020267	Hint1	A	FALSE	TRUE
ENSMUSG00000020315	Sptbn1	A	FALSE	TRUE
ENSMUSG00000020326	Ccng1	A	FALSE	TRUE
ENSMUSG00000020362	Cnot6	A	FALSE	TRUE
ENSMUSG00000020402	Vdac1	A	FALSE	TRUE
ENSMUSG00000020427	Igfbp3	A	FALSE	TRUE
ENSMUSG00000020429	Igfbp1	A	FALSE	TRUE
ENSMUSG00000020440	Arf5	A	FALSE	TRUE
ENSMUSG00000020519	Sap30l	A	FALSE	TRUE
ENSMUSG00000020570	Sypl	A	FALSE	TRUE
ENSMUSG00000020590	Snx13	A	FALSE	TRUE
ENSMUSG00000020612	Prkar1a	A	FALSE	TRUE
ENSMUSG00000020629	Adi1	A	FALSE	TRUE
ENSMUSG00000020659	Cbll1	A	FALSE	TRUE
ENSMUSG00000020700	Map3k3	A	FALSE	TRUE
ENSMUSG00000020817	Rabep1	A	FALSE	TRUE
ENSMUSG00000020864	Ankrd40	A	FALSE	TRUE
ENSMUSG00000021067	Nin	A	FALSE	TRUE
ENSMUSG00000021068	Serpina3n	A	FALSE	TRUE
ENSMUSG00000021124	Zfp36l1	A	FALSE	TRUE
ENSMUSG00000021131	Srsf5	A	FALSE	TRUE
ENSMUSG00000021135	Pcnx	A	FALSE	TRUE
ENSMUSG00000021140		A	FALSE	TRUE
ENSMUSG00000021143	Pacs2	A	FALSE	TRUE
ENSMUSG00000021248	Tmed10	A	FALSE	TRUE
ENSMUSG00000021277	Traf3	A	FALSE	TRUE
ENSMUSG00000021364	Elovl2	A	FALSE	TRUE
ENSMUSG00000021375	Kif13a	A	FALSE	TRUE
ENSMUSG00000021466	Ptch1	A	FALSE	TRUE
ENSMUSG00000021470	Ercc6l2	A	FALSE	TRUE
ENSMUSG00000021488	Nsd1	A	FALSE	TRUE
ENSMUSG00000021495	Fam193b	A	FALSE	TRUE
ENSMUSG00000021681	Aggf1	A	FALSE	TRUE
ENSMUSG00000021694	Ercc8	A	FALSE	TRUE
ENSMUSG00000021796	Bmpr1a	A	FALSE	TRUE
ENSMUSG00000021877	Arf4	A	FALSE	TRUE
ENSMUSG00000021959	Lats2	A	FALSE	TRUE
ENSMUSG00000021975	Ints9	A	FALSE	TRUE
ENSMUSG00000021978	Extl3	A	FALSE	TRUE
ENSMUSG00000022037	Clu	A	FALSE	TRUE
ENSMUSG00000022129	Dct	A	FALSE	TRUE
ENSMUSG00000022174	Dad1	A	FALSE	TRUE
ENSMUSG00000022205	Sub1	A	FALSE	TRUE
ENSMUSG00000022217	Emc9	A	FALSE	TRUE
ENSMUSG00000022219	Cideb	A	FALSE	TRUE
ENSMUSG00000022236	Ropn1l	A	FALSE	TRUE
ENSMUSG00000022257	Laptm4b	A	FALSE	TRUE
ENSMUSG00000022261	Sdc2	A	FALSE	TRUE
ENSMUSG00000022263	Trio	A	FALSE	TRUE
ENSMUSG00000022323	Hrsp12	A	FALSE	TRUE
ENSMUSG00000022361	Zhx1	A	FALSE	TRUE
ENSMUSG00000022426	Josd1	A	FALSE	TRUE
ENSMUSG00000022508	Bcl6	A	FALSE	TRUE
ENSMUSG00000022533	Atp13a3	A	FALSE	TRUE
ENSMUSG00000022587	Ly6e	A	FALSE	TRUE
ENSMUSG00000022757	Tfg	A	FALSE	TRUE
ENSMUSG00000022855	Senp2	A	FALSE	TRUE
ENSMUSG00000022890	Atp5j	A	FALSE	TRUE
ENSMUSG00000022895	Ets2	A	FALSE	TRUE
ENSMUSG00000022914	Brwd1	A	FALSE	TRUE
ENSMUSG00000022965	Ifngr2	A	FALSE	TRUE
ENSMUSG00000022999	Lmbr1l	A	FALSE	TRUE
ENSMUSG00000023010	Tmbim6	A	FALSE	TRUE
ENSMUSG00000023176	Cpn2	A	FALSE	TRUE
ENSMUSG00000023939	Mrpl14	A	FALSE	TRUE
ENSMUSG00000024042	Sik1	A	FALSE	TRUE
ENSMUSG00000024121	Atp6v0c	A	FALSE	TRUE
ENSMUSG00000024143	Rhoq	A	FALSE	TRUE
ENSMUSG00000024146	Cript	A	FALSE	TRUE
ENSMUSG00000024180	Tmem8	A	FALSE	TRUE
ENSMUSG00000024213	Nudt3	A	FALSE	TRUE
ENSMUSG00000024217	Snrpc	A	FALSE	TRUE
ENSMUSG00000024220	Zfp523	A	FALSE	TRUE
ENSMUSG00000024247	Pkdcc	A	FALSE	TRUE
ENSMUSG00000024286	Ccny	A	FALSE	TRUE
ENSMUSG00000024293	Esco1	A	FALSE	TRUE
ENSMUSG00000024294	Mib1	A	FALSE	TRUE
ENSMUSG00000024308	Tapbp	A	FALSE	TRUE
ENSMUSG00000024387	Csnk2b	A	FALSE	TRUE
ENSMUSG00000024472	Dcp2	A	FALSE	TRUE
ENSMUSG00000024513	Mbd2	A	FALSE	TRUE
ENSMUSG00000024610	Cd74	A	FALSE	TRUE
ENSMUSG00000024695	Zfp91	A	FALSE	TRUE
ENSMUSG00000024732	Ccdc86	A	FALSE	TRUE
ENSMUSG00000024758	Rtn3	A	FALSE	TRUE
ENSMUSG00000024777	Ppp2r5b	A	FALSE	TRUE
ENSMUSG00000024789	Jak2	A	FALSE	TRUE
ENSMUSG00000024792	Zfpl1	A	FALSE	TRUE
ENSMUSG00000024807	Syvn1	A	FALSE	TRUE
ENSMUSG00000024811	Tnks2	A	FALSE	TRUE
ENSMUSG00000024818	Slc25a45	A	FALSE	TRUE
ENSMUSG00000024866	Acy3	A	FALSE	TRUE
ENSMUSG00000024985	Tcf7l2	A	FALSE	TRUE
ENSMUSG00000024990	Rbp4	A	FALSE	TRUE
ENSMUSG00000025132	Arhgdia	A	FALSE	TRUE
ENSMUSG00000025197	Cyp2c44	A	FALSE	TRUE
ENSMUSG00000025207	Sema4g	A	FALSE	TRUE
ENSMUSG00000025255	Zfhx4	A	FALSE	TRUE
ENSMUSG00000025279	Dnase1l3	A	FALSE	TRUE
ENSMUSG00000025337	Sbds	A	FALSE	TRUE
ENSMUSG00000025354	Dnajc14	A	FALSE	TRUE
ENSMUSG00000025403	Shmt2	A	FALSE	TRUE
ENSMUSG00000025405	Inhbc	A	FALSE	TRUE
ENSMUSG00000025492	Ifitm3	A	FALSE	TRUE
ENSMUSG00000025510	Cd151	A	FALSE	TRUE
ENSMUSG00000025647	Shisa5	A	FALSE	TRUE
ENSMUSG00000025702	2015-03-08	A	FALSE	TRUE
ENSMUSG00000025779	Ly96	A	FALSE	TRUE
ENSMUSG00000025786	Zdhhc3	A	FALSE	TRUE
ENSMUSG00000026028	Trak2	A	FALSE	TRUE
ENSMUSG00000026032	Ndufb3	A	FALSE	TRUE
ENSMUSG00000026095	Asnsd1	A	FALSE	TRUE
ENSMUSG00000026135	Zfp142	A	FALSE	TRUE
ENSMUSG00000026142	Rhbdd1	A	FALSE	TRUE
ENSMUSG00000026158	Ogfrl1	A	FALSE	TRUE
ENSMUSG00000026189	Pecr	A	FALSE	TRUE
ENSMUSG00000026201	Stk16	A	FALSE	TRUE
ENSMUSG00000026269	Rnpepl1	A	FALSE	TRUE
ENSMUSG00000026384	Ptpn4	A	FALSE	TRUE
ENSMUSG00000026457	Adipor1	A	FALSE	TRUE
ENSMUSG00000026547	Tagln2	A	FALSE	TRUE
ENSMUSG00000026578	Ccdc181	A	FALSE	TRUE
ENSMUSG00000026608	Kctd3	A	FALSE	TRUE
ENSMUSG00000026667	Uhmk1	A	FALSE	TRUE
ENSMUSG00000026814	Eng	A	FALSE	TRUE
ENSMUSG00000026878	Rab14	A	FALSE	TRUE
ENSMUSG00000026921	Egfl7	A	FALSE	TRUE
ENSMUSG00000026927	Sdccag3	A	FALSE	TRUE
ENSMUSG00000026950	Neb	A	FALSE	TRUE
ENSMUSG00000026991	Pkp4	A	FALSE	TRUE
ENSMUSG00000027078	Ube2l6	A	FALSE	TRUE
ENSMUSG00000027177	Hipk3	A	FALSE	TRUE
ENSMUSG00000027274	Mkks	A	FALSE	TRUE
ENSMUSG00000027288	Zfp106	A	FALSE	TRUE
ENSMUSG00000027303	Ptpra	A	FALSE	TRUE
ENSMUSG00000027342	Pcna	A	FALSE	TRUE
ENSMUSG00000027404	Snrpb	A	FALSE	TRUE
ENSMUSG00000027465	Tbc1d20	A	FALSE	TRUE
ENSMUSG00000027665	Pik3ca	A	FALSE	TRUE
ENSMUSG00000027667	Zfp639	A	FALSE	TRUE
ENSMUSG00000027746	Ufm1	A	FALSE	TRUE
ENSMUSG00000027875	Hmgcs2	A	FALSE	TRUE
ENSMUSG00000028062	Lamtor2	A	FALSE	TRUE
ENSMUSG00000028195	Cyr61	A	FALSE	TRUE
ENSMUSG00000028282	Casp8ap2	A	FALSE	TRUE
ENSMUSG00000028284	Map3k7	A	FALSE	TRUE
ENSMUSG00000028333	Anp32b	A	FALSE	TRUE
ENSMUSG00000028416	Bag1	A	FALSE	TRUE
ENSMUSG00000028456	Unc13b	A	FALSE	TRUE
ENSMUSG00000028517	Ppap2b	A	FALSE	TRUE
ENSMUSG00000028538	St3gal3	A	FALSE	TRUE
ENSMUSG00000028557	Rnf11	A	FALSE	TRUE
ENSMUSG00000028619	Tceanc2	A	FALSE	TRUE
ENSMUSG00000028621	Cyb5rl	A	FALSE	TRUE
ENSMUSG00000028649	Macf1	A	FALSE	TRUE
ENSMUSG00000028675	Pnrc2	A	FALSE	TRUE
ENSMUSG00000028691	Prdx1	A	FALSE	TRUE
ENSMUSG00000028700	Pomgnt1	A	FALSE	TRUE
ENSMUSG00000028745	Capzb	A	FALSE	TRUE
ENSMUSG00000028788	Ptp4a2	A	FALSE	TRUE
ENSMUSG00000028837	Psmb2	A	FALSE	TRUE
ENSMUSG00000028868	Wasf2	A	FALSE	TRUE
ENSMUSG00000029071	Dvl1	A	FALSE	TRUE
ENSMUSG00000029128	Rab28	A	FALSE	TRUE
ENSMUSG00000029152	Ociad1	A	FALSE	TRUE
ENSMUSG00000029166	Mapre3	A	FALSE	TRUE
ENSMUSG00000029178	Klf3	A	FALSE	TRUE
ENSMUSG00000029304	Spp1	A	FALSE	TRUE
ENSMUSG00000029364	Wsb2	A	FALSE	TRUE
ENSMUSG00000029394	Cdk2ap1	A	FALSE	TRUE
ENSMUSG00000029404	Arl6ip4	A	FALSE	TRUE
ENSMUSG00000029454	Mapkapk5	A	FALSE	TRUE
ENSMUSG00000029455	Aldh2	A	FALSE	TRUE
ENSMUSG00000029513	Prkab1	A	FALSE	TRUE
ENSMUSG00000029536	Gatc	A	FALSE	TRUE
ENSMUSG00000029551	Psmg3	A	FALSE	TRUE
ENSMUSG00000029577	Ube3b	A	FALSE	TRUE
ENSMUSG00000029640	Usp12	A	FALSE	TRUE
ENSMUSG00000029647	Pan3	A	FALSE	TRUE
ENSMUSG00000030019	Fbxl14	A	FALSE	TRUE
ENSMUSG00000030022	Adamts9	A	FALSE	TRUE
ENSMUSG00000030035	Wbp1	A	FALSE	TRUE
ENSMUSG00000030059	Tmf1	A	FALSE	TRUE
ENSMUSG00000030201	Lrp6	A	FALSE	TRUE
ENSMUSG00000030259	Rassf8	A	FALSE	TRUE
ENSMUSG00000030352	Tspan9	A	FALSE	TRUE
ENSMUSG00000030386	Zfp606	A	FALSE	TRUE
ENSMUSG00000030409	Dmpk	A	FALSE	TRUE
ENSMUSG00000030499	Kctd15	A	FALSE	TRUE
ENSMUSG00000030530	Furin	A	FALSE	TRUE
ENSMUSG00000030630	Fah	A	FALSE	TRUE
ENSMUSG00000030655	Smg1	A	FALSE	TRUE
ENSMUSG00000030671	Pde3b	A	FALSE	TRUE
ENSMUSG00000030695	Aldoa	A	FALSE	TRUE
ENSMUSG00000030751	Psma1	A	FALSE	TRUE
ENSMUSG00000030753	Prkrir	A	FALSE	TRUE
ENSMUSG00000030770	Parva	A	FALSE	TRUE
ENSMUSG00000030787	Lyve1	A	FALSE	TRUE
ENSMUSG00000030868	Dctn5	A	FALSE	TRUE
ENSMUSG00000030967	Zranb1	A	FALSE	TRUE
ENSMUSG00000030968	Pdilt	A	FALSE	TRUE
ENSMUSG00000031065	Cdk16	A	FALSE	TRUE
ENSMUSG00000031246	Sh3bgrl	A	FALSE	TRUE
ENSMUSG00000031349	Nsdhl	A	FALSE	TRUE
ENSMUSG00000031392	Irak1	A	FALSE	TRUE
ENSMUSG00000031441	Atp11a	A	FALSE	TRUE
ENSMUSG00000031540	Kat6a	A	FALSE	TRUE
ENSMUSG00000031617	Tmem184c	A	FALSE	TRUE
ENSMUSG00000031628	Casp3	A	FALSE	TRUE
ENSMUSG00000031708	Tecr	A	FALSE	TRUE
ENSMUSG00000031835	Mbtps1	A	FALSE	TRUE
ENSMUSG00000031903	Pla2g15	A	FALSE	TRUE
ENSMUSG00000031980	Agt	A	FALSE	TRUE
ENSMUSG00000031987	Egln1	A	FALSE	TRUE
ENSMUSG00000032041	Tirap	A	FALSE	TRUE
ENSMUSG00000032089	Il10ra	A	FALSE	TRUE
ENSMUSG00000032199	Polr2m	A	FALSE	TRUE
ENSMUSG00000032288	Imp3	A	FALSE	TRUE
ENSMUSG00000032310	Cyp1a2	A	FALSE	TRUE
ENSMUSG00000032330	Cox7a2	A	FALSE	TRUE
ENSMUSG00000032381	Fam96a	A	FALSE	TRUE
ENSMUSG00000032525	Nktr	A	FALSE	TRUE
ENSMUSG00000032547	Ryk	A	FALSE	TRUE
ENSMUSG00000032548	Slco2a1	A	FALSE	TRUE
ENSMUSG00000032555	Topbp1	A	FALSE	TRUE
ENSMUSG00000032640	Chsy1	A	FALSE	TRUE
ENSMUSG00000032745	Gpbp1	A	FALSE	TRUE
ENSMUSG00000032827	Ppp1r9a	A	FALSE	TRUE
ENSMUSG00000032855	Pkd1	A	FALSE	TRUE
ENSMUSG00000032869	Psmf1	A	FALSE	TRUE
ENSMUSG00000032872	Cyb5r4	A	FALSE	TRUE
ENSMUSG00000032966	Fkbp1a	A	FALSE	TRUE
ENSMUSG00000033004	Mycbp2	A	FALSE	TRUE
ENSMUSG00000033022	Cdo1	A	FALSE	TRUE
ENSMUSG00000033306	Lpp	A	FALSE	TRUE
ENSMUSG00000033530	Ttc7b	A	FALSE	TRUE
ENSMUSG00000033557	Fam20b	A	FALSE	TRUE
ENSMUSG00000033809	Alg3	A	FALSE	TRUE
ENSMUSG00000033819	Ppp1r16a	A	FALSE	TRUE
ENSMUSG00000033880	Lgals3bp	A	FALSE	TRUE
ENSMUSG00000033960	9430020K01Rik	A	FALSE	TRUE
ENSMUSG00000033965	Slc16a2	A	FALSE	TRUE
ENSMUSG00000033972	Zfp944	A	FALSE	TRUE
ENSMUSG00000034042	Gpbp1l1	A	FALSE	TRUE
ENSMUSG00000034177	Rnf43	A	FALSE	TRUE
ENSMUSG00000034201	Gas2l1	A	FALSE	TRUE
ENSMUSG00000034252	Senp6	A	FALSE	TRUE
ENSMUSG00000034269	Setd5	A	FALSE	TRUE
ENSMUSG00000034297	Med13	A	FALSE	TRUE
ENSMUSG00000034377	Tulp4	A	FALSE	TRUE
ENSMUSG00000034456	Uroc1	A	FALSE	TRUE
ENSMUSG00000034462	Pkd2	A	FALSE	TRUE
ENSMUSG00000034501	Pcnxl4	A	FALSE	TRUE
ENSMUSG00000034509	Mad2l1bp	A	FALSE	TRUE
ENSMUSG00000034525	Ice1	A	FALSE	TRUE
ENSMUSG00000034659	Tmem109	A	FALSE	TRUE
ENSMUSG00000034774	Dsg1c	A	FALSE	TRUE
ENSMUSG00000034801	Sos2	A	FALSE	TRUE
ENSMUSG00000034832	Tet3	A	FALSE	TRUE
ENSMUSG00000035048	Anapc13	A	FALSE	TRUE
ENSMUSG00000035086	Becn1	A	FALSE	TRUE
ENSMUSG00000035376	Hacd2	A	FALSE	TRUE
ENSMUSG00000035382	Pcsk7	A	FALSE	TRUE
ENSMUSG00000035530	Eif1	A	FALSE	TRUE
ENSMUSG00000035614	Fam179b	A	FALSE	TRUE
ENSMUSG00000035704	Alg8	A	FALSE	TRUE
ENSMUSG00000035764	Fbxo45	A	FALSE	TRUE
ENSMUSG00000035834	Polr3g	A	FALSE	TRUE
ENSMUSG00000035875	AI182371	A	FALSE	TRUE
ENSMUSG00000035901	Dennd5a	A	FALSE	TRUE
ENSMUSG00000035941	Ibtk	A	FALSE	TRUE
ENSMUSG00000035949	Fbxw2	A	FALSE	TRUE
ENSMUSG00000036093	Arl5a	A	FALSE	TRUE
ENSMUSG00000036097	Fam178a	A	FALSE	TRUE
ENSMUSG00000036273	Lrrk2	A	FALSE	TRUE
ENSMUSG00000036299	BC031181	A	FALSE	TRUE
ENSMUSG00000036372	Tmem258	A	FALSE	TRUE
ENSMUSG00000036402	Gng12	A	FALSE	TRUE
ENSMUSG00000036403	Cep135	A	FALSE	TRUE
ENSMUSG00000036501	Fam13b	A	FALSE	TRUE
ENSMUSG00000036504	Phpt1	A	FALSE	TRUE
ENSMUSG00000036529	Sbf1	A	FALSE	TRUE
ENSMUSG00000036620	Mgat4b	A	FALSE	TRUE
ENSMUSG00000036751	Cox6b1	A	FALSE	TRUE
ENSMUSG00000036792	Mbd5	A	FALSE	TRUE
ENSMUSG00000036835	Psenen	A	FALSE	TRUE
ENSMUSG00000037216	Lipt1	A	FALSE	TRUE
ENSMUSG00000037253	Mex3c	A	FALSE	TRUE
ENSMUSG00000037339	Fam53a	A	FALSE	TRUE
ENSMUSG00000037348	Paqr7	A	FALSE	TRUE
ENSMUSG00000037416	Dmxl1	A	FALSE	TRUE
ENSMUSG00000037493	Cib2	A	FALSE	TRUE
ENSMUSG00000037503	Fam168b	A	FALSE	TRUE
ENSMUSG00000037674	Rfx7	A	FALSE	TRUE
ENSMUSG00000037706	Cd81	A	FALSE	TRUE
ENSMUSG00000037971	1110032A03Rik	A	FALSE	TRUE
ENSMUSG00000037999	Arap2	A	FALSE	TRUE
ENSMUSG00000038070	Cntln	A	FALSE	TRUE
ENSMUSG00000038126	Mphosph9	A	FALSE	TRUE
ENSMUSG00000038371	Sbf2	A	FALSE	TRUE
ENSMUSG00000038383	Pigu	A	FALSE	TRUE
ENSMUSG00000038387	Rras	A	FALSE	TRUE
ENSMUSG00000038485	Socs7	A	FALSE	TRUE
ENSMUSG00000038552	Fndc4	A	FALSE	TRUE
ENSMUSG00000038576	Susd4	A	FALSE	TRUE
ENSMUSG00000038658	Ric1	A	FALSE	TRUE
ENSMUSG00000038708	Golga4	A	FALSE	TRUE
ENSMUSG00000038745	Nlrp6	A	FALSE	TRUE
ENSMUSG00000038768	9130409I23Rik	A	FALSE	TRUE
ENSMUSG00000038859	Baiap2l1	A	FALSE	TRUE
ENSMUSG00000038872	Zfhx3	A	FALSE	TRUE
ENSMUSG00000038880	Mrps34	A	FALSE	TRUE
ENSMUSG00000038976	Ppp1r9b	A	FALSE	TRUE
ENSMUSG00000039033	Tasp1	A	FALSE	TRUE
ENSMUSG00000039041	Adrm1	A	FALSE	TRUE
ENSMUSG00000039068	Zzz3	A	FALSE	TRUE
ENSMUSG00000039159	Ube2h	A	FALSE	TRUE
ENSMUSG00000039163	Cmc1	A	FALSE	TRUE
ENSMUSG00000039275	Foxk2	A	FALSE	TRUE
ENSMUSG00000039285	Azi2	A	FALSE	TRUE
ENSMUSG00000039307	Hexdc	A	FALSE	TRUE
ENSMUSG00000039382	Wdr45	A	FALSE	TRUE
ENSMUSG00000039463	Slc9a8	A	FALSE	TRUE
ENSMUSG00000039473	Ubn1	A	FALSE	TRUE
ENSMUSG00000039497	Dse	A	FALSE	TRUE
ENSMUSG00000039523	Cep104	A	FALSE	TRUE
ENSMUSG00000039585	Myo9a	A	FALSE	TRUE
ENSMUSG00000039599	Fam149b	A	FALSE	TRUE
ENSMUSG00000039738	Slx4	A	FALSE	TRUE
ENSMUSG00000039809	Gabbr2	A	FALSE	TRUE
ENSMUSG00000039844	Rapgef1	A	FALSE	TRUE
ENSMUSG00000039879	Heca	A	FALSE	TRUE
ENSMUSG00000039908	Slc26a11	A	FALSE	TRUE
ENSMUSG00000039988	Ankrd13c	A	FALSE	TRUE
ENSMUSG00000040188	Scamp2	A	FALSE	TRUE
ENSMUSG00000040351	Ankib1	A	FALSE	TRUE
ENSMUSG00000040423	Rc3h1	A	FALSE	TRUE
ENSMUSG00000040435	Ppp1r15a	A	FALSE	TRUE
ENSMUSG00000040596	Pogk	A	FALSE	TRUE
ENSMUSG00000040661	Rad54l2	A	FALSE	TRUE
ENSMUSG00000040782	Rfwd2	A	FALSE	TRUE
ENSMUSG00000040865	Ino80d	A	FALSE	TRUE
ENSMUSG00000040913	Fbxw4	A	FALSE	TRUE
ENSMUSG00000040943	Tet2	A	FALSE	TRUE
ENSMUSG00000041058	Wwp1	A	FALSE	TRUE
ENSMUSG00000041161	Otud3	A	FALSE	TRUE
ENSMUSG00000041258	Zfp236	A	FALSE	TRUE
ENSMUSG00000041355	Ssr2	A	FALSE	TRUE
ENSMUSG00000041570	Camsap2	A	FALSE	TRUE
ENSMUSG00000041702	Btbd7	A	FALSE	TRUE
ENSMUSG00000041740	Rnf10	A	FALSE	TRUE
ENSMUSG00000041852	Tcf20	A	FALSE	TRUE
ENSMUSG00000041870	Ankrd13a	A	FALSE	TRUE
ENSMUSG00000041997	Tlk1	A	FALSE	TRUE
ENSMUSG00000042042	Csgalnact2	A	FALSE	TRUE
ENSMUSG00000042305	Tmem183a	A	FALSE	TRUE
ENSMUSG00000042390	Gatad2b	A	FALSE	TRUE
ENSMUSG00000042406	Atf4	A	FALSE	TRUE
ENSMUSG00000042594	Sh2b3	A	FALSE	TRUE
ENSMUSG00000042688	Mapk6	A	FALSE	TRUE
ENSMUSG00000042807	Hecw2	A	FALSE	TRUE
ENSMUSG00000042901	Aida	A	FALSE	TRUE
ENSMUSG00000043190	Rfesd	A	FALSE	TRUE
ENSMUSG00000043987	Cep164	A	FALSE	TRUE
ENSMUSG00000044033	Ccdc141	A	FALSE	TRUE
ENSMUSG00000044042	Fmn1	A	FALSE	TRUE
ENSMUSG00000044502	Bod1	A	FALSE	TRUE
ENSMUSG00000044674	Fzd1	A	FALSE	TRUE
ENSMUSG00000044676	Zfp612	A	FALSE	TRUE
ENSMUSG00000044786	Zfp36	A	FALSE	TRUE
ENSMUSG00000044894	Uqcrq	A	FALSE	TRUE
ENSMUSG00000045282	Tmem86b	A	FALSE	TRUE
ENSMUSG00000045314	Sowahb	A	FALSE	TRUE
ENSMUSG00000045365		A	FALSE	TRUE
ENSMUSG00000045438	Cox19	A	FALSE	TRUE
ENSMUSG00000045671	Spred2	A	FALSE	TRUE
ENSMUSG00000045980	Tmem104	A	FALSE	TRUE
ENSMUSG00000046111	Cep295	A	FALSE	TRUE
ENSMUSG00000046138	9930021J03Rik	A	FALSE	TRUE
ENSMUSG00000046329	Slc25a23	A	FALSE	TRUE
ENSMUSG00000046351	Zfp322a	A	FALSE	TRUE
ENSMUSG00000046679	C87436	A	FALSE	TRUE
ENSMUSG00000046982	Tshz1	A	FALSE	TRUE
ENSMUSG00000047284	Neurl4	A	FALSE	TRUE
ENSMUSG00000047459	Dynlrb1	A	FALSE	TRUE
ENSMUSG00000048154	Kmt2d	A	FALSE	TRUE
ENSMUSG00000048277	Syngr2	A	FALSE	TRUE
ENSMUSG00000048310	Pskh1	A	FALSE	TRUE
ENSMUSG00000048410	Zfp407	A	FALSE	TRUE
ENSMUSG00000049327	Setd8	A	FALSE	TRUE
ENSMUSG00000049422	Chchd10	A	FALSE	TRUE
ENSMUSG00000049606	Zfp644	A	FALSE	TRUE
ENSMUSG00000049658	Bdp1	A	FALSE	TRUE
ENSMUSG00000049739	Zfp646	A	FALSE	TRUE
ENSMUSG00000050079	Rspry1	A	FALSE	TRUE
ENSMUSG00000050148	Ubqln2	A	FALSE	TRUE
ENSMUSG00000050714	Zbtb26	A	FALSE	TRUE
ENSMUSG00000051166	Eml5	A	FALSE	TRUE
ENSMUSG00000051185	Fam174a	A	FALSE	TRUE
ENSMUSG00000051339	2900026A02Rik	A	FALSE	TRUE
ENSMUSG00000051391	Ywhag	A	FALSE	TRUE
ENSMUSG00000051403	Ppp1r37	A	FALSE	TRUE
ENSMUSG00000051695	Pcbp1	A	FALSE	TRUE
ENSMUSG00000051716	Apon	A	FALSE	TRUE
ENSMUSG00000051786	Tubgcp6	A	FALSE	TRUE
ENSMUSG00000052031	Tagap1	A	FALSE	TRUE
ENSMUSG00000052139	Bre	A	FALSE	TRUE
ENSMUSG00000052707	Tnrc6a	A	FALSE	TRUE
ENSMUSG00000052915	Msl1	A	FALSE	TRUE
ENSMUSG00000052974	Cyp2f2	A	FALSE	TRUE
ENSMUSG00000053128	Rnf26	A	FALSE	TRUE
ENSMUSG00000053769	Lysmd1	A	FALSE	TRUE
ENSMUSG00000053877	Srcap	A	FALSE	TRUE
ENSMUSG00000054008	Ndst1	A	FALSE	TRUE
ENSMUSG00000054387	Mdm4	A	FALSE	TRUE
ENSMUSG00000054408	Spcs3	A	FALSE	TRUE
ENSMUSG00000054422	Fabp1	A	FALSE	TRUE
ENSMUSG00000054545	Ugt1a6a	A	FALSE	TRUE
ENSMUSG00000054843	Atrnl1	A	FALSE	TRUE
ENSMUSG00000054920	Klhl5	A	FALSE	TRUE
ENSMUSG00000055044	Pdlim1	A	FALSE	TRUE
ENSMUSG00000055302	Mrfap1	A	FALSE	TRUE
ENSMUSG00000055720	Ubl7	A	FALSE	TRUE
ENSMUSG00000055884	Fancm	A	FALSE	TRUE
ENSMUSG00000055991	Zkscan5	A	FALSE	TRUE
ENSMUSG00000056116	H2-T22	A	FALSE	TRUE
ENSMUSG00000056201	Cfl1	A	FALSE	TRUE
ENSMUSG00000056342	Usp34	A	FALSE	TRUE
ENSMUSG00000056612	Ppp1r14b	A	FALSE	TRUE
ENSMUSG00000056952	Tatdn2	A	FALSE	TRUE
ENSMUSG00000057037	Cfhr1	A	FALSE	TRUE
ENSMUSG00000057101	Zfp180	A	FALSE	TRUE
ENSMUSG00000057522	Spop	A	FALSE	TRUE
ENSMUSG00000057551	Zfp317	A	FALSE	TRUE
ENSMUSG00000058135	Gstm1	A	FALSE	TRUE
ENSMUSG00000058230	Arhgap35	A	FALSE	TRUE
ENSMUSG00000058388	Phtf1	A	FALSE	TRUE
ENSMUSG00000058396	Gpr182	A	FALSE	TRUE
ENSMUSG00000058690	Ccser2	A	FALSE	TRUE
ENSMUSG00000058709	Egln2	A	FALSE	TRUE
ENSMUSG00000059355	Wdr83os	A	FALSE	TRUE
ENSMUSG00000059475	Zfp426	A	FALSE	TRUE
ENSMUSG00000059495	Arhgef12	A	FALSE	TRUE
ENSMUSG00000059552	Trp53	A	FALSE	TRUE
ENSMUSG00000059920	4930453N24Rik	A	FALSE	TRUE
ENSMUSG00000059923	Grb2	A	FALSE	TRUE
ENSMUSG00000059981	Taok2	A	FALSE	TRUE
ENSMUSG00000059995	Atxn7l3	A	FALSE	TRUE
ENSMUSG00000060002	Chpt1	A	FALSE	TRUE
ENSMUSG00000060708	Bloc1s4	A	FALSE	TRUE
ENSMUSG00000060743	H3f3a	A	FALSE	TRUE
ENSMUSG00000060802	B2m	A	FALSE	TRUE
ENSMUSG00000061731	Ext1	A	FALSE	TRUE
ENSMUSG00000061740	Cyp2d22	A	FALSE	TRUE
ENSMUSG00000062169	Cnih4	A	FALSE	TRUE
ENSMUSG00000062410	Hsd3b3	A	FALSE	TRUE
ENSMUSG00000062866	Phactr2	A	FALSE	TRUE
ENSMUSG00000063171	Rps4l	A	FALSE	TRUE
ENSMUSG00000063253	Scoc	A	FALSE	TRUE
ENSMUSG00000063281	Zfp35	A	FALSE	TRUE
ENSMUSG00000063415	Cyp26b1	A	FALSE	TRUE
ENSMUSG00000063480	Nhp2l1	A	FALSE	TRUE
ENSMUSG00000063488	Zkscan7	A	FALSE	TRUE
ENSMUSG00000063524	Eno1	A	FALSE	TRUE
ENSMUSG00000063659	Zbtb18	A	FALSE	TRUE
ENSMUSG00000064128	Cenpj	A	FALSE	TRUE
ENSMUSG00000066150	Slc31a1	A	FALSE	TRUE
ENSMUSG00000066571	4931406P16Rik	A	FALSE	TRUE
ENSMUSG00000066829	Zfp810	A	FALSE	TRUE
ENSMUSG00000066900	Suds3	A	FALSE	TRUE
ENSMUSG00000067274	Rplp0	A	FALSE	TRUE
ENSMUSG00000068267	Cenpb	A	FALSE	TRUE
ENSMUSG00000068284	Gm608	A	FALSE	TRUE
ENSMUSG00000068523	Gng5	A	FALSE	TRUE
ENSMUSG00000068762	Gstm6	A	FALSE	TRUE
ENSMUSG00000068856	Sf3b4	A	FALSE	TRUE
ENSMUSG00000069833	Ahnak	A	FALSE	TRUE
ENSMUSG00000069895	Atxn1l	A	FALSE	TRUE
ENSMUSG00000070493	Chchd2	A	FALSE	TRUE
ENSMUSG00000070605	Gm13251	A	FALSE	TRUE
ENSMUSG00000070738	Dgkd	A	FALSE	TRUE
ENSMUSG00000070934	Rraga	A	FALSE	TRUE
ENSMUSG00000071072	Ptges3	A	FALSE	TRUE
ENSMUSG00000071078	Nr2c2ap	A	FALSE	TRUE
ENSMUSG00000071379	Hpcal1	A	FALSE	TRUE
ENSMUSG00000071866	Ppia	A	FALSE	TRUE
ENSMUSG00000072941	Sod3	A	FALSE	TRUE
ENSMUSG00000073409	H2-Q6	A	FALSE	TRUE
ENSMUSG00000073639	Rab18	A	FALSE	TRUE
ENSMUSG00000073982	Rhog	A	FALSE	TRUE
ENSMUSG00000074151	Nlrc5	A	FALSE	TRUE
ENSMUSG00000074238	Ap1ar	A	FALSE	TRUE
ENSMUSG00000074272	Ceacam1	A	FALSE	TRUE
ENSMUSG00000074746	Pdzd8	A	FALSE	TRUE
ENSMUSG00000074749	Kiz	A	FALSE	TRUE
ENSMUSG00000074785	Plxnc1	A	FALSE	TRUE
ENSMUSG00000074886	Grk6	A	FALSE	TRUE
ENSMUSG00000075376	Rc3h2	A	FALSE	TRUE
ENSMUSG00000075595	Zfp652	A	FALSE	TRUE
ENSMUSG00000075705	Msrb1	A	FALSE	TRUE
ENSMUSG00000076435	Acsf2	A	FALSE	TRUE
ENSMUSG00000078348	Sf3b5	A	FALSE	TRUE
ENSMUSG00000078578	Ube2d3	A	FALSE	TRUE
ENSMUSG00000078812	Eif5a	A	FALSE	TRUE
ENSMUSG00000078923	Ube2v1	A	FALSE	TRUE
ENSMUSG00000079111	Kdelr2	A	FALSE	TRUE
ENSMUSG00000079477	Rab7	A	FALSE	TRUE
ENSMUSG00000079478	Sssca1	A	FALSE	TRUE
ENSMUSG00000079557	2015-03-02	A	FALSE	TRUE
ENSMUSG00000084786	Ubl5	A	FALSE	TRUE
ENSMUSG00000089862	Umad1	A	FALSE	TRUE
ENSMUSG00000092008	Cyp2c69	A	FALSE	TRUE
ENSMUSG00000094410	Gm38394	A	FALSE	TRUE
ENSMUSG00000094472	Gm21897	A	FALSE	TRUE
ENSMUSG00000096210	H1f0	A	FALSE	TRUE
ENSMUSG00000096463	Gm21750	A	FALSE	TRUE
ENSMUSG00000000355	Mcts1	A	TRUE	TRUE
ENSMUSG00000000693	Loxl3	A	TRUE	FALSE
ENSMUSG00000000776	Polr3d	A	TRUE	FALSE
ENSMUSG00000001143	Lman2l	A	TRUE	FALSE
ENSMUSG00000001227	Sema6b	A	TRUE	FALSE
ENSMUSG00000001240	Ramp2	A	TRUE	TRUE
ENSMUSG00000001289	Pfdn5	A	TRUE	FALSE
ENSMUSG00000001707	Eef1e1	A	TRUE	FALSE
ENSMUSG00000001964	Emd	A	TRUE	TRUE
ENSMUSG00000002043	Trappc6a	A	TRUE	FALSE
ENSMUSG00000002059	Rab34	A	TRUE	FALSE
ENSMUSG00000002111	Spi1	A	TRUE	FALSE
ENSMUSG00000002265	Peg3	A	TRUE	FALSE
ENSMUSG00000002603	Tgfb1	A	TRUE	FALSE
ENSMUSG00000002804	Nudt14	A	TRUE	FALSE
ENSMUSG00000002910	Arrdc2	A	TRUE	FALSE
ENSMUSG00000003038	Hmgn2	A	TRUE	FALSE
ENSMUSG00000003382	Etv3	A	TRUE	FALSE
ENSMUSG00000003527	Dgcr14	A	TRUE	FALSE
ENSMUSG00000003581	Rnf215	A	TRUE	FALSE
ENSMUSG00000003929	Zfp81	A	TRUE	FALSE
ENSMUSG00000004035	Gstm7	A	TRUE	TRUE
ENSMUSG00000004849	Ap1s1	A	TRUE	TRUE
ENSMUSG00000004947	Dtx2	A	TRUE	FALSE
ENSMUSG00000005043	Sgsh	A	TRUE	TRUE
ENSMUSG00000005371	Fbxo11	A	TRUE	FALSE
ENSMUSG00000005899	Smpd4	A	TRUE	FALSE
ENSMUSG00000006333	Rps9	A	TRUE	FALSE
ENSMUSG00000006906	Stambp	A	TRUE	TRUE
ENSMUSG00000006958	Chrd	A	TRUE	FALSE
ENSMUSG00000007050	Lsm2	A	TRUE	TRUE
ENSMUSG00000008450	Nutf2	A	TRUE	TRUE
ENSMUSG00000008690	Ncaph2	A	TRUE	FALSE
ENSMUSG00000009035	Tmem184b	A	TRUE	FALSE
ENSMUSG00000010362	Rdm1	A	TRUE	FALSE
ENSMUSG00000012296	Tjap1	A	TRUE	FALSE
ENSMUSG00000013033	Adgrl1	A	TRUE	TRUE
ENSMUSG00000013646	Sh3bp5l	A	TRUE	TRUE
ENSMUSG00000014633	Cmc2	A	TRUE	FALSE
ENSMUSG00000014767	Tbp	A	TRUE	FALSE
ENSMUSG00000014852	Adamts13	A	TRUE	FALSE
ENSMUSG00000015335	Zdhhc12	A	TRUE	TRUE
ENSMUSG00000015647	Lama5	A	TRUE	FALSE
ENSMUSG00000015653	Steap2	A	TRUE	FALSE
ENSMUSG00000016087	Fli1	A	TRUE	FALSE
ENSMUSG00000017188	Coa3	A	TRUE	FALSE
ENSMUSG00000017778	Cox7c	A	TRUE	FALSE
ENSMUSG00000018196	Glrx2	A	TRUE	FALSE
ENSMUSG00000018322	Tomm34	A	TRUE	TRUE
ENSMUSG00000018381	Abi3	A	TRUE	FALSE
ENSMUSG00000018415	Gid4	A	TRUE	FALSE
ENSMUSG00000018774	Cd68	A	TRUE	TRUE
ENSMUSG00000018920	Cxcl16	A	TRUE	FALSE
ENSMUSG00000019558	Slc6a8	A	TRUE	FALSE
ENSMUSG00000019774	Mtrf1l	A	TRUE	FALSE
ENSMUSG00000019975	Ikbip	A	TRUE	FALSE
ENSMUSG00000019997	Ctgf	A	TRUE	TRUE
ENSMUSG00000020018	Snrpf	A	TRUE	FALSE
ENSMUSG00000020120	Plek	A	TRUE	FALSE
ENSMUSG00000020211	Sf3a2	A	TRUE	TRUE
ENSMUSG00000020241	Col6a2	A	TRUE	FALSE
ENSMUSG00000020248	Nfyb	A	TRUE	FALSE
ENSMUSG00000020282	Rhbdf1	A	TRUE	FALSE
ENSMUSG00000020319	Wdpcp	A	TRUE	FALSE
ENSMUSG00000020393	Kremen1	A	TRUE	FALSE
ENSMUSG00000020397	Med7	A	TRUE	FALSE
ENSMUSG00000020420	Zfp607	A	TRUE	FALSE
ENSMUSG00000020467	Efemp1	A	TRUE	TRUE
ENSMUSG00000020483	Dynll2	A	TRUE	TRUE
ENSMUSG00000020648	Dus4l	A	TRUE	FALSE
ENSMUSG00000020653	Klf11	A	TRUE	FALSE
ENSMUSG00000020737	Hn1	A	TRUE	FALSE
ENSMUSG00000020773	Trim47	A	TRUE	FALSE
ENSMUSG00000020857	Nme2	A	TRUE	FALSE
ENSMUSG00000021013	Ttc8	A	TRUE	FALSE
ENSMUSG00000021020	Sav1	A	TRUE	FALSE
ENSMUSG00000021453	Gadd45g	A	TRUE	FALSE
ENSMUSG00000021619	Atg10	A	TRUE	FALSE
ENSMUSG00000021643	Serf1	A	TRUE	FALSE
ENSMUSG00000021820	Camk2g	A	TRUE	FALSE
ENSMUSG00000021840	Mapk1ip1l	A	TRUE	TRUE
ENSMUSG00000021958	Pinx1	A	TRUE	FALSE
ENSMUSG00000022194	Pabpn1	A	TRUE	FALSE
ENSMUSG00000022292	Rrm2b	A	TRUE	FALSE
ENSMUSG00000022313	Utp23	A	TRUE	FALSE
ENSMUSG00000022472	Desi1	A	TRUE	FALSE
ENSMUSG00000022516	Nudt16l1	A	TRUE	TRUE
ENSMUSG00000022560	Slc52a2	A	TRUE	FALSE
ENSMUSG00000022674	Ube2v2	A	TRUE	TRUE
ENSMUSG00000022701	2610015P09Rik	A	TRUE	FALSE
ENSMUSG00000022816	Fstl1	A	TRUE	FALSE
ENSMUSG00000022881	Rfc4	A	TRUE	FALSE
ENSMUSG00000022884	Eif4a2	A	TRUE	FALSE
ENSMUSG00000022973	Synj1	A	TRUE	TRUE
ENSMUSG00000023004	Tuba1b	A	TRUE	FALSE
ENSMUSG00000023031	Cela1	A	TRUE	FALSE
ENSMUSG00000023191	P3h3	A	TRUE	FALSE
ENSMUSG00000023232	Serinc2	A	TRUE	FALSE
ENSMUSG00000023806	Rsph3b	A	TRUE	TRUE
ENSMUSG00000023886	Smoc2	A	TRUE	FALSE
ENSMUSG00000024029	Tff3	A	TRUE	FALSE
ENSMUSG00000024048	Myl12a	A	TRUE	TRUE
ENSMUSG00000024050	Wiz	A	TRUE	FALSE
ENSMUSG00000024218	Taf11	A	TRUE	FALSE
ENSMUSG00000024246	Thumpd2	A	TRUE	FALSE
ENSMUSG00000024300	Myo1f	A	TRUE	FALSE
ENSMUSG00000024659	Anxa1	A	TRUE	FALSE
ENSMUSG00000024678	Ms4a4d	A	TRUE	TRUE
ENSMUSG00000024790	Sac3d1	A	TRUE	FALSE
ENSMUSG00000024844	Banf1	A	TRUE	TRUE
ENSMUSG00000024949	Sf1	A	TRUE	TRUE
ENSMUSG00000024986	Hhex	A	TRUE	TRUE
ENSMUSG00000025024	Smndc1	A	TRUE	TRUE
ENSMUSG00000025086	Trub1	A	TRUE	FALSE
ENSMUSG00000025203	Scd2	A	TRUE	TRUE
ENSMUSG00000025608	Podxl	A	TRUE	TRUE
ENSMUSG00000025730	Rab40c	A	TRUE	FALSE
ENSMUSG00000025794	Rpl14	A	TRUE	FALSE
ENSMUSG00000025868	Higd2a	A	TRUE	TRUE
ENSMUSG00000025888	Casp1	A	TRUE	FALSE
ENSMUSG00000025939	Ube2w	A	TRUE	FALSE
ENSMUSG00000025959	Klf7	A	TRUE	FALSE
ENSMUSG00000025979	Mob4	A	TRUE	TRUE
ENSMUSG00000026017	Carf	A	TRUE	TRUE
ENSMUSG00000026049	Tex30	A	TRUE	FALSE
ENSMUSG00000026134	Prim2	A	TRUE	FALSE
ENSMUSG00000026208	Des	A	TRUE	FALSE
ENSMUSG00000026213	Stk11ip	A	TRUE	FALSE
ENSMUSG00000026238	Ptma	A	TRUE	TRUE
ENSMUSG00000026240	Cops7b	A	TRUE	FALSE
ENSMUSG00000026283	Ing5	A	TRUE	FALSE
ENSMUSG00000026404	Ddx59	A	TRUE	FALSE
ENSMUSG00000026492	Tfb2m	A	TRUE	TRUE
ENSMUSG00000026536	Mnda	A	TRUE	TRUE
ENSMUSG00000026574	Dpt	A	TRUE	FALSE
ENSMUSG00000026678	Rgs5	A	TRUE	TRUE
ENSMUSG00000026727	Rsu1	A	TRUE	TRUE
ENSMUSG00000026761	Orc4	A	TRUE	FALSE
ENSMUSG00000026840	Lamc3	A	TRUE	FALSE
ENSMUSG00000026939	Tmem141	A	TRUE	FALSE
ENSMUSG00000027080	Med19	A	TRUE	TRUE
ENSMUSG00000027130	Slc12a6	A	TRUE	TRUE
ENSMUSG00000027132	Katnbl1	A	TRUE	FALSE
ENSMUSG00000027203	Dut	A	TRUE	FALSE
ENSMUSG00000027314	Dll4	A	TRUE	FALSE
ENSMUSG00000027384	Ndufaf5	A	TRUE	FALSE
ENSMUSG00000027424	Mgme1	A	TRUE	FALSE
ENSMUSG00000027508	Pag1	A	TRUE	FALSE
ENSMUSG00000027551	Zfp64	A	TRUE	FALSE
ENSMUSG00000027699	Ect2	A	TRUE	FALSE
ENSMUSG00000027845	Dclre1b	A	TRUE	FALSE
ENSMUSG00000027854	Sike1	A	TRUE	FALSE
ENSMUSG00000028101	Pias3	A	TRUE	TRUE
ENSMUSG00000028345	Tex10	A	TRUE	FALSE
ENSMUSG00000028373	Astn2	A	TRUE	FALSE
ENSMUSG00000028398	Tmem261	A	TRUE	TRUE
ENSMUSG00000028581	Laptm5	A	TRUE	TRUE
ENSMUSG00000028677	Rnf220	A	TRUE	TRUE
ENSMUSG00000028712	Cyp4a31	A	TRUE	FALSE
ENSMUSG00000028863	Meaf6	A	TRUE	FALSE
ENSMUSG00000028974	Dffa	A	TRUE	FALSE
ENSMUSG00000028978	Nos3	A	TRUE	FALSE
ENSMUSG00000029032	Arhgef16	A	TRUE	FALSE
ENSMUSG00000029049	Morn1	A	TRUE	FALSE
ENSMUSG00000029070	Mxra8	A	TRUE	FALSE
ENSMUSG00000029322	Plac8	A	TRUE	FALSE
ENSMUSG00000029718	Pcolce	A	TRUE	TRUE
ENSMUSG00000029762	Akr1b8	A	TRUE	FALSE
ENSMUSG00000029765	Plxna4	A	TRUE	TRUE
ENSMUSG00000029925	Tbxas1	A	TRUE	FALSE
ENSMUSG00000030220	Arhgdib	A	TRUE	FALSE
ENSMUSG00000030407	Qpctl	A	TRUE	TRUE
ENSMUSG00000030410	Dmwd	A	TRUE	FALSE
ENSMUSG00000030431	Tmem238	A	TRUE	FALSE
ENSMUSG00000030680	Pagr1a	A	TRUE	FALSE
ENSMUSG00000030774	Pak1	A	TRUE	FALSE
ENSMUSG00000030865	Chp2	A	TRUE	FALSE
ENSMUSG00000030869	Ndufab1	A	TRUE	TRUE
ENSMUSG00000031075	Ano1	A	TRUE	FALSE
ENSMUSG00000031156	Slc35a2	A	TRUE	FALSE
ENSMUSG00000031227	Magee1	A	TRUE	FALSE
ENSMUSG00000031242	2610002M06Rik	A	TRUE	TRUE
ENSMUSG00000031642	Sh3rf1	A	TRUE	FALSE
ENSMUSG00000031706	Rfx1	A	TRUE	FALSE
ENSMUSG00000031709	Tbc1d9	A	TRUE	FALSE
ENSMUSG00000031808	Slc27a1	A	TRUE	FALSE
ENSMUSG00000031843	Mphosph6	A	TRUE	FALSE
ENSMUSG00000031848	Lsm4	A	TRUE	FALSE
ENSMUSG00000031887	Tradd	A	TRUE	FALSE
ENSMUSG00000031921	Terf2	A	TRUE	FALSE
ENSMUSG00000032085	Tagln	A	TRUE	FALSE
ENSMUSG00000032324	Tspan3	A	TRUE	FALSE
ENSMUSG00000032384	Csnk1g1	A	TRUE	FALSE
ENSMUSG00000032398	Snapc5	A	TRUE	TRUE
ENSMUSG00000032413	Rasa2	A	TRUE	FALSE
ENSMUSG00000032518	Rpsa	A	TRUE	TRUE
ENSMUSG00000032842	Abcc10	A	TRUE	FALSE
ENSMUSG00000033126	Ybey	A	TRUE	FALSE
ENSMUSG00000033170	Card10	A	TRUE	FALSE
ENSMUSG00000033209	Ttc28	A	TRUE	FALSE
ENSMUSG00000033760	Rbm4b	A	TRUE	FALSE
ENSMUSG00000033777	Tlr13	A	TRUE	FALSE
ENSMUSG00000033898	Cfhr2	A	TRUE	TRUE
ENSMUSG00000034105	Tldc1	A	TRUE	FALSE
ENSMUSG00000034165	Ccnd3	A	TRUE	FALSE
ENSMUSG00000034333	Zbed4	A	TRUE	TRUE
ENSMUSG00000034771	Tle2	A	TRUE	FALSE
ENSMUSG00000034868	Myl12b	A	TRUE	FALSE
ENSMUSG00000034892	Rps29	A	TRUE	FALSE
ENSMUSG00000034928	Rnf44	A	TRUE	TRUE
ENSMUSG00000034993	Vat1	A	TRUE	FALSE
ENSMUSG00000035004	Igsf6	A	TRUE	FALSE
ENSMUSG00000035125	Gcfc2	A	TRUE	FALSE
ENSMUSG00000035245	Eogt	A	TRUE	FALSE
ENSMUSG00000035451	Foxa1	A	TRUE	TRUE
ENSMUSG00000035601	Trmt10b	A	TRUE	FALSE
ENSMUSG00000035783	Acta2	A	TRUE	FALSE
ENSMUSG00000035885	Cox8a	A	TRUE	FALSE
ENSMUSG00000036167	Pphln1	A	TRUE	FALSE
ENSMUSG00000036450	Hif1an	A	TRUE	FALSE
ENSMUSG00000036810	Cnep1r1	A	TRUE	TRUE
ENSMUSG00000036890	Gtdc1	A	TRUE	FALSE
ENSMUSG00000036943	Rab8b	A	TRUE	FALSE
ENSMUSG00000037157	Il22ra1	A	TRUE	FALSE
ENSMUSG00000037306	Man1c1	A	TRUE	FALSE
ENSMUSG00000037553	Zdhhc18	A	TRUE	FALSE
ENSMUSG00000037731	Themis2	A	TRUE	FALSE
ENSMUSG00000037805	Rpl10a	A	TRUE	FALSE
ENSMUSG00000038000	Acd	A	TRUE	FALSE
ENSMUSG00000038215	Cep44	A	TRUE	FALSE
ENSMUSG00000038437	Mllt6	A	TRUE	TRUE
ENSMUSG00000038456	Dennd2a	A	TRUE	FALSE
ENSMUSG00000038489	Polr2l	A	TRUE	FALSE
ENSMUSG00000038871	Bpgm	A	TRUE	FALSE
ENSMUSG00000038900	Rpl12	A	TRUE	TRUE
ENSMUSG00000038967	Pdk2	A	TRUE	TRUE
ENSMUSG00000039001	Rps21	A	TRUE	FALSE
ENSMUSG00000039158	Akna	A	TRUE	TRUE
ENSMUSG00000039195	1110008P14Rik	A	TRUE	FALSE
ENSMUSG00000039304	Tnfsf10	A	TRUE	FALSE
ENSMUSG00000039483	Asb6	A	TRUE	FALSE
ENSMUSG00000039680	Mrps6	A	TRUE	TRUE
ENSMUSG00000039715	Wdr34	A	TRUE	FALSE
ENSMUSG00000039842	Mcph1	A	TRUE	FALSE
ENSMUSG00000039910	Cited2	A	TRUE	TRUE
ENSMUSG00000040270	Bach2	A	TRUE	FALSE
ENSMUSG00000040274	Cdk6	A	TRUE	FALSE
ENSMUSG00000040345	Arhgap9	A	TRUE	TRUE
ENSMUSG00000040370	Lyrm5	A	TRUE	FALSE
ENSMUSG00000040389	Wdr47	A	TRUE	FALSE
ENSMUSG00000040690	Col16a1	A	TRUE	FALSE
ENSMUSG00000040795	Iqcc	A	TRUE	FALSE
ENSMUSG00000040938	Slc16a11	A	TRUE	FALSE
ENSMUSG00000041180	Hectd2	A	TRUE	FALSE
ENSMUSG00000041219	Arhgap11a	A	TRUE	FALSE
ENSMUSG00000041354	Rgl2	A	TRUE	TRUE
ENSMUSG00000041624	Gucy1a2	A	TRUE	FALSE
ENSMUSG00000042066	Tmcc2	A	TRUE	FALSE
ENSMUSG00000042111	Ccdc115	A	TRUE	FALSE
ENSMUSG00000042292	Mkl1	A	TRUE	TRUE
ENSMUSG00000042423	Fbrs	A	TRUE	FALSE
ENSMUSG00000042625	Safb2	A	TRUE	FALSE
ENSMUSG00000043008	Klhl6	A	TRUE	FALSE
ENSMUSG00000043415	Otud1	A	TRUE	FALSE
ENSMUSG00000043467	Zbtb37	A	TRUE	TRUE
ENSMUSG00000043572	Pars2	A	TRUE	FALSE
ENSMUSG00000044501	Zfp758	A	TRUE	FALSE
ENSMUSG00000044533	Rps2	A	TRUE	TRUE
ENSMUSG00000044934	Zfp367	A	TRUE	FALSE
ENSMUSG00000045268	Zfp691	A	TRUE	FALSE
ENSMUSG00000045392	Olfr1033	A	TRUE	TRUE
ENSMUSG00000045519	Zfp560	A	TRUE	FALSE
ENSMUSG00000045917	6330416G13Rik	A	TRUE	FALSE
ENSMUSG00000045996	Polr2k	A	TRUE	TRUE
ENSMUSG00000046229	Scand1	A	TRUE	FALSE
ENSMUSG00000046280	She	A	TRUE	FALSE
ENSMUSG00000046447	Camk2n1	A	TRUE	FALSE
ENSMUSG00000046573	Lyrm4	A	TRUE	TRUE
ENSMUSG00000046687	Gm5424	A	TRUE	TRUE
ENSMUSG00000046722	Cdc42se1	A	TRUE	FALSE
ENSMUSG00000046727	Cystm1	A	TRUE	FALSE
ENSMUSG00000046994	Mars2	A	TRUE	FALSE
ENSMUSG00000047238	Mageh1	A	TRUE	FALSE
ENSMUSG00000047423	AI837181	A	TRUE	TRUE
ENSMUSG00000047517	Dmbt1	A	TRUE	FALSE
ENSMUSG00000047719	Ubiad1	A	TRUE	FALSE
ENSMUSG00000047989	Ino80c	A	TRUE	FALSE
ENSMUSG00000048285	Frmd6	A	TRUE	FALSE
ENSMUSG00000049517	Rps23	A	TRUE	TRUE
ENSMUSG00000049521	Cdc42ep1	A	TRUE	TRUE
ENSMUSG00000049932	H2afx	A	TRUE	TRUE
ENSMUSG00000050621	Rps27rt	A	TRUE	TRUE
ENSMUSG00000050663	Trhde	A	TRUE	FALSE
ENSMUSG00000051238	Swsap1	A	TRUE	FALSE
ENSMUSG00000051730	Mettl5	A	TRUE	TRUE
ENSMUSG00000052160	Pld4	A	TRUE	FALSE
ENSMUSG00000052534	Pbx1	A	TRUE	FALSE
ENSMUSG00000053293	Pom121	A	TRUE	FALSE
ENSMUSG00000054715	Zscan22	A	TRUE	FALSE
ENSMUSG00000054720	Lrrc8c	A	TRUE	FALSE
ENSMUSG00000056493	Foxk1	A	TRUE	TRUE
ENSMUSG00000056978	Hamp2	A	TRUE	TRUE
ENSMUSG00000057156	Homez	A	TRUE	FALSE
ENSMUSG00000057230	Aak1	A	TRUE	FALSE
ENSMUSG00000057322	Rpl38	A	TRUE	FALSE
ENSMUSG00000057506	Bloc1s2	A	TRUE	FALSE
ENSMUSG00000057835	Zfp119a	A	TRUE	FALSE
ENSMUSG00000057863	Rpl36	A	TRUE	FALSE
ENSMUSG00000057933	Gsta2	A	TRUE	TRUE
ENSMUSG00000058258	Idi1	A	TRUE	TRUE
ENSMUSG00000058748	Zfp958	A	TRUE	FALSE
ENSMUSG00000059005	Hnrnpa3	A	TRUE	TRUE
ENSMUSG00000059173	Pde1a	A	TRUE	TRUE
ENSMUSG00000059689	Zfp637	A	TRUE	FALSE
ENSMUSG00000060036	Rpl3	A	TRUE	FALSE
ENSMUSG00000060244	Alyref2	A	TRUE	FALSE
ENSMUSG00000061118	Dnajc30	A	TRUE	FALSE
ENSMUSG00000061477	Rps7	A	TRUE	FALSE
ENSMUSG00000061887	Ssbp3	A	TRUE	TRUE
ENSMUSG00000061898	Rbak	A	TRUE	FALSE
ENSMUSG00000062006	Rpl34	A	TRUE	FALSE
ENSMUSG00000062101	Zfp119b	A	TRUE	FALSE
ENSMUSG00000062328	Rpl17	A	TRUE	TRUE
ENSMUSG00000062373	Tmem65	A	TRUE	FALSE
ENSMUSG00000062683	Atp5g2	A	TRUE	FALSE
ENSMUSG00000062995	Ica1	A	TRUE	FALSE
ENSMUSG00000062997	Rpl35	A	TRUE	FALSE
ENSMUSG00000063065	Mapk3	A	TRUE	TRUE
ENSMUSG00000063236	1110038F14Rik	A	TRUE	FALSE
ENSMUSG00000063317	Usp31	A	TRUE	TRUE
ENSMUSG00000063457	Rps15	A	TRUE	FALSE
ENSMUSG00000066154	Mup3	A	TRUE	TRUE
ENSMUSG00000066366	Serpina1a	A	TRUE	FALSE
ENSMUSG00000068130	Zfp442	A	TRUE	FALSE
ENSMUSG00000068134	Zfp120	A	TRUE	FALSE
ENSMUSG00000068206	Pick1	A	TRUE	FALSE
ENSMUSG00000068220	Lgals1	A	TRUE	FALSE
ENSMUSG00000069265	Hist1h3a	A	TRUE	FALSE
ENSMUSG00000069274	Hist1h4f	A	TRUE	FALSE
ENSMUSG00000069324	Gm5096	A	TRUE	TRUE
ENSMUSG00000069727	Gm5595	A	TRUE	FALSE
ENSMUSG00000070427	Il18bp	A	TRUE	TRUE
ENSMUSG00000071180	Smim15	A	TRUE	FALSE
ENSMUSG00000071266	Zfp946	A	TRUE	TRUE
ENSMUSG00000071291	Zfp58	A	TRUE	FALSE
ENSMUSG00000072704	Smim10l1	A	TRUE	FALSE
ENSMUSG00000072969	Armcx5	A	TRUE	FALSE
ENSMUSG00000073422	H2-Ke6	A	TRUE	FALSE
ENSMUSG00000073435	Nme3	A	TRUE	TRUE
ENSMUSG00000073830	Mup14	A	TRUE	FALSE
ENSMUSG00000073842	Mup7	A	TRUE	TRUE
ENSMUSG00000073940	Hbb-bt	A	TRUE	FALSE
ENSMUSG00000074129	Rpl13a	A	TRUE	TRUE
ENSMUSG00000074166	AW146154	A	TRUE	FALSE
ENSMUSG00000074247	Dda1	A	TRUE	FALSE
ENSMUSG00000075032		A	TRUE	TRUE
ENSMUSG00000075043		A	TRUE	TRUE
ENSMUSG00000075271	Ttc30a1	A	TRUE	FALSE
ENSMUSG00000075528	Aarsd1	A	TRUE	TRUE
ENSMUSG00000075600	Zc3h3	A	TRUE	FALSE
ENSMUSG00000075602	Ly6a	A	TRUE	TRUE
ENSMUSG00000076437	2700094K13Rik	A	TRUE	FALSE
ENSMUSG00000078201	Tmem203	A	TRUE	FALSE
ENSMUSG00000078495	Gm13157	A	TRUE	TRUE
ENSMUSG00000078675	Mup16	A	TRUE	TRUE
ENSMUSG00000078683	Mup1	A	TRUE	FALSE
ENSMUSG00000078713	Tomm5	A	TRUE	FALSE
ENSMUSG00000078784	1810022K09Rik	A	TRUE	FALSE
ENSMUSG00000078931	Pdf	A	TRUE	FALSE
ENSMUSG00000079015	Serpina1c	A	TRUE	FALSE
ENSMUSG00000079036	Alkbh1	A	TRUE	FALSE
ENSMUSG00000079283	2310009B15Rik	A	TRUE	FALSE
ENSMUSG00000079419	Ms4a6c	A	TRUE	FALSE
ENSMUSG00000079427	Mthfsl	A	TRUE	FALSE
ENSMUSG00000079523	Tmsb10	A	TRUE	FALSE
ENSMUSG00000079658	Tceb1	A	TRUE	TRUE
ENSMUSG00000089824	Rbm12	A	TRUE	FALSE
ENSMUSG00000090000	Ier3ip1	A	TRUE	TRUE
ENSMUSG00000090083	Rnf8	A	TRUE	TRUE
ENSMUSG00000090137	Uba52	A	TRUE	FALSE
ENSMUSG00000090286	Gm17615	A	TRUE	TRUE
ENSMUSG00000090353	Gm17555	A	TRUE	TRUE
ENSMUSG00000091803	Cox16	A	TRUE	TRUE
ENSMUSG00000092072	Gm4540	A	TRUE	TRUE
ENSMUSG00000092558	Med20	A	TRUE	FALSE
ENSMUSG00000094441	Zfp955a	A	TRUE	FALSE
ENSMUSG00000094559	Cyp2d34	A	TRUE	FALSE
ENSMUSG00000094793	Mup12	A	TRUE	TRUE
ENSMUSG00000094856	Gm21962	A	TRUE	TRUE
ENSMUSG00000094936	Rbm4	A	TRUE	TRUE
ENSMUSG00000095193	Gm20939	A	TRUE	FALSE
ENSMUSG00000096433	Gm4944	A	TRUE	FALSE
ENSMUSG00000099083	Atf7	A	TRUE	FALSE
ENSMUSG00000000568	Hnrnpd	B	FALSE	TRUE
ENSMUSG00000001313	Rnd2	B	FALSE	TRUE
ENSMUSG00000001666	Ddt	B	FALSE	TRUE
ENSMUSG00000004071	Cdip1	B	FALSE	TRUE
ENSMUSG00000007817	Zmiz1	B	FALSE	TRUE
ENSMUSG00000015749	Anp32e	B	FALSE	TRUE
ENSMUSG00000017754	Pltp	B	FALSE	TRUE
ENSMUSG00000018585	Atox1	B	FALSE	TRUE
ENSMUSG00000020098	Pcbd1	B	FALSE	TRUE
ENSMUSG00000021707	Dhfr	B	FALSE	TRUE
ENSMUSG00000021774	Ube2e1	B	FALSE	TRUE
ENSMUSG00000022500	Litaf	B	FALSE	TRUE
ENSMUSG00000024958	Gpr137	B	FALSE	TRUE
ENSMUSG00000025135	Anapc11	B	FALSE	TRUE
ENSMUSG00000026123	Plekhb2	B	FALSE	TRUE
ENSMUSG00000026986	Hnmt	B	FALSE	TRUE
ENSMUSG00000027236	Eif3j1	B	FALSE	TRUE
ENSMUSG00000027365	Trpm7	B	FALSE	TRUE
ENSMUSG00000028049	Scamp3	B	FALSE	TRUE
ENSMUSG00000028108	Ecm1	B	FALSE	TRUE
ENSMUSG00000028521	Slc35d1	B	FALSE	TRUE
ENSMUSG00000028630	Dyrk2	B	FALSE	TRUE
ENSMUSG00000028647	Mycbp	B	FALSE	TRUE
ENSMUSG00000028832	Stmn1	B	FALSE	TRUE
ENSMUSG00000029190	D5Ertd579e	B	FALSE	TRUE
ENSMUSG00000029403	Cdkl2	B	FALSE	TRUE
ENSMUSG00000030281	Il17rc	B	FALSE	TRUE
ENSMUSG00000030847	Bag3	B	FALSE	TRUE
ENSMUSG00000031245	Hmgn5	B	FALSE	TRUE
ENSMUSG00000031513	Leprotl1	B	FALSE	TRUE
ENSMUSG00000031827	Cotl1	B	FALSE	TRUE
ENSMUSG00000032485	Scap	B	FALSE	TRUE
ENSMUSG00000032679	Cd59a	B	FALSE	TRUE
ENSMUSG00000033307	Mif	B	FALSE	TRUE
ENSMUSG00000034175	Rhbdd3	B	FALSE	TRUE
ENSMUSG00000034341	Wbp2	B	FALSE	TRUE
ENSMUSG00000035199	Arl6ip5	B	FALSE	TRUE
ENSMUSG00000035671	Zswim4	B	FALSE	TRUE
ENSMUSG00000036446	Lum	B	FALSE	TRUE
ENSMUSG00000037242	Clic4	B	FALSE	TRUE
ENSMUSG00000037942	Crp	B	FALSE	TRUE
ENSMUSG00000051390	Zbtb22	B	FALSE	TRUE
ENSMUSG00000051853	Arf3	B	FALSE	TRUE
ENSMUSG00000052407	Ccdc171	B	FALSE	TRUE
ENSMUSG00000055923	Aasdh	B	FALSE	TRUE
ENSMUSG00000057858	Fam204a	B	FALSE	TRUE
ENSMUSG00000062825	Actg1	B	FALSE	TRUE
ENSMUSG00000071528	Usmg5	B	FALSE	TRUE
ENSMUSG00000002831	Plin4	B	TRUE	TRUE
ENSMUSG00000003518	Dusp3	B	TRUE	TRUE
ENSMUSG00000005674	Tomm40l	B	TRUE	TRUE
ENSMUSG00000005882	Uqcc1	B	TRUE	FALSE
ENSMUSG00000006134	Crkl	B	TRUE	TRUE
ENSMUSG00000006342	Susd2	B	TRUE	FALSE
ENSMUSG00000007892	Rplp1	B	TRUE	TRUE
ENSMUSG00000016252	Atp5e	B	TRUE	FALSE
ENSMUSG00000017418	Arl5b	B	TRUE	FALSE
ENSMUSG00000018102	Hist1h2bc	B	TRUE	FALSE
ENSMUSG00000018927	Ccl6	B	TRUE	TRUE
ENSMUSG00000019986	Ahi1	B	TRUE	FALSE
ENSMUSG00000020032	Nuak1	B	TRUE	FALSE
ENSMUSG00000020100	Slc29a3	B	TRUE	FALSE
ENSMUSG00000020413	Hus1	B	TRUE	FALSE
ENSMUSG00000020473	Aebp1	B	TRUE	FALSE
ENSMUSG00000020546	Stxbp4	B	TRUE	FALSE
ENSMUSG00000020935	Dcakd	B	TRUE	TRUE
ENSMUSG00000021716	Srek1ip1	B	TRUE	TRUE
ENSMUSG00000021806	Nid2	B	TRUE	FALSE
ENSMUSG00000022453	Naga	B	TRUE	TRUE
ENSMUSG00000022614	Lmf2	B	TRUE	TRUE
ENSMUSG00000022698	Naa50	B	TRUE	TRUE
ENSMUSG00000022849	Hspbap1	B	TRUE	FALSE
ENSMUSG00000023048	Prr13	B	TRUE	TRUE
ENSMUSG00000023904	Hcfc1r1	B	TRUE	TRUE
ENSMUSG00000024019	Cmtr1	B	TRUE	TRUE
ENSMUSG00000024446	Rpp21	B	TRUE	FALSE
ENSMUSG00000025158	Rfng	B	TRUE	FALSE
ENSMUSG00000025362	Rps26	B	TRUE	FALSE
ENSMUSG00000025484	Bet1l	B	TRUE	FALSE
ENSMUSG00000025491	Ifitm1	B	TRUE	TRUE
ENSMUSG00000026064	Ptp4a1	B	TRUE	TRUE
ENSMUSG00000026227	2810459M11Rik	B	TRUE	FALSE
ENSMUSG00000026411	Tmem9	B	TRUE	TRUE
ENSMUSG00000026674	Ddr2	B	TRUE	FALSE
ENSMUSG00000026688	Mgst3	B	TRUE	TRUE
ENSMUSG00000026999	Nup35	B	TRUE	FALSE
ENSMUSG00000027133	Nop10	B	TRUE	TRUE
ENSMUSG00000027188	Pamr1	B	TRUE	FALSE
ENSMUSG00000027556	Car1	B	TRUE	TRUE
ENSMUSG00000027953	Slc50a1	B	TRUE	FALSE
ENSMUSG00000027954	Efna1	B	TRUE	FALSE
ENSMUSG00000028369	Svep1	B	TRUE	FALSE
ENSMUSG00000029108	Pcdh7	B	TRUE	FALSE
ENSMUSG00000029561	Oasl2	B	TRUE	FALSE
ENSMUSG00000030811	Fbxl19	B	TRUE	TRUE
ENSMUSG00000031375	Bgn	B	TRUE	TRUE
ENSMUSG00000032081	Apoc3	B	TRUE	TRUE
ENSMUSG00000032177	Pde4a	B	TRUE	FALSE
ENSMUSG00000032905	Atg12	B	TRUE	TRUE
ENSMUSG00000034795	Ccdc122	B	TRUE	FALSE
ENSMUSG00000035413	Tmem98	B	TRUE	FALSE
ENSMUSG00000035914	Cd276	B	TRUE	FALSE
ENSMUSG00000035919	Bbs9	B	TRUE	FALSE
ENSMUSG00000036362	P2ry13	B	TRUE	TRUE
ENSMUSG00000036570	Fxyd1	B	TRUE	TRUE
ENSMUSG00000037071	Scd1	B	TRUE	TRUE
ENSMUSG00000037148	Arhgap10	B	TRUE	FALSE
ENSMUSG00000037211	Spry1	B	TRUE	FALSE
ENSMUSG00000037262	Kin	B	TRUE	FALSE
ENSMUSG00000038173	Enpp6	B	TRUE	FALSE
ENSMUSG00000038803	Ost4	B	TRUE	TRUE
ENSMUSG00000038975	Rabggtb	B	TRUE	FALSE
ENSMUSG00000039168	Dap	B	TRUE	TRUE
ENSMUSG00000040061	Plcb2	B	TRUE	TRUE
ENSMUSG00000041319	Thoc6	B	TRUE	FALSE
ENSMUSG00000041378	Cldn5	B	TRUE	FALSE
ENSMUSG00000041577	Prelp	B	TRUE	TRUE
ENSMUSG00000042419	Nfkbil1	B	TRUE	FALSE
ENSMUSG00000042500	Ago4	B	TRUE	FALSE
ENSMUSG00000045128	Rpl18a	B	TRUE	FALSE
ENSMUSG00000045854	Lyrm2	B	TRUE	FALSE
ENSMUSG00000046330	Rpl37a	B	TRUE	TRUE
ENSMUSG00000047246	Hist1h2be	B	TRUE	TRUE
ENSMUSG00000048368	Omd	B	TRUE	FALSE
ENSMUSG00000048758	Rpl29	B	TRUE	FALSE
ENSMUSG00000049775	Tmsb4x	B	TRUE	TRUE
ENSMUSG00000050188	Lsm10	B	TRUE	FALSE
ENSMUSG00000050440	Hamp	B	TRUE	TRUE
ENSMUSG00000055900	Tmem69	B	TRUE	TRUE
ENSMUSG00000058523	Mup5	B	TRUE	TRUE
ENSMUSG00000059309		B	TRUE	FALSE
ENSMUSG00000059436	Max	B	TRUE	FALSE
ENSMUSG00000059534	Uqcr10	B	TRUE	FALSE
ENSMUSG00000059820	AU019823	B	TRUE	FALSE
ENSMUSG00000059897	Zfp930	B	TRUE	FALSE
ENSMUSG00000060093	Hist1h4a	B	TRUE	FALSE
ENSMUSG00000060678	Hist1h4c	B	TRUE	TRUE
ENSMUSG00000061474	Mrps36	B	TRUE	TRUE
ENSMUSG00000061479	Snrpa	B	TRUE	TRUE
ENSMUSG00000061482	Hist1h4d	B	TRUE	FALSE
ENSMUSG00000062397	Zfp706	B	TRUE	TRUE
ENSMUSG00000066361	Serpina3c	B	TRUE	TRUE
ENSMUSG00000066442	Mthfs	B	TRUE	FALSE
ENSMUSG00000068270	Shroom4	B	TRUE	FALSE
ENSMUSG00000069266	Hist1h4b	B	TRUE	TRUE
ENSMUSG00000069305	Hist1h4n	B	TRUE	TRUE
ENSMUSG00000069662	Marcks	B	TRUE	TRUE
ENSMUSG00000069792	Wfdc17	B	TRUE	FALSE
ENSMUSG00000070709	1700049G17Rik	B	TRUE	FALSE
ENSMUSG00000071176	Arhgef10	B	TRUE	TRUE
ENSMUSG00000075031	Hist1h2bb	B	TRUE	FALSE
ENSMUSG00000078974	Sec61g	B	TRUE	FALSE
ENSMUSG00000079003	Samd1	B	TRUE	FALSE
ENSMUSG00000089873	Mup13	B	TRUE	TRUE
ENSMUSG00000096145	Vkorc1	B	TRUE	TRUE
ENSMUSG00000006456	Rbm14	C	FALSE	TRUE
ENSMUSG00000015806	Qdpr	C	FALSE	TRUE
ENSMUSG00000018446	C1qbp	C	FALSE	TRUE
ENSMUSG00000019132	BC005537	C	FALSE	TRUE
ENSMUSG00000019820	Utrn	C	FALSE	TRUE
ENSMUSG00000020044	Timp3	C	FALSE	TRUE
ENSMUSG00000020821	Kif1c	C	FALSE	TRUE
ENSMUSG00000021557	Agtpbp1	C	FALSE	TRUE
ENSMUSG00000021629	Slc30a5	C	FALSE	TRUE
ENSMUSG00000022871	Fetub	C	FALSE	TRUE
ENSMUSG00000023224	Serping1	C	FALSE	TRUE
ENSMUSG00000023367	Tmem176a	C	FALSE	TRUE
ENSMUSG00000024168	Tmem204	C	FALSE	TRUE
ENSMUSG00000024421	Lama3	C	FALSE	TRUE
ENSMUSG00000026031	Cflar	C	FALSE	TRUE
ENSMUSG00000026870	Cutal	C	FALSE	TRUE
ENSMUSG00000027351	Spred1	C	FALSE	TRUE
ENSMUSG00000027559	Car3	C	FALSE	TRUE
ENSMUSG00000028343	Erp44	C	FALSE	TRUE
ENSMUSG00000028670	Lypla2	C	FALSE	TRUE
ENSMUSG00000029090	Adgra3	C	FALSE	TRUE
ENSMUSG00000033705	Stard9	C	FALSE	TRUE
ENSMUSG00000035847	Ids	C	FALSE	TRUE
ENSMUSG00000036046	5031439G07Rik	C	FALSE	TRUE
ENSMUSG00000038072	Galnt11	C	FALSE	TRUE
ENSMUSG00000038685	Rtel1	C	FALSE	TRUE
ENSMUSG00000039987	Phtf2	C	FALSE	TRUE
ENSMUSG00000045973	Slc25a51	C	FALSE	TRUE
ENSMUSG00000052957	Gas1	C	FALSE	TRUE
ENSMUSG00000057894	Zfp329	C	FALSE	TRUE
ENSMUSG00000063015	Ccni	C	FALSE	TRUE
ENSMUSG00000063450	Syne2	C	FALSE	TRUE
ENSMUSG00000063810	Alms1	C	FALSE	TRUE
ENSMUSG00000072115	Ang	C	FALSE	TRUE
ENSMUSG00000090663		C	FALSE	TRUE
ENSMUSG00000000552	Zfp385a	C	TRUE	FALSE
ENSMUSG00000004127	Trmt10a	C	TRUE	FALSE
ENSMUSG00000004665	Cnn2	C	TRUE	FALSE
ENSMUSG00000005251	Ripk4	C	TRUE	FALSE
ENSMUSG00000008668	Rps18	C	TRUE	TRUE
ENSMUSG00000008682	Rpl10	C	TRUE	FALSE
ENSMUSG00000009927	Rps25	C	TRUE	FALSE
ENSMUSG00000011257	Pabpc4	C	TRUE	FALSE
ENSMUSG00000012848	Rps5	C	TRUE	FALSE
ENSMUSG00000013701	Timm23	C	TRUE	TRUE
ENSMUSG00000020372	Gnb2l1	C	TRUE	FALSE
ENSMUSG00000020460	Rps27a	C	TRUE	FALSE
ENSMUSG00000020888	Dvl2	C	TRUE	FALSE
ENSMUSG00000020941	Map3k14	C	TRUE	FALSE
ENSMUSG00000021302	Ggps1	C	TRUE	FALSE
ENSMUSG00000021752	Kctd6	C	TRUE	FALSE
ENSMUSG00000022283	Pabpc1	C	TRUE	FALSE
ENSMUSG00000024535	Snx24	C	TRUE	FALSE
ENSMUSG00000024661	Fth1	C	TRUE	FALSE
ENSMUSG00000025025	Mxi1	C	TRUE	TRUE
ENSMUSG00000025226	Fbxl15	C	TRUE	FALSE
ENSMUSG00000025508	Rplp2	C	TRUE	FALSE
ENSMUSG00000025759	Mfsd8	C	TRUE	FALSE
ENSMUSG00000025967	Eef1b2	C	TRUE	TRUE
ENSMUSG00000027360	Hdc	C	TRUE	FALSE
ENSMUSG00000027562	Car2	C	TRUE	FALSE
ENSMUSG00000027624	Epb4.1l1	C	TRUE	FALSE
ENSMUSG00000028081	Rps3a1	C	TRUE	TRUE
ENSMUSG00000028234	Rps20	C	TRUE	TRUE
ENSMUSG00000028495	Rps6	C	TRUE	FALSE
ENSMUSG00000028936	Rpl22	C	TRUE	FALSE
ENSMUSG00000029446	Psph	C	TRUE	FALSE
ENSMUSG00000029469	Ift81	C	TRUE	FALSE
ENSMUSG00000029614	Rpl6	C	TRUE	FALSE
ENSMUSG00000030228	Pik3c2g	C	TRUE	TRUE
ENSMUSG00000030432	Rpl28	C	TRUE	FALSE
ENSMUSG00000030739	Myh14	C	TRUE	FALSE
ENSMUSG00000031320	Rps4x	C	TRUE	FALSE
ENSMUSG00000031508	Ankrd10	C	TRUE	FALSE
ENSMUSG00000031586	Rbpms	C	TRUE	TRUE
ENSMUSG00000032298	Neil1	C	TRUE	FALSE
ENSMUSG00000032567	Aste1	C	TRUE	FALSE
ENSMUSG00000032606	Nicn1	C	TRUE	TRUE
ENSMUSG00000034334	Fam151b	C	TRUE	FALSE
ENSMUSG00000034438	Gbp8	C	TRUE	FALSE
ENSMUSG00000034947	Tmem106a	C	TRUE	TRUE
ENSMUSG00000034994	Eef2	C	TRUE	FALSE
ENSMUSG00000037243	Zfp692	C	TRUE	FALSE
ENSMUSG00000037563	Rps16	C	TRUE	FALSE
ENSMUSG00000037621	Atoh8	C	TRUE	FALSE
ENSMUSG00000037742	Eef1a1	C	TRUE	FALSE
ENSMUSG00000039117	Taf4a	C	TRUE	FALSE
ENSMUSG00000040929	Rfx3	C	TRUE	FALSE
ENSMUSG00000040952	Rps19	C	TRUE	TRUE
ENSMUSG00000041841	Rpl37	C	TRUE	FALSE
ENSMUSG00000043432	Leng9	C	TRUE	FALSE
ENSMUSG00000043716	Rpl7	C	TRUE	FALSE
ENSMUSG00000044155	Lsm8	C	TRUE	FALSE
ENSMUSG00000044345	Marveld1	C	TRUE	FALSE
ENSMUSG00000045211	Nudt18	C	TRUE	FALSE
ENSMUSG00000046364	Rpl27a	C	TRUE	FALSE
ENSMUSG00000047215	Rpl9	C	TRUE	FALSE
ENSMUSG00000047675	Rps8	C	TRUE	FALSE
ENSMUSG00000047909	Ankrd16	C	TRUE	TRUE
ENSMUSG00000049922	Slc35c1	C	TRUE	FALSE
ENSMUSG00000049950	Rpp38	C	TRUE	FALSE
ENSMUSG00000050628	Ubald2	C	TRUE	TRUE
ENSMUSG00000050708	Ftl1	C	TRUE	FALSE
ENSMUSG00000050936	Hist2h2bb	C	TRUE	FALSE
ENSMUSG00000052137	Rbm12b2	C	TRUE	FALSE
ENSMUSG00000052146	Rps10	C	TRUE	FALSE
ENSMUSG00000052423	B4galt3	C	TRUE	FALSE
ENSMUSG00000056144	Trim34a	C	TRUE	FALSE
ENSMUSG00000057113	Npm1	C	TRUE	FALSE
ENSMUSG00000057841	Rpl32	C	TRUE	TRUE
ENSMUSG00000058546	Rpl23a	C	TRUE	FALSE
ENSMUSG00000058558	Rpl5	C	TRUE	FALSE
ENSMUSG00000058600	Rpl30	C	TRUE	FALSE
ENSMUSG00000058886	Deaf1	C	TRUE	FALSE
ENSMUSG00000059291	Rpl11	C	TRUE	FALSE
ENSMUSG00000059586	Nsmce2	C	TRUE	TRUE
ENSMUSG00000060126	Tpt1	C	TRUE	FALSE
ENSMUSG00000060938	Rpl26	C	TRUE	FALSE
ENSMUSG00000061536	Sec22c	C	TRUE	FALSE
ENSMUSG00000061601	Pclo	C	TRUE	TRUE
ENSMUSG00000061787	Rps17	C	TRUE	FALSE
ENSMUSG00000061983	Rps12	C	TRUE	TRUE
ENSMUSG00000062647	Rpl7a	C	TRUE	FALSE
ENSMUSG00000062761	Zfp512	C	TRUE	FALSE
ENSMUSG00000063727	Tnfrsf11b	C	TRUE	FALSE
ENSMUSG00000064262	Gimap8	C	TRUE	FALSE
ENSMUSG00000064341	mt-Nd1	C	TRUE	TRUE
ENSMUSG00000064345	mt-Nd2	C	TRUE	FALSE
ENSMUSG00000064351	mt-Co1	C	TRUE	TRUE
ENSMUSG00000064354	mt-Co2	C	TRUE	TRUE
ENSMUSG00000064357	mt-Atp6	C	TRUE	TRUE
ENSMUSG00000064358	mt-Co3	C	TRUE	TRUE
ENSMUSG00000064360	mt-Nd3	C	TRUE	TRUE
ENSMUSG00000064363	mt-Nd4	C	TRUE	TRUE
ENSMUSG00000064368	mt-Nd6	C	TRUE	FALSE
ENSMUSG00000067288	Rps28	C	TRUE	FALSE
ENSMUSG00000067825	Pex26	C	TRUE	FALSE
ENSMUSG00000069917	Hba-a2	C	TRUE	FALSE
ENSMUSG00000069919	Hba-a1	C	TRUE	FALSE
ENSMUSG00000070348	Ccnd1	C	TRUE	TRUE
ENSMUSG00000070583	Fv1	C	TRUE	FALSE
ENSMUSG00000071415	Rpl23	C	TRUE	TRUE
ENSMUSG00000071644	Eef1g	C	TRUE	FALSE
ENSMUSG00000072235	Tuba1a	C	TRUE	FALSE
ENSMUSG00000073702	Rpl31	C	TRUE	FALSE
ENSMUSG00000079435	Rpl36a	C	TRUE	TRUE
ENSMUSG00000098274	Rpl24	C	TRUE	FALSE
ENSMUSG00000001095	Slc13a2	D	FALSE	TRUE
ENSMUSG00000001627	Ifrd1	D	FALSE	TRUE
ENSMUSG00000001761	Smo	D	FALSE	TRUE
ENSMUSG00000002297	Dbf4	D	FALSE	TRUE
ENSMUSG00000002393	Nr2f6	D	FALSE	TRUE
ENSMUSG00000004951	Hspb1	D	FALSE	TRUE
ENSMUSG00000005225	Plekha8	D	FALSE	TRUE
ENSMUSG00000006014	Prg4	D	FALSE	TRUE
ENSMUSG00000006356	Crip2	D	FALSE	TRUE
ENSMUSG00000006390	Elovl1	D	FALSE	TRUE
ENSMUSG00000010064	Slc38a3	D	FALSE	TRUE
ENSMUSG00000011179	Odc1	D	FALSE	TRUE
ENSMUSG00000014226	Cacybp	D	FALSE	TRUE
ENSMUSG00000019082	Slc25a22	D	FALSE	TRUE
ENSMUSG00000020644	Id2	D	FALSE	TRUE
ENSMUSG00000021091	Vti1b	D	FALSE	TRUE
ENSMUSG00000021127	Erh	D	FALSE	TRUE
ENSMUSG00000021591	Glrx	D	FALSE	TRUE
ENSMUSG00000021868	Ppif	D	FALSE	TRUE
ENSMUSG00000022723	Crybg3	D	FALSE	TRUE
ENSMUSG00000024998	Plce1	D	FALSE	TRUE
ENSMUSG00000025871	4833439L19Rik	D	FALSE	TRUE
ENSMUSG00000026082	Rev1	D	FALSE	TRUE
ENSMUSG00000026131	Dst	D	FALSE	TRUE
ENSMUSG00000026249	Serpine2	D	FALSE	TRUE
ENSMUSG00000027997	Casp6	D	FALSE	TRUE
ENSMUSG00000028792	Ak2	D	FALSE	TRUE
ENSMUSG00000029003	Mad2l2	D	FALSE	TRUE
ENSMUSG00000029810	Tmem176b	D	FALSE	TRUE
ENSMUSG00000030126	Tmcc1	D	FALSE	TRUE
ENSMUSG00000030421	Uri1	D	FALSE	TRUE
ENSMUSG00000030814	Bcl7c	D	FALSE	TRUE
ENSMUSG00000031024	St5	D	FALSE	TRUE
ENSMUSG00000031431	Tsc22d3	D	FALSE	TRUE
ENSMUSG00000031549	Ido2	D	FALSE	TRUE
ENSMUSG00000032349	Elovl5	D	FALSE	TRUE
ENSMUSG00000033904	Ccp110	D	FALSE	TRUE
ENSMUSG00000034371	Tkfc	D	FALSE	TRUE
ENSMUSG00000034880	Mrpl34	D	FALSE	TRUE
ENSMUSG00000036591	Arhgap21	D	FALSE	TRUE
ENSMUSG00000037095	Lrg1	D	FALSE	TRUE
ENSMUSG00000037270	4932438A13Rik	D	FALSE	TRUE
ENSMUSG00000037278	Tmem97	D	FALSE	TRUE
ENSMUSG00000037583	Nr0b2	D	FALSE	TRUE
ENSMUSG00000038028	Tigar	D	FALSE	TRUE
ENSMUSG00000038150	Ormdl3	D	FALSE	TRUE
ENSMUSG00000038422	Hdhd3	D	FALSE	TRUE
ENSMUSG00000038526	Car14	D	FALSE	TRUE
ENSMUSG00000039976	Tbc1d16	D	FALSE	TRUE
ENSMUSG00000040658	Dnph1	D	FALSE	TRUE
ENSMUSG00000041220	Elovl6	D	FALSE	TRUE
ENSMUSG00000041264	Uspl1	D	FALSE	TRUE
ENSMUSG00000041548	Hspb8	D	FALSE	TRUE
ENSMUSG00000045672	Col27a1	D	FALSE	TRUE
ENSMUSG00000048279	Sacs	D	FALSE	TRUE
ENSMUSG00000049580	Tsku	D	FALSE	TRUE
ENSMUSG00000050777	Tmem37	D	FALSE	TRUE
ENSMUSG00000056476	Med12l	D	FALSE	TRUE
ENSMUSG00000058056	Palld	D	FALSE	TRUE
ENSMUSG00000058454	Dhcr7	D	FALSE	TRUE
ENSMUSG00000058756	Thra	D	FALSE	TRUE
ENSMUSG00000060591	Ifitm2	D	FALSE	TRUE
ENSMUSG00000060807	Serpina6	D	FALSE	TRUE
ENSMUSG00000061175	Fnip2	D	FALSE	TRUE
ENSMUSG00000061353	Cxcl12	D	FALSE	TRUE
ENSMUSG00000061540	Orm2	D	FALSE	TRUE
ENSMUSG00000062480	Acat3	D	FALSE	TRUE
ENSMUSG00000066278	Vps37b	D	FALSE	TRUE
ENSMUSG00000068394	Cep152	D	FALSE	TRUE
ENSMUSG00000070056	Mfhas1	D	FALSE	TRUE
ENSMUSG00000070473	Cldn3	D	FALSE	TRUE
ENSMUSG00000073563	Csnk1g3	D	FALSE	TRUE
ENSMUSG00000074063	Osgin1	D	FALSE	TRUE
ENSMUSG00000074824	Rslcan18	D	FALSE	TRUE
ENSMUSG00000094786	Gm14403	D	FALSE	TRUE
ENSMUSG00000002661	Alkbh7	D	TRUE	FALSE
ENSMUSG00000002699	Lcp2	D	TRUE	FALSE
ENSMUSG00000003228	Grk5	D	TRUE	FALSE
ENSMUSG00000003865	Gys1	D	TRUE	TRUE
ENSMUSG00000005125	Ndrg1	D	TRUE	TRUE
ENSMUSG00000005233	Spc25	D	TRUE	FALSE
ENSMUSG00000006850	Tmco6	D	TRUE	FALSE
ENSMUSG00000007950	Abhd8	D	TRUE	FALSE
ENSMUSG00000008683	Rps15a	D	TRUE	FALSE
ENSMUSG00000012519	Mlkl	D	TRUE	FALSE
ENSMUSG00000015850	Adamtsl4	D	TRUE	FALSE
ENSMUSG00000016128	Stard13	D	TRUE	FALSE
ENSMUSG00000017713	Tha1	D	TRUE	FALSE
ENSMUSG00000018906	P4ha2	D	TRUE	FALSE
ENSMUSG00000019659	Ccdc12	D	TRUE	FALSE
ENSMUSG00000020069	Hnrnph3	D	TRUE	TRUE
ENSMUSG00000021134	Slc10a1	D	TRUE	FALSE
ENSMUSG00000021943	Gdf10	D	TRUE	TRUE
ENSMUSG00000022025	Lect1	D	TRUE	FALSE
ENSMUSG00000022179	4931414P19Rik	D	TRUE	FALSE
ENSMUSG00000022847	Thpo	D	TRUE	FALSE
ENSMUSG00000023087	Ccrn4l	D	TRUE	FALSE
ENSMUSG00000023206	Il15ra	D	TRUE	FALSE
ENSMUSG00000023913	Pla2g7	D	TRUE	FALSE
ENSMUSG00000024101	Wash1	D	TRUE	FALSE
ENSMUSG00000025474	Tubgcp2	D	TRUE	FALSE
ENSMUSG00000025986	Slc39a10	D	TRUE	FALSE
ENSMUSG00000026278	Bok	D	TRUE	TRUE
ENSMUSG00000027890	Gstm4	D	TRUE	TRUE
ENSMUSG00000029016	Clcn6	D	TRUE	FALSE
ENSMUSG00000030302	Atp2b2	D	TRUE	FALSE
ENSMUSG00000030342	Cd9	D	TRUE	TRUE
ENSMUSG00000030364	Clec2h	D	TRUE	FALSE
ENSMUSG00000030556	Lrrc28	D	TRUE	FALSE
ENSMUSG00000030795	Fus	D	TRUE	TRUE
ENSMUSG00000031016	Wee1	D	TRUE	FALSE
ENSMUSG00000031740	Mmp2	D	TRUE	FALSE
ENSMUSG00000031939	Taf1d	D	TRUE	FALSE
ENSMUSG00000032010	Usp2	D	TRUE	FALSE
ENSMUSG00000035112	Wnk4	D	TRUE	FALSE
ENSMUSG00000035692	Isg15	D	TRUE	TRUE
ENSMUSG00000035864	Syt1	D	TRUE	FALSE
ENSMUSG00000037606	Osbpl5	D	TRUE	FALSE
ENSMUSG00000037750	Fam222b	D	TRUE	TRUE
ENSMUSG00000037890	Wdr19	D	TRUE	FALSE
ENSMUSG00000037904	Ankrd9	D	TRUE	FALSE
ENSMUSG00000038375	Trp53inp2	D	TRUE	FALSE
ENSMUSG00000040857	Erf	D	TRUE	FALSE
ENSMUSG00000041333	Mup4	D	TRUE	TRUE
ENSMUSG00000041481	Serpina3g	D	TRUE	FALSE
ENSMUSG00000042408	Zmym6	D	TRUE	TRUE
ENSMUSG00000043858	Nup62	D	TRUE	FALSE
ENSMUSG00000045193	Cirbp	D	TRUE	FALSE
ENSMUSG00000045287	Rtn4rl1	D	TRUE	FALSE
ENSMUSG00000046667	Rbm12b1	D	TRUE	FALSE
ENSMUSG00000047228	BC048546	D	TRUE	TRUE
ENSMUSG00000048445	Ccdc57	D	TRUE	FALSE
ENSMUSG00000049539	Hist1h1a	D	TRUE	FALSE
ENSMUSG00000049555	Tmie	D	TRUE	TRUE
ENSMUSG00000050069	Grem2	D	TRUE	TRUE
ENSMUSG00000050954	Zfp169	D	TRUE	TRUE
ENSMUSG00000051000	Fam160a1	D	TRUE	FALSE
ENSMUSG00000051451	Crebzf	D	TRUE	TRUE
ENSMUSG00000052676	Zmat1	D	TRUE	FALSE
ENSMUSG00000053559	Smagp	D	TRUE	TRUE
ENSMUSG00000054434	Tmem120b	D	TRUE	FALSE
ENSMUSG00000054588		D	TRUE	FALSE
ENSMUSG00000057465	Saa2	D	TRUE	FALSE
ENSMUSG00000058013	2015-09-11	D	TRUE	FALSE
ENSMUSG00000058706	0610030E20Rik	D	TRUE	FALSE
ENSMUSG00000059970	Hspa2	D	TRUE	FALSE
ENSMUSG00000060317	Acnat2	D	TRUE	FALSE
ENSMUSG00000060371	Caln1	D	TRUE	FALSE
ENSMUSG00000060981	Hist1h4h	D	TRUE	TRUE
ENSMUSG00000063704	Mapk15	D	TRUE	TRUE
ENSMUSG00000064325	Hhip	D	TRUE	FALSE
ENSMUSG00000064356	mt-Atp8	D	TRUE	FALSE
ENSMUSG00000064367	mt-Nd5	D	TRUE	FALSE
ENSMUSG00000064370	mt-Cytb	D	TRUE	TRUE
ENSMUSG00000067455	Hist1h4j	D	TRUE	TRUE
ENSMUSG00000069733	Ube2u	D	TRUE	FALSE
ENSMUSG00000074802	Gas2l3	D	TRUE	FALSE
ENSMUSG00000074896	Ifit3	D	TRUE	FALSE
ENSMUSG00000078452	Raet1d	D	TRUE	FALSE
ENSMUSG00000078687	Mup8	D	TRUE	TRUE
ENSMUSG00000078689	Mup6	D	TRUE	TRUE
ENSMUSG00000079334	Nat6	D	TRUE	FALSE
ENSMUSG00000079641	Rpl39	D	TRUE	FALSE
ENSMUSG00000084883	Ccdc85c	D	TRUE	FALSE
ENSMUSG00000090247	Bloc1s1	D	TRUE	FALSE
ENSMUSG00000090264	Eif4ebp3	D	TRUE	TRUE
ENSMUSG00000090862	Rps13	D	TRUE	FALSE
ENSMUSG00000093674	Rpl41	D	TRUE	TRUE
