# Supplementary material for: Ribosome profiling reveals the rhythmic liver translatome and circadian clock regulation by upstream open reading frames
Source: HighWire-hosted journal article supplement (doi:10.1101/gr.195404.115), 2015-10-20
Supplement: SuppDataset_1.zip [file 1600029D21Rik_set_A.pdf › Supplemental Dataset 1/A-mRNA_nonrhyth_translation_nonrhyth/1600029D21Rik_set_A.pdf]

# 1600029D21Rik TR

1600029D21Rik log2(Ribosome occup
