# Supplementary material for: Ribosome profiling reveals the rhythmic liver translatome and circadian clock regulation by upstream open reading frames
Source: HighWire-hosted journal article supplement (doi:10.1101/gr.195404.115), 2015-10-20
Supplement: SuppDataset_1.zip [file Hapln1_set_C.pdf › Supplemental Dataset 1/C-mRNA_nonrhythm_translation_rhyth/Hapln1_set_C.pdf]

# HapIn1 TR

# HapIn1 $\log_2(\text{Ribosome occupancy})$
