# Supplementary figures and images for: Ribosome profiling reveals the rhythmic liver translatome and circadian clock regulation by upstream open reading frames (part 1 of 113)
Source: HighWire-hosted journal article supplement (doi:10.1101/gr.195404.115), 2015-10-20

# 0610007P14Rik

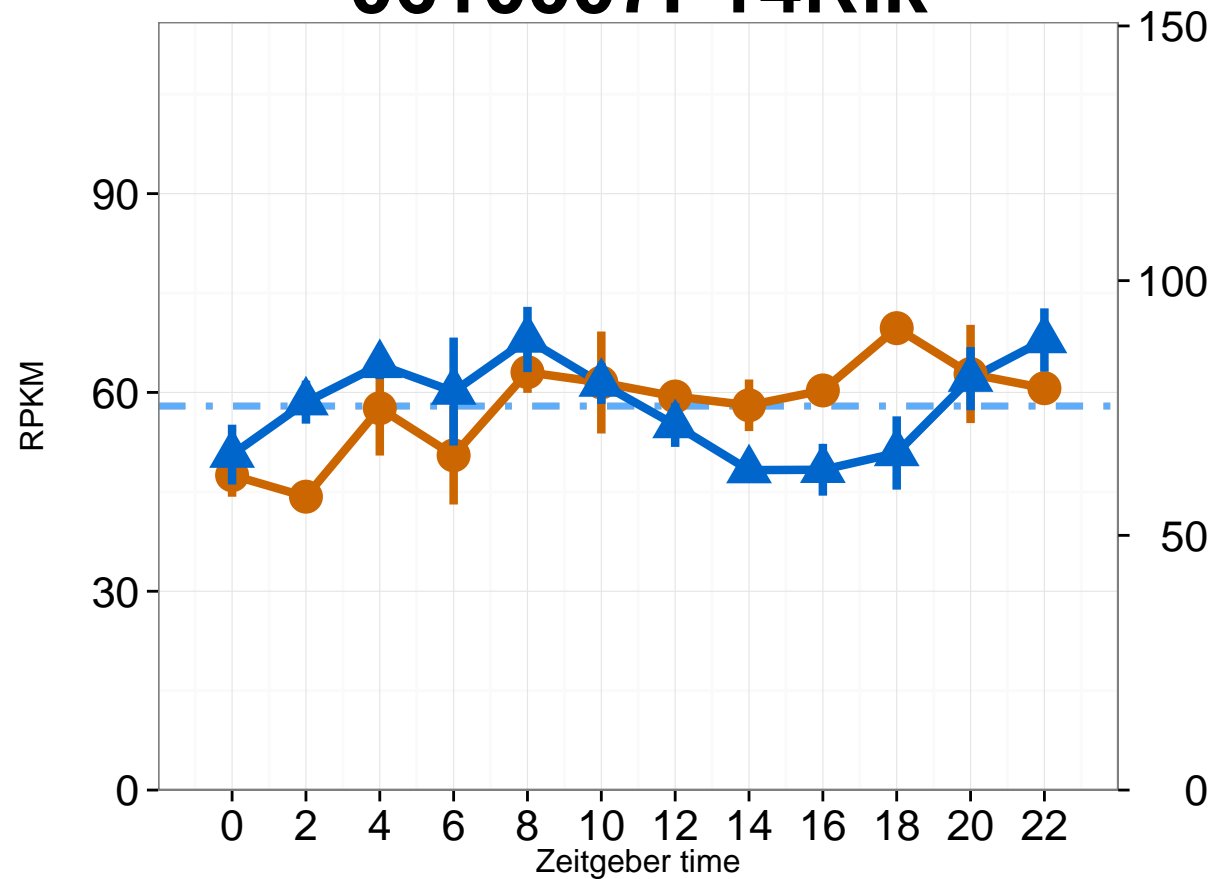

# 0610007P14Rik

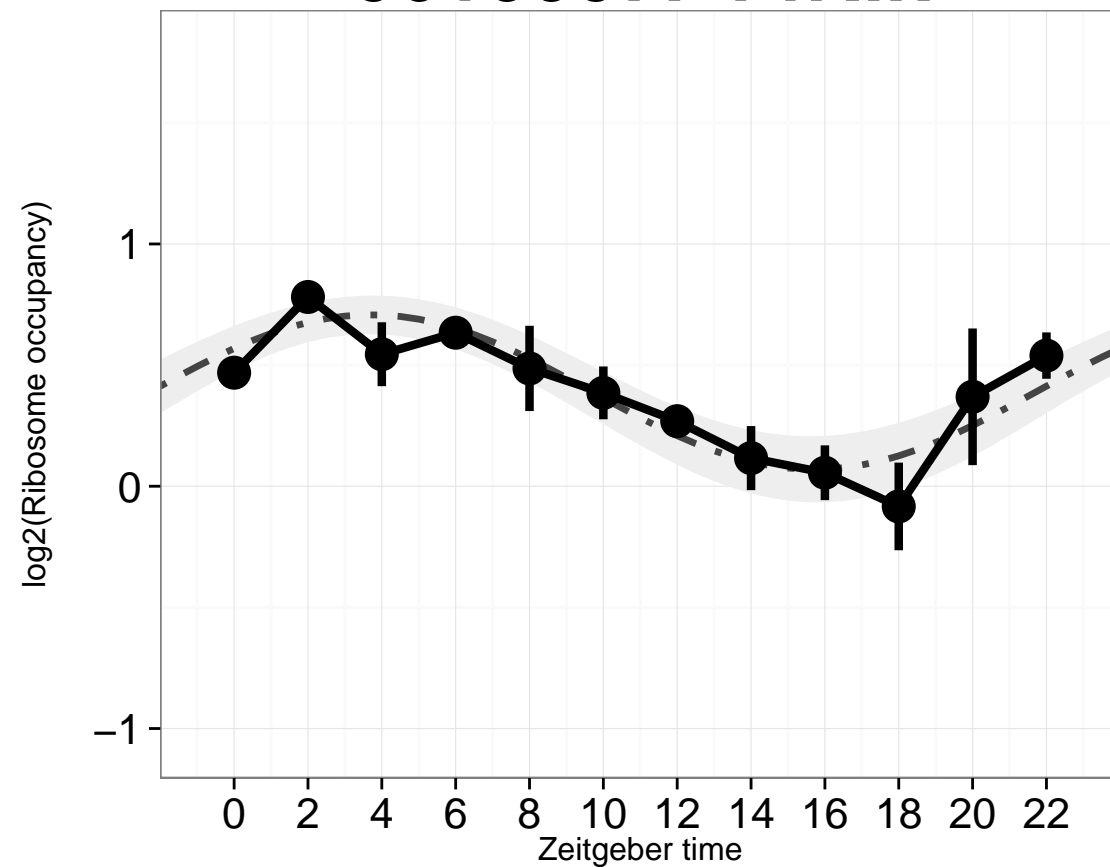

Supplement: SuppDataset_1.zip [file 0610007P14Rik_set_A.pdf › Supplemental Dataset 1/A-mRNA_nonrhyth_translation_nonrhyth/0610007P14Rik_set_A.pdf]

# 0610009B22Rik

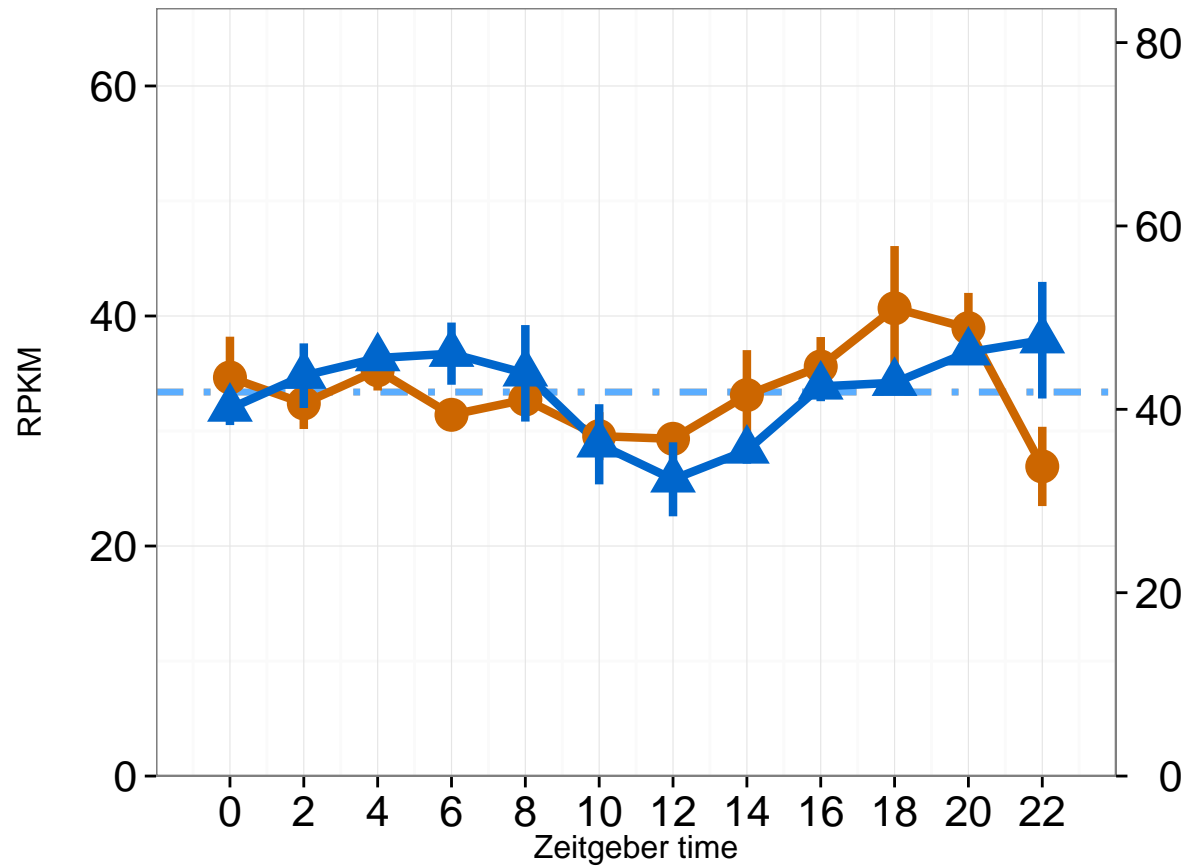

# 0610009B22Rik

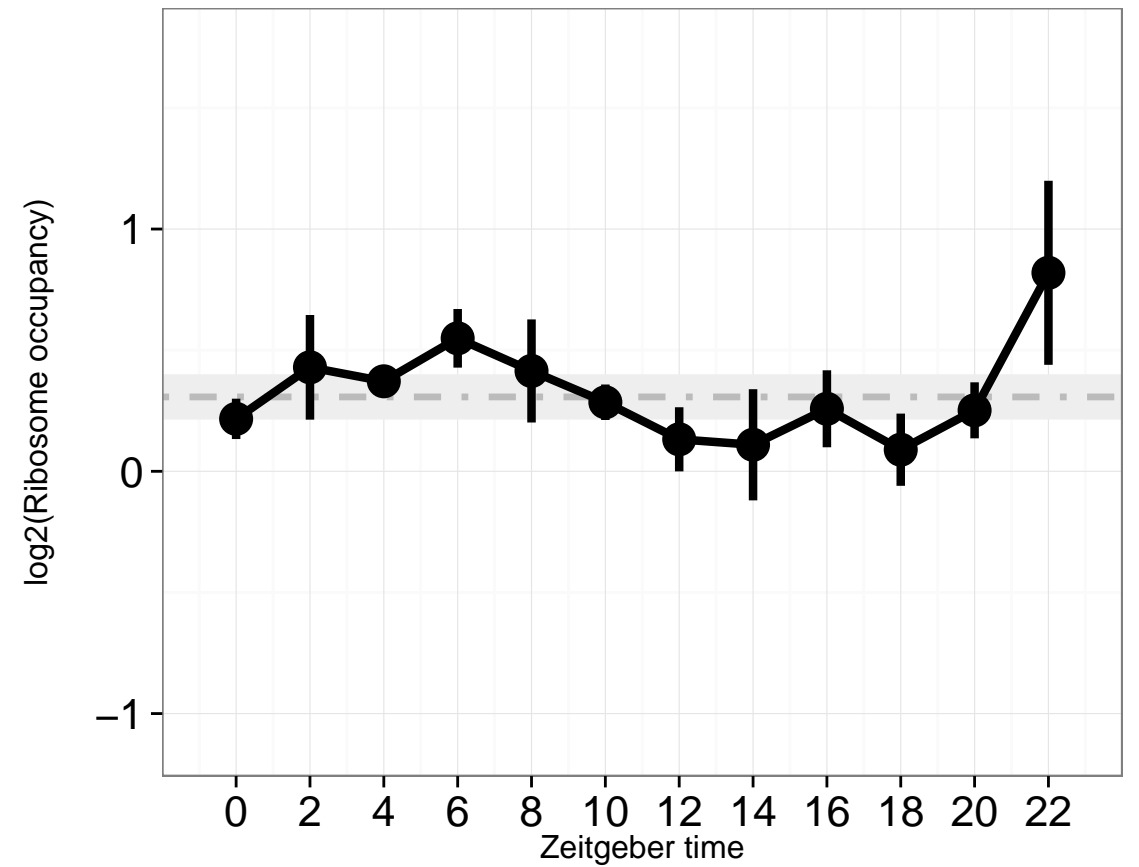

Supplement: SuppDataset_1.zip [file 0610009B22Rik_set_A.pdf › Supplemental Dataset 1/A-mRNA_nonrhyth_translation_nonrhyth/0610009B22Rik_set_A.pdf]

**0610009D07Rik**

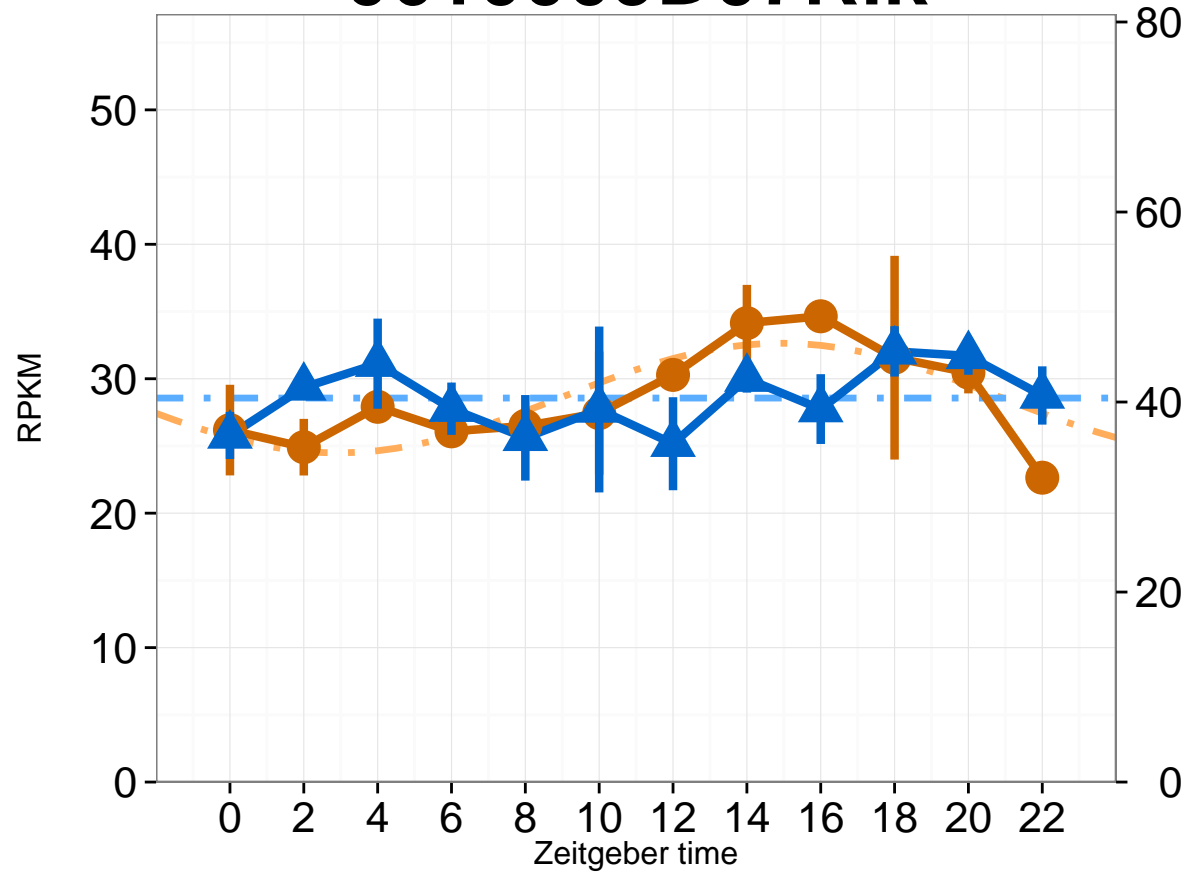

**0610009D07Rik**

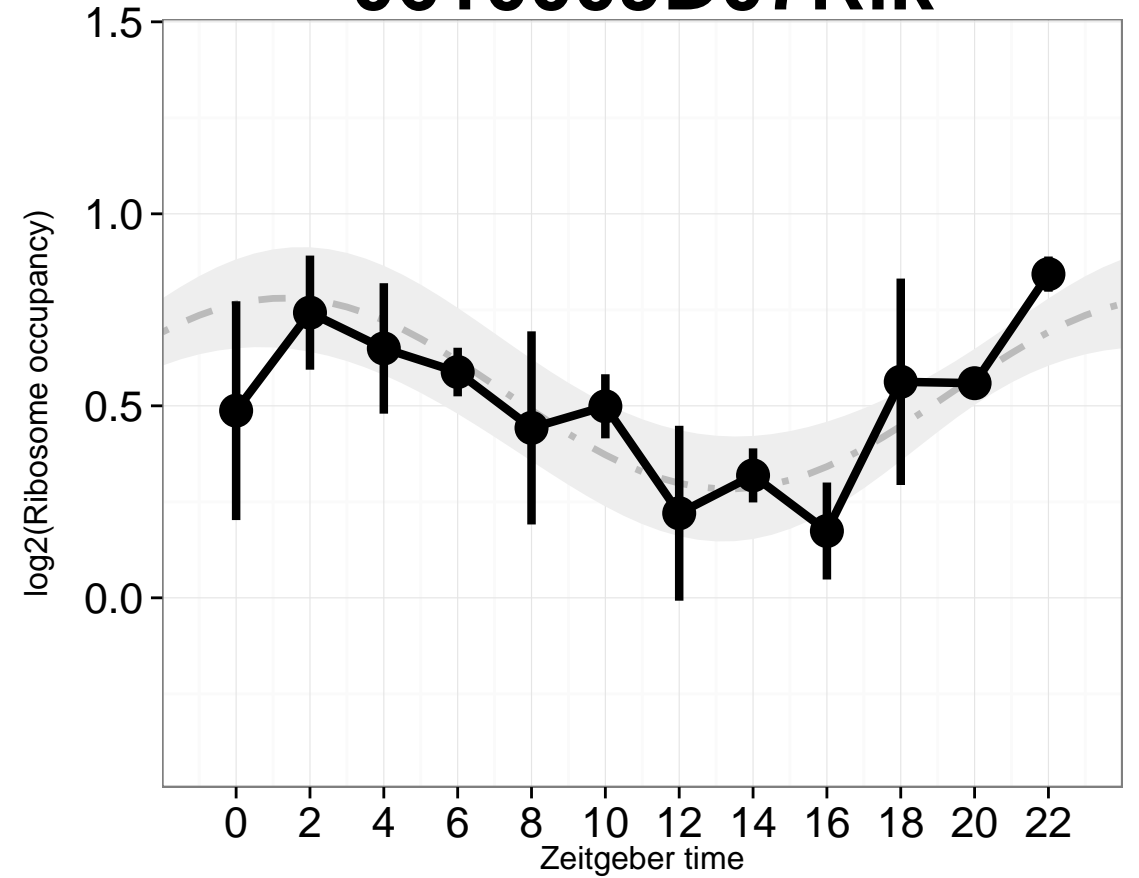

Supplement: SuppDataset_1.zip [file 0610009D07Rik_set_A.pdf › Supplemental Dataset 1/A-mRNA_nonrhyth_translation_nonrhyth/0610009D07Rik_set_A.pdf]

# 0610009O20Rik

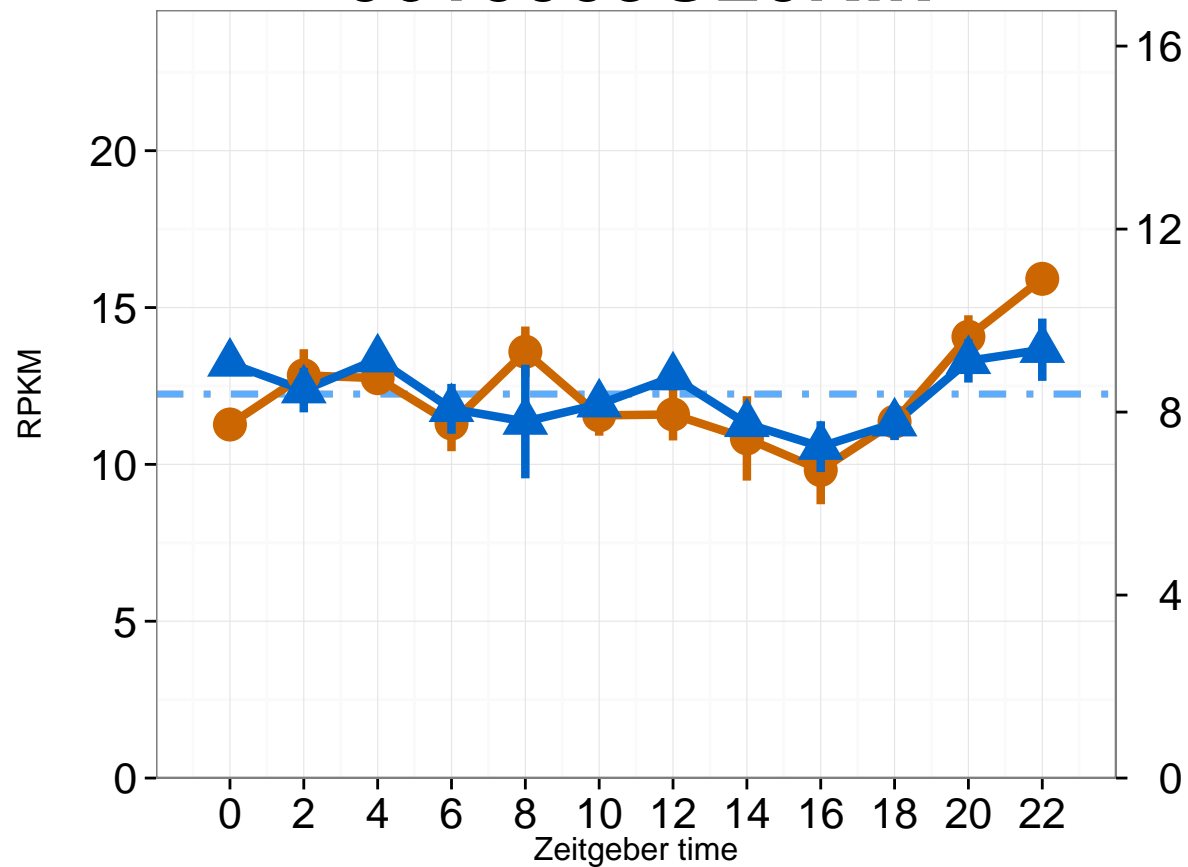

# 0610009O20Rik

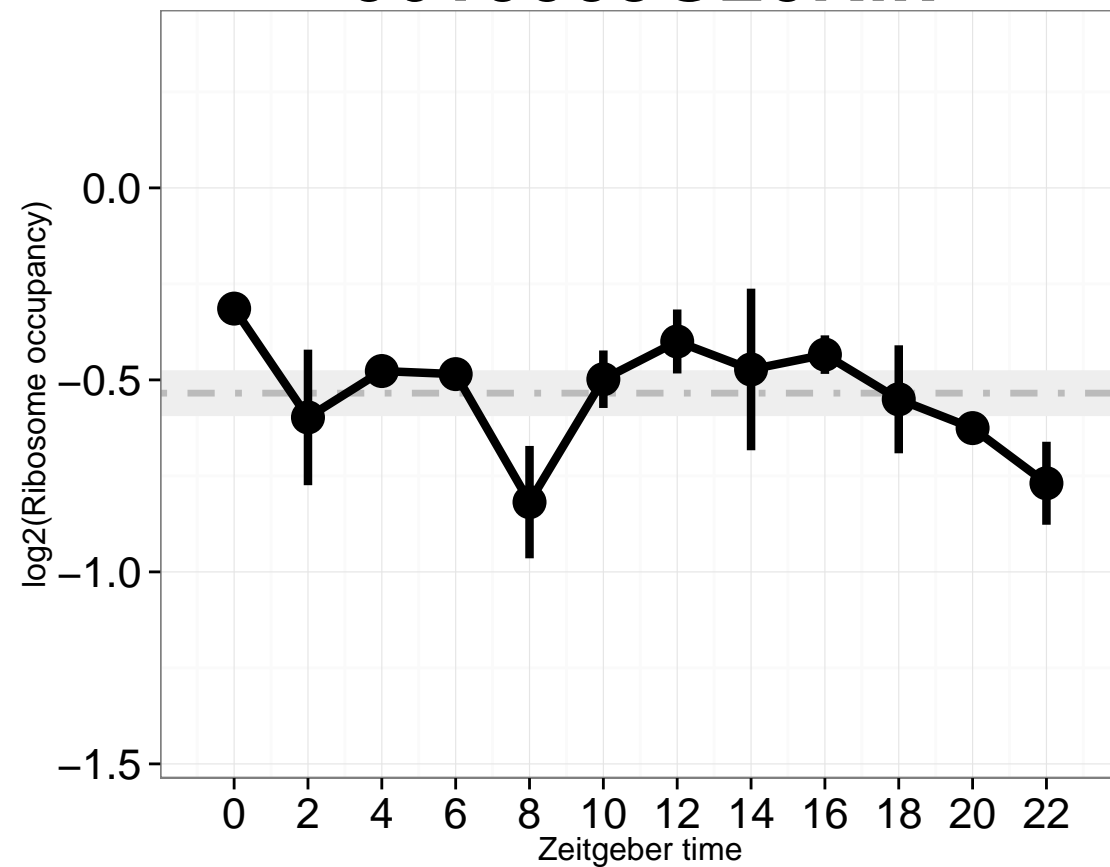

Supplement: SuppDataset_1.zip [file 0610009O20Rik_set_A.pdf › Supplemental Dataset 1/A-mRNA_nonrhyth_translation_nonrhyth/0610009O20Rik_set_A.pdf]

0610010K14Rik

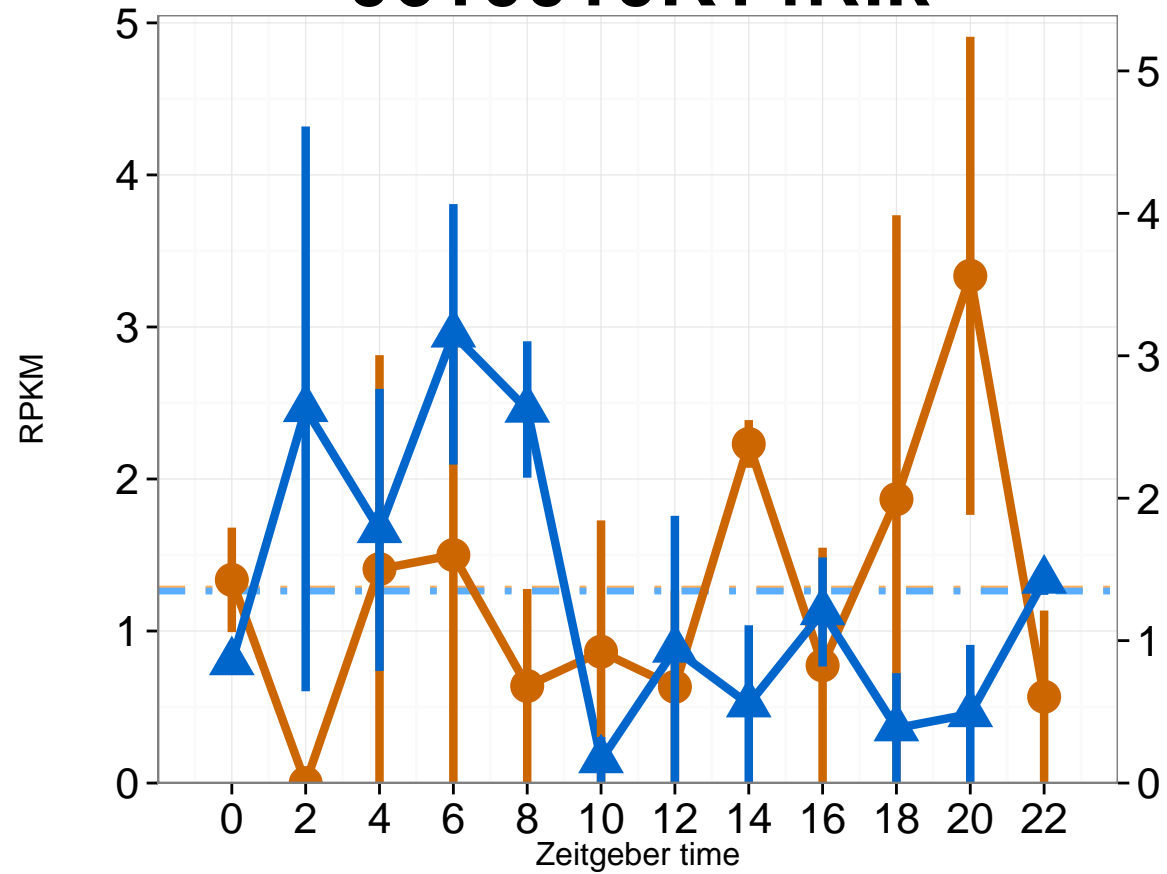

0610010K14Rik

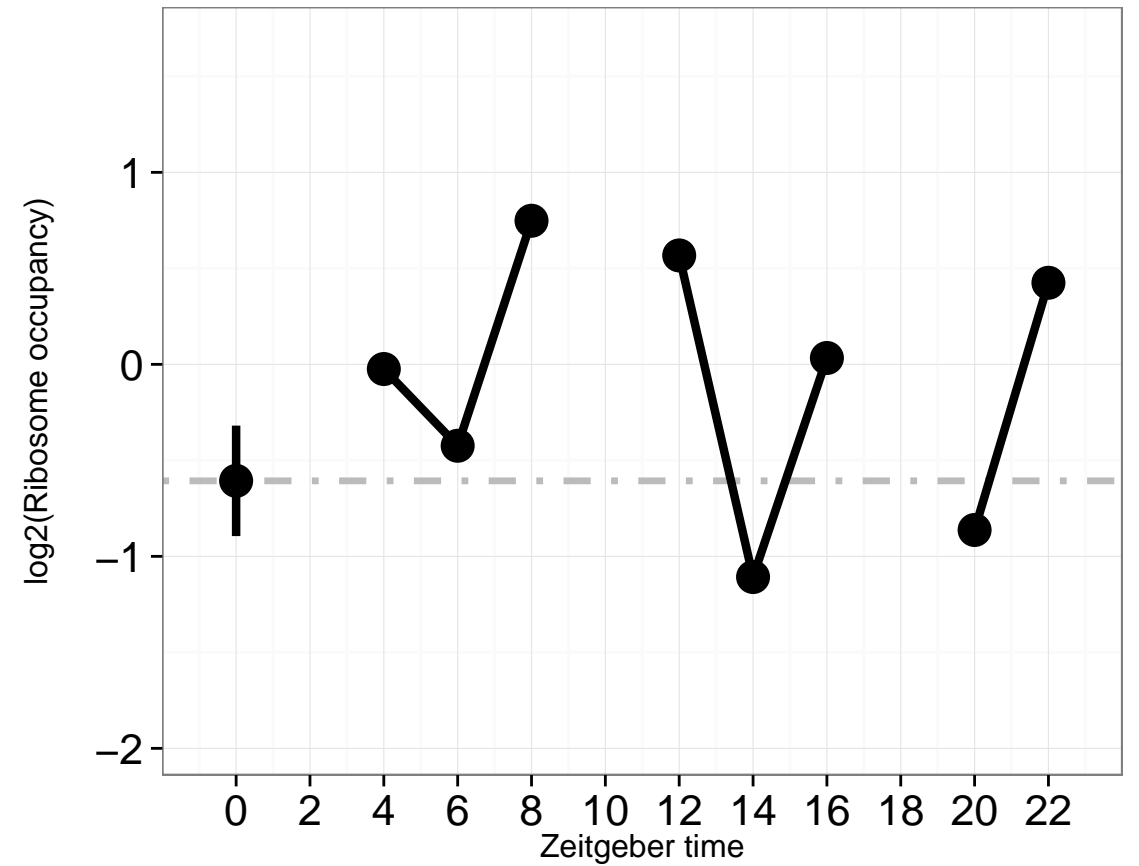

Supplement: SuppDataset_1.zip [file 0610010K14Rik_set_A.pdf › Supplemental Dataset 1/A-mRNA_nonrhyth_translation_nonrhyth/0610010K14Rik_set_A.pdf]

## 0610011F06Rik

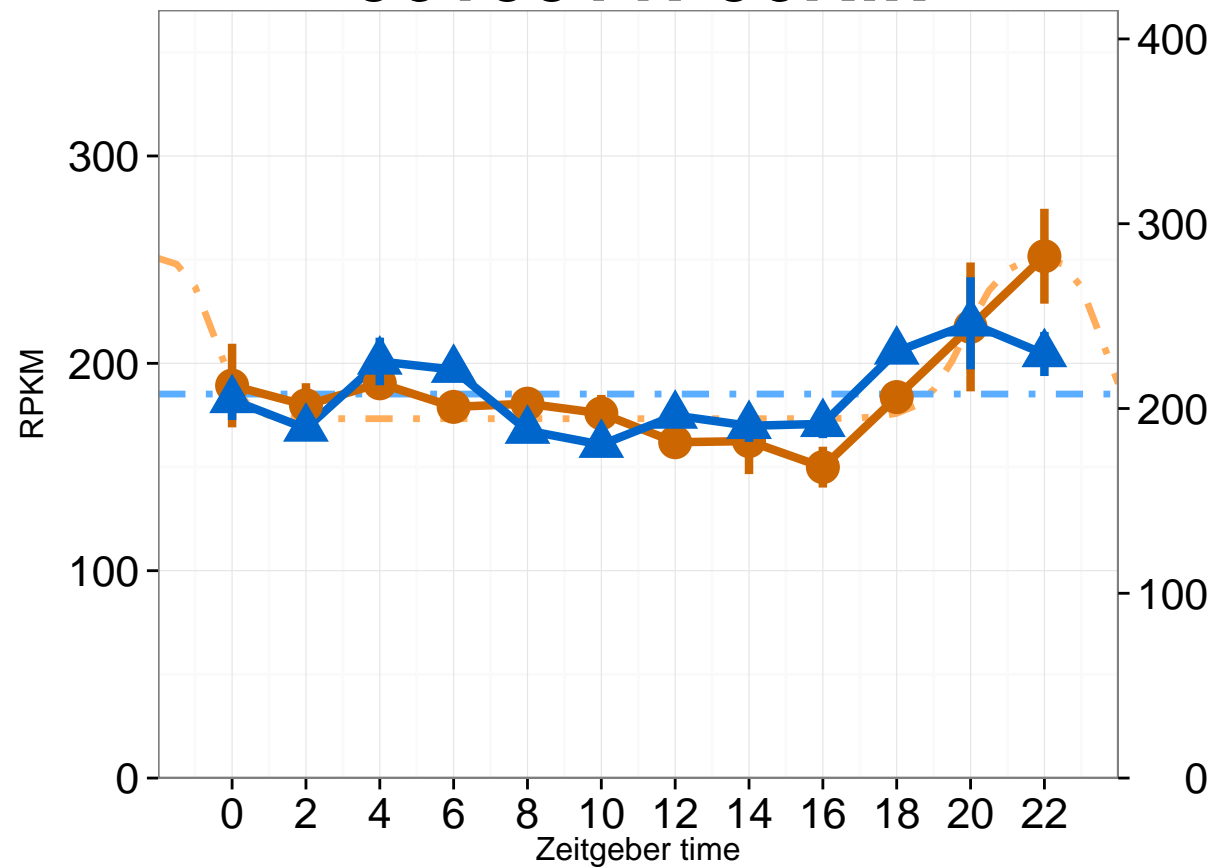

## 0610011F06Rik

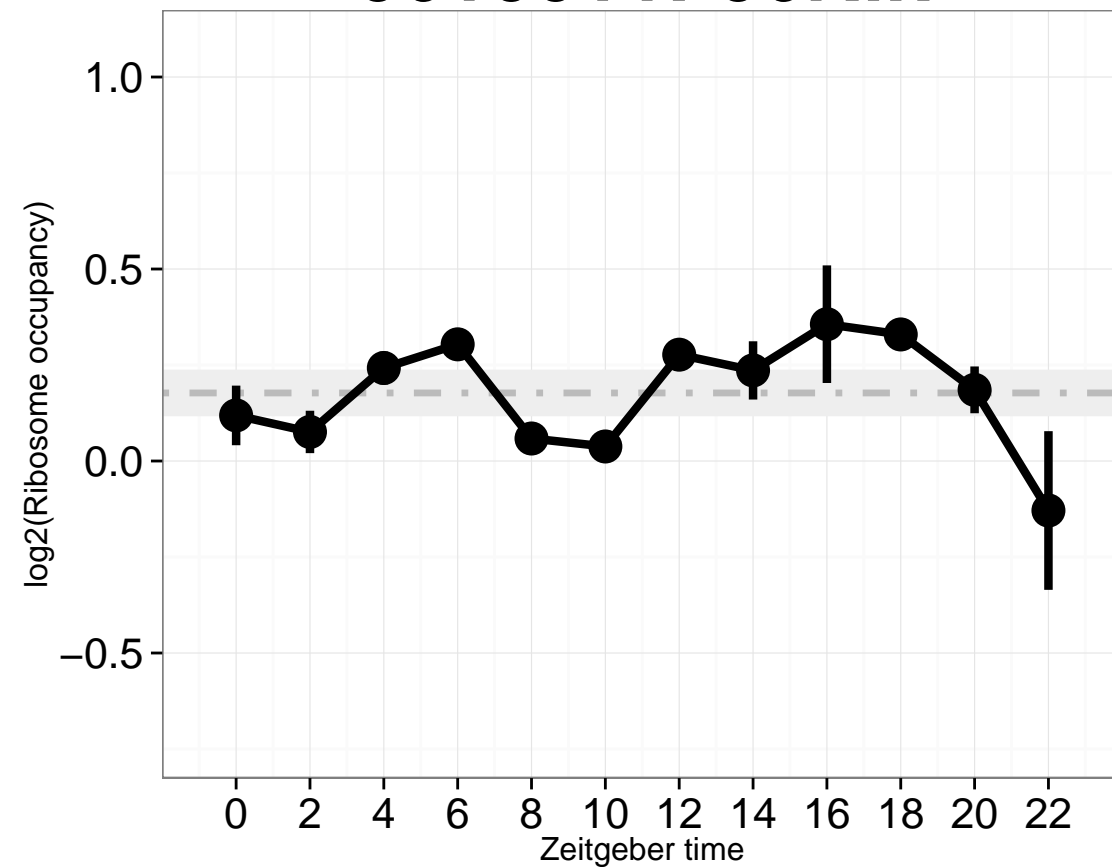

Supplement: SuppDataset_1.zip [file 0610011F06Rik_set_A.pdf › Supplemental Dataset 1/A-mRNA_nonrhyth_translation_nonrhyth/0610011F06Rik_set_A.pdf]

**0610012H03Rik**

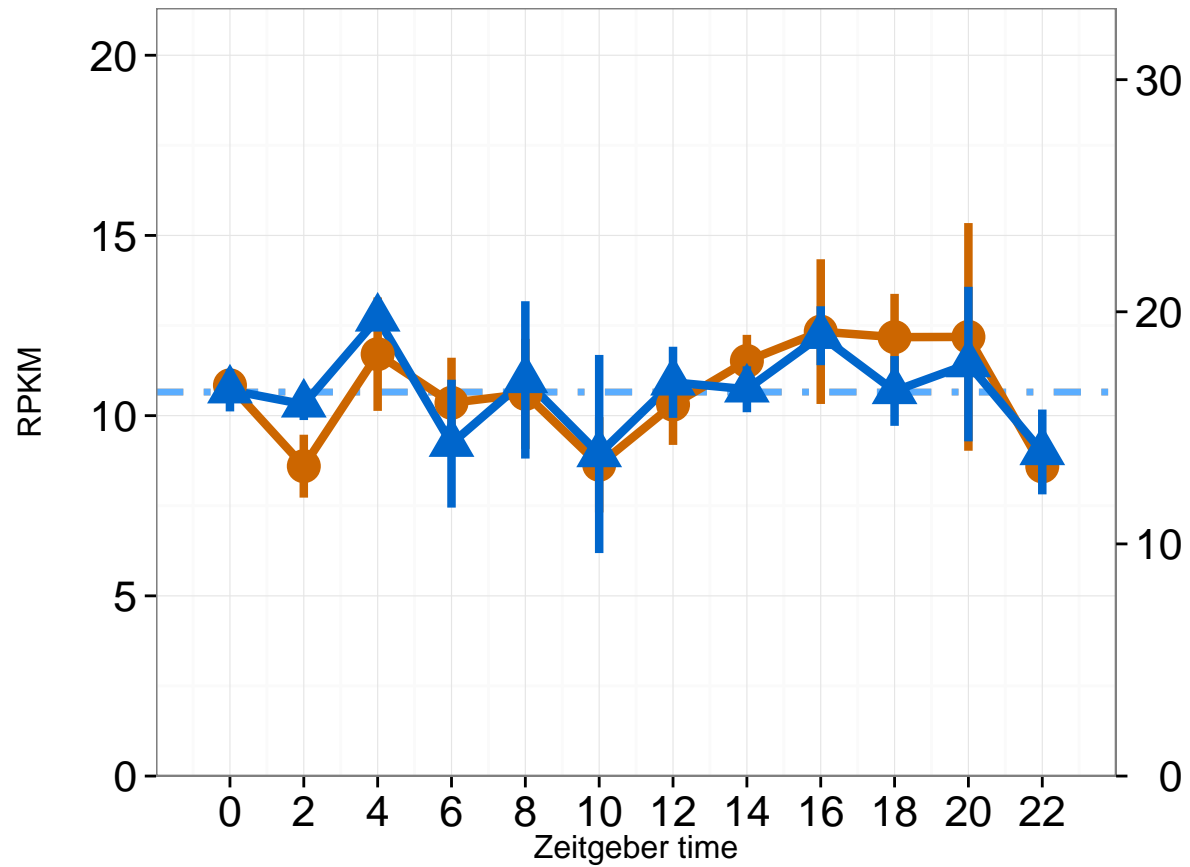

**0610012H03Rik**

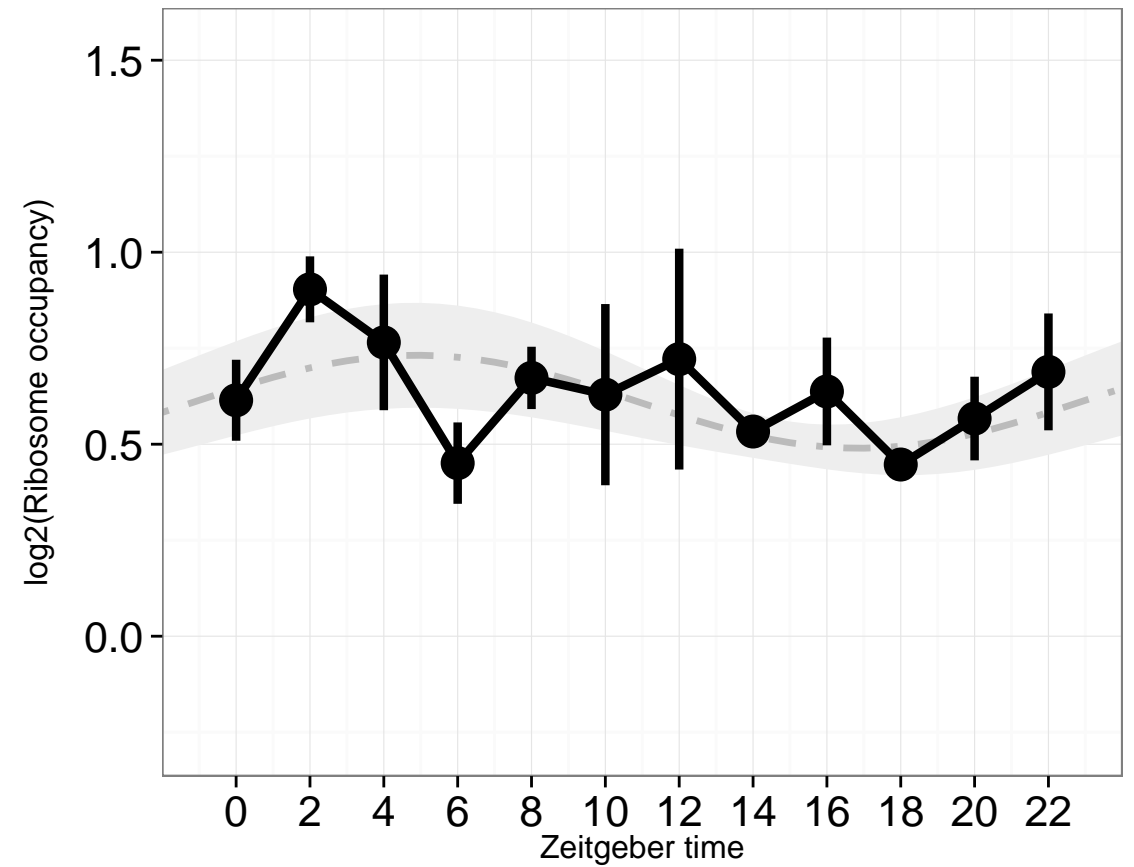

Supplement: SuppDataset_1.zip [file 0610012H03Rik_set_A.pdf › Supplemental Dataset 1/A-mRNA_nonrhyth_translation_nonrhyth/0610012H03Rik_set_A.pdf]

## 0610031J06Rik

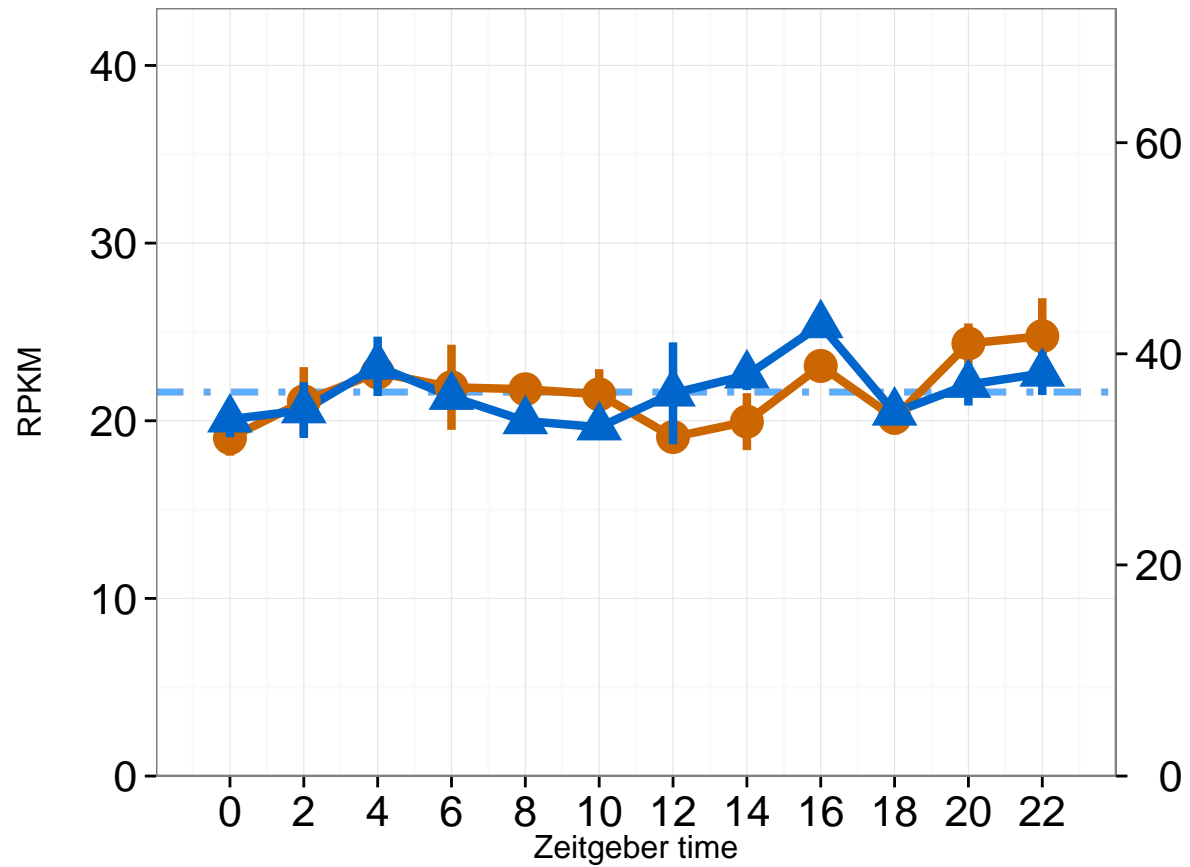

## 0610031J06Rik

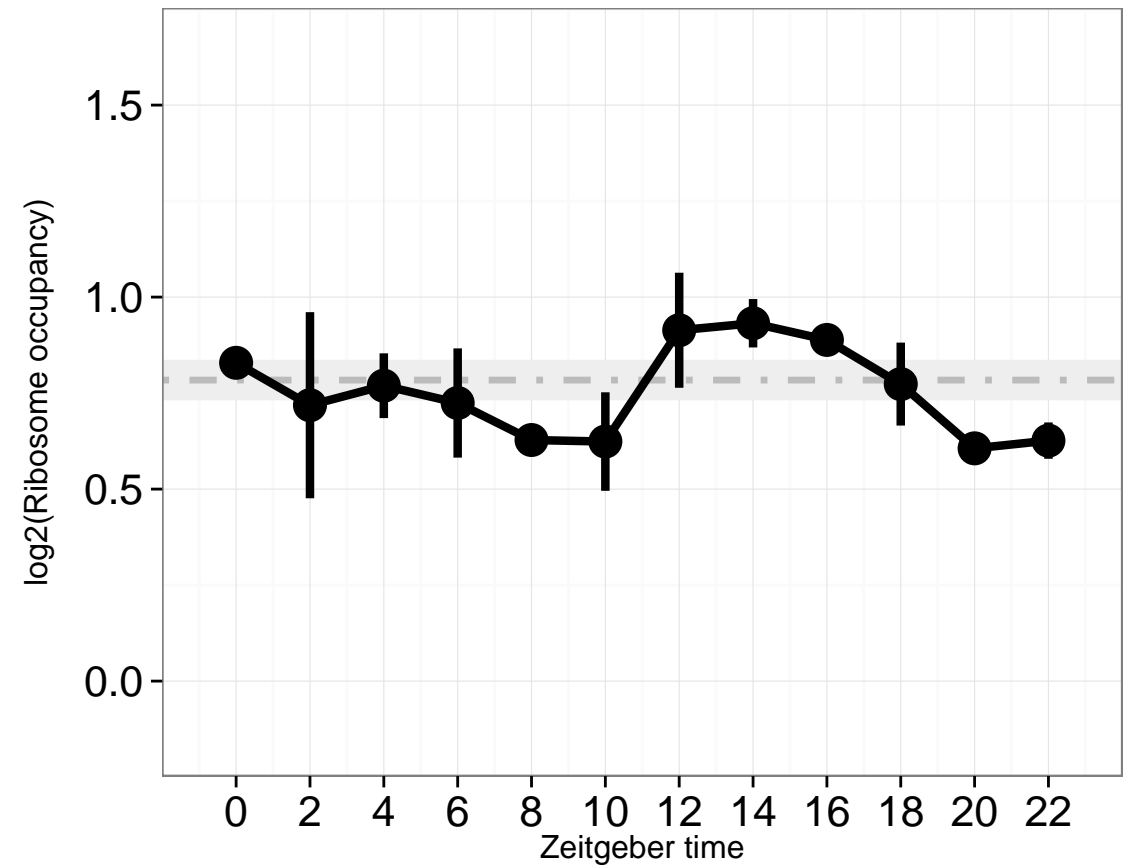

Supplement: SuppDataset_1.zip [file 0610031J06Rik_set_A.pdf › Supplemental Dataset 1/A-mRNA_nonrhyth_translation_nonrhyth/0610031J06Rik_set_A.pdf]

**0610037L13Rik**

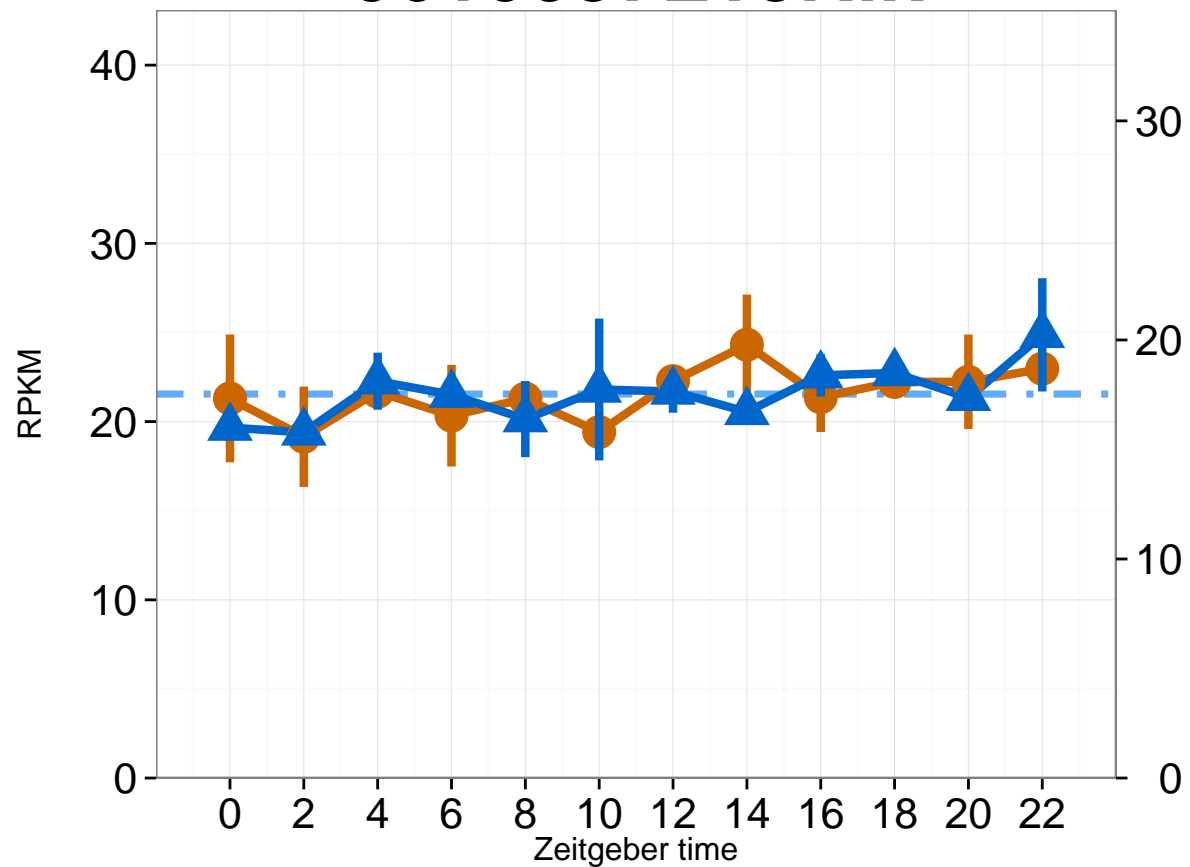

**0610037L13Rik**

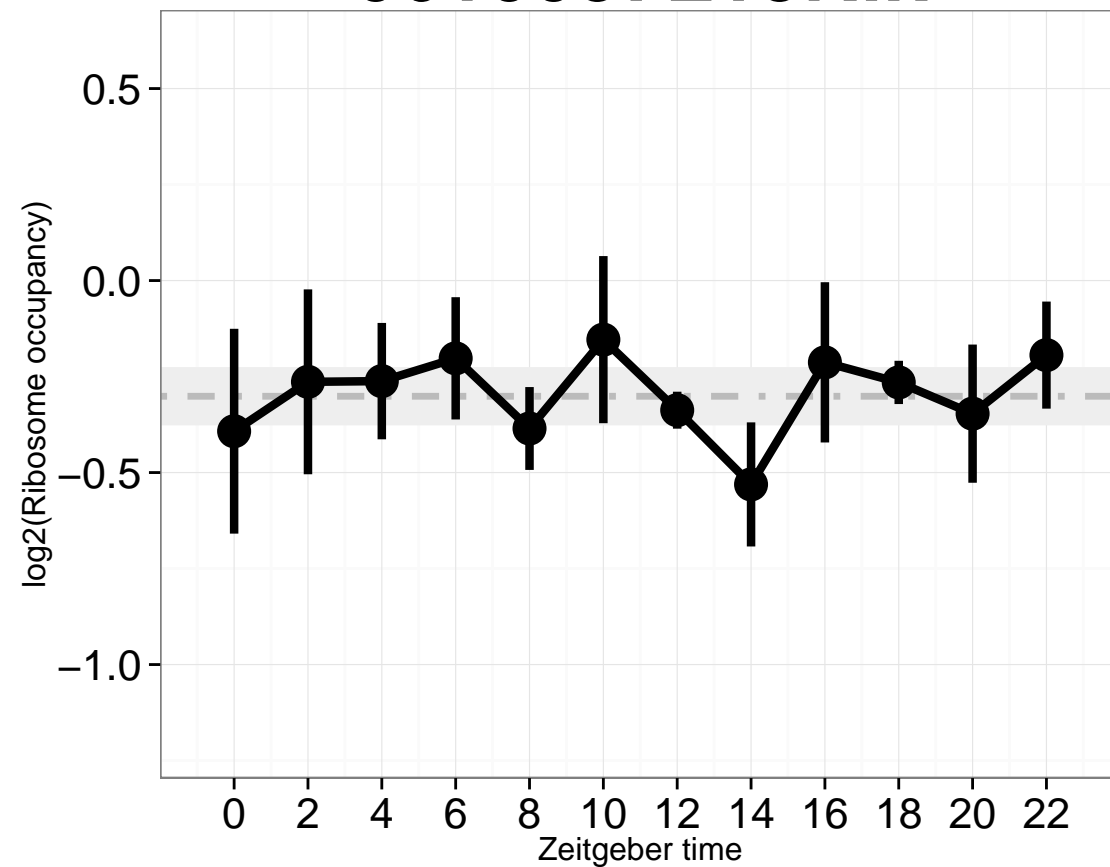

Supplement: SuppDataset_1.zip [file 0610037L13Rik_set_A.pdf › Supplemental Dataset 1/A-mRNA_nonrhyth_translation_nonrhyth/0610037L13Rik_set_A.pdf]

**0610040J01Rik**

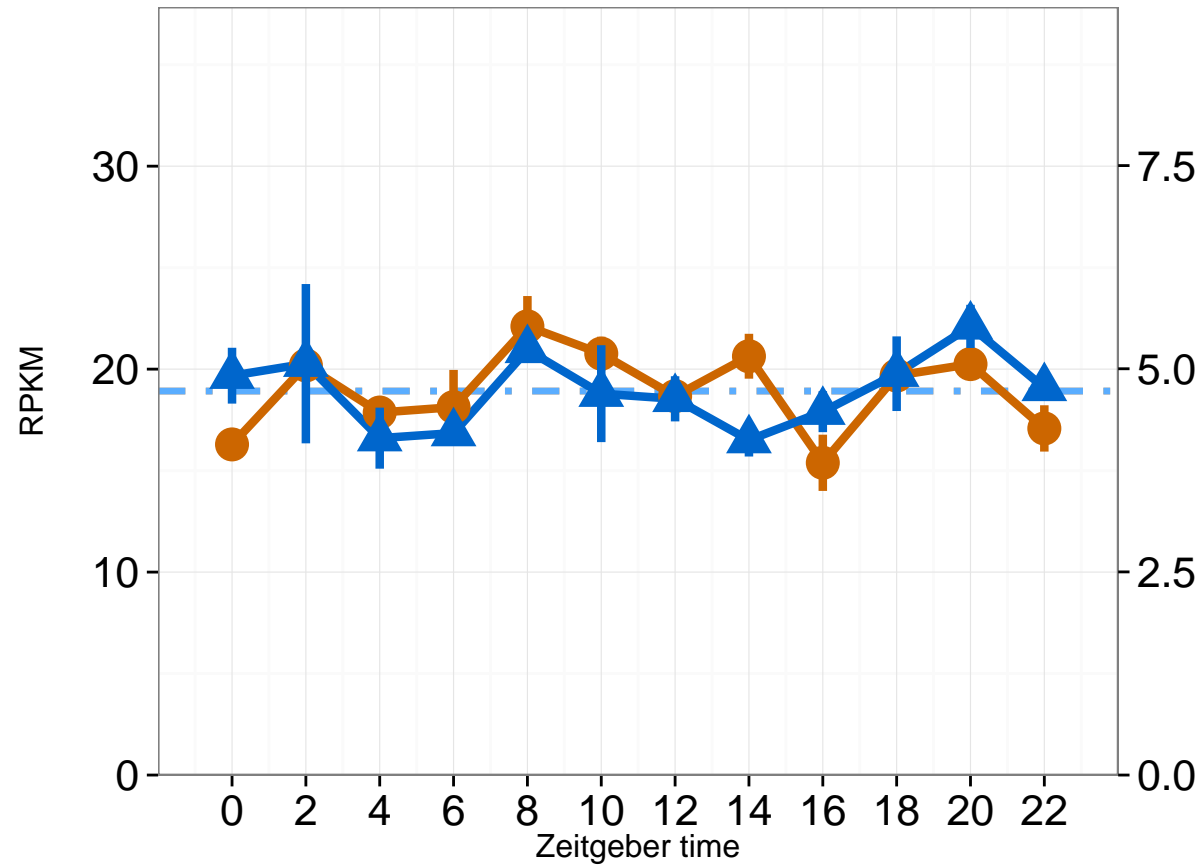

**0610040J01Rik**

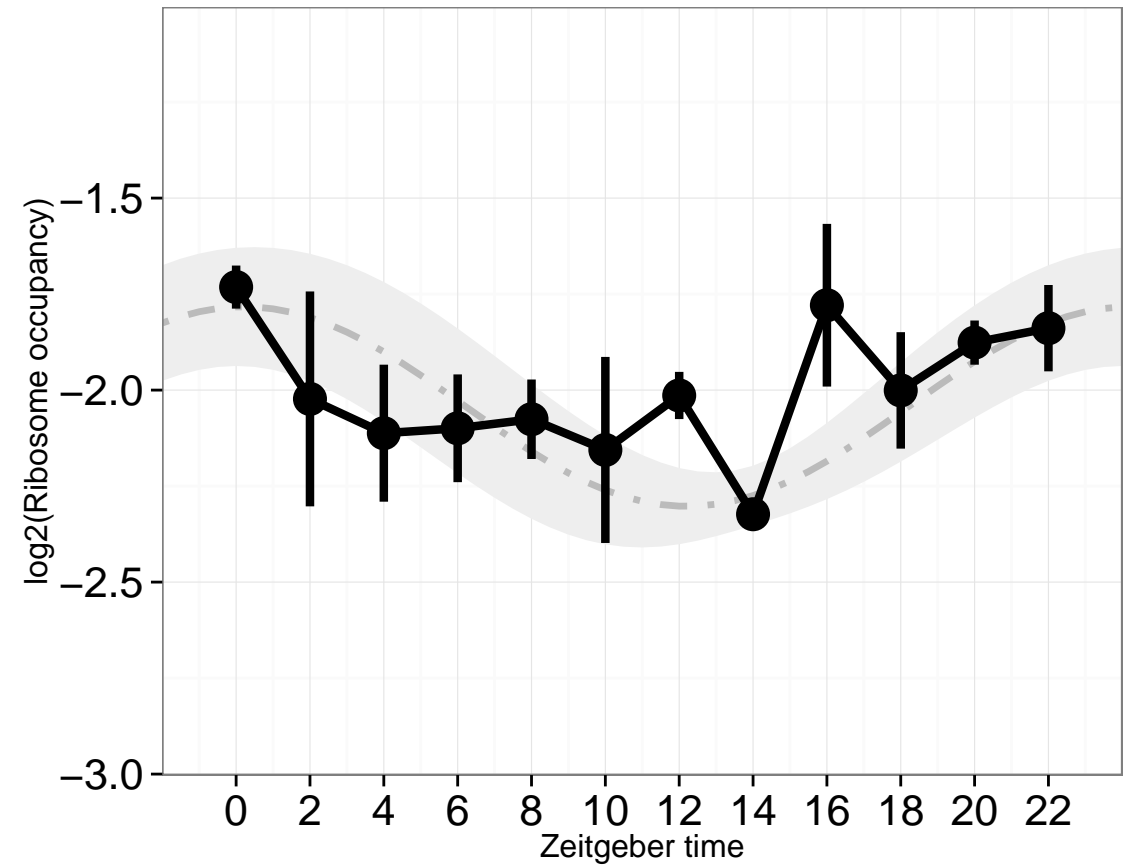

Supplement: SuppDataset_1.zip [file 0610040J01Rik_set_A.pdf › Supplemental Dataset 1/A-mRNA_nonrhyth_translation_nonrhyth/0610040J01Rik_set_A.pdf]

# 1110001A16Rik

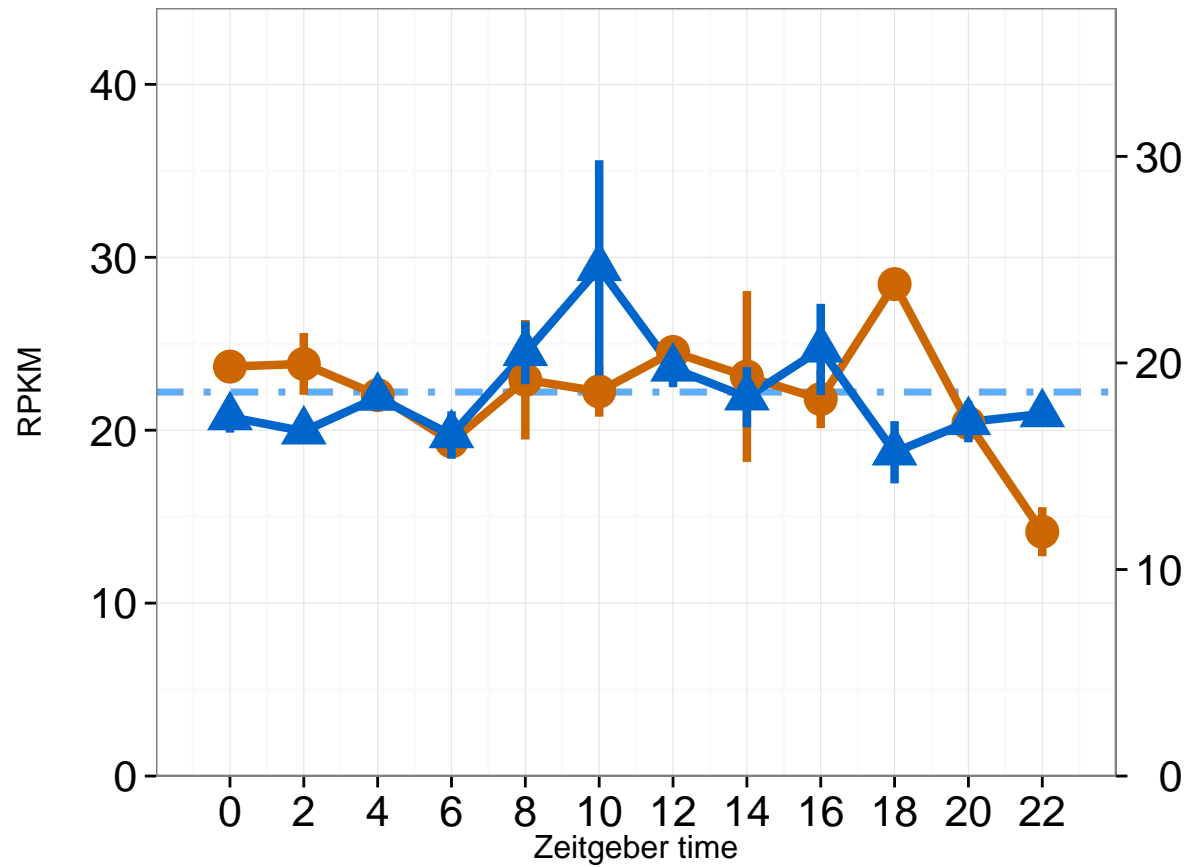

# 1110001A16Rik

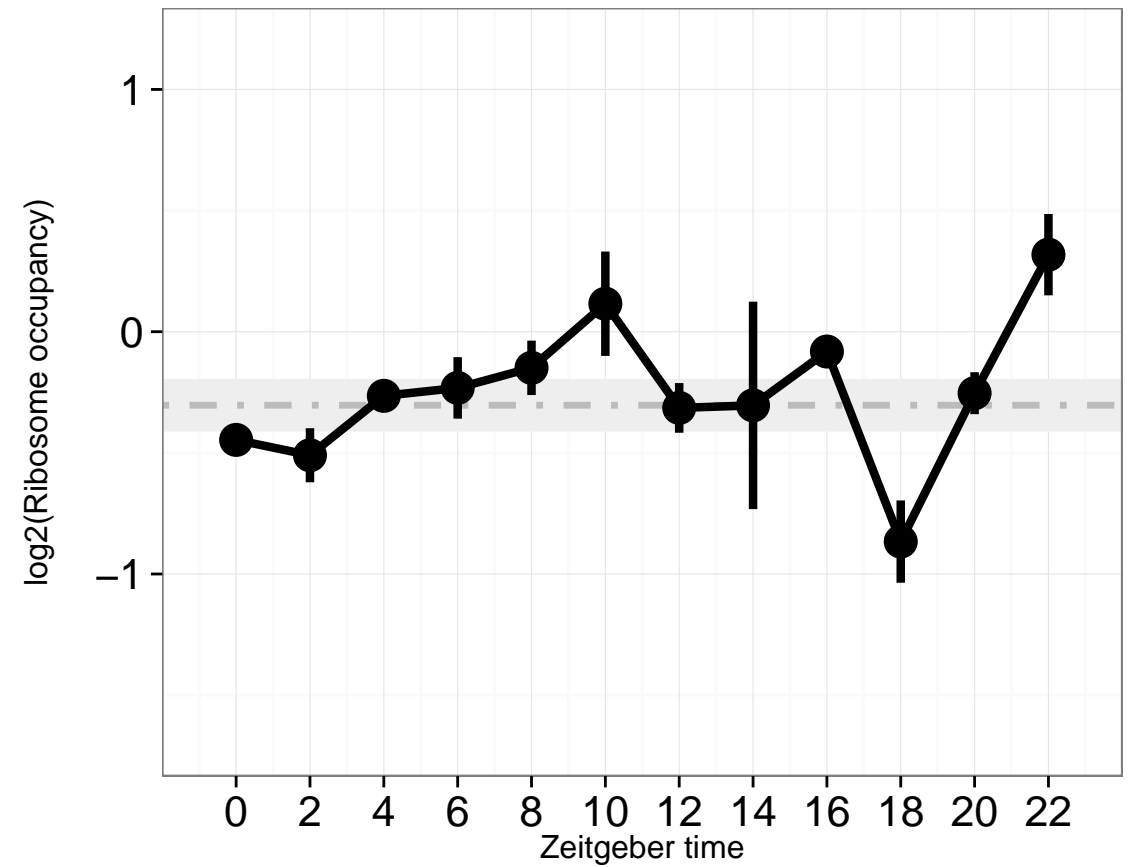

Supplement: SuppDataset_1.zip [file 1110001A16Rik_set_A.pdf › Supplemental Dataset 1/A-mRNA_nonrhyth_translation_nonrhyth/1110001A16Rik_set_A.pdf]

# 1110002L01Rik

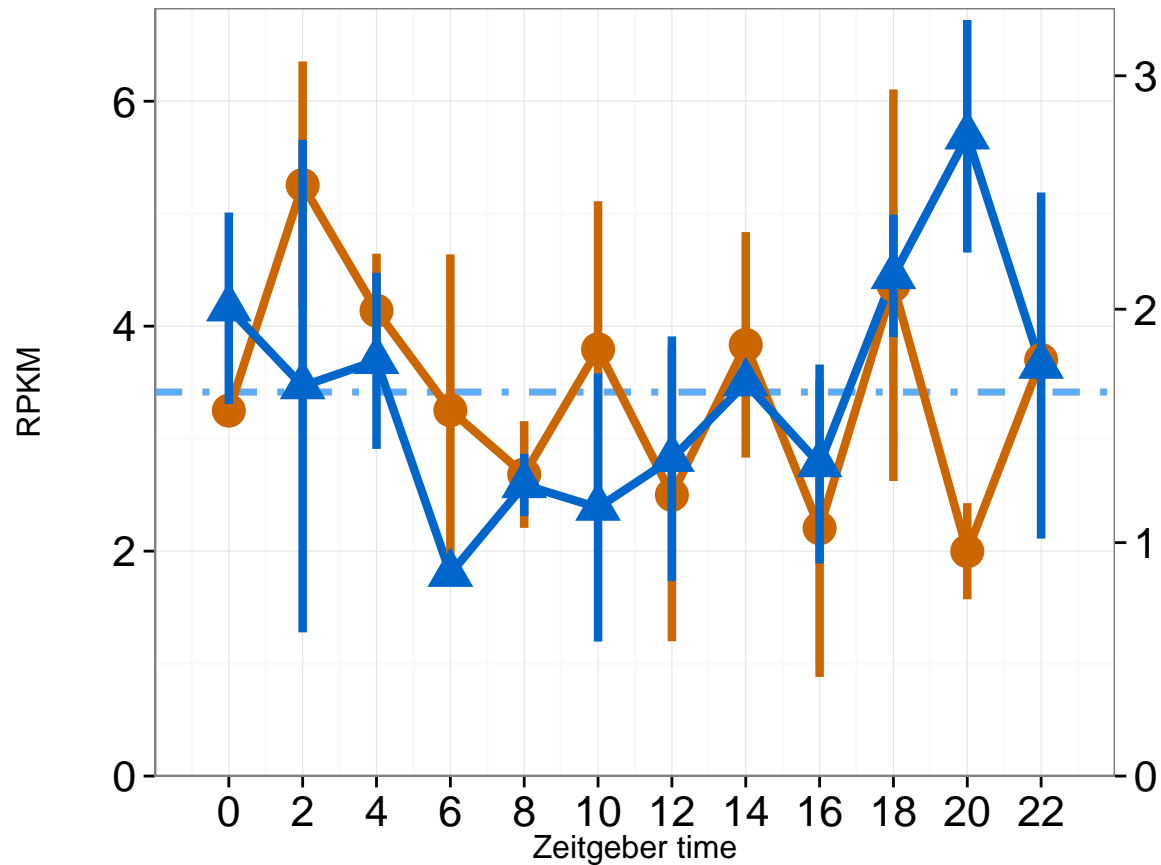

# 1110002L01Rik

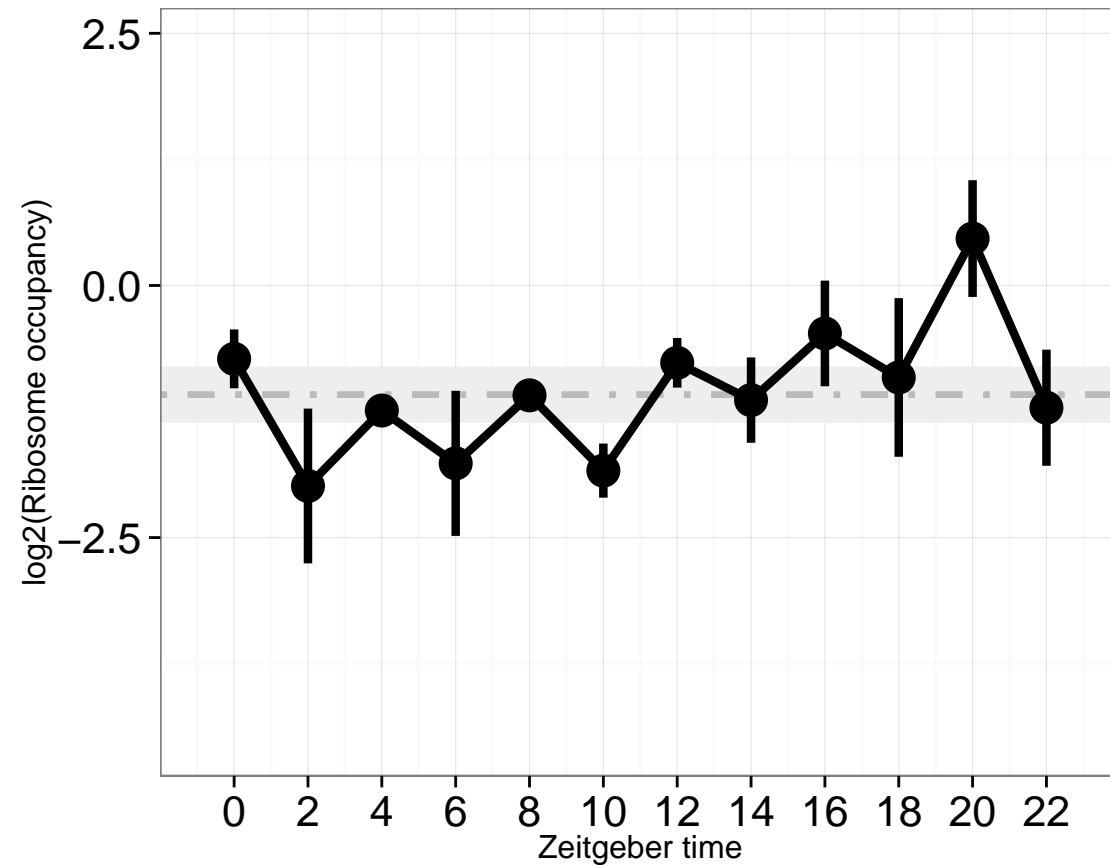

Supplement: SuppDataset_1.zip [file 1110002L01Rik_set_A.pdf › Supplemental Dataset 1/A-mRNA_nonrhyth_translation_nonrhyth/1110002L01Rik_set_A.pdf]

# 1110004E09Rik

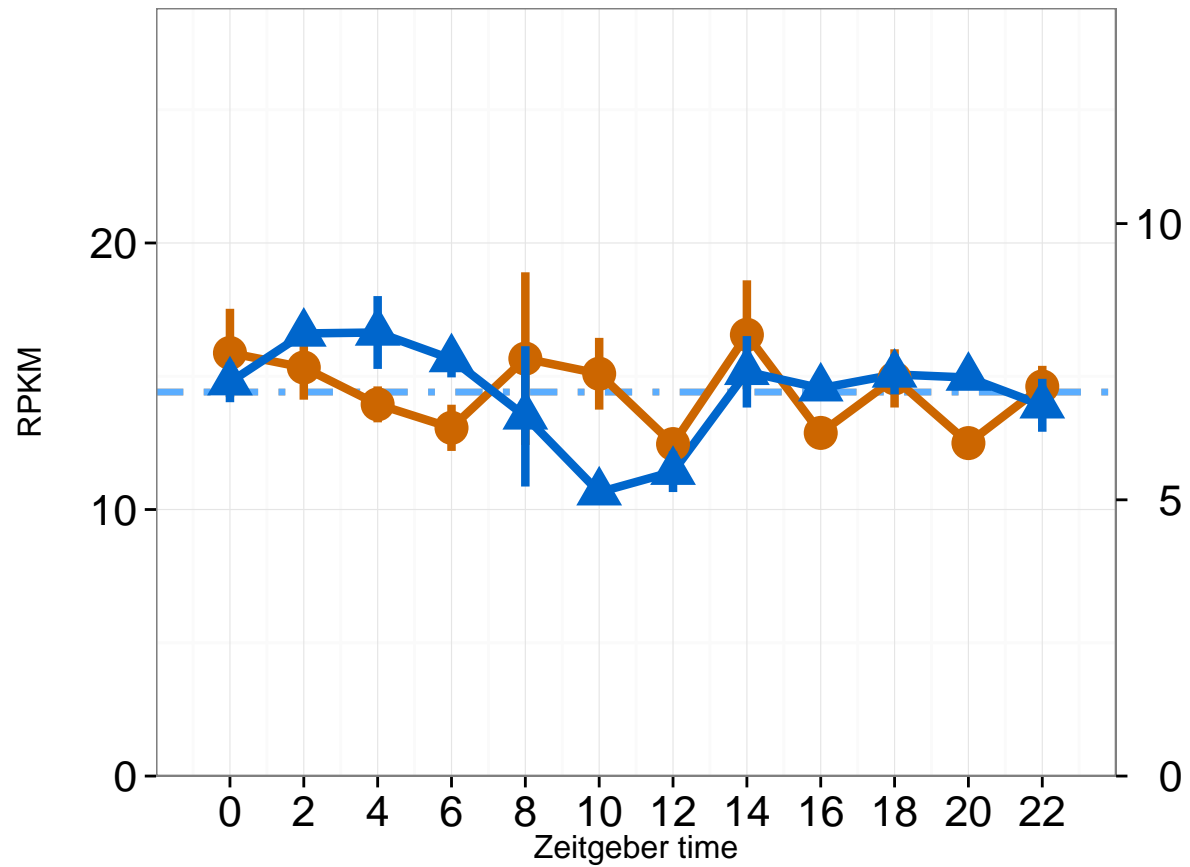

# 1110004E09Rik

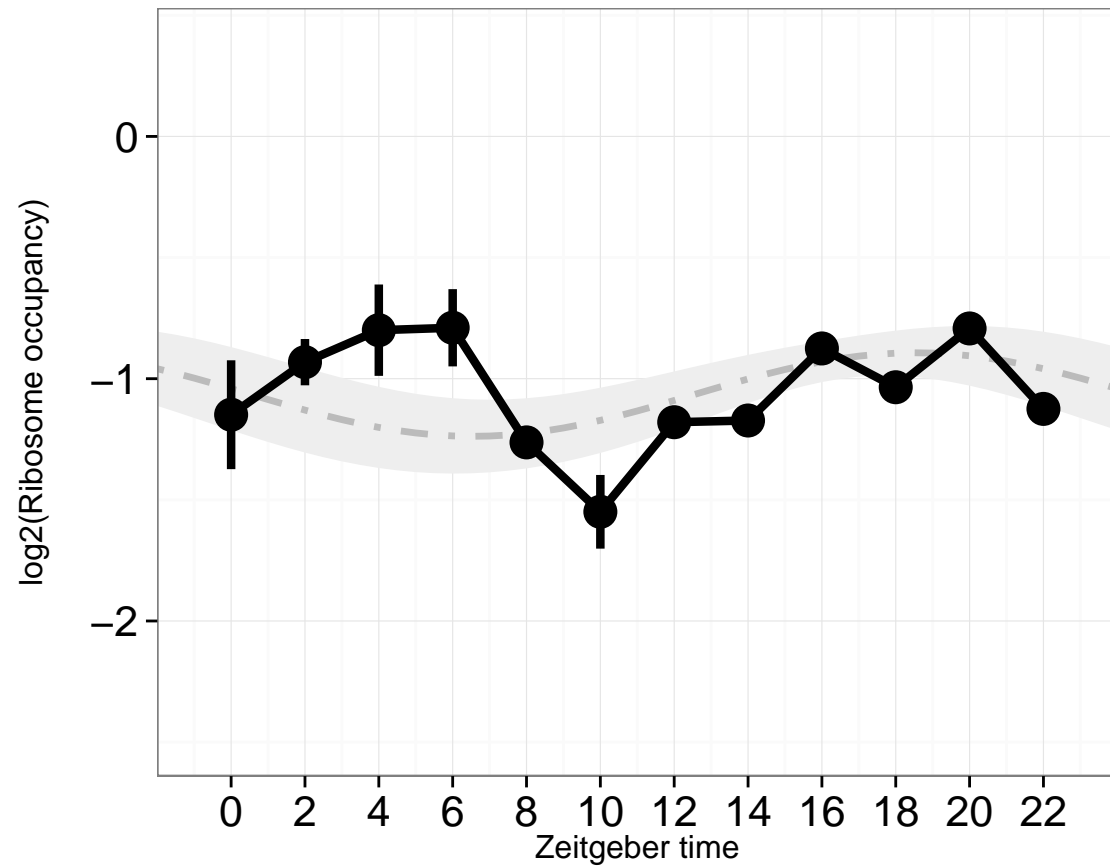

Supplement: SuppDataset_1.zip [file 1110004E09Rik_set_A.pdf › Supplemental Dataset 1/A-mRNA_nonrhyth_translation_nonrhyth/1110004E09Rik_set_A.pdf]

# 1110004F10Rik

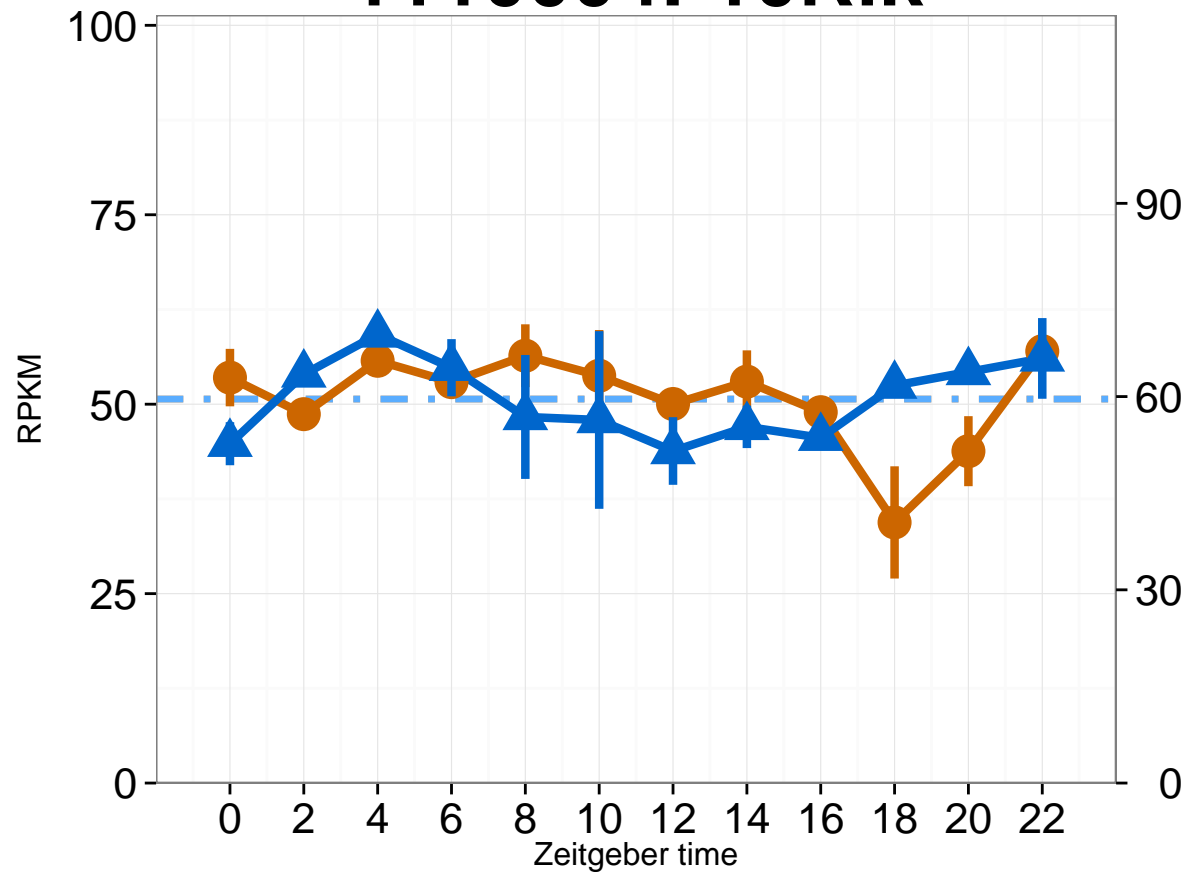

# 1110004F10Rik

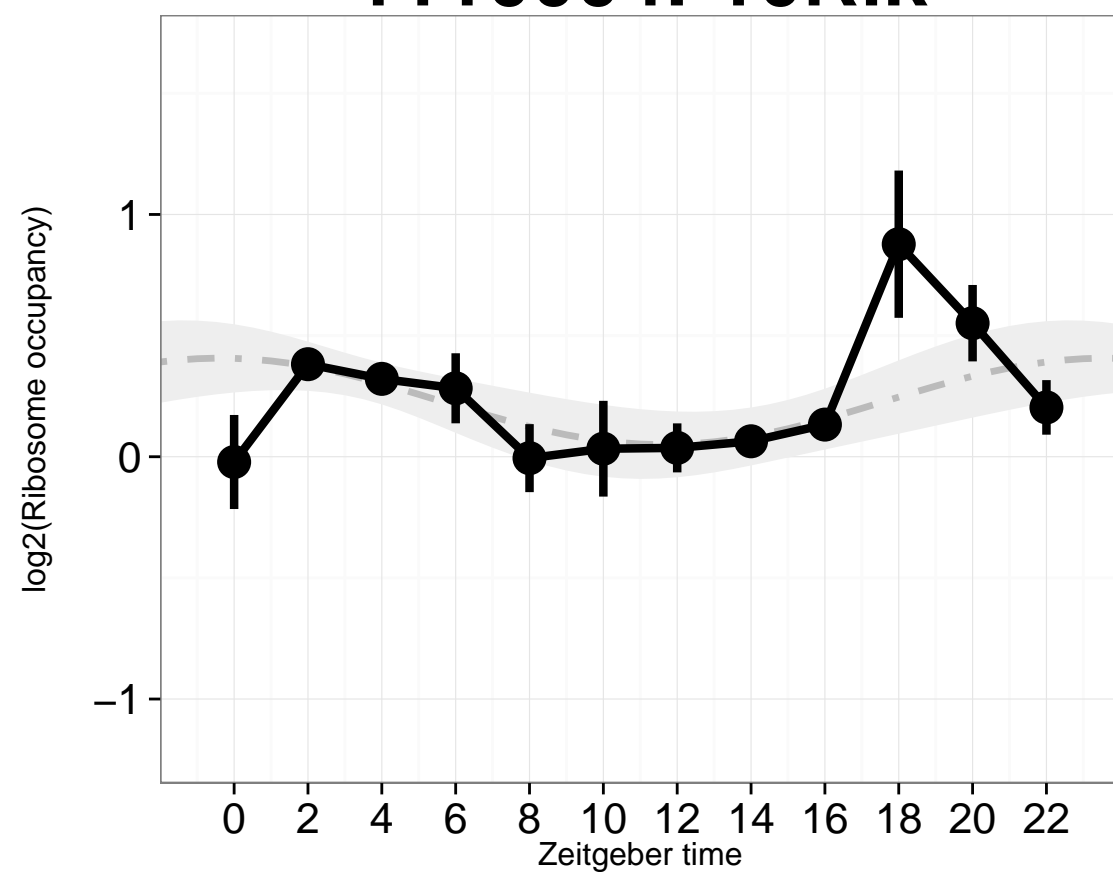

Supplement: SuppDataset_1.zip [file 1110004F10Rik_set_A.pdf › Supplemental Dataset 1/A-mRNA_nonrhyth_translation_nonrhyth/1110004F10Rik_set_A.pdf]

# 1110007C09Rik

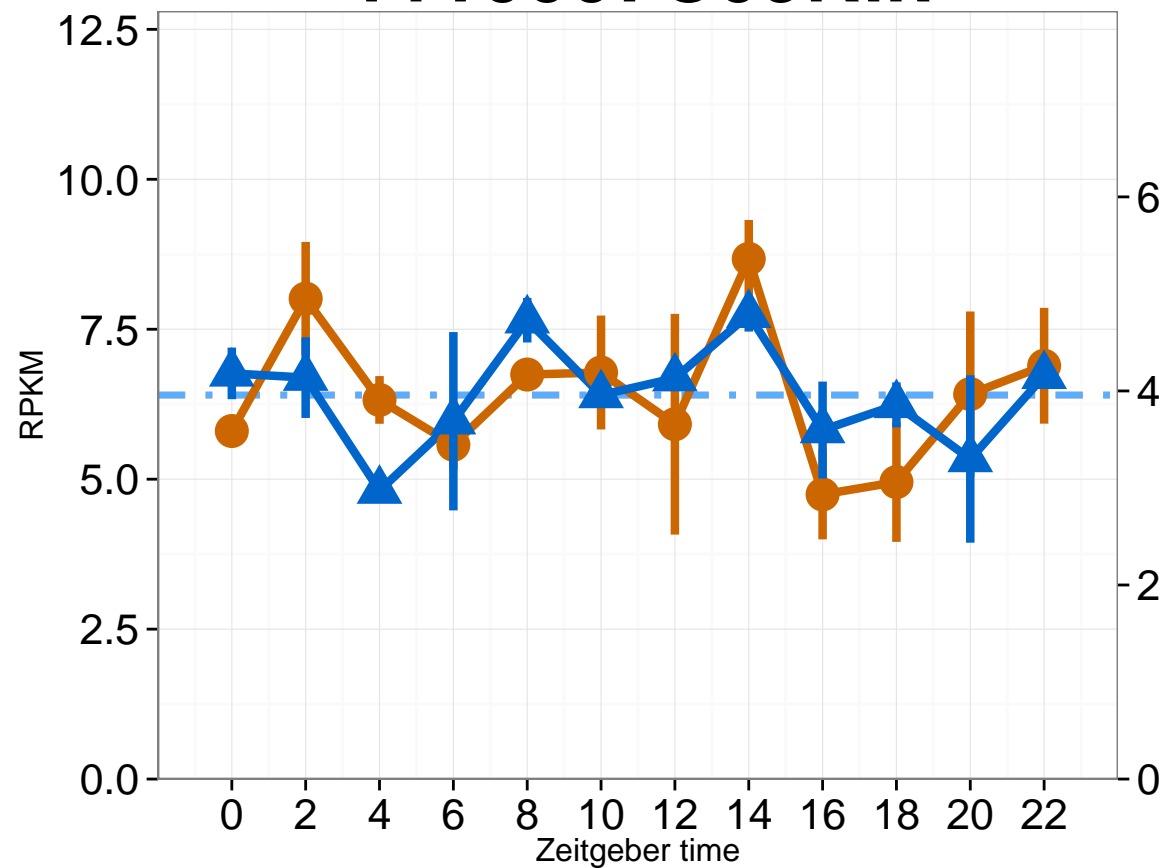

# 1110007C09Rik

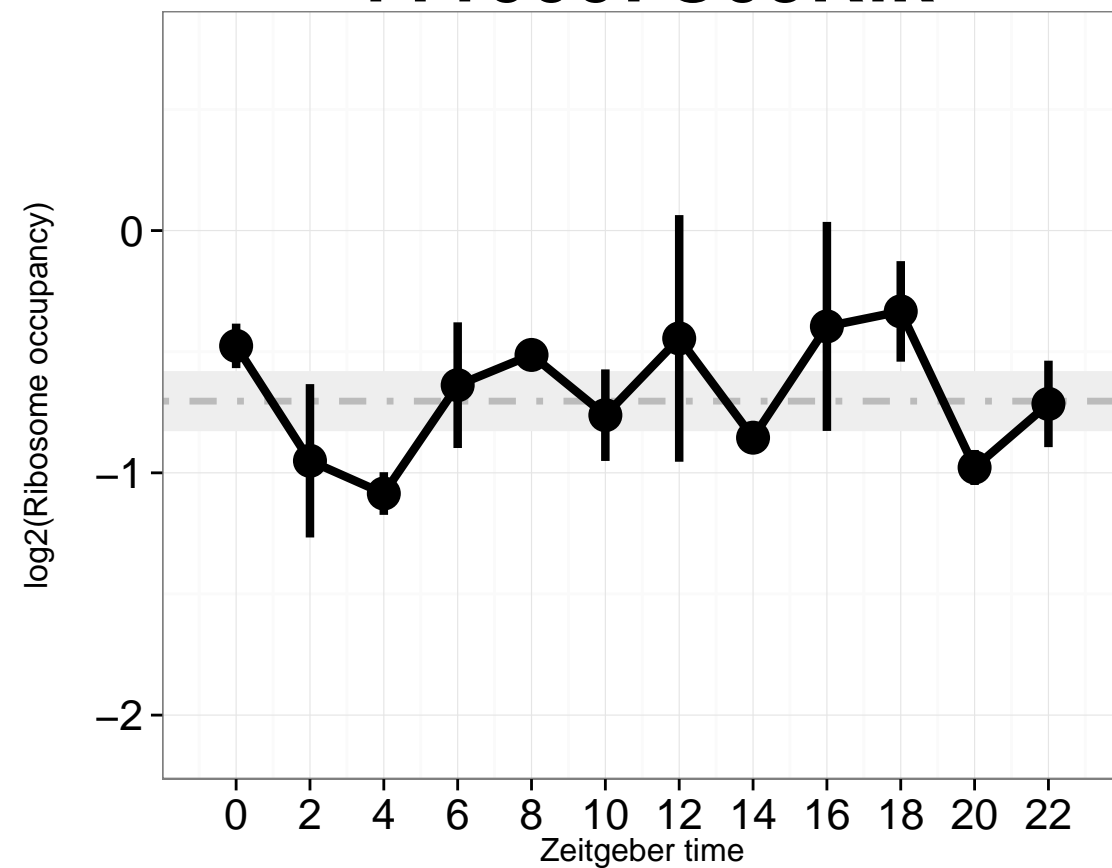

Supplement: SuppDataset_1.zip [file 1110007C09Rik_set_A.pdf › Supplemental Dataset 1/A-mRNA_nonrhyth_translation_nonrhyth/1110007C09Rik_set_A.pdf]

# 1110008F13Rik

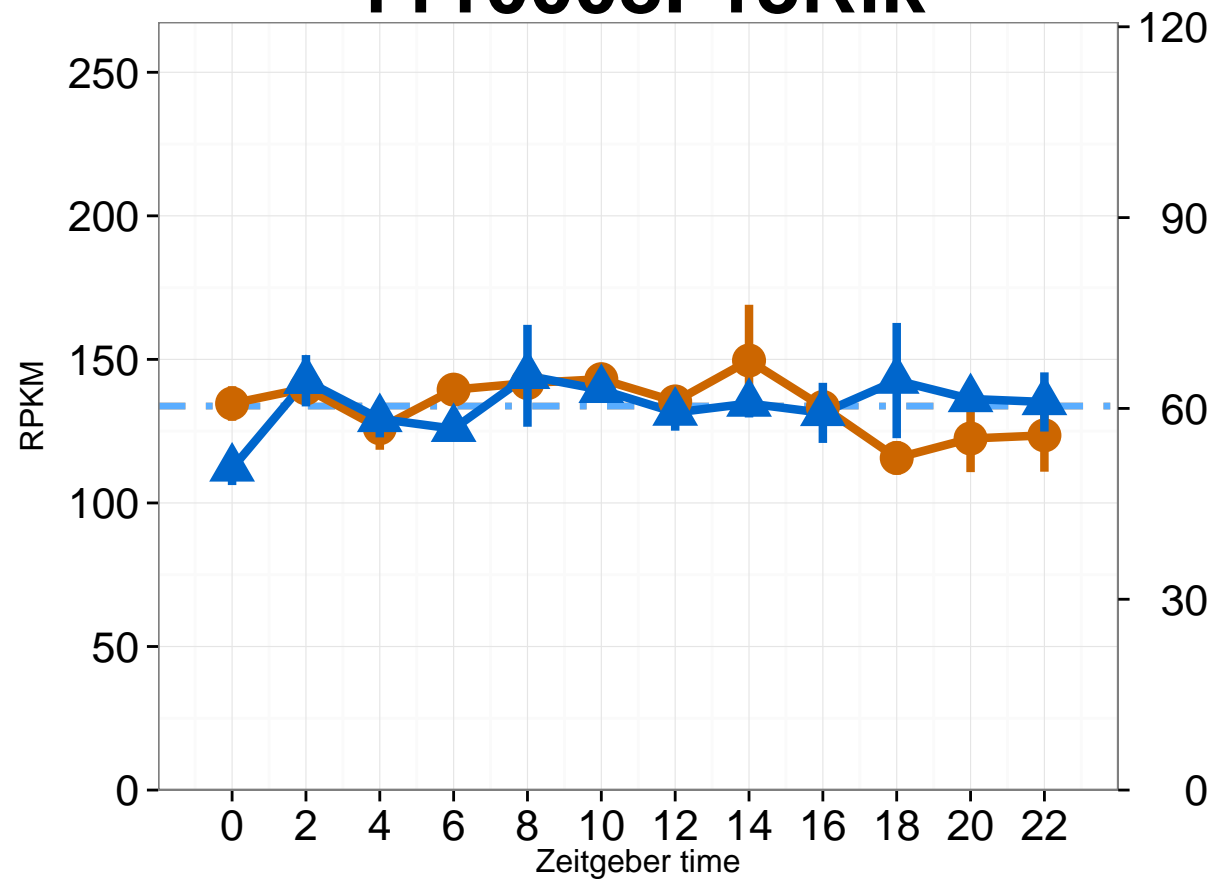

# 1110008F13Rik

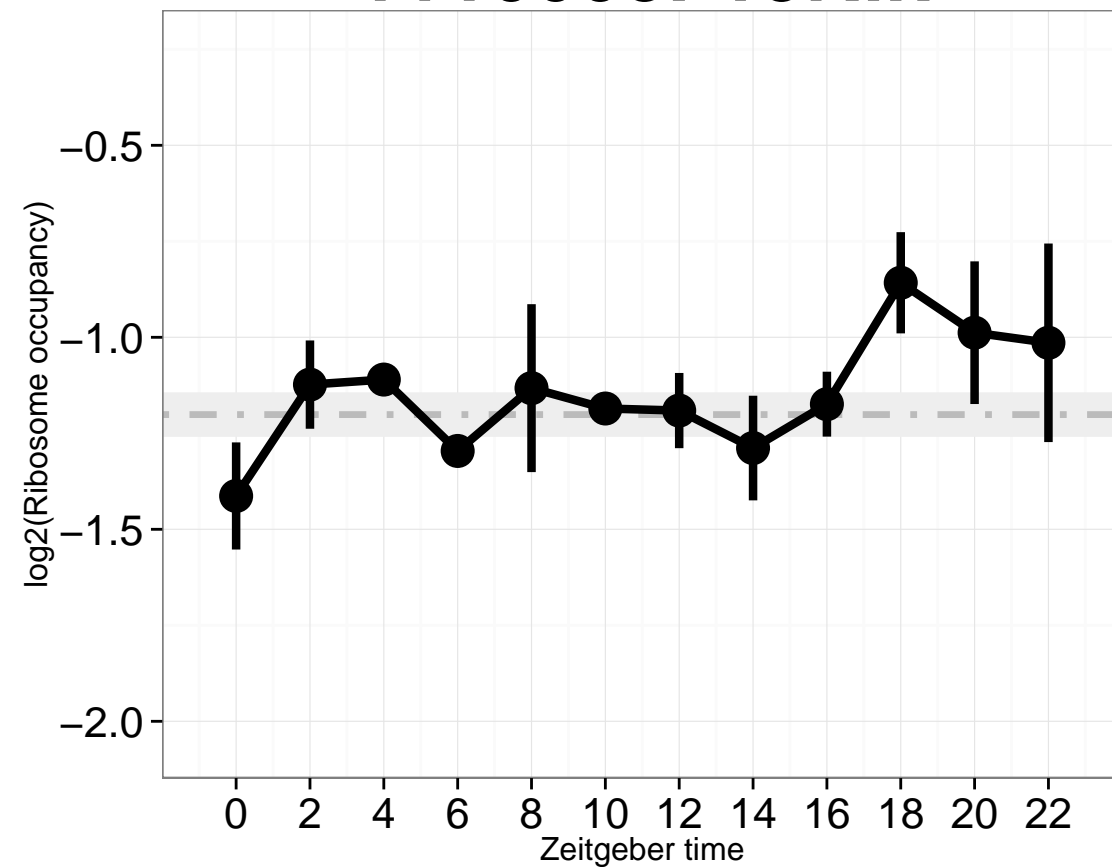

Supplement: SuppDataset_1.zip [file 1110008F13Rik_set_A.pdf › Supplemental Dataset 1/A-mRNA_nonrhyth_translation_nonrhyth/1110008F13Rik_set_A.pdf]

# 1110008J03Rik

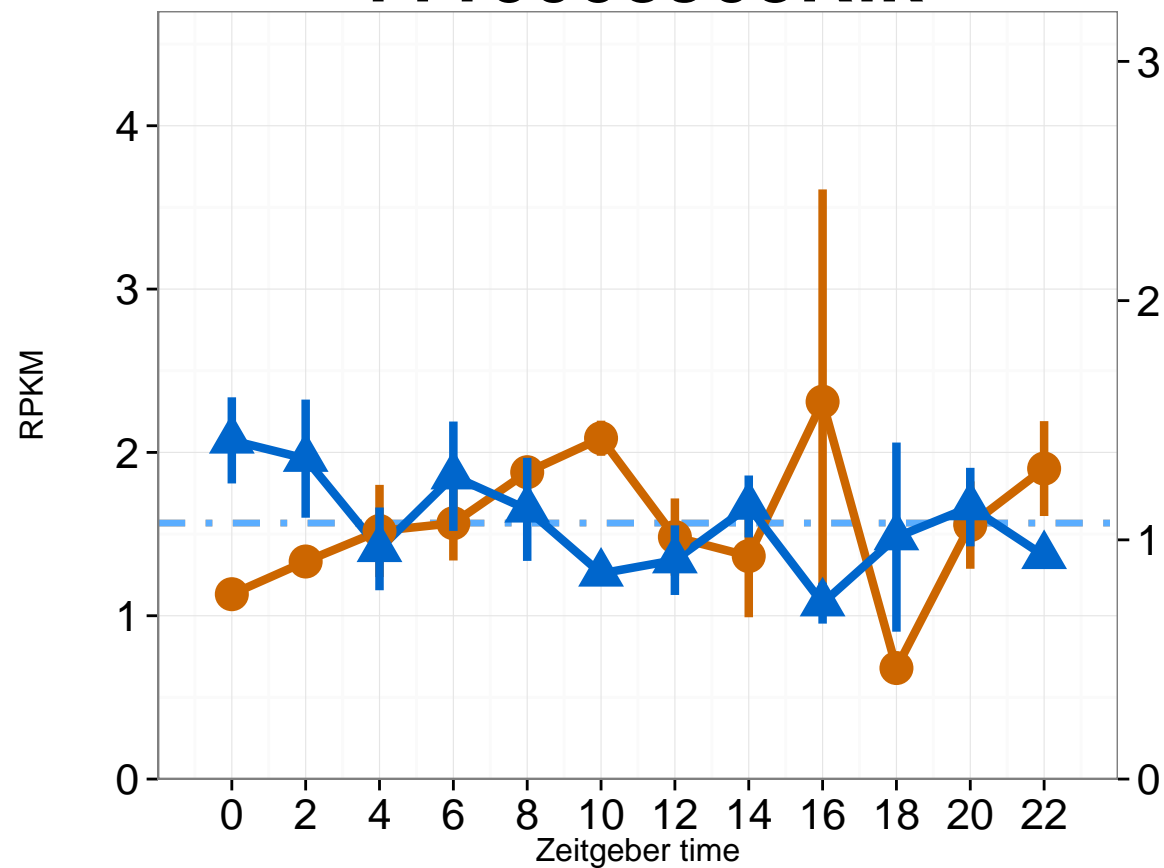

# 1110008J03Rik

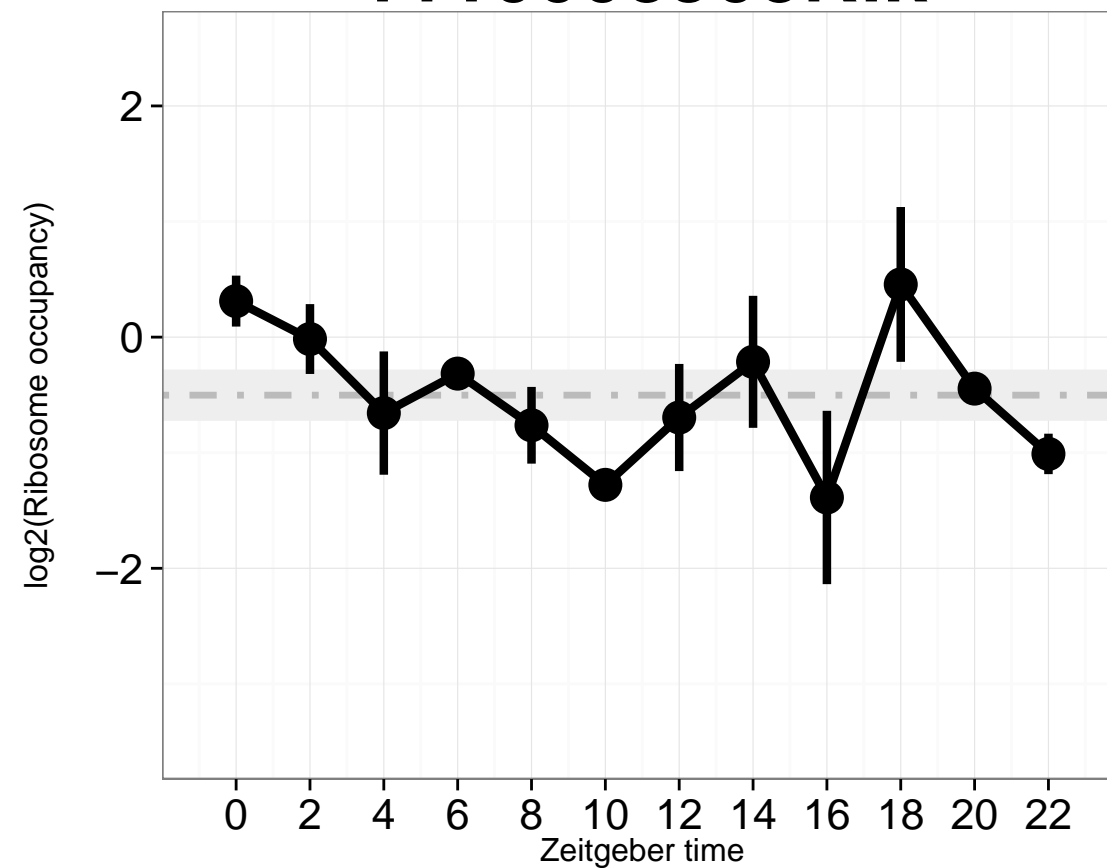

Supplement: SuppDataset_1.zip [file 1110008J03Rik_set_A.pdf › Supplemental Dataset 1/A-mRNA_nonrhyth_translation_nonrhyth/1110008J03Rik_set_A.pdf]

# 1110008L16Rik

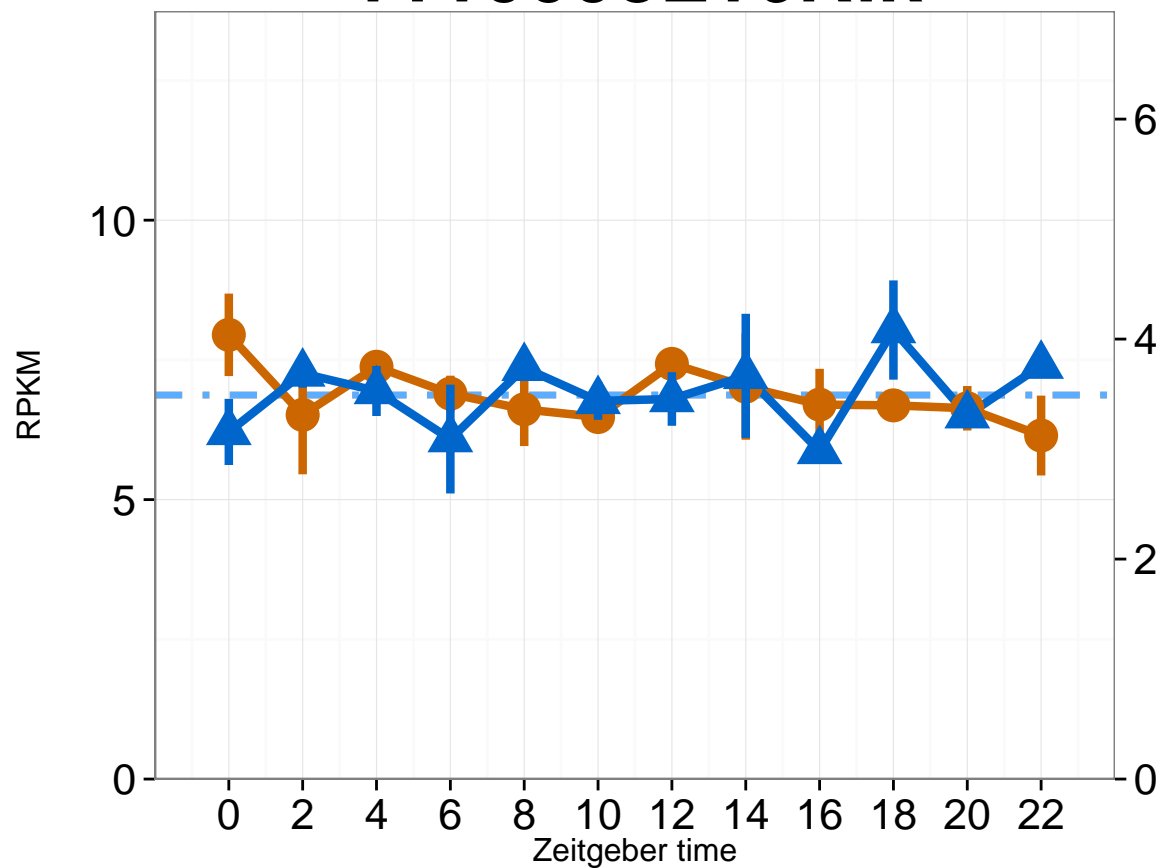

# 1110008L16Rik

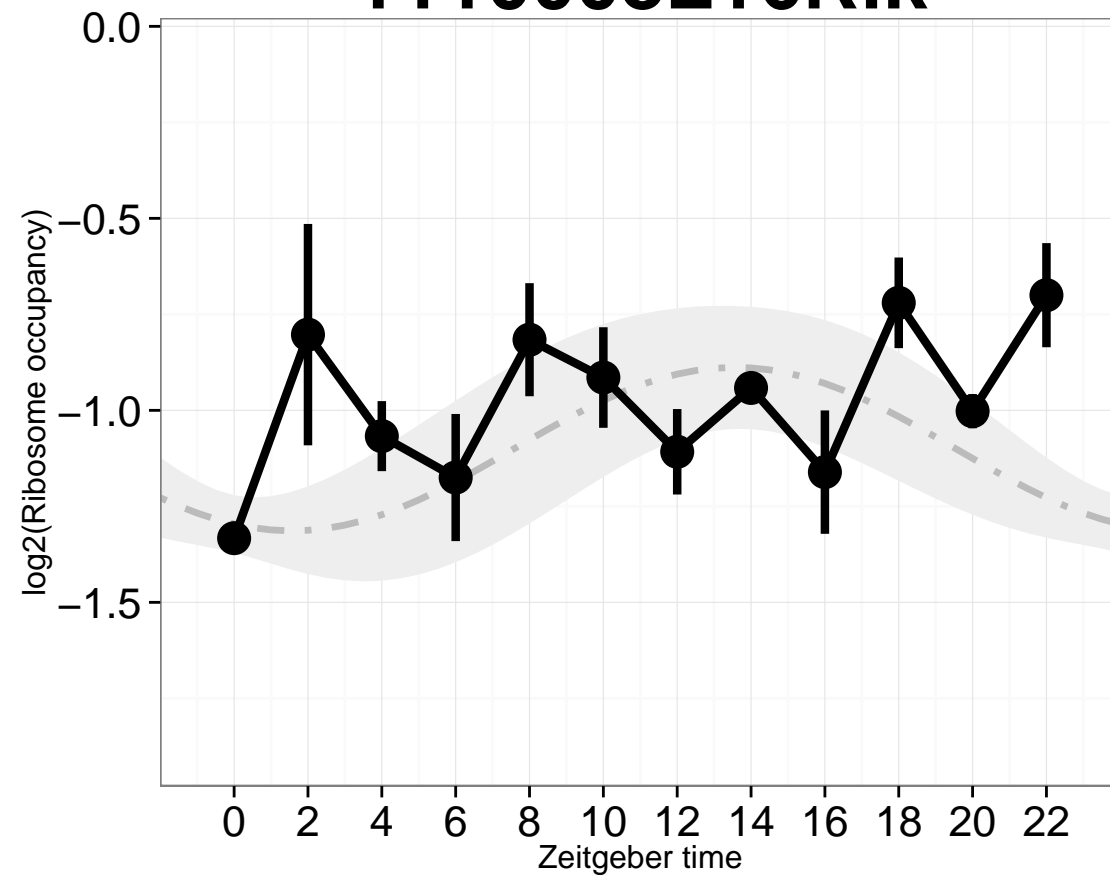

Supplement: SuppDataset_1.zip [file 1110008L16Rik_set_A.pdf › Supplemental Dataset 1/A-mRNA_nonrhyth_translation_nonrhyth/1110008L16Rik_set_A.pdf]

# 1110008P14Rik

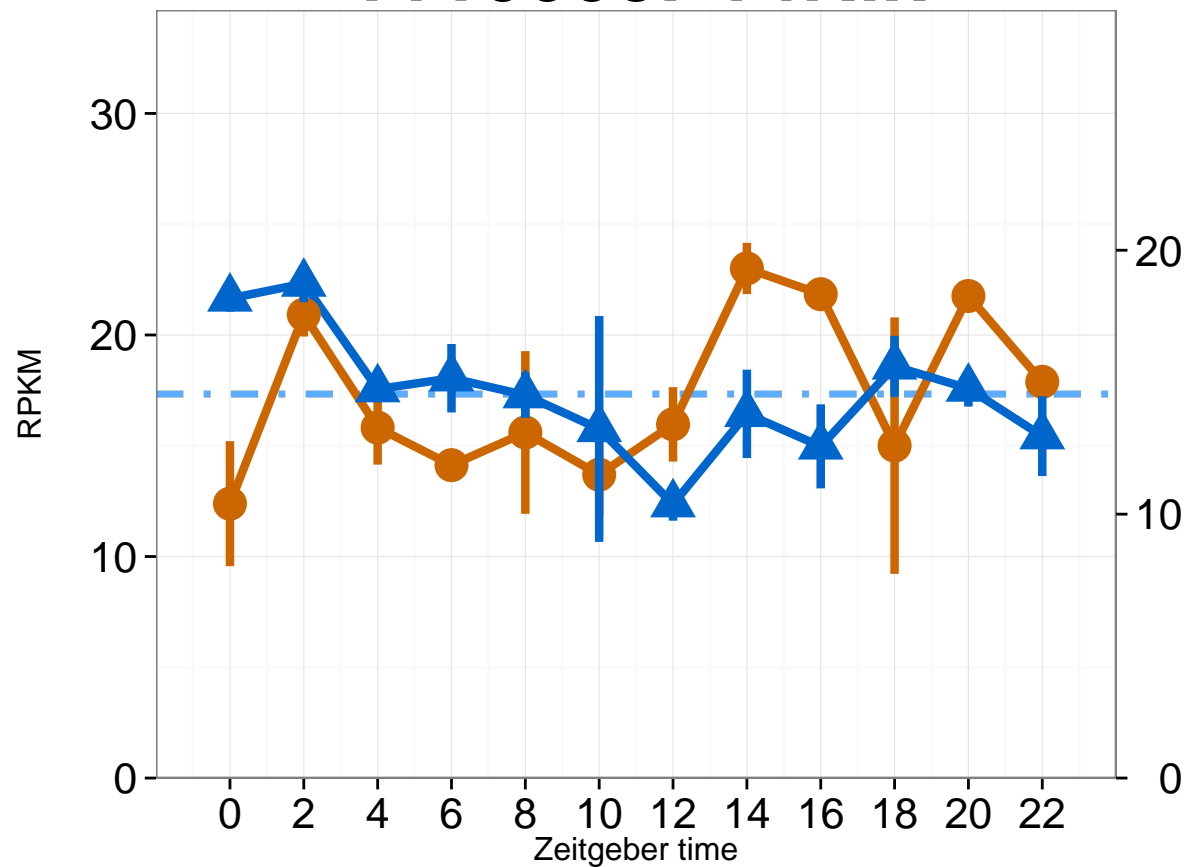

# 1110008P14Rik

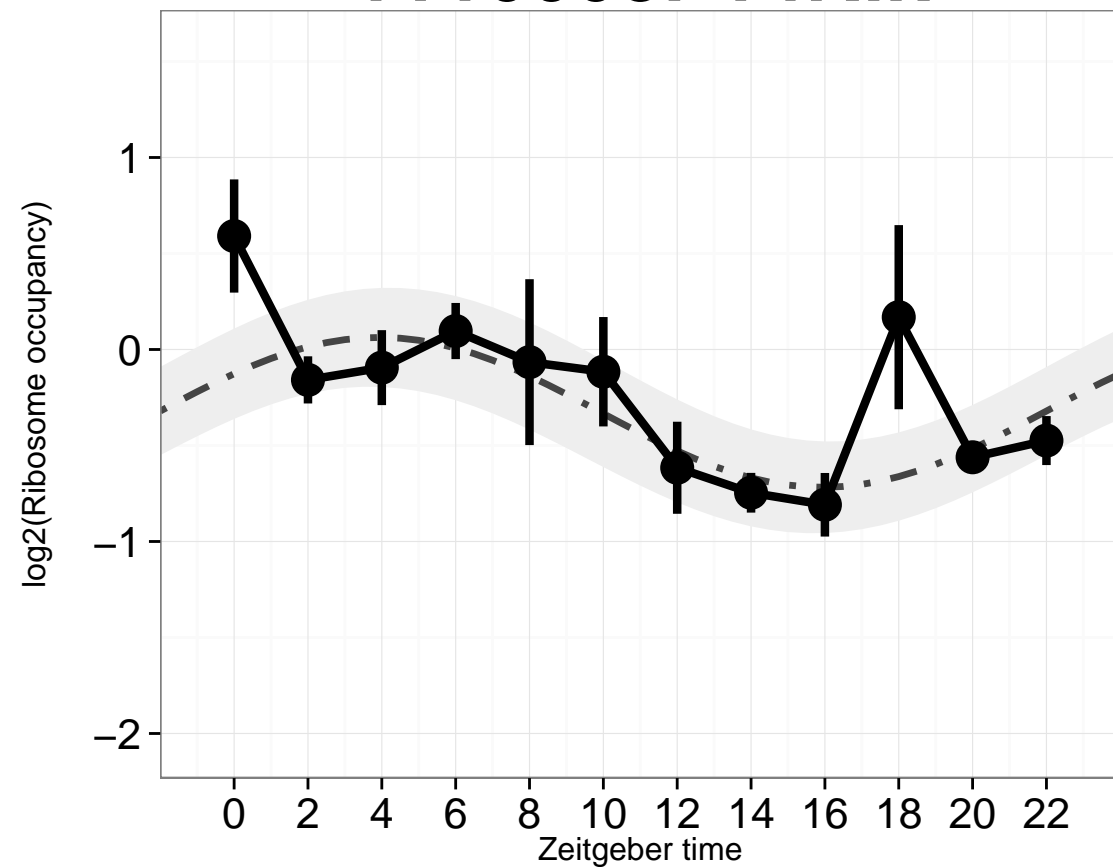

Supplement: SuppDataset_1.zip [file 1110008P14Rik_set_A.pdf › Supplemental Dataset 1/A-mRNA_nonrhyth_translation_nonrhyth/1110008P14Rik_set_A.pdf]

# 1110012L19Rik

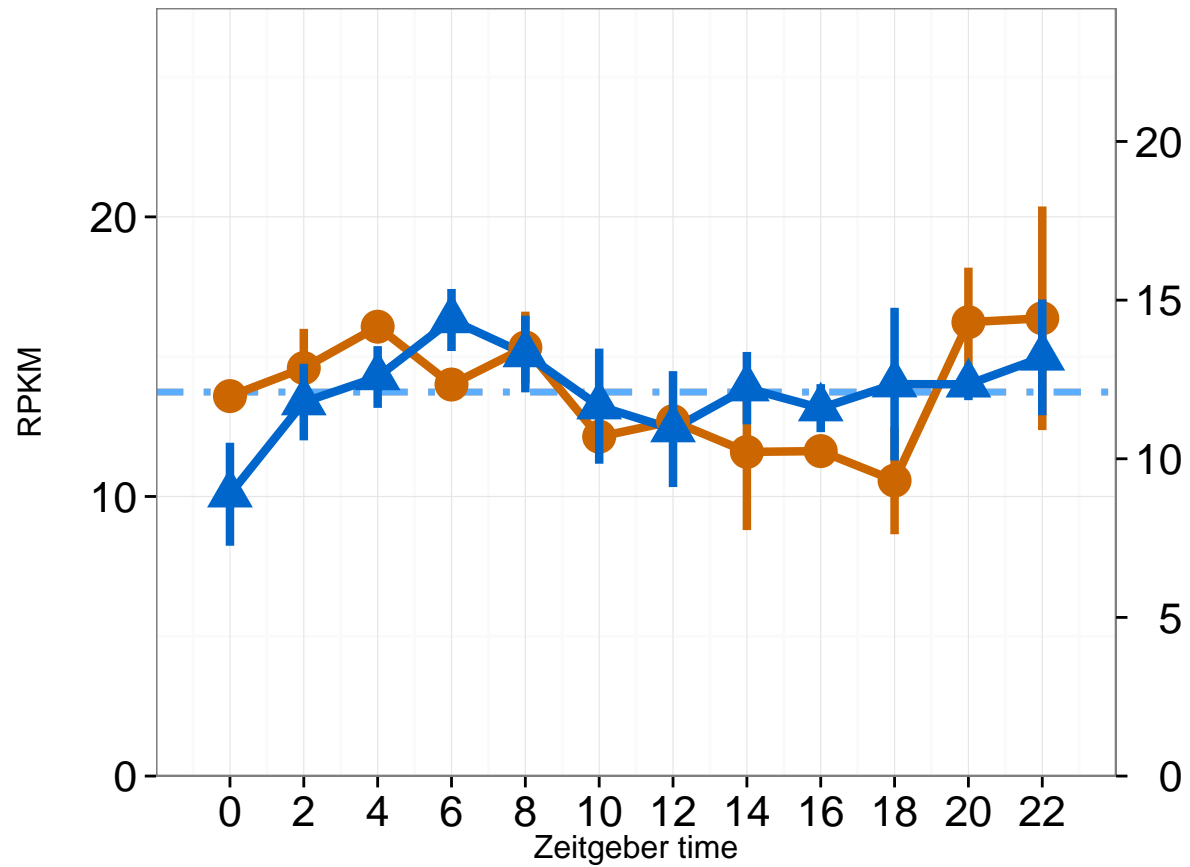

# 1110012L19Rik

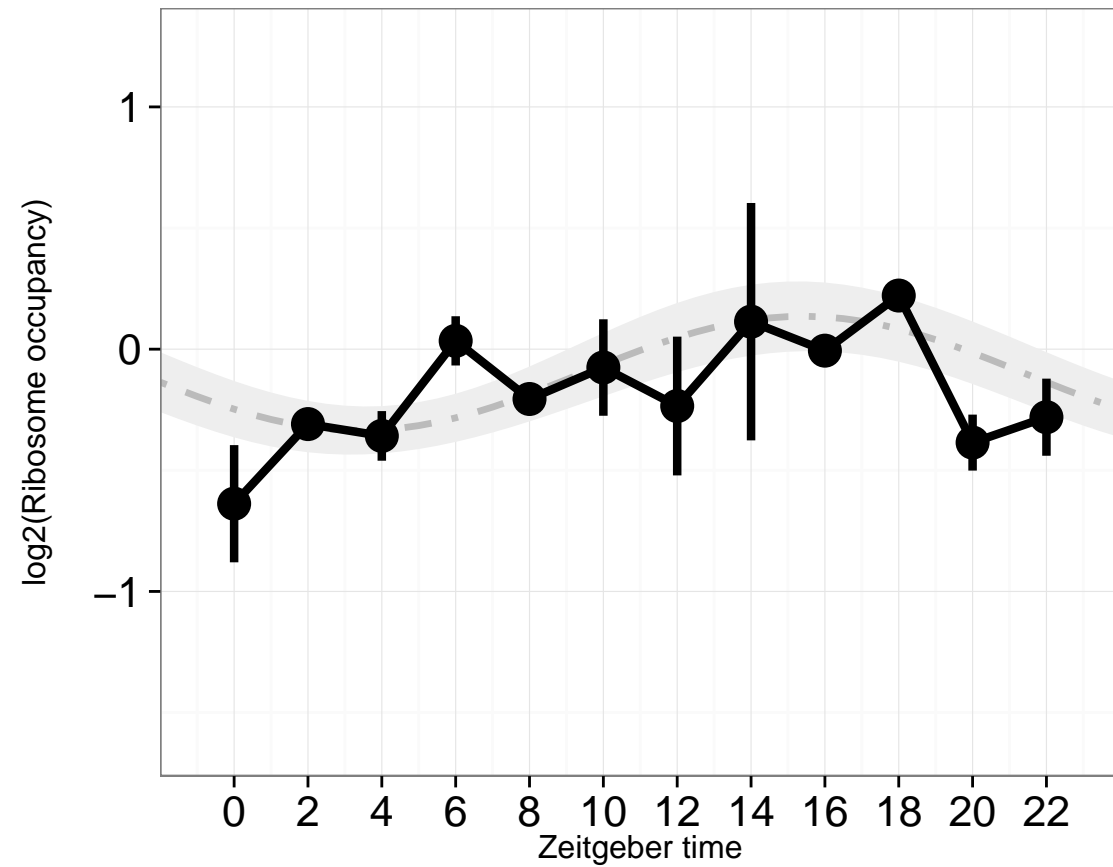

Supplement: SuppDataset_1.zip [file 1110012L19Rik_set_A.pdf › Supplemental Dataset 1/A-mRNA_nonrhyth_translation_nonrhyth/1110012L19Rik_set_A.pdf]

# 1110032A03Rik

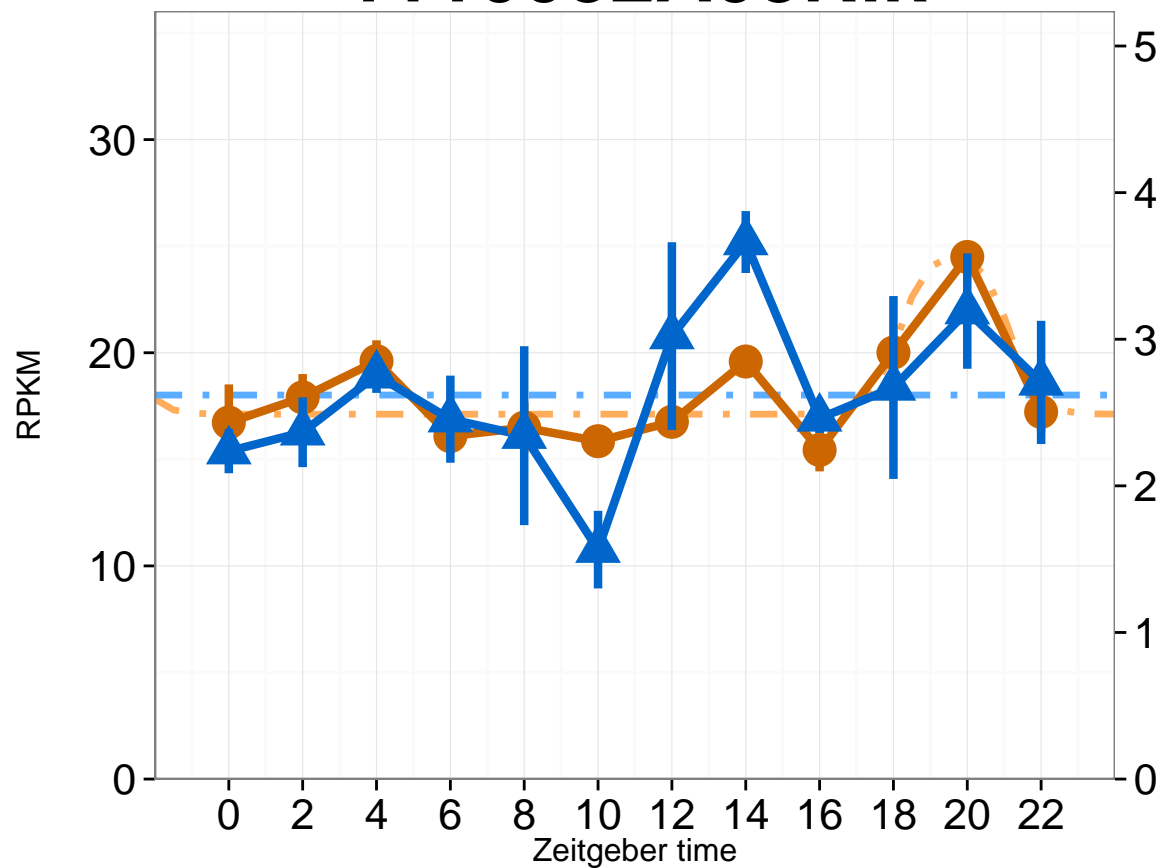

# 1110032A03Rik

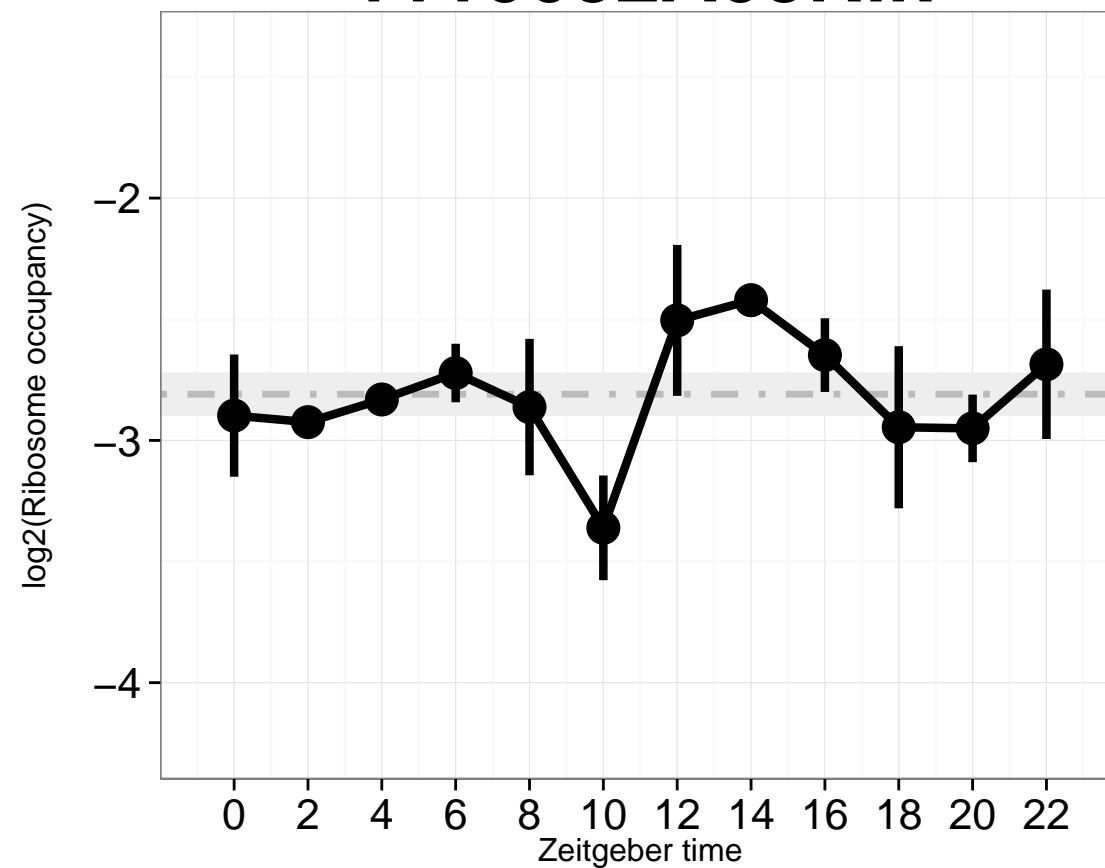

Supplement: SuppDataset_1.zip [file 1110032A03Rik_set_A.pdf › Supplemental Dataset 1/A-mRNA_nonrhyth_translation_nonrhyth/1110032A03Rik_set_A.pdf]

# 1110034G24Rik

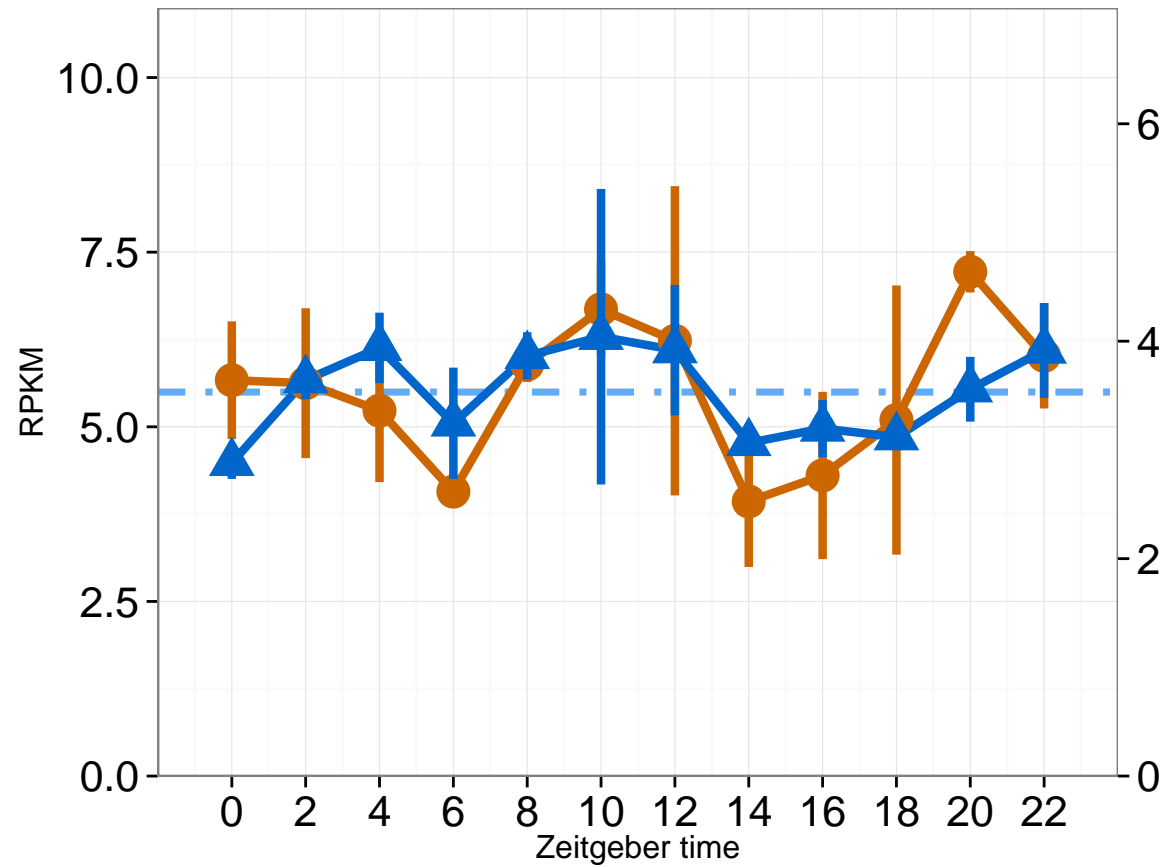

# 1110034G24Rik

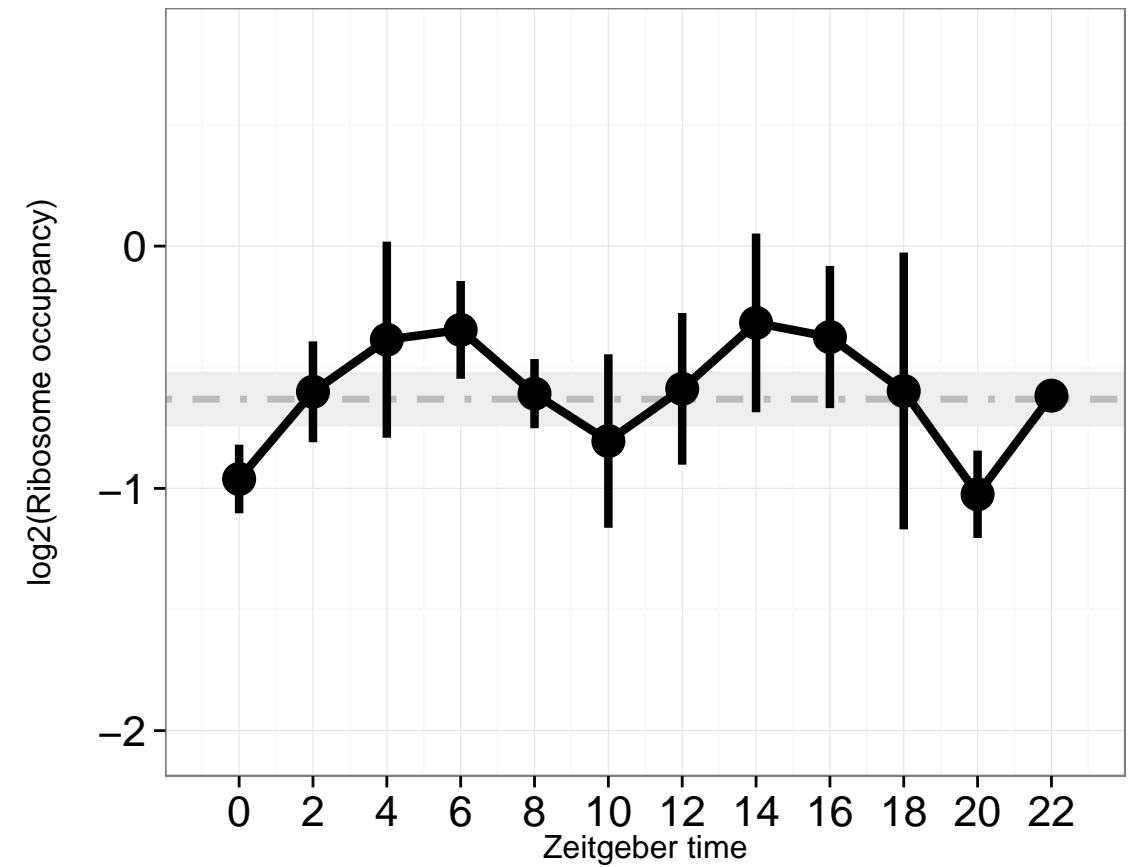

Supplement: SuppDataset_1.zip [file 1110034G24Rik_set_A.pdf › Supplemental Dataset 1/A-mRNA_nonrhyth_translation_nonrhyth/1110034G24Rik_set_A.pdf]

# 1110037F02Rik

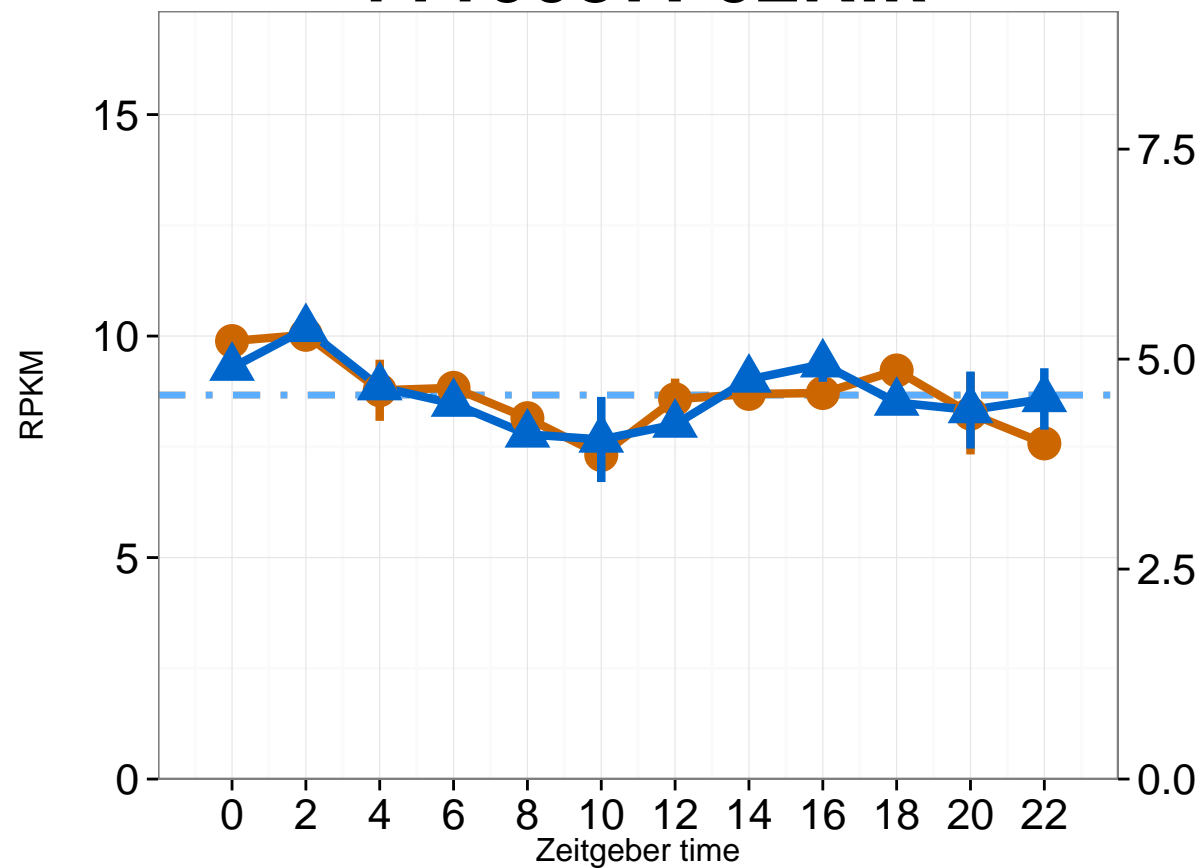

# 1110037F02Rik

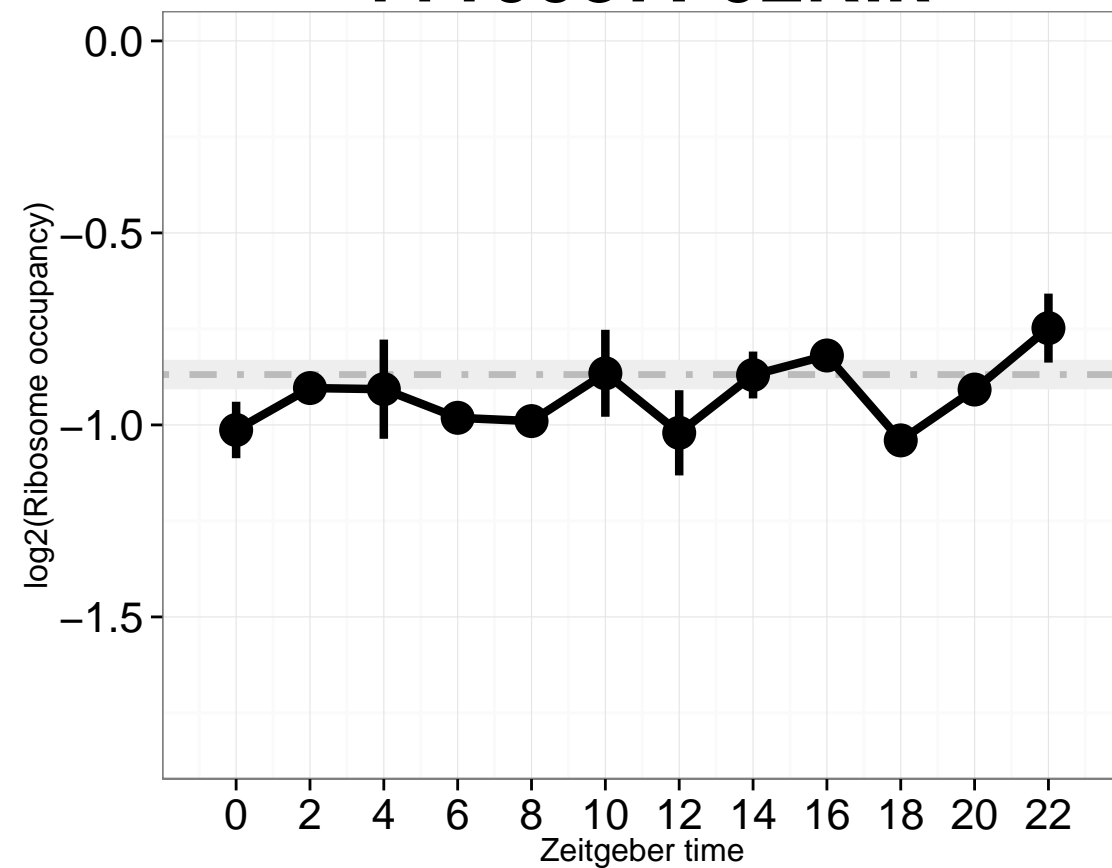

Supplement: SuppDataset_1.zip [file 1110037F02Rik_set_A.pdf › Supplemental Dataset 1/A-mRNA_nonrhyth_translation_nonrhyth/1110037F02Rik_set_A.pdf]

# 1110038F14Rik

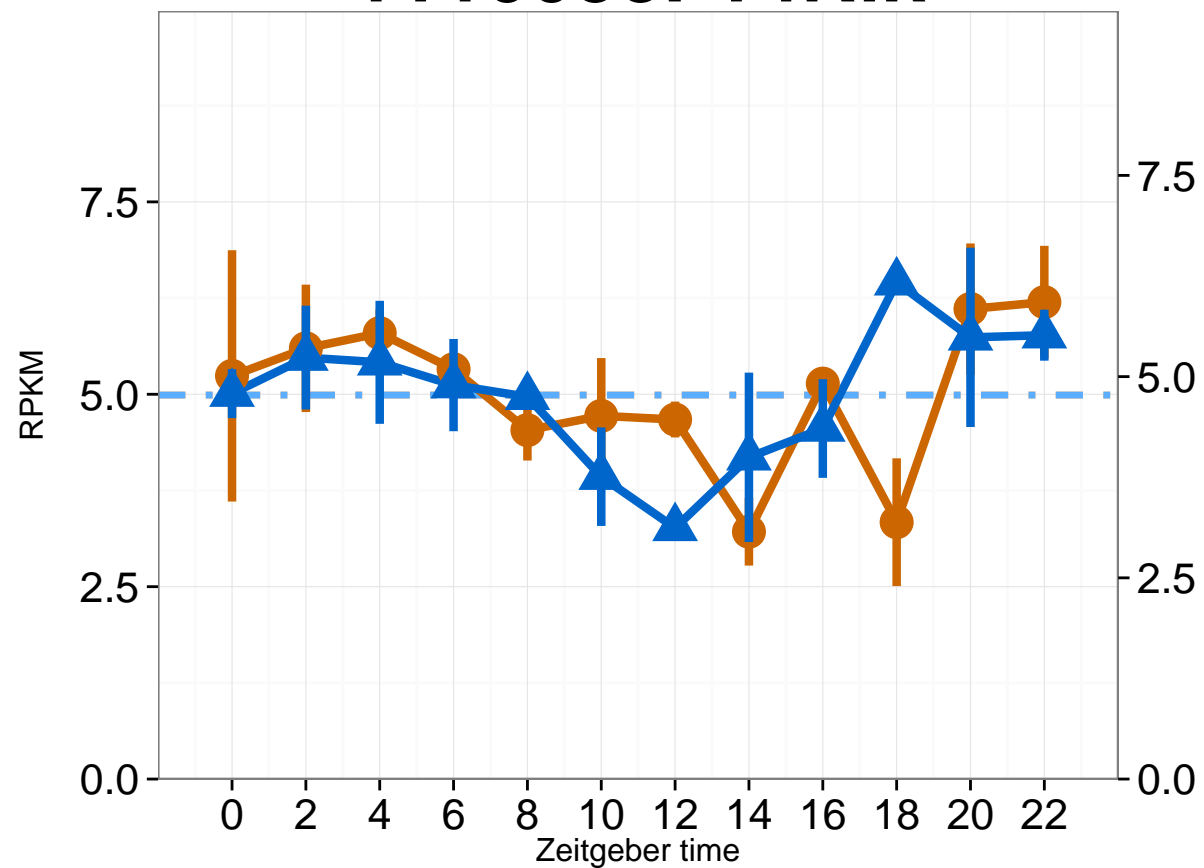

# 1110038F14Rik

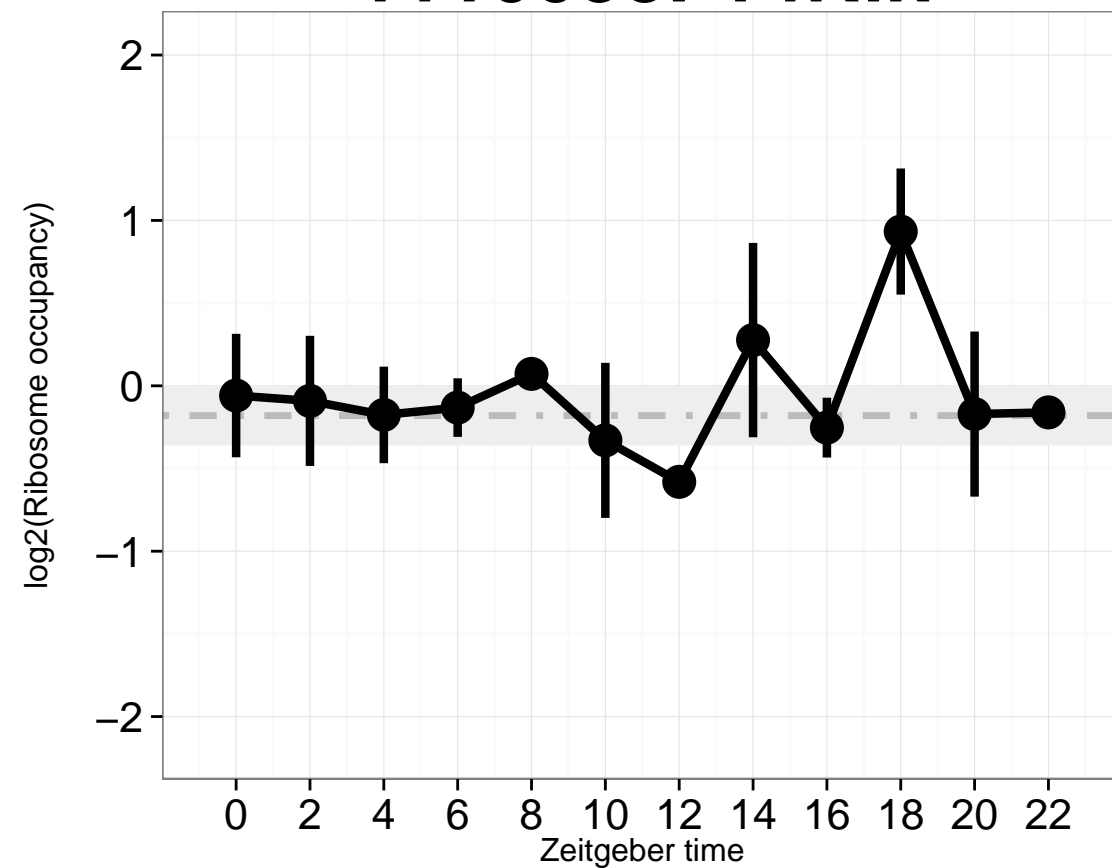

Supplement: SuppDataset_1.zip [file 1110038F14Rik_set_A.pdf › Supplemental Dataset 1/A-mRNA_nonrhyth_translation_nonrhyth/1110038F14Rik_set_A.pdf]

# 1110051M20Rik

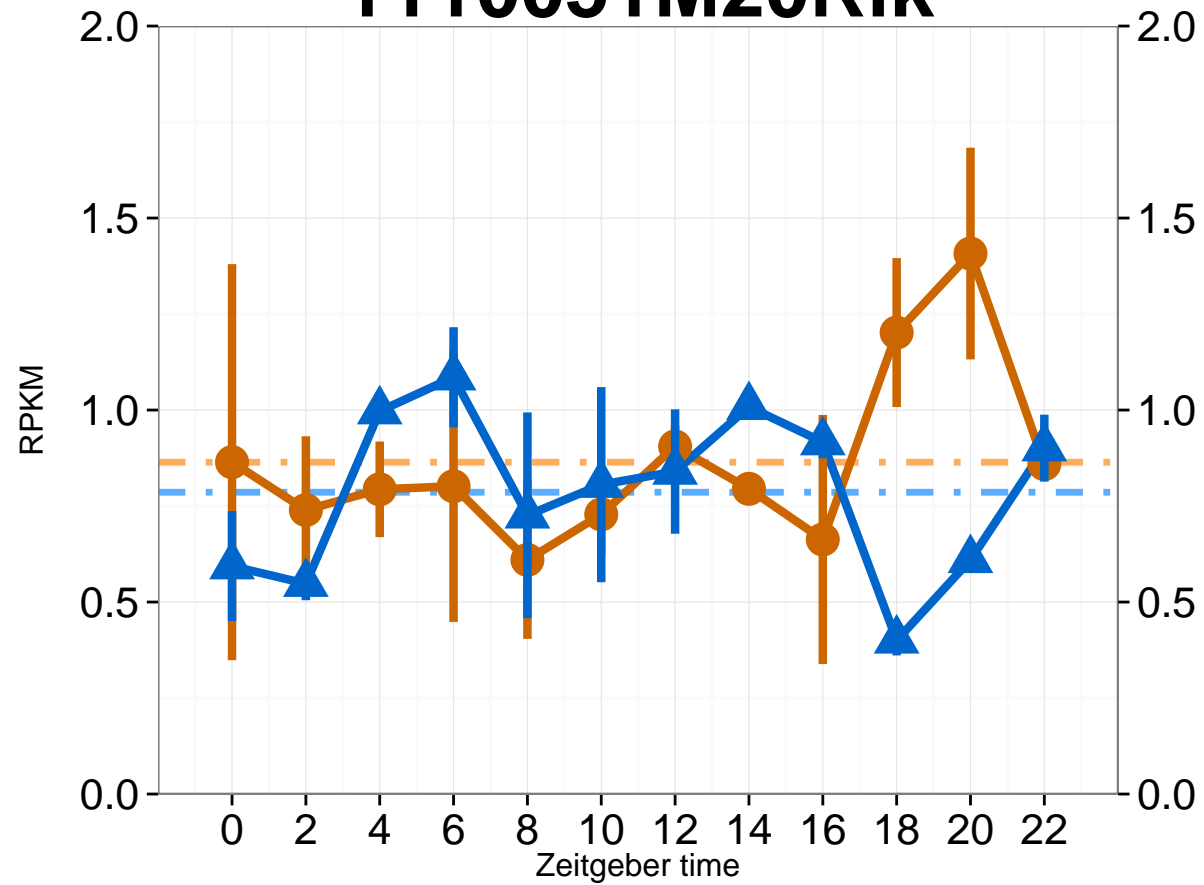

# 1110051M20Rik

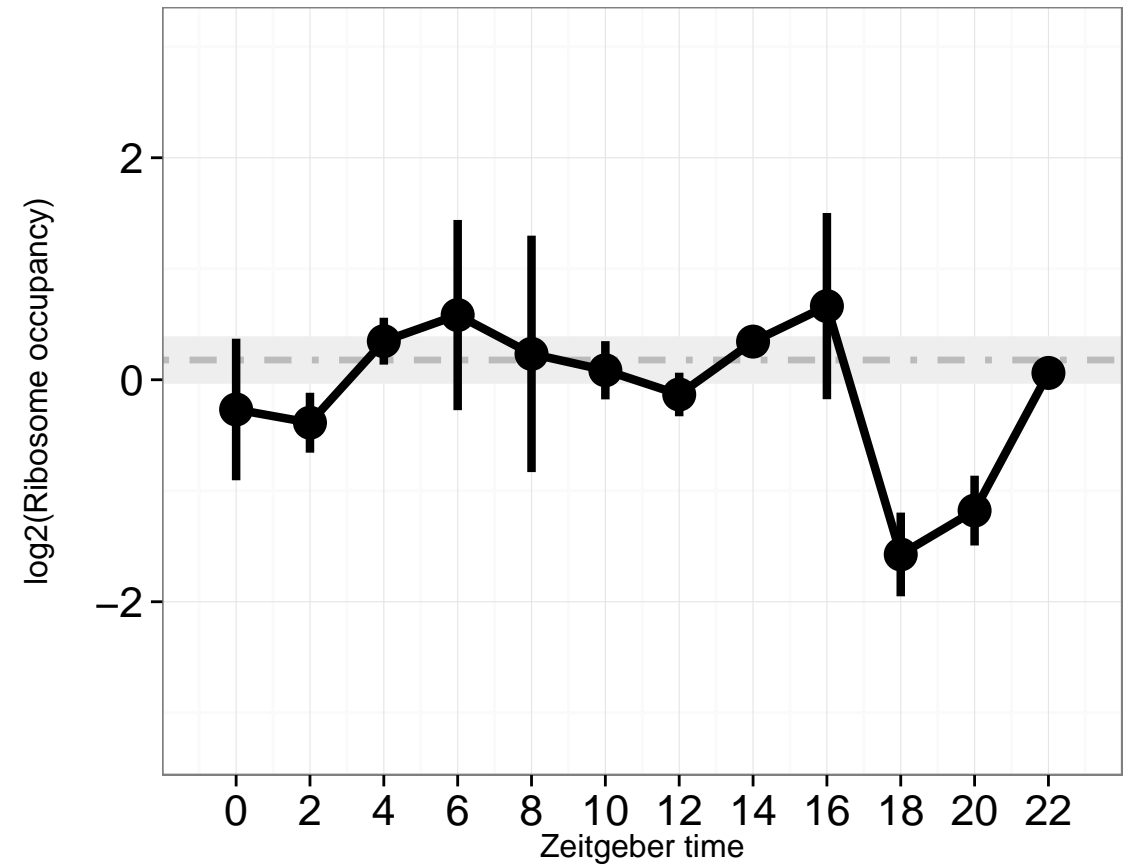

Supplement: SuppDataset_1.zip [file 1110051M20Rik_set_A.pdf › Supplemental Dataset 1/A-mRNA_nonrhyth_translation_nonrhyth/1110051M20Rik_set_A.pdf]

# 1110059G10Rik

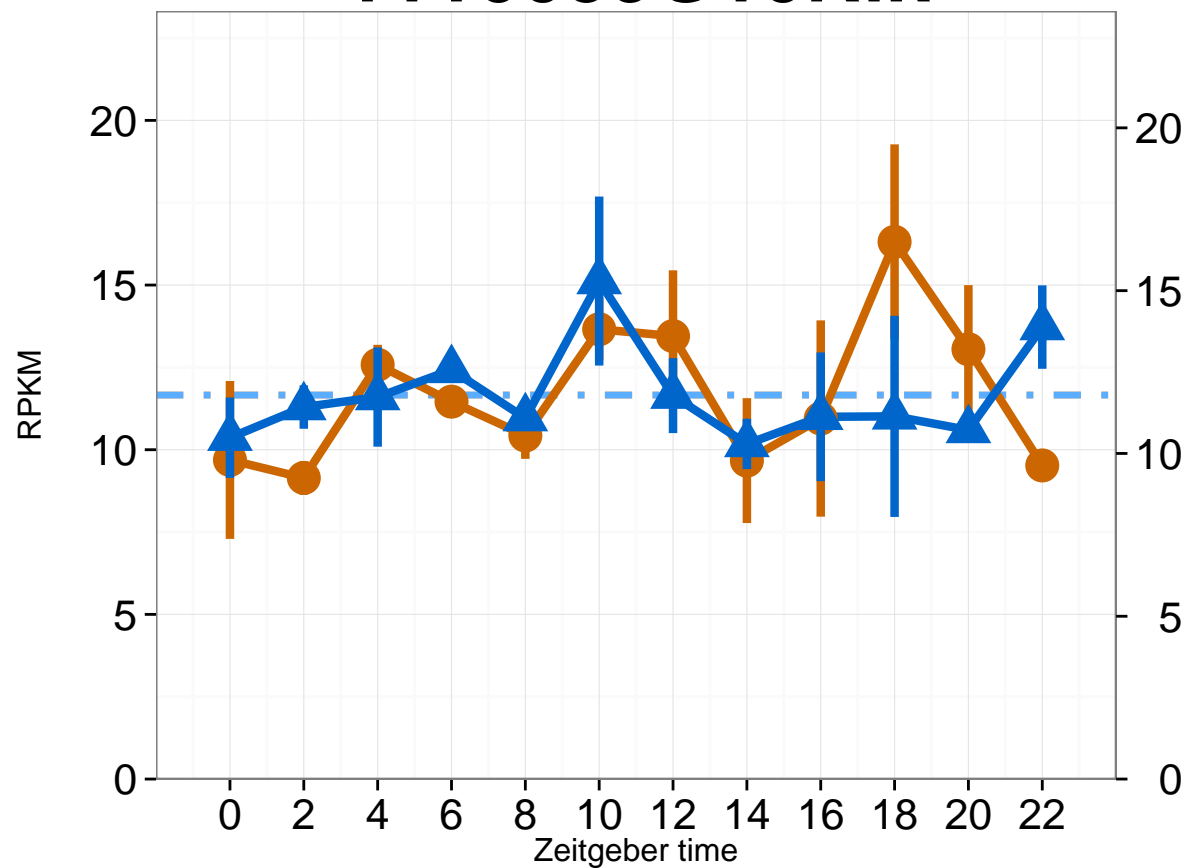

# 1110059G10Rik

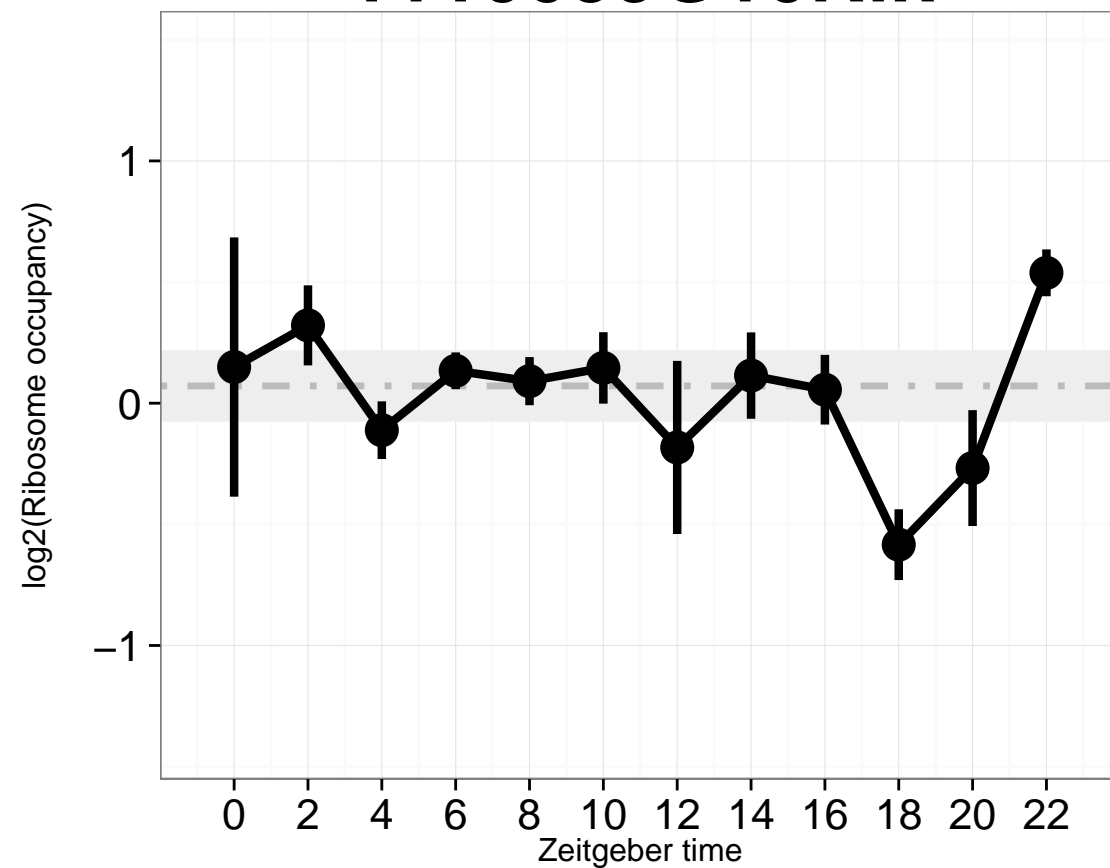

Supplement: SuppDataset_1.zip [file 1110059G10Rik_set_A.pdf › Supplemental Dataset 1/A-mRNA_nonrhyth_translation_nonrhyth/1110059G10Rik_set_A.pdf]

**1110065P20Rik**

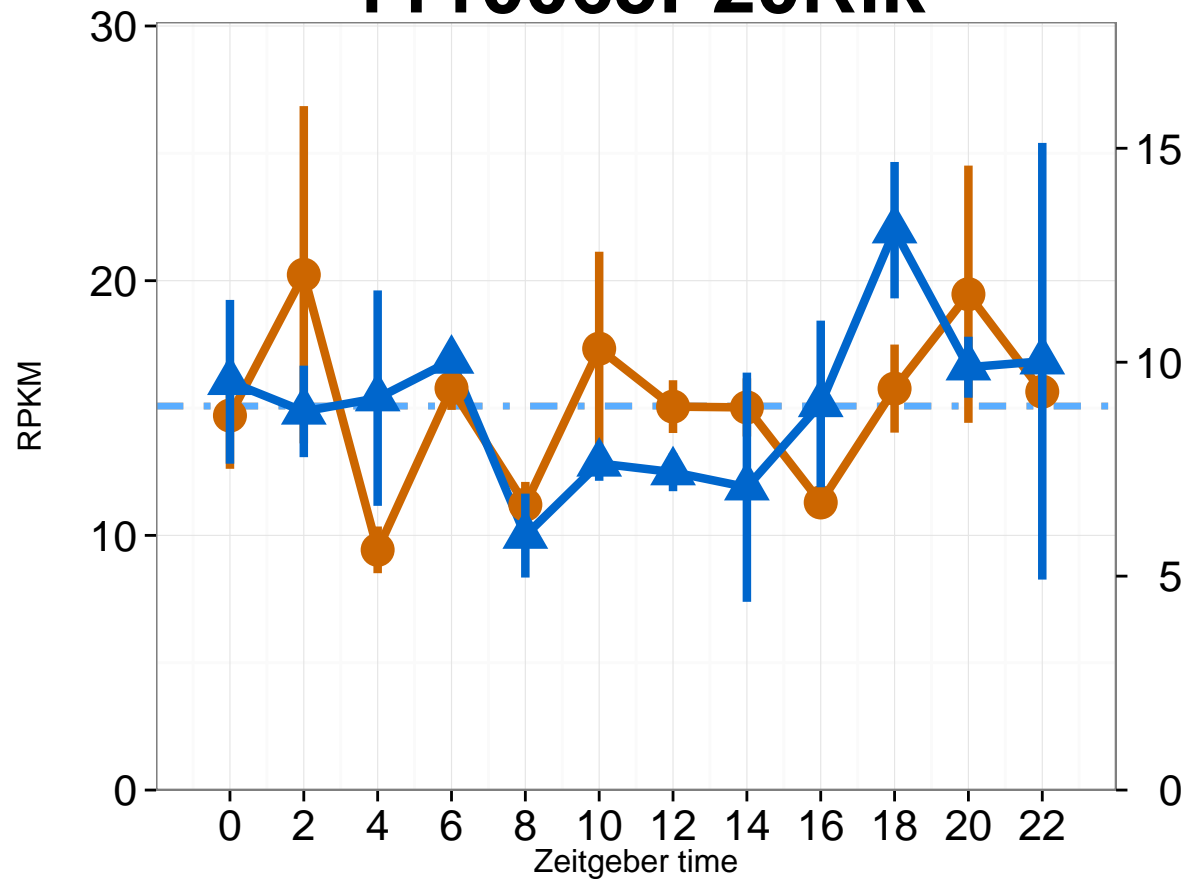

**1110065P20Rik**

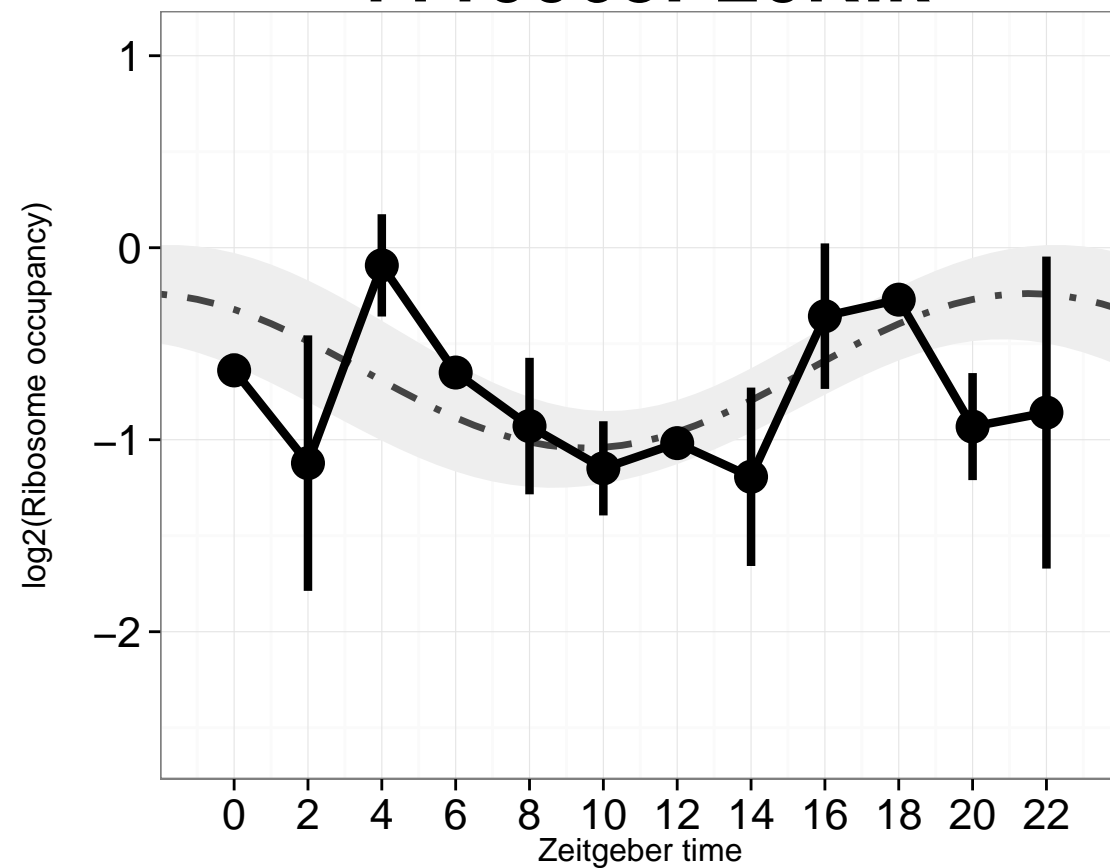

Supplement: SuppDataset_1.zip [file 1110065P20Rik_set_A.pdf › Supplemental Dataset 1/A-mRNA_nonrhyth_translation_nonrhyth/1110065P20Rik_set_A.pdf]

# 1190007I07Rik

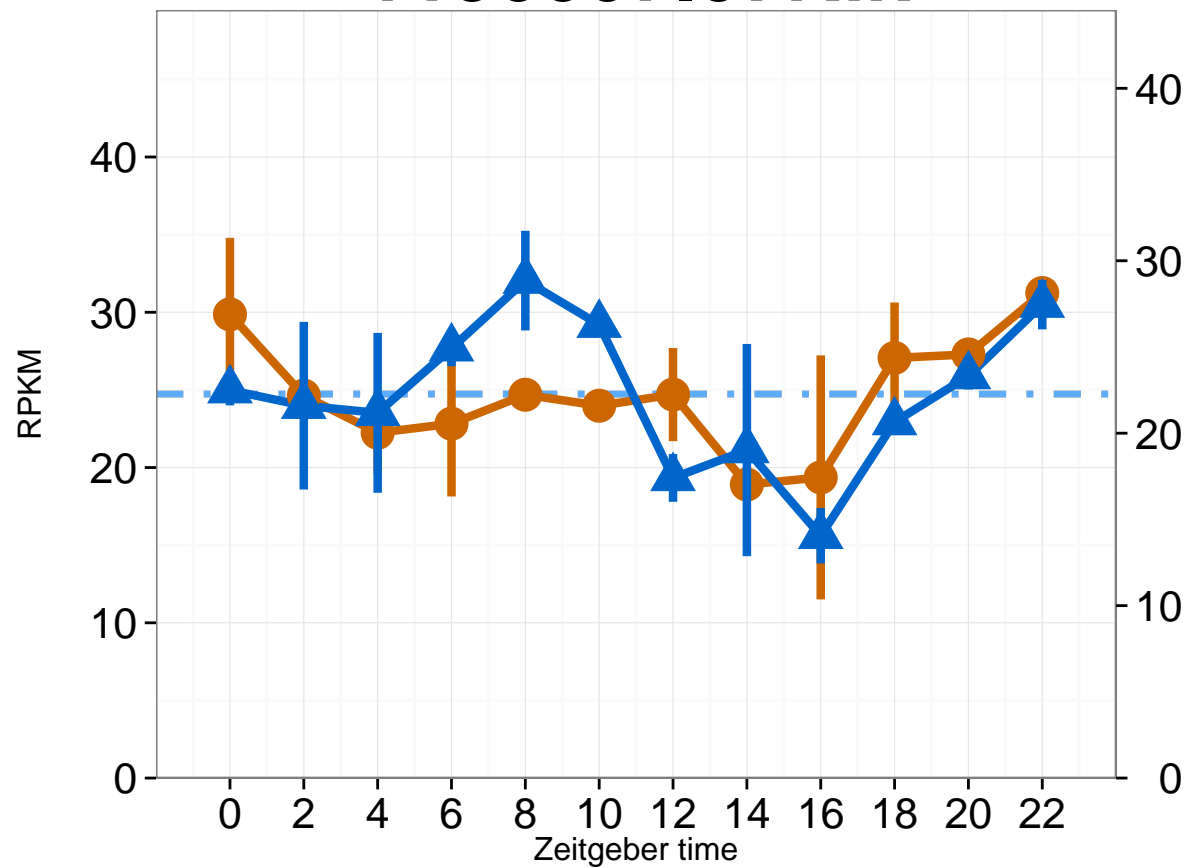

# 1190007I07Rik

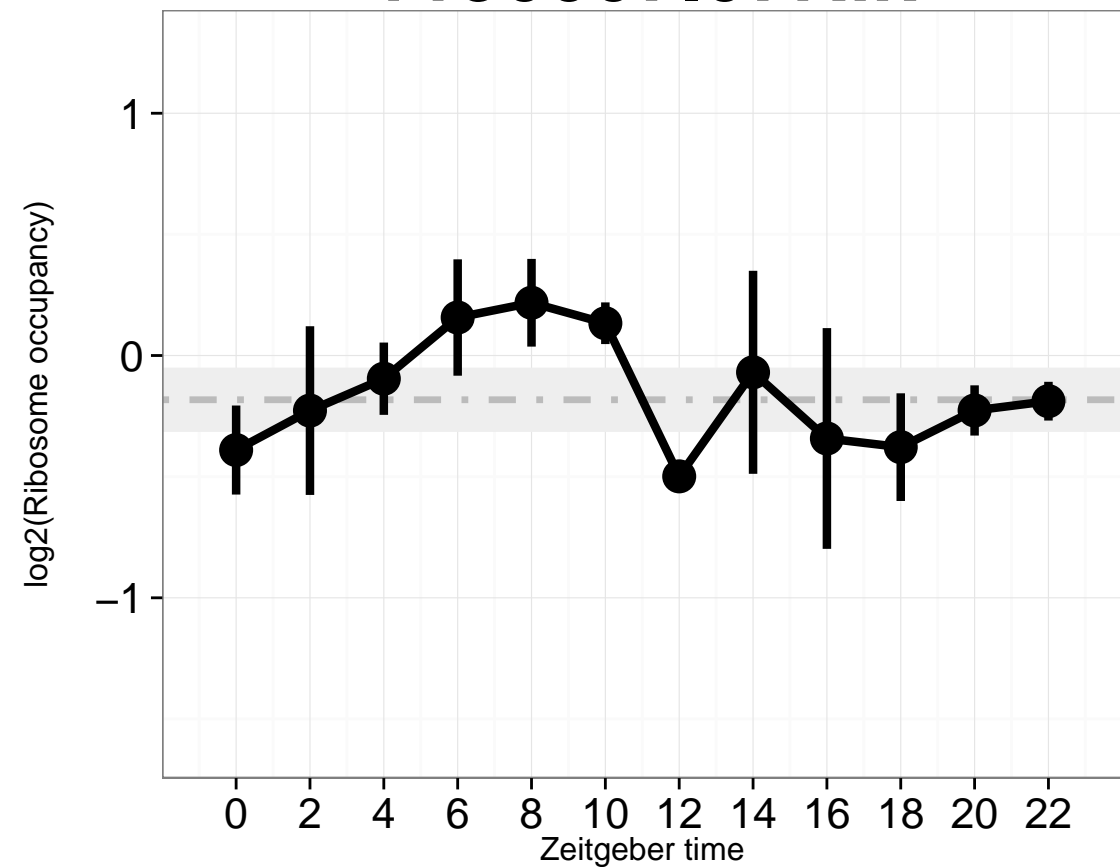

Supplement: SuppDataset_1.zip [file 1190007I07Rik_set_A.pdf › Supplemental Dataset 1/A-mRNA_nonrhyth_translation_nonrhyth/1190007I07Rik_set_A.pdf]

# 1200014J11Rik

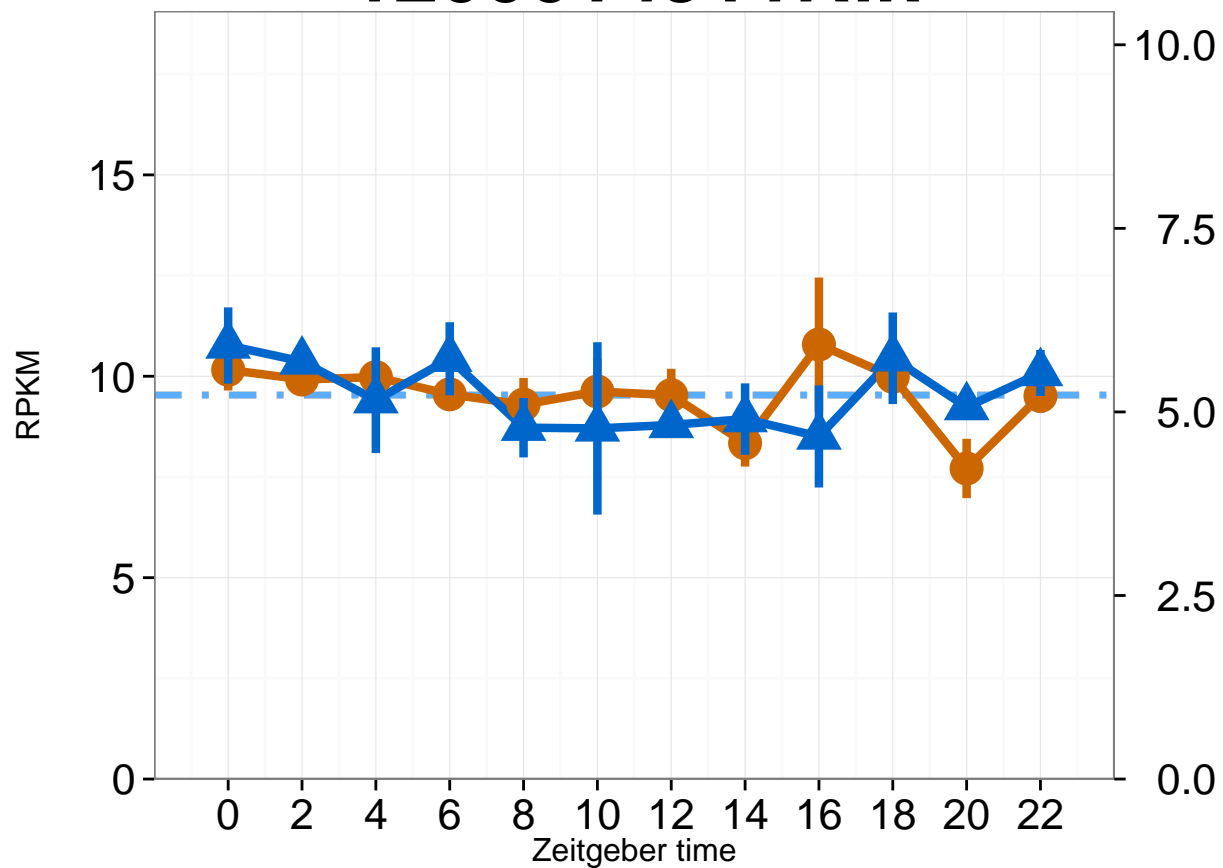

# 1200014J11Rik

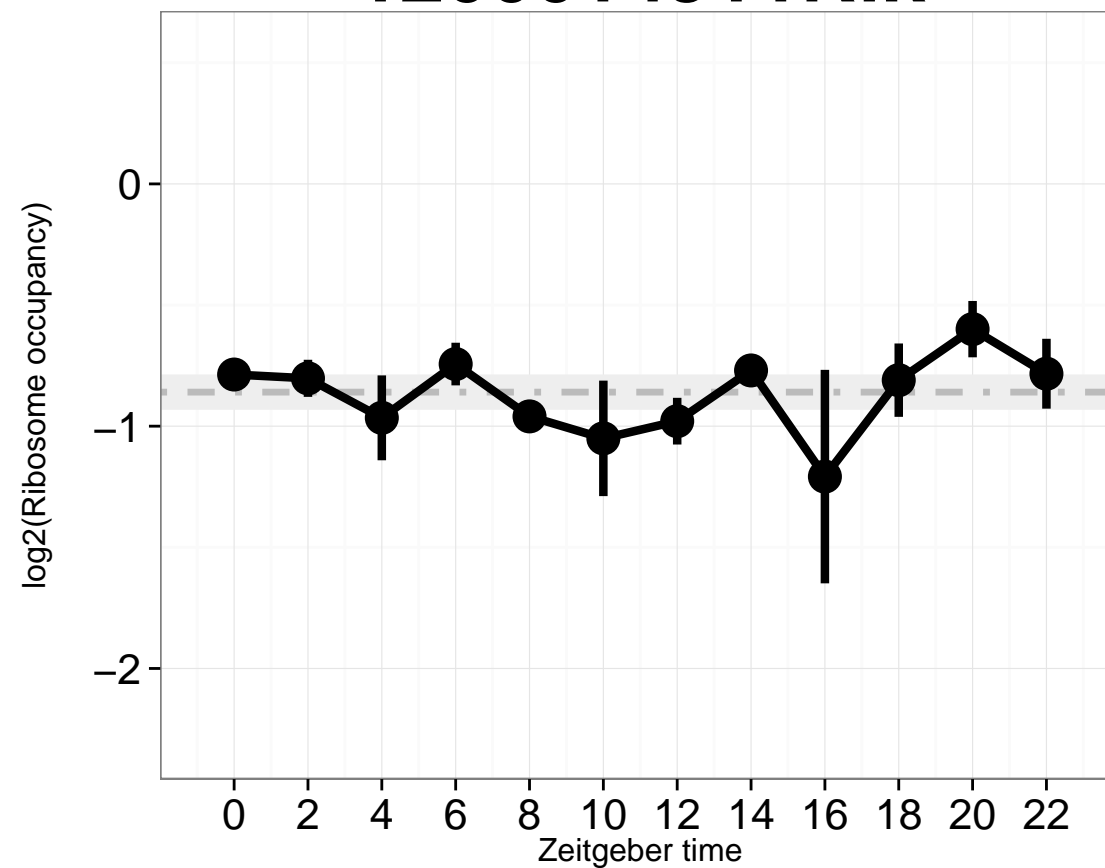

Supplement: SuppDataset_1.zip [file 1200014J11Rik_set_A.pdf › Supplemental Dataset 1/A-mRNA_nonrhyth_translation_nonrhyth/1200014J11Rik_set_A.pdf]

# 1300017J02Rik

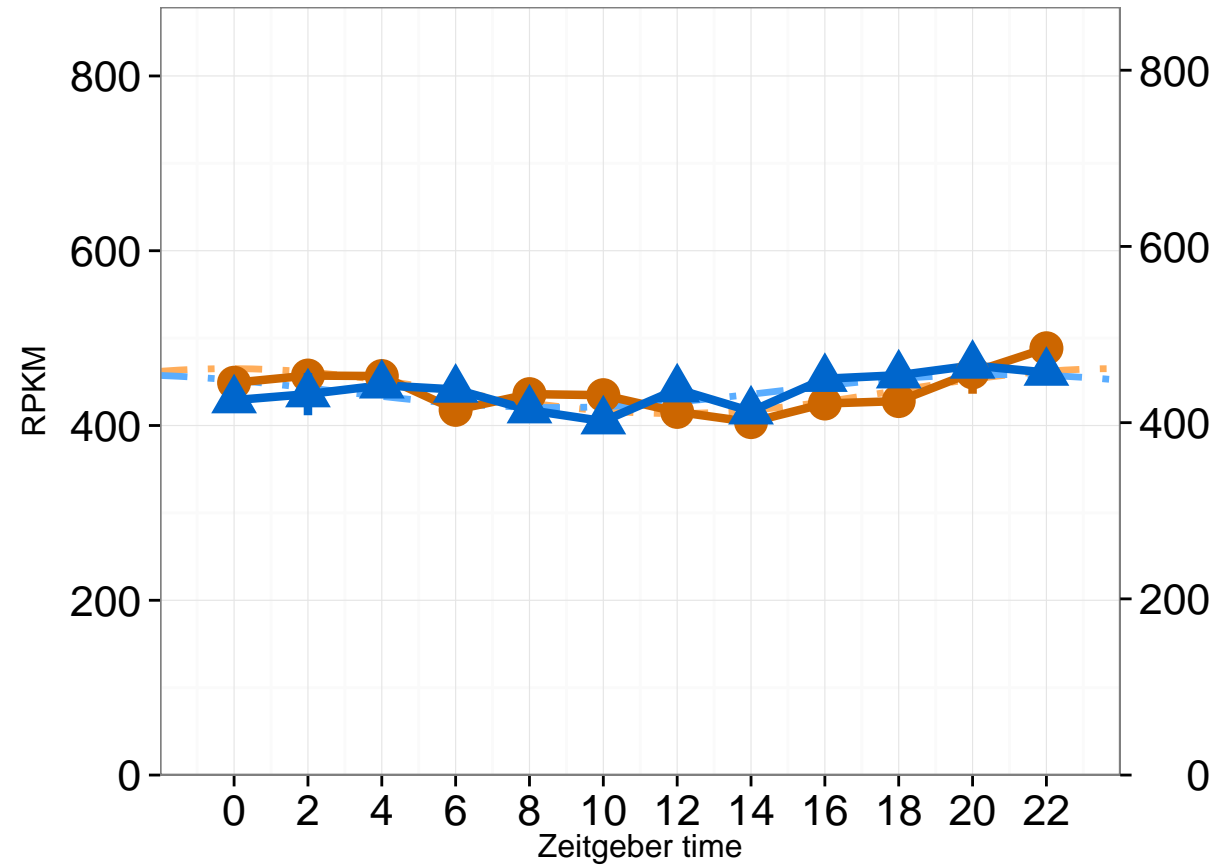

# 1300017J02Rik

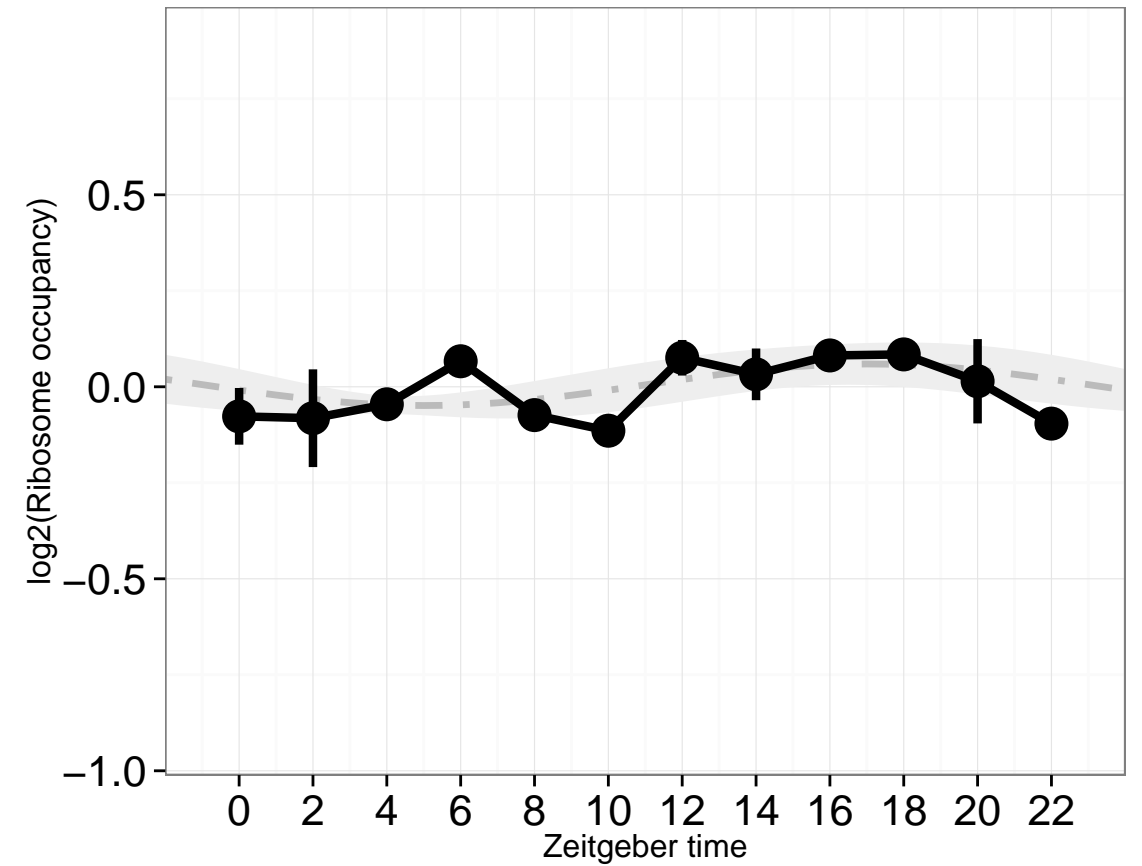

Supplement: SuppDataset_1.zip [file 1300017J02Rik_set_A.pdf › Supplemental Dataset 1/A-mRNA_nonrhyth_translation_nonrhyth/1300017J02Rik_set_A.pdf]

# 1600012H06Rik

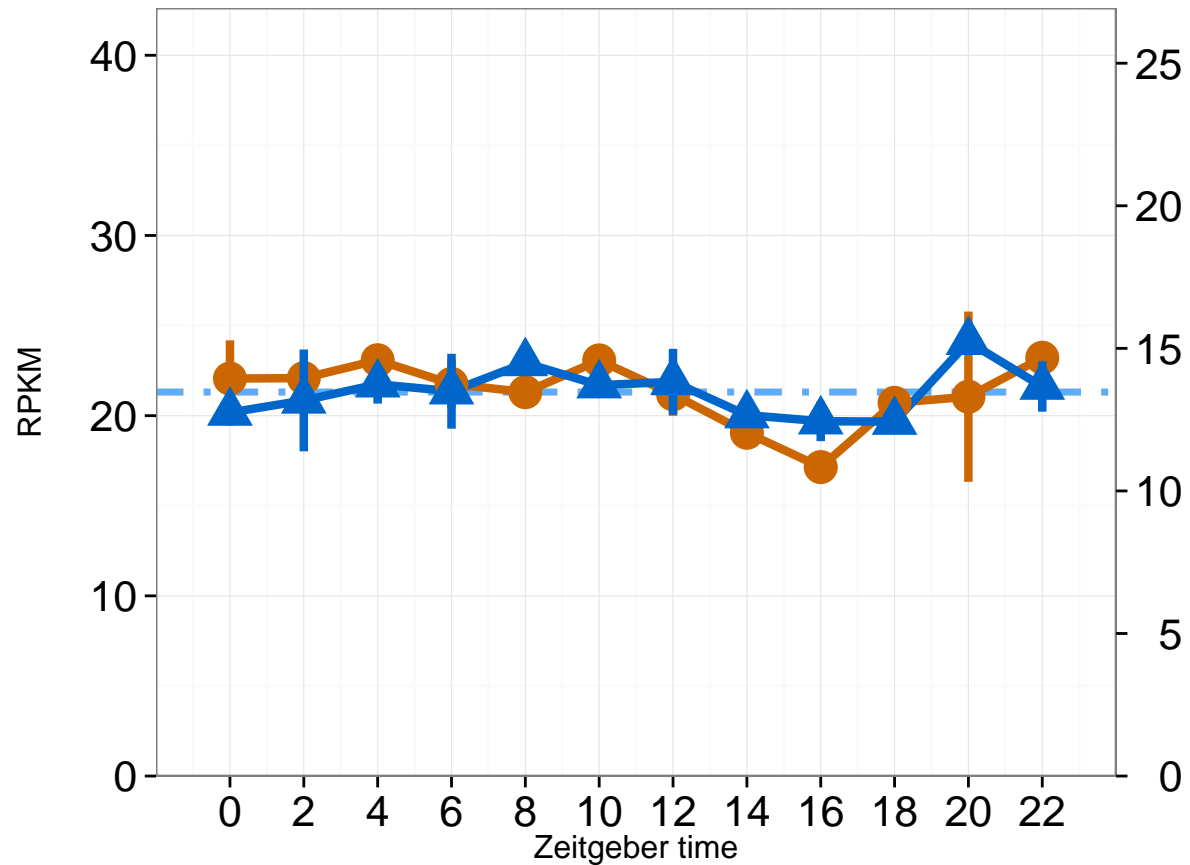

# 1600012H06Rik

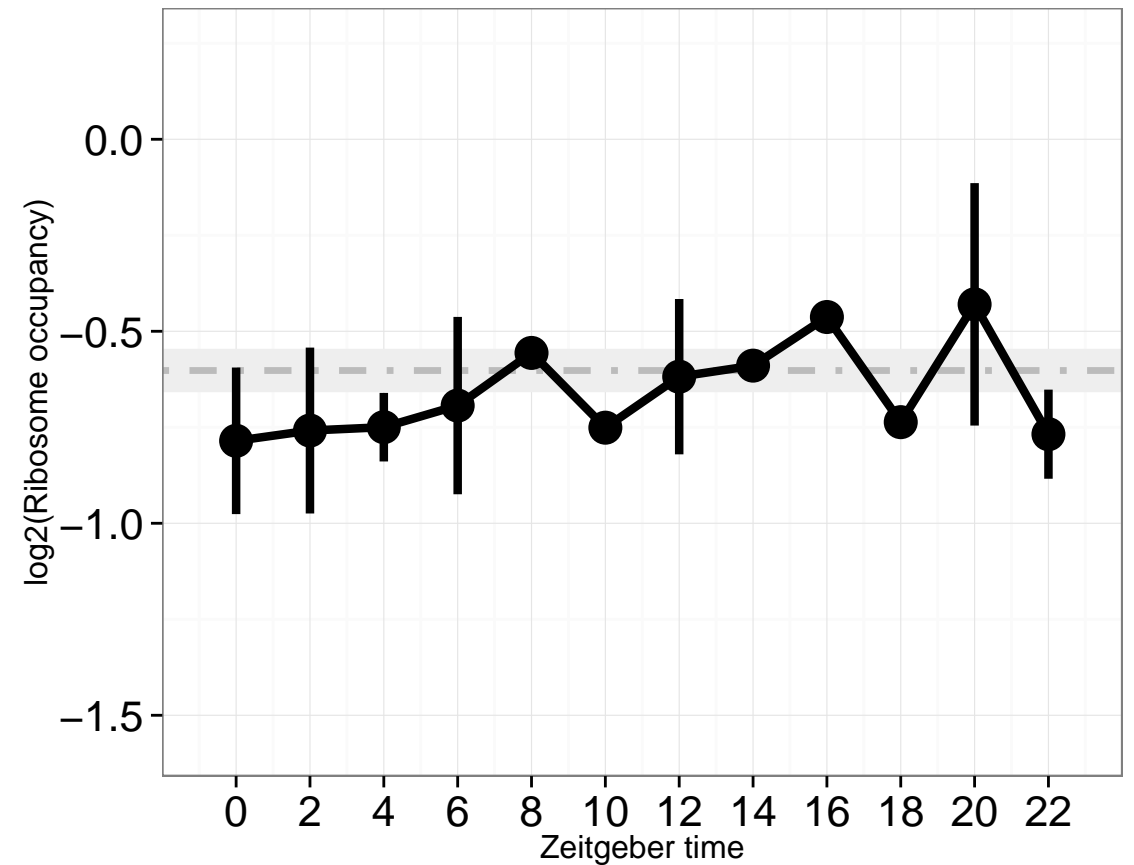

Supplement: SuppDataset_1.zip [file 1600012H06Rik_set_A.pdf › Supplemental Dataset 1/A-mRNA_nonrhyth_translation_nonrhyth/1600012H06Rik_set_A.pdf]

# 1700001C19Rik

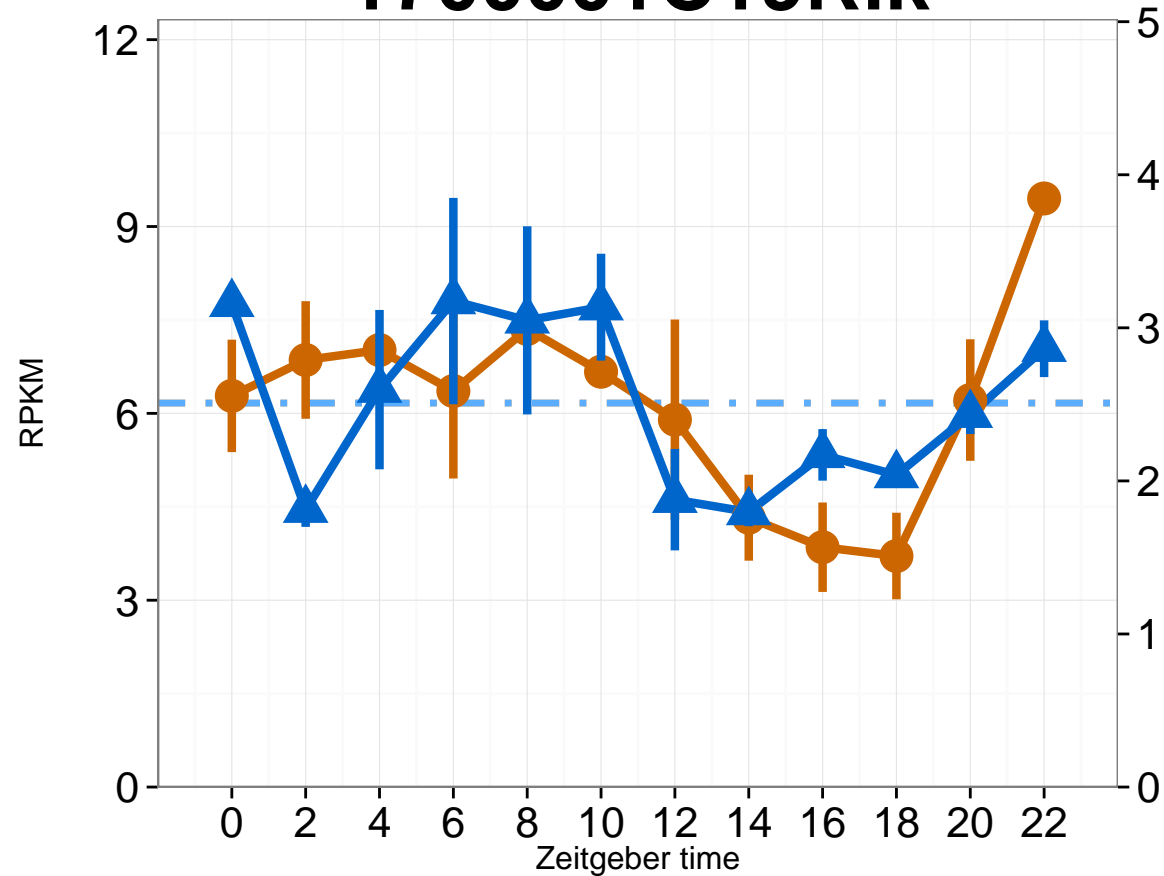

# 1700001C19Rik

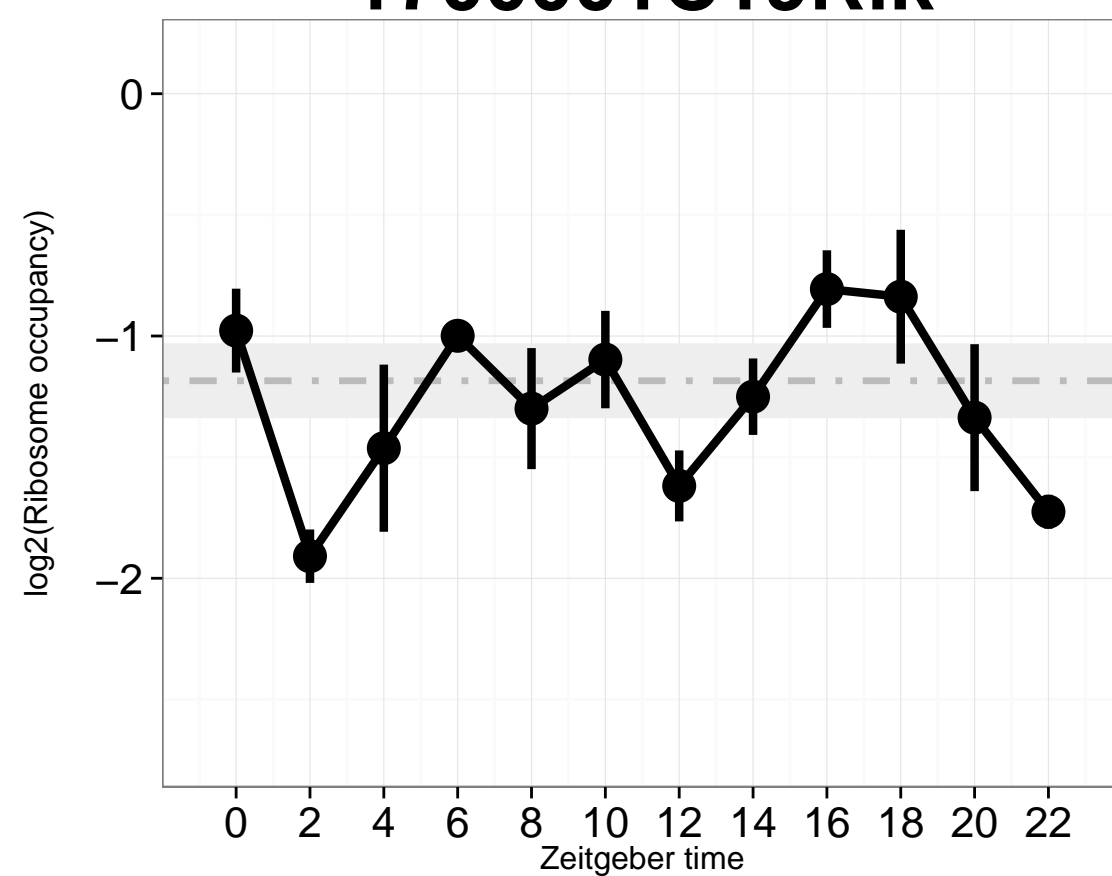

Supplement: SuppDataset_1.zip [file 1700001C19Rik_set_A.pdf › Supplemental Dataset 1/A-mRNA_nonrhyth_translation_nonrhyth/1700001C19Rik_set_A.pdf]

**1700010114Rik**

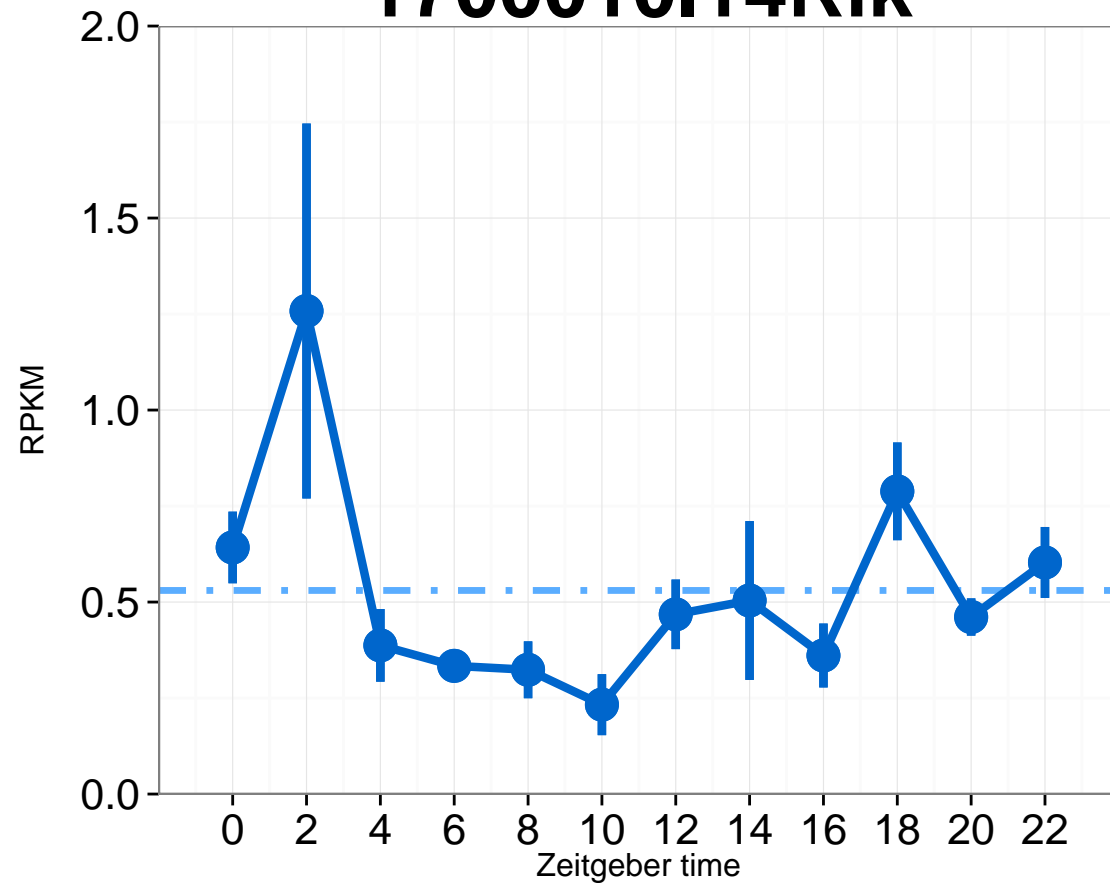

**1700010114Rik log2(Ribosome occupancy)**

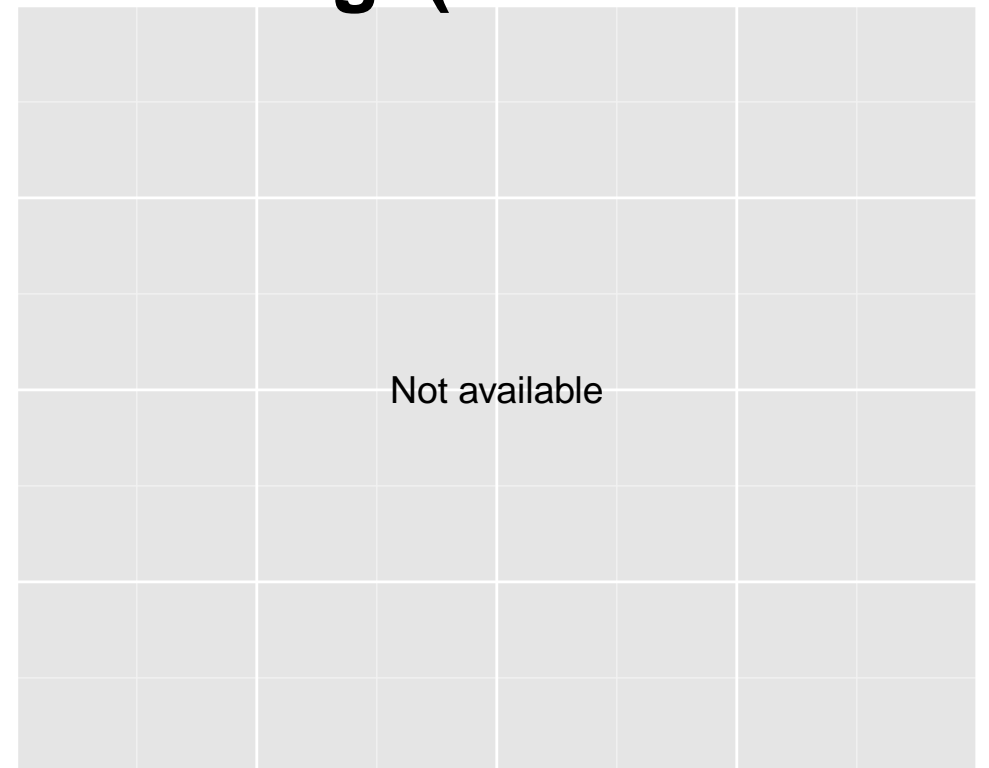

Supplement: SuppDataset_1.zip [file 1700010I14Rik_set_A.pdf › Supplemental Dataset 1/A-mRNA_nonrhyth_translation_nonrhyth/1700010I14Rik_set_A.pdf]

## 1700021F05Rik

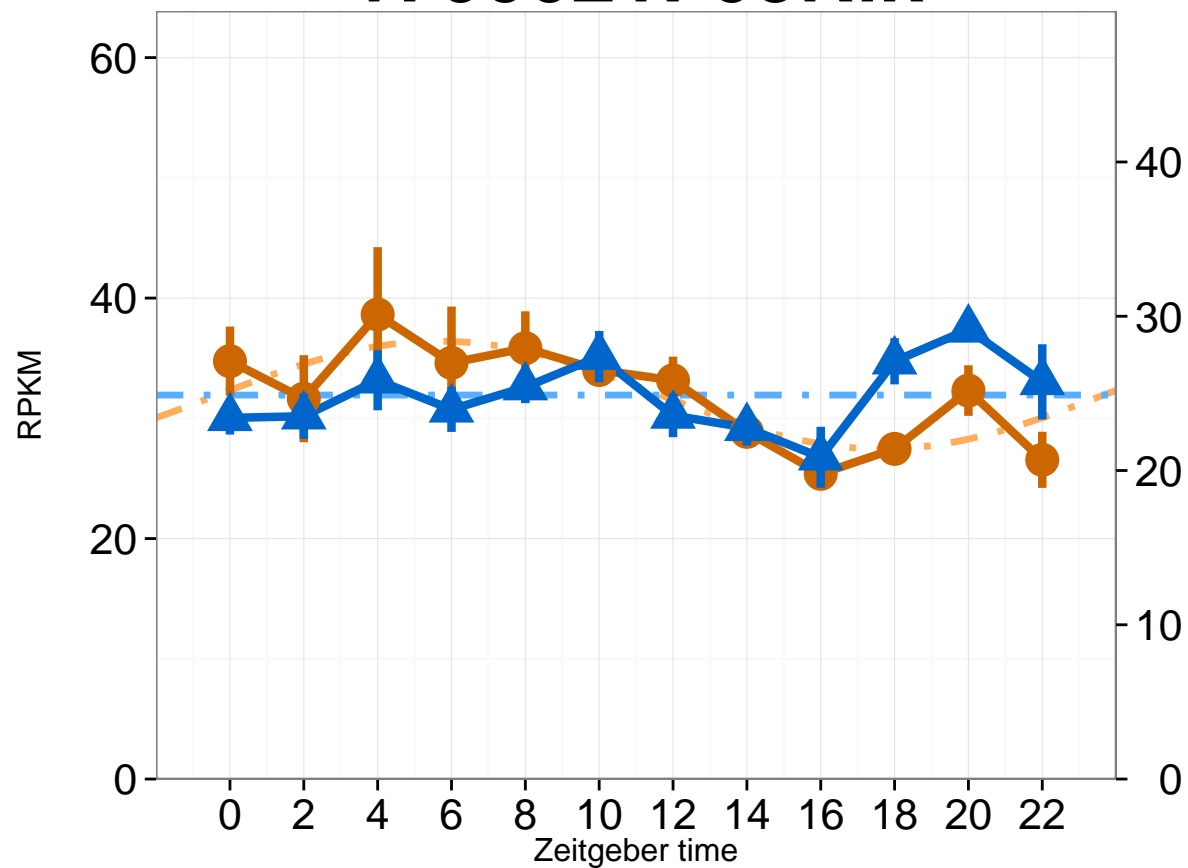

## 1700021F05Rik

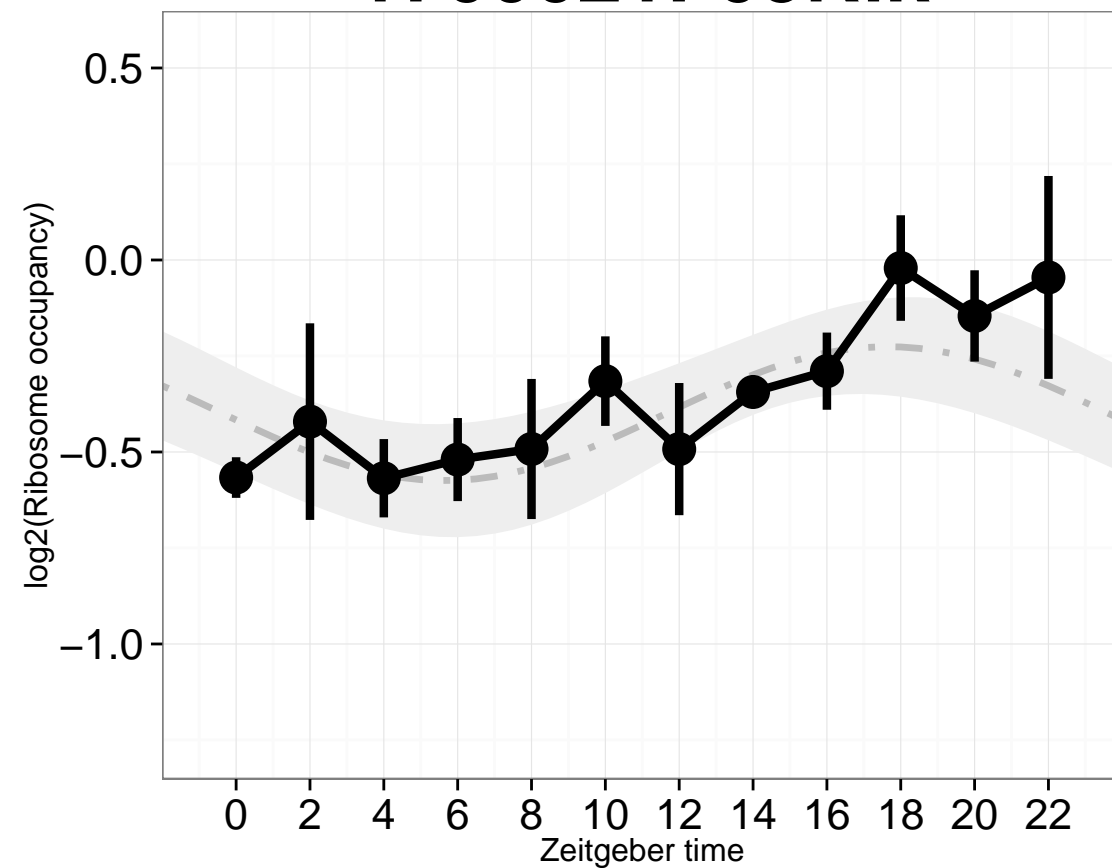

Supplement: SuppDataset_1.zip [file 1700021F05Rik_set_A.pdf › Supplemental Dataset 1/A-mRNA_nonrhyth_translation_nonrhyth/1700021F05Rik_set_A.pdf]

# 1700021K19Rik

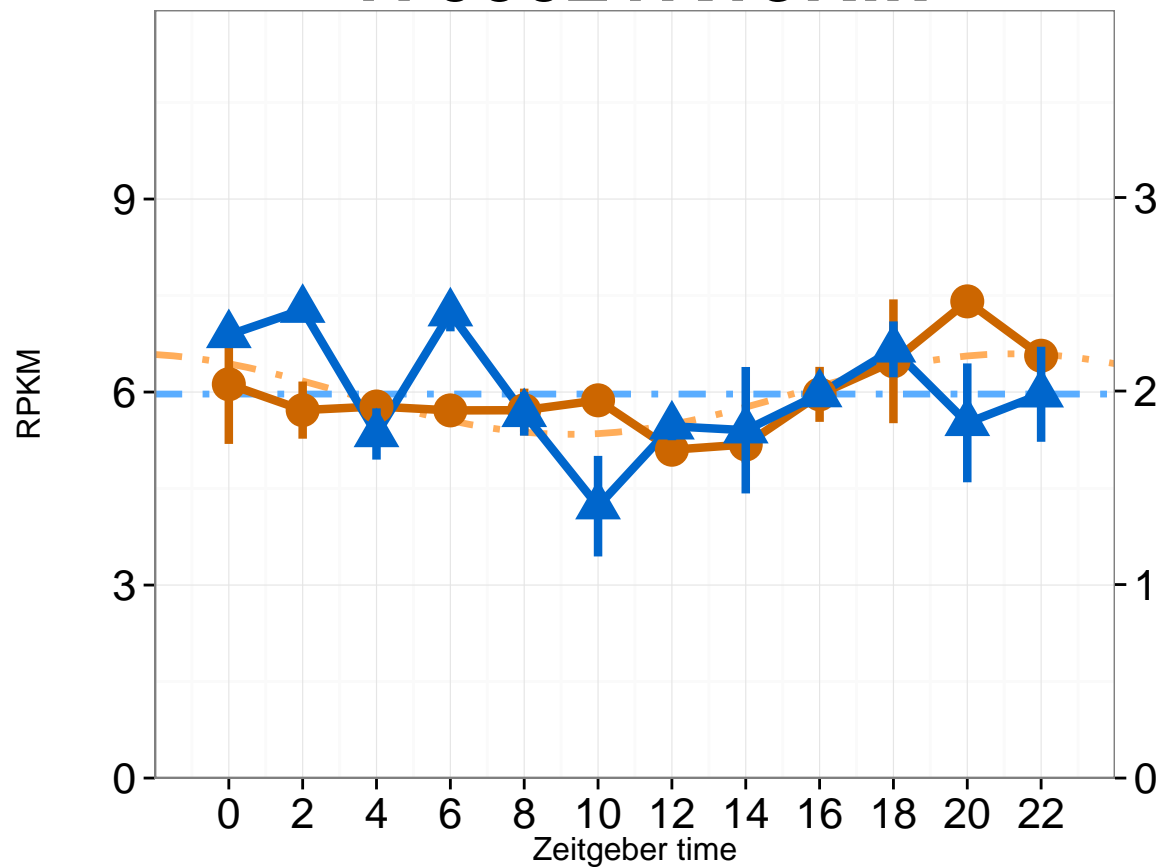

# 1700021K19Rik

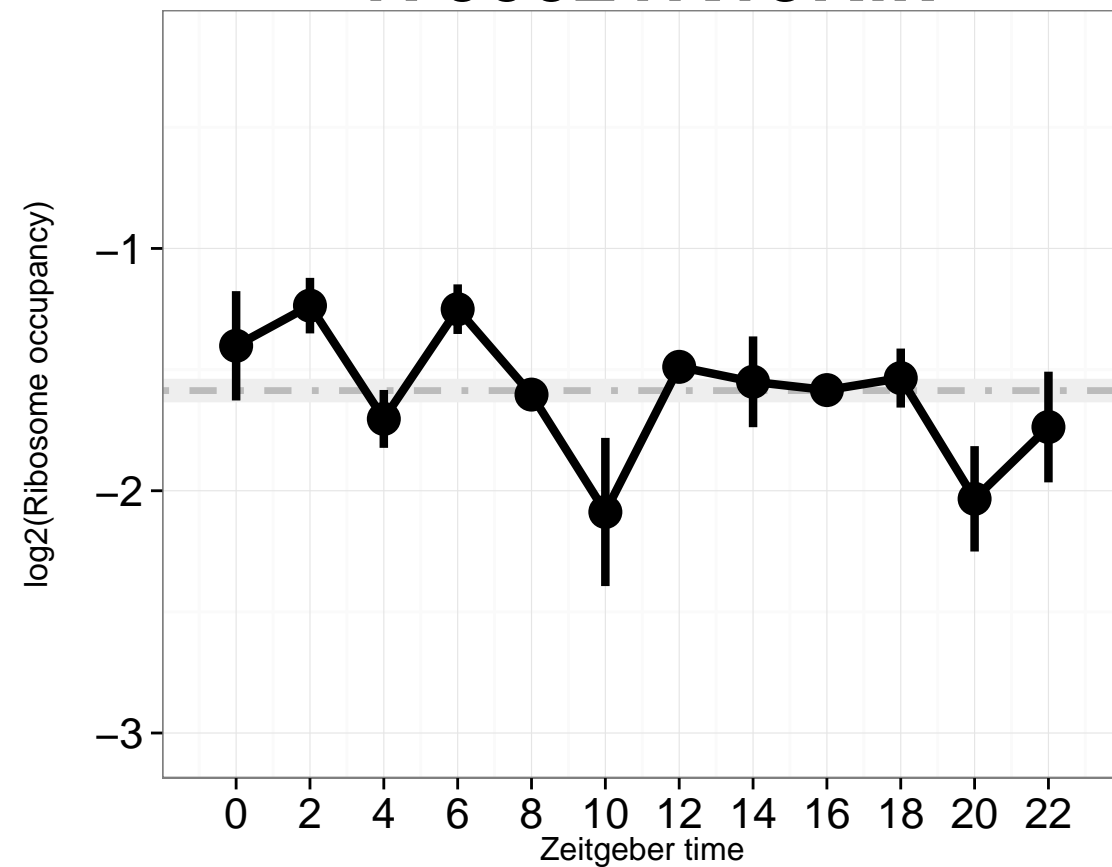

Supplement: SuppDataset_1.zip [file 1700021K19Rik_set_A.pdf › Supplemental Dataset 1/A-mRNA_nonrhyth_translation_nonrhyth/1700021K19Rik_set_A.pdf]

# 1700025G04Rik

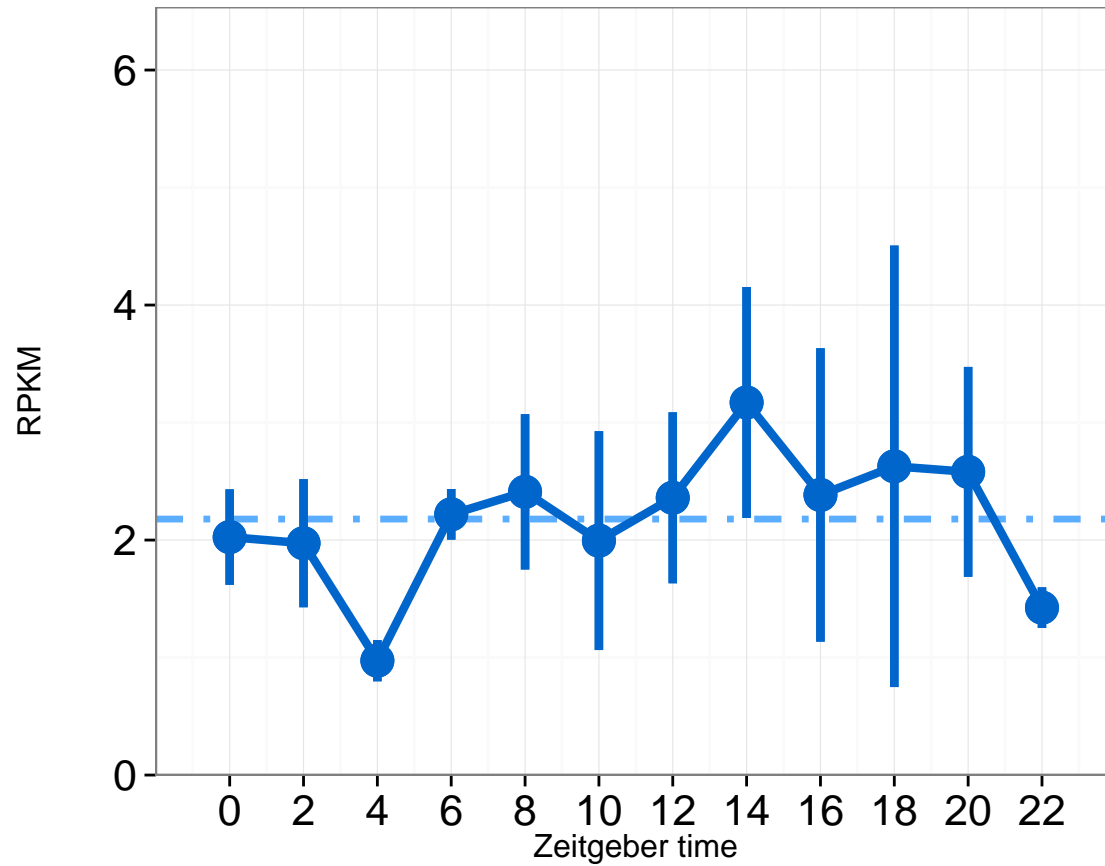

# 1700025G04Rik log2(Ribosome occup

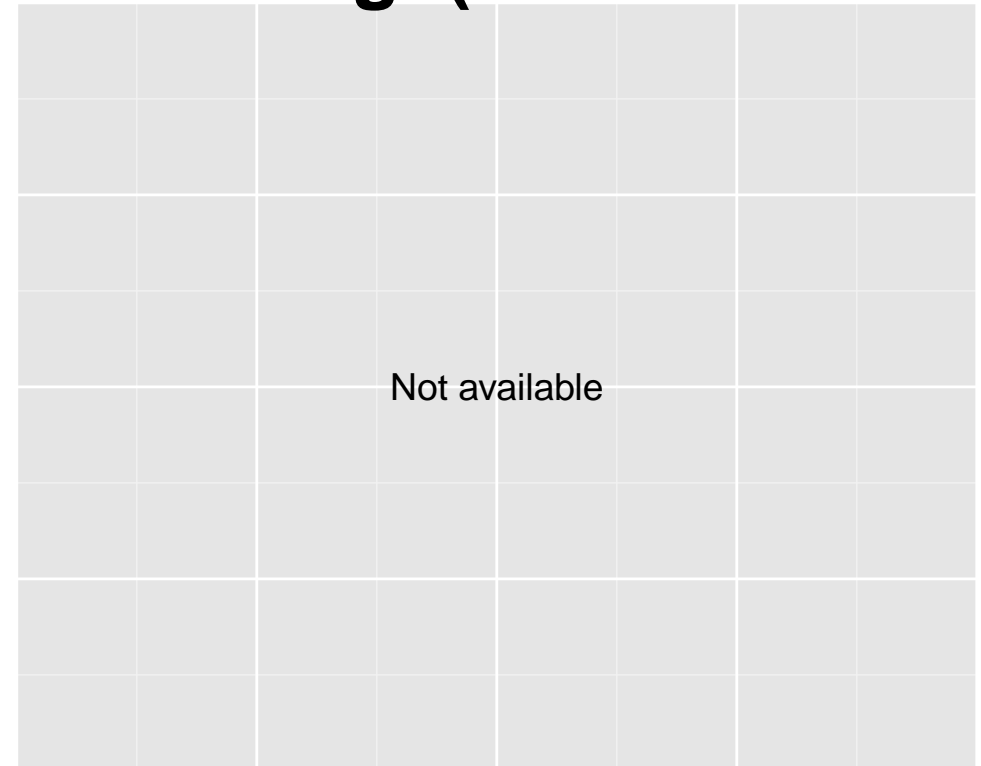

Supplement: SuppDataset_1.zip [file 1700025G04Rik_set_A.pdf › Supplemental Dataset 1/A-mRNA_nonrhyth_translation_nonrhyth/1700025G04Rik_set_A.pdf]

# 1700030K09Rik

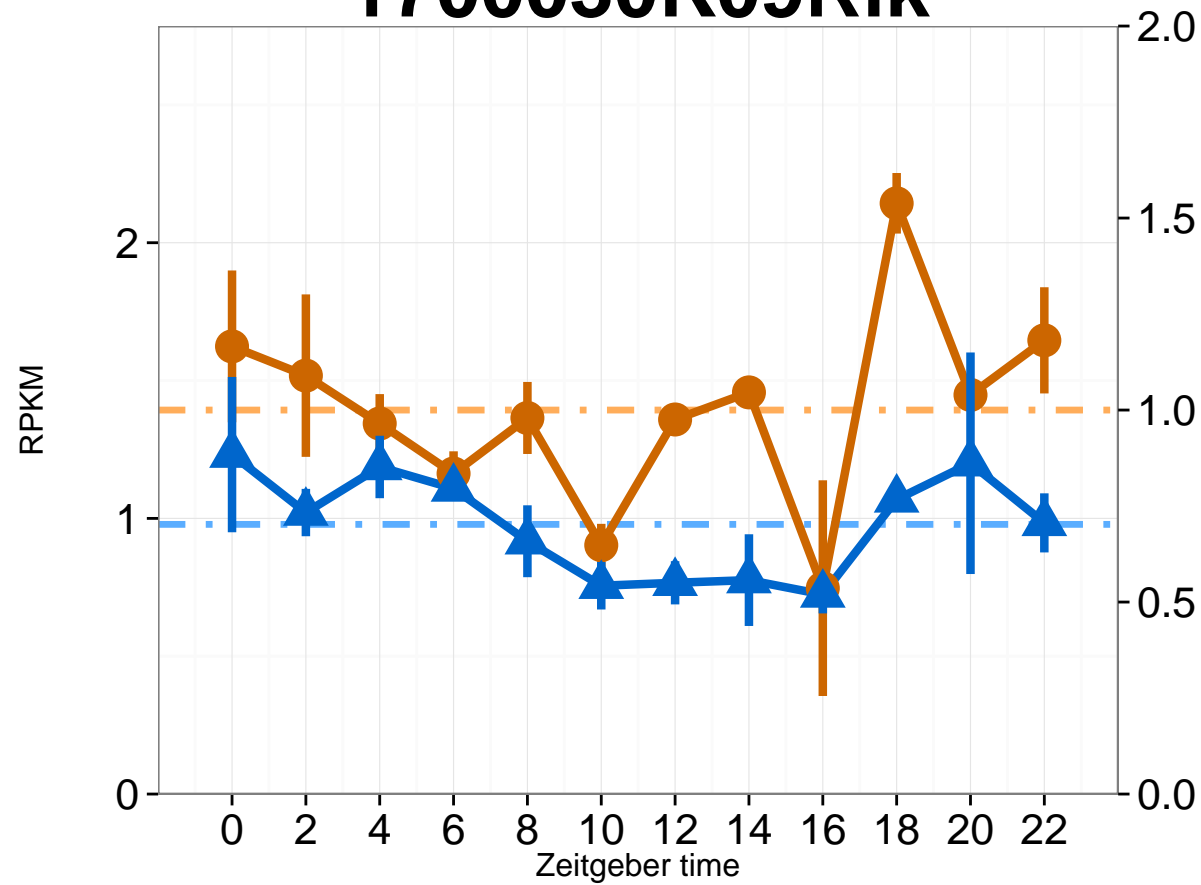

# 1700030K09Rik

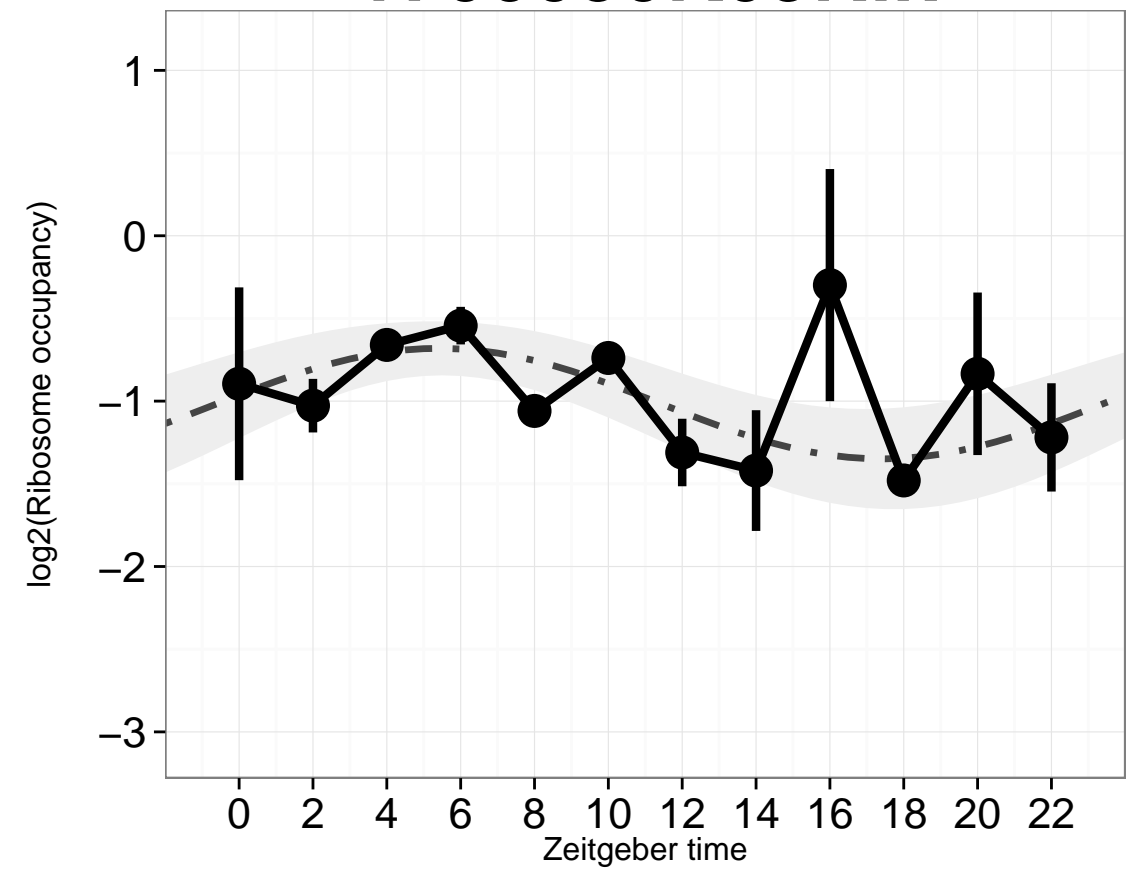

Supplement: SuppDataset_1.zip [file 1700030K09Rik_set_A.pdf › Supplemental Dataset 1/A-mRNA_nonrhyth_translation_nonrhyth/1700030K09Rik_set_A.pdf]

# 1700037H04Rik

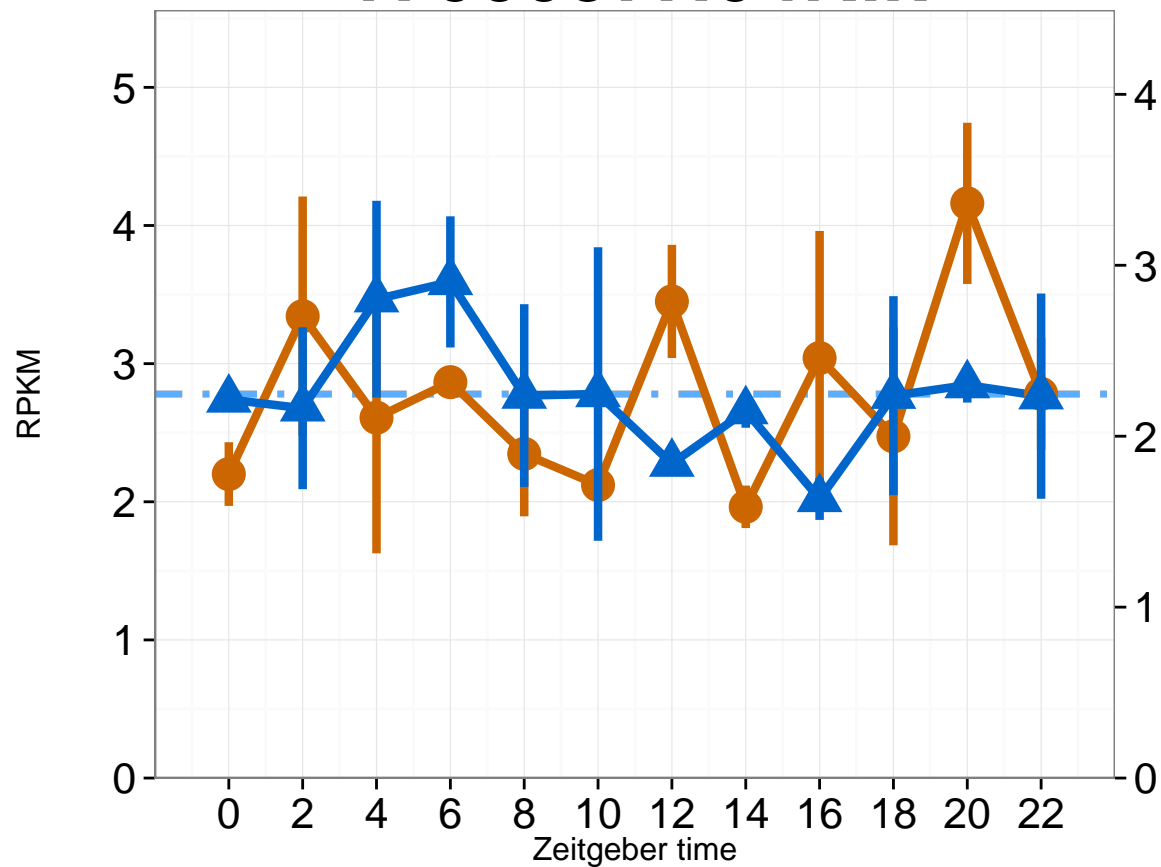

# 1700037H04Rik

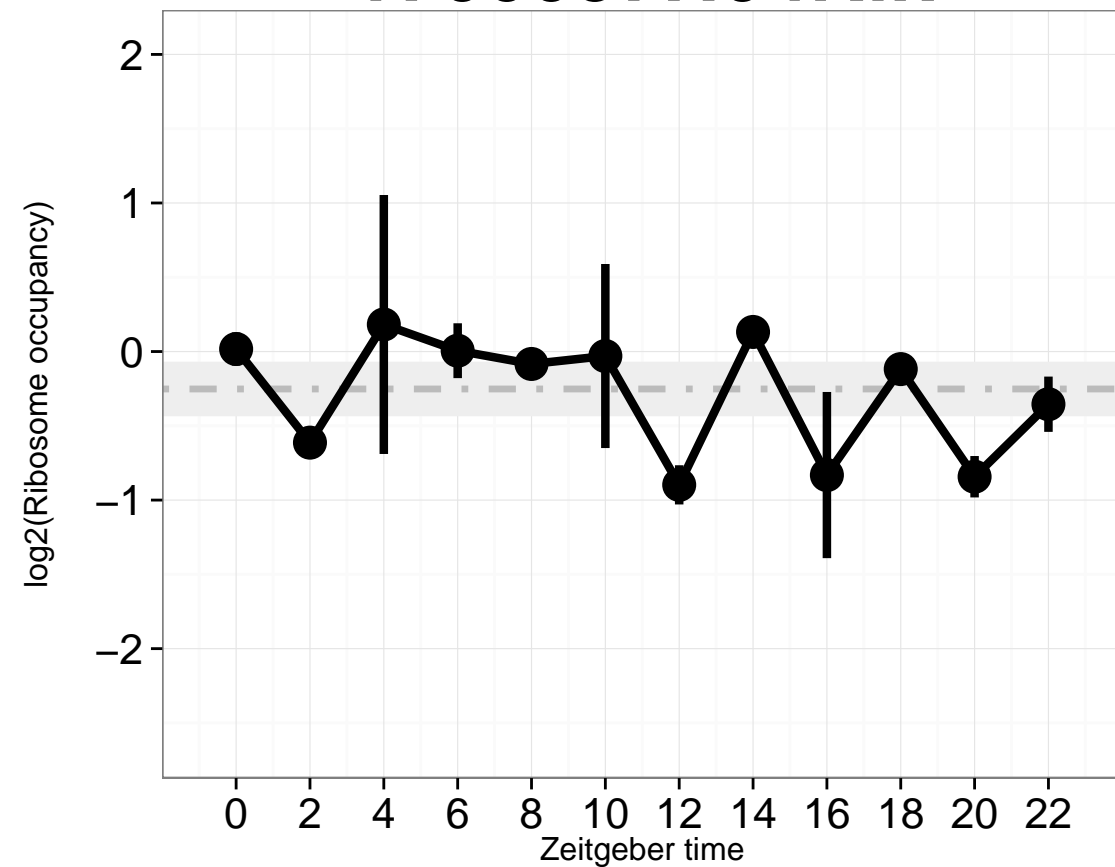

Supplement: SuppDataset_1.zip [file 1700037H04Rik_set_A.pdf › Supplemental Dataset 1/A-mRNA_nonrhyth_translation_nonrhyth/1700037H04Rik_set_A.pdf]

## 1700052N19Rik

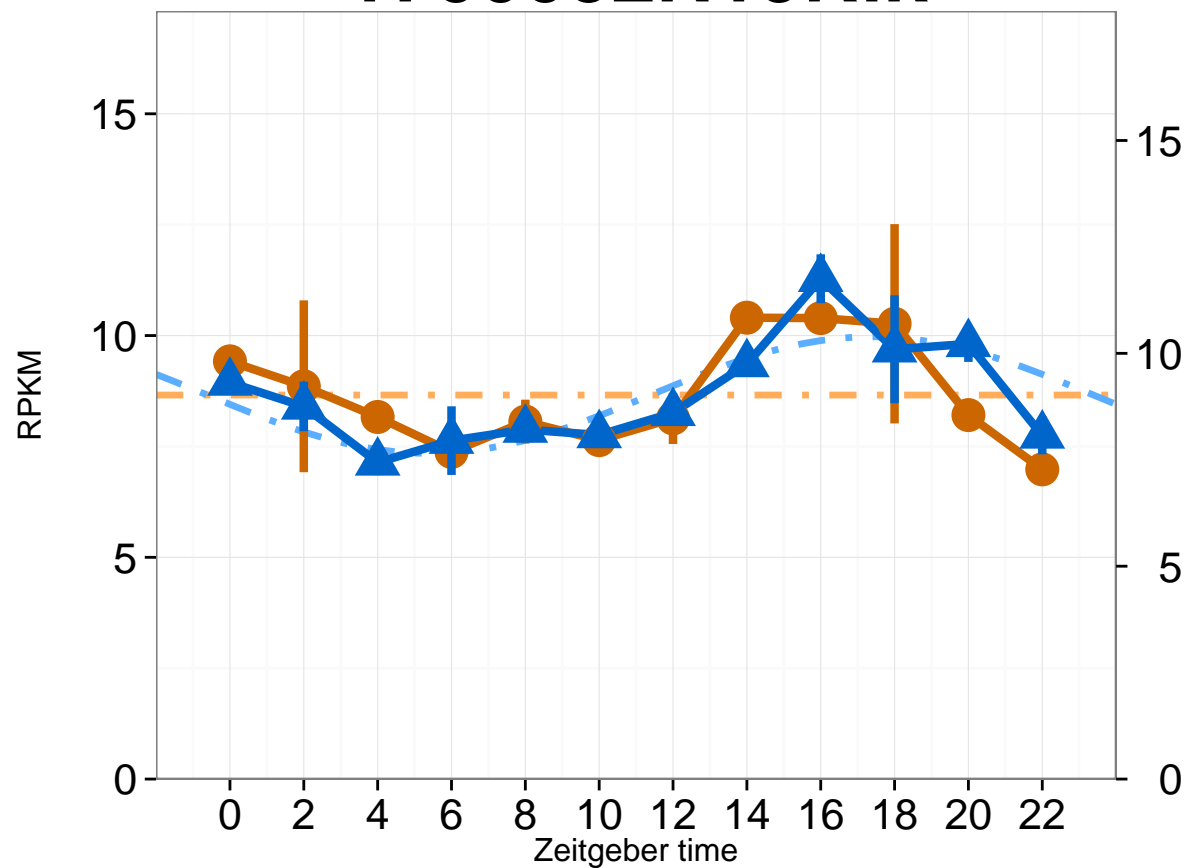

## 1700052N19Rik

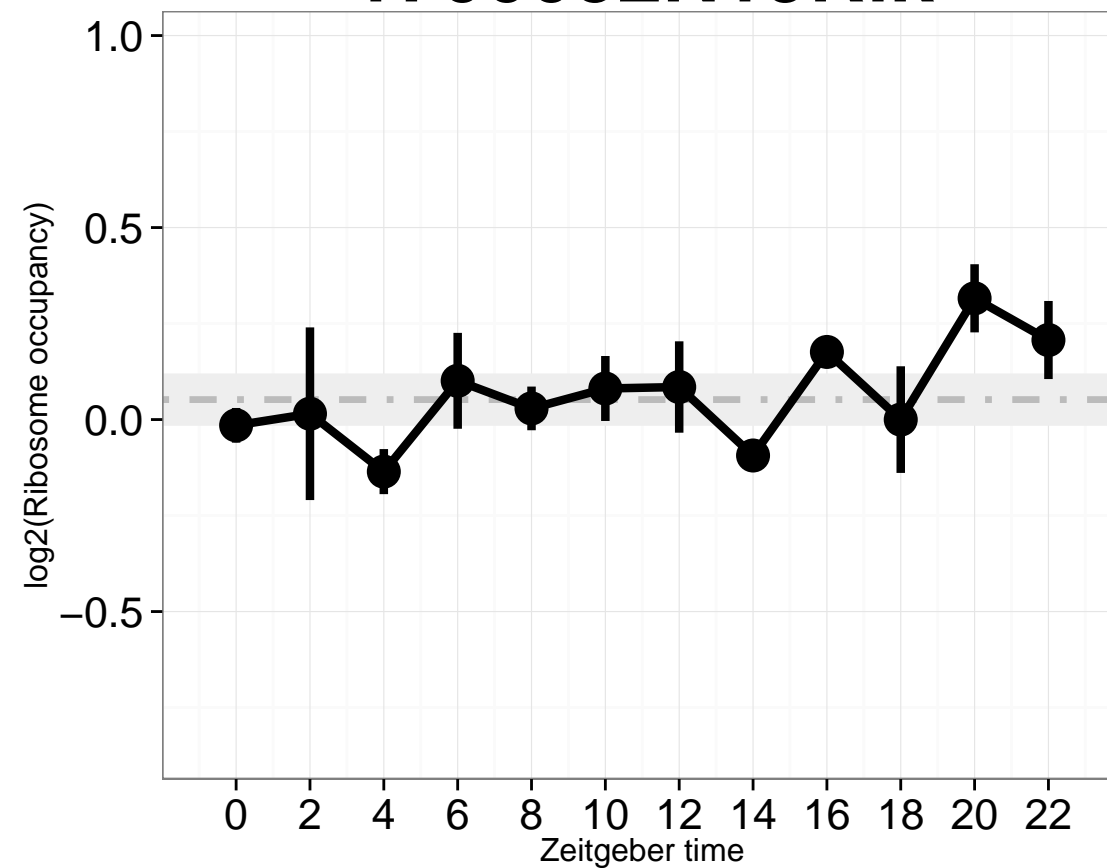

Supplement: SuppDataset_1.zip [file 1700052N19Rik_set_A.pdf › Supplemental Dataset 1/A-mRNA_nonrhyth_translation_nonrhyth/1700052N19Rik_set_A.pdf]

# 1700066M21Rik

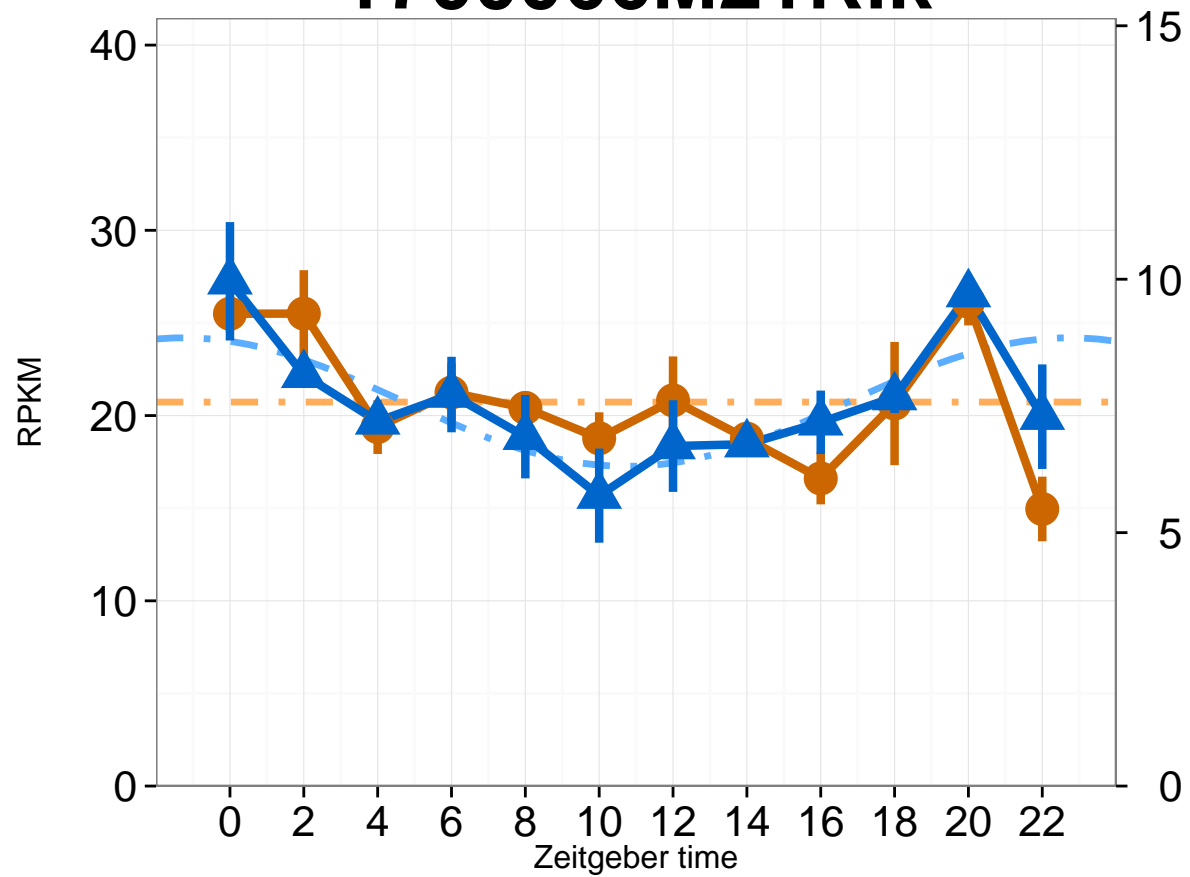

# 1700066M21Rik

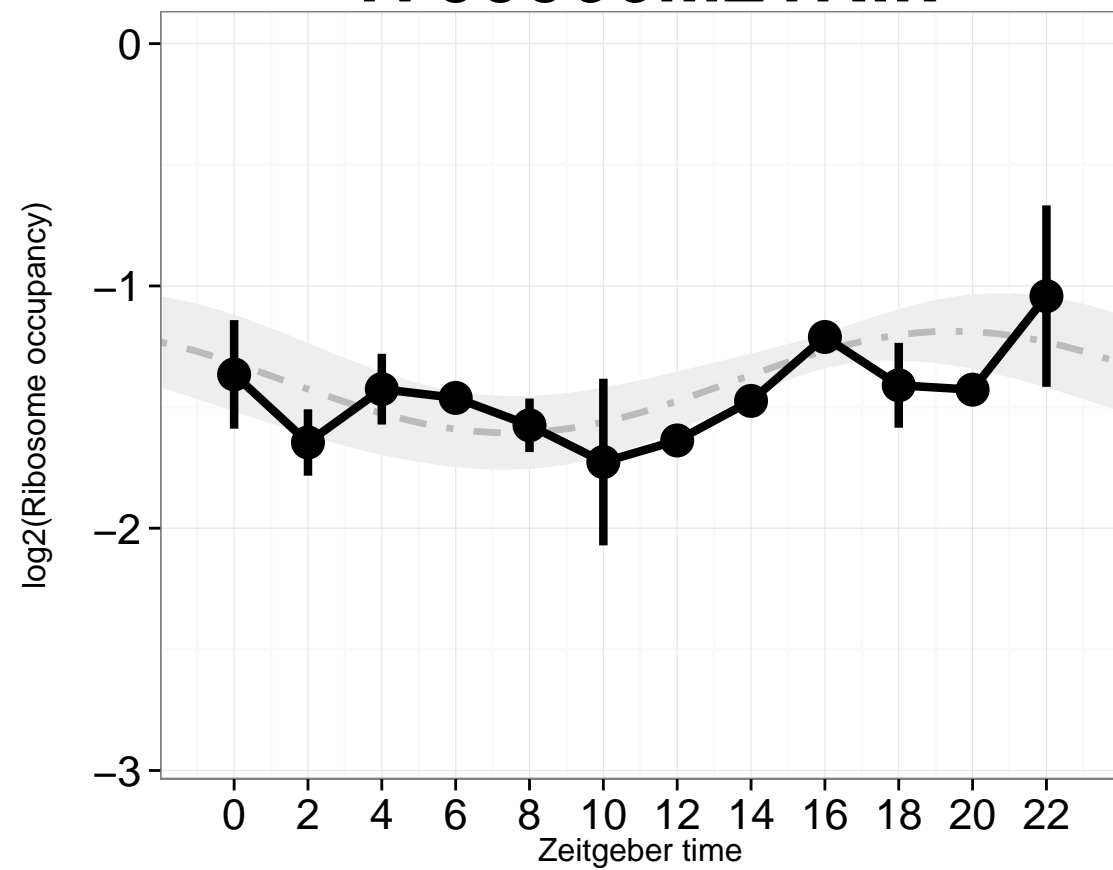

Supplement: SuppDataset_1.zip [file 1700066M21Rik_set_A.pdf › Supplemental Dataset 1/A-mRNA_nonrhyth_translation_nonrhyth/1700066M21Rik_set_A.pdf]

# 1700094D03Rik

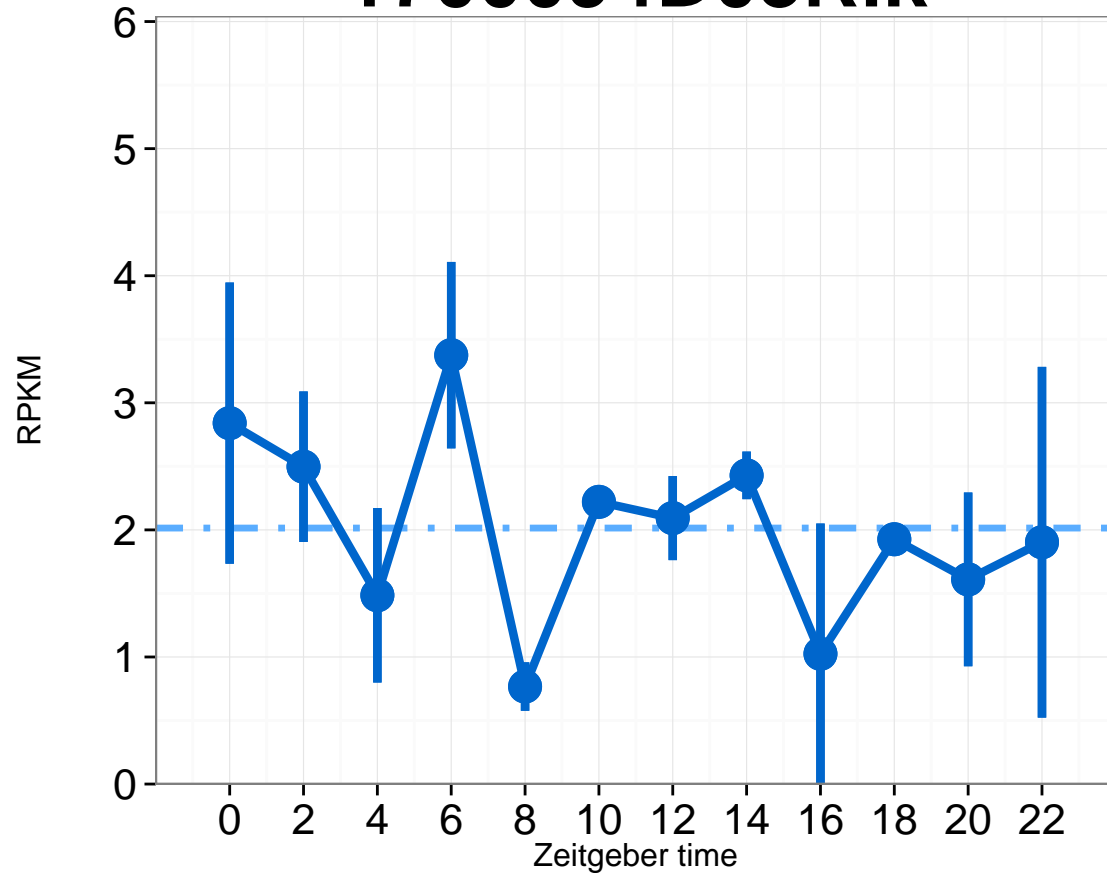

# 1700094D03Rik log2(Ribosome occup

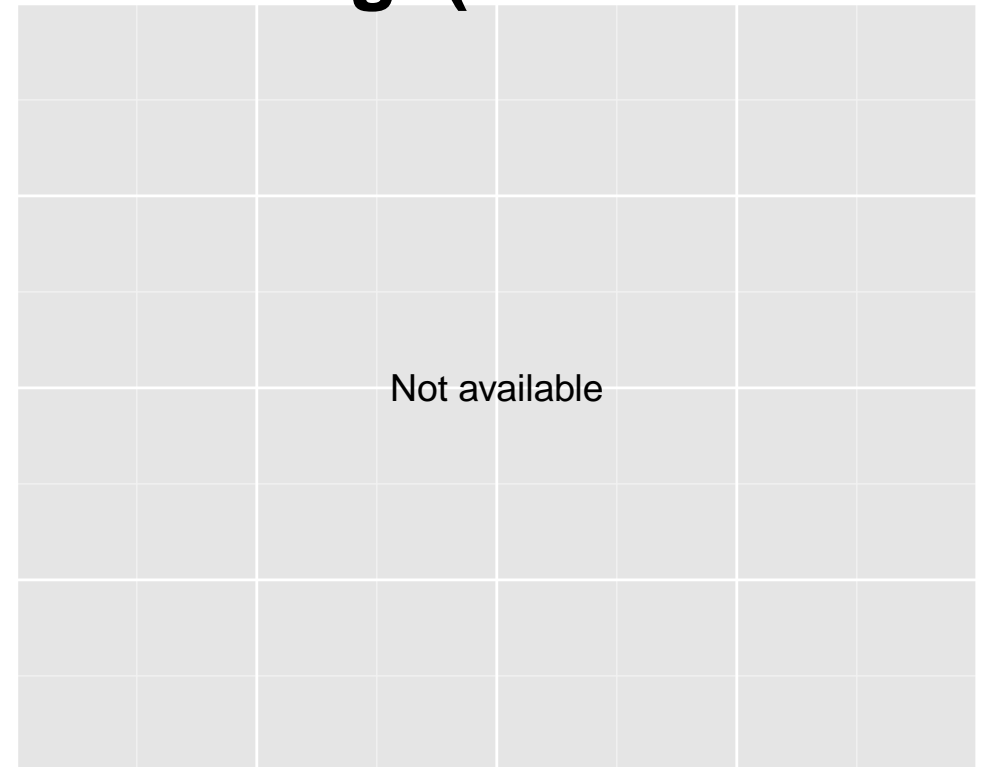

Supplement: SuppDataset_1.zip [file 1700094D03Rik_set_A.pdf › Supplemental Dataset 1/A-mRNA_nonrhyth_translation_nonrhyth/1700094D03Rik_set_A.pdf]

# 1700123O20Rik

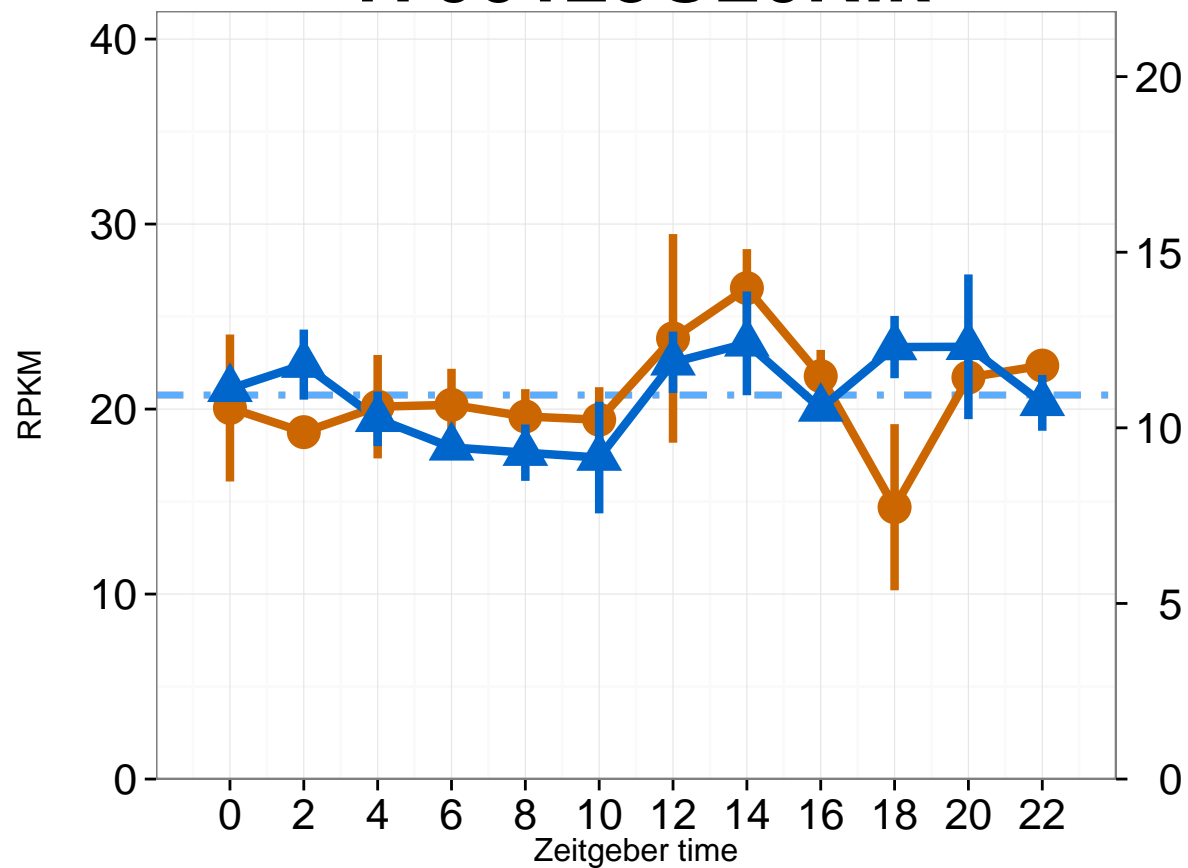

# 1700123O20Rik

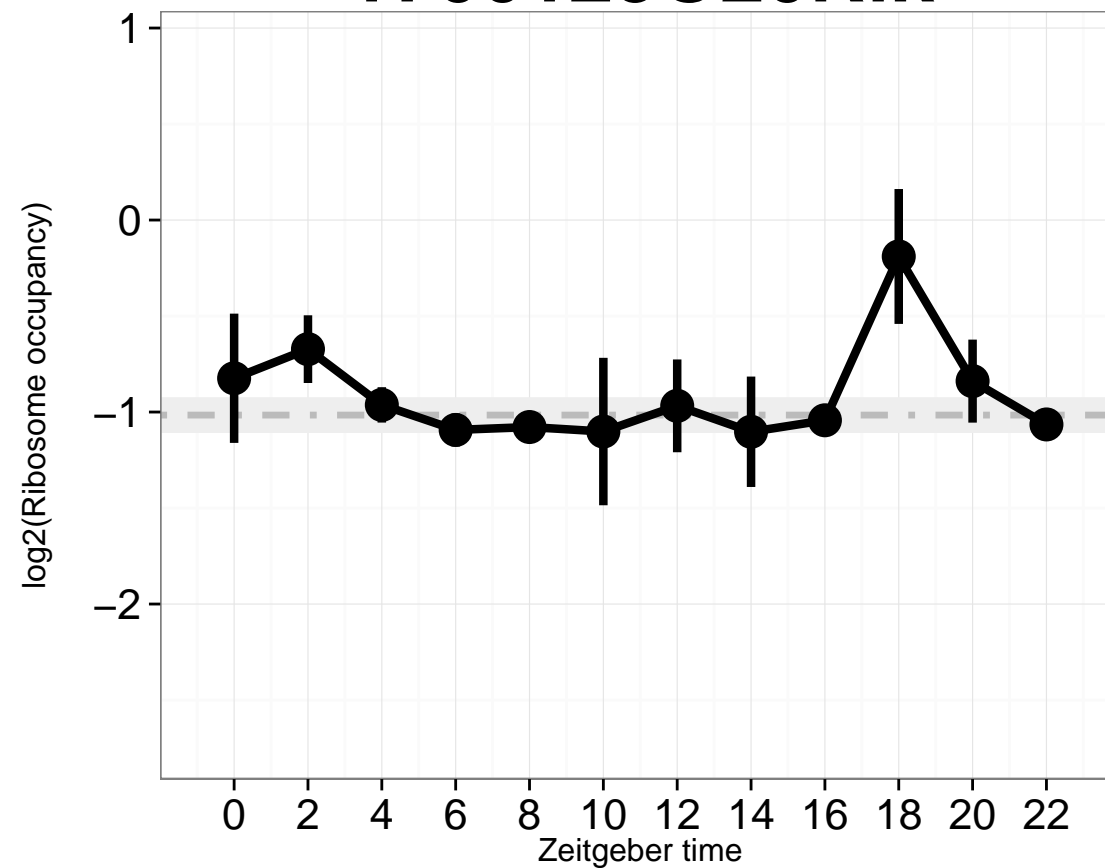

Supplement: SuppDataset_1.zip [file 1700123O20Rik_set_A.pdf › Supplemental Dataset 1/A-mRNA_nonrhyth_translation_nonrhyth/1700123O20Rik_set_A.pdf]

# 1810009A15Rik

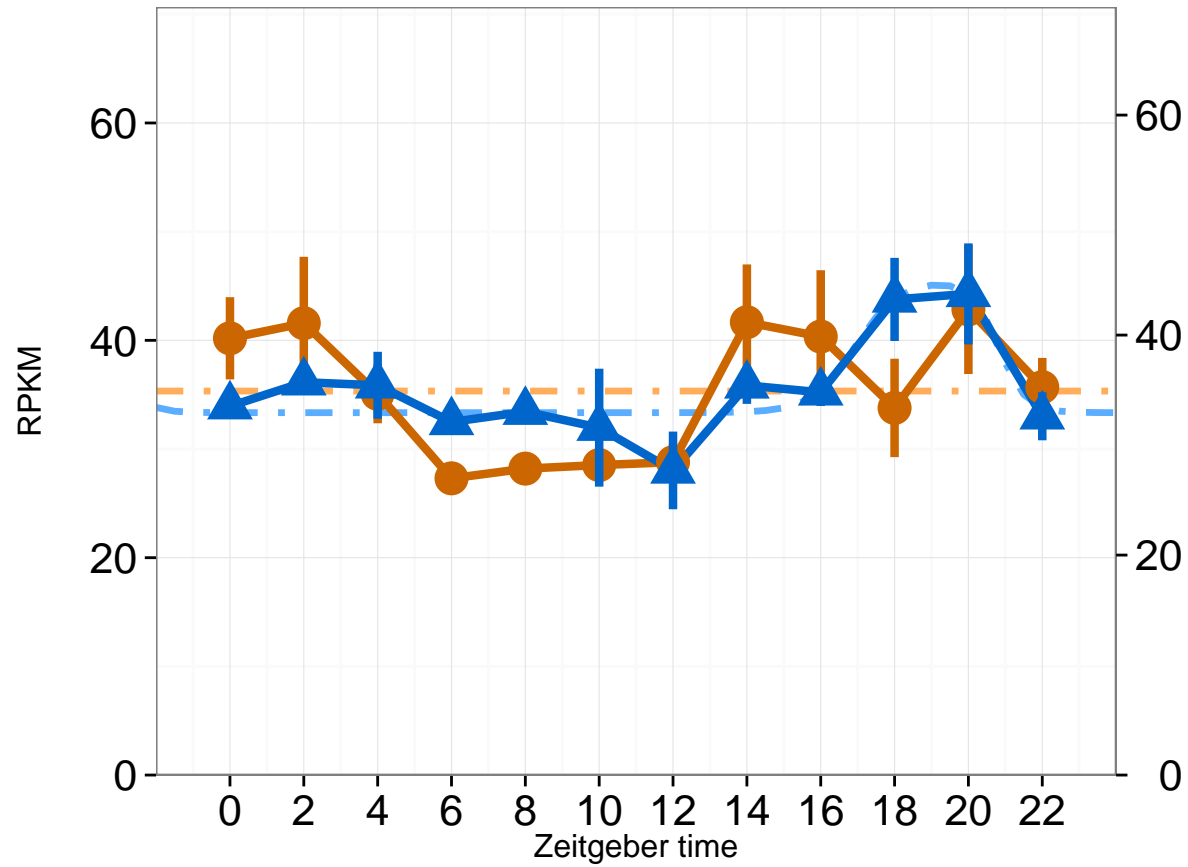

# 1810009A15Rik

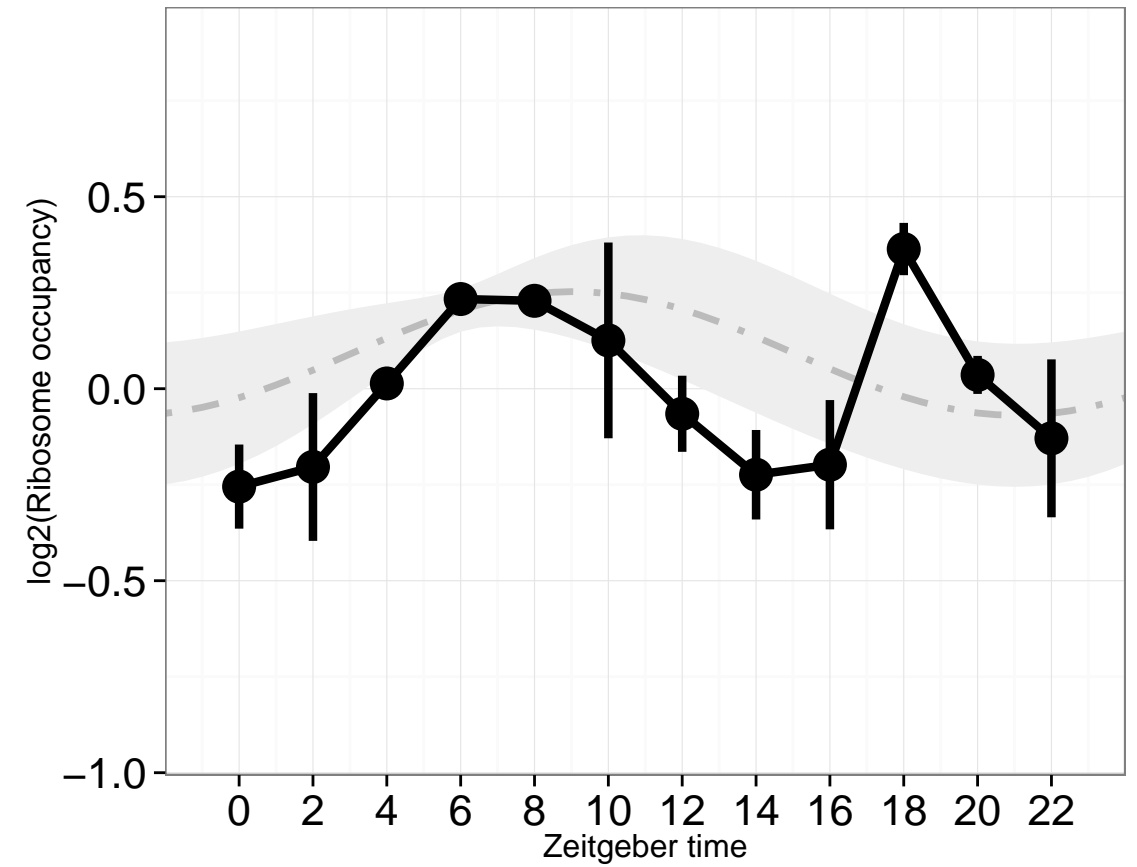

Supplement: SuppDataset_1.zip [file 1810009A15Rik_set_A.pdf › Supplemental Dataset 1/A-mRNA_nonrhyth_translation_nonrhyth/1810009A15Rik_set_A.pdf]

## 1810013L24Rik

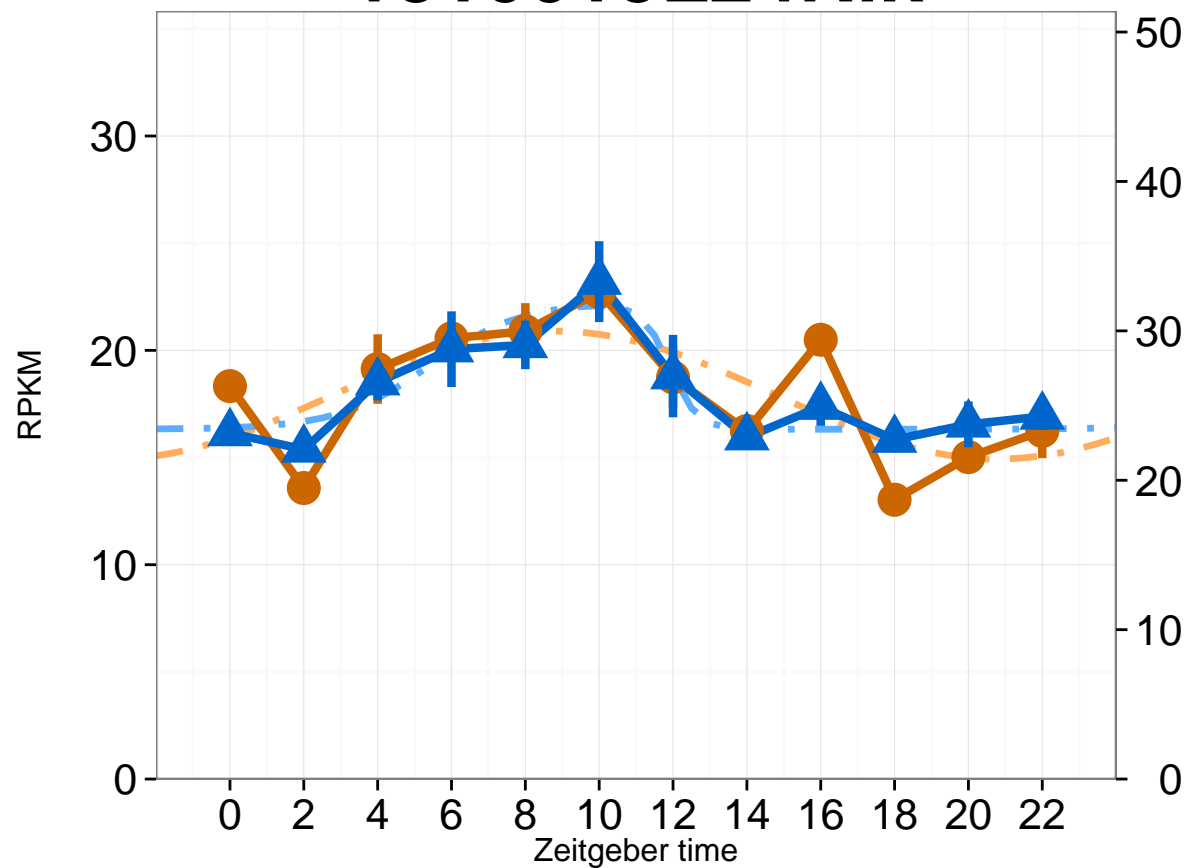

## 1810013L24Rik

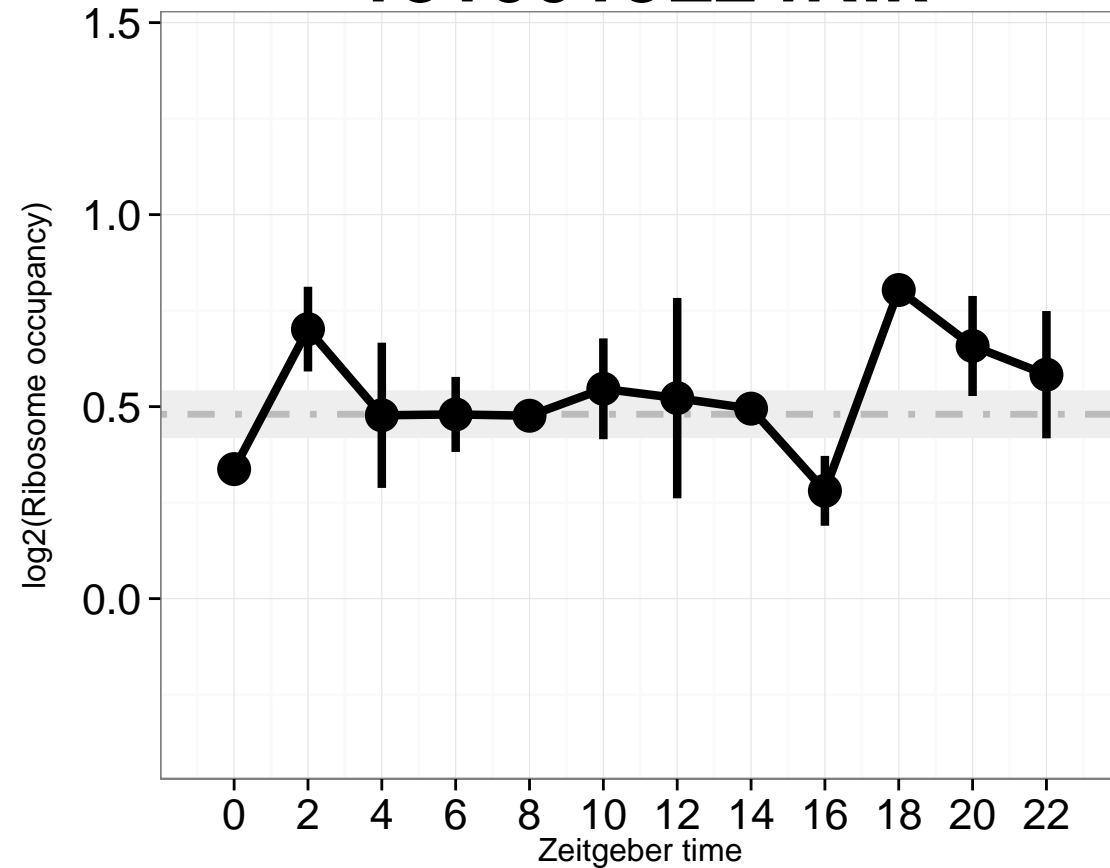

Supplement: SuppDataset_1.zip [file 1810013L24Rik_set_A.pdf › Supplemental Dataset 1/A-mRNA_nonrhyth_translation_nonrhyth/1810013L24Rik_set_A.pdf]

# 1810019J16Rik

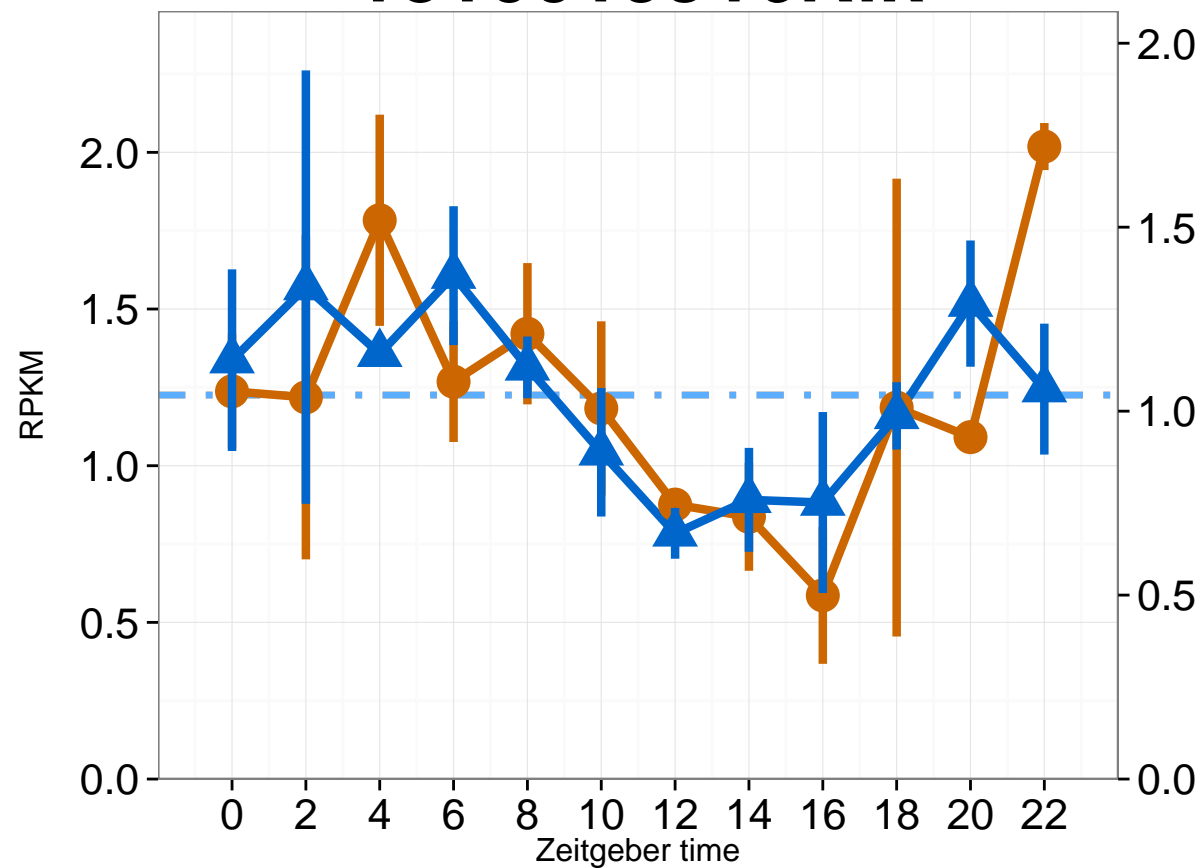

# 1810019J16Rik

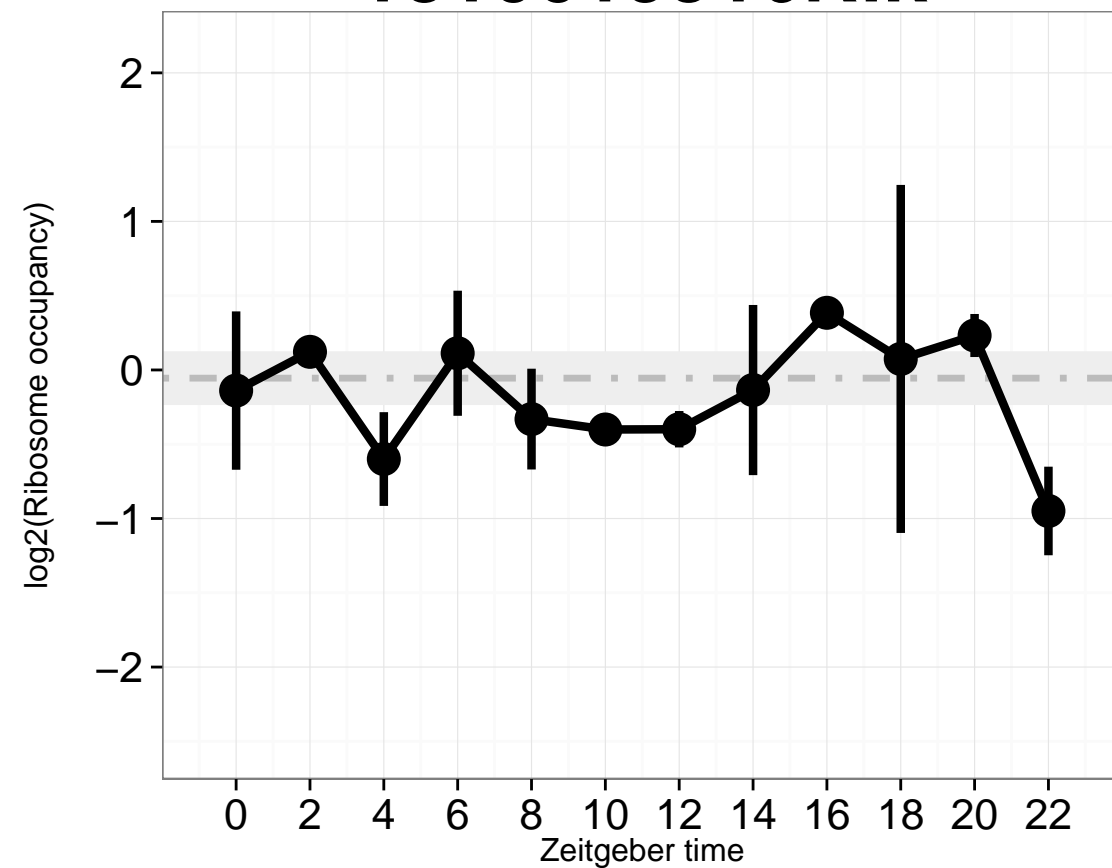

Supplement: SuppDataset_1.zip [file 1810019J16Rik_set_A.pdf › Supplemental Dataset 1/A-mRNA_nonrhyth_translation_nonrhyth/1810019J16Rik_set_A.pdf]

# 1810022K09Rik

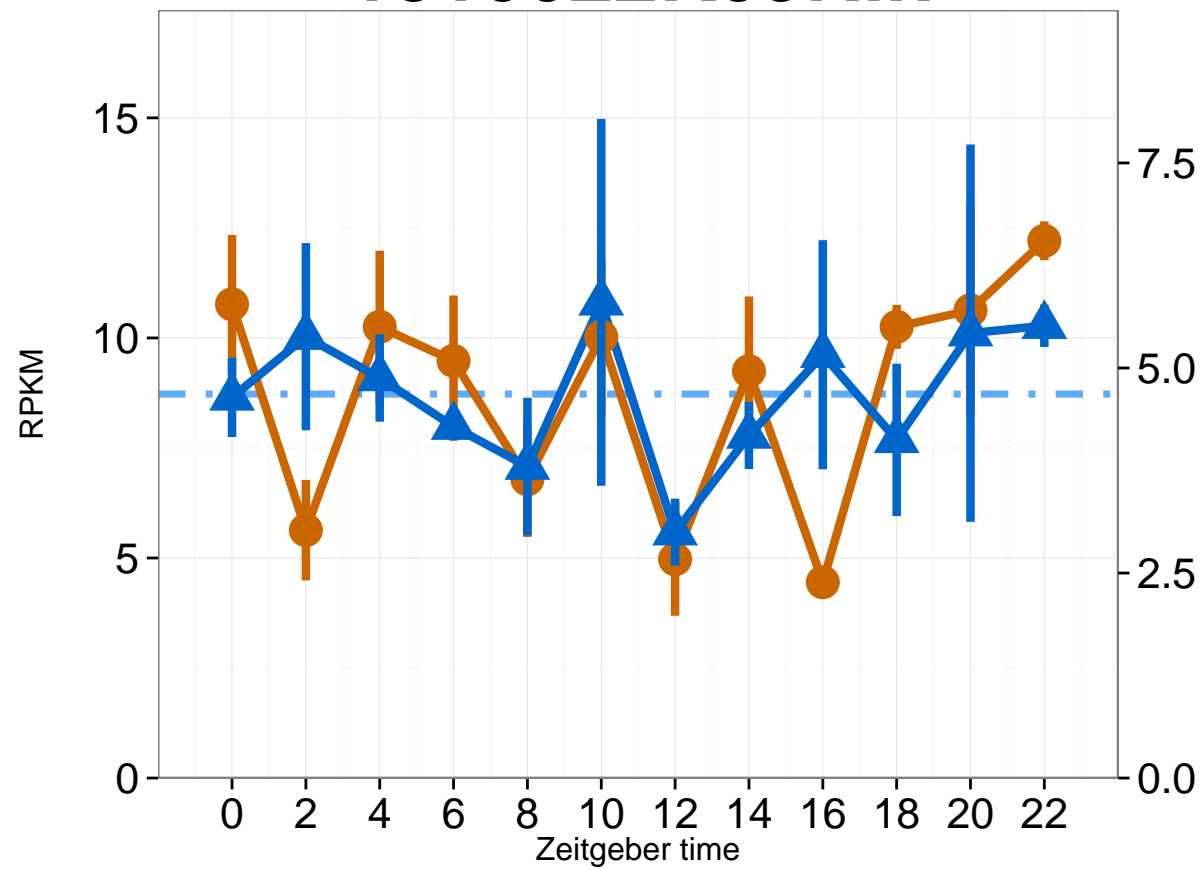

# 1810022K09Rik

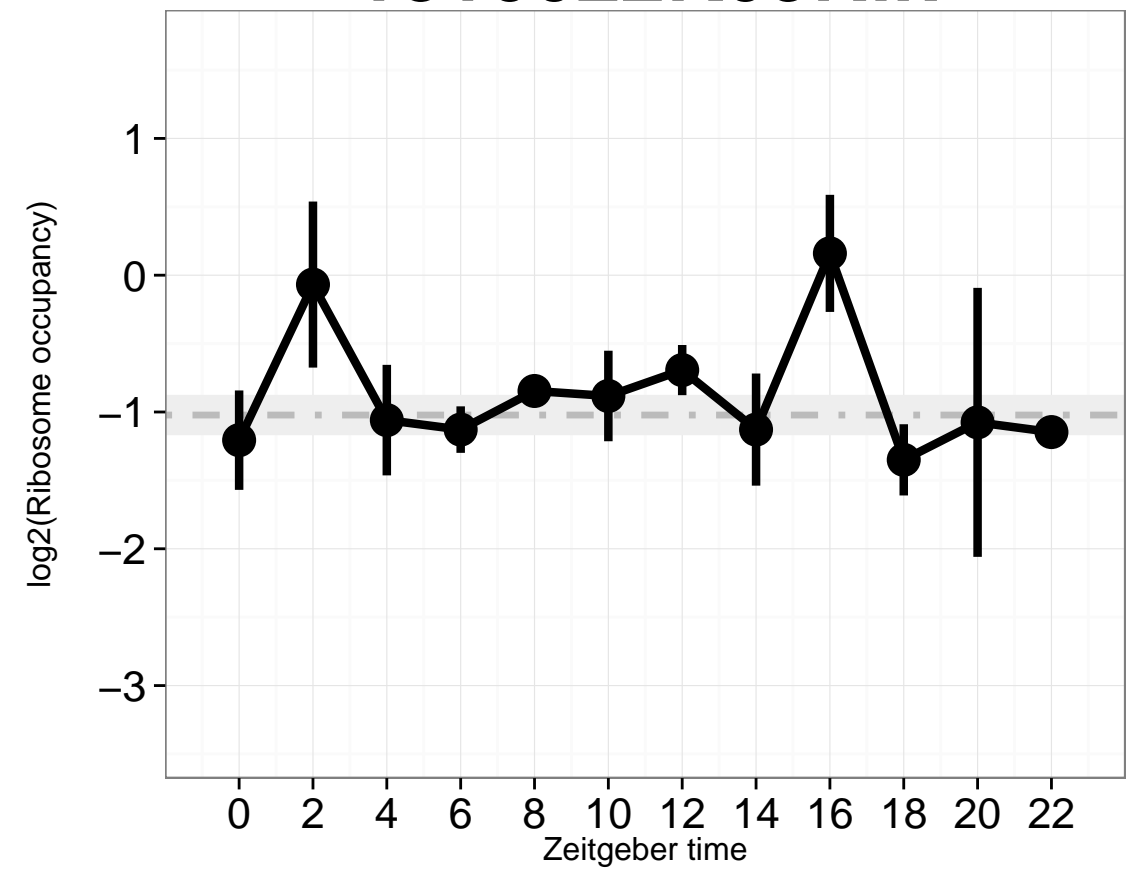

Supplement: SuppDataset_1.zip [file 1810022K09Rik_set_A.pdf › Supplemental Dataset 1/A-mRNA_nonrhyth_translation_nonrhyth/1810022K09Rik_set_A.pdf]

# 1810026J23Rik

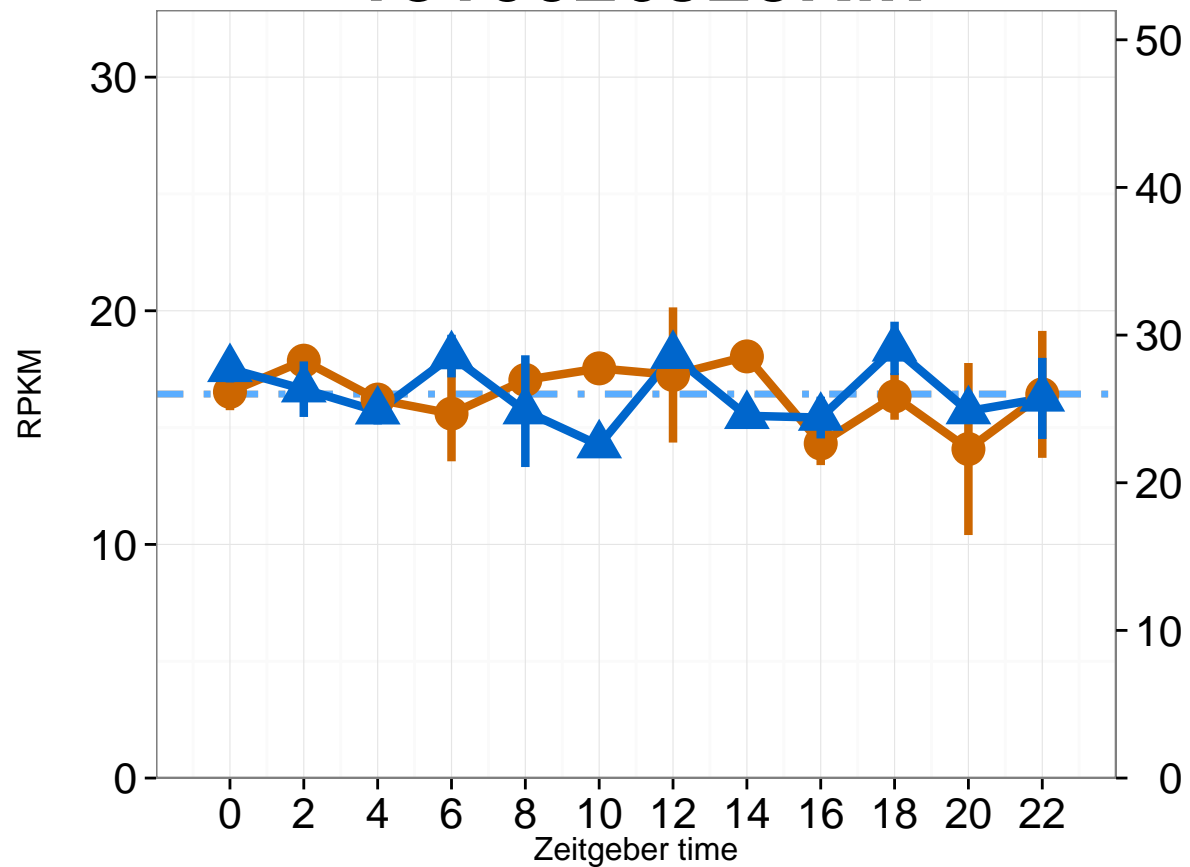

# 1810026J23Rik

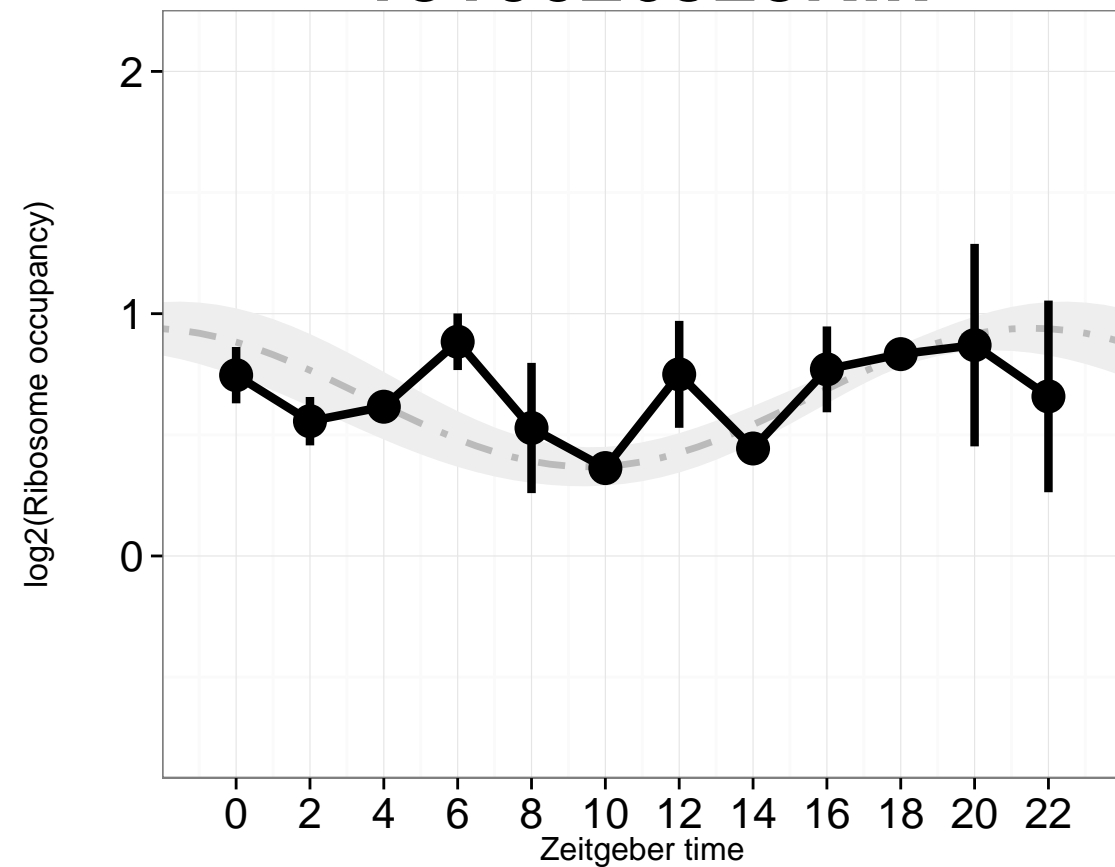

Supplement: SuppDataset_1.zip [file 1810026J23Rik_set_A.pdf › Supplemental Dataset 1/A-mRNA_nonrhyth_translation_nonrhyth/1810026J23Rik_set_A.pdf]

# 1810037I17Rik

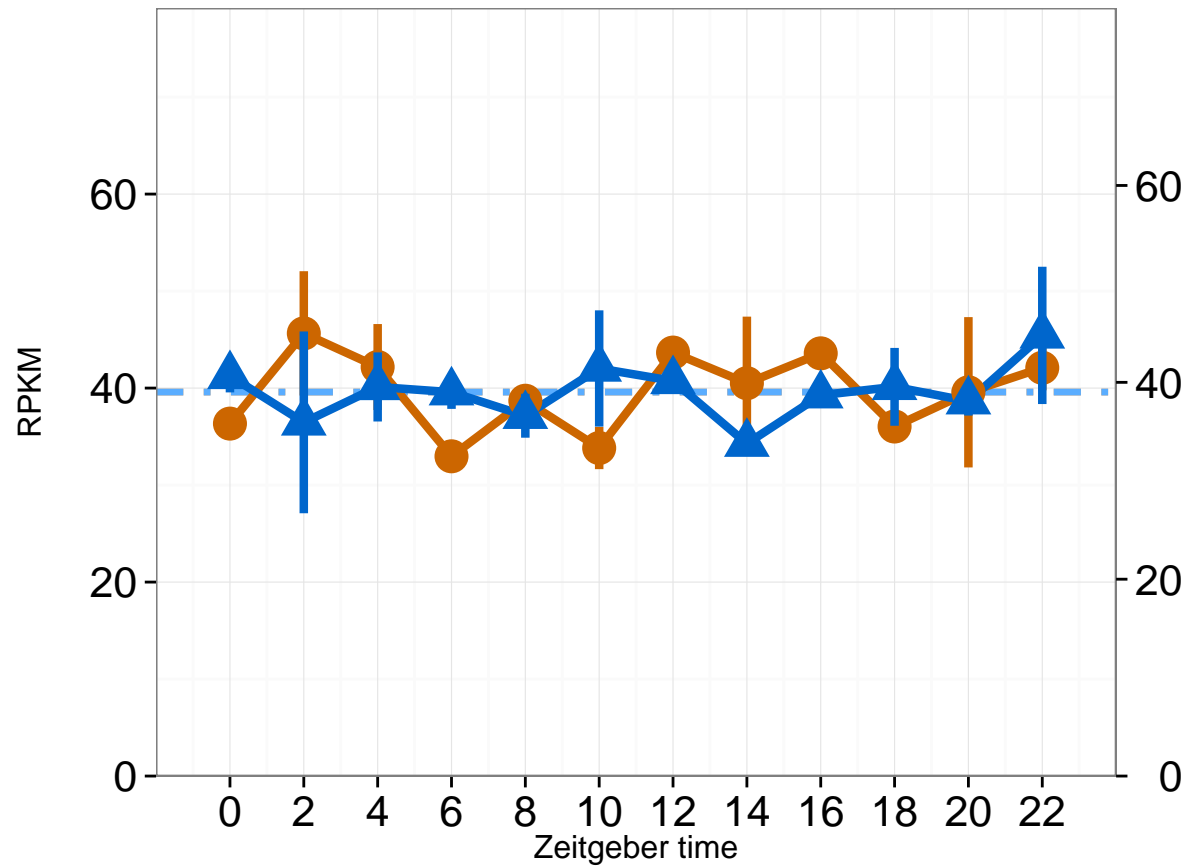

# 1810037I17Rik

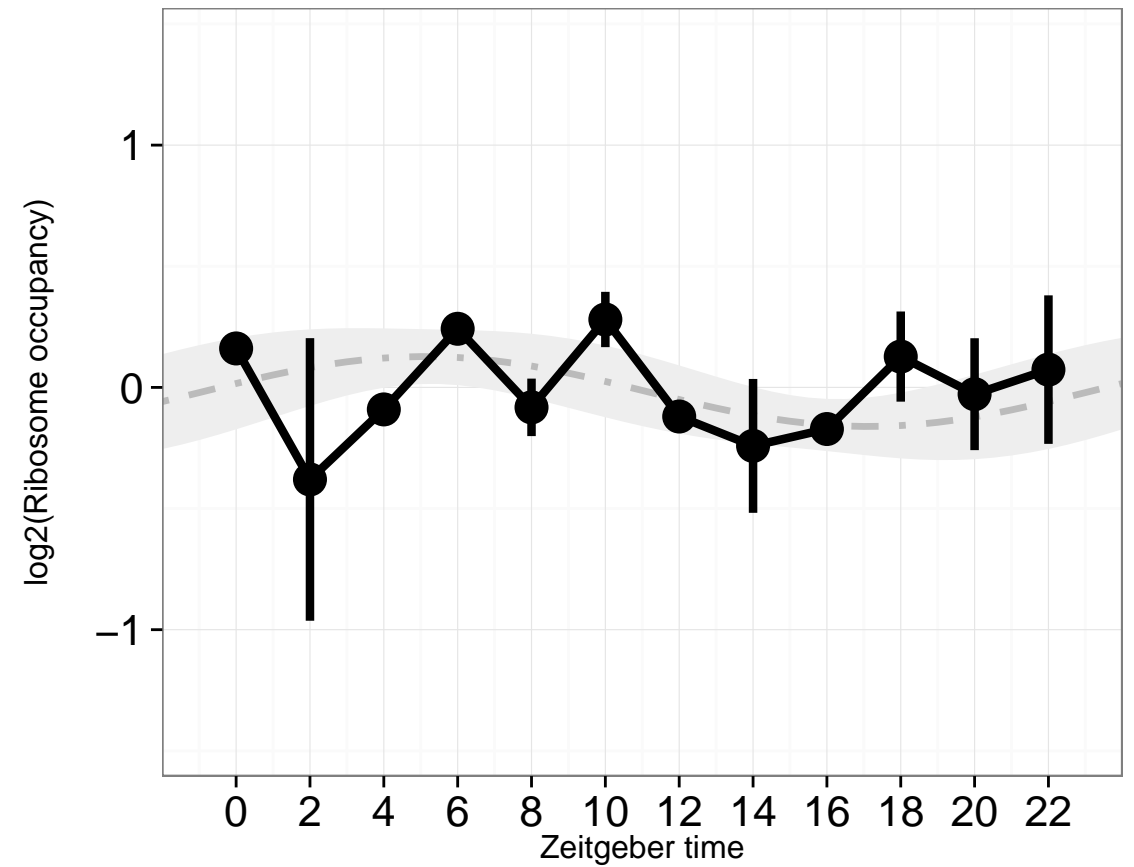

Supplement: SuppDataset_1.zip [file 1810037I17Rik_set_A.pdf › Supplemental Dataset 1/A-mRNA_nonrhyth_translation_nonrhyth/1810037I17Rik_set_A.pdf]

# 1810043H04Rik

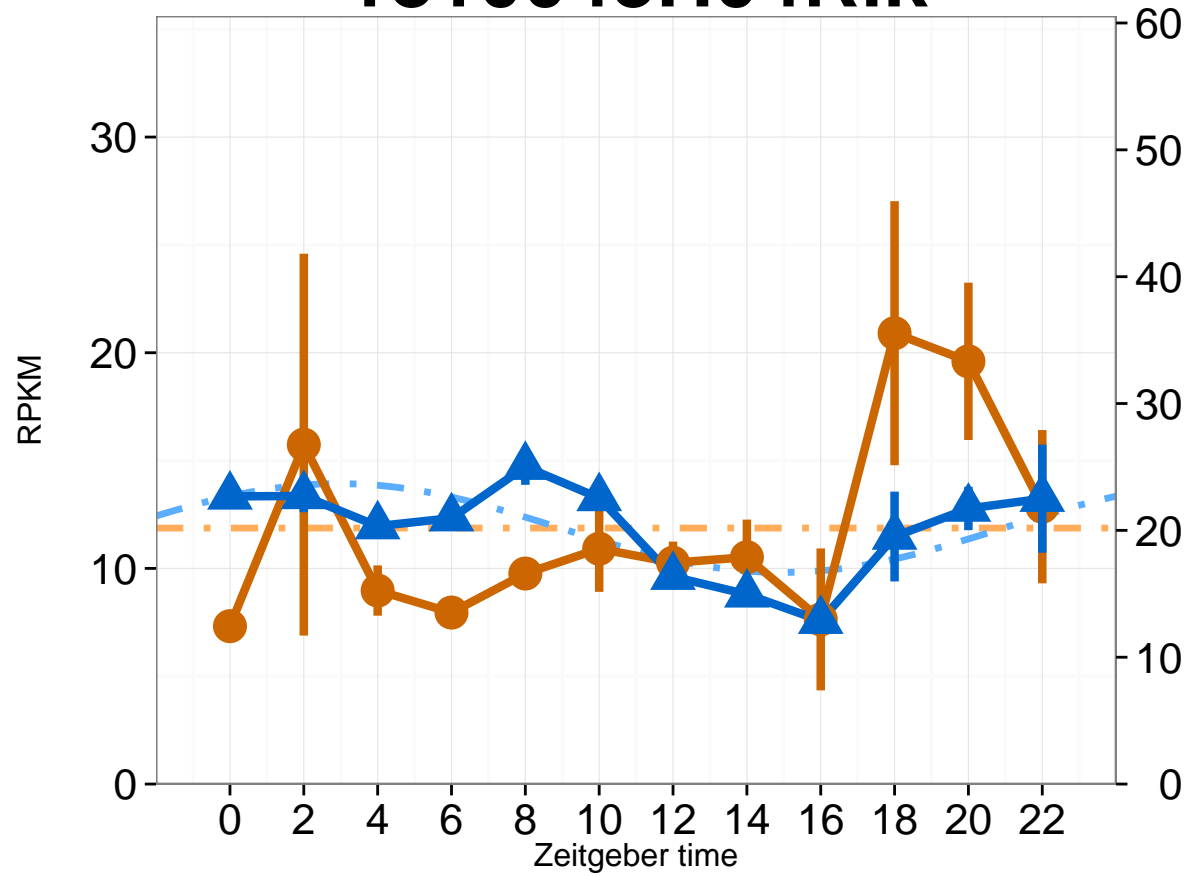

# 1810043H04Rik

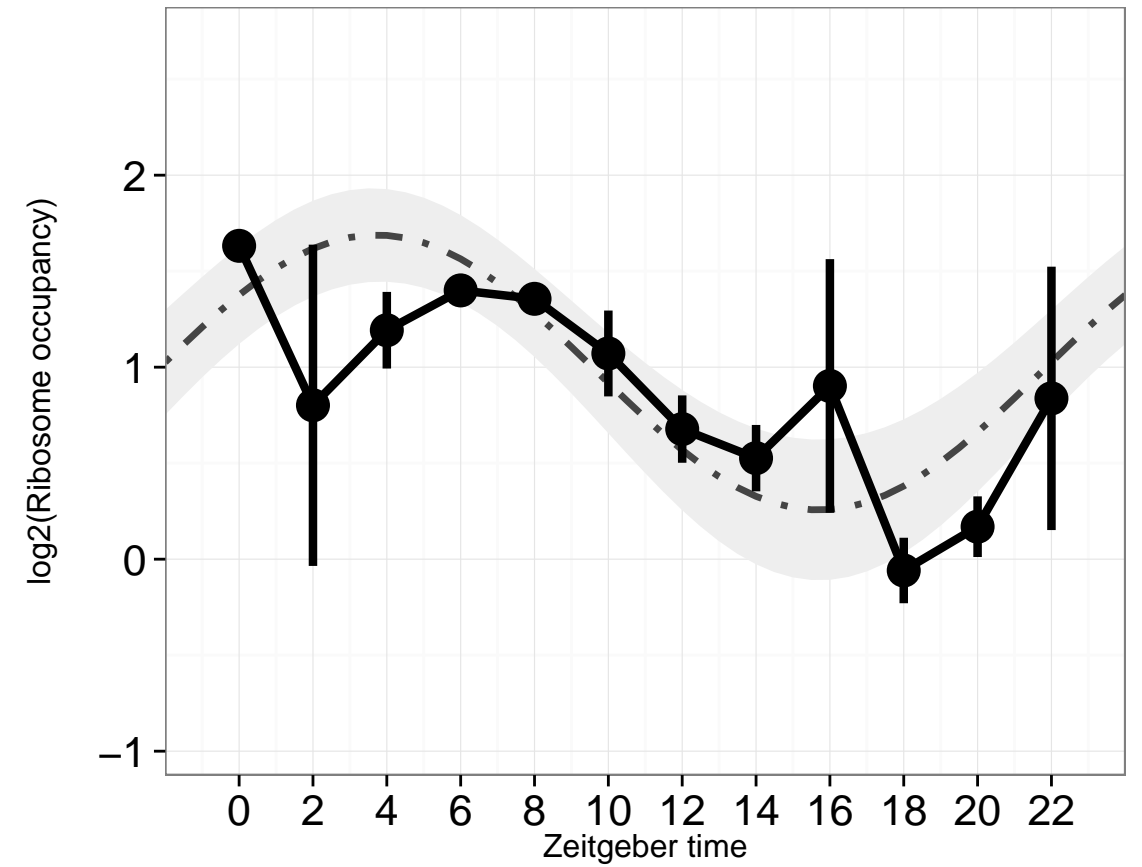

Supplement: SuppDataset_1.zip [file 1810043H04Rik_set_A.pdf › Supplemental Dataset 1/A-mRNA_nonrhyth_translation_nonrhyth/1810043H04Rik_set_A.pdf]

# 2010003K11Rik

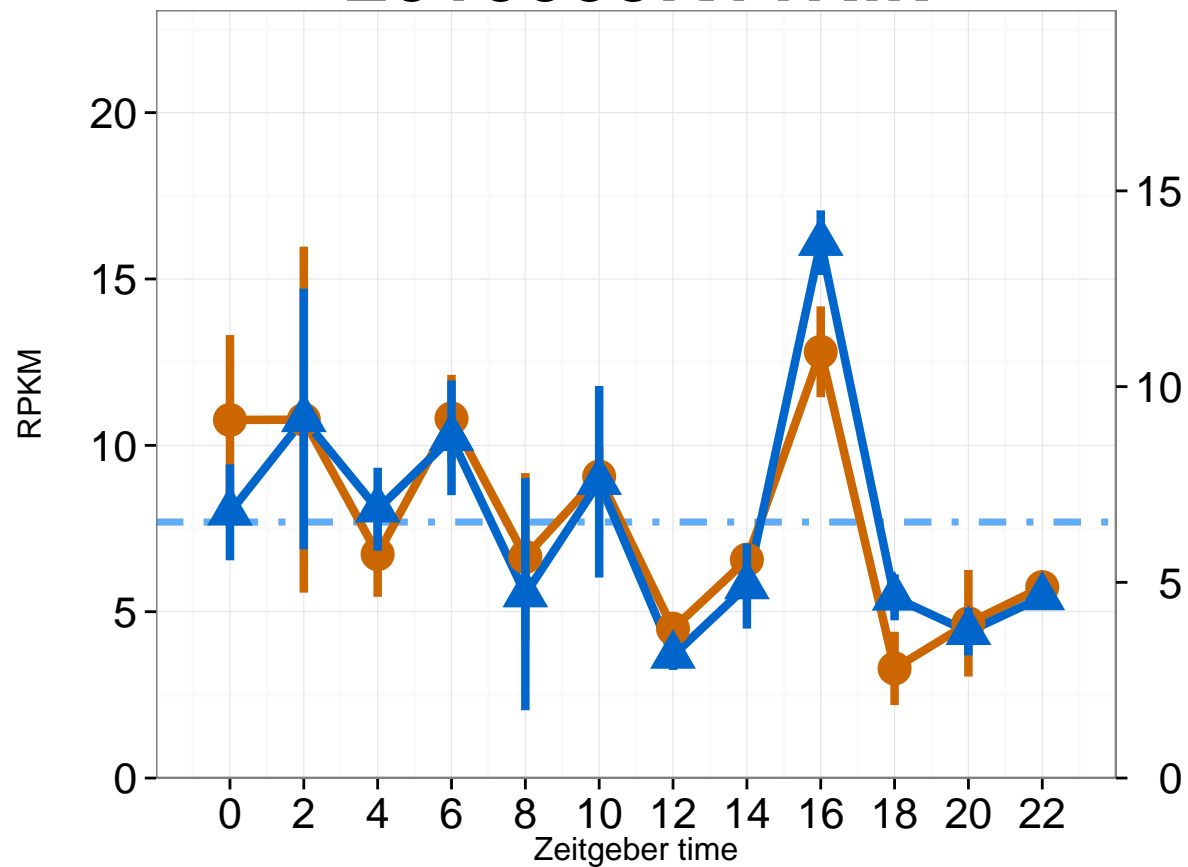

# 2010003K11Rik

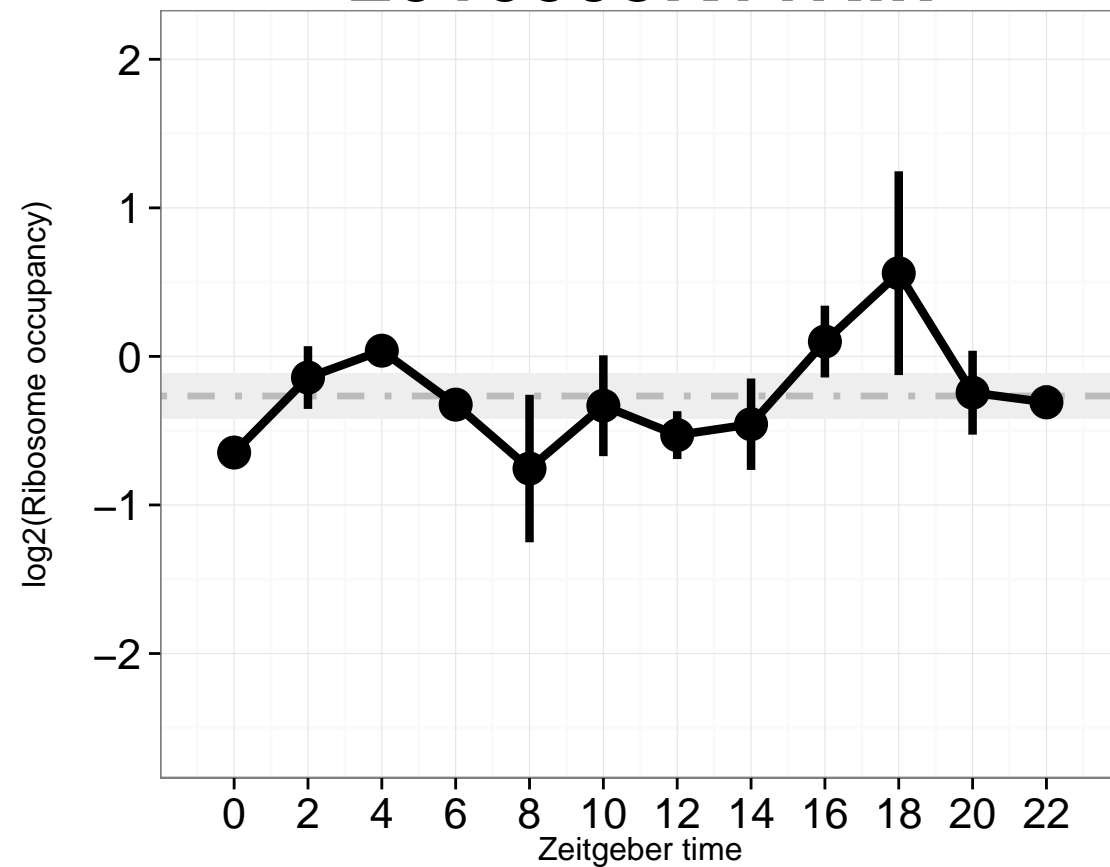

Supplement: SuppDataset_1.zip [file 2010003K11Rik_set_A.pdf › Supplemental Dataset 1/A-mRNA_nonrhyth_translation_nonrhyth/2010003K11Rik_set_A.pdf]

# 2010012005Rik

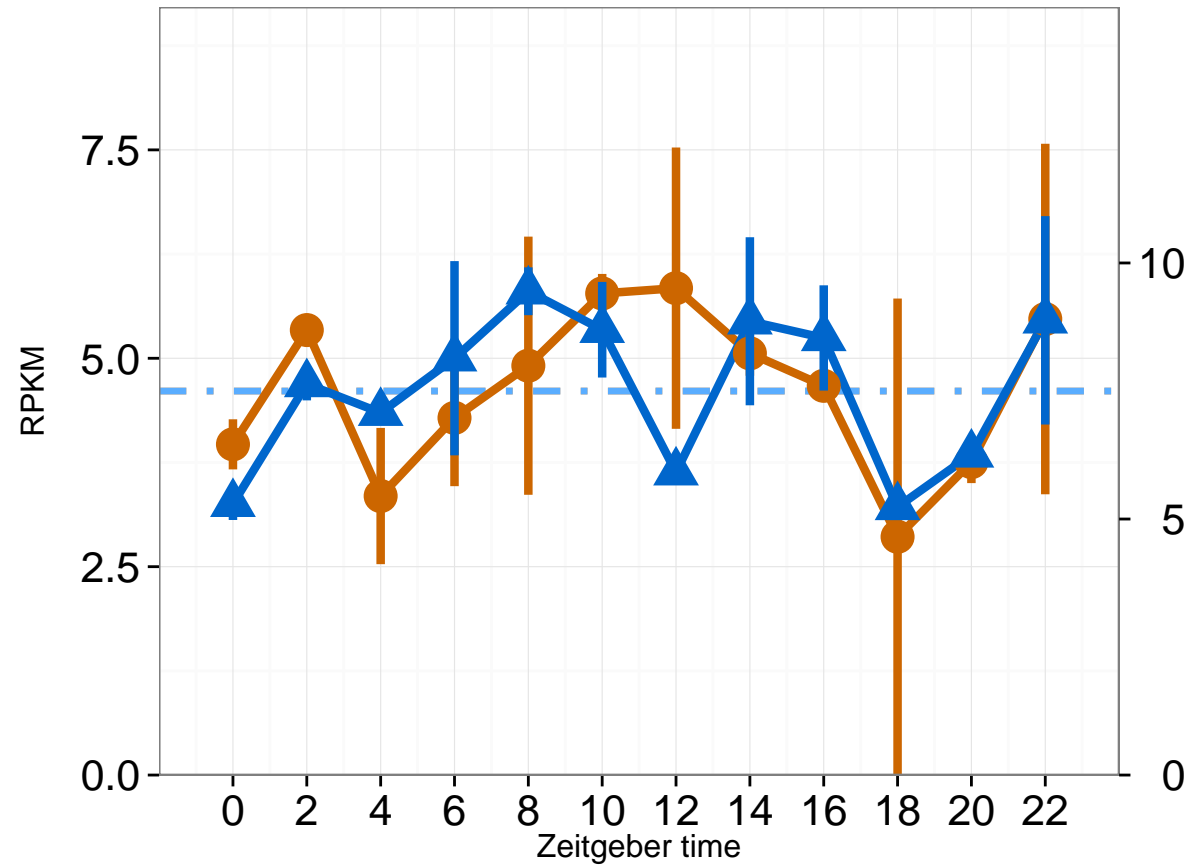

# 2010012005Rik

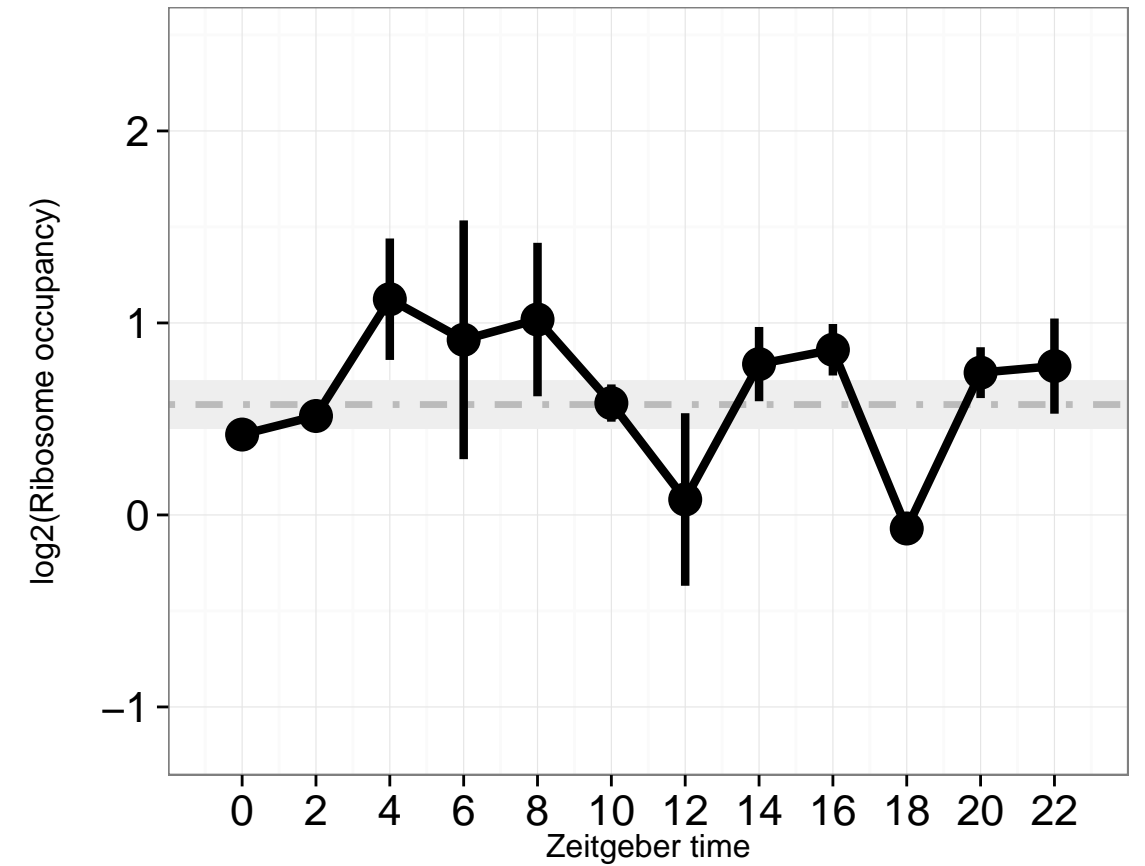

Supplement: SuppDataset_1.zip [file 2010012O05Rik_set_A.pdf › Supplemental Dataset 1/A-mRNA_nonrhyth_translation_nonrhyth/2010012O05Rik_set_A.pdf]

**2010107E04Rik**

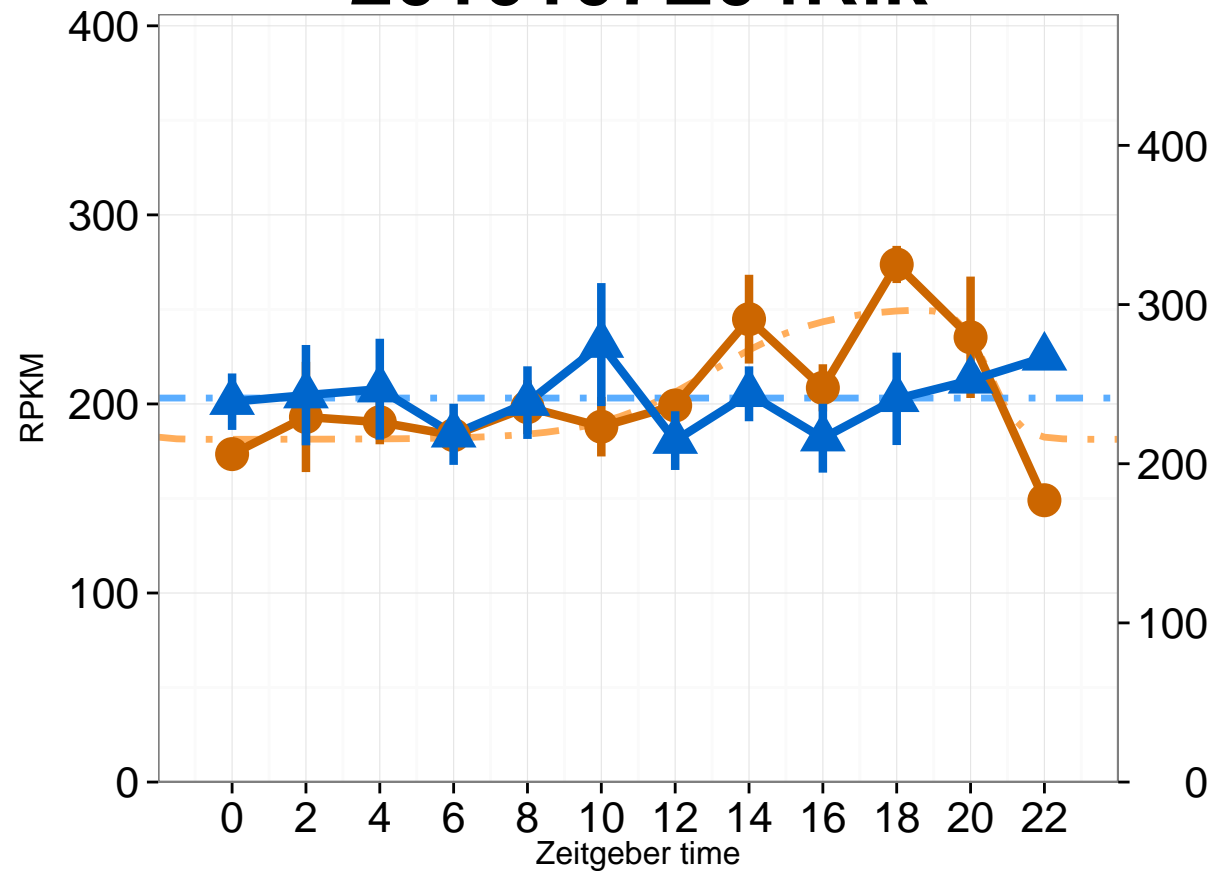

**2010107E04Rik**

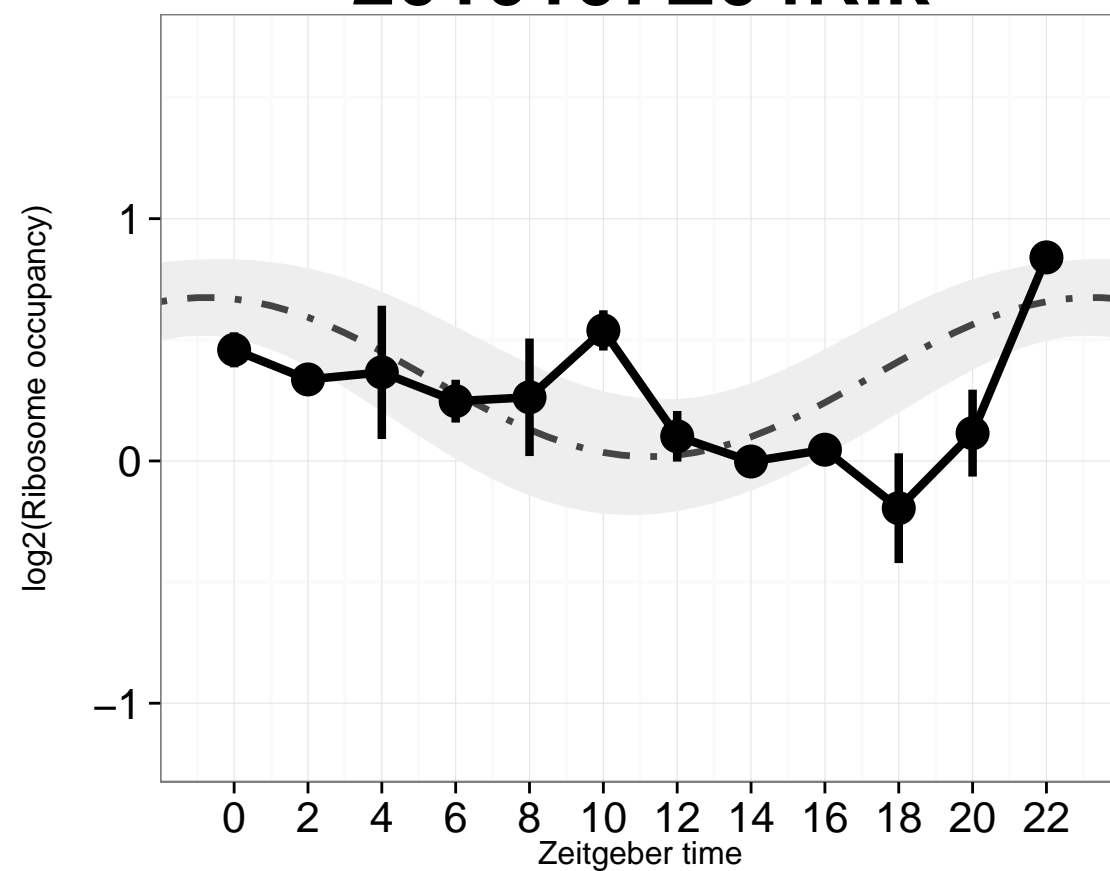

Supplement: SuppDataset_1.zip [file 2010107E04Rik_set_A.pdf › Supplemental Dataset 1/A-mRNA_nonrhyth_translation_nonrhyth/2010107E04Rik_set_A.pdf]

## 2010111I01Rik

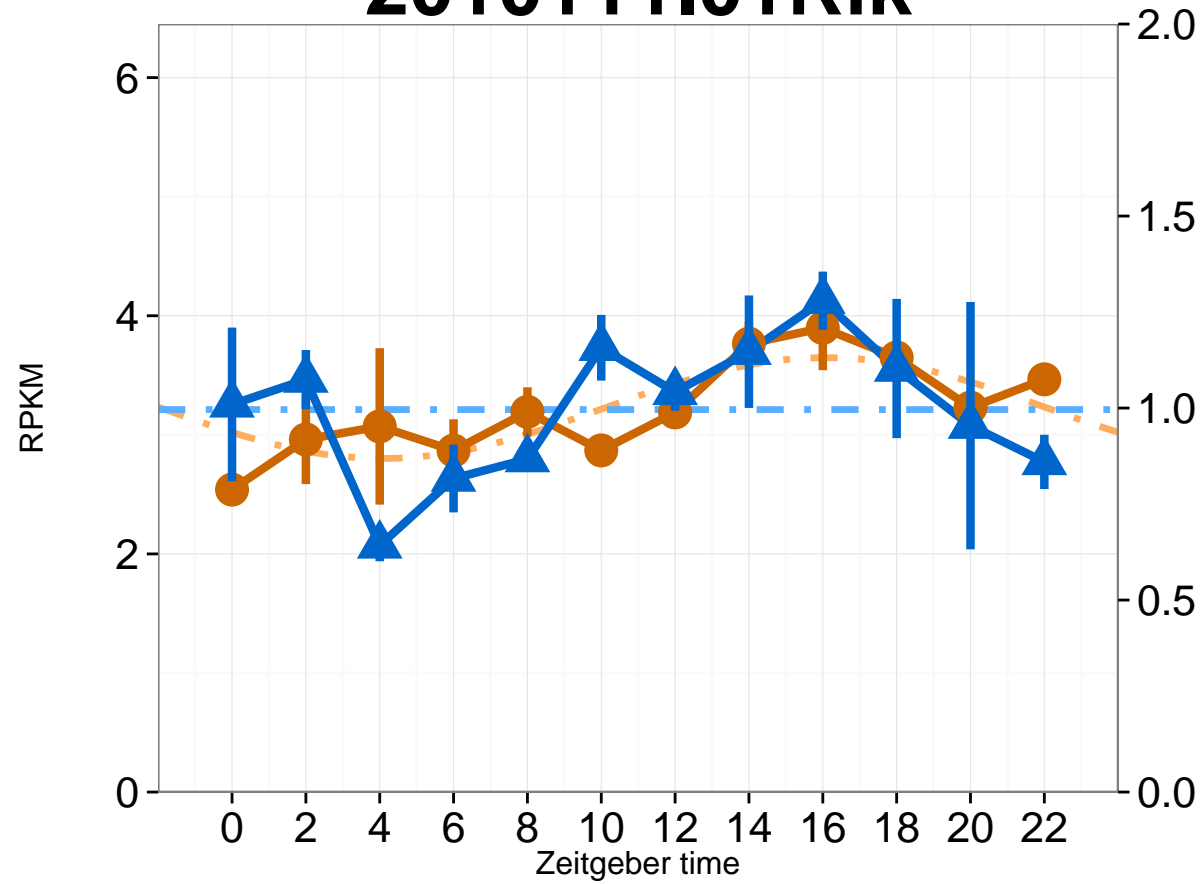

## 2010111I01Rik

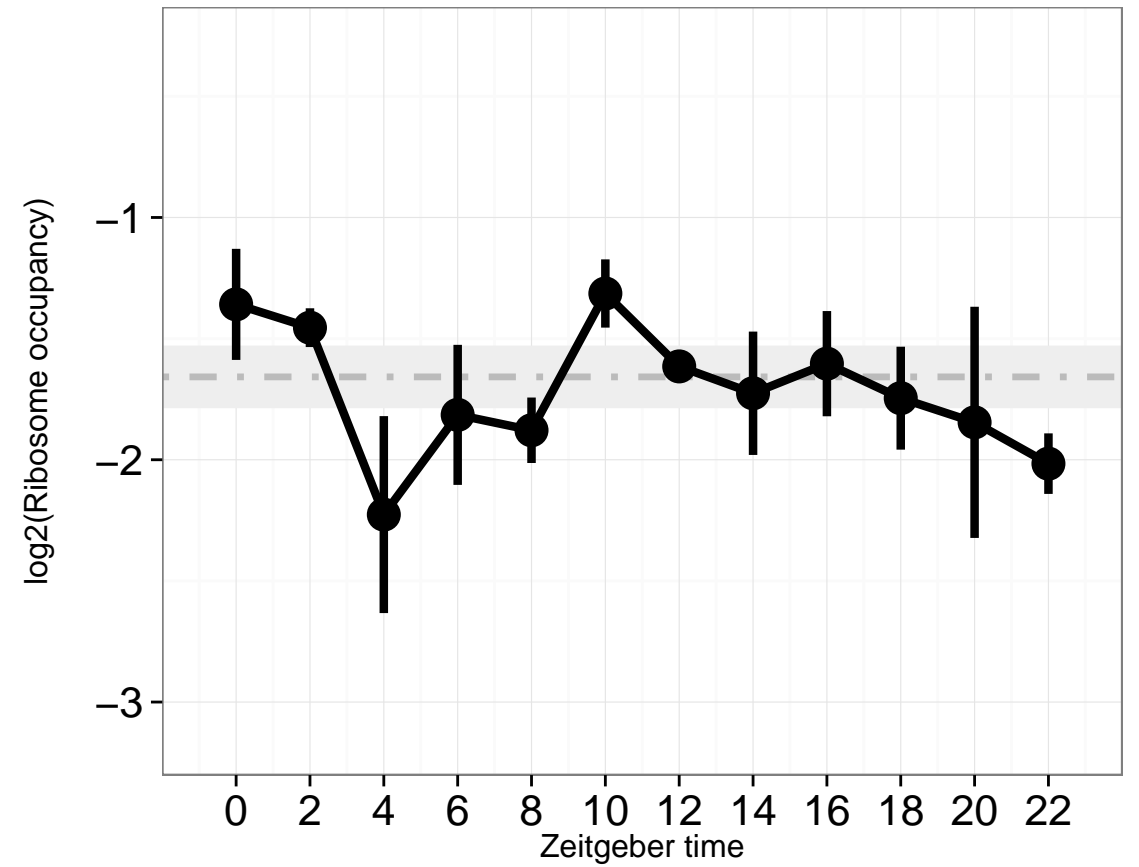

Supplement: SuppDataset_1.zip [file 2010111I01Rik_set_A.pdf › Supplemental Dataset 1/A-mRNA_nonrhyth_translation_nonrhyth/2010111I01Rik_set_A.pdf]

## 2210010C04Rik

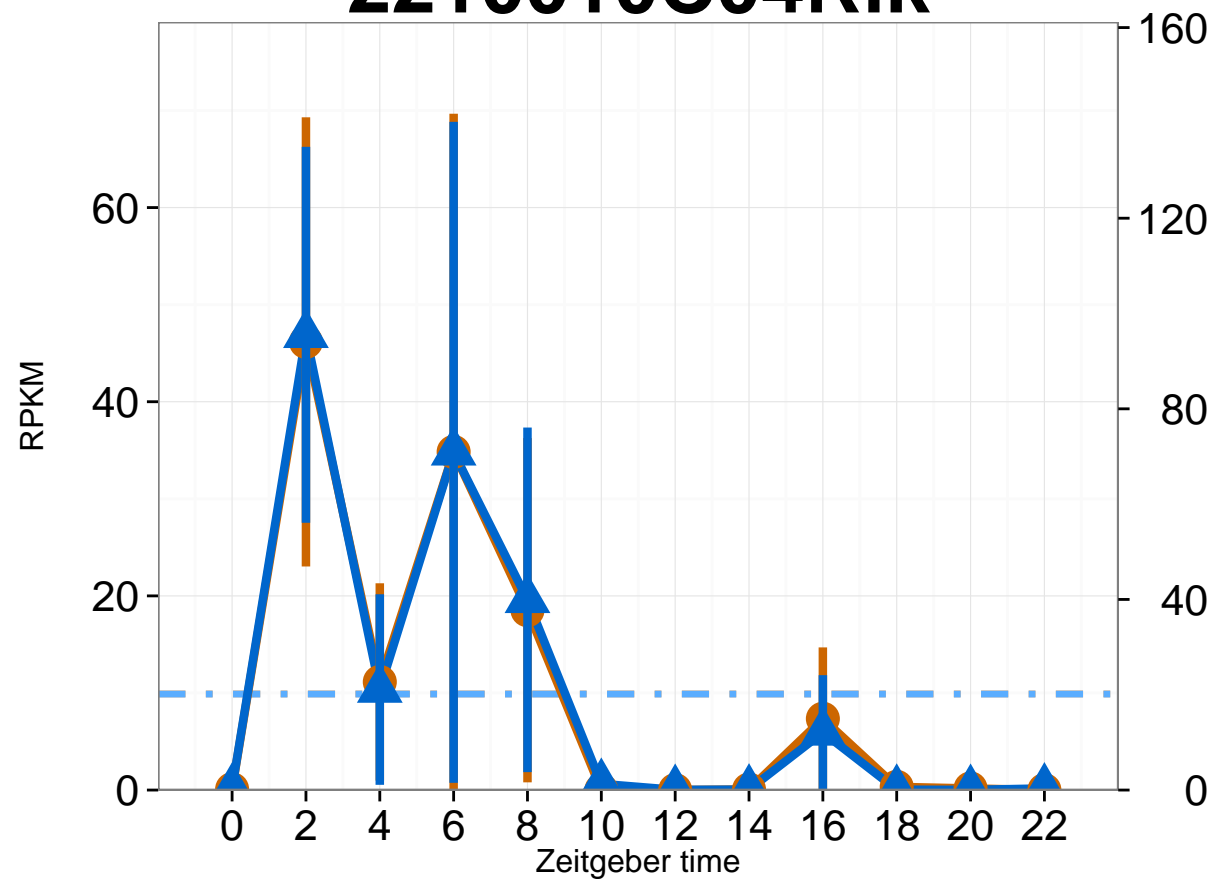

## 2210010C04Rik

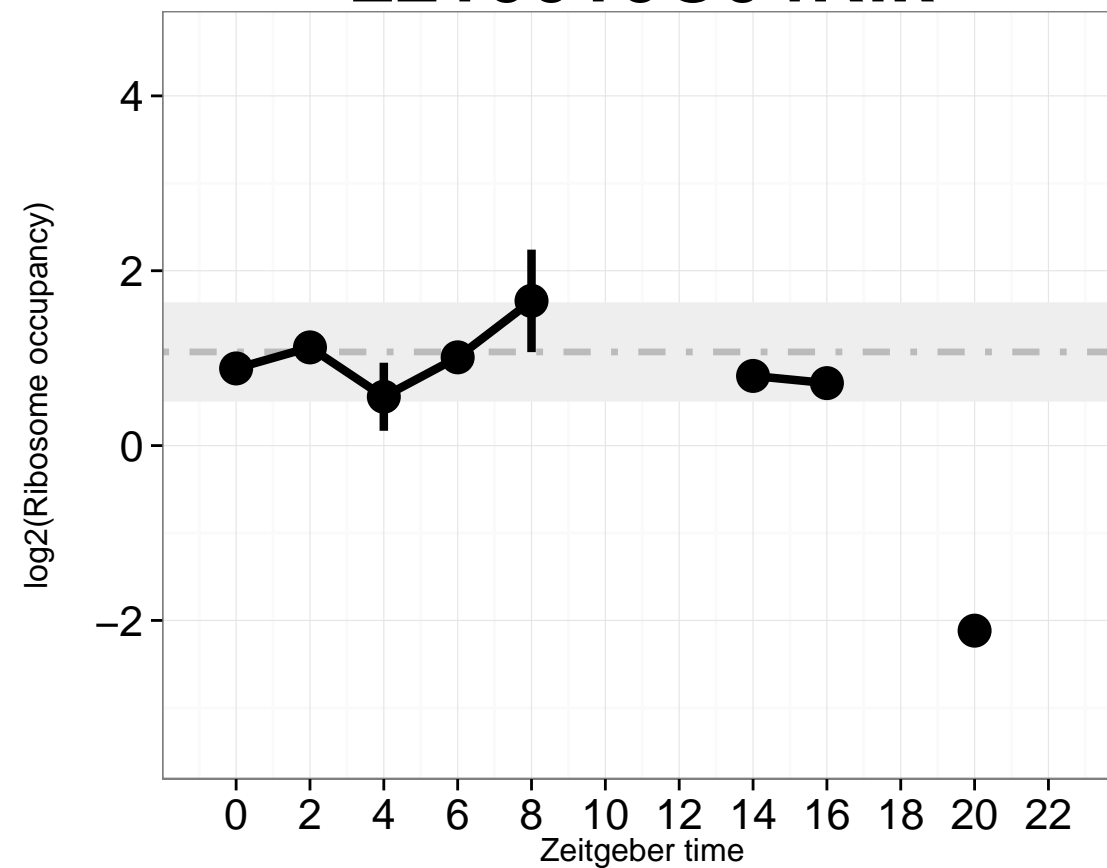

Supplement: SuppDataset_1.zip [file 2210010C04Rik_set_A.pdf › Supplemental Dataset 1/A-mRNA_nonrhyth_translation_nonrhyth/2210010C04Rik_set_A.pdf]

## 2210016F16Rik

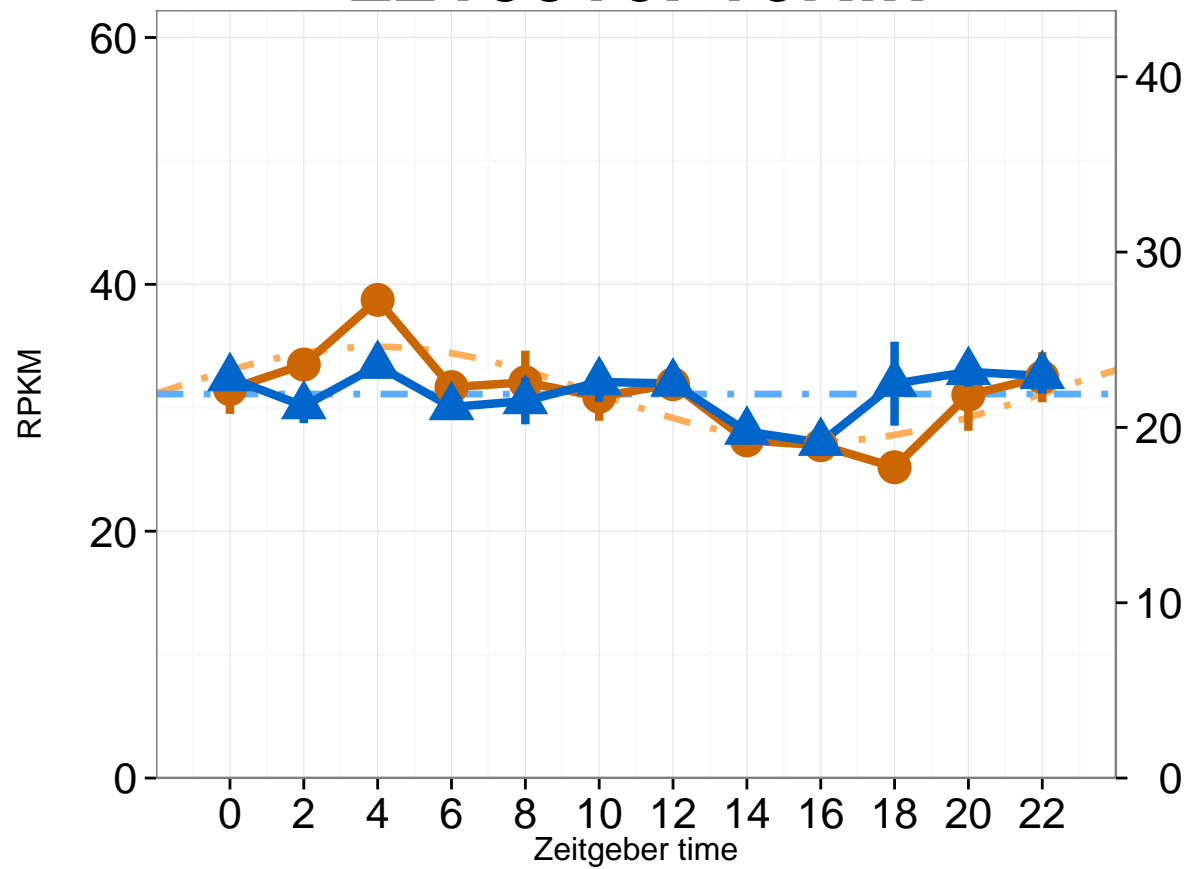

## 2210016F16Rik

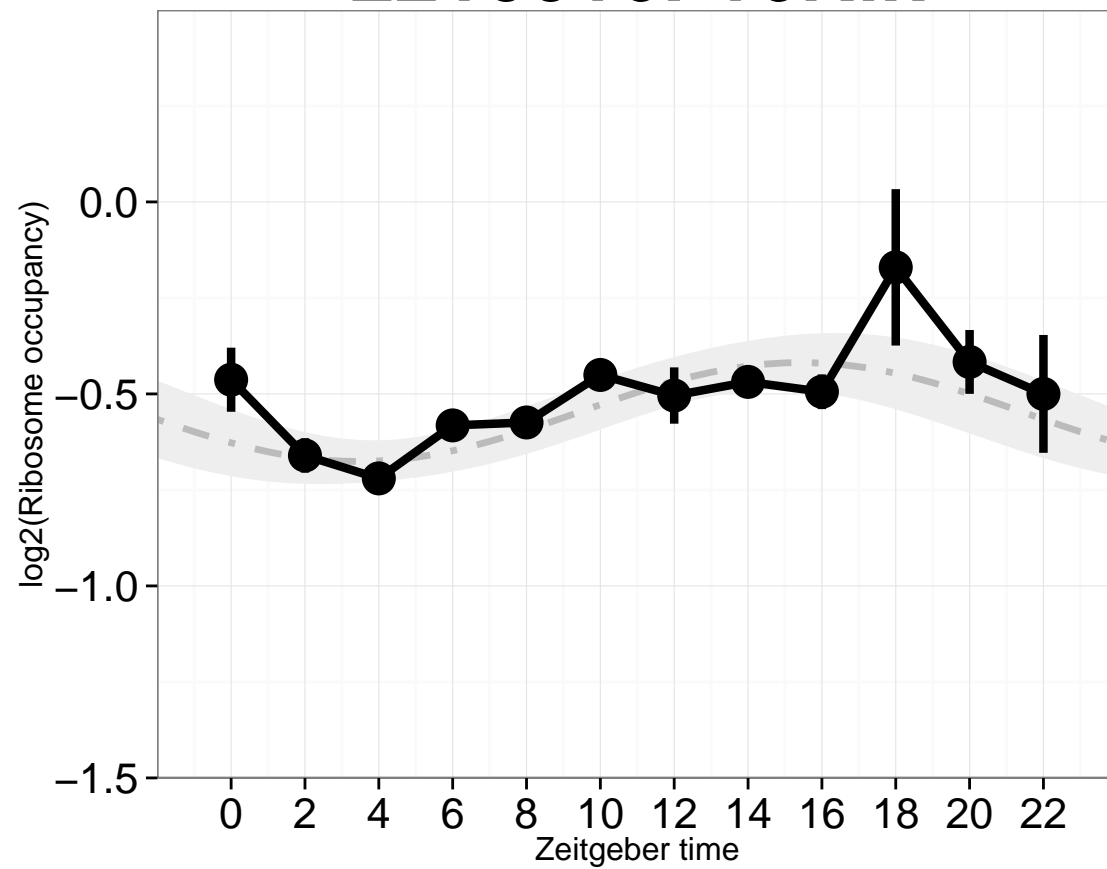

Supplement: SuppDataset_1.zip [file 2210016F16Rik_set_A.pdf › Supplemental Dataset 1/A-mRNA_nonrhyth_translation_nonrhyth/2210016F16Rik_set_A.pdf]

# 2210016L21Rik

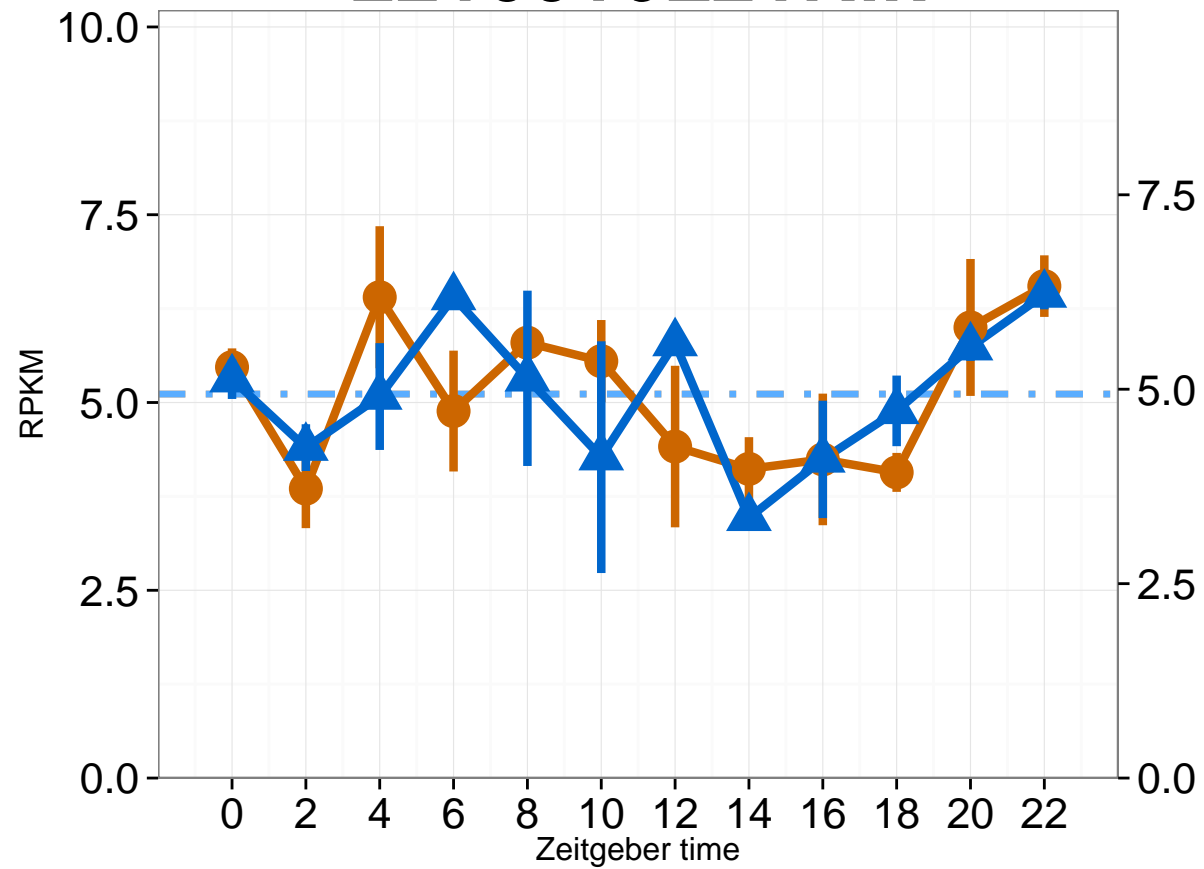

# 2210016L21Rik

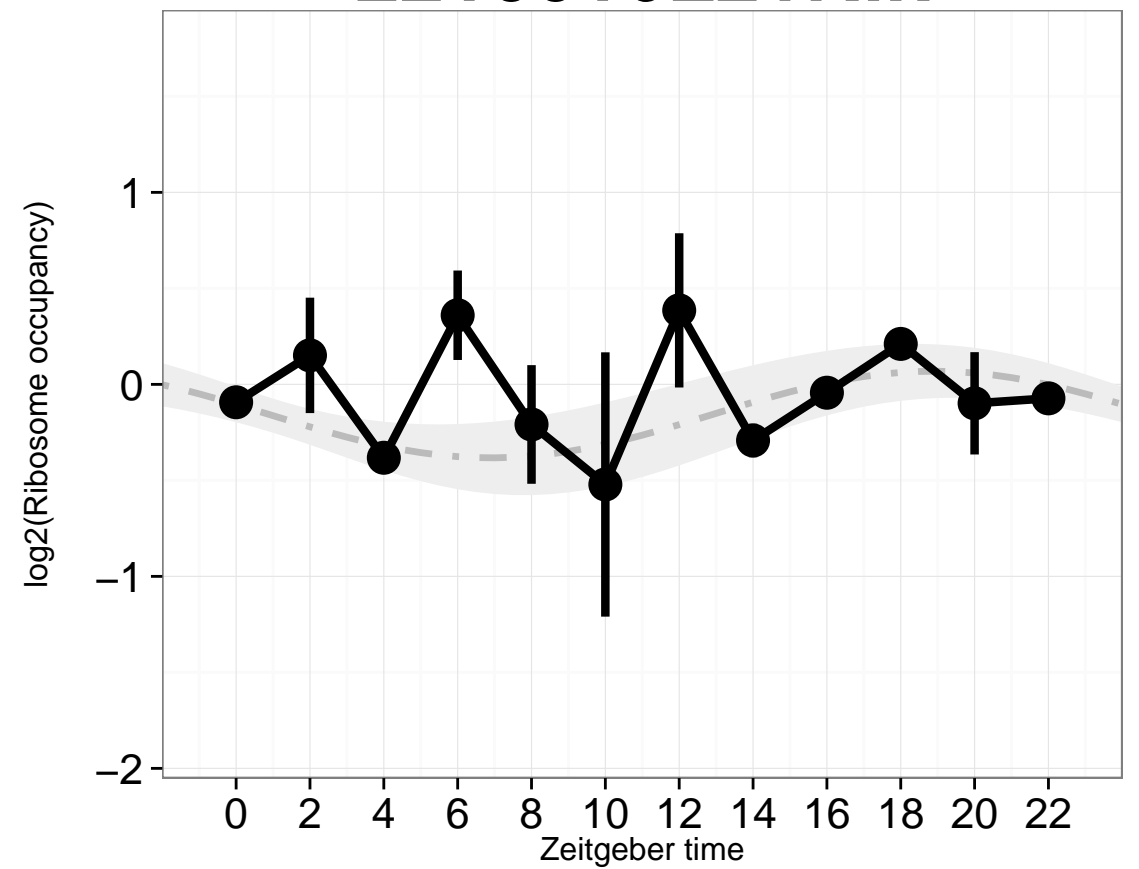

Supplement: SuppDataset_1.zip [file 2210016L21Rik_set_A.pdf › Supplemental Dataset 1/A-mRNA_nonrhyth_translation_nonrhyth/2210016L21Rik_set_A.pdf]

## 2210018M11Rik

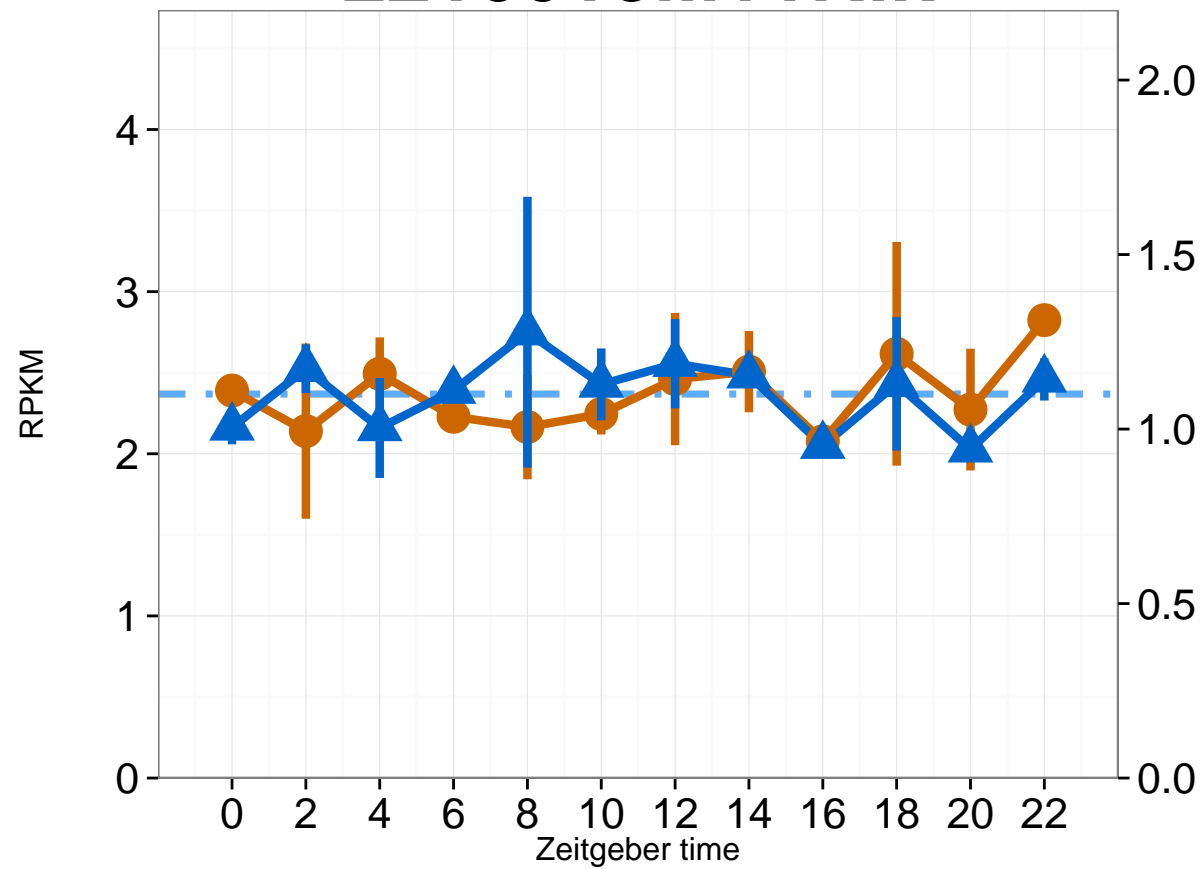

## 2210018M11Rik

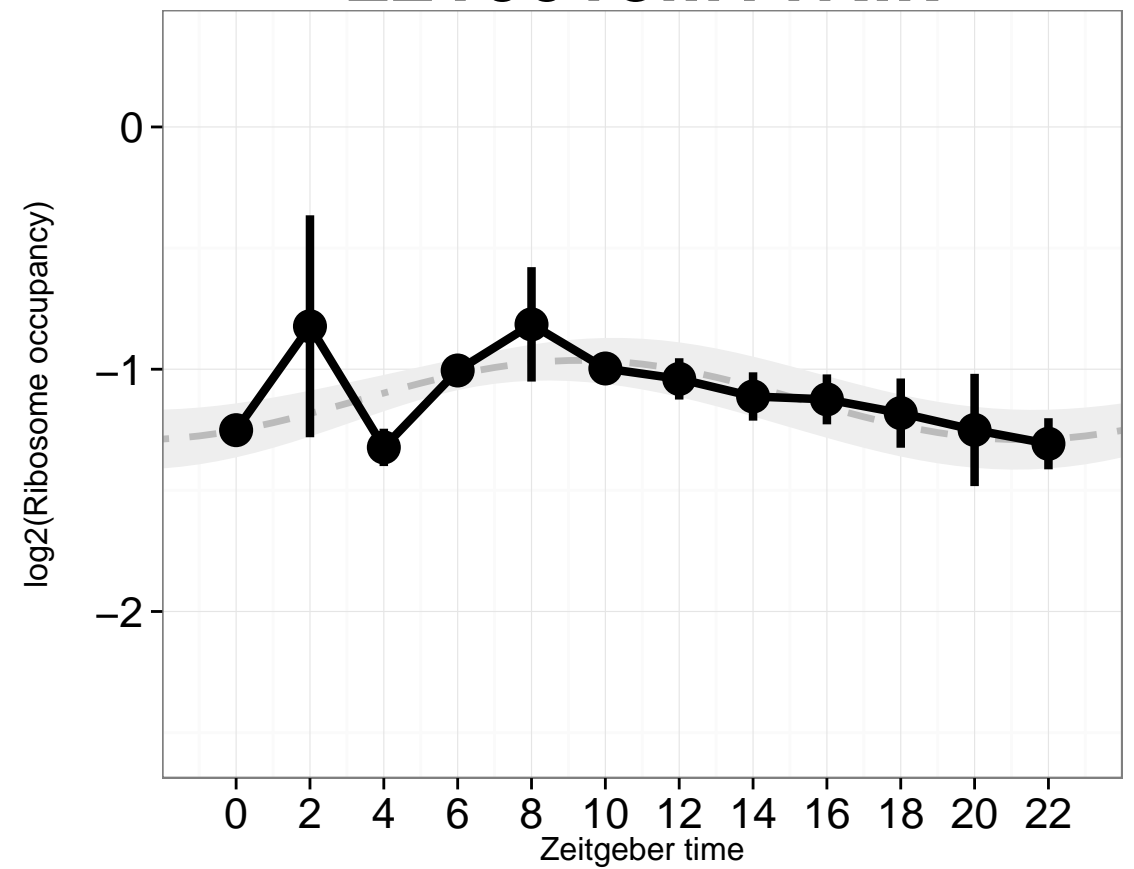

Supplement: SuppDataset_1.zip [file 2210018M11Rik_set_A.pdf › Supplemental Dataset 1/A-mRNA_nonrhyth_translation_nonrhyth/2210018M11Rik_set_A.pdf]

# 2210404O09Rik

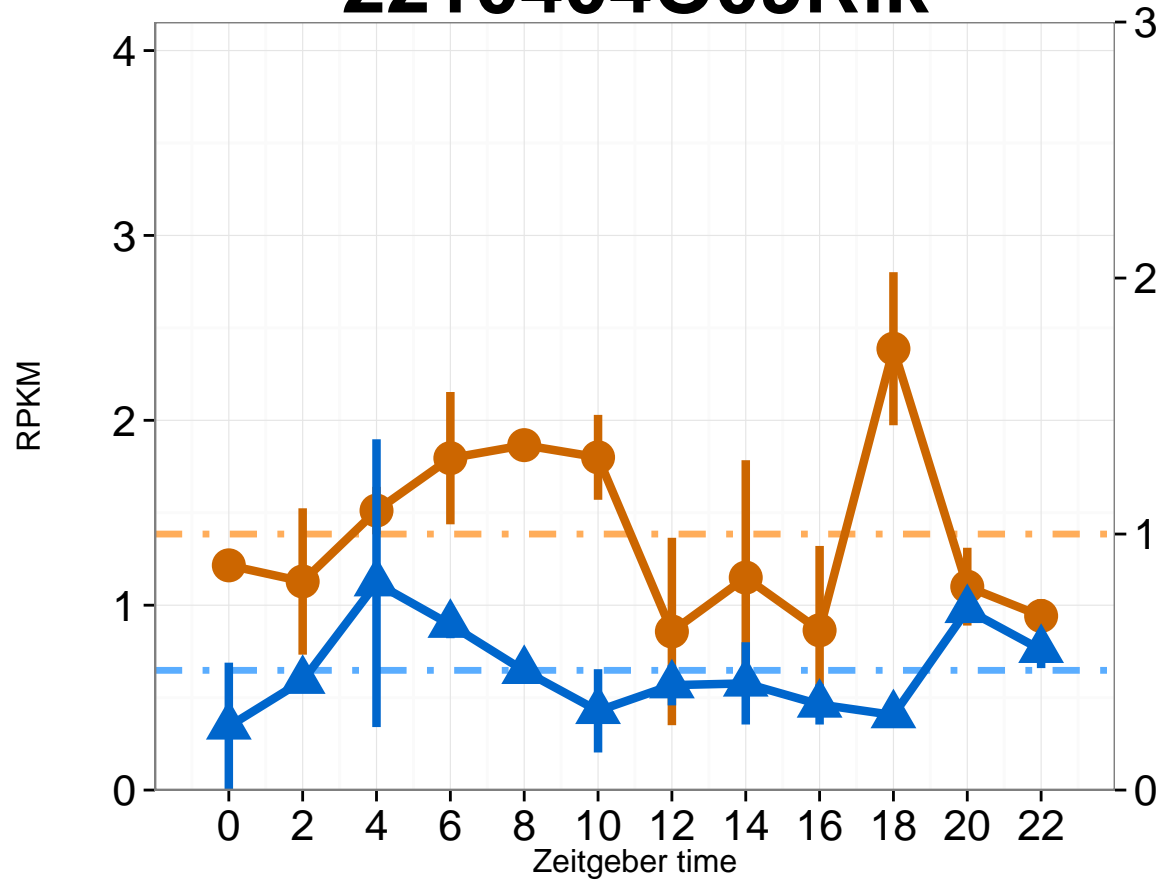

# 2210404O09Rik

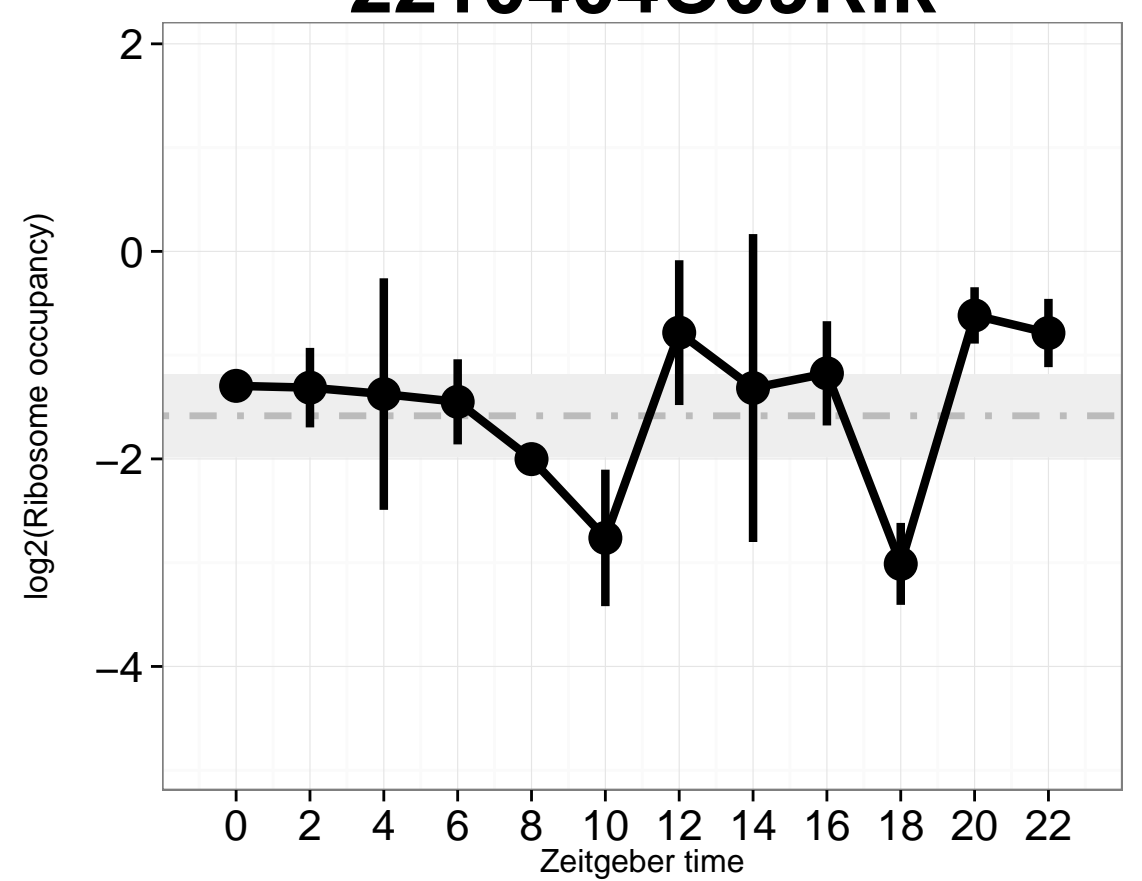

Supplement: SuppDataset_1.zip [file 2210404O09Rik_set_A.pdf › Supplemental Dataset 1/A-mRNA_nonrhyth_translation_nonrhyth/2210404O09Rik_set_A.pdf]

## 2300009A05Rik

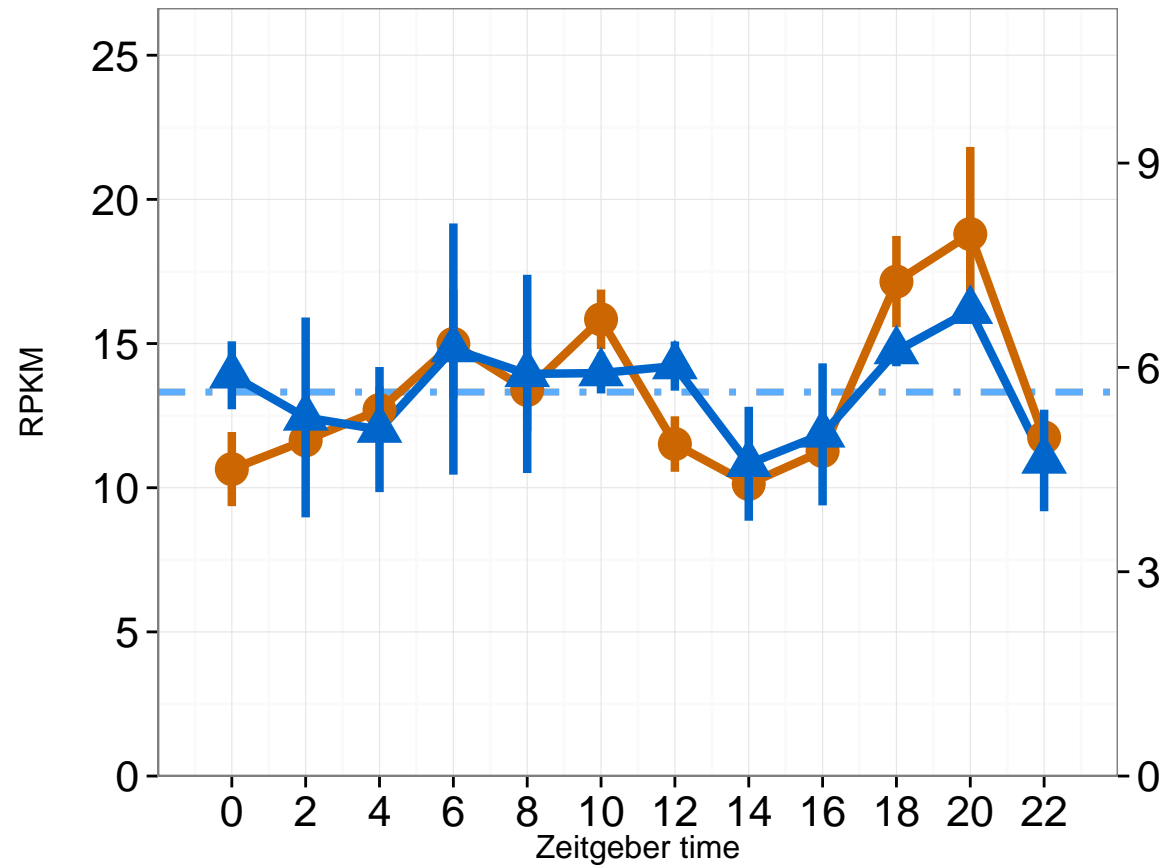

## 2300009A05Rik

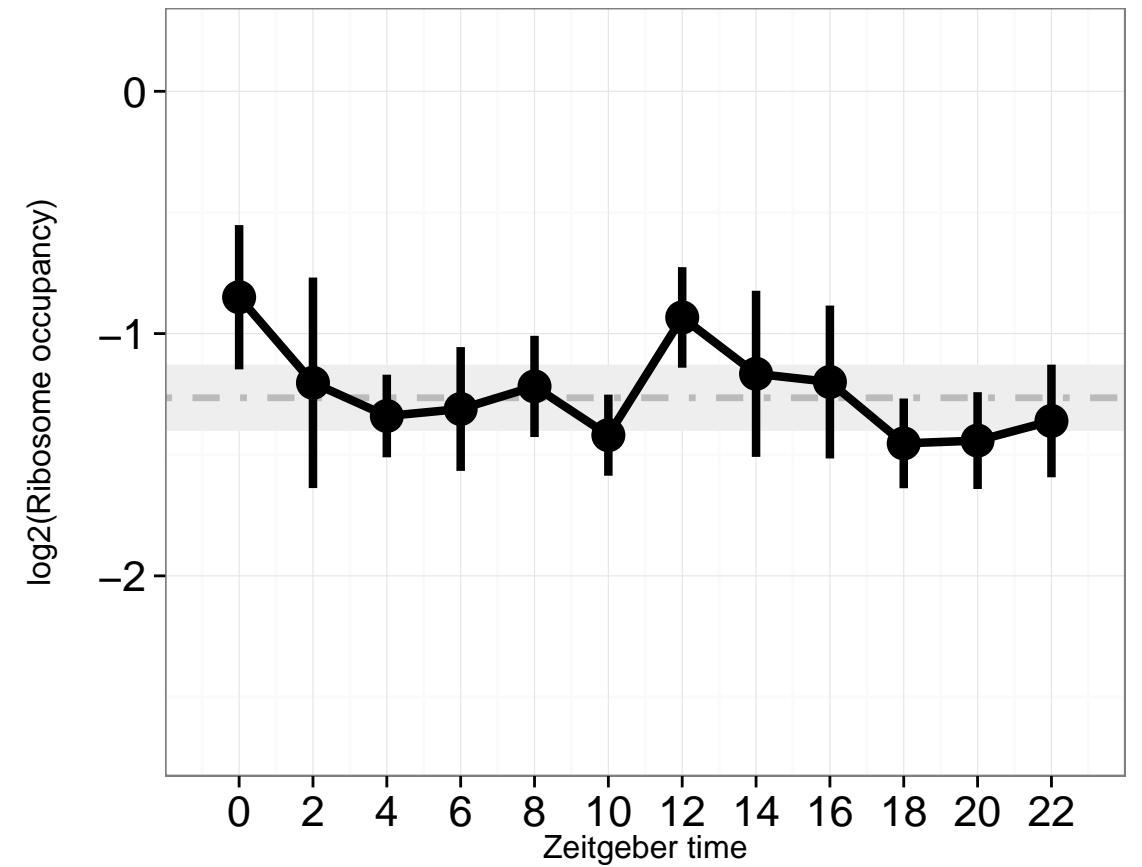

Supplement: SuppDataset_1.zip [file 2300009A05Rik_set_A.pdf › Supplemental Dataset 1/A-mRNA_nonrhyth_translation_nonrhyth/2300009A05Rik_set_A.pdf]

## 2310009B15Rik

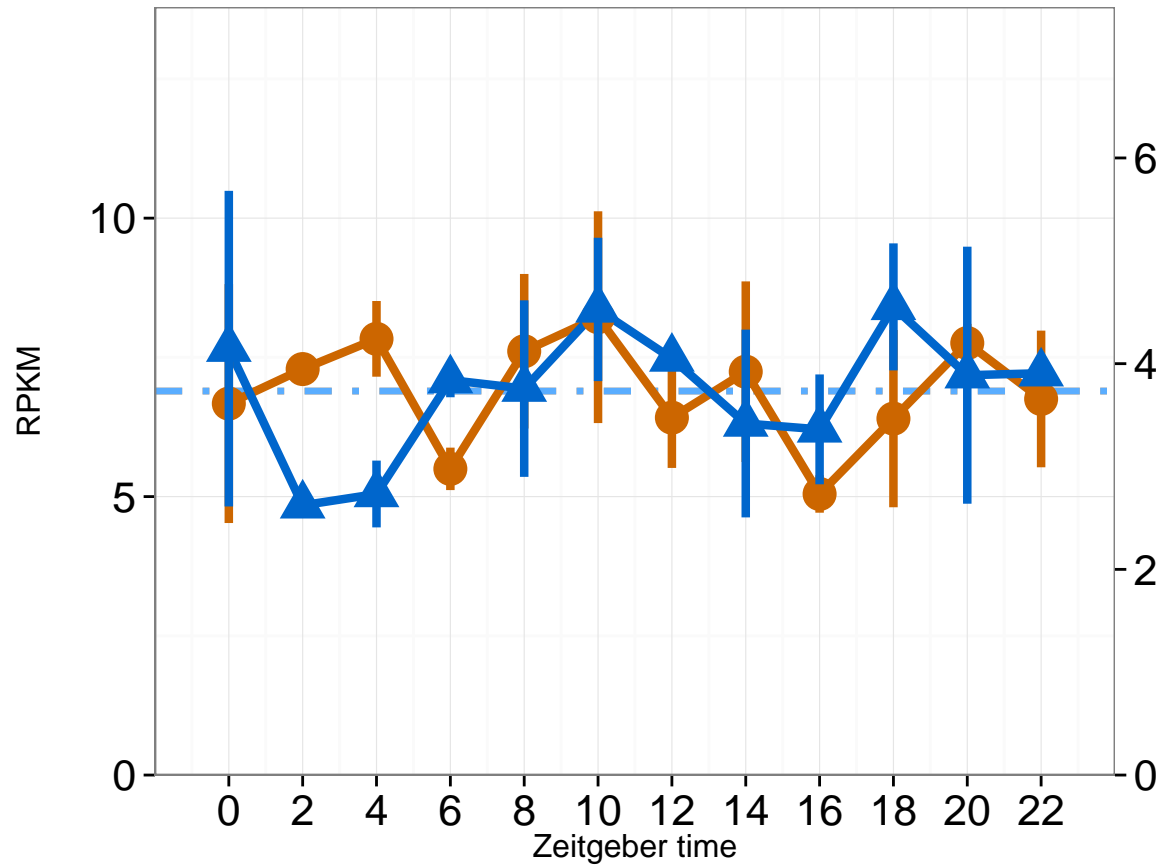

## 2310009B15Rik

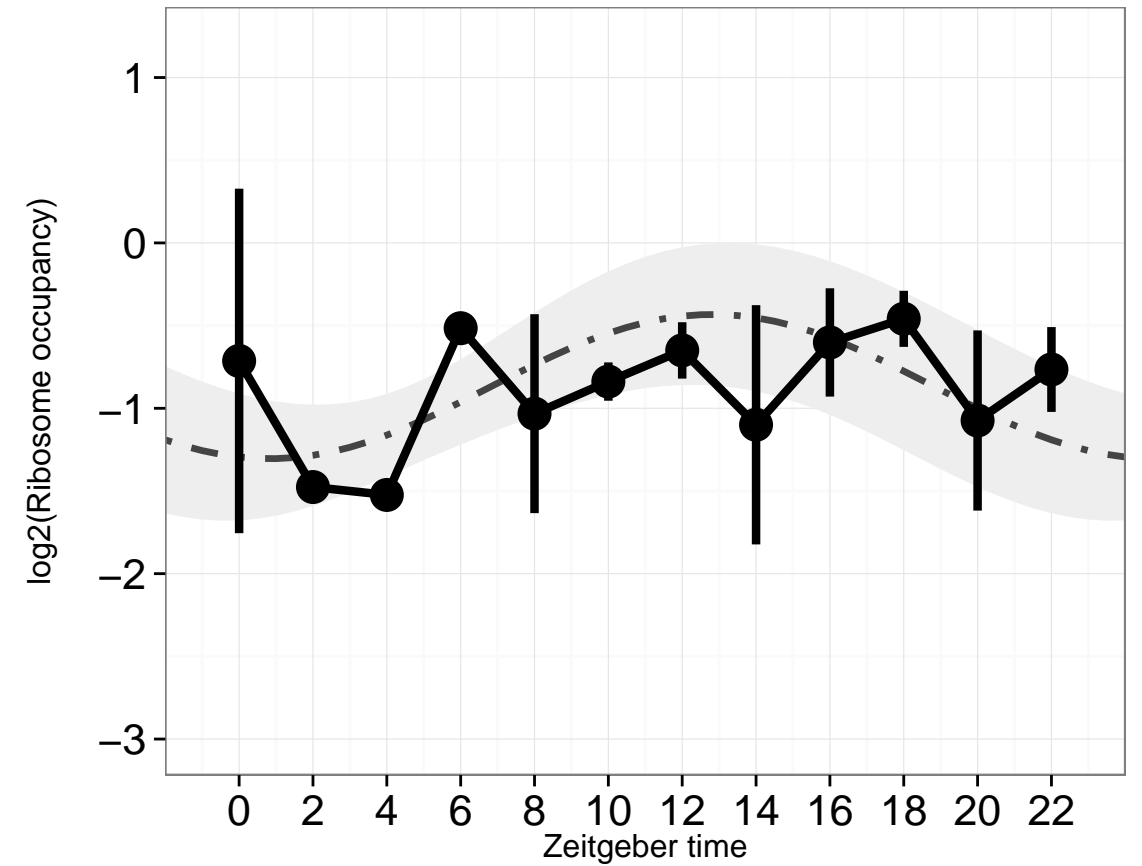

Supplement: SuppDataset_1.zip [file 2310009B15Rik_set_A.pdf › Supplemental Dataset 1/A-mRNA_nonrhyth_translation_nonrhyth/2310009B15Rik_set_A.pdf]

## 2310011J03Rik

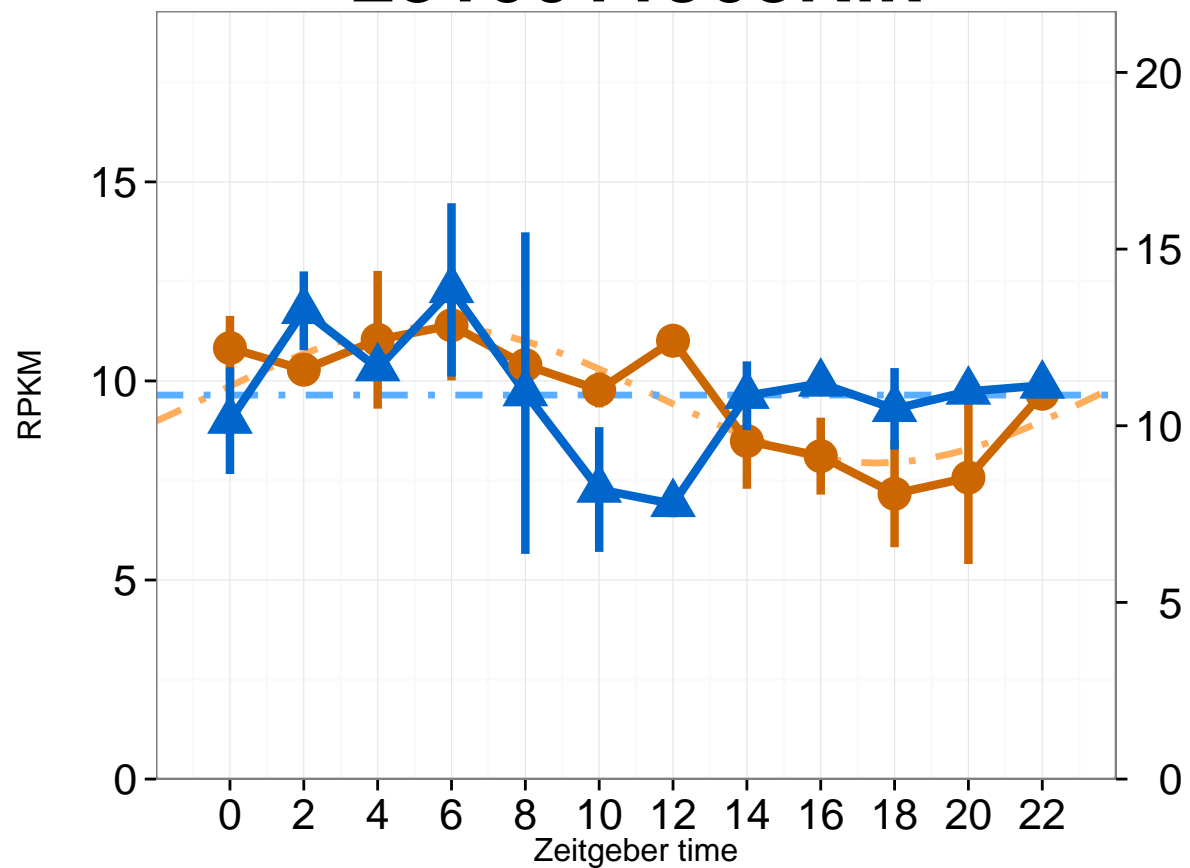

## 2310011J03Rik

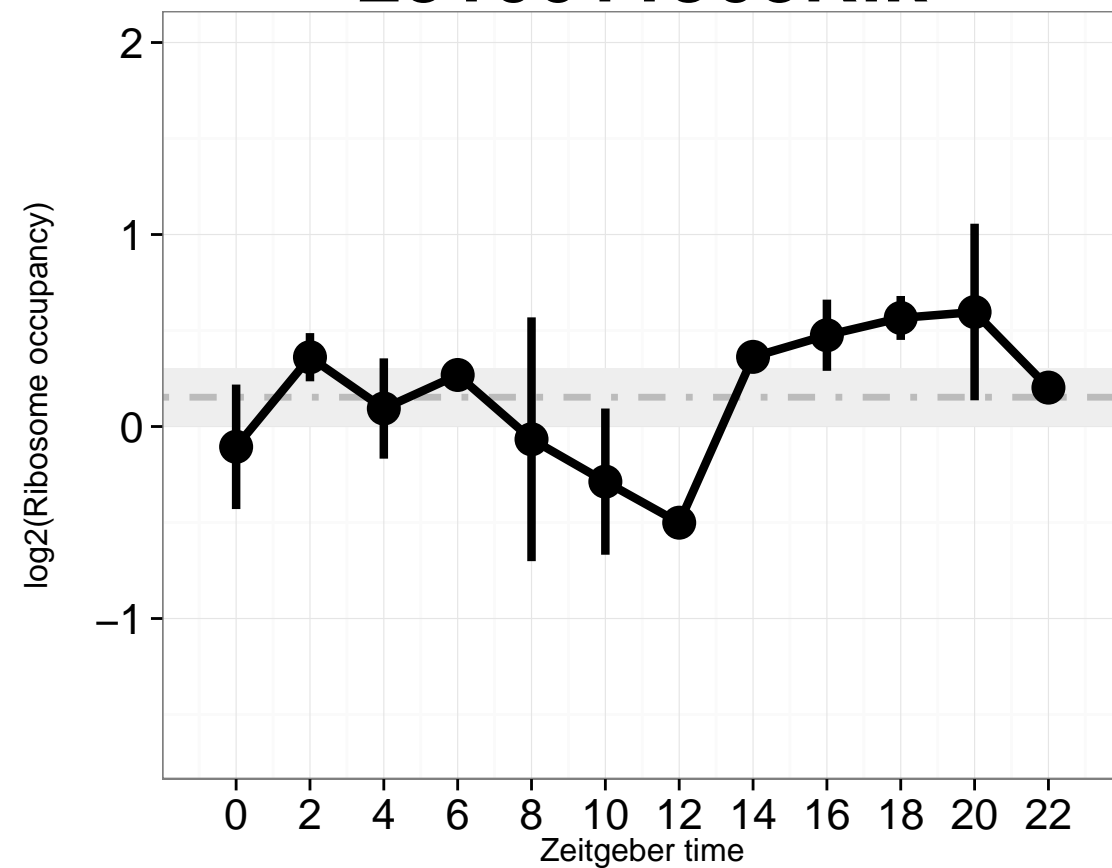

Supplement: SuppDataset_1.zip [file 2310011J03Rik_set_A.pdf › Supplemental Dataset 1/A-mRNA_nonrhyth_translation_nonrhyth/2310011J03Rik_set_A.pdf]

## 2310022A10Rik

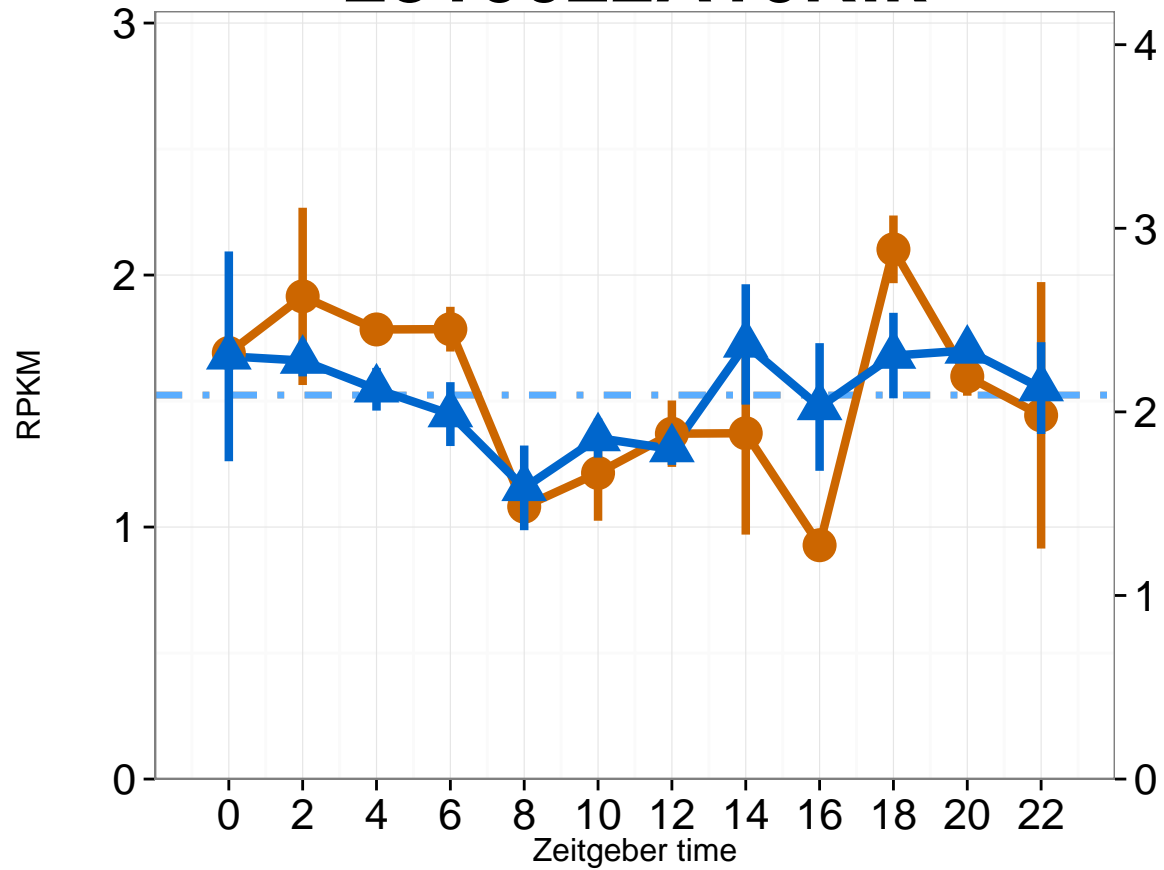

## 2310022A10Rik

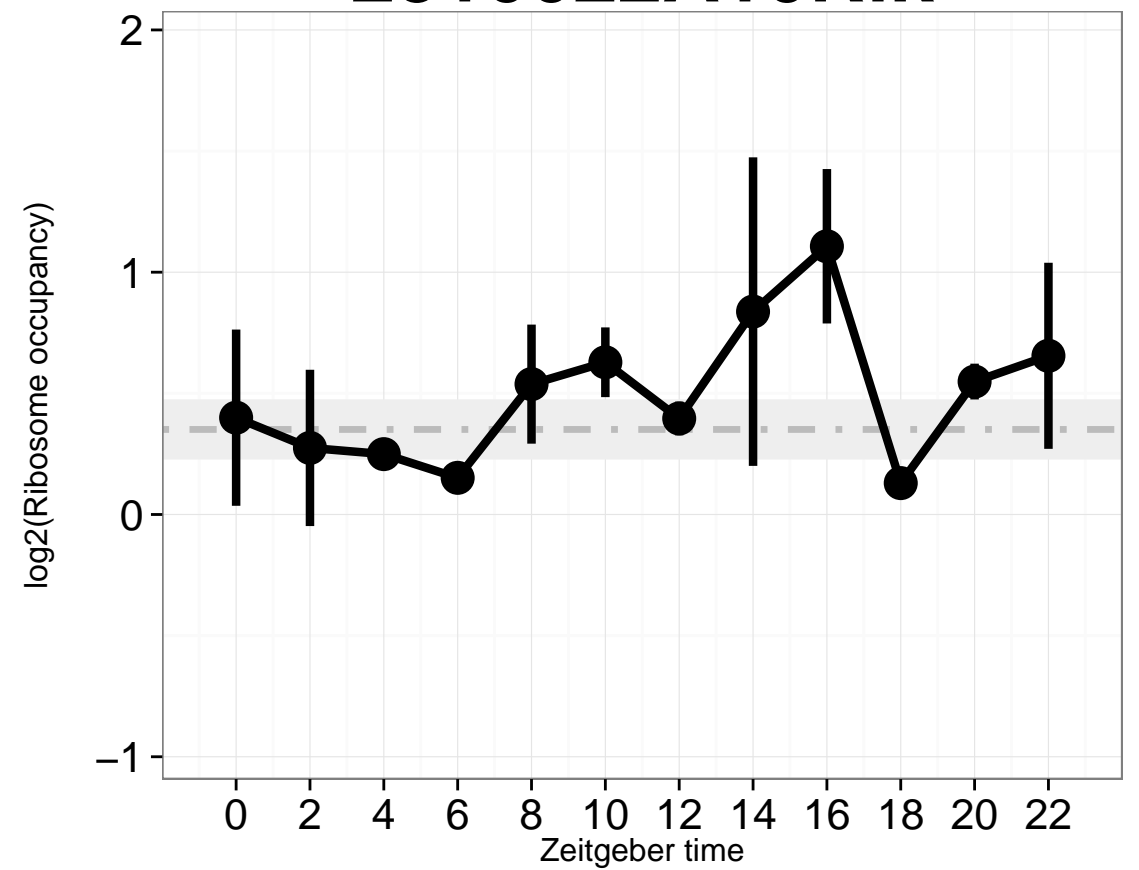

Supplement: SuppDataset_1.zip [file 2310022A10Rik_set_A.pdf › Supplemental Dataset 1/A-mRNA_nonrhyth_translation_nonrhyth/2310022A10Rik_set_A.pdf]

## 2310022B05Rik

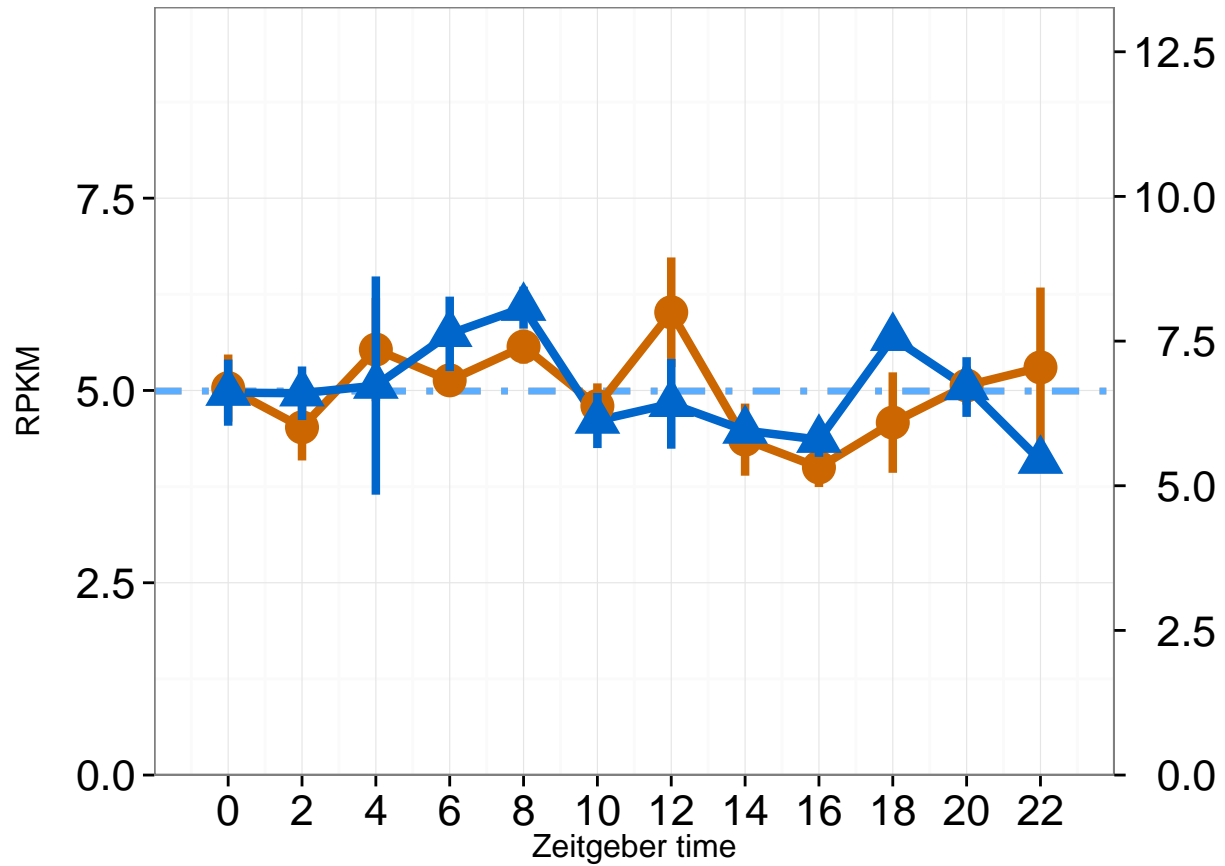

## 2310022B05Rik

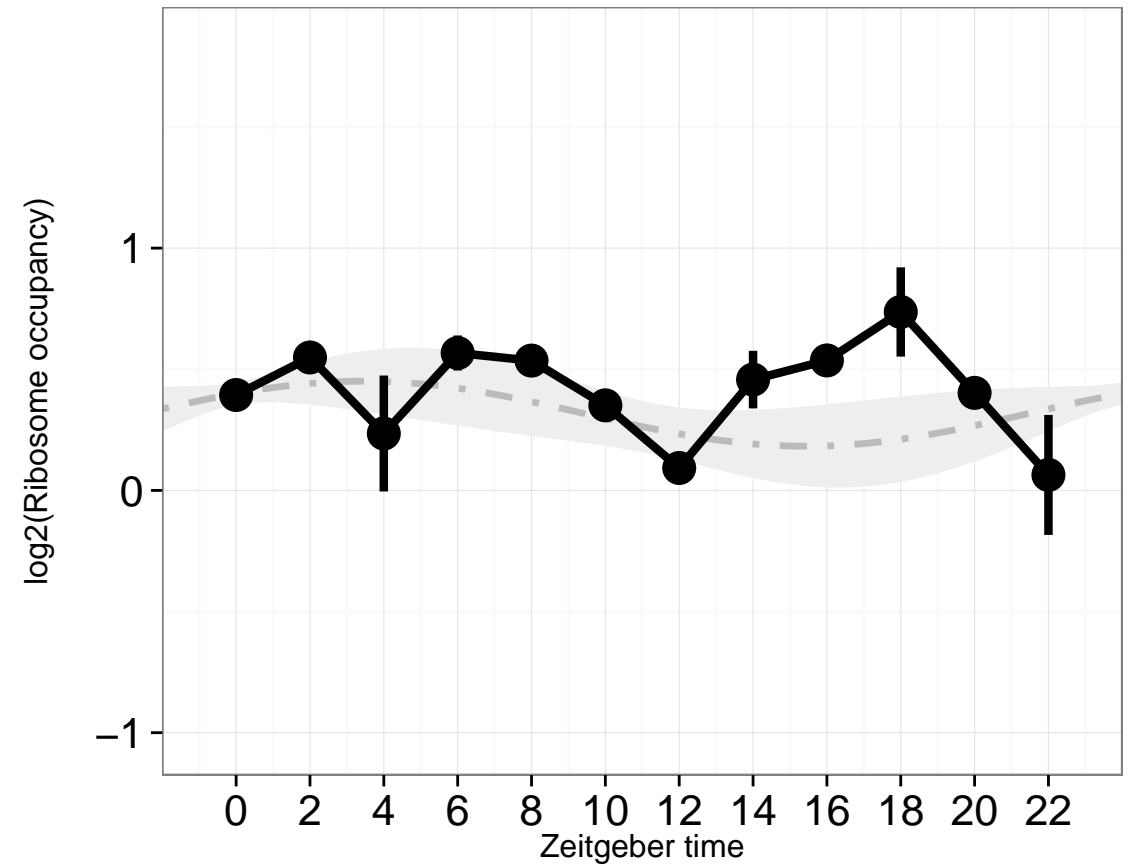

Supplement: SuppDataset_1.zip [file 2310022B05Rik_set_A.pdf › Supplemental Dataset 1/A-mRNA_nonrhyth_translation_nonrhyth/2310022B05Rik_set_A.pdf]

## 2310030G06Rik

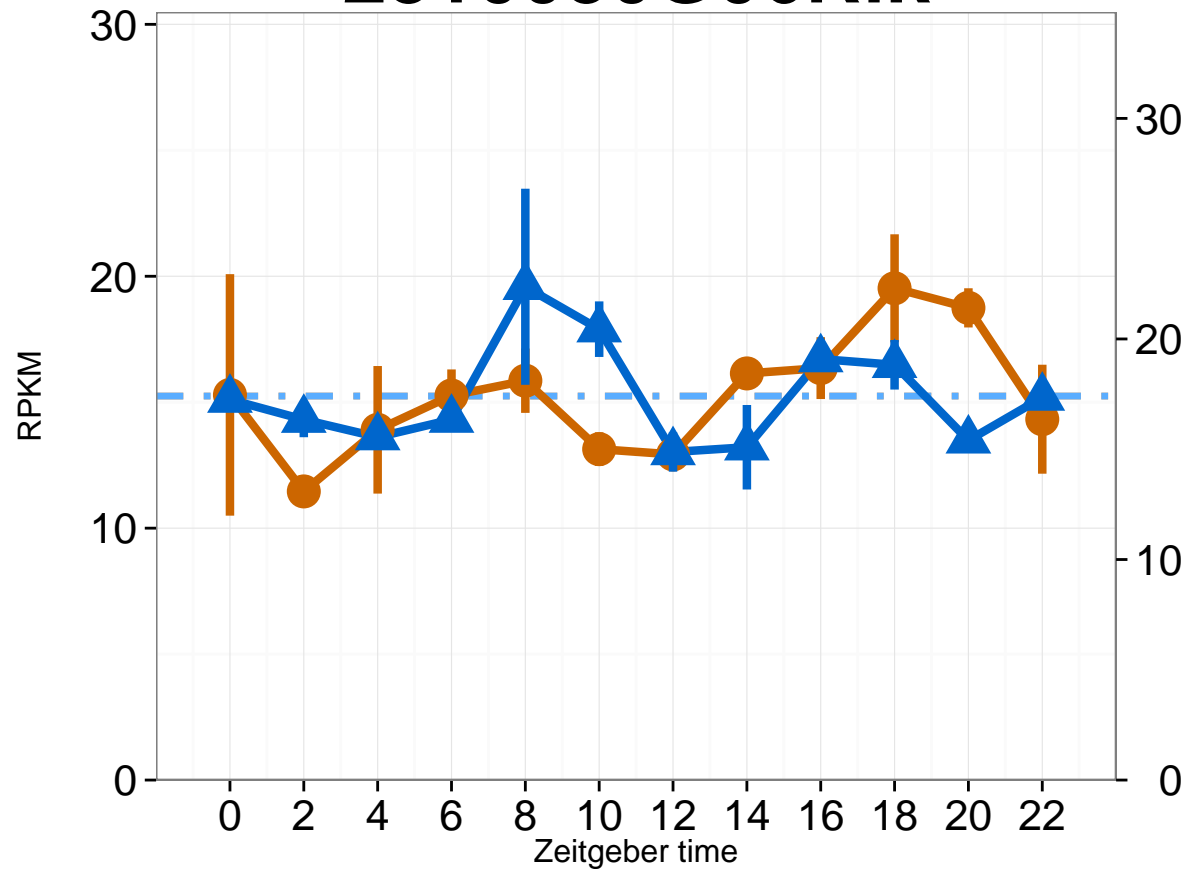

## 2310030G06Rik

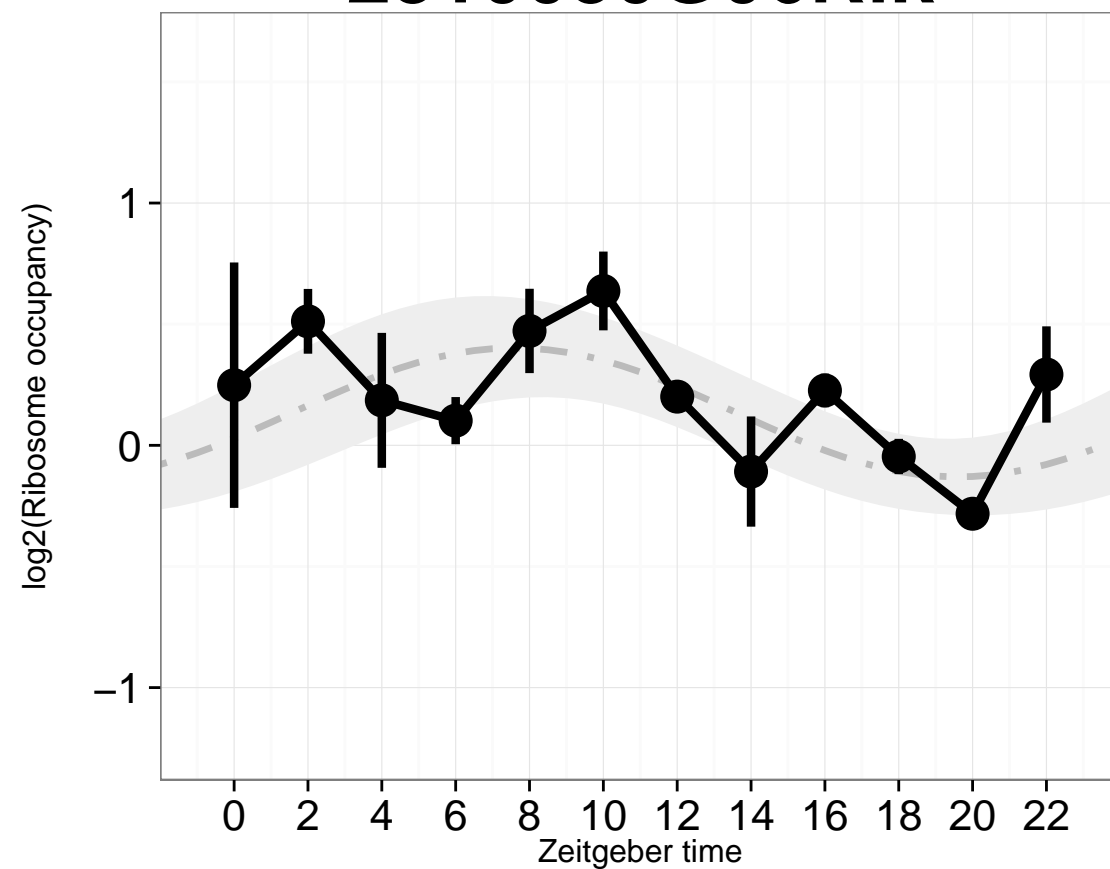

Supplement: SuppDataset_1.zip [file 2310030G06Rik_set_A.pdf › Supplemental Dataset 1/A-mRNA_nonrhyth_translation_nonrhyth/2310030G06Rik_set_A.pdf]

## 2310033P09Rik

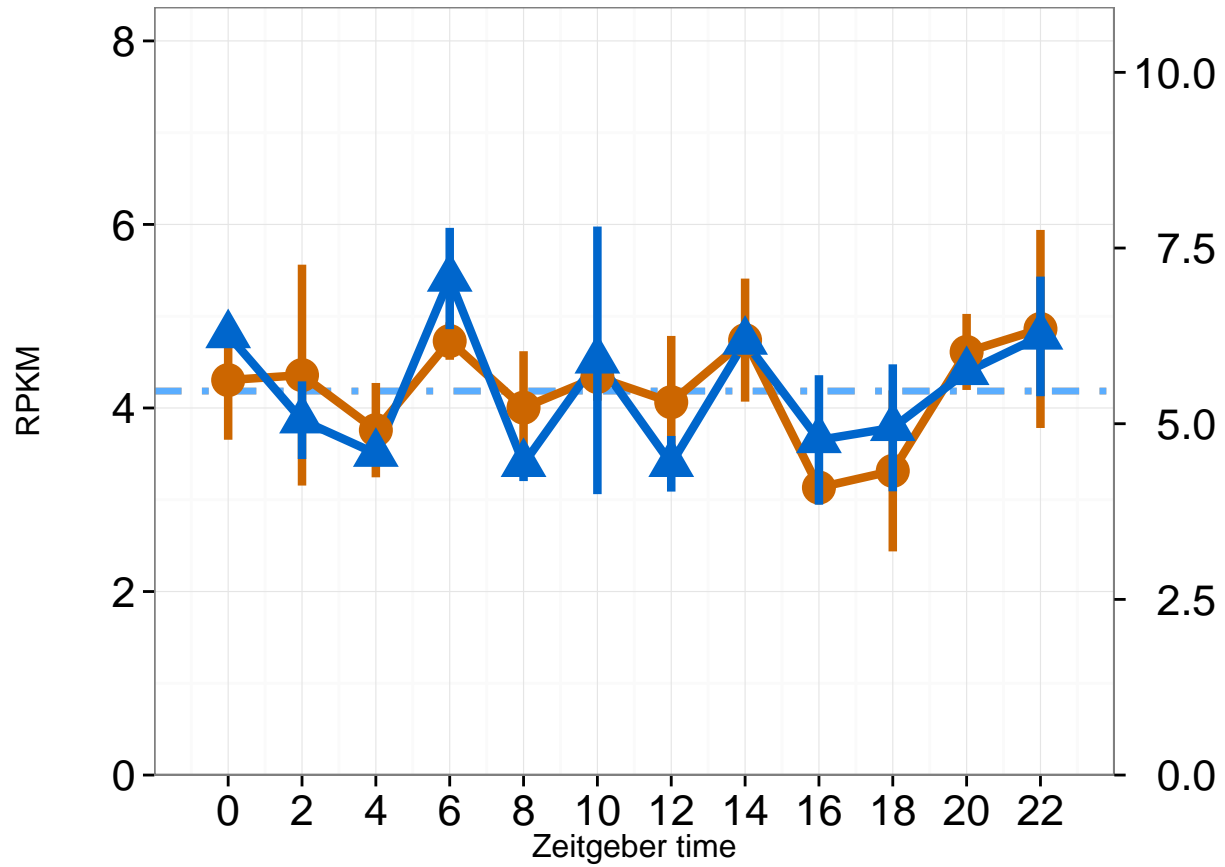

## 2310033P09Rik

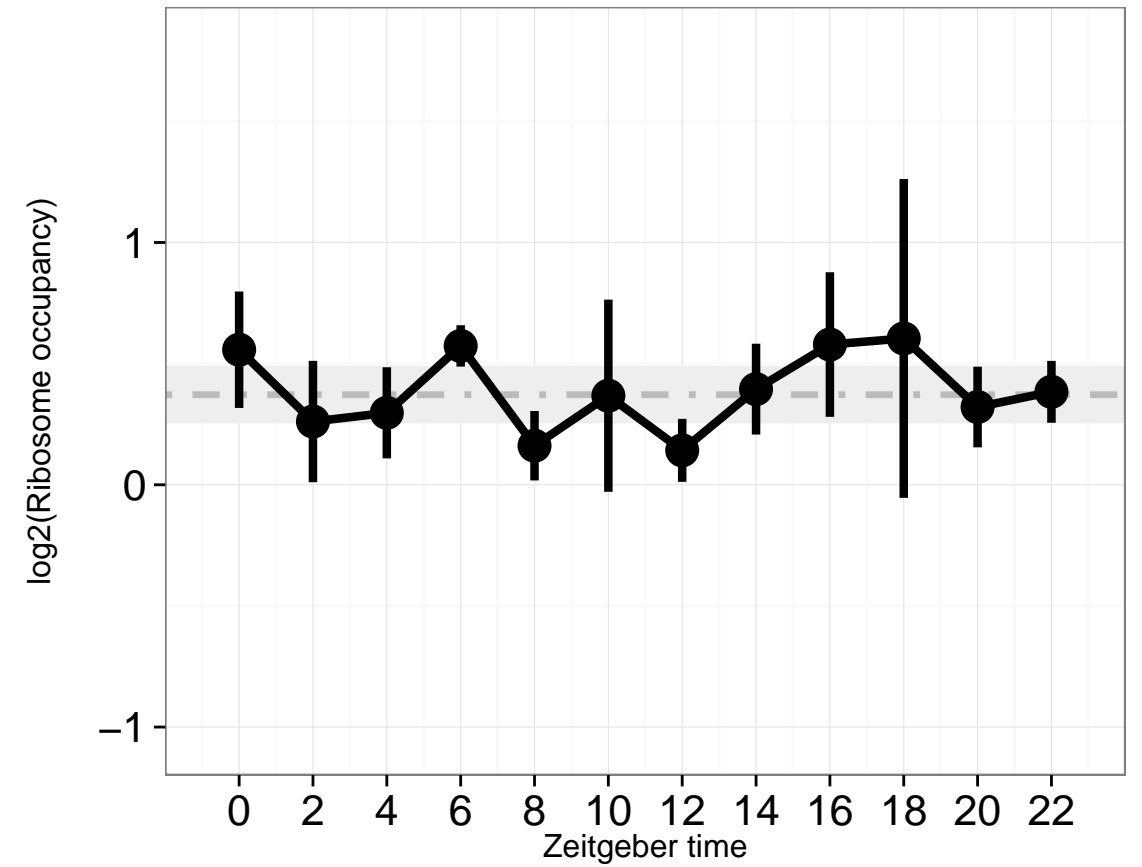

Supplement: SuppDataset_1.zip [file 2310033P09Rik_set_A.pdf › Supplemental Dataset 1/A-mRNA_nonrhyth_translation_nonrhyth/2310033P09Rik_set_A.pdf]

# 2310035C23Rik

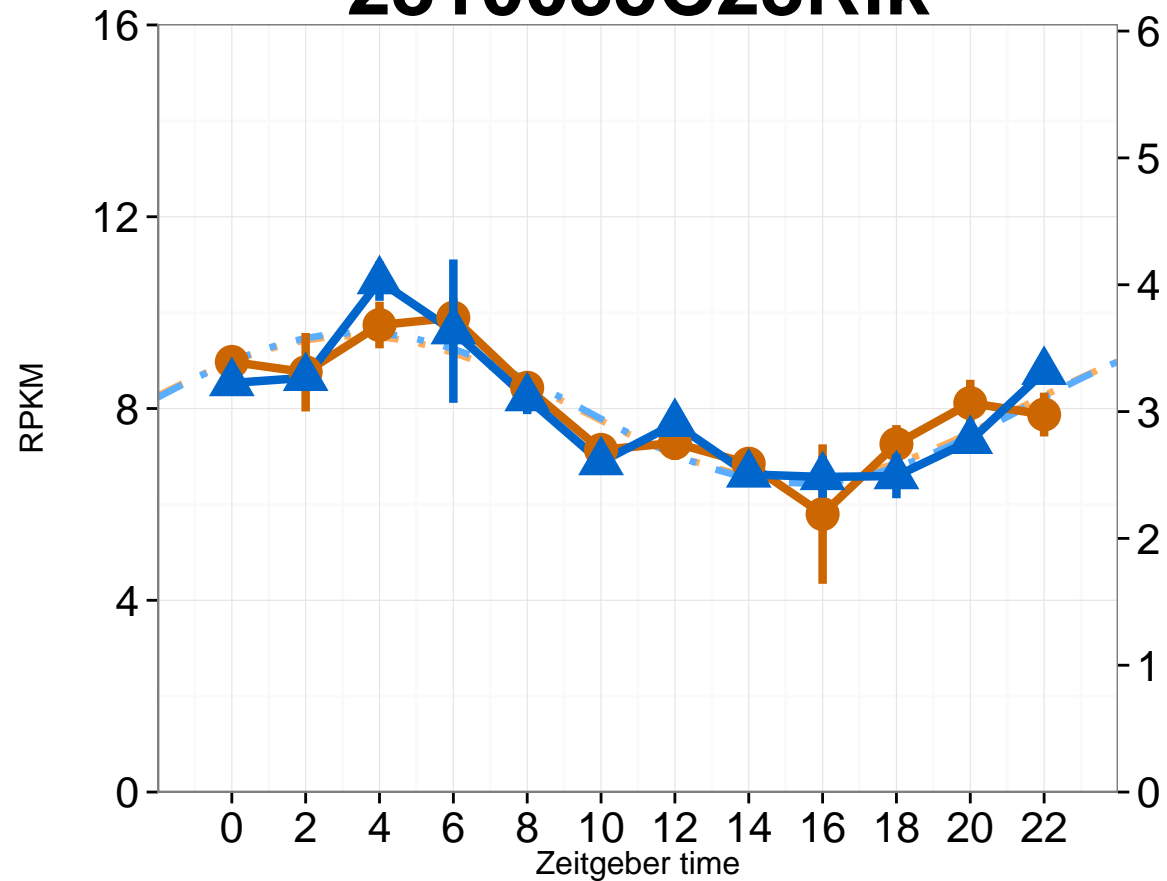

# 2310035C23Rik

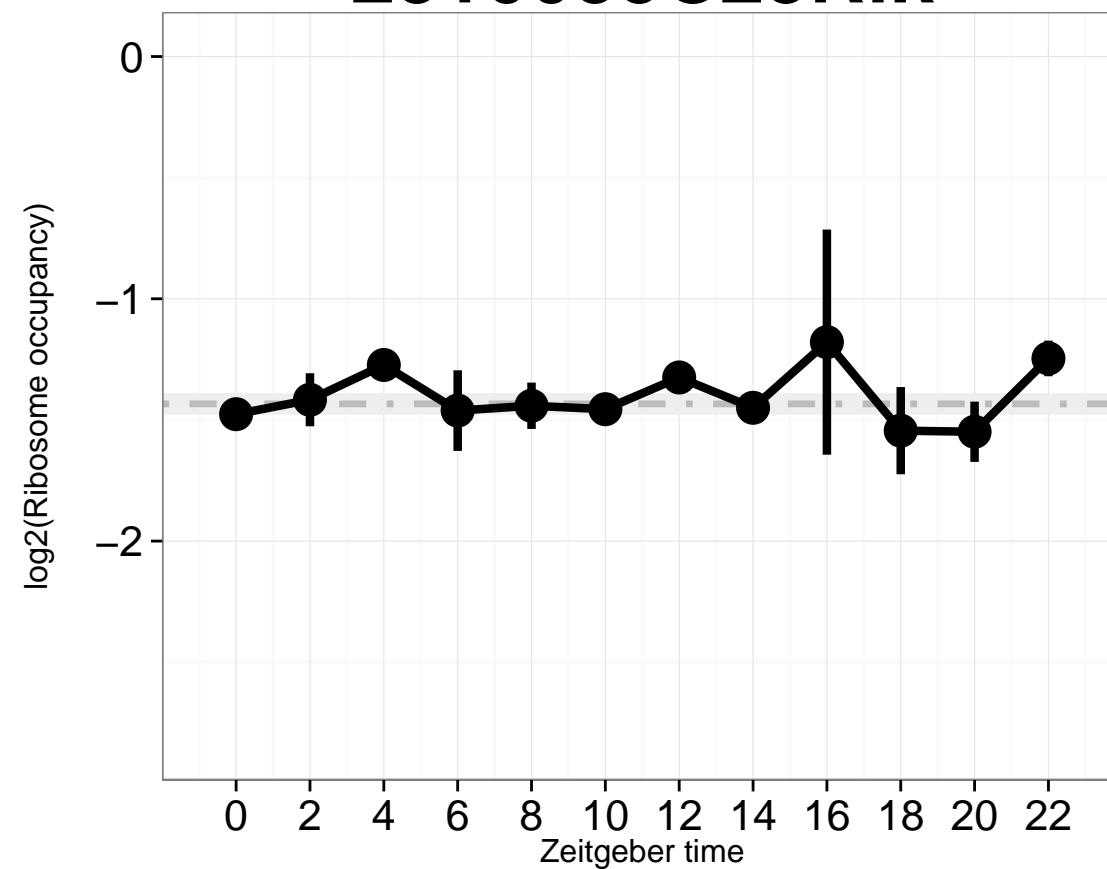

Supplement: SuppDataset_1.zip [file 2310035C23Rik_set_A.pdf › Supplemental Dataset 1/A-mRNA_nonrhyth_translation_nonrhyth/2310035C23Rik_set_A.pdf]

## 2310036O22Rik

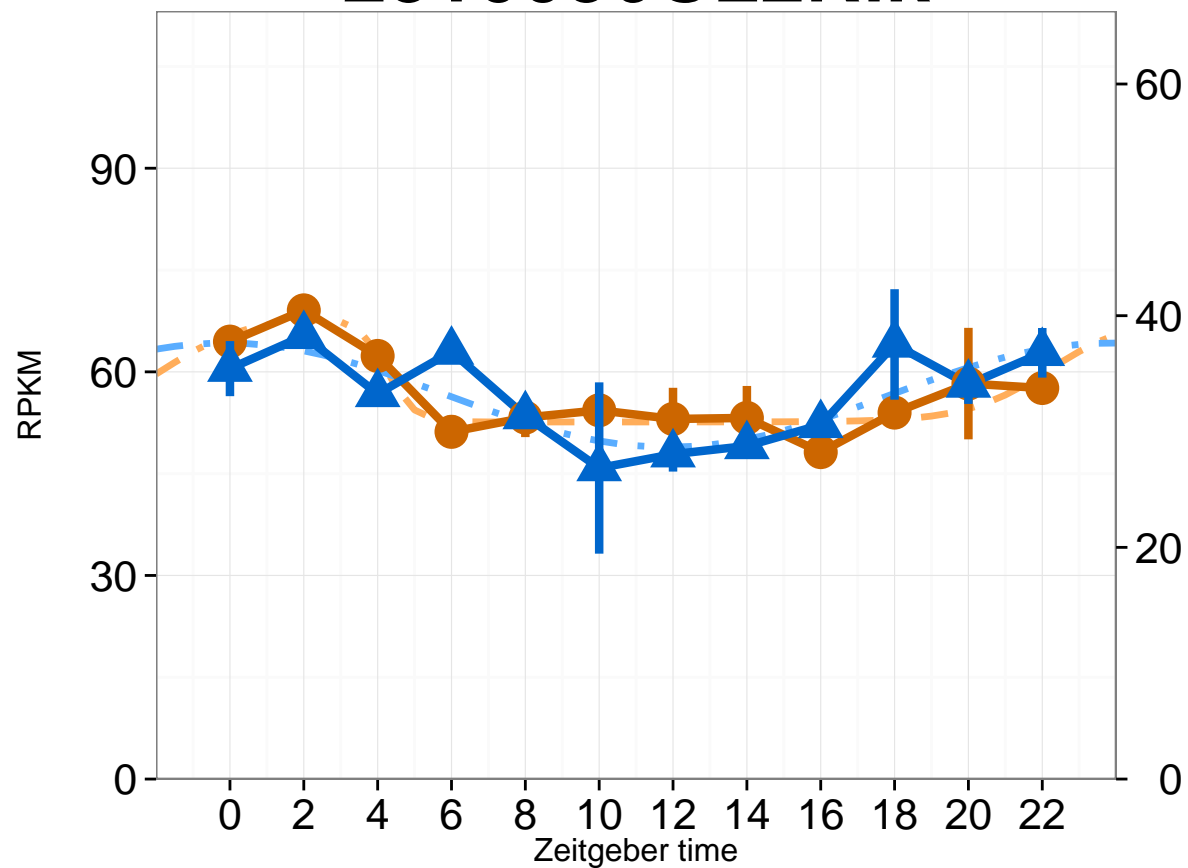

## 2310036O22Rik

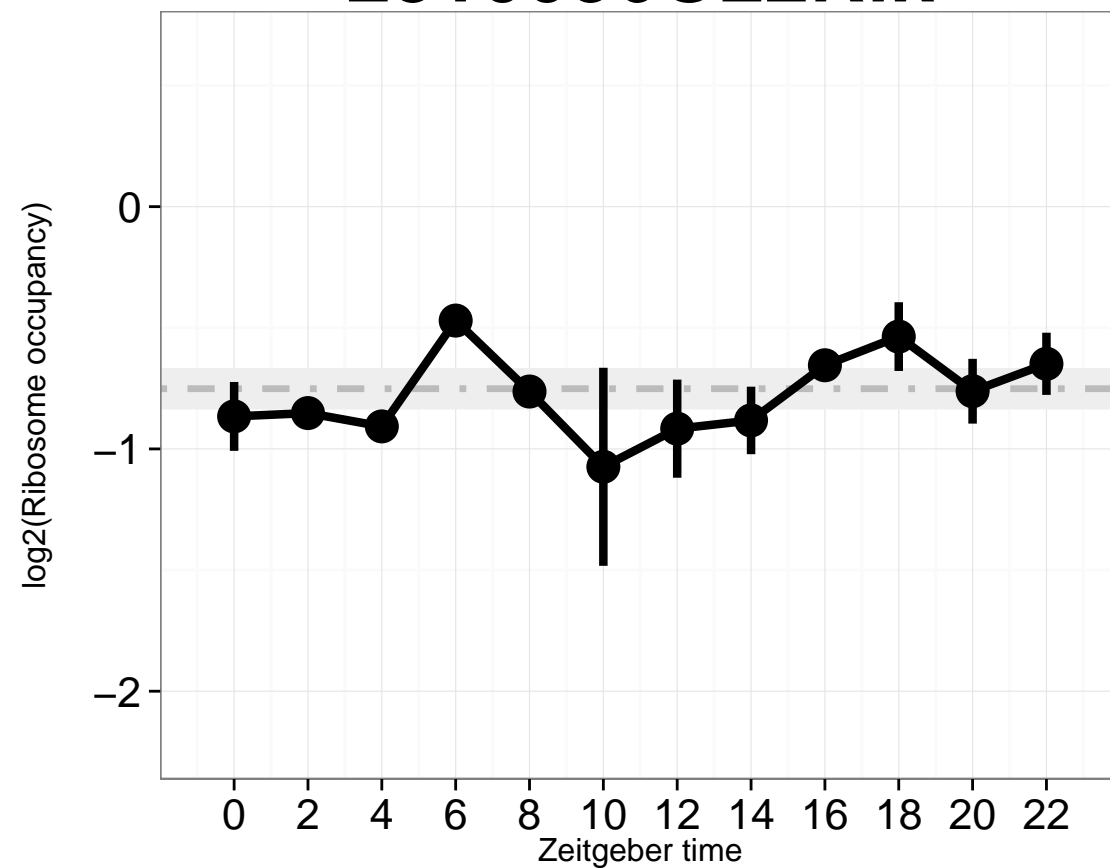

Supplement: SuppDataset_1.zip [file 2310036O22Rik_set_A.pdf › Supplemental Dataset 1/A-mRNA_nonrhyth_translation_nonrhyth/2310036O22Rik_set_A.pdf]

## 2310045N01Rik

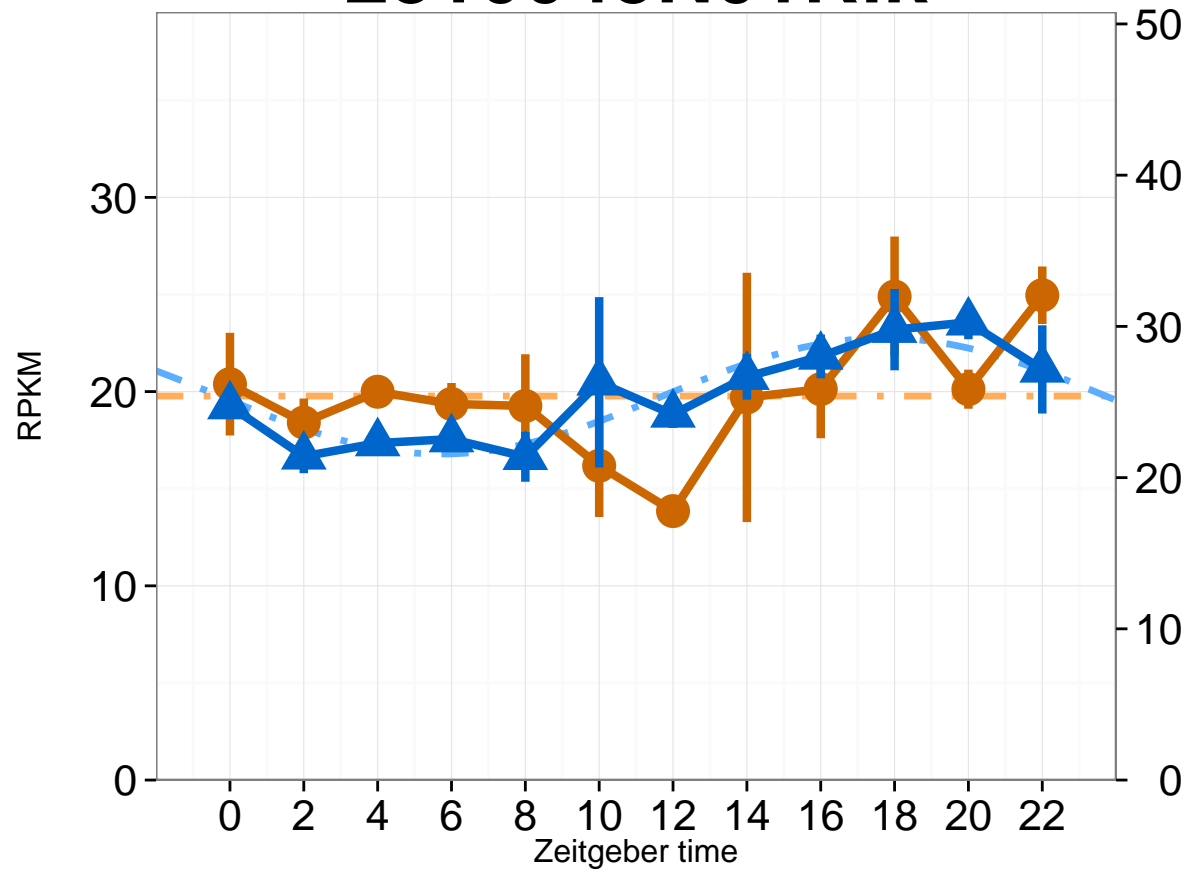

## 2310045N01Rik

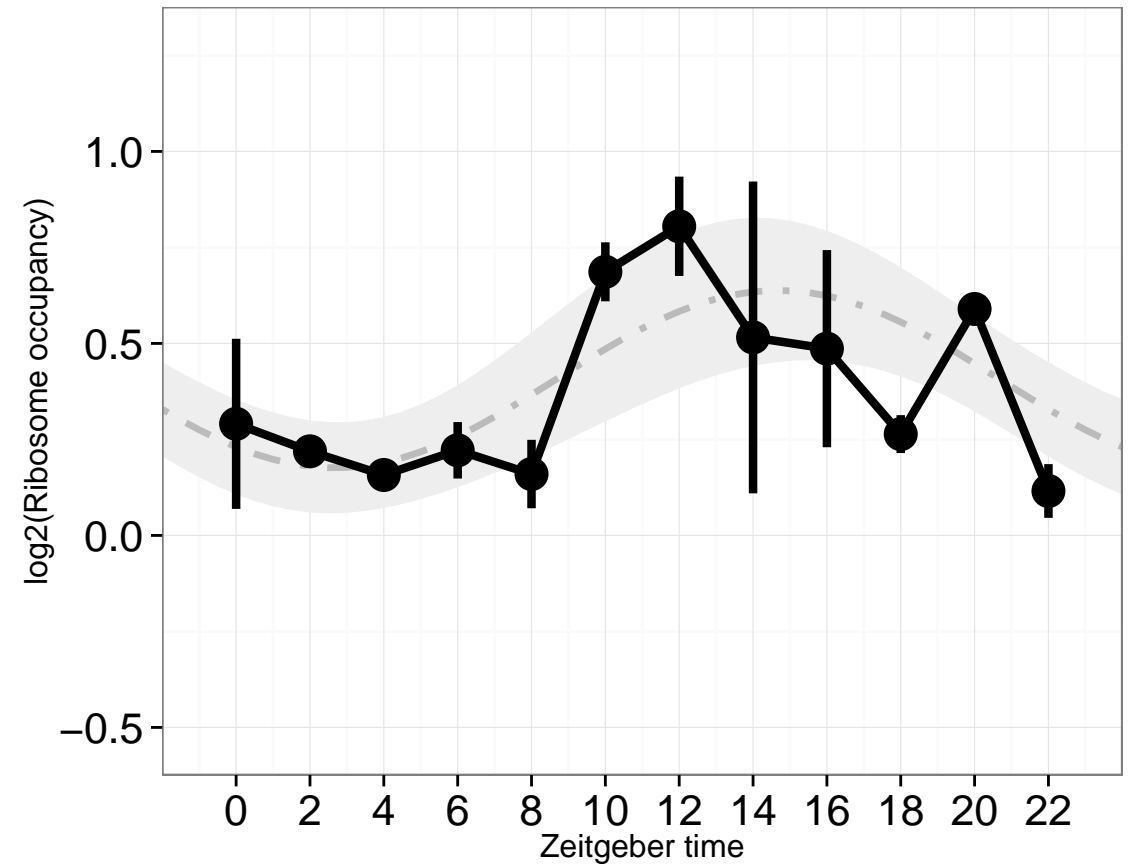

Supplement: SuppDataset_1.zip [file 2310045N01Rik_set_A.pdf › Supplemental Dataset 1/A-mRNA_nonrhyth_translation_nonrhyth/2310045N01Rik_set_A.pdf]

# 2310047M10Rik

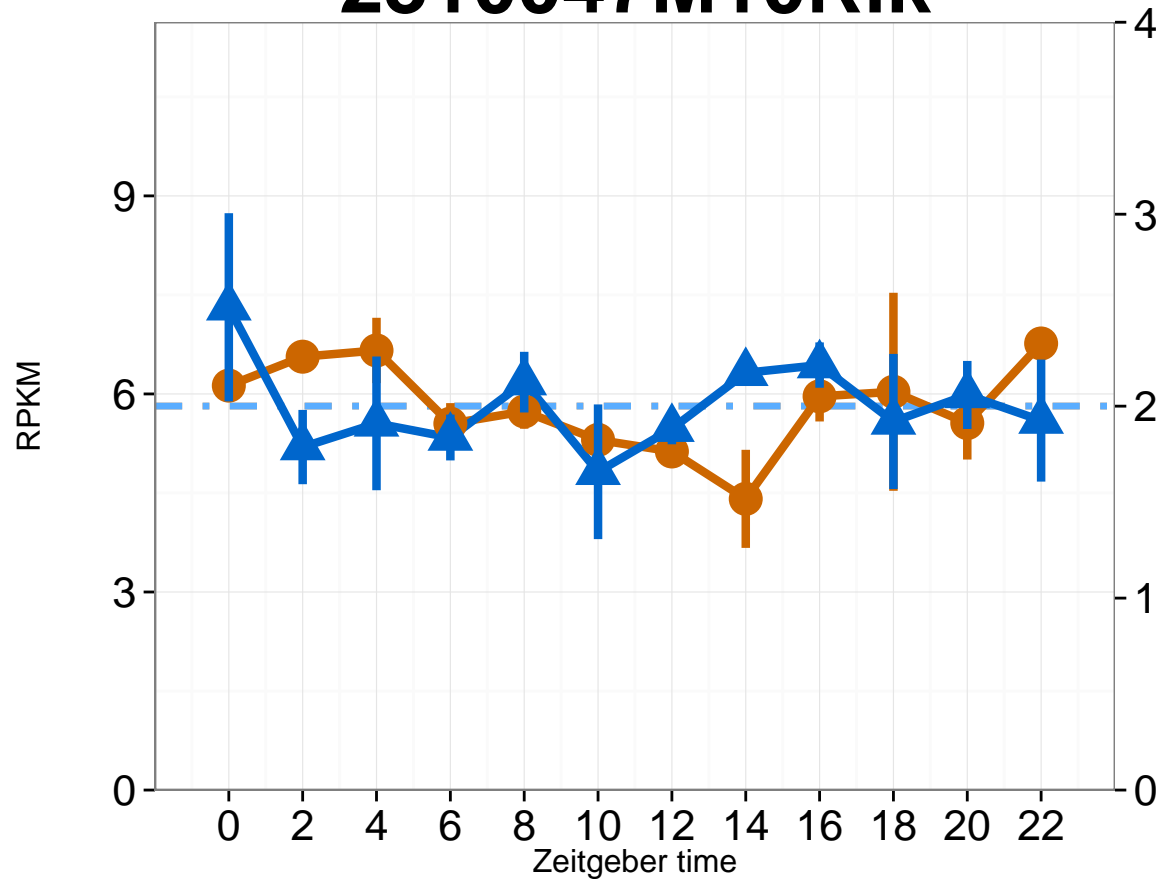

# 2310047M10Rik

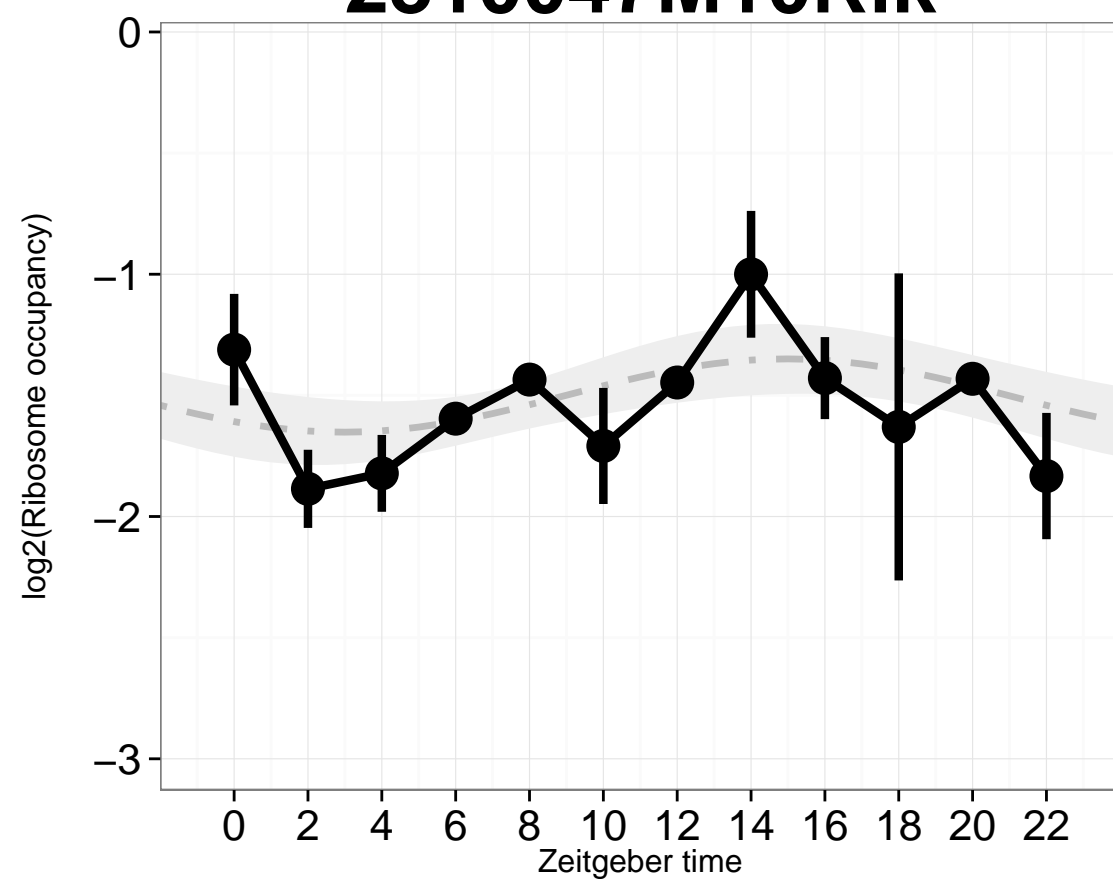

Supplement: SuppDataset_1.zip [file 2310047M10Rik_set_A.pdf › Supplemental Dataset 1/A-mRNA_nonrhyth_translation_nonrhyth/2310047M10Rik_set_A.pdf]

## 2310057M21Rik

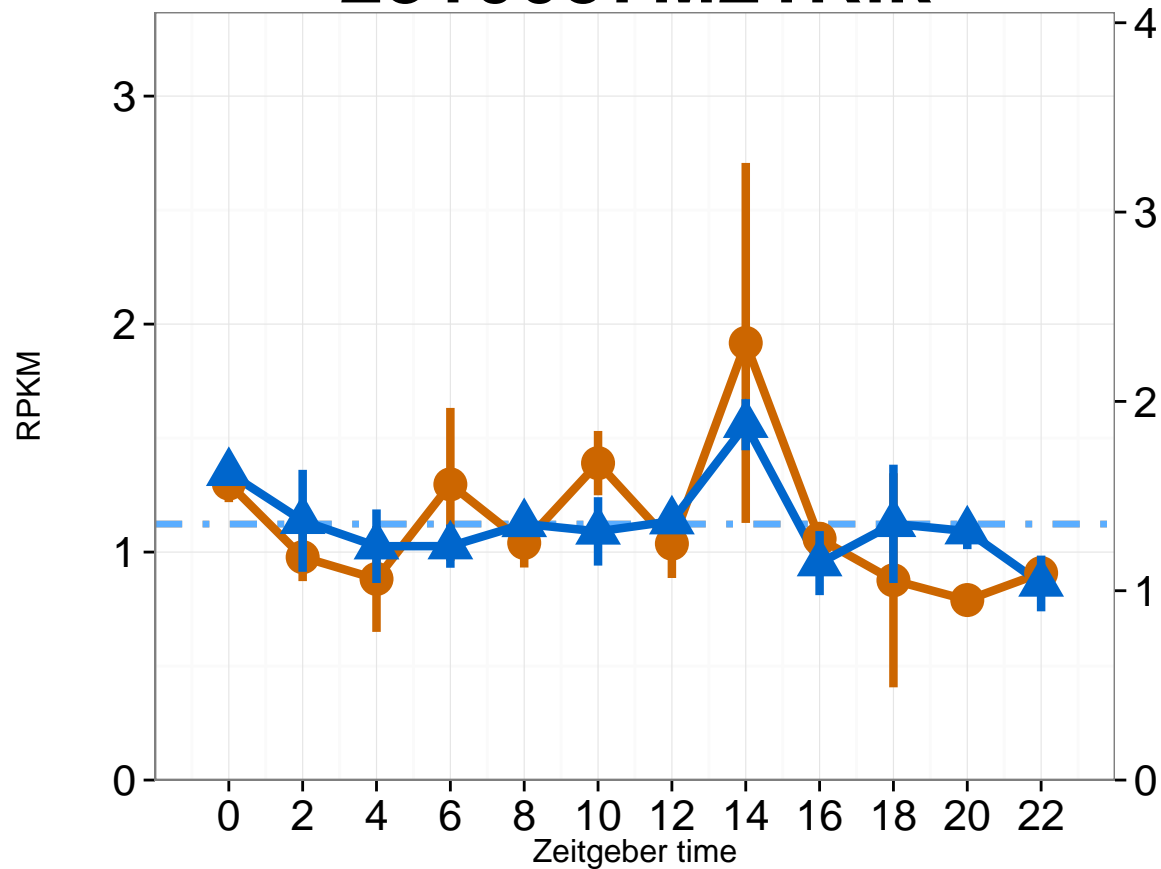

## 2310057M21Rik

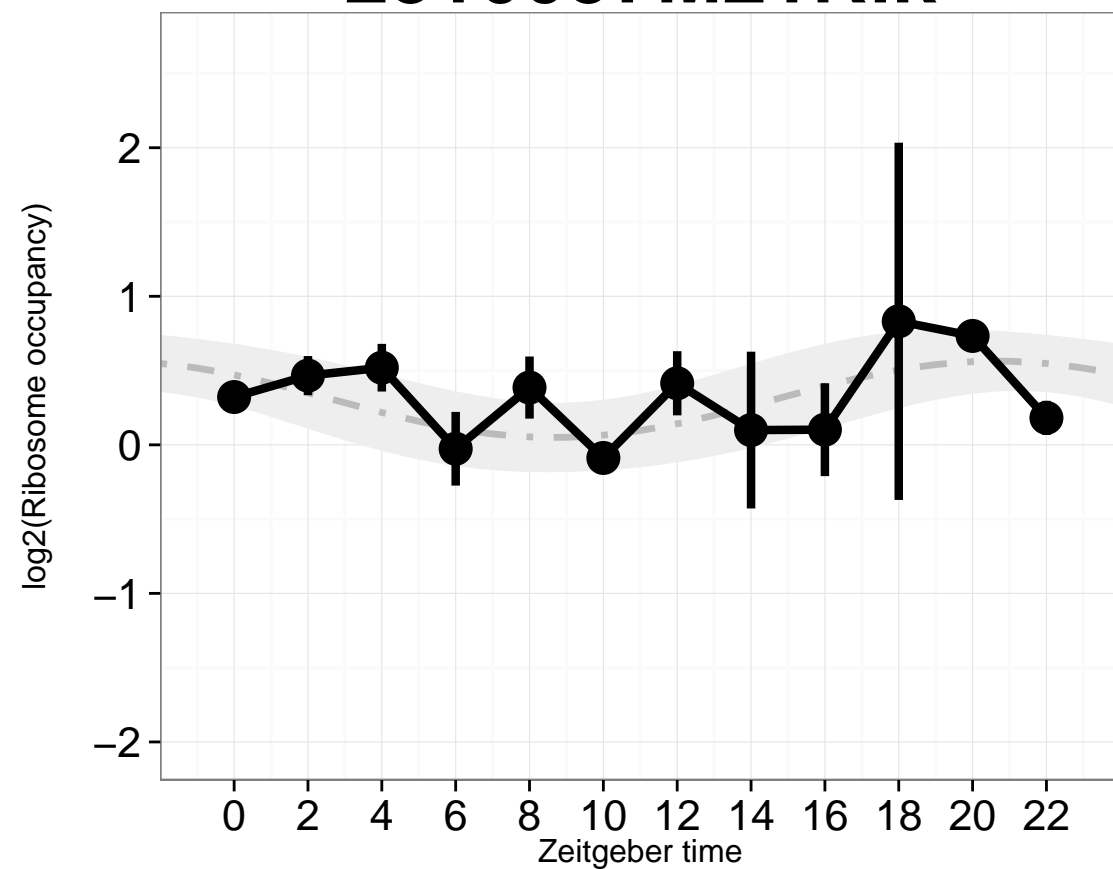

Supplement: SuppDataset_1.zip [file 2310057M21Rik_set_A.pdf › Supplemental Dataset 1/A-mRNA_nonrhyth_translation_nonrhyth/2310057M21Rik_set_A.pdf]

## 2310061I04Rik

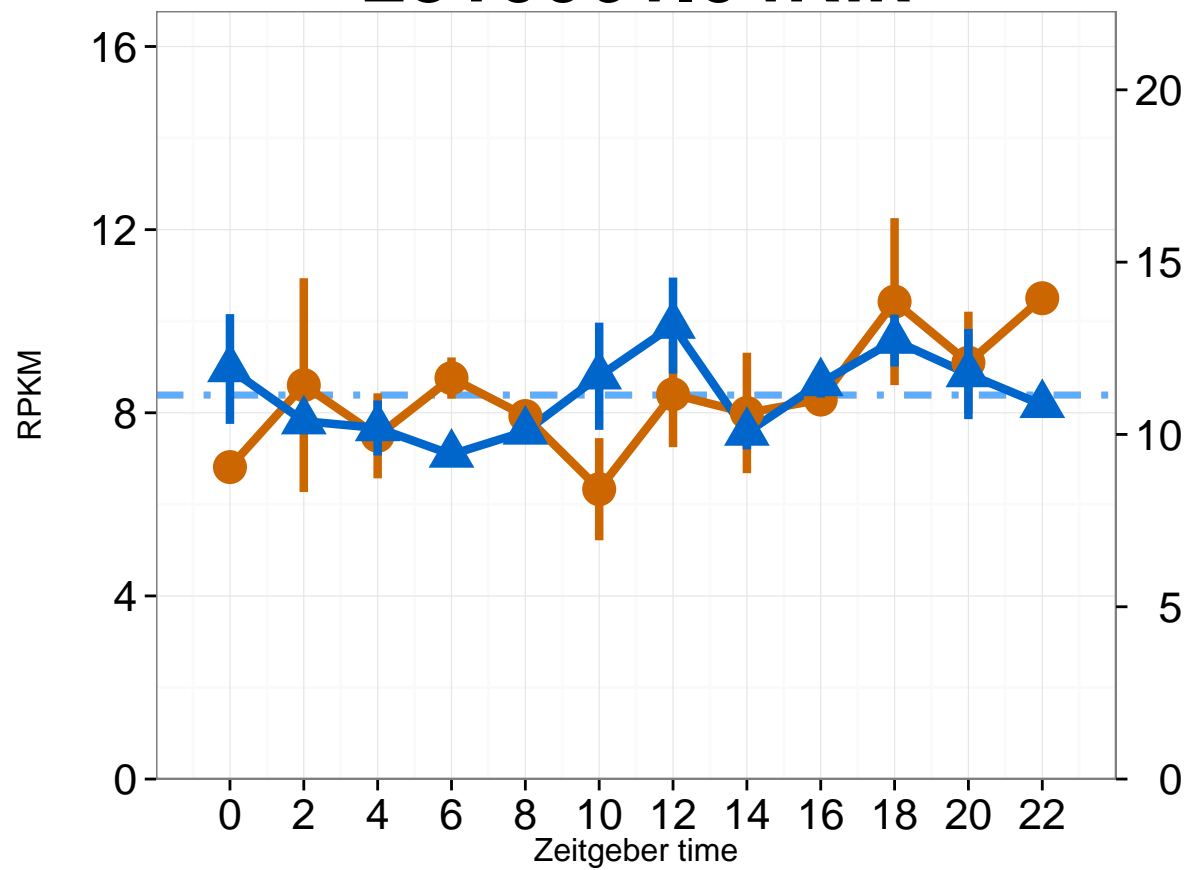

## 2310061I04Rik

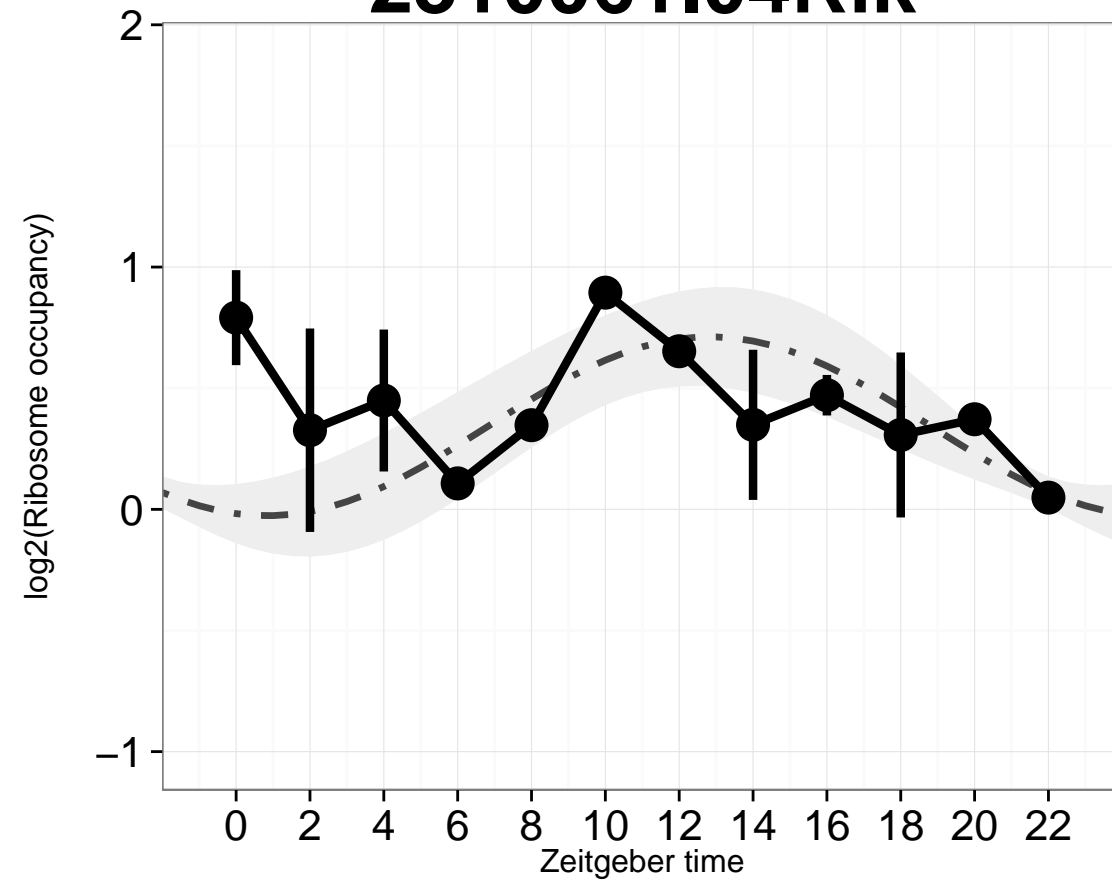

Supplement: SuppDataset_1.zip [file 2310061I04Rik_set_A.pdf › Supplemental Dataset 1/A-mRNA_nonrhyth_translation_nonrhyth/2310061I04Rik_set_A.pdf]

## 2310067B10Rik

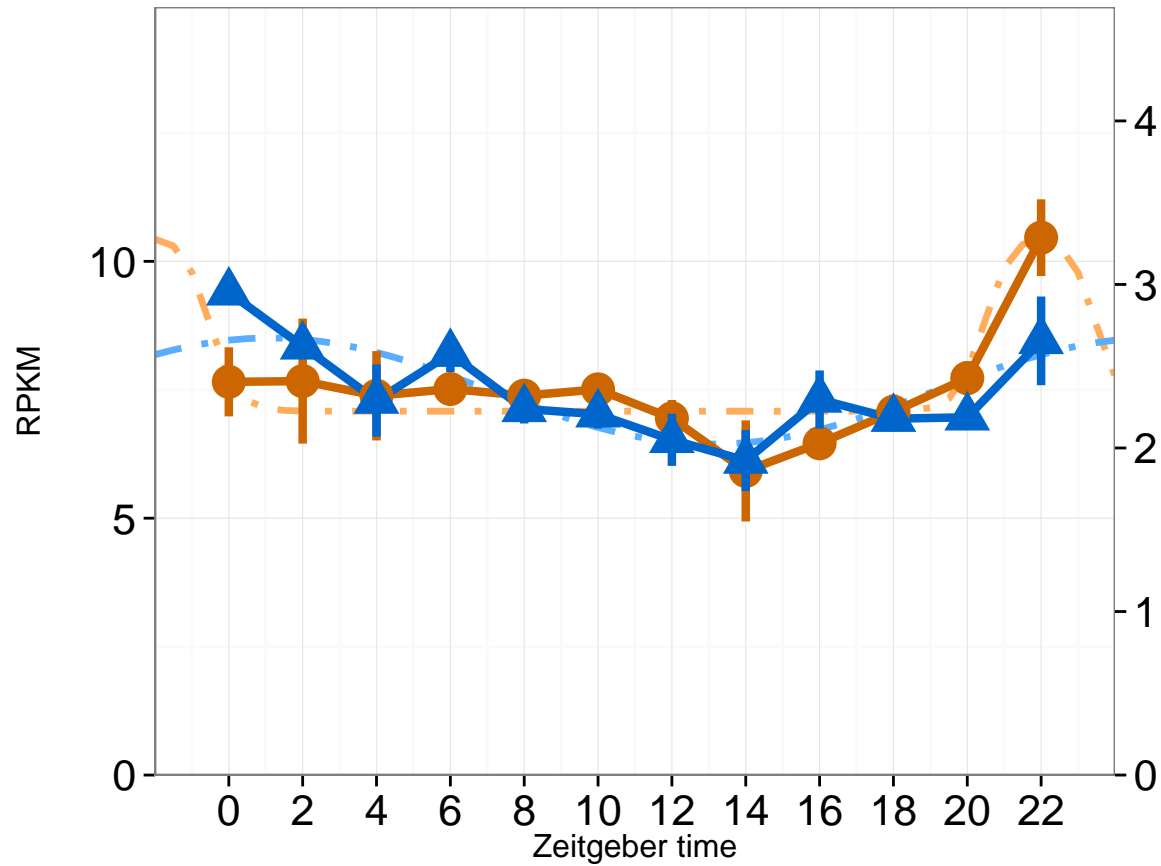

## 2310067B10Rik

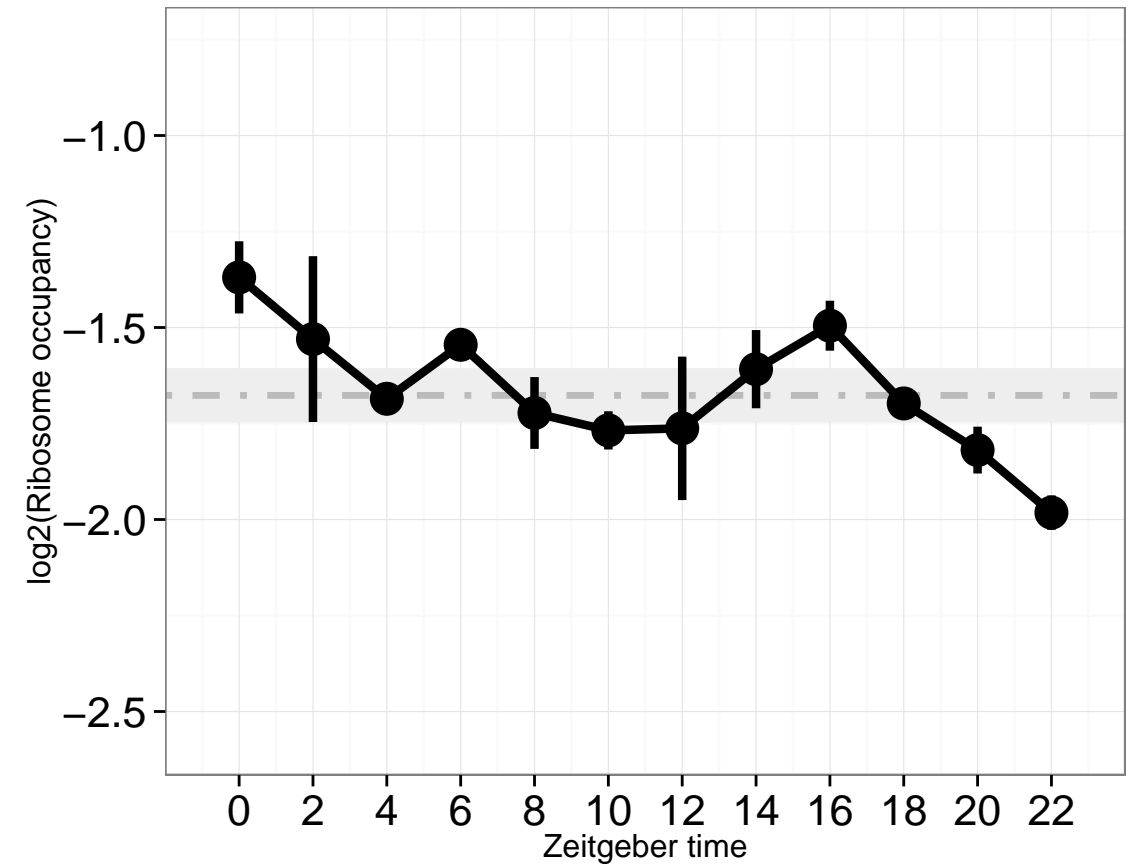

Supplement: SuppDataset_1.zip [file 2310067B10Rik_set_A.pdf › Supplemental Dataset 1/A-mRNA_nonrhyth_translation_nonrhyth/2310067B10Rik_set_A.pdf]

# 2410004B18Rik

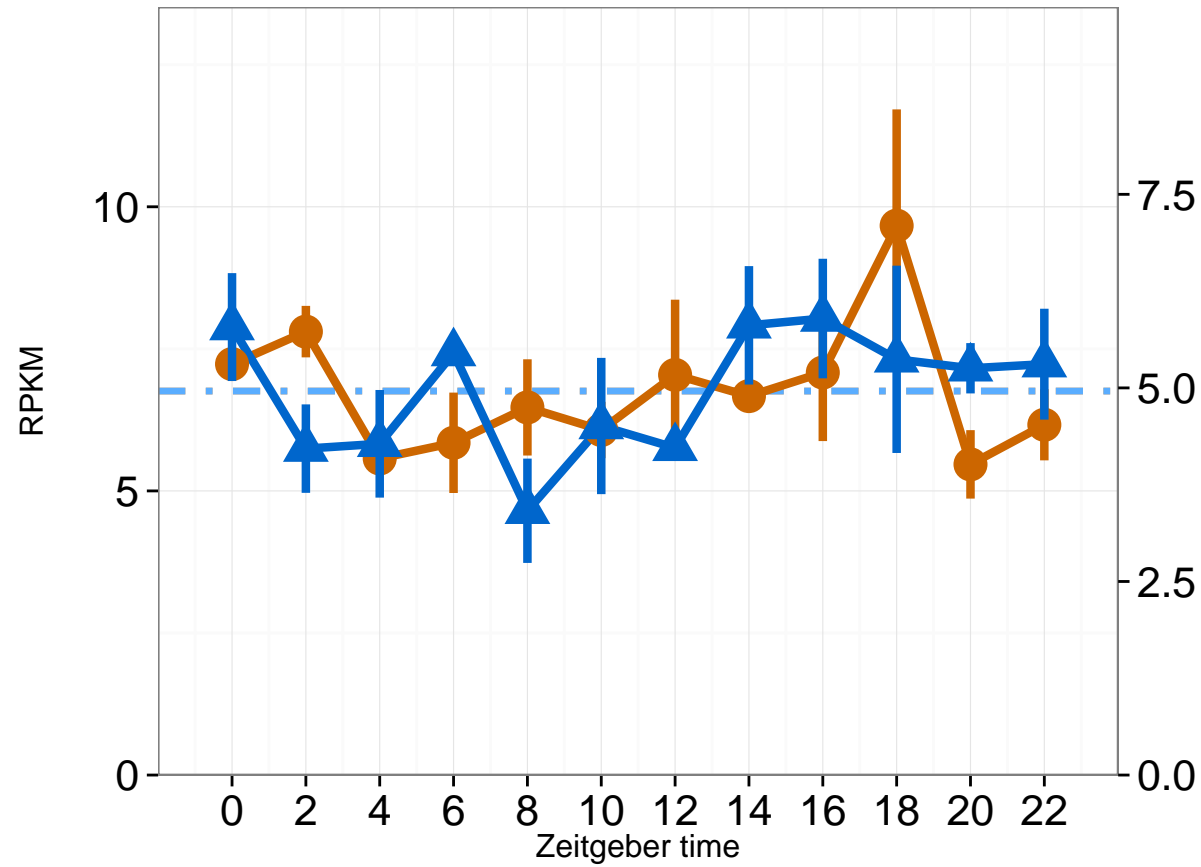

# 2410004B18Rik

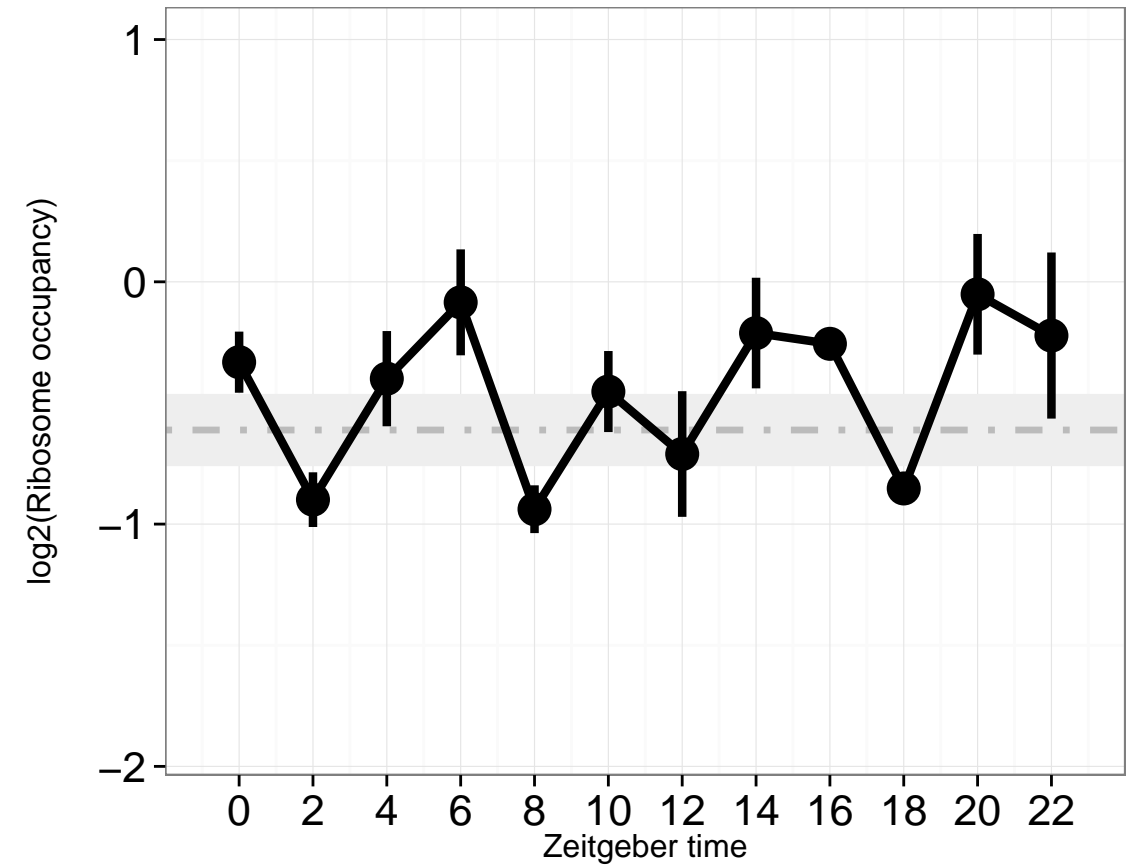

Supplement: SuppDataset_1.zip [file 2410004B18Rik_set_A.pdf › Supplemental Dataset 1/A-mRNA_nonrhyth_translation_nonrhyth/2410004B18Rik_set_A.pdf]

## 2410015M20Rik

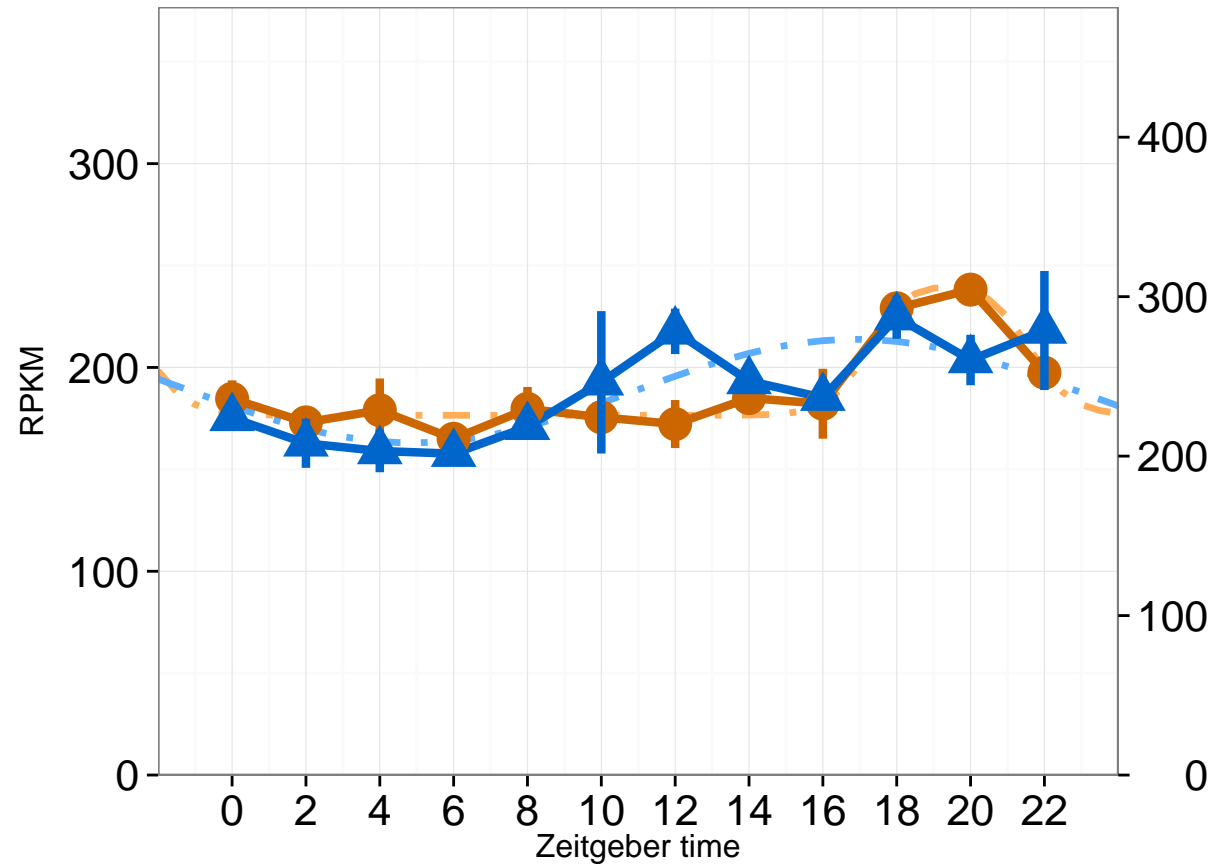

## 2410015M20Rik

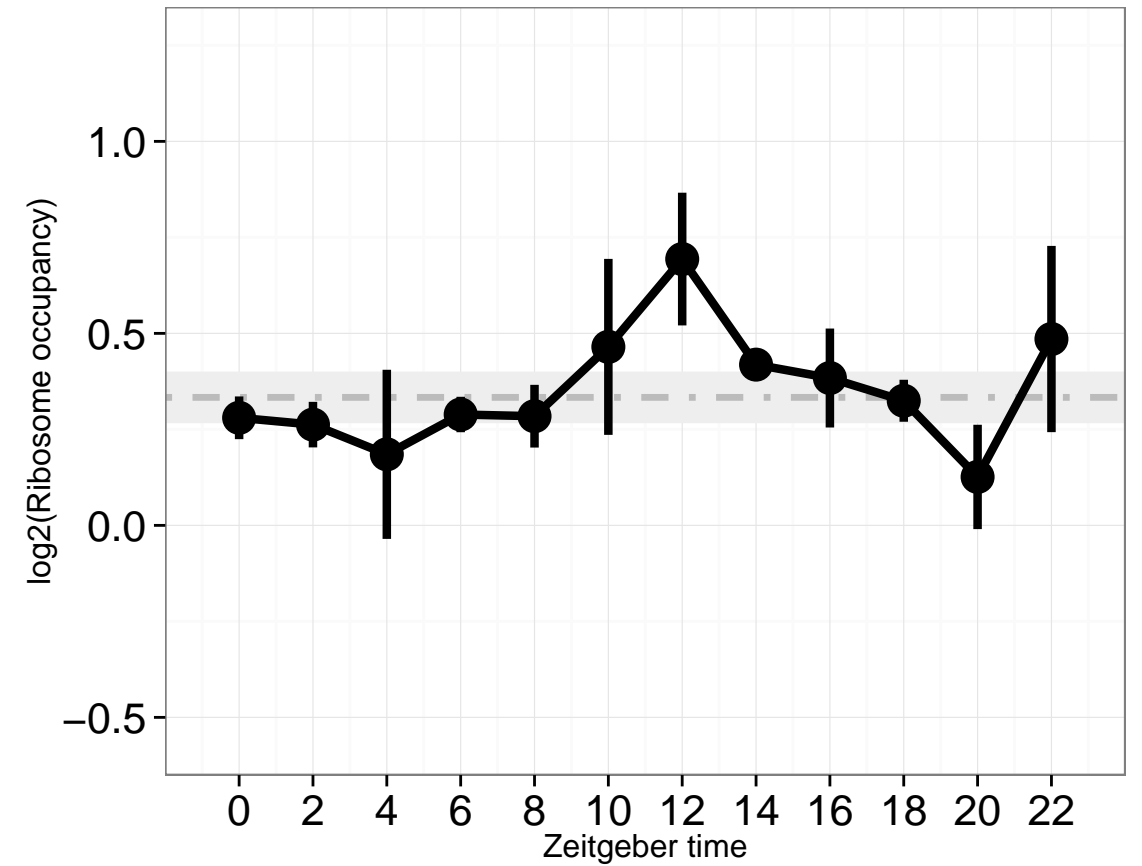

Supplement: SuppDataset_1.zip [file 2410015M20Rik_set_A.pdf › Supplemental Dataset 1/A-mRNA_nonrhyth_translation_nonrhyth/2410015M20Rik_set_A.pdf]

## 2410016O06Rik

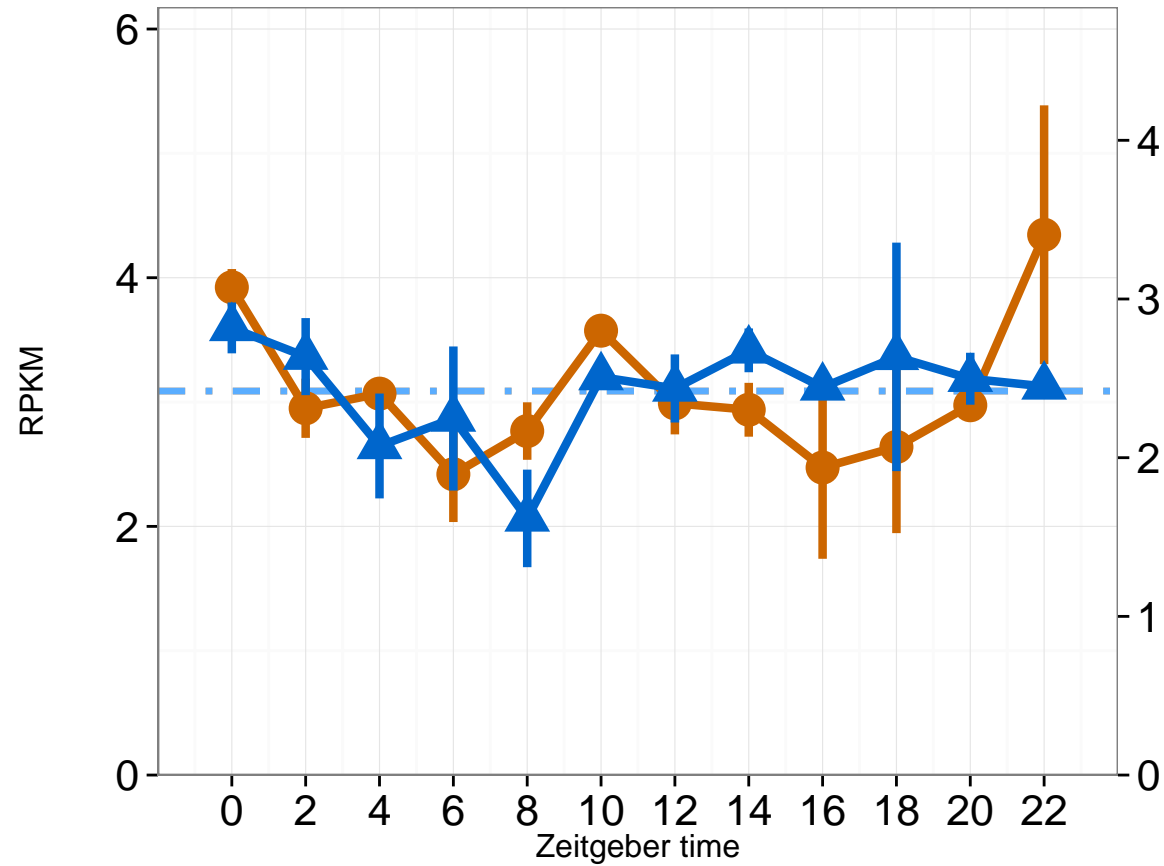

## 2410016O06Rik

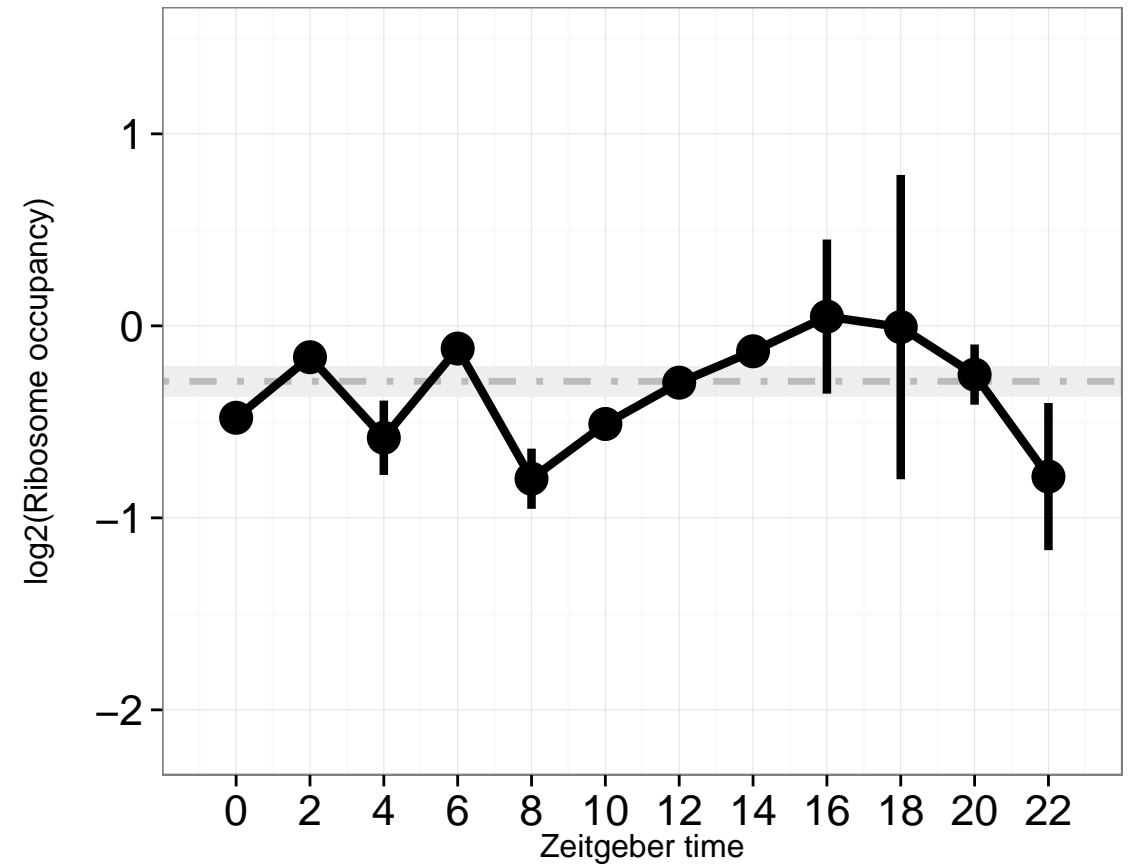

Supplement: SuppDataset_1.zip [file 2410016O06Rik_set_A.pdf › Supplemental Dataset 1/A-mRNA_nonrhyth_translation_nonrhyth/2410016O06Rik_set_A.pdf]

# 2410076l21Rik

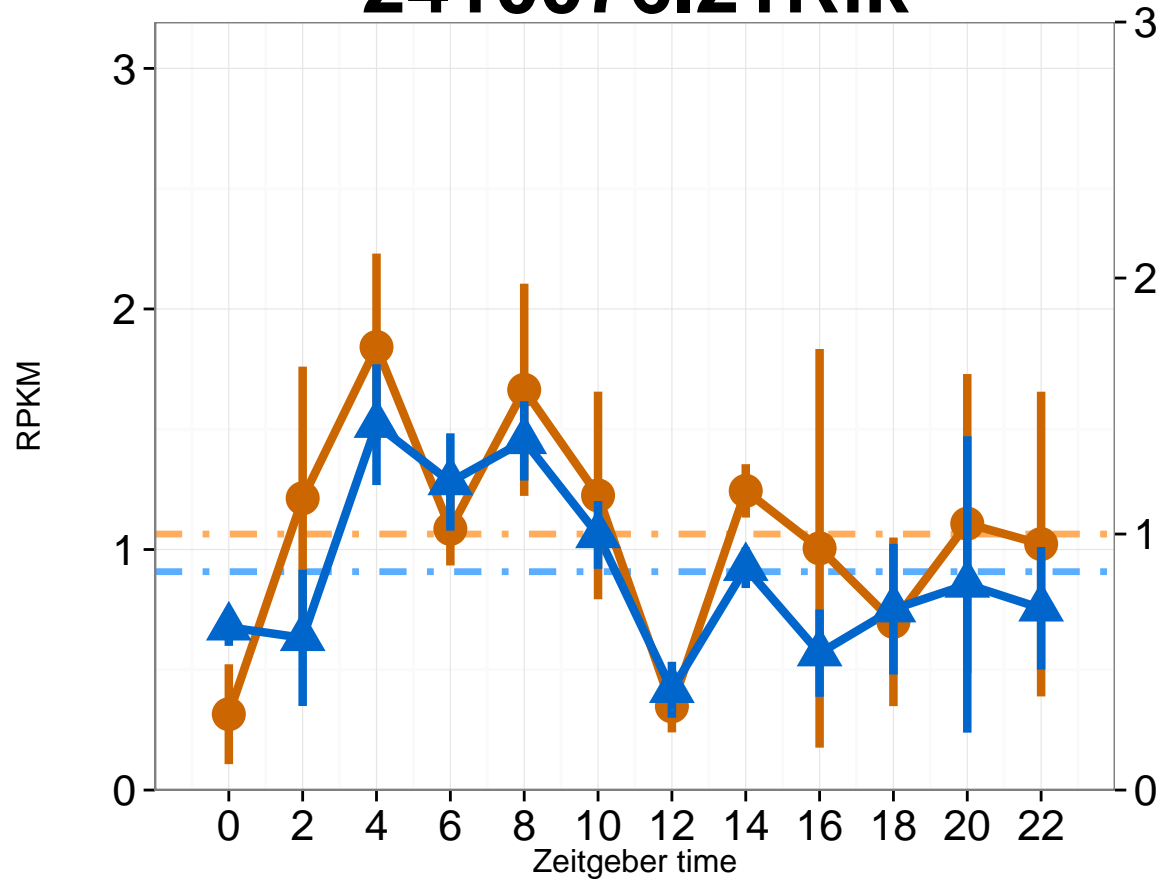

# 2410076l21Rik

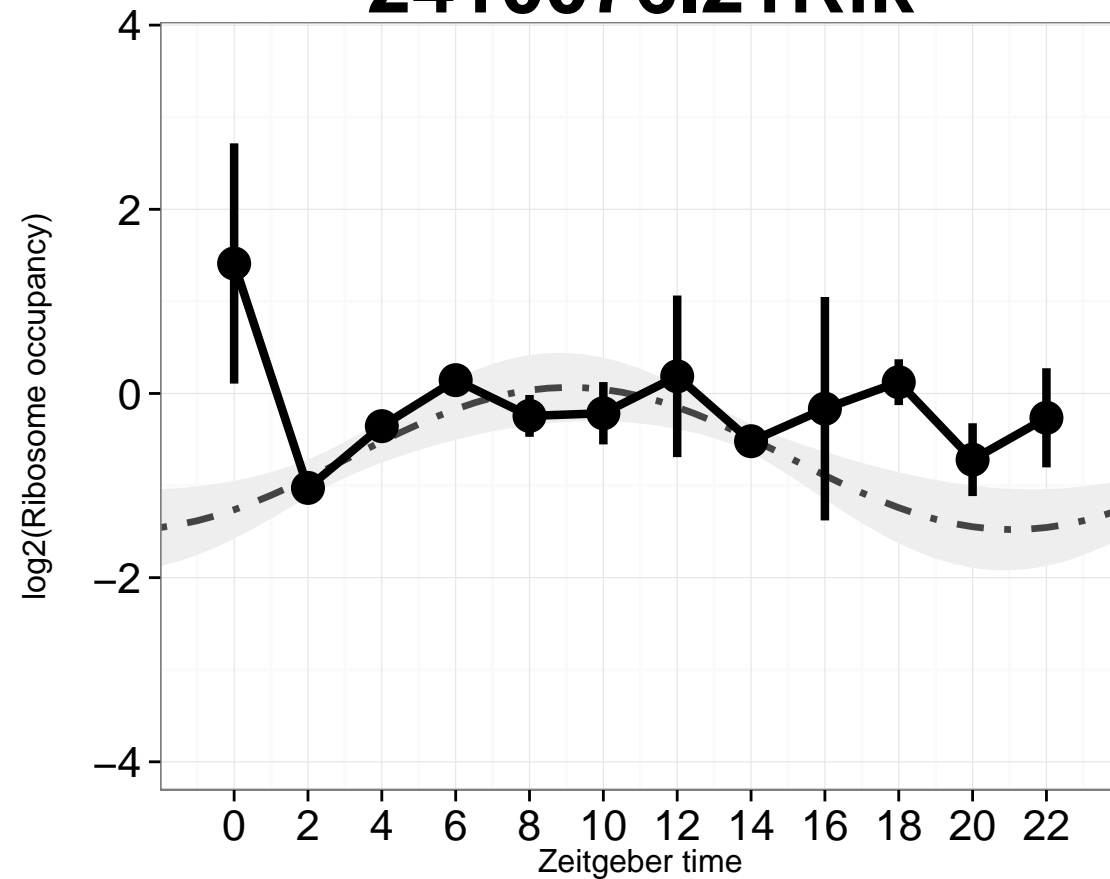

Supplement: SuppDataset_1.zip [file 2410076I21Rik_set_A.pdf › Supplemental Dataset 1/A-mRNA_nonrhyth_translation_nonrhyth/2410076I21Rik_set_A.pdf]

## 2410127L17Rik

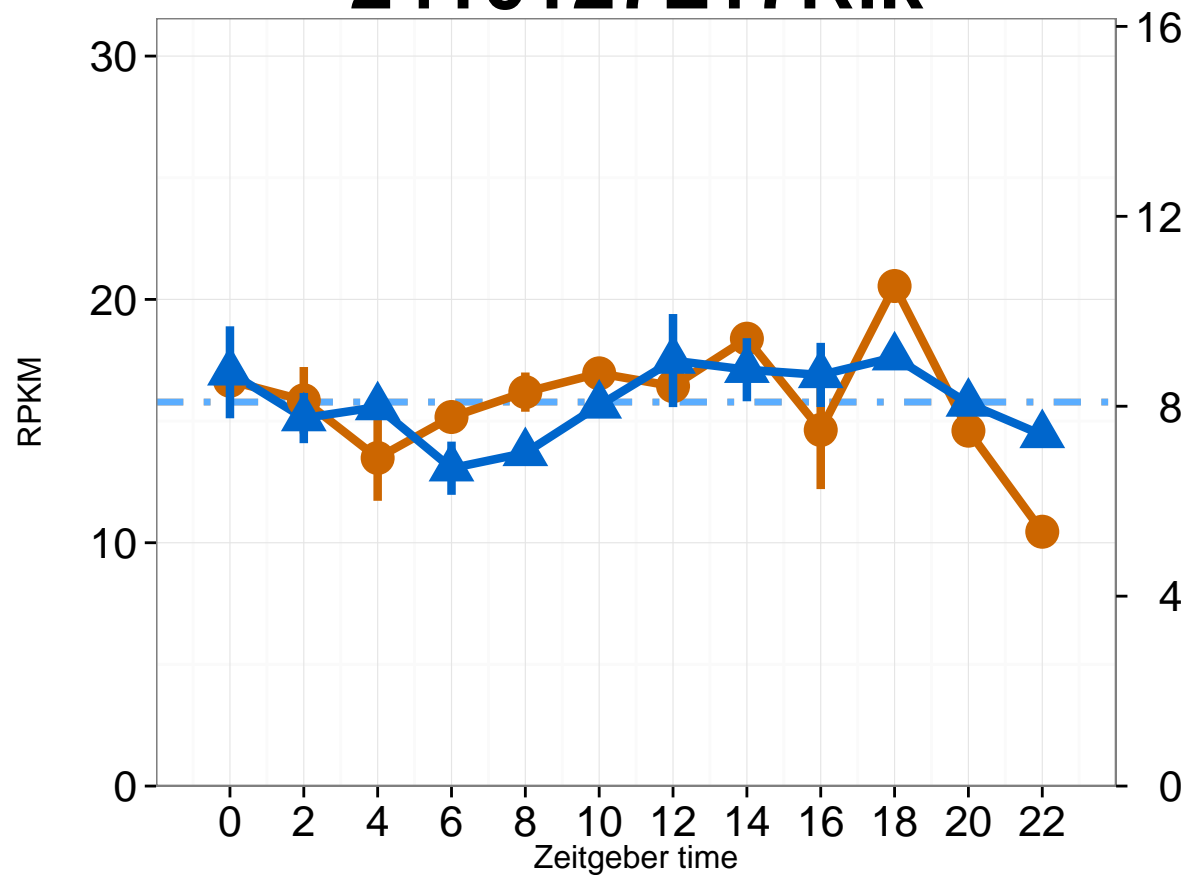

## 2410127L17Rik

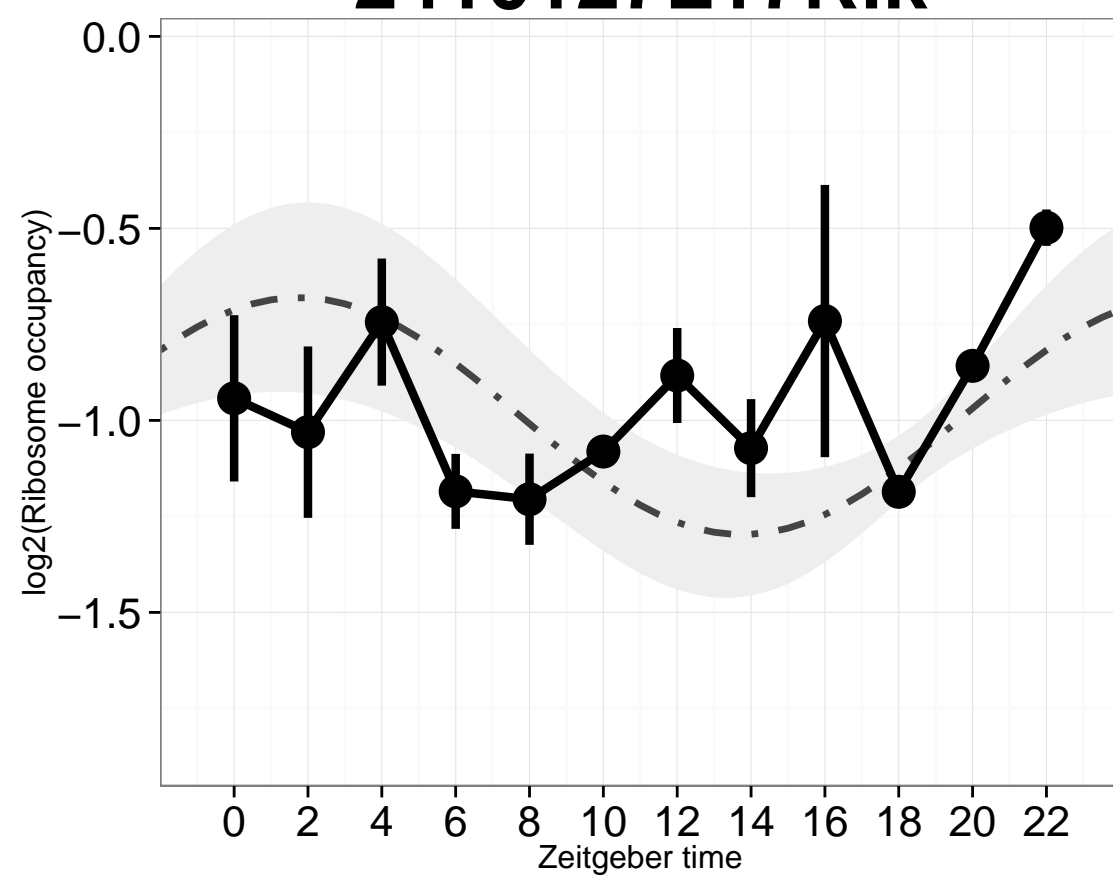

Supplement: SuppDataset_1.zip [file 2410127L17Rik_set_A.pdf › Supplemental Dataset 1/A-mRNA_nonrhyth_translation_nonrhyth/2410127L17Rik_set_A.pdf]

## 2410131K14Rik

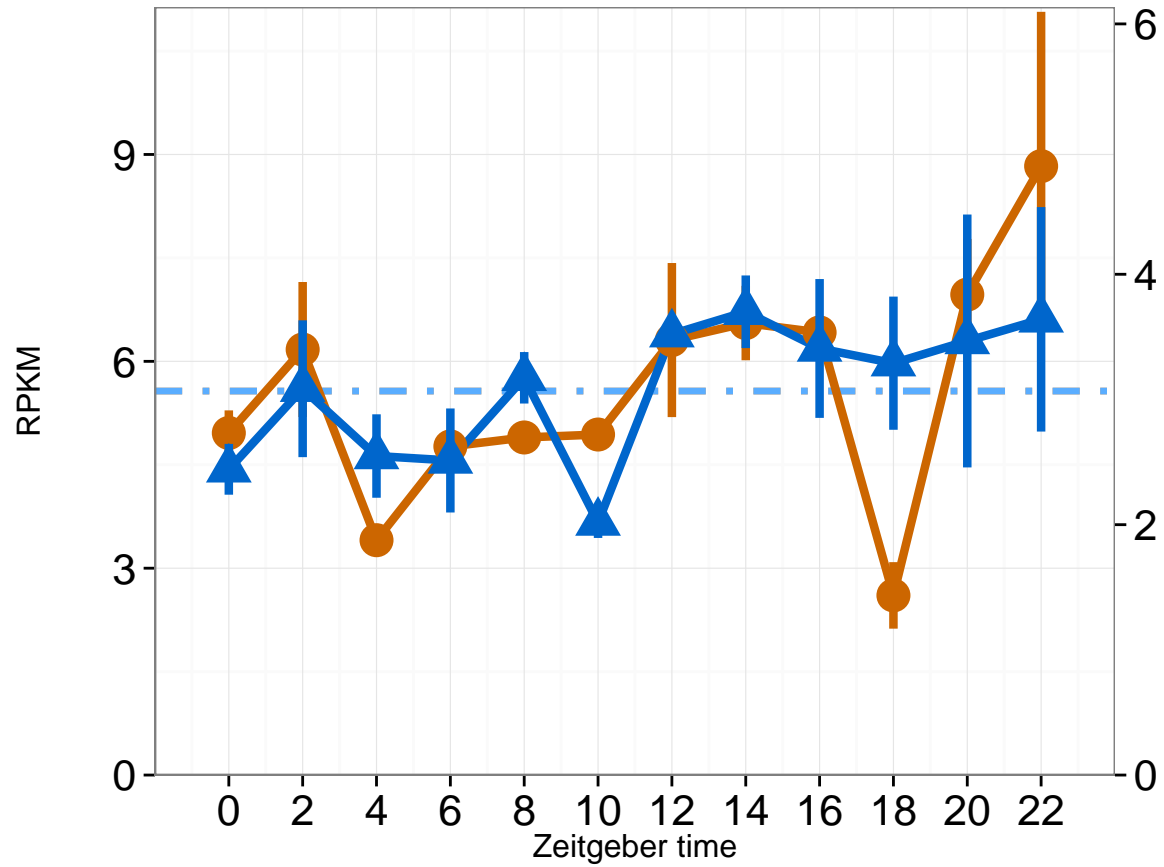

## 2410131K14Rik

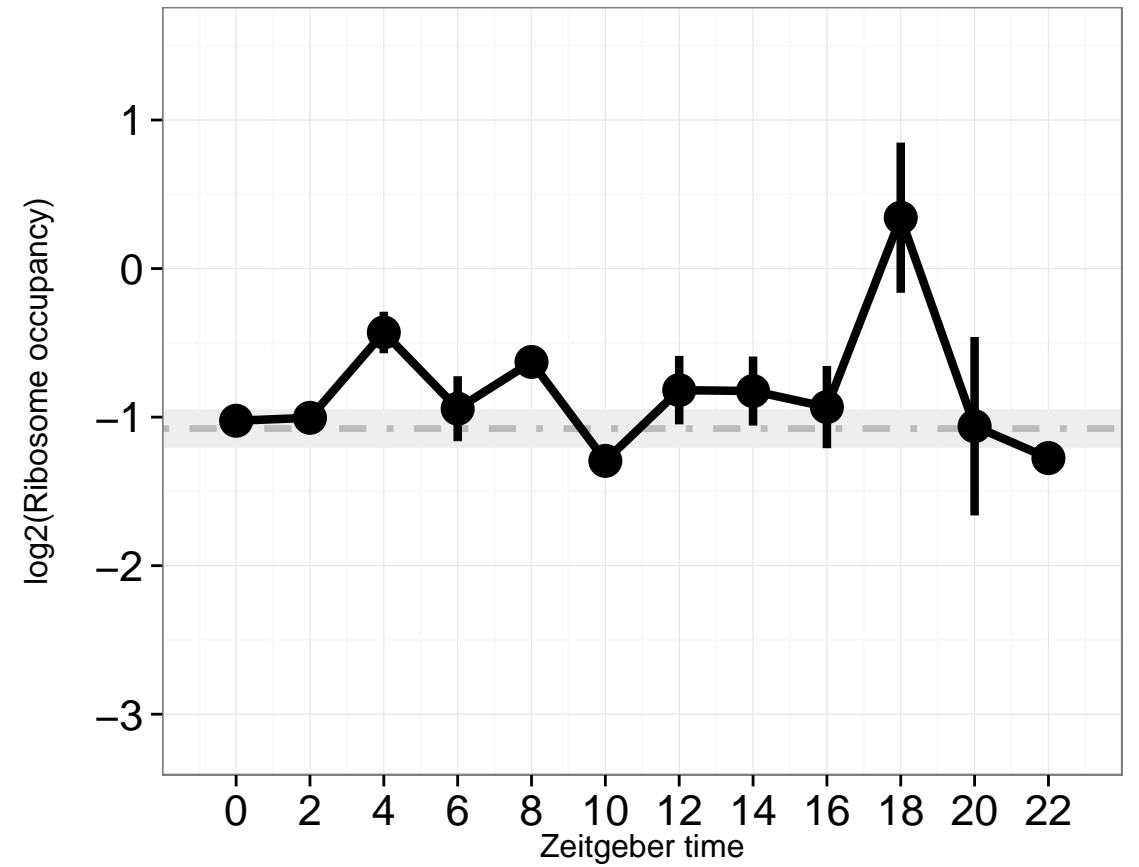

Supplement: SuppDataset_1.zip [file 2410131K14Rik_set_A.pdf › Supplemental Dataset 1/A-mRNA_nonrhyth_translation_nonrhyth/2410131K14Rik_set_A.pdf]

## 2510003E04Rik

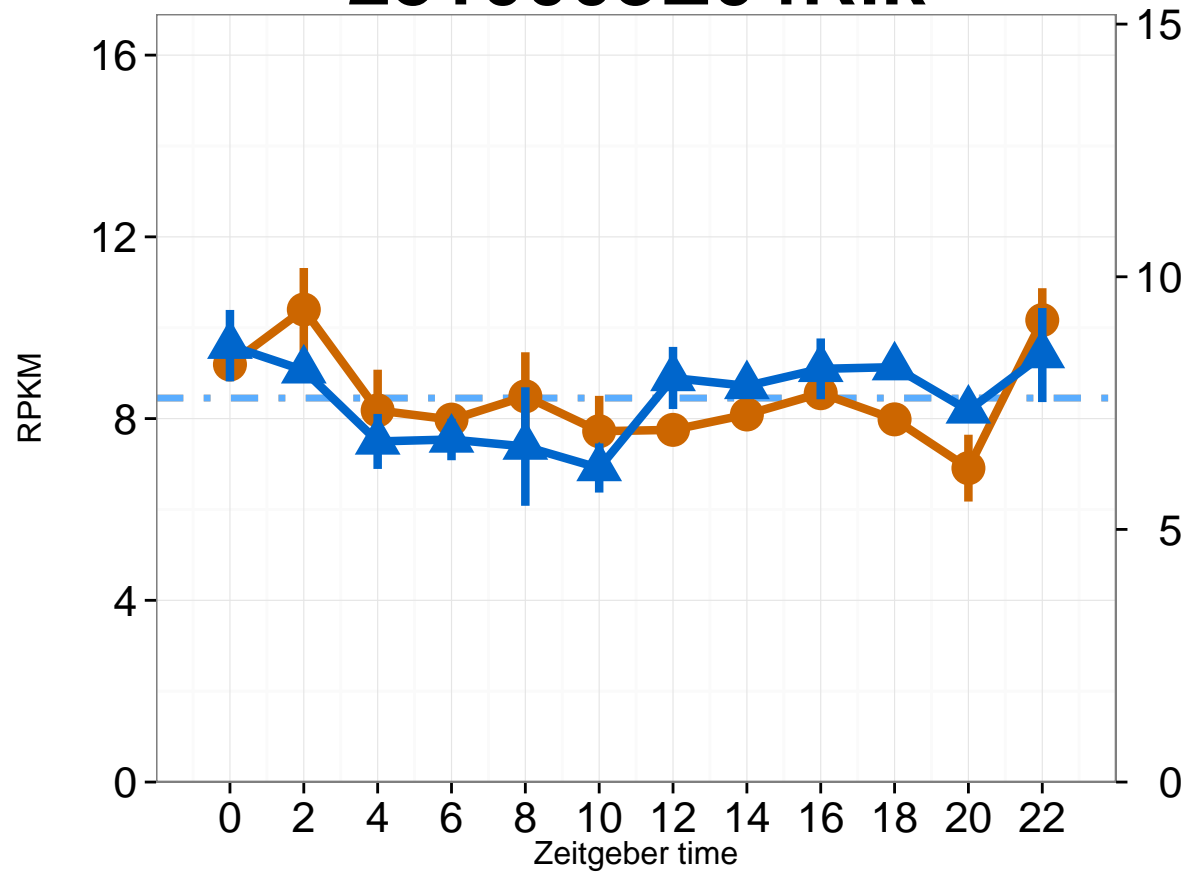

## 2510003E04Rik

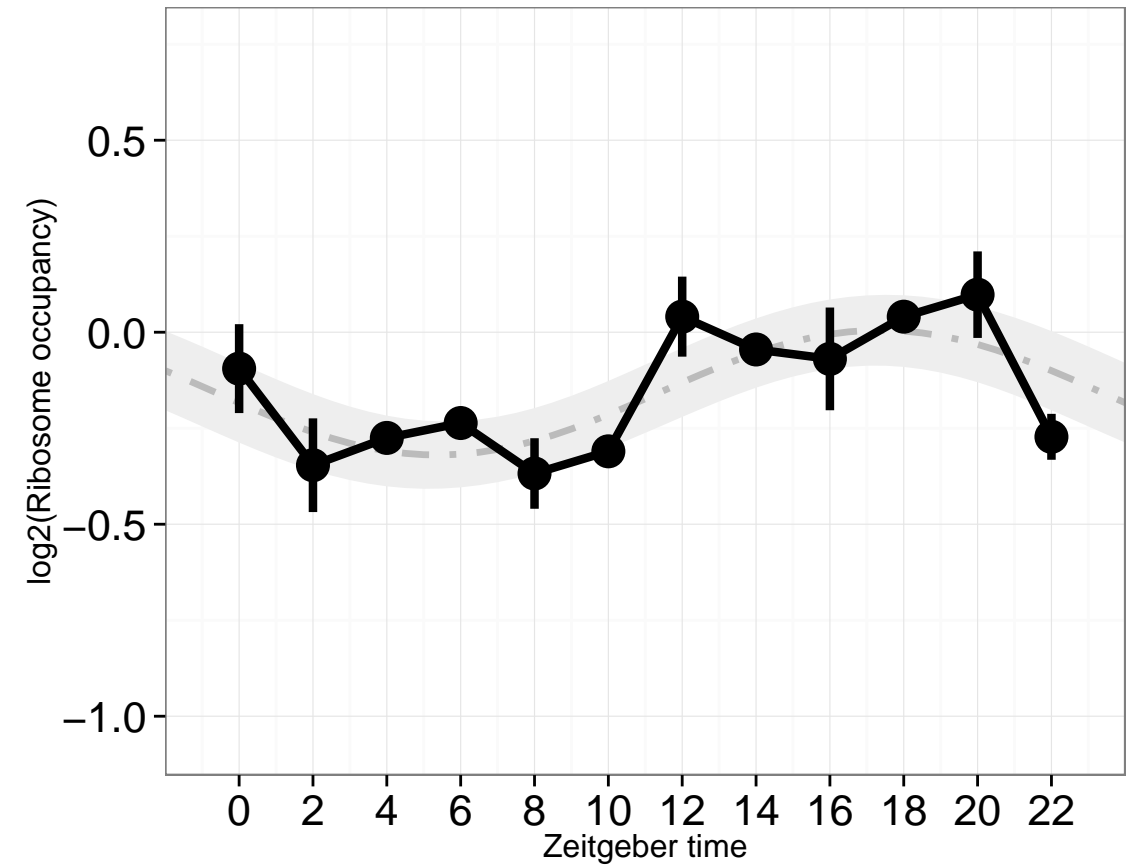

Supplement: SuppDataset_1.zip [file 2510003E04Rik_set_A.pdf › Supplemental Dataset 1/A-mRNA_nonrhyth_translation_nonrhyth/2510003E04Rik_set_A.pdf]

## 2510009E07Rik

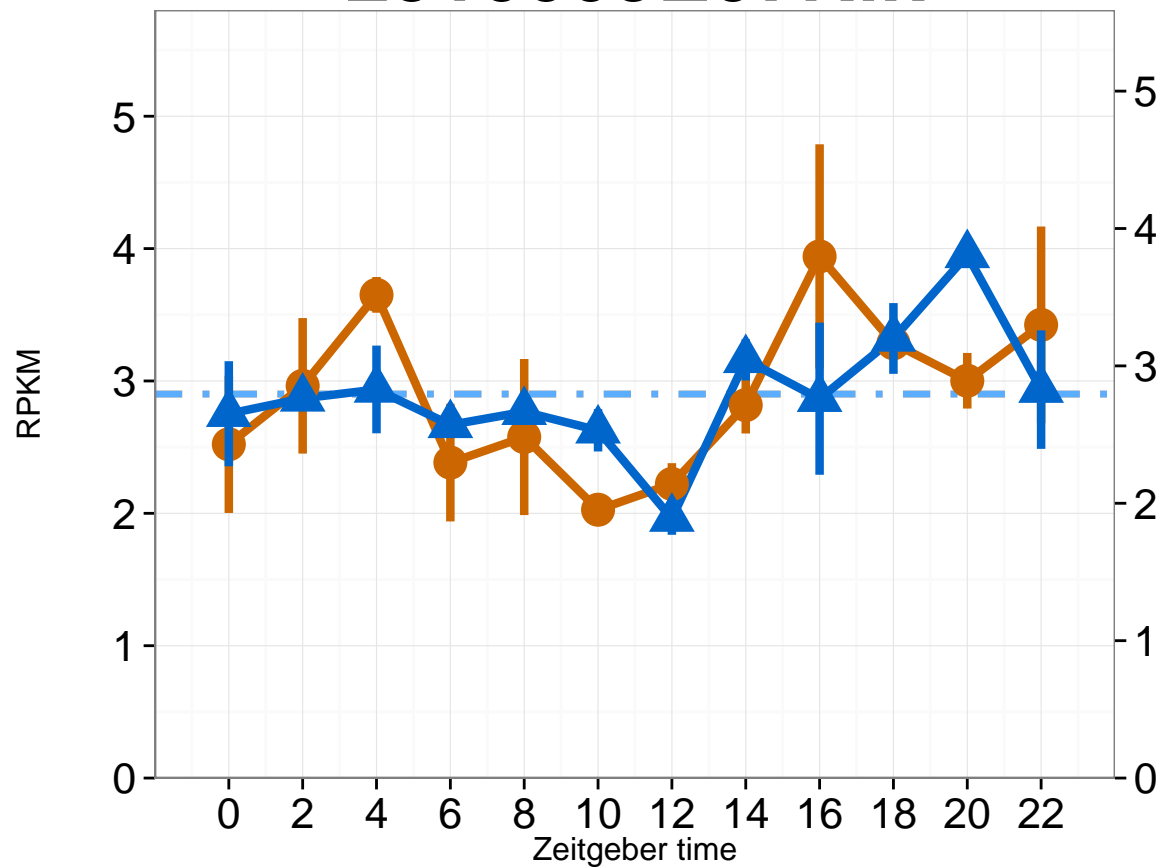

## 2510009E07Rik

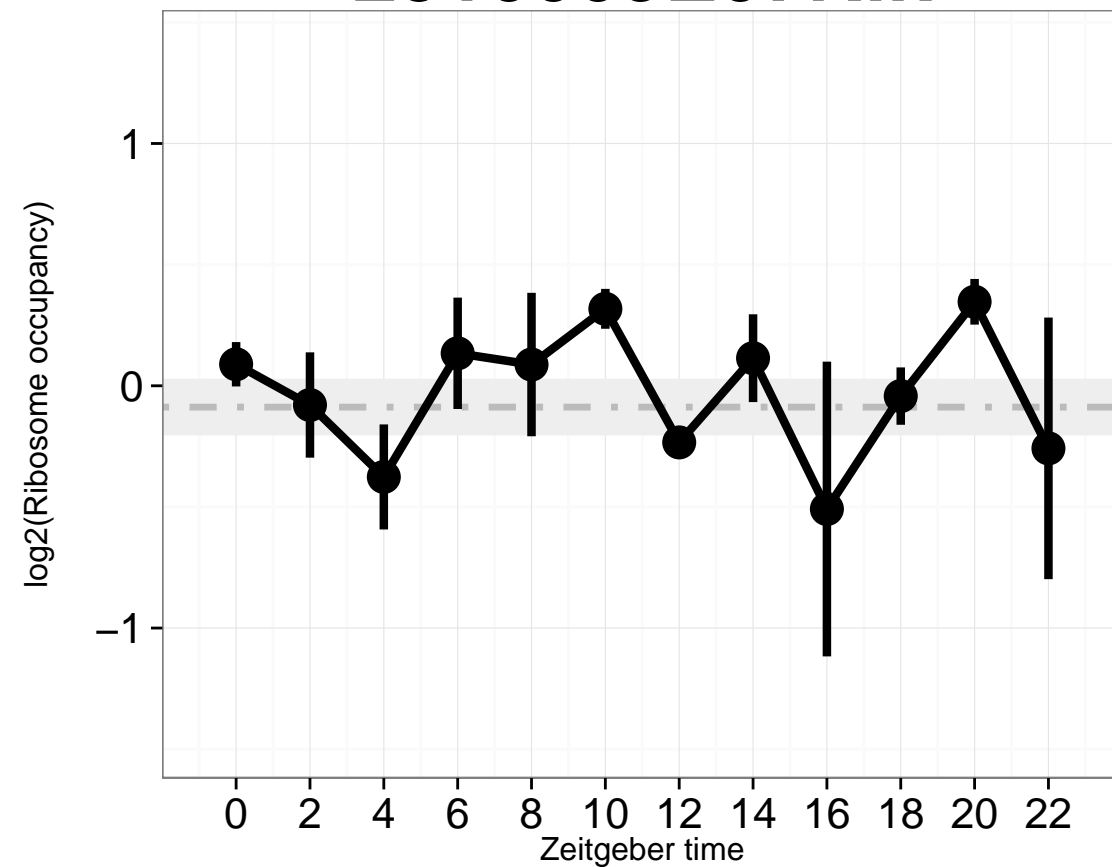

Supplement: SuppDataset_1.zip [file 2510009E07Rik_set_A.pdf › Supplemental Dataset 1/A-mRNA_nonrhyth_translation_nonrhyth/2510009E07Rik_set_A.pdf]

# 2510039O18Rik

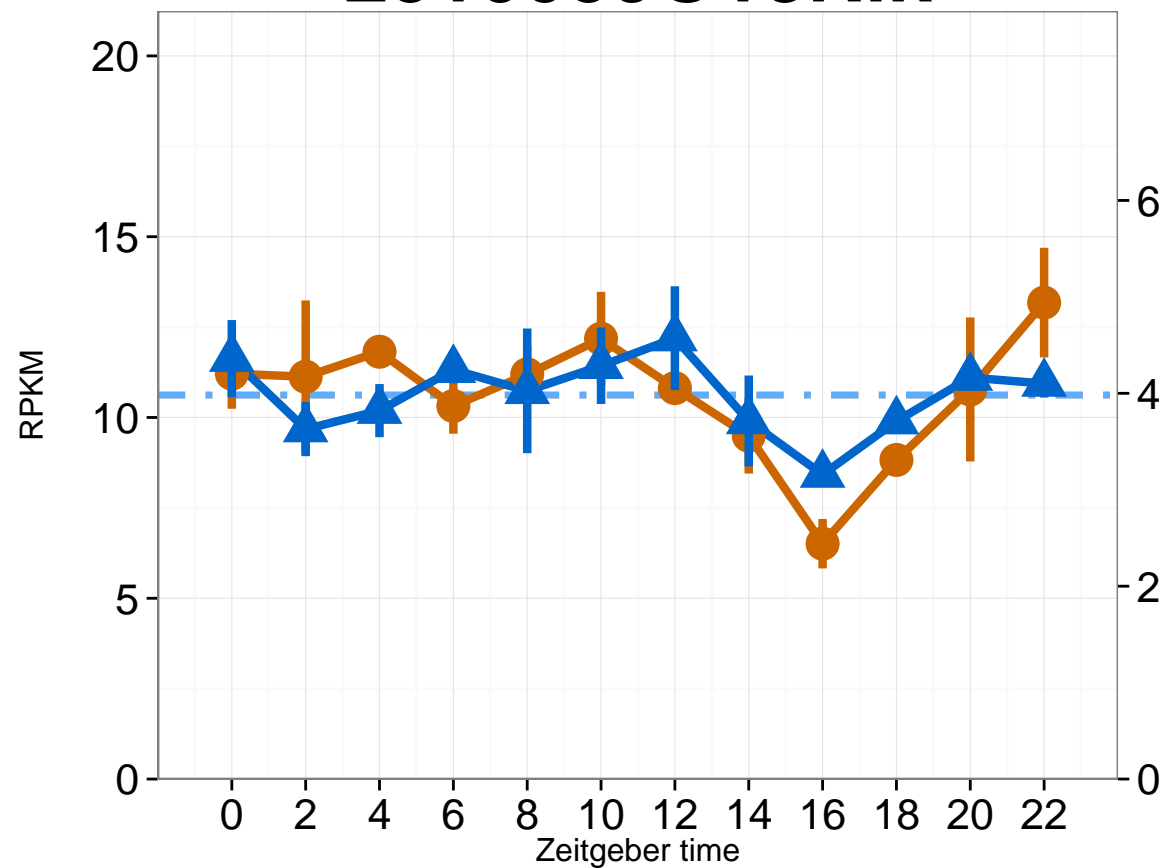

# 2510039O18Rik

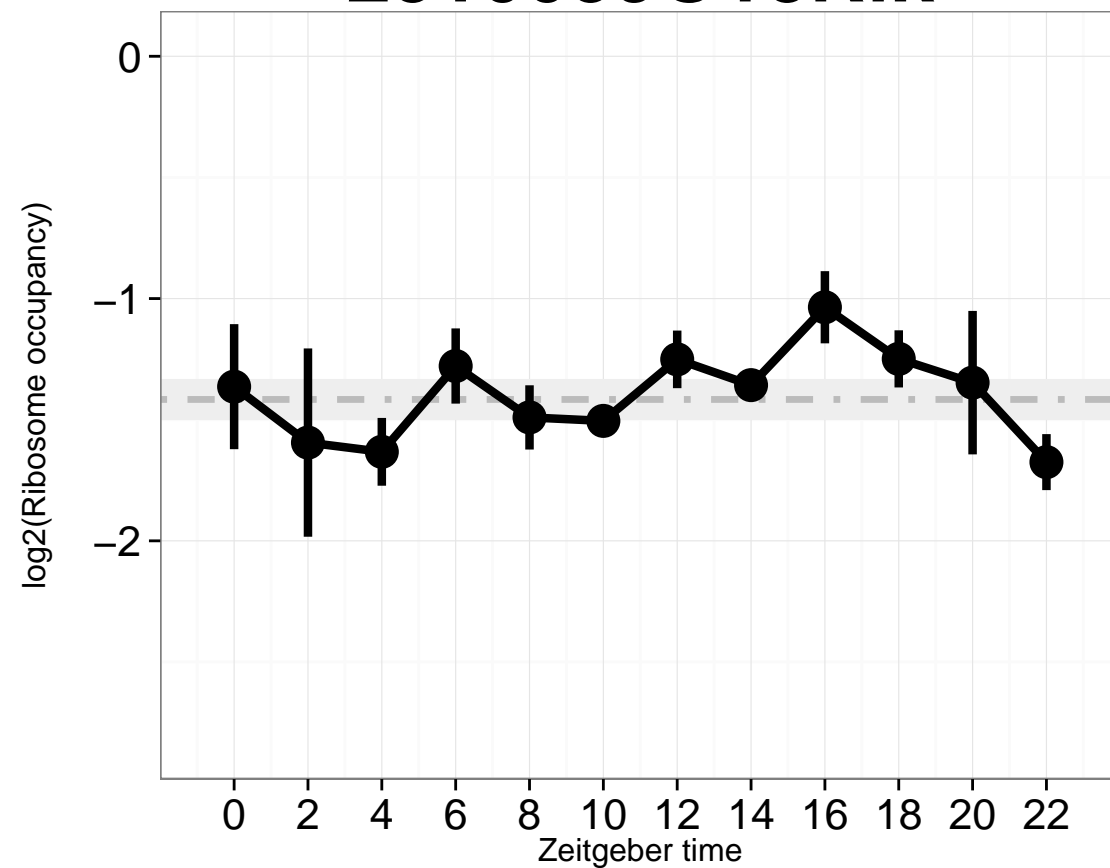

Supplement: SuppDataset_1.zip [file 2510039O18Rik_set_A.pdf › Supplemental Dataset 1/A-mRNA_nonrhyth_translation_nonrhyth/2510039O18Rik_set_A.pdf]

## 2510049J12Rik

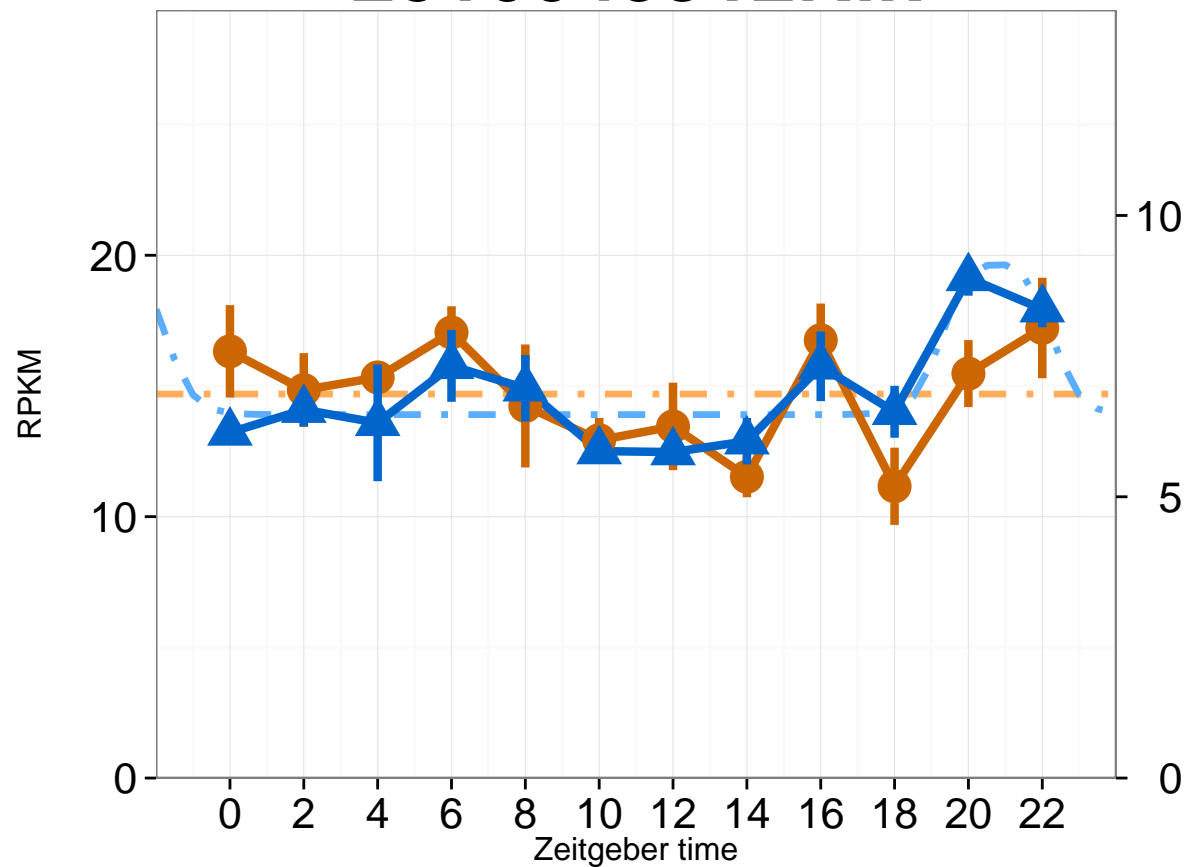

## 2510049J12Rik

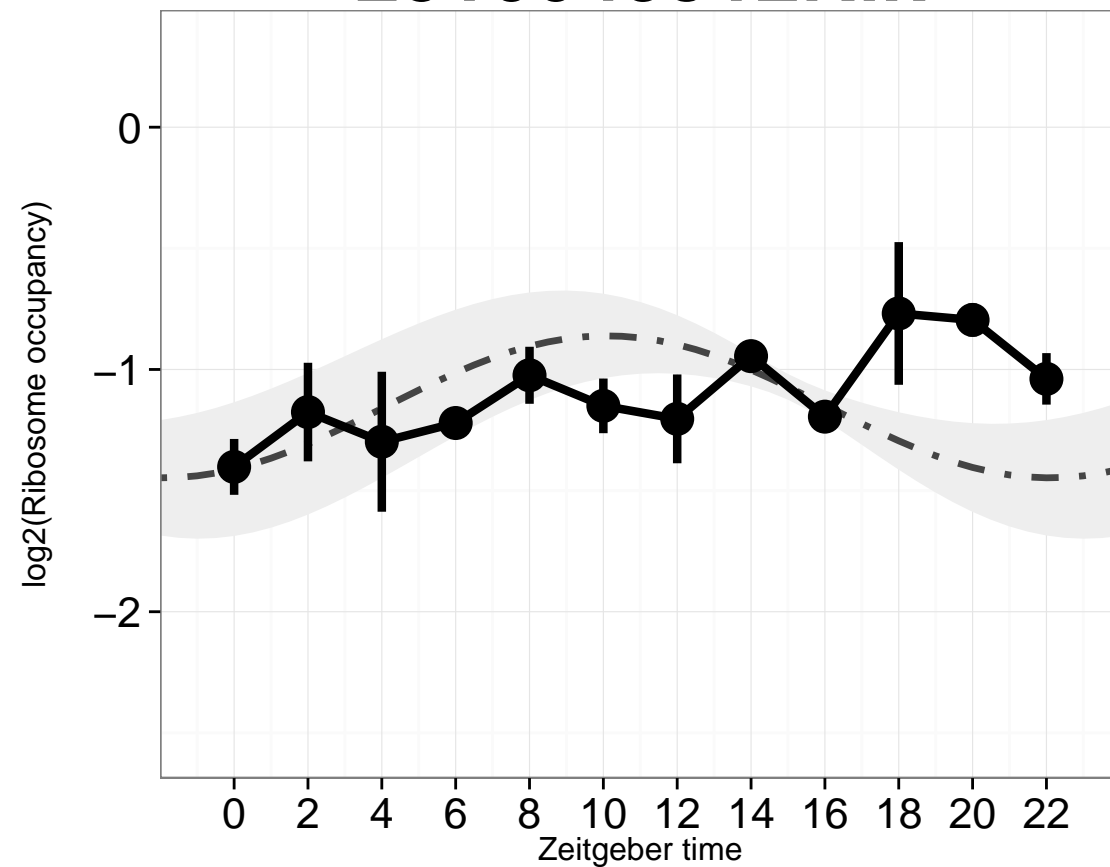

Supplement: SuppDataset_1.zip [file 2510049J12Rik_set_A.pdf › Supplemental Dataset 1/A-mRNA_nonrhyth_translation_nonrhyth/2510049J12Rik_set_A.pdf]

# 2610002J02Rik

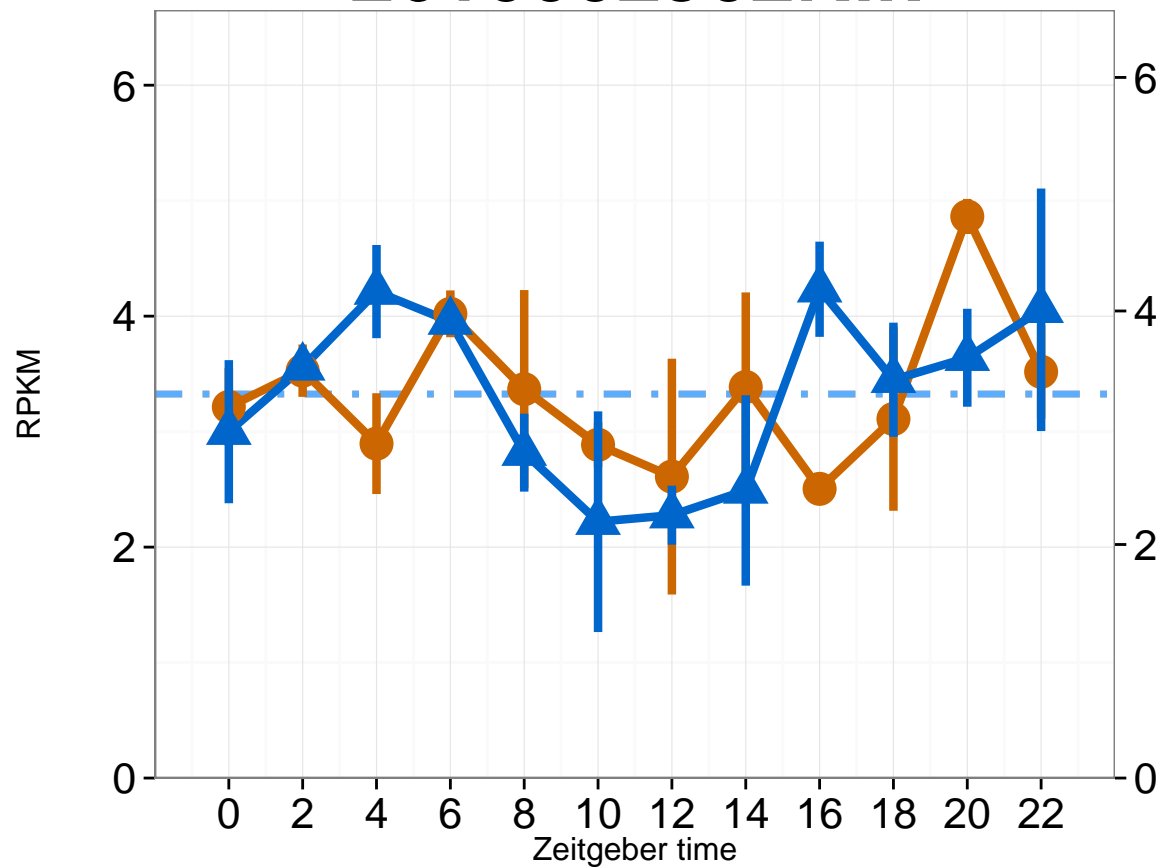

# 2610002J02Rik

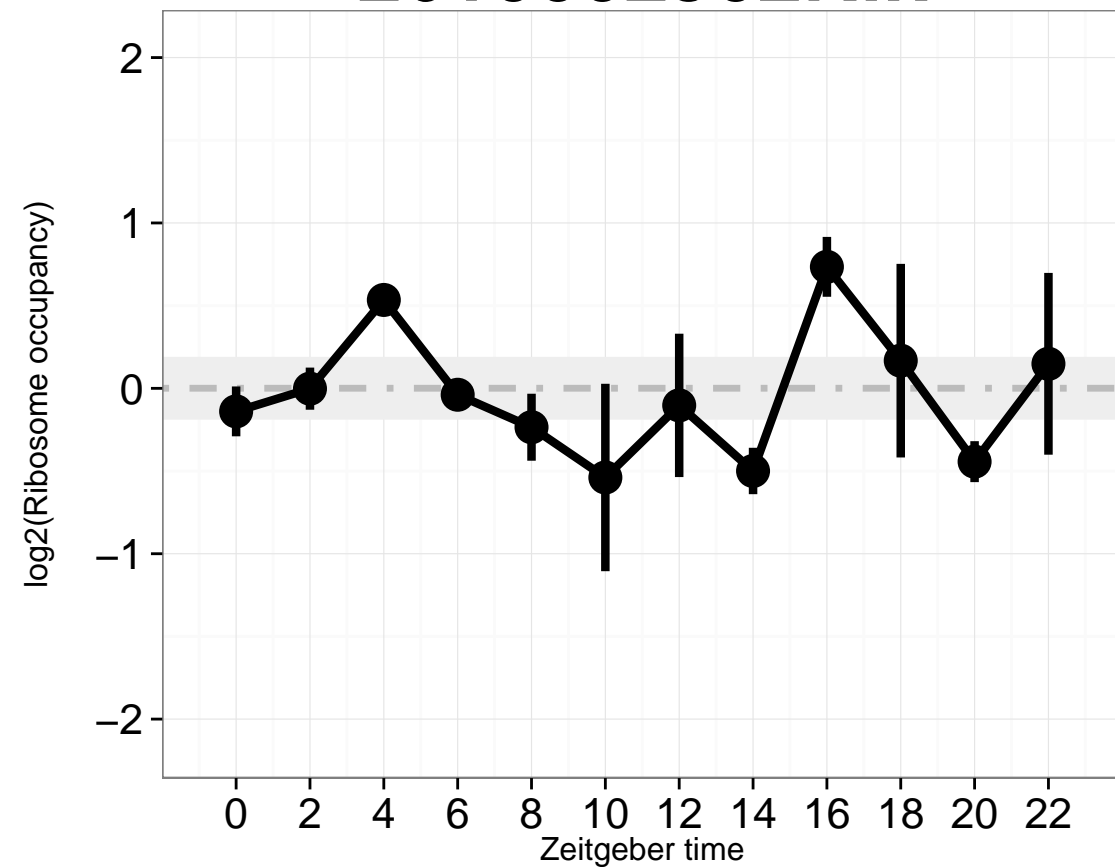

Supplement: SuppDataset_1.zip [file 2610002J02Rik_set_A.pdf › Supplemental Dataset 1/A-mRNA_nonrhyth_translation_nonrhyth/2610002J02Rik_set_A.pdf]

## 2610002M06Rik

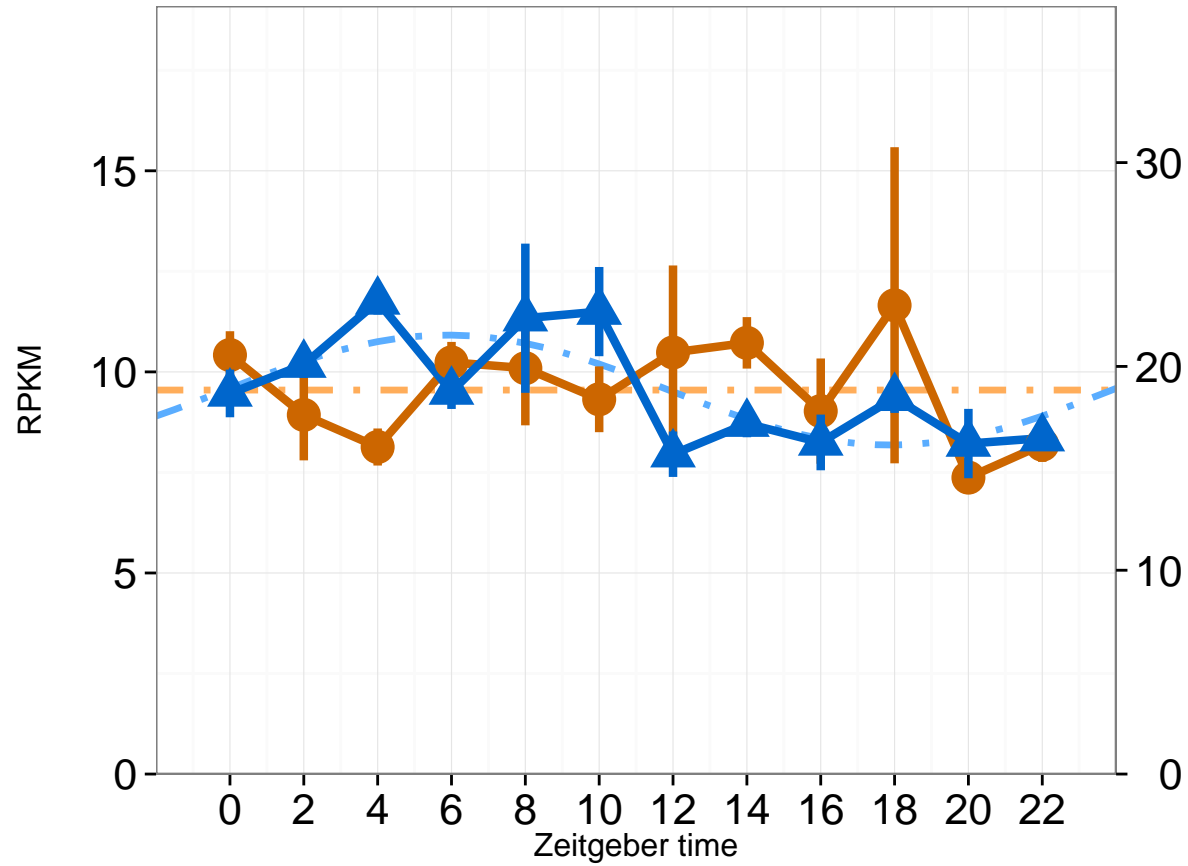

## 2610002M06Rik

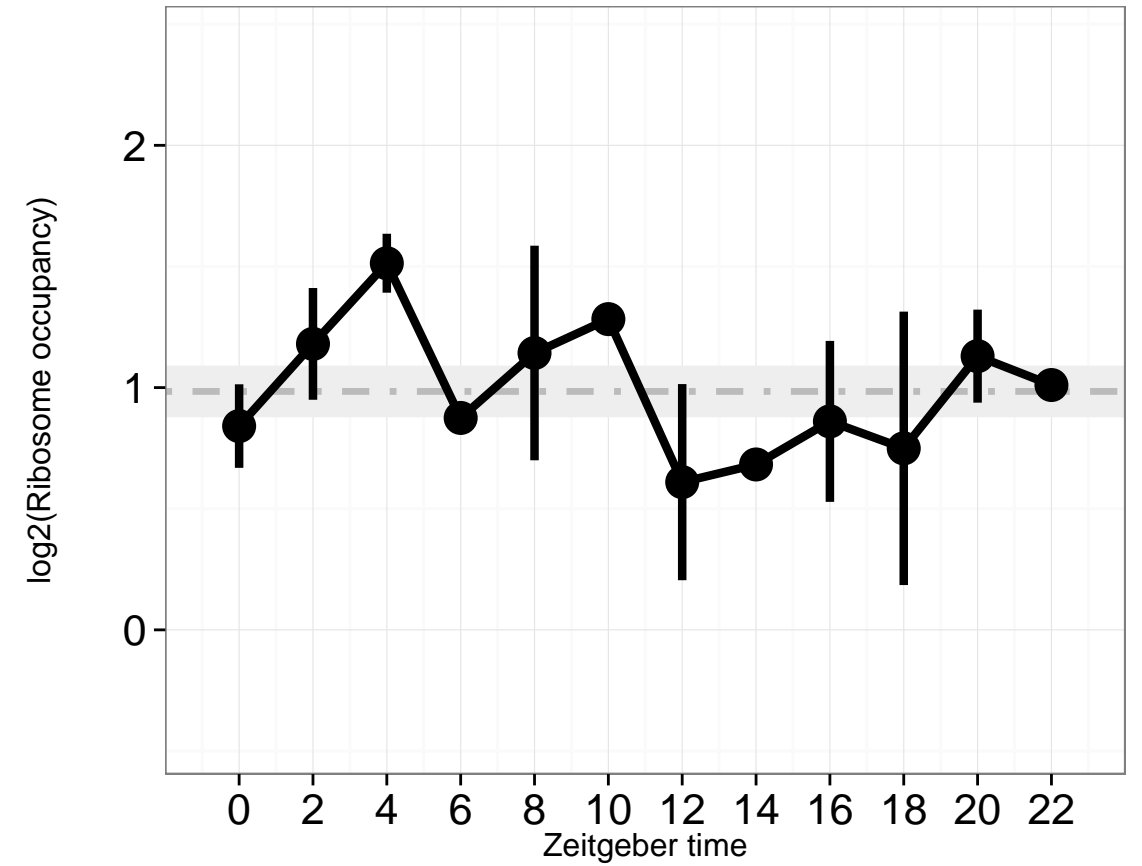

Supplement: SuppDataset_1.zip [file 2610002M06Rik_set_A.pdf › Supplemental Dataset 1/A-mRNA_nonrhyth_translation_nonrhyth/2610002M06Rik_set_A.pdf]

**2610008E11Rik**

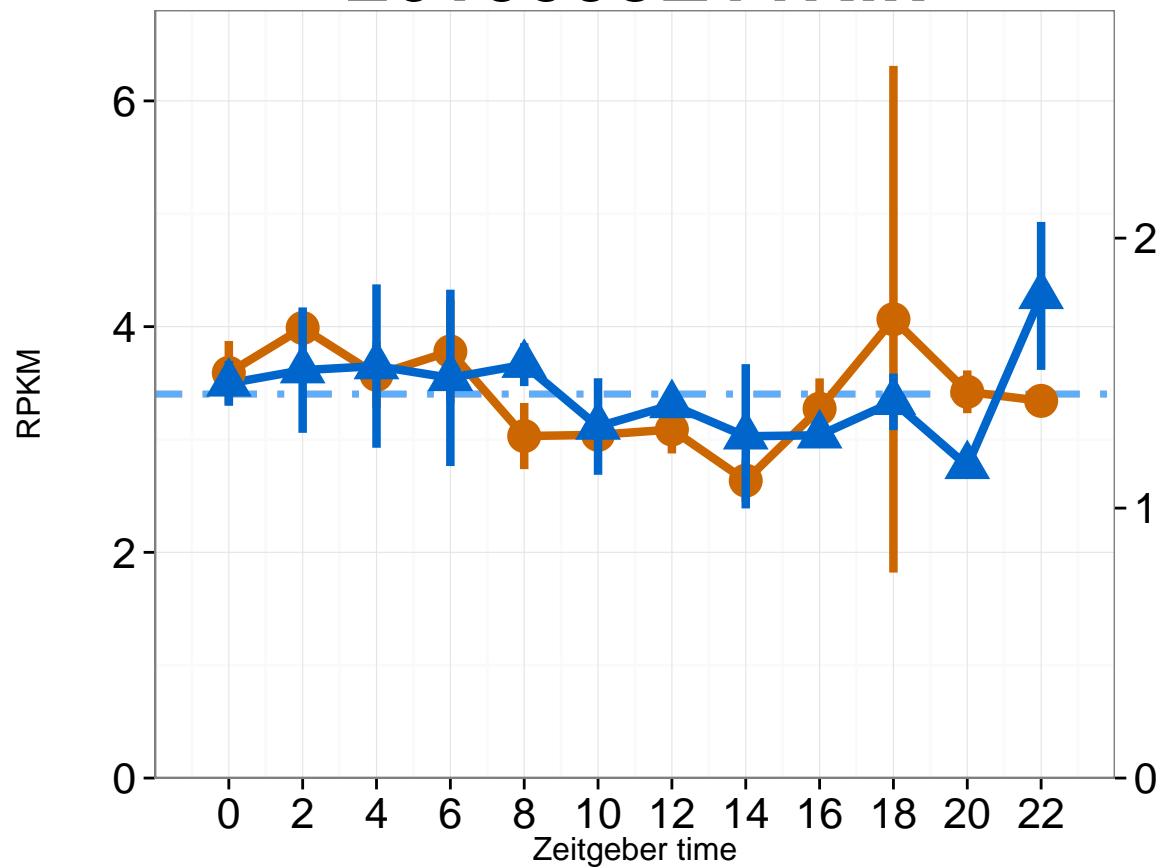

**2610008E11Rik**

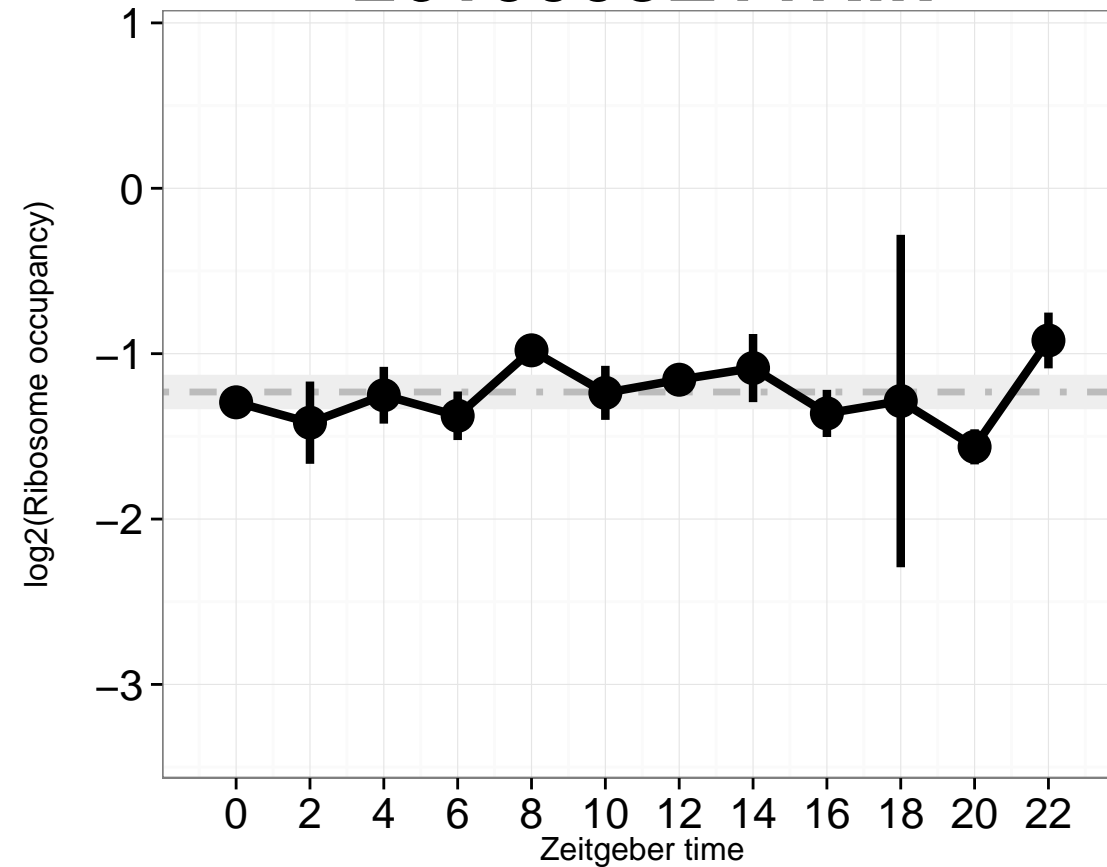

Supplement: SuppDataset_1.zip [file 2610008E11Rik_set_A.pdf › Supplemental Dataset 1/A-mRNA_nonrhyth_translation_nonrhyth/2610008E11Rik_set_A.pdf]

# 2610015P09Rik

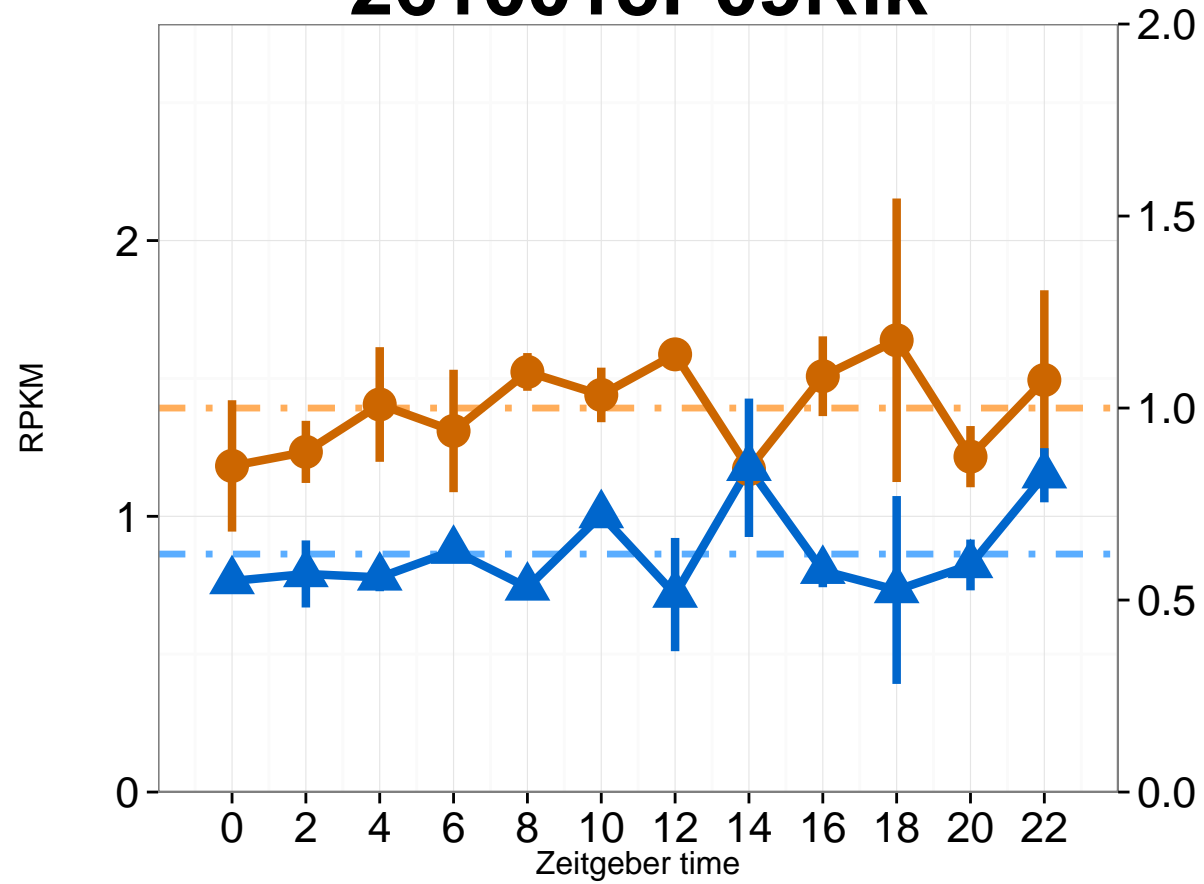

# 2610015P09Rik

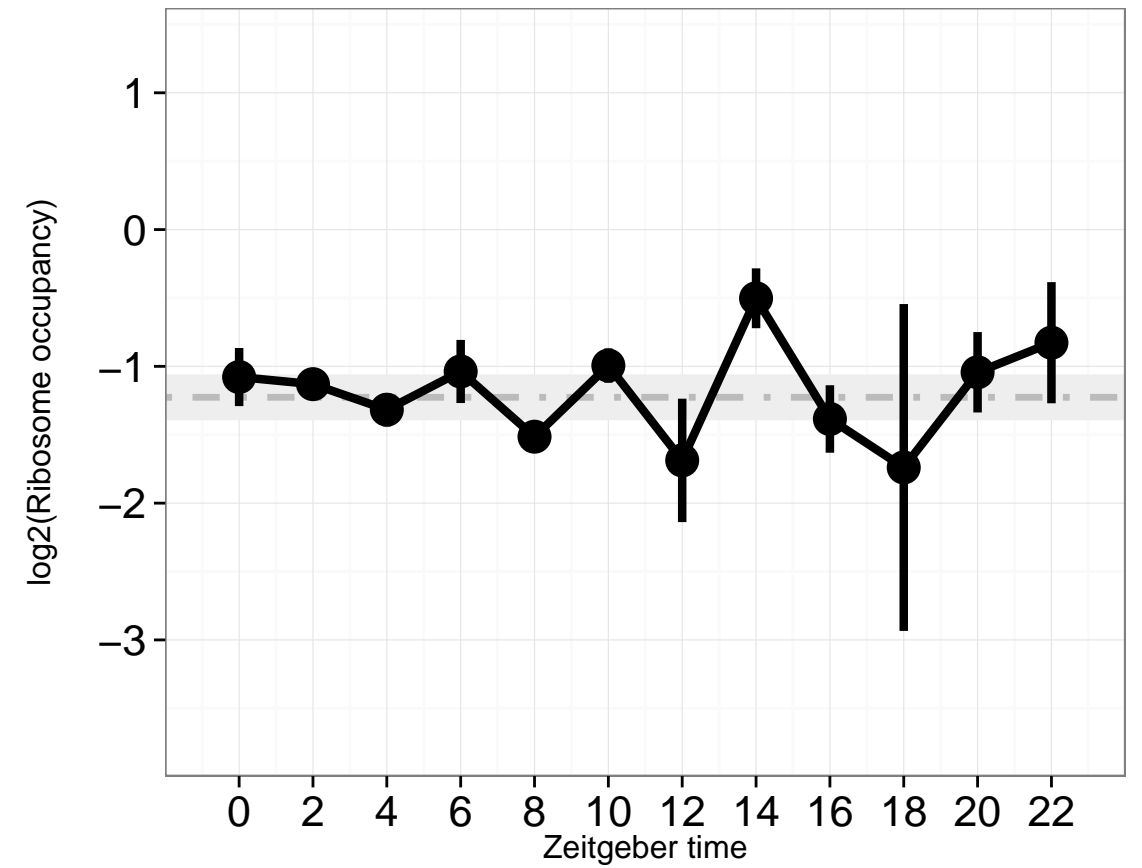

Supplement: SuppDataset_1.zip [file 2610015P09Rik_set_A.pdf › Supplemental Dataset 1/A-mRNA_nonrhyth_translation_nonrhyth/2610015P09Rik_set_A.pdf]

# 2610020H08Rik

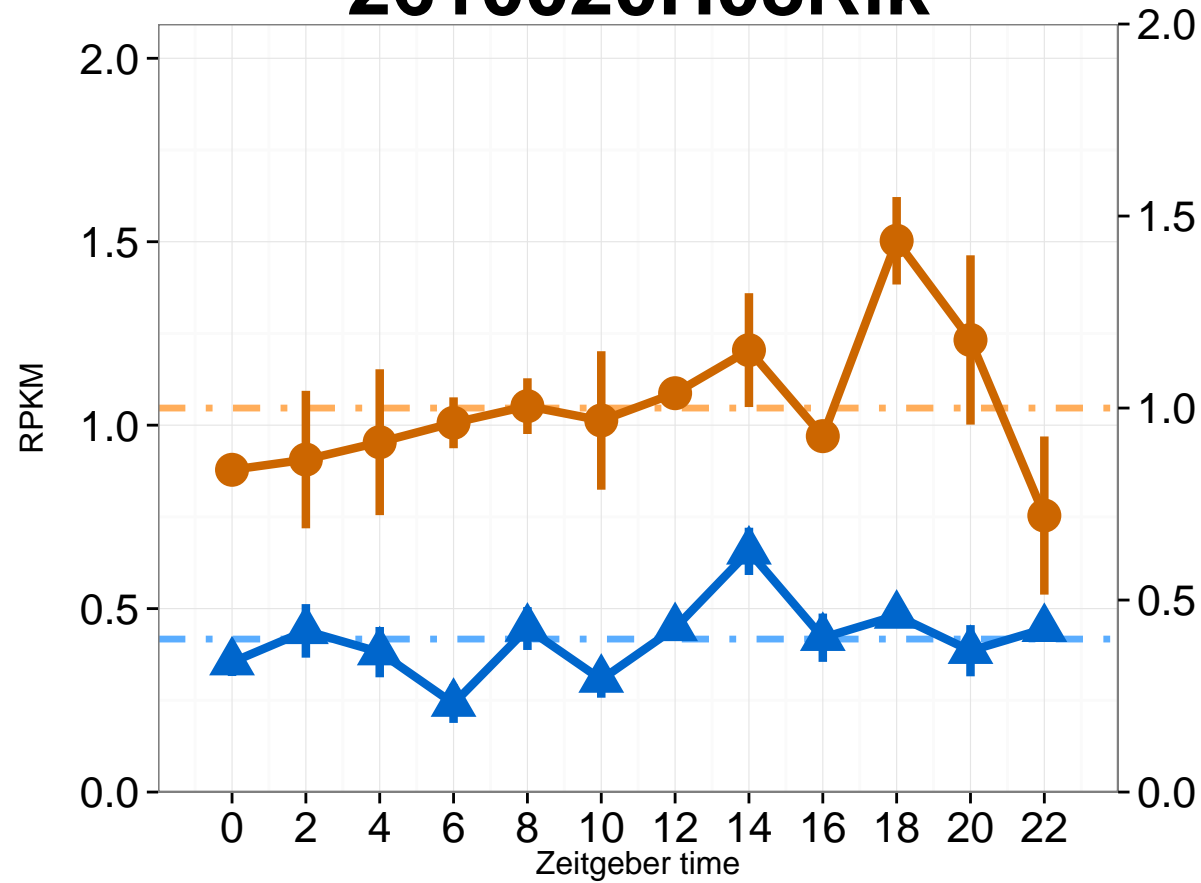

# 2610020H08Rik

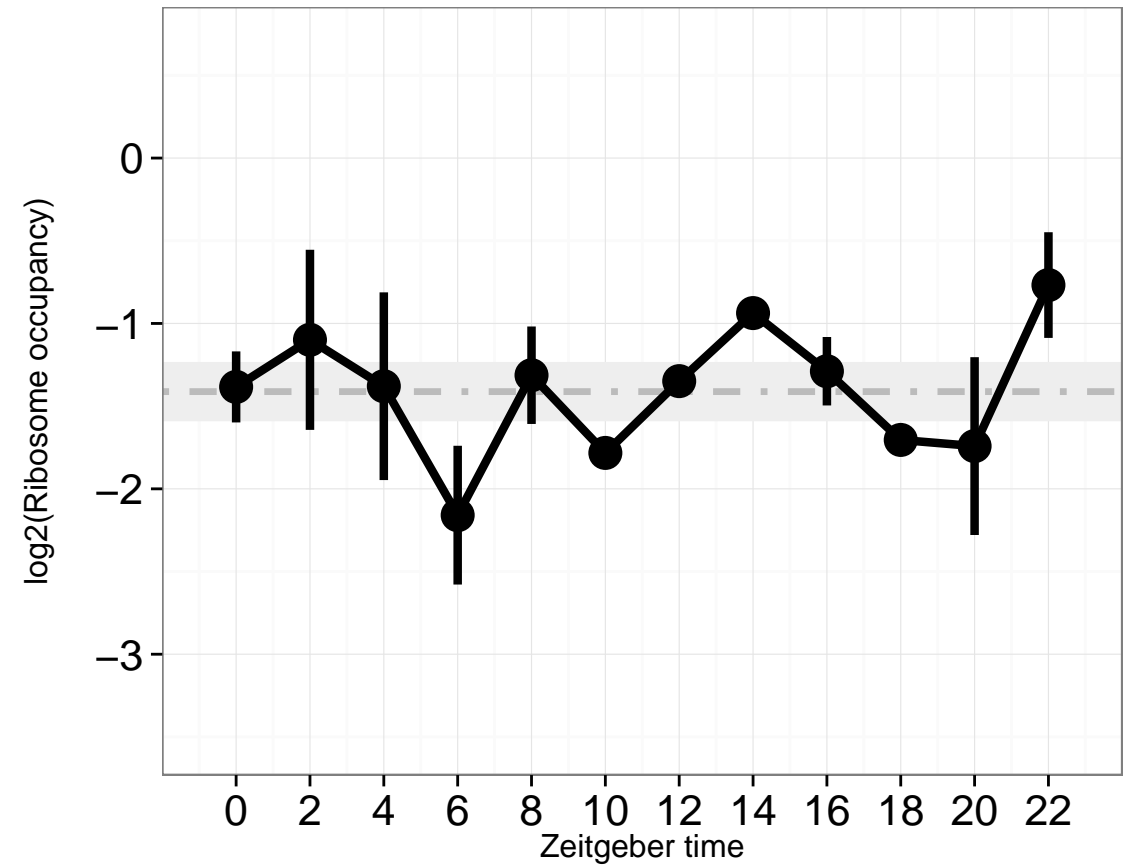

Supplement: SuppDataset_1.zip [file 2610020H08Rik_set_A.pdf › Supplemental Dataset 1/A-mRNA_nonrhyth_translation_nonrhyth/2610020H08Rik_set_A.pdf]

# 2610034B18Rik

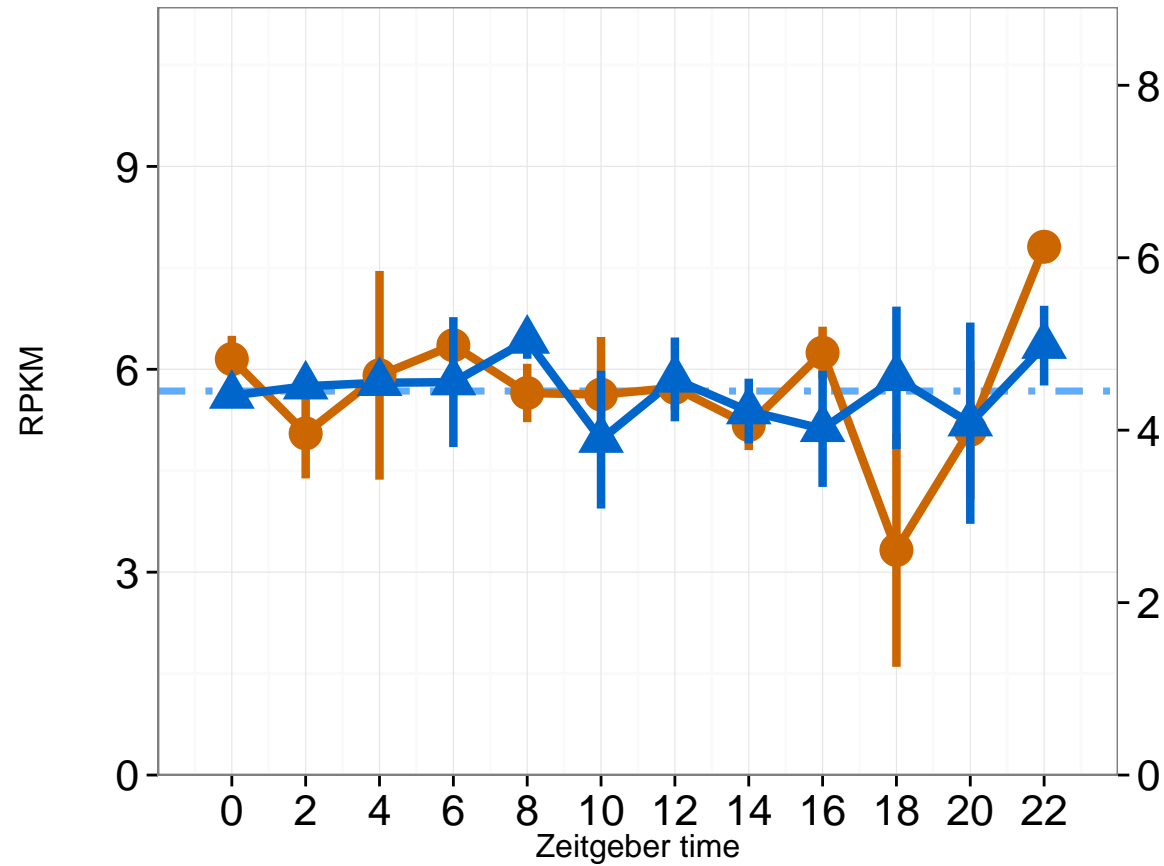

# 2610034B18Rik

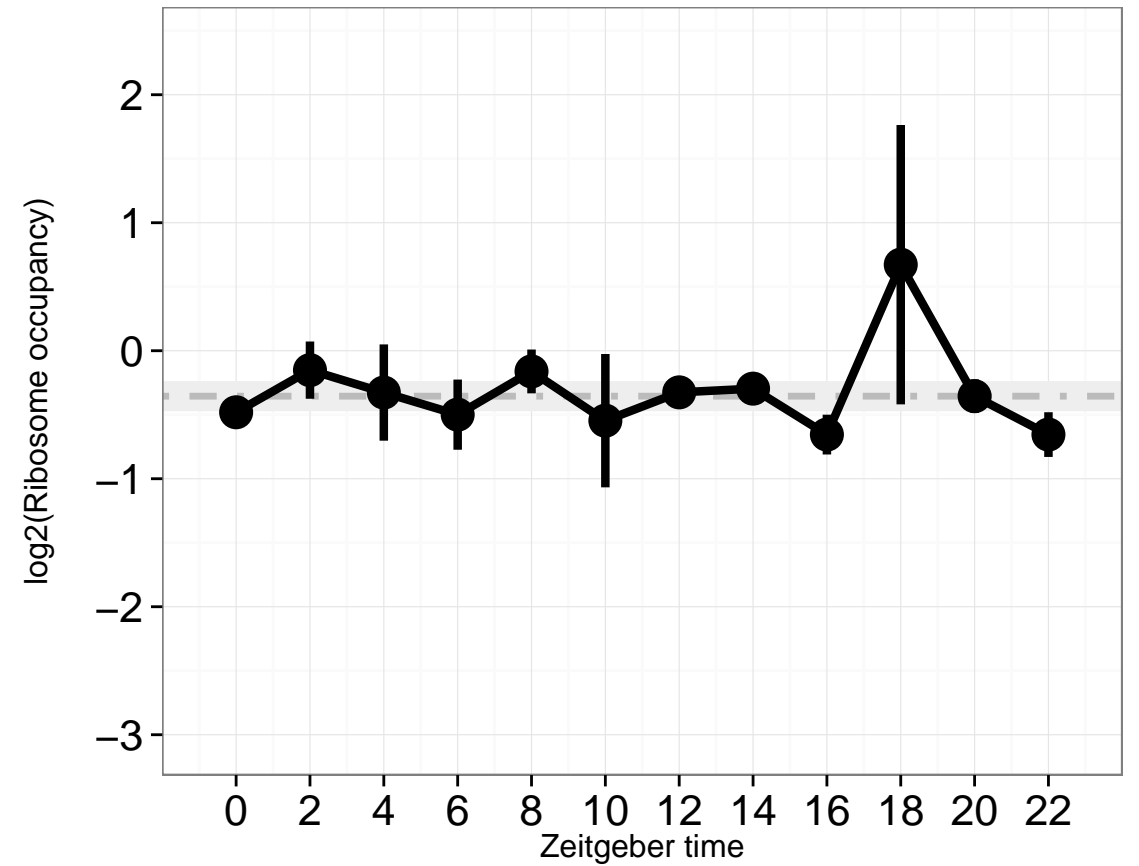

Supplement: SuppDataset_1.zip [file 2610034B18Rik_set_A.pdf › Supplemental Dataset 1/A-mRNA_nonrhyth_translation_nonrhyth/2610034B18Rik_set_A.pdf]

**2610044O15Rik8**

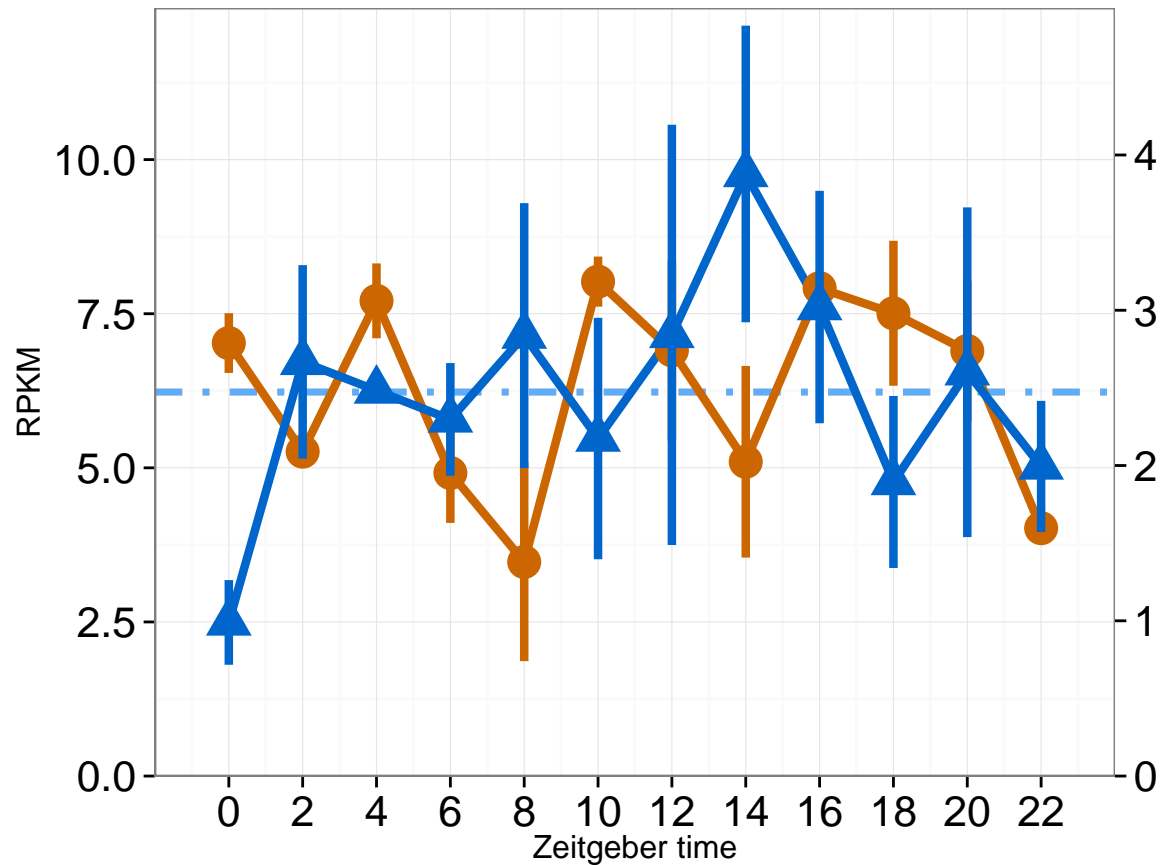

**2610044O15Rik8**

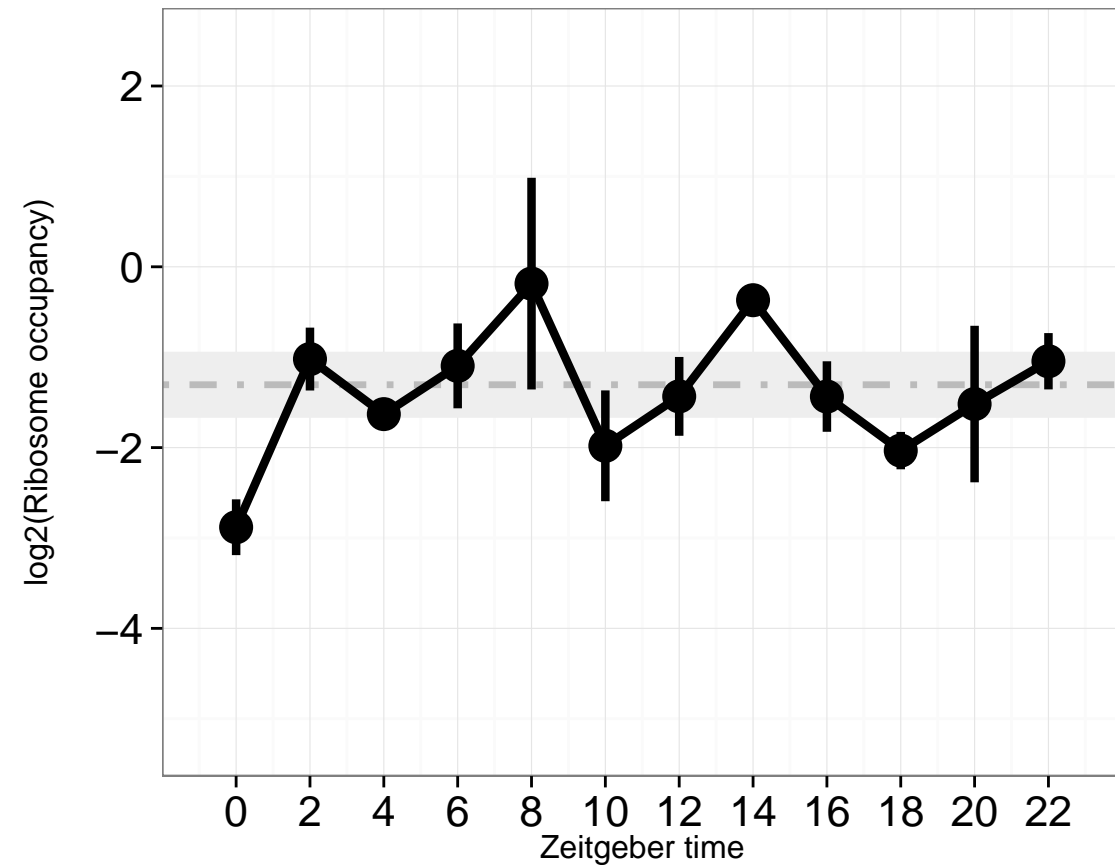

Supplement: SuppDataset_1.zip [file 2610044O15Rik8_set_A.pdf › Supplemental Dataset 1/A-mRNA_nonrhyth_translation_nonrhyth/2610044O15Rik8_set_A.pdf]

# 2610301B20Rik

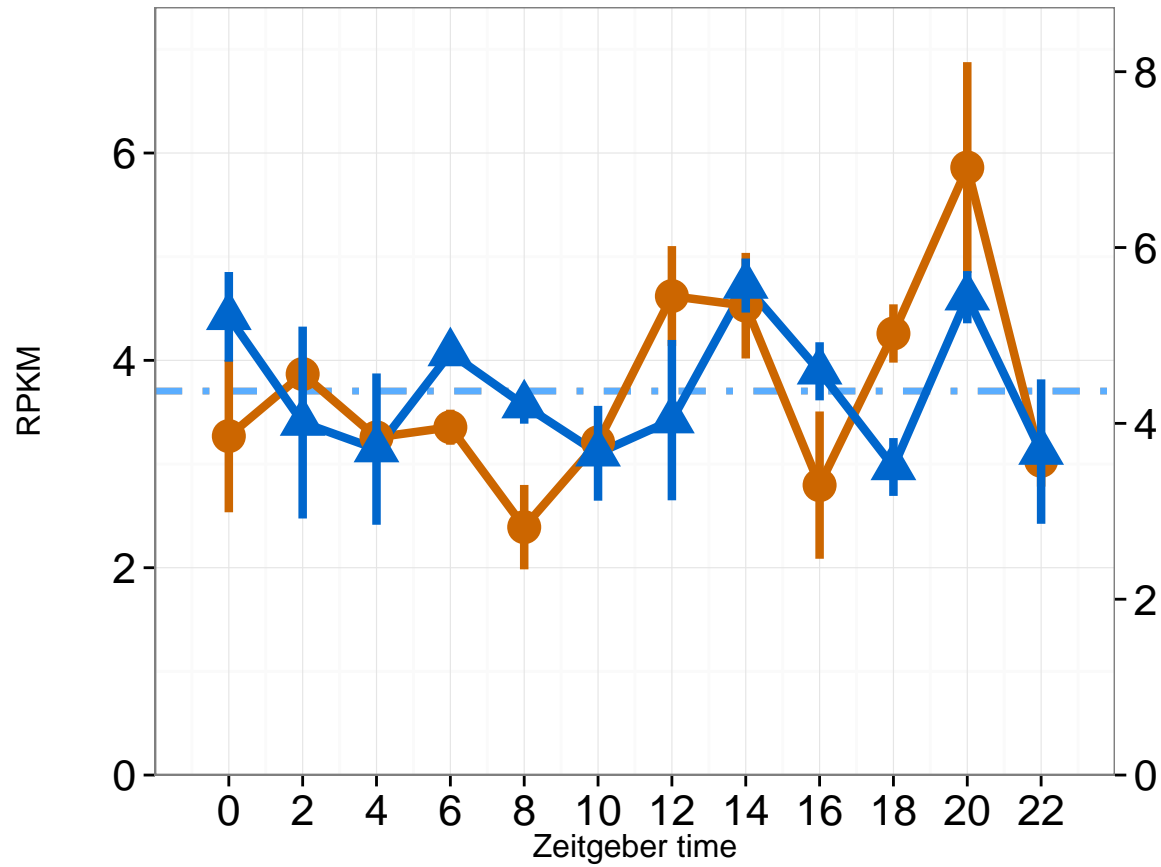

# 2610301B20Rik

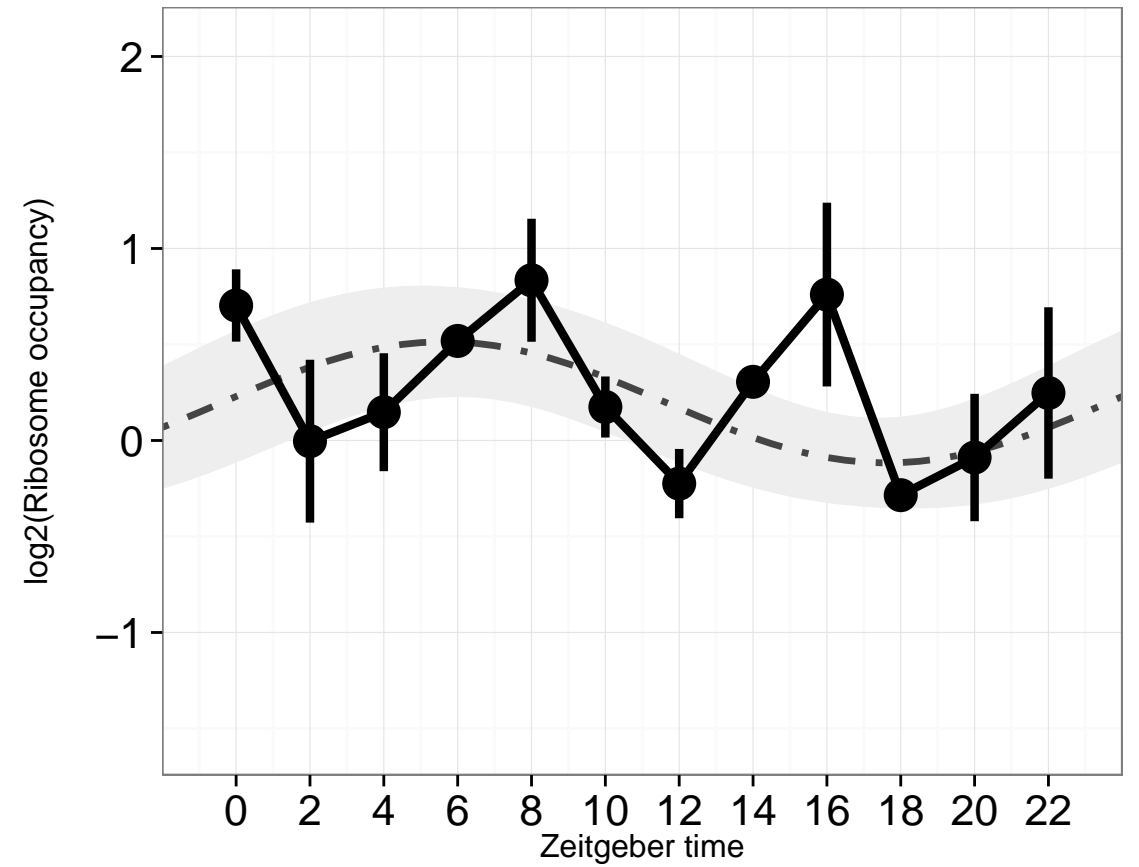

Supplement: SuppDataset_1.zip [file 2610301B20Rik_set_A.pdf › Supplemental Dataset 1/A-mRNA_nonrhyth_translation_nonrhyth/2610301B20Rik_set_A.pdf]

## 2610507B11Rik

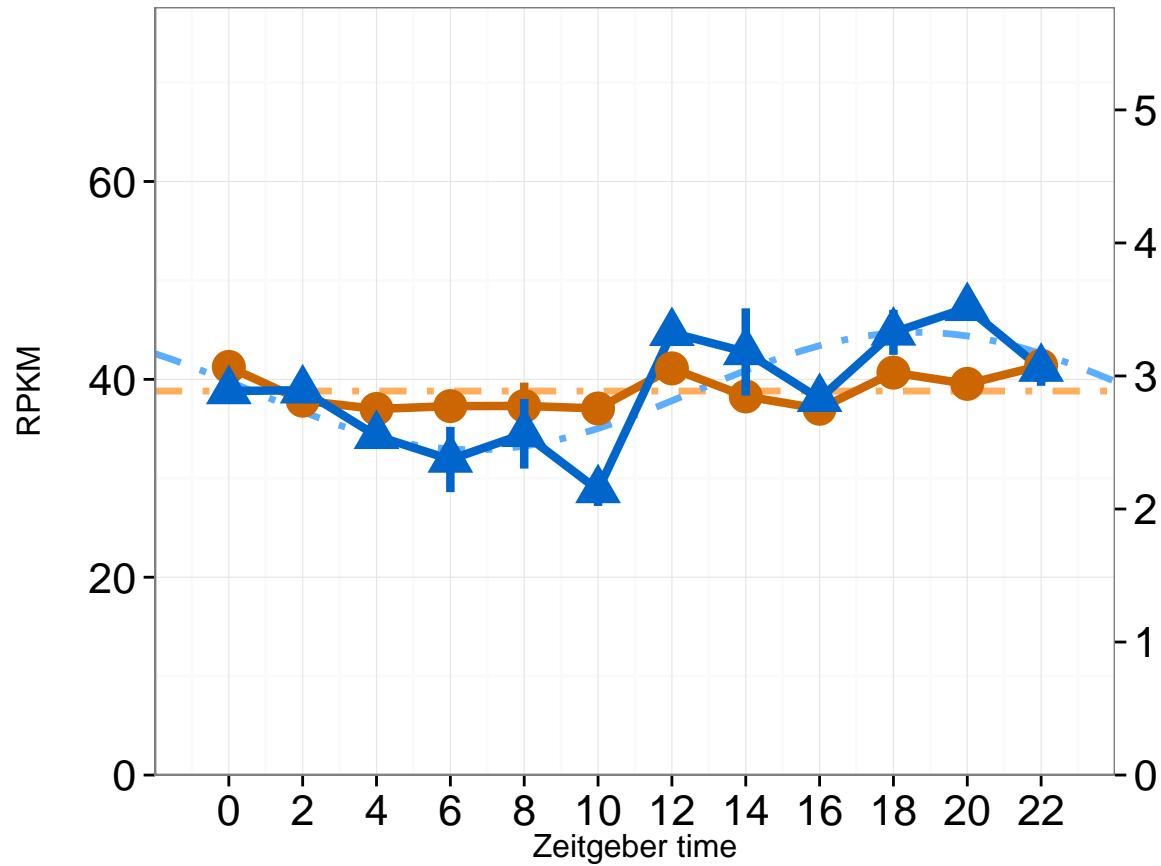

## 2610507B11Rik

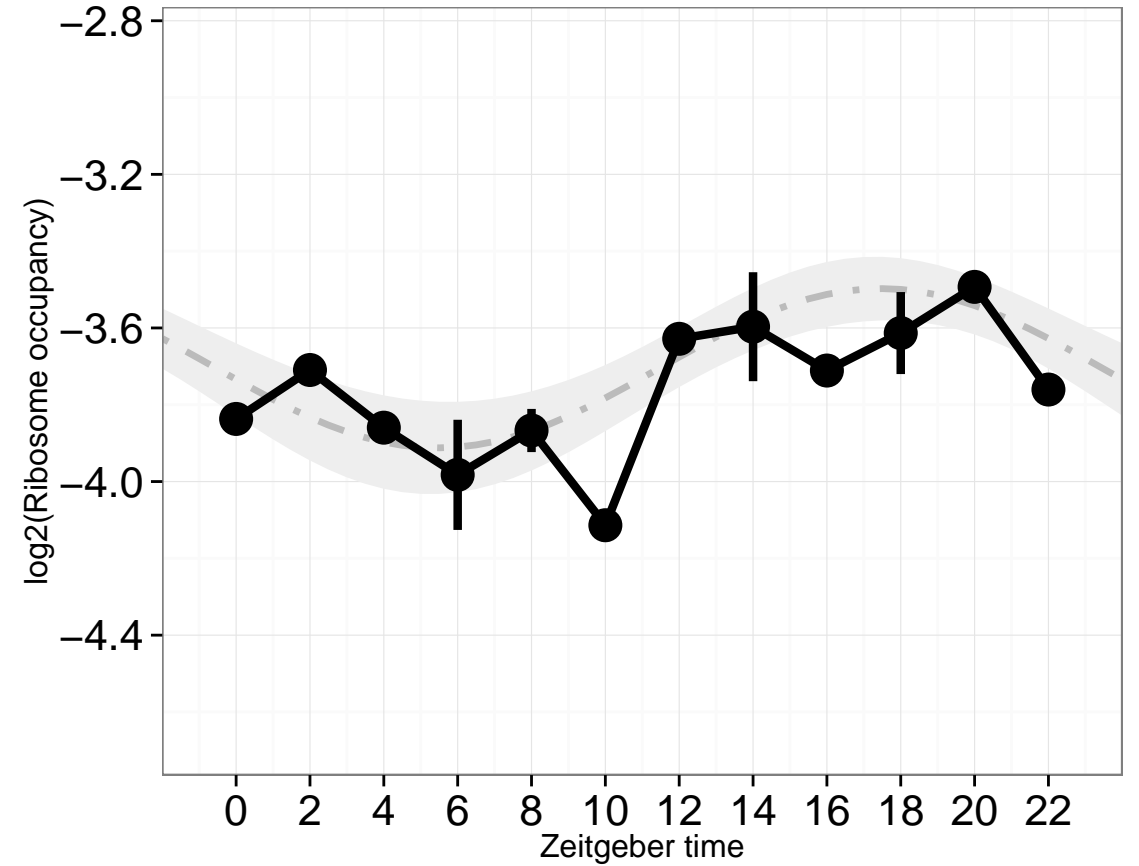

Supplement: SuppDataset_1.zip [file 2610507B11Rik_set_A.pdf › Supplemental Dataset 1/A-mRNA_nonrhyth_translation_nonrhyth/2610507B11Rik_set_A.pdf]

## 2700029M09Rik

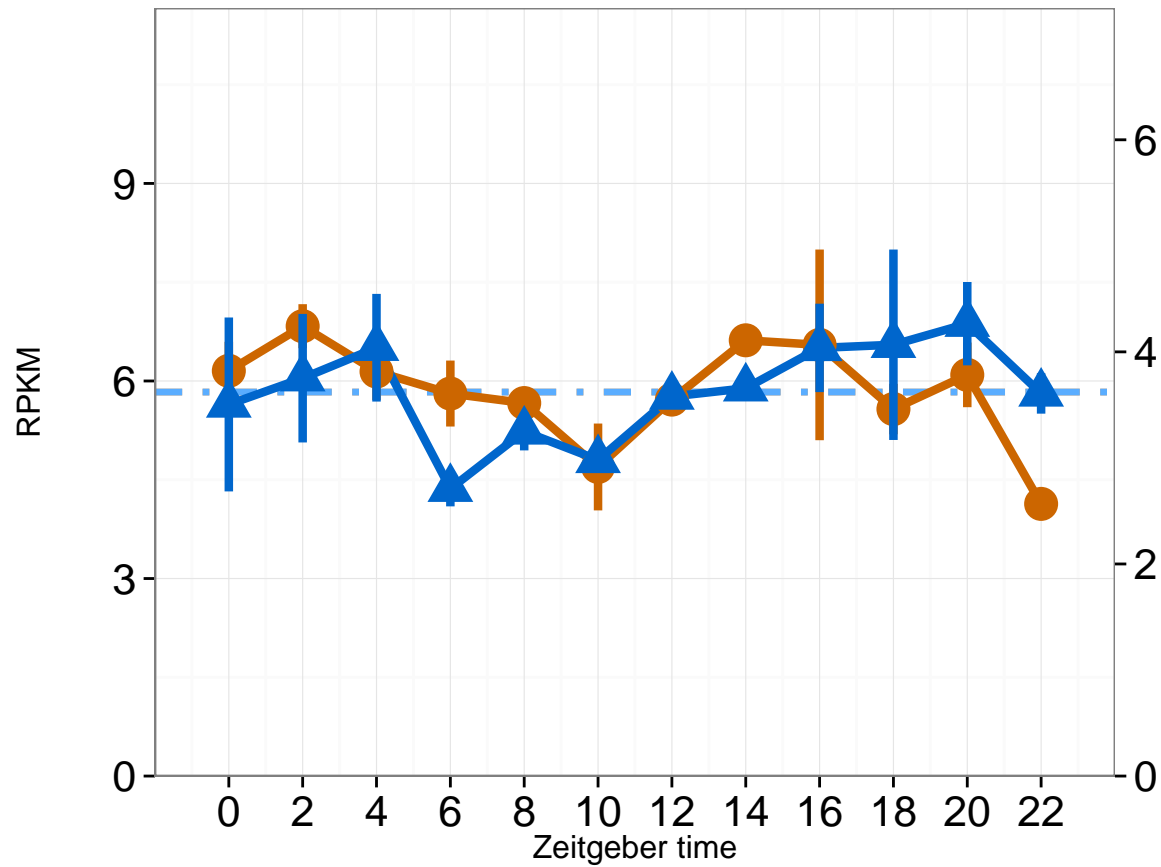

## 2700029M09Rik

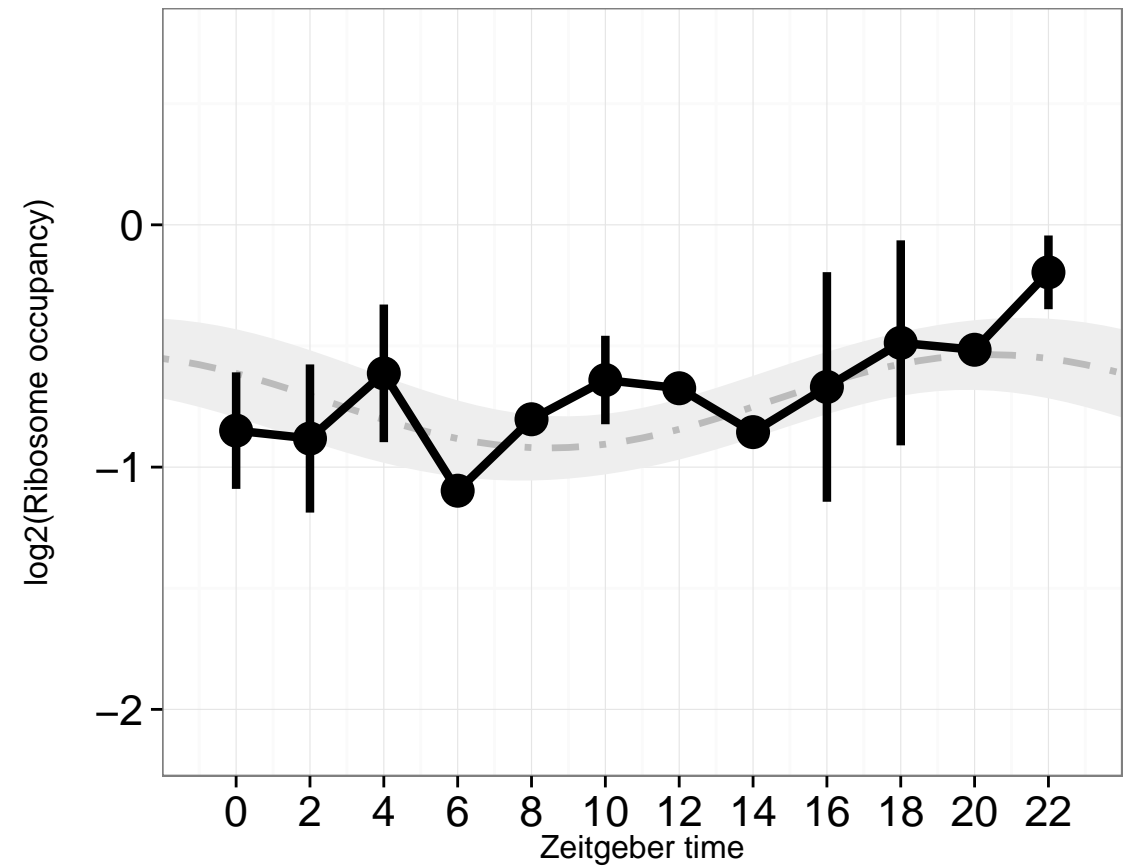

Supplement: SuppDataset_1.zip [file 2700029M09Rik_set_A.pdf › Supplemental Dataset 1/A-mRNA_nonrhyth_translation_nonrhyth/2700029M09Rik_set_A.pdf]

## 2700049A03Rik

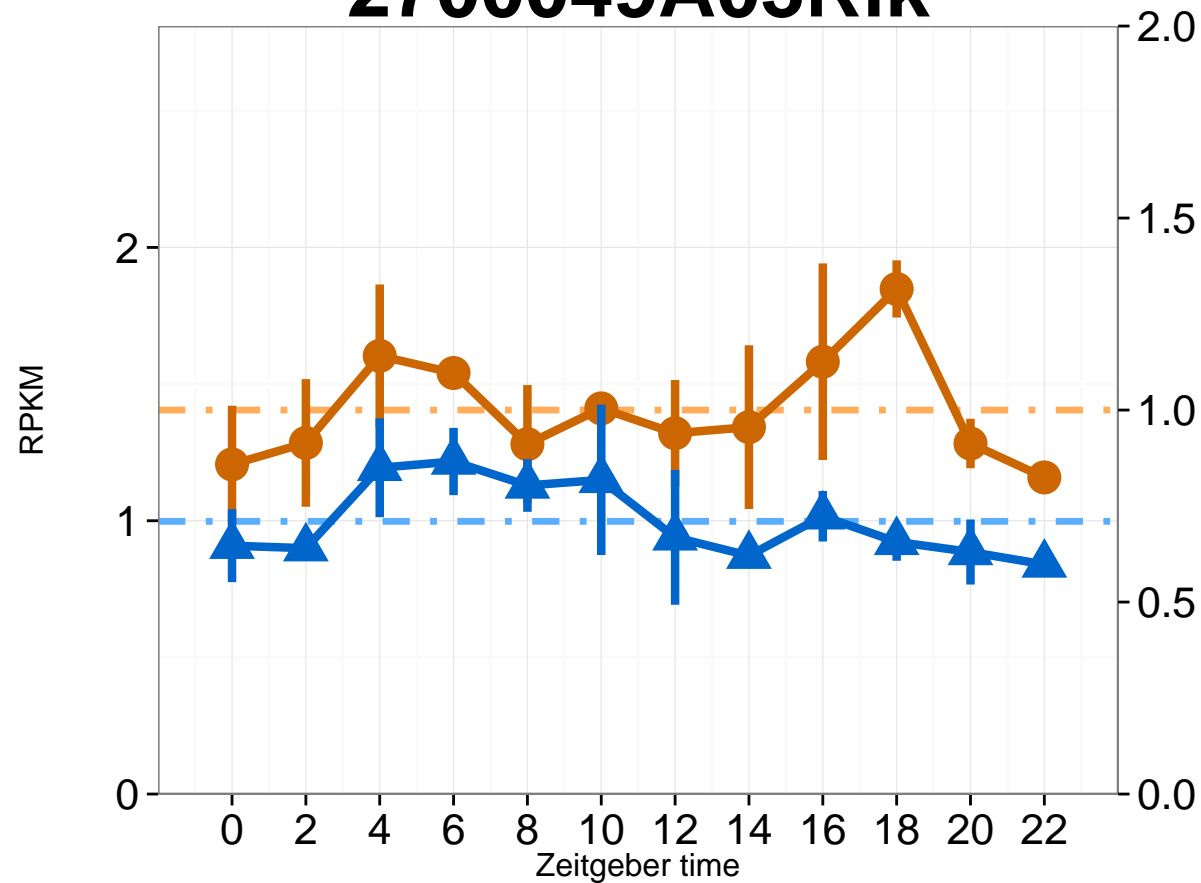

## 2700049A03Rik

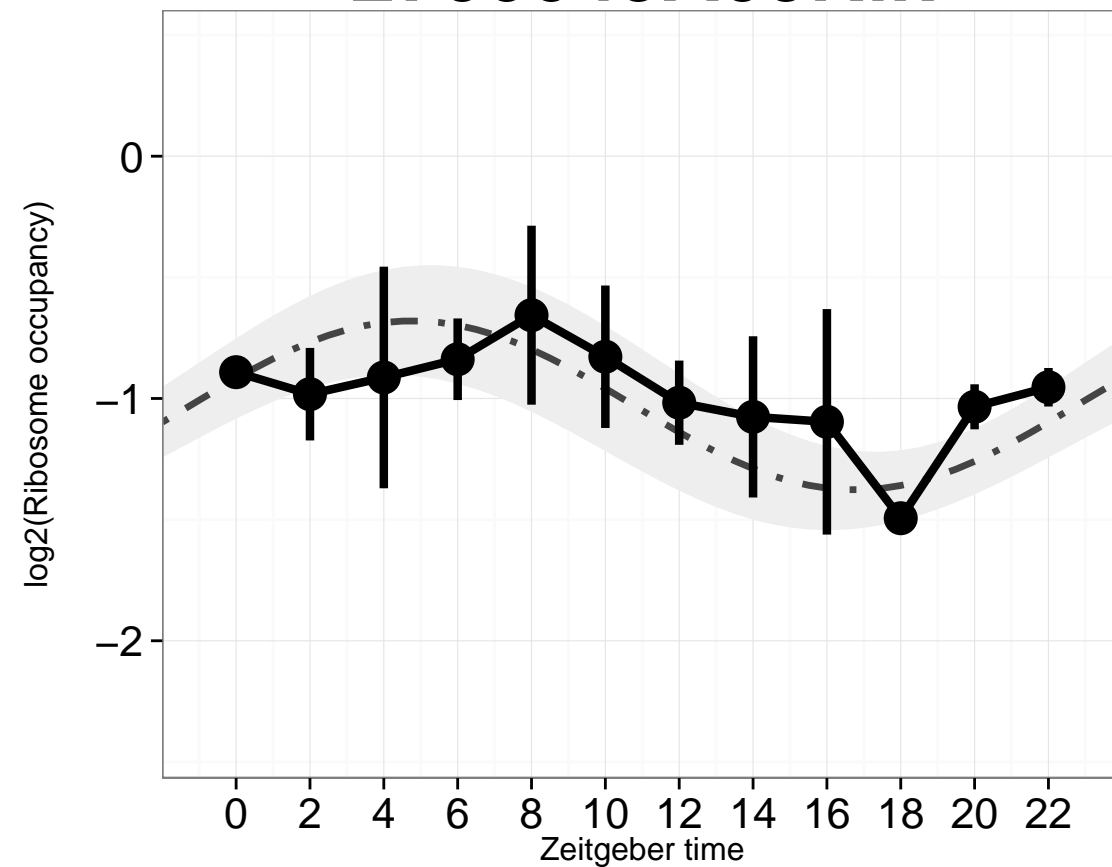

Supplement: SuppDataset_1.zip [file 2700049A03Rik_set_A.pdf › Supplemental Dataset 1/A-mRNA_nonrhyth_translation_nonrhyth/2700049A03Rik_set_A.pdf]

# 2700060E02Rik

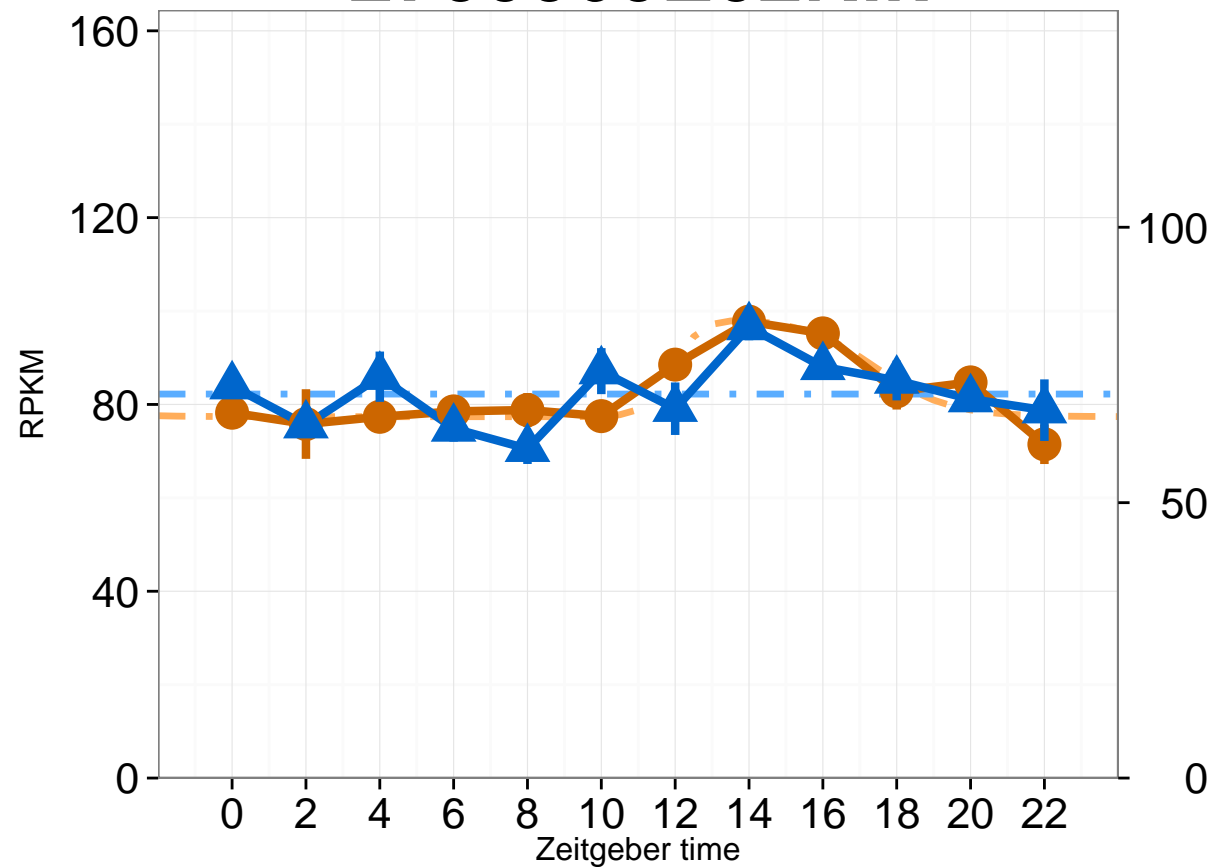

# 2700060E02Rik

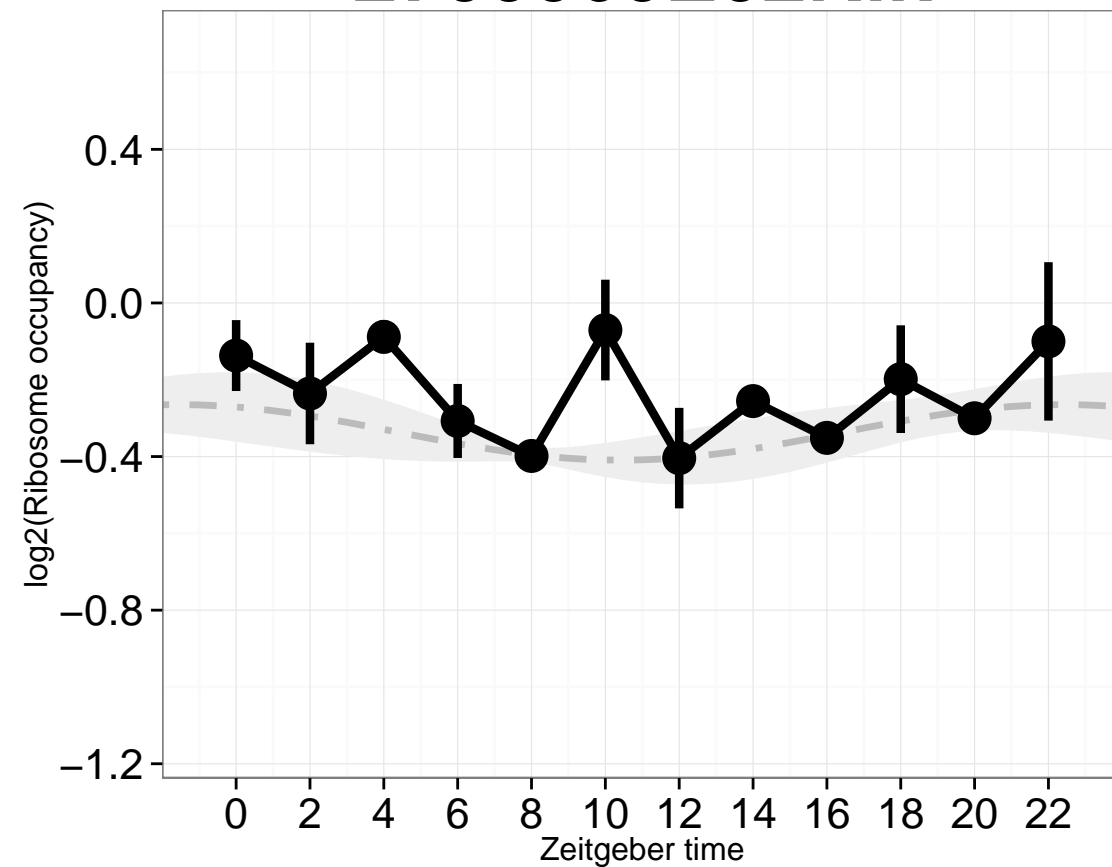

Supplement: SuppDataset_1.zip [file 2700060E02Rik_set_A.pdf › Supplemental Dataset 1/A-mRNA_nonrhyth_translation_nonrhyth/2700060E02Rik_set_A.pdf]

# 2700062C07Rik

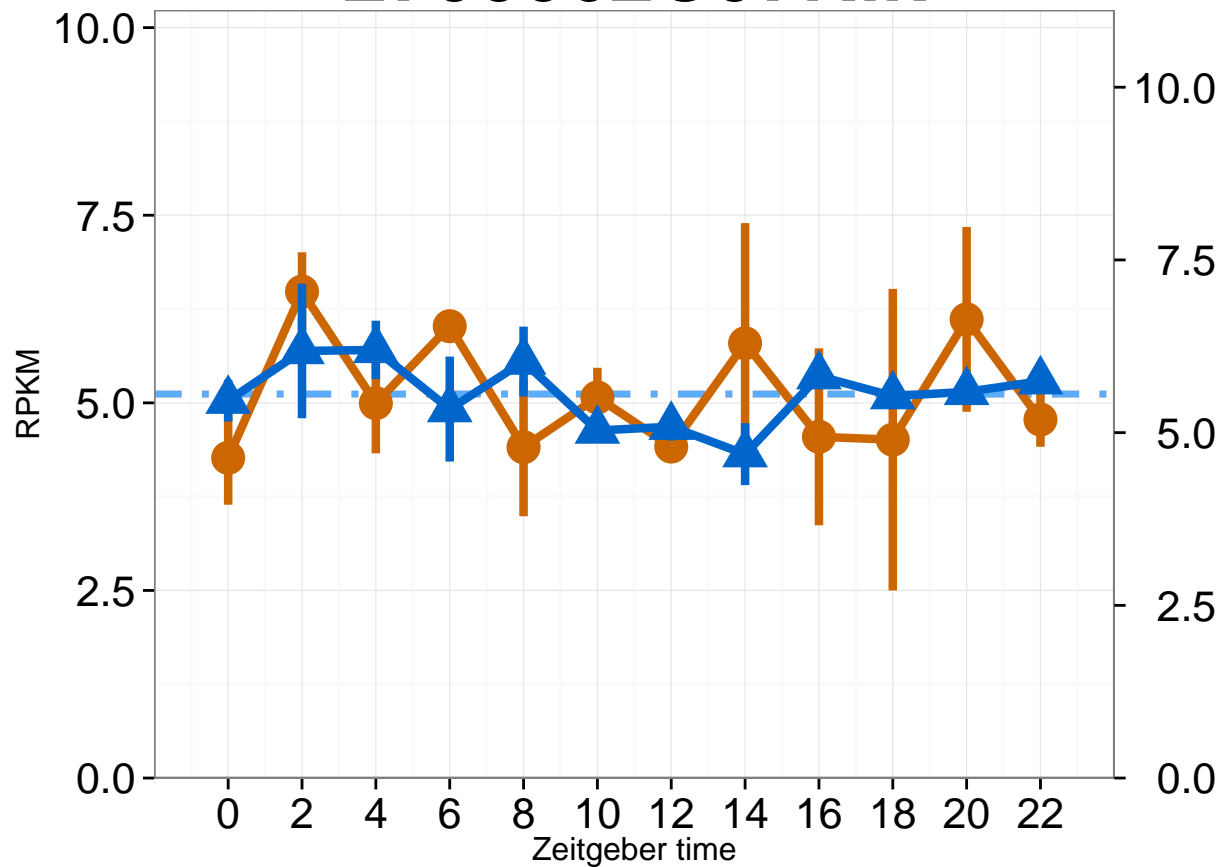

# 2700062C07Rik

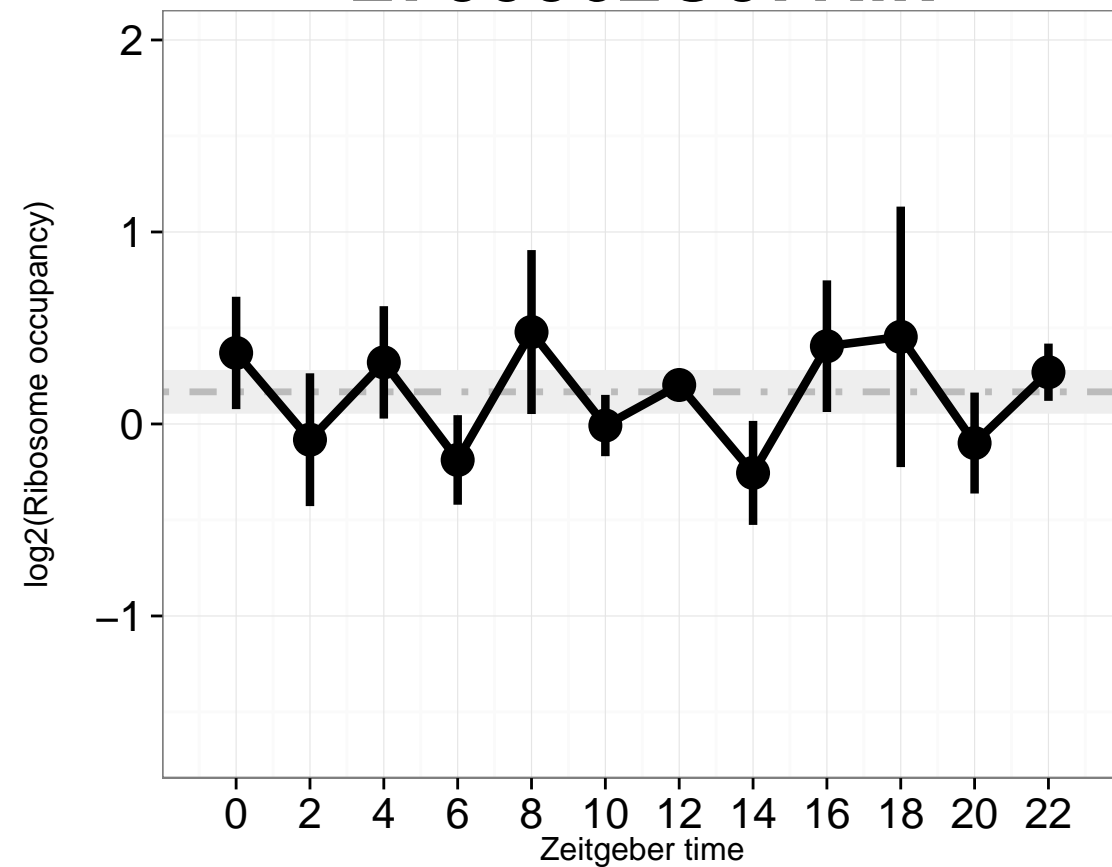

Supplement: SuppDataset_1.zip [file 2700062C07Rik_set_A.pdf › Supplemental Dataset 1/A-mRNA_nonrhyth_translation_nonrhyth/2700062C07Rik_set_A.pdf]

## 2700081O15Rik

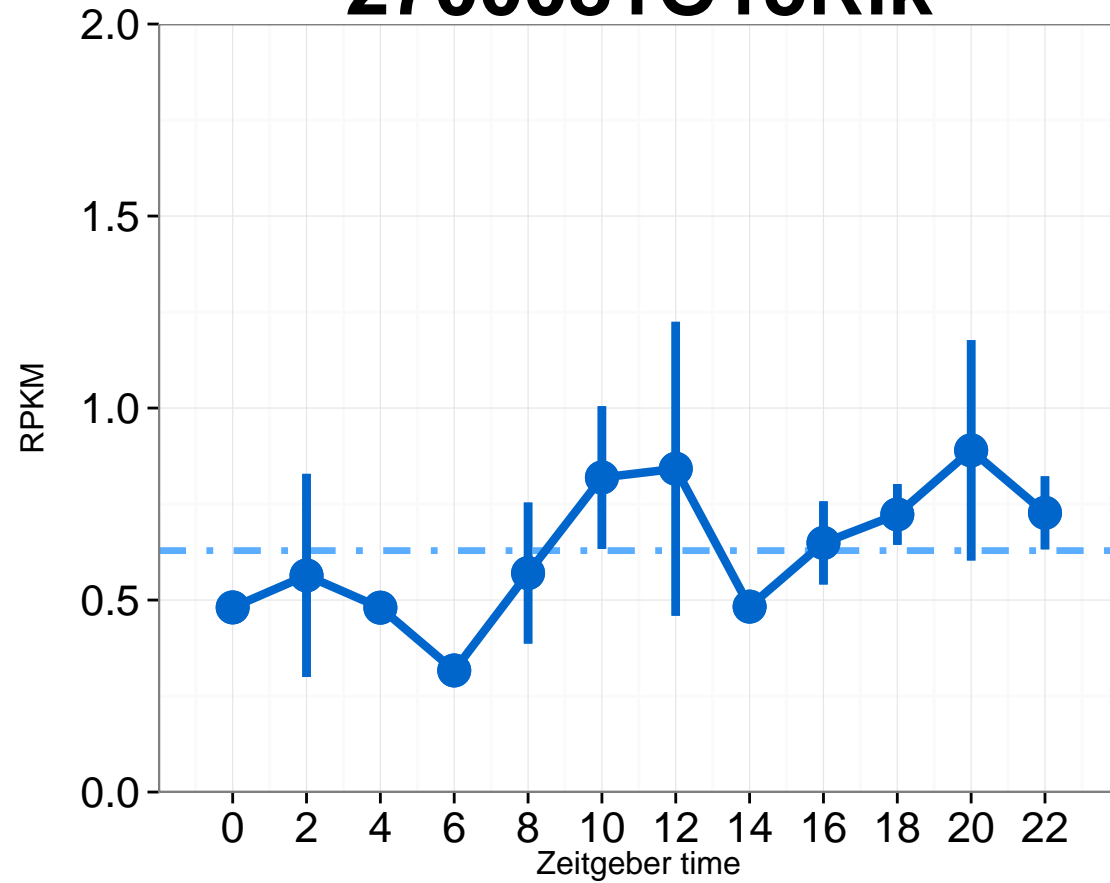

## 2700081O15Rik log2(Ribosome occup

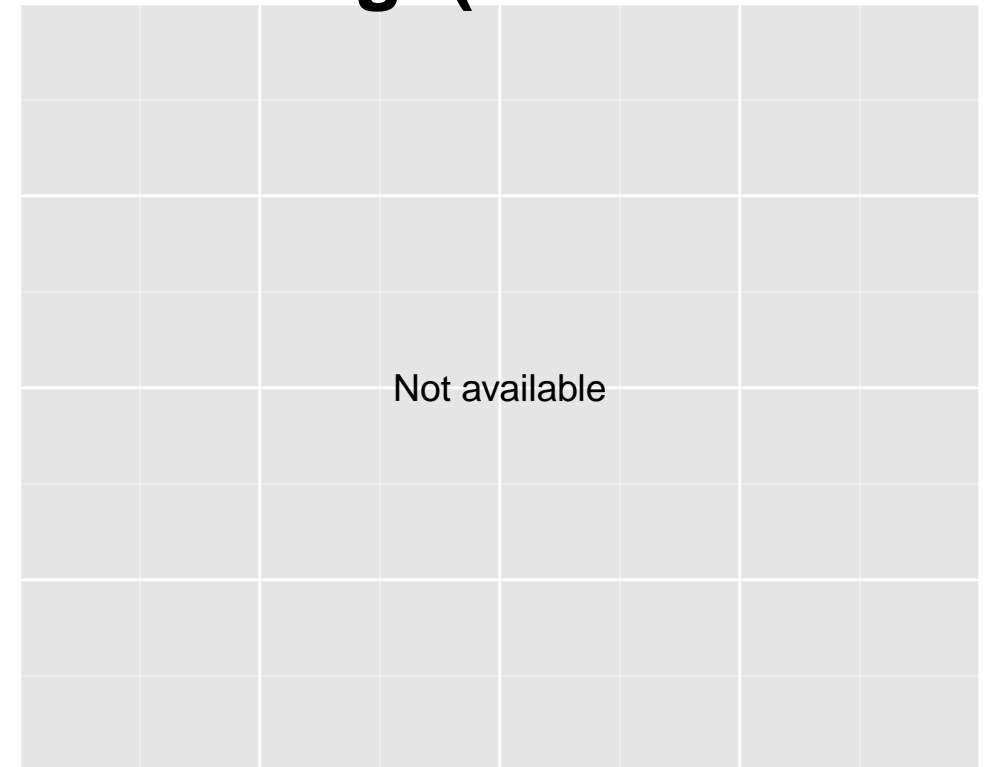

Supplement: SuppDataset_1.zip [file 2700081O15Rik_set_A.pdf › Supplemental Dataset 1/A-mRNA_nonrhyth_translation_nonrhyth/2700081O15Rik_set_A.pdf]

## 2700089E24Rik

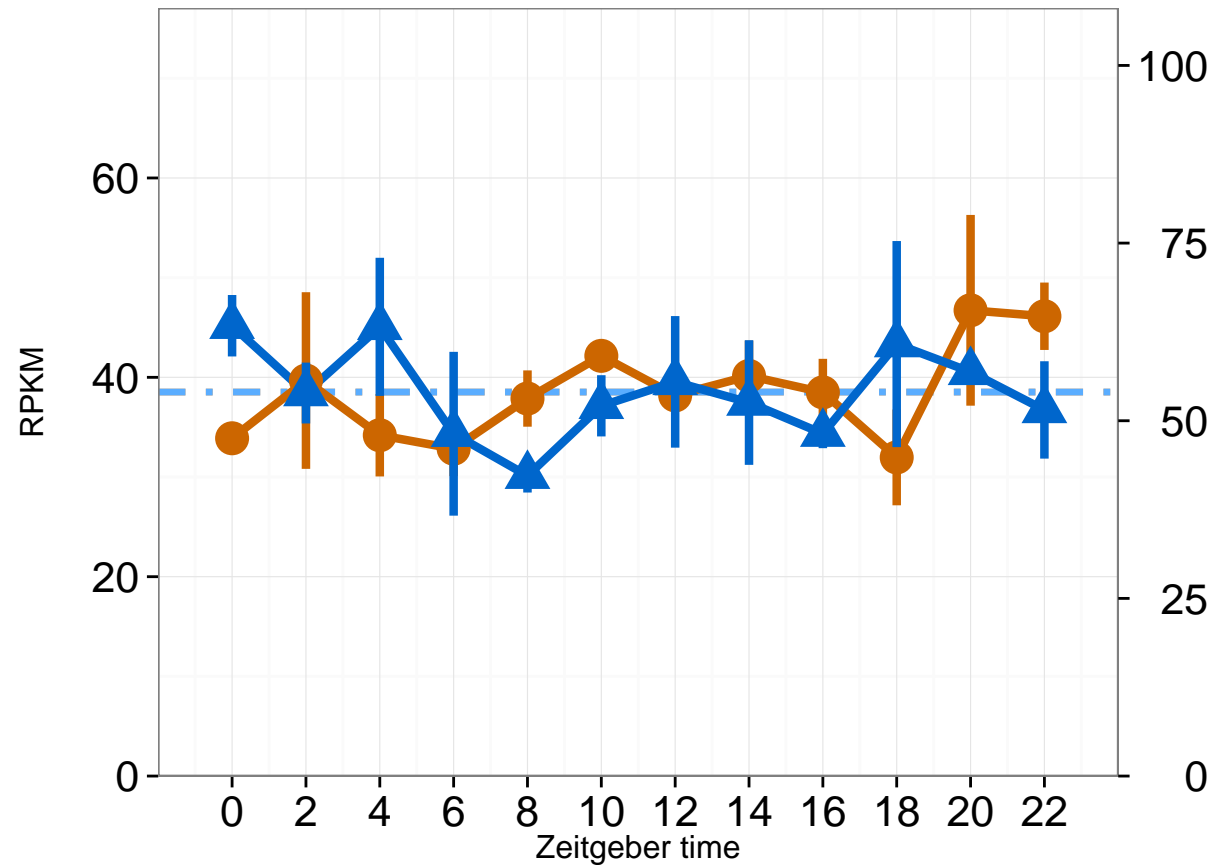

## 2700089E24Rik

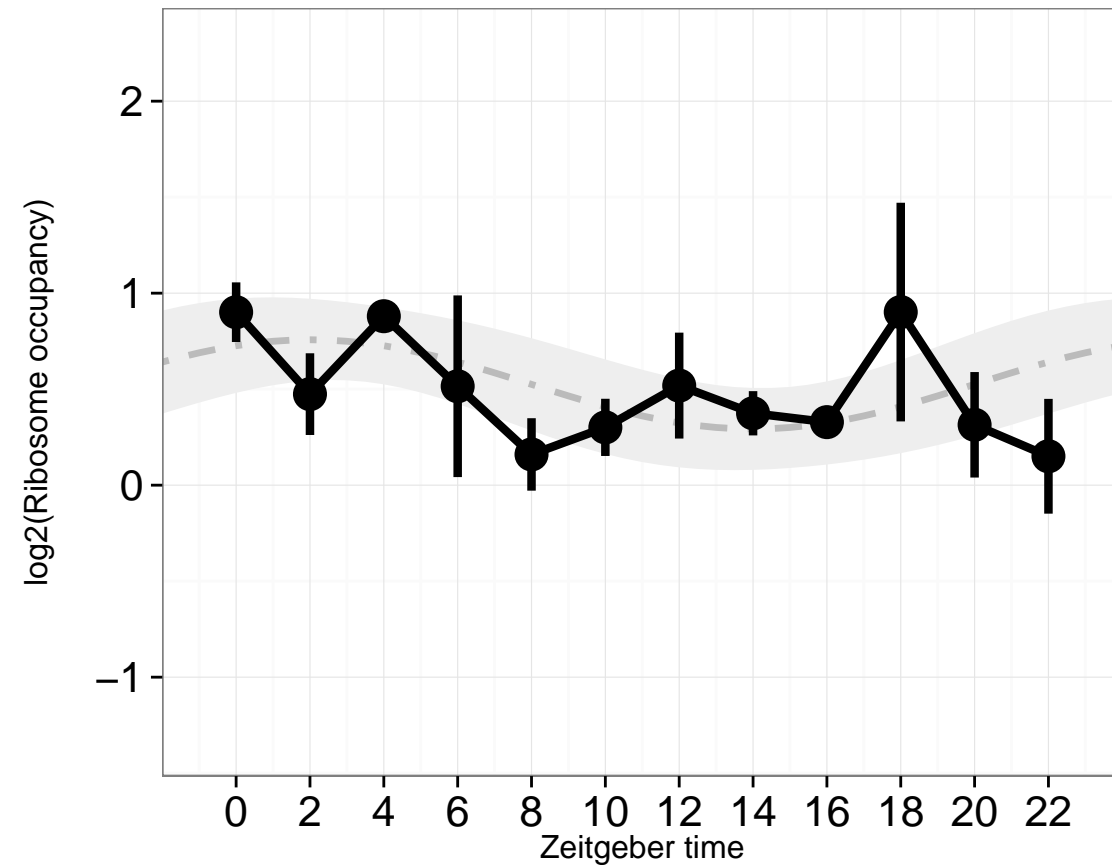

Supplement: SuppDataset_1.zip [file 2700089E24Rik_set_A.pdf › Supplemental Dataset 1/A-mRNA_nonrhyth_translation_nonrhyth/2700089E24Rik_set_A.pdf]

# 2700094K13Rik

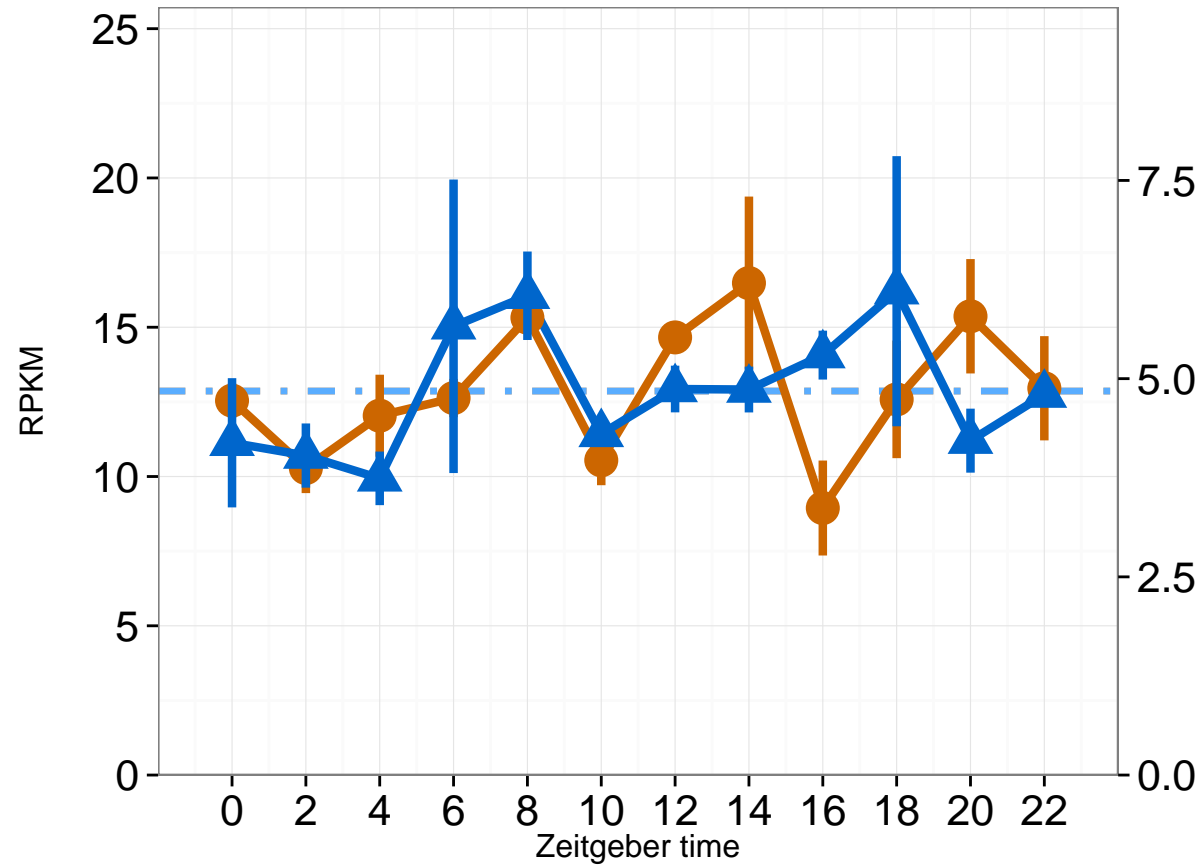

# 2700094K13Rik

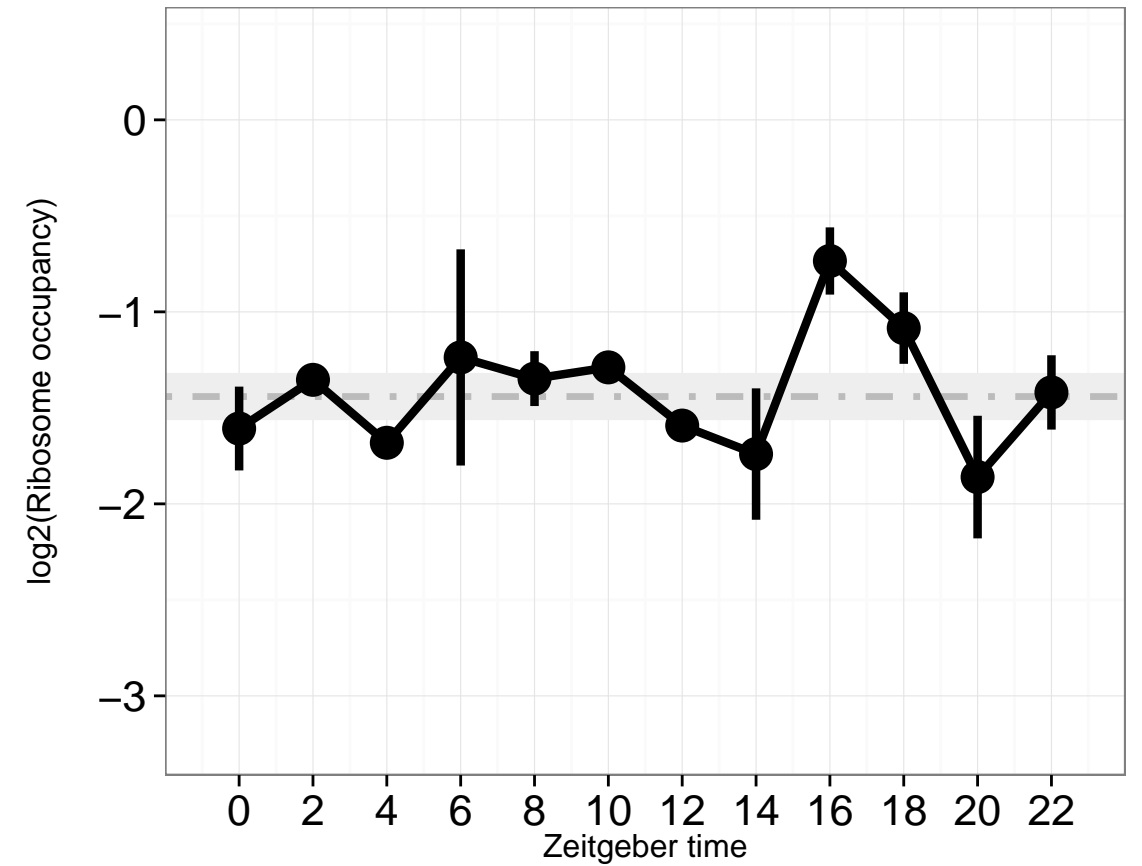

Supplement: SuppDataset_1.zip [file 2700094K13Rik_set_A.pdf › Supplemental Dataset 1/A-mRNA_nonrhyth_translation_nonrhyth/2700094K13Rik_set_A.pdf]

## 2700097O09Rik

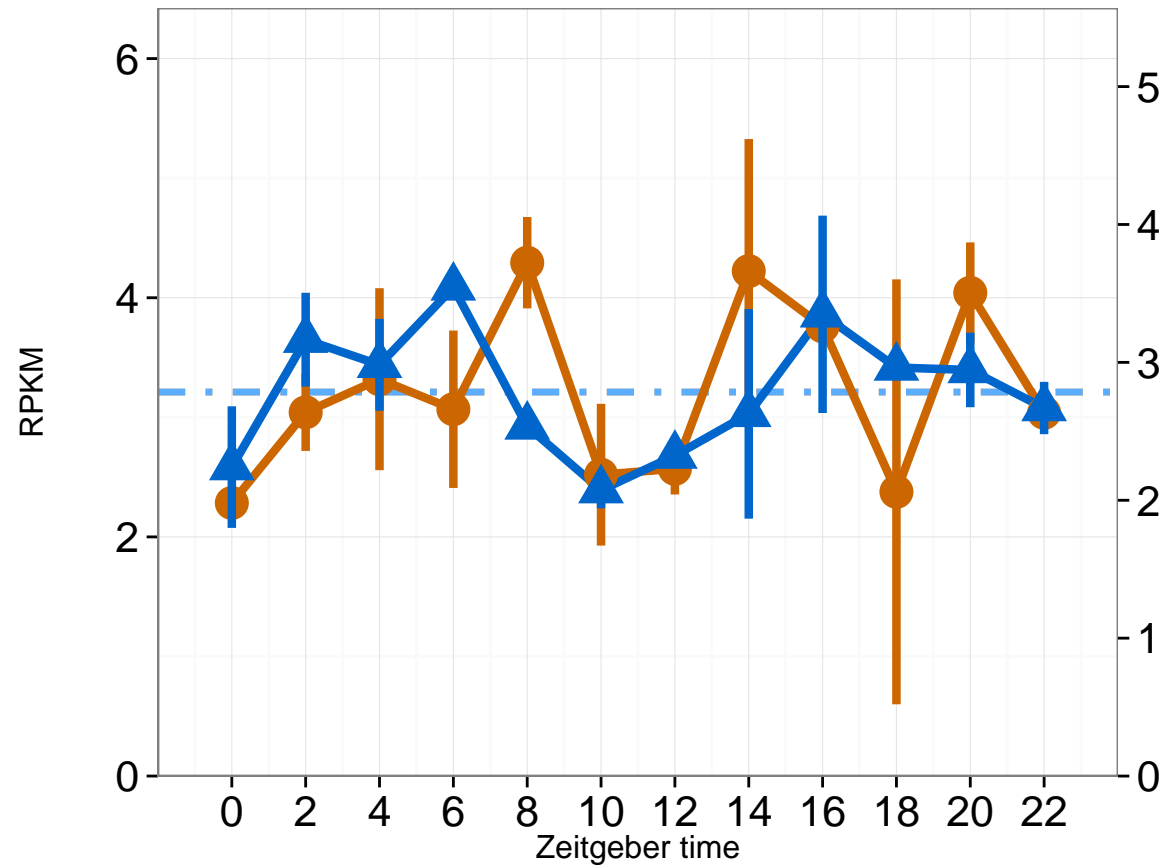

## 2700097O09Rik

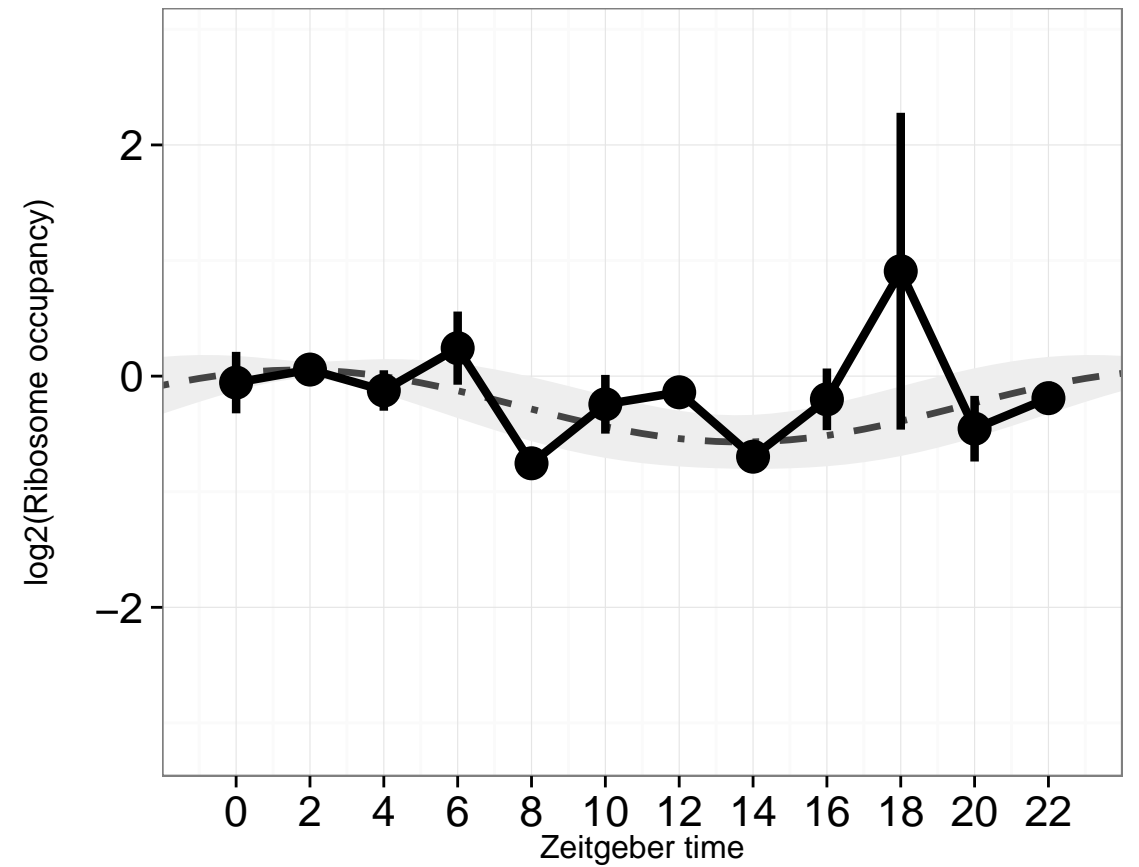

Supplement: SuppDataset_1.zip [file 2700097O09Rik_set_A.pdf › Supplemental Dataset 1/A-mRNA_nonrhyth_translation_nonrhyth/2700097O09Rik_set_A.pdf]

## 2810004N23Rik

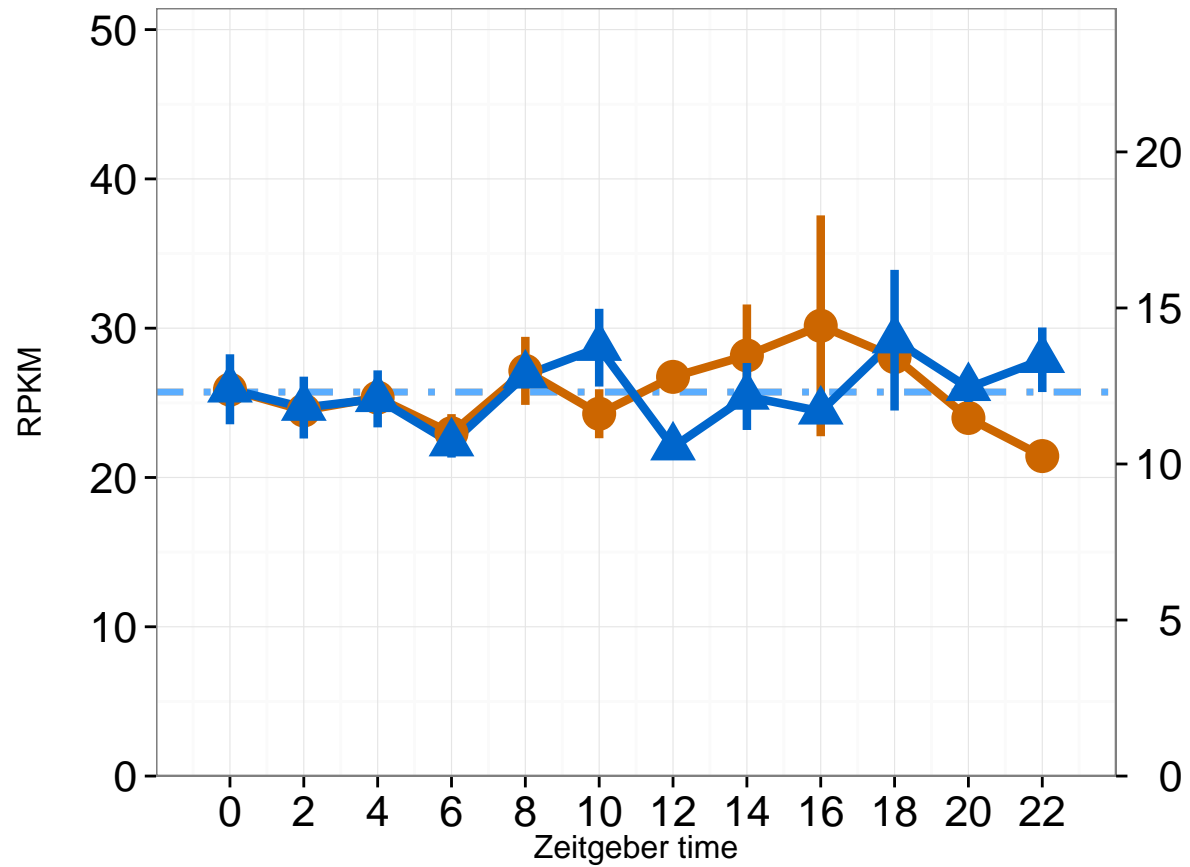

## 2810004N23Rik

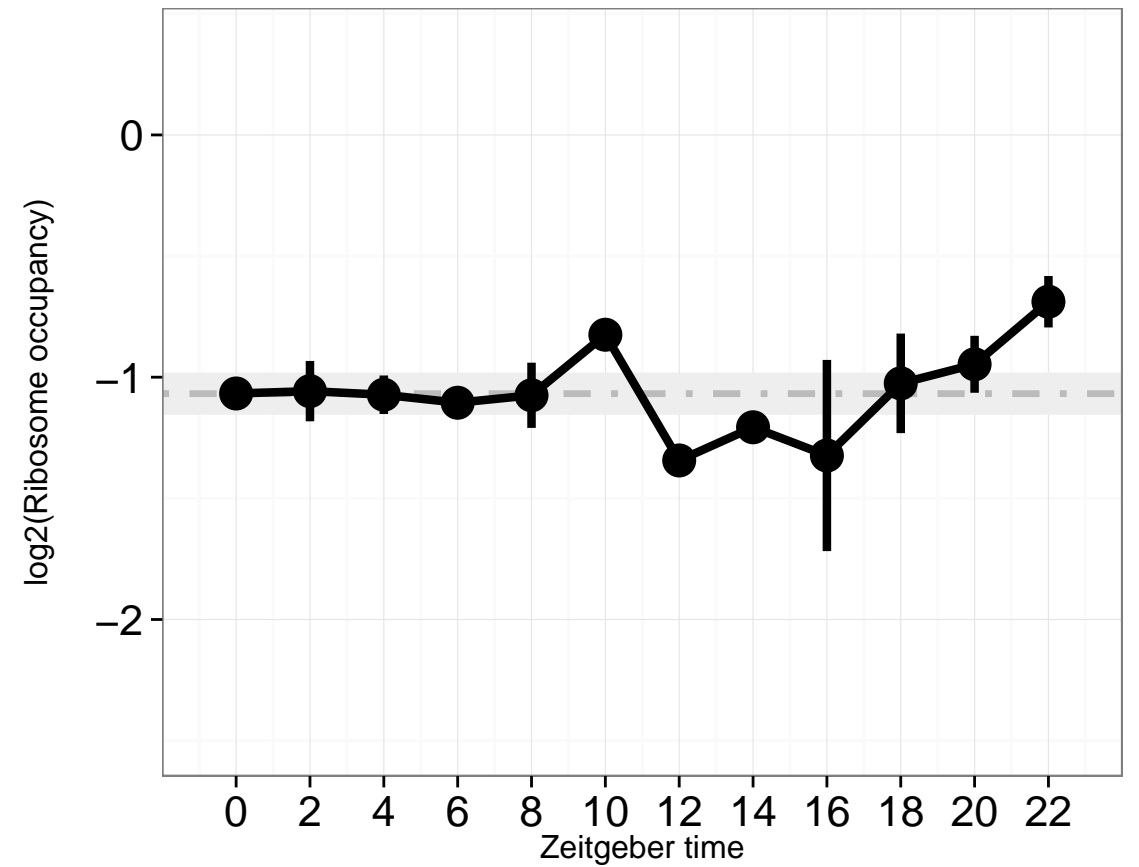

Supplement: SuppDataset_1.zip [file 2810004N23Rik_set_A.pdf › Supplemental Dataset 1/A-mRNA_nonrhyth_translation_nonrhyth/2810004N23Rik_set_A.pdf]
