# Supplementary figures and images for: Ribosome profiling reveals the rhythmic liver translatome and circadian clock regulation by upstream open reading frames (part 2 of 113)
Source: HighWire-hosted journal article supplement (doi:10.1101/gr.195404.115), 2015-10-20

# 2810007J24Rik

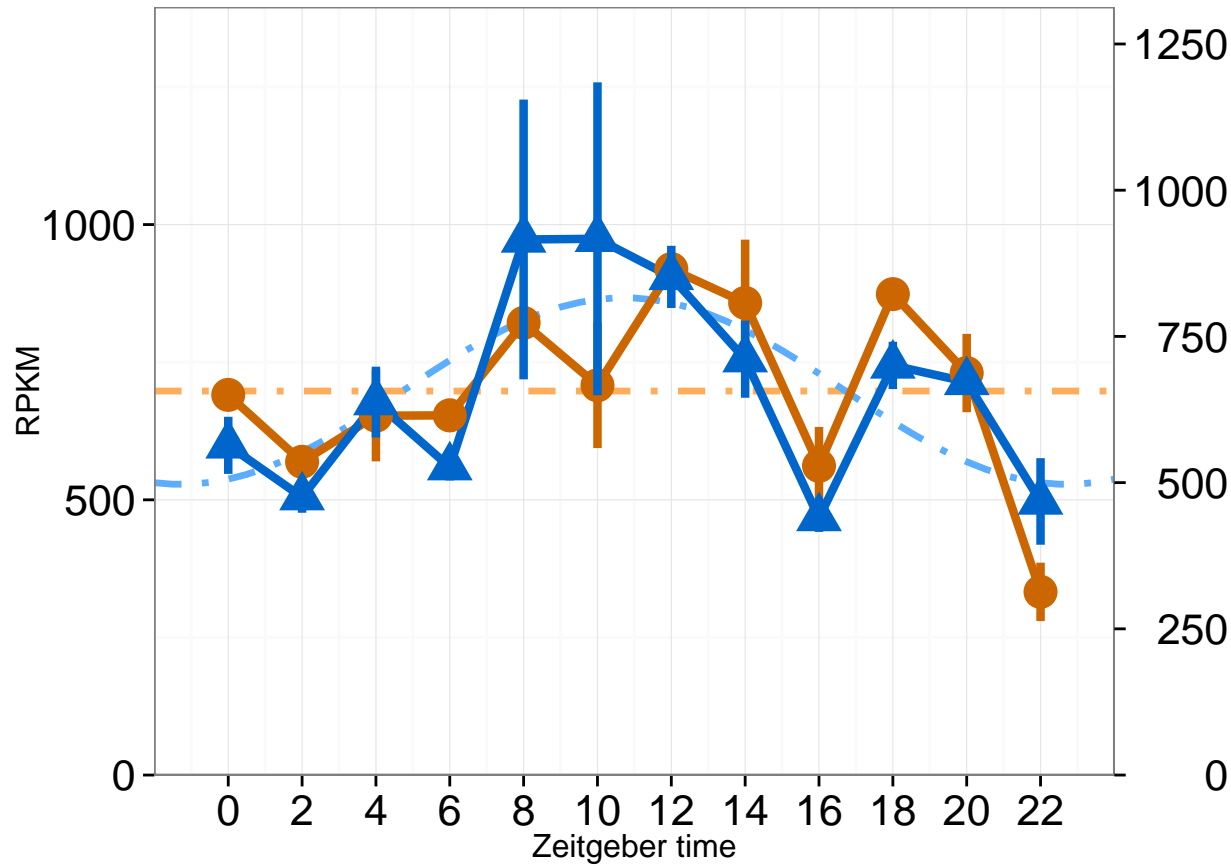

# 2810007J24Rik

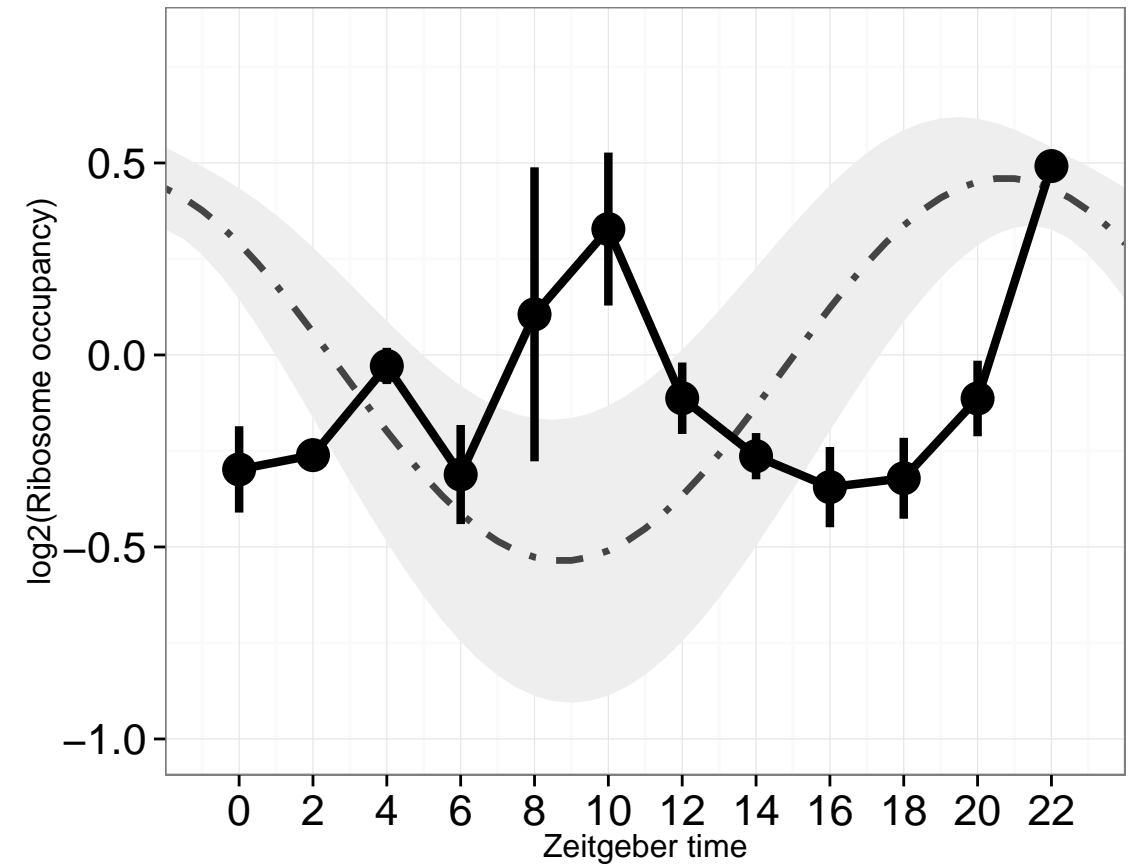

Supplement: SuppDataset_1.zip [file 2810007J24Rik_set_A.pdf › Supplemental Dataset 1/A-mRNA_nonrhyth_translation_nonrhyth/2810007J24Rik_set_A.pdf]

# 2810021J22Rik

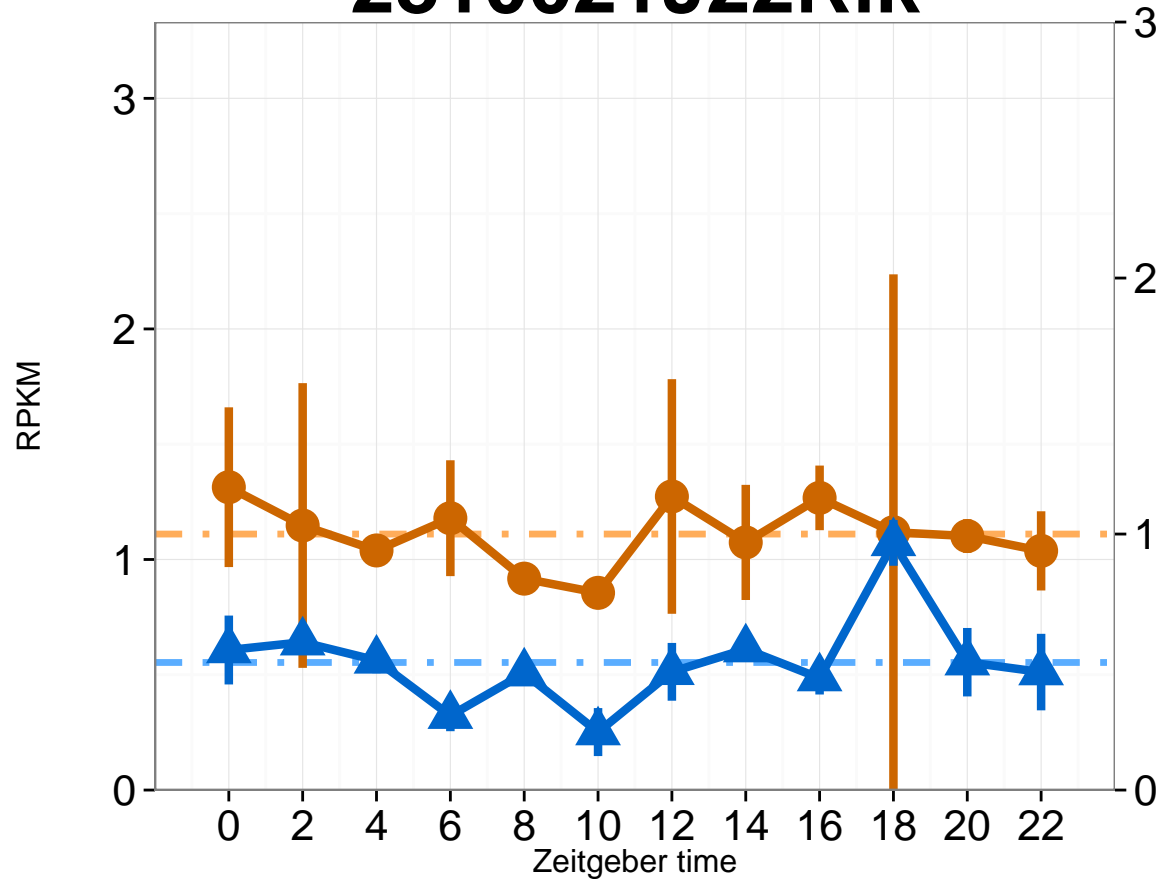

# 2810021J22Rik

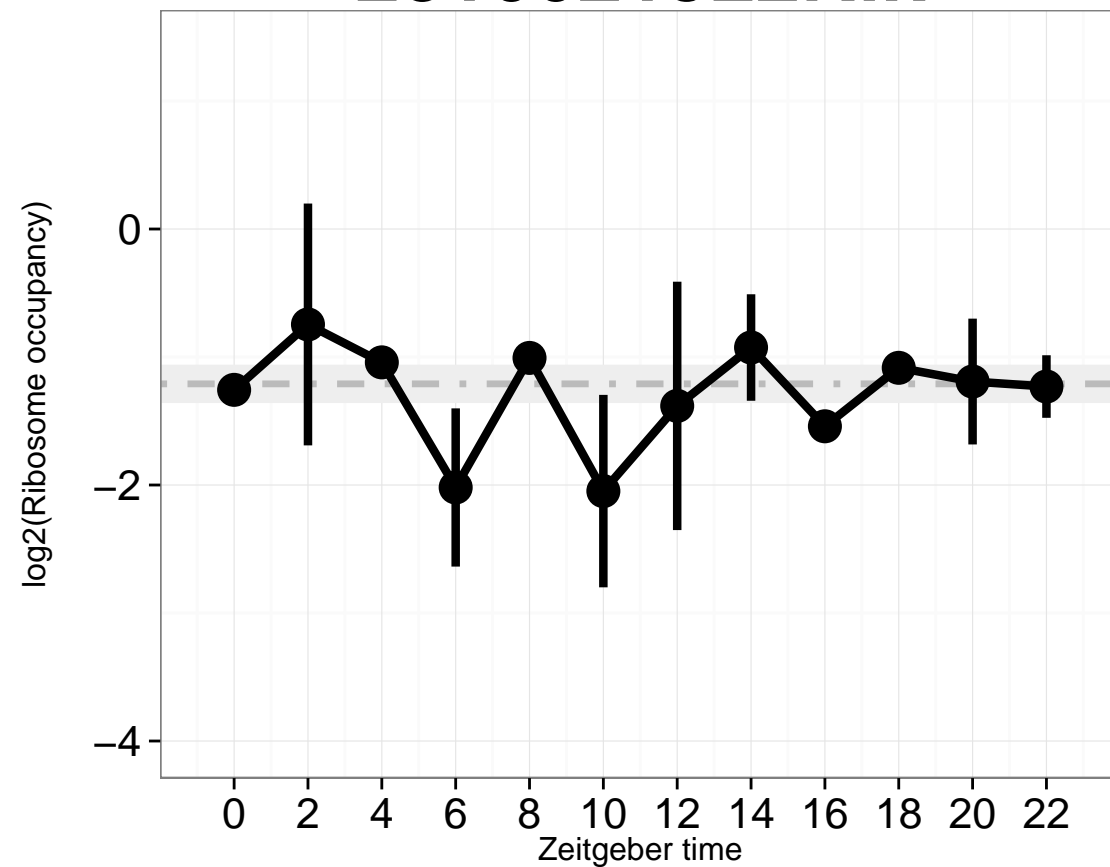

Supplement: SuppDataset_1.zip [file 2810021J22Rik_set_A.pdf › Supplemental Dataset 1/A-mRNA_nonrhyth_translation_nonrhyth/2810021J22Rik_set_A.pdf]

# 2810025M15Rik

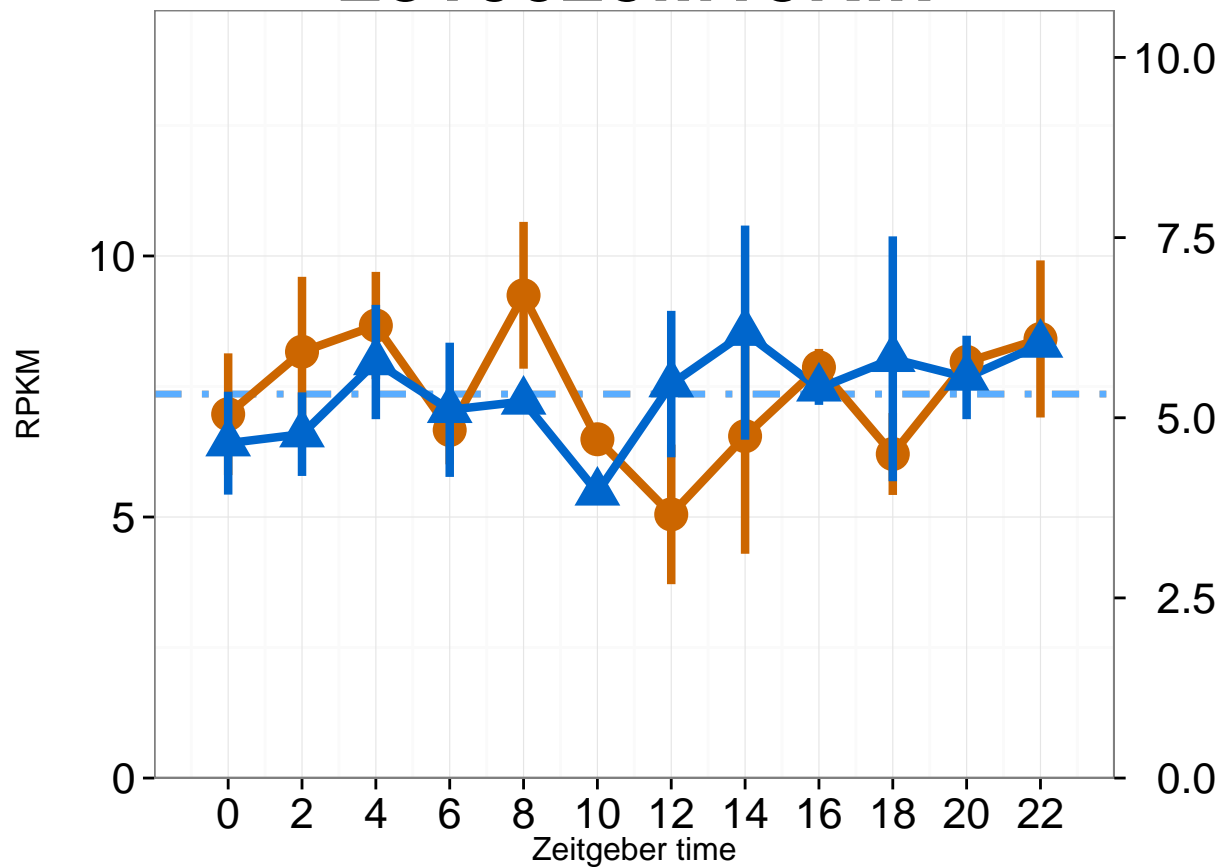

# 2810025M15Rik

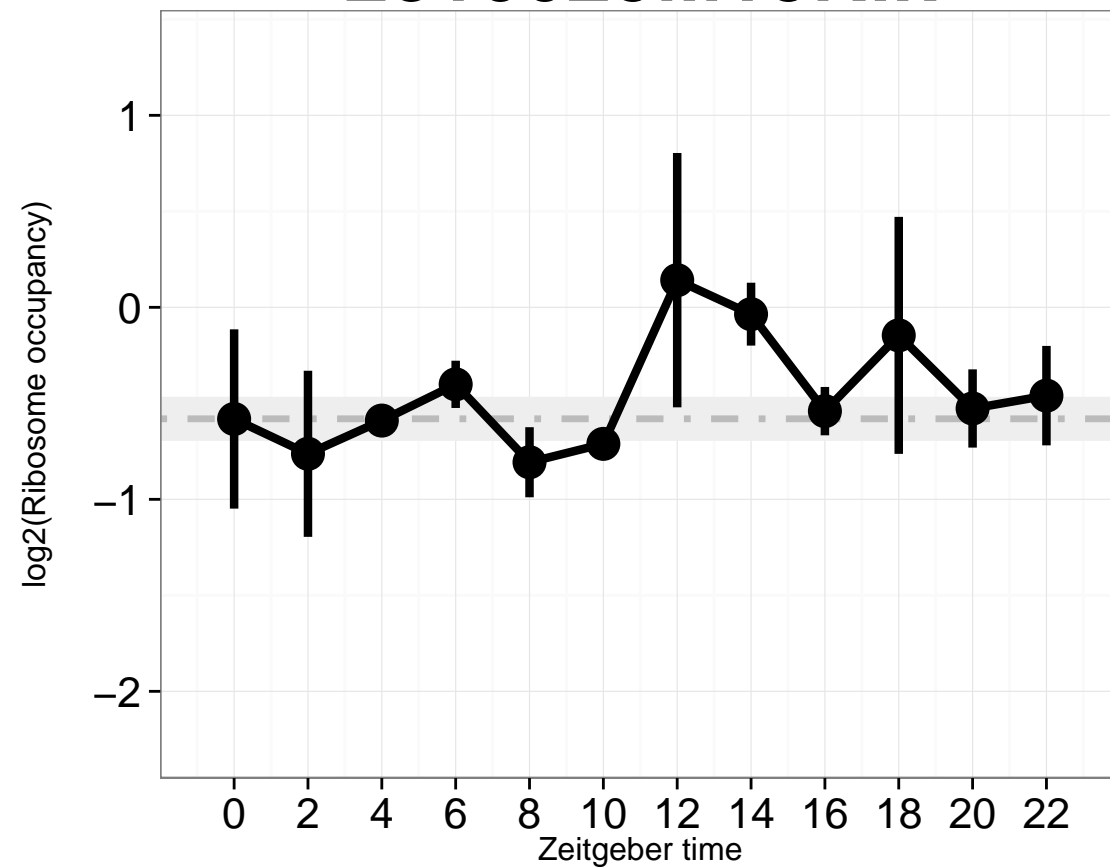

Supplement: SuppDataset_1.zip [file 2810025M15Rik_set_A.pdf › Supplemental Dataset 1/A-mRNA_nonrhyth_translation_nonrhyth/2810025M15Rik_set_A.pdf]

# 2810403A07Rik

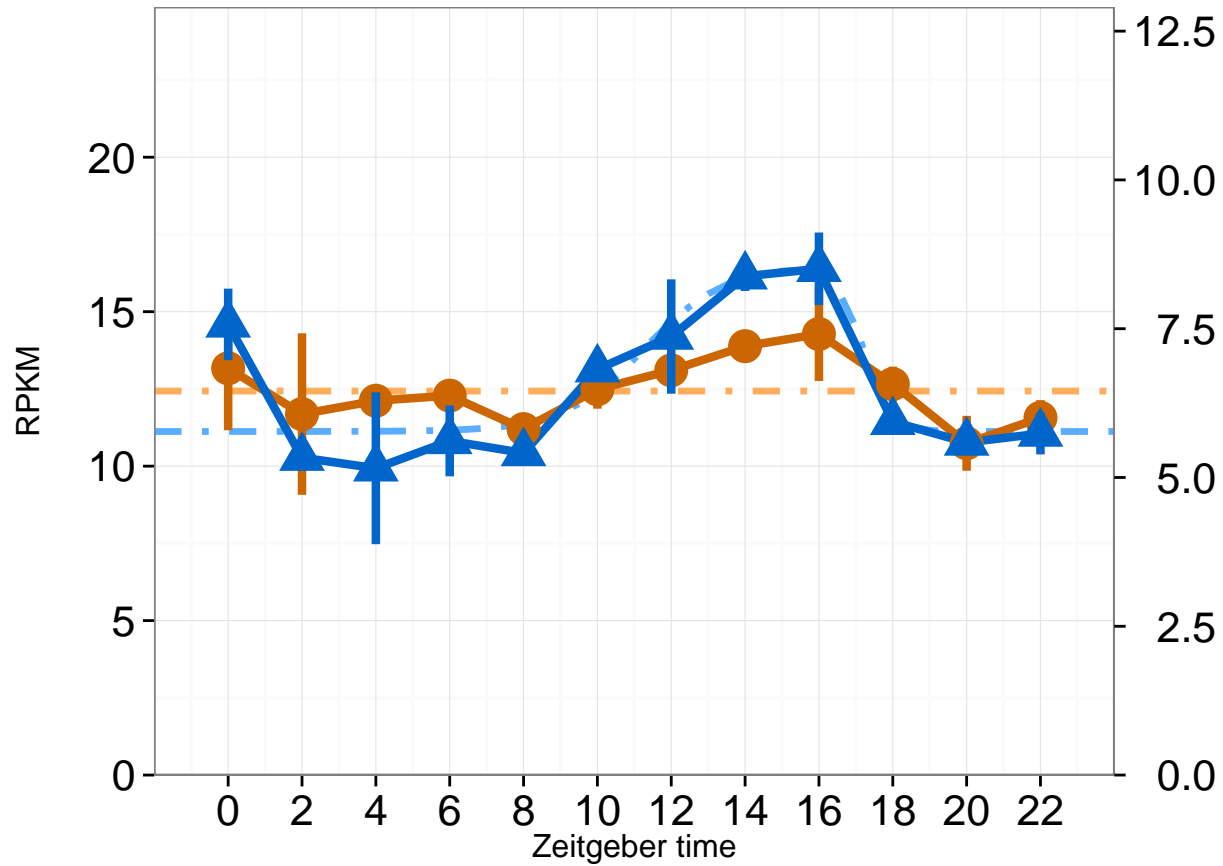

# 2810403A07Rik

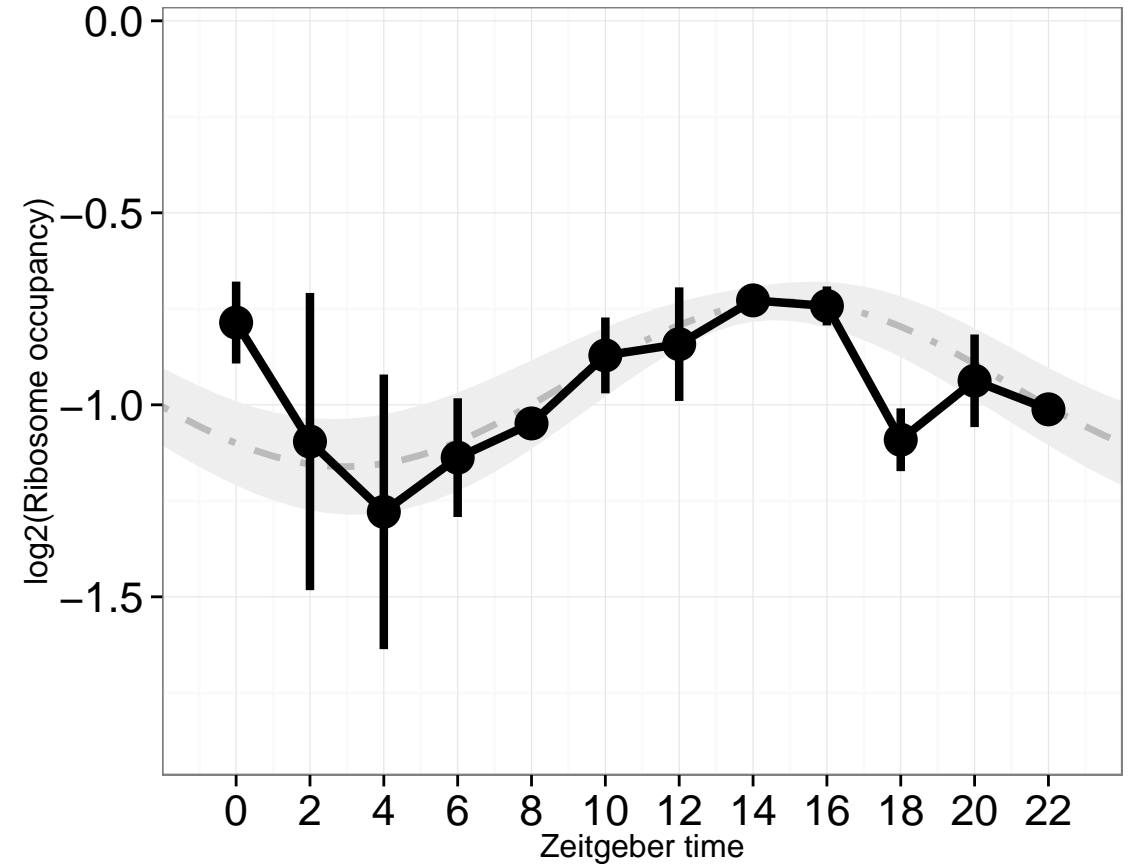

Supplement: SuppDataset_1.zip [file 2810403A07Rik_set_A.pdf › Supplemental Dataset 1/A-mRNA_nonrhyth_translation_nonrhyth/2810403A07Rik_set_A.pdf]

# 2810408M09Rik

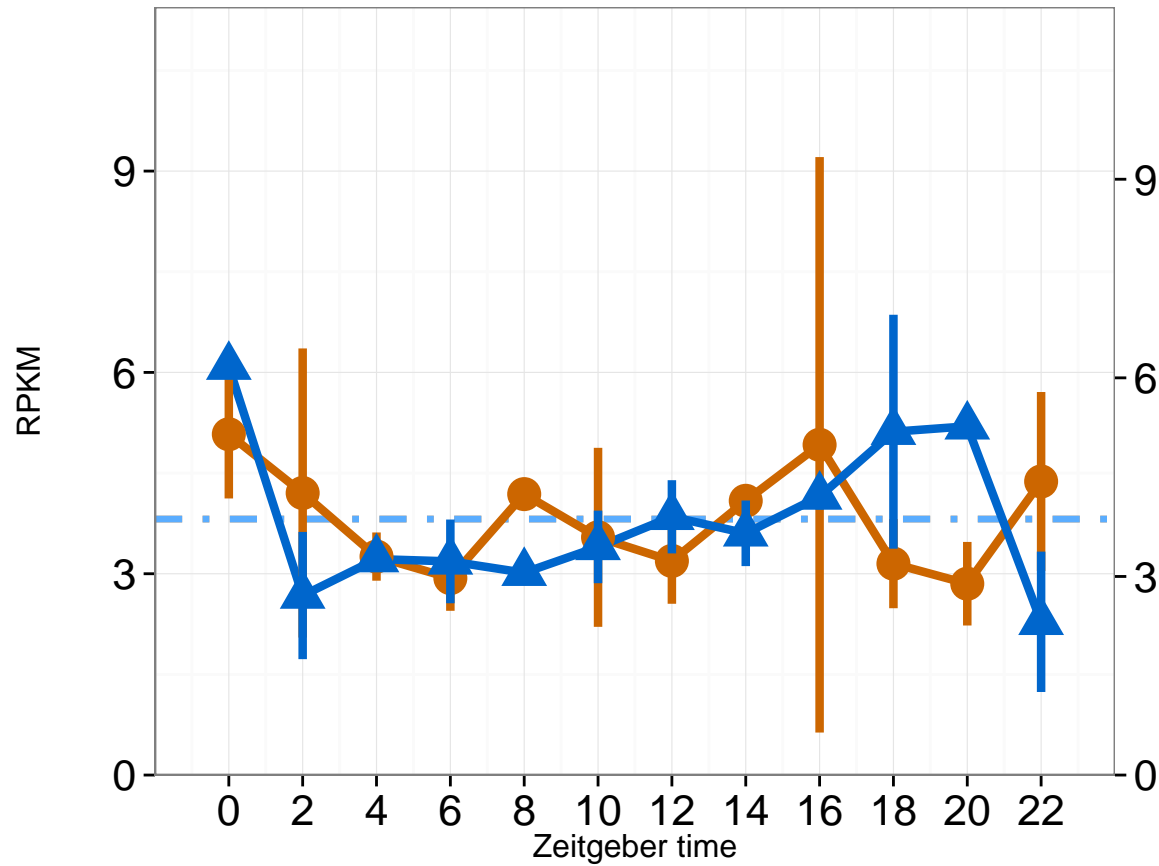

# 2810408M09Rik

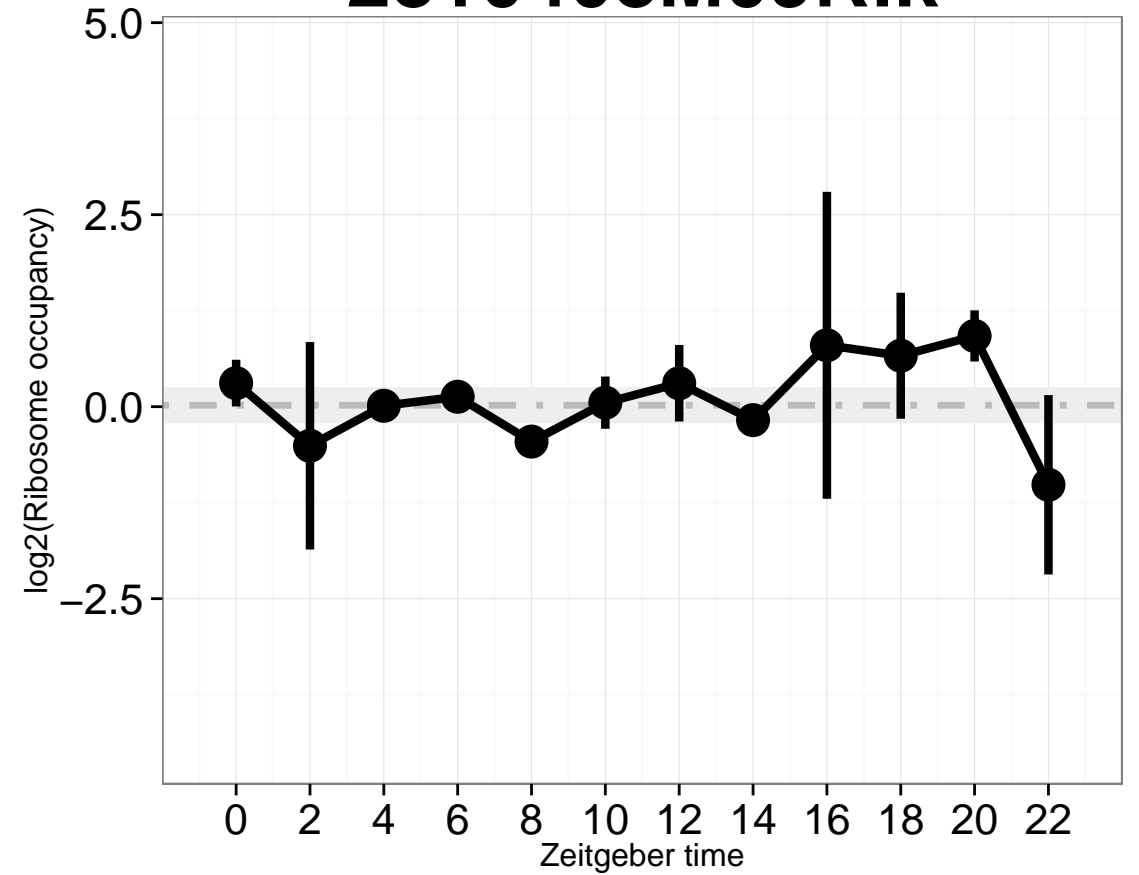

Supplement: SuppDataset_1.zip [file 2810408M09Rik_set_A.pdf › Supplemental Dataset 1/A-mRNA_nonrhyth_translation_nonrhyth/2810408M09Rik_set_A.pdf]

## 2810428I15Rik

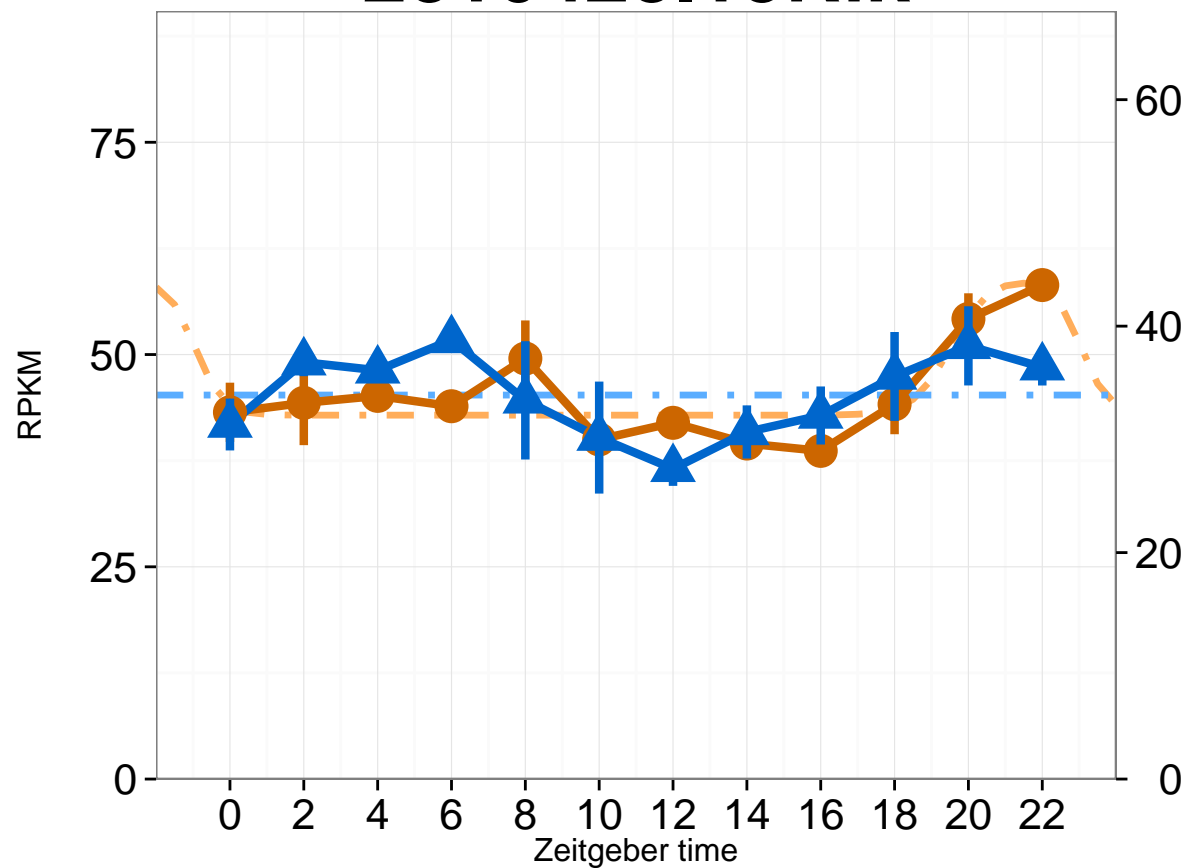

## 2810428I15Rik

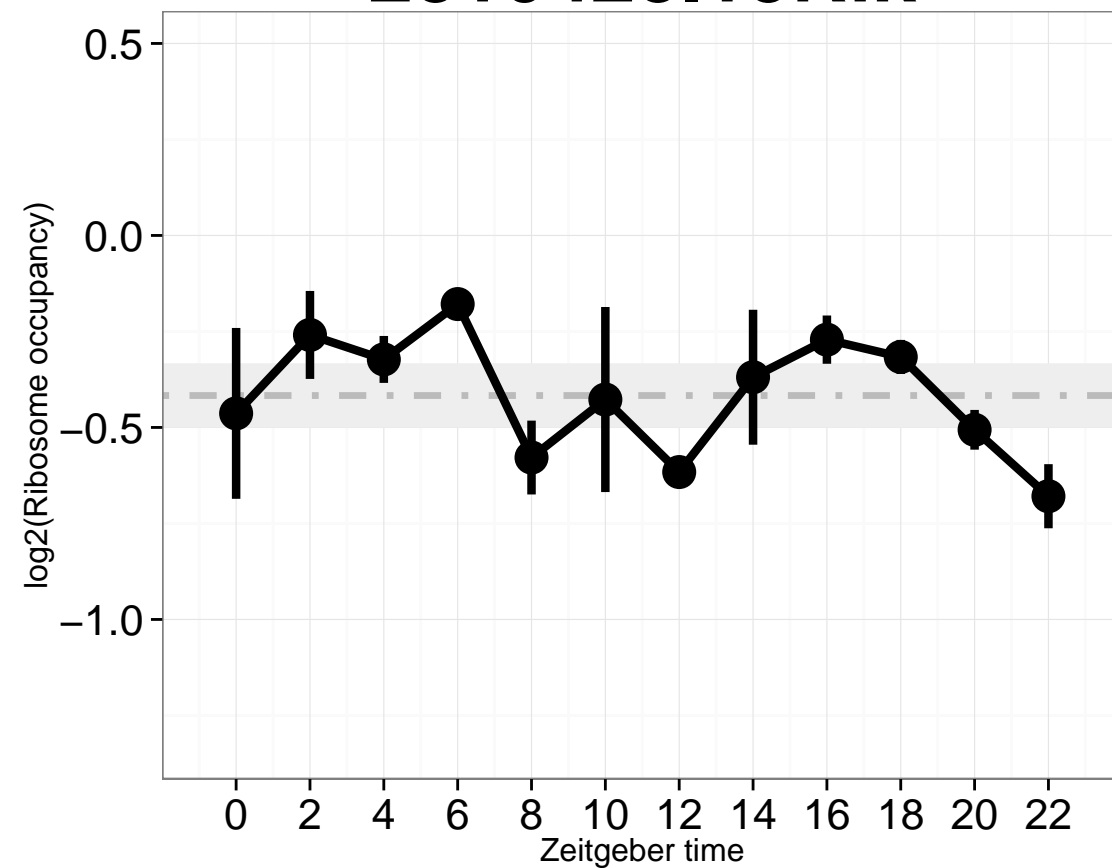

Supplement: SuppDataset_1.zip [file 2810428I15Rik_set_A.pdf › Supplemental Dataset 1/A-mRNA_nonrhyth_translation_nonrhyth/2810428I15Rik_set_A.pdf]

## 2900026A02Rik

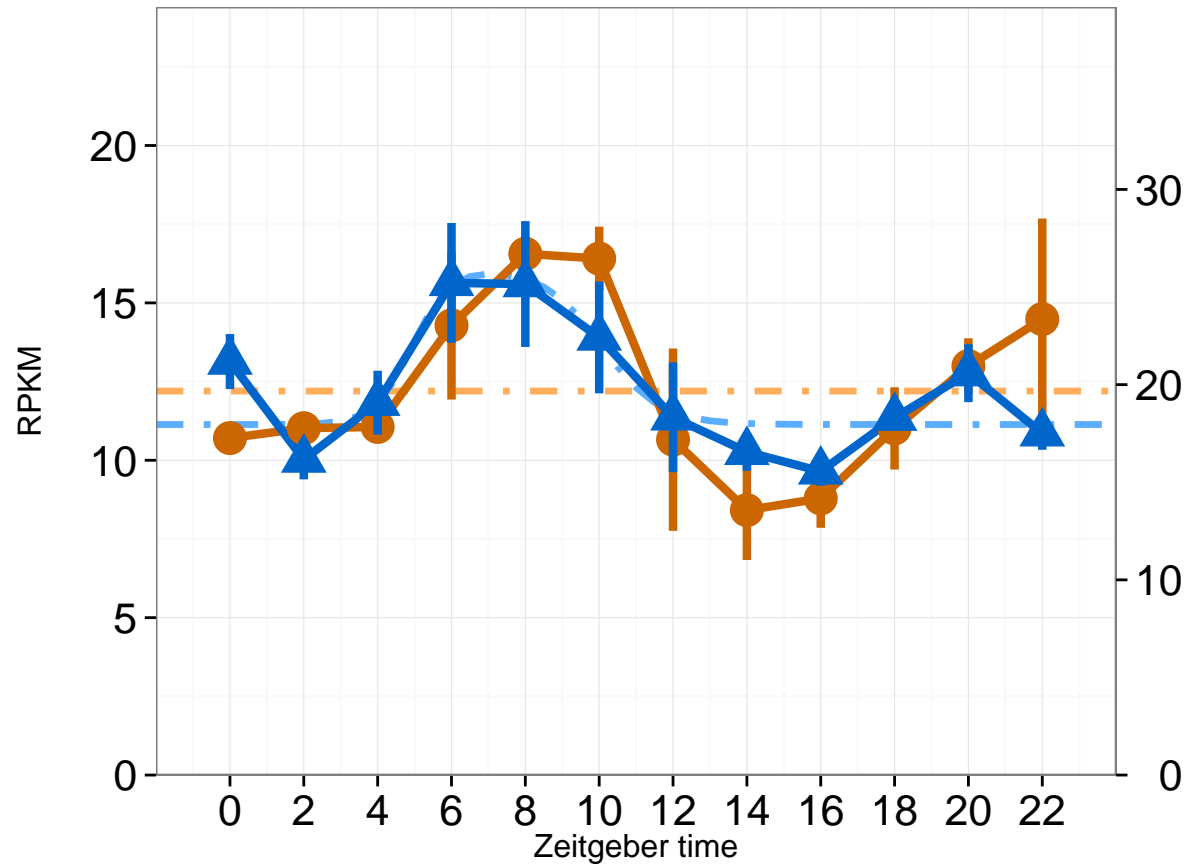

## 2900026A02Rik

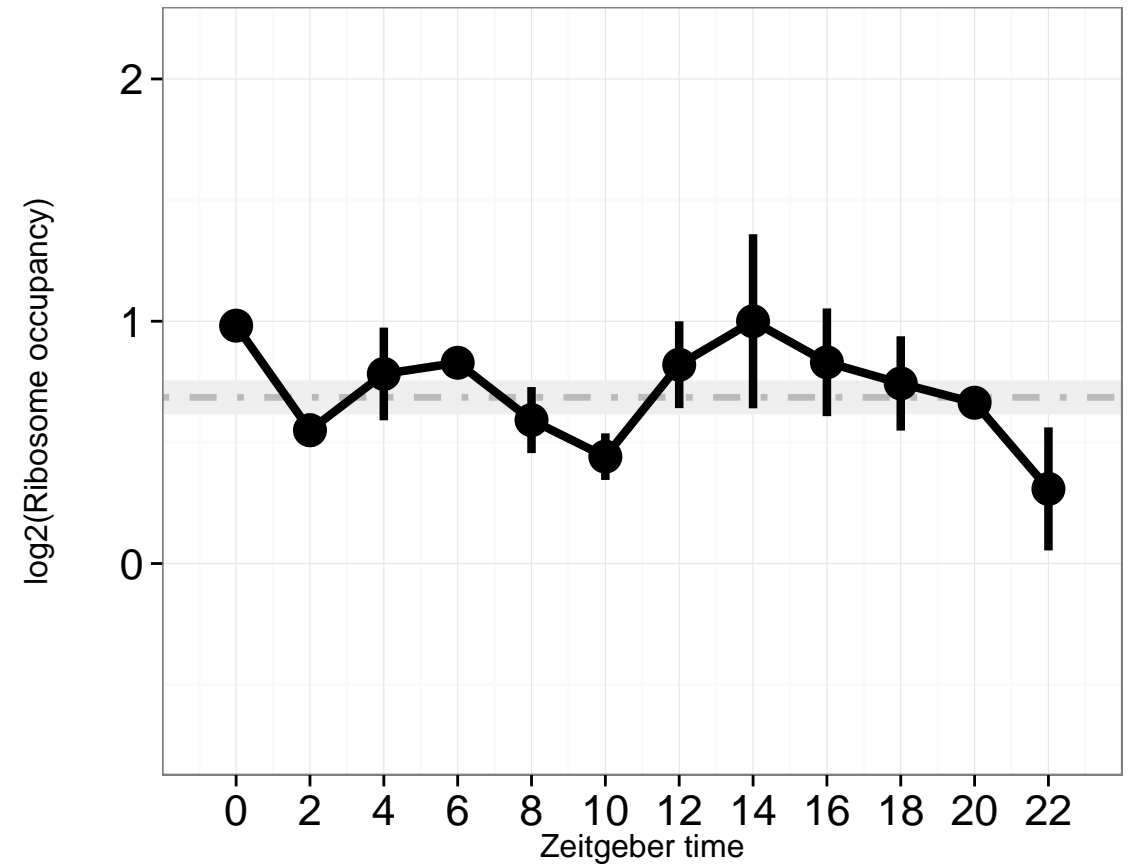

Supplement: SuppDataset_1.zip [file 2900026A02Rik_set_A.pdf › Supplemental Dataset 1/A-mRNA_nonrhyth_translation_nonrhyth/2900026A02Rik_set_A.pdf]

## 3110002H16Rik

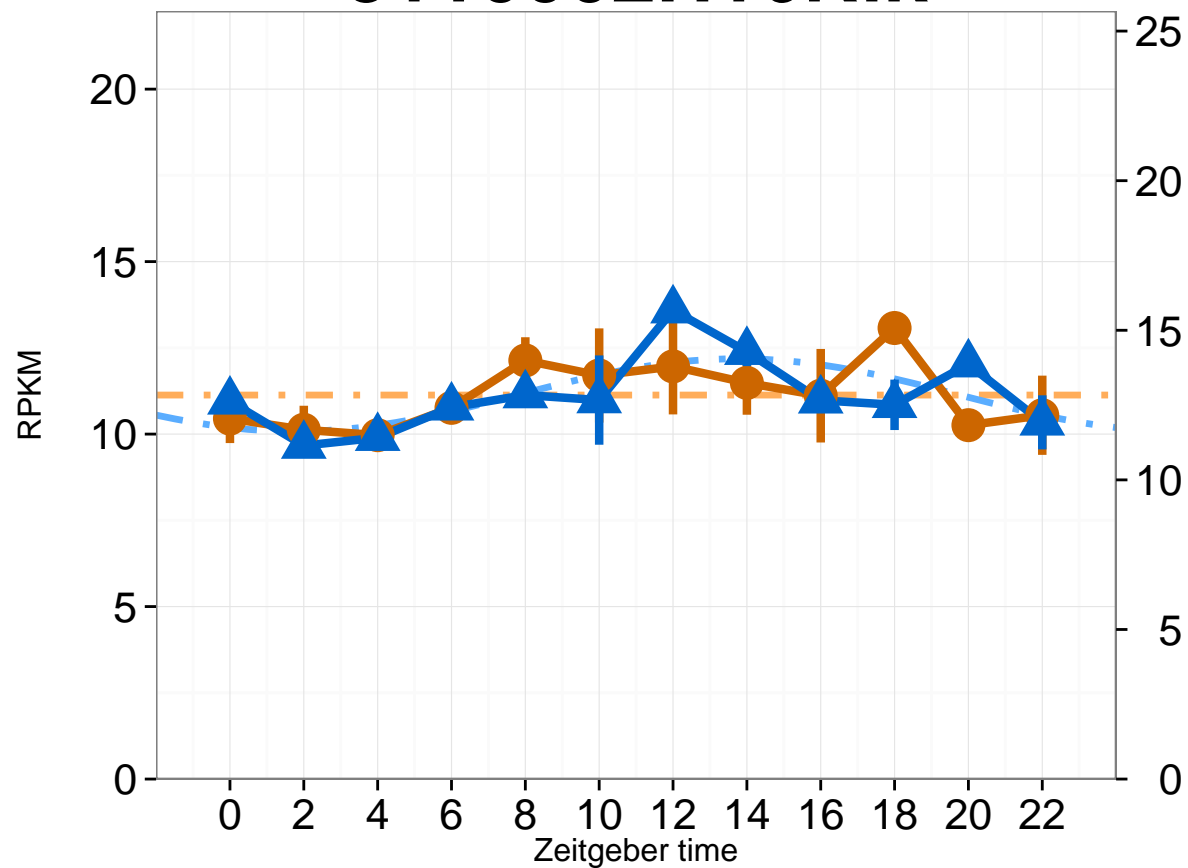

## 3110002H16Rik

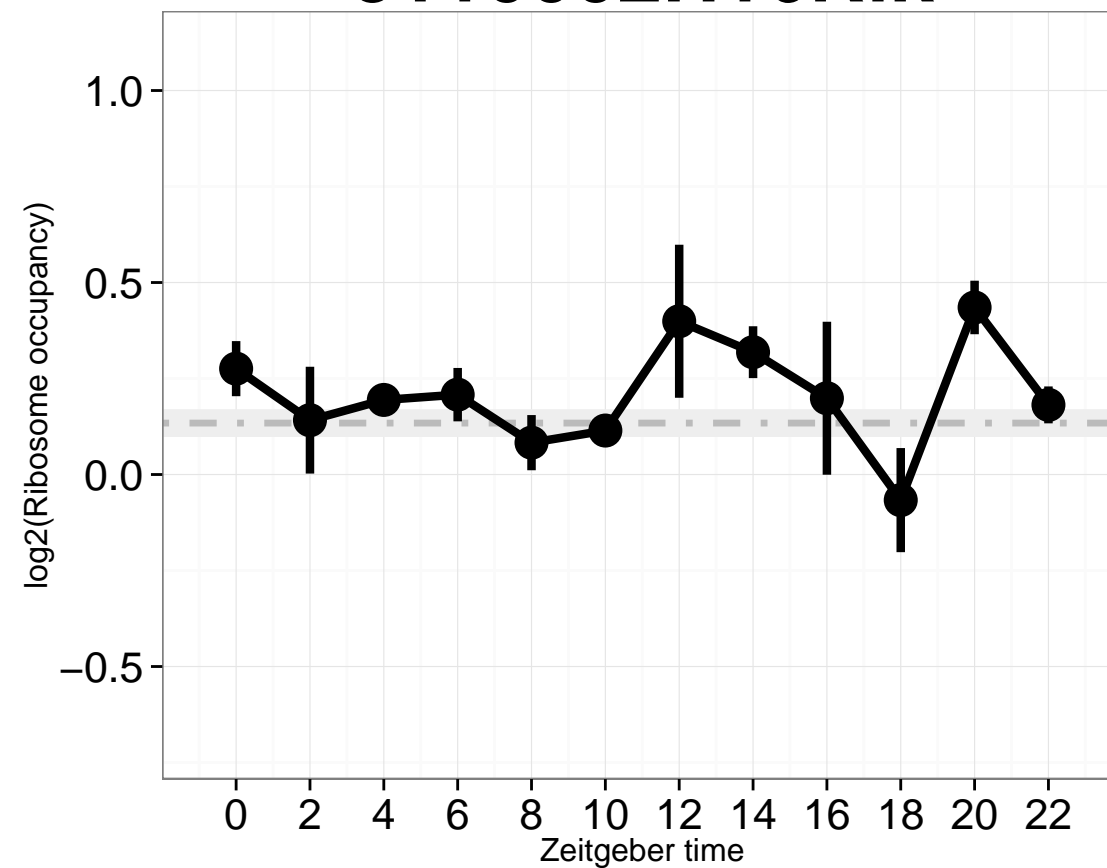

Supplement: SuppDataset_1.zip [file 3110002H16Rik_set_A.pdf › Supplemental Dataset 1/A-mRNA_nonrhyth_translation_nonrhyth/3110002H16Rik_set_A.pdf]

# 3110040N11Rik

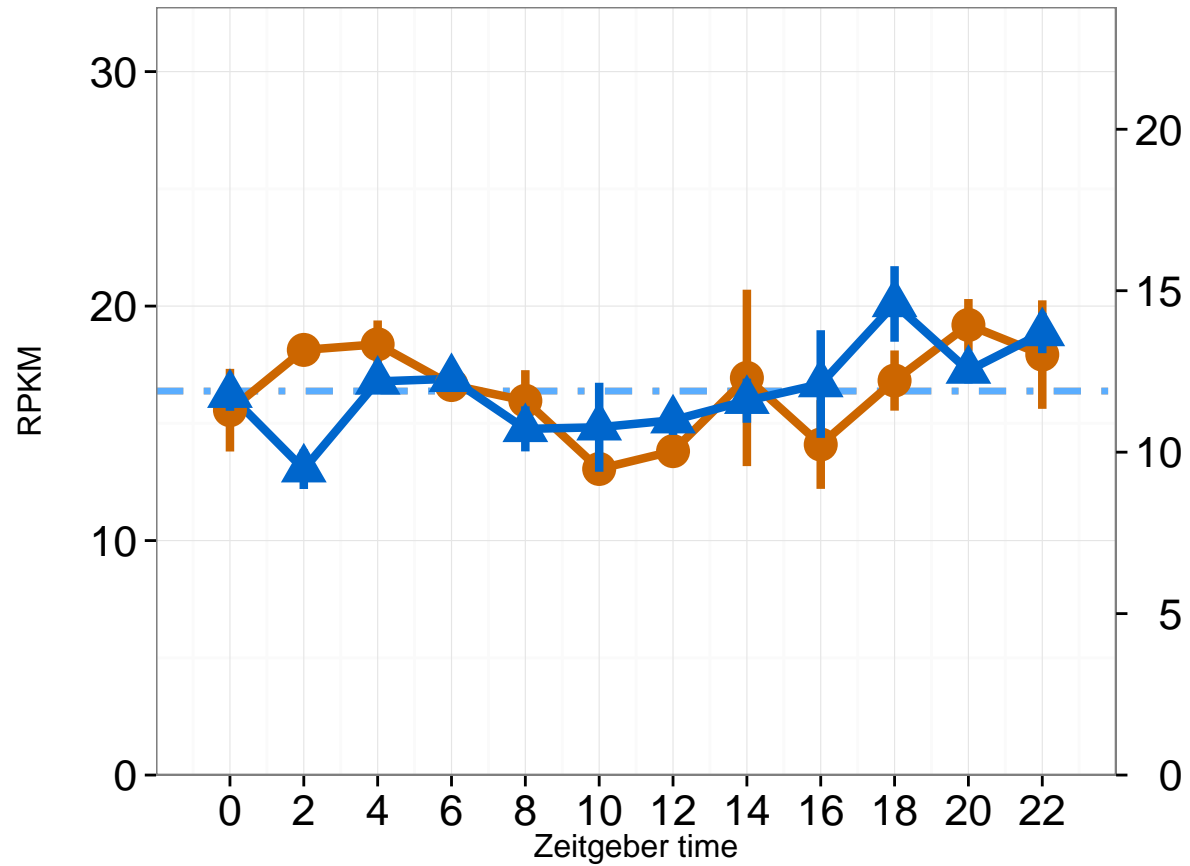

# 3110040N11Rik

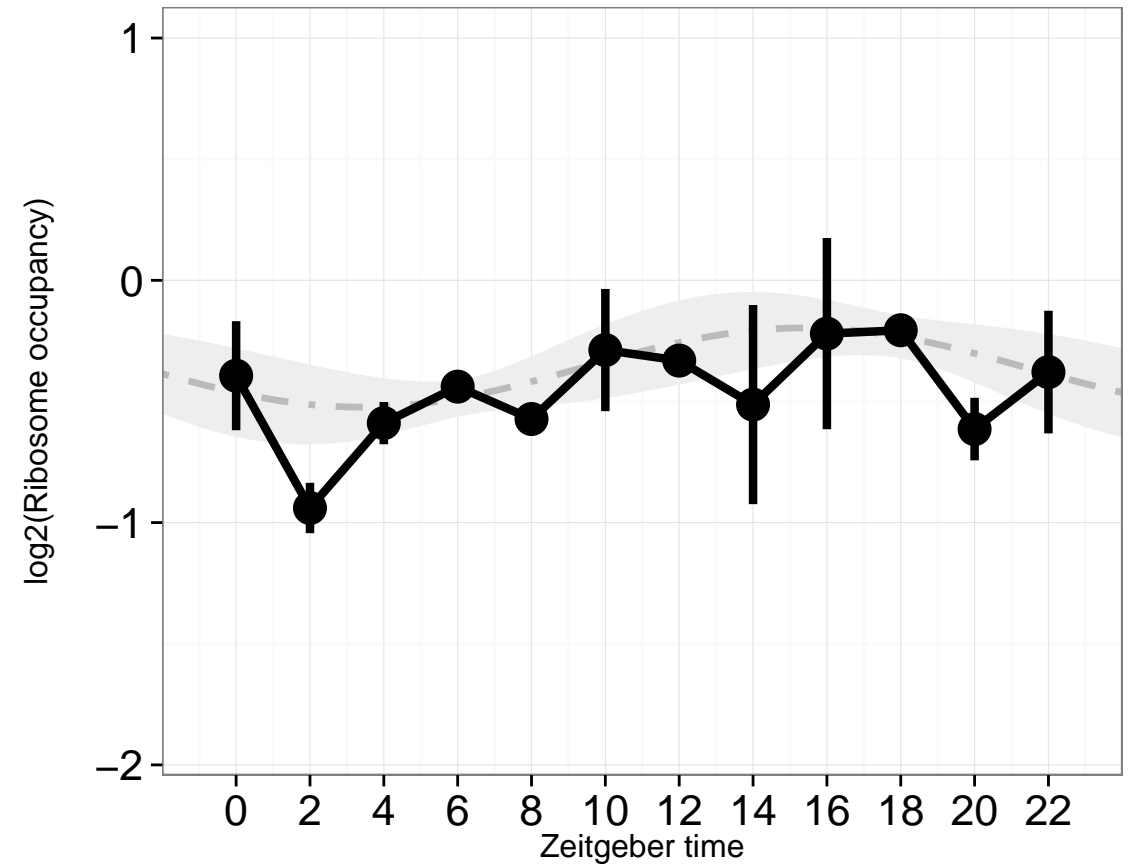

Supplement: SuppDataset_1.zip [file 3110040N11Rik_set_A.pdf › Supplemental Dataset 1/A-mRNA_nonrhyth_translation_nonrhyth/3110040N11Rik_set_A.pdf]

# 3110043O21Rik

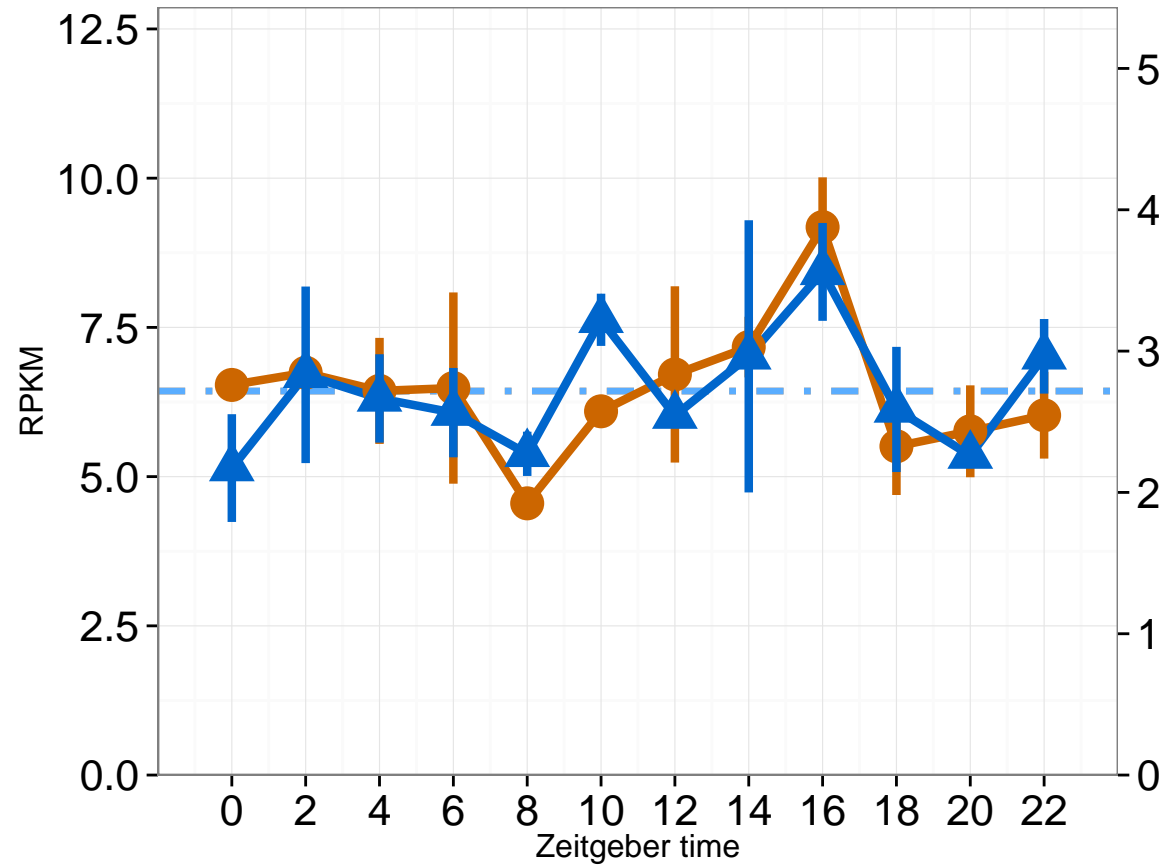

# 3110043O21Rik

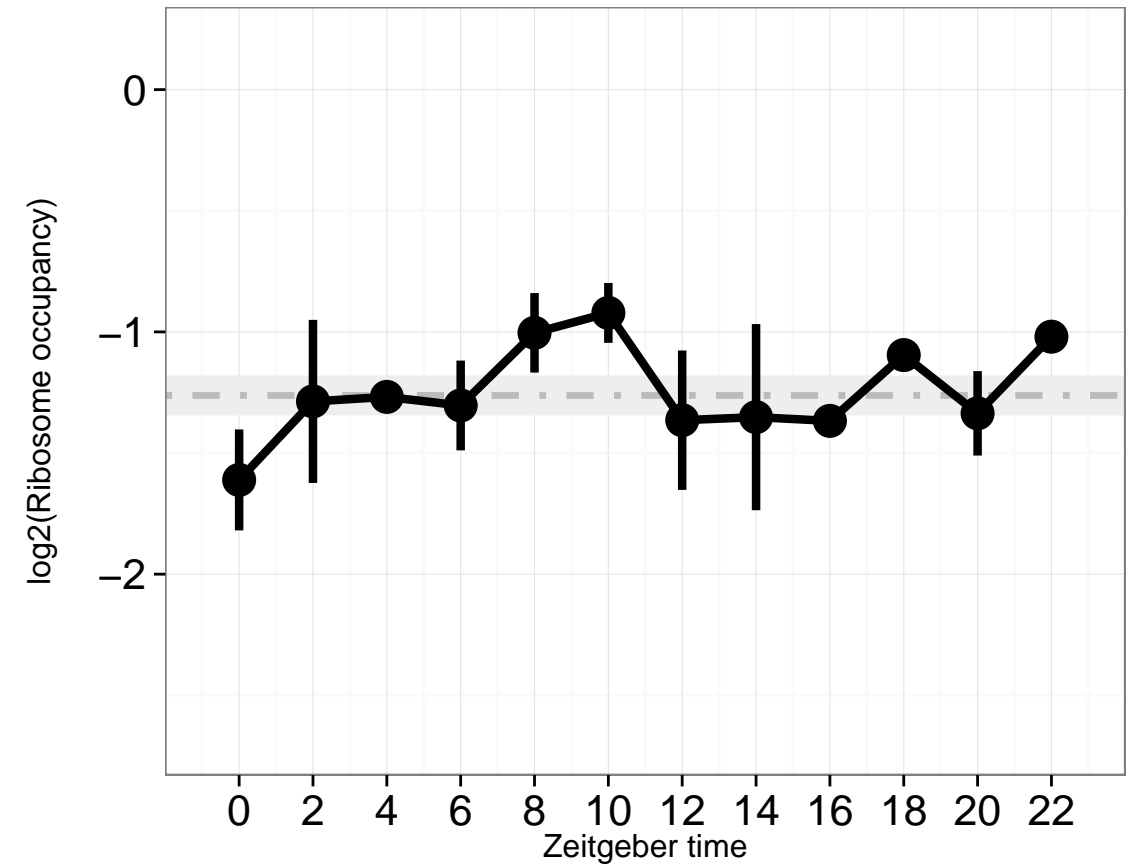

Supplement: SuppDataset_1.zip [file 3110043O21Rik_set_A.pdf › Supplemental Dataset 1/A-mRNA_nonrhyth_translation_nonrhyth/3110043O21Rik_set_A.pdf]

# 3110057O12Rik

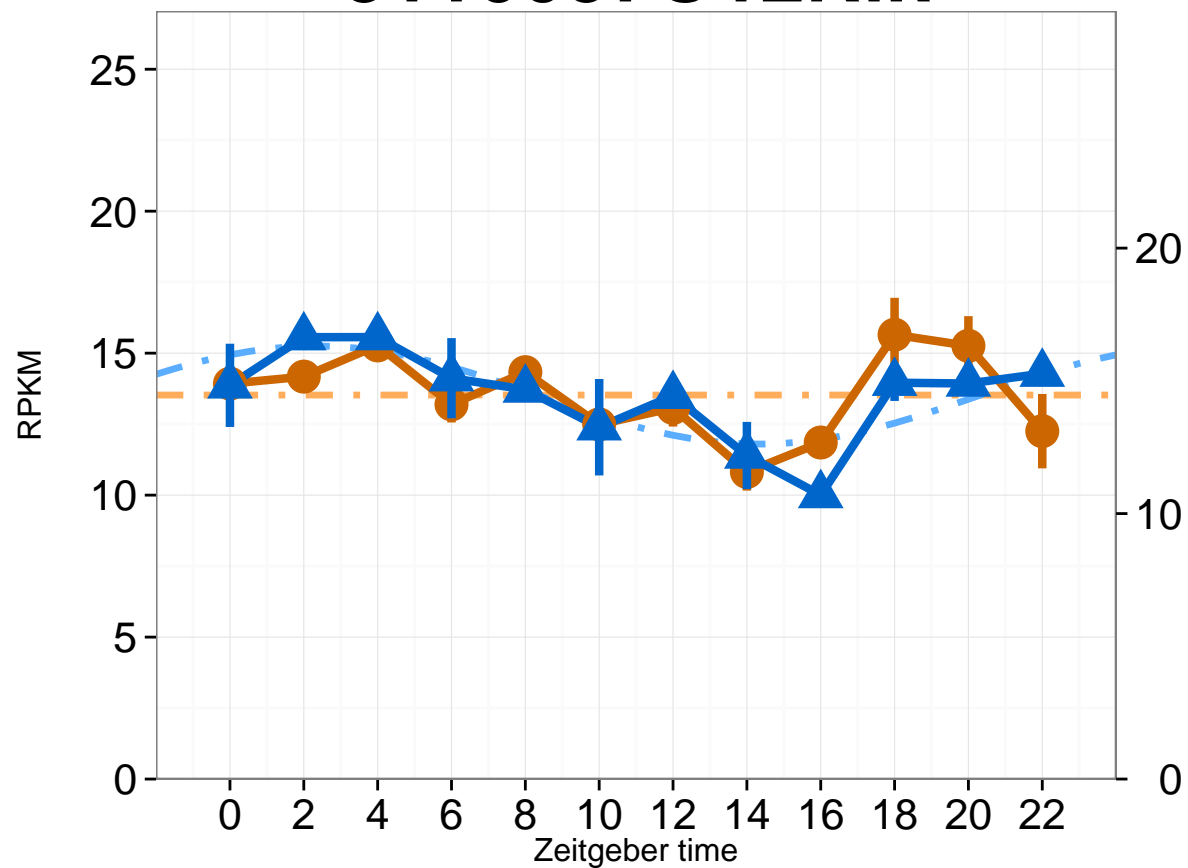

# 3110057O12Rik

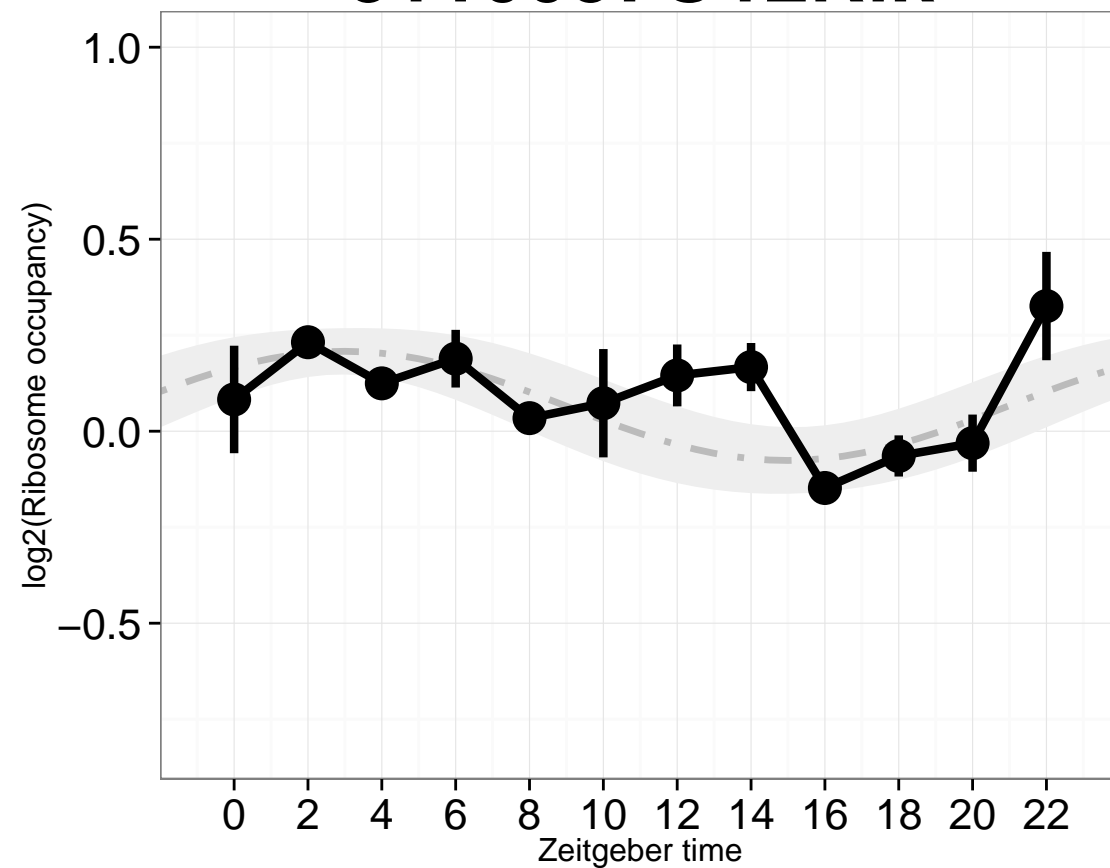

Supplement: SuppDataset_1.zip [file 3110057O12Rik_set_A.pdf › Supplemental Dataset 1/A-mRNA_nonrhyth_translation_nonrhyth/3110057O12Rik_set_A.pdf]

# 3110062M04Rik

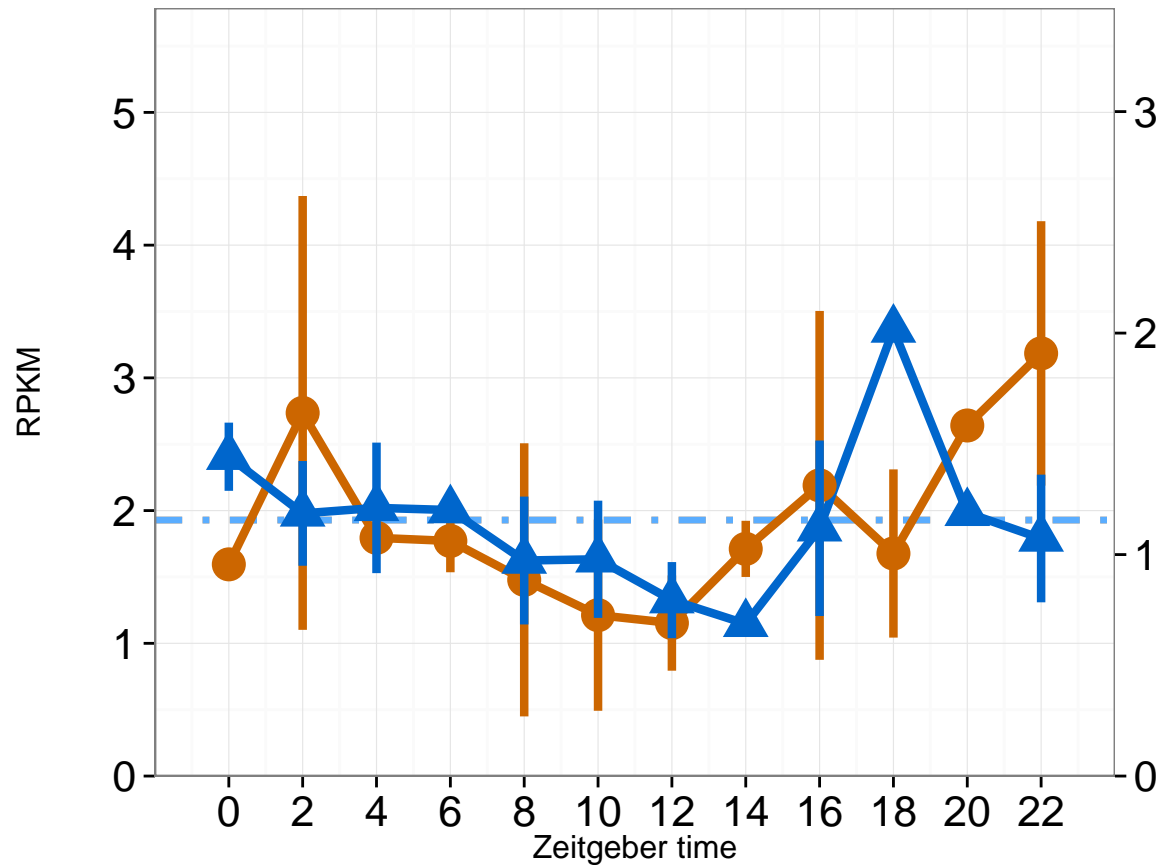

# 3110062M04Rik

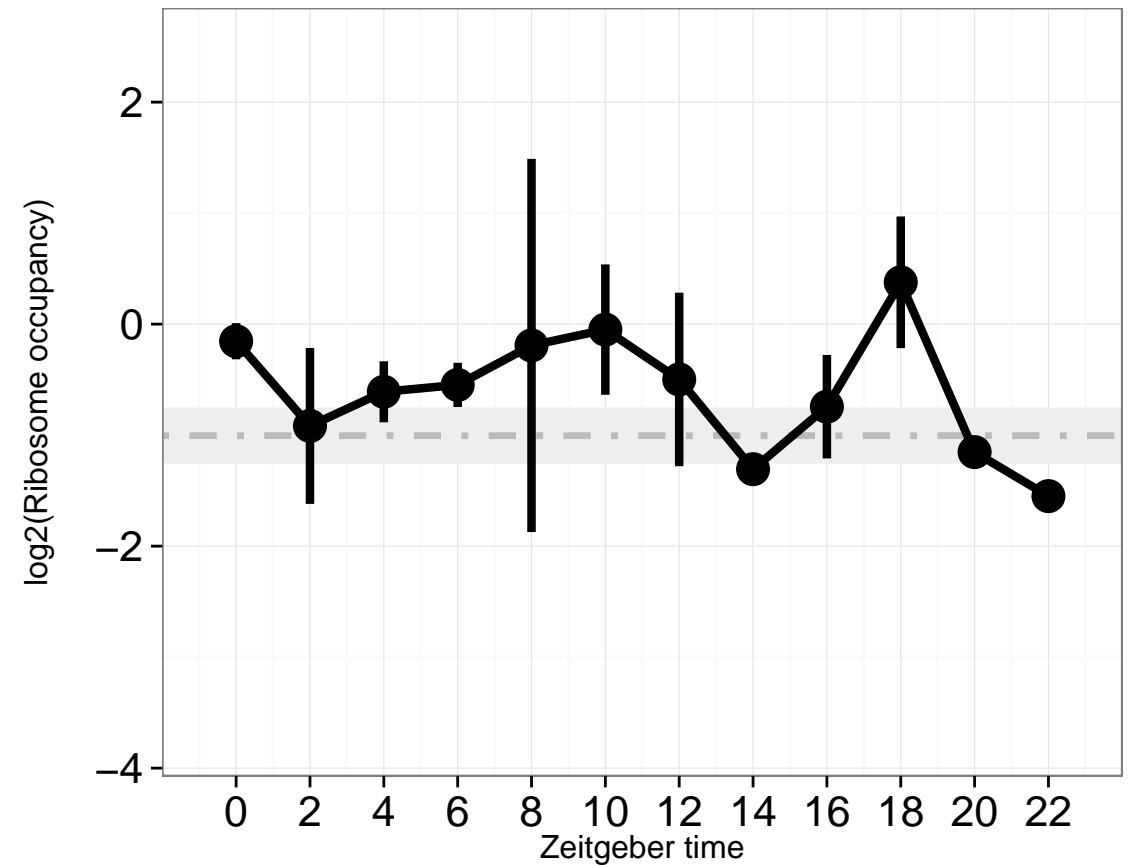

Supplement: SuppDataset_1.zip [file 3110062M04Rik_set_A.pdf › Supplemental Dataset 1/A-mRNA_nonrhyth_translation_nonrhyth/3110062M04Rik_set_A.pdf]

# 3830406C13Rik

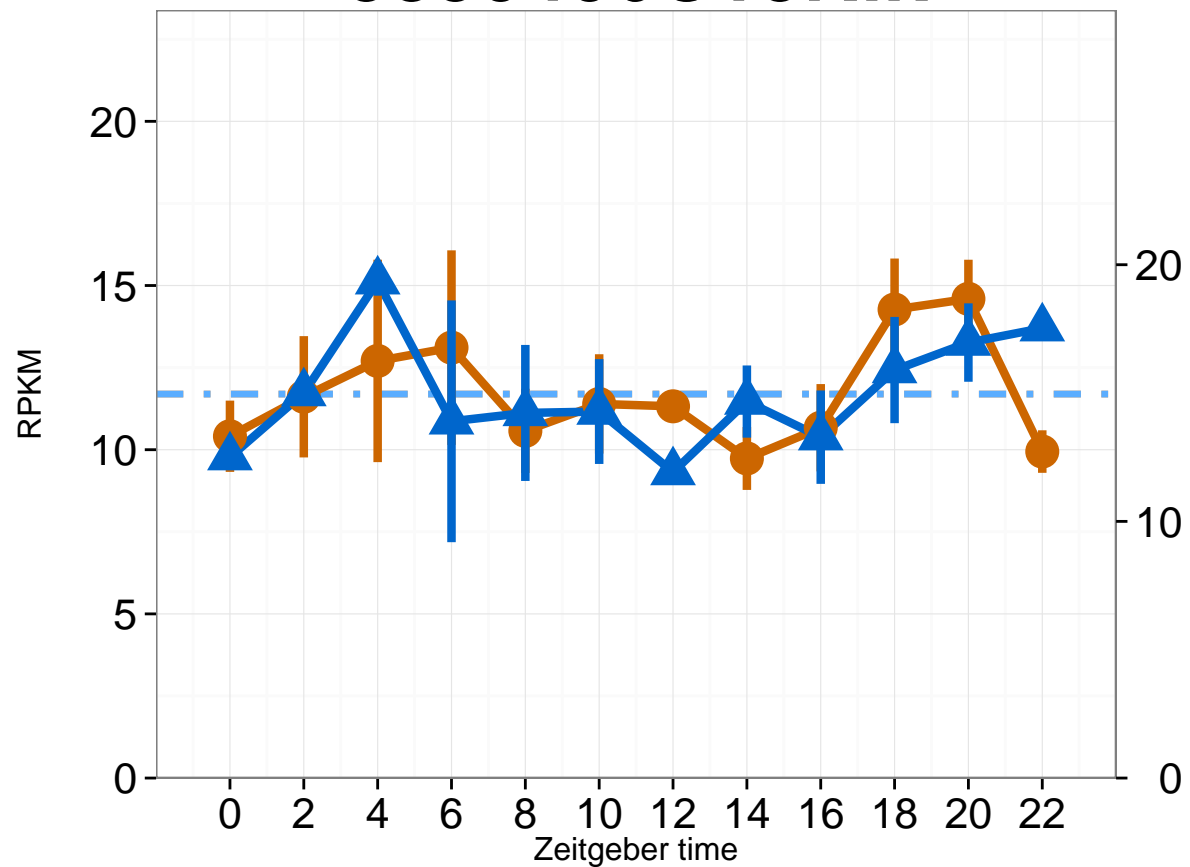

# 3830406C13Rik

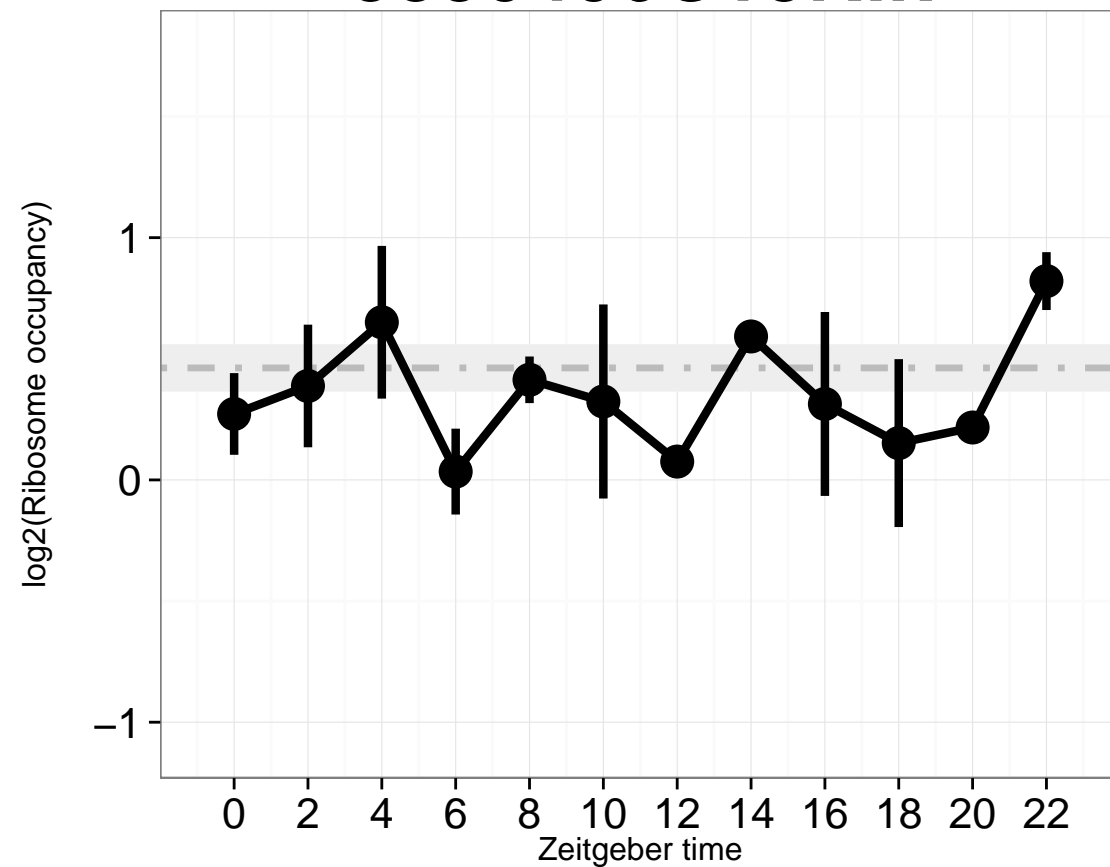

Supplement: SuppDataset_1.zip [file 3830406C13Rik_set_A.pdf › Supplemental Dataset 1/A-mRNA_nonrhyth_translation_nonrhyth/3830406C13Rik_set_A.pdf]

4632415L05Rik

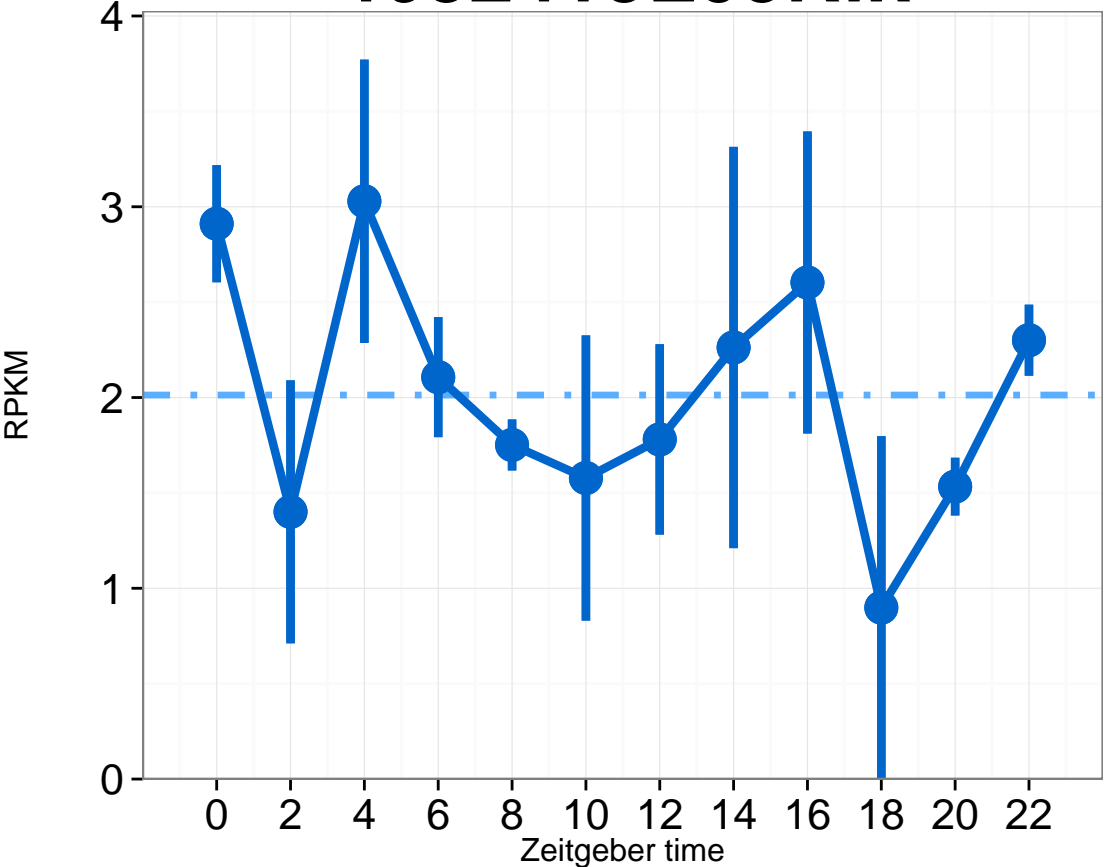

4632415L05Rik log2(Ribosome occupancy)

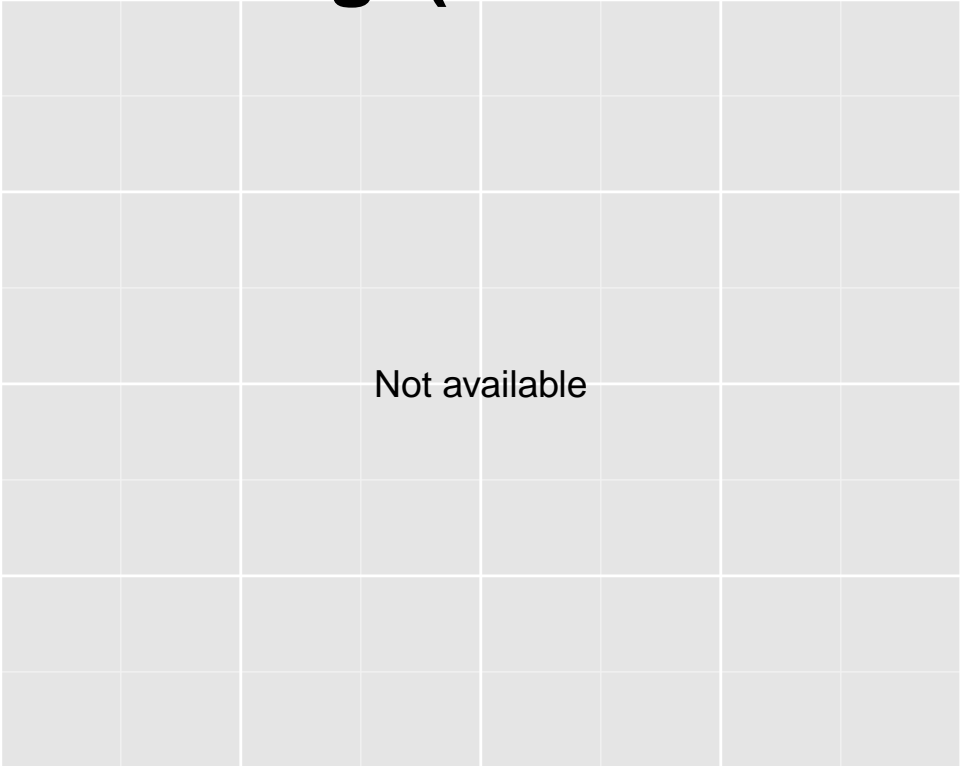

Supplement: SuppDataset_1.zip [file 4632415L05Rik_set_A.pdf › Supplemental Dataset 1/A-mRNA_nonrhyth_translation_nonrhyth/4632415L05Rik_set_A.pdf]

4632434I11Rik

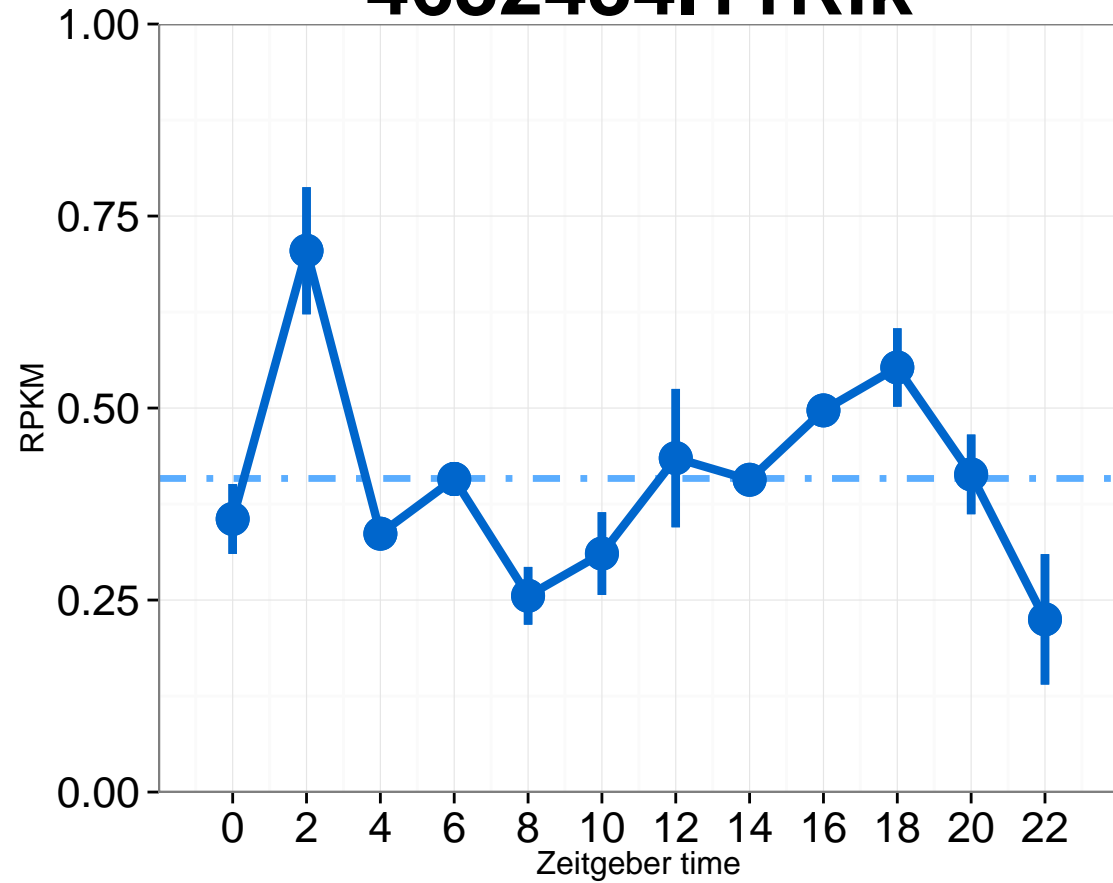

4632434I11Rik log2(Ribosome occupa

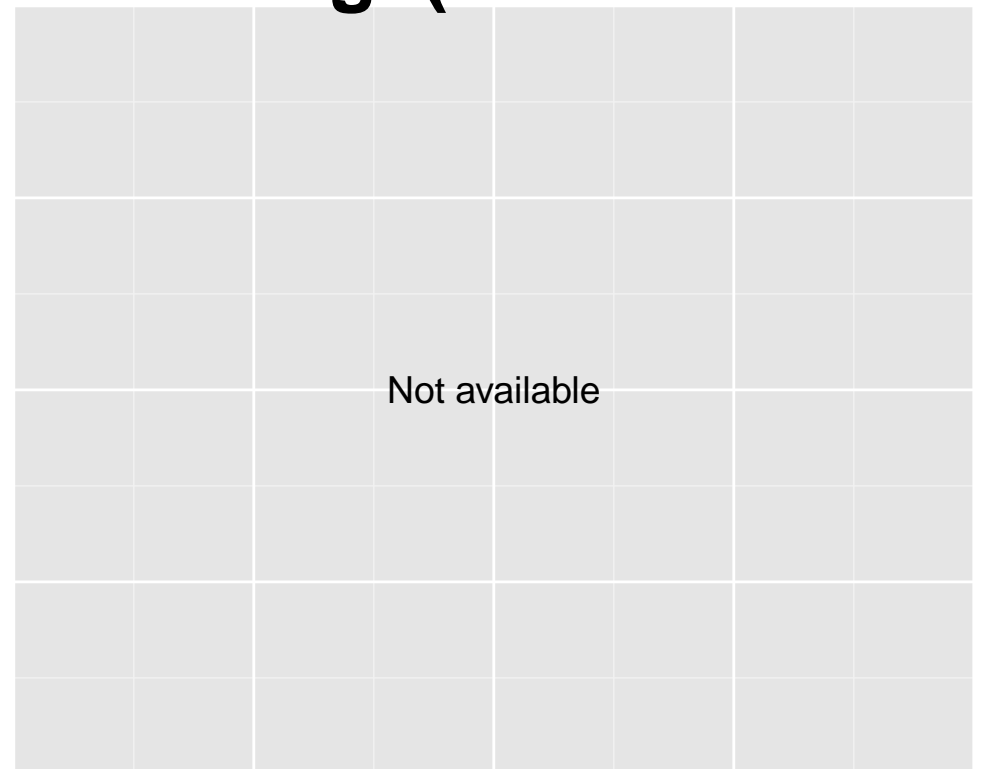

Supplement: SuppDataset_1.zip [file 4632434I11Rik_set_A.pdf › Supplemental Dataset 1/A-mRNA_nonrhyth_translation_nonrhyth/4632434I11Rik_set_A.pdf]

# 4833420G17Rik

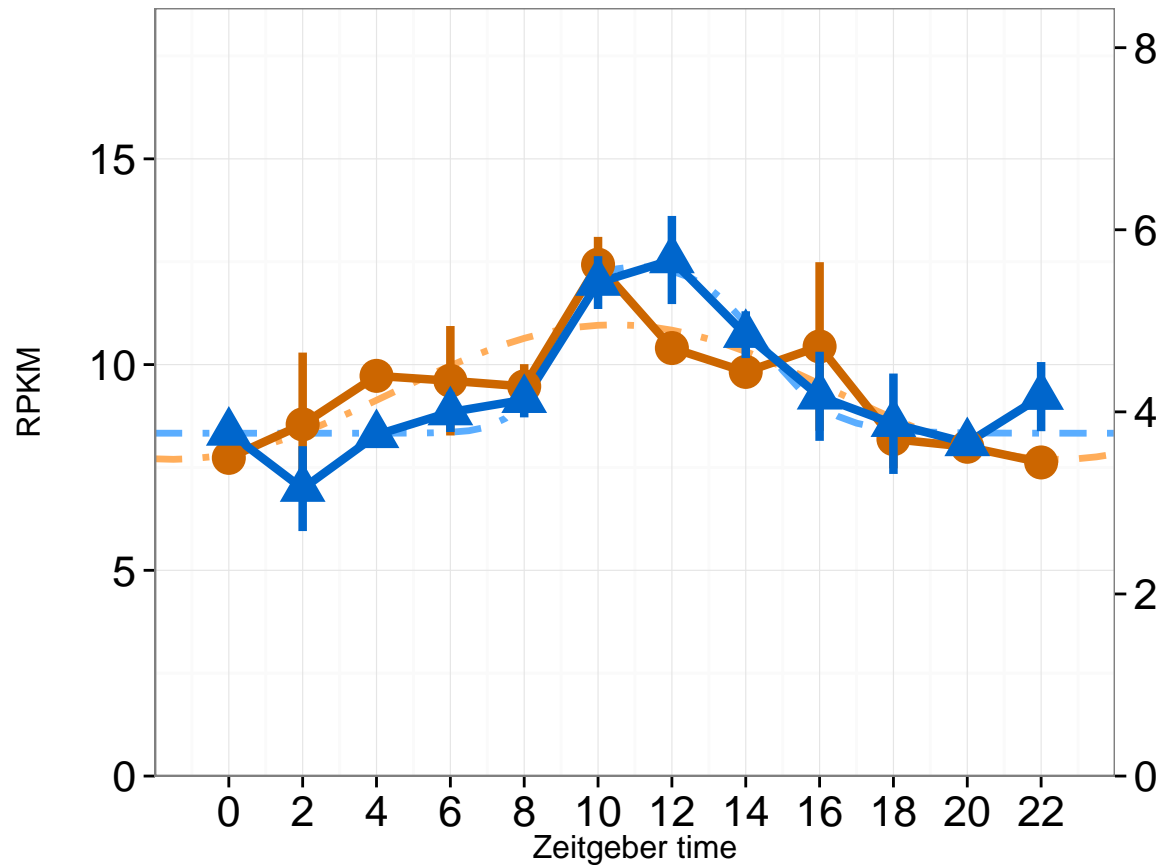

# 4833420G17Rik

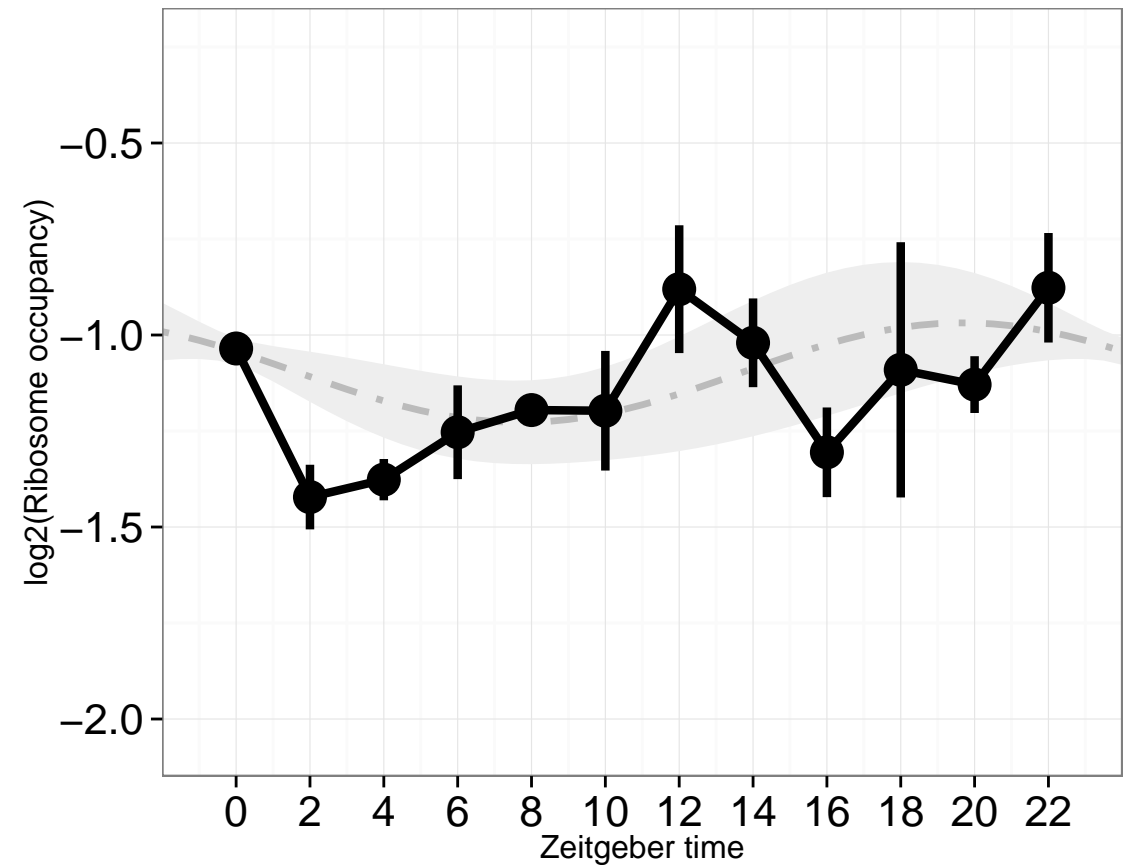

Supplement: SuppDataset_1.zip [file 4833420G17Rik_set_A.pdf › Supplemental Dataset 1/A-mRNA_nonrhyth_translation_nonrhyth/4833420G17Rik_set_A.pdf]

# 4922501C03Rik

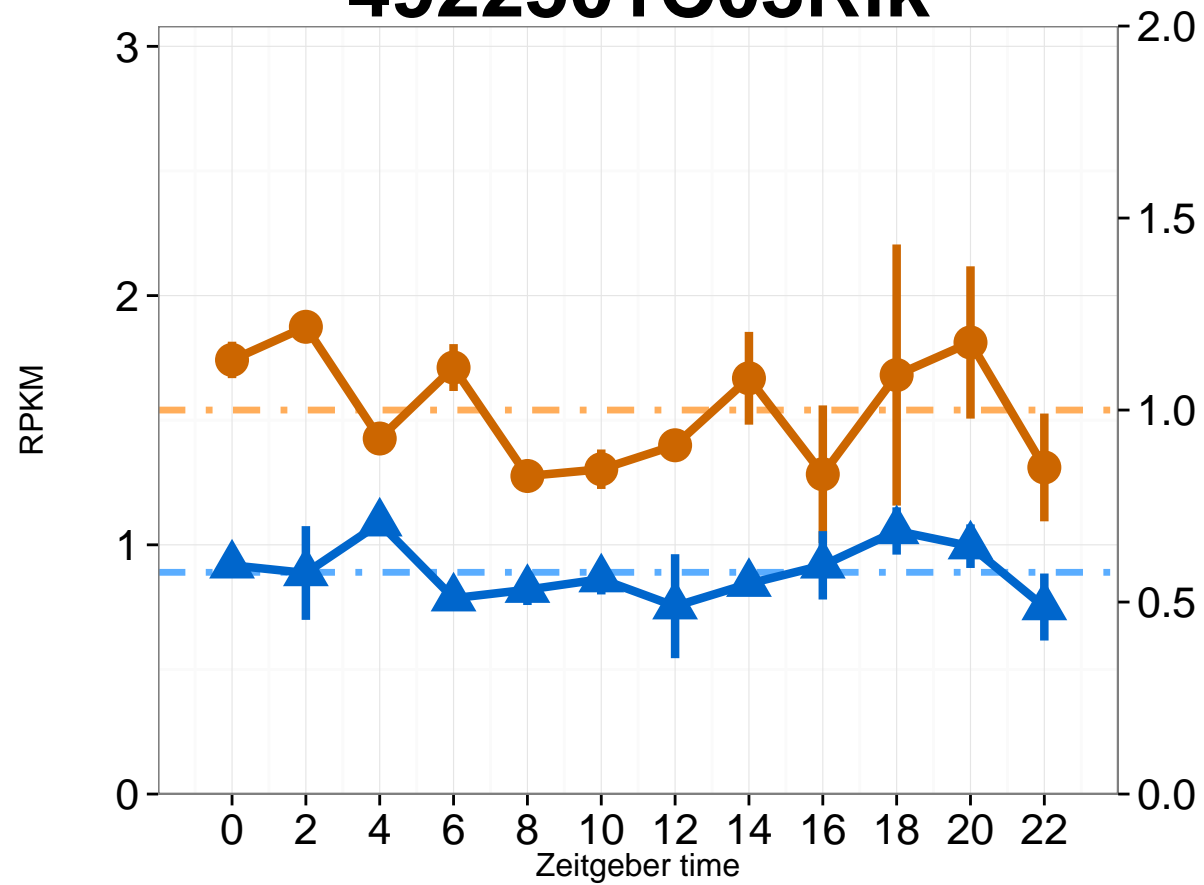

# 4922501C03Rik

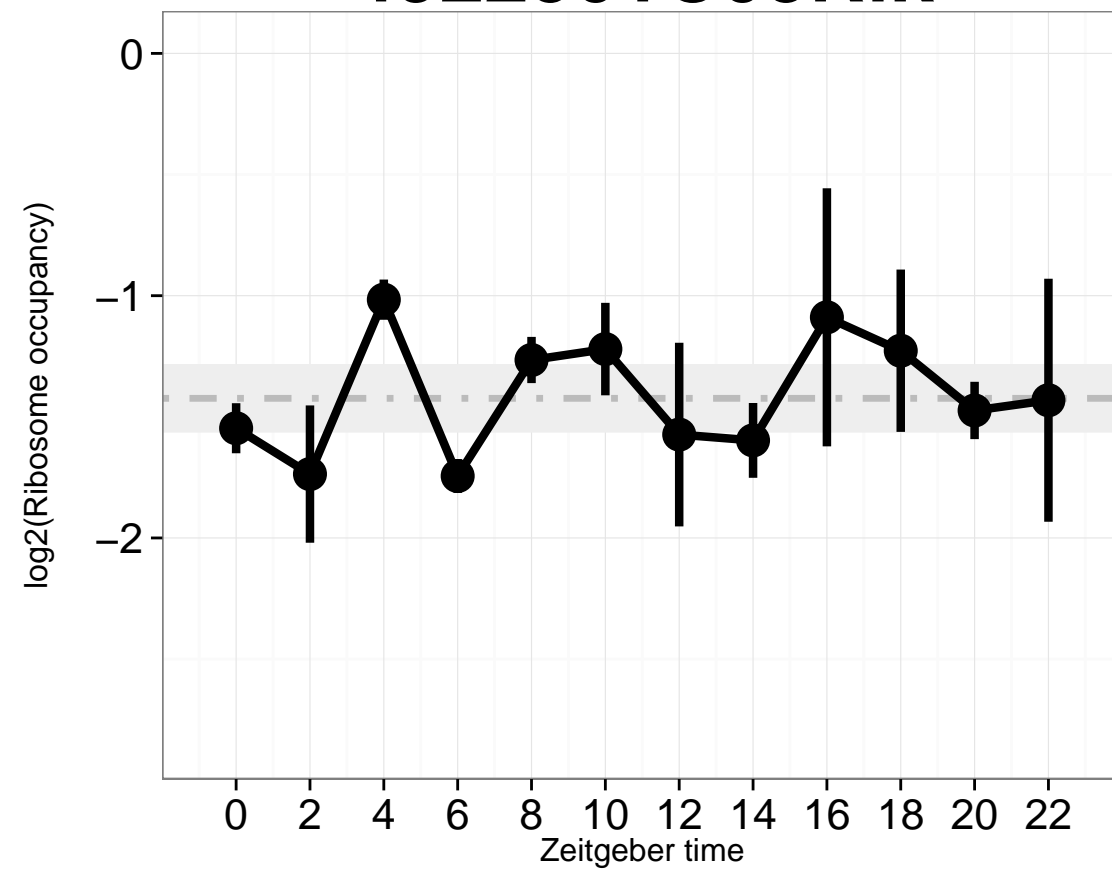

Supplement: SuppDataset_1.zip [file 4922501C03Rik_set_A.pdf › Supplemental Dataset 1/A-mRNA_nonrhyth_translation_nonrhyth/4922501C03Rik_set_A.pdf]

## 4930402H24Rik

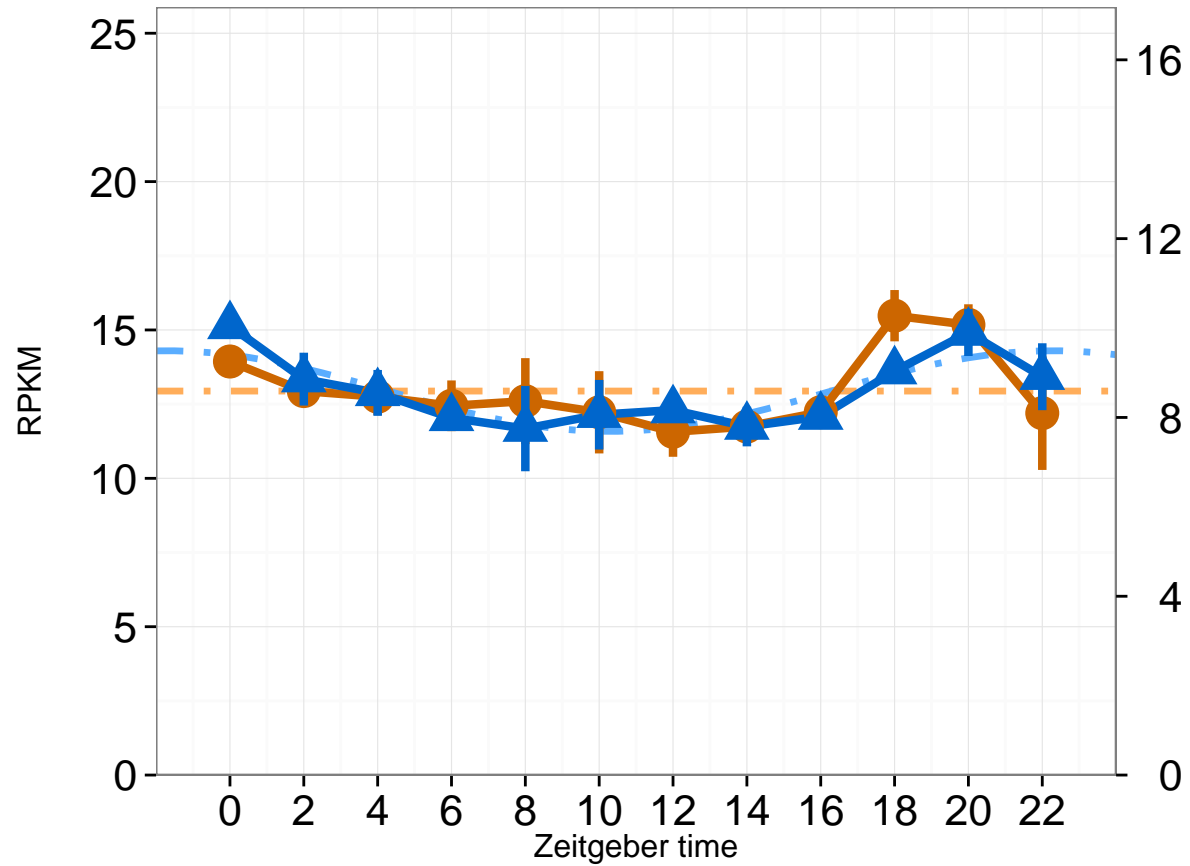

## 4930402H24Rik

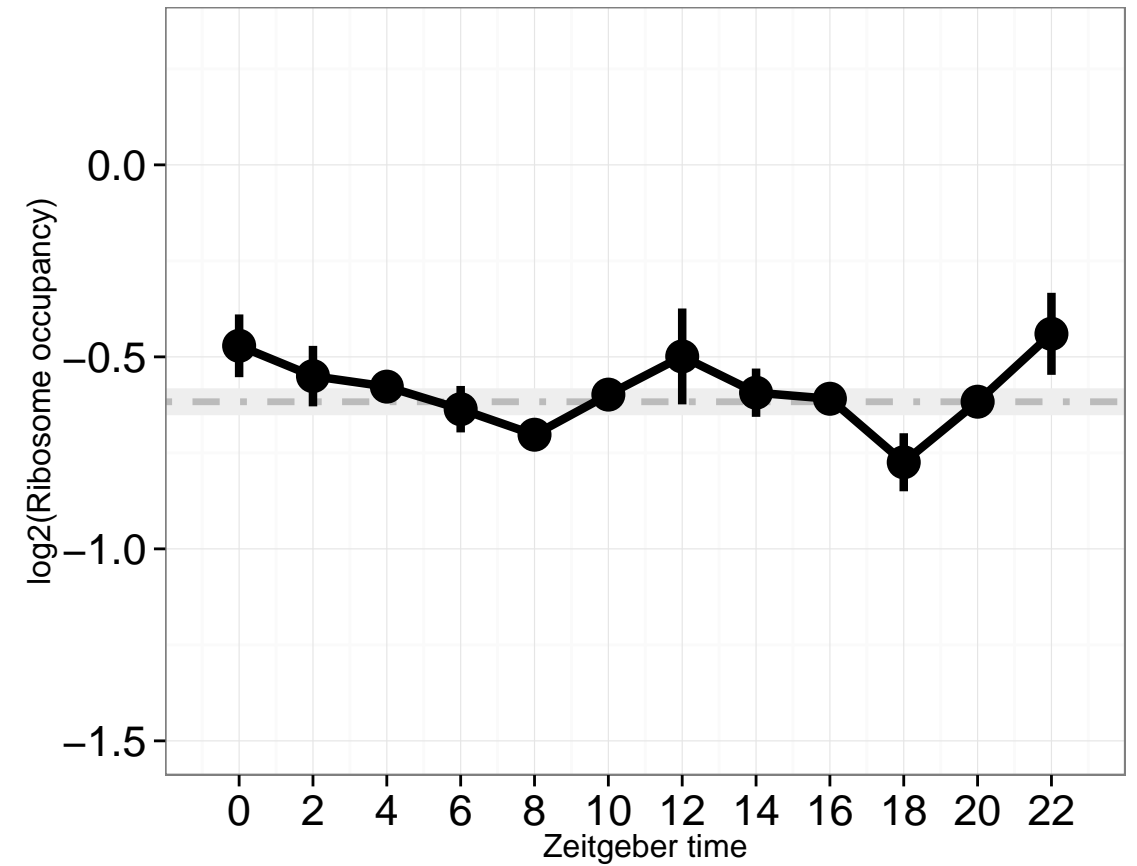

Supplement: SuppDataset_1.zip [file 4930402H24Rik_set_A.pdf › Supplemental Dataset 1/A-mRNA_nonrhyth_translation_nonrhyth/4930402H24Rik_set_A.pdf]

# 4930422G04Rik

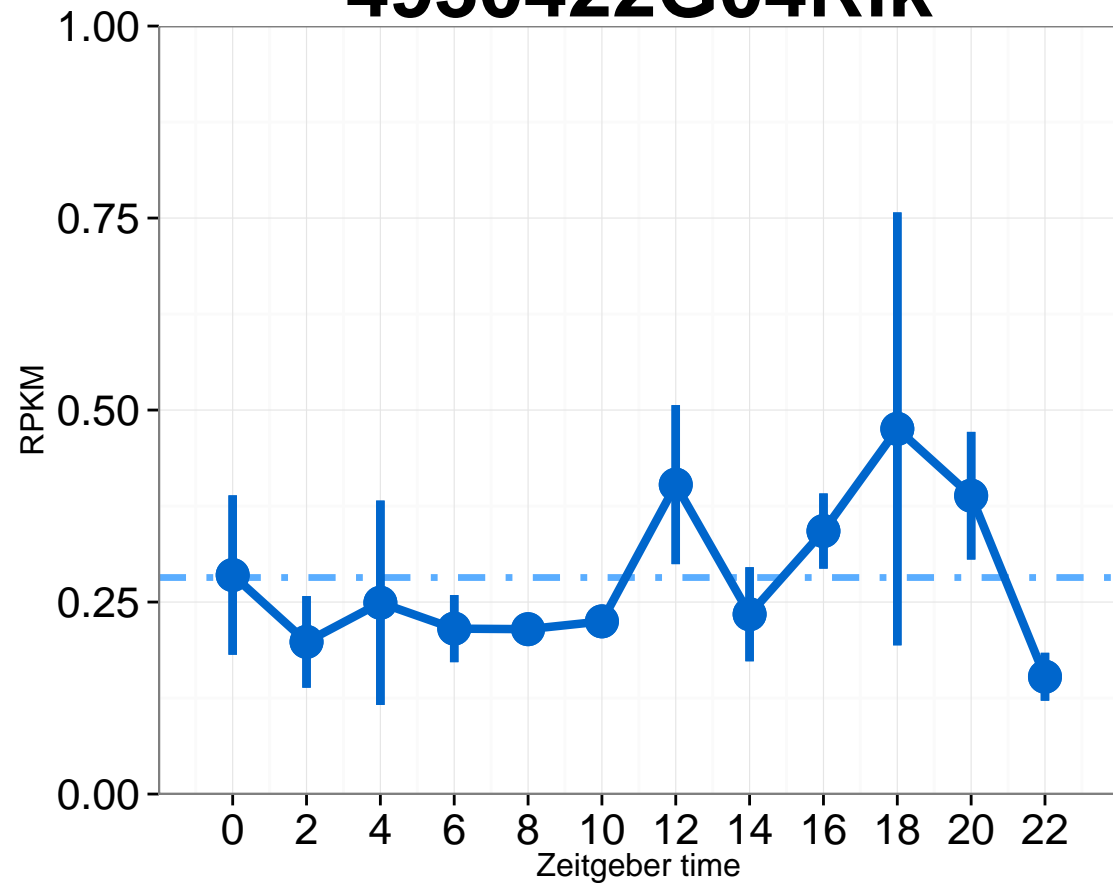

# 4930422G04Rik log2(Ribosome occup

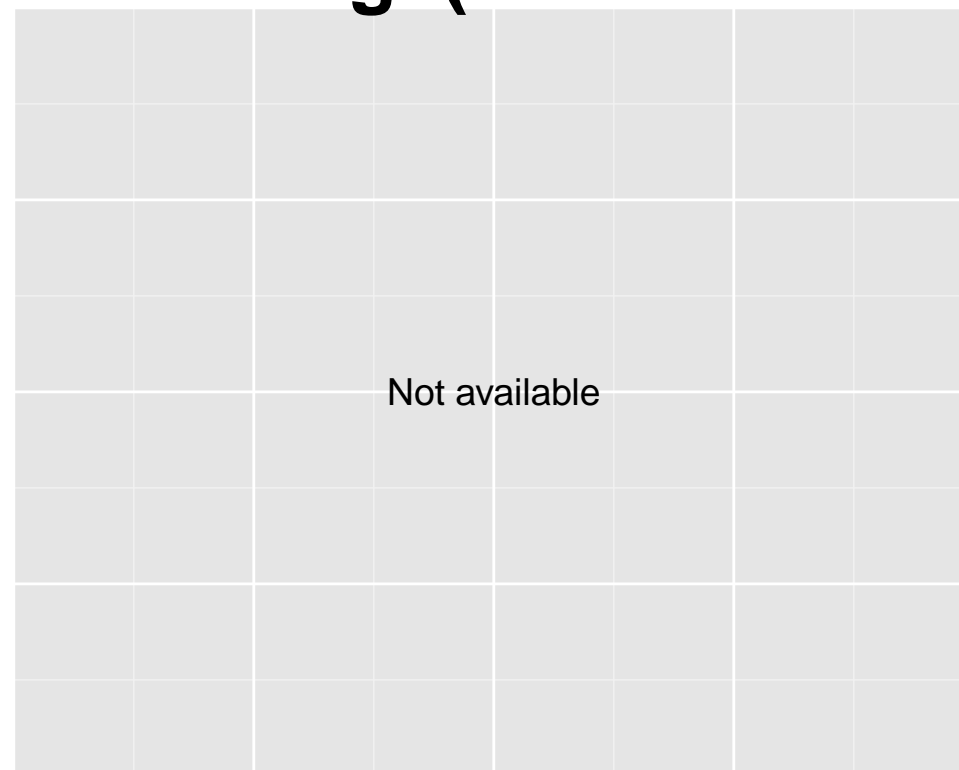

Supplement: SuppDataset_1.zip [file 4930422G04Rik_set_A.pdf › Supplemental Dataset 1/A-mRNA_nonrhyth_translation_nonrhyth/4930422G04Rik_set_A.pdf]

**4930423020Rik**

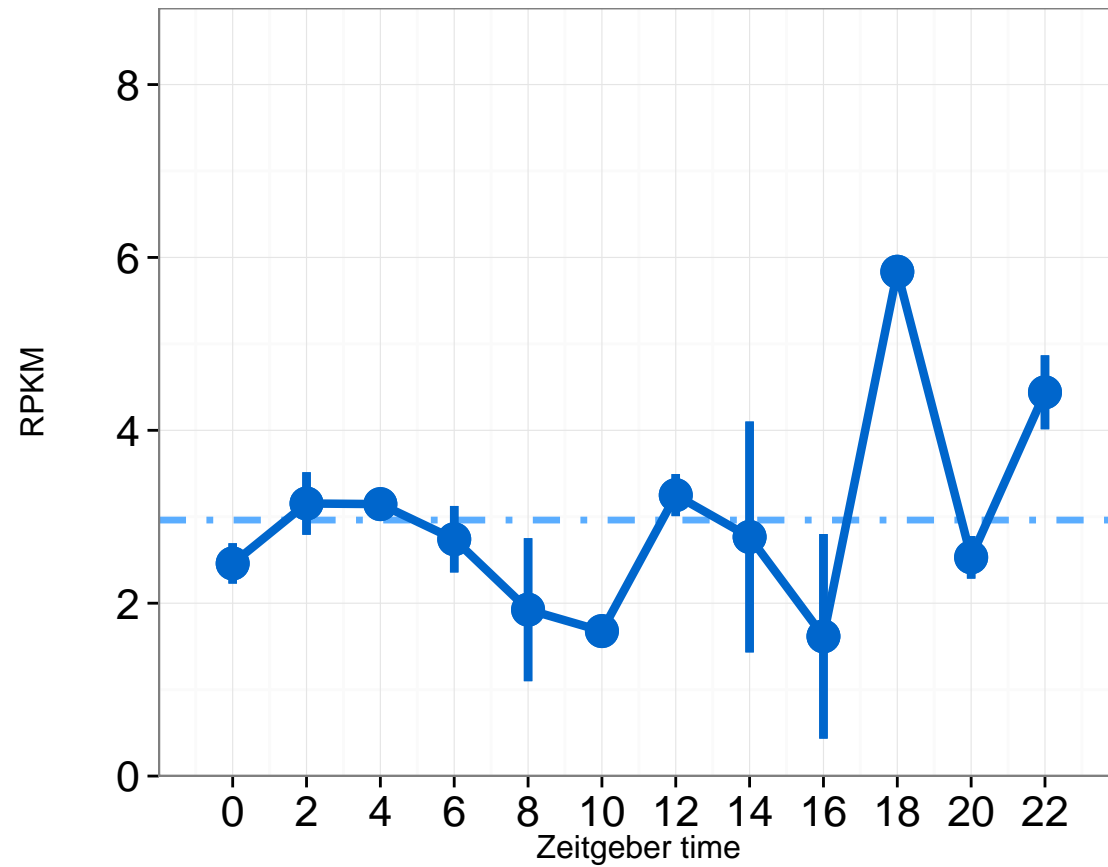

4930423O20Rik  $\log_2(\text{Ribosome occup})$

Supplement: SuppDataset_1.zip [file 4930423O20Rik_set_A.pdf › Supplemental Dataset 1/A-mRNA_nonrhyth_translation_nonrhyth/4930423O20Rik_set_A.pdf]

## 4930452B06Rik

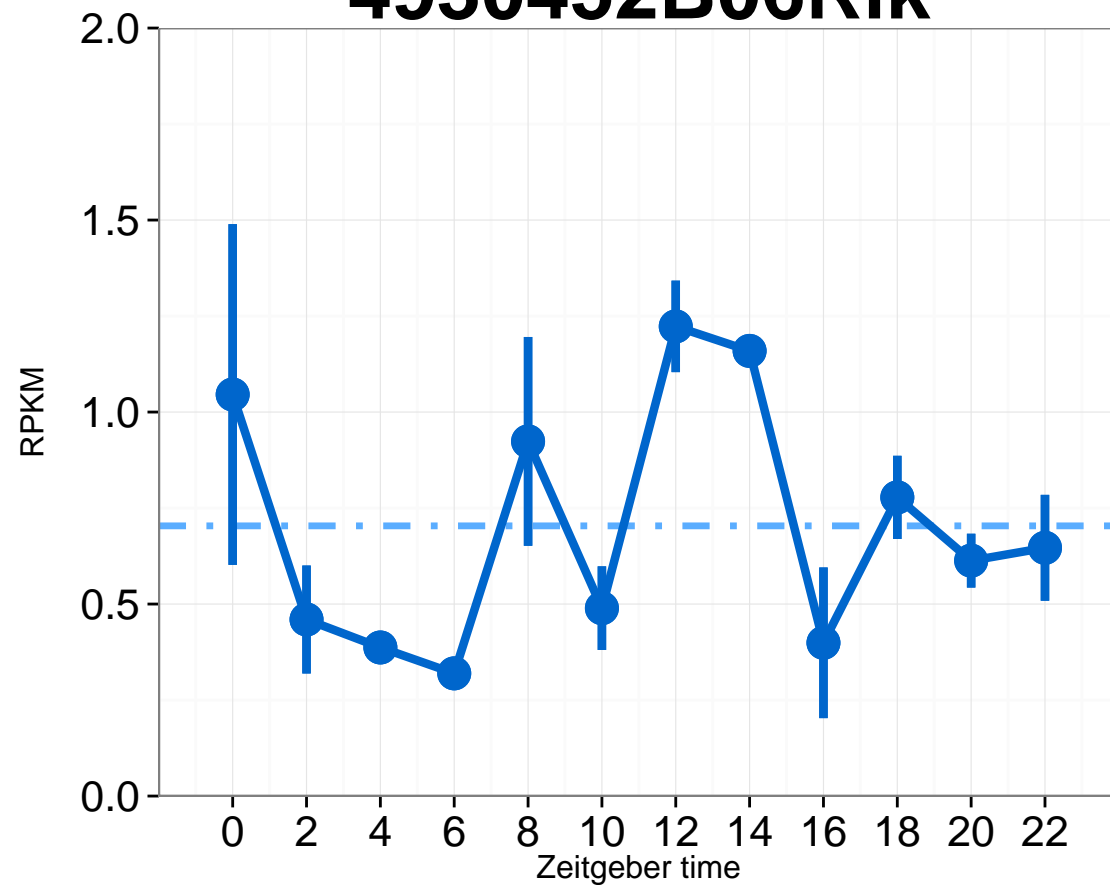

## 4930452B06Rik log2(Ribosome occup

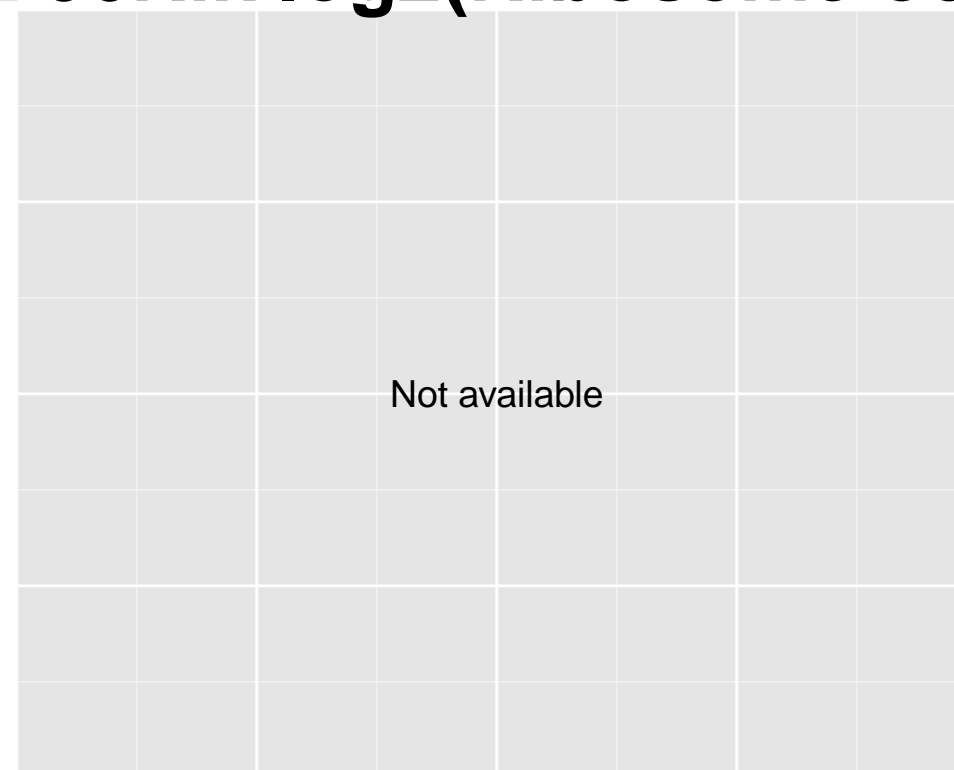

Supplement: SuppDataset_1.zip [file 4930452B06Rik_set_A.pdf › Supplemental Dataset 1/A-mRNA_nonrhyth_translation_nonrhyth/4930452B06Rik_set_A.pdf]

## 4930453N24Rik

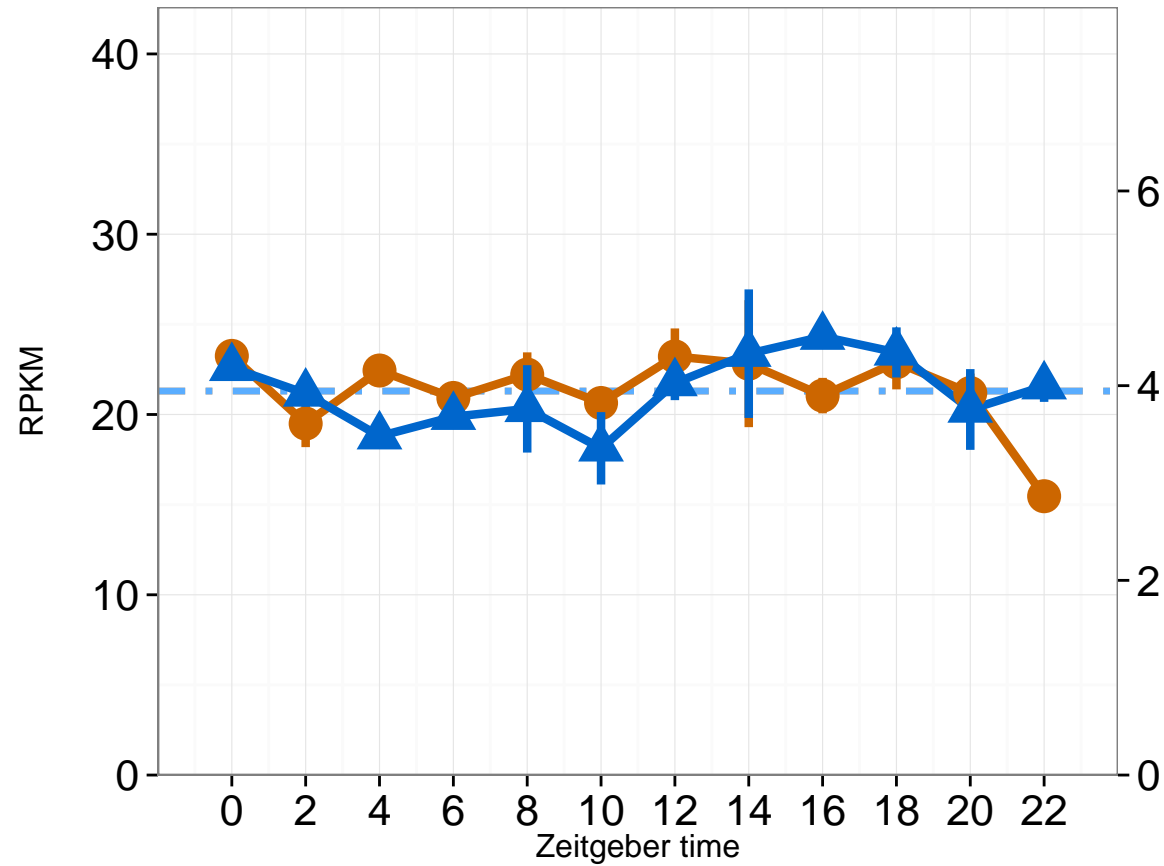

## 4930453N24Rik

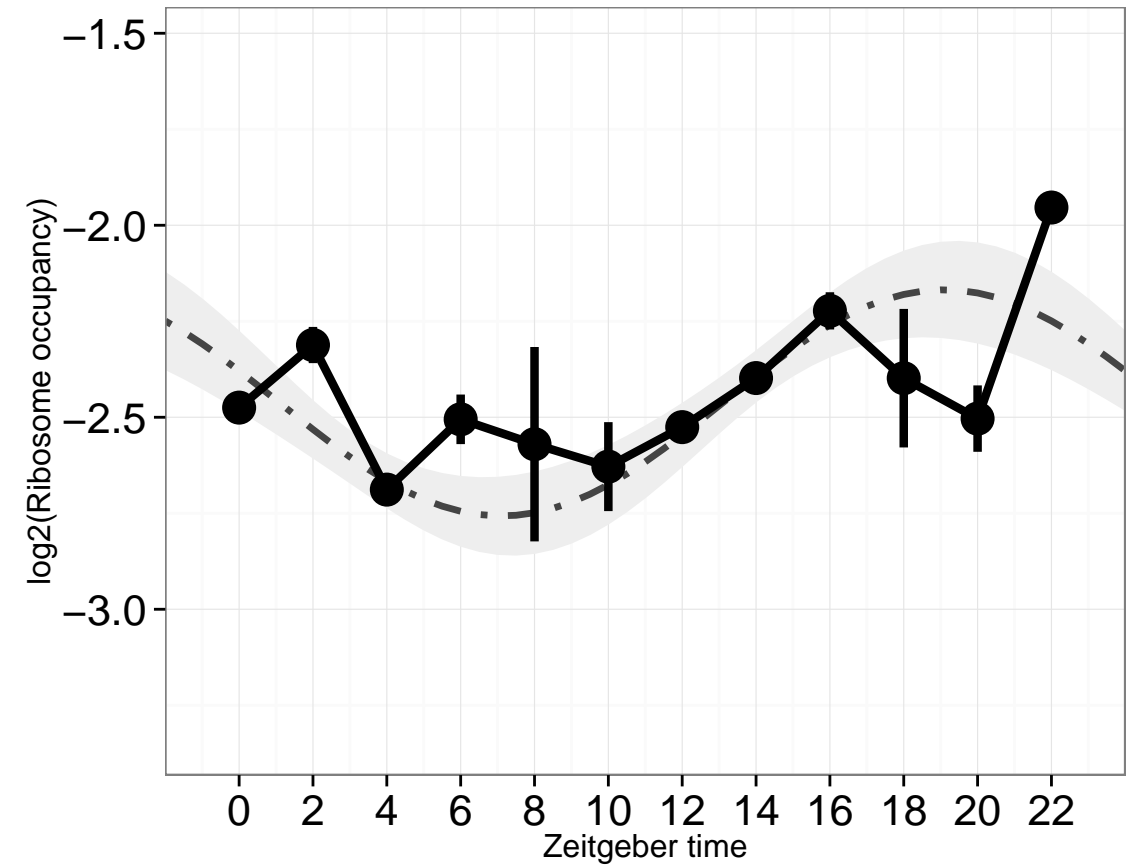

Supplement: SuppDataset_1.zip [file 4930453N24Rik_set_A.pdf › Supplemental Dataset 1/A-mRNA_nonrhyth_translation_nonrhyth/4930453N24Rik_set_A.pdf]

## 4930503L19Rik

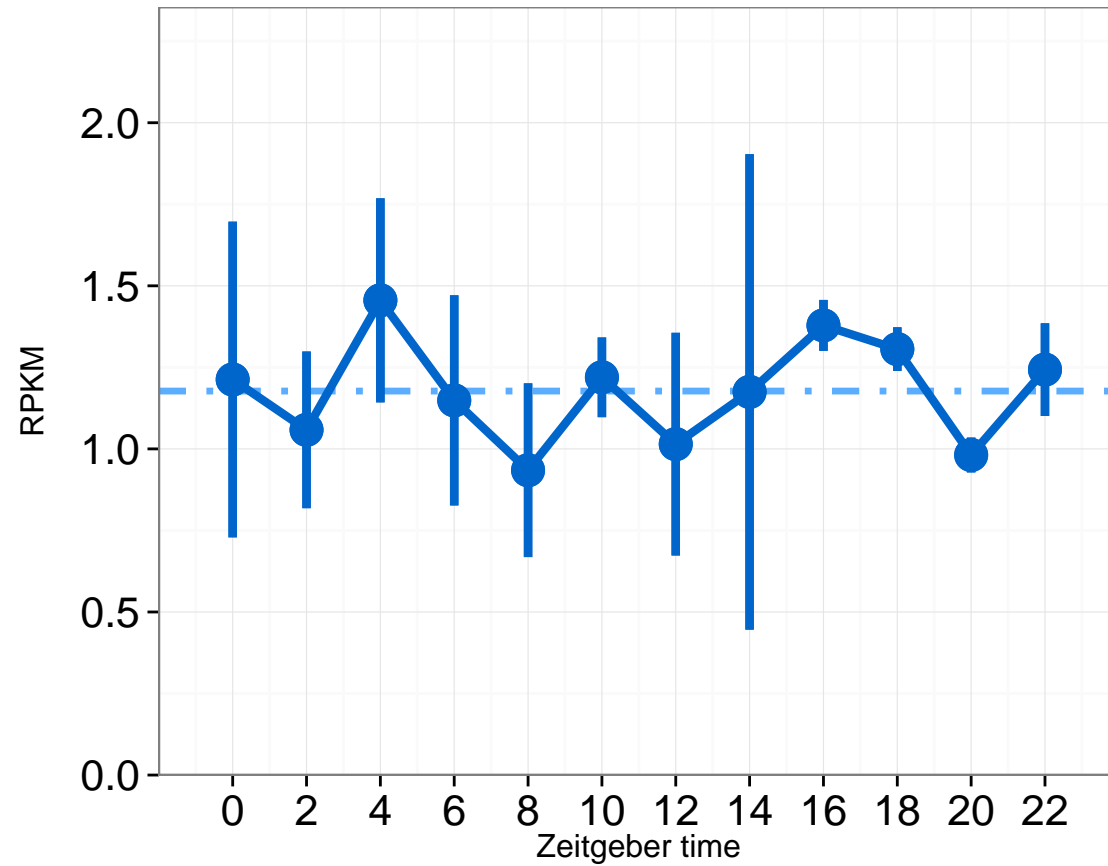

## 4930503L19Rik log<sub>2</sub>(Ribosome occupancy)

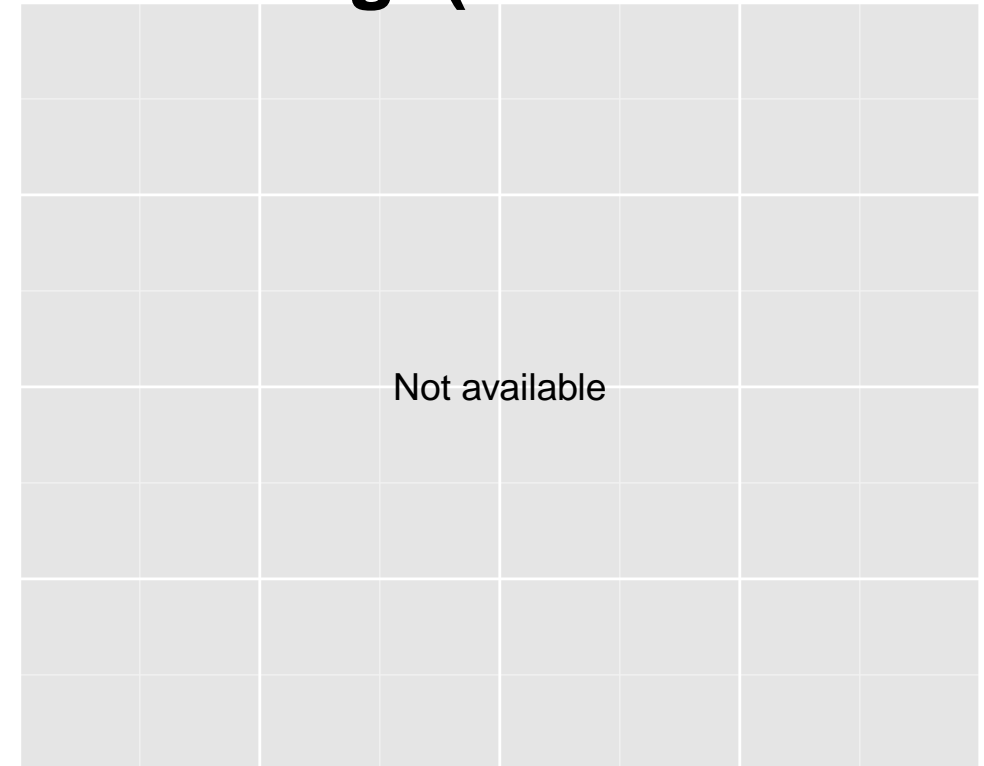

Supplement: SuppDataset_1.zip [file 4930503L19Rik_set_A.pdf › Supplemental Dataset 1/A-mRNA_nonrhyth_translation_nonrhyth/4930503L19Rik_set_A.pdf]

## 4930506M07Rik

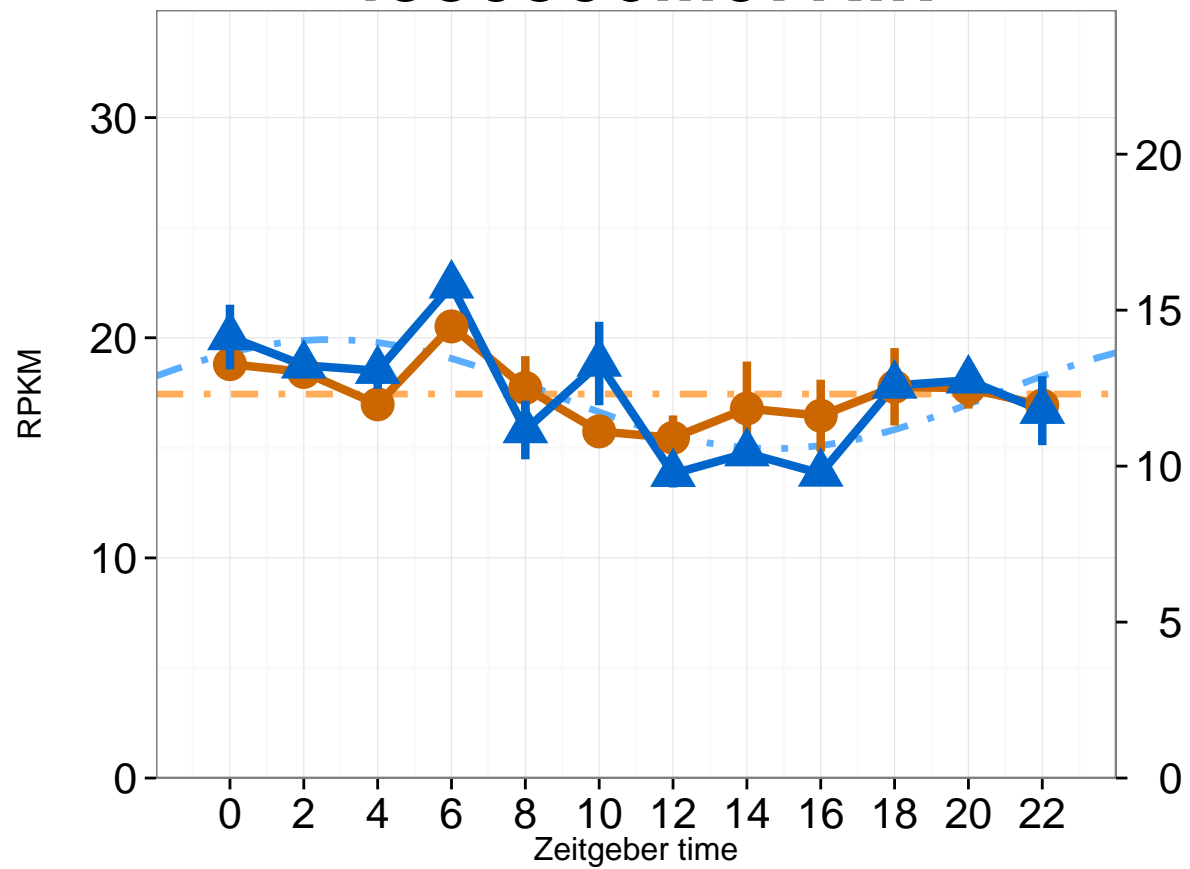

## 4930506M07Rik

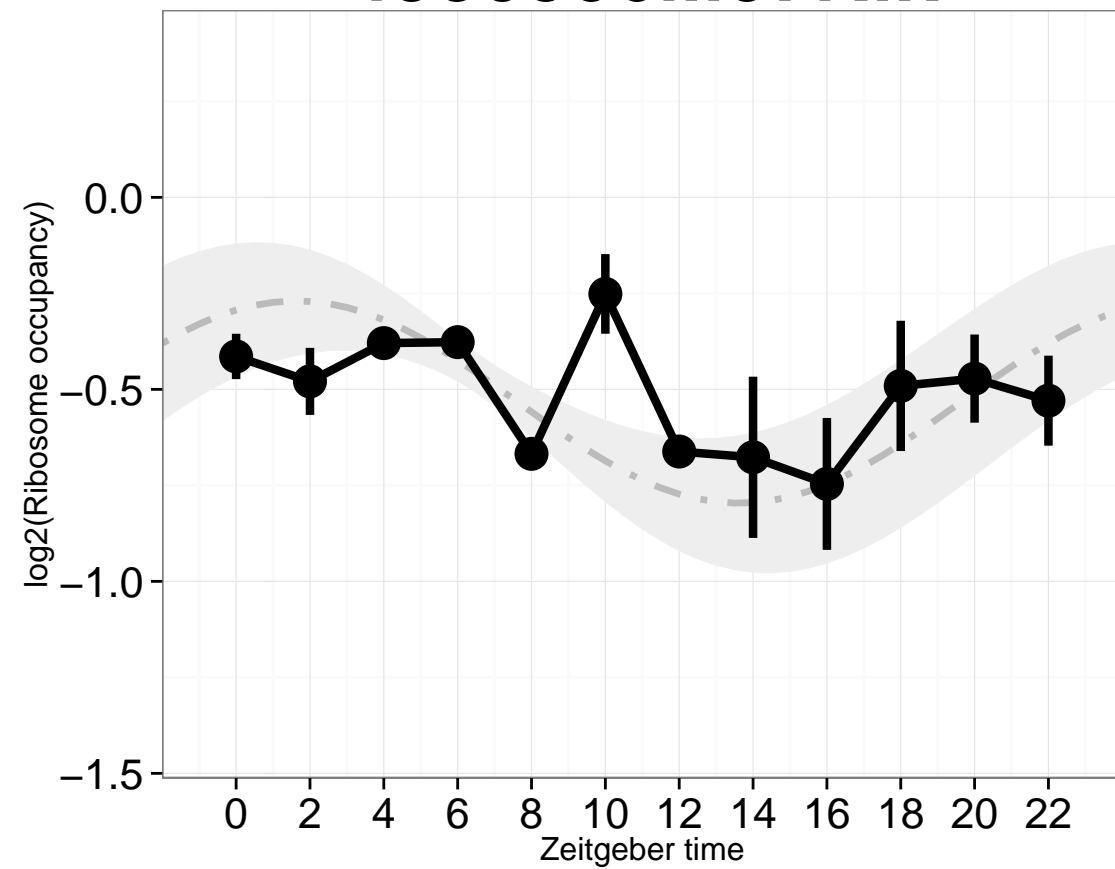

Supplement: SuppDataset_1.zip [file 4930506M07Rik_set_A.pdf › Supplemental Dataset 1/A-mRNA_nonrhyth_translation_nonrhyth/4930506M07Rik_set_A.pdf]

# 4930523C07Rik

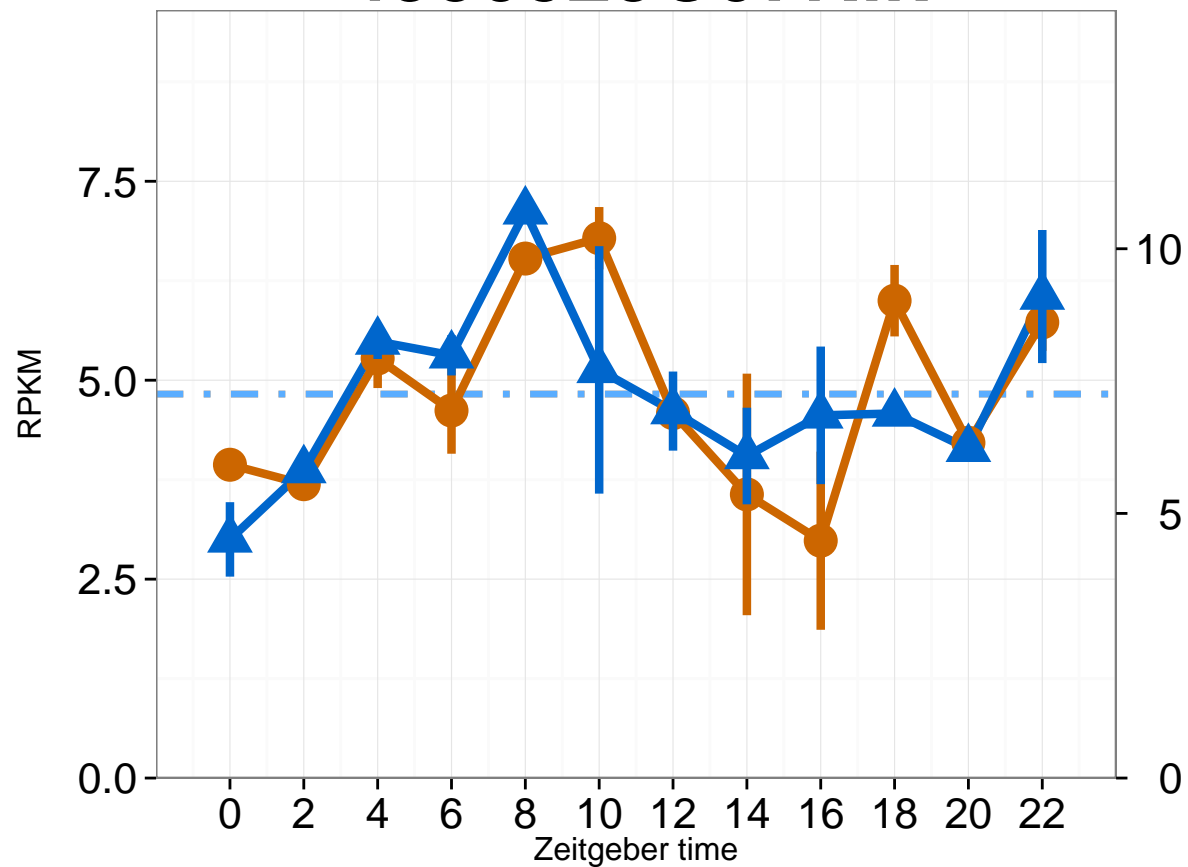

# 4930523C07Rik

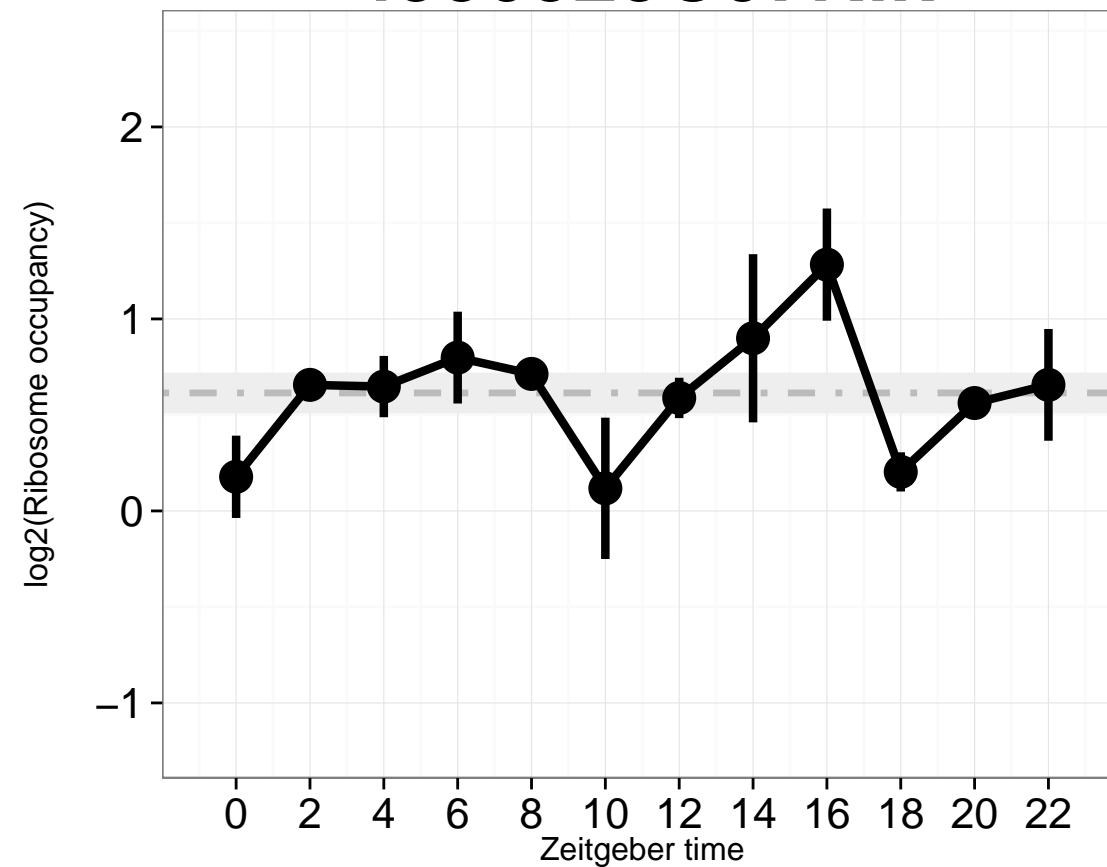

Supplement: SuppDataset_1.zip [file 4930523C07Rik_set_A.pdf › Supplemental Dataset 1/A-mRNA_nonrhyth_translation_nonrhyth/4930523C07Rik_set_A.pdf]

## 4931406C07Rik

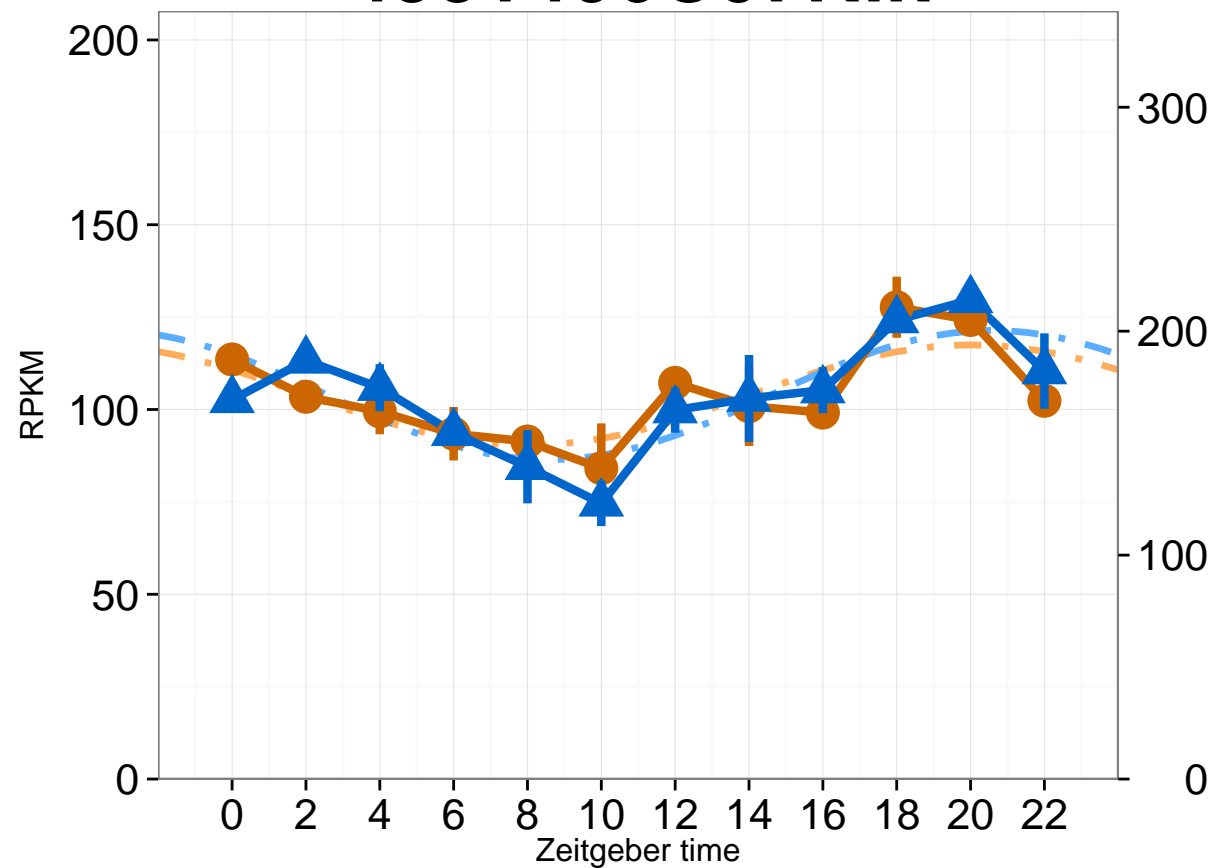

## 4931406C07Rik

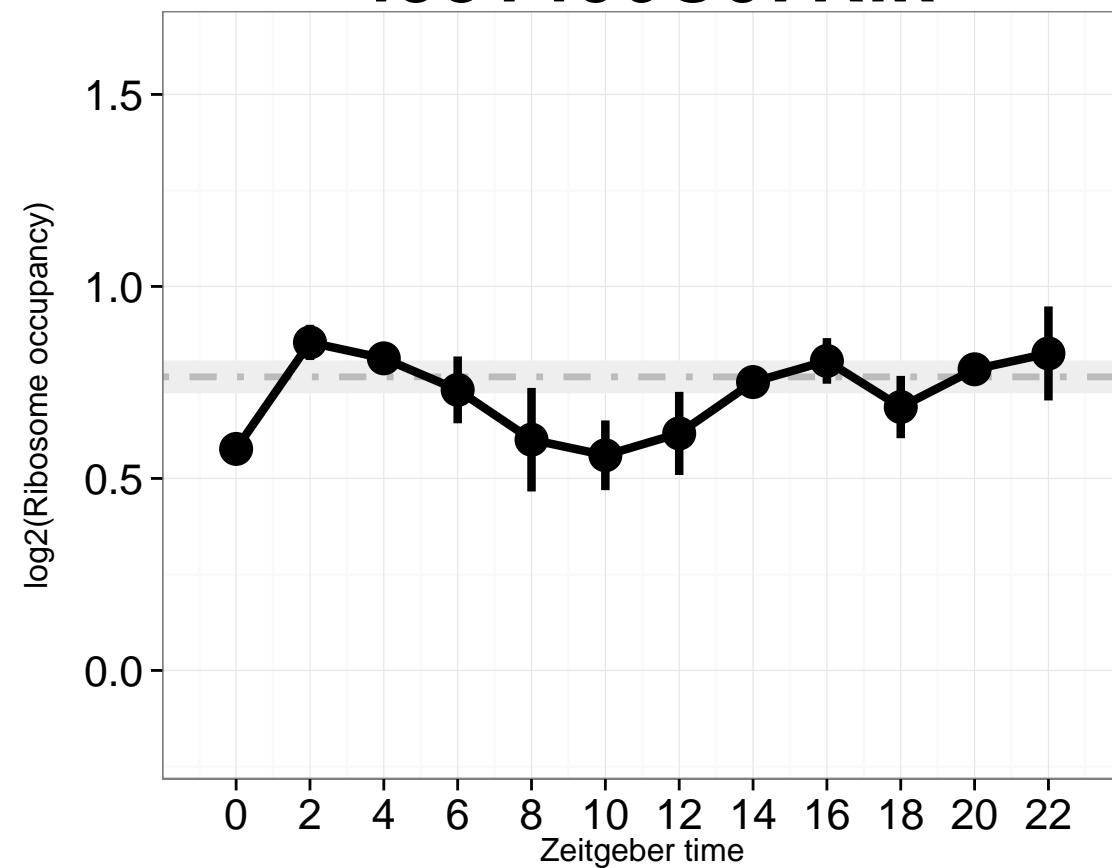

Supplement: SuppDataset_1.zip [file 4931406C07Rik_set_A.pdf › Supplemental Dataset 1/A-mRNA_nonrhyth_translation_nonrhyth/4931406C07Rik_set_A.pdf]

# 4931406P16Rik

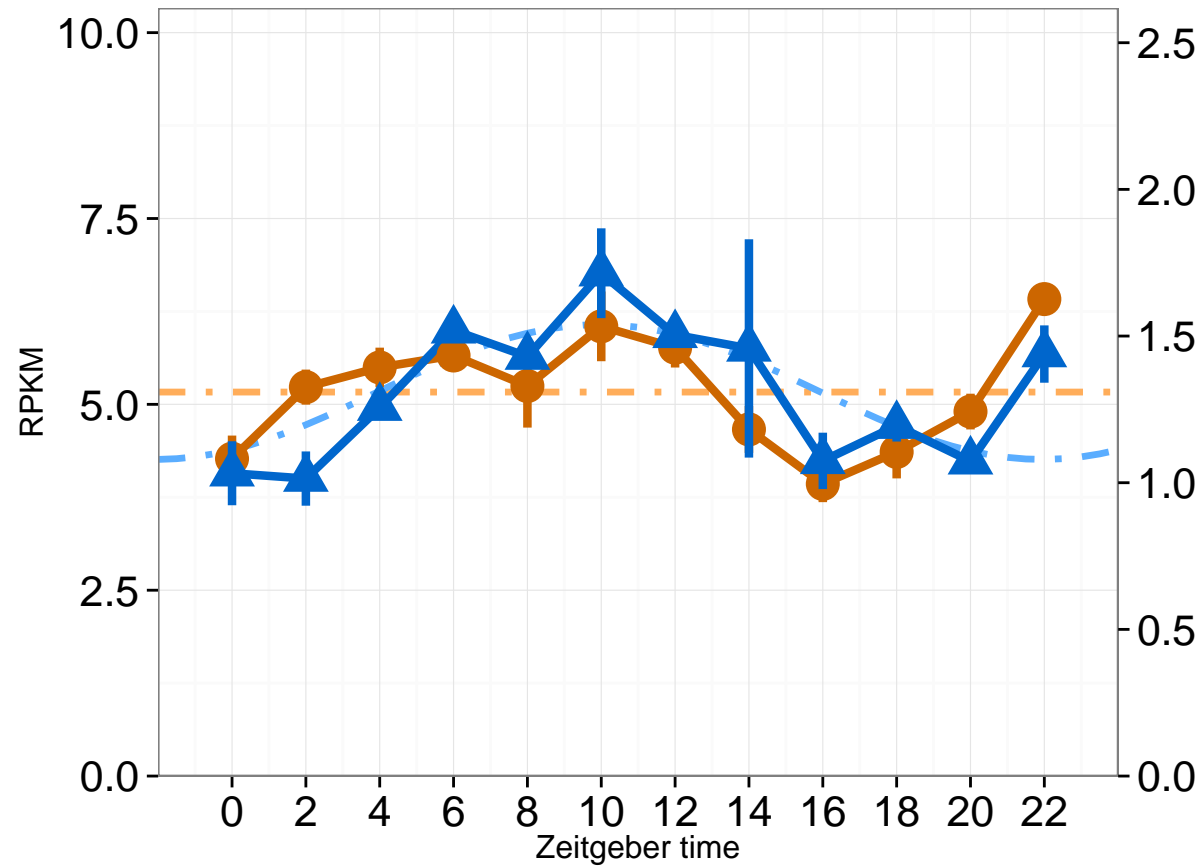

# 4931406P16Rik

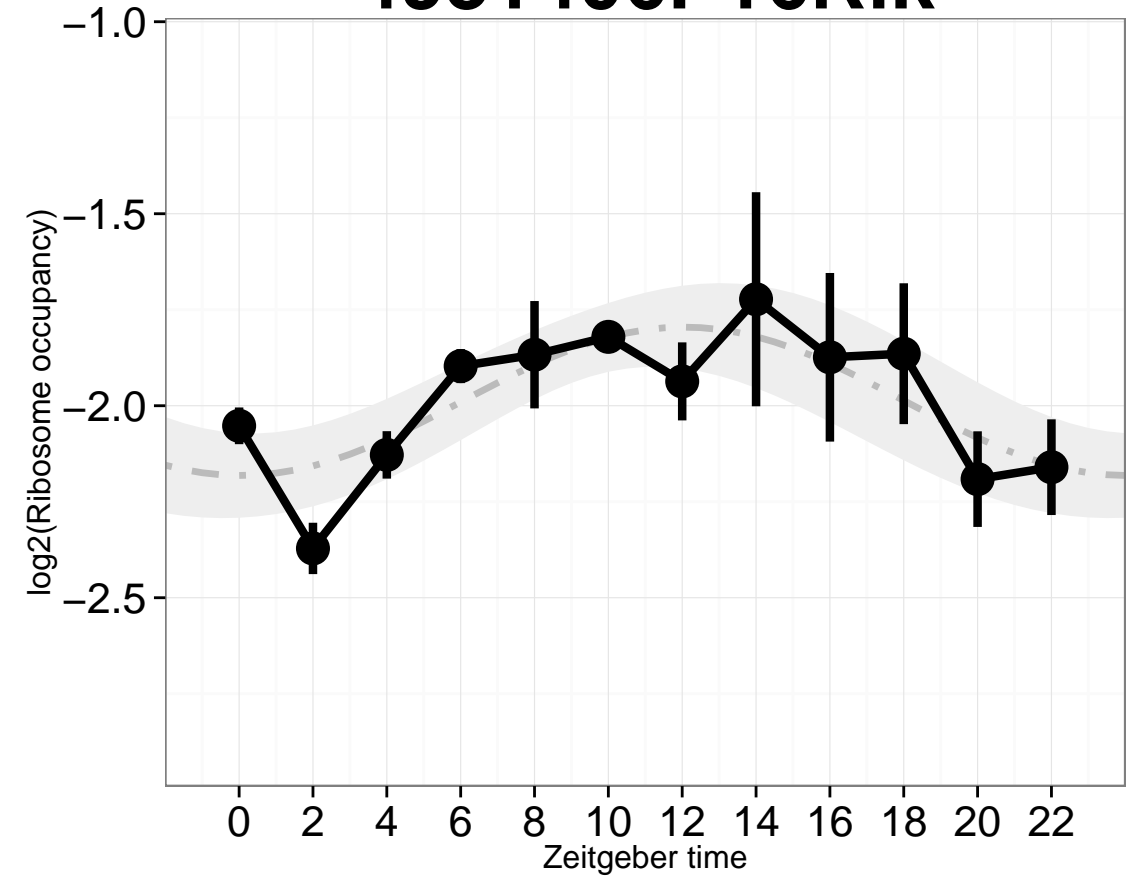

Supplement: SuppDataset_1.zip [file 4931406P16Rik_set_A.pdf › Supplemental Dataset 1/A-mRNA_nonrhyth_translation_nonrhyth/4931406P16Rik_set_A.pdf]

## 4933411K16Rik

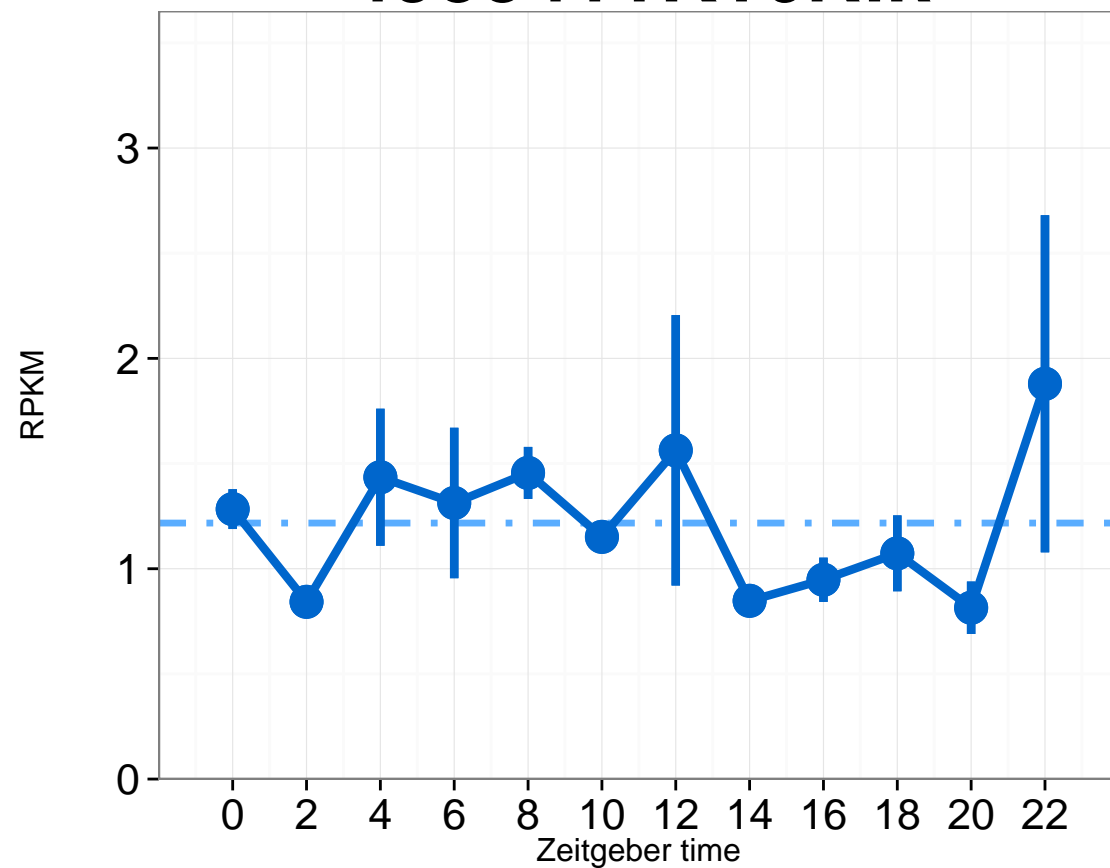

## 4933411K16Rik log2(Ribosome occup

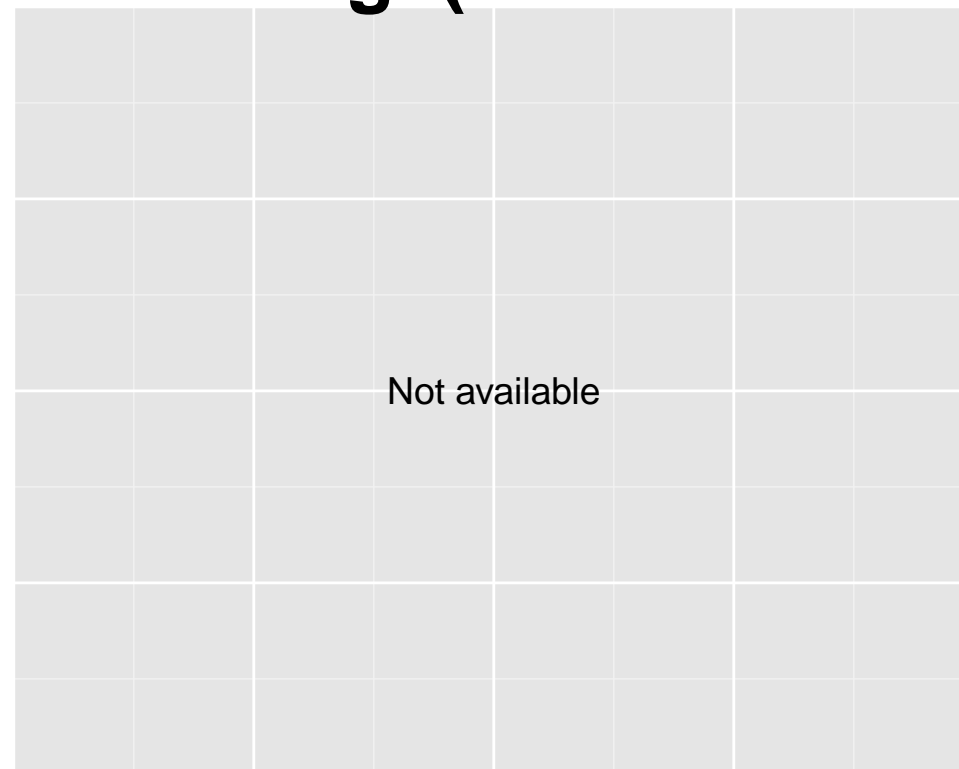

Supplement: SuppDataset_1.zip [file 4933411K16Rik_set_A.pdf › Supplemental Dataset 1/A-mRNA_nonrhyth_translation_nonrhyth/4933411K16Rik_set_A.pdf]

## 4933411K20Rik

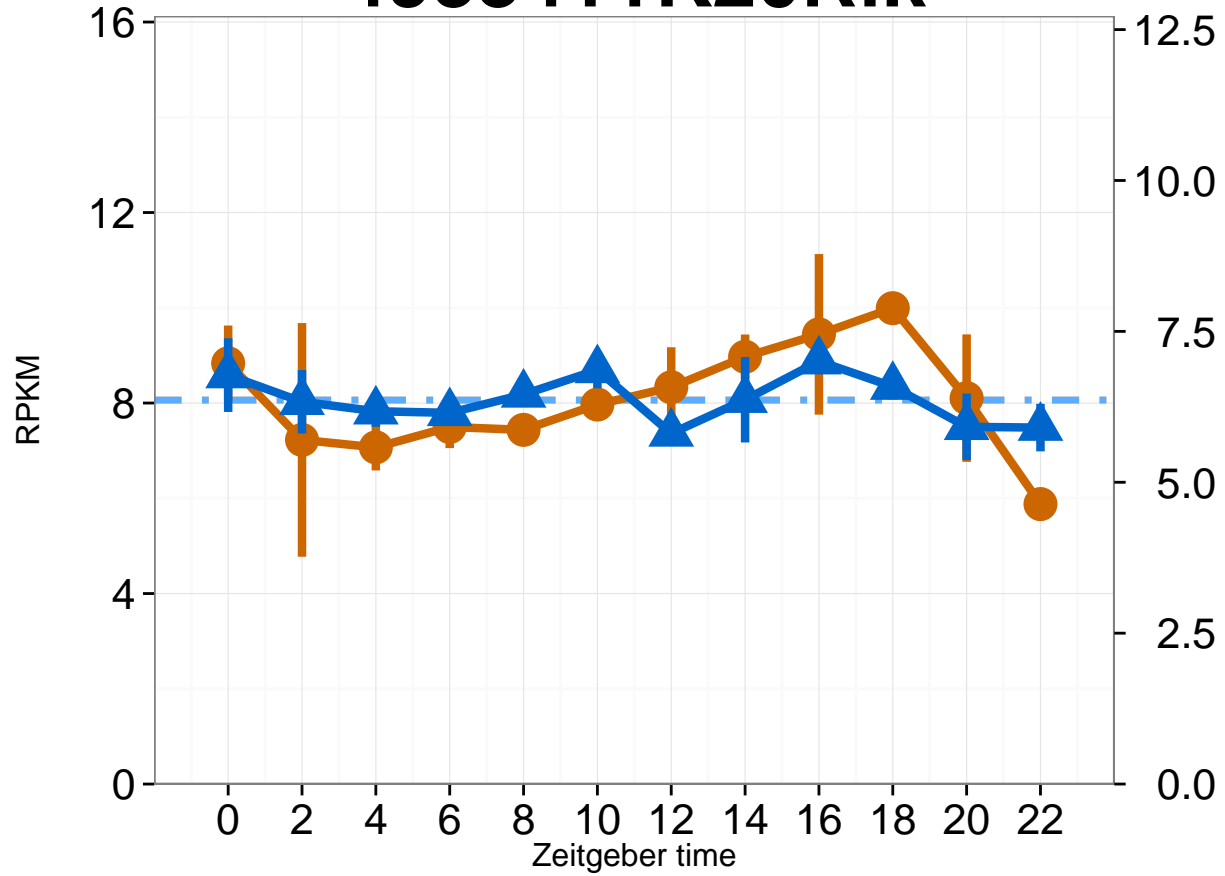

## 4933411K20Rik

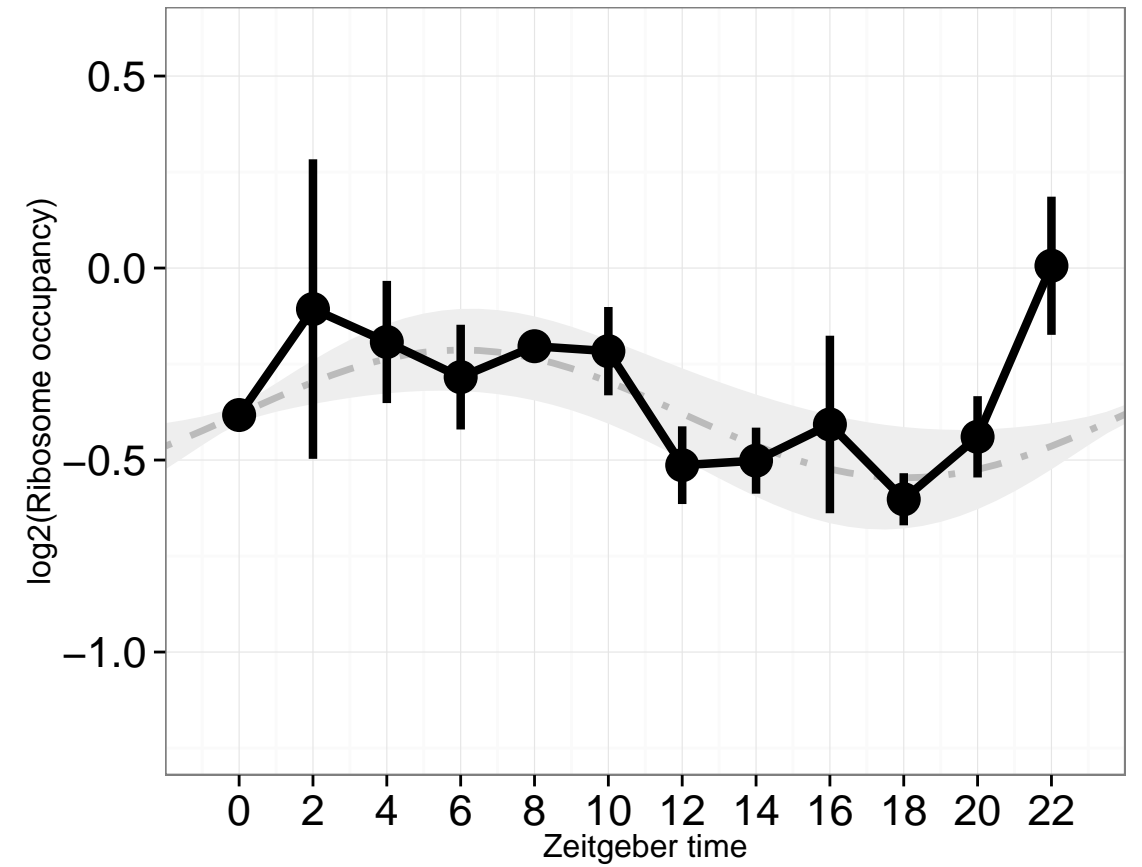

Supplement: SuppDataset_1.zip [file 4933411K20Rik_set_A.pdf › Supplemental Dataset 1/A-mRNA_nonrhyth_translation_nonrhyth/4933411K20Rik_set_A.pdf]

# 4933434E20Rik

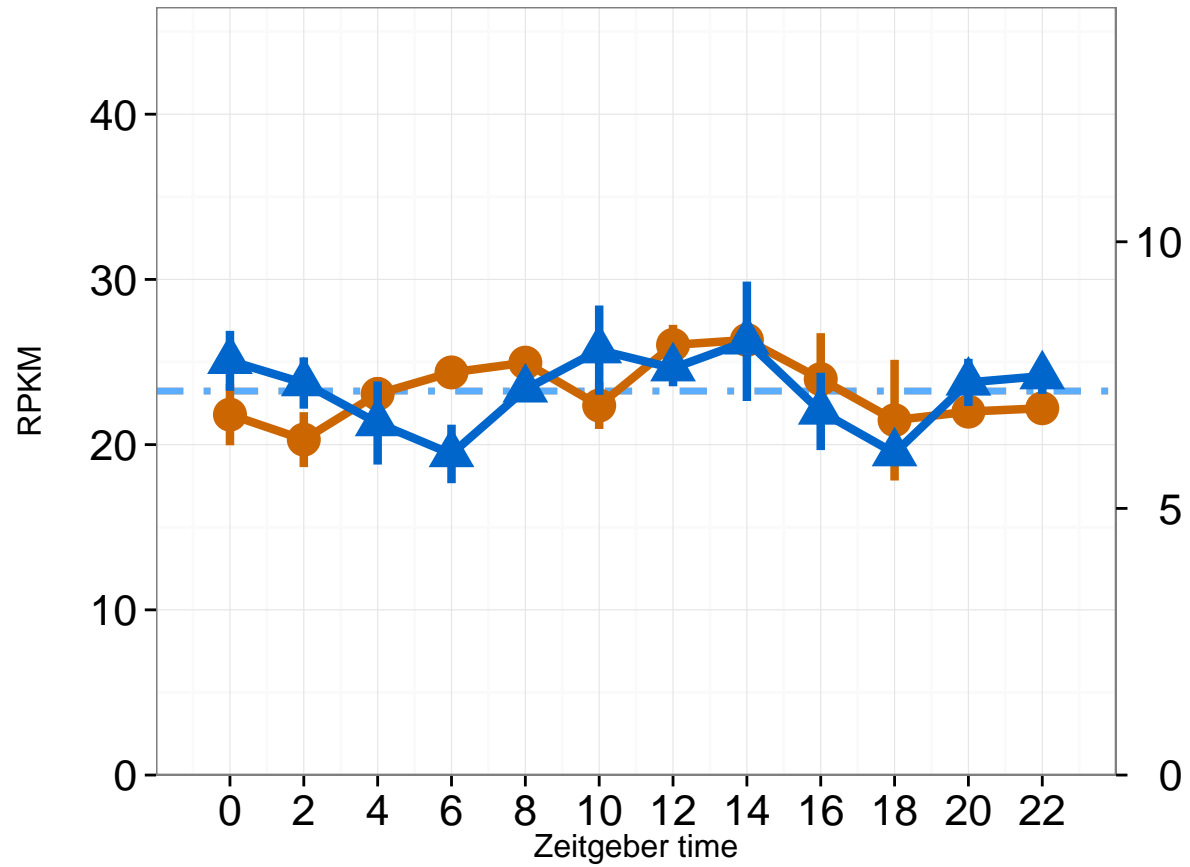

# 4933434E20Rik

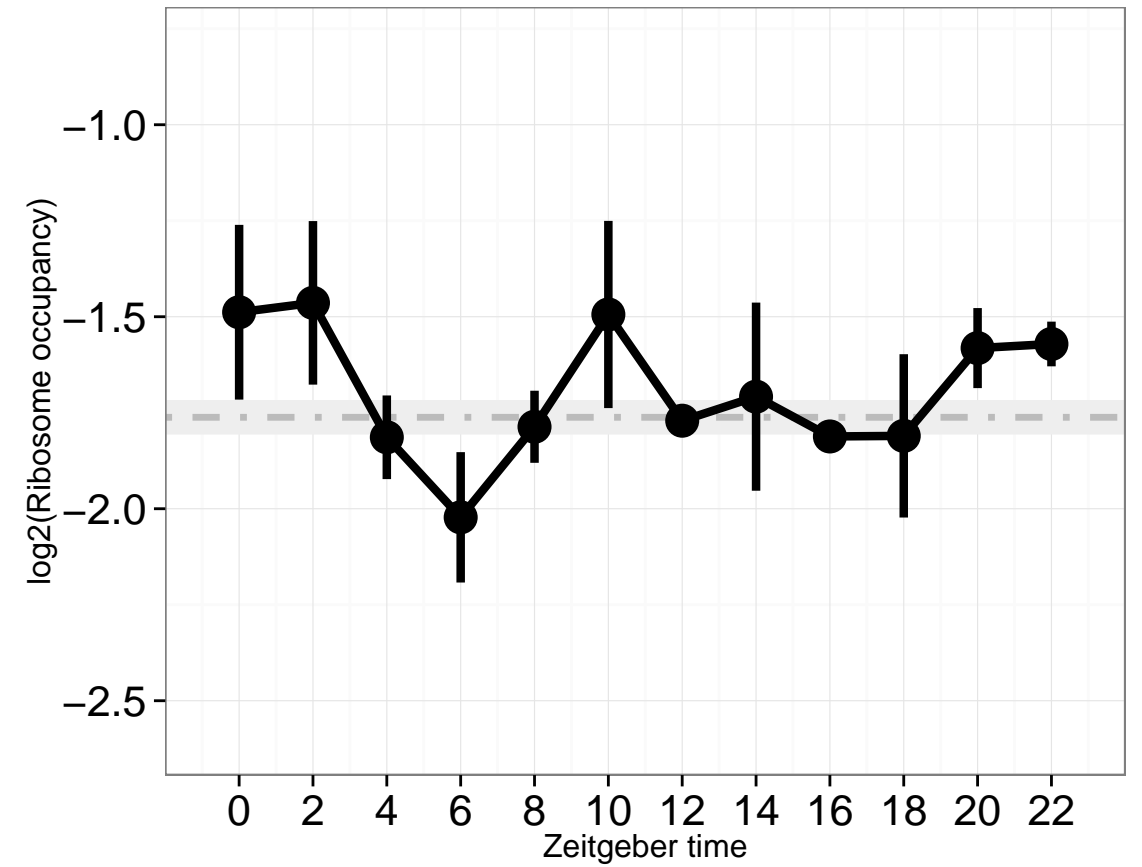

Supplement: SuppDataset_1.zip [file 4933434E20Rik_set_A.pdf › Supplemental Dataset 1/A-mRNA_nonrhyth_translation_nonrhyth/4933434E20Rik_set_A.pdf]

**5031414D18Rik TR**

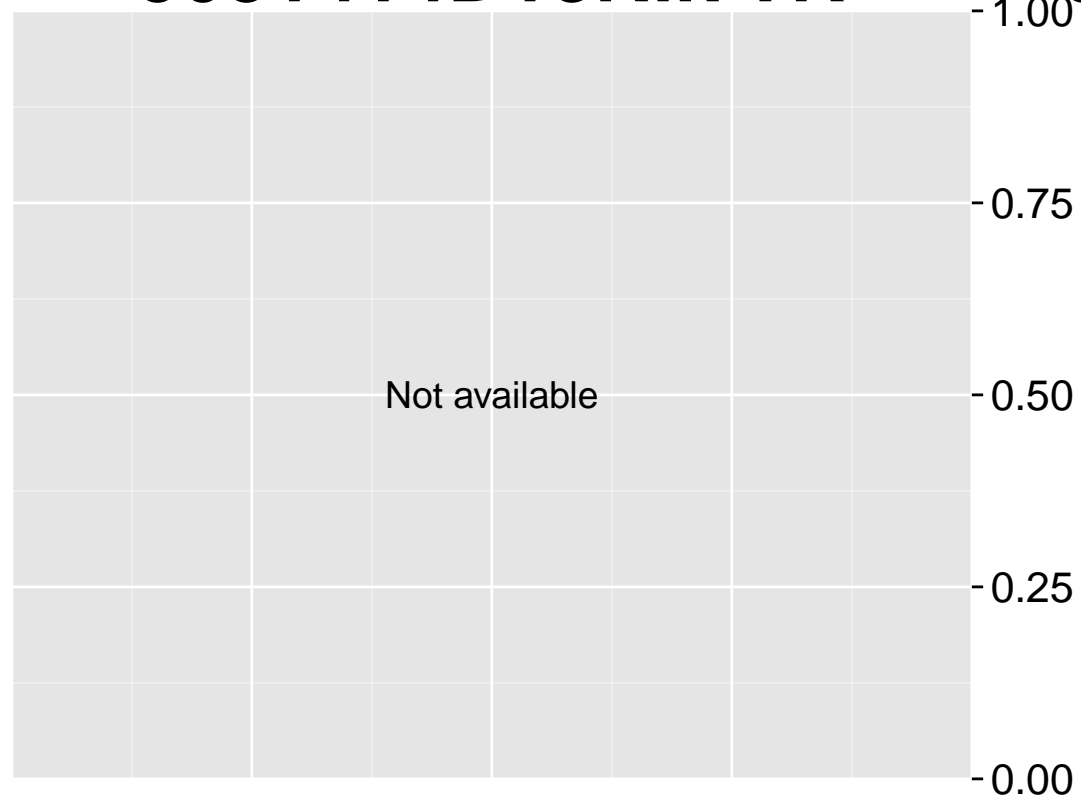

**5031414D18Rik log2(Ribosome occup**

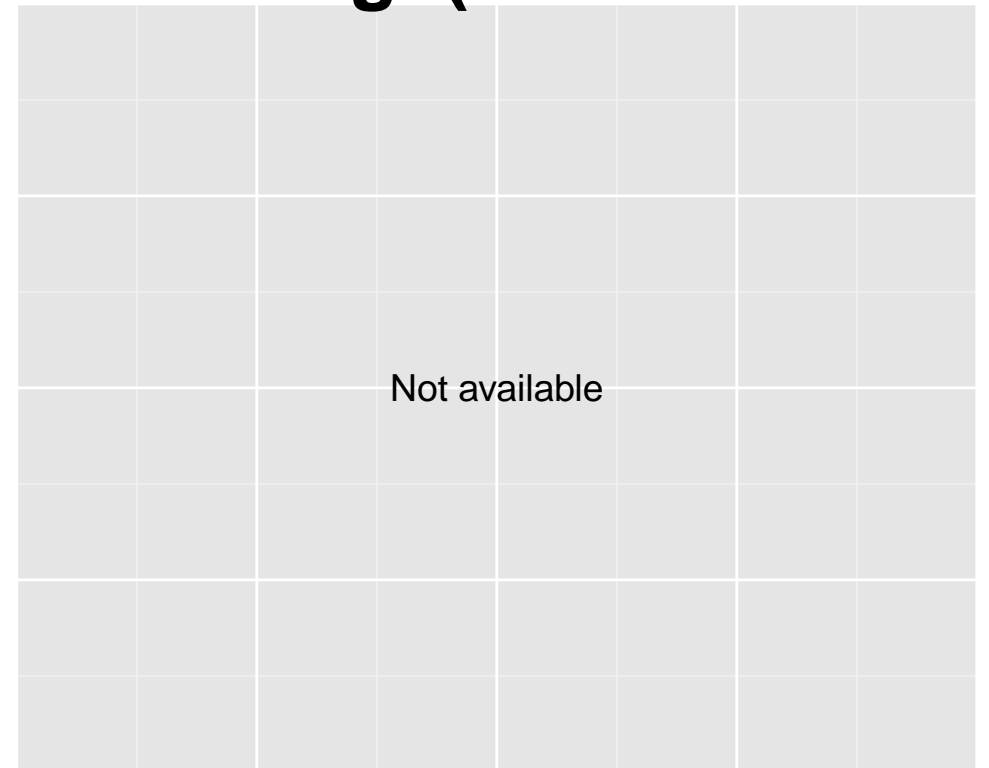

Supplement: SuppDataset_1.zip [file 5031414D18Rik_set_A.pdf › Supplemental Dataset 1/A-mRNA_nonrhyth_translation_nonrhyth/5031414D18Rik_set_A.pdf]

# 5031425E22Rik

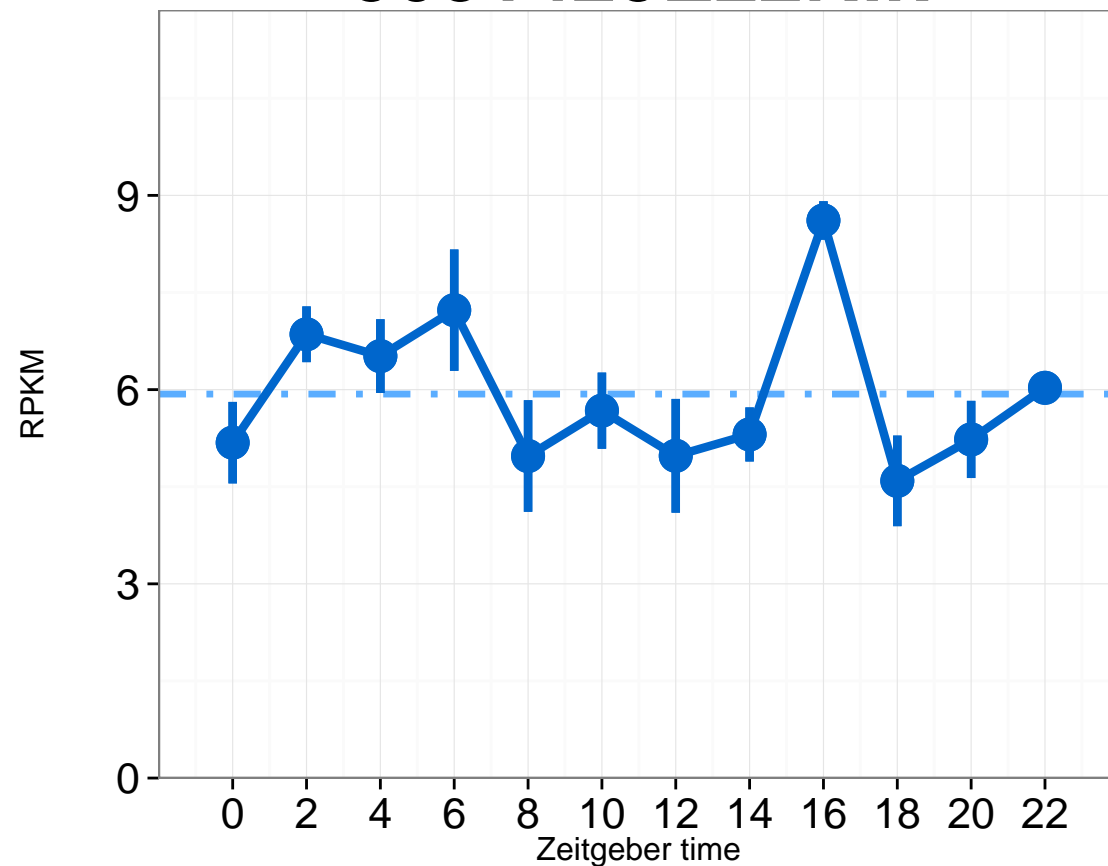

# 5031425E22Rik log2(Ribosome occup

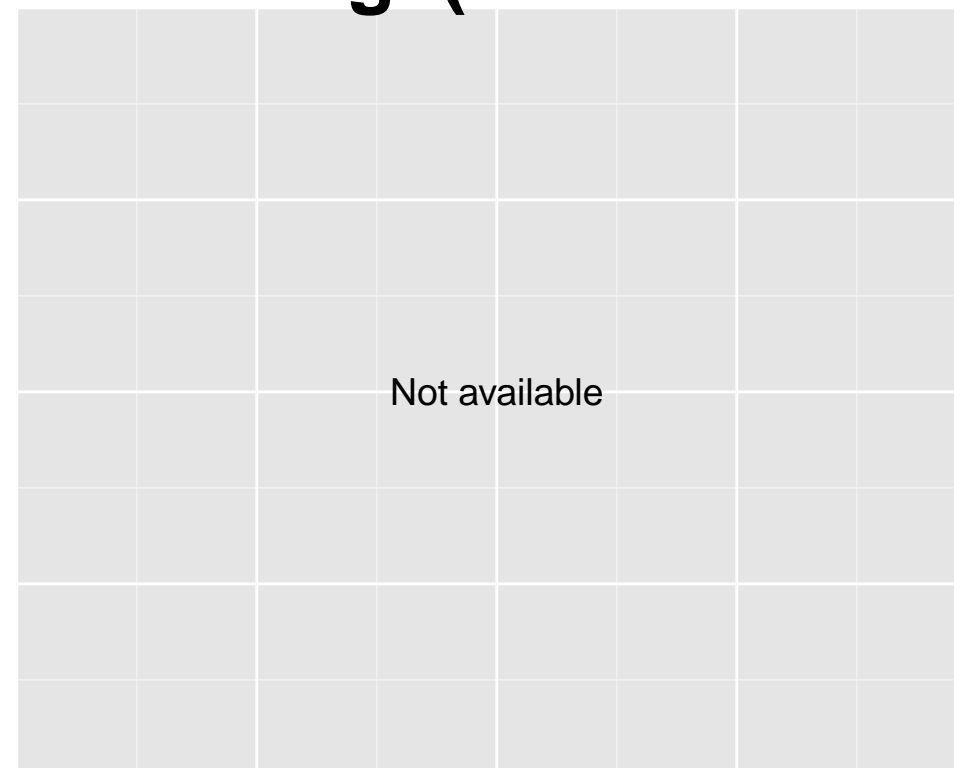

Supplement: SuppDataset_1.zip [file 5031425E22Rik_set_A.pdf › Supplemental Dataset 1/A-mRNA_nonrhyth_translation_nonrhyth/5031425E22Rik_set_A.pdf]

## 5033411D12Rik

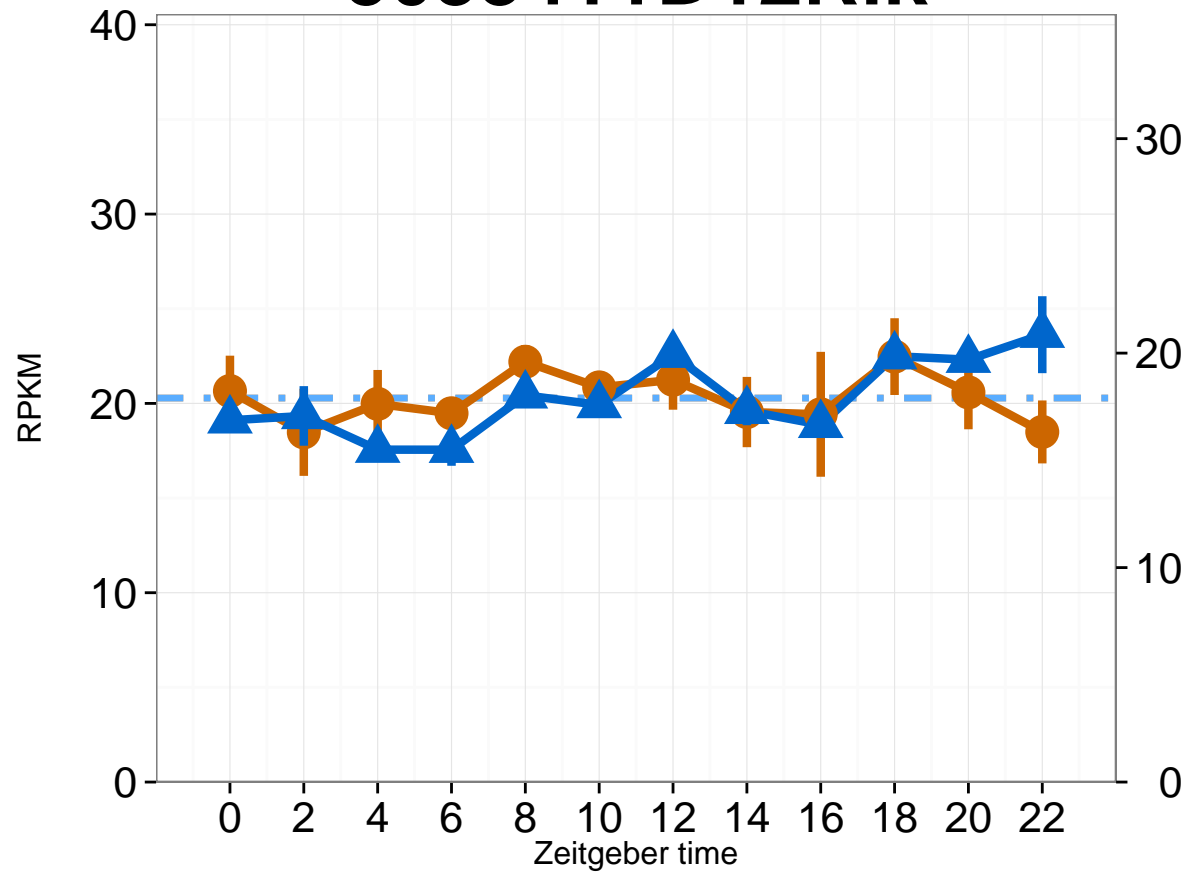

## 5033411D12Rik

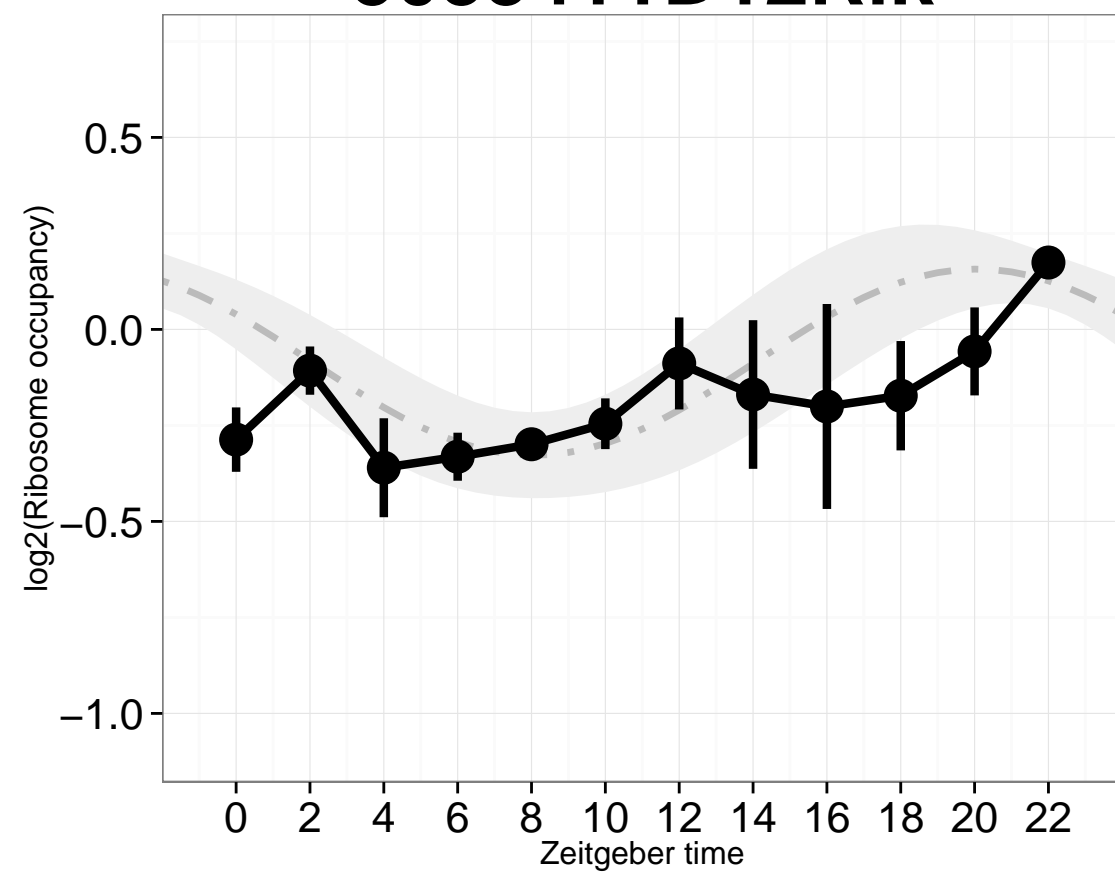

Supplement: SuppDataset_1.zip [file 5033411D12Rik_set_A.pdf › Supplemental Dataset 1/A-mRNA_nonrhyth_translation_nonrhyth/5033411D12Rik_set_A.pdf]

## 5730455P16Rik

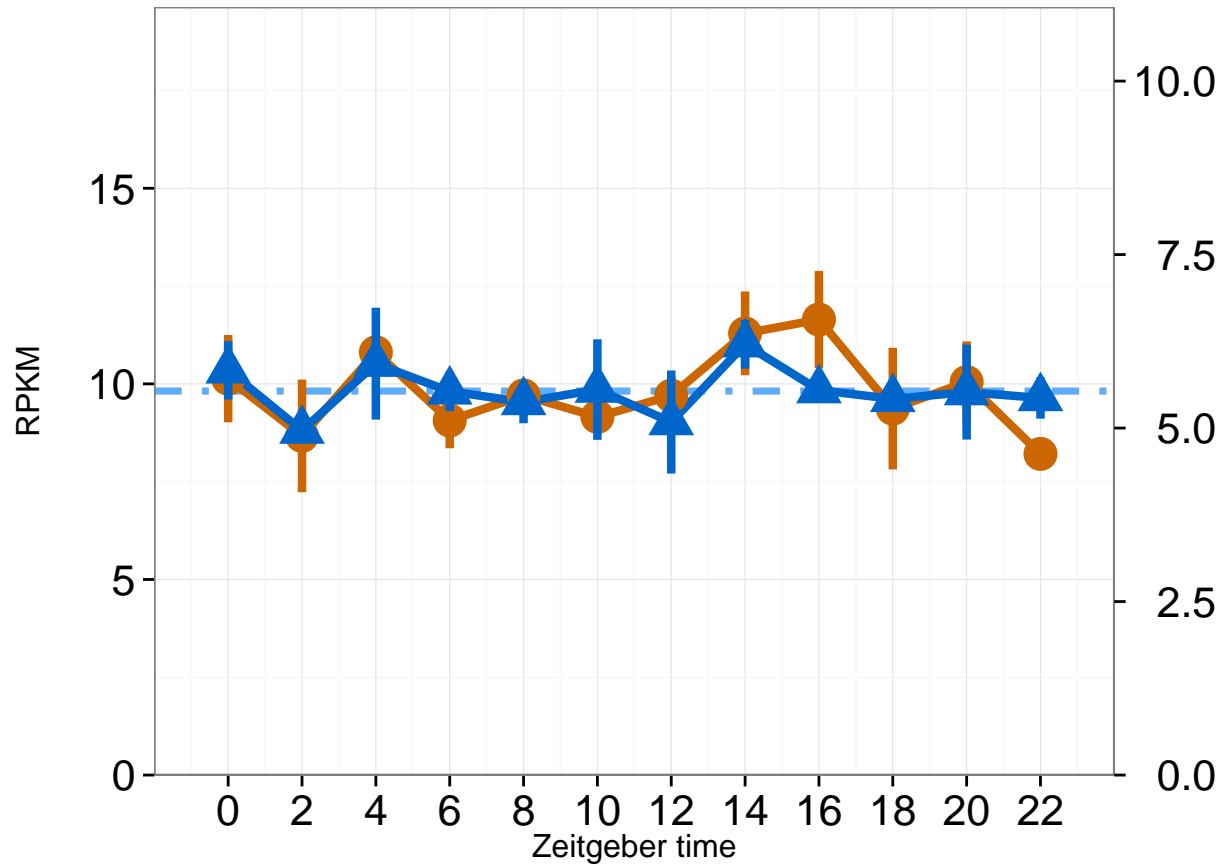

## 5730455P16Rik

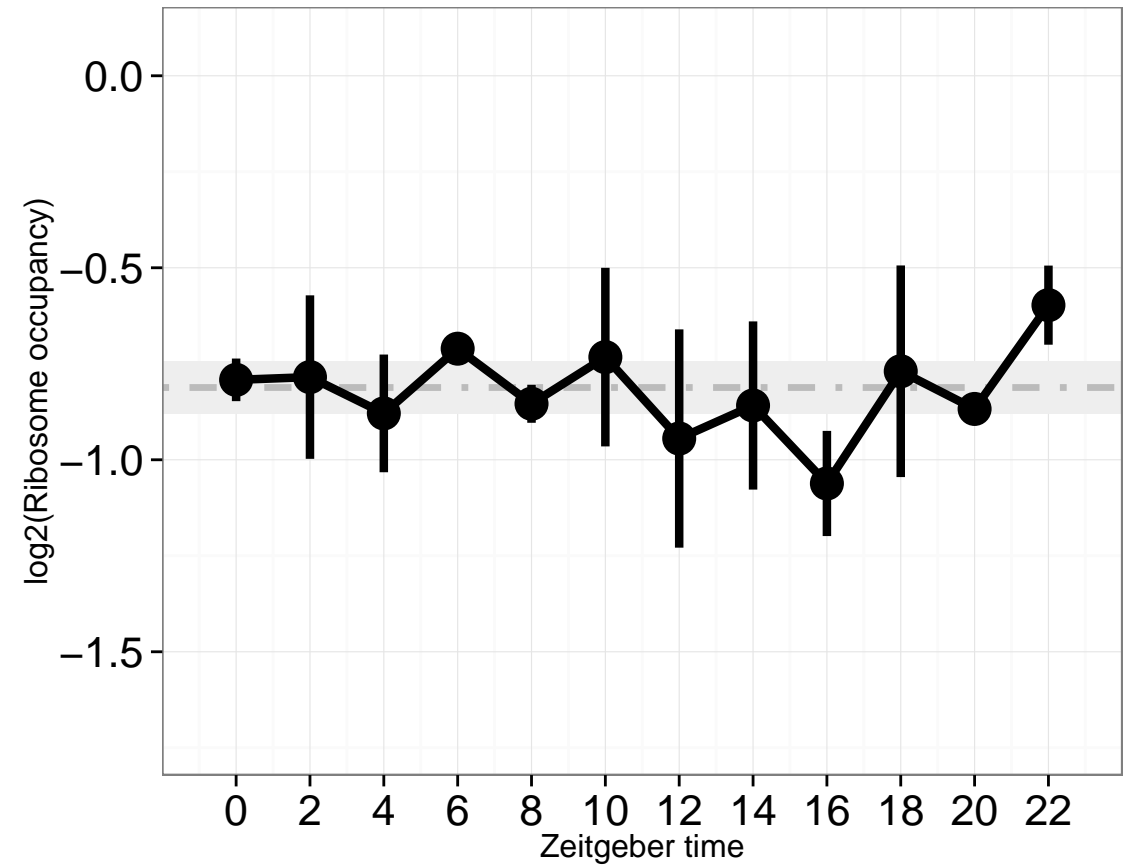

Supplement: SuppDataset_1.zip [file 5730455P16Rik_set_A.pdf › Supplemental Dataset 1/A-mRNA_nonrhyth_translation_nonrhyth/5730455P16Rik_set_A.pdf]

# 5730507C01Rik

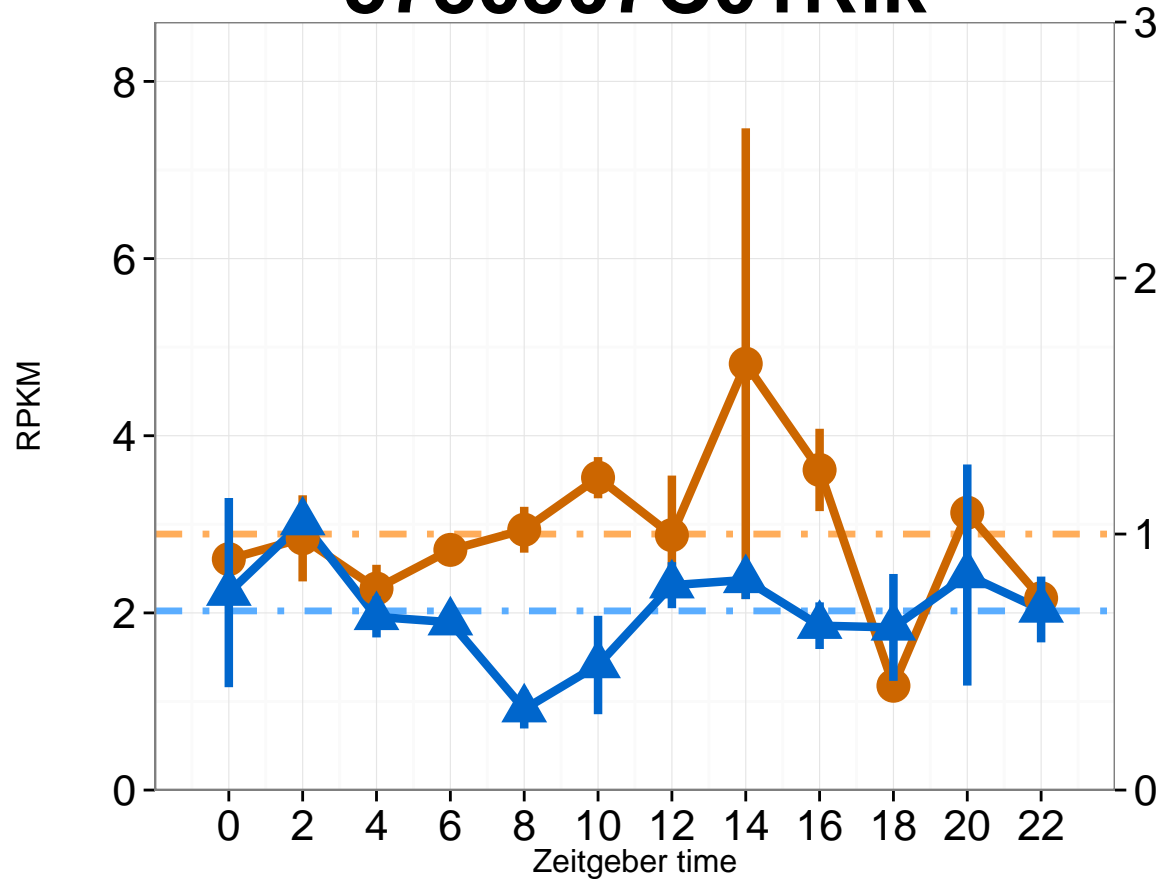

# 5730507C01Rik

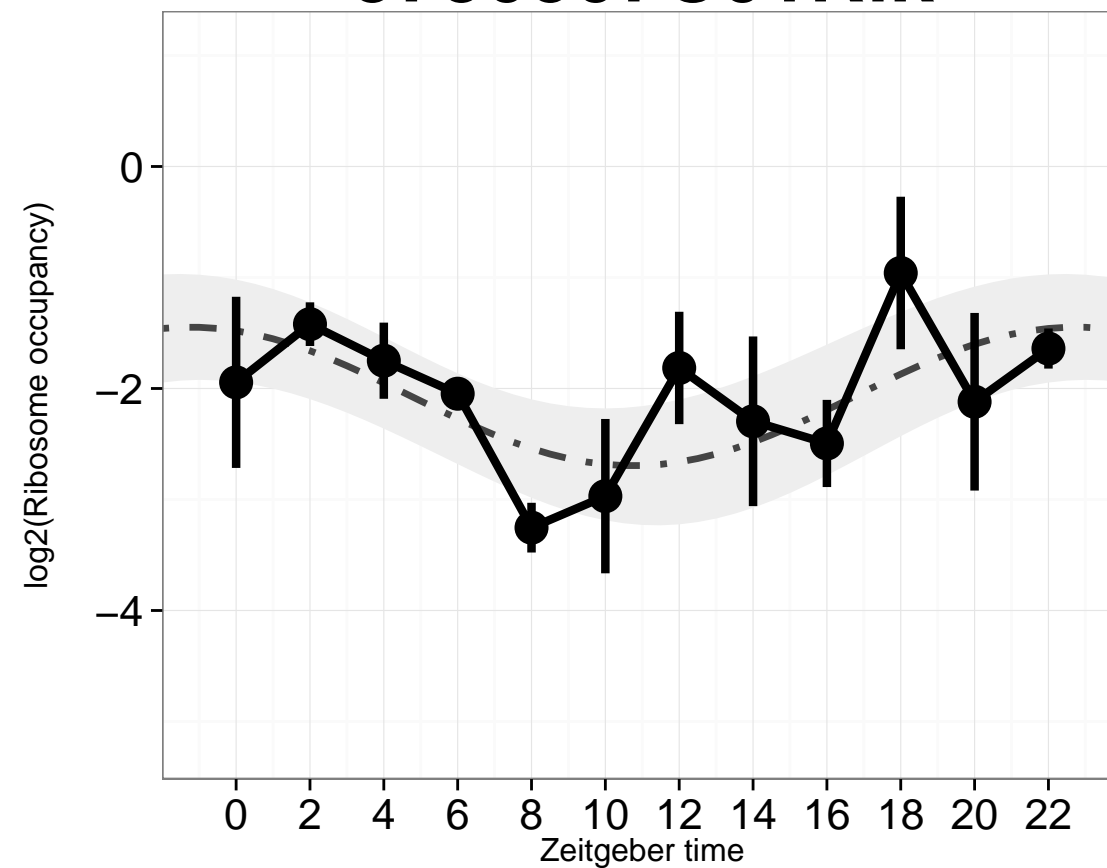

Supplement: SuppDataset_1.zip [file 5730507C01Rik_set_A.pdf › Supplemental Dataset 1/A-mRNA_nonrhyth_translation_nonrhyth/5730507C01Rik_set_A.pdf]

# 5730508B09Rik

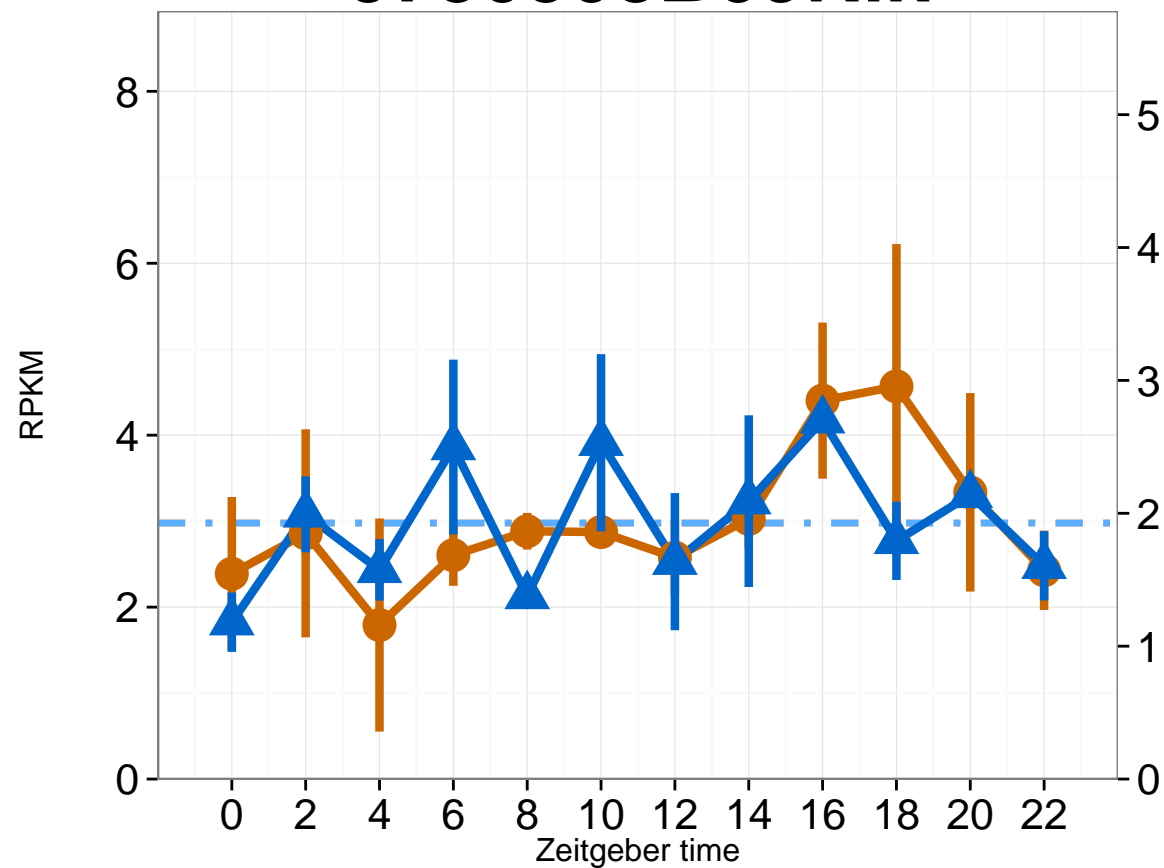

# 5730508B09Rik

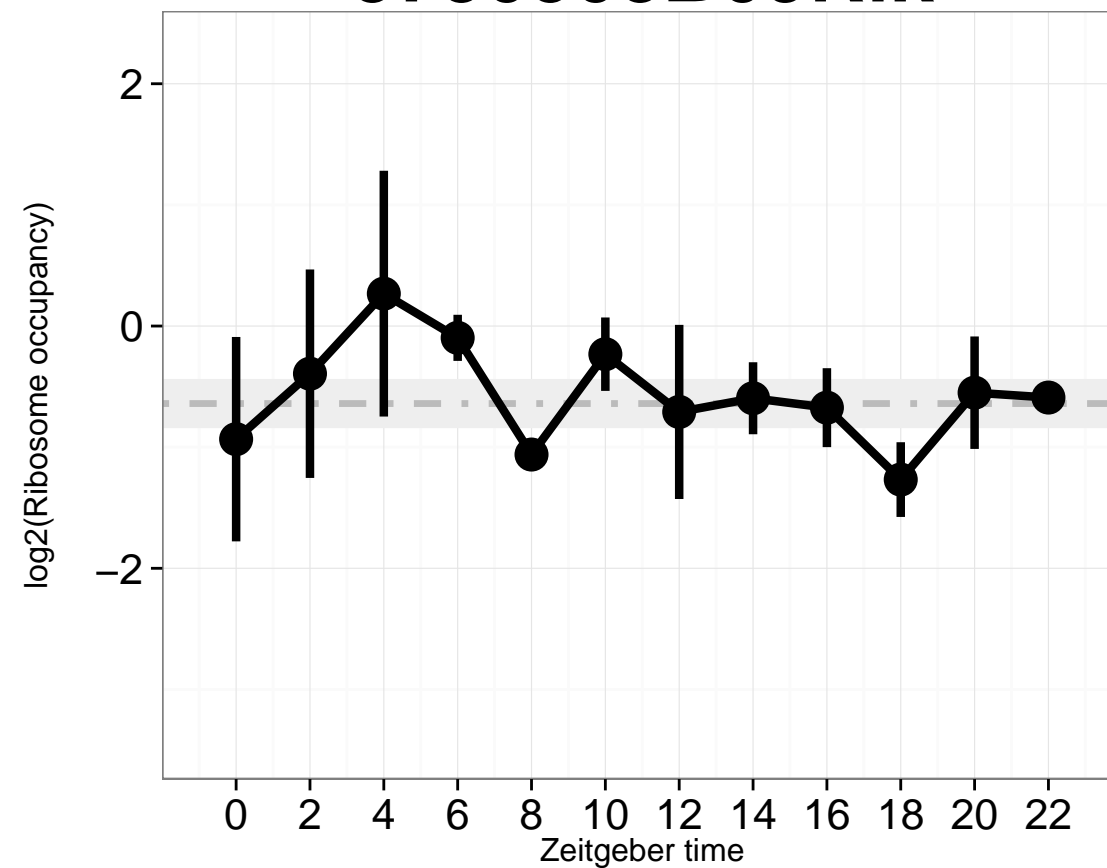

Supplement: SuppDataset_1.zip [file 5730508B09Rik_set_A.pdf › Supplemental Dataset 1/A-mRNA_nonrhyth_translation_nonrhyth/5730508B09Rik_set_A.pdf]

## 5830415F09Rik

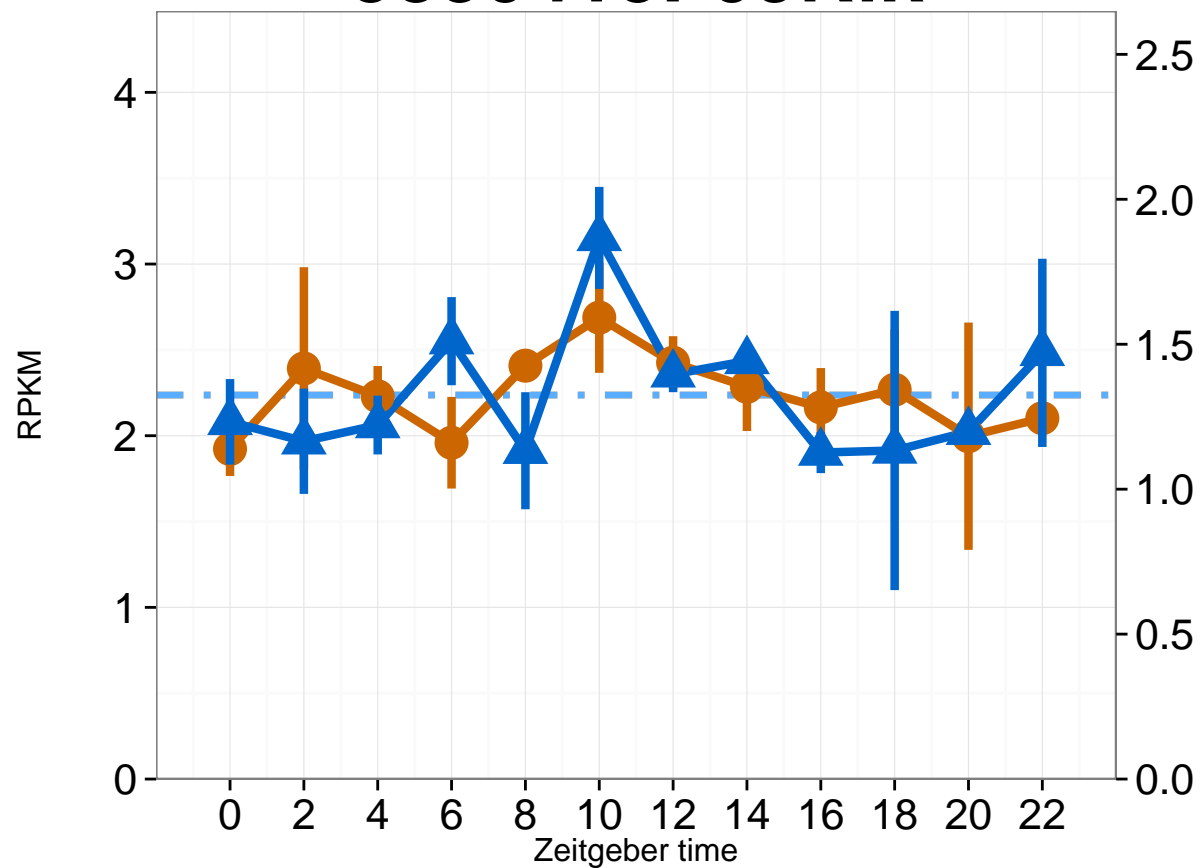

## 5830415F09Rik

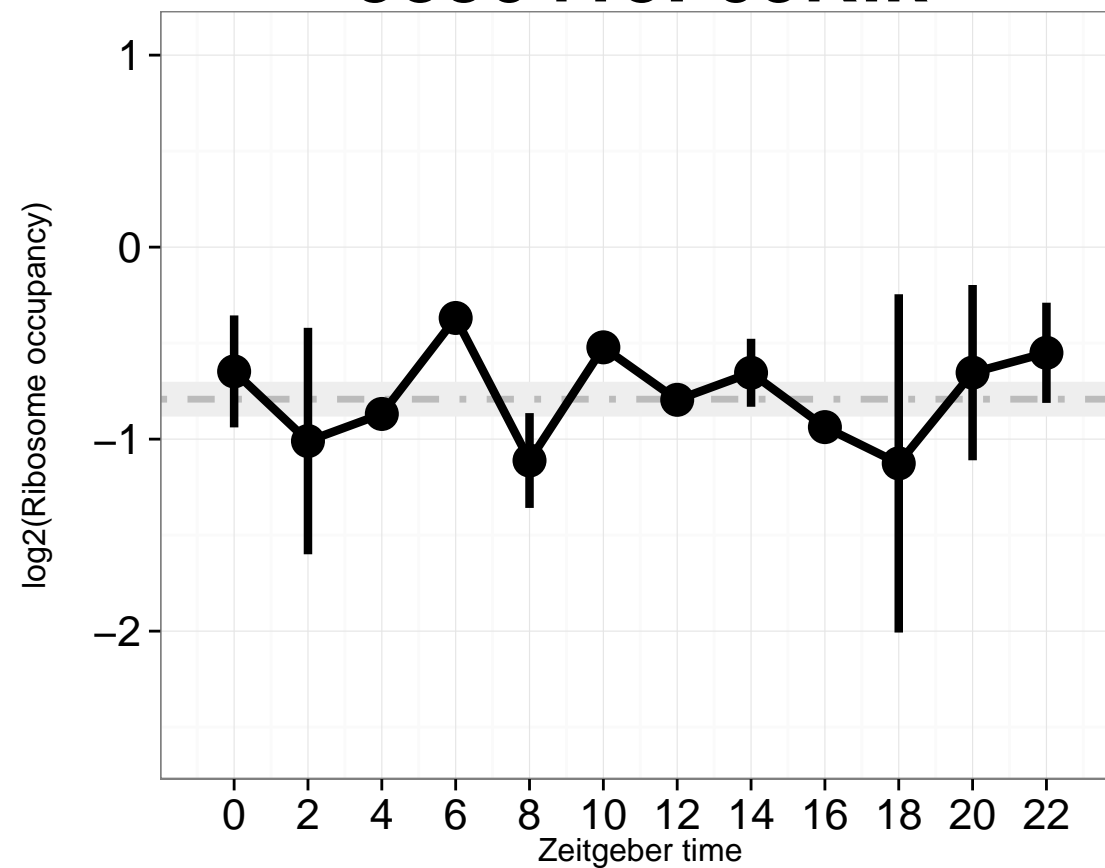

Supplement: SuppDataset_1.zip [file 5830415F09Rik_set_A.pdf › Supplemental Dataset 1/A-mRNA_nonrhyth_translation_nonrhyth/5830415F09Rik_set_A.pdf]

## 5830418K08Rik

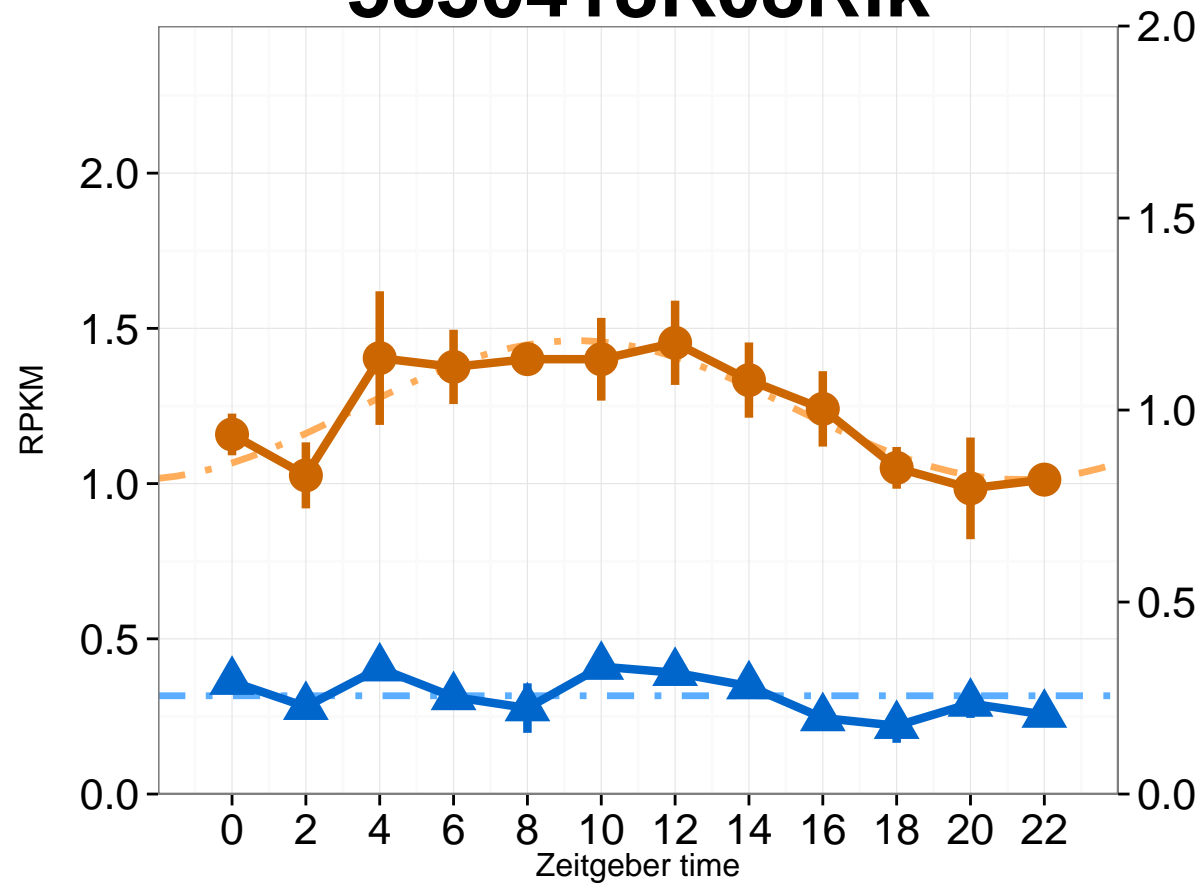

## 5830418K08Rik

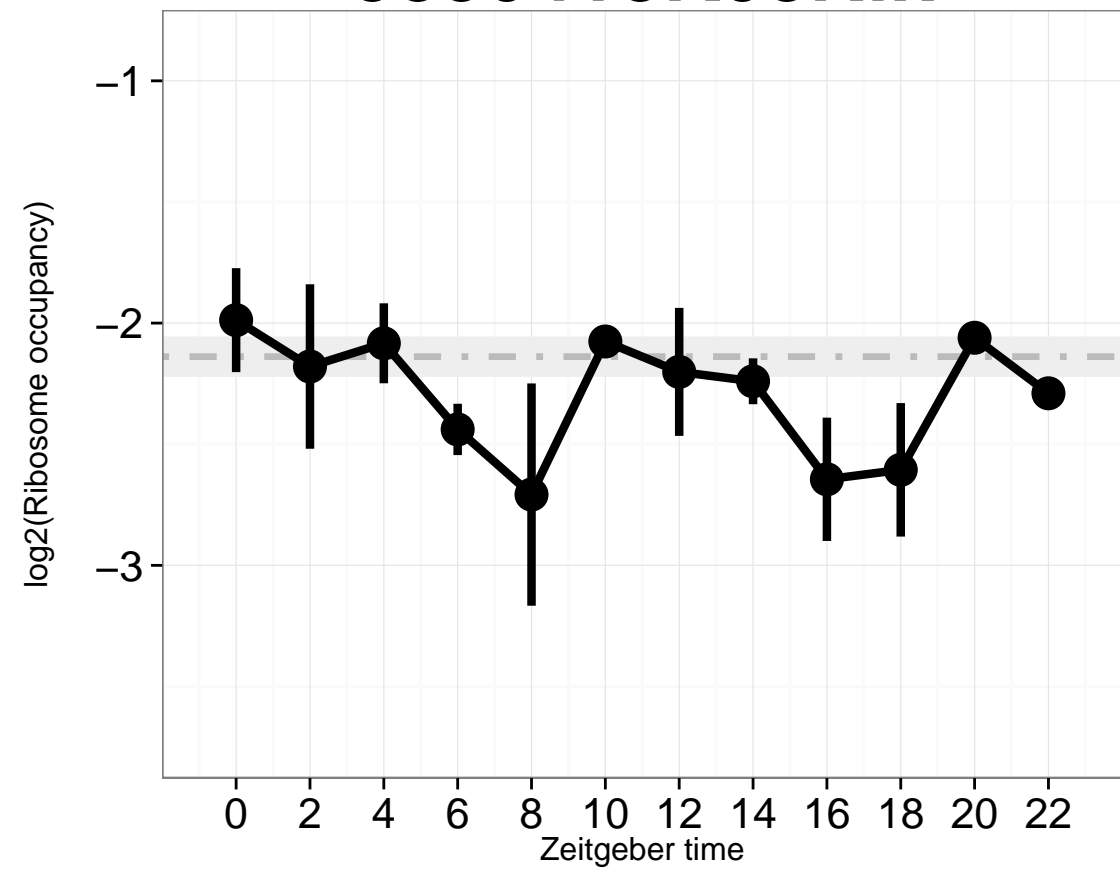

Supplement: SuppDataset_1.zip [file 5830418K08Rik_set_A.pdf › Supplemental Dataset 1/A-mRNA_nonrhyth_translation_nonrhyth/5830418K08Rik_set_A.pdf]

## 5830473C10Rik

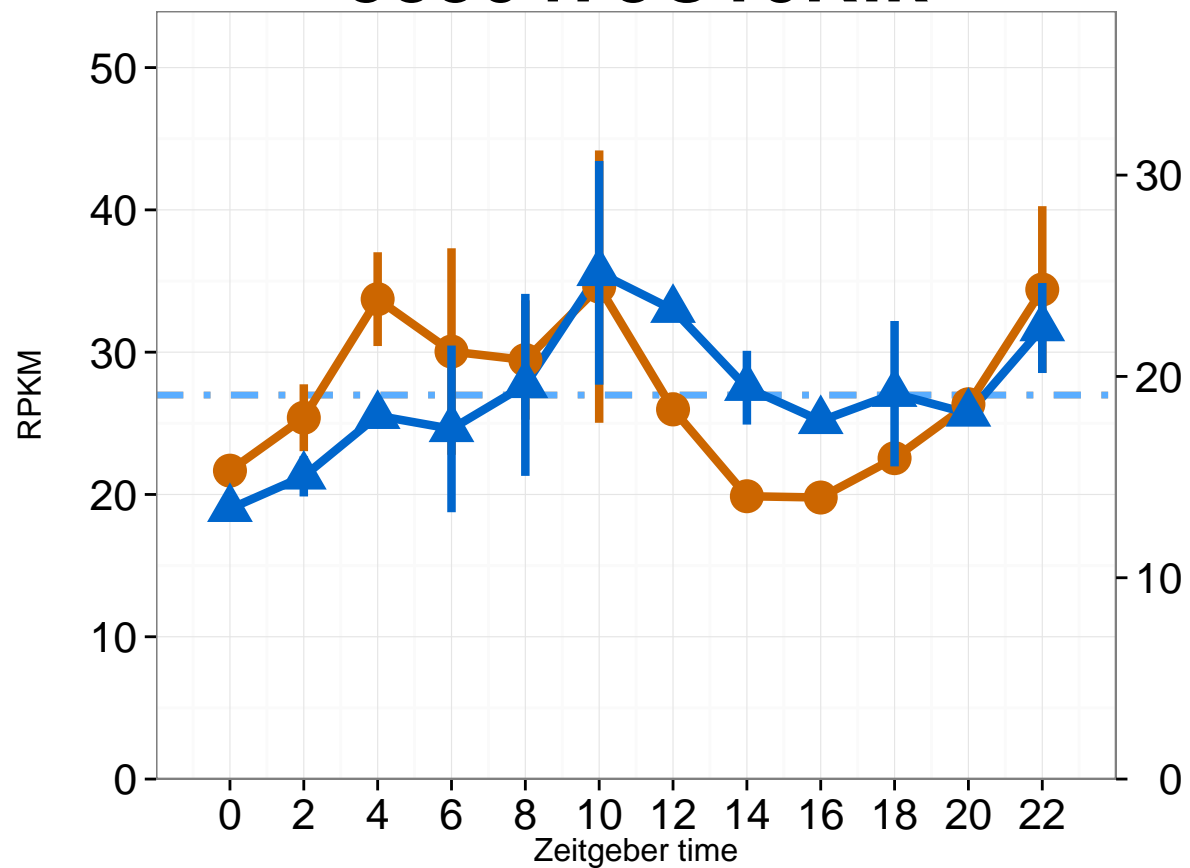

## 5830473C10Rik

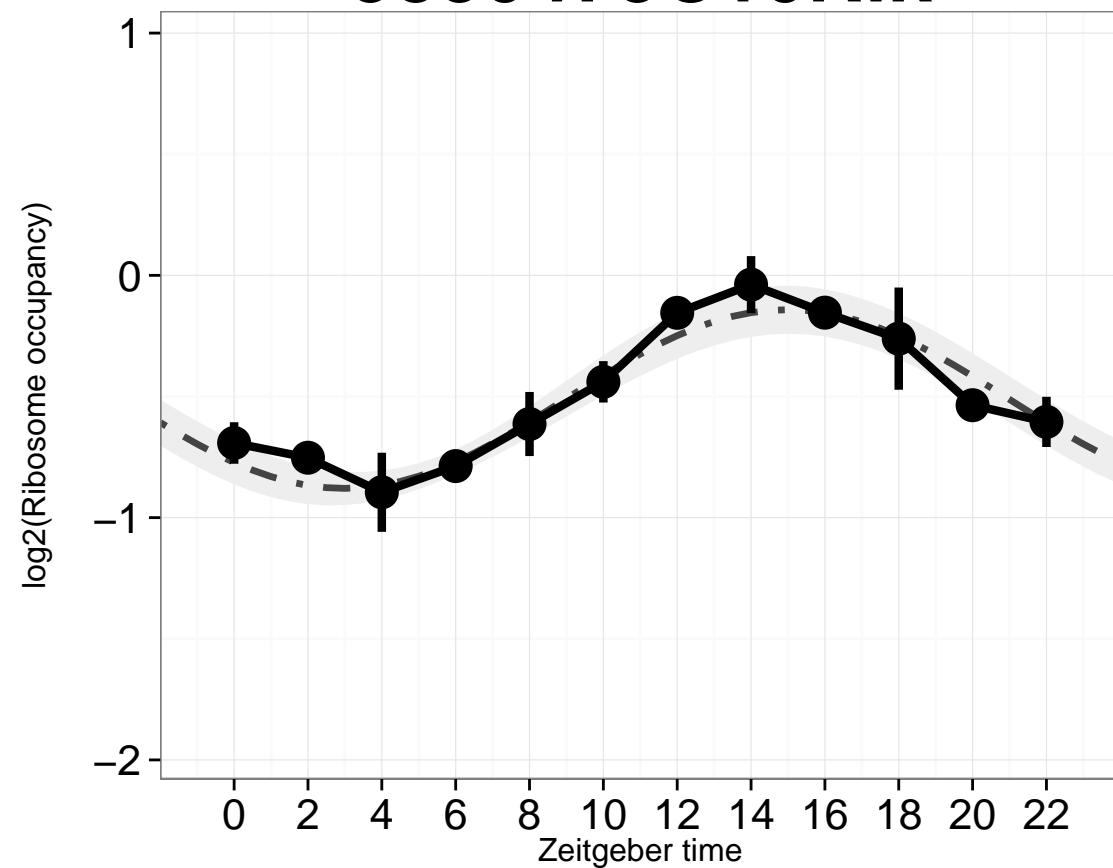

Supplement: SuppDataset_1.zip [file 5830473C10Rik_set_A.pdf › Supplemental Dataset 1/A-mRNA_nonrhyth_translation_nonrhyth/5830473C10Rik_set_A.pdf]

## 6030458C11Rik

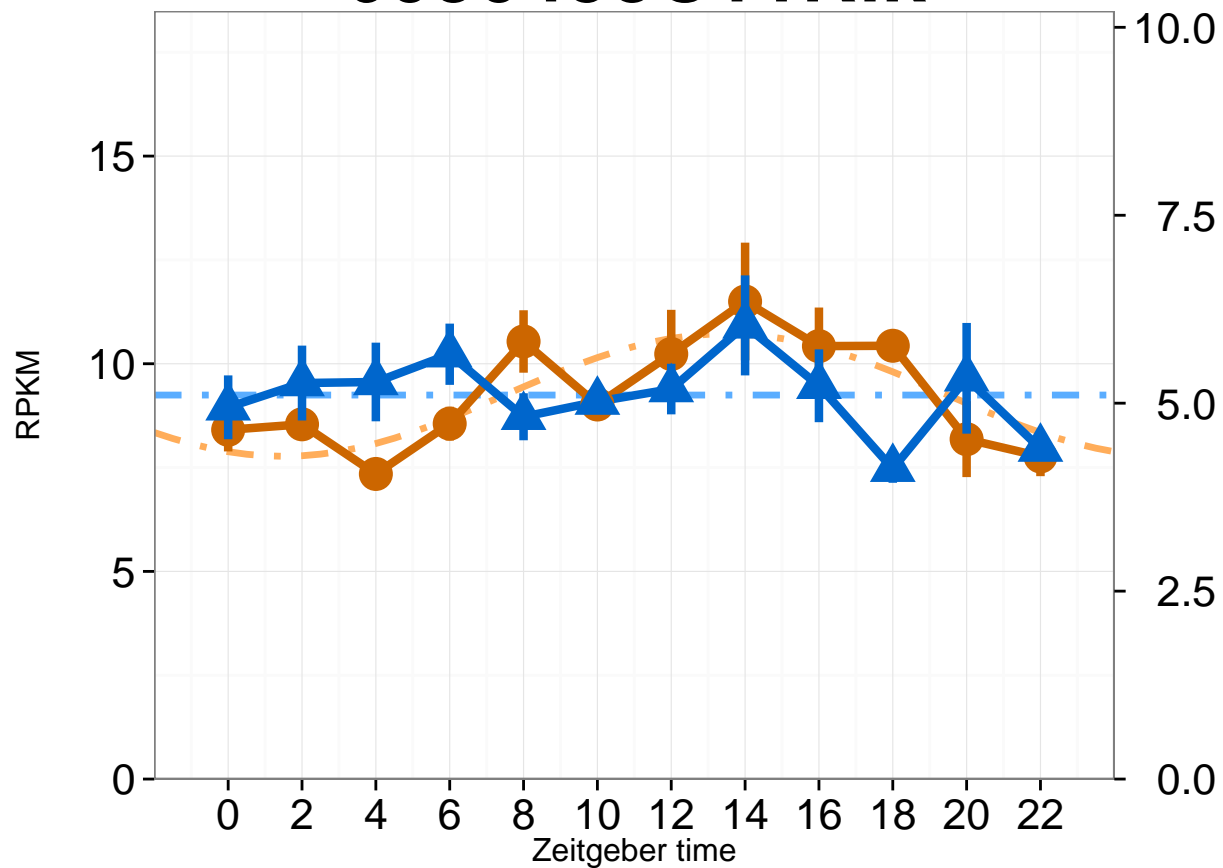

## 6030458C11Rik

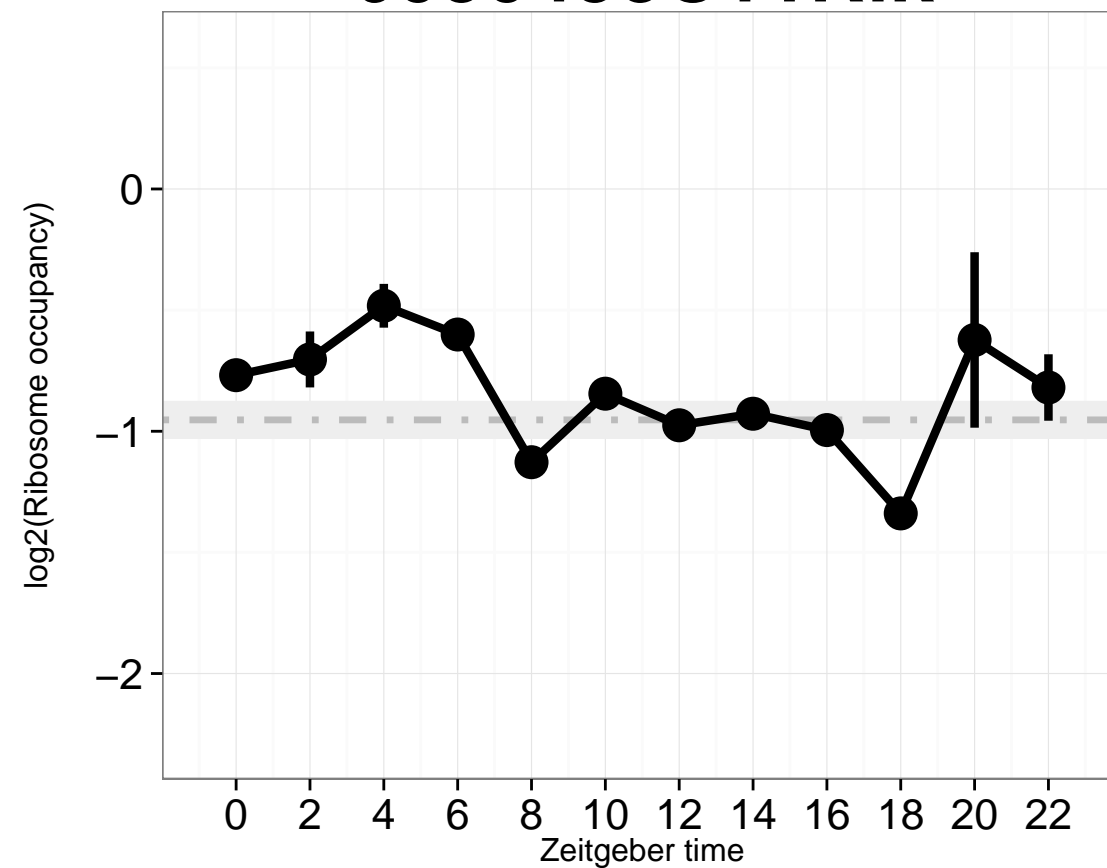

Supplement: SuppDataset_1.zip [file 6030458C11Rik_set_A.pdf › Supplemental Dataset 1/A-mRNA_nonrhyth_translation_nonrhyth/6030458C11Rik_set_A.pdf]

## 6330408A02Rik

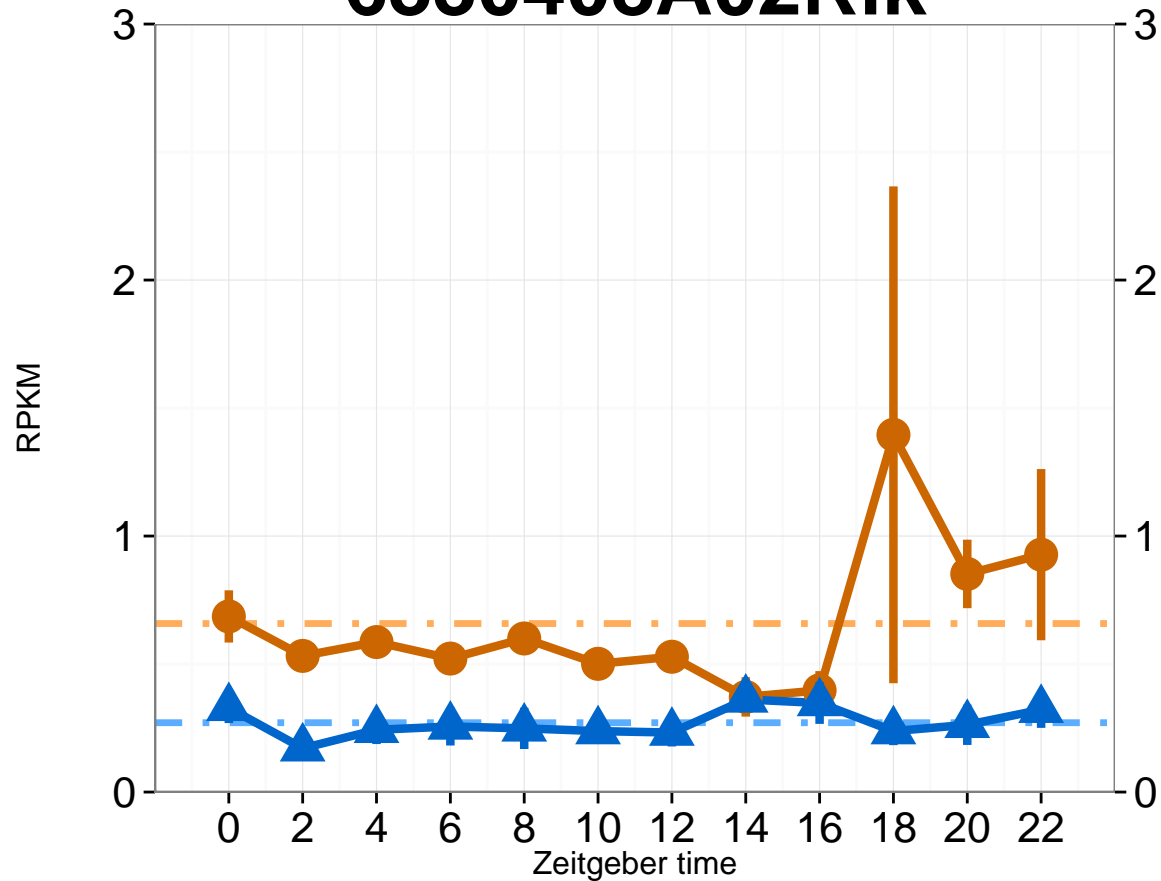

## 6330408A02Rik

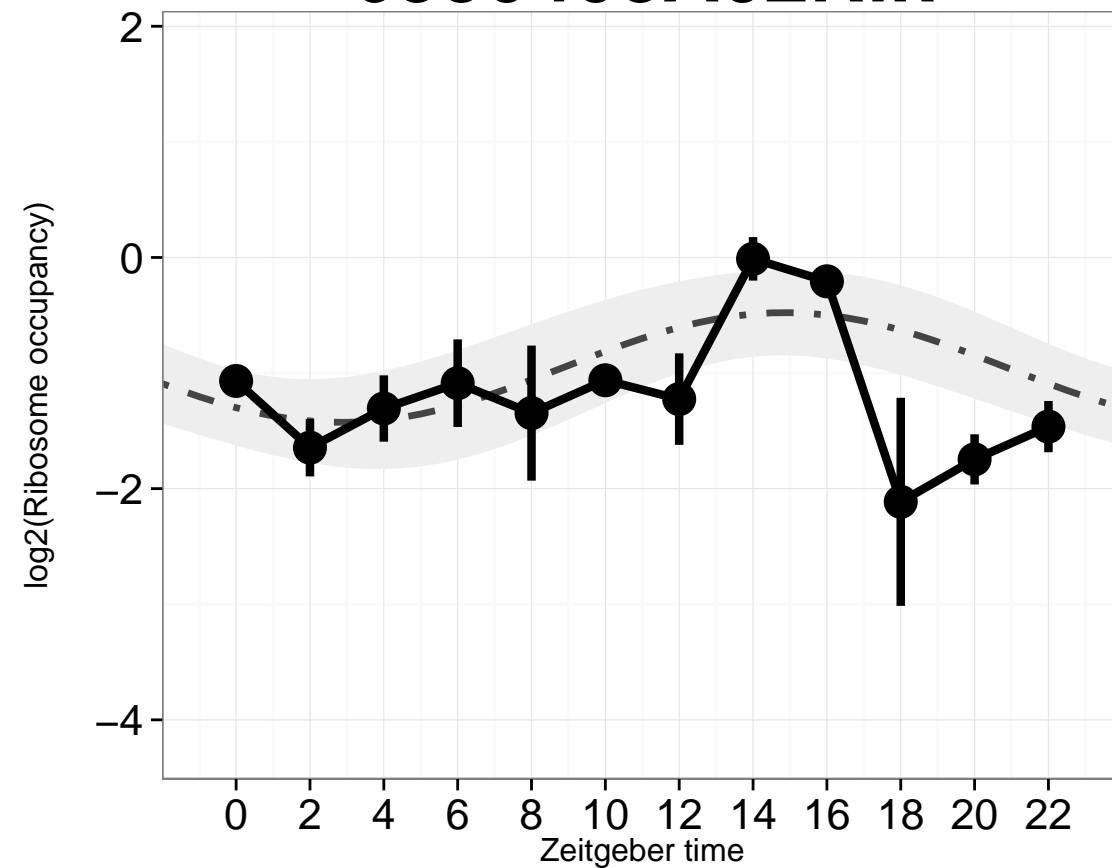

Supplement: SuppDataset_1.zip [file 6330408A02Rik_set_A.pdf › Supplemental Dataset 1/A-mRNA_nonrhyth_translation_nonrhyth/6330408A02Rik_set_A.pdf]

# 6330416G13Rik

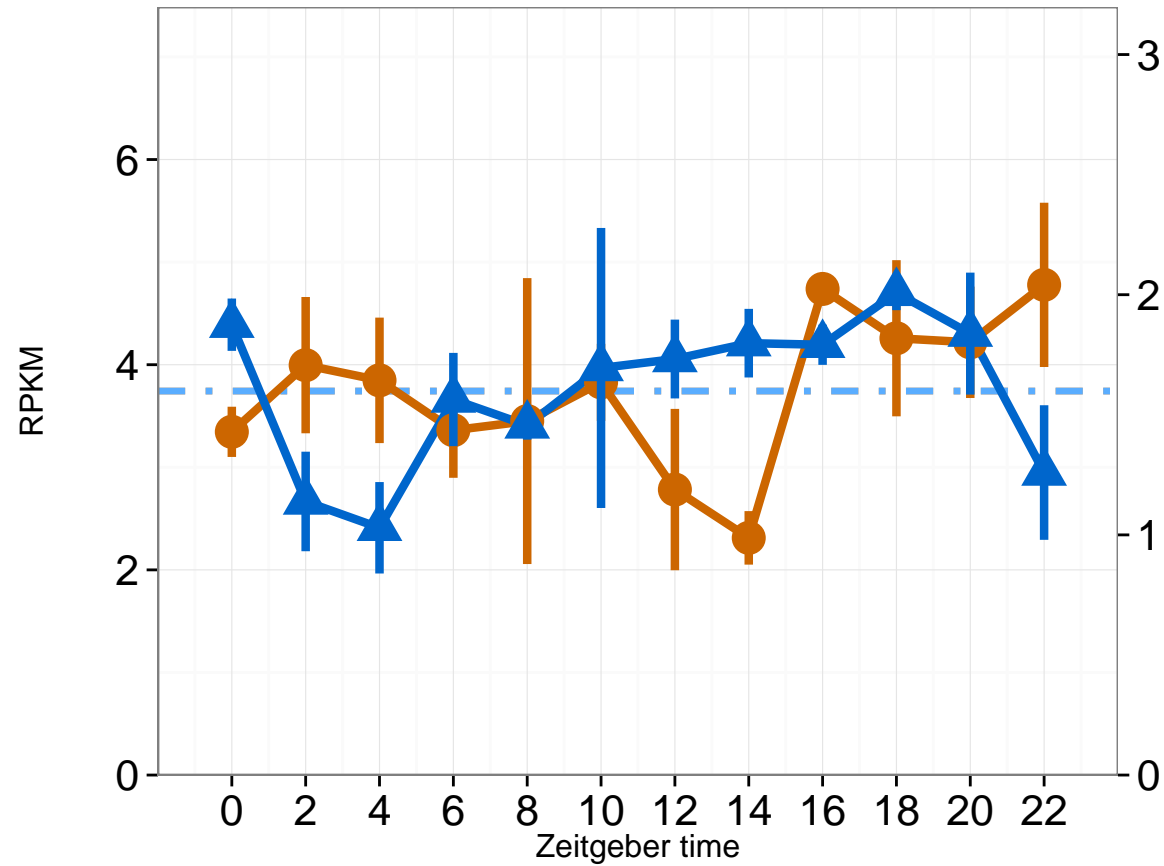

# 6330416G13Rik

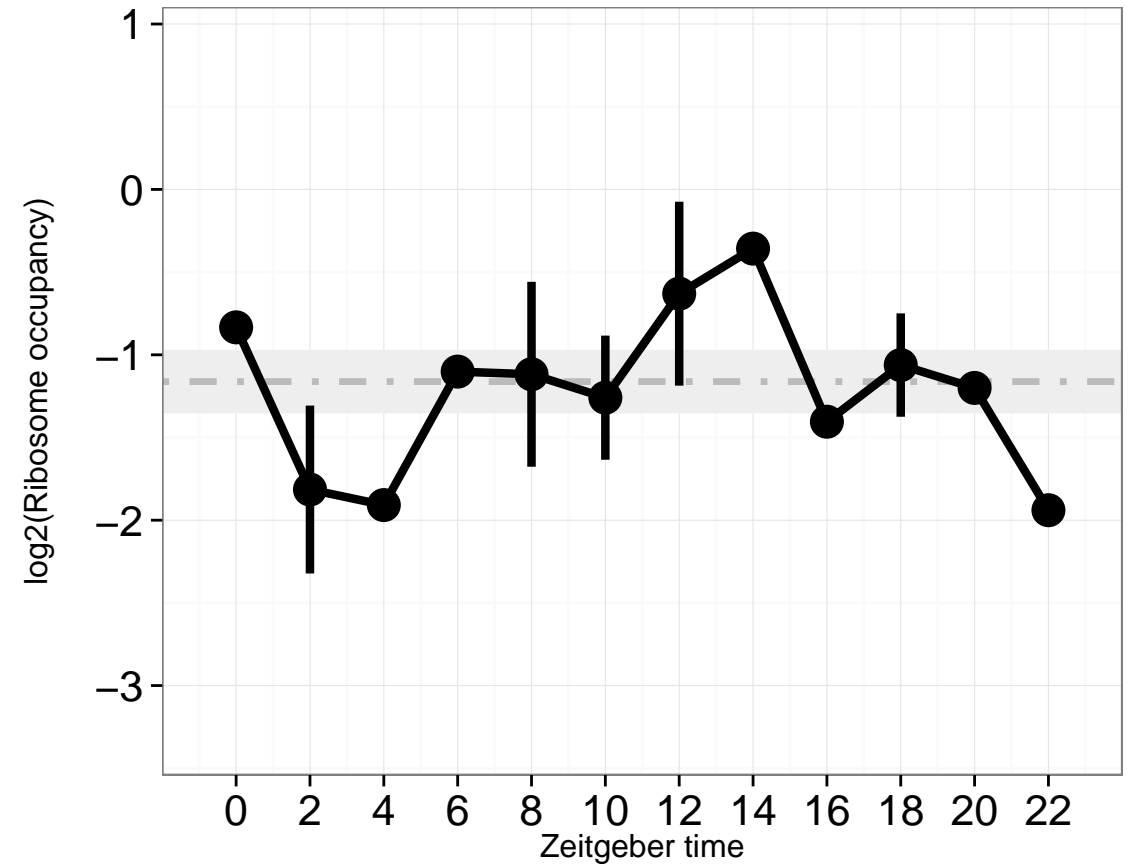

Supplement: SuppDataset_1.zip [file 6330416G13Rik_set_A.pdf › Supplemental Dataset 1/A-mRNA_nonrhyth_translation_nonrhyth/6330416G13Rik_set_A.pdf]

# 8030462N17Rik

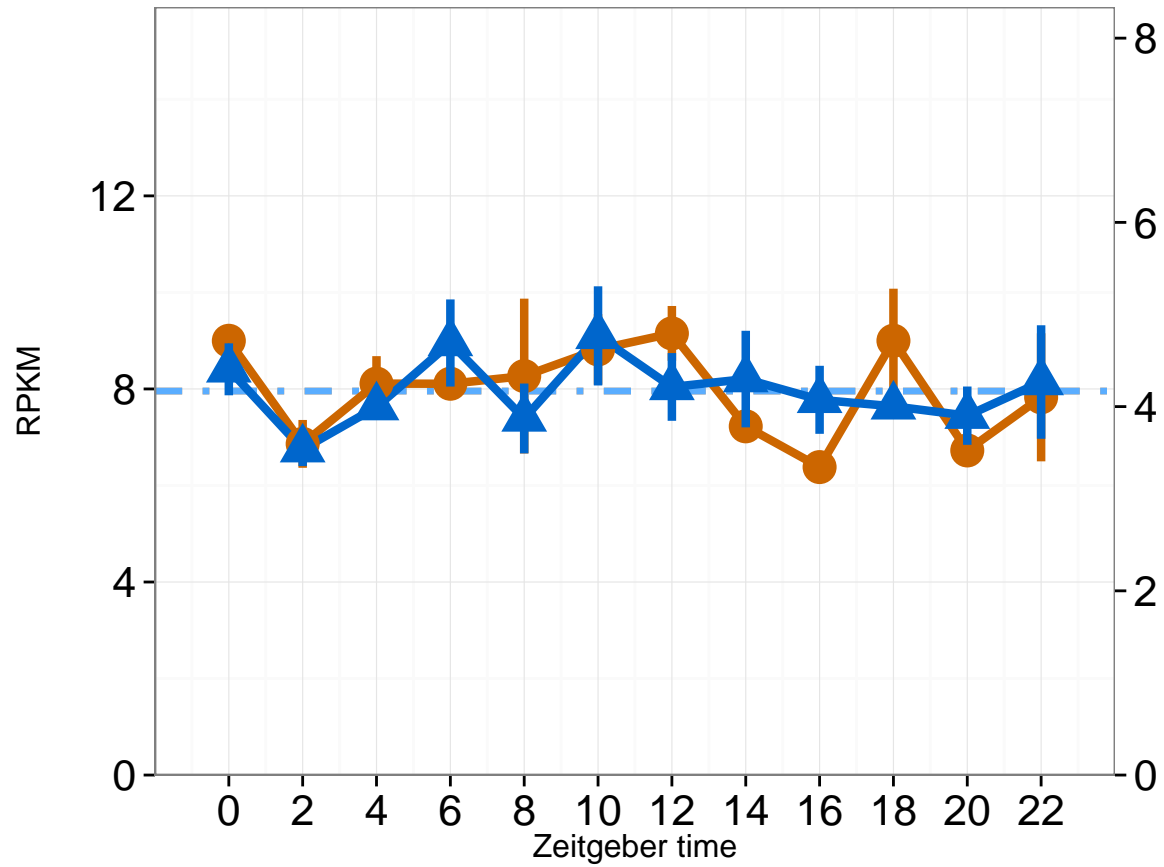

# 8030462N17Rik

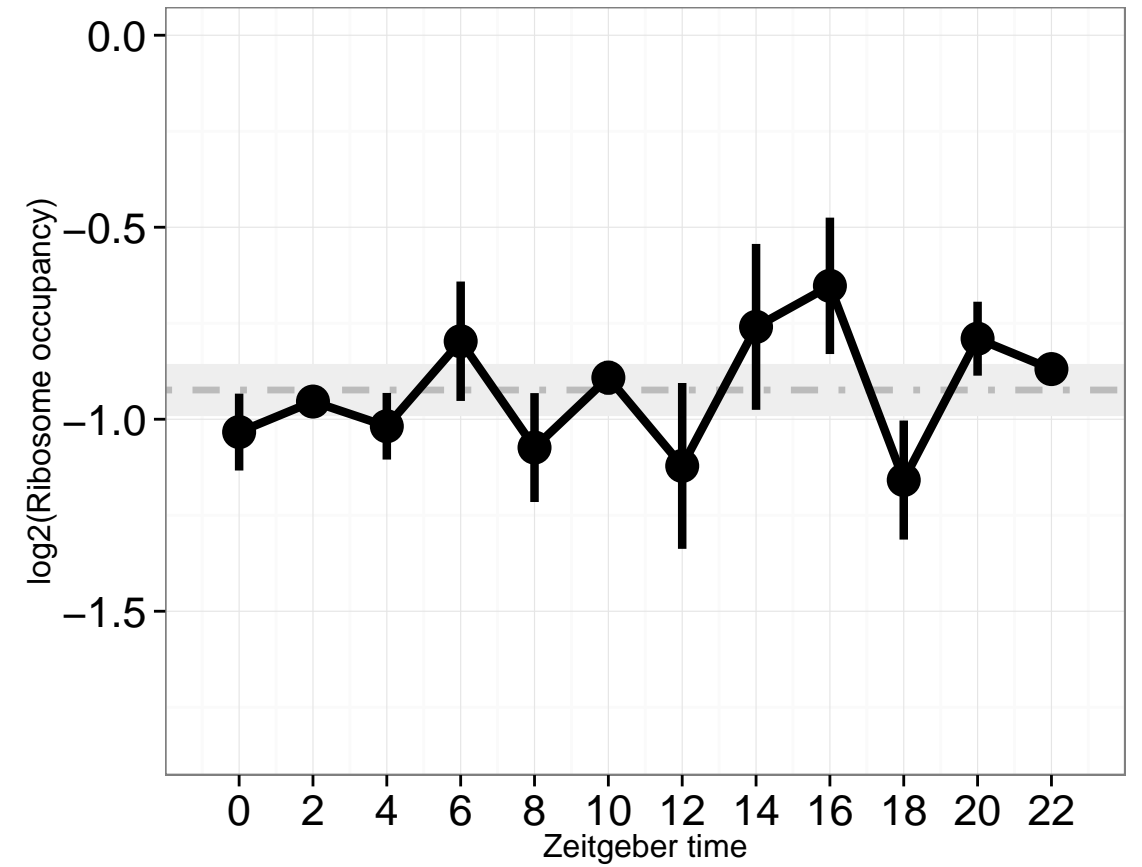

Supplement: SuppDataset_1.zip [file 8030462N17Rik_set_A.pdf › Supplemental Dataset 1/A-mRNA_nonrhyth_translation_nonrhyth/8030462N17Rik_set_A.pdf]

## 8430408G22Rik

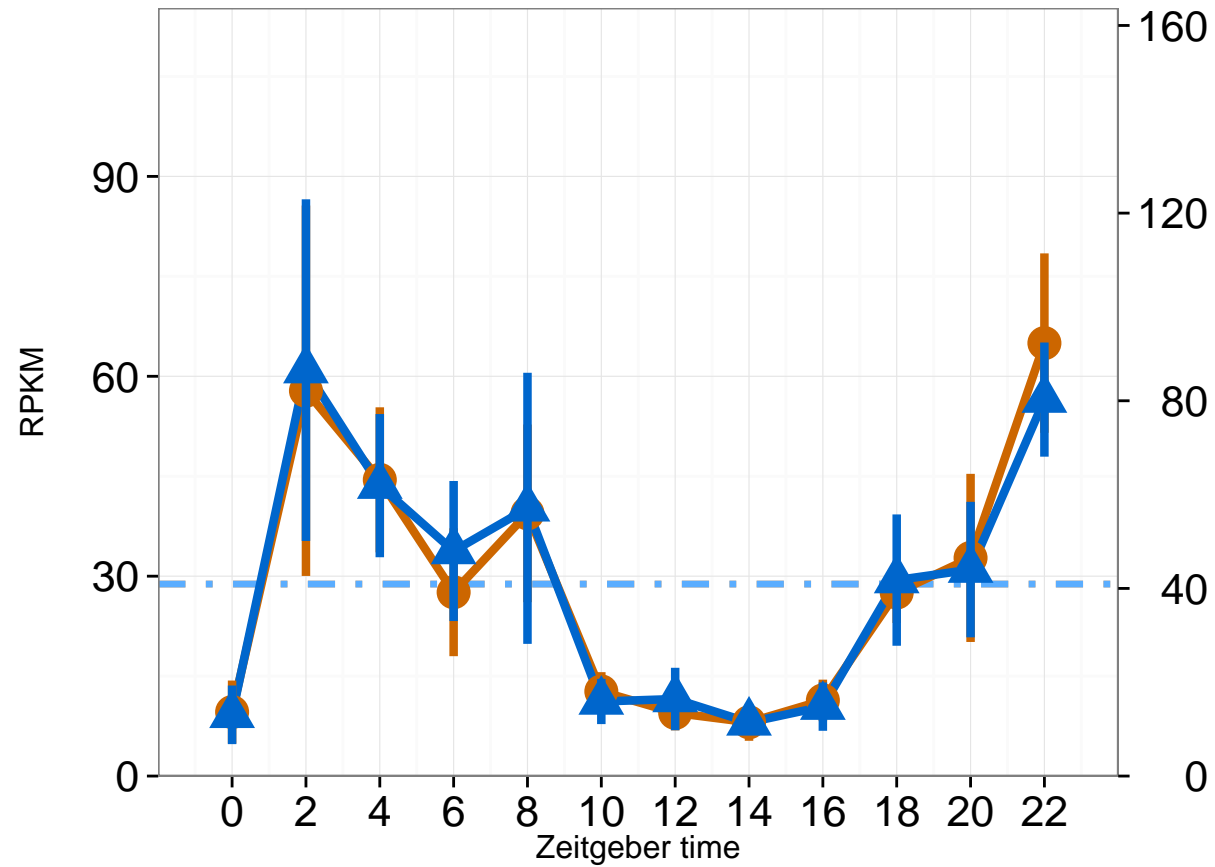

## 8430408G22Rik

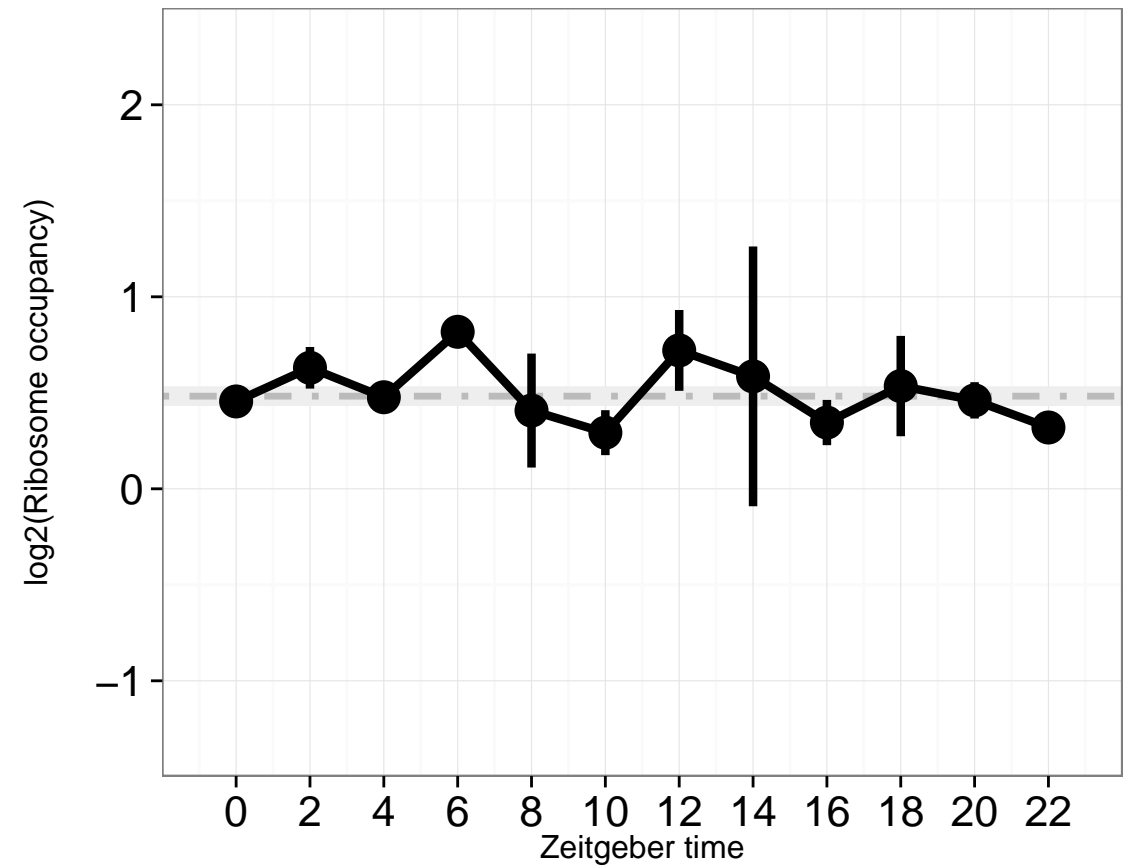

Supplement: SuppDataset_1.zip [file 8430408G22Rik_set_A.pdf › Supplemental Dataset 1/A-mRNA_nonrhyth_translation_nonrhyth/8430408G22Rik_set_A.pdf]

# 9030025P20Rik

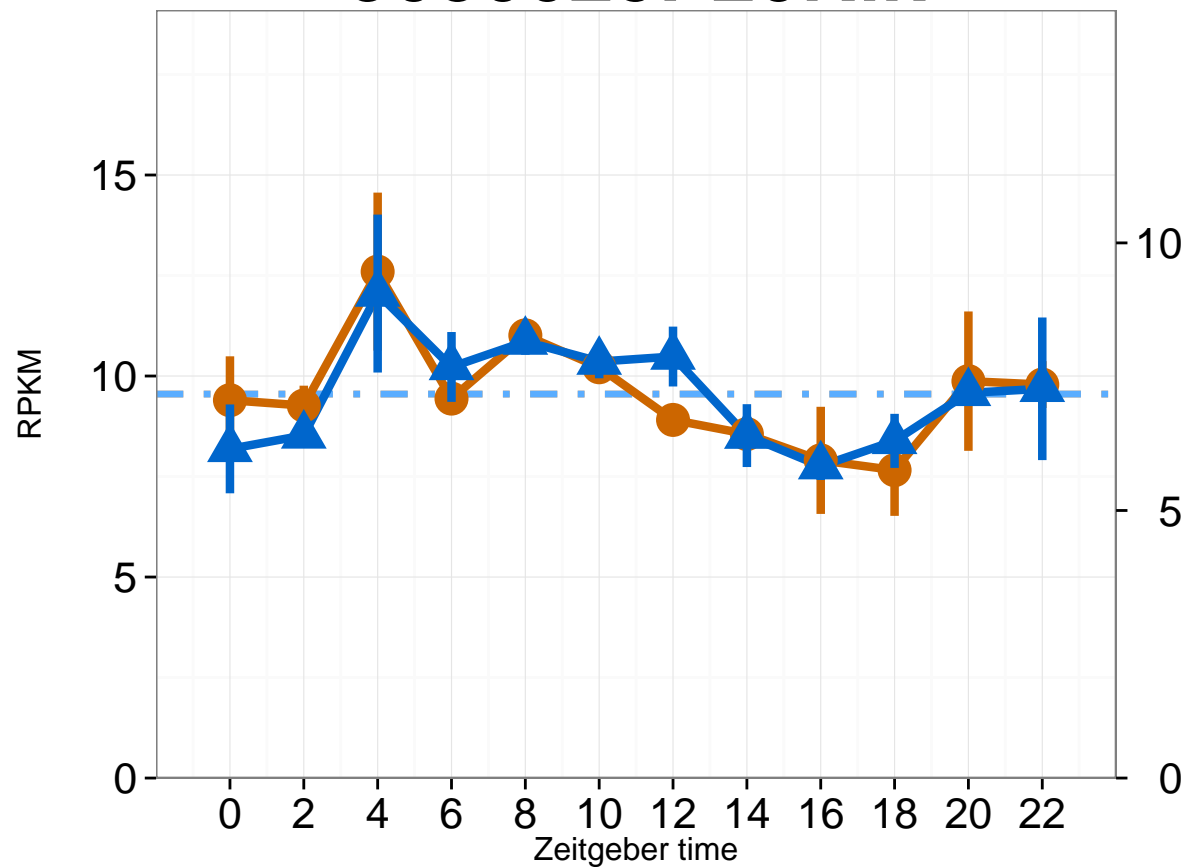

# 9030025P20Rik

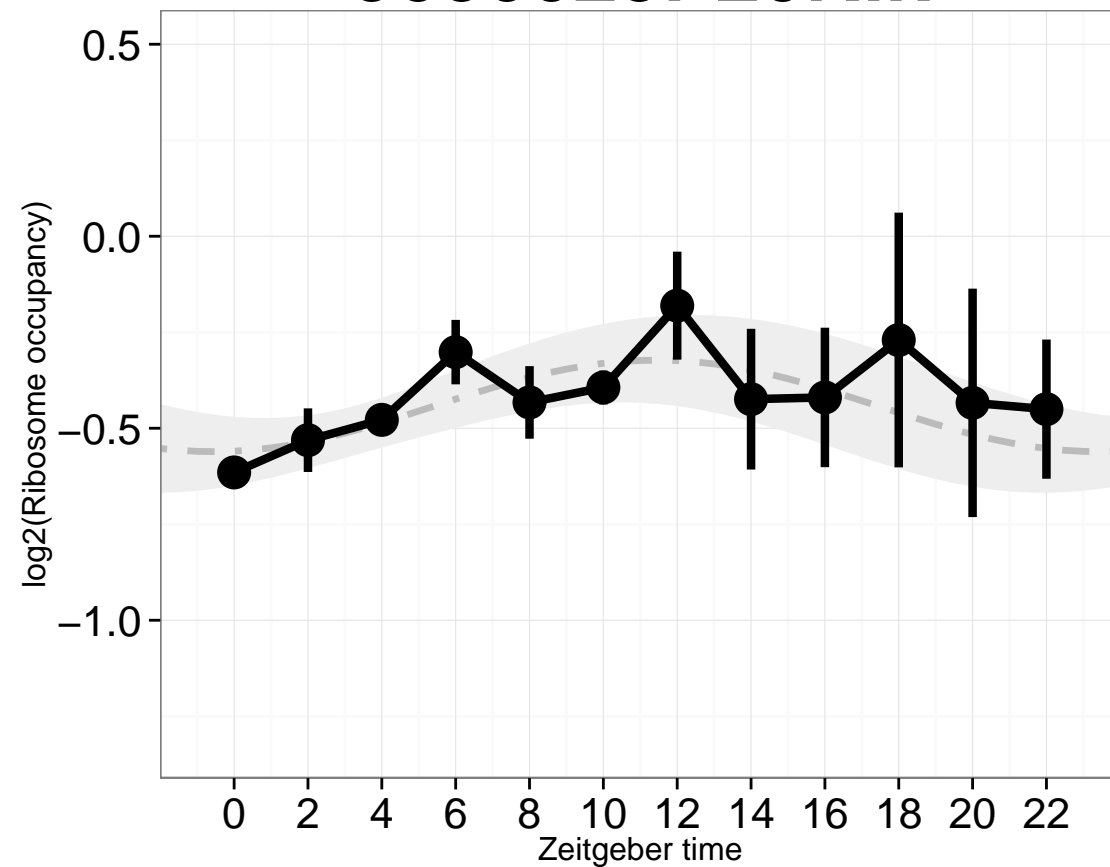

Supplement: SuppDataset_1.zip [file 9030025P20Rik_set_A.pdf › Supplemental Dataset 1/A-mRNA_nonrhyth_translation_nonrhyth/9030025P20Rik_set_A.pdf]

# 9030617O03Rik

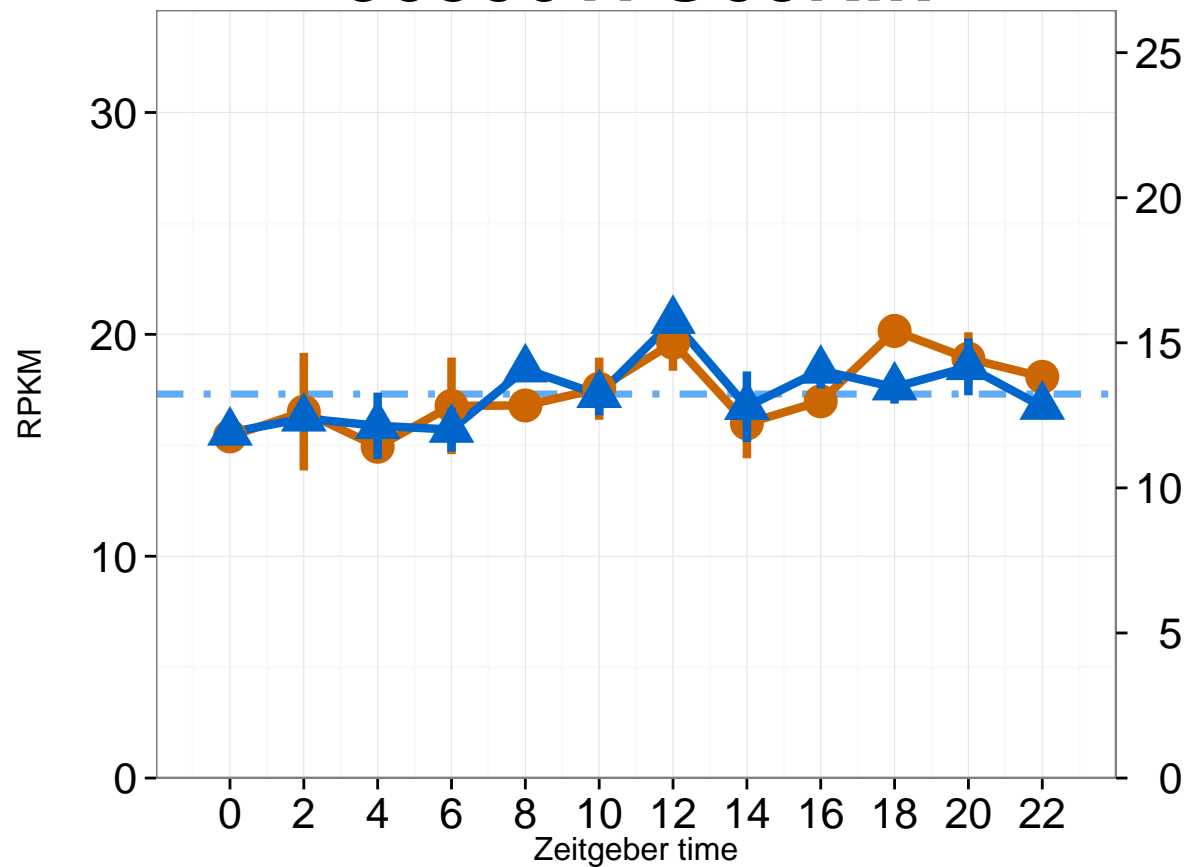

# 9030617O03Rik

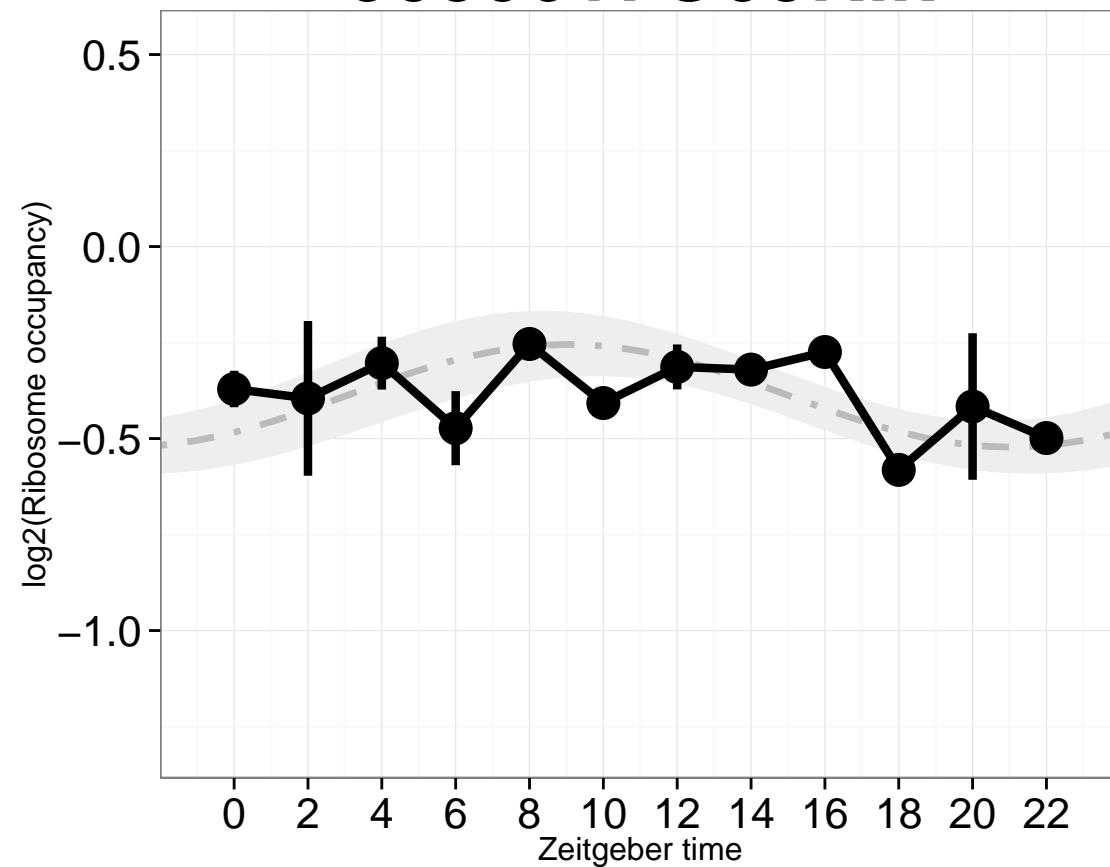

Supplement: SuppDataset_1.zip [file 9030617O03Rik_set_A.pdf › Supplemental Dataset 1/A-mRNA_nonrhyth_translation_nonrhyth/9030617O03Rik_set_A.pdf]

# 9030624J02Rik

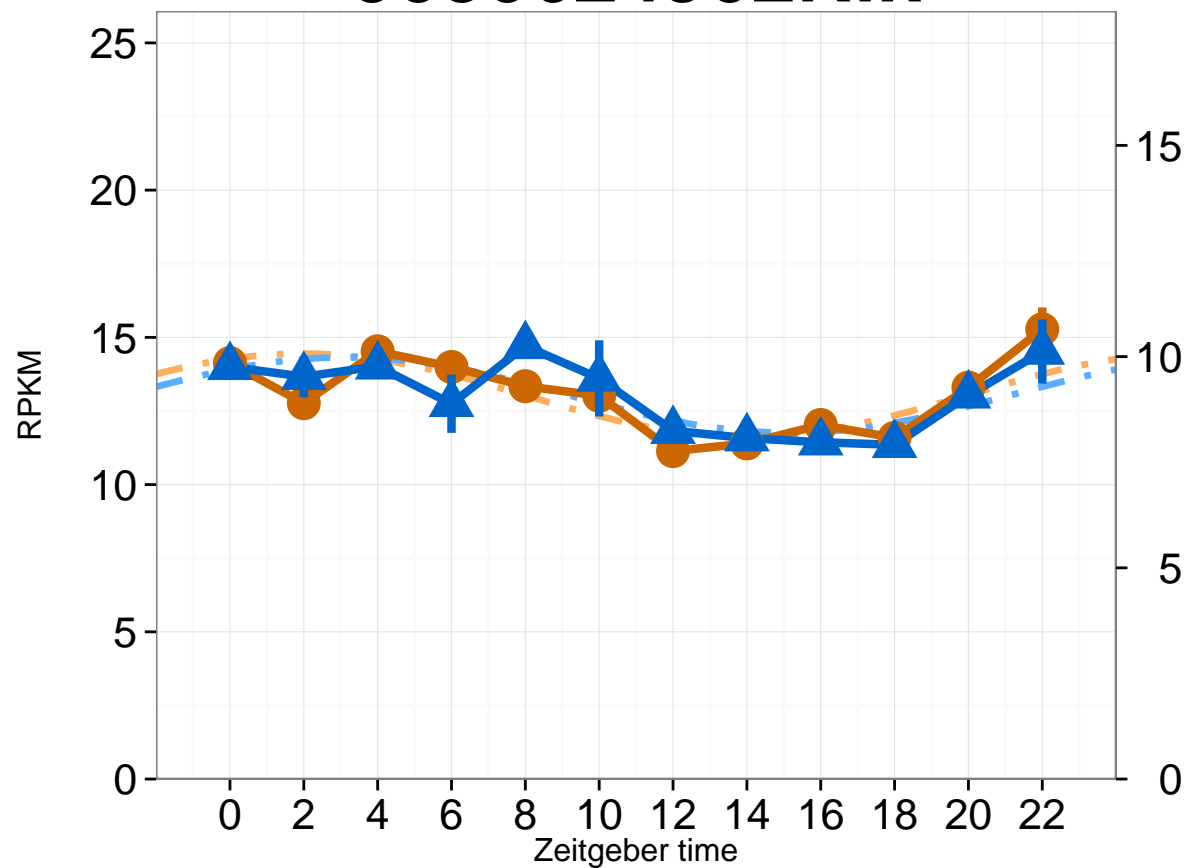

# 9030624J02Rik

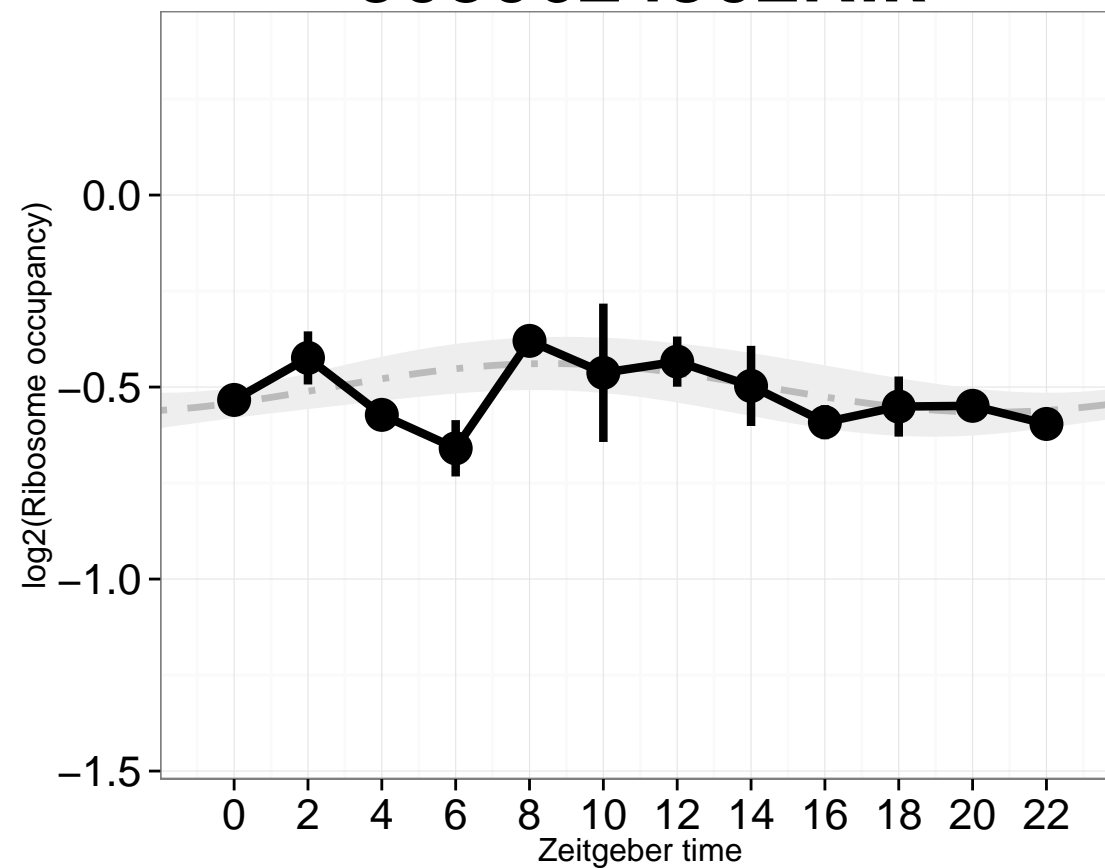

Supplement: SuppDataset_1.zip [file 9030624J02Rik_set_A.pdf › Supplemental Dataset 1/A-mRNA_nonrhyth_translation_nonrhyth/9030624J02Rik_set_A.pdf]

**9130011E15Rik**

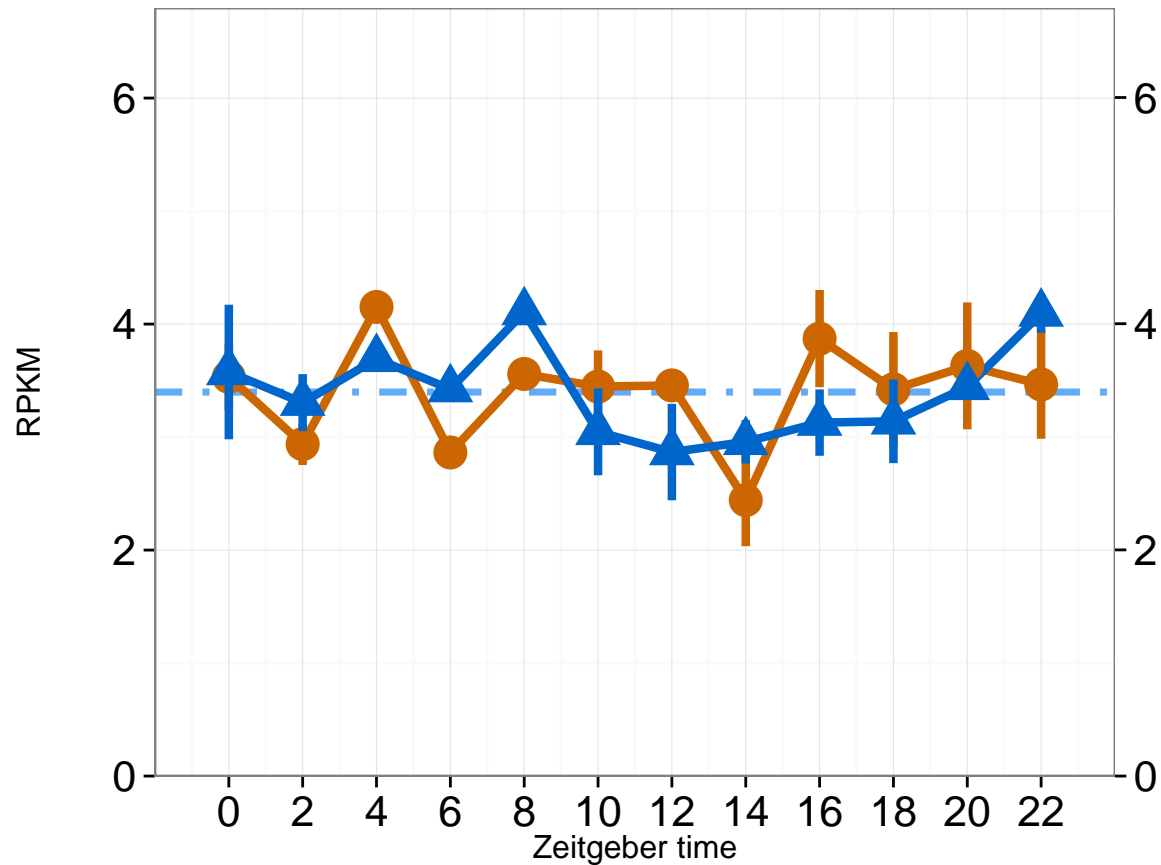

**9130011E15Rik**

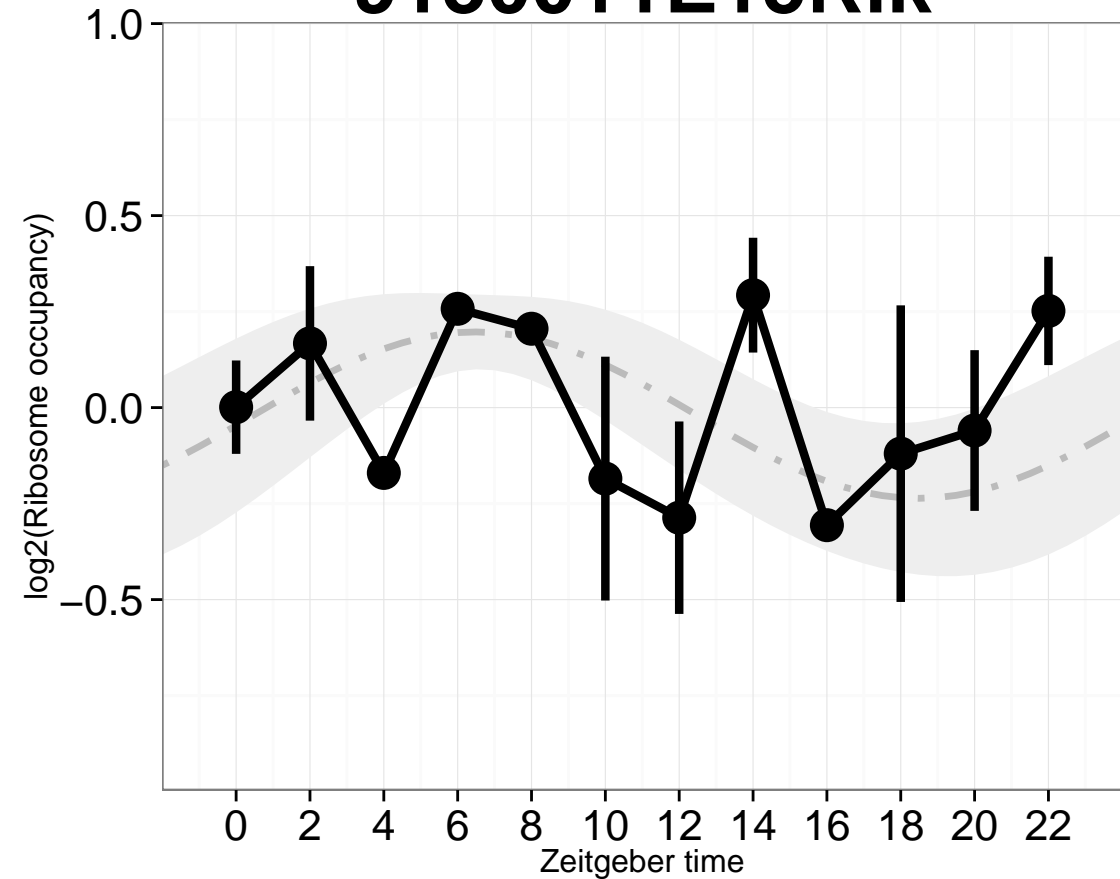

Supplement: SuppDataset_1.zip [file 9130011E15Rik_set_A.pdf › Supplemental Dataset 1/A-mRNA_nonrhyth_translation_nonrhyth/9130011E15Rik_set_A.pdf]

# 9130019O22Rik

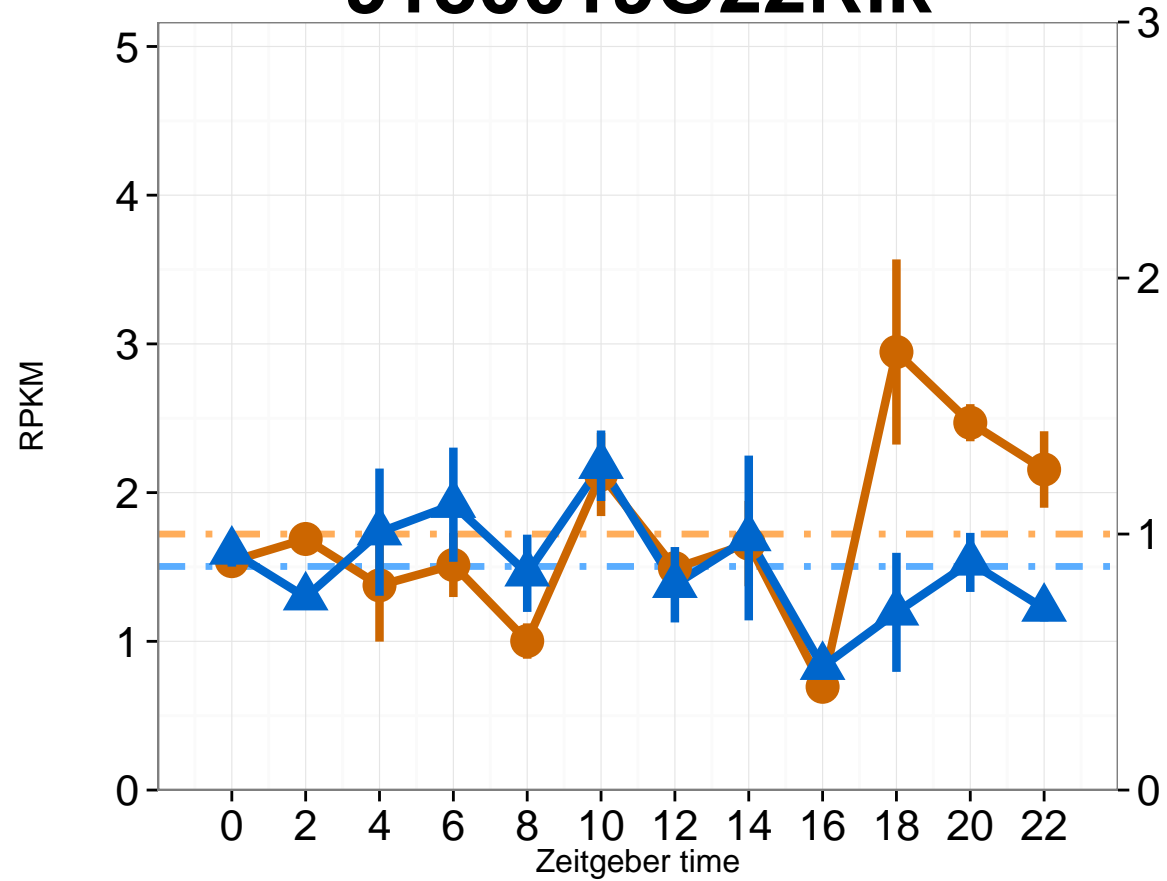

# 9130019O22Rik

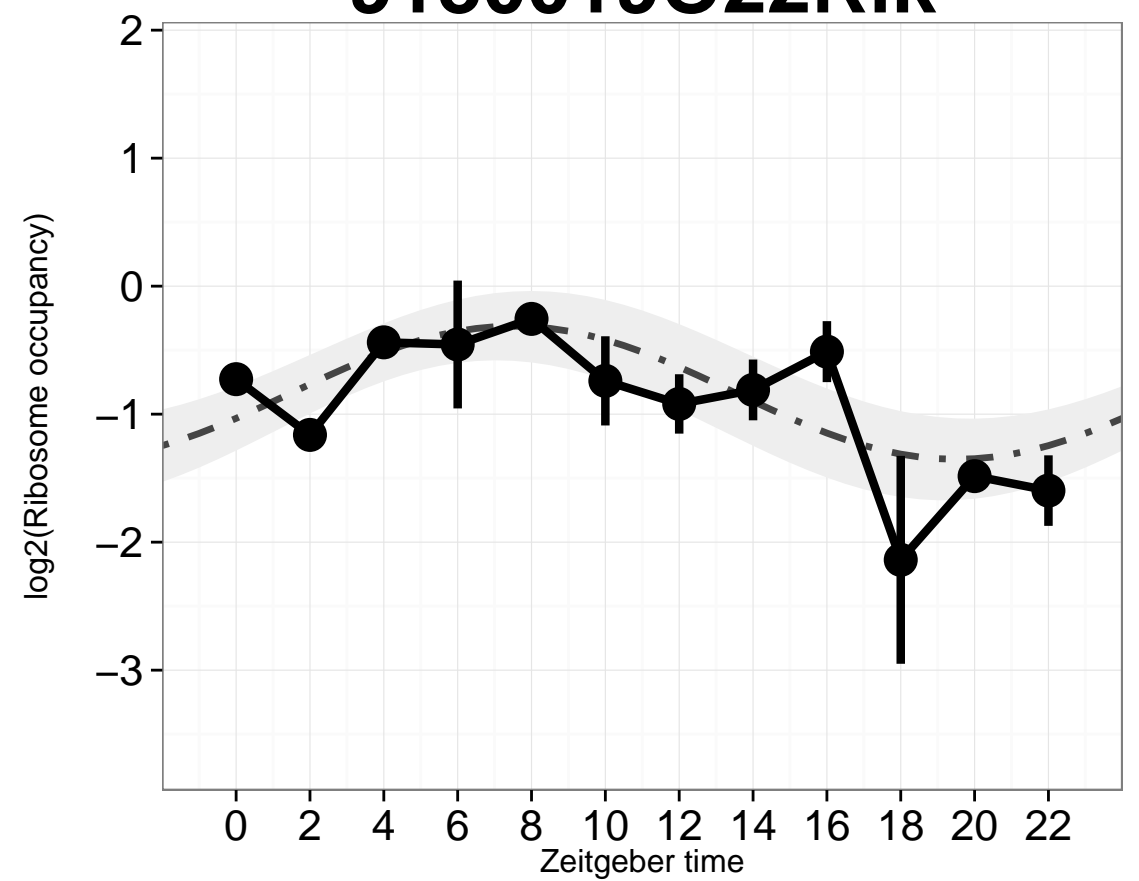

Supplement: SuppDataset_1.zip [file 9130019O22Rik_set_A.pdf › Supplemental Dataset 1/A-mRNA_nonrhyth_translation_nonrhyth/9130019O22Rik_set_A.pdf]

## 9130023H24Rik

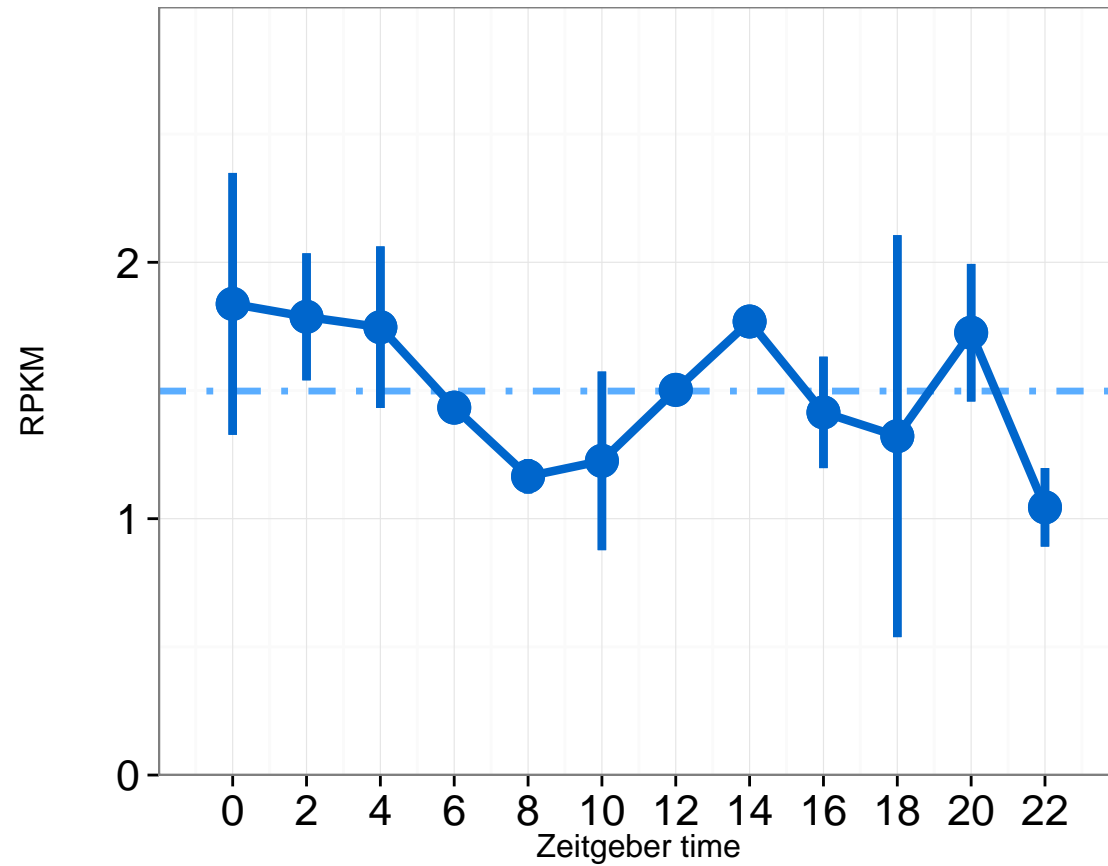

## 9130023H24Rik log2(Ribosome occup

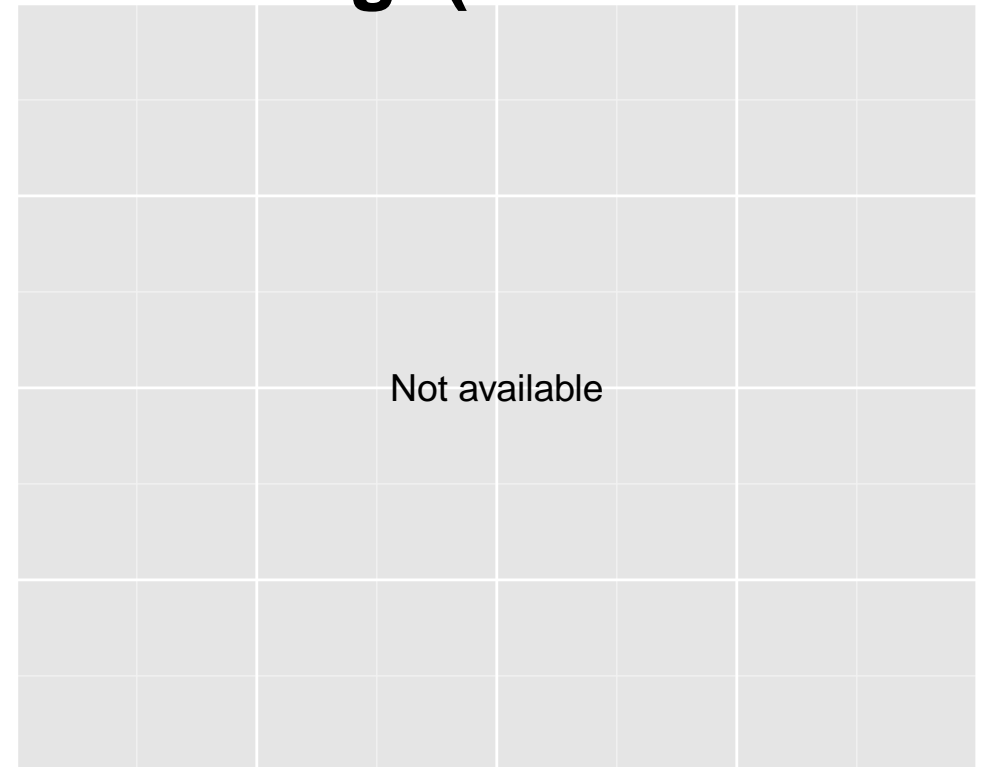

Supplement: SuppDataset_1.zip [file 9130023H24Rik_set_A.pdf › Supplemental Dataset 1/A-mRNA_nonrhyth_translation_nonrhyth/9130023H24Rik_set_A.pdf]

# 9130401M01Rik

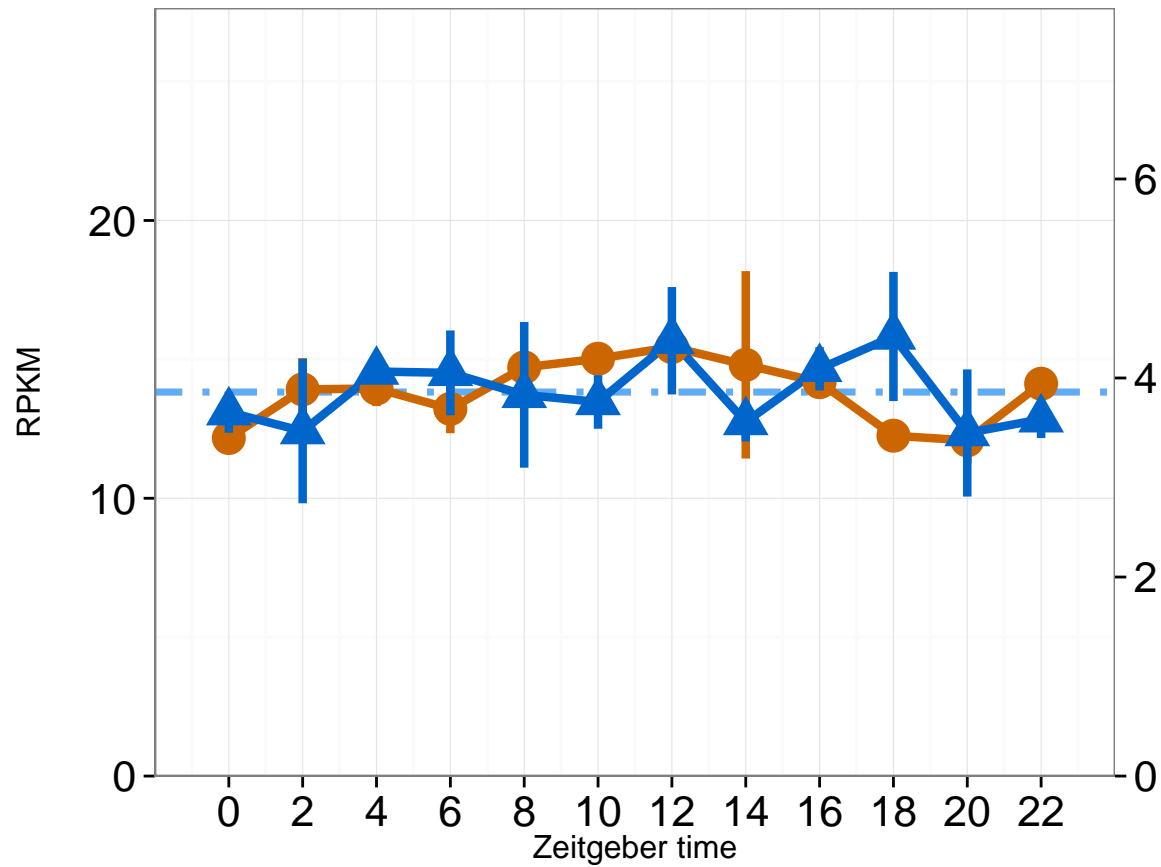

# 9130401M01Rik

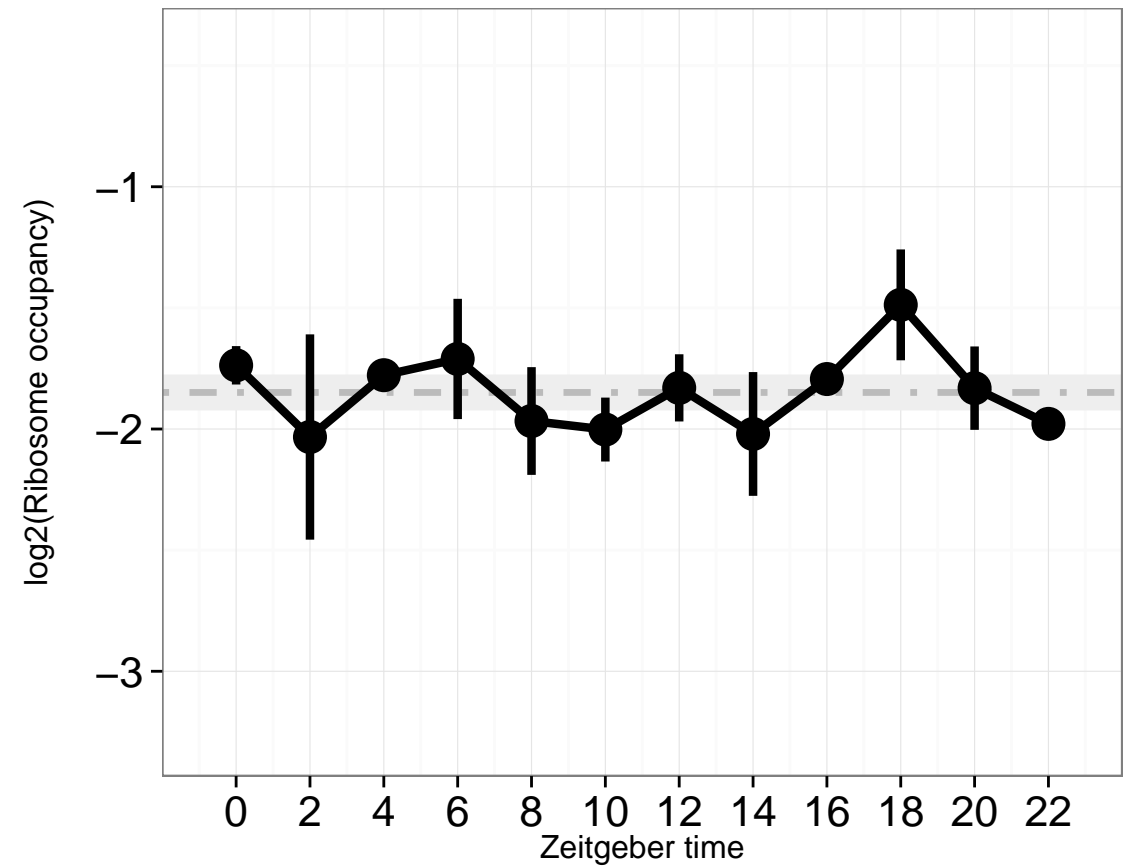

Supplement: SuppDataset_1.zip [file 9130401M01Rik_set_A.pdf › Supplemental Dataset 1/A-mRNA_nonrhyth_translation_nonrhyth/9130401M01Rik_set_A.pdf]

# 9130409I23Rik

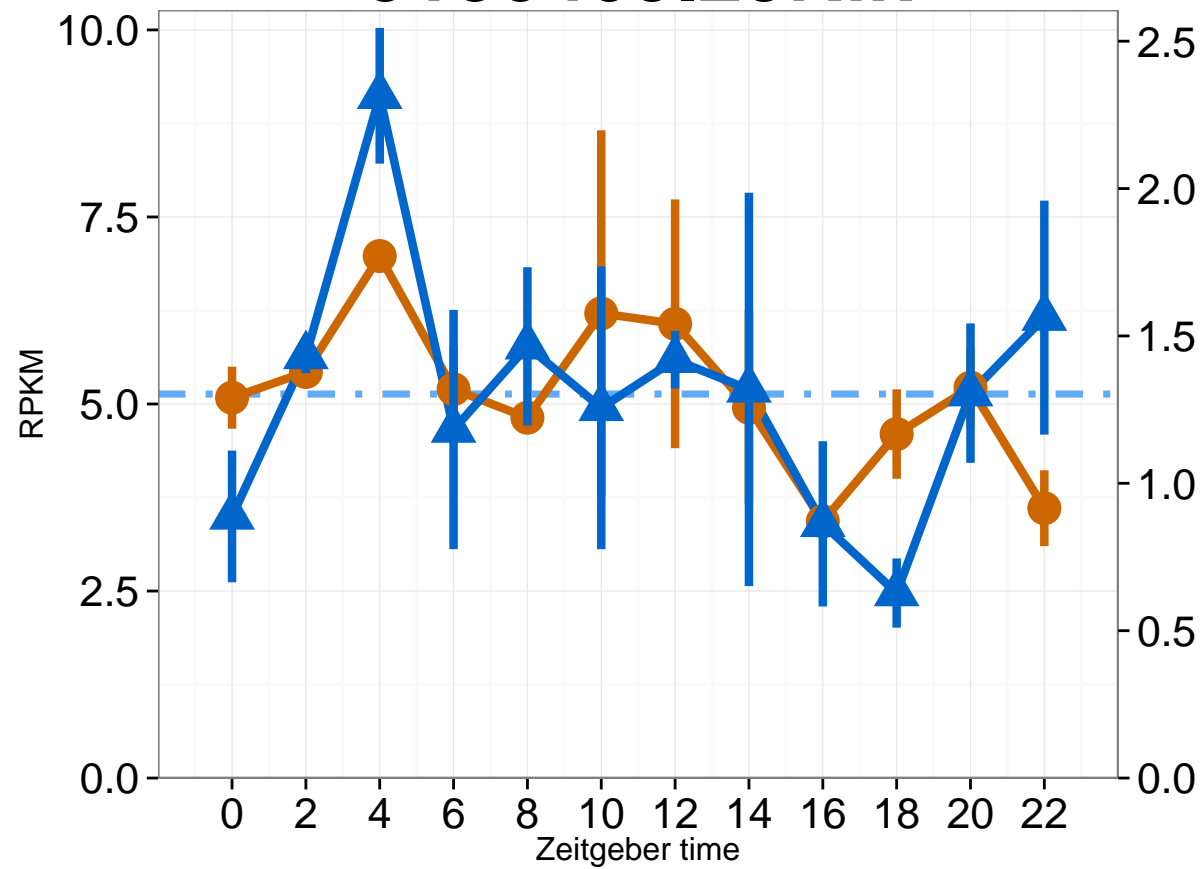

# 9130409I23Rik

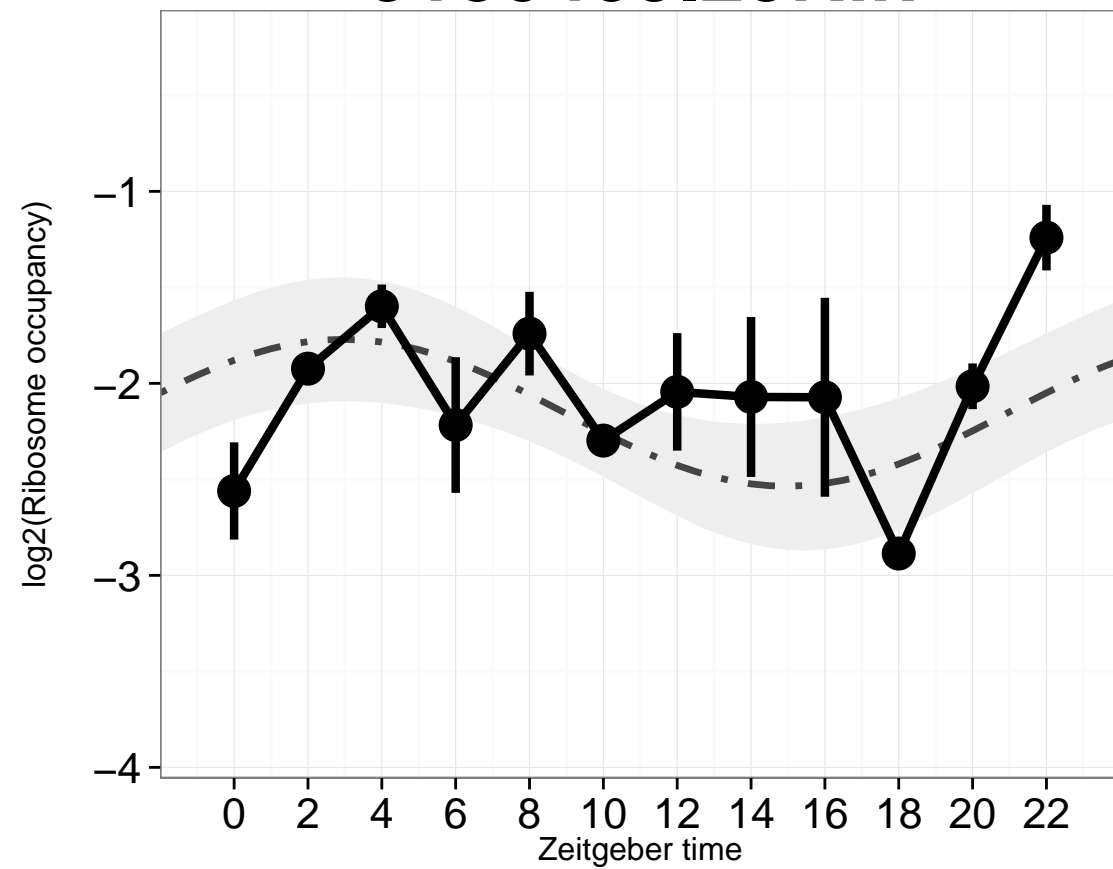

Supplement: SuppDataset_1.zip [file 9130409I23Rik_set_A.pdf › Supplemental Dataset 1/A-mRNA_nonrhyth_translation_nonrhyth/9130409I23Rik_set_A.pdf]

## 9430016H08Rik

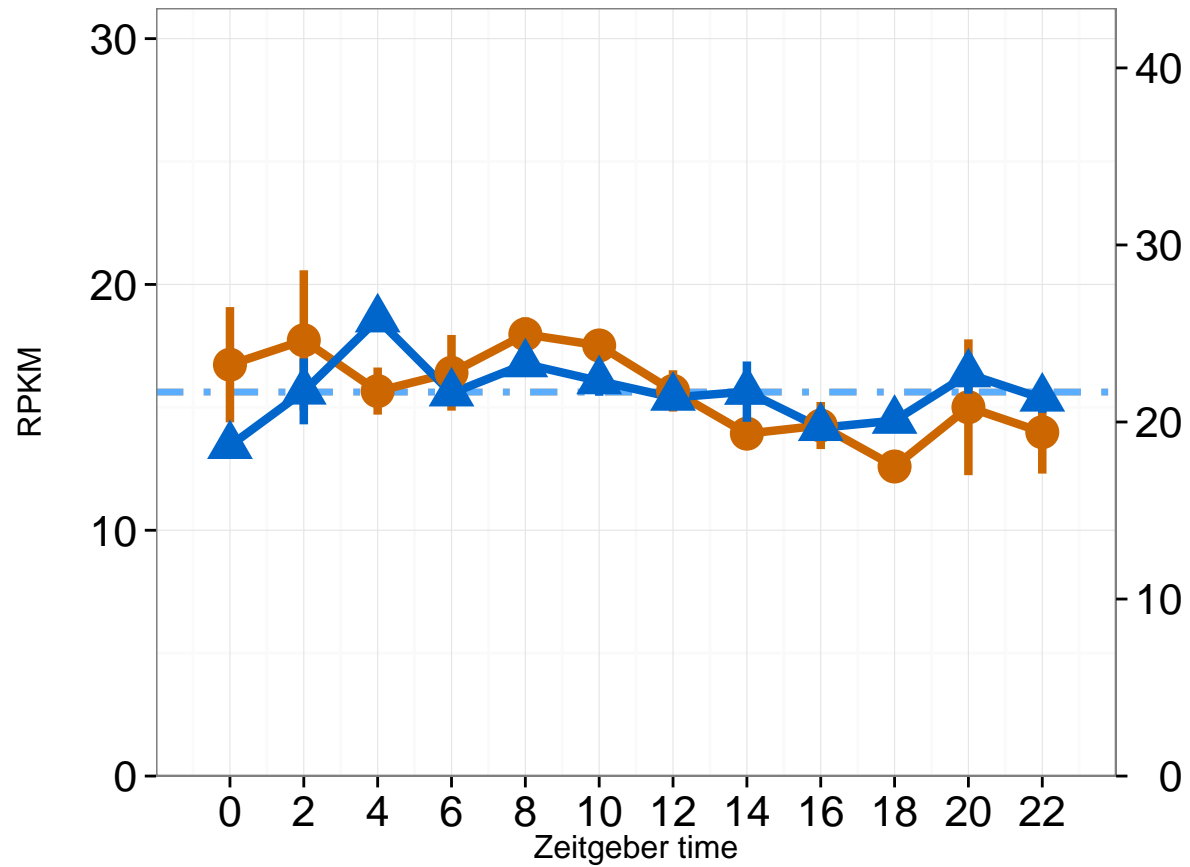

## 9430016H08Rik

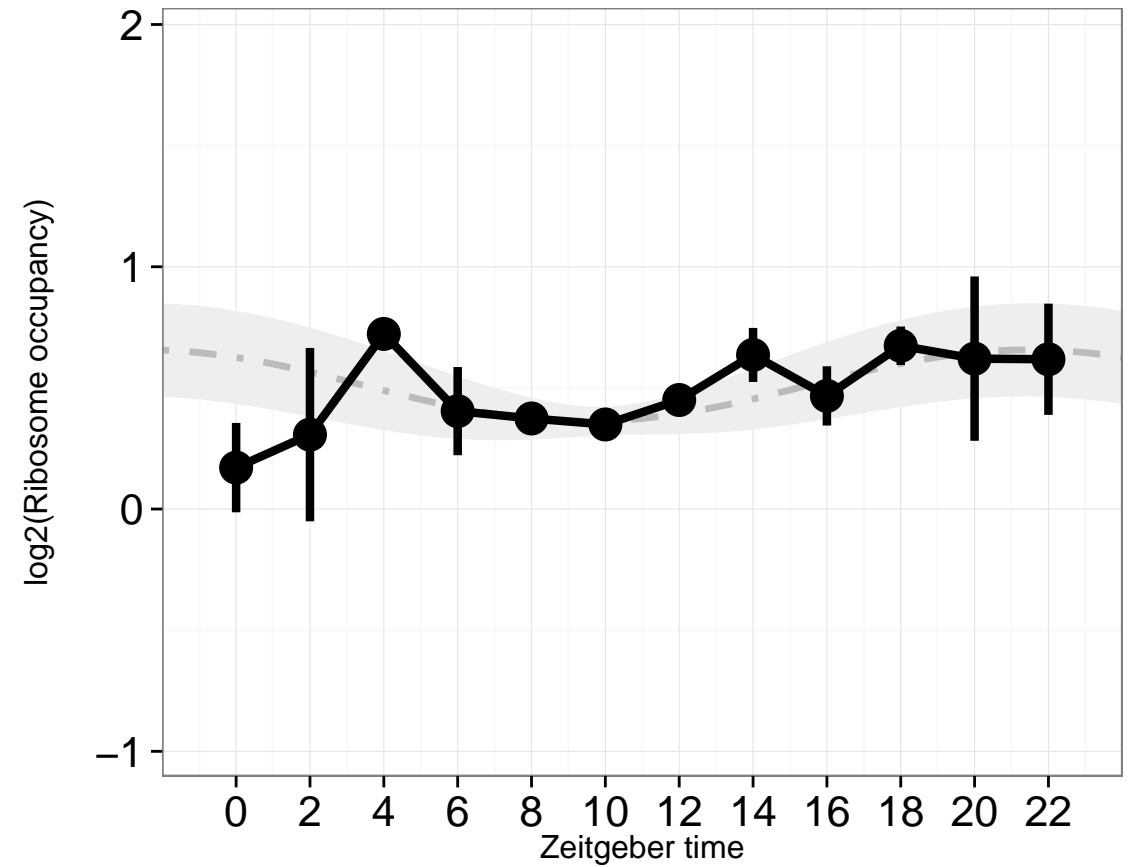

Supplement: SuppDataset_1.zip [file 9430016H08Rik_set_A.pdf › Supplemental Dataset 1/A-mRNA_nonrhyth_translation_nonrhyth/9430016H08Rik_set_A.pdf]

# 9430020K01Rik

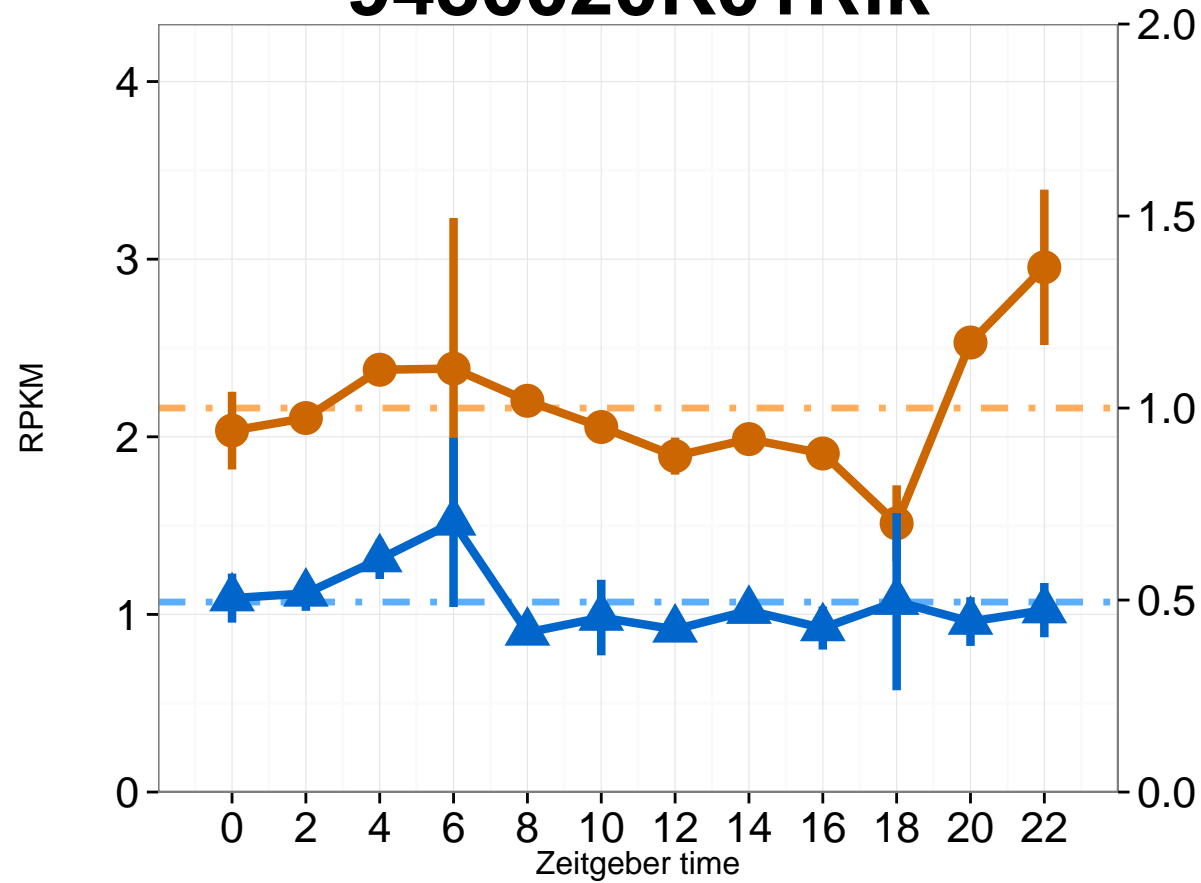

# 9430020K01Rik

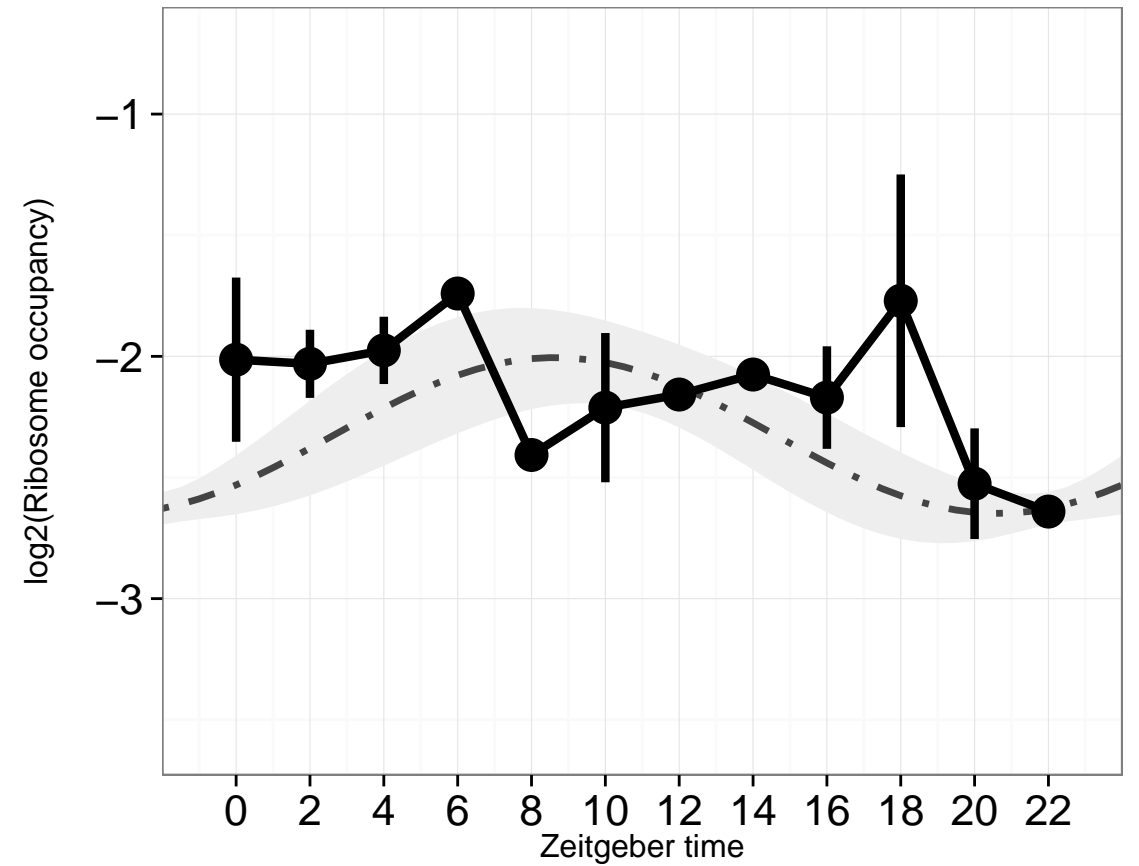

Supplement: SuppDataset_1.zip [file 9430020K01Rik_set_A.pdf › Supplemental Dataset 1/A-mRNA_nonrhyth_translation_nonrhyth/9430020K01Rik_set_A.pdf]

## 9530068E07Rik

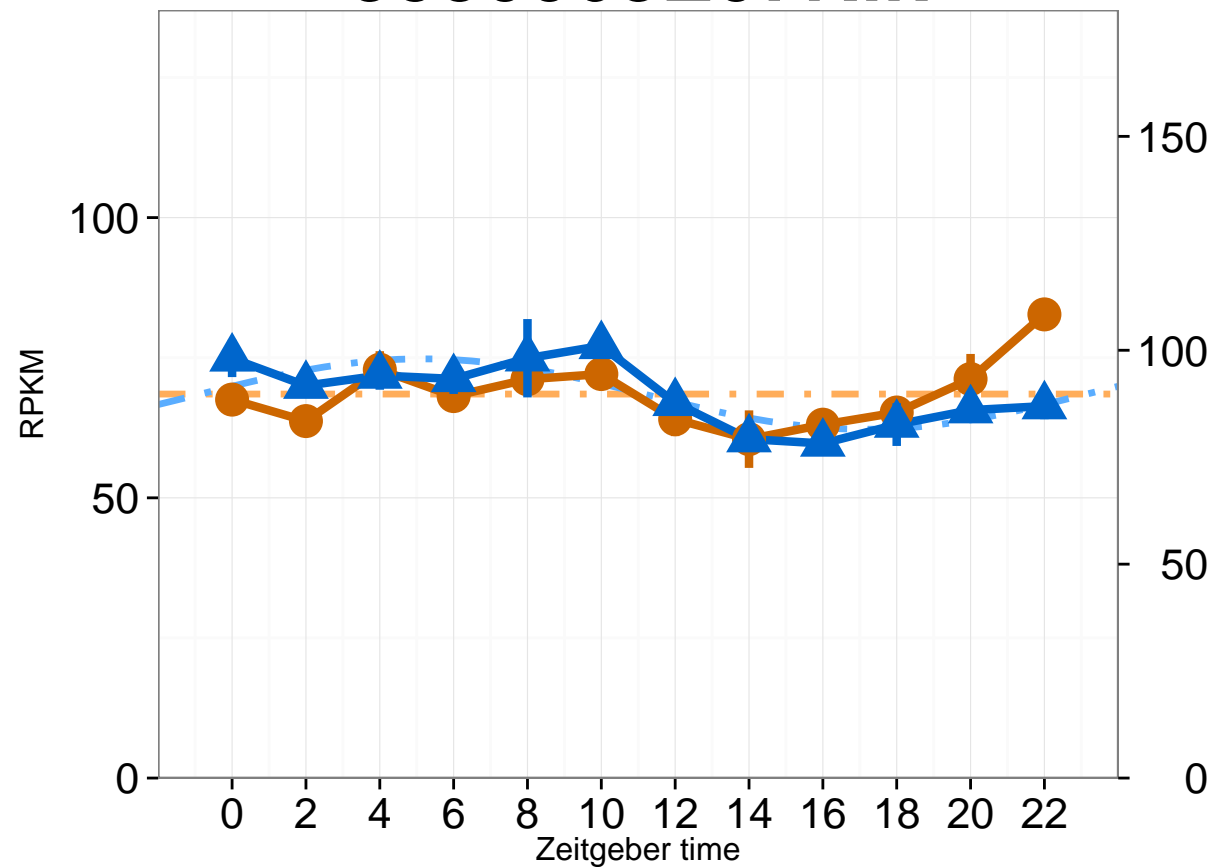

## 9530068E07Rik

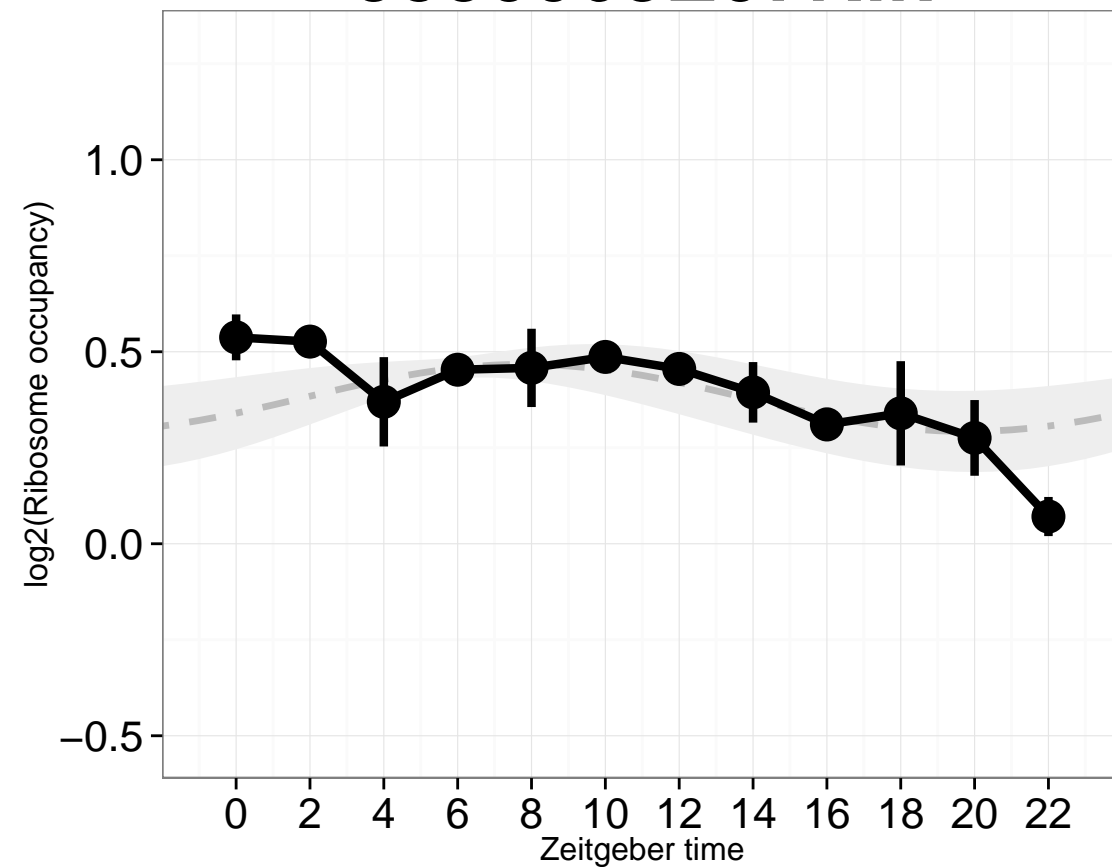

Supplement: SuppDataset_1.zip [file 9530068E07Rik_set_A.pdf › Supplemental Dataset 1/A-mRNA_nonrhyth_translation_nonrhyth/9530068E07Rik_set_A.pdf]

## 9930021J03Rik

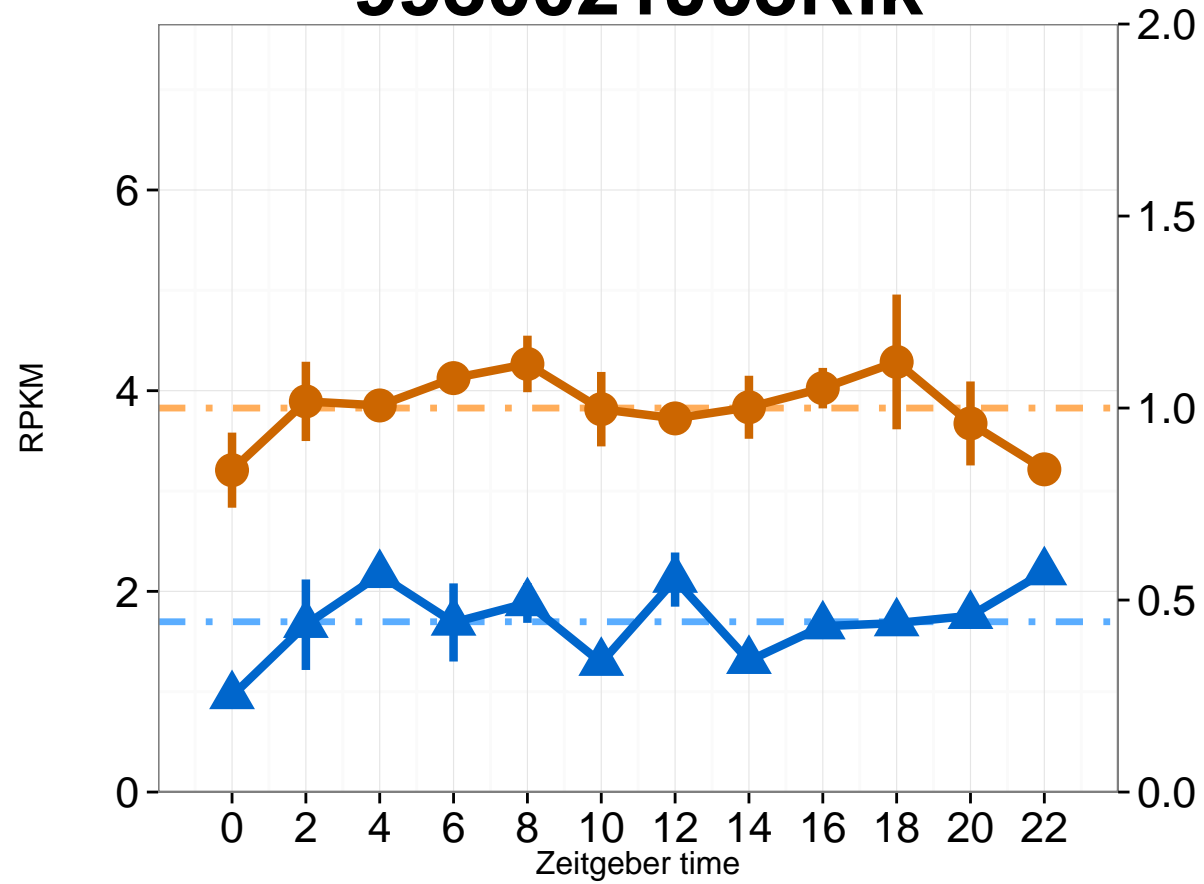

## 9930021J03Rik

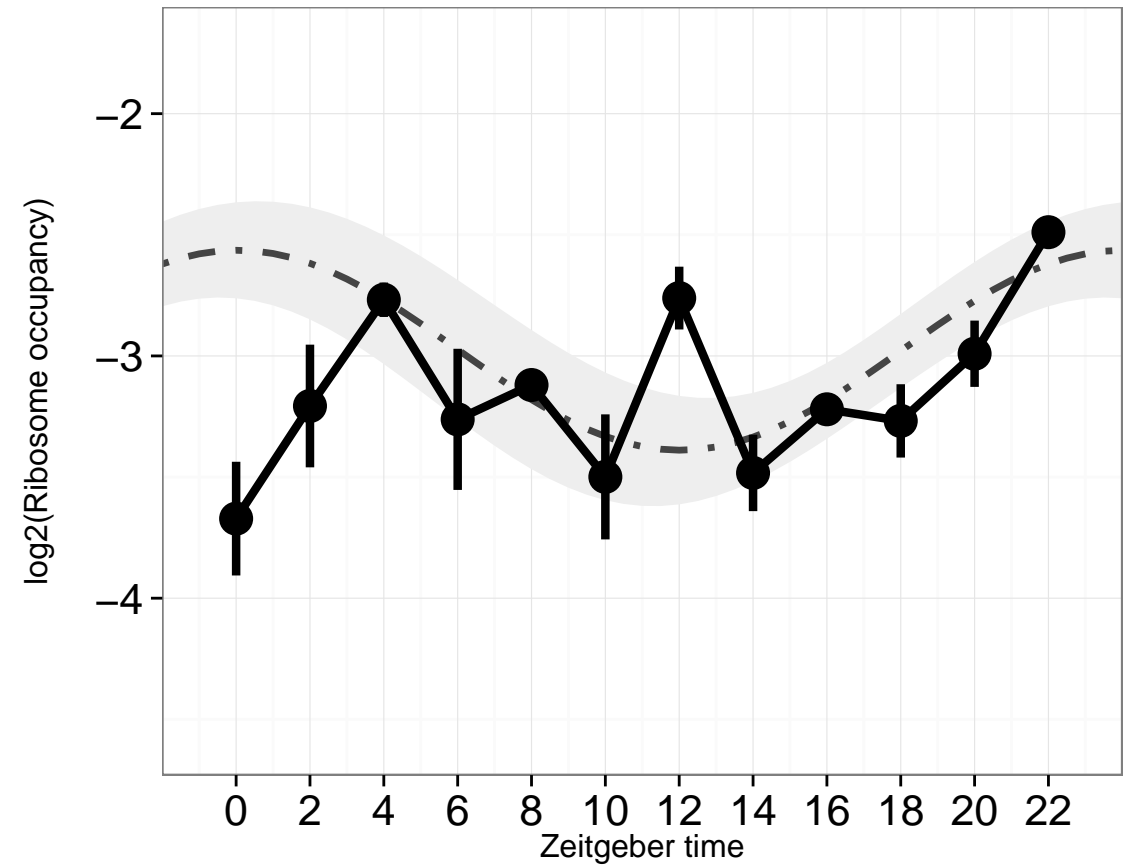

Supplement: SuppDataset_1.zip [file 9930021J03Rik_set_A.pdf › Supplemental Dataset 1/A-mRNA_nonrhyth_translation_nonrhyth/9930021J03Rik_set_A.pdf]

# 9930111J21Rik1

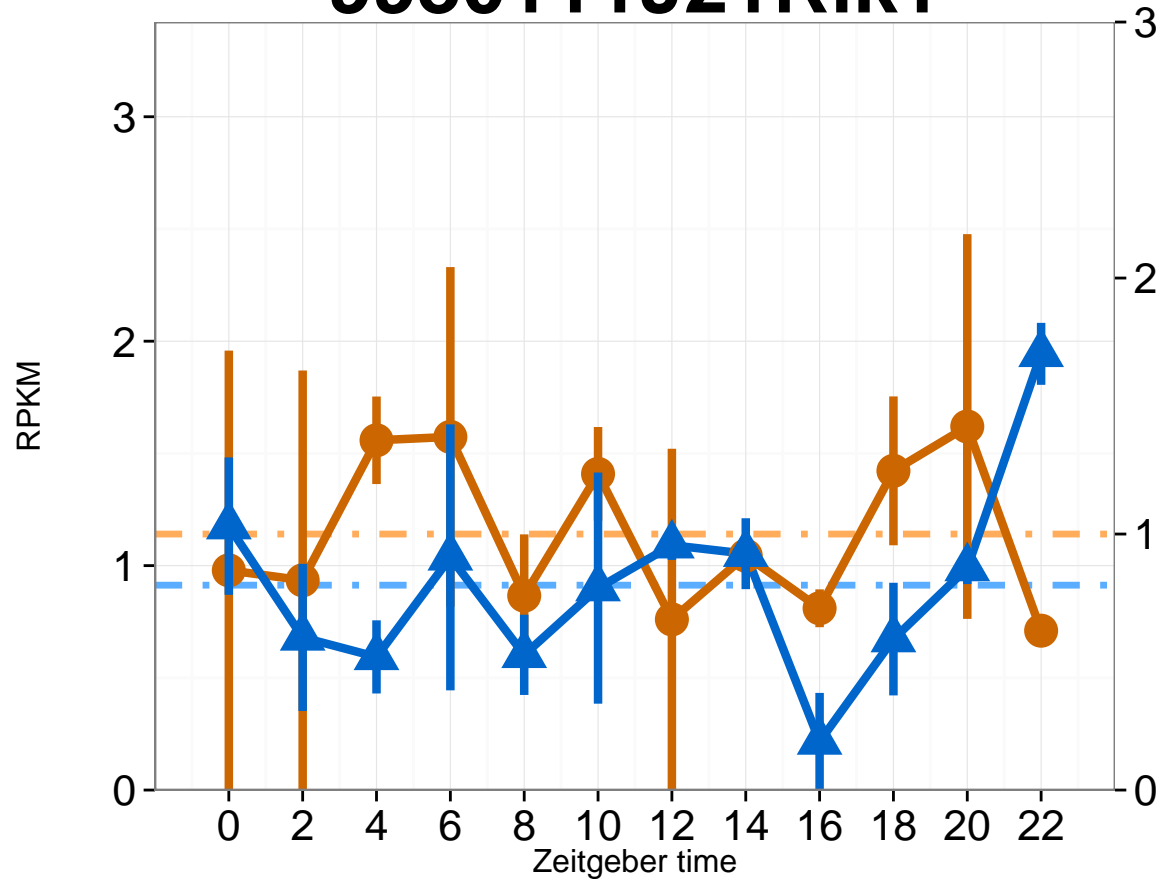

# 9930111J21Rik1

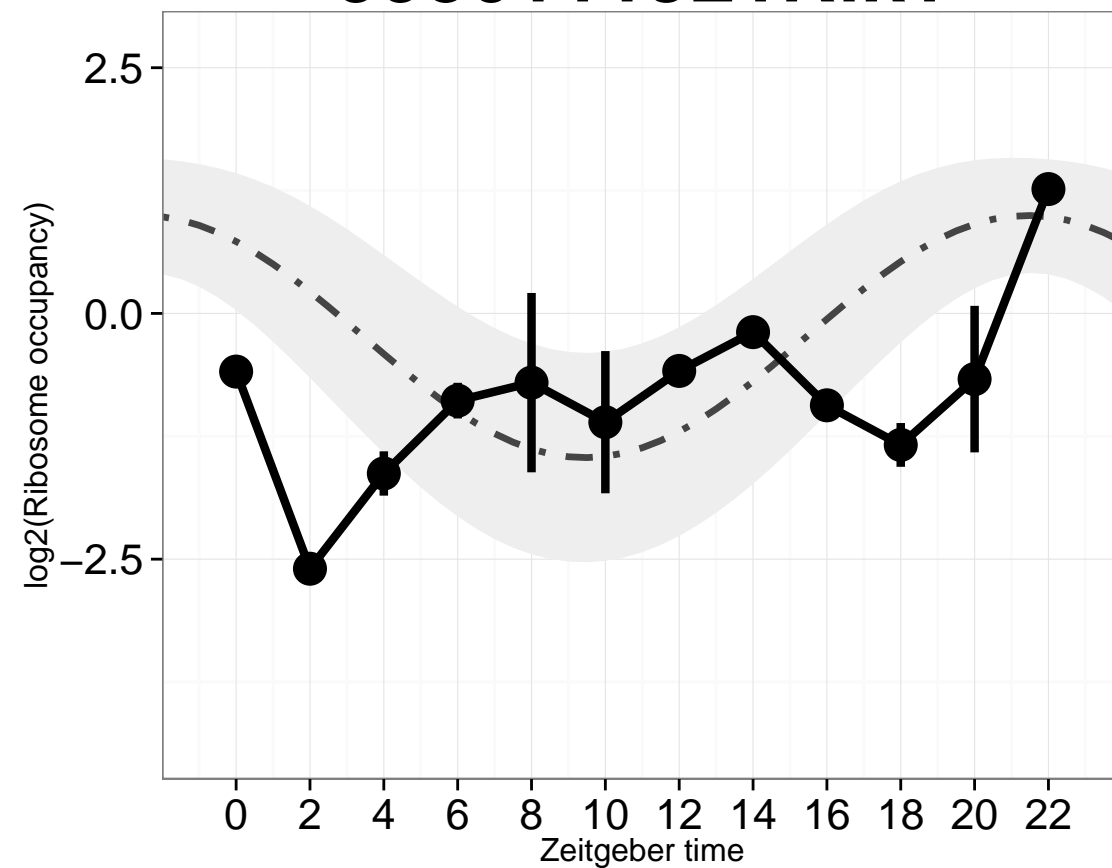

Supplement: SuppDataset_1.zip [file 9930111J21Rik1_set_A.pdf › Supplemental Dataset 1/A-mRNA_nonrhyth_translation_nonrhyth/9930111J21Rik1_set_A.pdf]

# A130010J15Rik

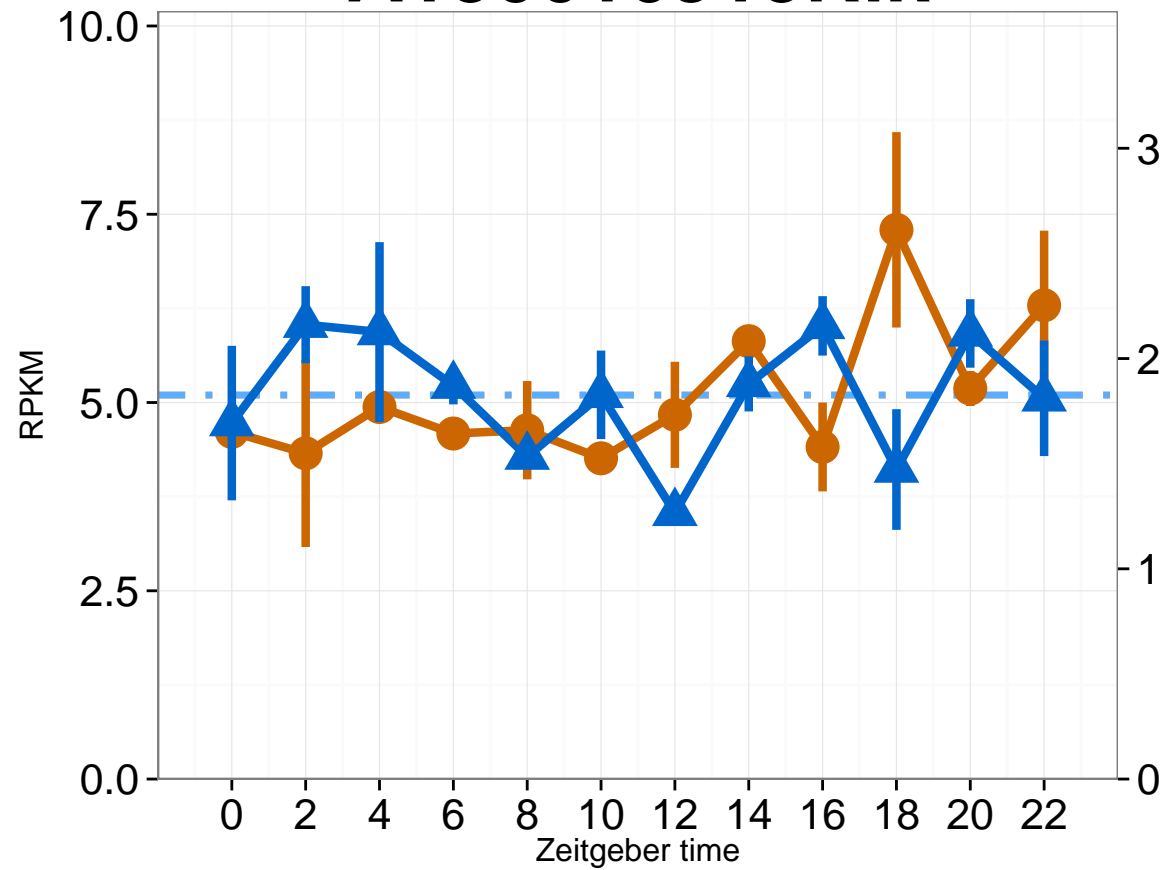

# A130010J15Rik

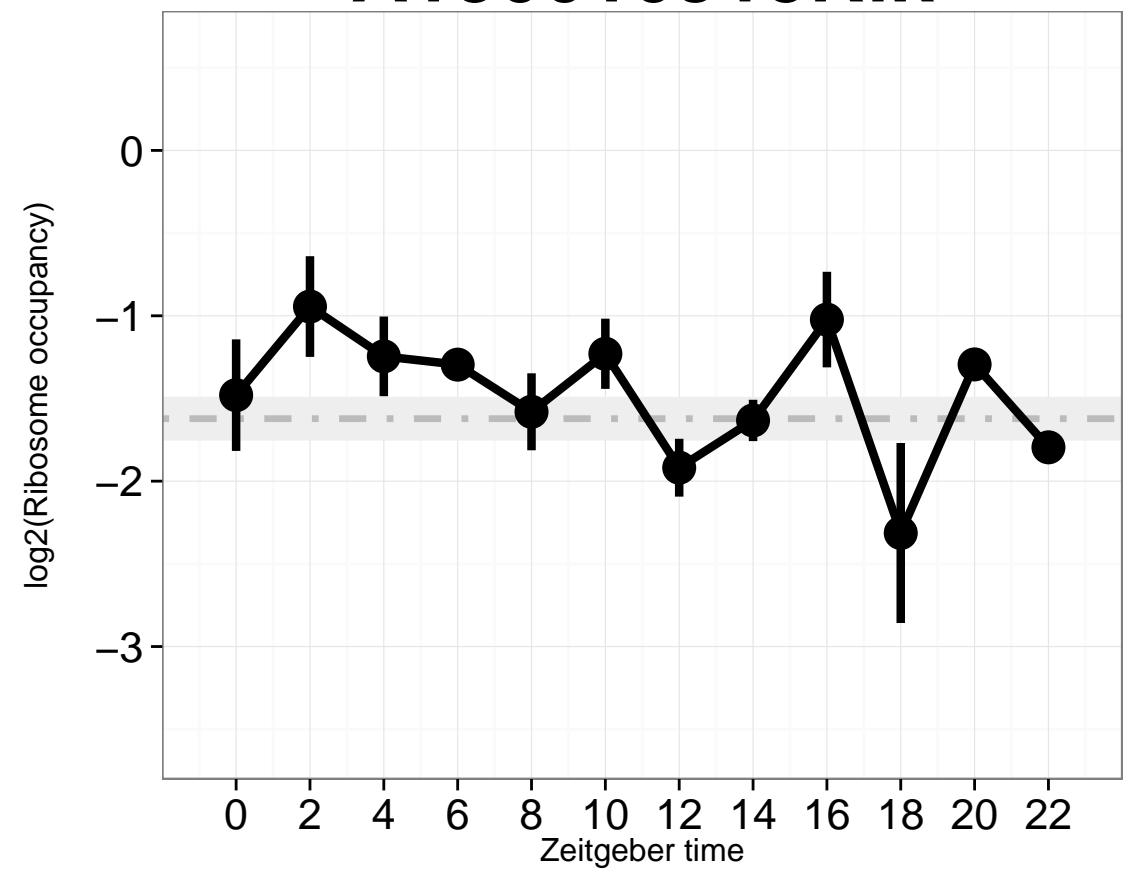

Supplement: SuppDataset_1.zip [file A130010J15Rik_set_A.pdf › Supplemental Dataset 1/A-mRNA_nonrhyth_translation_nonrhyth/A130010J15Rik_set_A.pdf]

# A1cf

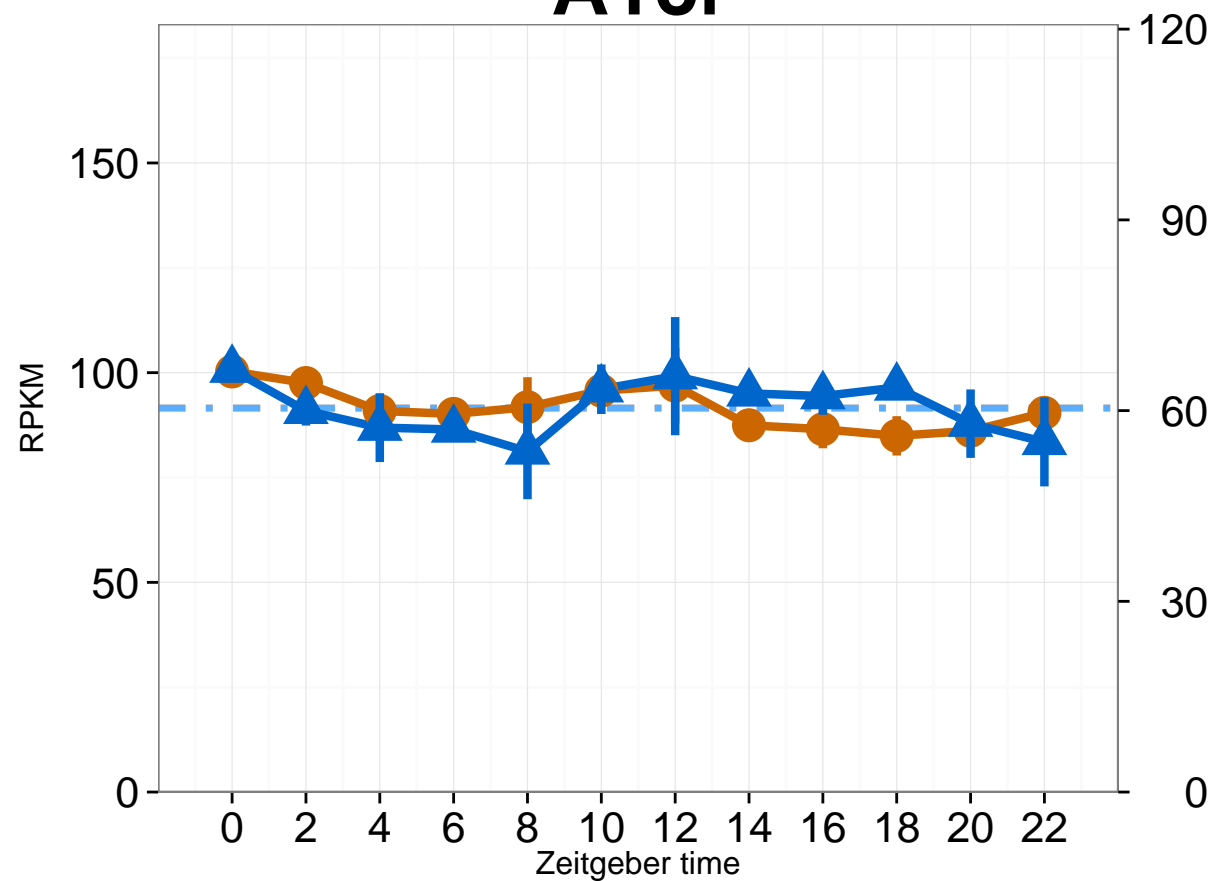

# A1cf

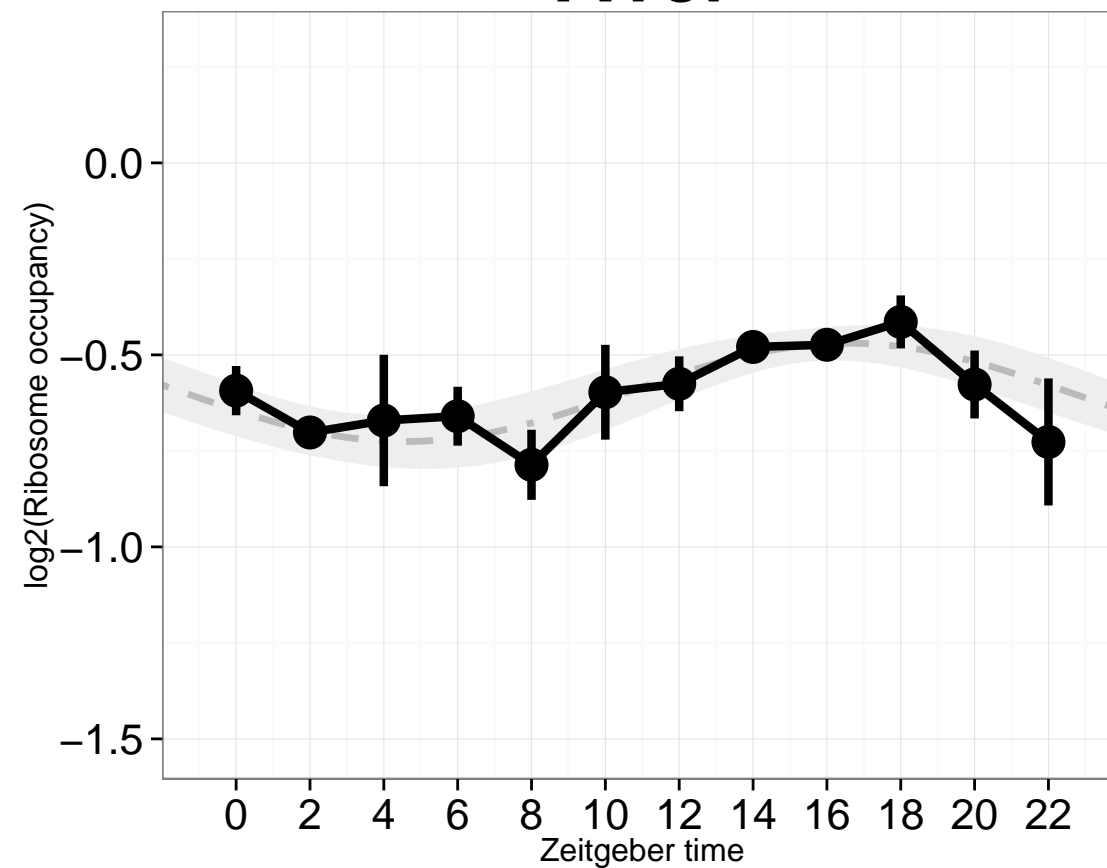

Supplement: SuppDataset_1.zip [file A1cf_set_A.pdf › Supplemental Dataset 1/A-mRNA_nonrhyth_translation_nonrhyth/A1cf_set_A.pdf]

# A230046K03Rik

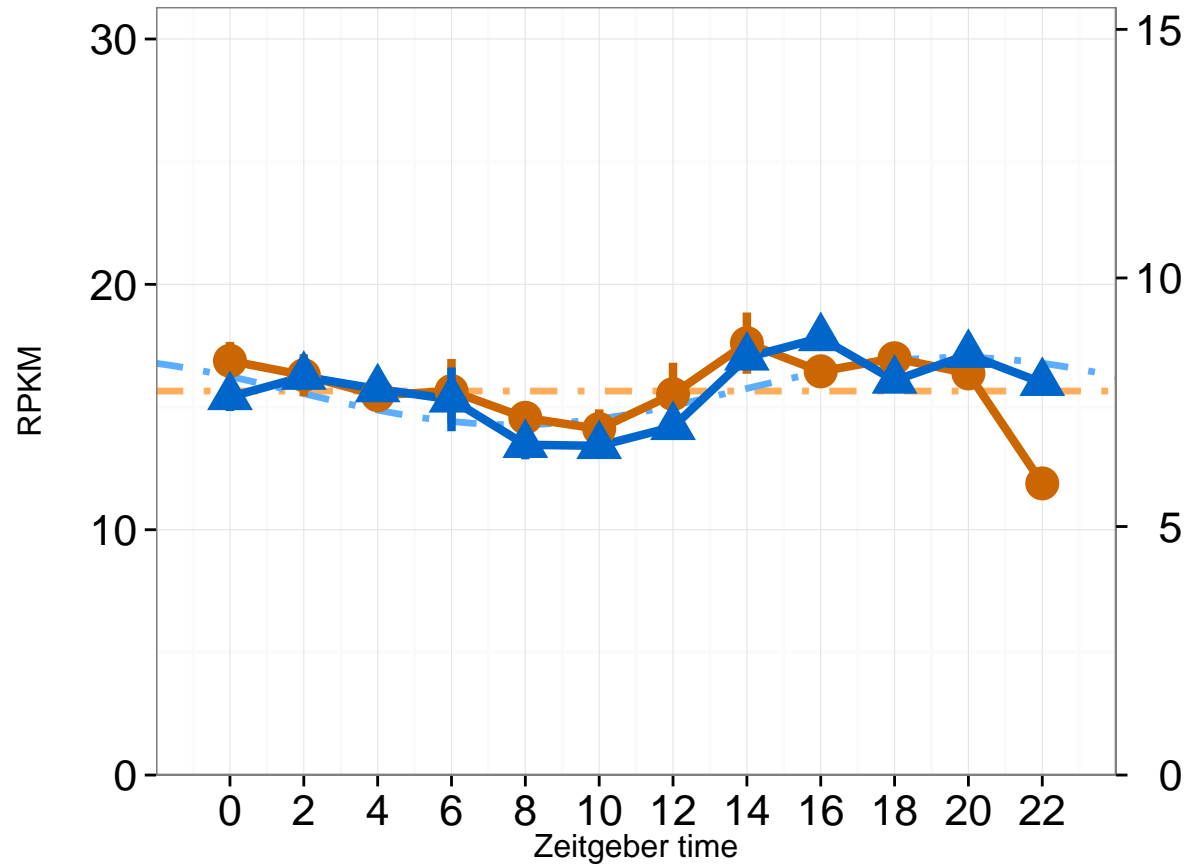

# A230046K03Rik

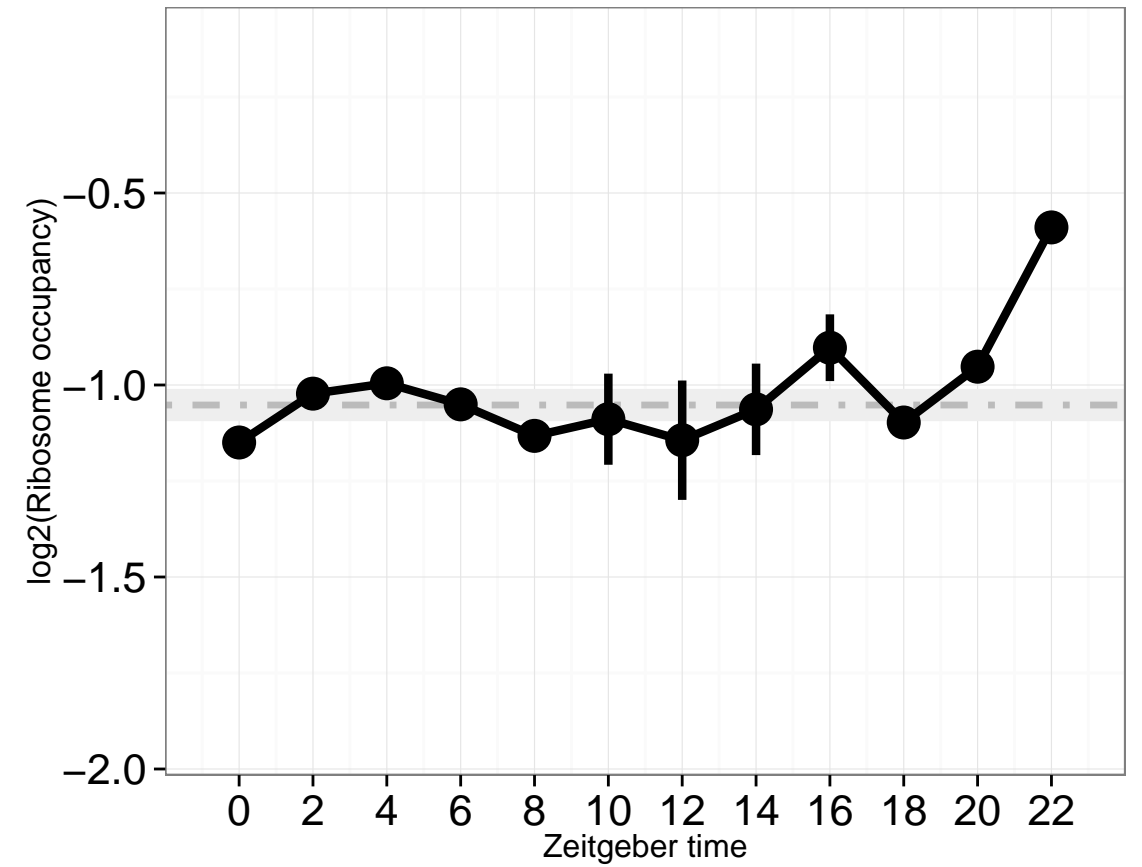

Supplement: SuppDataset_1.zip [file A230046K03Rik_set_A.pdf › Supplemental Dataset 1/A-mRNA_nonrhyth_translation_nonrhyth/A230046K03Rik_set_A.pdf]

## A430033K04Rik

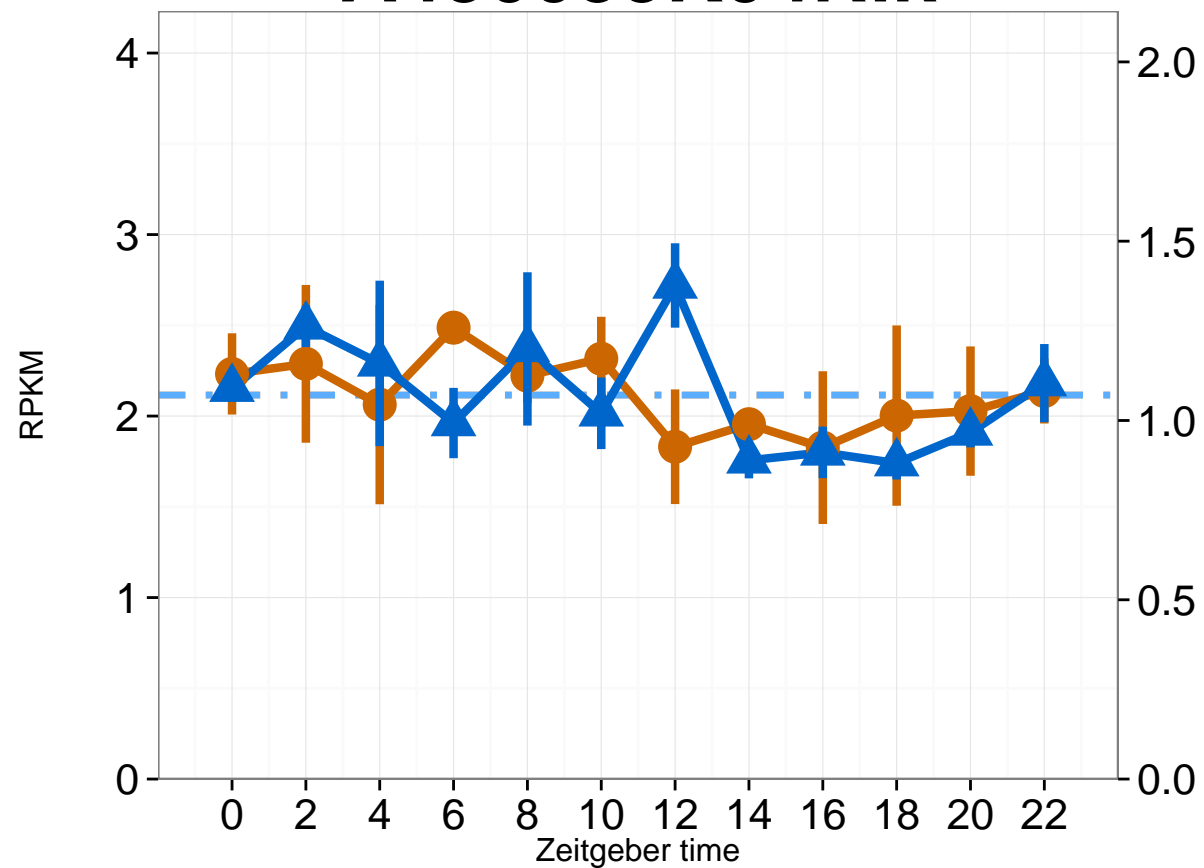

## A430033K04Rik

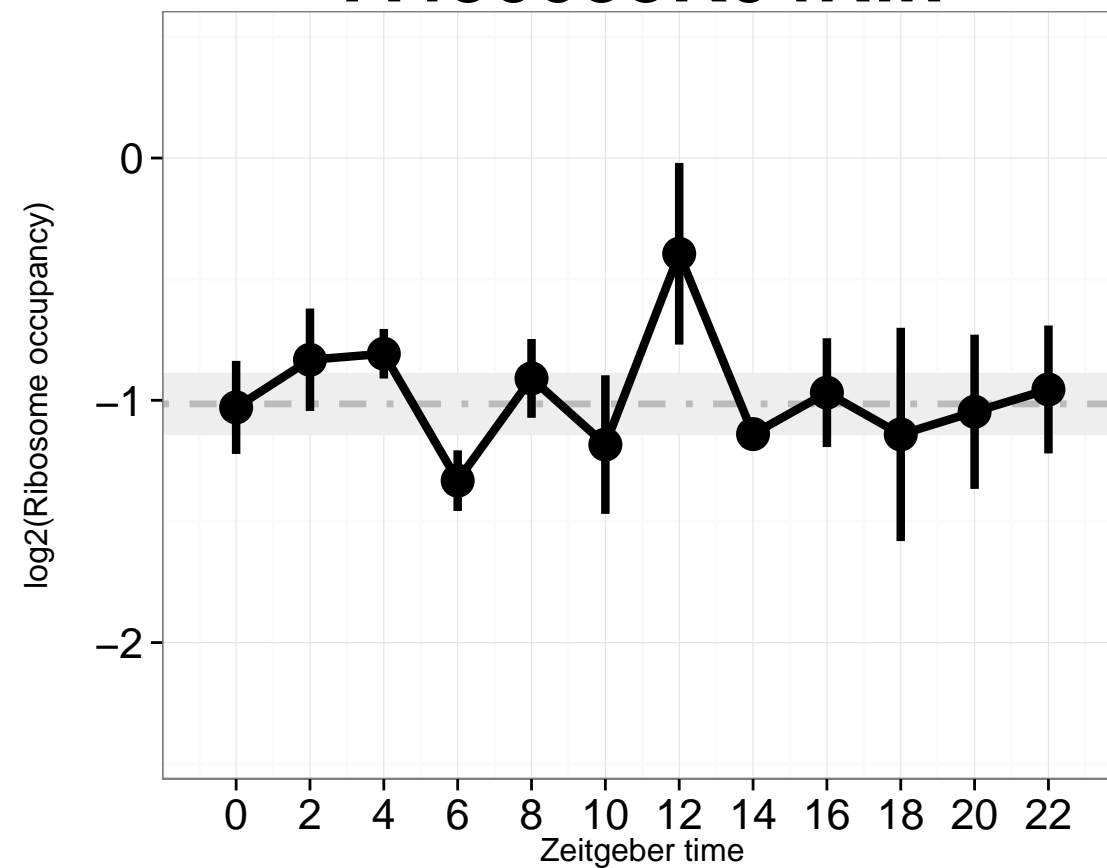

Supplement: SuppDataset_1.zip [file A430033K04Rik_set_A.pdf › Supplemental Dataset 1/A-mRNA_nonrhyth_translation_nonrhyth/A430033K04Rik_set_A.pdf]

# A430105I19Rik

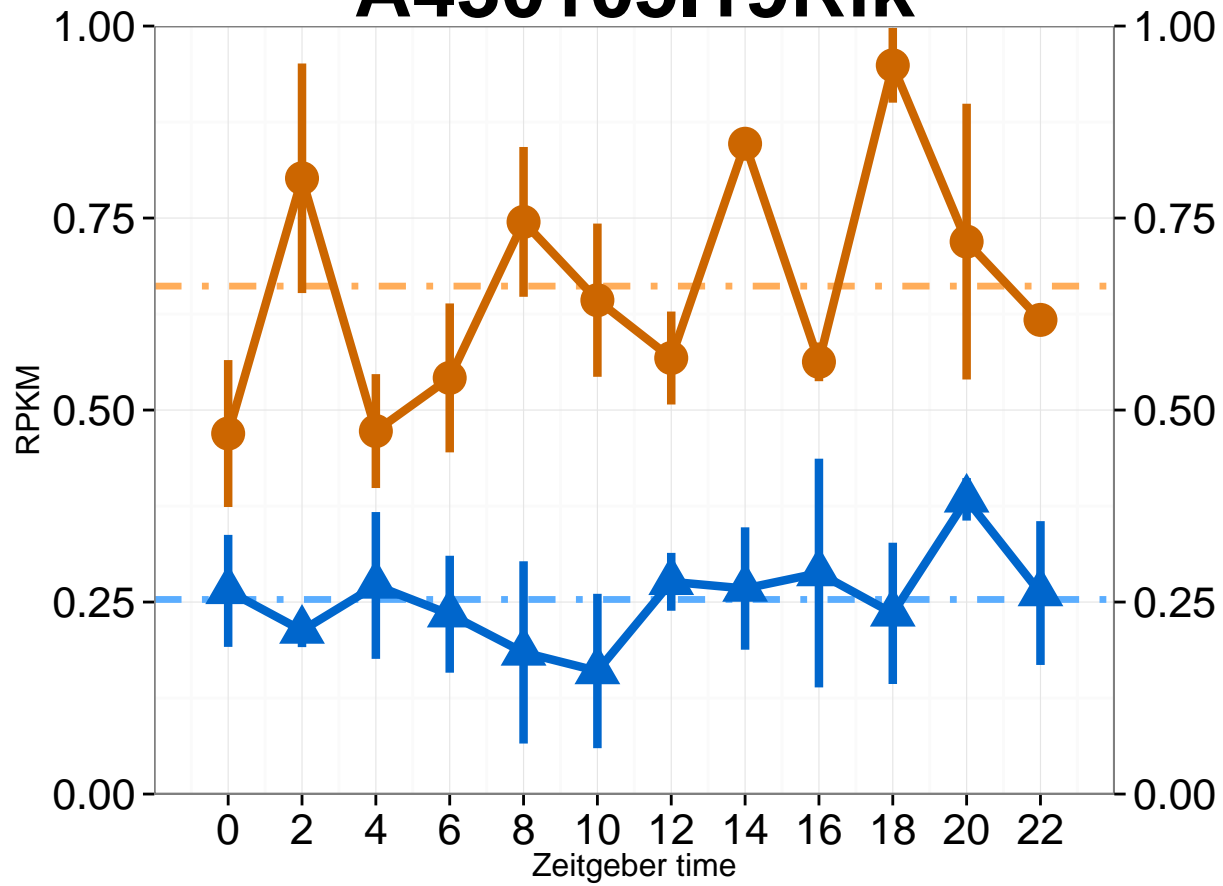

# A430105I19Rik

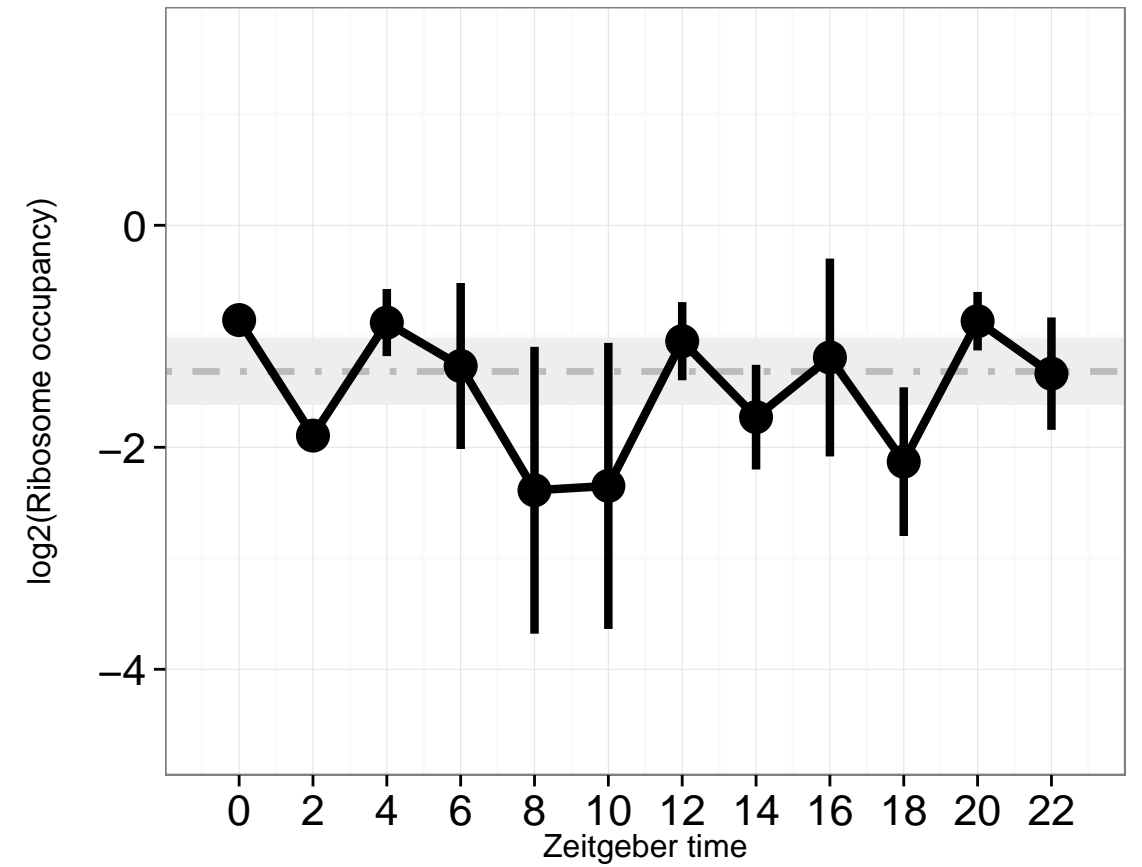

Supplement: SuppDataset_1.zip [file A430105I19Rik_set_A.pdf › Supplemental Dataset 1/A-mRNA_nonrhyth_translation_nonrhyth/A430105I19Rik_set_A.pdf]

# A630007B06Rik

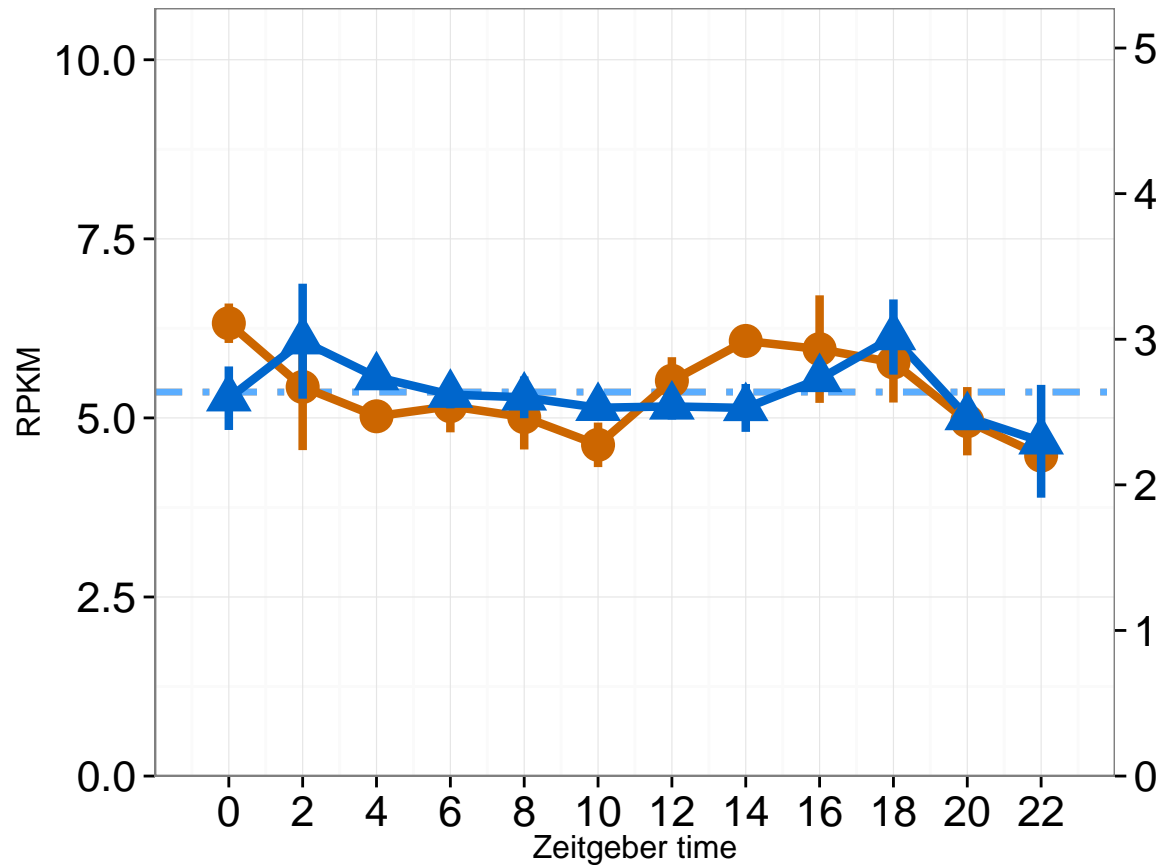

# A630007B06Rik

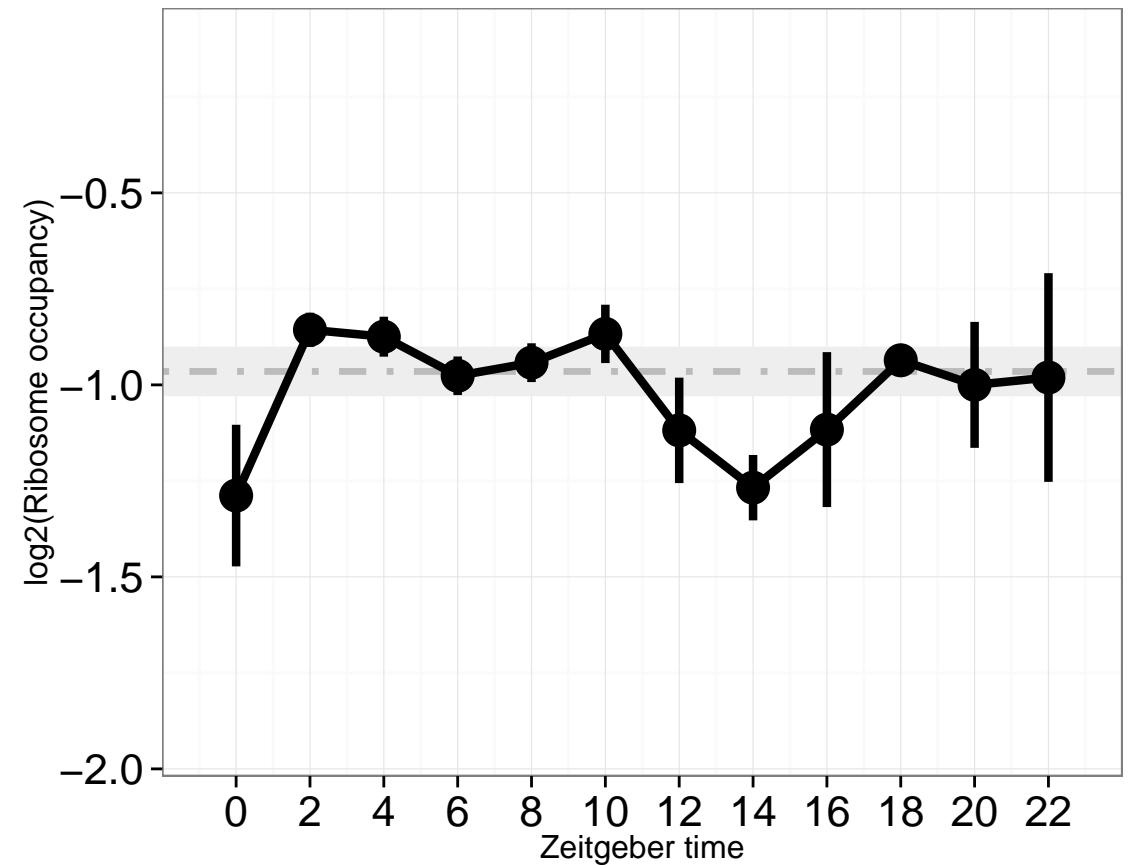

Supplement: SuppDataset_1.zip [file A630007B06Rik_set_A.pdf › Supplemental Dataset 1/A-mRNA_nonrhyth_translation_nonrhyth/A630007B06Rik_set_A.pdf]

# A830010M20Rik

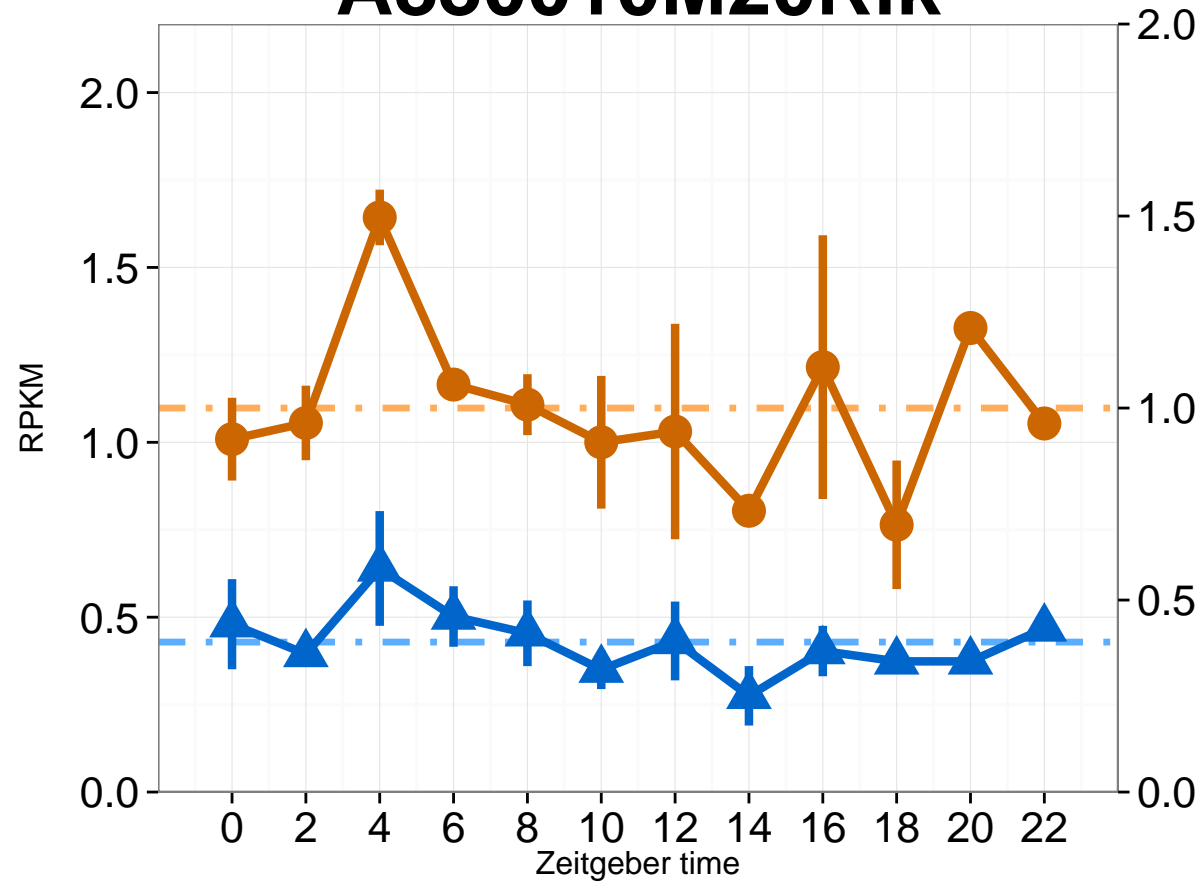

# A830010M20Rik

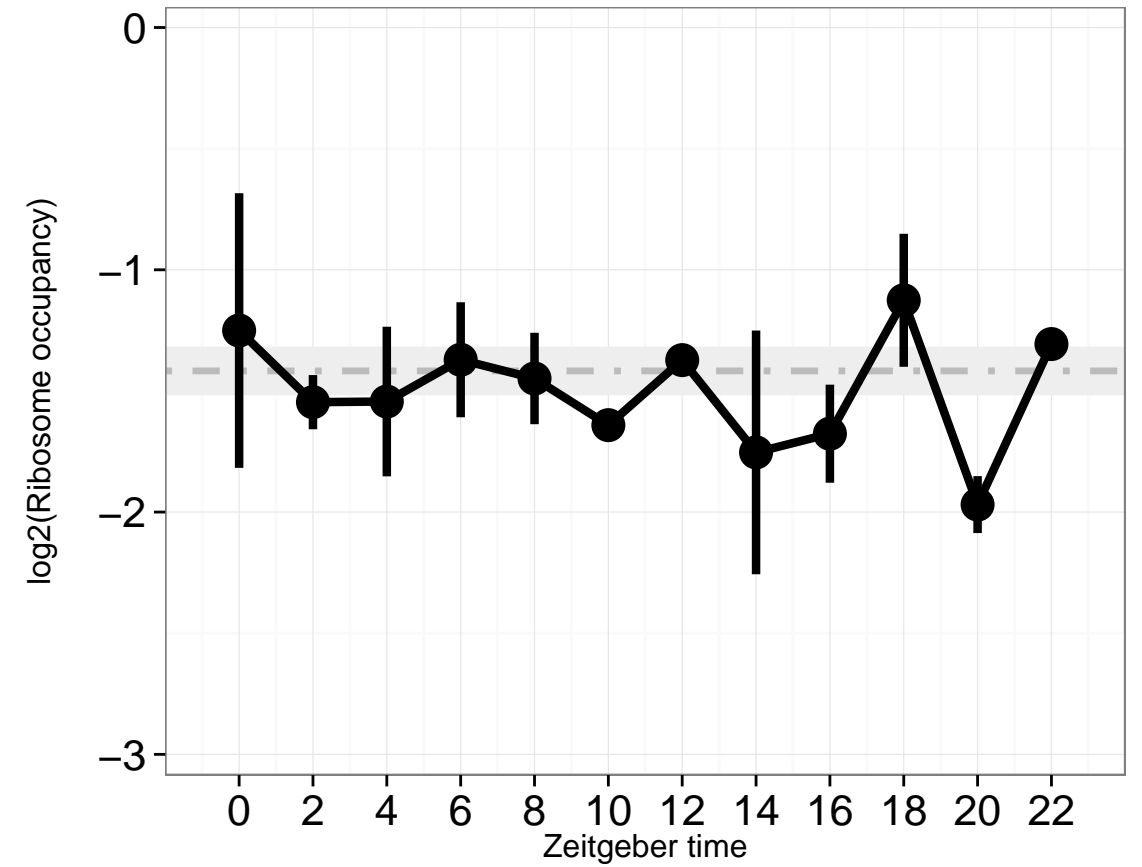

Supplement: SuppDataset_1.zip [file A830010M20Rik_set_A.pdf › Supplemental Dataset 1/A-mRNA_nonrhyth_translation_nonrhyth/A830010M20Rik_set_A.pdf]

**A930005H10Rik TR**

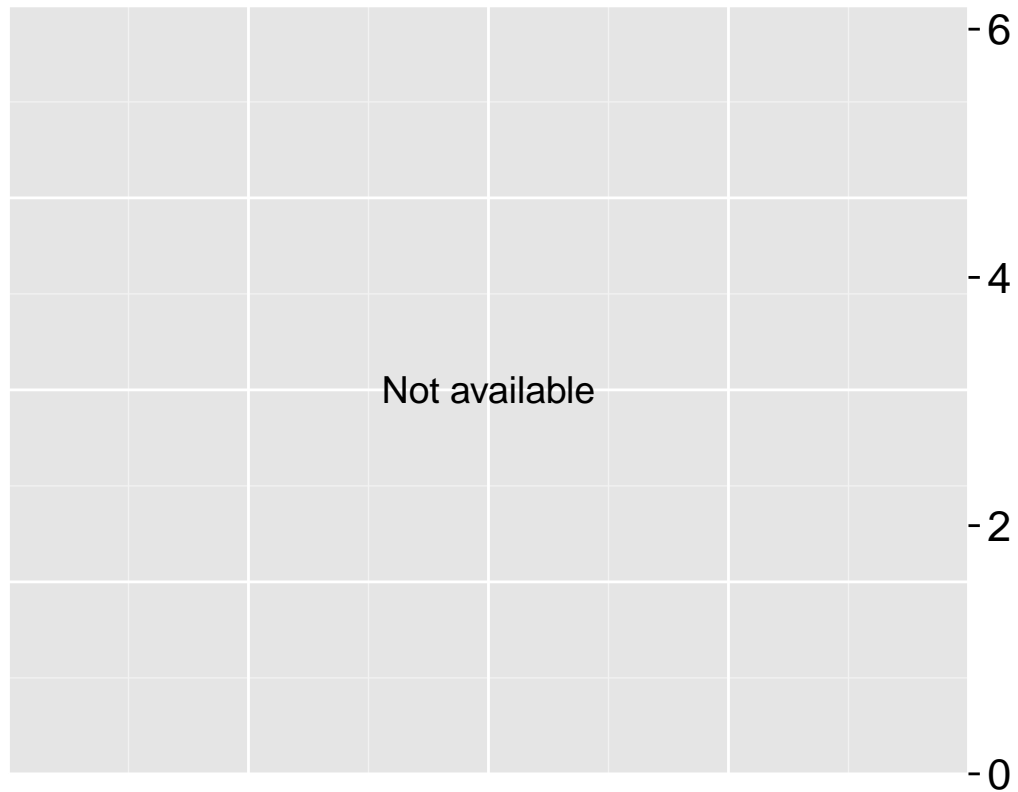

**A930005H10Rik log<sub>2</sub>(Ribosome occup**

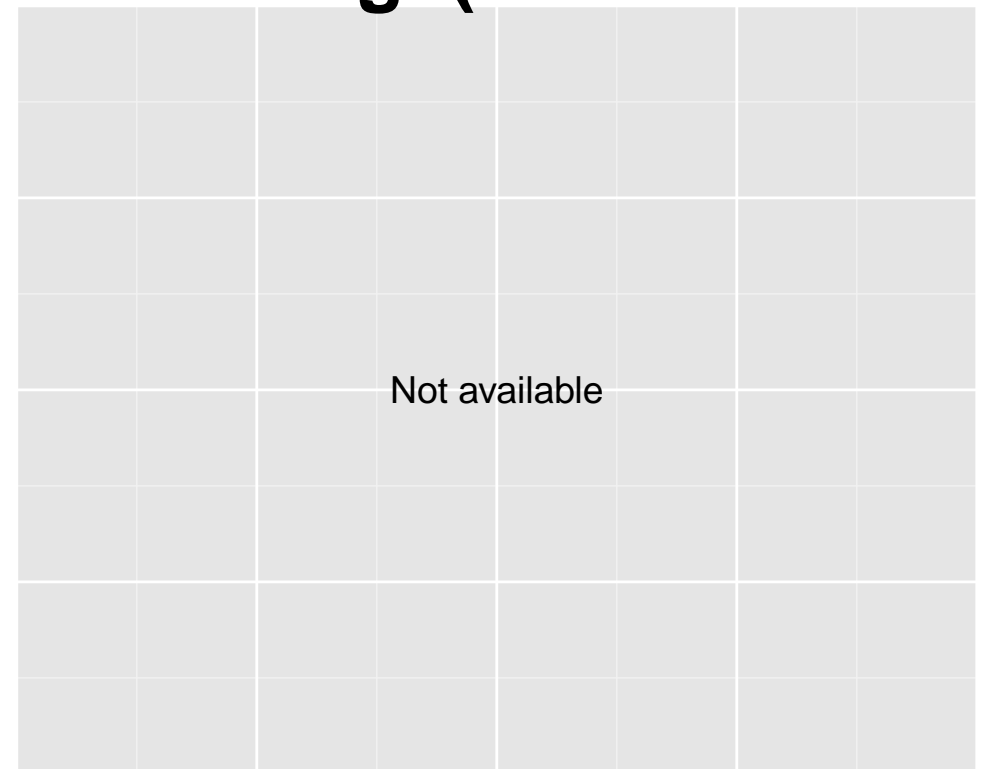

Supplement: SuppDataset_1.zip [file A930005H10Rik_set_A.pdf › Supplemental Dataset 1/A-mRNA_nonrhyth_translation_nonrhyth/A930005H10Rik_set_A.pdf]

## A930039A15Rik

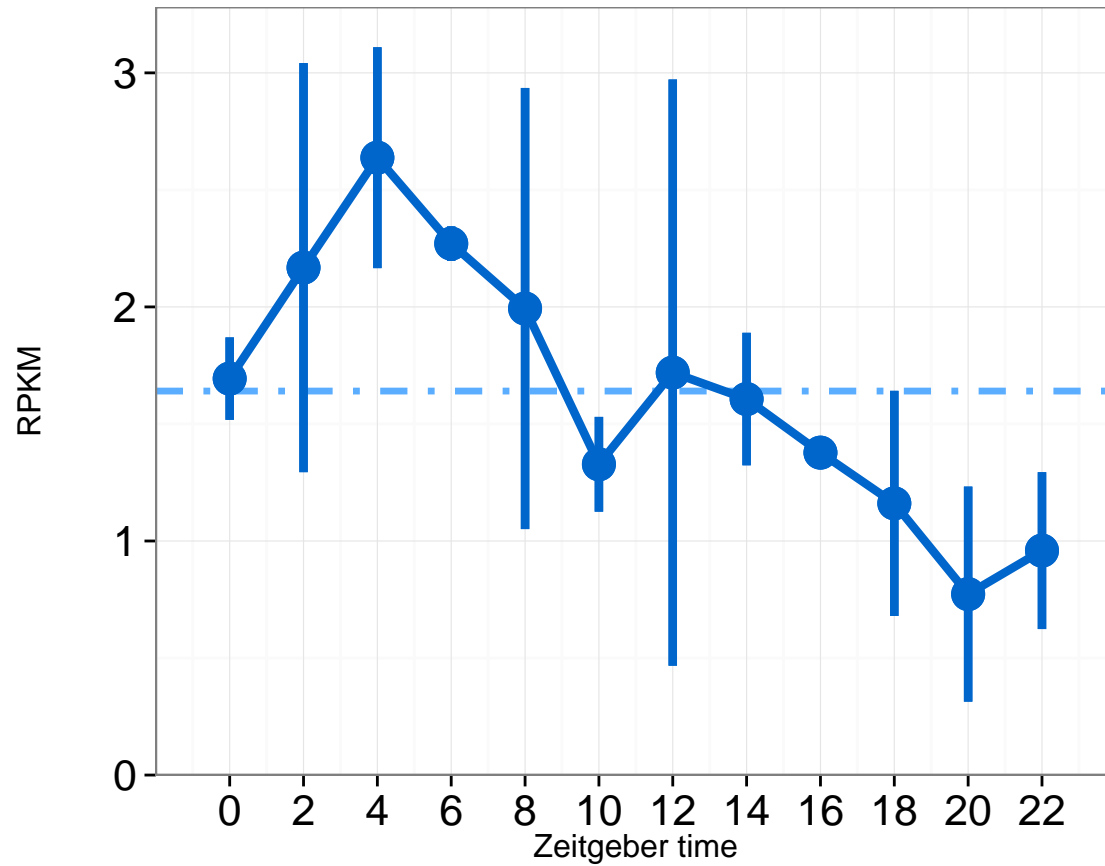

## A930039A15Rik log<sub>2</sub>(Ribosome occup

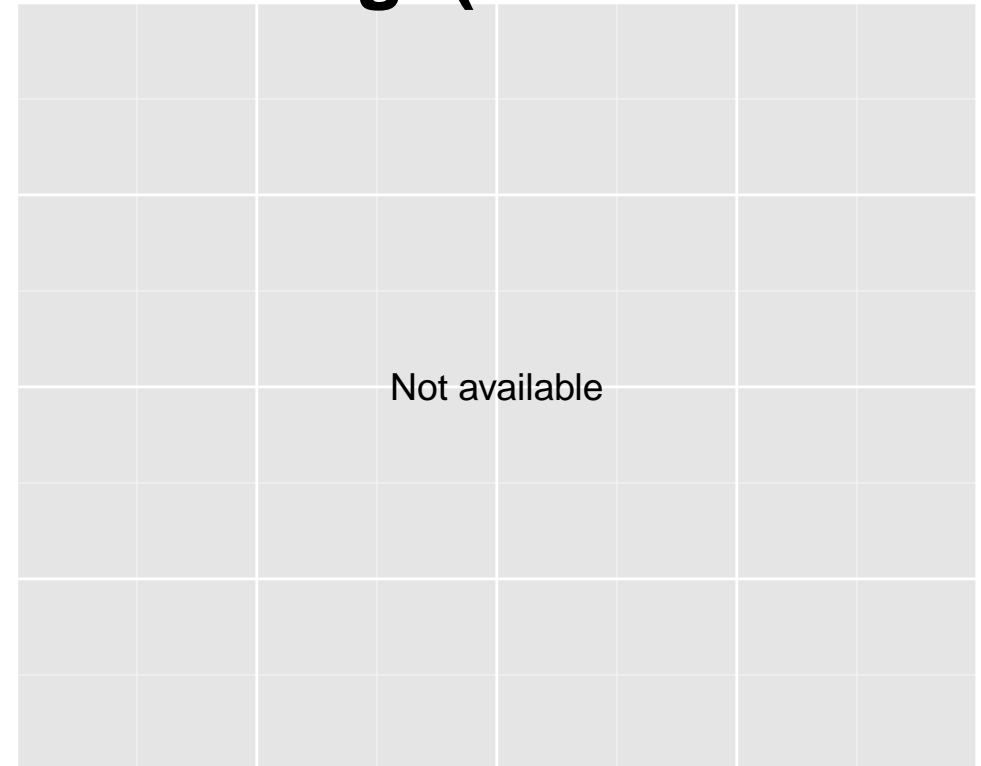

Supplement: SuppDataset_1.zip [file A930039A15Rik_set_A.pdf › Supplemental Dataset 1/A-mRNA_nonrhyth_translation_nonrhyth/A930039A15Rik_set_A.pdf]

## AA415398

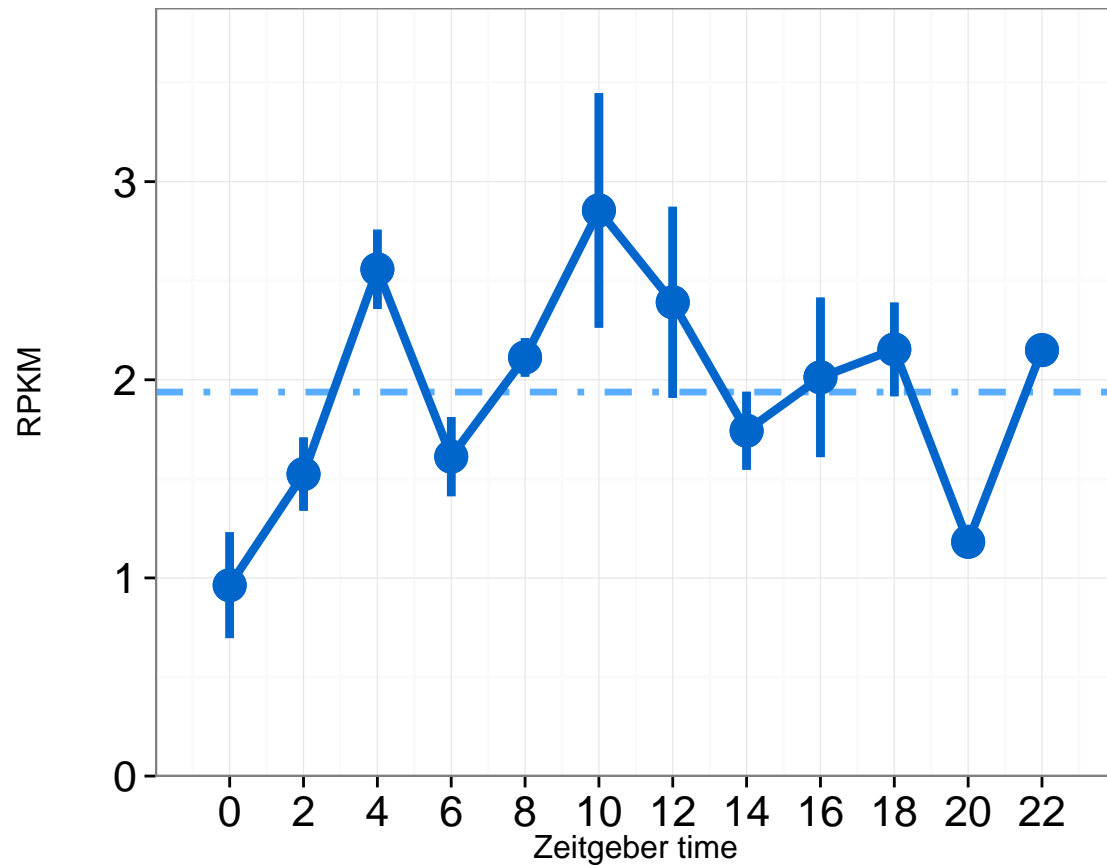

## AA415398 log2(Ribosome occupancy)

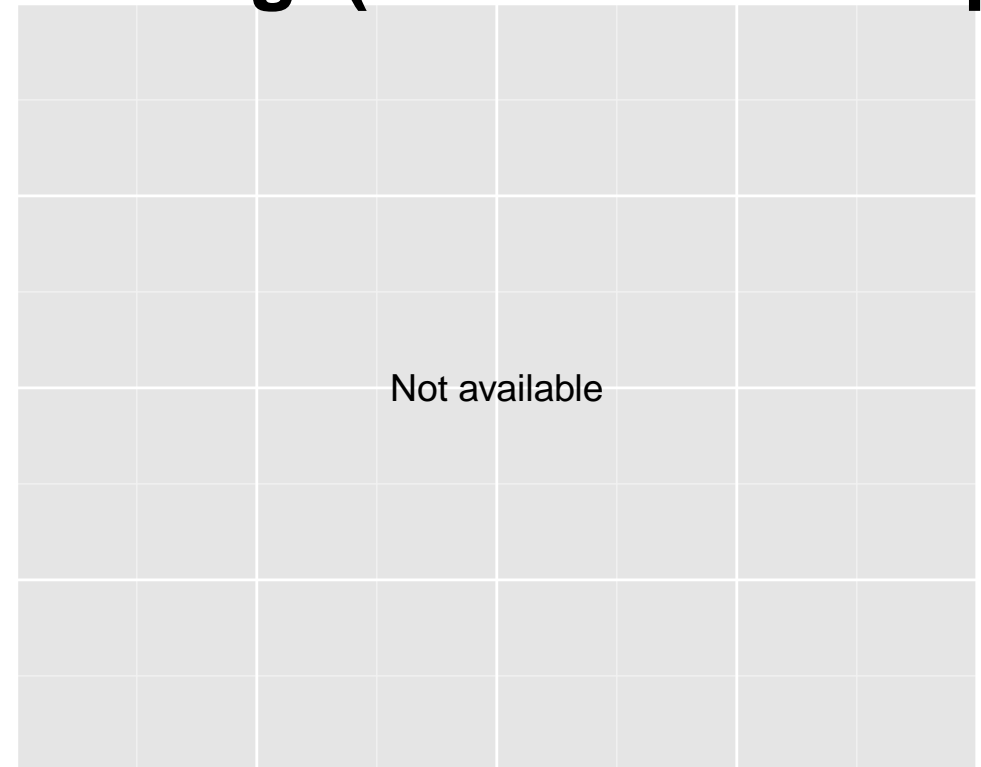

Supplement: SuppDataset_1.zip [file AA415398_set_A.pdf › Supplemental Dataset 1/A-mRNA_nonrhyth_translation_nonrhyth/AA415398_set_A.pdf]

# AB124611

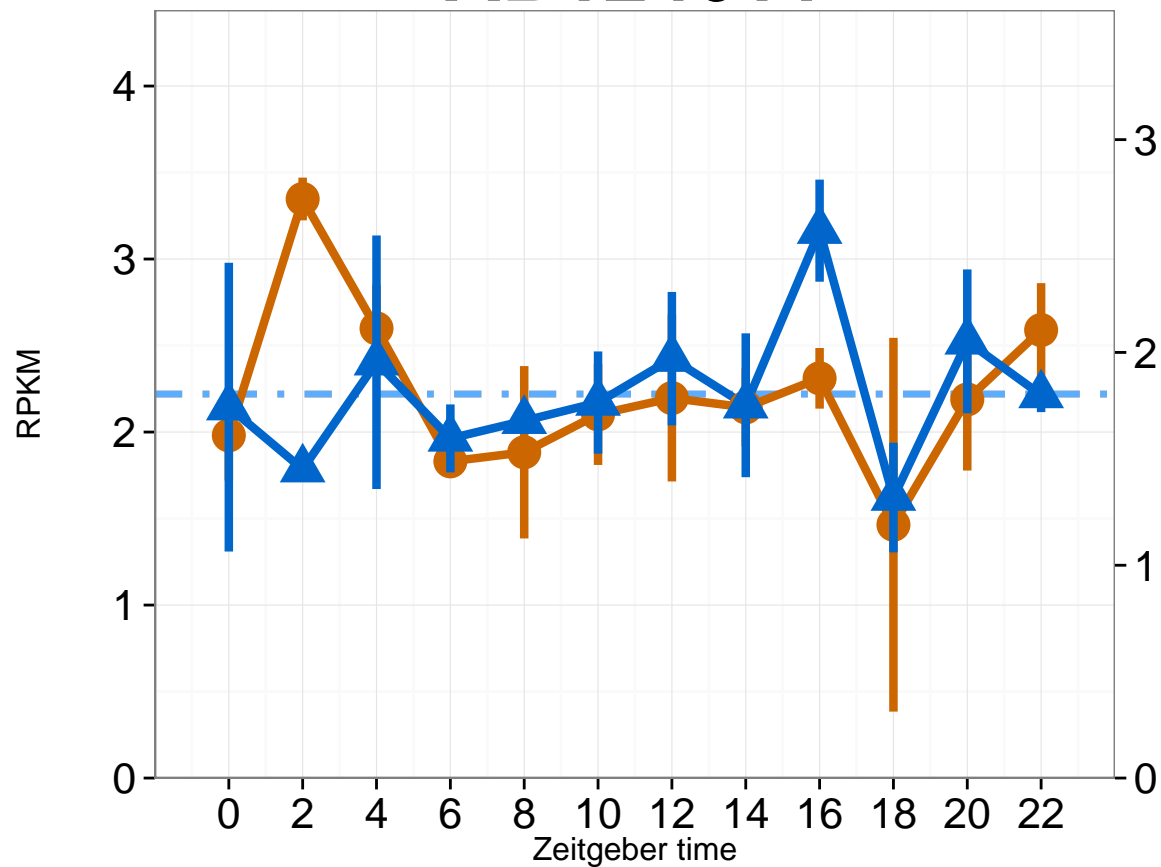

# AB124611

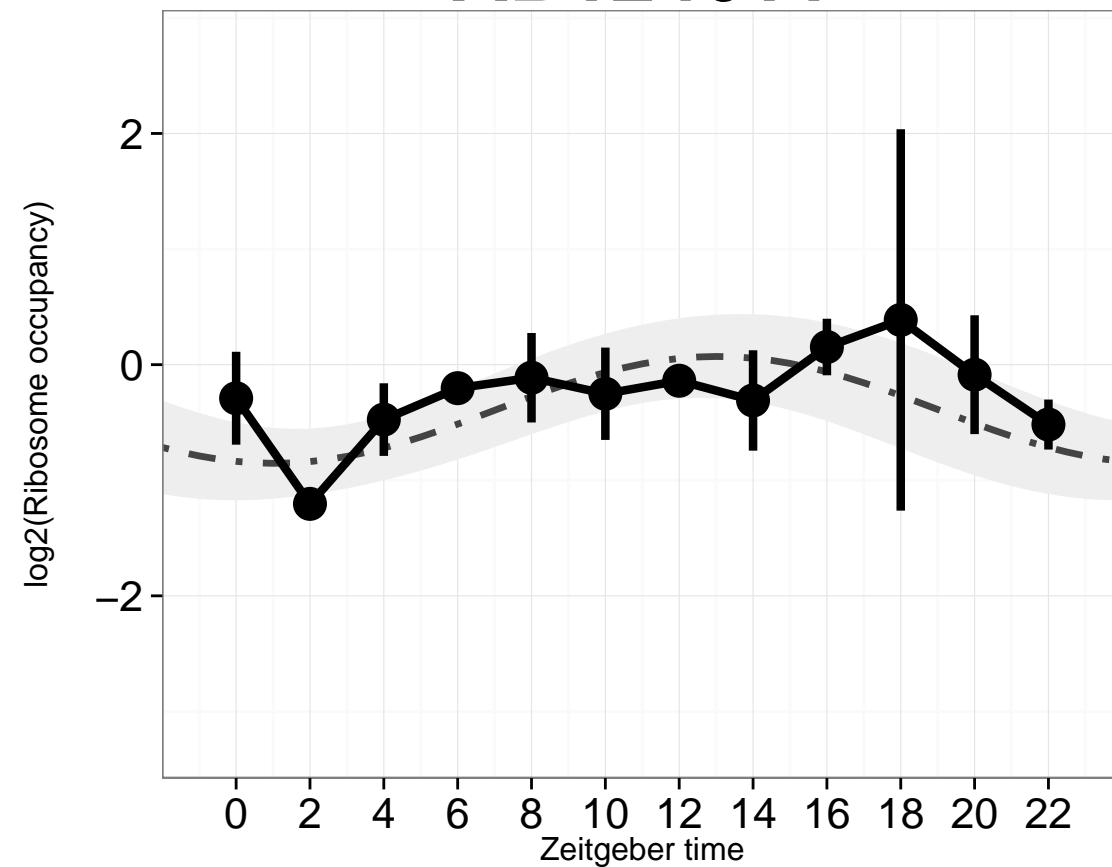

Supplement: SuppDataset_1.zip [file AB124611_set_A.pdf › Supplemental Dataset 1/A-mRNA_nonrhyth_translation_nonrhyth/AB124611_set_A.pdf]

## AF251705

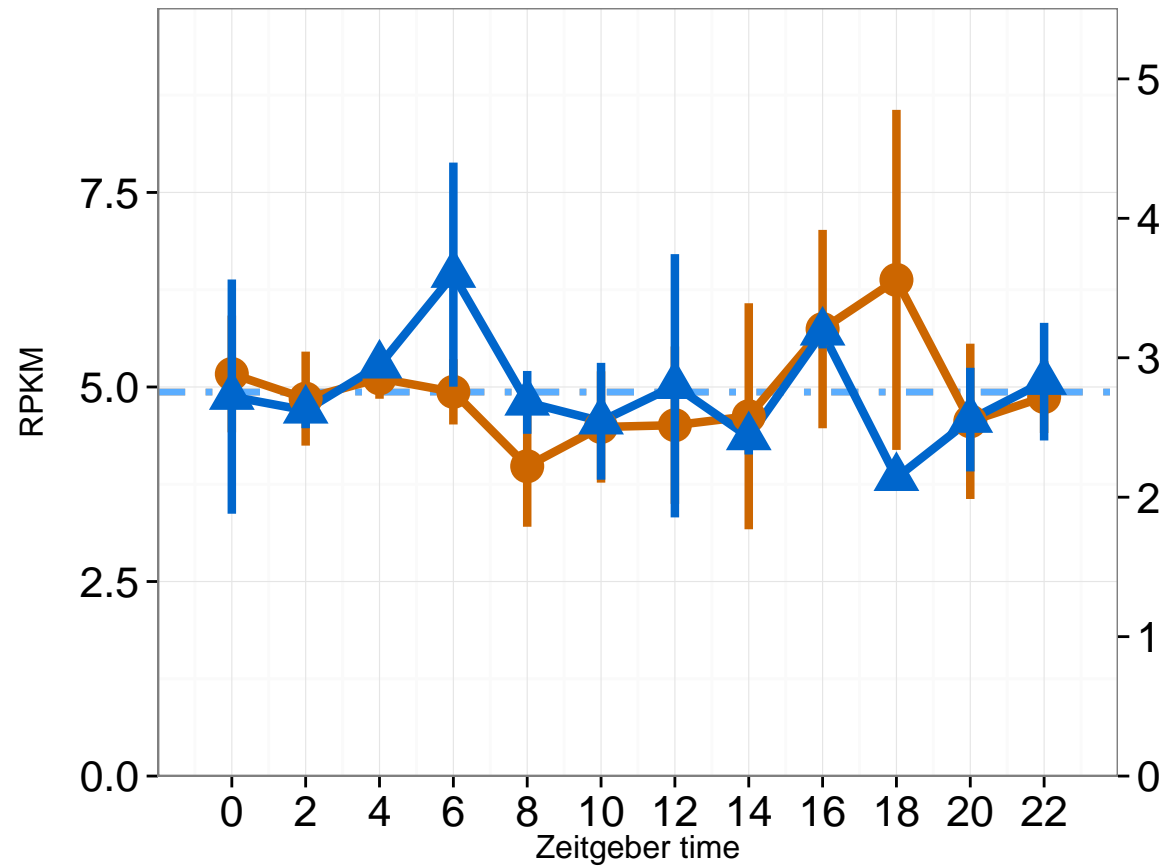

## AF251705

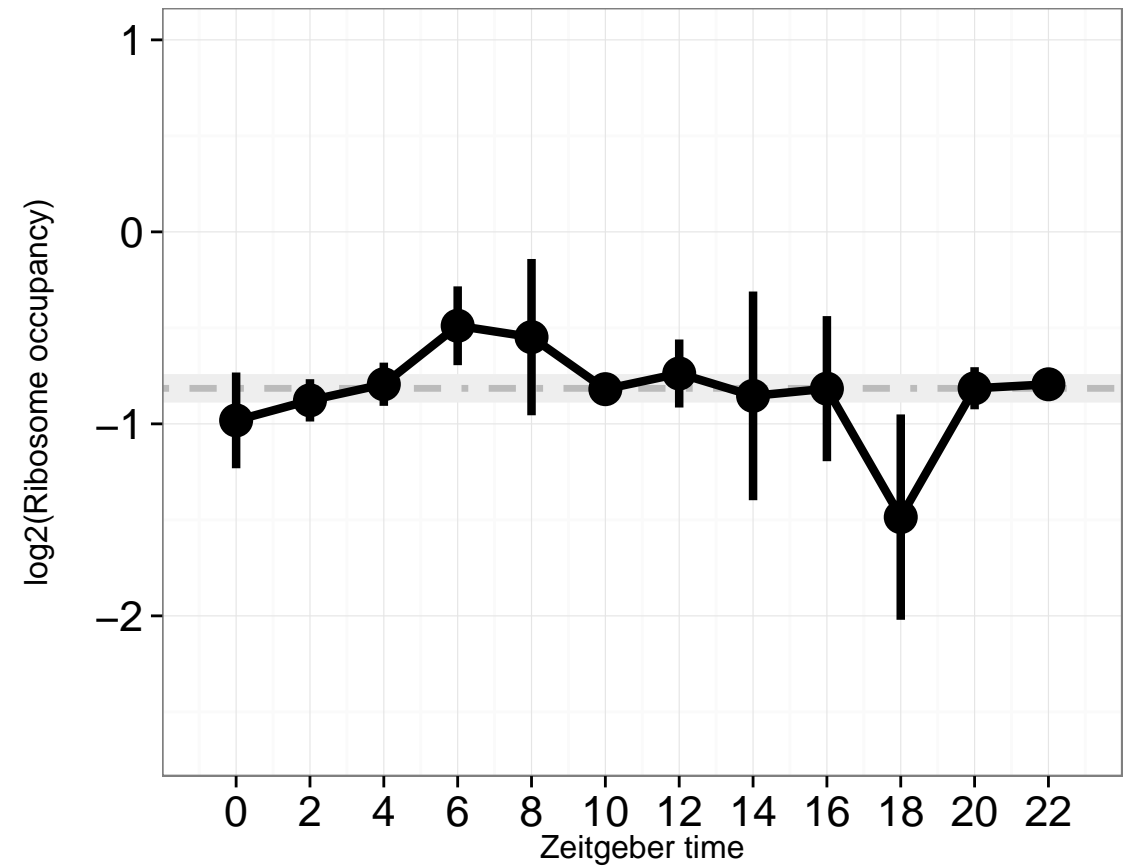

Supplement: SuppDataset_1.zip [file AF251705_set_A.pdf › Supplemental Dataset 1/A-mRNA_nonrhyth_translation_nonrhyth/AF251705_set_A.pdf]

## AI118078

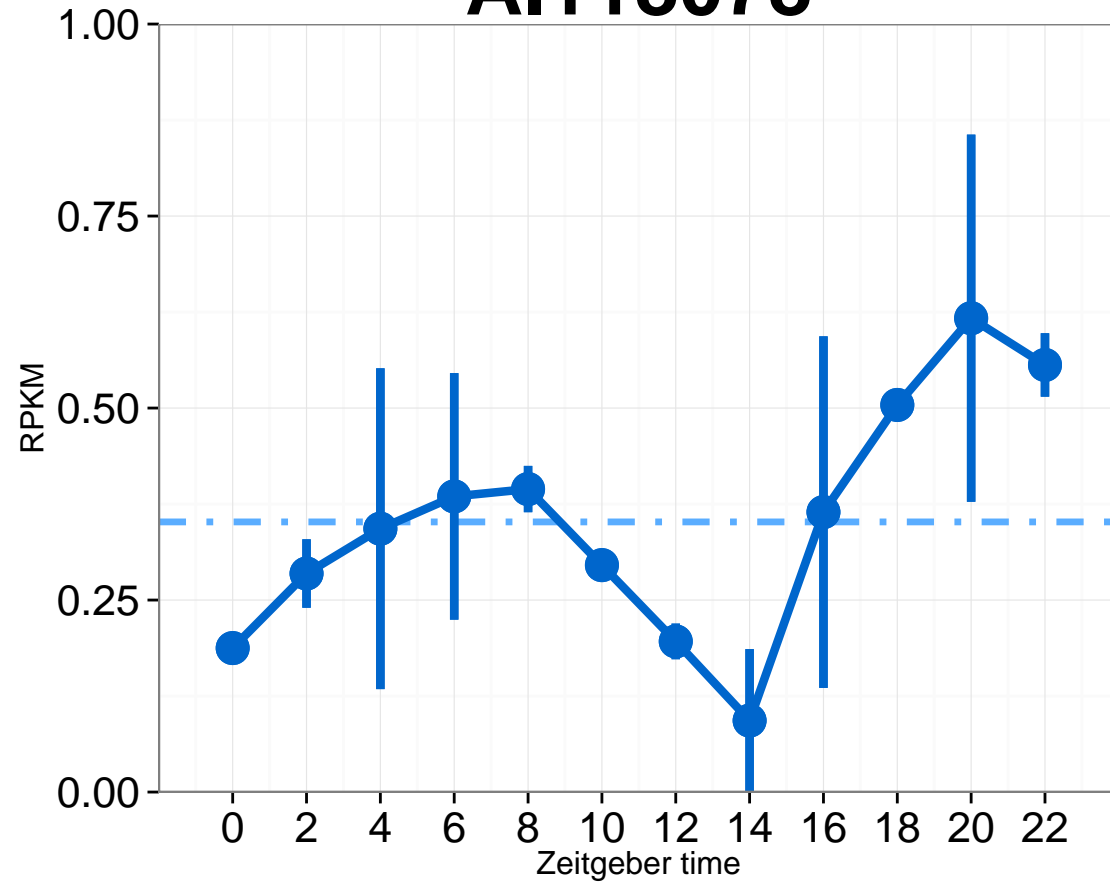

## AI118078 log2(Ribosome occupanc

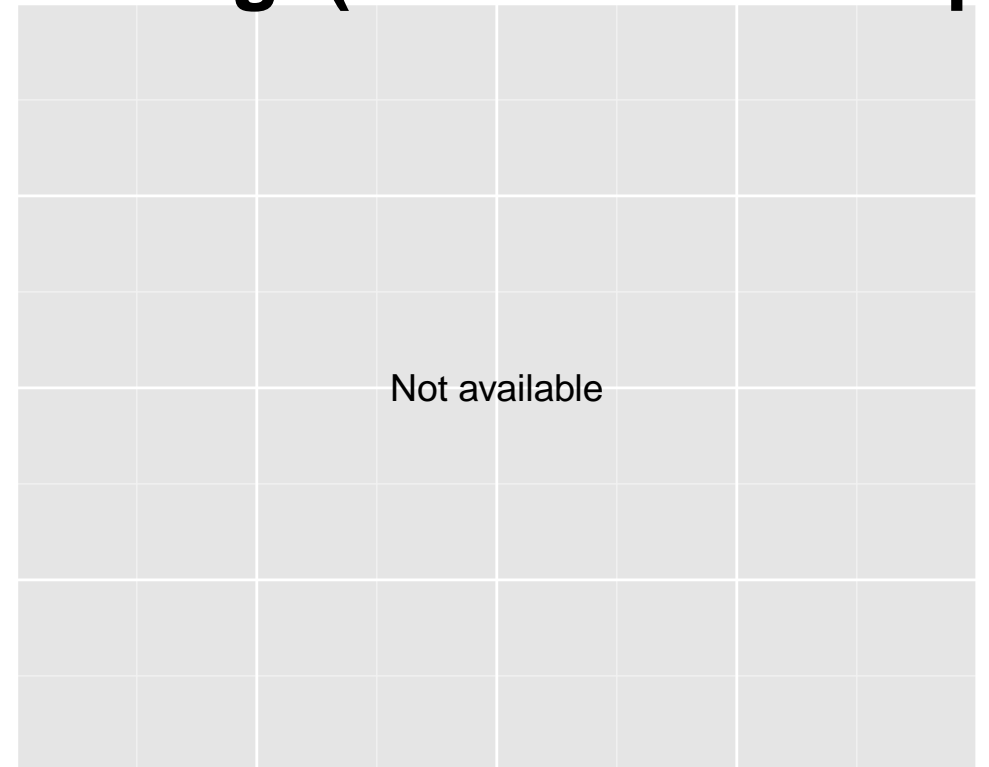

Supplement: SuppDataset_1.zip [file AI118078_set_A.pdf › Supplemental Dataset 1/A-mRNA_nonrhyth_translation_nonrhyth/AI118078_set_A.pdf]

## AI182371

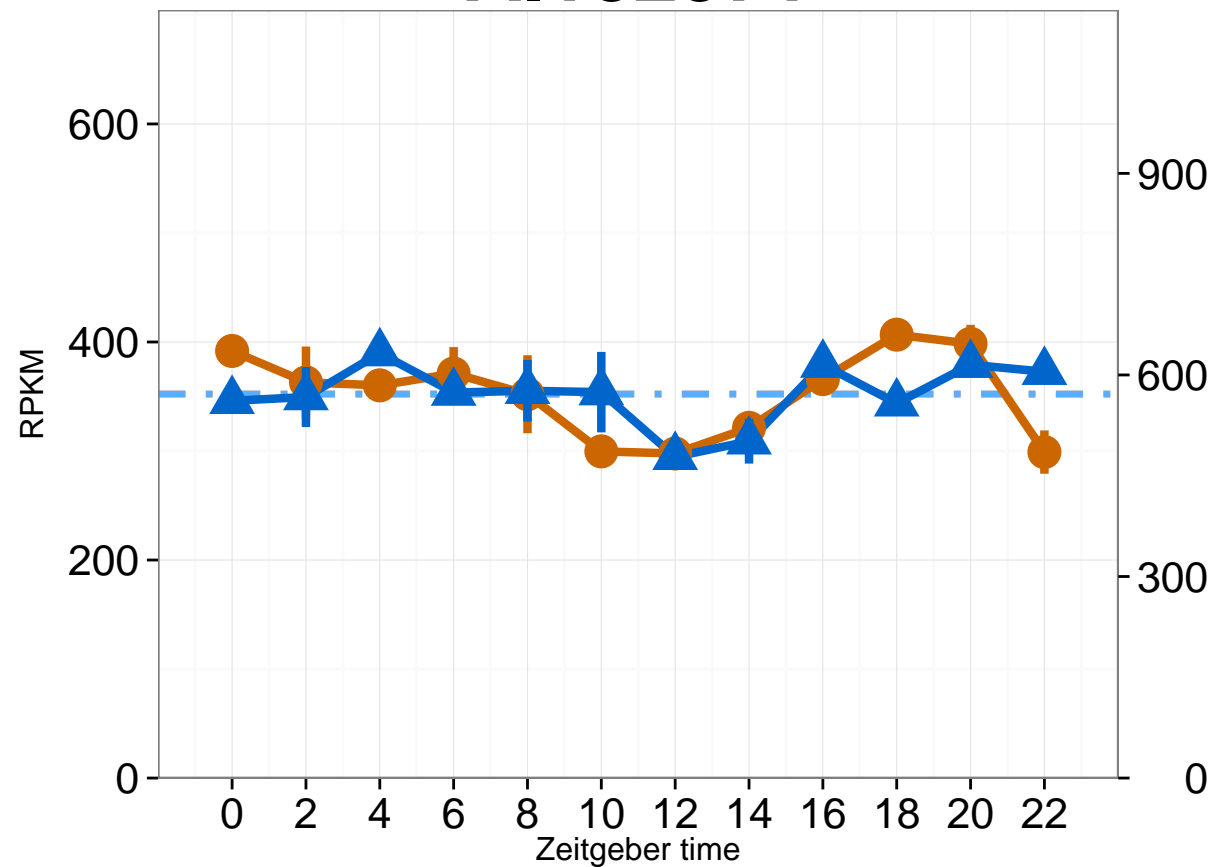

## AI182371

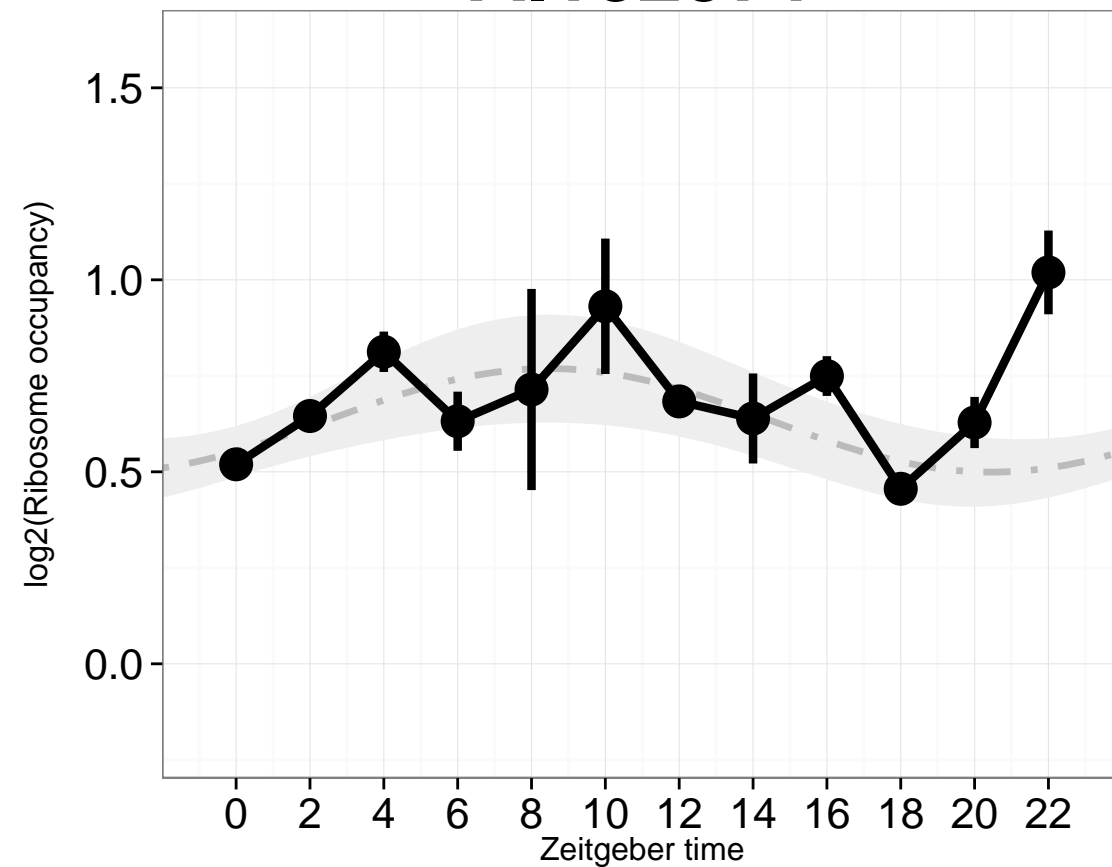

Supplement: SuppDataset_1.zip [file AI182371_set_A.pdf › Supplemental Dataset 1/A-mRNA_nonrhyth_translation_nonrhyth/AI182371_set_A.pdf]

# AI314180

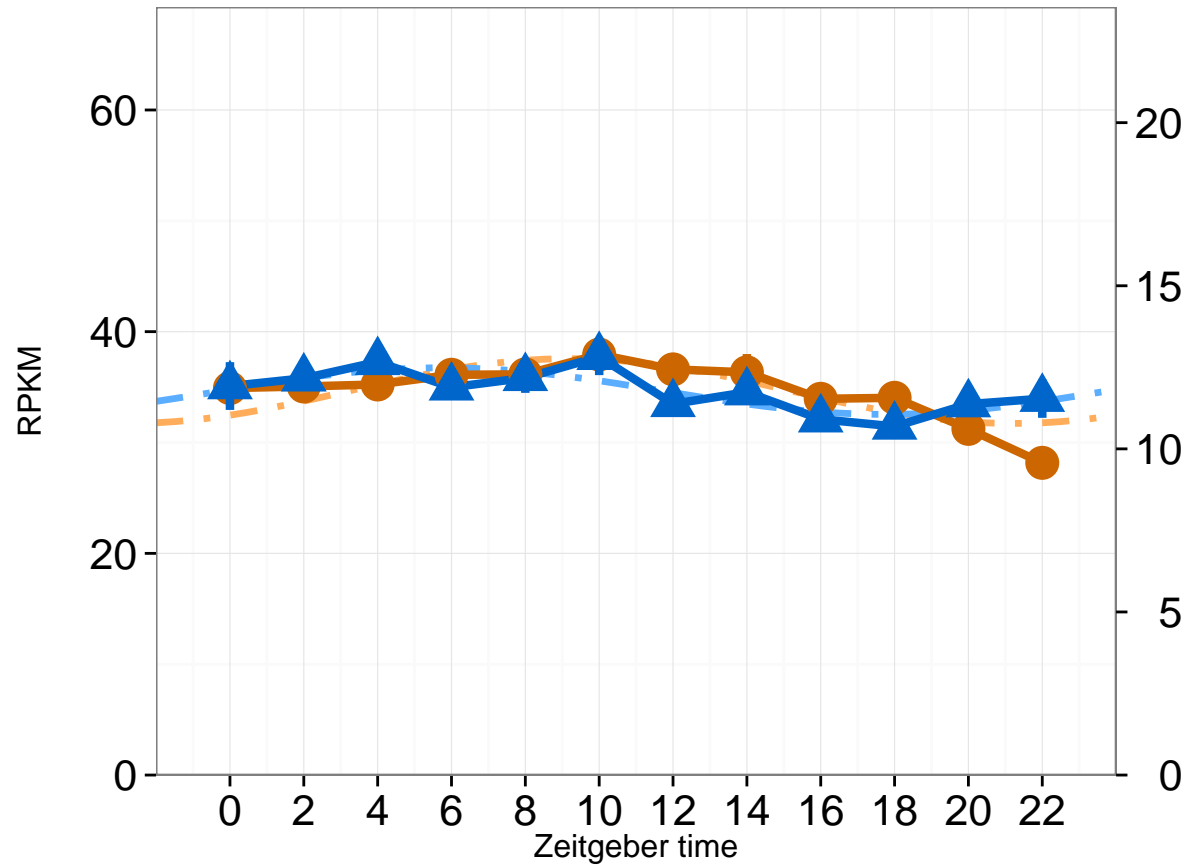

# AI314180

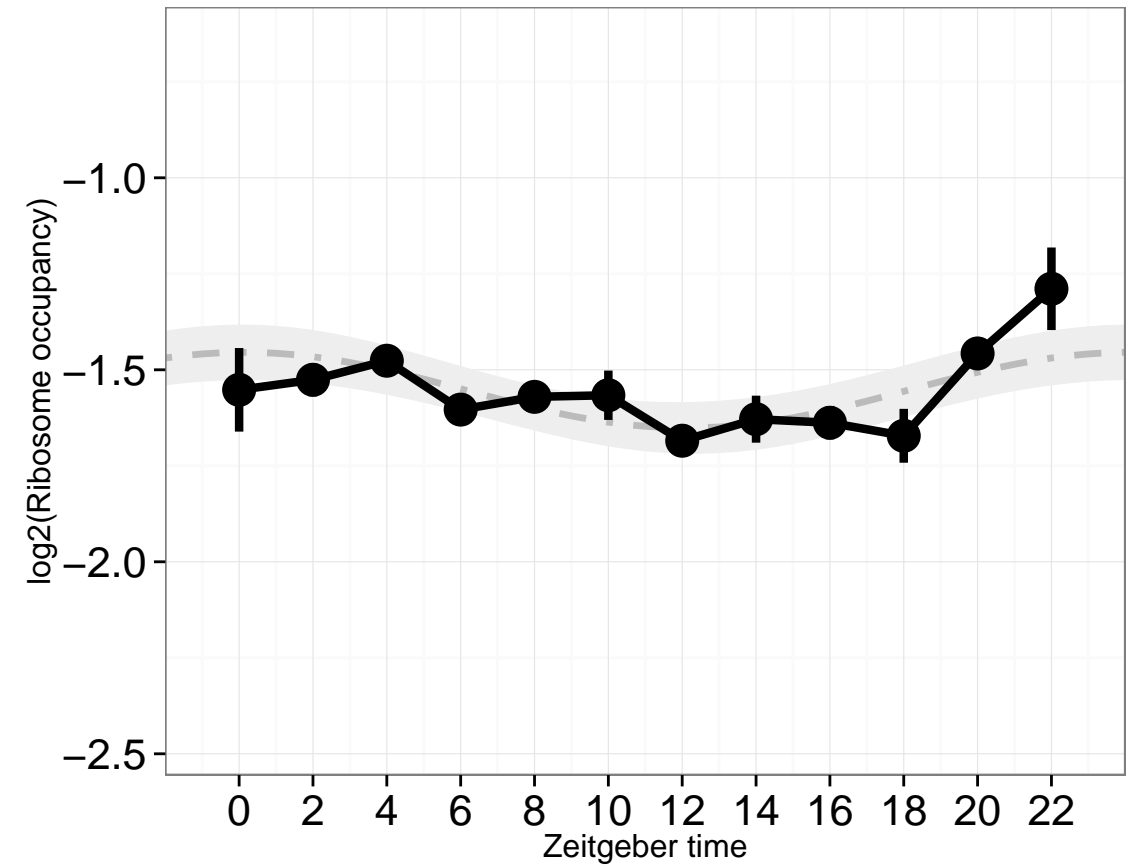

Supplement: SuppDataset_1.zip [file AI314180_set_A.pdf › Supplemental Dataset 1/A-mRNA_nonrhyth_translation_nonrhyth/AI314180_set_A.pdf]

# AI317395

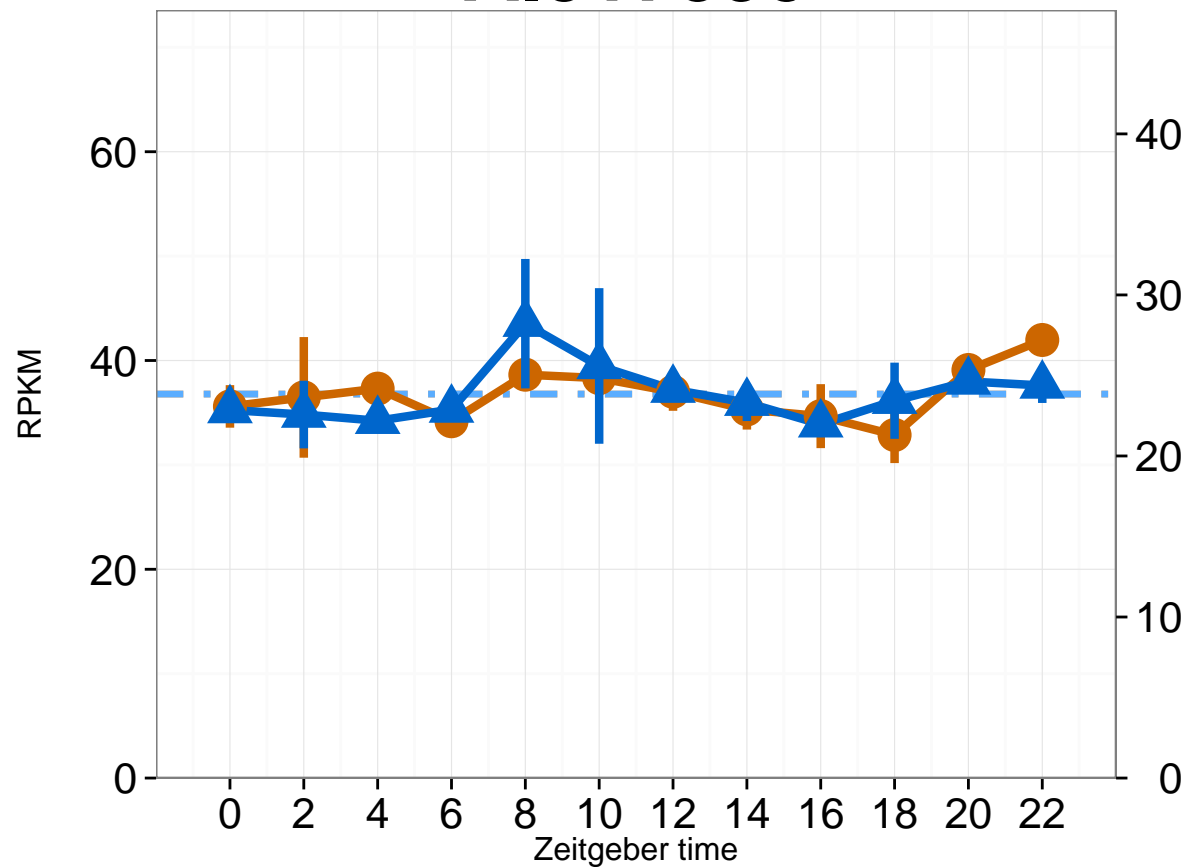

# AI317395

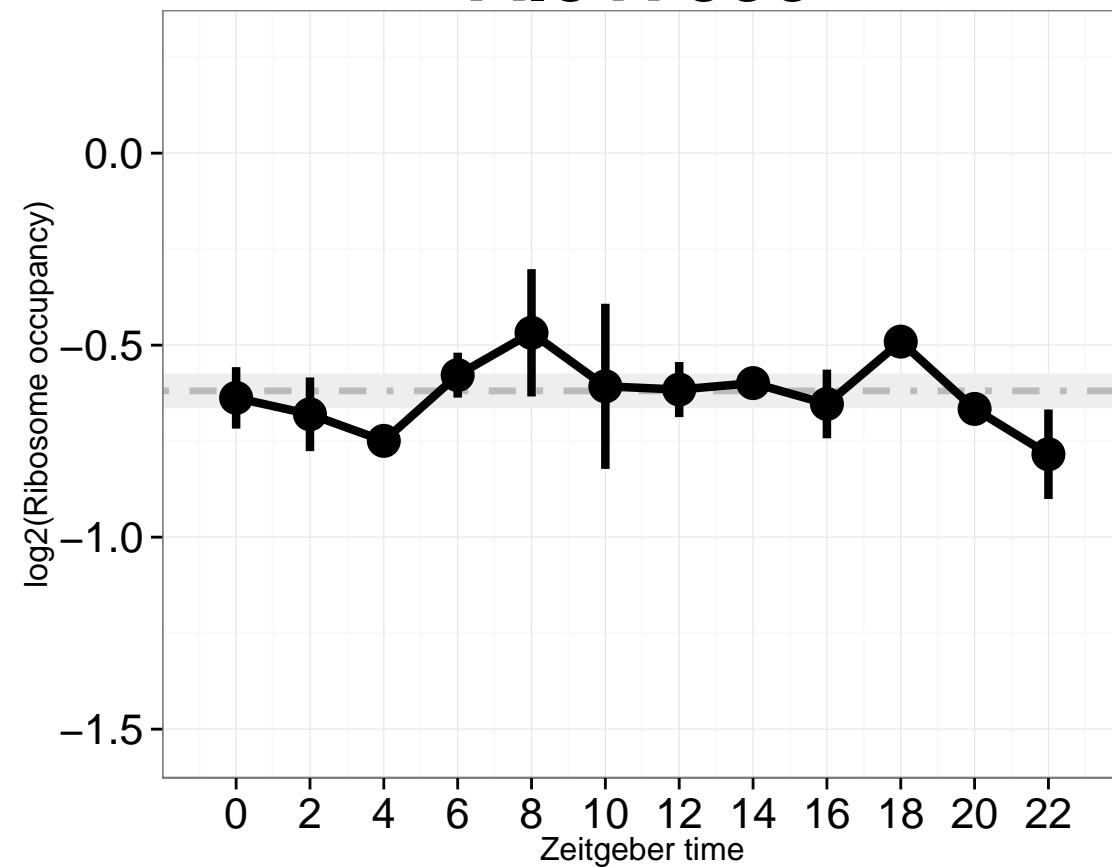

Supplement: SuppDataset_1.zip [file AI317395_set_A.pdf › Supplemental Dataset 1/A-mRNA_nonrhyth_translation_nonrhyth/AI317395_set_A.pdf]

# AI462493

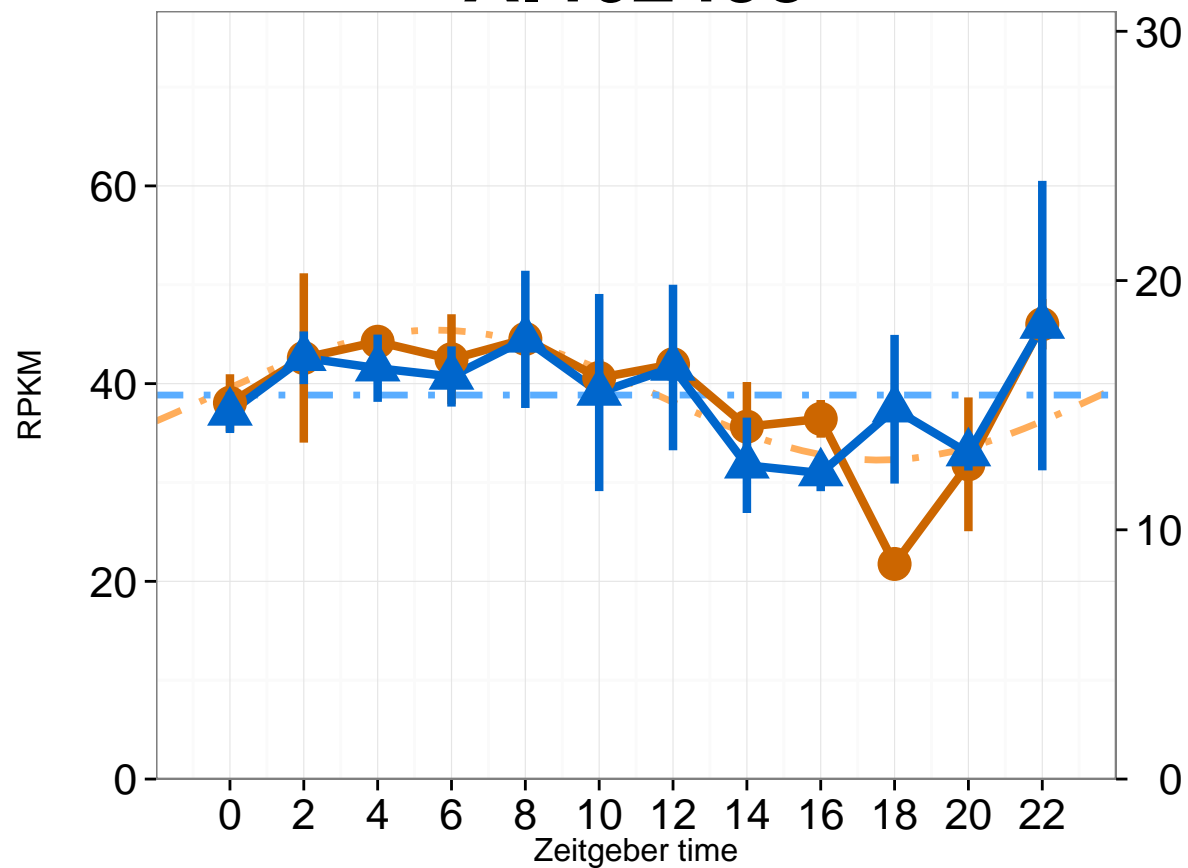

# AI462493

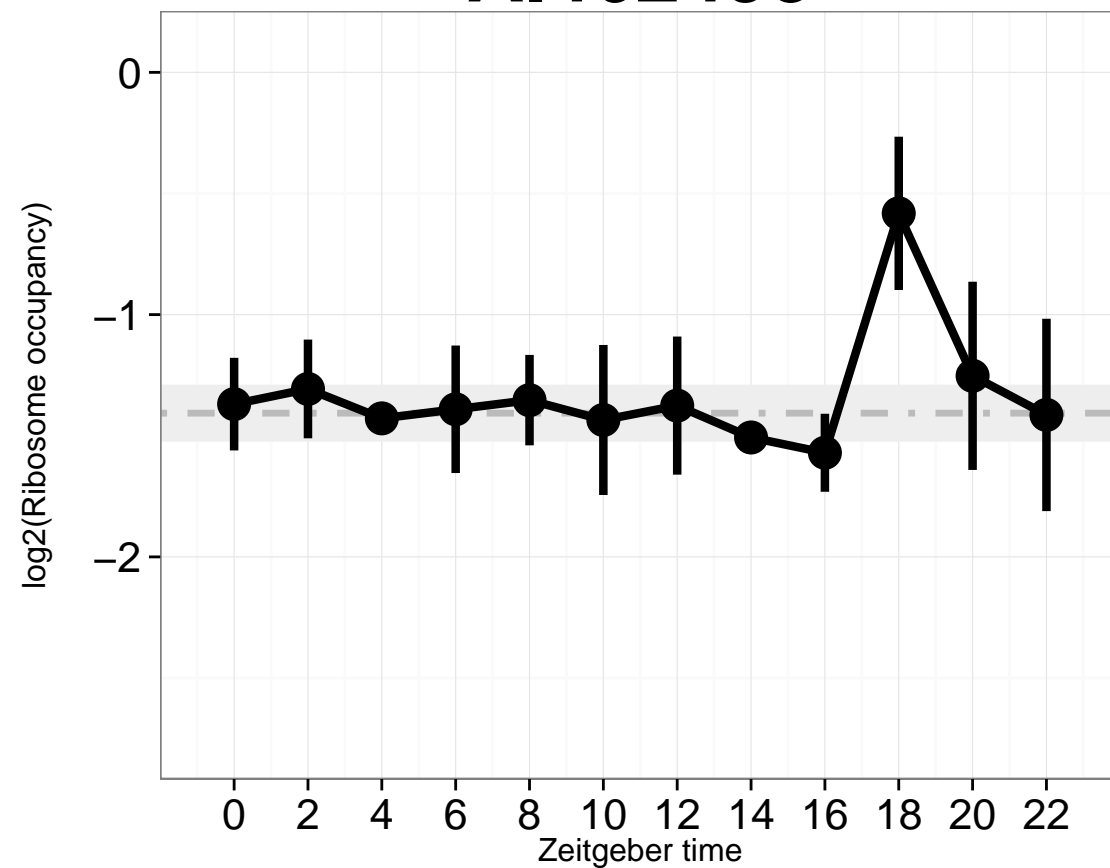

Supplement: SuppDataset_1.zip [file AI462493_set_A.pdf › Supplemental Dataset 1/A-mRNA_nonrhyth_translation_nonrhyth/AI462493_set_A.pdf]

## AI597468

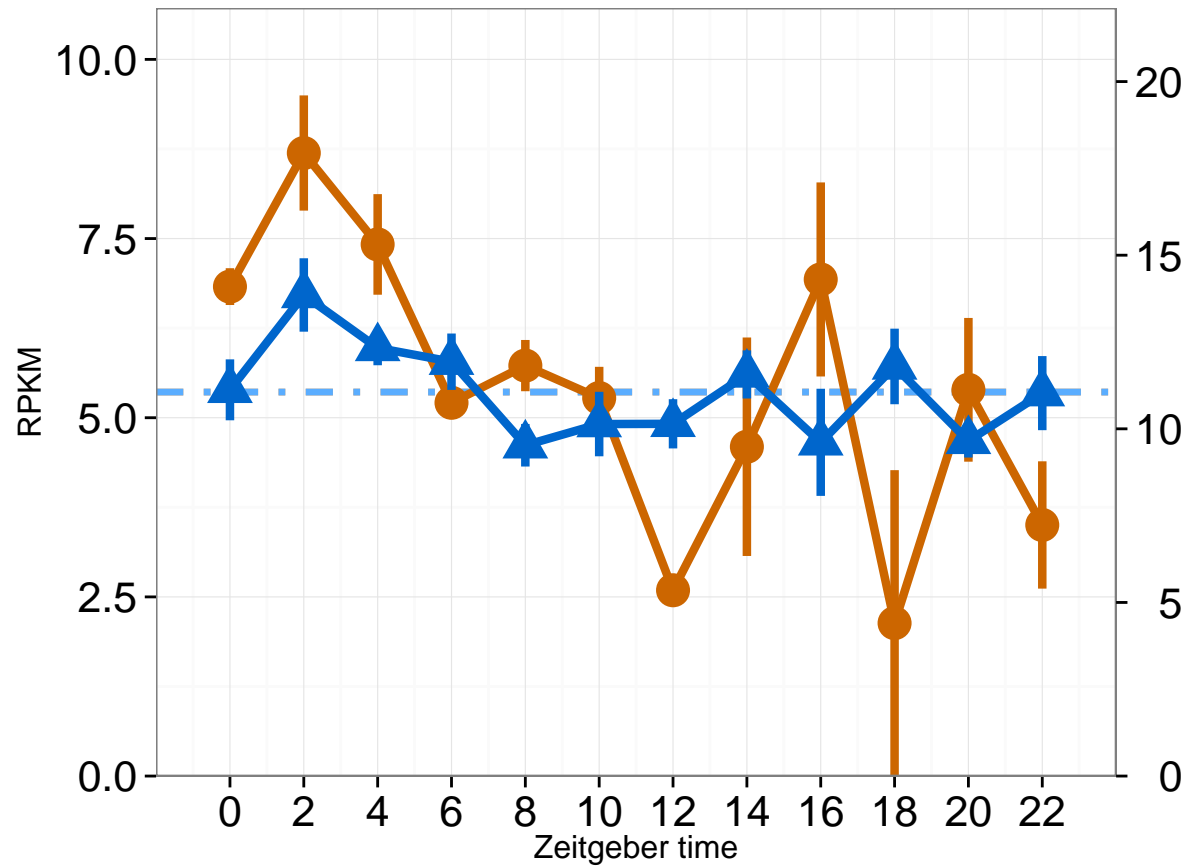

## AI597468

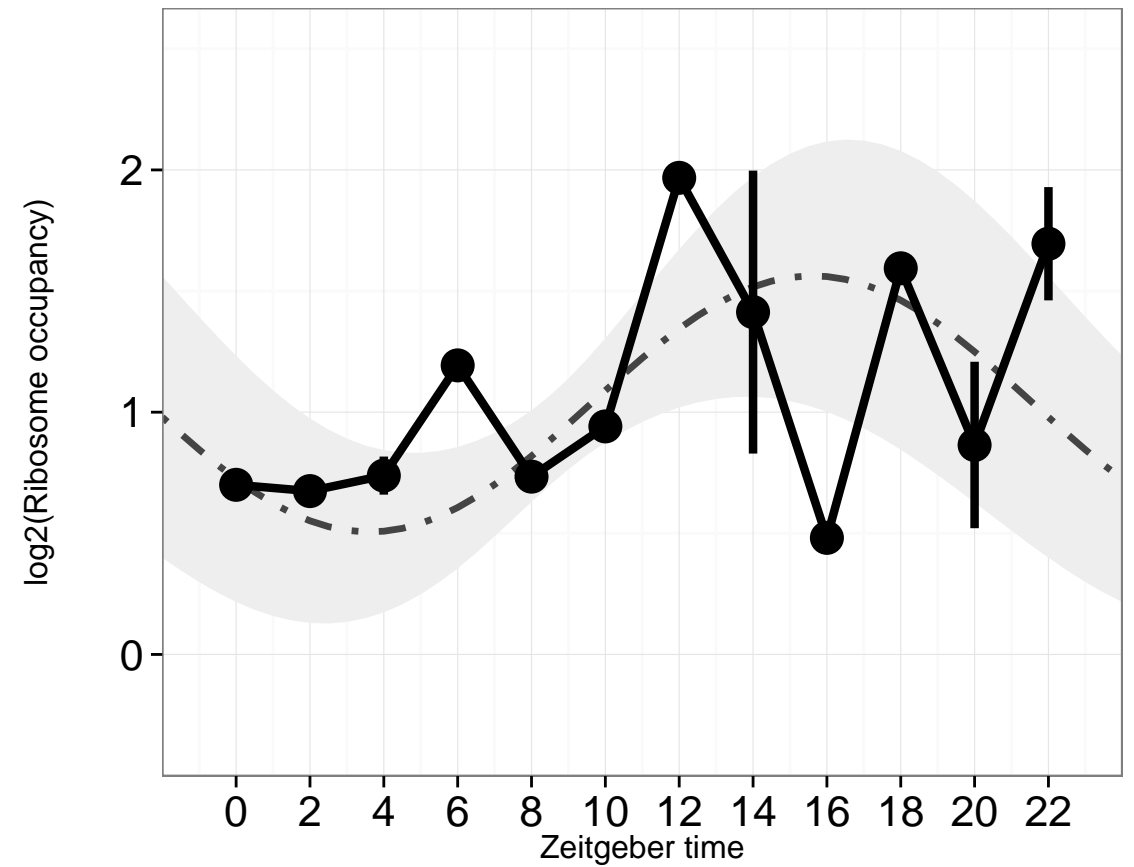

Supplement: SuppDataset_1.zip [file AI597468_set_A.pdf › Supplemental Dataset 1/A-mRNA_nonrhyth_translation_nonrhyth/AI597468_set_A.pdf]

## AI597479

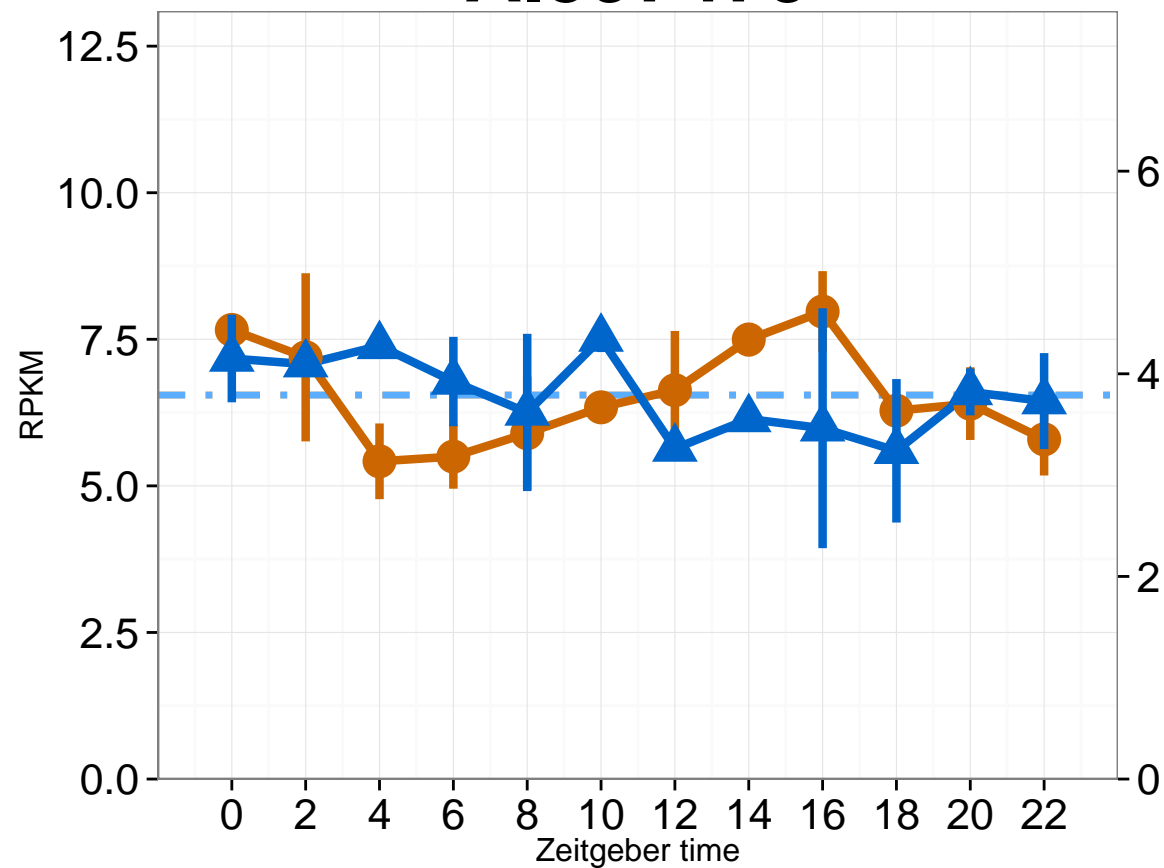

## AI597479

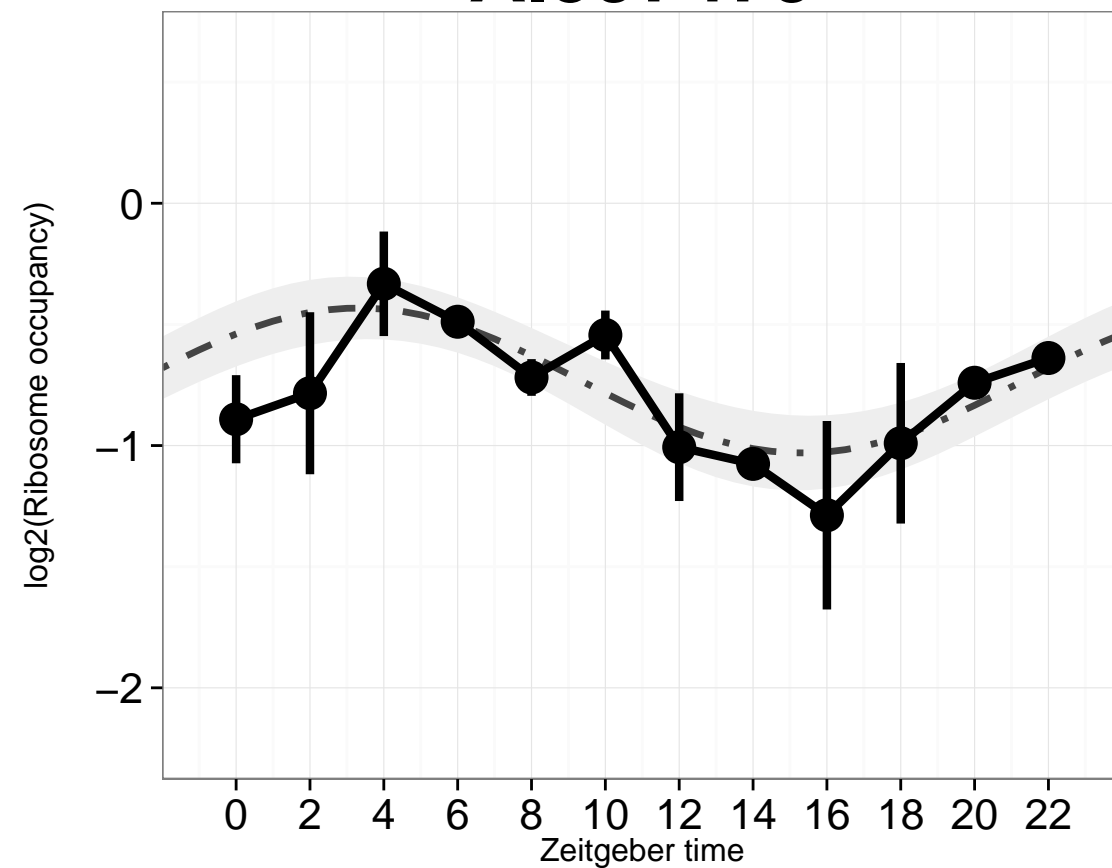

Supplement: SuppDataset_1.zip [file AI597479_set_A.pdf › Supplemental Dataset 1/A-mRNA_nonrhyth_translation_nonrhyth/AI597479_set_A.pdf]

## AI607873

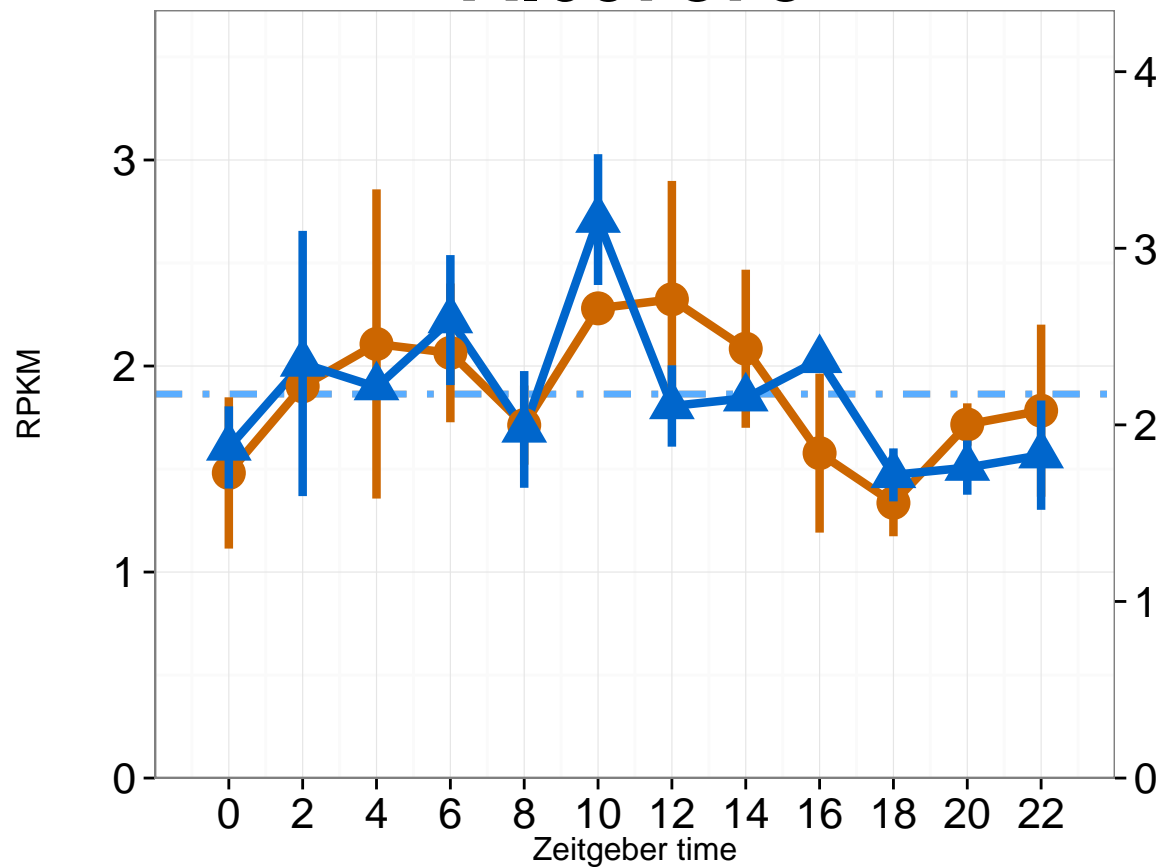

## AI607873

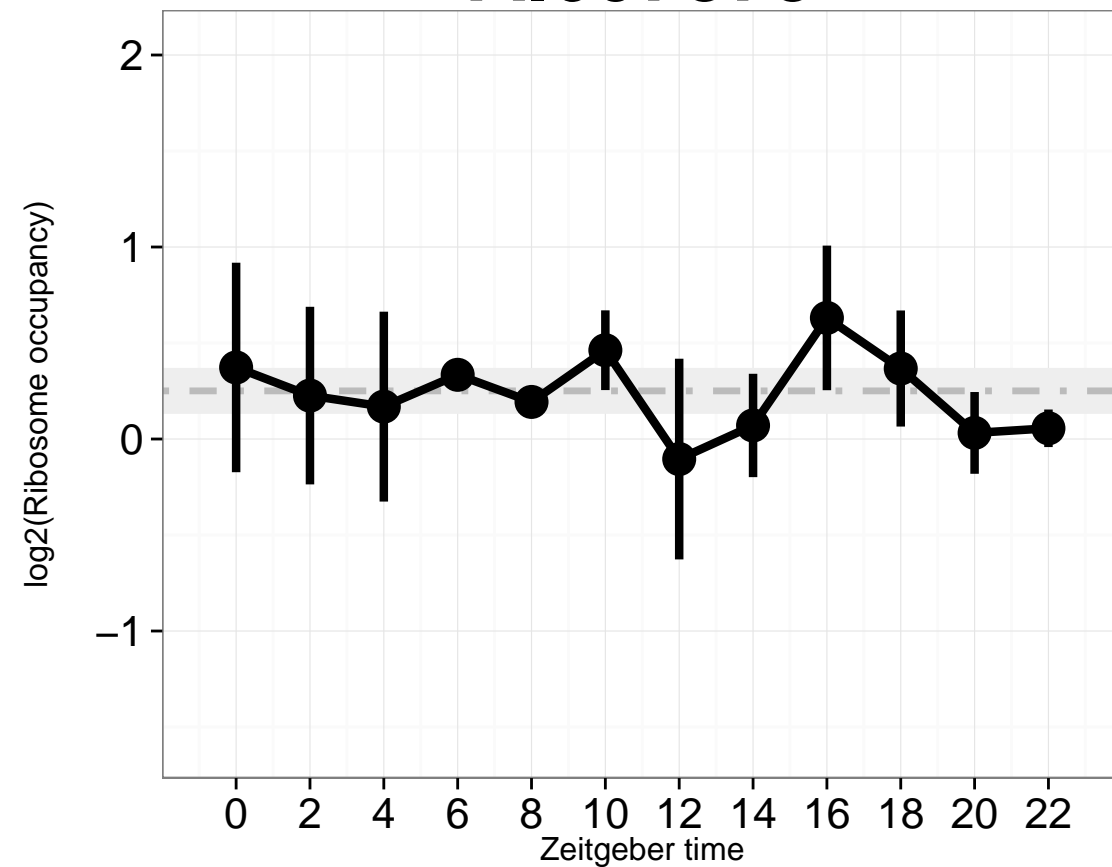

Supplement: SuppDataset_1.zip [file AI607873_set_A.pdf › Supplemental Dataset 1/A-mRNA_nonrhyth_translation_nonrhyth/AI607873_set_A.pdf]

# AI837181

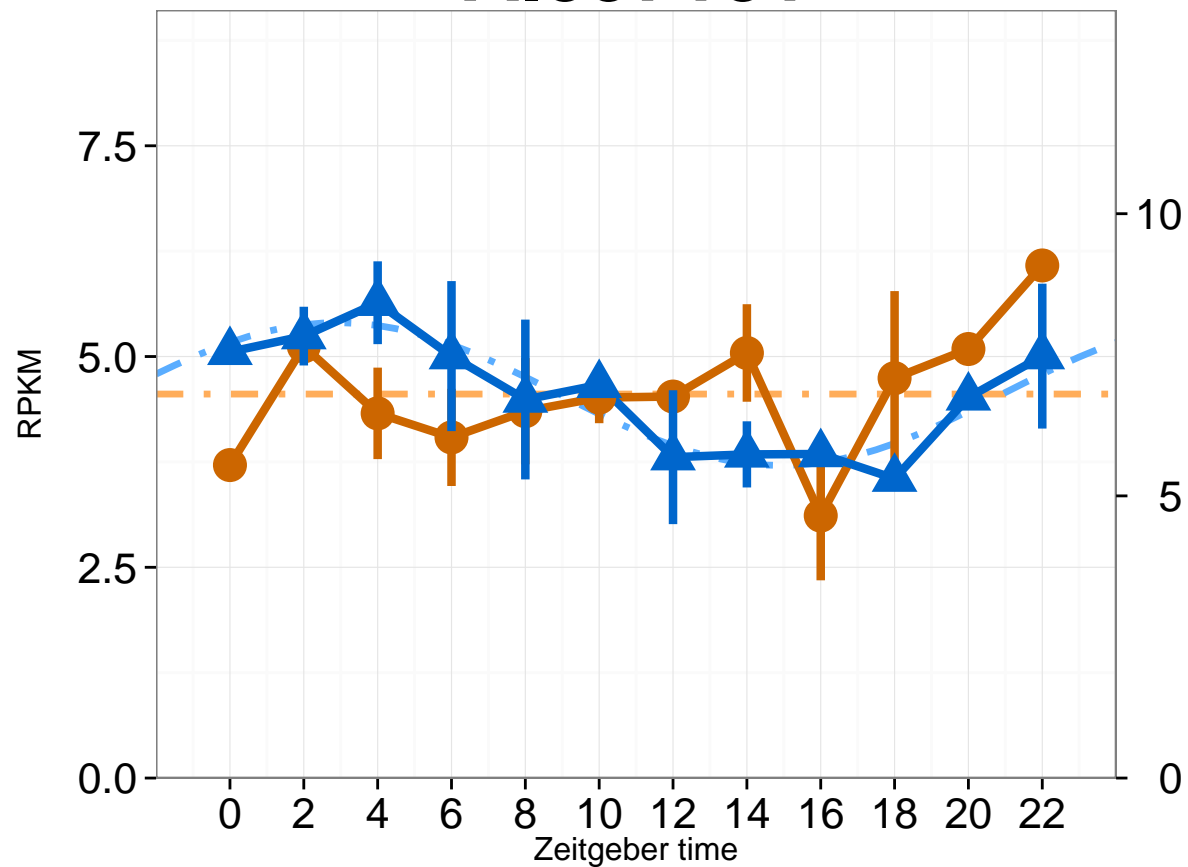

# AI837181

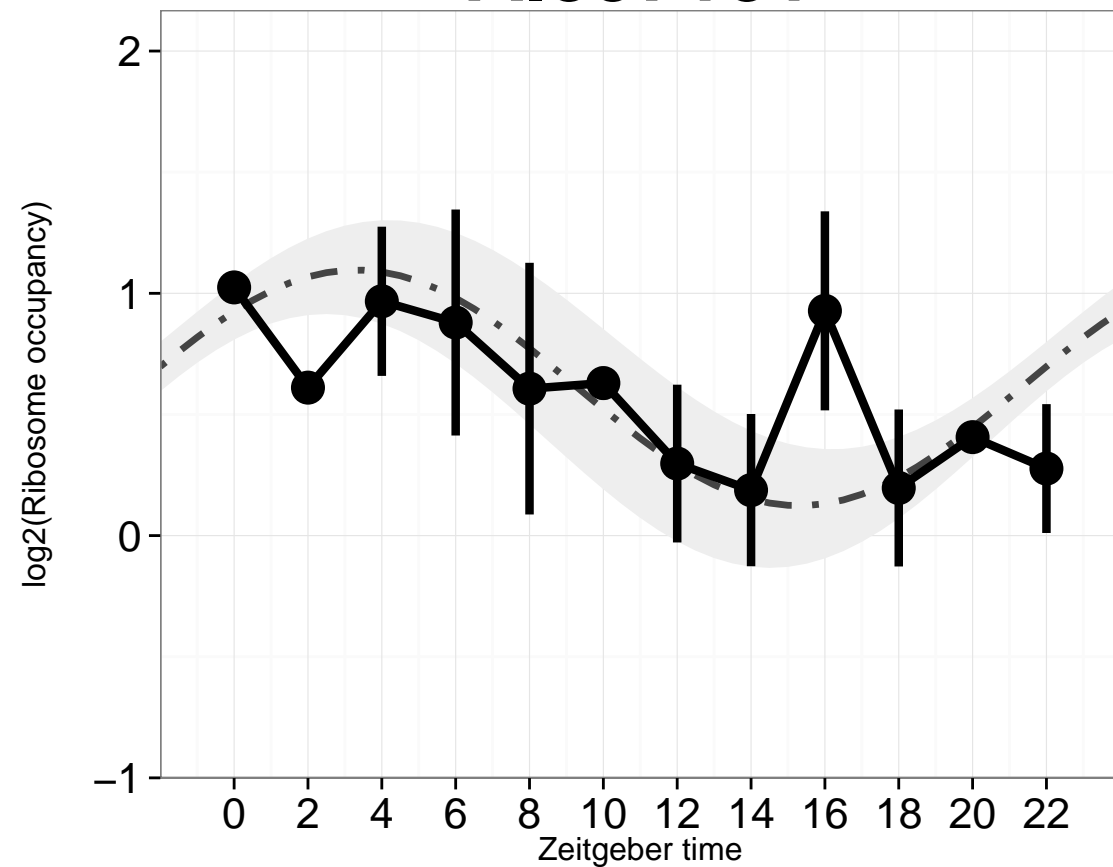

Supplement: SuppDataset_1.zip [file AI837181_set_A.pdf › Supplemental Dataset 1/A-mRNA_nonrhyth_translation_nonrhyth/AI837181_set_A.pdf]

# AI846148

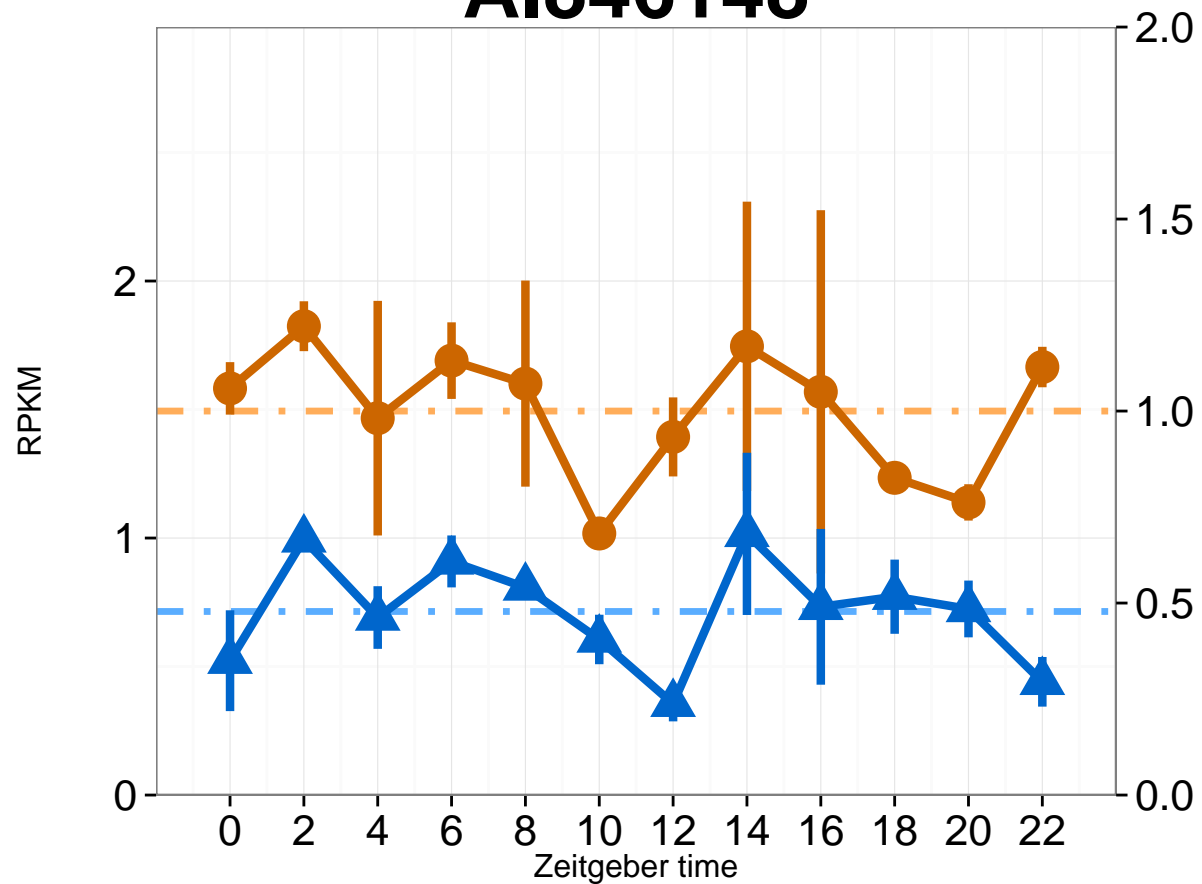

# AI846148

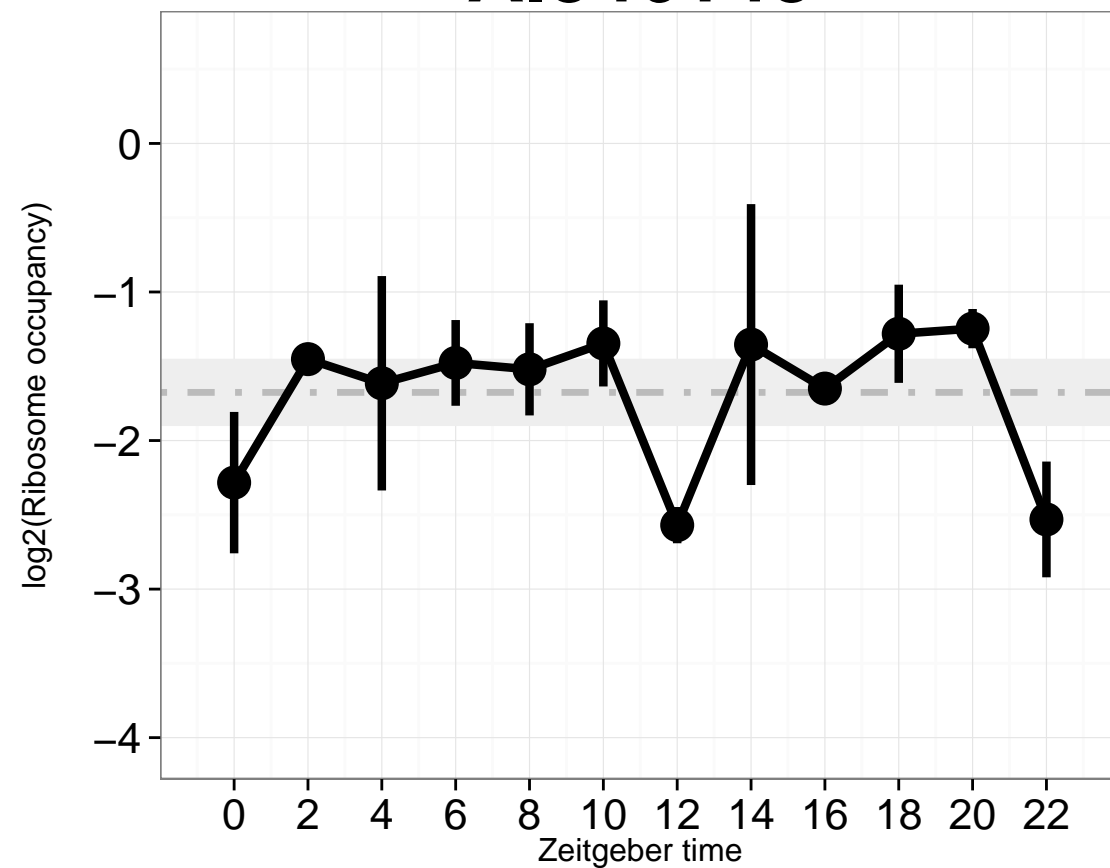

Supplement: SuppDataset_1.zip [file AI846148_set_A.pdf › Supplemental Dataset 1/A-mRNA_nonrhyth_translation_nonrhyth/AI846148_set_A.pdf]

# AI987944

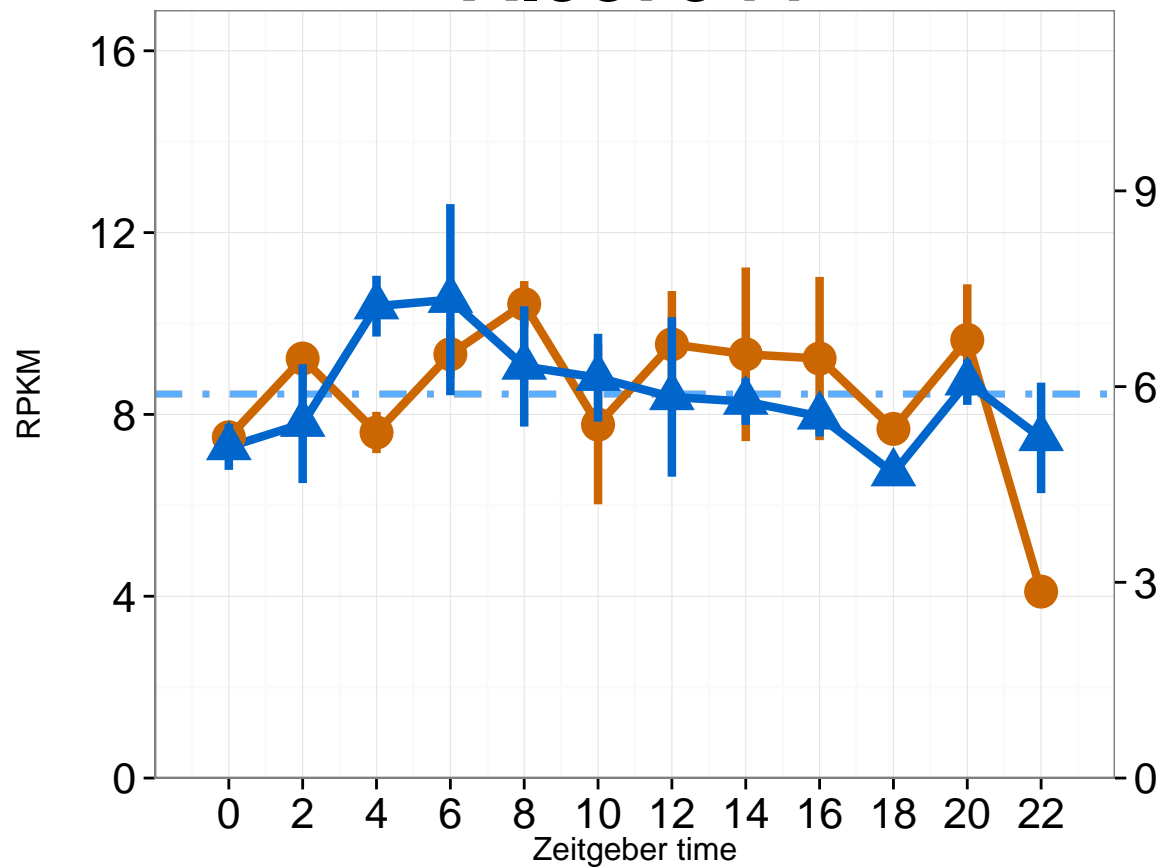

# AI987944

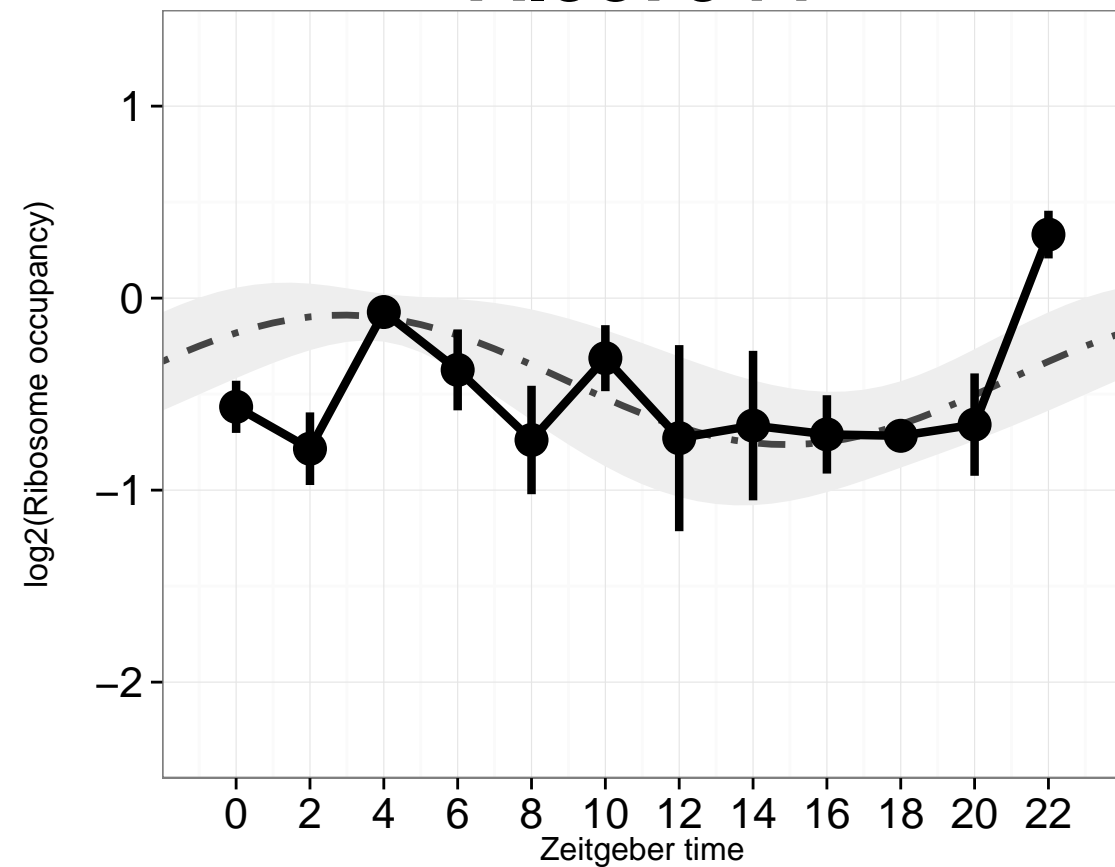

Supplement: SuppDataset_1.zip [file AI987944_set_A.pdf › Supplemental Dataset 1/A-mRNA_nonrhyth_translation_nonrhyth/AI987944_set_A.pdf]

# AK010878

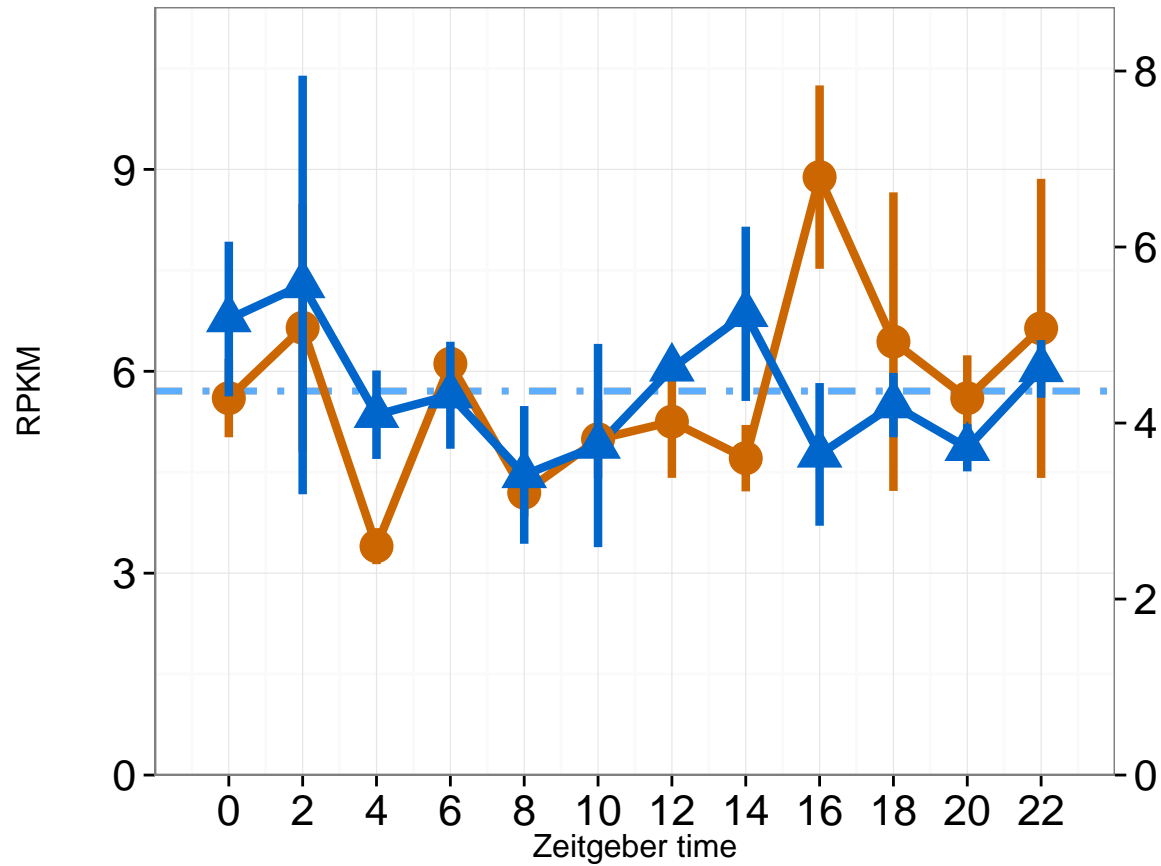

# AK010878

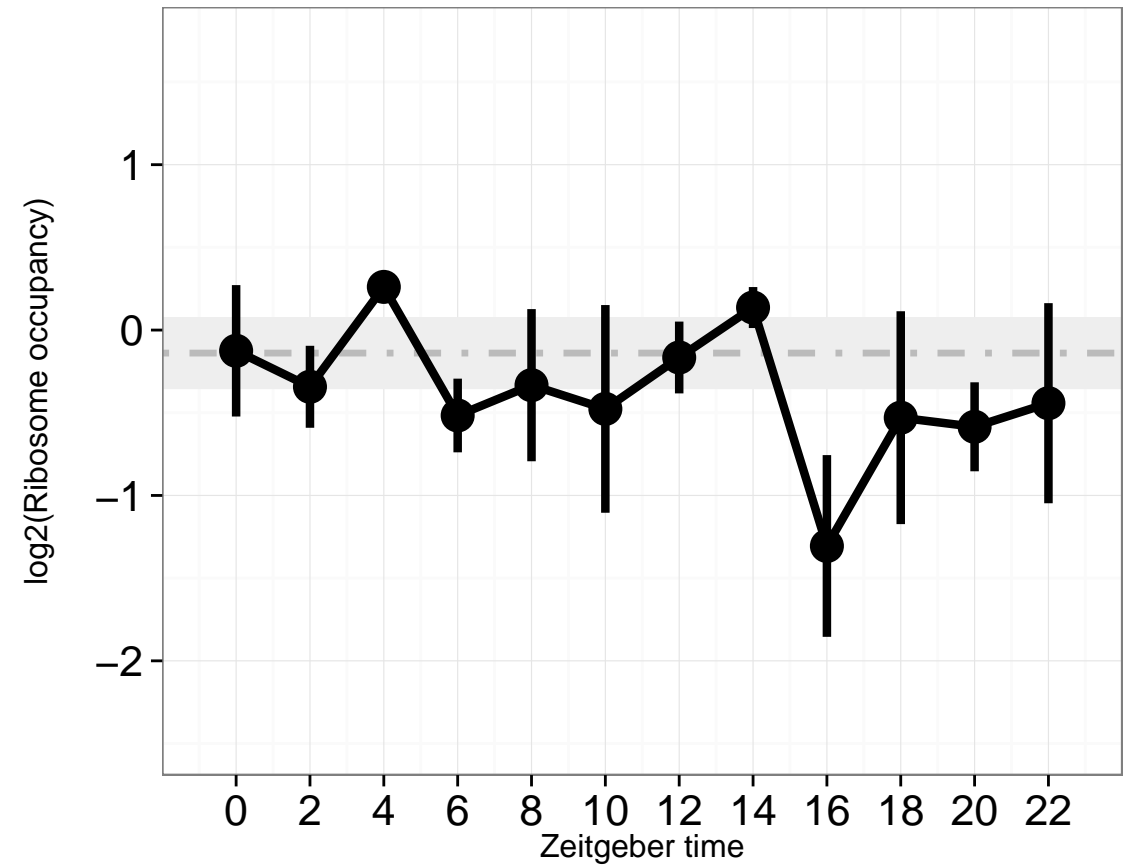

Supplement: SuppDataset_1.zip [file AK010878_set_A.pdf › Supplemental Dataset 1/A-mRNA_nonrhyth_translation_nonrhyth/AK010878_set_A.pdf]

## ATF7

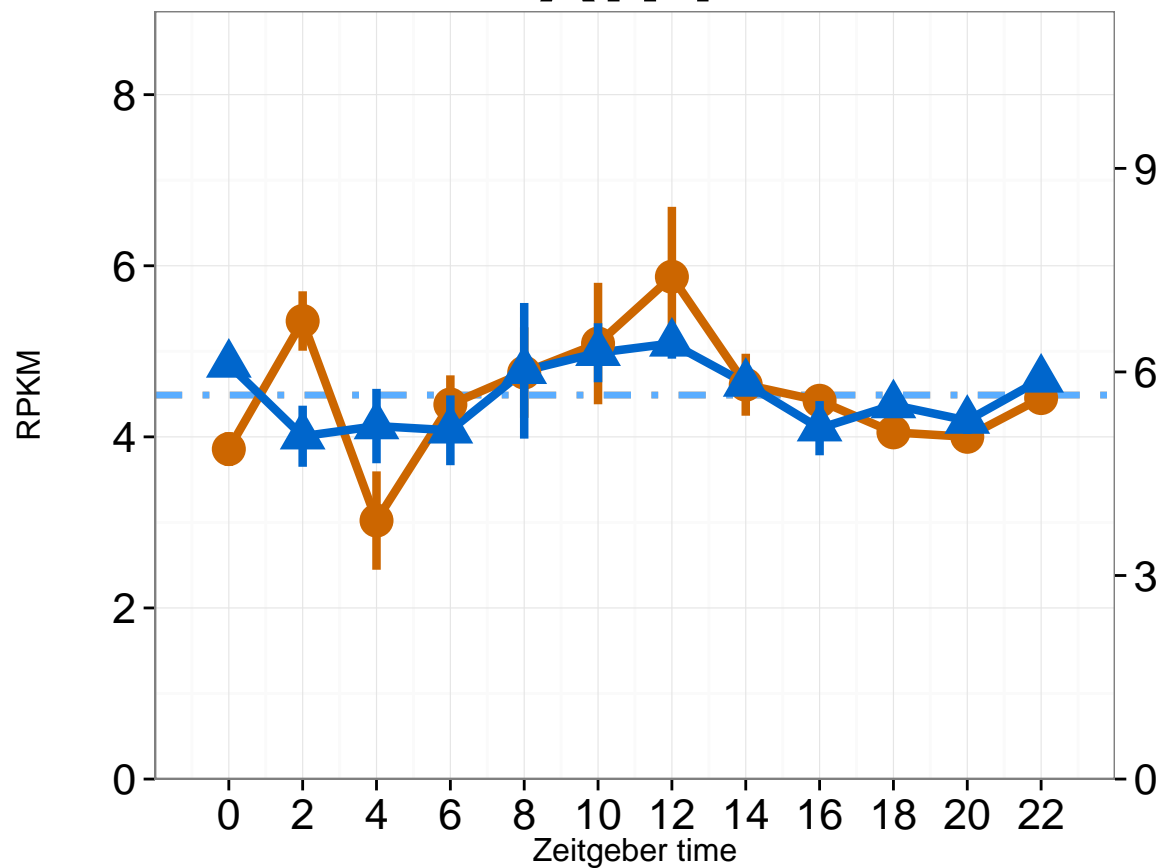

## ATF7

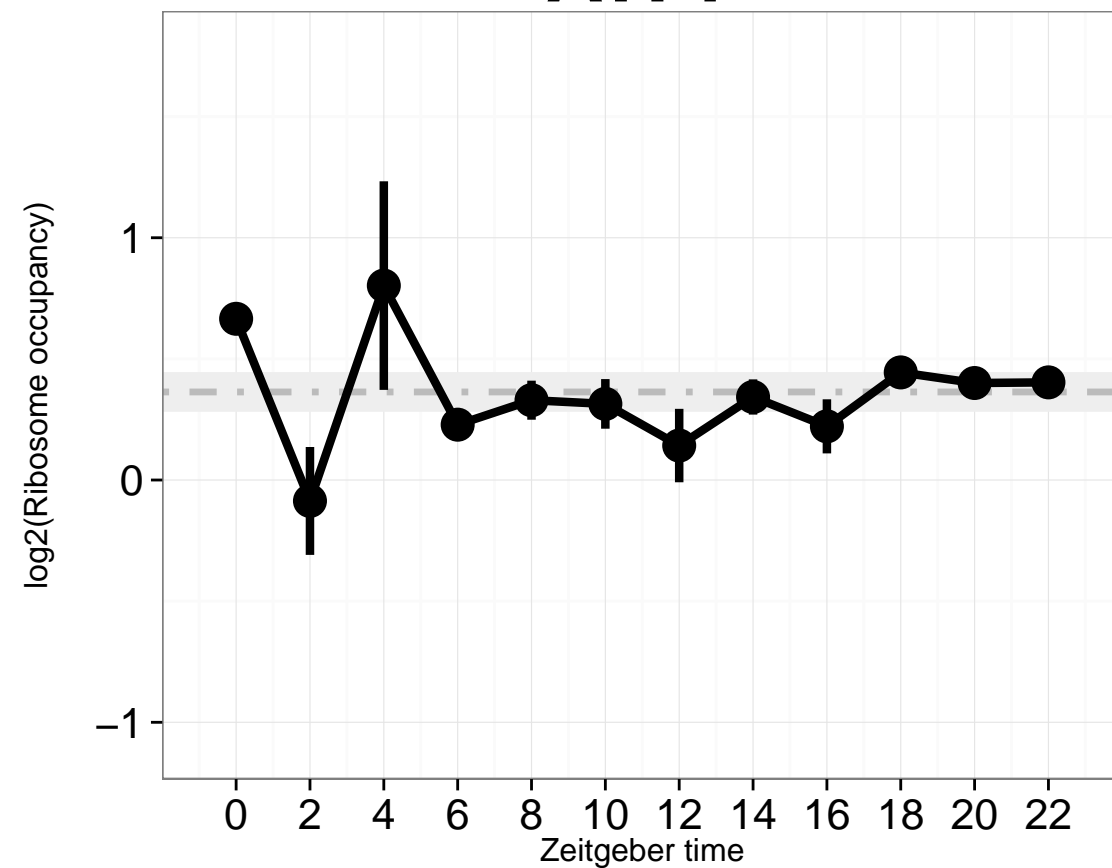

Supplement: SuppDataset_1.zip [file ATF7_set_A.pdf › Supplemental Dataset 1/A-mRNA_nonrhyth_translation_nonrhyth/ATF7_set_A.pdf]

# AU021092

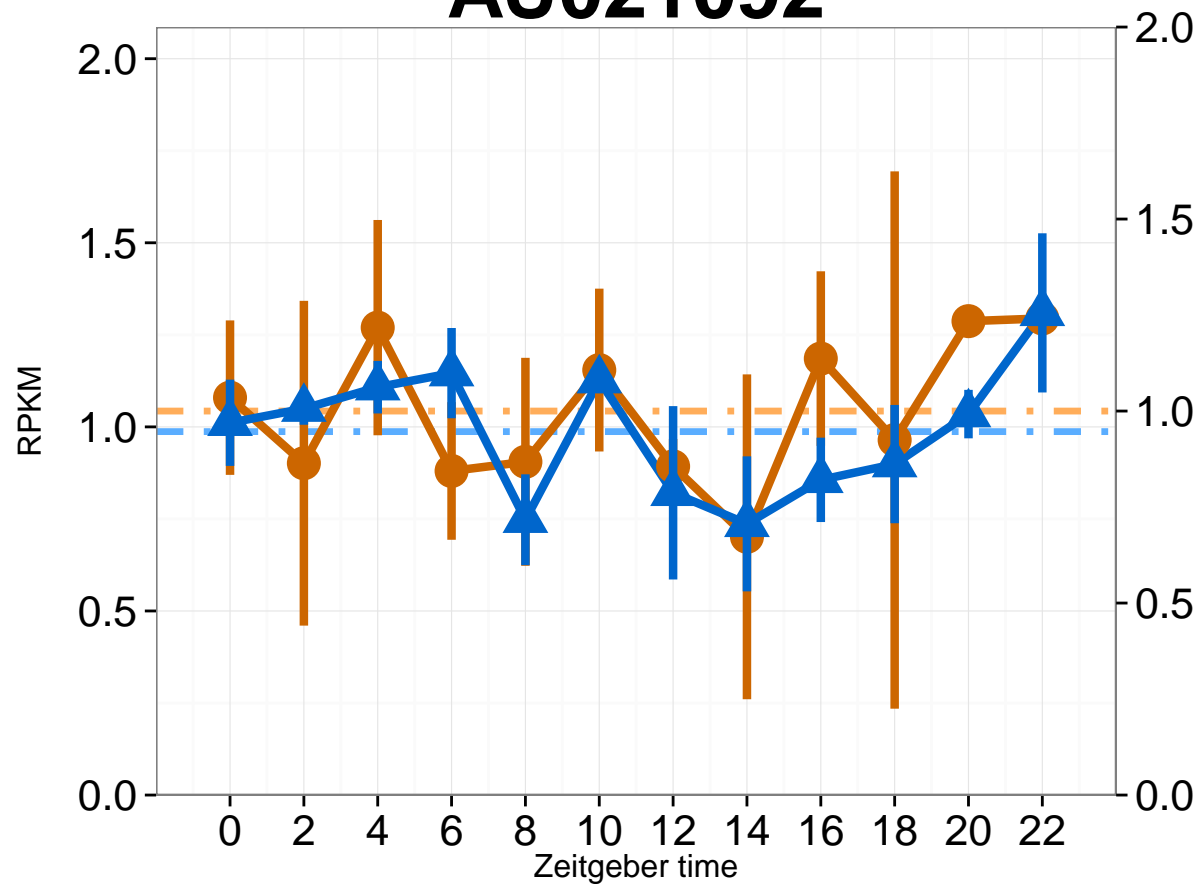

# AU021092

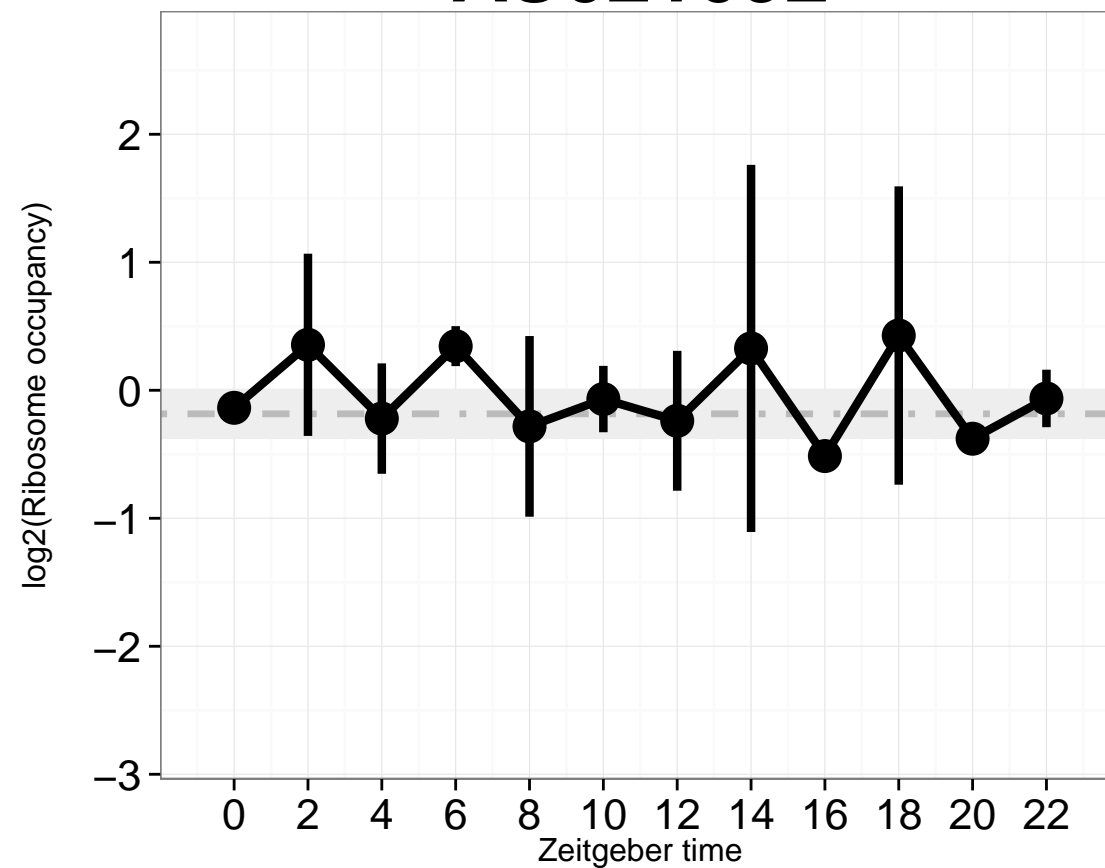

Supplement: SuppDataset_1.zip [file AU021092_set_A.pdf › Supplemental Dataset 1/A-mRNA_nonrhyth_translation_nonrhyth/AU021092_set_A.pdf]

## AU022252

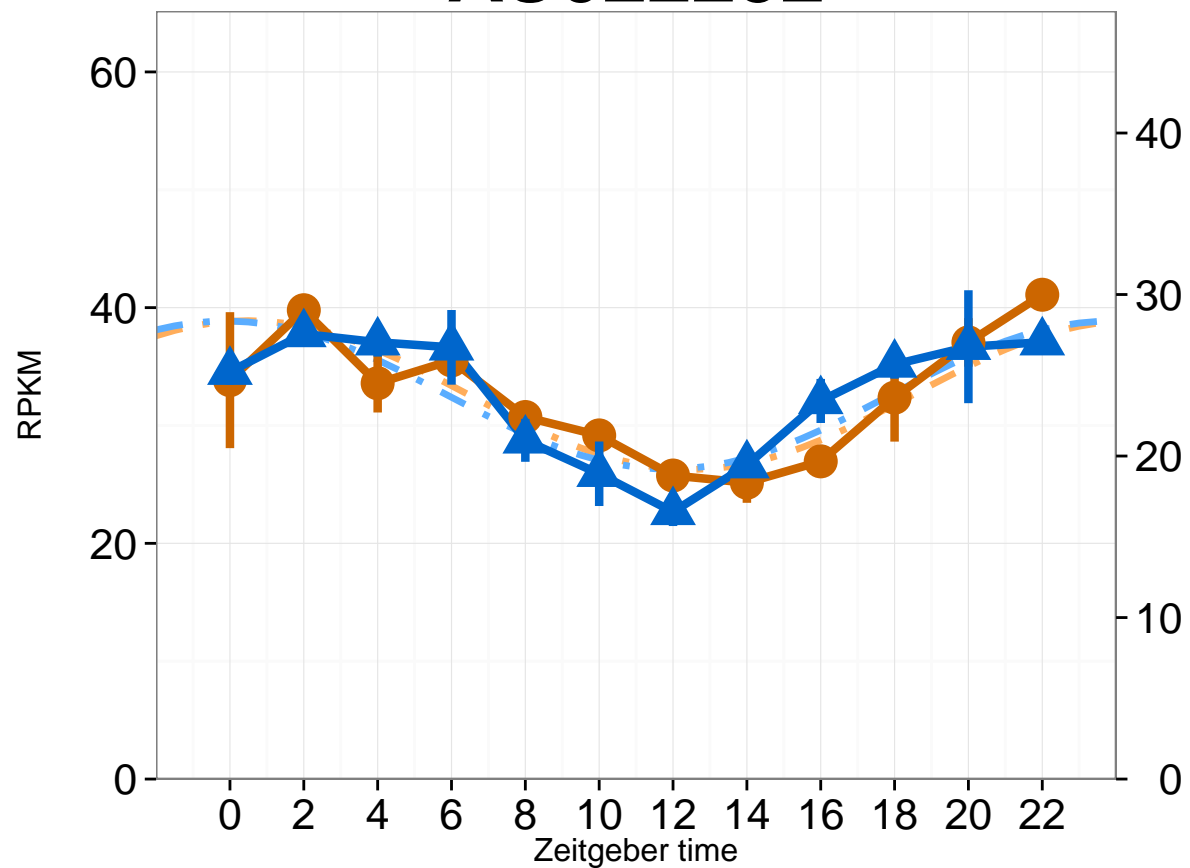

## AU022252

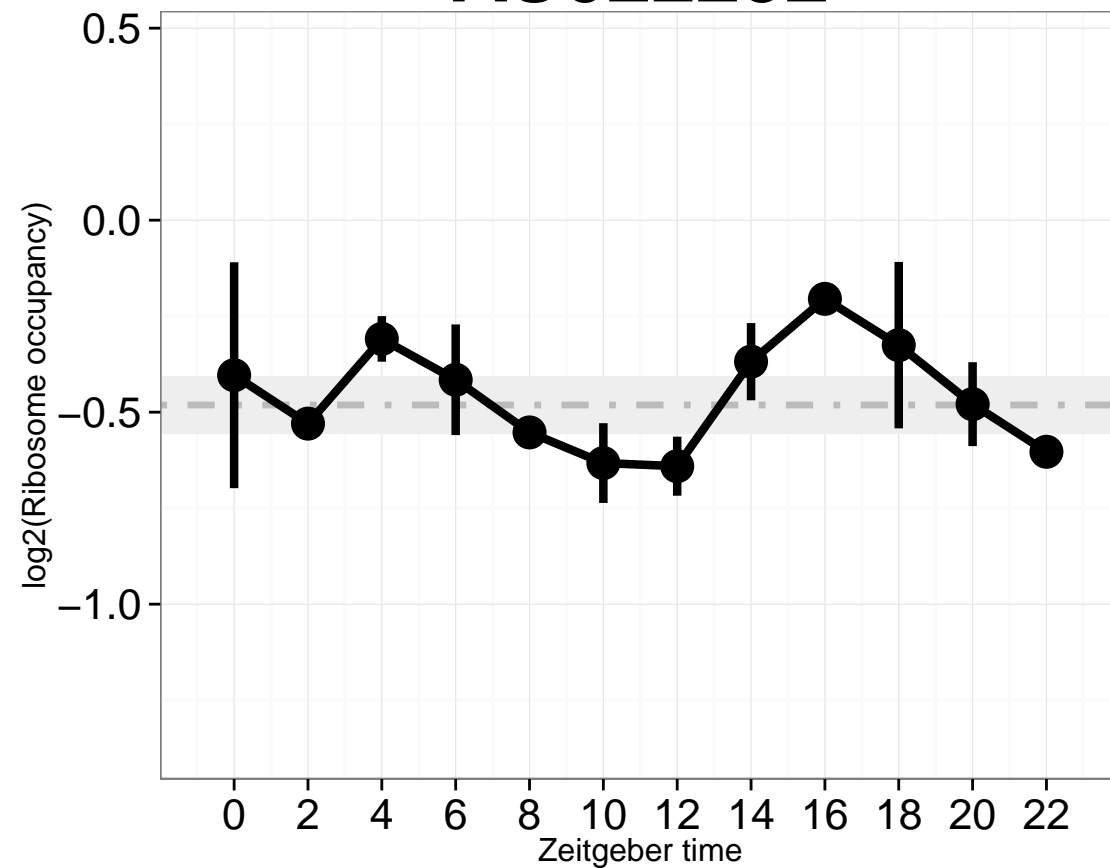

Supplement: SuppDataset_1.zip [file AU022252_set_A.pdf › Supplemental Dataset 1/A-mRNA_nonrhyth_translation_nonrhyth/AU022252_set_A.pdf]

# AU040320

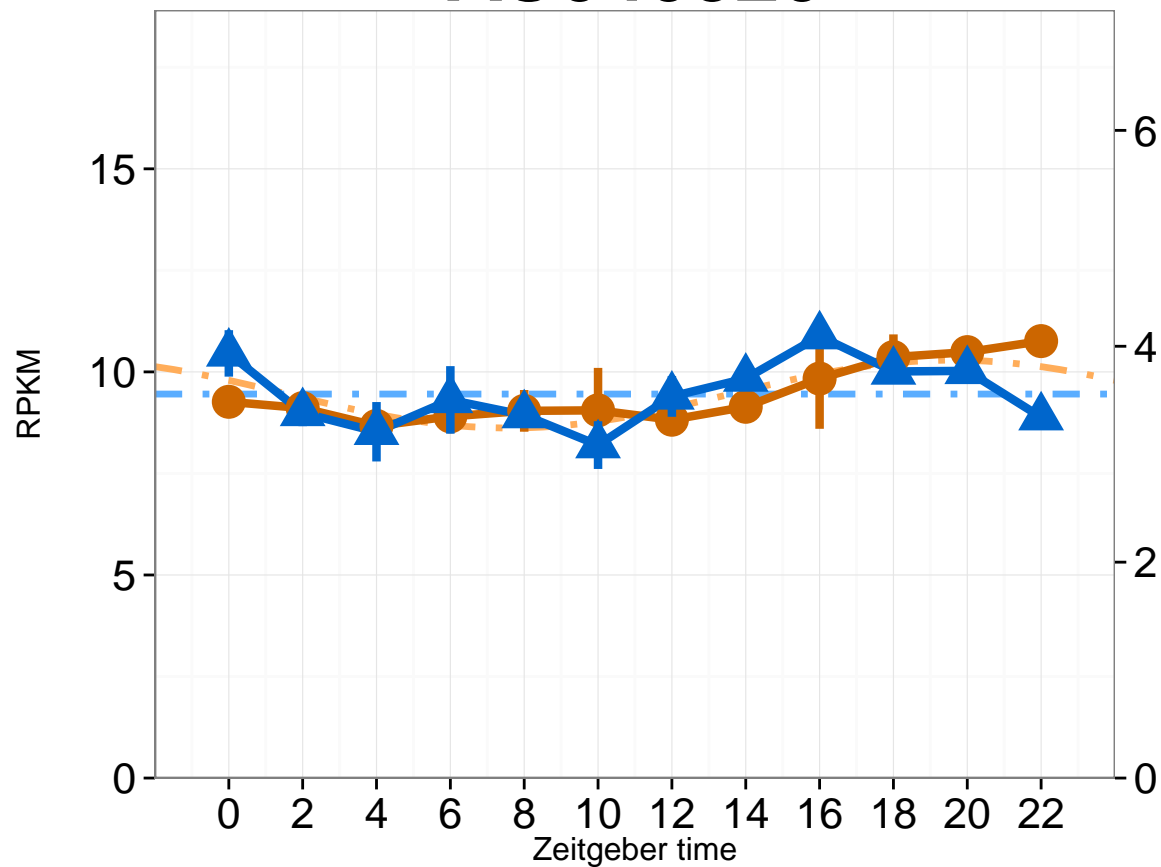

# AU040320

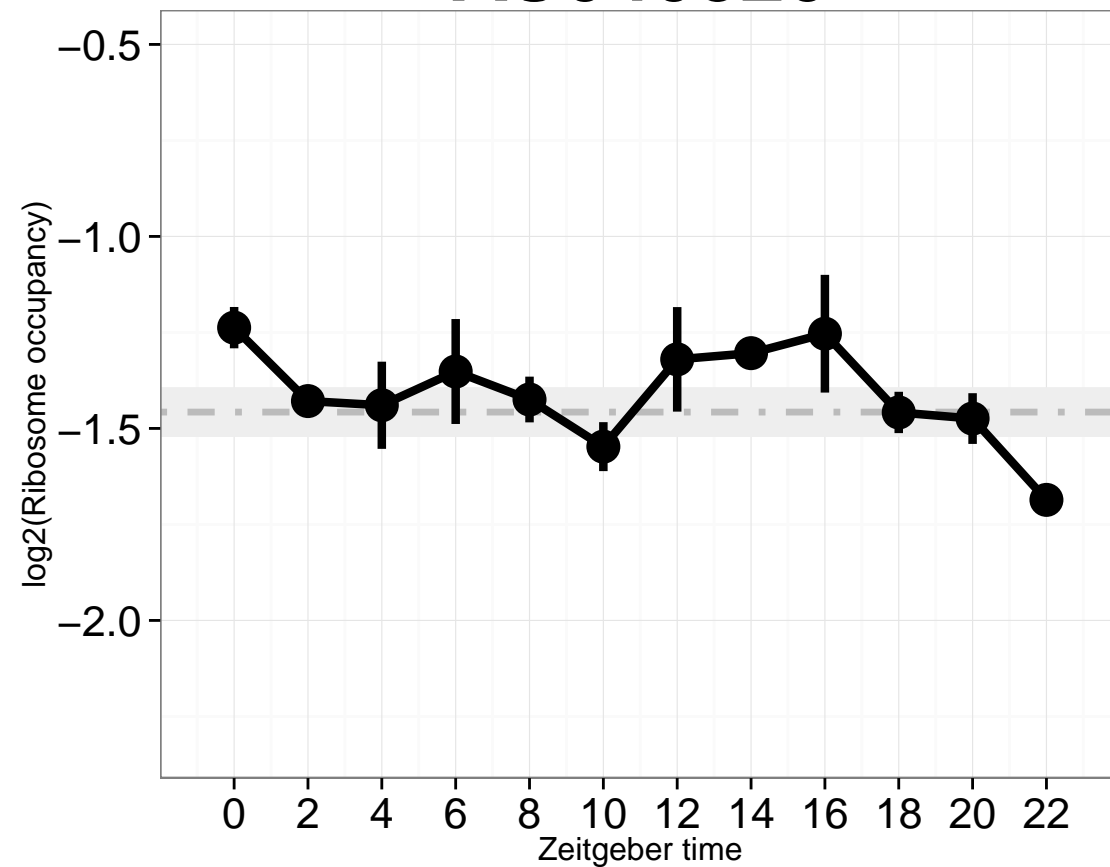

Supplement: SuppDataset_1.zip [file AU040320_set_A.pdf › Supplemental Dataset 1/A-mRNA_nonrhyth_translation_nonrhyth/AU040320_set_A.pdf]

# AW146154

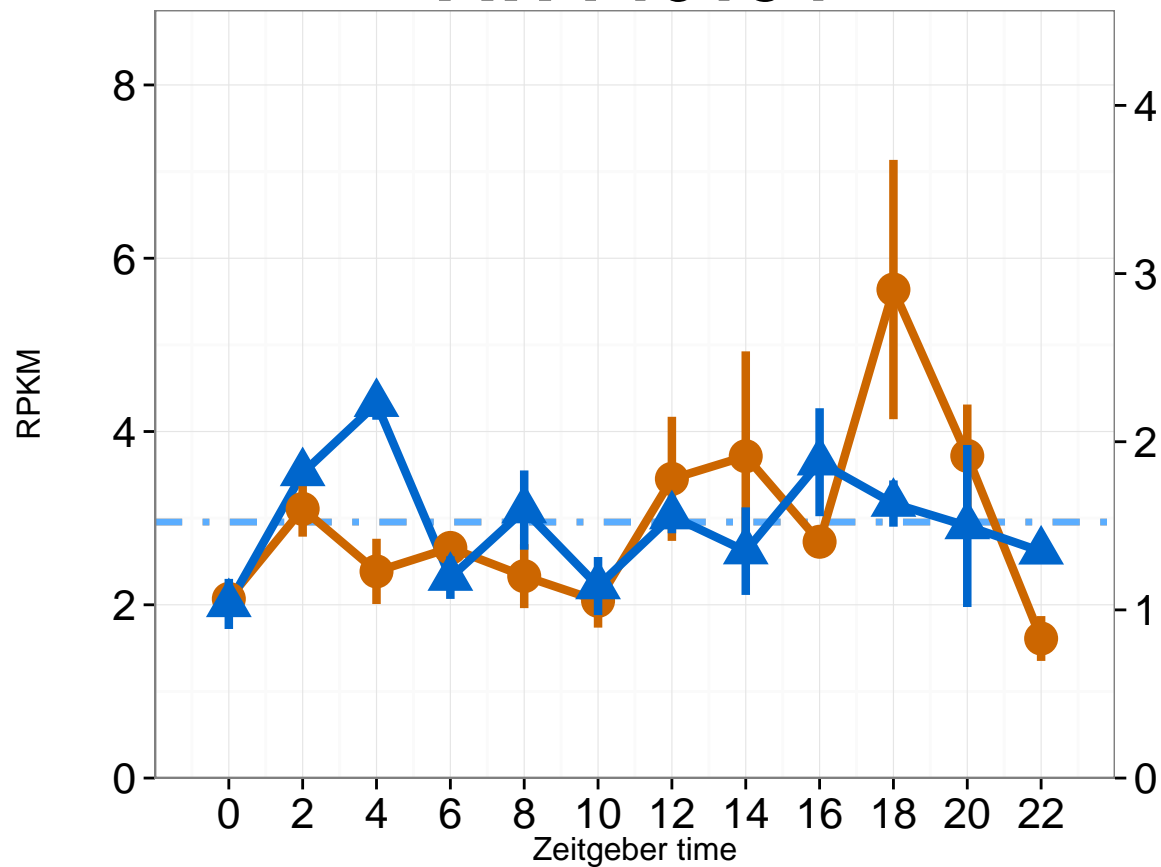

# AW146154

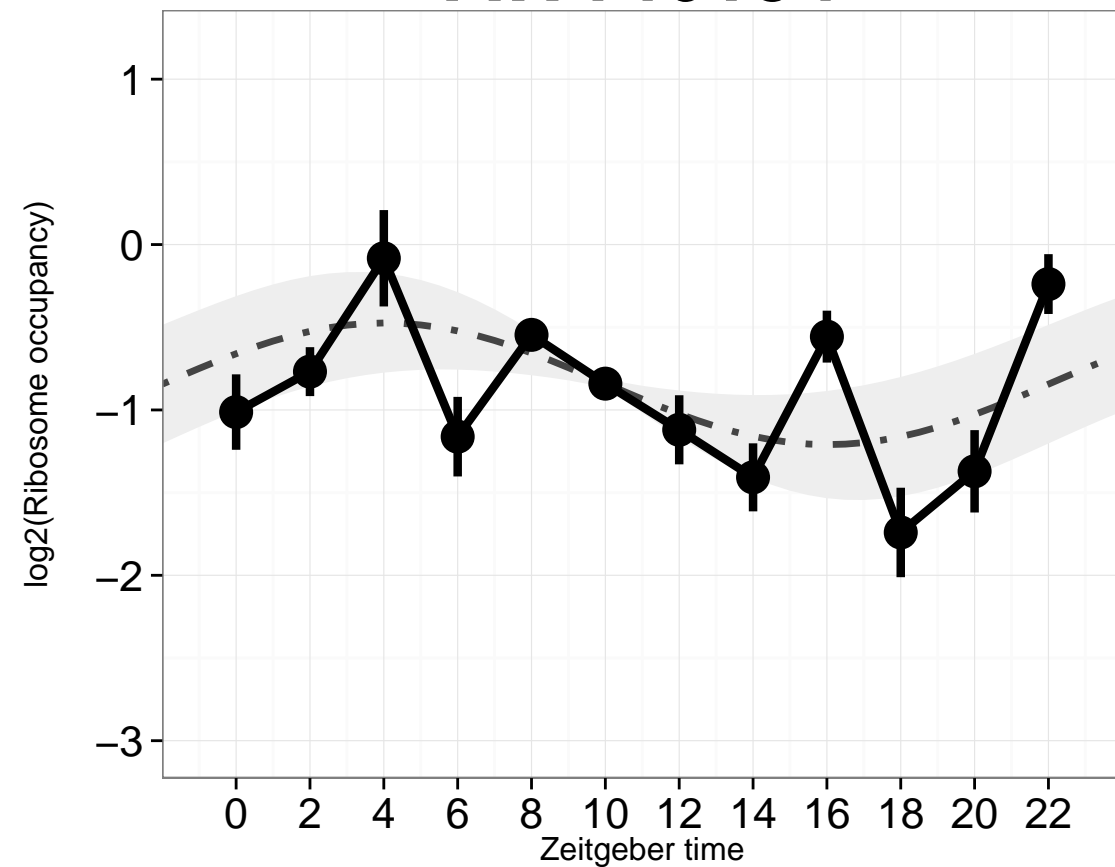

Supplement: SuppDataset_1.zip [file AW146154_set_A.pdf › Supplemental Dataset 1/A-mRNA_nonrhyth_translation_nonrhyth/AW146154_set_A.pdf]

## AW209491

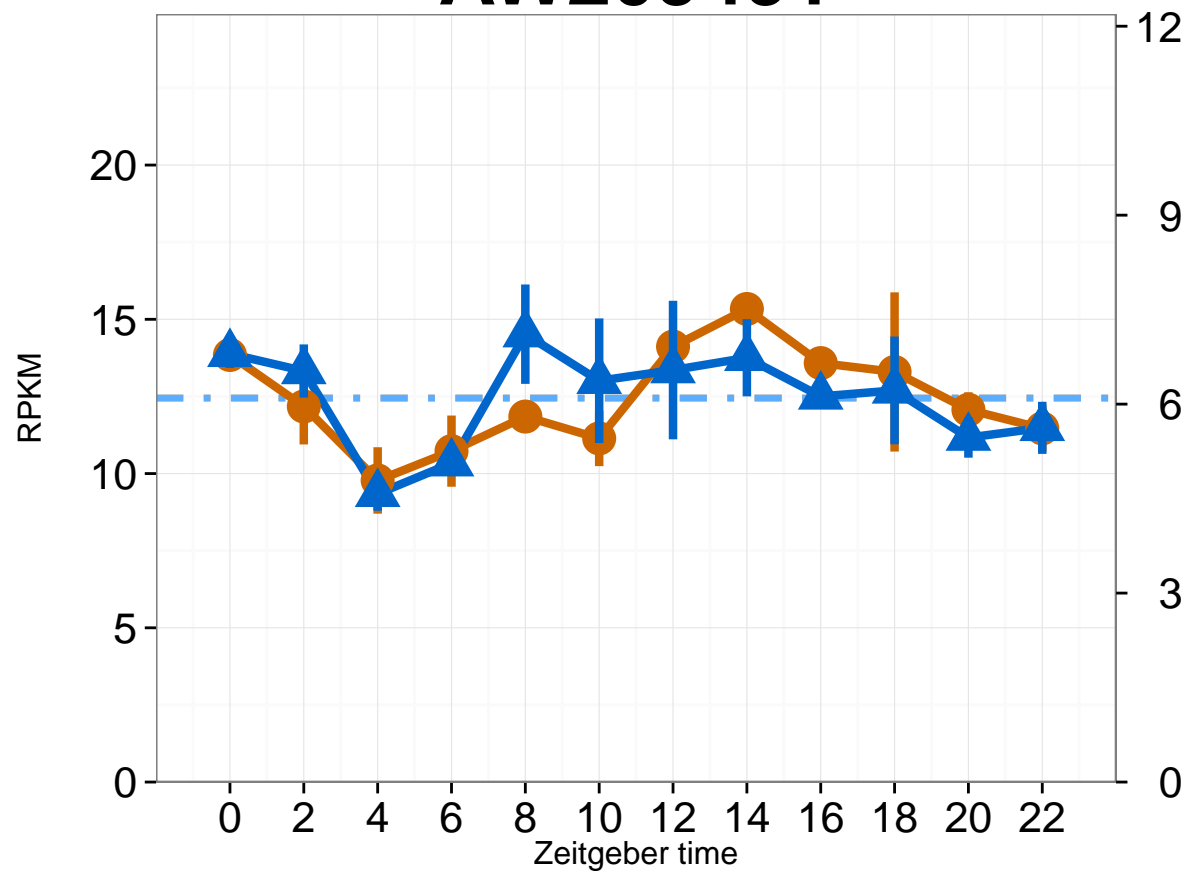

## AW209491

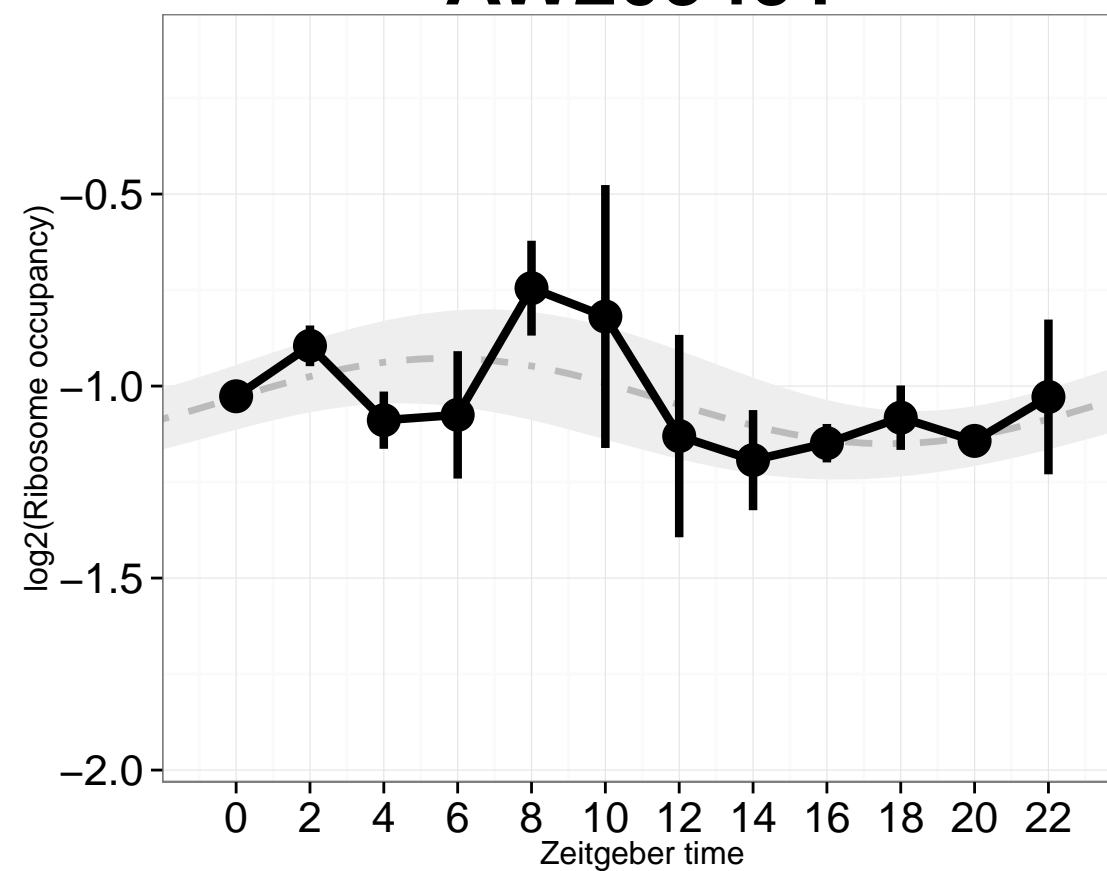

Supplement: SuppDataset_1.zip [file AW209491_set_A.pdf › Supplemental Dataset 1/A-mRNA_nonrhyth_translation_nonrhyth/AW209491_set_A.pdf]

## AW549877

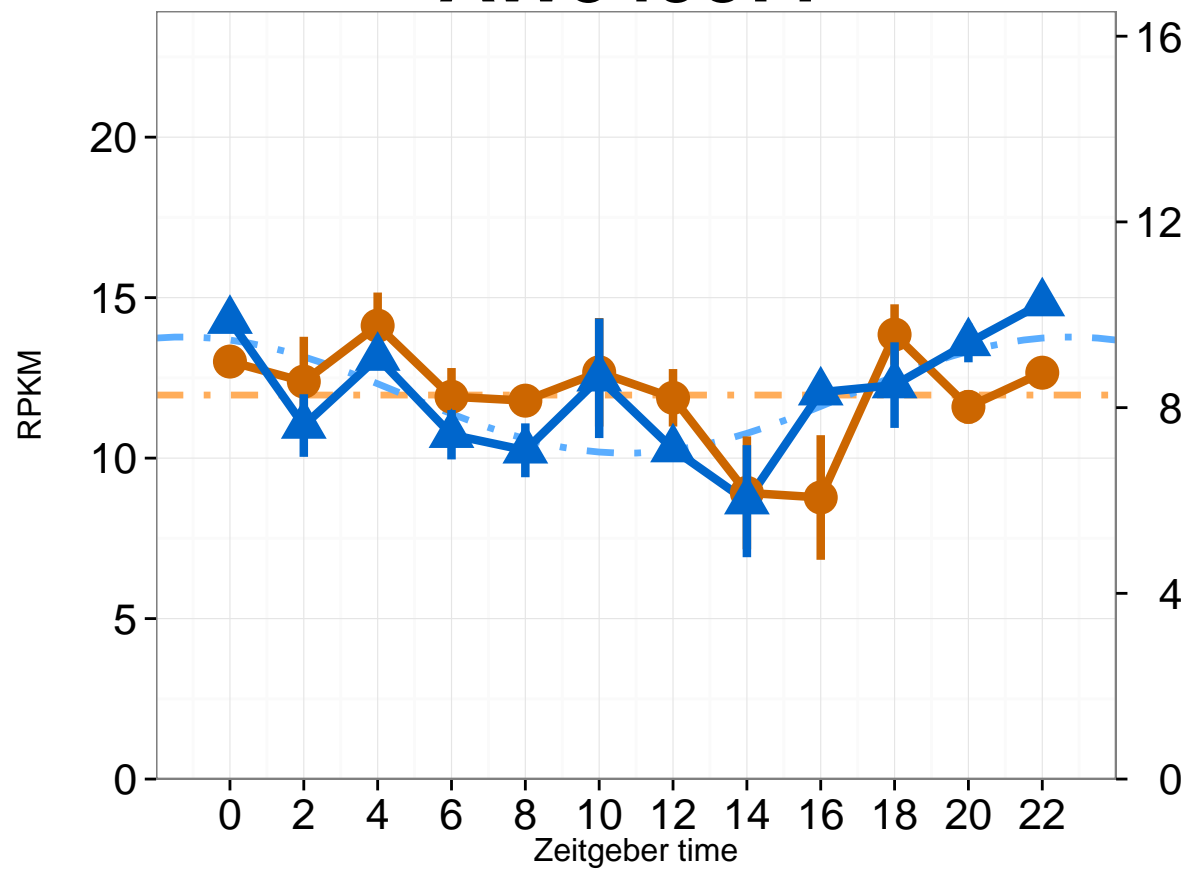

## AW549877

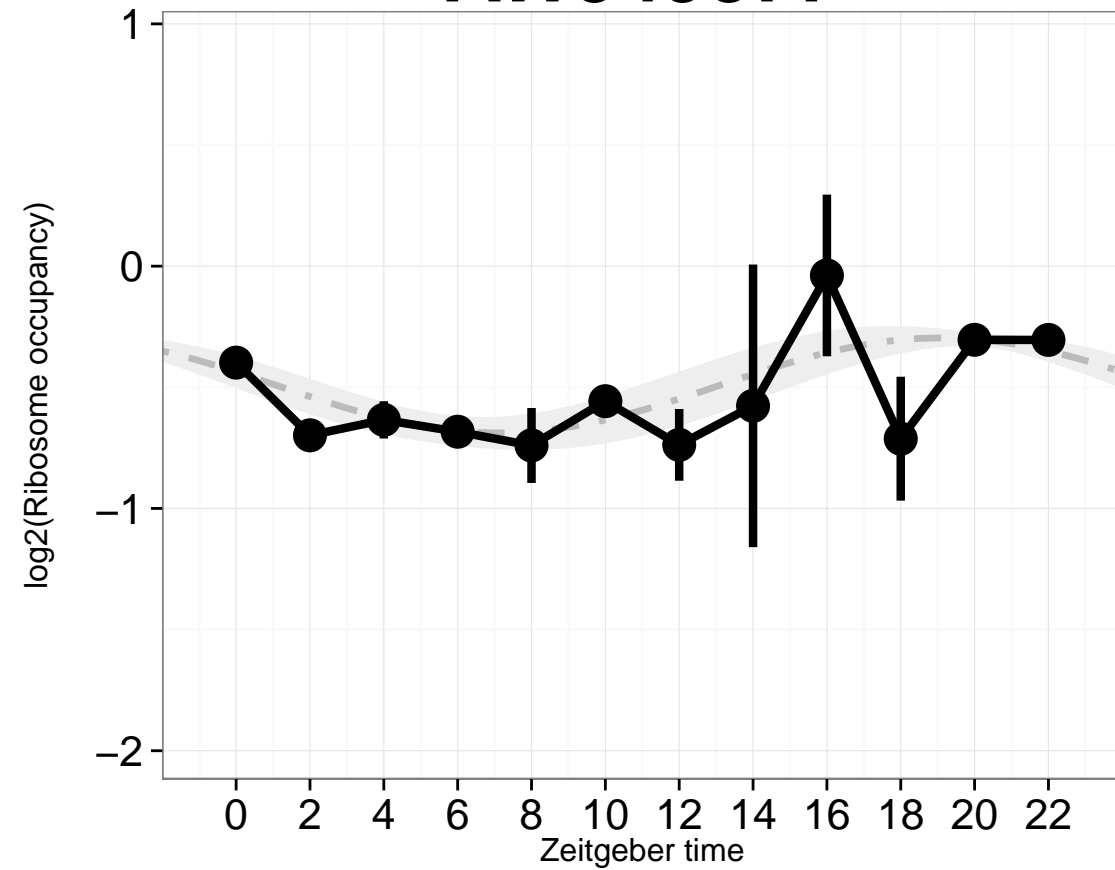

Supplement: SuppDataset_1.zip [file AW549877_set_A.pdf › Supplemental Dataset 1/A-mRNA_nonrhyth_translation_nonrhyth/AW549877_set_A.pdf]

# AW554918

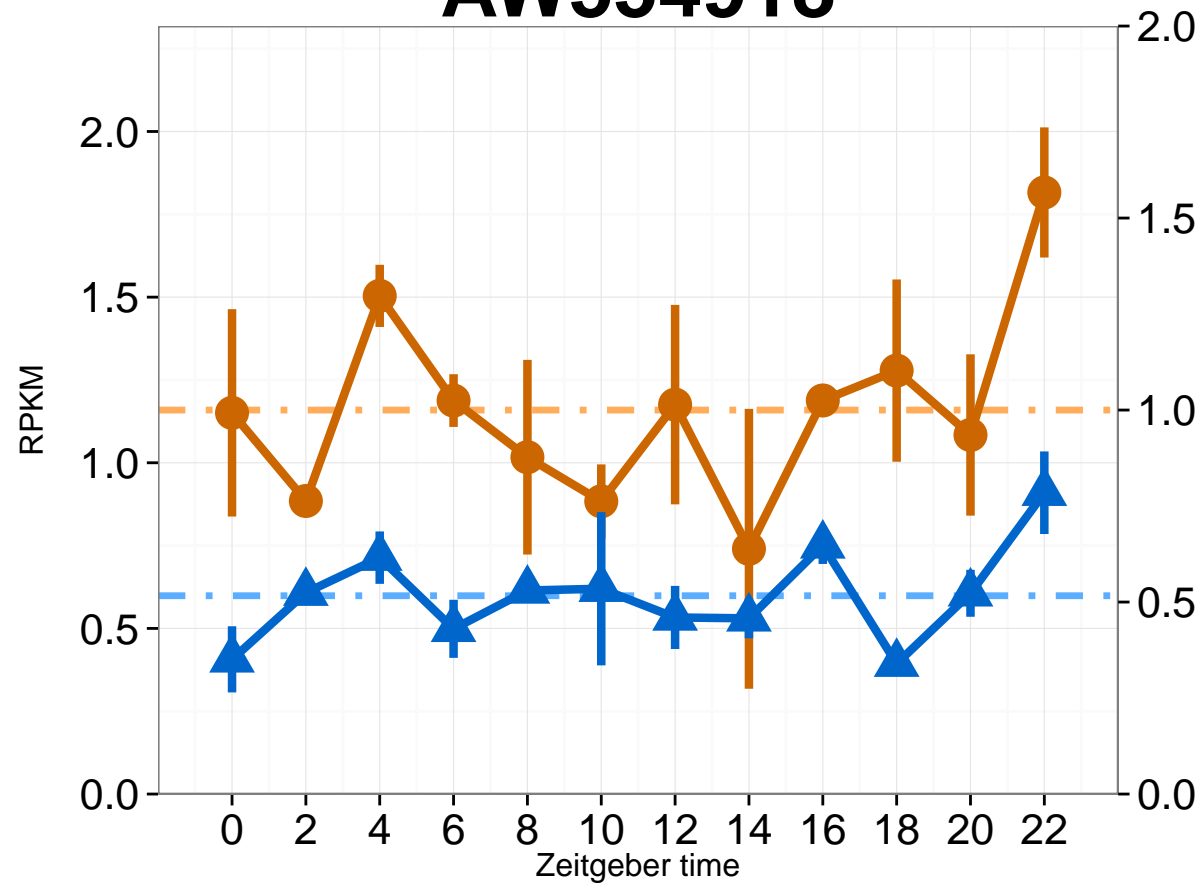

# AW554918

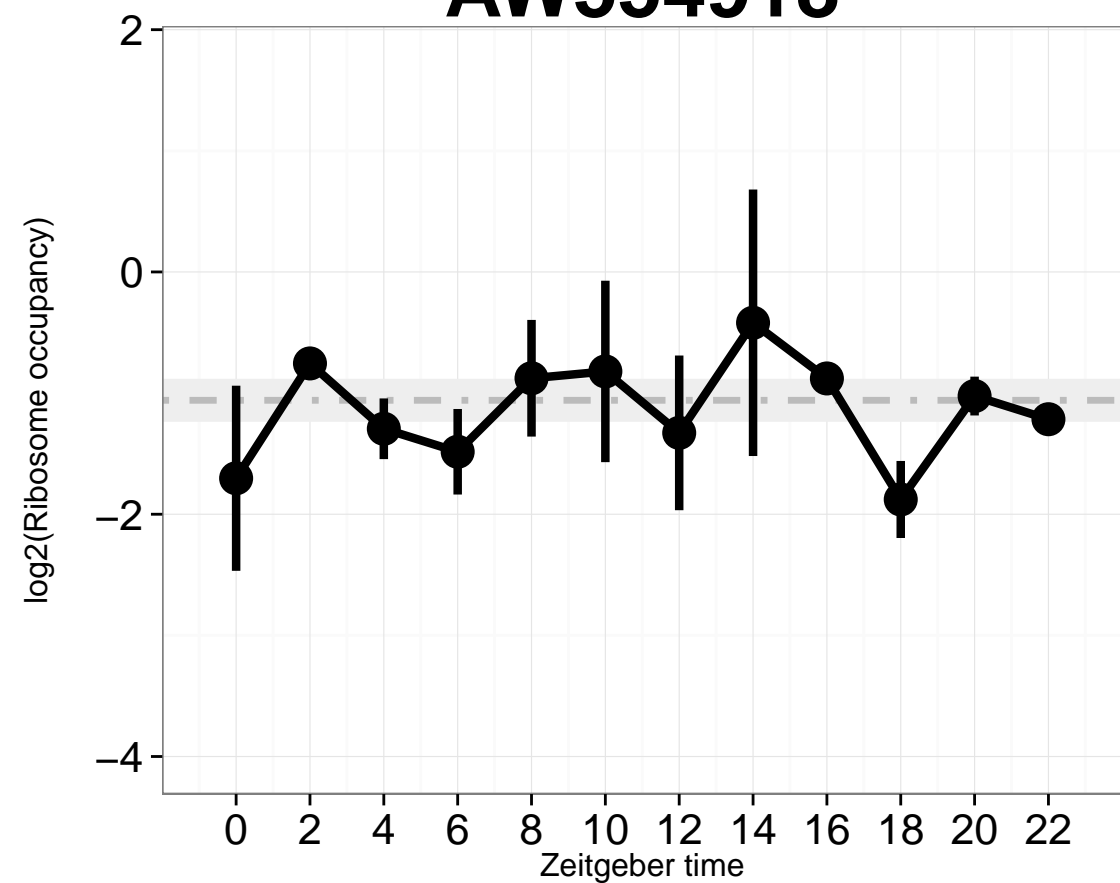

Supplement: SuppDataset_1.zip [file AW554918_set_A.pdf › Supplemental Dataset 1/A-mRNA_nonrhyth_translation_nonrhyth/AW554918_set_A.pdf]

## Aaas

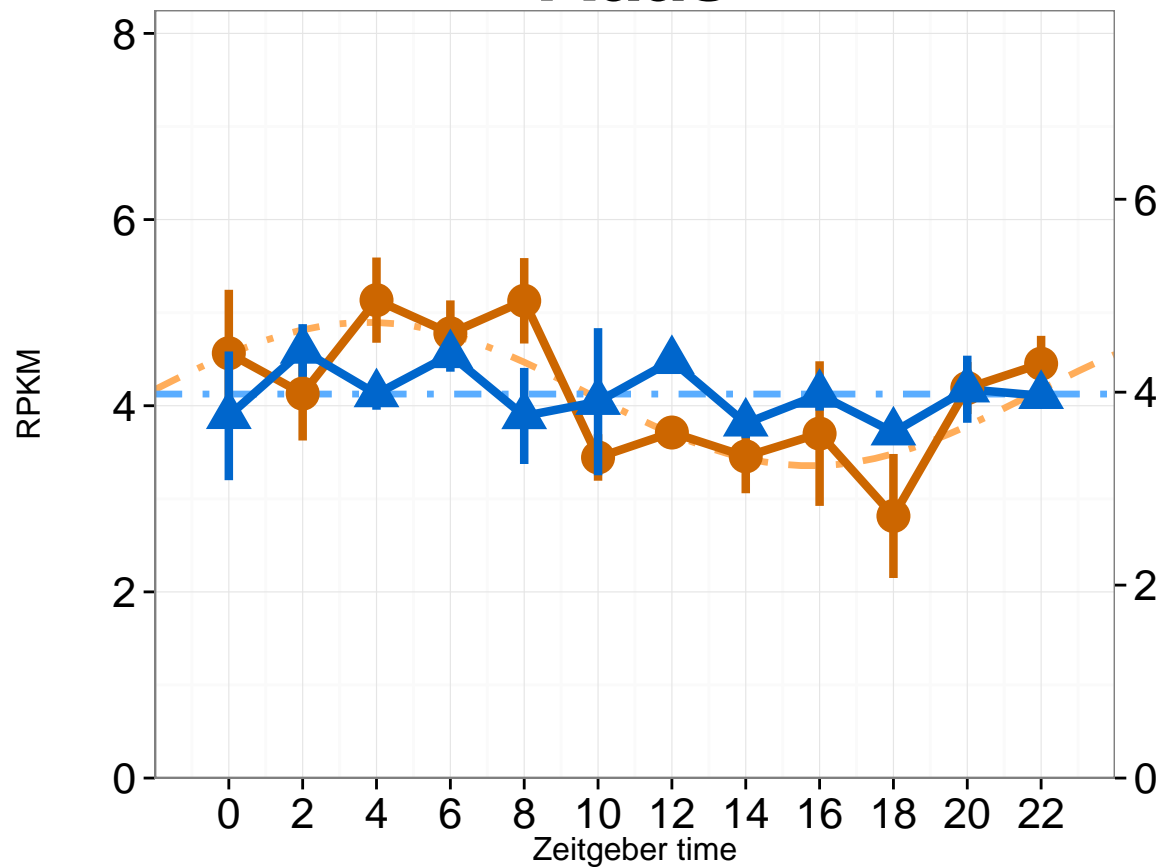

## Aaas

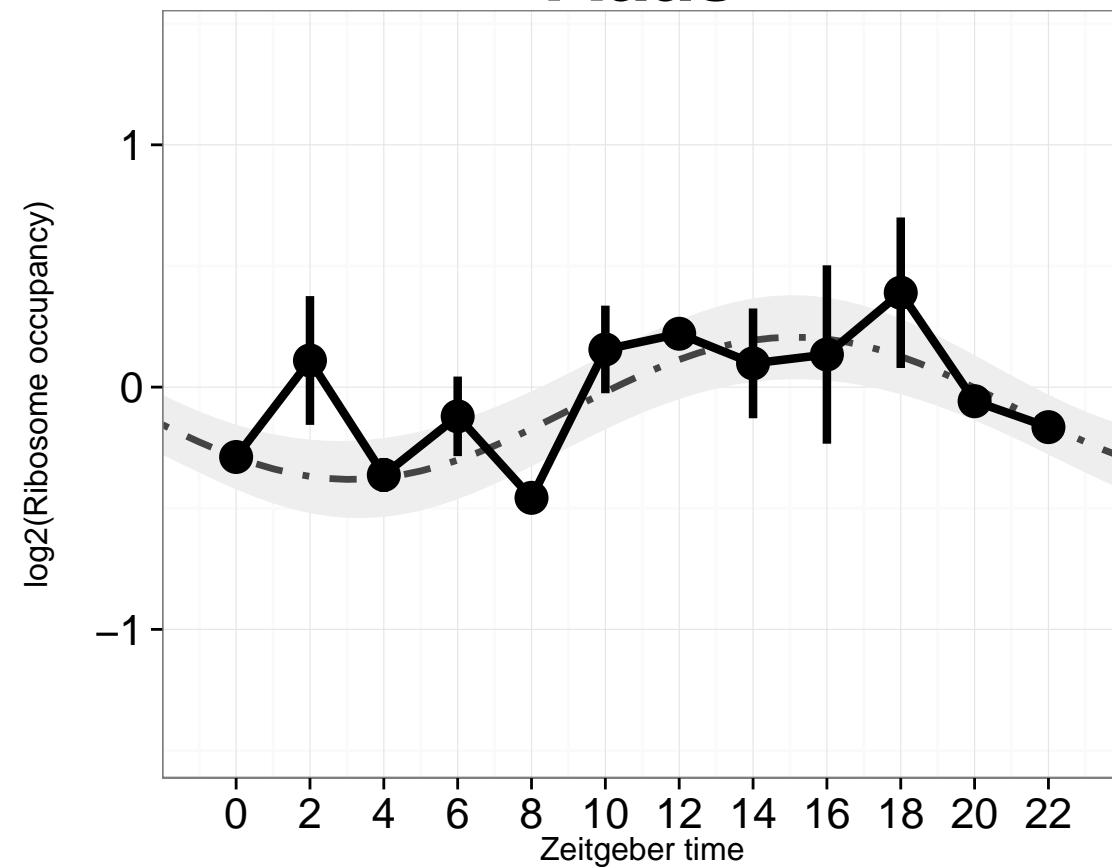

Supplement: SuppDataset_1.zip [file Aaas_set_A.pdf › Supplemental Dataset 1/A-mRNA_nonrhyth_translation_nonrhyth/Aaas_set_A.pdf]

## Aadac

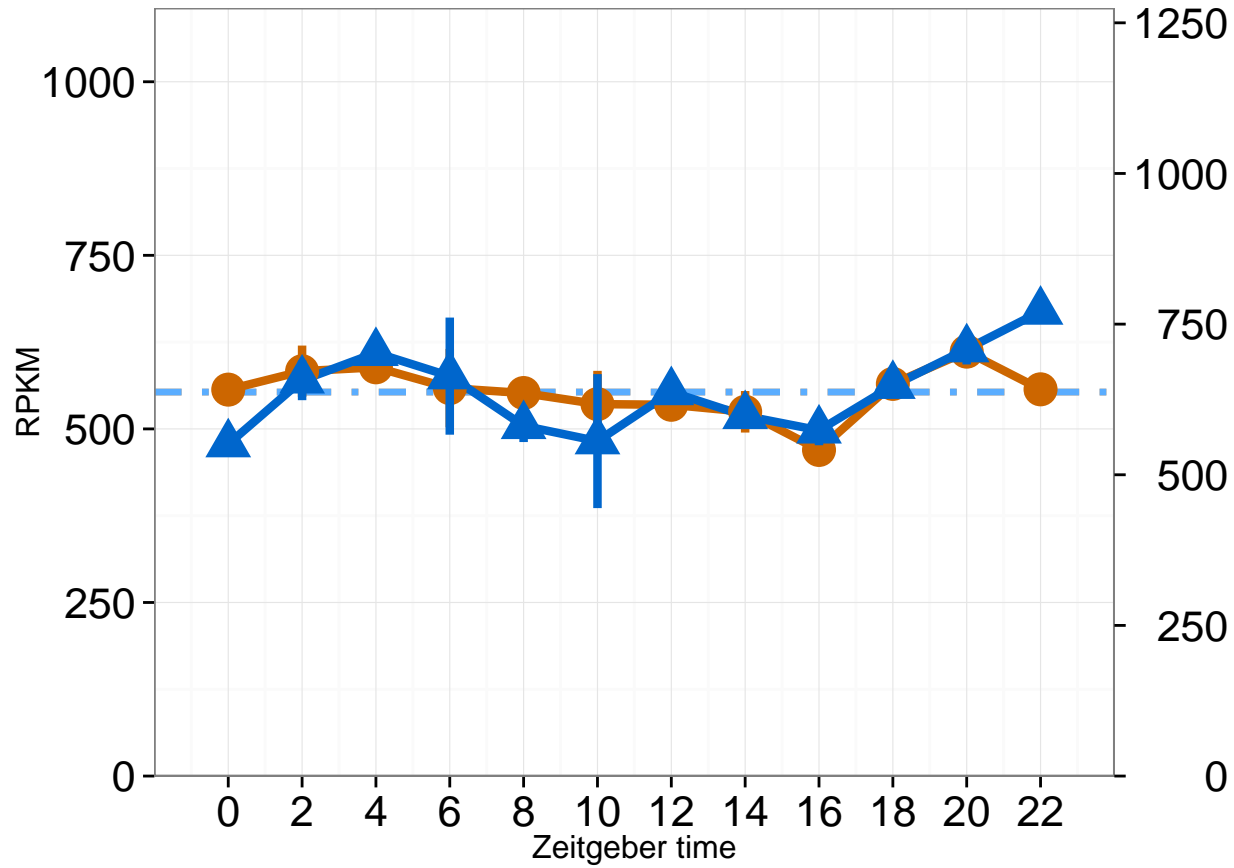

## Aadac

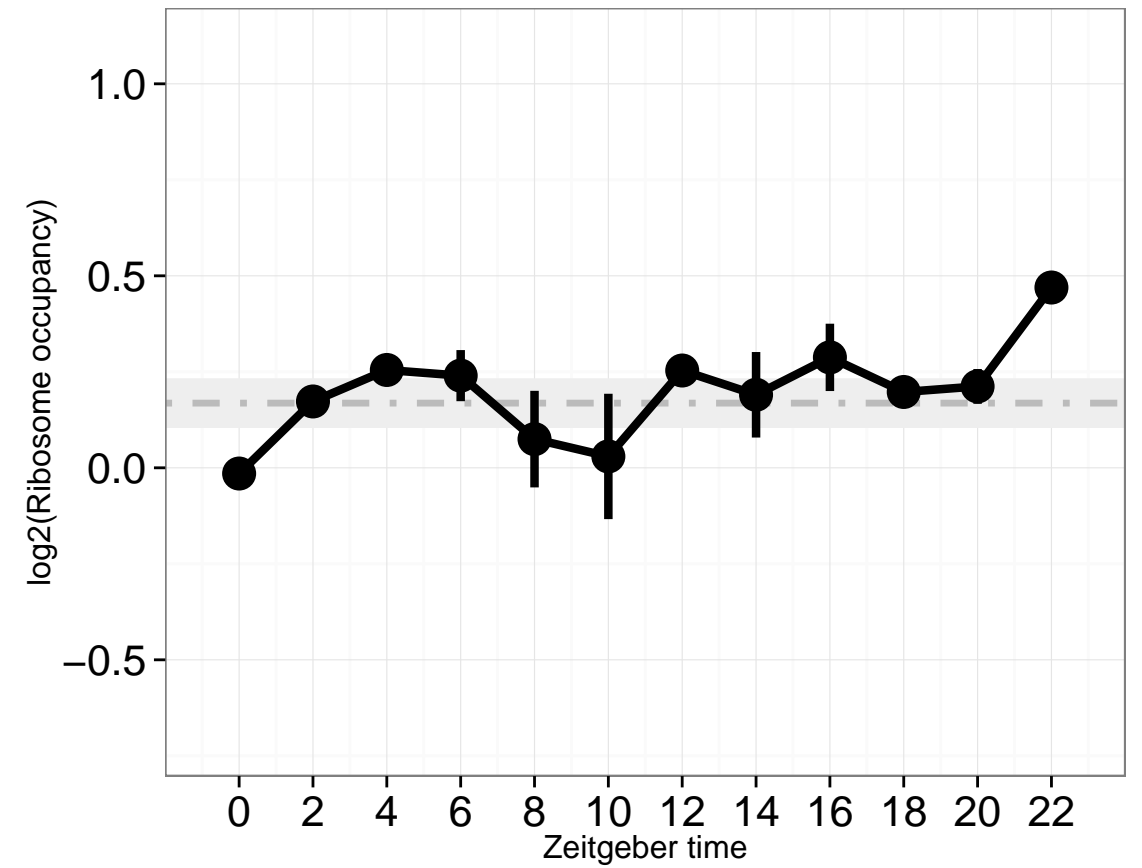

Supplement: SuppDataset_1.zip [file Aadac_set_A.pdf › Supplemental Dataset 1/A-mRNA_nonrhyth_translation_nonrhyth/Aadac_set_A.pdf]

## Aadat

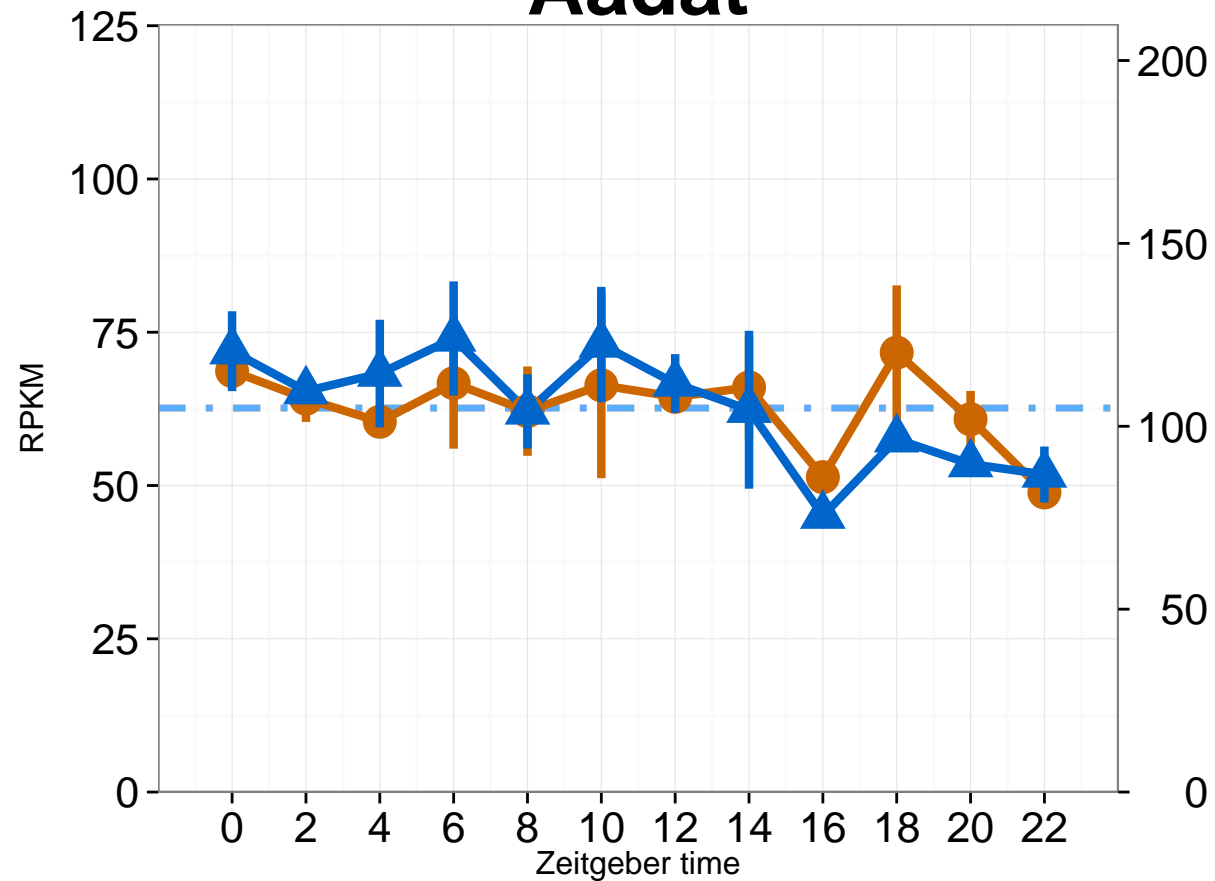

## Aadat

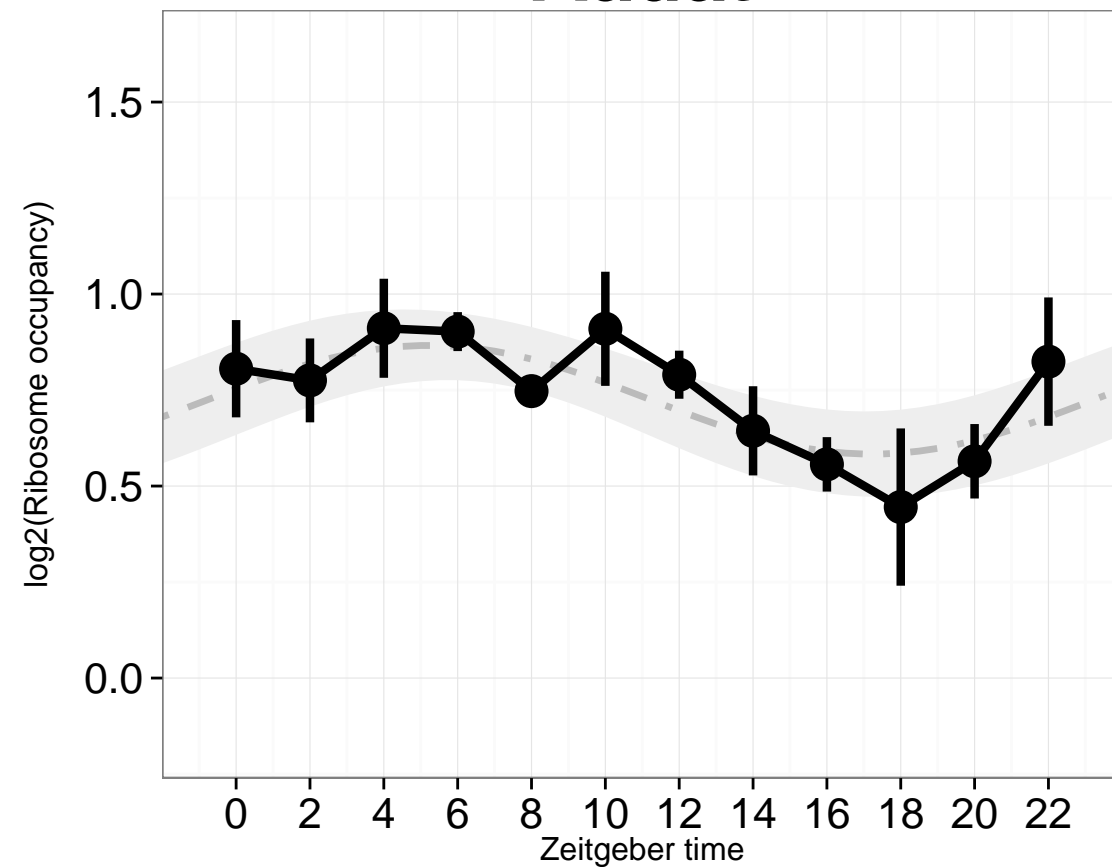

Supplement: SuppDataset_1.zip [file Aadat_set_A.pdf › Supplemental Dataset 1/A-mRNA_nonrhyth_translation_nonrhyth/Aadat_set_A.pdf]

## Aaed1

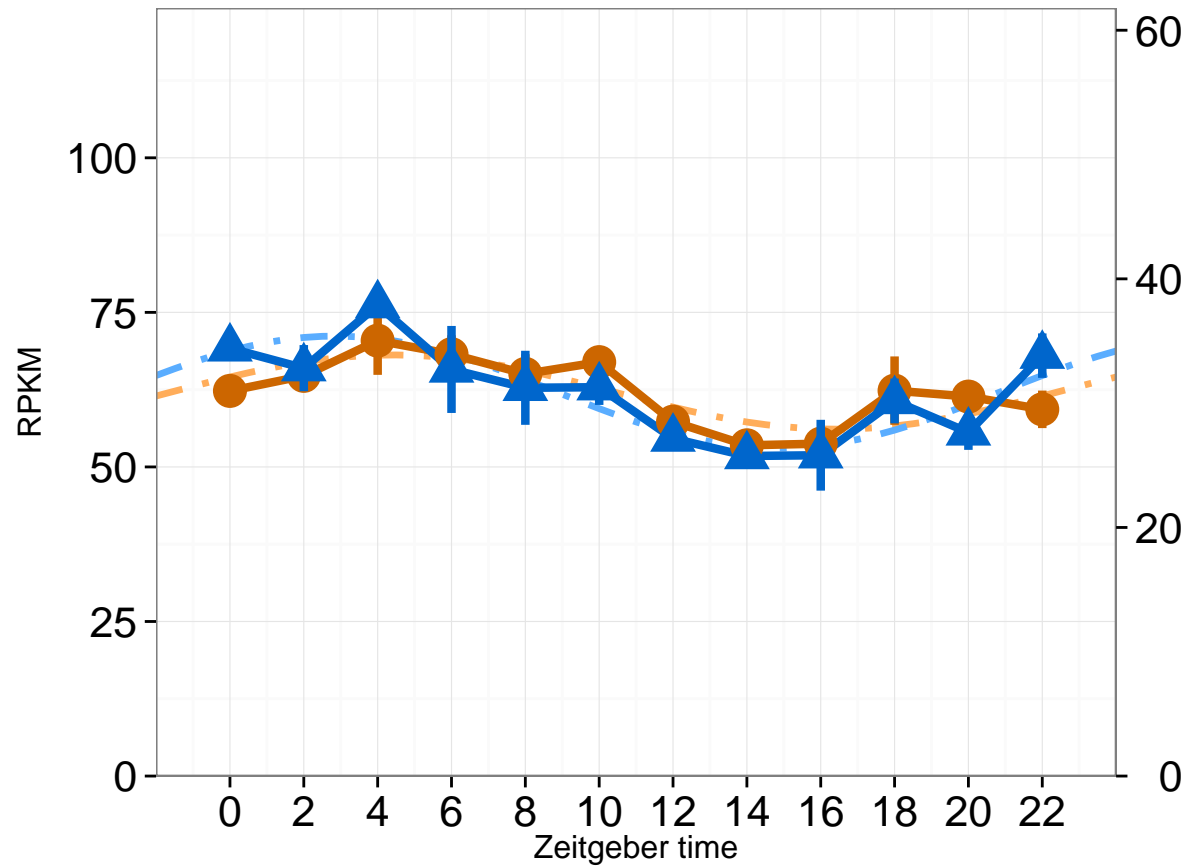

## Aaed1

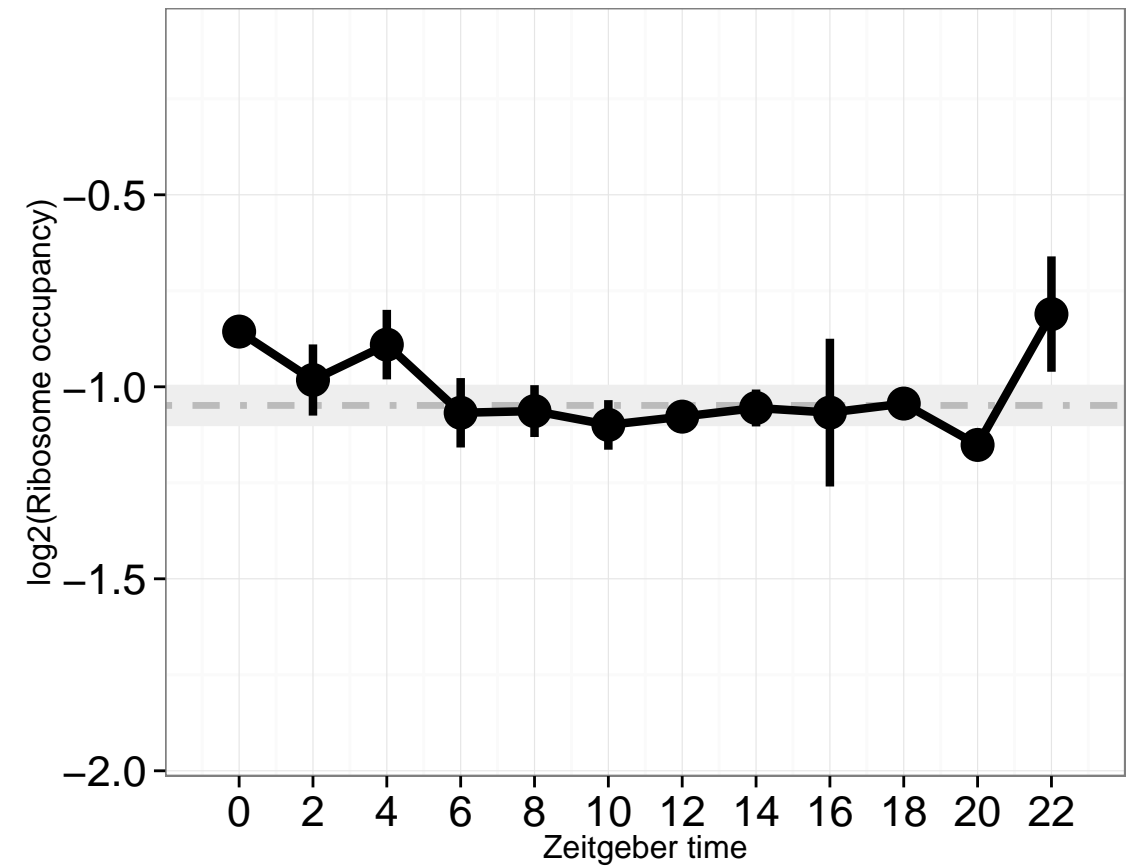

Supplement: SuppDataset_1.zip [file Aaed1_set_A.pdf › Supplemental Dataset 1/A-mRNA_nonrhyth_translation_nonrhyth/Aaed1_set_A.pdf]

## Aagab

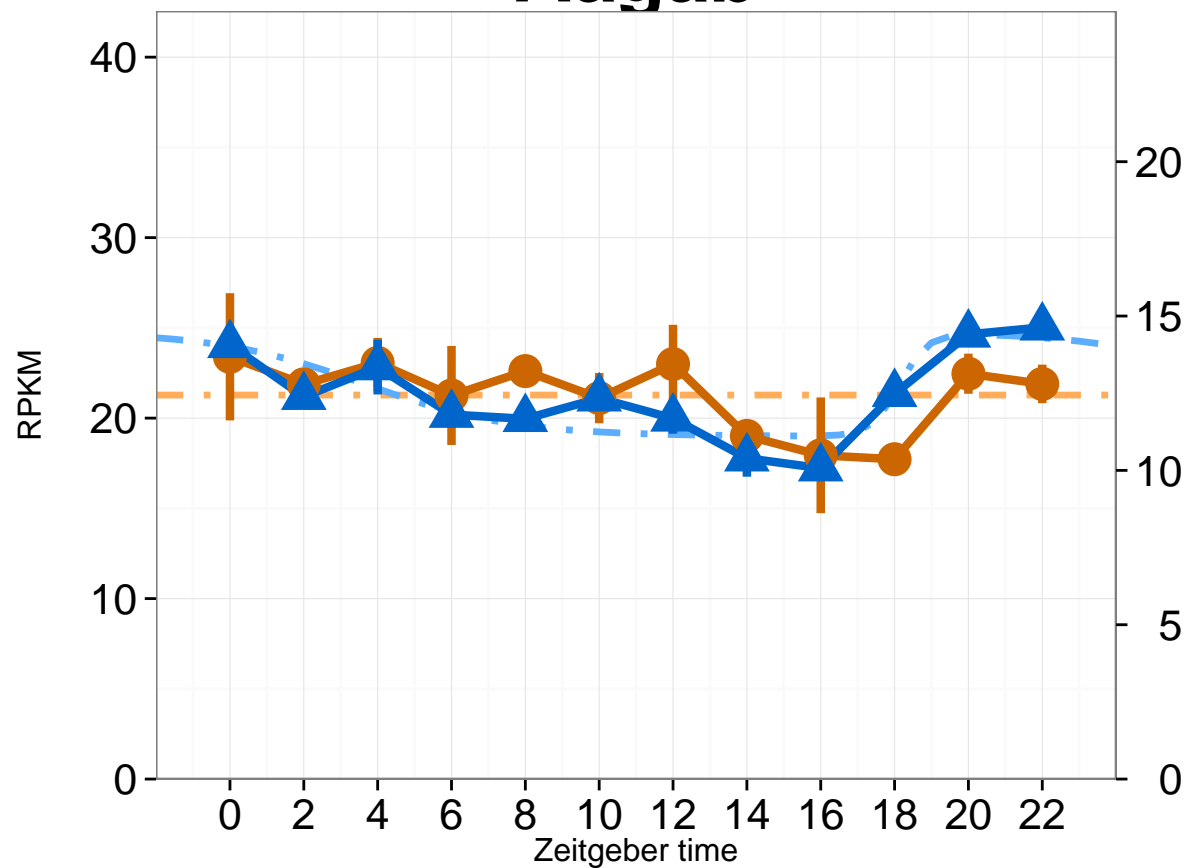

## Aagab

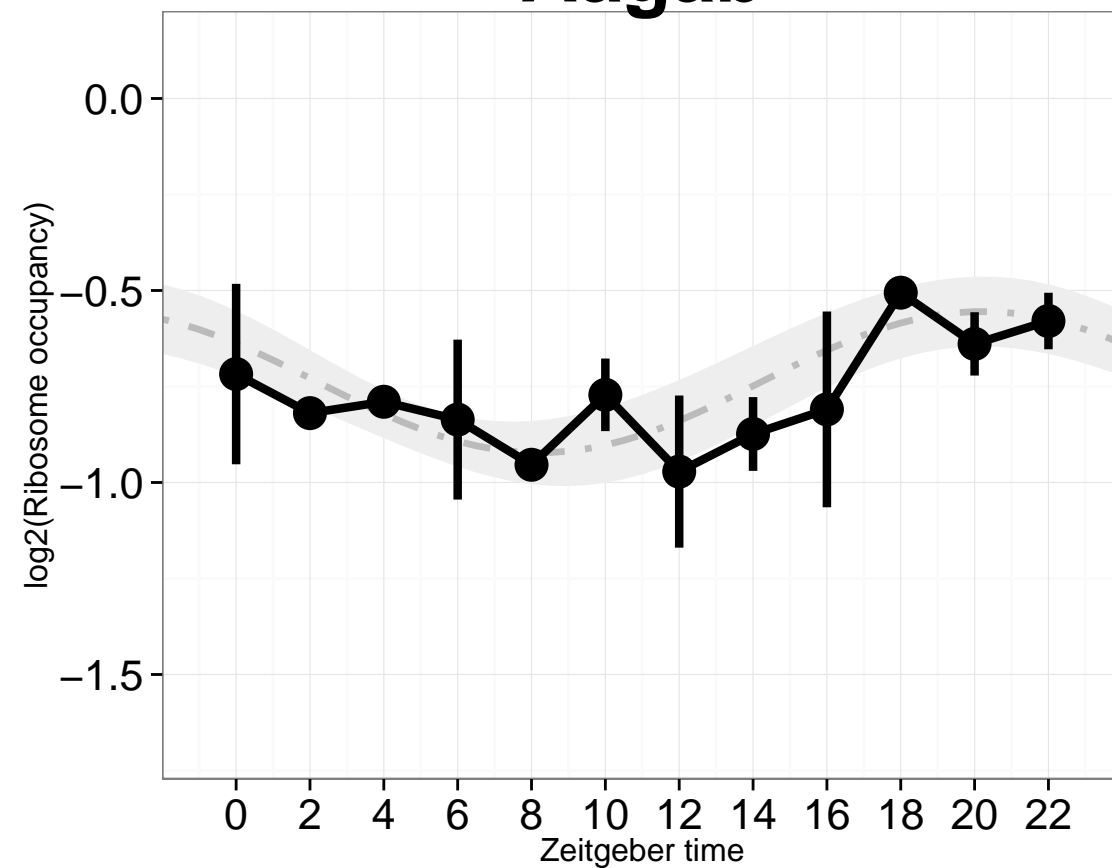

Supplement: SuppDataset_1.zip [file Aagab_set_A.pdf › Supplemental Dataset 1/A-mRNA_nonrhyth_translation_nonrhyth/Aagab_set_A.pdf]

## Aak1

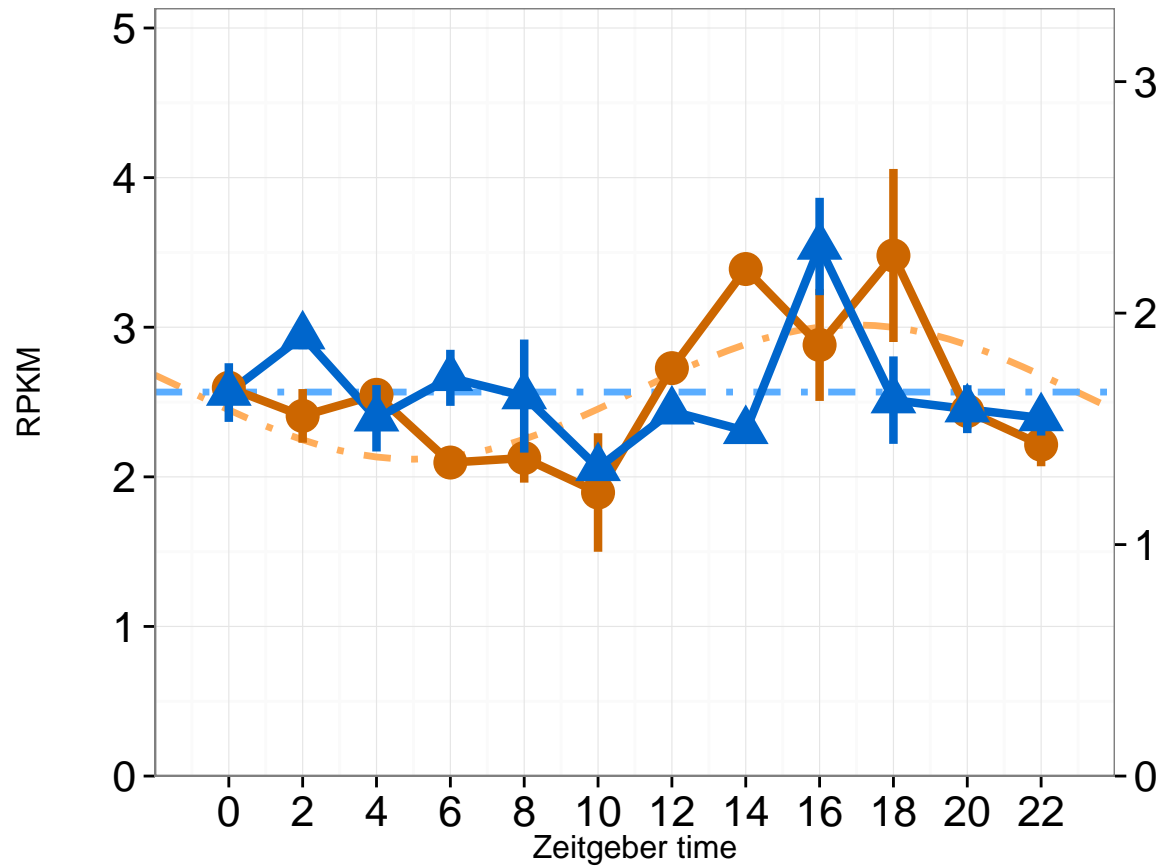

## Aak1

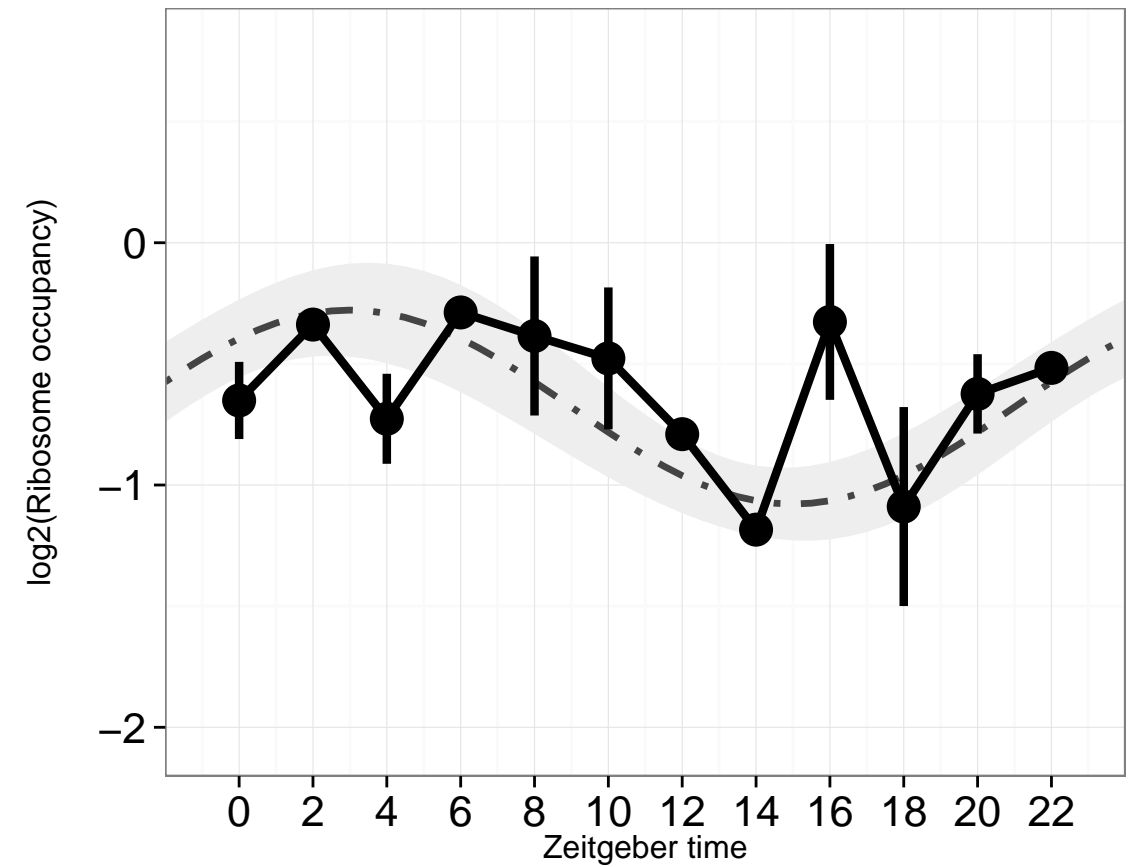

Supplement: SuppDataset_1.zip [file Aak1_set_A.pdf › Supplemental Dataset 1/A-mRNA_nonrhyth_translation_nonrhyth/Aak1_set_A.pdf]

# Aamdc

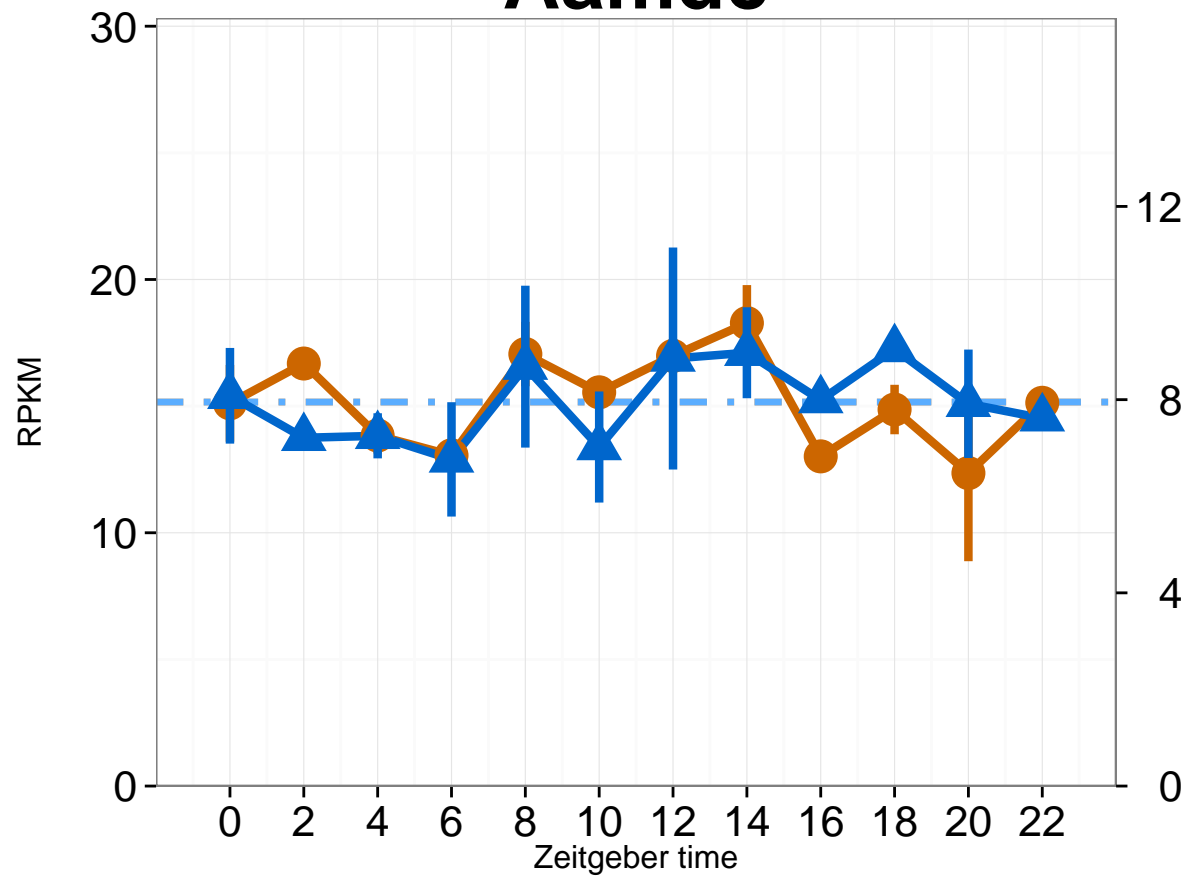

# Aamdc

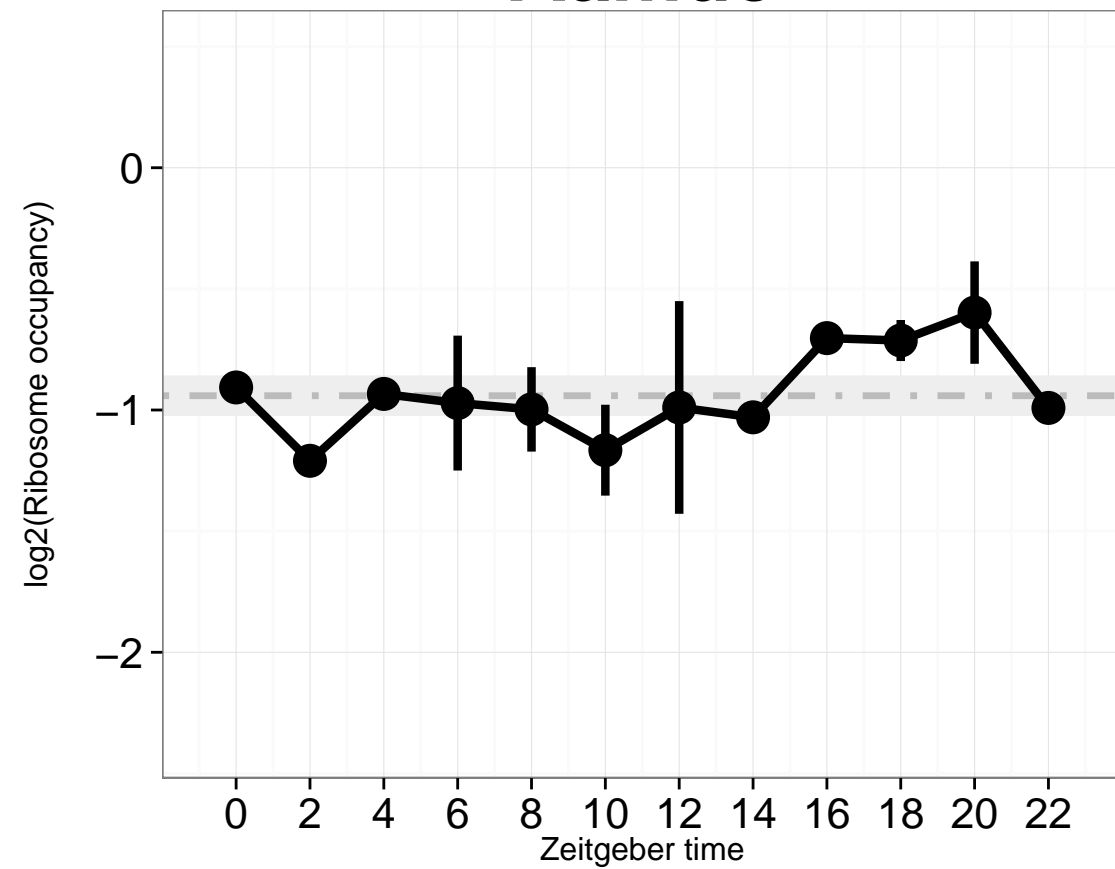

Supplement: SuppDataset_1.zip [file Aamdc_set_A.pdf › Supplemental Dataset 1/A-mRNA_nonrhyth_translation_nonrhyth/Aamdc_set_A.pdf]

## Aamp

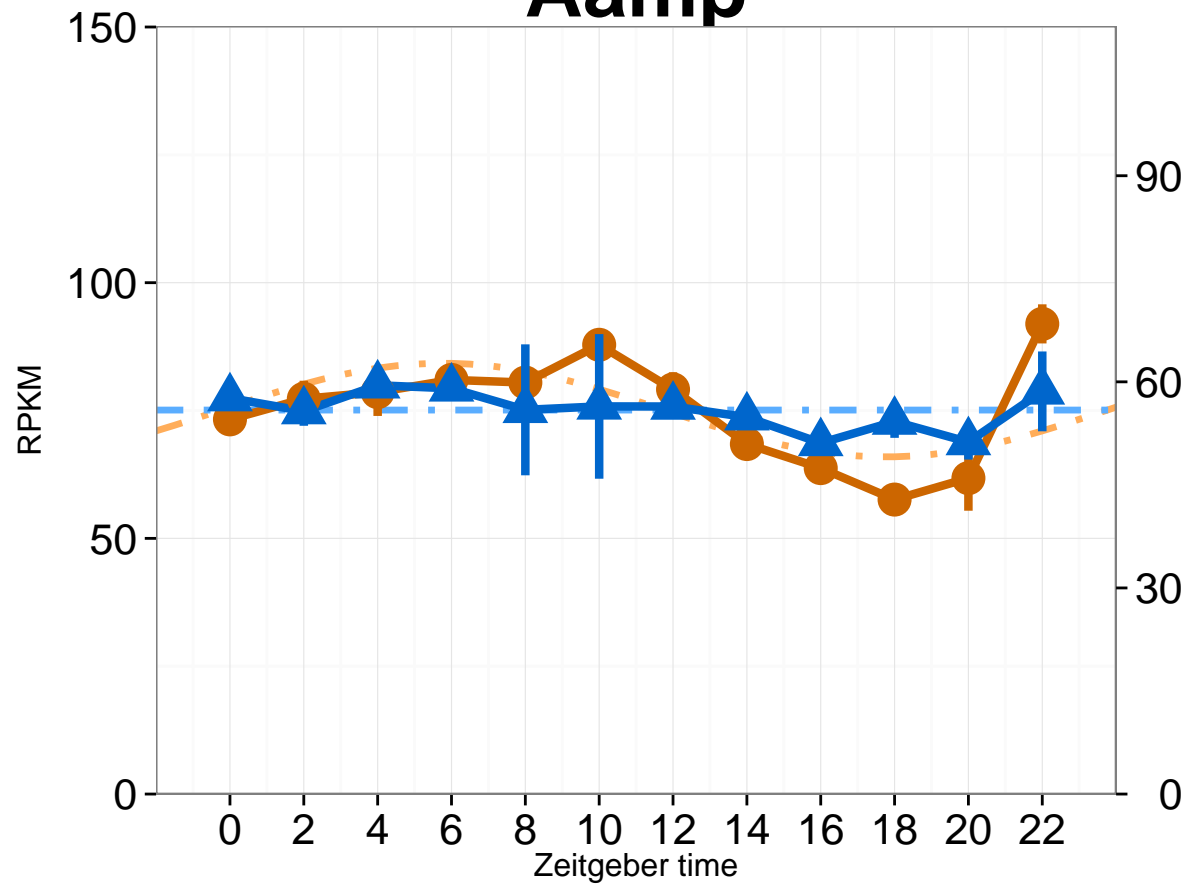

## Aamp

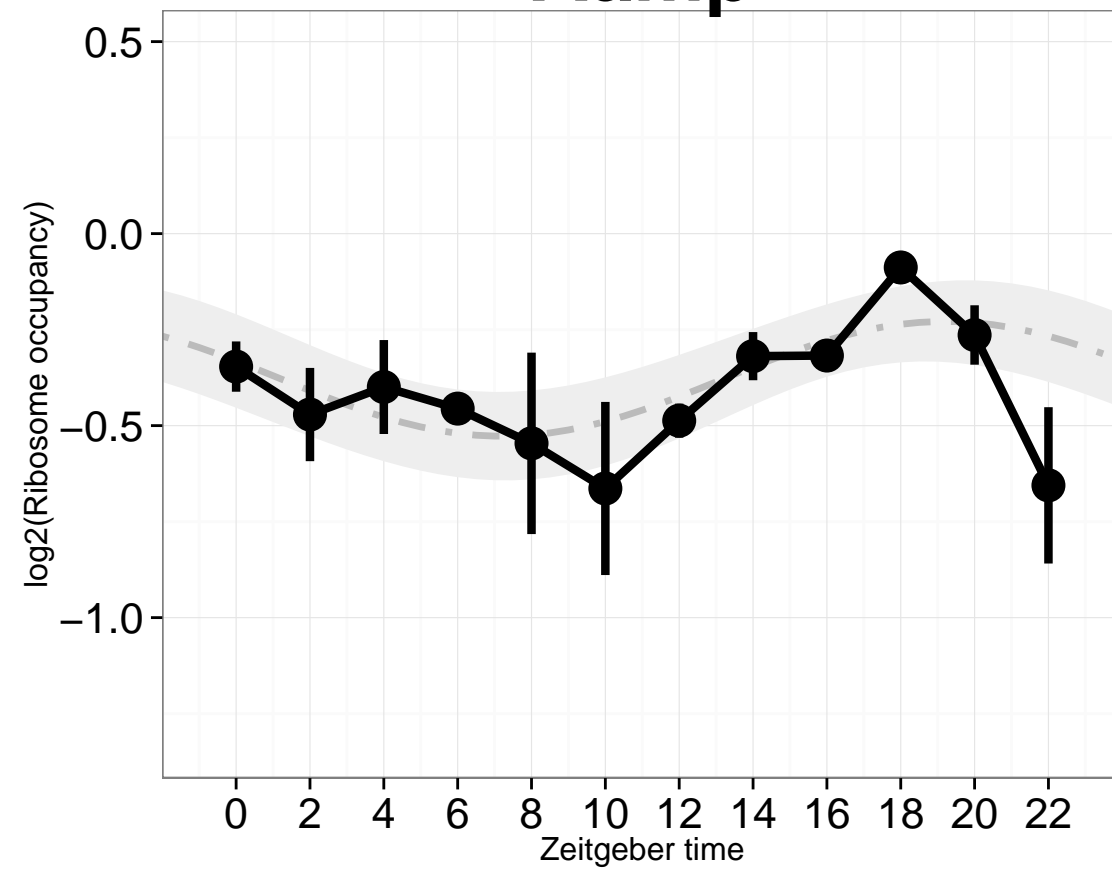

Supplement: SuppDataset_1.zip [file Aamp_set_A.pdf › Supplemental Dataset 1/A-mRNA_nonrhyth_translation_nonrhyth/Aamp_set_A.pdf]

## Aar2

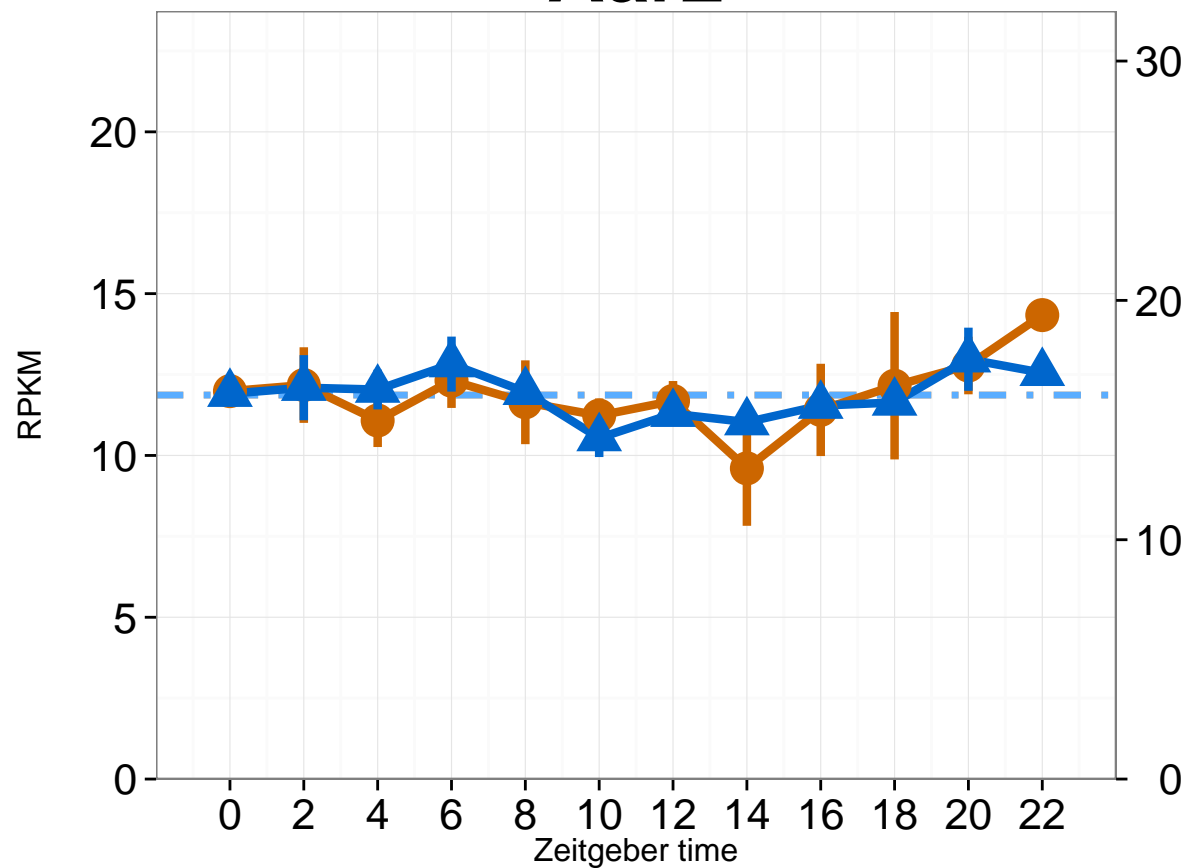

## Aar2

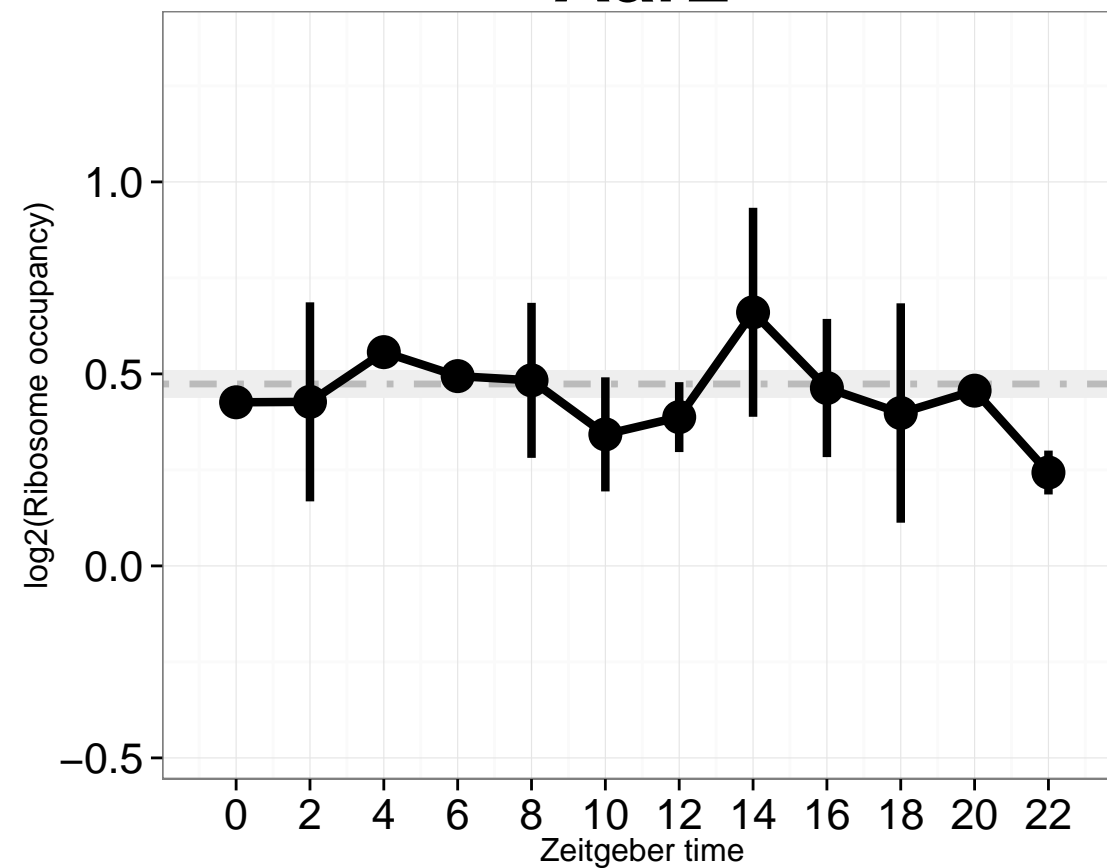

Supplement: SuppDataset_1.zip [file Aar2_set_A.pdf › Supplemental Dataset 1/A-mRNA_nonrhyth_translation_nonrhyth/Aar2_set_A.pdf]

**Aard TR**

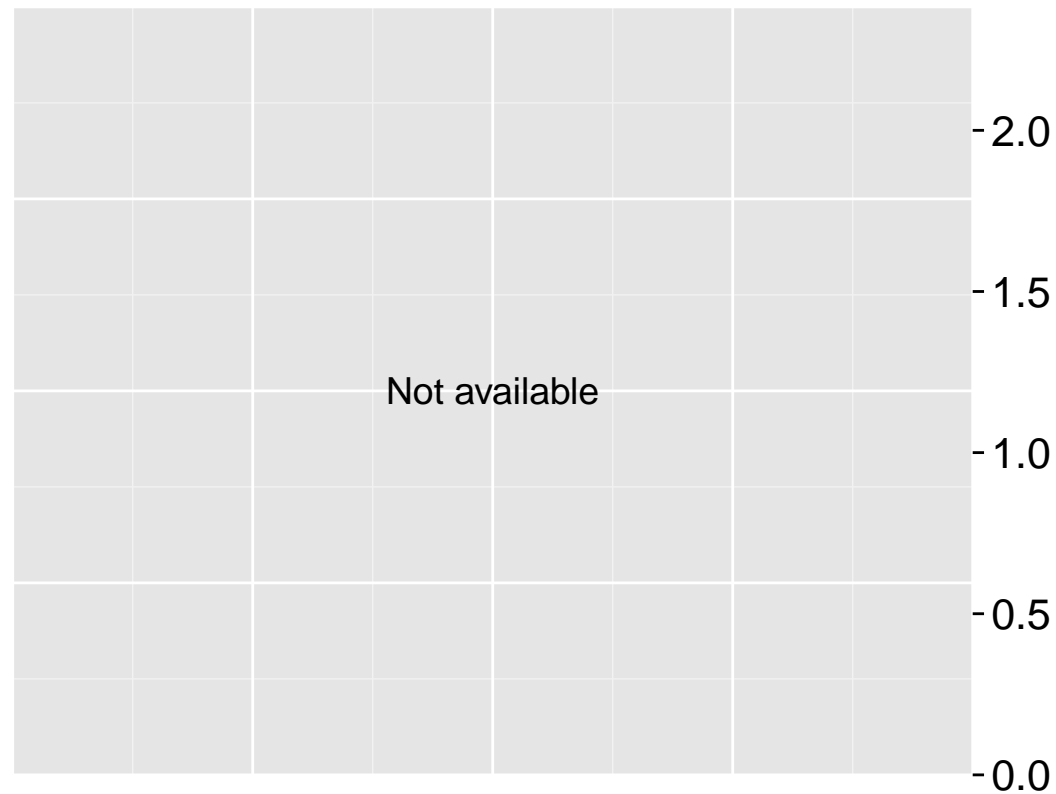

**Aard log2(Ribosome occupancy)**

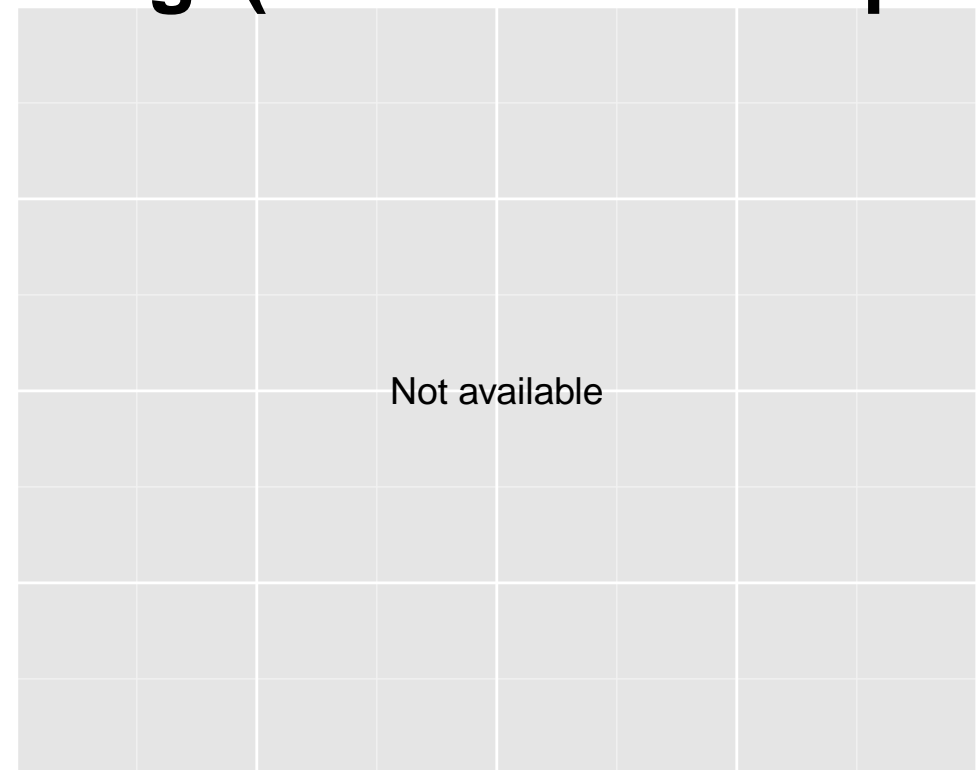

Supplement: SuppDataset_1.zip [file Aard_set_A.pdf › Supplemental Dataset 1/A-mRNA_nonrhyth_translation_nonrhyth/Aard_set_A.pdf]

## Aars2

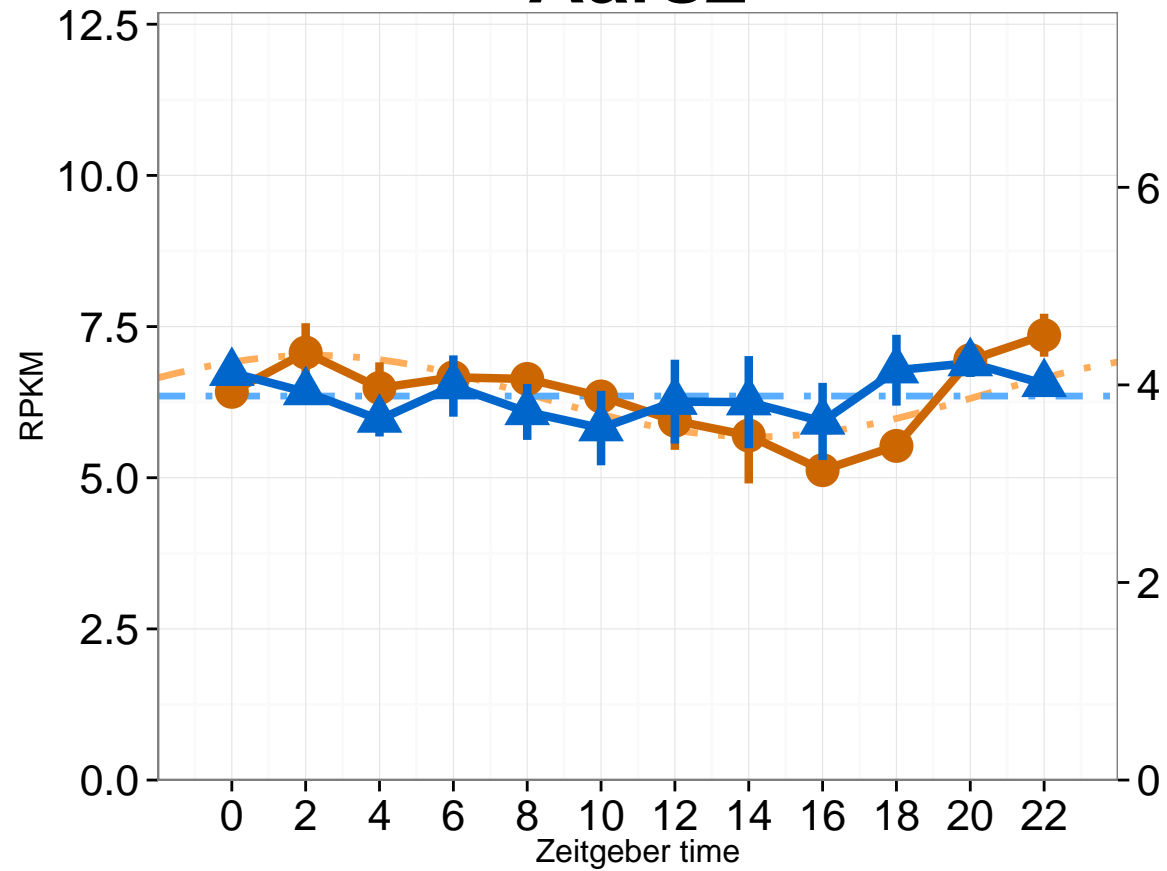

## Aars2

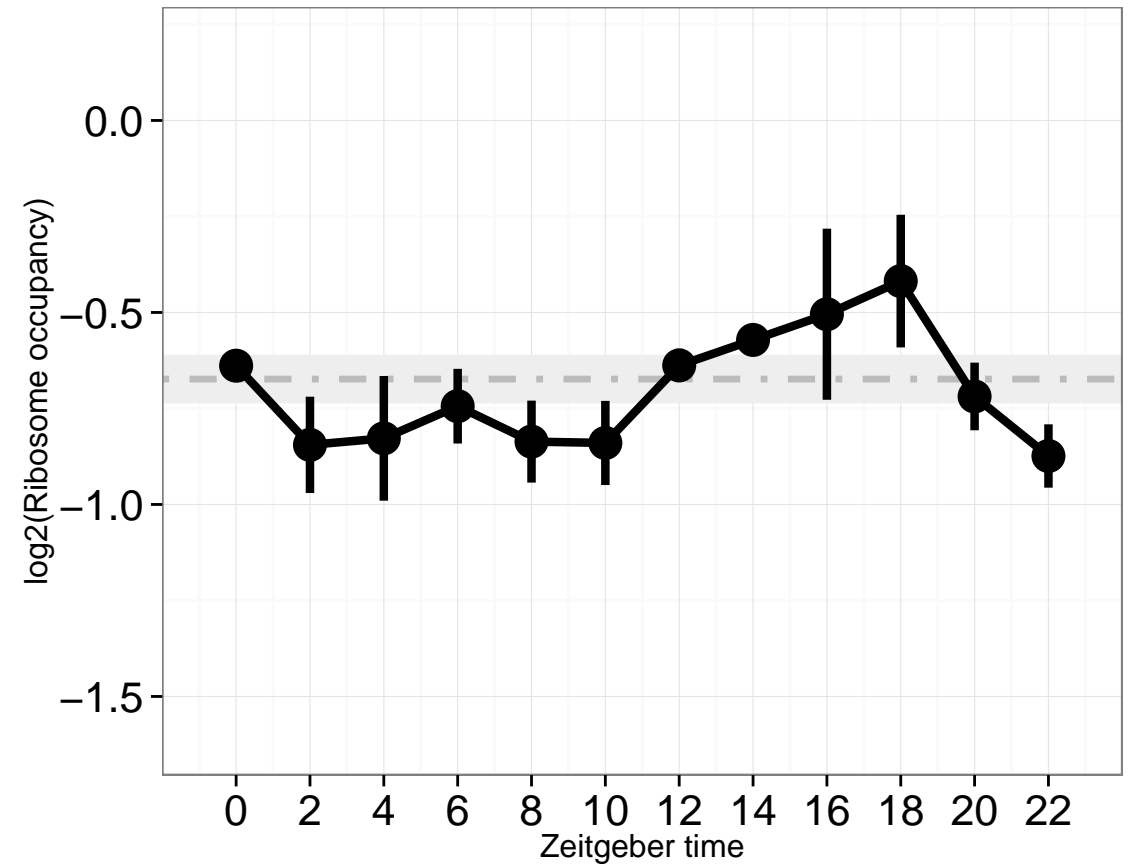

Supplement: SuppDataset_1.zip [file Aars2_set_A.pdf › Supplemental Dataset 1/A-mRNA_nonrhyth_translation_nonrhyth/Aars2_set_A.pdf]
