# Supplementary figures and images for: Ribosome profiling reveals the rhythmic liver translatome and circadian clock regulation by upstream open reading frames (part 102 of 113)
Source: HighWire-hosted journal article supplement (doi:10.1101/gr.195404.115), 2015-10-20

## Aacs

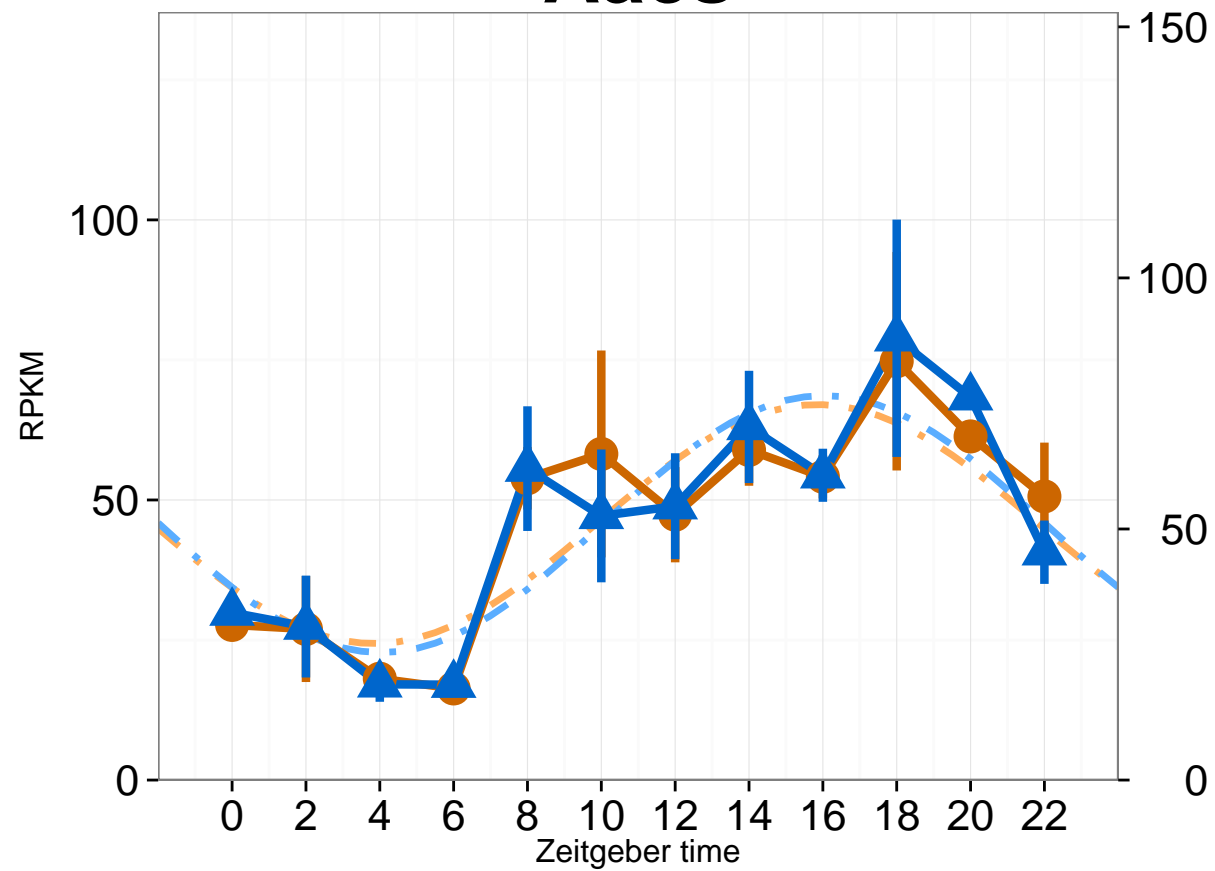

## Aacs

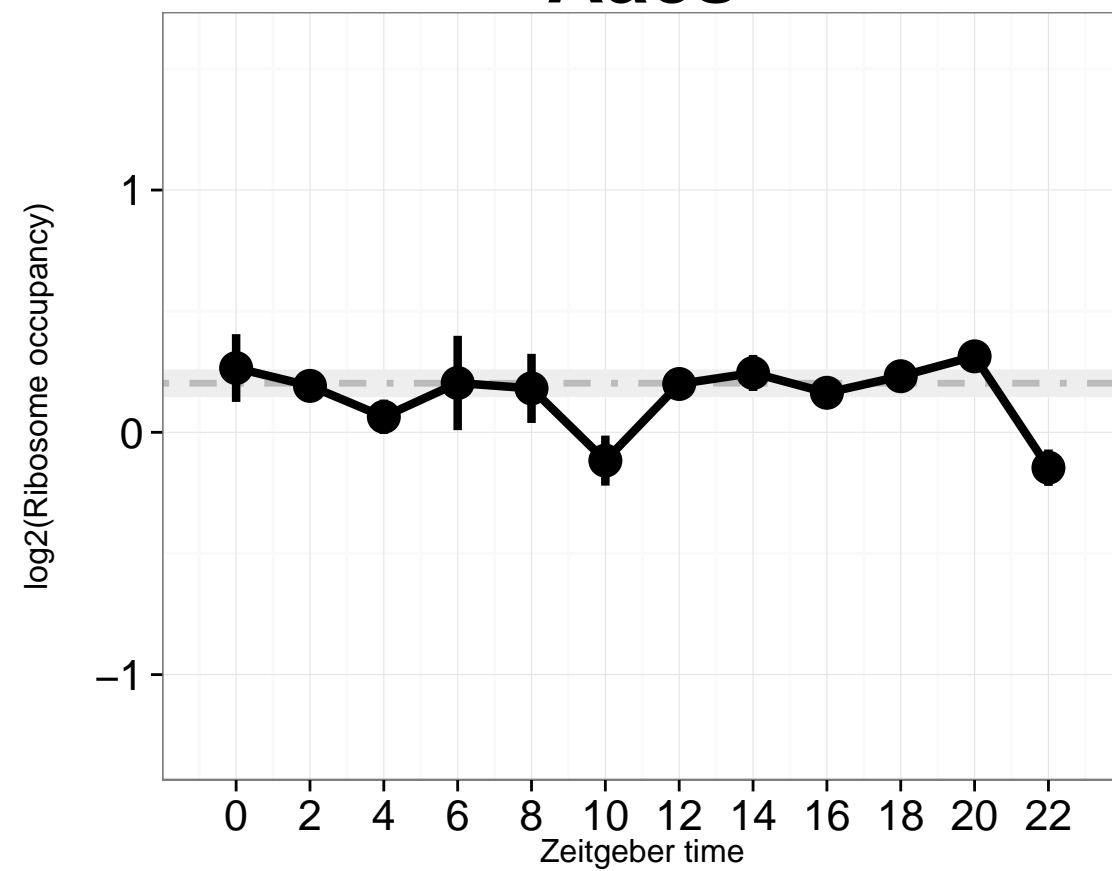

Supplement: SuppDataset_1.zip [file Aacs_set_D.pdf › Supplemental Dataset 1/D-mRNA_rhythm_translation_rhyth/Aacs_set_D.pdf]

## Abca6

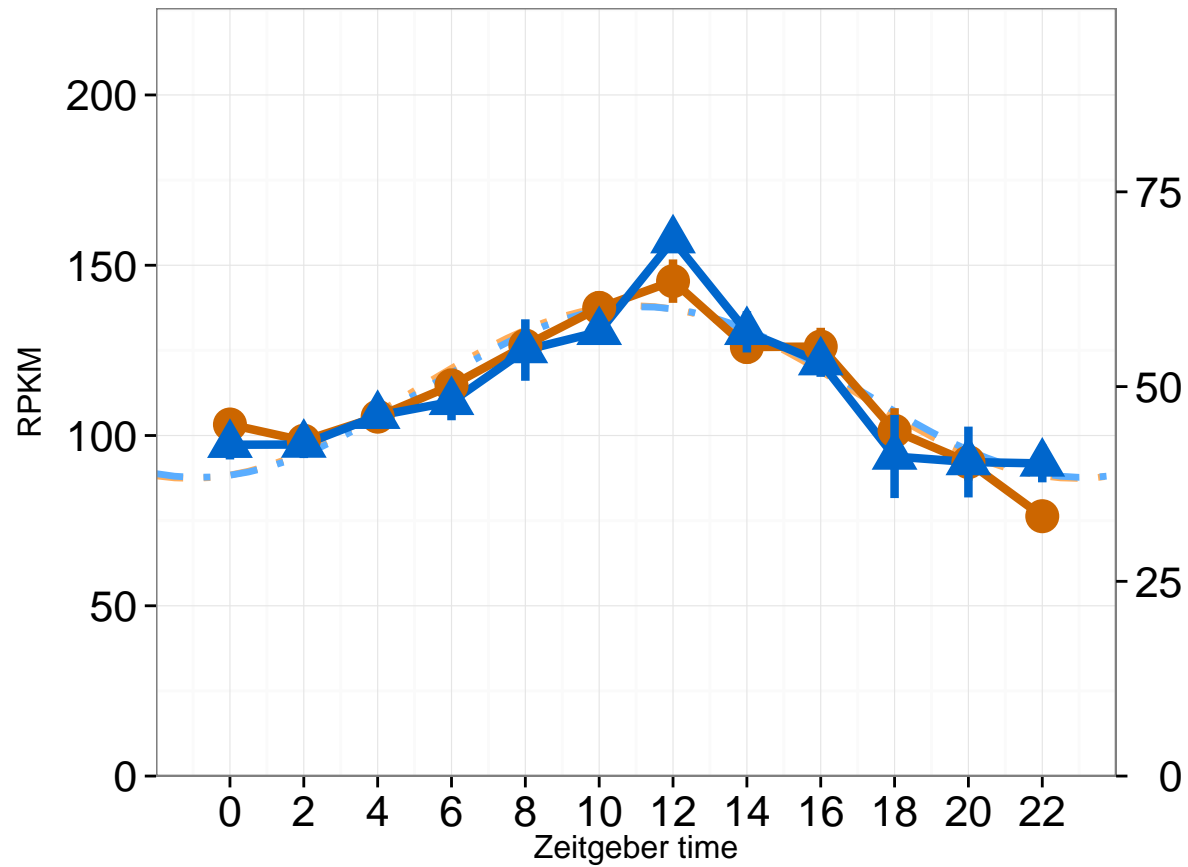

## Abca6

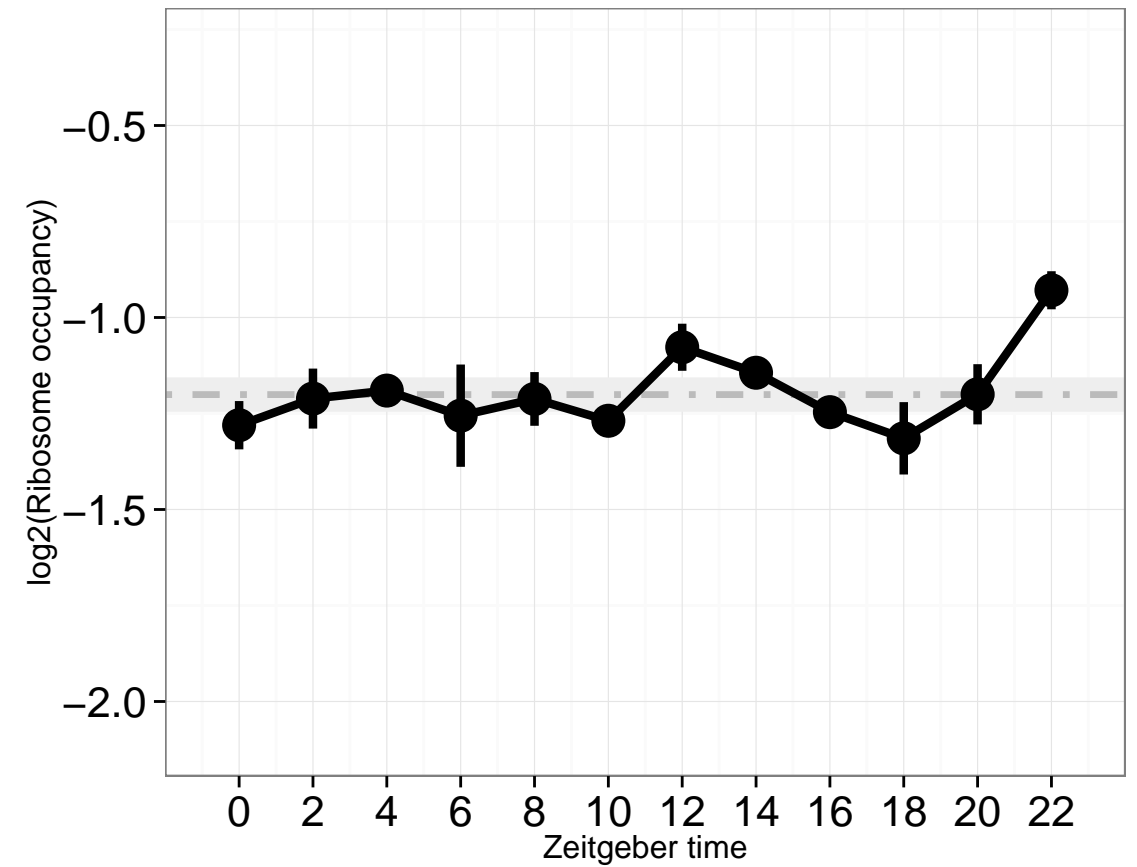

Supplement: SuppDataset_1.zip [file Abca6_set_D.pdf › Supplemental Dataset 1/D-mRNA_rhythm_translation_rhyth/Abca6_set_D.pdf]

## Abca8b

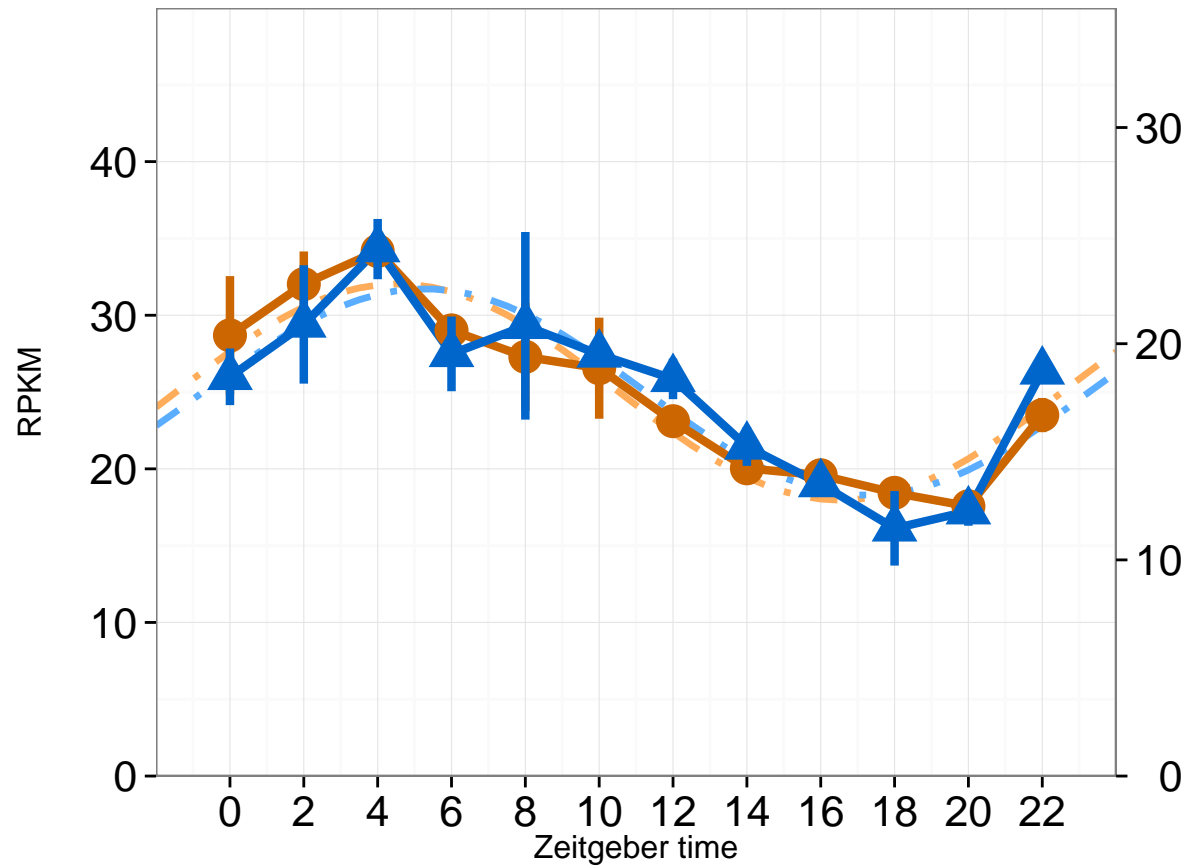

## Abca8b

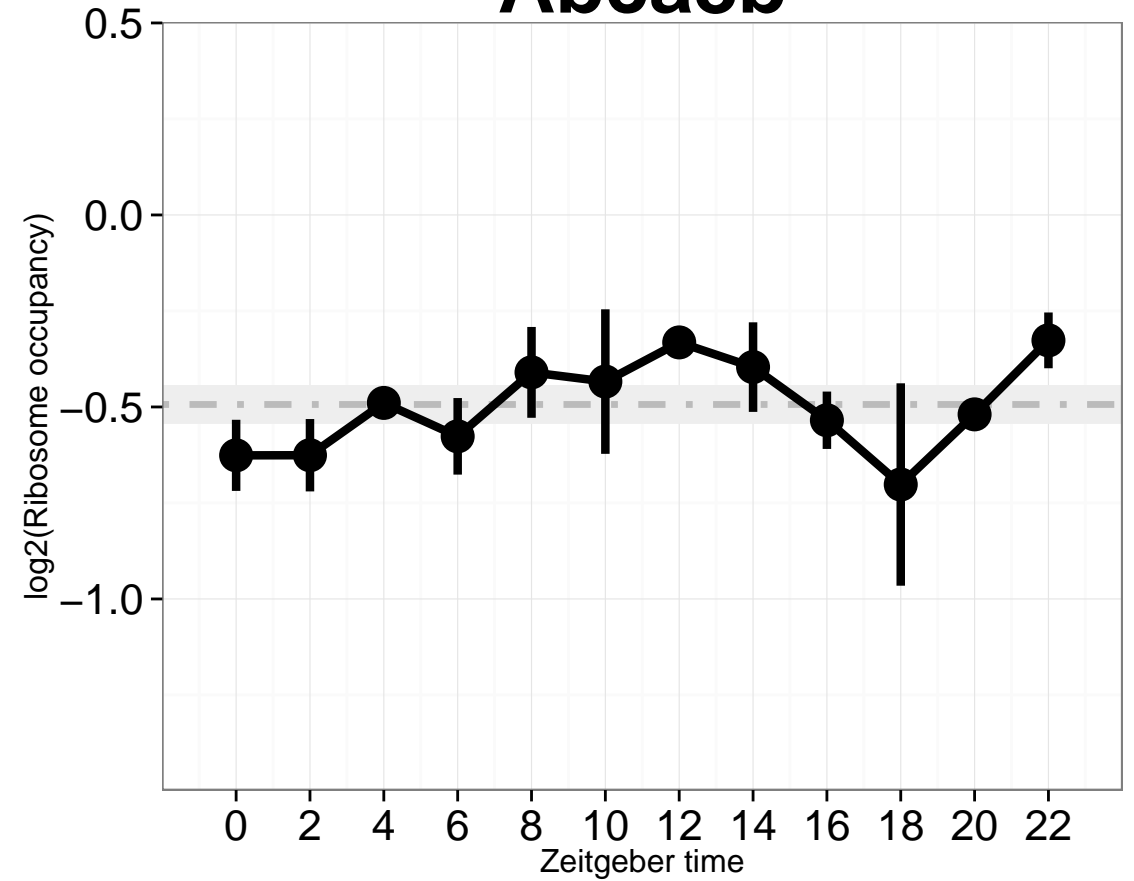

Supplement: SuppDataset_1.zip [file Abca8b_set_D.pdf › Supplemental Dataset 1/D-mRNA_rhythm_translation_rhyth/Abca8b_set_D.pdf]

## Abcb11

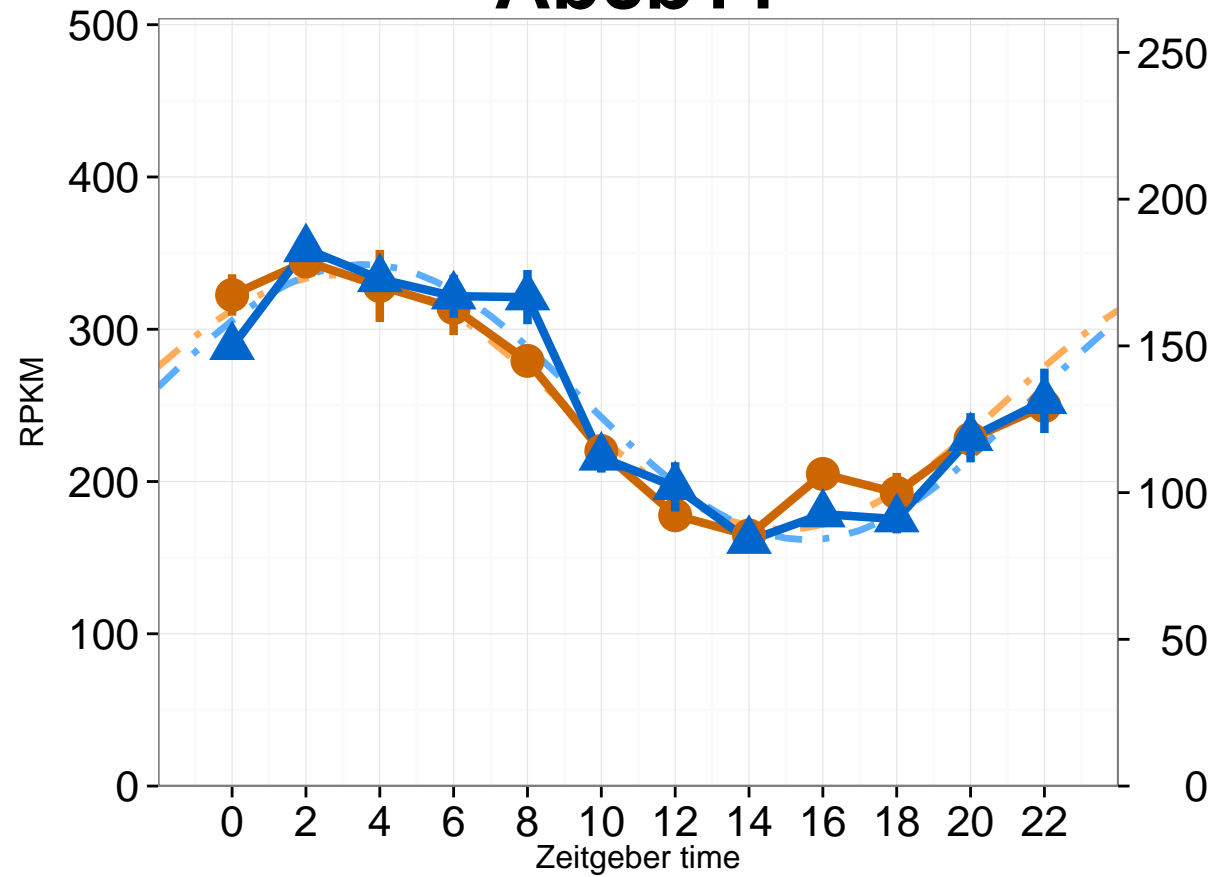

## Abcb11

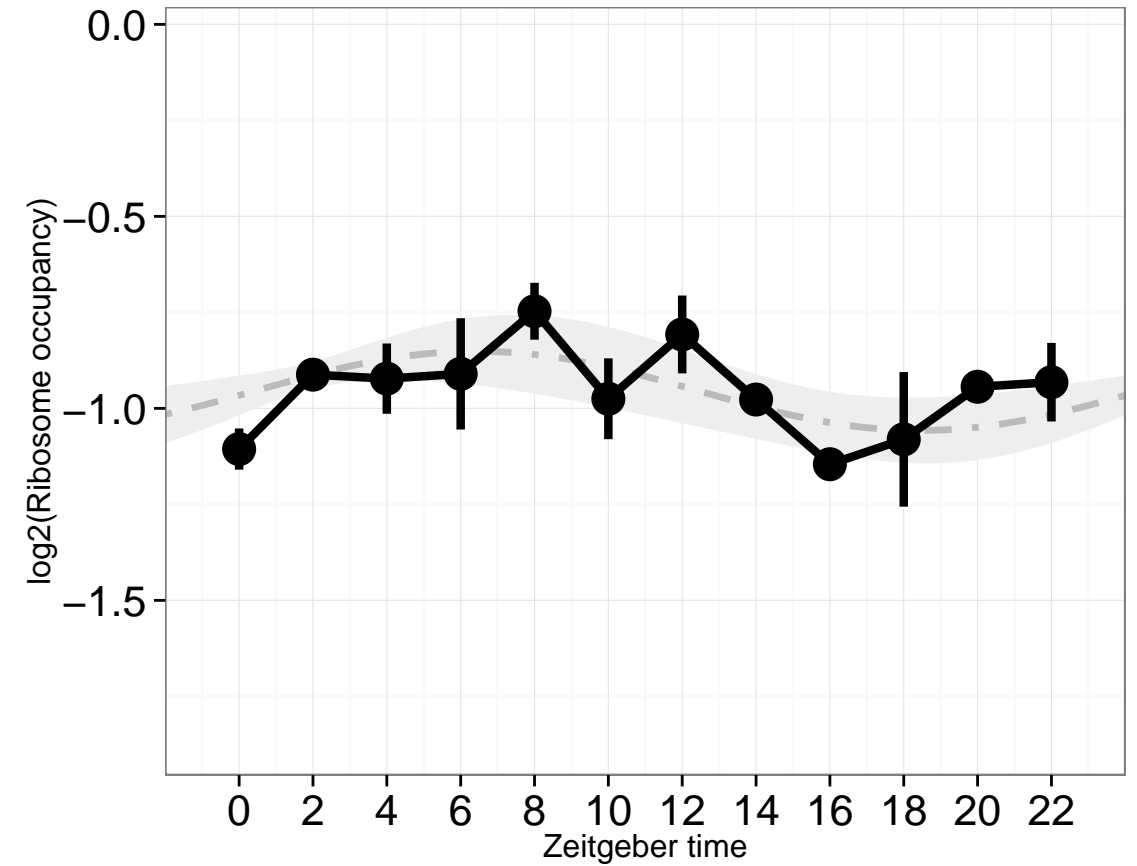

Supplement: SuppDataset_1.zip [file Abcb11_set_D.pdf › Supplemental Dataset 1/D-mRNA_rhythm_translation_rhyth/Abcb11_set_D.pdf]

# Abcb1a

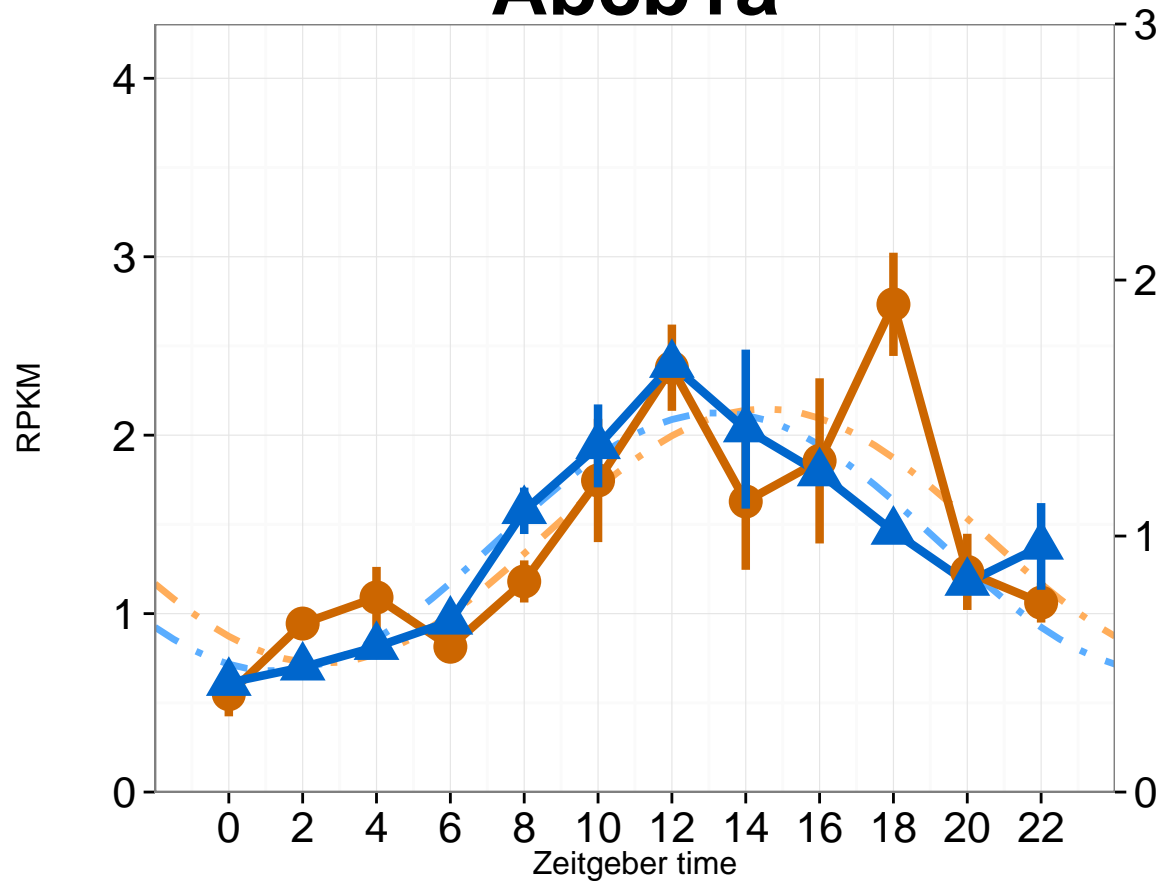

# Abcb1a

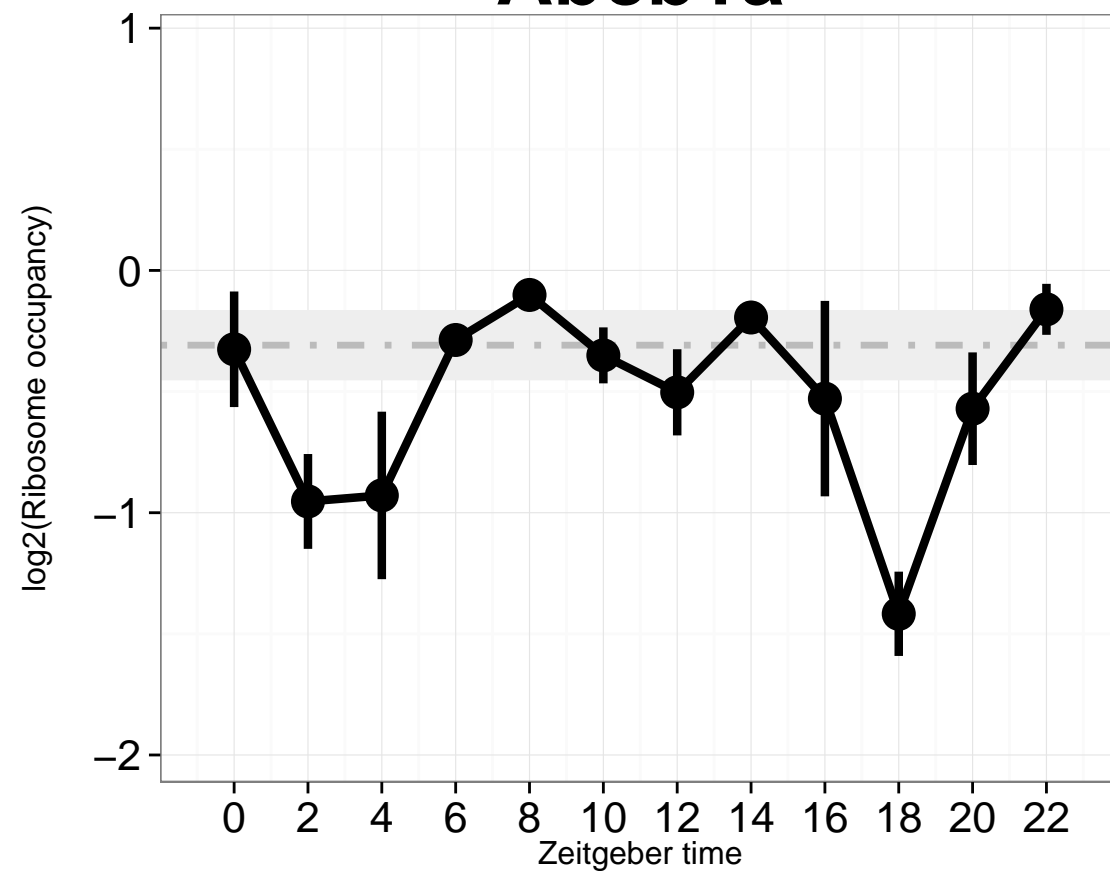

Supplement: SuppDataset_1.zip [file Abcb1a_set_D.pdf › Supplemental Dataset 1/D-mRNA_rhythm_translation_rhyth/Abcb1a_set_D.pdf]

## Abcc2

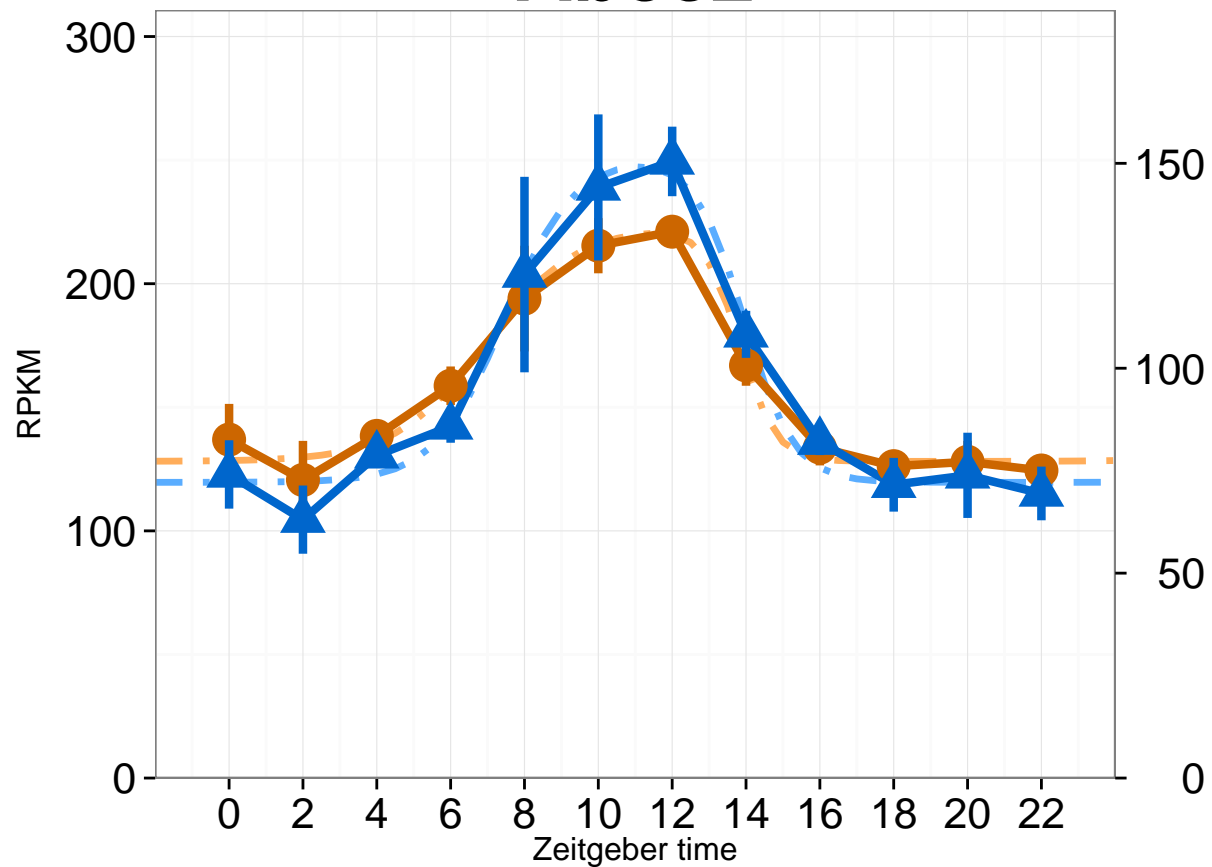

## Abcc2

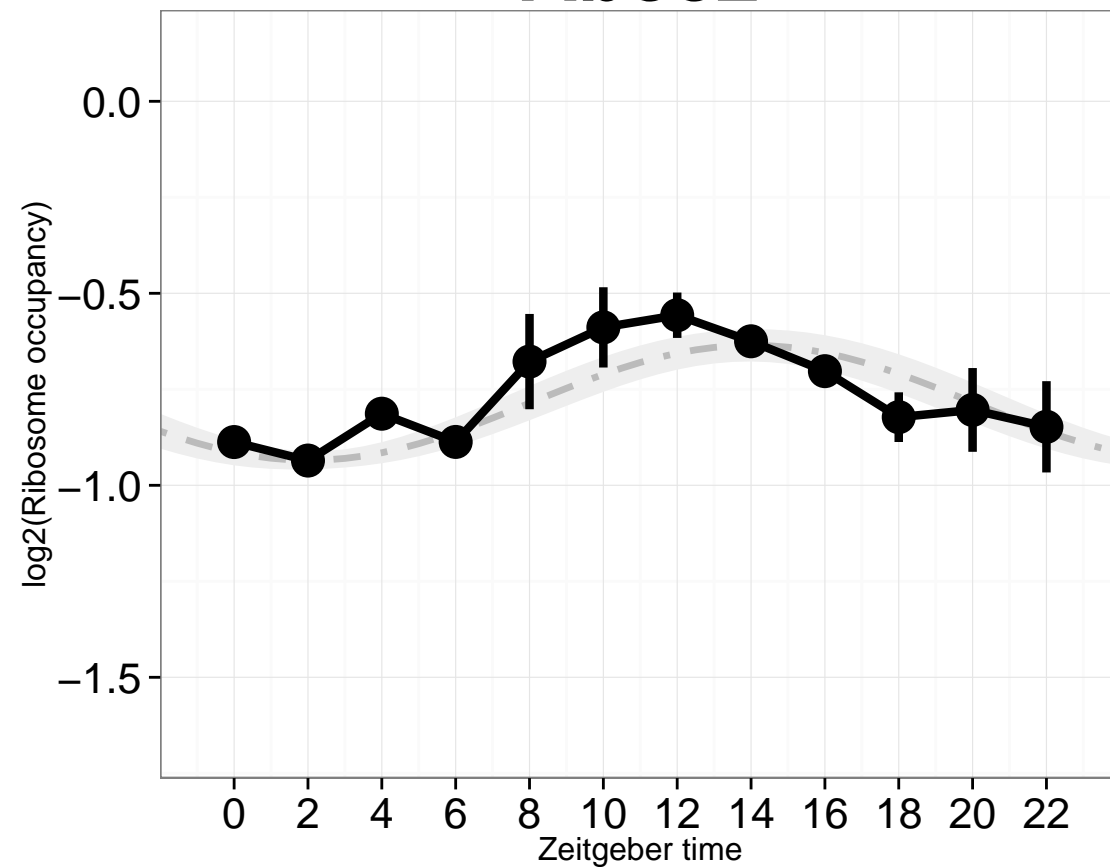

Supplement: SuppDataset_1.zip [file Abcc2_set_D.pdf › Supplemental Dataset 1/D-mRNA_rhythm_translation_rhyth/Abcc2_set_D.pdf]

# Abcg5

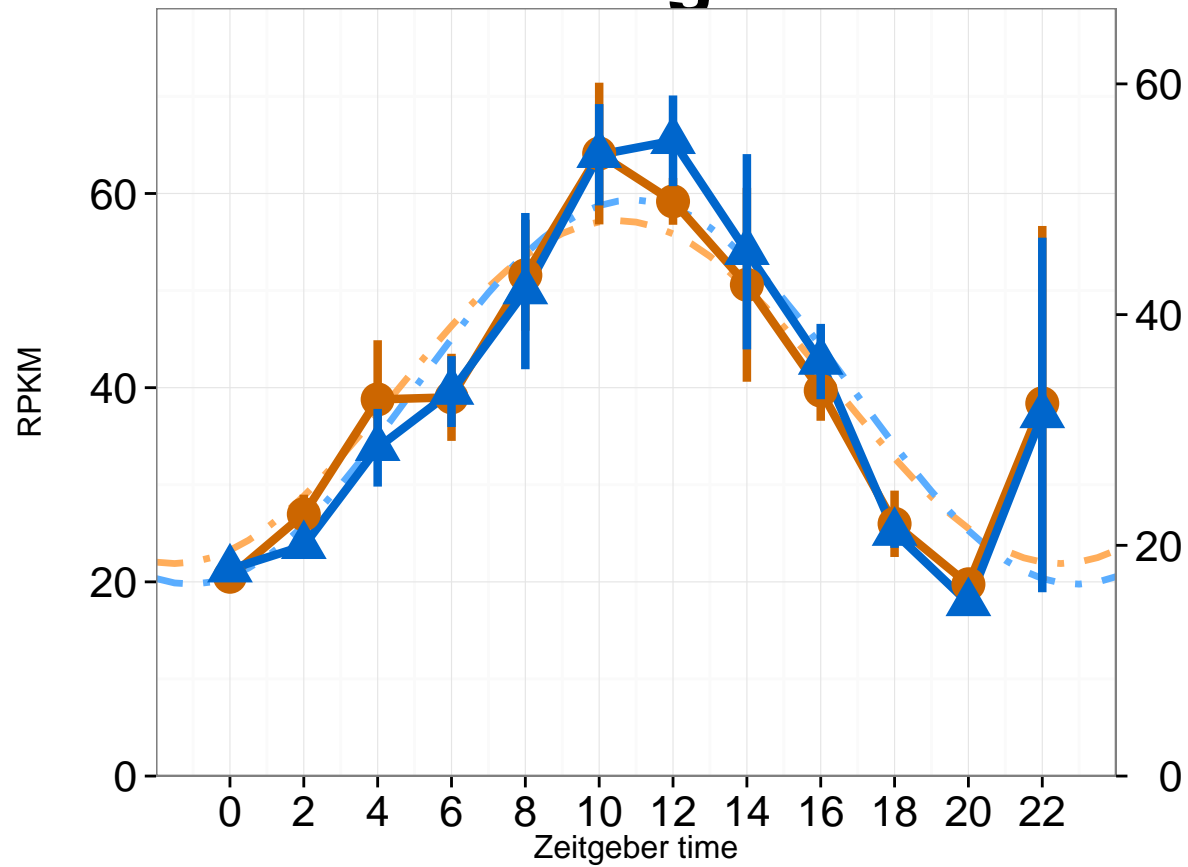

# Abcg5

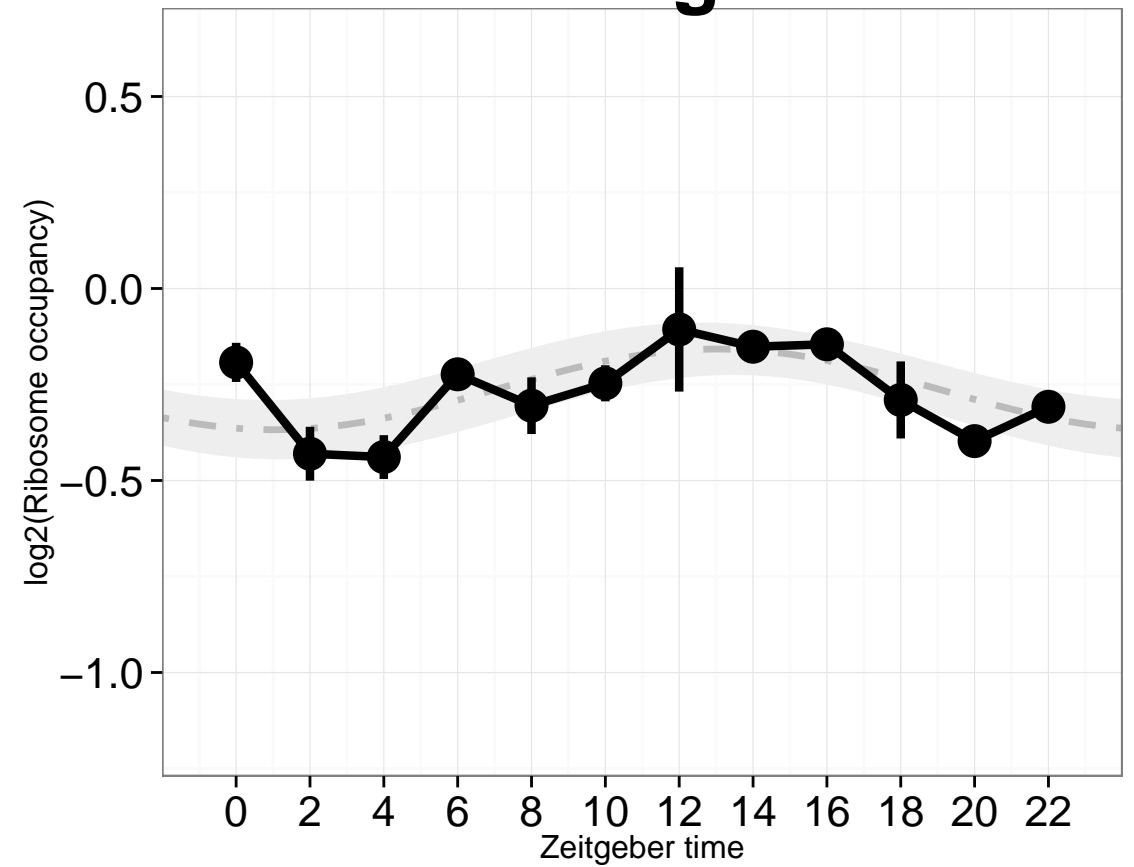

Supplement: SuppDataset_1.zip [file Abcg5_set_D.pdf › Supplemental Dataset 1/D-mRNA_rhythm_translation_rhyth/Abcg5_set_D.pdf]

# Abcg8

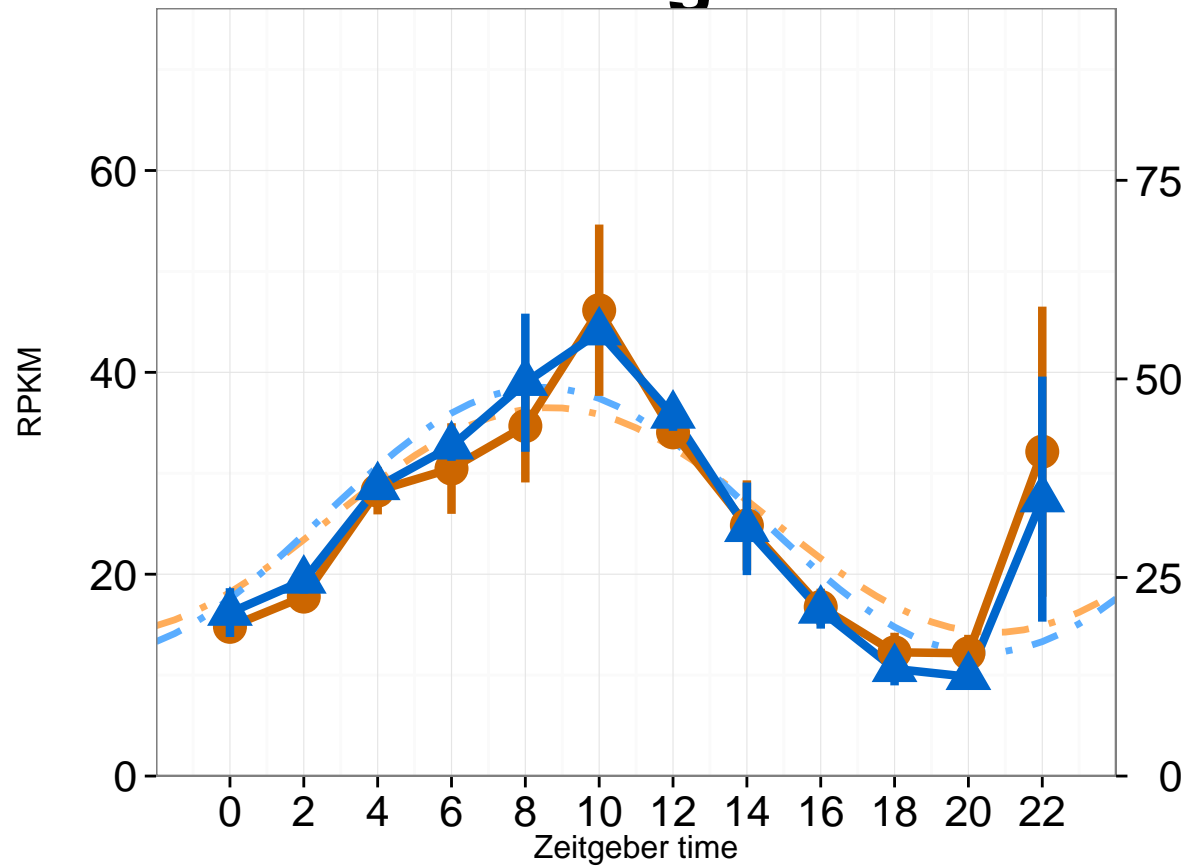

# Abcg8

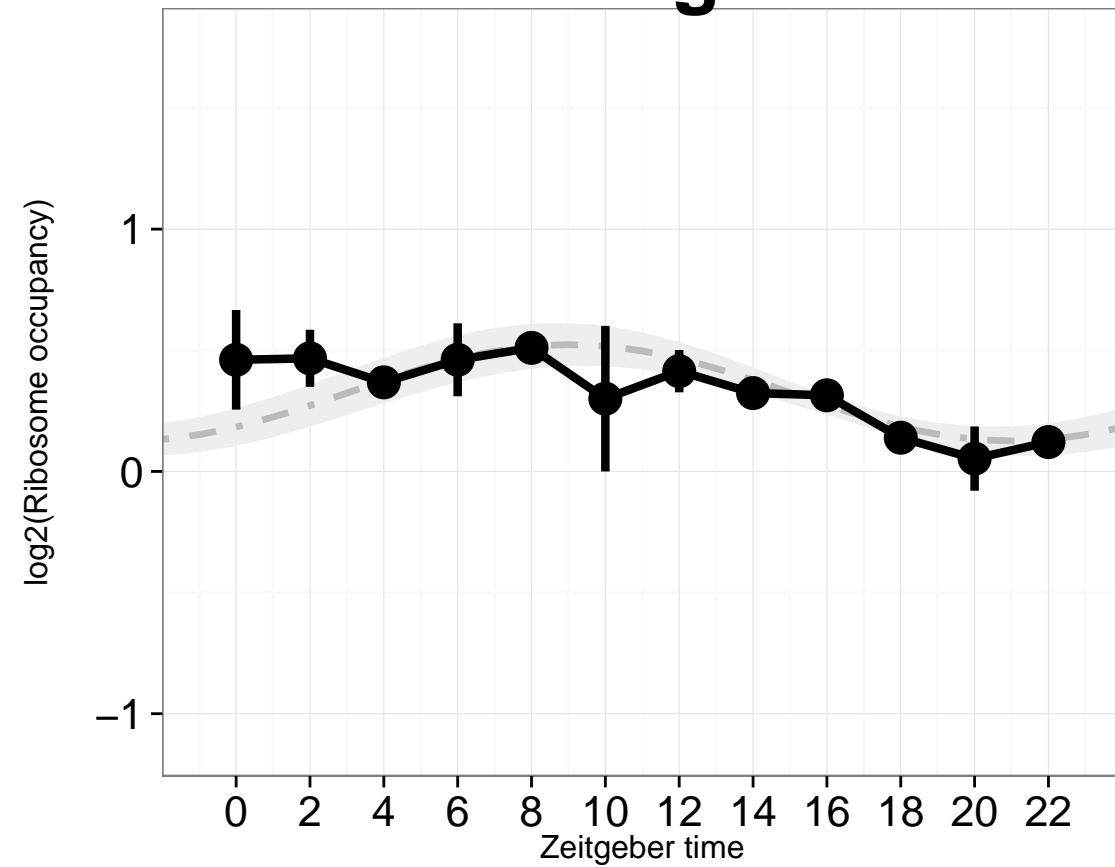

Supplement: SuppDataset_1.zip [file Abcg8_set_D.pdf › Supplemental Dataset 1/D-mRNA_rhythm_translation_rhyth/Abcg8_set_D.pdf]

# Abhd14a

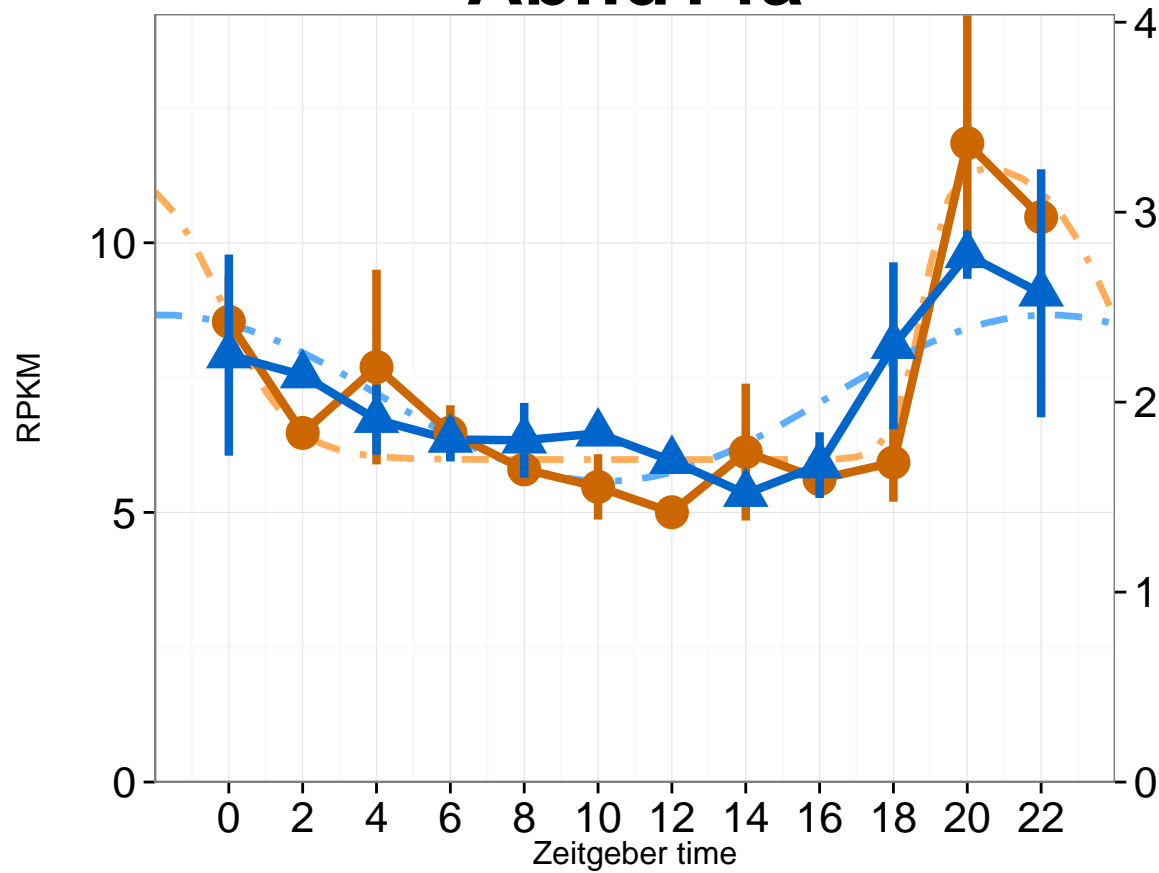

# Abhd14a

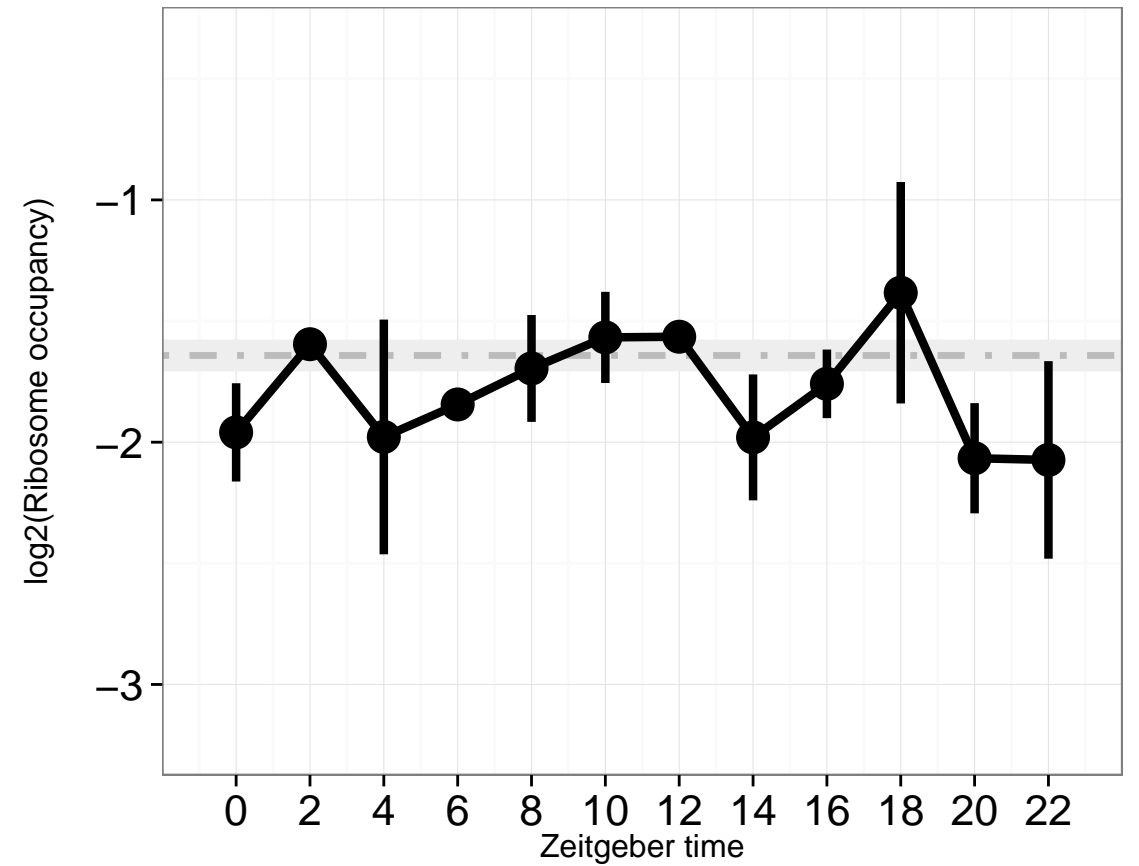

Supplement: SuppDataset_1.zip [file Abhd14a_set_D.pdf › Supplemental Dataset 1/D-mRNA_rhythm_translation_rhyth/Abhd14a_set_D.pdf]

# Abhd17b

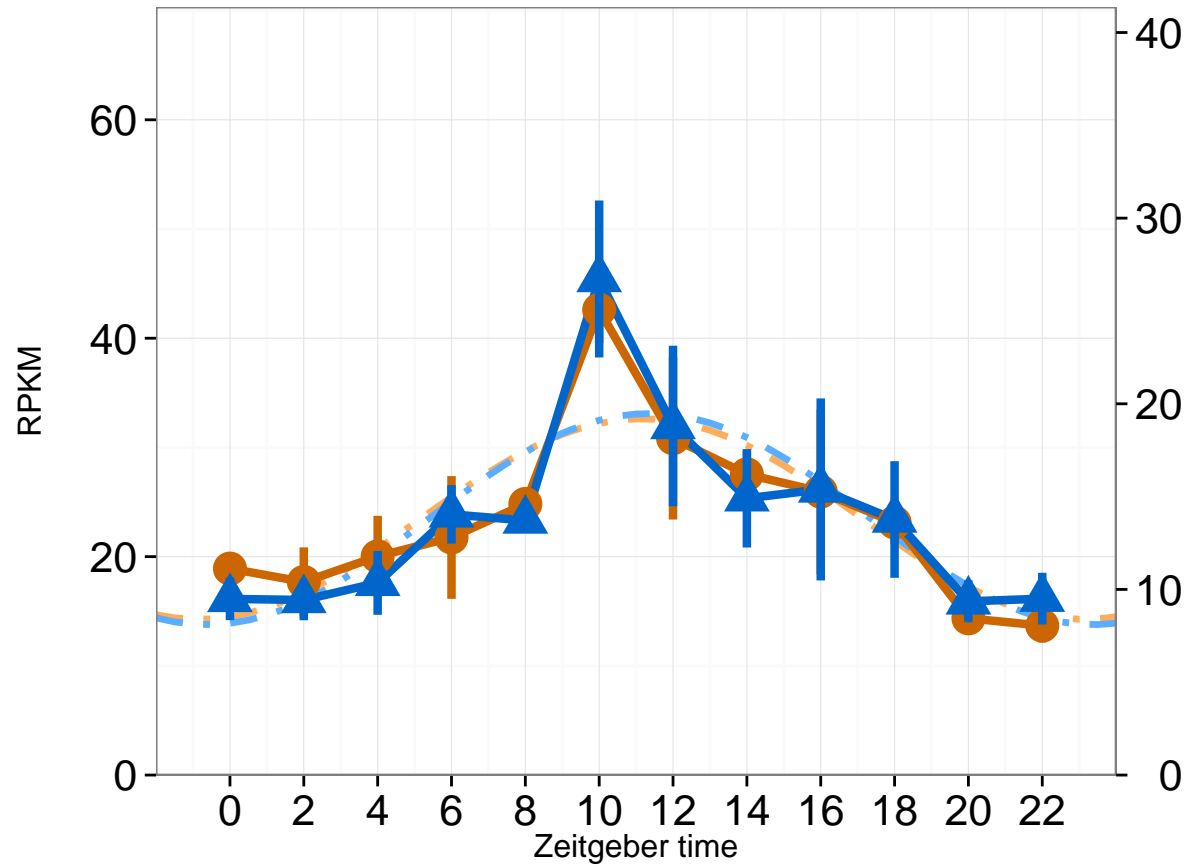

# Abhd17b

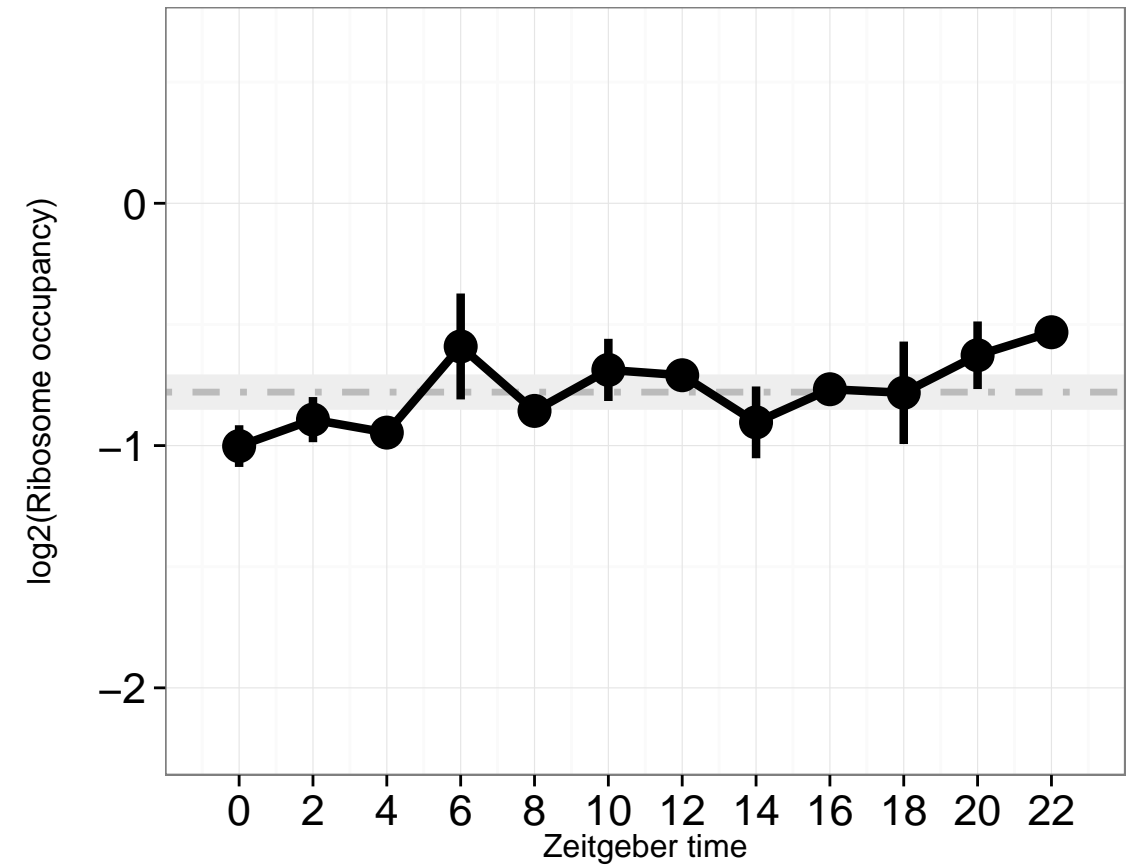

Supplement: SuppDataset_1.zip [file Abhd17b_set_D.pdf › Supplemental Dataset 1/D-mRNA_rhythm_translation_rhyth/Abhd17b_set_D.pdf]

## Abhd6

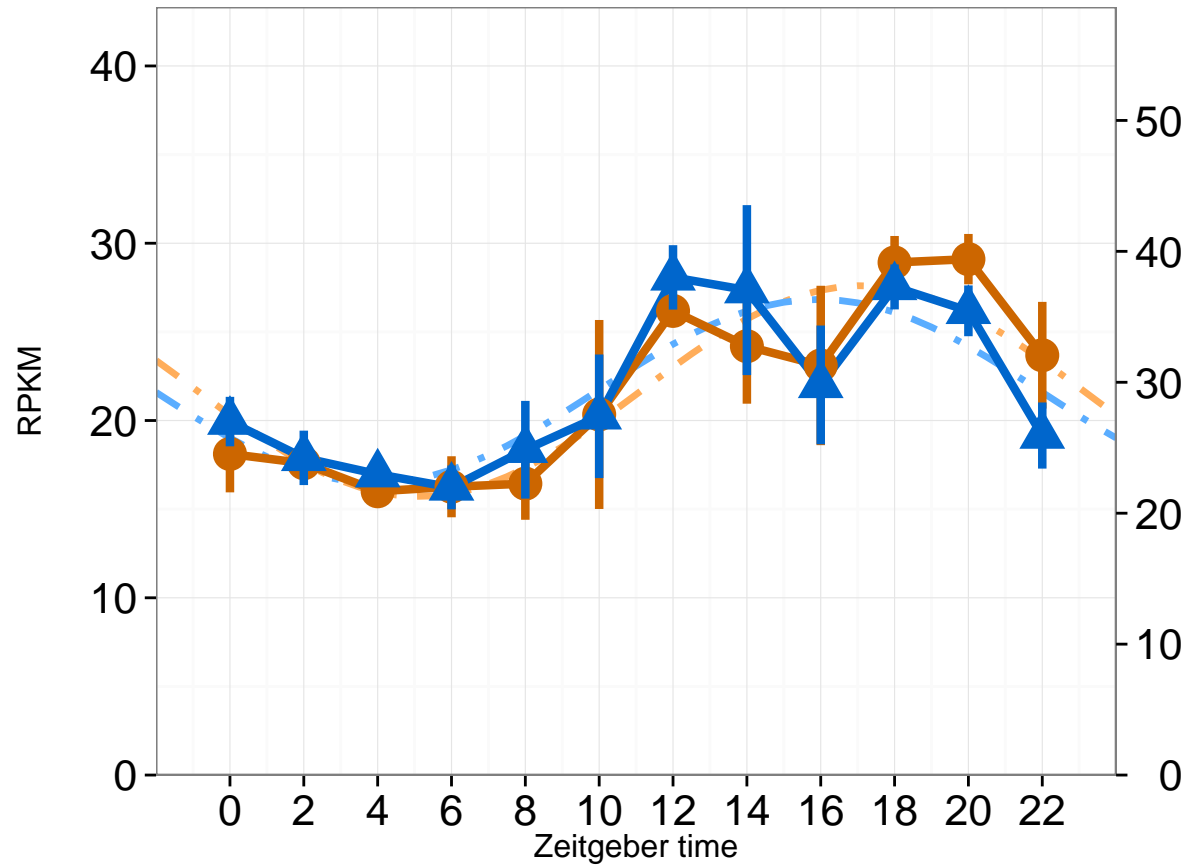

## Abhd6

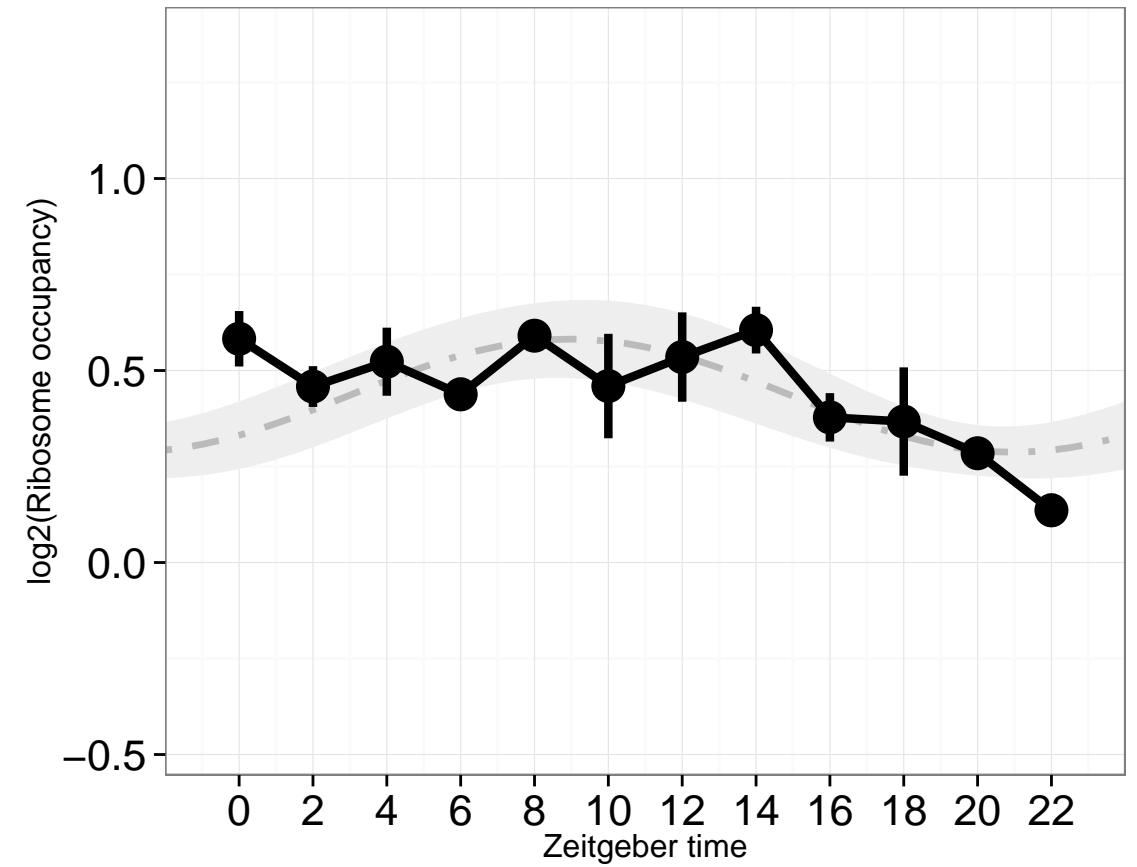

Supplement: SuppDataset_1.zip [file Abhd6_set_D.pdf › Supplemental Dataset 1/D-mRNA_rhythm_translation_rhyth/Abhd6_set_D.pdf]

## Abhd8

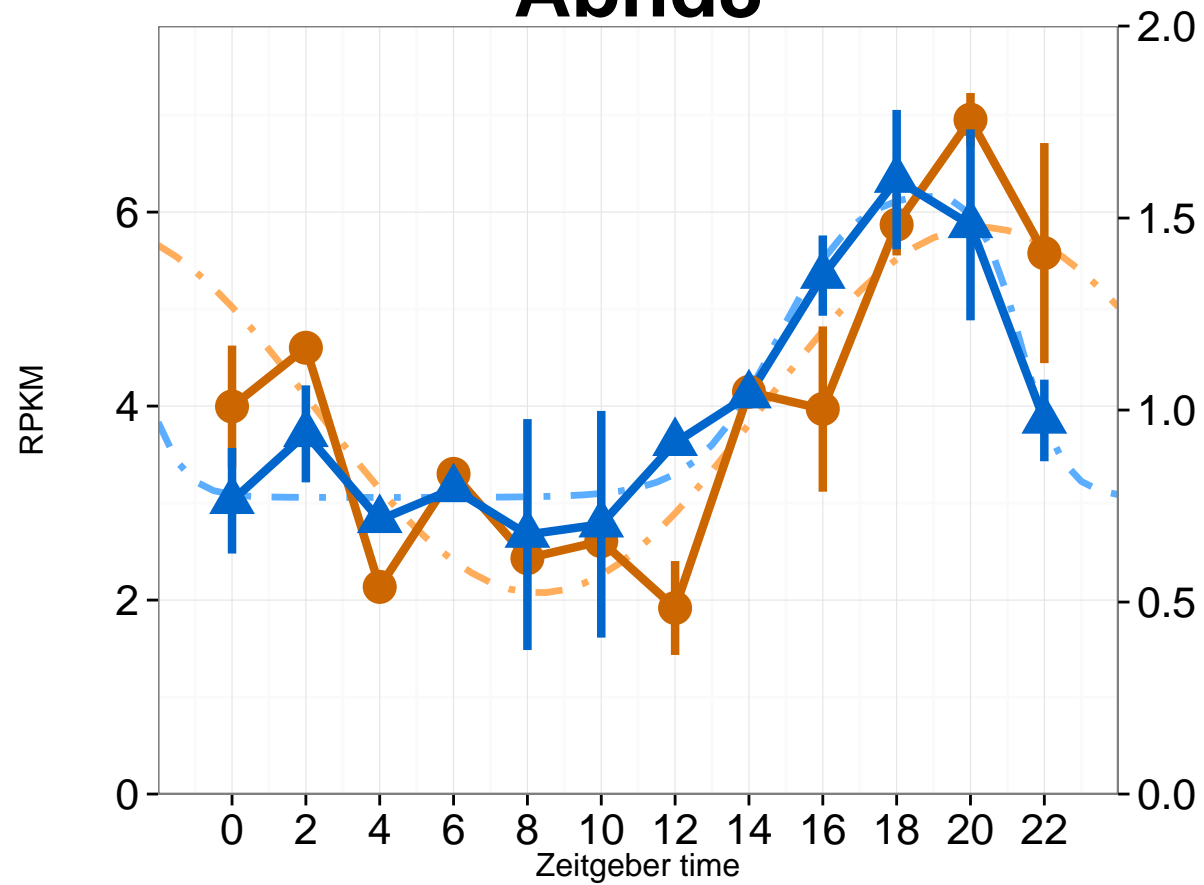

## Abhd8

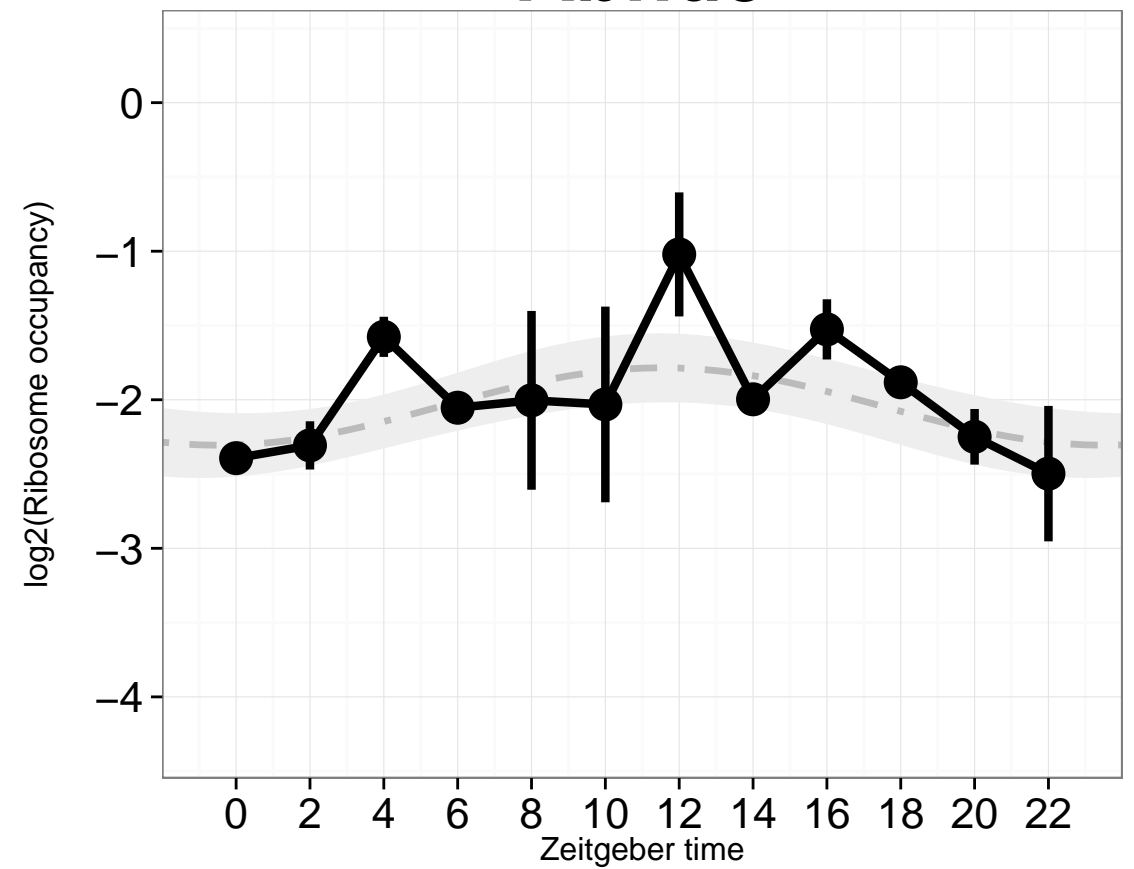

Supplement: SuppDataset_1.zip [file Abhd8_set_D.pdf › Supplemental Dataset 1/D-mRNA_rhythm_translation_rhyth/Abhd8_set_D.pdf]

# Ablim1

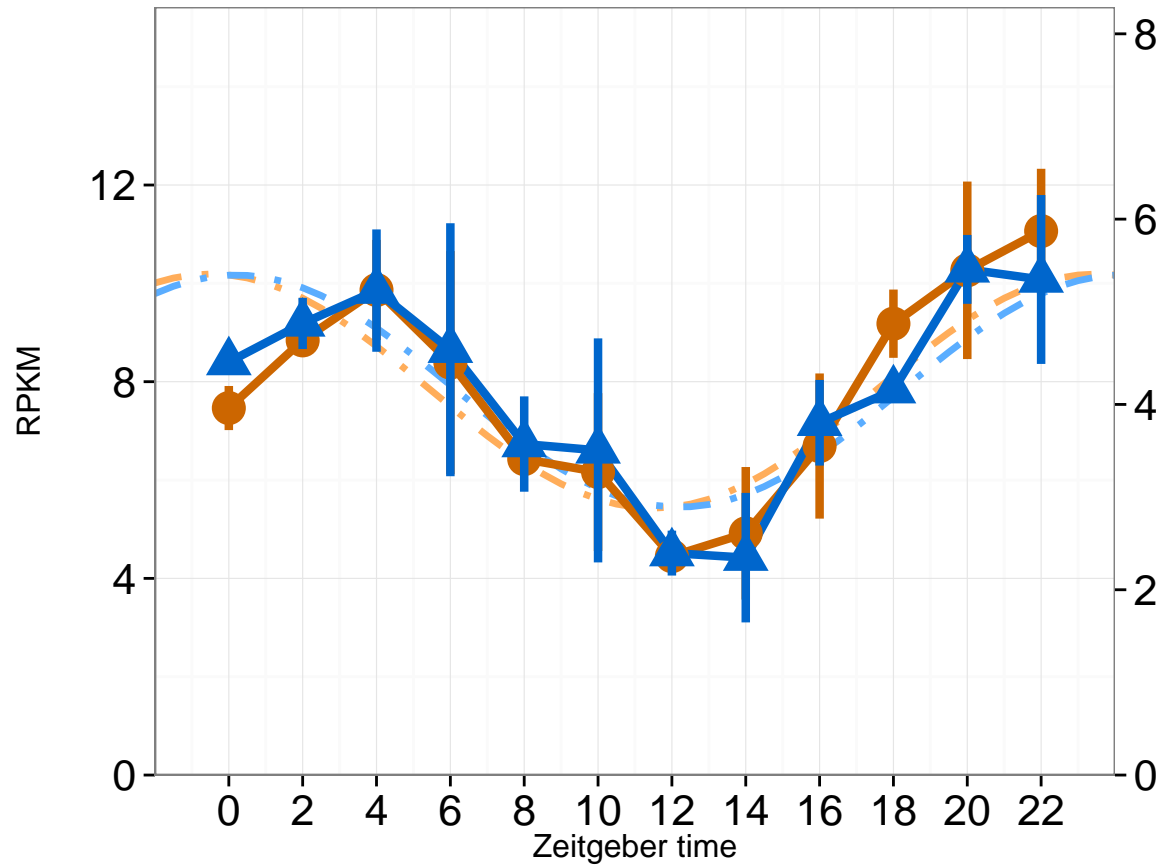

# Ablim1

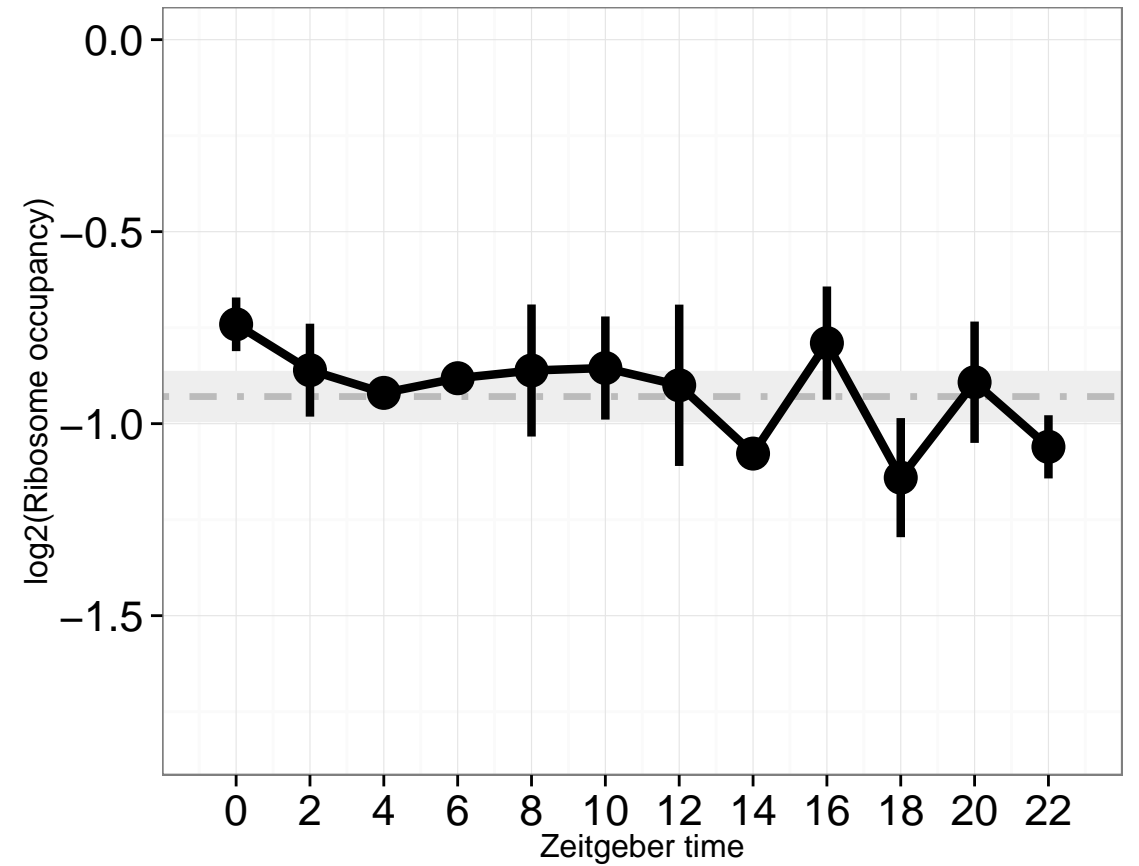

Supplement: SuppDataset_1.zip [file Ablim1_set_D.pdf › Supplemental Dataset 1/D-mRNA_rhythm_translation_rhyth/Ablim1_set_D.pdf]

## Ablim3

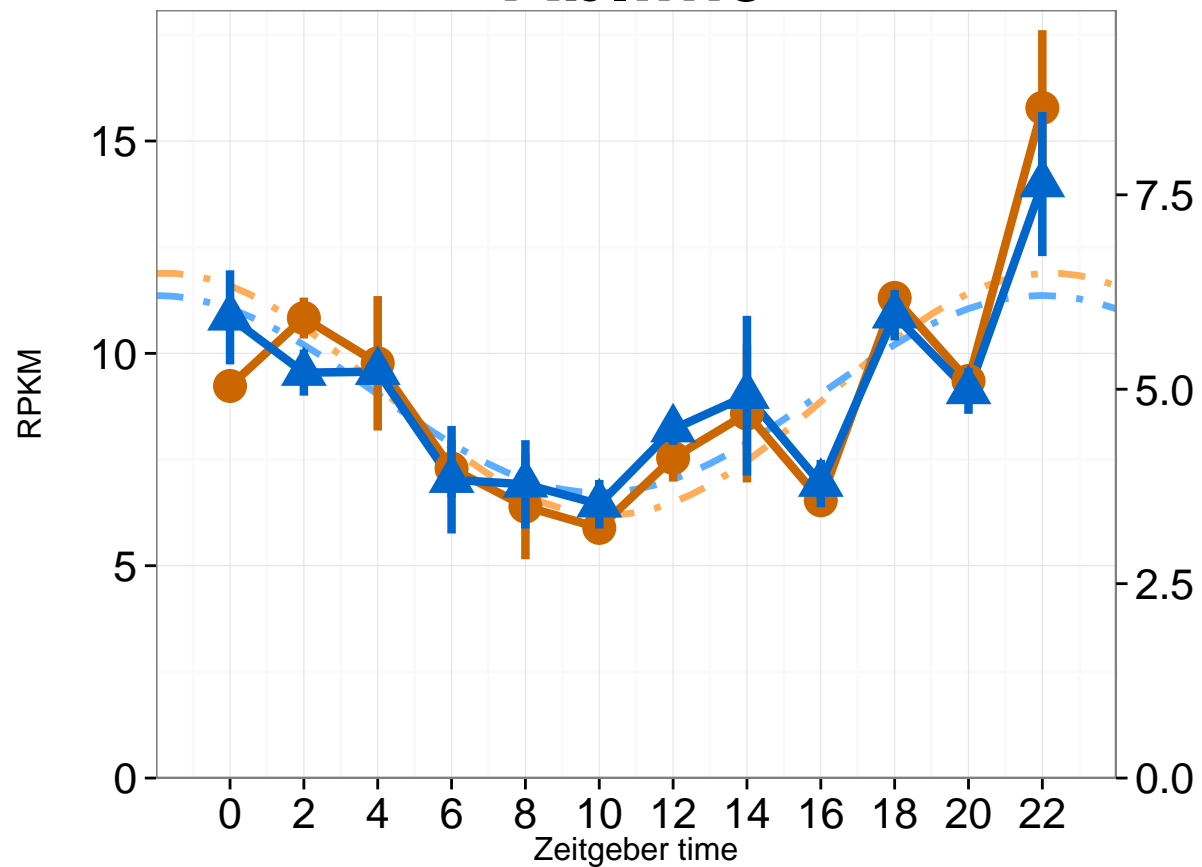

## Ablim3

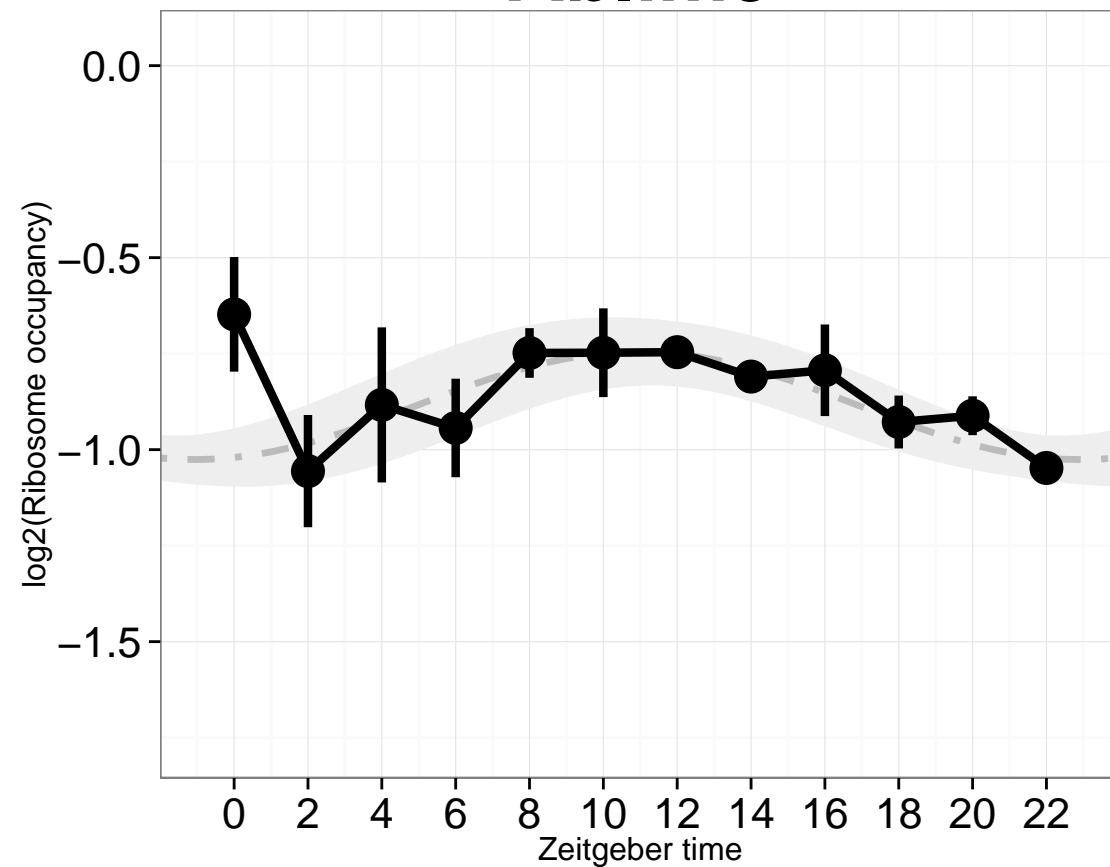

Supplement: SuppDataset_1.zip [file Ablim3_set_D.pdf › Supplemental Dataset 1/D-mRNA_rhythm_translation_rhyth/Ablim3_set_D.pdf]

## Abtb2

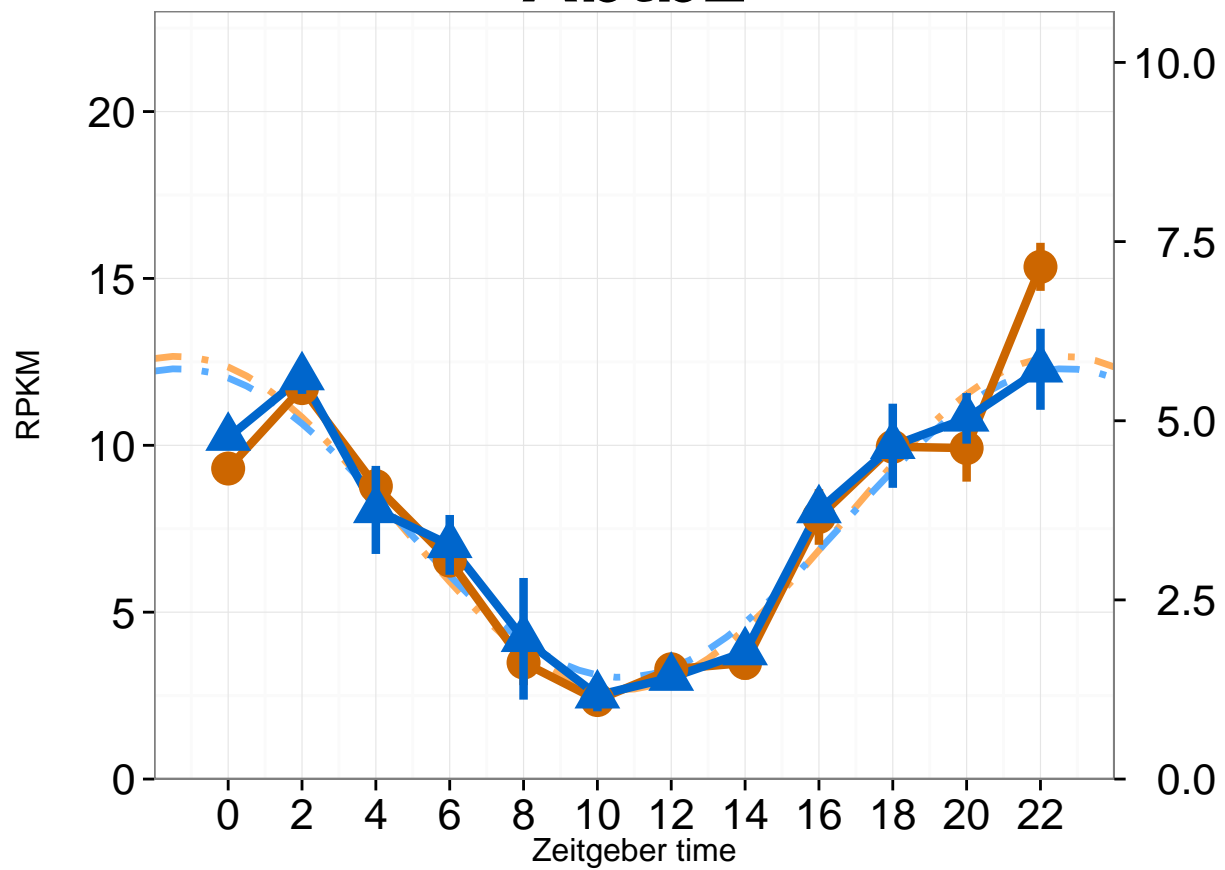

## Abtb2

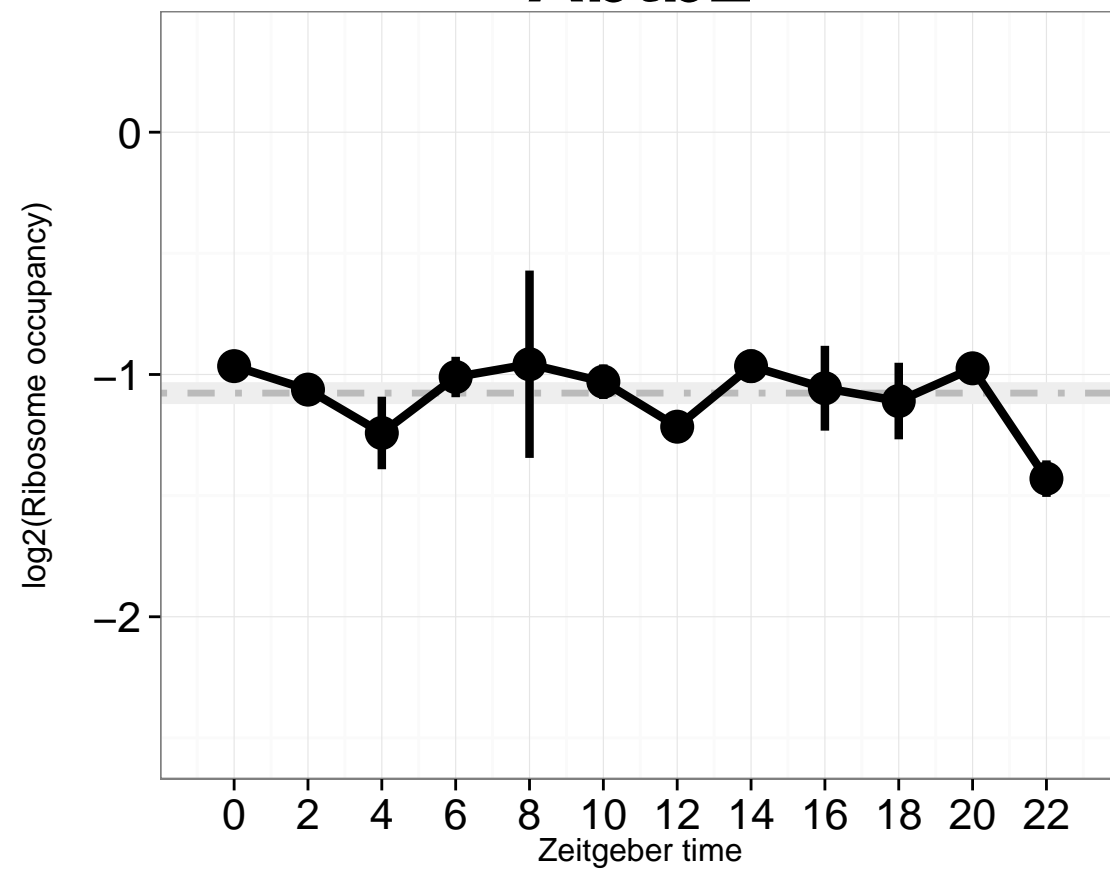

Supplement: SuppDataset_1.zip [file Abtb2_set_D.pdf › Supplemental Dataset 1/D-mRNA_rhythm_translation_rhyth/Abtb2_set_D.pdf]

## Acaca

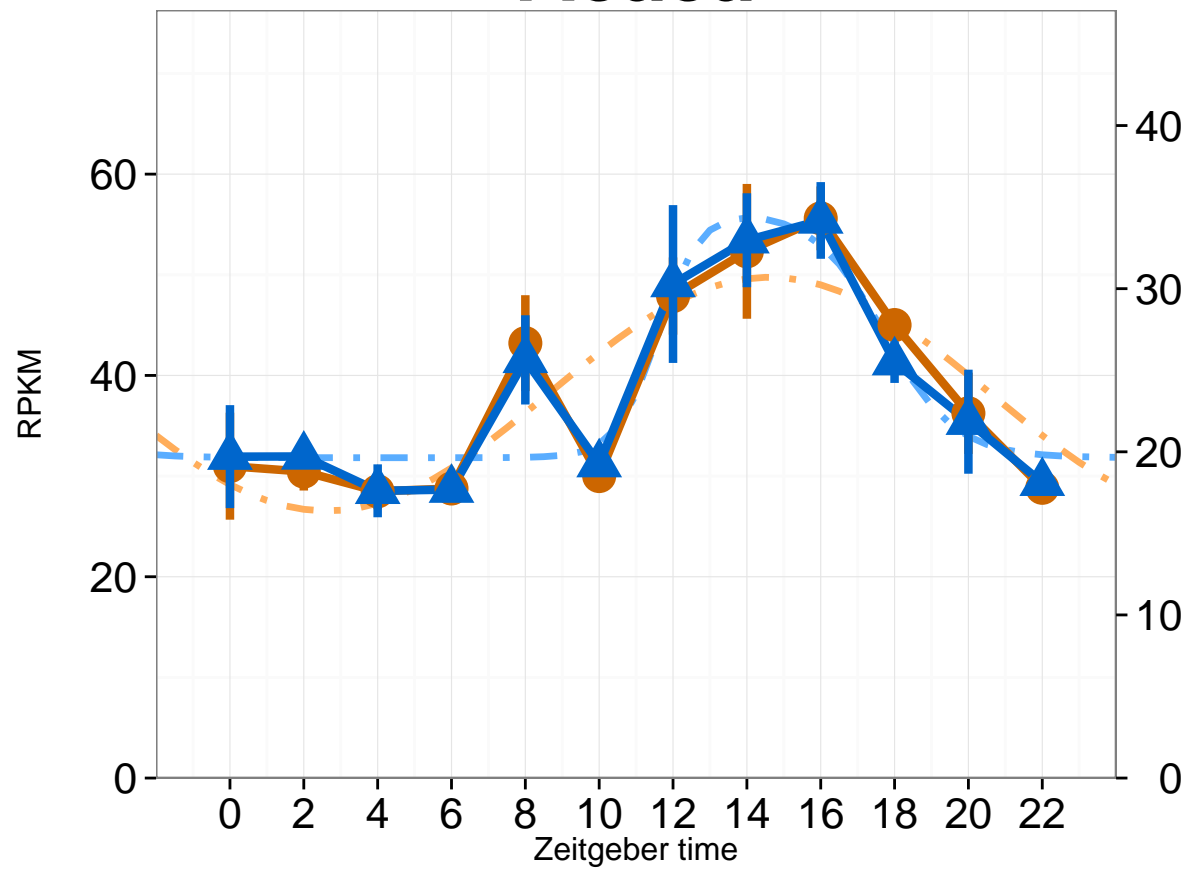

## Acaca

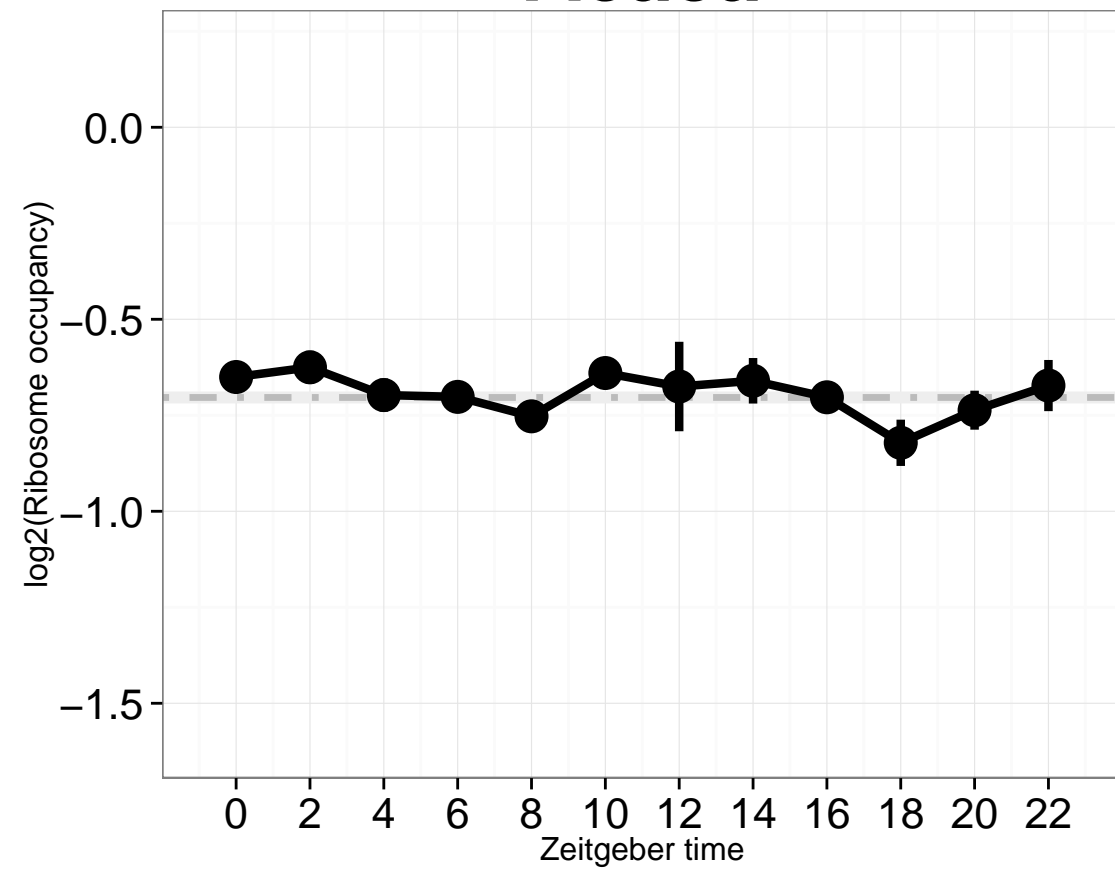

Supplement: SuppDataset_1.zip [file Acaca_set_D.pdf › Supplemental Dataset 1/D-mRNA_rhythm_translation_rhyth/Acaca_set_D.pdf]

## Acat3

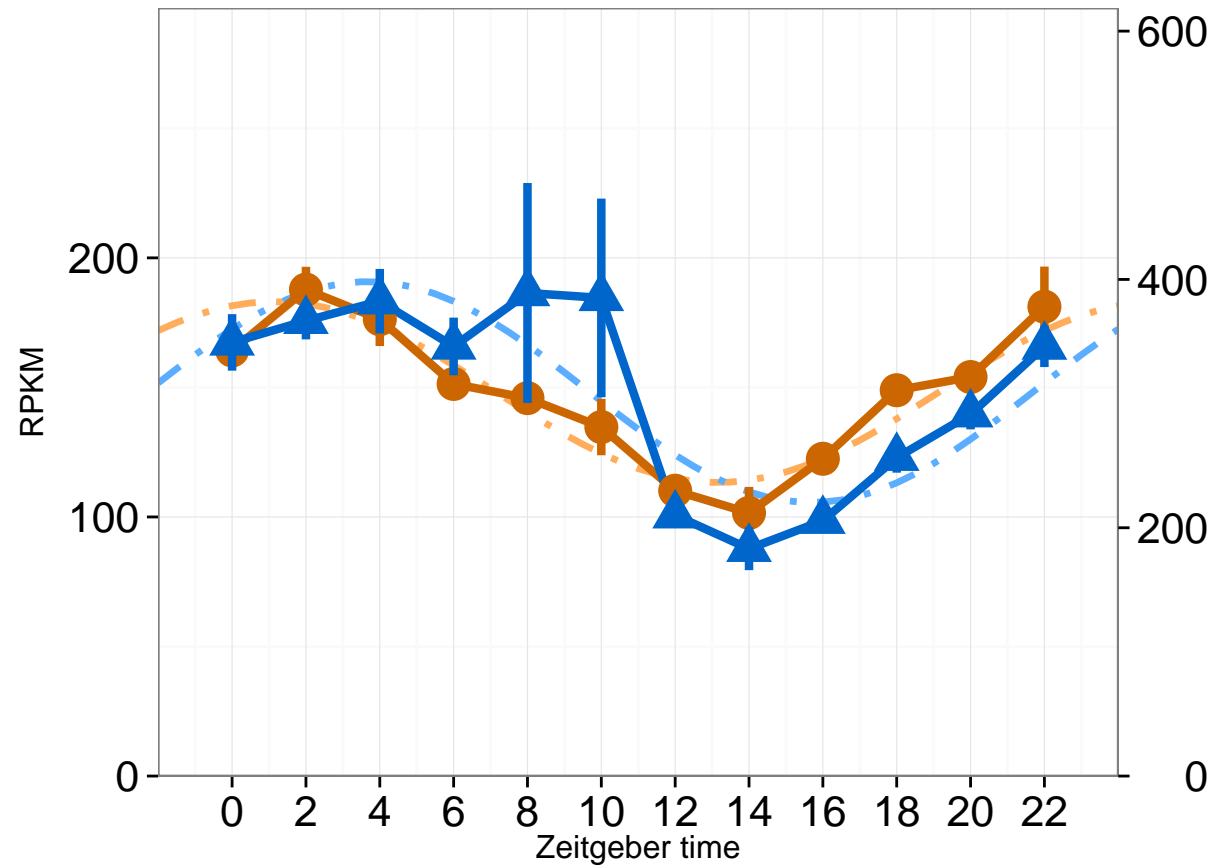

## Acat3

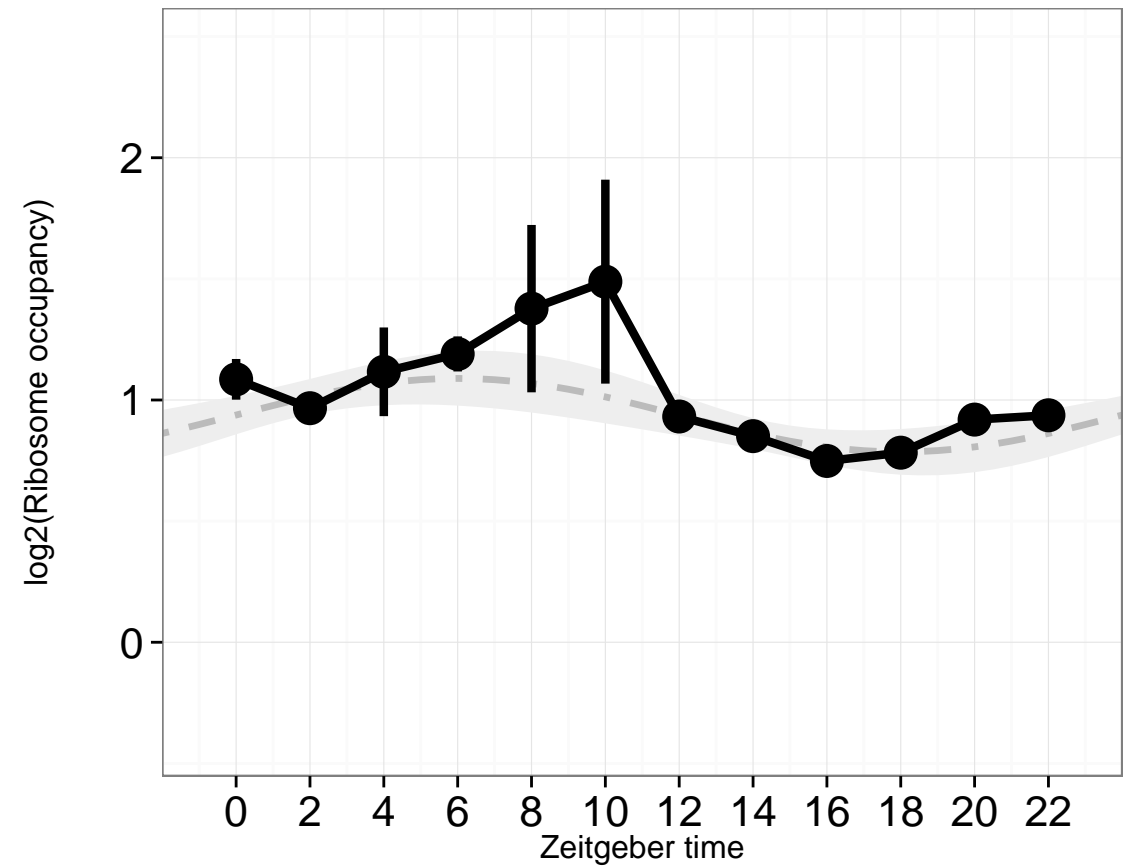

Supplement: SuppDataset_1.zip [file Acat3_set_D.pdf › Supplemental Dataset 1/D-mRNA_rhythm_translation_rhyth/Acat3_set_D.pdf]

## Acly

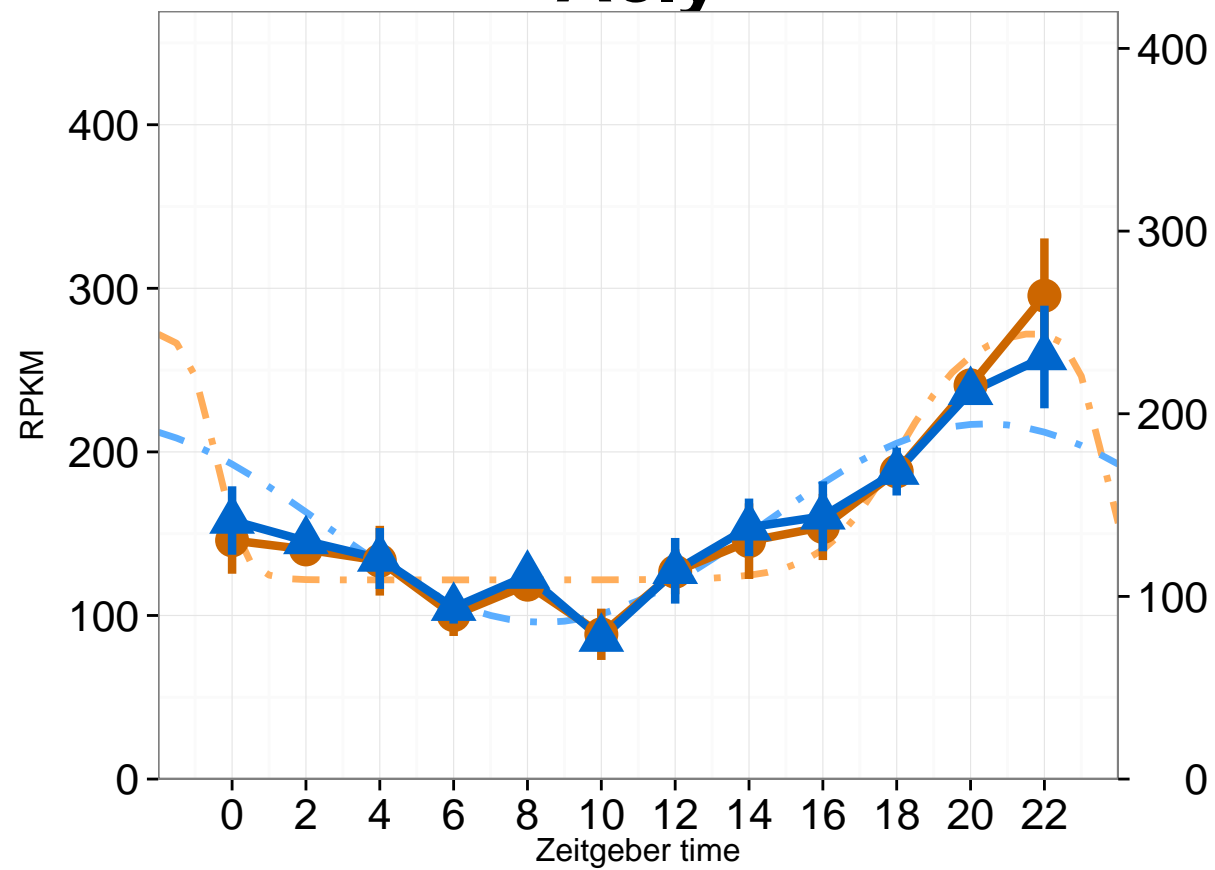

## Acly

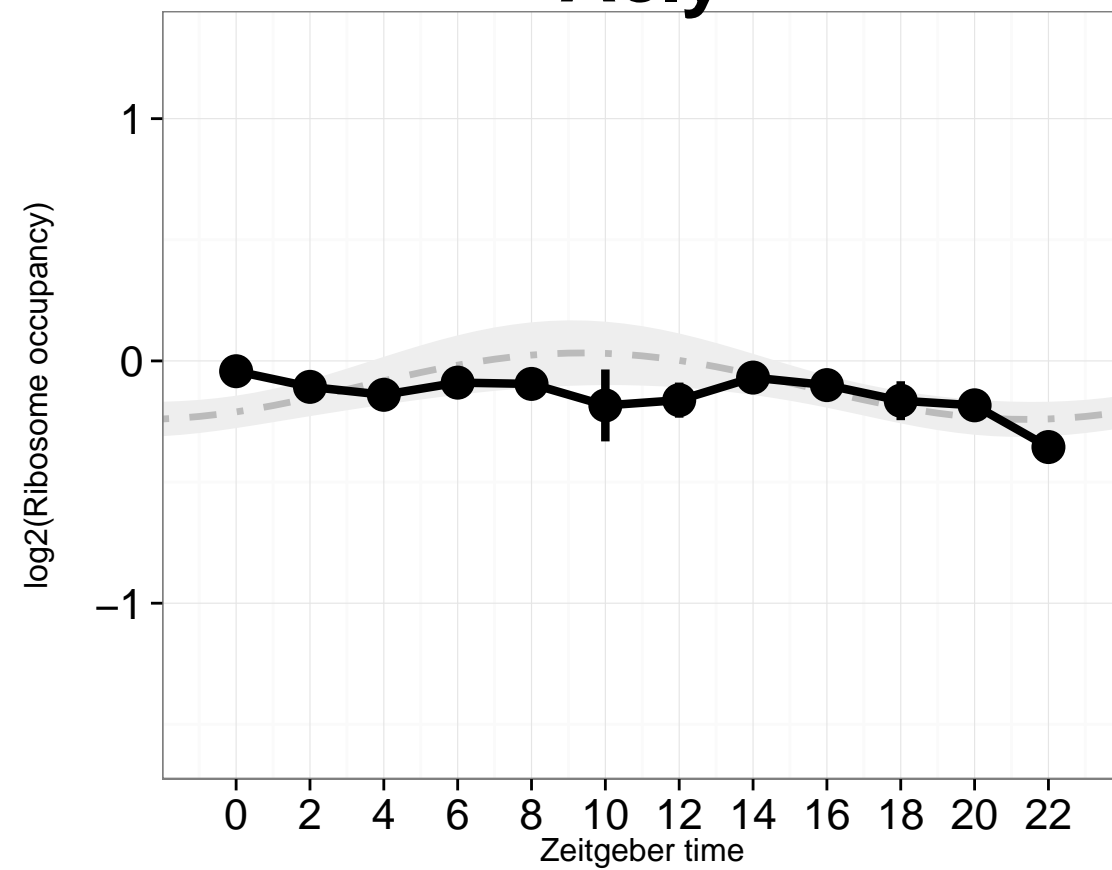

Supplement: SuppDataset_1.zip [file Acly_set_D.pdf › Supplemental Dataset 1/D-mRNA_rhythm_translation_rhyth/Acly_set_D.pdf]

## Acmsd

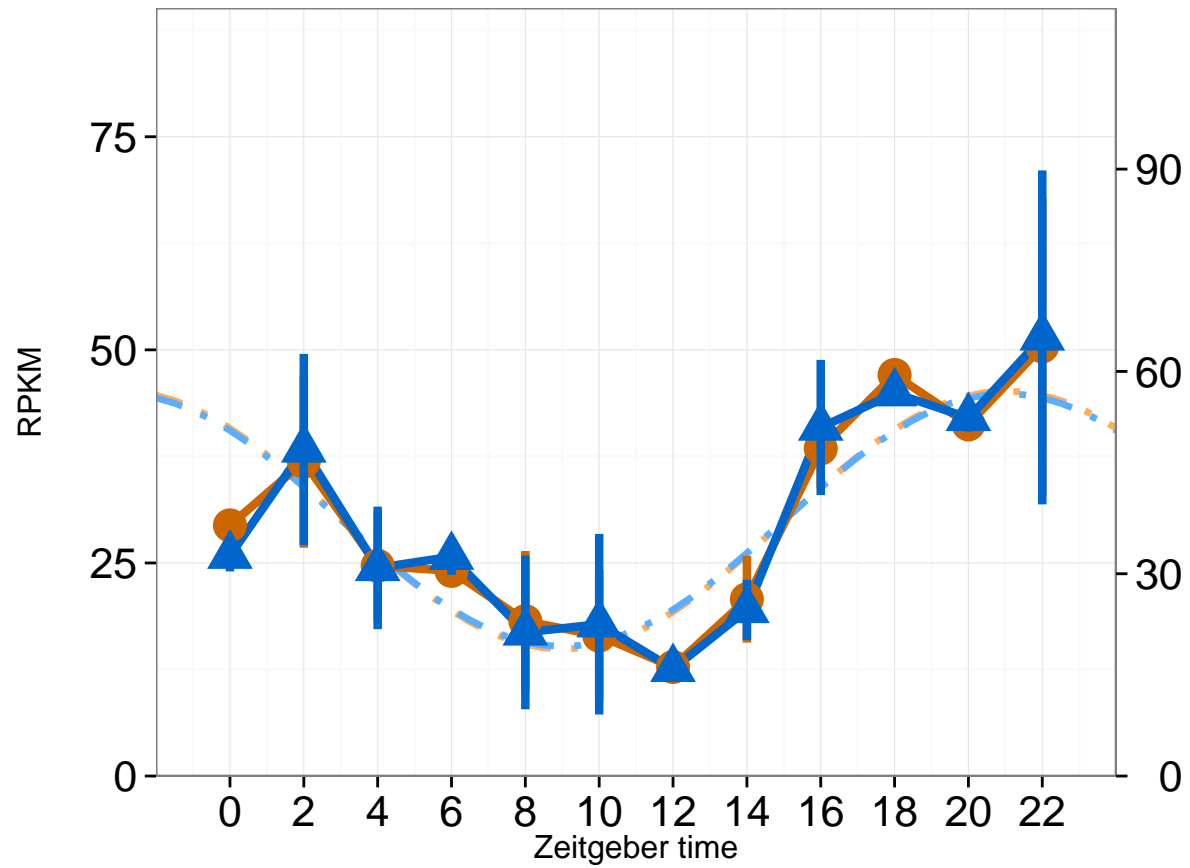

## Acmsd

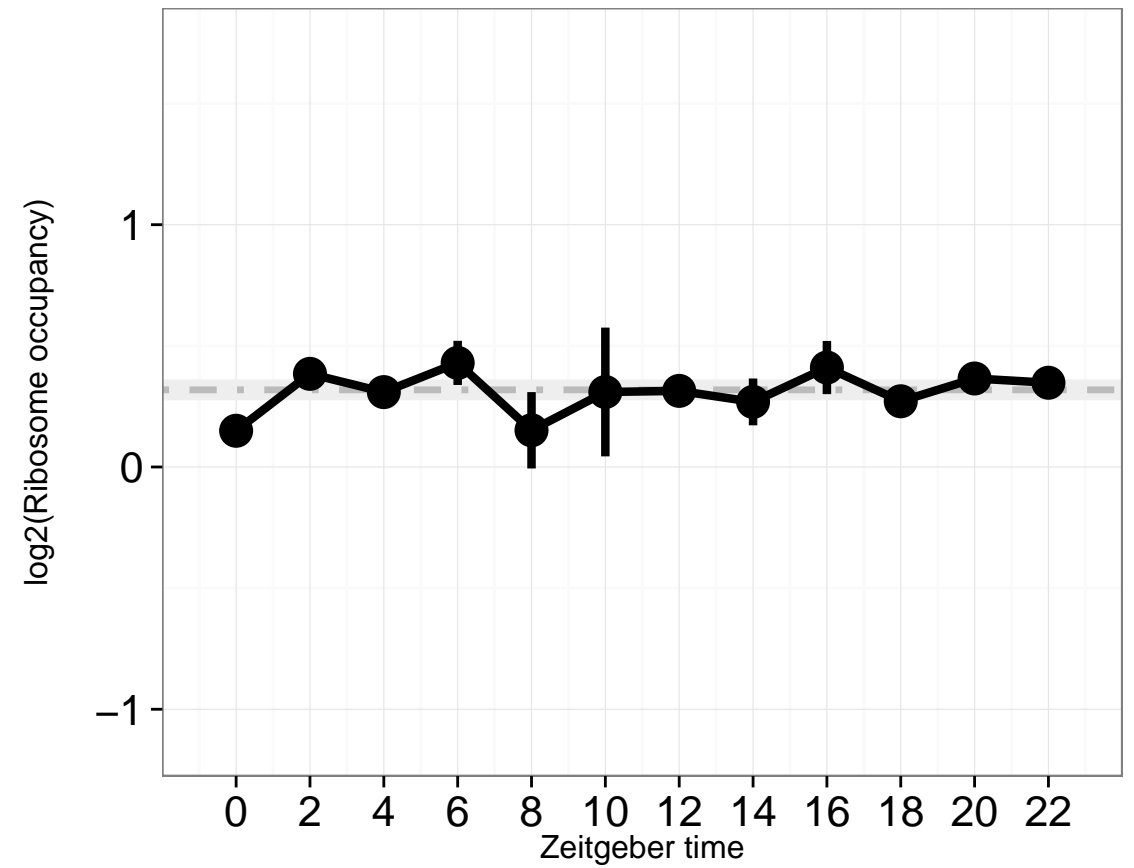

Supplement: SuppDataset_1.zip [file Acmsd_set_D.pdf › Supplemental Dataset 1/D-mRNA_rhythm_translation_rhyth/Acmsd_set_D.pdf]

# Acnat1

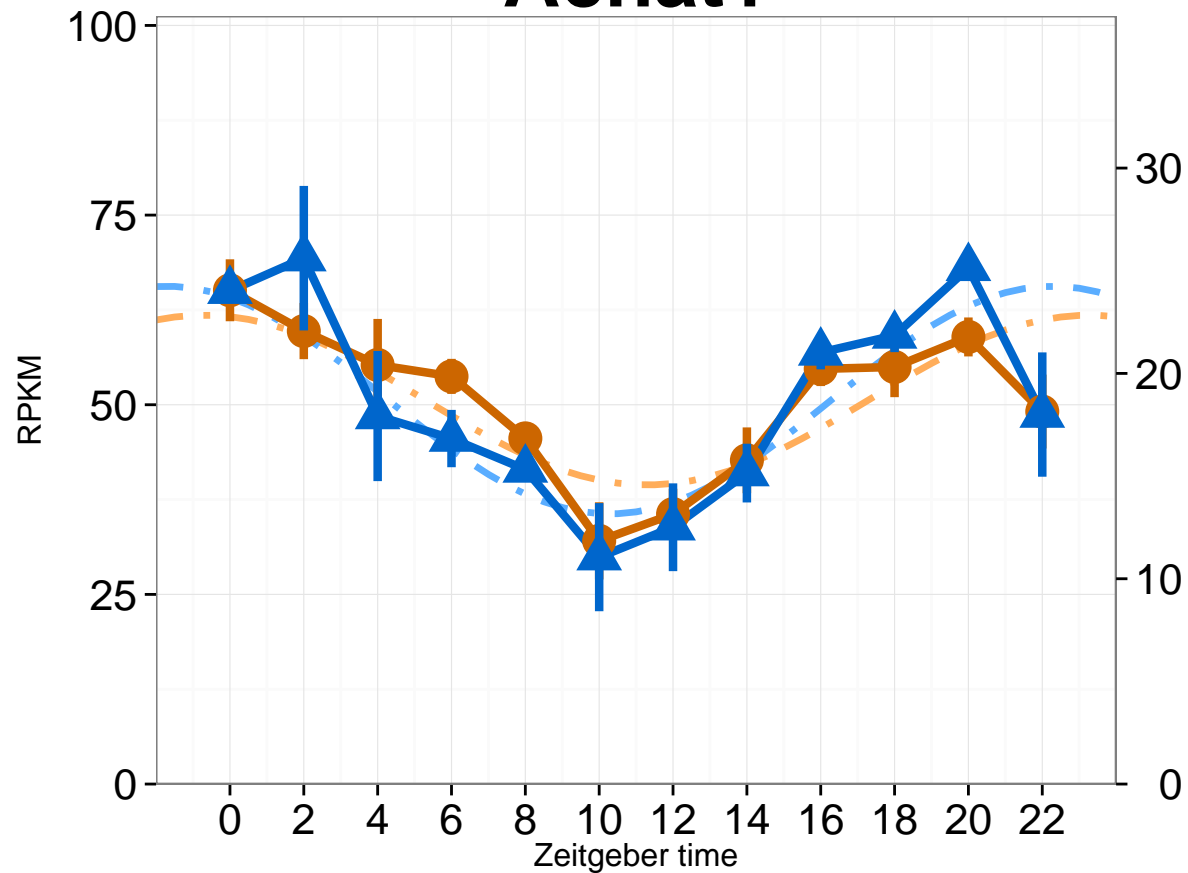

# Acnat1

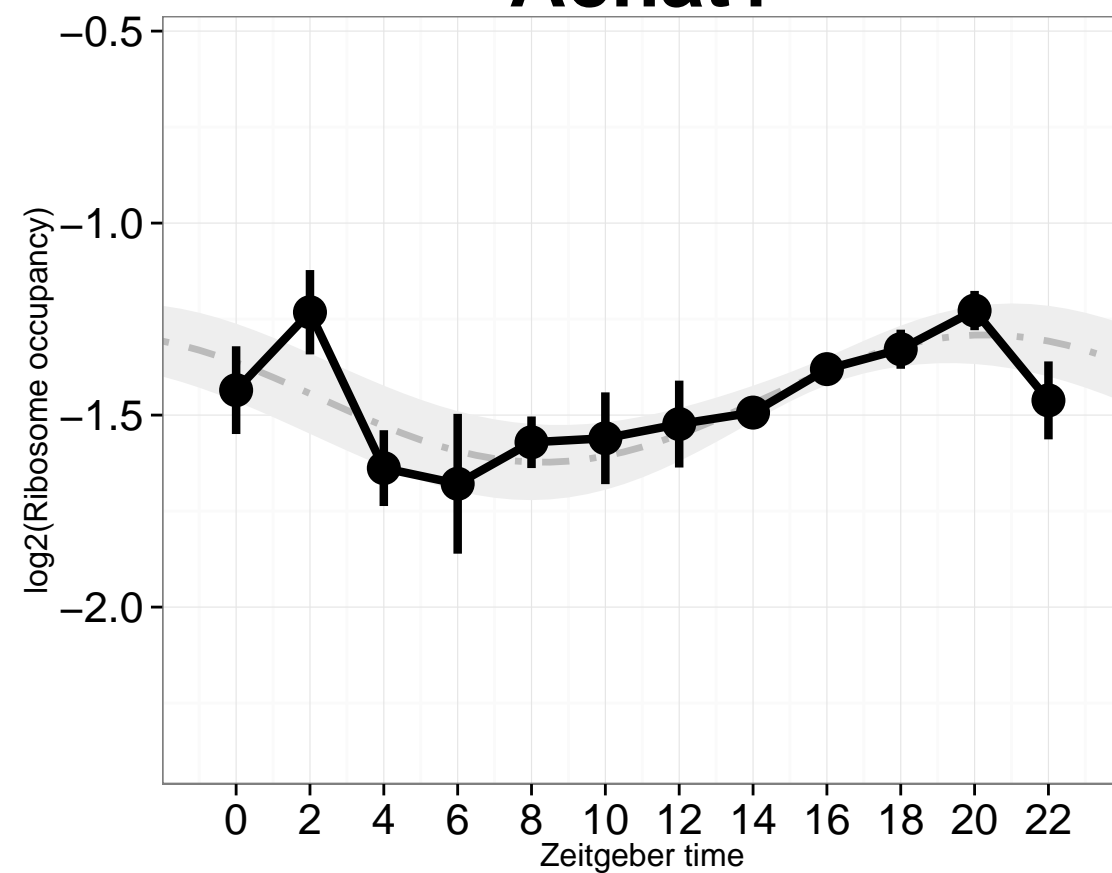

Supplement: SuppDataset_1.zip [file Acnat1_set_D.pdf › Supplemental Dataset 1/D-mRNA_rhythm_translation_rhyth/Acnat1_set_D.pdf]

## Acnat2

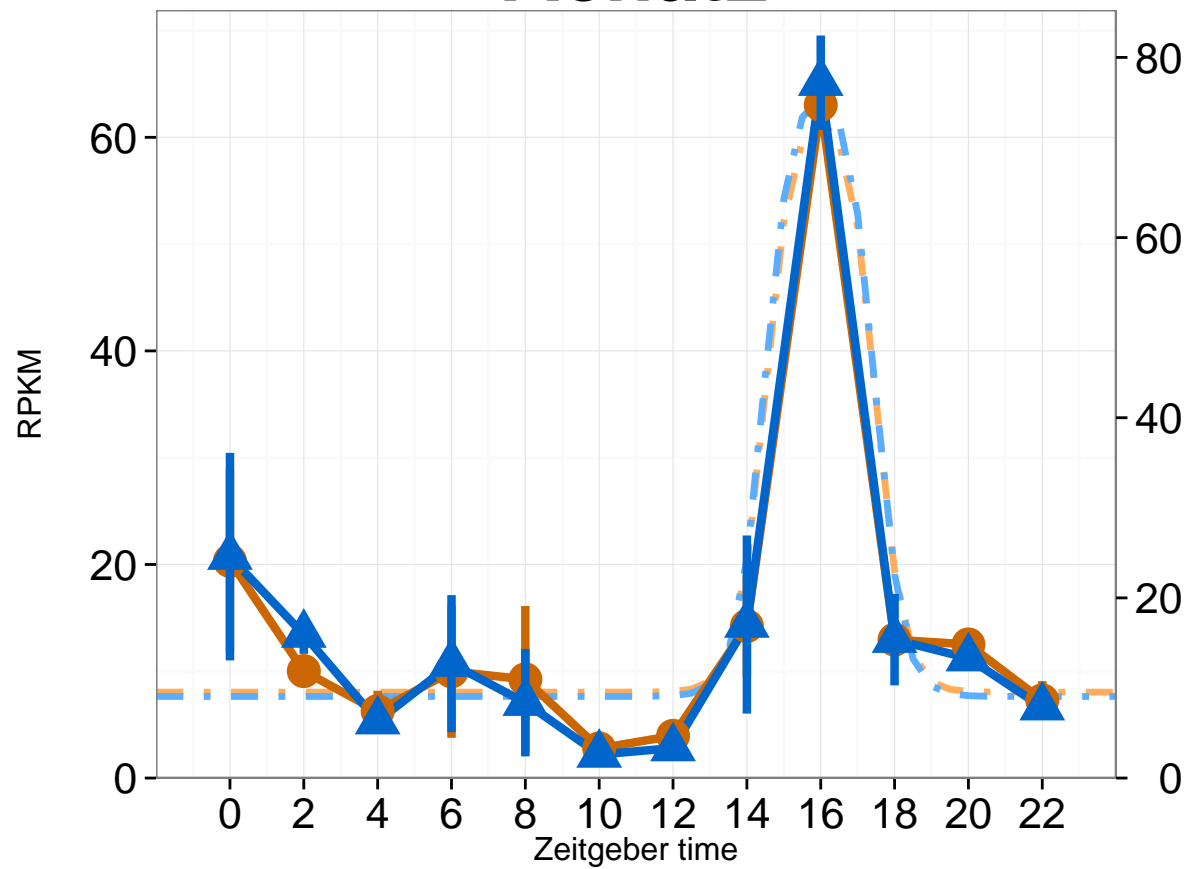

## Acnat2

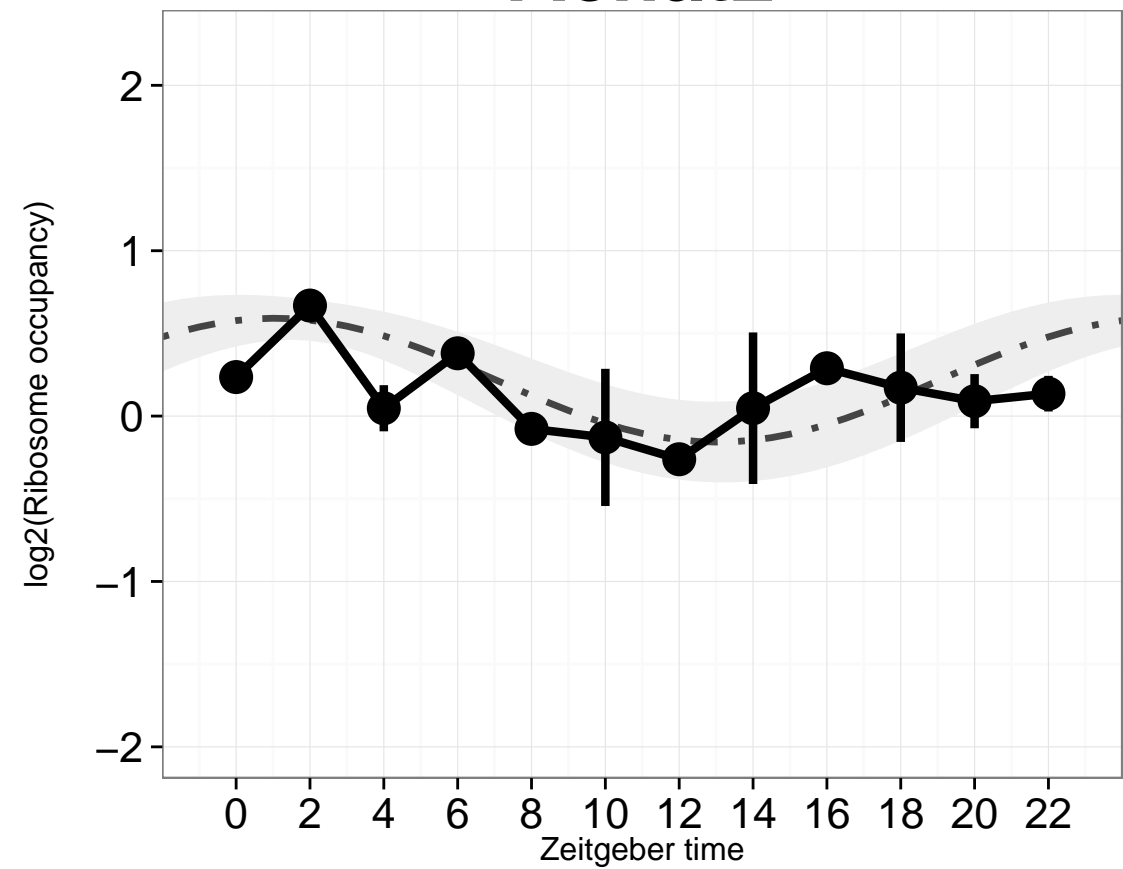

Supplement: SuppDataset_1.zip [file Acnat2_set_D.pdf › Supplemental Dataset 1/D-mRNA_rhythm_translation_rhyth/Acnat2_set_D.pdf]

# Acot1

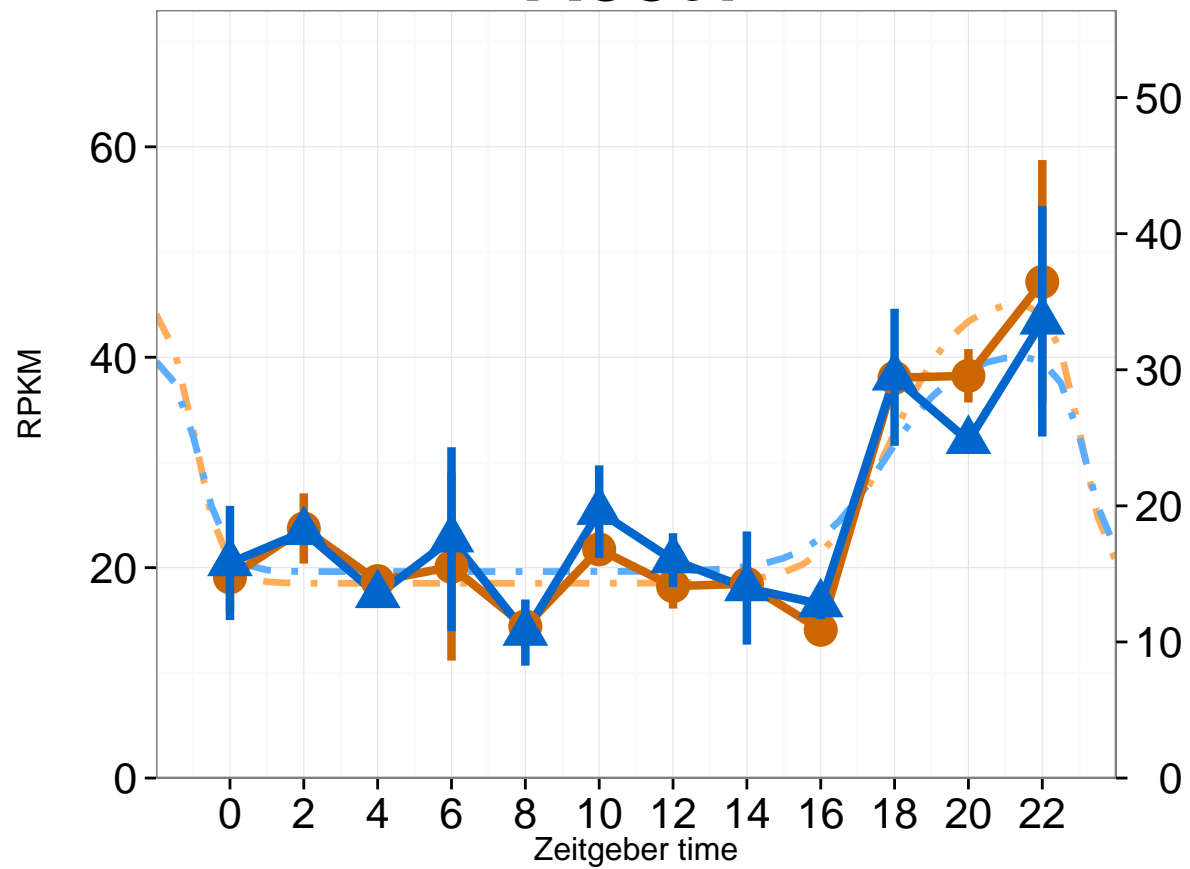

# Acot1

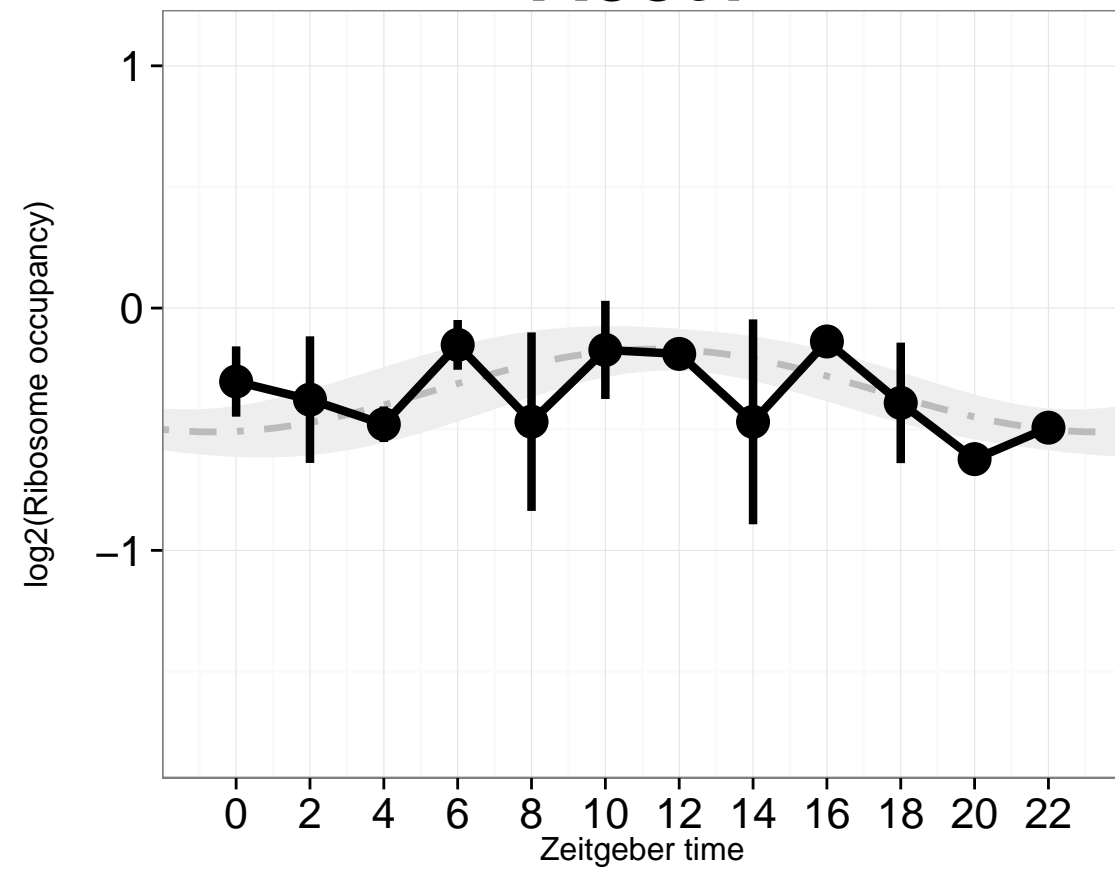

Supplement: SuppDataset_1.zip [file Acot1_set_D.pdf › Supplemental Dataset 1/D-mRNA_rhythm_translation_rhyth/Acot1_set_D.pdf]

# Acot4

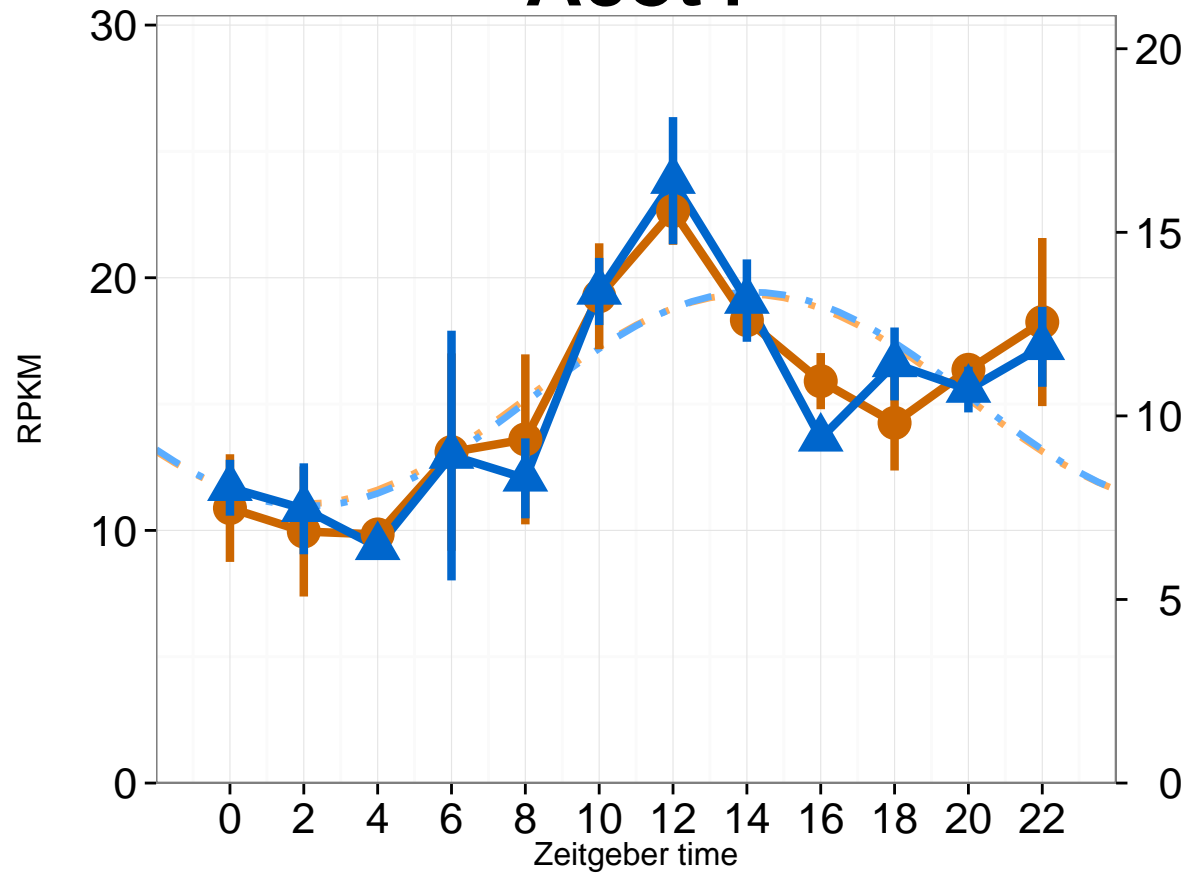

# Acot4

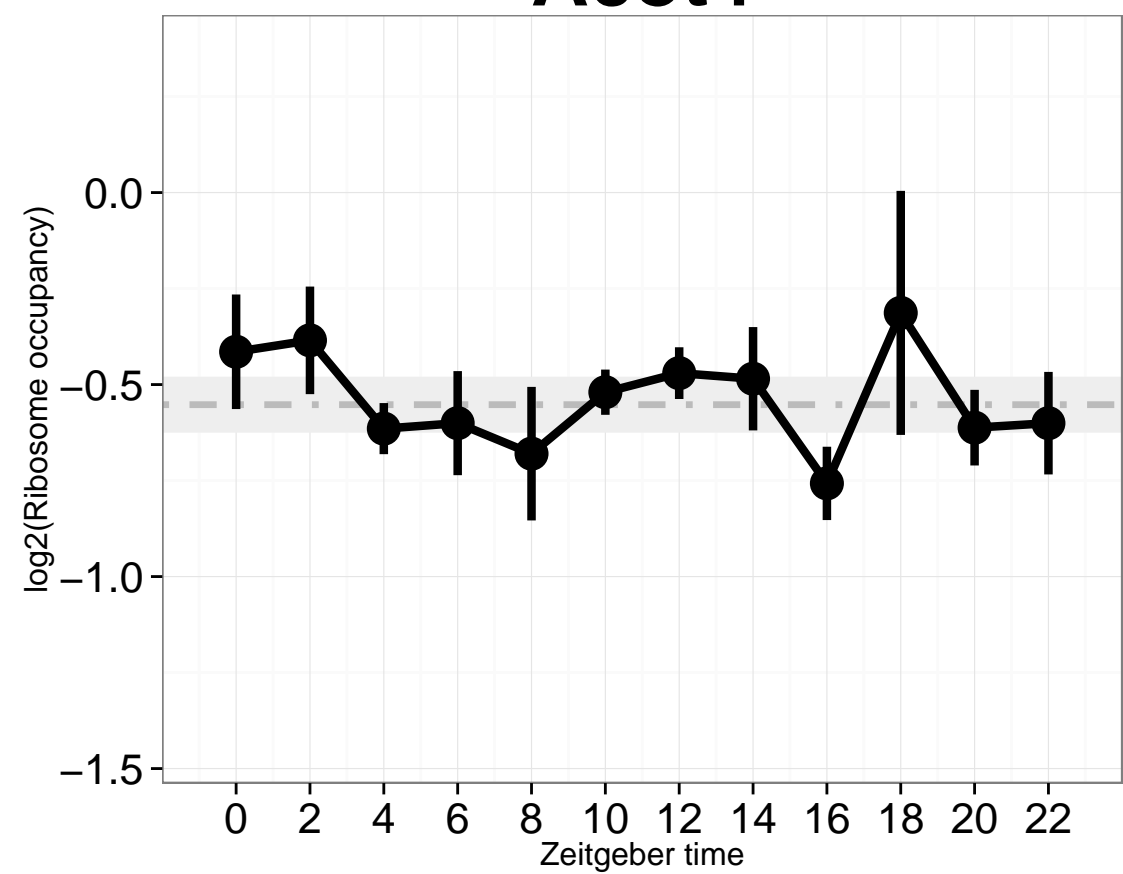

Supplement: SuppDataset_1.zip [file Acot4_set_D.pdf › Supplemental Dataset 1/D-mRNA_rhythm_translation_rhyth/Acot4_set_D.pdf]

## Acsl3

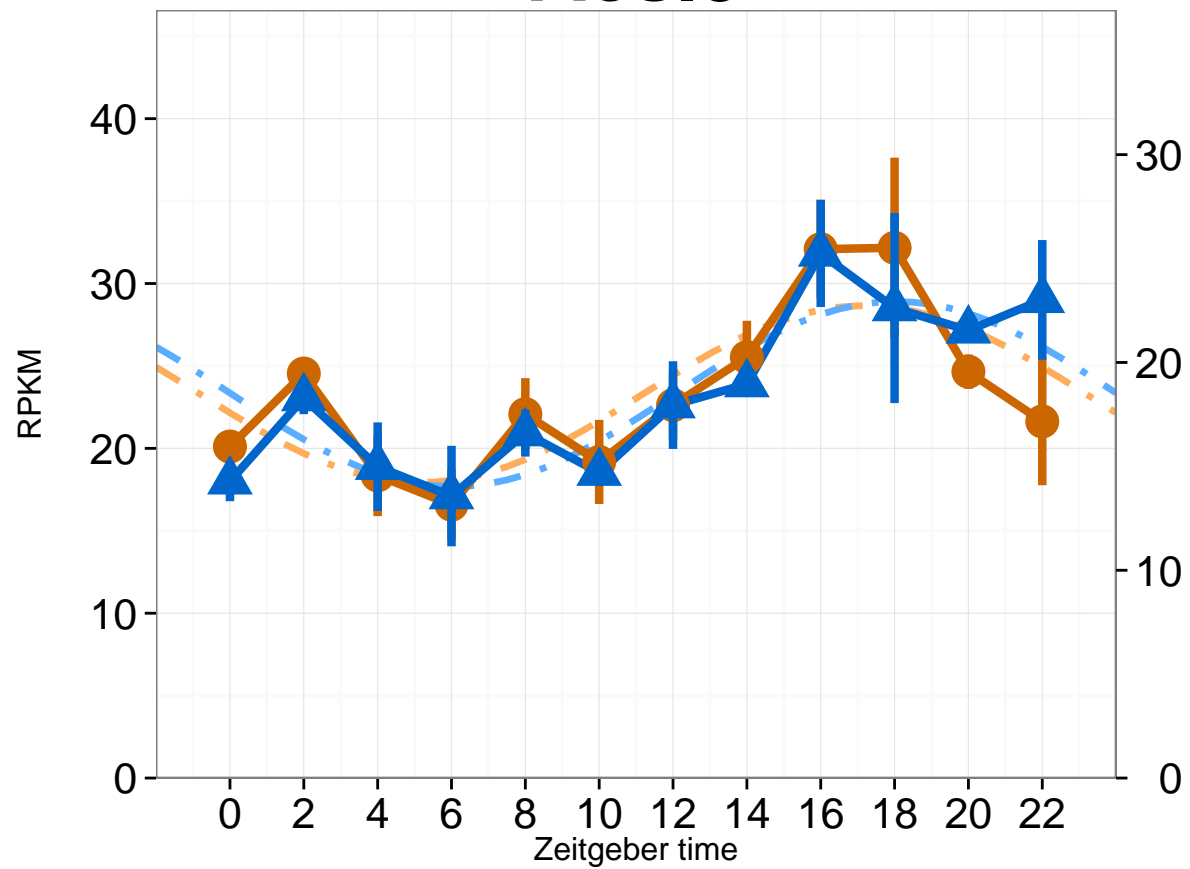

## Acsl3

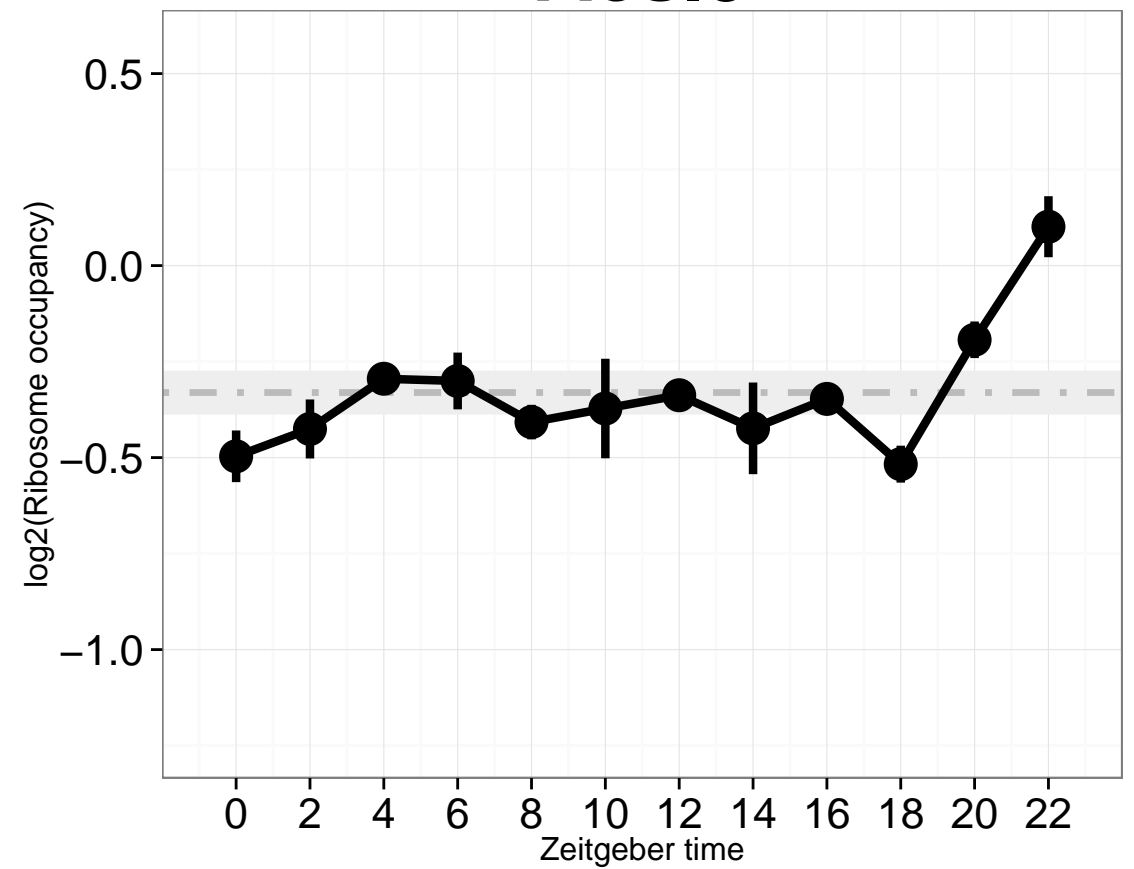

Supplement: SuppDataset_1.zip [file Acsl3_set_D.pdf › Supplemental Dataset 1/D-mRNA_rhythm_translation_rhyth/Acsl3_set_D.pdf]

## Acss2

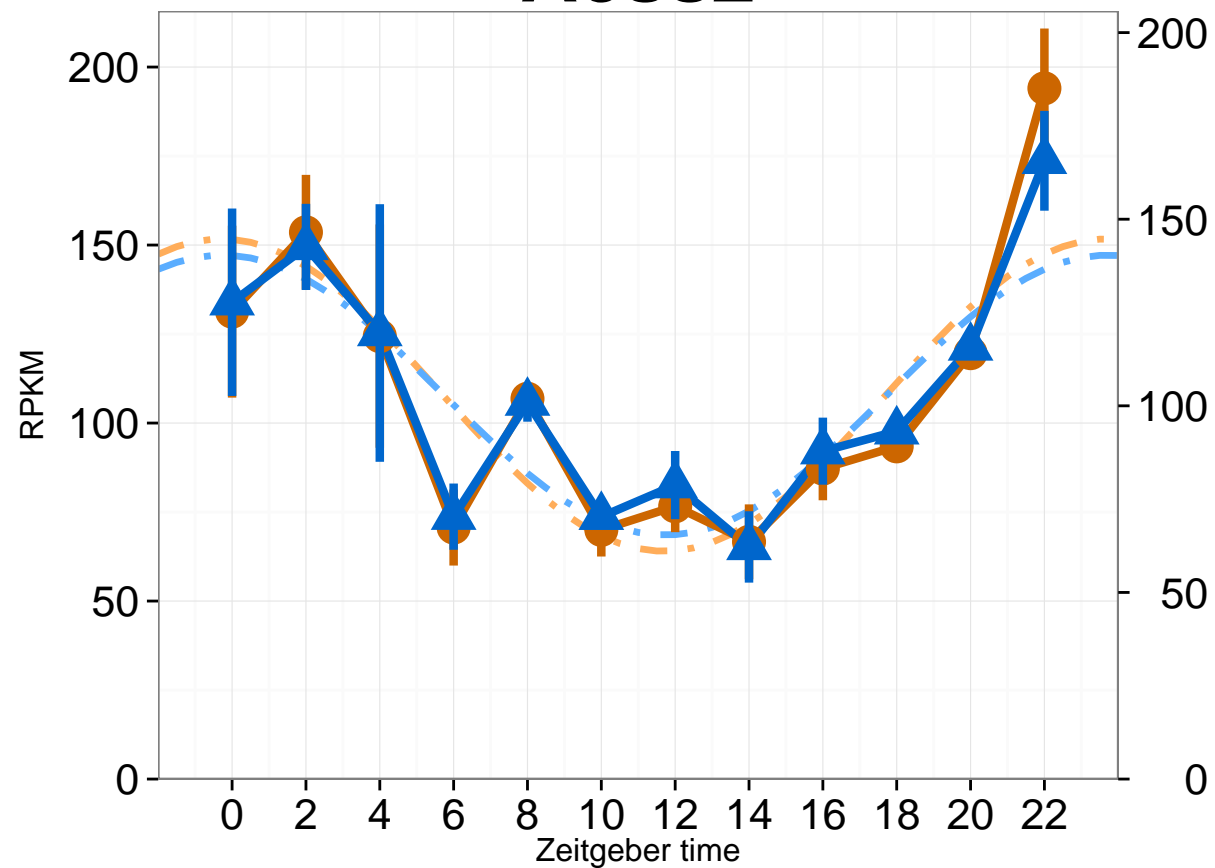

## Acss2

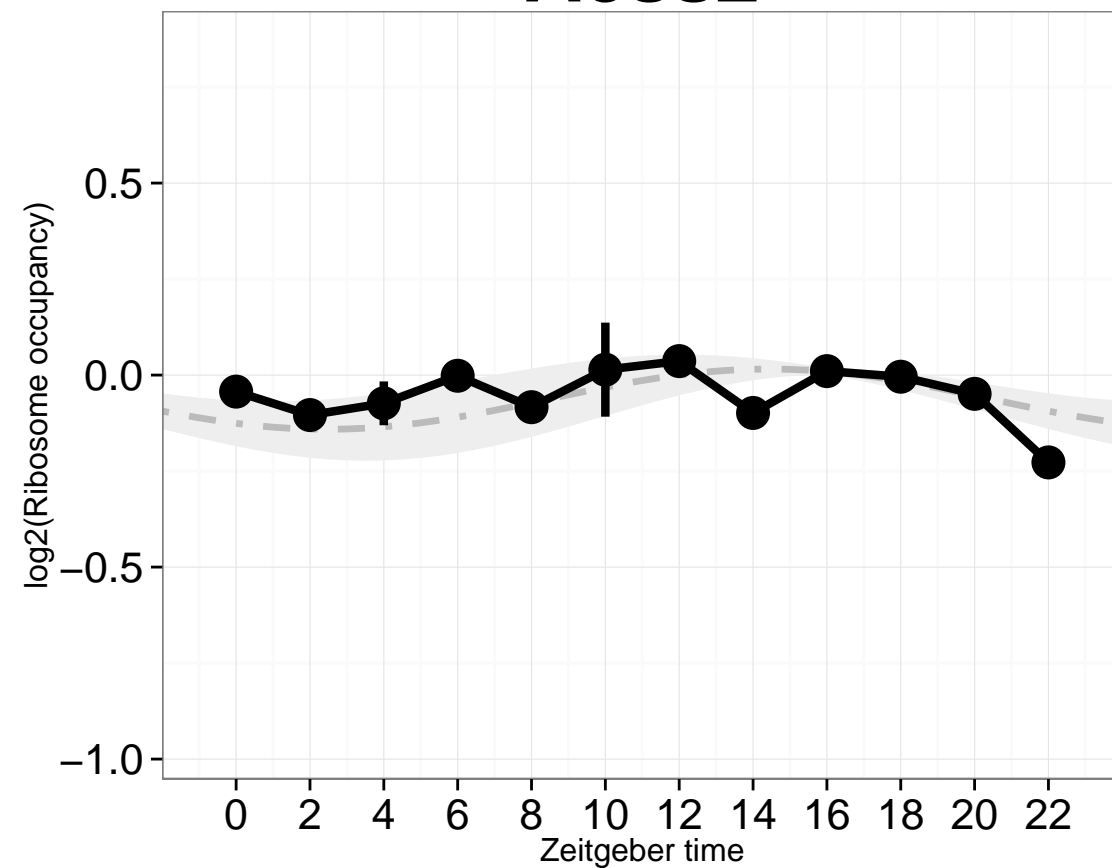

Supplement: SuppDataset_1.zip [file Acss2_set_D.pdf › Supplemental Dataset 1/D-mRNA_rhythm_translation_rhyth/Acss2_set_D.pdf]

# Actn1

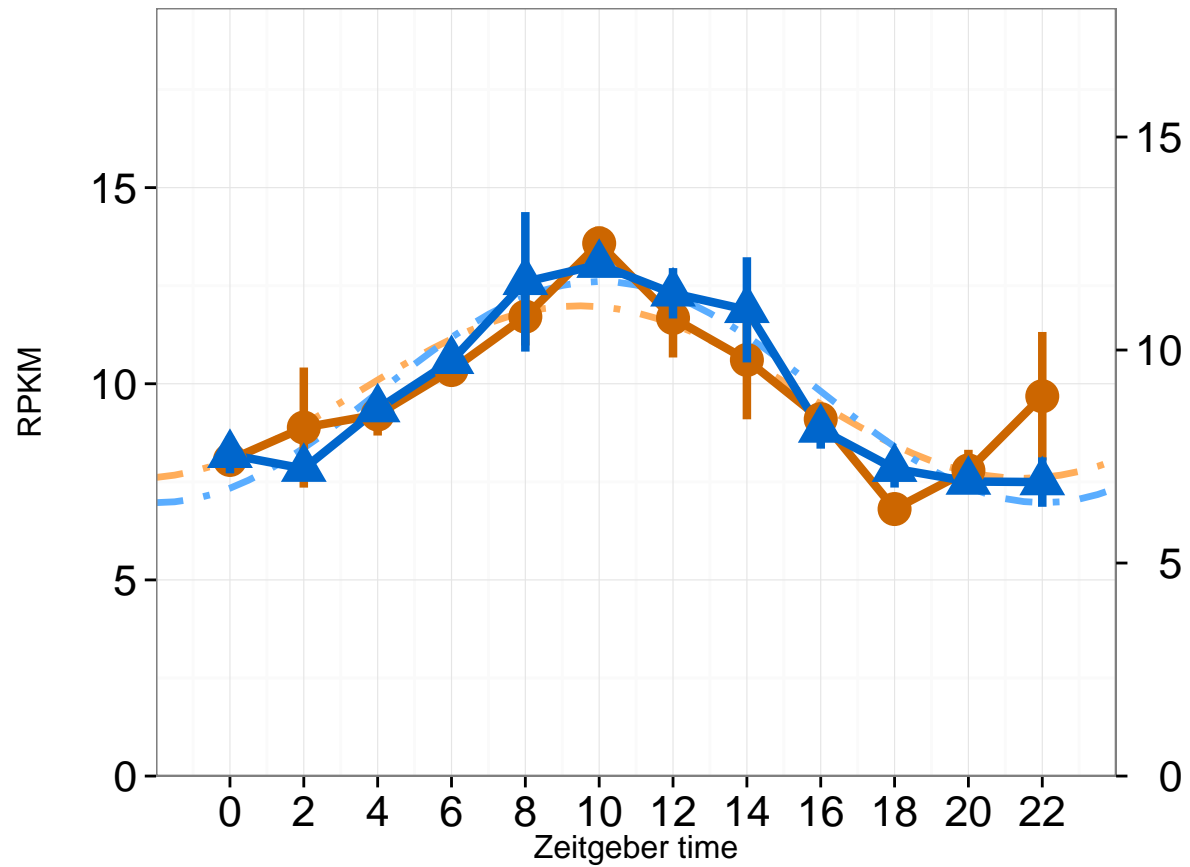

# Actn1

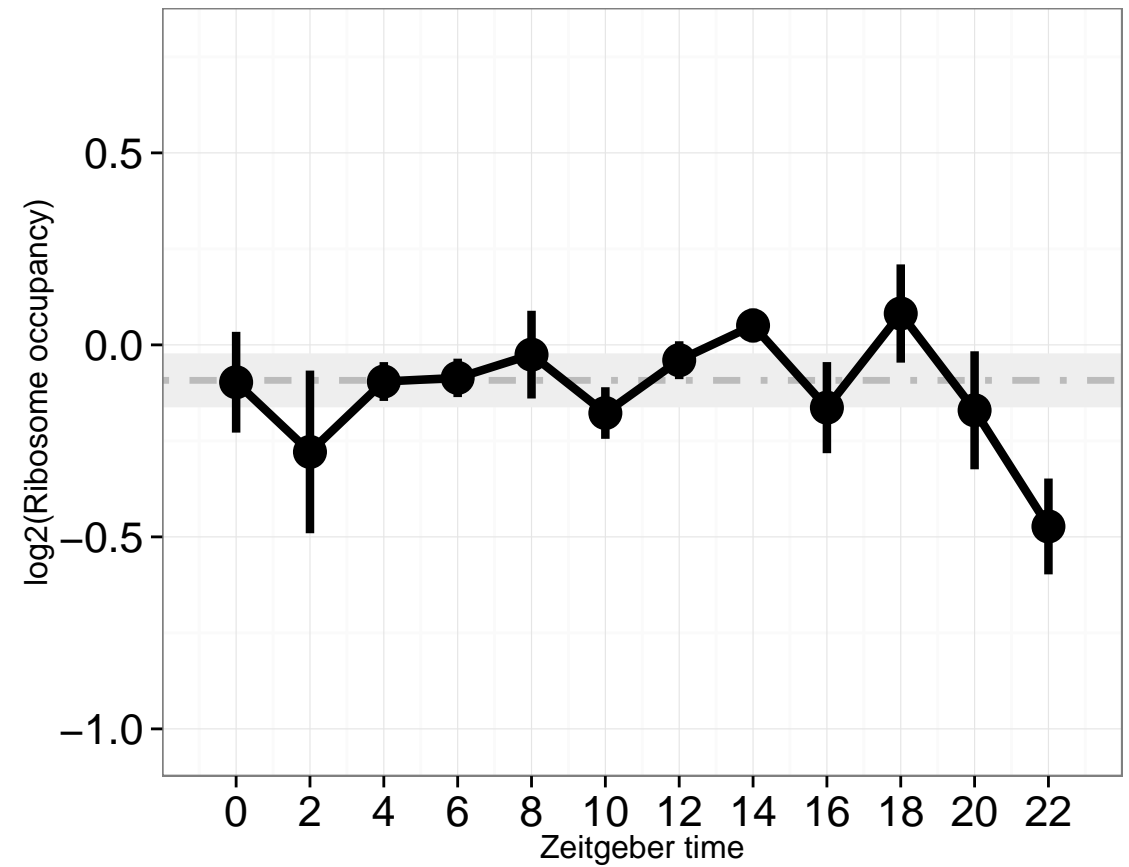

Supplement: SuppDataset_1.zip [file Actn1_set_D.pdf › Supplemental Dataset 1/D-mRNA_rhythm_translation_rhyth/Actn1_set_D.pdf]

# Actr6

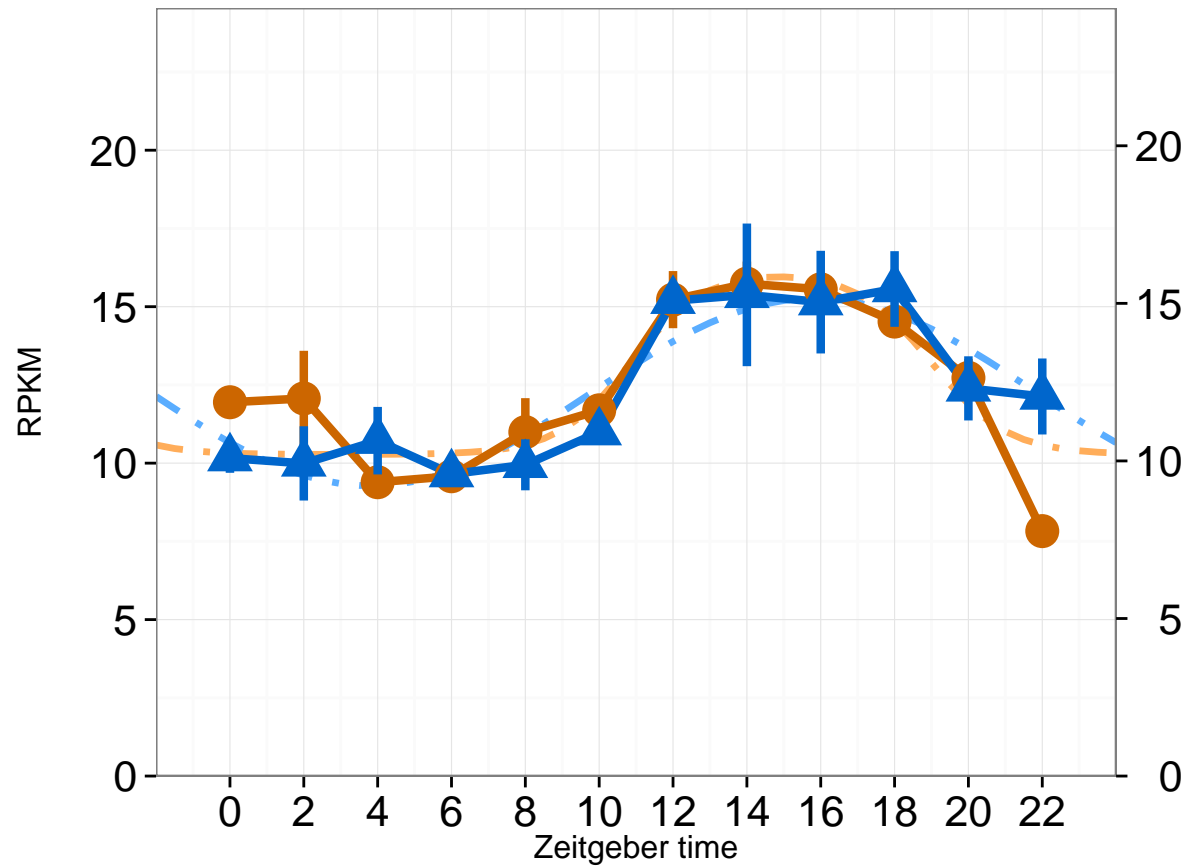

# Actr6

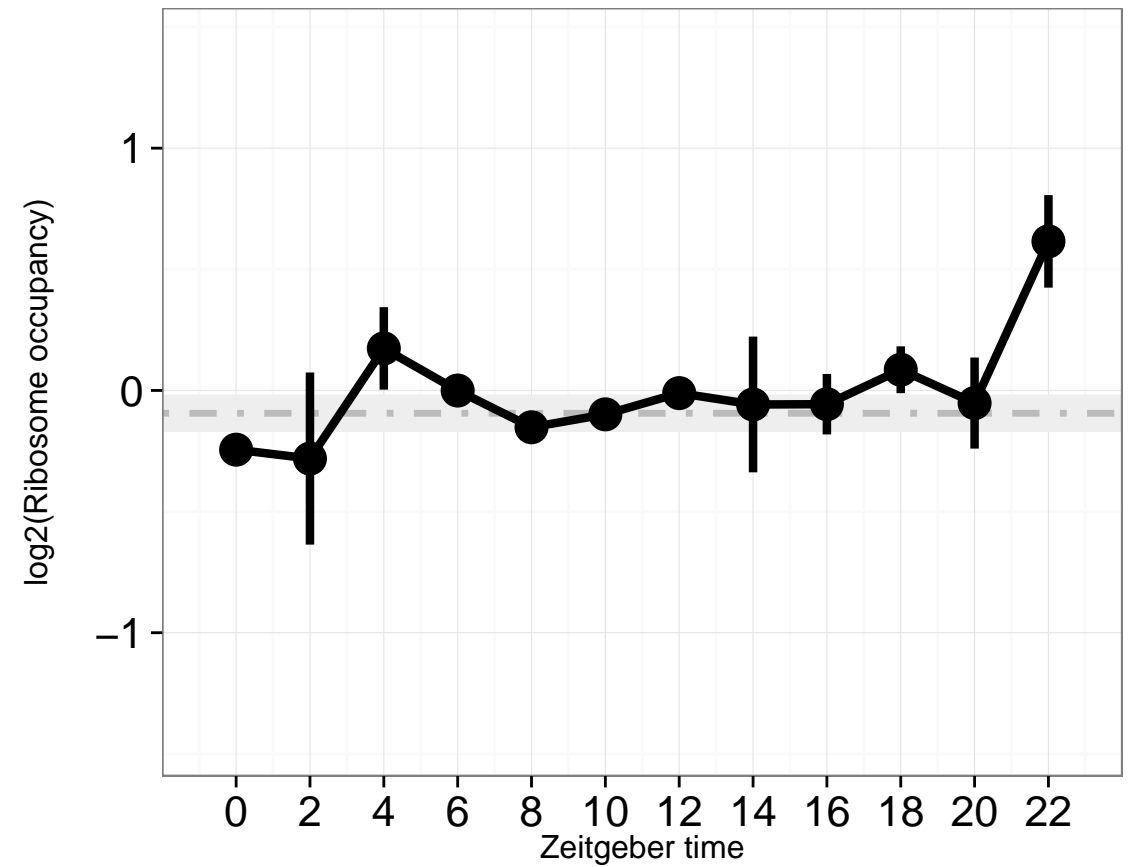

Supplement: SuppDataset_1.zip [file Actr6_set_D.pdf › Supplemental Dataset 1/D-mRNA_rhythm_translation_rhyth/Actr6_set_D.pdf]

## Adamtsl4

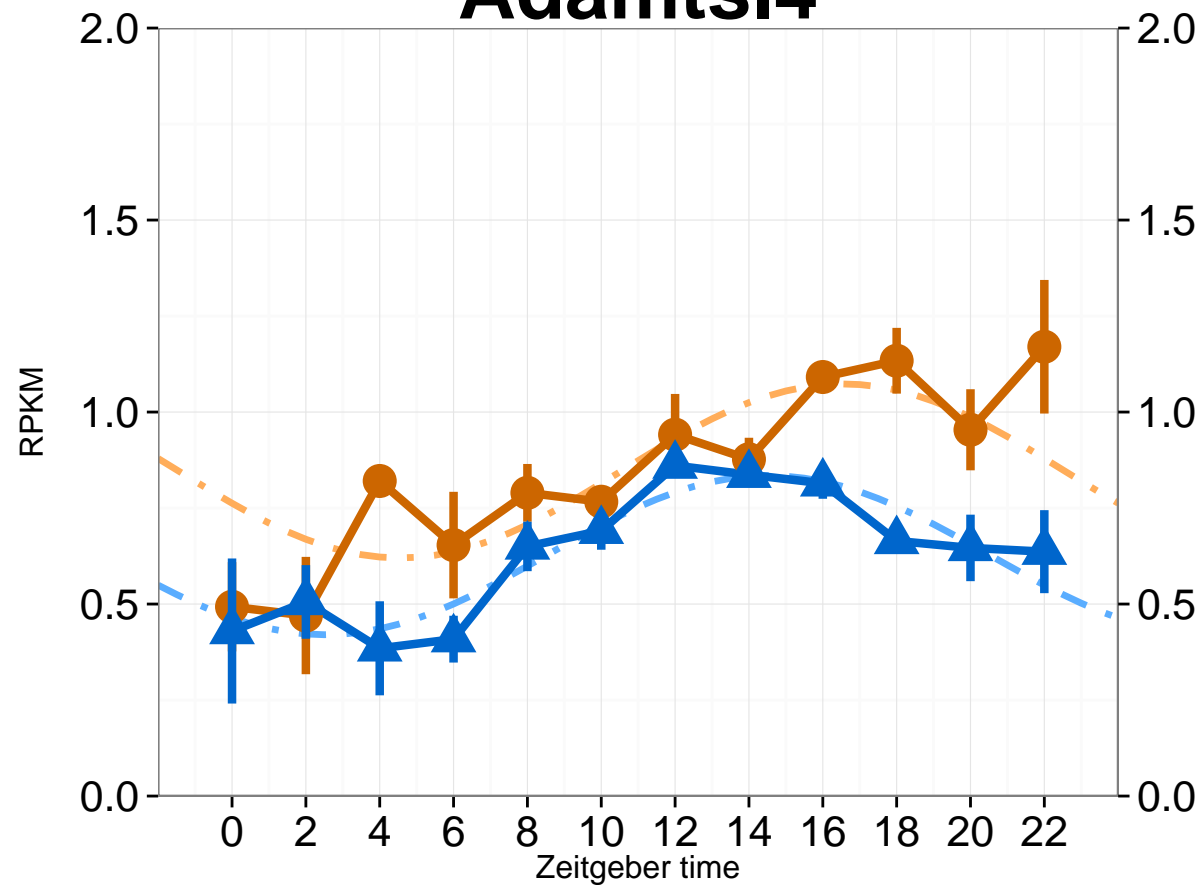

## Adamtsl4

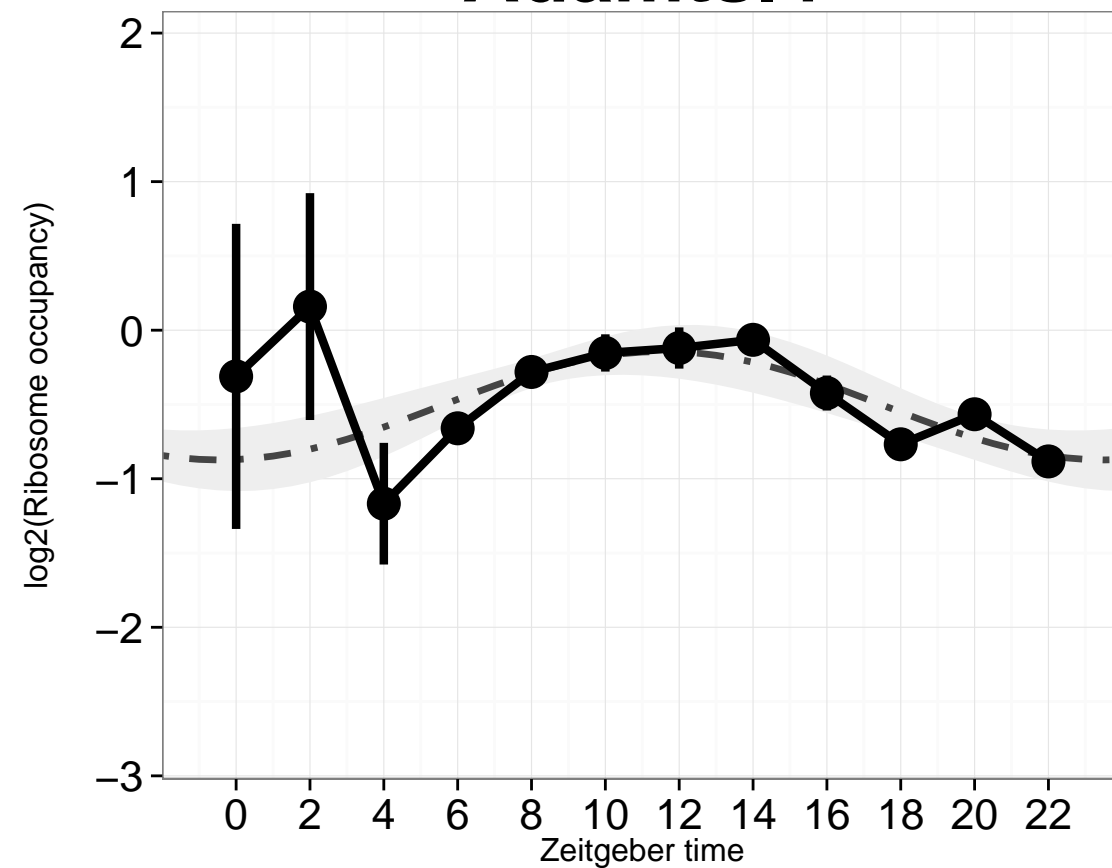

Supplement: SuppDataset_1.zip [file Adamtsl4_set_D.pdf › Supplemental Dataset 1/D-mRNA_rhythm_translation_rhyth/Adamtsl4_set_D.pdf]

## Adar

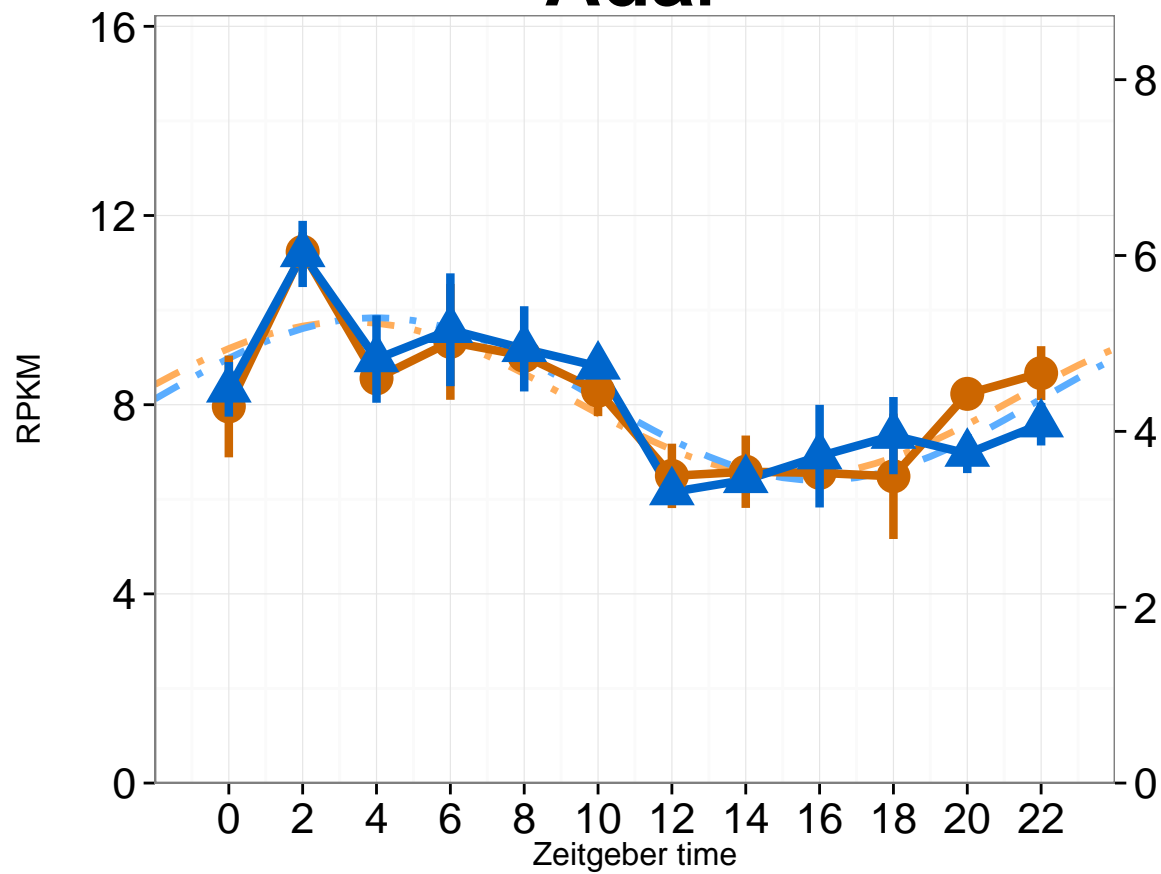

## Adar

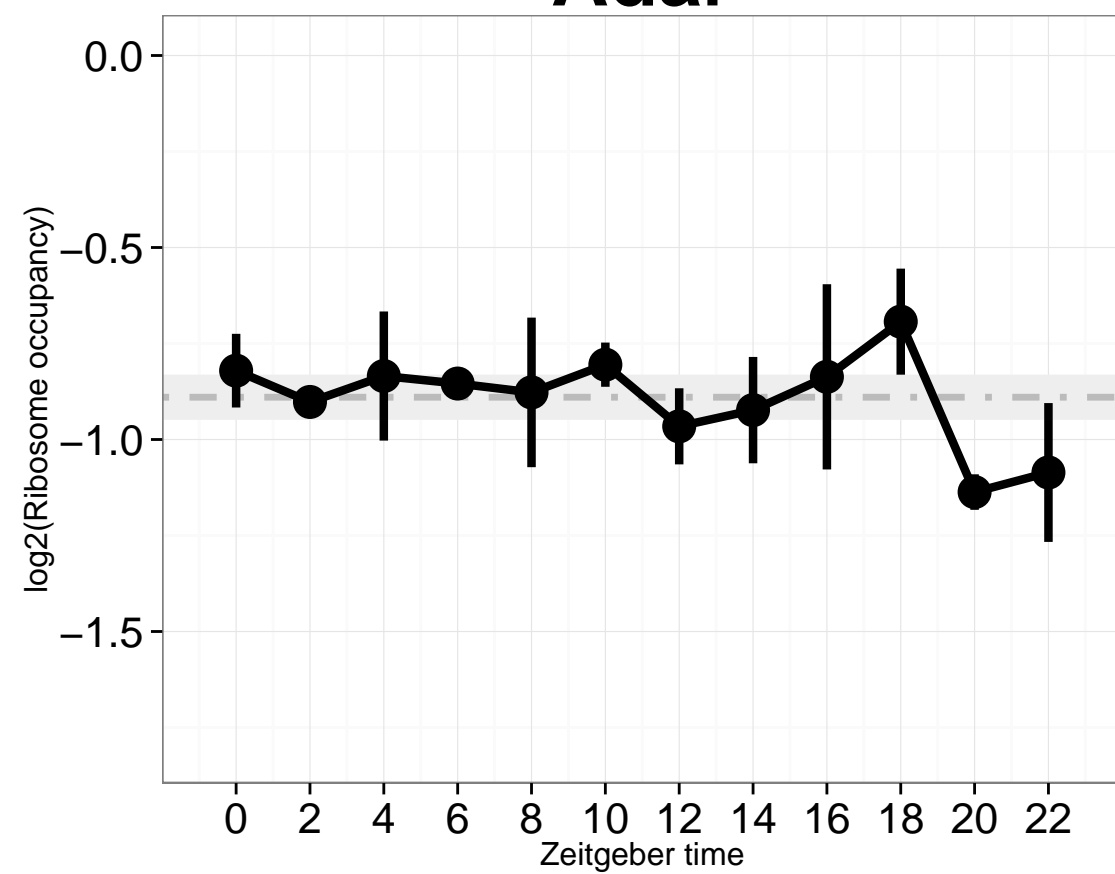

Supplement: SuppDataset_1.zip [file Adar_set_D.pdf › Supplemental Dataset 1/D-mRNA_rhythm_translation_rhyth/Adar_set_D.pdf]

# Adarb1

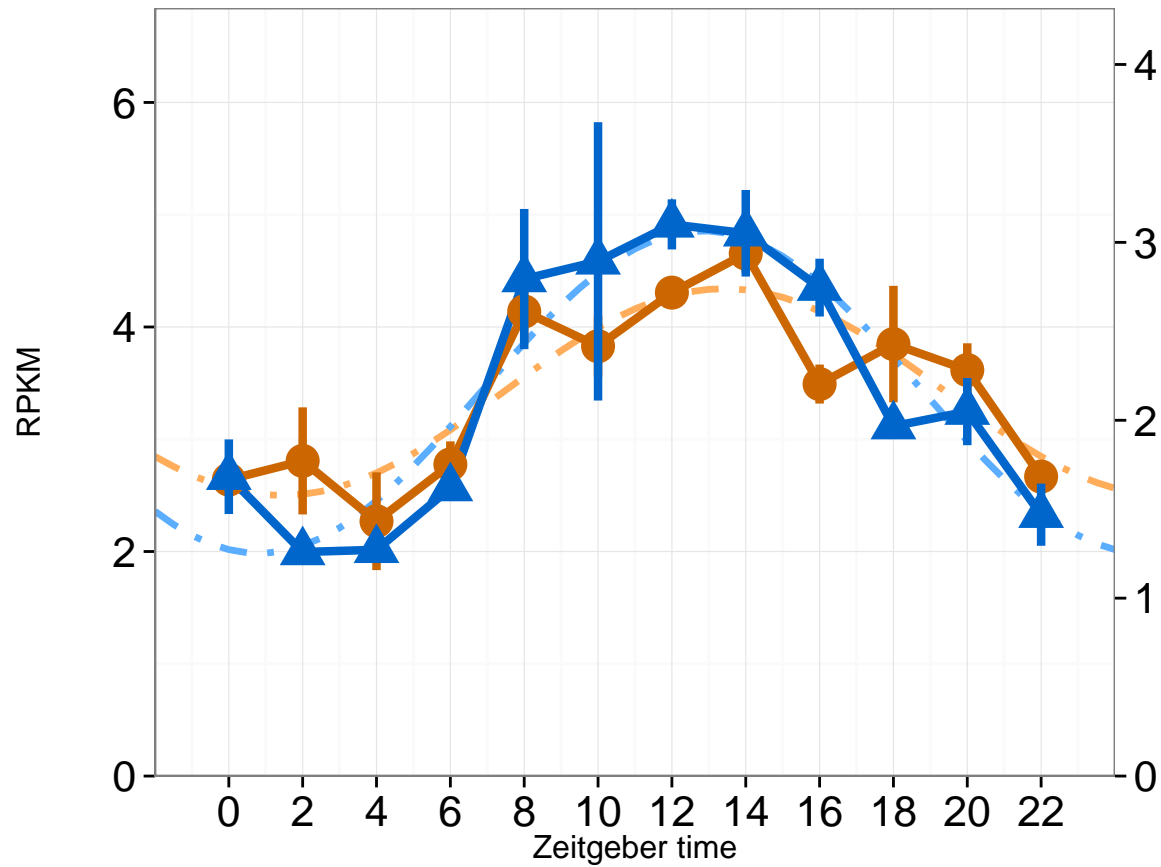

# Adarb1

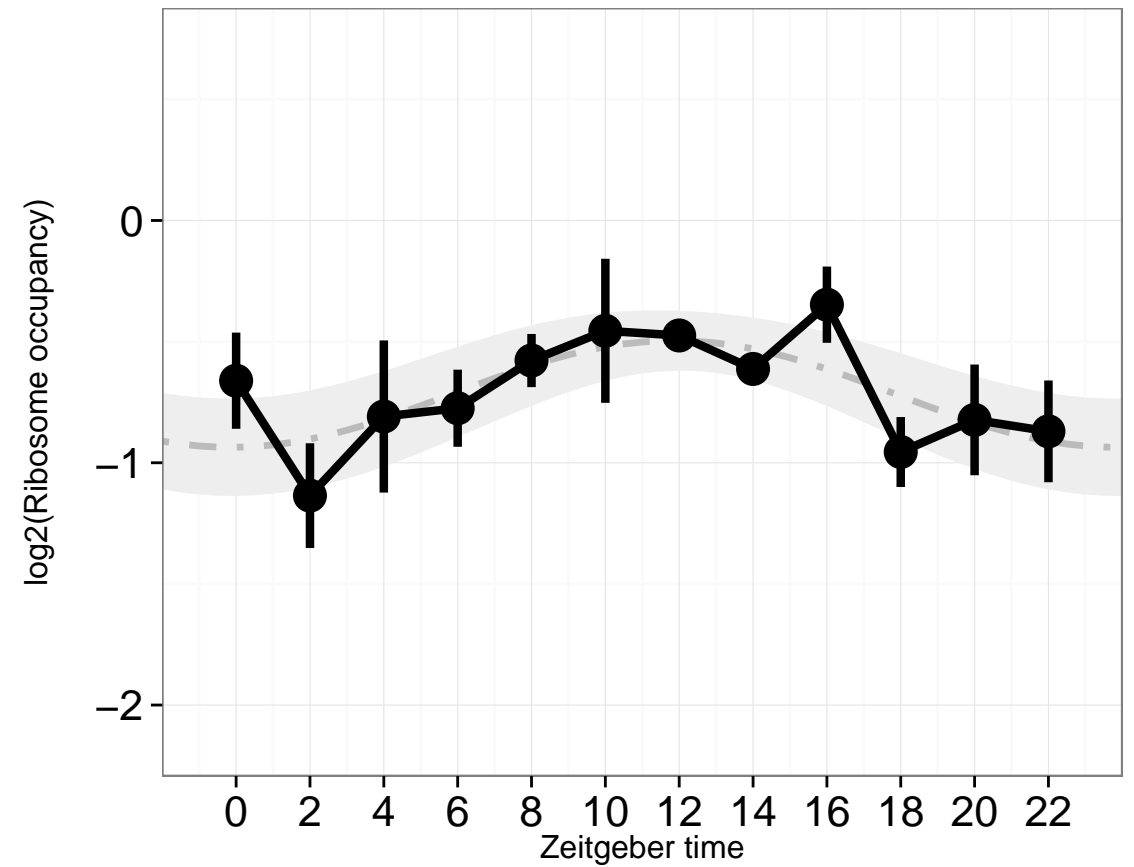

Supplement: SuppDataset_1.zip [file Adarb1_set_D.pdf › Supplemental Dataset 1/D-mRNA_rhythm_translation_rhyth/Adarb1_set_D.pdf]

## Adck3

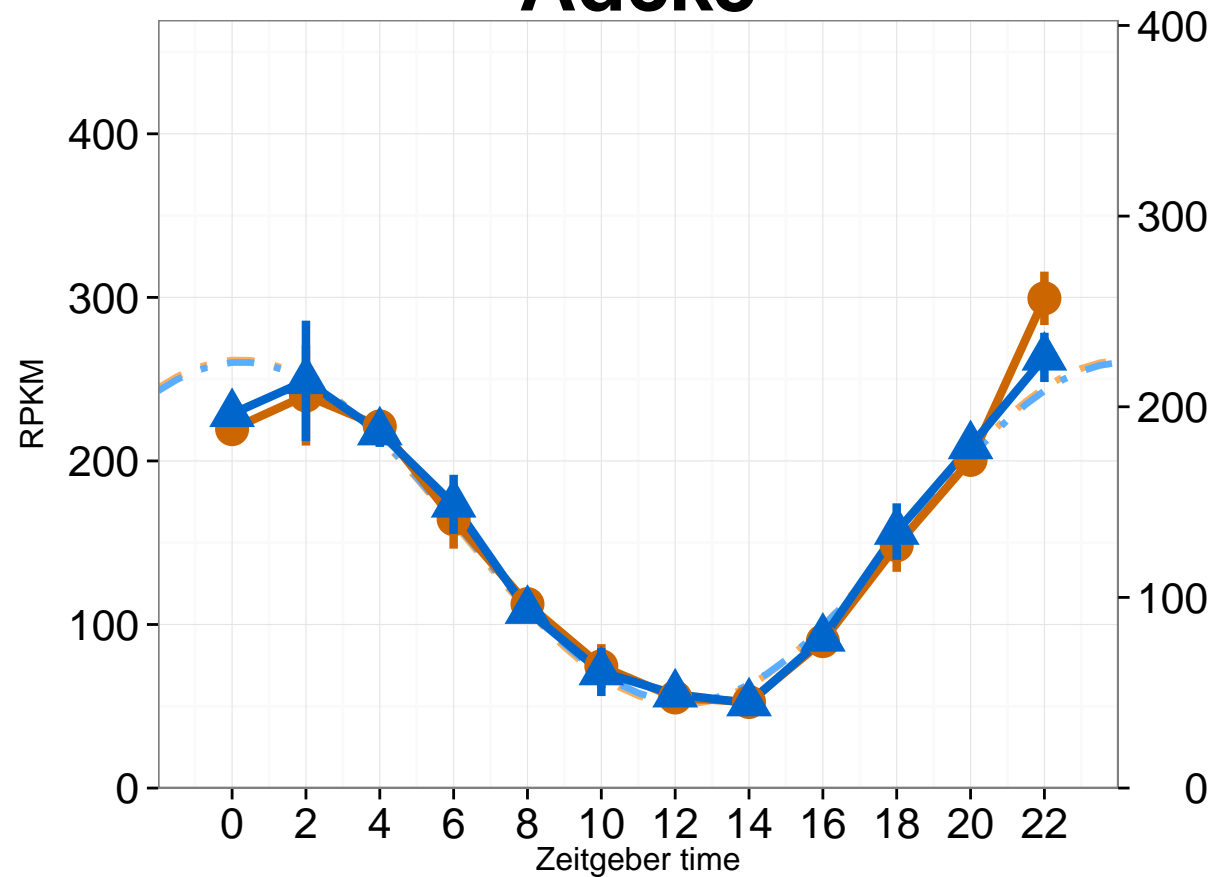

## Adck3

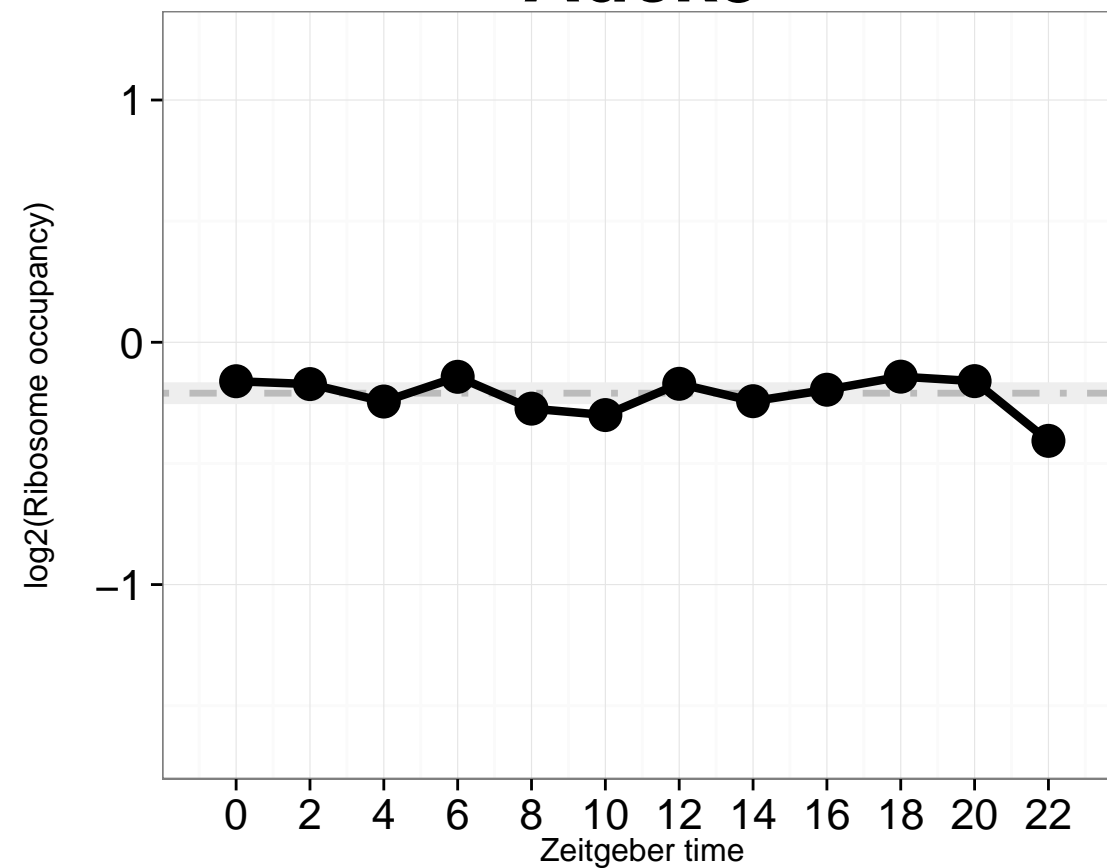

Supplement: SuppDataset_1.zip [file Adck3_set_D.pdf › Supplemental Dataset 1/D-mRNA_rhythm_translation_rhyth/Adck3_set_D.pdf]

# Adck5

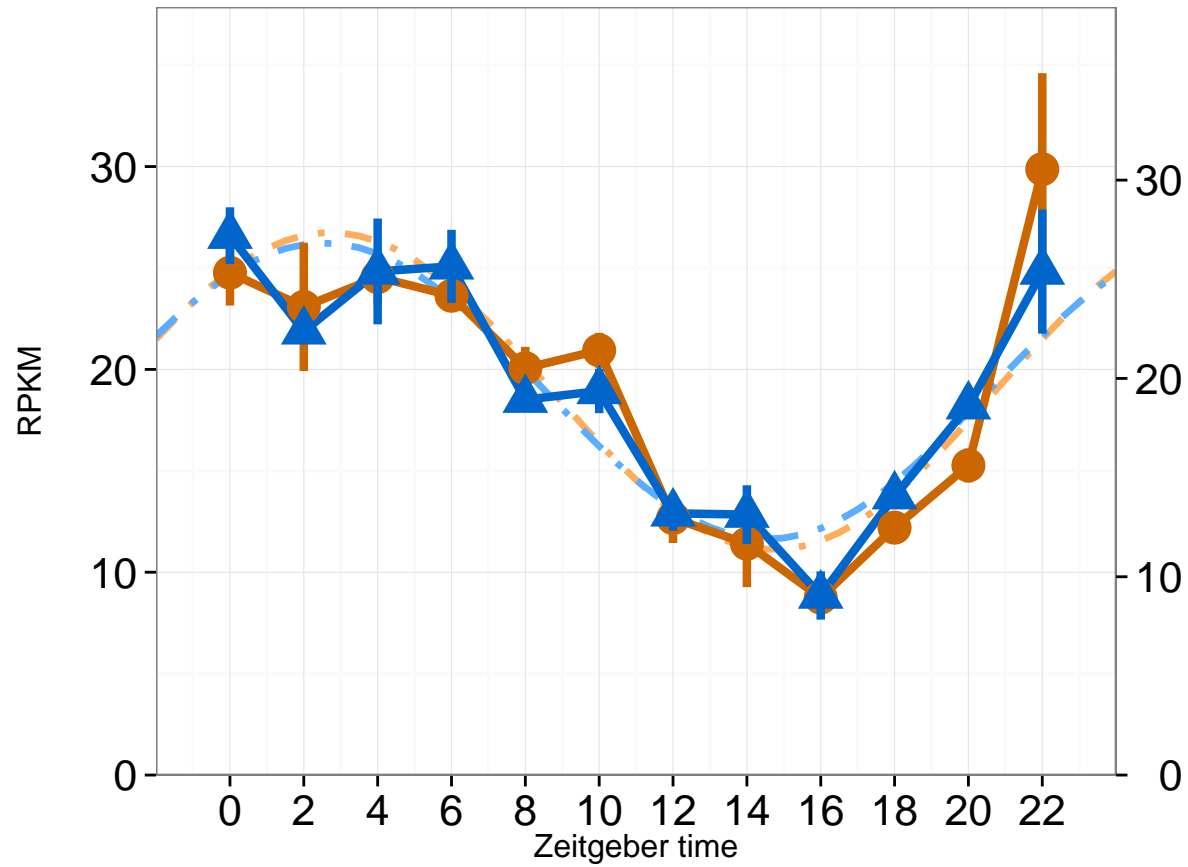

# Adck5

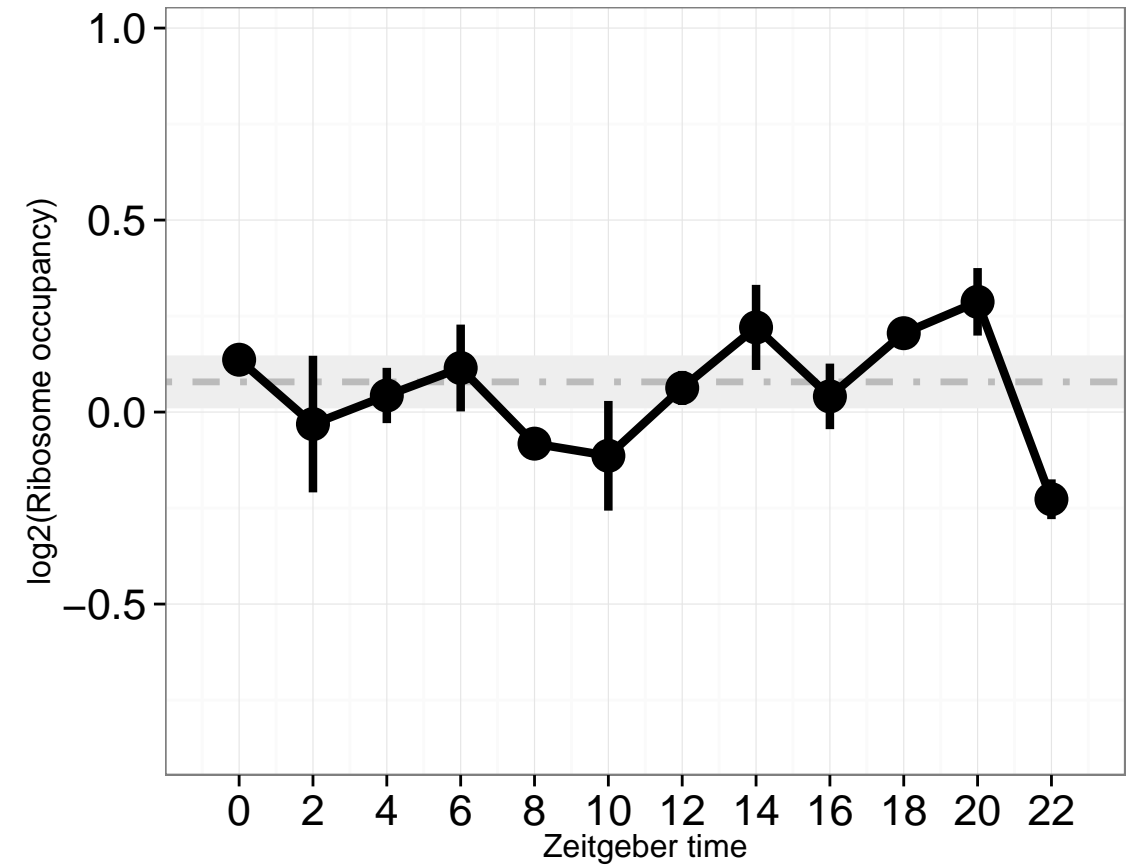

Supplement: SuppDataset_1.zip [file Adck5_set_D.pdf › Supplemental Dataset 1/D-mRNA_rhythm_translation_rhyth/Adck5_set_D.pdf]

# Adcy6

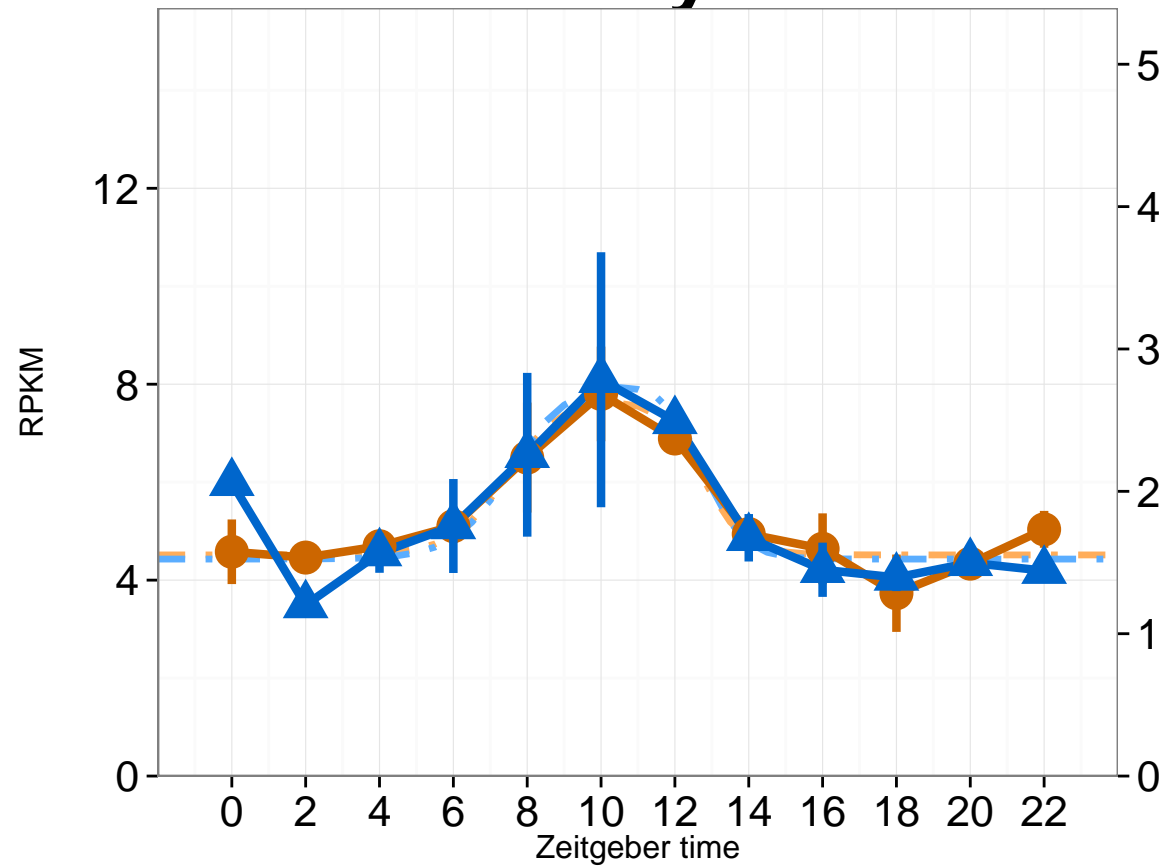

# Adcy6

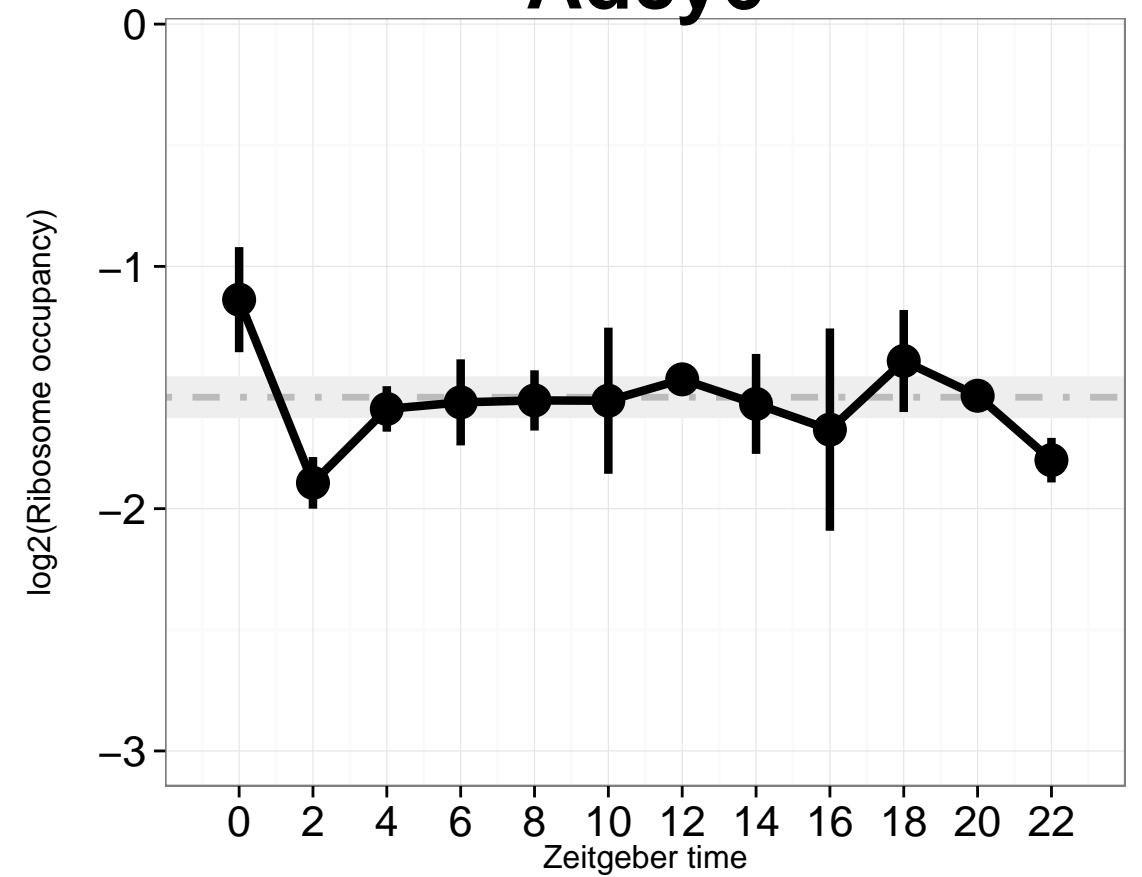

Supplement: SuppDataset_1.zip [file Adcy6_set_D.pdf › Supplemental Dataset 1/D-mRNA_rhythm_translation_rhyth/Adcy6_set_D.pdf]

## Adprh

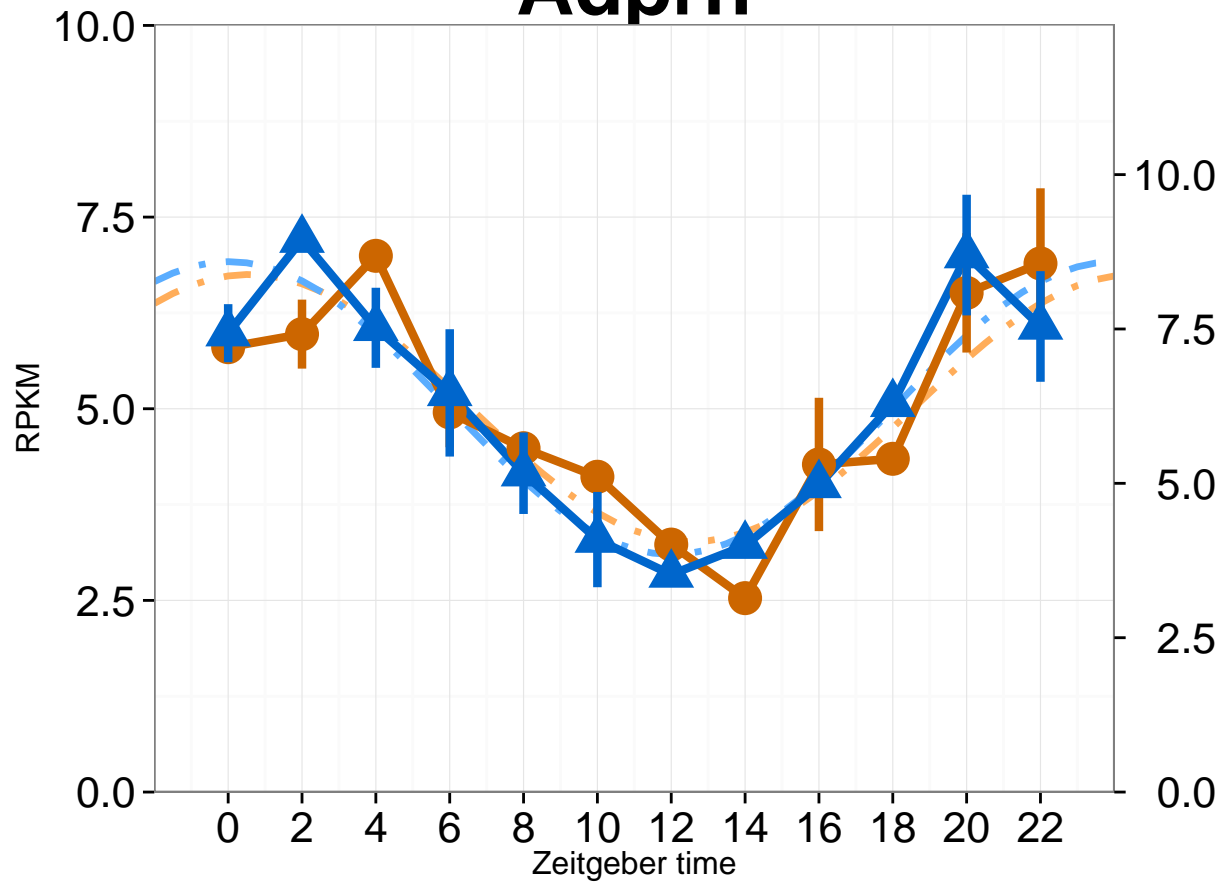

## Adprh

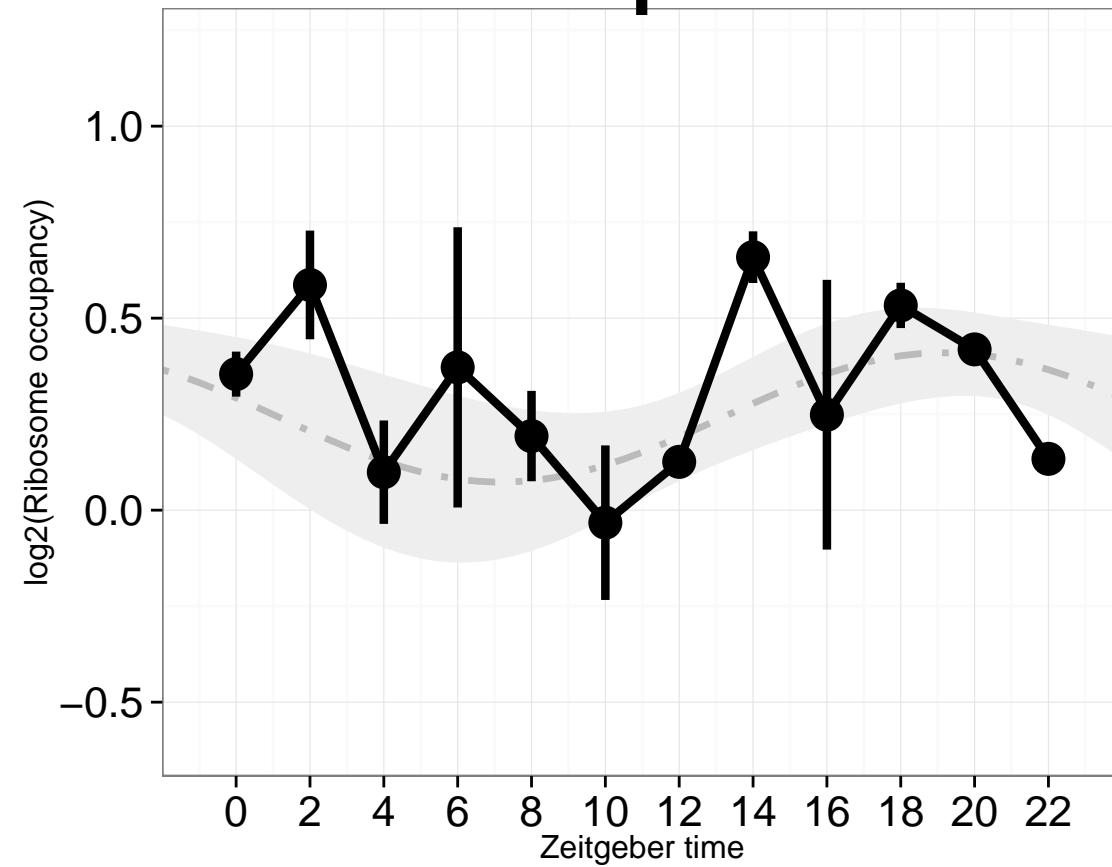

Supplement: SuppDataset_1.zip [file Adprh_set_D.pdf › Supplemental Dataset 1/D-mRNA_rhythm_translation_rhyth/Adprh_set_D.pdf]

# Adra1b

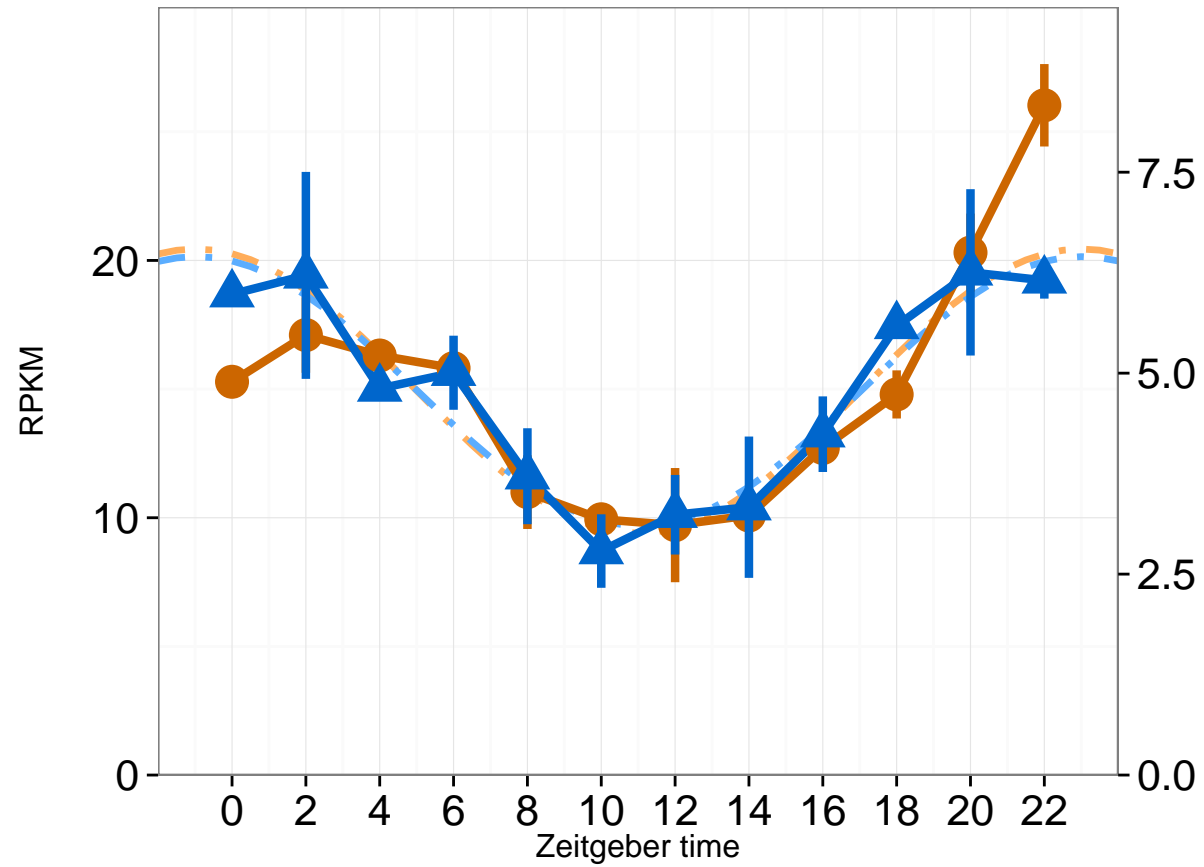

# Adra1b

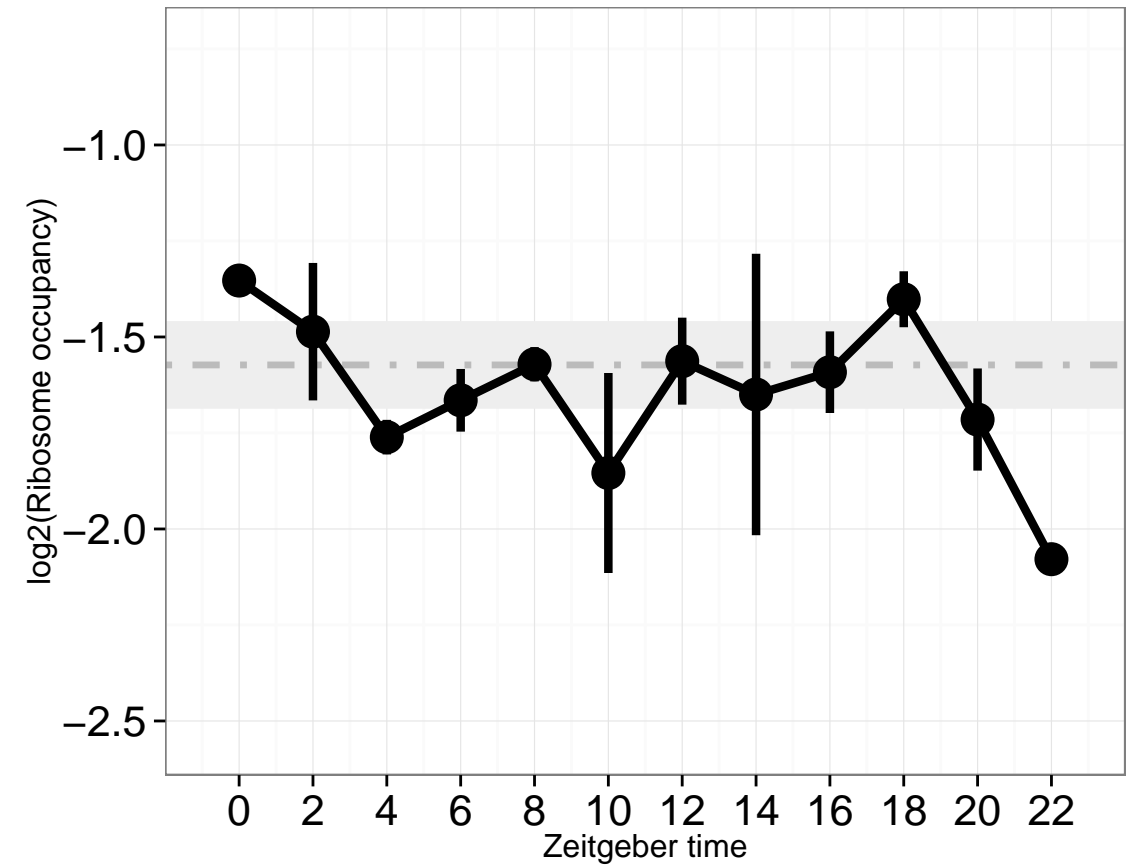

Supplement: SuppDataset_1.zip [file Adra1b_set_D.pdf › Supplemental Dataset 1/D-mRNA_rhythm_translation_rhyth/Adra1b_set_D.pdf]

# Adra2b

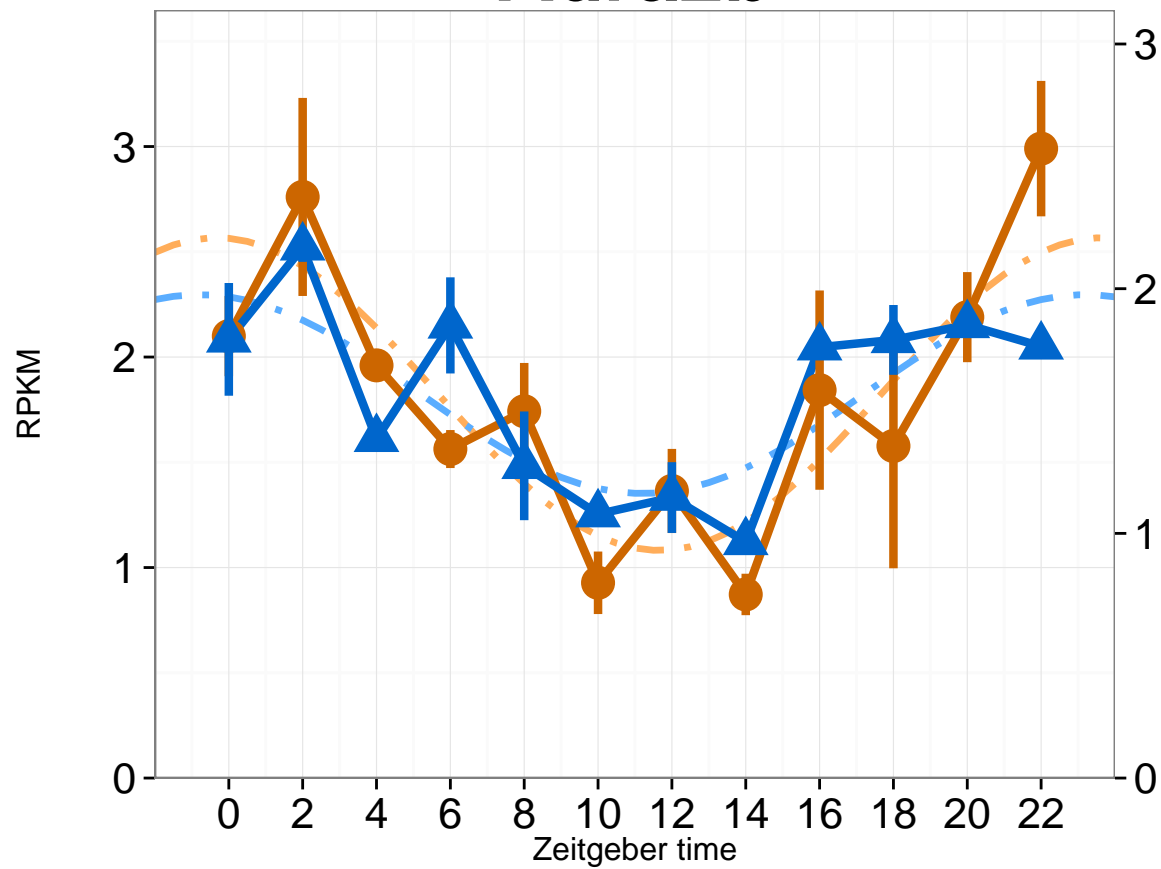

# Adra2b

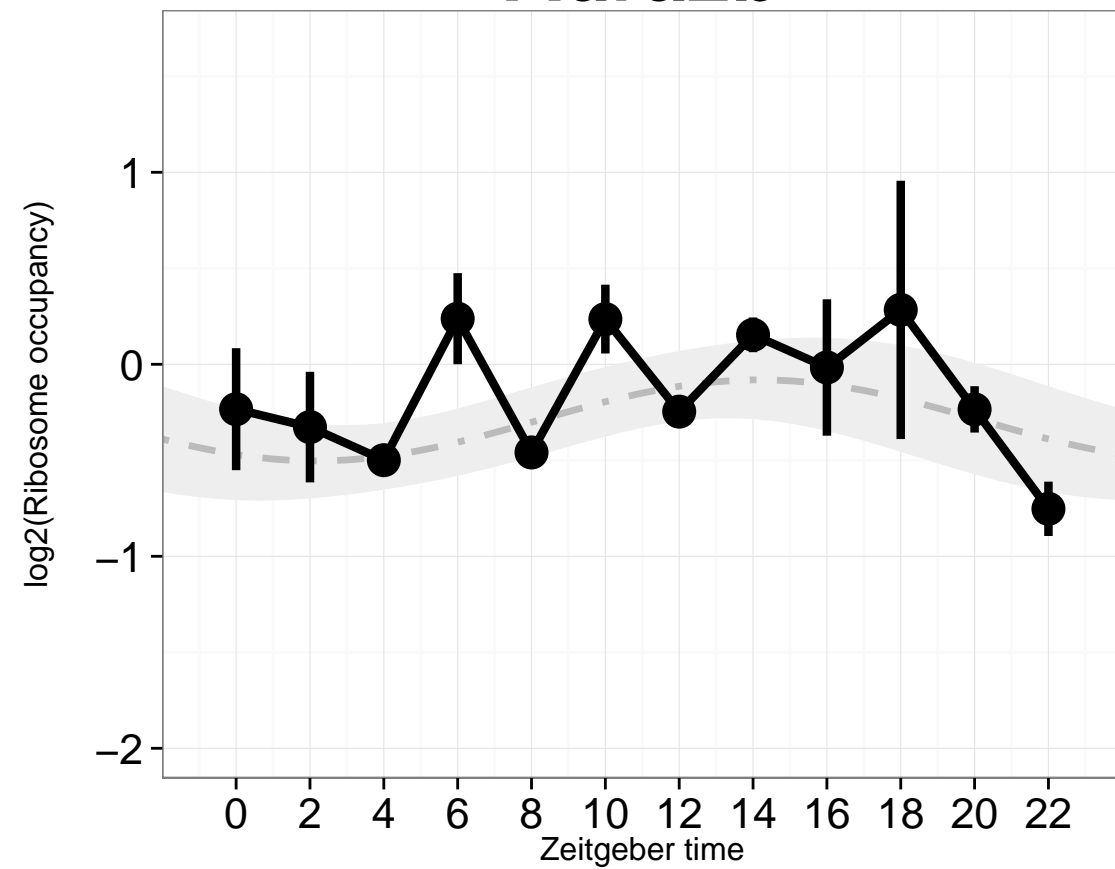

Supplement: SuppDataset_1.zip [file Adra2b_set_D.pdf › Supplemental Dataset 1/D-mRNA_rhythm_translation_rhyth/Adra2b_set_D.pdf]

## Afmid

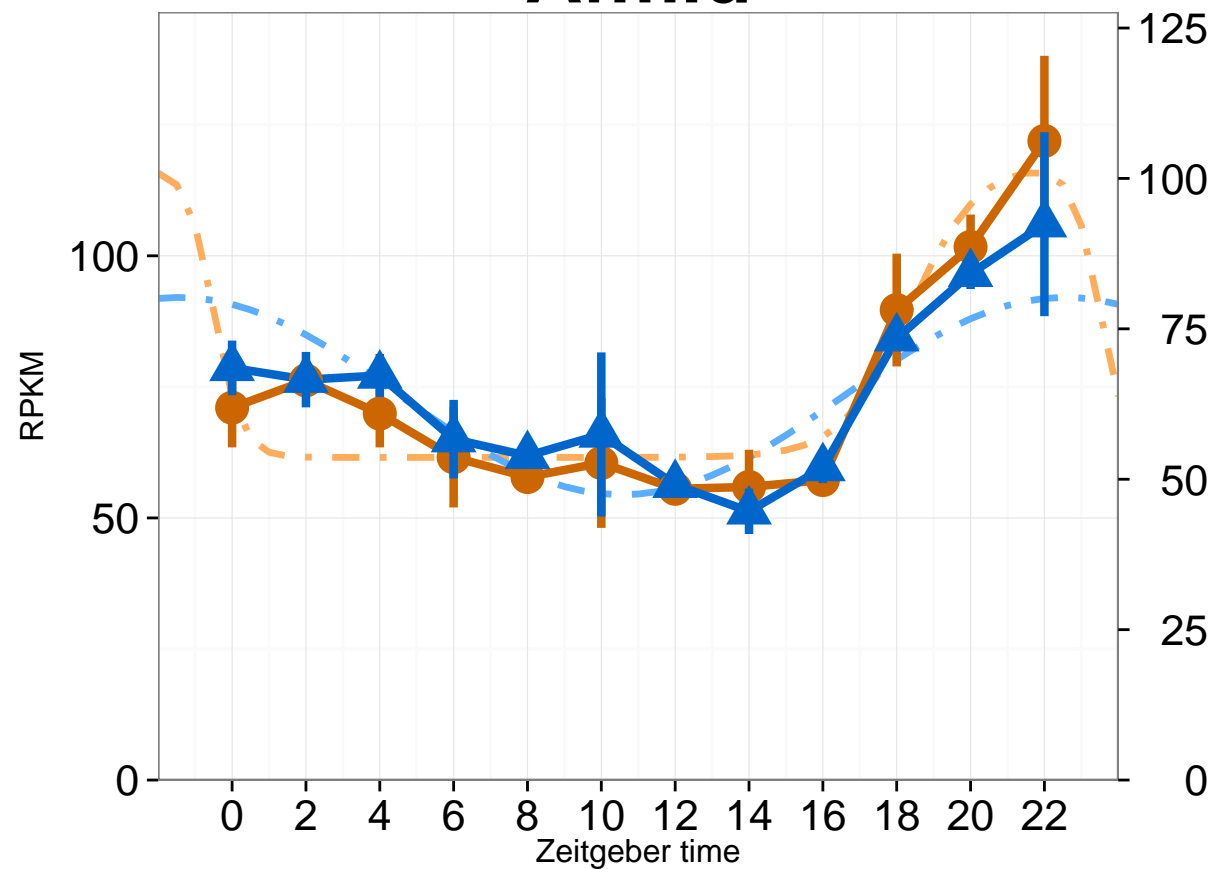

## Afmid

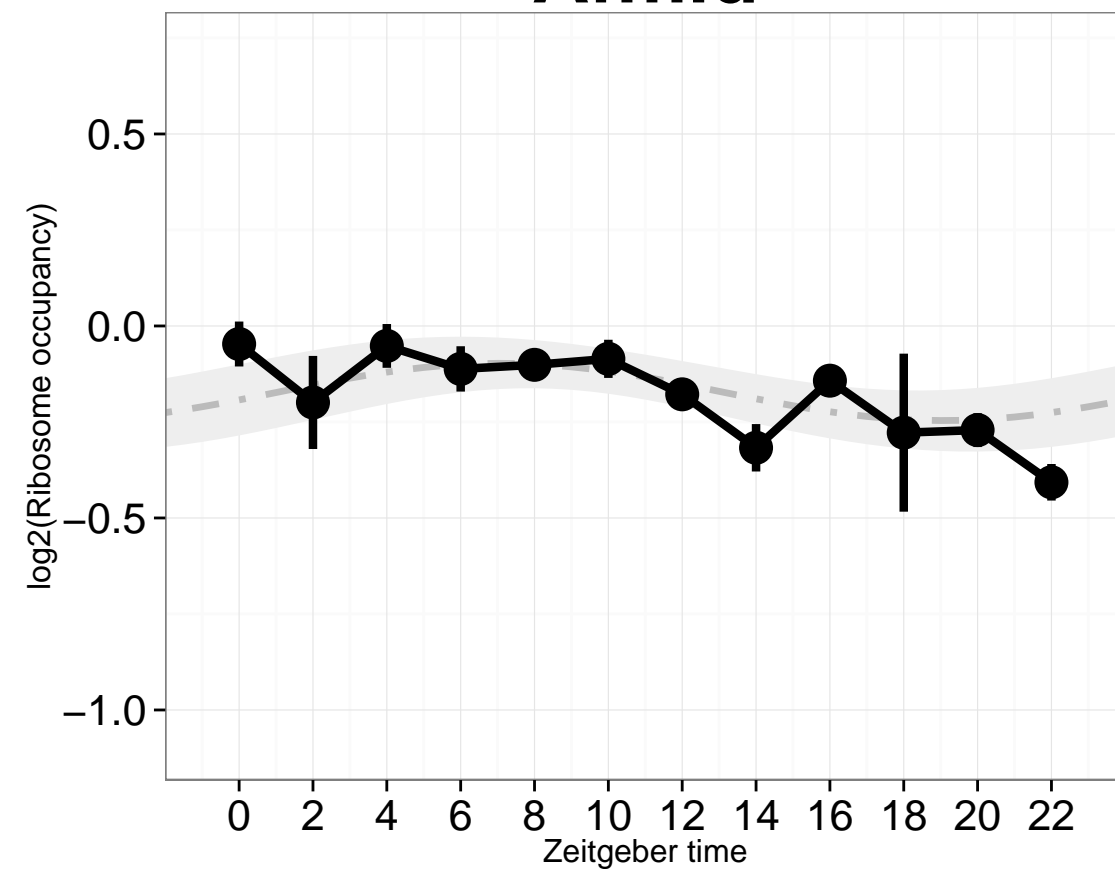

Supplement: SuppDataset_1.zip [file Afmid_set_D.pdf › Supplemental Dataset 1/D-mRNA_rhythm_translation_rhyth/Afmid_set_D.pdf]

# Agap2

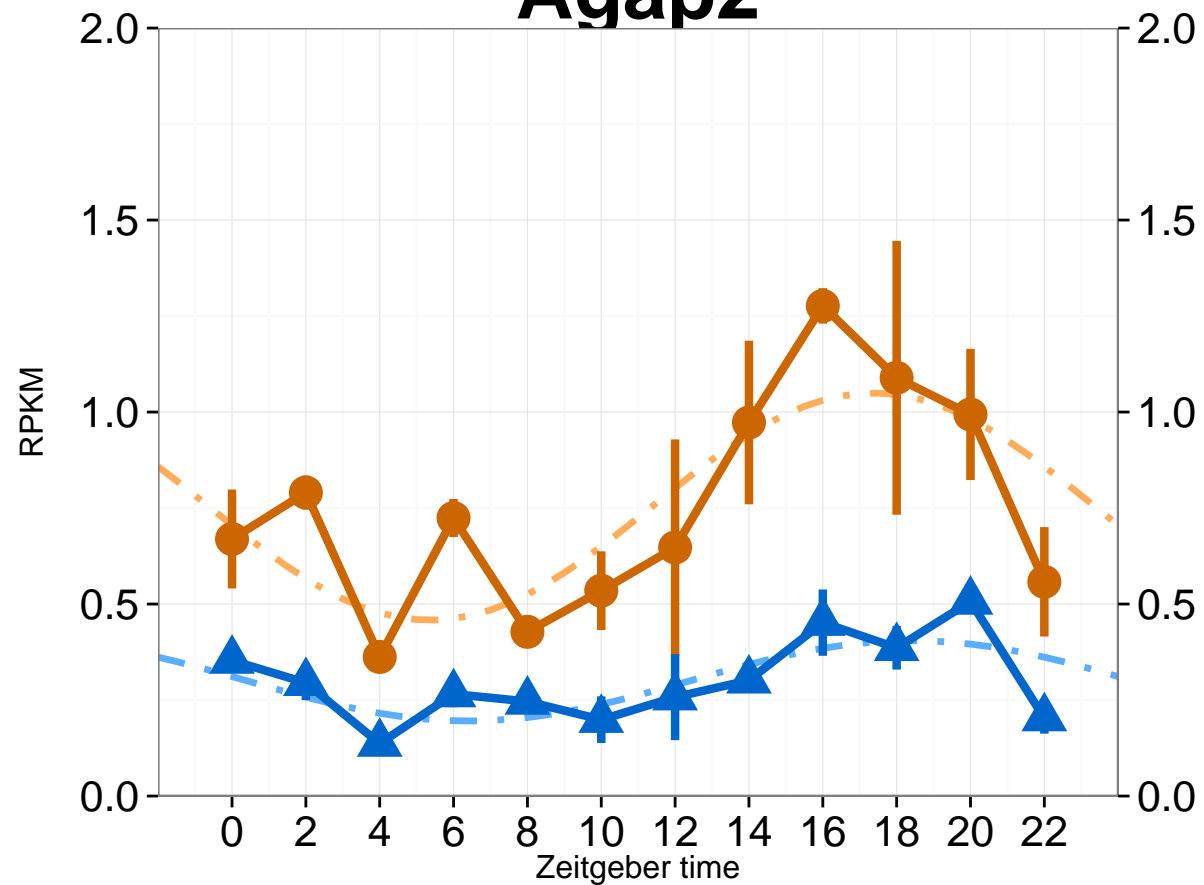

# Agap2

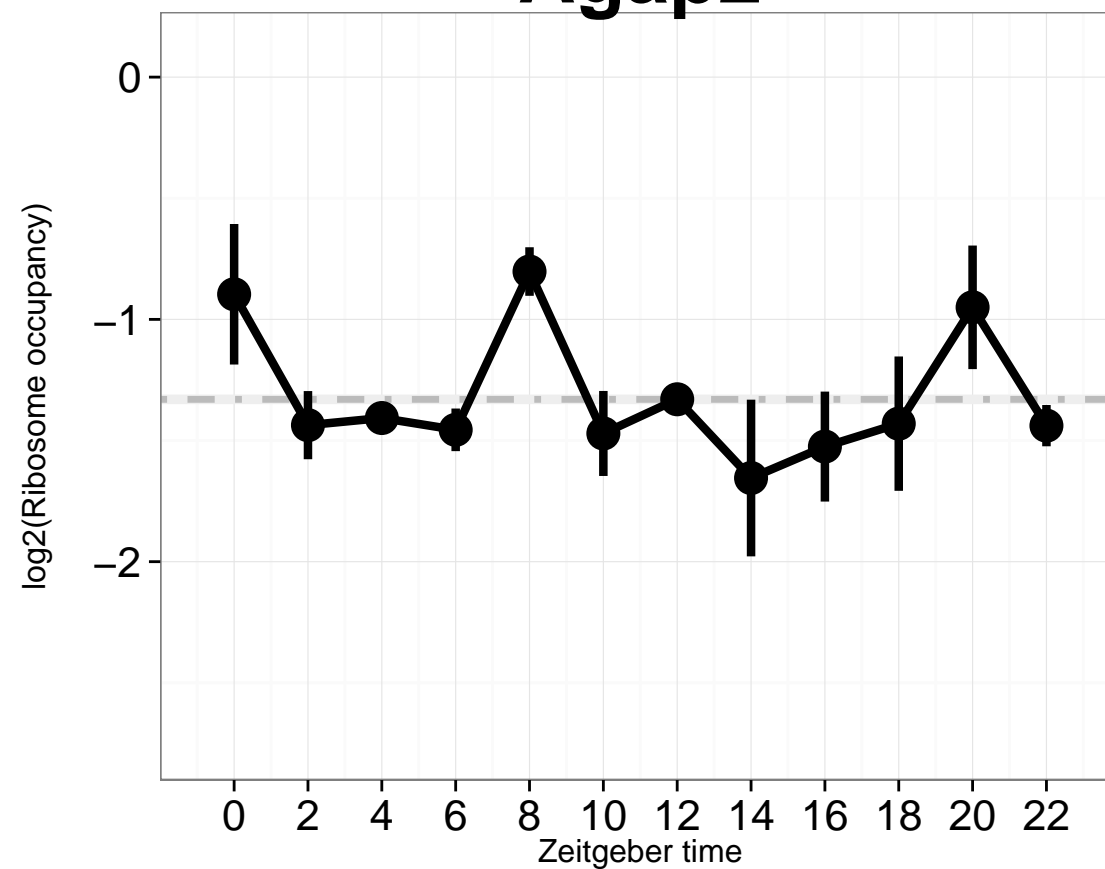

Supplement: SuppDataset_1.zip [file Agap2_set_D.pdf › Supplemental Dataset 1/D-mRNA_rhythm_translation_rhyth/Agap2_set_D.pdf]

## Agl

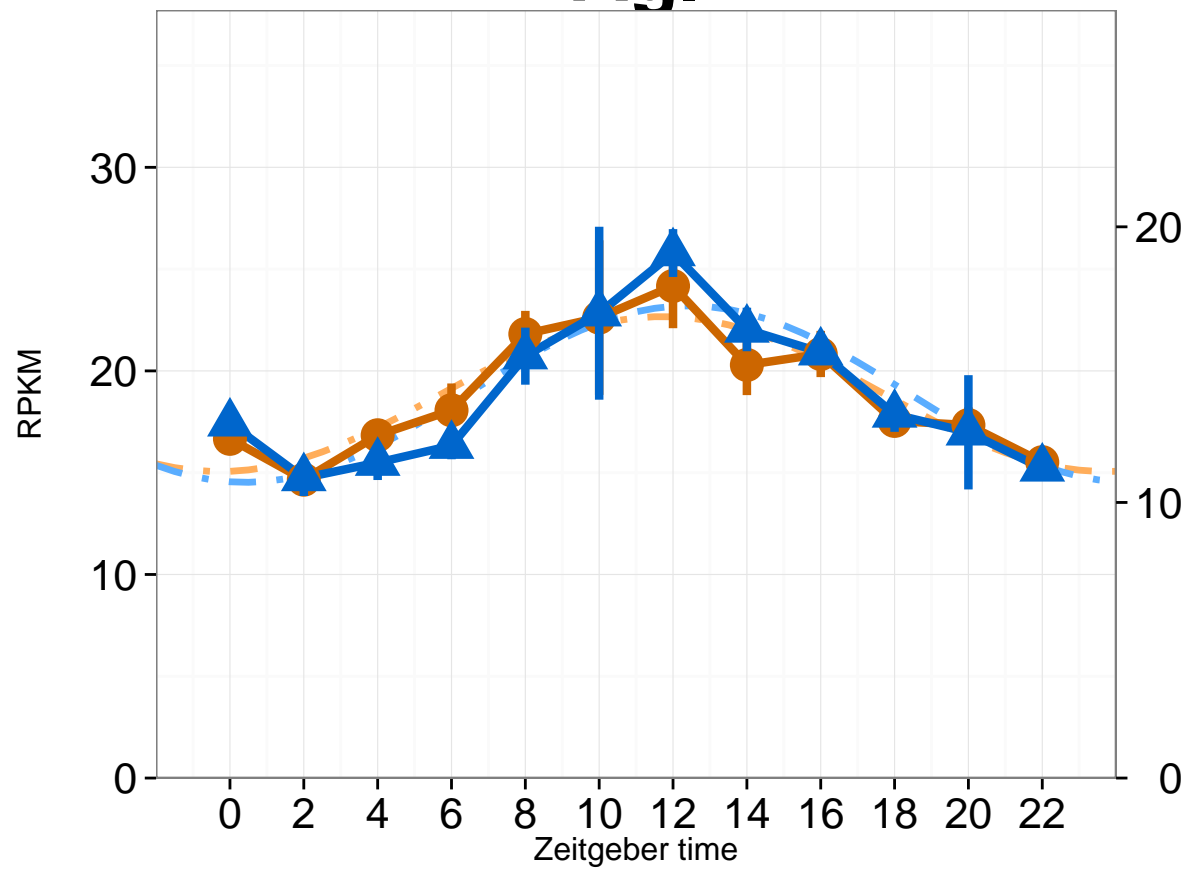

## Agl

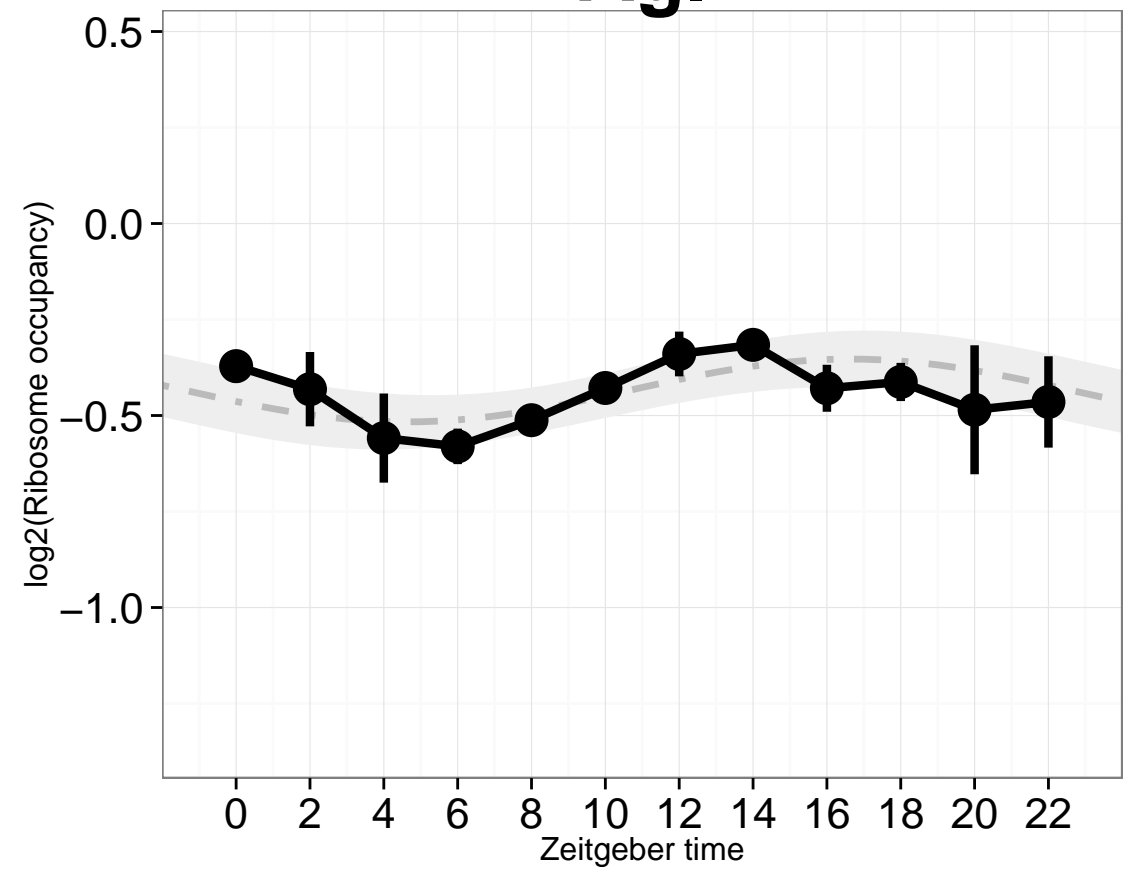

Supplement: SuppDataset_1.zip [file Agl_set_D.pdf › Supplemental Dataset 1/D-mRNA_rhythm_translation_rhyth/Agl_set_D.pdf]

# Agpat2

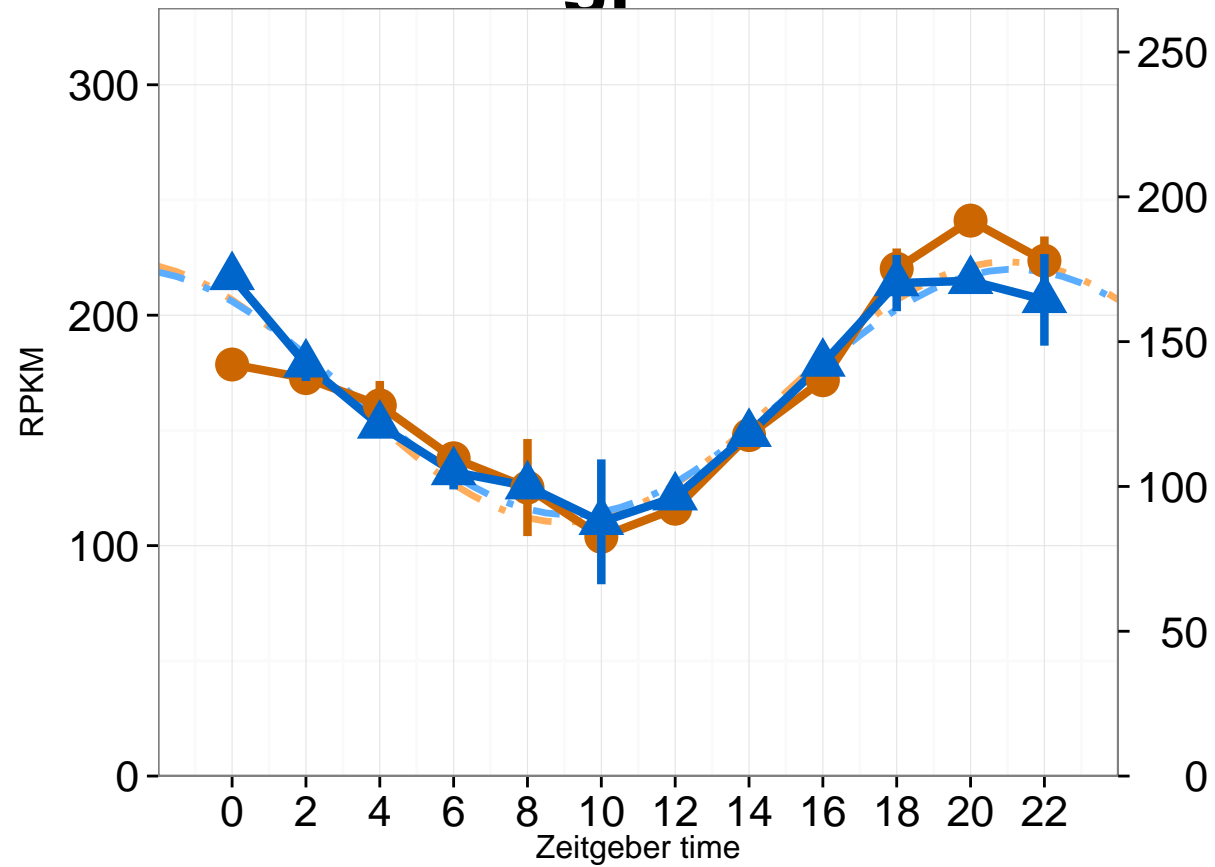

# Agpat2

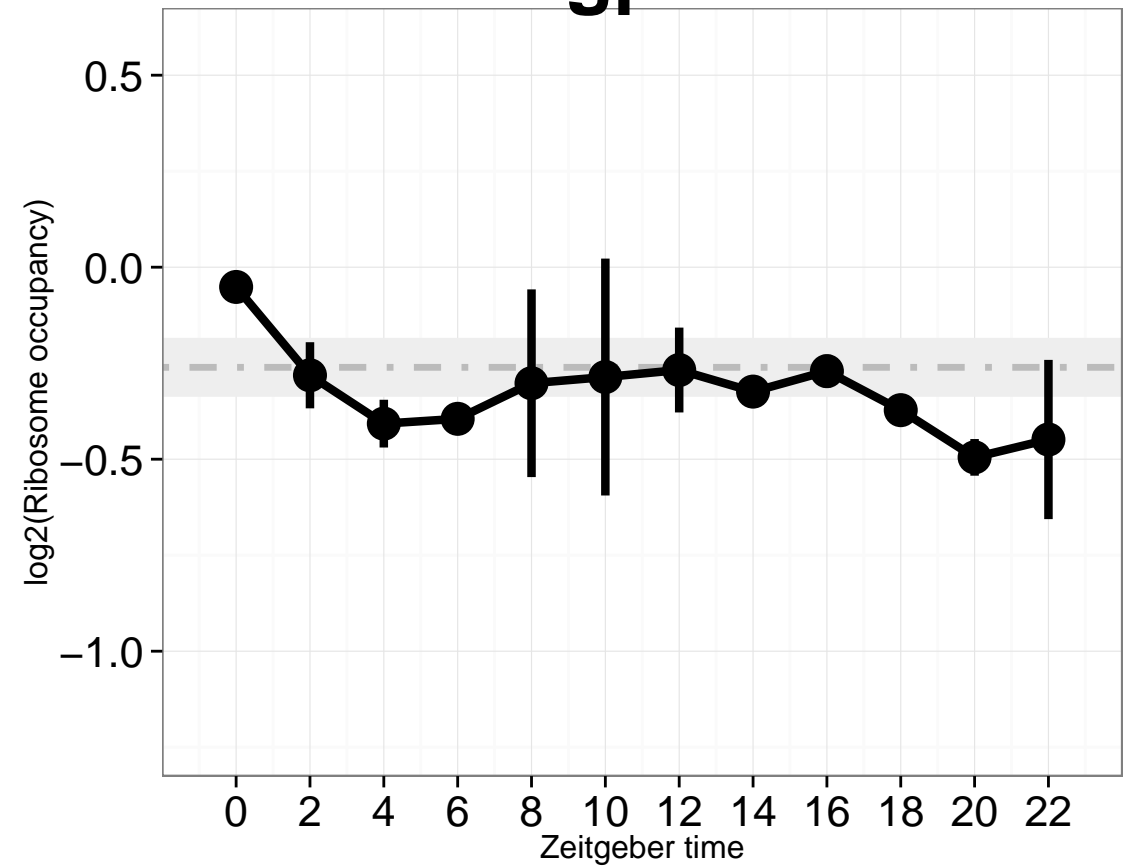

Supplement: SuppDataset_1.zip [file Agpat2_set_D.pdf › Supplemental Dataset 1/D-mRNA_rhythm_translation_rhyth/Agpat2_set_D.pdf]

# Agxt

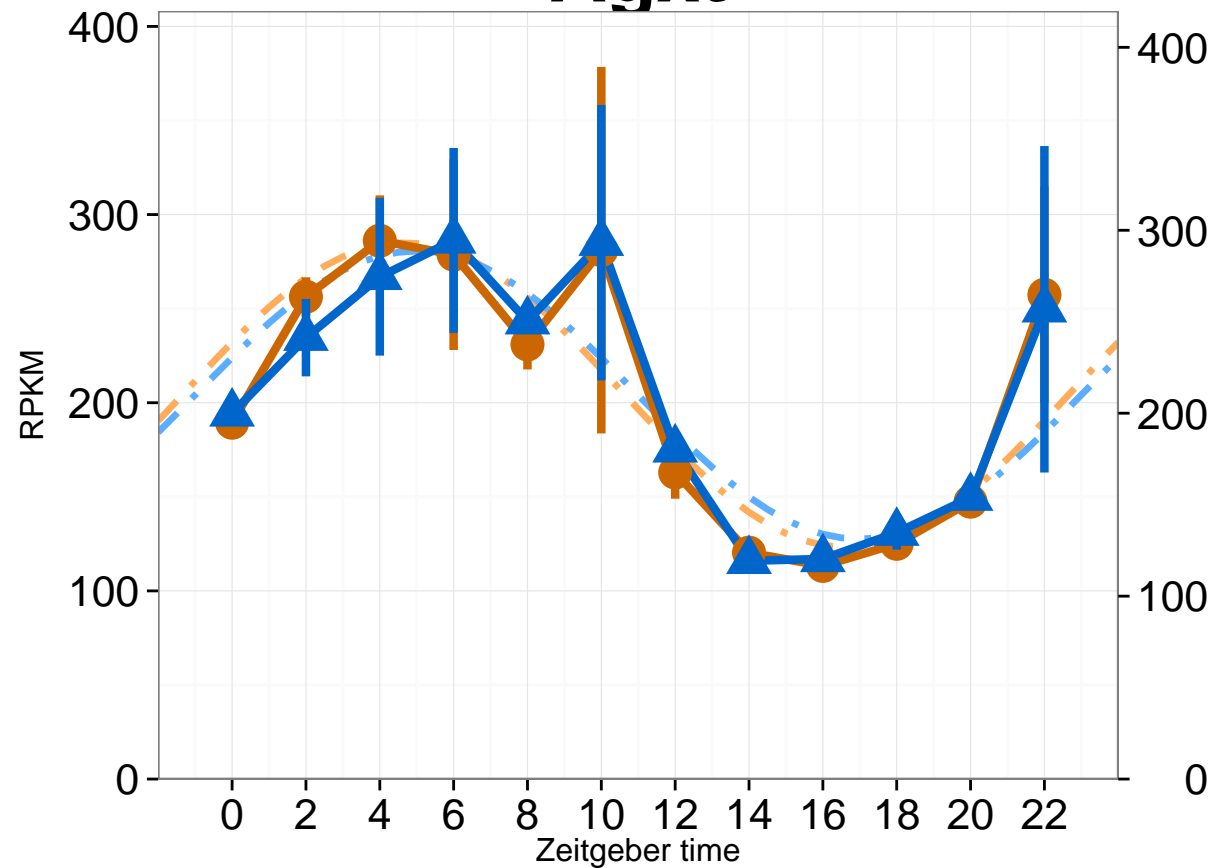

# Agxt

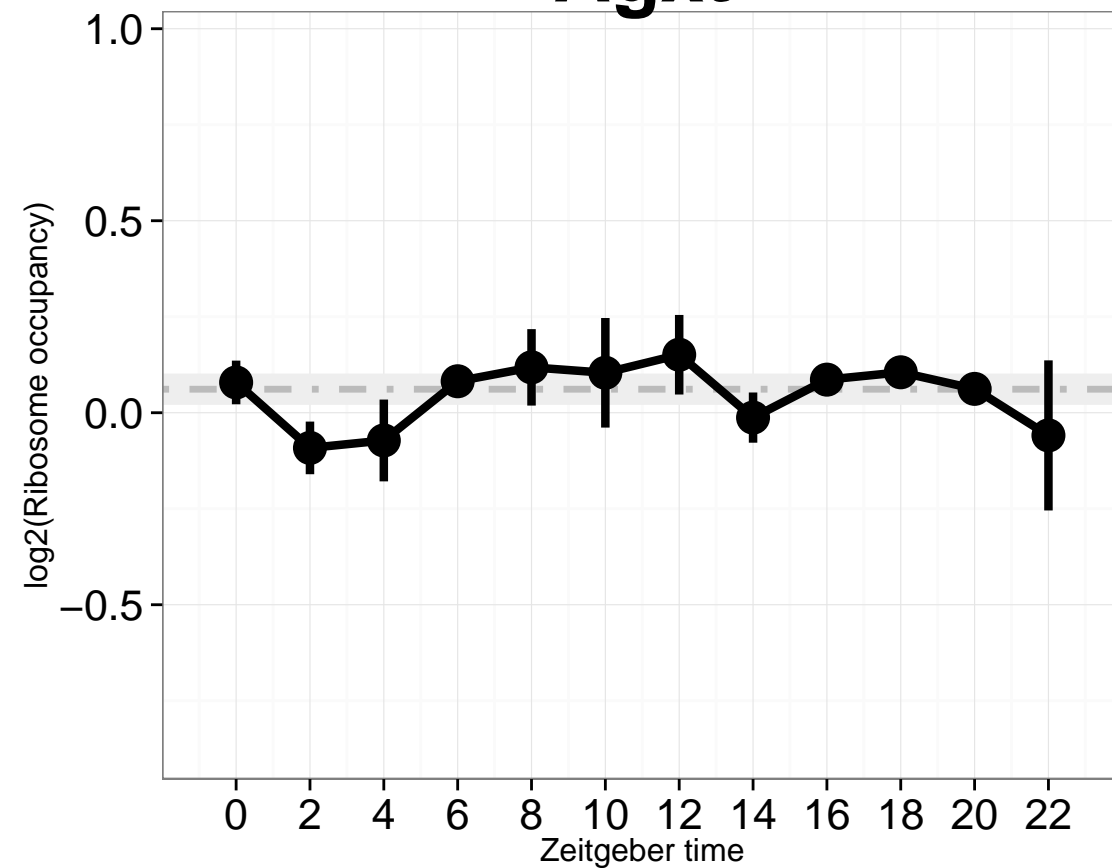

Supplement: SuppDataset_1.zip [file Agxt_set_D.pdf › Supplemental Dataset 1/D-mRNA_rhythm_translation_rhyth/Agxt_set_D.pdf]

# Ahctf1

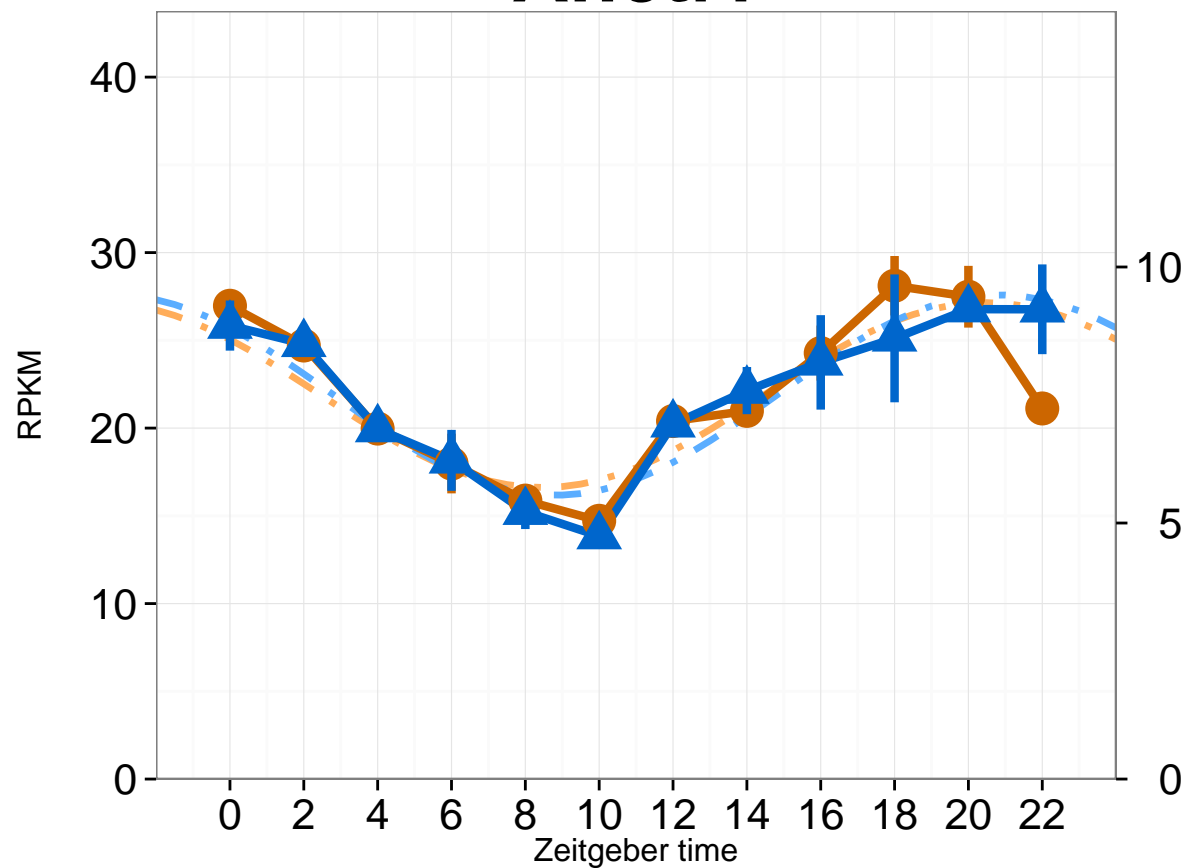

# Ahctf1

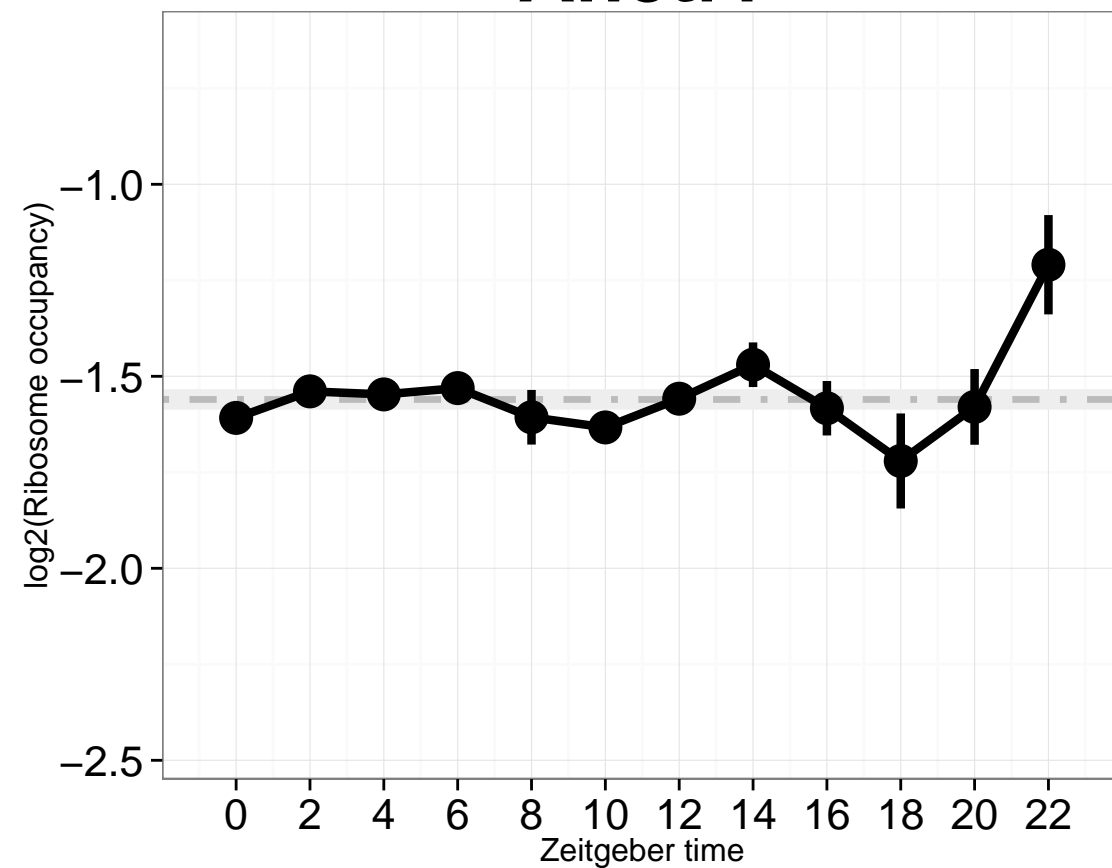

Supplement: SuppDataset_1.zip [file Ahctf1_set_D.pdf › Supplemental Dataset 1/D-mRNA_rhythm_translation_rhyth/Ahctf1_set_D.pdf]

## Ahcy

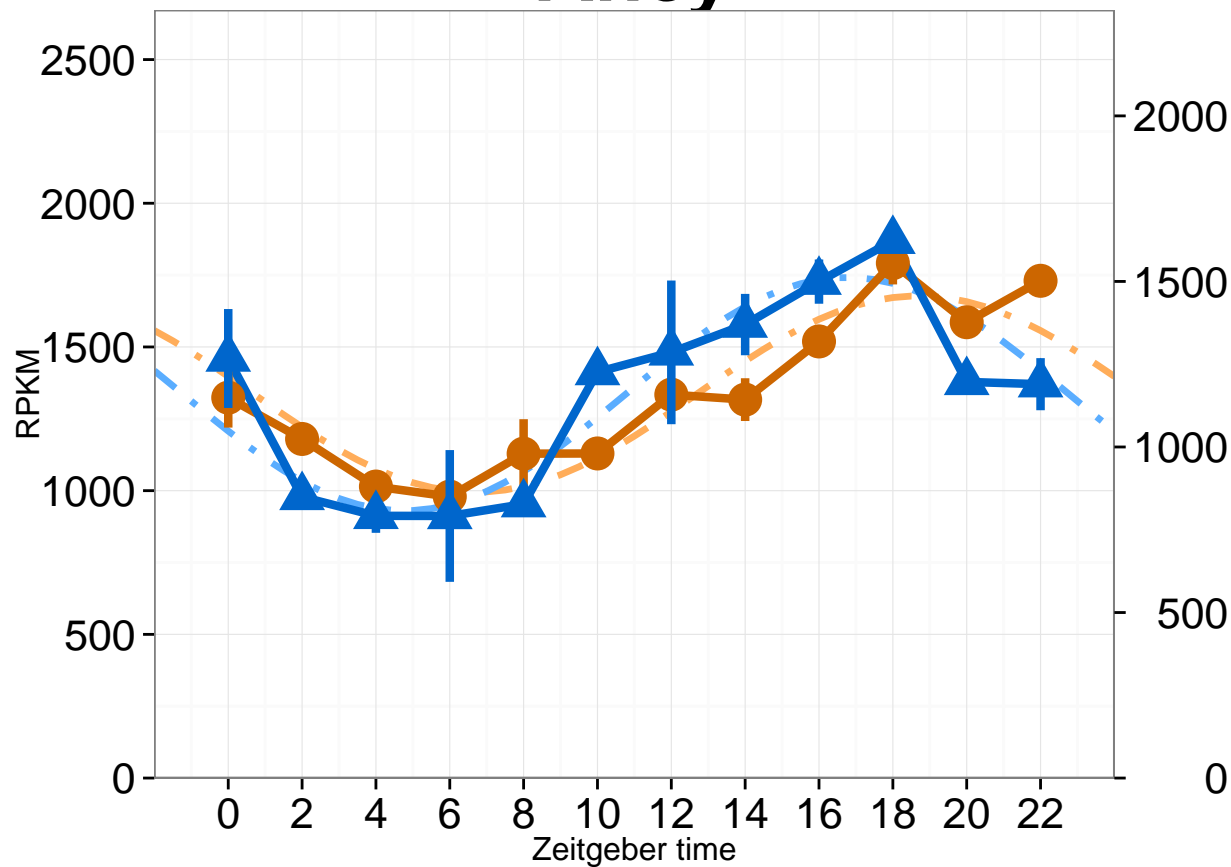

## Ahcy

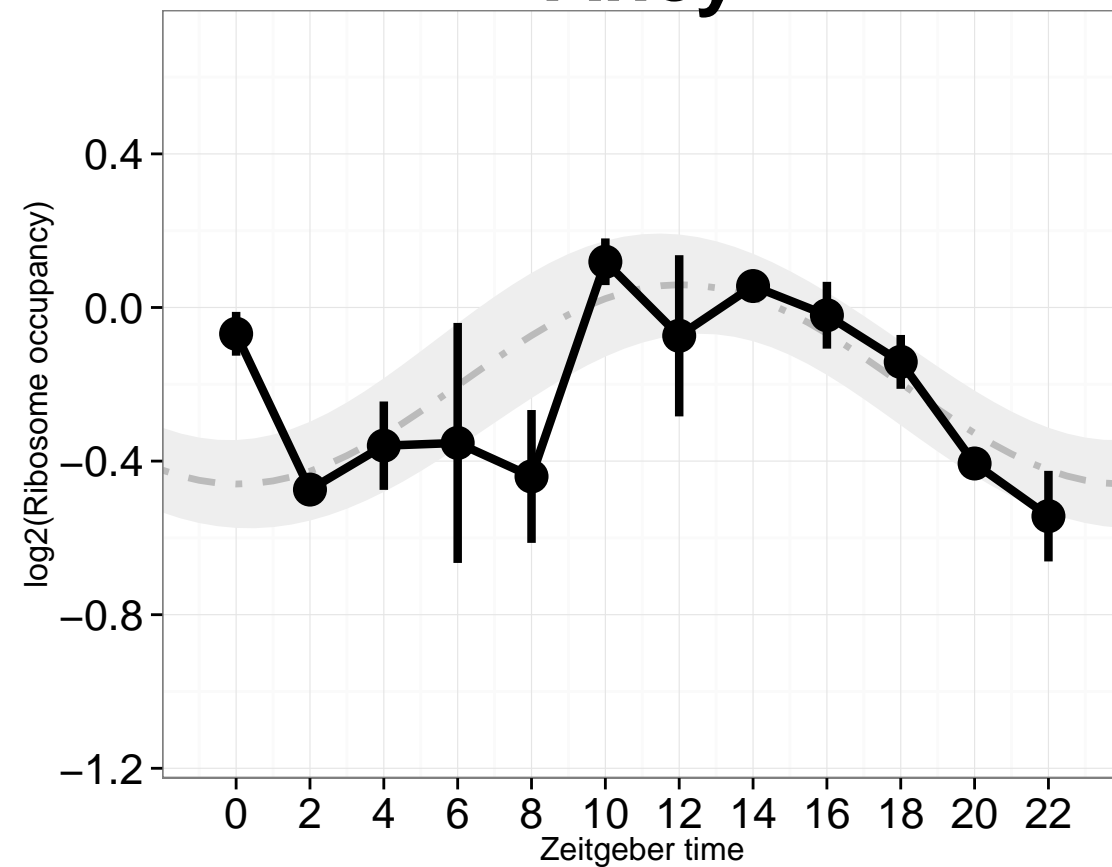

Supplement: SuppDataset_1.zip [file Ahcy_set_D.pdf › Supplemental Dataset 1/D-mRNA_rhythm_translation_rhyth/Ahcy_set_D.pdf]

## Ahsa2

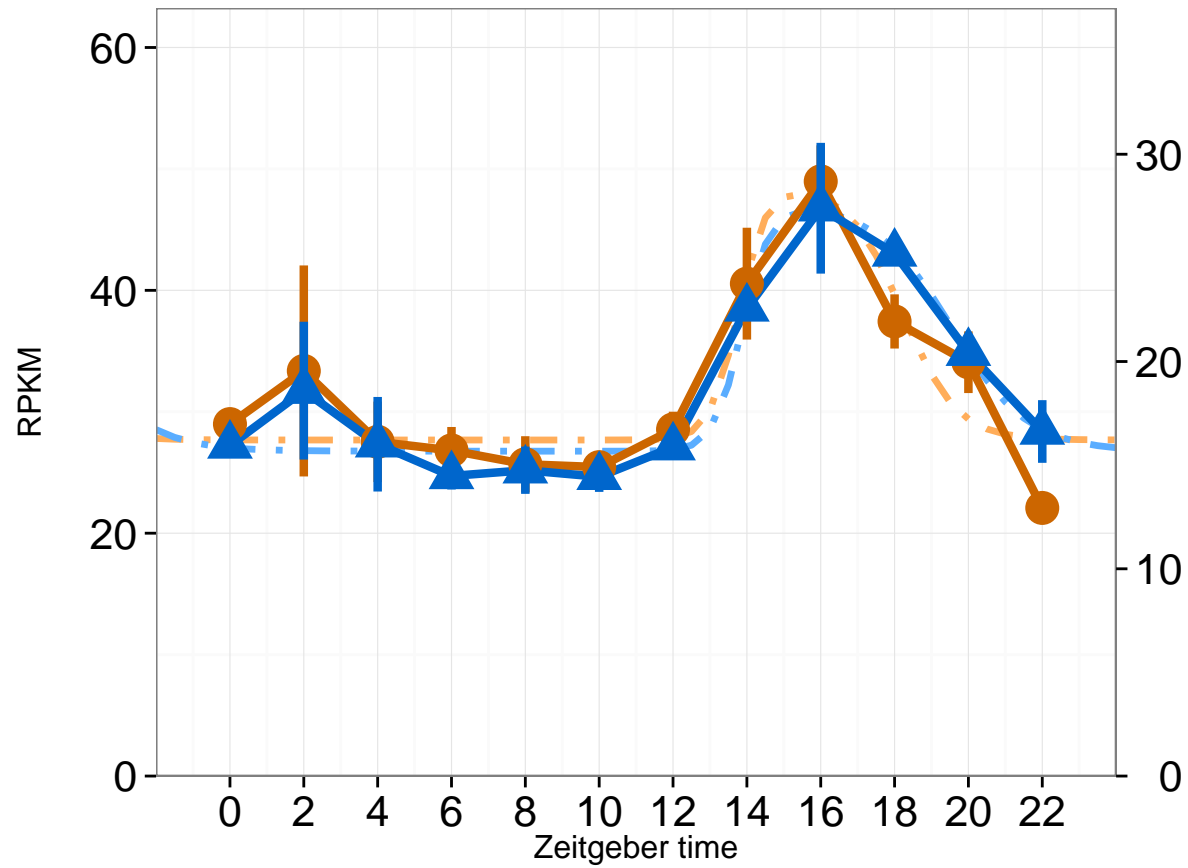

## Ahsa2

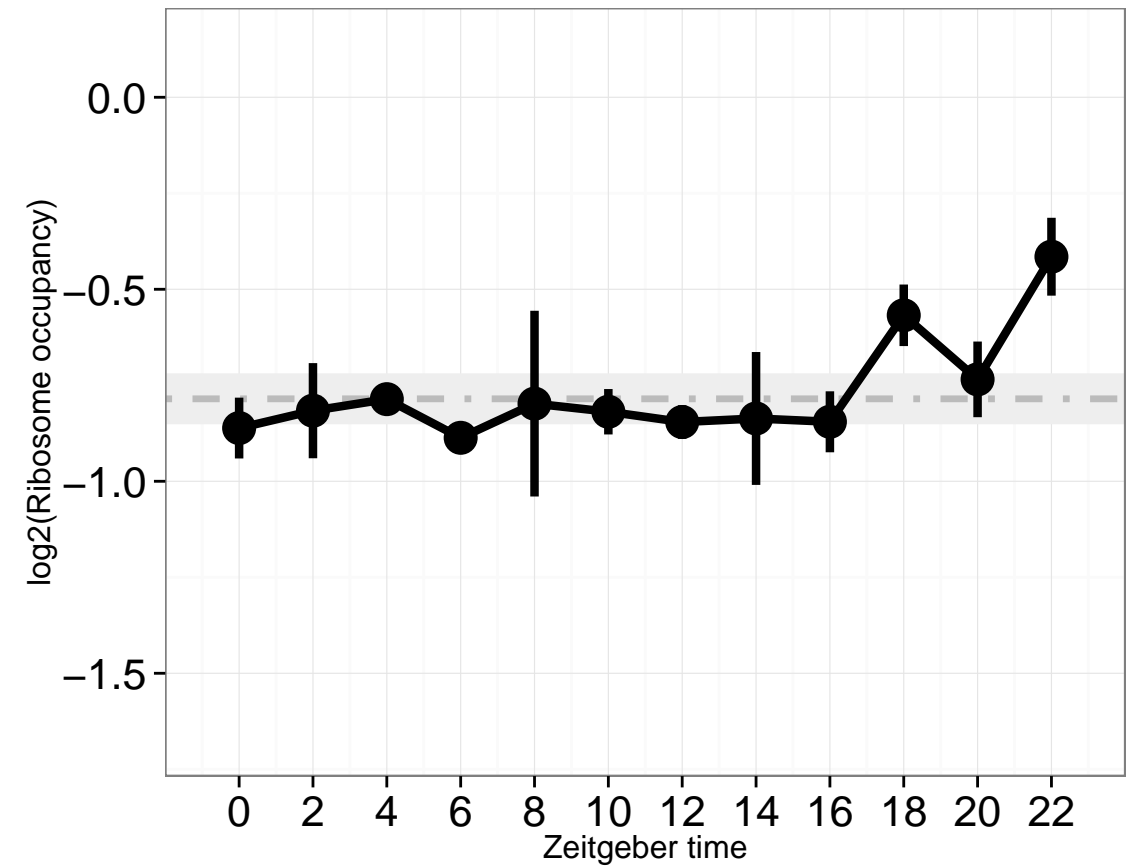

Supplement: SuppDataset_1.zip [file Ahsa2_set_D.pdf › Supplemental Dataset 1/D-mRNA_rhythm_translation_rhyth/Ahsa2_set_D.pdf]

## Aifm2

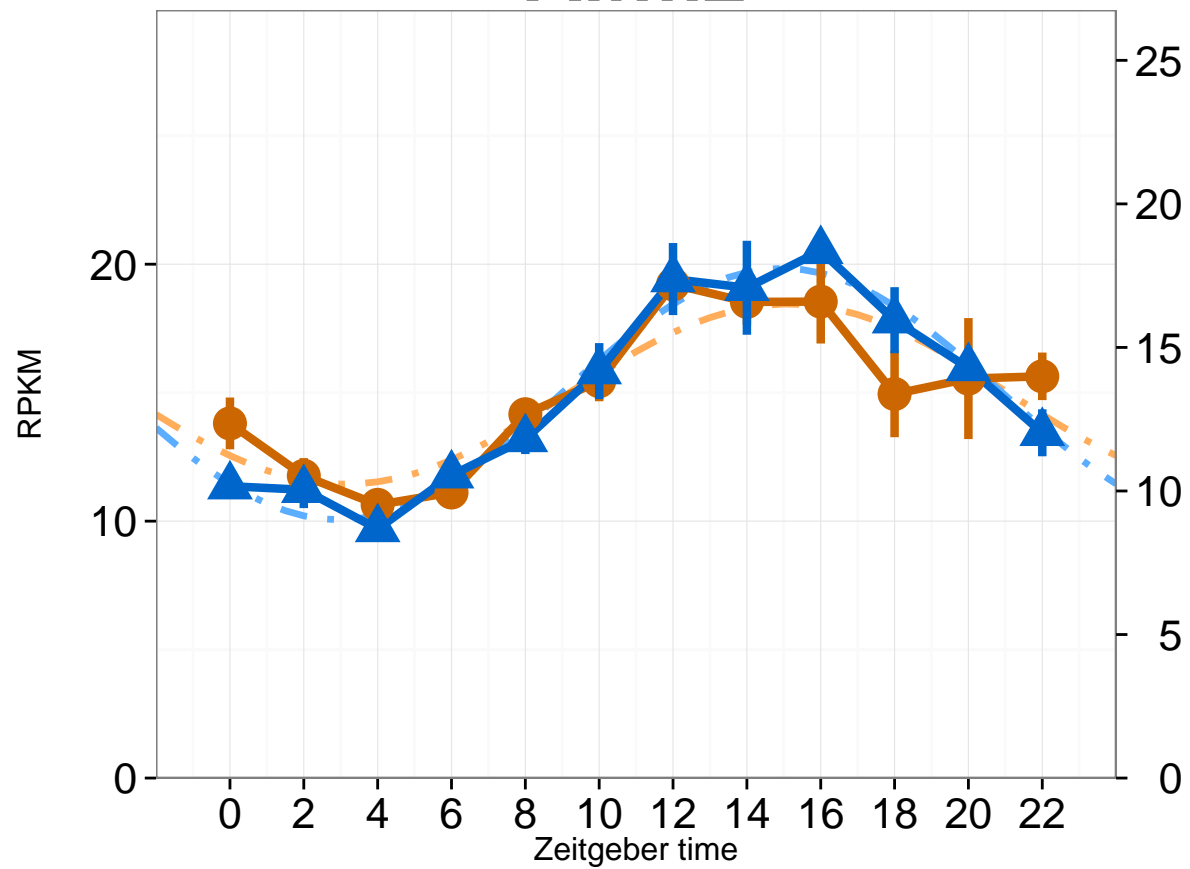

## Aifm2

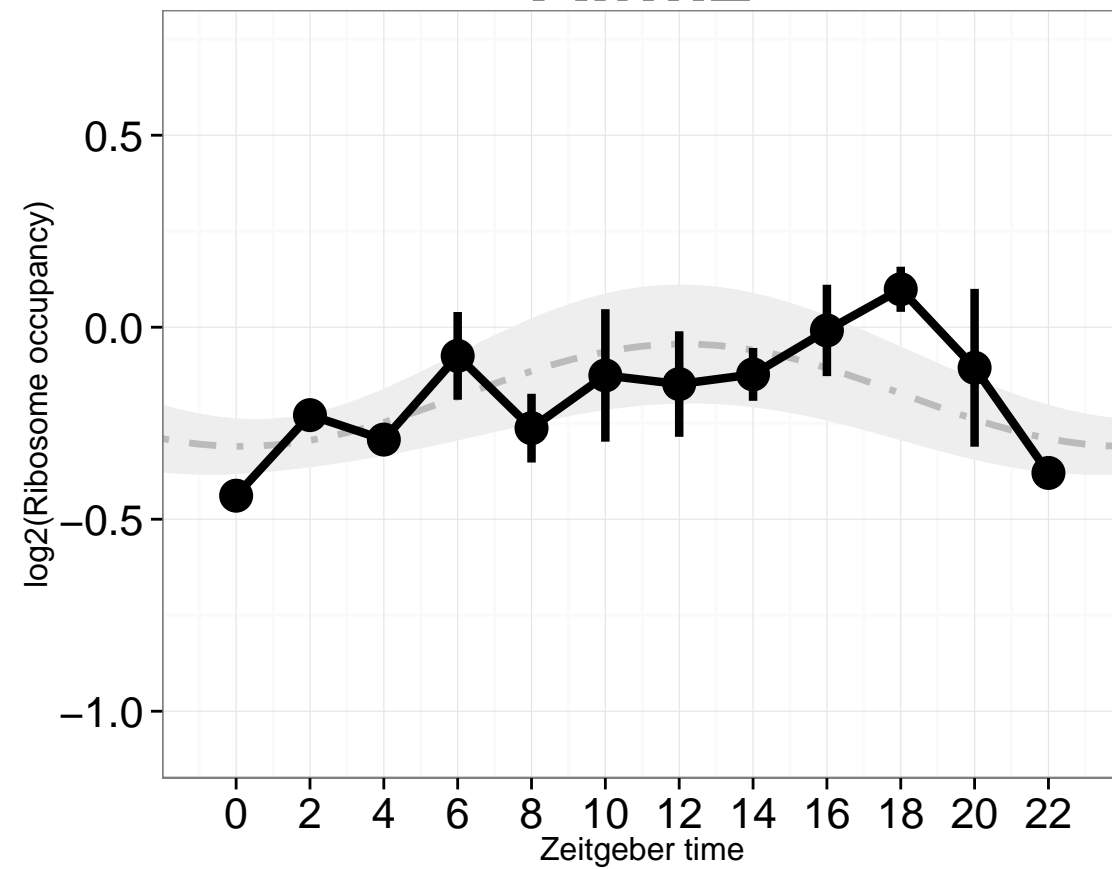

Supplement: SuppDataset_1.zip [file Aifm2_set_D.pdf › Supplemental Dataset 1/D-mRNA_rhythm_translation_rhyth/Aifm2_set_D.pdf]

## Ak2

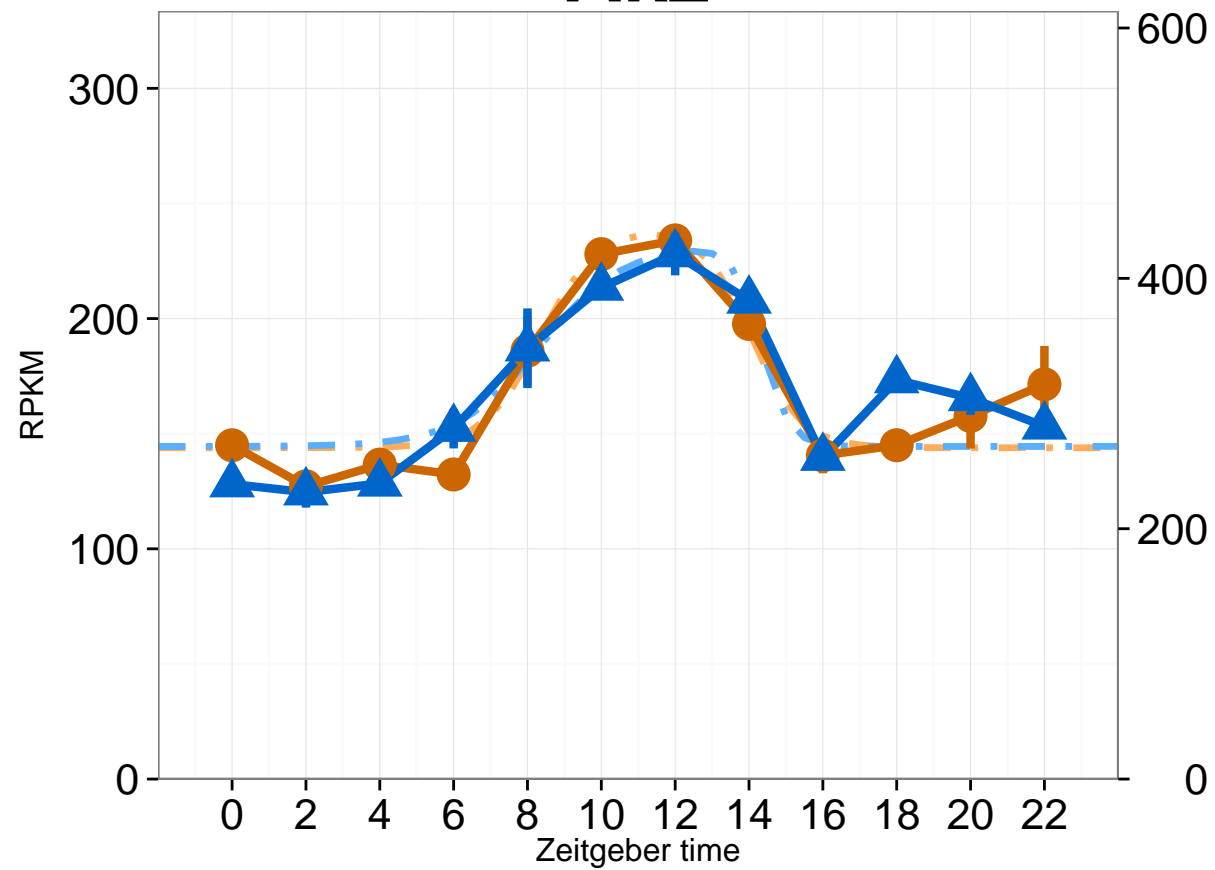

## Ak2

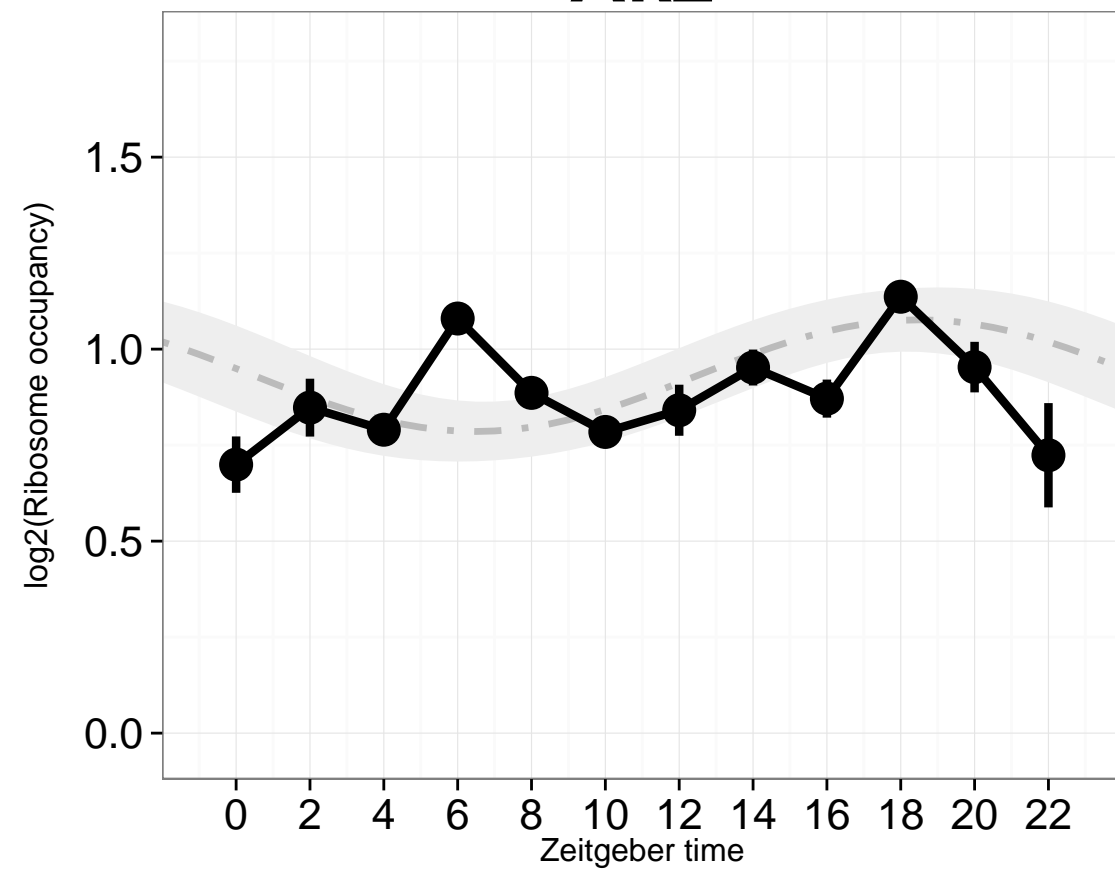

Supplement: SuppDataset_1.zip [file Ak2_set_D.pdf › Supplemental Dataset 1/D-mRNA_rhythm_translation_rhyth/Ak2_set_D.pdf]

## Ak4

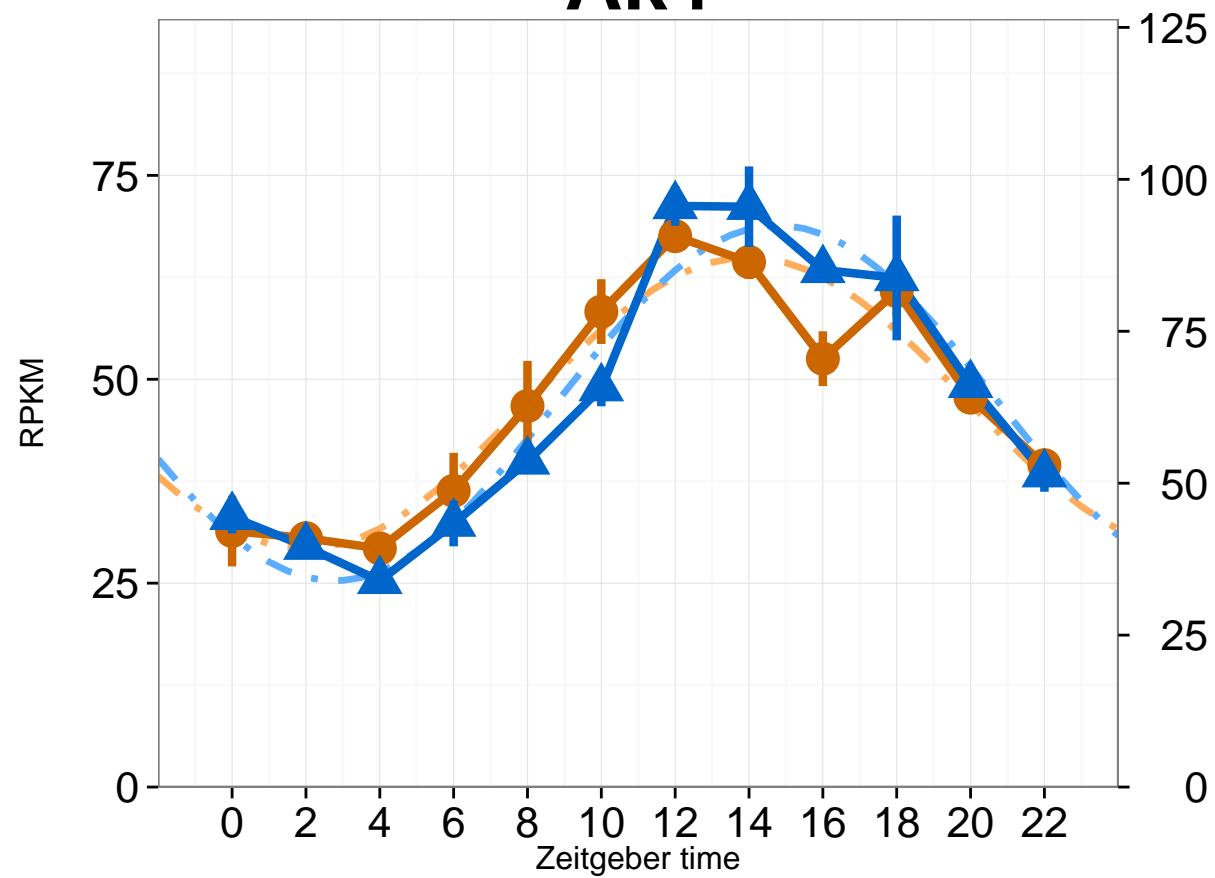

## Ak4

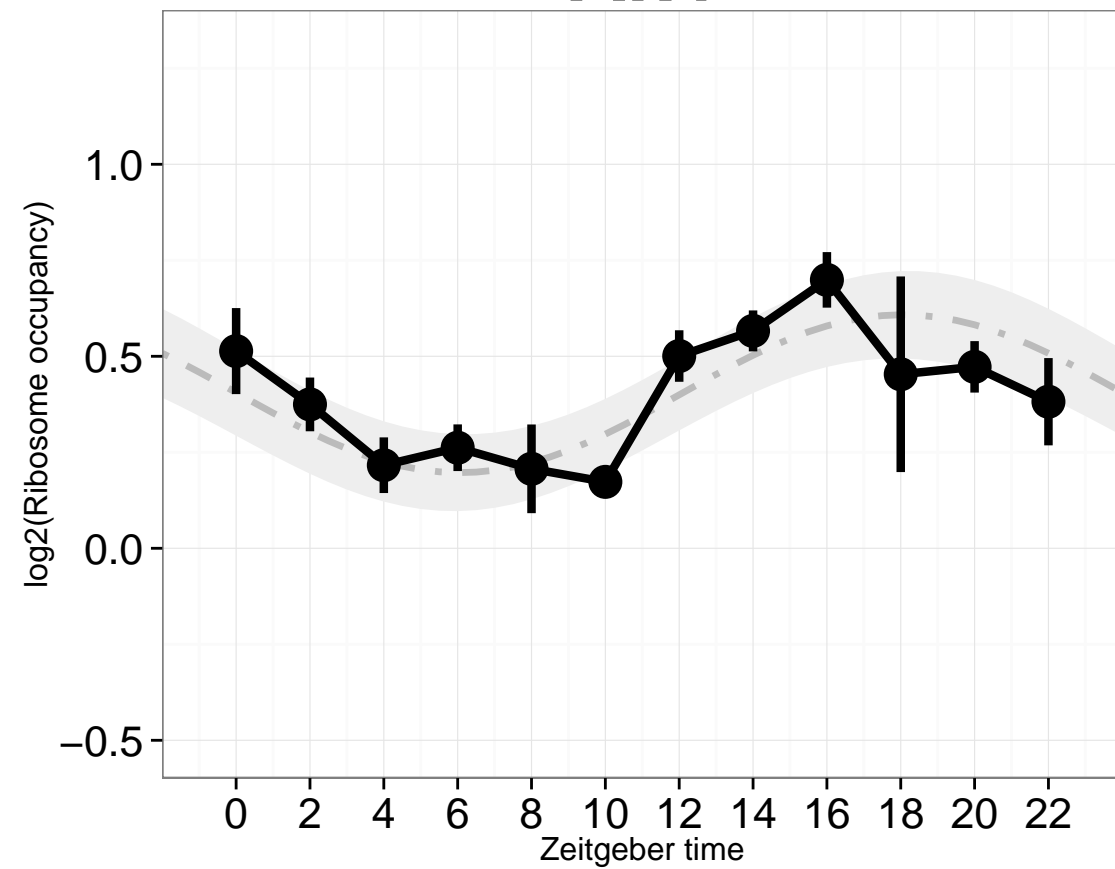

Supplement: SuppDataset_1.zip [file Ak4_set_D.pdf › Supplemental Dataset 1/D-mRNA_rhythm_translation_rhyth/Ak4_set_D.pdf]

## Akr1c14

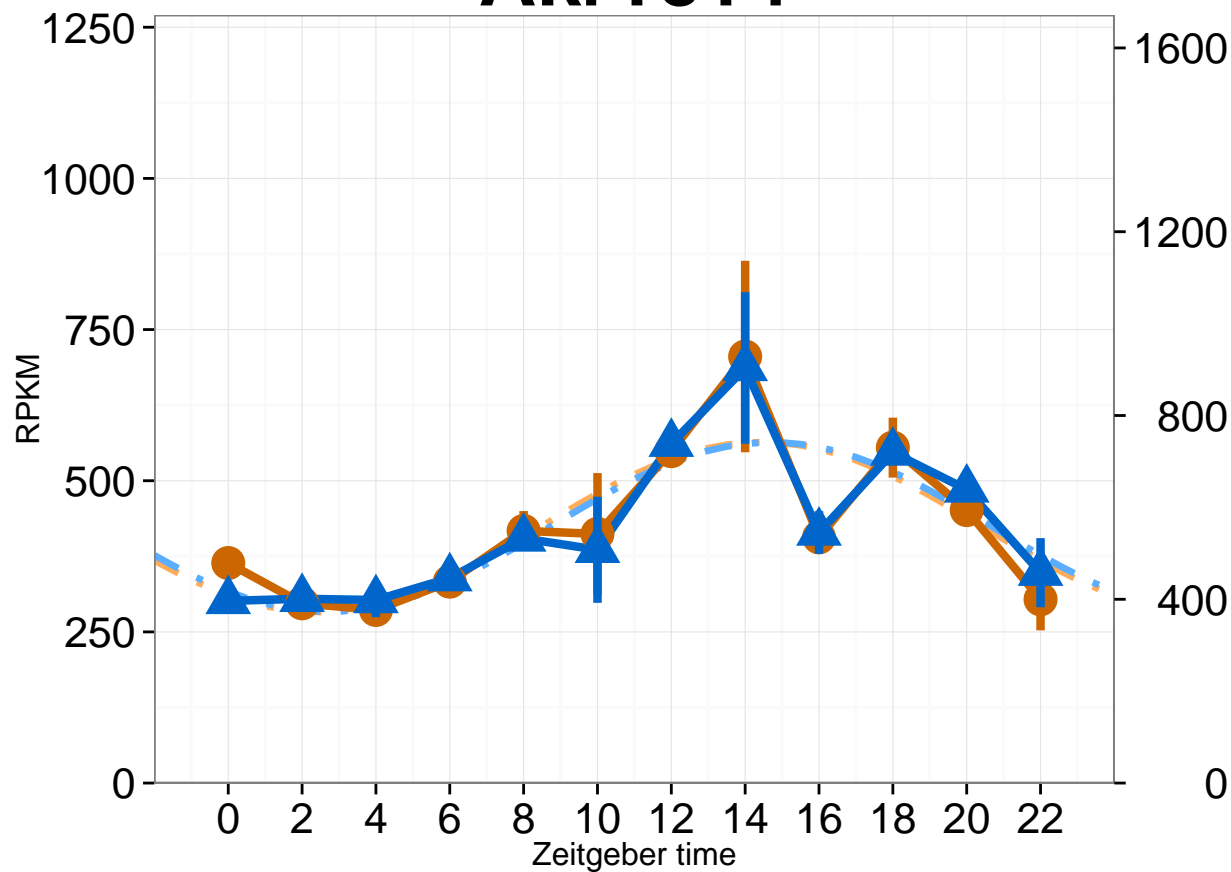

## Akr1c14

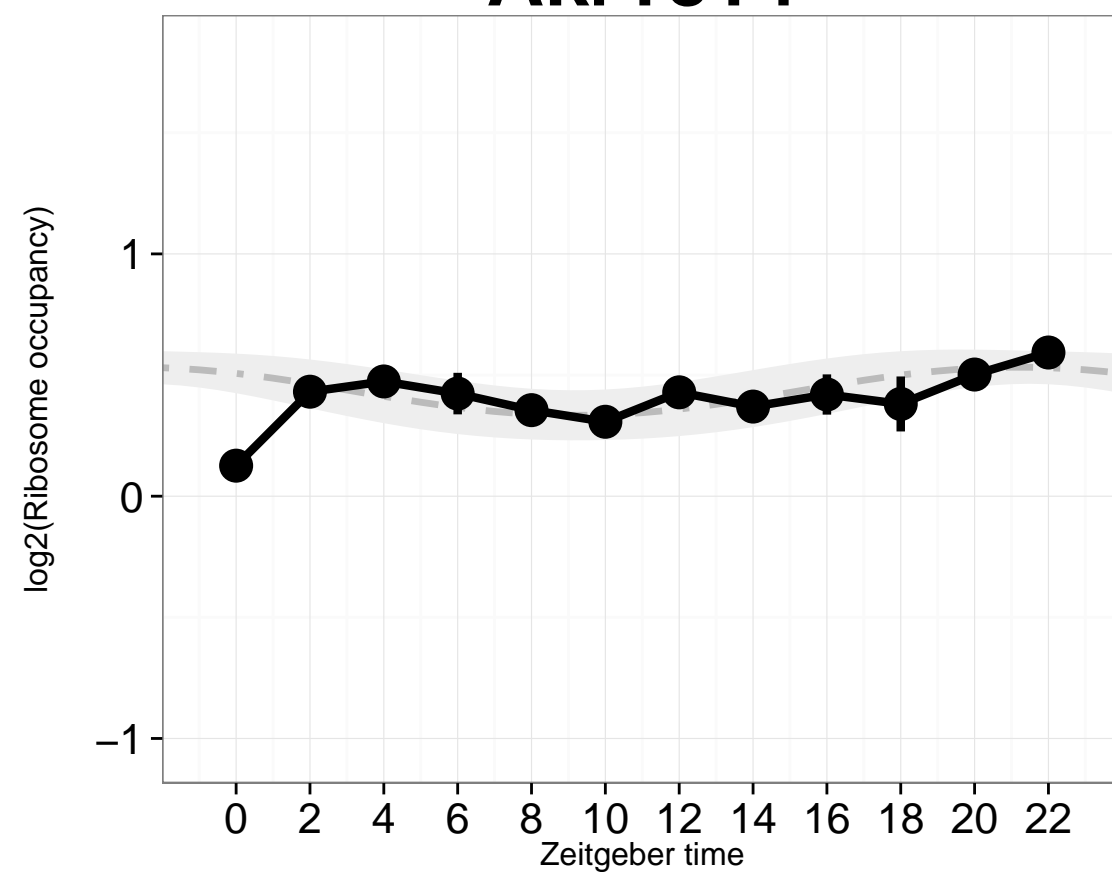

Supplement: SuppDataset_1.zip [file Akr1c14_set_D.pdf › Supplemental Dataset 1/D-mRNA_rhythm_translation_rhyth/Akr1c14_set_D.pdf]

# Akr1c19

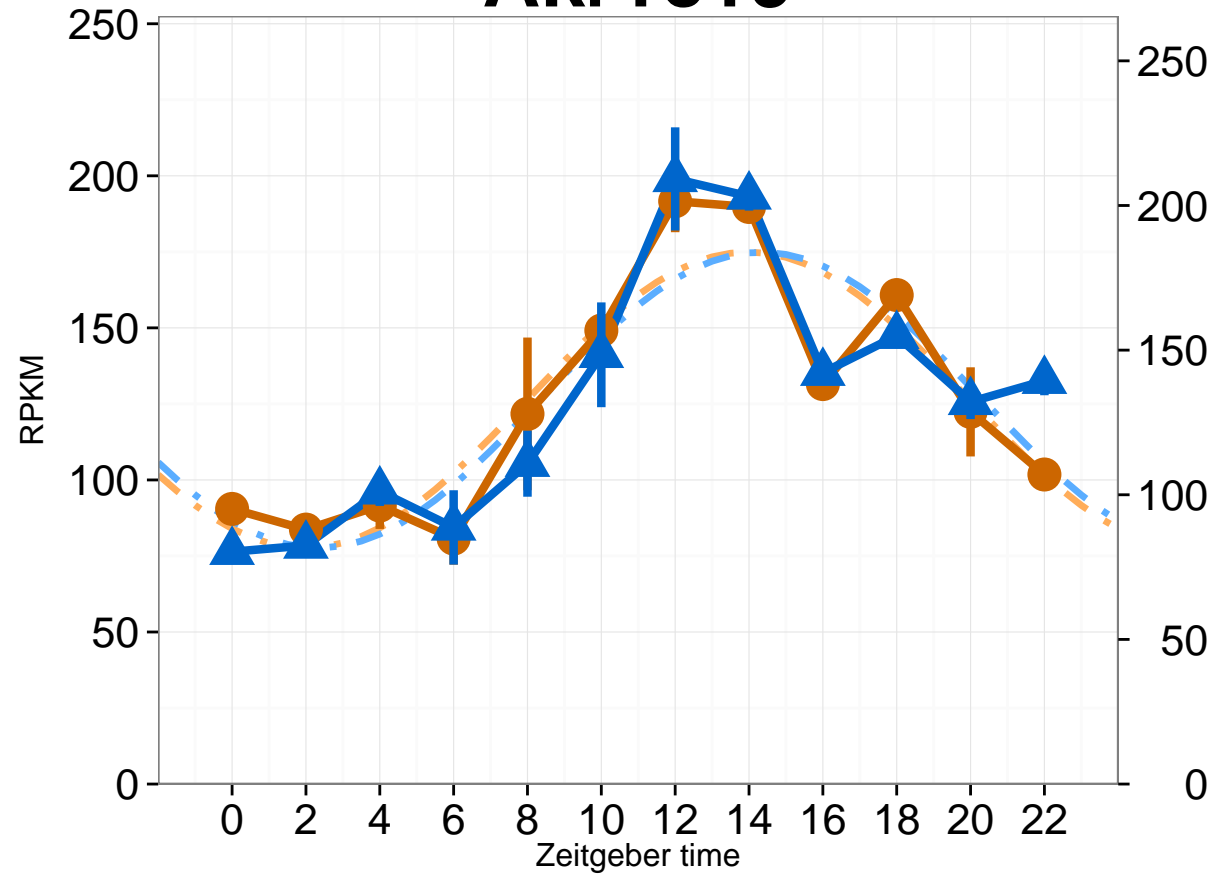

# Akr1c19

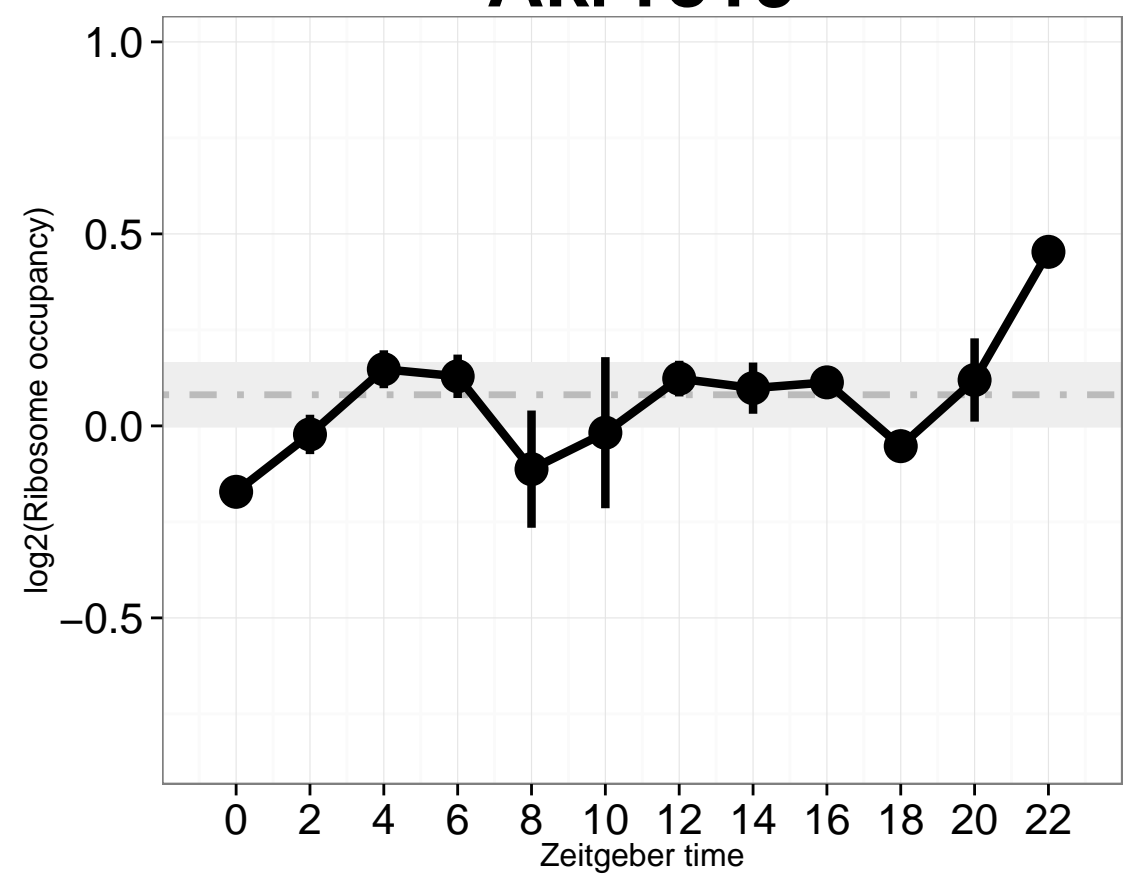

Supplement: SuppDataset_1.zip [file Akr1c19_set_D.pdf › Supplemental Dataset 1/D-mRNA_rhythm_translation_rhyth/Akr1c19_set_D.pdf]

# Akr1d1

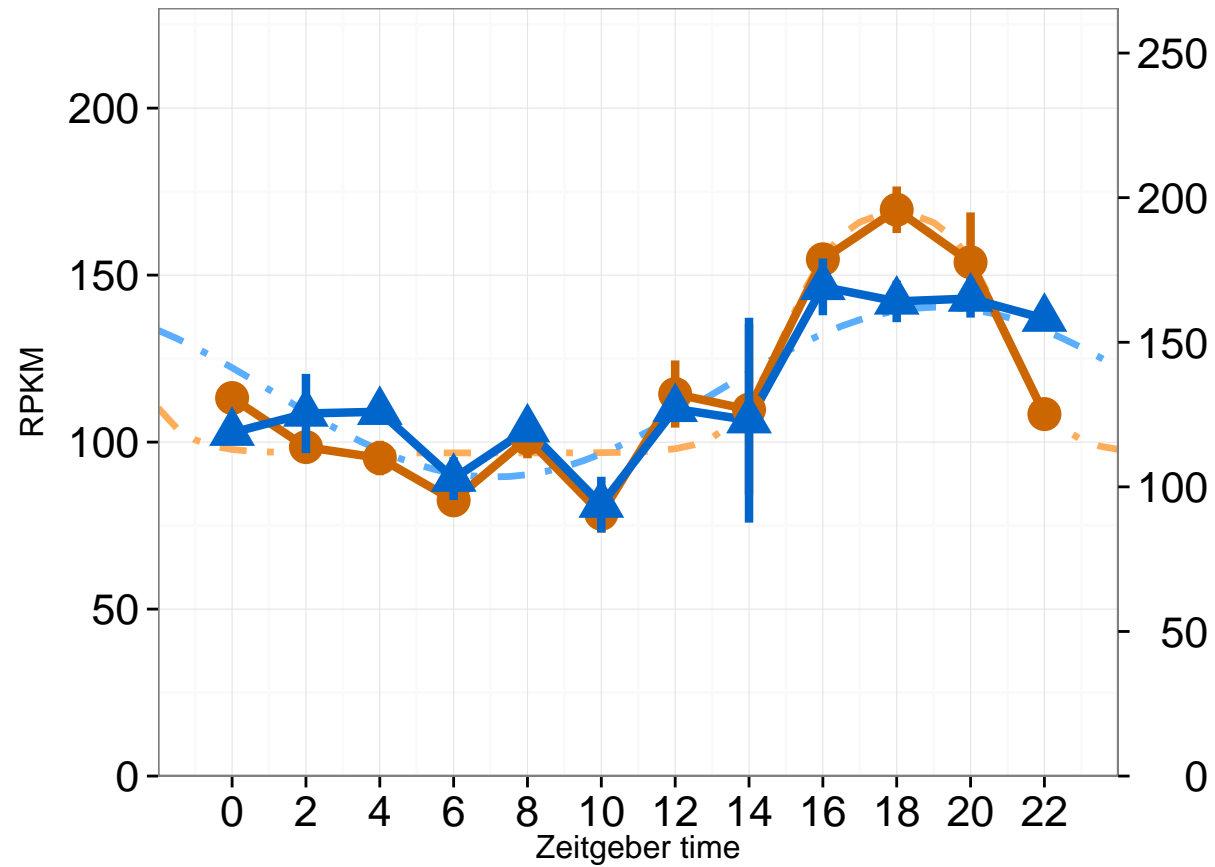

# Akr1d1

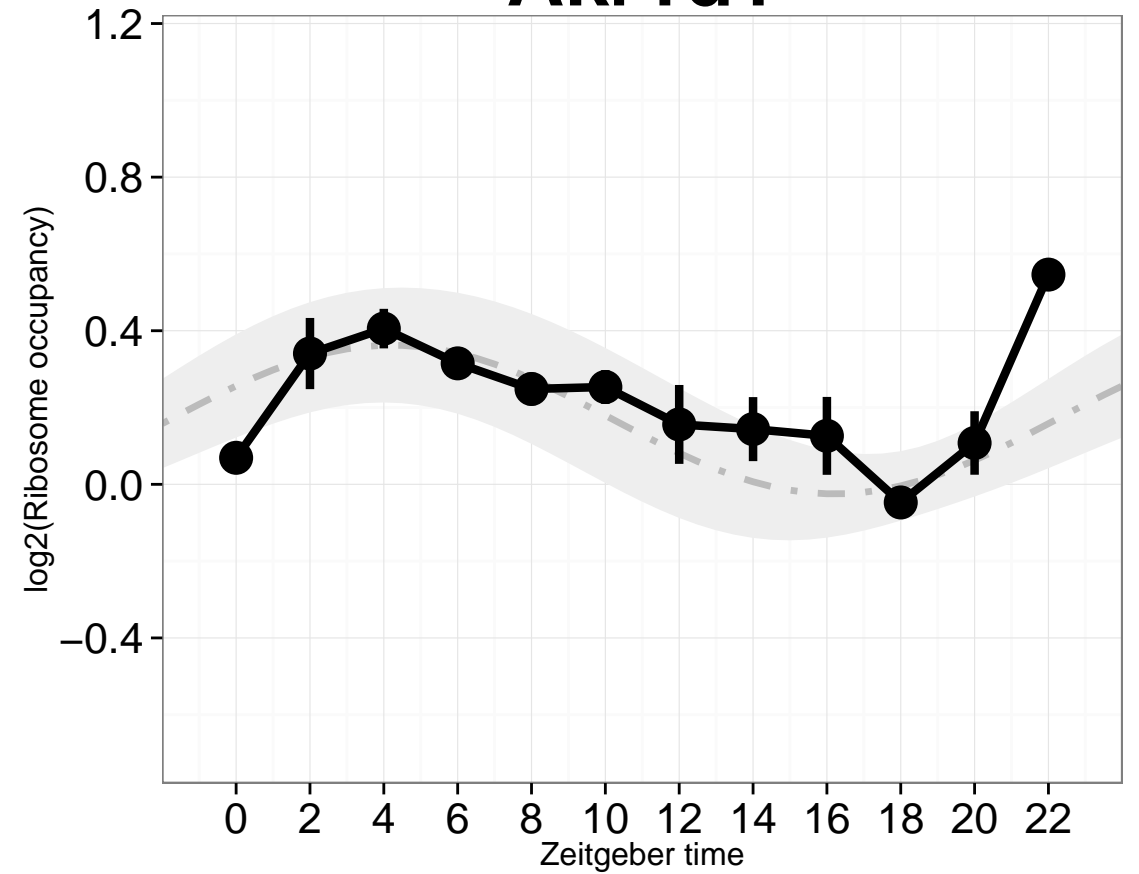

Supplement: SuppDataset_1.zip [file Akr1d1_set_D.pdf › Supplemental Dataset 1/D-mRNA_rhythm_translation_rhyth/Akr1d1_set_D.pdf]

# Alas1

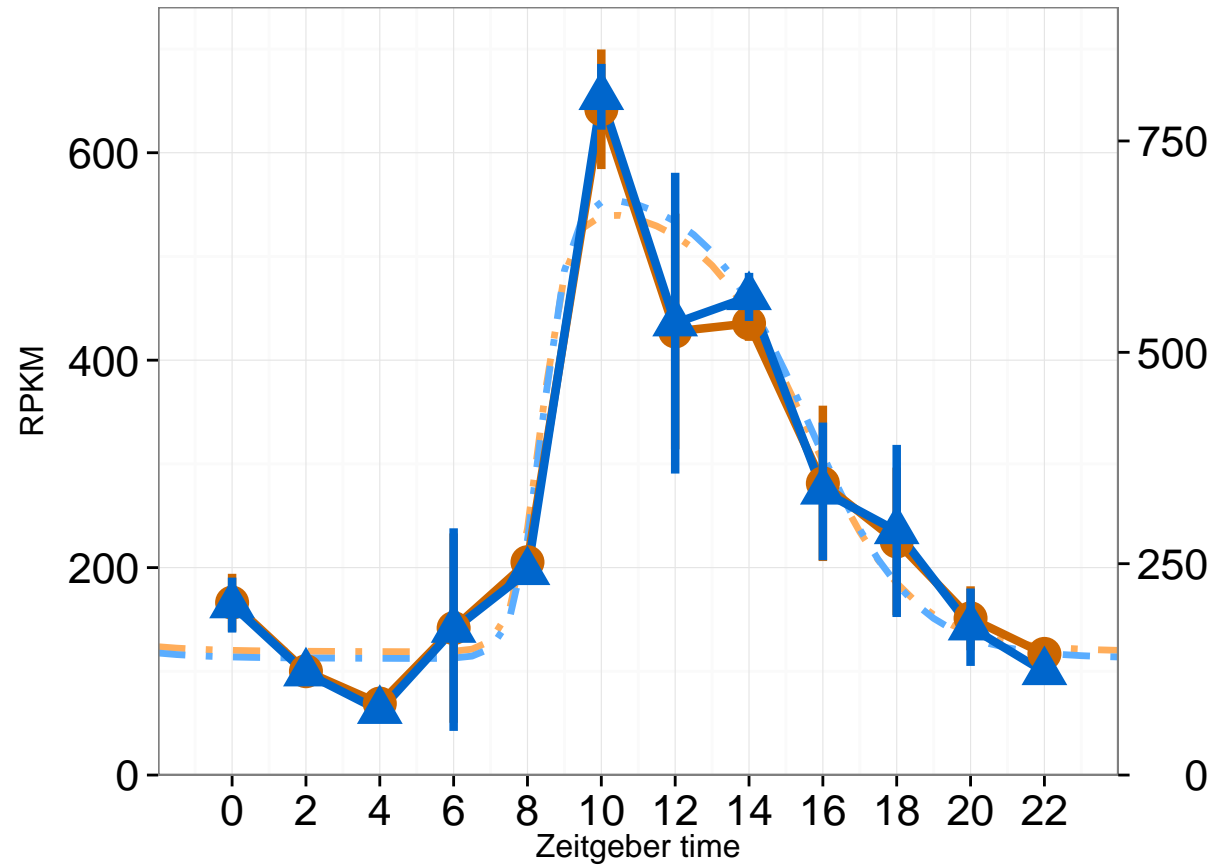

# Alas1

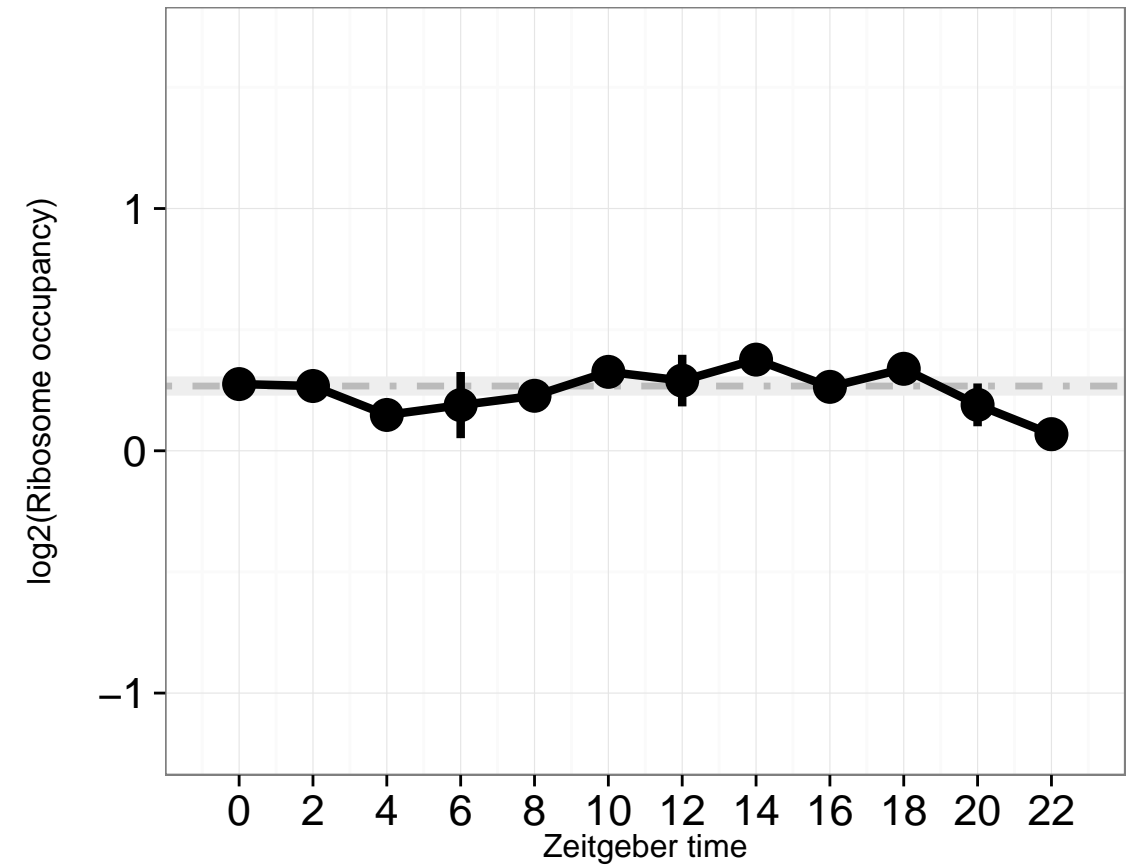

Supplement: SuppDataset_1.zip [file Alas1_set_D.pdf › Supplemental Dataset 1/D-mRNA_rhythm_translation_rhyth/Alas1_set_D.pdf]

## Aldob

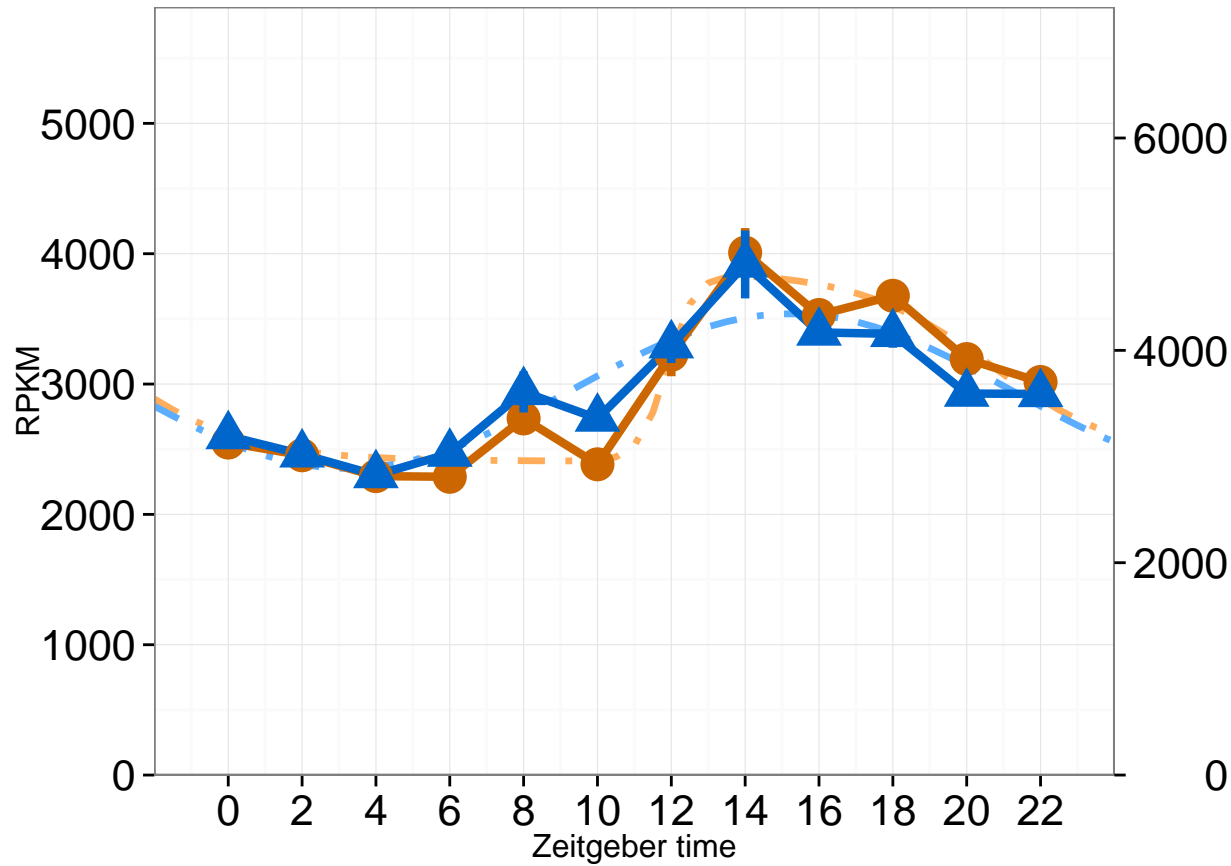

## Aldob

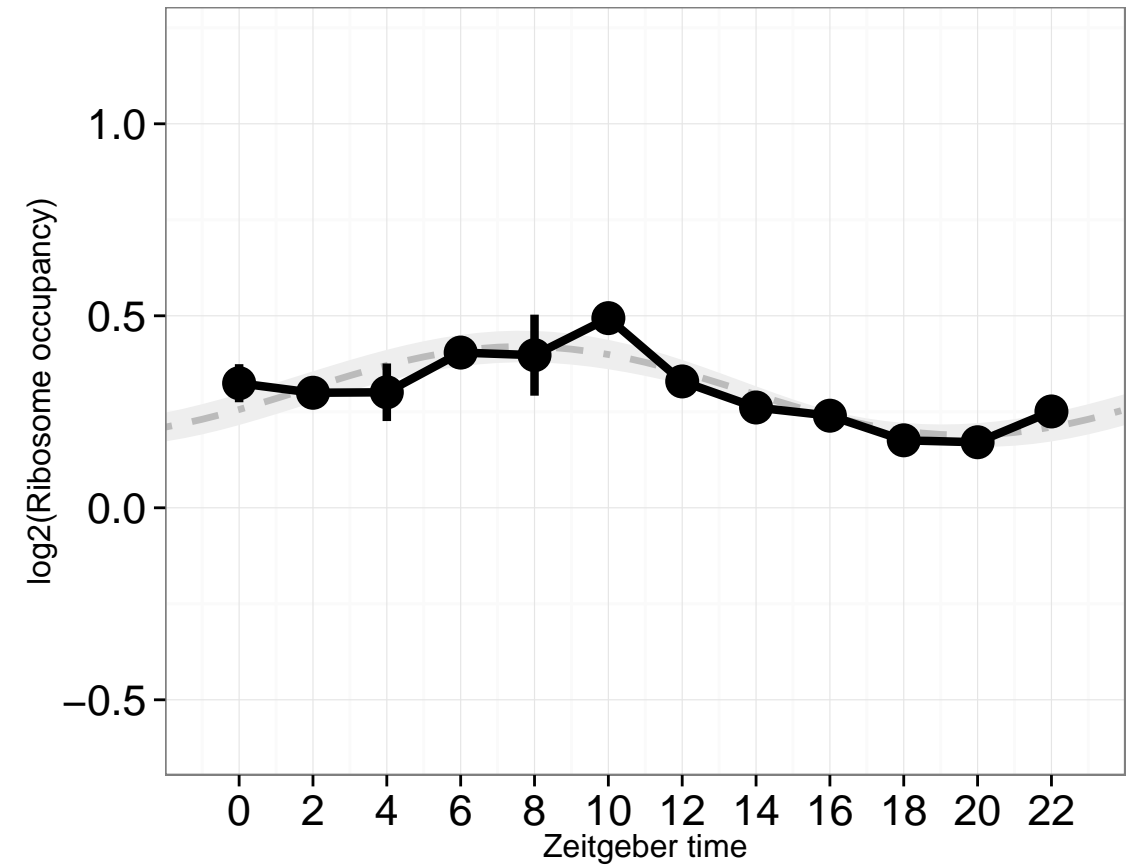

Supplement: SuppDataset_1.zip [file Aldob_set_D.pdf › Supplemental Dataset 1/D-mRNA_rhythm_translation_rhyth/Aldob_set_D.pdf]

## Alkbh7

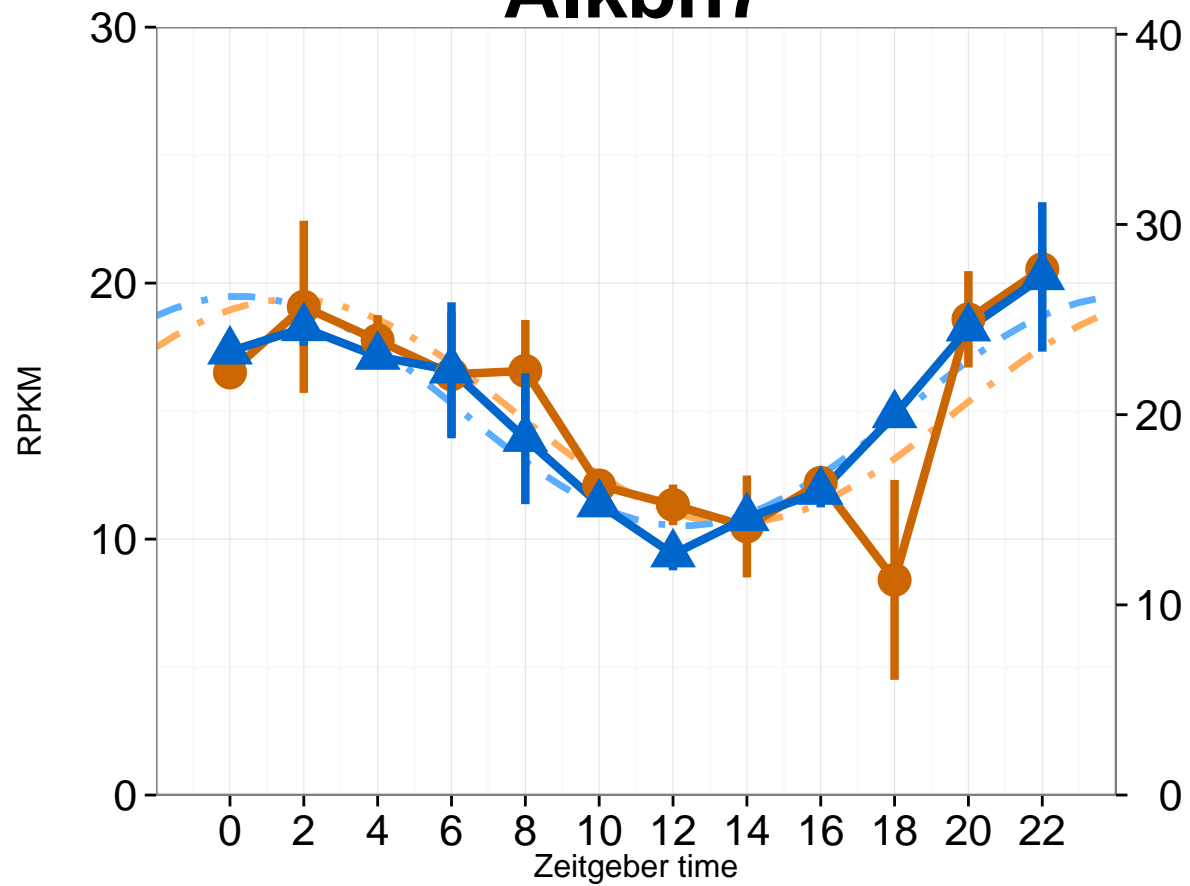

## Alkbh7

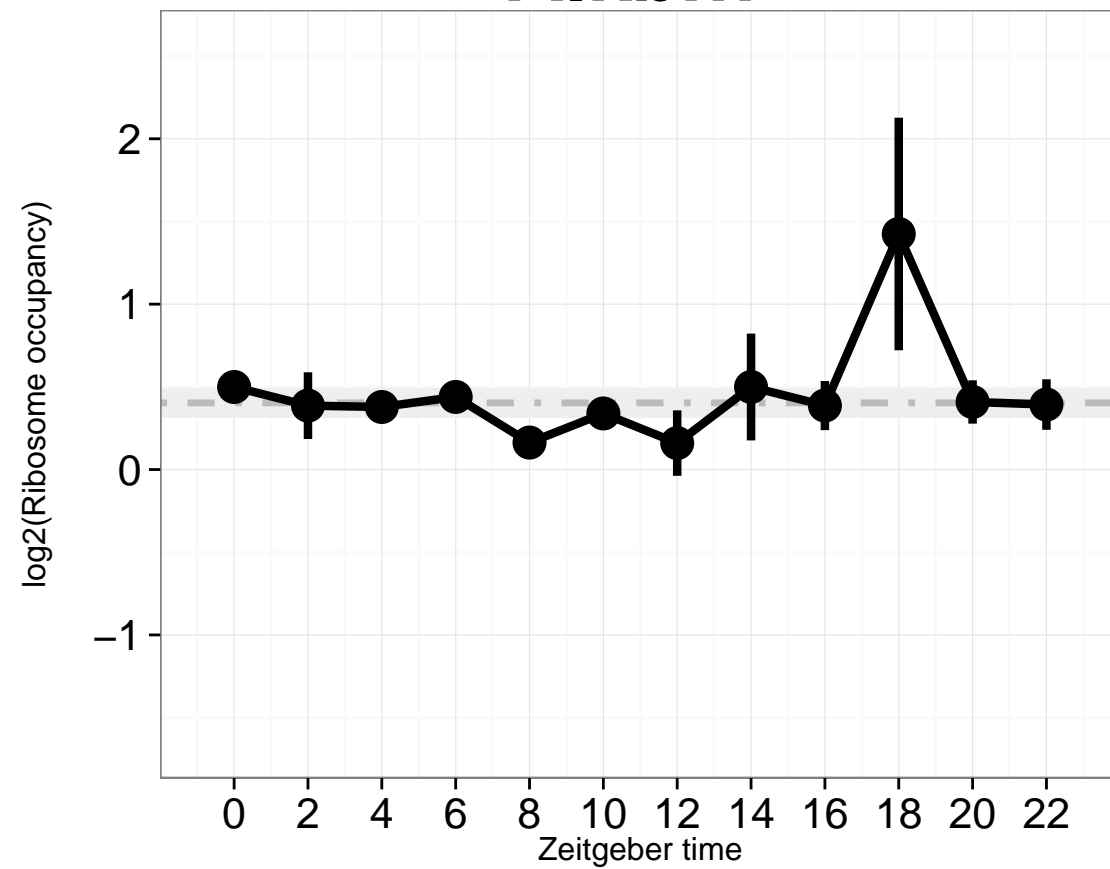

Supplement: SuppDataset_1.zip [file Alkbh7_set_D.pdf › Supplemental Dataset 1/D-mRNA_rhythm_translation_rhyth/Alkbh7_set_D.pdf]

## Alox5ap

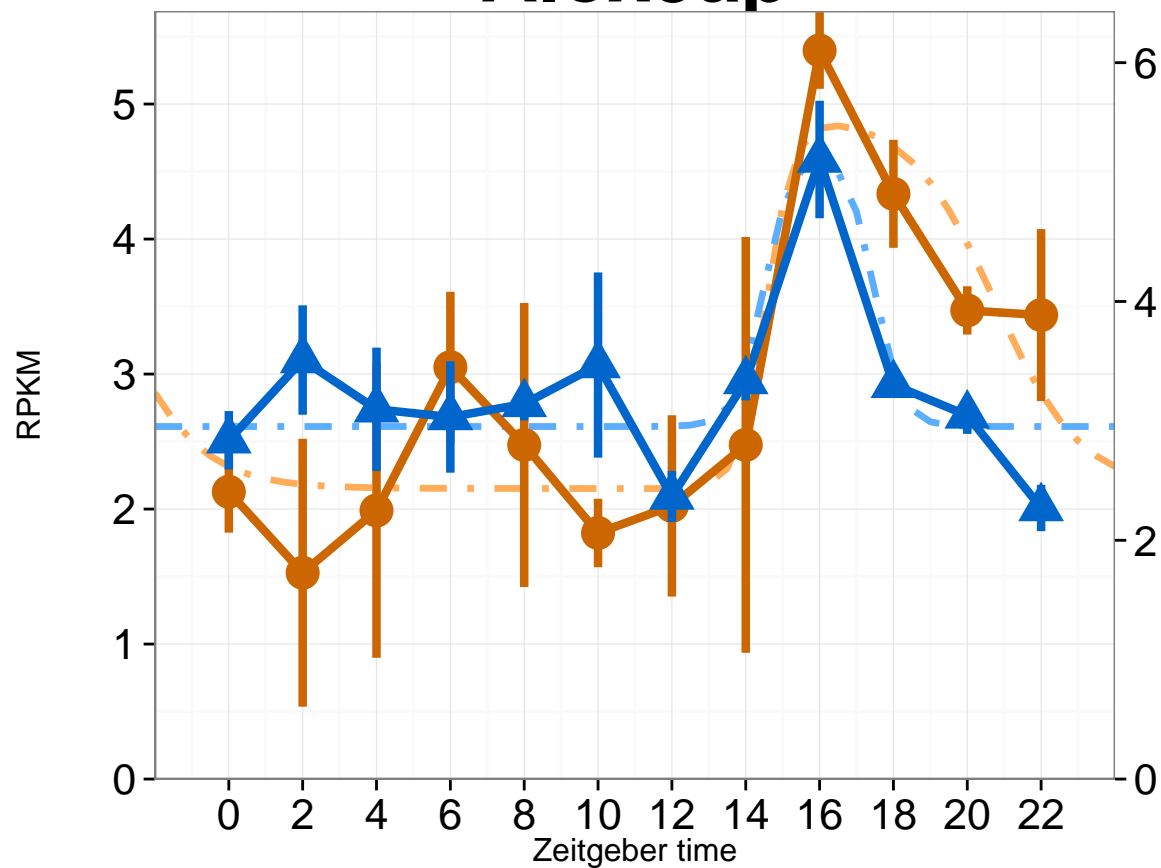

## Alox5ap

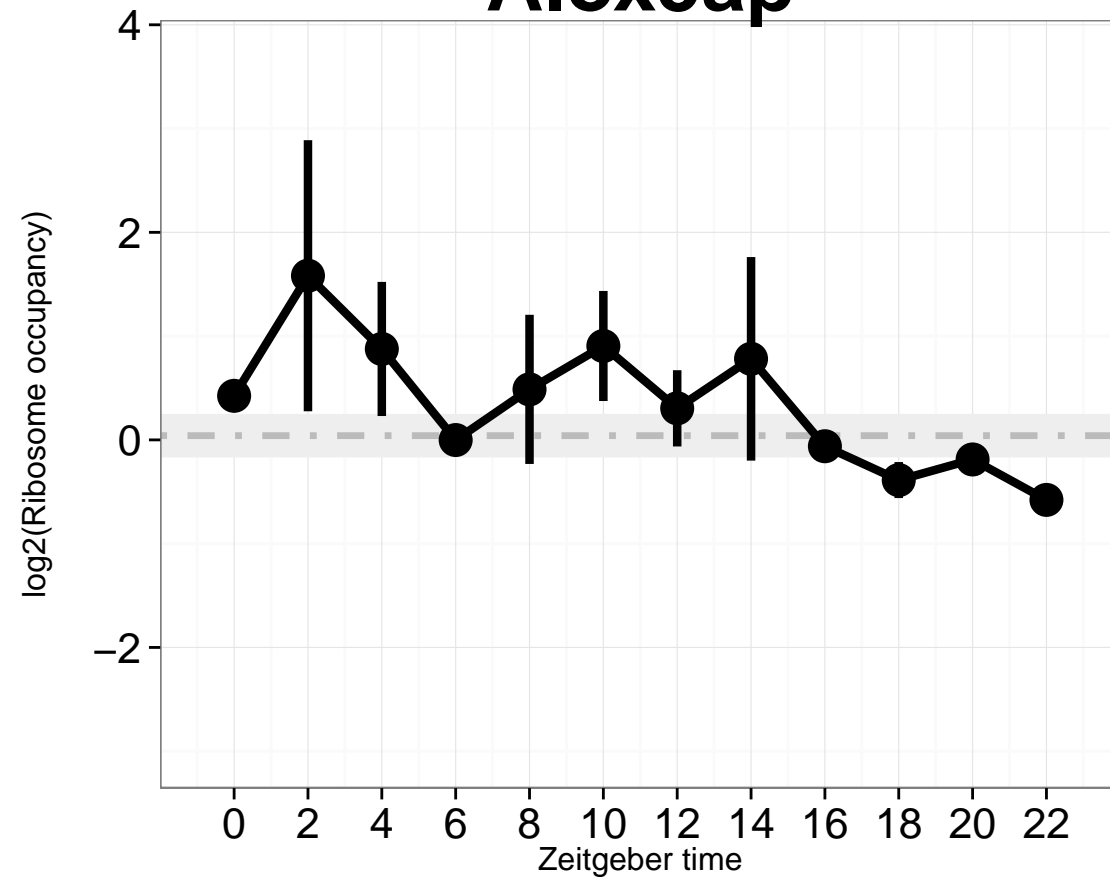

Supplement: SuppDataset_1.zip [file Alox5ap_set_D.pdf › Supplemental Dataset 1/D-mRNA_rhythm_translation_rhyth/Alox5ap_set_D.pdf]

# Alpk1

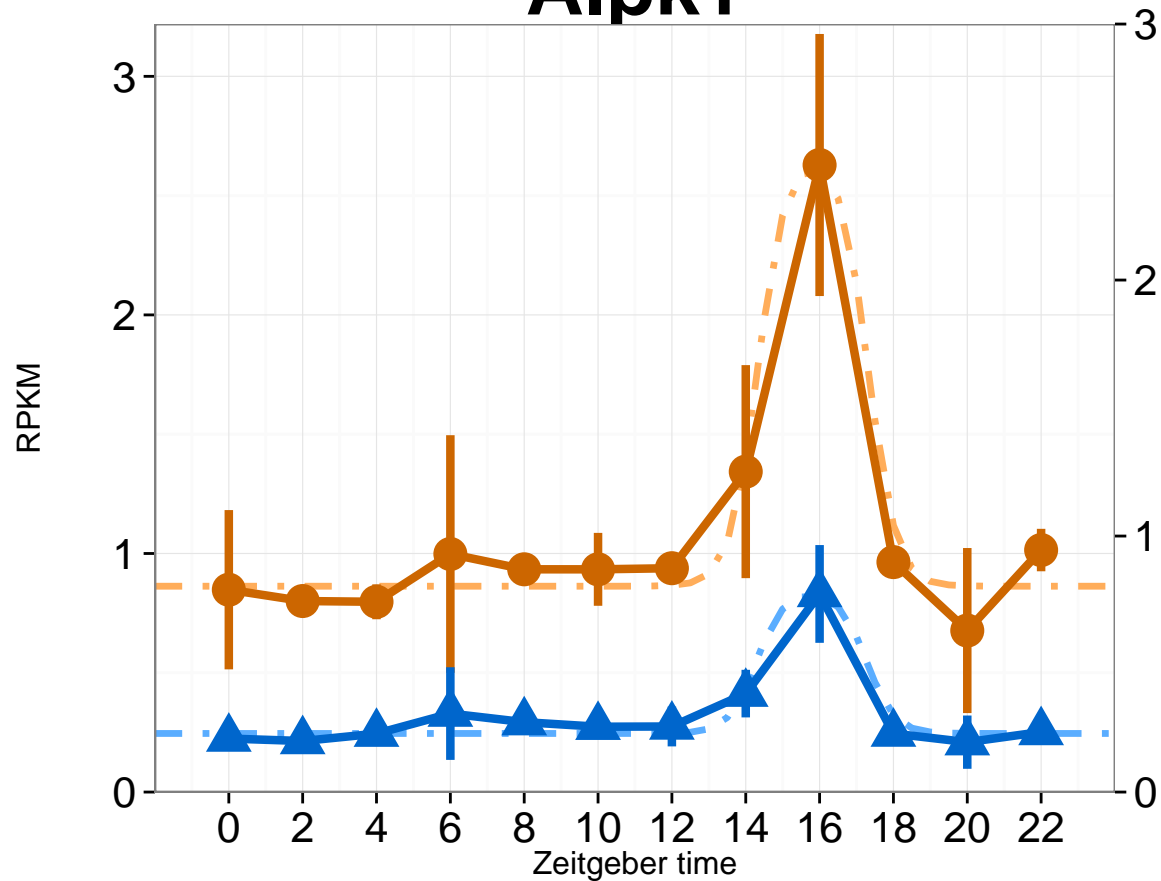

# Alpk1

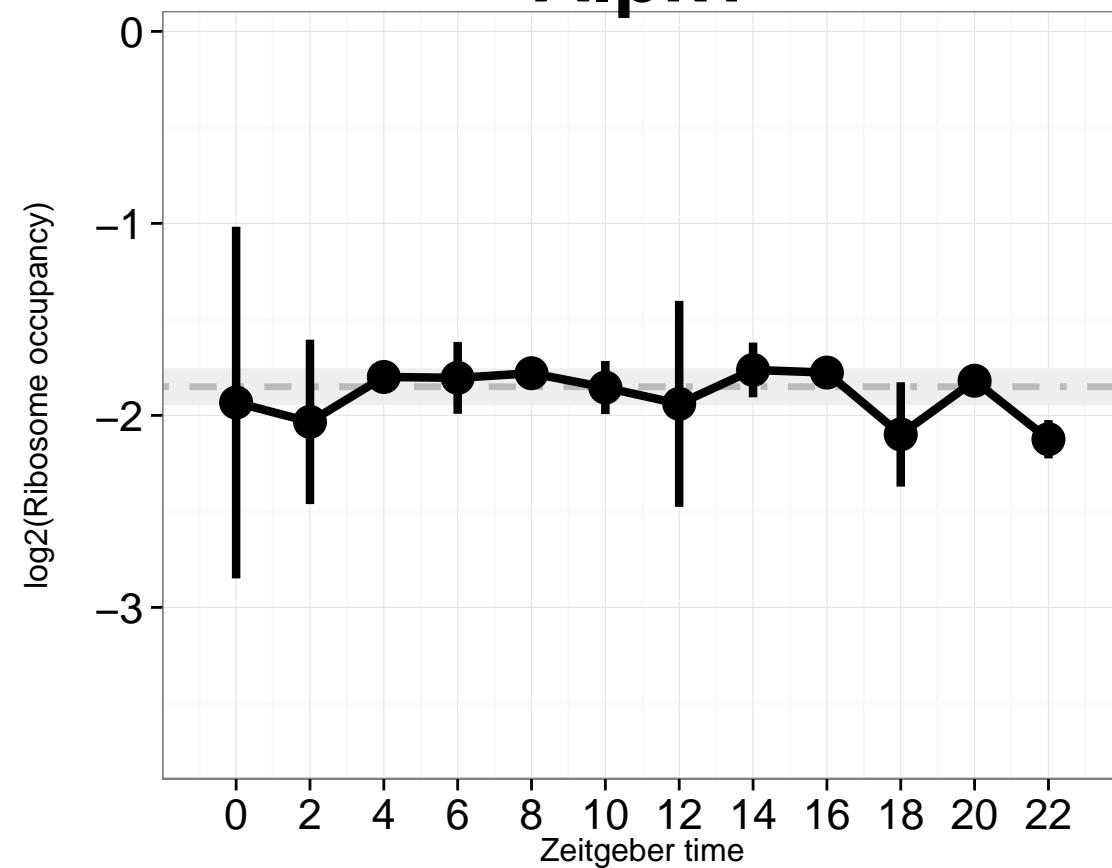

Supplement: SuppDataset_1.zip [file Alpk1_set_D.pdf › Supplemental Dataset 1/D-mRNA_rhythm_translation_rhyth/Alpk1_set_D.pdf]

## Alpl

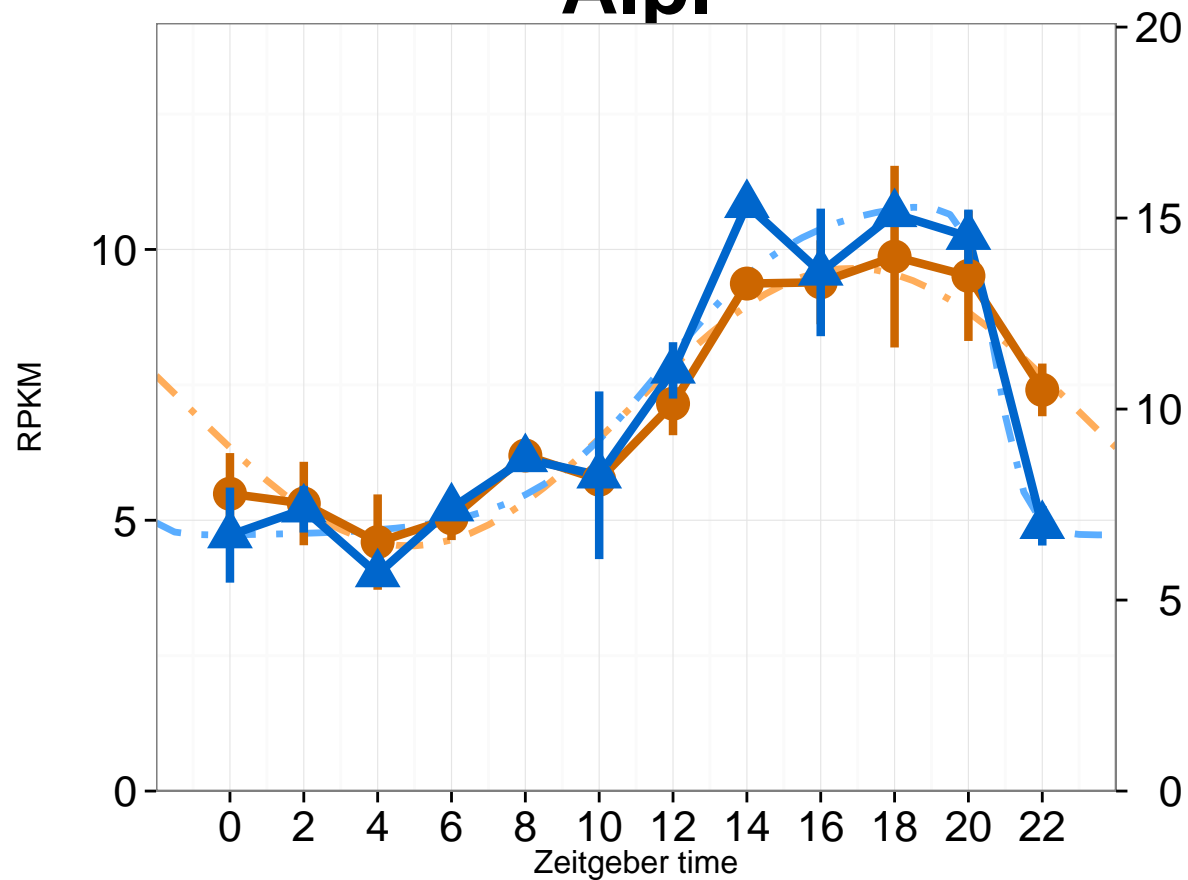

## Alpl

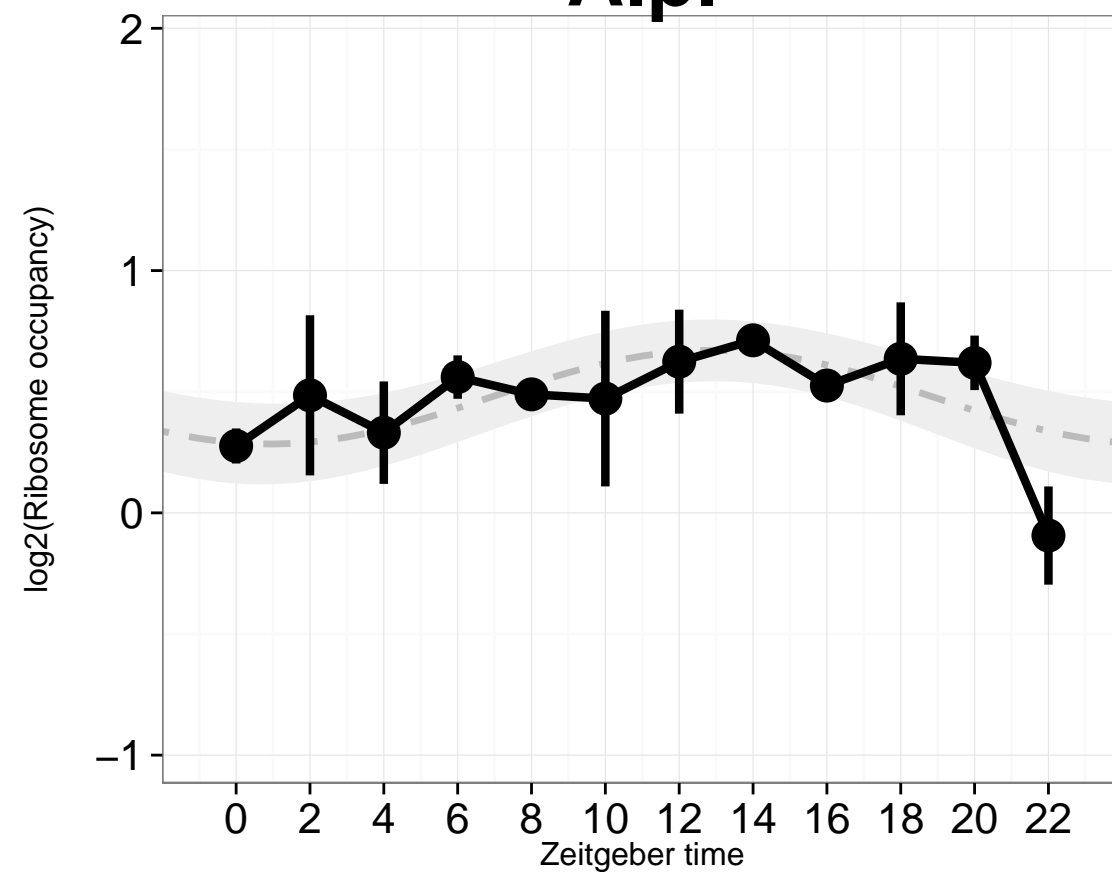

Supplement: SuppDataset_1.zip [file Alpl_set_D.pdf › Supplemental Dataset 1/D-mRNA_rhythm_translation_rhyth/Alpl_set_D.pdf]

## Ambp

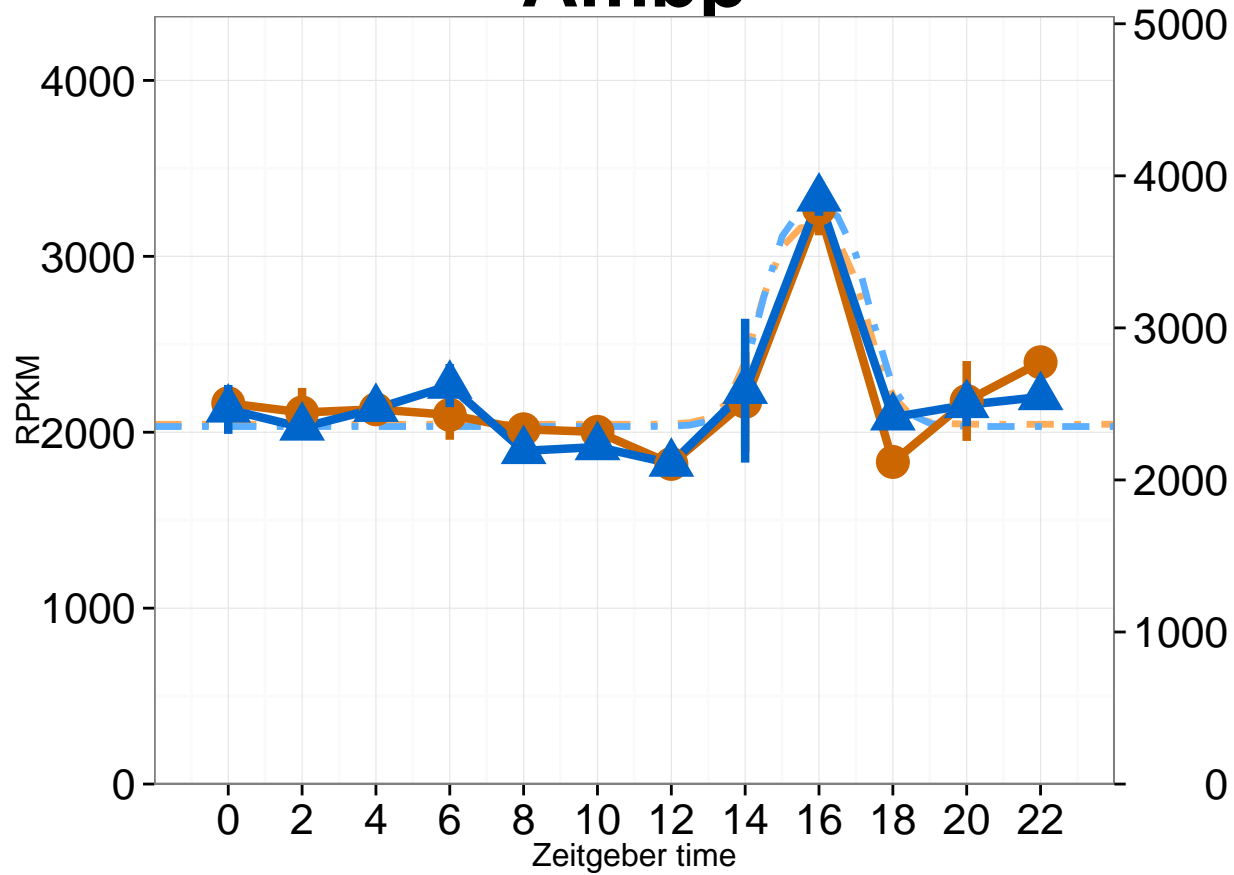

## Ambp

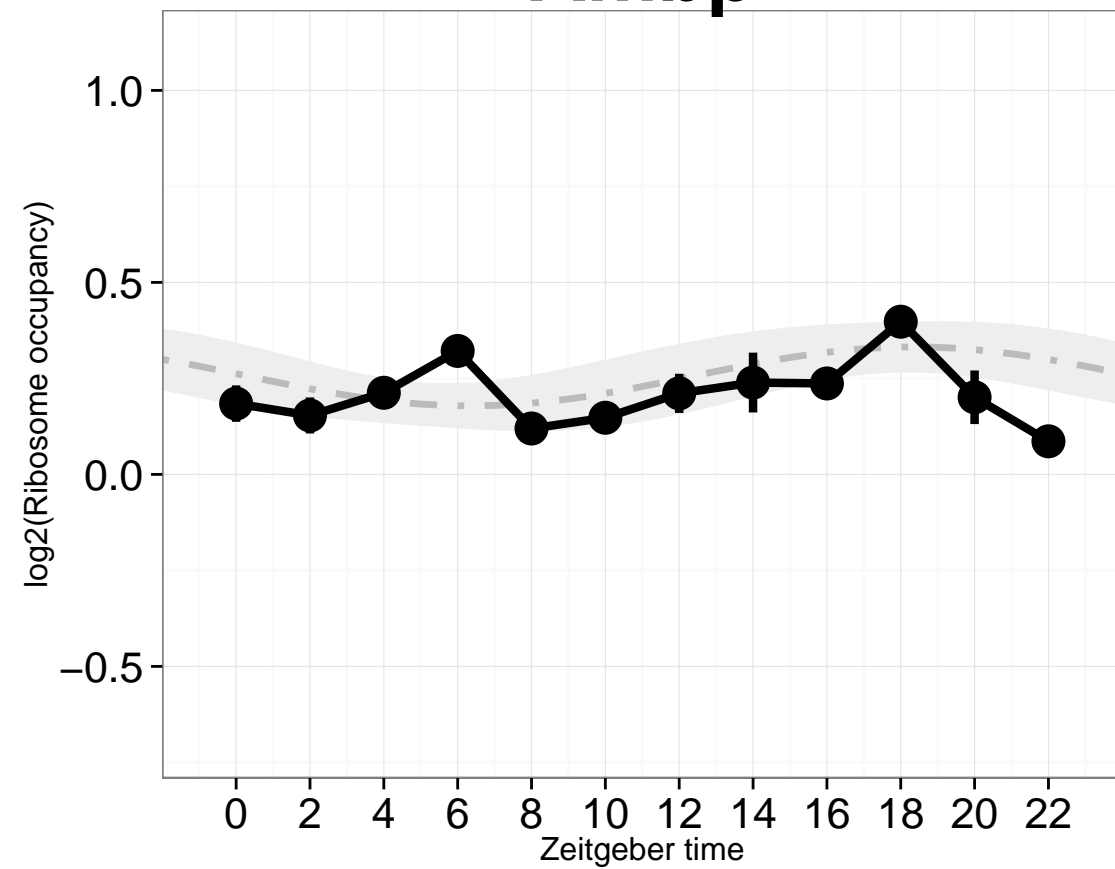

Supplement: SuppDataset_1.zip [file Ambp_set_D.pdf › Supplemental Dataset 1/D-mRNA_rhythm_translation_rhyth/Ambp_set_D.pdf]

# Amd1

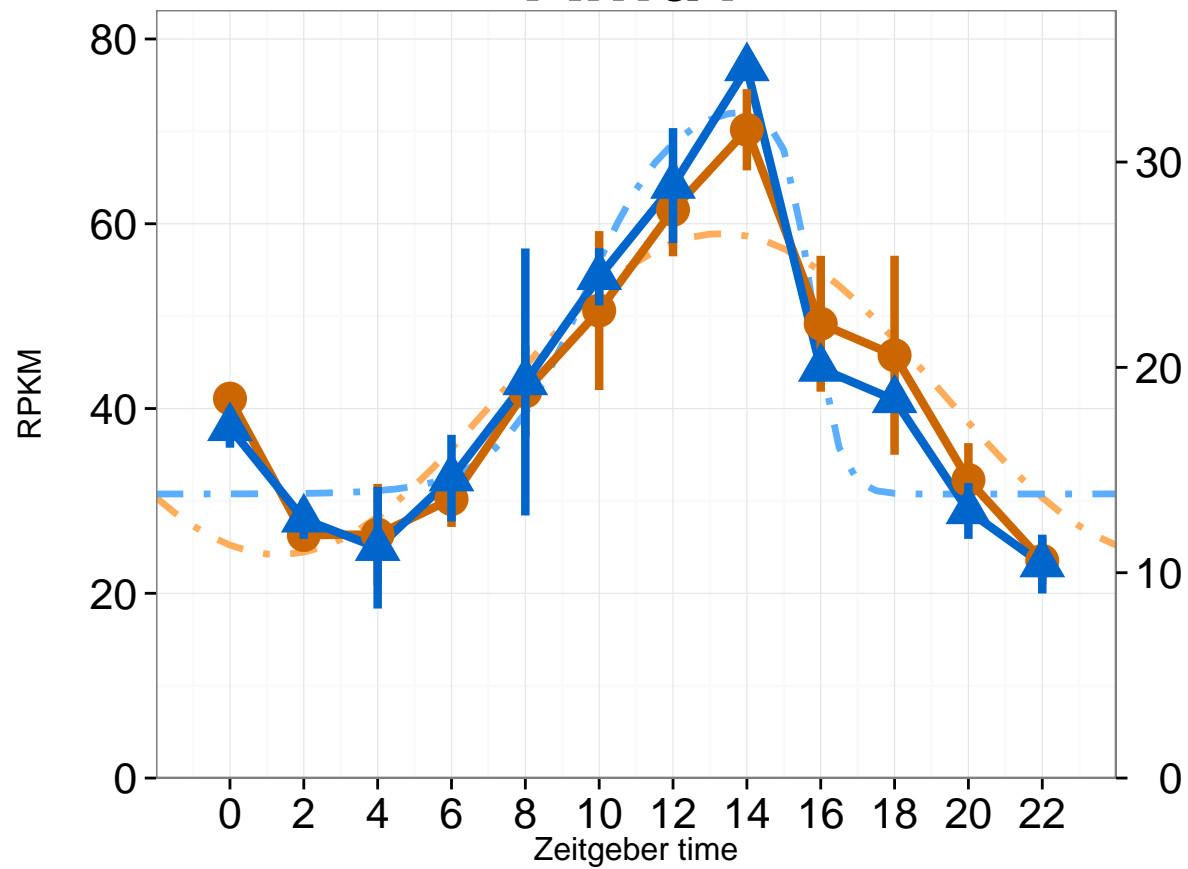

# Amd1

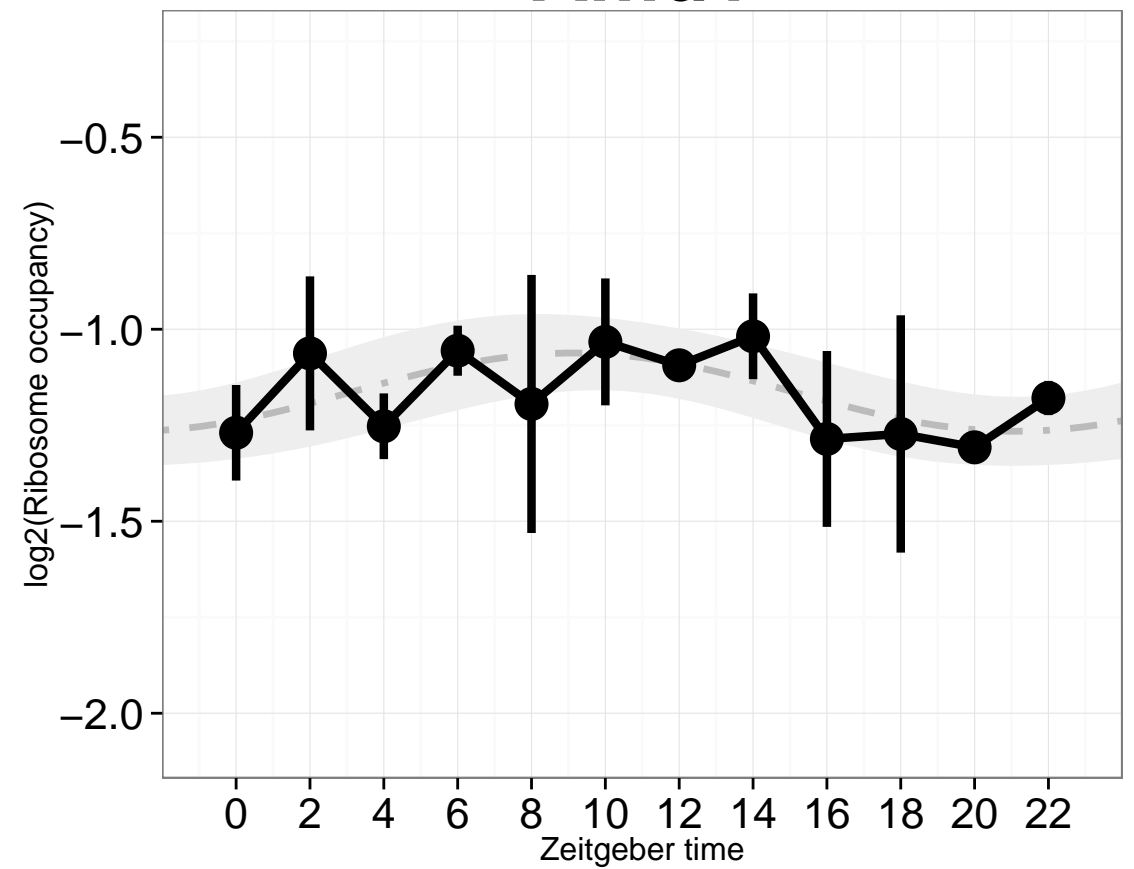

Supplement: SuppDataset_1.zip [file Amd1_set_D.pdf › Supplemental Dataset 1/D-mRNA_rhythm_translation_rhyth/Amd1_set_D.pdf]

# Amdhd1

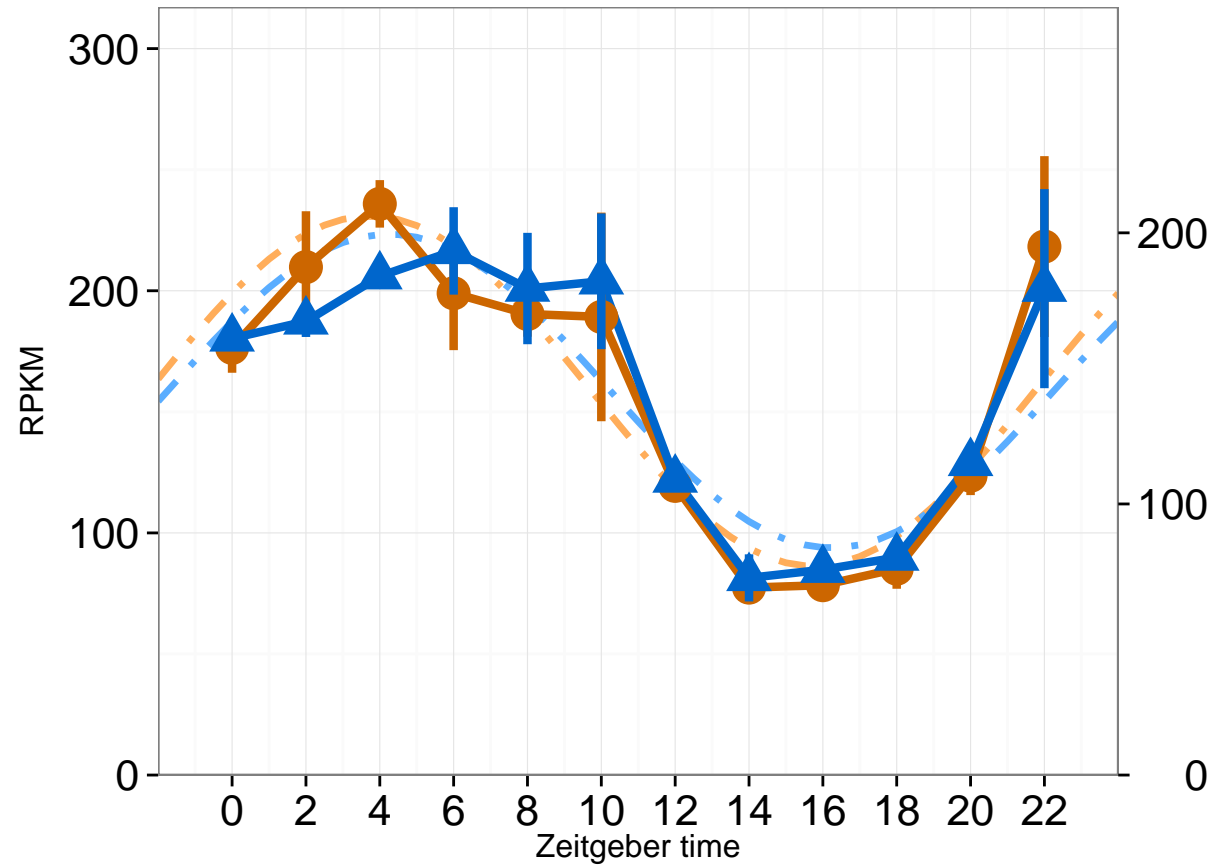

# Amdhd1

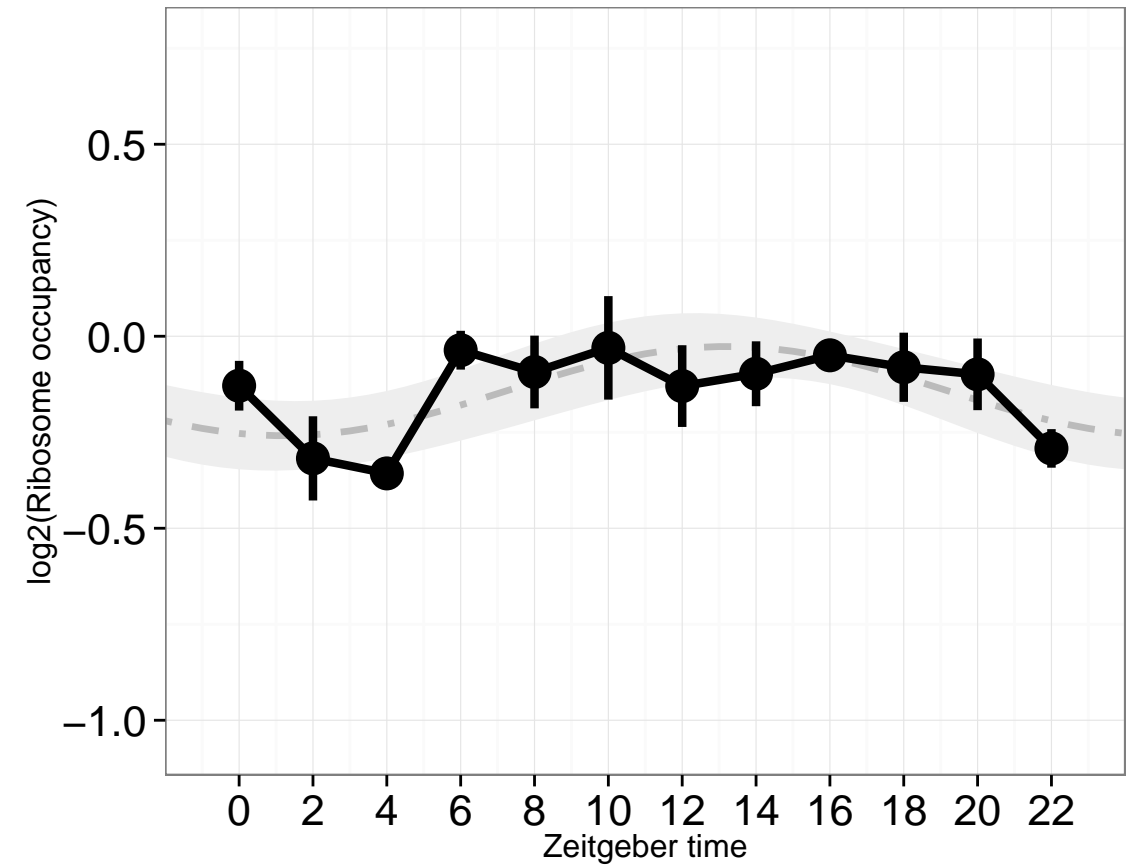

Supplement: SuppDataset_1.zip [file Amdhd1_set_D.pdf › Supplemental Dataset 1/D-mRNA_rhythm_translation_rhyth/Amdhd1_set_D.pdf]

## Amt

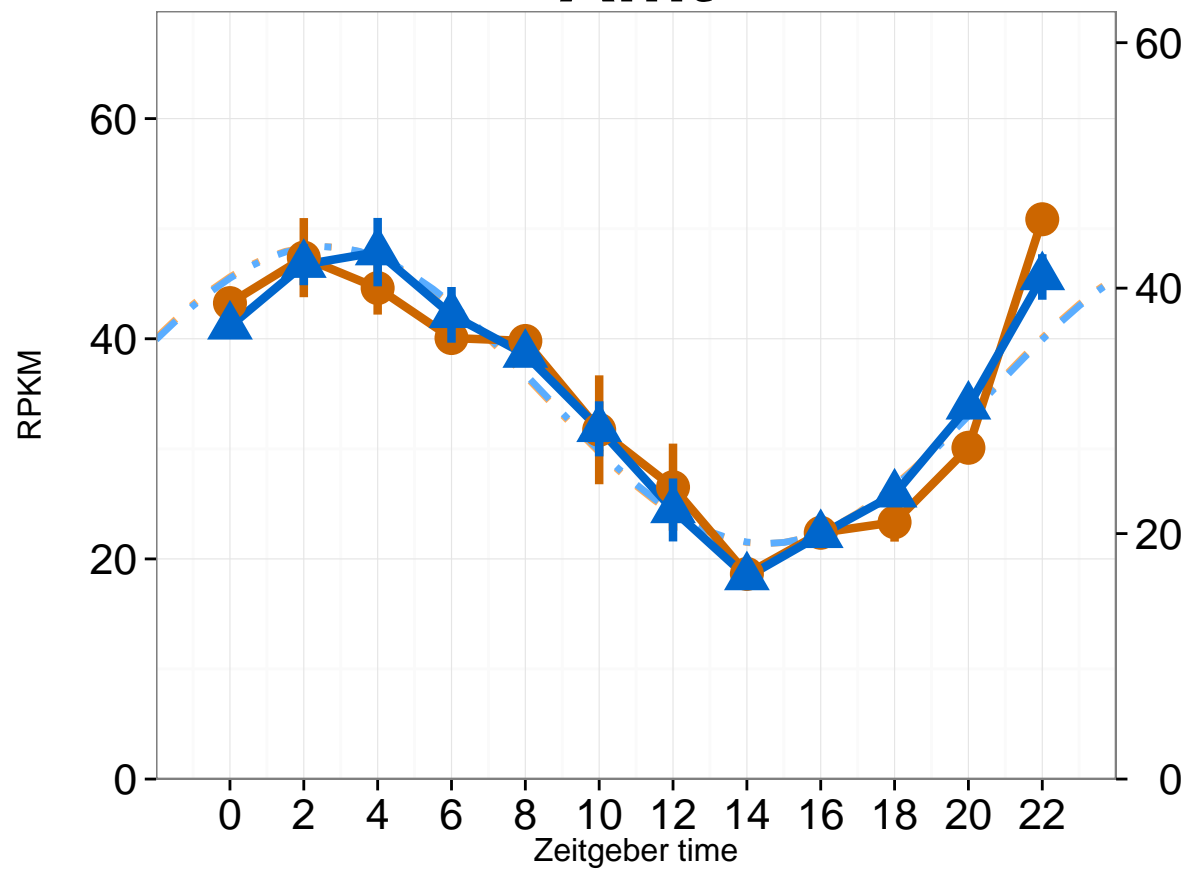

## Amt

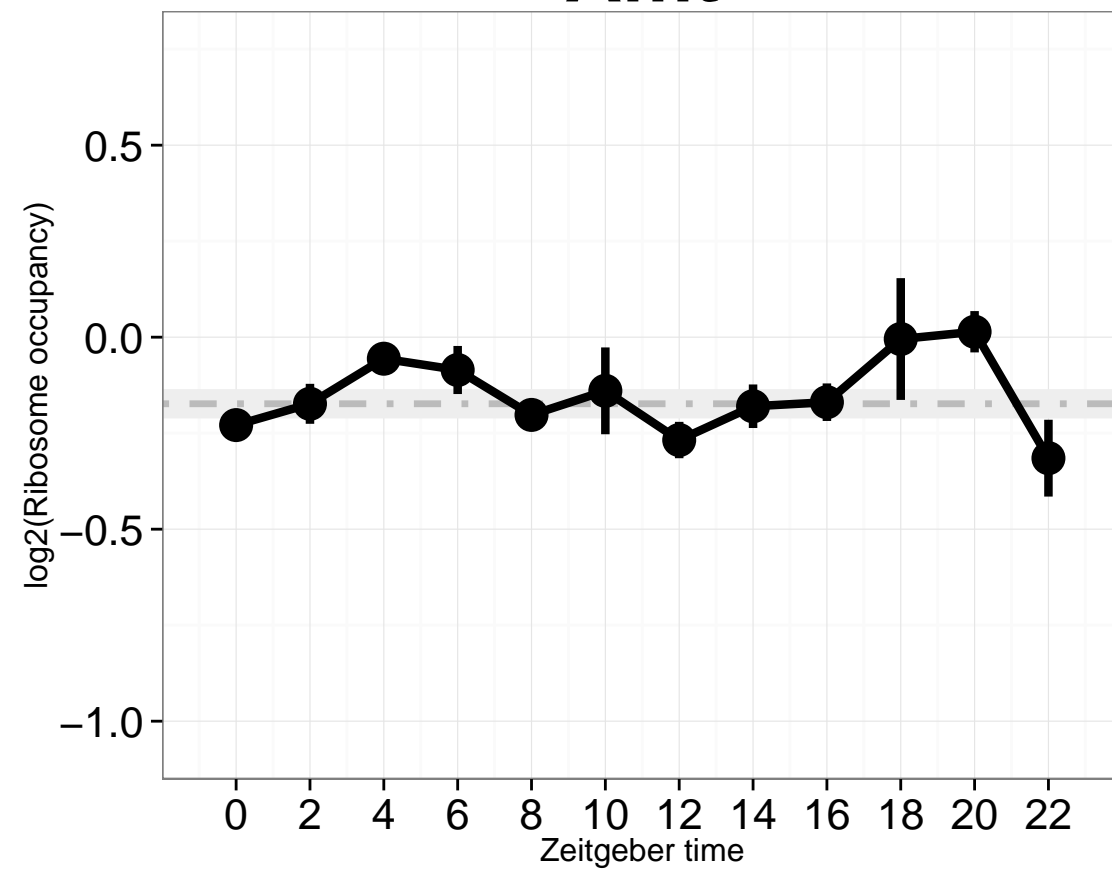

Supplement: SuppDataset_1.zip [file Amt_set_D.pdf › Supplemental Dataset 1/D-mRNA_rhythm_translation_rhyth/Amt_set_D.pdf]

# Ankrd12

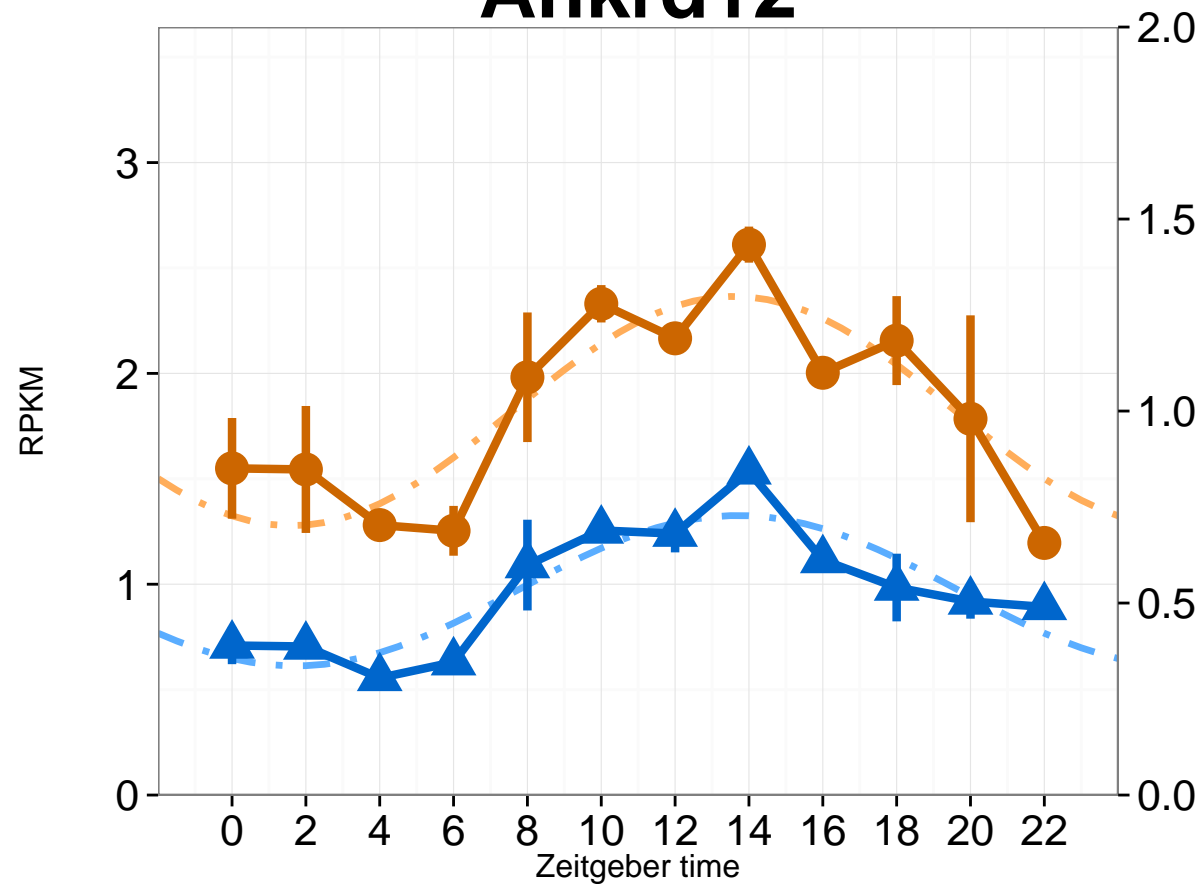

# Ankrd12

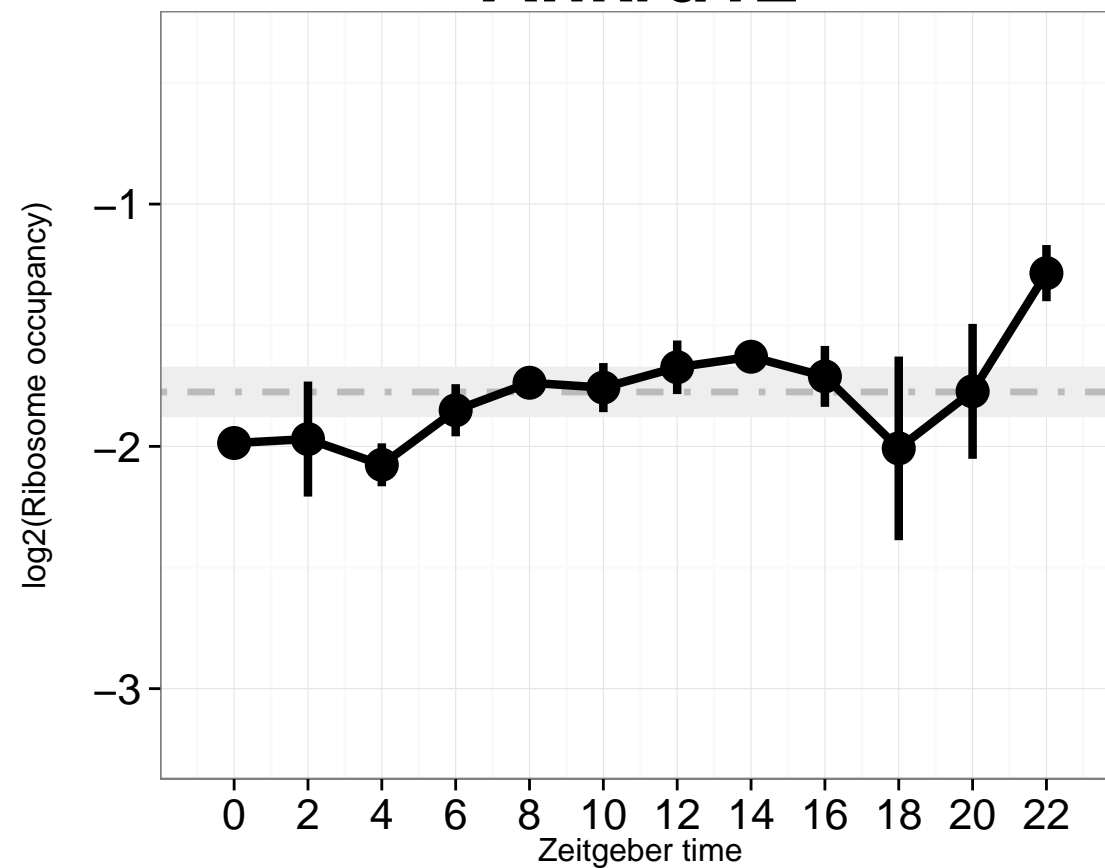

Supplement: SuppDataset_1.zip [file Ankrd12_set_D.pdf › Supplemental Dataset 1/D-mRNA_rhythm_translation_rhyth/Ankrd12_set_D.pdf]

# Ankrd9

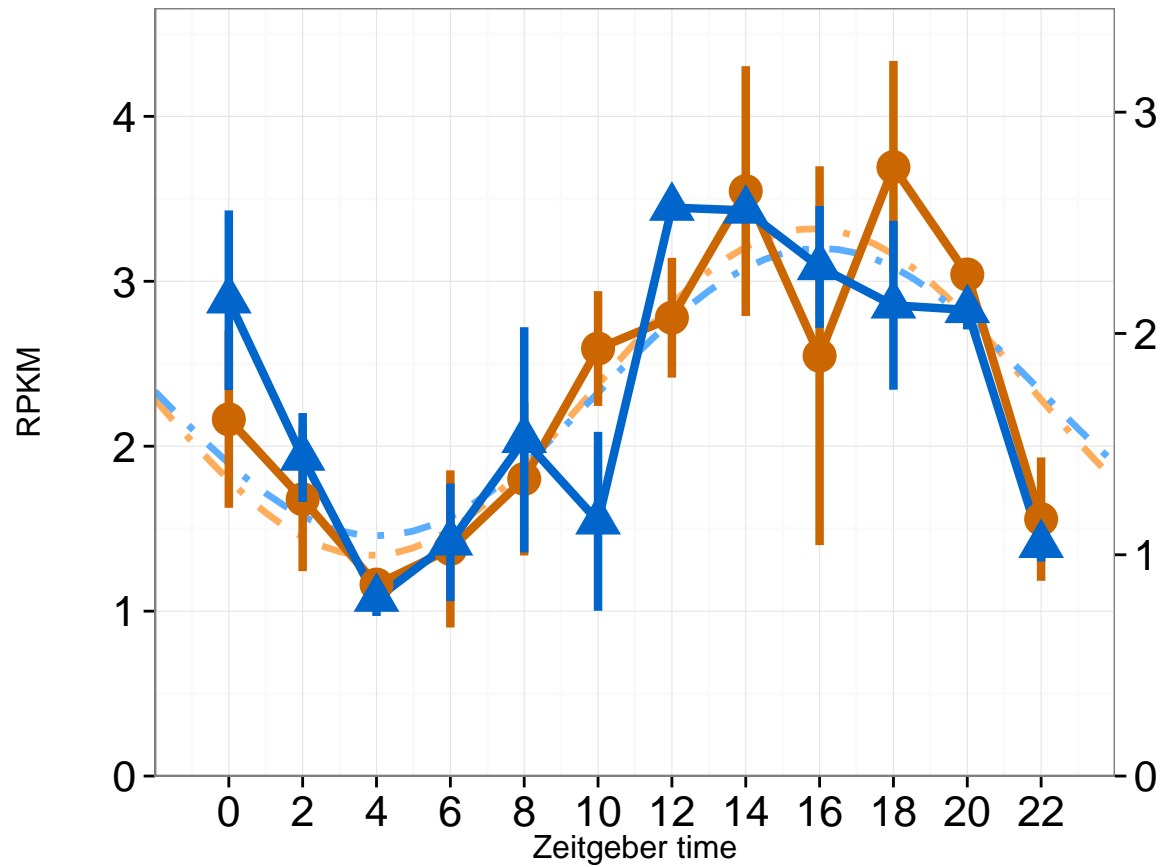

# Ankrd9

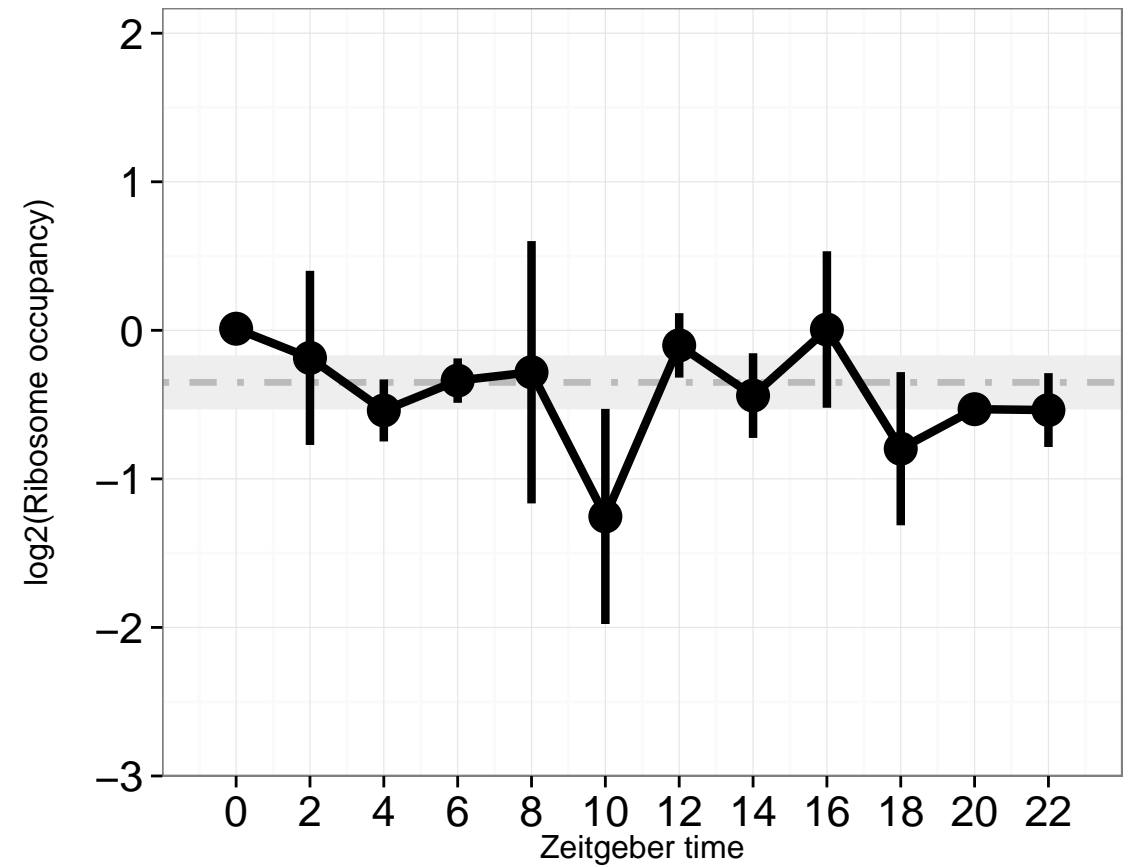

Supplement: SuppDataset_1.zip [file Ankrd9_set_D.pdf › Supplemental Dataset 1/D-mRNA_rhythm_translation_rhyth/Ankrd9_set_D.pdf]

# Anp32a

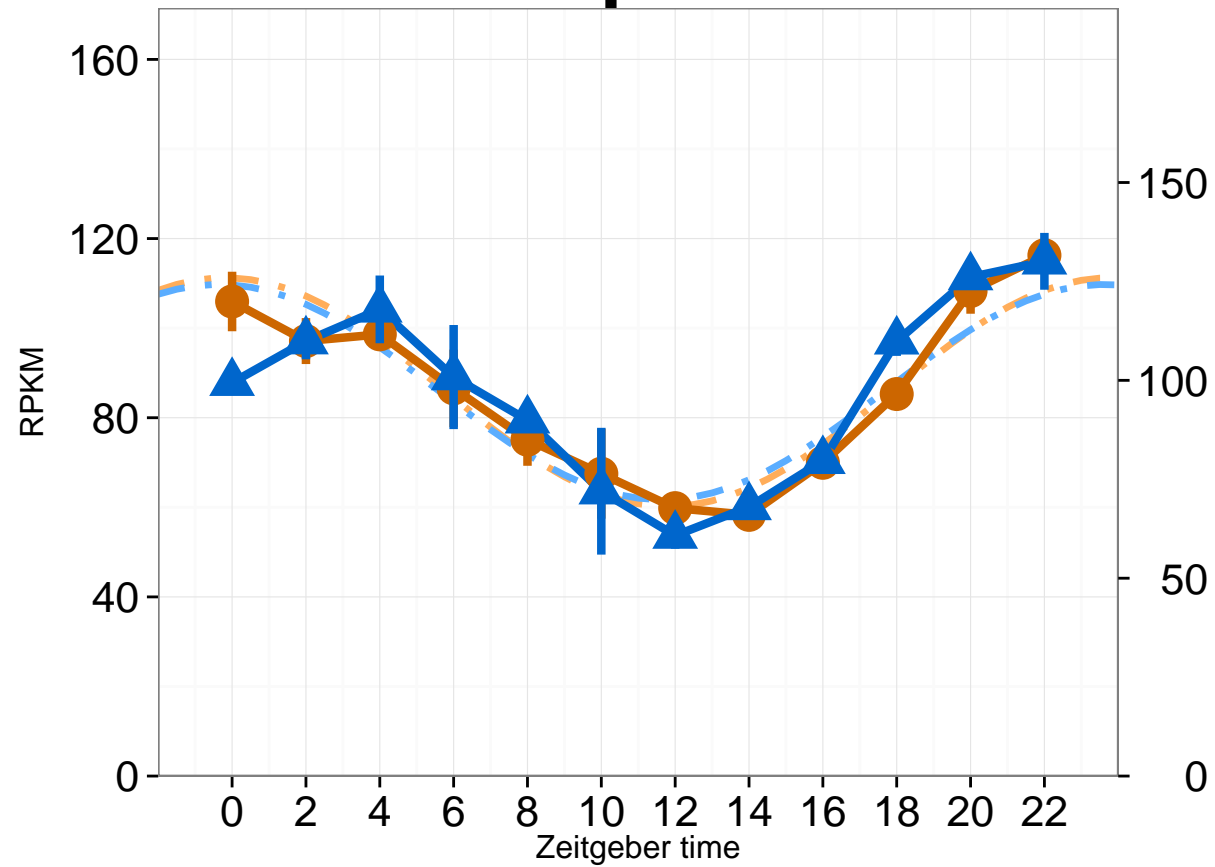

# Anp32a

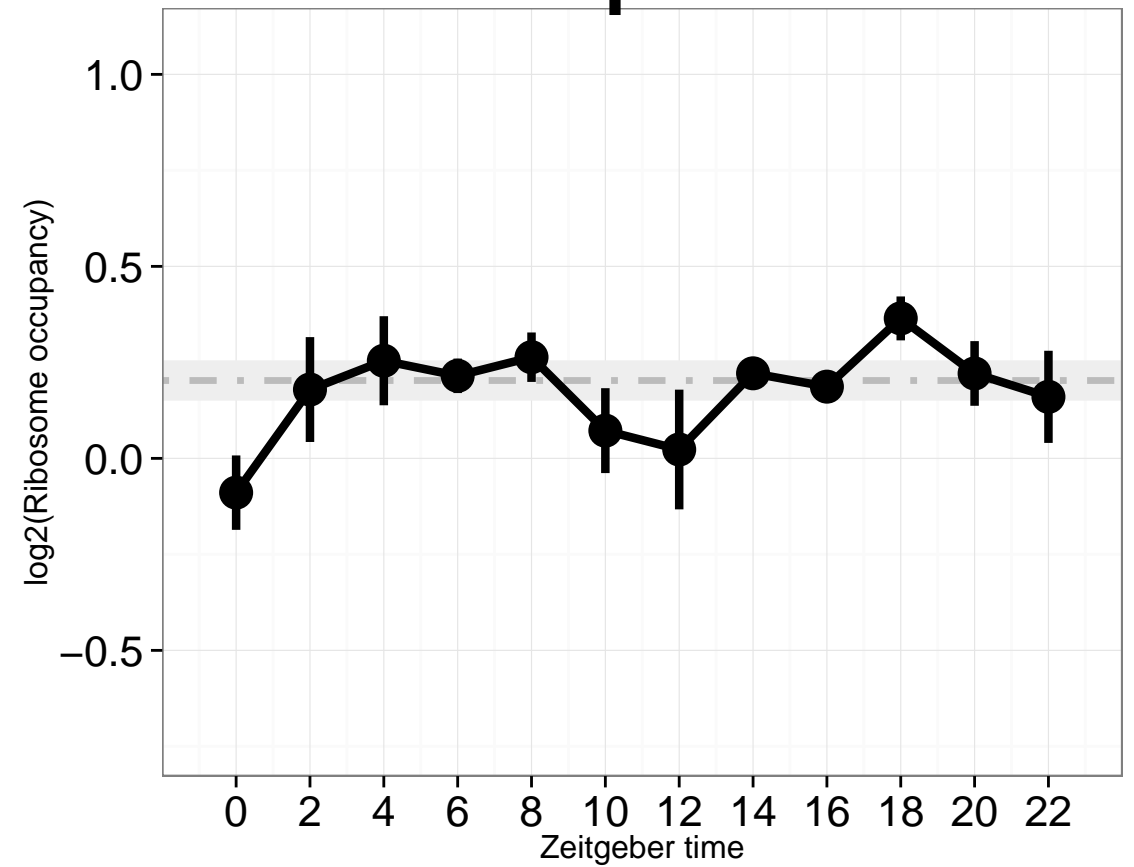

Supplement: SuppDataset_1.zip [file Anp32a_set_D.pdf › Supplemental Dataset 1/D-mRNA_rhythm_translation_rhyth/Anp32a_set_D.pdf]

## Anxa7

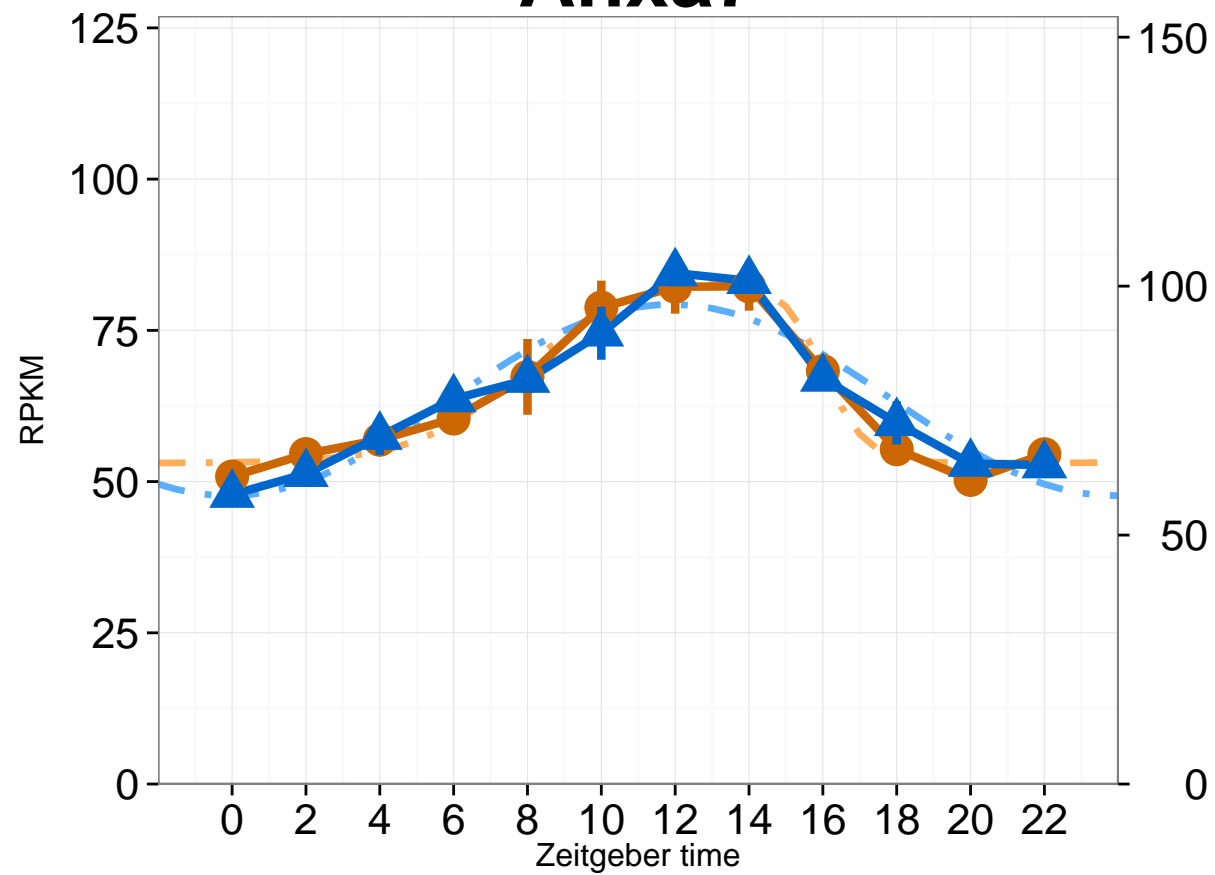

## Anxa7

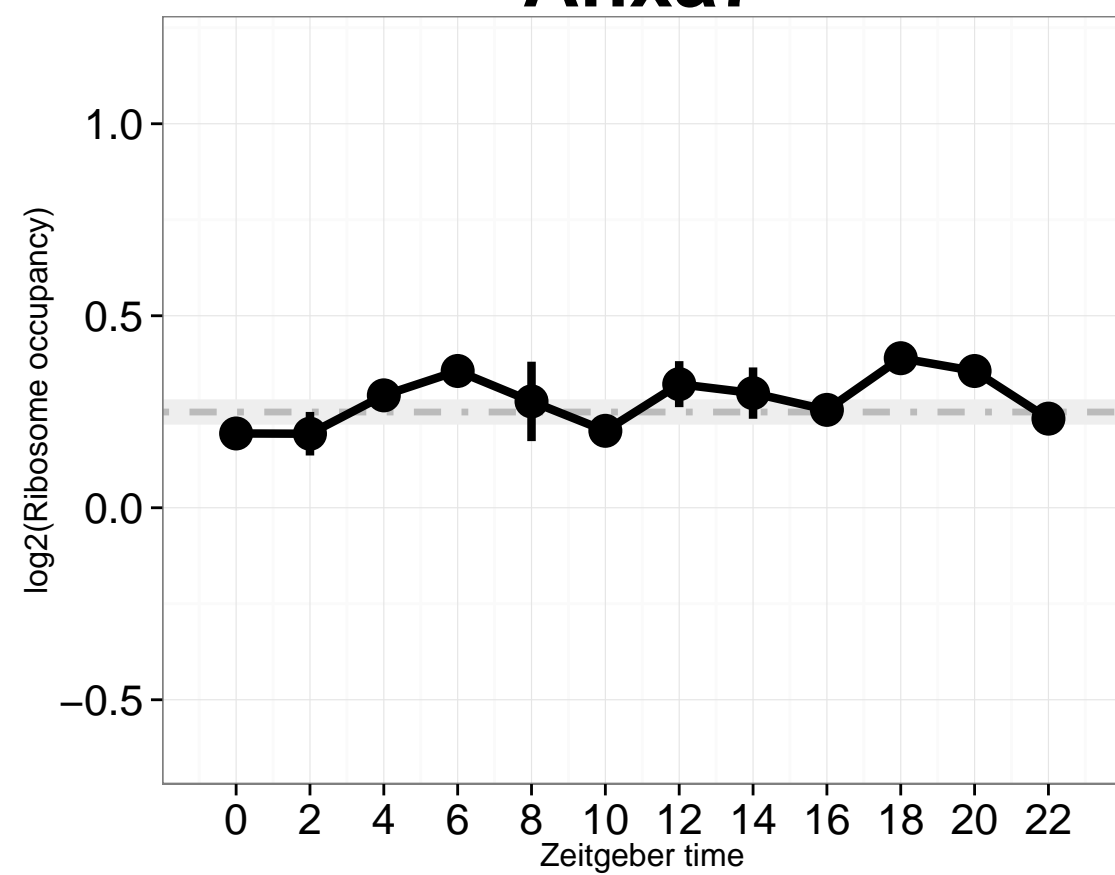

Supplement: SuppDataset_1.zip [file Anxa7_set_D.pdf › Supplemental Dataset 1/D-mRNA_rhythm_translation_rhyth/Anxa7_set_D.pdf]

## Aox3

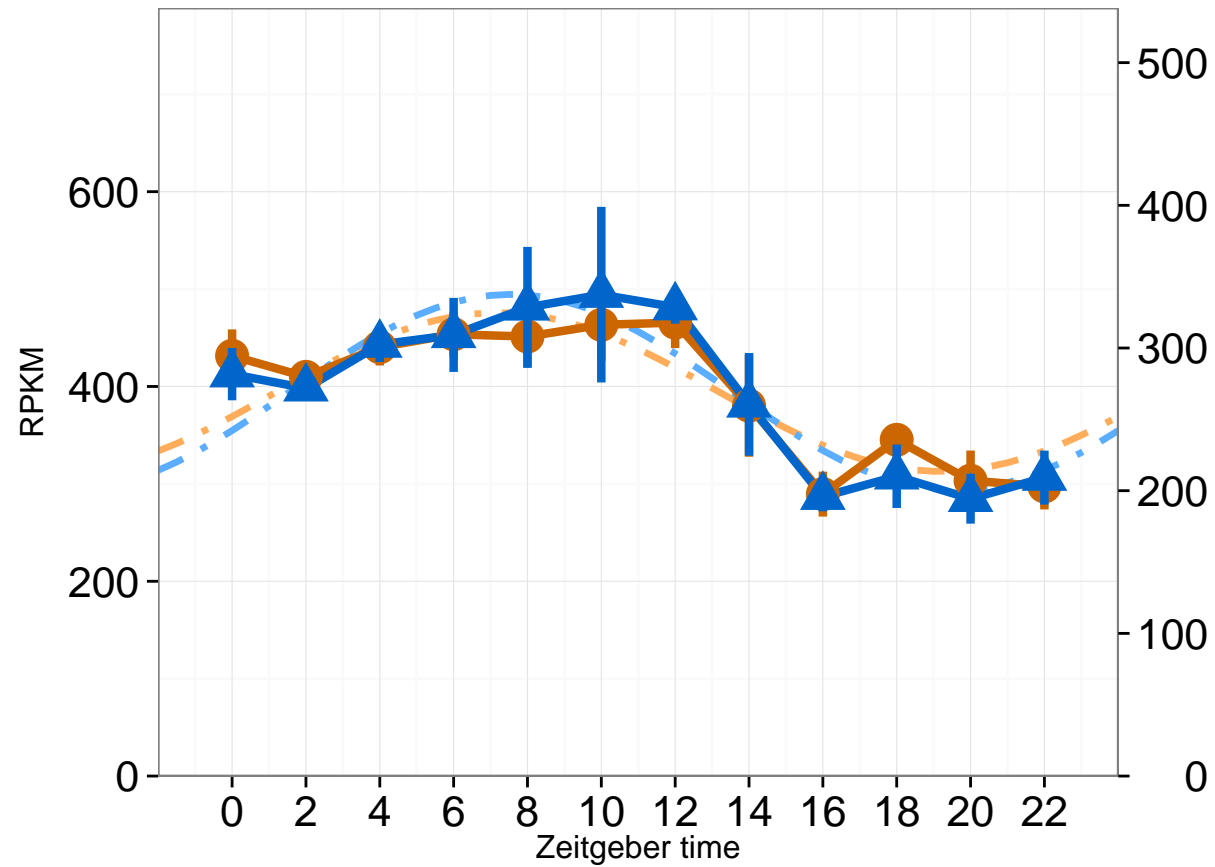

## Aox3

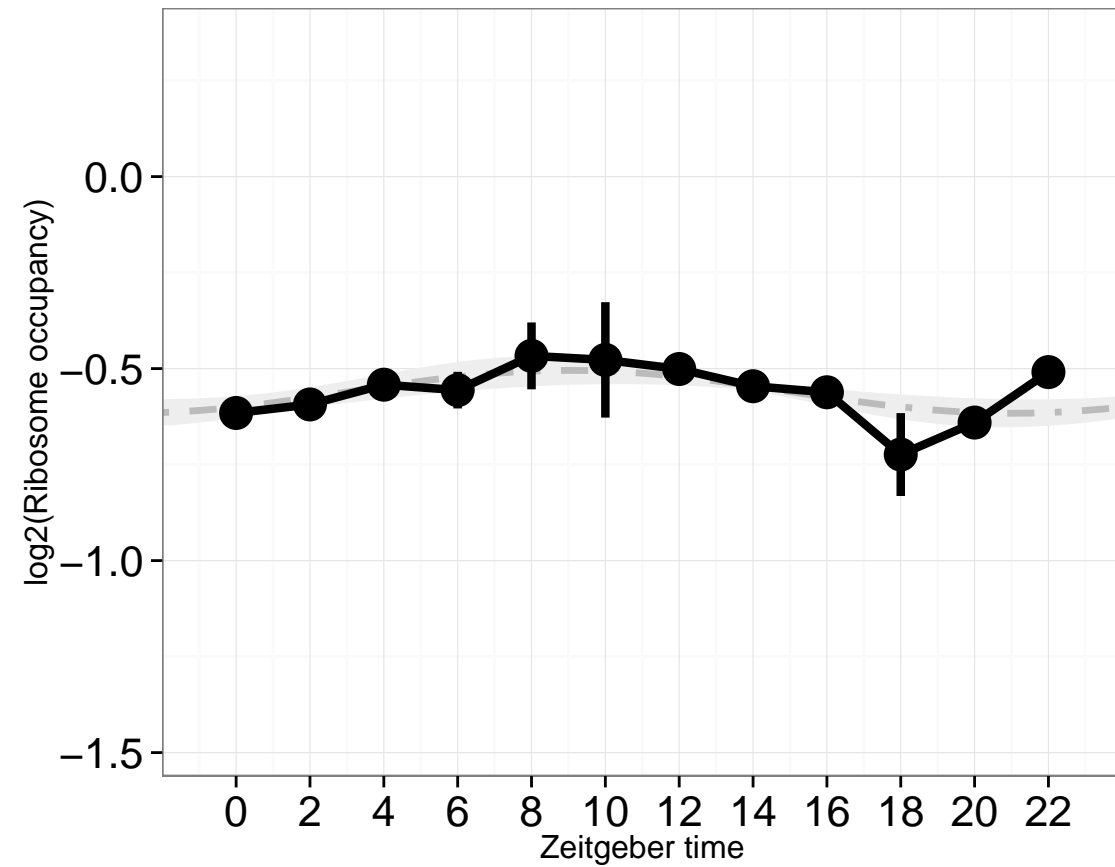

Supplement: SuppDataset_1.zip [file Aox3_set_D.pdf › Supplemental Dataset 1/D-mRNA_rhythm_translation_rhyth/Aox3_set_D.pdf]

## Ap2a2

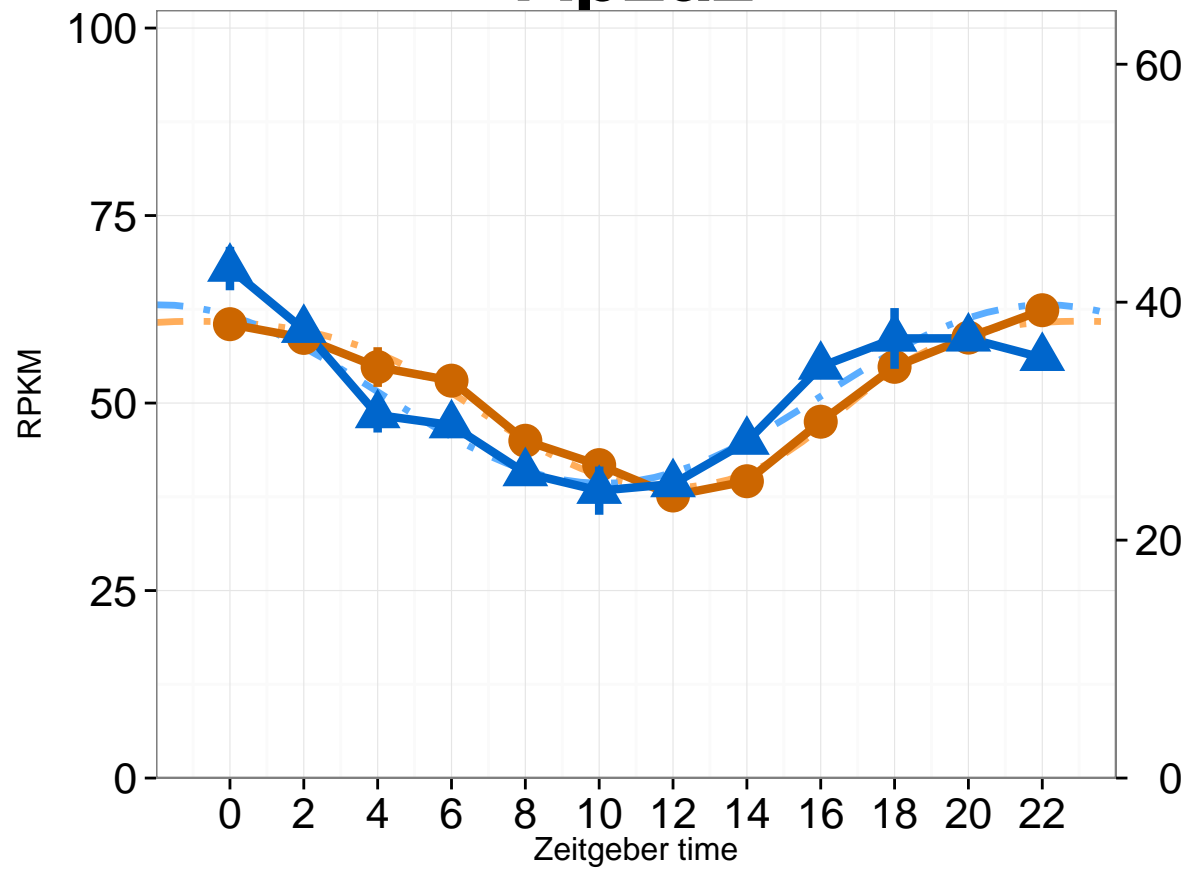

## Ap2a2

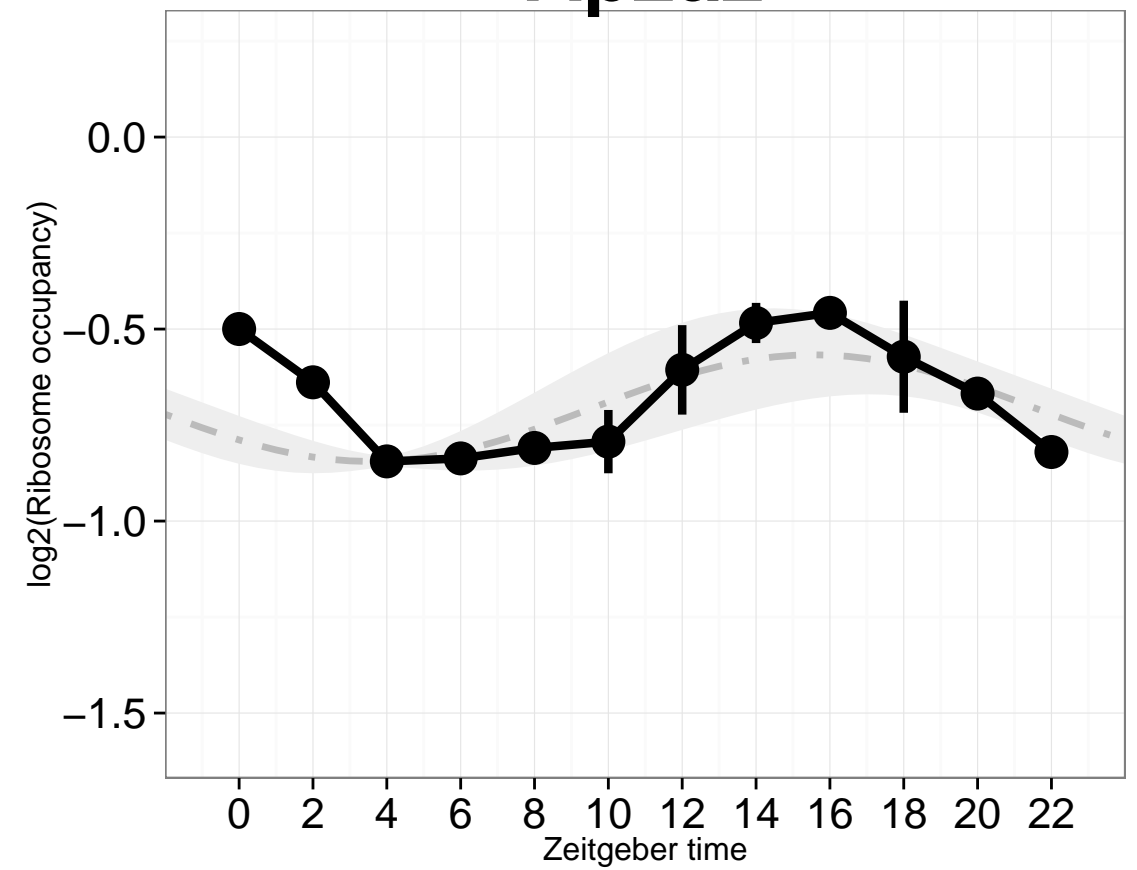

Supplement: SuppDataset_1.zip [file Ap2a2_set_D.pdf › Supplemental Dataset 1/D-mRNA_rhythm_translation_rhyth/Ap2a2_set_D.pdf]

# Ap3m1

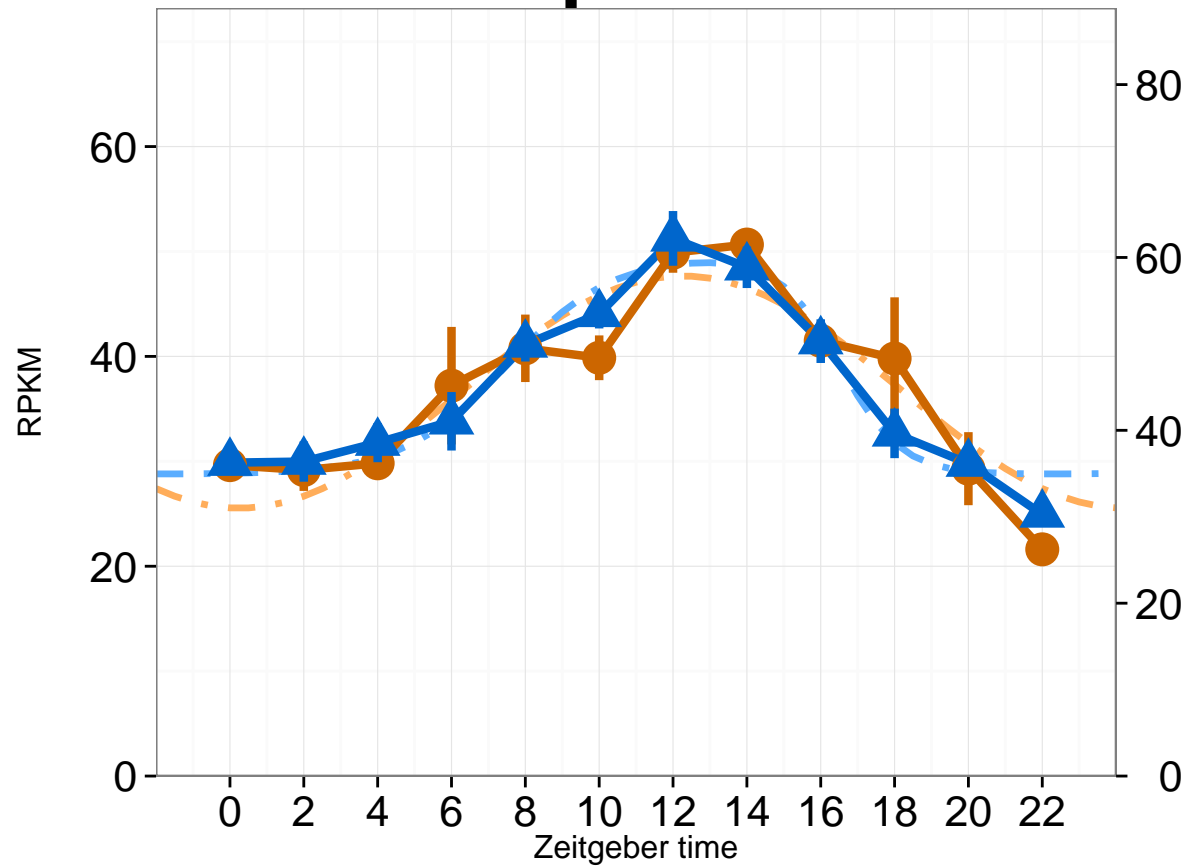

# Ap3m1

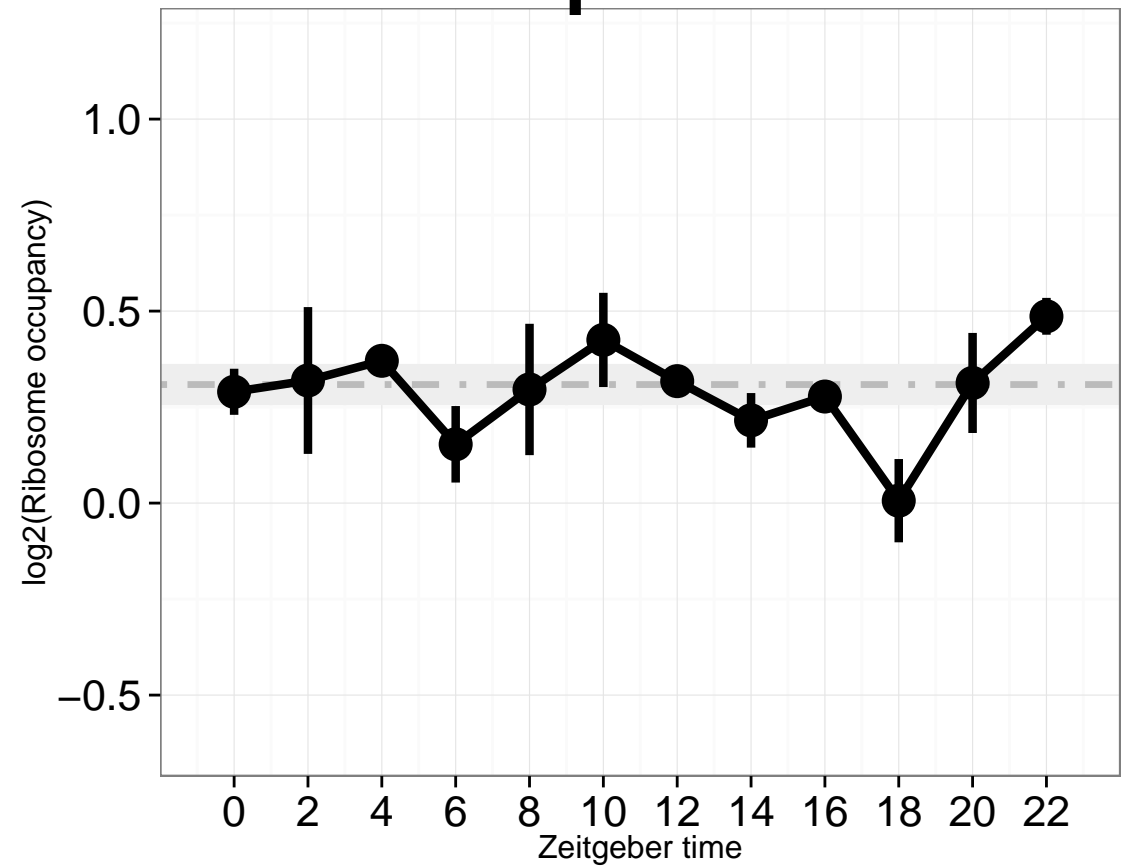

Supplement: SuppDataset_1.zip [file Ap3m1_set_D.pdf › Supplemental Dataset 1/D-mRNA_rhythm_translation_rhyth/Ap3m1_set_D.pdf]

# Apbb3

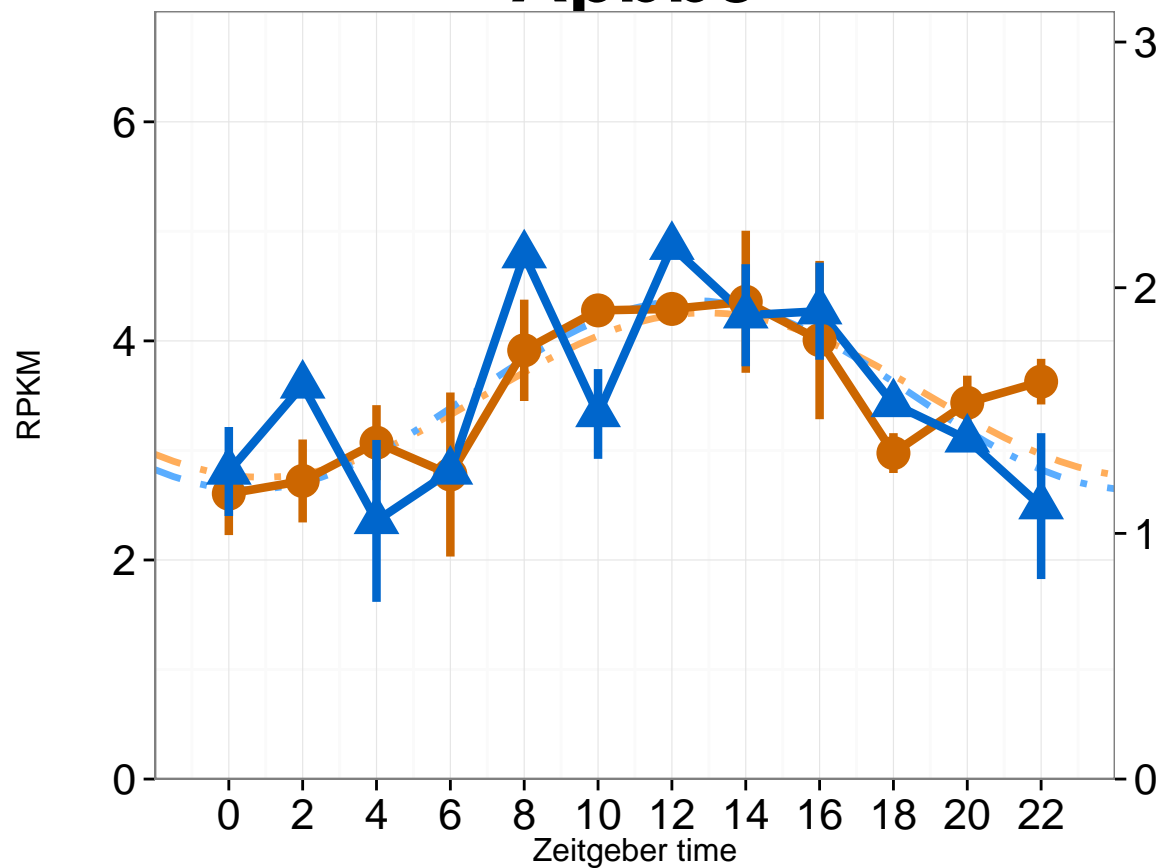

# Apbb3

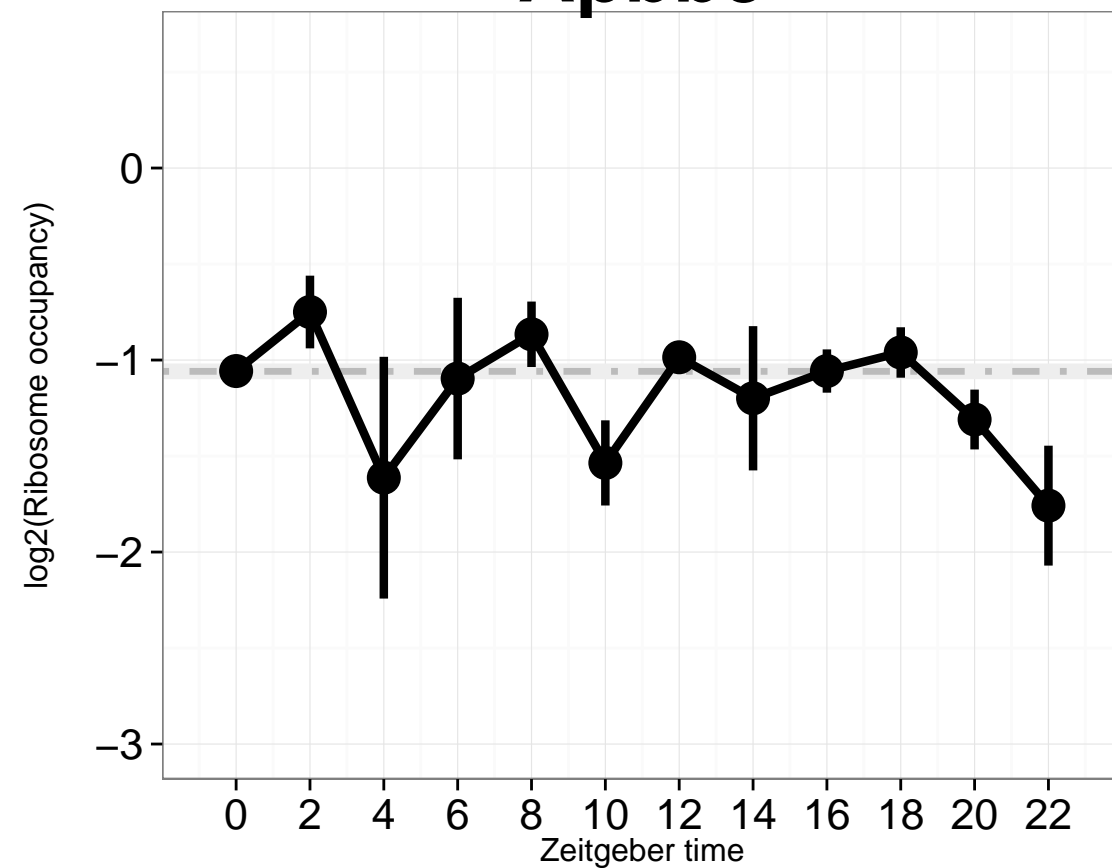

Supplement: SuppDataset_1.zip [file Apbb3_set_D.pdf › Supplemental Dataset 1/D-mRNA_rhythm_translation_rhyth/Apbb3_set_D.pdf]

## Apcs

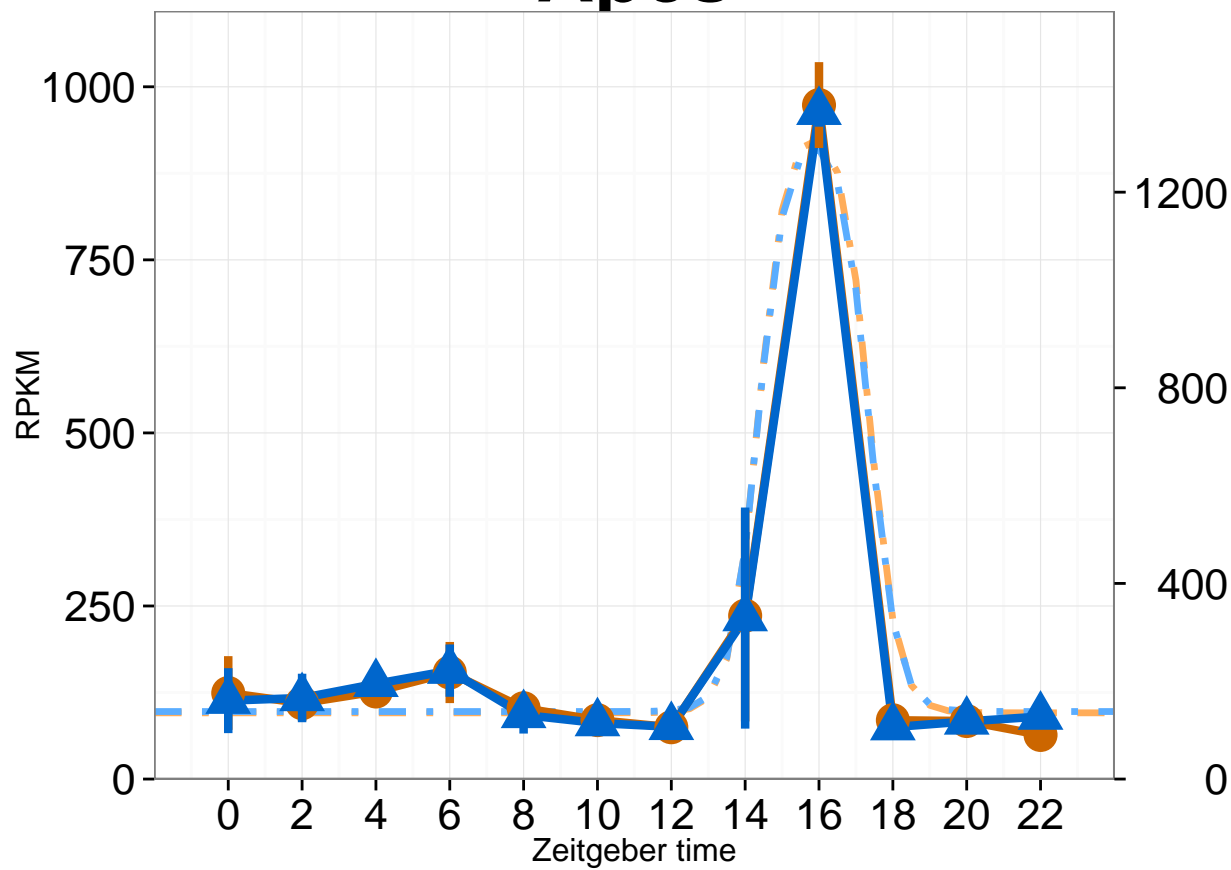

## Apcs

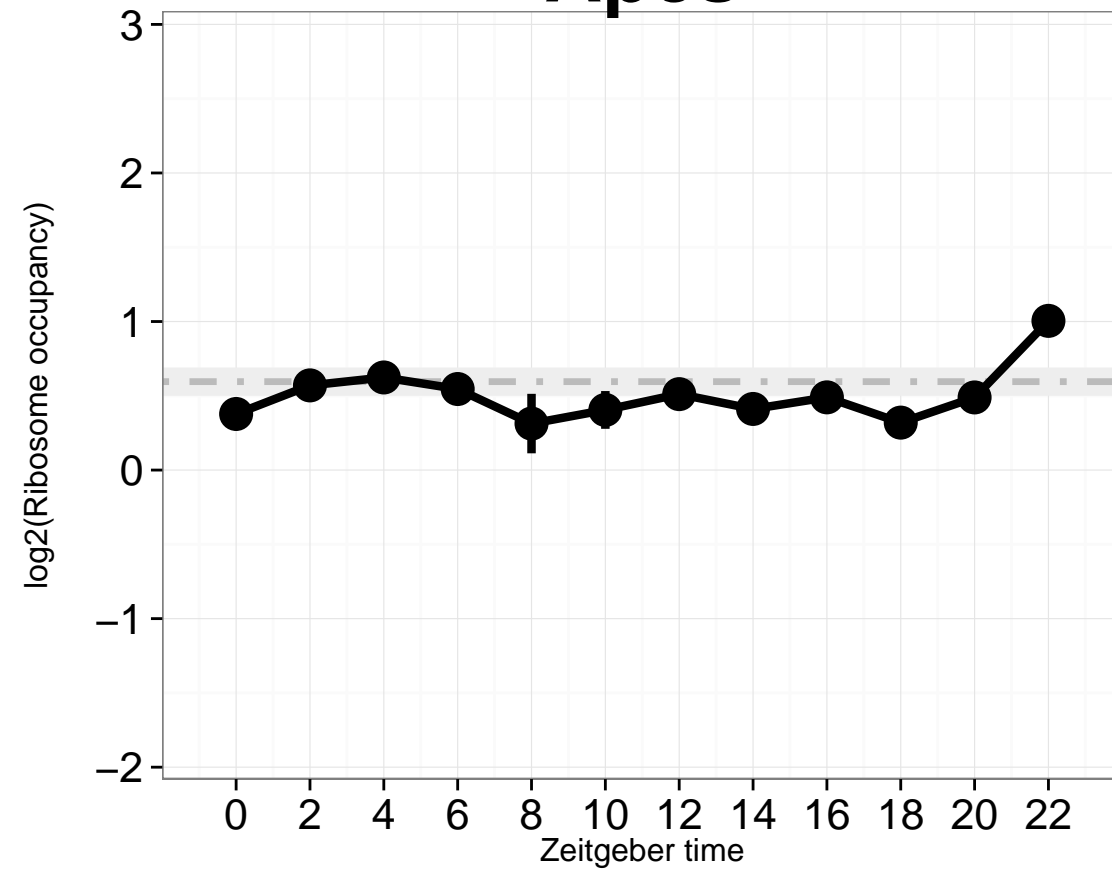

Supplement: SuppDataset_1.zip [file Apcs_set_D.pdf › Supplemental Dataset 1/D-mRNA_rhythm_translation_rhyth/Apcs_set_D.pdf]

# Aqp11

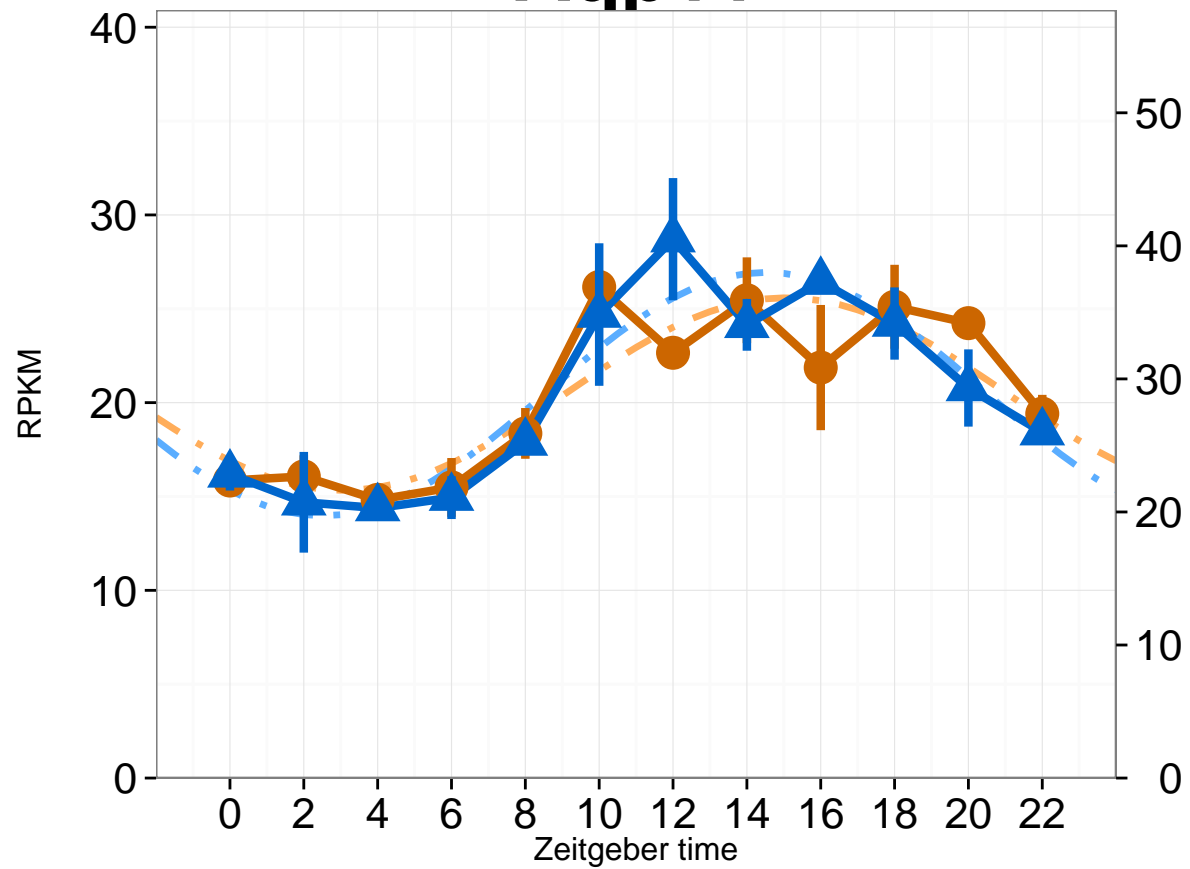

# Aqp11

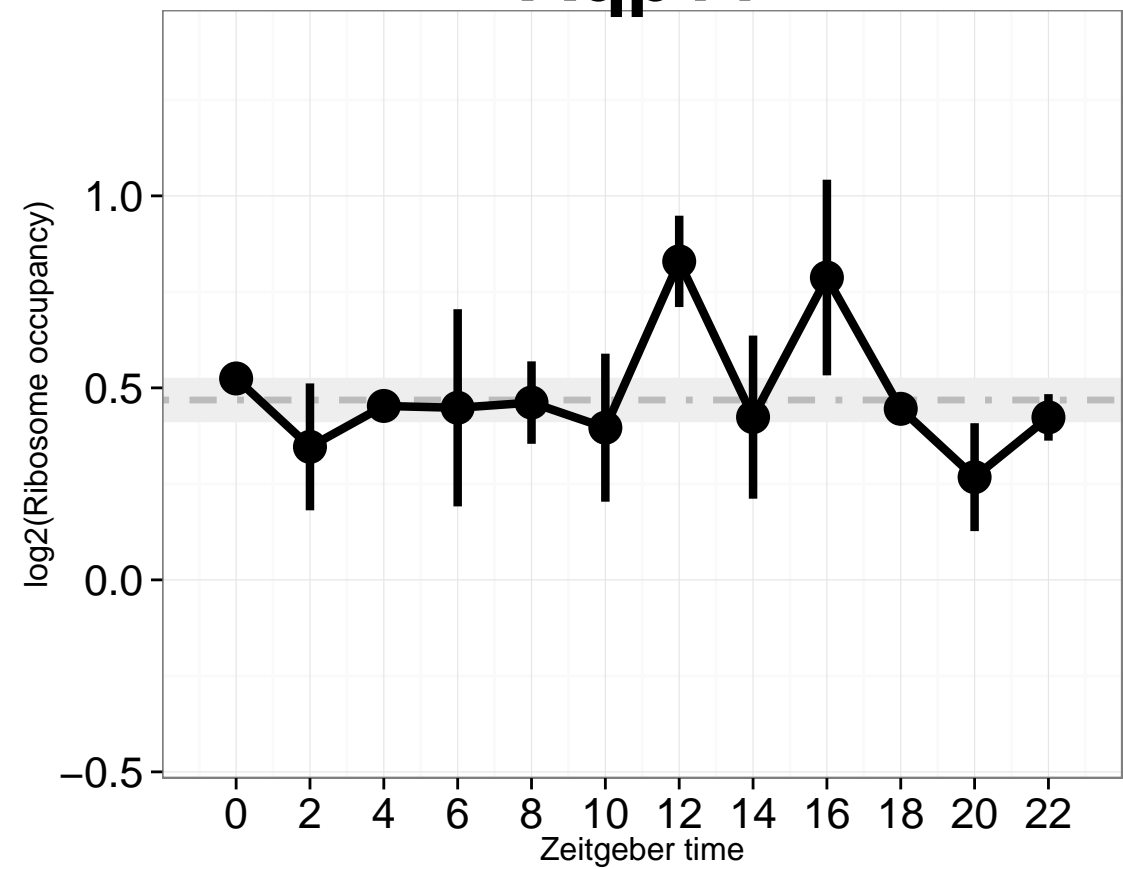

Supplement: SuppDataset_1.zip [file Aqp11_set_D.pdf › Supplemental Dataset 1/D-mRNA_rhythm_translation_rhyth/Aqp11_set_D.pdf]

# Aqp8

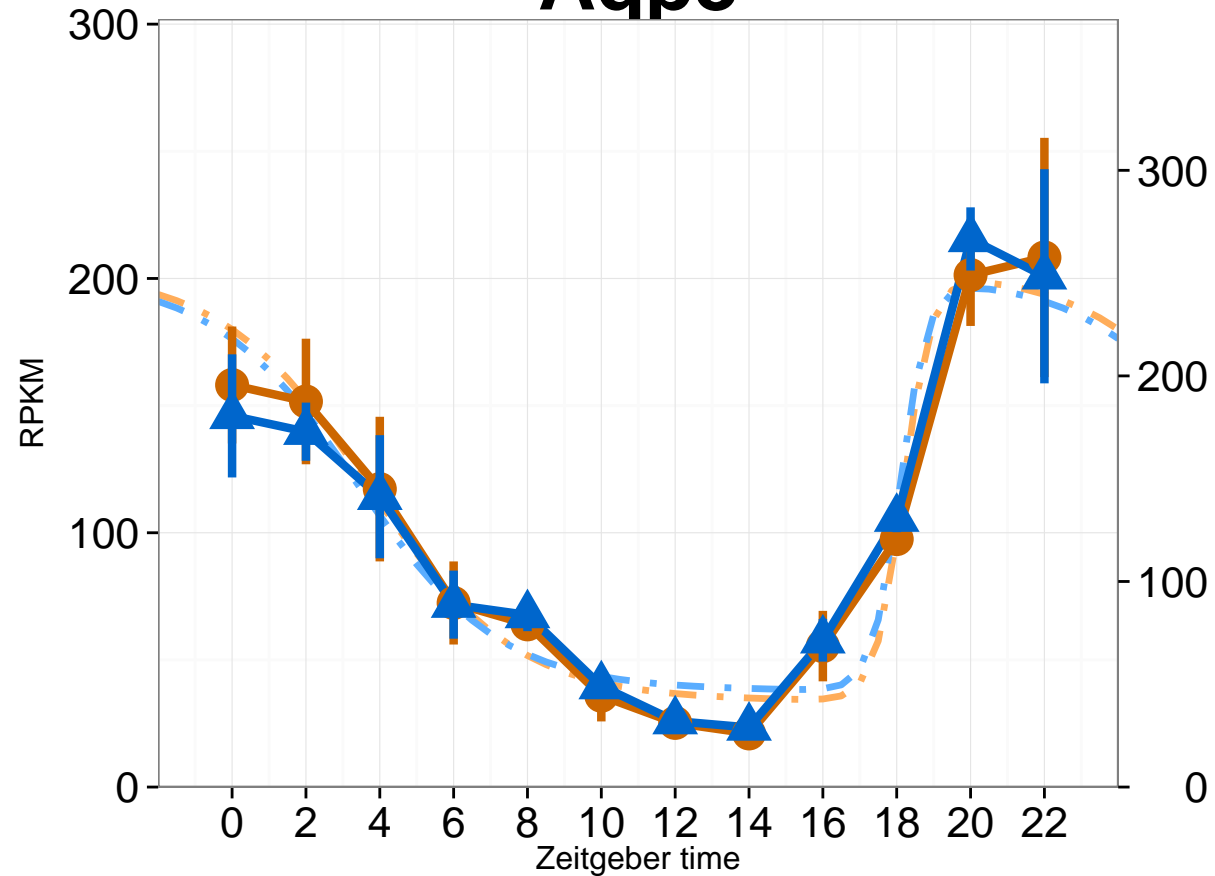

# Aqp8

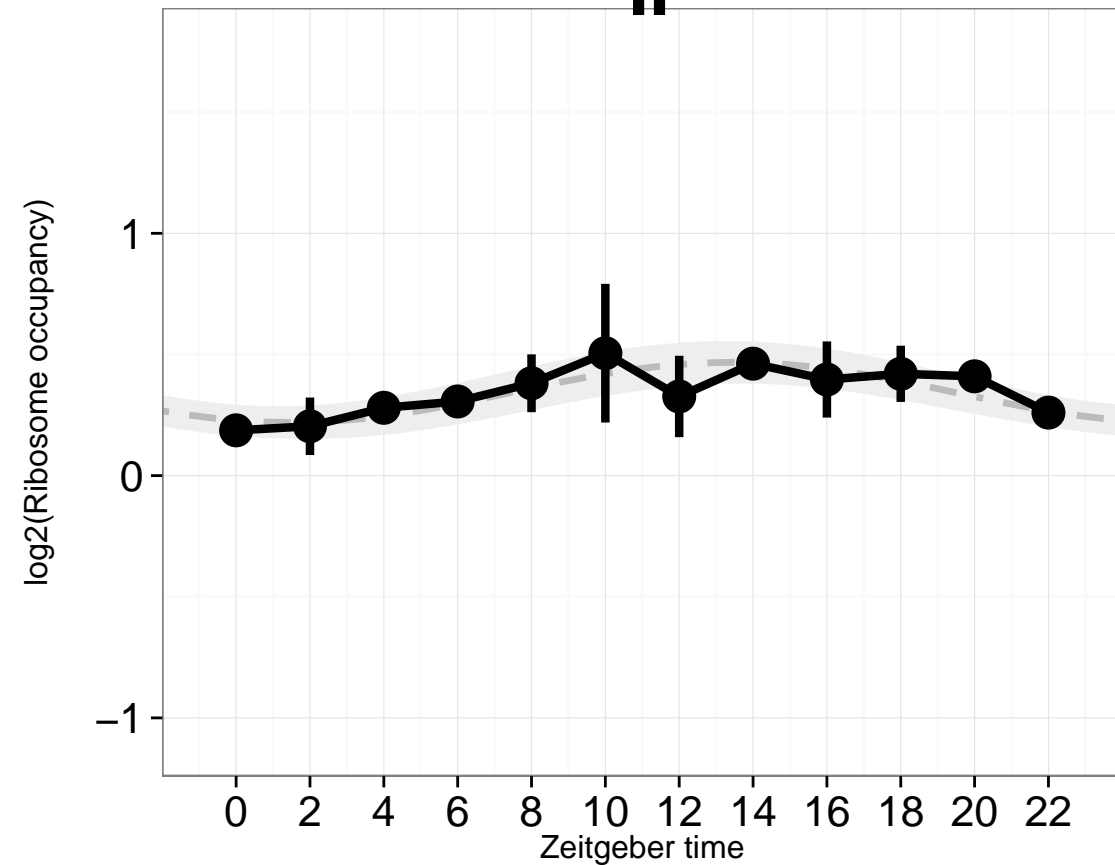

Supplement: SuppDataset_1.zip [file Aqp8_set_D.pdf › Supplemental Dataset 1/D-mRNA_rhythm_translation_rhyth/Aqp8_set_D.pdf]

Ar

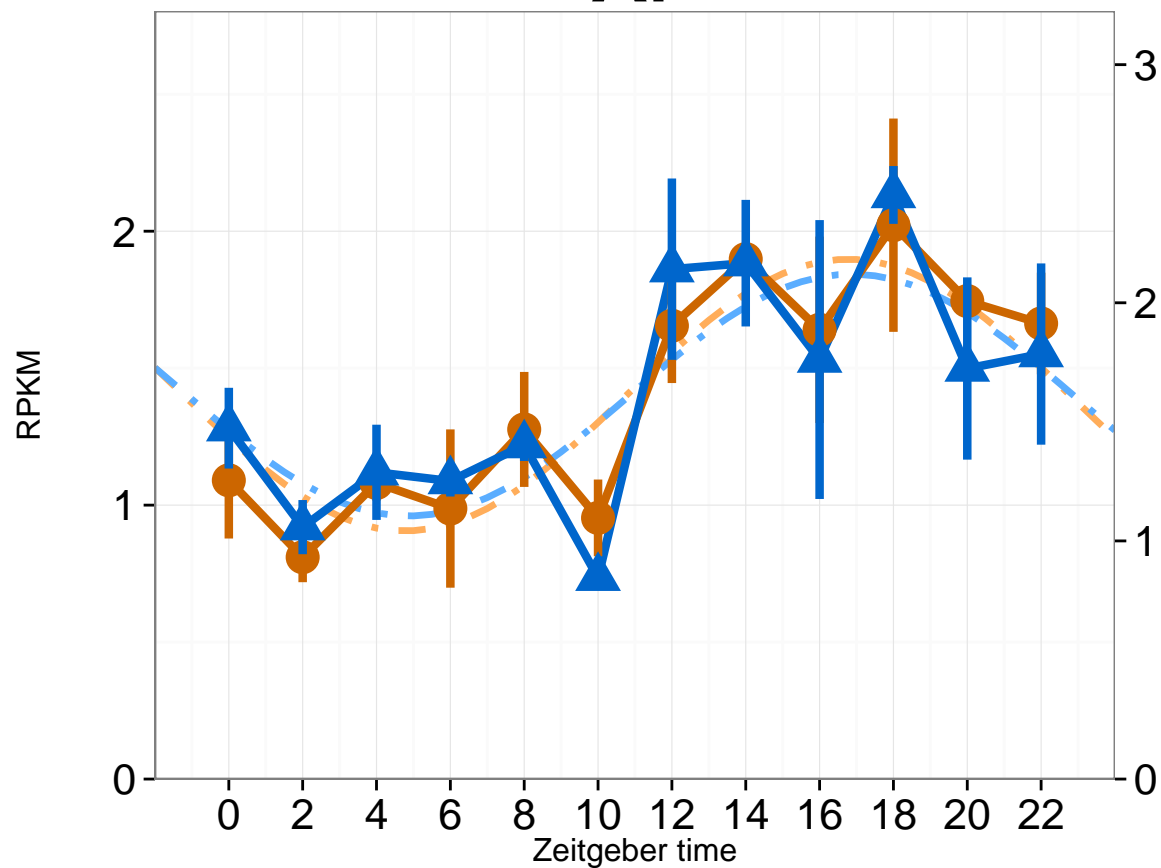

Ar

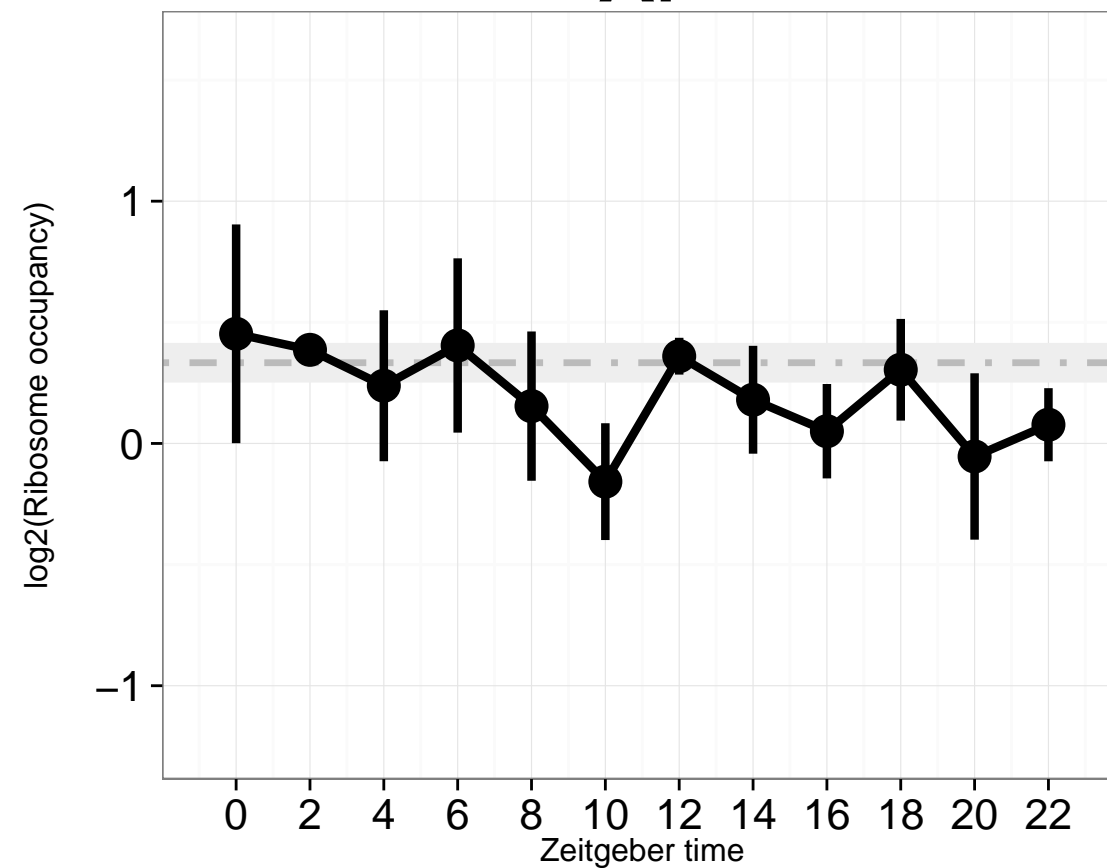

Supplement: SuppDataset_1.zip [file Ar_set_D.pdf › Supplemental Dataset 1/D-mRNA_rhythm_translation_rhyth/Ar_set_D.pdf]

# Arhgap21

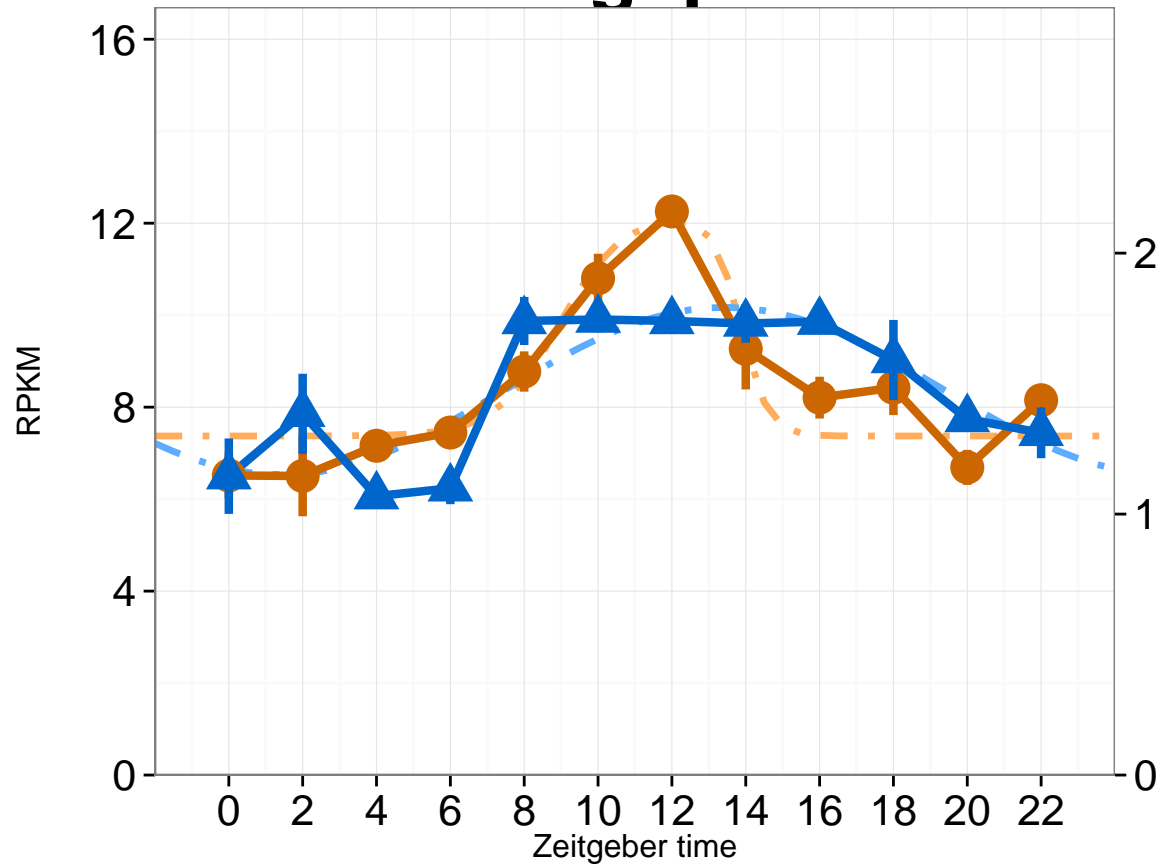

# Arhgap21

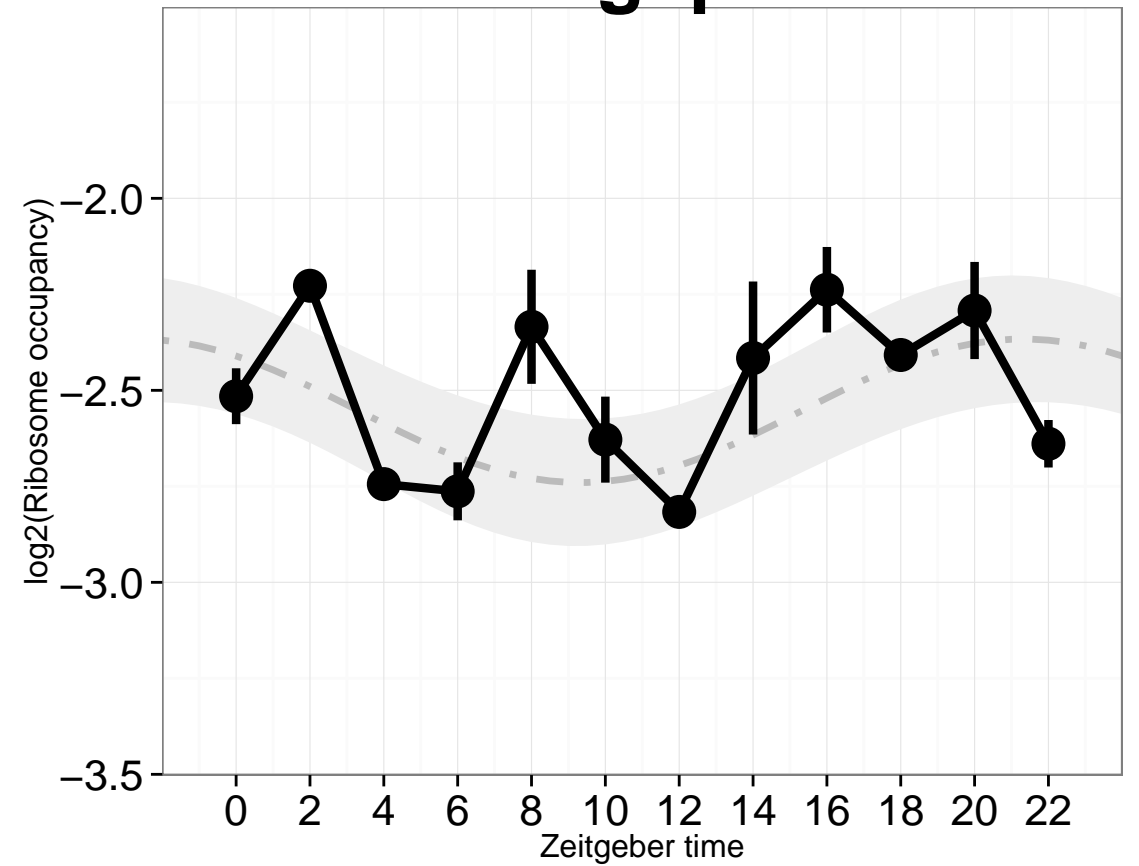

Supplement: SuppDataset_1.zip [file Arhgap21_set_D.pdf › Supplemental Dataset 1/D-mRNA_rhythm_translation_rhyth/Arhgap21_set_D.pdf]

# Arhgap24

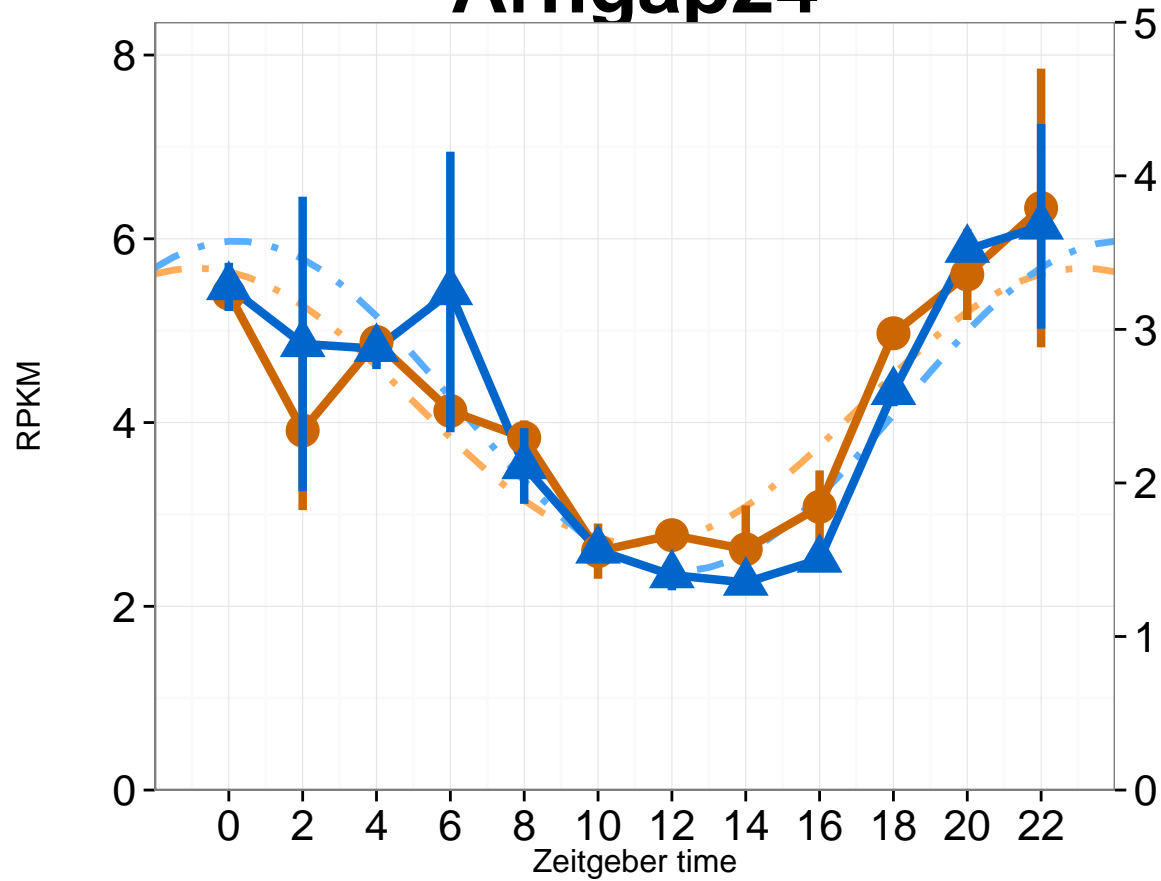

# Arhgap24

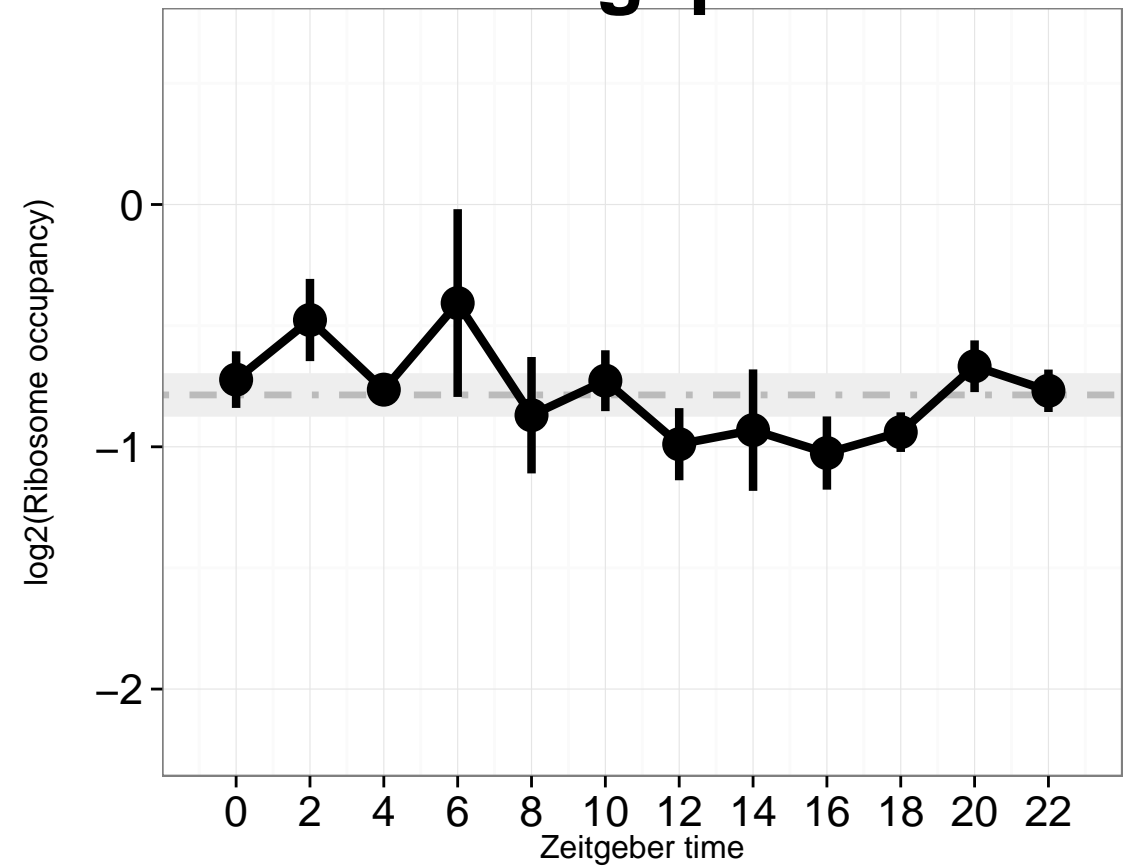

Supplement: SuppDataset_1.zip [file Arhgap24_set_D.pdf › Supplemental Dataset 1/D-mRNA_rhythm_translation_rhyth/Arhgap24_set_D.pdf]

## Arhgef10l

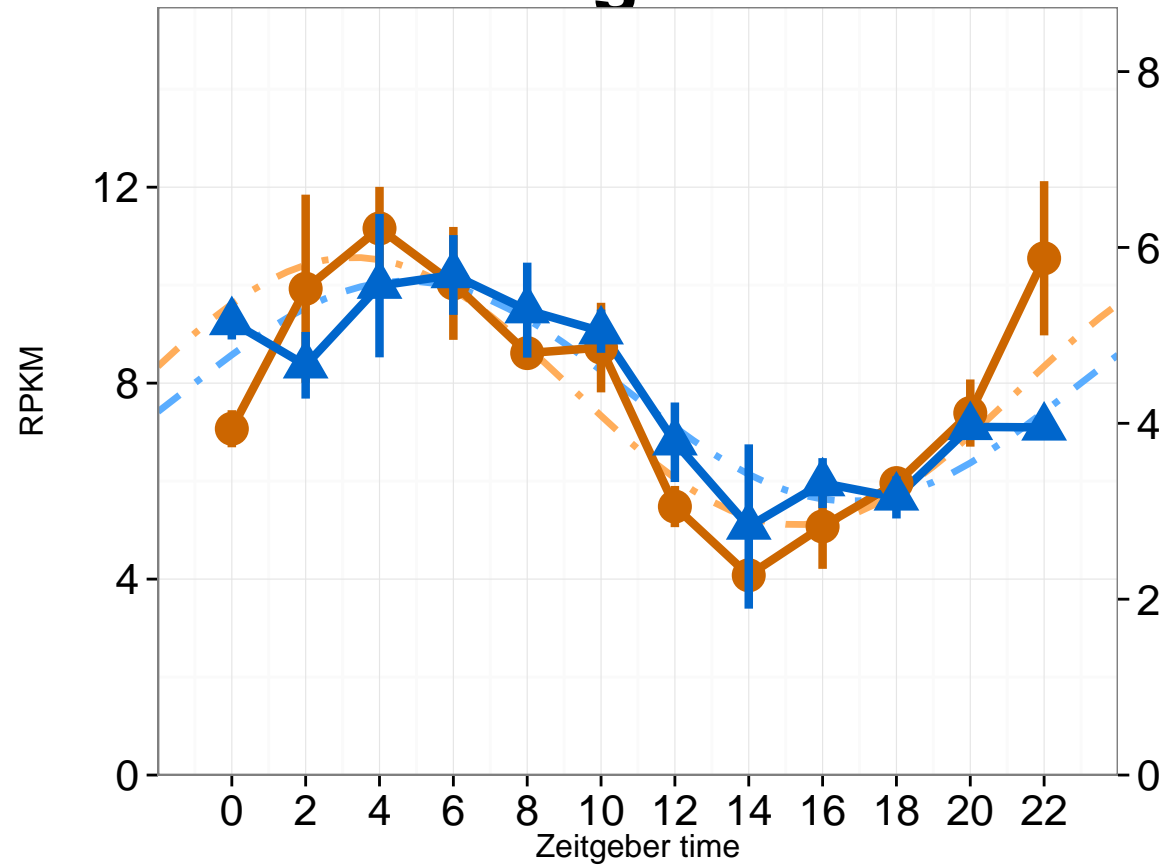

## Arhgef10l

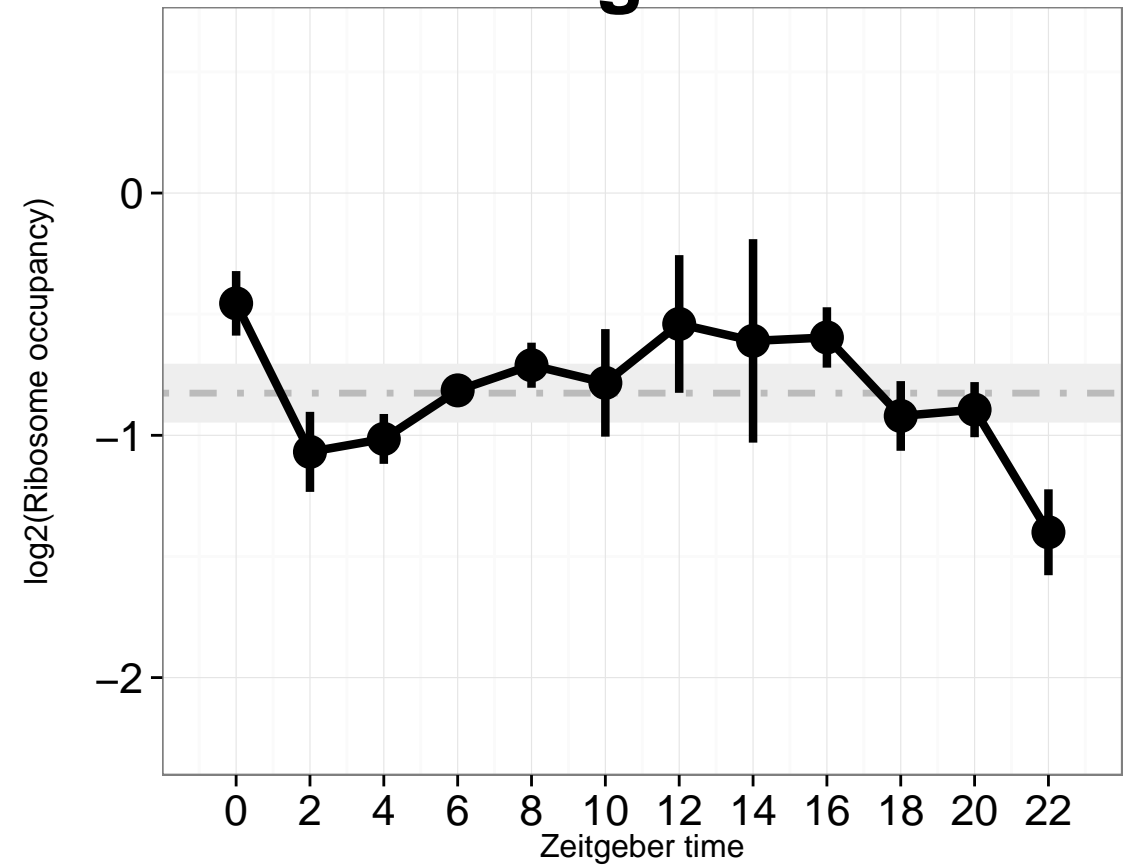

Supplement: SuppDataset_1.zip [file Arhgef10l_set_D.pdf › Supplemental Dataset 1/D-mRNA_rhythm_translation_rhyth/Arhgef10l_set_D.pdf]

# Arhgef19

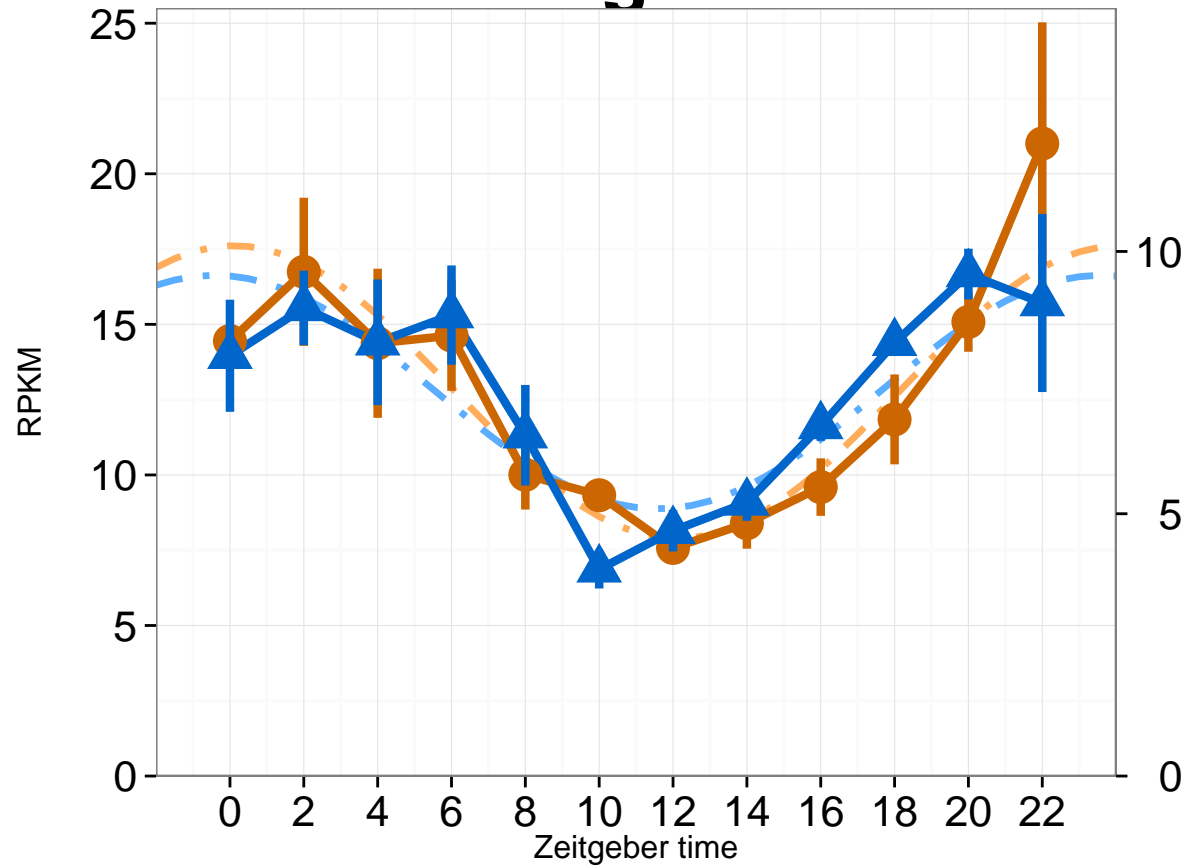

# Arhgef19

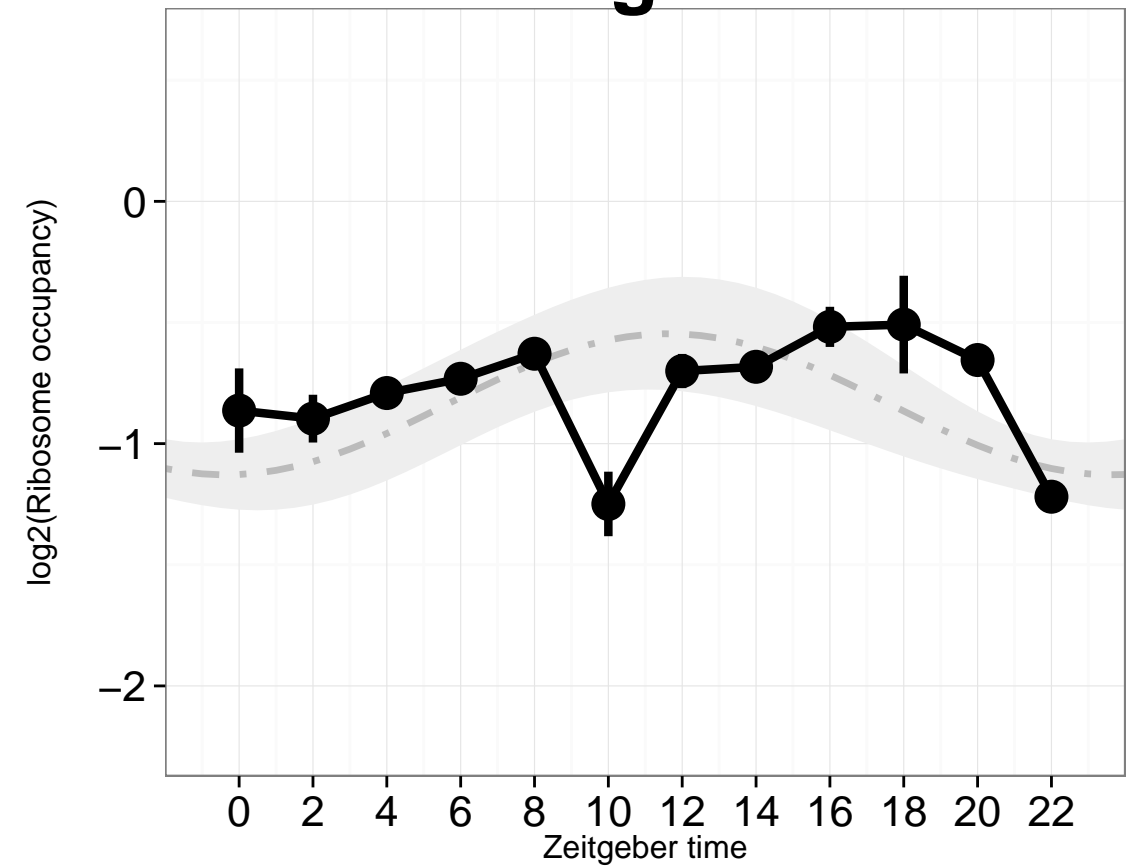

Supplement: SuppDataset_1.zip [file Arhgef19_set_D.pdf › Supplemental Dataset 1/D-mRNA_rhythm_translation_rhyth/Arhgef19_set_D.pdf]

# Arhgef26

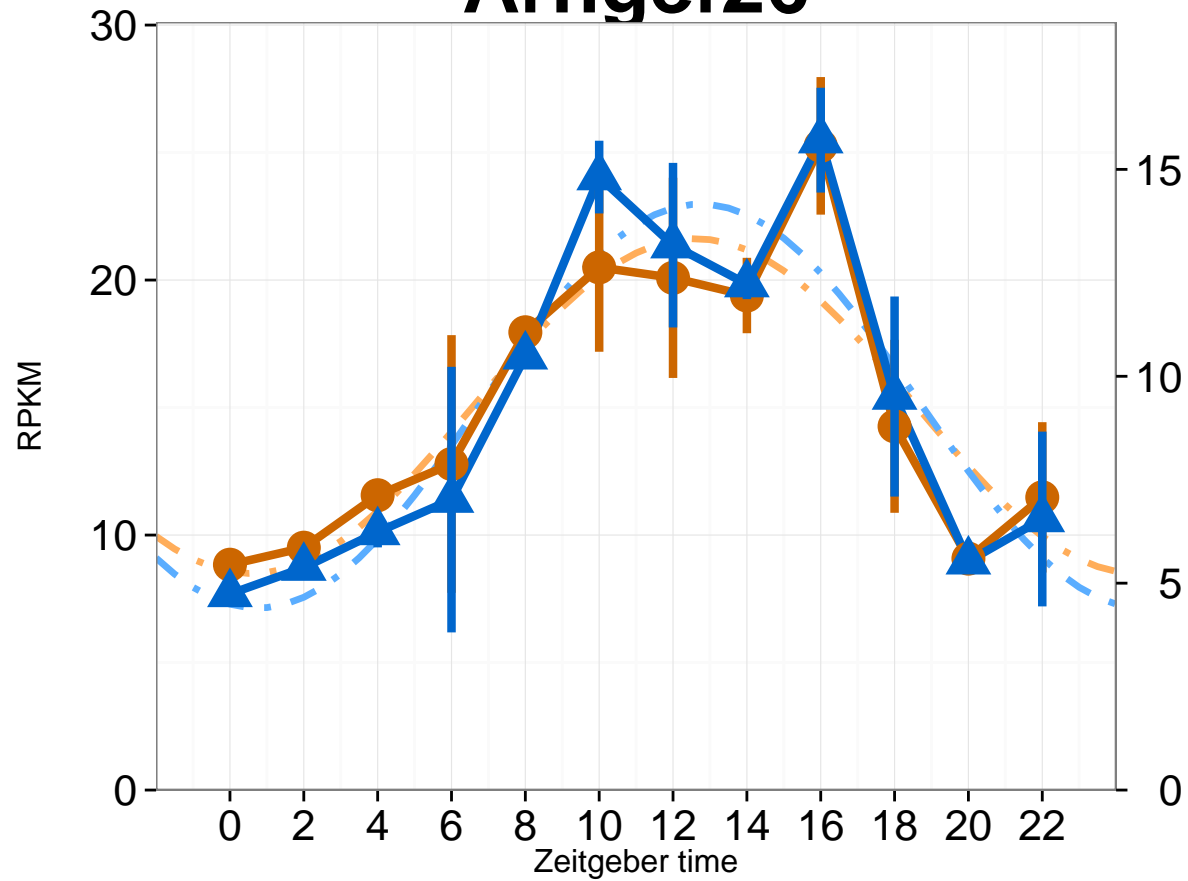

# Arhgef26

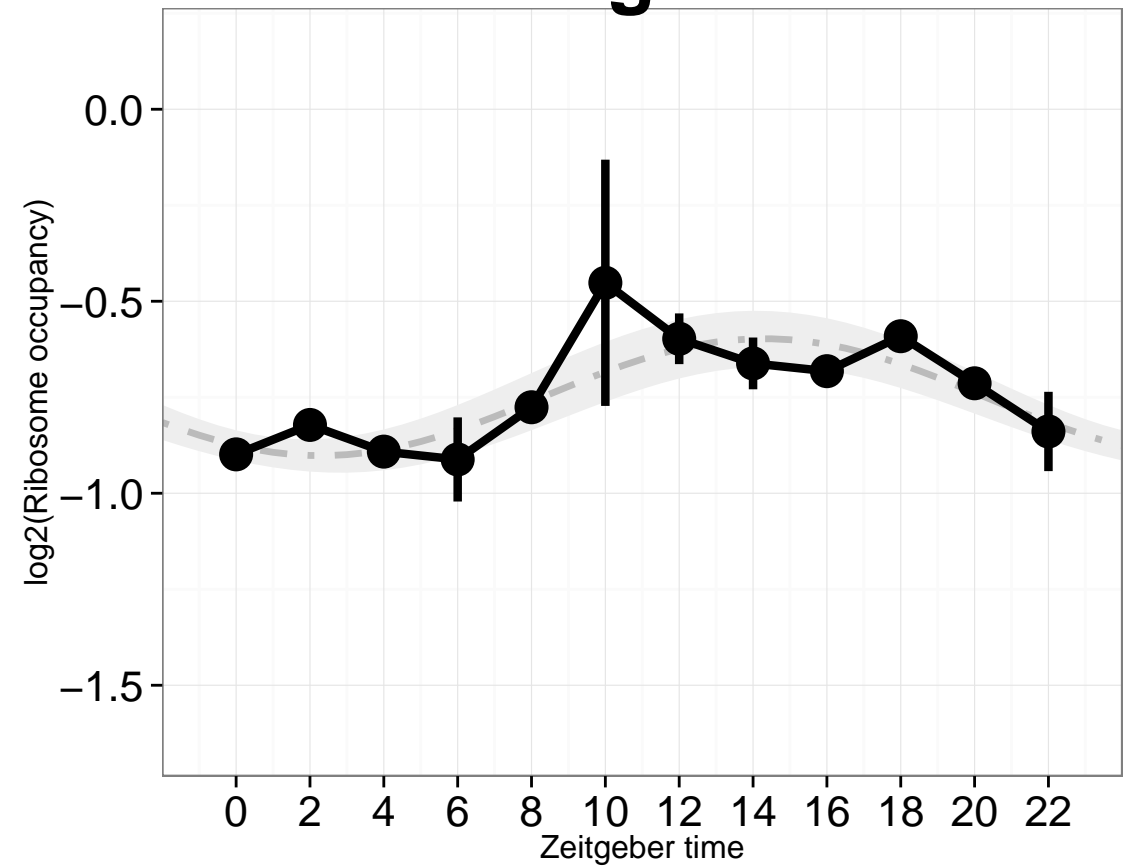

Supplement: SuppDataset_1.zip [file Arhgef26_set_D.pdf › Supplemental Dataset 1/D-mRNA_rhythm_translation_rhyth/Arhgef26_set_D.pdf]

# Arhgef37

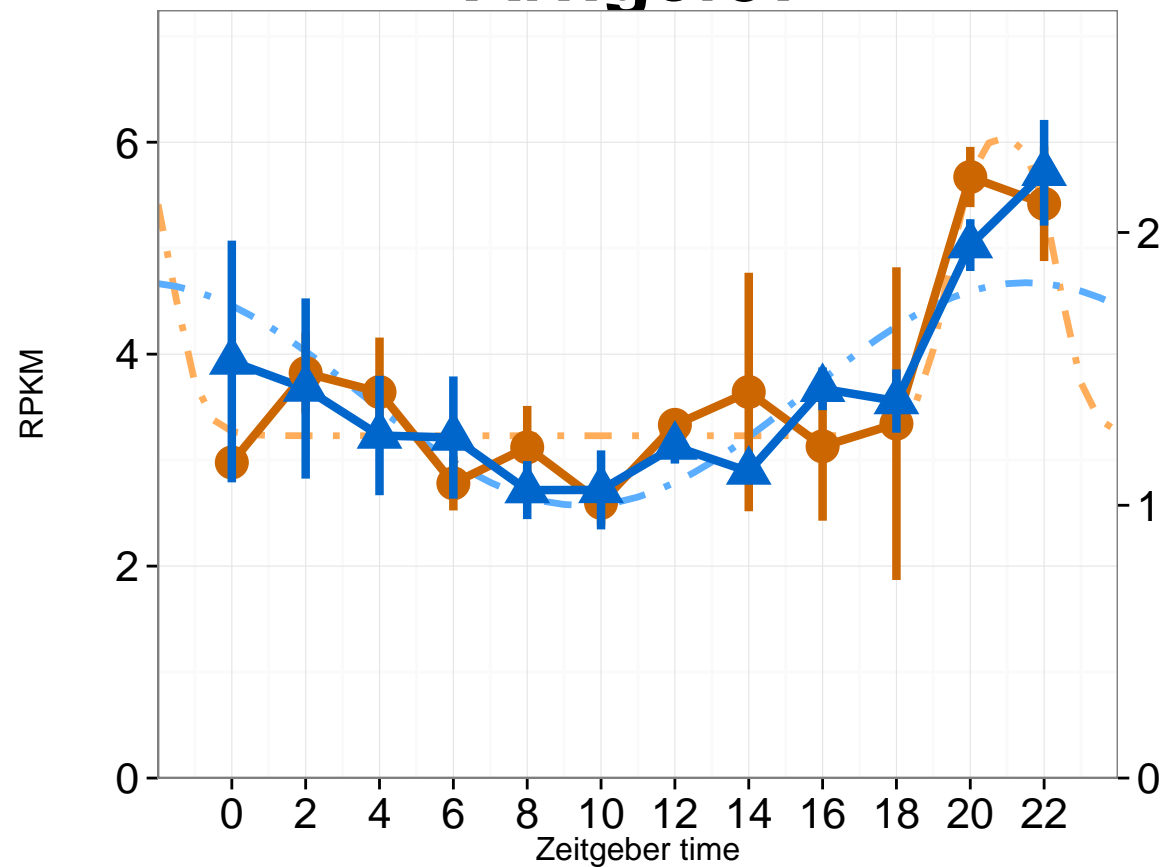

# Arhgef37

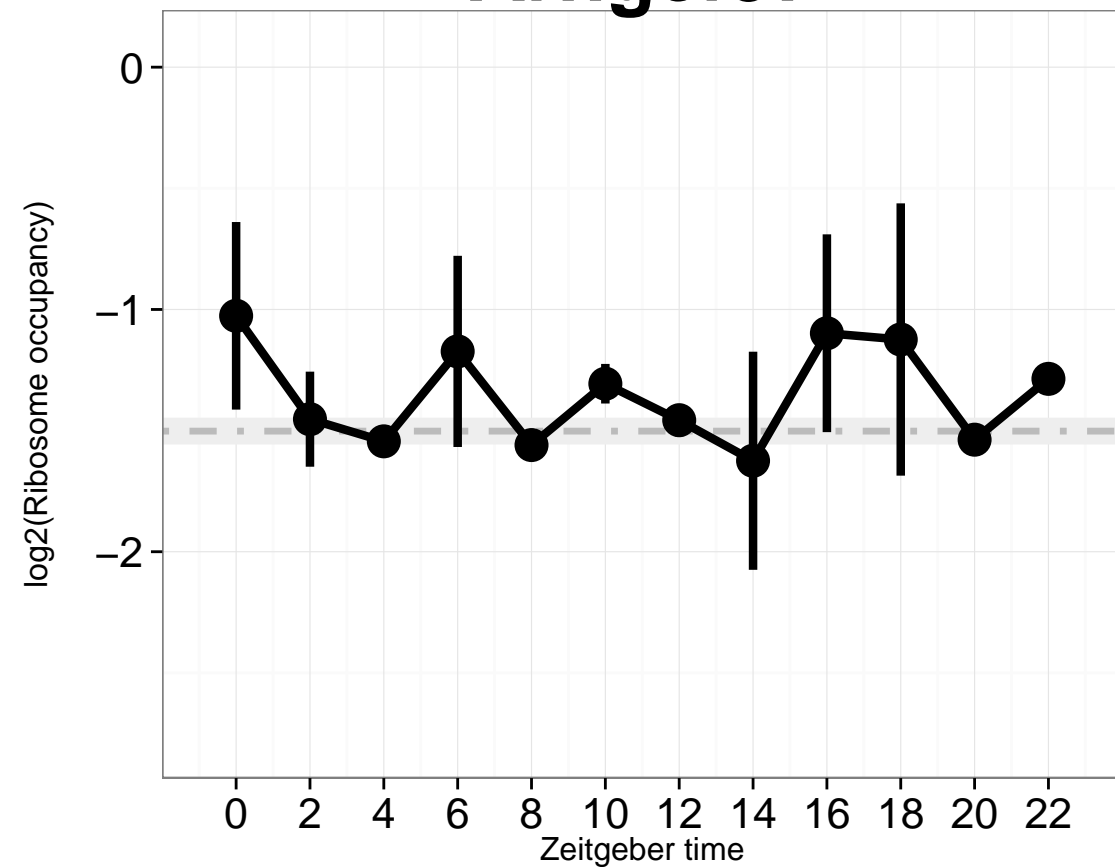

Supplement: SuppDataset_1.zip [file Arhgef37_set_D.pdf › Supplemental Dataset 1/D-mRNA_rhythm_translation_rhyth/Arhgef37_set_D.pdf]

# Arl4a

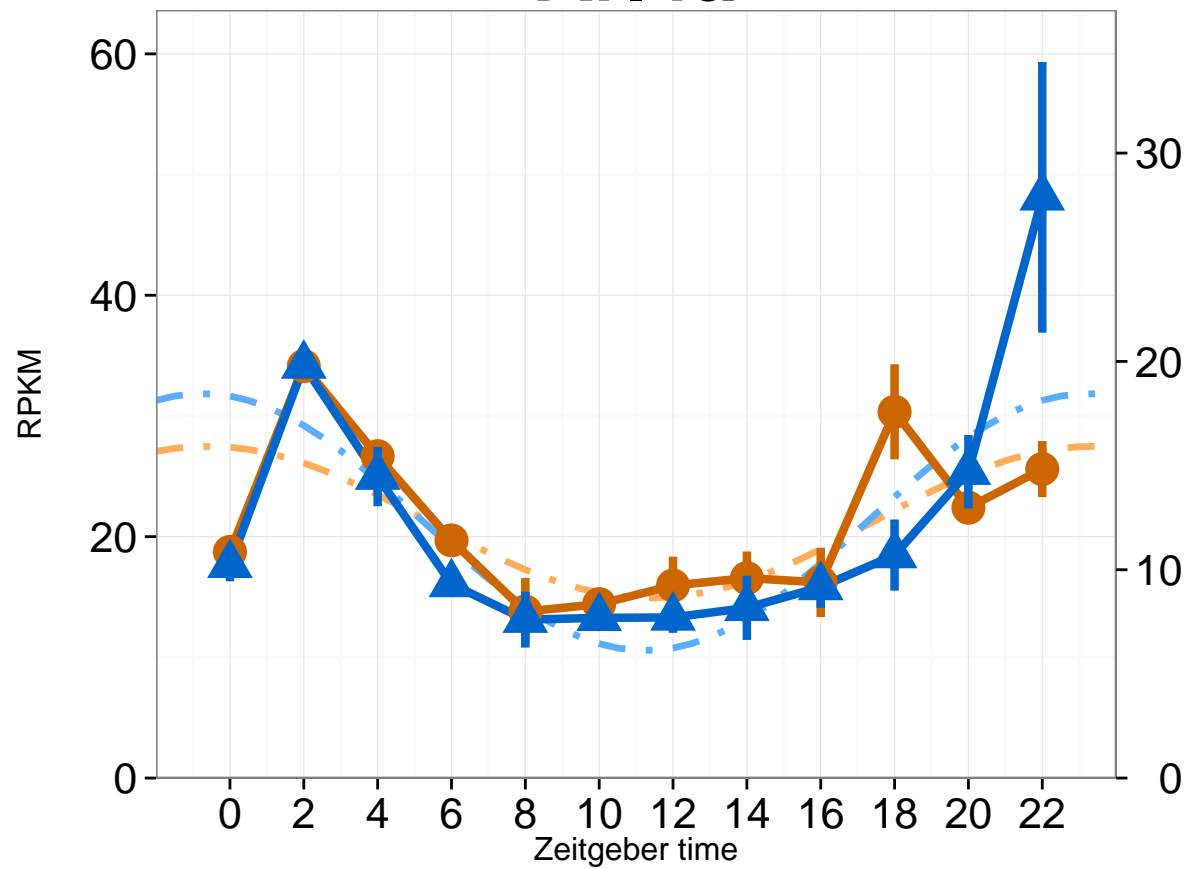

# Arl4a

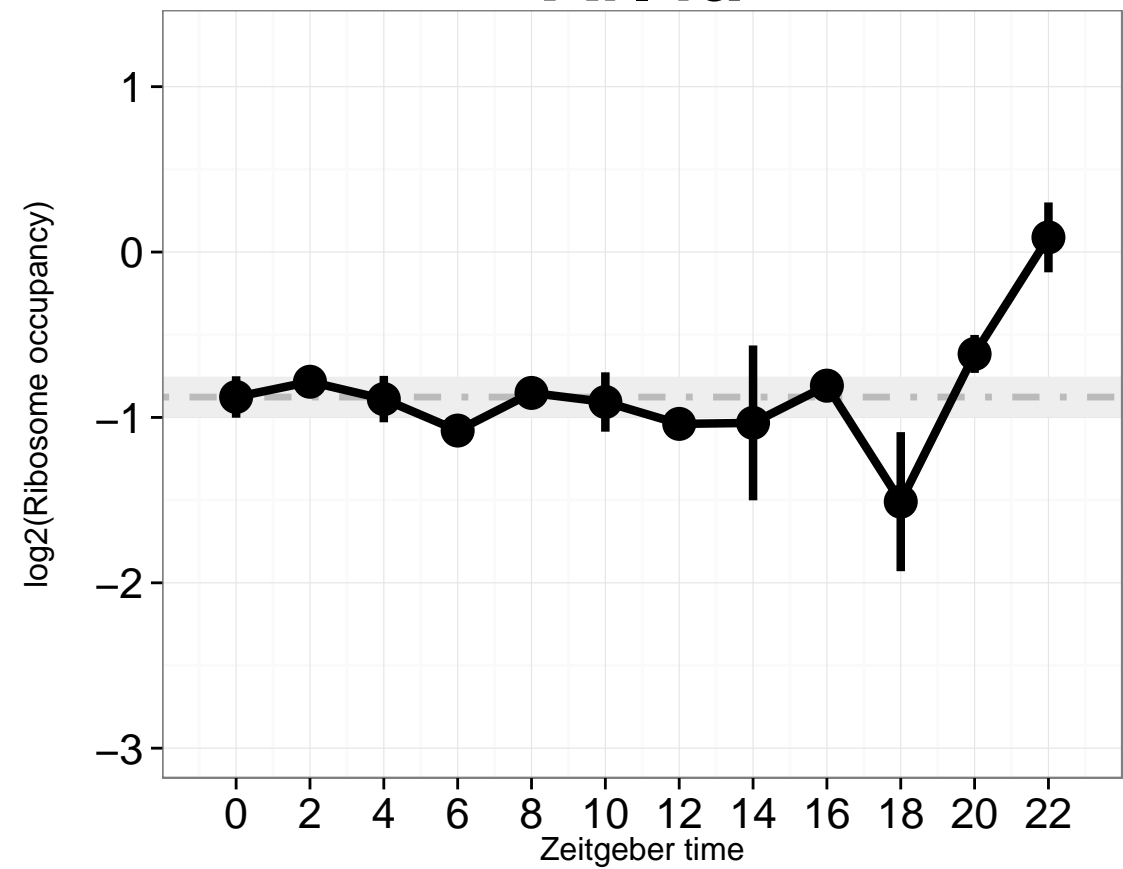

Supplement: SuppDataset_1.zip [file Arl4a_set_D.pdf › Supplemental Dataset 1/D-mRNA_rhythm_translation_rhyth/Arl4a_set_D.pdf]

## Arntl

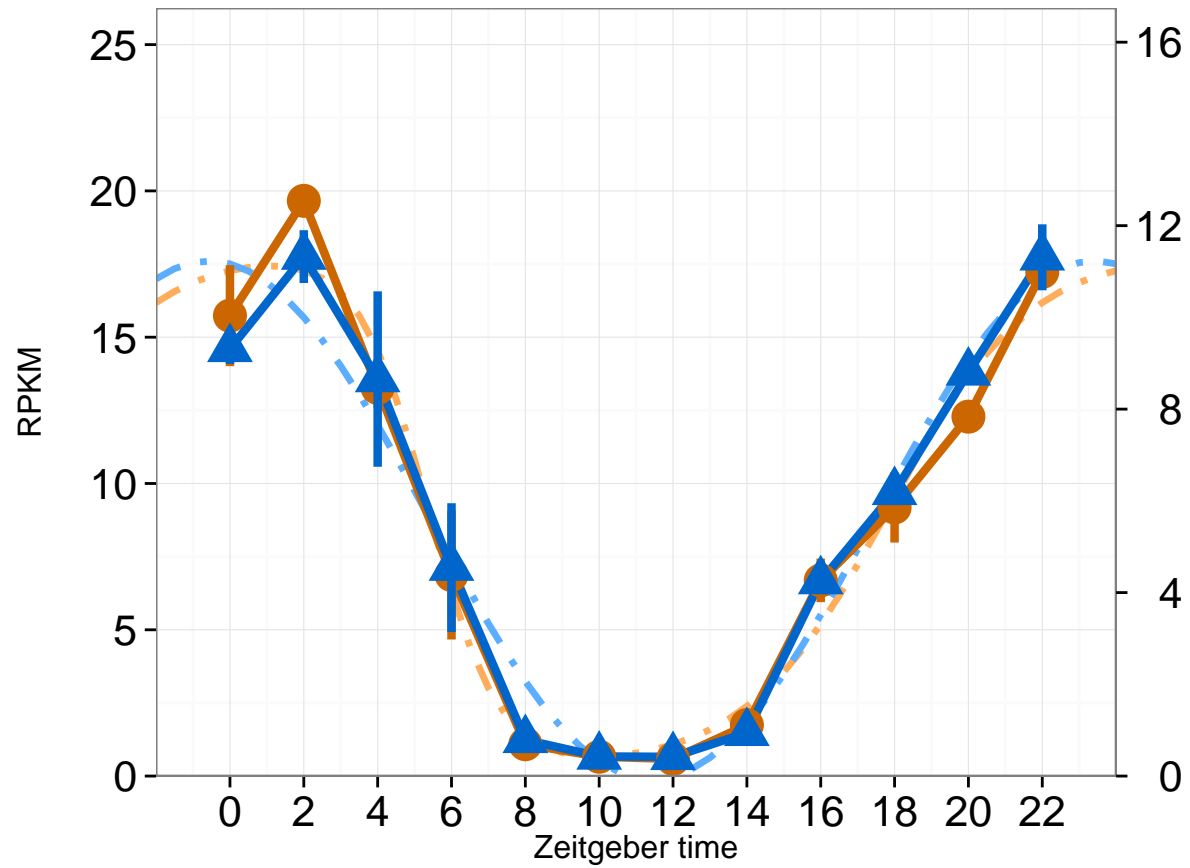

## Arntl

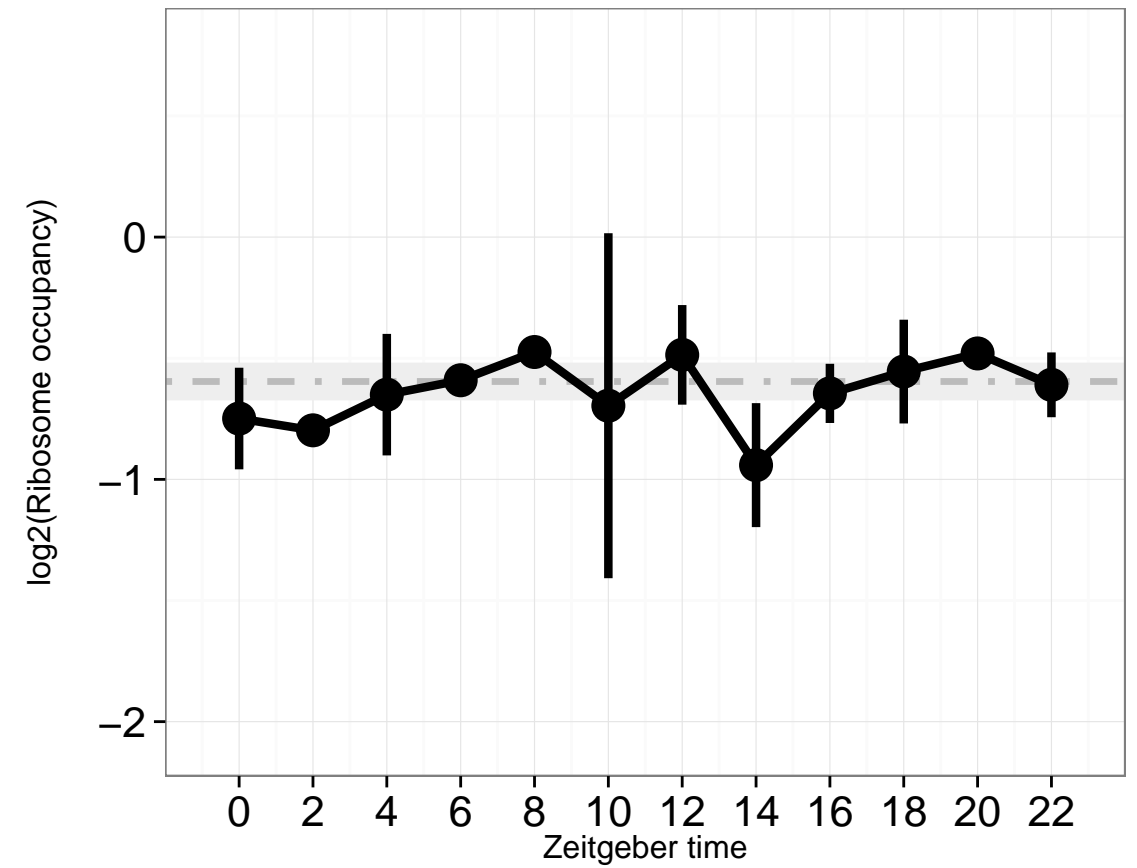

Supplement: SuppDataset_1.zip [file Arntl_set_D.pdf › Supplemental Dataset 1/D-mRNA_rhythm_translation_rhyth/Arntl_set_D.pdf]

# Arrdc3

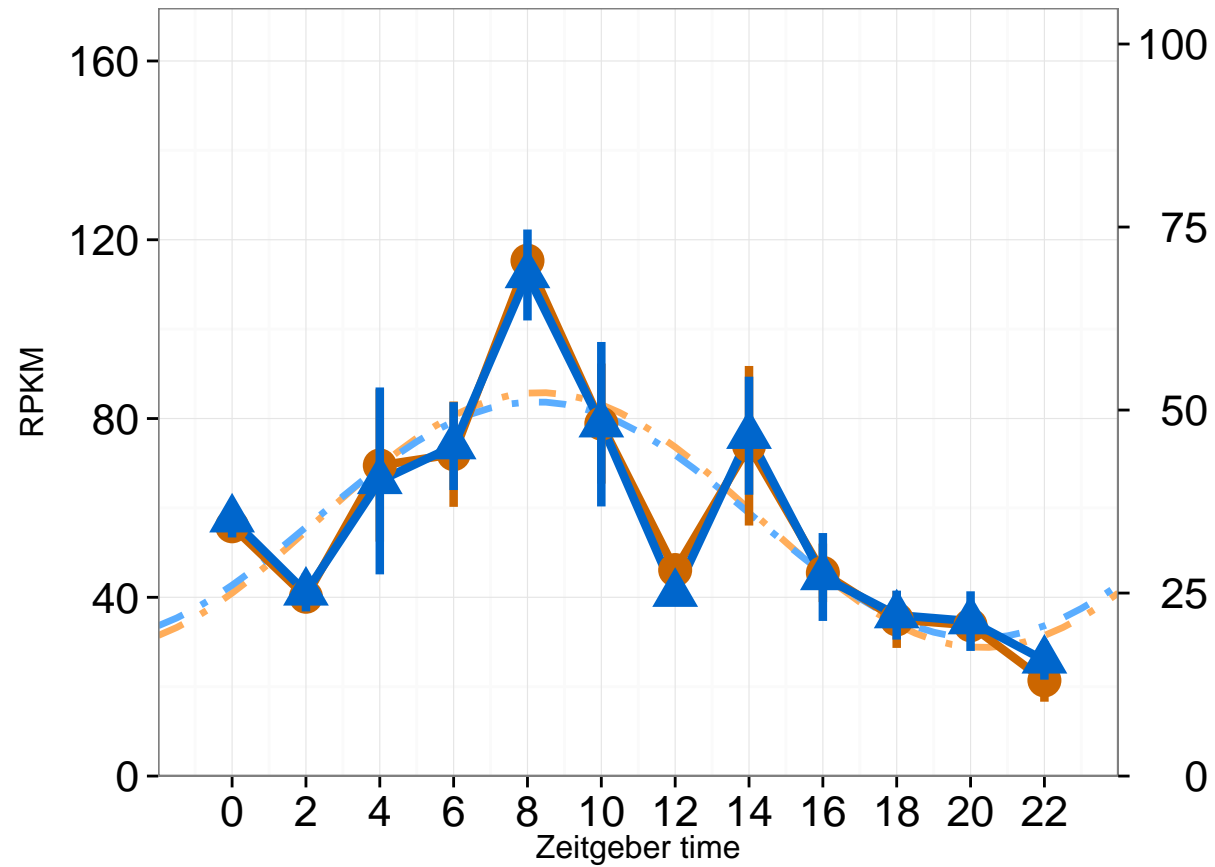

# Arrdc3

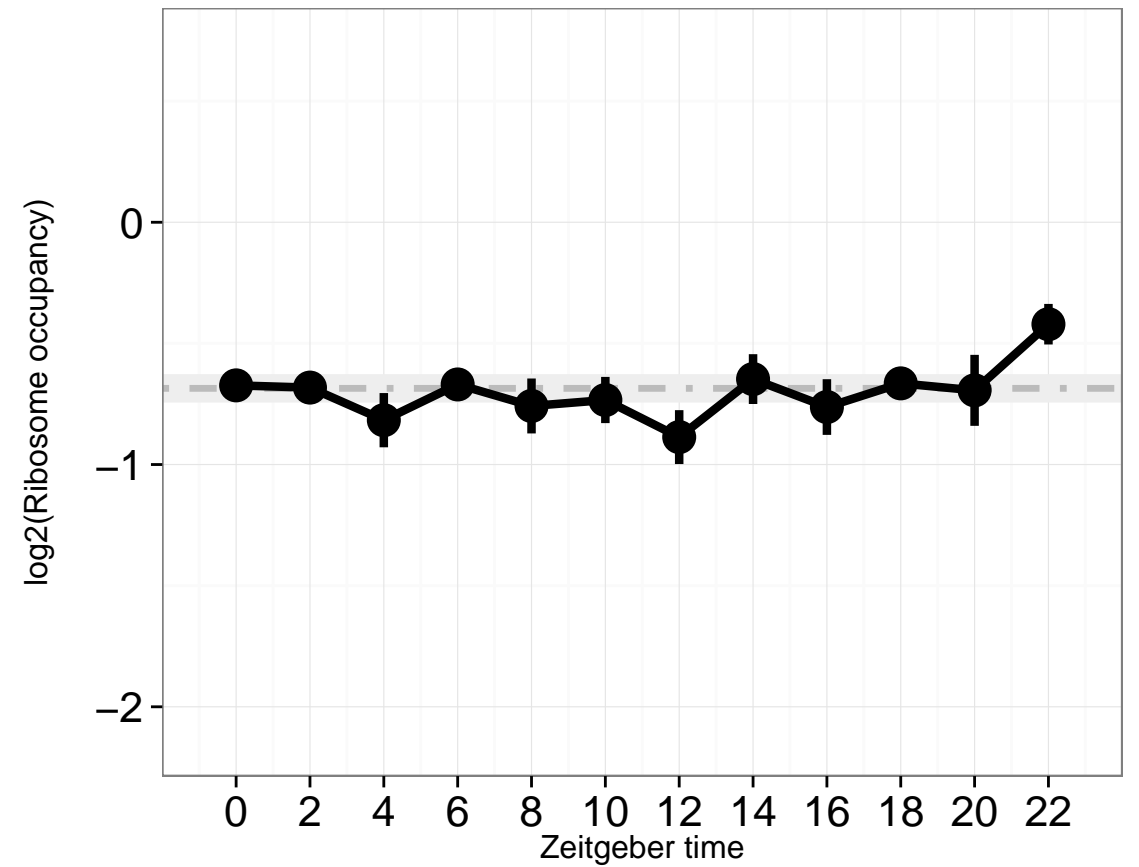

Supplement: SuppDataset_1.zip [file Arrdc3_set_D.pdf › Supplemental Dataset 1/D-mRNA_rhythm_translation_rhyth/Arrdc3_set_D.pdf]

## Arsg

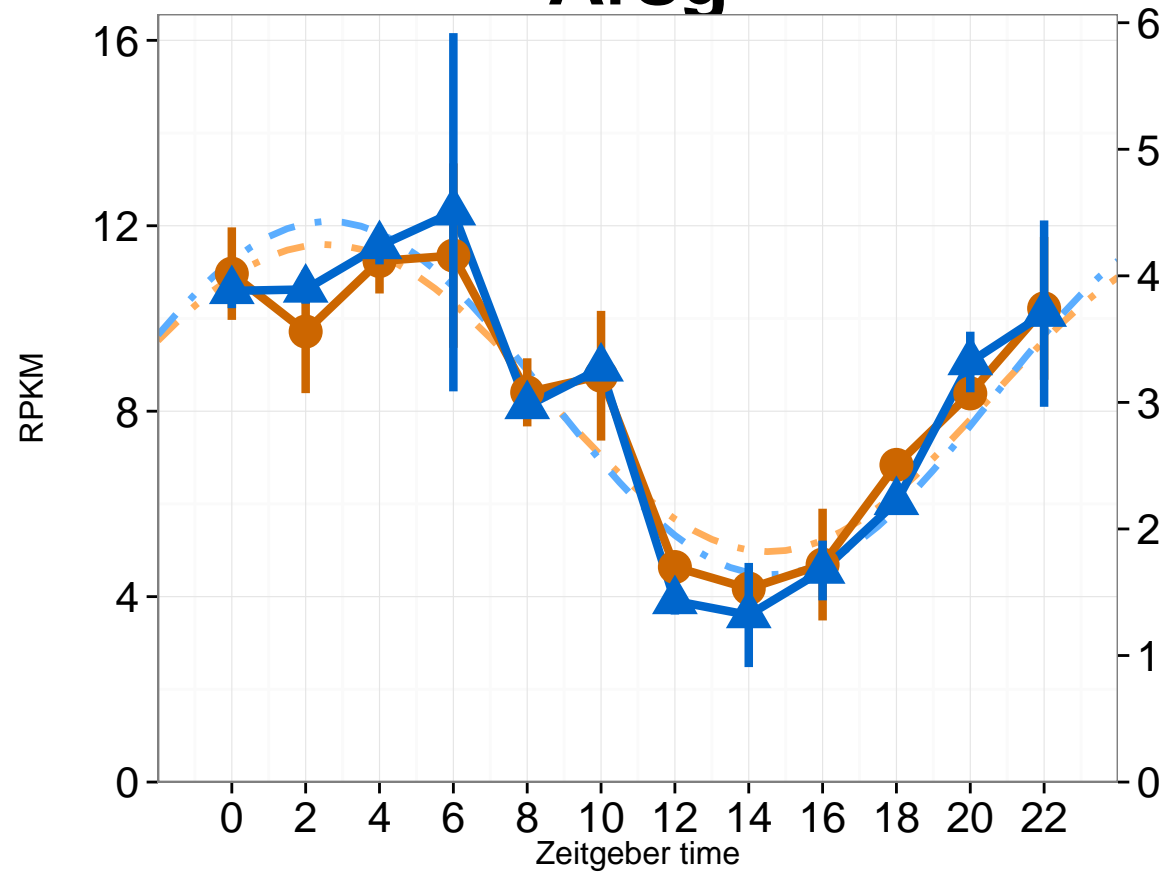

## Arsg

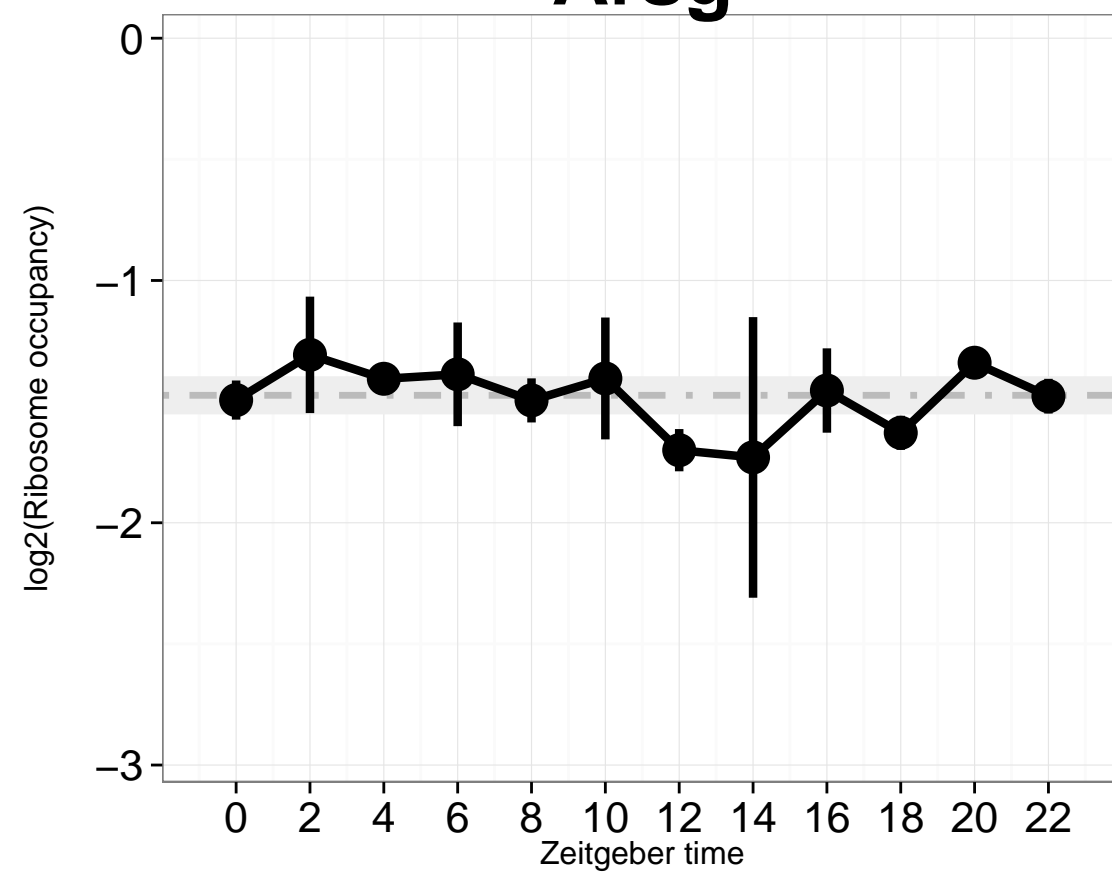

Supplement: SuppDataset_1.zip [file Arsg_set_D.pdf › Supplemental Dataset 1/D-mRNA_rhythm_translation_rhyth/Arsg_set_D.pdf]

# Asap2

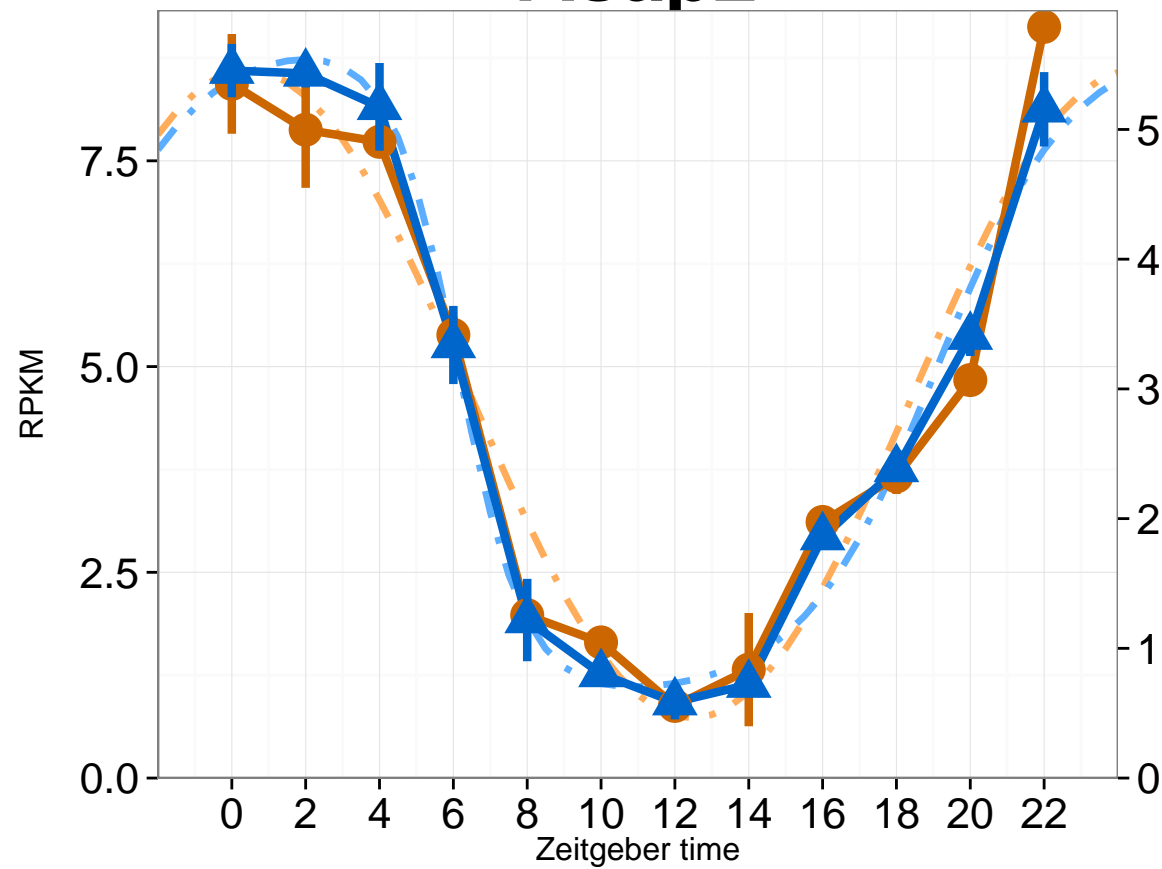

# Asap2

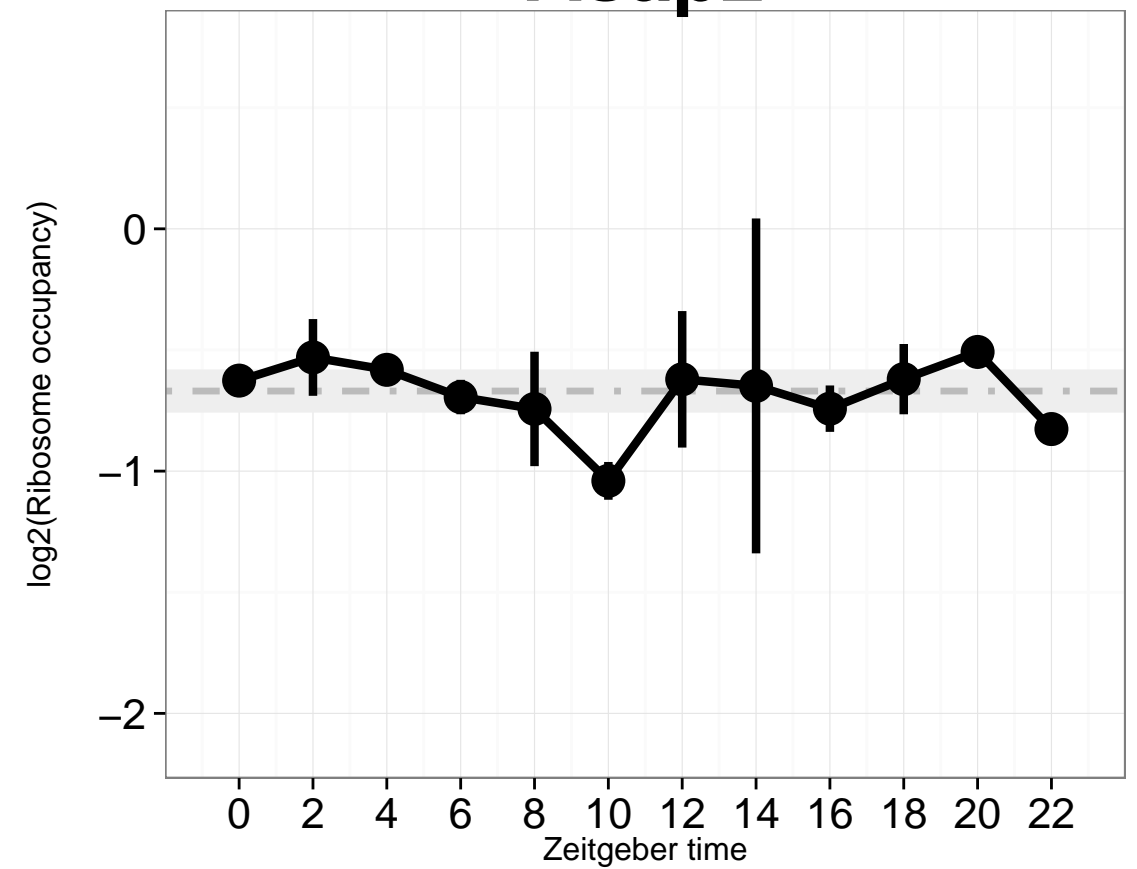

Supplement: SuppDataset_1.zip [file Asap2_set_D.pdf › Supplemental Dataset 1/D-mRNA_rhythm_translation_rhyth/Asap2_set_D.pdf]

## Asb13

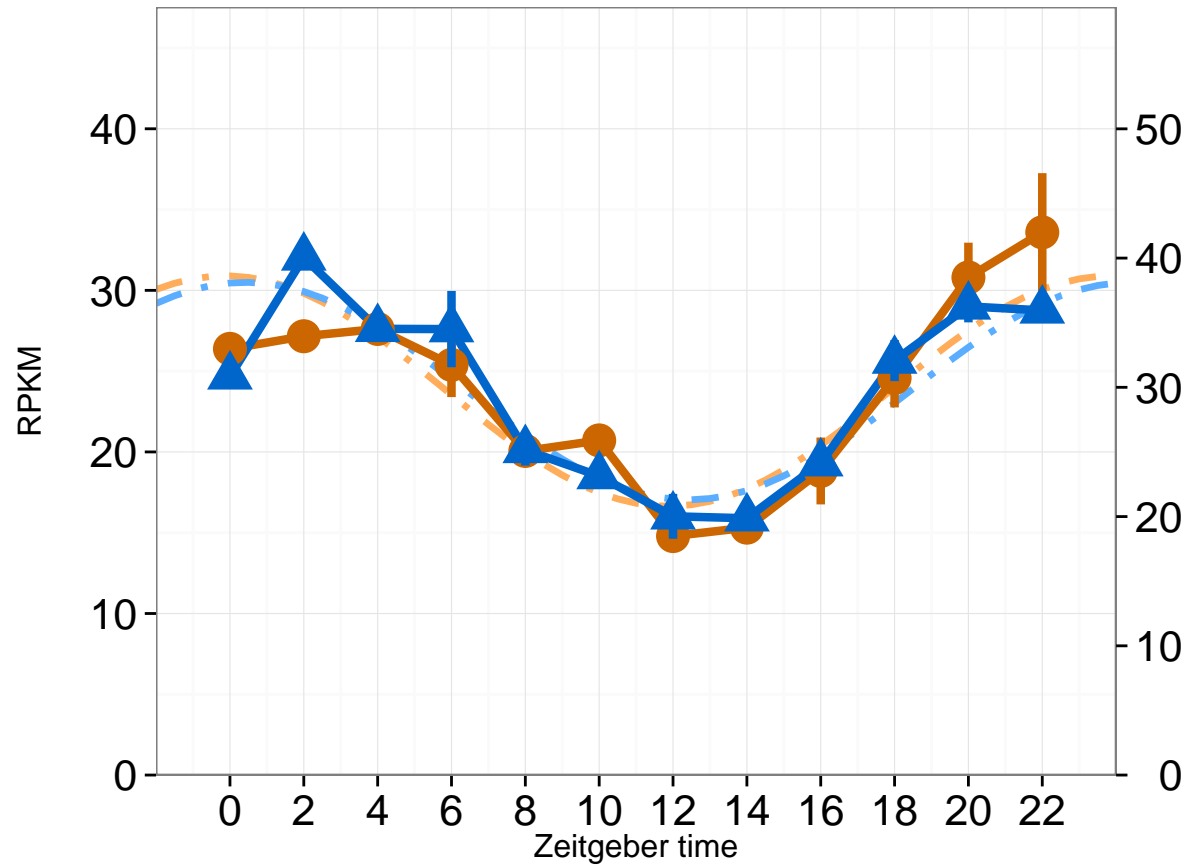

## Asb13

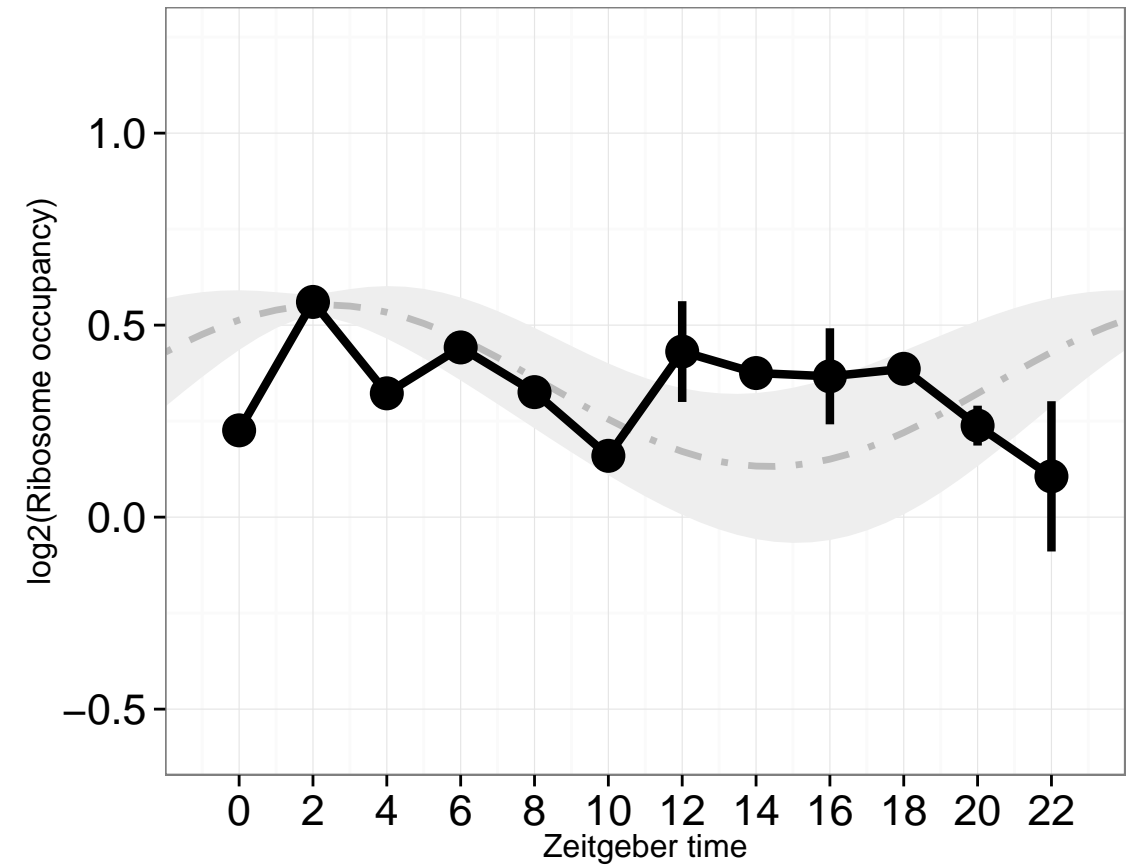

Supplement: SuppDataset_1.zip [file Asb13_set_D.pdf › Supplemental Dataset 1/D-mRNA_rhythm_translation_rhyth/Asb13_set_D.pdf]

# Asl

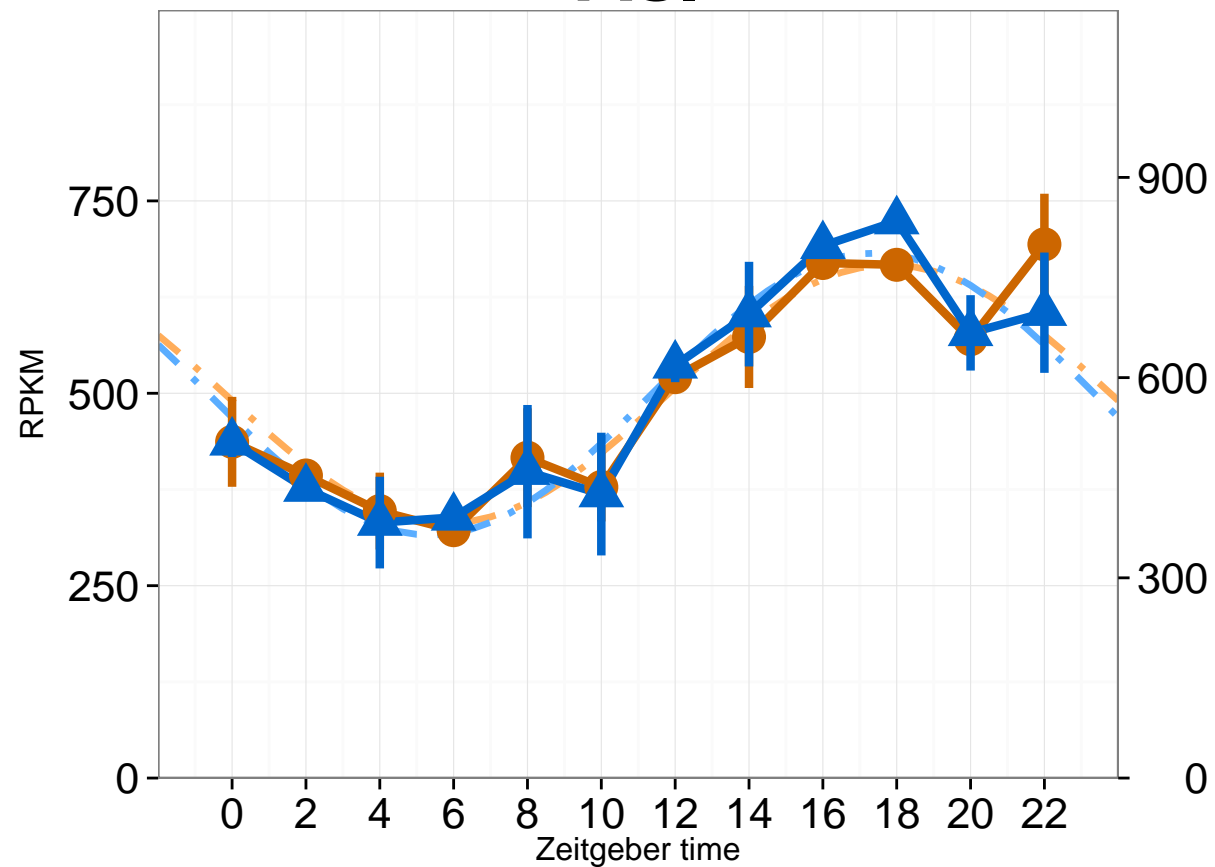

# Asl

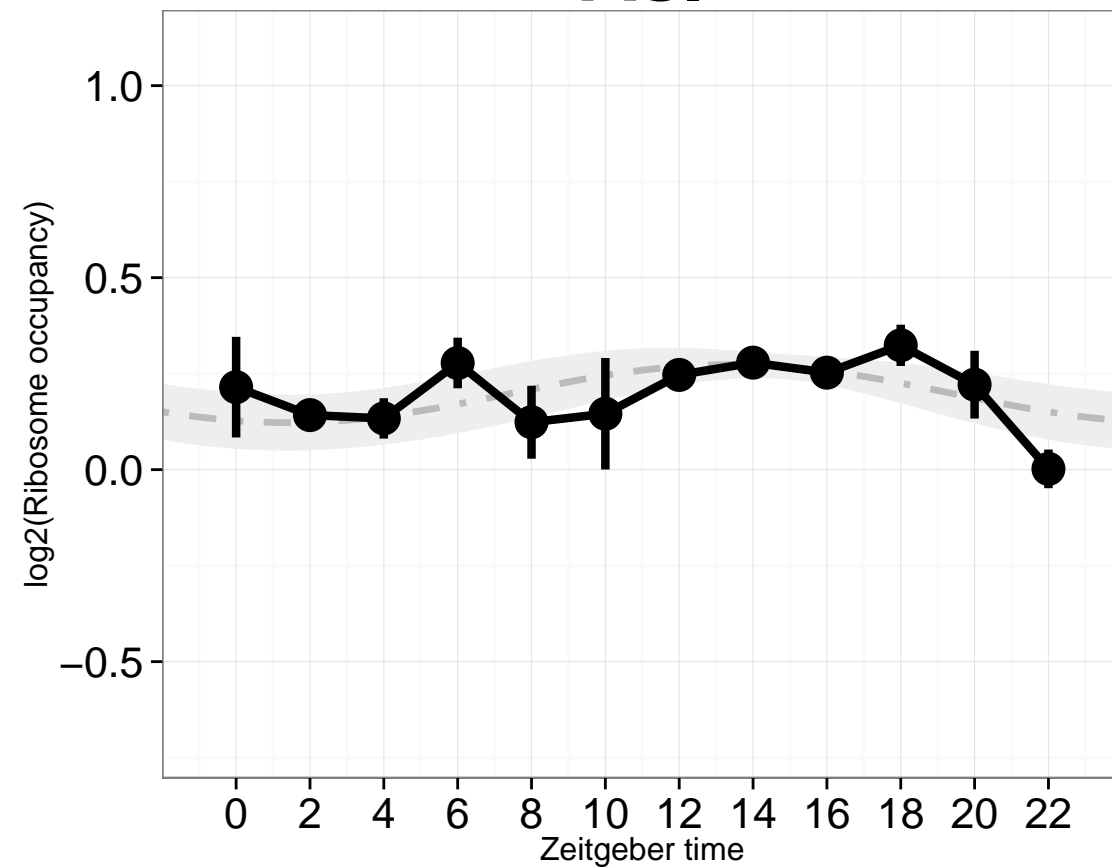

Supplement: SuppDataset_1.zip [file Asl_set_D.pdf › Supplemental Dataset 1/D-mRNA_rhythm_translation_rhyth/Asl_set_D.pdf]

## Aspa

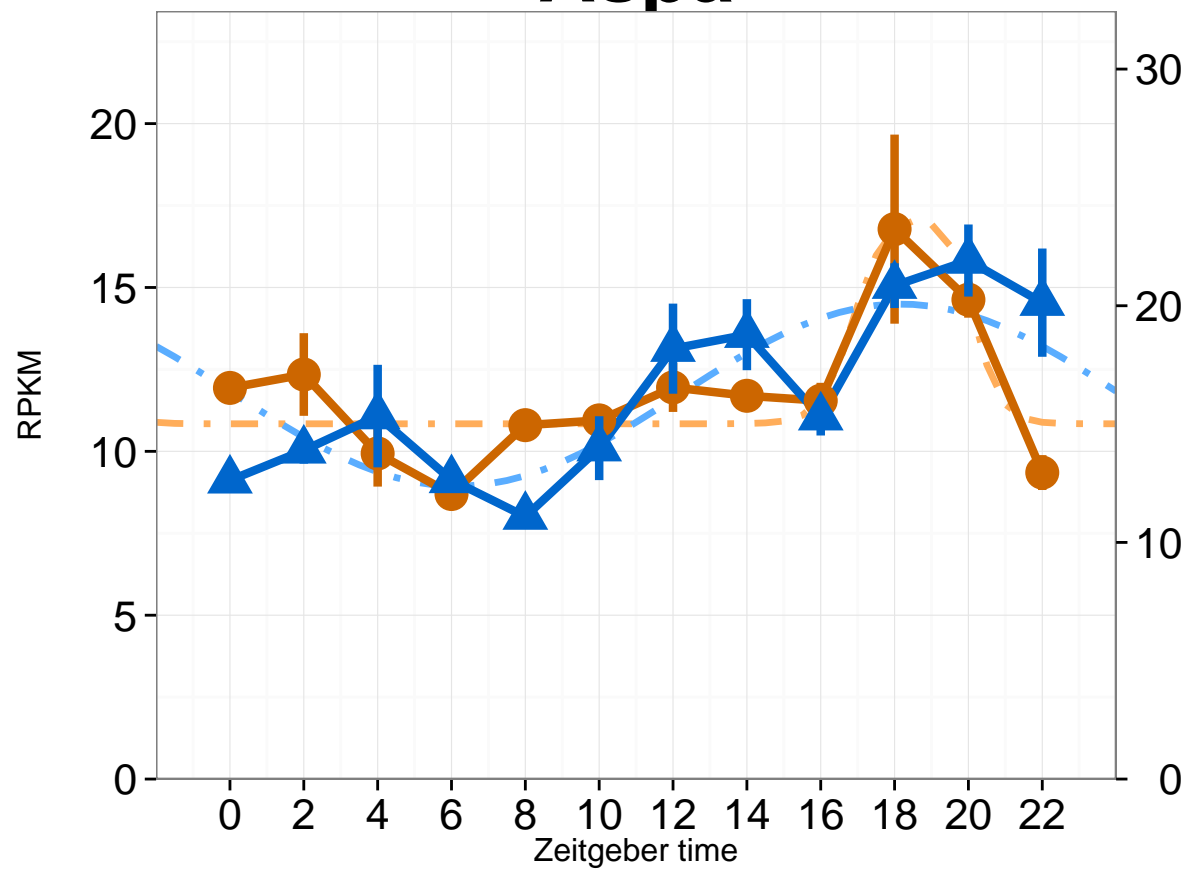

## Aspa

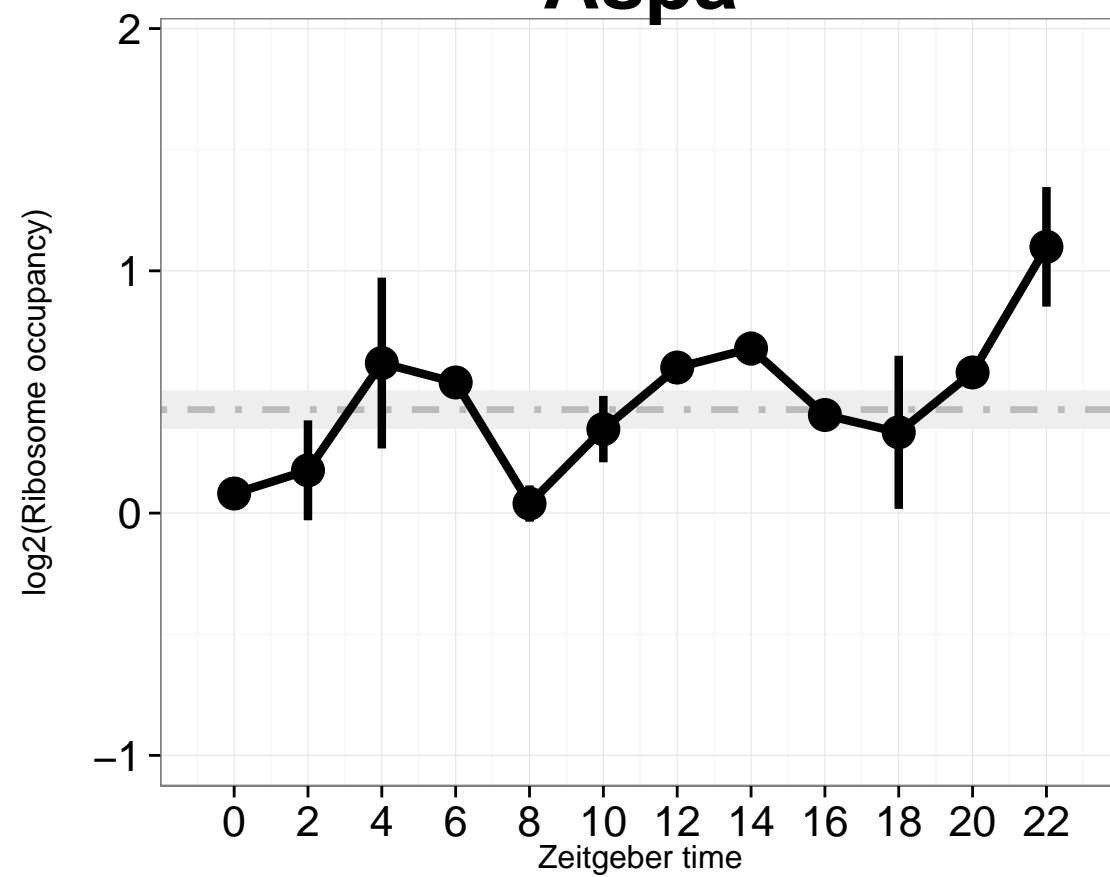

Supplement: SuppDataset_1.zip [file Aspa_set_D.pdf › Supplemental Dataset 1/D-mRNA_rhythm_translation_rhyth/Aspa_set_D.pdf]

## Aspg

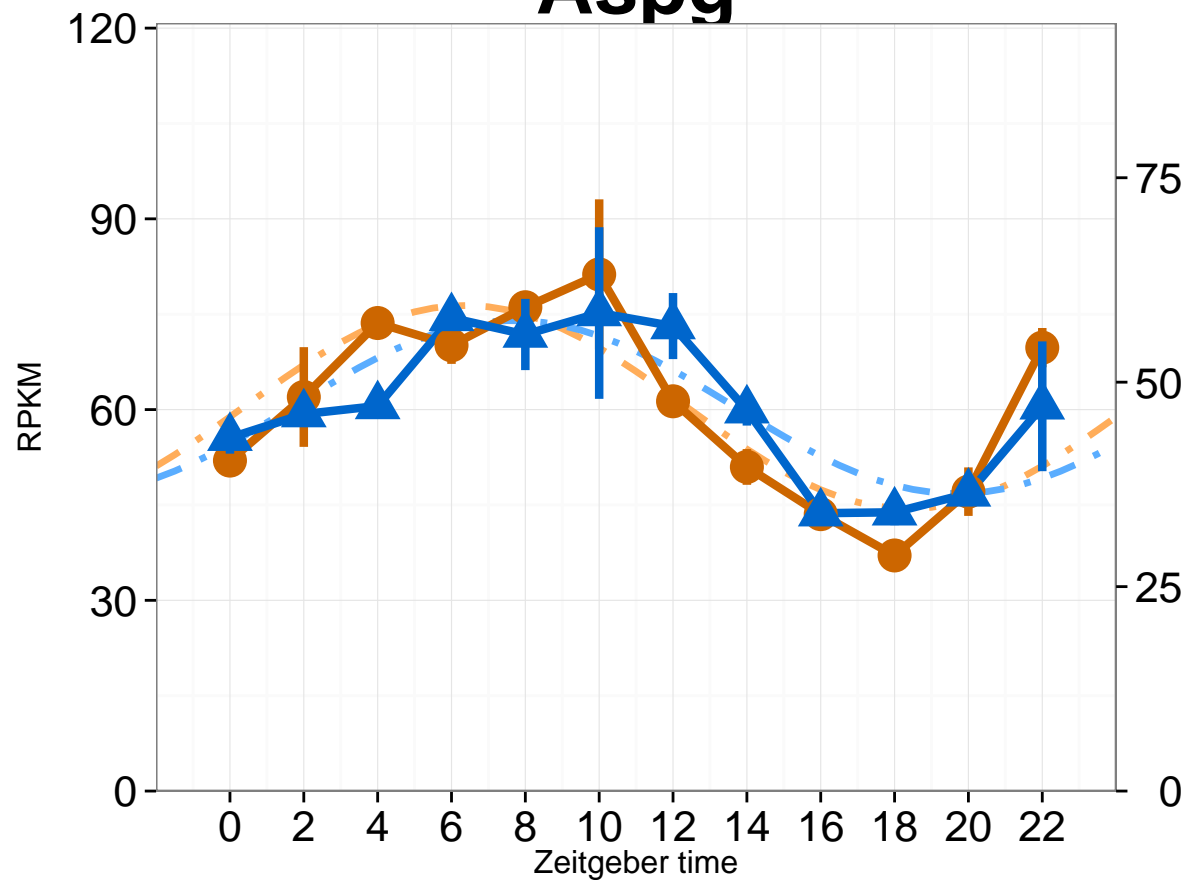

## Aspg

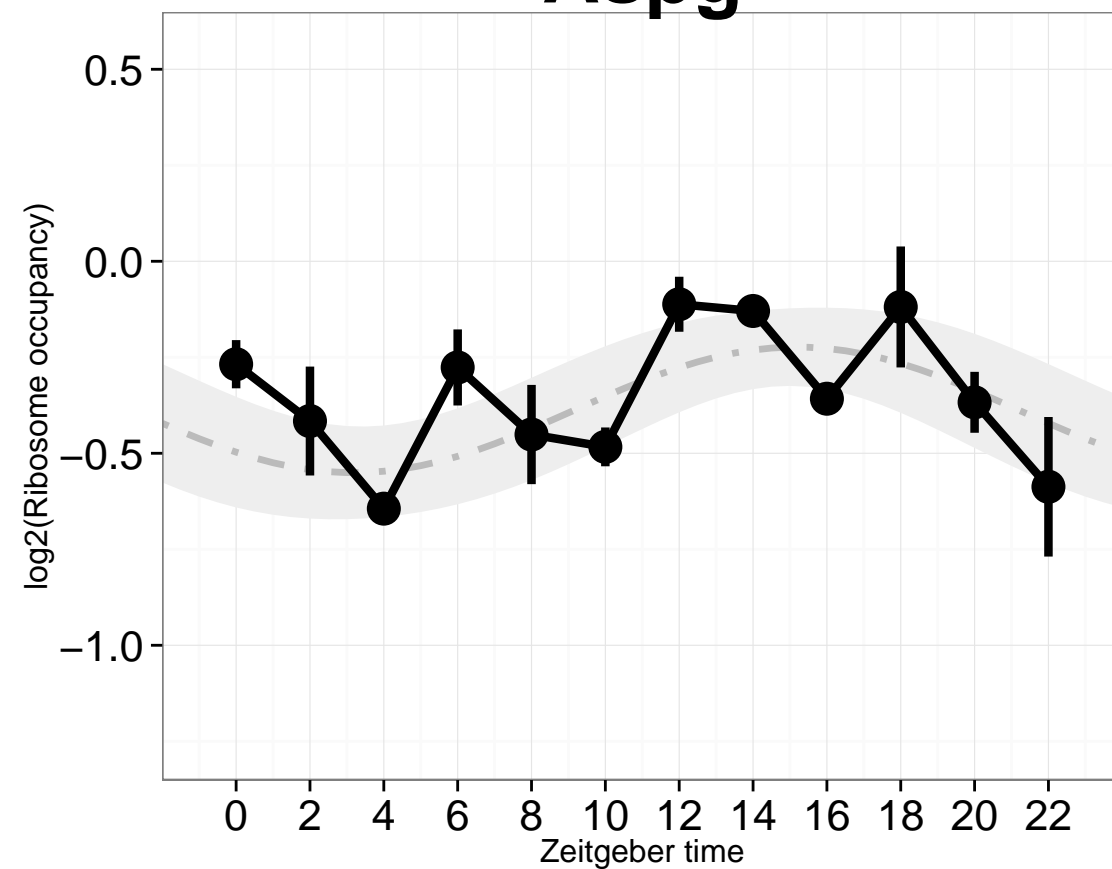

Supplement: SuppDataset_1.zip [file Aspg_set_D.pdf › Supplemental Dataset 1/D-mRNA_rhythm_translation_rhyth/Aspg_set_D.pdf]

## Atad2

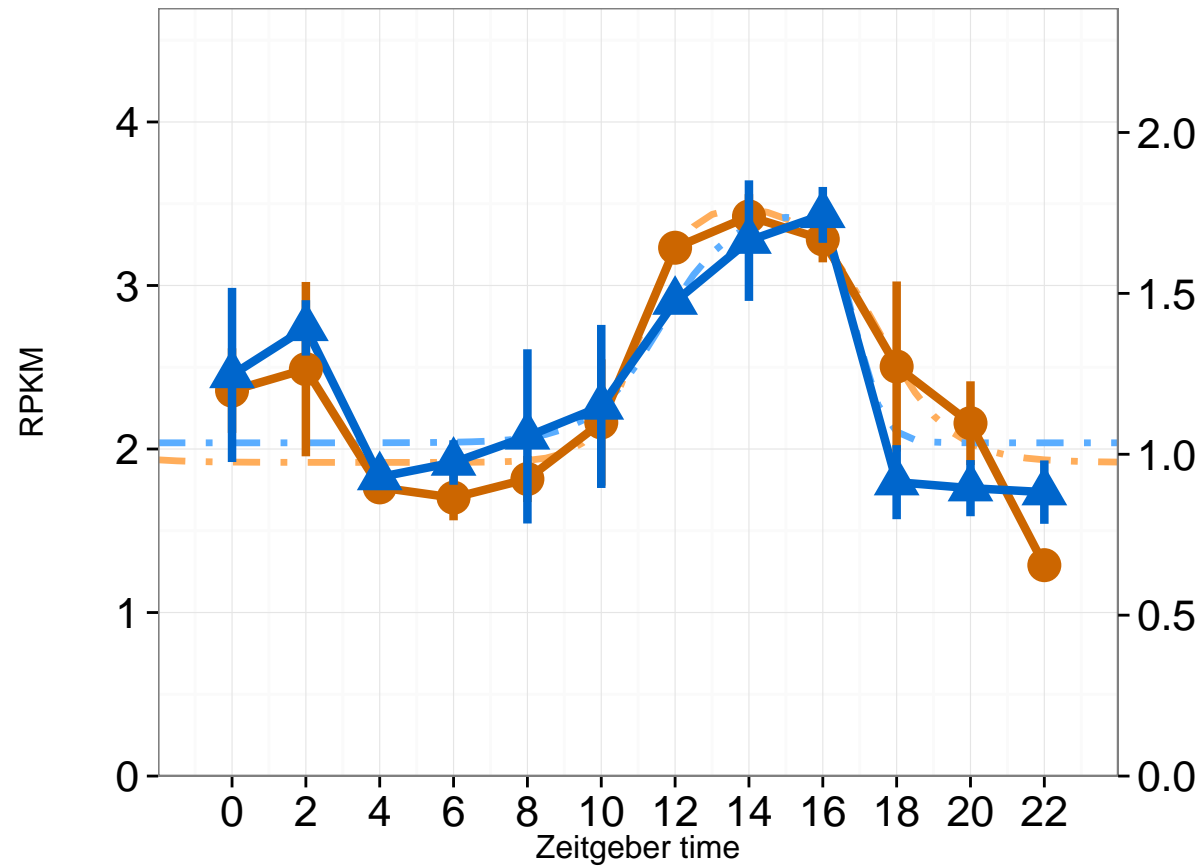

## Atad2

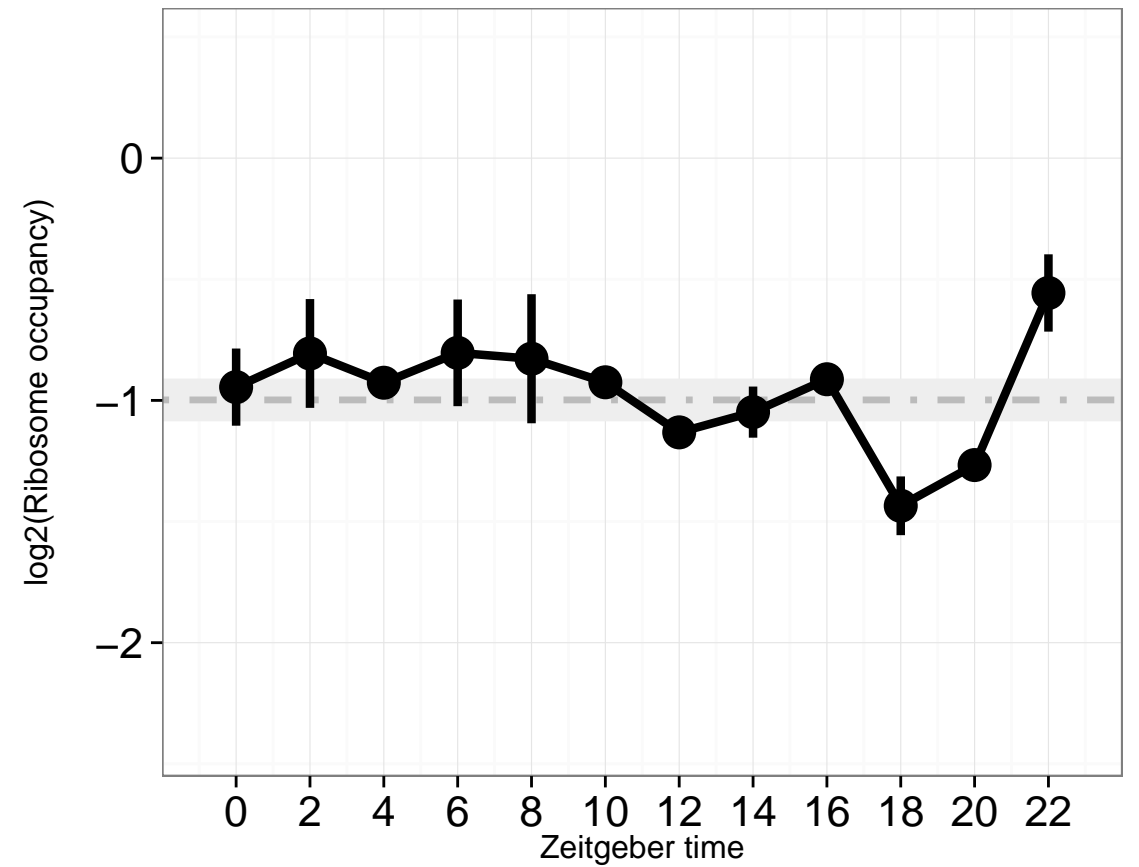

Supplement: SuppDataset_1.zip [file Atad2_set_D.pdf › Supplemental Dataset 1/D-mRNA_rhythm_translation_rhyth/Atad2_set_D.pdf]

## Atf5

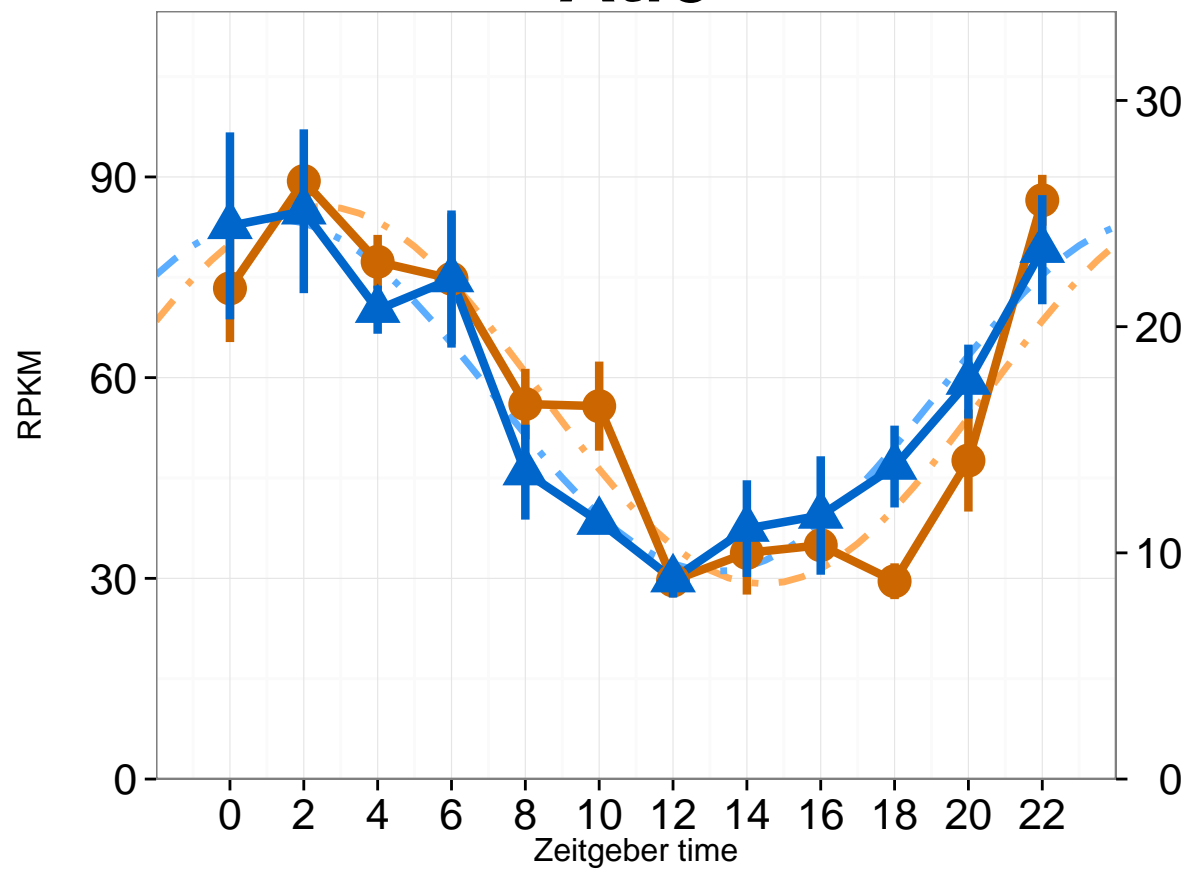

## Atf5

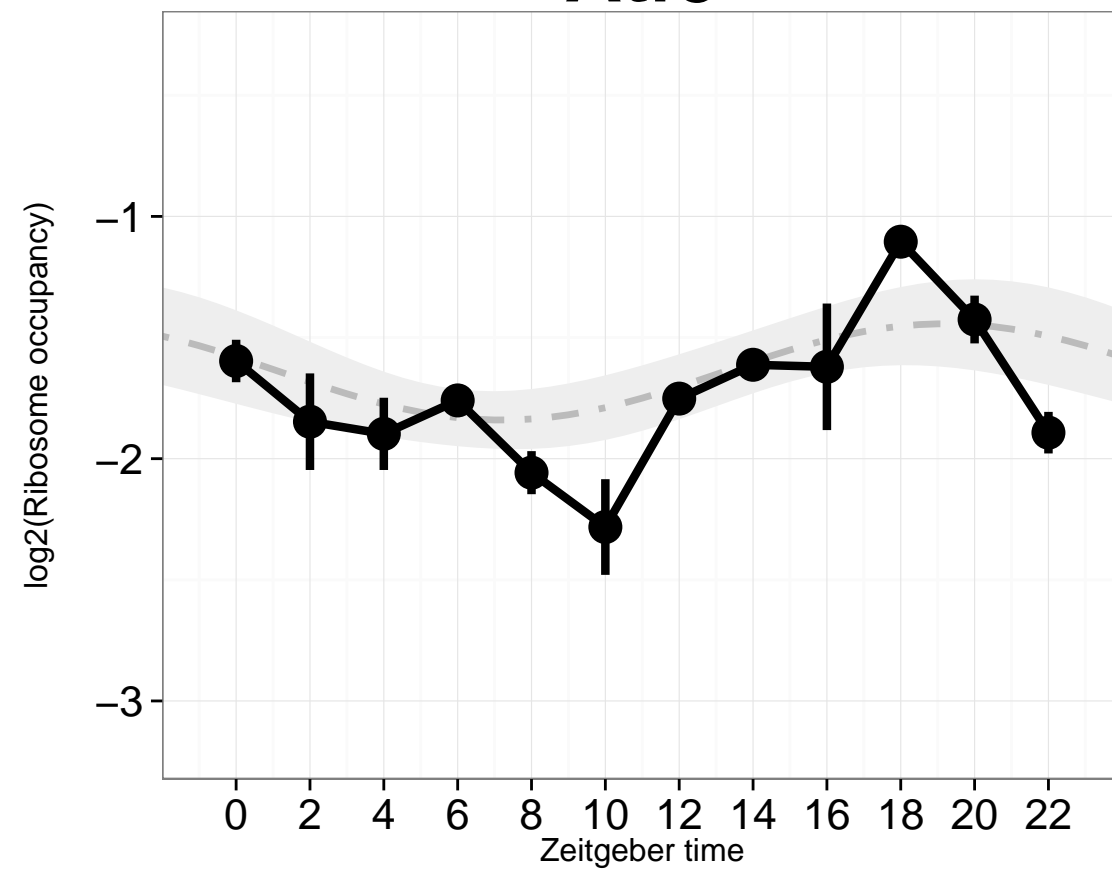

Supplement: SuppDataset_1.zip [file Atf5_set_D.pdf › Supplemental Dataset 1/D-mRNA_rhythm_translation_rhyth/Atf5_set_D.pdf]

# Atf6b

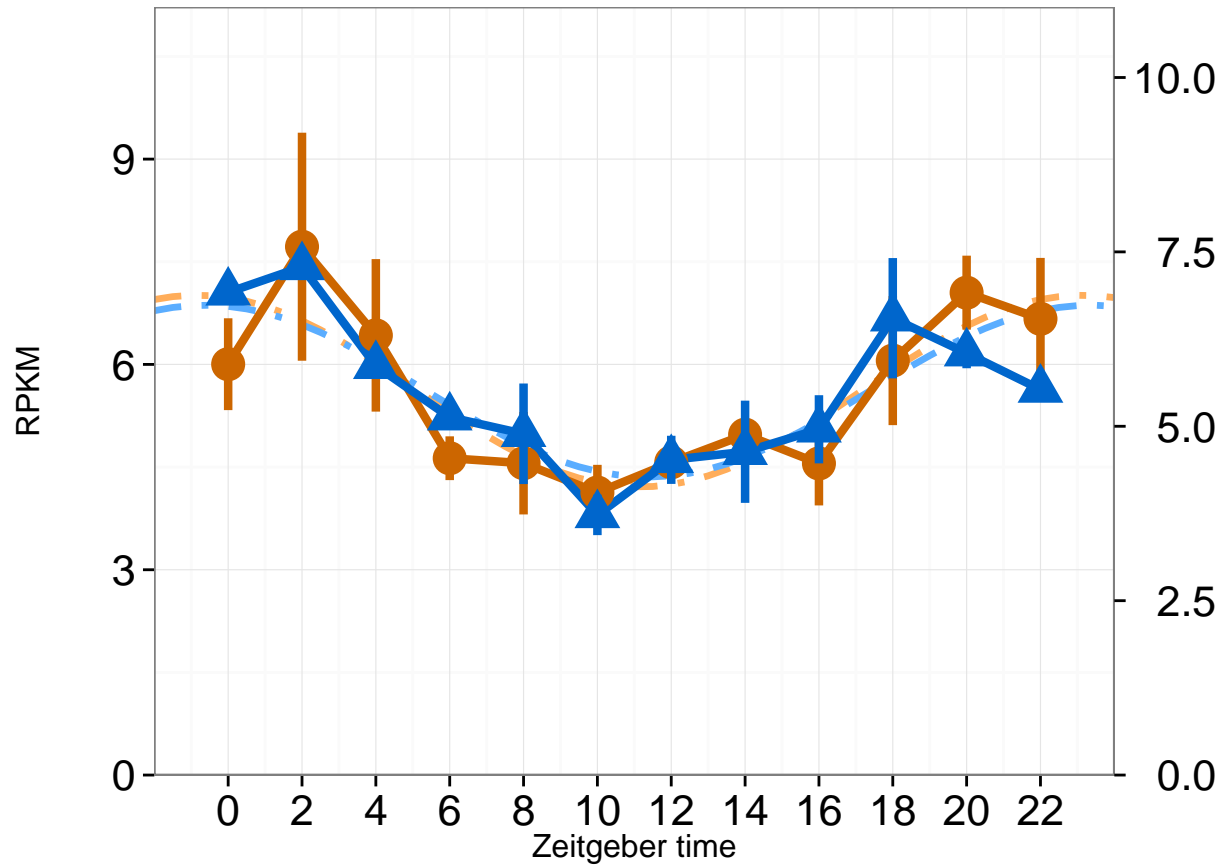

# Atf6b

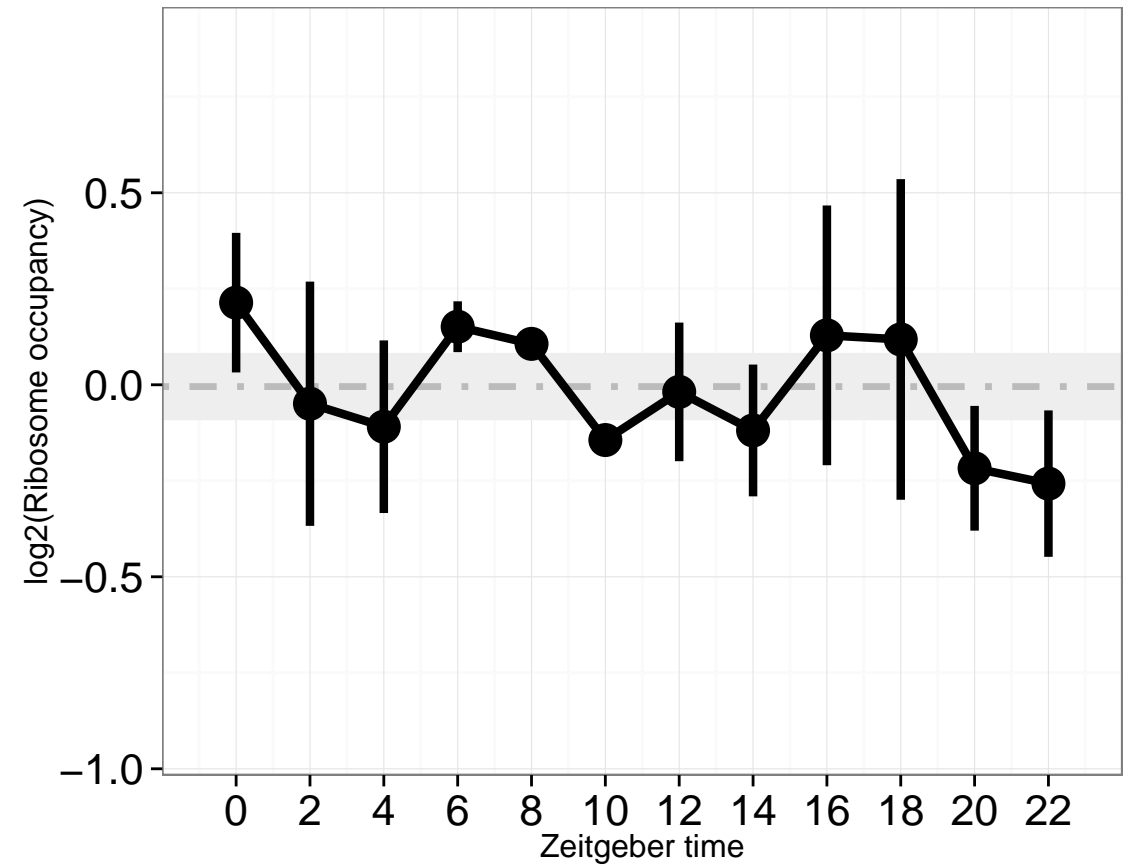

Supplement: SuppDataset_1.zip [file Atf6b_set_D.pdf › Supplemental Dataset 1/D-mRNA_rhythm_translation_rhyth/Atf6b_set_D.pdf]

# Atg16l2

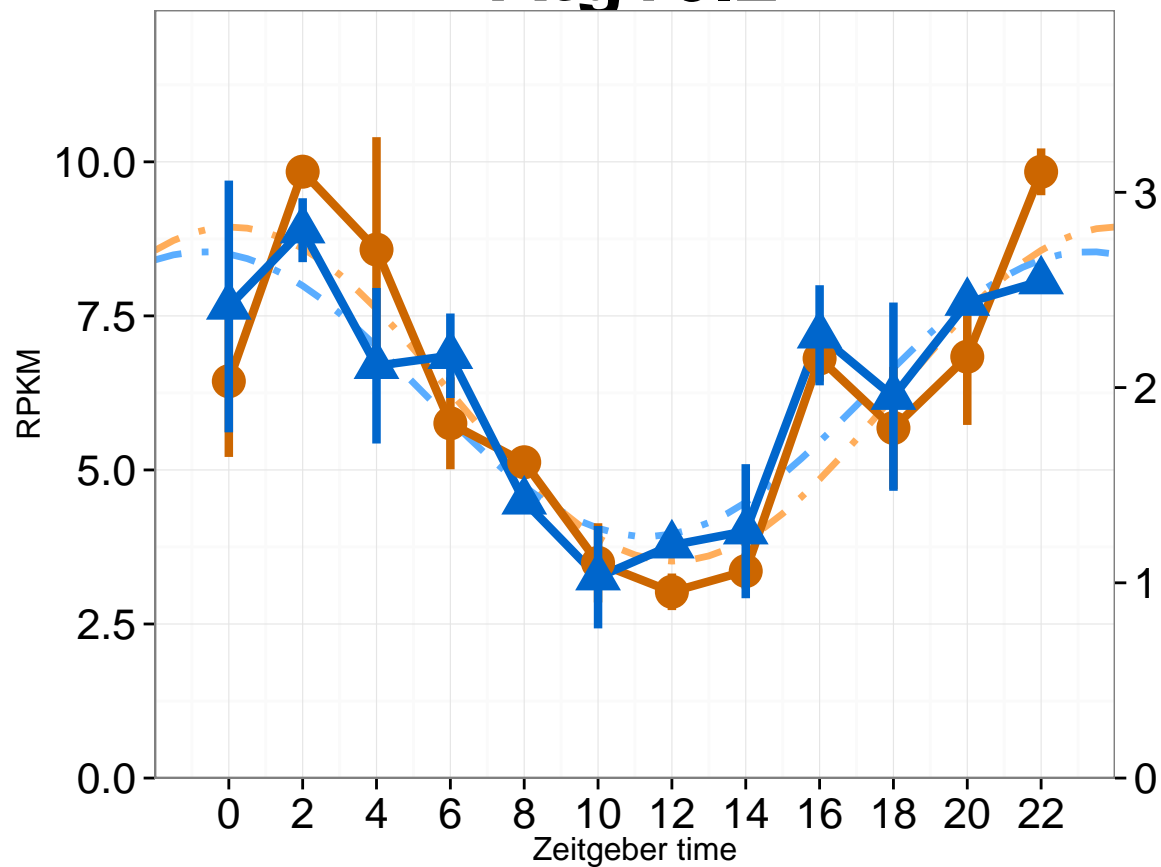

# Atg16l2

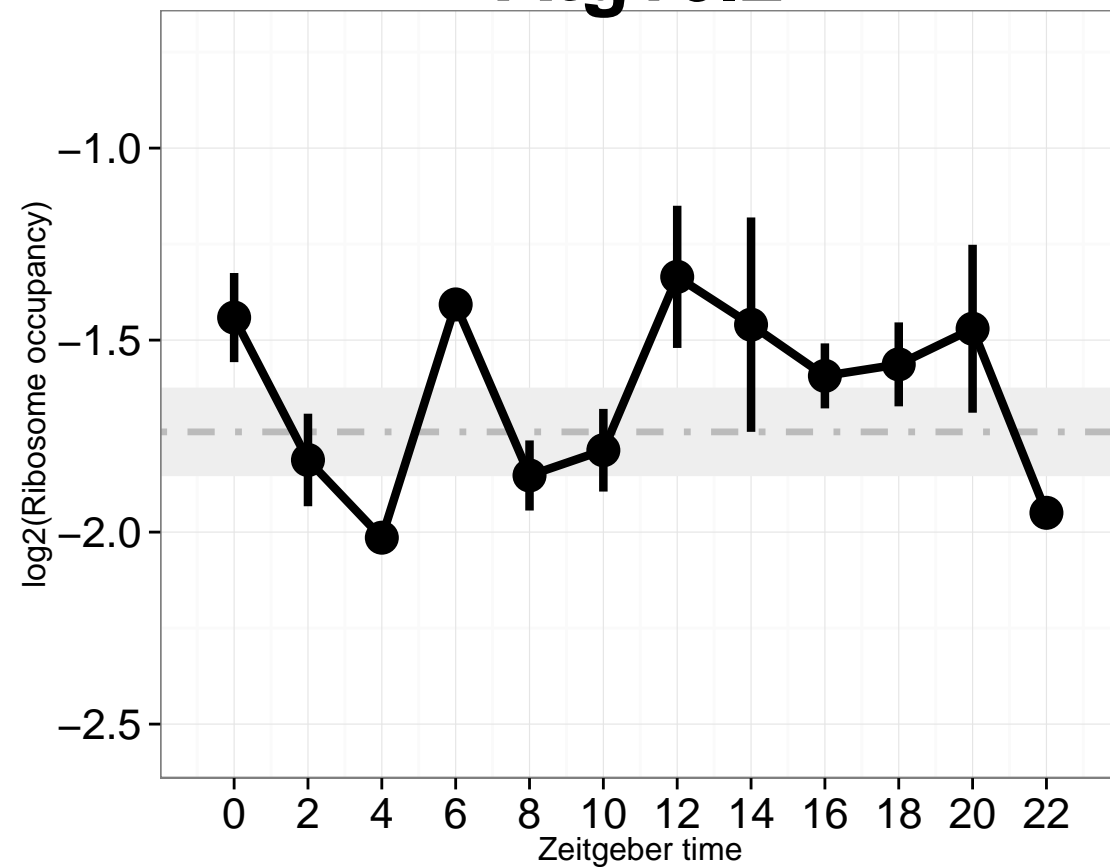

Supplement: SuppDataset_1.zip [file Atg16l2_set_D.pdf › Supplemental Dataset 1/D-mRNA_rhythm_translation_rhyth/Atg16l2_set_D.pdf]

# Atp1a1

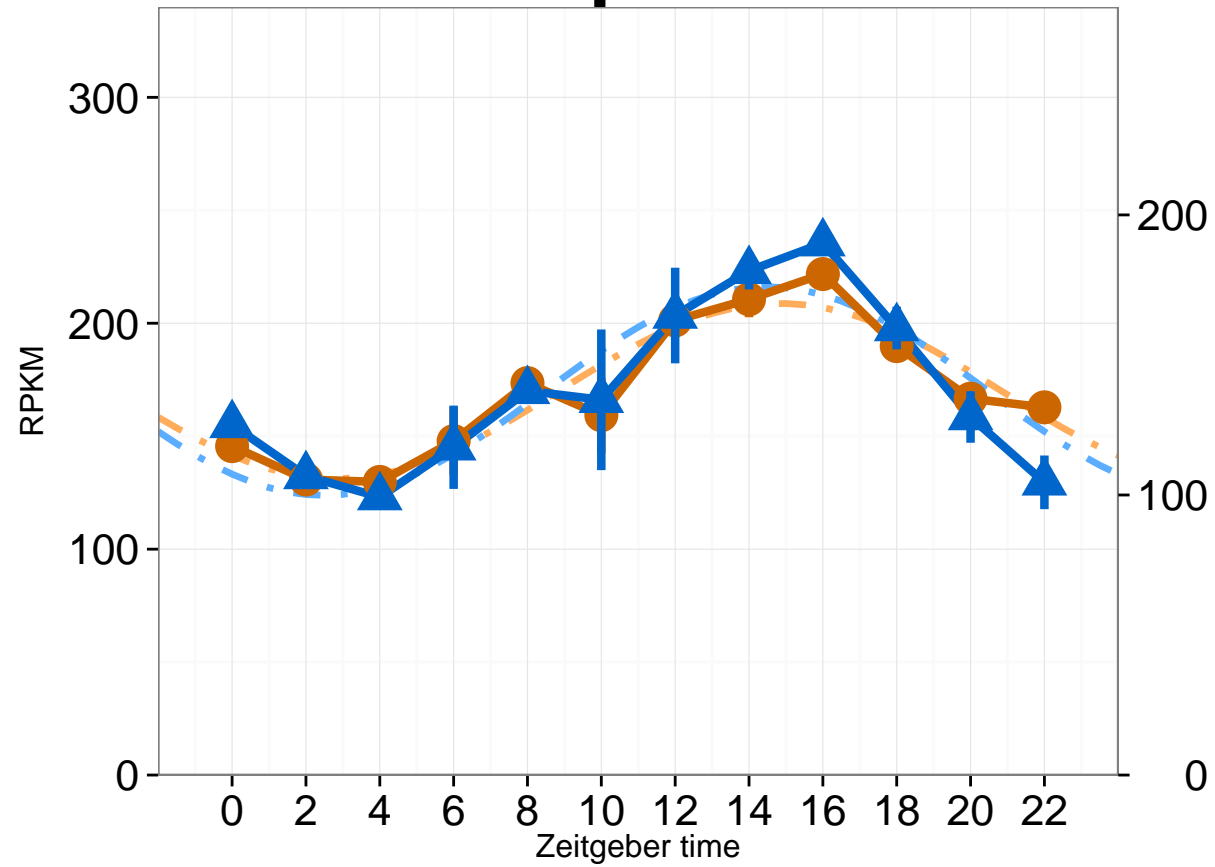

# Atp1a1

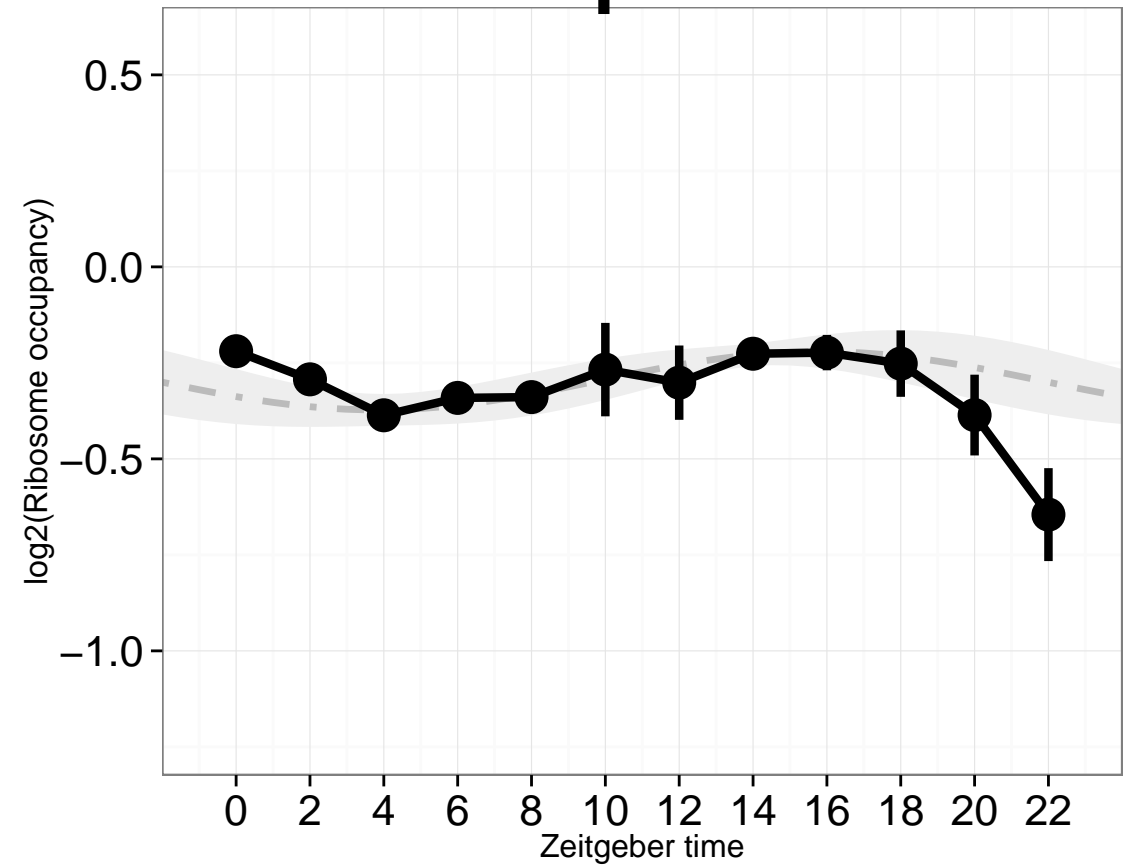

Supplement: SuppDataset_1.zip [file Atp1a1_set_D.pdf › Supplemental Dataset 1/D-mRNA_rhythm_translation_rhyth/Atp1a1_set_D.pdf]

# Atp2b2

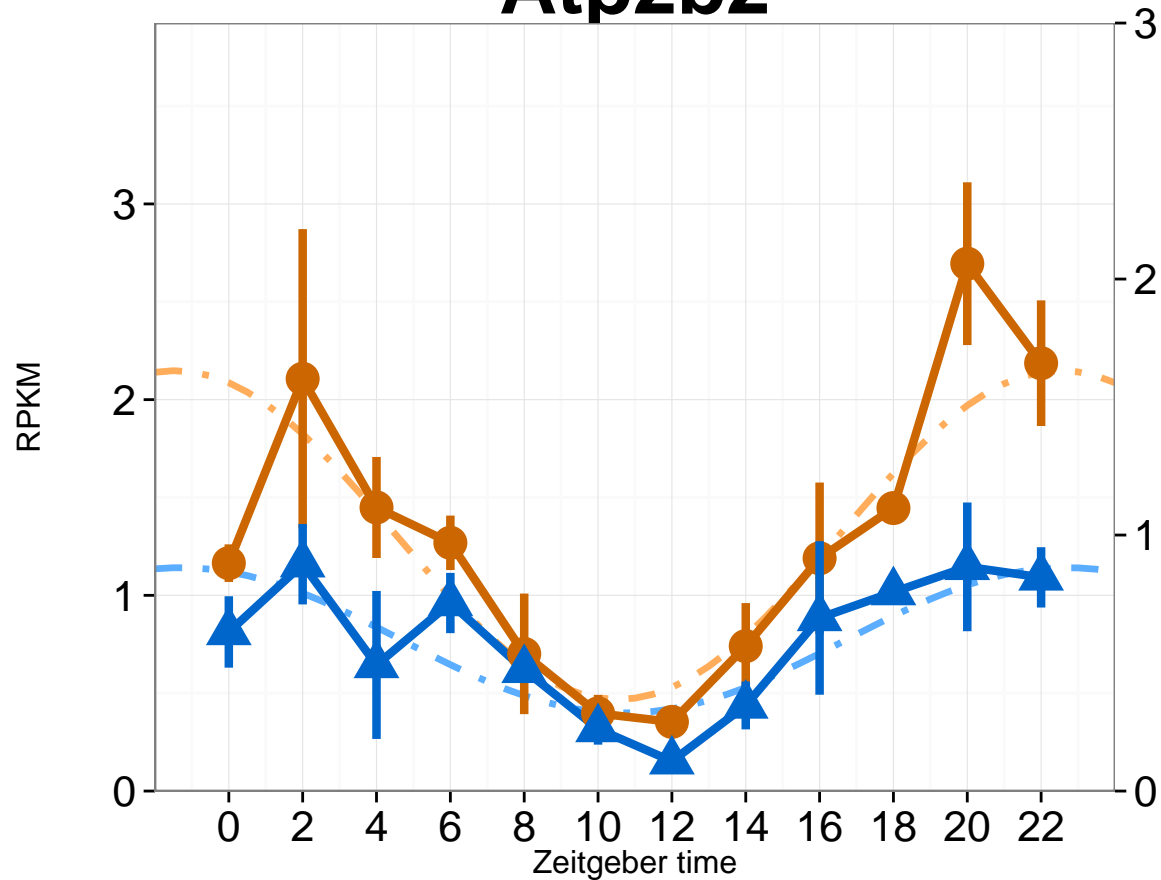

# Atp2b2

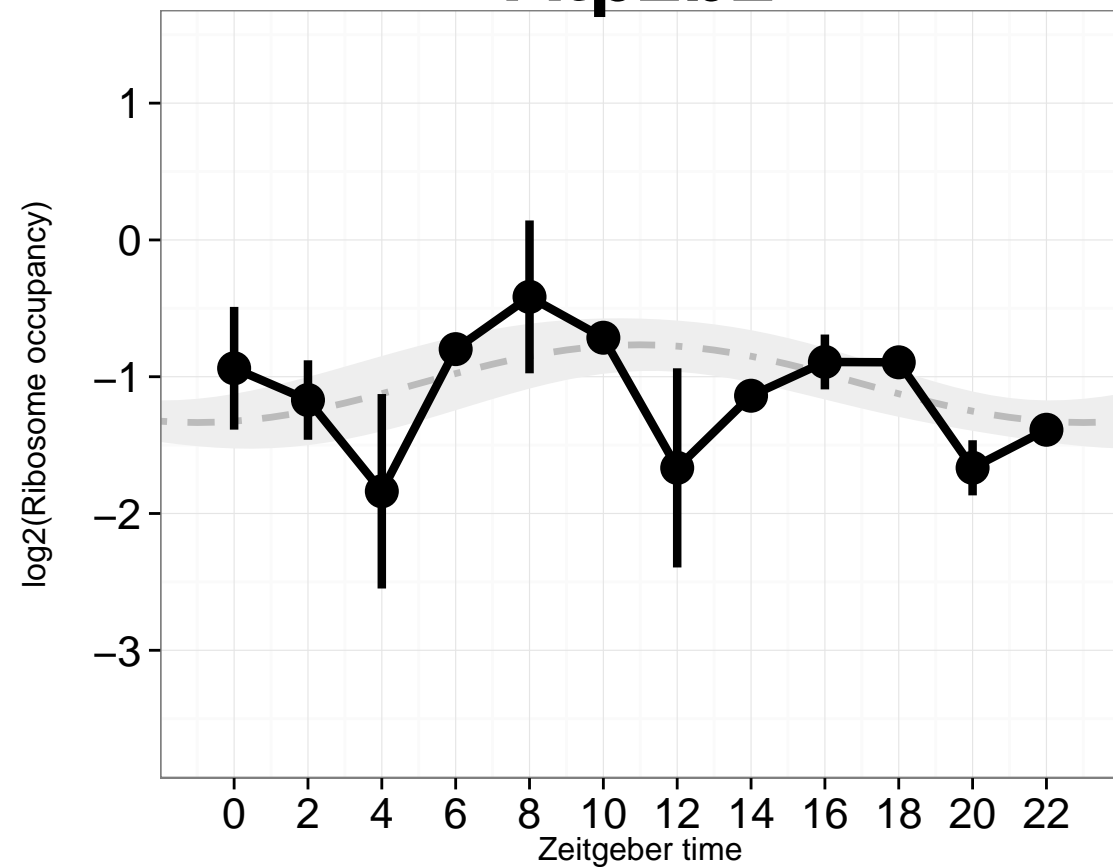

Supplement: SuppDataset_1.zip [file Atp2b2_set_D.pdf › Supplemental Dataset 1/D-mRNA_rhythm_translation_rhyth/Atp2b2_set_D.pdf]

## Atp5s

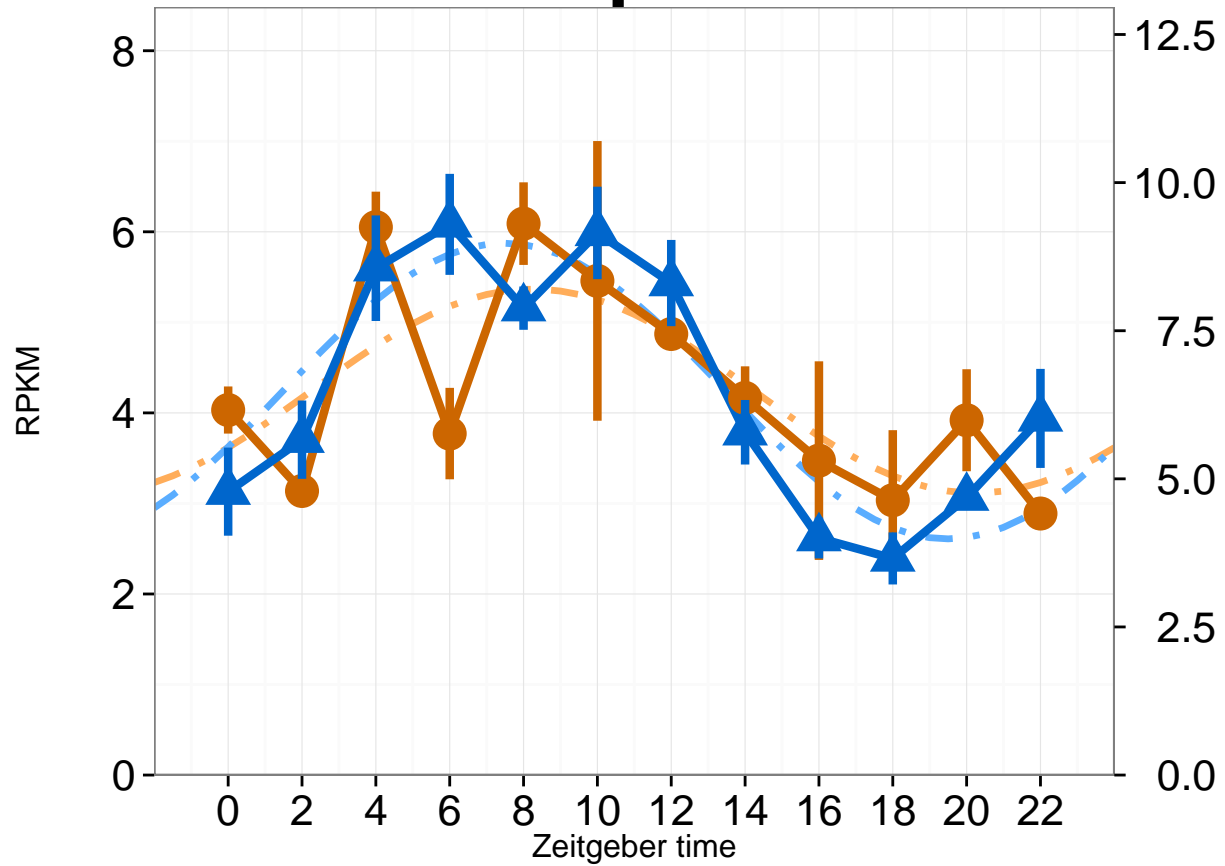

## Atp5s

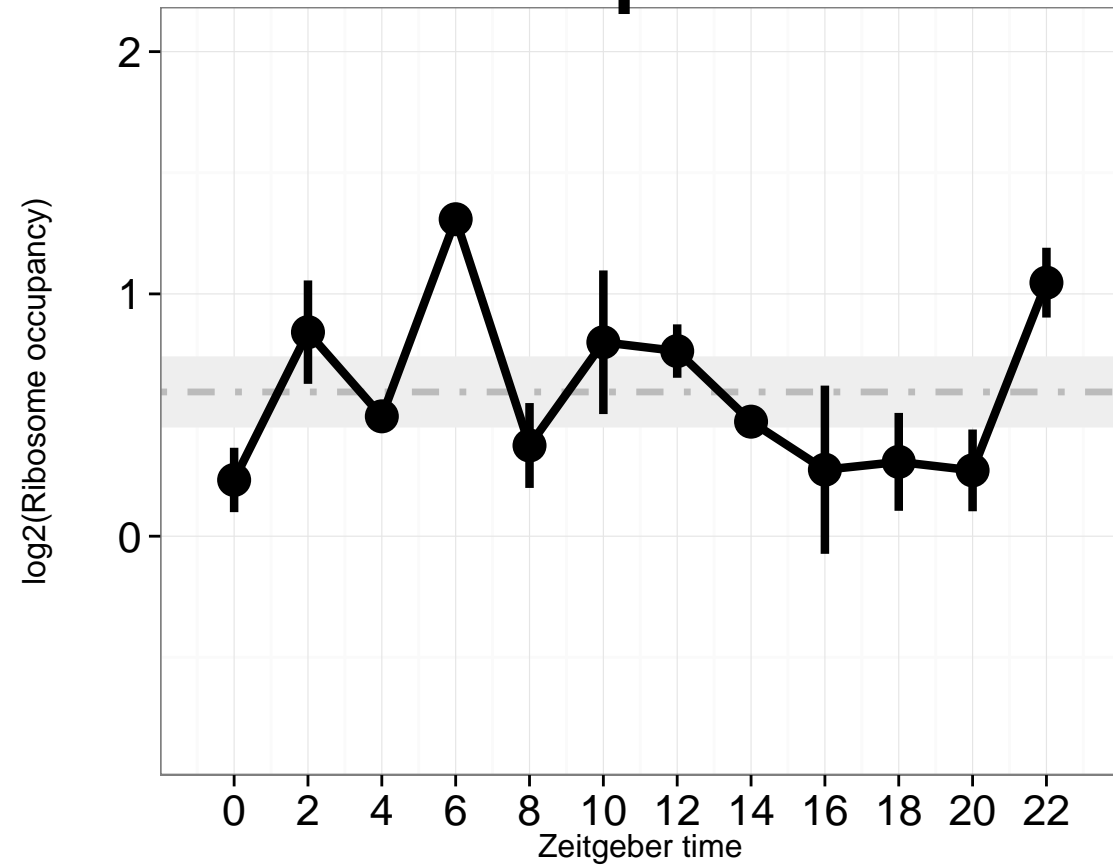

Supplement: SuppDataset_1.zip [file Atp5s_set_D.pdf › Supplemental Dataset 1/D-mRNA_rhythm_translation_rhyth/Atp5s_set_D.pdf]

# Atp6v1d

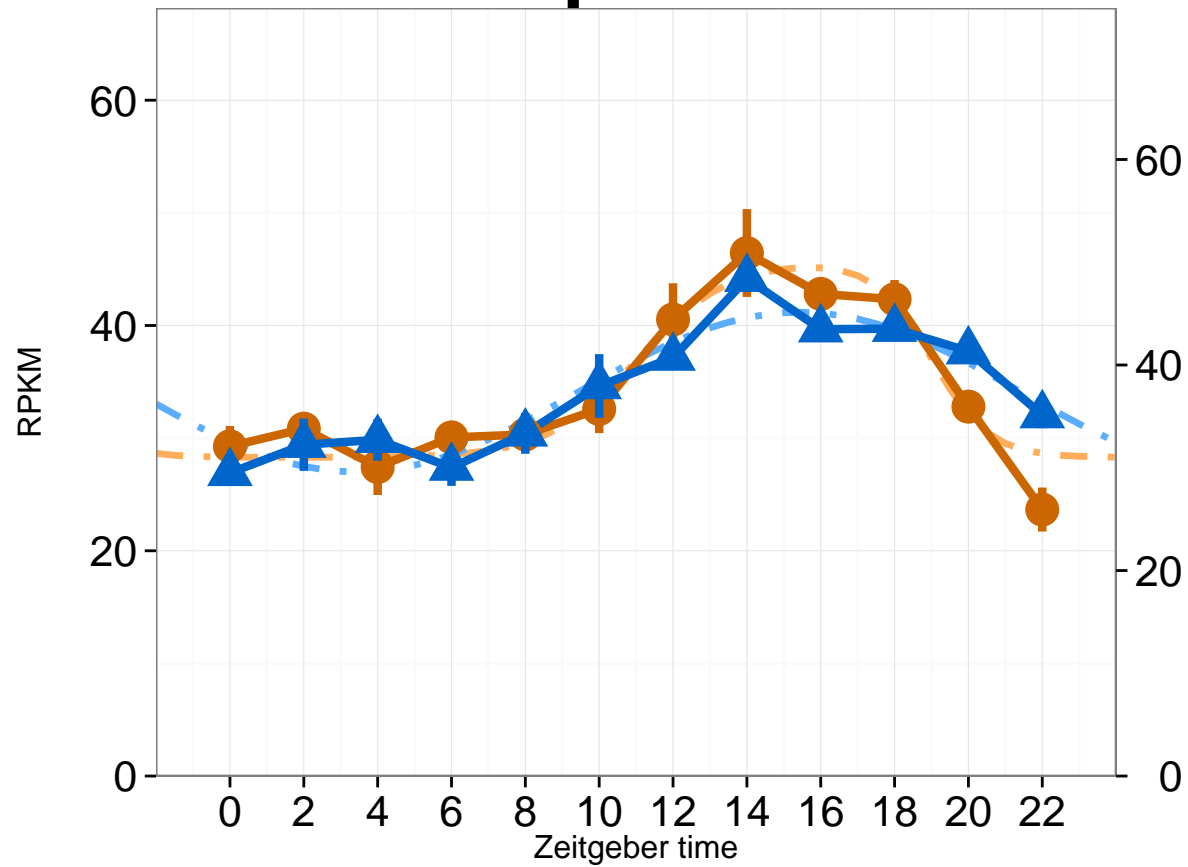

# Atp6v1d

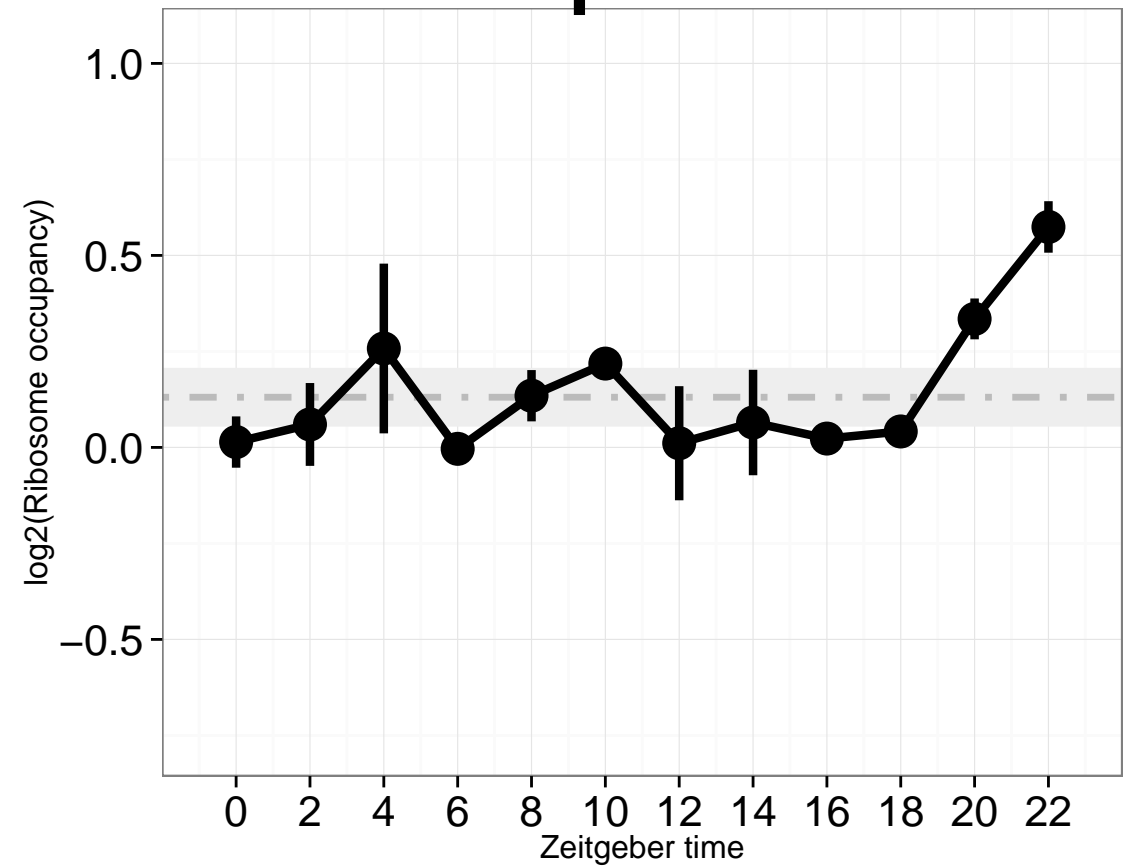

Supplement: SuppDataset_1.zip [file Atp6v1d_set_D.pdf › Supplemental Dataset 1/D-mRNA_rhythm_translation_rhyth/Atp6v1d_set_D.pdf]

## Atr

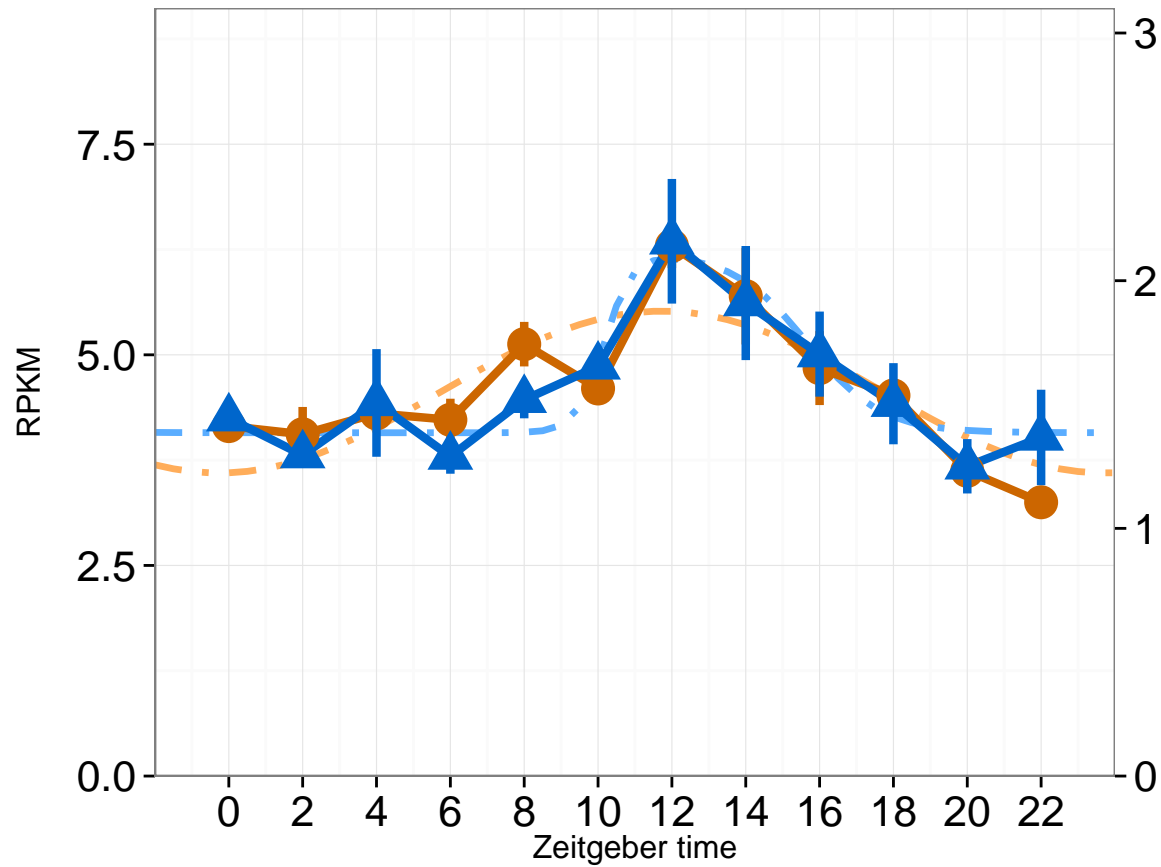

## Atr

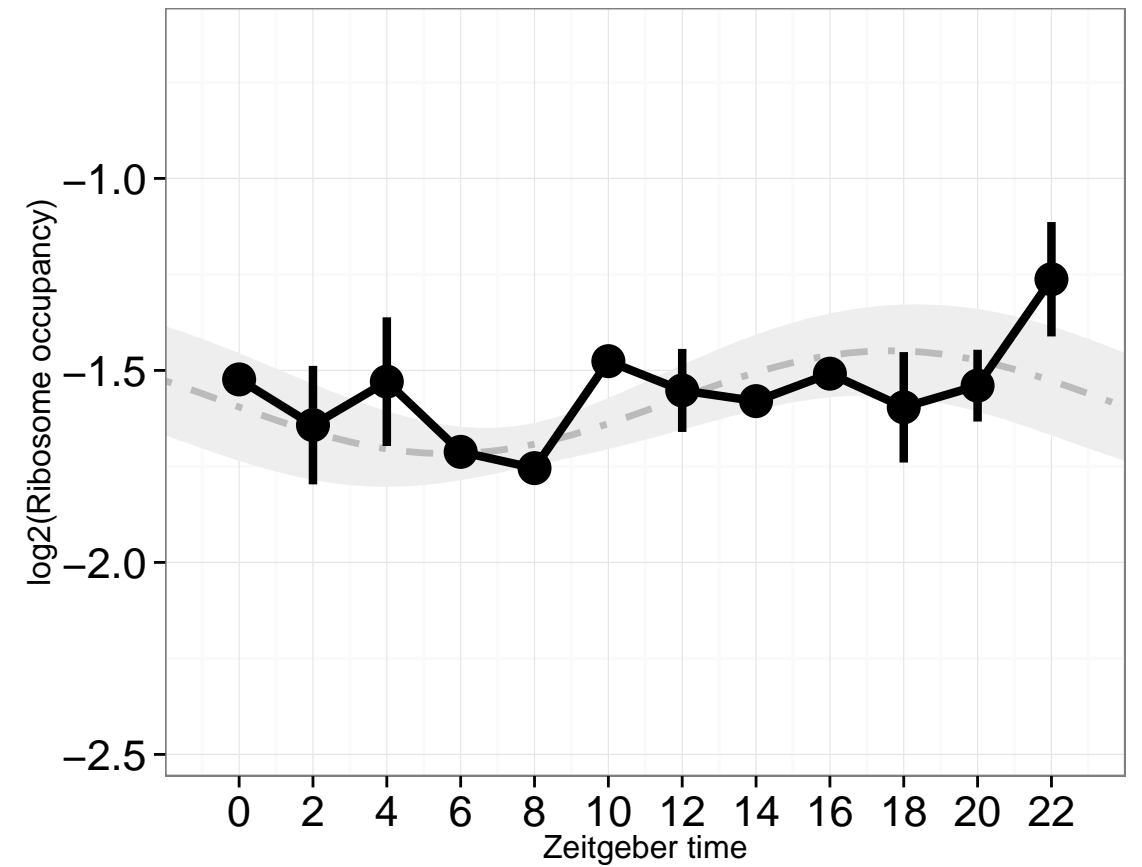

Supplement: SuppDataset_1.zip [file Atr_set_D.pdf › Supplemental Dataset 1/D-mRNA_rhythm_translation_rhyth/Atr_set_D.pdf]

# Avpr1a

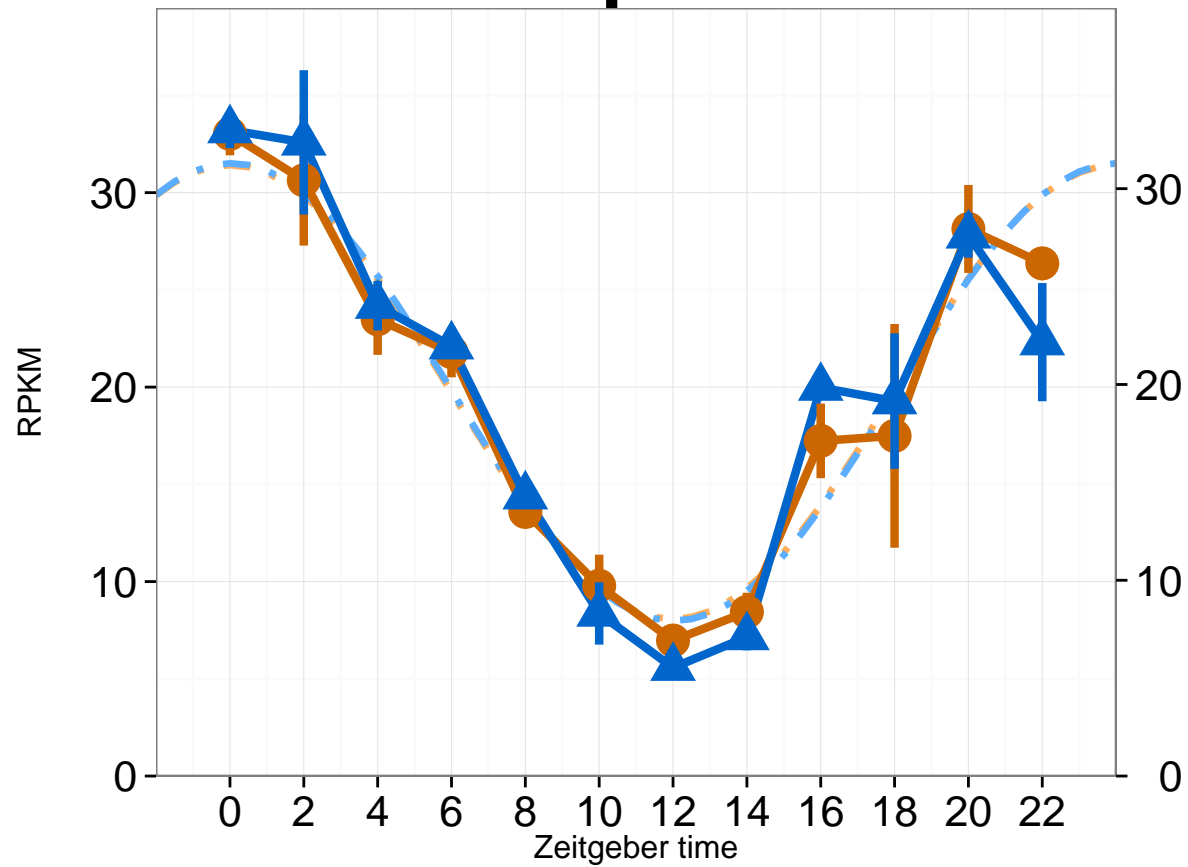

# Avpr1a

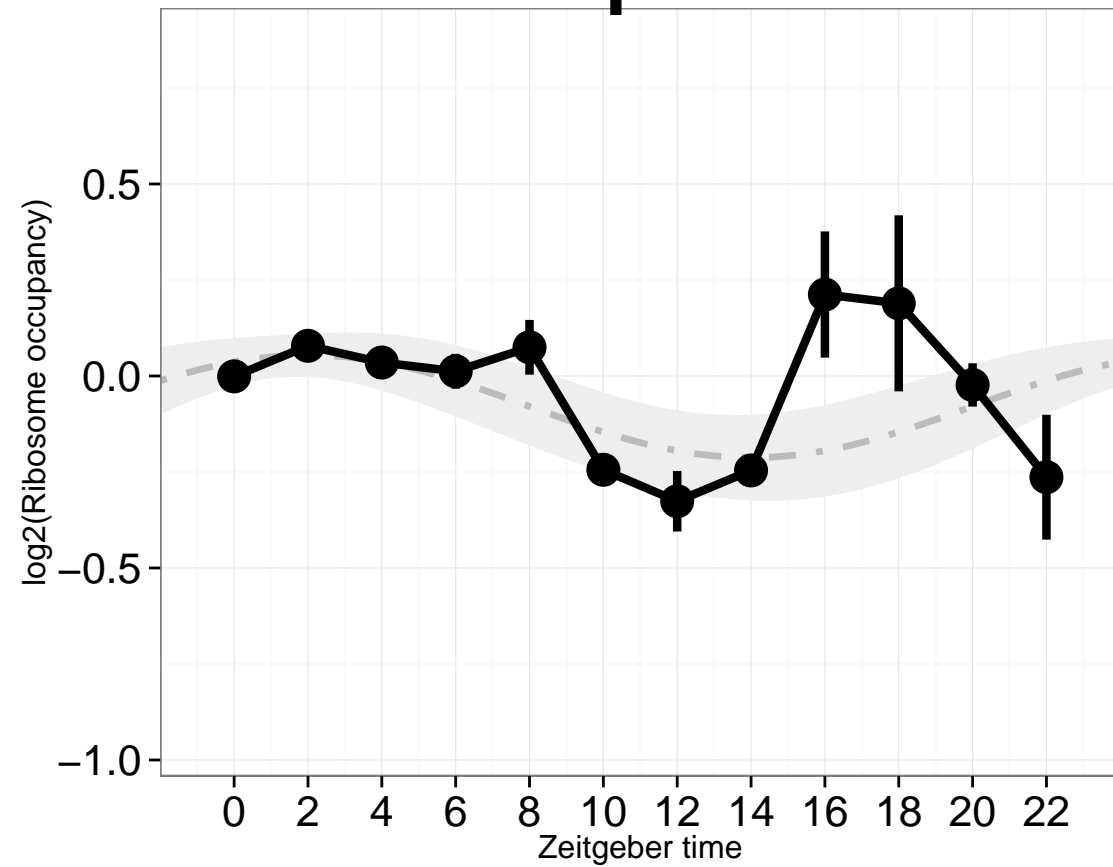

Supplement: SuppDataset_1.zip [file Avpr1a_set_D.pdf › Supplemental Dataset 1/D-mRNA_rhythm_translation_rhyth/Avpr1a_set_D.pdf]

## Azin1

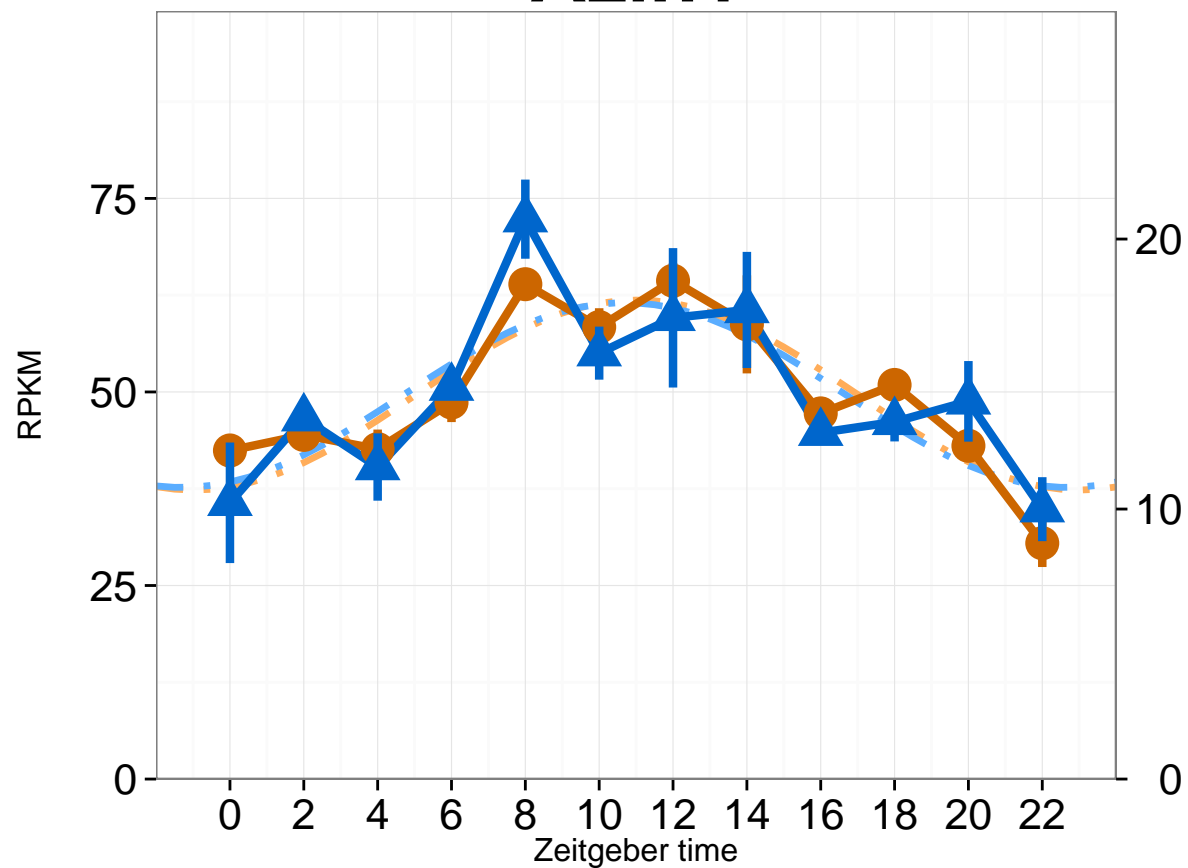

## Azin1

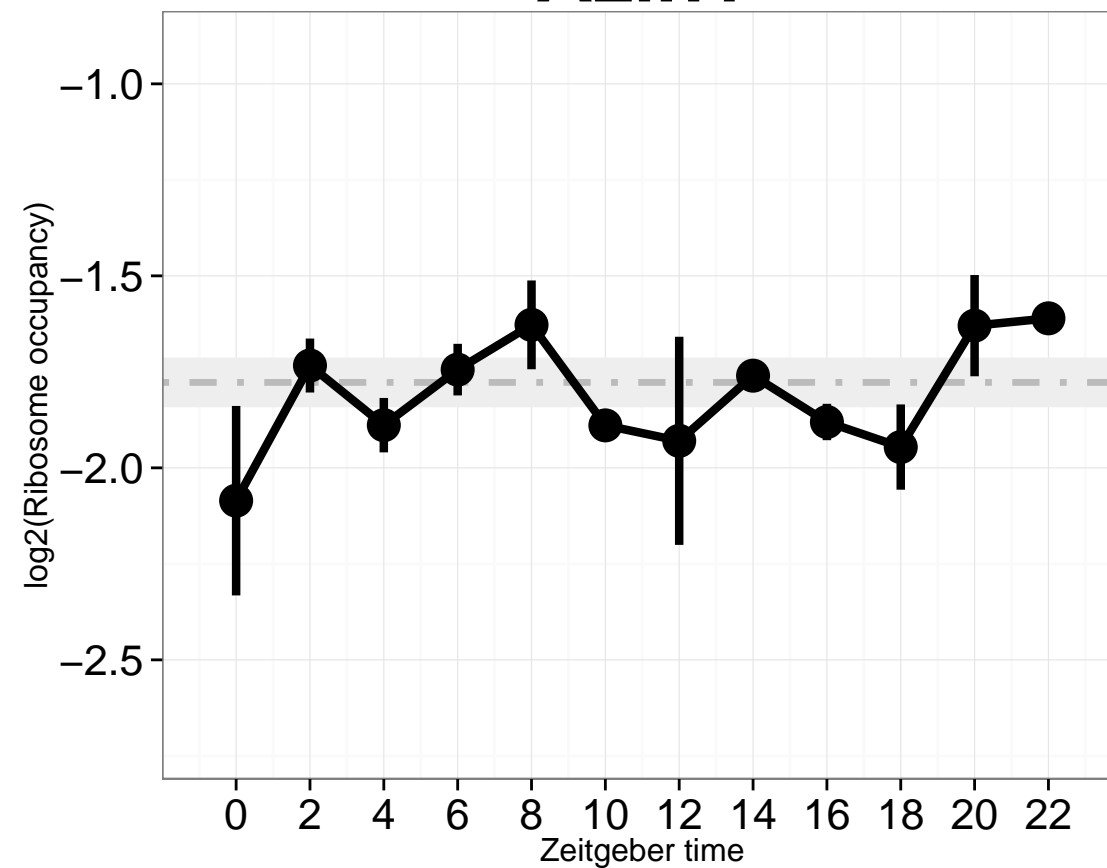

Supplement: SuppDataset_1.zip [file Azin1_set_D.pdf › Supplemental Dataset 1/D-mRNA_rhythm_translation_rhyth/Azin1_set_D.pdf]

# B3galnt1

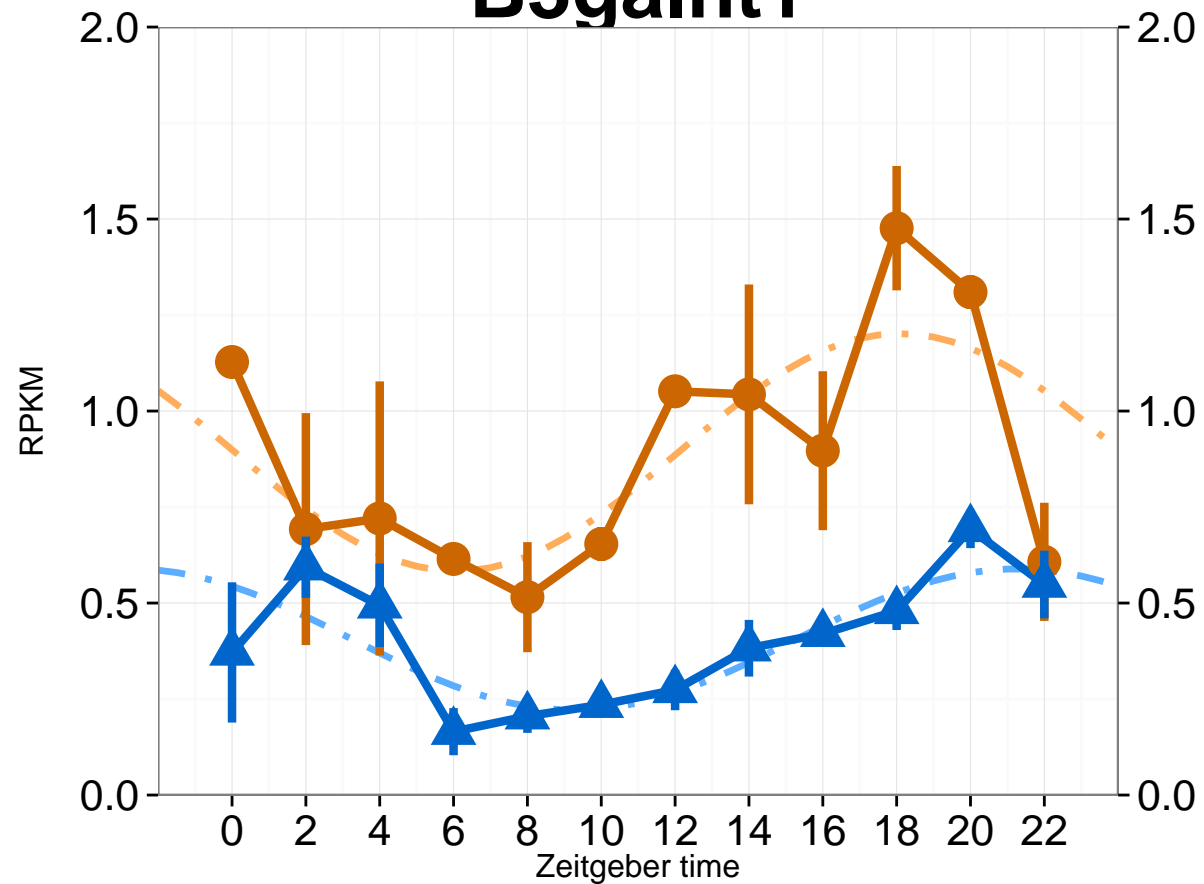

# B3galnt1

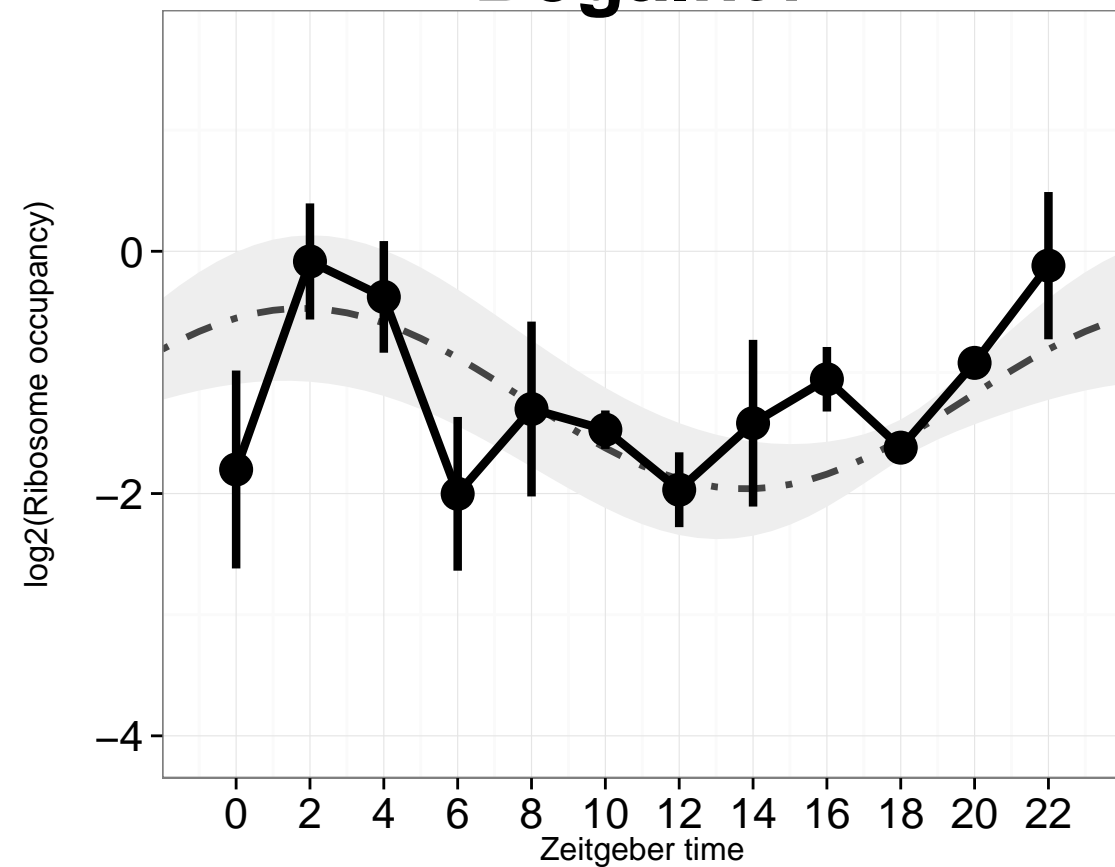

Supplement: SuppDataset_1.zip [file B3galnt1_set_D.pdf › Supplemental Dataset 1/D-mRNA_rhythm_translation_rhyth/B3galnt1_set_D.pdf]

# B3gat3

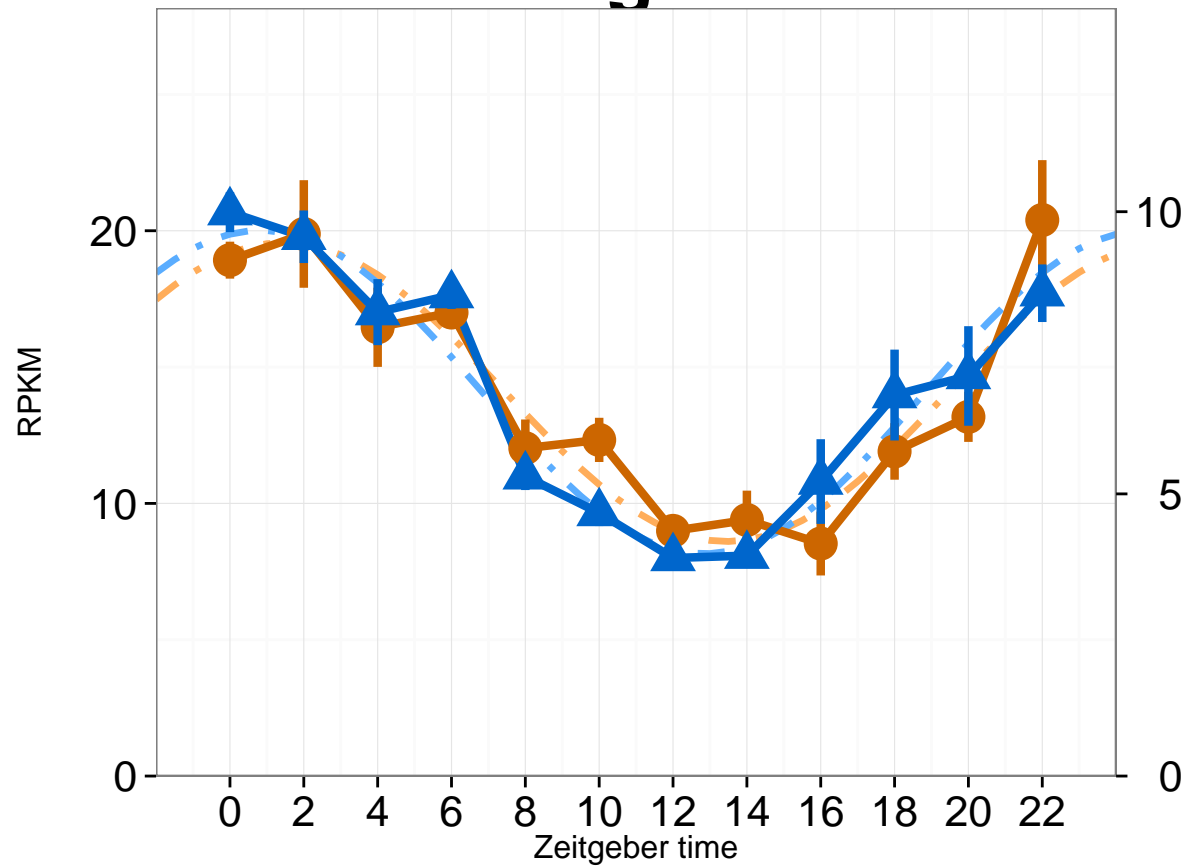

# B3gat3

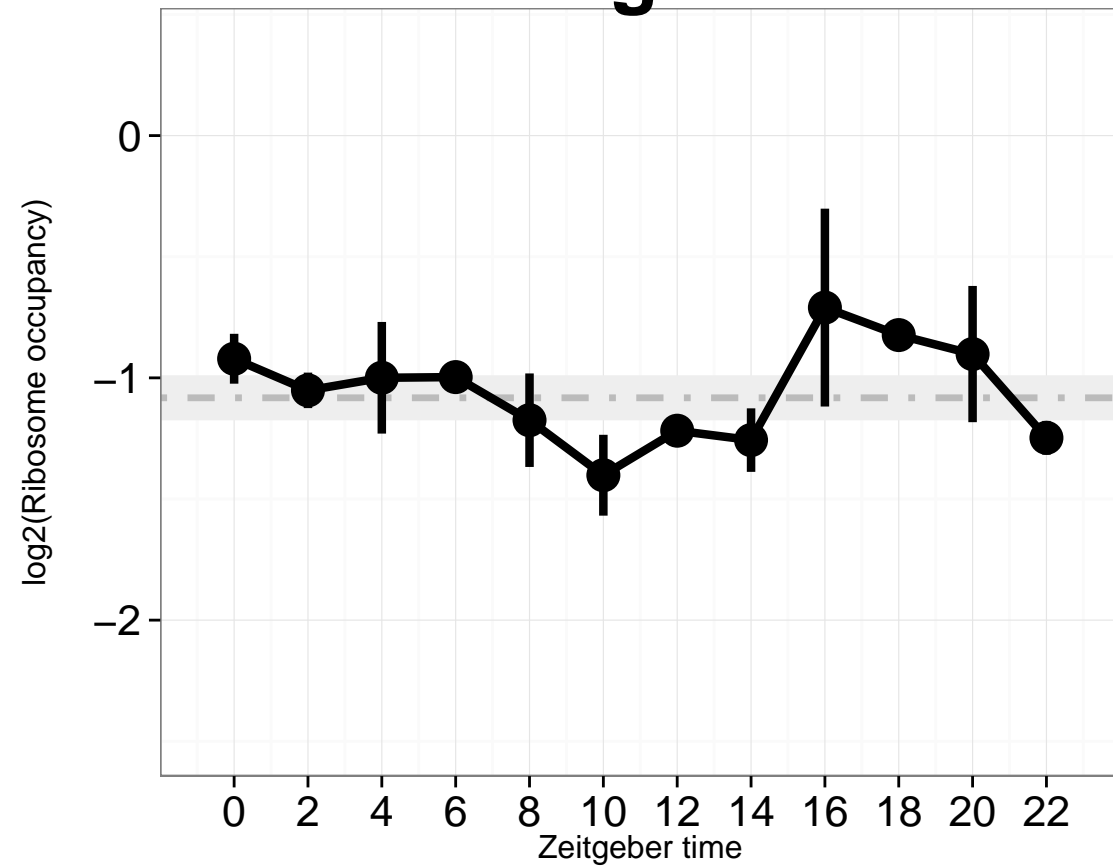

Supplement: SuppDataset_1.zip [file B3gat3_set_D.pdf › Supplemental Dataset 1/D-mRNA_rhythm_translation_rhyth/B3gat3_set_D.pdf]
