# Supplementary figures and images for: Ribosome profiling reveals the rhythmic liver translatome and circadian clock regulation by upstream open reading frames (part 3 of 113)
Source: HighWire-hosted journal article supplement (doi:10.1101/gr.195404.115), 2015-10-20

## Aars

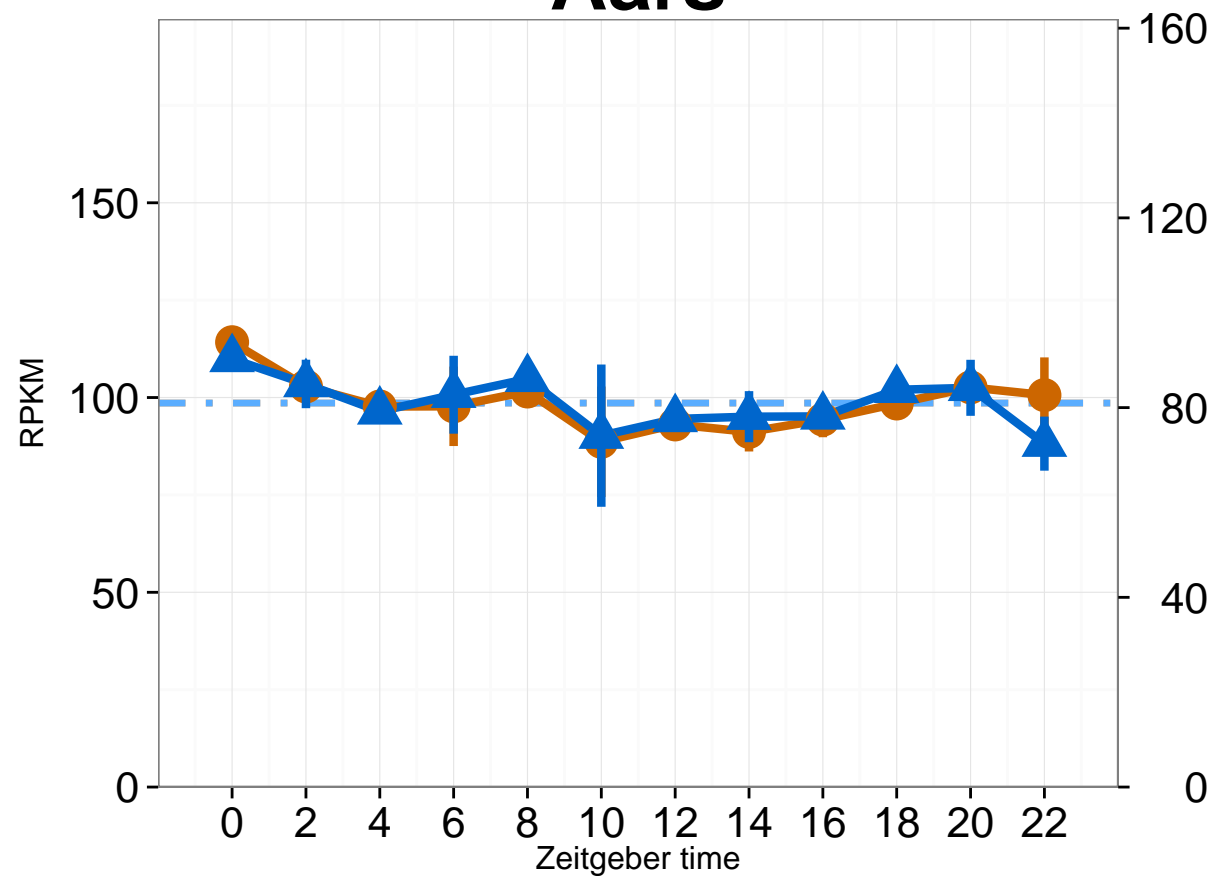

## Aars

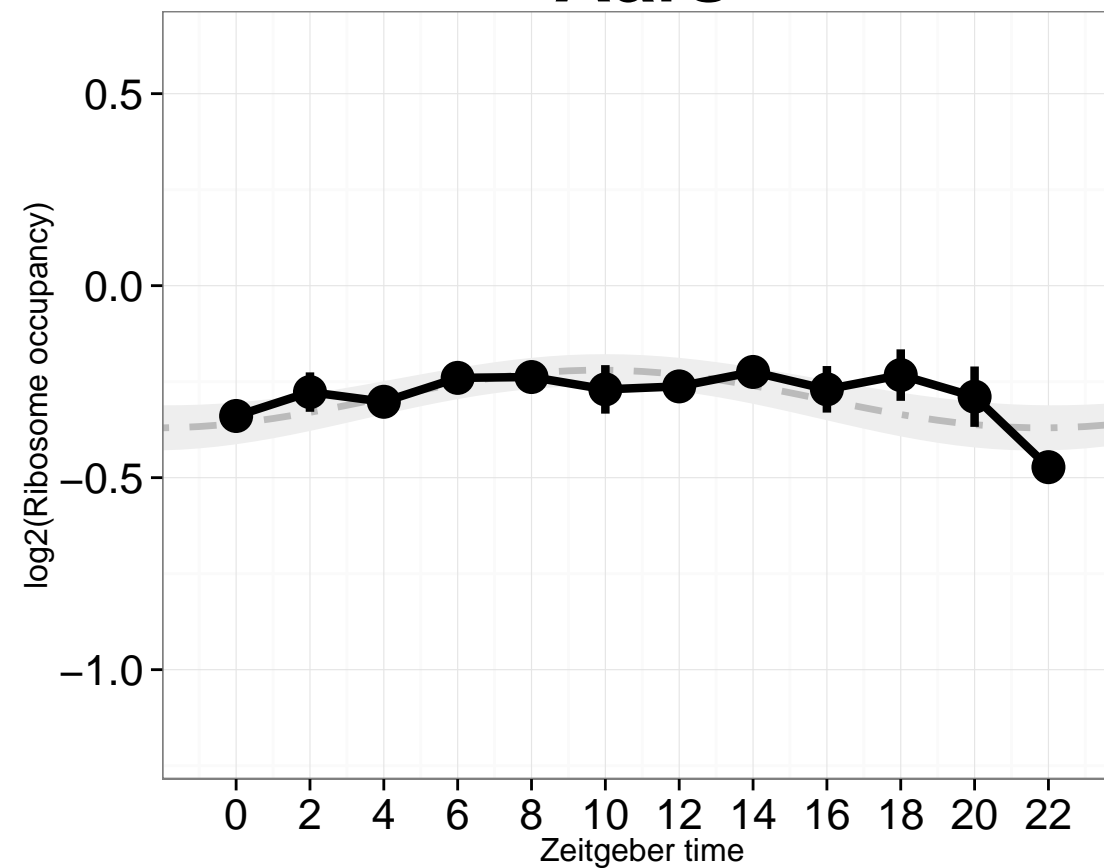

Supplement: SuppDataset_1.zip [file Aars_set_A.pdf › Supplemental Dataset 1/A-mRNA_nonrhyth_translation_nonrhyth/Aars_set_A.pdf]

## Aarsd1

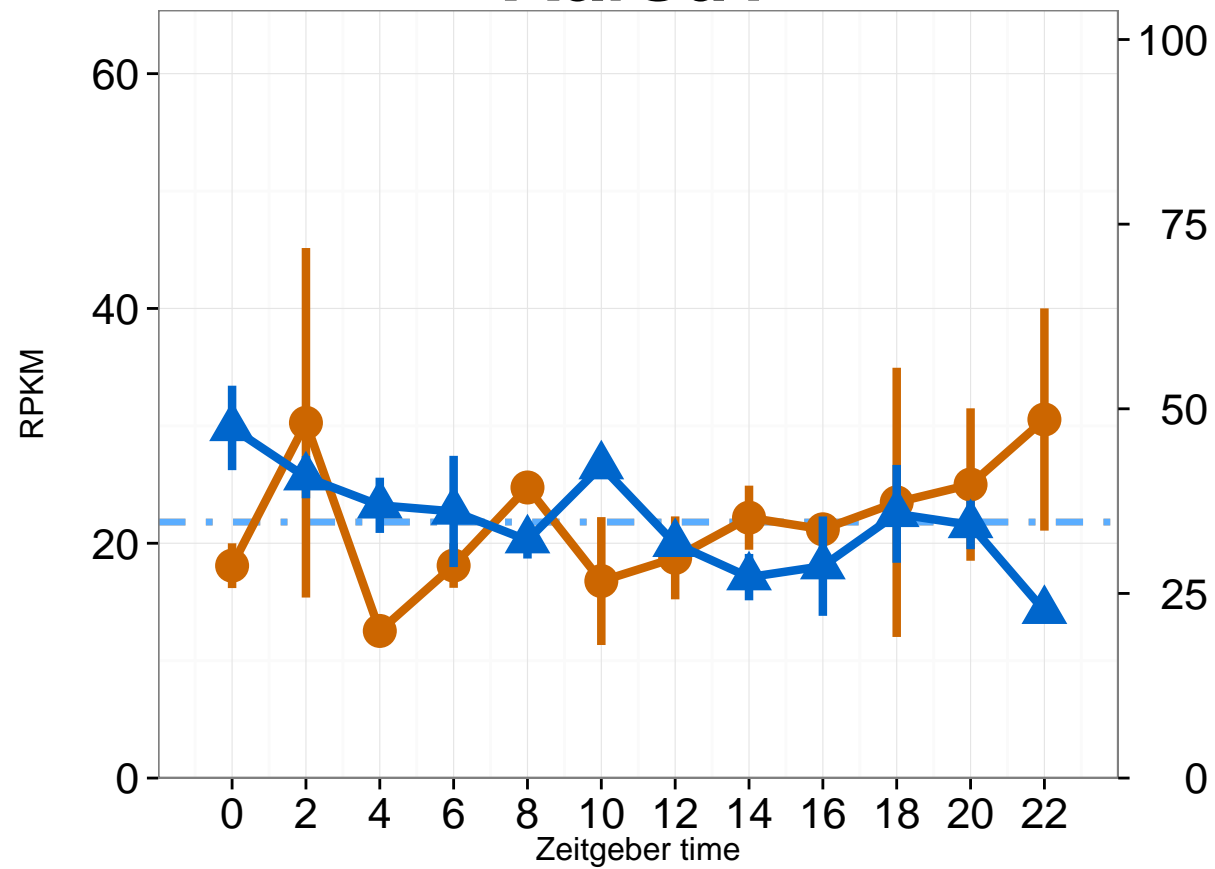

## Aarsd1

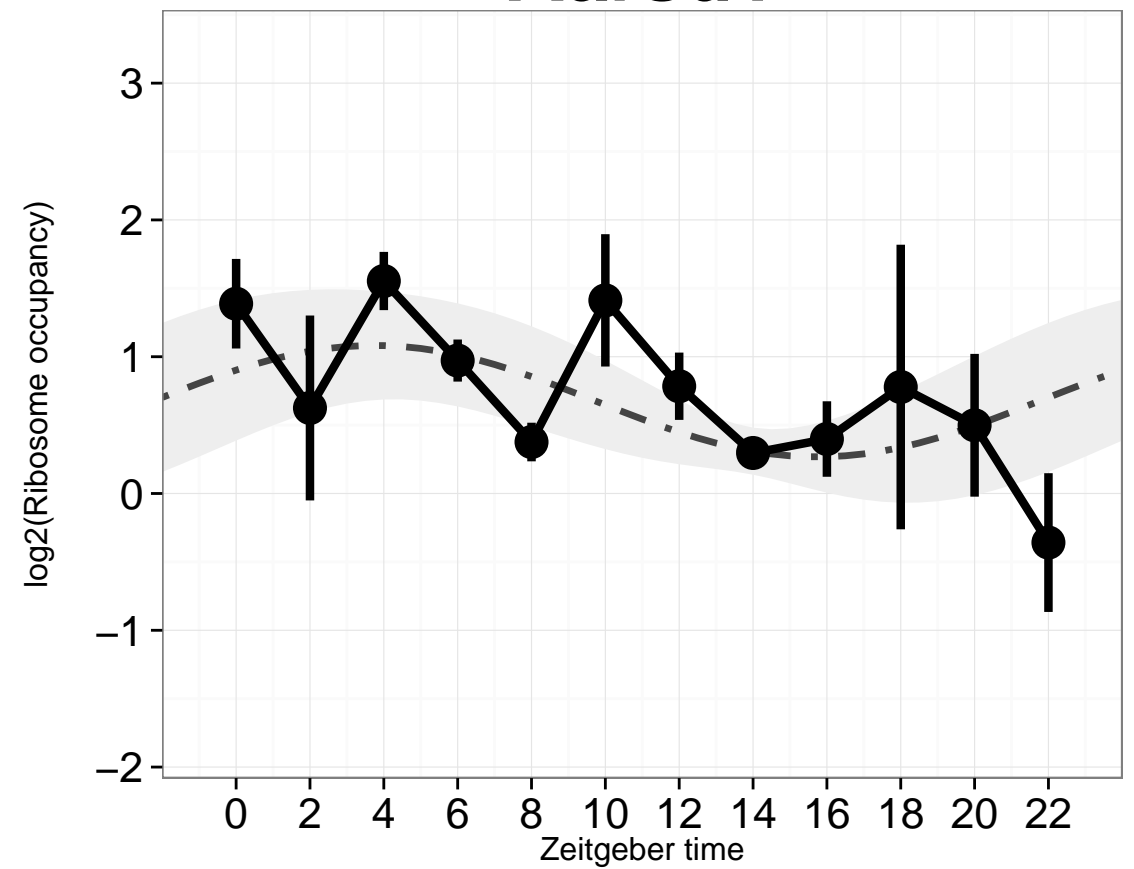

Supplement: SuppDataset_1.zip [file Aarsd1_set_A.pdf › Supplemental Dataset 1/A-mRNA_nonrhyth_translation_nonrhyth/Aarsd1_set_A.pdf]

## Aasdhppt

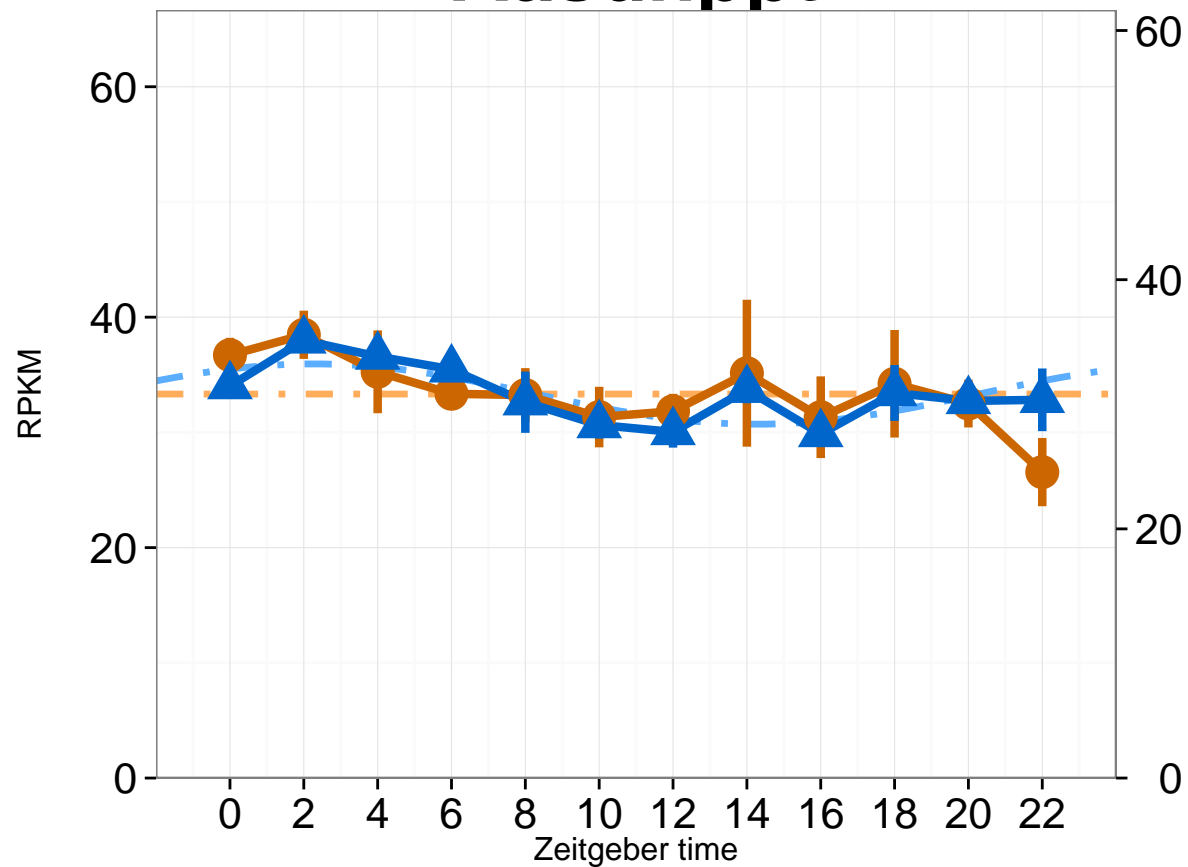

## Aasdhppt

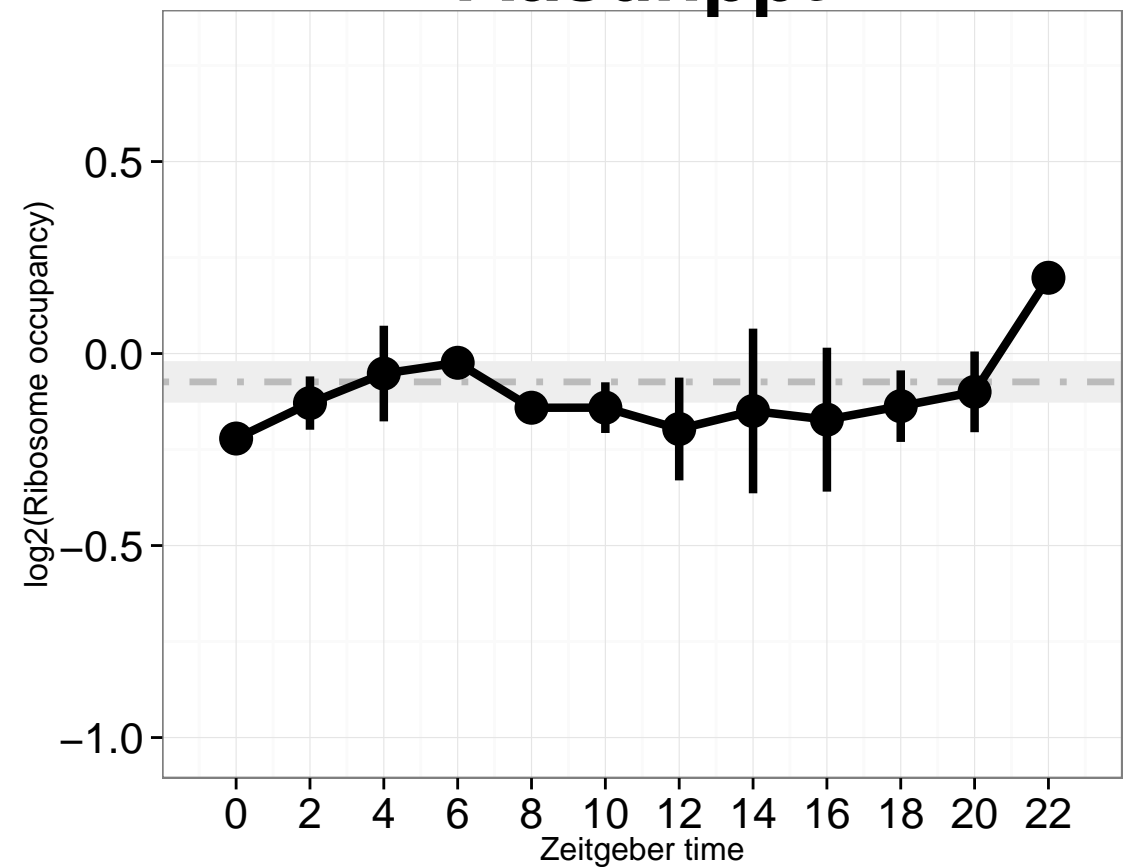

Supplement: SuppDataset_1.zip [file Aasdhppt_set_A.pdf › Supplemental Dataset 1/A-mRNA_nonrhyth_translation_nonrhyth/Aasdhppt_set_A.pdf]

## Aass

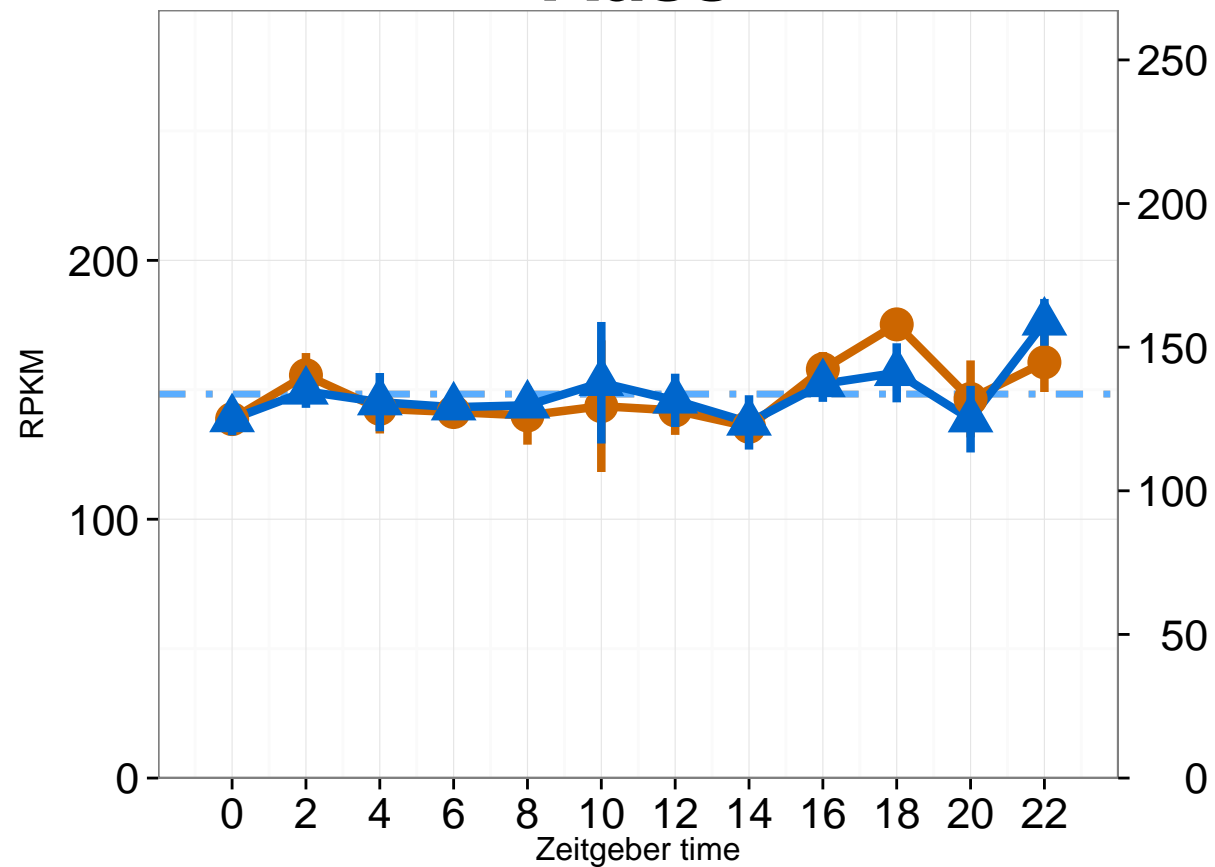

## Aass

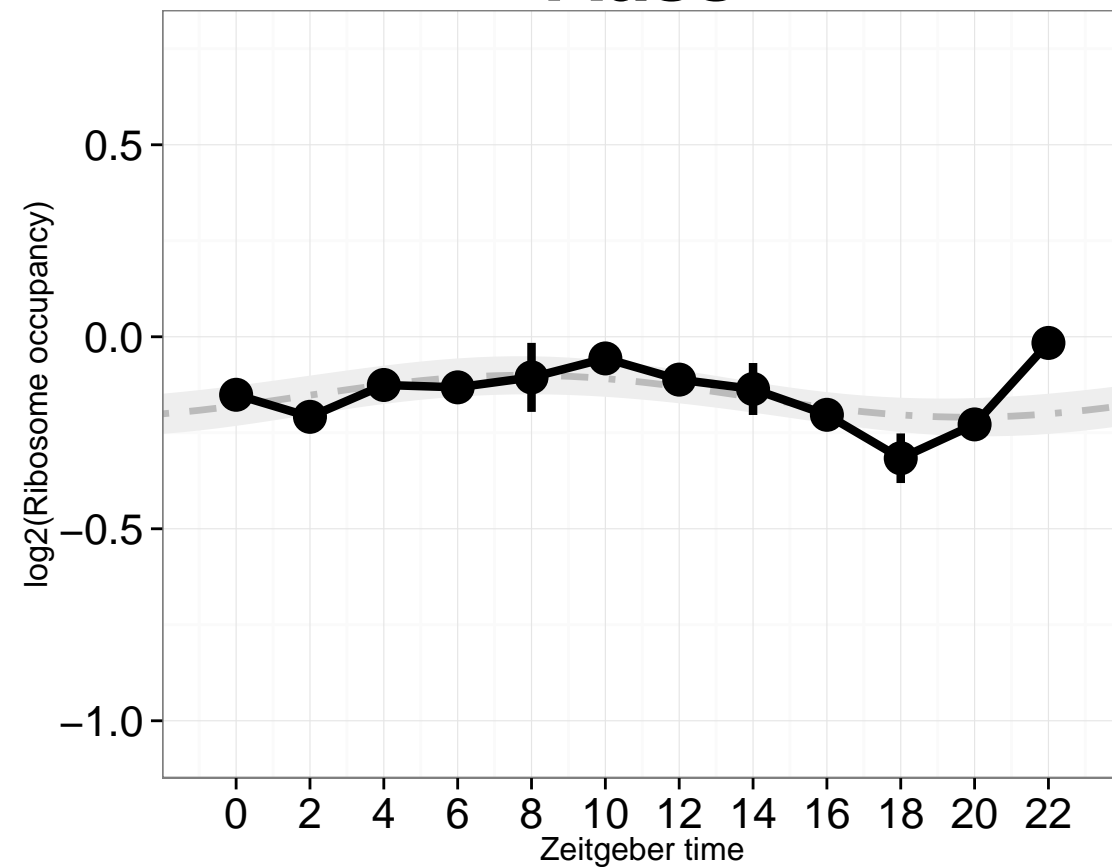

Supplement: SuppDataset_1.zip [file Aass_set_A.pdf › Supplemental Dataset 1/A-mRNA_nonrhyth_translation_nonrhyth/Aass_set_A.pdf]

## Aatf

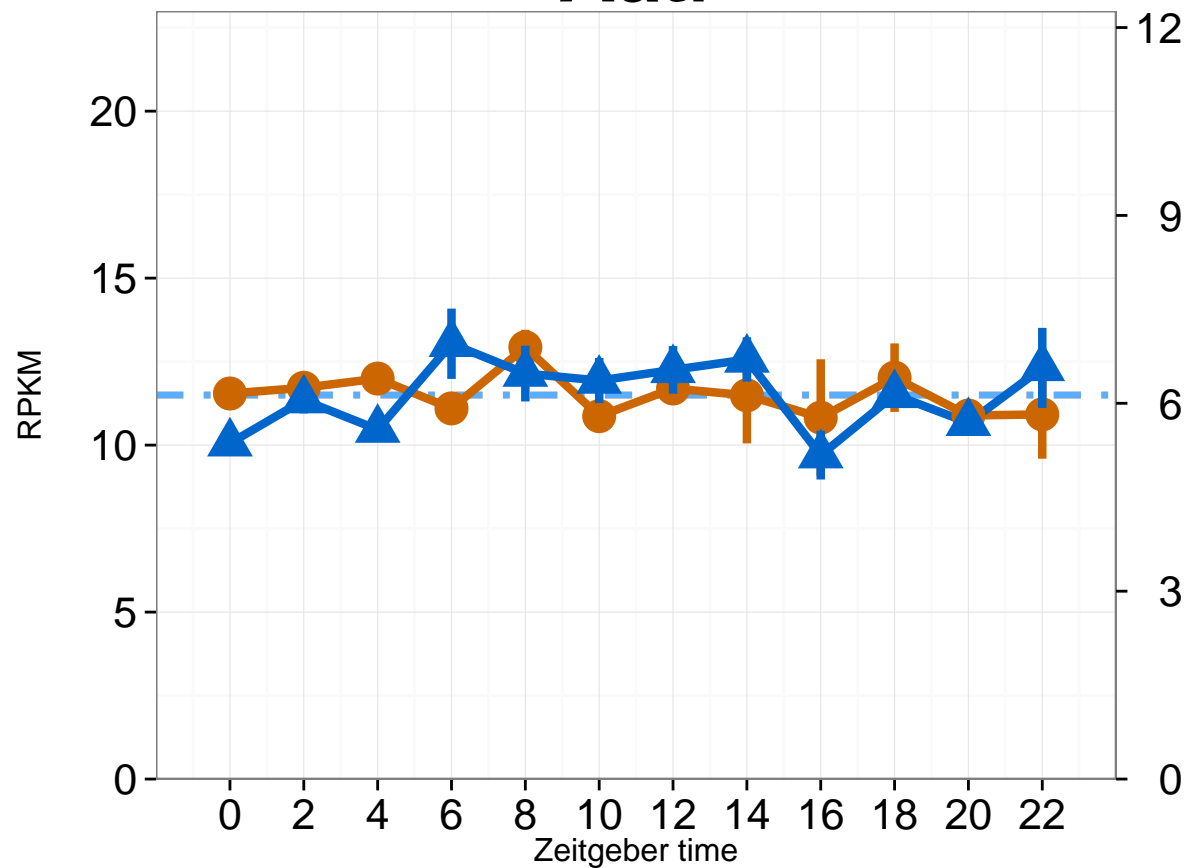

## Aatf

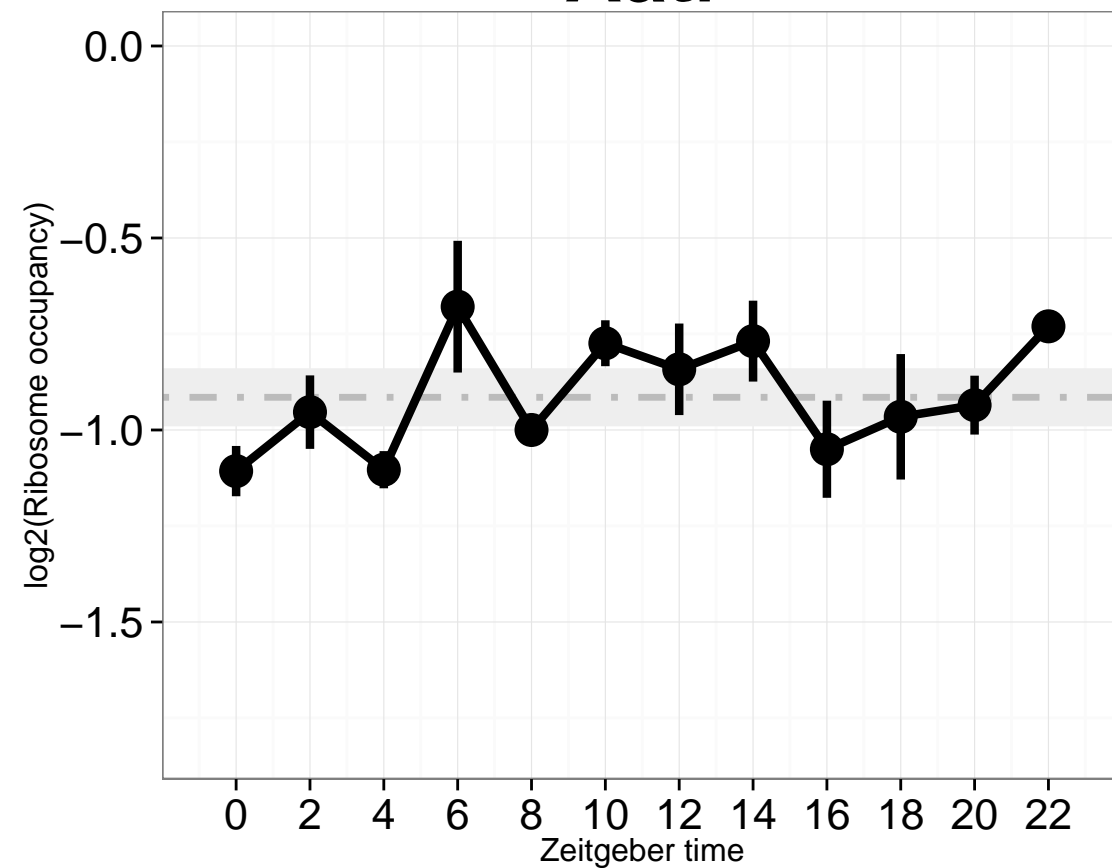

Supplement: SuppDataset_1.zip [file Aatf_set_A.pdf › Supplemental Dataset 1/A-mRNA_nonrhyth_translation_nonrhyth/Aatf_set_A.pdf]

## Aatk

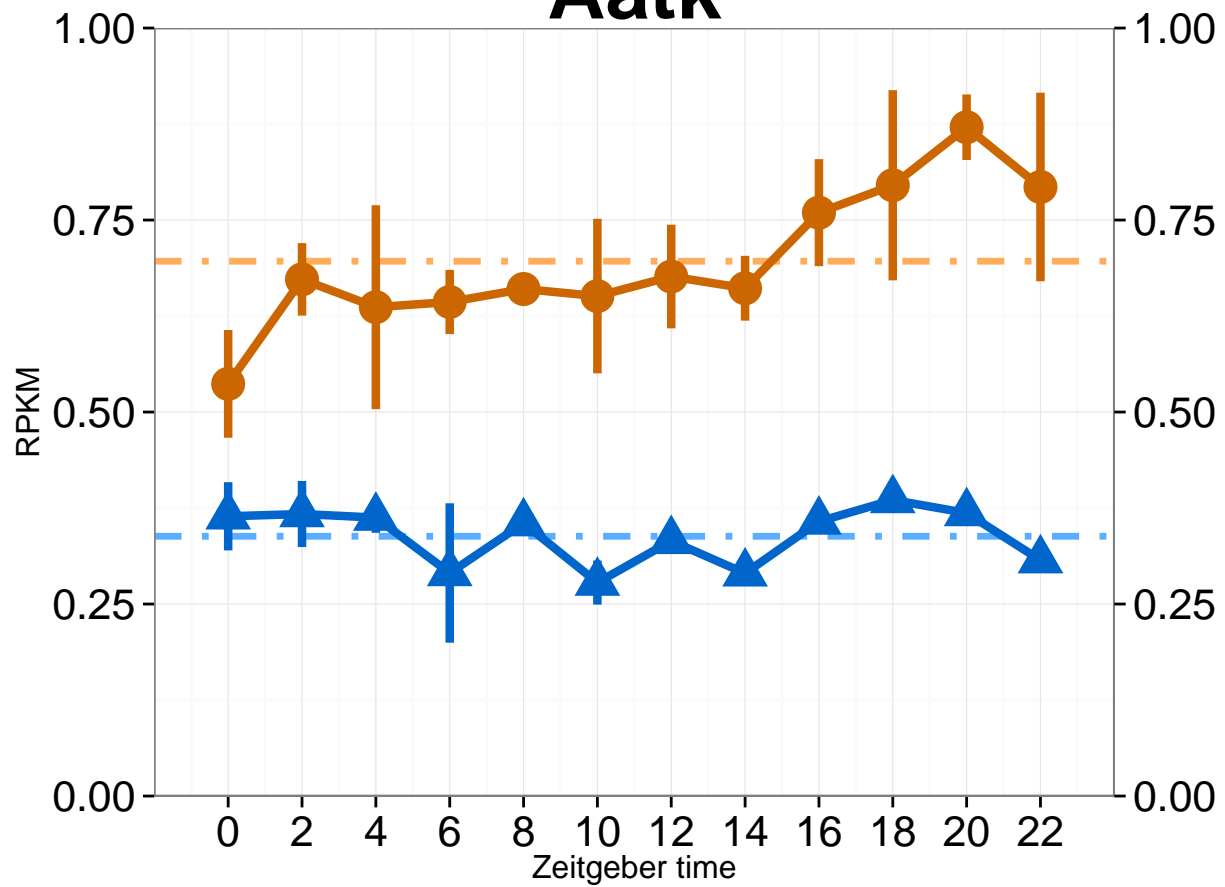

## Aatk

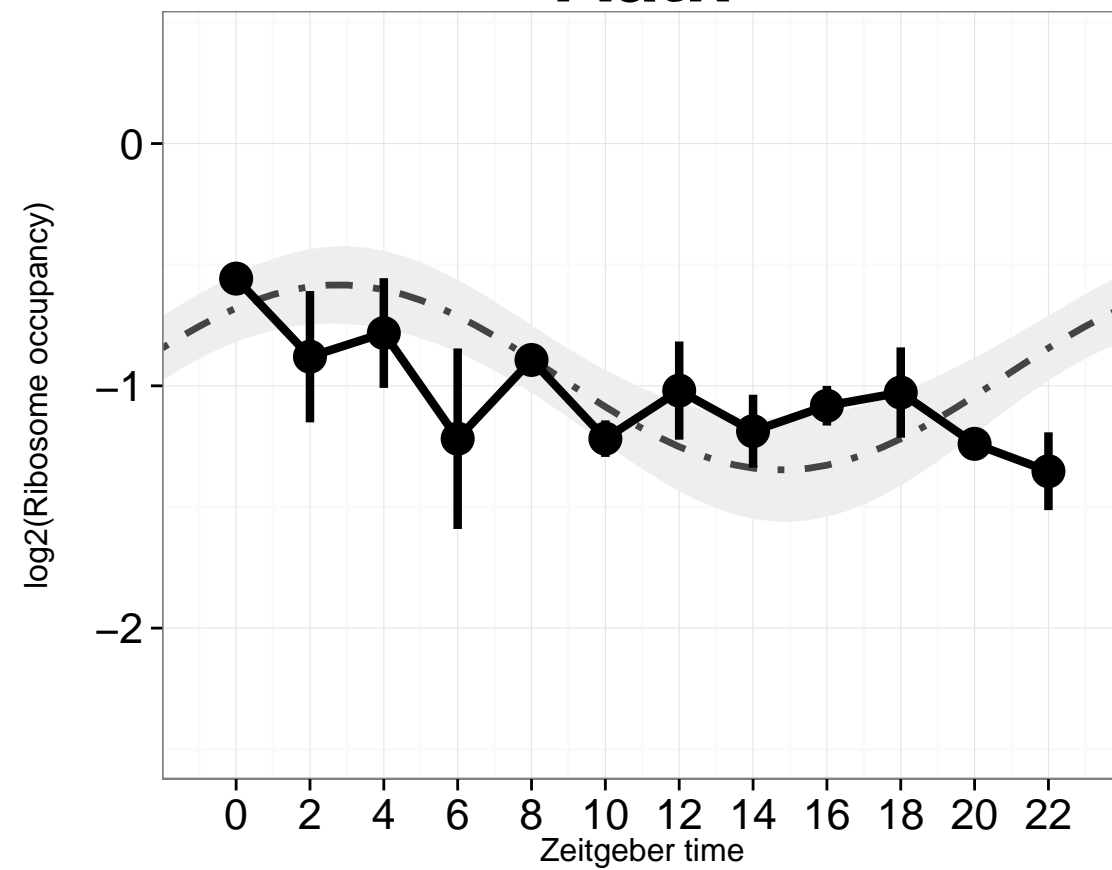

Supplement: SuppDataset_1.zip [file Aatk_set_A.pdf › Supplemental Dataset 1/A-mRNA_nonrhyth_translation_nonrhyth/Aatk_set_A.pdf]

## Abat

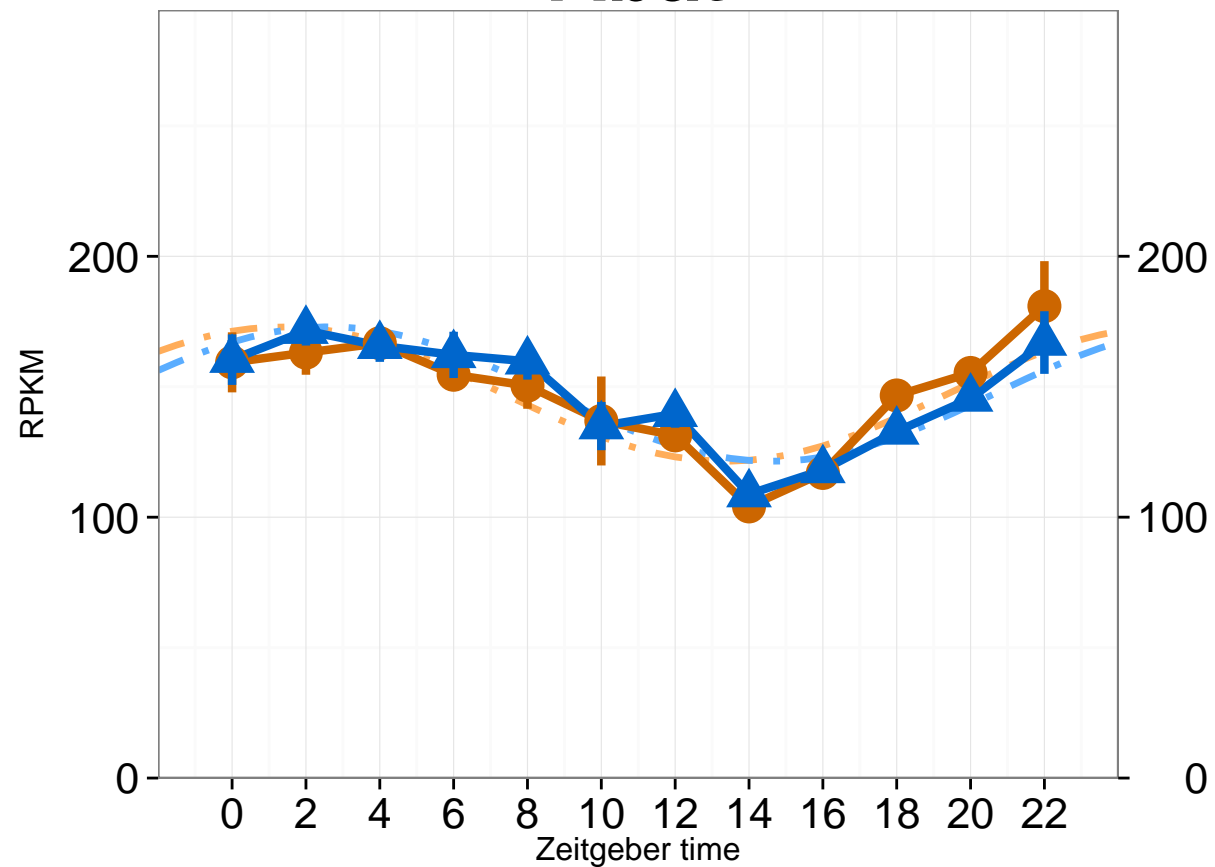

## Abat

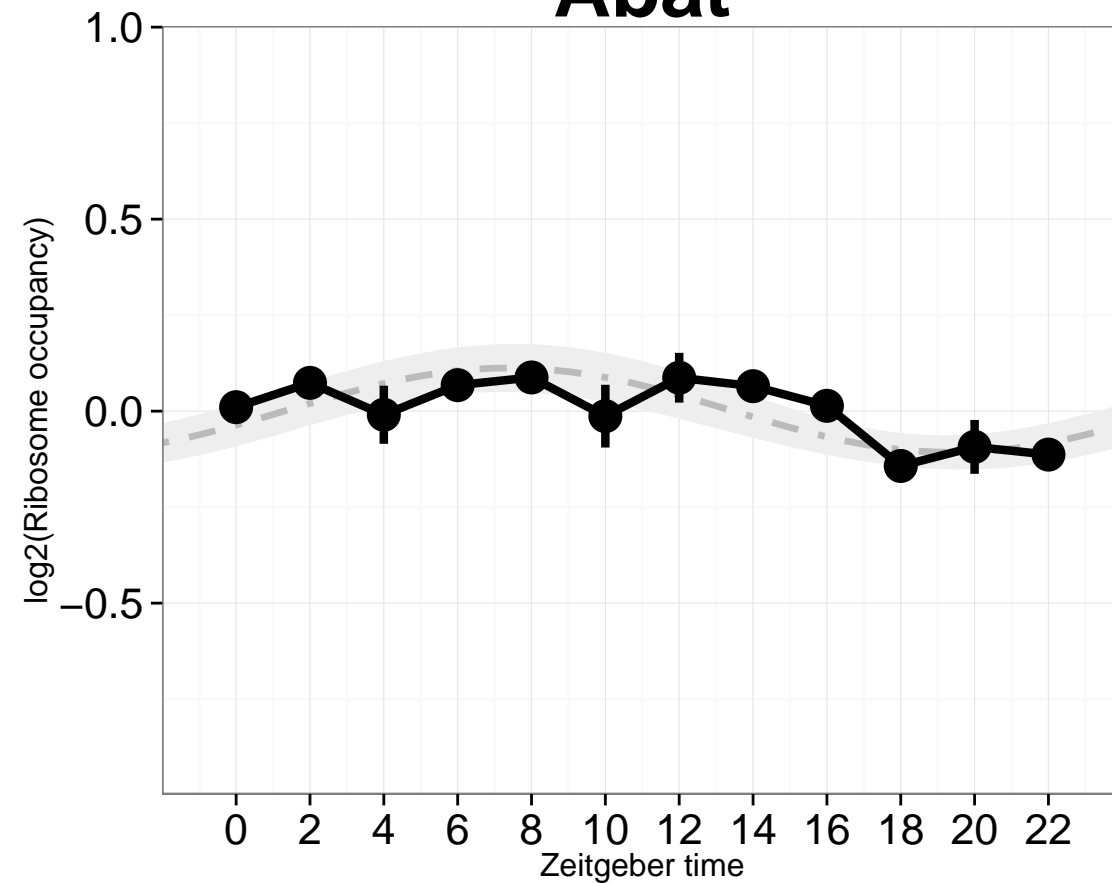

Supplement: SuppDataset_1.zip [file Abat_set_A.pdf › Supplemental Dataset 1/A-mRNA_nonrhyth_translation_nonrhyth/Abat_set_A.pdf]

## Abca1

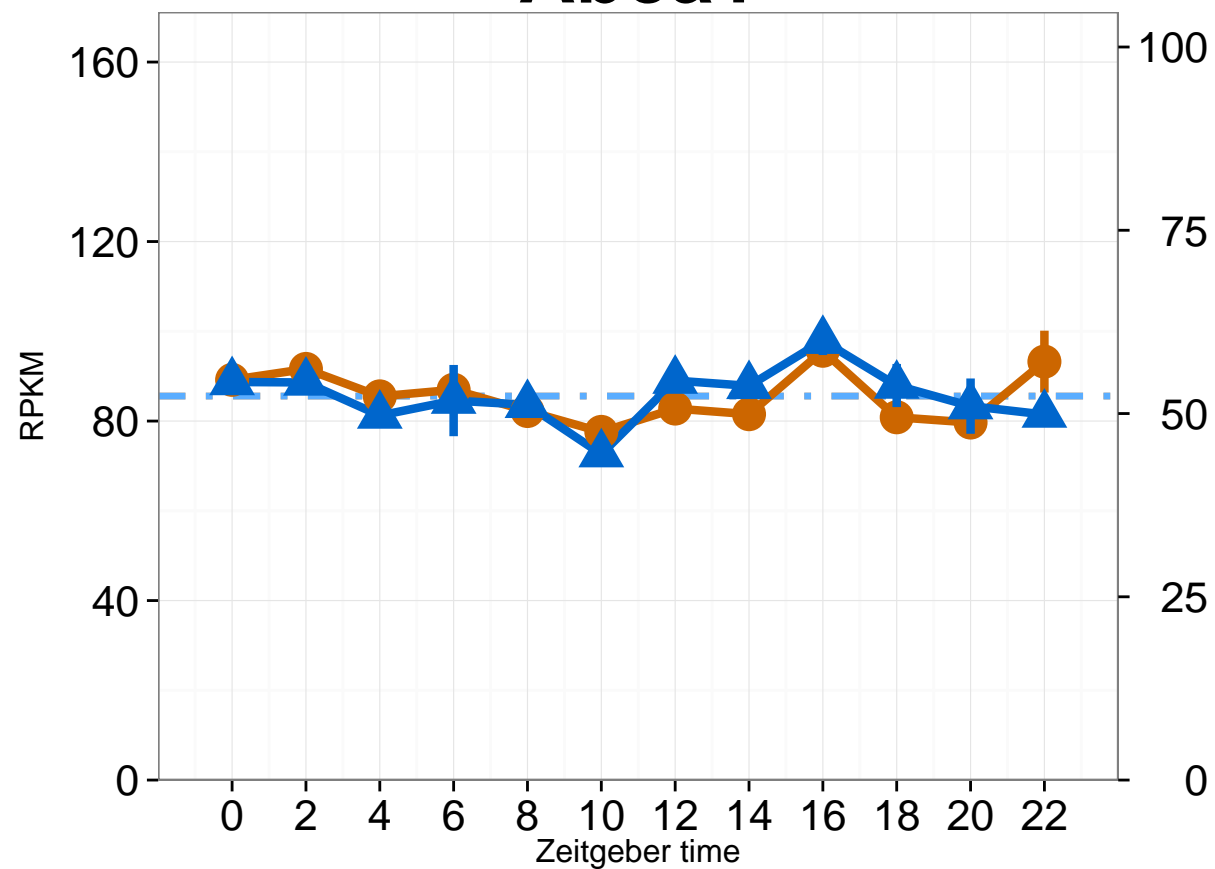

## Abca1

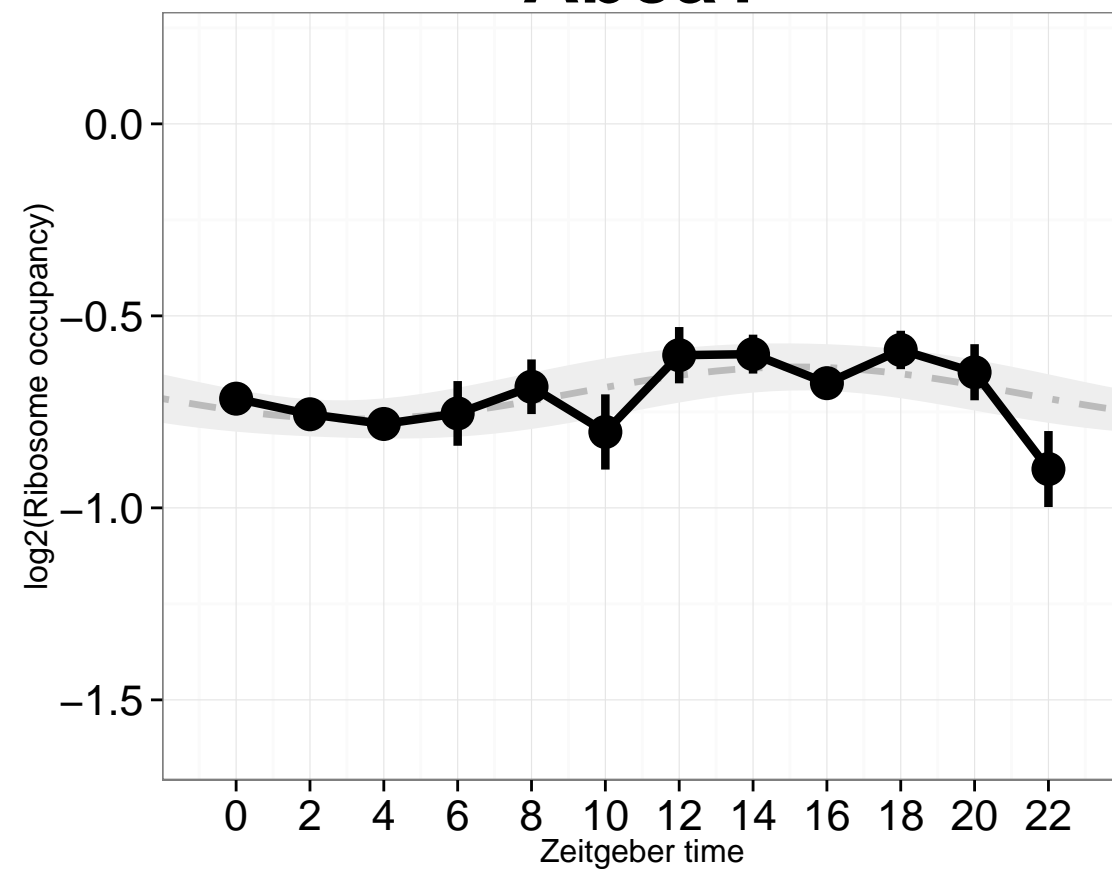

Supplement: SuppDataset_1.zip [file Abca1_set_A.pdf › Supplemental Dataset 1/A-mRNA_nonrhyth_translation_nonrhyth/Abca1_set_A.pdf]

## Abca3

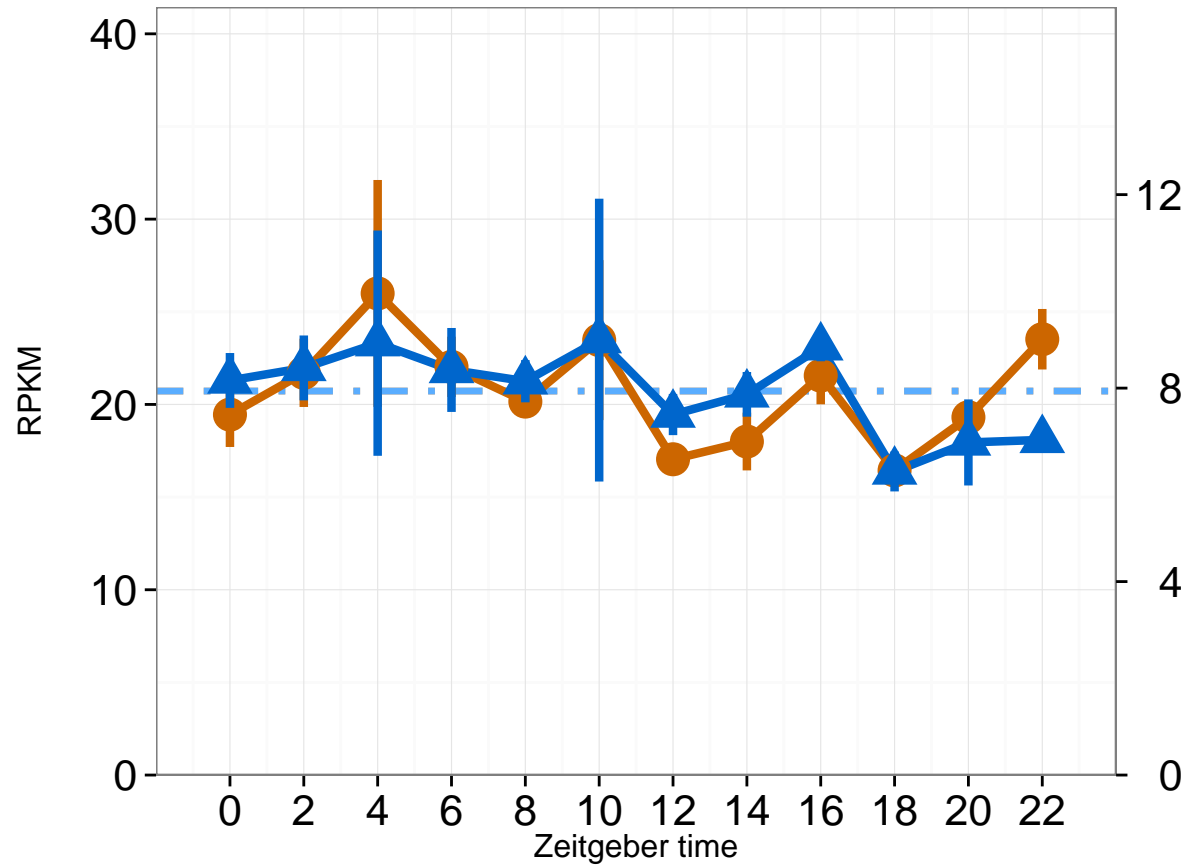

## Abca3

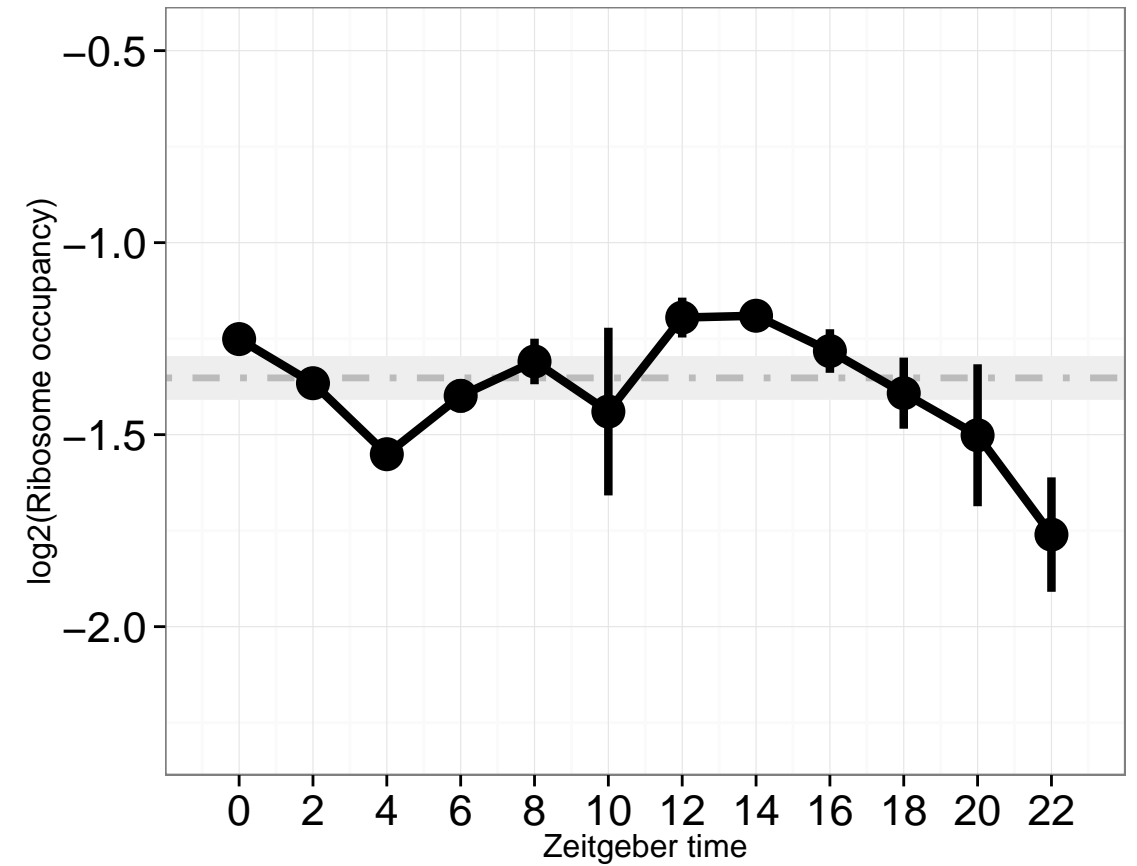

Supplement: SuppDataset_1.zip [file Abca3_set_A.pdf › Supplemental Dataset 1/A-mRNA_nonrhyth_translation_nonrhyth/Abca3_set_A.pdf]

## Abca5

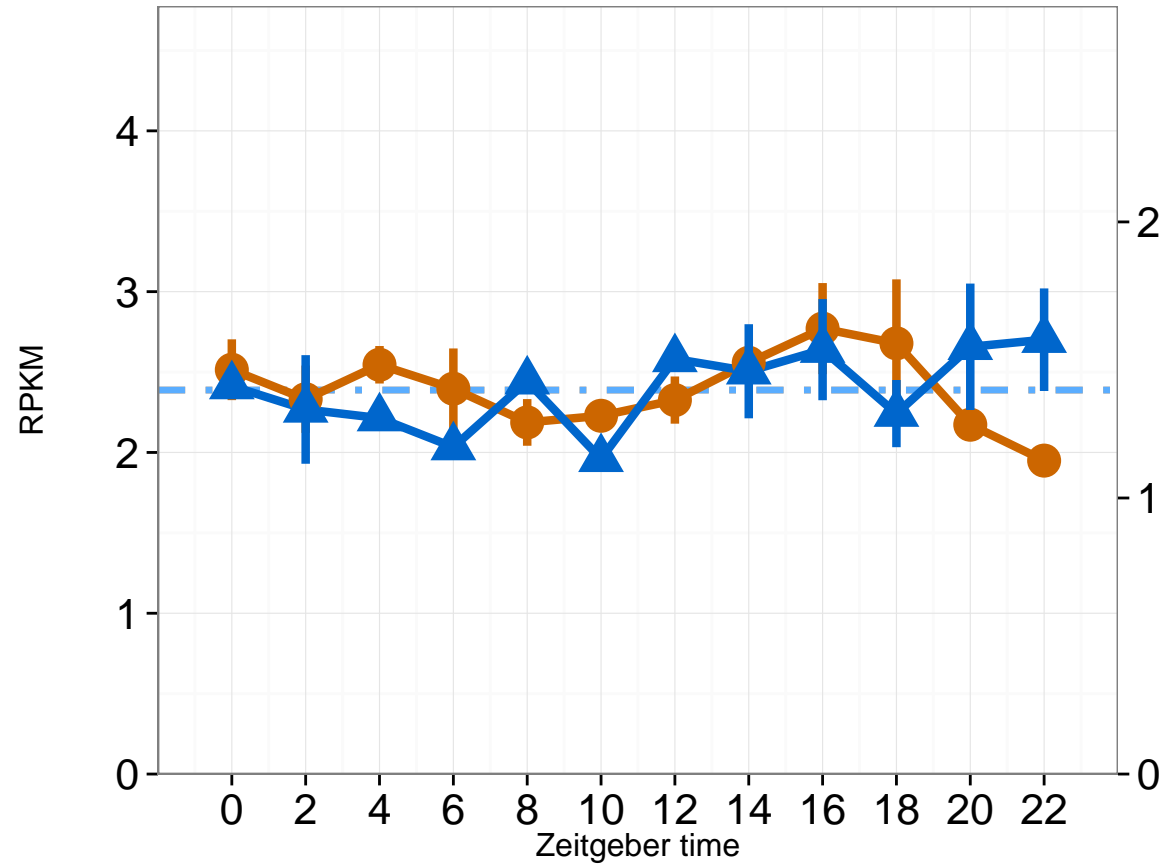

## Abca5

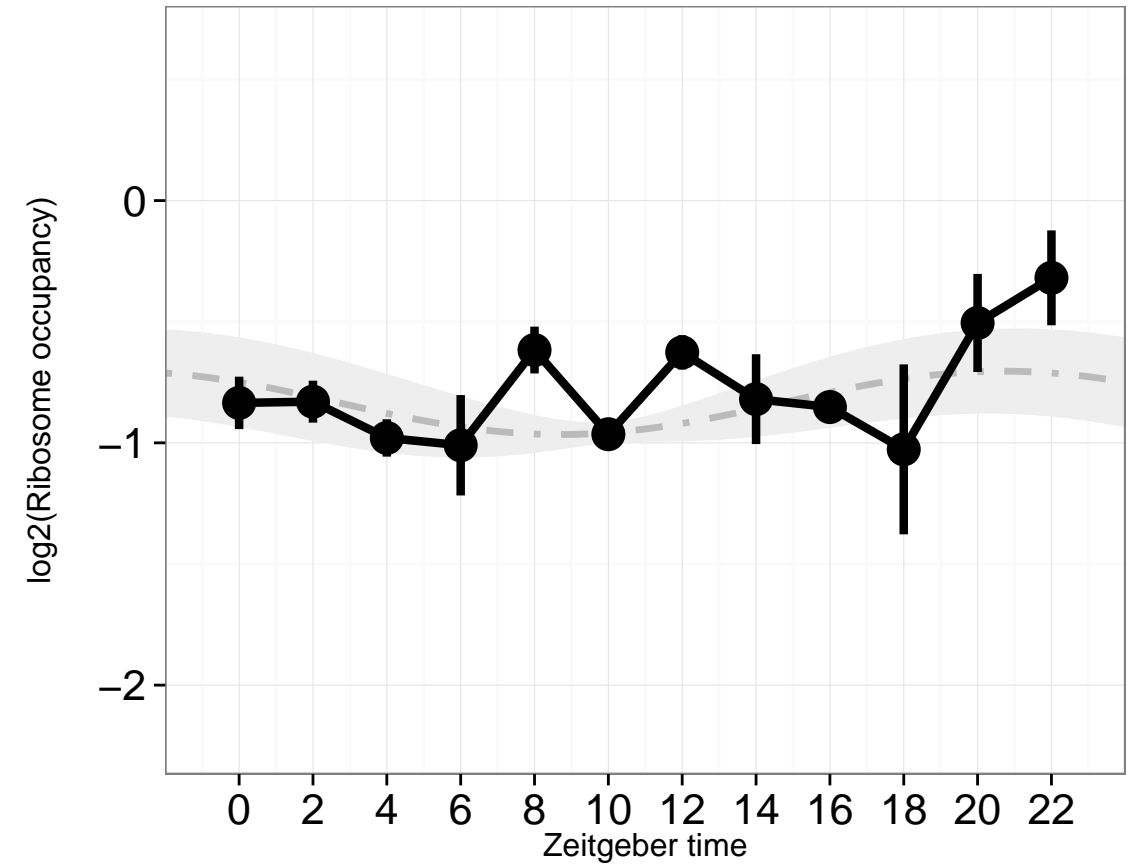

Supplement: SuppDataset_1.zip [file Abca5_set_A.pdf › Supplemental Dataset 1/A-mRNA_nonrhyth_translation_nonrhyth/Abca5_set_A.pdf]

# Abca7

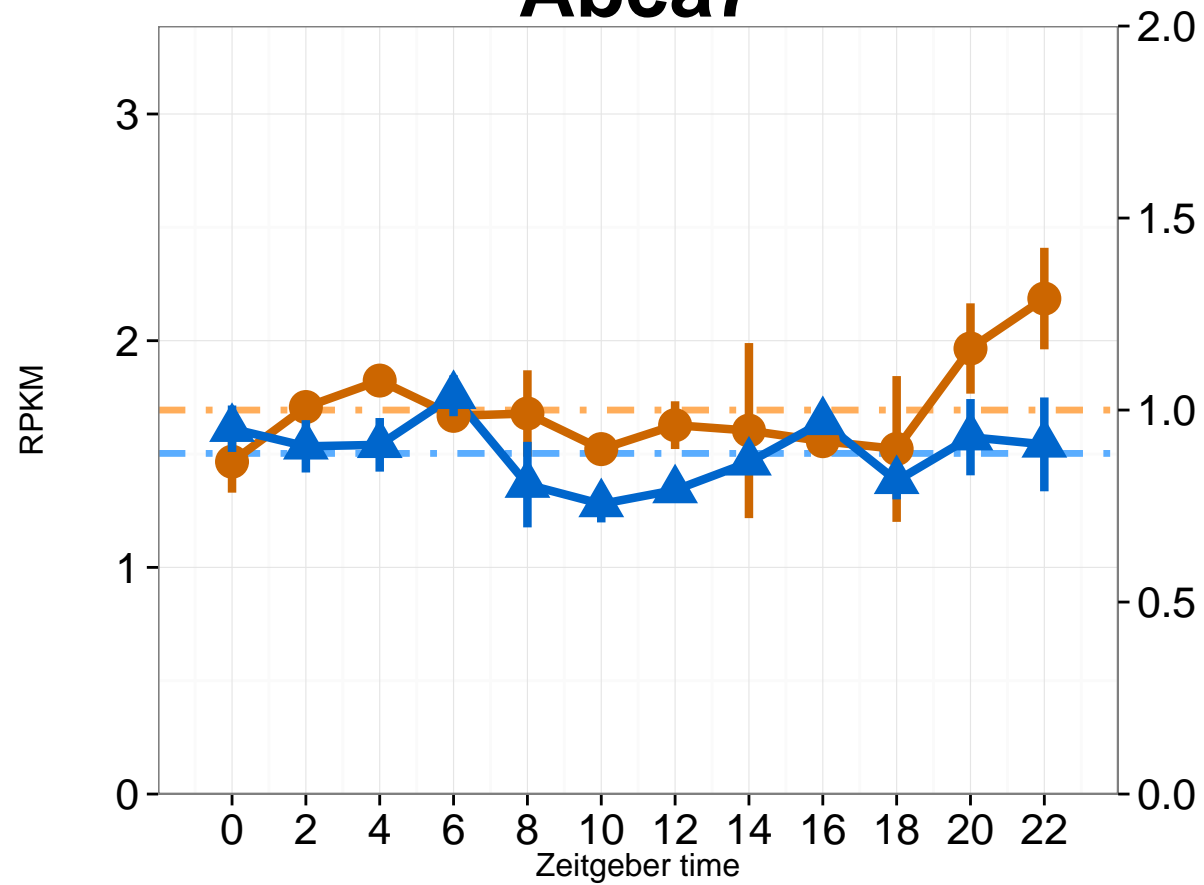

# Abca7

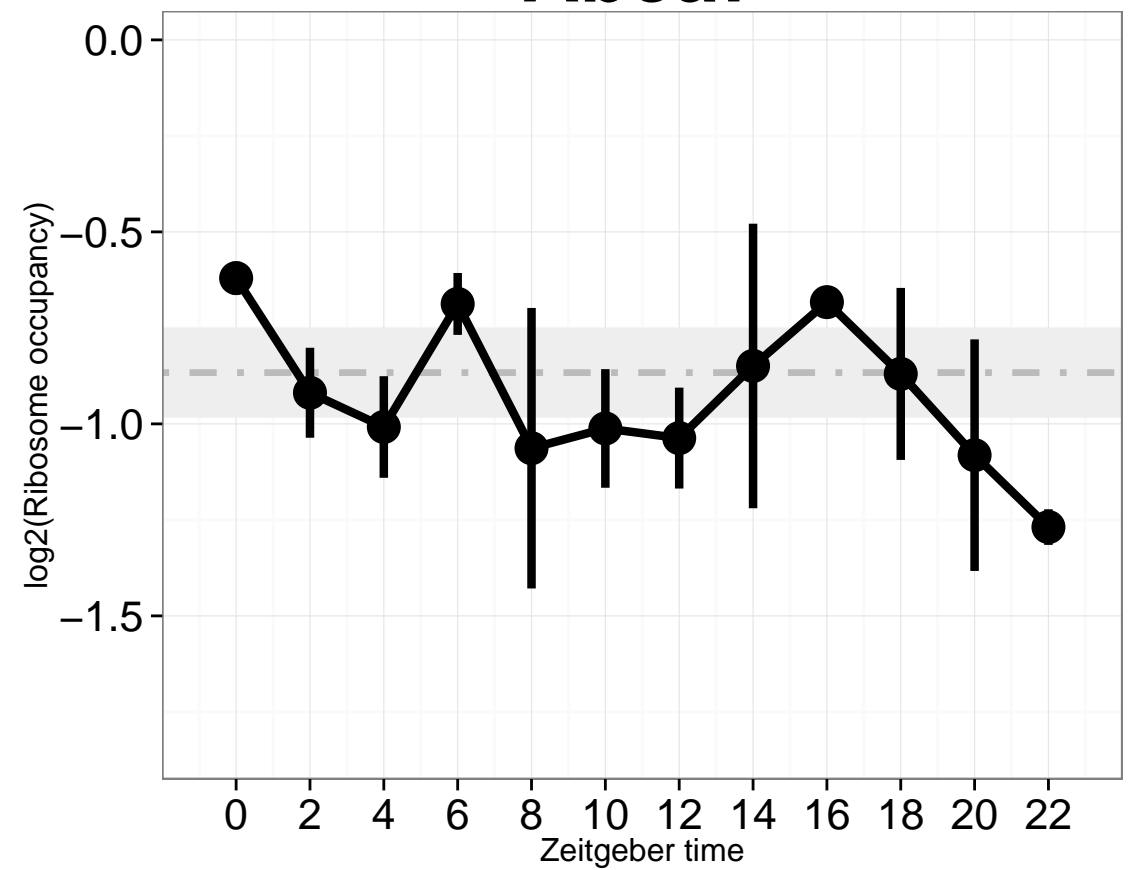

Supplement: SuppDataset_1.zip [file Abca7_set_A.pdf › Supplemental Dataset 1/A-mRNA_nonrhyth_translation_nonrhyth/Abca7_set_A.pdf]

# Abca8a

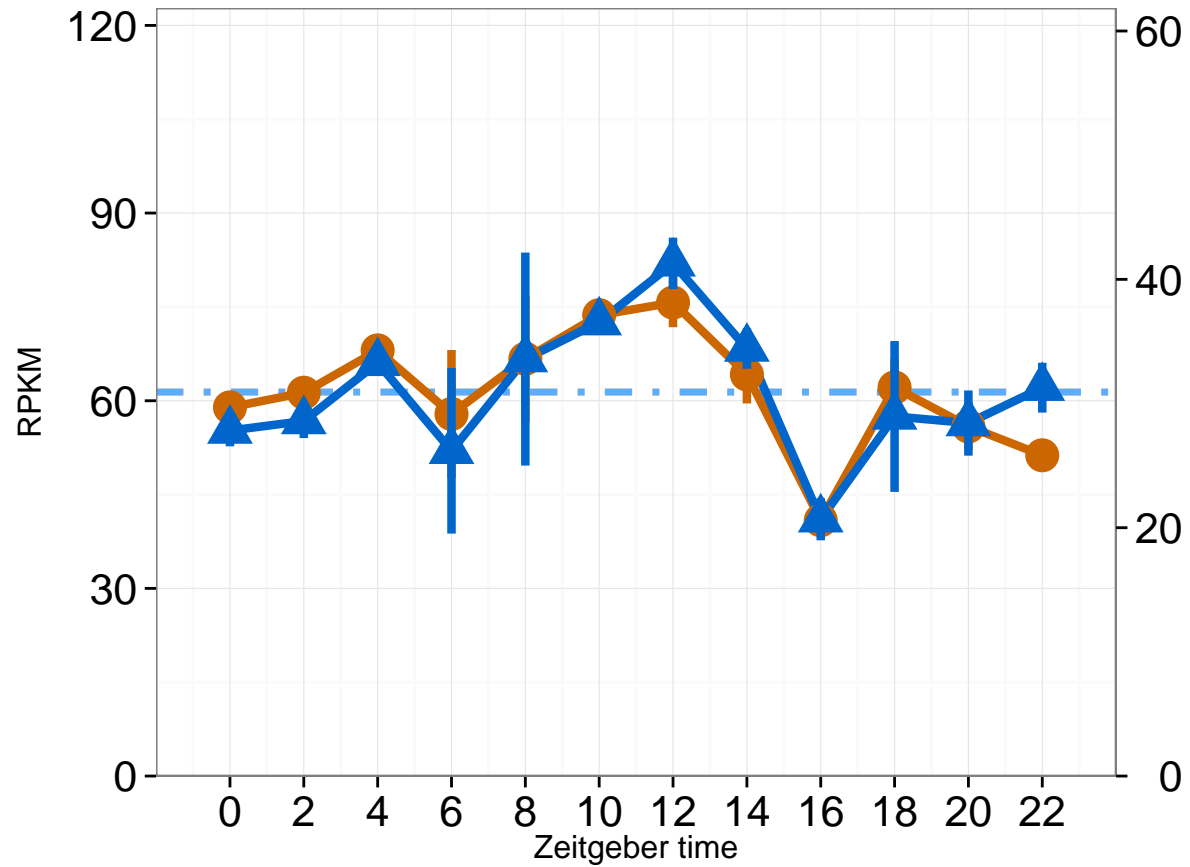

# Abca8a

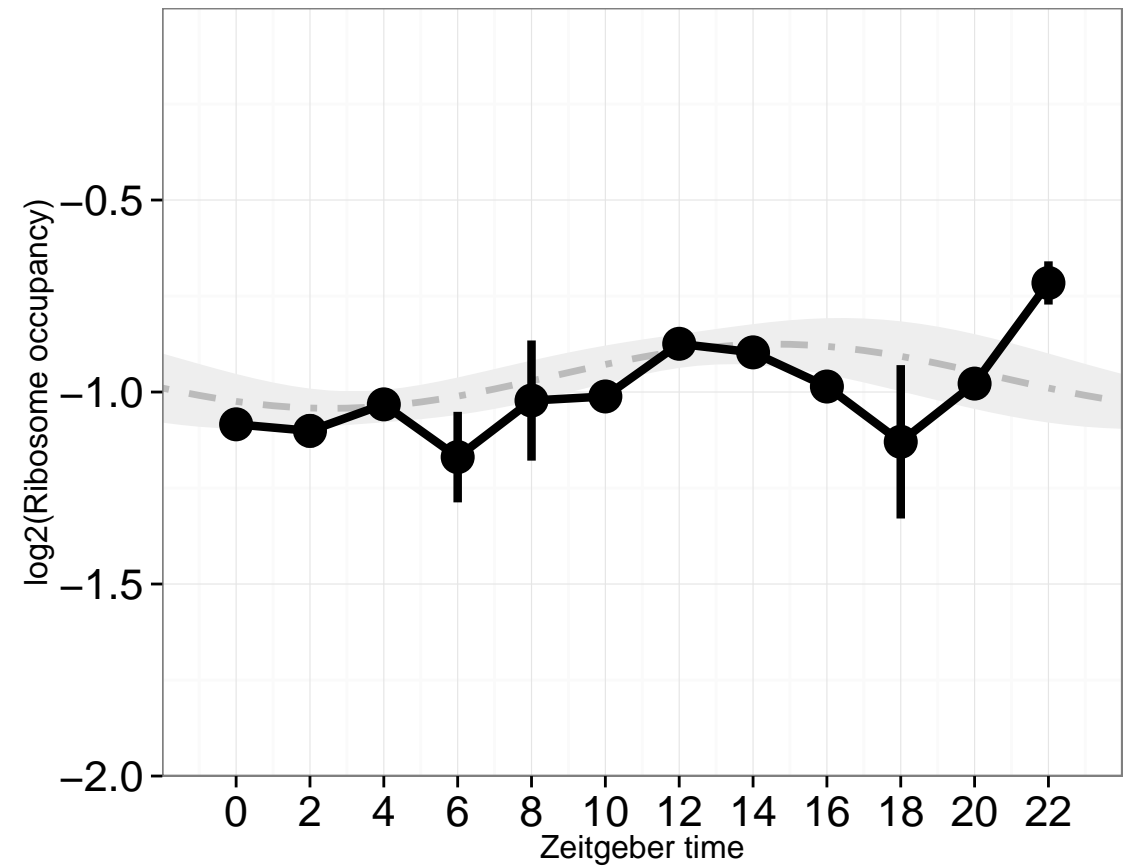

Supplement: SuppDataset_1.zip [file Abca8a_set_A.pdf › Supplemental Dataset 1/A-mRNA_nonrhyth_translation_nonrhyth/Abca8a_set_A.pdf]

## Abca9

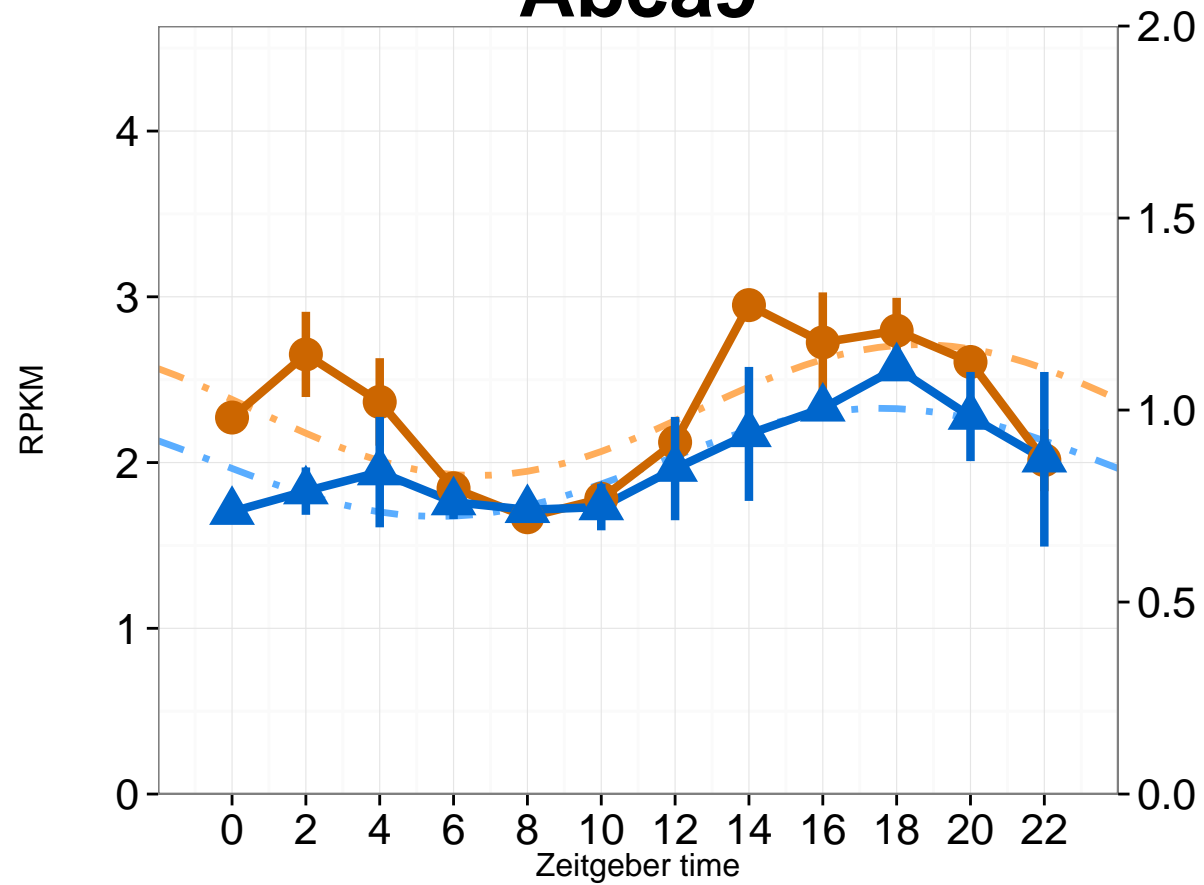

## Abca9

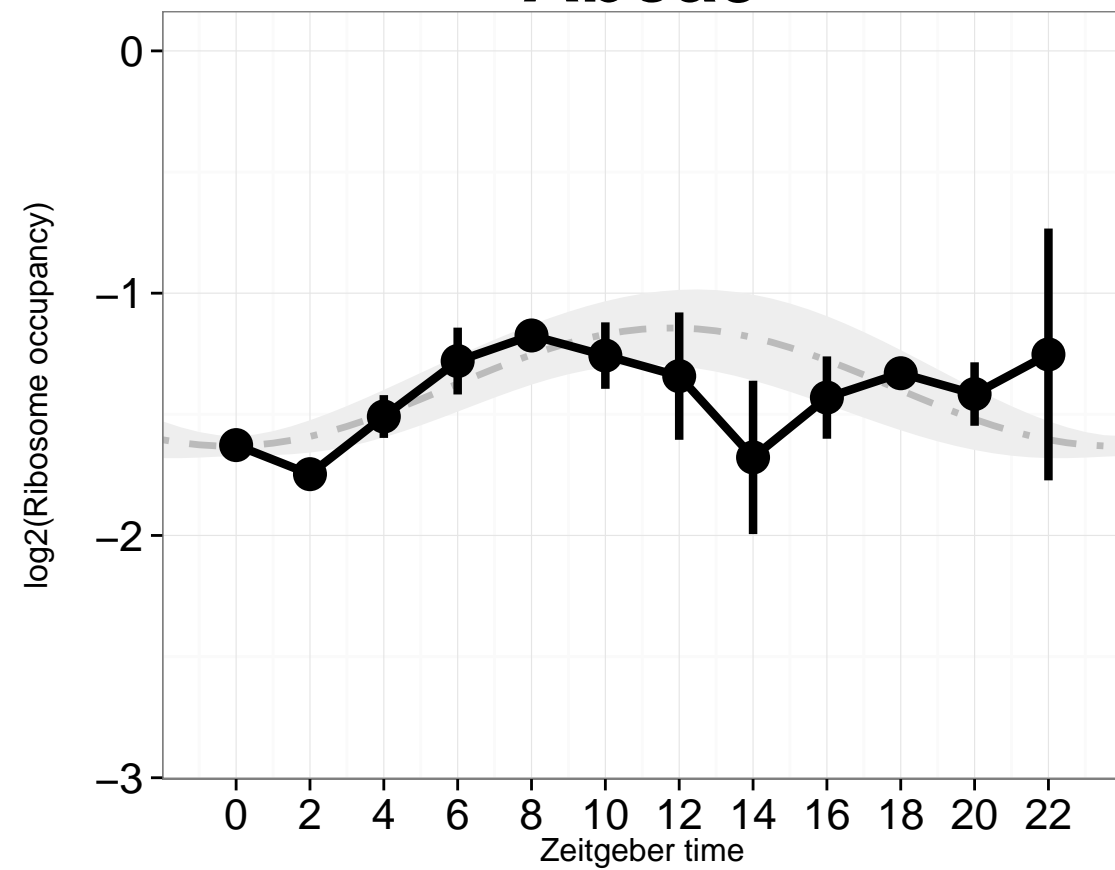

Supplement: SuppDataset_1.zip [file Abca9_set_A.pdf › Supplemental Dataset 1/A-mRNA_nonrhyth_translation_nonrhyth/Abca9_set_A.pdf]

# Abcb1b

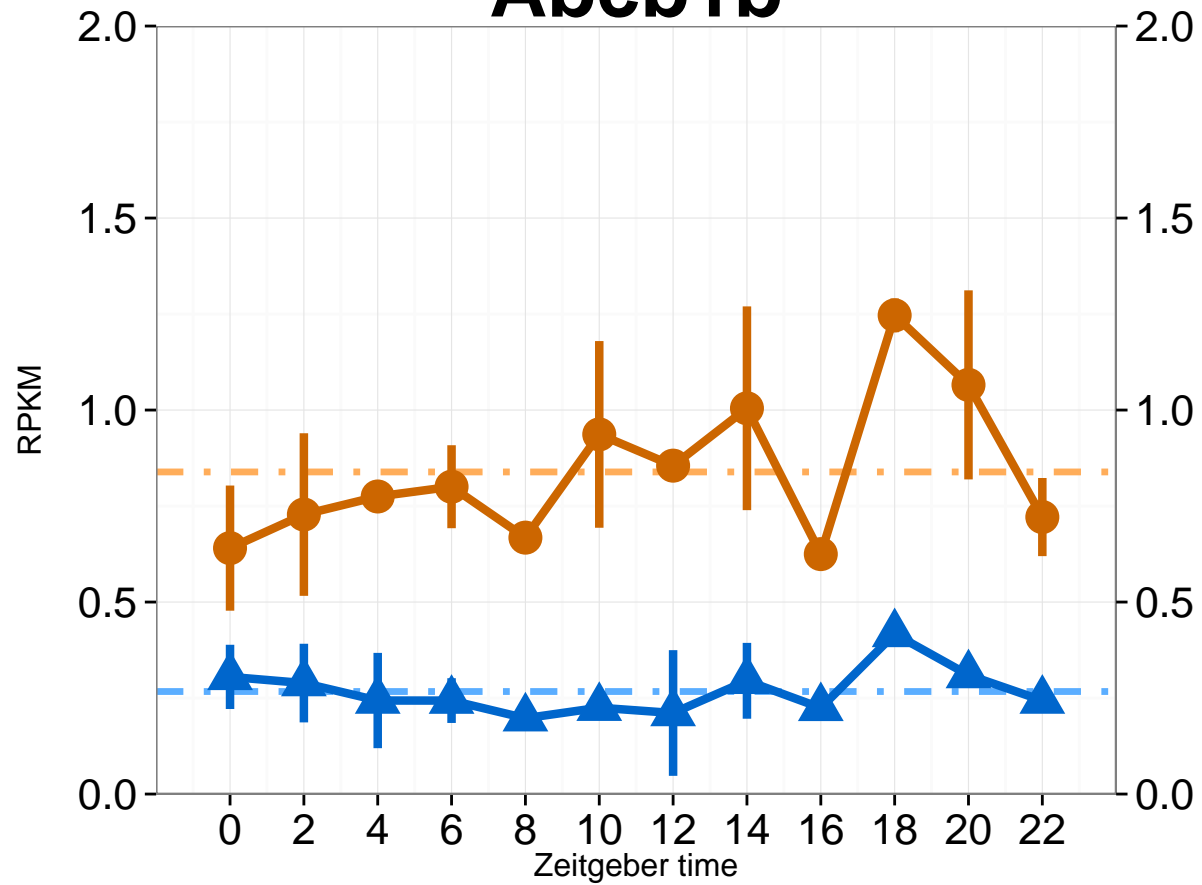

# Abcb1b

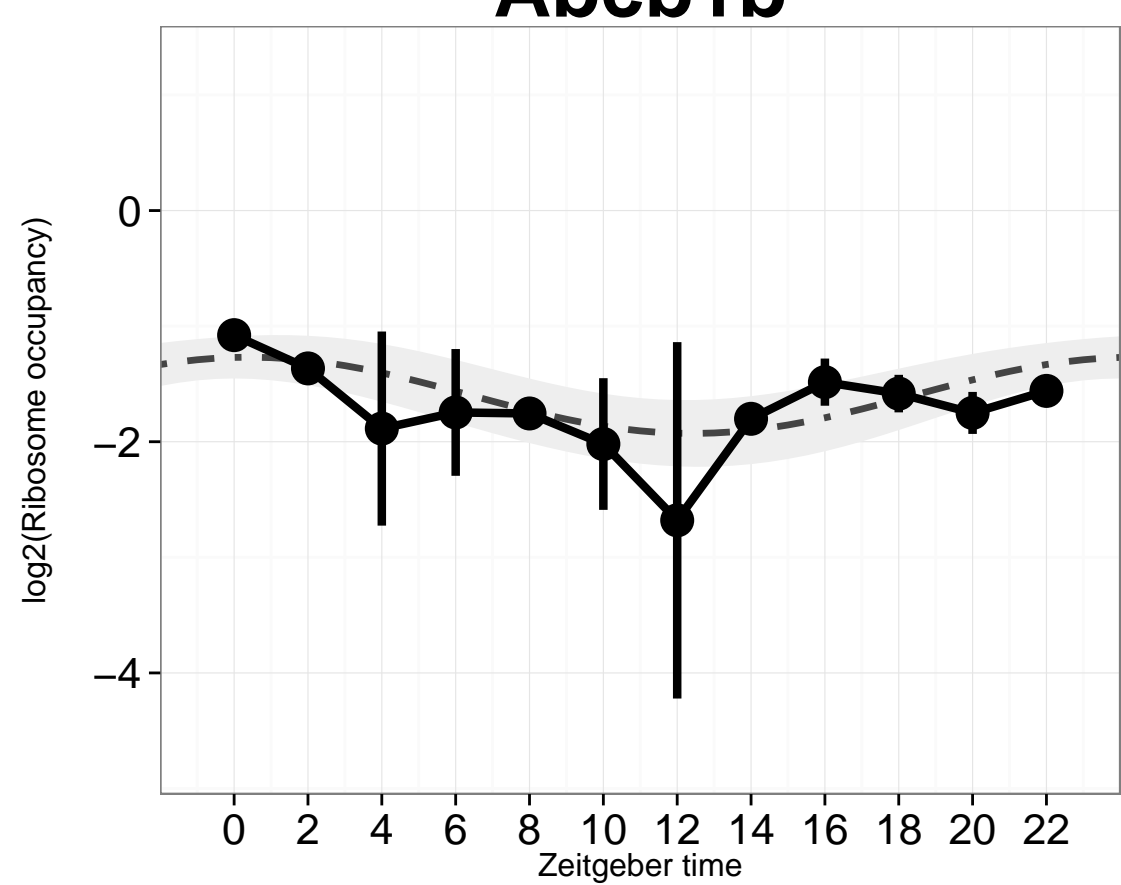

Supplement: SuppDataset_1.zip [file Abcb1b_set_A.pdf › Supplemental Dataset 1/A-mRNA_nonrhyth_translation_nonrhyth/Abcb1b_set_A.pdf]

# Abcb6

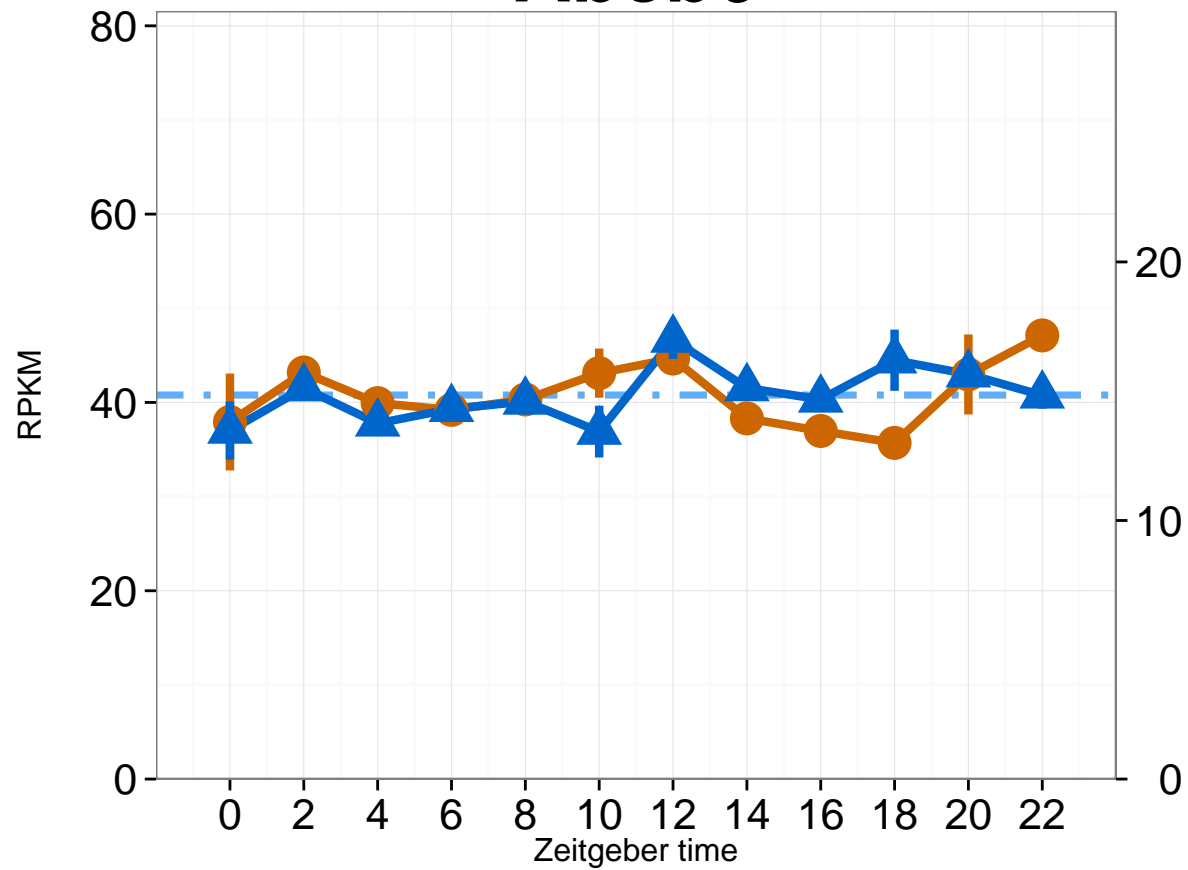

# Abcb6

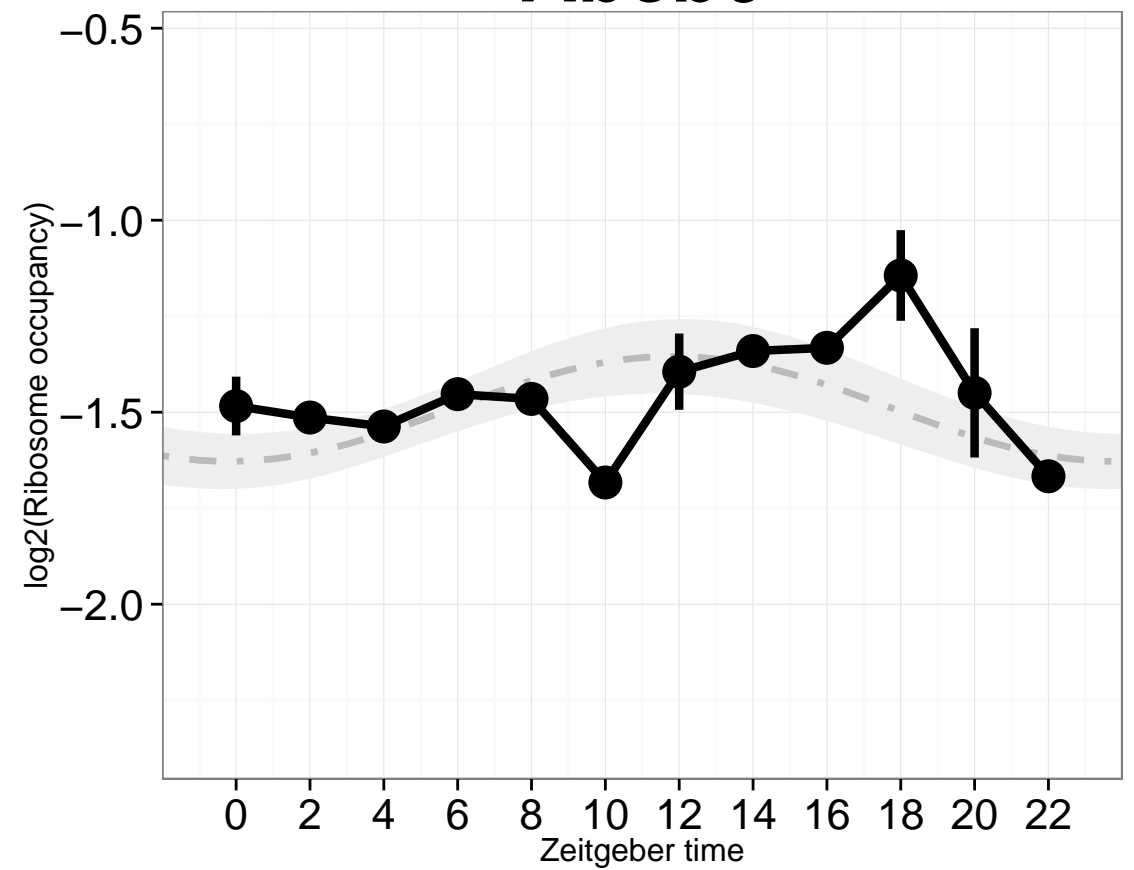

Supplement: SuppDataset_1.zip [file Abcb6_set_A.pdf › Supplemental Dataset 1/A-mRNA_nonrhyth_translation_nonrhyth/Abcb6_set_A.pdf]

## Abcb7

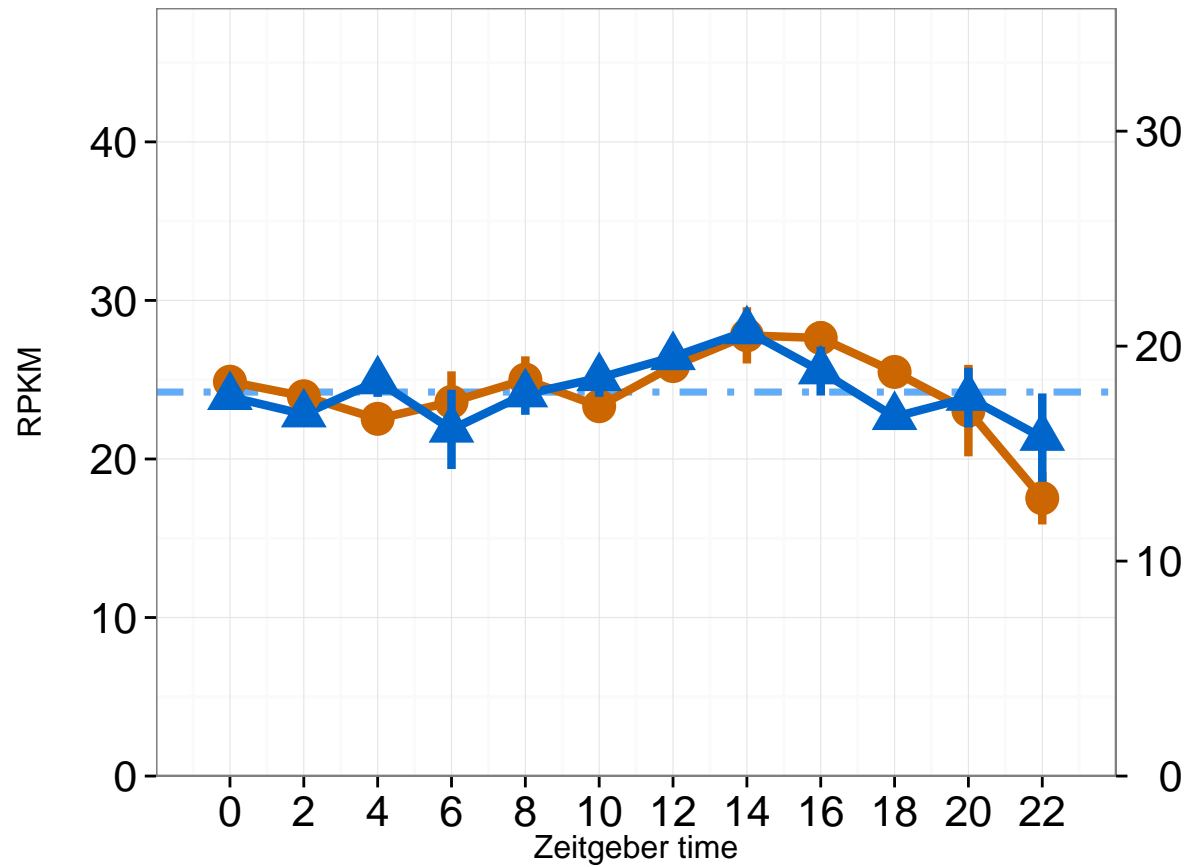

## Abcb7

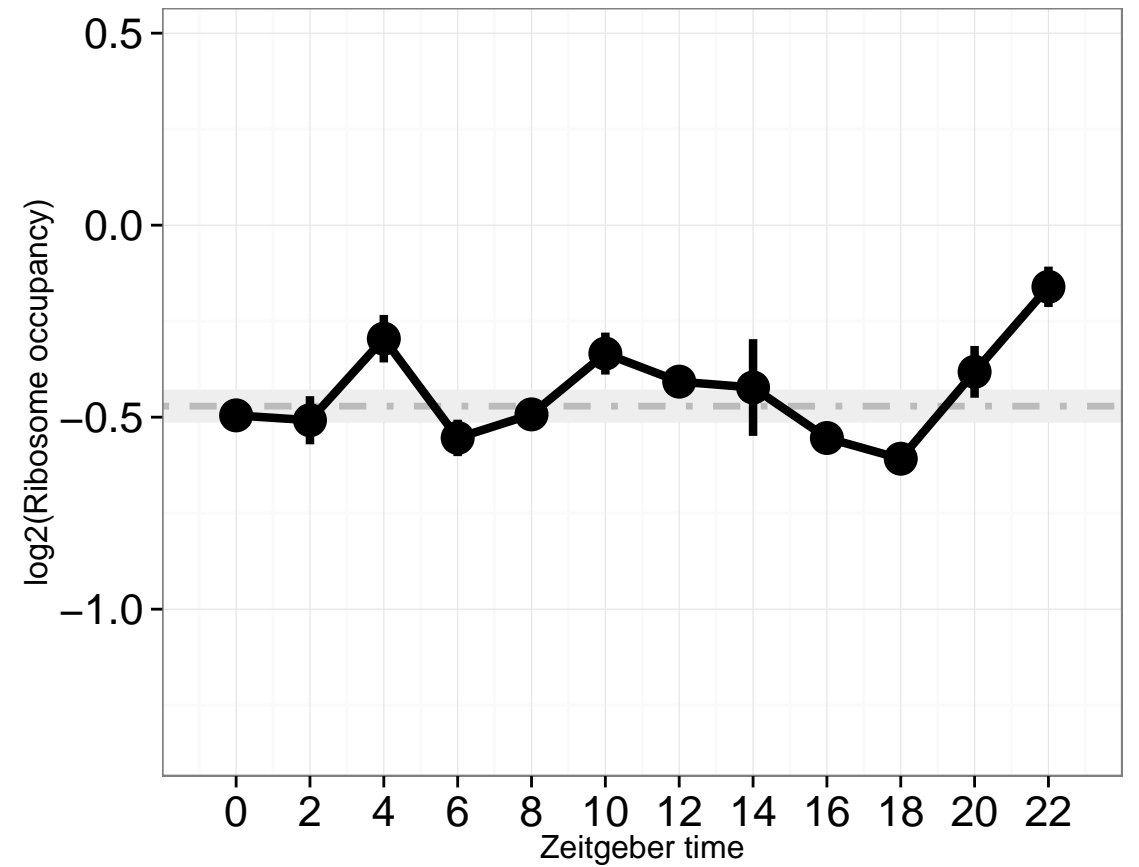

Supplement: SuppDataset_1.zip [file Abcb7_set_A.pdf › Supplemental Dataset 1/A-mRNA_nonrhyth_translation_nonrhyth/Abcb7_set_A.pdf]

# Abcb8

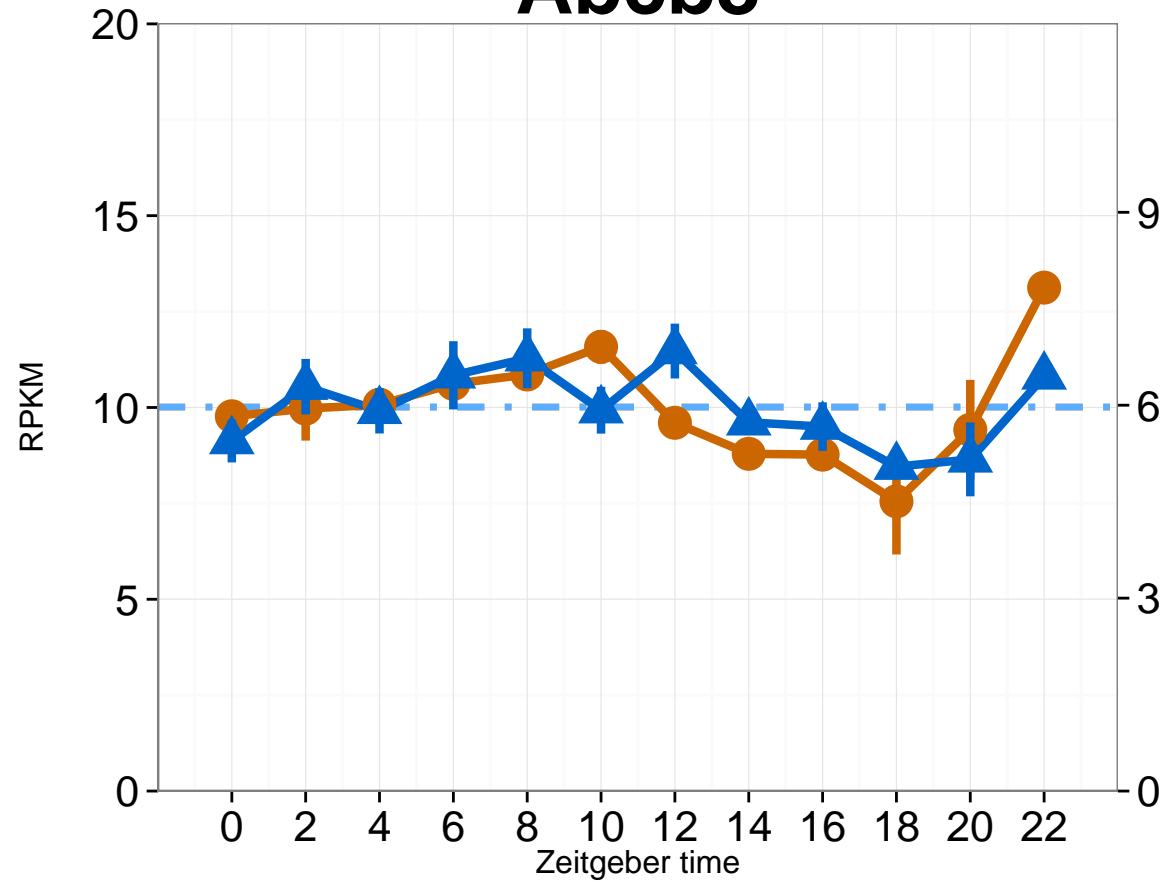

# Abcb8

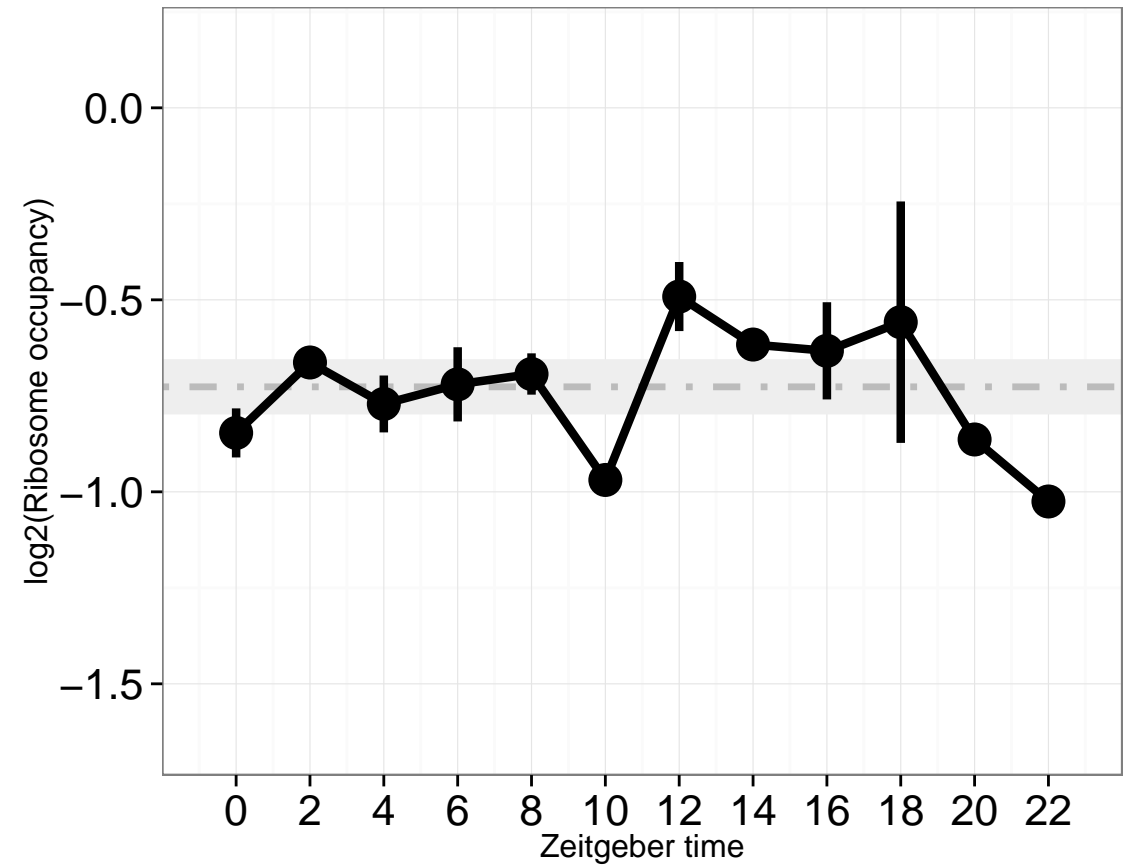

Supplement: SuppDataset_1.zip [file Abcb8_set_A.pdf › Supplemental Dataset 1/A-mRNA_nonrhyth_translation_nonrhyth/Abcb8_set_A.pdf]

# Abcb9

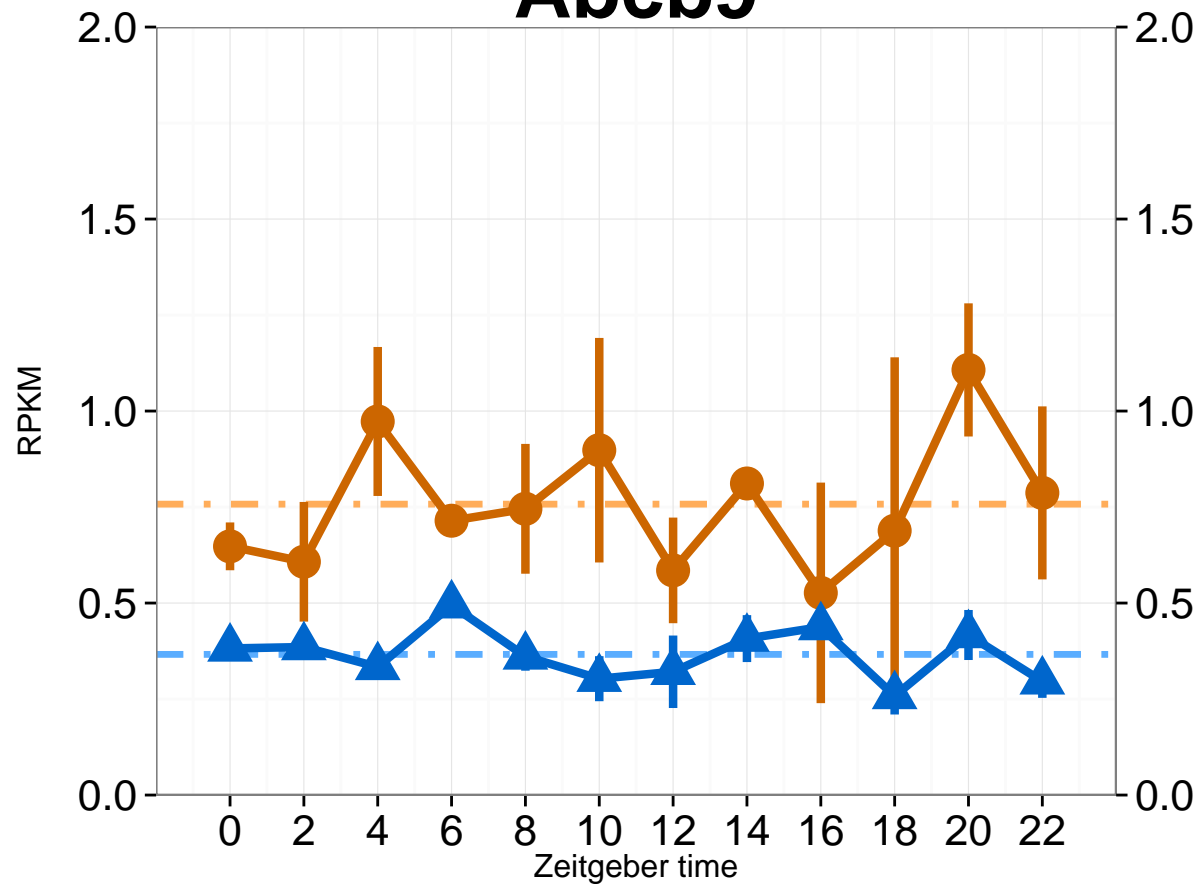

# Abcb9

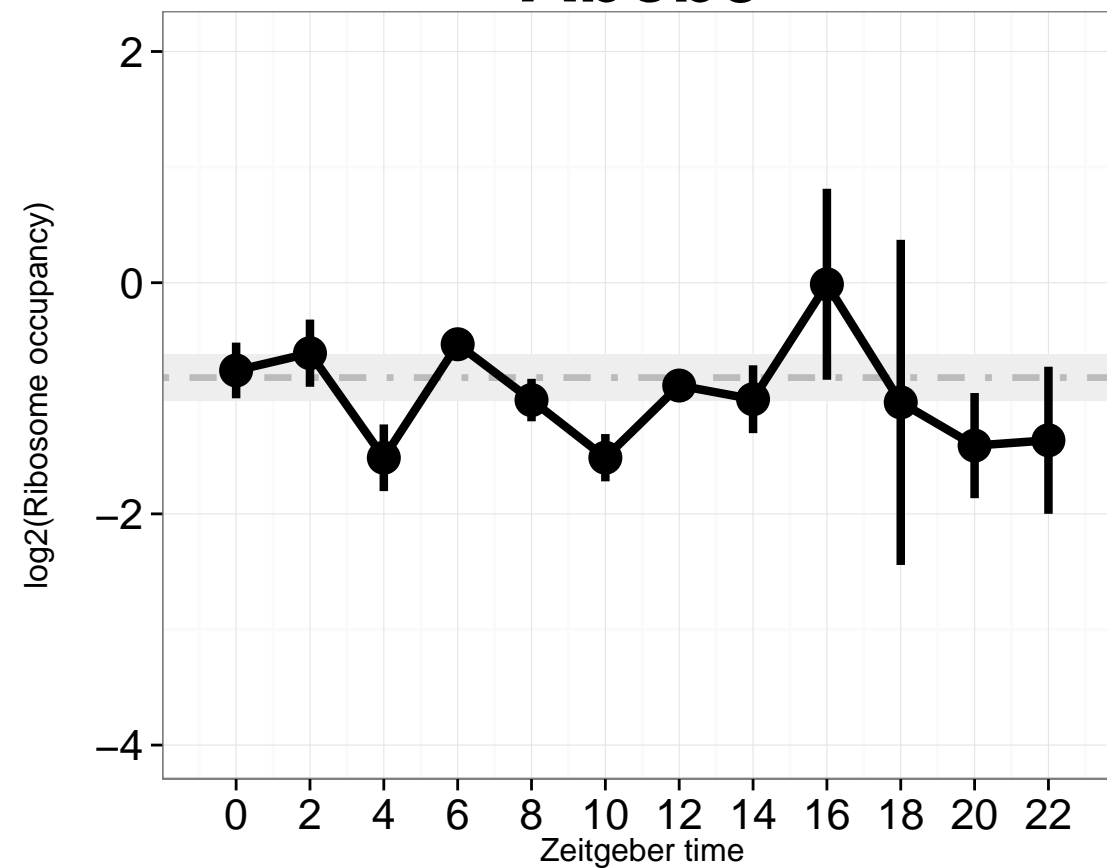

Supplement: SuppDataset_1.zip [file Abcb9_set_A.pdf › Supplemental Dataset 1/A-mRNA_nonrhyth_translation_nonrhyth/Abcb9_set_A.pdf]

## Abcc10

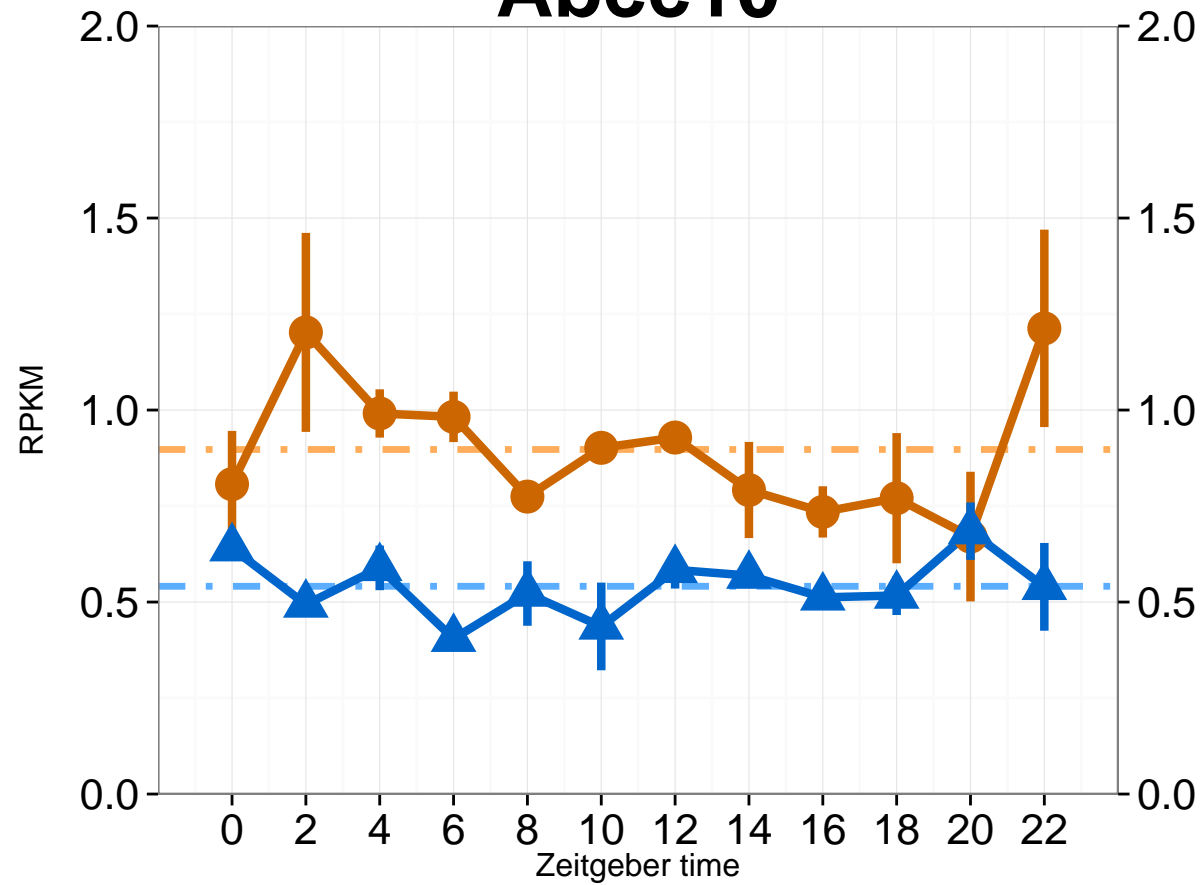

## Abcc10

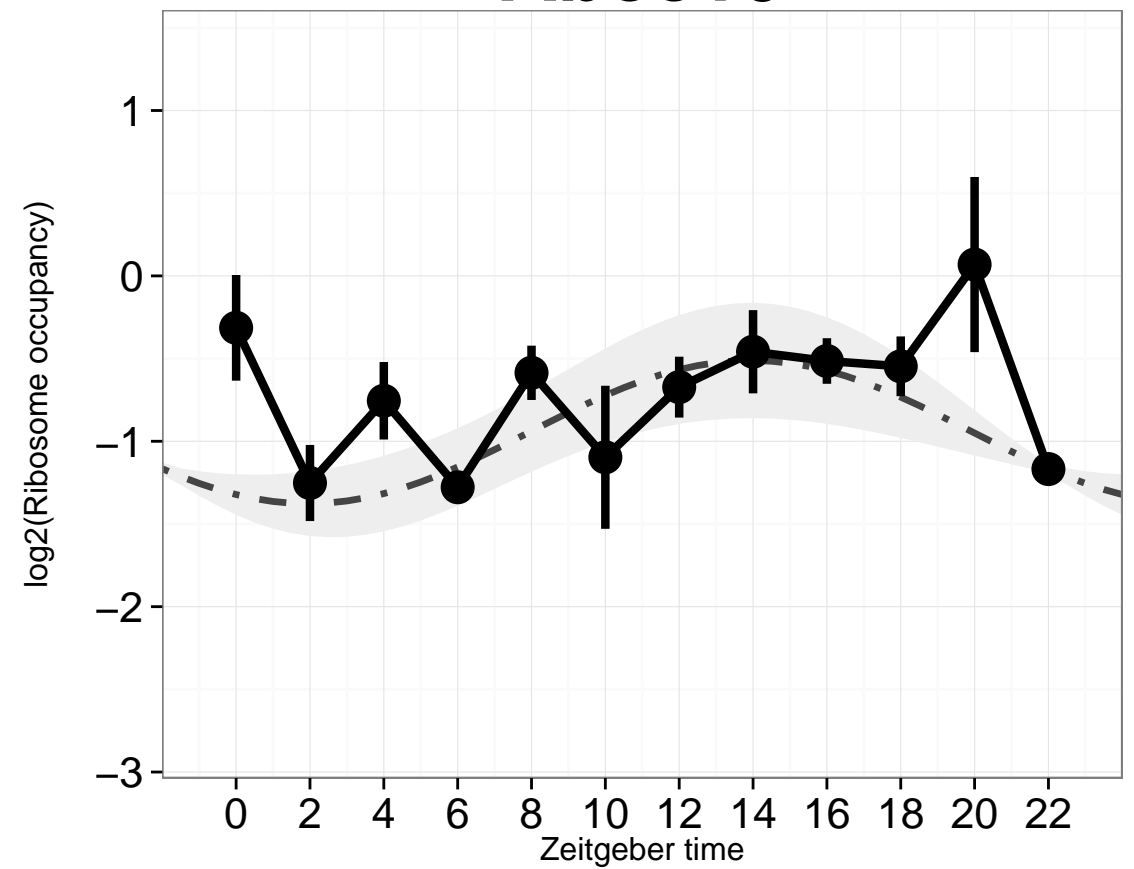

Supplement: SuppDataset_1.zip [file Abcc10_set_A.pdf › Supplemental Dataset 1/A-mRNA_nonrhyth_translation_nonrhyth/Abcc10_set_A.pdf]

## Abcc1

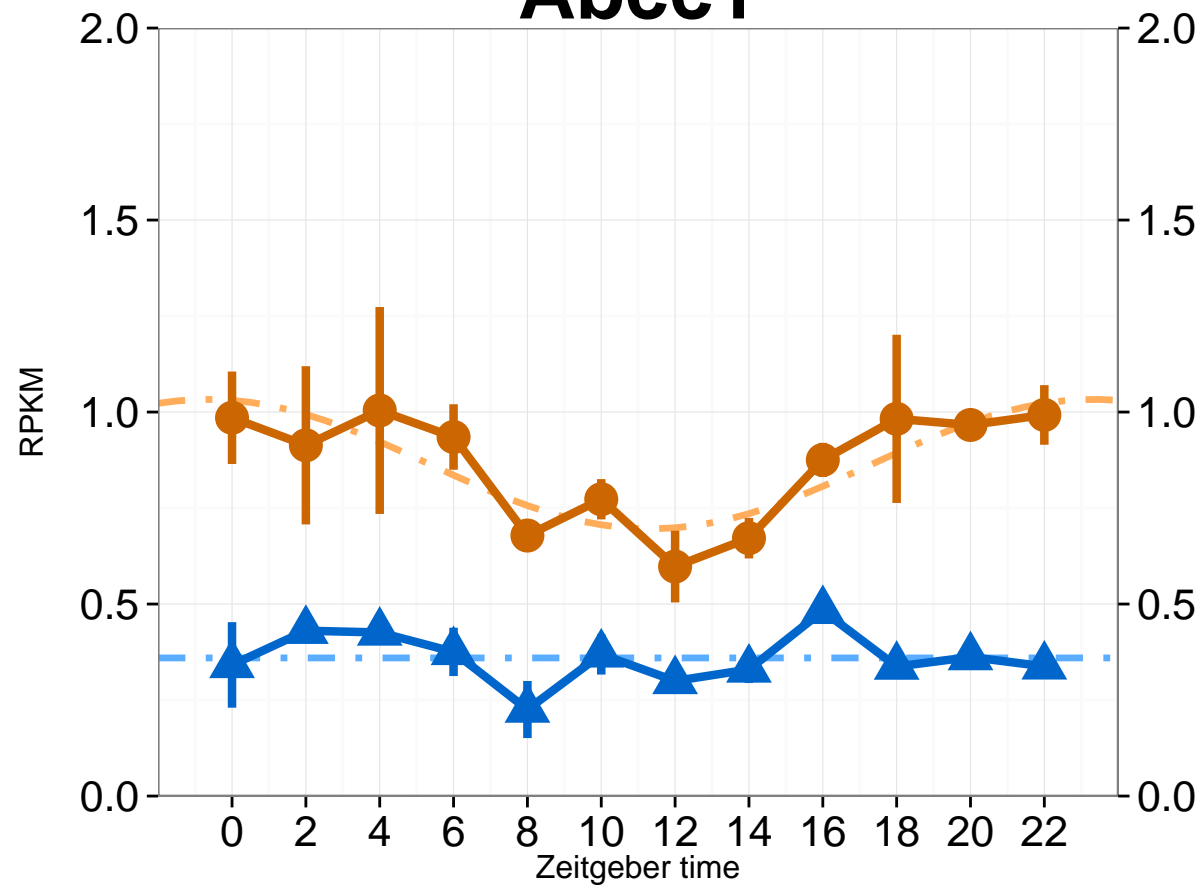

## Abcc1

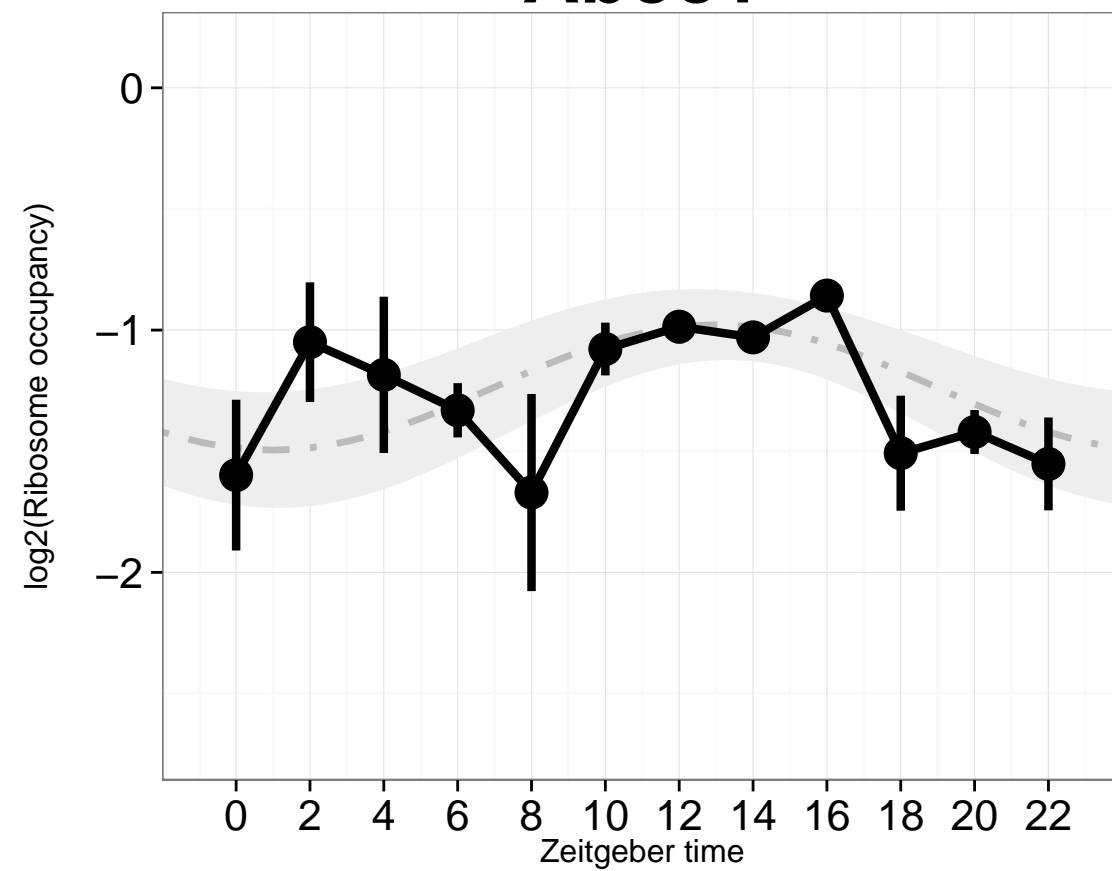

Supplement: SuppDataset_1.zip [file Abcc1_set_A.pdf › Supplemental Dataset 1/A-mRNA_nonrhyth_translation_nonrhyth/Abcc1_set_A.pdf]

# Abcc3

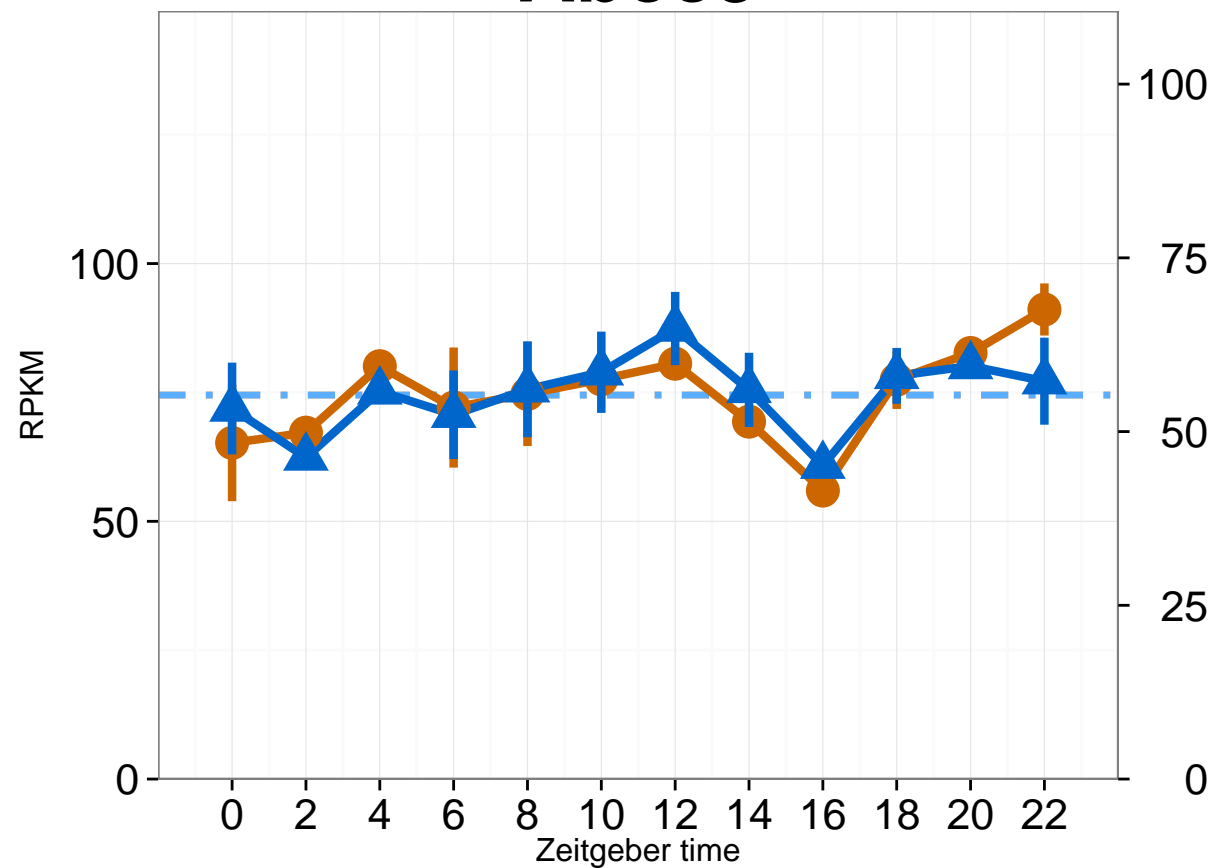

# Abcc3

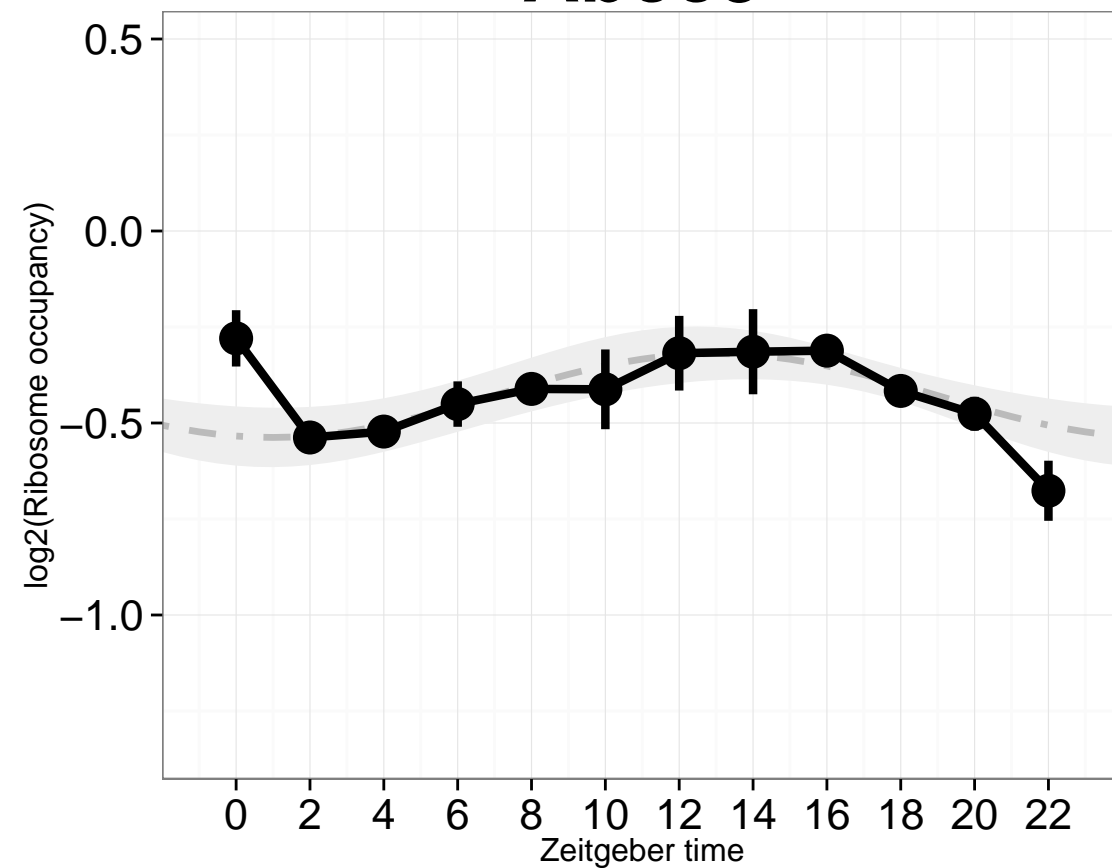

Supplement: SuppDataset_1.zip [file Abcc3_set_A.pdf › Supplemental Dataset 1/A-mRNA_nonrhyth_translation_nonrhyth/Abcc3_set_A.pdf]

## Abcc4

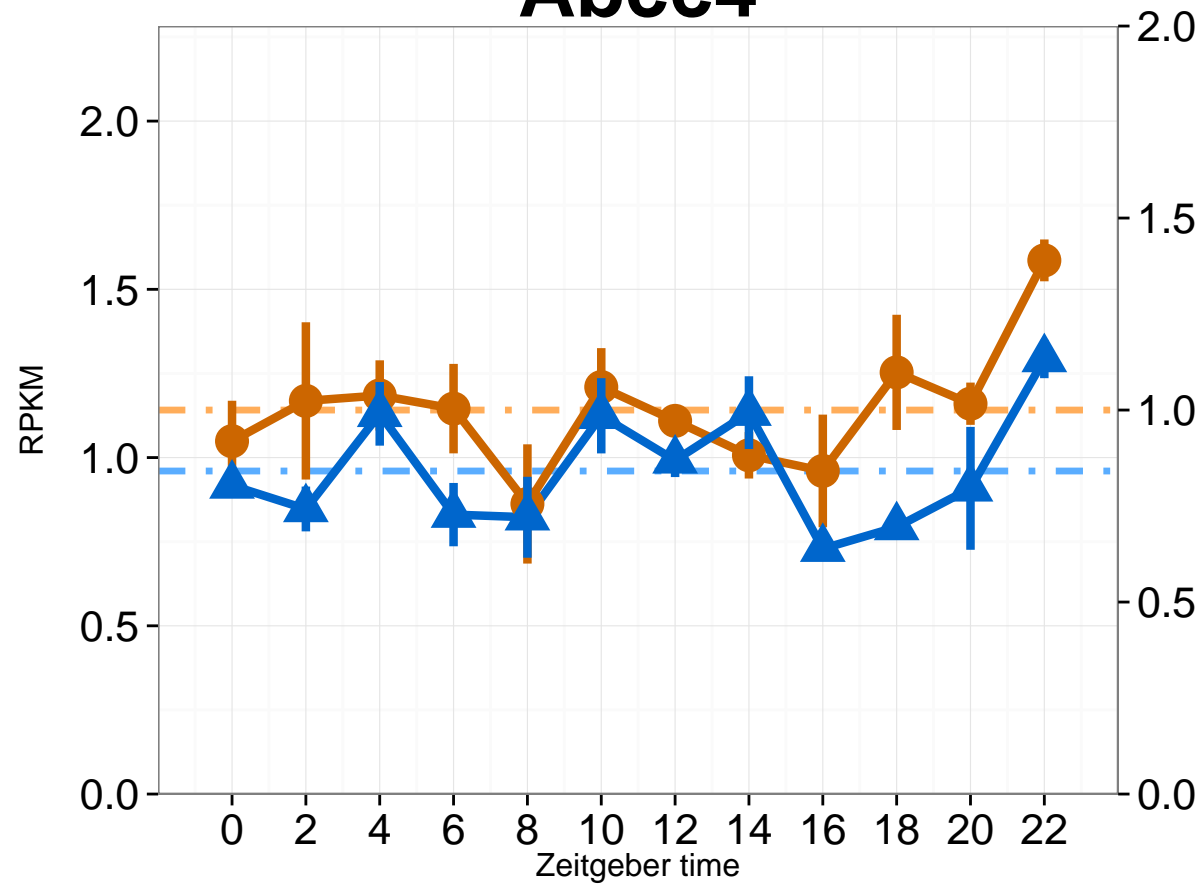

## Abcc4

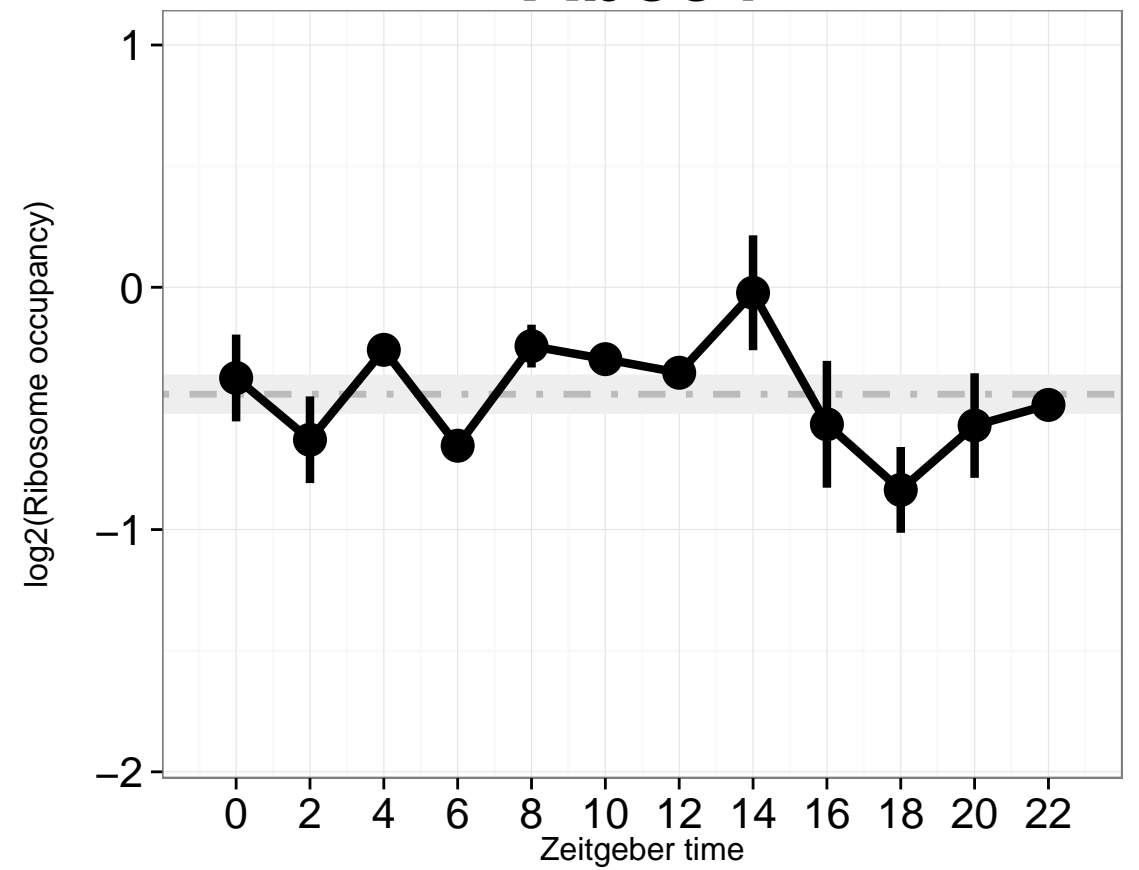

Supplement: SuppDataset_1.zip [file Abcc4_set_A.pdf › Supplemental Dataset 1/A-mRNA_nonrhyth_translation_nonrhyth/Abcc4_set_A.pdf]

## Abcc5

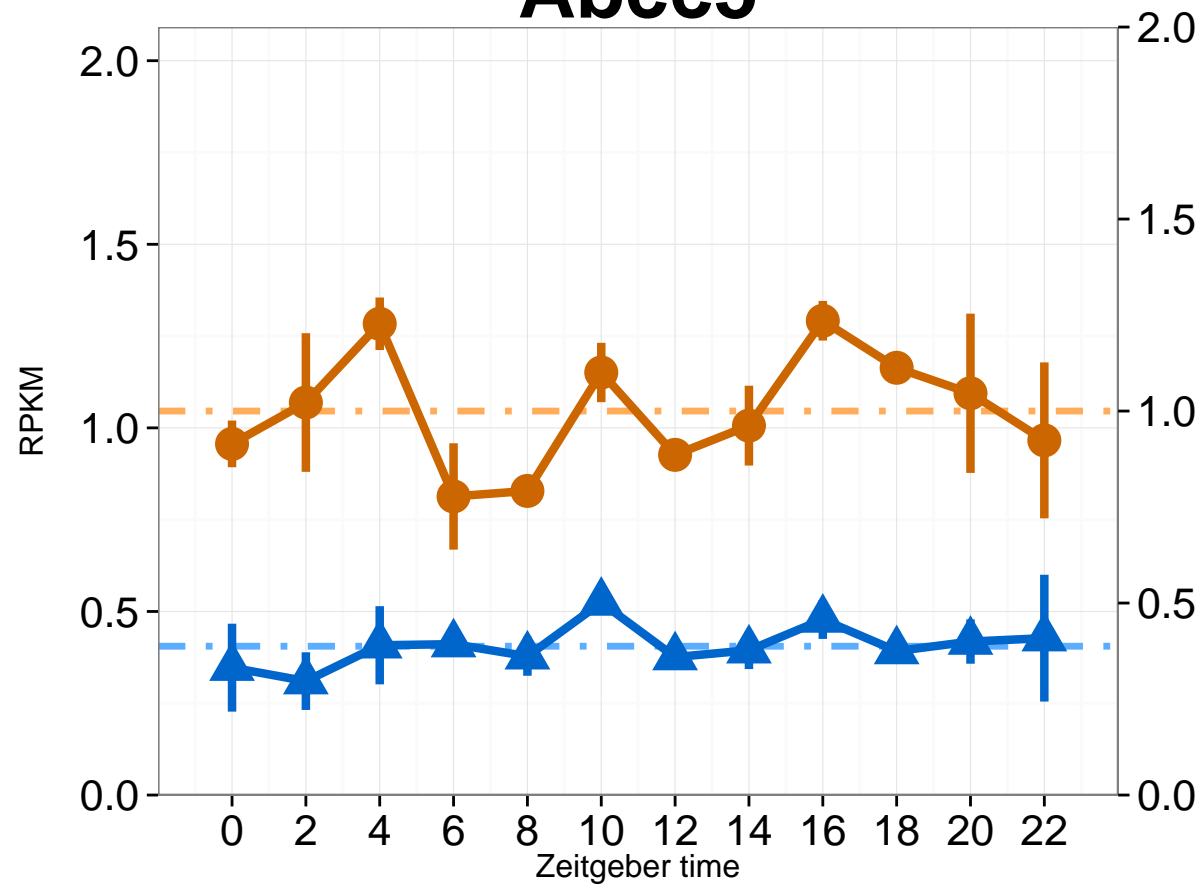

## Abcc5

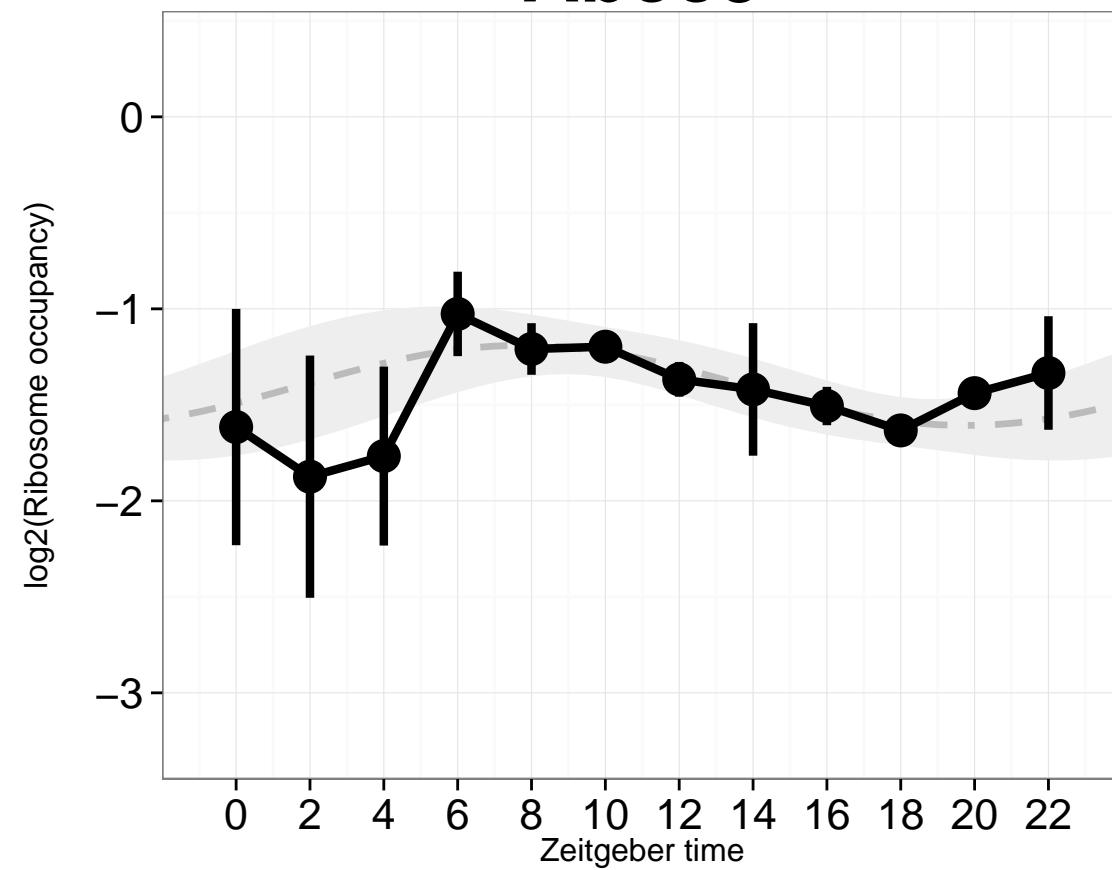

Supplement: SuppDataset_1.zip [file Abcc5_set_A.pdf › Supplemental Dataset 1/A-mRNA_nonrhyth_translation_nonrhyth/Abcc5_set_A.pdf]

## Abcc6

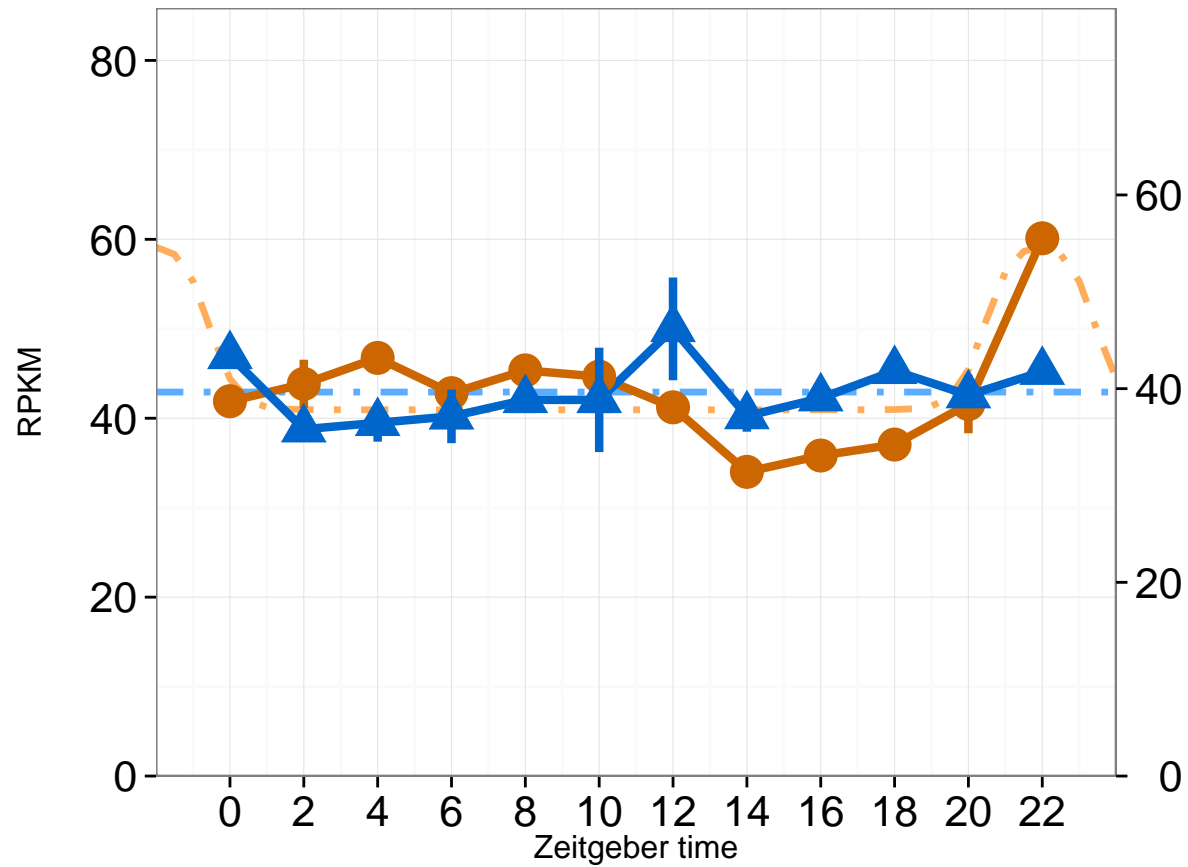

## Abcc6

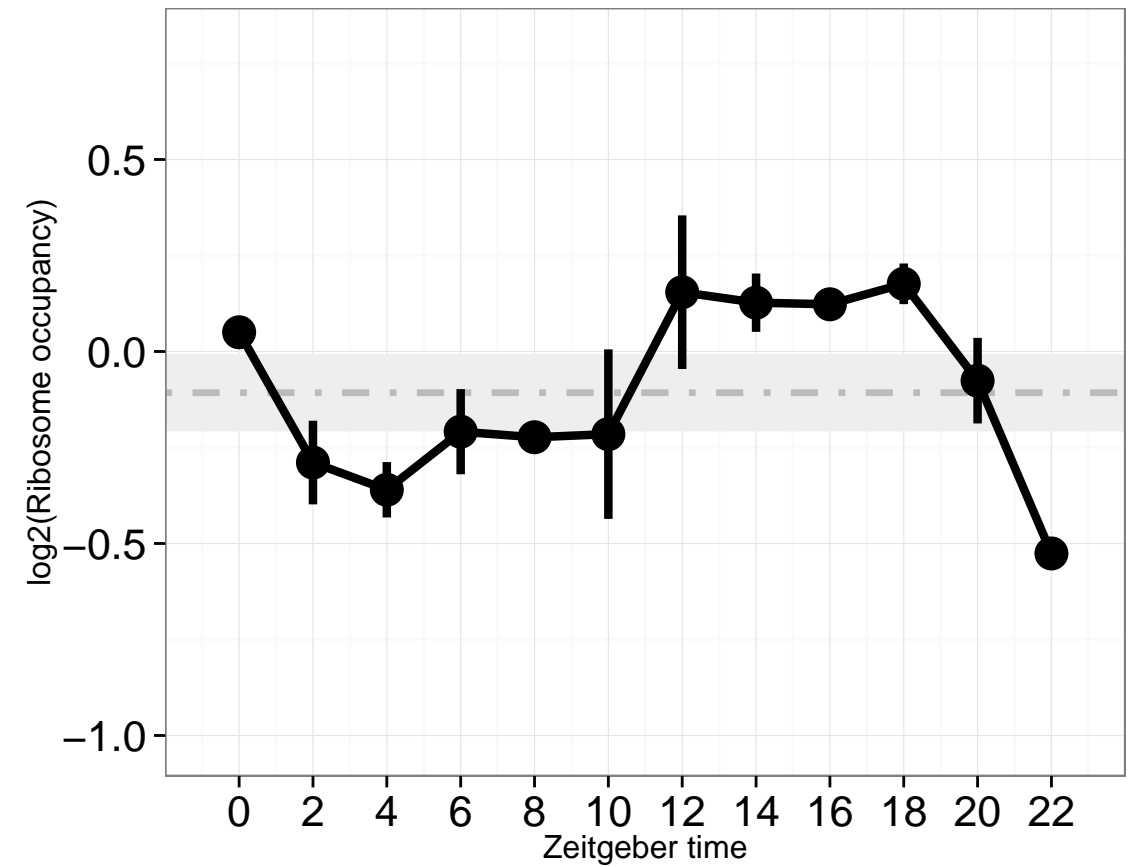

Supplement: SuppDataset_1.zip [file Abcc6_set_A.pdf › Supplemental Dataset 1/A-mRNA_nonrhyth_translation_nonrhyth/Abcc6_set_A.pdf]

## Abcc9

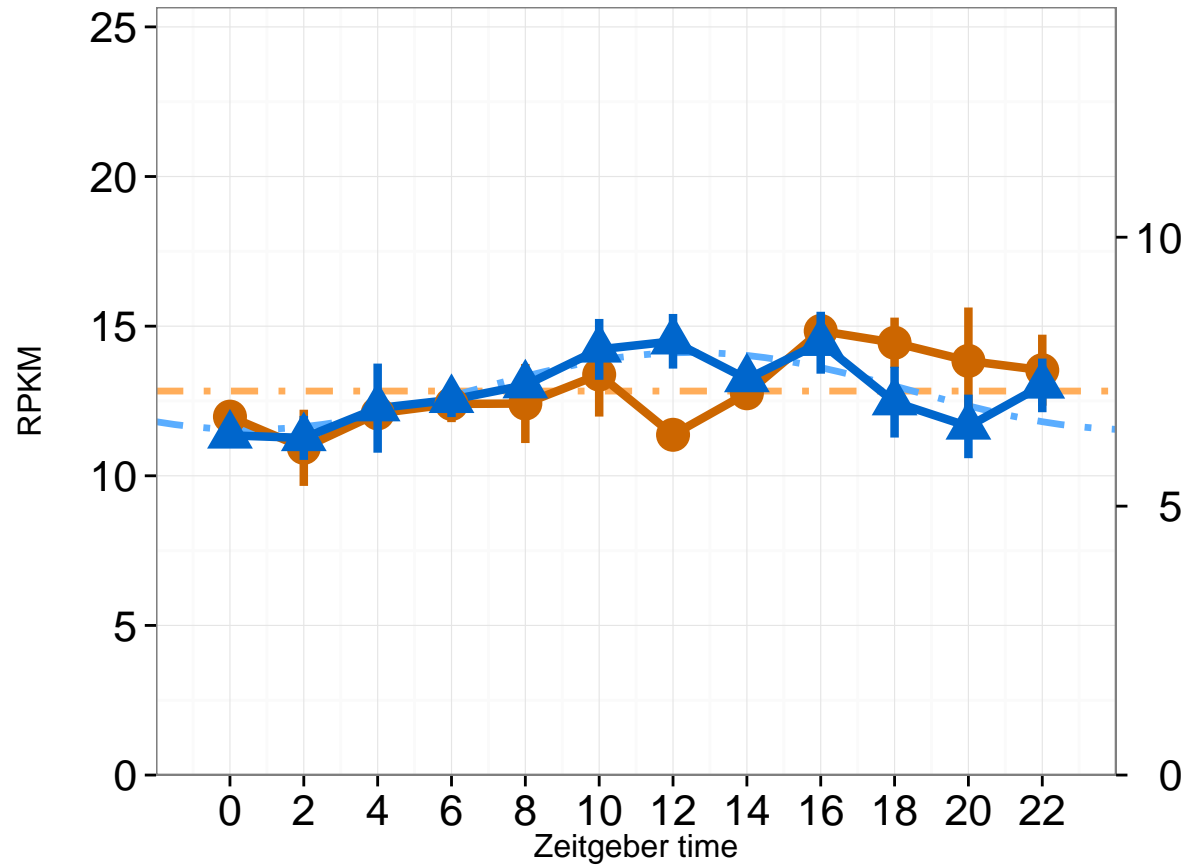

## Abcc9

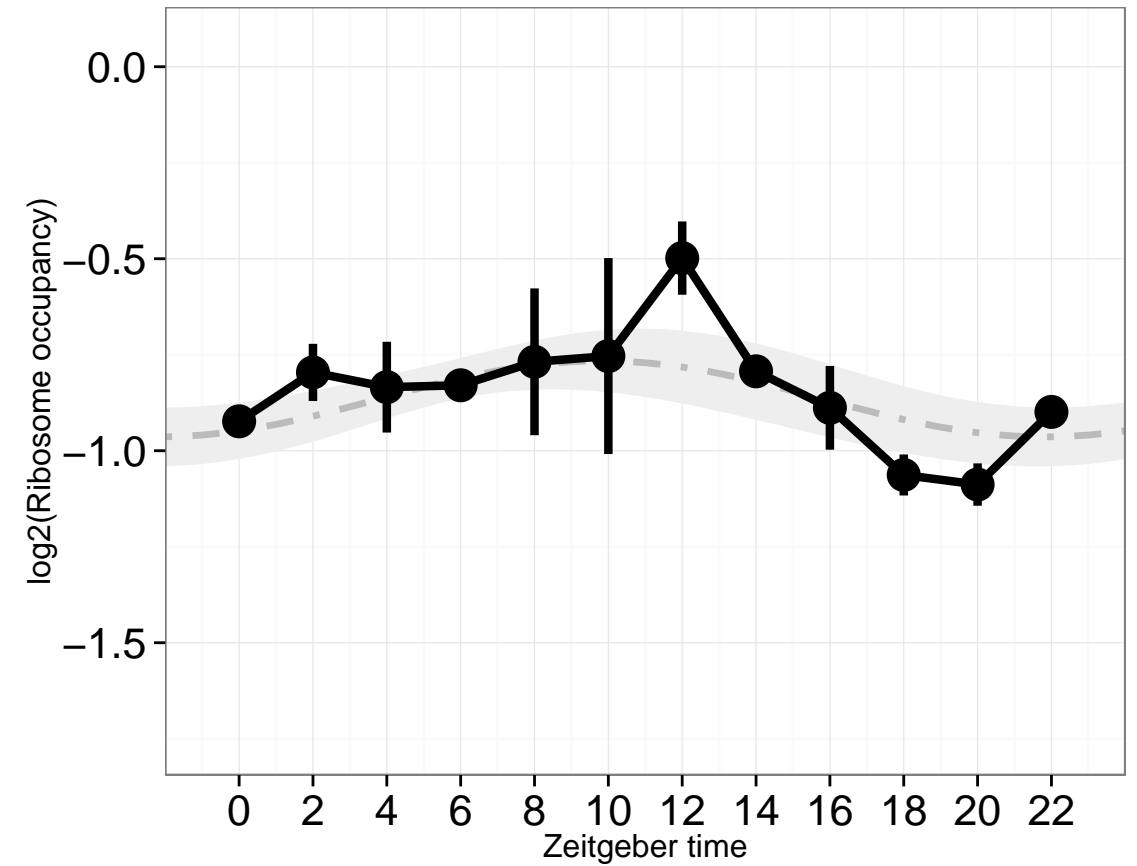

Supplement: SuppDataset_1.zip [file Abcc9_set_A.pdf › Supplemental Dataset 1/A-mRNA_nonrhyth_translation_nonrhyth/Abcc9_set_A.pdf]

# Abcd1

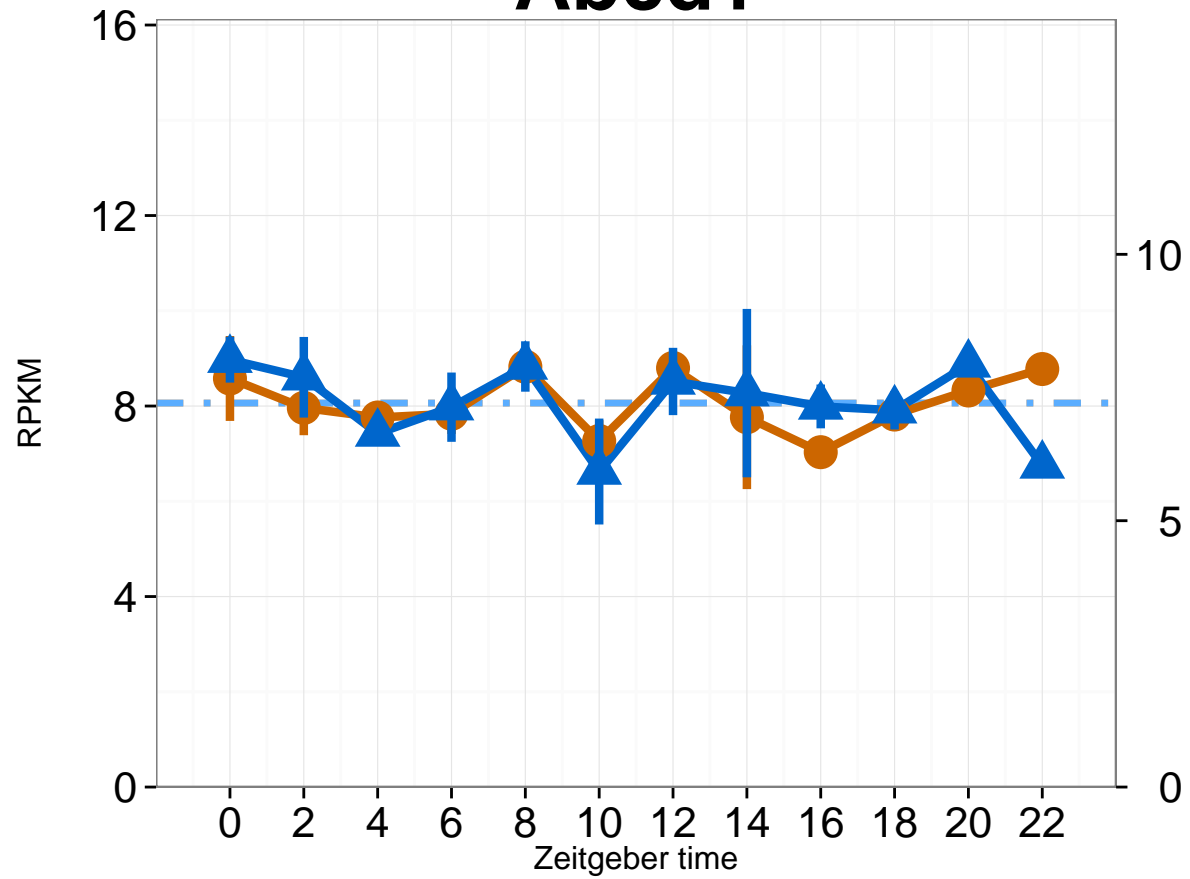

# Abcd1

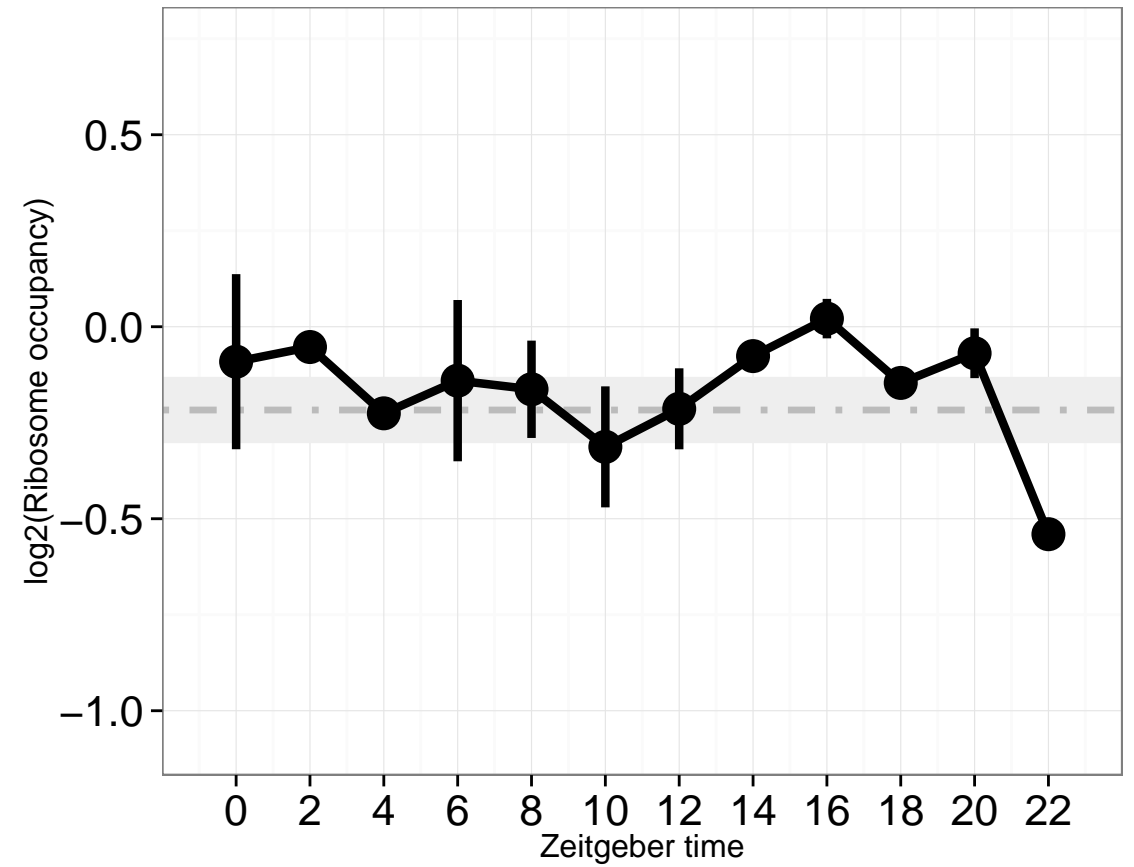

Supplement: SuppDataset_1.zip [file Abcd1_set_A.pdf › Supplemental Dataset 1/A-mRNA_nonrhyth_translation_nonrhyth/Abcd1_set_A.pdf]

# Abcd2

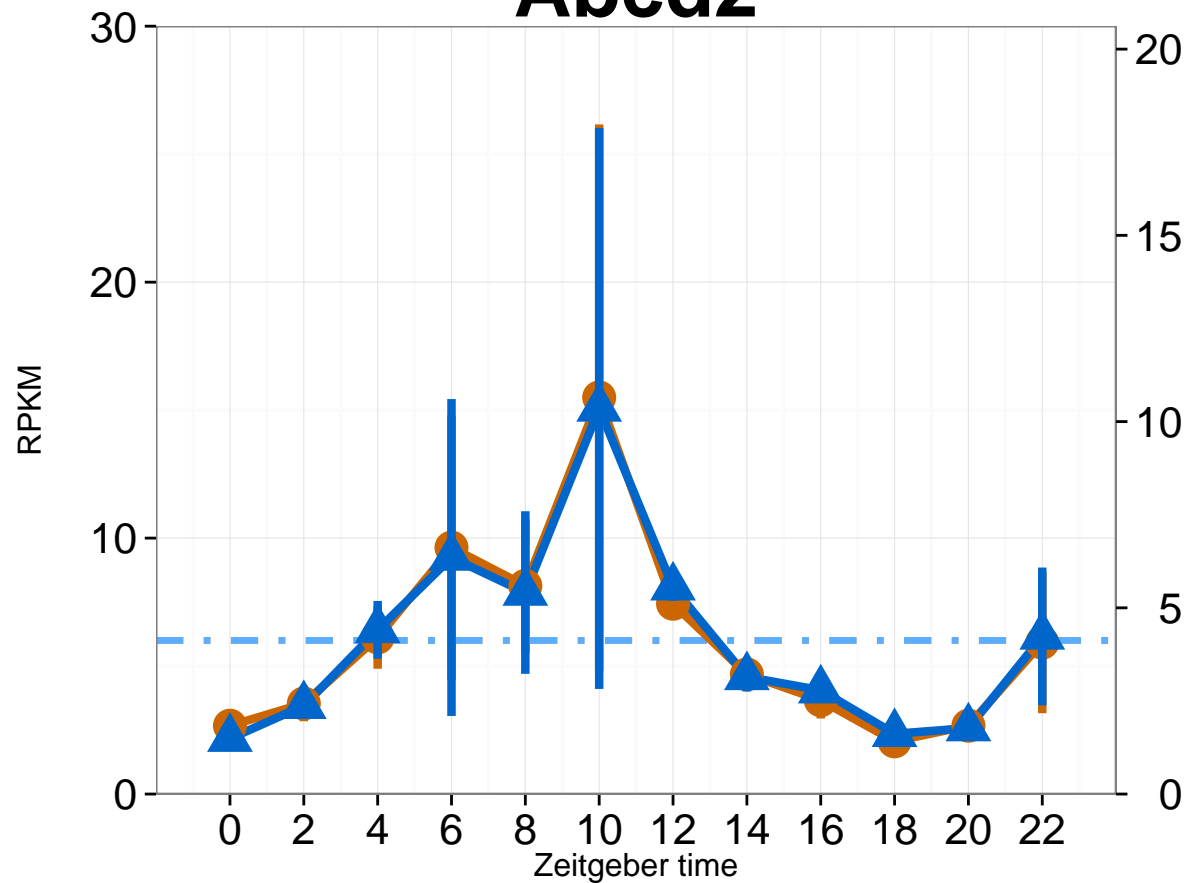

# Abcd2

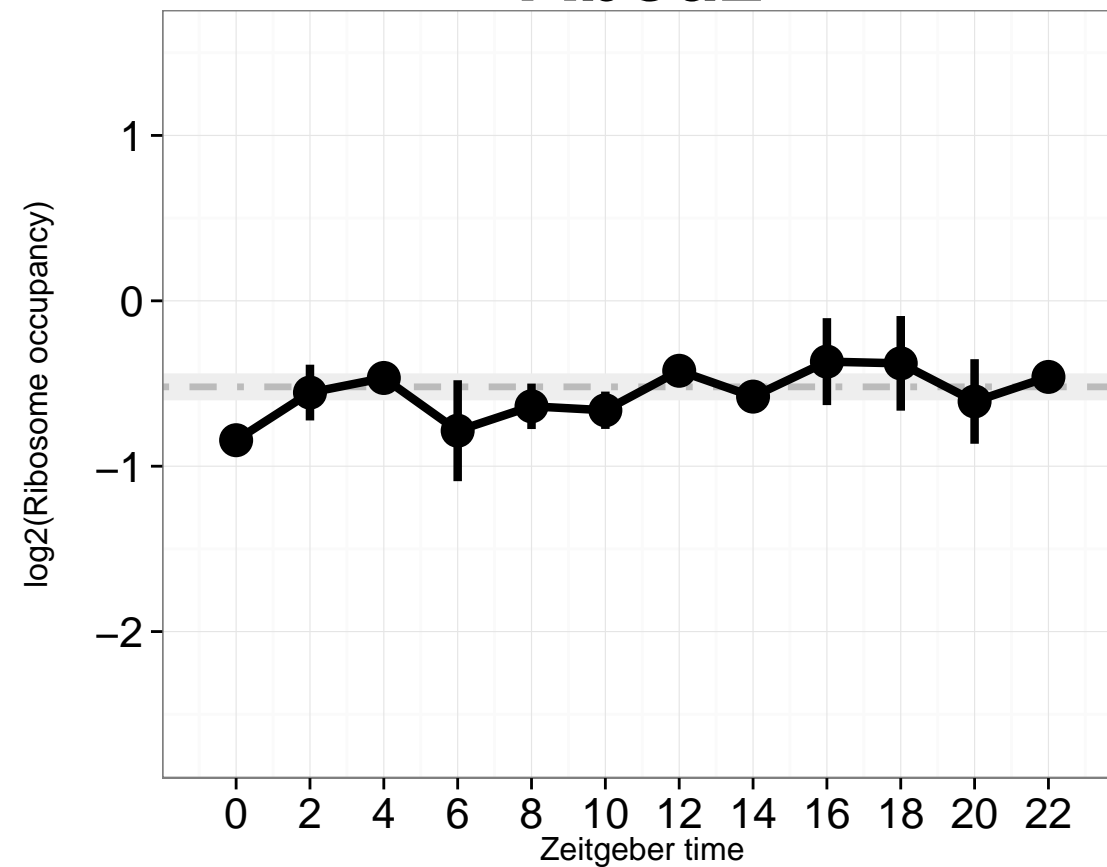

Supplement: SuppDataset_1.zip [file Abcd2_set_A.pdf › Supplemental Dataset 1/A-mRNA_nonrhyth_translation_nonrhyth/Abcd2_set_A.pdf]

## Abcd3

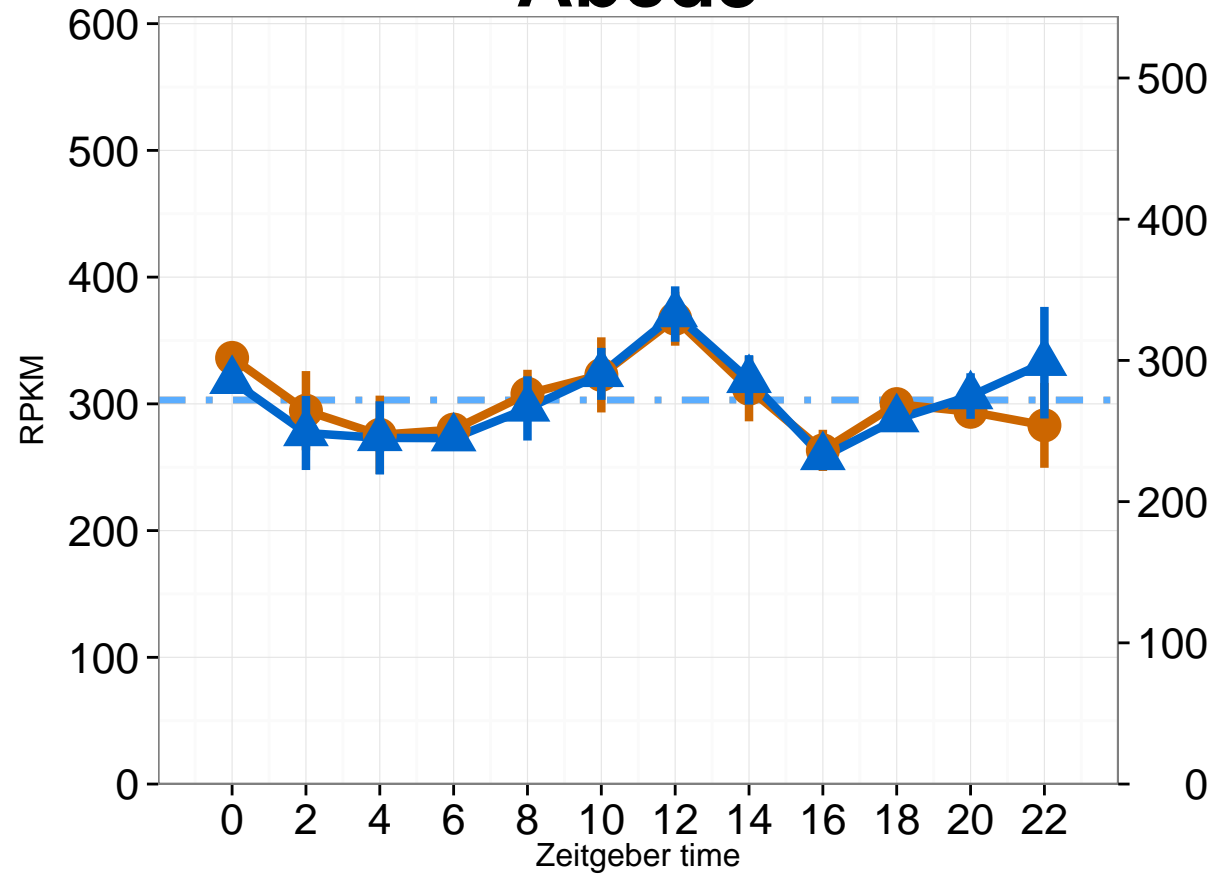

## Abcd3

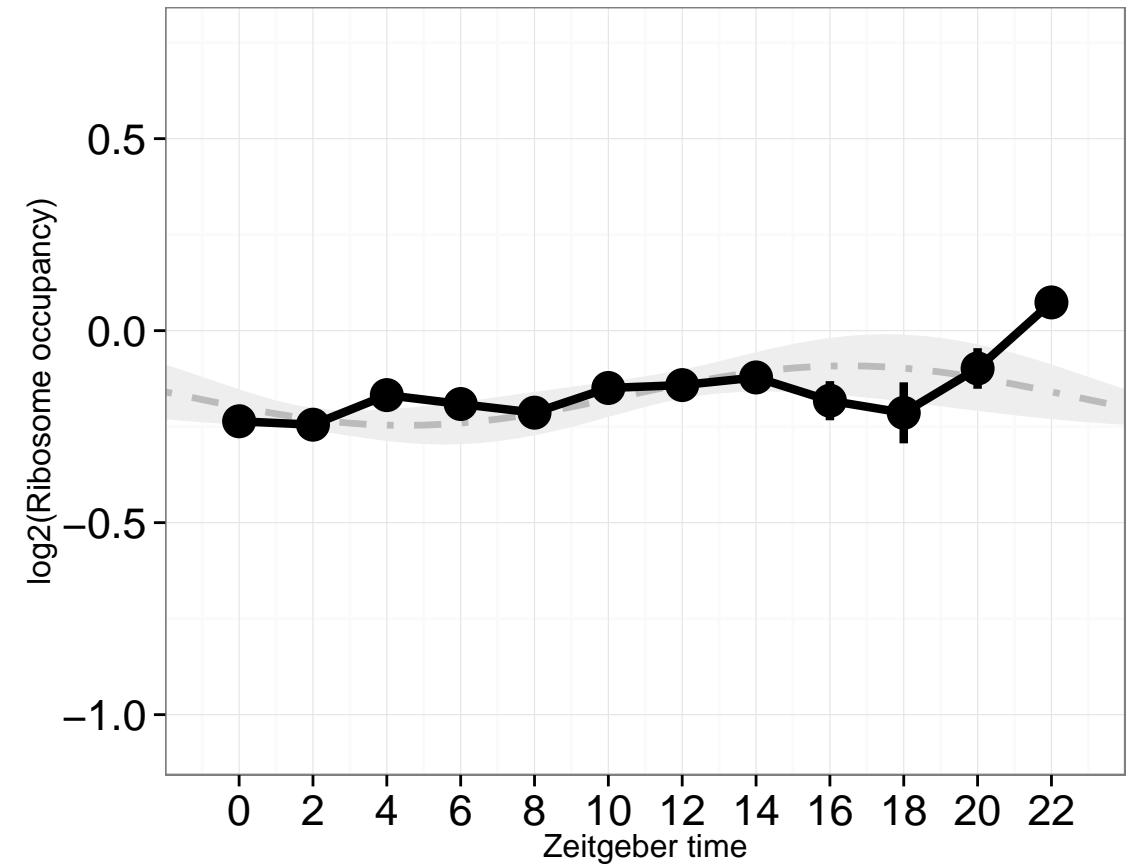

Supplement: SuppDataset_1.zip [file Abcd3_set_A.pdf › Supplemental Dataset 1/A-mRNA_nonrhyth_translation_nonrhyth/Abcd3_set_A.pdf]

## Abce1

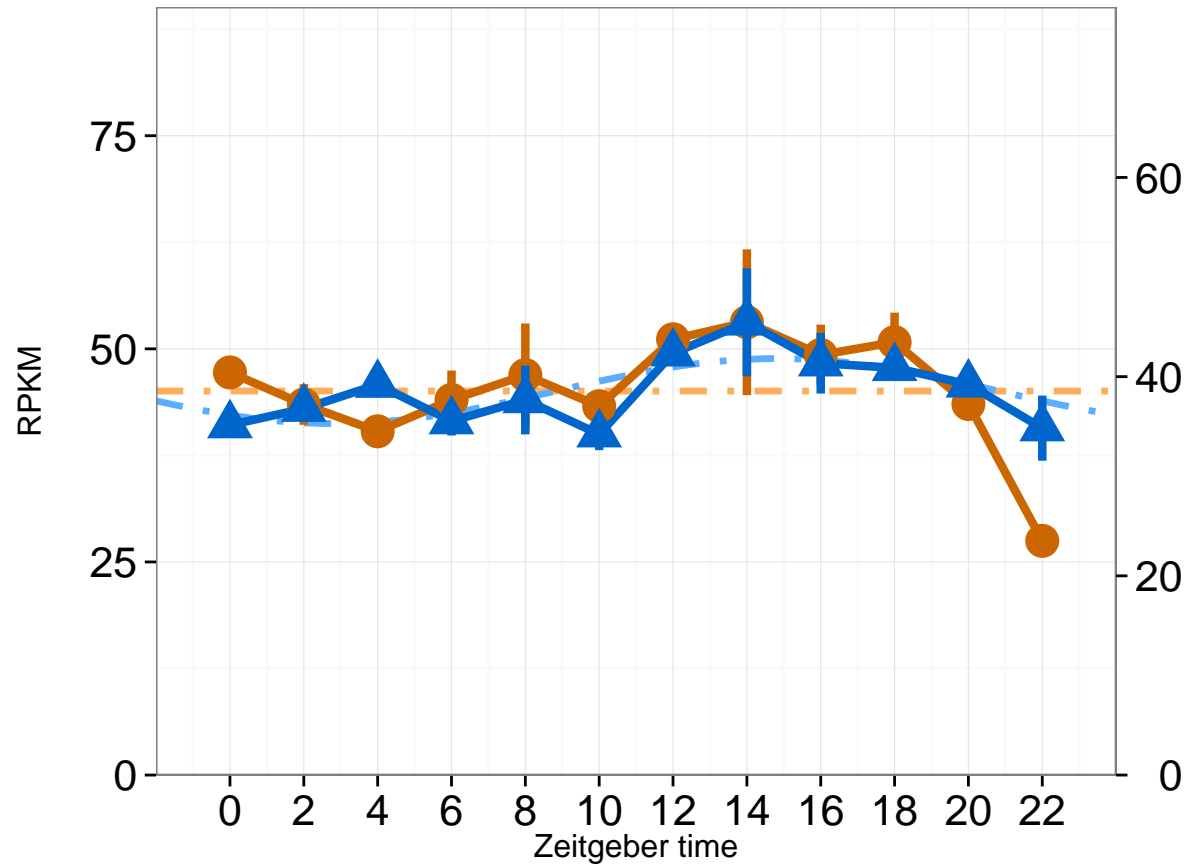

## Abce1

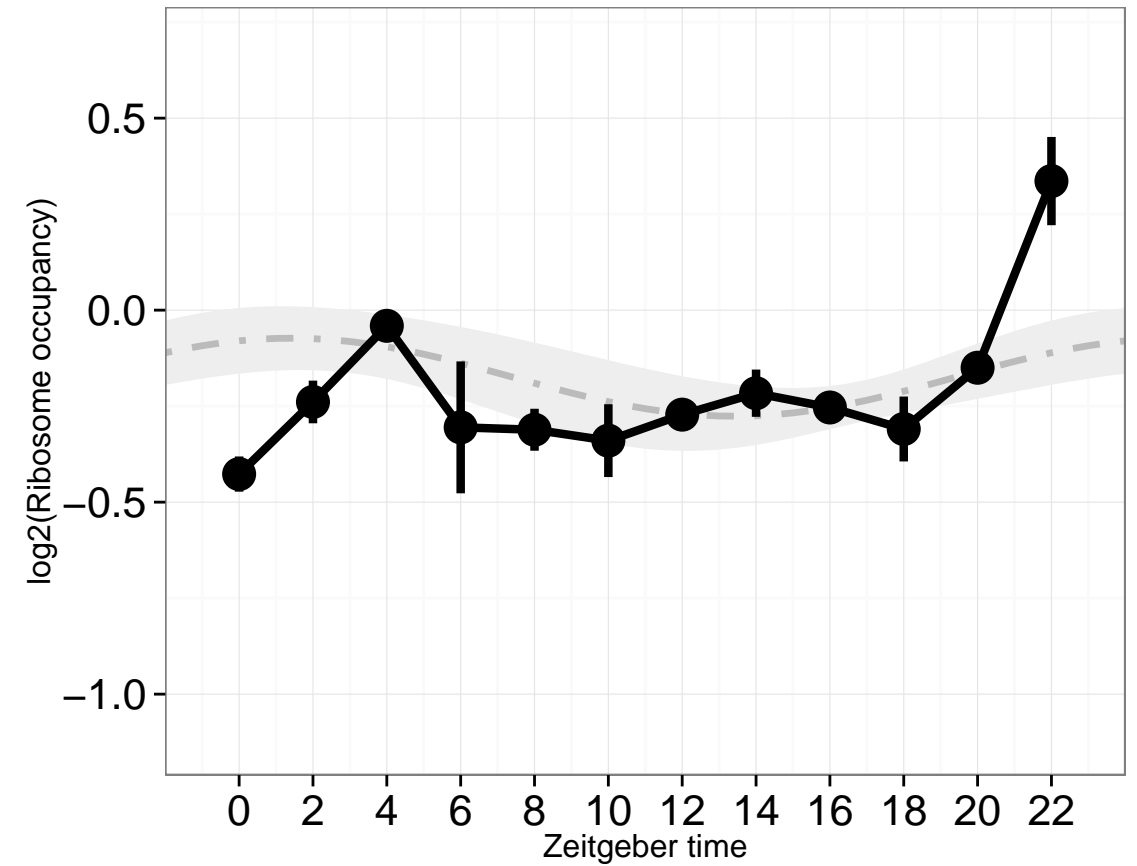

Supplement: SuppDataset_1.zip [file Abce1_set_A.pdf › Supplemental Dataset 1/A-mRNA_nonrhyth_translation_nonrhyth/Abce1_set_A.pdf]

## Abcf1

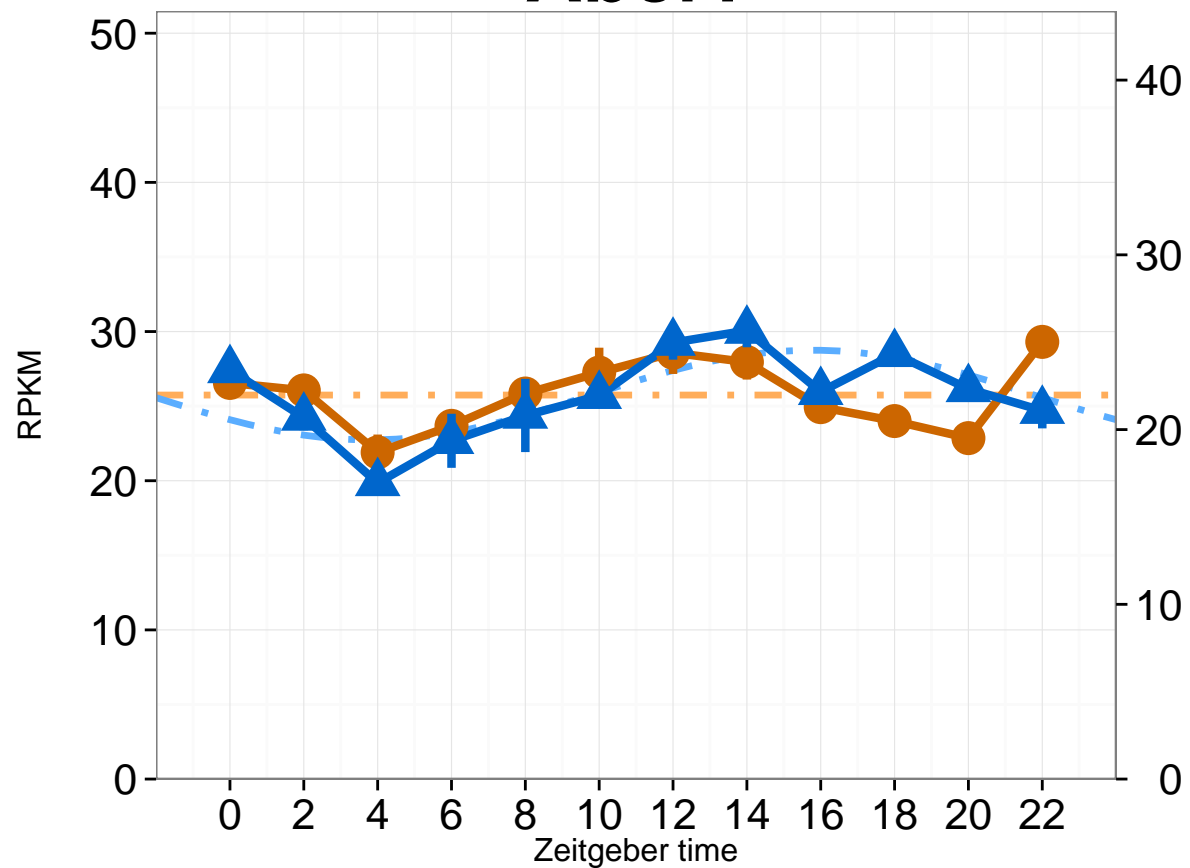

## Abcf1

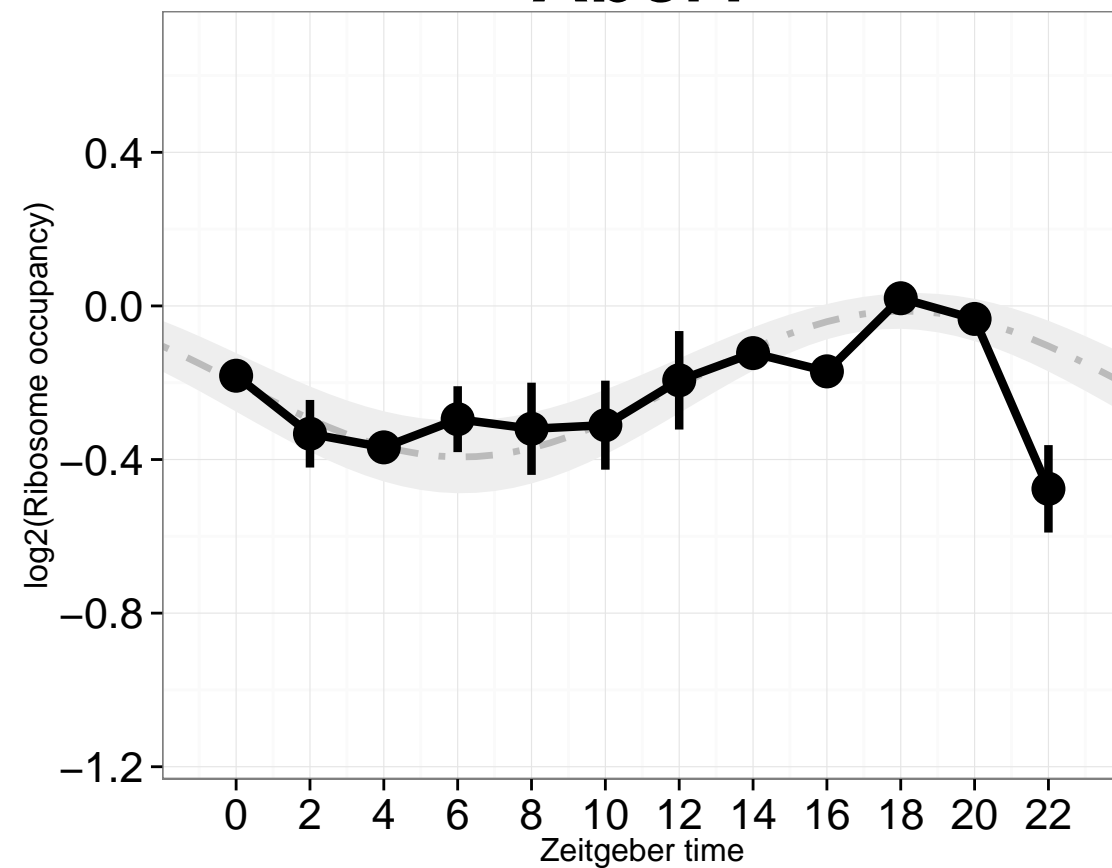

Supplement: SuppDataset_1.zip [file Abcf1_set_A.pdf › Supplemental Dataset 1/A-mRNA_nonrhyth_translation_nonrhyth/Abcf1_set_A.pdf]

## Abcf2

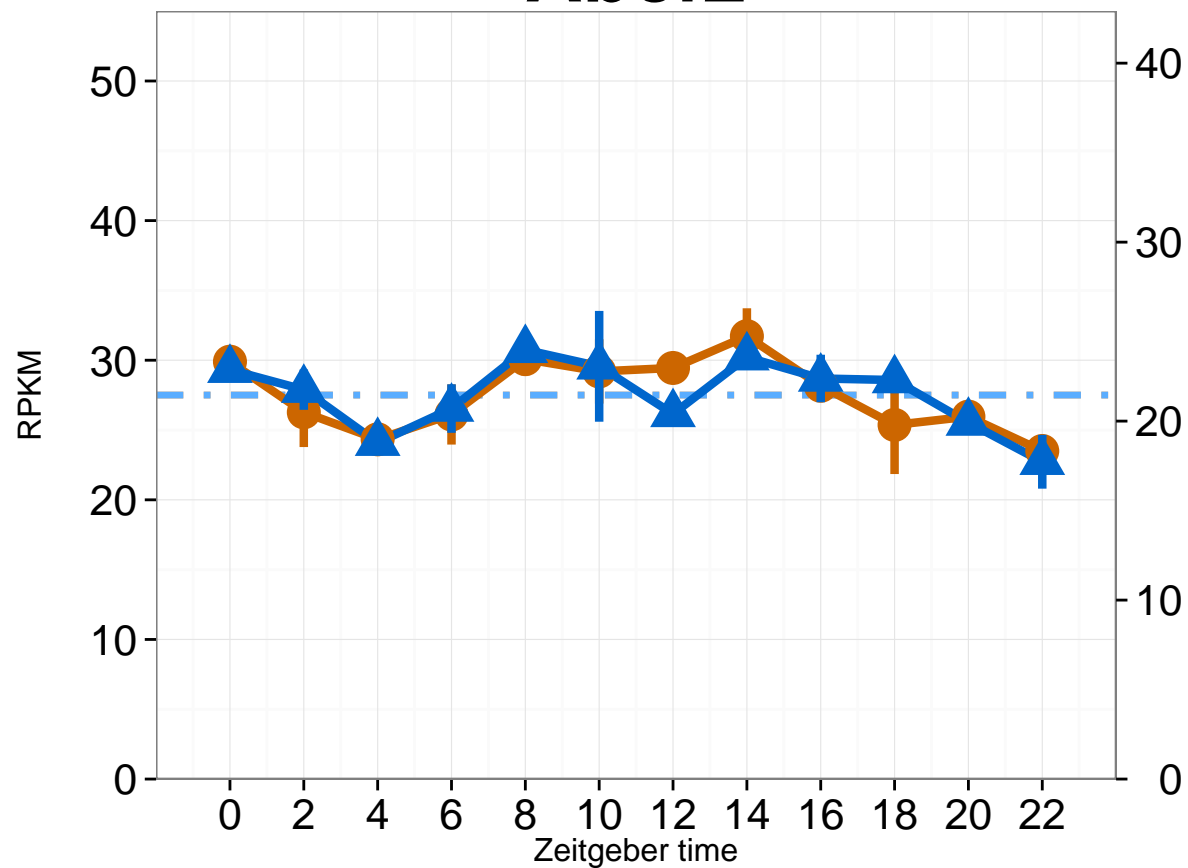

## Abcf2

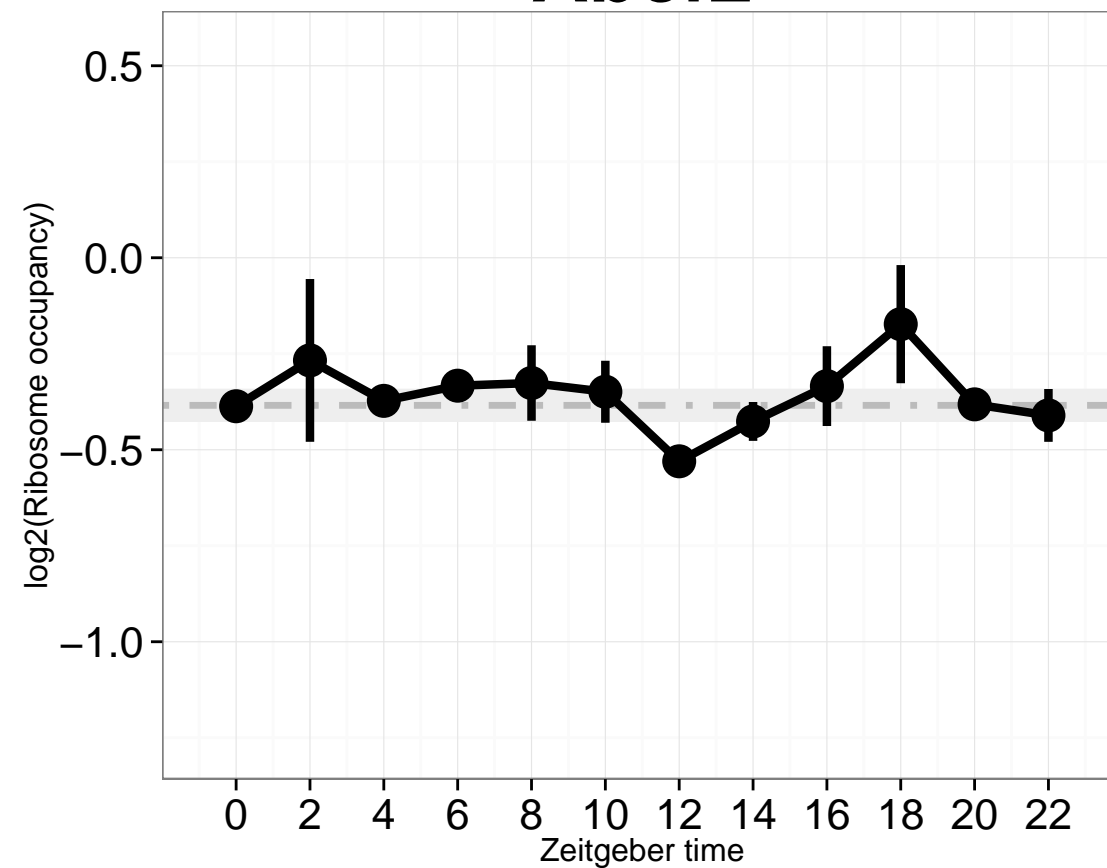

Supplement: SuppDataset_1.zip [file Abcf2_set_A.pdf › Supplemental Dataset 1/A-mRNA_nonrhyth_translation_nonrhyth/Abcf2_set_A.pdf]

## Abcf3

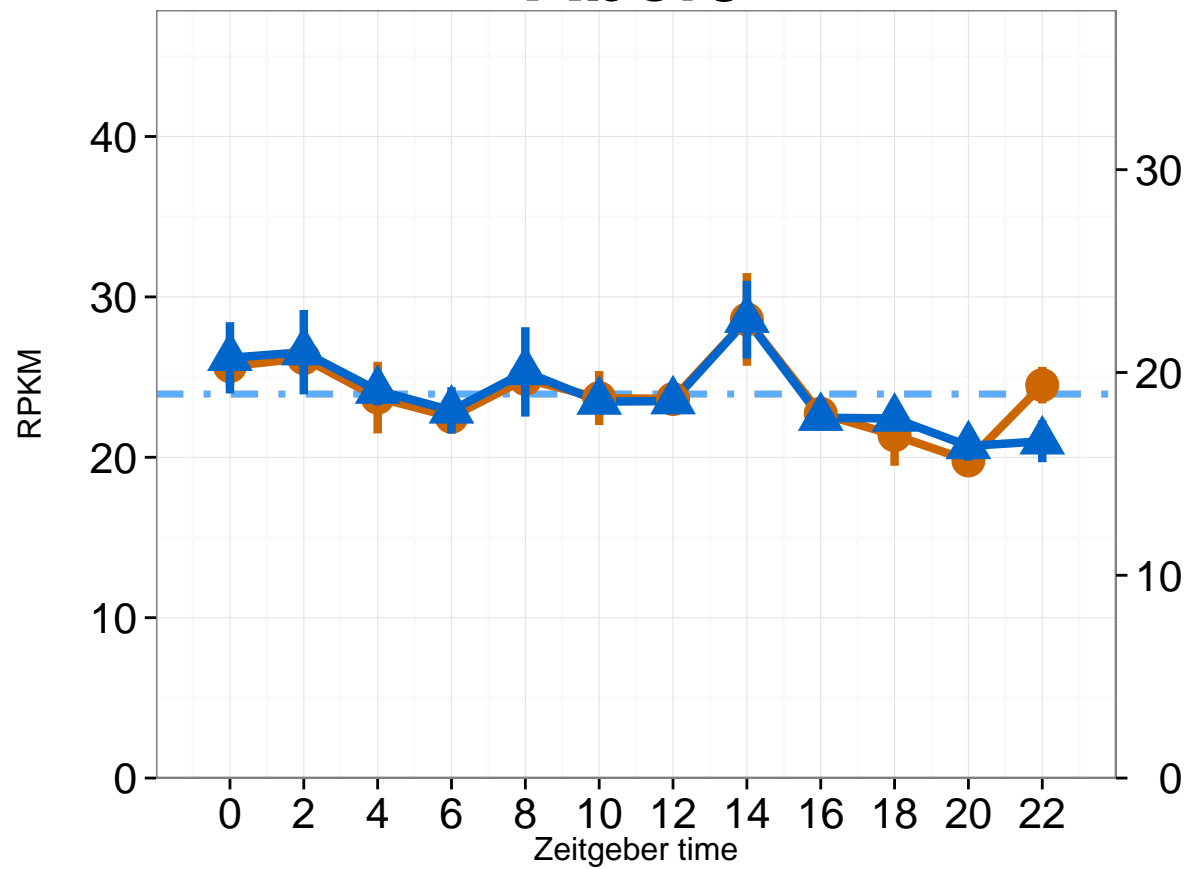

## Abcf3

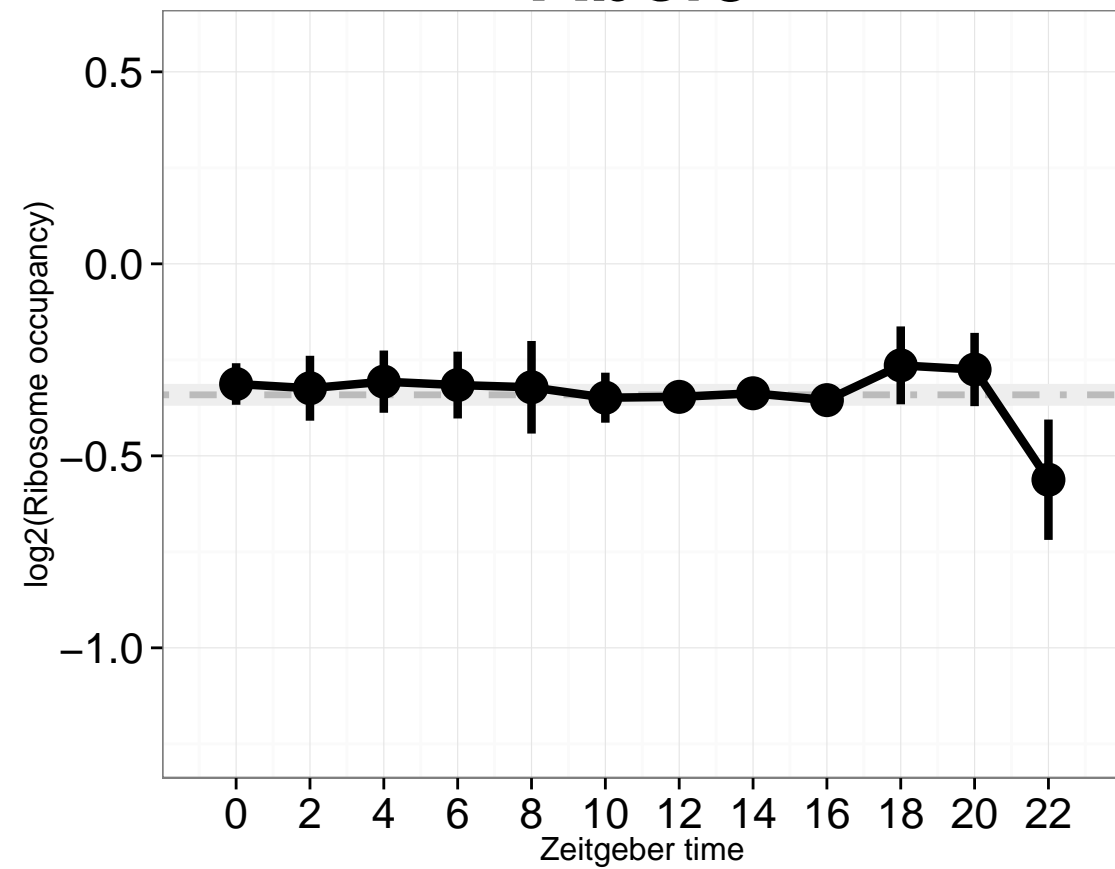

Supplement: SuppDataset_1.zip [file Abcf3_set_A.pdf › Supplemental Dataset 1/A-mRNA_nonrhyth_translation_nonrhyth/Abcf3_set_A.pdf]

# Abcg1

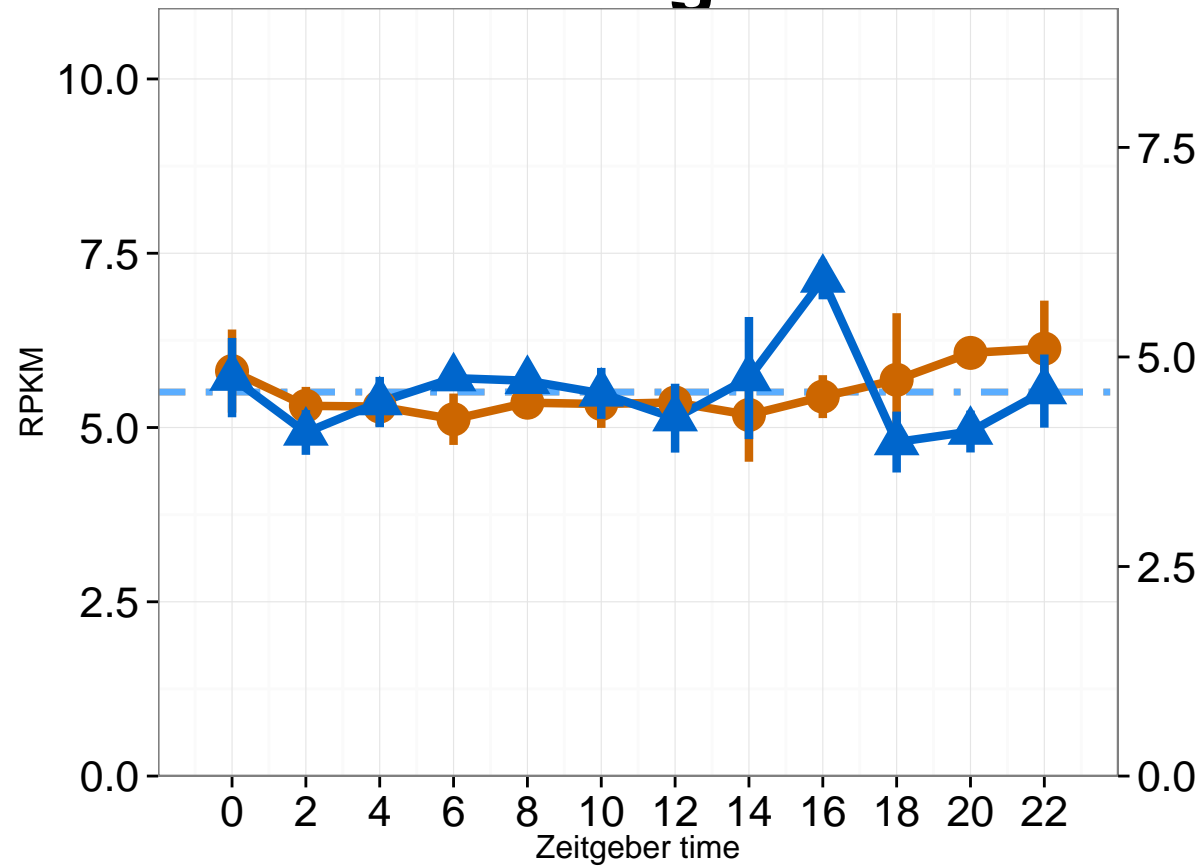

# Abcg1

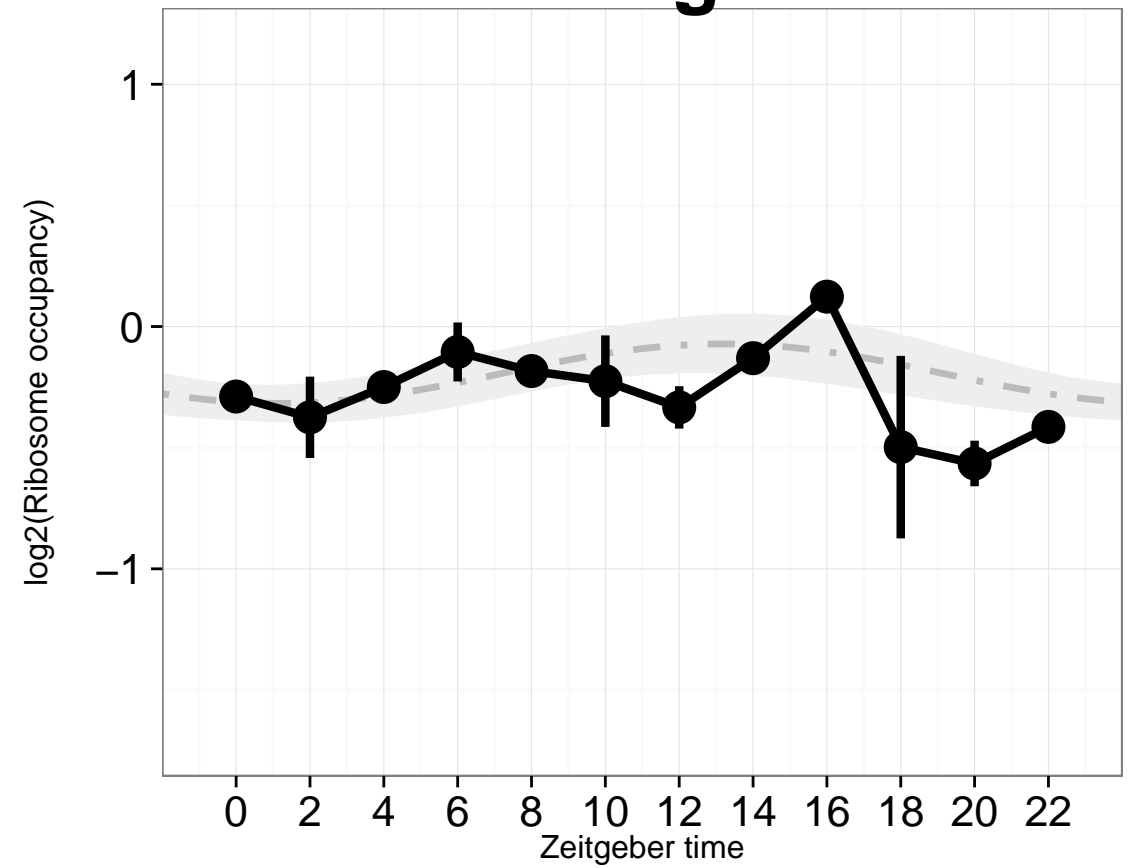

Supplement: SuppDataset_1.zip [file Abcg1_set_A.pdf › Supplemental Dataset 1/A-mRNA_nonrhyth_translation_nonrhyth/Abcg1_set_A.pdf]

## Abcg2

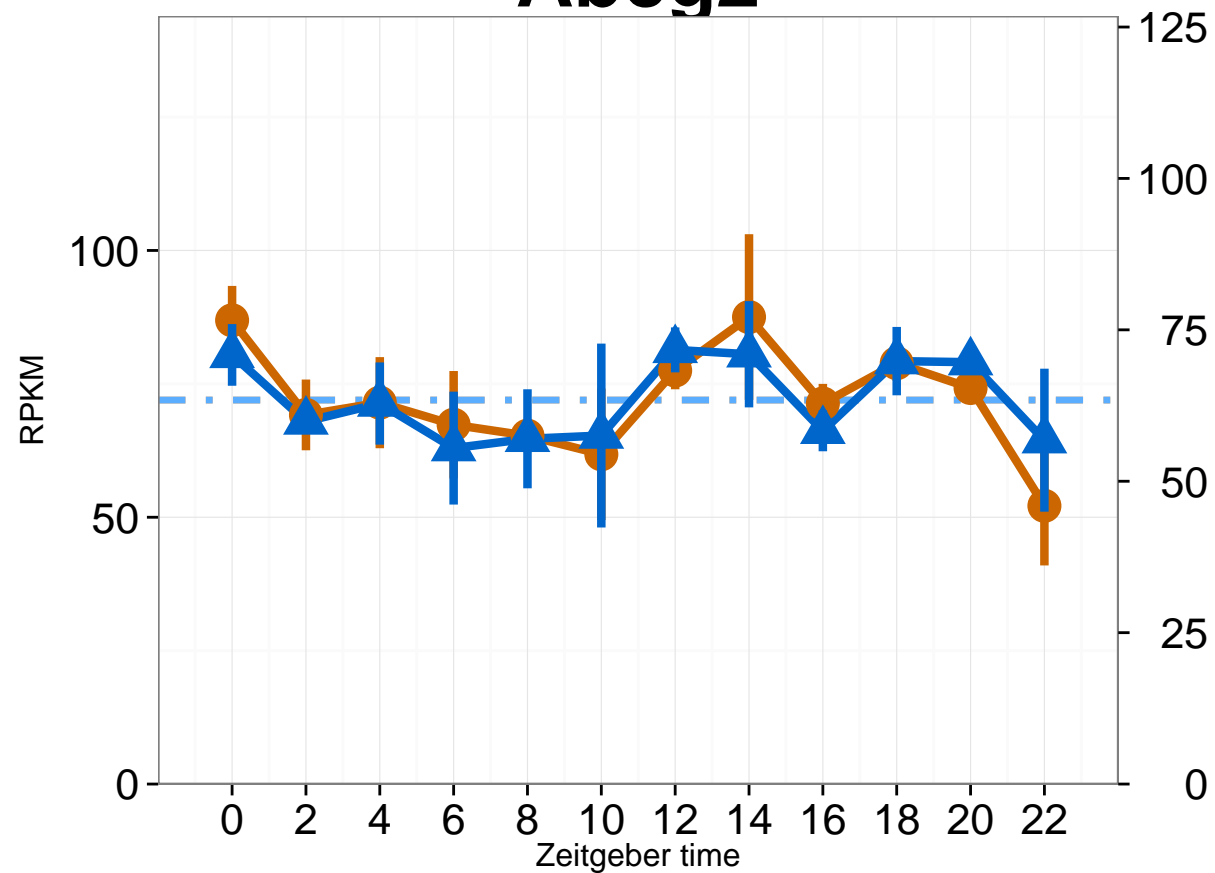

## Abcg2

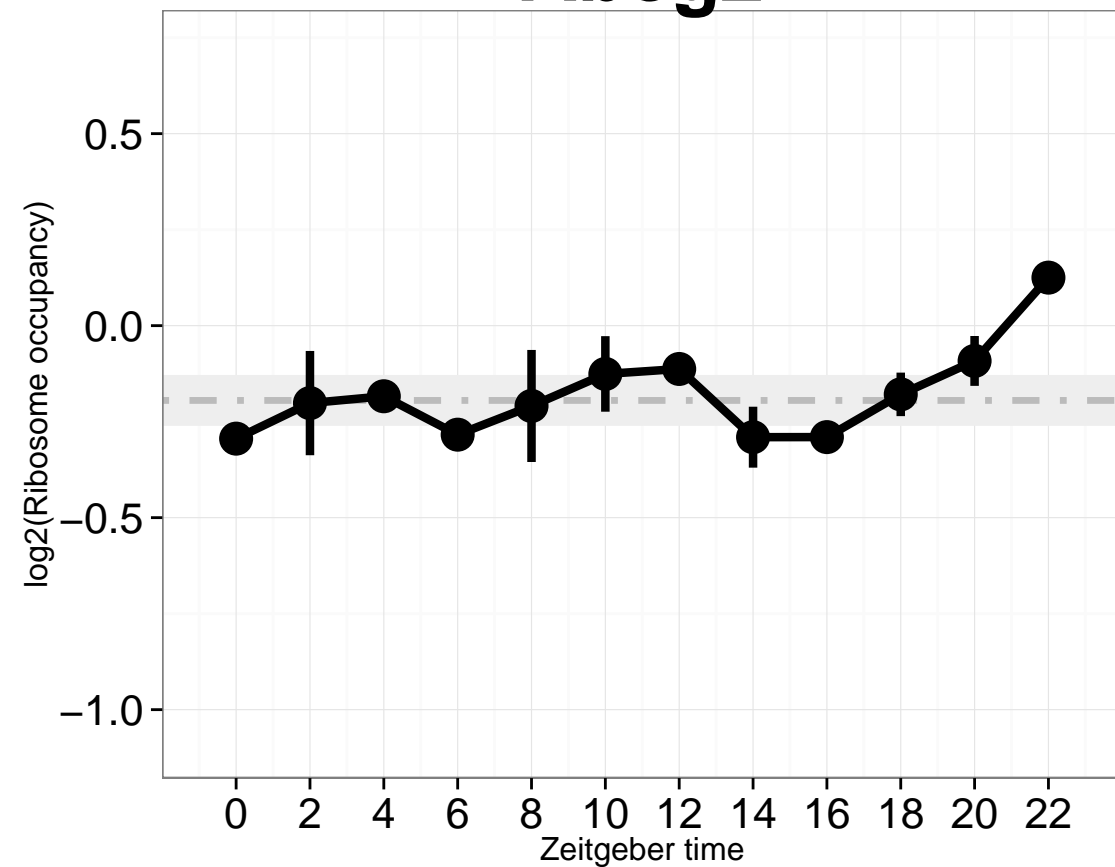

Supplement: SuppDataset_1.zip [file Abcg2_set_A.pdf › Supplemental Dataset 1/A-mRNA_nonrhyth_translation_nonrhyth/Abcg2_set_A.pdf]

## Abcg3

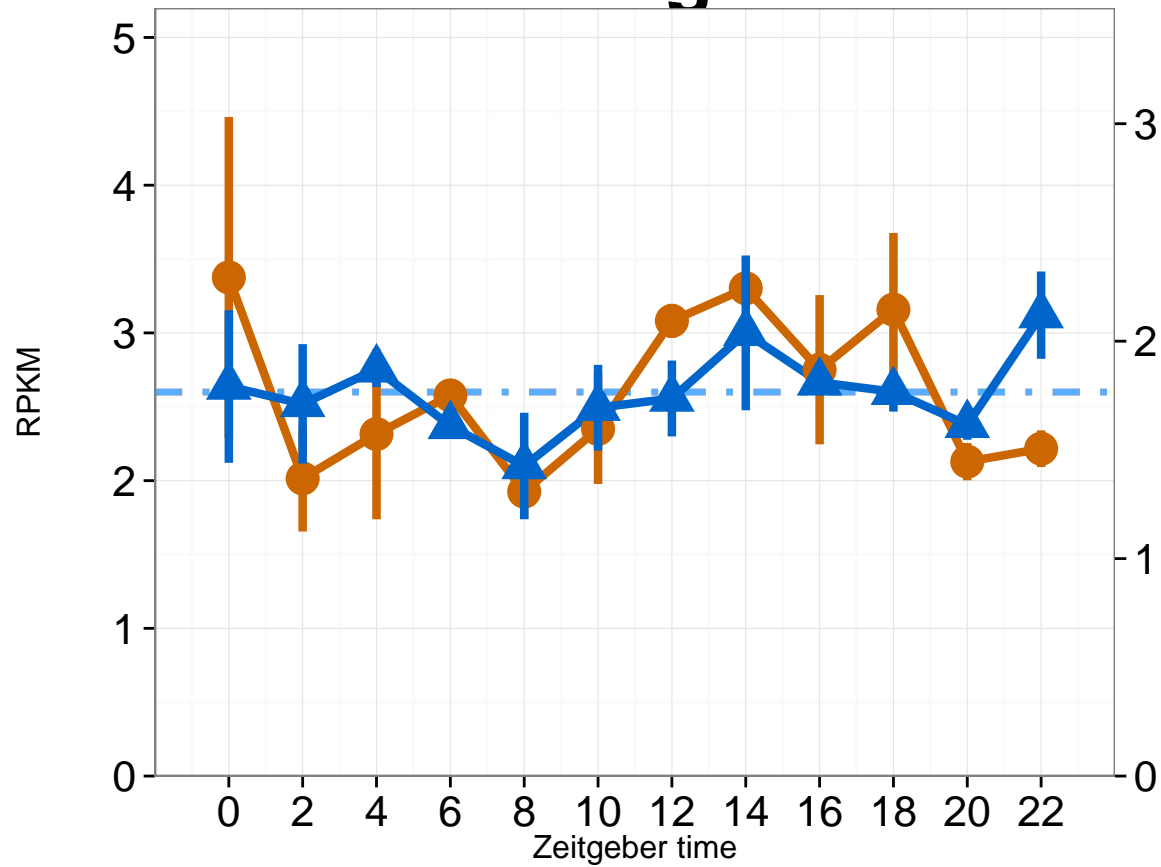

## Abcg3

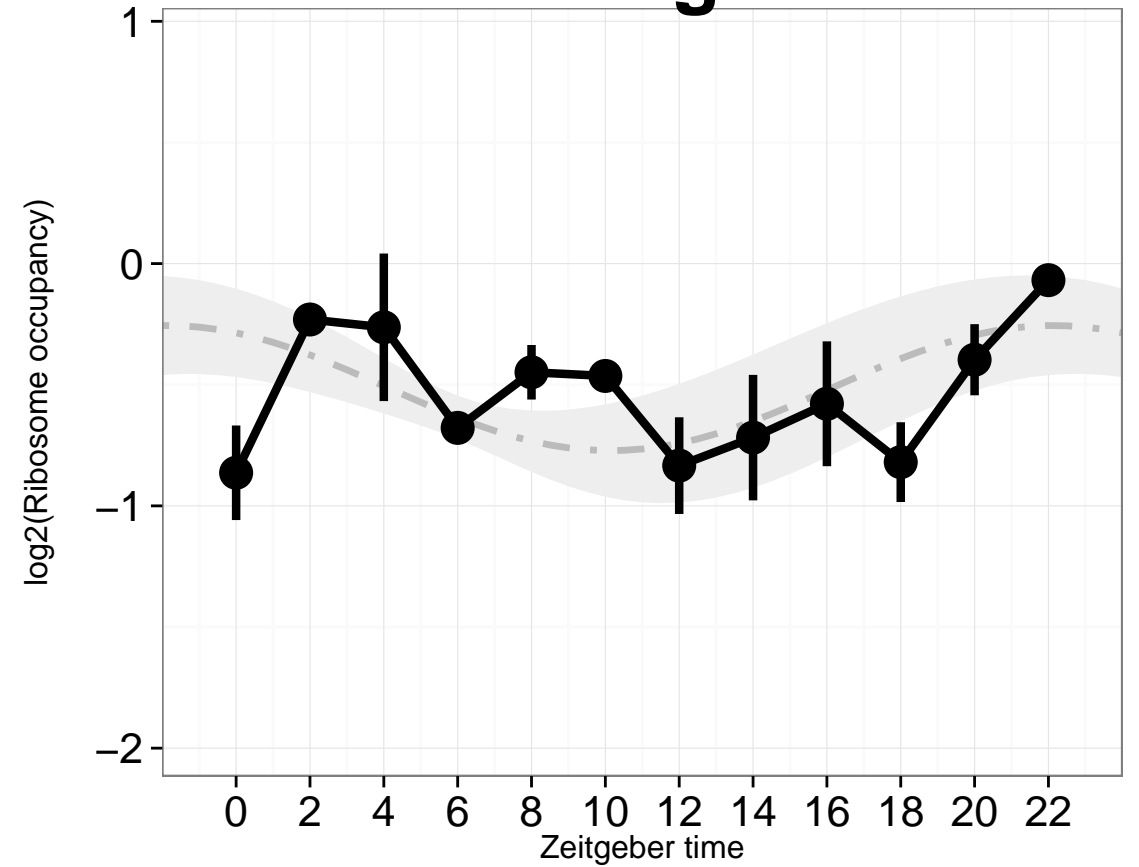

Supplement: SuppDataset_1.zip [file Abcg3_set_A.pdf › Supplemental Dataset 1/A-mRNA_nonrhyth_translation_nonrhyth/Abcg3_set_A.pdf]

## Abhd10

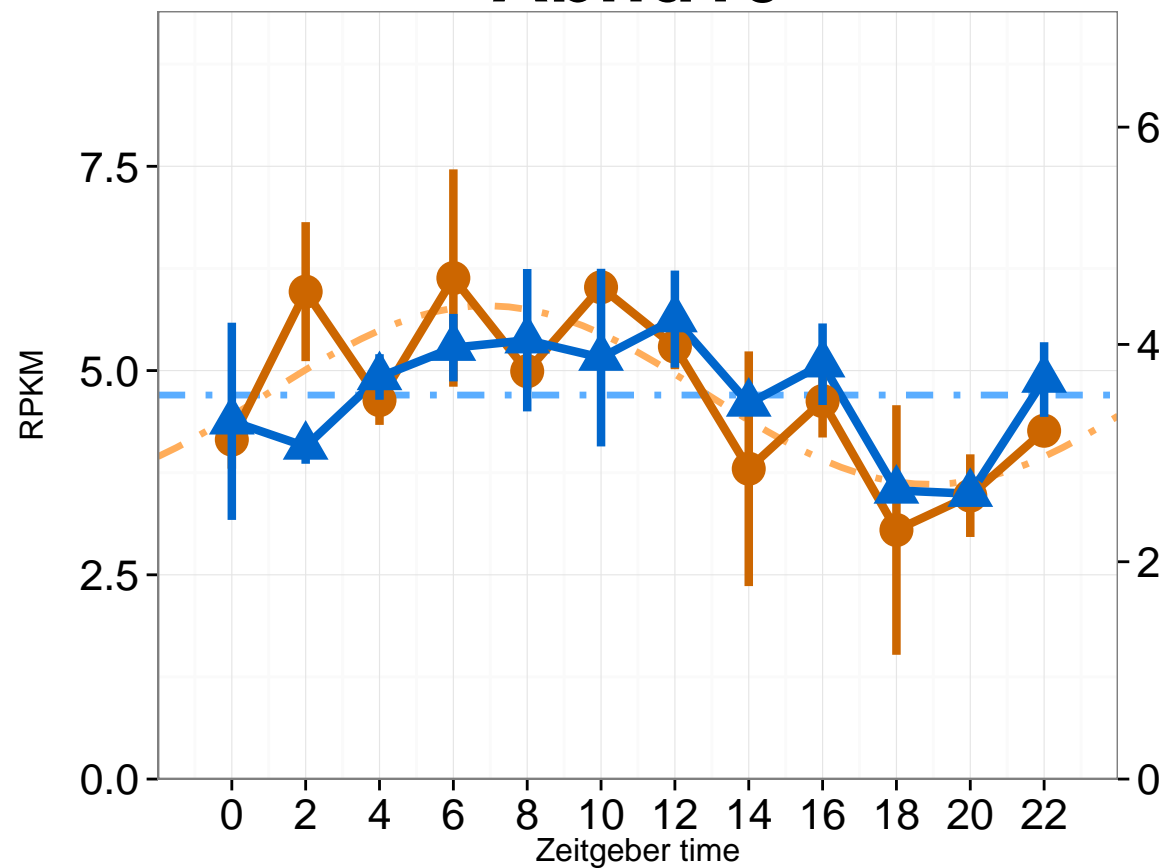

## Abhd10

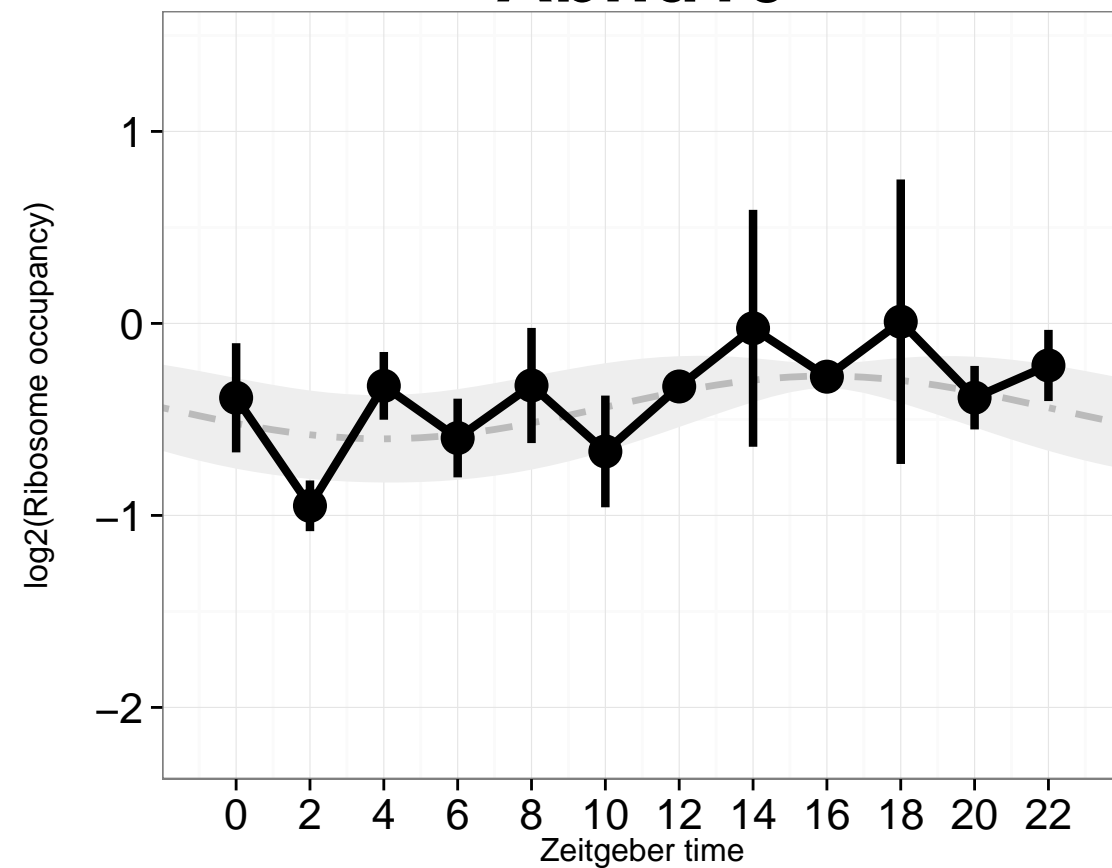

Supplement: SuppDataset_1.zip [file Abhd10_set_A.pdf › Supplemental Dataset 1/A-mRNA_nonrhyth_translation_nonrhyth/Abhd10_set_A.pdf]

# Abhd11

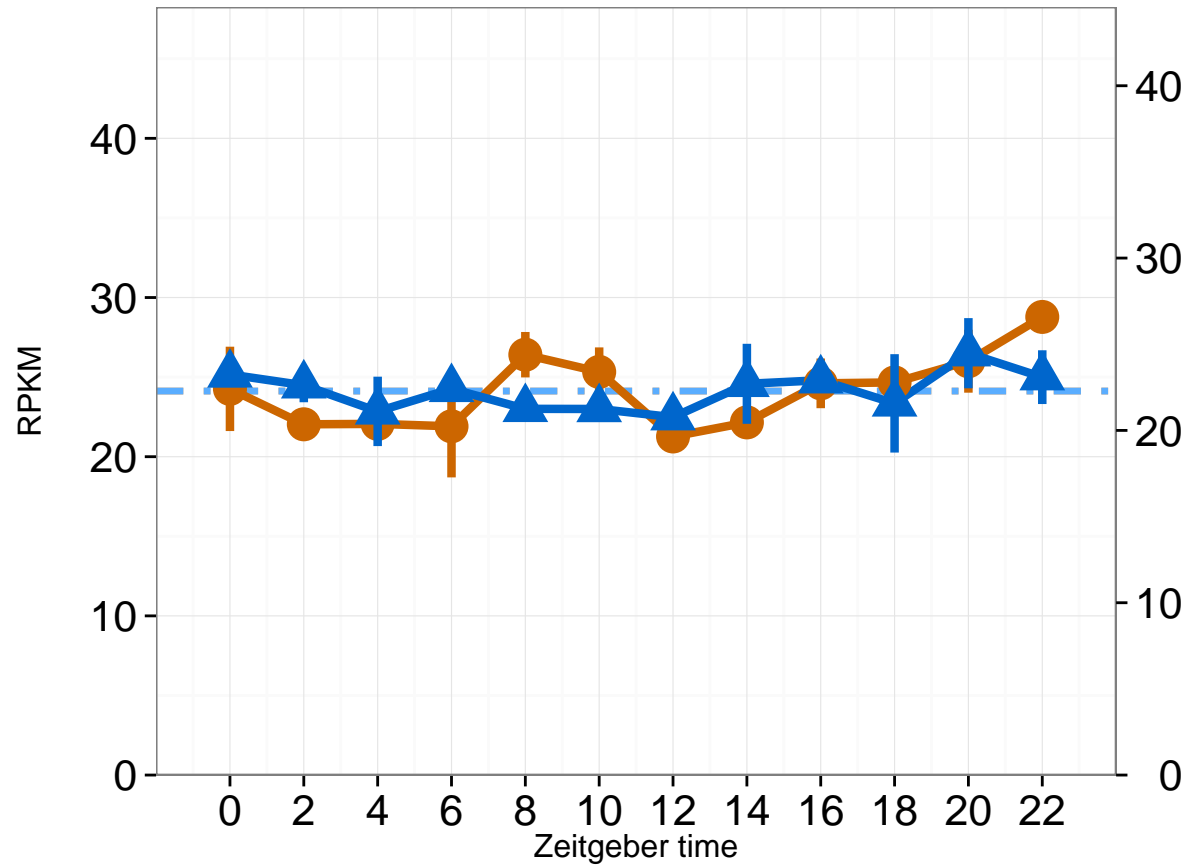

# Abhd11

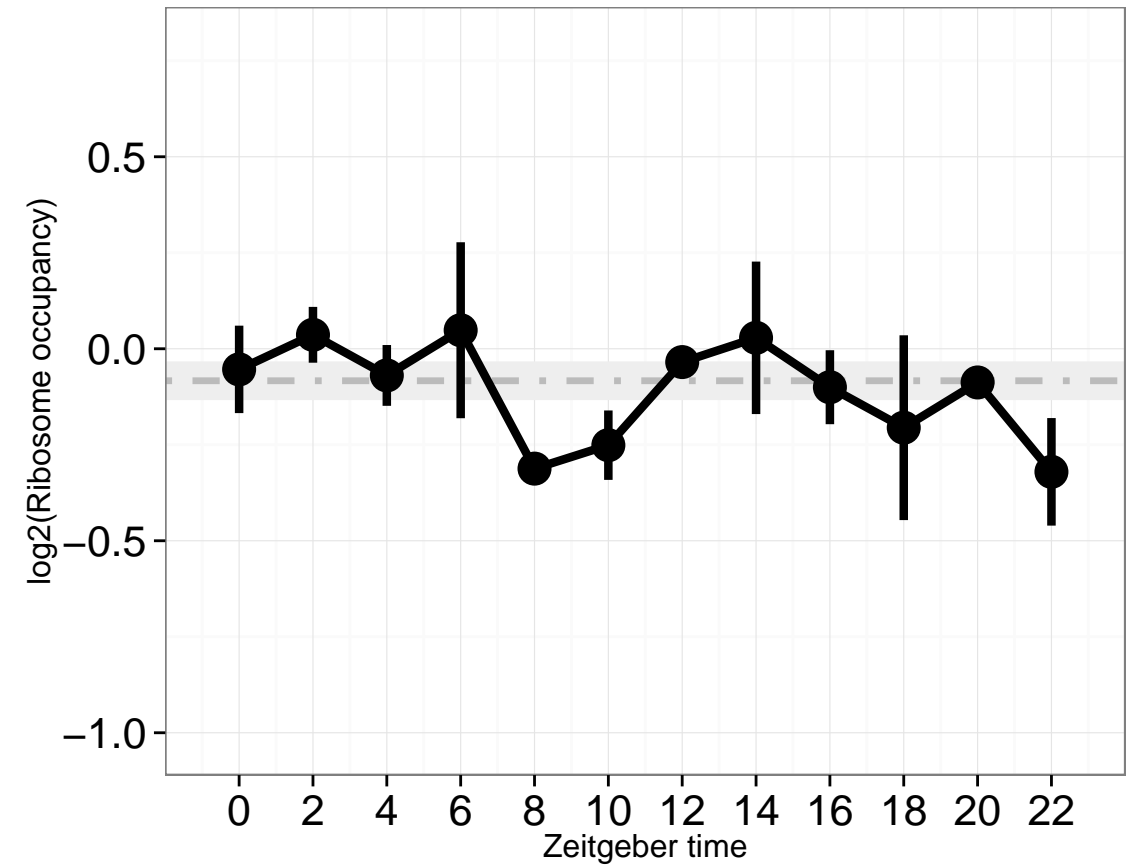

Supplement: SuppDataset_1.zip [file Abhd11_set_A.pdf › Supplemental Dataset 1/A-mRNA_nonrhyth_translation_nonrhyth/Abhd11_set_A.pdf]

## Abhd12

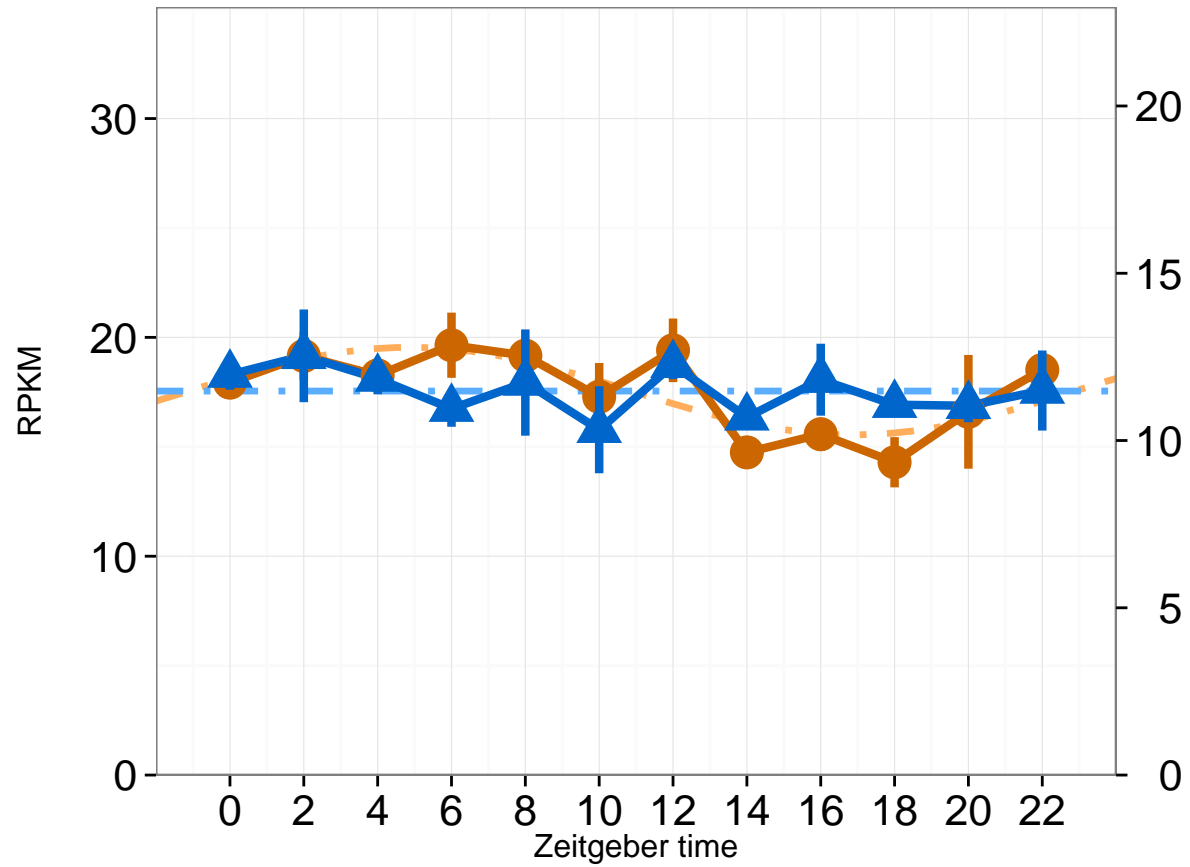

## Abhd12

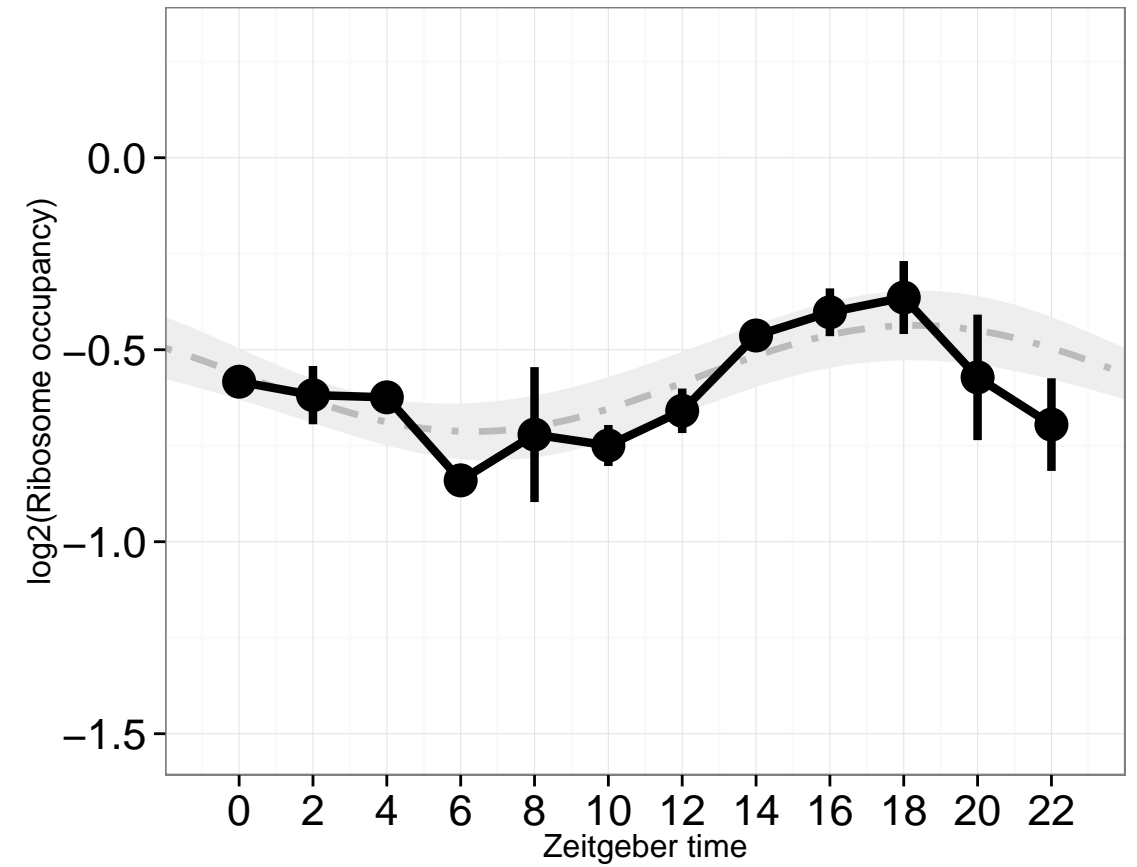

Supplement: SuppDataset_1.zip [file Abhd12_set_A.pdf › Supplemental Dataset 1/A-mRNA_nonrhyth_translation_nonrhyth/Abhd12_set_A.pdf]

# Abhd13

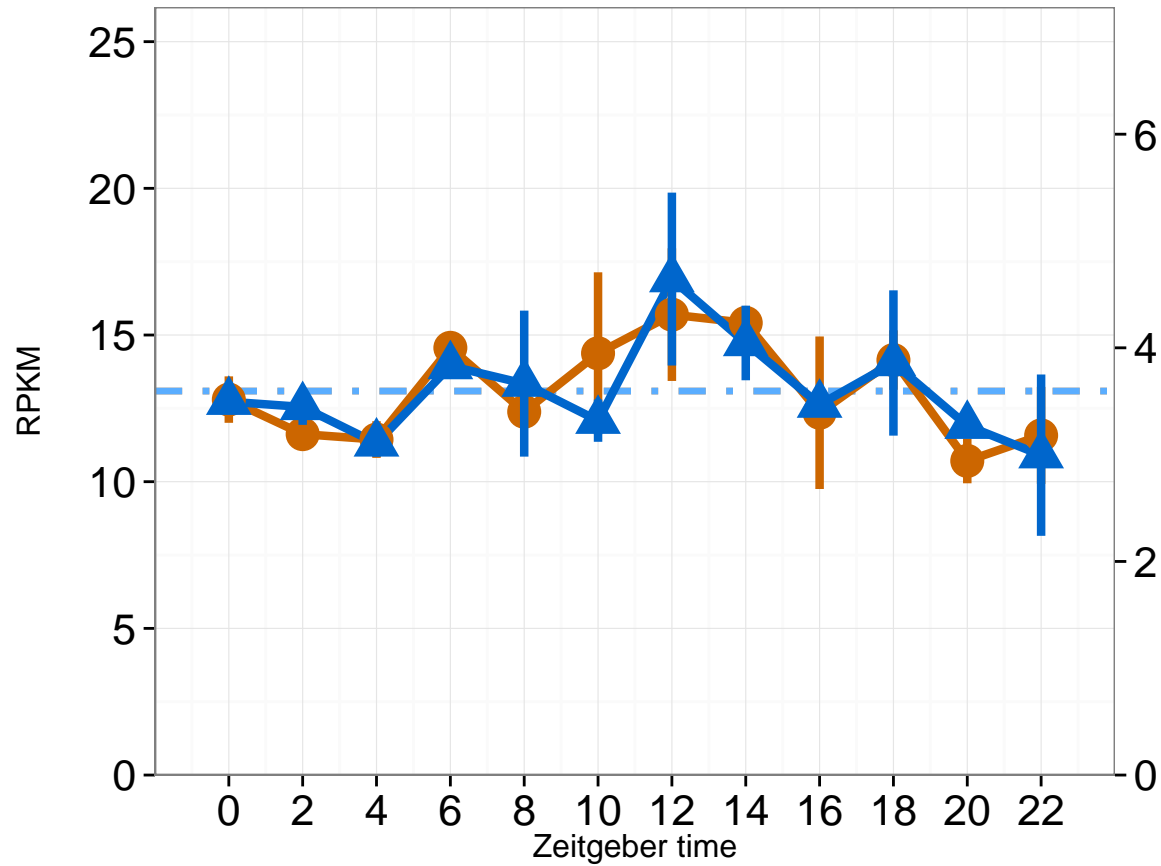

# Abhd13

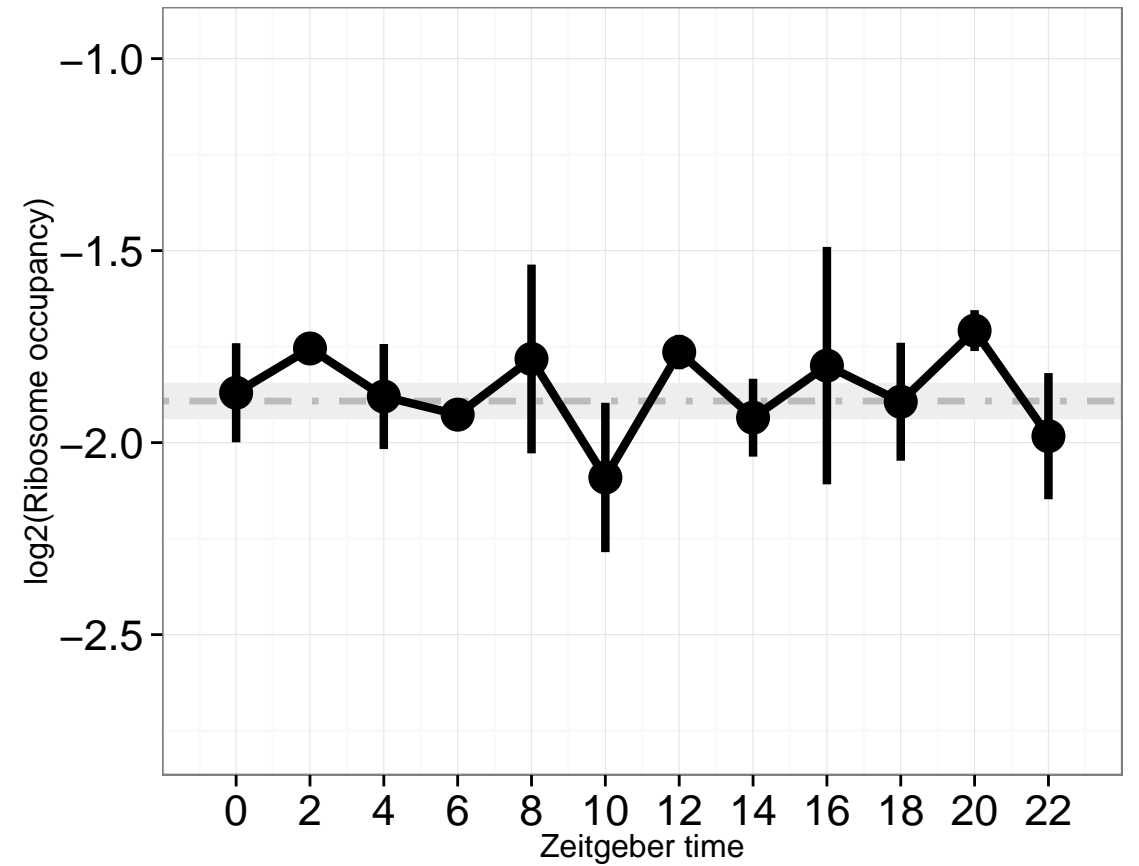

Supplement: SuppDataset_1.zip [file Abhd13_set_A.pdf › Supplemental Dataset 1/A-mRNA_nonrhyth_translation_nonrhyth/Abhd13_set_A.pdf]

# Abhd14b

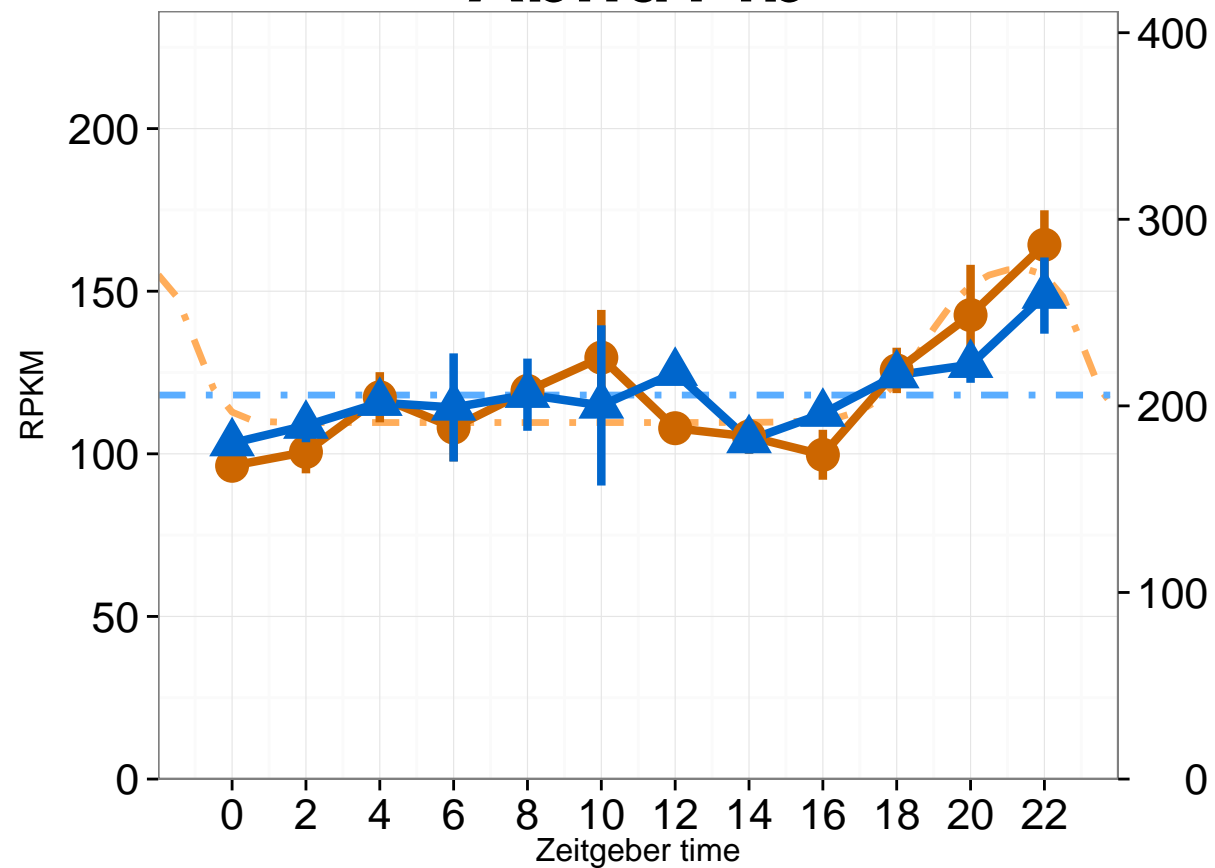

# Abhd14b

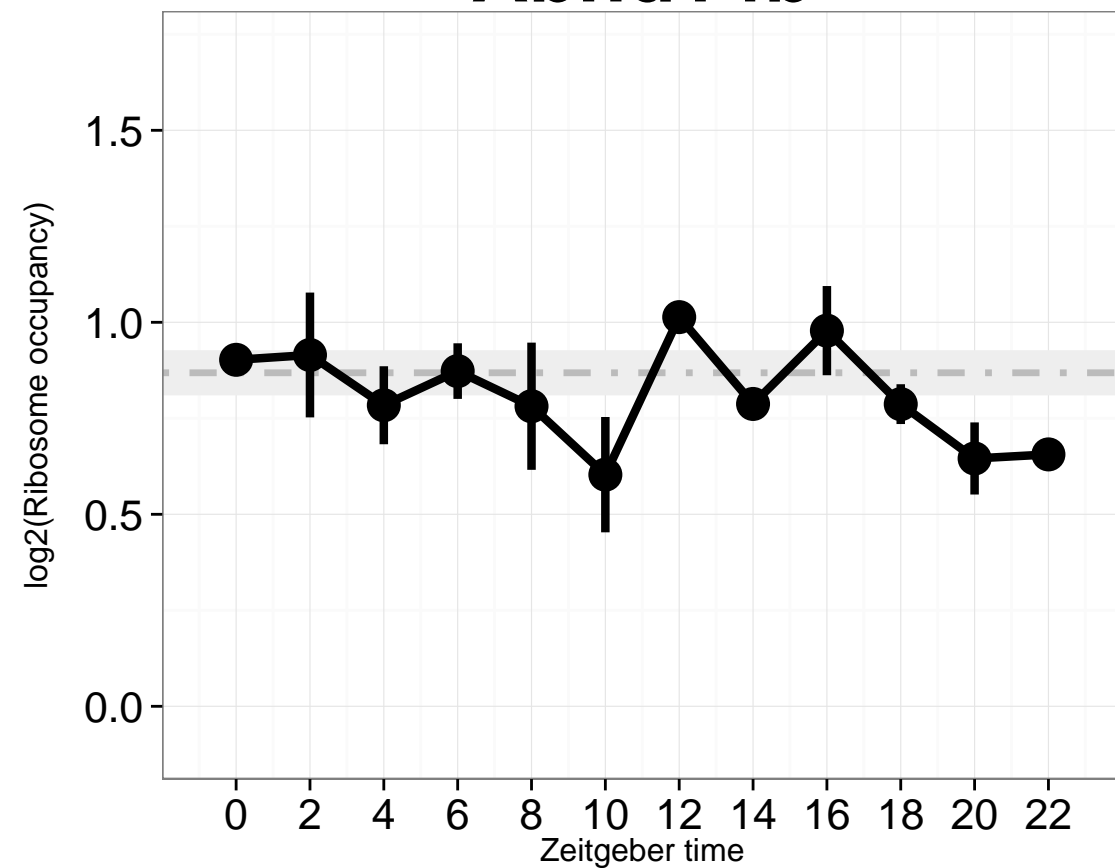

Supplement: SuppDataset_1.zip [file Abhd14b_set_A.pdf › Supplemental Dataset 1/A-mRNA_nonrhyth_translation_nonrhyth/Abhd14b_set_A.pdf]

## Abhd15

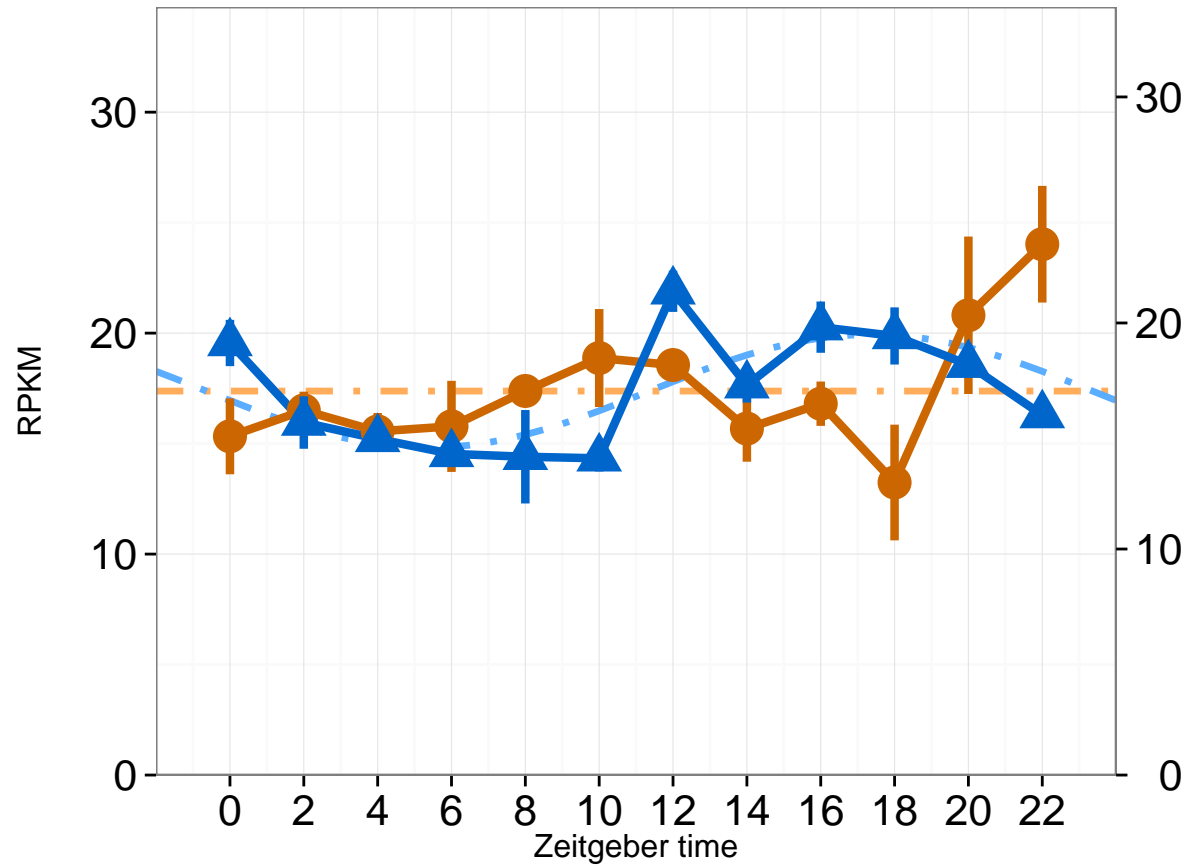

## Abhd15

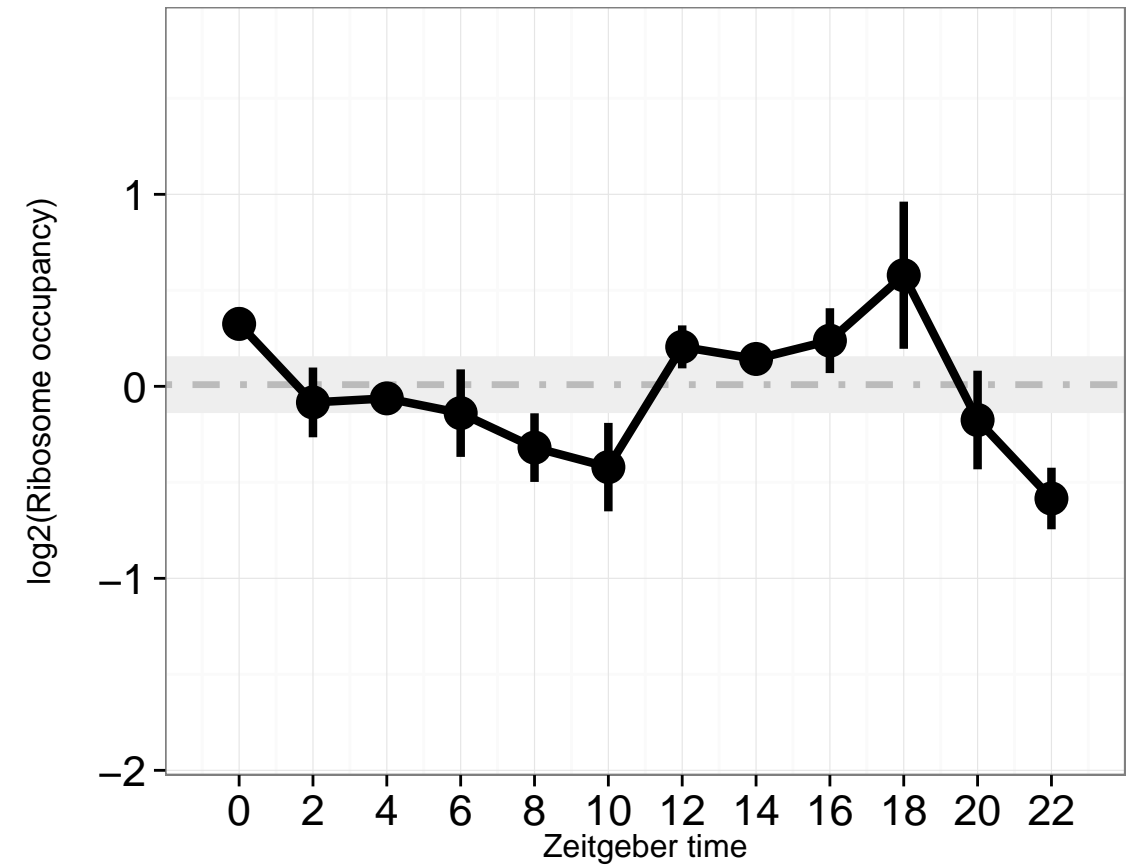

Supplement: SuppDataset_1.zip [file Abhd15_set_A.pdf › Supplemental Dataset 1/A-mRNA_nonrhyth_translation_nonrhyth/Abhd15_set_A.pdf]

# Abhd16a

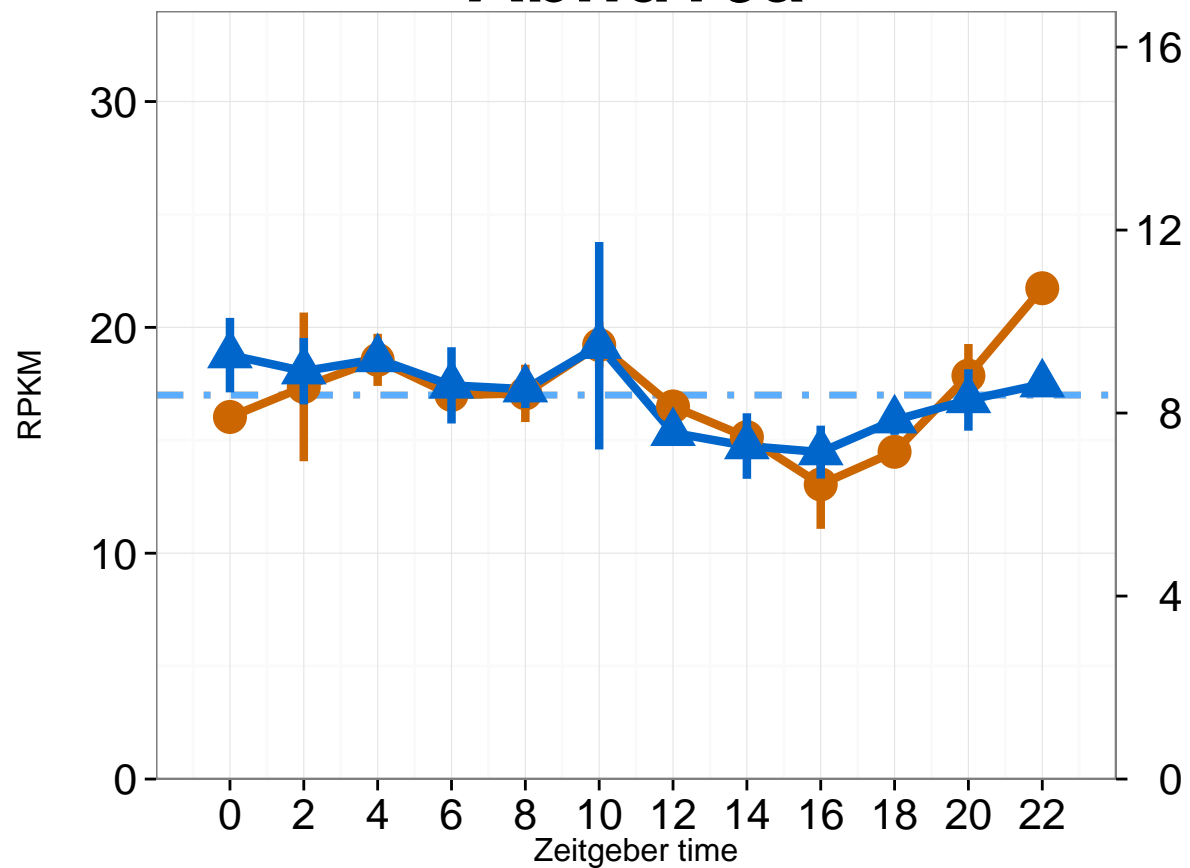

# Abhd16a

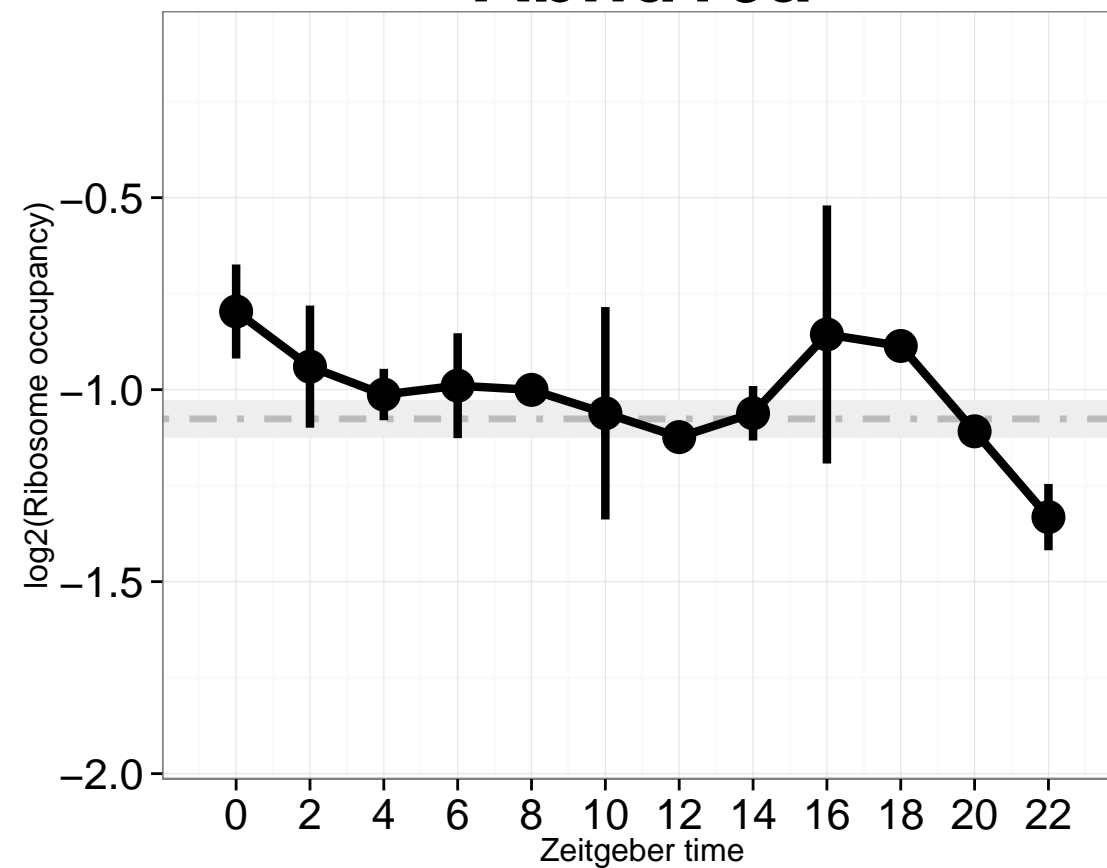

Supplement: SuppDataset_1.zip [file Abhd16a_set_A.pdf › Supplemental Dataset 1/A-mRNA_nonrhyth_translation_nonrhyth/Abhd16a_set_A.pdf]

# Abhd17a

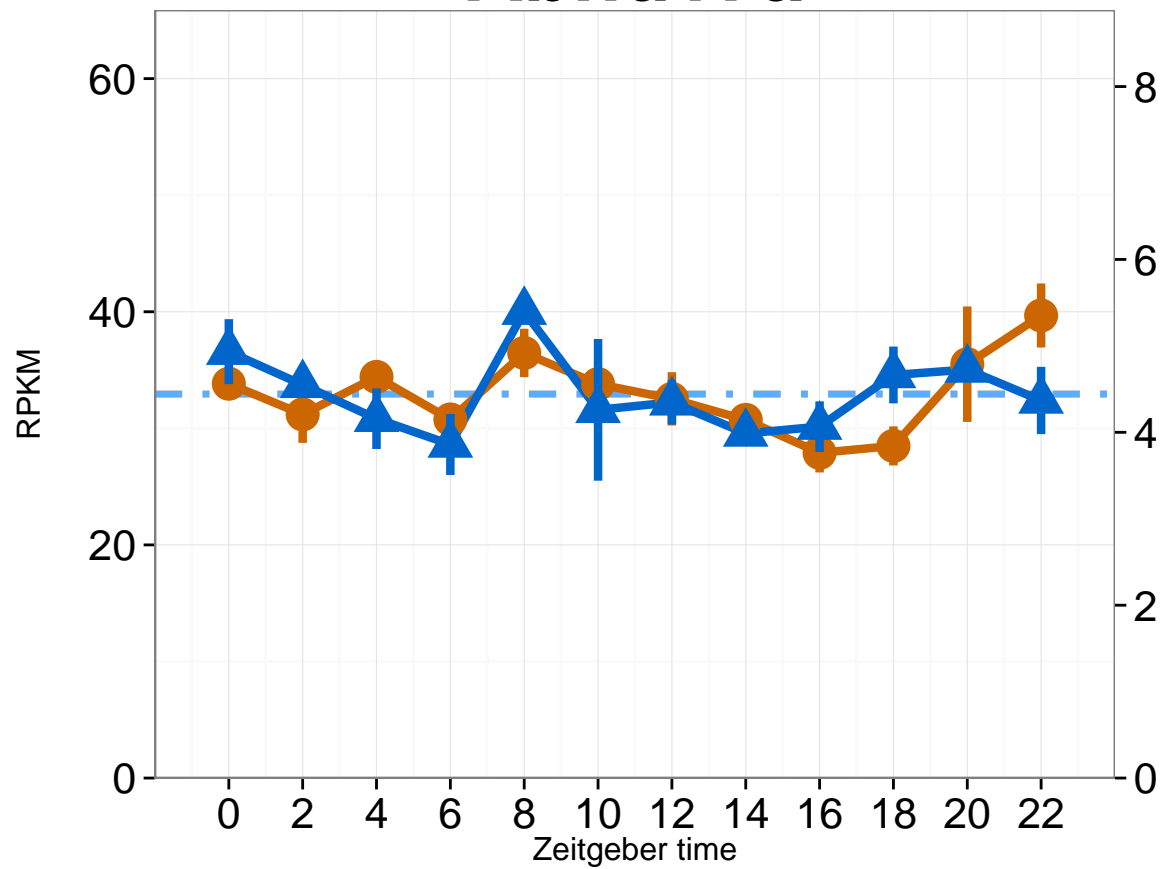

# Abhd17a

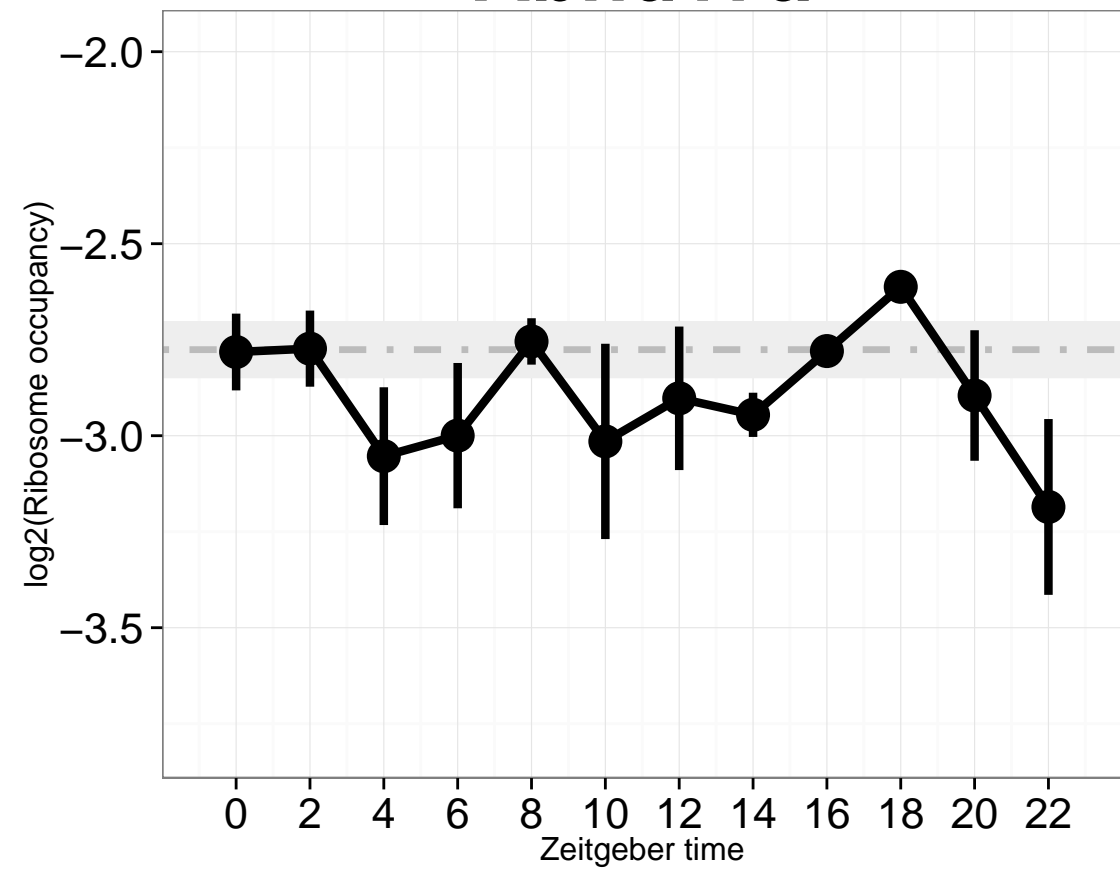

Supplement: SuppDataset_1.zip [file Abhd17a_set_A.pdf › Supplemental Dataset 1/A-mRNA_nonrhyth_translation_nonrhyth/Abhd17a_set_A.pdf]

## Abhd2

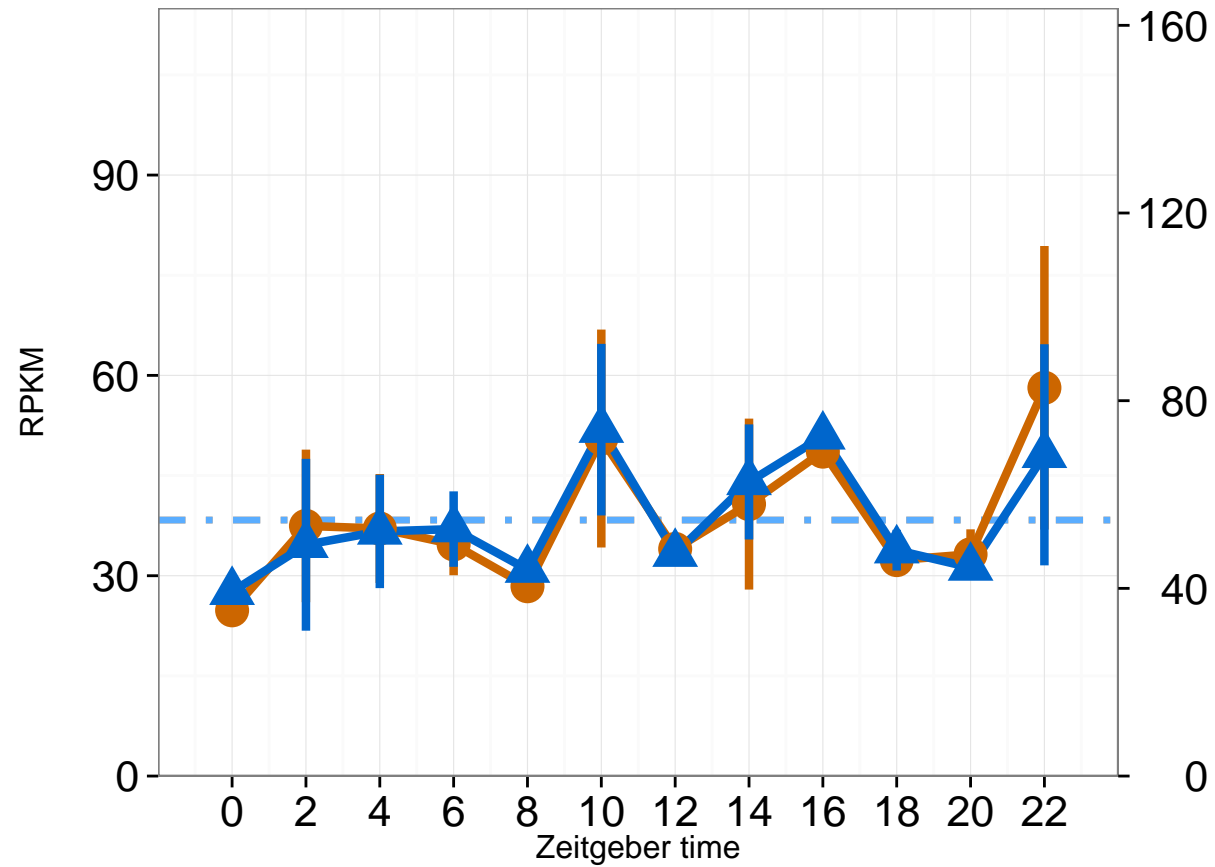

## Abhd2

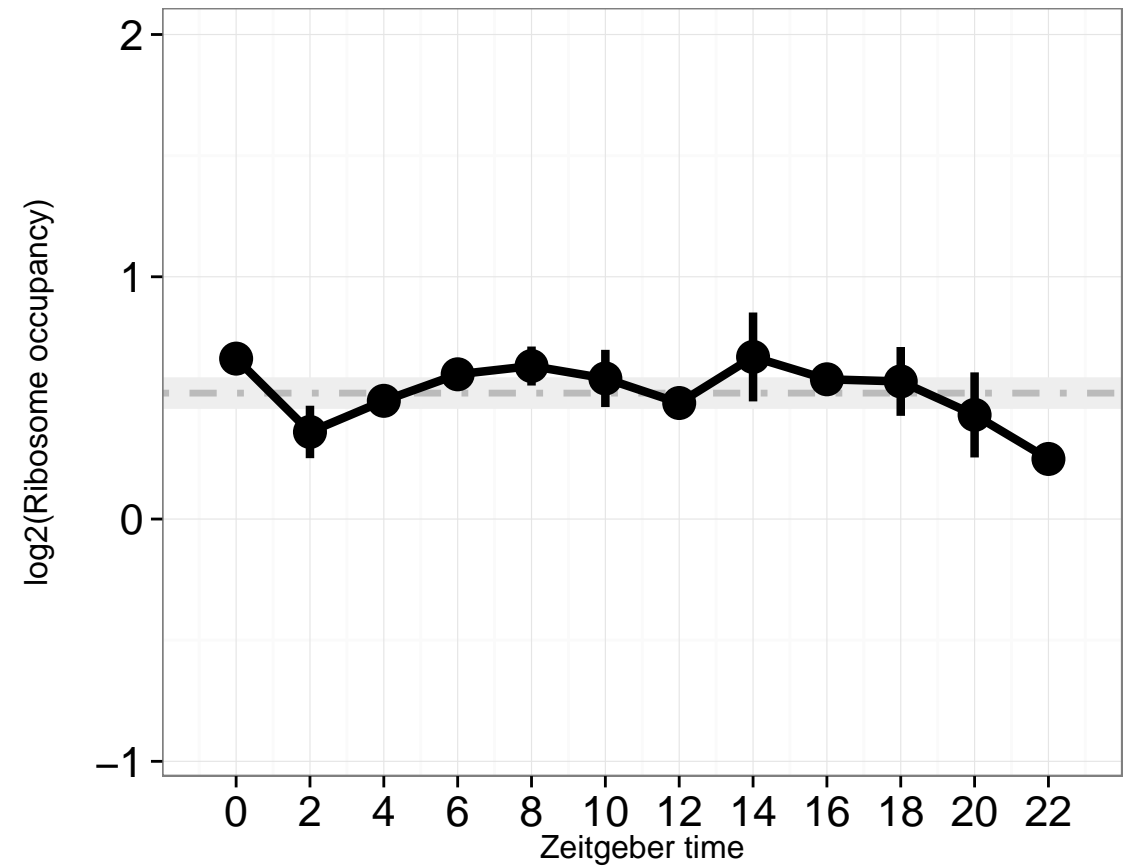

Supplement: SuppDataset_1.zip [file Abhd2_set_A.pdf › Supplemental Dataset 1/A-mRNA_nonrhyth_translation_nonrhyth/Abhd2_set_A.pdf]

## Abhd3

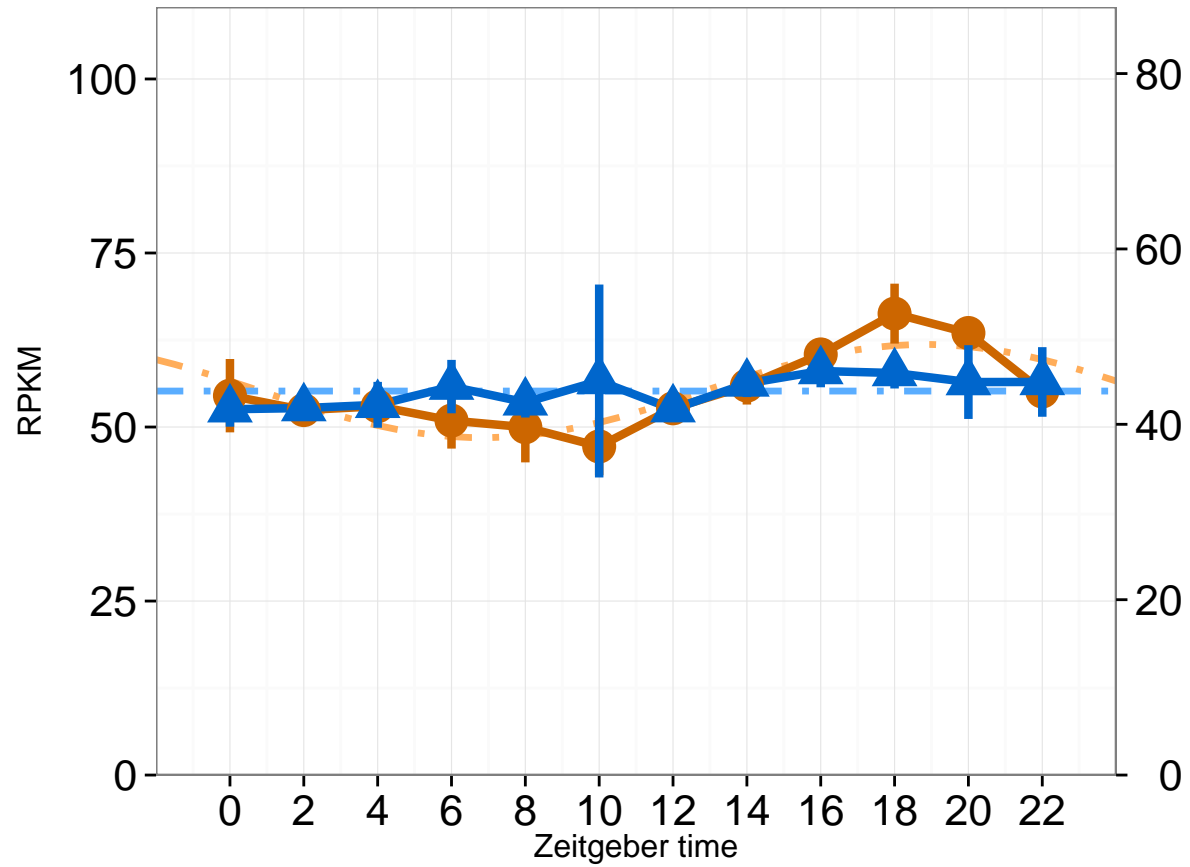

## Abhd3

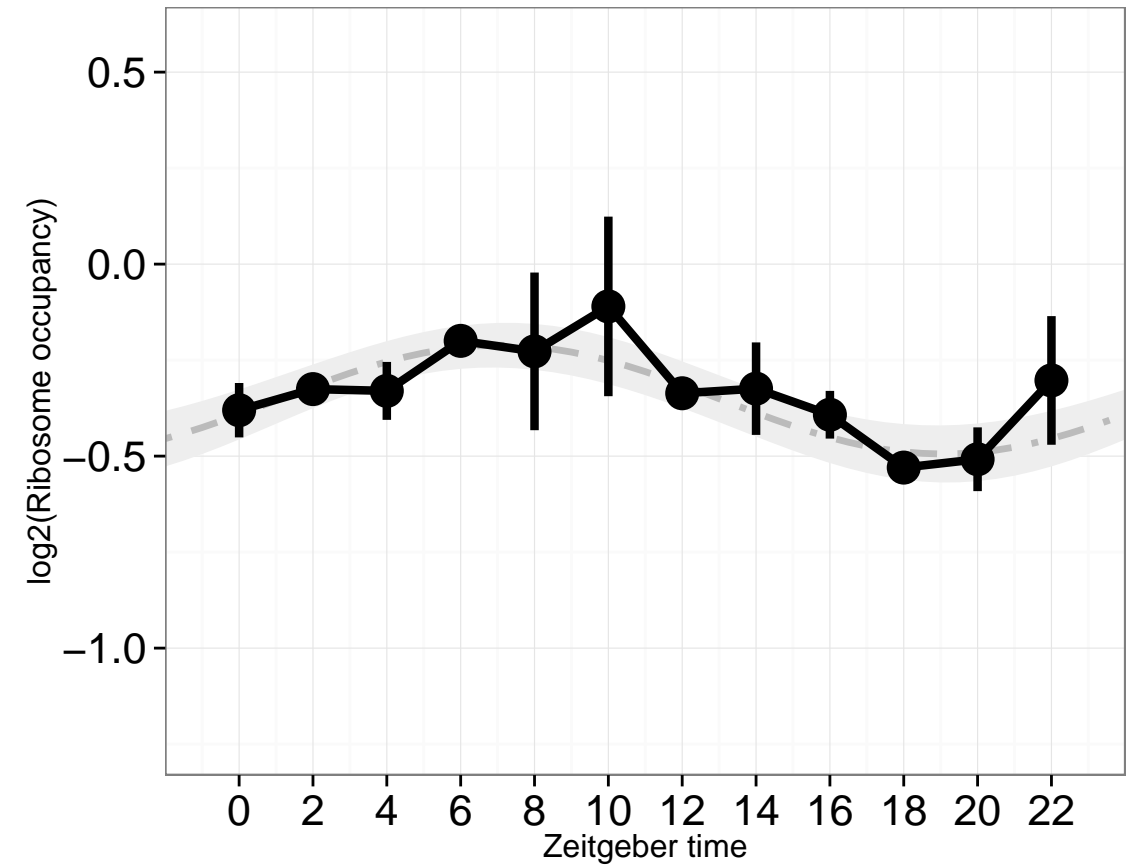

Supplement: SuppDataset_1.zip [file Abhd3_set_A.pdf › Supplemental Dataset 1/A-mRNA_nonrhyth_translation_nonrhyth/Abhd3_set_A.pdf]

## Abhd4

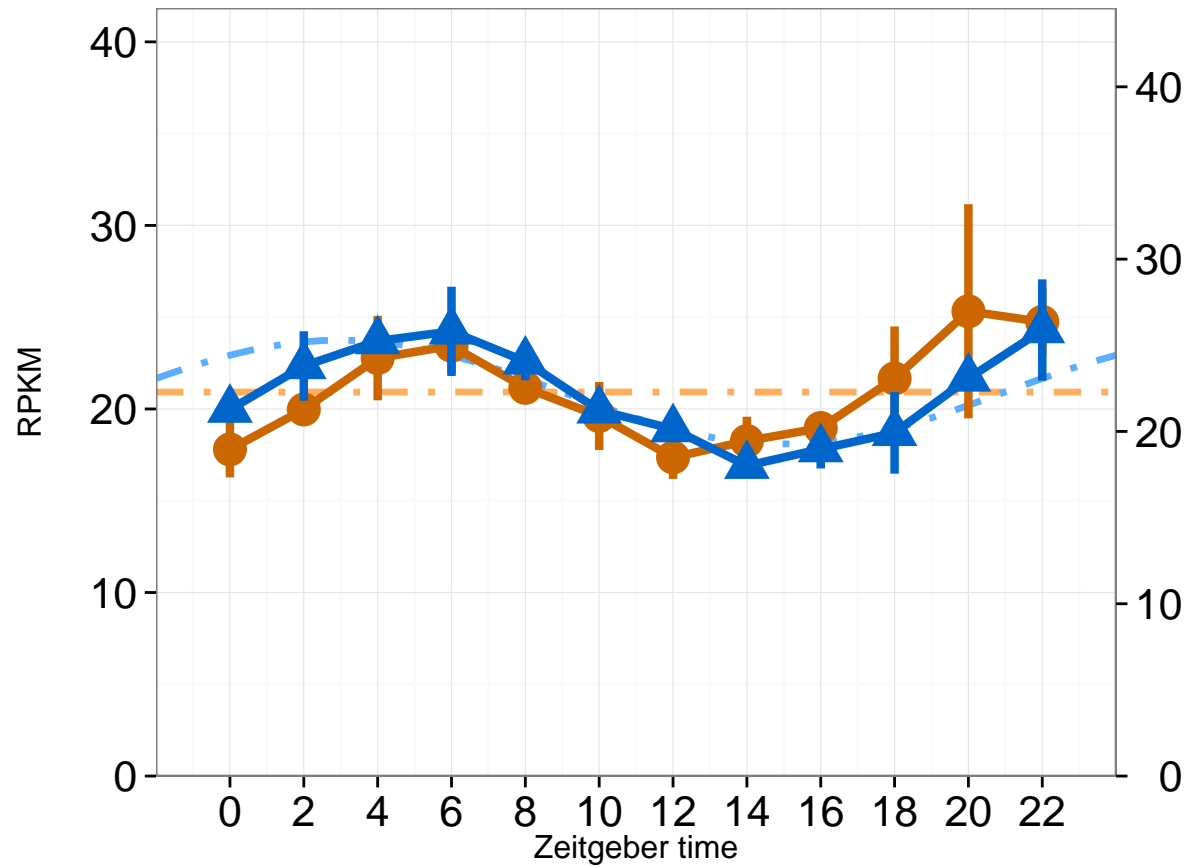

## Abhd4

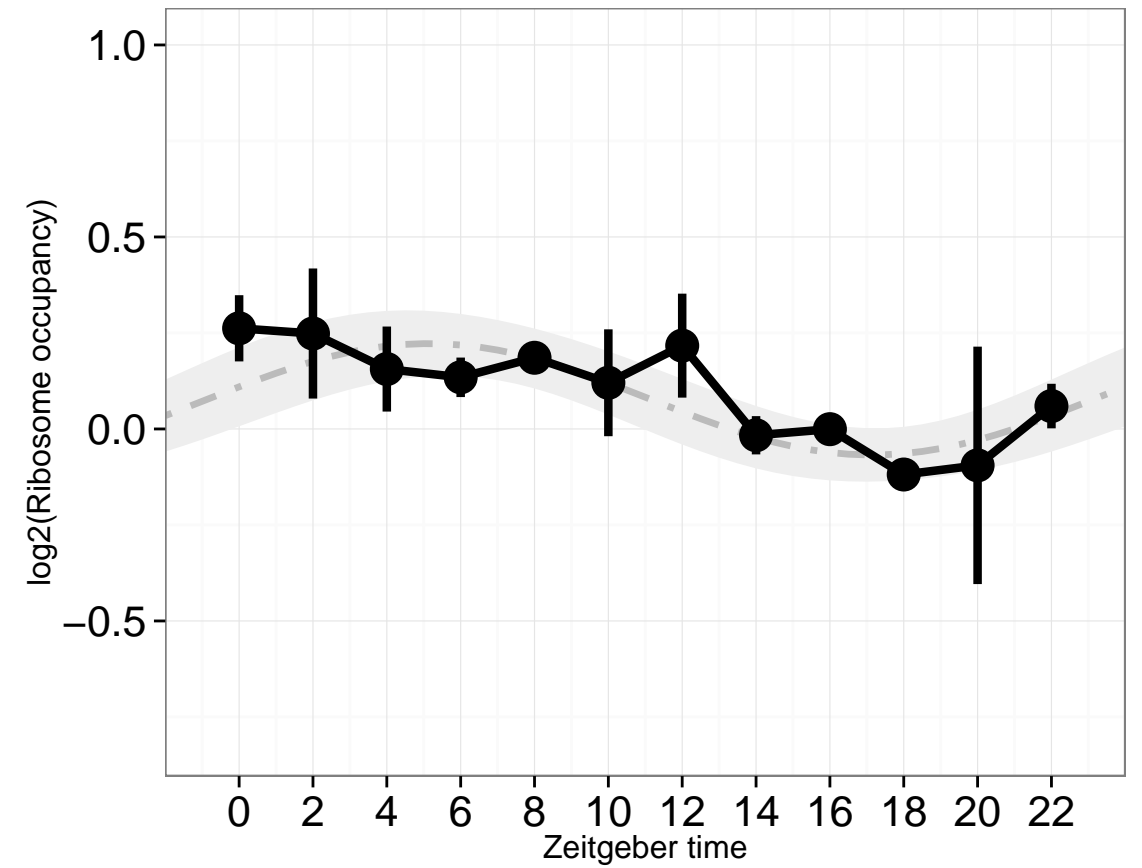

Supplement: SuppDataset_1.zip [file Abhd4_set_A.pdf › Supplemental Dataset 1/A-mRNA_nonrhyth_translation_nonrhyth/Abhd4_set_A.pdf]

## Abhd5

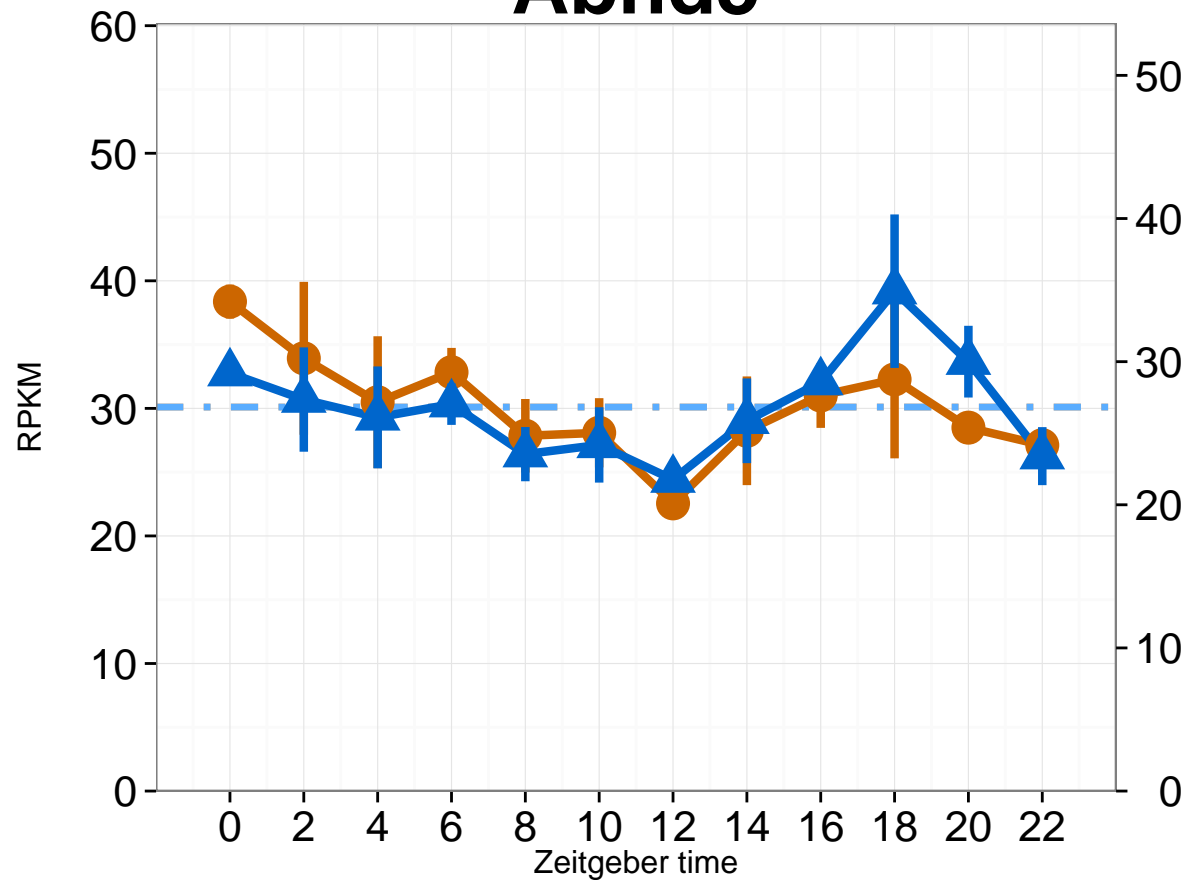

## Abhd5

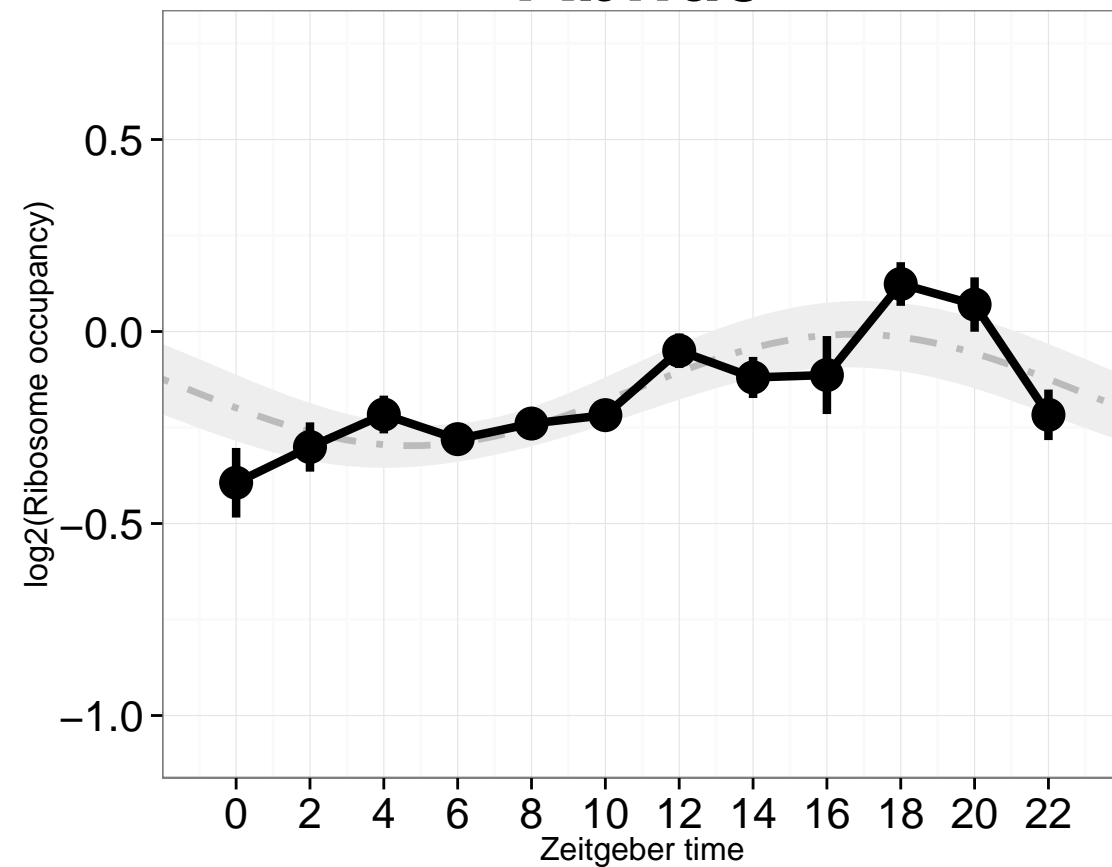

Supplement: SuppDataset_1.zip [file Abhd5_set_A.pdf › Supplemental Dataset 1/A-mRNA_nonrhyth_translation_nonrhyth/Abhd5_set_A.pdf]

## Abi1

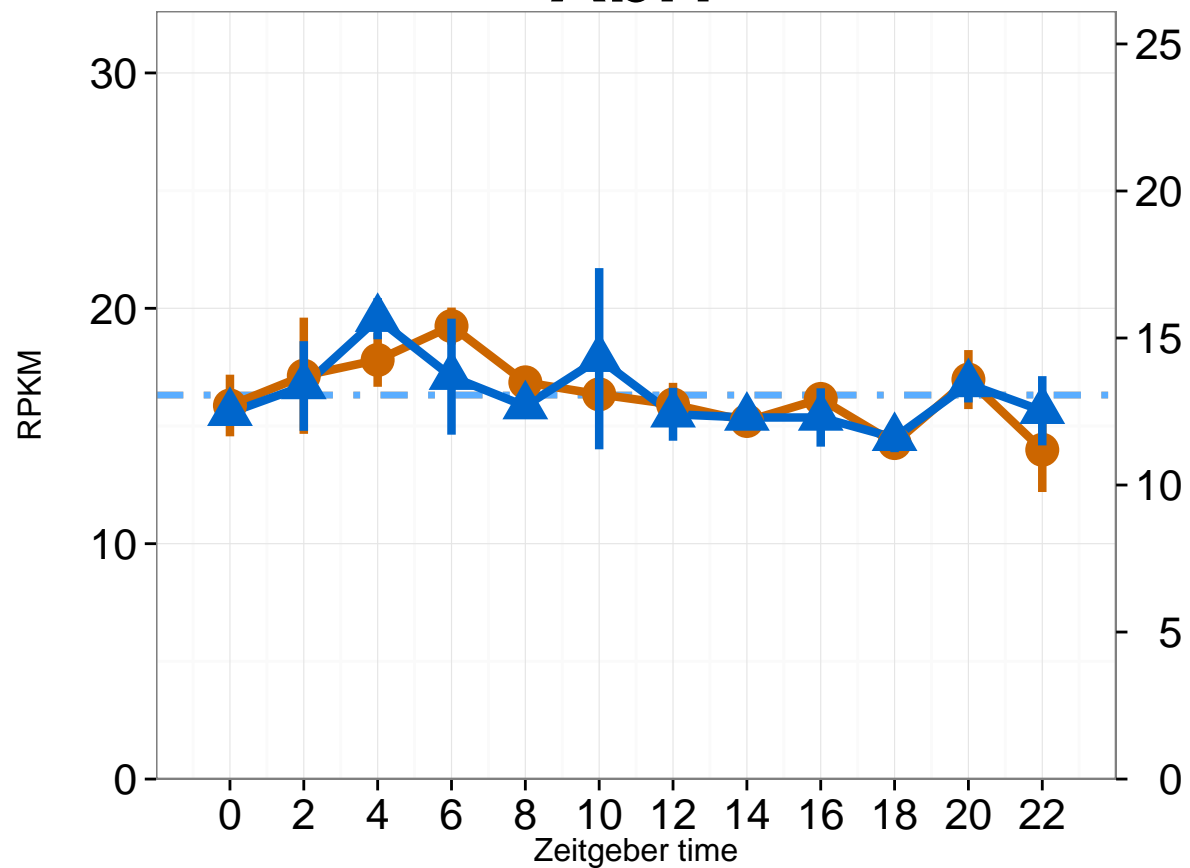

## Abi1

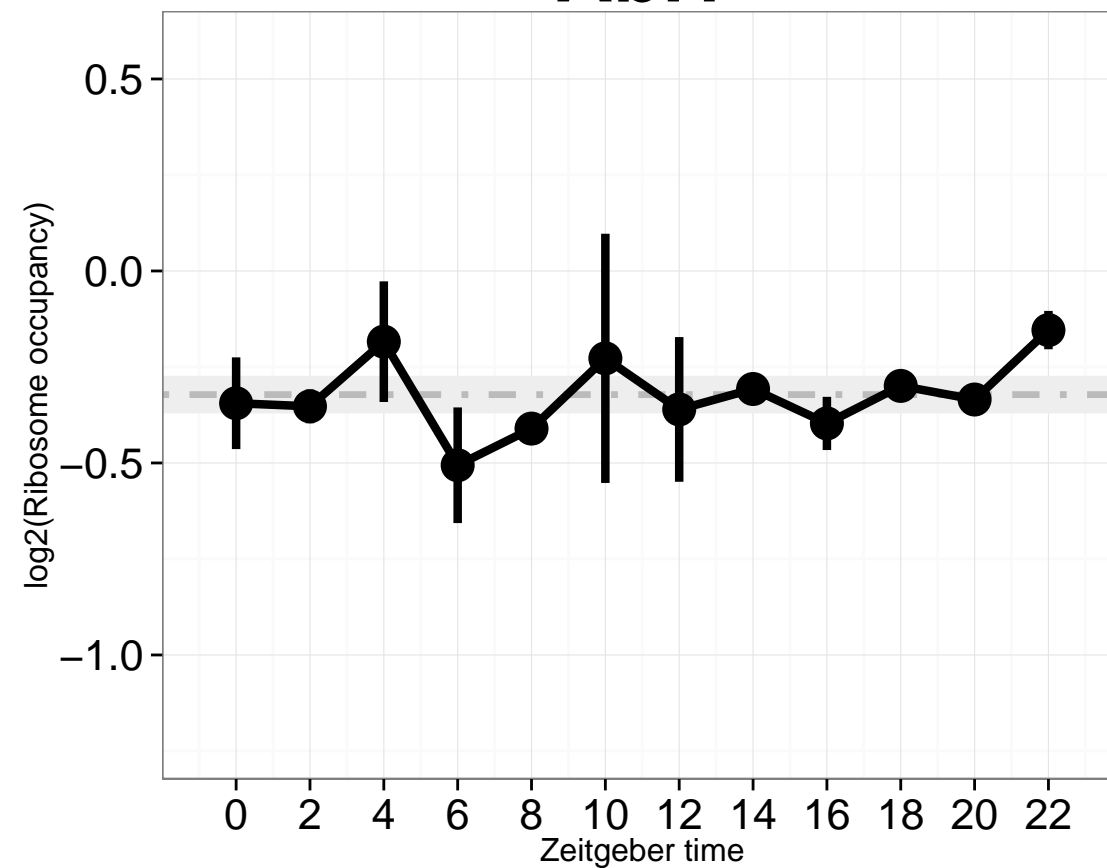

Supplement: SuppDataset_1.zip [file Abi1_set_A.pdf › Supplemental Dataset 1/A-mRNA_nonrhyth_translation_nonrhyth/Abi1_set_A.pdf]

## Abi2

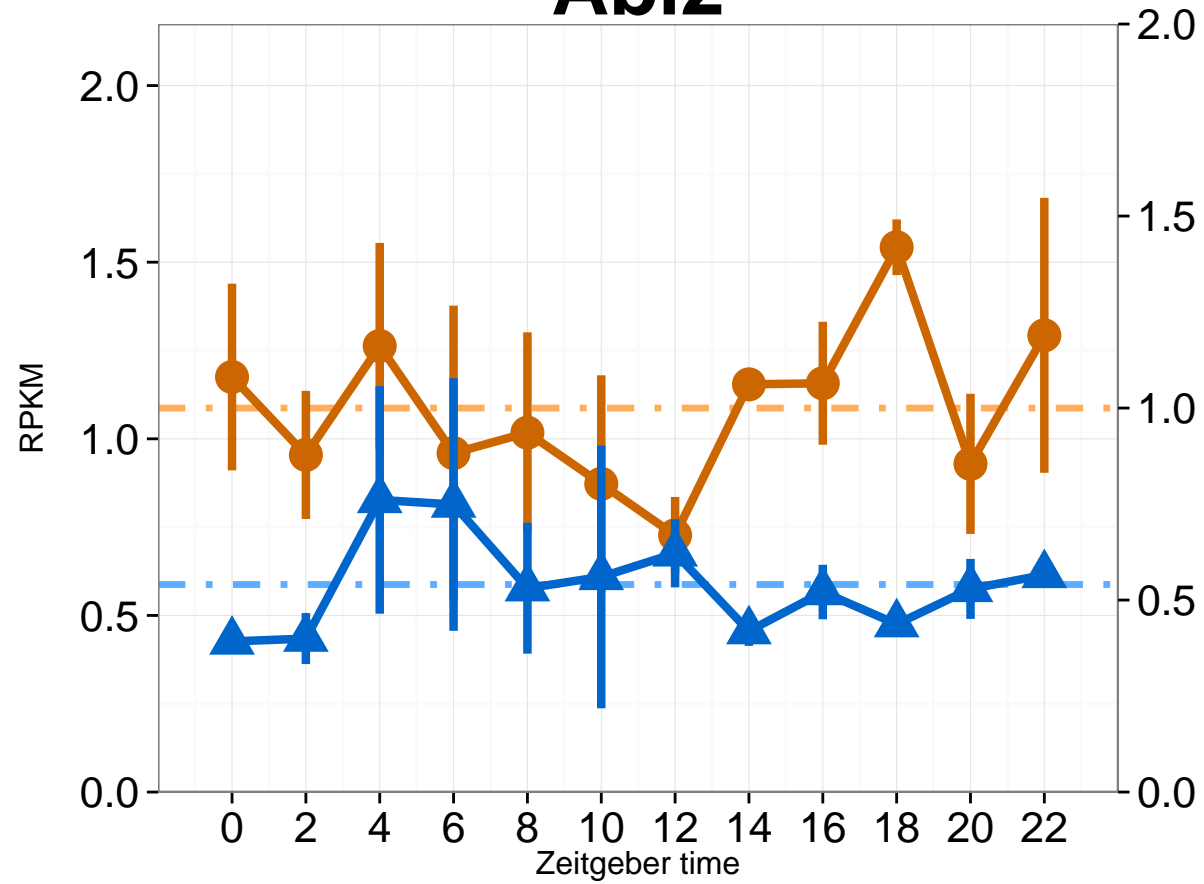

## Abi2

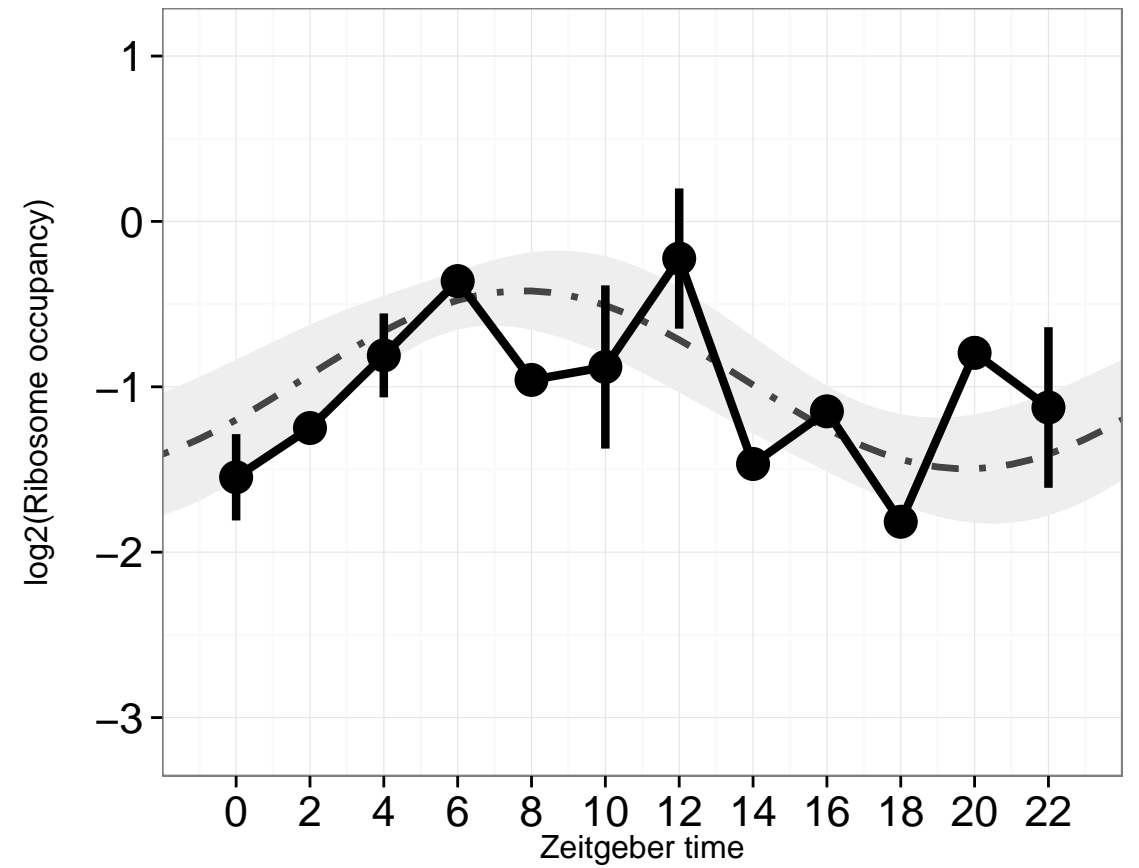

Supplement: SuppDataset_1.zip [file Abi2_set_A.pdf › Supplemental Dataset 1/A-mRNA_nonrhyth_translation_nonrhyth/Abi2_set_A.pdf]

## Abi3

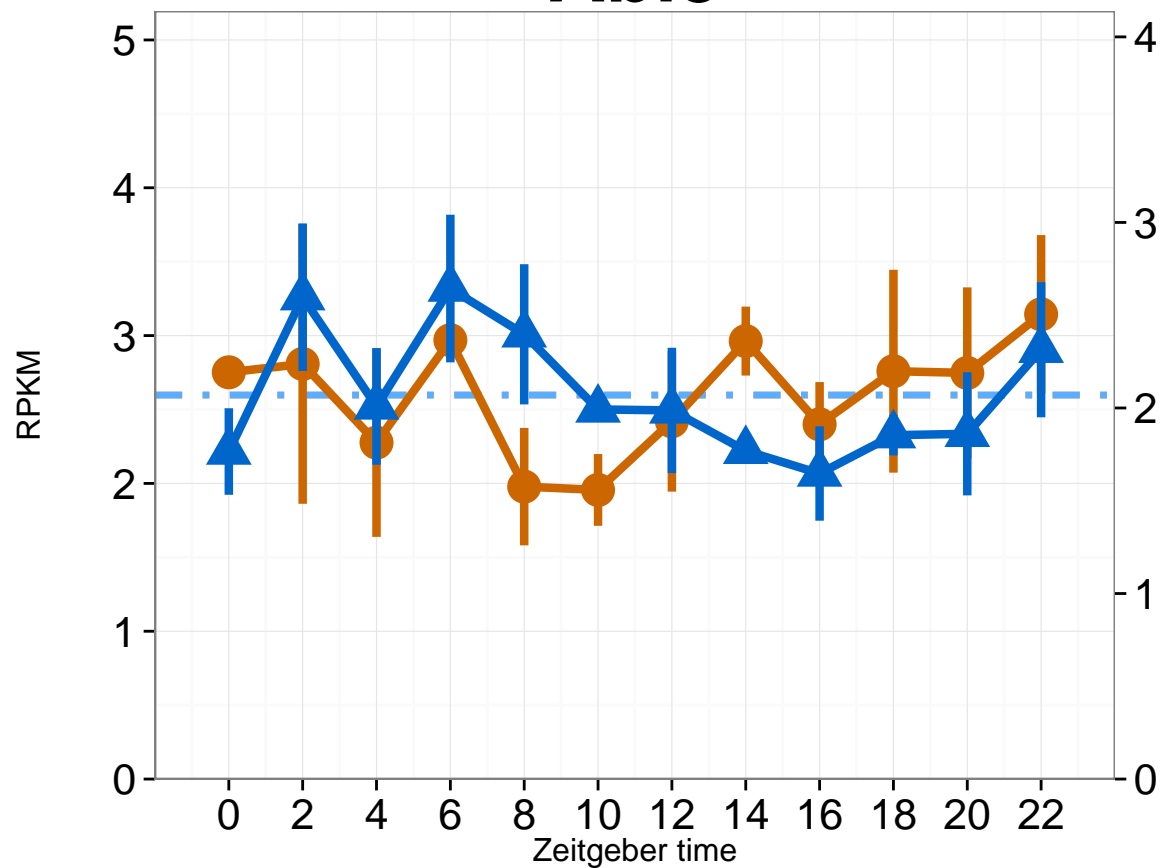

## Abi3

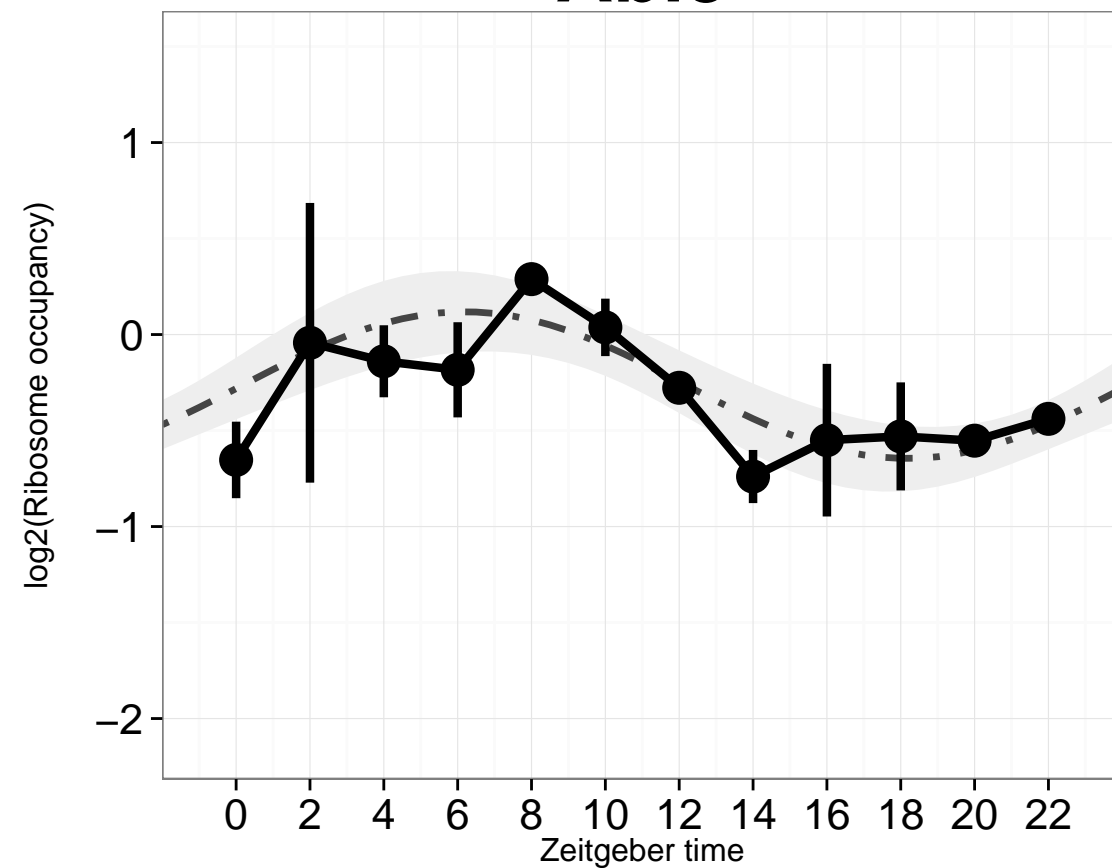

Supplement: SuppDataset_1.zip [file Abi3_set_A.pdf › Supplemental Dataset 1/A-mRNA_nonrhyth_translation_nonrhyth/Abi3_set_A.pdf]

## Abi3bp

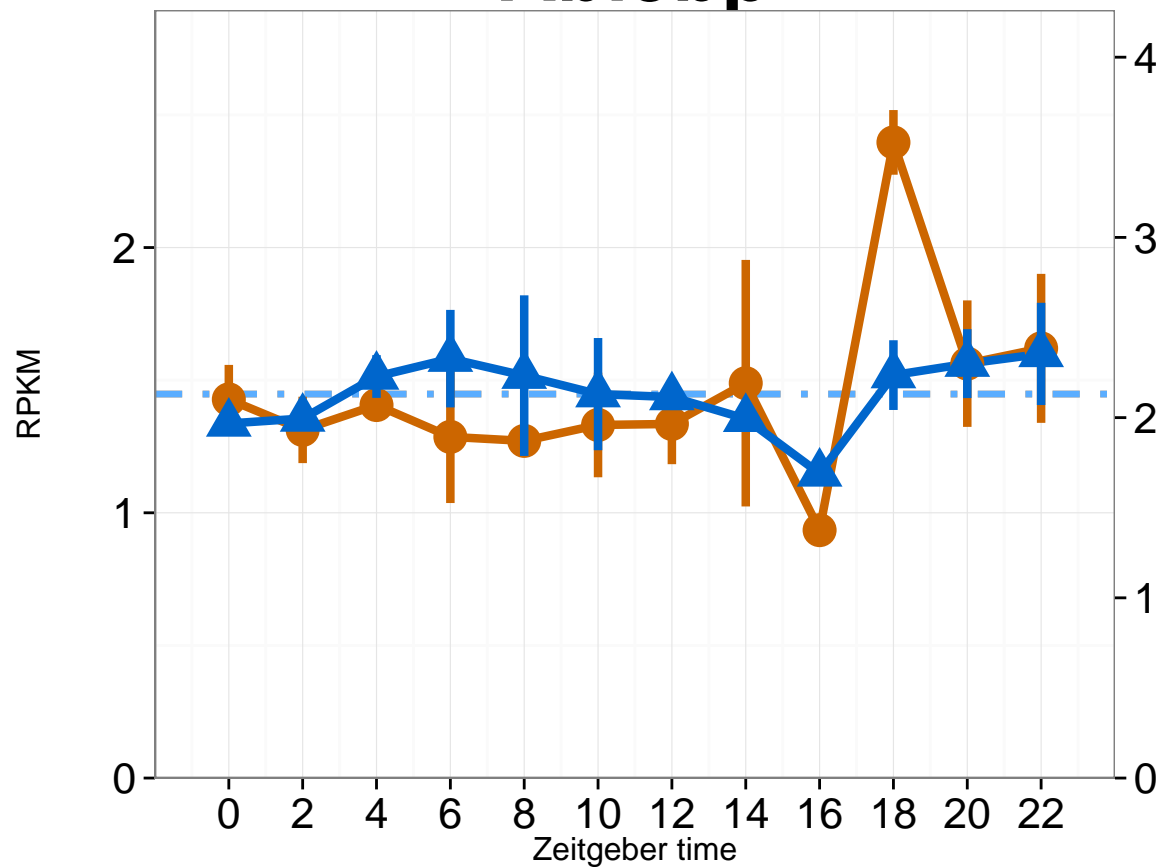

## Abi3bp

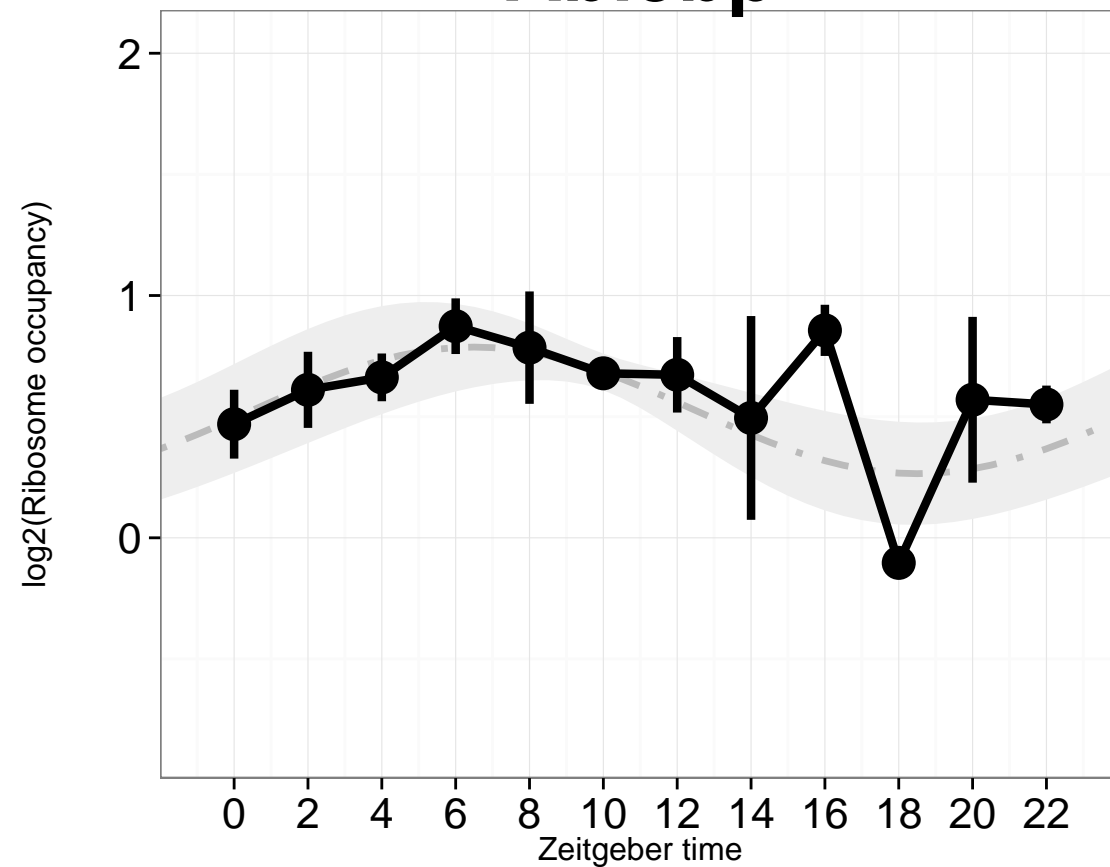

Supplement: SuppDataset_1.zip [file Abi3bp_set_A.pdf › Supplemental Dataset 1/A-mRNA_nonrhyth_translation_nonrhyth/Abi3bp_set_A.pdf]

## AbI1

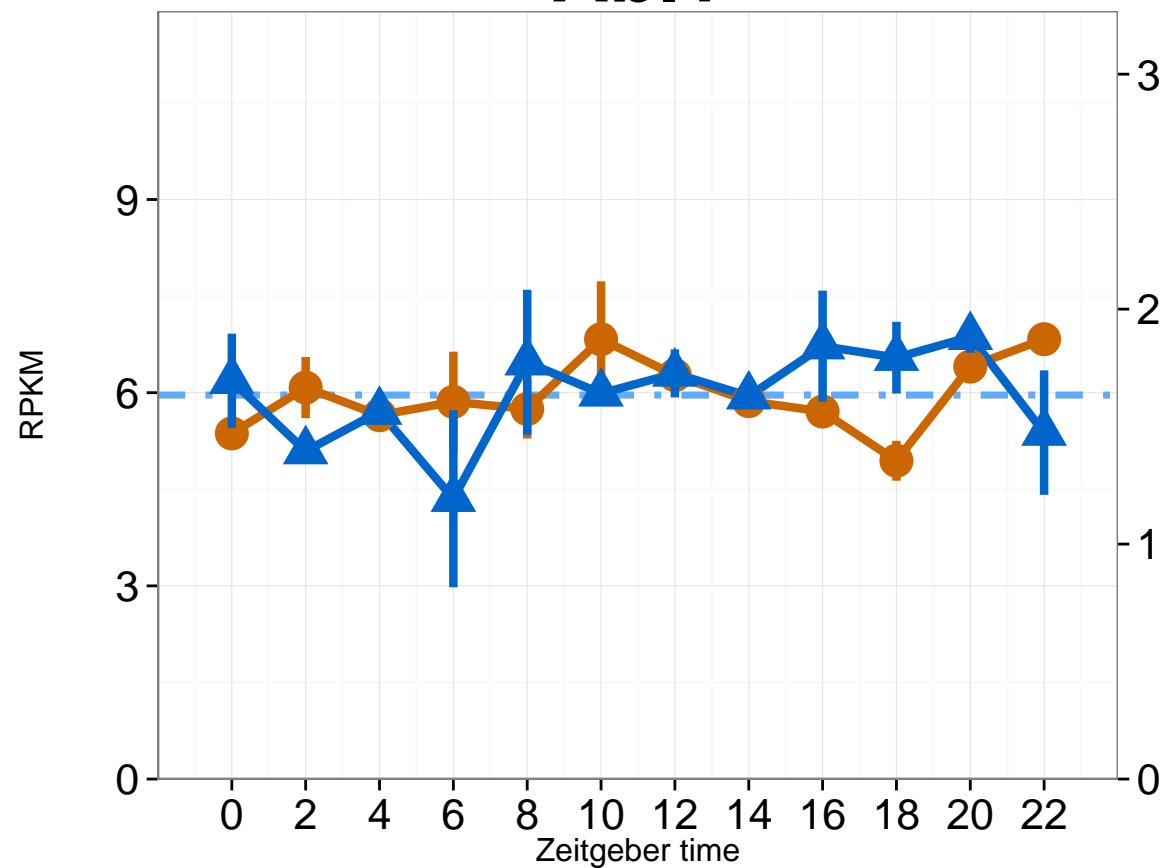

## AbI1

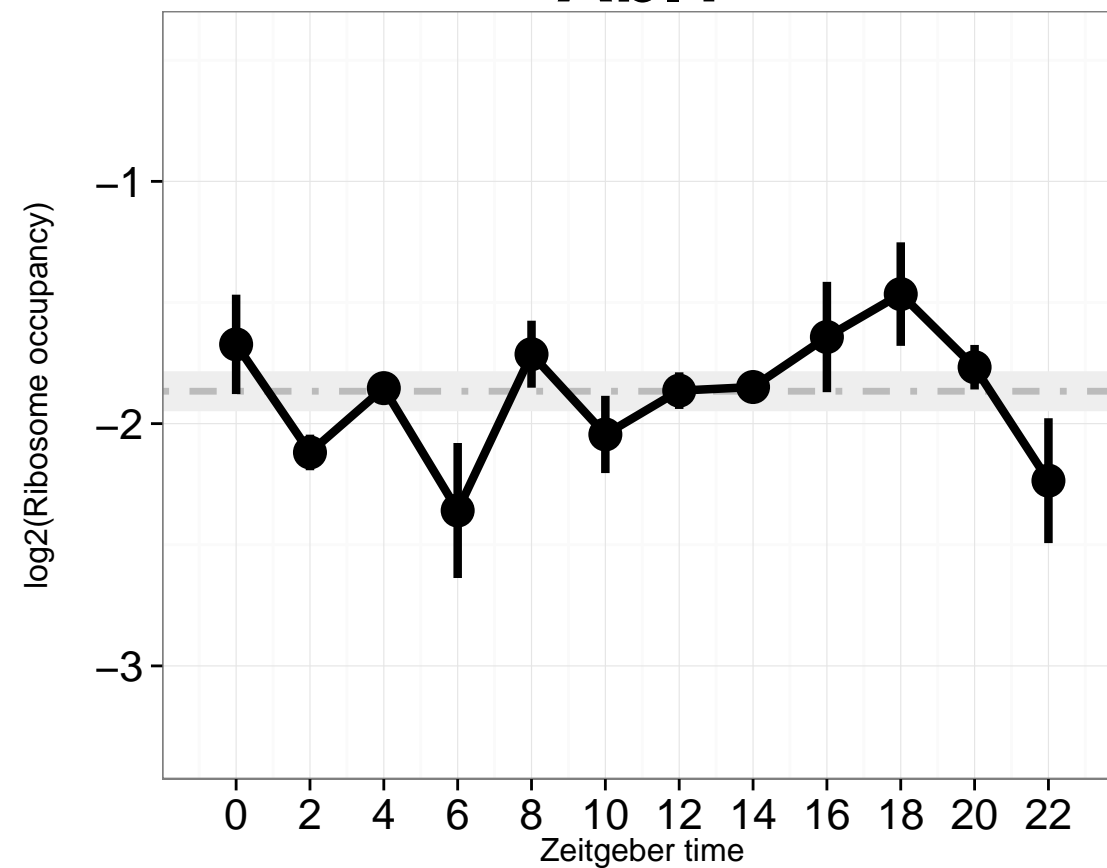

Supplement: SuppDataset_1.zip [file Abl1_set_A.pdf › Supplemental Dataset 1/A-mRNA_nonrhyth_translation_nonrhyth/Abl1_set_A.pdf]

## Abl2

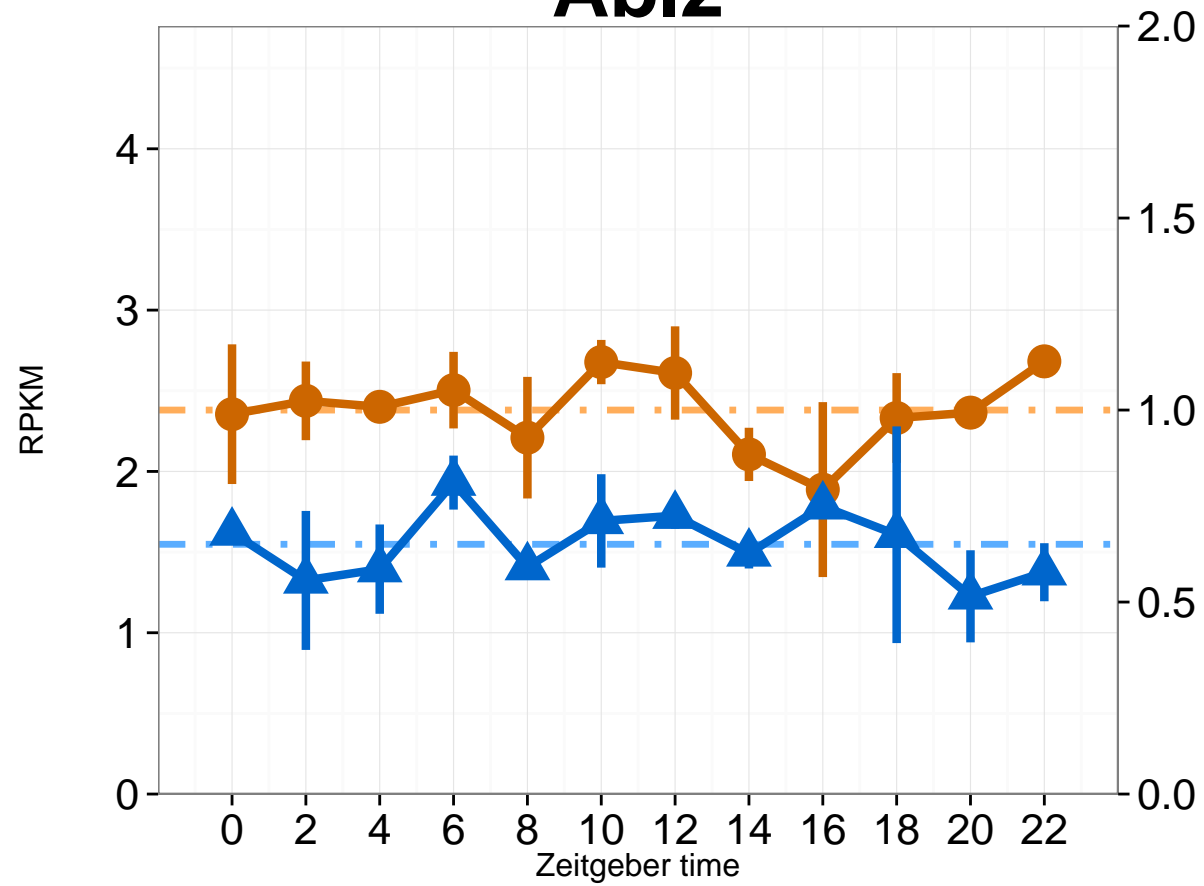

## Abl2

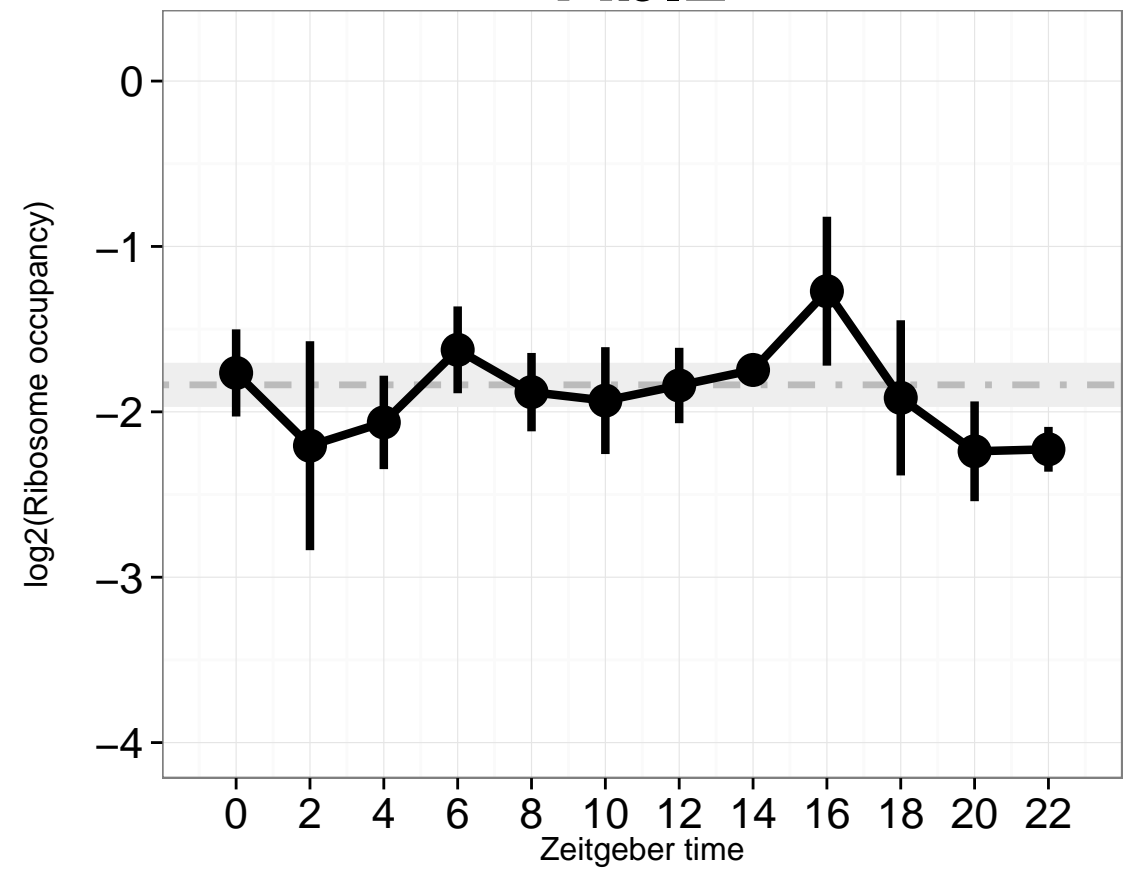

Supplement: SuppDataset_1.zip [file Abl2_set_A.pdf › Supplemental Dataset 1/A-mRNA_nonrhyth_translation_nonrhyth/Abl2_set_A.pdf]

## Ablim2

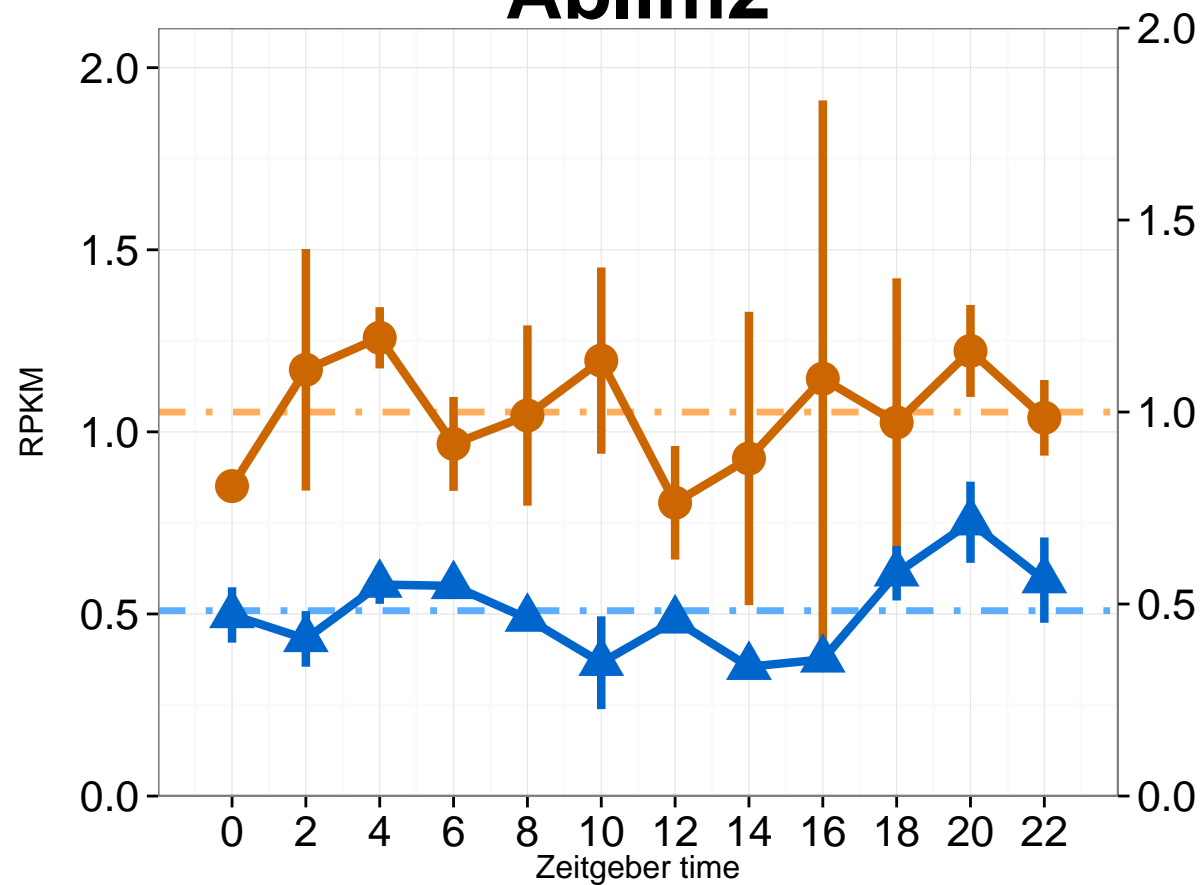

## Ablim2

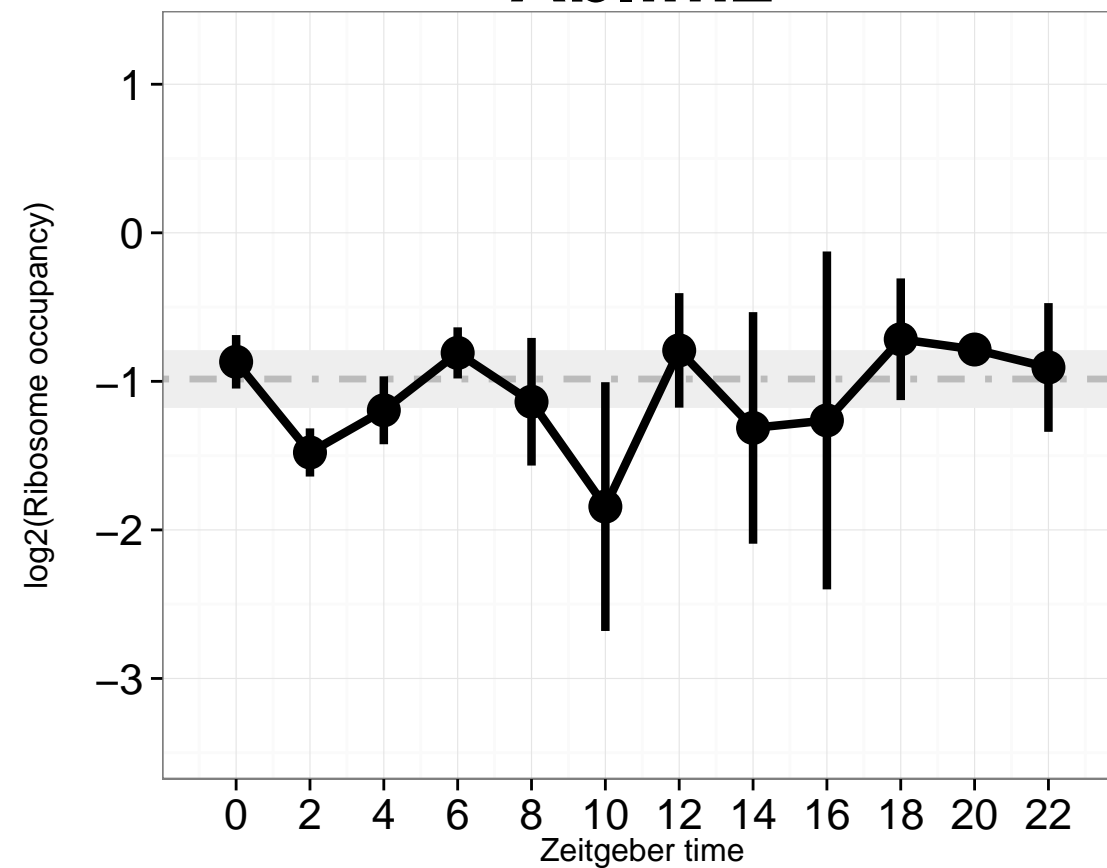

Supplement: SuppDataset_1.zip [file Ablim2_set_A.pdf › Supplemental Dataset 1/A-mRNA_nonrhyth_translation_nonrhyth/Ablim2_set_A.pdf]

# Abr

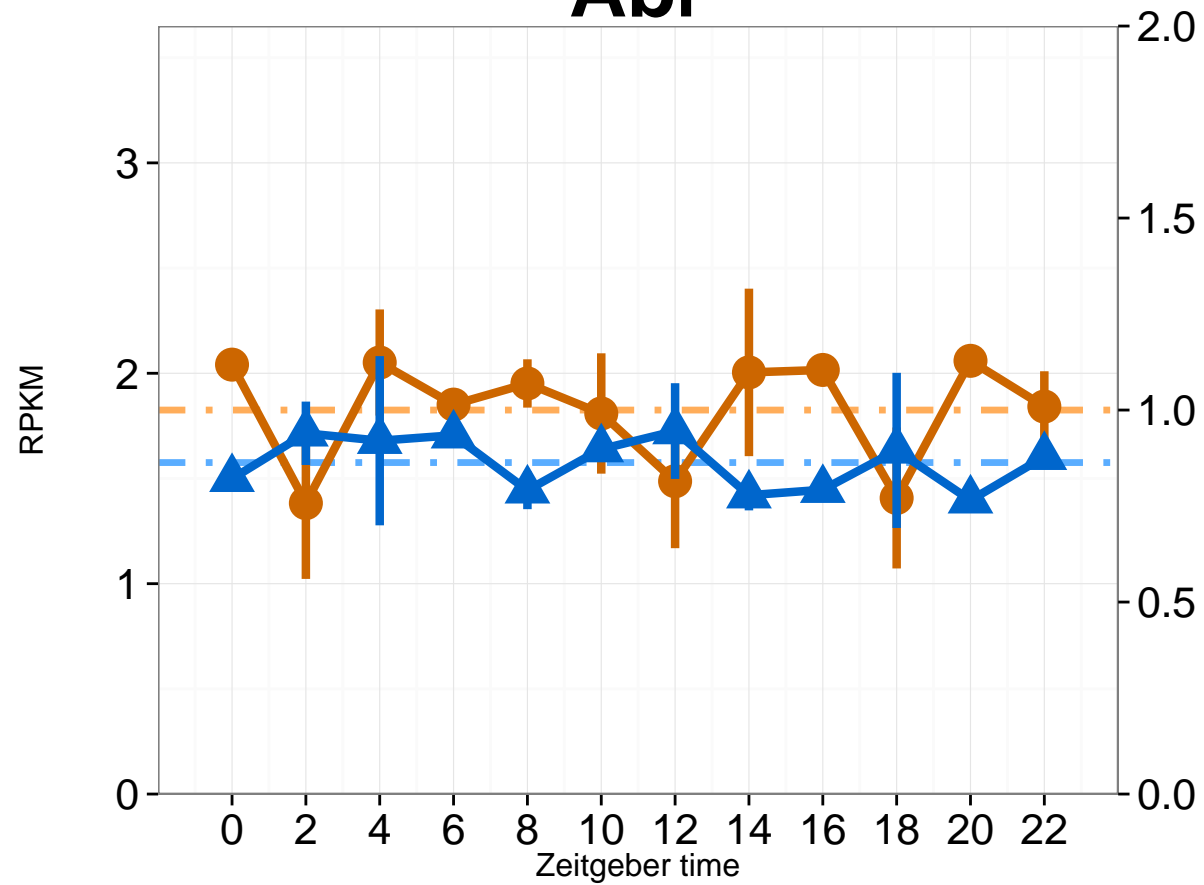

# Abr

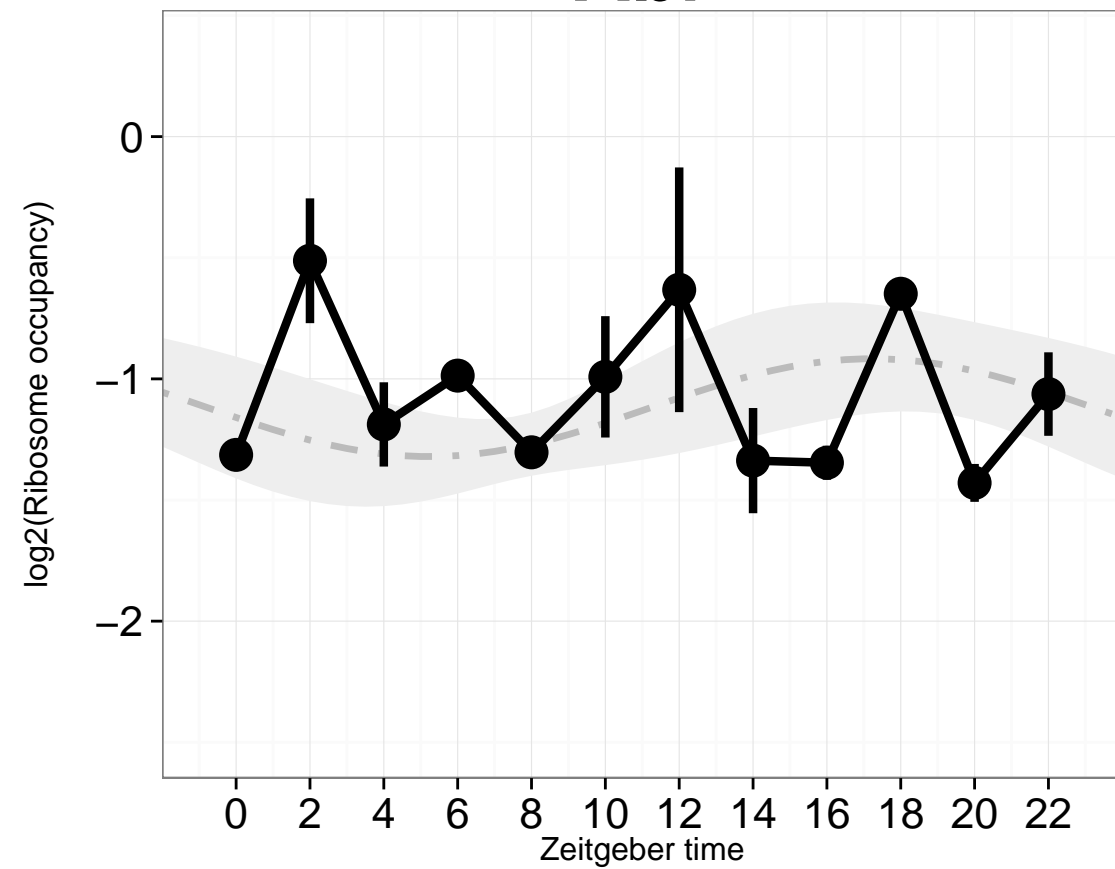

Supplement: SuppDataset_1.zip [file Abr_set_A.pdf › Supplemental Dataset 1/A-mRNA_nonrhyth_translation_nonrhyth/Abr_set_A.pdf]

## Abraci

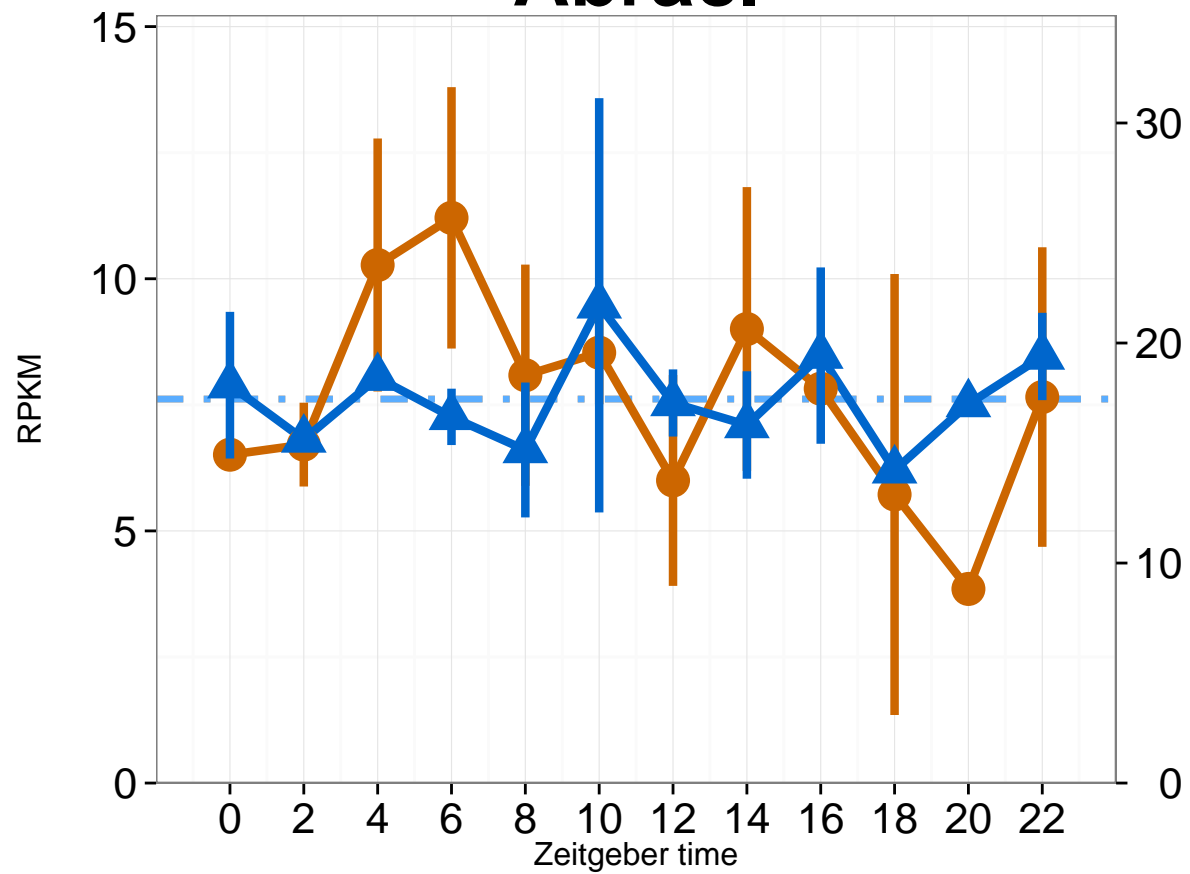

## Abraci

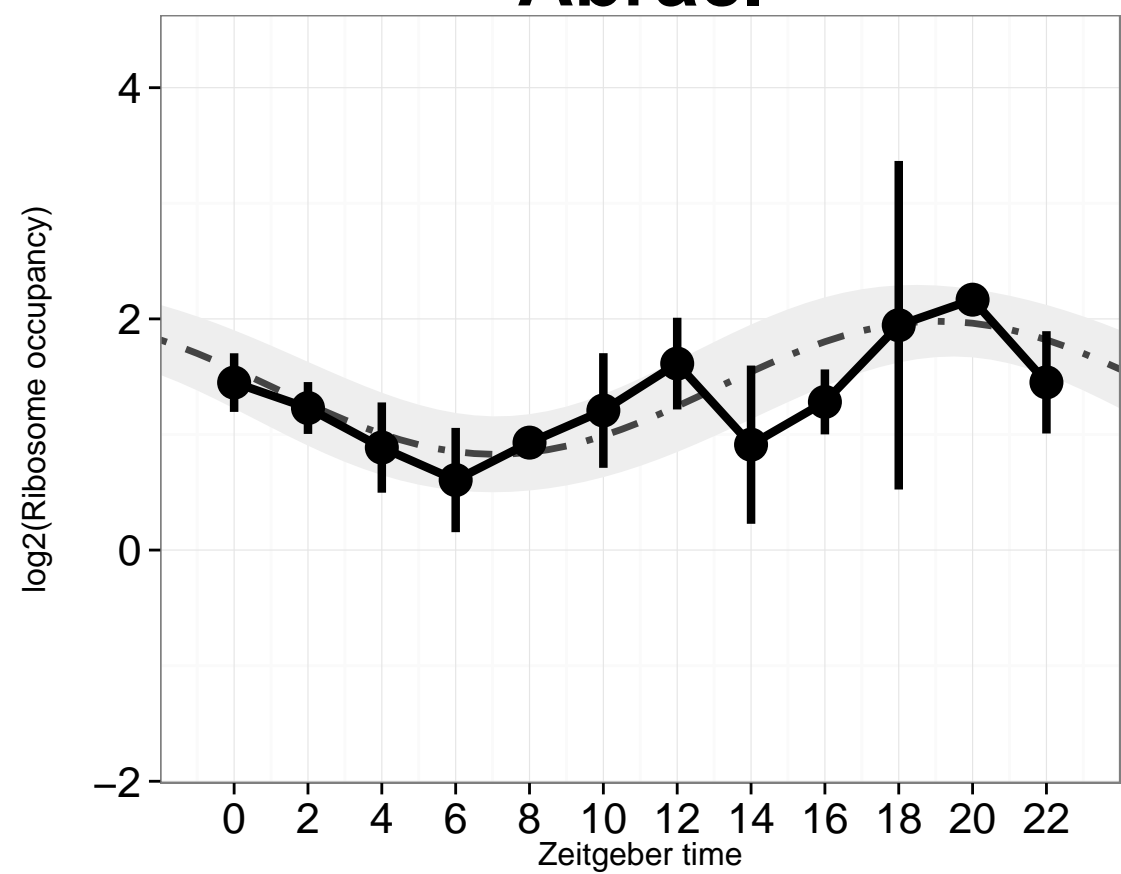

Supplement: SuppDataset_1.zip [file Abracl_set_A.pdf › Supplemental Dataset 1/A-mRNA_nonrhyth_translation_nonrhyth/Abracl_set_A.pdf]

## Abt1

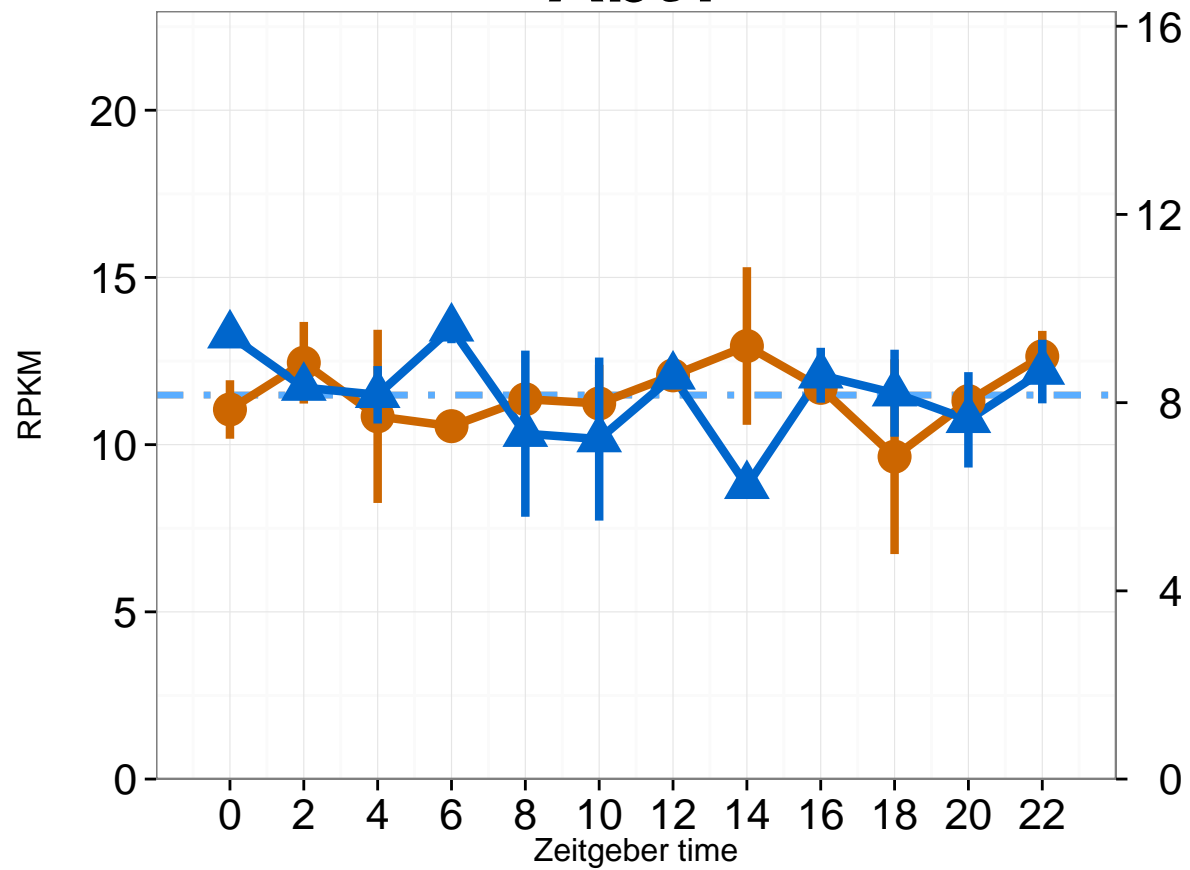

## Abt1

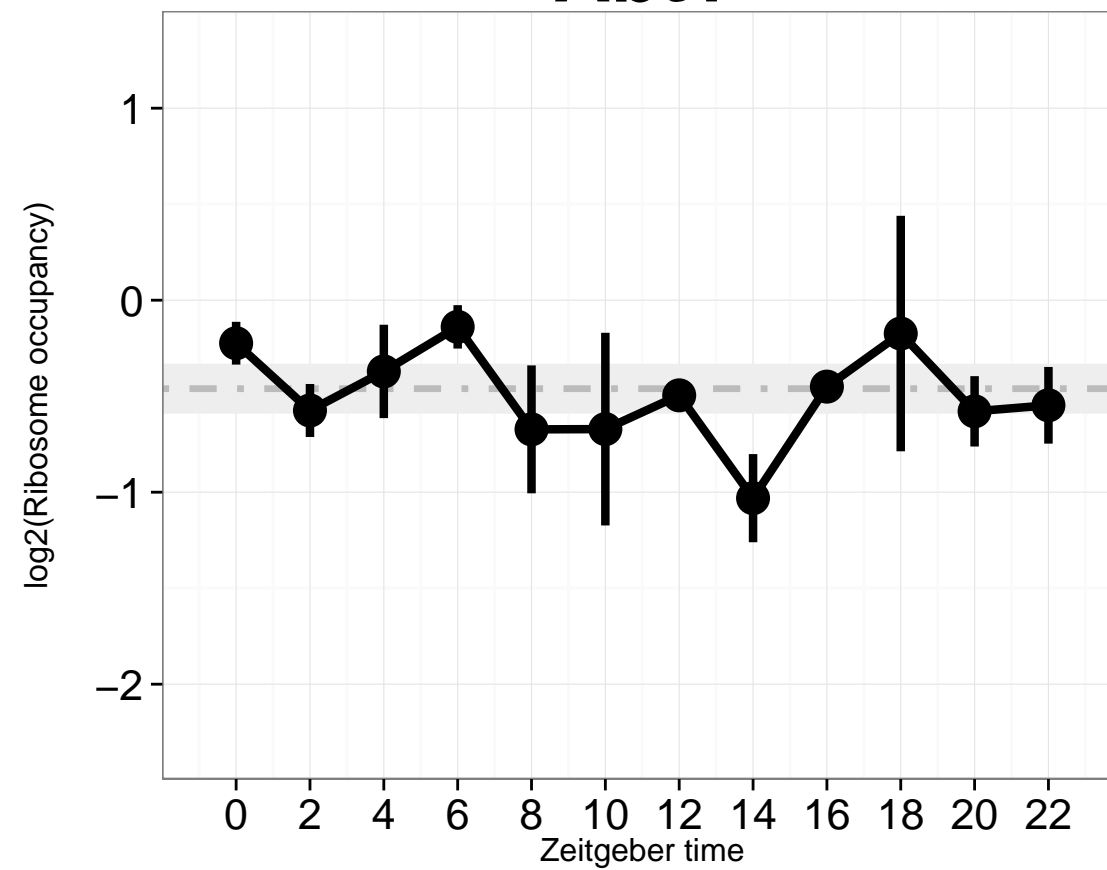

Supplement: SuppDataset_1.zip [file Abt1_set_A.pdf › Supplemental Dataset 1/A-mRNA_nonrhyth_translation_nonrhyth/Abt1_set_A.pdf]

# Acaa1b

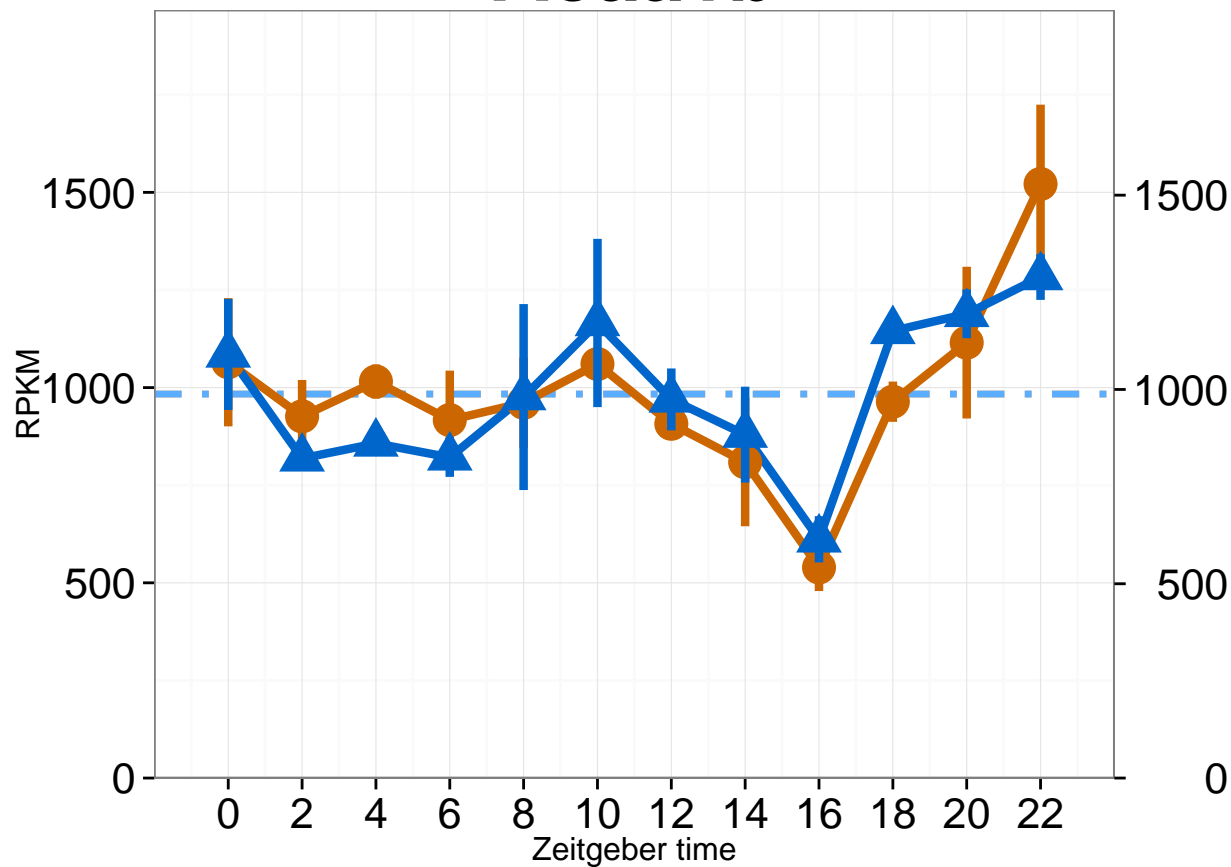

# Acaa1b

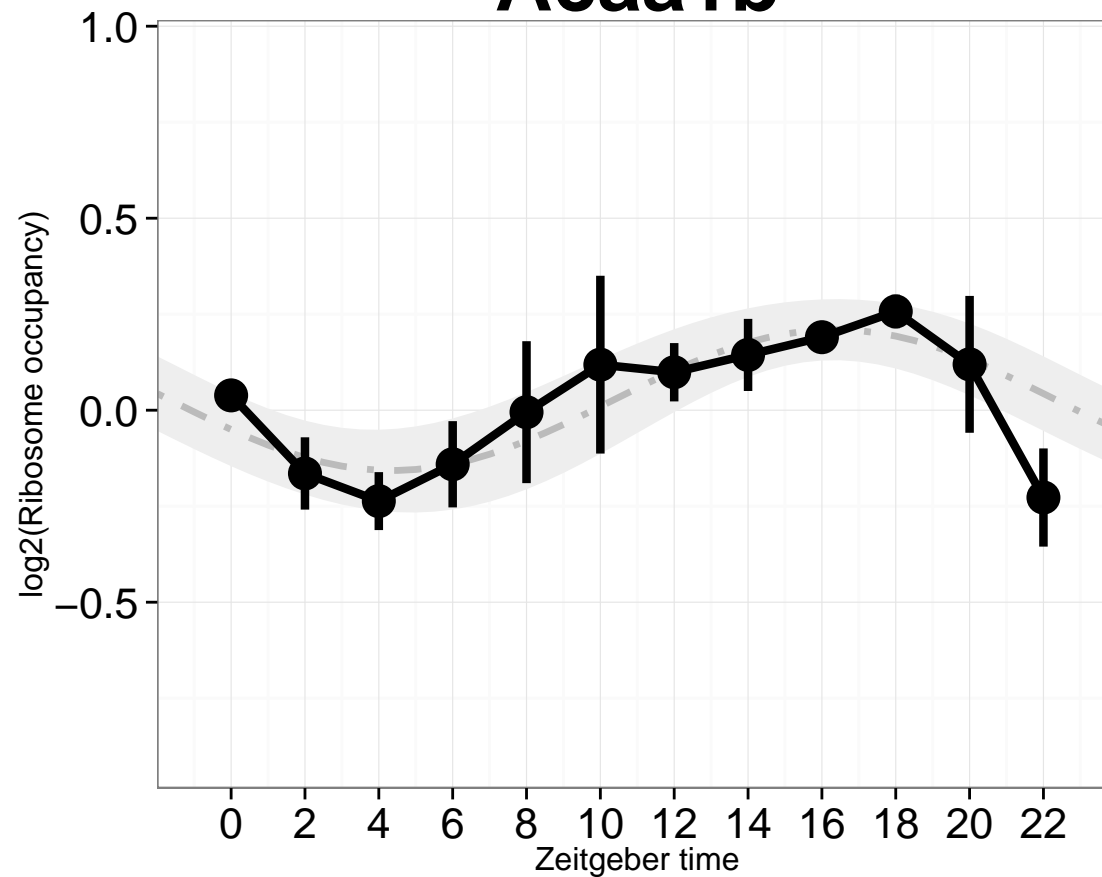

Supplement: SuppDataset_1.zip [file Acaa1b_set_A.pdf › Supplemental Dataset 1/A-mRNA_nonrhyth_translation_nonrhyth/Acaa1b_set_A.pdf]

## Acaa2

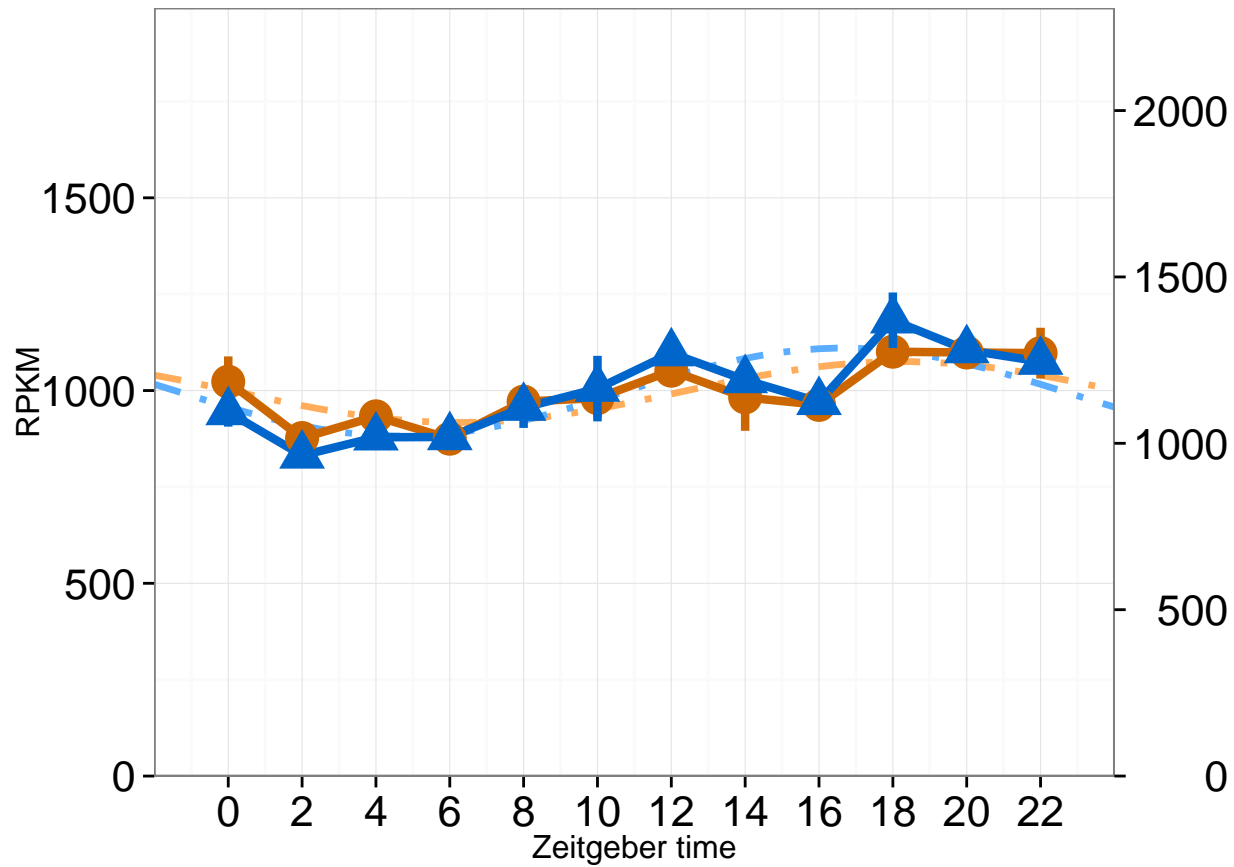

## Acaa2

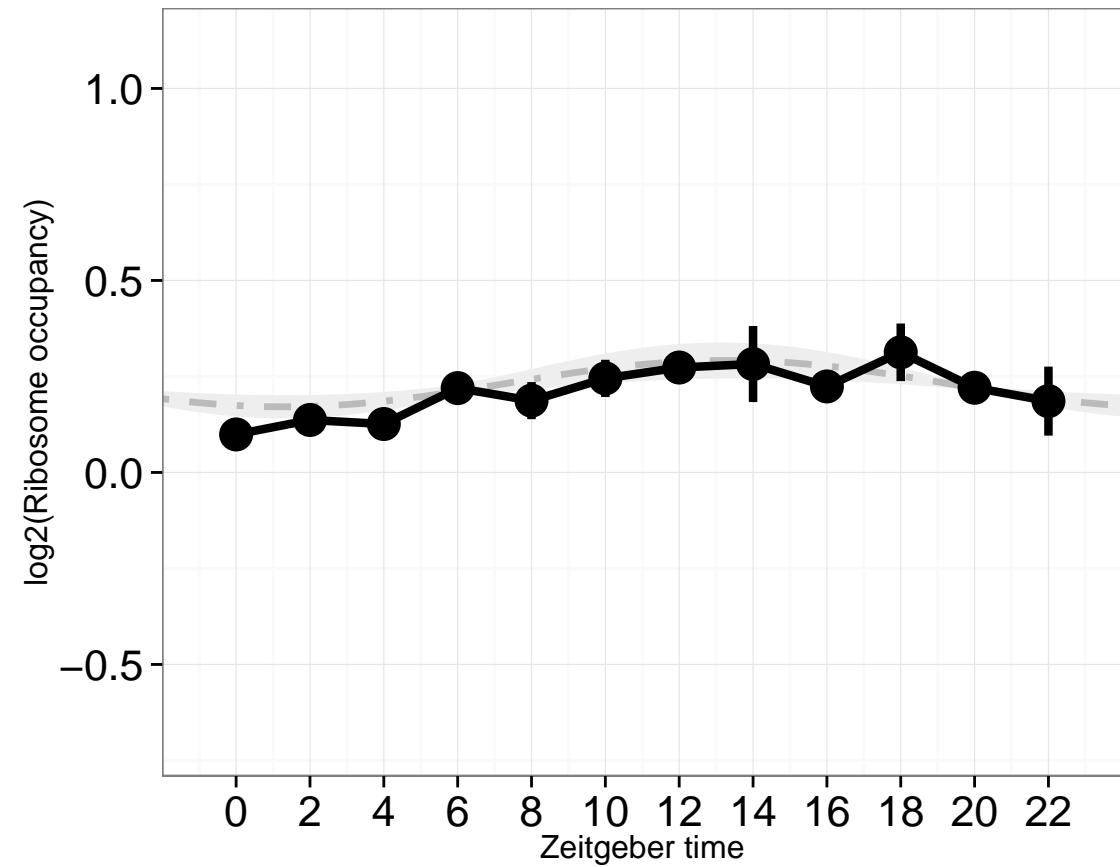

Supplement: SuppDataset_1.zip [file Acaa2_set_A.pdf › Supplemental Dataset 1/A-mRNA_nonrhyth_translation_nonrhyth/Acaa2_set_A.pdf]

## Acad11

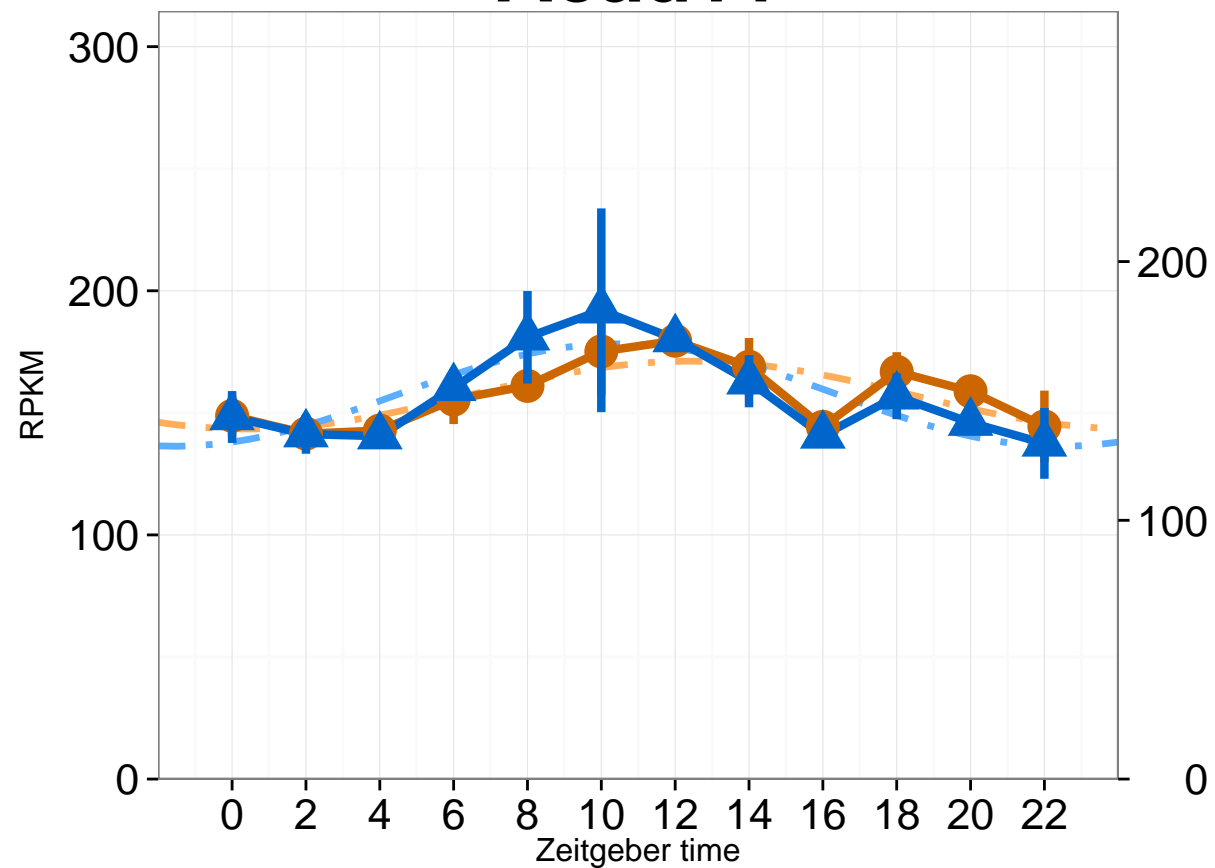

## Acad11

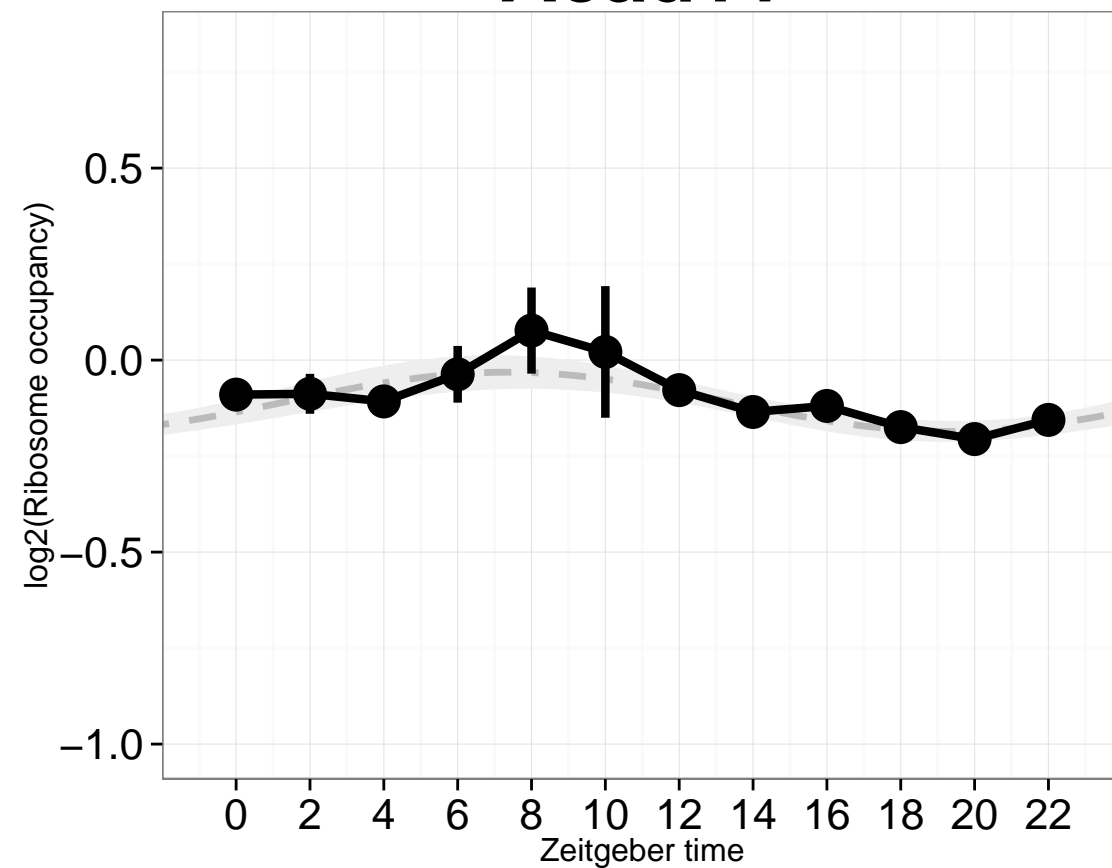

Supplement: SuppDataset_1.zip [file Acad11_set_A.pdf › Supplemental Dataset 1/A-mRNA_nonrhyth_translation_nonrhyth/Acad11_set_A.pdf]

## Acad8

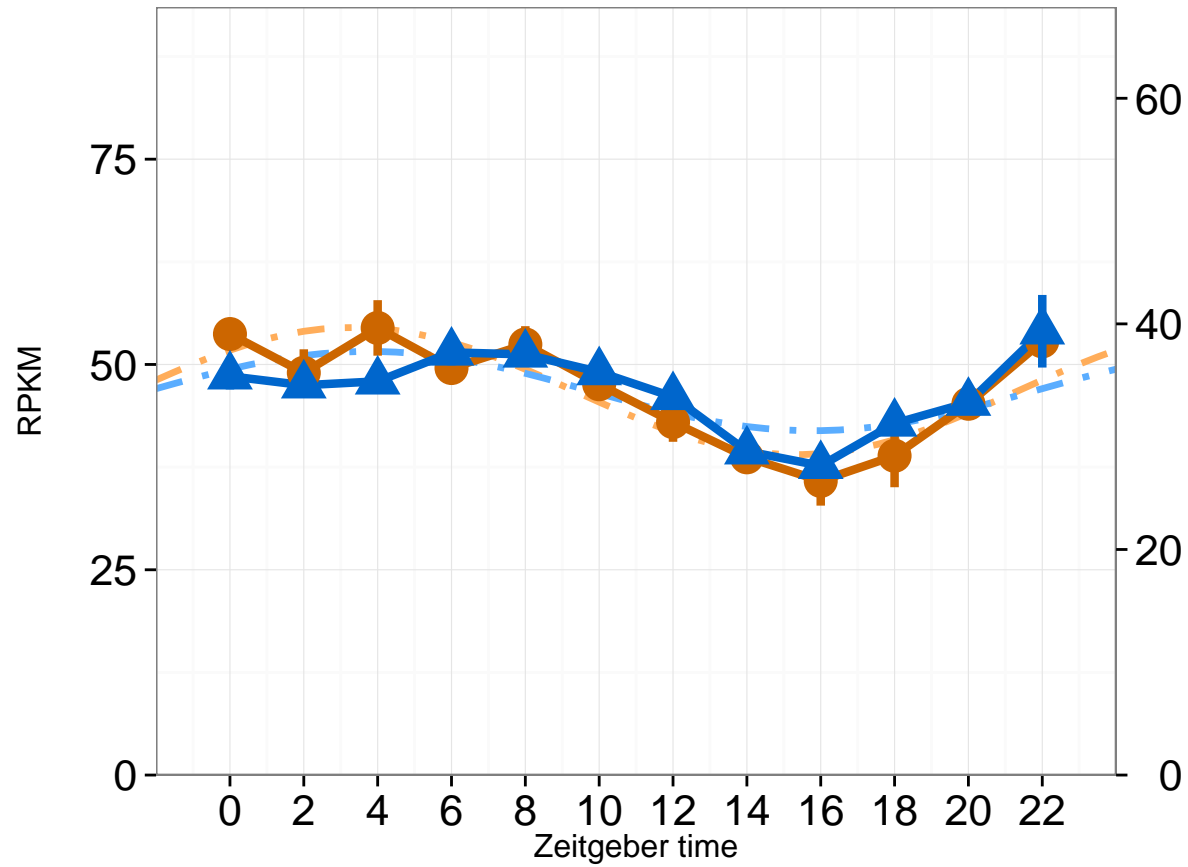

## Acad8

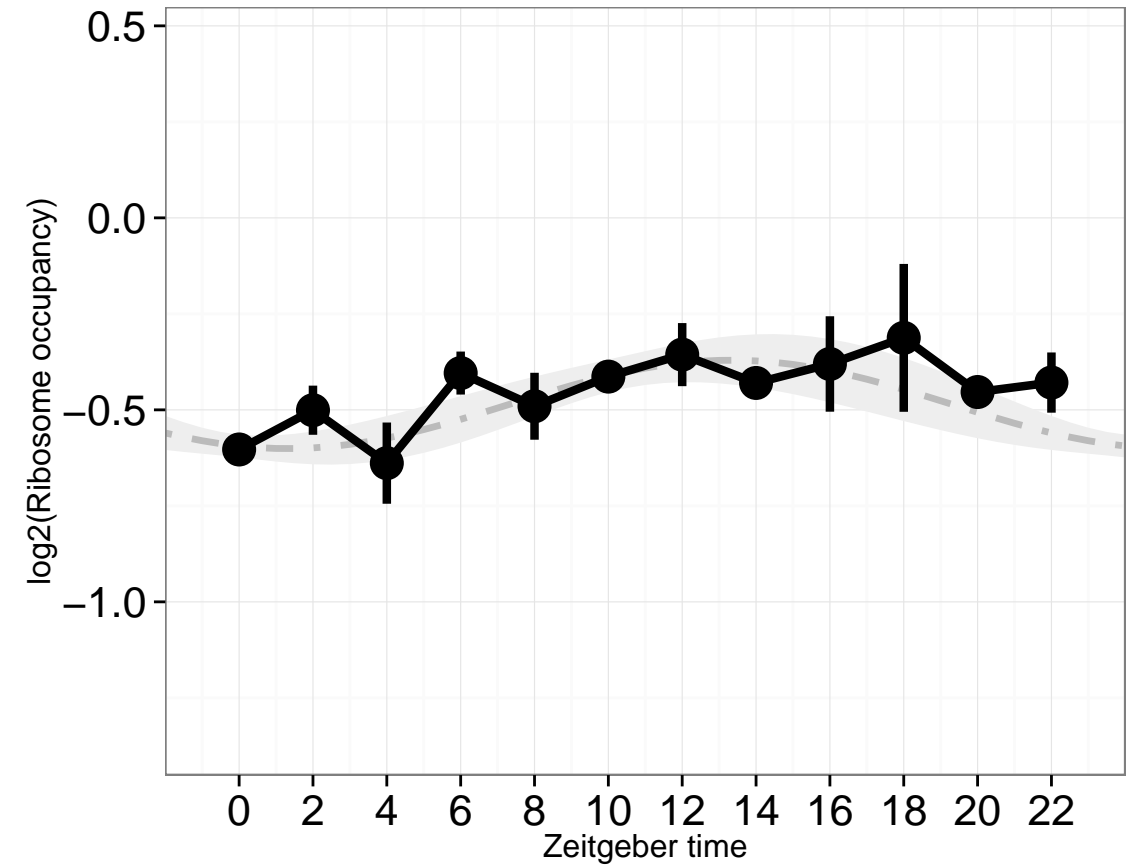

Supplement: SuppDataset_1.zip [file Acad8_set_A.pdf › Supplemental Dataset 1/A-mRNA_nonrhyth_translation_nonrhyth/Acad8_set_A.pdf]

## Acad9

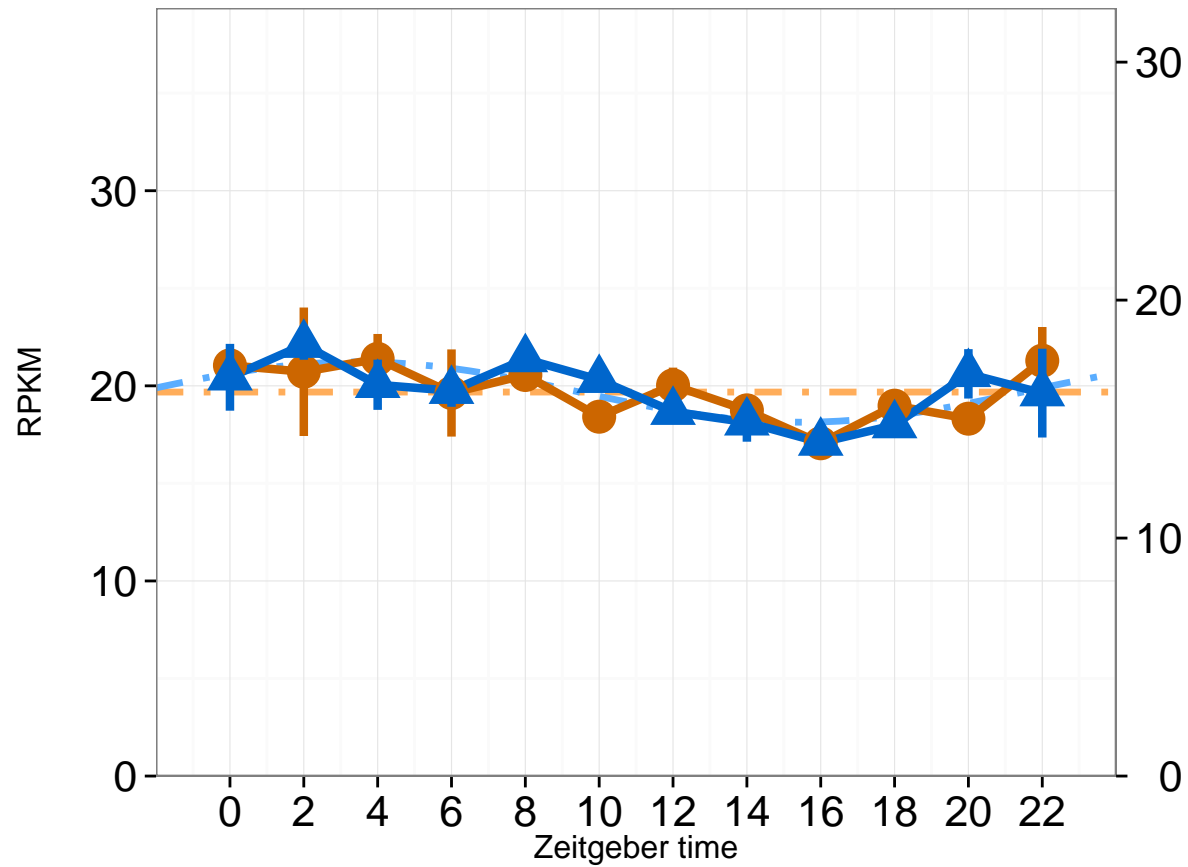

## Acad9

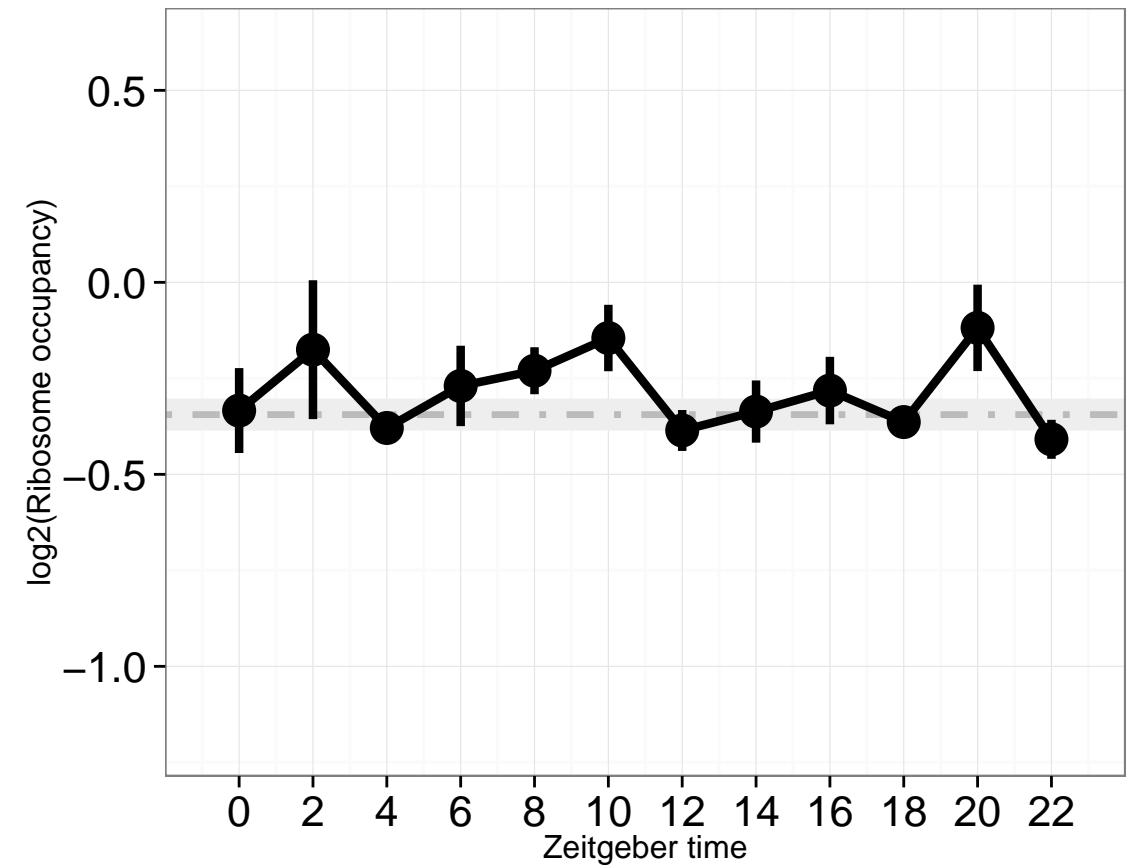

Supplement: SuppDataset_1.zip [file Acad9_set_A.pdf › Supplemental Dataset 1/A-mRNA_nonrhyth_translation_nonrhyth/Acad9_set_A.pdf]

## Acadl

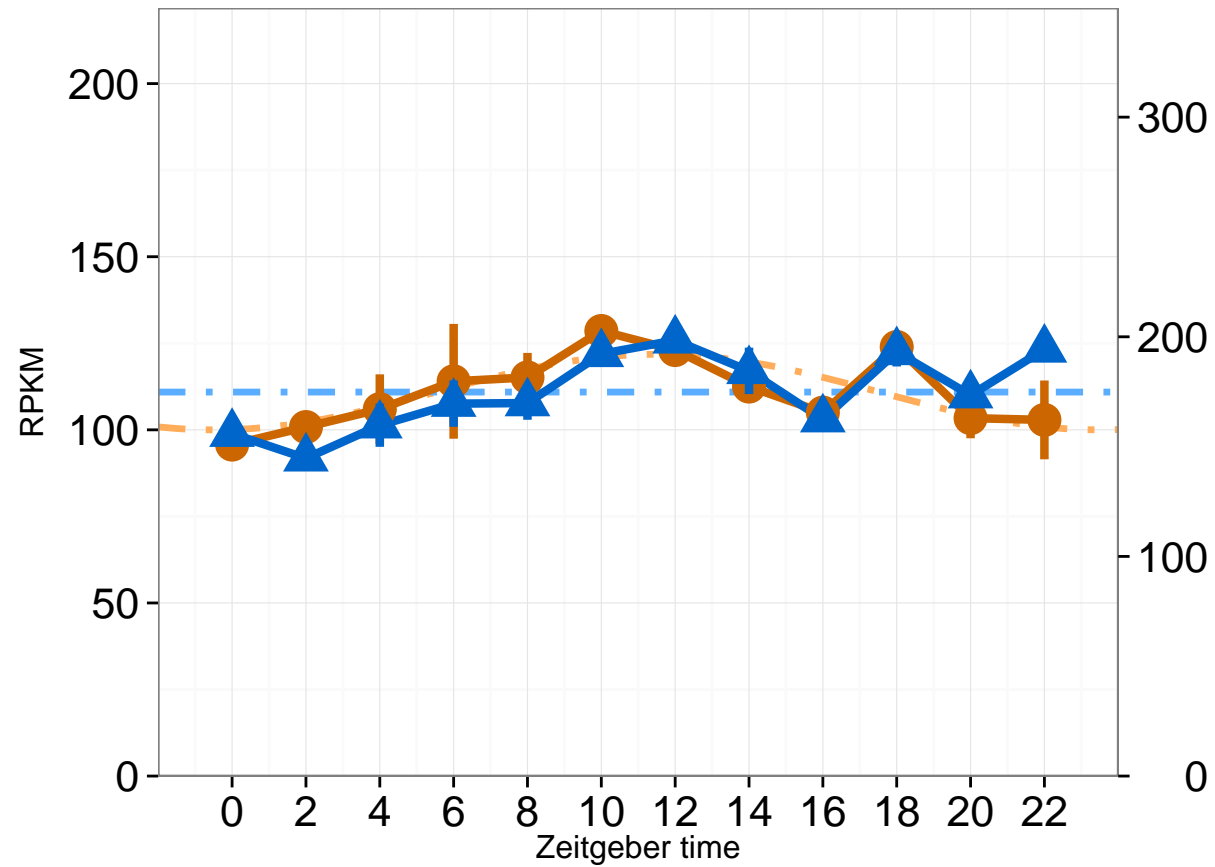

## Acadl

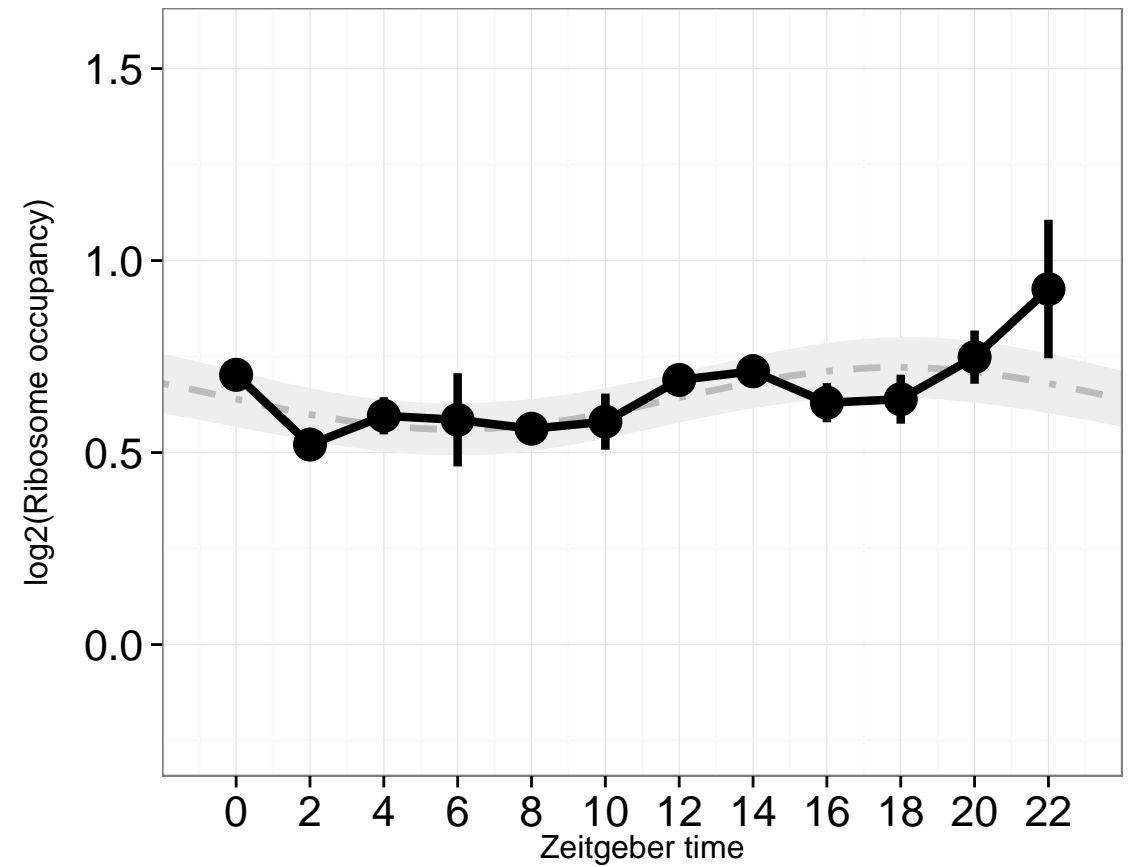

Supplement: SuppDataset_1.zip [file Acadl_set_A.pdf › Supplemental Dataset 1/A-mRNA_nonrhyth_translation_nonrhyth/Acadl_set_A.pdf]

## Acadm

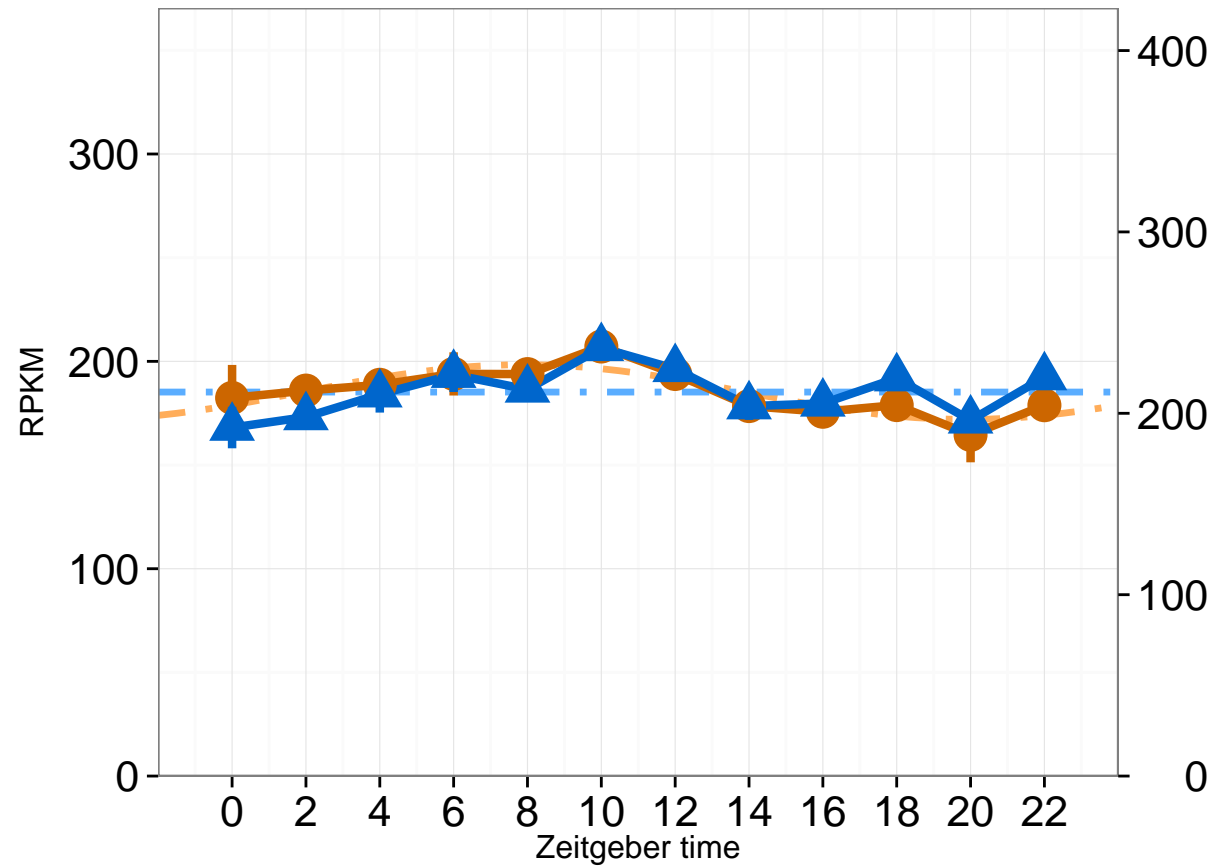

## Acadm

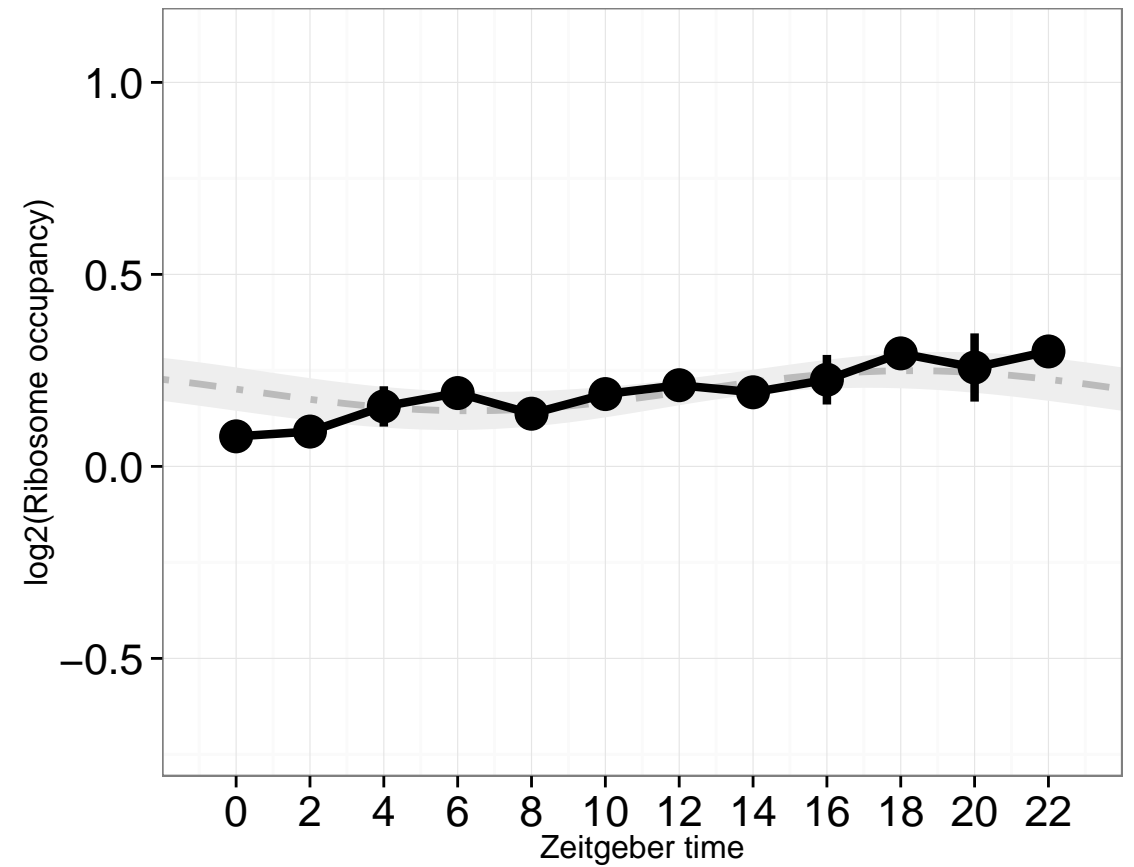

Supplement: SuppDataset_1.zip [file Acadm_set_A.pdf › Supplemental Dataset 1/A-mRNA_nonrhyth_translation_nonrhyth/Acadm_set_A.pdf]

## Acads

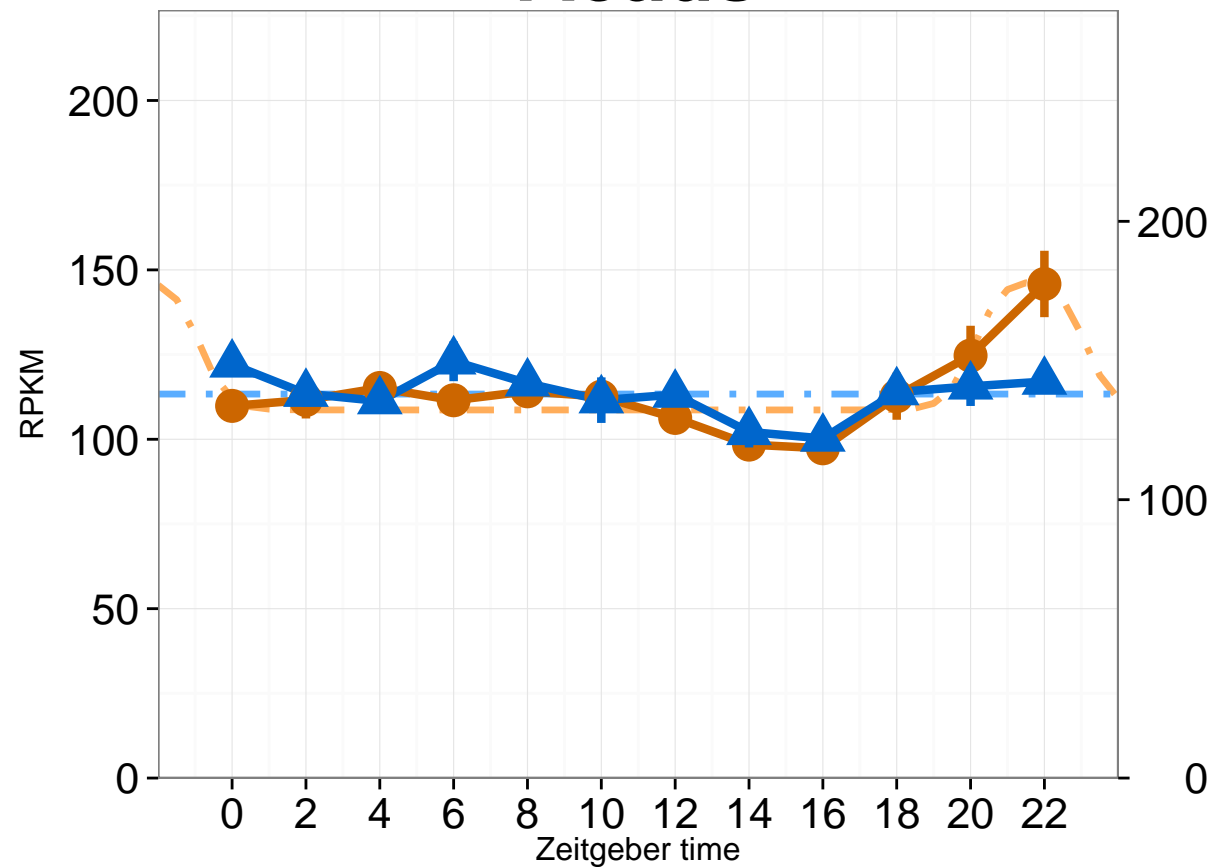

## Acads

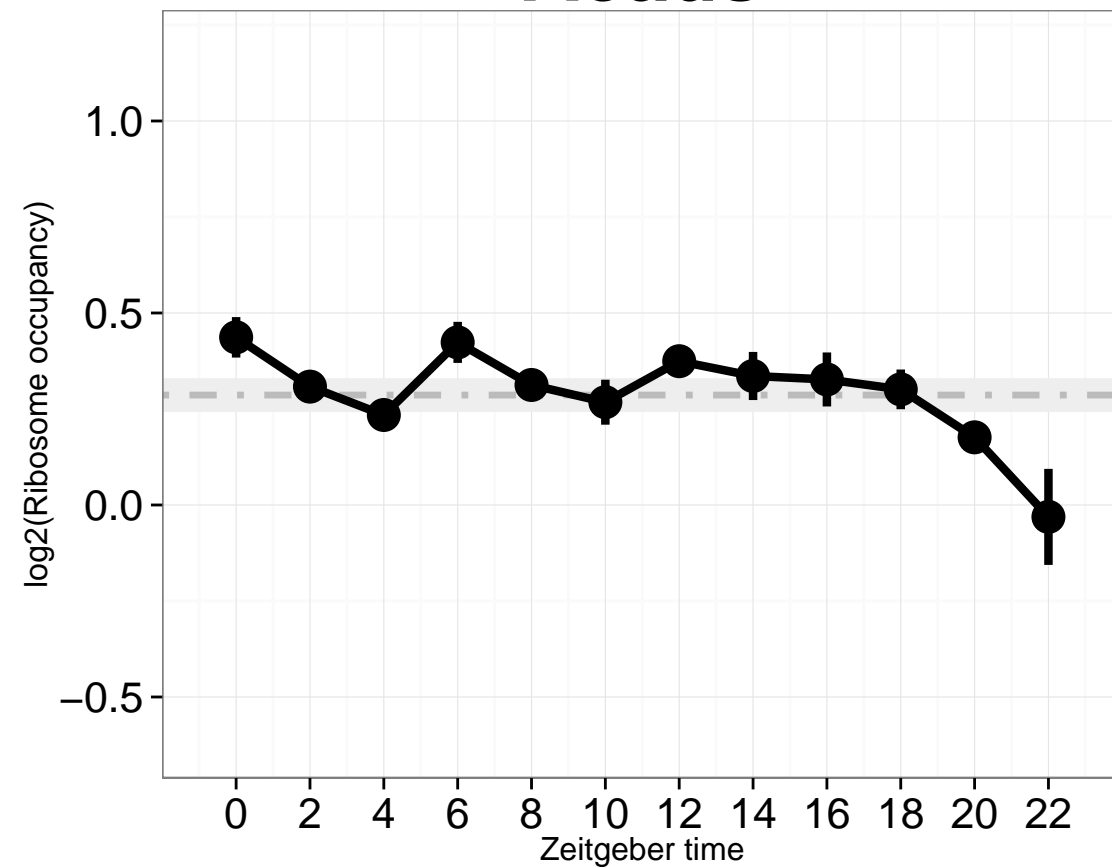

Supplement: SuppDataset_1.zip [file Acads_set_A.pdf › Supplemental Dataset 1/A-mRNA_nonrhyth_translation_nonrhyth/Acads_set_A.pdf]

## Acadsb

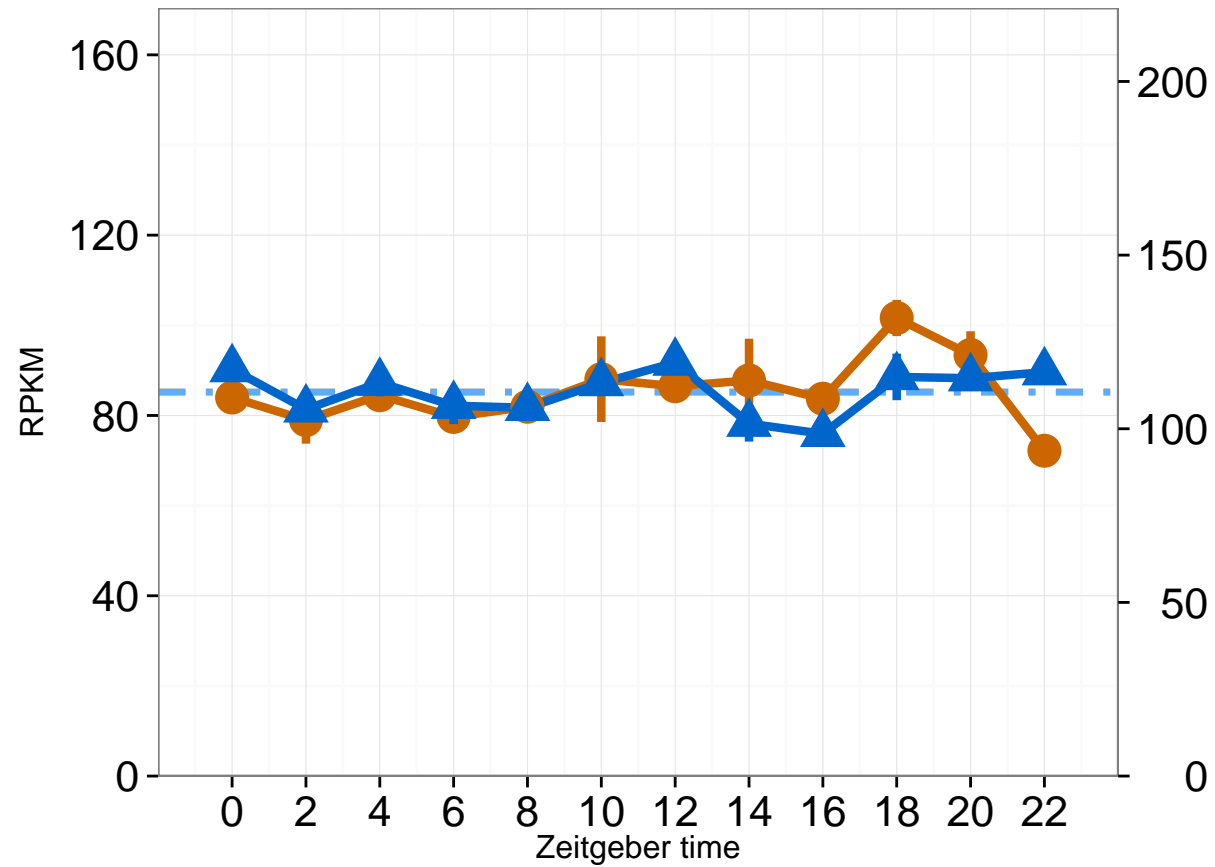

## Acadsb

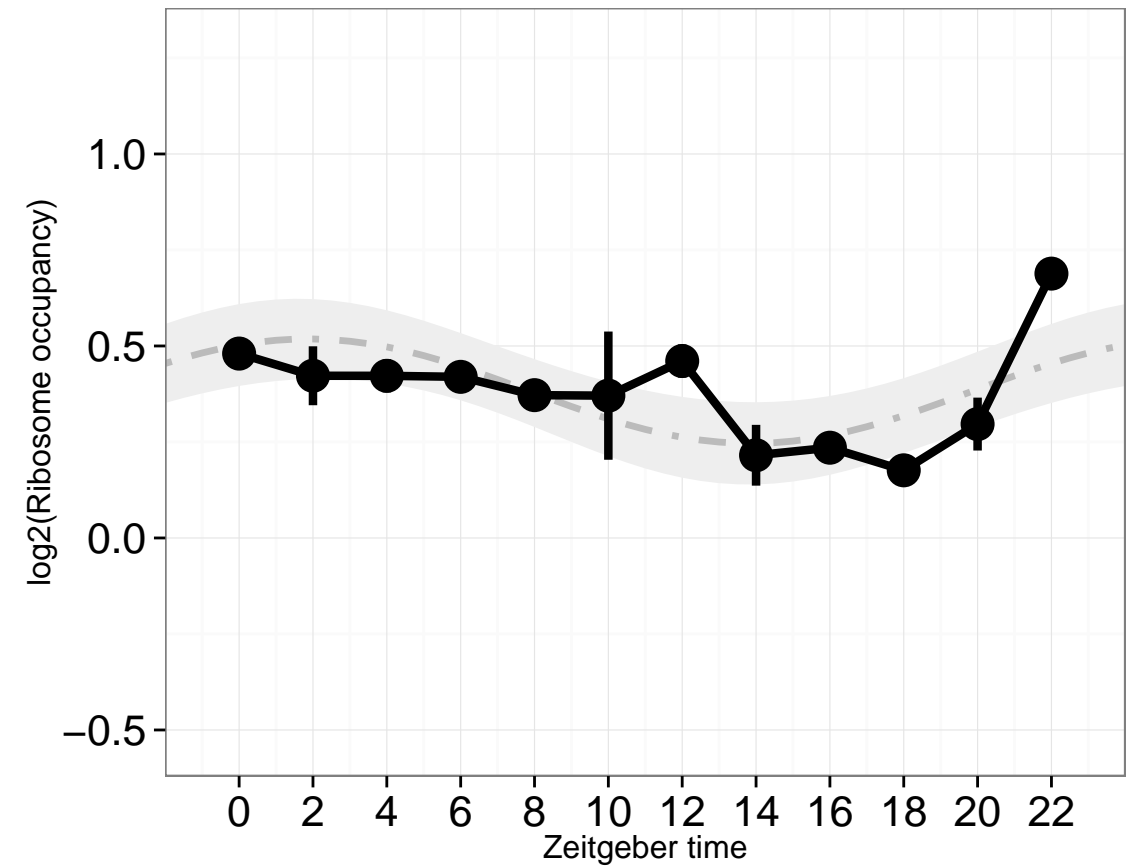

Supplement: SuppDataset_1.zip [file Acadsb_set_A.pdf › Supplemental Dataset 1/A-mRNA_nonrhyth_translation_nonrhyth/Acadsb_set_A.pdf]

## Acadvl

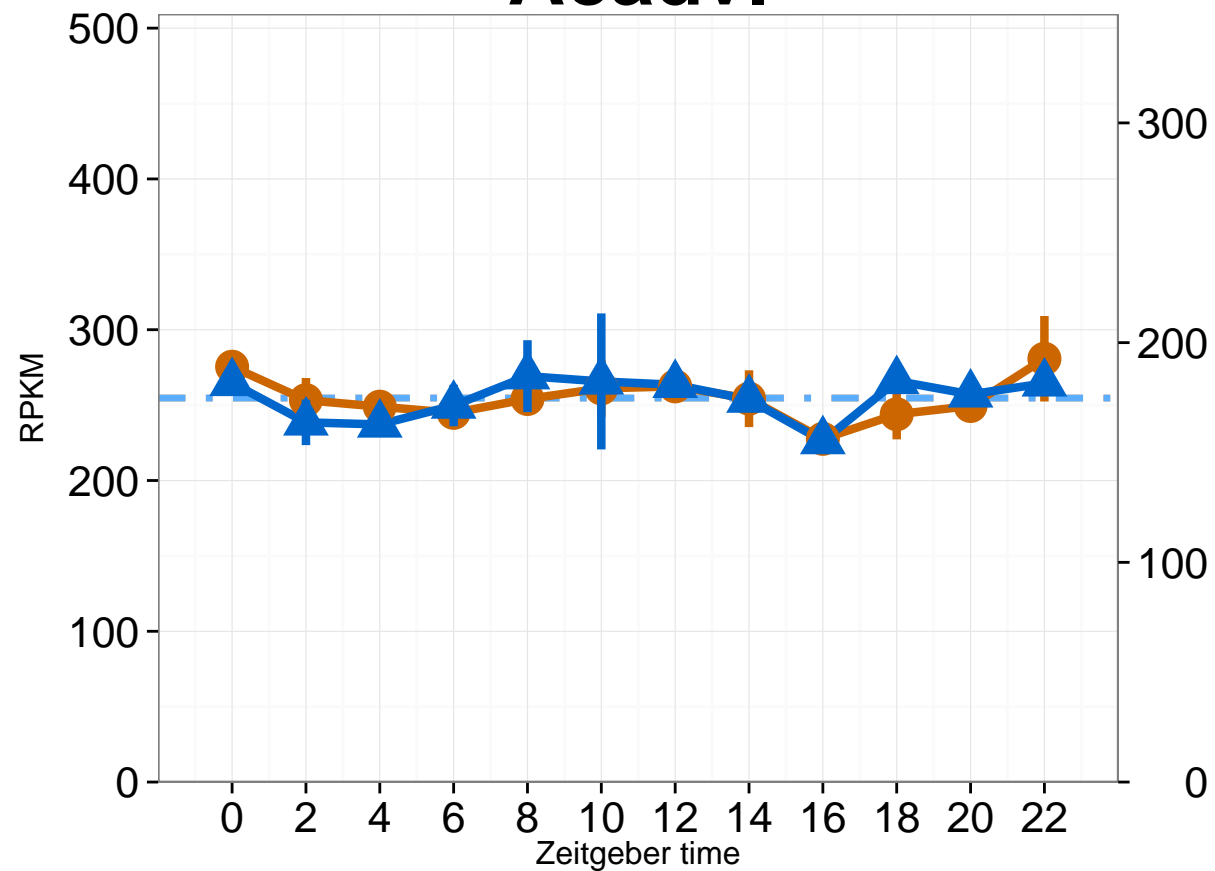

## Acadvl

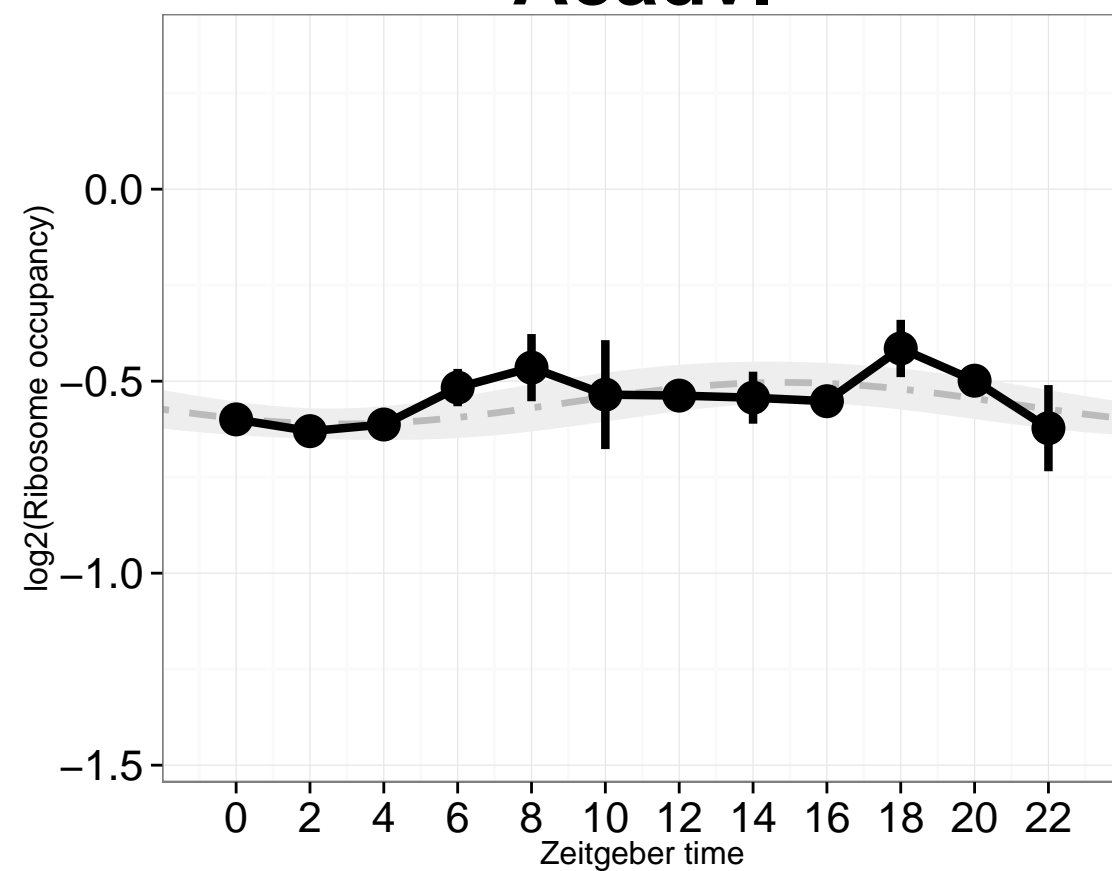

Supplement: SuppDataset_1.zip [file Acadvl_set_A.pdf › Supplemental Dataset 1/A-mRNA_nonrhyth_translation_nonrhyth/Acadvl_set_A.pdf]

# Acap1

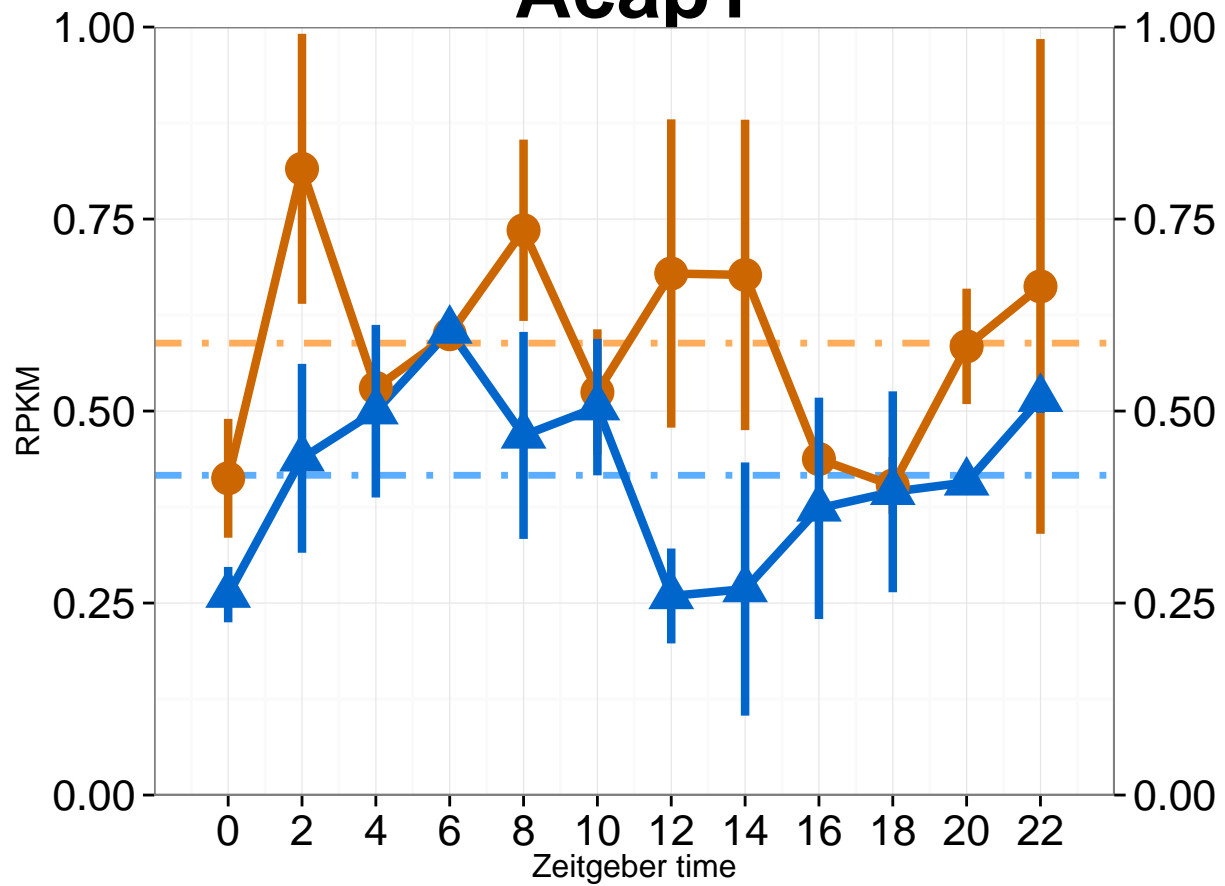

# Acap1

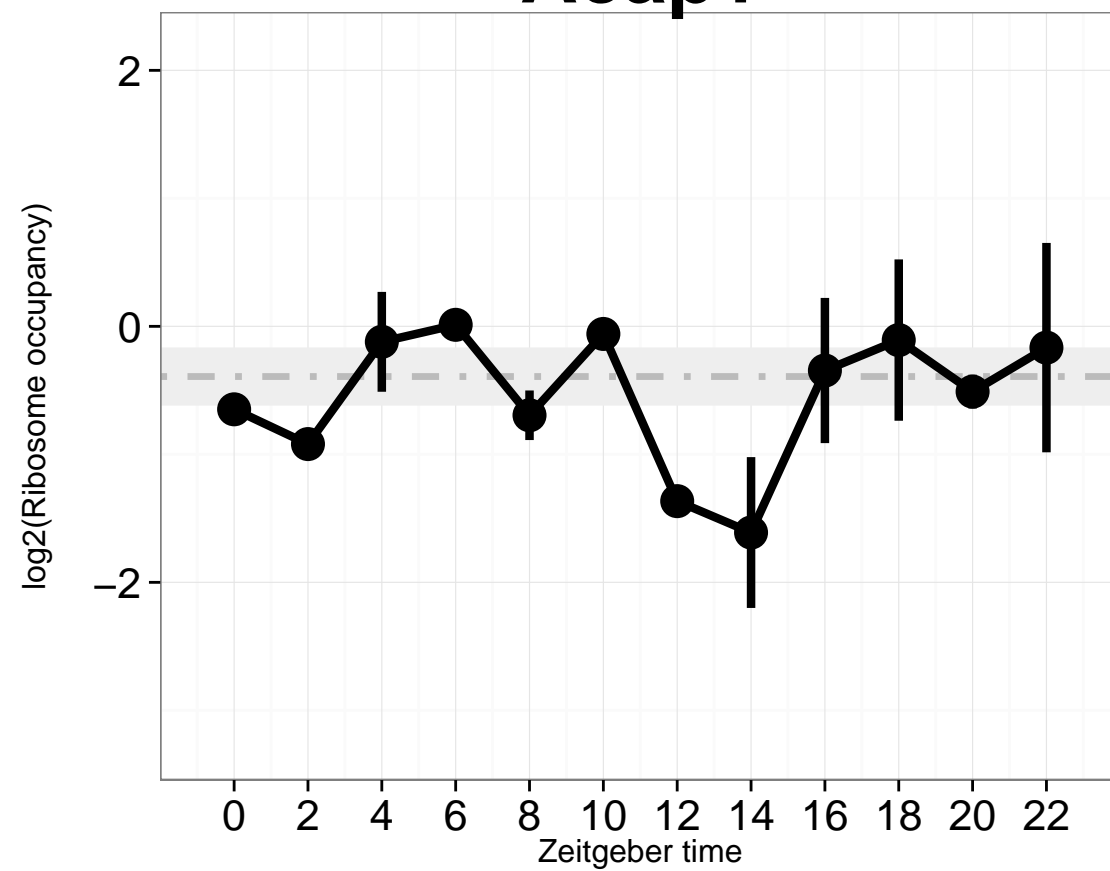

Supplement: SuppDataset_1.zip [file Acap1_set_A.pdf › Supplemental Dataset 1/A-mRNA_nonrhyth_translation_nonrhyth/Acap1_set_A.pdf]

# Acap2

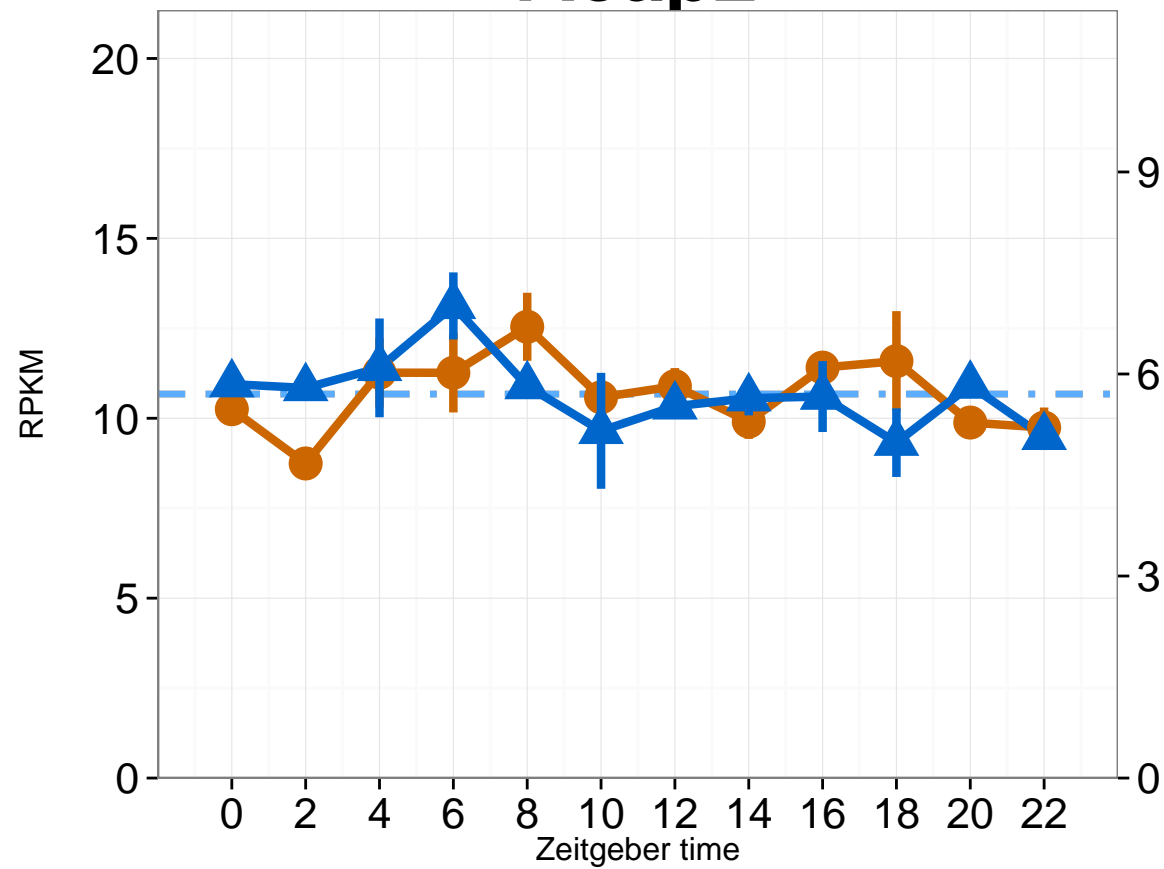

# Acap2

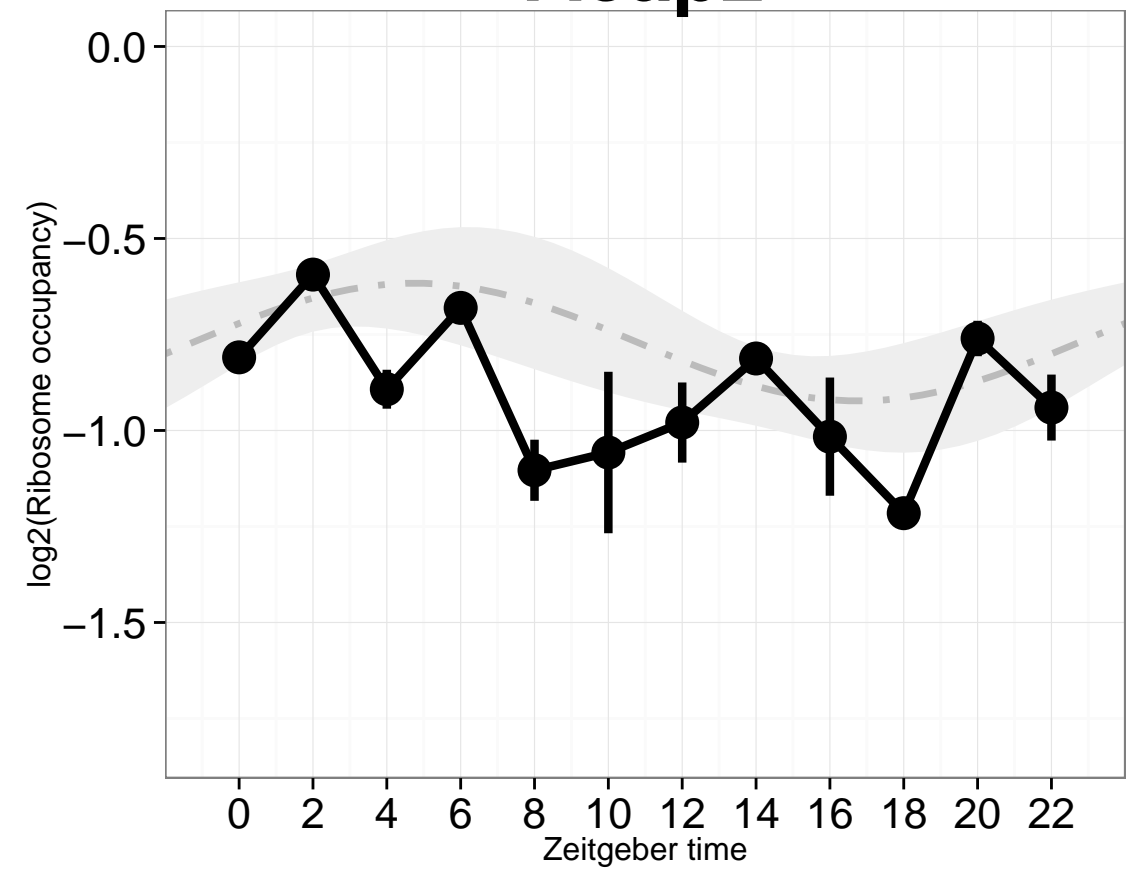

Supplement: SuppDataset_1.zip [file Acap2_set_A.pdf › Supplemental Dataset 1/A-mRNA_nonrhyth_translation_nonrhyth/Acap2_set_A.pdf]

## Acap3

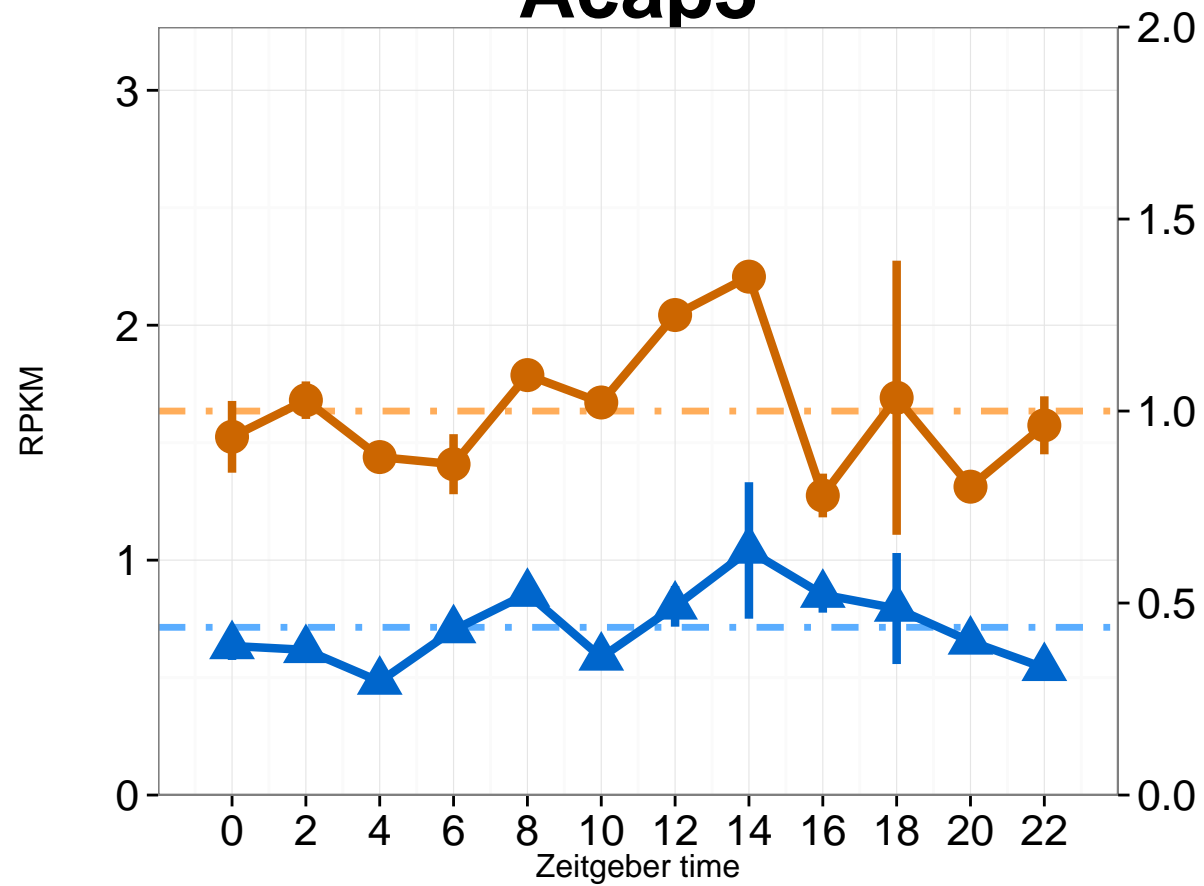

## Acap3

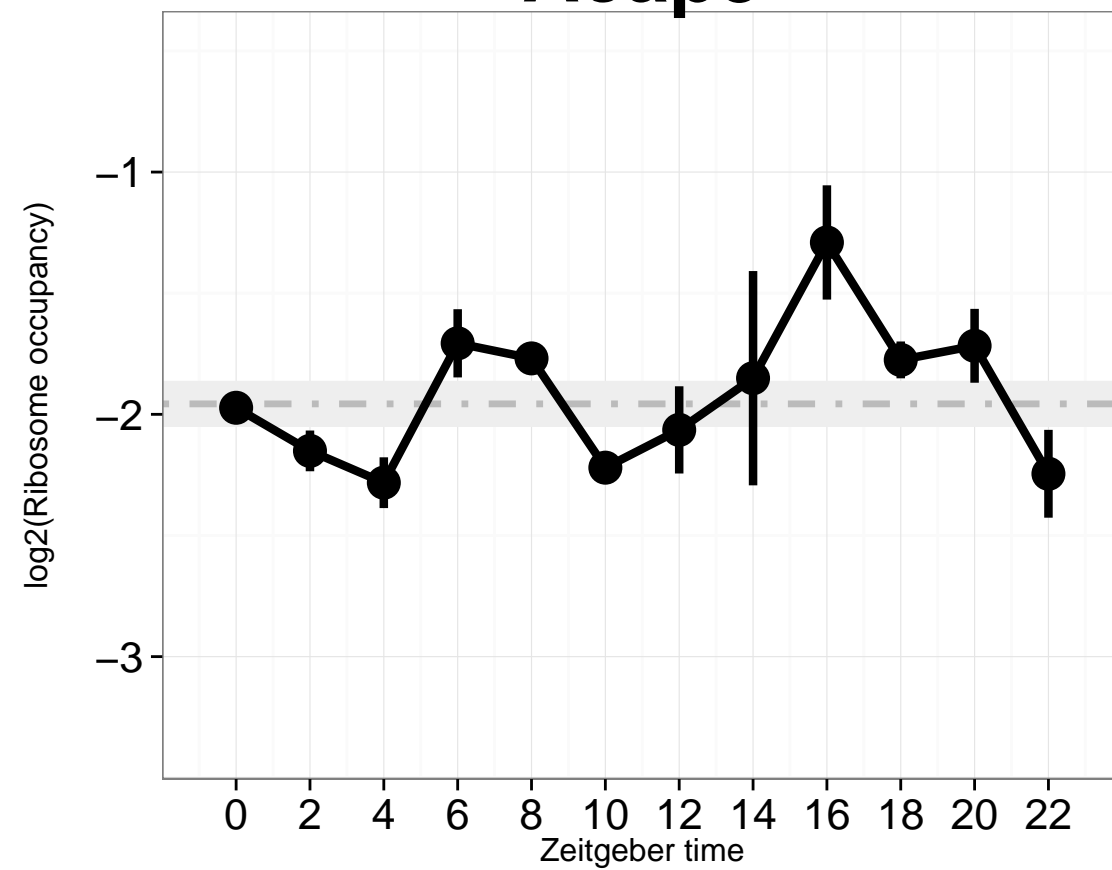

Supplement: SuppDataset_1.zip [file Acap3_set_A.pdf › Supplemental Dataset 1/A-mRNA_nonrhyth_translation_nonrhyth/Acap3_set_A.pdf]

# Acat1

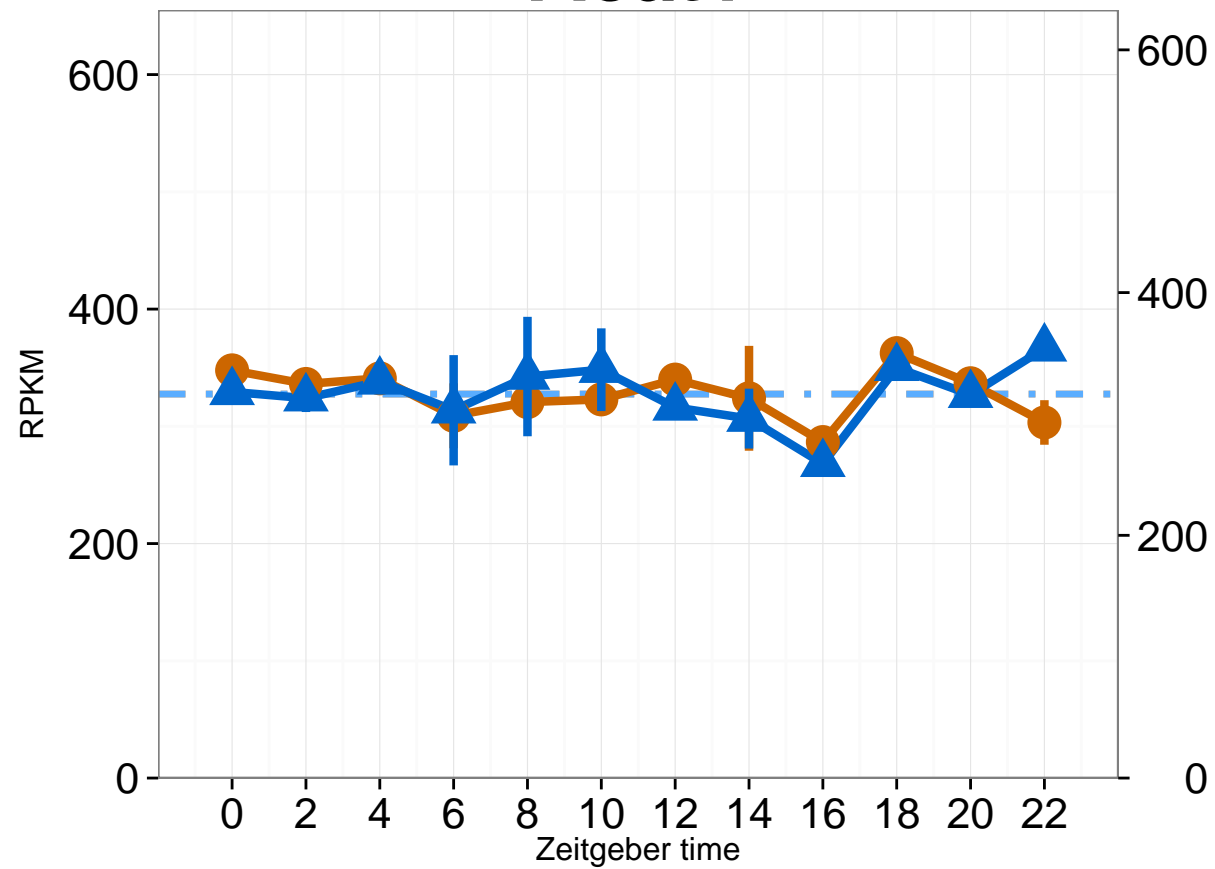

# Acat1

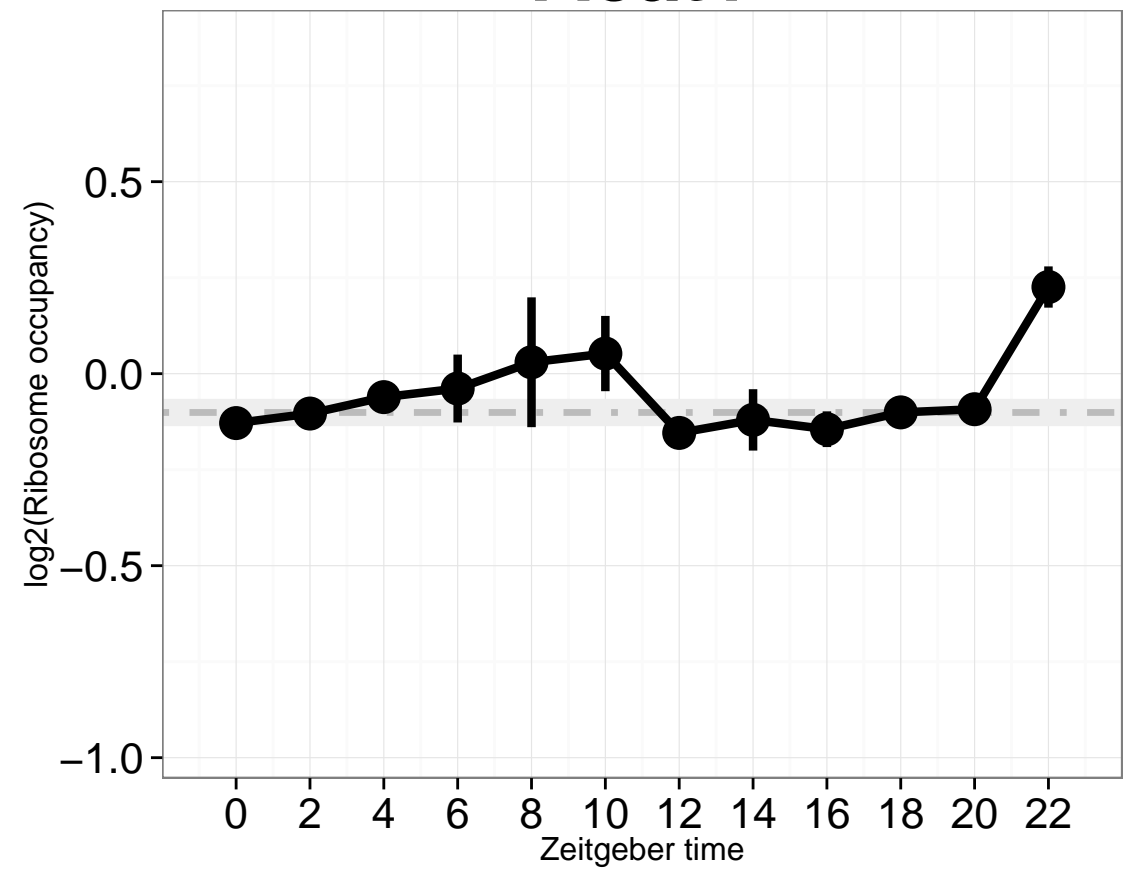

Supplement: SuppDataset_1.zip [file Acat1_set_A.pdf › Supplemental Dataset 1/A-mRNA_nonrhyth_translation_nonrhyth/Acat1_set_A.pdf]

## Acat2

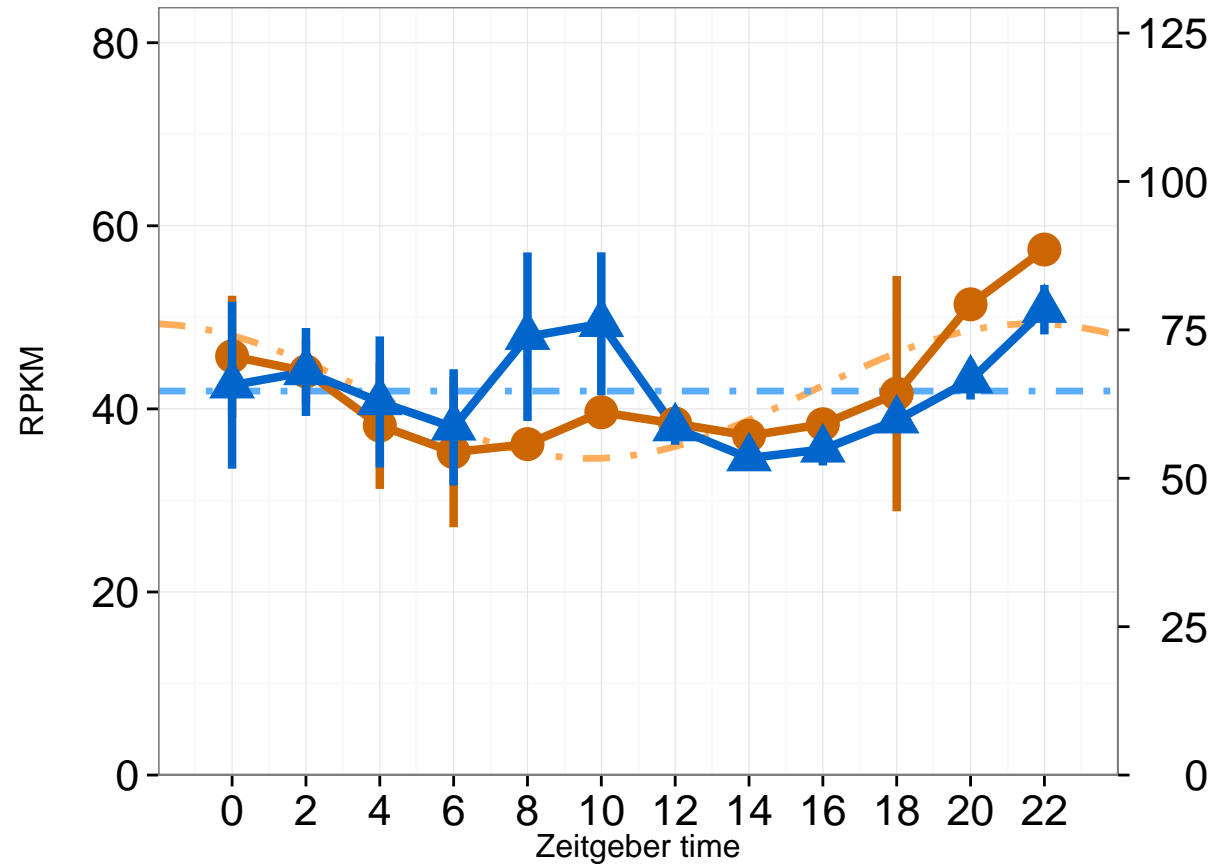

## Acat2

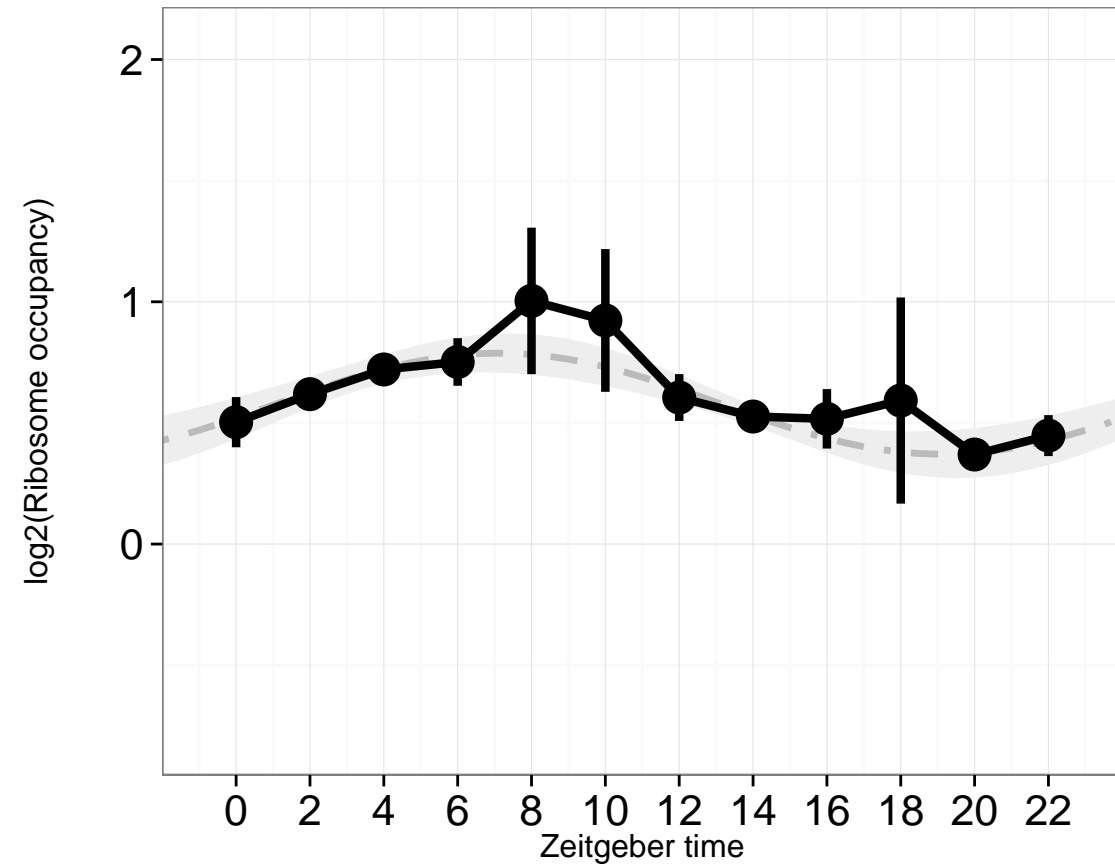

Supplement: SuppDataset_1.zip [file Acat2_set_A.pdf › Supplemental Dataset 1/A-mRNA_nonrhyth_translation_nonrhyth/Acat2_set_A.pdf]

## Acbd3

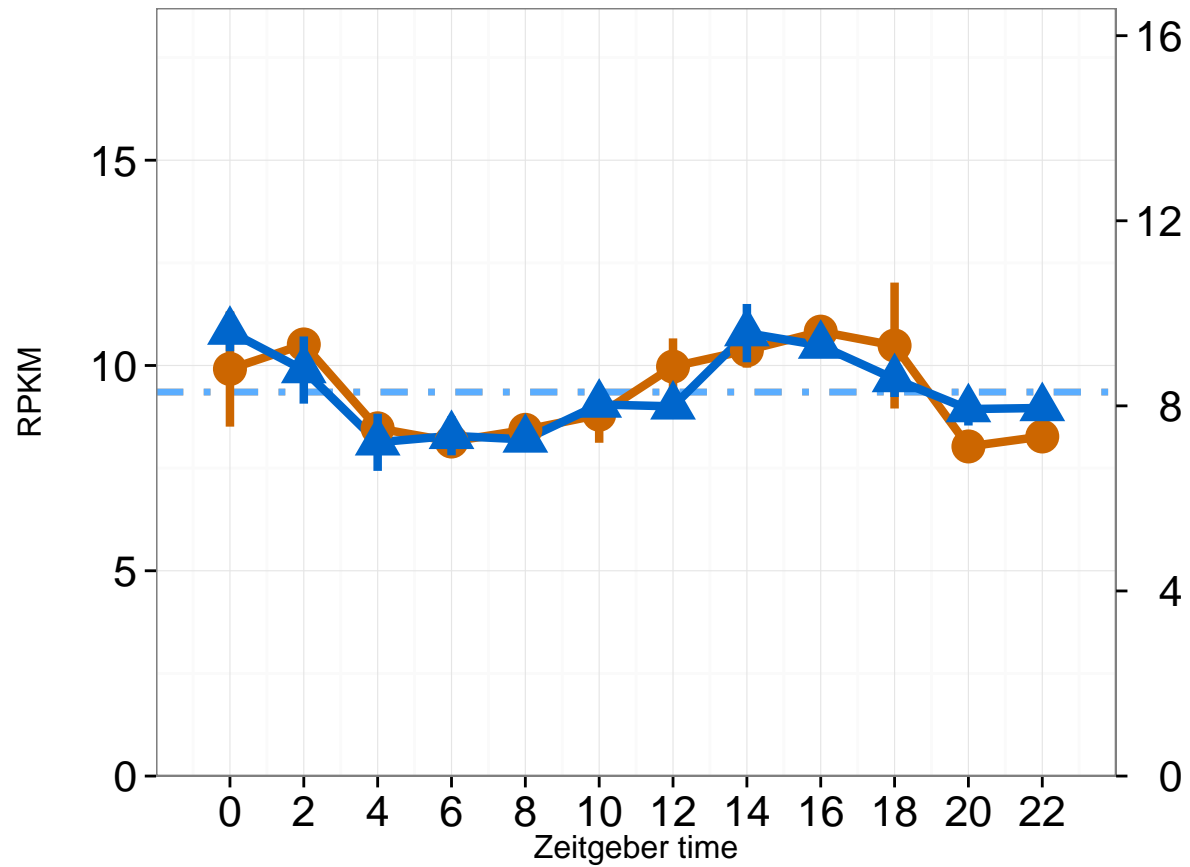

## Acbd3

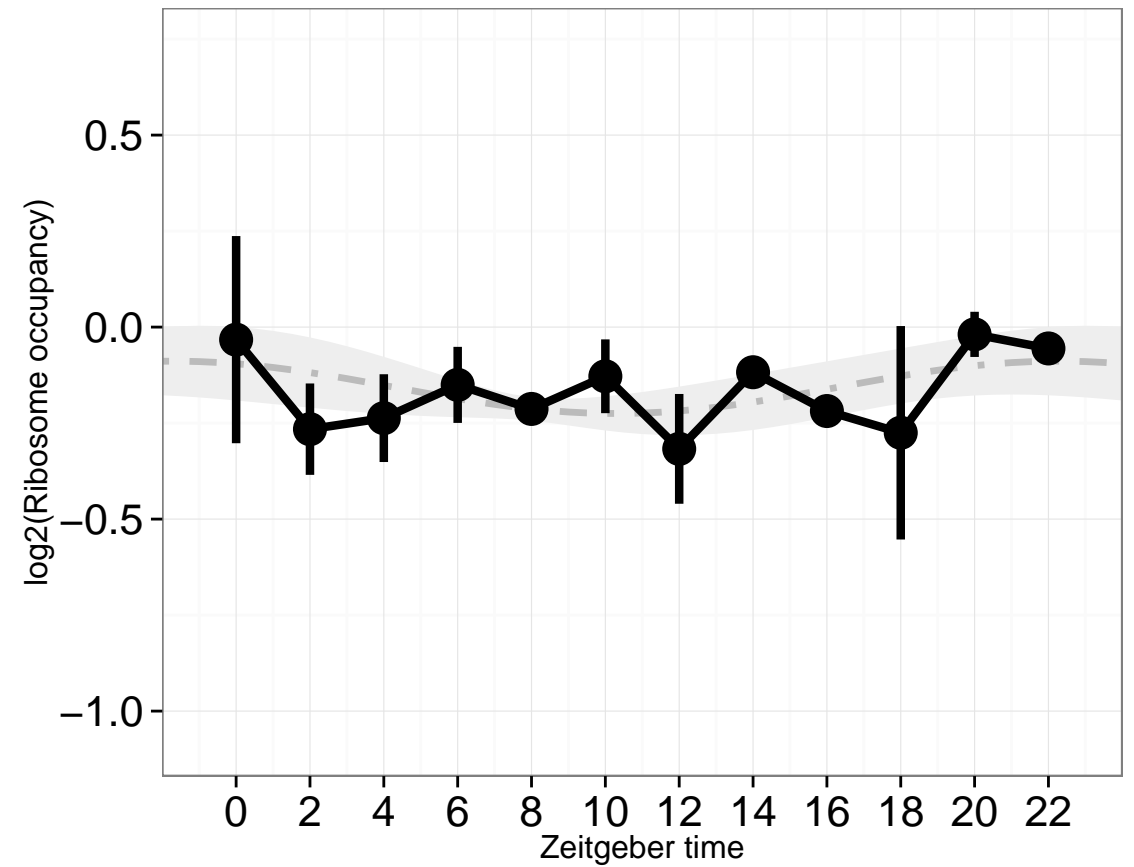

Supplement: SuppDataset_1.zip [file Acbd3_set_A.pdf › Supplemental Dataset 1/A-mRNA_nonrhyth_translation_nonrhyth/Acbd3_set_A.pdf]

## Acbd5

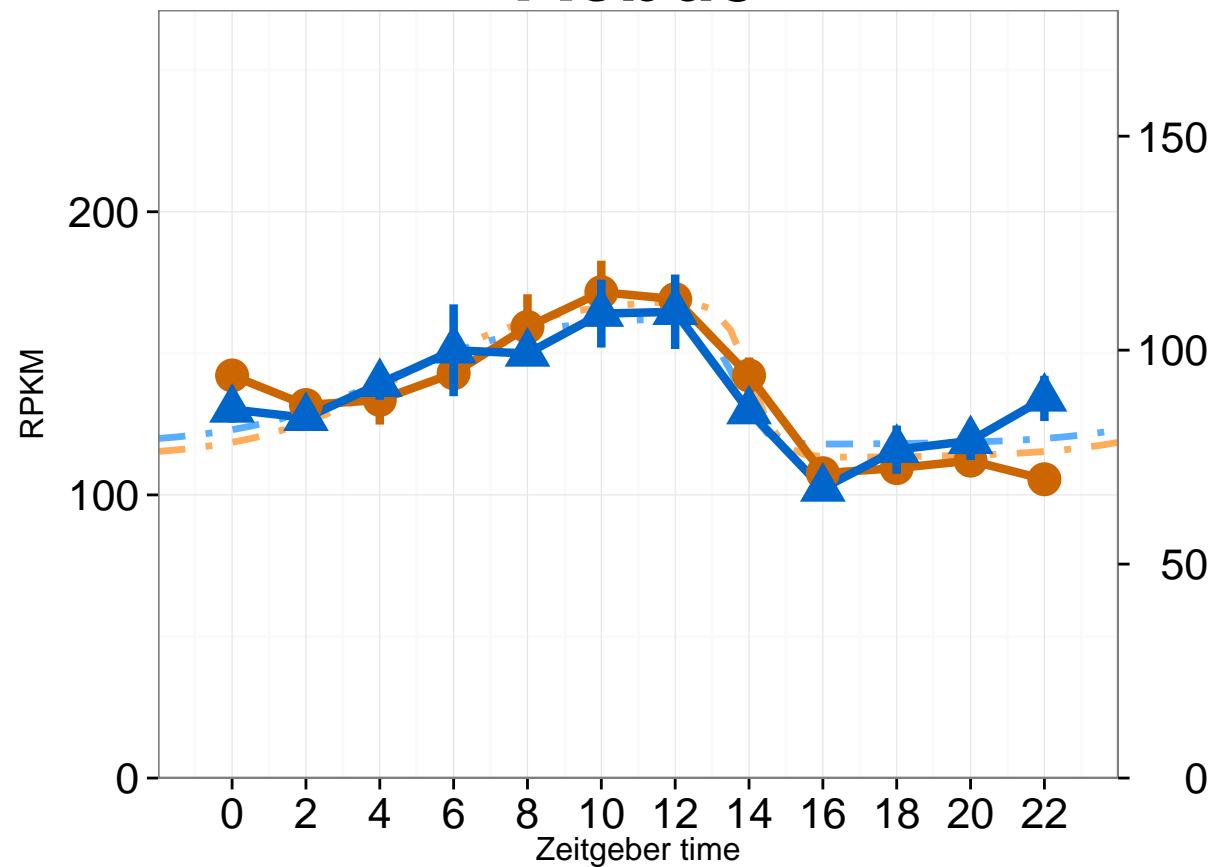

## Acbd5

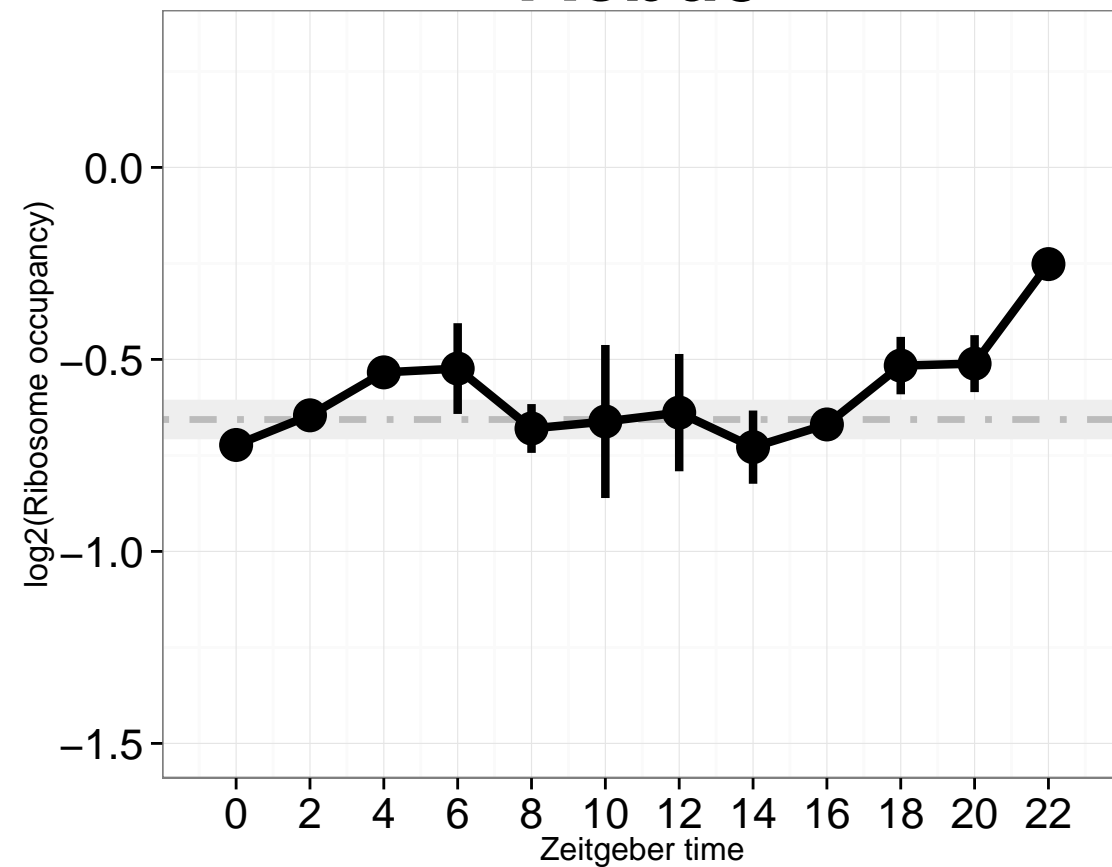

Supplement: SuppDataset_1.zip [file Acbd5_set_A.pdf › Supplemental Dataset 1/A-mRNA_nonrhyth_translation_nonrhyth/Acbd5_set_A.pdf]

# Acbd6

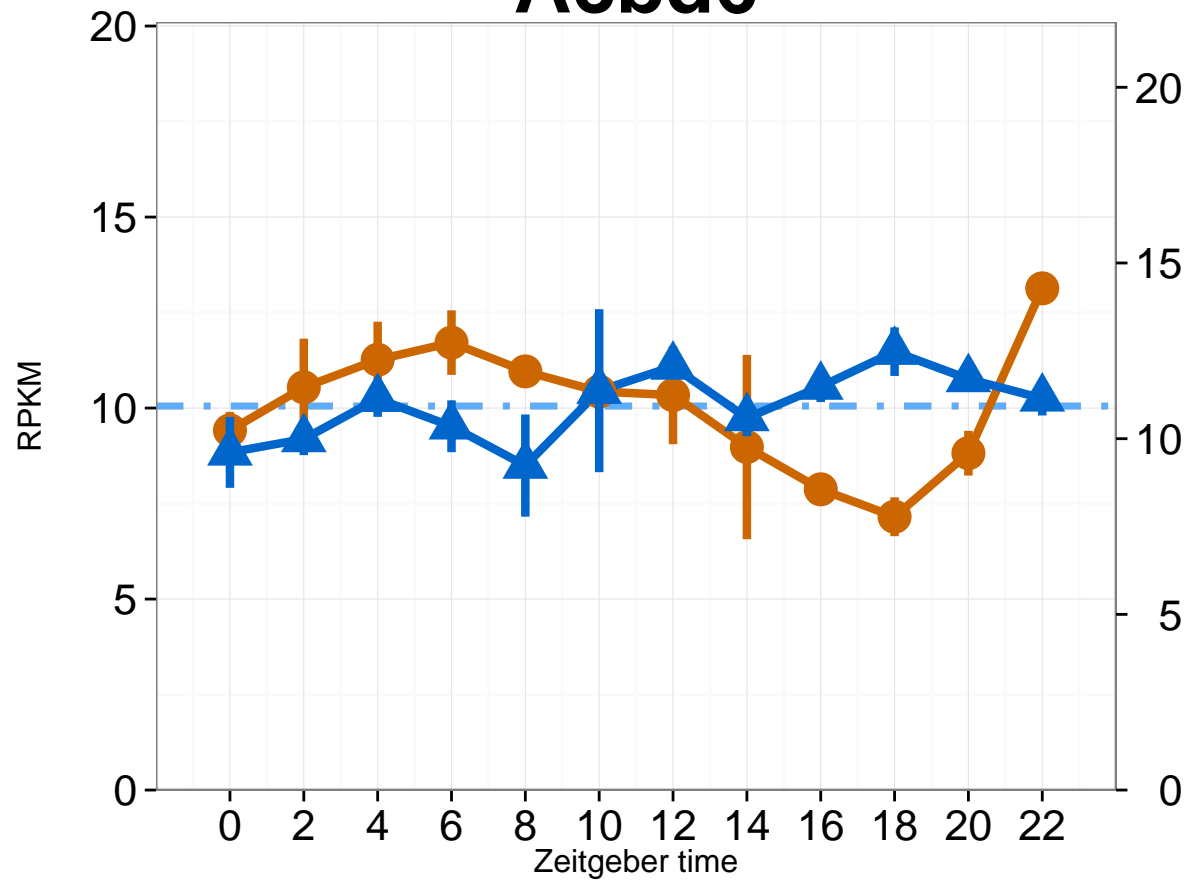

# Acbd6

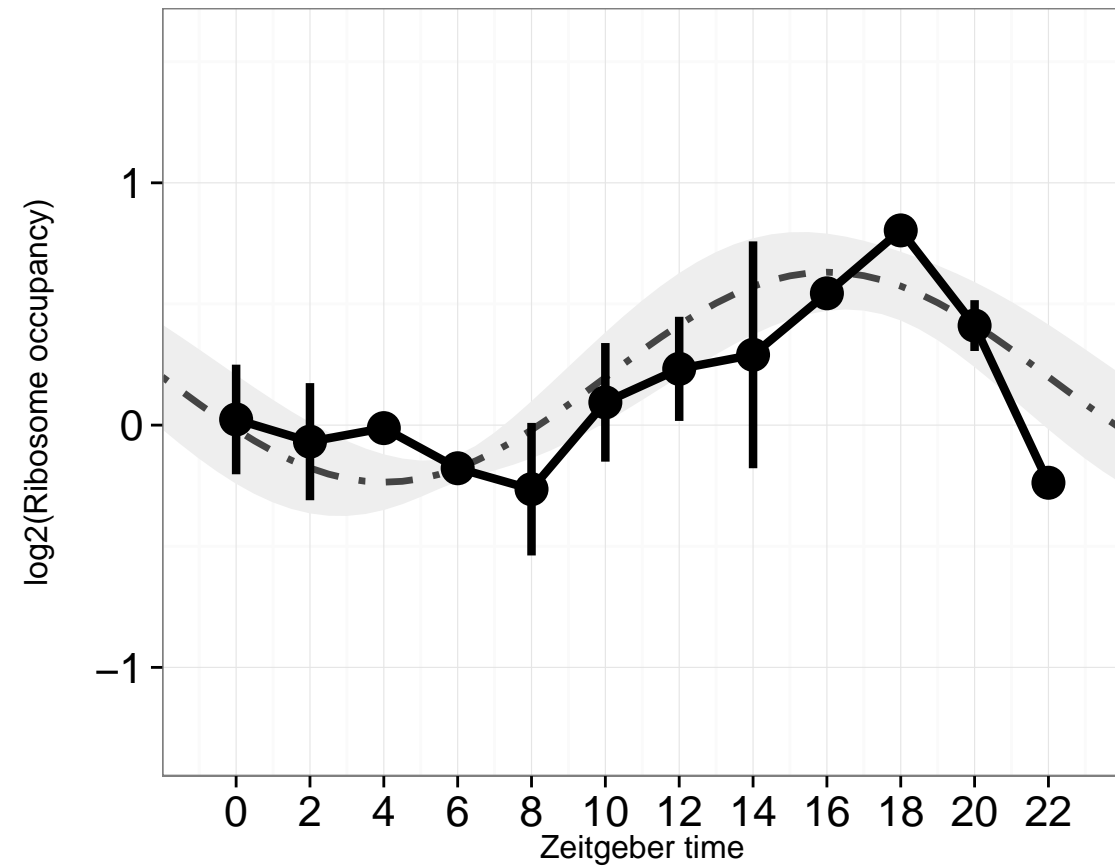

Supplement: SuppDataset_1.zip [file Acbd6_set_A.pdf › Supplemental Dataset 1/A-mRNA_nonrhyth_translation_nonrhyth/Acbd6_set_A.pdf]

## Acd

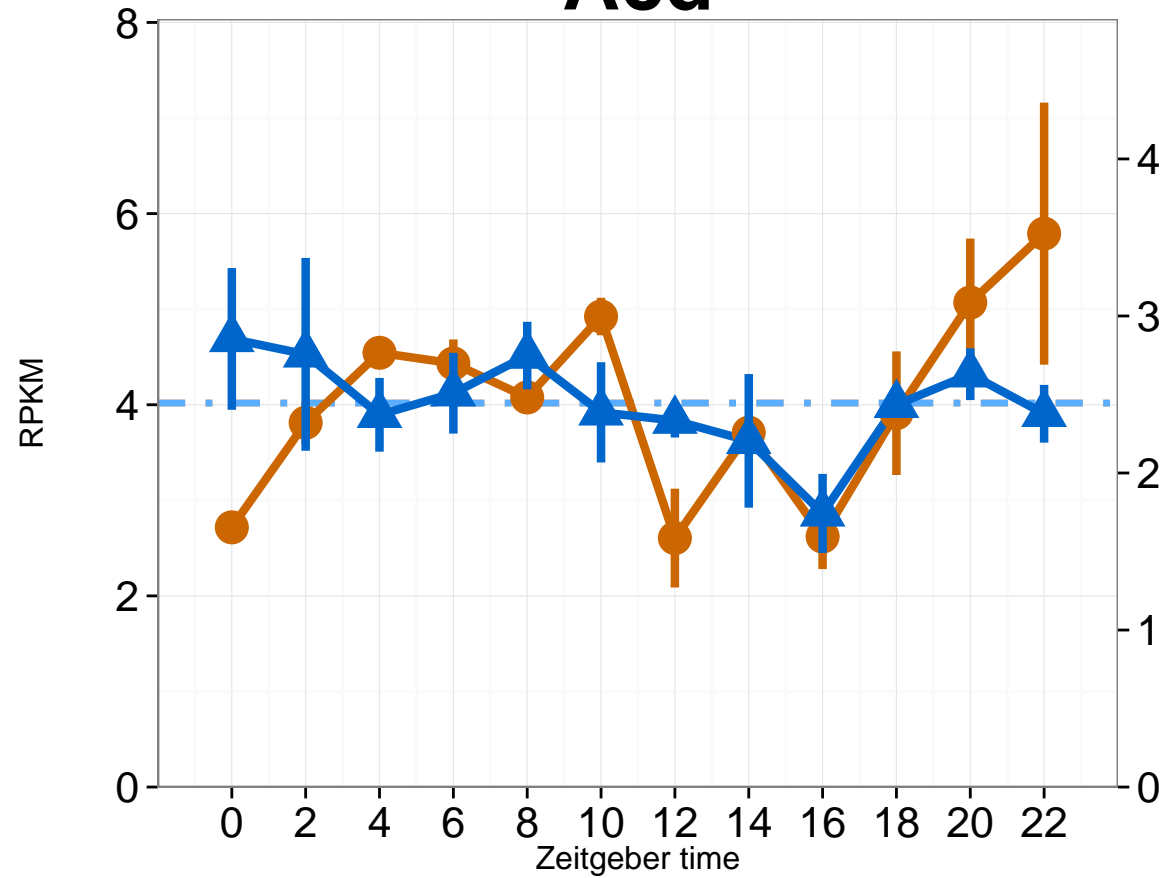

## Acd

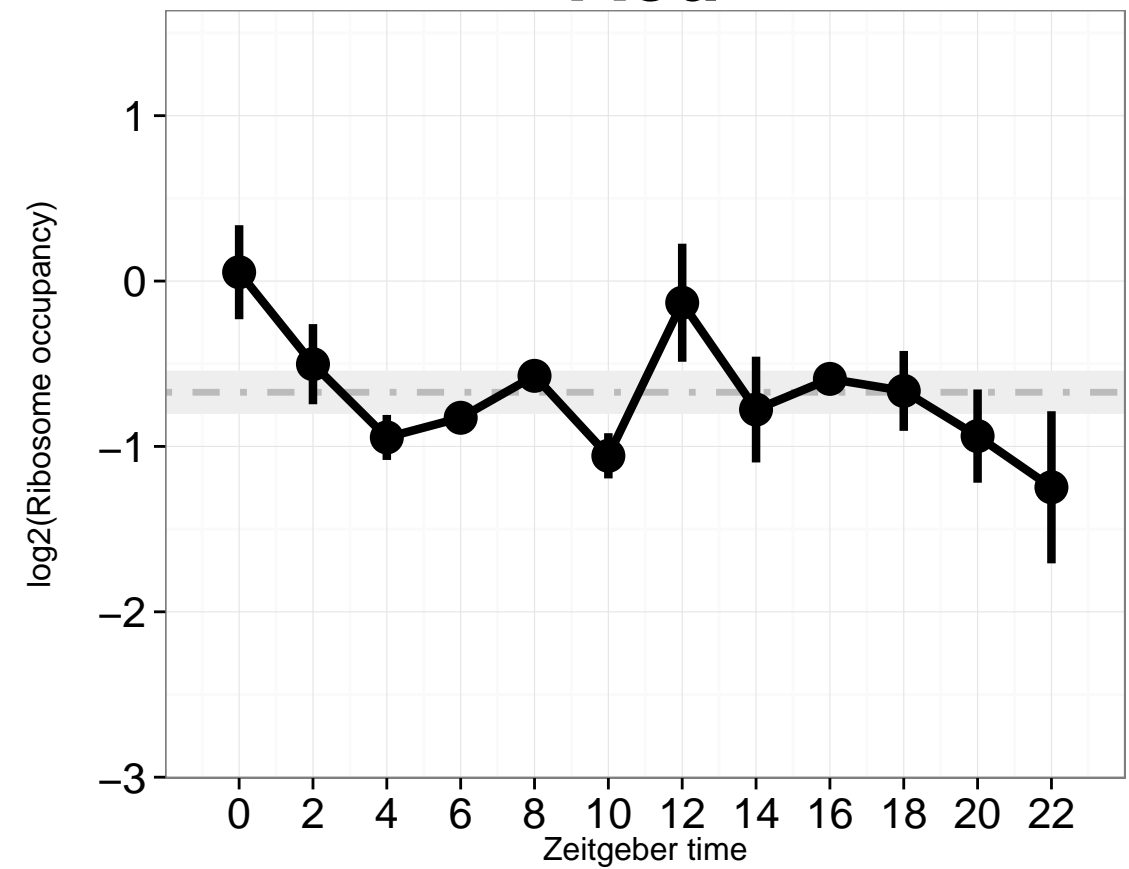

Supplement: SuppDataset_1.zip [file Acd_set_A.pdf › Supplemental Dataset 1/A-mRNA_nonrhyth_translation_nonrhyth/Acd_set_A.pdf]

## Acer2

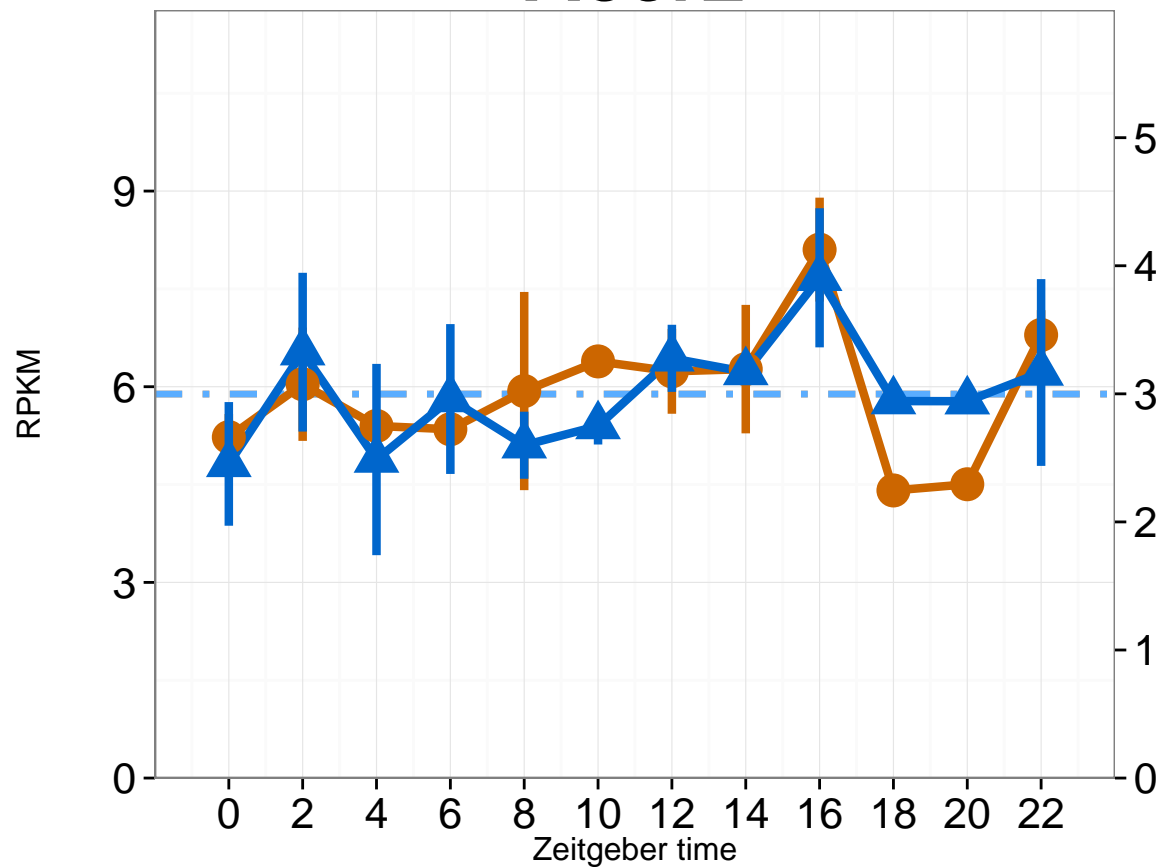

## Acer2

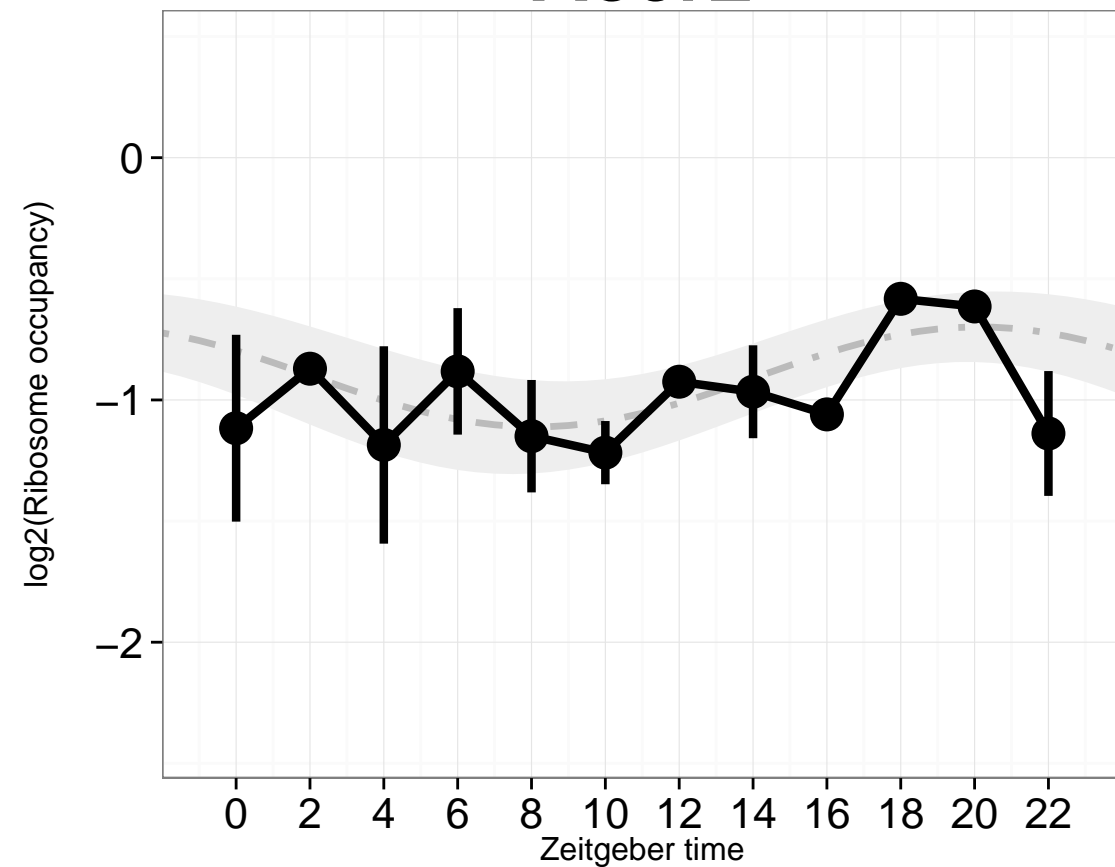

Supplement: SuppDataset_1.zip [file Acer2_set_A.pdf › Supplemental Dataset 1/A-mRNA_nonrhyth_translation_nonrhyth/Acer2_set_A.pdf]

## Acer3

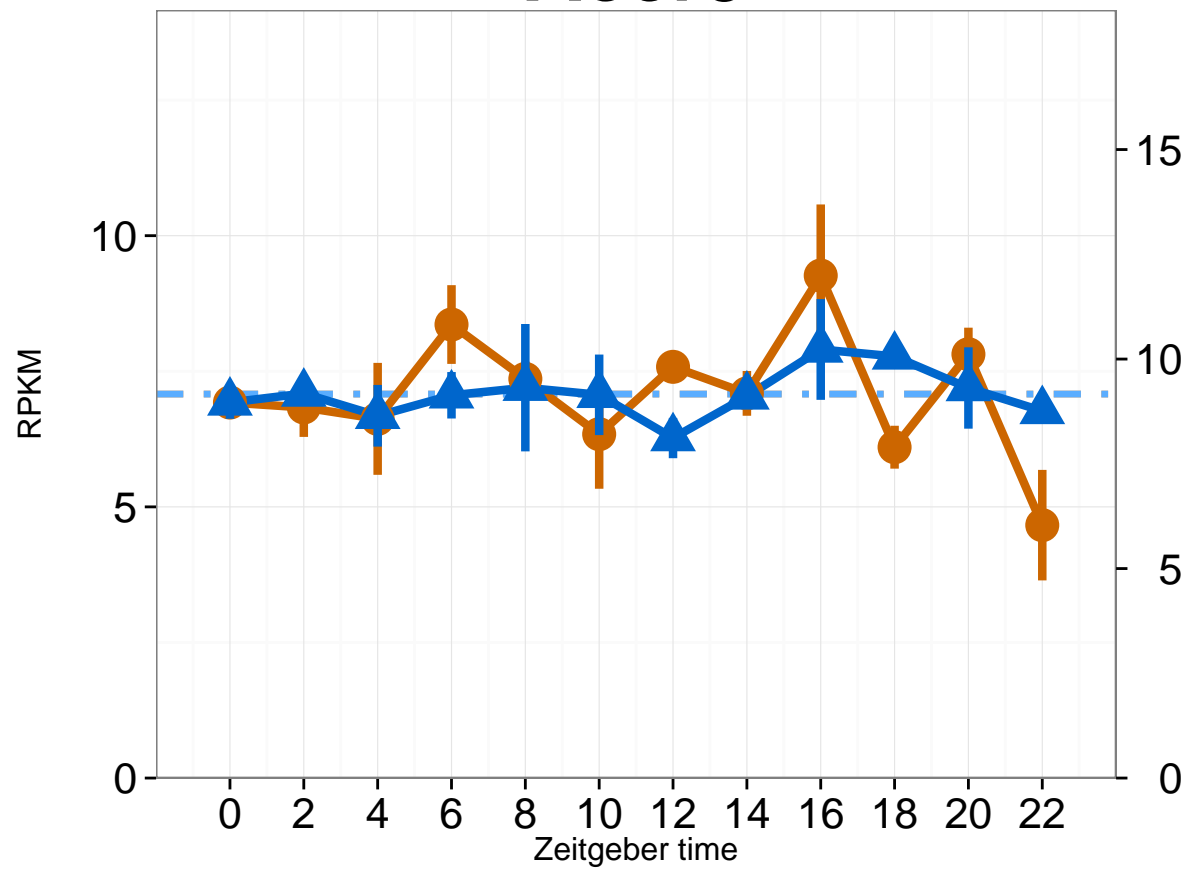

## Acer3

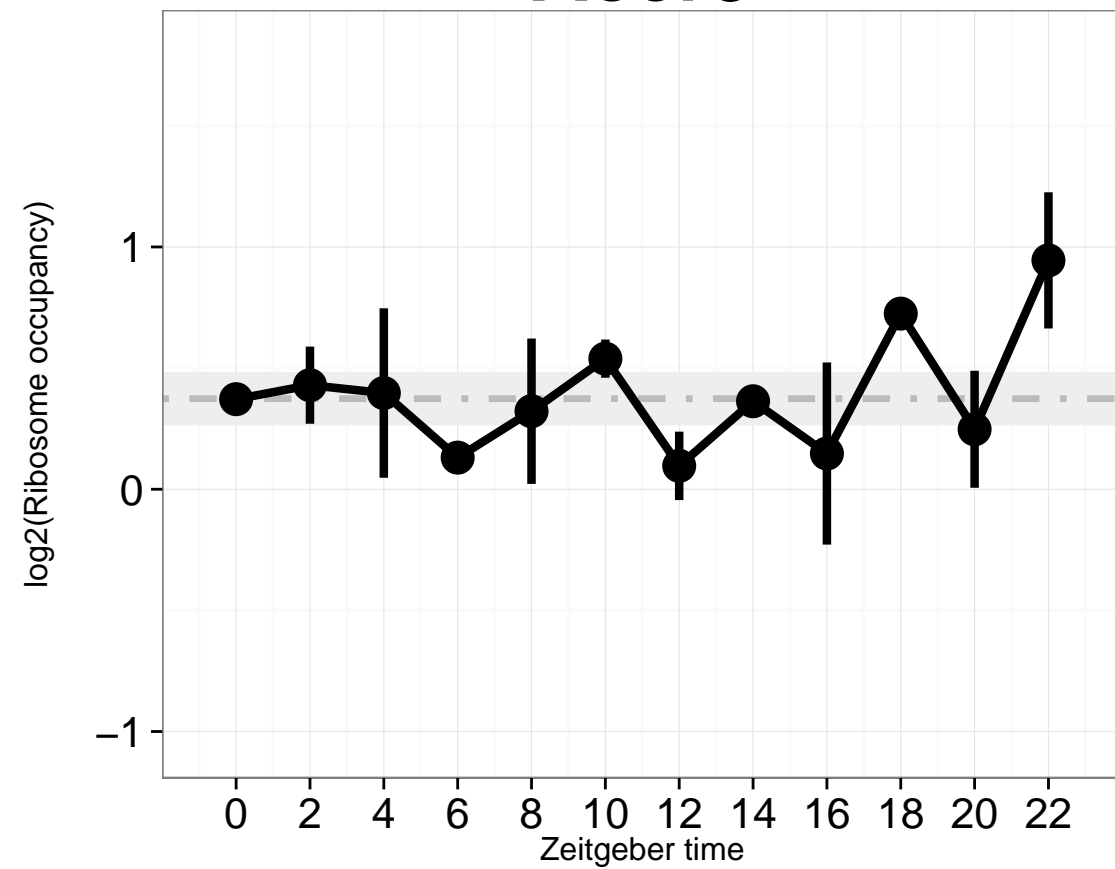

Supplement: SuppDataset_1.zip [file Acer3_set_A.pdf › Supplemental Dataset 1/A-mRNA_nonrhyth_translation_nonrhyth/Acer3_set_A.pdf]

# Acin1

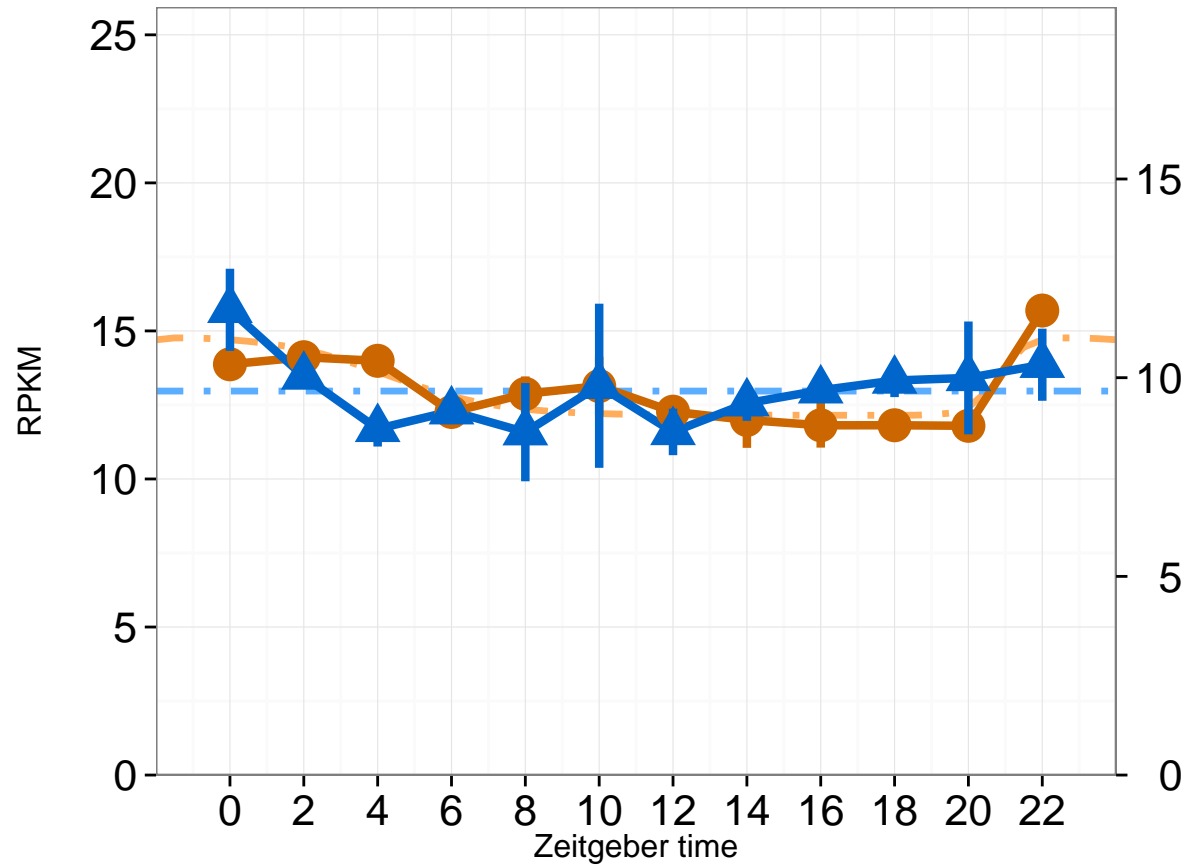

# Acin1

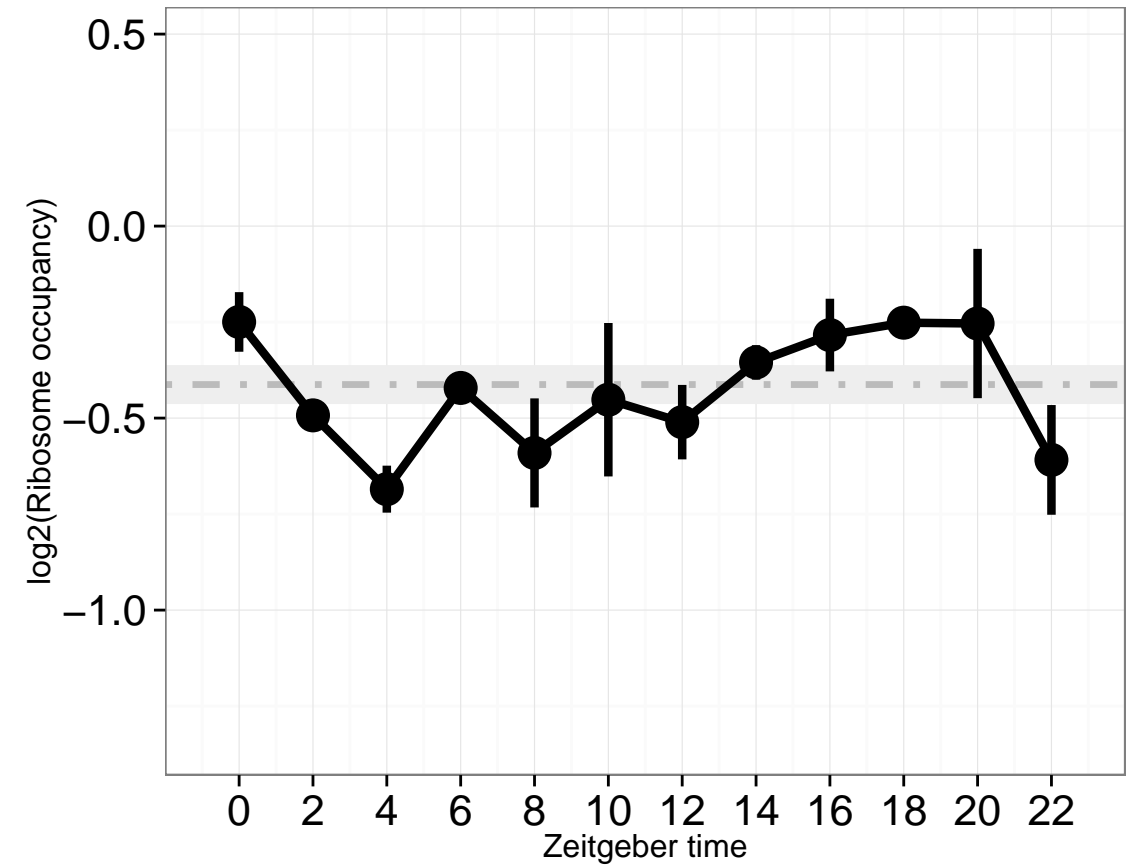

Supplement: SuppDataset_1.zip [file Acin1_set_A.pdf › Supplemental Dataset 1/A-mRNA_nonrhyth_translation_nonrhyth/Acin1_set_A.pdf]

# Ackr2

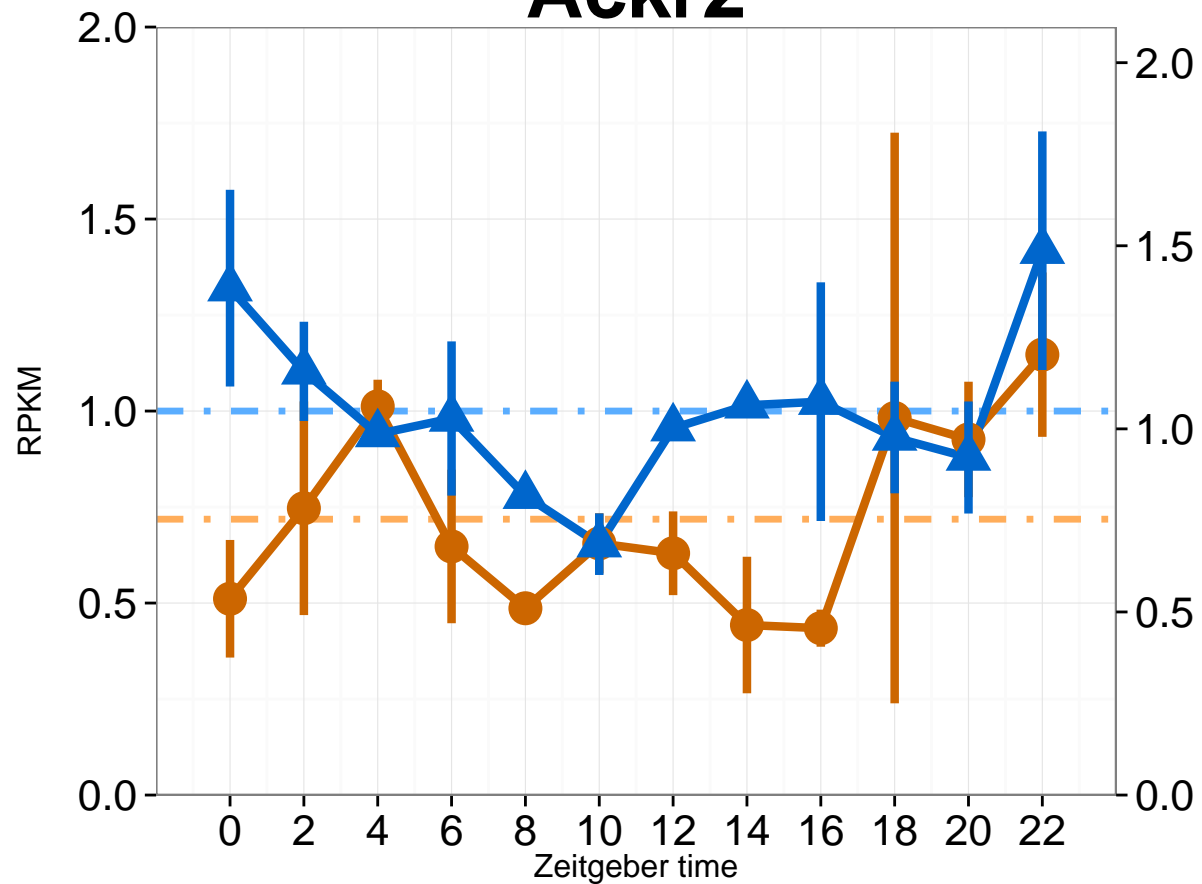

# Ackr2

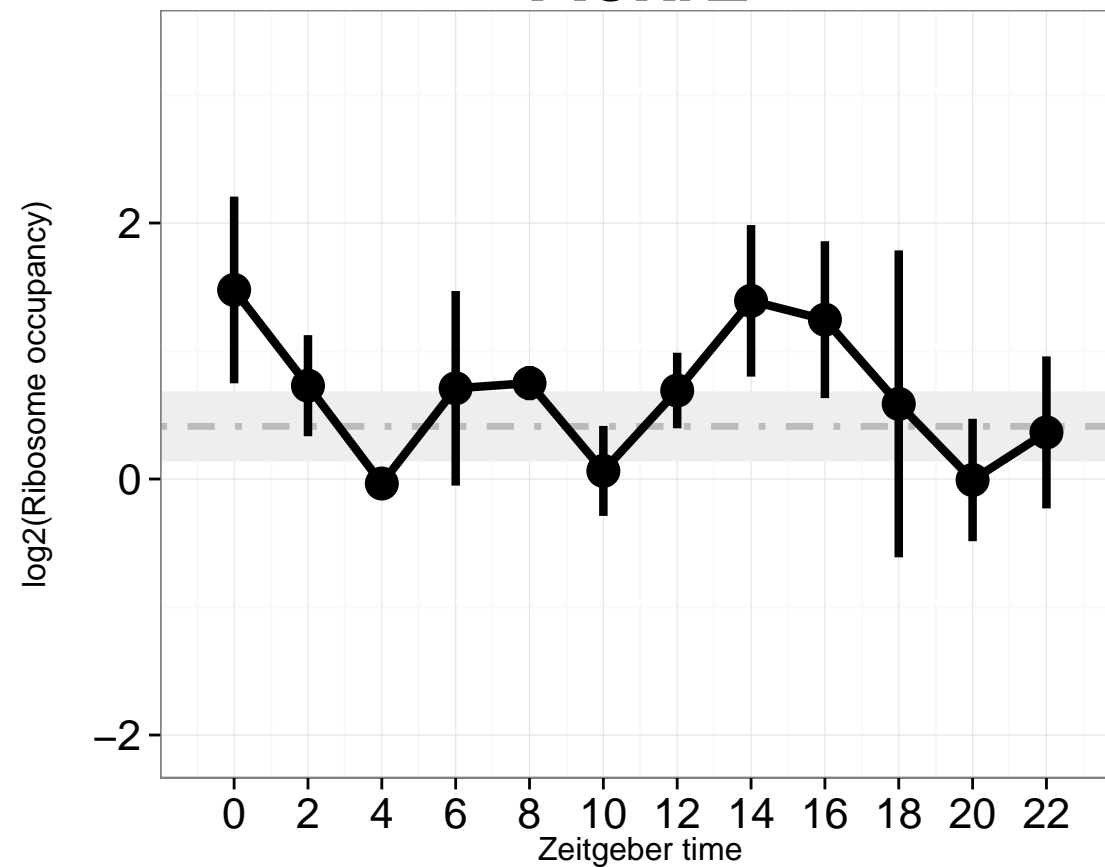

Supplement: SuppDataset_1.zip [file Ackr2_set_A.pdf › Supplemental Dataset 1/A-mRNA_nonrhyth_translation_nonrhyth/Ackr2_set_A.pdf]

**Ackr3 TR**

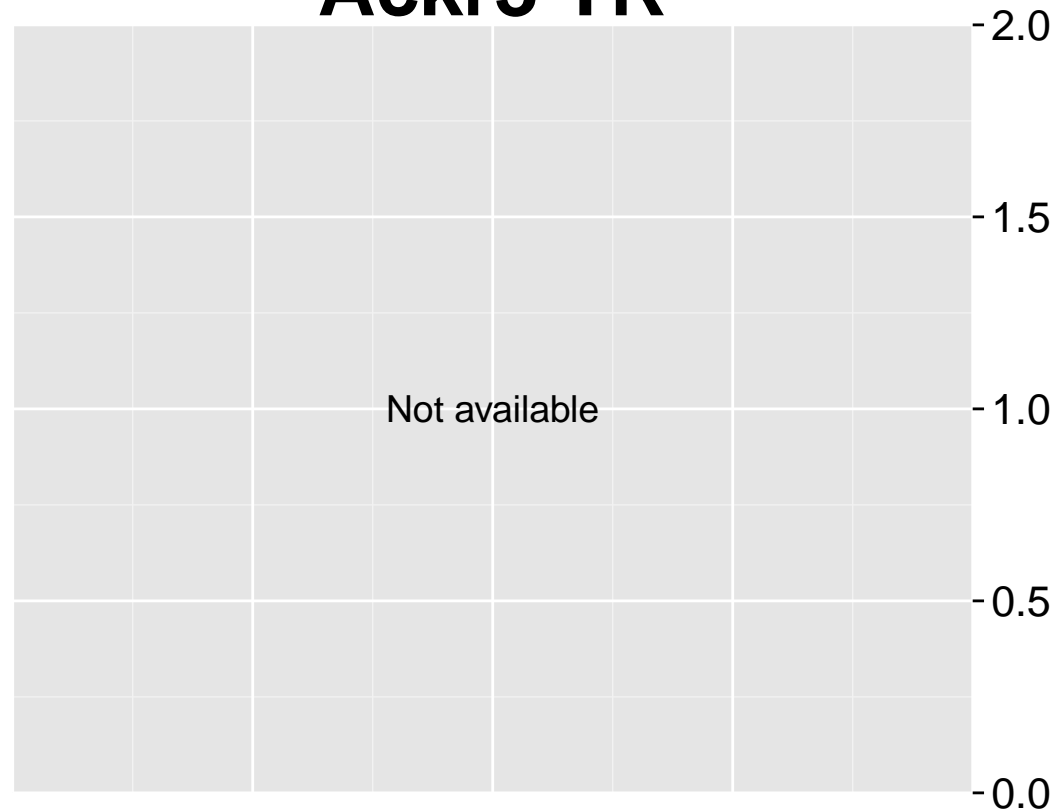

**Ackr3 log2(Ribosome occupancy**

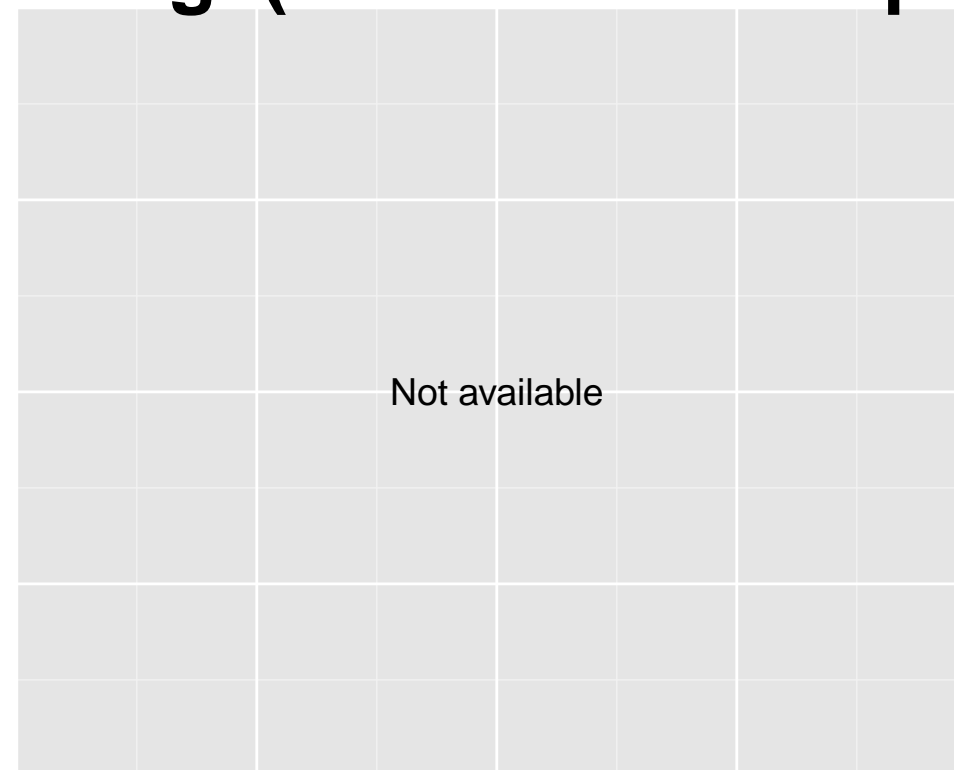

Supplement: SuppDataset_1.zip [file Ackr3_set_A.pdf › Supplemental Dataset 1/A-mRNA_nonrhyth_translation_nonrhyth/Ackr3_set_A.pdf]

# Ackr4

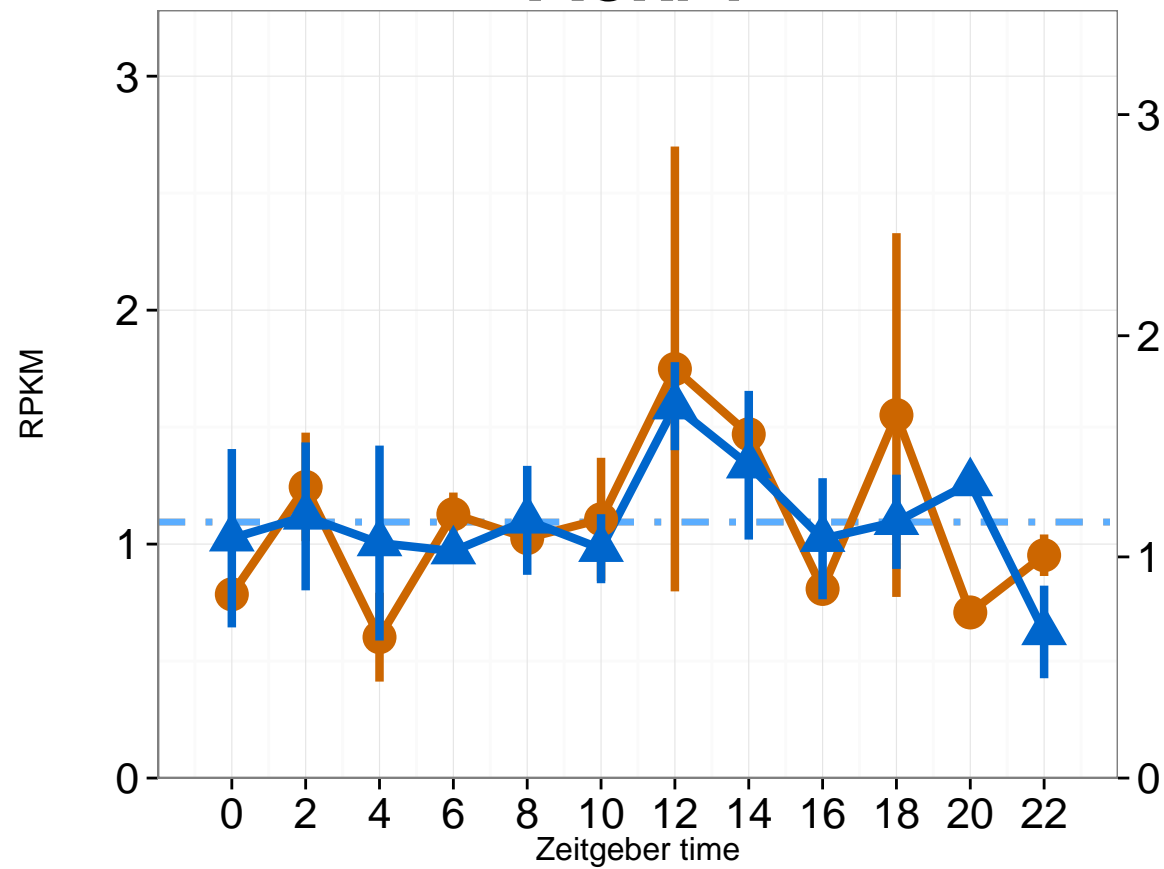

# Ackr4

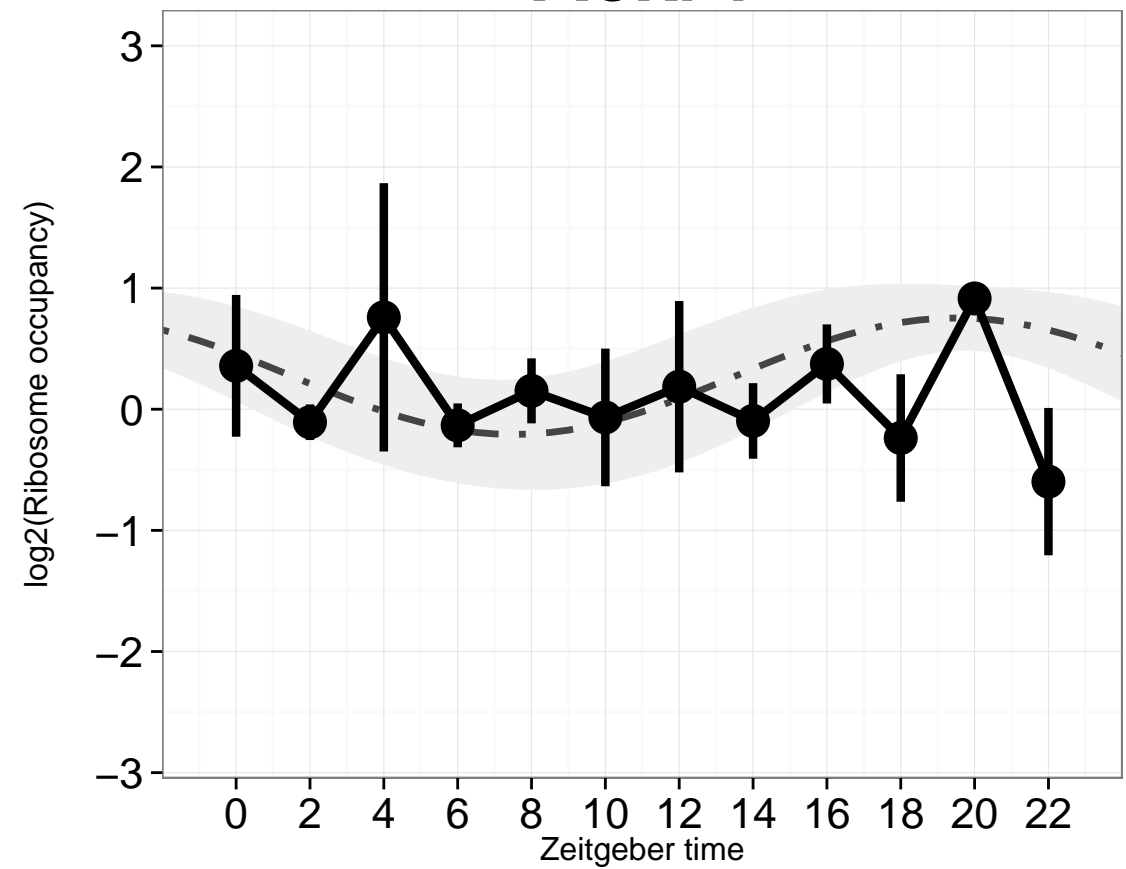

Supplement: SuppDataset_1.zip [file Ackr4_set_A.pdf › Supplemental Dataset 1/A-mRNA_nonrhyth_translation_nonrhyth/Ackr4_set_A.pdf]

## Acn9

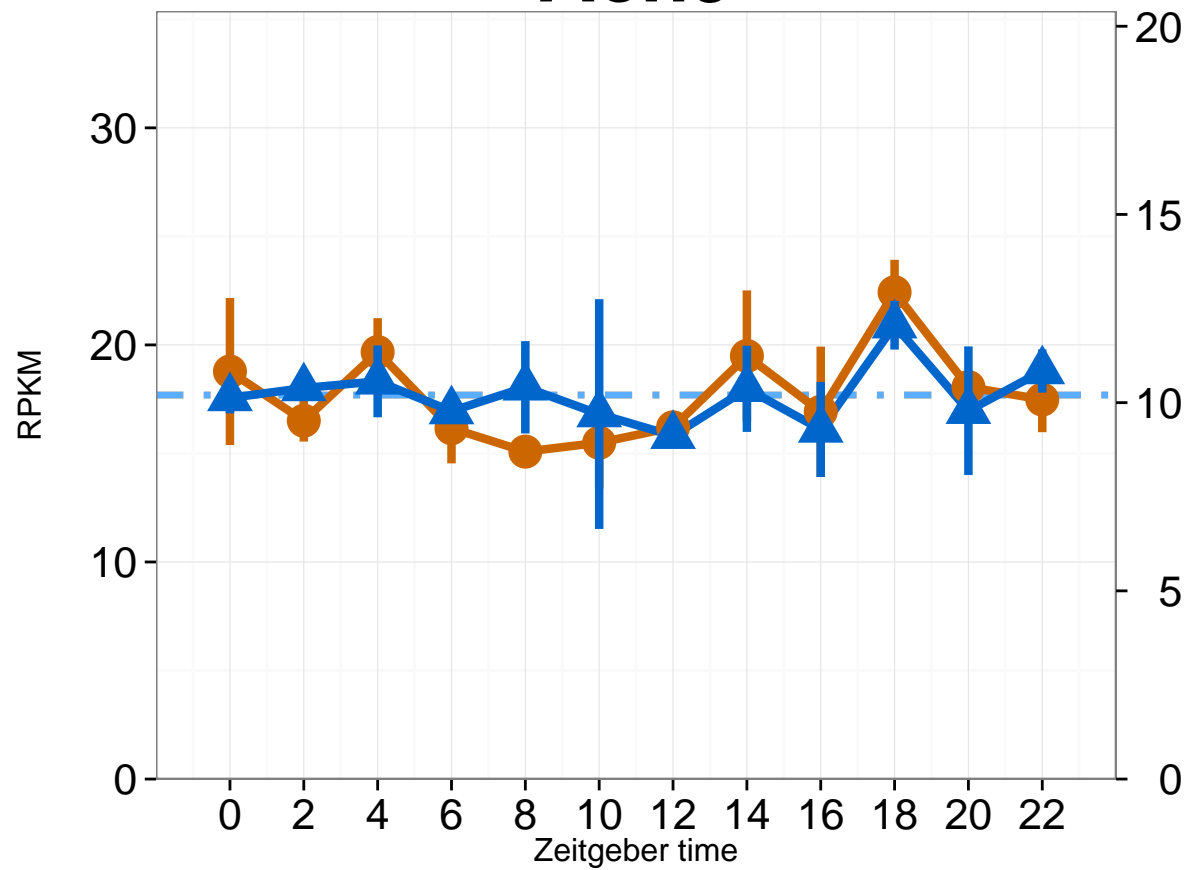

## Acn9

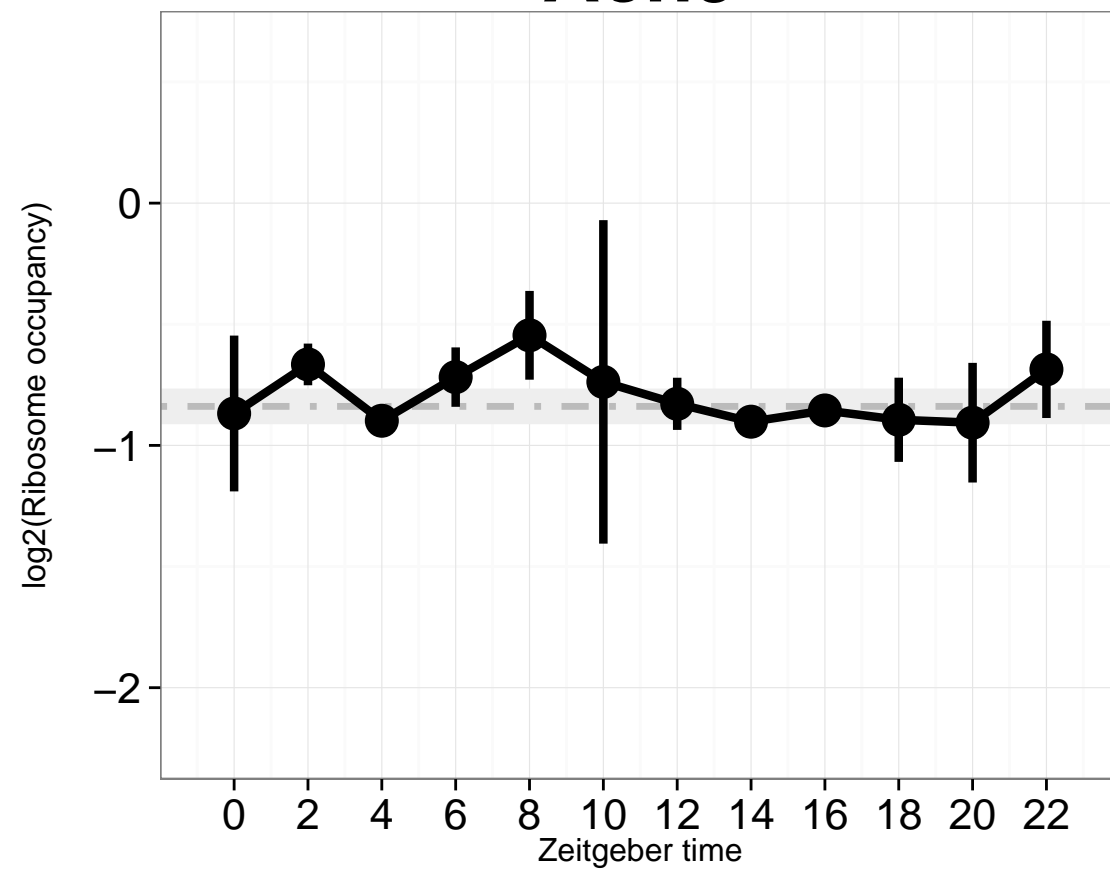

Supplement: SuppDataset_1.zip [file Acn9_set_A.pdf › Supplemental Dataset 1/A-mRNA_nonrhyth_translation_nonrhyth/Acn9_set_A.pdf]

# Aco1

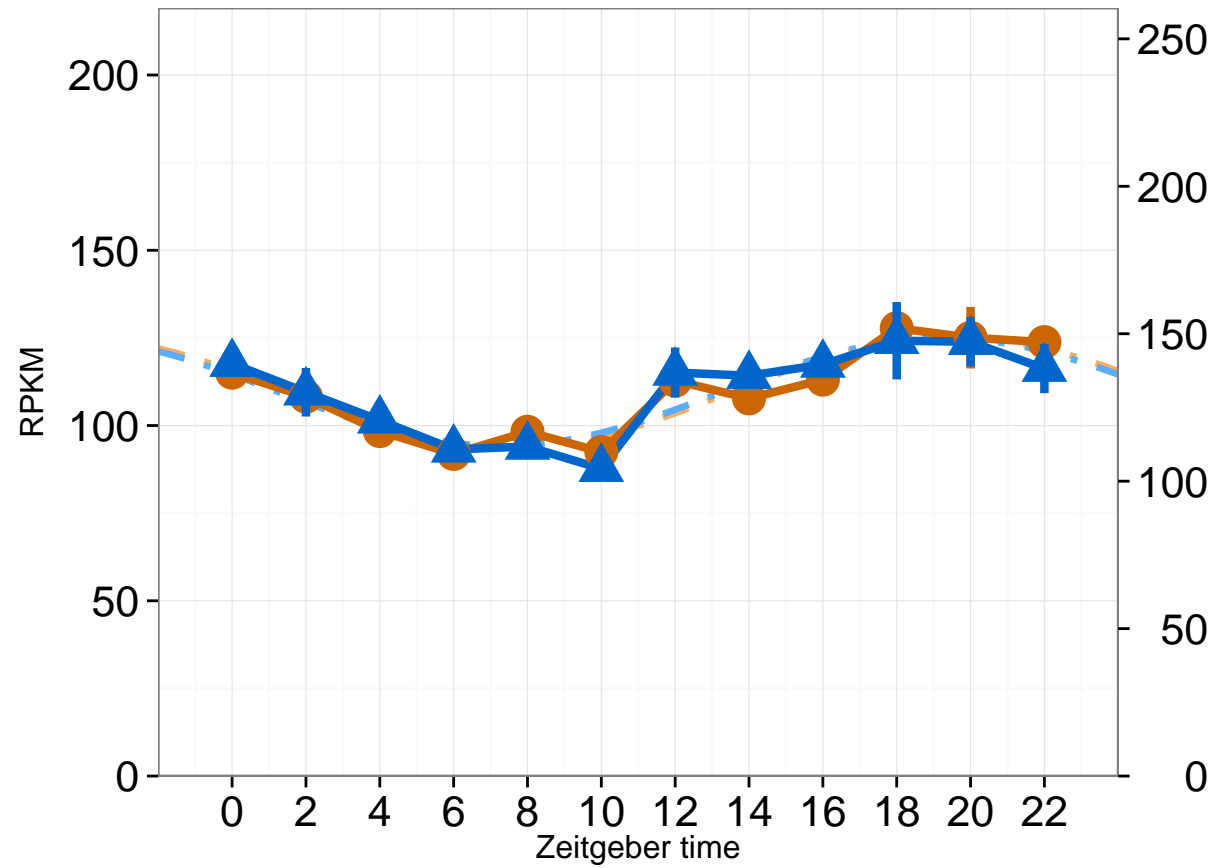

# Aco1

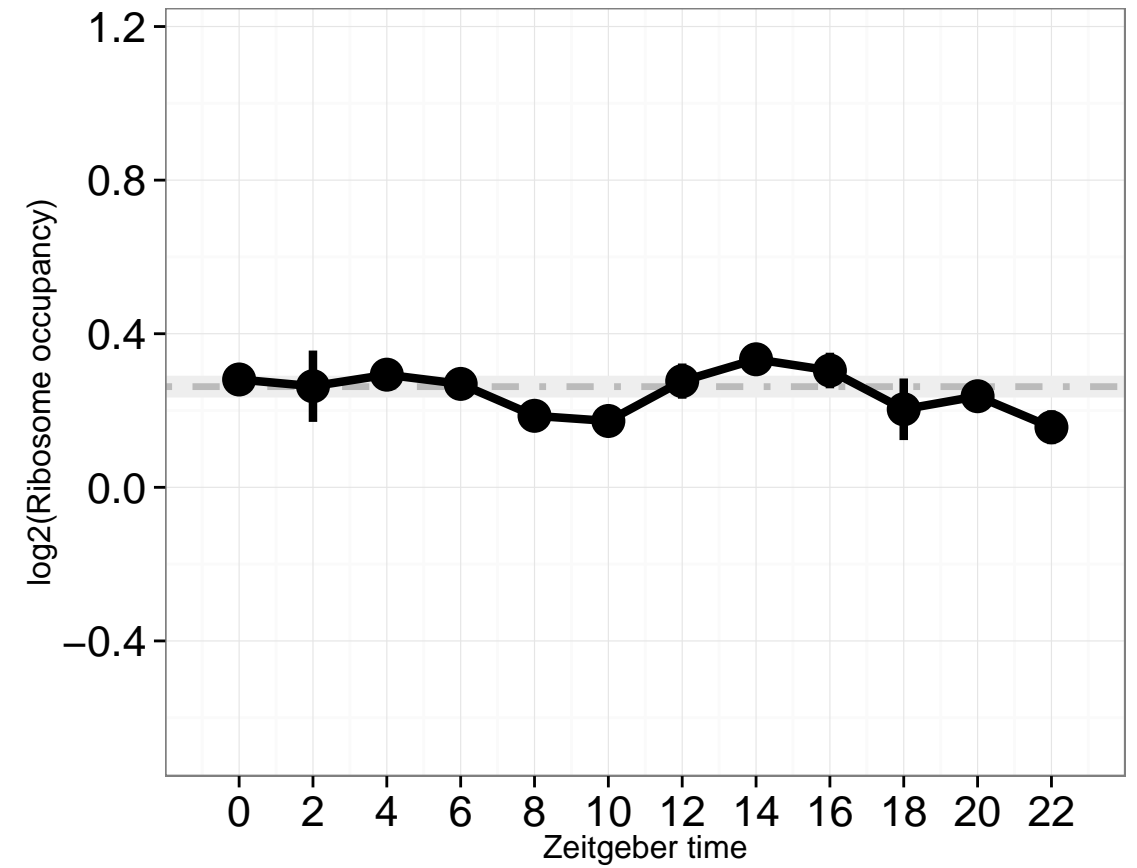

Supplement: SuppDataset_1.zip [file Aco1_set_A.pdf › Supplemental Dataset 1/A-mRNA_nonrhyth_translation_nonrhyth/Aco1_set_A.pdf]

## Aco2

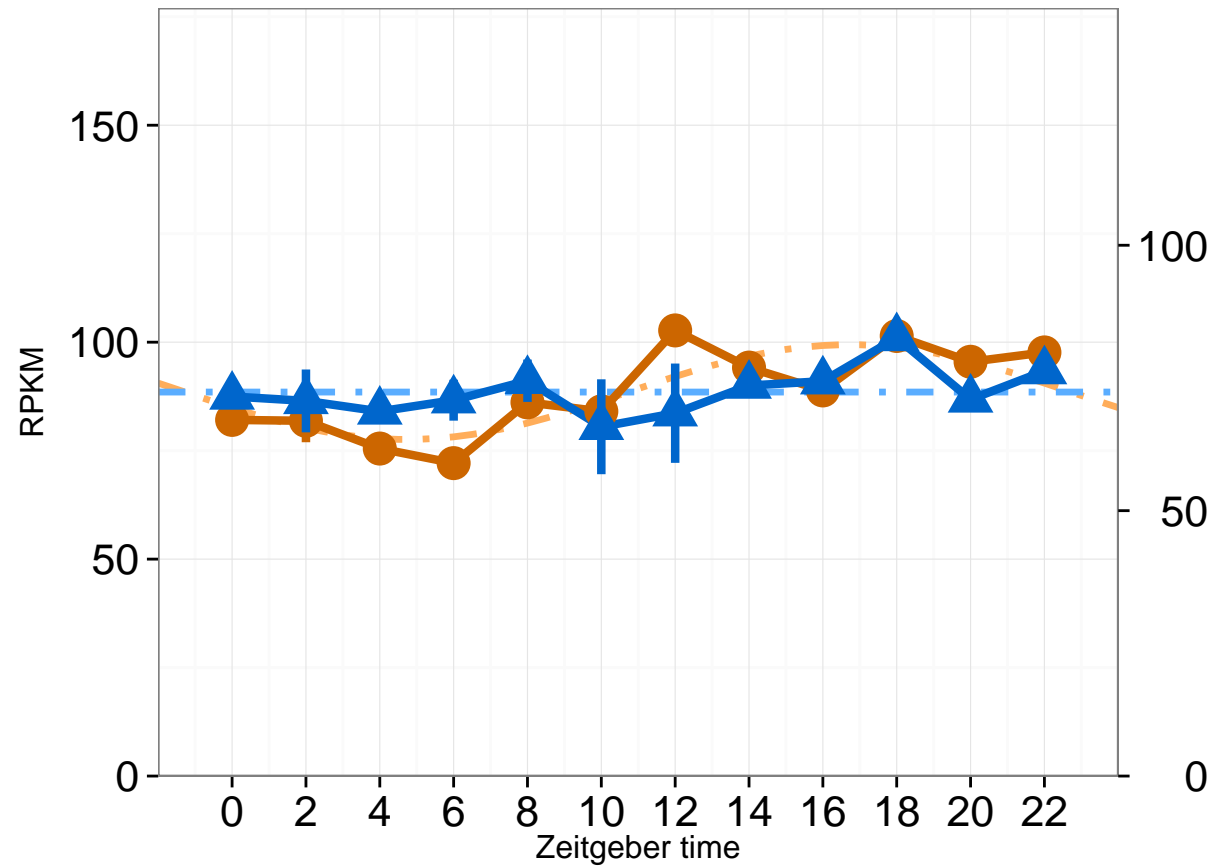

## Aco2

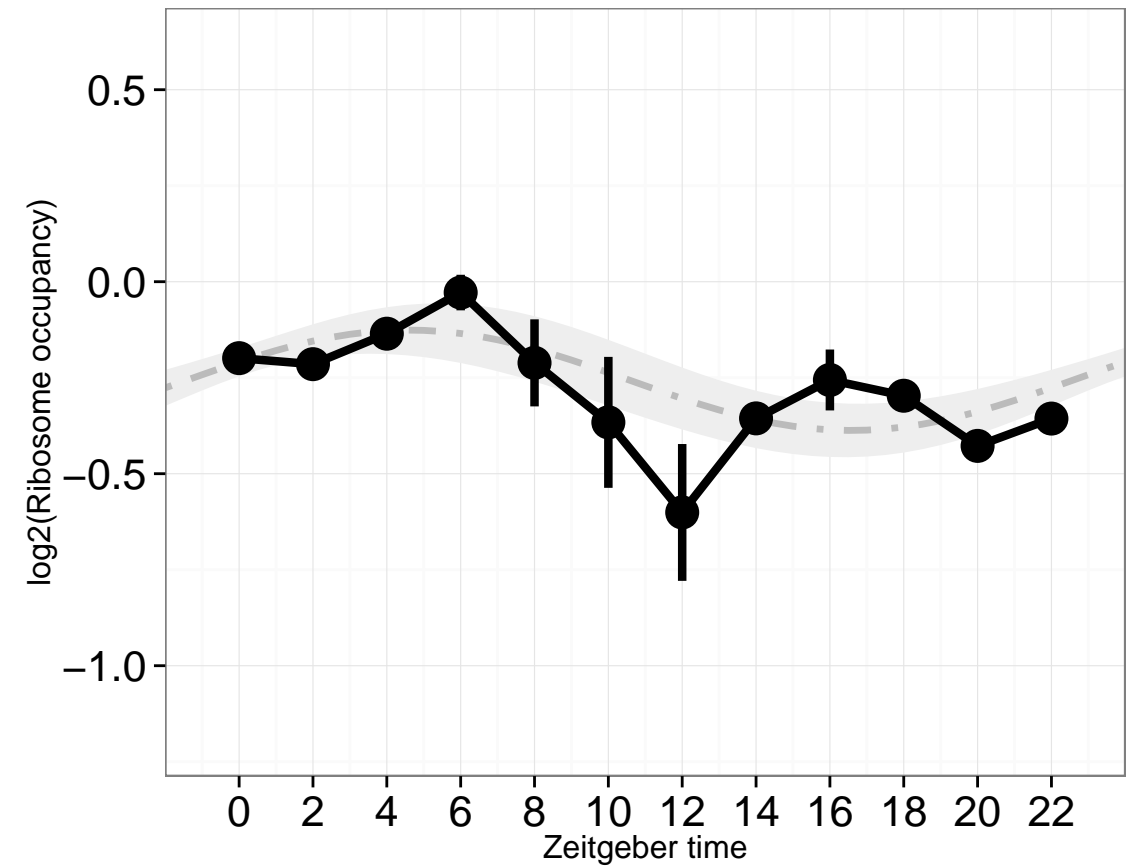

Supplement: SuppDataset_1.zip [file Aco2_set_A.pdf › Supplemental Dataset 1/A-mRNA_nonrhyth_translation_nonrhyth/Aco2_set_A.pdf]

# Acot13

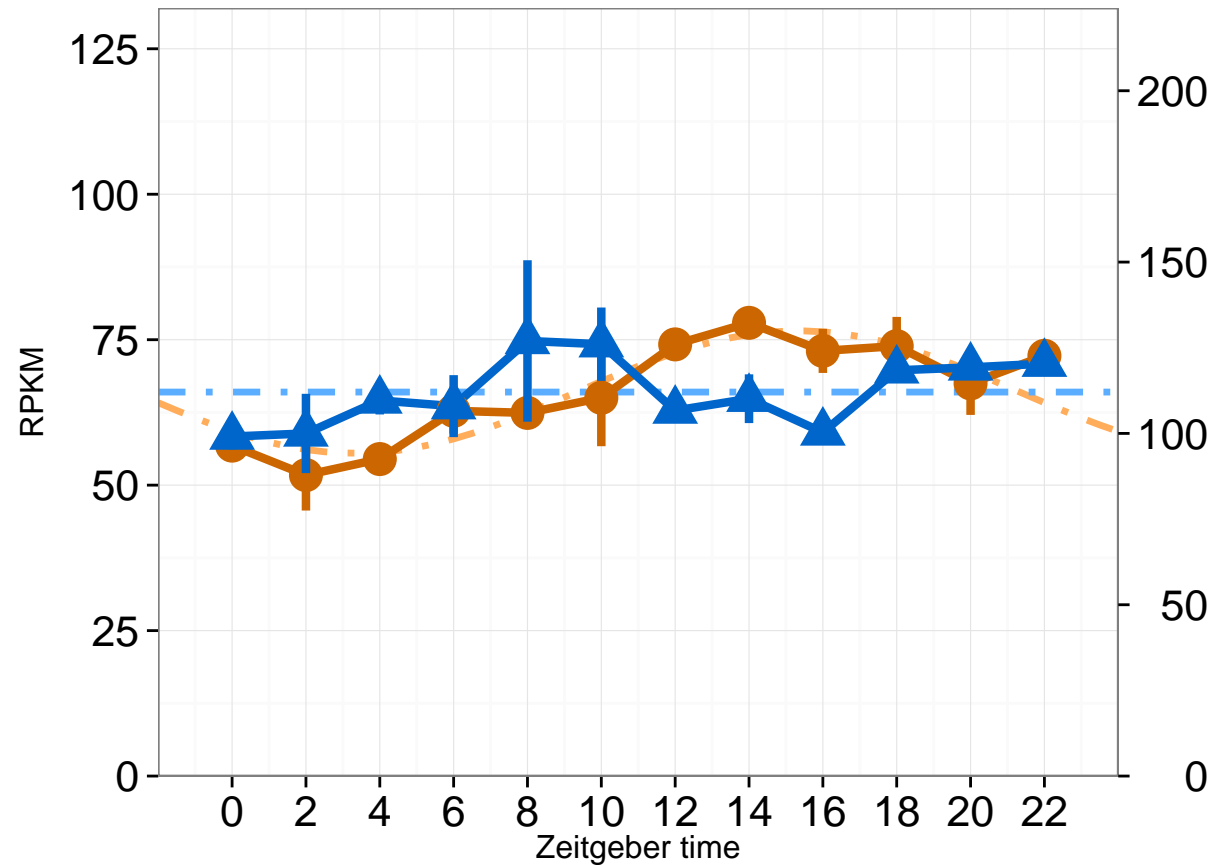

# Acot13

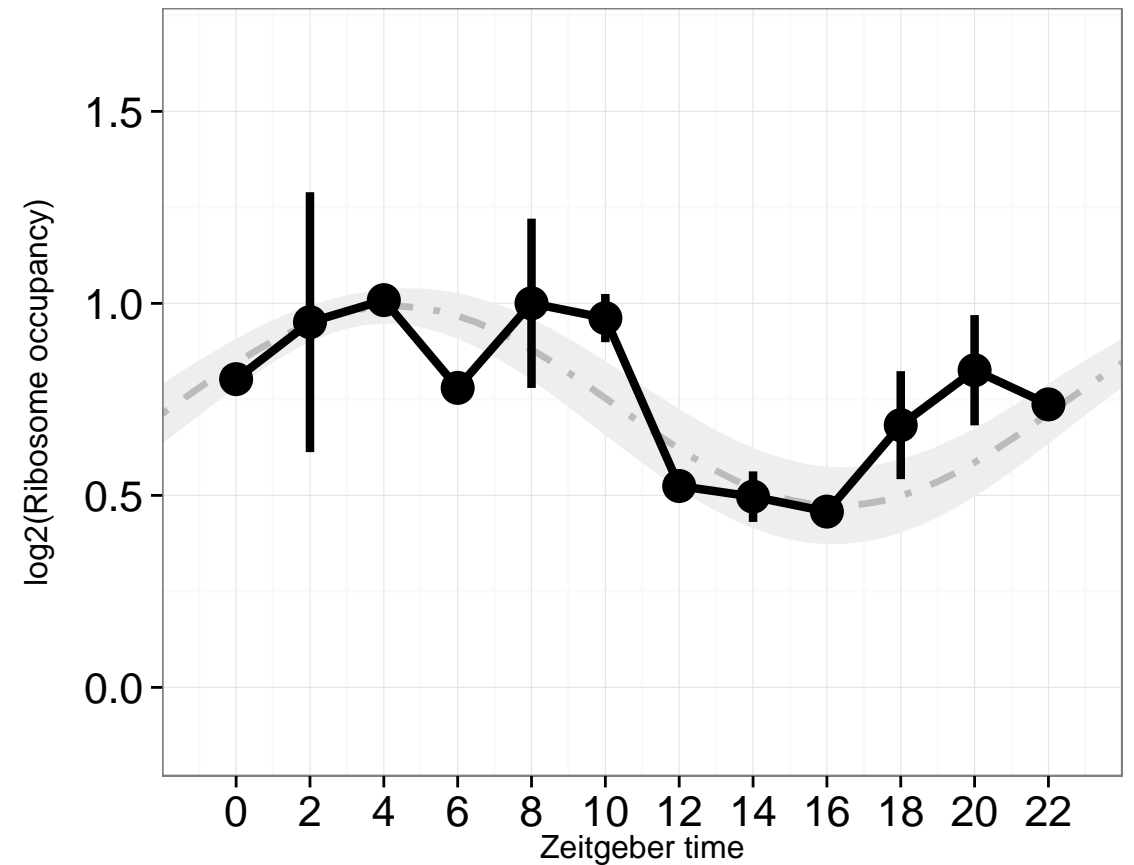

Supplement: SuppDataset_1.zip [file Acot13_set_A.pdf › Supplemental Dataset 1/A-mRNA_nonrhyth_translation_nonrhyth/Acot13_set_A.pdf]

## Acot2

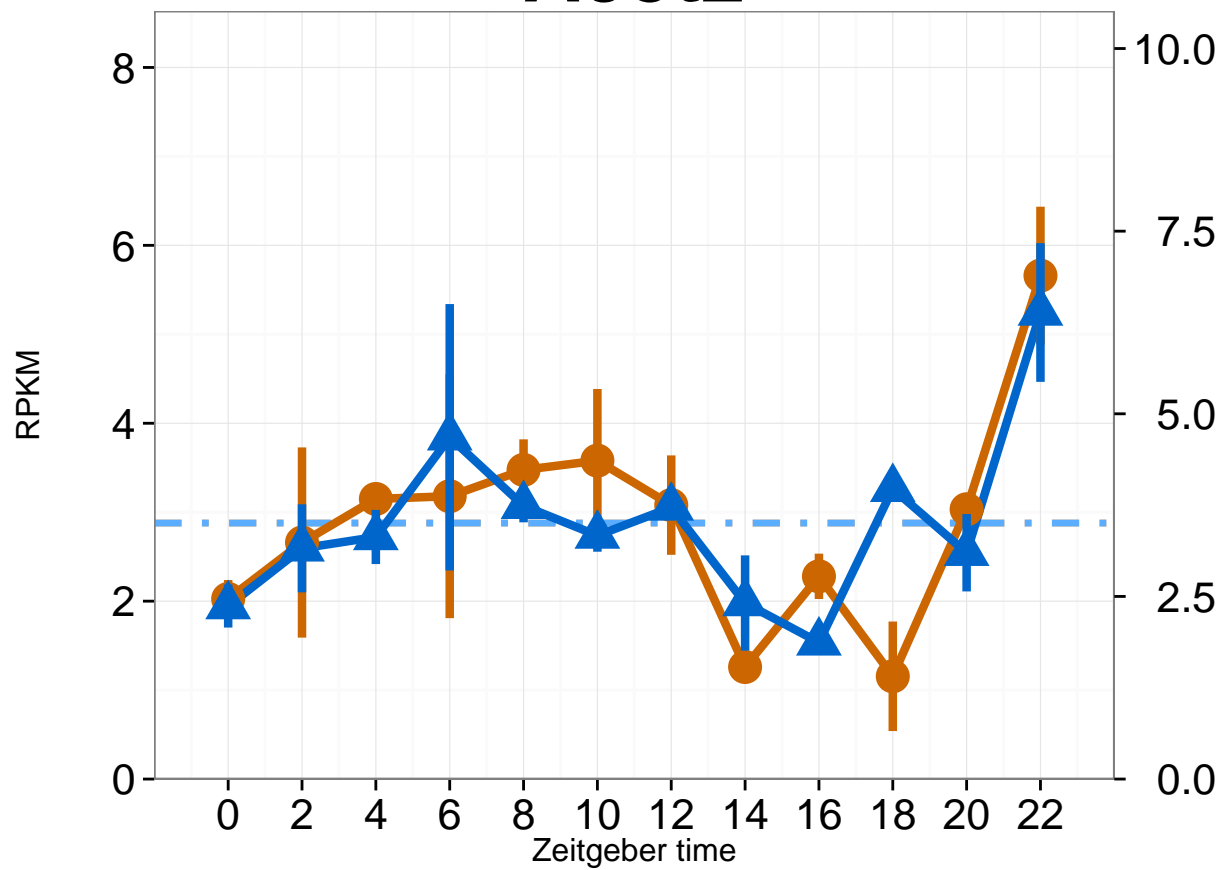

## Acot2

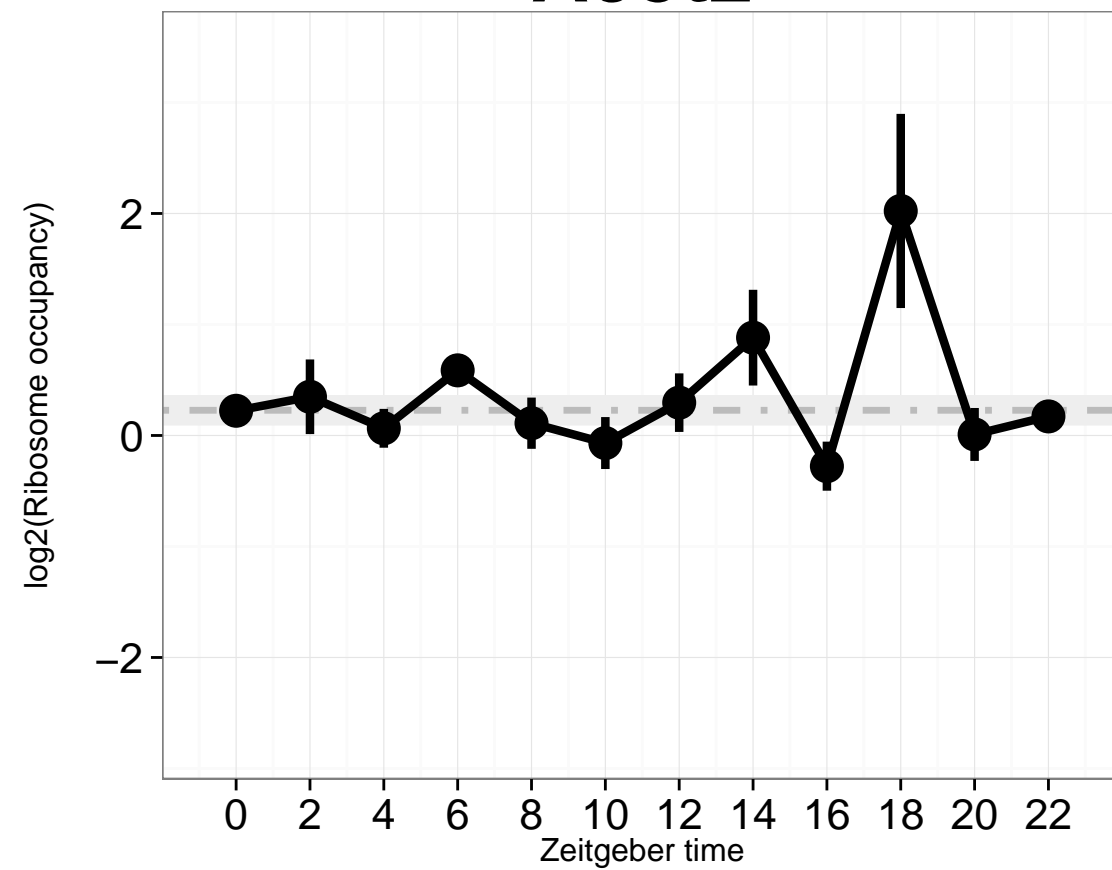

Supplement: SuppDataset_1.zip [file Acot2_set_A.pdf › Supplemental Dataset 1/A-mRNA_nonrhyth_translation_nonrhyth/Acot2_set_A.pdf]

## Acot3

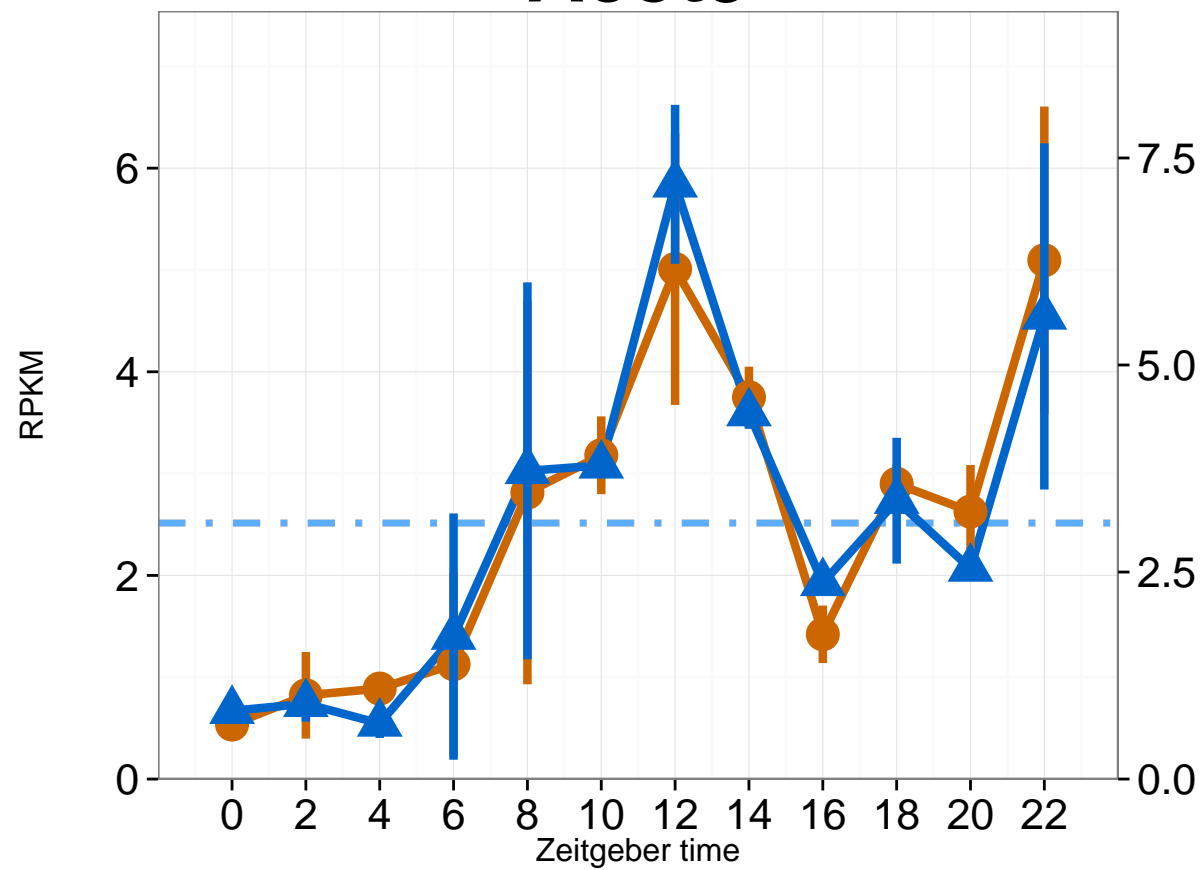

## Acot3

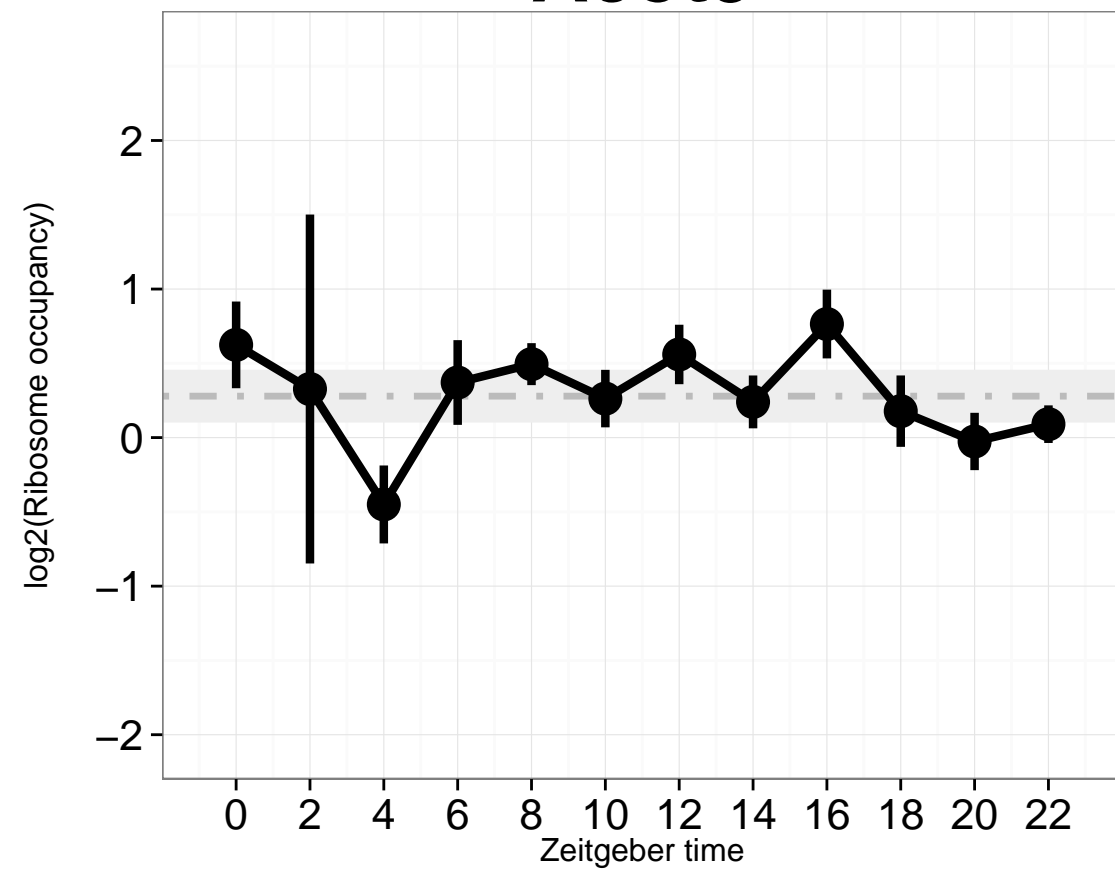

Supplement: SuppDataset_1.zip [file Acot3_set_A.pdf › Supplemental Dataset 1/A-mRNA_nonrhyth_translation_nonrhyth/Acot3_set_A.pdf]

**Acot6 TR**

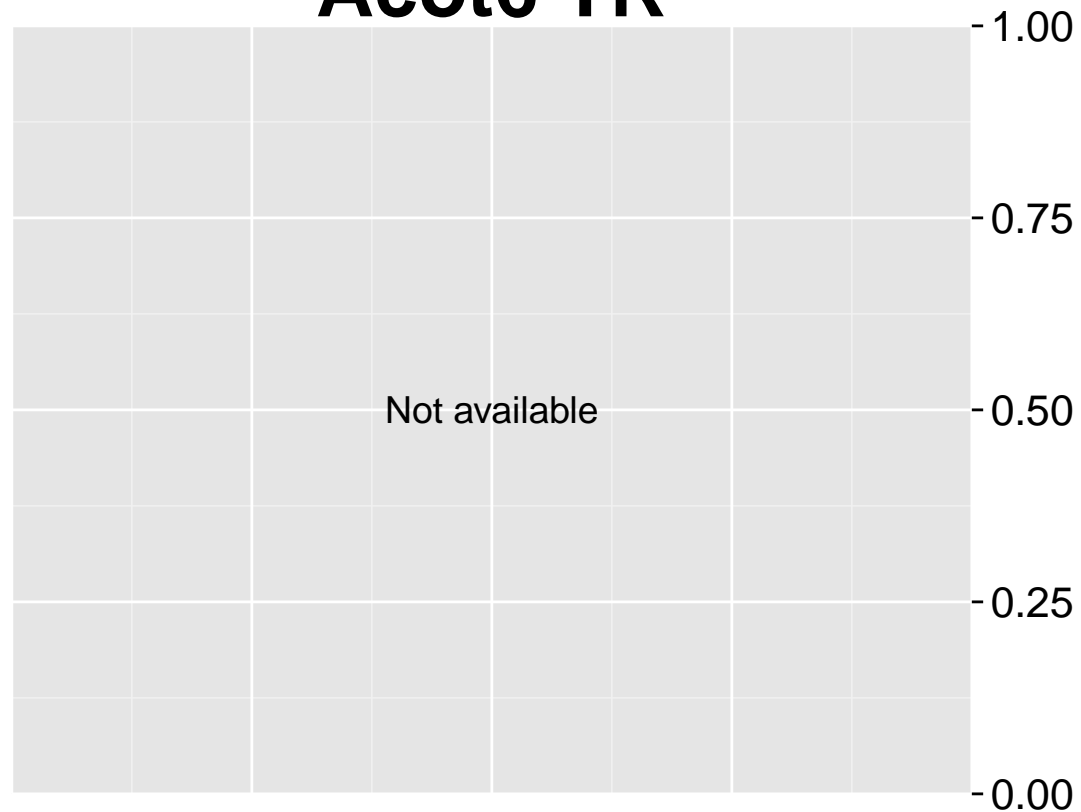

**Acot6 log2(Ribosome occupancy**

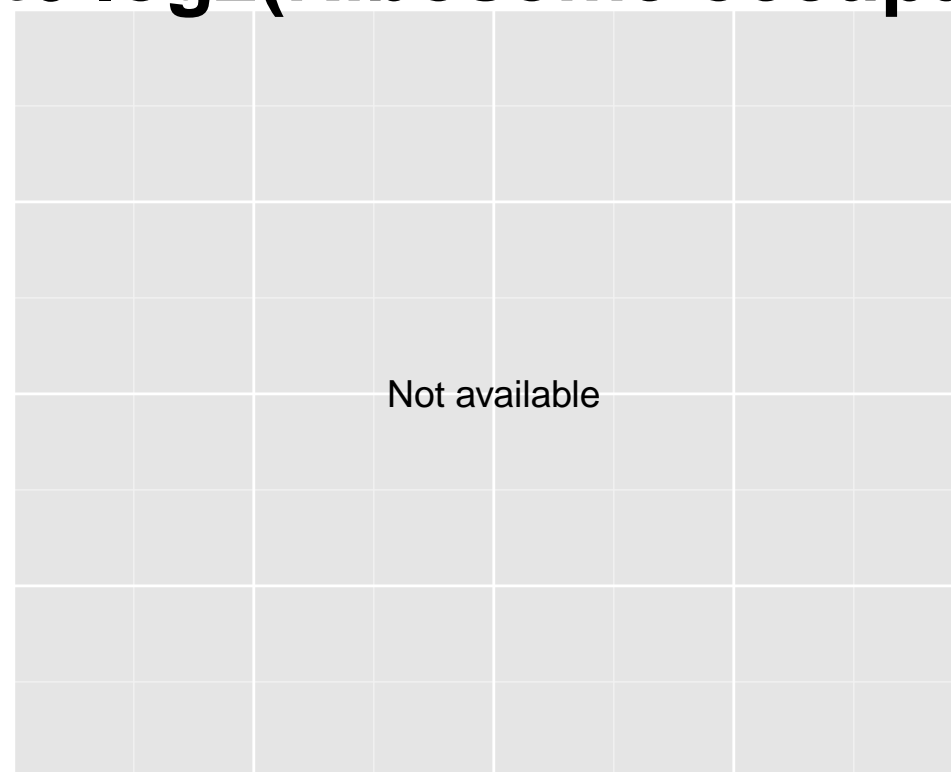

Supplement: SuppDataset_1.zip [file Acot6_set_A.pdf › Supplemental Dataset 1/A-mRNA_nonrhyth_translation_nonrhyth/Acot6_set_A.pdf]

# Acot7

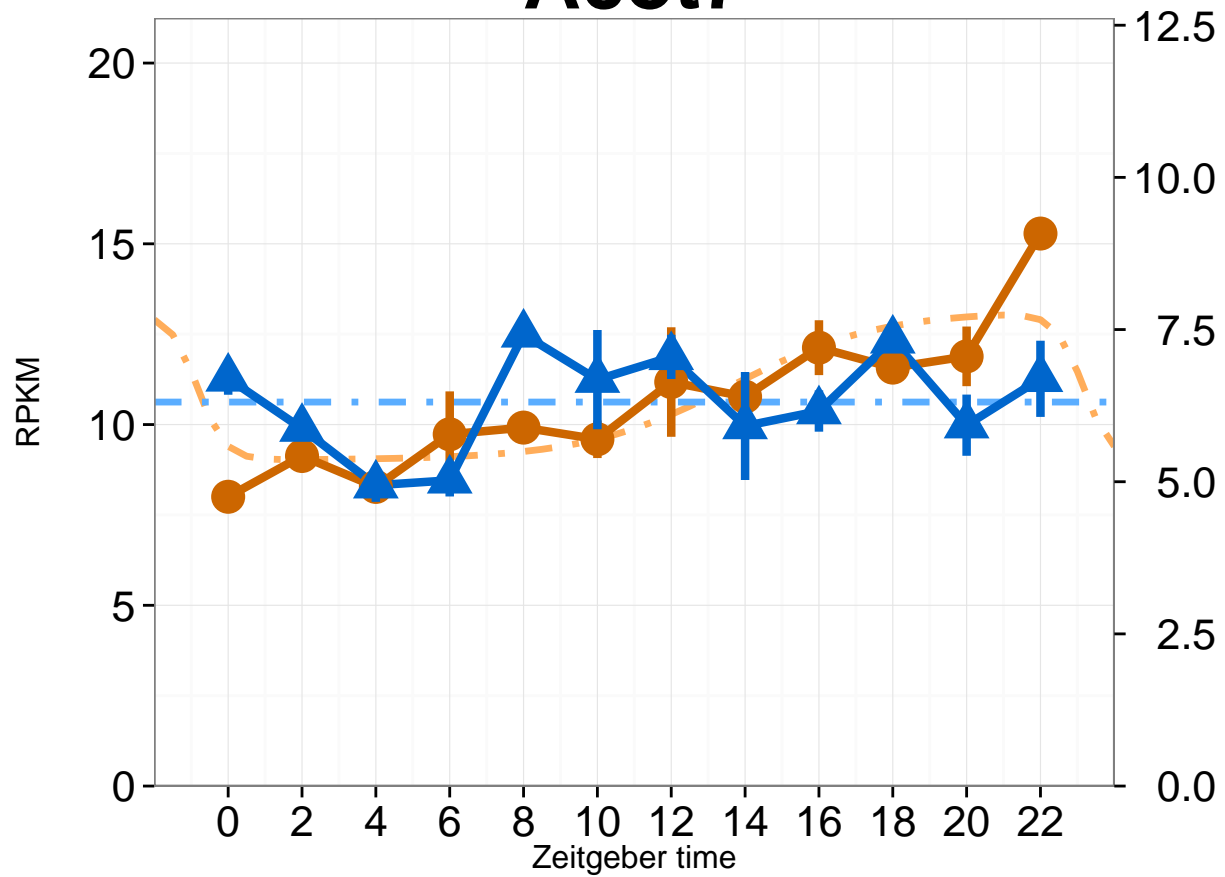

# Acot7

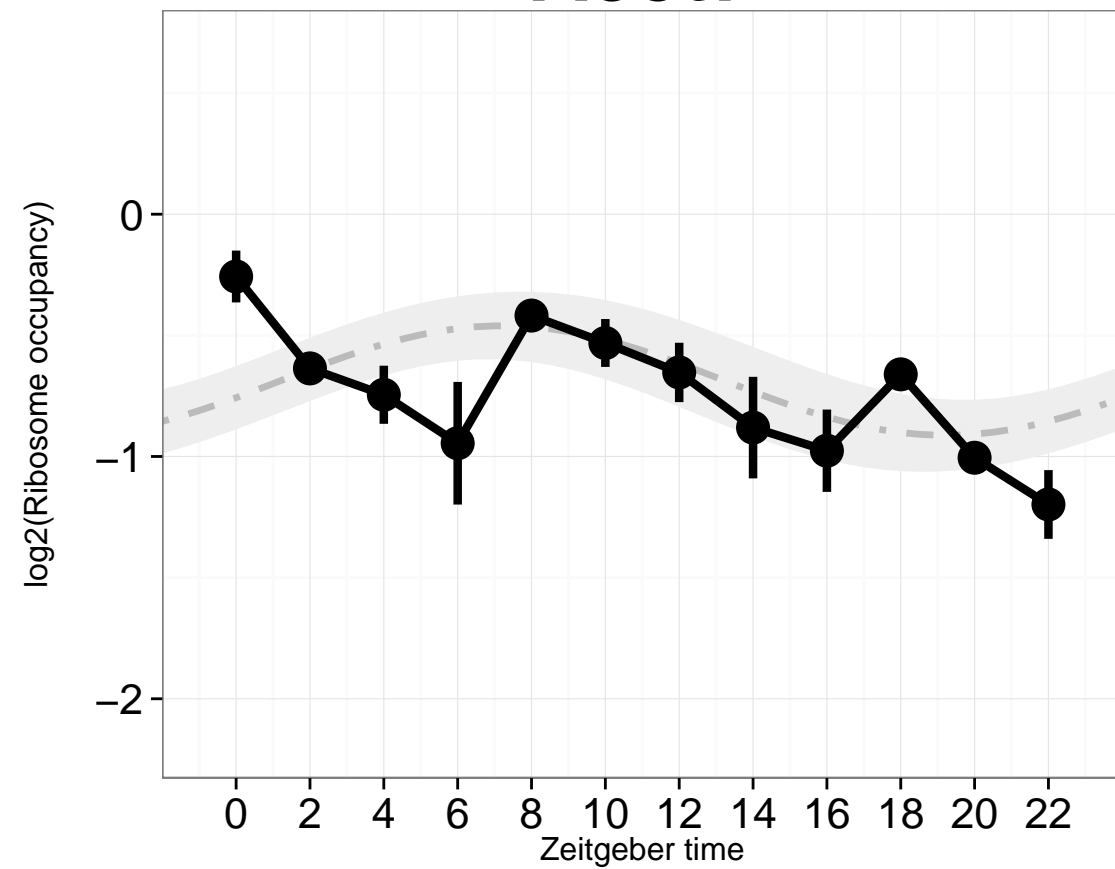

Supplement: SuppDataset_1.zip [file Acot7_set_A.pdf › Supplemental Dataset 1/A-mRNA_nonrhyth_translation_nonrhyth/Acot7_set_A.pdf]

## Acot8

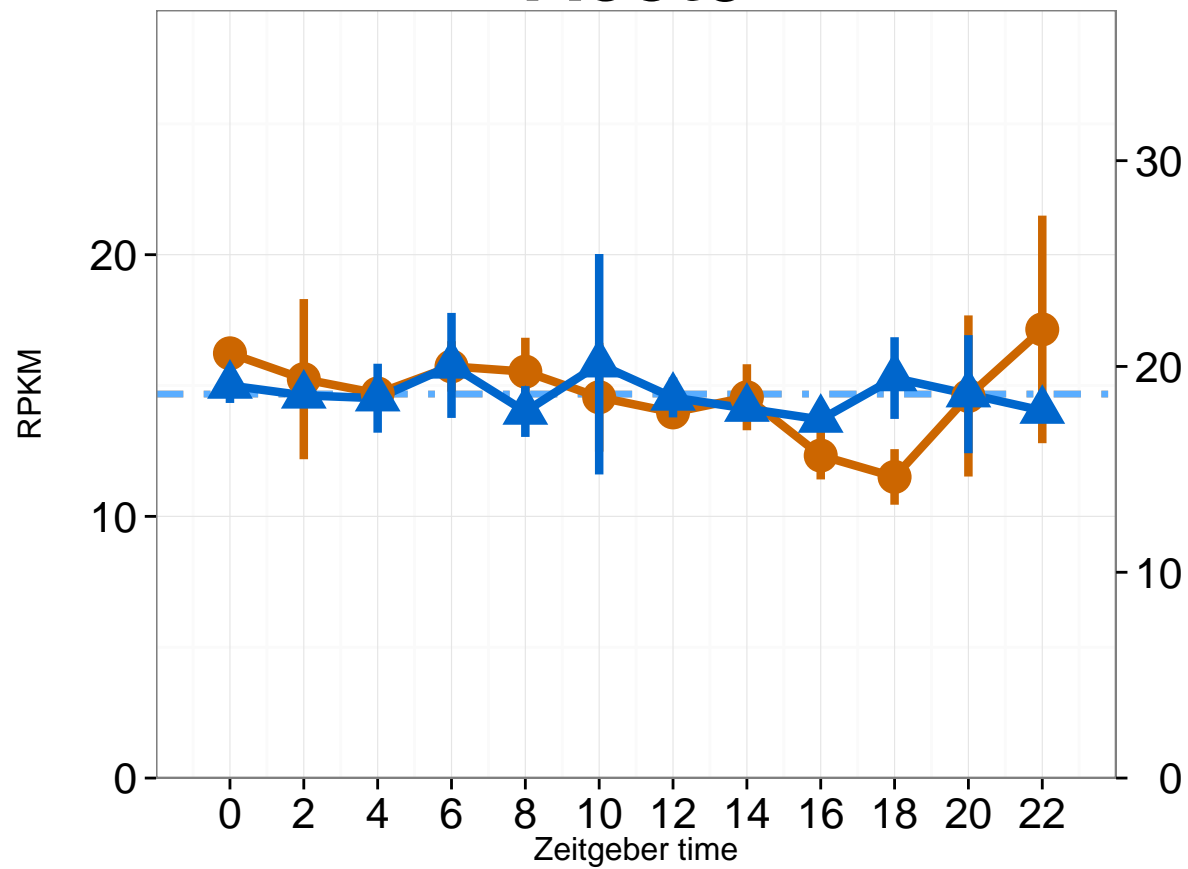

## Acot8

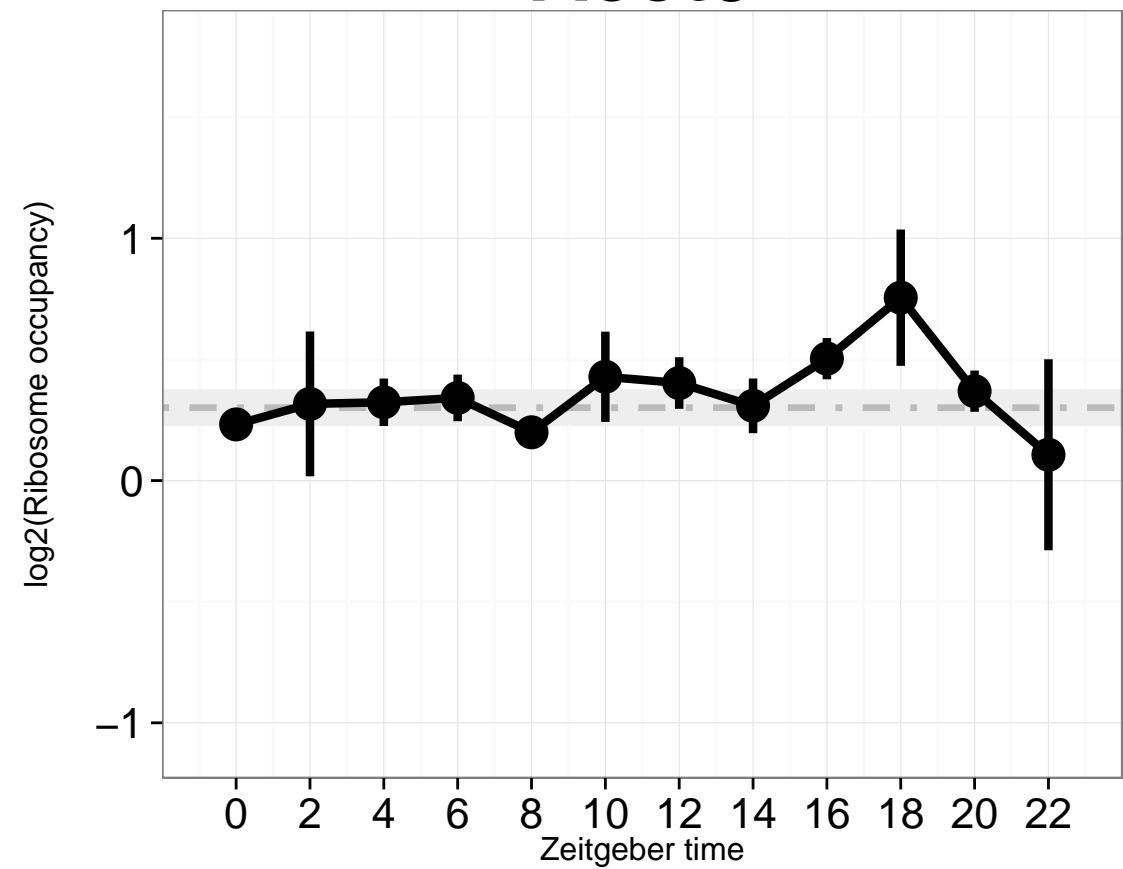

Supplement: SuppDataset_1.zip [file Acot8_set_A.pdf › Supplemental Dataset 1/A-mRNA_nonrhyth_translation_nonrhyth/Acot8_set_A.pdf]

## Acot9

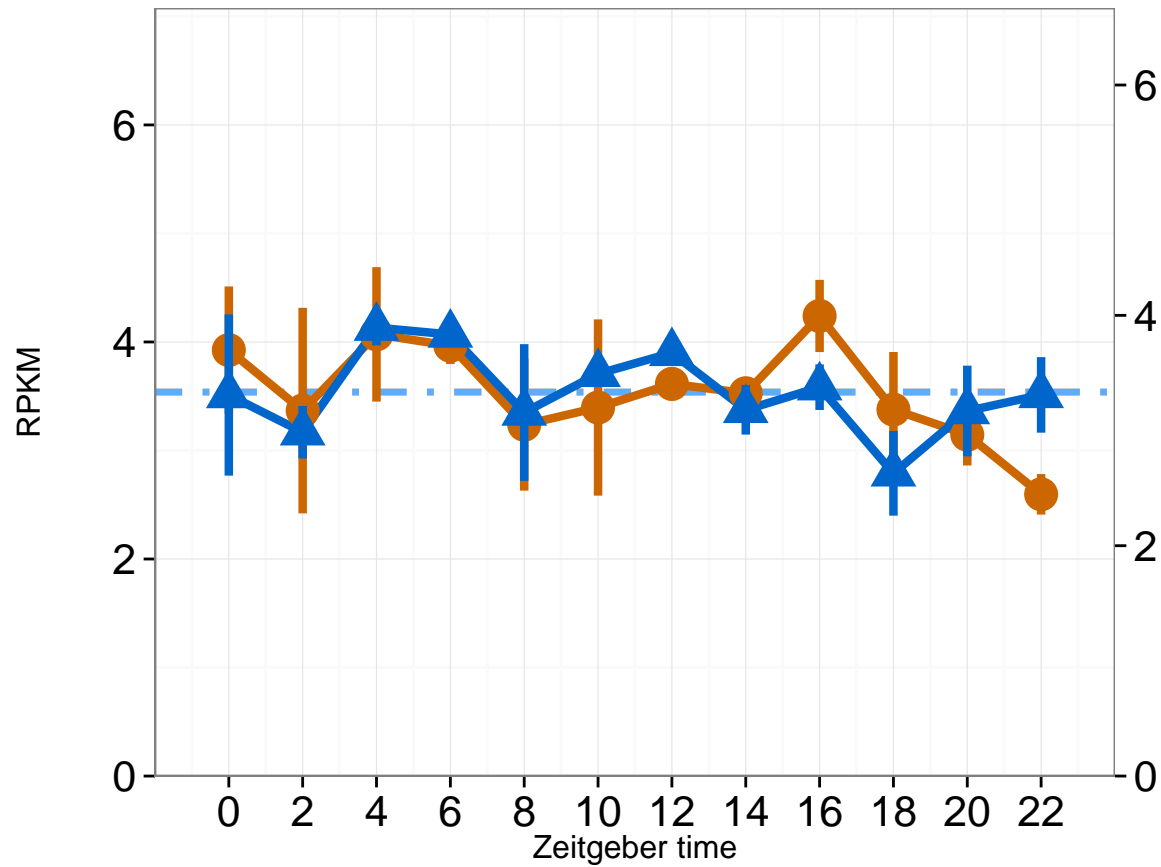

## Acot9

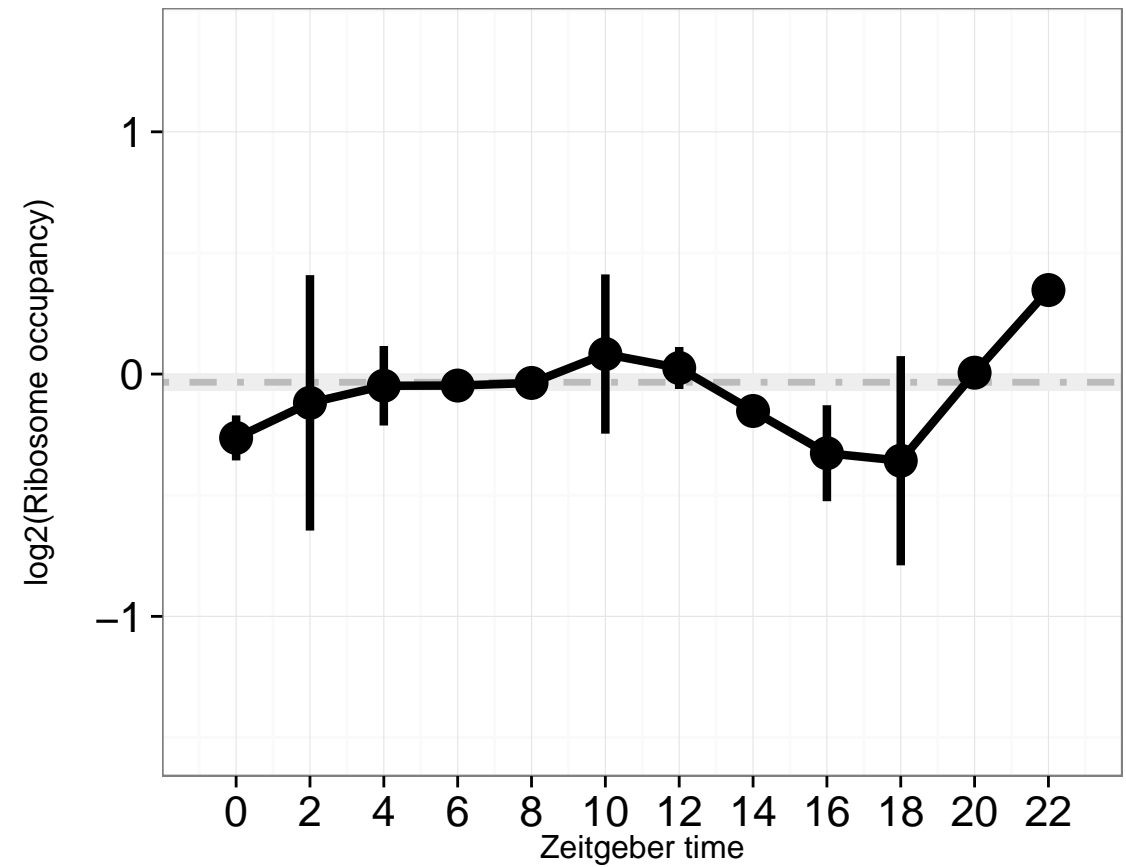

Supplement: SuppDataset_1.zip [file Acot9_set_A.pdf › Supplemental Dataset 1/A-mRNA_nonrhyth_translation_nonrhyth/Acot9_set_A.pdf]

# Acox1

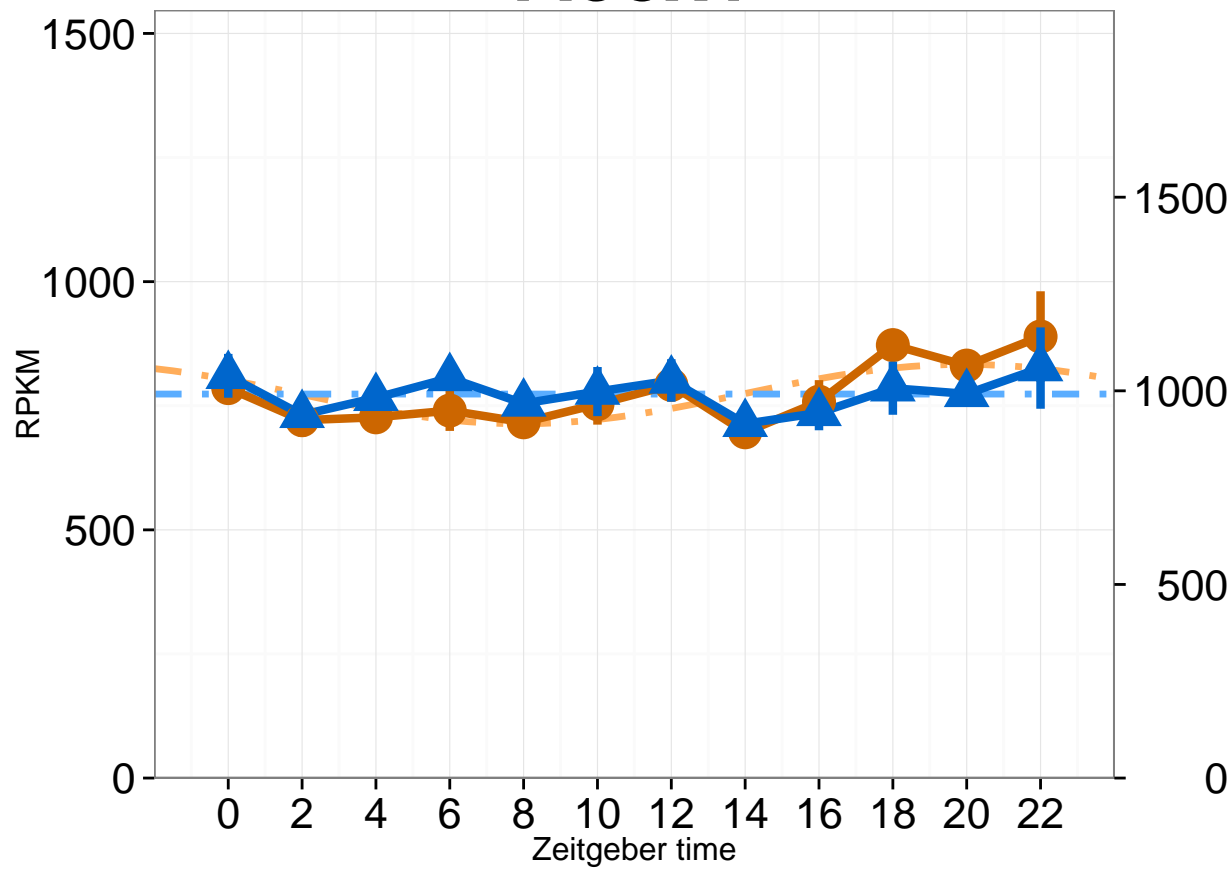

# Acox1

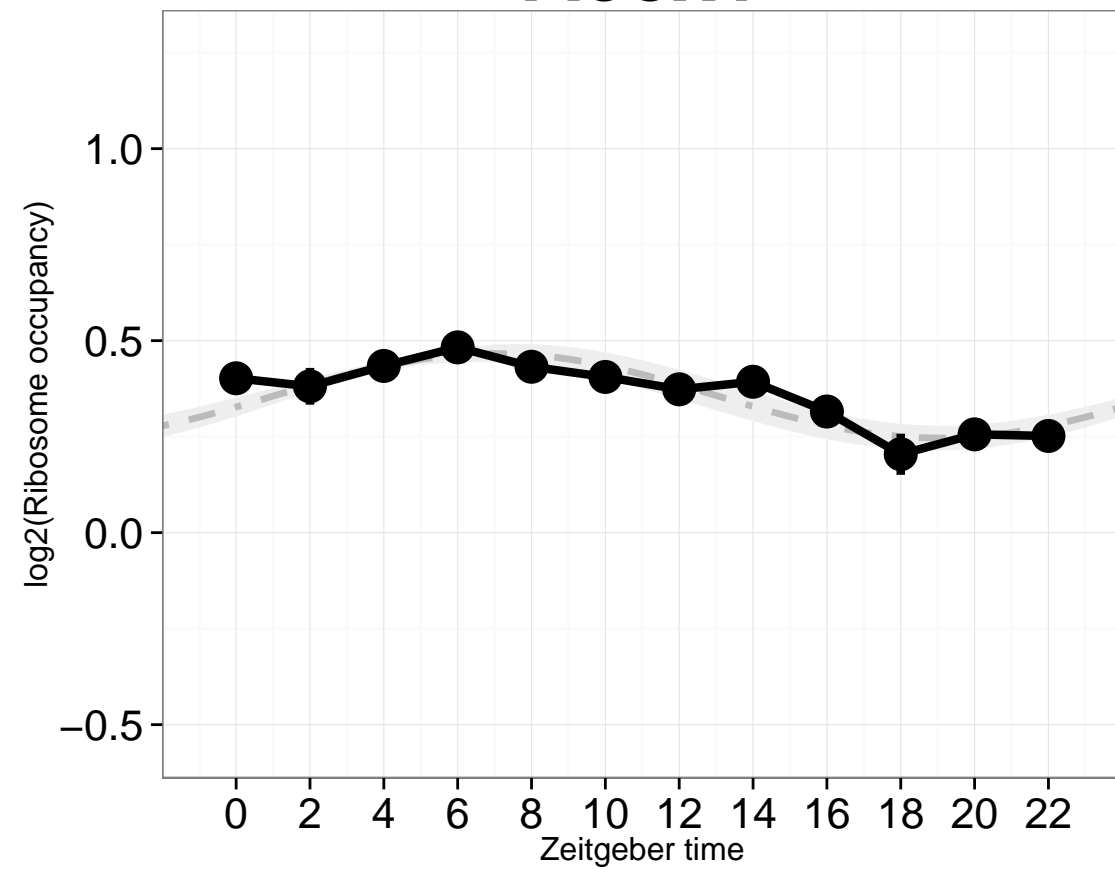

Supplement: SuppDataset_1.zip [file Acox1_set_A.pdf › Supplemental Dataset 1/A-mRNA_nonrhyth_translation_nonrhyth/Acox1_set_A.pdf]

## Acox3

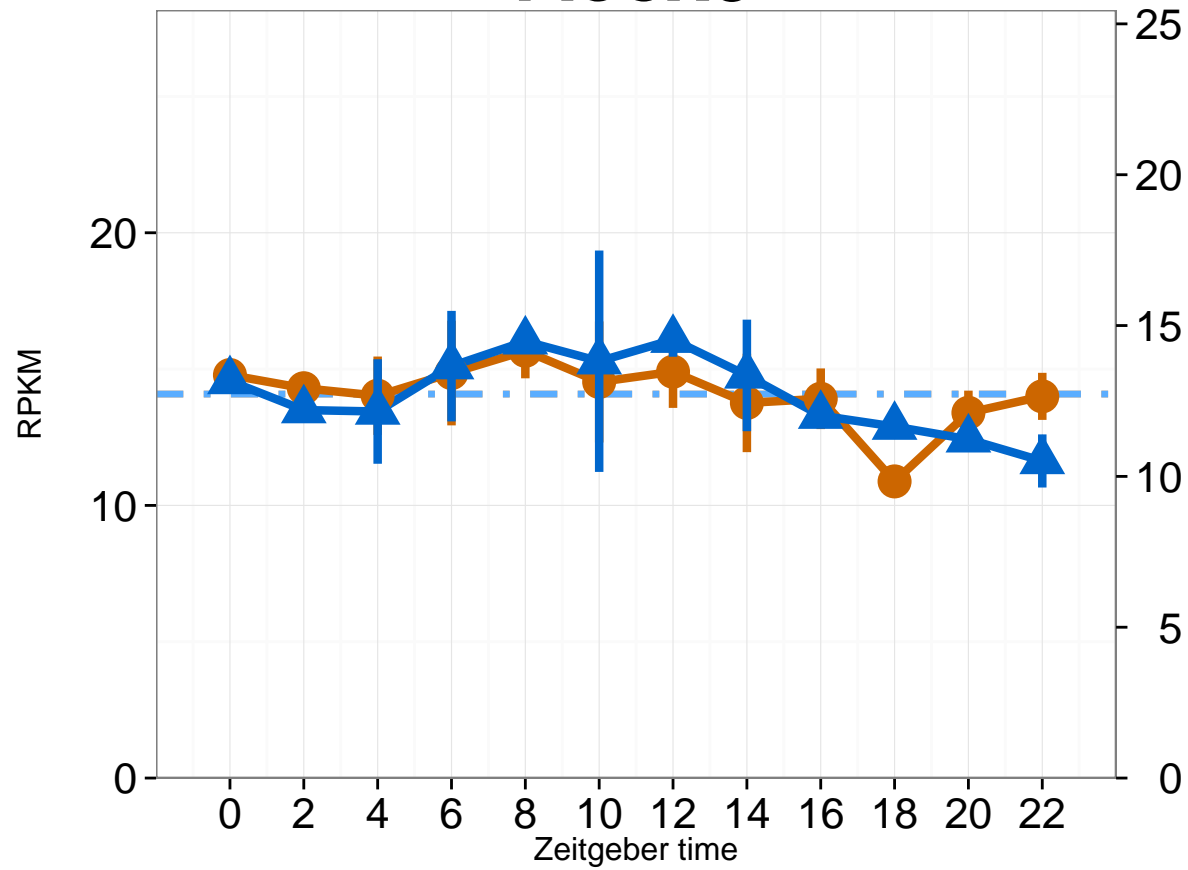

## Acox3

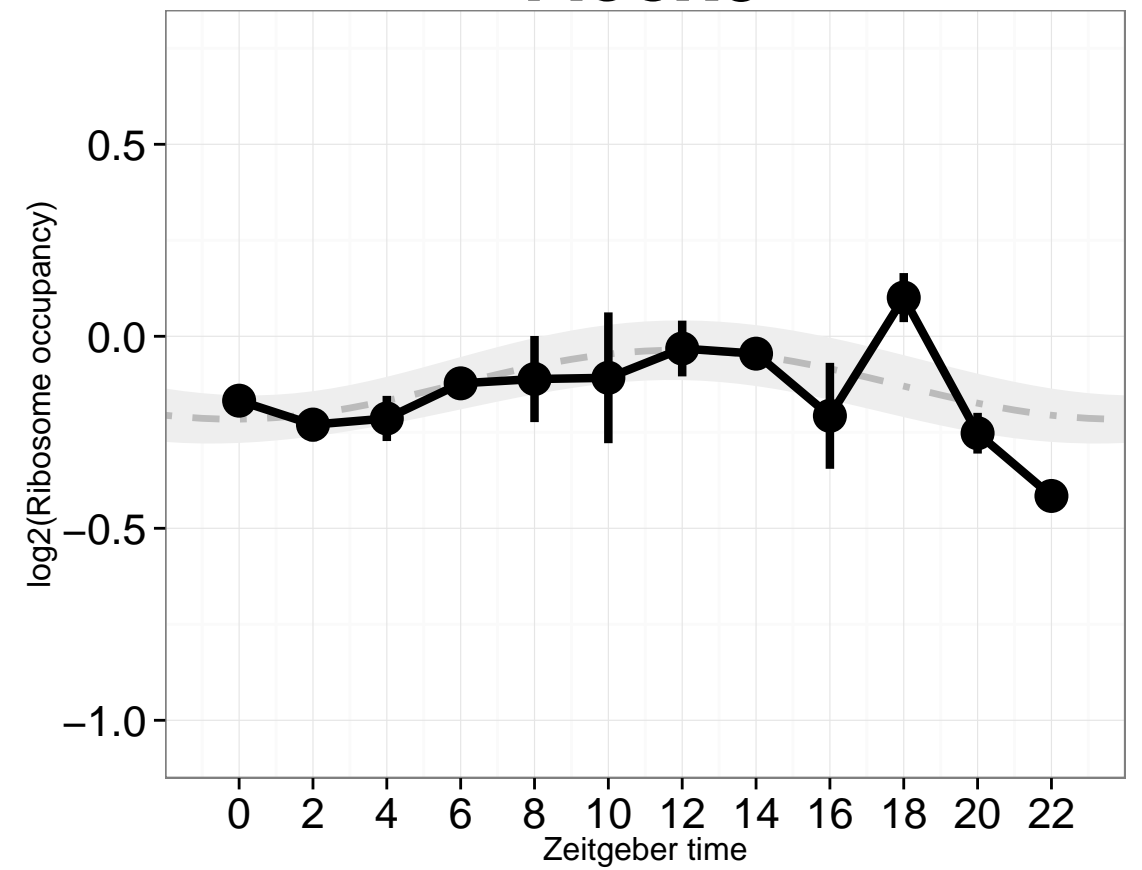

Supplement: SuppDataset_1.zip [file Acox3_set_A.pdf › Supplemental Dataset 1/A-mRNA_nonrhyth_translation_nonrhyth/Acox3_set_A.pdf]

# Acp1

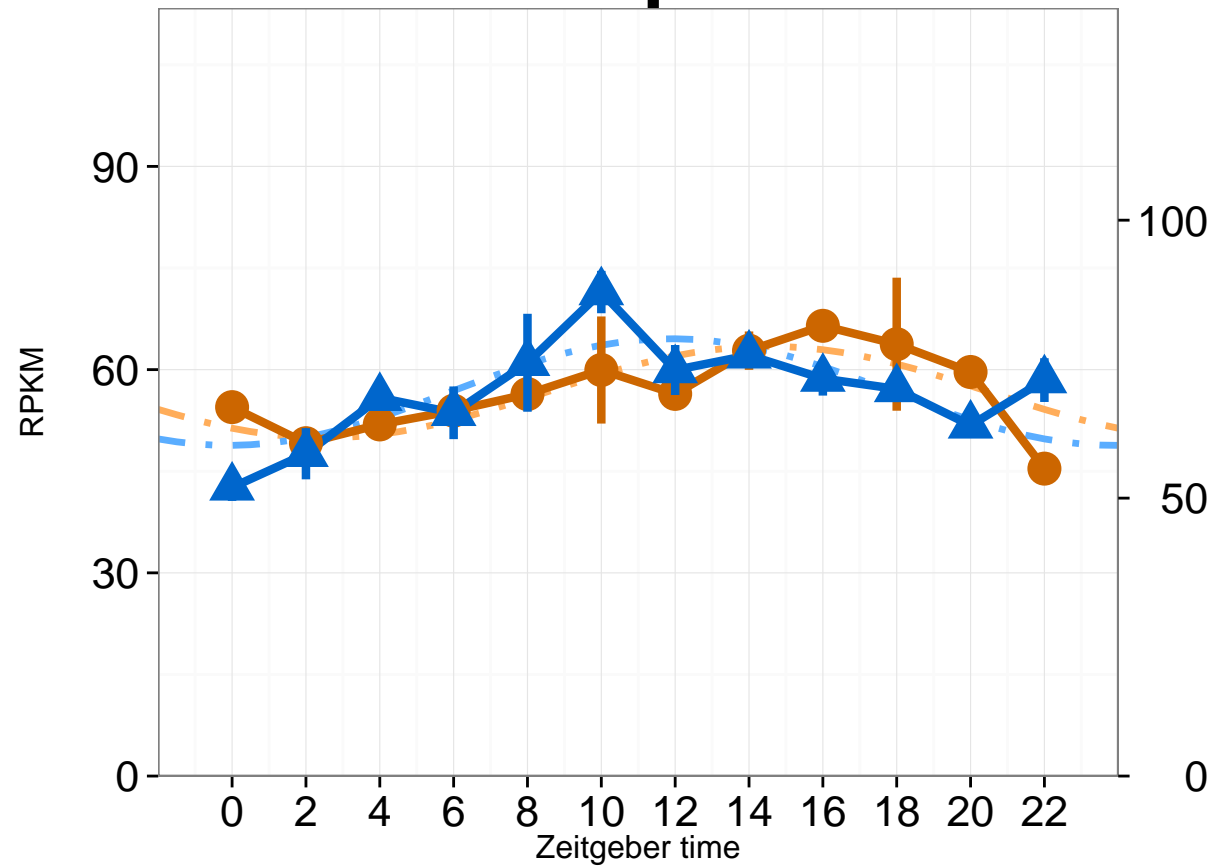

# Acp1

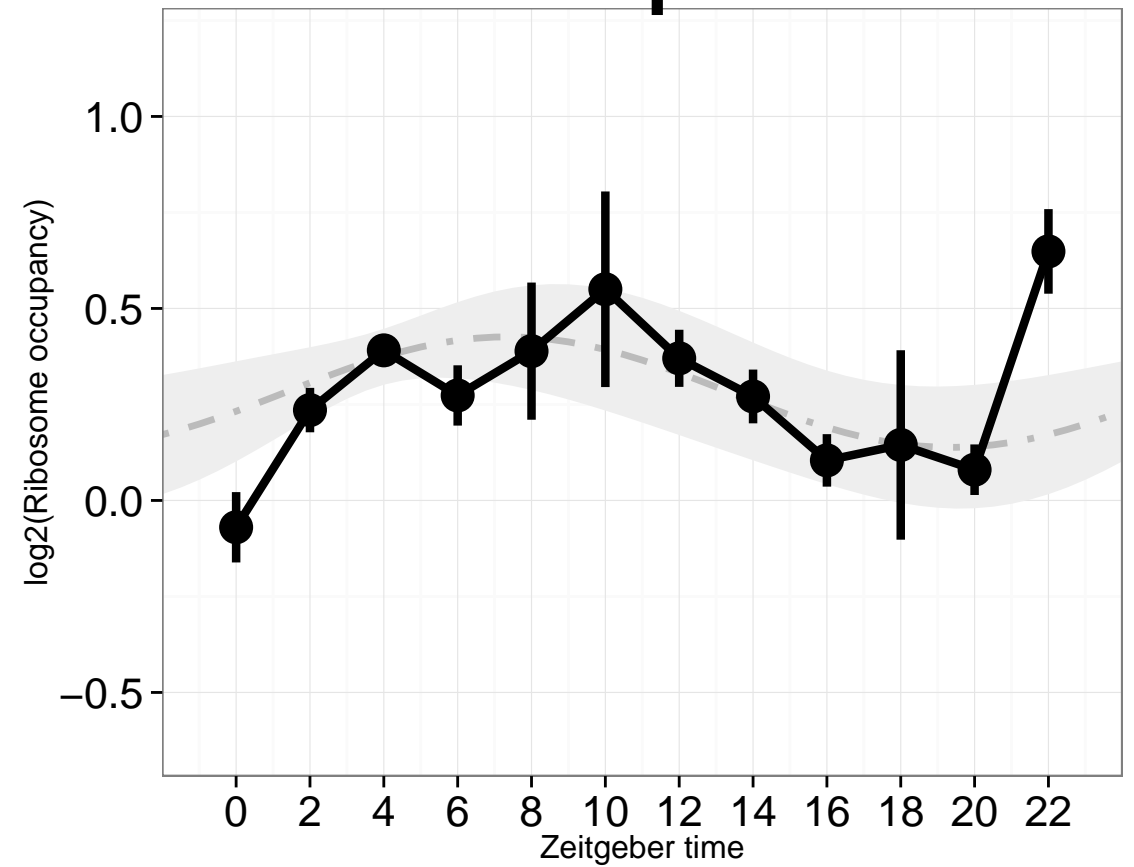

Supplement: SuppDataset_1.zip [file Acp1_set_A.pdf › Supplemental Dataset 1/A-mRNA_nonrhyth_translation_nonrhyth/Acp1_set_A.pdf]

# Acp2

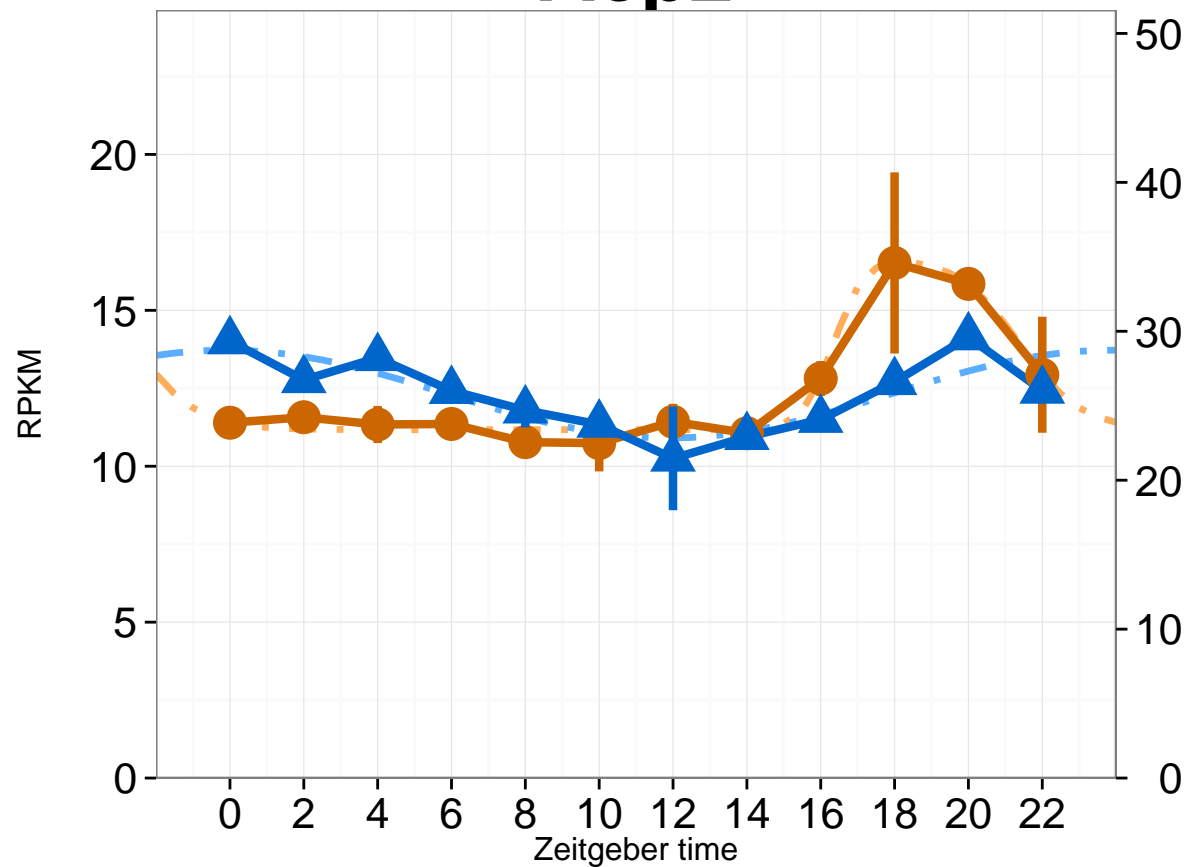

# Acp2

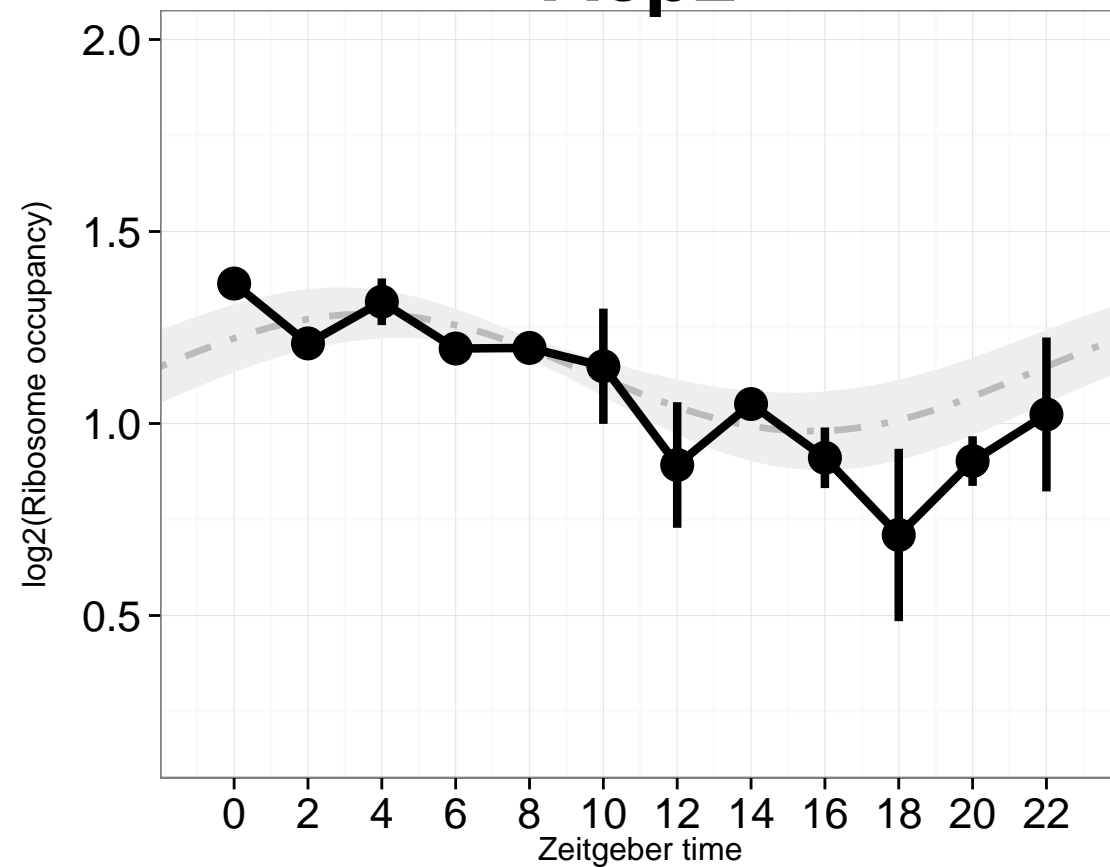

Supplement: SuppDataset_1.zip [file Acp2_set_A.pdf › Supplemental Dataset 1/A-mRNA_nonrhyth_translation_nonrhyth/Acp2_set_A.pdf]

# Acp5

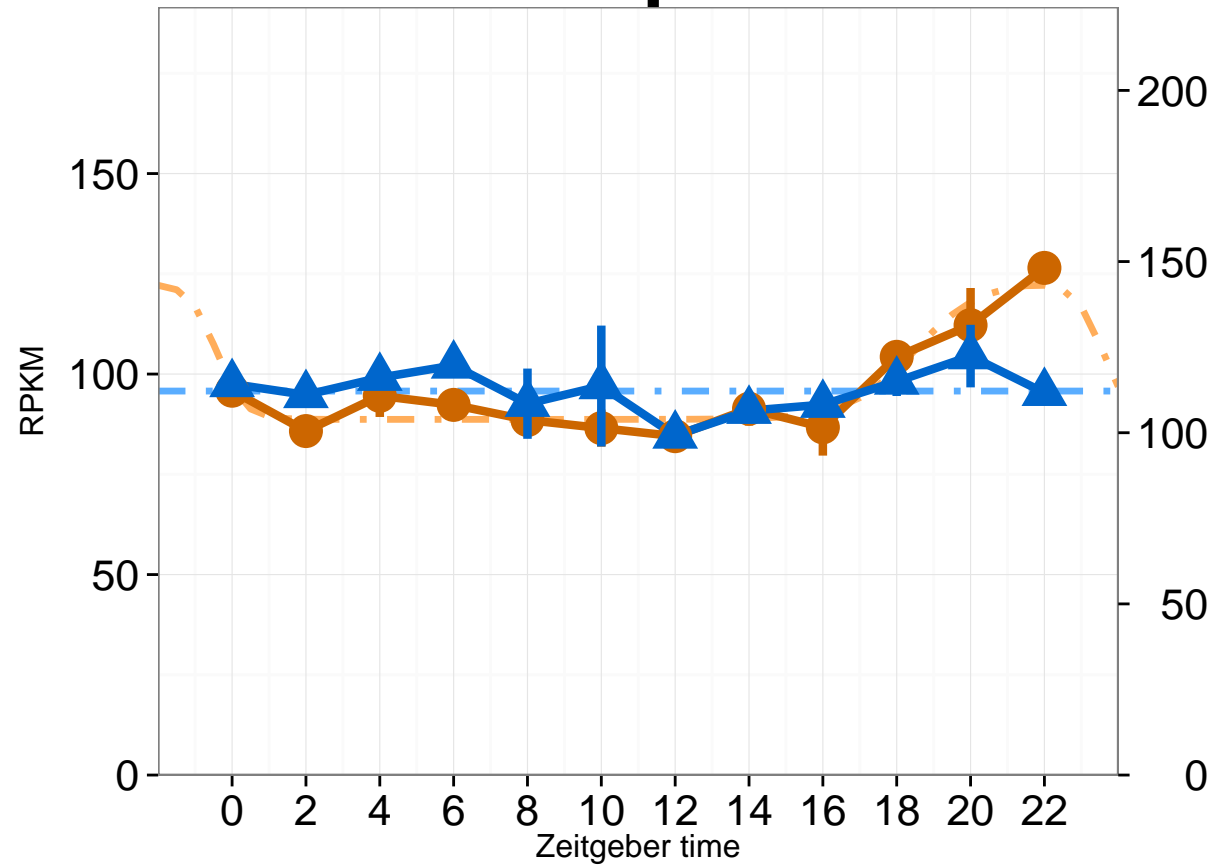

# Acp5

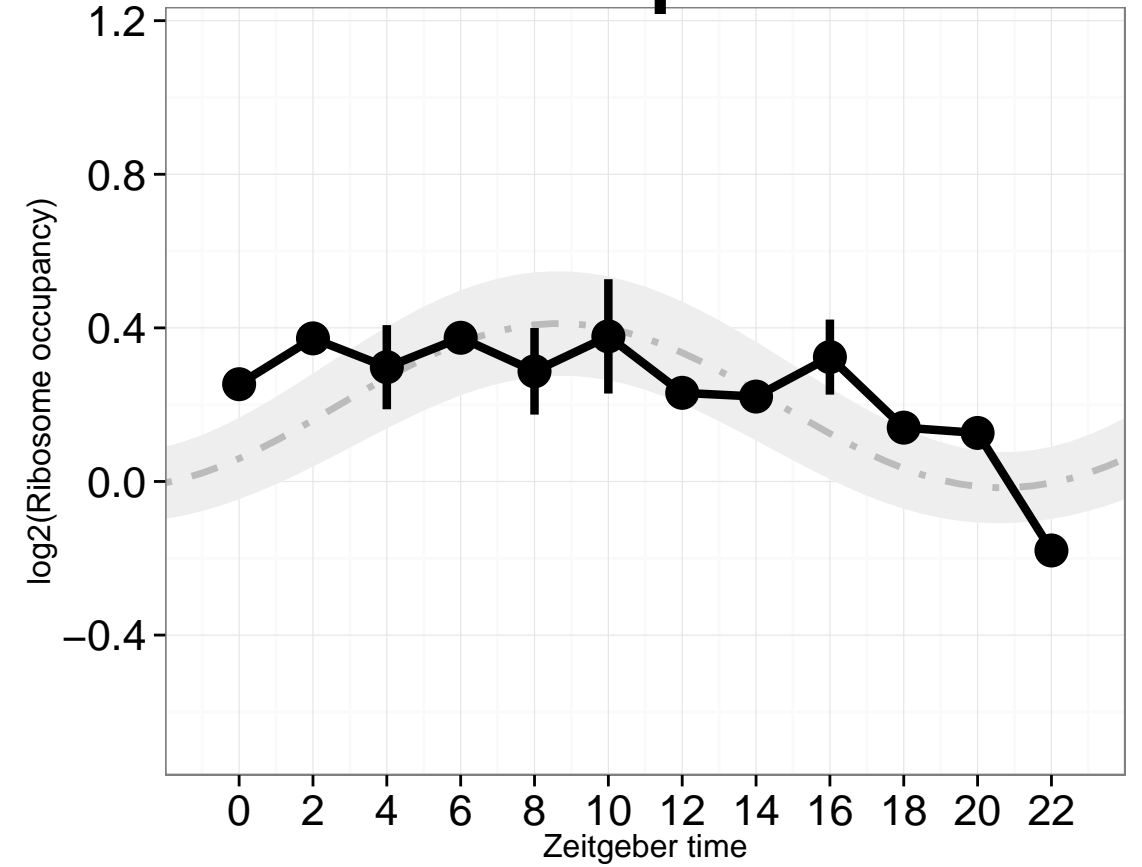

Supplement: SuppDataset_1.zip [file Acp5_set_A.pdf › Supplemental Dataset 1/A-mRNA_nonrhyth_translation_nonrhyth/Acp5_set_A.pdf]

# Acp6

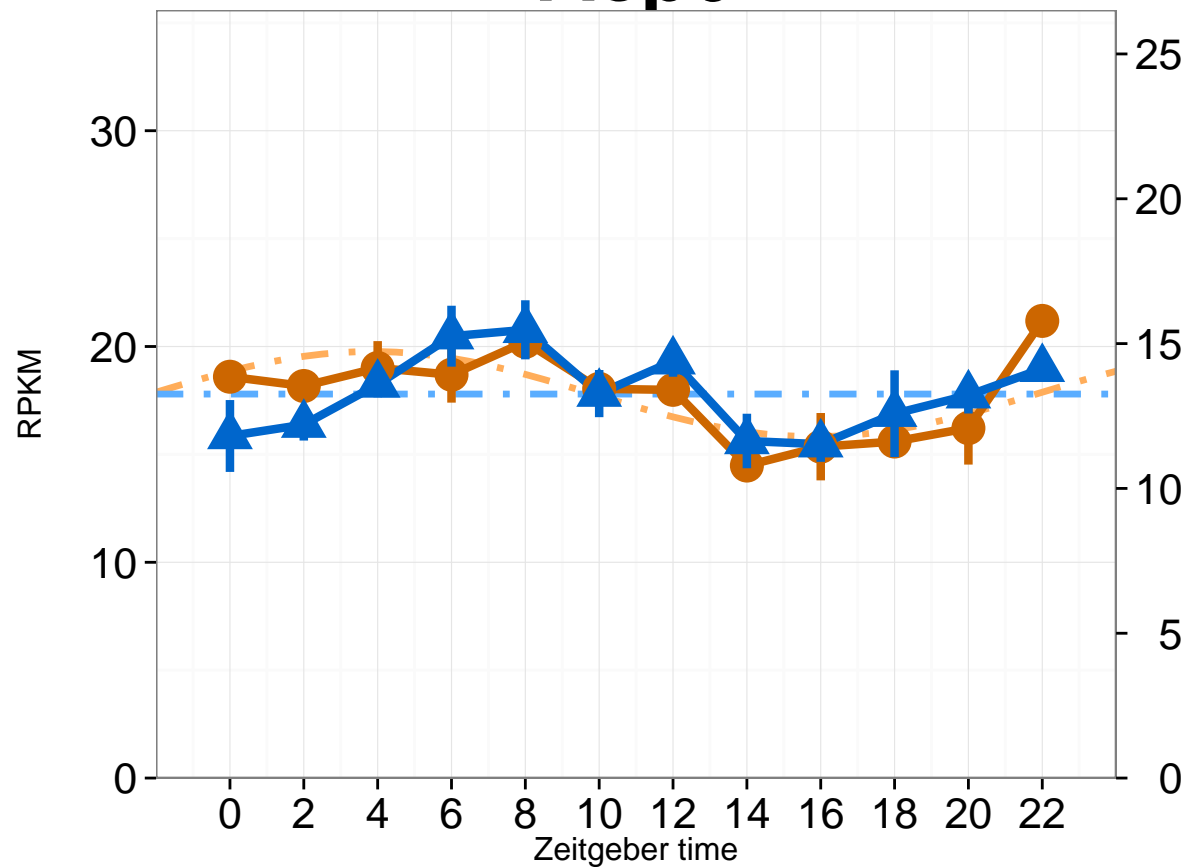

# Acp6

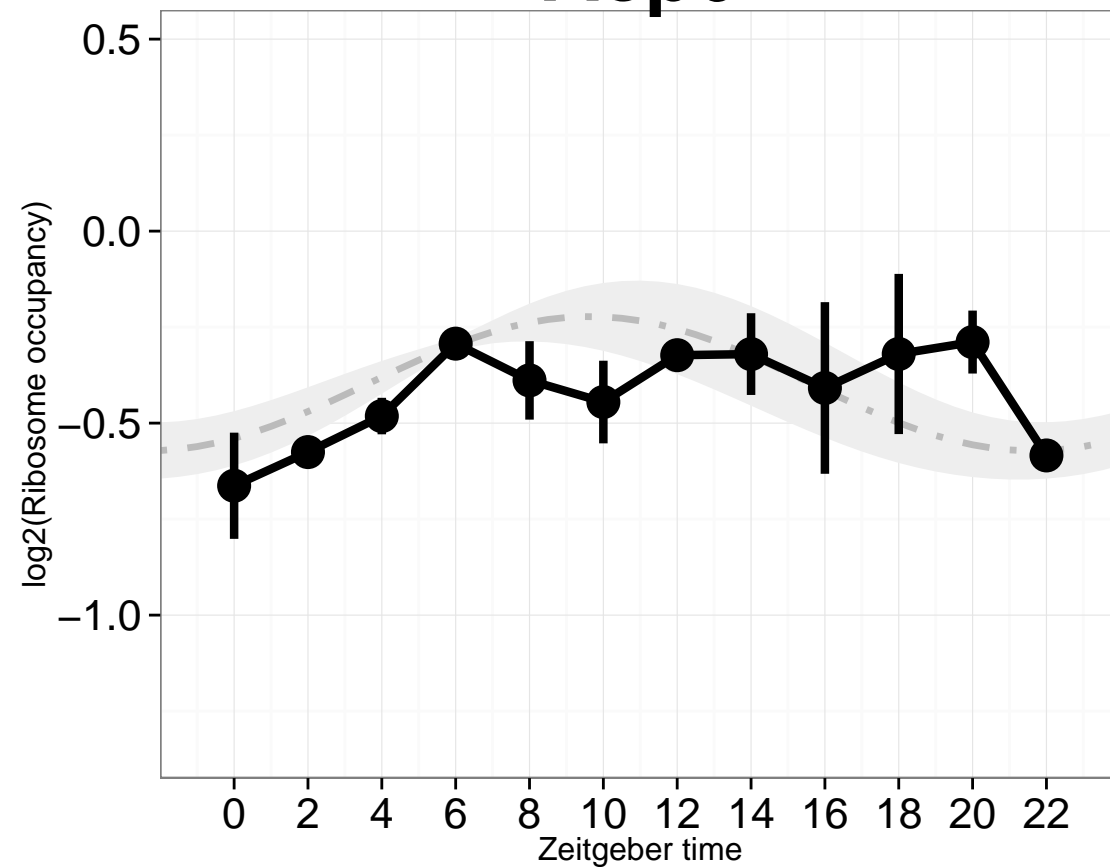

Supplement: SuppDataset_1.zip [file Acp6_set_A.pdf › Supplemental Dataset 1/A-mRNA_nonrhyth_translation_nonrhyth/Acp6_set_A.pdf]

## Acpl2

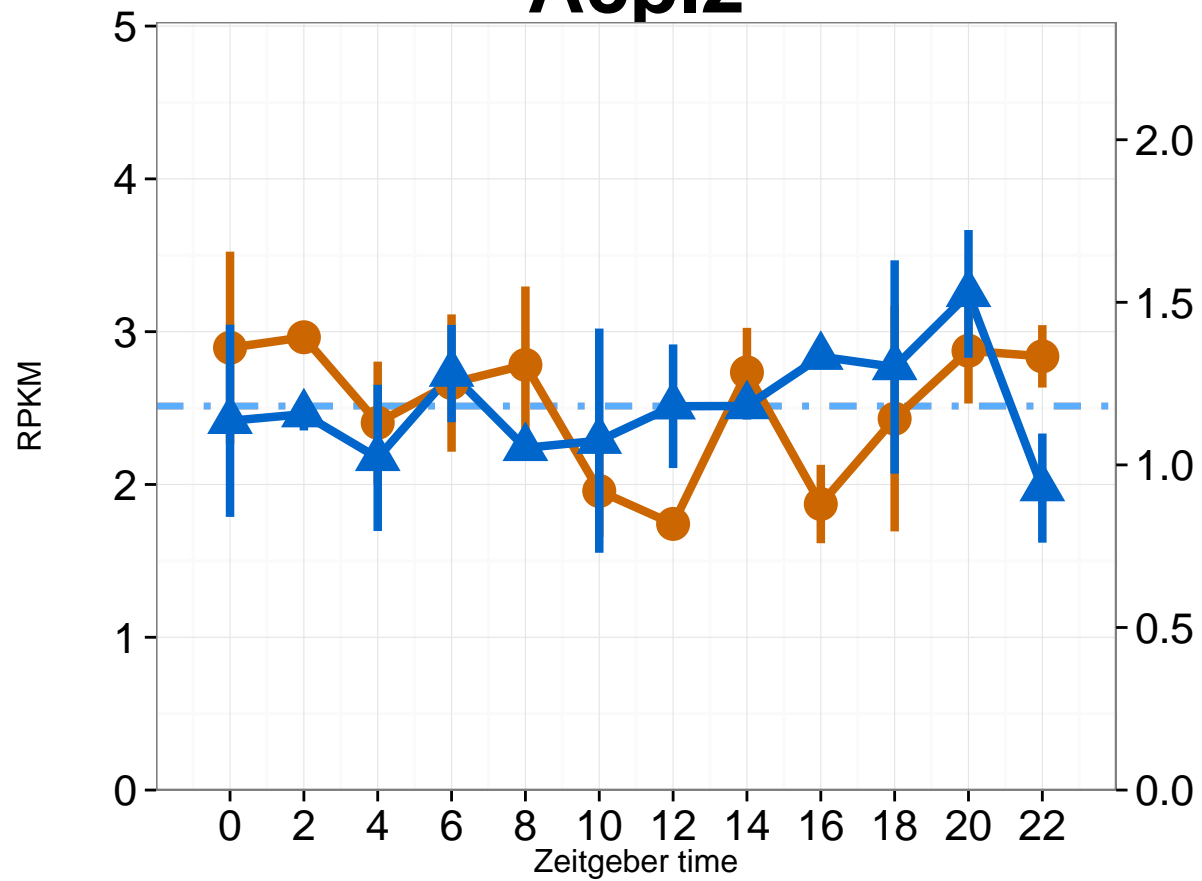

## Acpl2

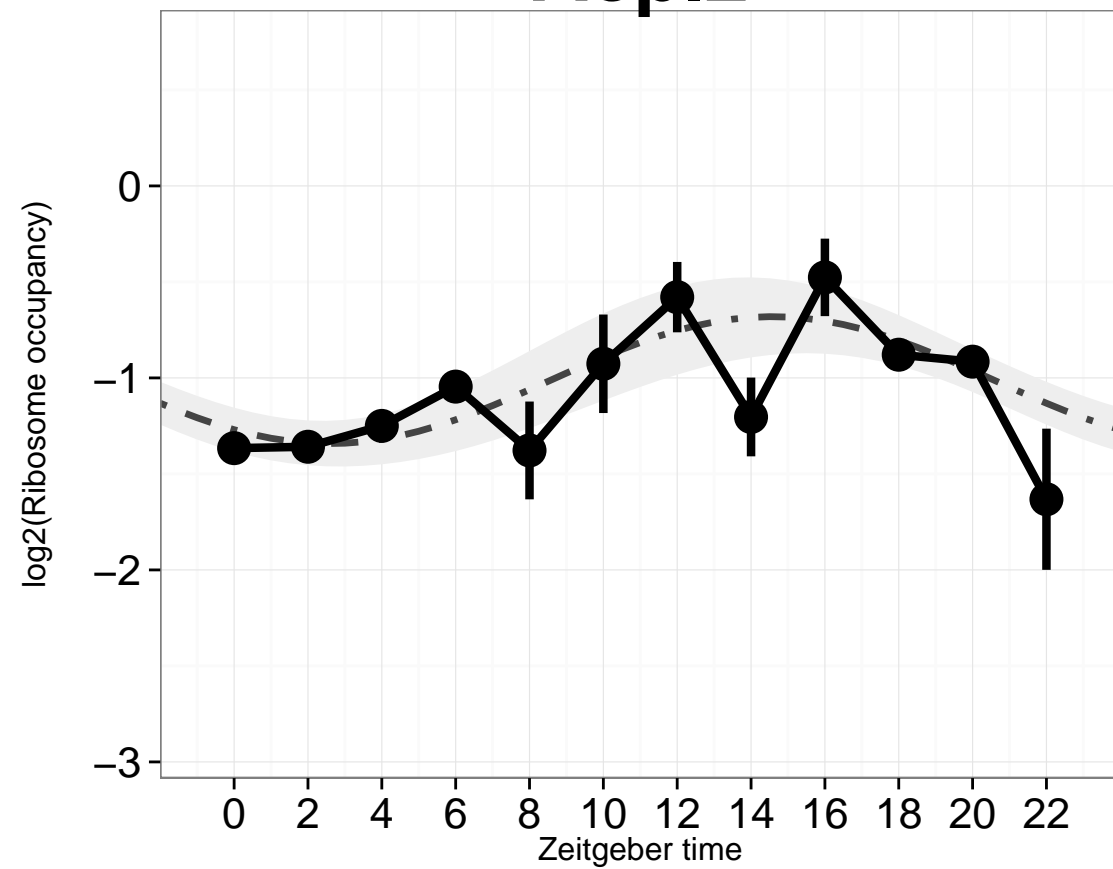

Supplement: SuppDataset_1.zip [file Acpl2_set_A.pdf › Supplemental Dataset 1/A-mRNA_nonrhyth_translation_nonrhyth/Acpl2_set_A.pdf]

## Acpp

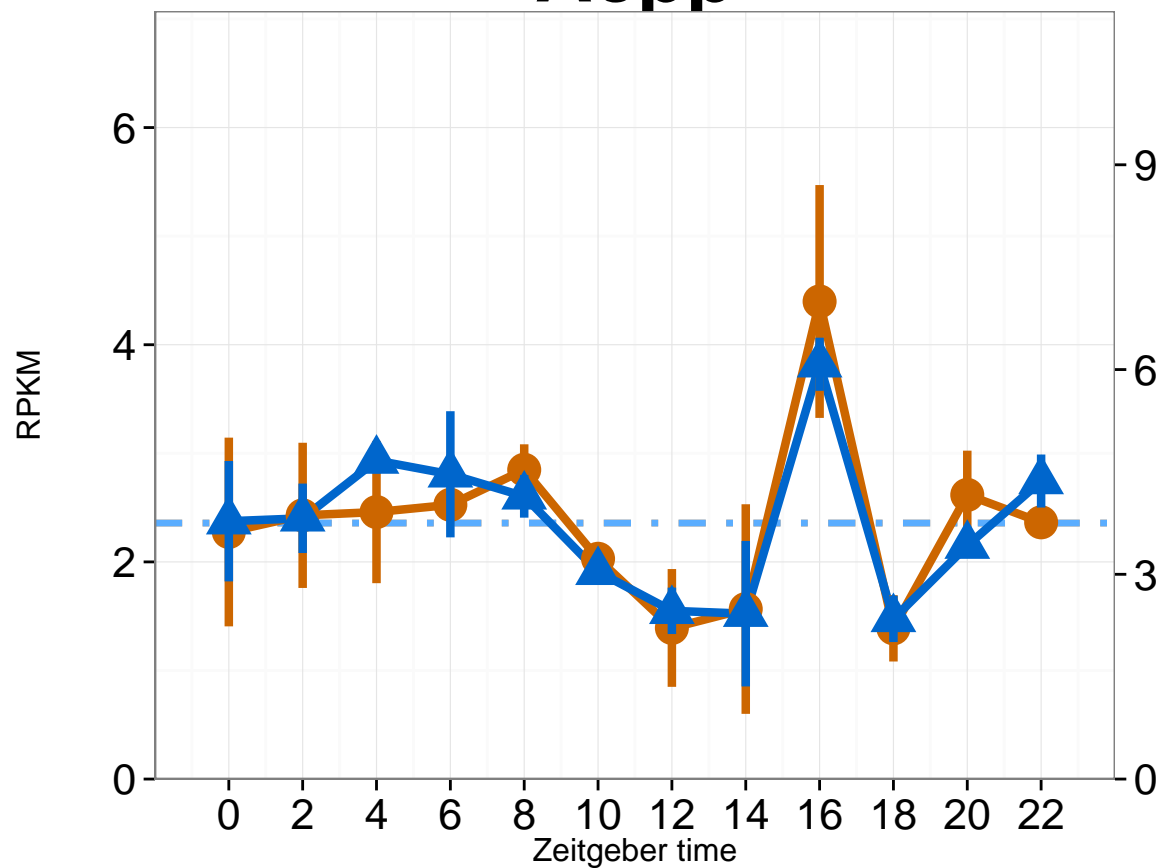

## Acpp

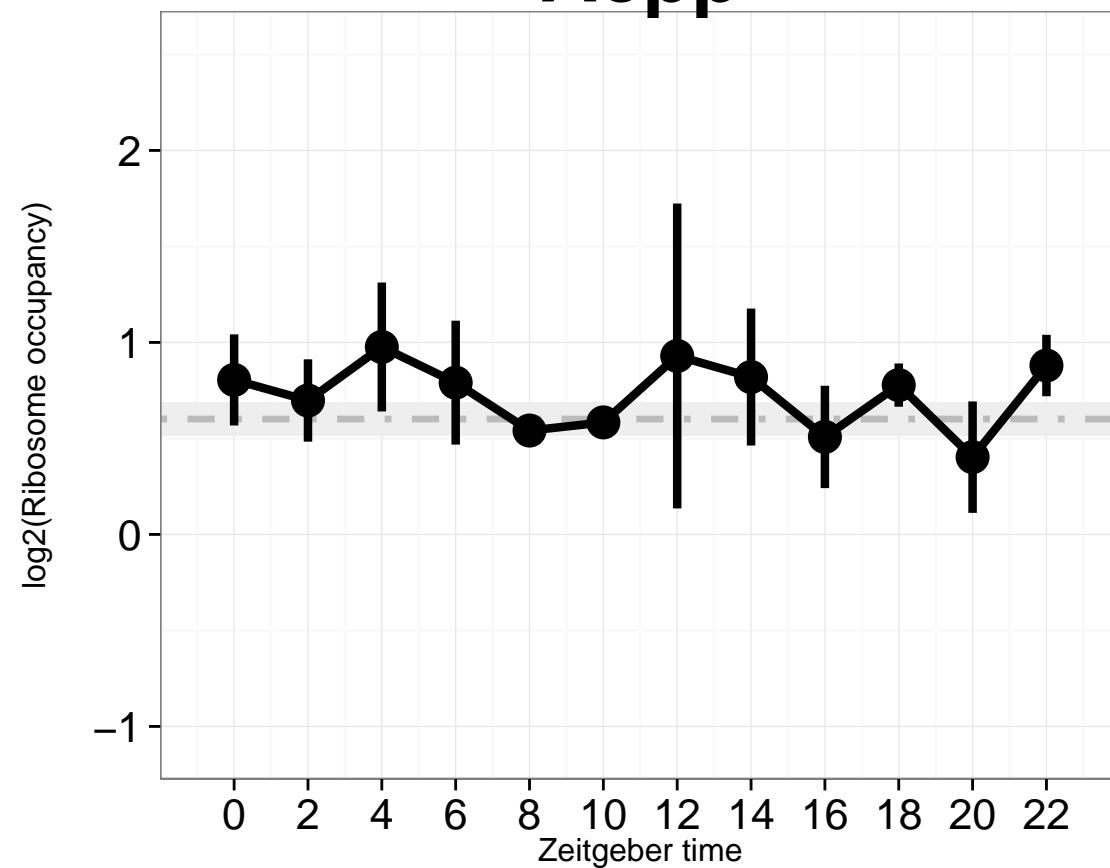

Supplement: SuppDataset_1.zip [file Acpp_set_A.pdf › Supplemental Dataset 1/A-mRNA_nonrhyth_translation_nonrhyth/Acpp_set_A.pdf]
