# Supplementary figures and images for: Ribosome profiling reveals the rhythmic liver translatome and circadian clock regulation by upstream open reading frames (part 4 of 113)
Source: HighWire-hosted journal article supplement (doi:10.1101/gr.195404.115), 2015-10-20

## Acsf2

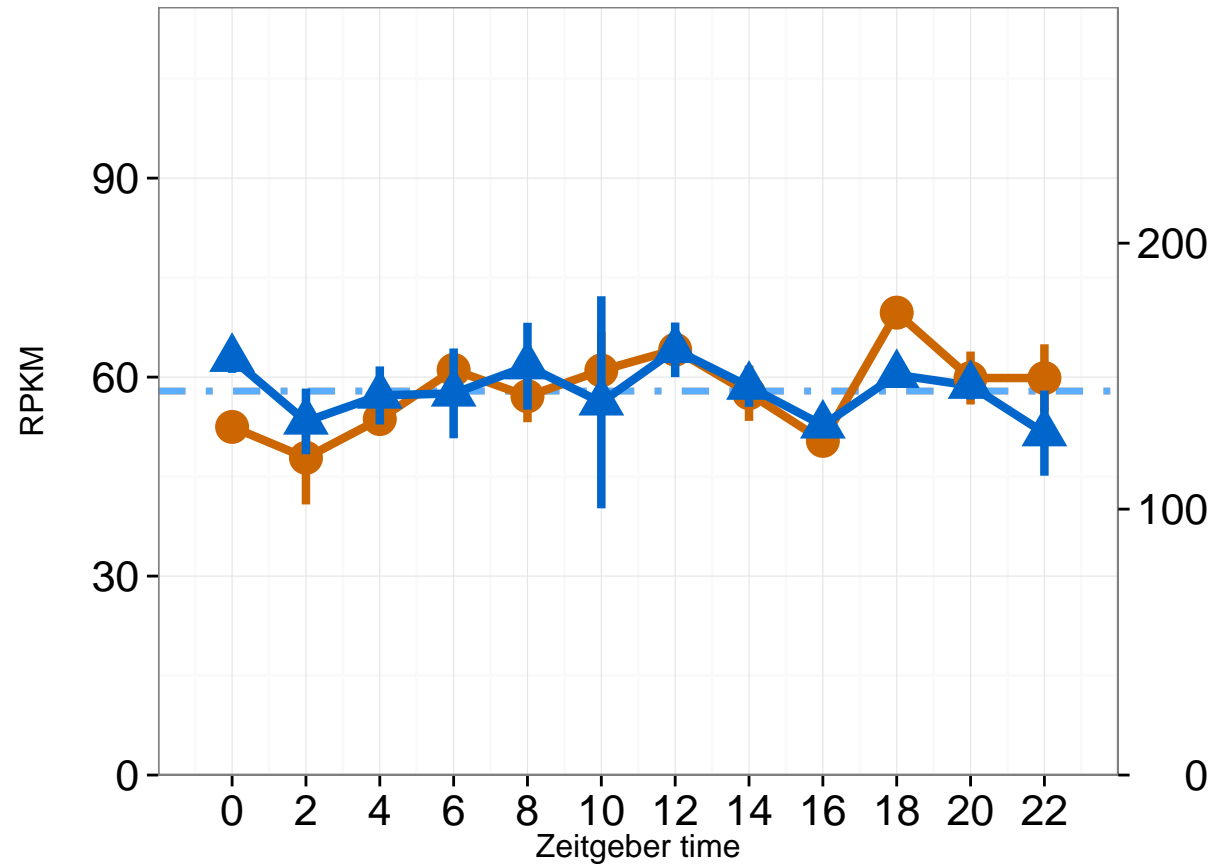

## Acsf2

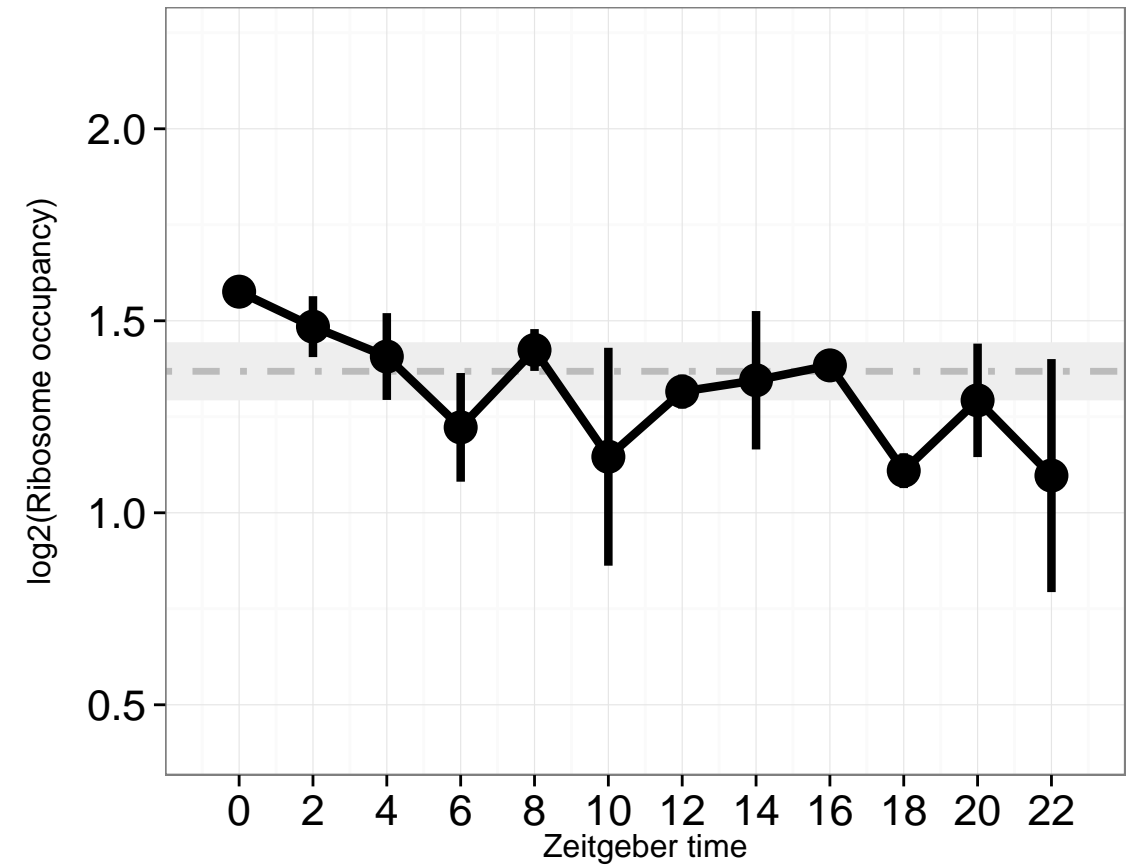

Supplement: SuppDataset_1.zip [file Acsf2_set_A.pdf › Supplemental Dataset 1/A-mRNA_nonrhyth_translation_nonrhyth/Acsf2_set_A.pdf]

# AcsI1

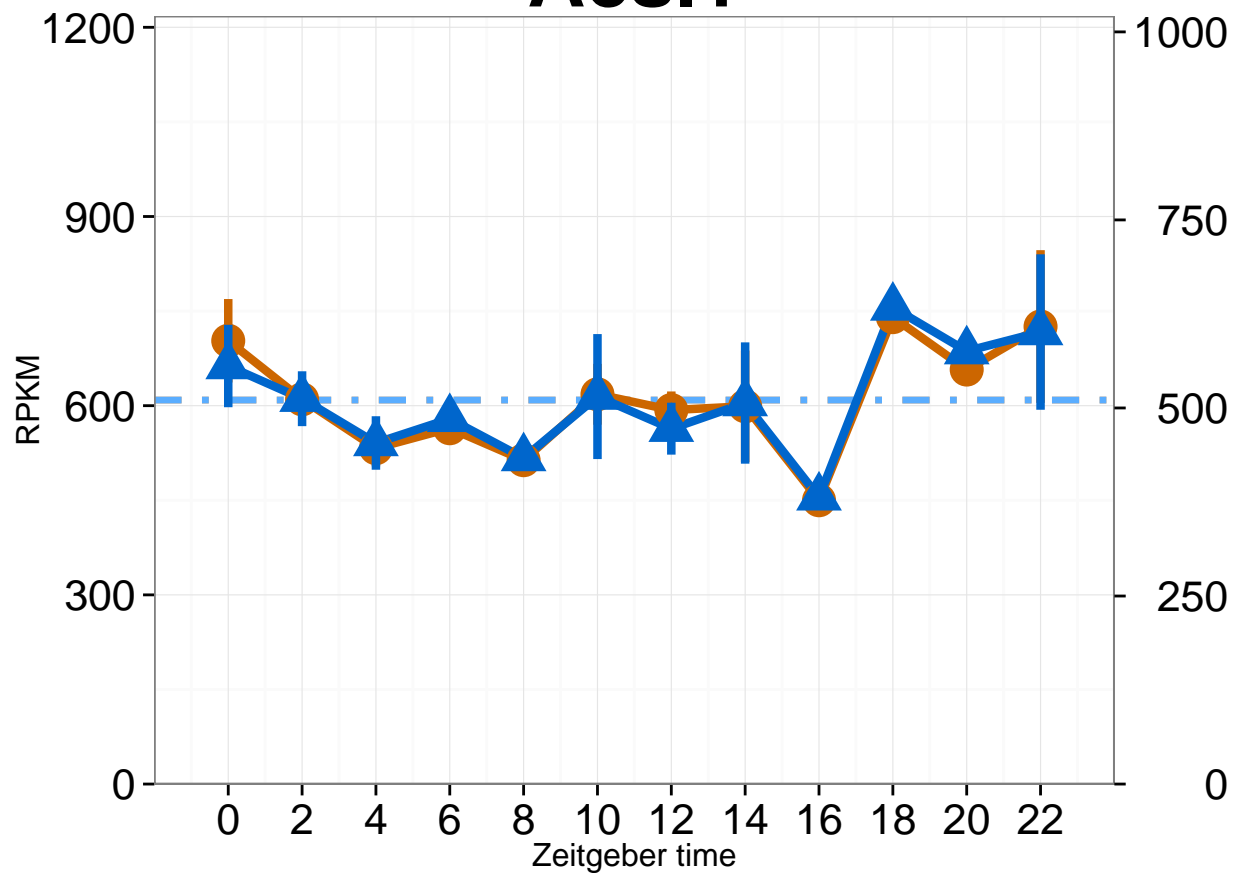

# AcsI1

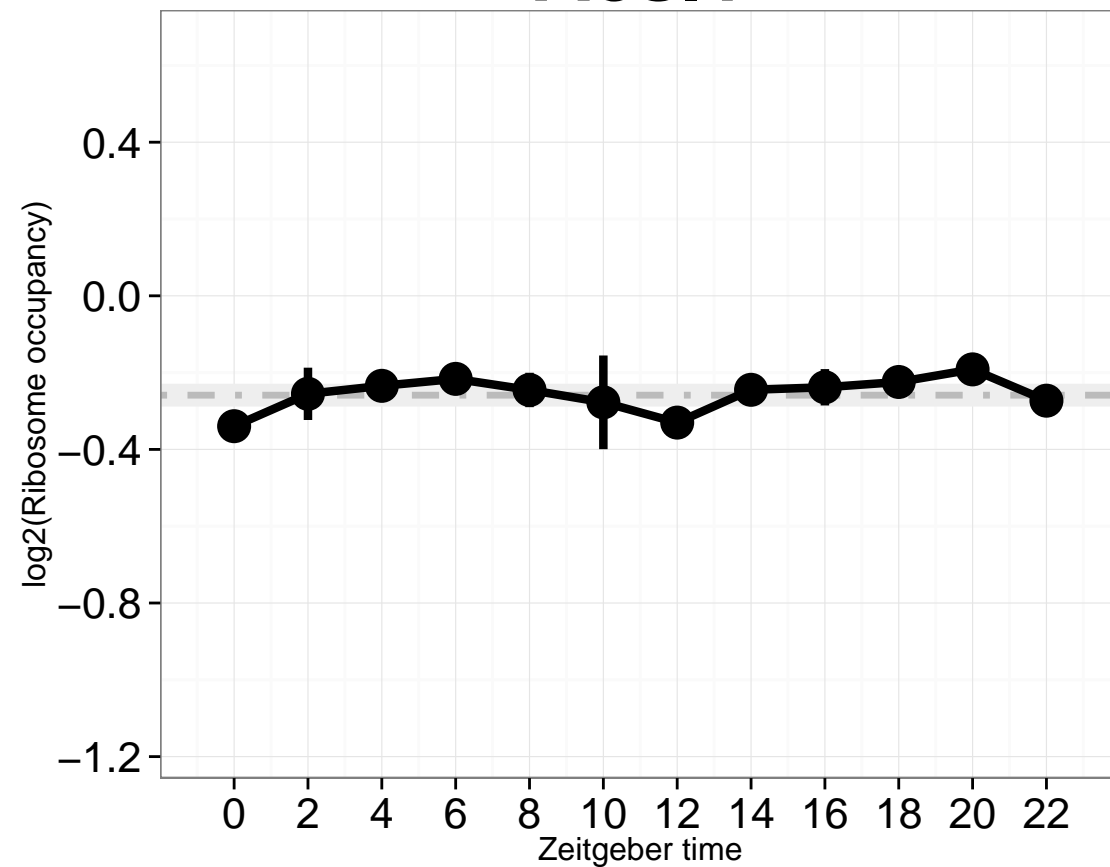

Supplement: SuppDataset_1.zip [file Acsl1_set_A.pdf › Supplemental Dataset 1/A-mRNA_nonrhyth_translation_nonrhyth/Acsl1_set_A.pdf]

## AcsI4

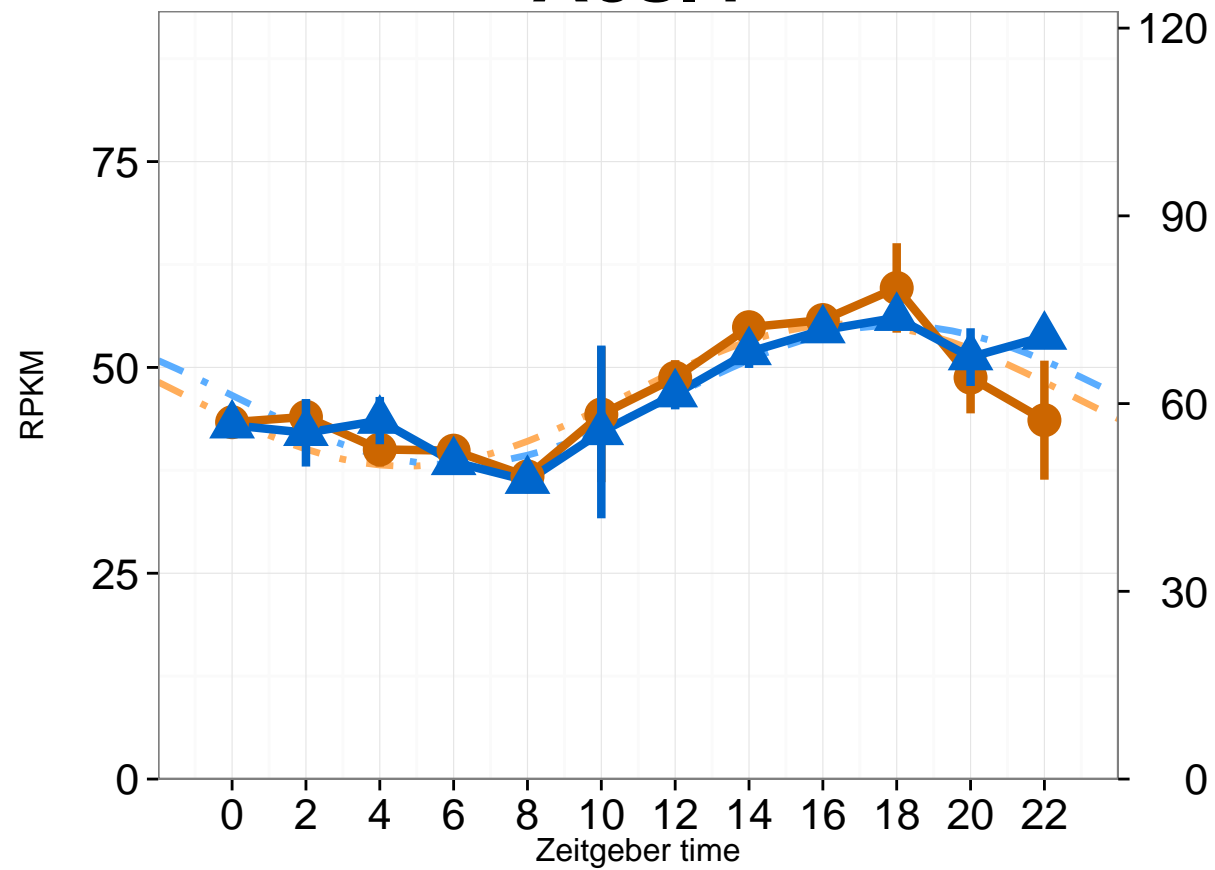

## AcsI4

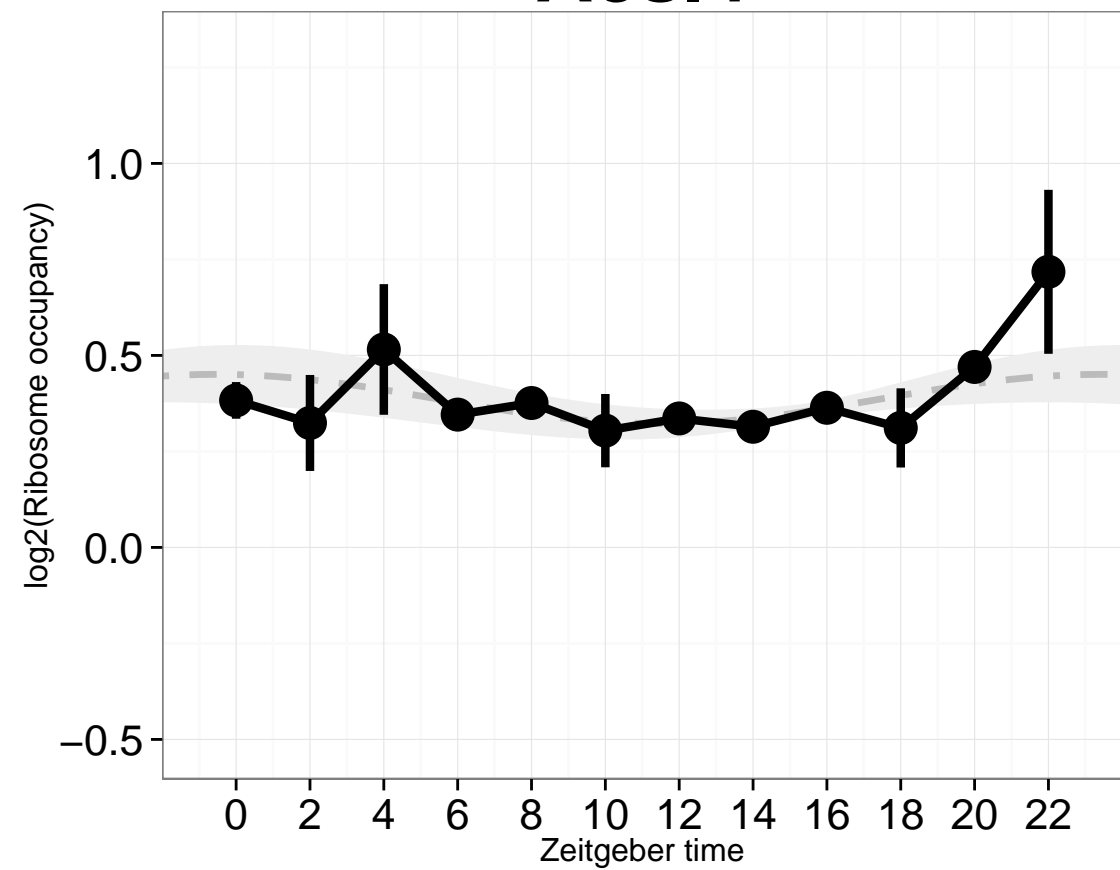

Supplement: SuppDataset_1.zip [file Acsl4_set_A.pdf › Supplemental Dataset 1/A-mRNA_nonrhyth_translation_nonrhyth/Acsl4_set_A.pdf]

## Acs15

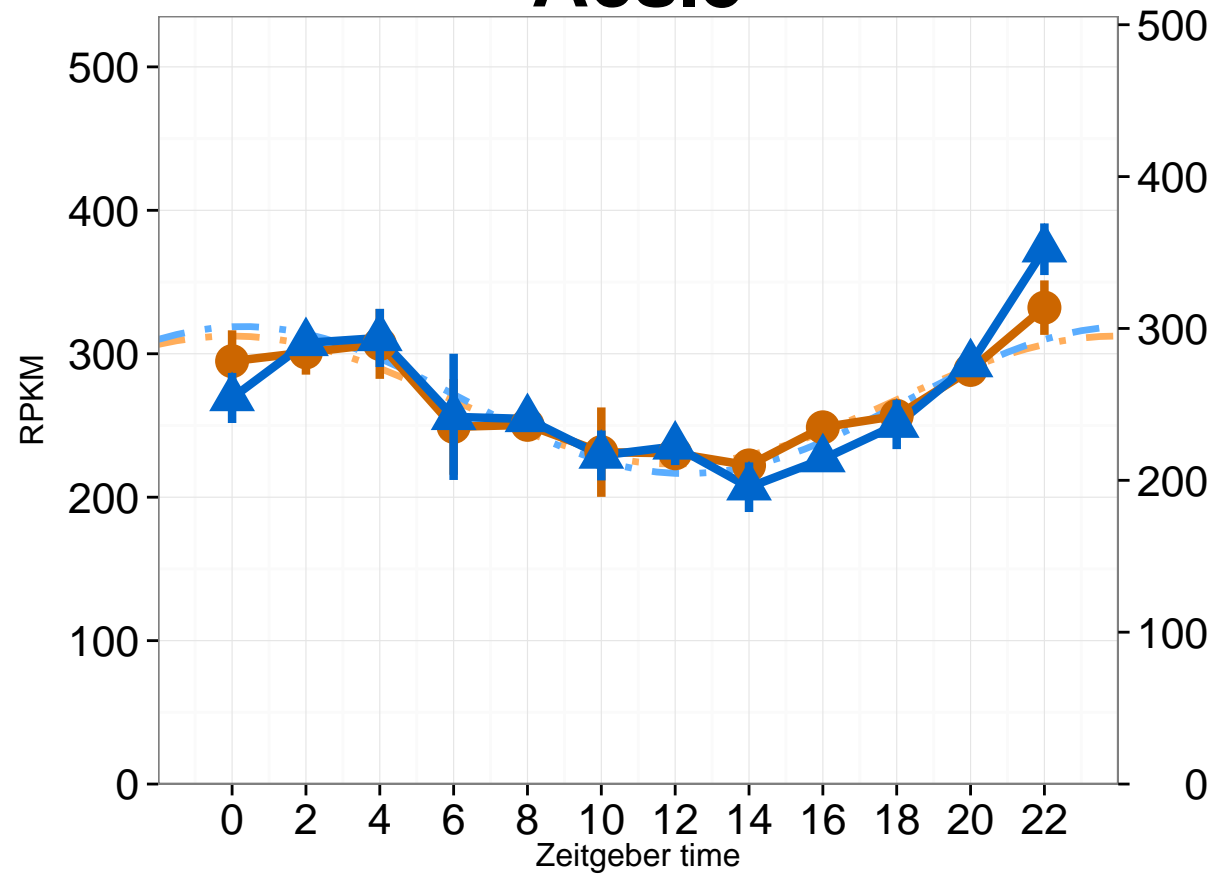

## Acs15

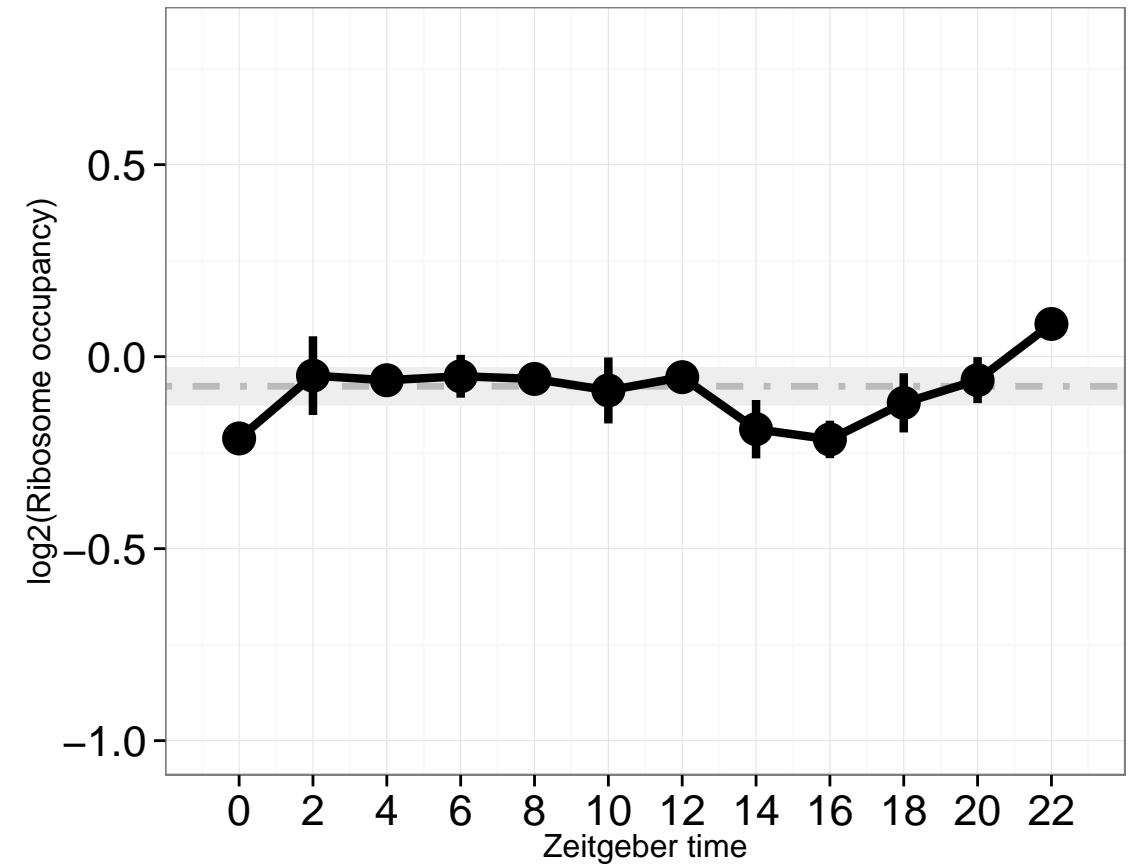

Supplement: SuppDataset_1.zip [file Acsl5_set_A.pdf › Supplemental Dataset 1/A-mRNA_nonrhyth_translation_nonrhyth/Acsl5_set_A.pdf]

# Acsm1

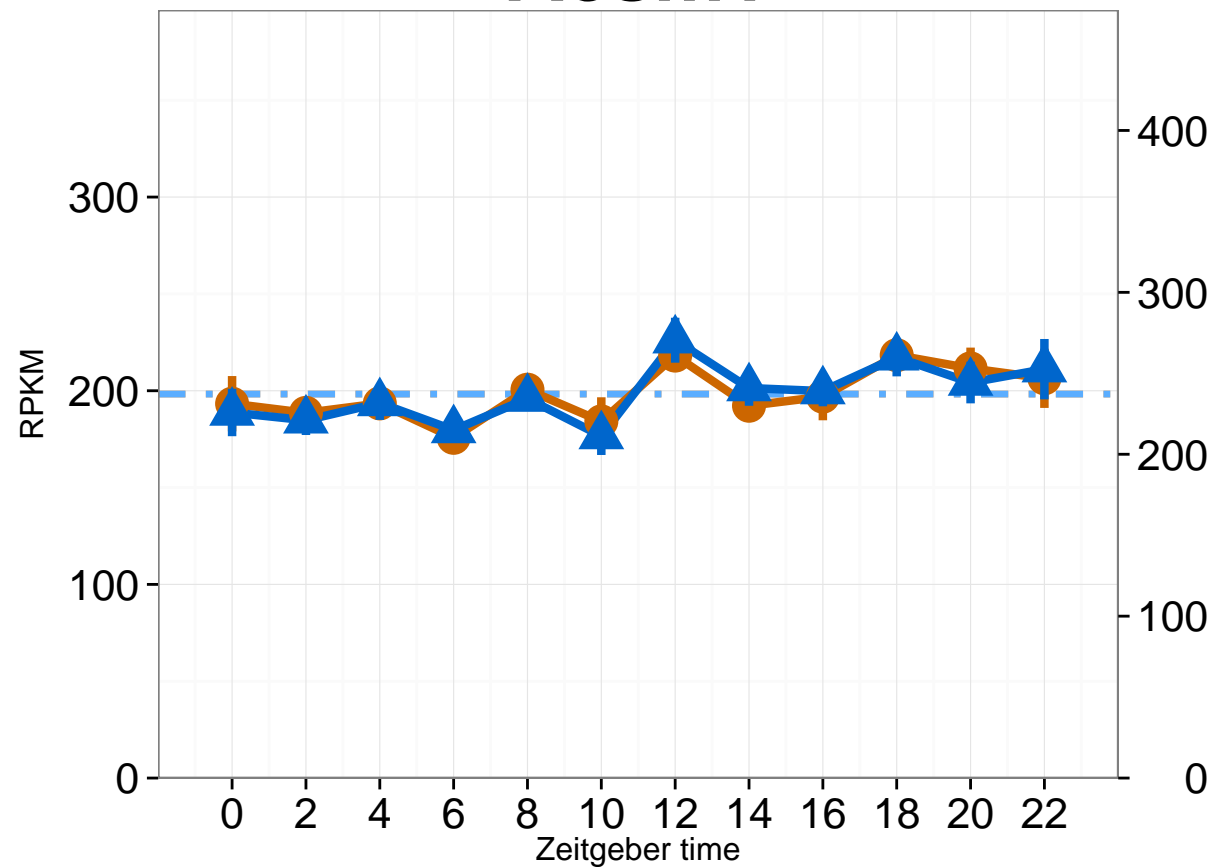

# Acsm1

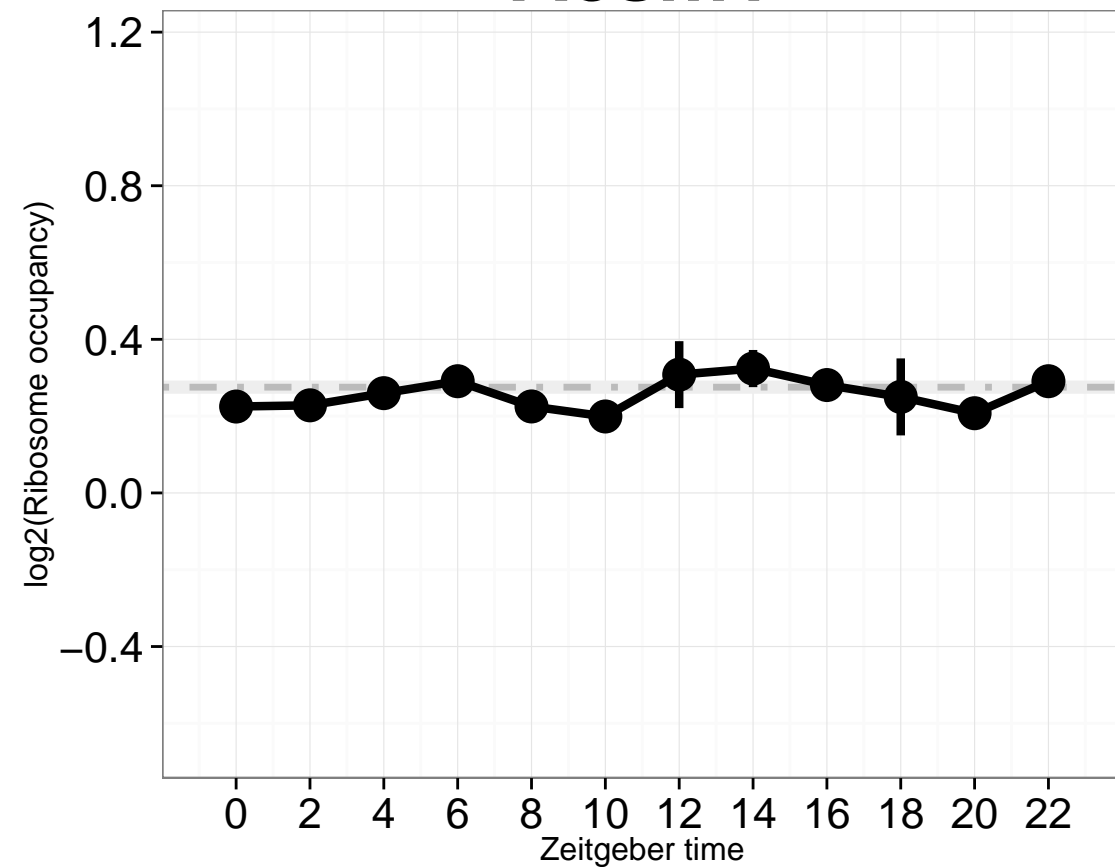

Supplement: SuppDataset_1.zip [file Acsm1_set_A.pdf › Supplemental Dataset 1/A-mRNA_nonrhyth_translation_nonrhyth/Acsm1_set_A.pdf]

# Acsm2

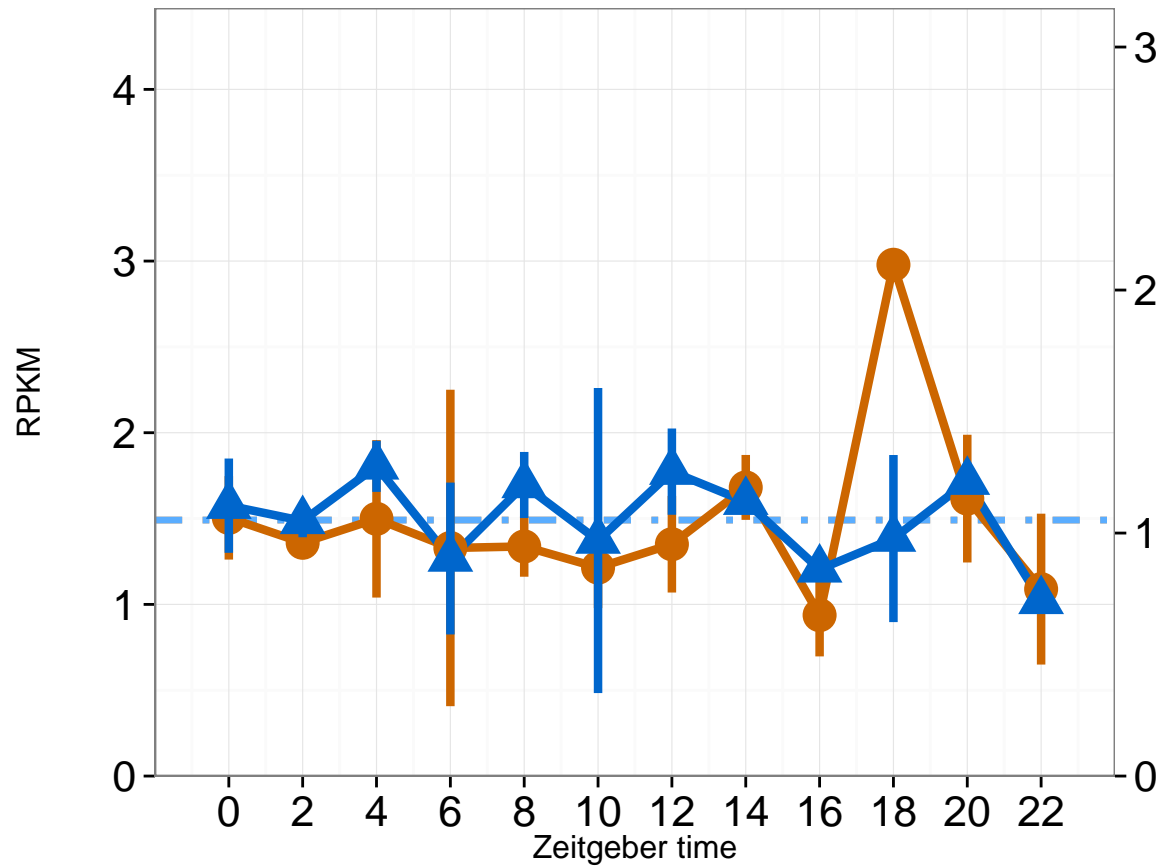

# Acsm2

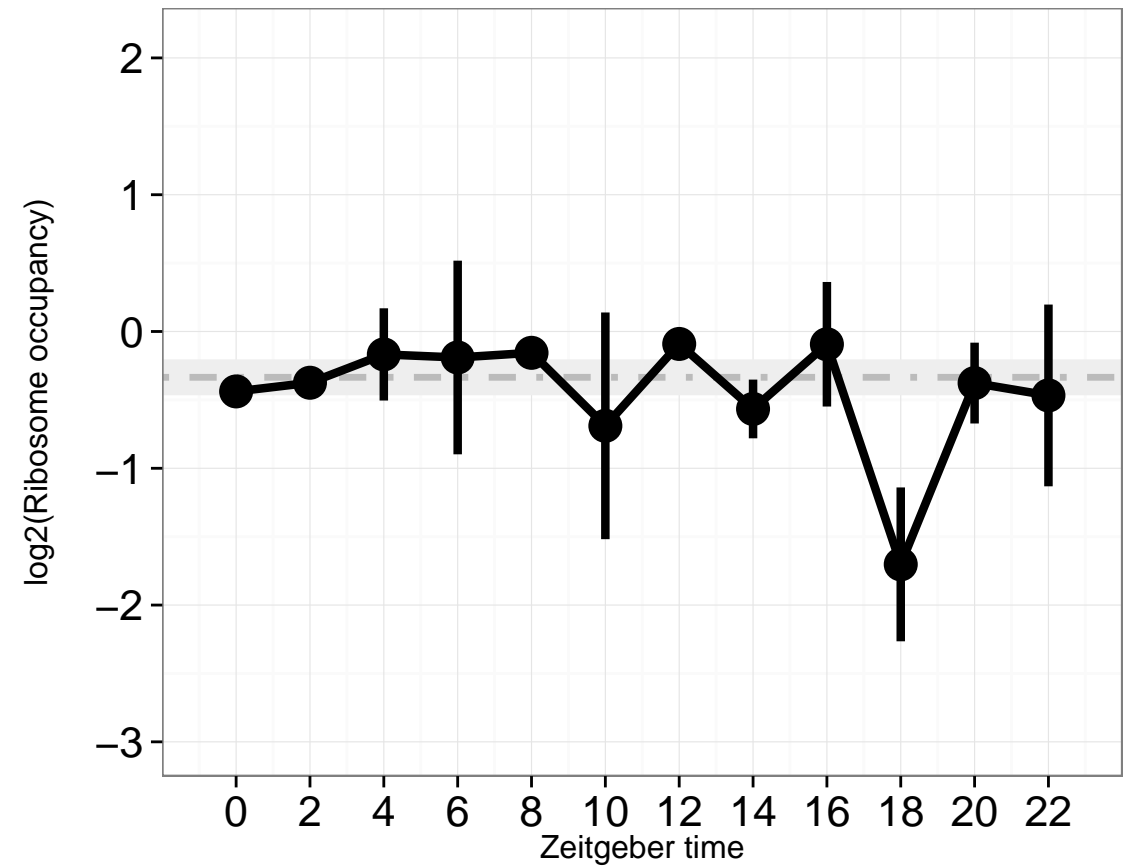

Supplement: SuppDataset_1.zip [file Acsm2_set_A.pdf › Supplemental Dataset 1/A-mRNA_nonrhyth_translation_nonrhyth/Acsm2_set_A.pdf]

# Acsm3

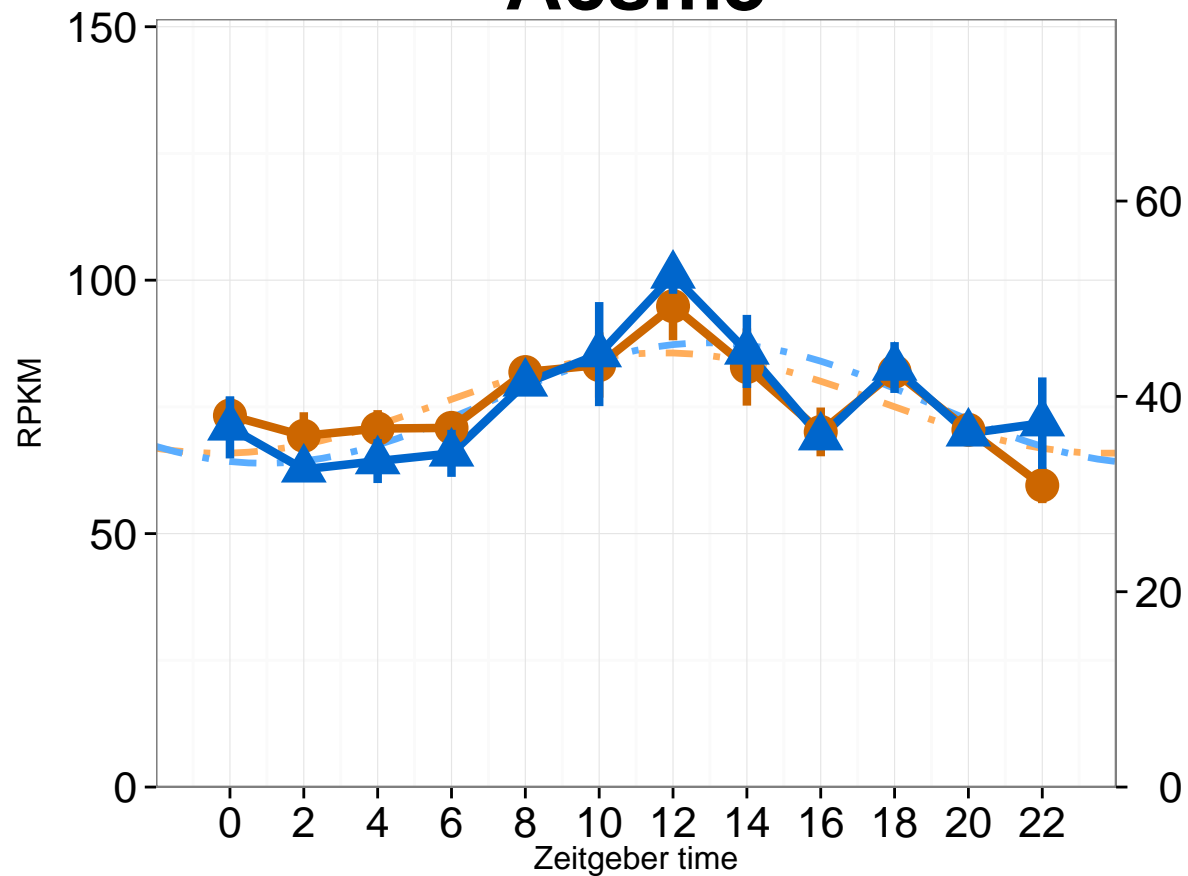

# Acsm3

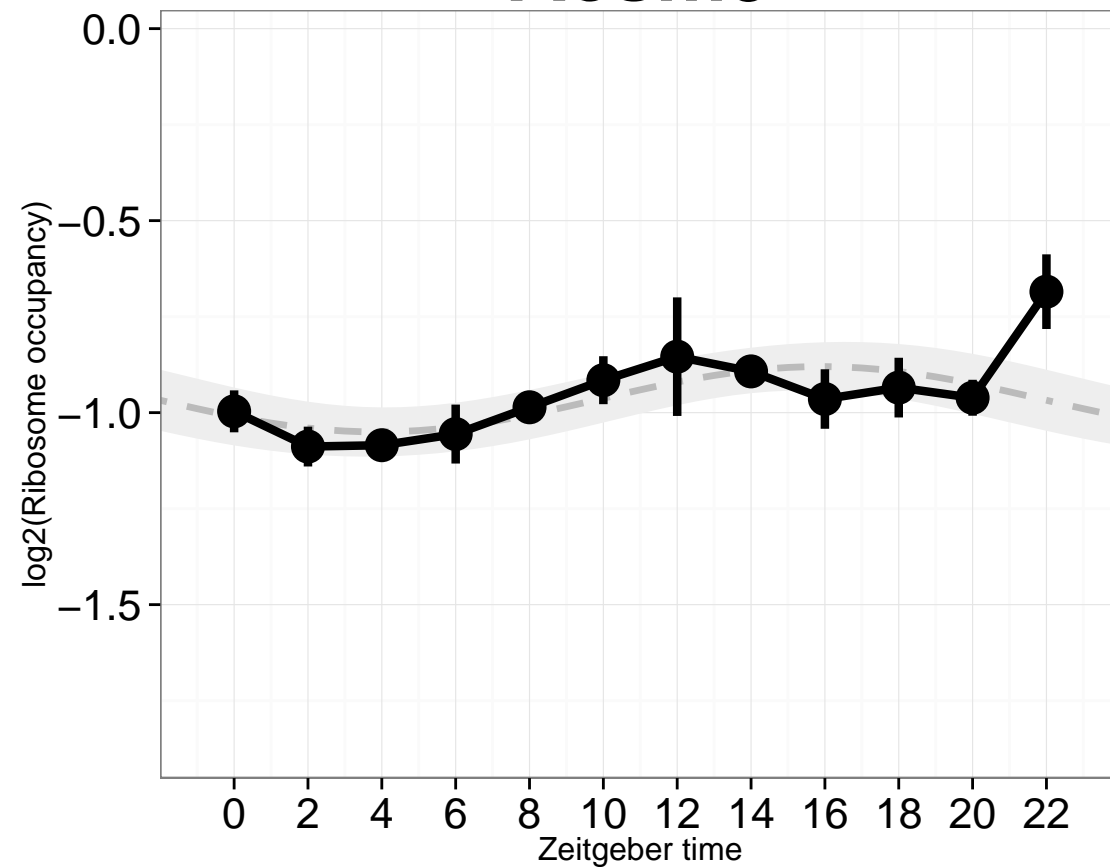

Supplement: SuppDataset_1.zip [file Acsm3_set_A.pdf › Supplemental Dataset 1/A-mRNA_nonrhyth_translation_nonrhyth/Acsm3_set_A.pdf]

## Acss3

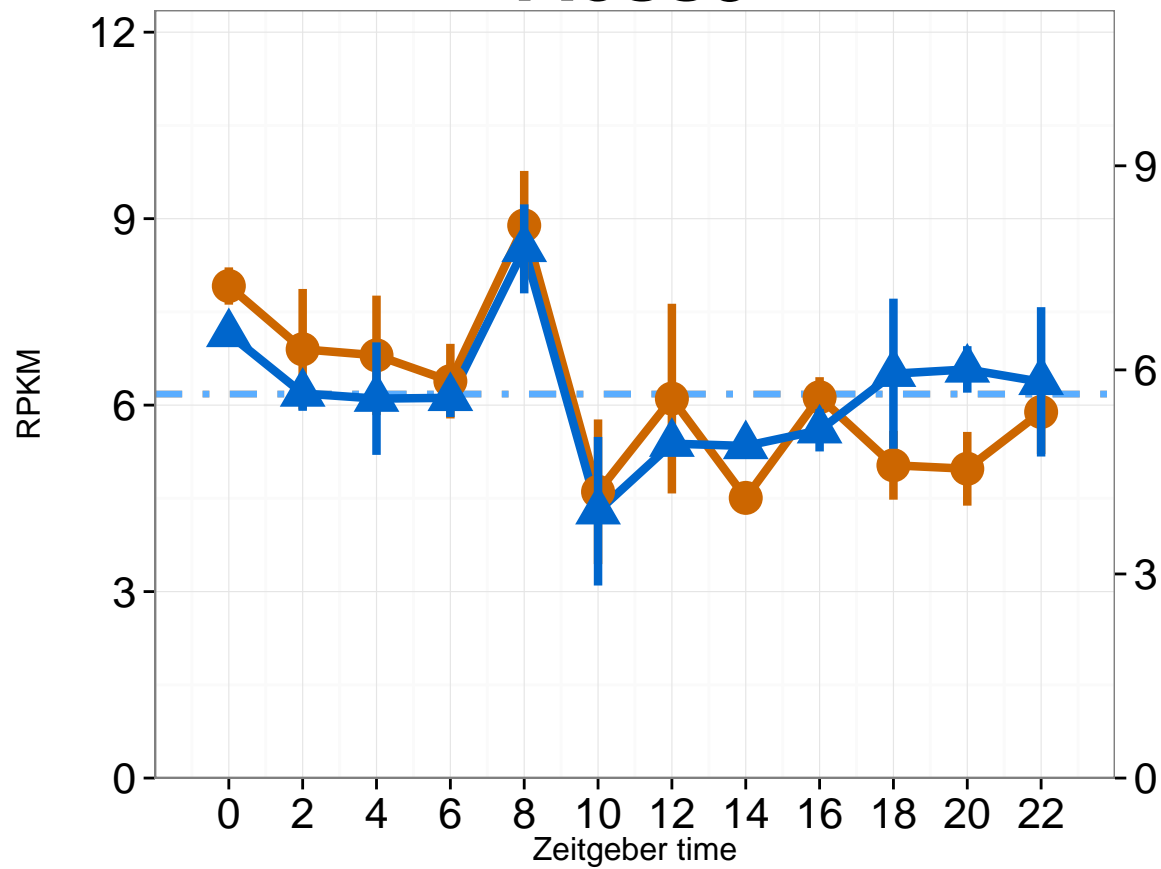

## Acss3

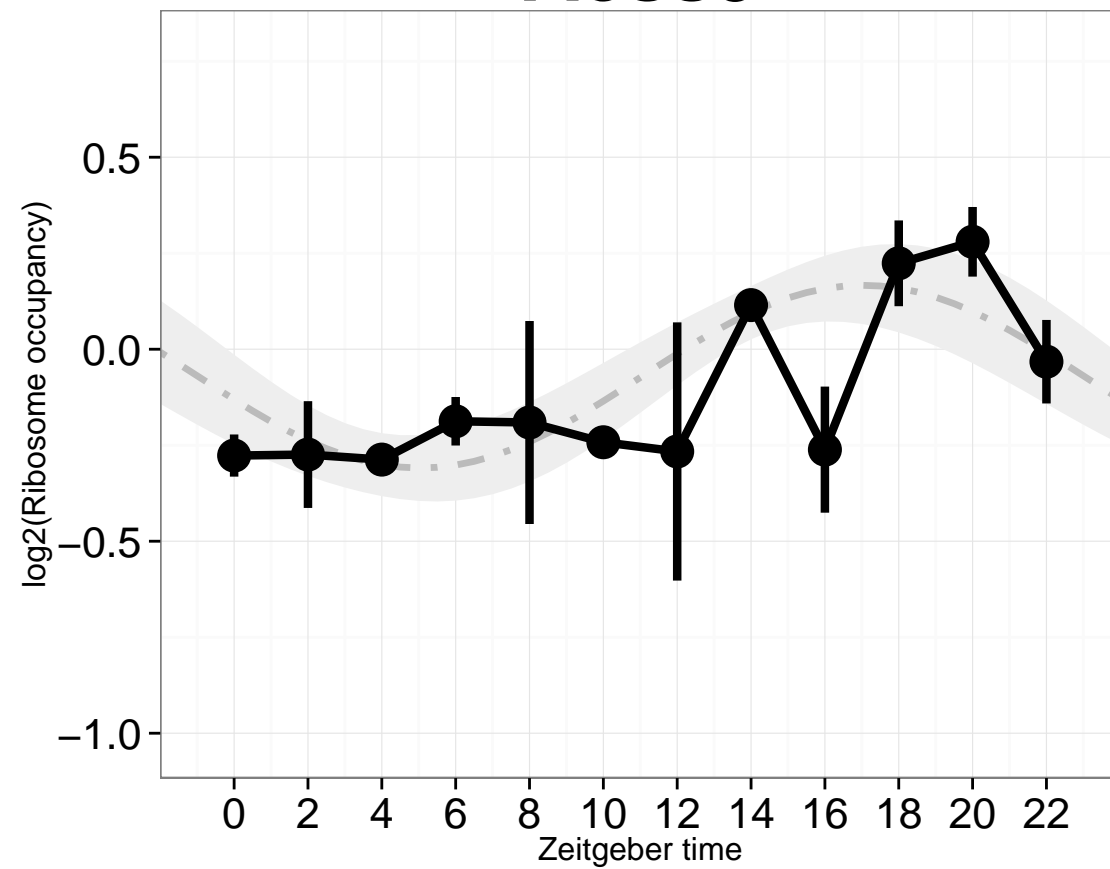

Supplement: SuppDataset_1.zip [file Acss3_set_A.pdf › Supplemental Dataset 1/A-mRNA_nonrhyth_translation_nonrhyth/Acss3_set_A.pdf]

# Acta2

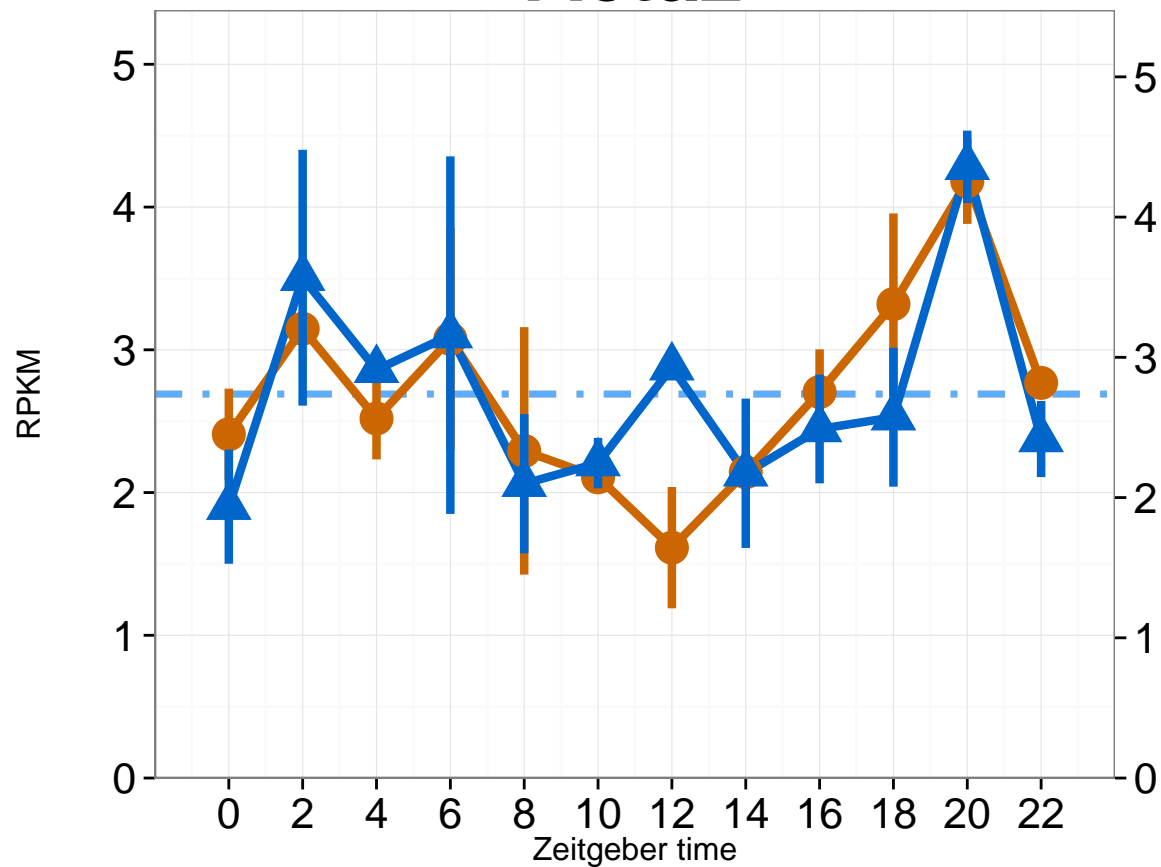

# Acta2

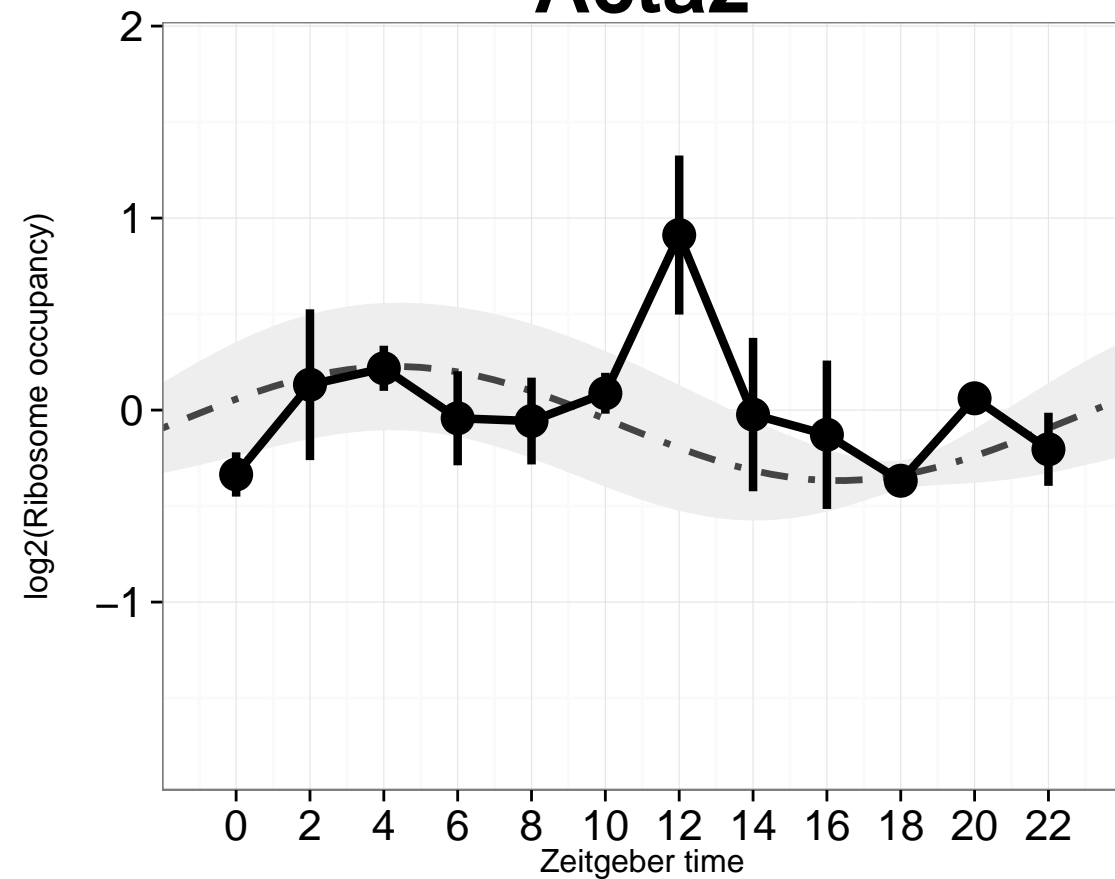

Supplement: SuppDataset_1.zip [file Acta2_set_A.pdf › Supplemental Dataset 1/A-mRNA_nonrhyth_translation_nonrhyth/Acta2_set_A.pdf]

## Actb

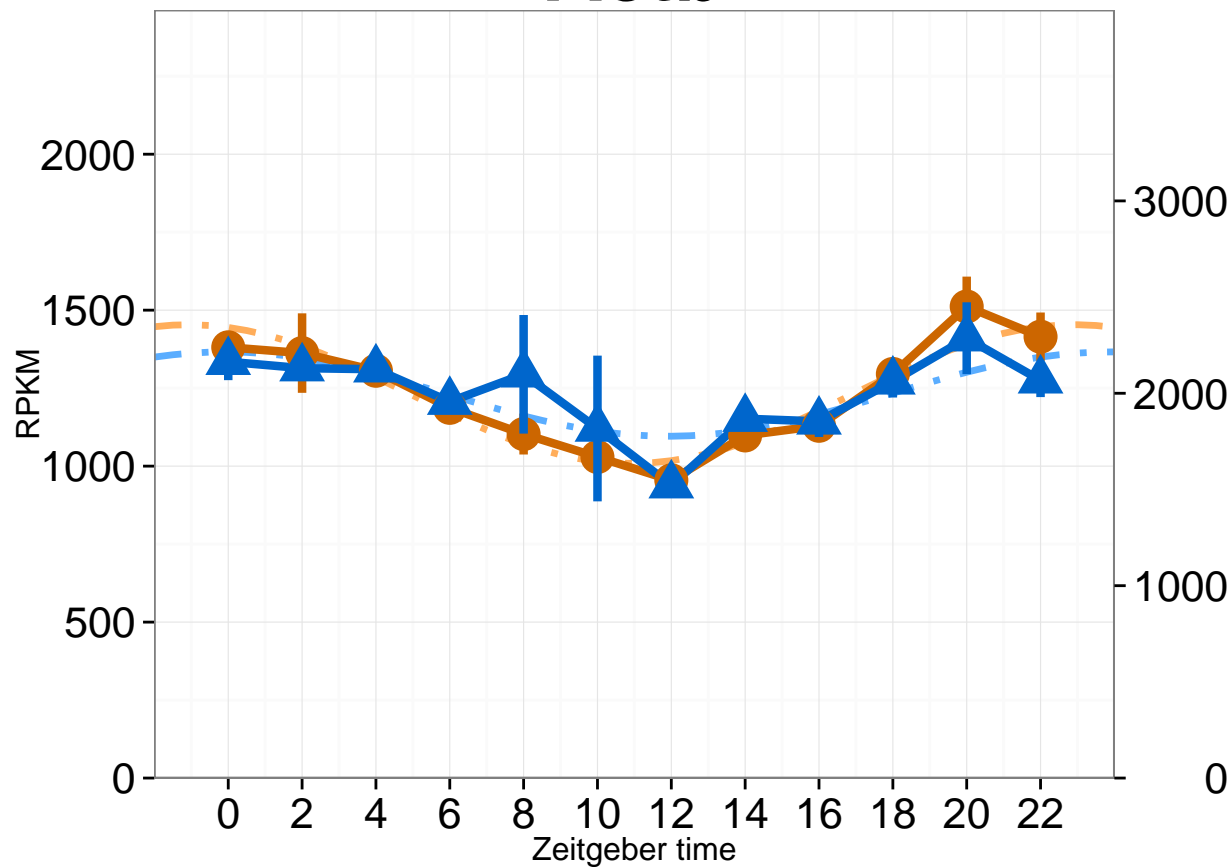

## Actb

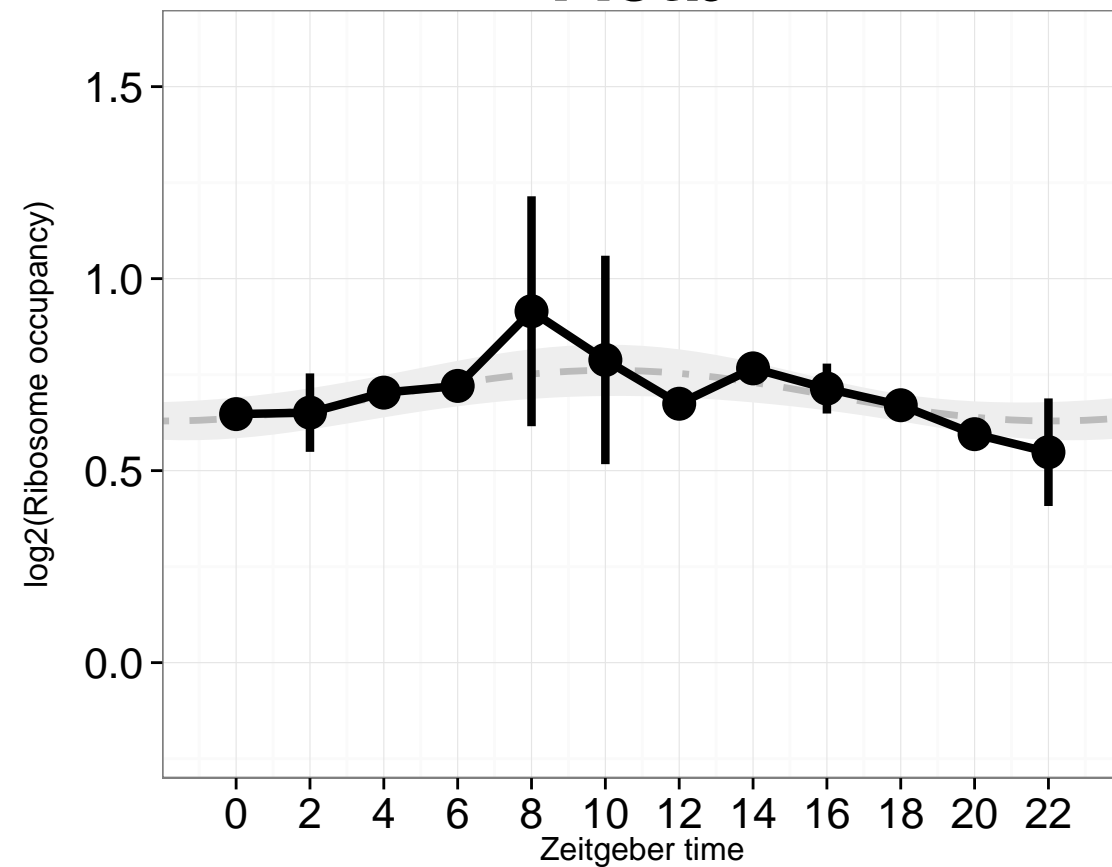

Supplement: SuppDataset_1.zip [file Actb_set_A.pdf › Supplemental Dataset 1/A-mRNA_nonrhyth_translation_nonrhyth/Actb_set_A.pdf]

# Actl6a

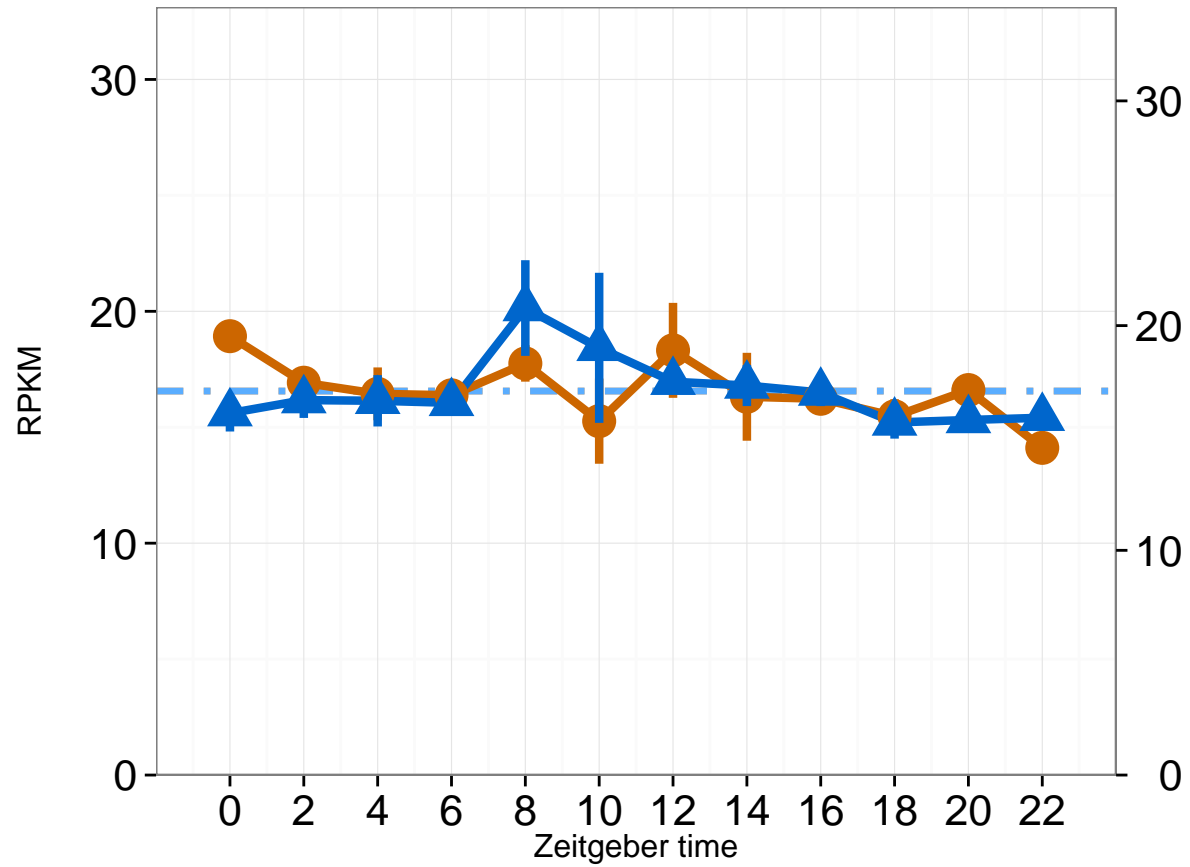

# Actl6a

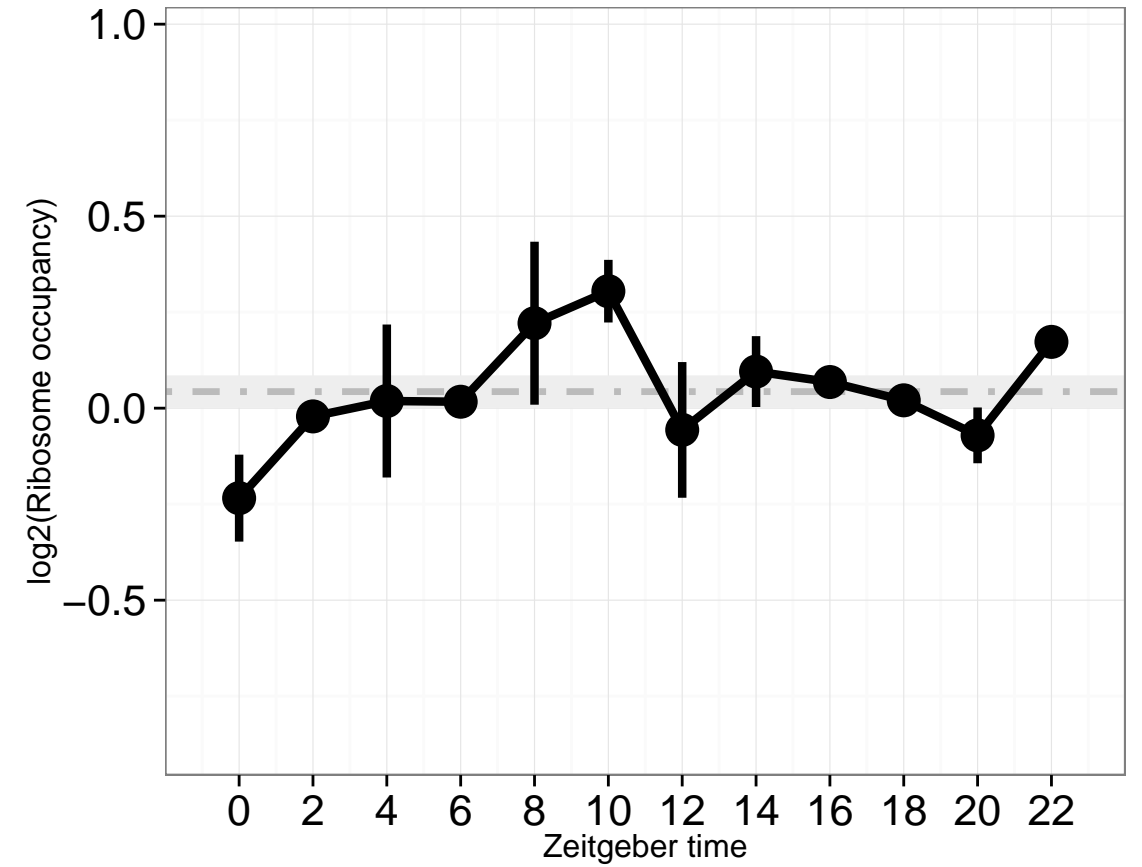

Supplement: SuppDataset_1.zip [file Actl6a_set_A.pdf › Supplemental Dataset 1/A-mRNA_nonrhyth_translation_nonrhyth/Actl6a_set_A.pdf]

# Actn4

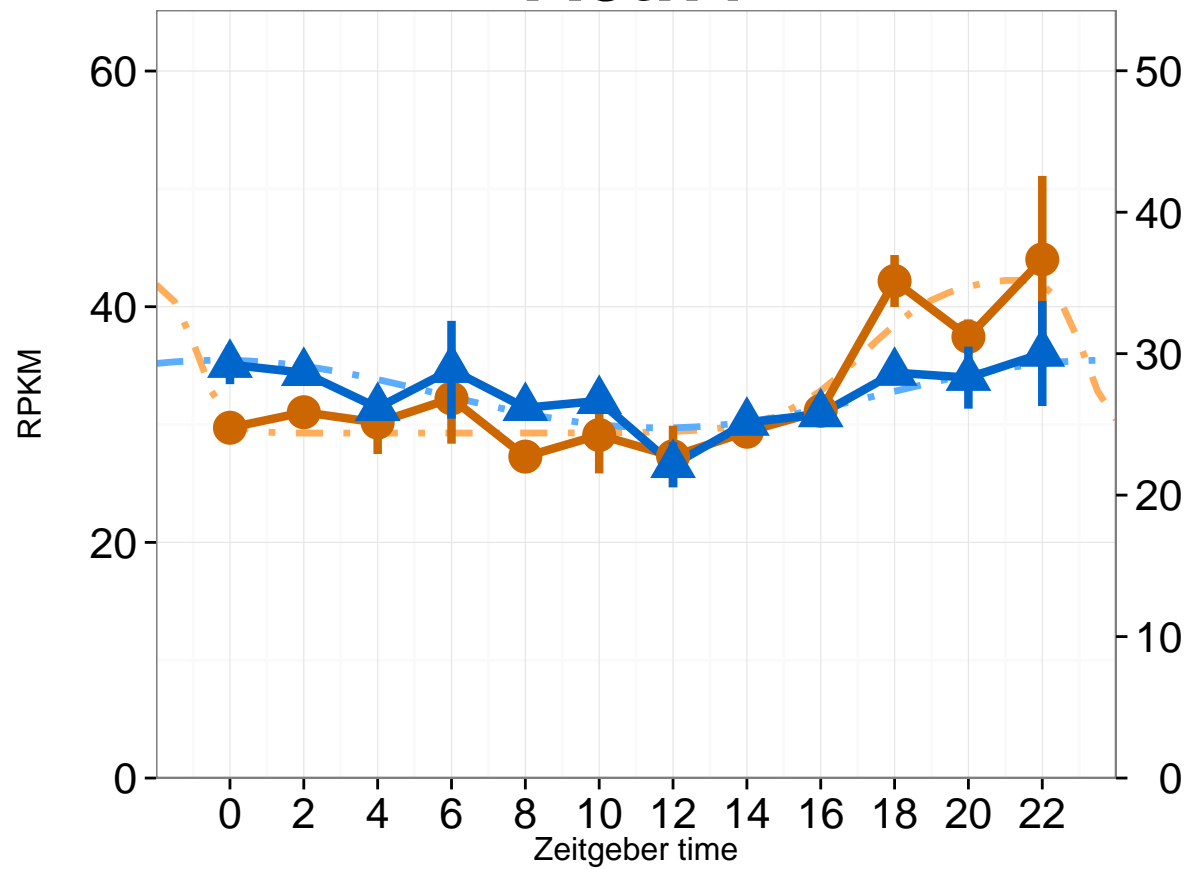

# Actn4

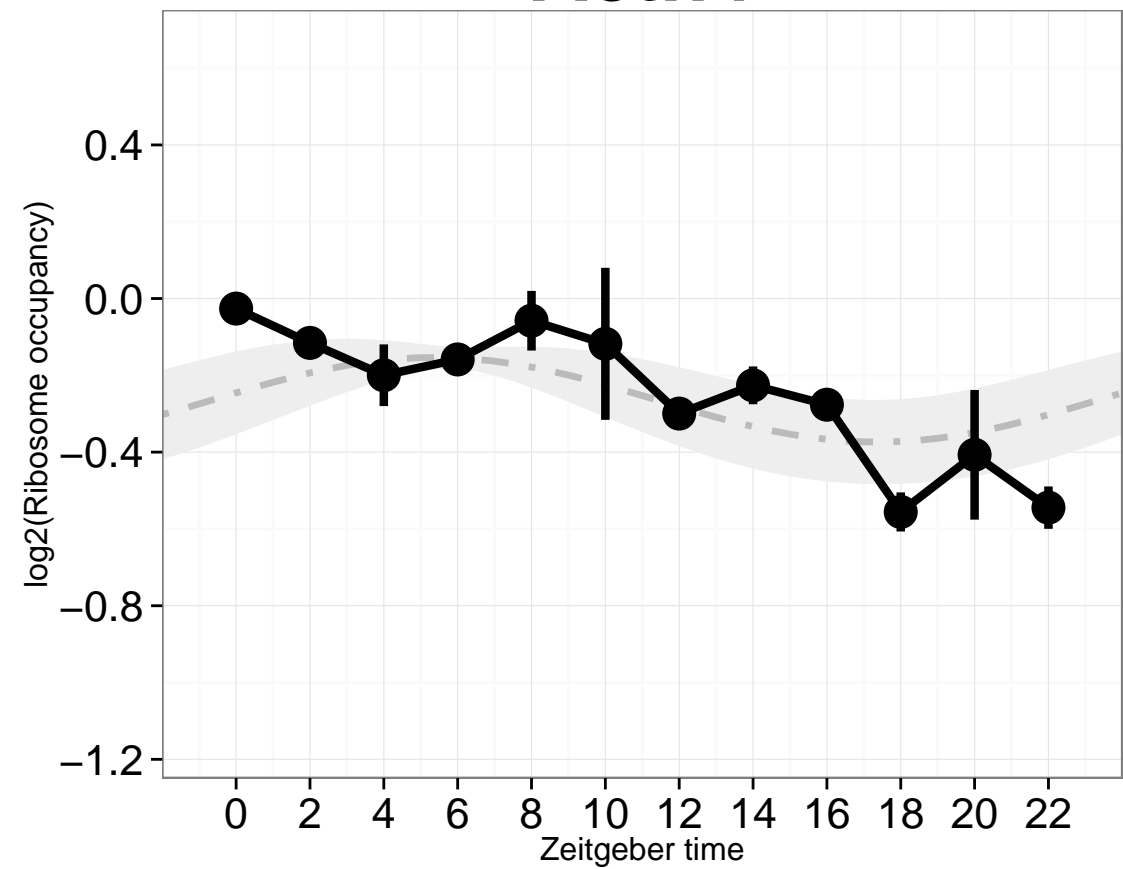

Supplement: SuppDataset_1.zip [file Actn4_set_A.pdf › Supplemental Dataset 1/A-mRNA_nonrhyth_translation_nonrhyth/Actn4_set_A.pdf]

# Actr10

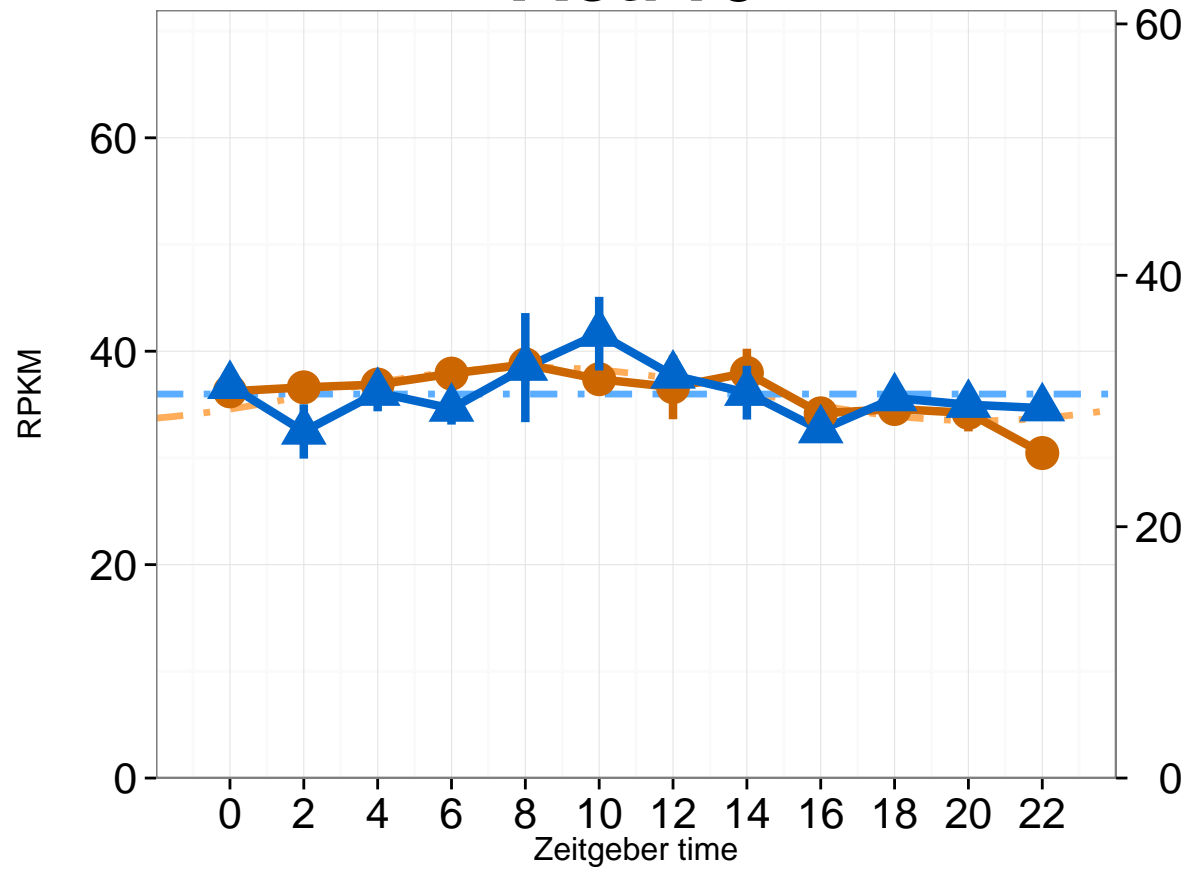

# Actr10

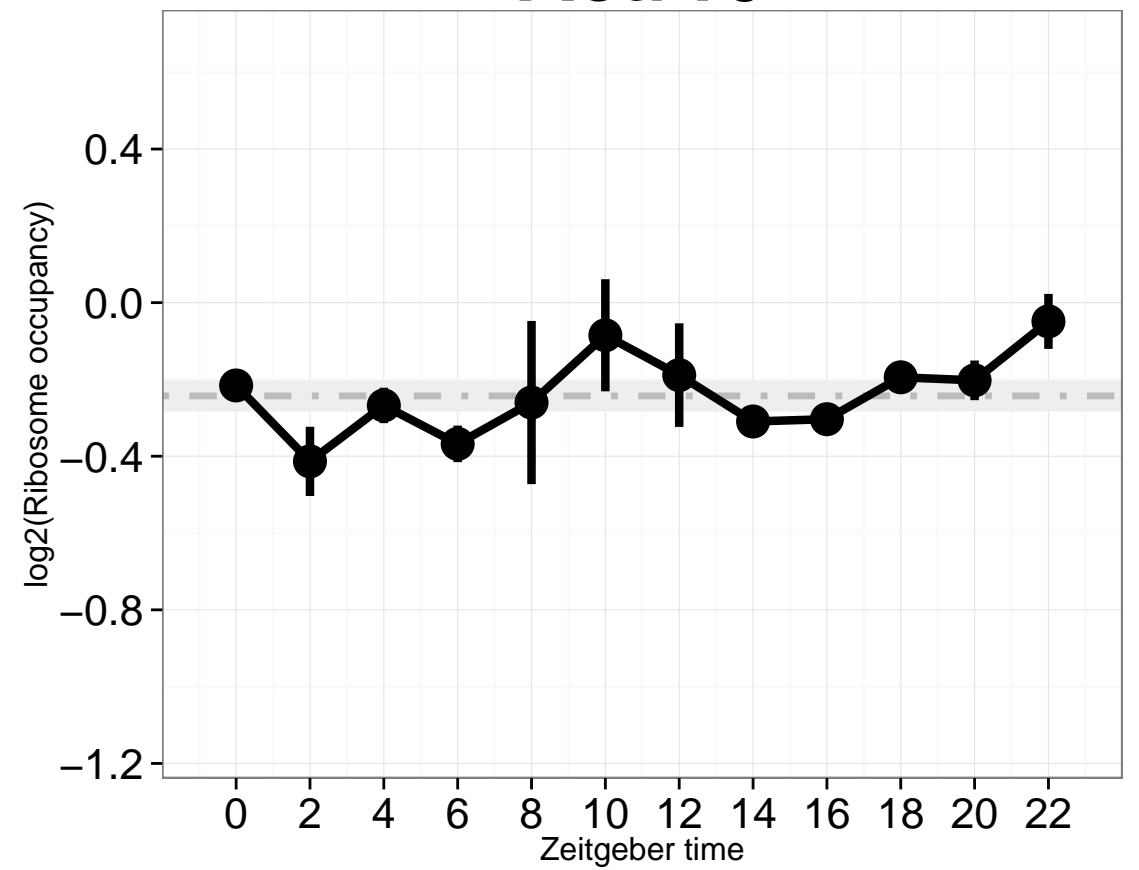

Supplement: SuppDataset_1.zip [file Actr10_set_A.pdf › Supplemental Dataset 1/A-mRNA_nonrhyth_translation_nonrhyth/Actr10_set_A.pdf]

# Actr1a

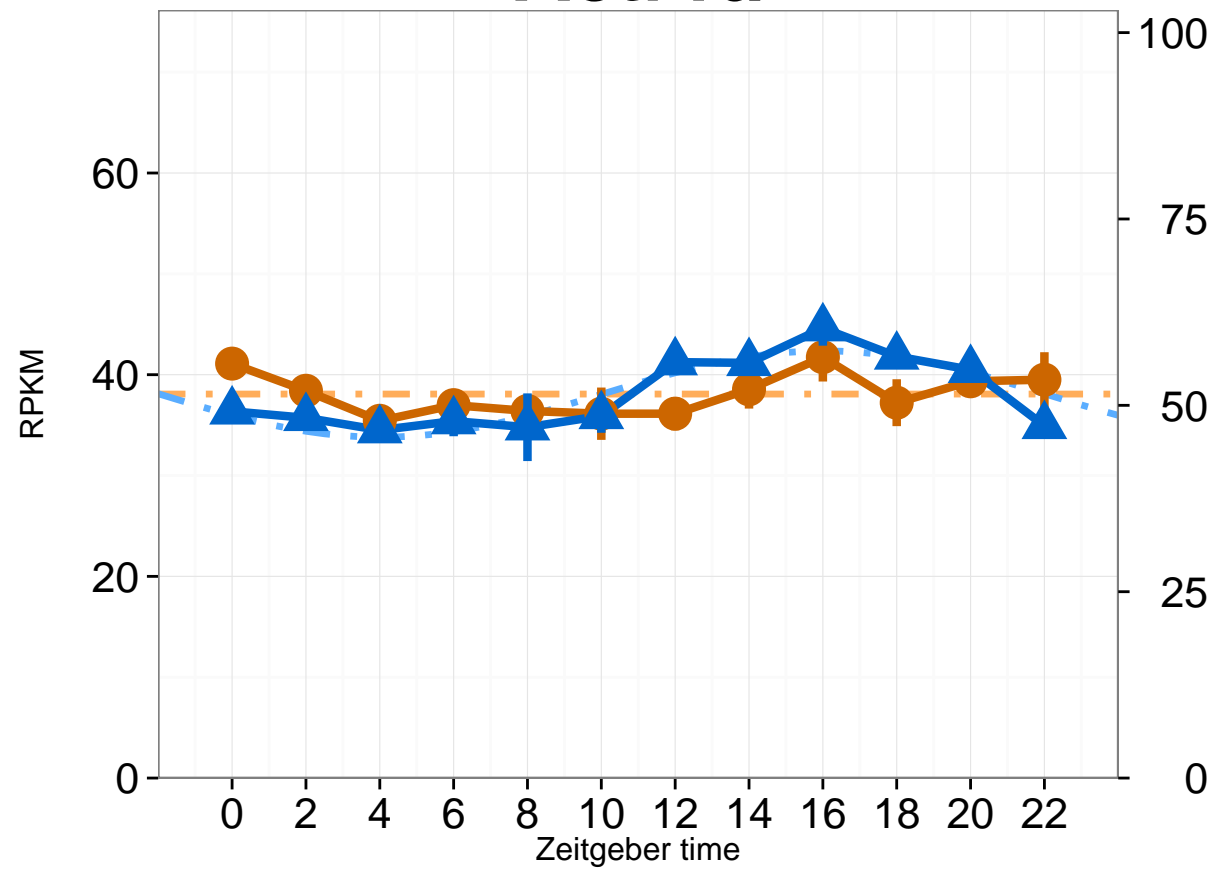

# Actr1a

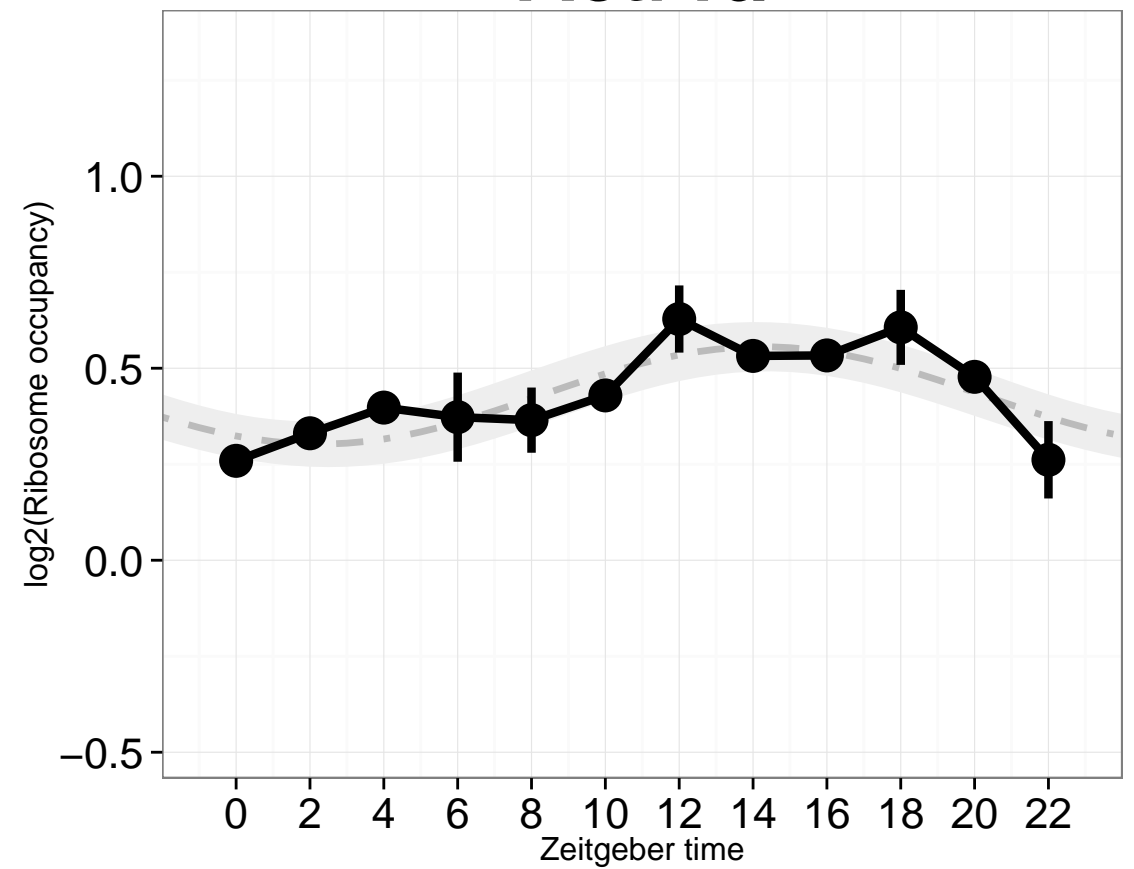

Supplement: SuppDataset_1.zip [file Actr1a_set_A.pdf › Supplemental Dataset 1/A-mRNA_nonrhyth_translation_nonrhyth/Actr1a_set_A.pdf]

# Actr1b

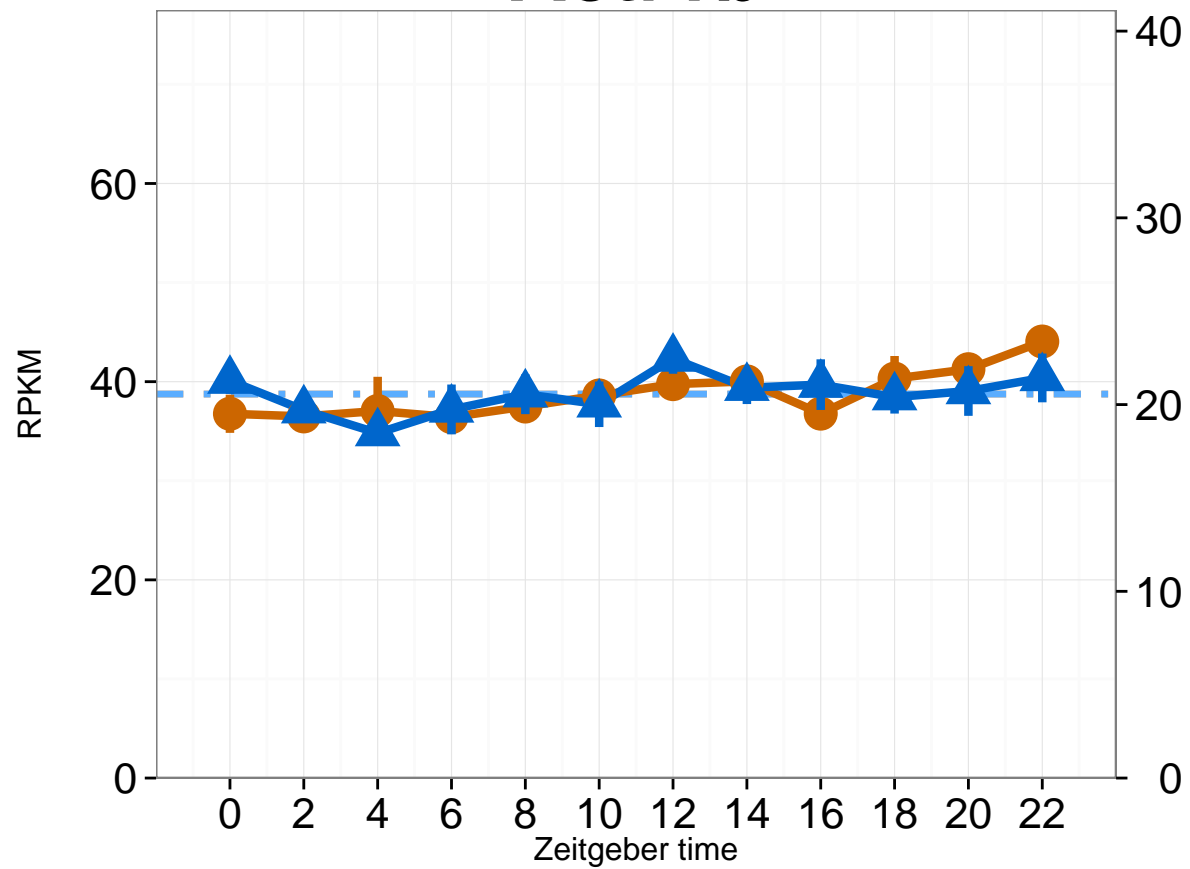

# Actr1b

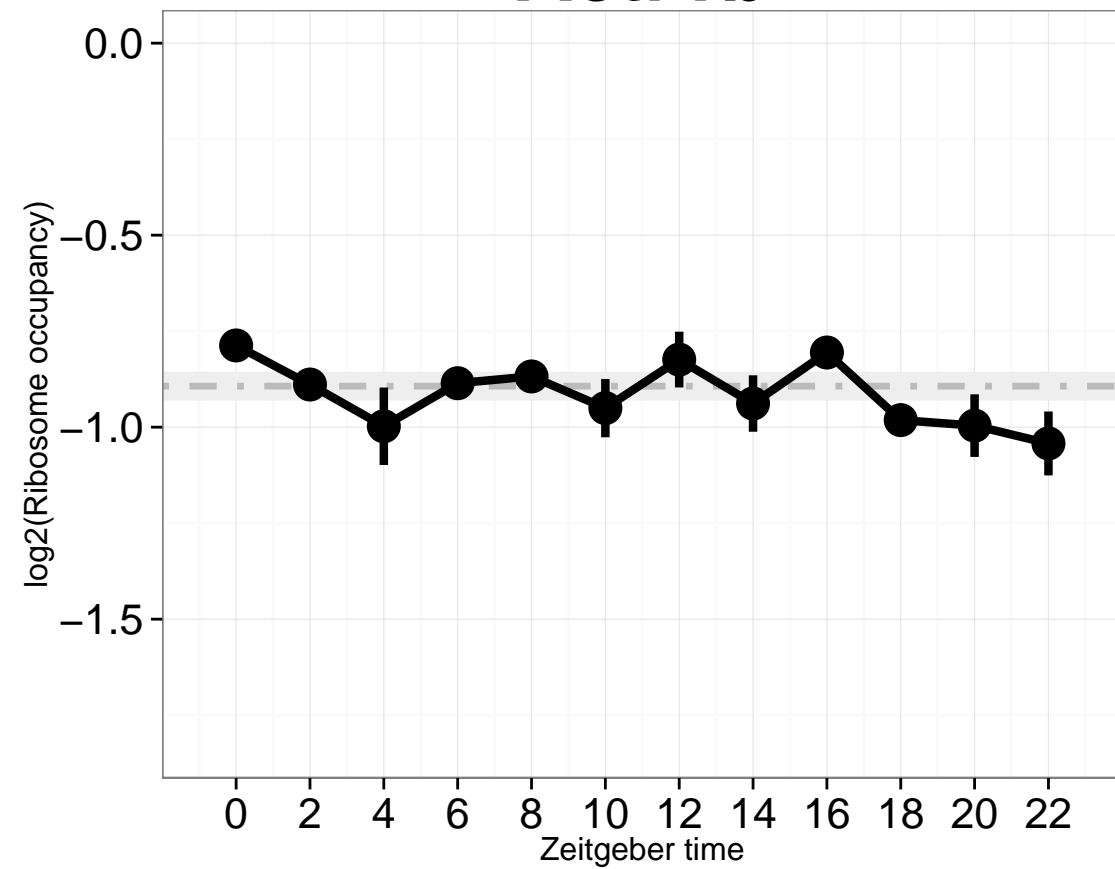

Supplement: SuppDataset_1.zip [file Actr1b_set_A.pdf › Supplemental Dataset 1/A-mRNA_nonrhyth_translation_nonrhyth/Actr1b_set_A.pdf]

## Actr2

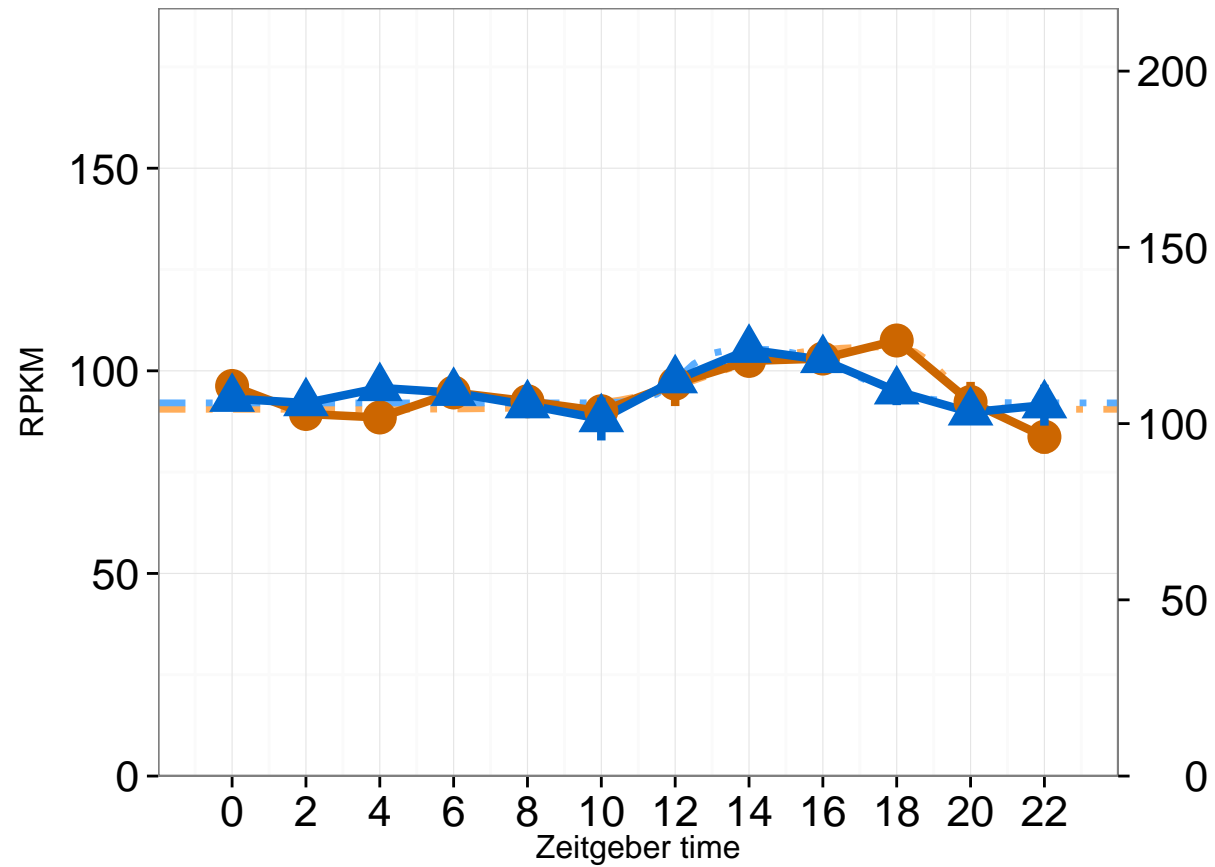

## Actr2

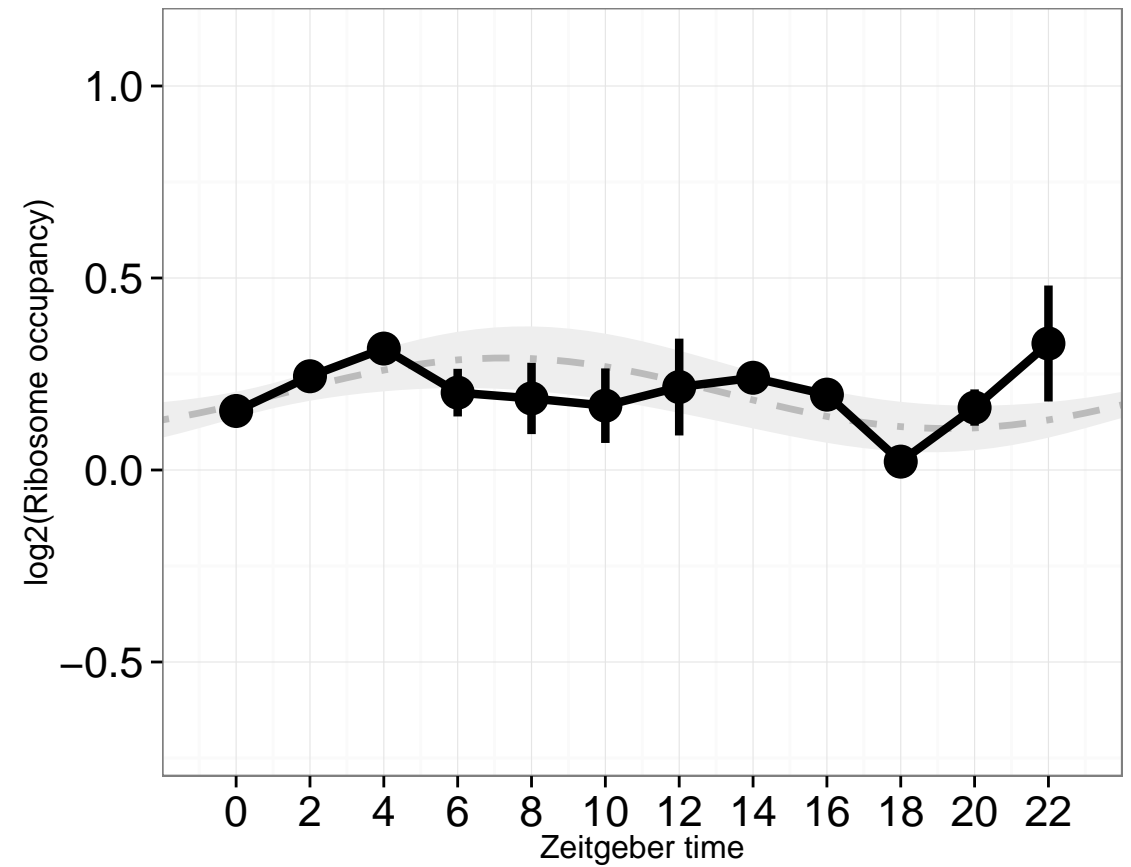

Supplement: SuppDataset_1.zip [file Actr2_set_A.pdf › Supplemental Dataset 1/A-mRNA_nonrhyth_translation_nonrhyth/Actr2_set_A.pdf]

# Actr3

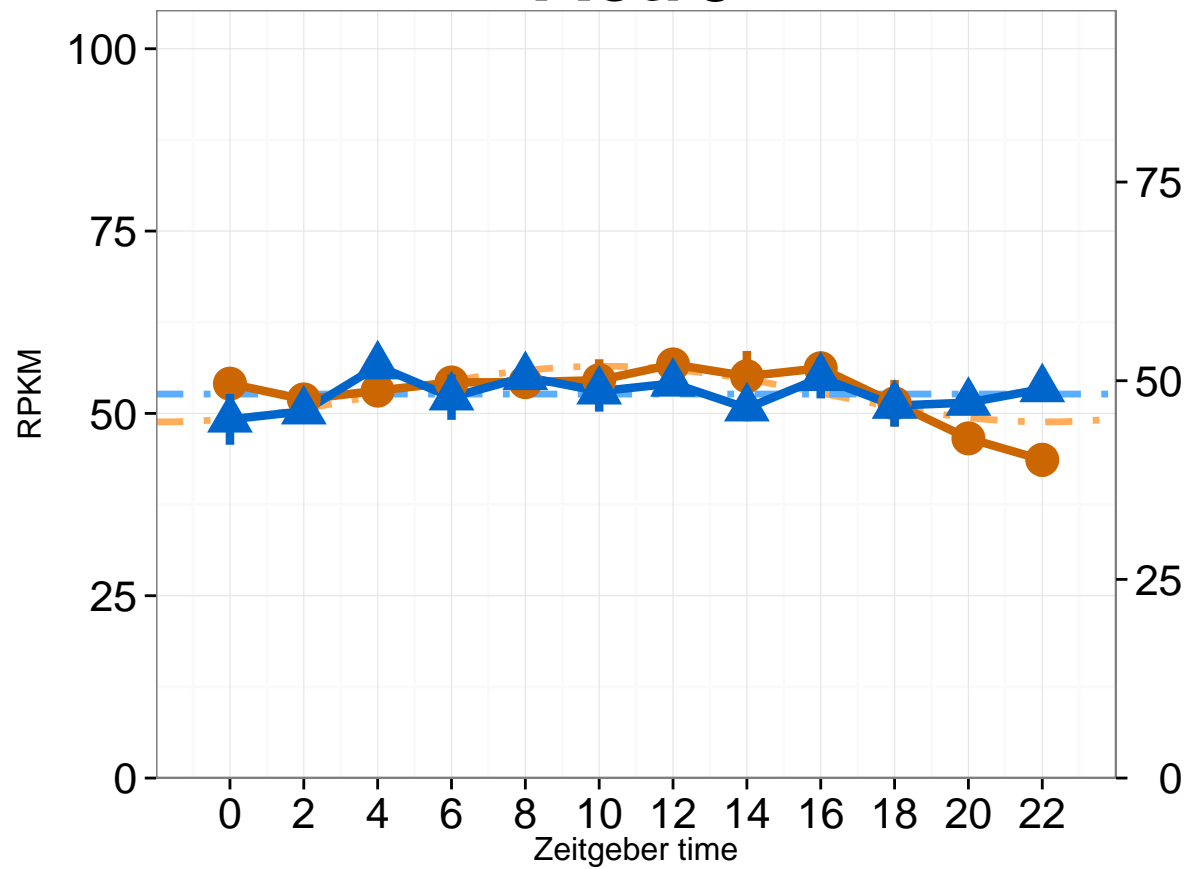

# Actr3

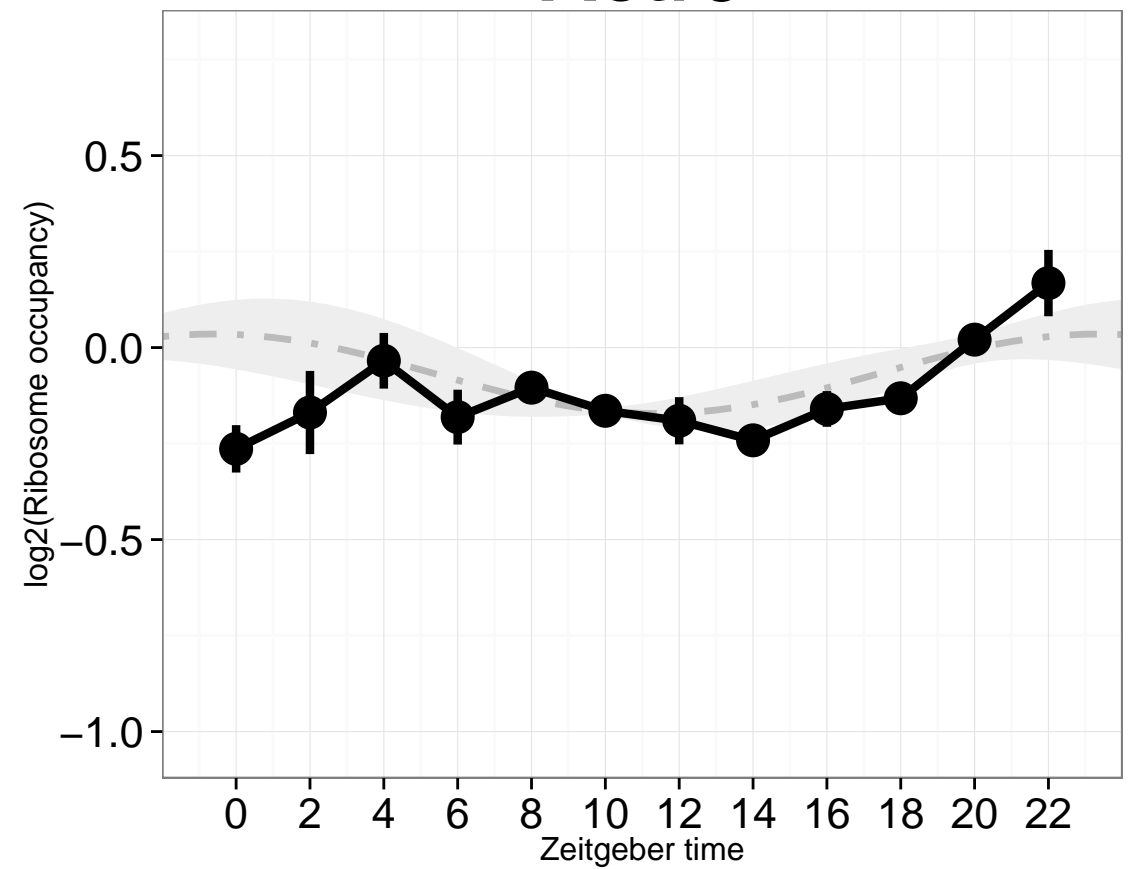

Supplement: SuppDataset_1.zip [file Actr3_set_A.pdf › Supplemental Dataset 1/A-mRNA_nonrhyth_translation_nonrhyth/Actr3_set_A.pdf]

# Actr5

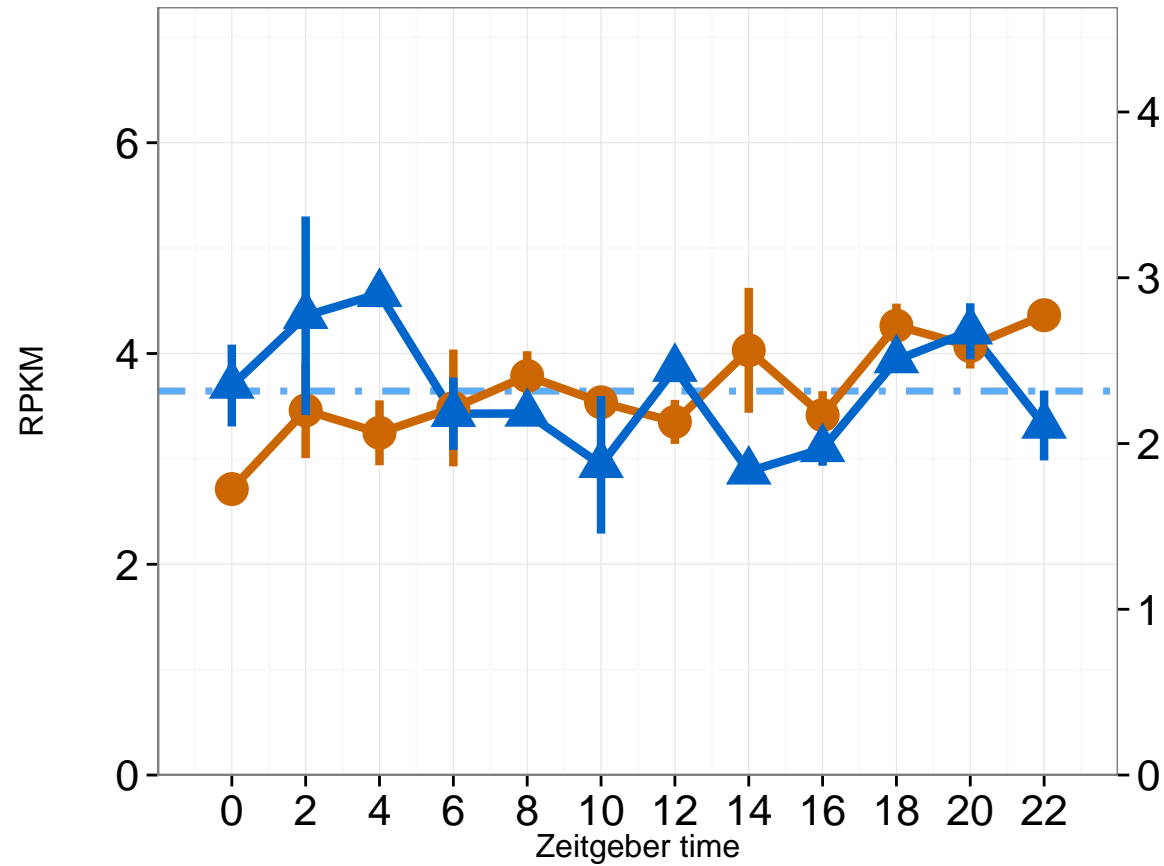

# Actr5

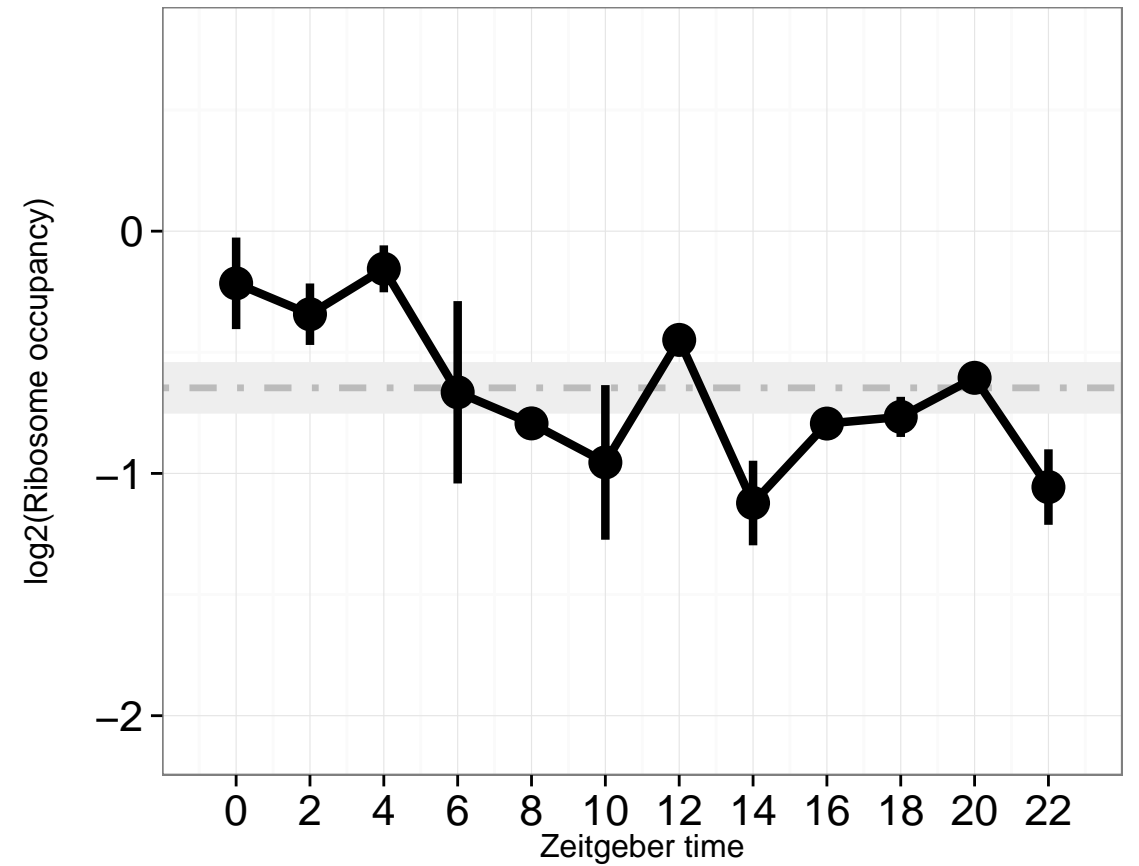

Supplement: SuppDataset_1.zip [file Actr5_set_A.pdf › Supplemental Dataset 1/A-mRNA_nonrhyth_translation_nonrhyth/Actr5_set_A.pdf]

# Actr8

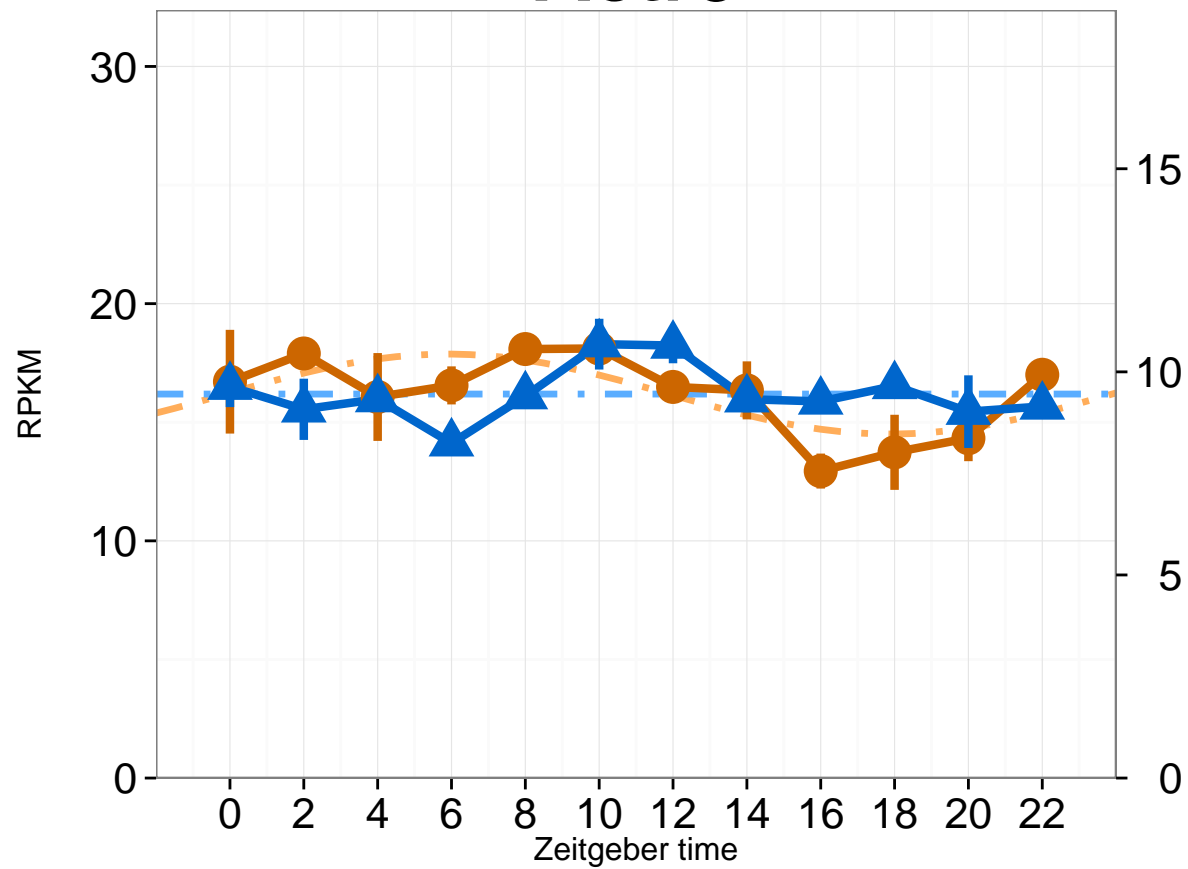

# Actr8

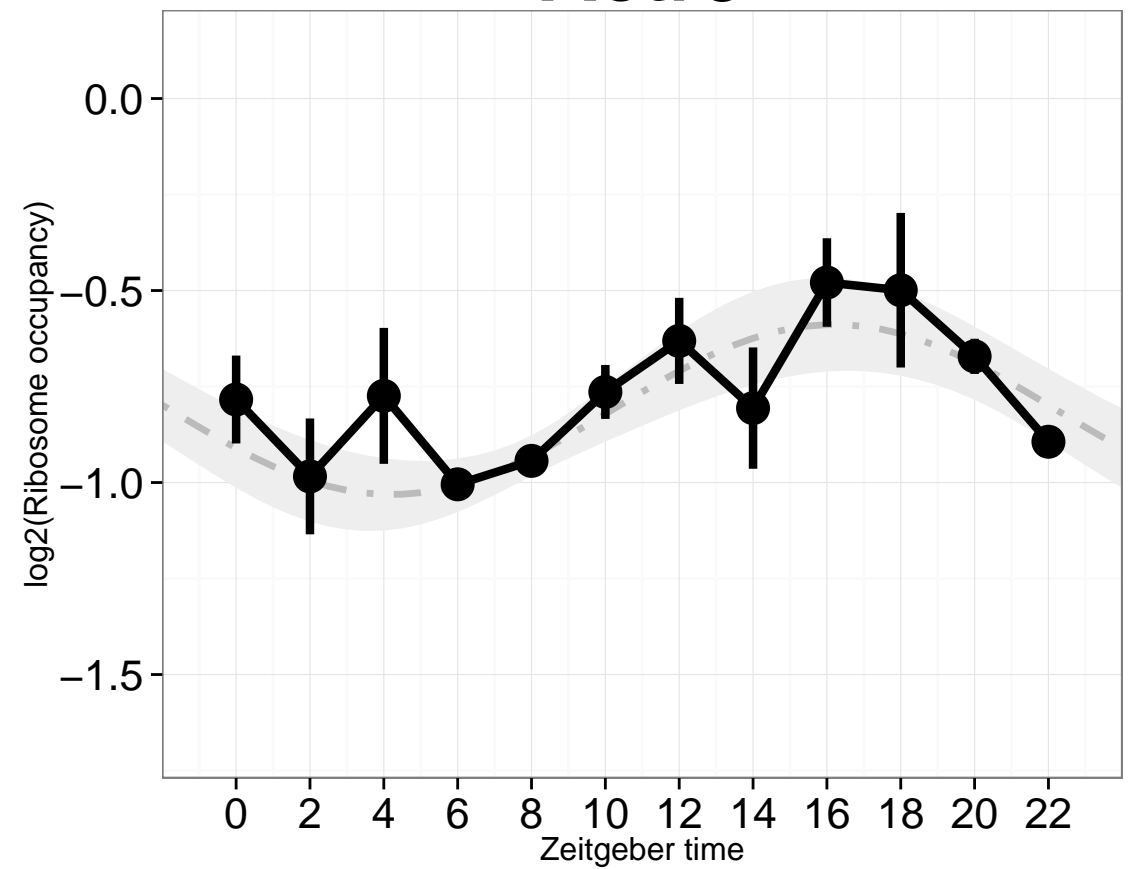

Supplement: SuppDataset_1.zip [file Actr8_set_A.pdf › Supplemental Dataset 1/A-mRNA_nonrhyth_translation_nonrhyth/Actr8_set_A.pdf]

# Acvr1

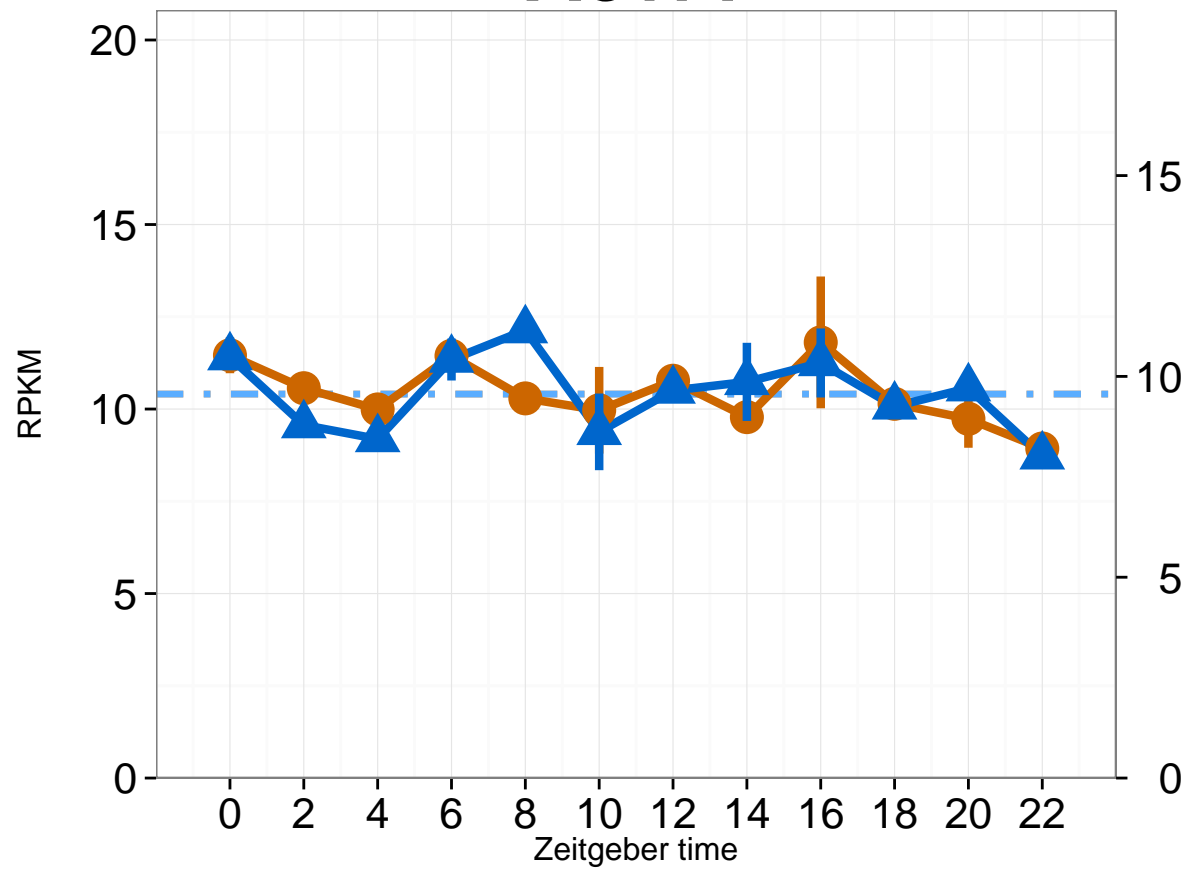

# Acvr1

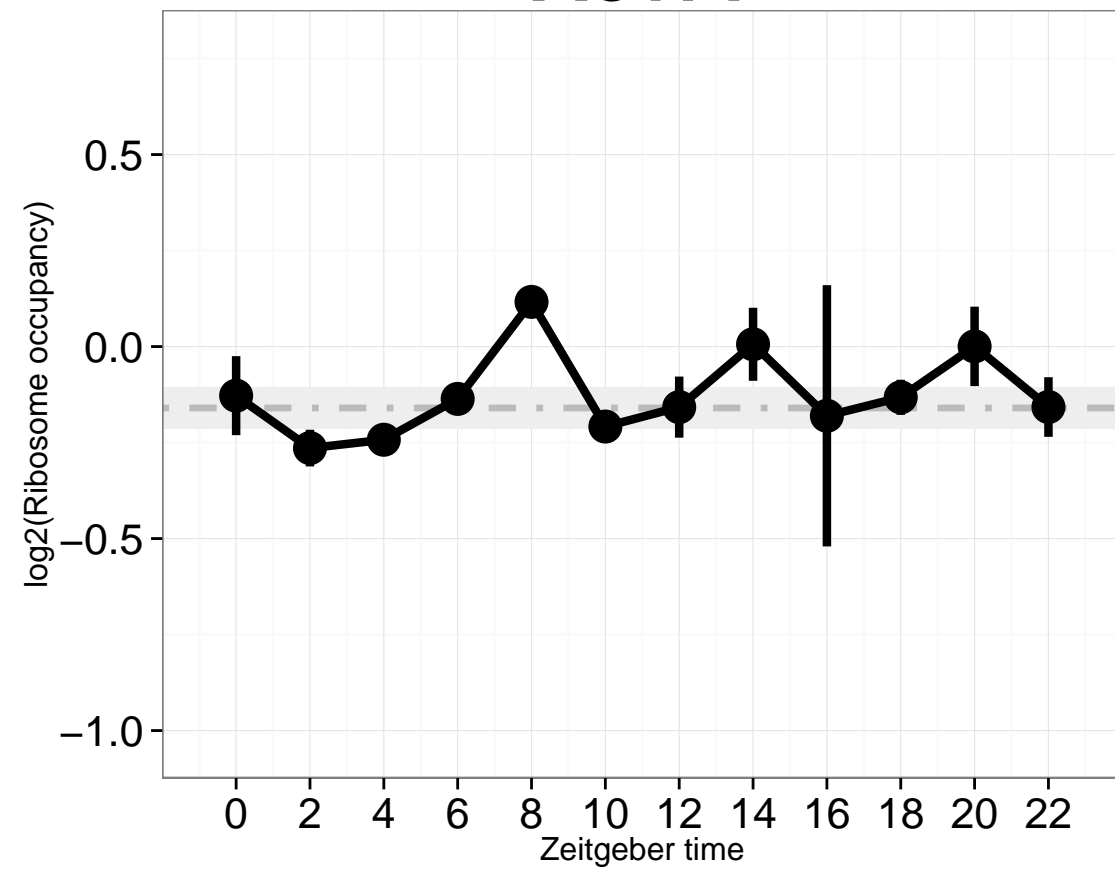

Supplement: SuppDataset_1.zip [file Acvr1_set_A.pdf › Supplemental Dataset 1/A-mRNA_nonrhyth_translation_nonrhyth/Acvr1_set_A.pdf]

# Acvr2a

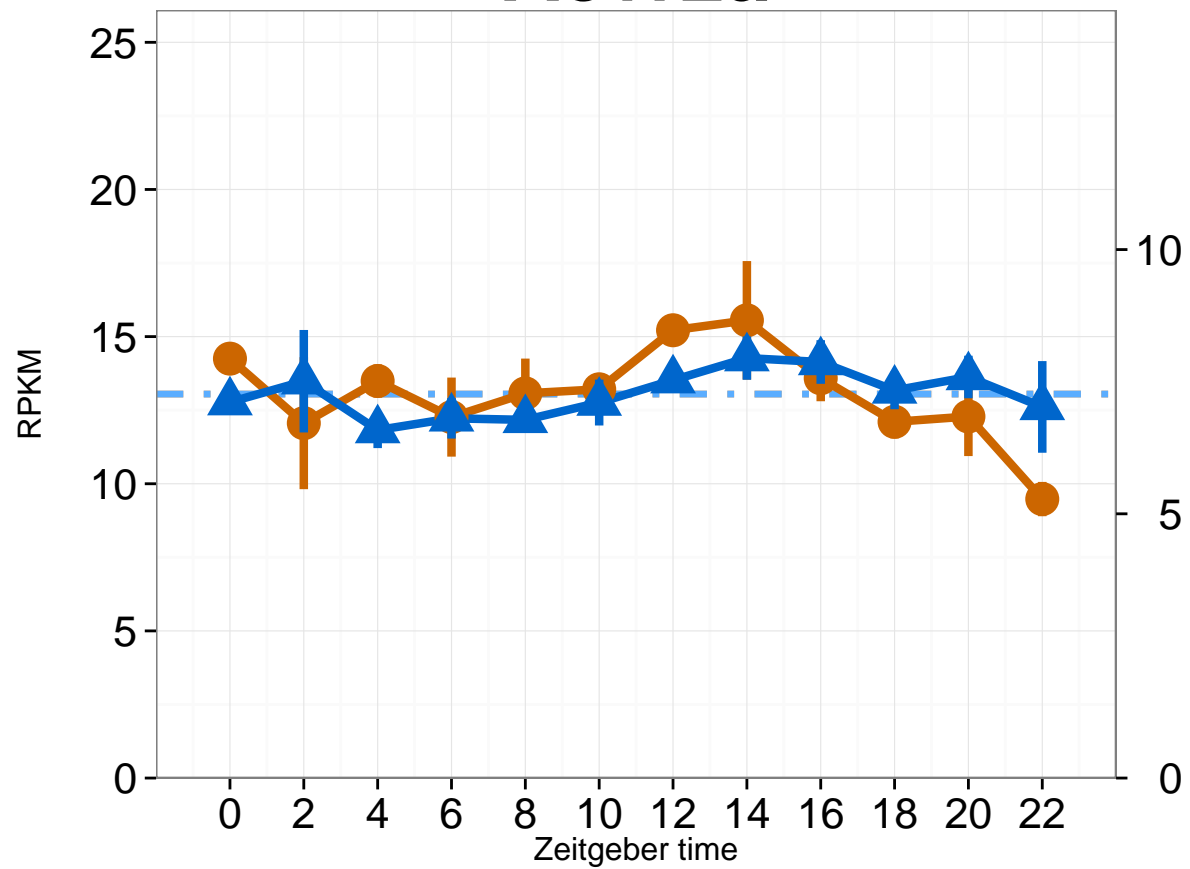

# Acvr2a

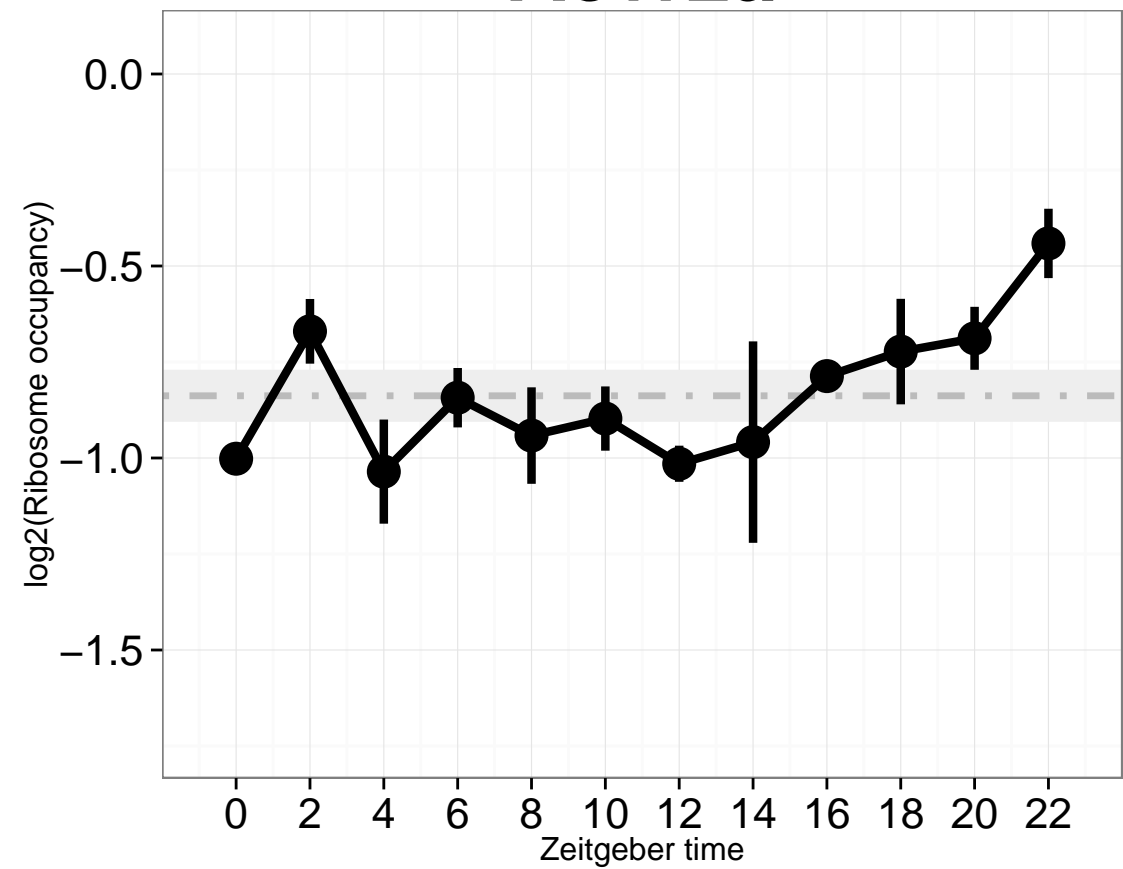

Supplement: SuppDataset_1.zip [file Acvr2a_set_A.pdf › Supplemental Dataset 1/A-mRNA_nonrhyth_translation_nonrhyth/Acvr2a_set_A.pdf]

# Acvr2b

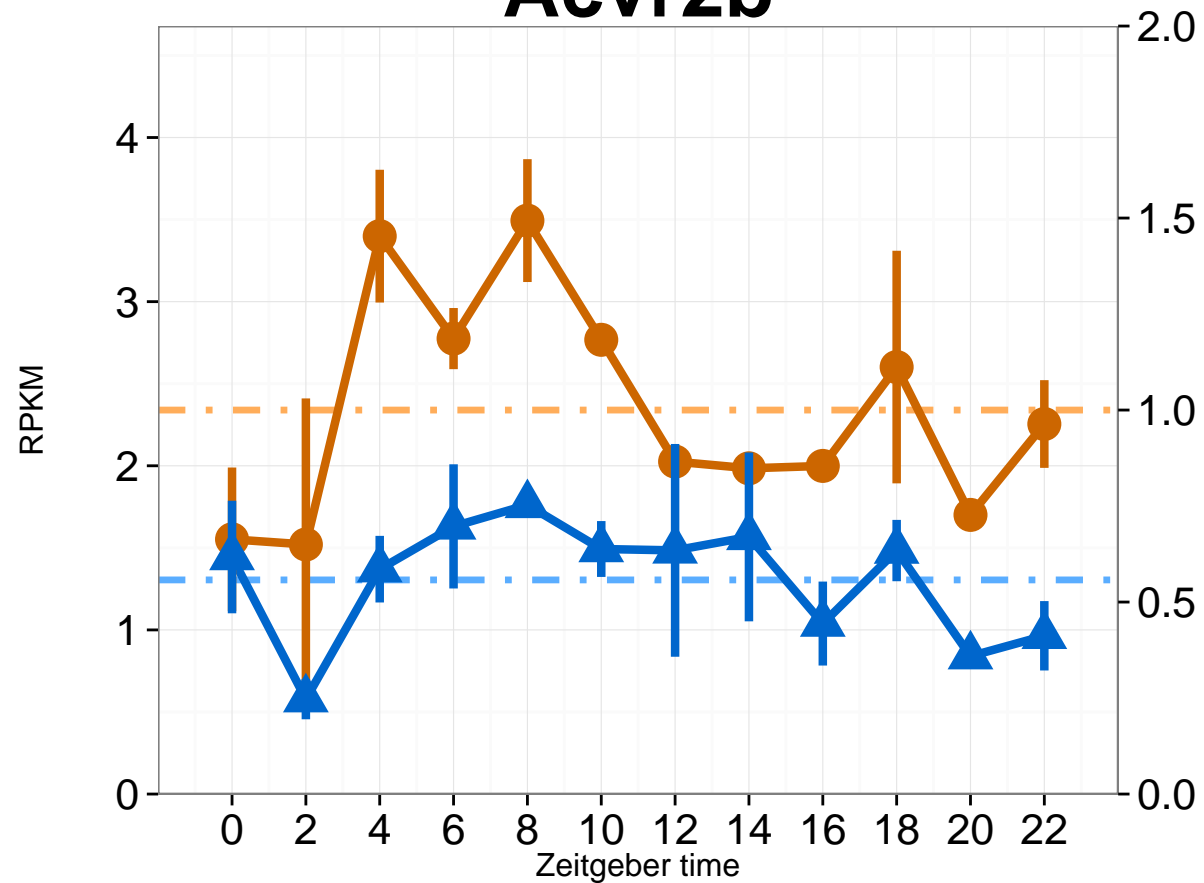

# Acvr2b

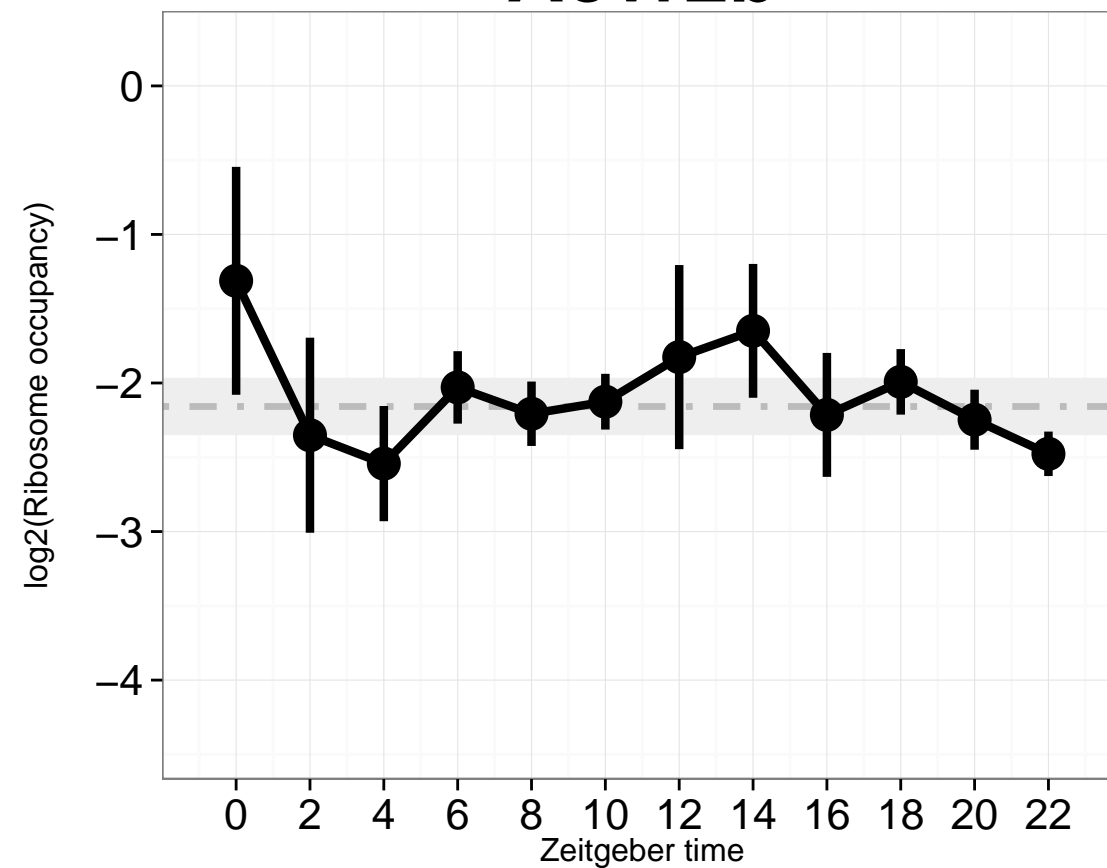

Supplement: SuppDataset_1.zip [file Acvr2b_set_A.pdf › Supplemental Dataset 1/A-mRNA_nonrhyth_translation_nonrhyth/Acvr2b_set_A.pdf]

# Acvrl1

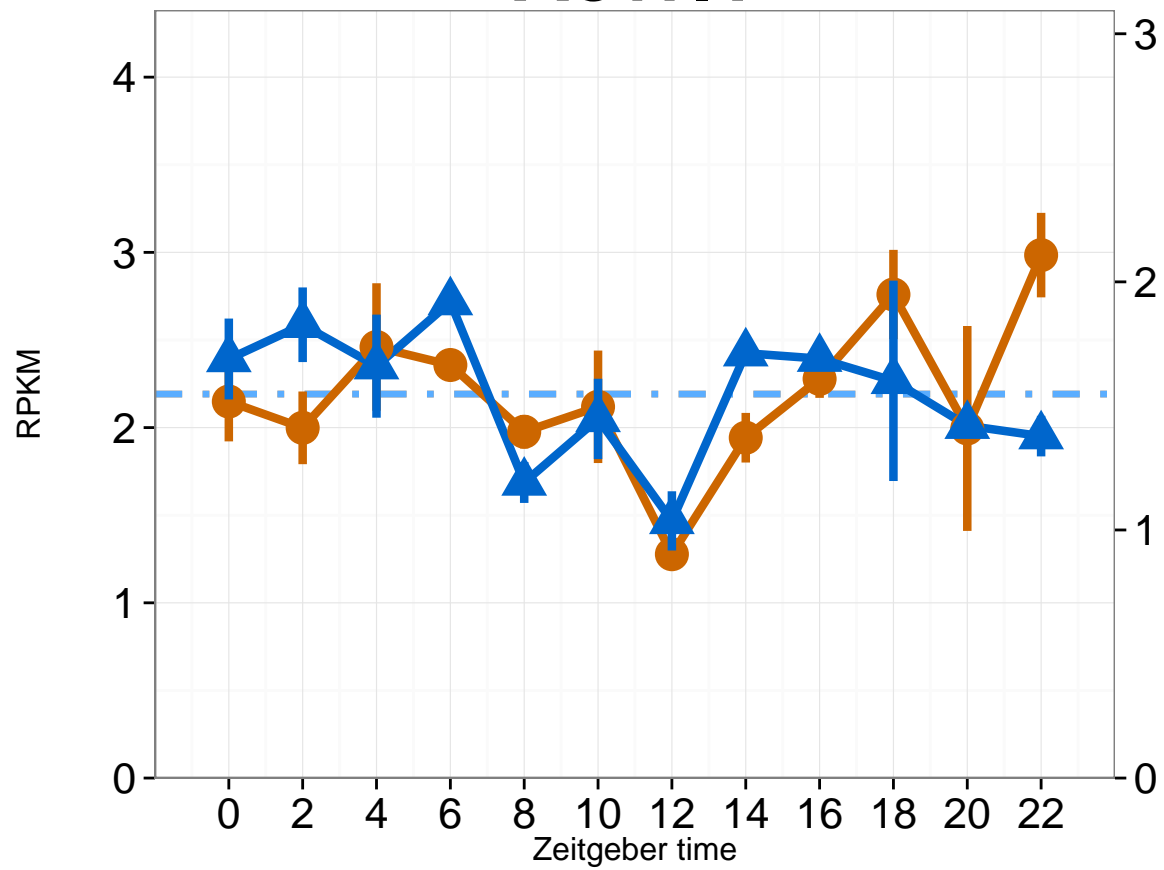

# Acvrl1

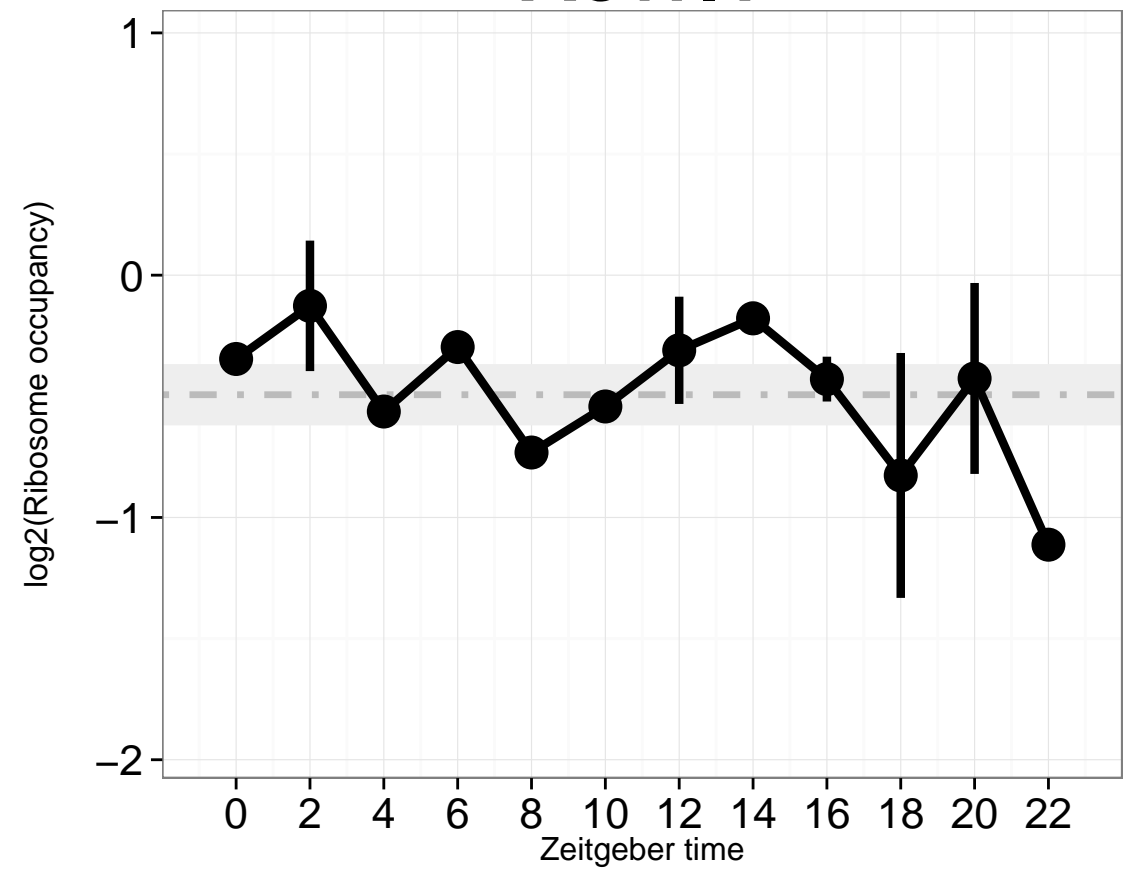

Supplement: SuppDataset_1.zip [file Acvrl1_set_A.pdf › Supplemental Dataset 1/A-mRNA_nonrhyth_translation_nonrhyth/Acvrl1_set_A.pdf]

# Acy1

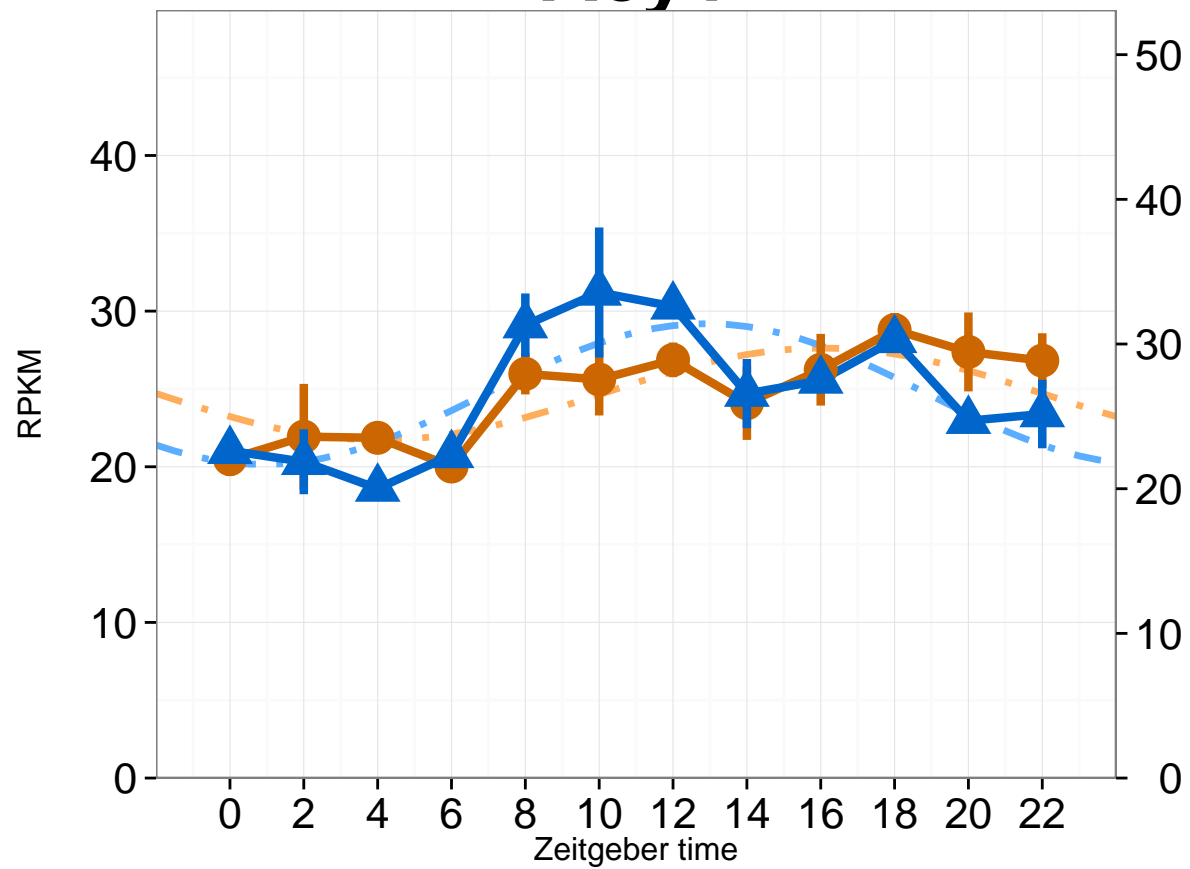

# Acy1

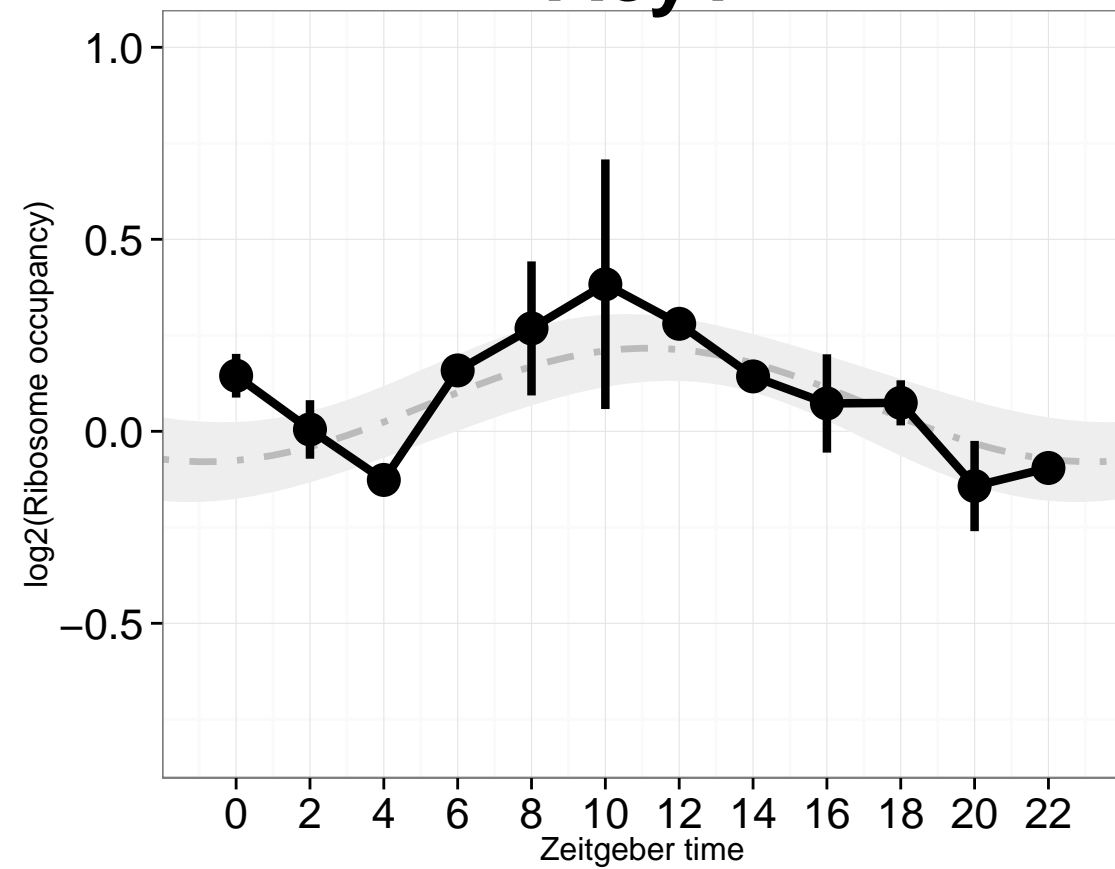

Supplement: SuppDataset_1.zip [file Acy1_set_A.pdf › Supplemental Dataset 1/A-mRNA_nonrhyth_translation_nonrhyth/Acy1_set_A.pdf]

## Acy3

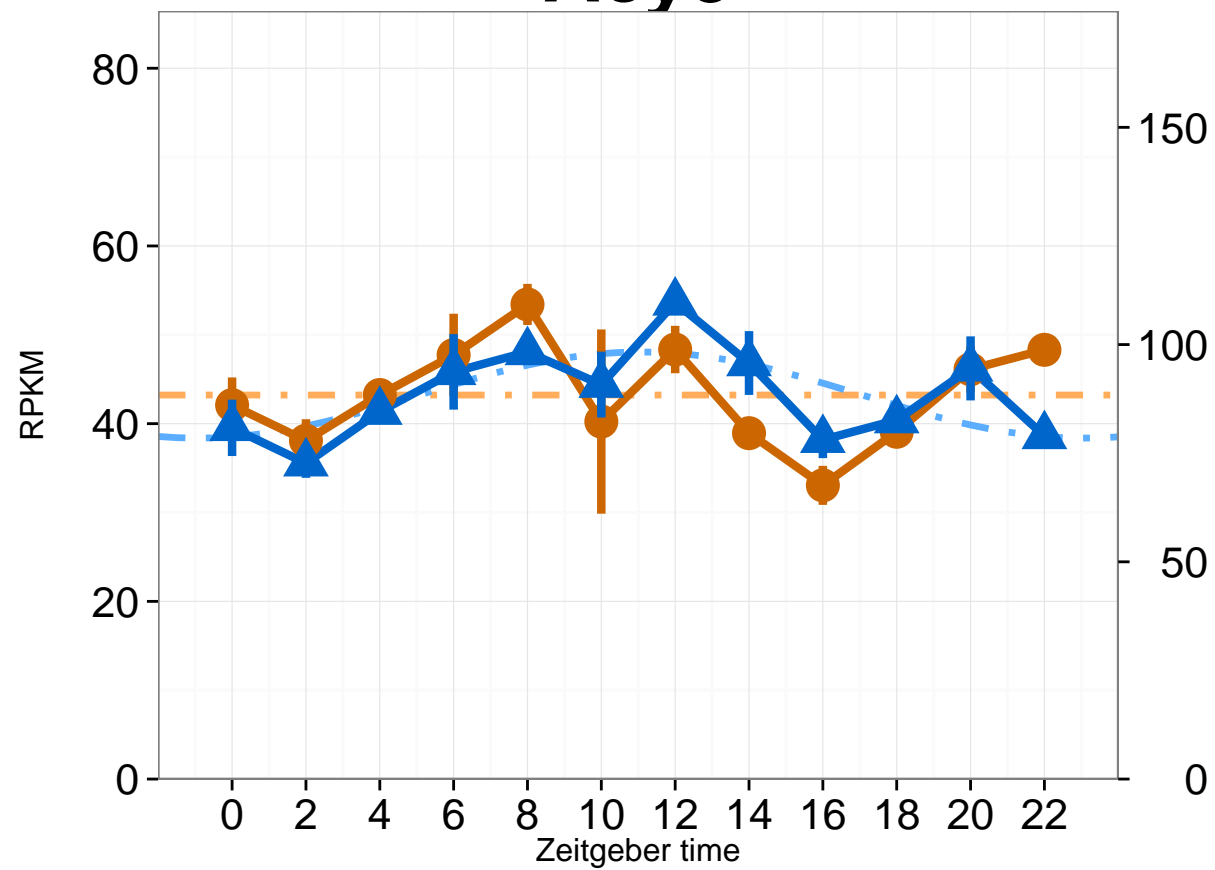

## Acy3

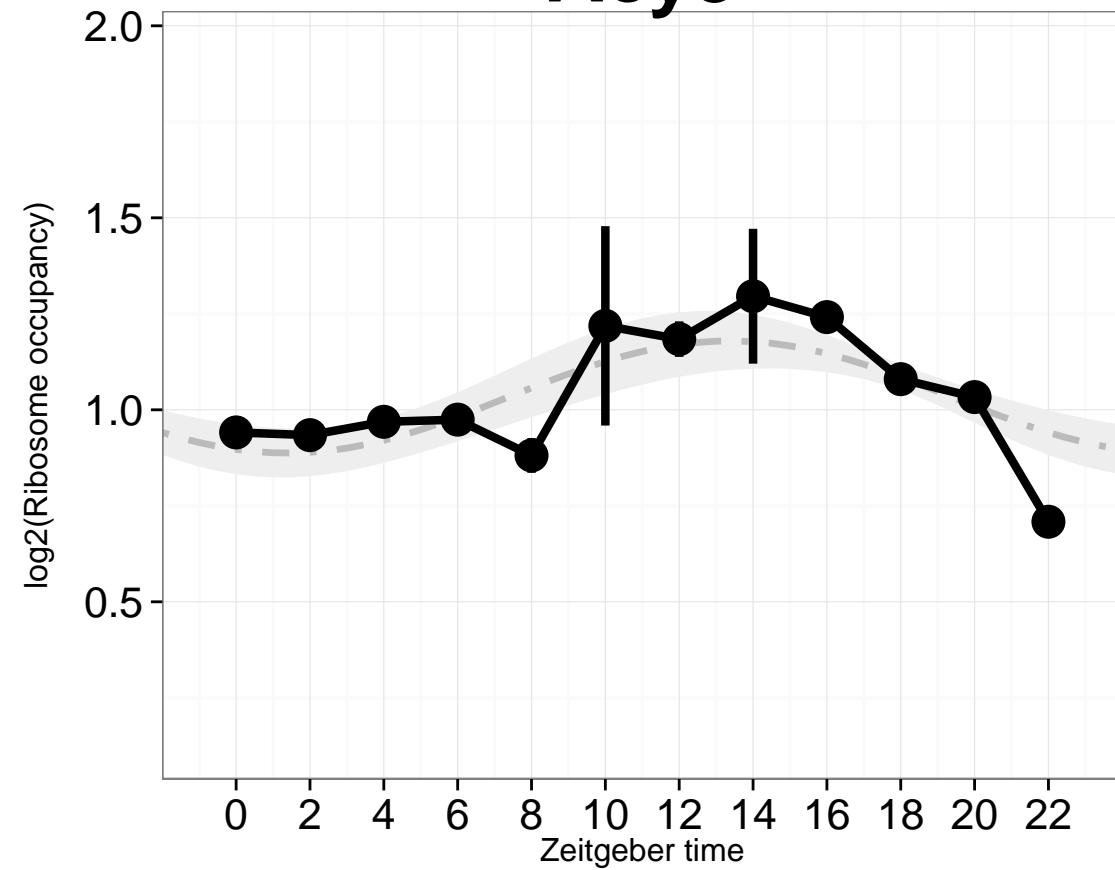

Supplement: SuppDataset_1.zip [file Acy3_set_A.pdf › Supplemental Dataset 1/A-mRNA_nonrhyth_translation_nonrhyth/Acy3_set_A.pdf]

## Acyp1

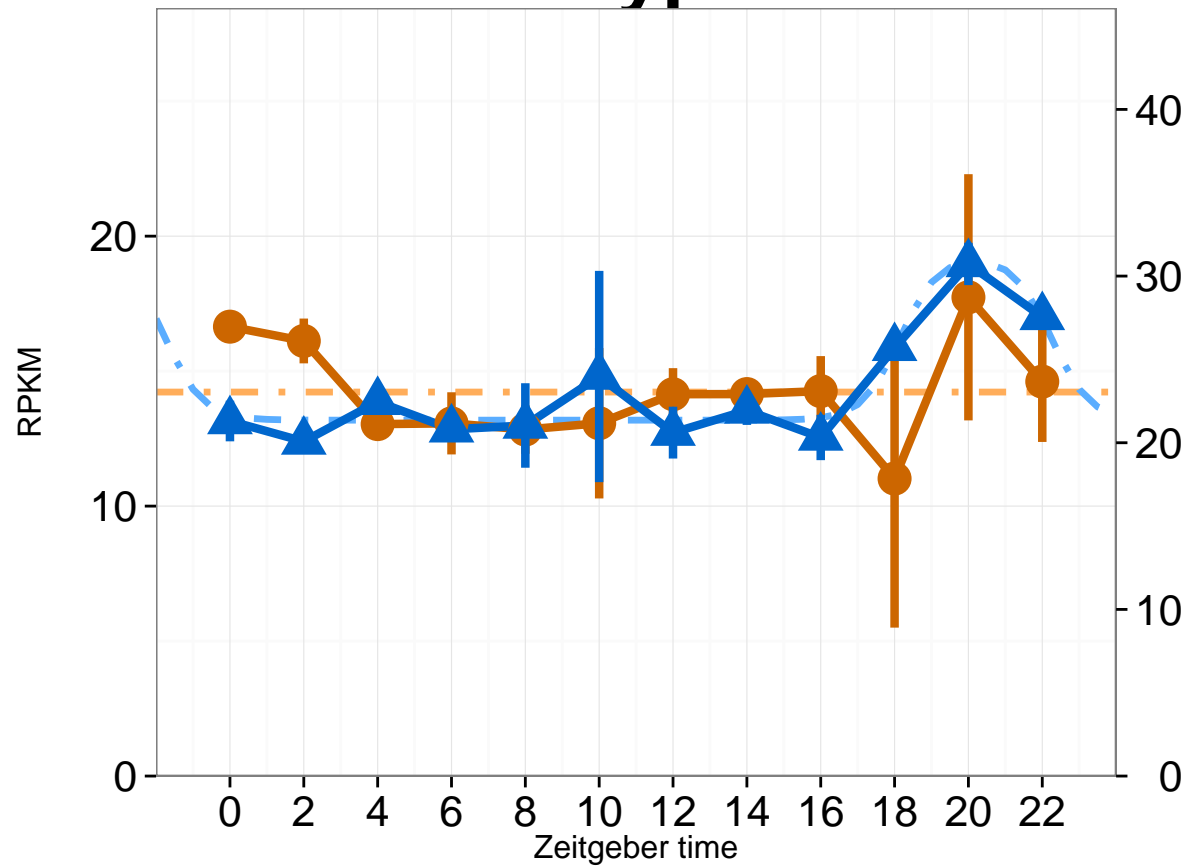

## Acyp1

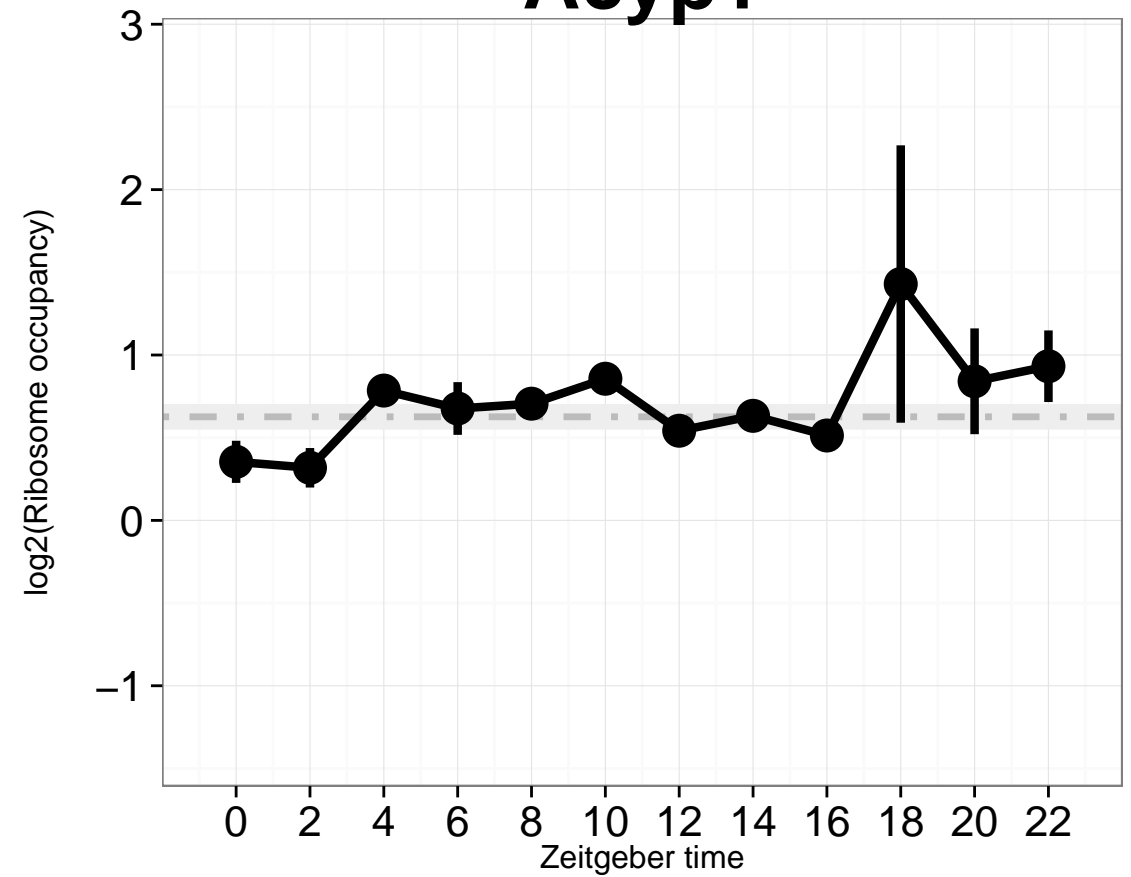

Supplement: SuppDataset_1.zip [file Acyp1_set_A.pdf › Supplemental Dataset 1/A-mRNA_nonrhyth_translation_nonrhyth/Acyp1_set_A.pdf]

## Ada

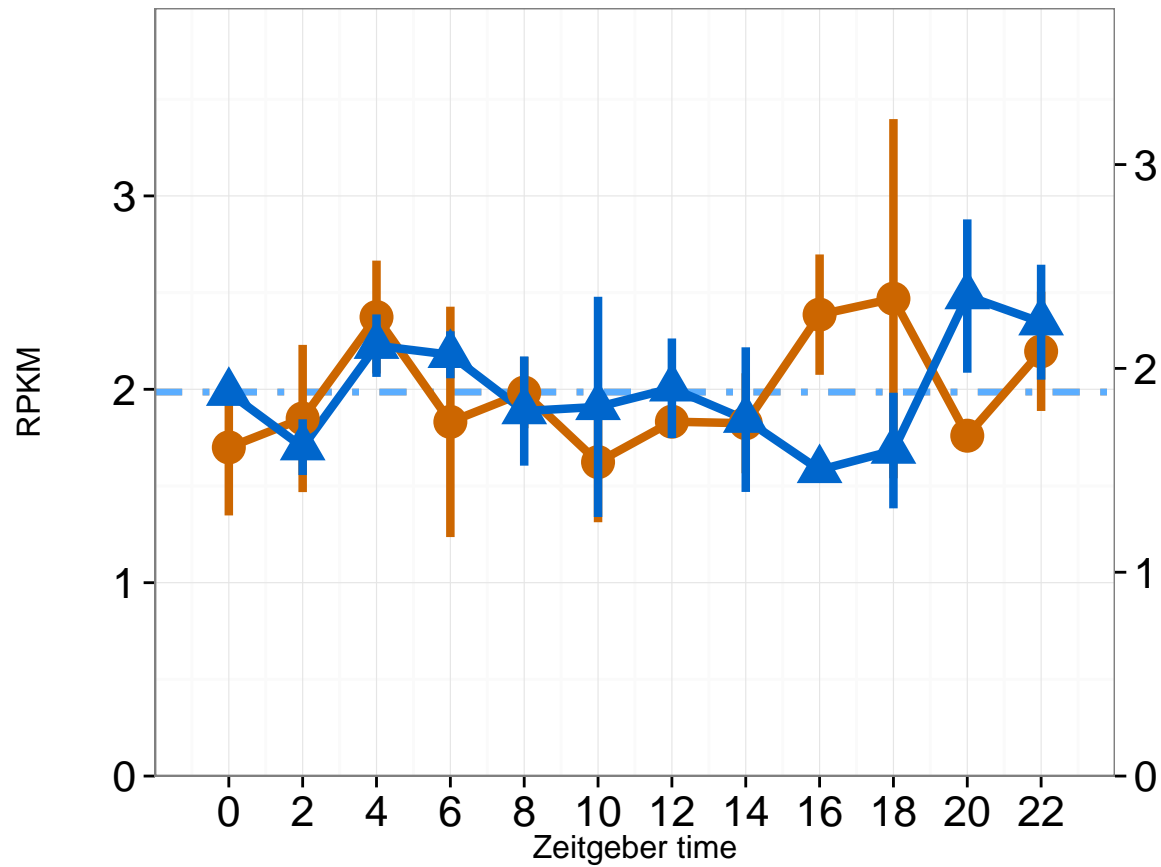

## Ada

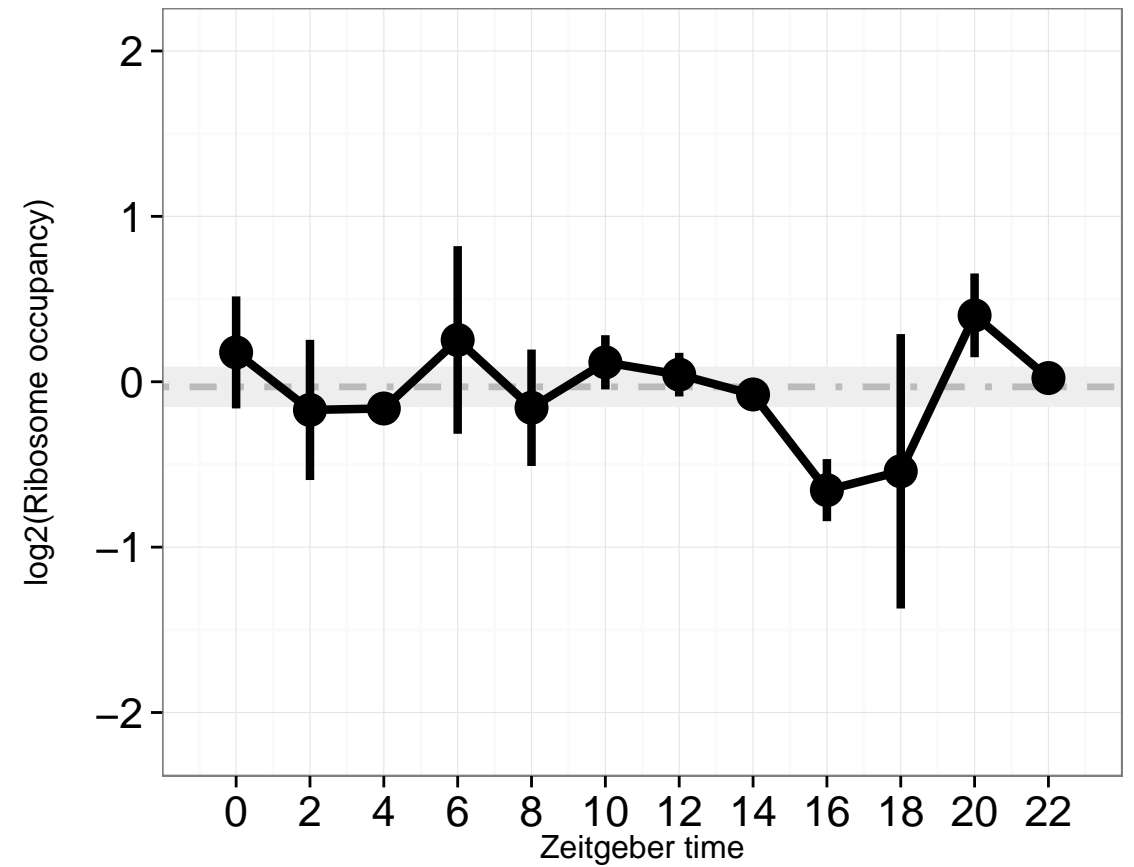

Supplement: SuppDataset_1.zip [file Ada_set_A.pdf › Supplemental Dataset 1/A-mRNA_nonrhyth_translation_nonrhyth/Ada_set_A.pdf]

# Adal

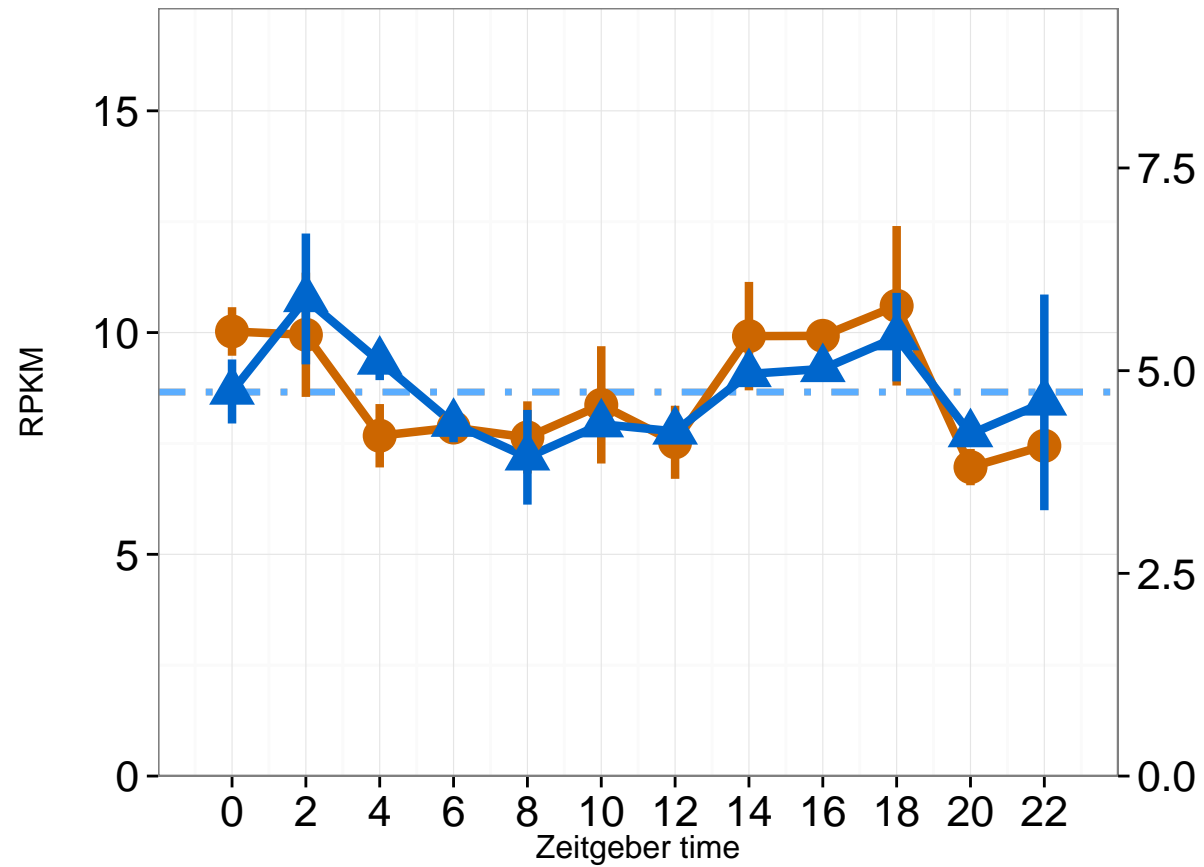

# Adal

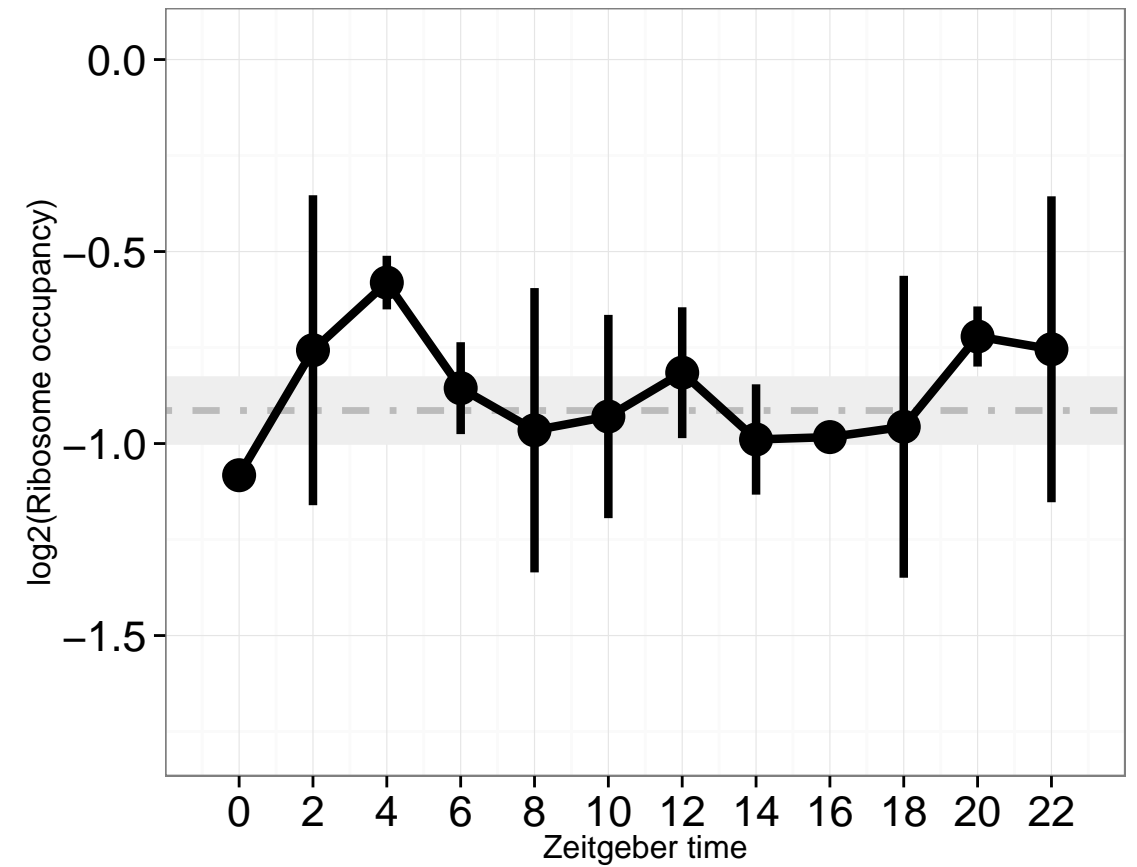

Supplement: SuppDataset_1.zip [file Adal_set_A.pdf › Supplemental Dataset 1/A-mRNA_nonrhyth_translation_nonrhyth/Adal_set_A.pdf]

# Adam10

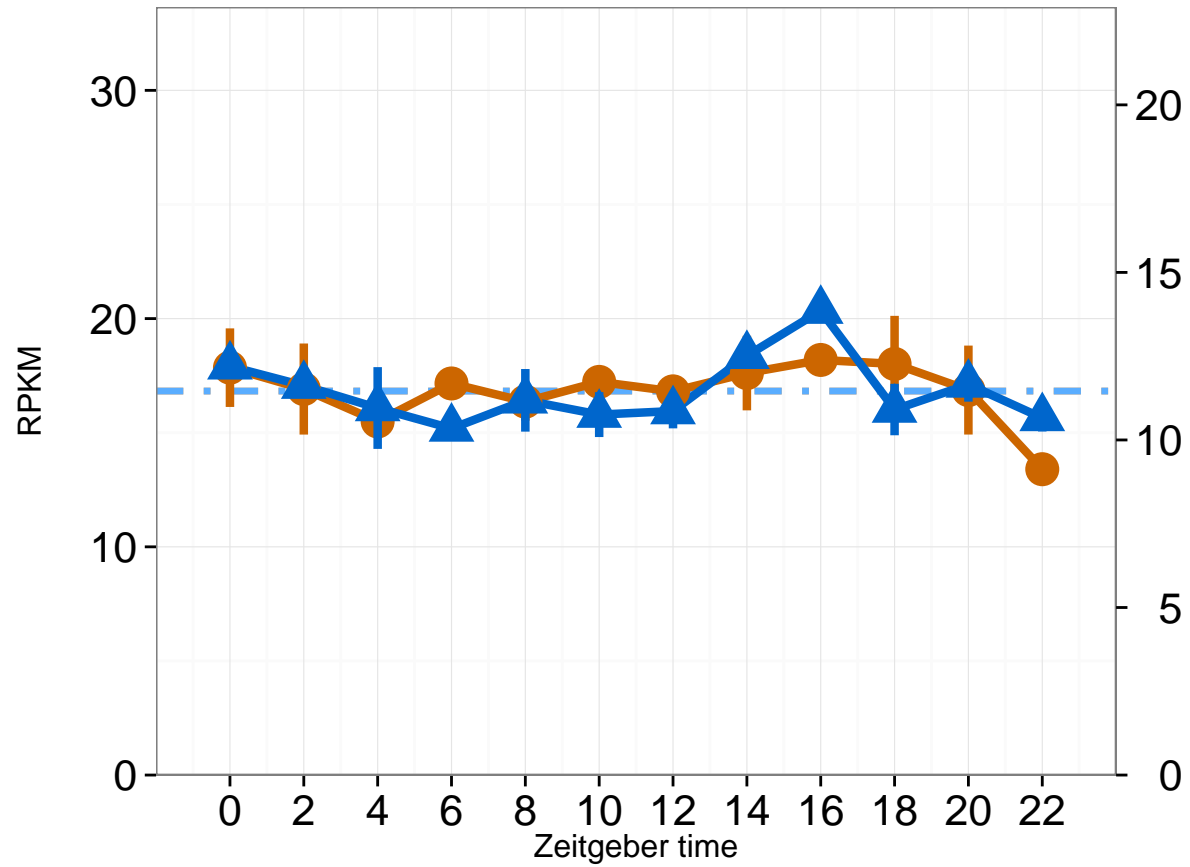

# Adam10

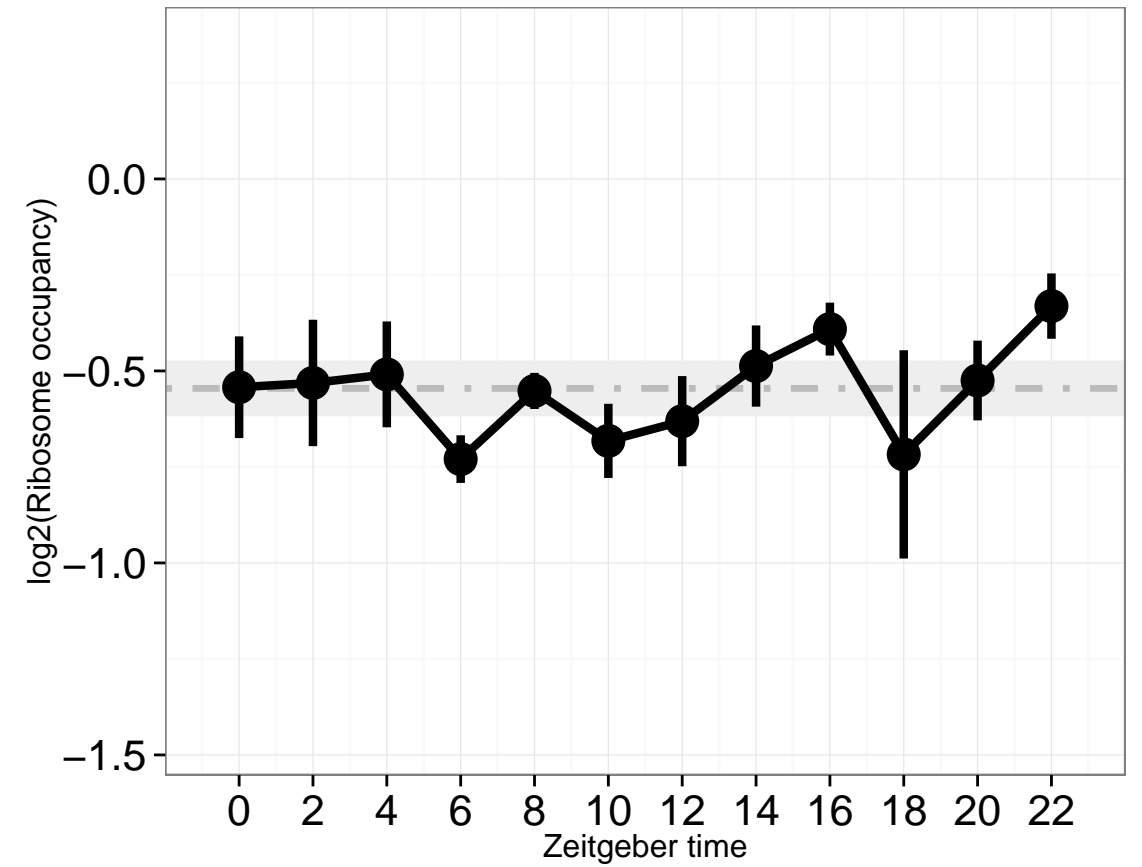

Supplement: SuppDataset_1.zip [file Adam10_set_A.pdf › Supplemental Dataset 1/A-mRNA_nonrhyth_translation_nonrhyth/Adam10_set_A.pdf]

# Adam11

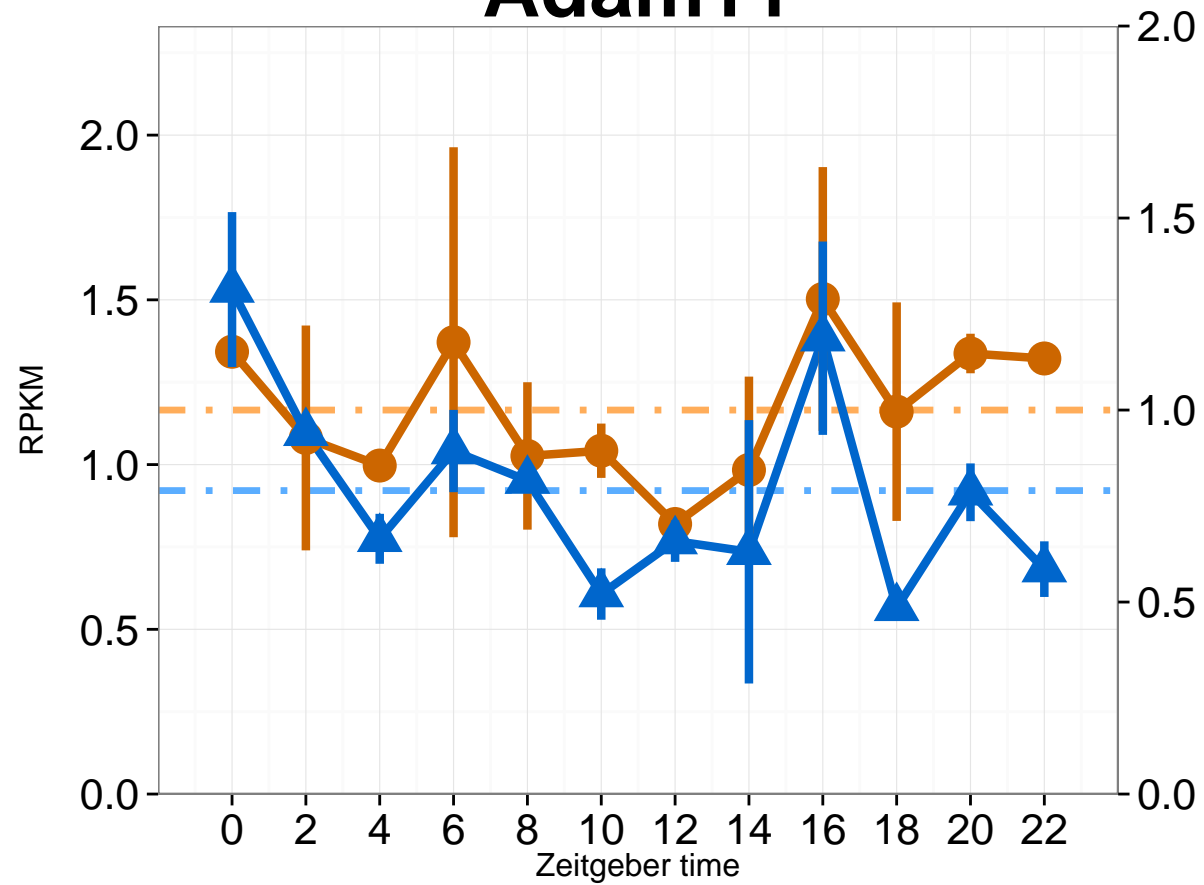

# Adam11

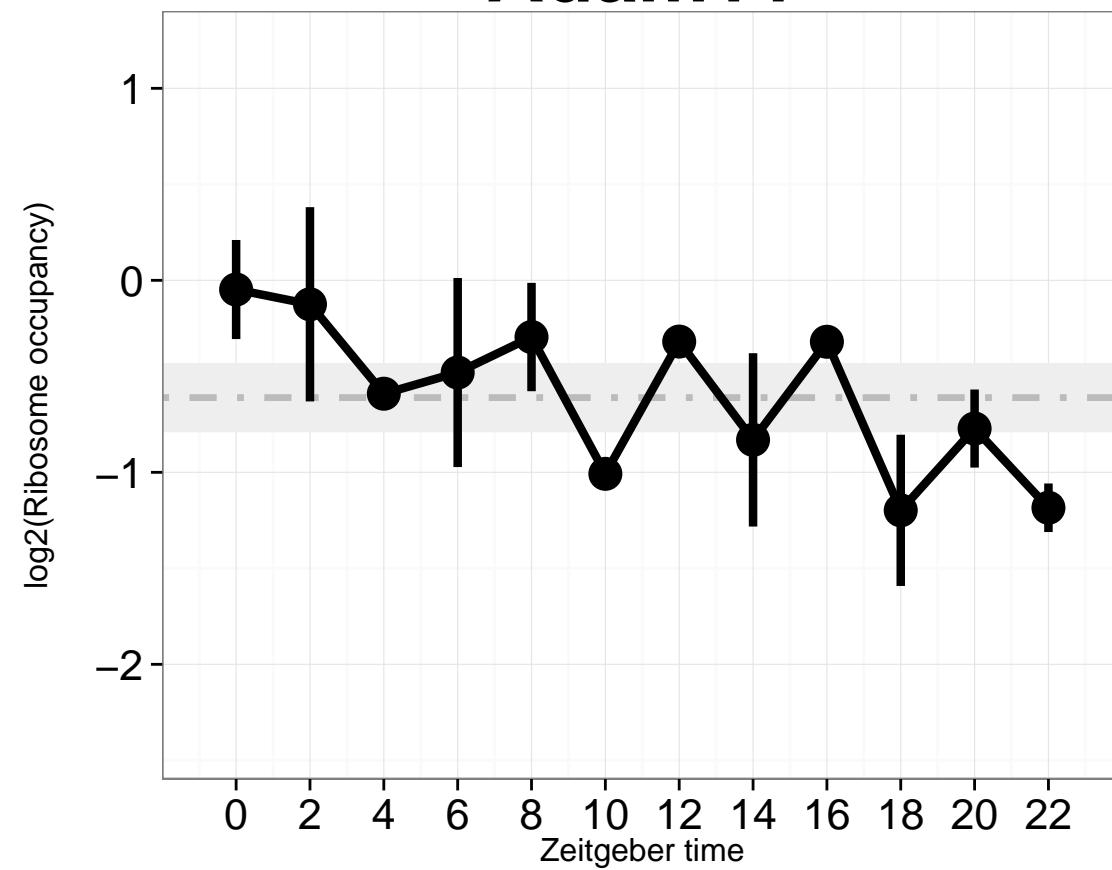

Supplement: SuppDataset_1.zip [file Adam11_set_A.pdf › Supplemental Dataset 1/A-mRNA_nonrhyth_translation_nonrhyth/Adam11_set_A.pdf]

# Adam15

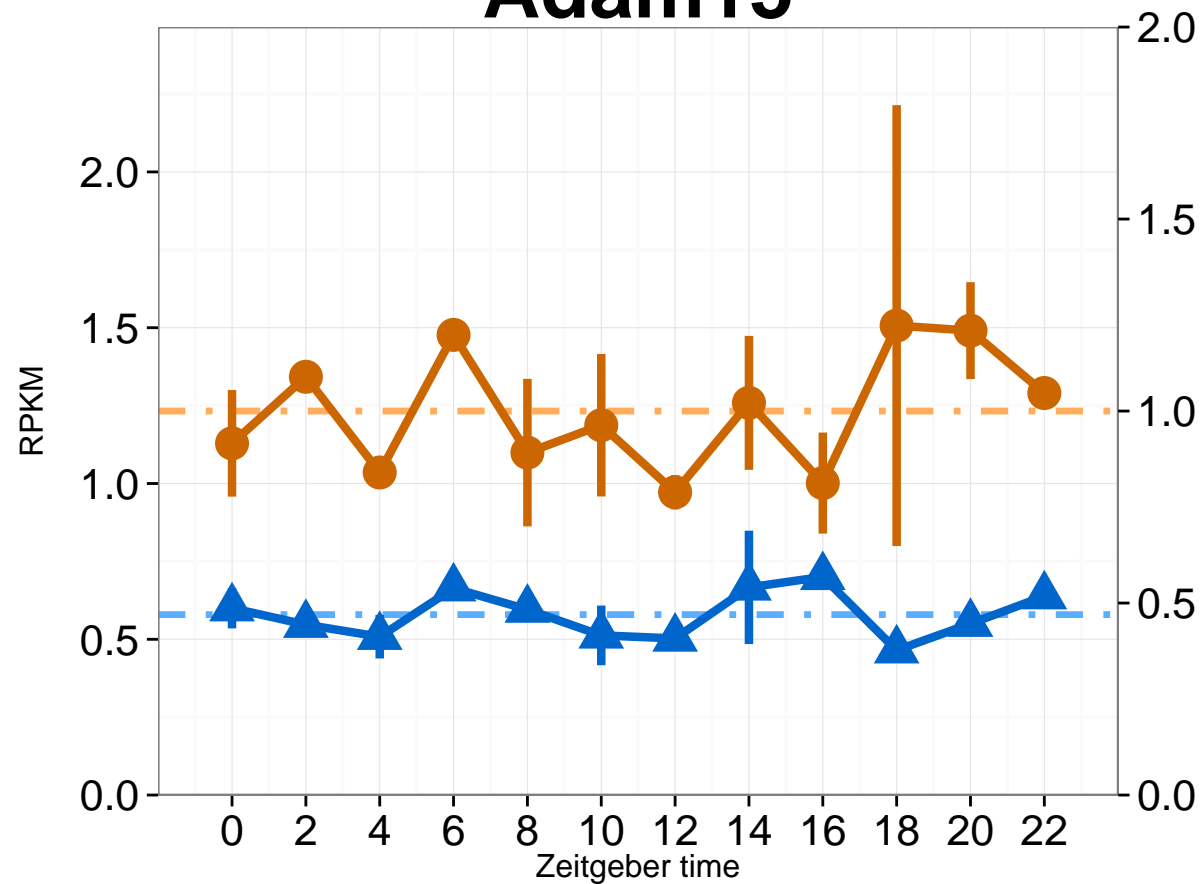

# Adam15

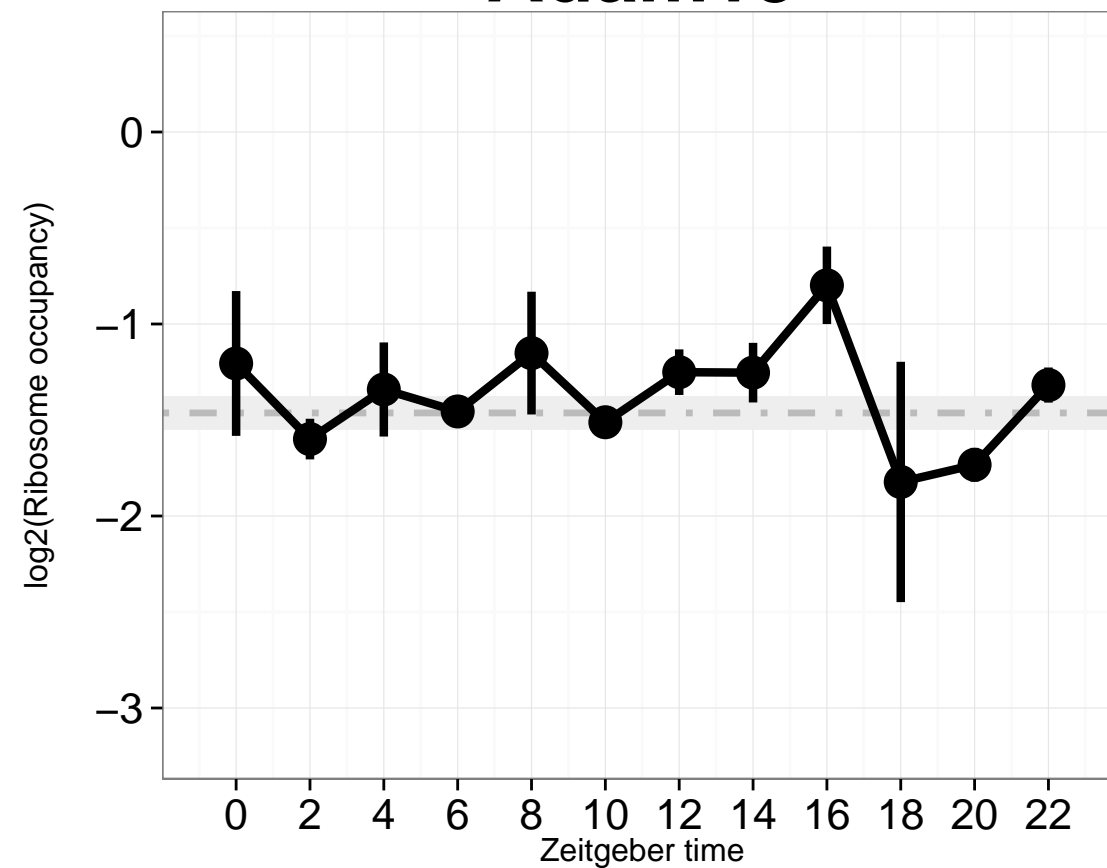

Supplement: SuppDataset_1.zip [file Adam15_set_A.pdf › Supplemental Dataset 1/A-mRNA_nonrhyth_translation_nonrhyth/Adam15_set_A.pdf]

# Adam17

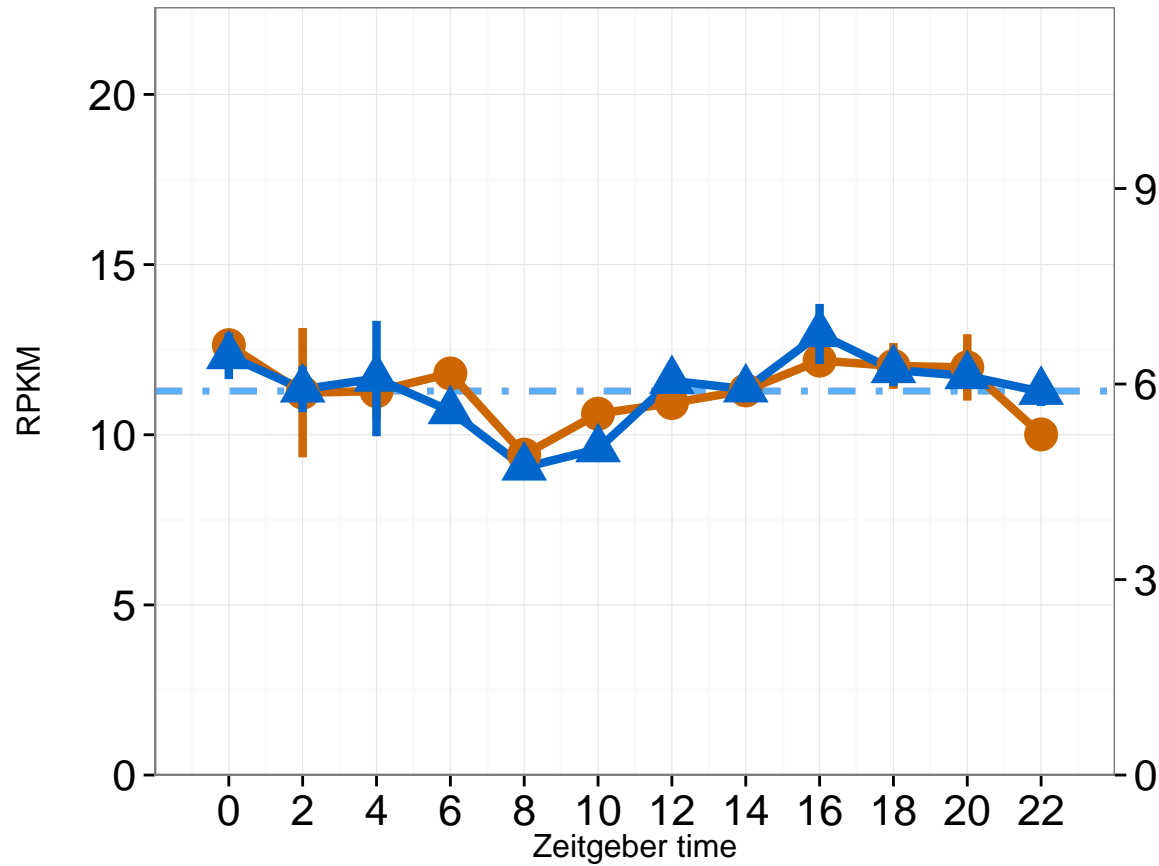

# Adam17

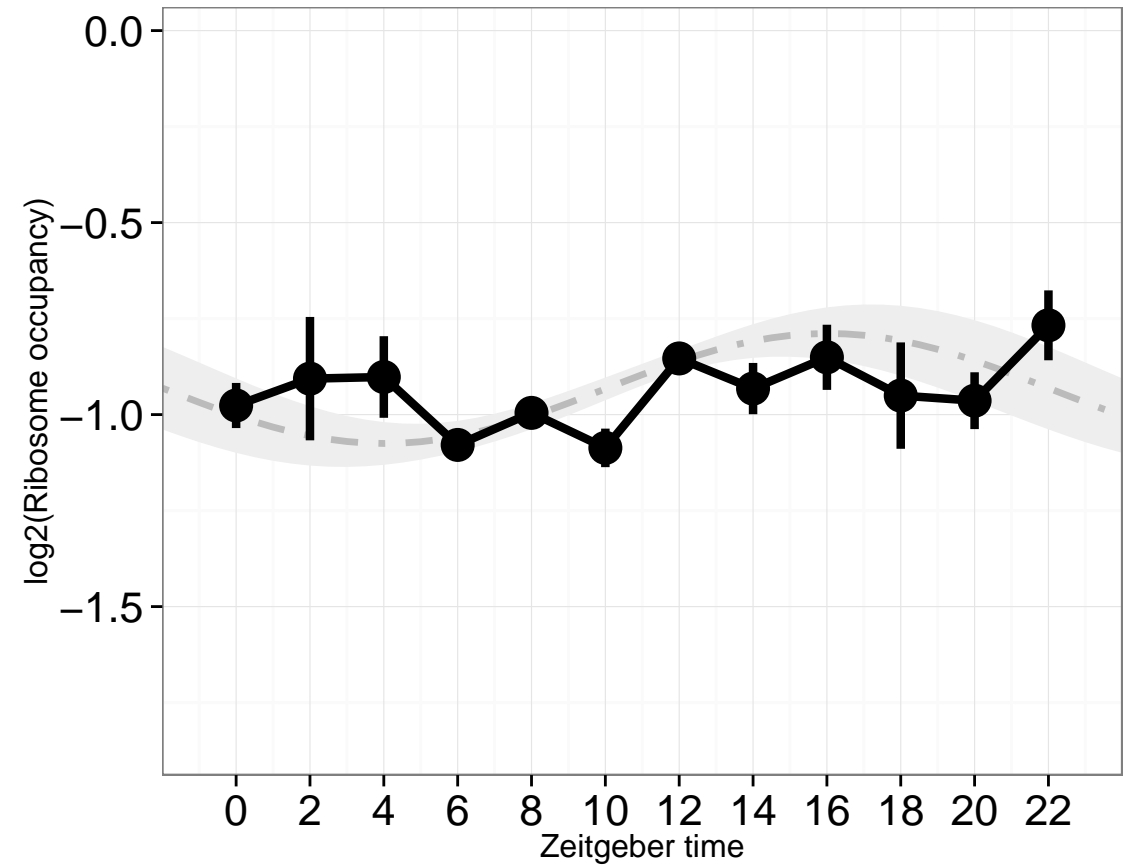

Supplement: SuppDataset_1.zip [file Adam17_set_A.pdf › Supplemental Dataset 1/A-mRNA_nonrhyth_translation_nonrhyth/Adam17_set_A.pdf]

## Adam19

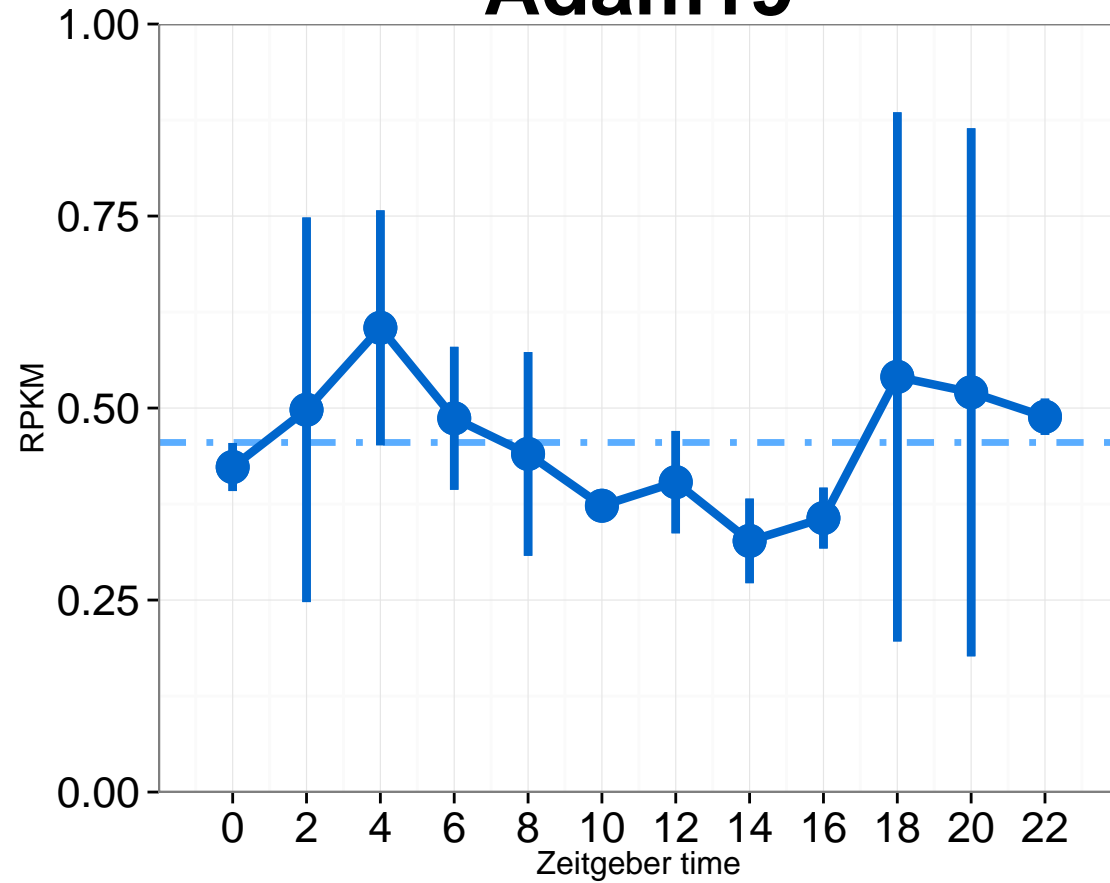

## Adam19 log2(Ribosome occupanc

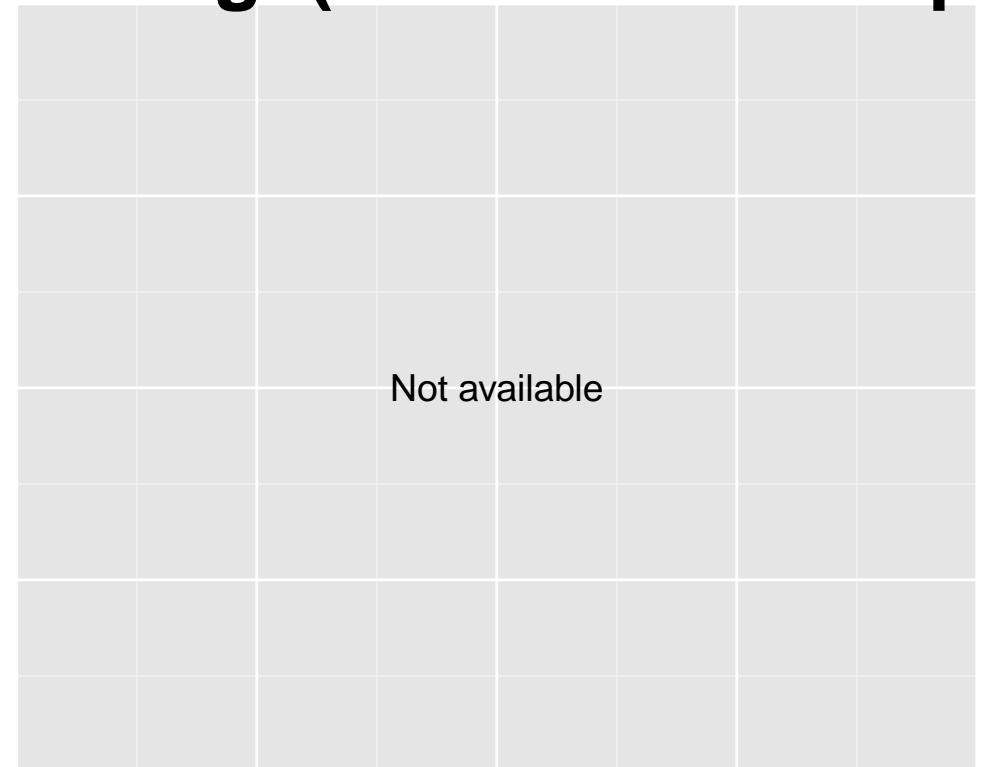

Supplement: SuppDataset_1.zip [file Adam19_set_A.pdf › Supplemental Dataset 1/A-mRNA_nonrhyth_translation_nonrhyth/Adam19_set_A.pdf]

## Adam4

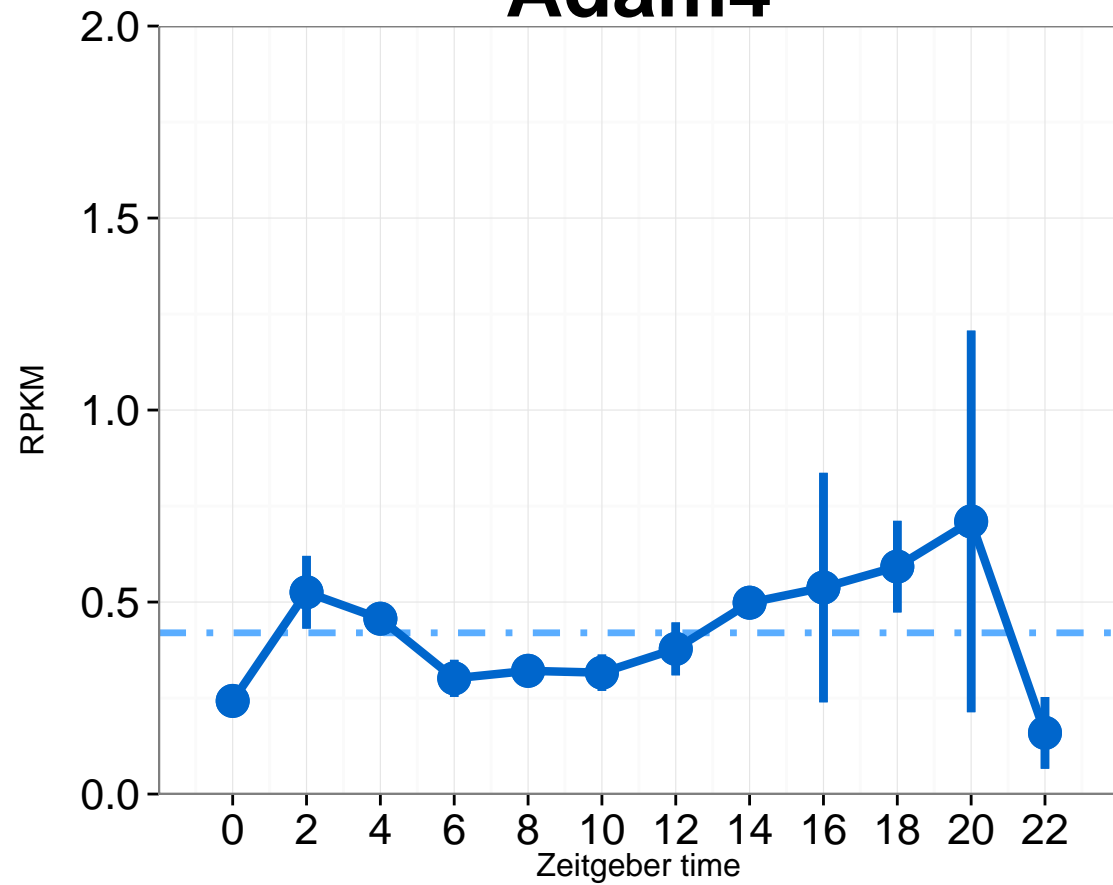

## Adam4 log2(Ribosome occupancy

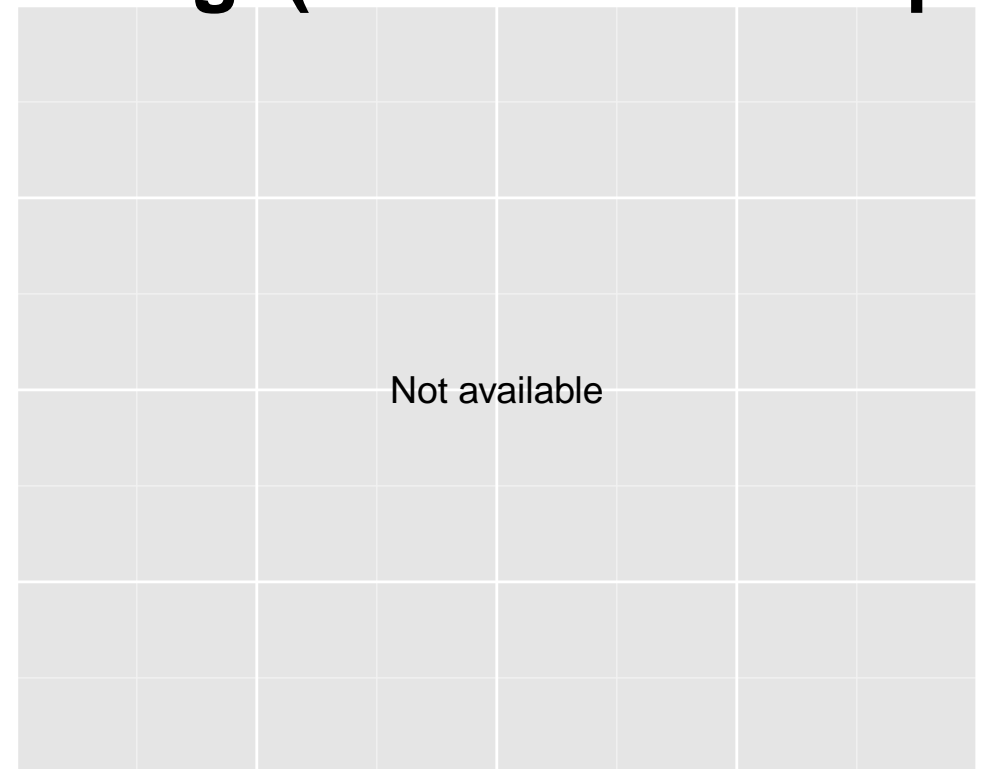

Supplement: SuppDataset_1.zip [file Adam4_set_A.pdf › Supplemental Dataset 1/A-mRNA_nonrhyth_translation_nonrhyth/Adam4_set_A.pdf]

# Adam9

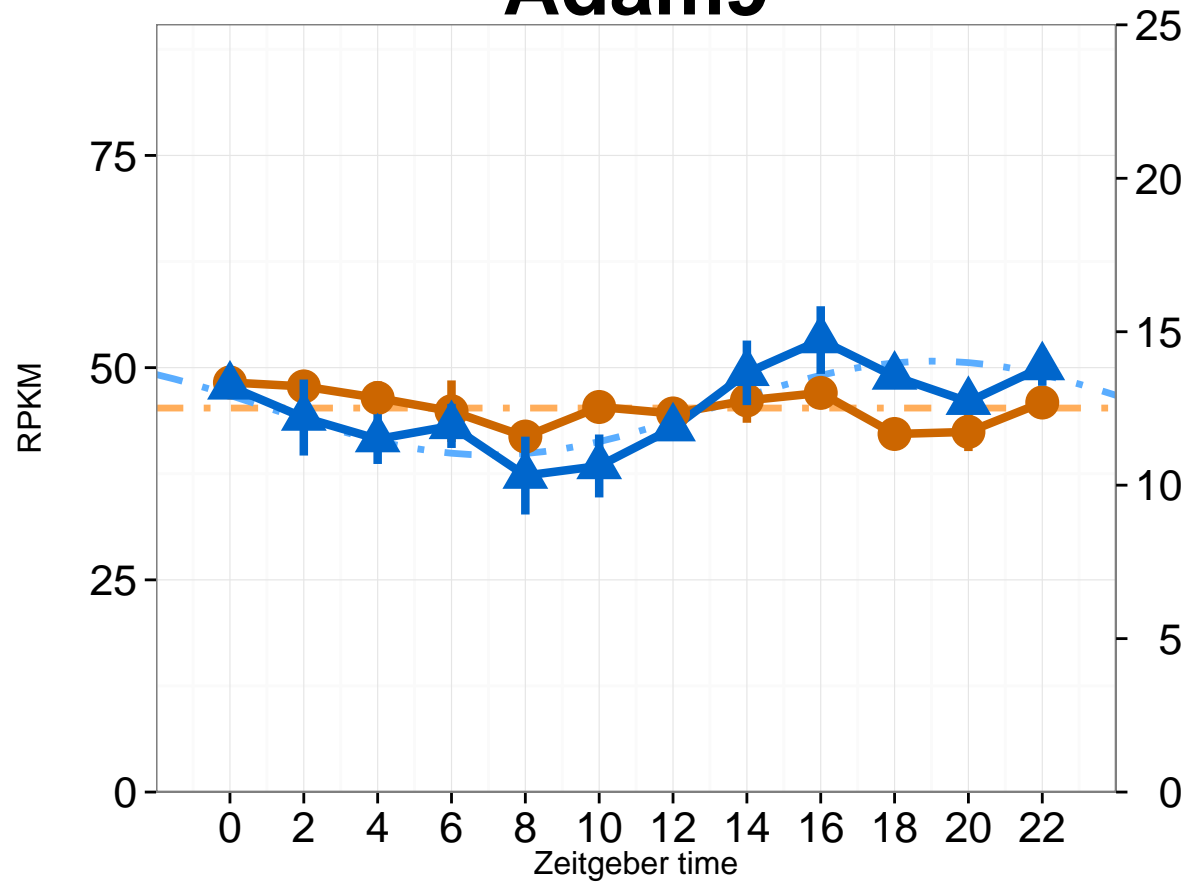

# Adam9

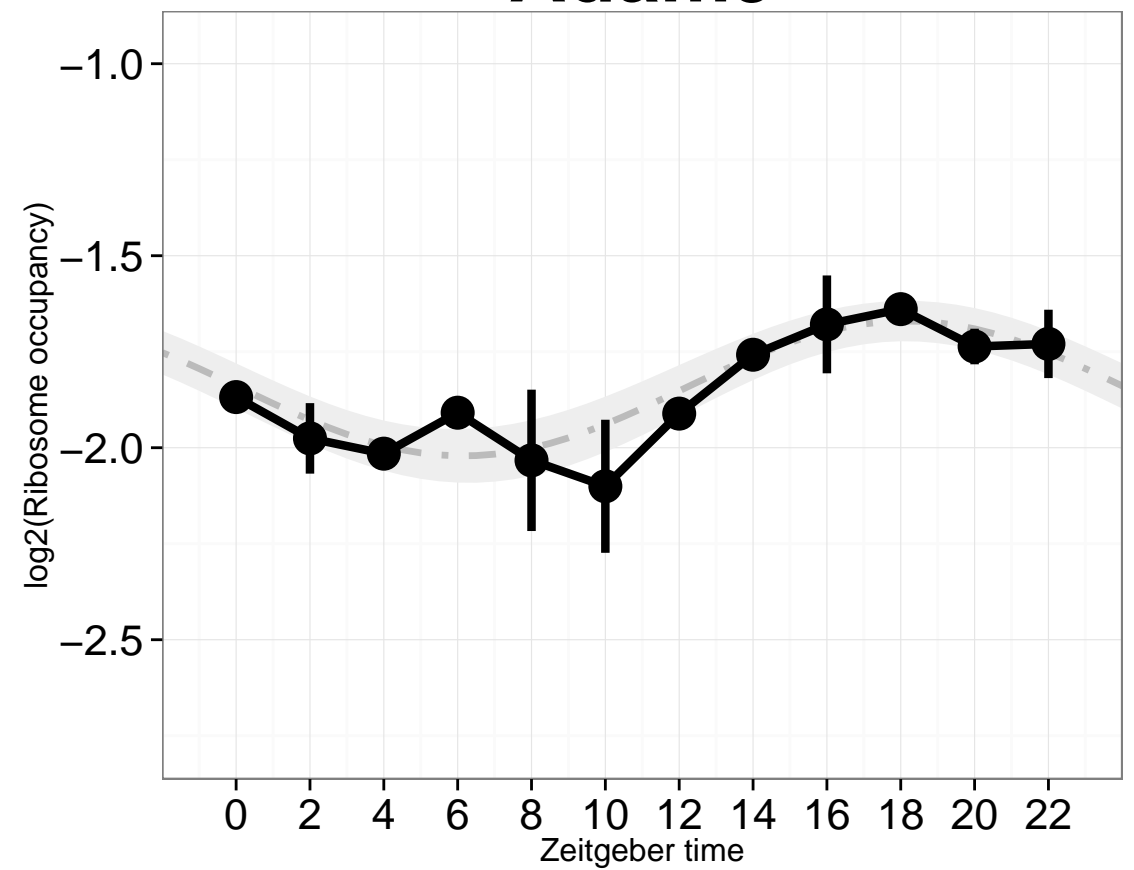

Supplement: SuppDataset_1.zip [file Adam9_set_A.pdf › Supplemental Dataset 1/A-mRNA_nonrhyth_translation_nonrhyth/Adam9_set_A.pdf]

# Adamdec1

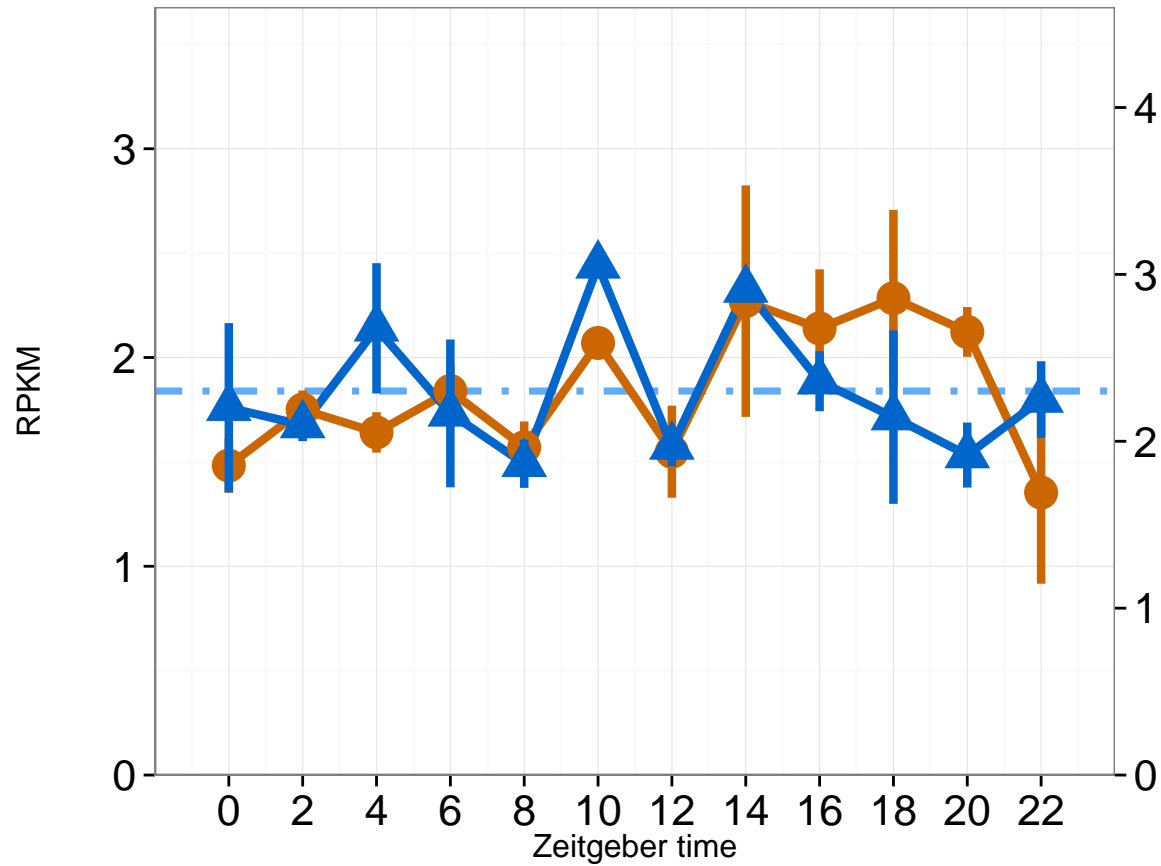

# Adamdec1

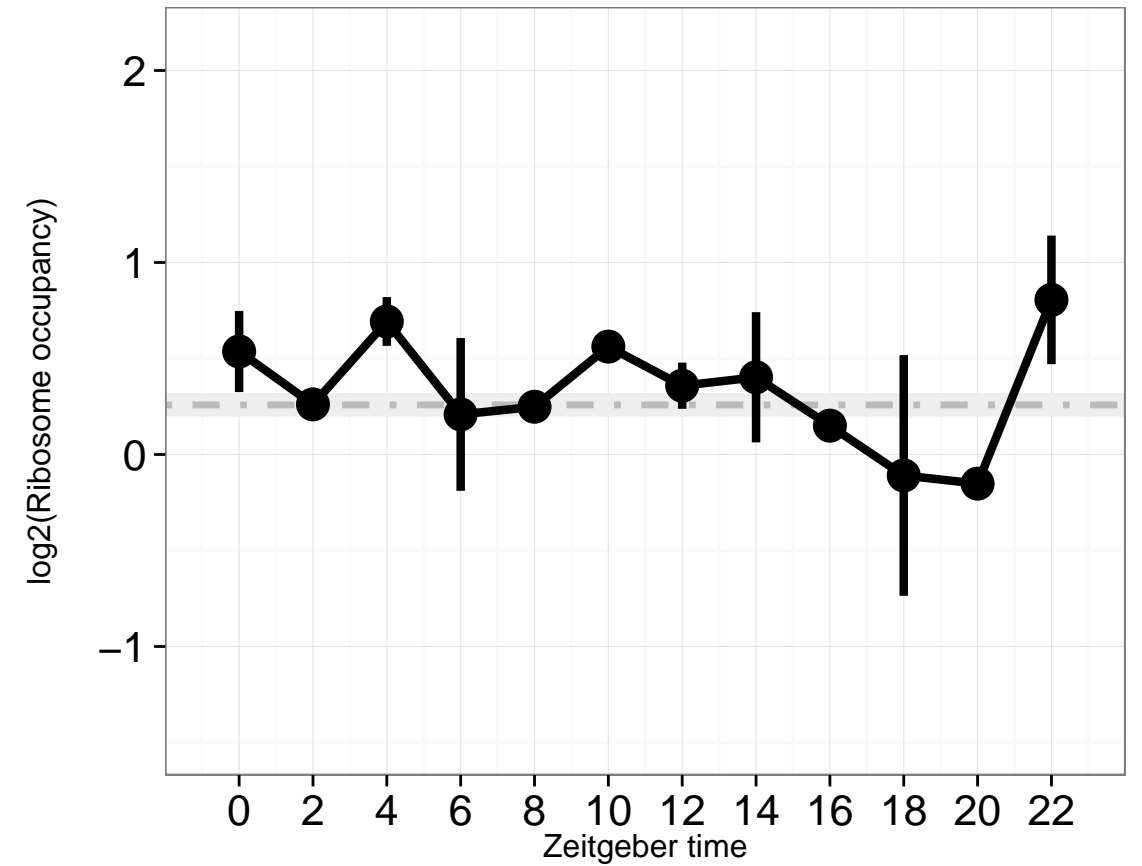

Supplement: SuppDataset_1.zip [file Adamdec1_set_A.pdf › Supplemental Dataset 1/A-mRNA_nonrhyth_translation_nonrhyth/Adamdec1_set_A.pdf]

## Adamts10

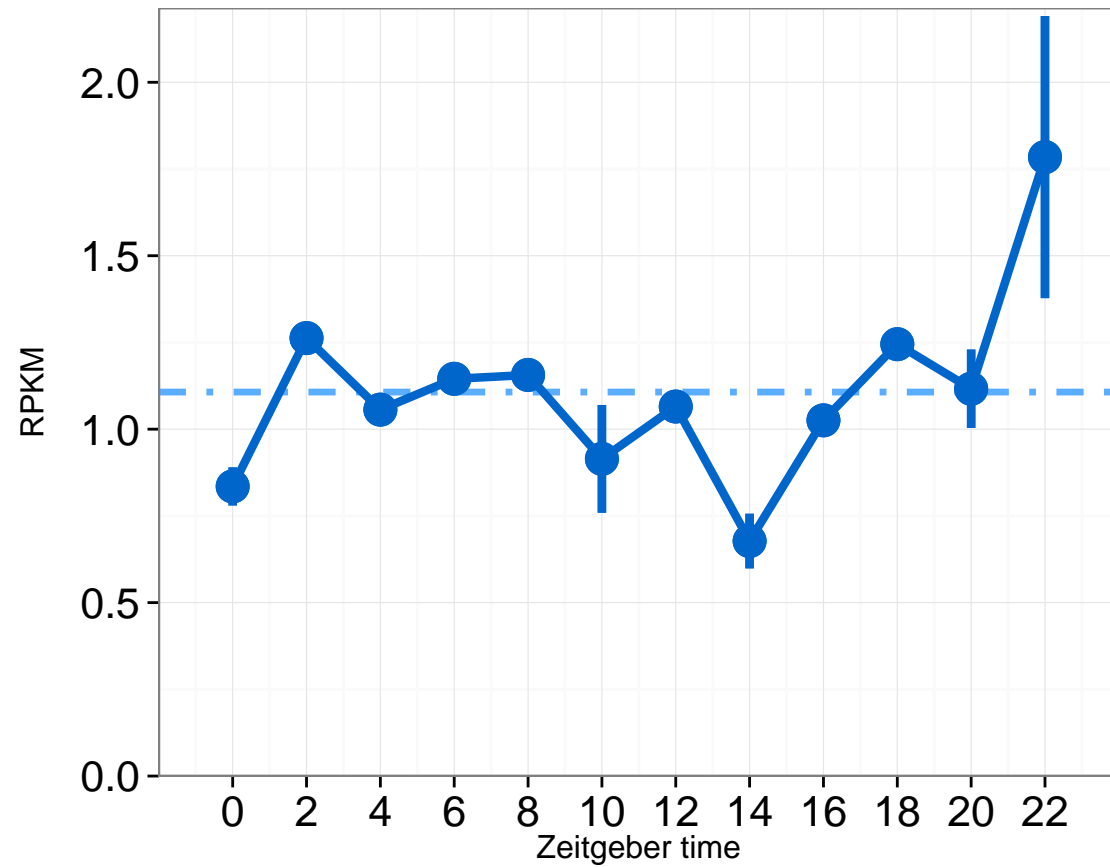

## Adamts10 log2(Ribosome occupancy)

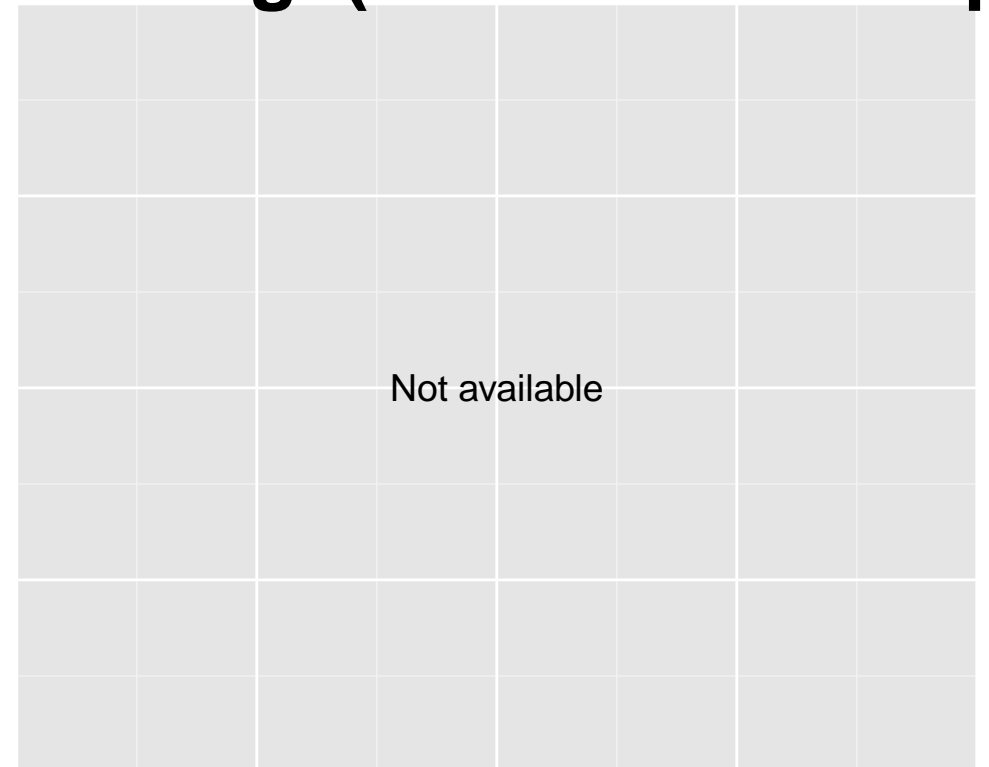

Supplement: SuppDataset_1.zip [file Adamts10_set_A.pdf › Supplemental Dataset 1/A-mRNA_nonrhyth_translation_nonrhyth/Adamts10_set_A.pdf]

# Adamts13

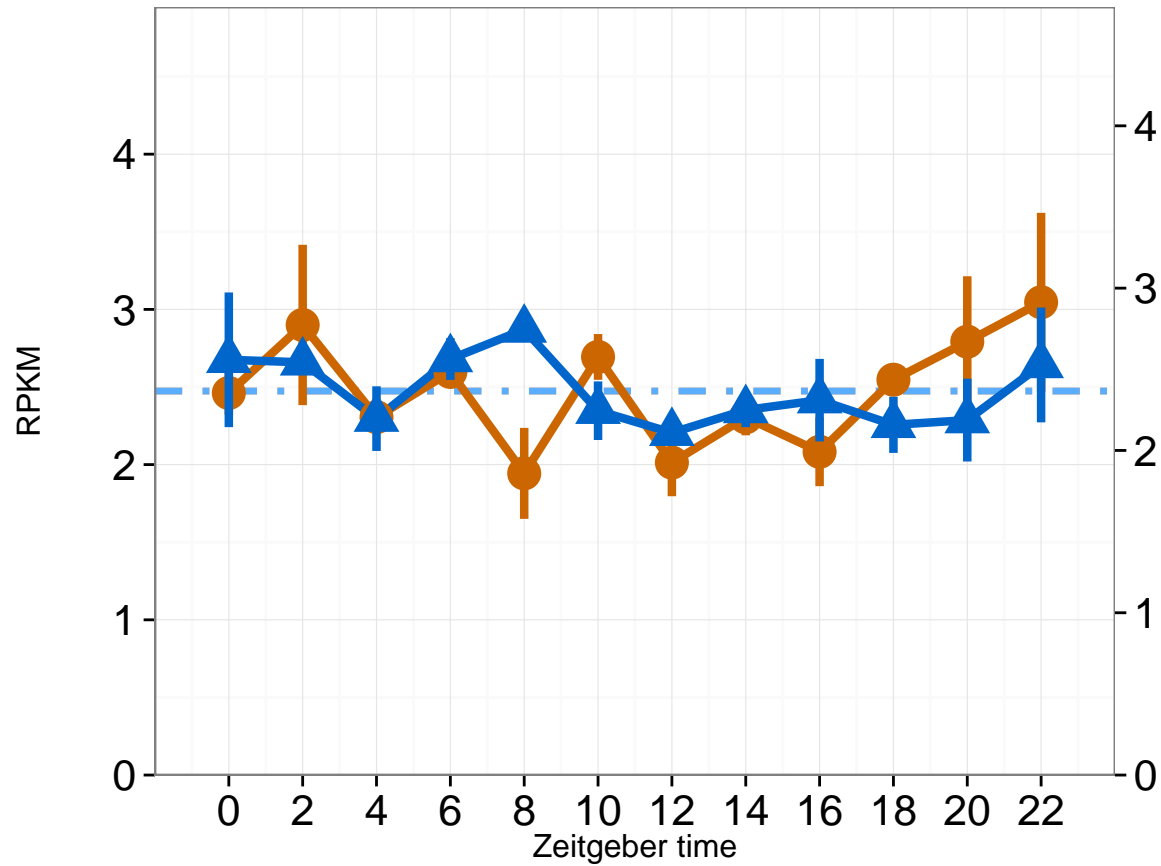

# Adamts13

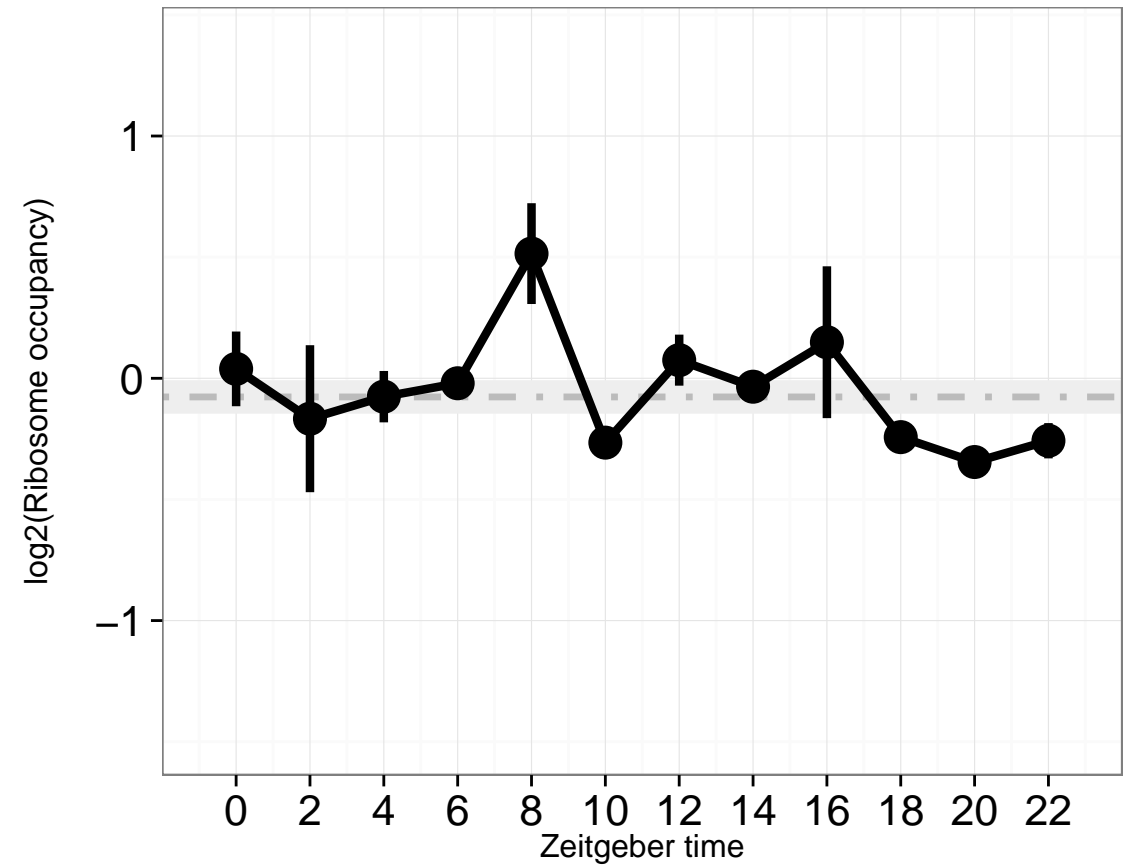

Supplement: SuppDataset_1.zip [file Adamts13_set_A.pdf › Supplemental Dataset 1/A-mRNA_nonrhyth_translation_nonrhyth/Adamts13_set_A.pdf]

# Adamts15

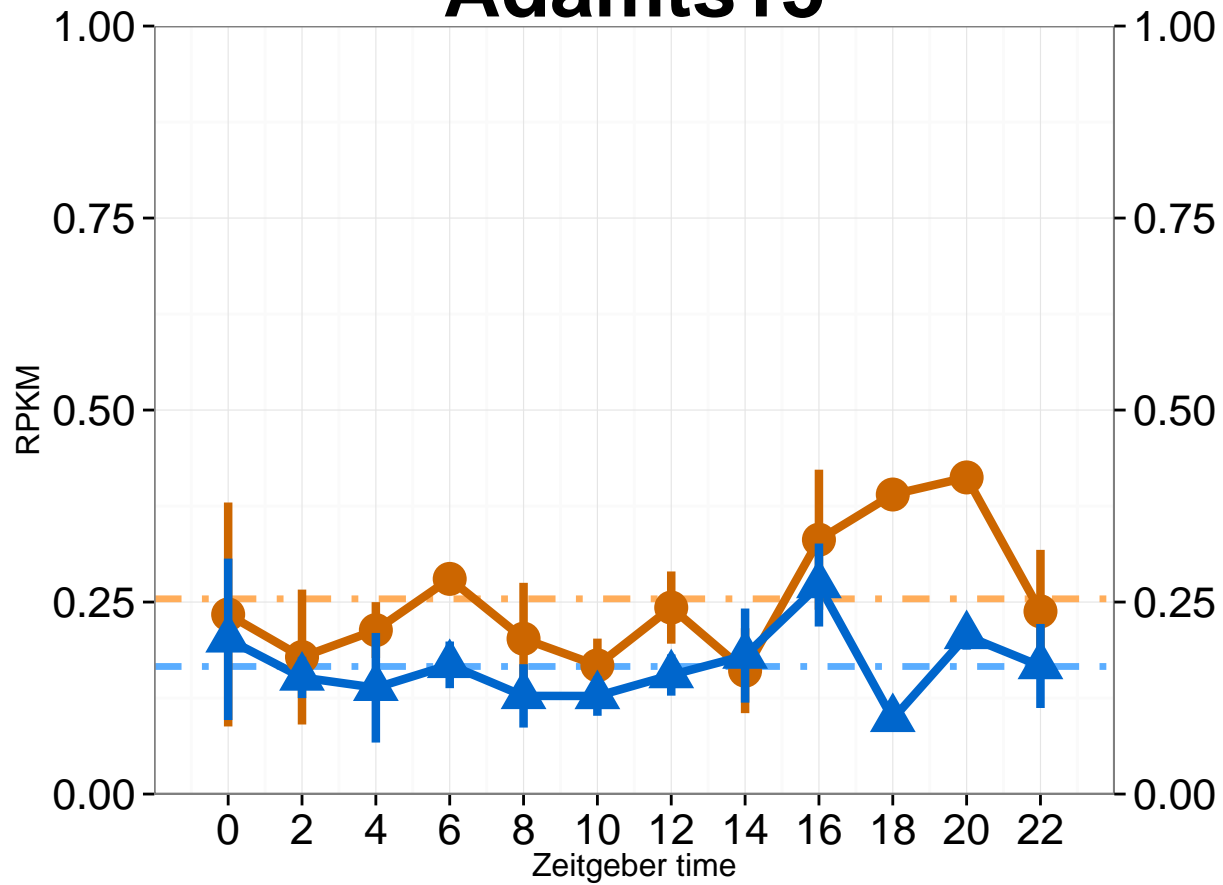

# Adamts15

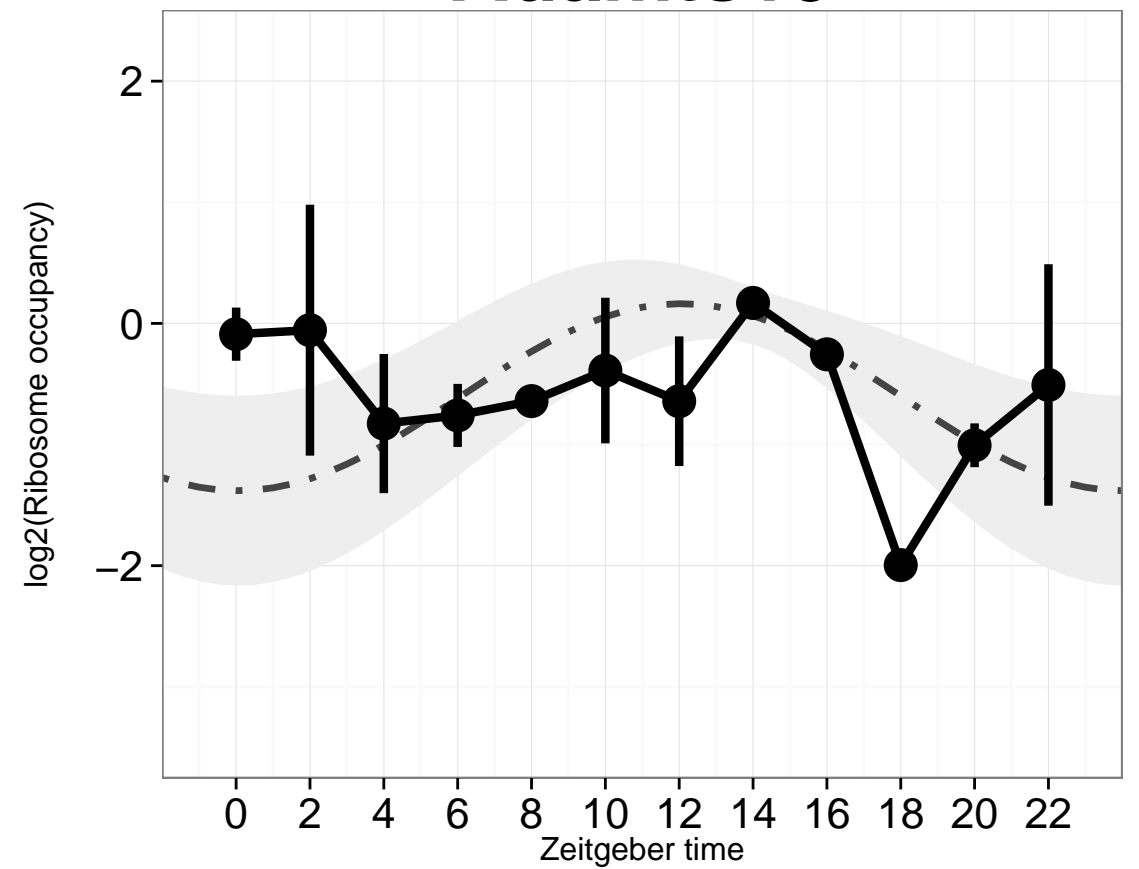

Supplement: SuppDataset_1.zip [file Adamts15_set_A.pdf › Supplemental Dataset 1/A-mRNA_nonrhyth_translation_nonrhyth/Adamts15_set_A.pdf]

## Adamts2

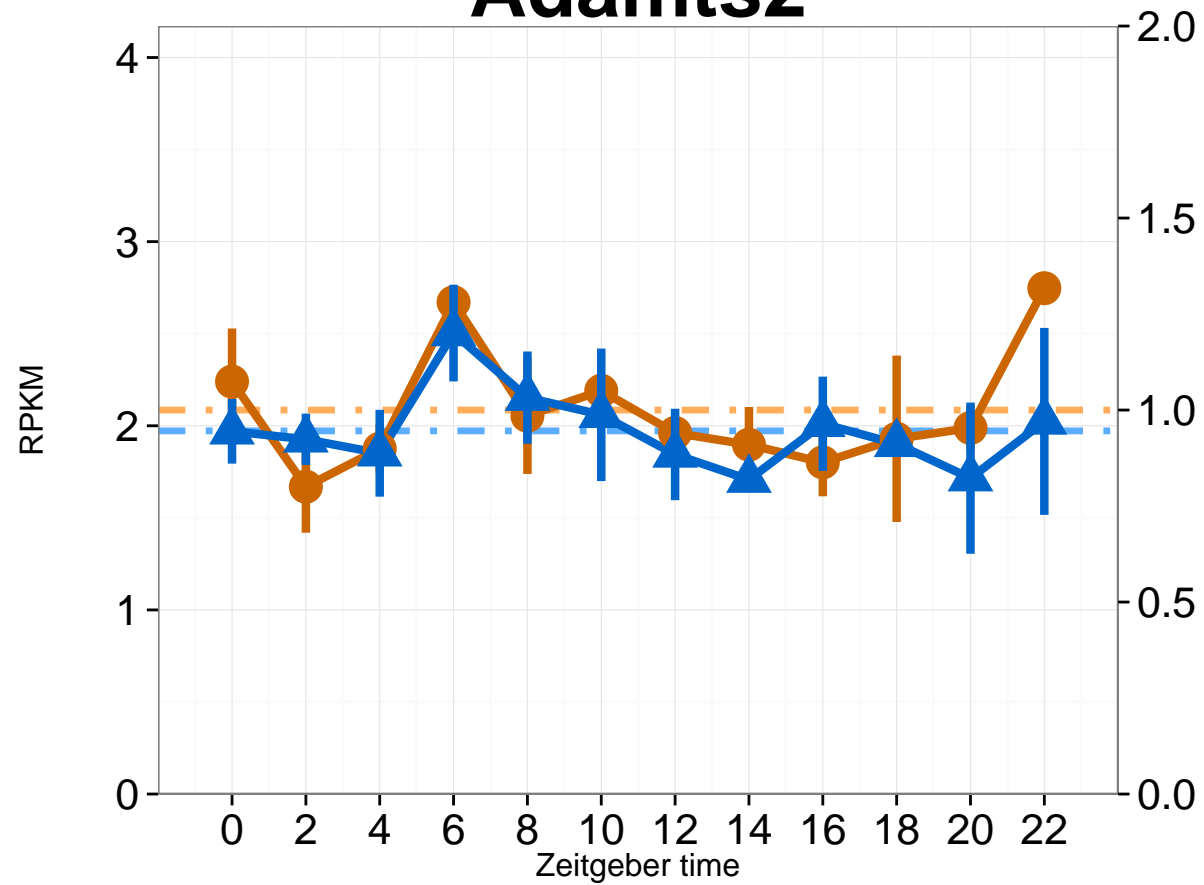

## Adamts2

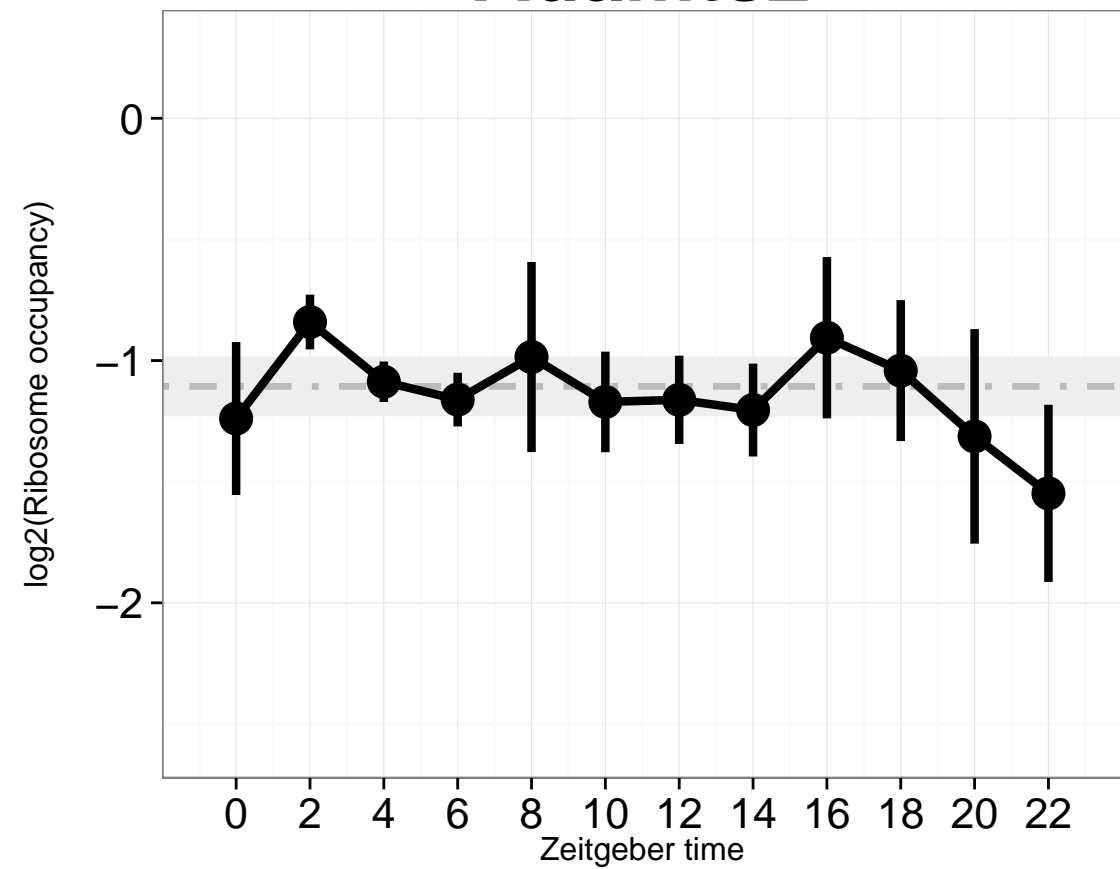

Supplement: SuppDataset_1.zip [file Adamts2_set_A.pdf › Supplemental Dataset 1/A-mRNA_nonrhyth_translation_nonrhyth/Adamts2_set_A.pdf]

## Adamts5

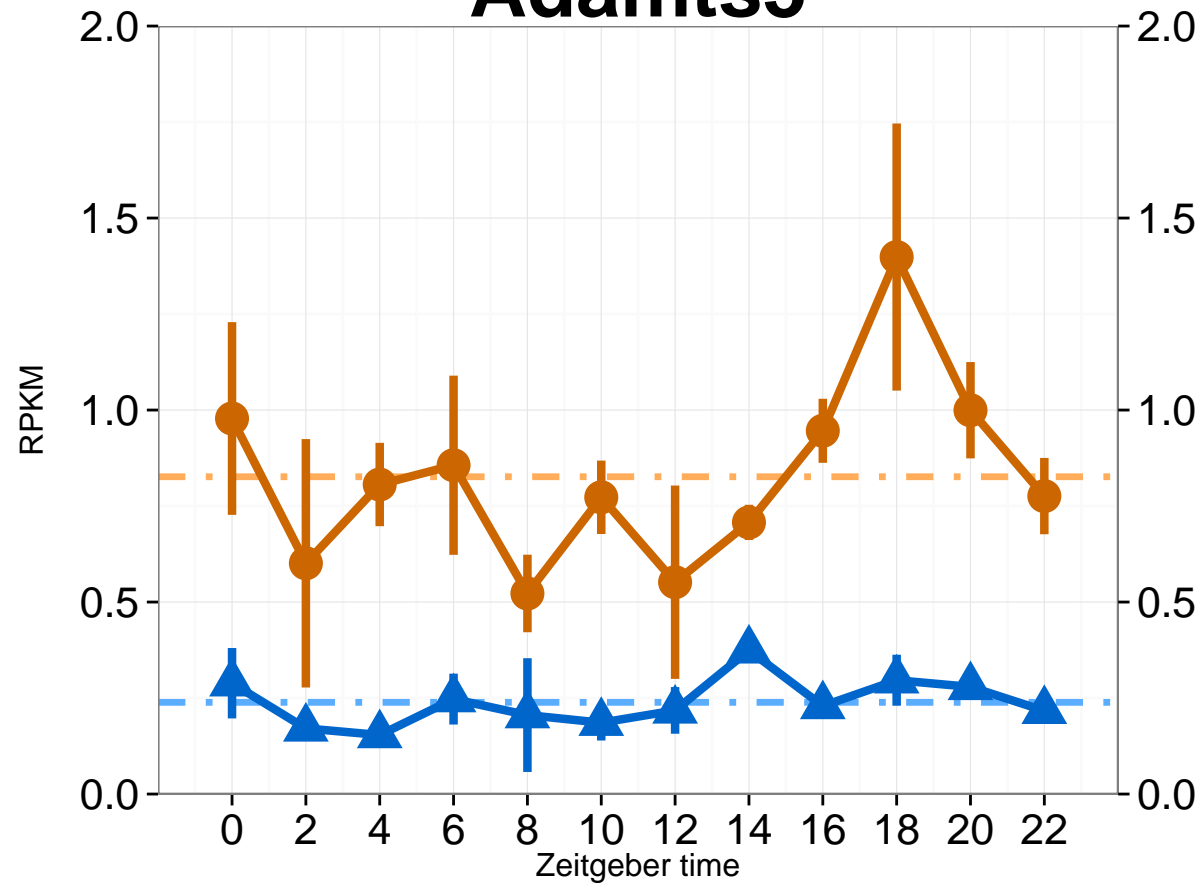

## Adamts5

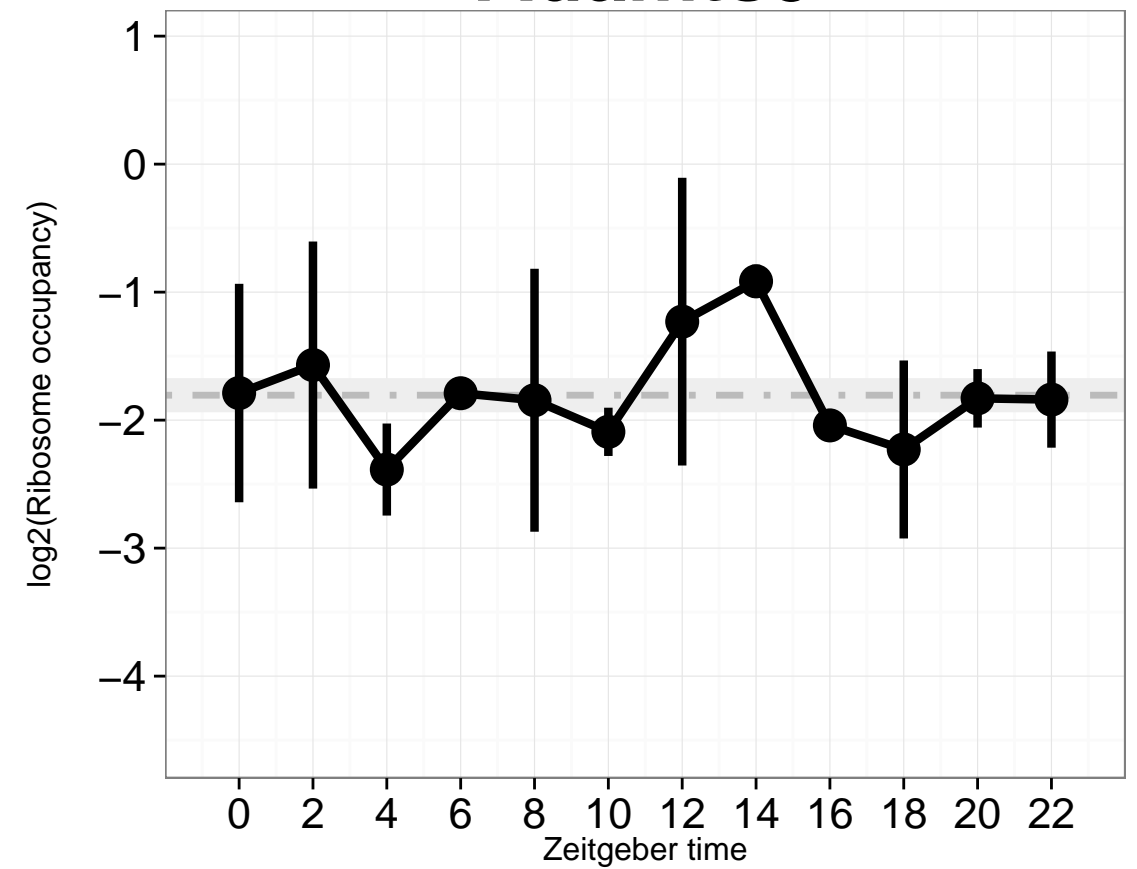

Supplement: SuppDataset_1.zip [file Adamts5_set_A.pdf › Supplemental Dataset 1/A-mRNA_nonrhyth_translation_nonrhyth/Adamts5_set_A.pdf]

## Adamts6

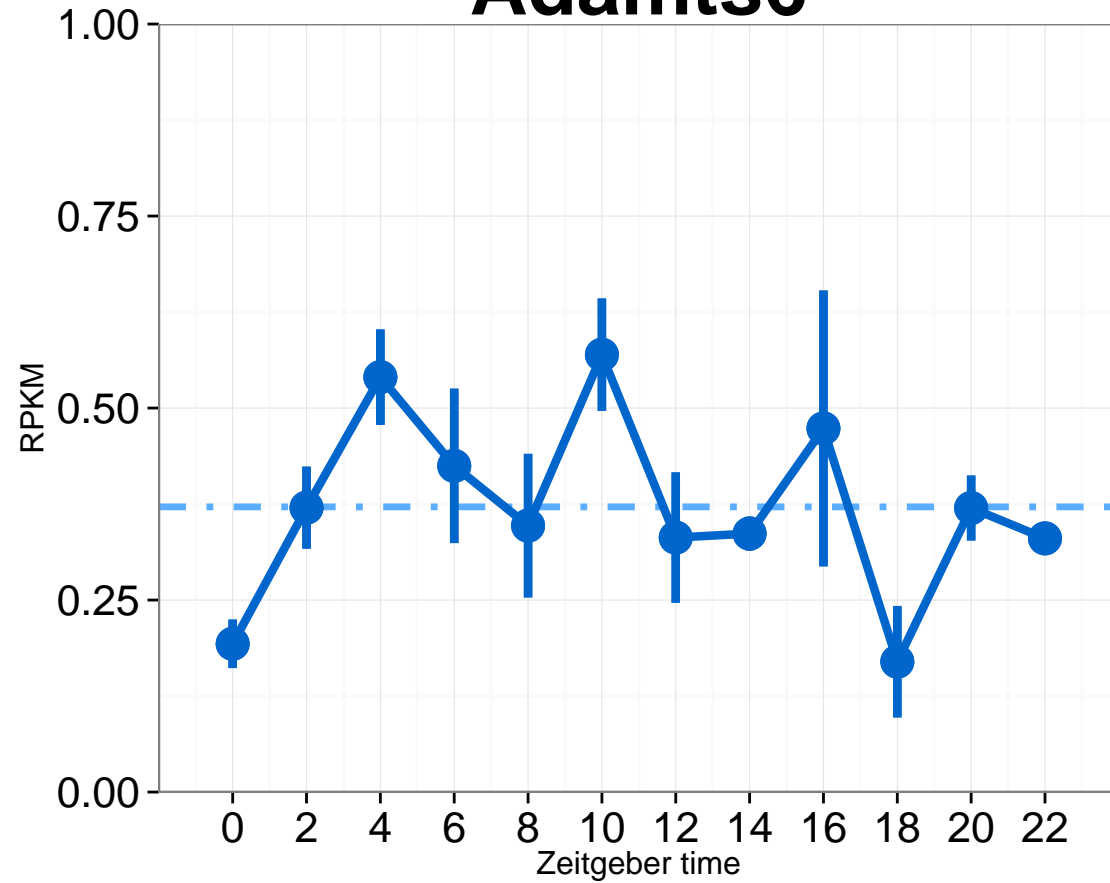

## Adamts6 log2(Ribosome occupanc

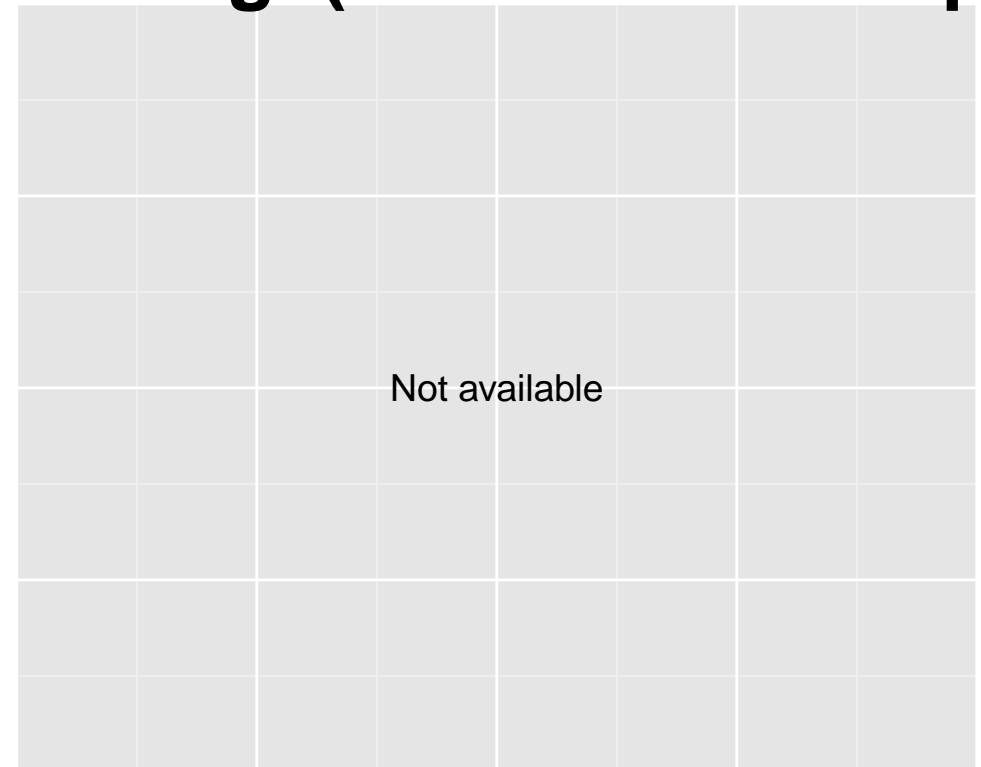

Supplement: SuppDataset_1.zip [file Adamts6_set_A.pdf › Supplemental Dataset 1/A-mRNA_nonrhyth_translation_nonrhyth/Adamts6_set_A.pdf]

# Adamts7

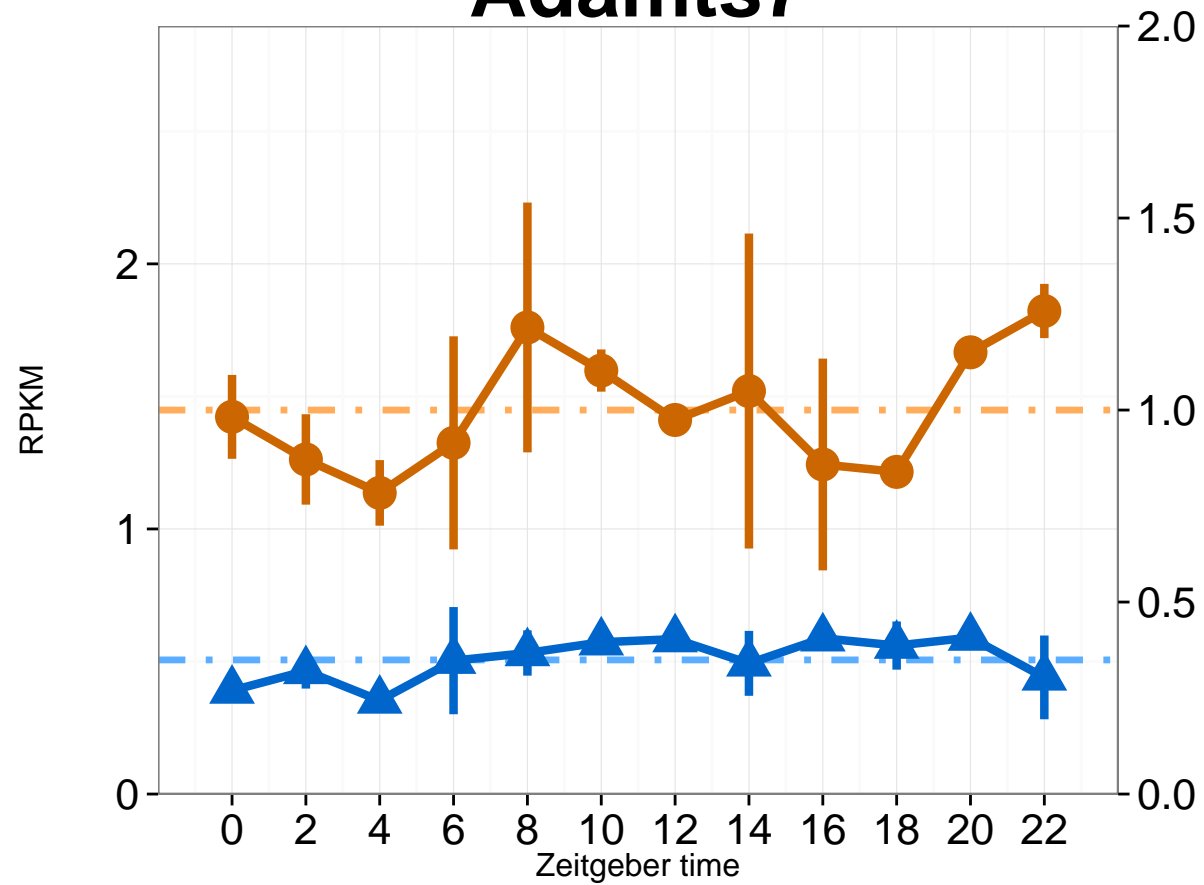

# Adamts7

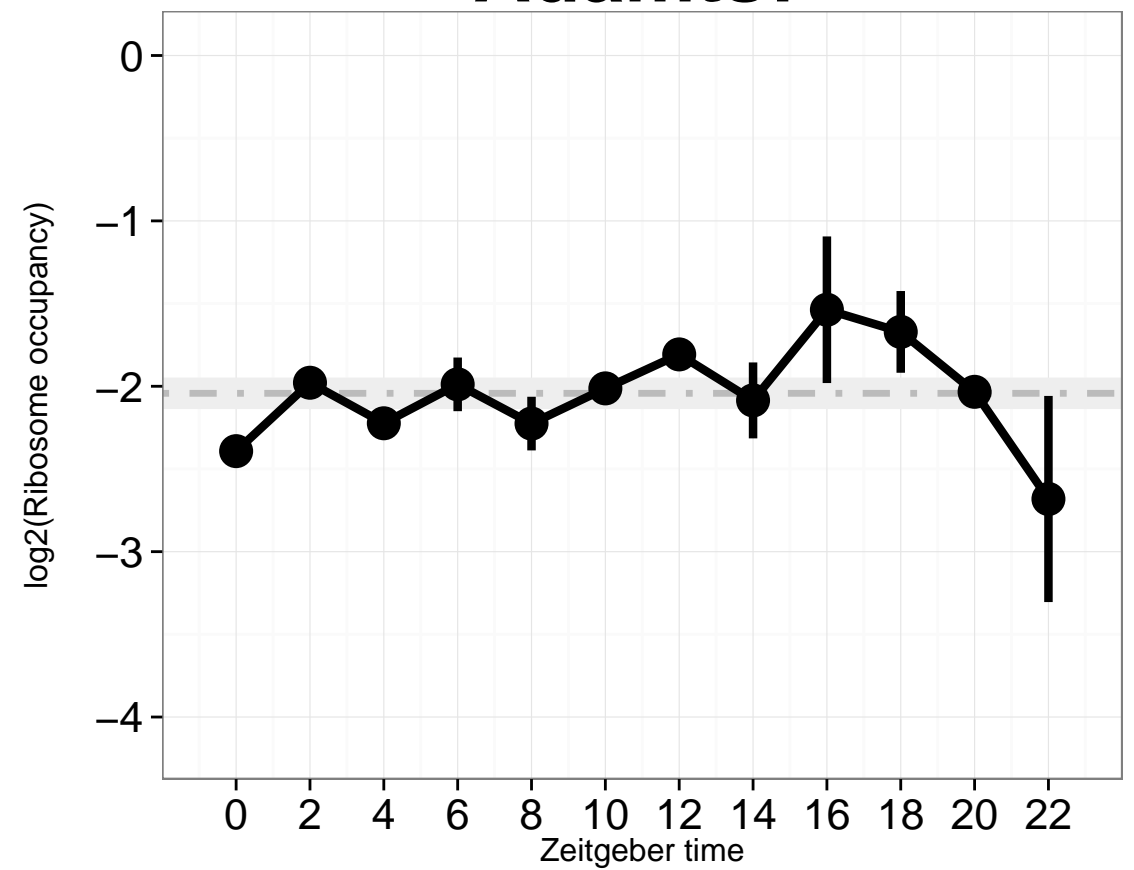

Supplement: SuppDataset_1.zip [file Adamts7_set_A.pdf › Supplemental Dataset 1/A-mRNA_nonrhyth_translation_nonrhyth/Adamts7_set_A.pdf]

## Adamts9

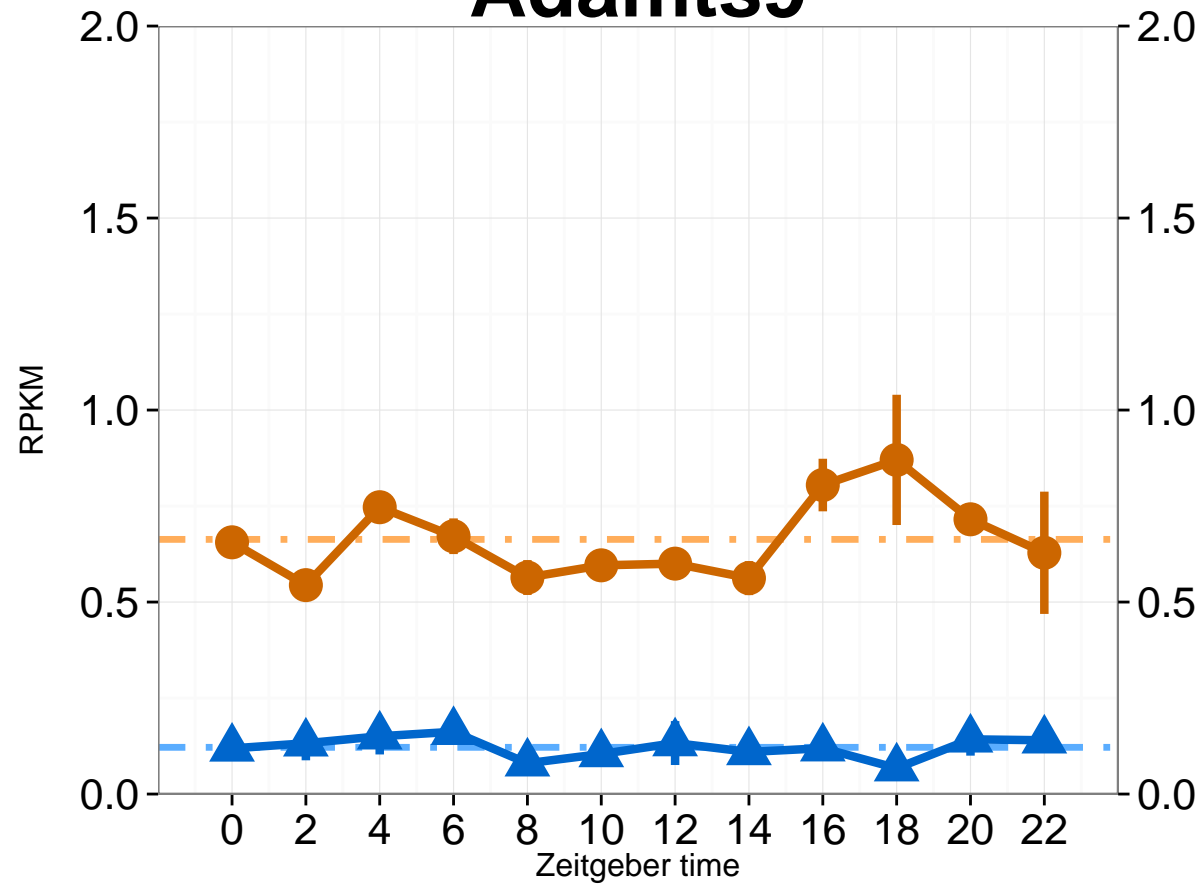

## Adamts9

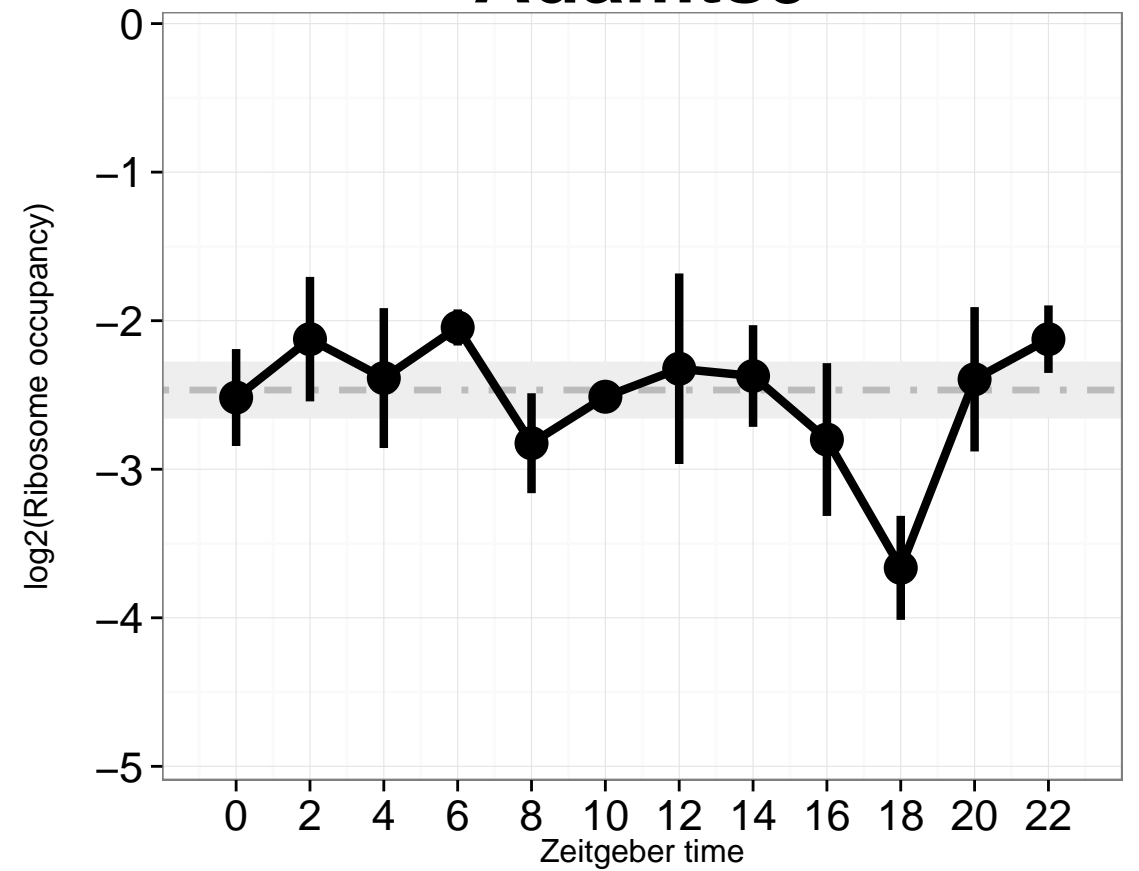

Supplement: SuppDataset_1.zip [file Adamts9_set_A.pdf › Supplemental Dataset 1/A-mRNA_nonrhyth_translation_nonrhyth/Adamts9_set_A.pdf]

## Adamtsl2

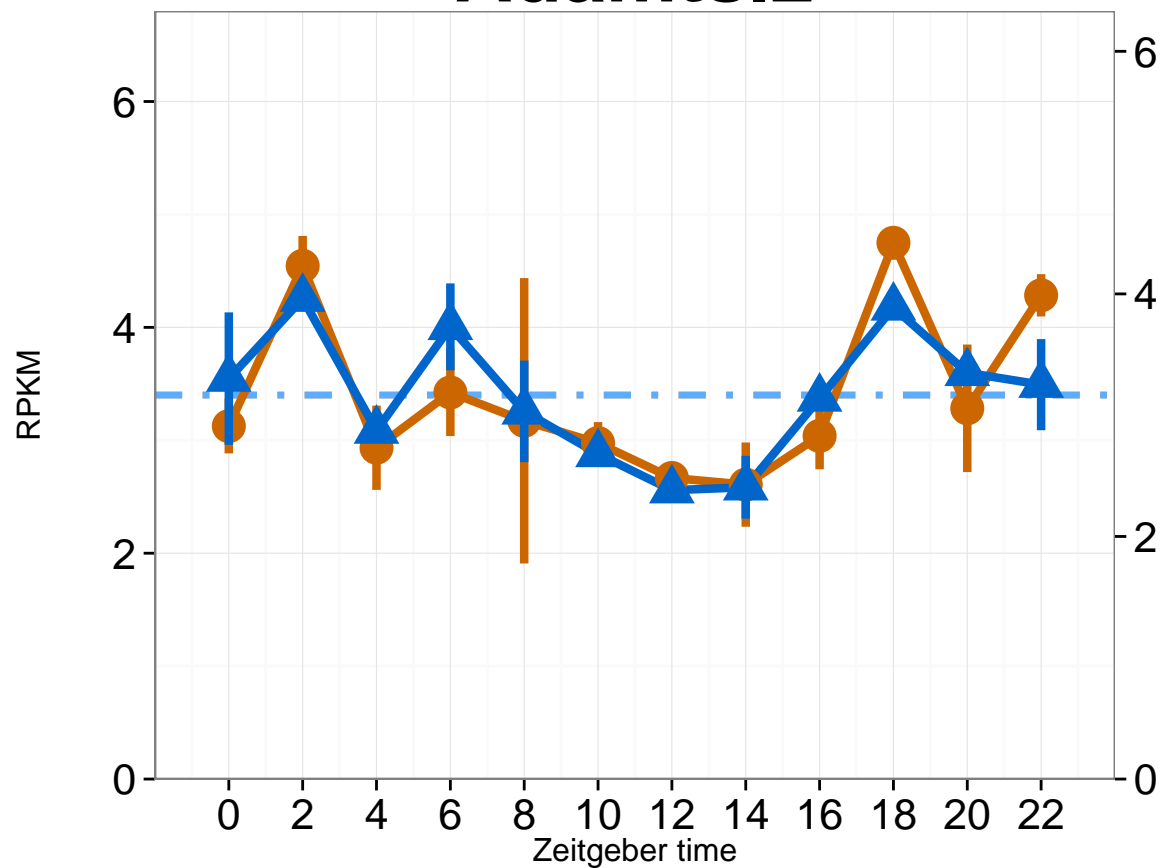

## Adamtsl2

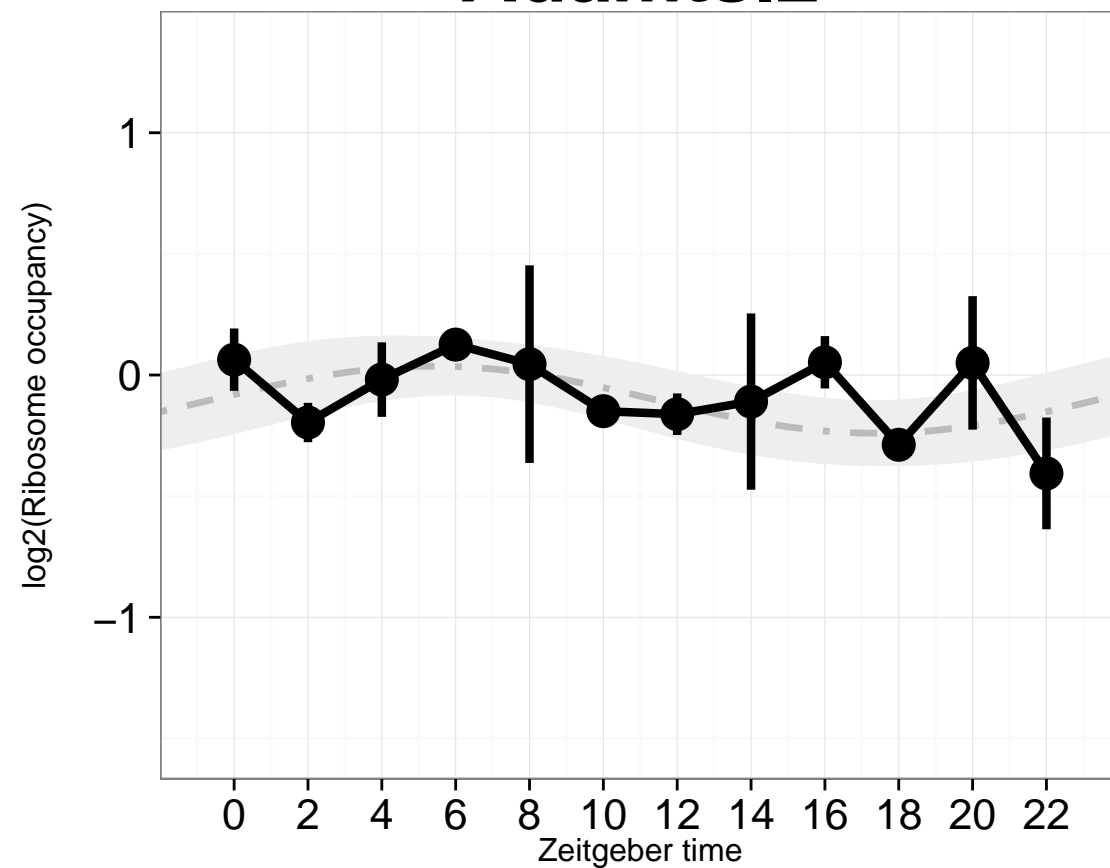

Supplement: SuppDataset_1.zip [file Adamtsl2_set_A.pdf › Supplemental Dataset 1/A-mRNA_nonrhyth_translation_nonrhyth/Adamtsl2_set_A.pdf]

## Adap2

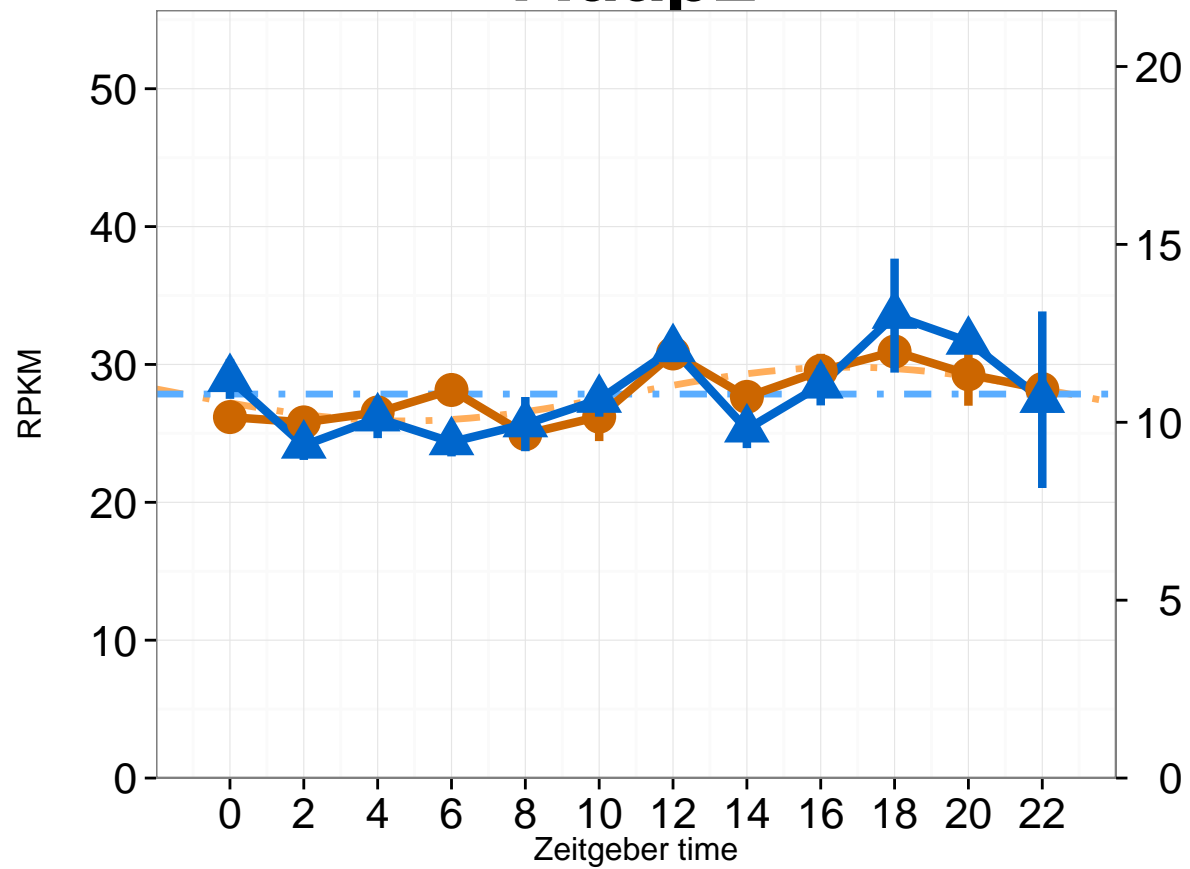

## Adap2

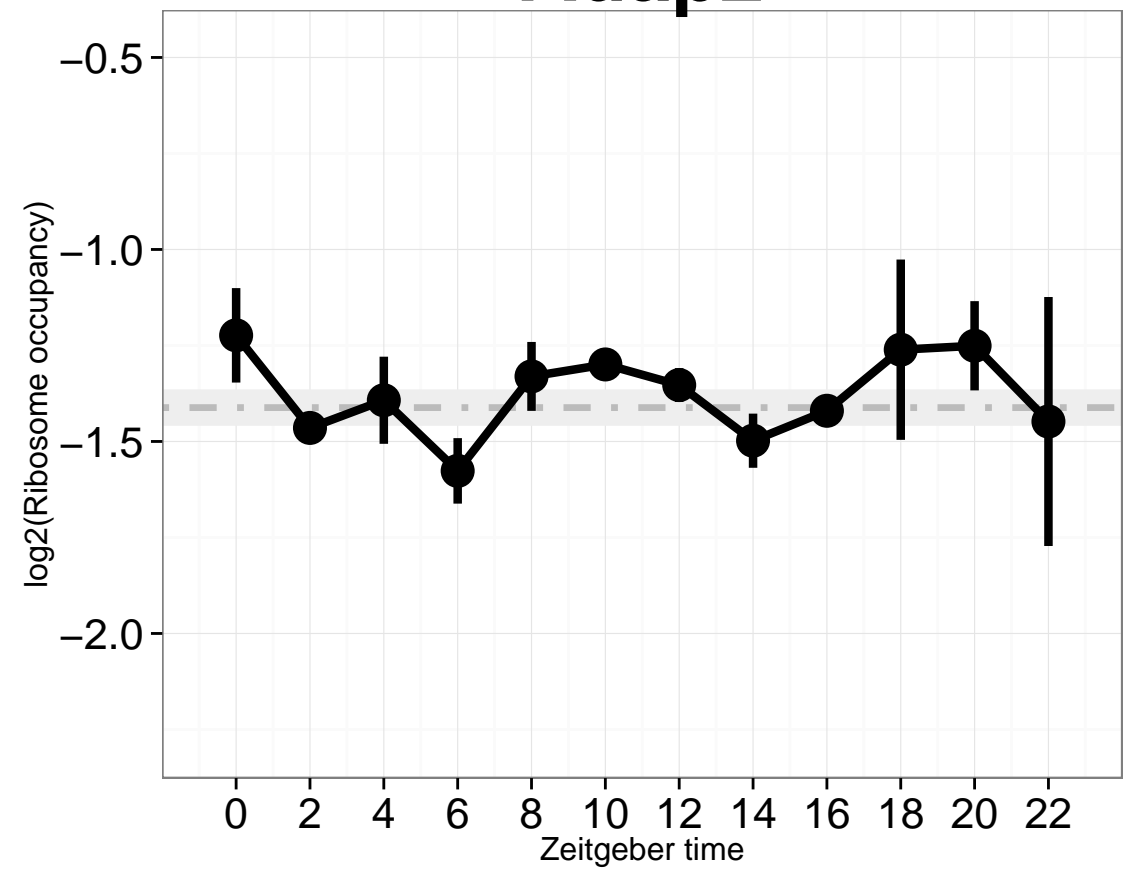

Supplement: SuppDataset_1.zip [file Adap2_set_A.pdf › Supplemental Dataset 1/A-mRNA_nonrhyth_translation_nonrhyth/Adap2_set_A.pdf]

# Adat1

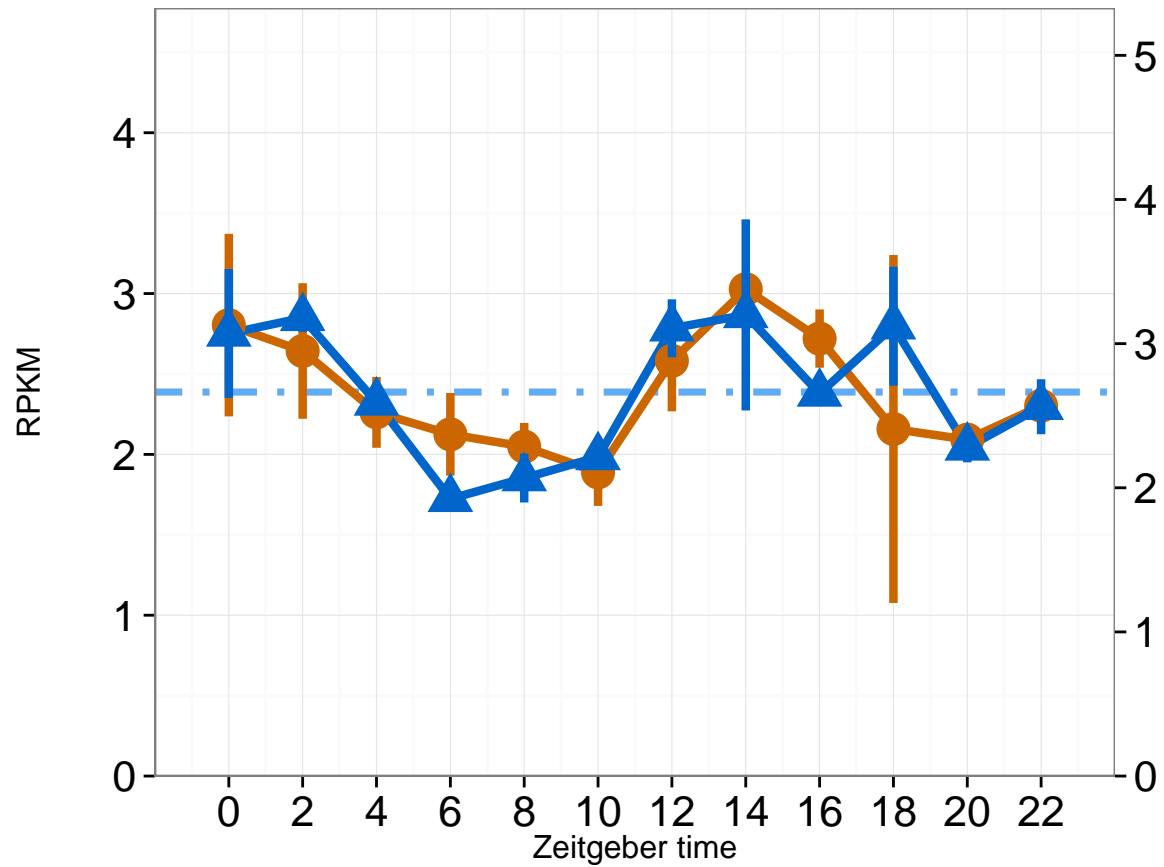

# Adat1

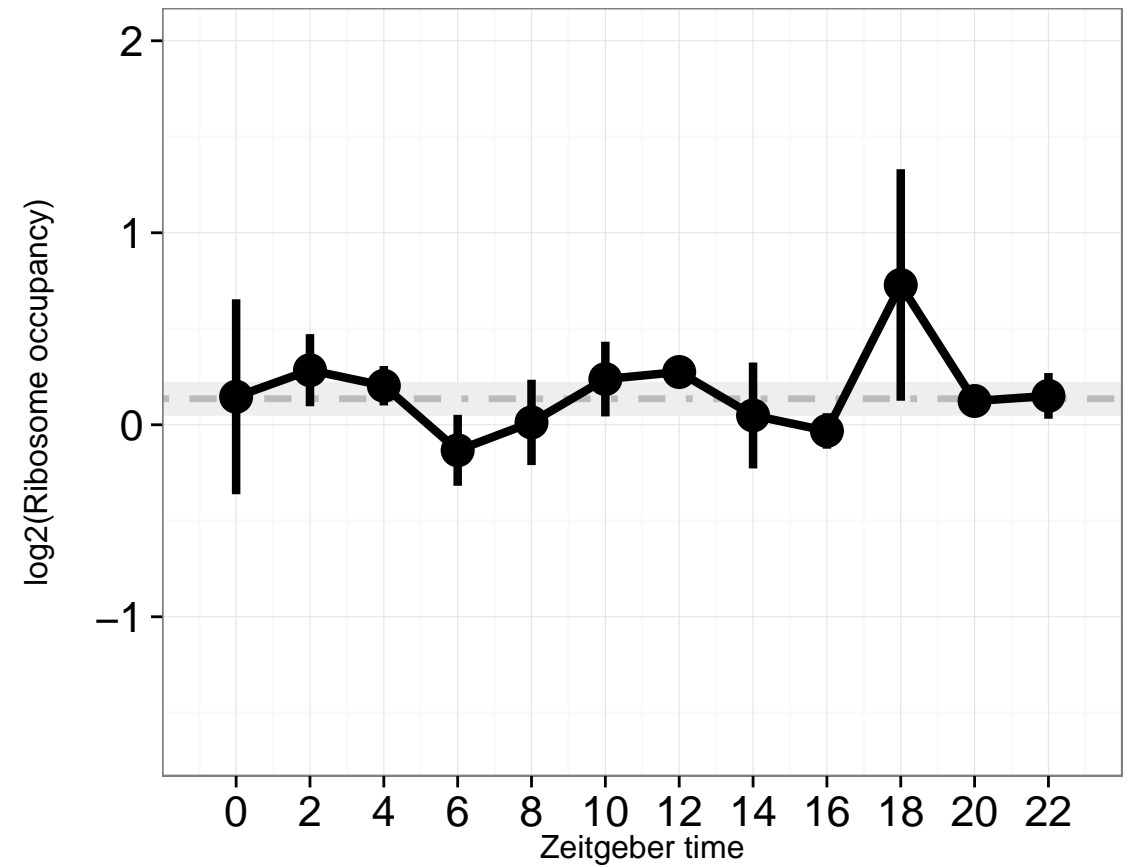

Supplement: SuppDataset_1.zip [file Adat1_set_A.pdf › Supplemental Dataset 1/A-mRNA_nonrhyth_translation_nonrhyth/Adat1_set_A.pdf]

# Adat2

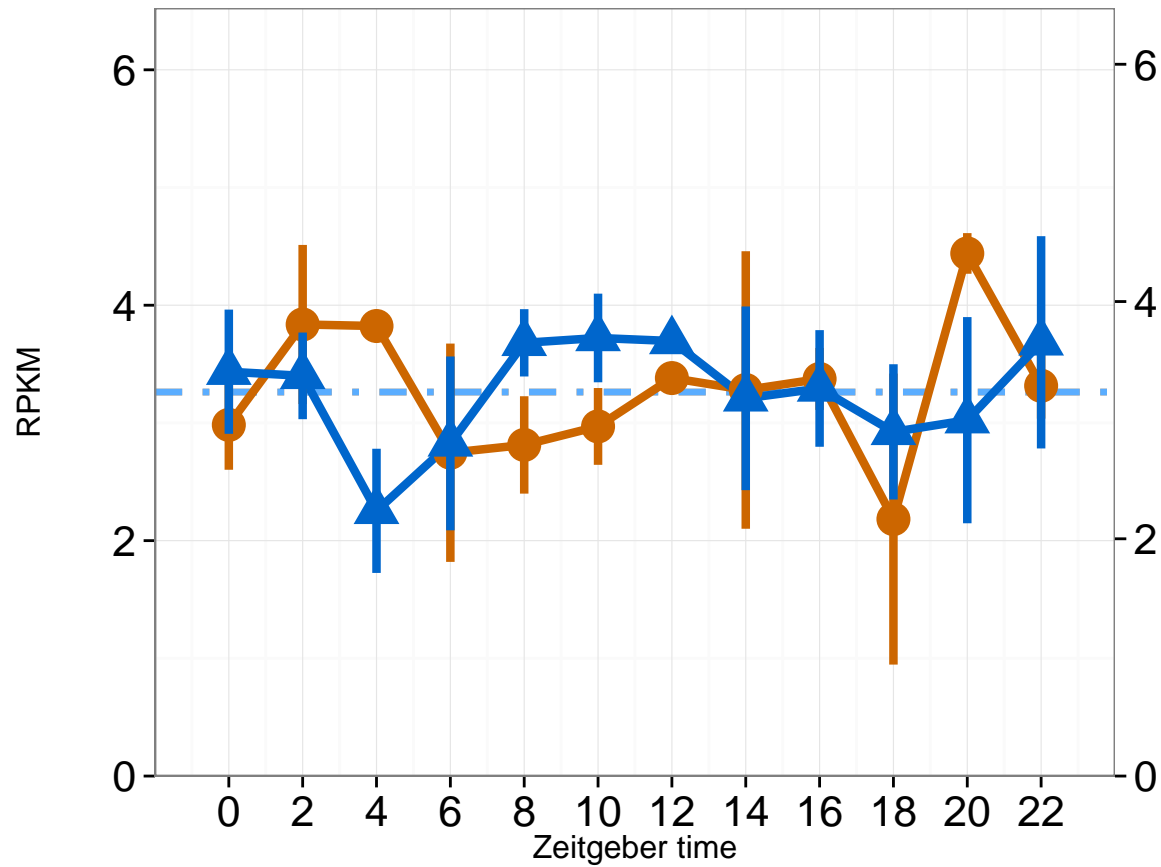

# Adat2

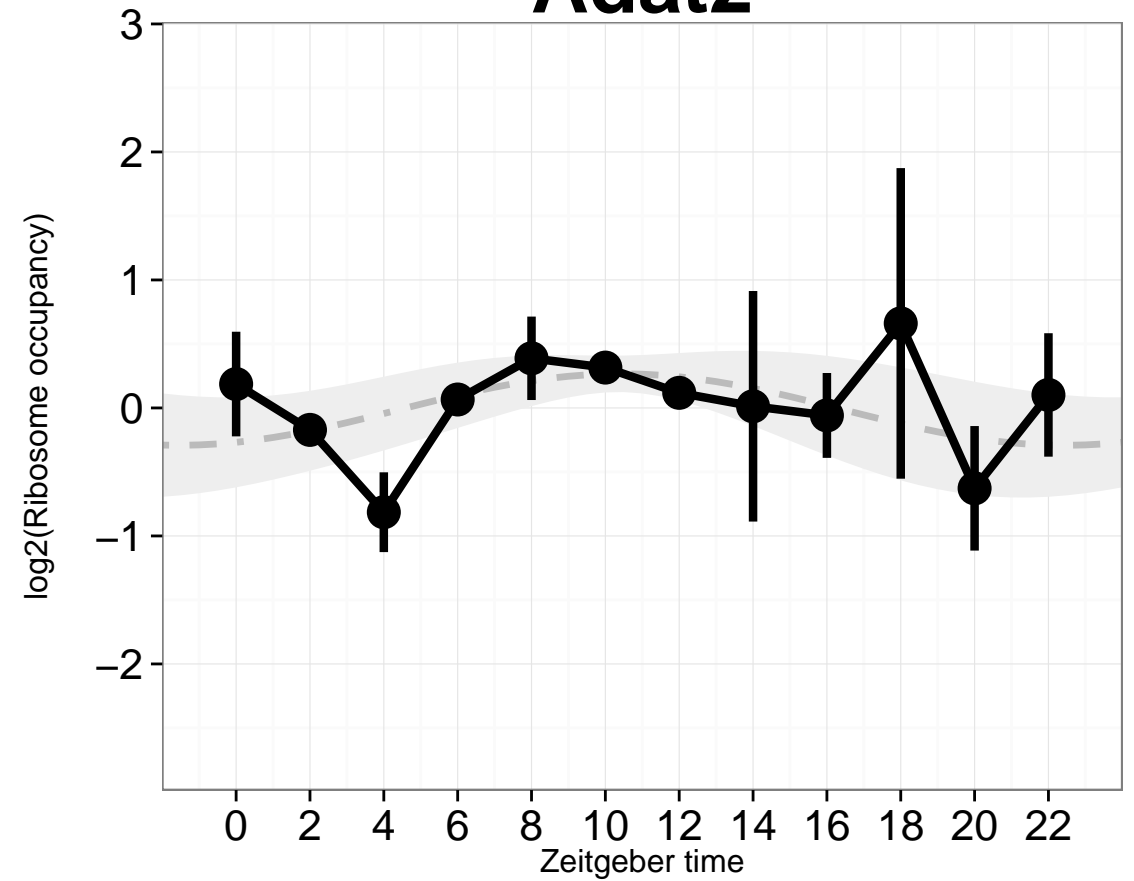

Supplement: SuppDataset_1.zip [file Adat2_set_A.pdf › Supplemental Dataset 1/A-mRNA_nonrhyth_translation_nonrhyth/Adat2_set_A.pdf]

**Adat3 TR**

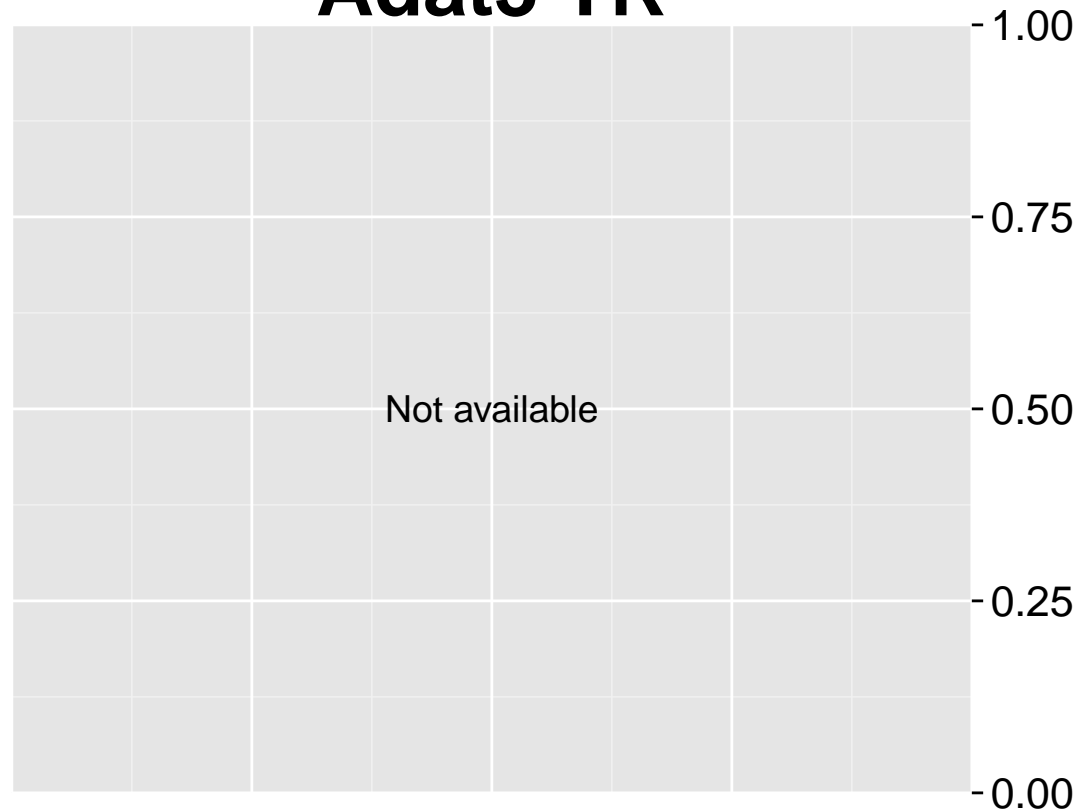

**Adat3 log2(Ribosome occupancy**

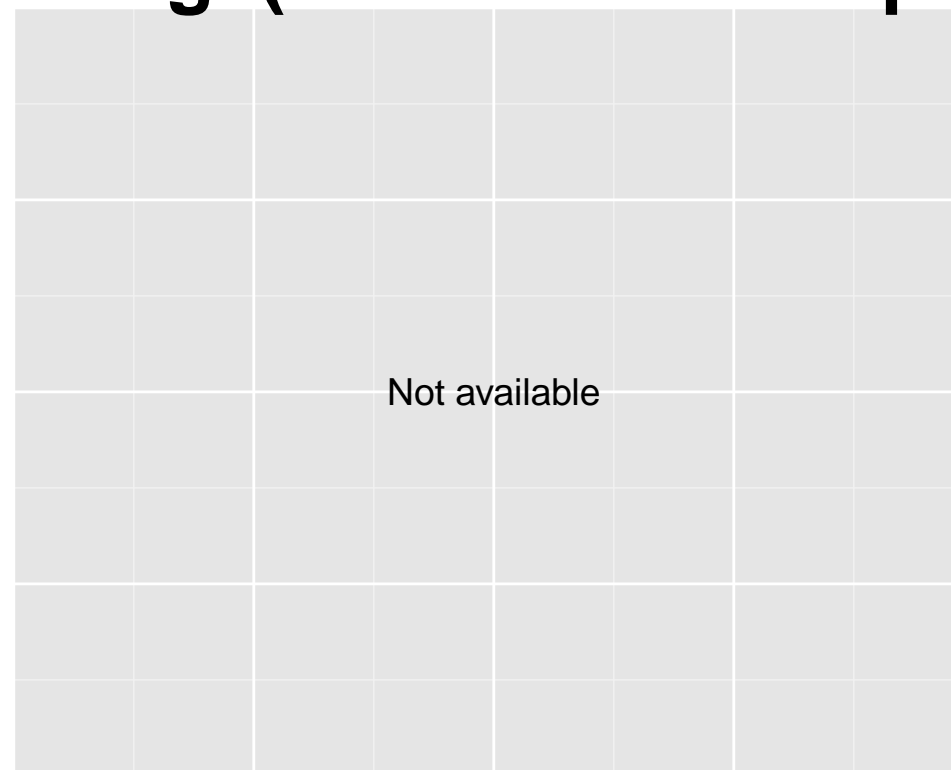

Supplement: SuppDataset_1.zip [file Adat3_set_A.pdf › Supplemental Dataset 1/A-mRNA_nonrhyth_translation_nonrhyth/Adat3_set_A.pdf]

## Adck2

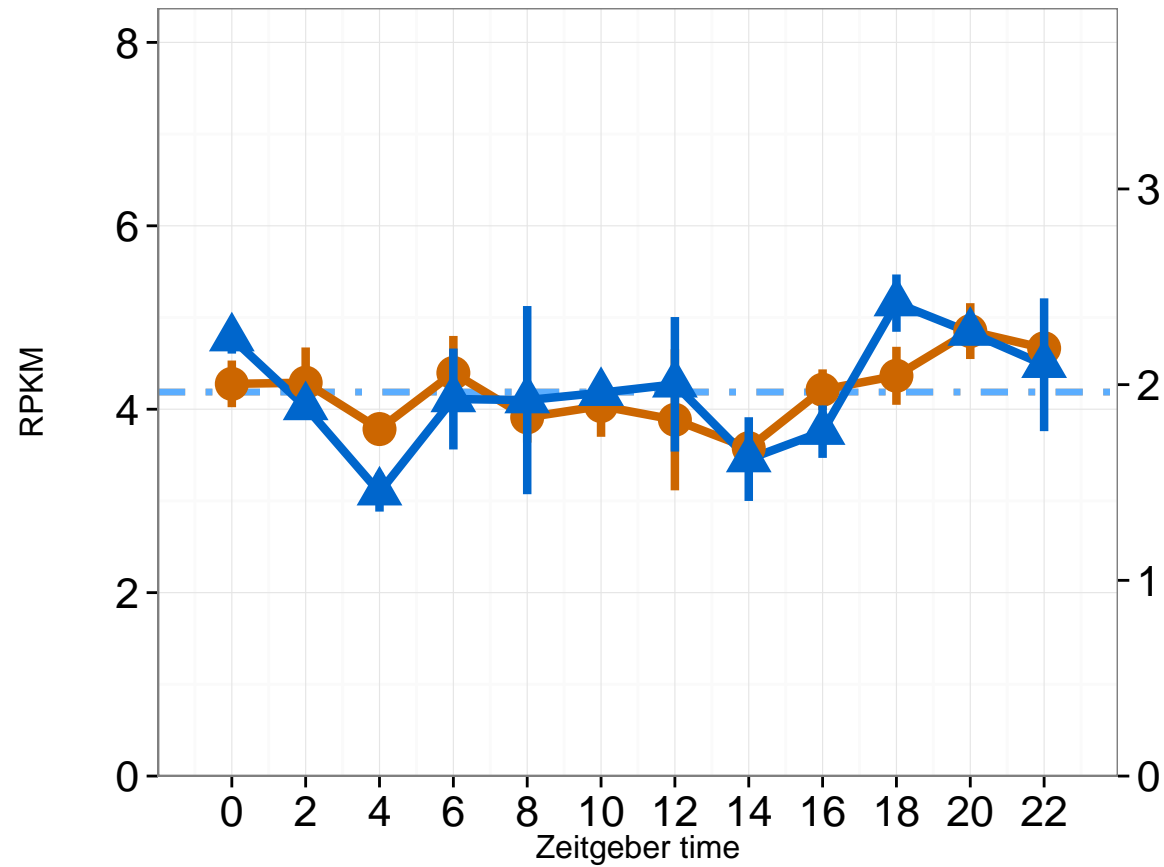

## Adck2

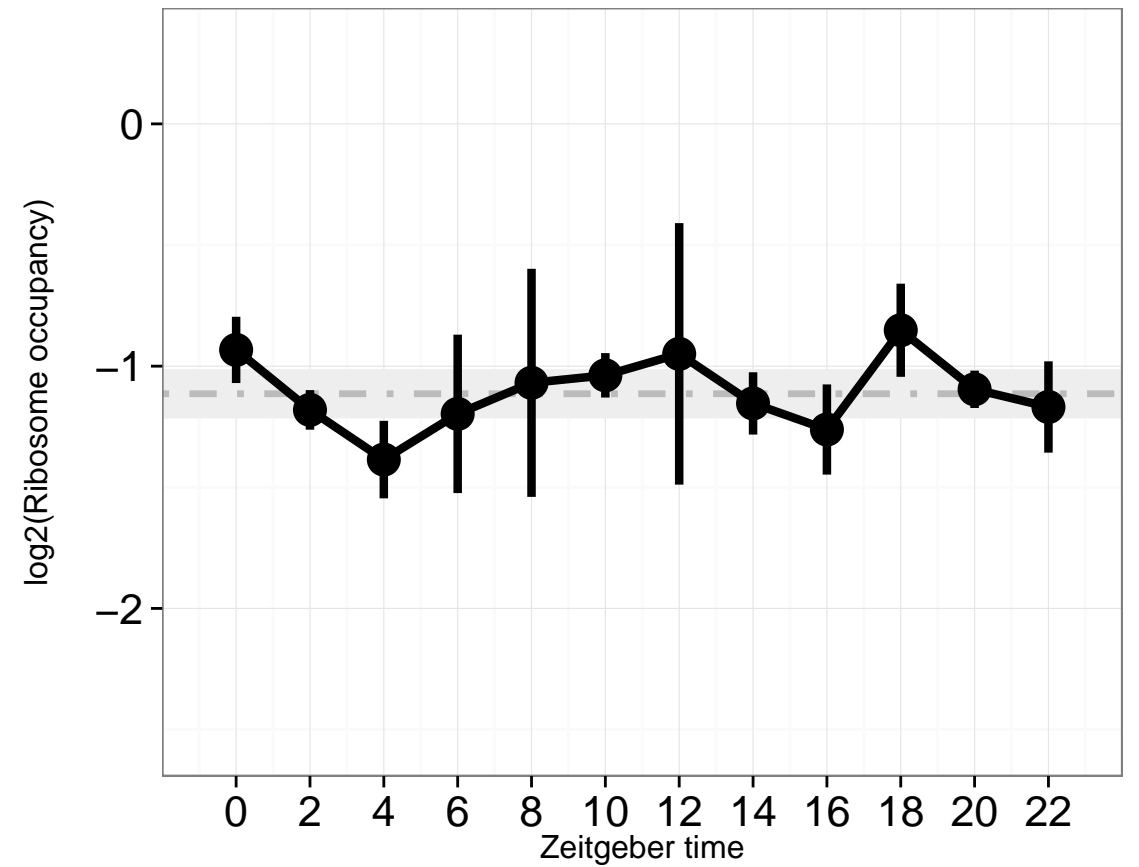

Supplement: SuppDataset_1.zip [file Adck2_set_A.pdf › Supplemental Dataset 1/A-mRNA_nonrhyth_translation_nonrhyth/Adck2_set_A.pdf]

## Adck4

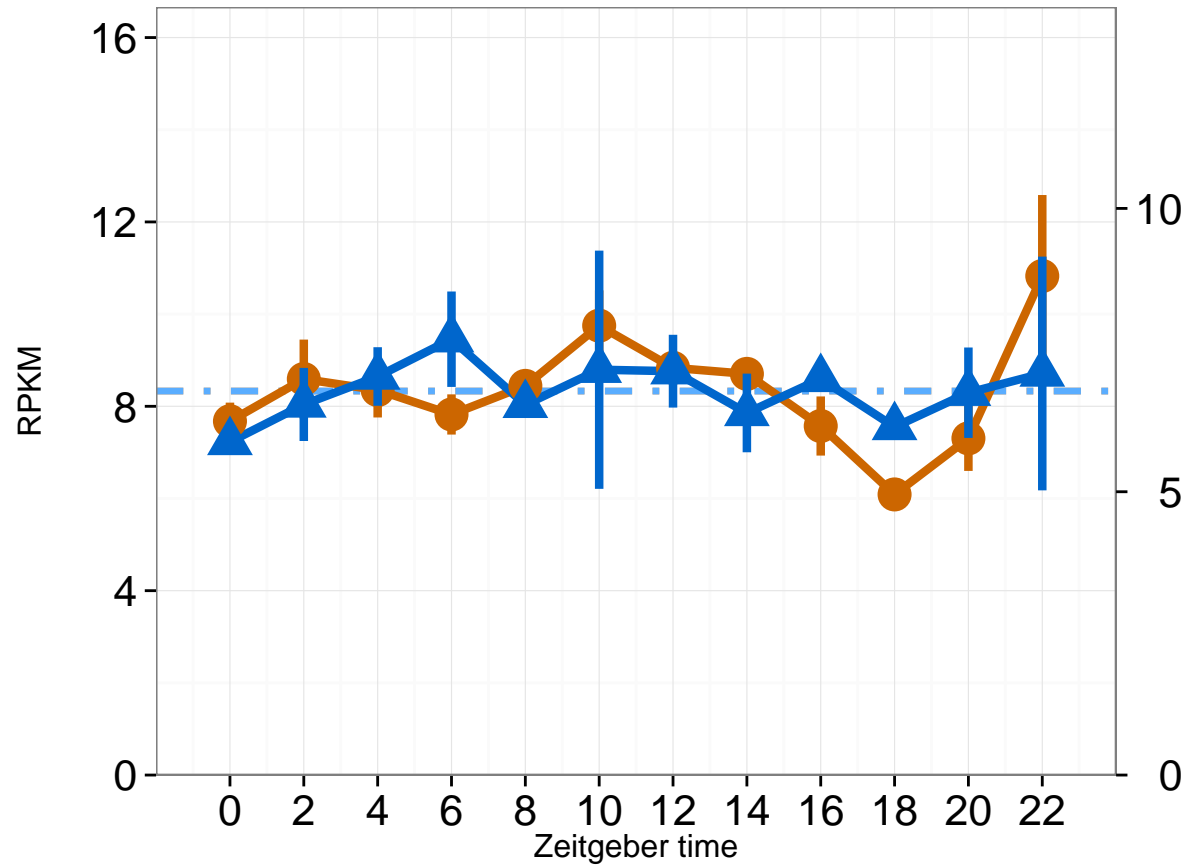

## Adck4

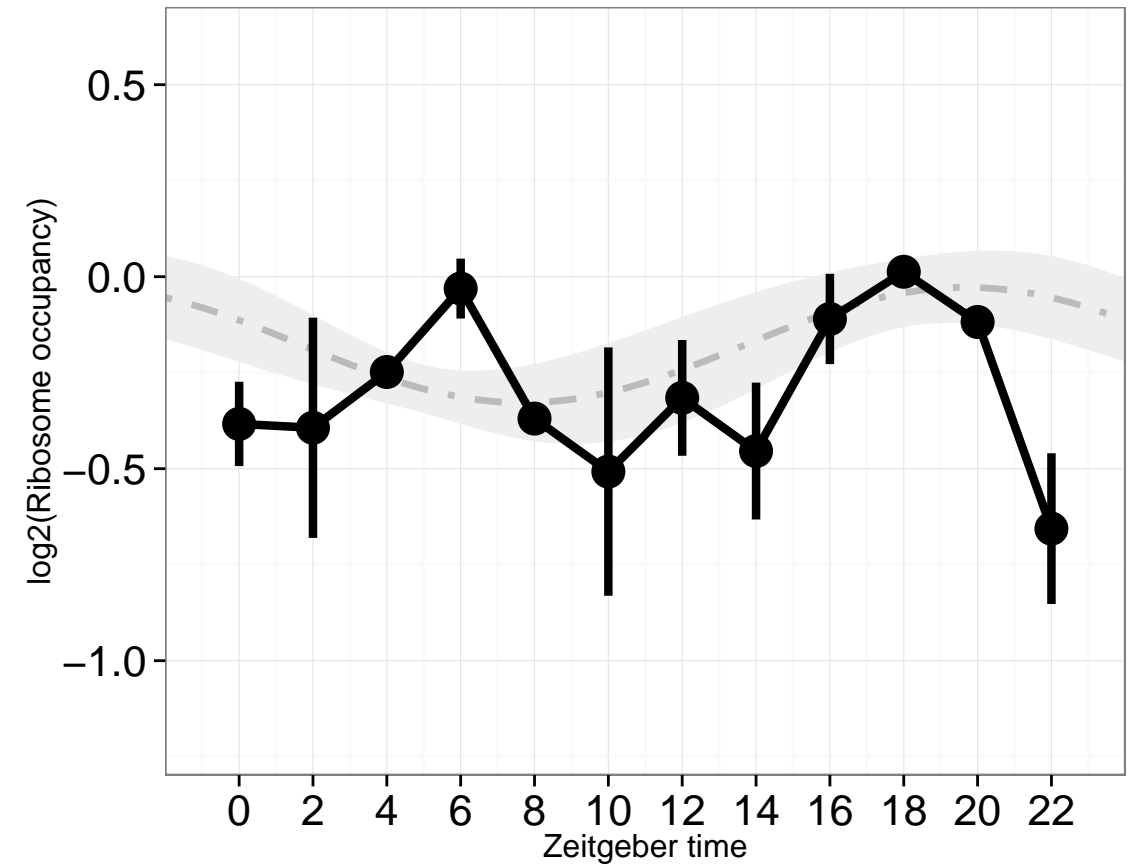

Supplement: SuppDataset_1.zip [file Adck4_set_A.pdf › Supplemental Dataset 1/A-mRNA_nonrhyth_translation_nonrhyth/Adck4_set_A.pdf]

# Adcy4

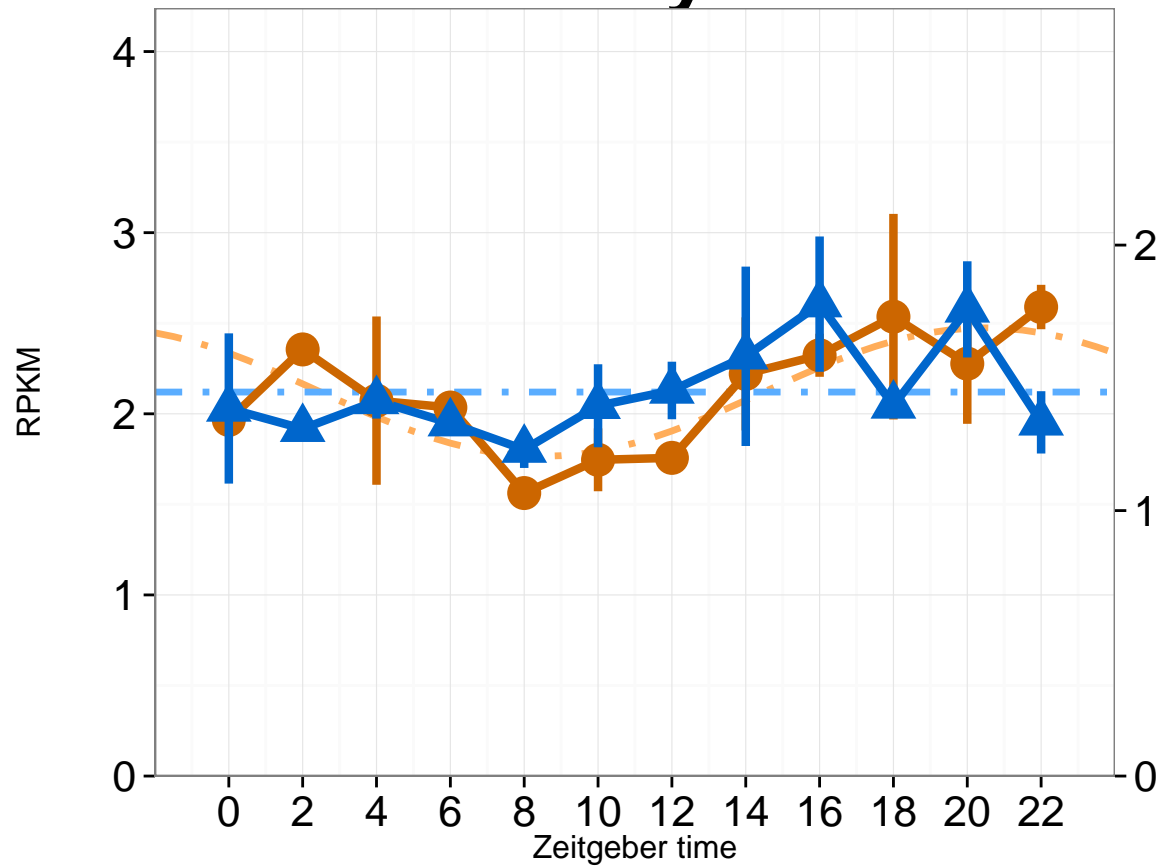

# Adcy4

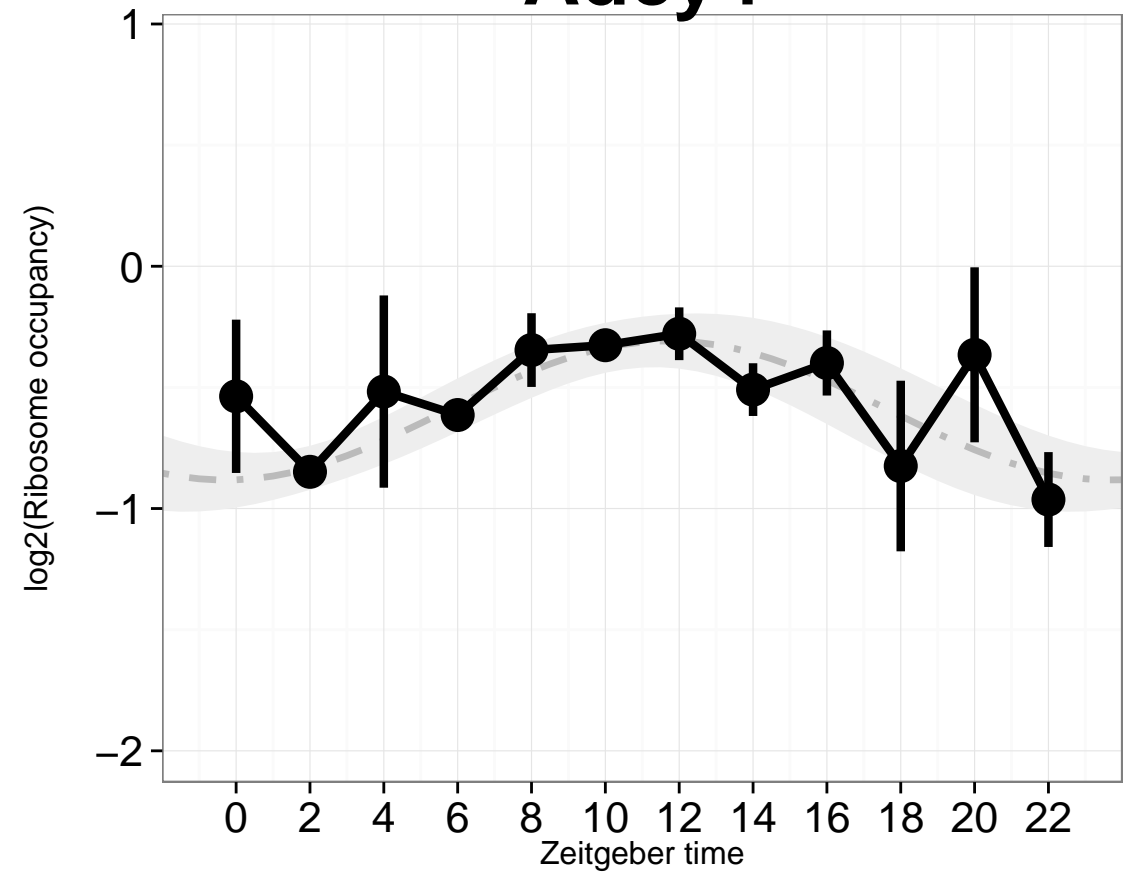

Supplement: SuppDataset_1.zip [file Adcy4_set_A.pdf › Supplemental Dataset 1/A-mRNA_nonrhyth_translation_nonrhyth/Adcy4_set_A.pdf]

# Adcy7

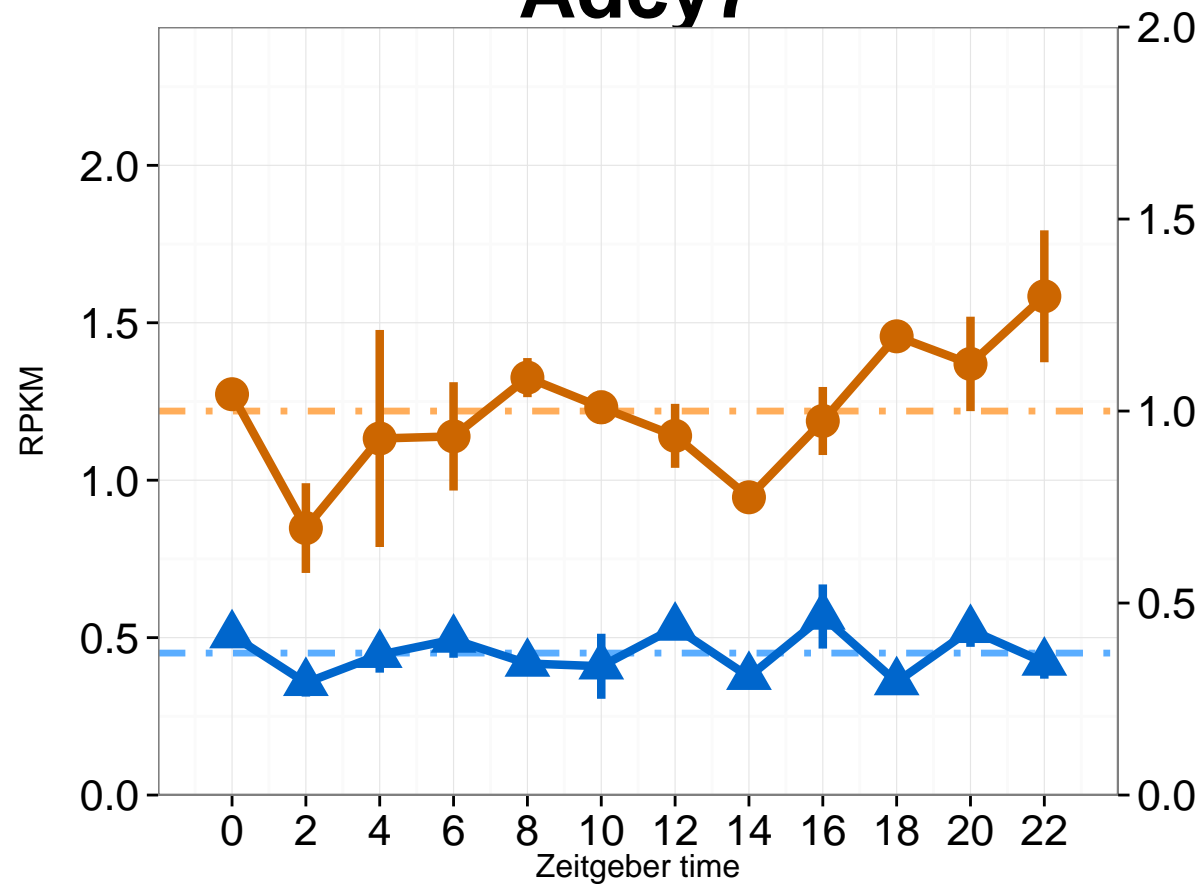

# Adcy7

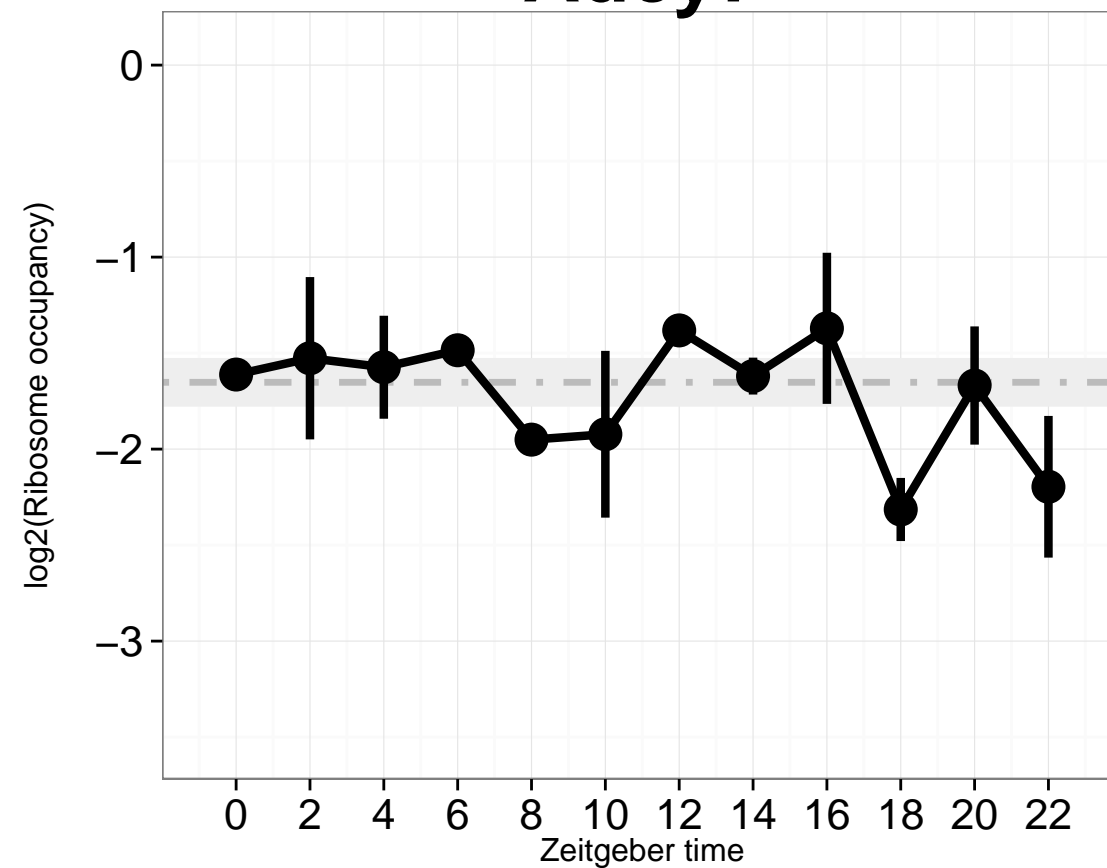

Supplement: SuppDataset_1.zip [file Adcy7_set_A.pdf › Supplemental Dataset 1/A-mRNA_nonrhyth_translation_nonrhyth/Adcy7_set_A.pdf]

# Adcy9

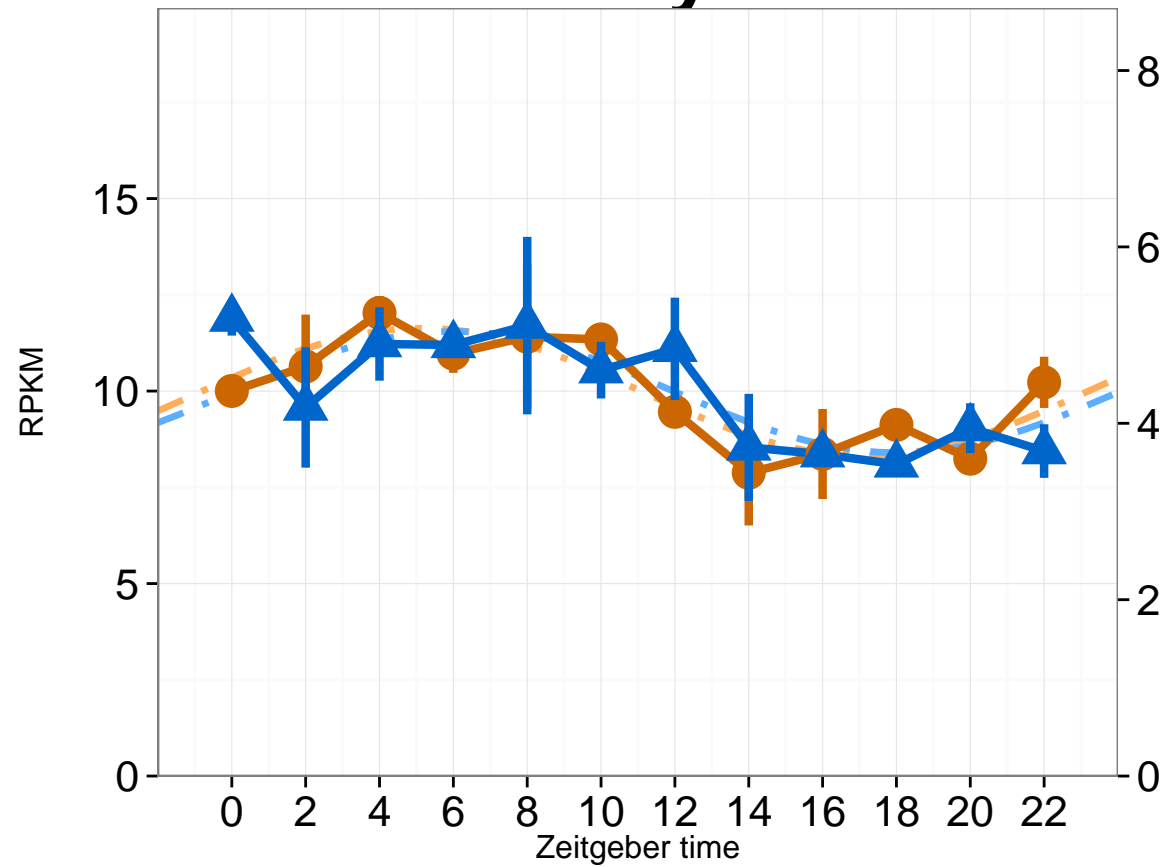

# Adcy9

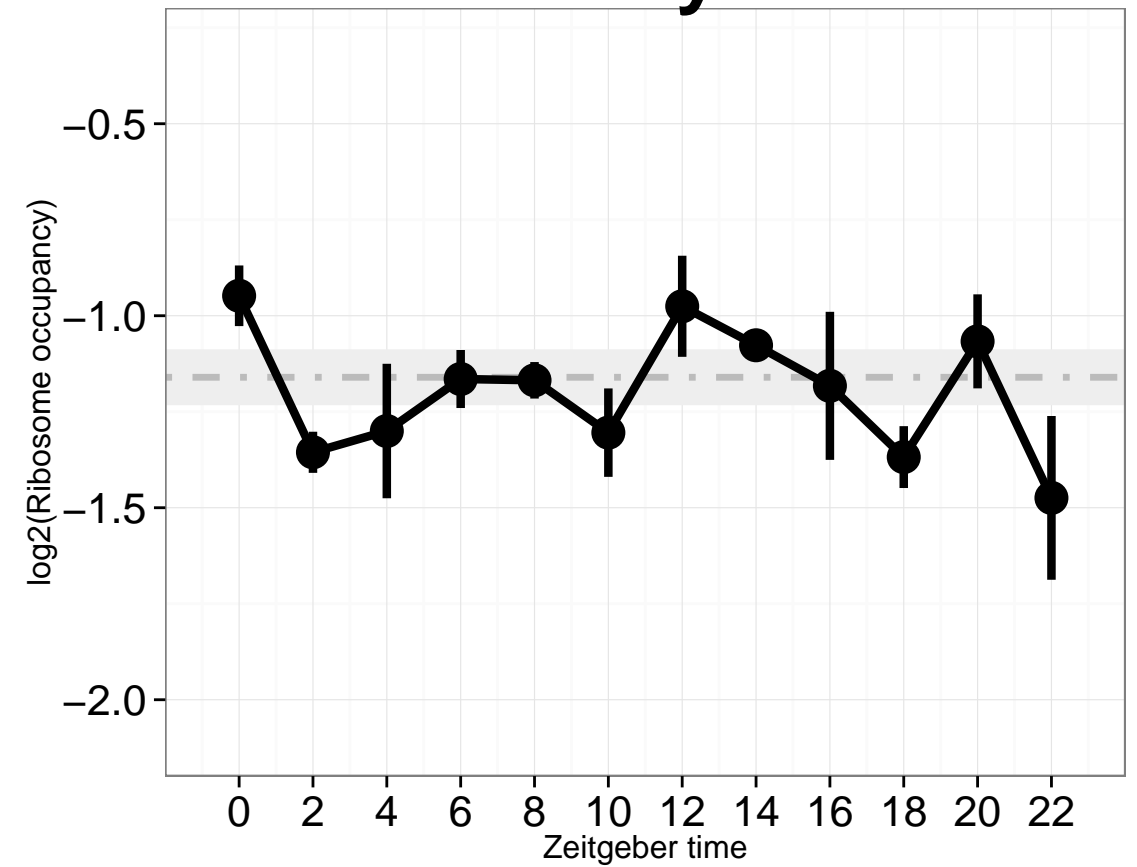

Supplement: SuppDataset_1.zip [file Adcy9_set_A.pdf › Supplemental Dataset 1/A-mRNA_nonrhyth_translation_nonrhyth/Adcy9_set_A.pdf]

# Adcyap1r1

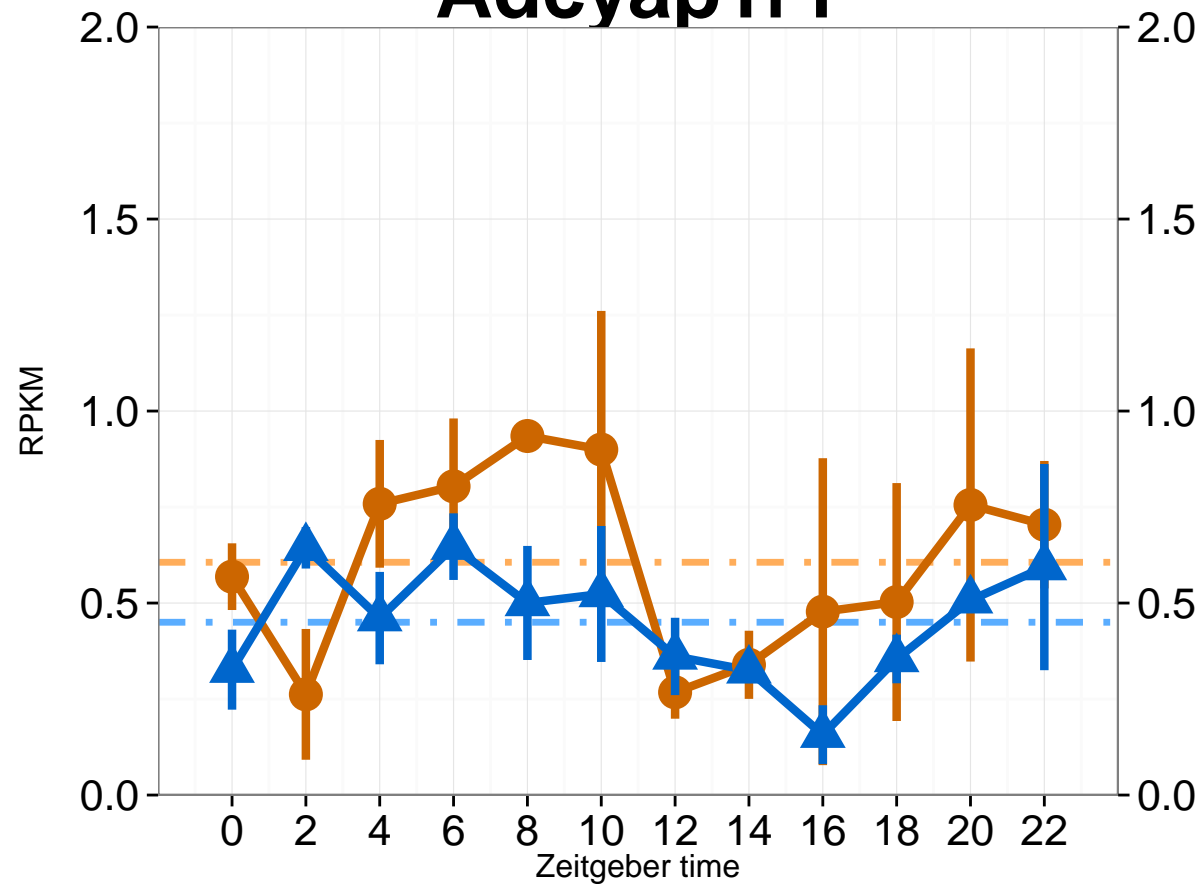

# Adcyap1r1

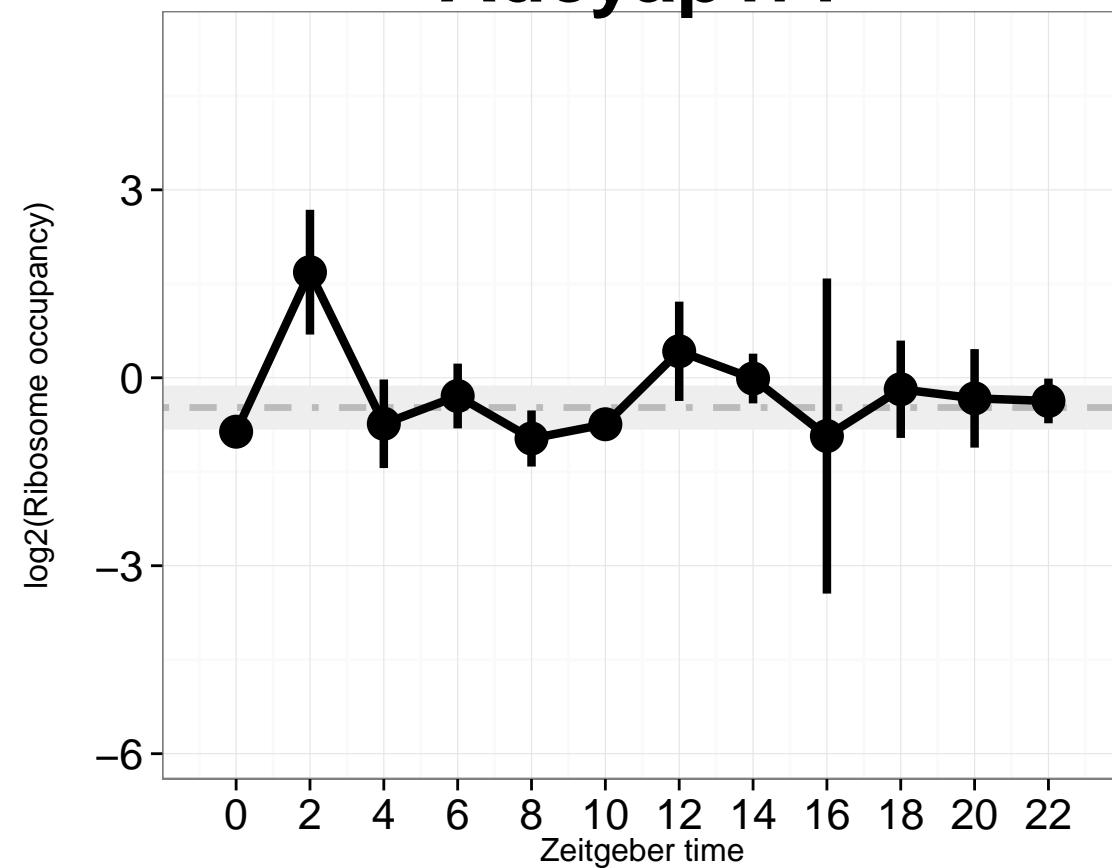

Supplement: SuppDataset_1.zip [file Adcyap1r1_set_A.pdf › Supplemental Dataset 1/A-mRNA_nonrhyth_translation_nonrhyth/Adcyap1r1_set_A.pdf]

## Add1

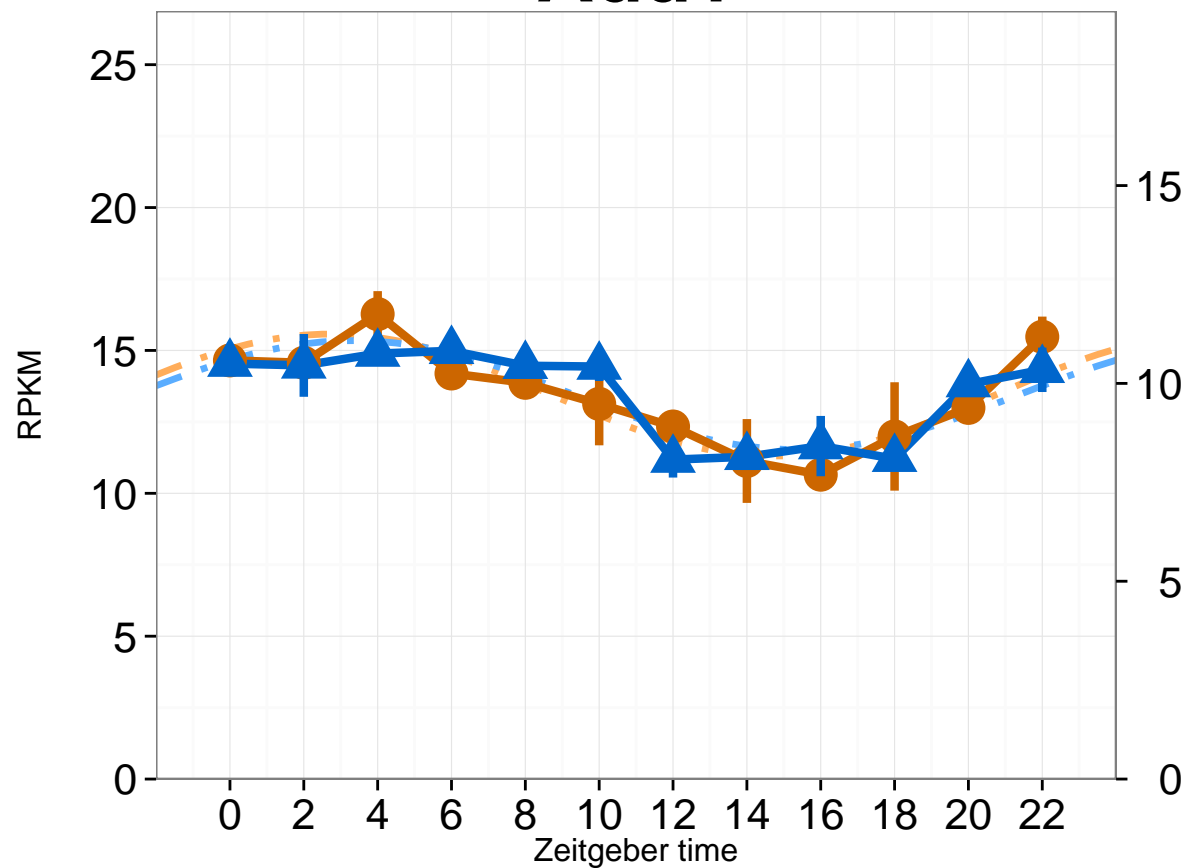

## Add1

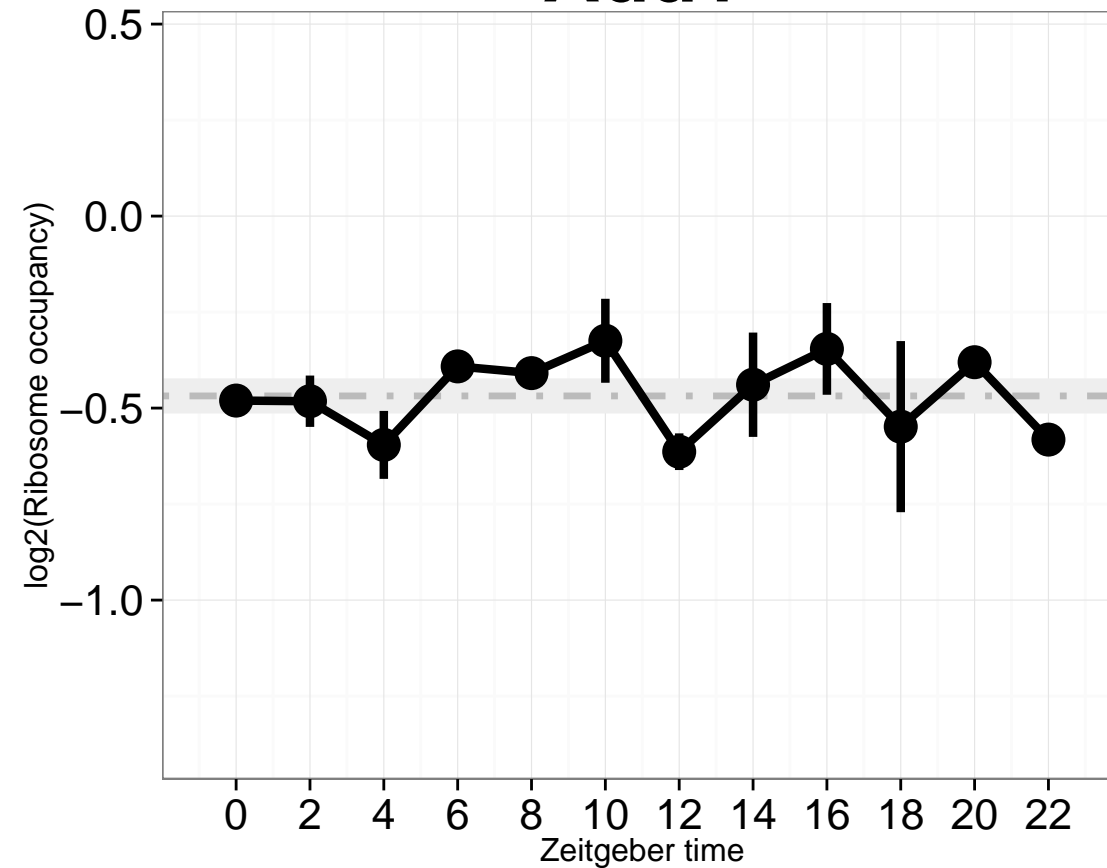

Supplement: SuppDataset_1.zip [file Add1_set_A.pdf › Supplemental Dataset 1/A-mRNA_nonrhyth_translation_nonrhyth/Add1_set_A.pdf]

## Add3

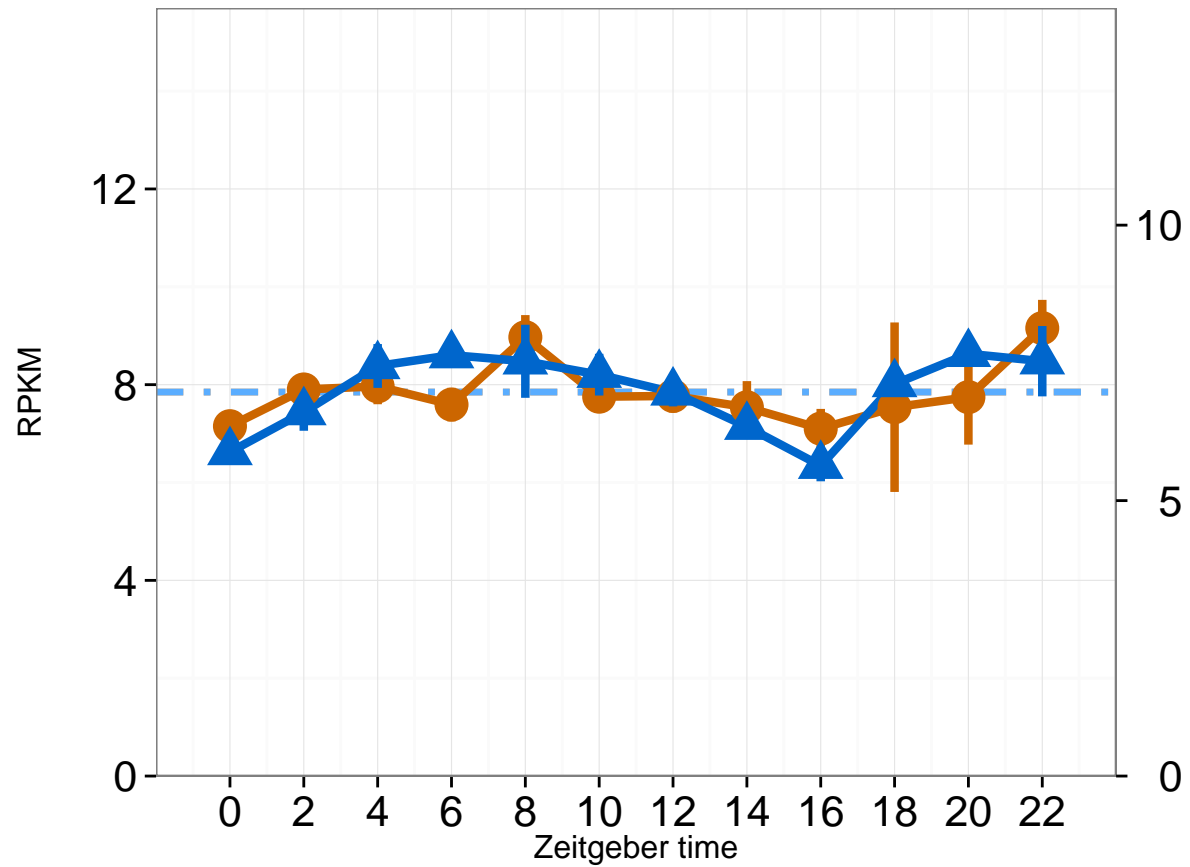

## Add3

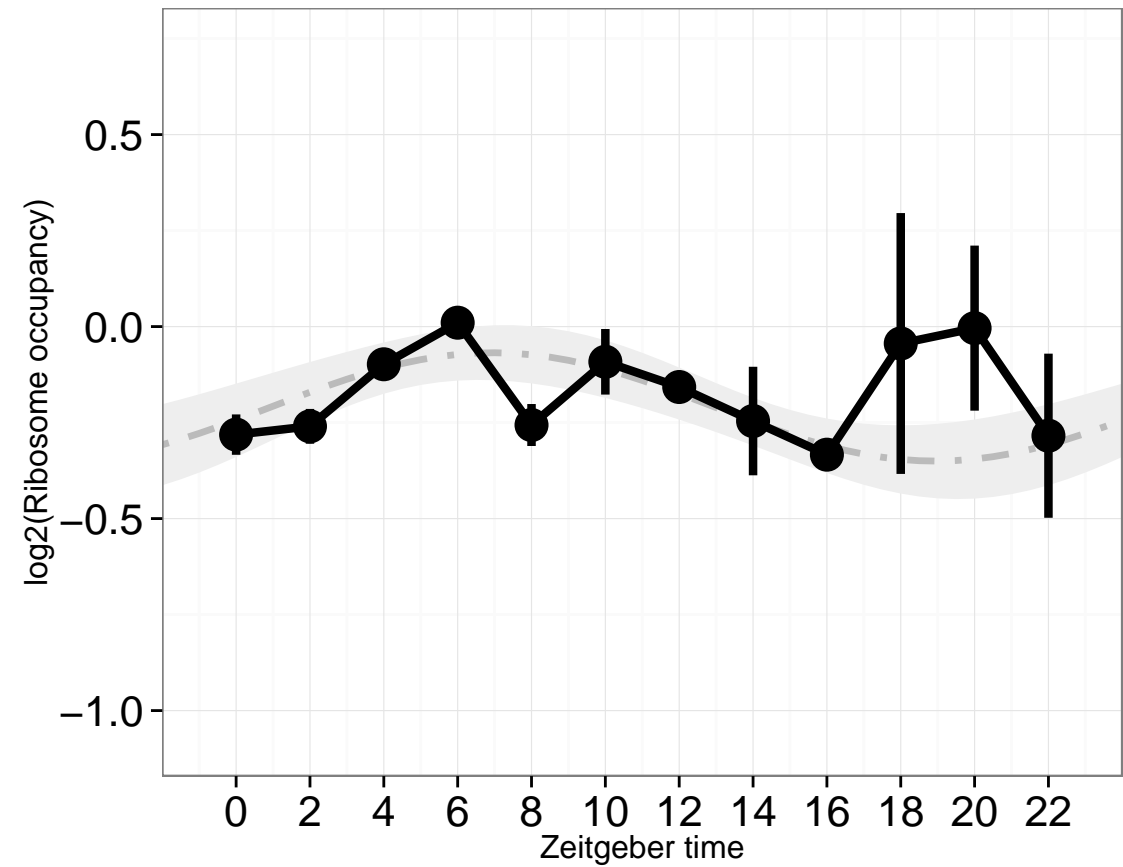

Supplement: SuppDataset_1.zip [file Add3_set_A.pdf › Supplemental Dataset 1/A-mRNA_nonrhyth_translation_nonrhyth/Add3_set_A.pdf]

## Adgb

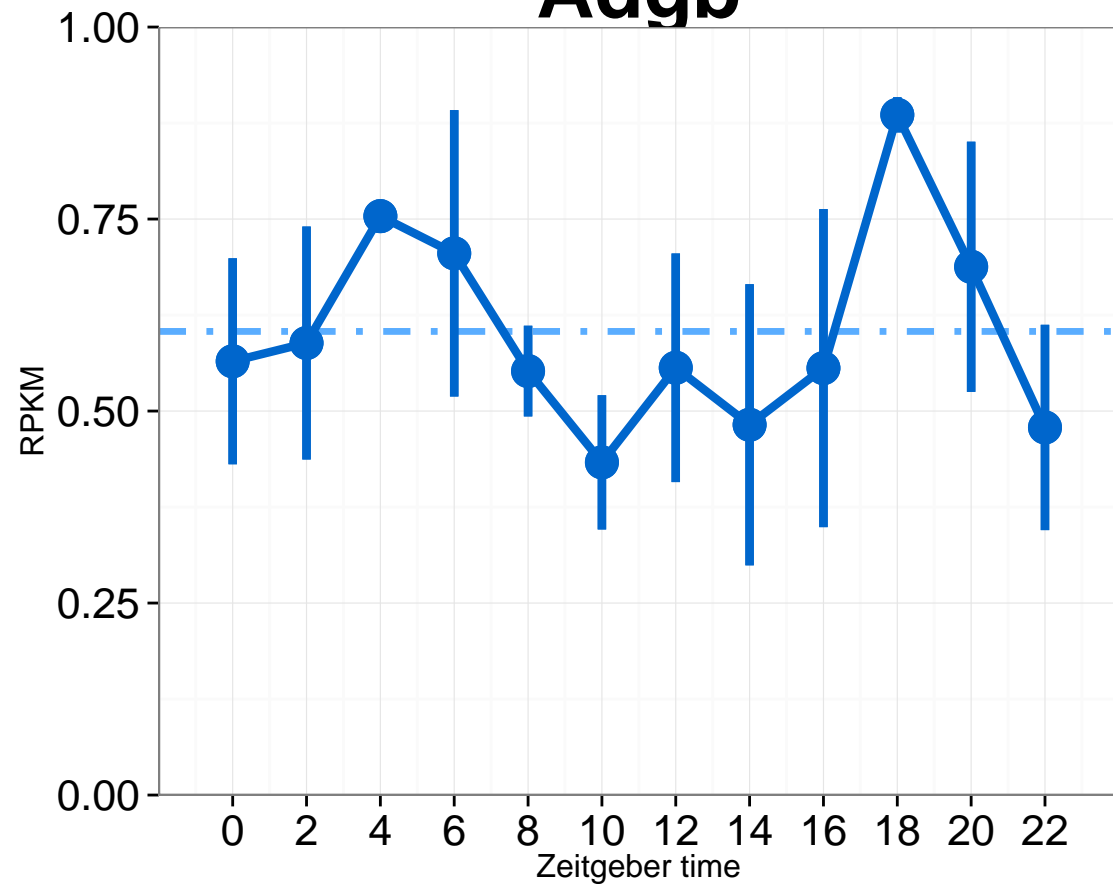

## Adgb log2(Ribosome occupancy)

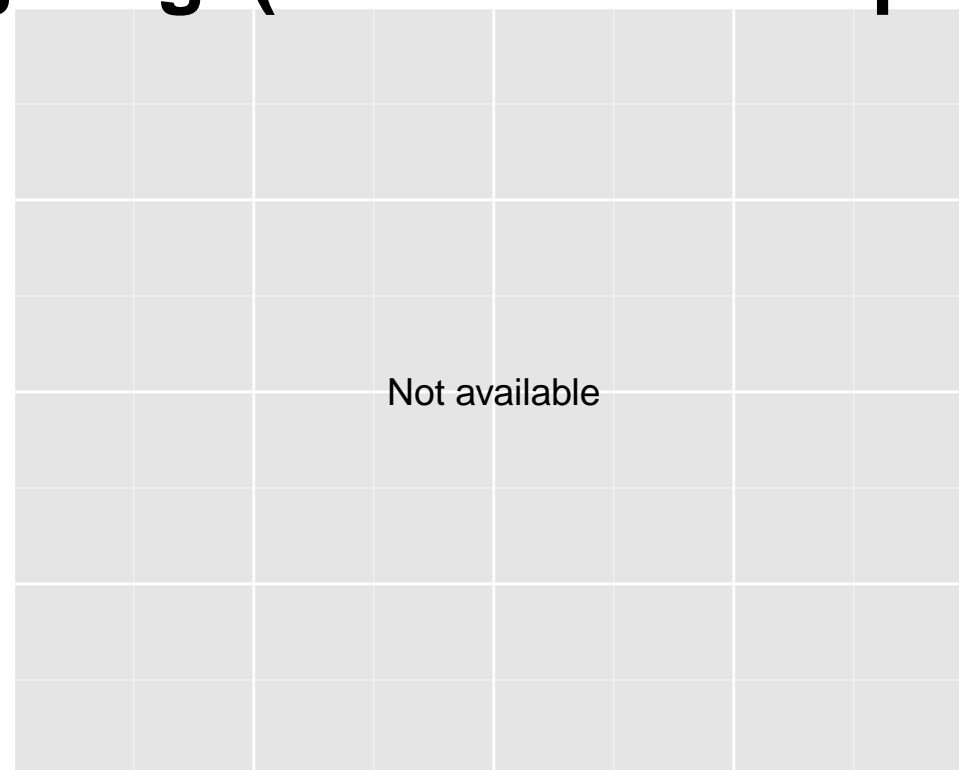

Supplement: SuppDataset_1.zip [file Adgb_set_A.pdf › Supplemental Dataset 1/A-mRNA_nonrhyth_translation_nonrhyth/Adgb_set_A.pdf]

## Adh5

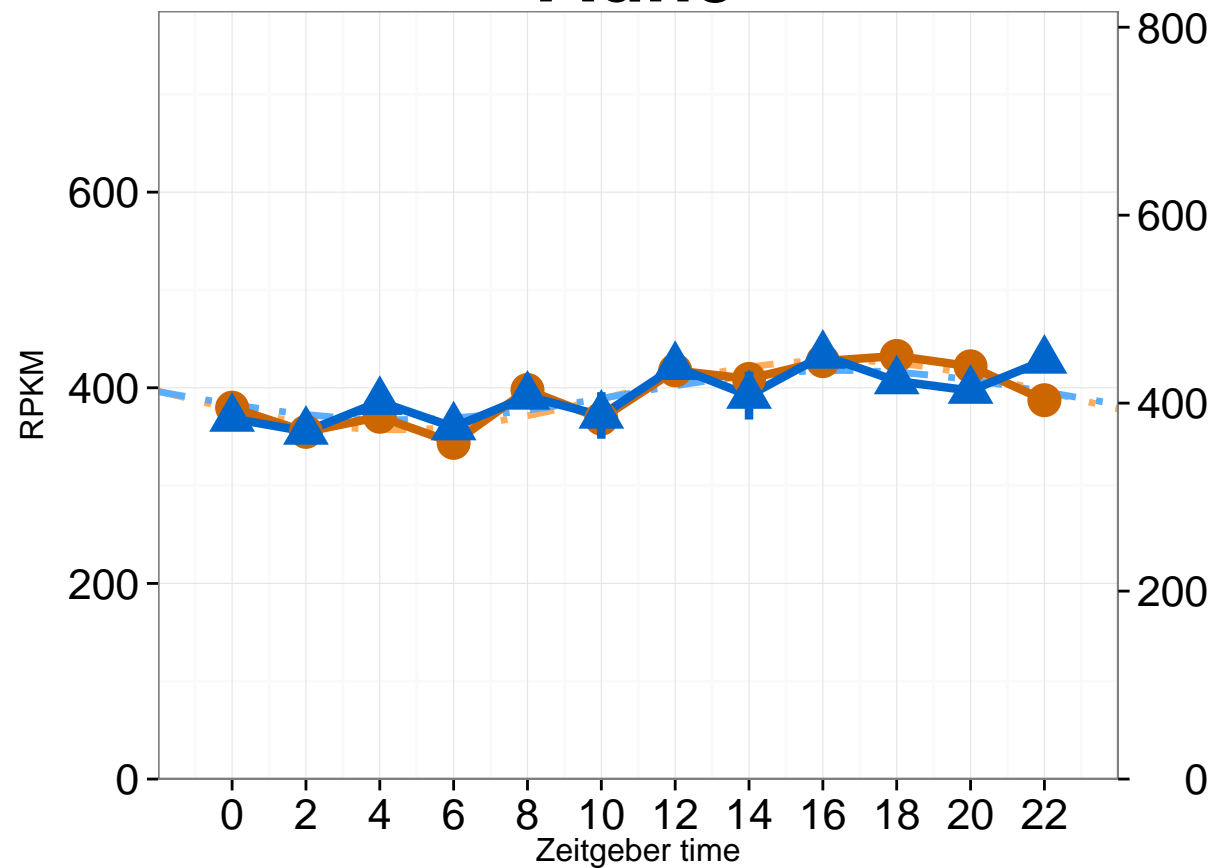

## Adh5

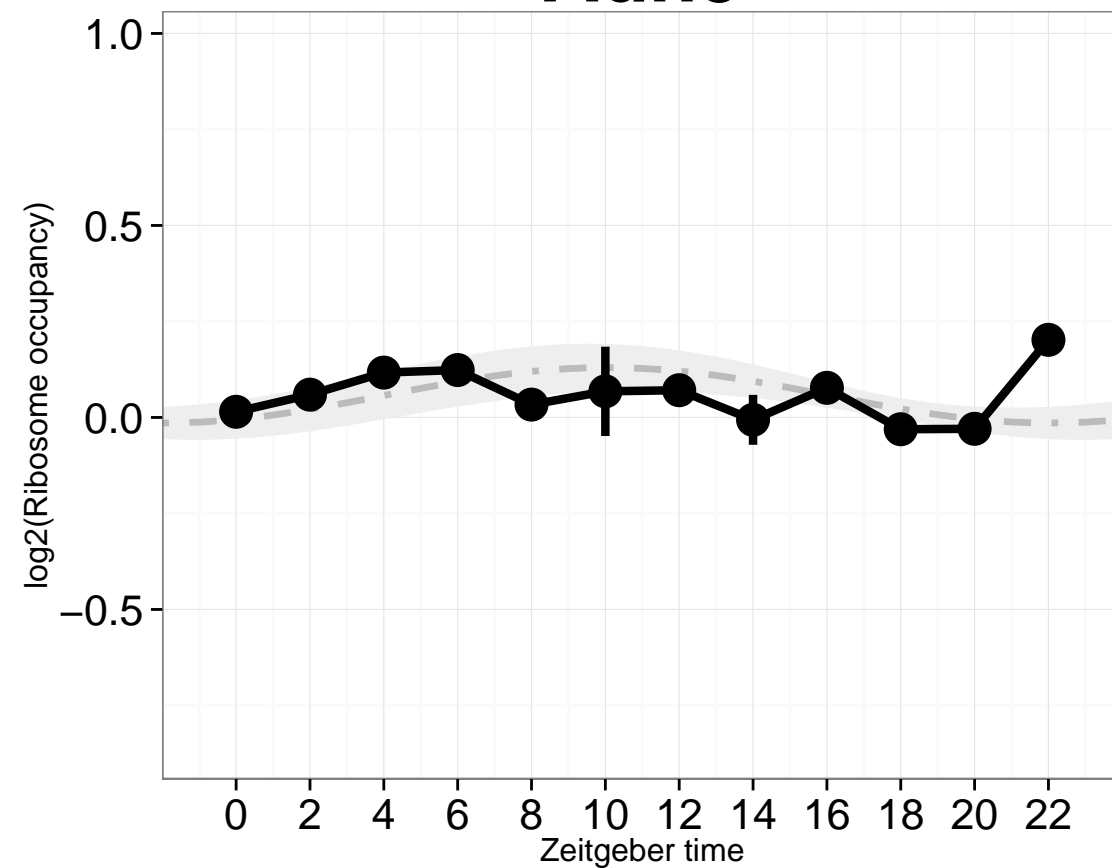

Supplement: SuppDataset_1.zip [file Adh5_set_A.pdf › Supplemental Dataset 1/A-mRNA_nonrhyth_translation_nonrhyth/Adh5_set_A.pdf]

# Adh7

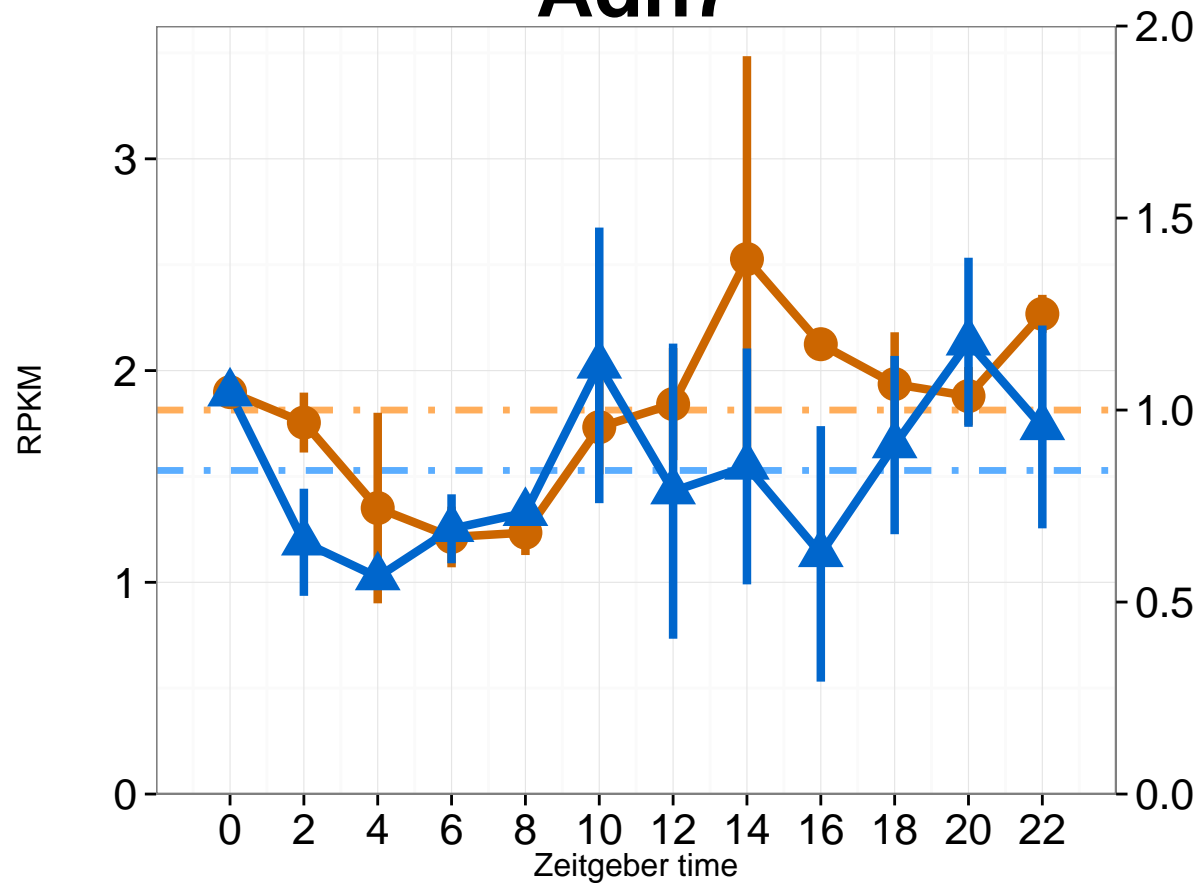

# Adh7

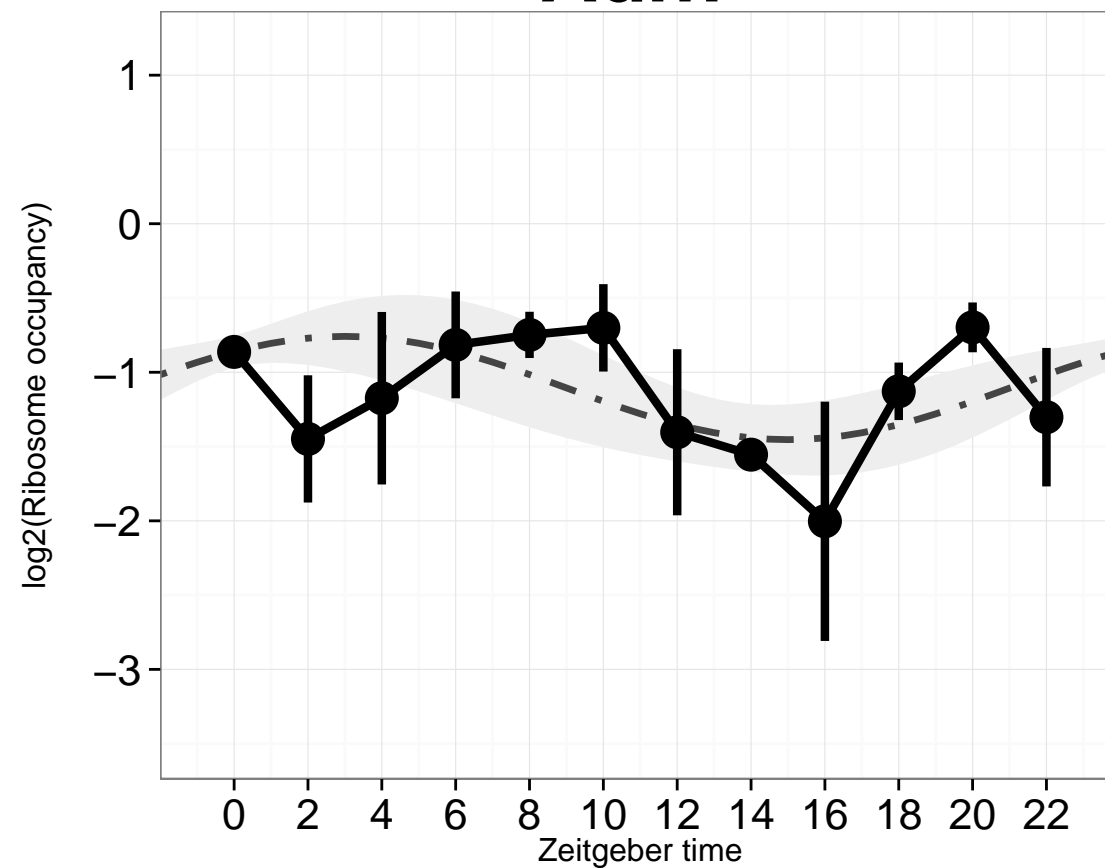

Supplement: SuppDataset_1.zip [file Adh7_set_A.pdf › Supplemental Dataset 1/A-mRNA_nonrhyth_translation_nonrhyth/Adh7_set_A.pdf]

## Adhfe1

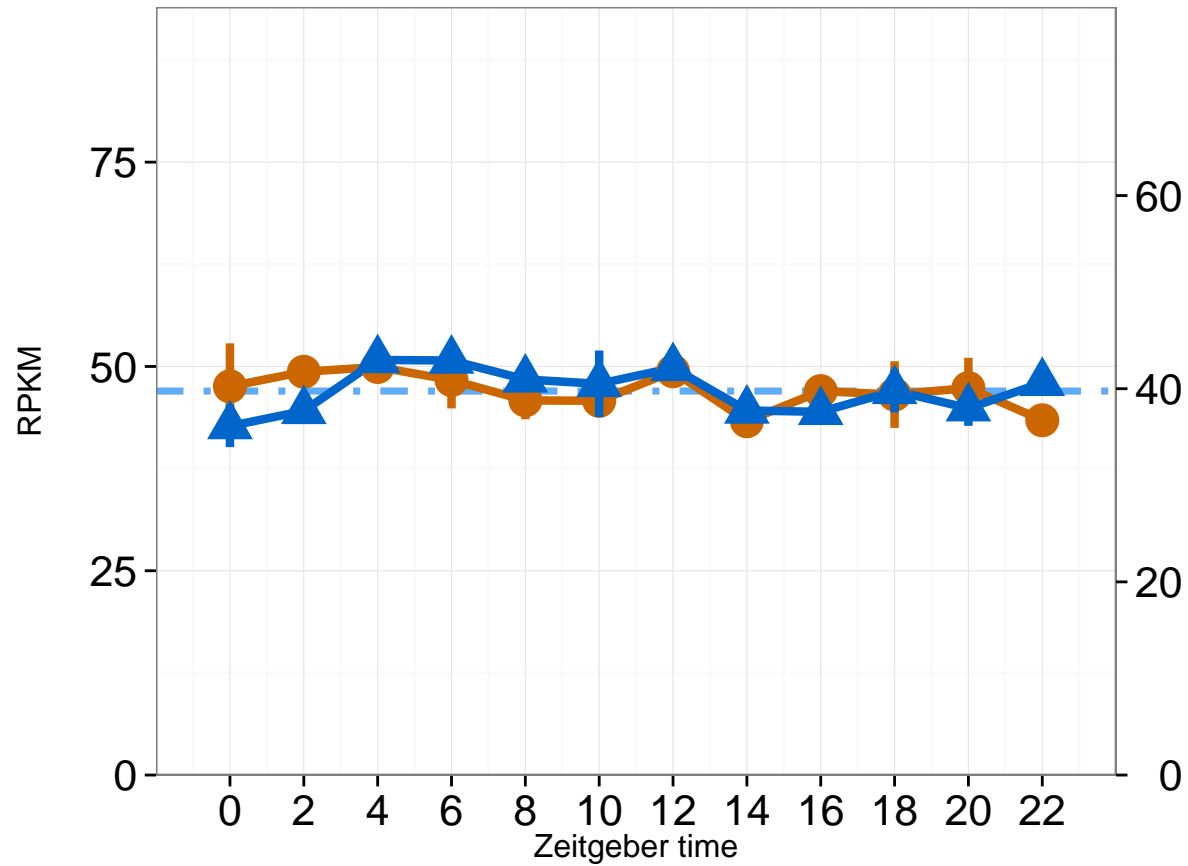

## Adhfe1

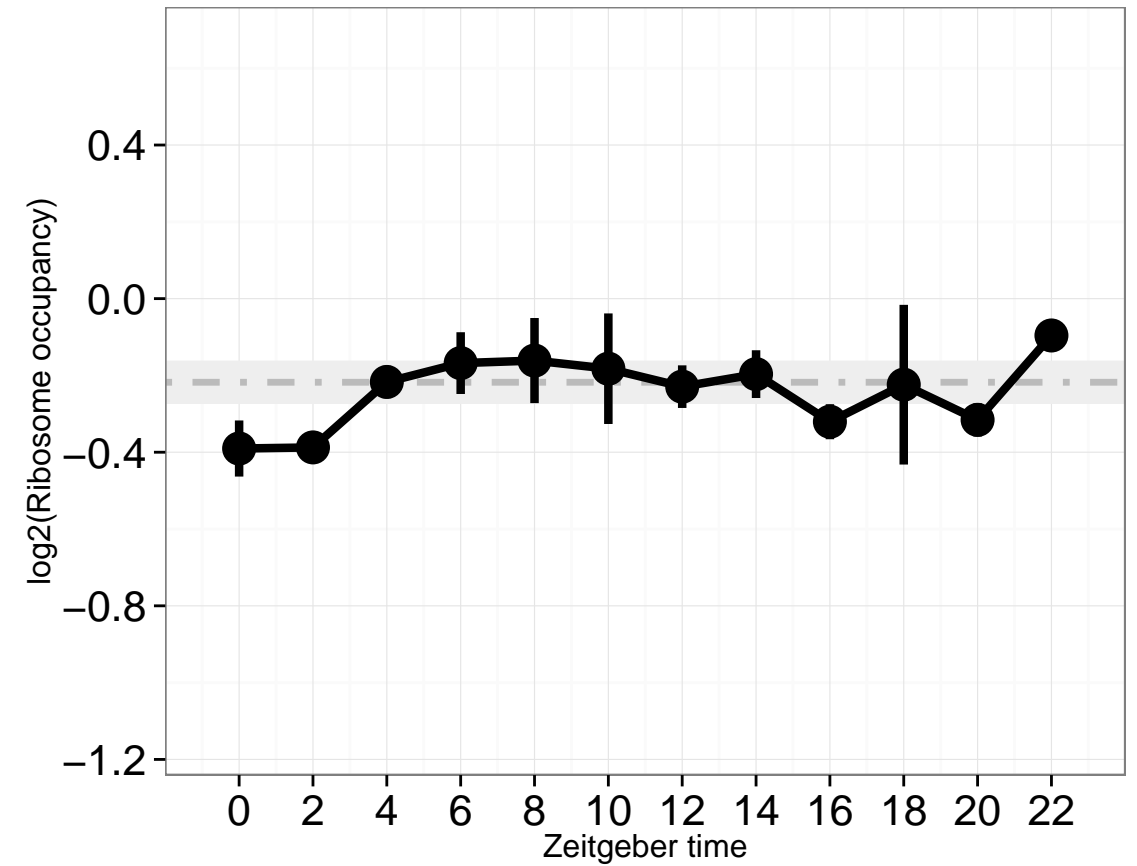

Supplement: SuppDataset_1.zip [file Adhfe1_set_A.pdf › Supplemental Dataset 1/A-mRNA_nonrhyth_translation_nonrhyth/Adhfe1_set_A.pdf]

## Adi1

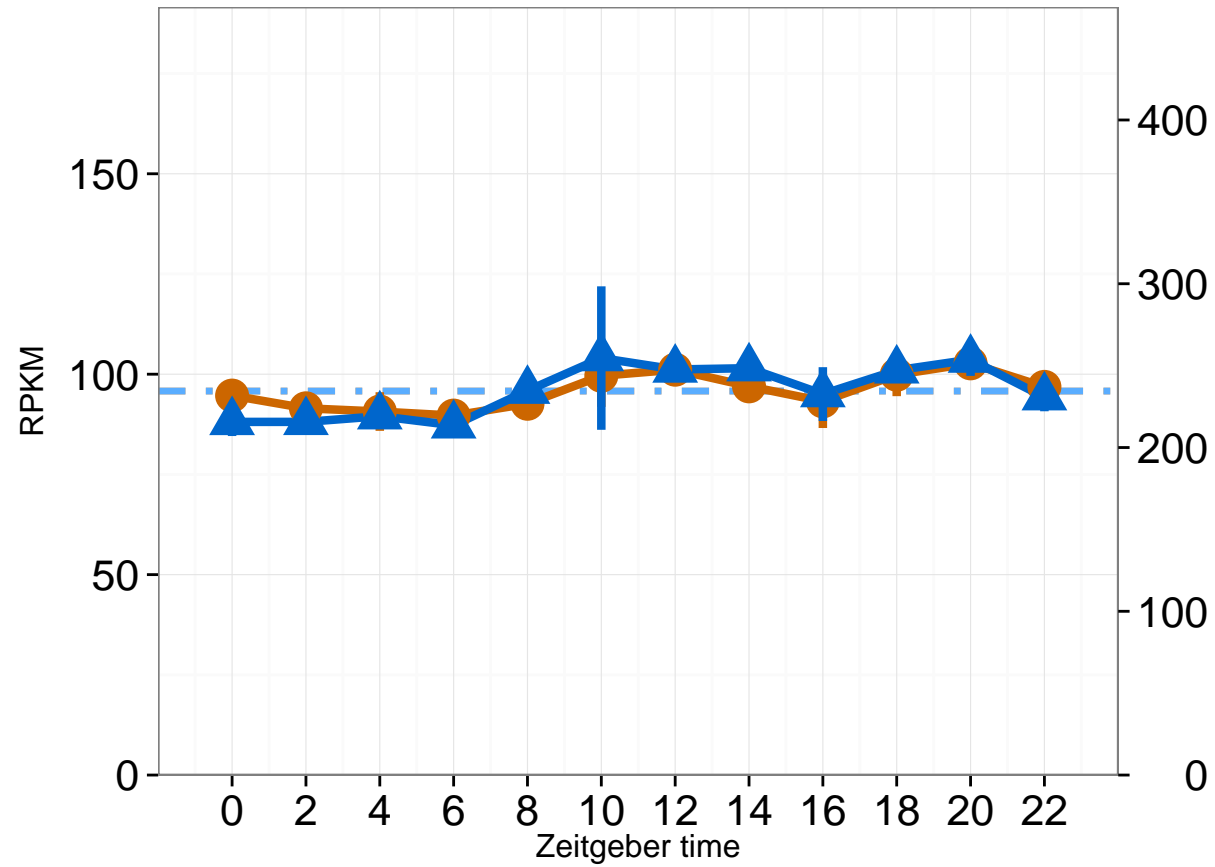

## Adi1

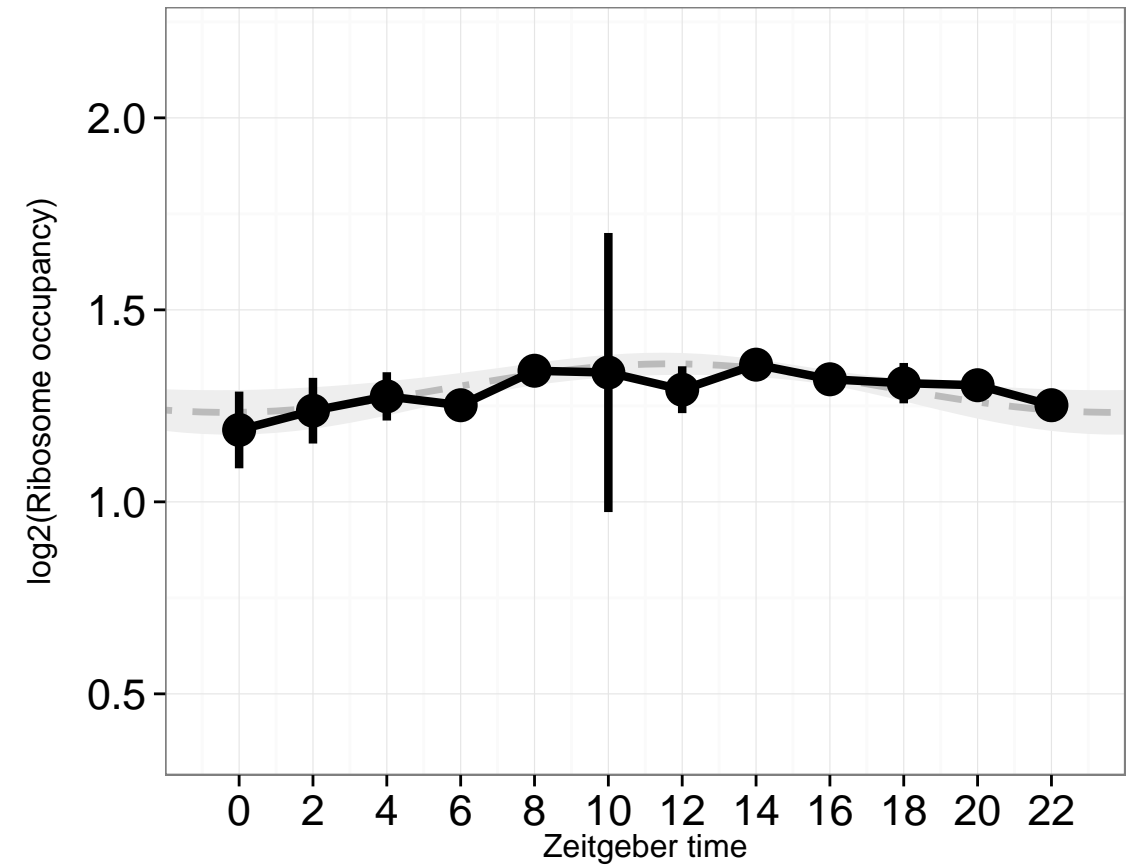

Supplement: SuppDataset_1.zip [file Adi1_set_A.pdf › Supplemental Dataset 1/A-mRNA_nonrhyth_translation_nonrhyth/Adi1_set_A.pdf]

## Adipor1

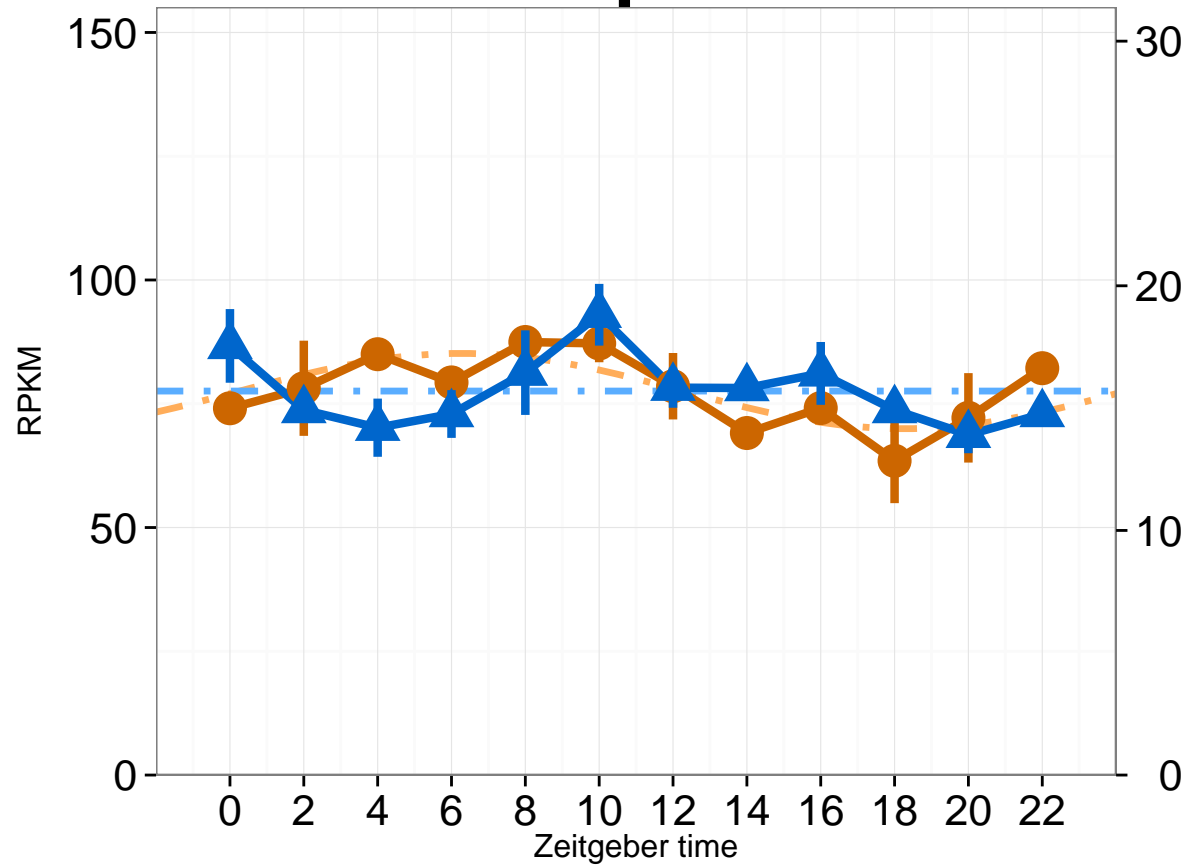

## Adipor1

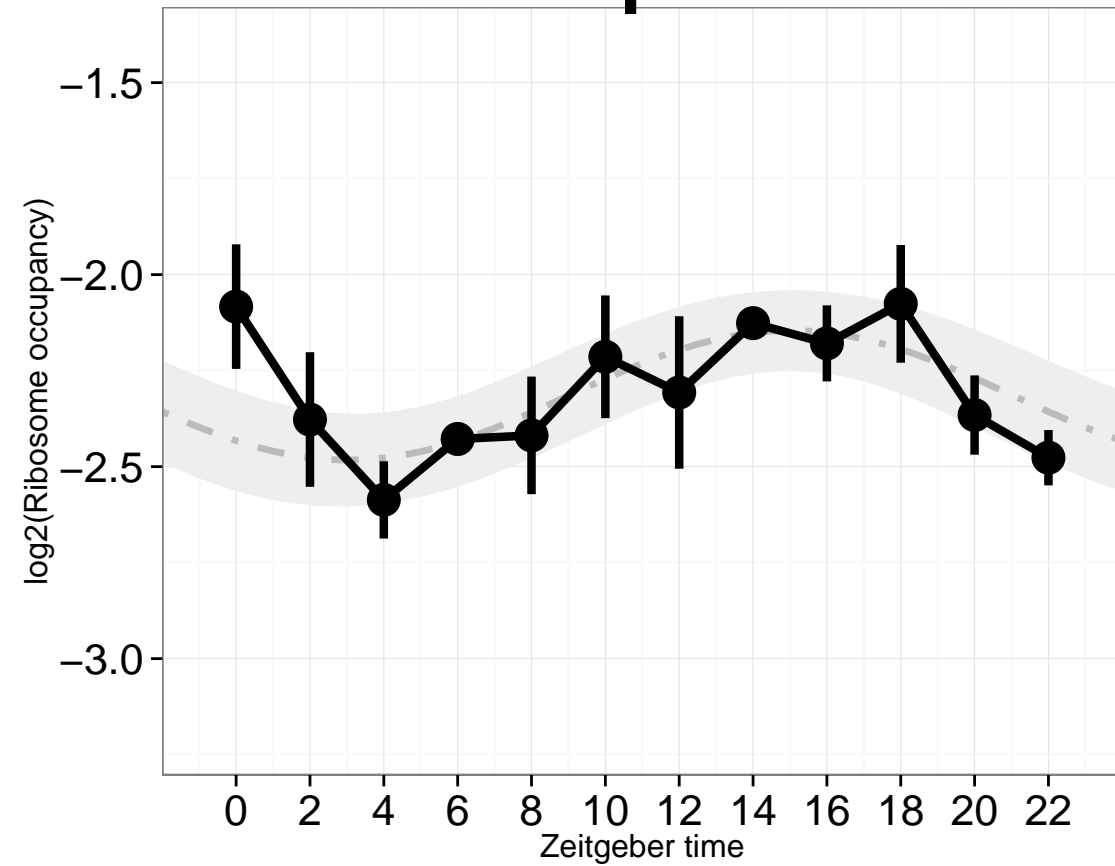

Supplement: SuppDataset_1.zip [file Adipor1_set_A.pdf › Supplemental Dataset 1/A-mRNA_nonrhyth_translation_nonrhyth/Adipor1_set_A.pdf]

## Adipor2

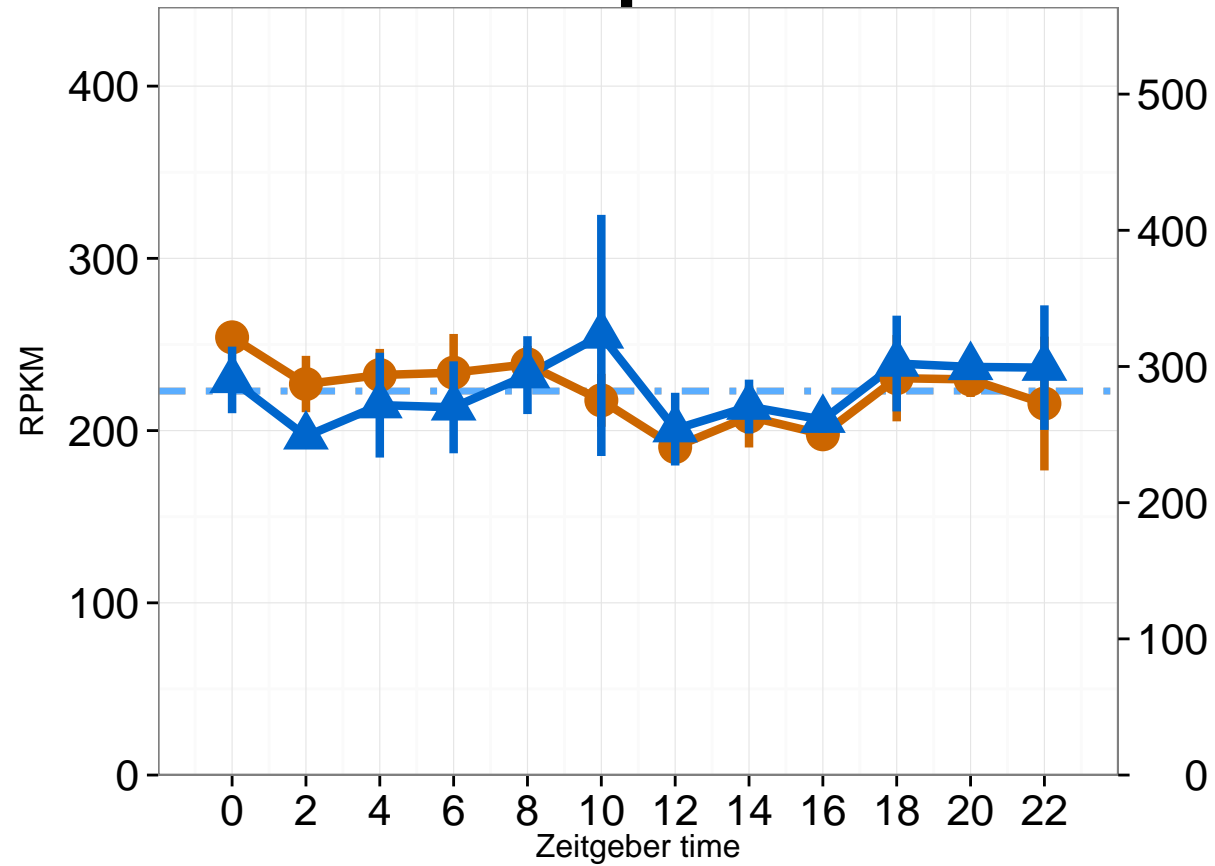

## Adipor2

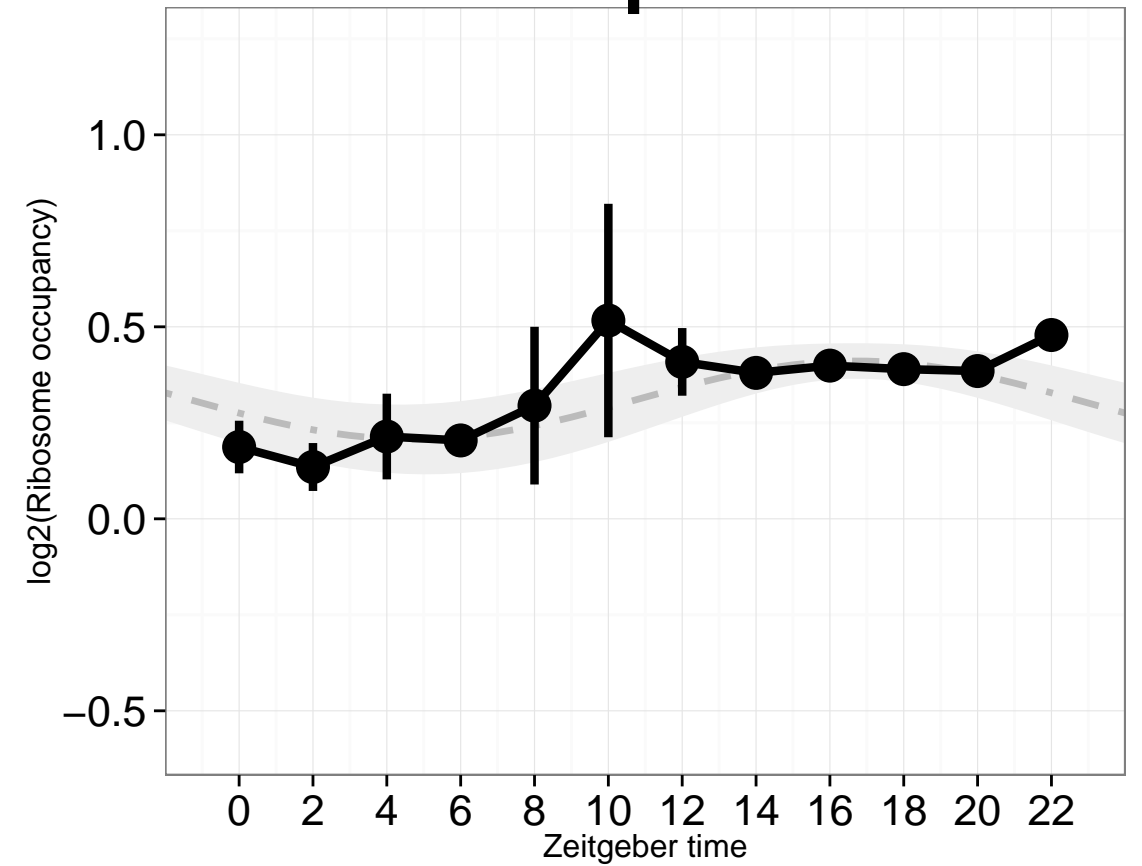

Supplement: SuppDataset_1.zip [file Adipor2_set_A.pdf › Supplemental Dataset 1/A-mRNA_nonrhyth_translation_nonrhyth/Adipor2_set_A.pdf]

## Adk

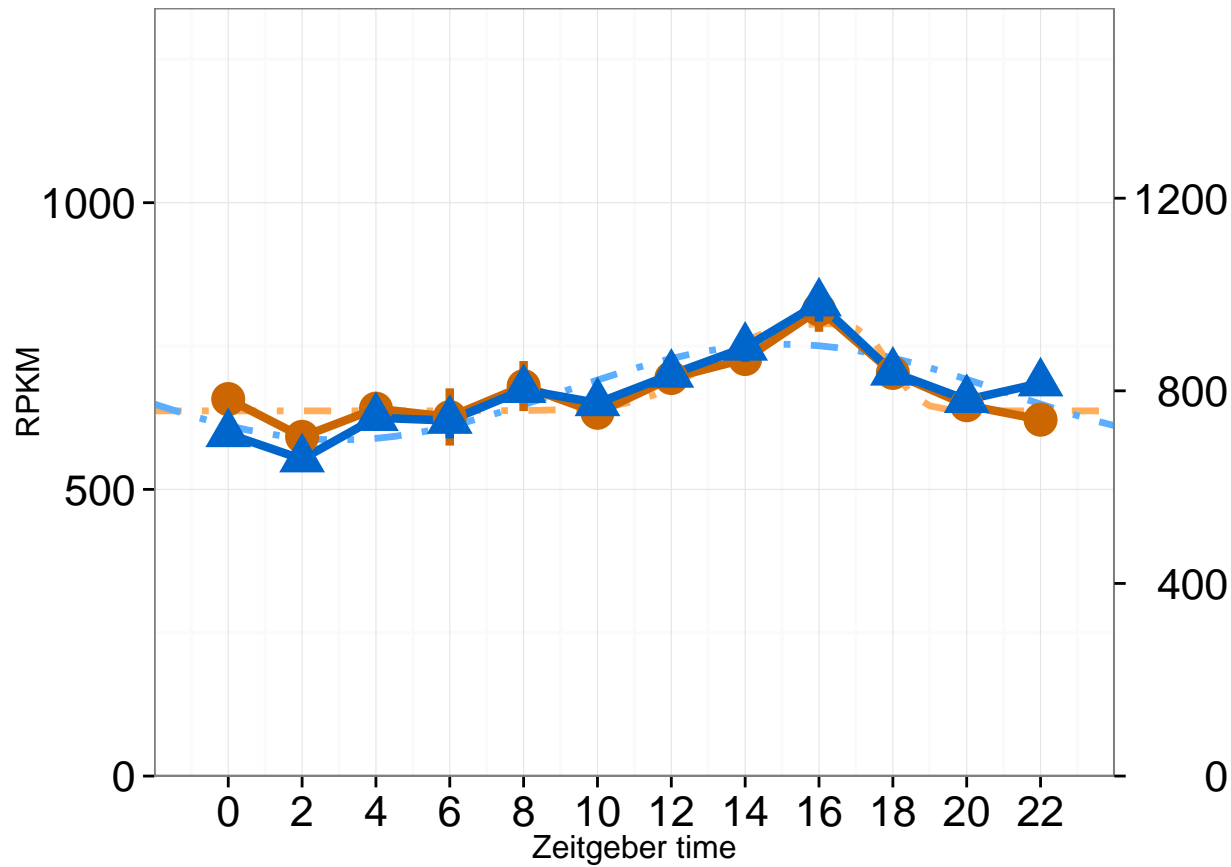

## Adk

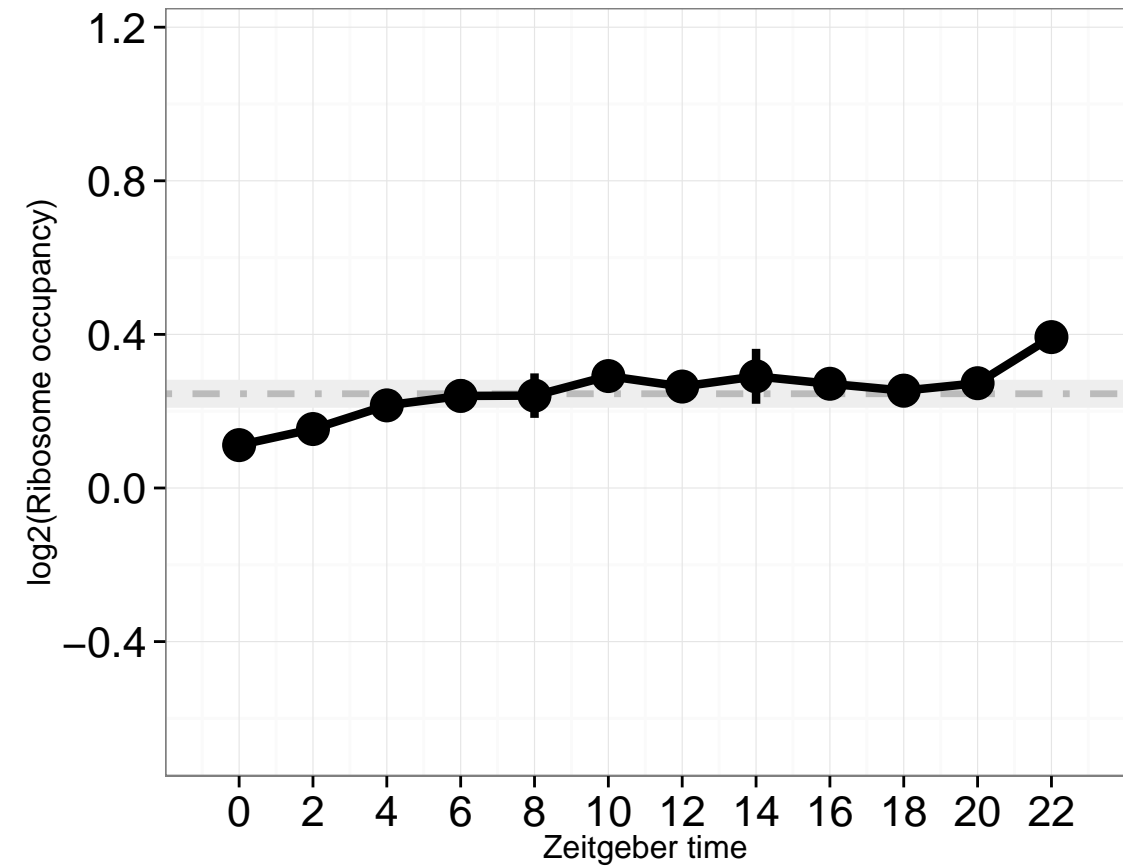

Supplement: SuppDataset_1.zip [file Adk_set_A.pdf › Supplemental Dataset 1/A-mRNA_nonrhyth_translation_nonrhyth/Adk_set_A.pdf]

## Adm

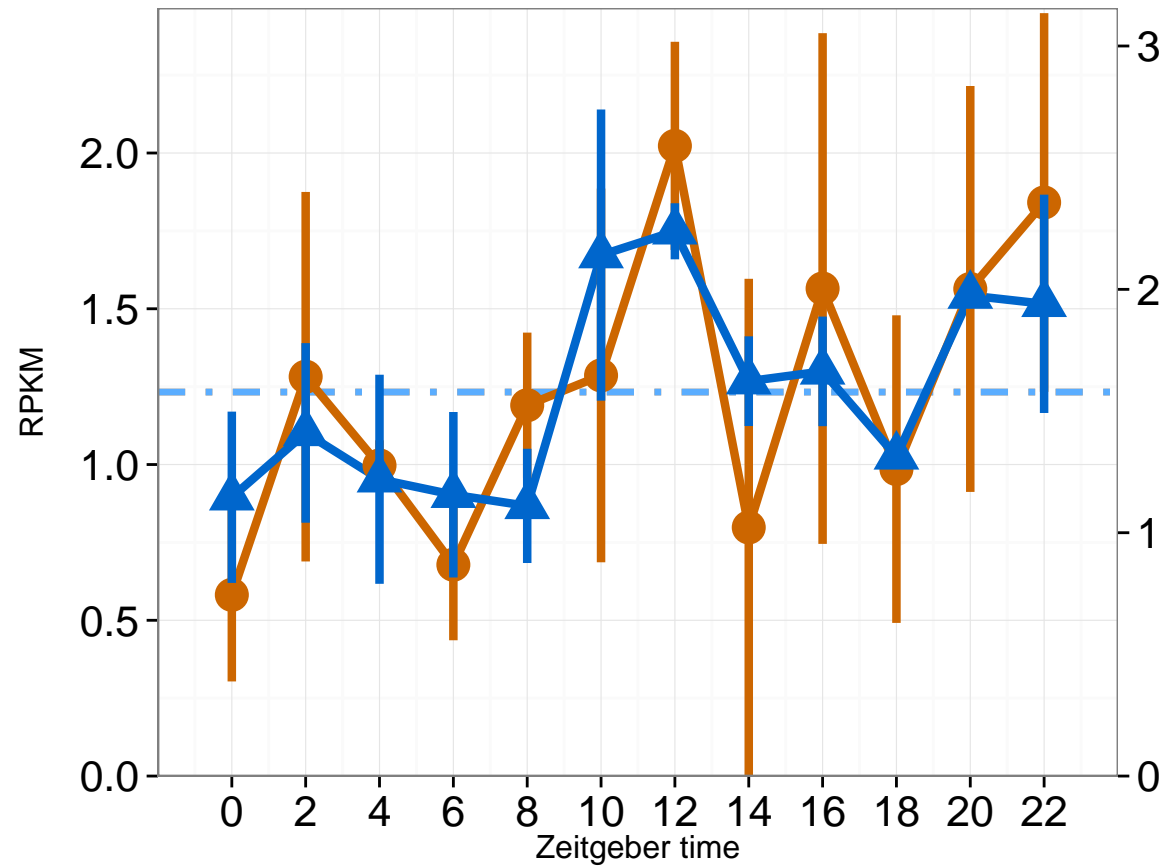

## Adm

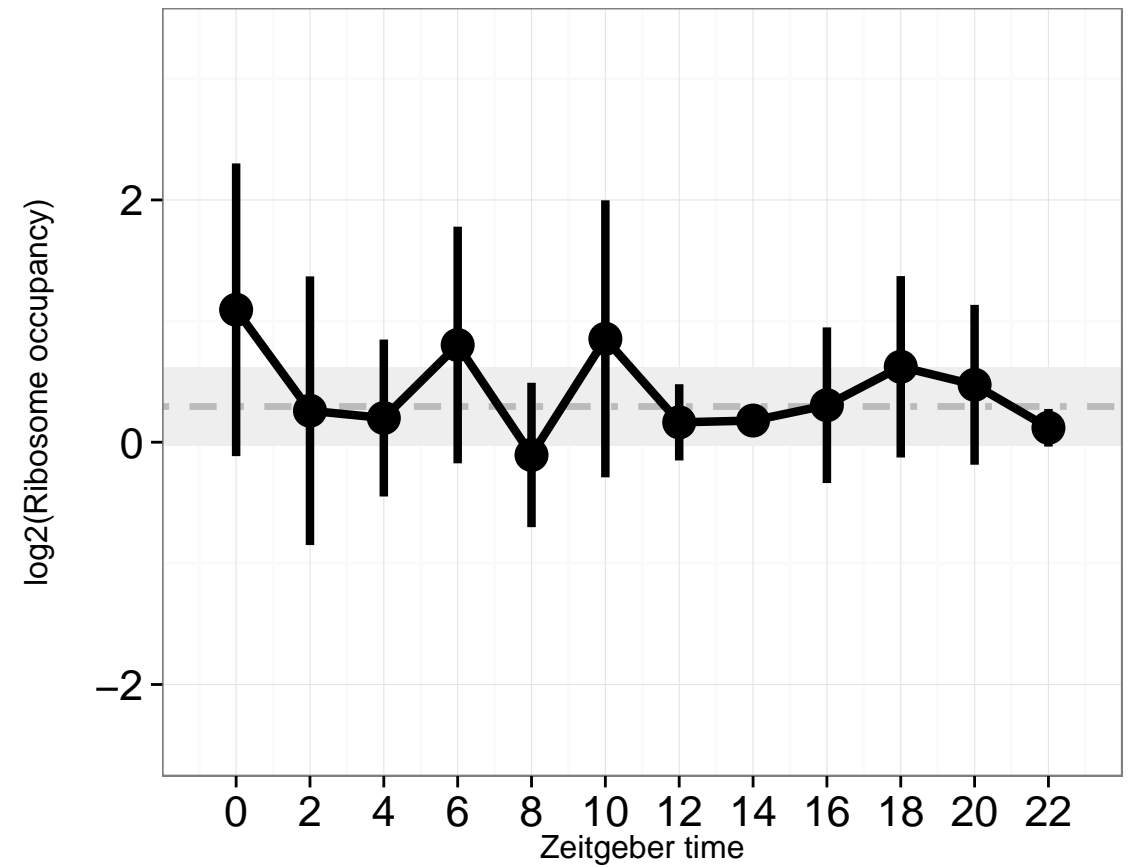

Supplement: SuppDataset_1.zip [file Adm_set_A.pdf › Supplemental Dataset 1/A-mRNA_nonrhyth_translation_nonrhyth/Adm_set_A.pdf]

## Adnp2

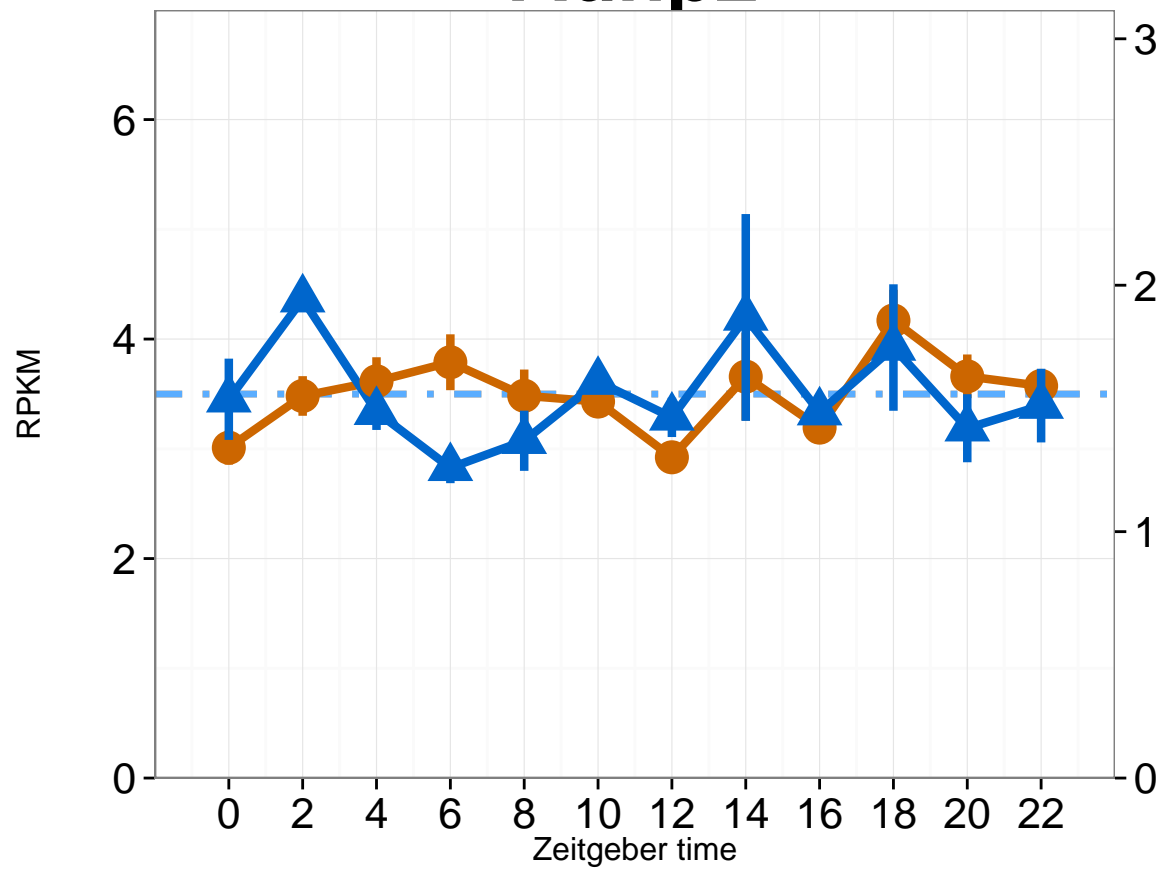

## Adnp2

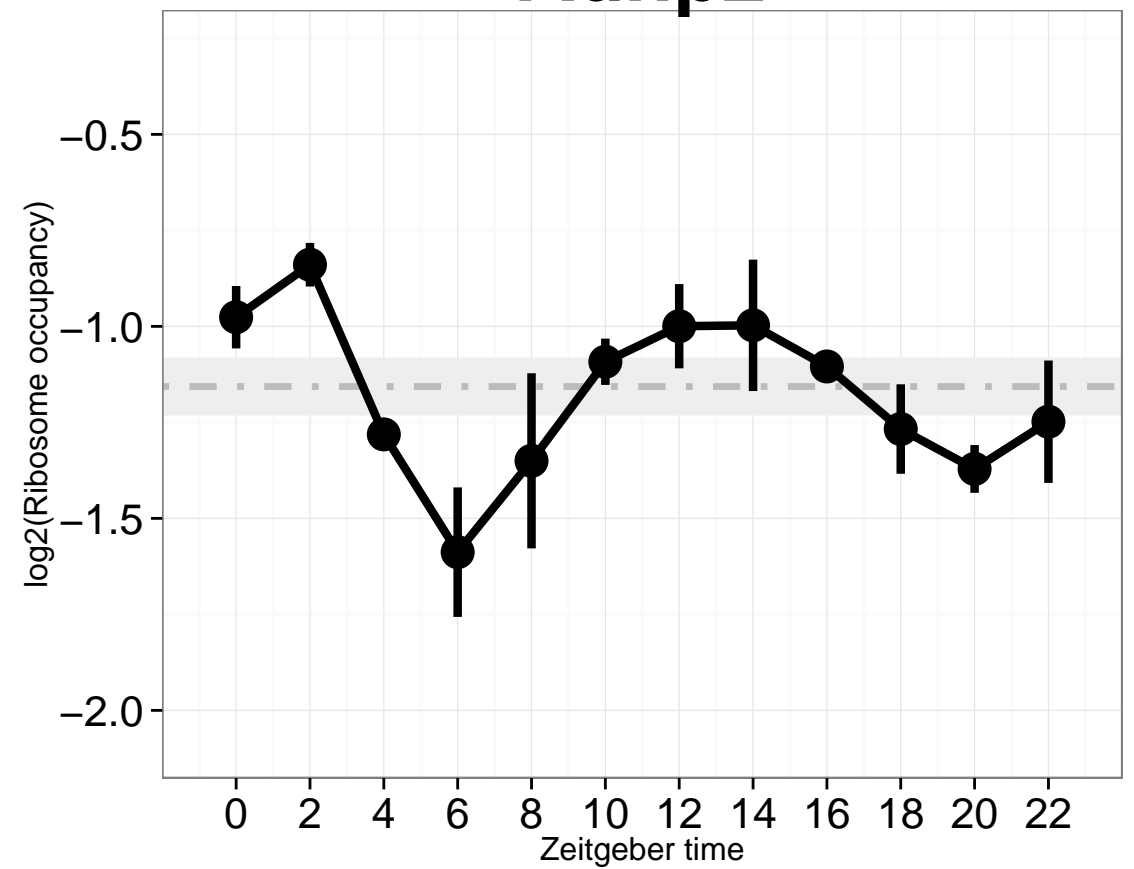

Supplement: SuppDataset_1.zip [file Adnp2_set_A.pdf › Supplemental Dataset 1/A-mRNA_nonrhyth_translation_nonrhyth/Adnp2_set_A.pdf]

**Adnp TR**

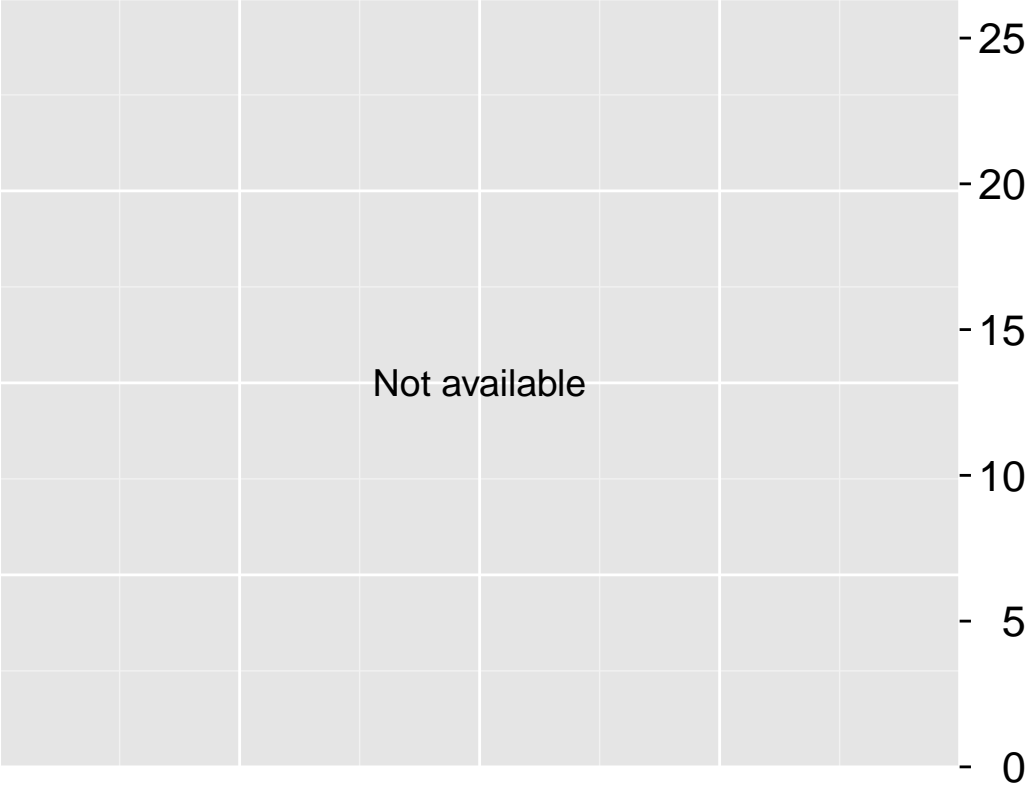

**Adnp log2(Ribosome occupancy)**

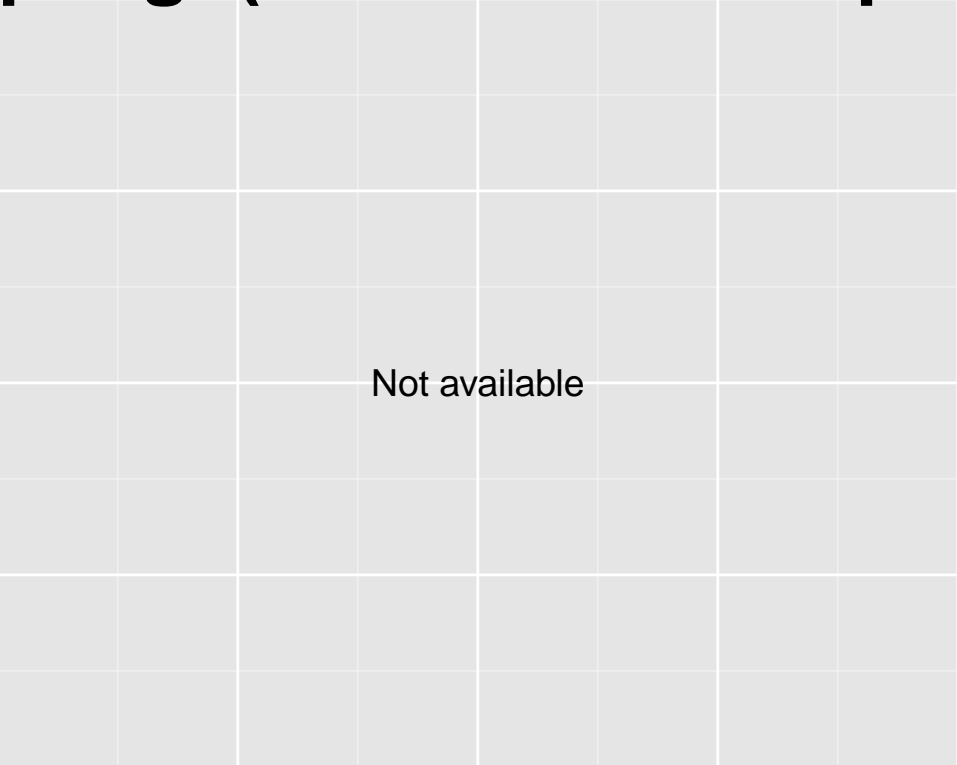

Supplement: SuppDataset_1.zip [file Adnp_set_A.pdf › Supplemental Dataset 1/A-mRNA_nonrhyth_translation_nonrhyth/Adnp_set_A.pdf]

## Ado

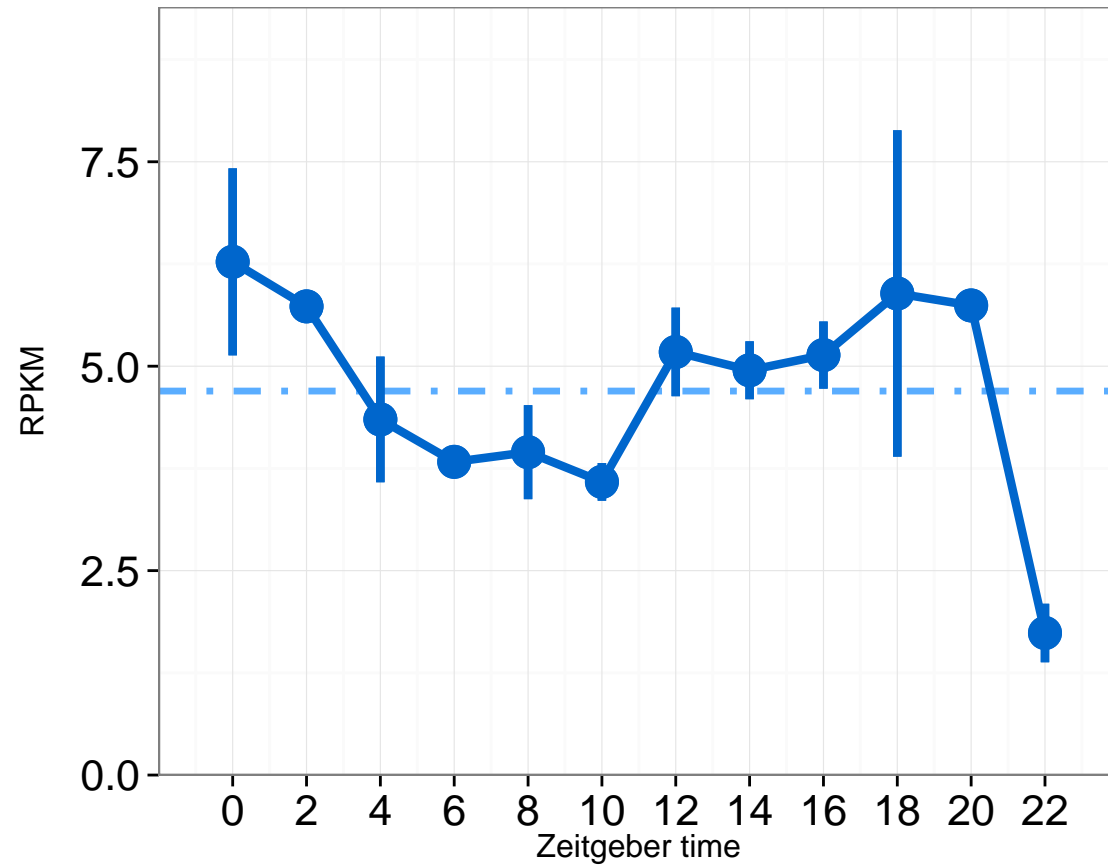

## Ado log2(Ribosome occupancy)

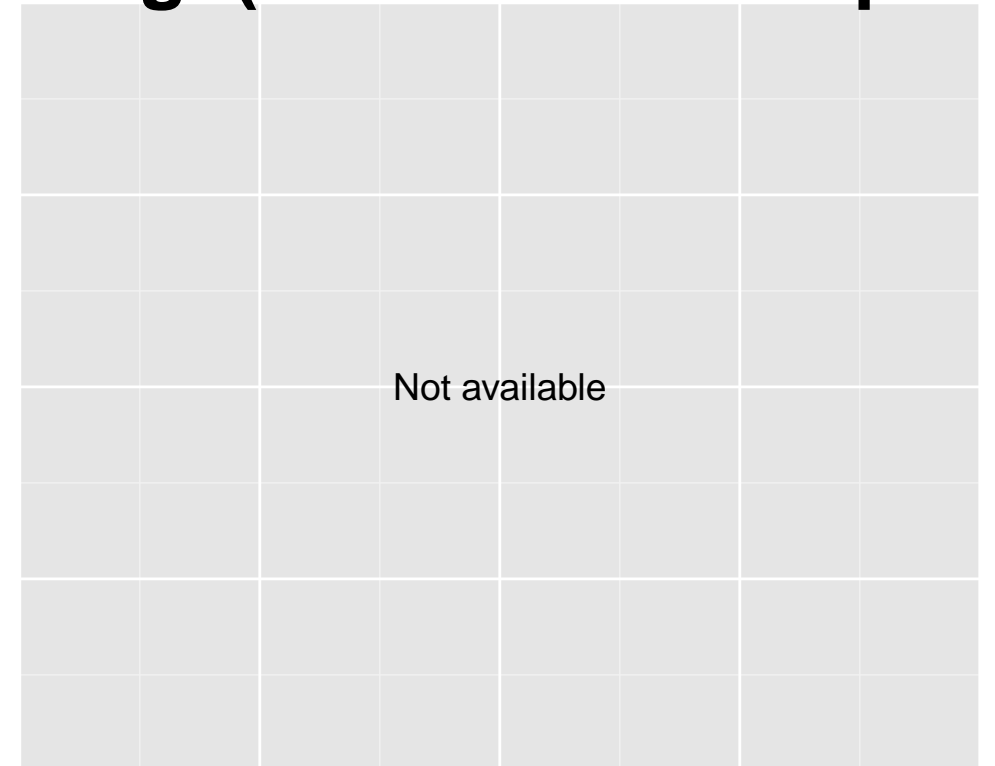

Supplement: SuppDataset_1.zip [file Ado_set_A.pdf › Supplemental Dataset 1/A-mRNA_nonrhyth_translation_nonrhyth/Ado_set_A.pdf]

## Adpgk

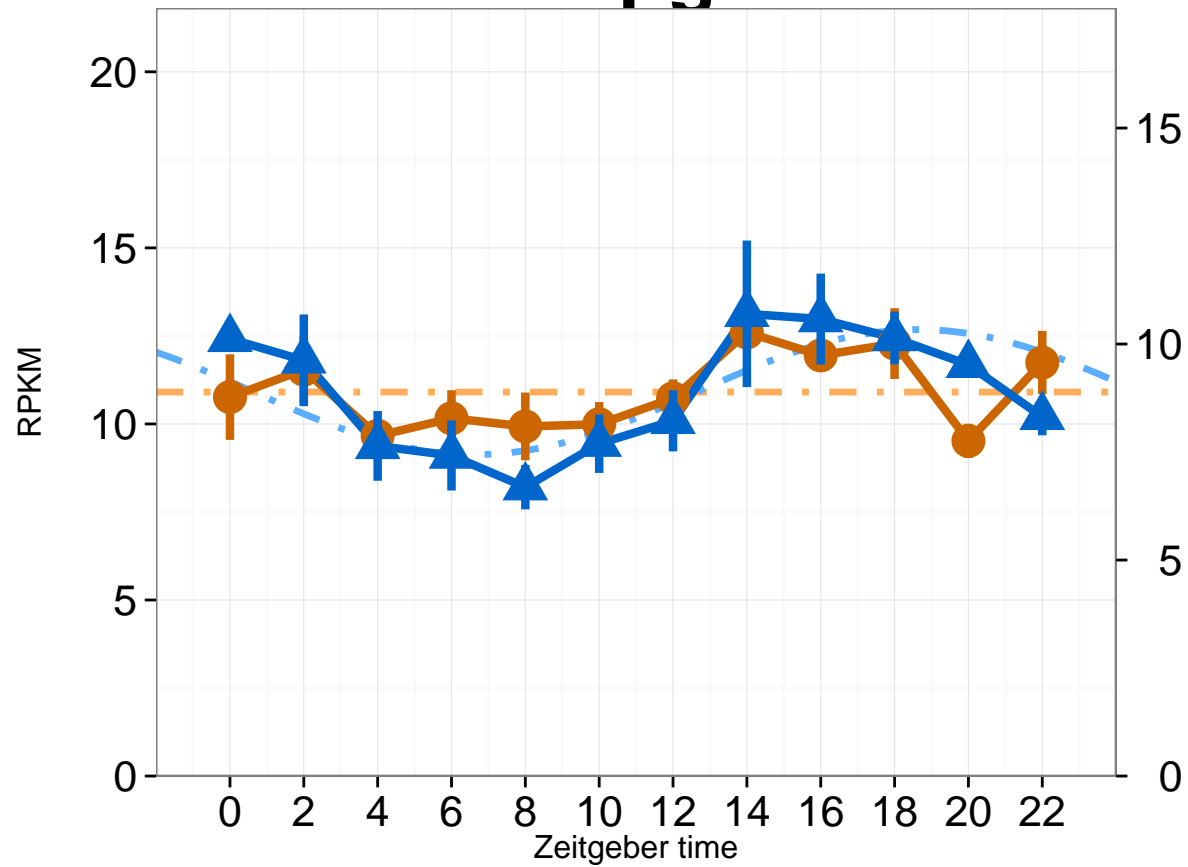

## Adpgk

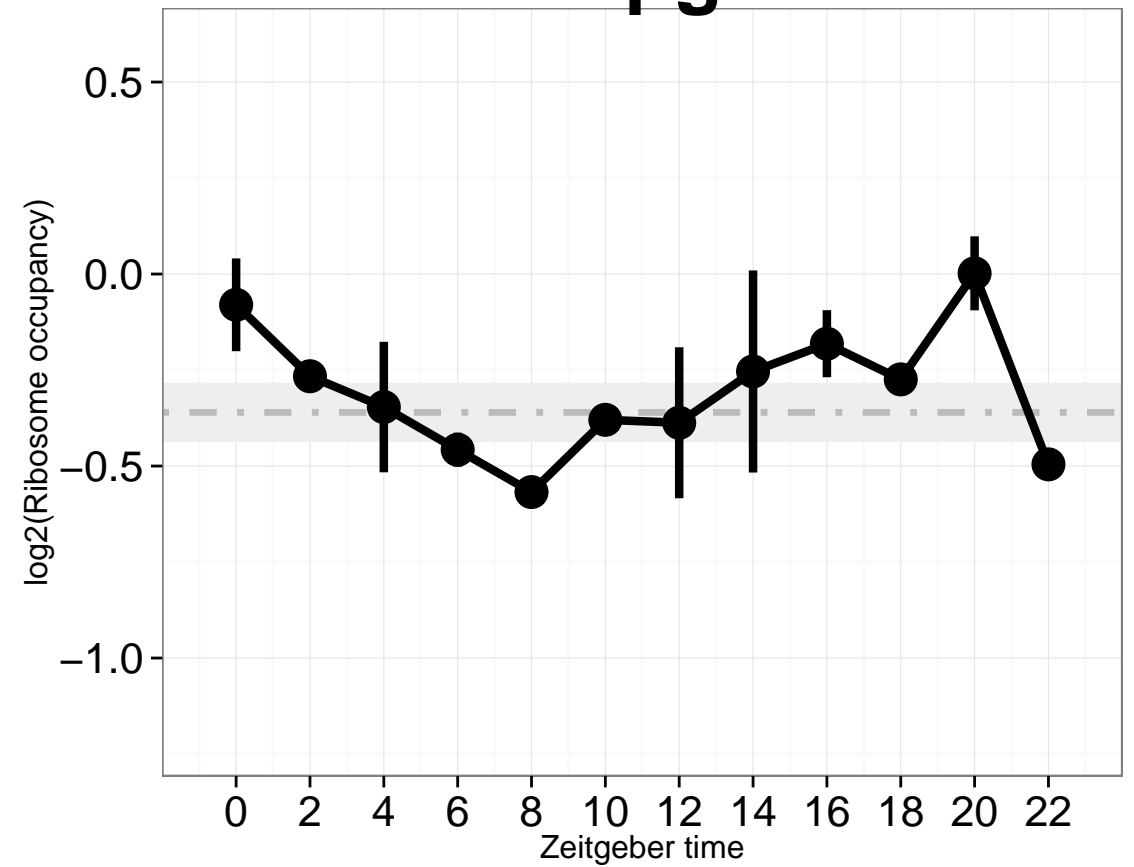

Supplement: SuppDataset_1.zip [file Adpgk_set_A.pdf › Supplemental Dataset 1/A-mRNA_nonrhyth_translation_nonrhyth/Adpgk_set_A.pdf]

## Adprhl2

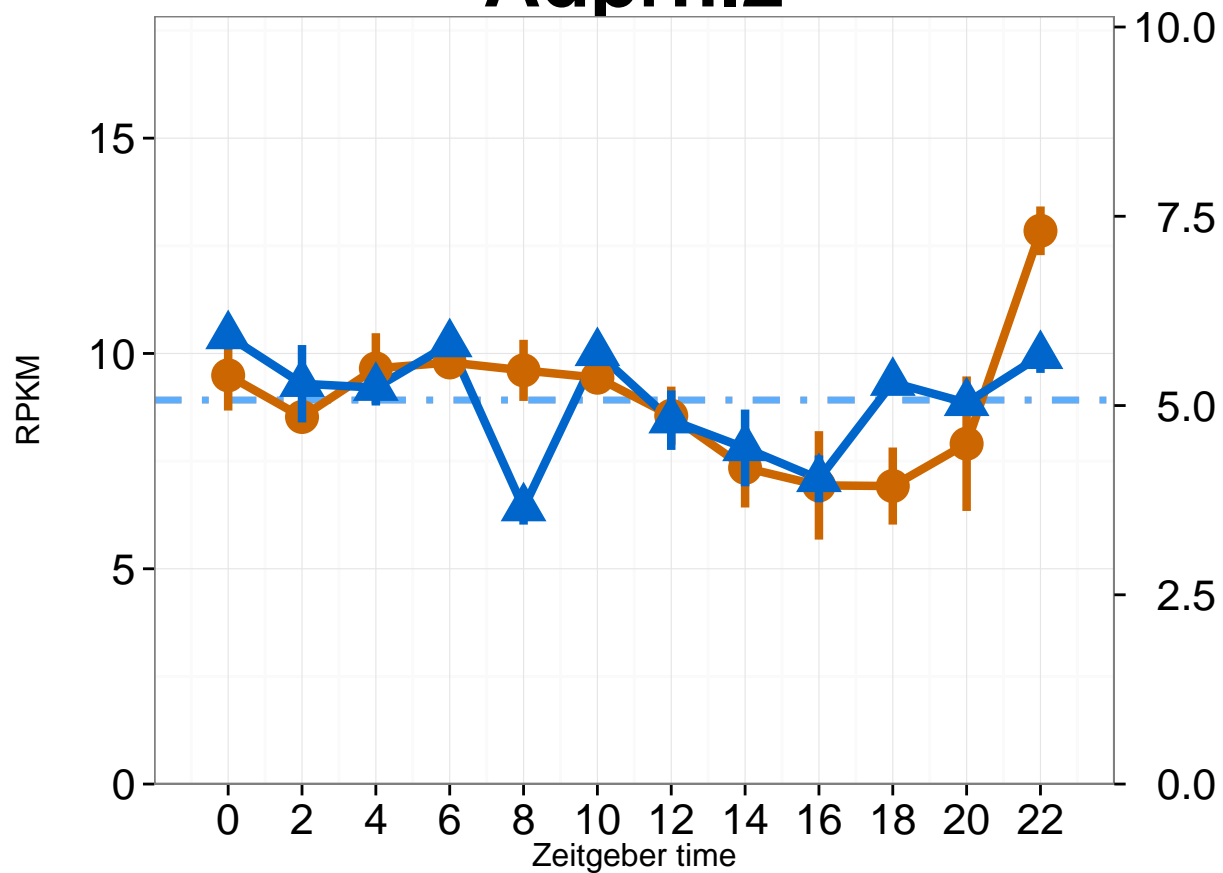

## Adprhl2

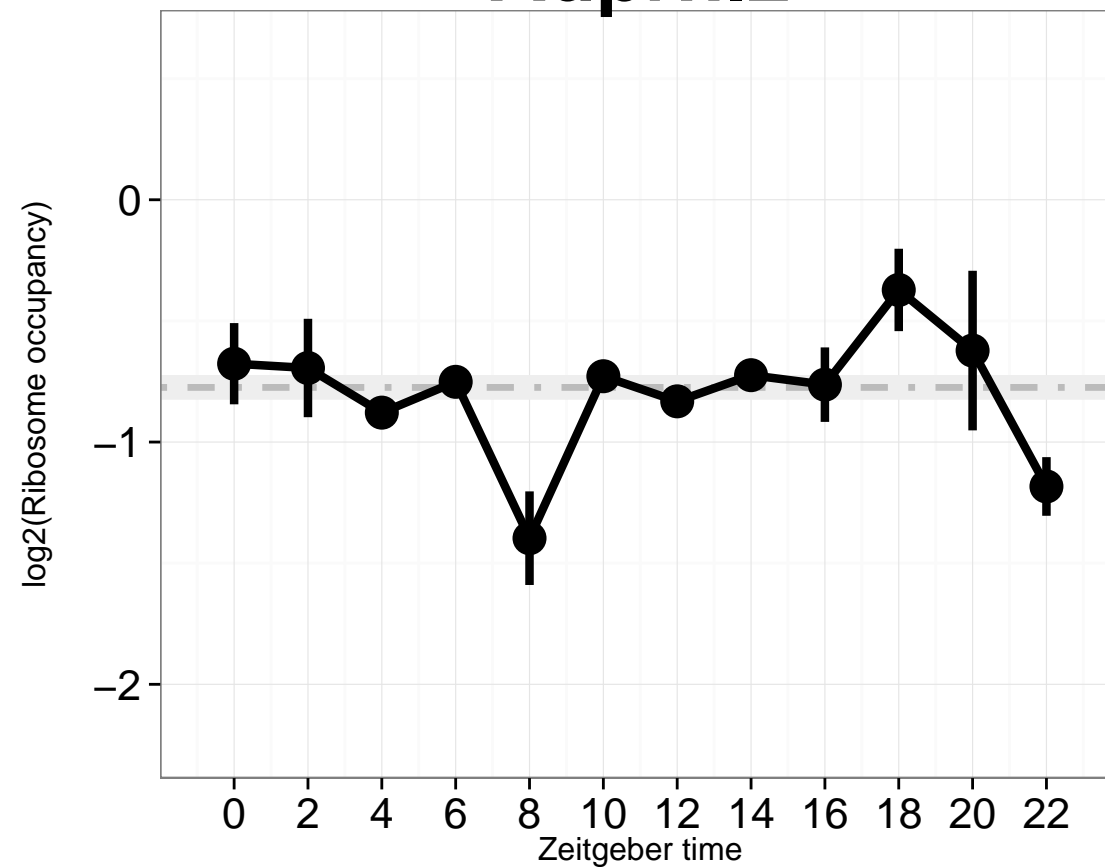

Supplement: SuppDataset_1.zip [file Adprhl2_set_A.pdf › Supplemental Dataset 1/A-mRNA_nonrhyth_translation_nonrhyth/Adprhl2_set_A.pdf]

# Adprm

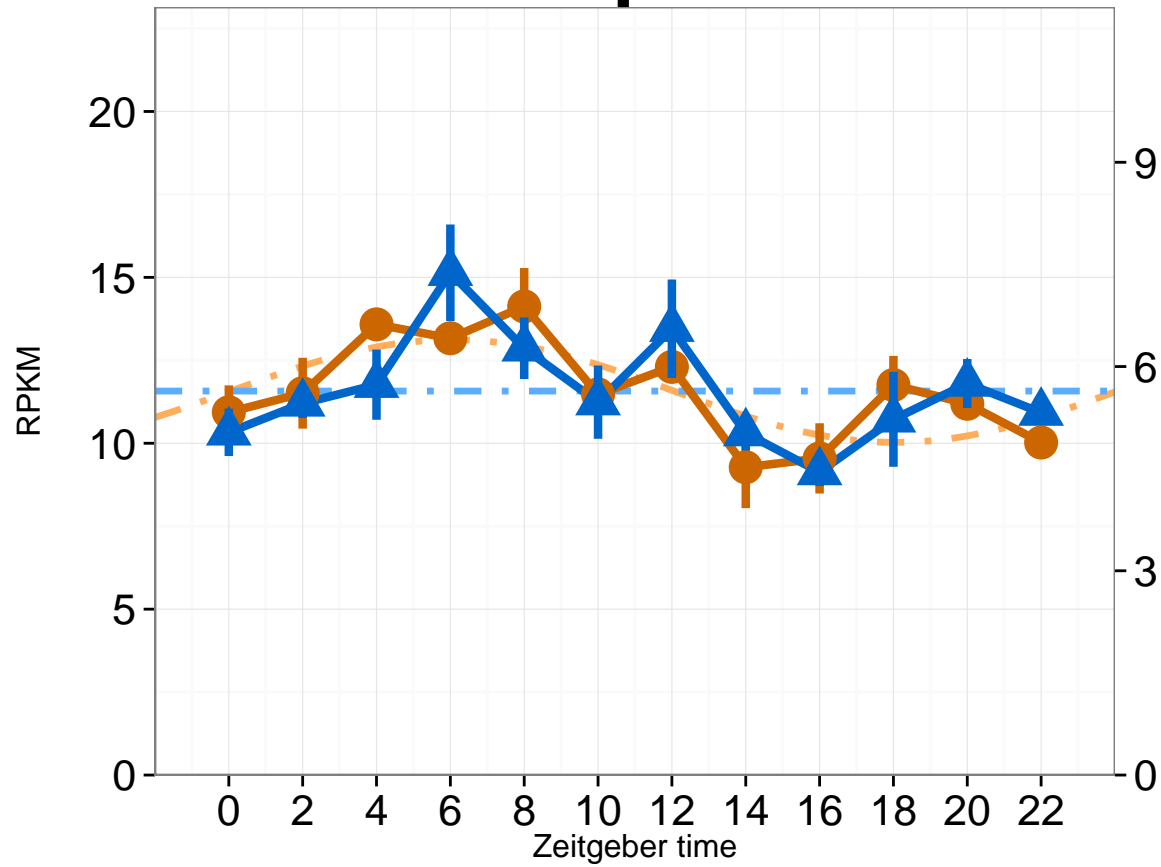

# Adprm

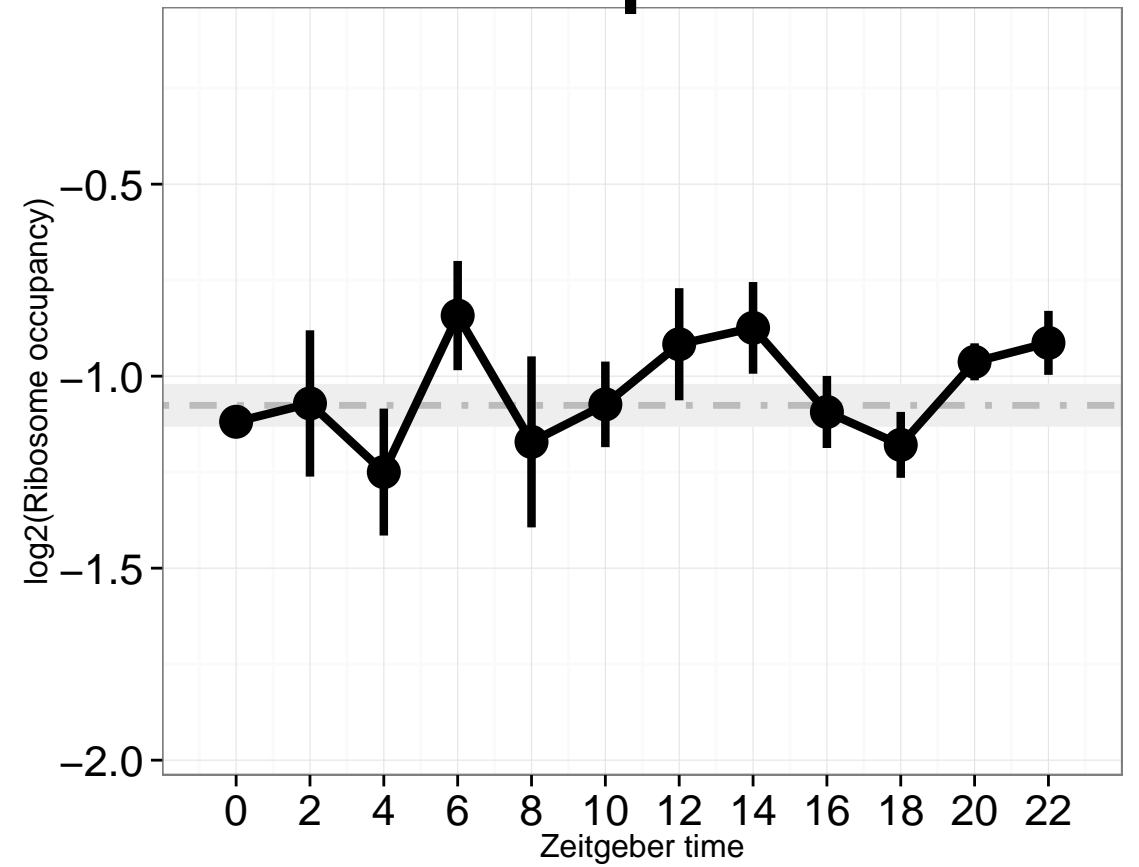

Supplement: SuppDataset_1.zip [file Adprm_set_A.pdf › Supplemental Dataset 1/A-mRNA_nonrhyth_translation_nonrhyth/Adprm_set_A.pdf]

# Adra1a

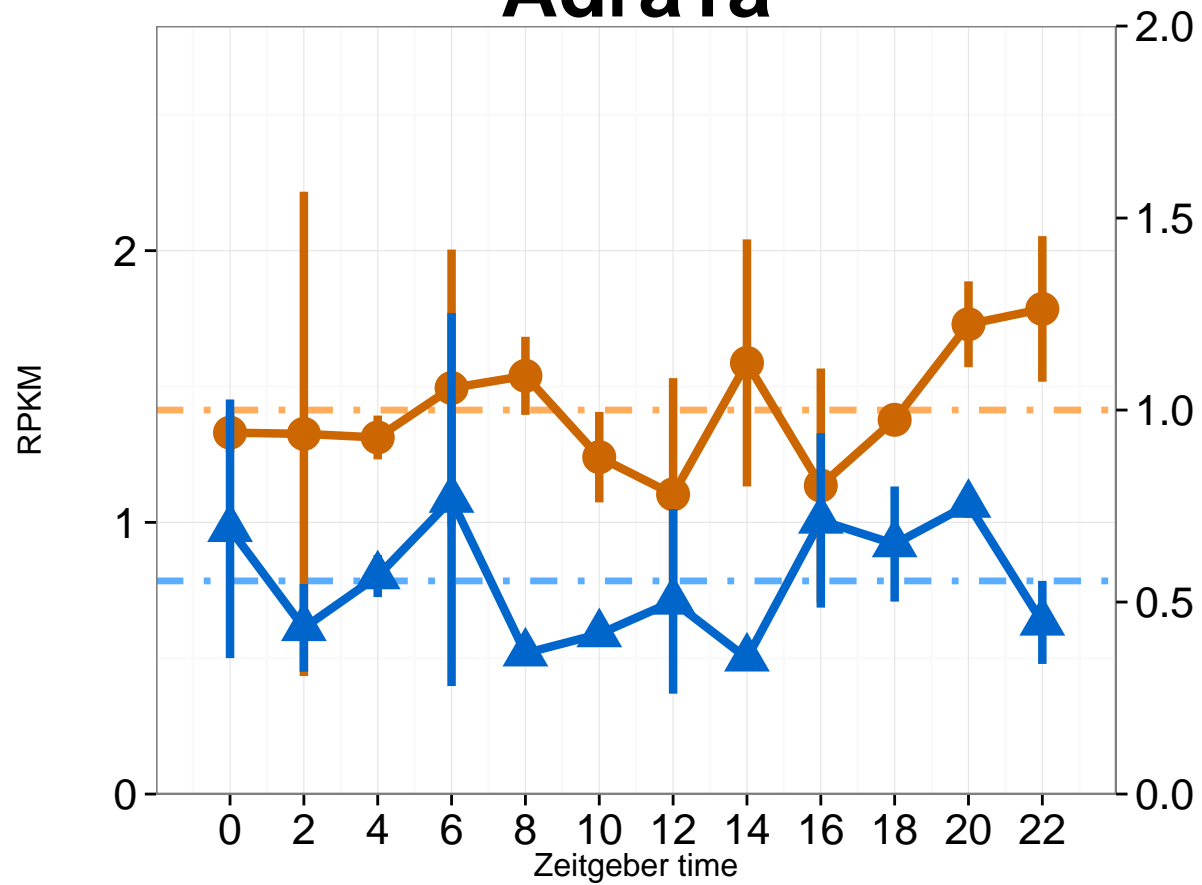

# Adra1a

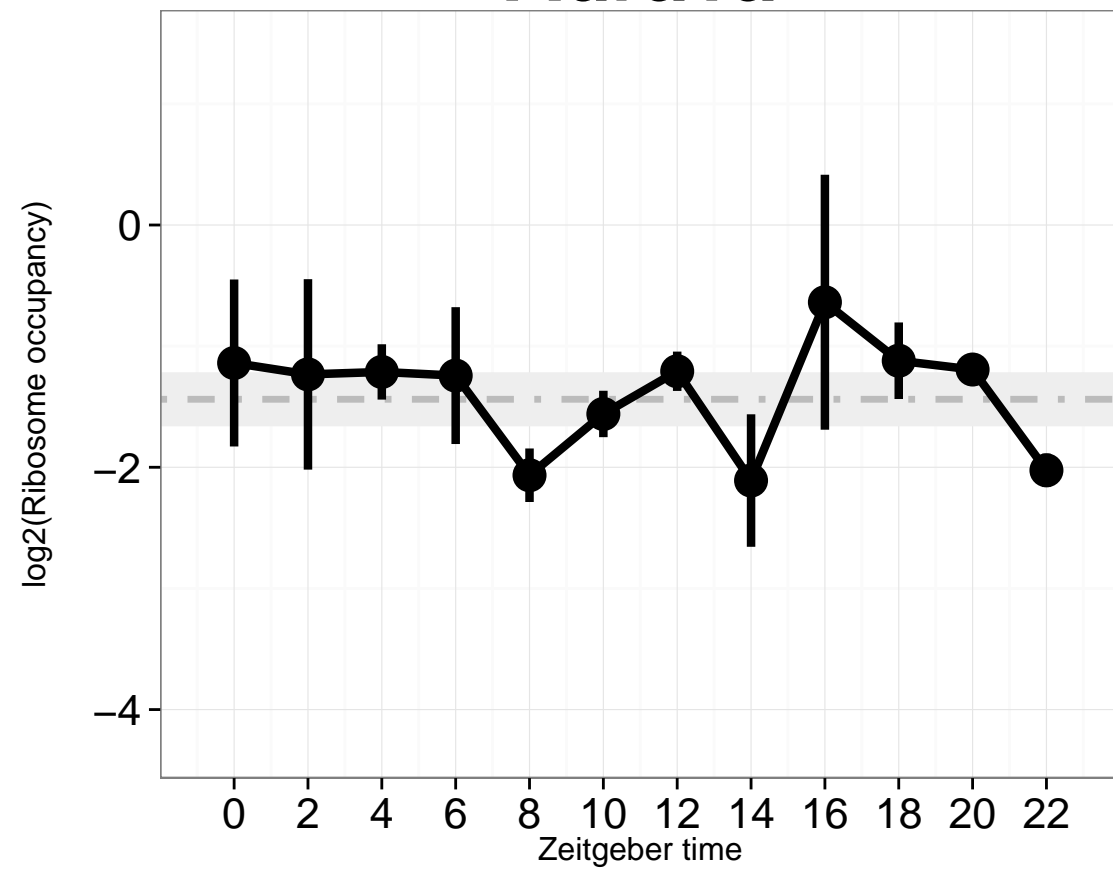

Supplement: SuppDataset_1.zip [file Adra1a_set_A.pdf › Supplemental Dataset 1/A-mRNA_nonrhyth_translation_nonrhyth/Adra1a_set_A.pdf]

## Adrb2

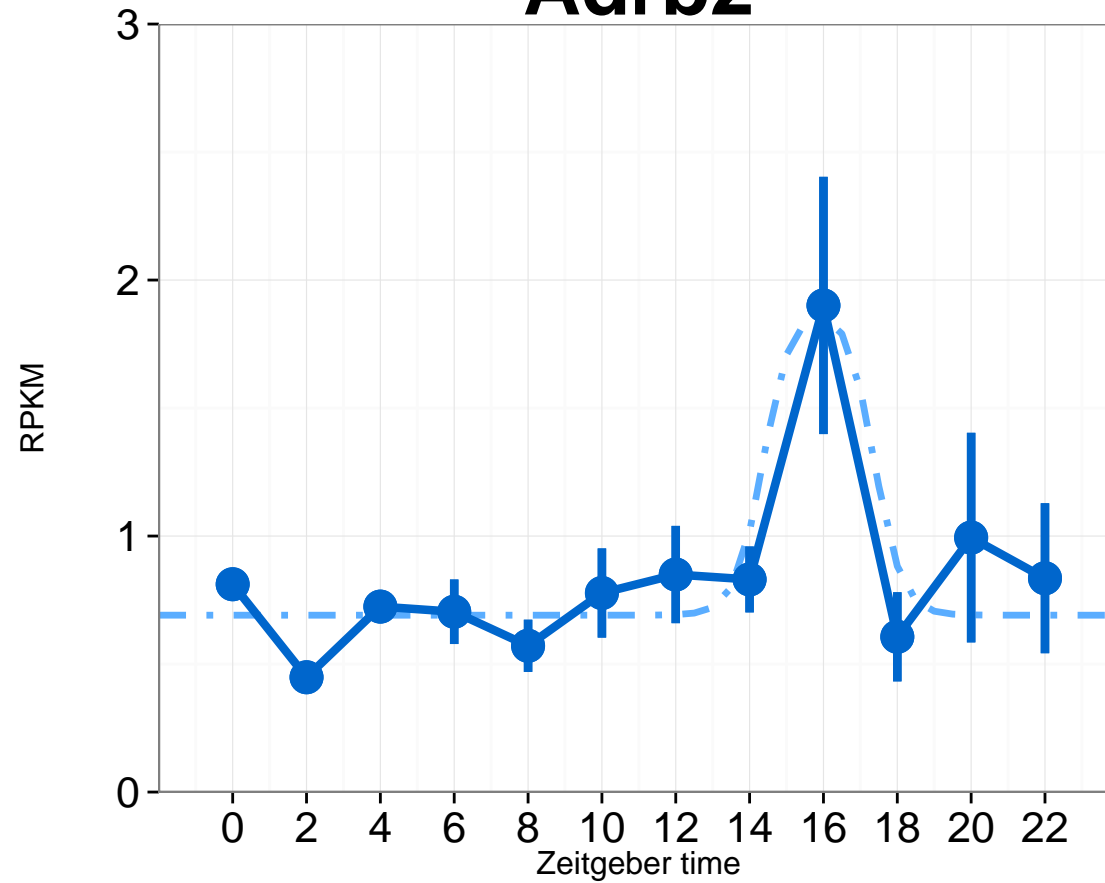

## Adrb2 log2(Ribosome occupancy

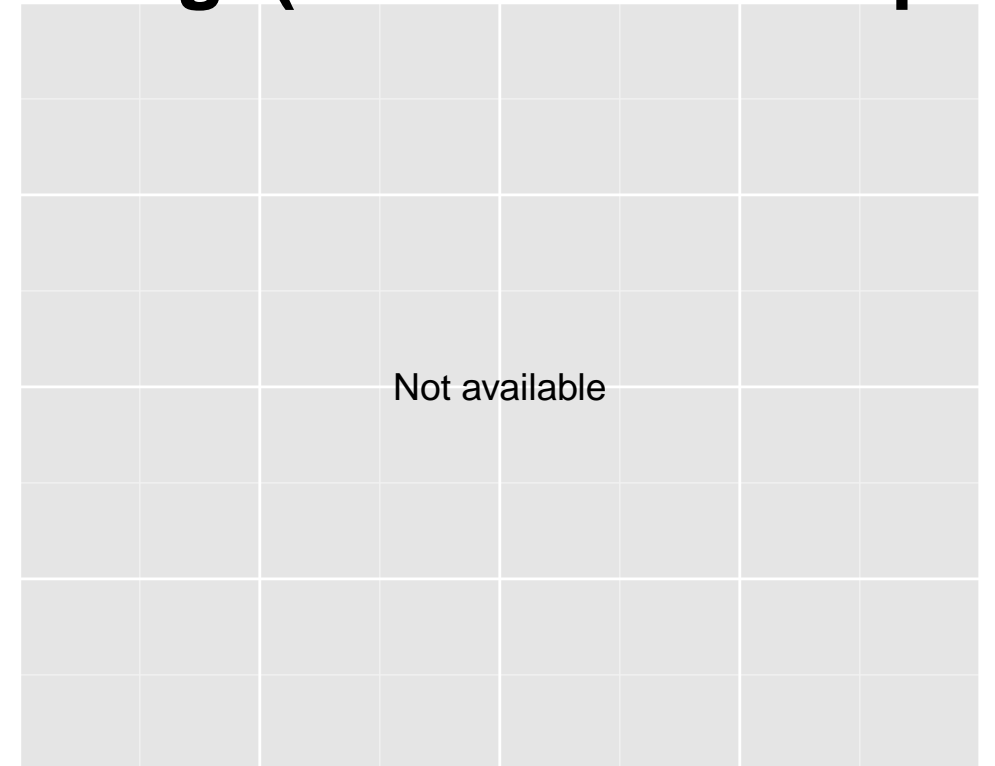

Supplement: SuppDataset_1.zip [file Adrb2_set_A.pdf › Supplemental Dataset 1/A-mRNA_nonrhyth_translation_nonrhyth/Adrb2_set_A.pdf]

## Adrb3

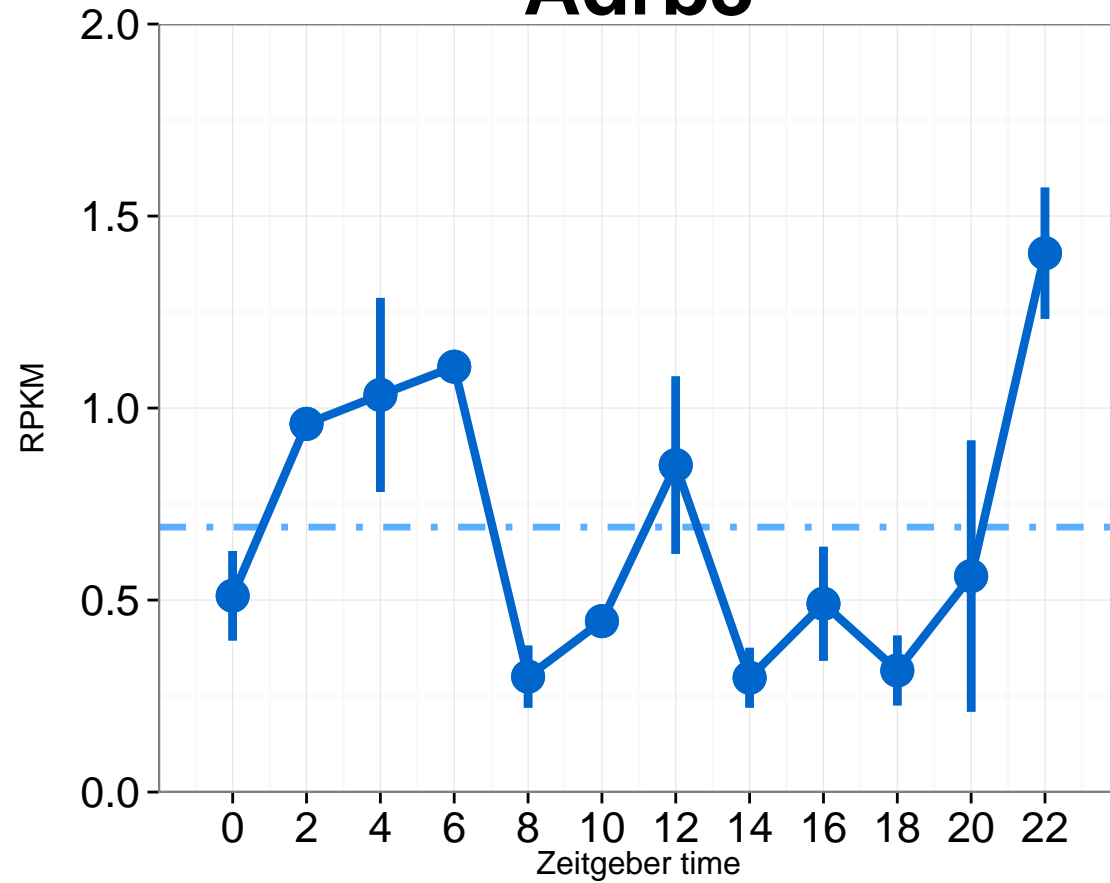

## Adrb3 log2(Ribosome occupancy

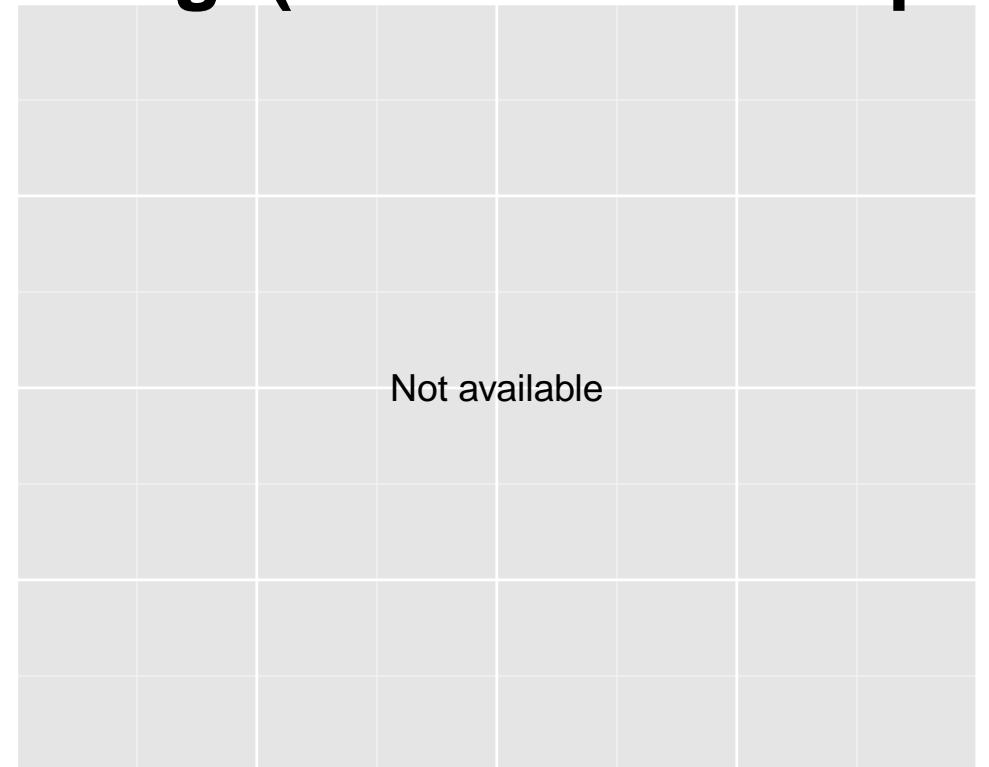

Supplement: SuppDataset_1.zip [file Adrb3_set_A.pdf › Supplemental Dataset 1/A-mRNA_nonrhyth_translation_nonrhyth/Adrb3_set_A.pdf]

## Adrbk1

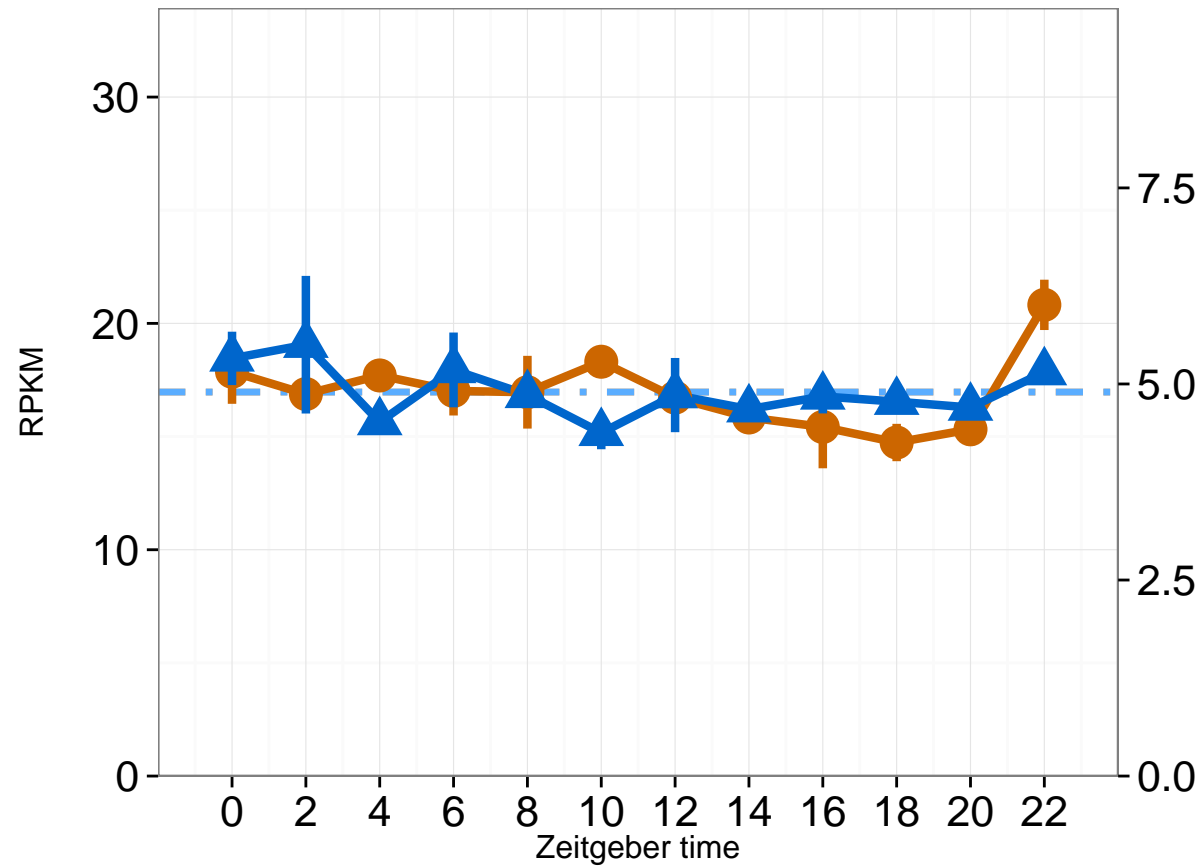

## Adrbk1

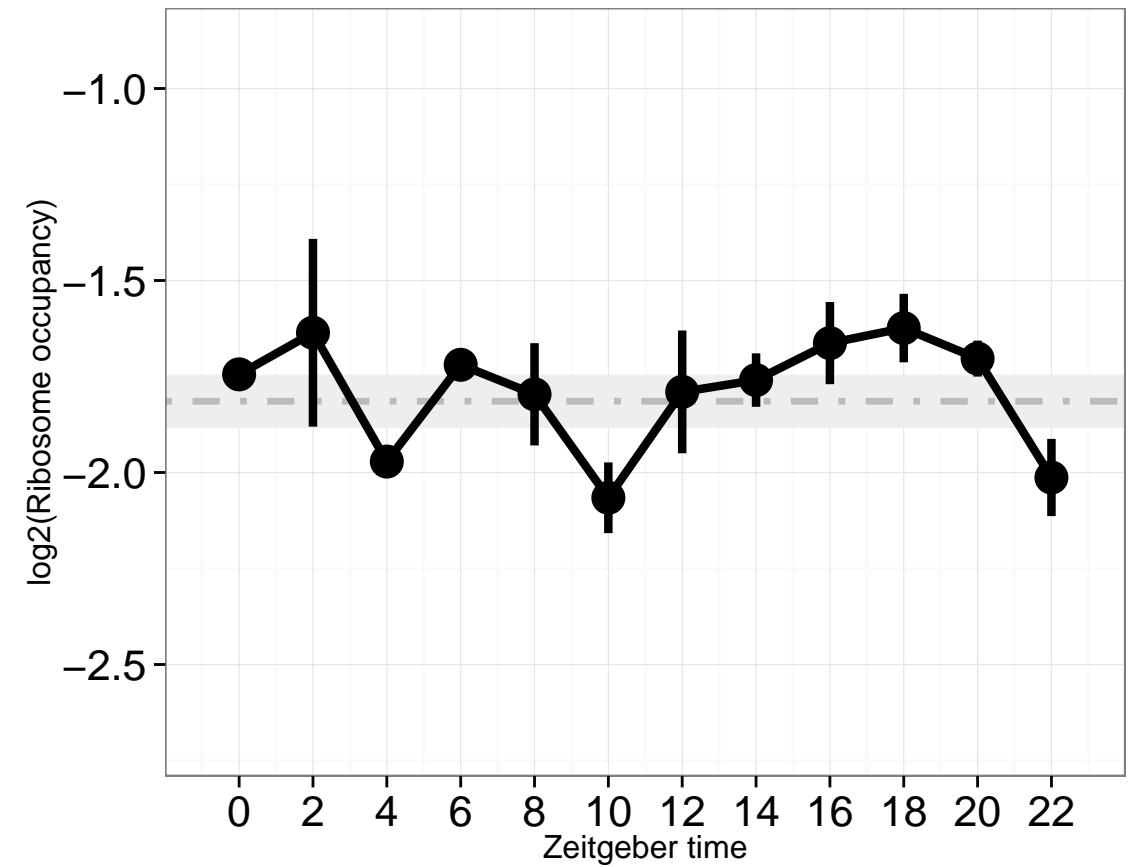

Supplement: SuppDataset_1.zip [file Adrbk1_set_A.pdf › Supplemental Dataset 1/A-mRNA_nonrhyth_translation_nonrhyth/Adrbk1_set_A.pdf]

# Adrbk2

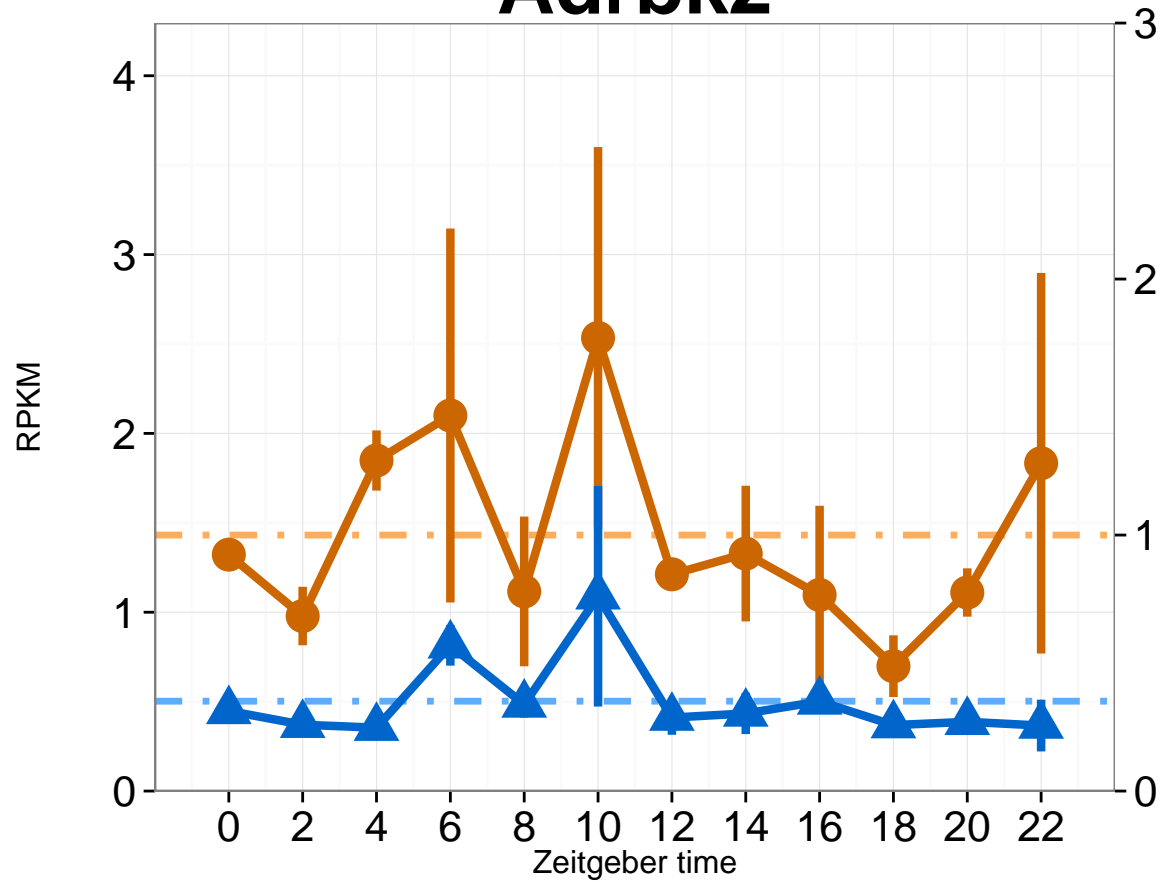

# Adrbk2

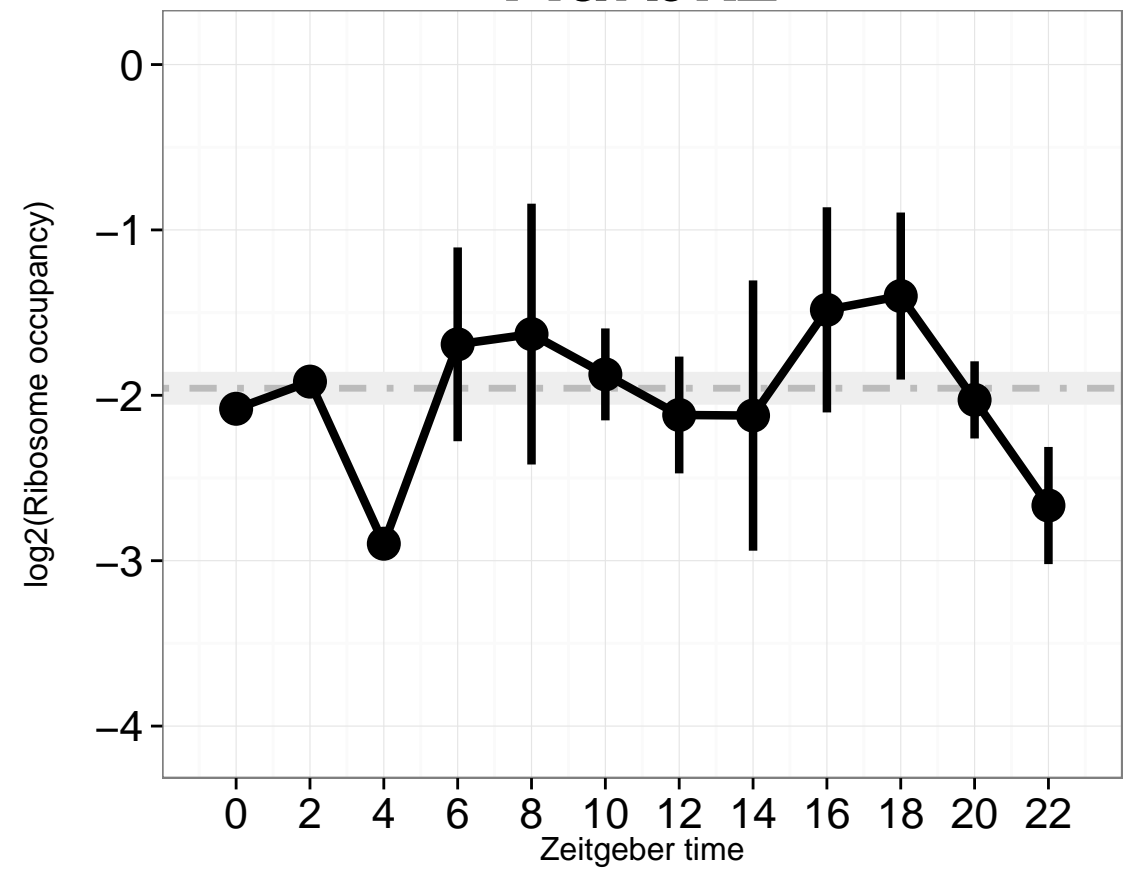

Supplement: SuppDataset_1.zip [file Adrbk2_set_A.pdf › Supplemental Dataset 1/A-mRNA_nonrhyth_translation_nonrhyth/Adrbk2_set_A.pdf]

# Adrm1

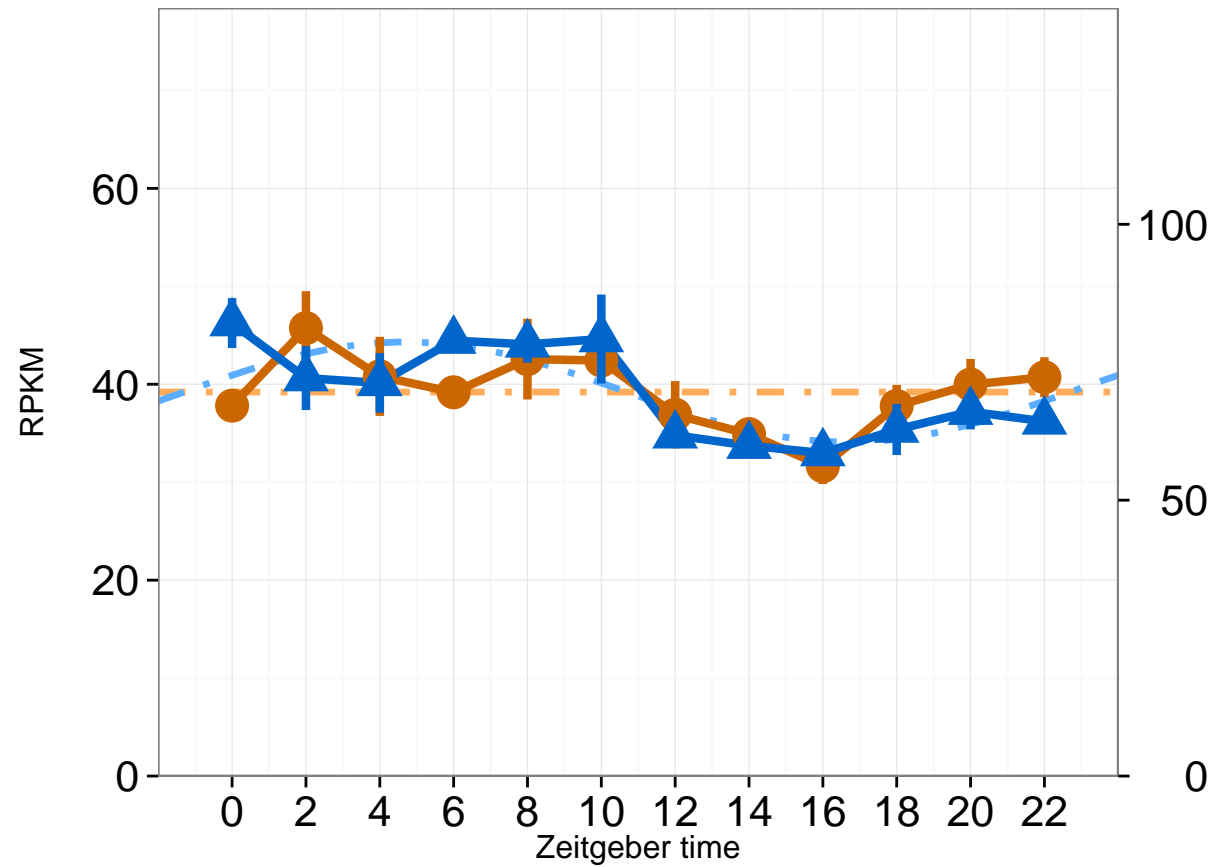

# Adrm1

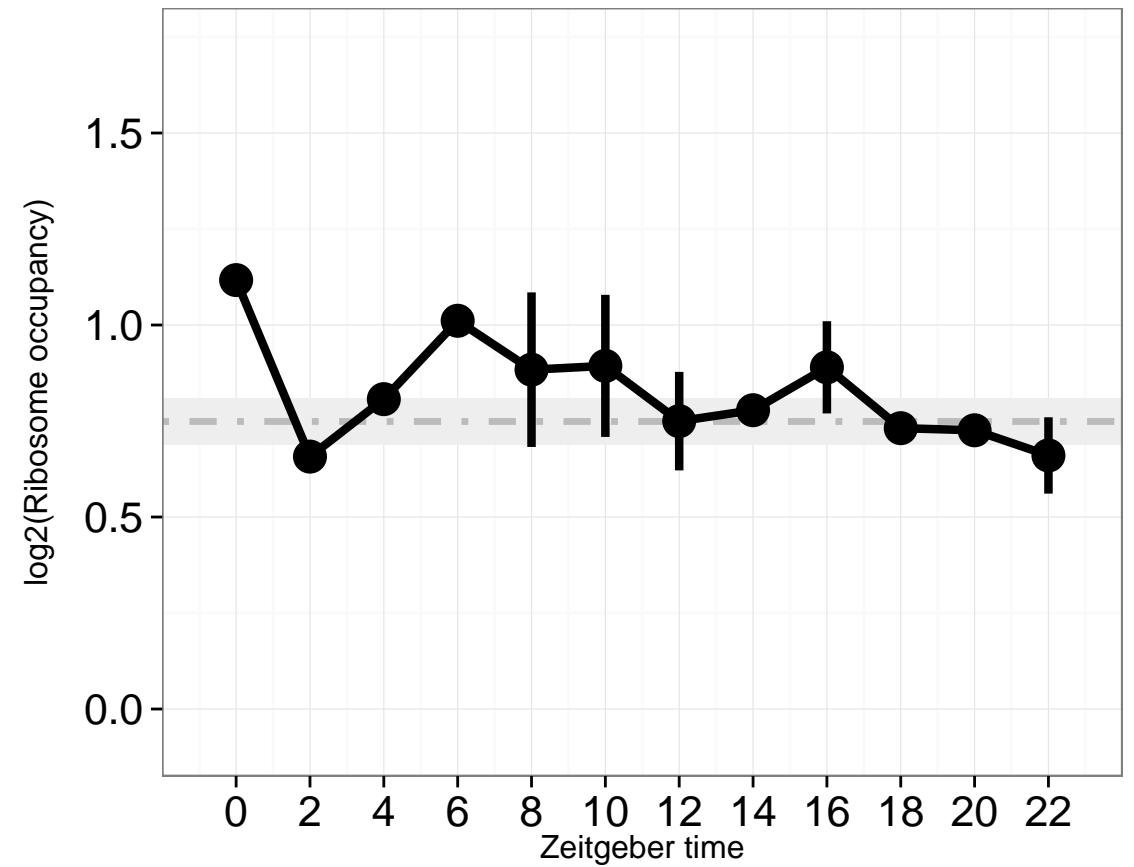

Supplement: SuppDataset_1.zip [file Adrm1_set_A.pdf › Supplemental Dataset 1/A-mRNA_nonrhyth_translation_nonrhyth/Adrm1_set_A.pdf]

## Adsl

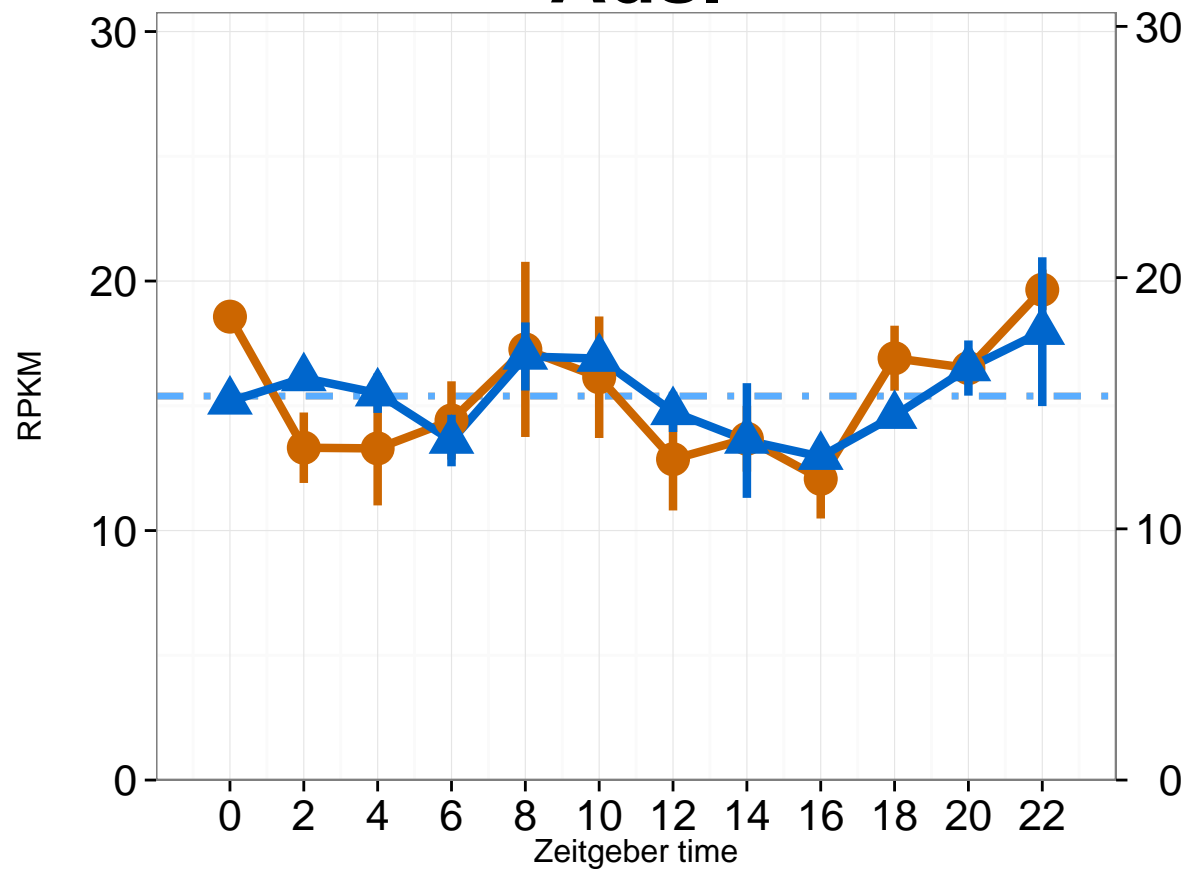

## Adsl

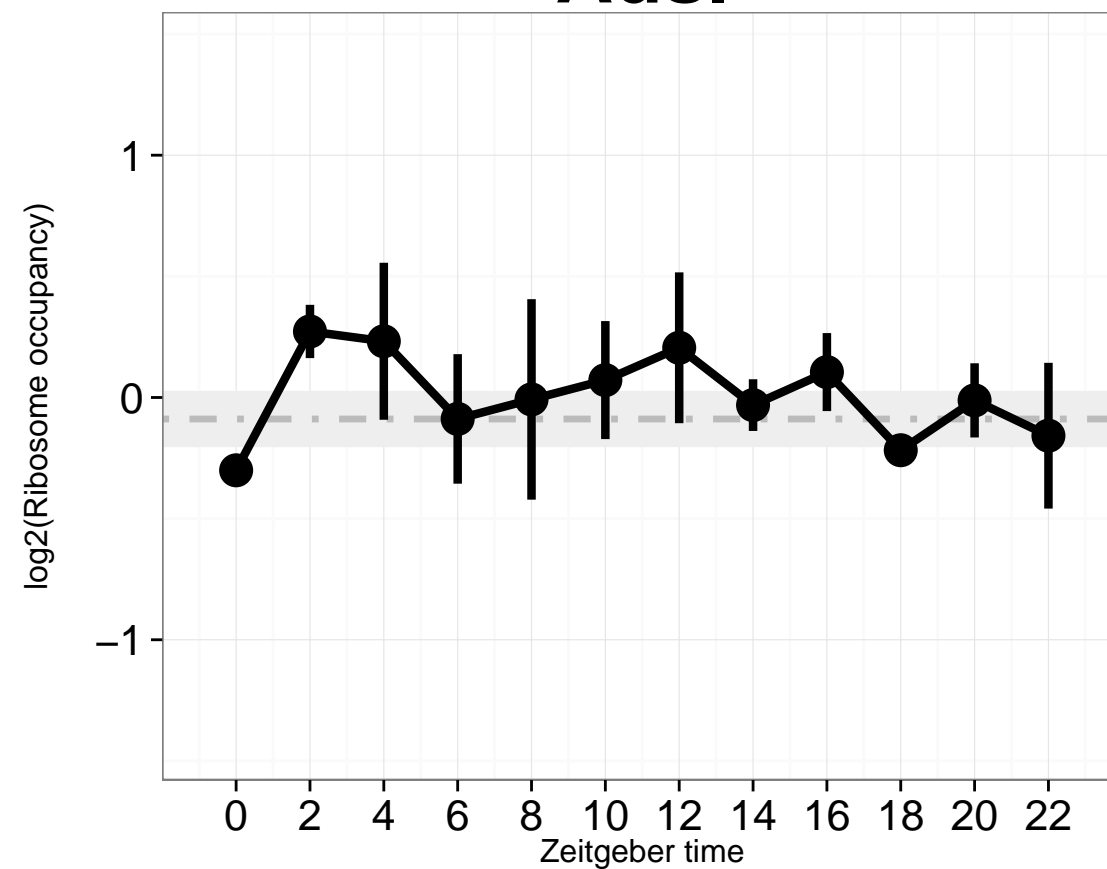

Supplement: SuppDataset_1.zip [file Adsl_set_A.pdf › Supplemental Dataset 1/A-mRNA_nonrhyth_translation_nonrhyth/Adsl_set_A.pdf]

## Adss

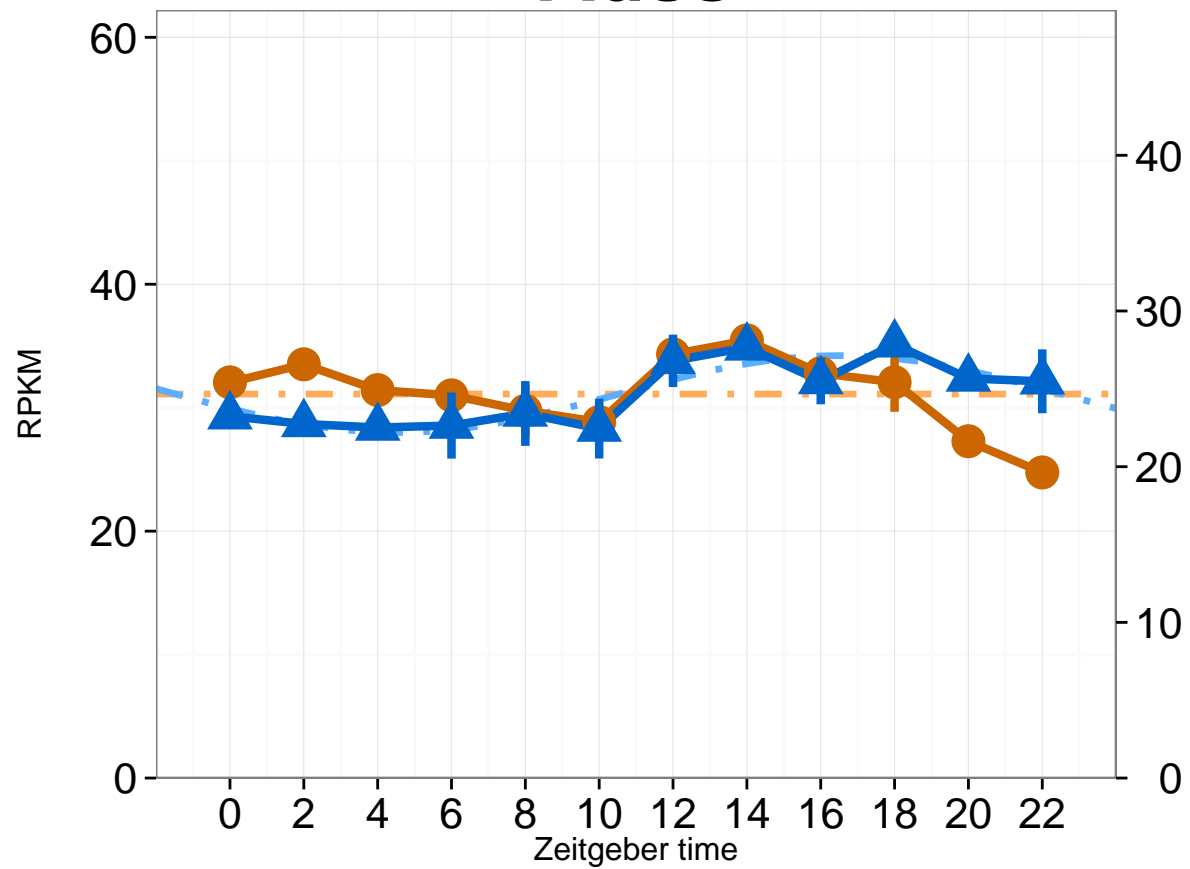

## Adss

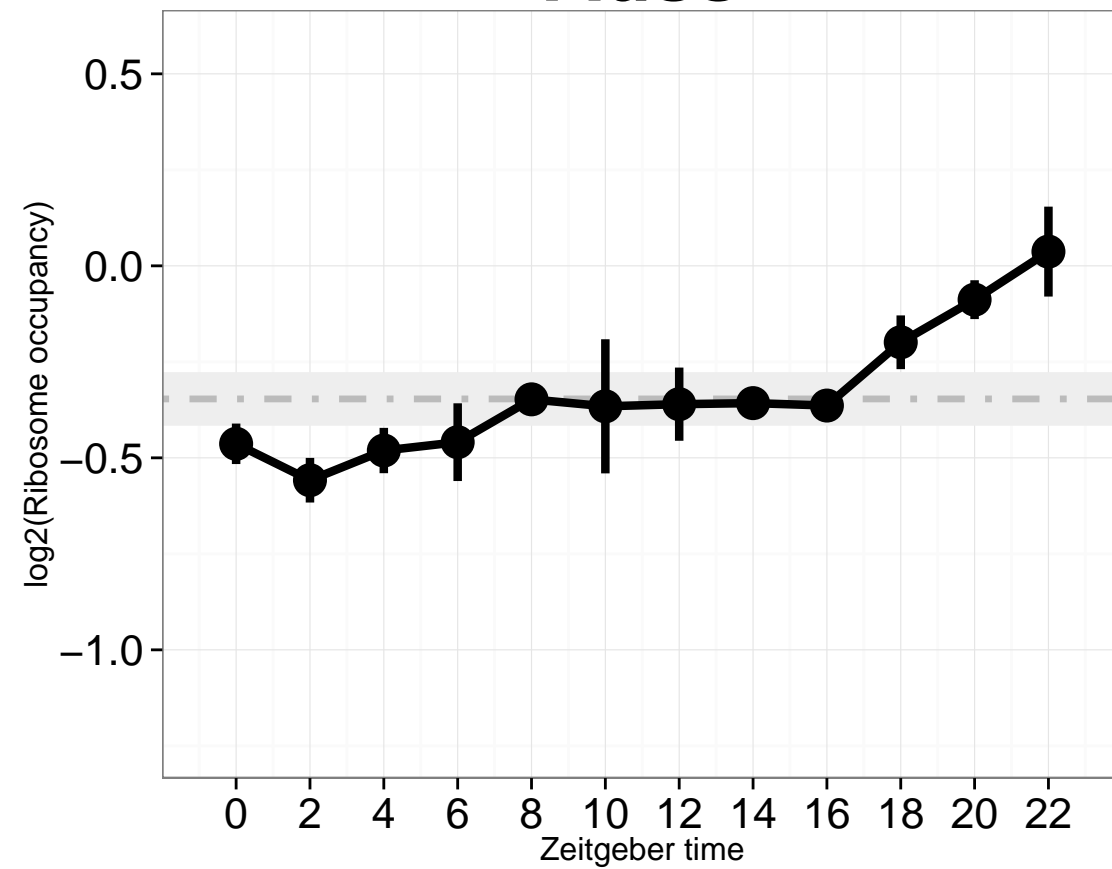

Supplement: SuppDataset_1.zip [file Adss_set_A.pdf › Supplemental Dataset 1/A-mRNA_nonrhyth_translation_nonrhyth/Adss_set_A.pdf]

## Adssl1

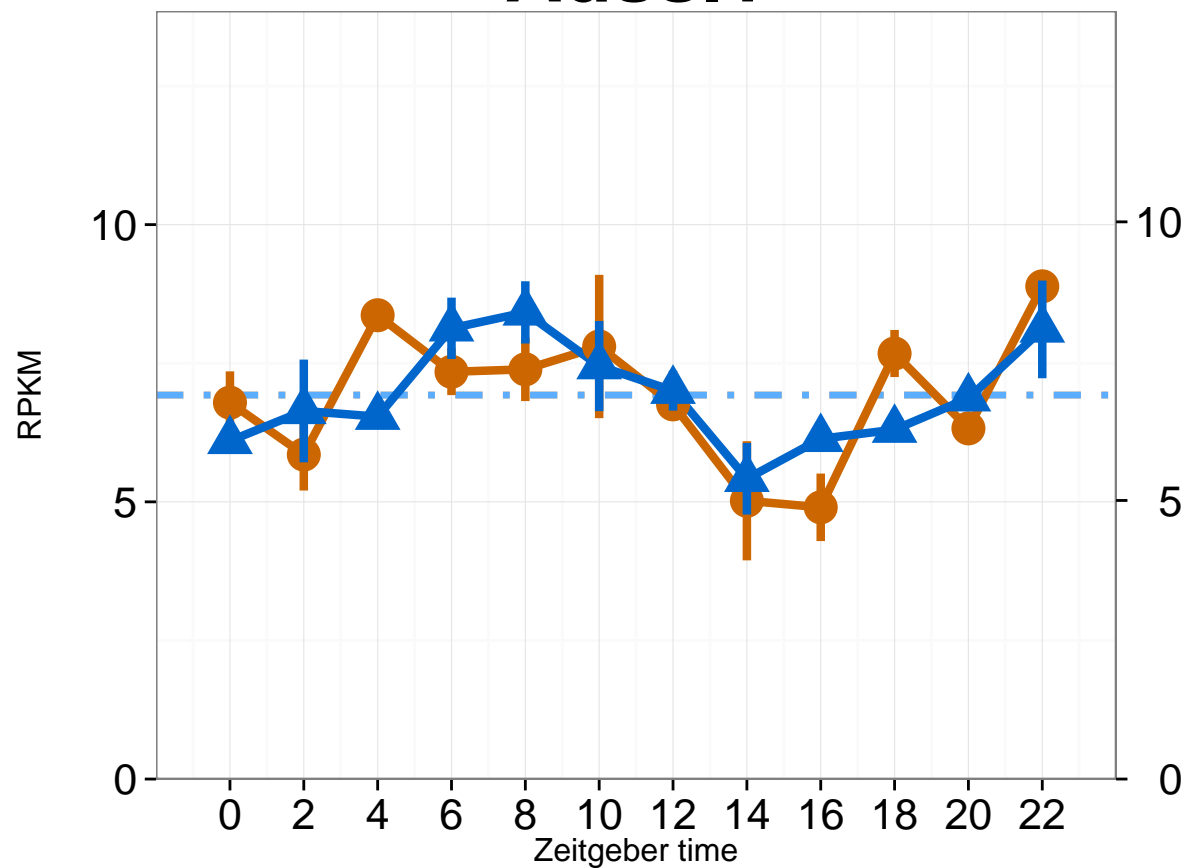

## Adssl1

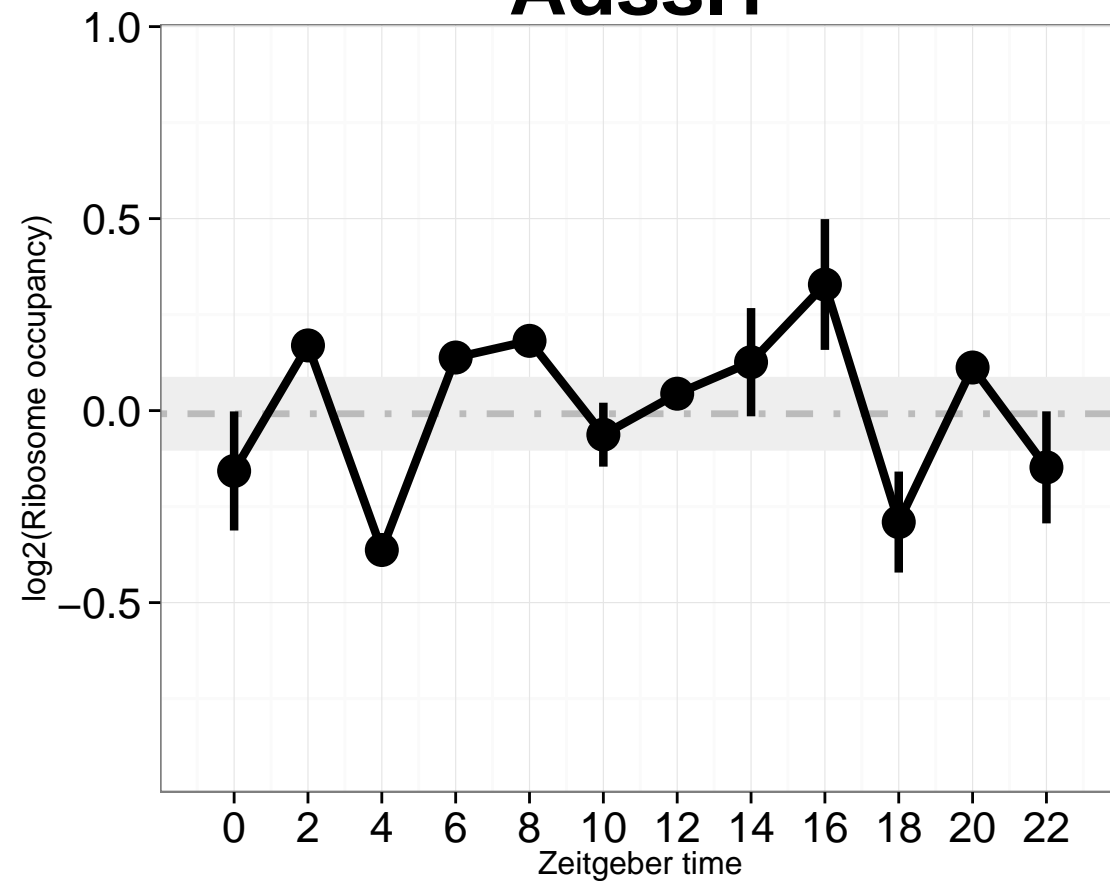

Supplement: SuppDataset_1.zip [file Adssl1_set_A.pdf › Supplemental Dataset 1/A-mRNA_nonrhyth_translation_nonrhyth/Adssl1_set_A.pdf]

## Adtrp

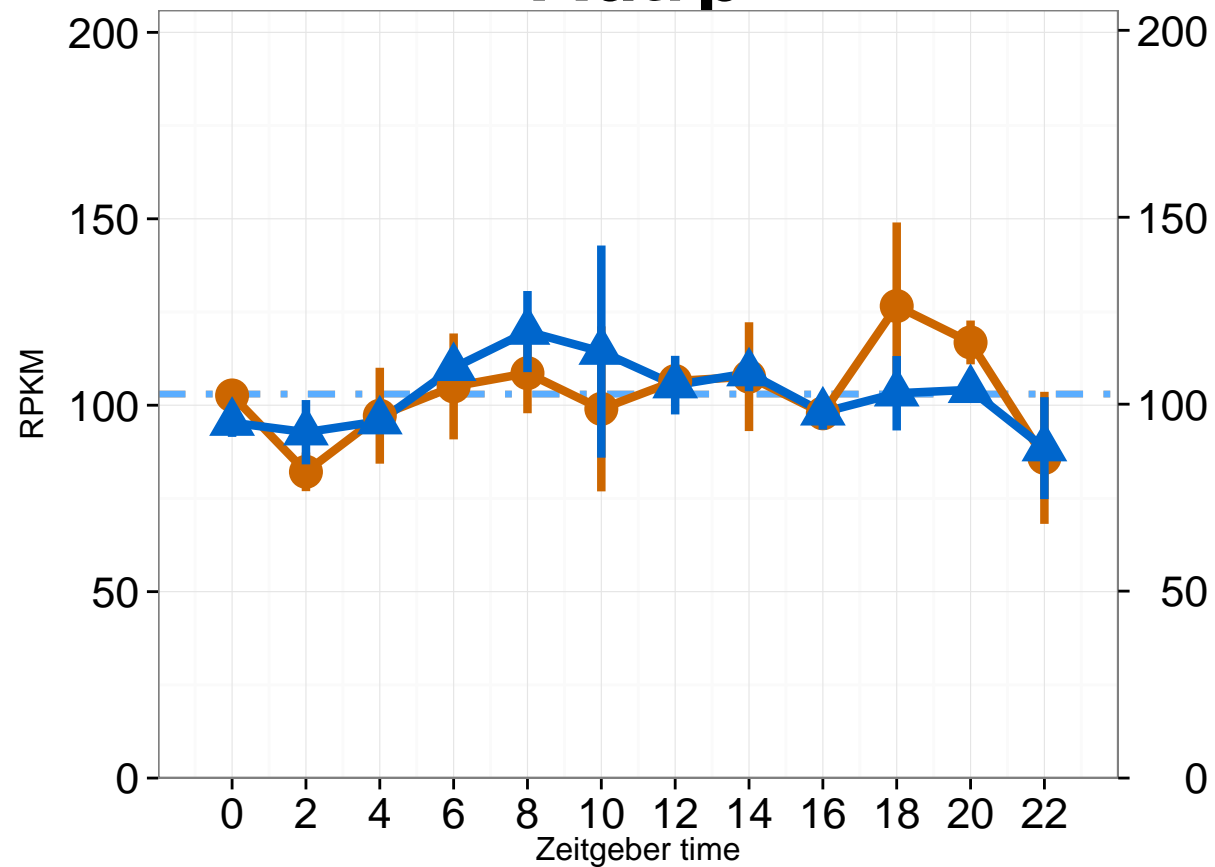

## Adtrp

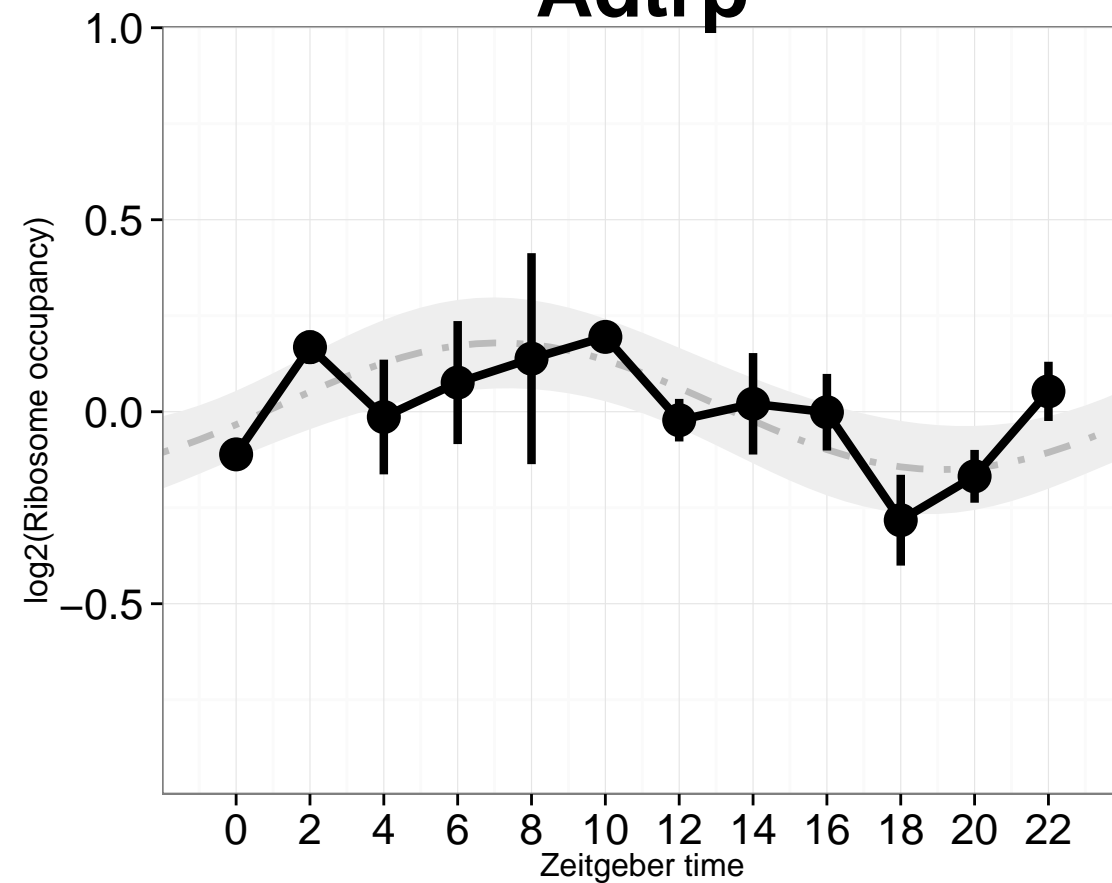

Supplement: SuppDataset_1.zip [file Adtrp_set_A.pdf › Supplemental Dataset 1/A-mRNA_nonrhyth_translation_nonrhyth/Adtrp_set_A.pdf]

# Aebp2

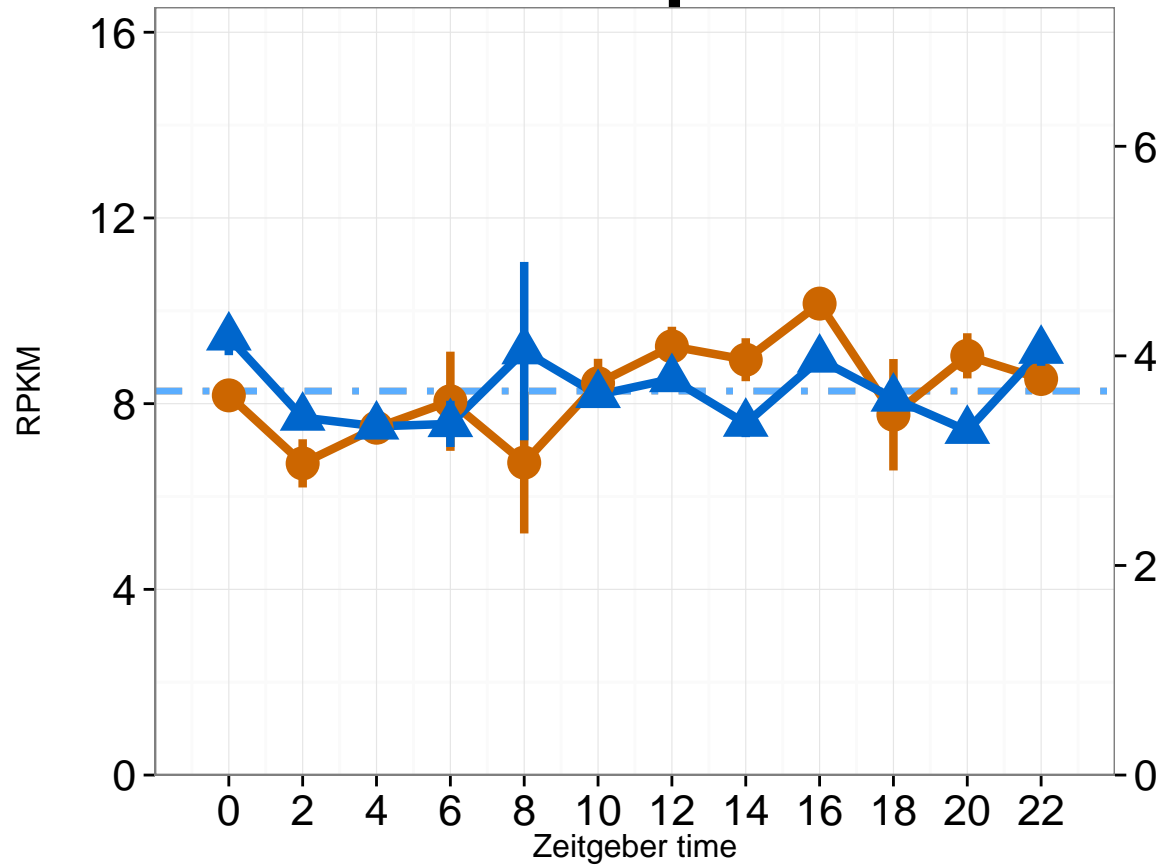

# Aebp2

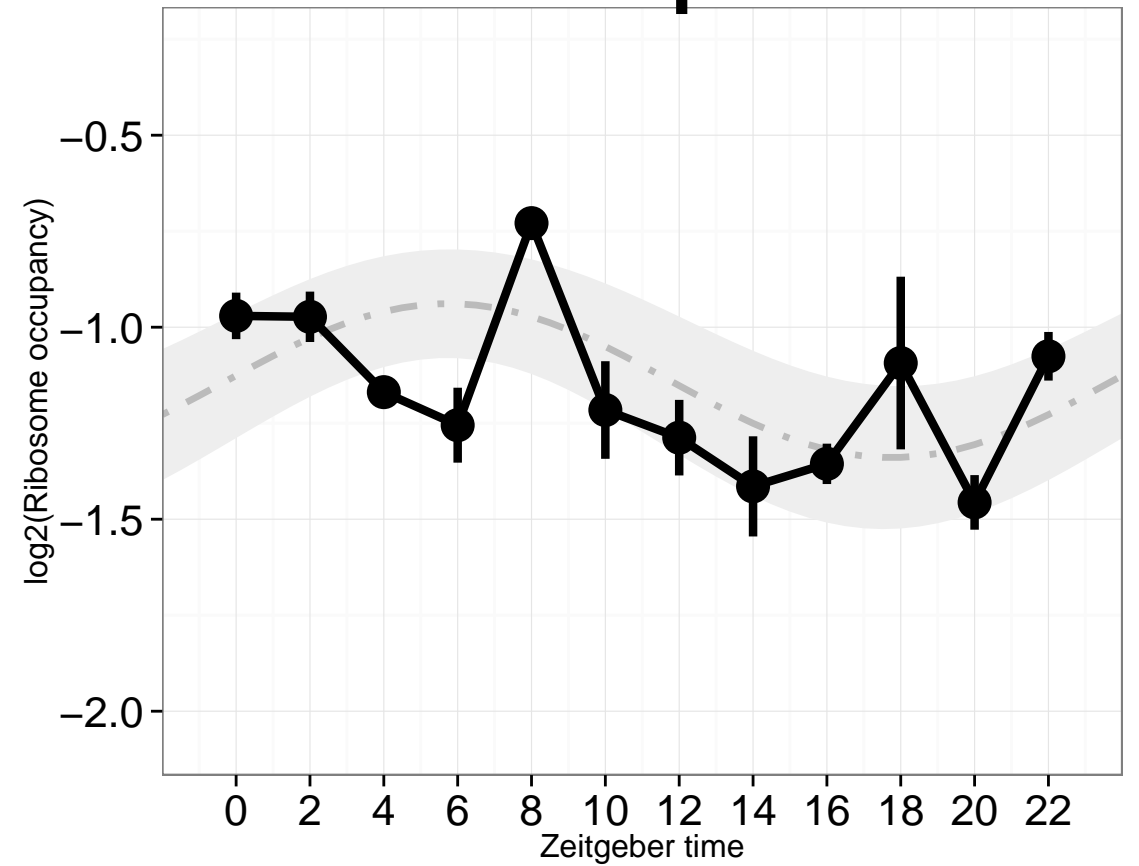

Supplement: SuppDataset_1.zip [file Aebp2_set_A.pdf › Supplemental Dataset 1/A-mRNA_nonrhyth_translation_nonrhyth/Aebp2_set_A.pdf]

## Aen

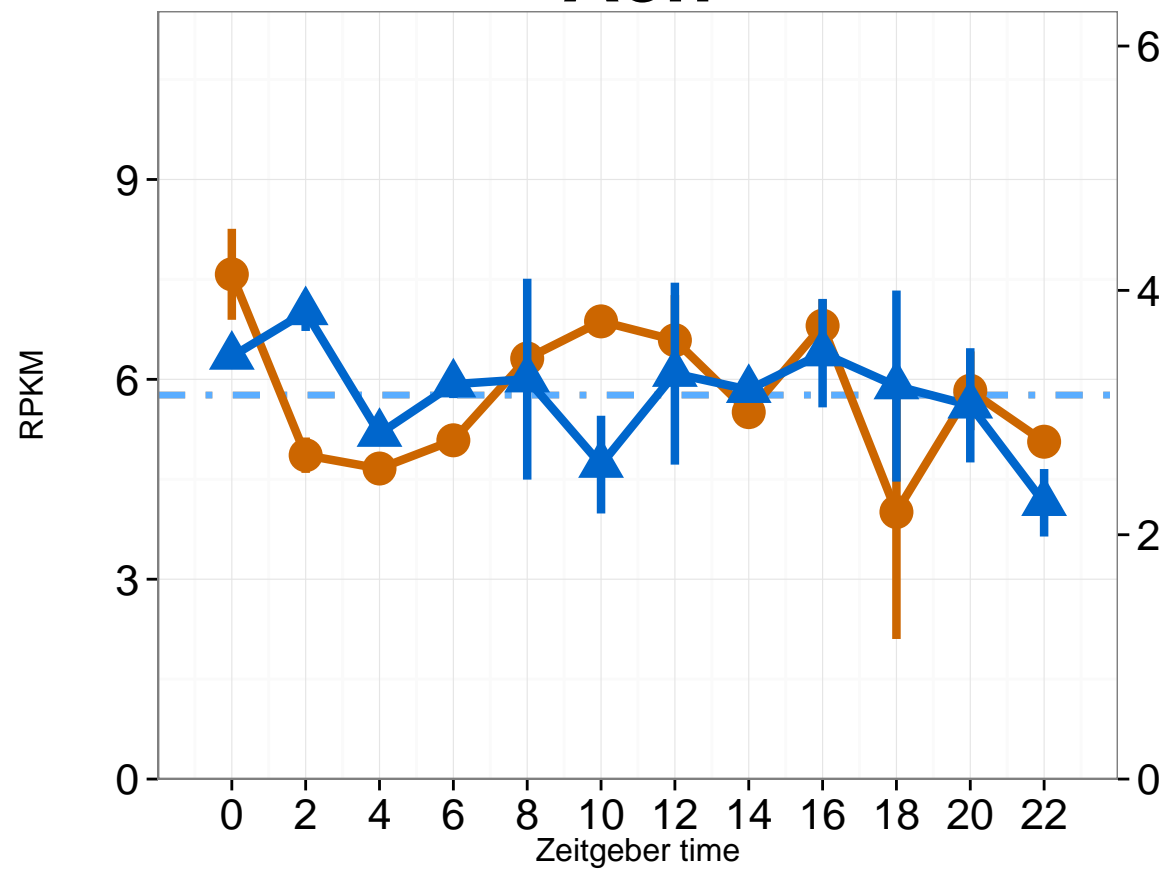

## Aen

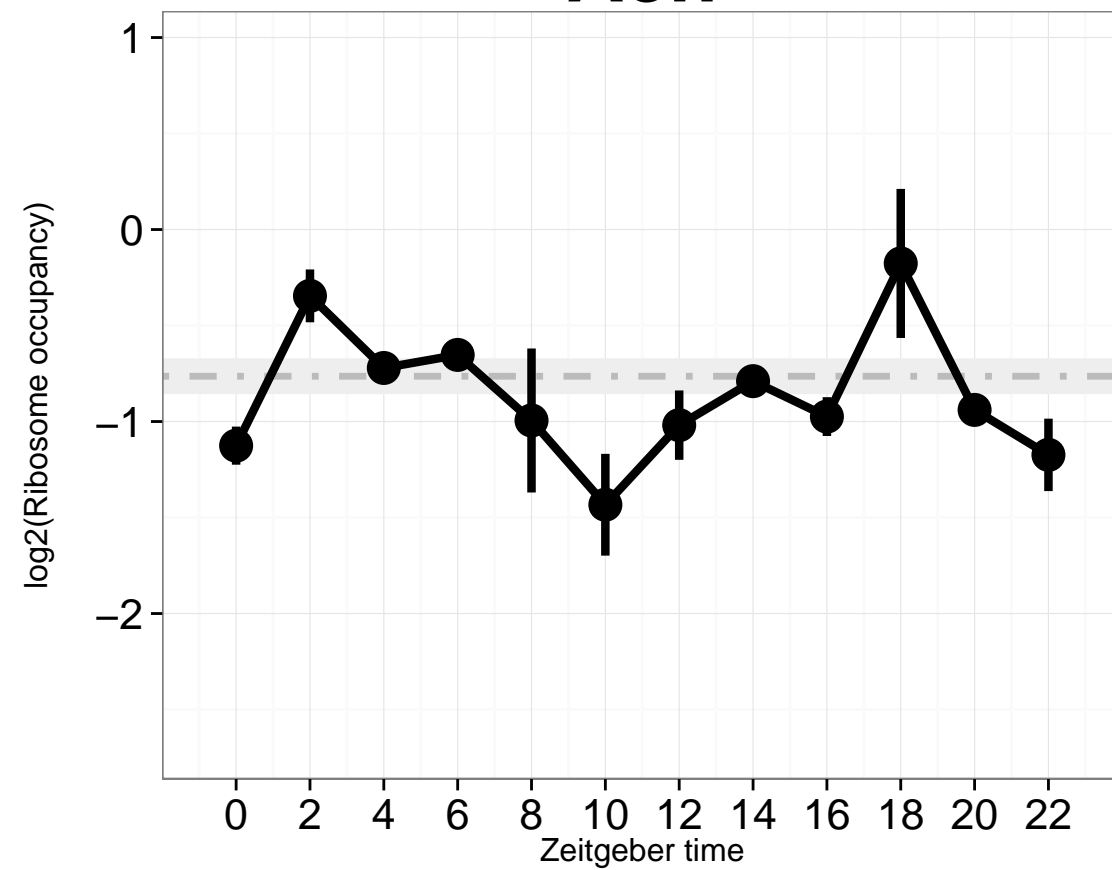

Supplement: SuppDataset_1.zip [file Aen_set_A.pdf › Supplemental Dataset 1/A-mRNA_nonrhyth_translation_nonrhyth/Aen_set_A.pdf]

## Aes

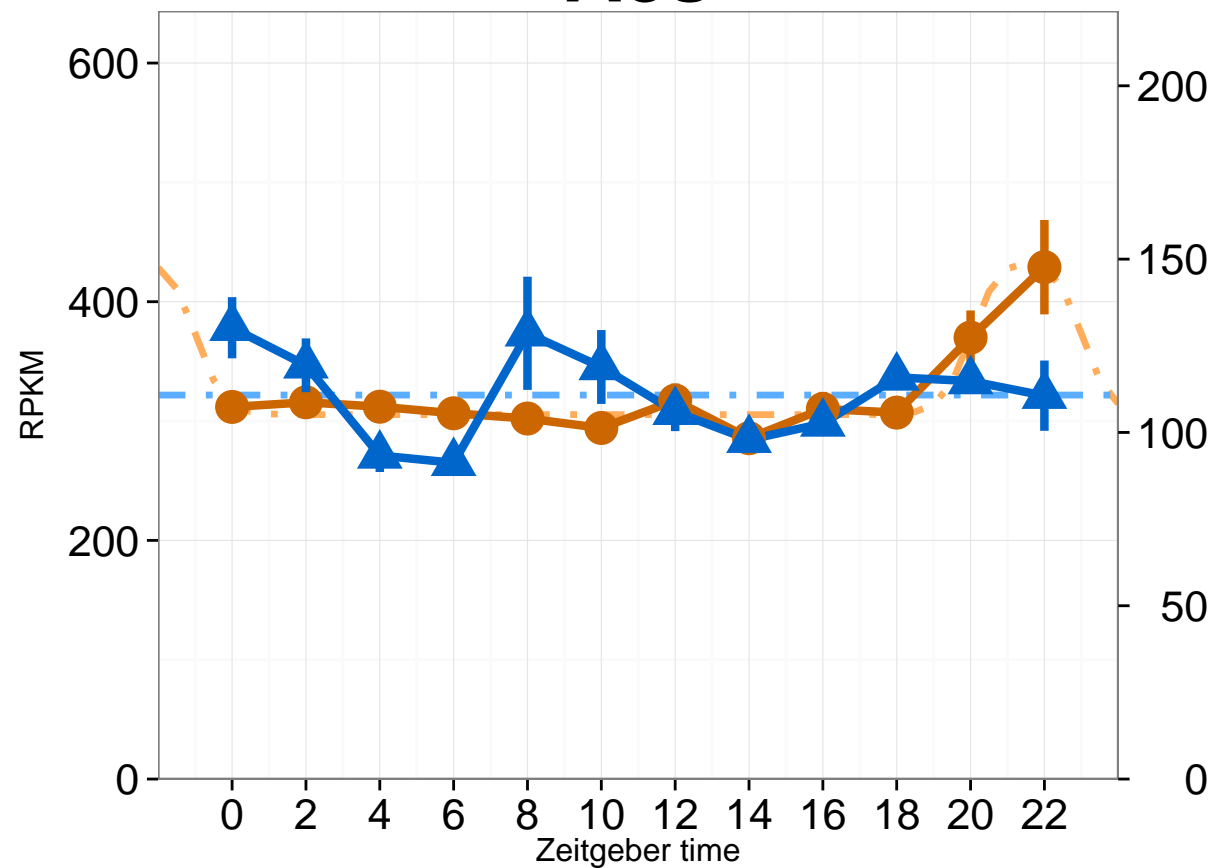

## Aes

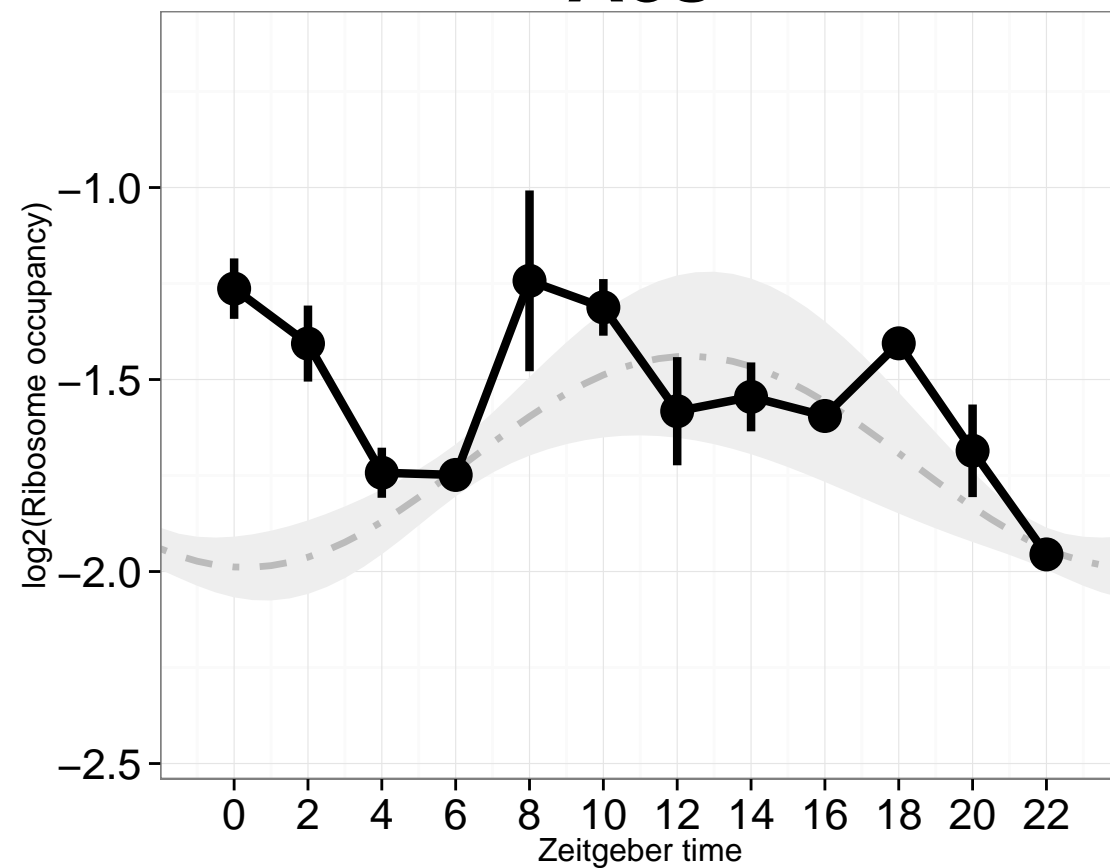

Supplement: SuppDataset_1.zip [file Aes_set_A.pdf › Supplemental Dataset 1/A-mRNA_nonrhyth_translation_nonrhyth/Aes_set_A.pdf]

# Afap1l1

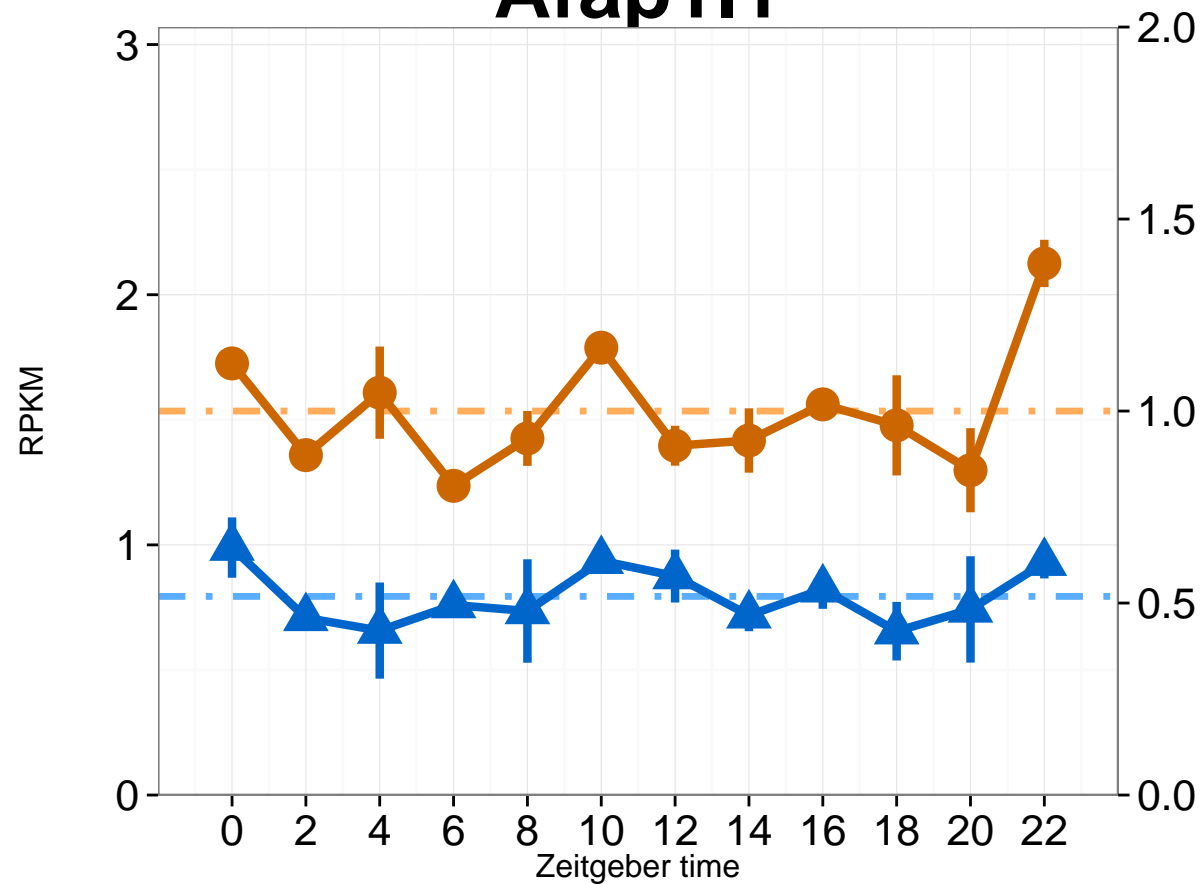

# Afap1l1

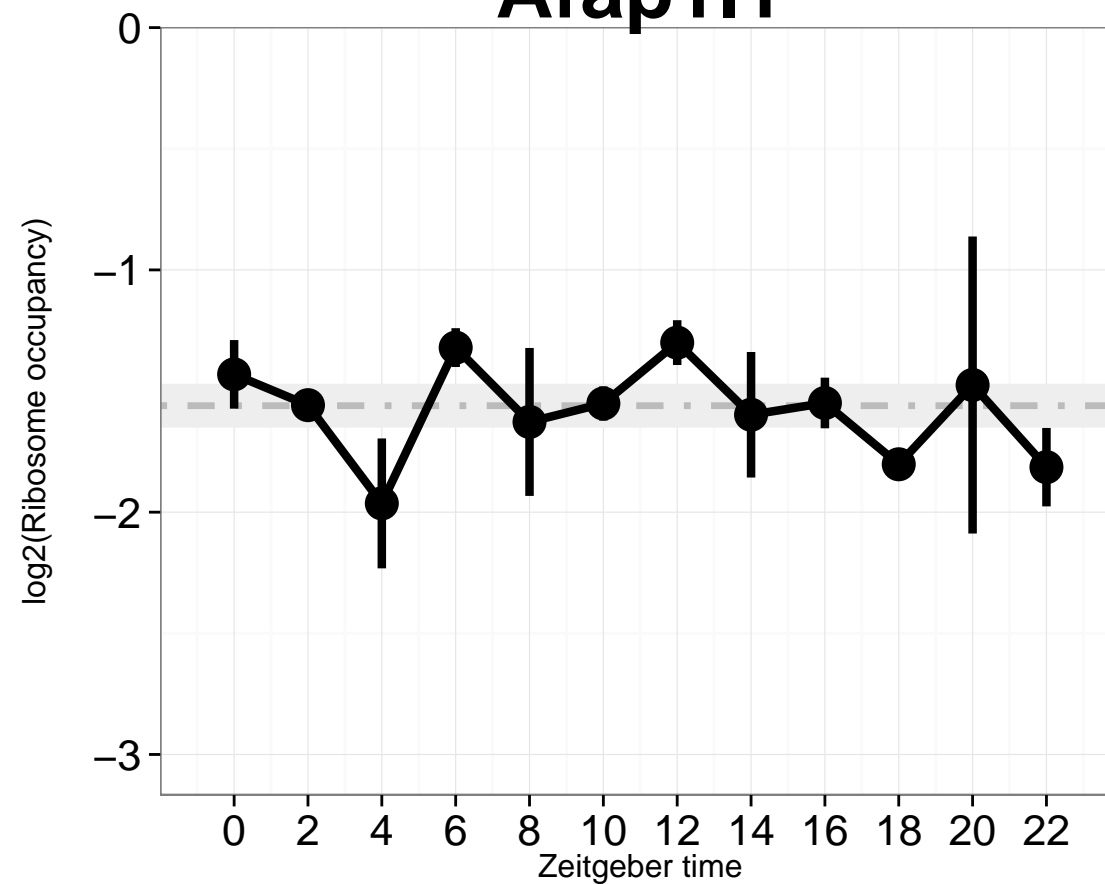

Supplement: SuppDataset_1.zip [file Afap1l1_set_A.pdf › Supplemental Dataset 1/A-mRNA_nonrhyth_translation_nonrhyth/Afap1l1_set_A.pdf]

## Aff1

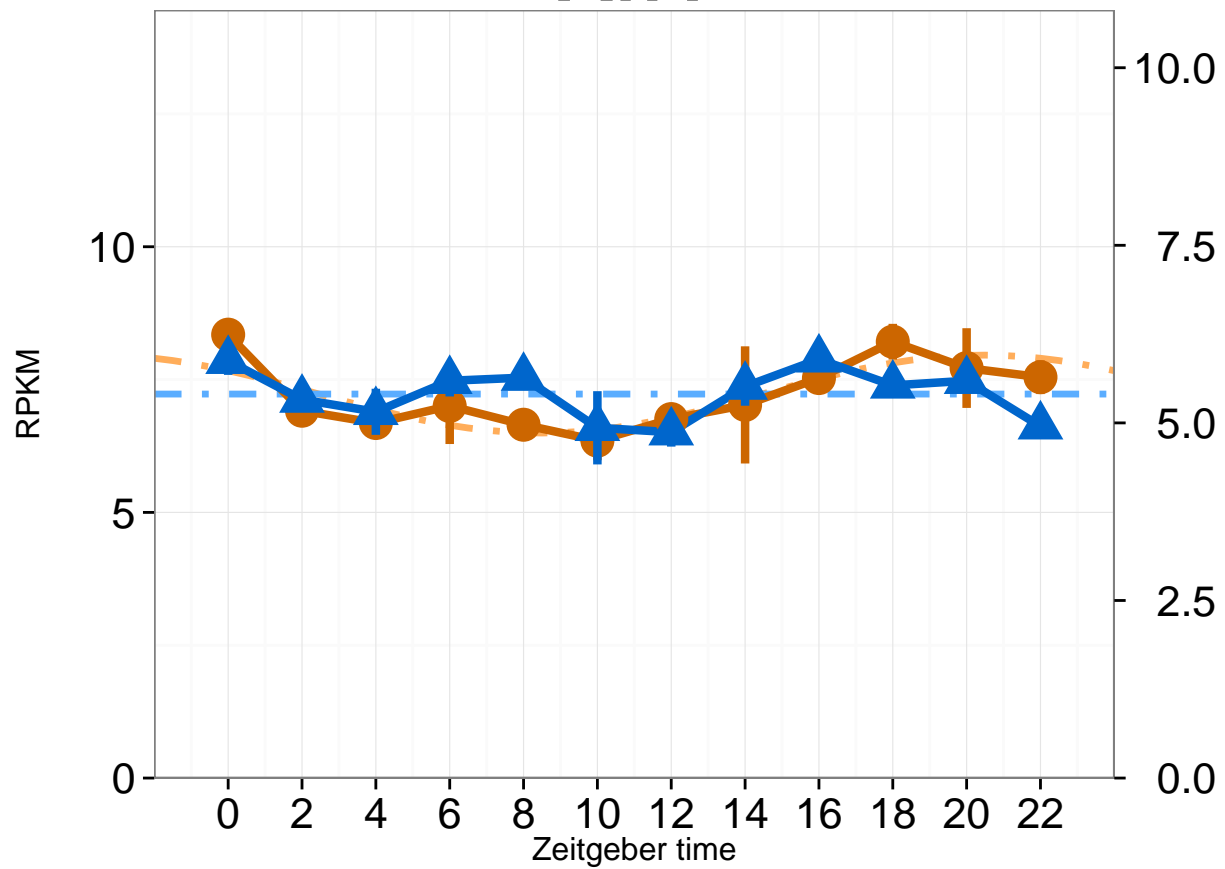

## Aff1

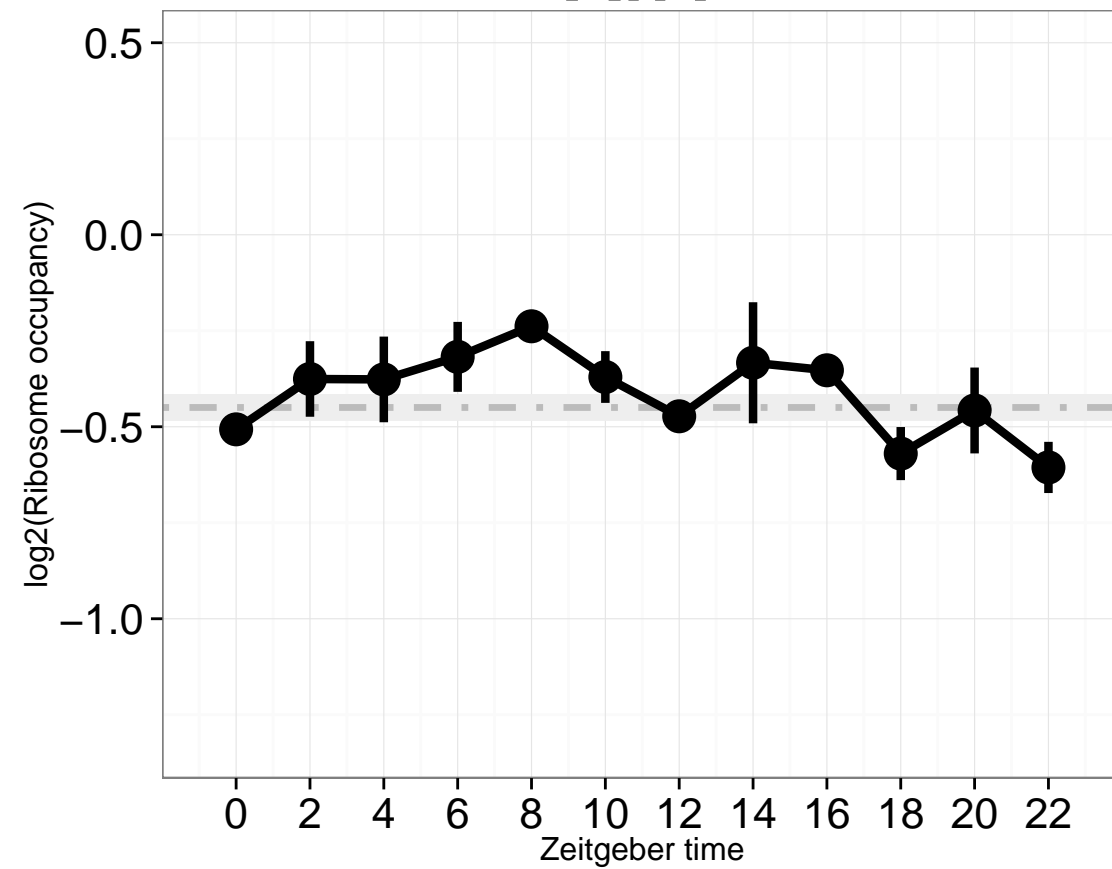

Supplement: SuppDataset_1.zip [file Aff1_set_A.pdf › Supplemental Dataset 1/A-mRNA_nonrhyth_translation_nonrhyth/Aff1_set_A.pdf]

## Aff4

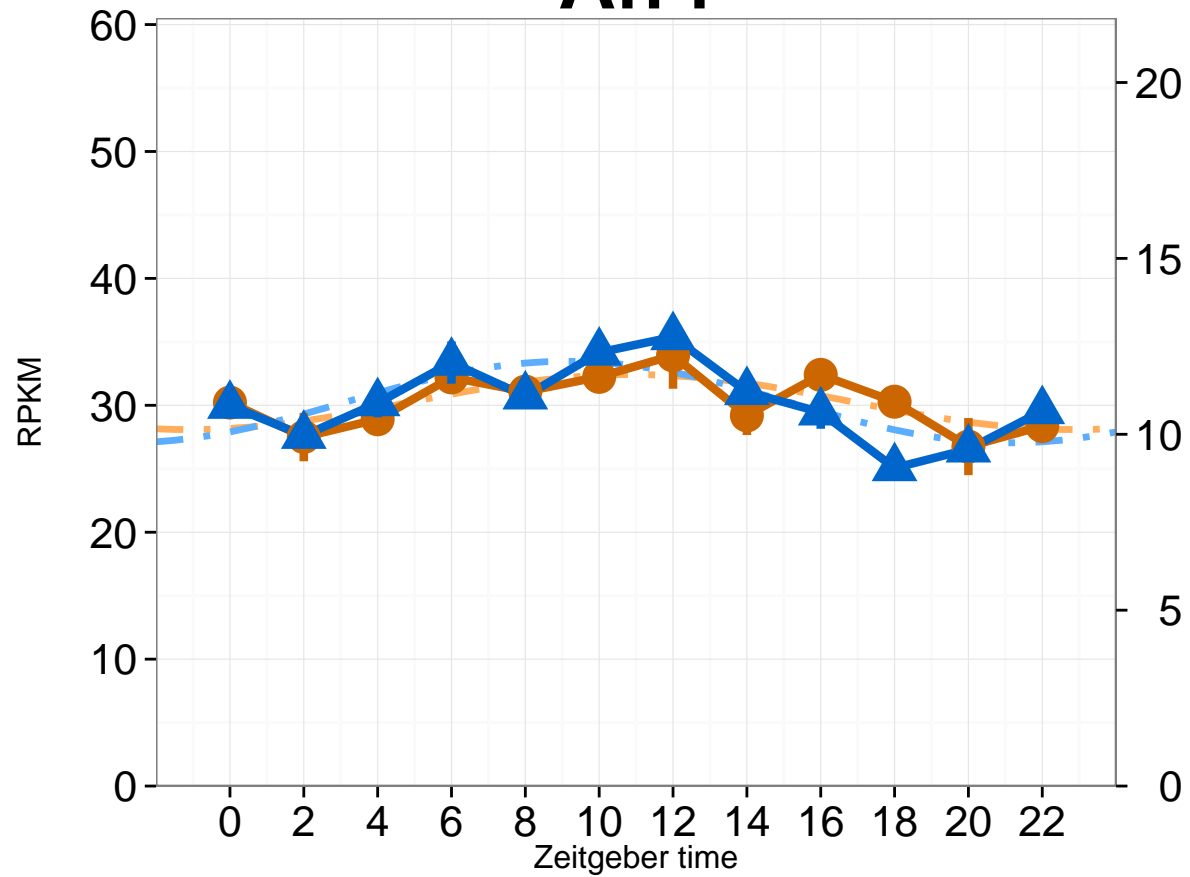

## Aff4

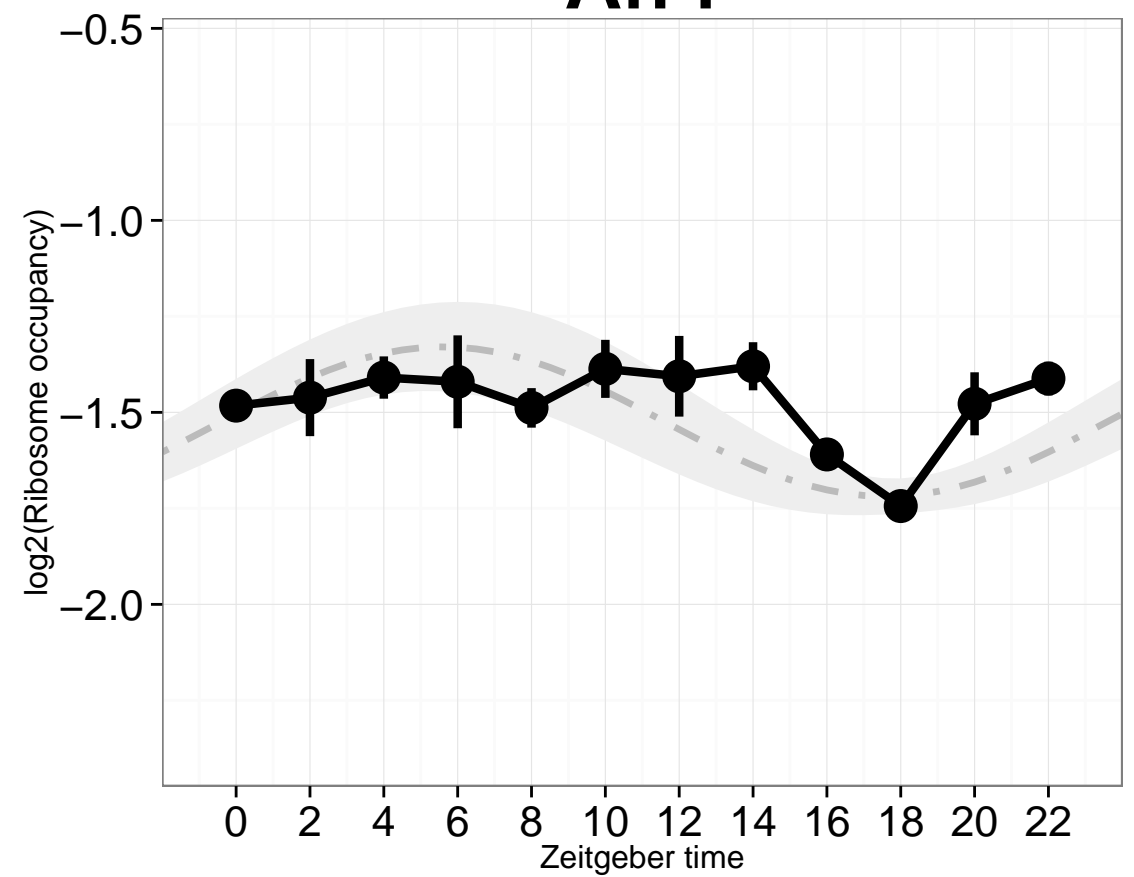

Supplement: SuppDataset_1.zip [file Aff4_set_A.pdf › Supplemental Dataset 1/A-mRNA_nonrhyth_translation_nonrhyth/Aff4_set_A.pdf]

# Afg3l2

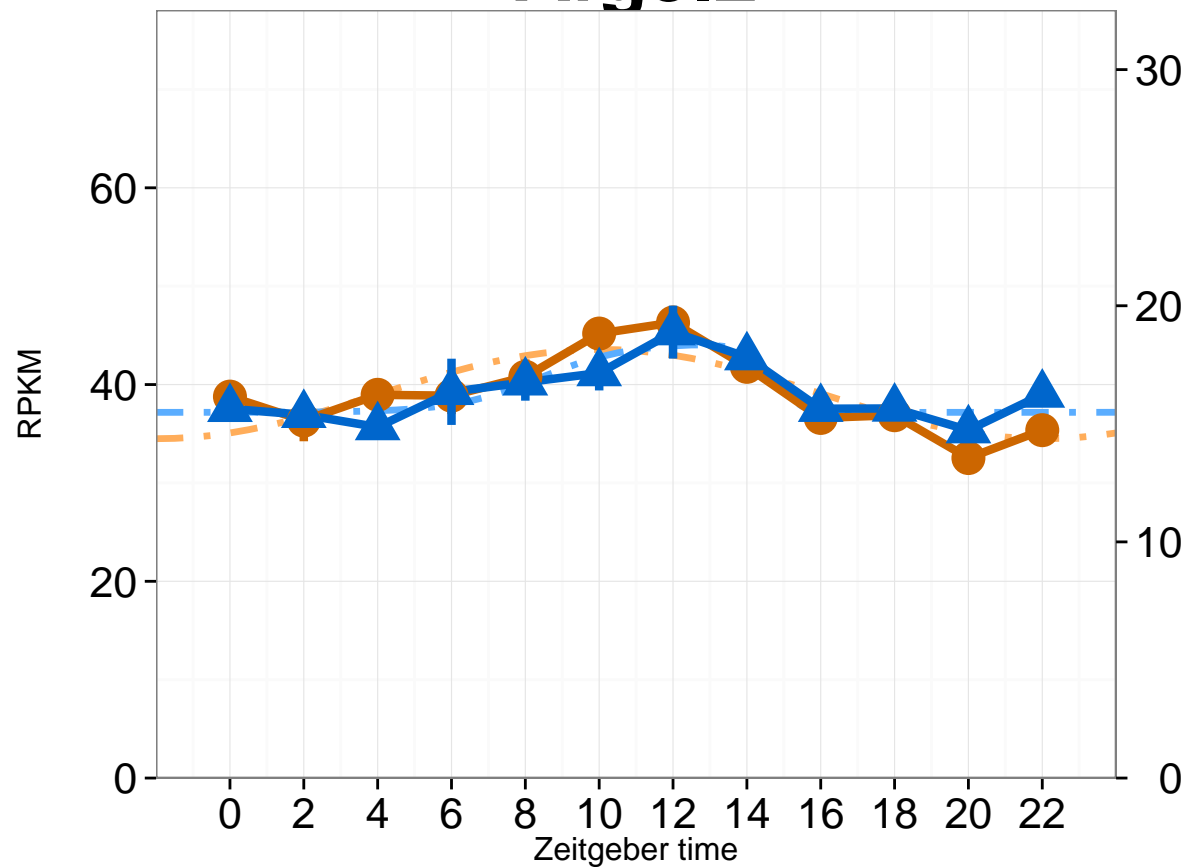

# Afg3l2

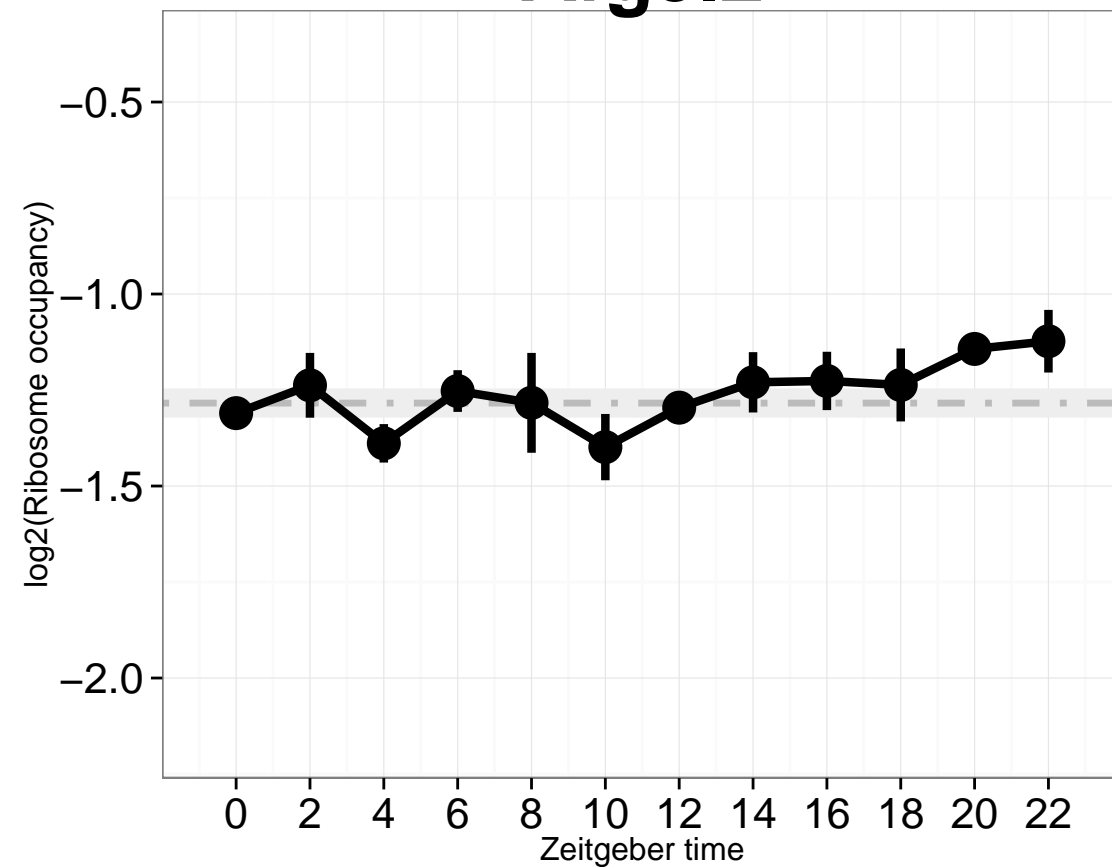

Supplement: SuppDataset_1.zip [file Afg3l2_set_A.pdf › Supplemental Dataset 1/A-mRNA_nonrhyth_translation_nonrhyth/Afg3l2_set_A.pdf]

## Afm

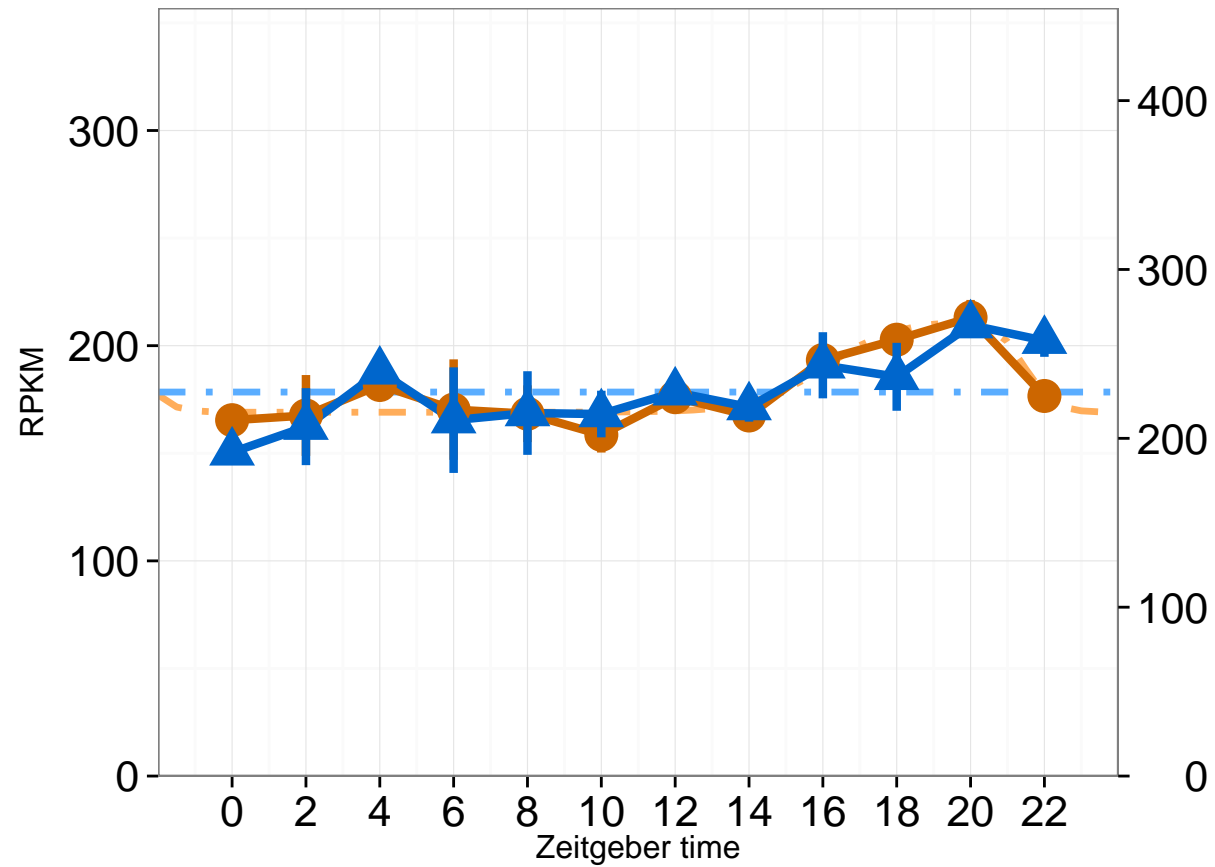

## Afm

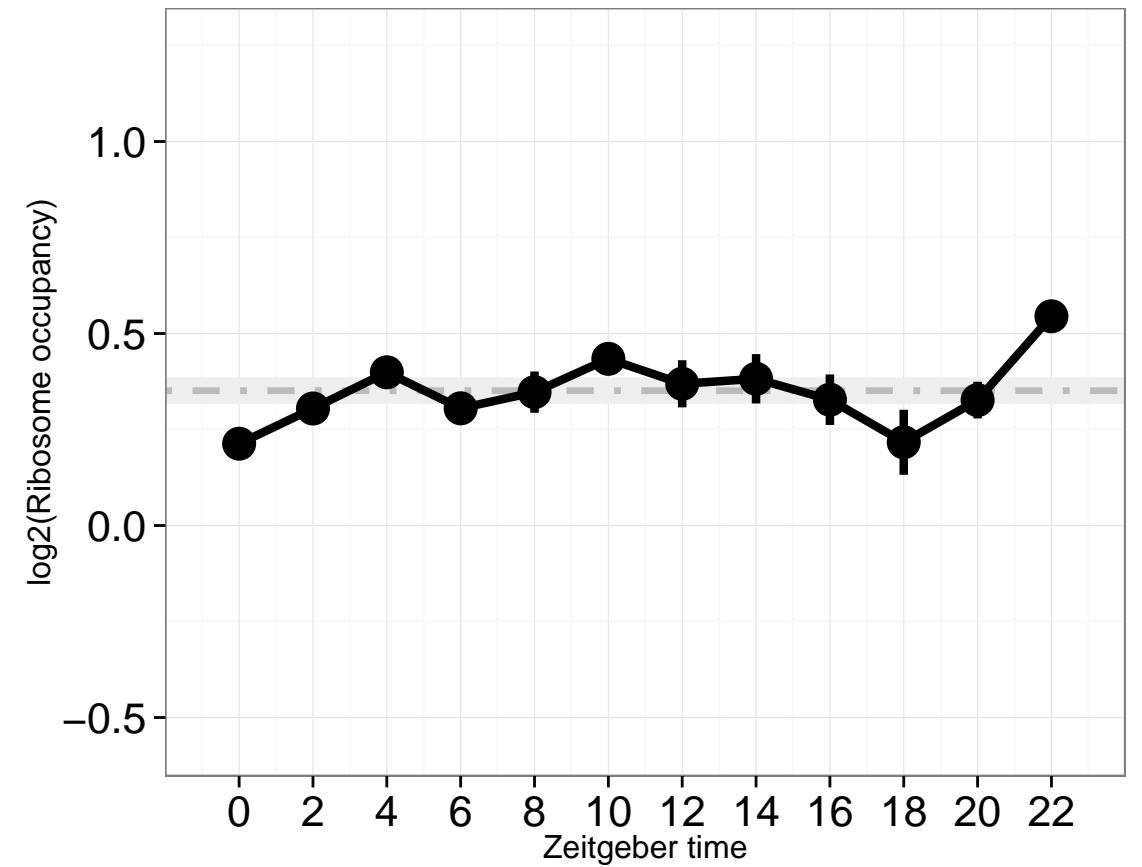

Supplement: SuppDataset_1.zip [file Afm_set_A.pdf › Supplemental Dataset 1/A-mRNA_nonrhyth_translation_nonrhyth/Afm_set_A.pdf]

## Afp

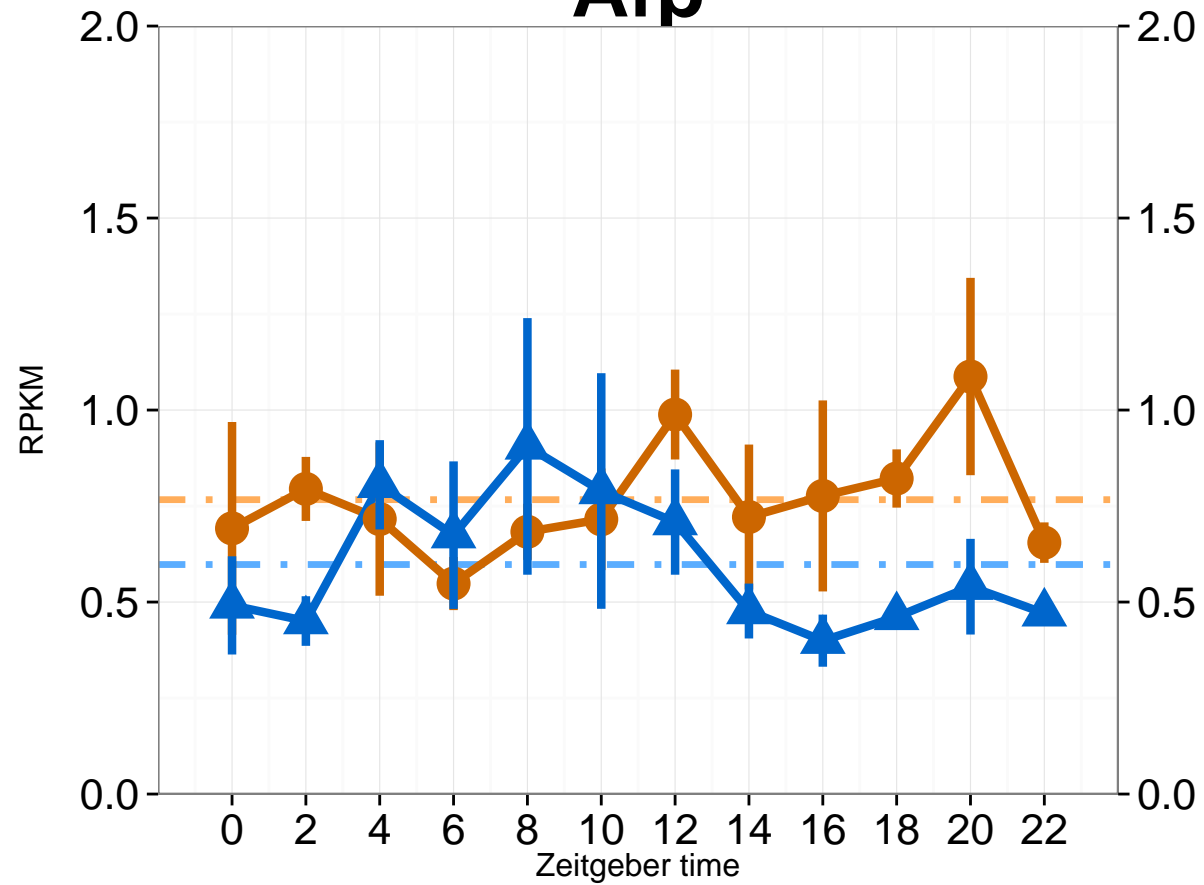

## Afp

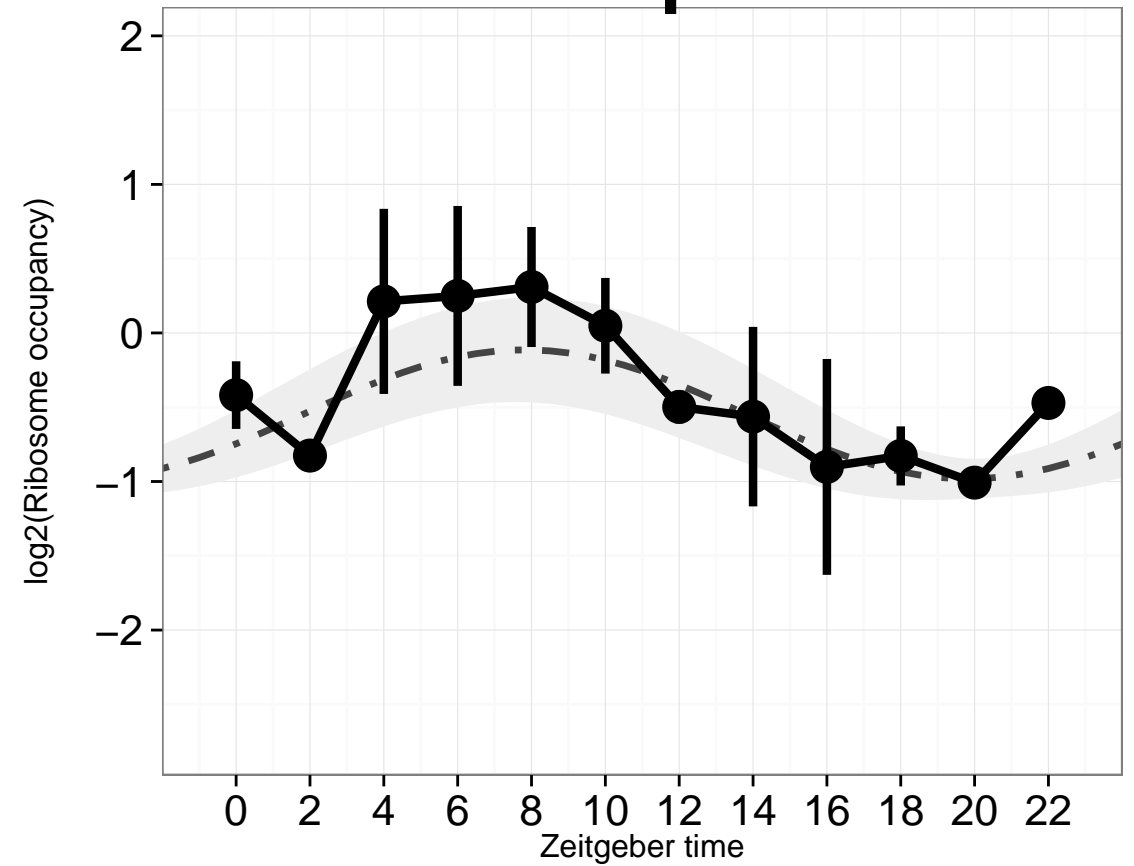

Supplement: SuppDataset_1.zip [file Afp_set_A.pdf › Supplemental Dataset 1/A-mRNA_nonrhyth_translation_nonrhyth/Afp_set_A.pdf]

## Aftph

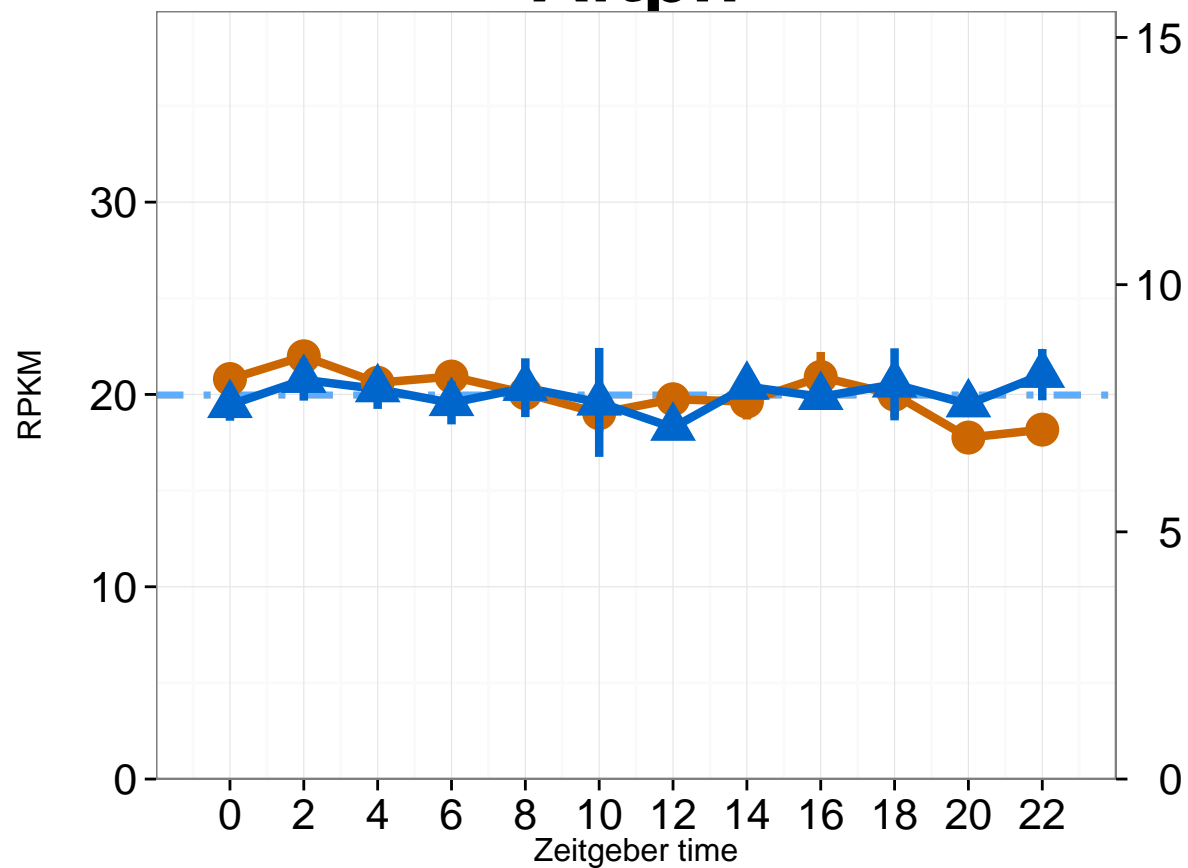

## Aftph

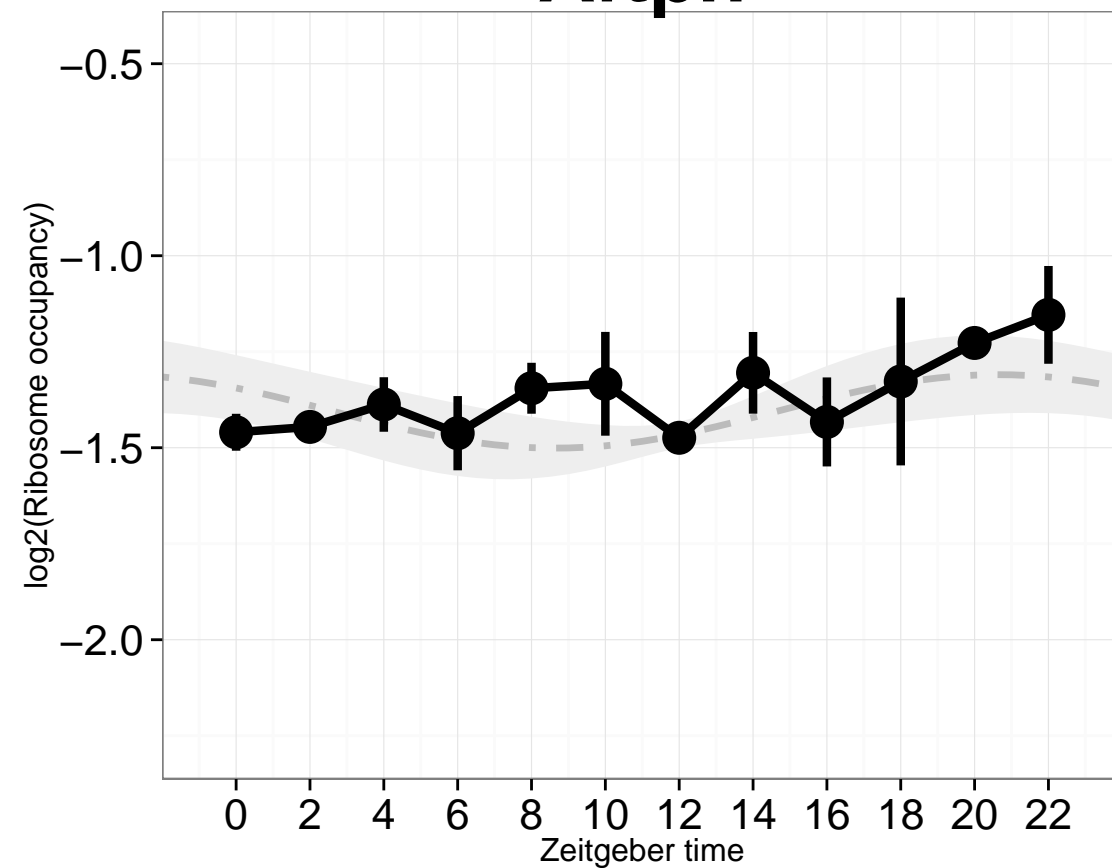

Supplement: SuppDataset_1.zip [file Aftph_set_A.pdf › Supplemental Dataset 1/A-mRNA_nonrhyth_translation_nonrhyth/Aftph_set_A.pdf]

## Aga

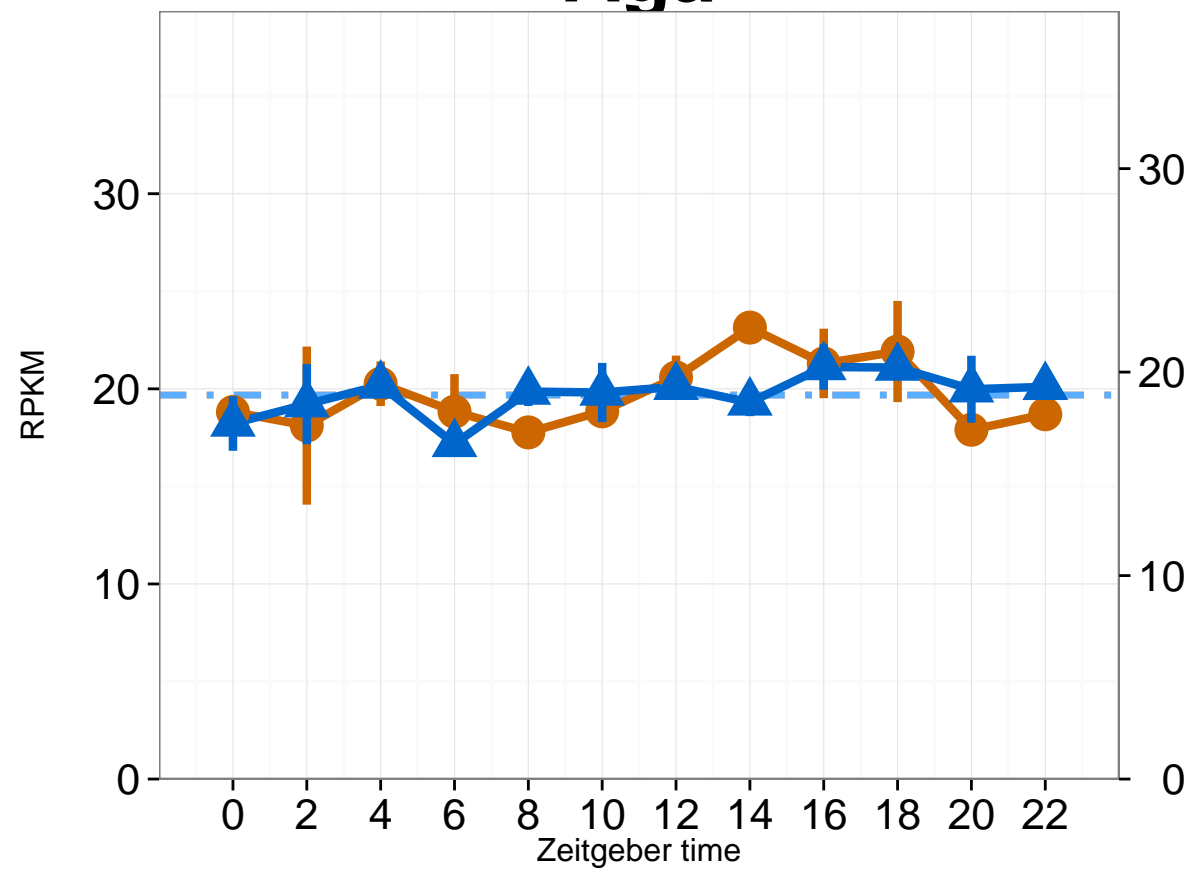

## Aga

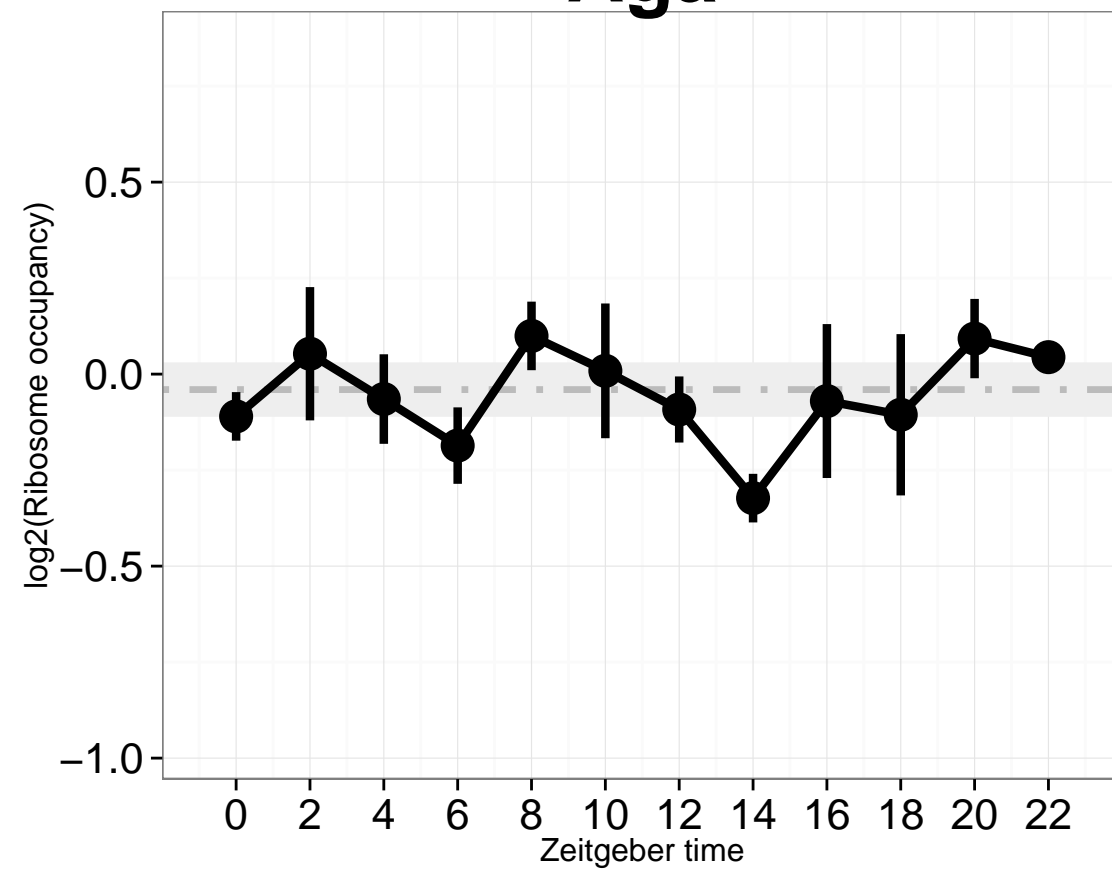

Supplement: SuppDataset_1.zip [file Aga_set_A.pdf › Supplemental Dataset 1/A-mRNA_nonrhyth_translation_nonrhyth/Aga_set_A.pdf]

# Agap1

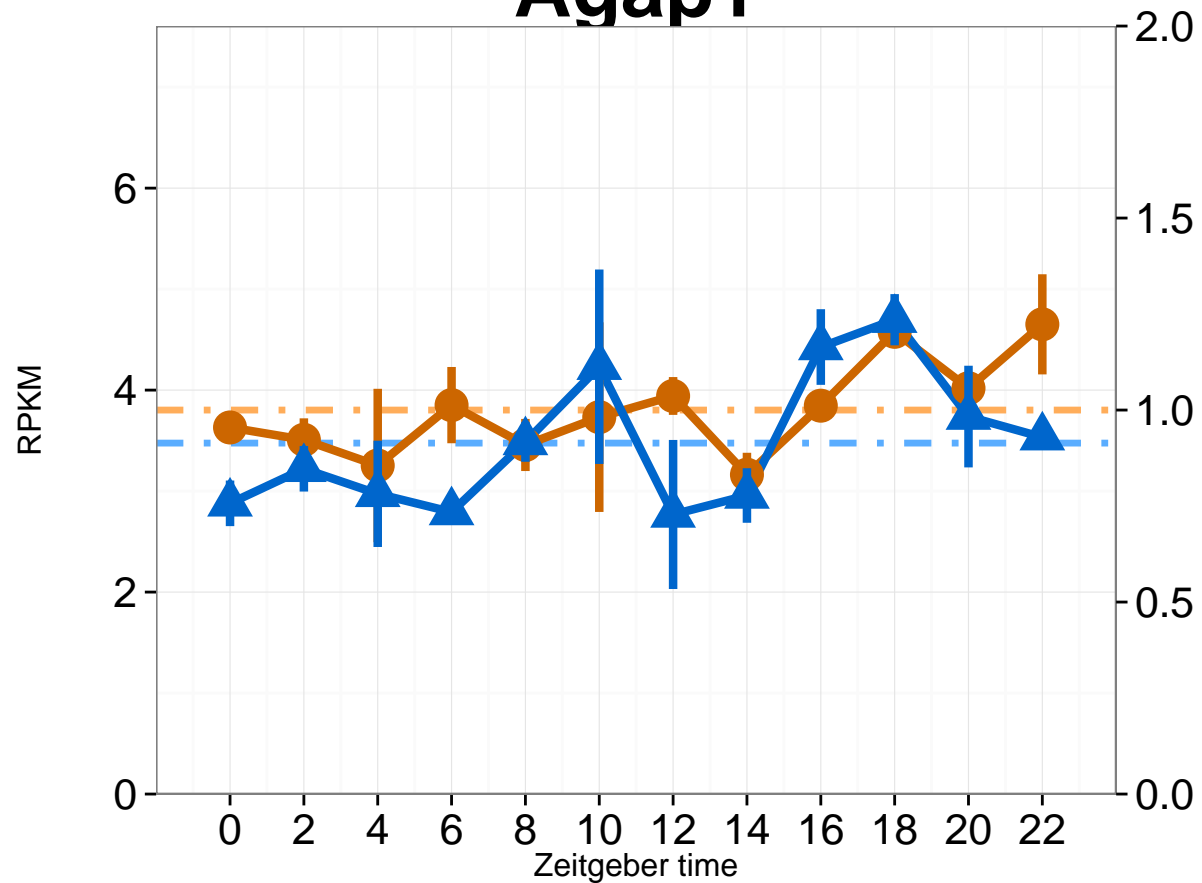

# Agap1

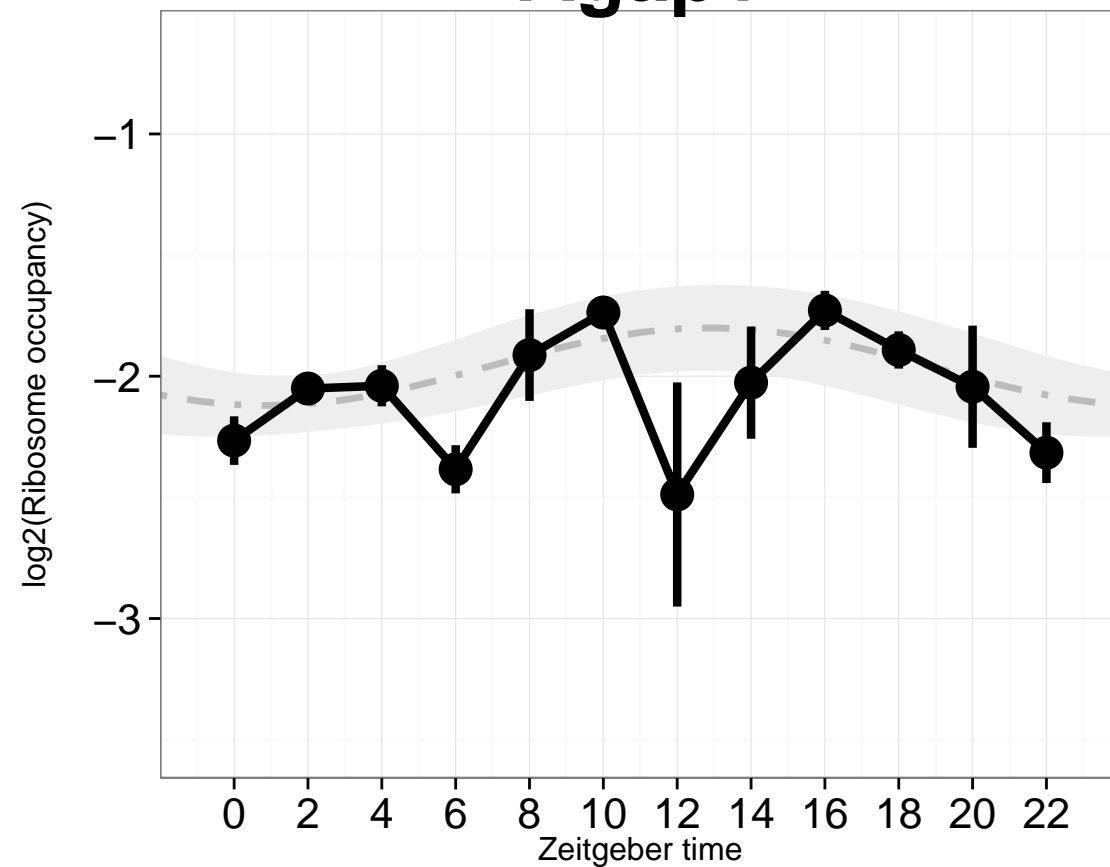

Supplement: SuppDataset_1.zip [file Agap1_set_A.pdf › Supplemental Dataset 1/A-mRNA_nonrhyth_translation_nonrhyth/Agap1_set_A.pdf]

# Agap3

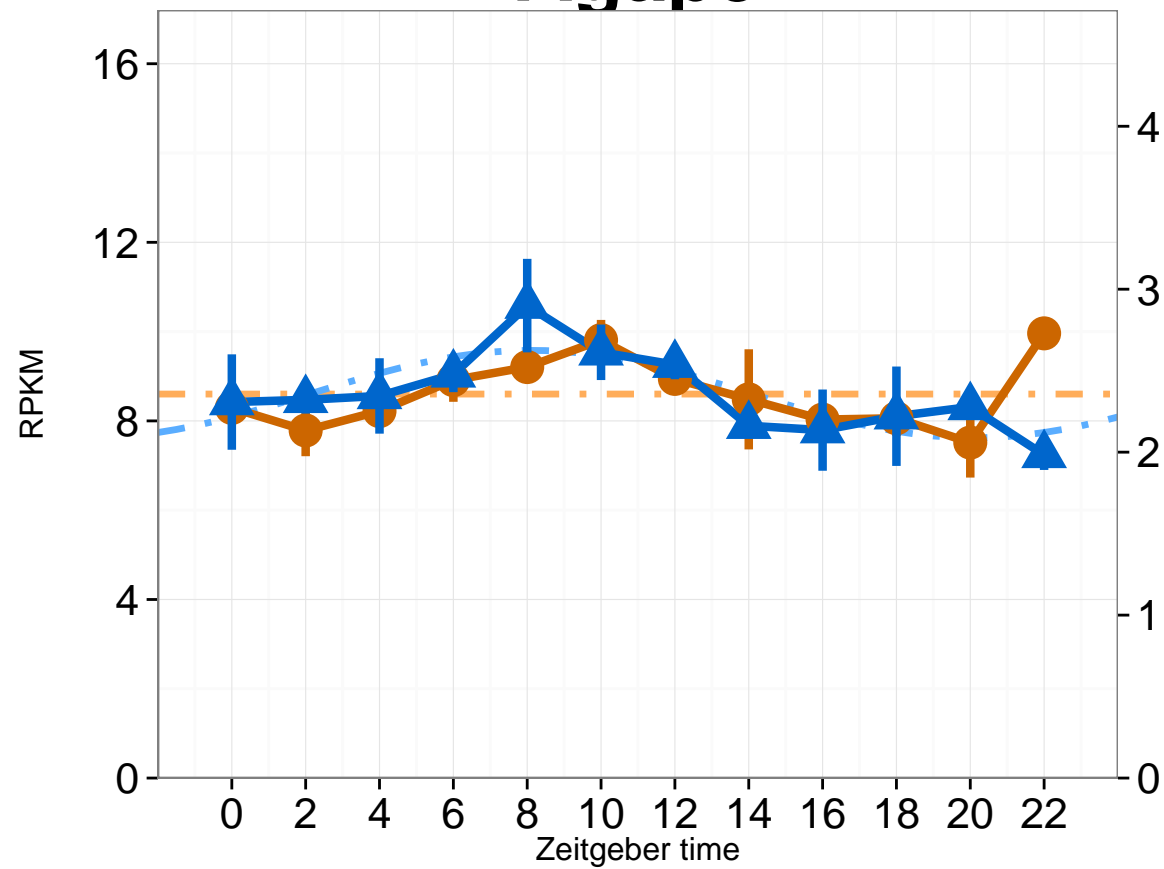

# Agap3

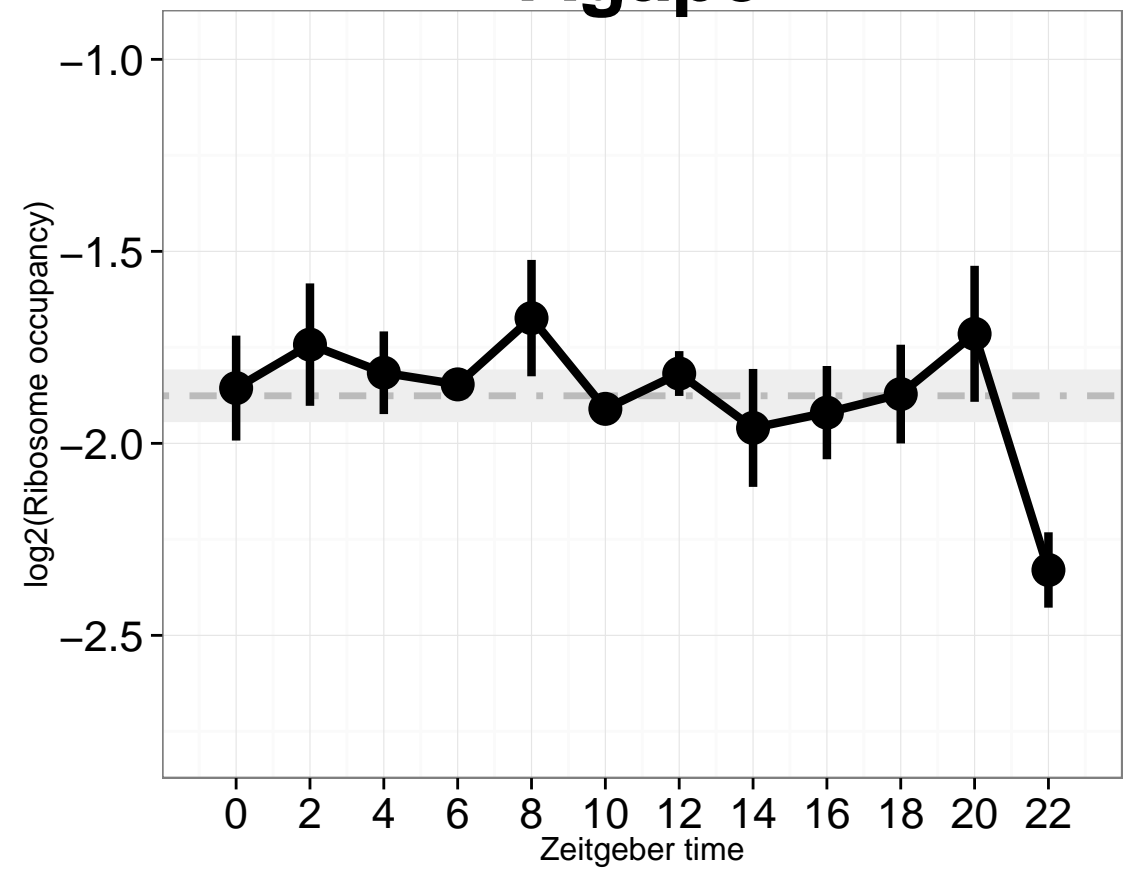

Supplement: SuppDataset_1.zip [file Agap3_set_A.pdf › Supplemental Dataset 1/A-mRNA_nonrhyth_translation_nonrhyth/Agap3_set_A.pdf]

## Agbl3

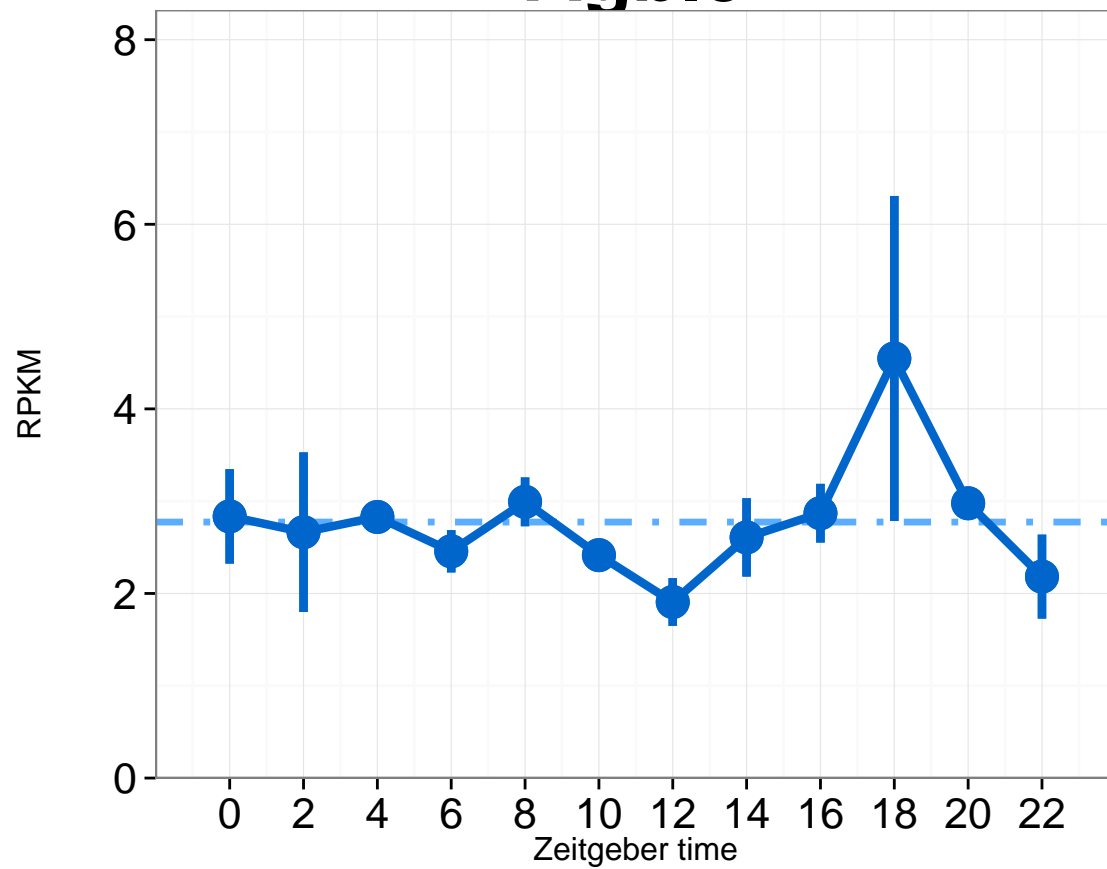

## Agbl3 log2(Ribosome occupancy

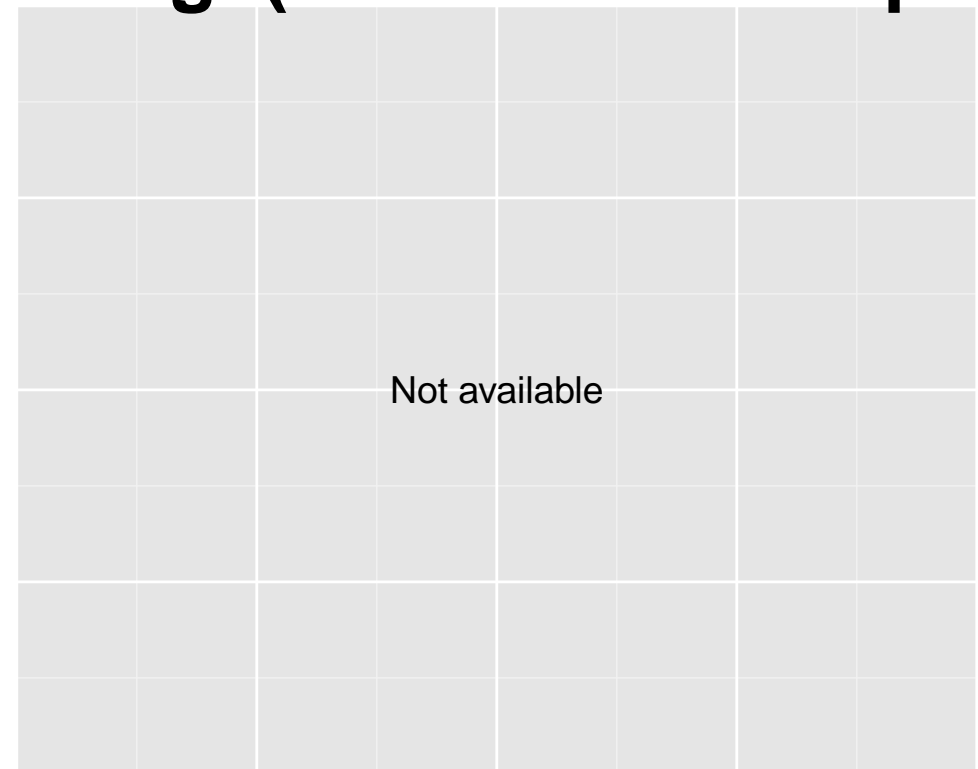

Supplement: SuppDataset_1.zip [file Agbl3_set_A.pdf › Supplemental Dataset 1/A-mRNA_nonrhyth_translation_nonrhyth/Agbl3_set_A.pdf]

# Agfg1

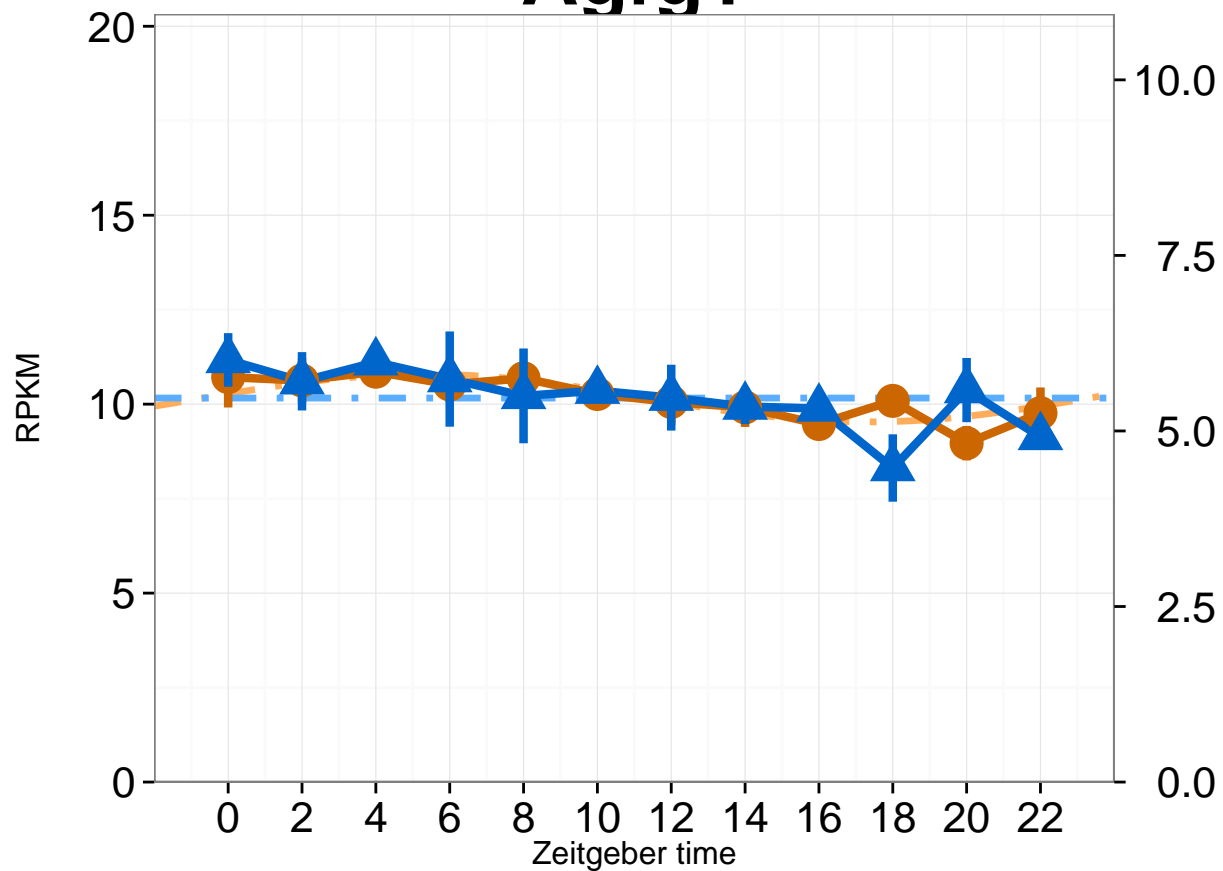

# Agfg1

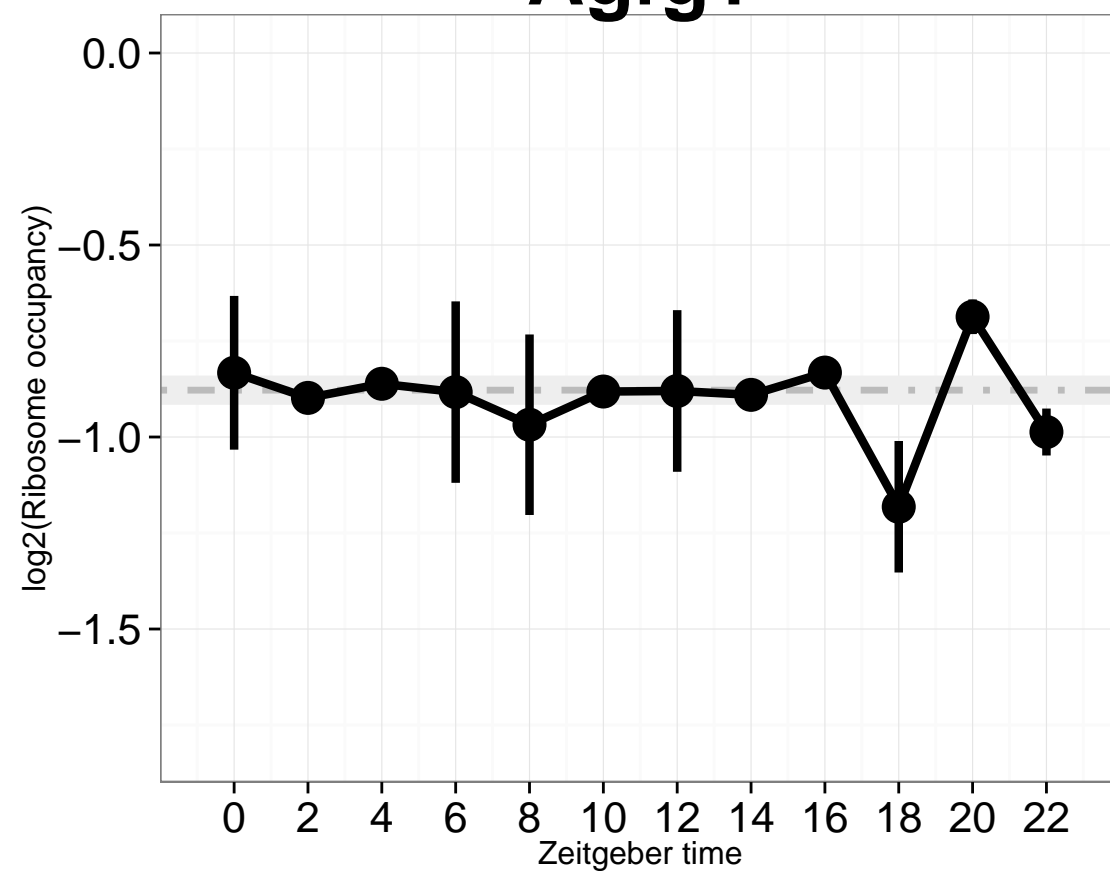

Supplement: SuppDataset_1.zip [file Agfg1_set_A.pdf › Supplemental Dataset 1/A-mRNA_nonrhyth_translation_nonrhyth/Agfg1_set_A.pdf]

# Agfg2

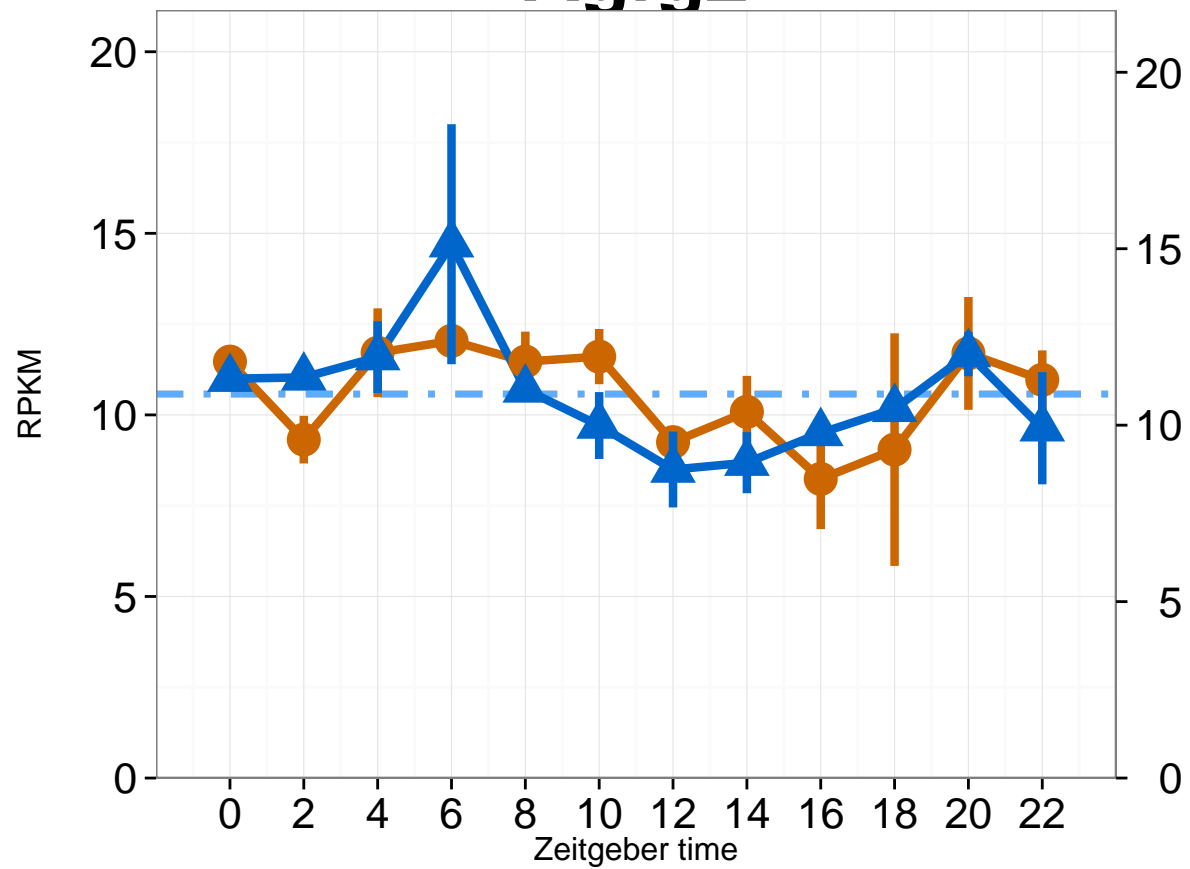

# Agfg2

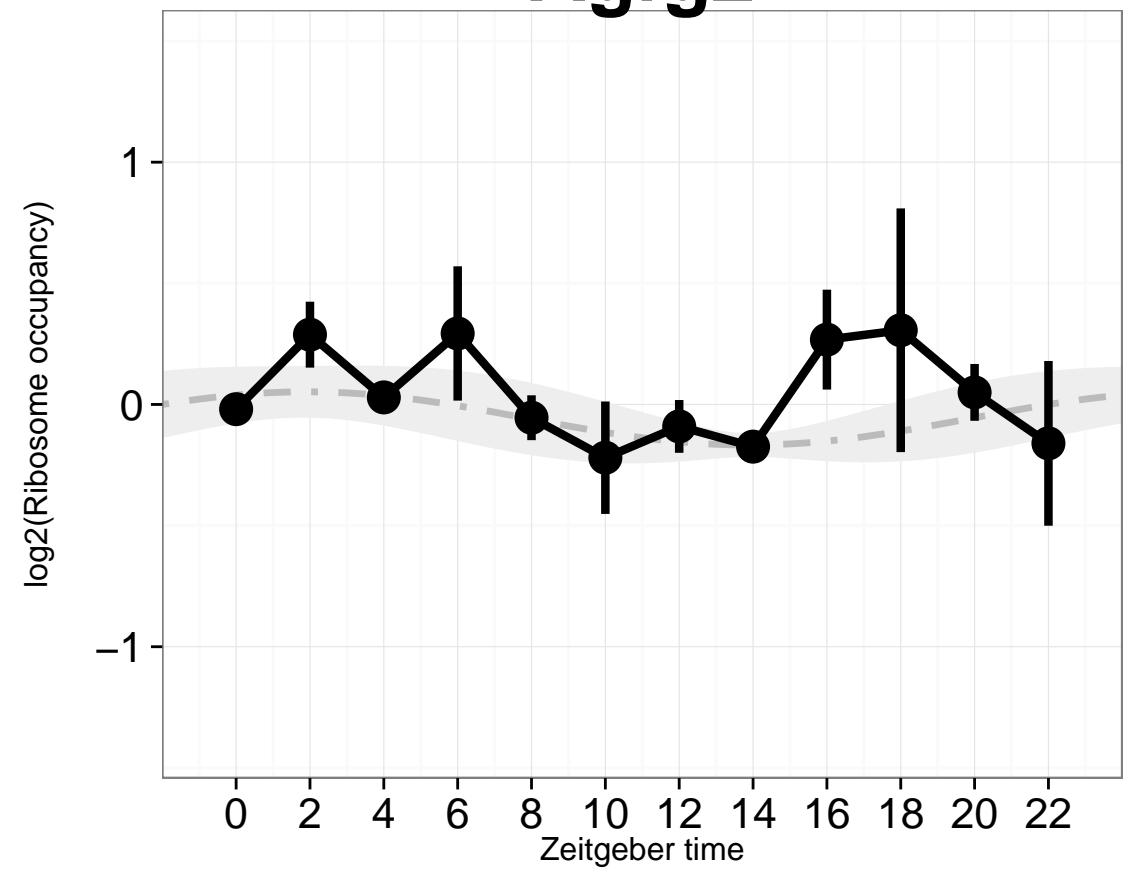

Supplement: SuppDataset_1.zip [file Agfg2_set_A.pdf › Supplemental Dataset 1/A-mRNA_nonrhyth_translation_nonrhyth/Agfg2_set_A.pdf]

# Aggf1

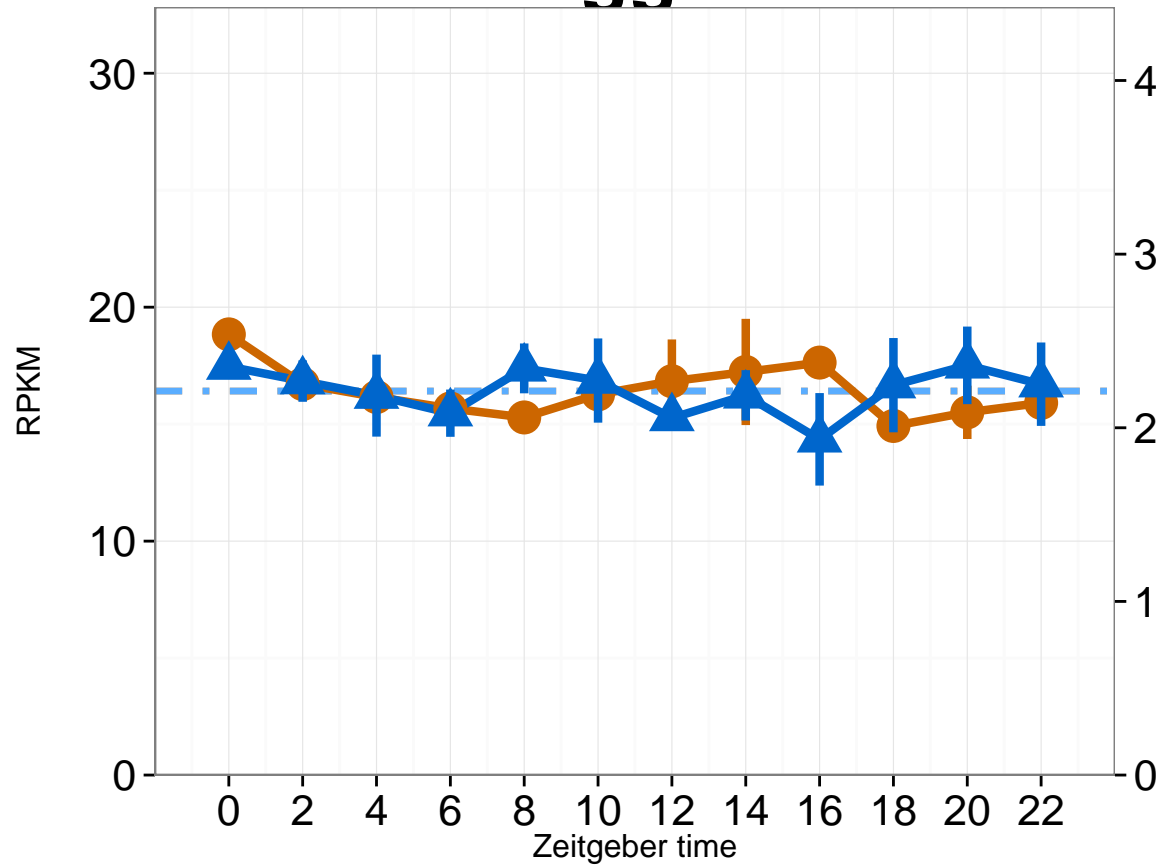

# Aggf1

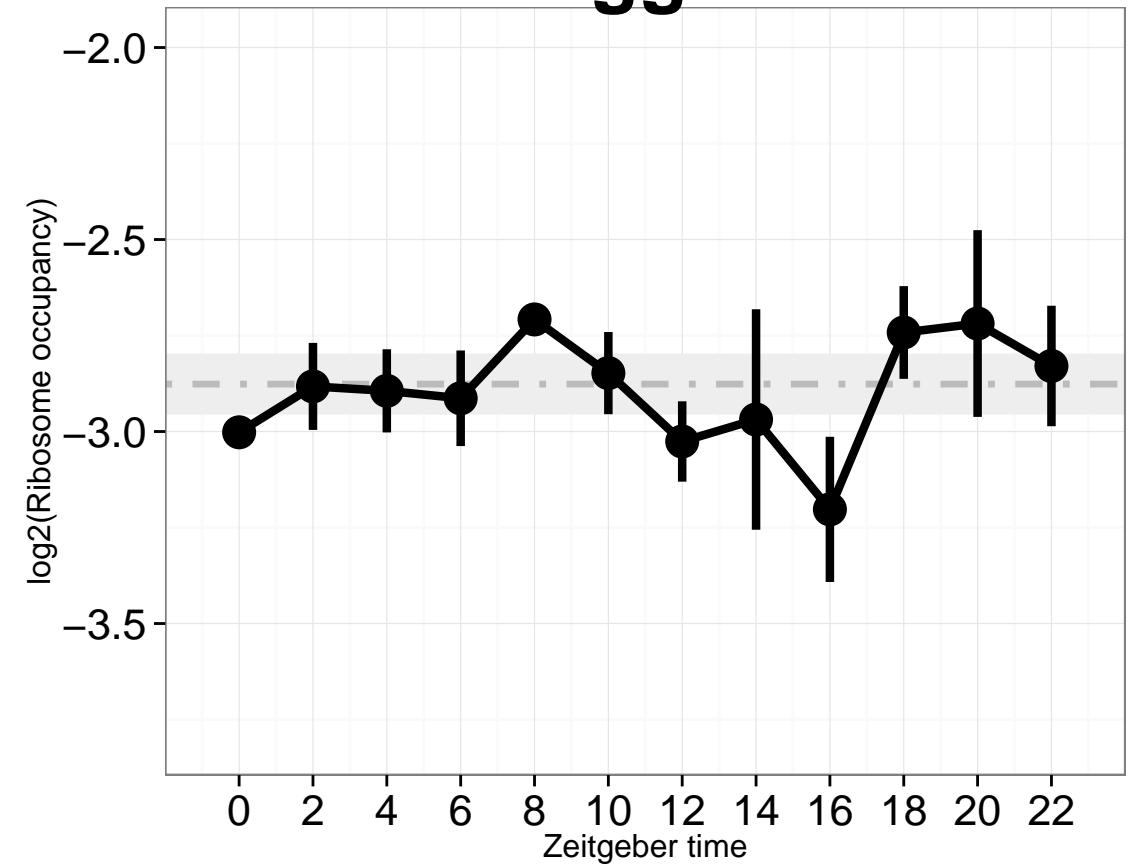

Supplement: SuppDataset_1.zip [file Aggf1_set_A.pdf › Supplemental Dataset 1/A-mRNA_nonrhyth_translation_nonrhyth/Aggf1_set_A.pdf]

## Agk

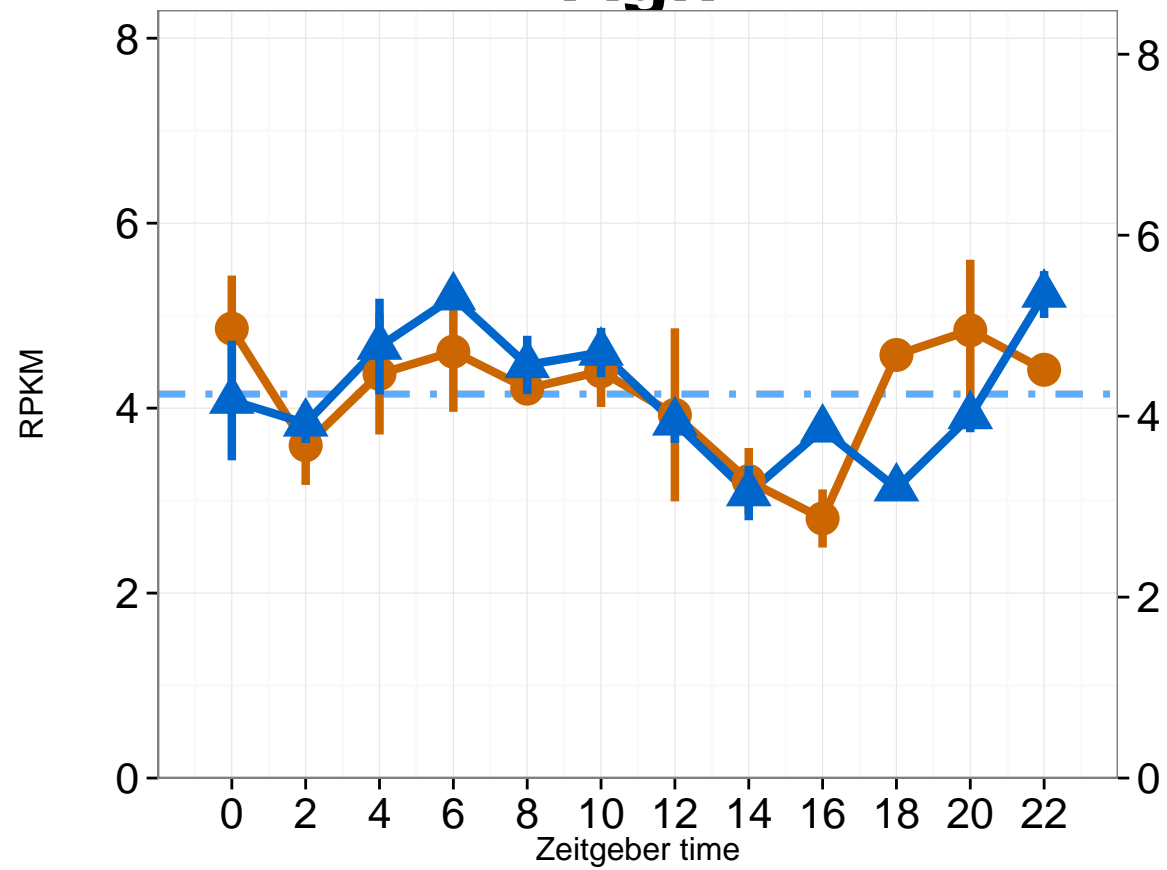

## Agk

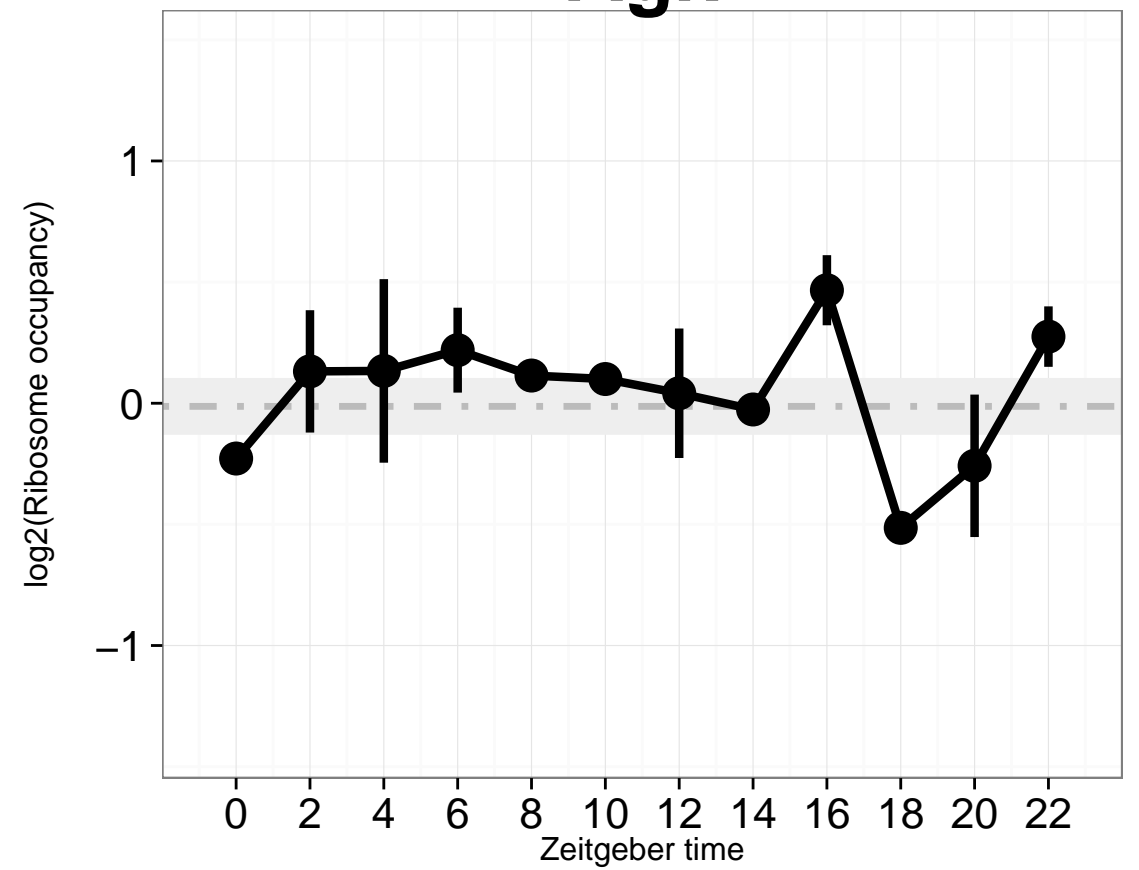

Supplement: SuppDataset_1.zip [file Agk_set_A.pdf › Supplemental Dataset 1/A-mRNA_nonrhyth_translation_nonrhyth/Agk_set_A.pdf]
