# Supplementary figures and images for: Ribosome profiling reveals the rhythmic liver translatome and circadian clock regulation by upstream open reading frames (part 5 of 113)
Source: HighWire-hosted journal article supplement (doi:10.1101/gr.195404.115), 2015-10-20

## Agmat

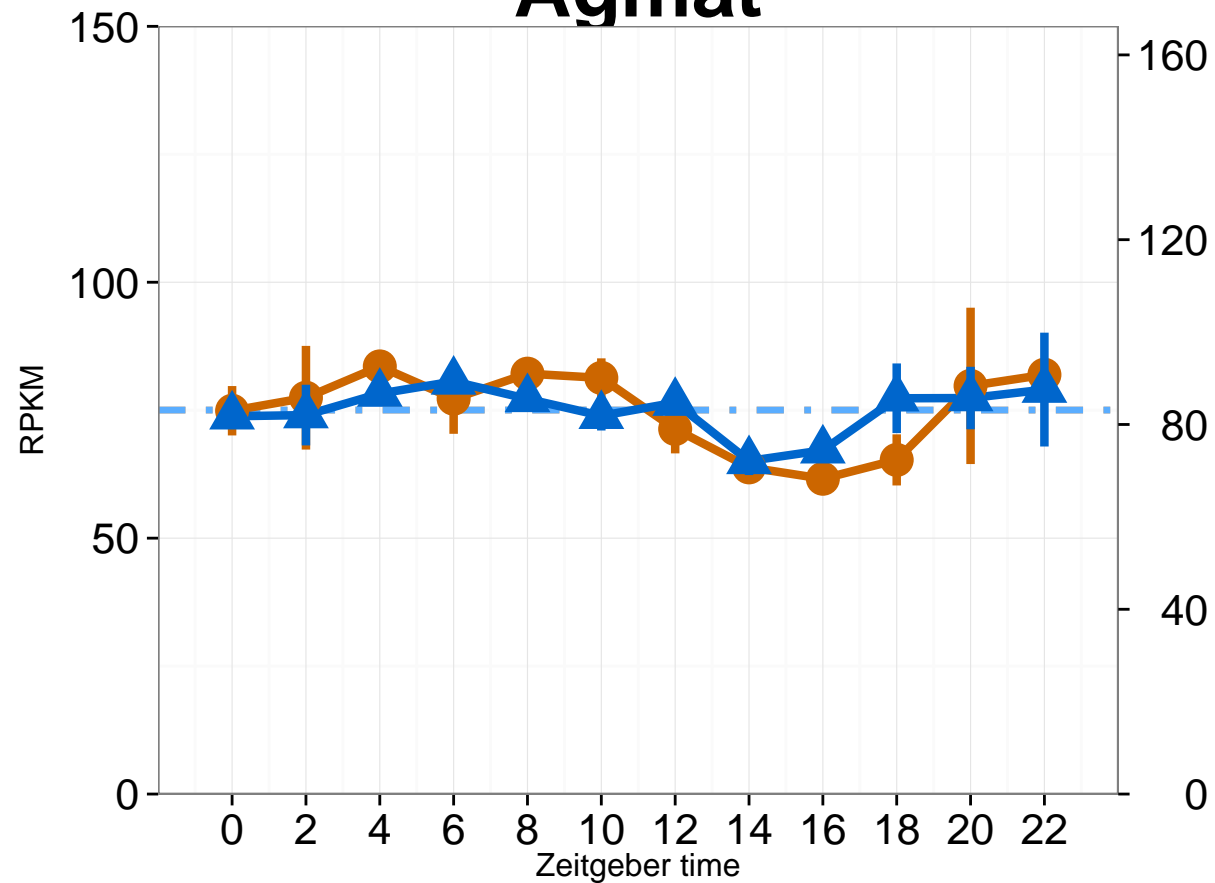

## Agmat

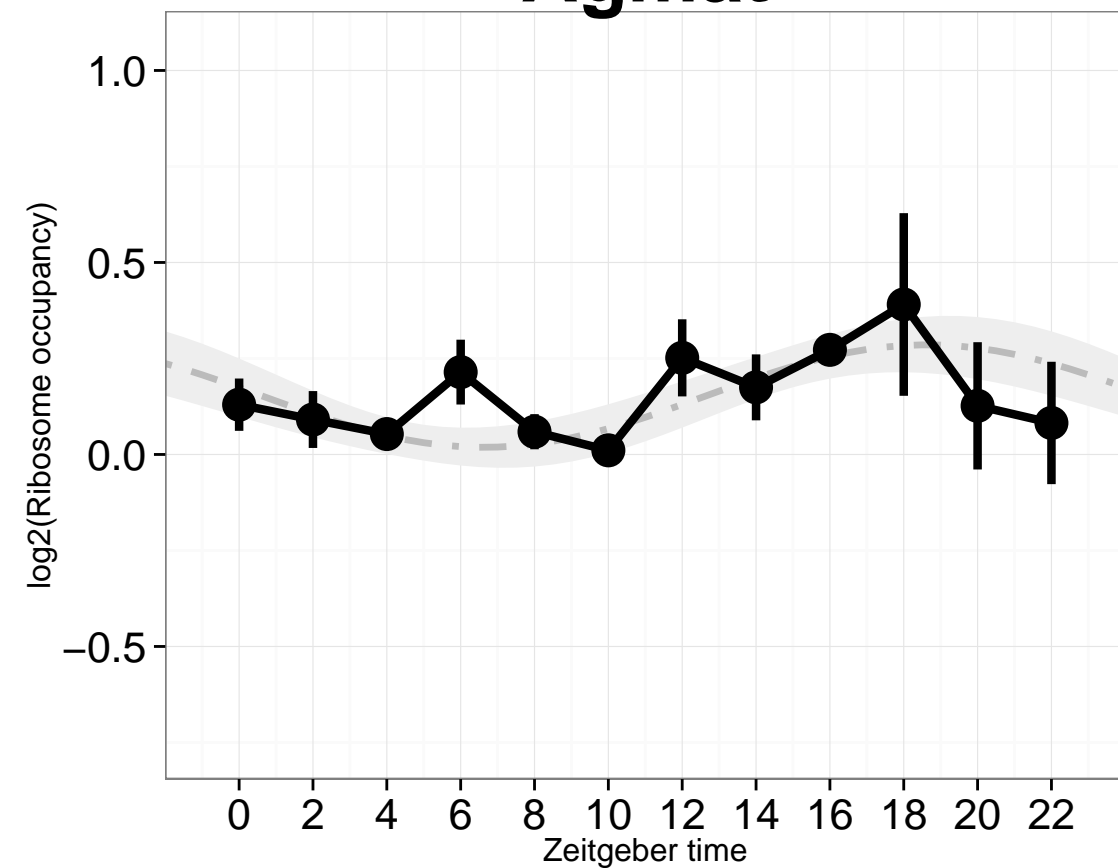

Supplement: SuppDataset_1.zip [file Agmat_set_A.pdf › Supplemental Dataset 1/A-mRNA_nonrhyth_translation_nonrhyth/Agmat_set_A.pdf]

## Agmo

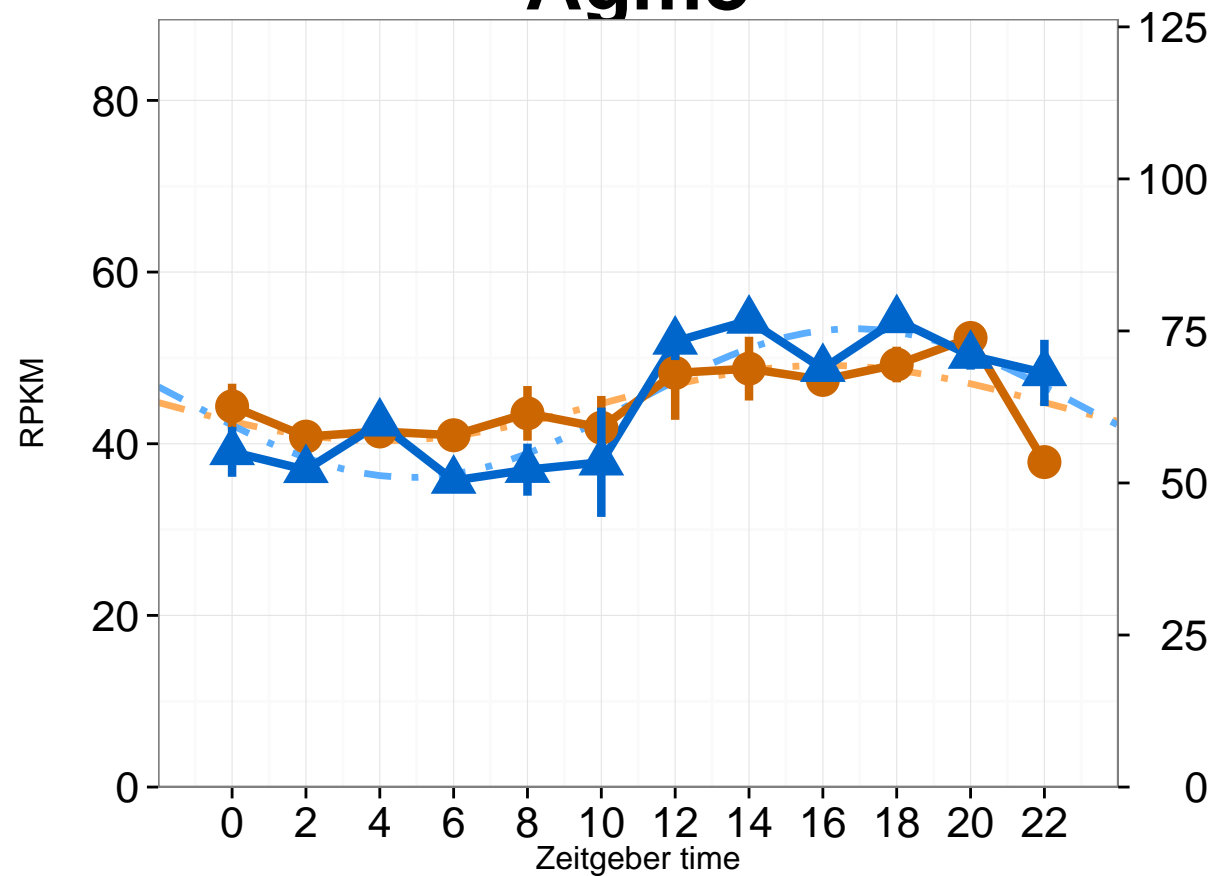

## Agmo

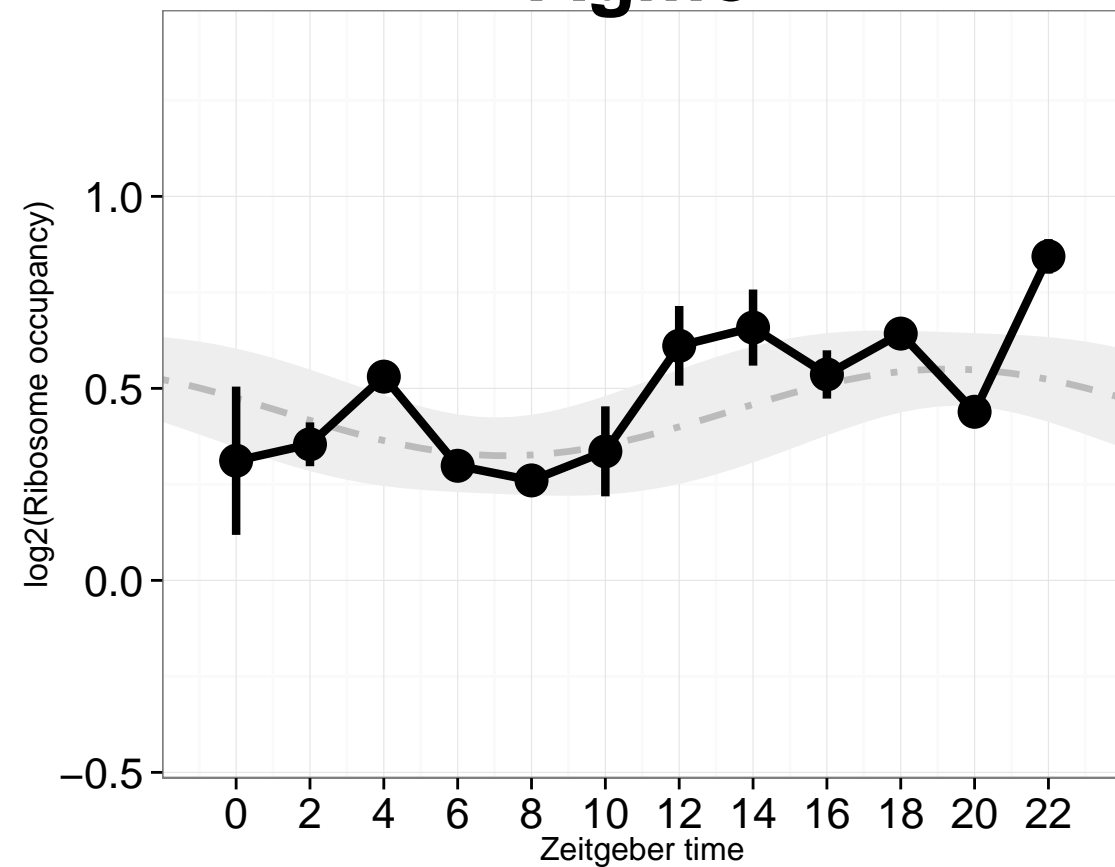

Supplement: SuppDataset_1.zip [file Agmo_set_A.pdf › Supplemental Dataset 1/A-mRNA_nonrhyth_translation_nonrhyth/Agmo_set_A.pdf]

## Ago1

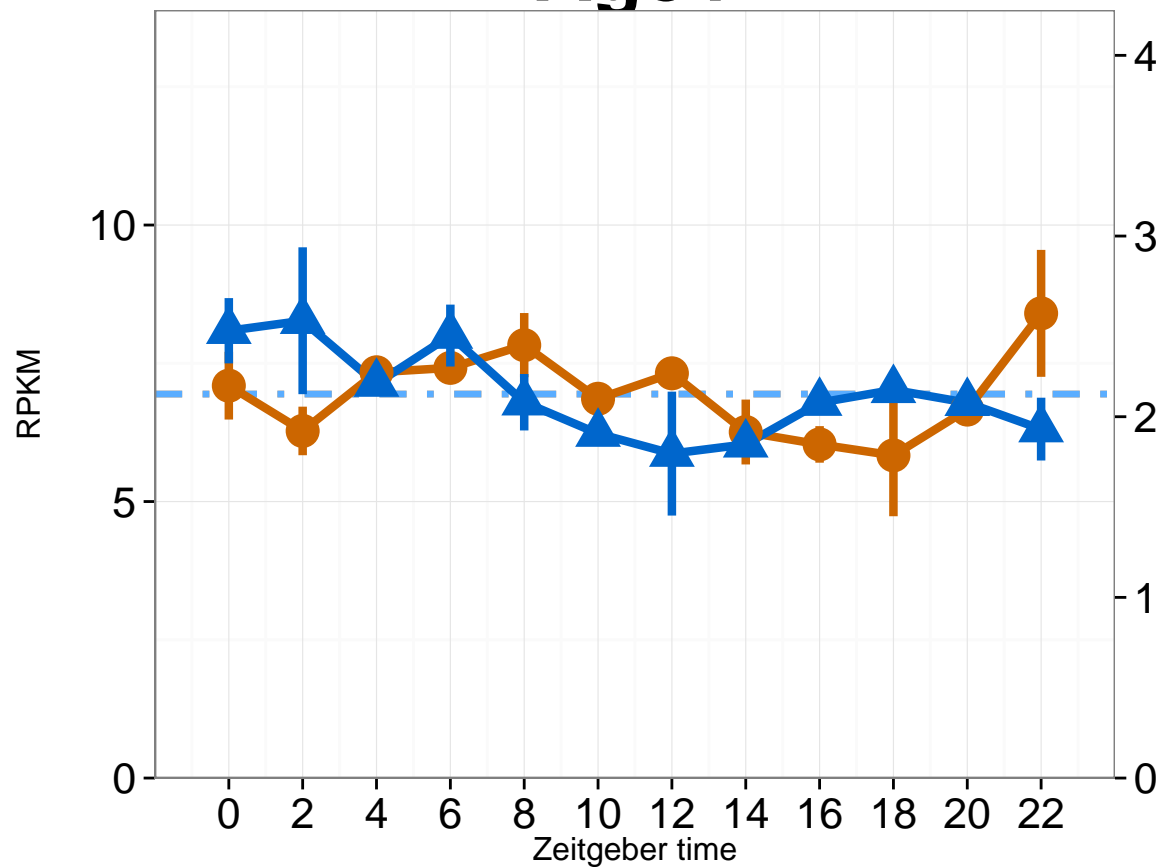

## Ago1

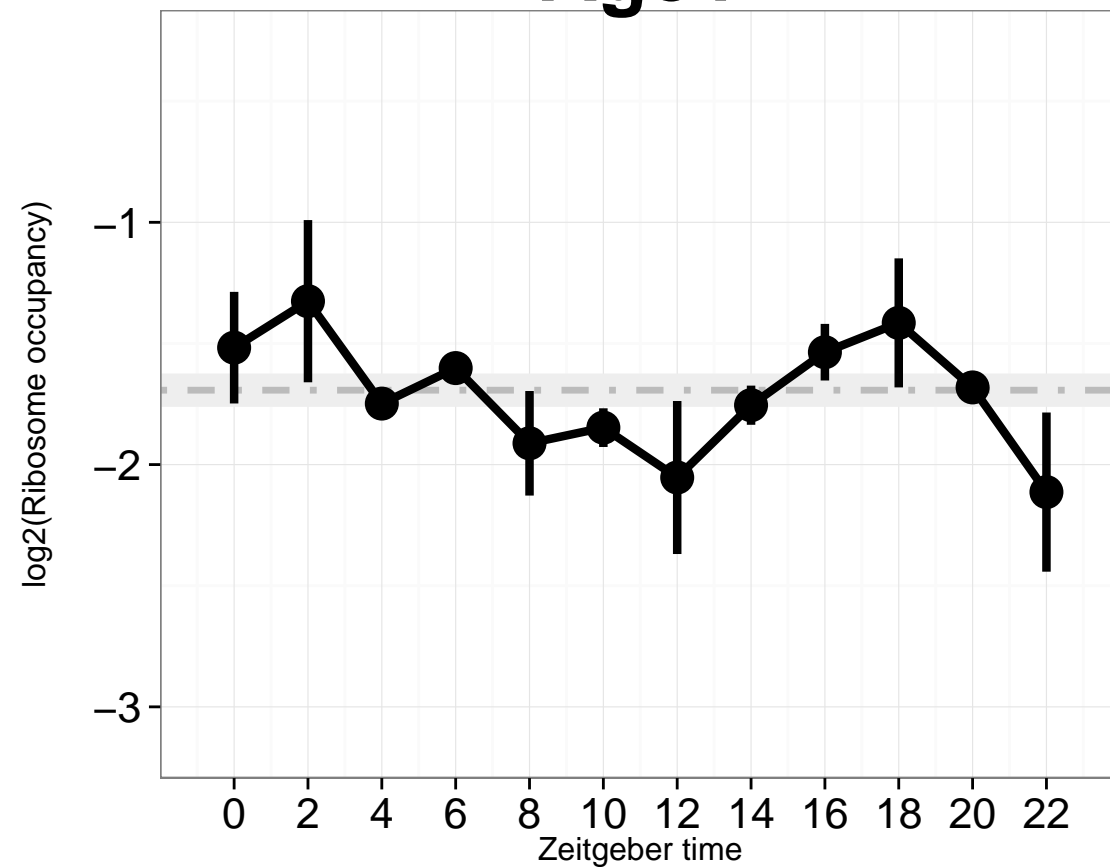

Supplement: SuppDataset_1.zip [file Ago1_set_A.pdf › Supplemental Dataset 1/A-mRNA_nonrhyth_translation_nonrhyth/Ago1_set_A.pdf]

## Ago2

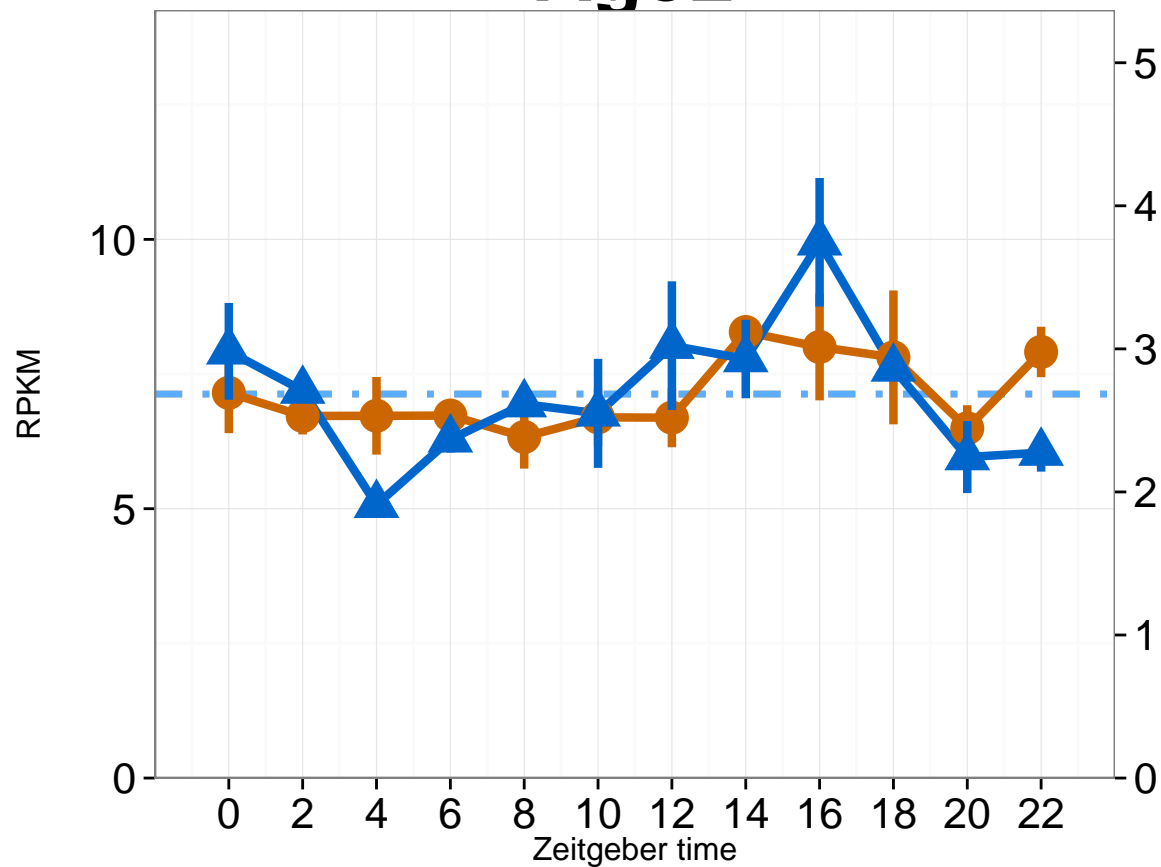

## Ago2

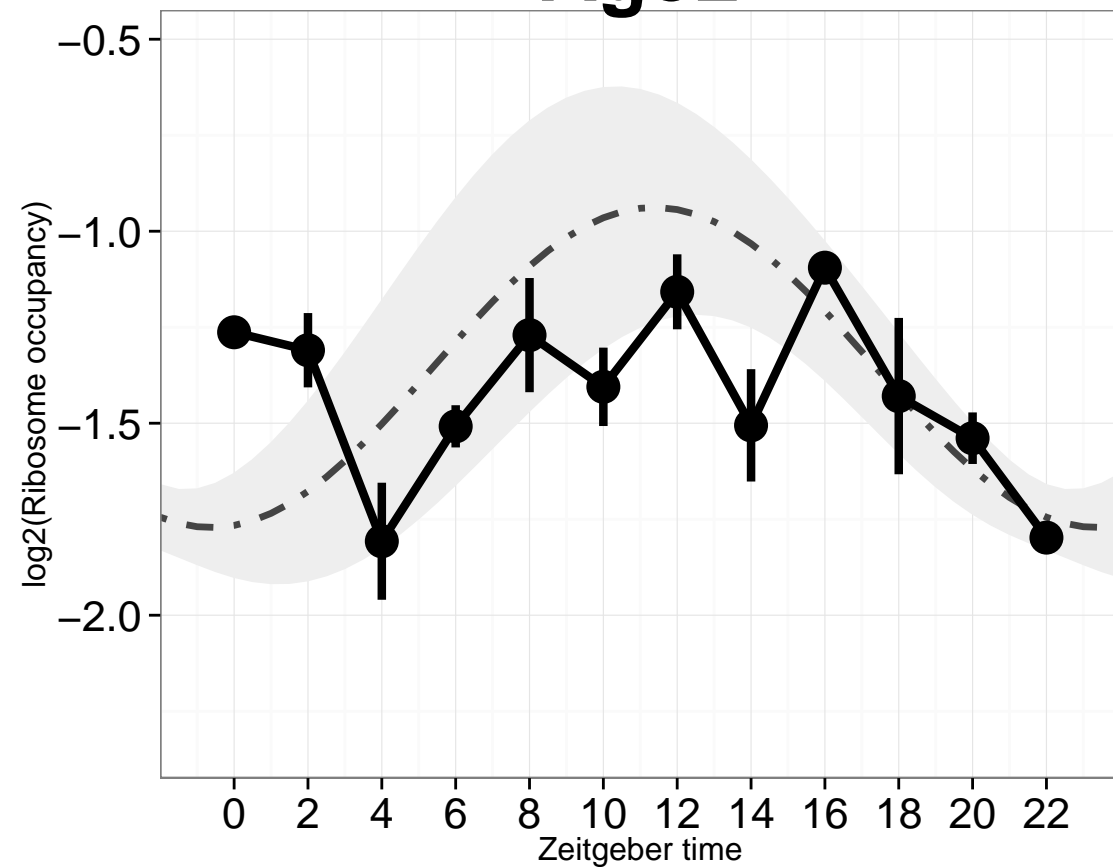

Supplement: SuppDataset_1.zip [file Ago2_set_A.pdf › Supplemental Dataset 1/A-mRNA_nonrhyth_translation_nonrhyth/Ago2_set_A.pdf]

# Agpat3

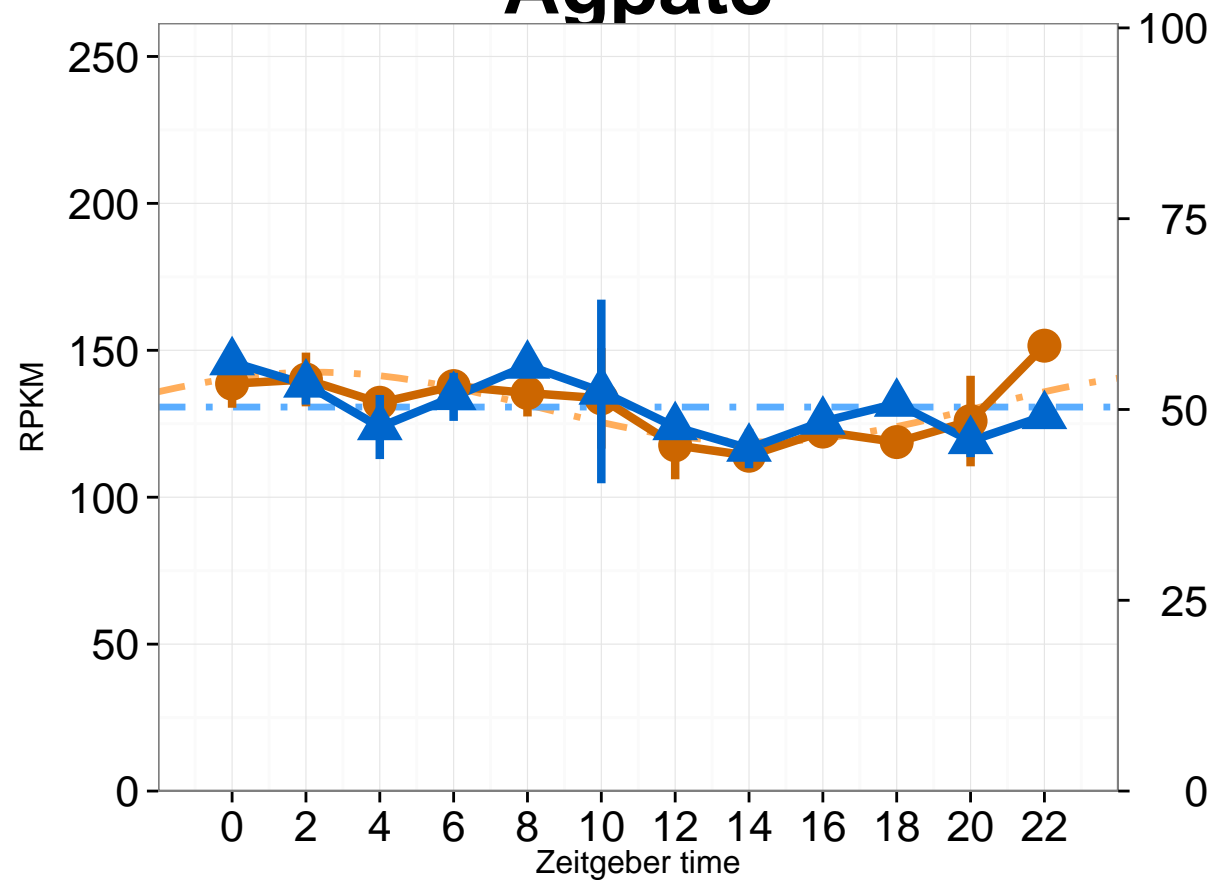

# Agpat3

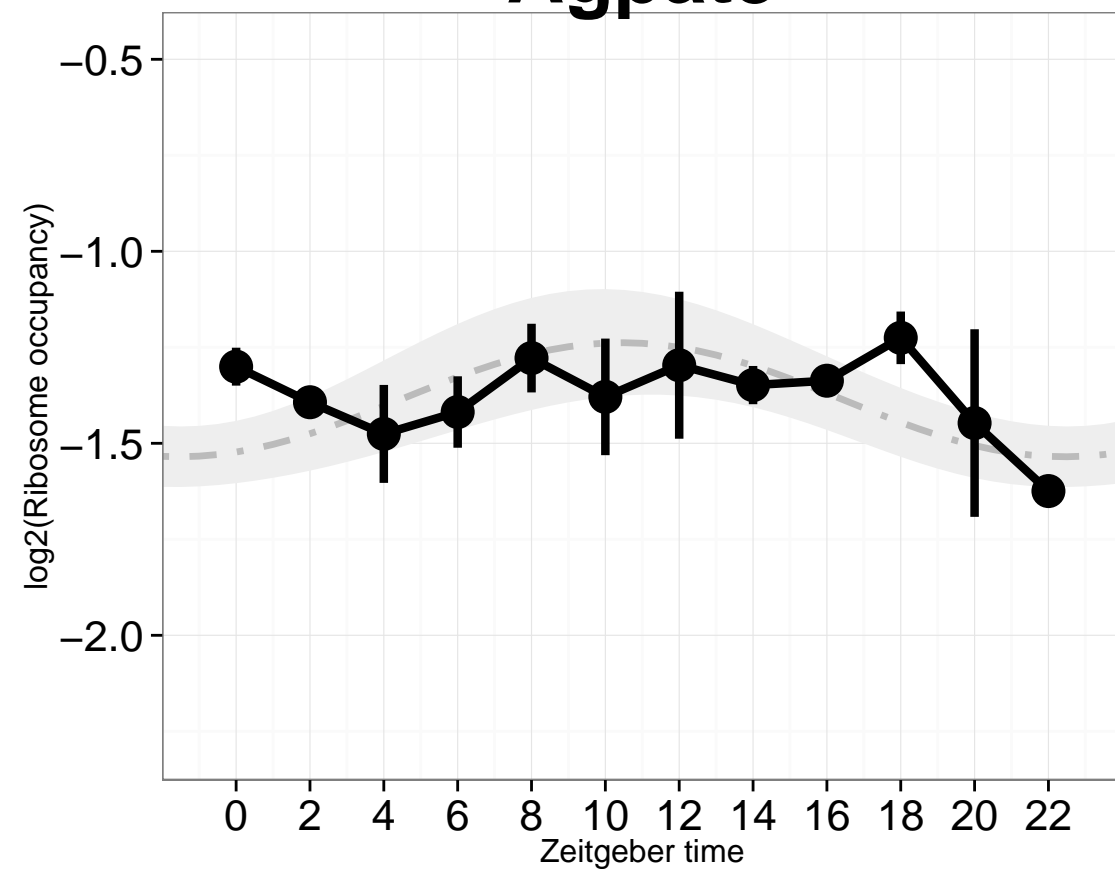

Supplement: SuppDataset_1.zip [file Agpat3_set_A.pdf › Supplemental Dataset 1/A-mRNA_nonrhyth_translation_nonrhyth/Agpat3_set_A.pdf]

# Agpat4

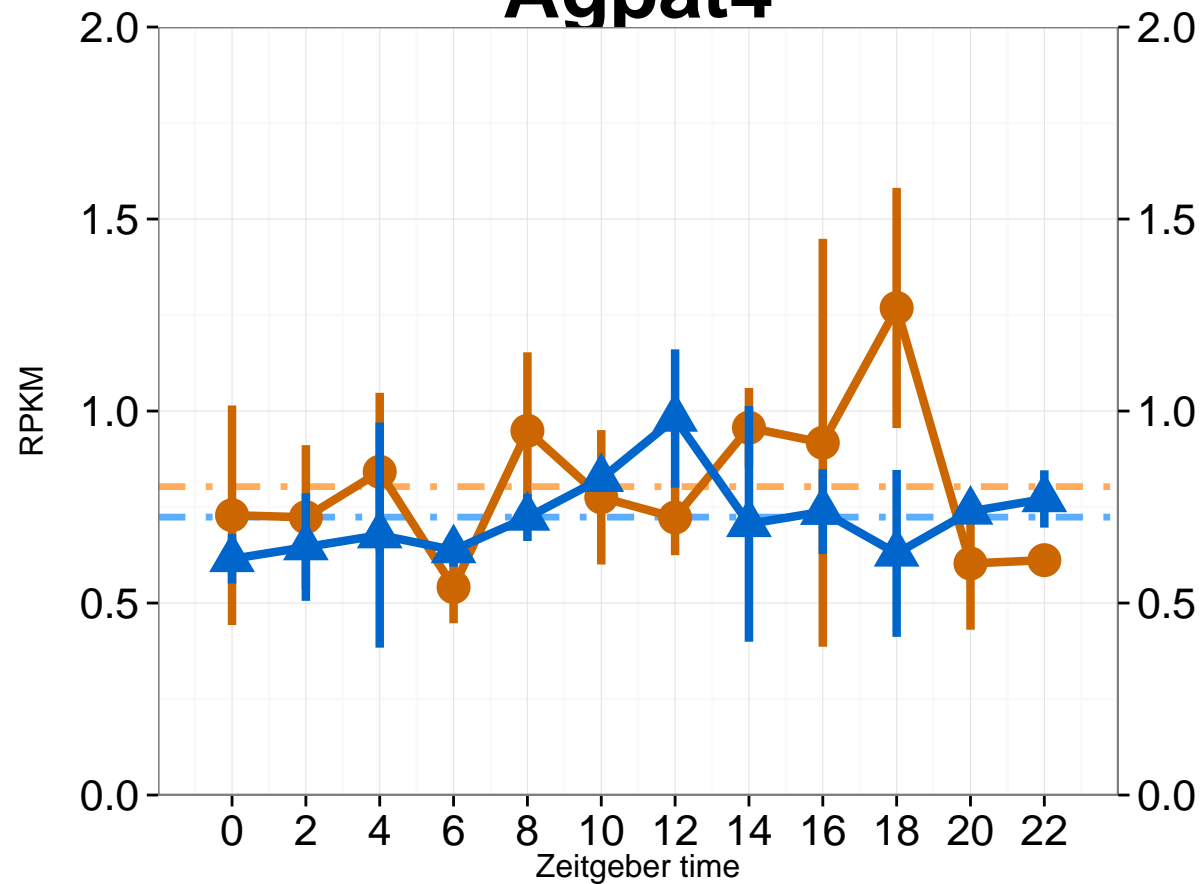

# Agpat4

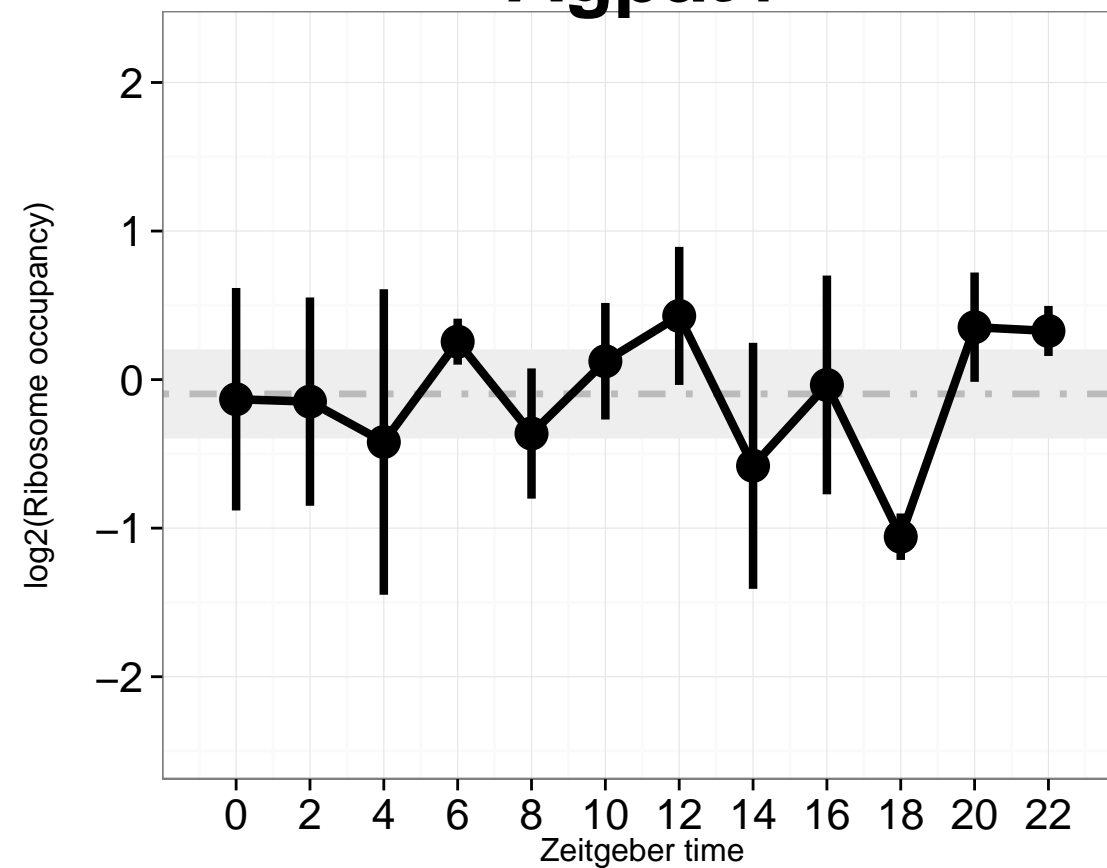

Supplement: SuppDataset_1.zip [file Agpat4_set_A.pdf › Supplemental Dataset 1/A-mRNA_nonrhyth_translation_nonrhyth/Agpat4_set_A.pdf]

## Agpat5

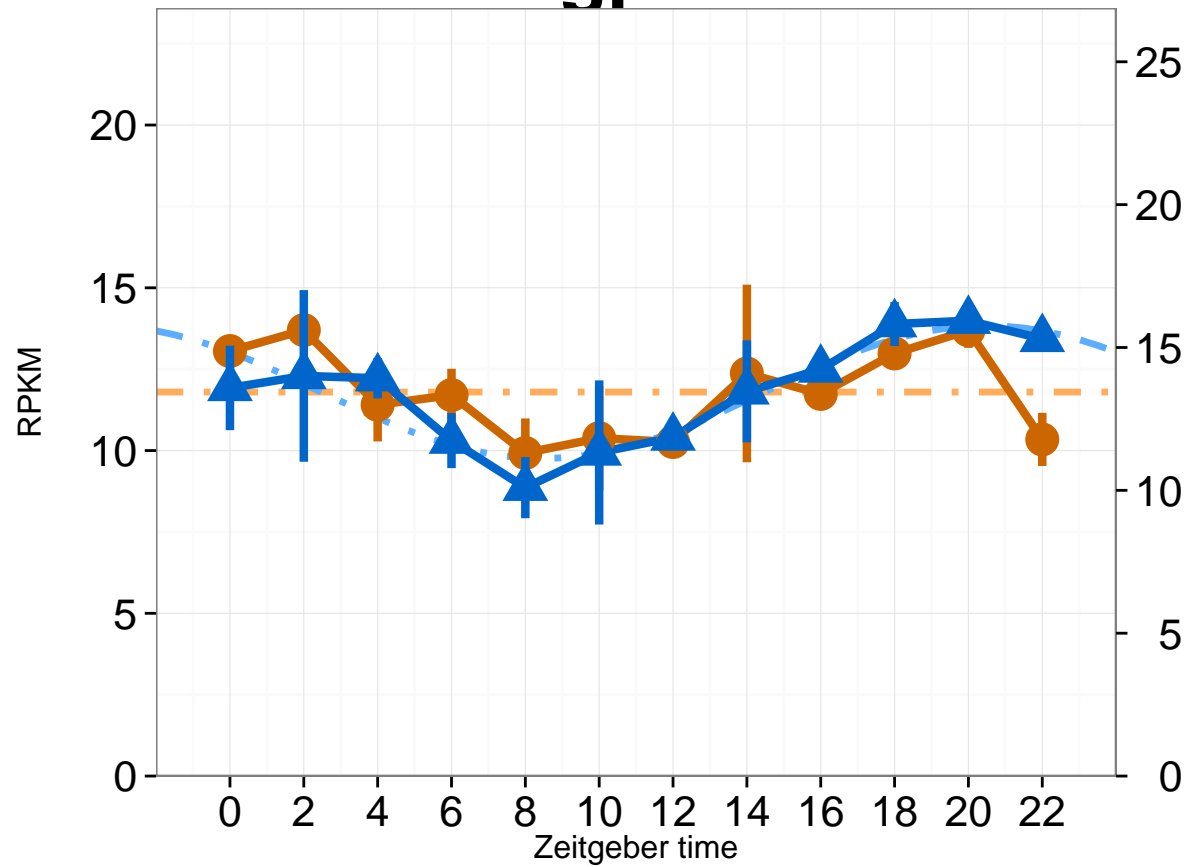

## Agpat5

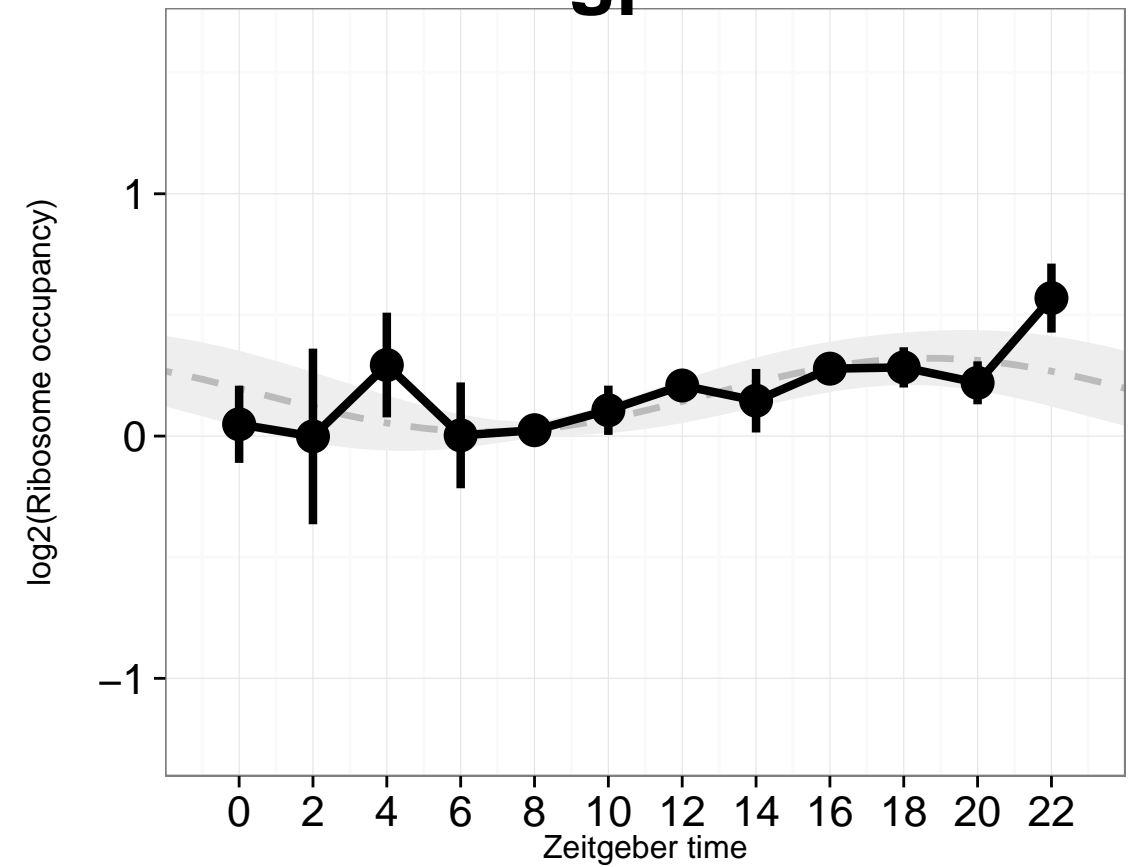

Supplement: SuppDataset_1.zip [file Agpat5_set_A.pdf › Supplemental Dataset 1/A-mRNA_nonrhyth_translation_nonrhyth/Agpat5_set_A.pdf]

# Agpat9

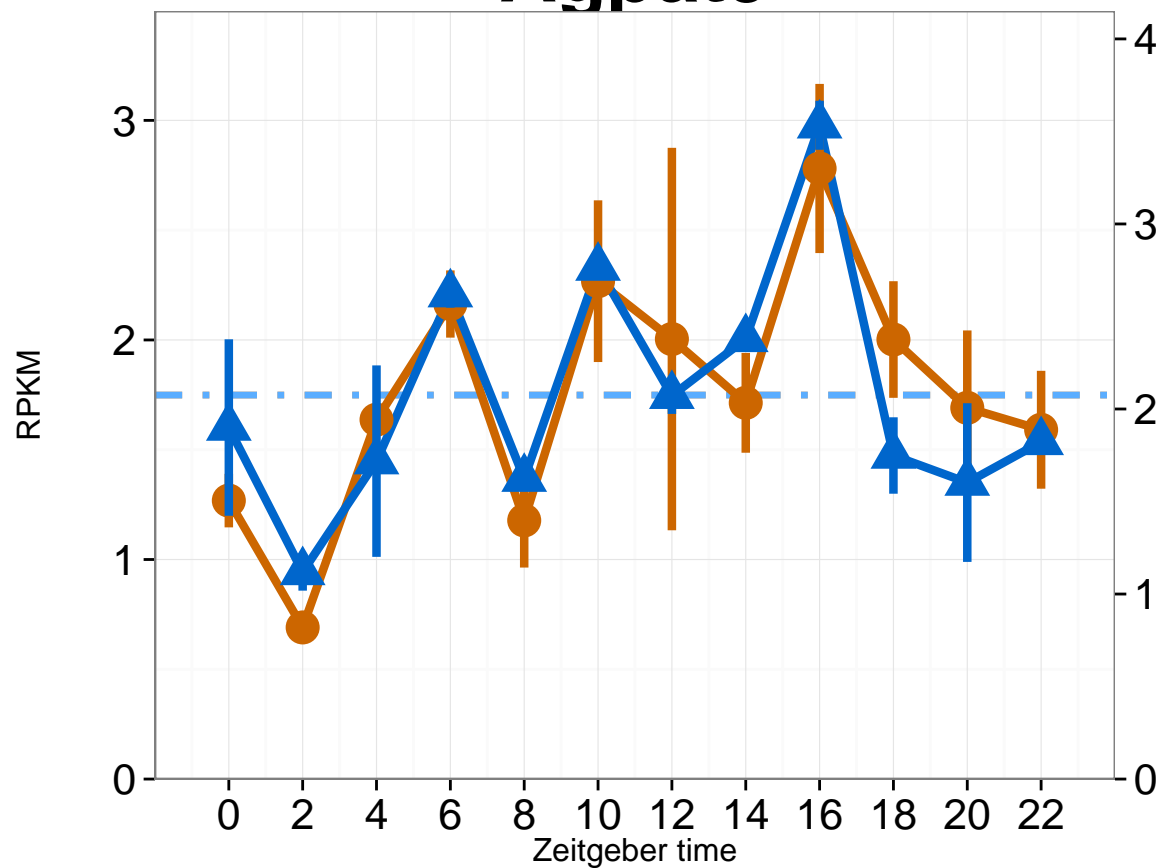

# Agpat9

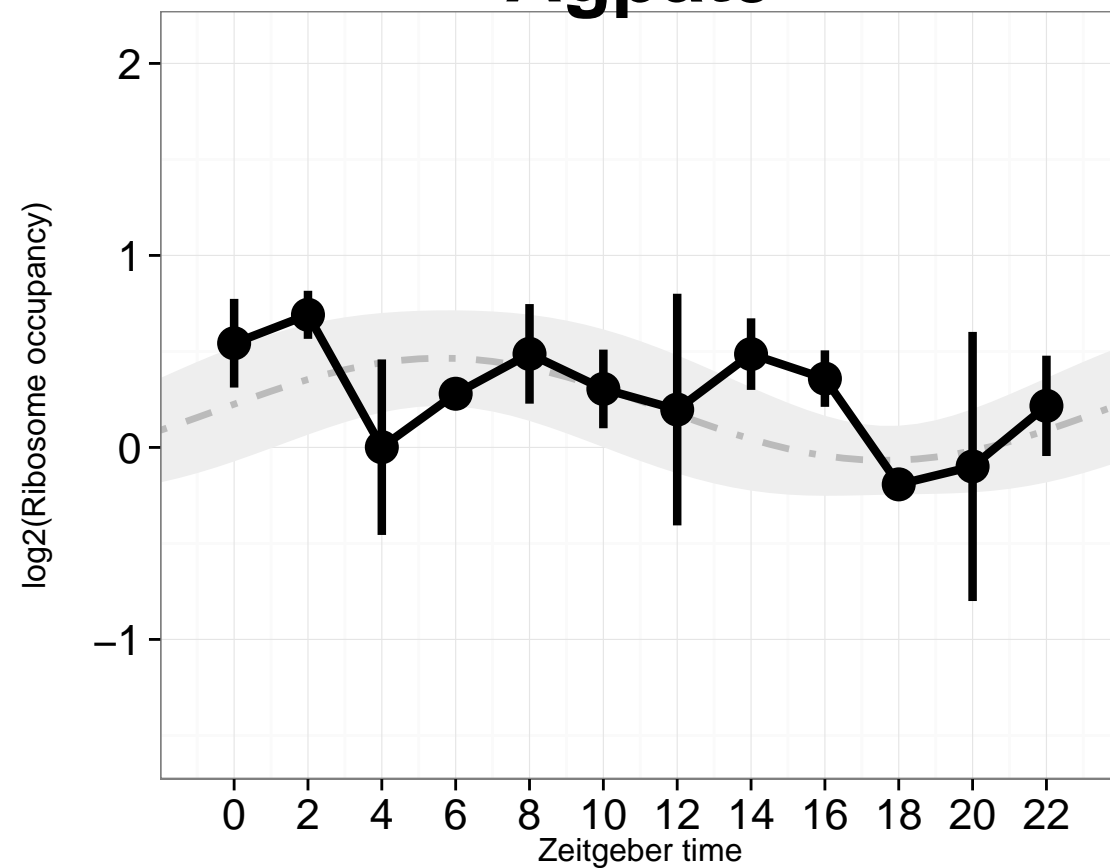

Supplement: SuppDataset_1.zip [file Agpat9_set_A.pdf › Supplemental Dataset 1/A-mRNA_nonrhyth_translation_nonrhyth/Agpat9_set_A.pdf]

## Agps

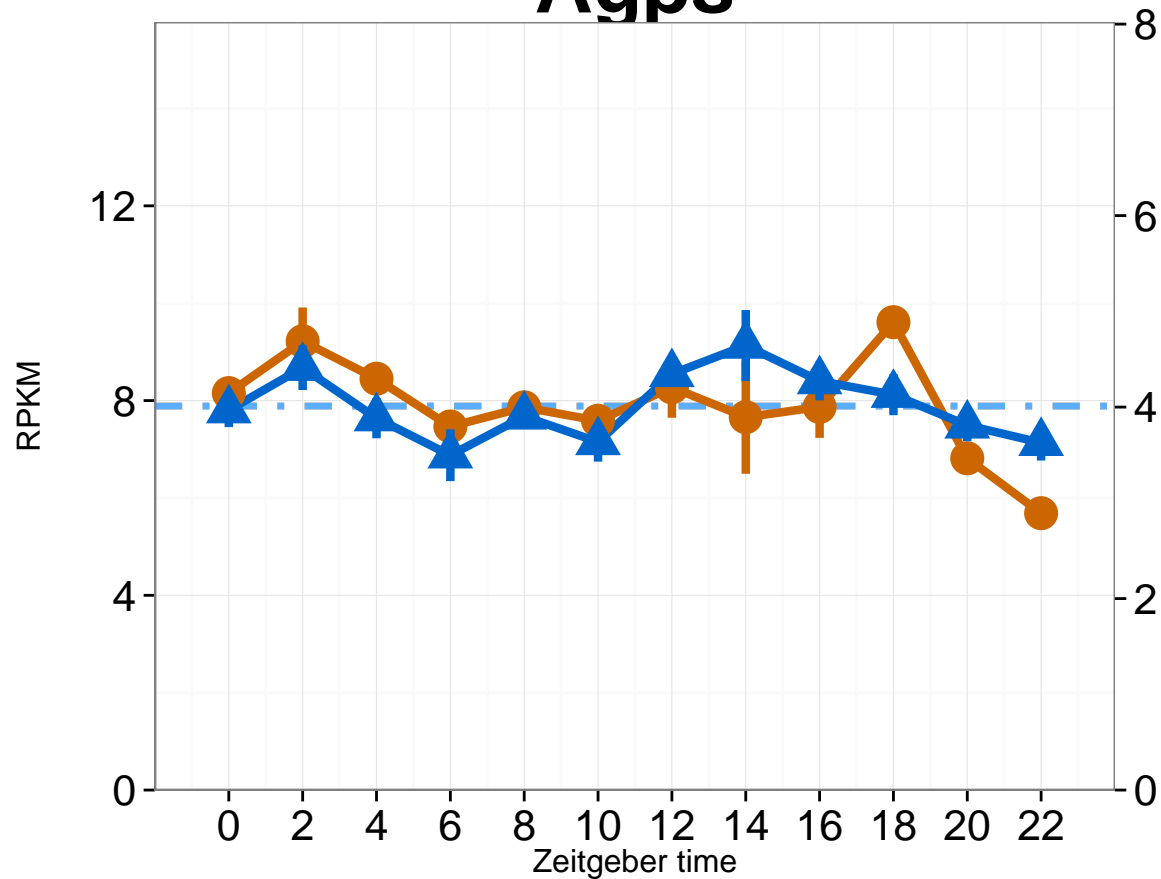

## Agps

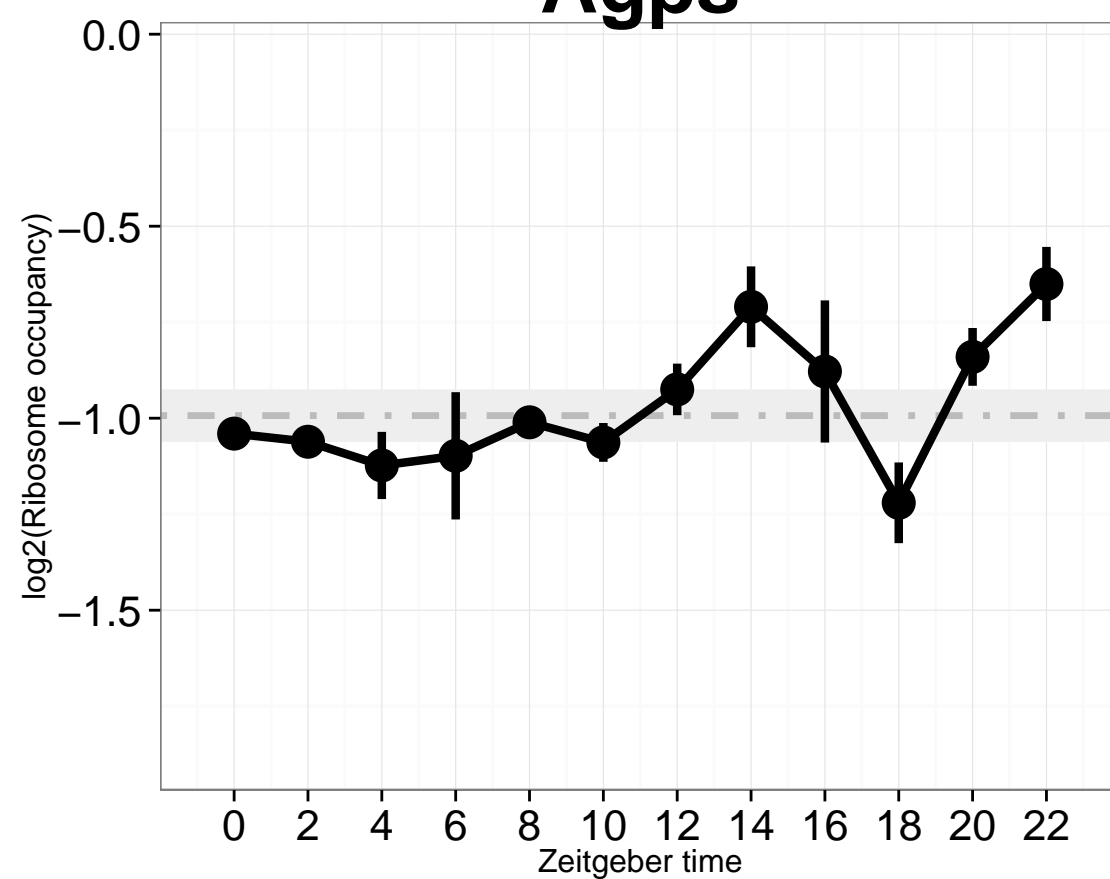

Supplement: SuppDataset_1.zip [file Agps_set_A.pdf › Supplemental Dataset 1/A-mRNA_nonrhyth_translation_nonrhyth/Agps_set_A.pdf]

## Agrn

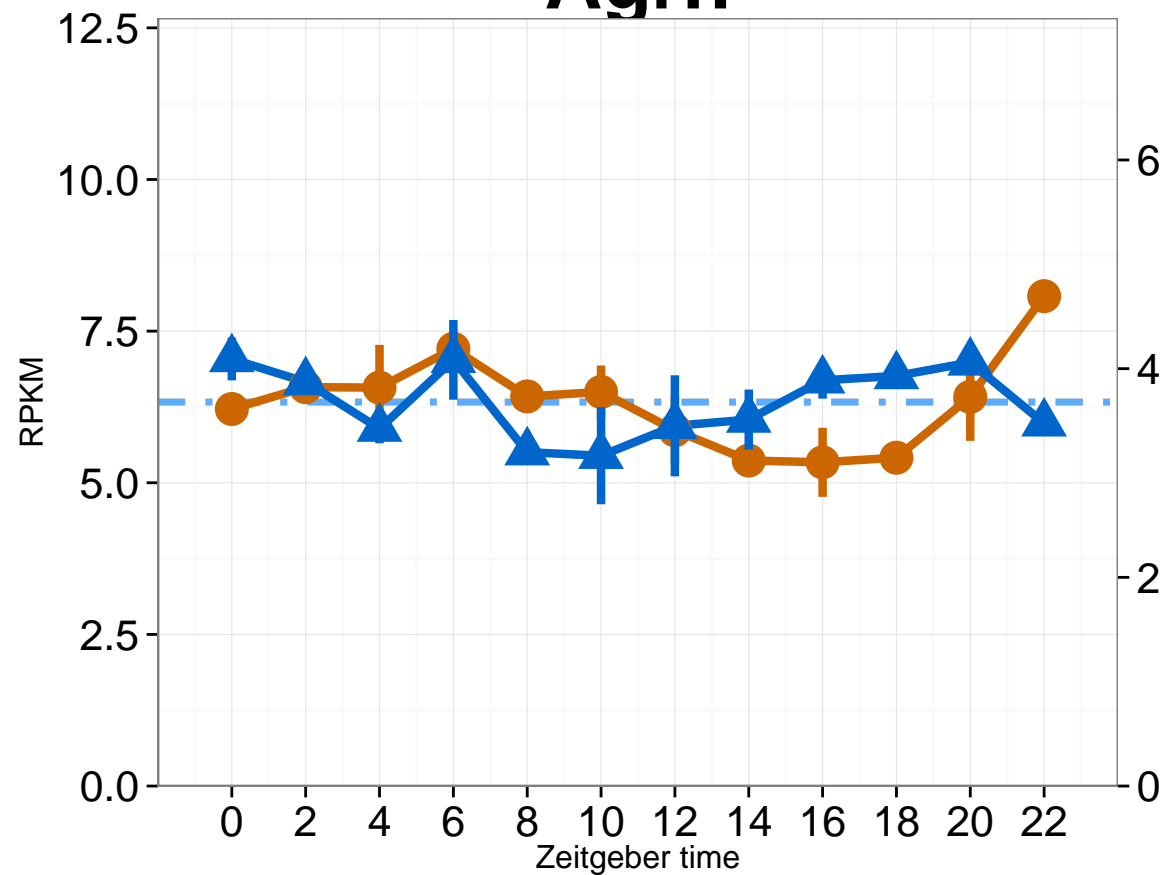

## Agrn

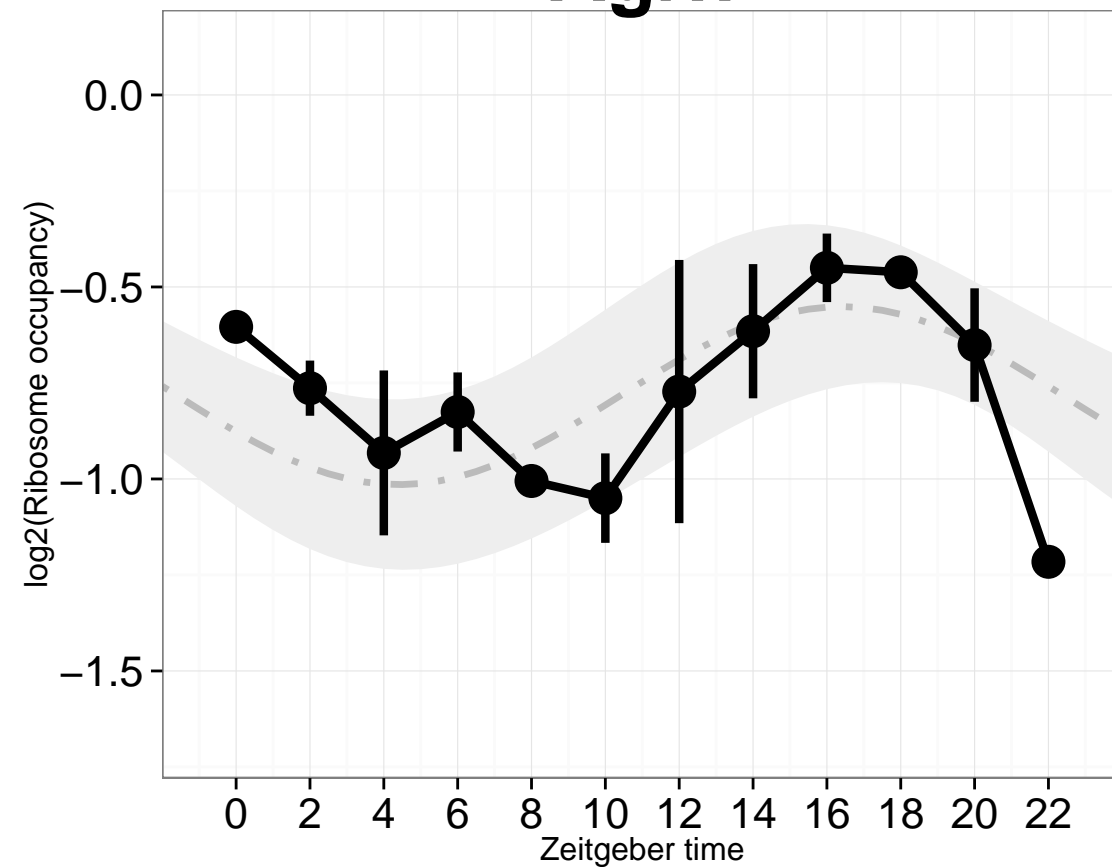

Supplement: SuppDataset_1.zip [file Agrn_set_A.pdf › Supplemental Dataset 1/A-mRNA_nonrhyth_translation_nonrhyth/Agrn_set_A.pdf]

## Agt

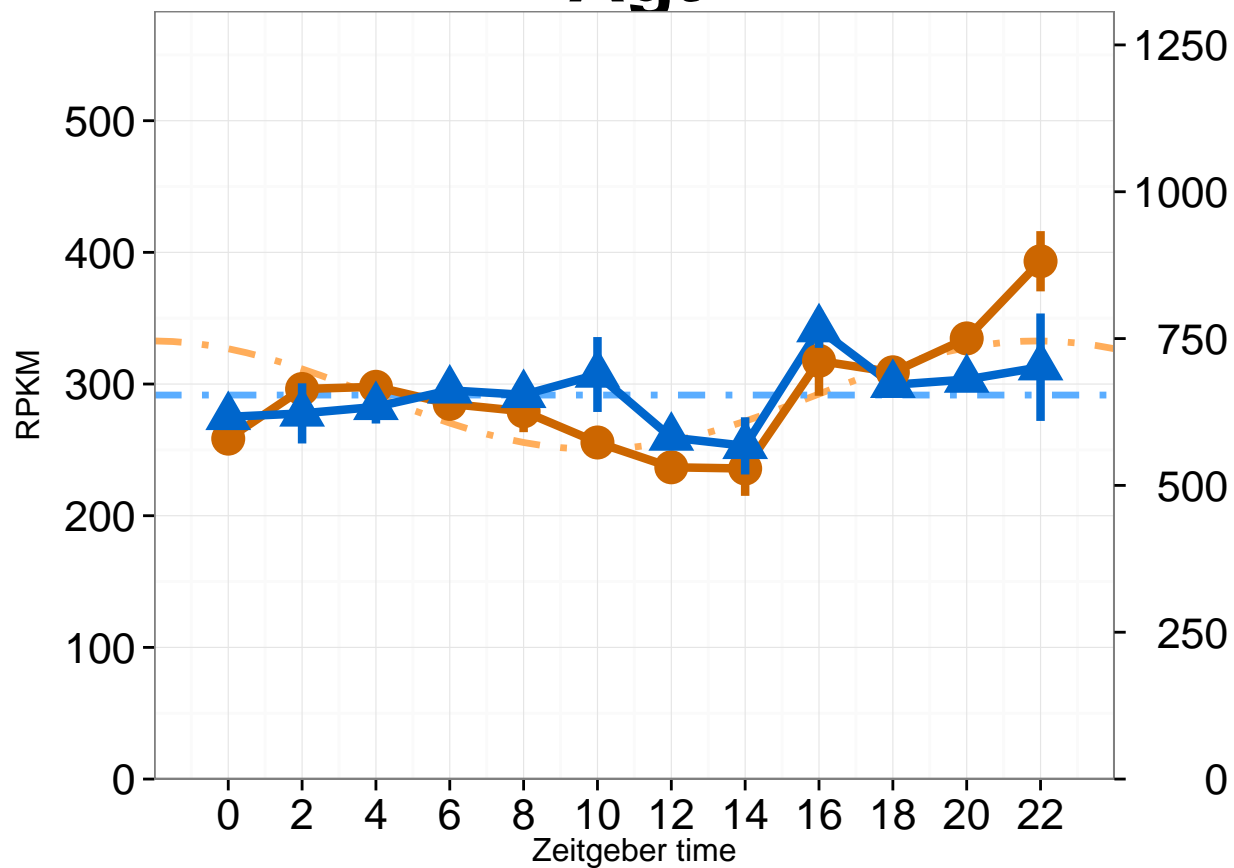

## Agt

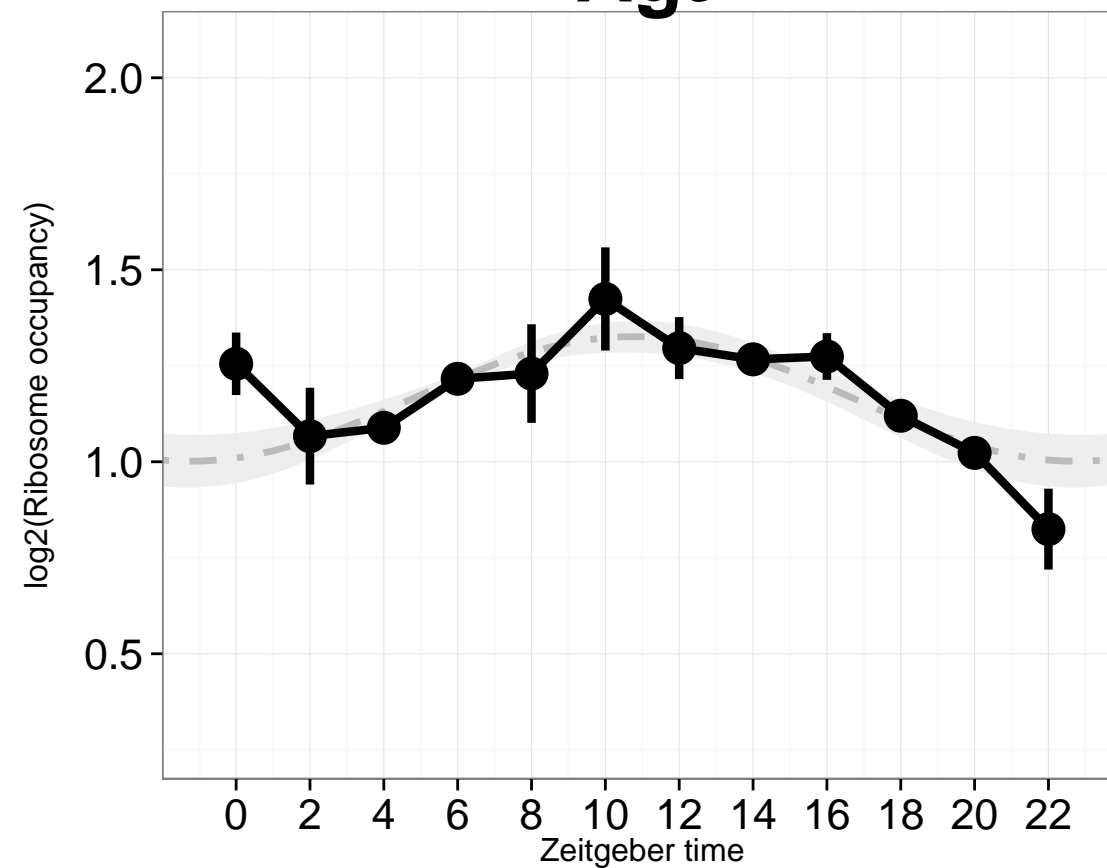

Supplement: SuppDataset_1.zip [file Agt_set_A.pdf › Supplemental Dataset 1/A-mRNA_nonrhyth_translation_nonrhyth/Agt_set_A.pdf]

# Agtrap

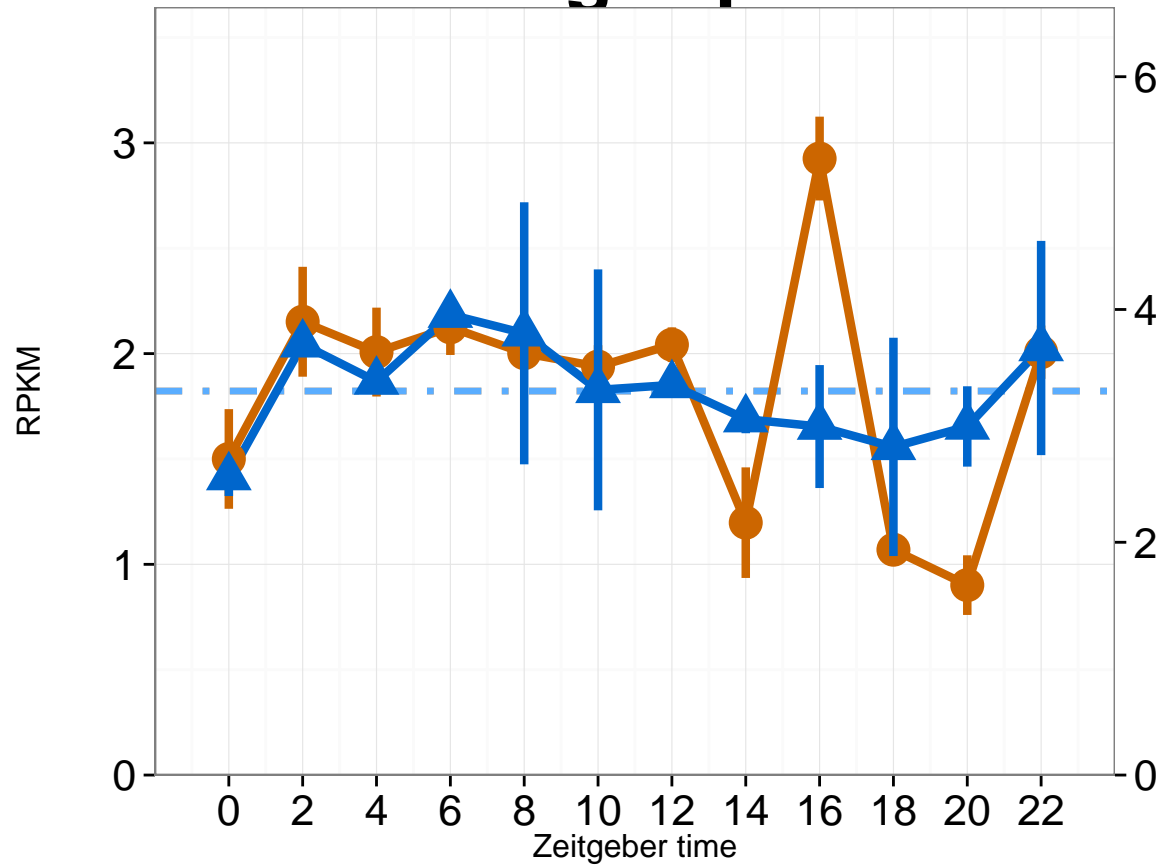

# Agtrap

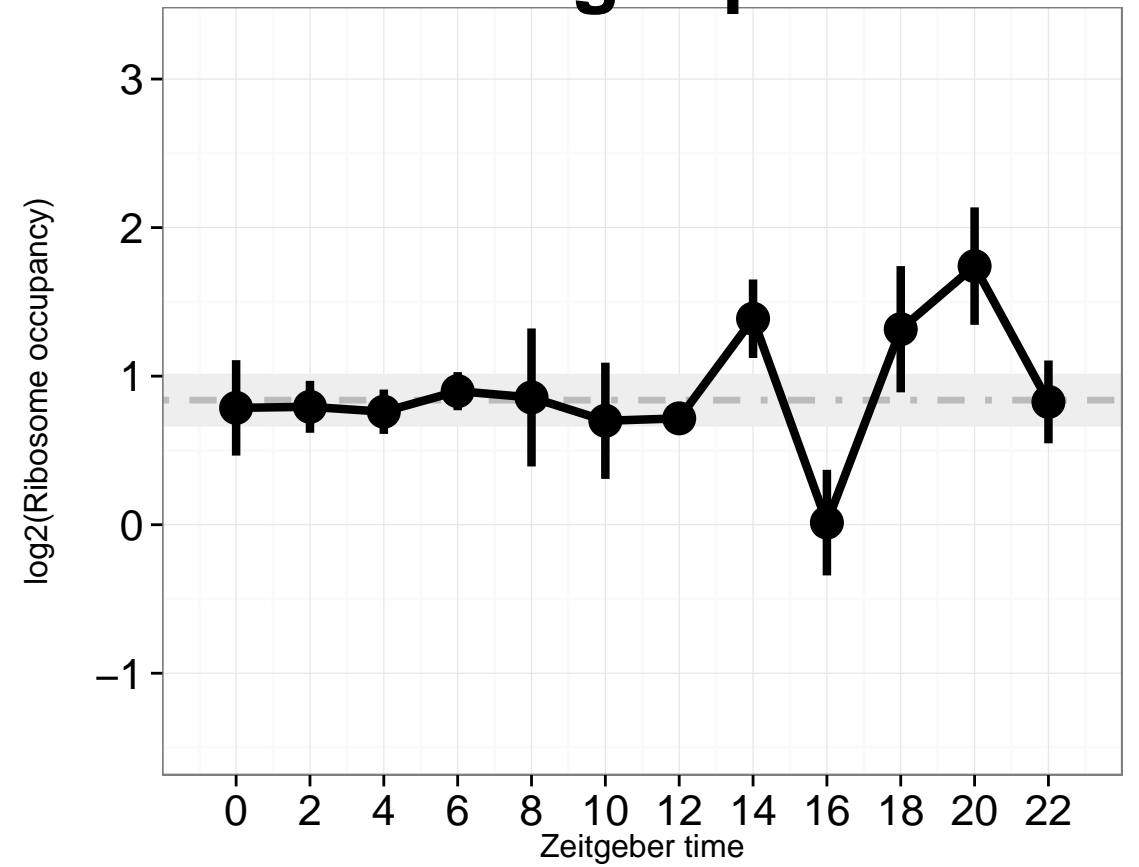

Supplement: SuppDataset_1.zip [file Agtrap_set_A.pdf › Supplemental Dataset 1/A-mRNA_nonrhyth_translation_nonrhyth/Agtrap_set_A.pdf]

## Agxt2

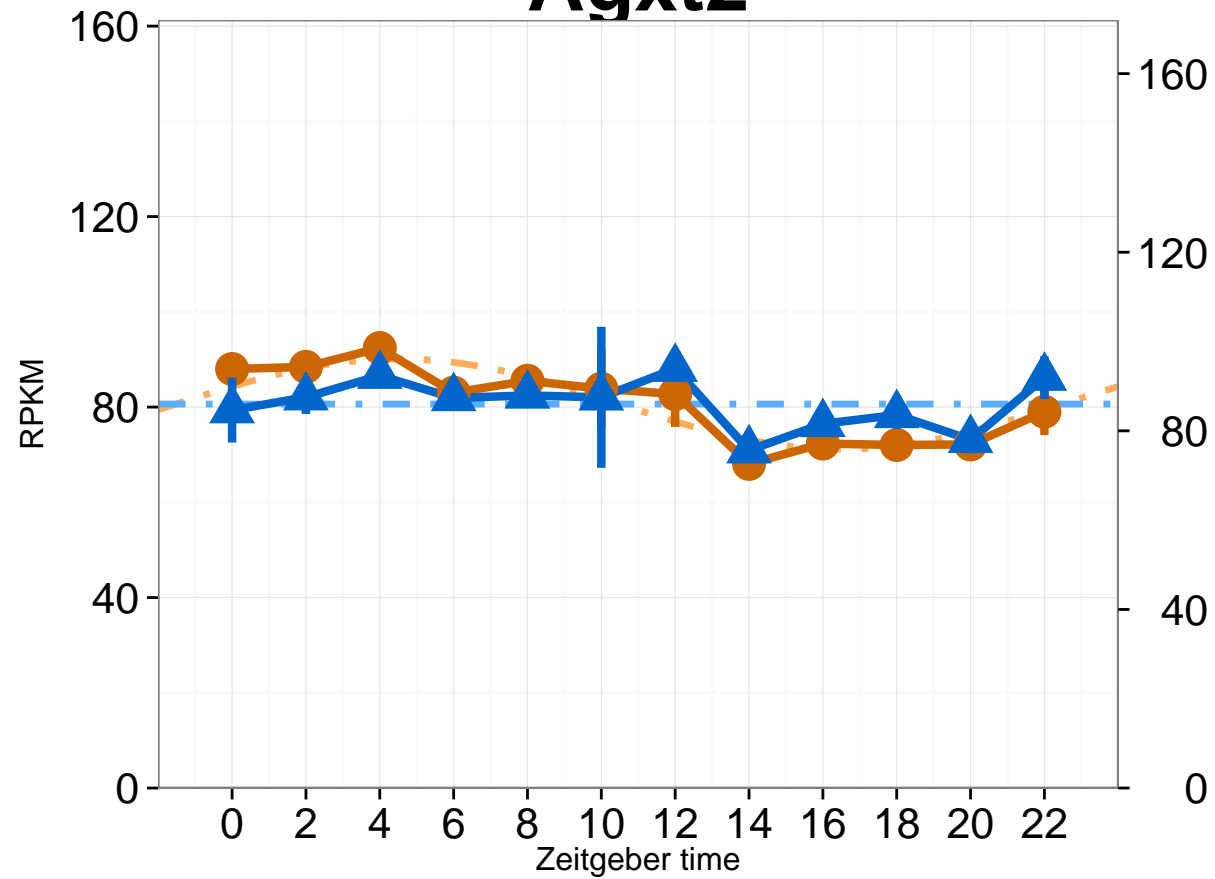

## Agxt2

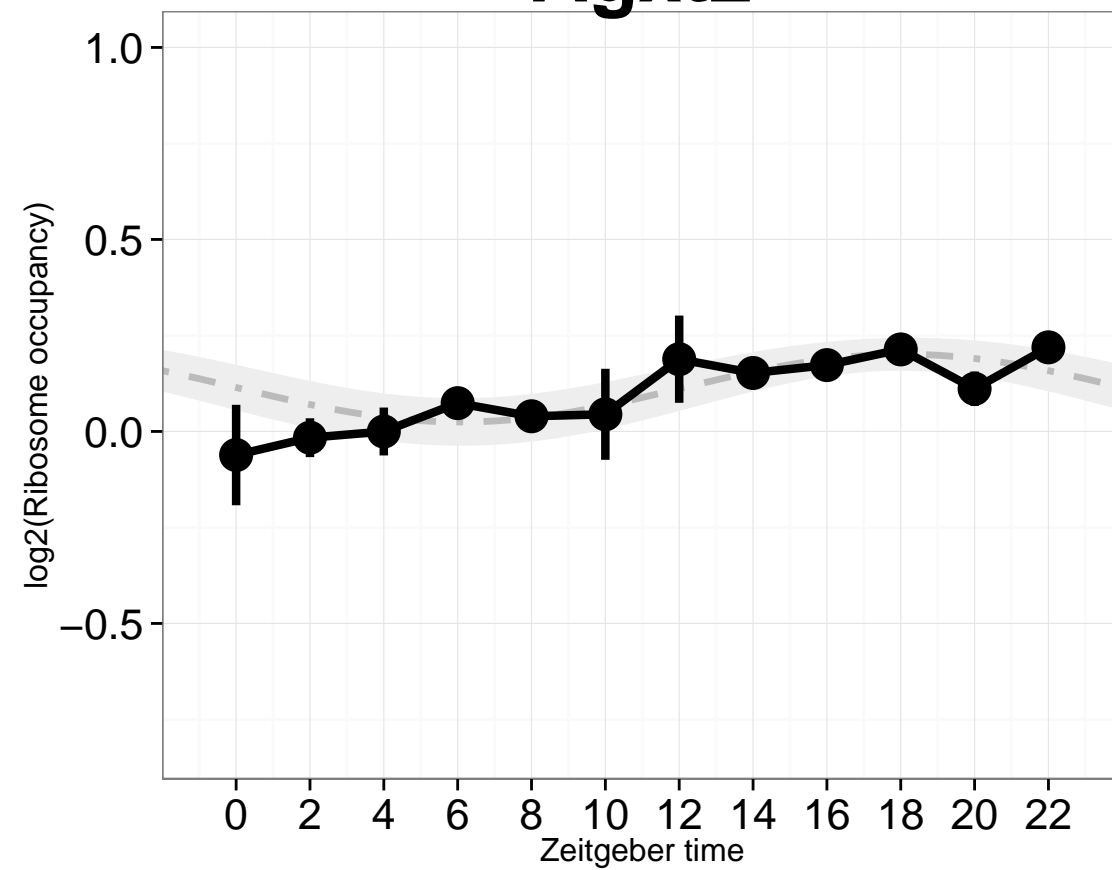

Supplement: SuppDataset_1.zip [file Agxt2_set_A.pdf › Supplemental Dataset 1/A-mRNA_nonrhyth_translation_nonrhyth/Agxt2_set_A.pdf]

# AhcyI1

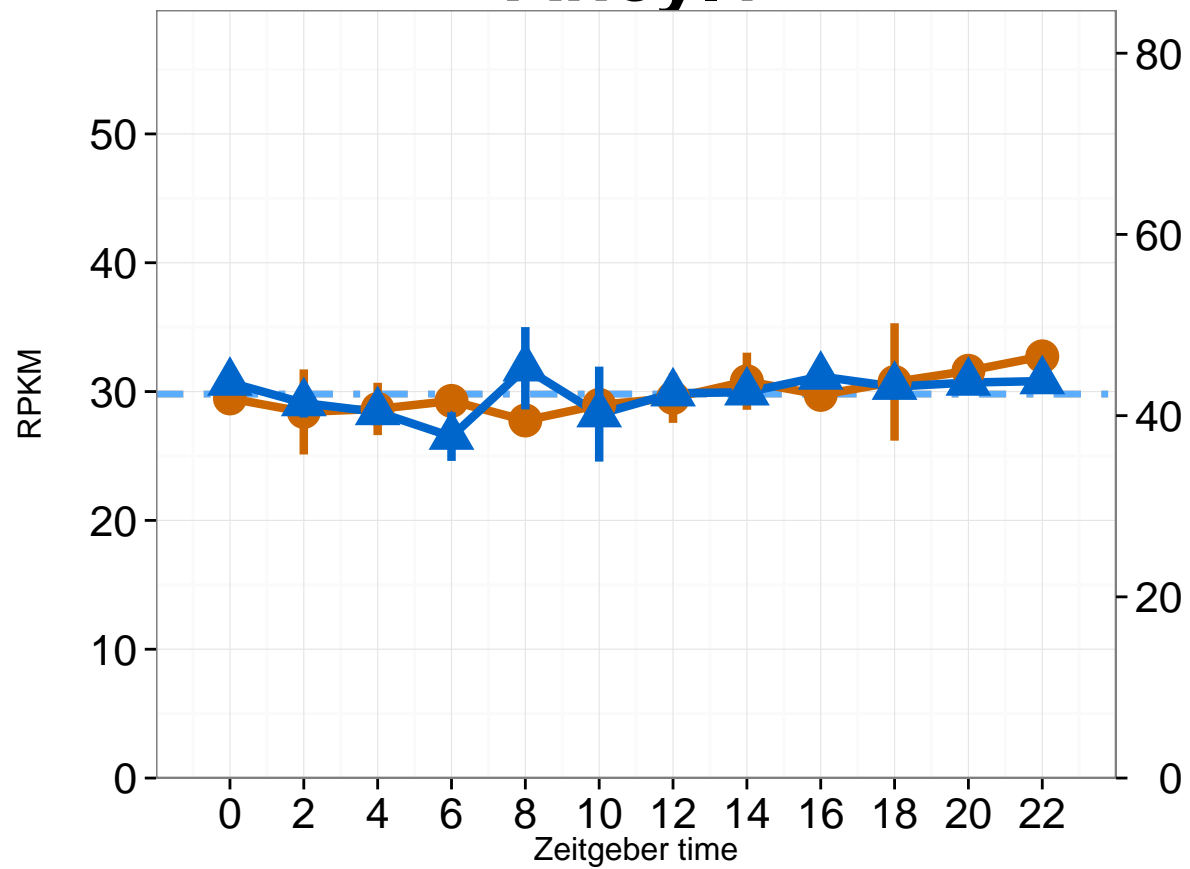

# AhcyI1

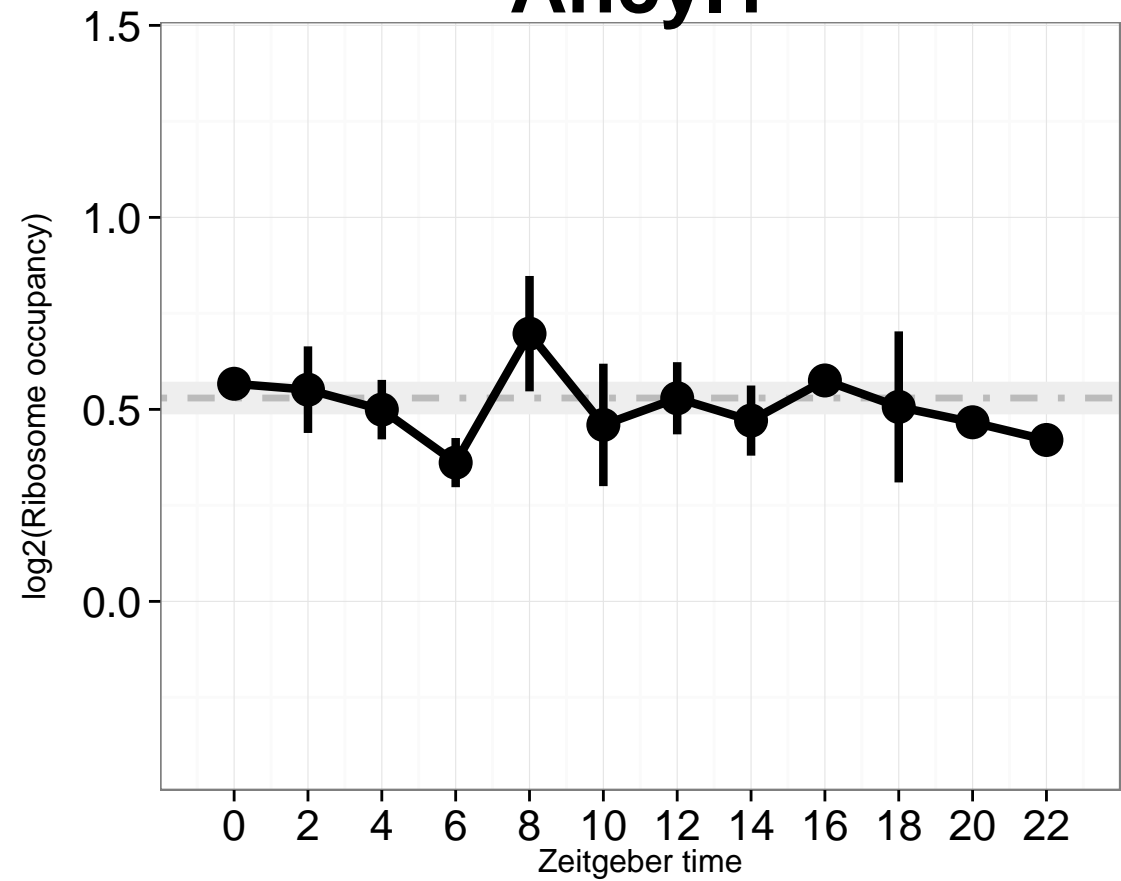

Supplement: SuppDataset_1.zip [file Ahcyl1_set_A.pdf › Supplemental Dataset 1/A-mRNA_nonrhyth_translation_nonrhyth/Ahcyl1_set_A.pdf]

## Ahnak

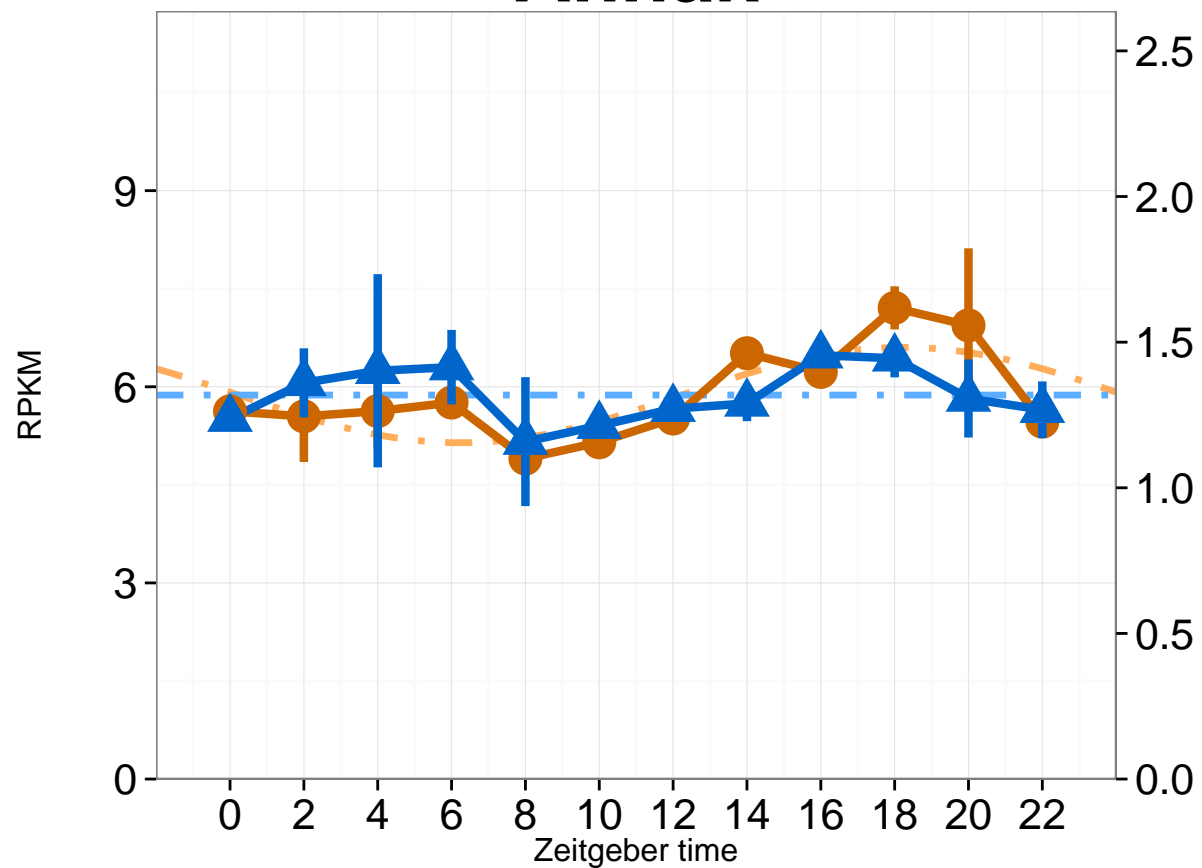

## Ahnak

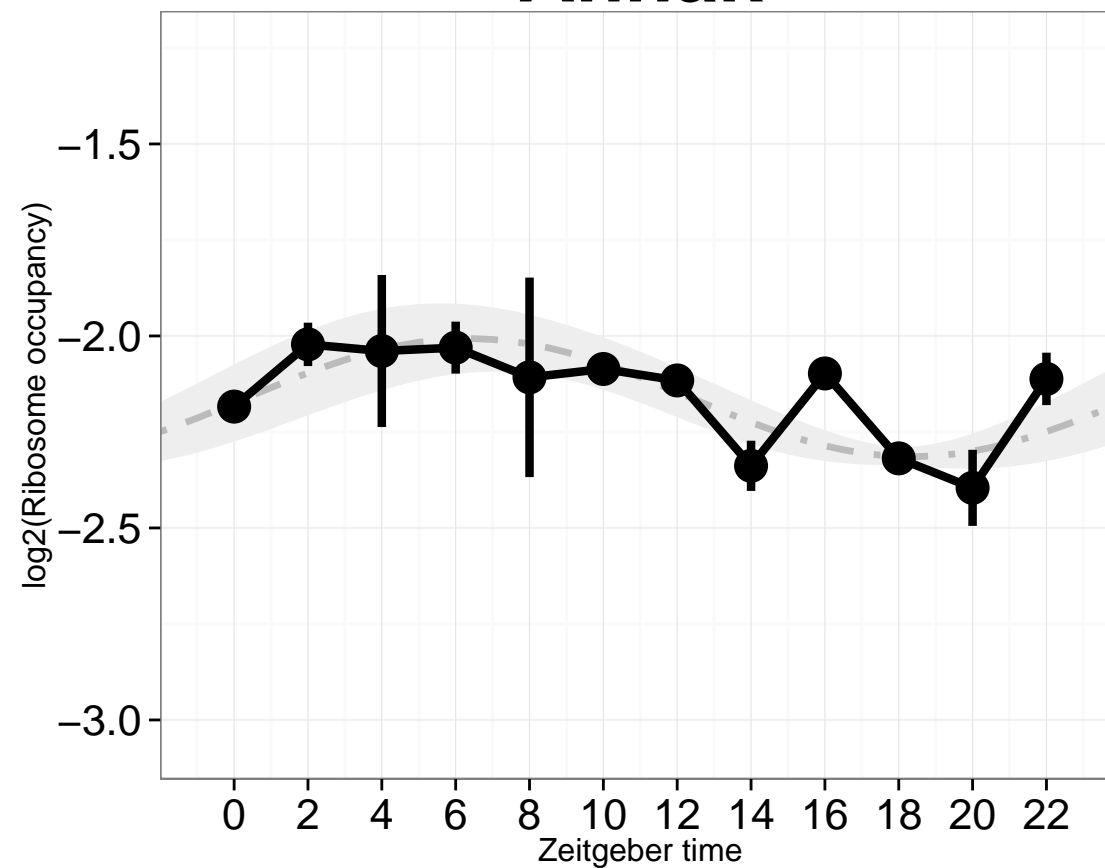

Supplement: SuppDataset_1.zip [file Ahnak_set_A.pdf › Supplemental Dataset 1/A-mRNA_nonrhyth_translation_nonrhyth/Ahnak_set_A.pdf]

# Ahr

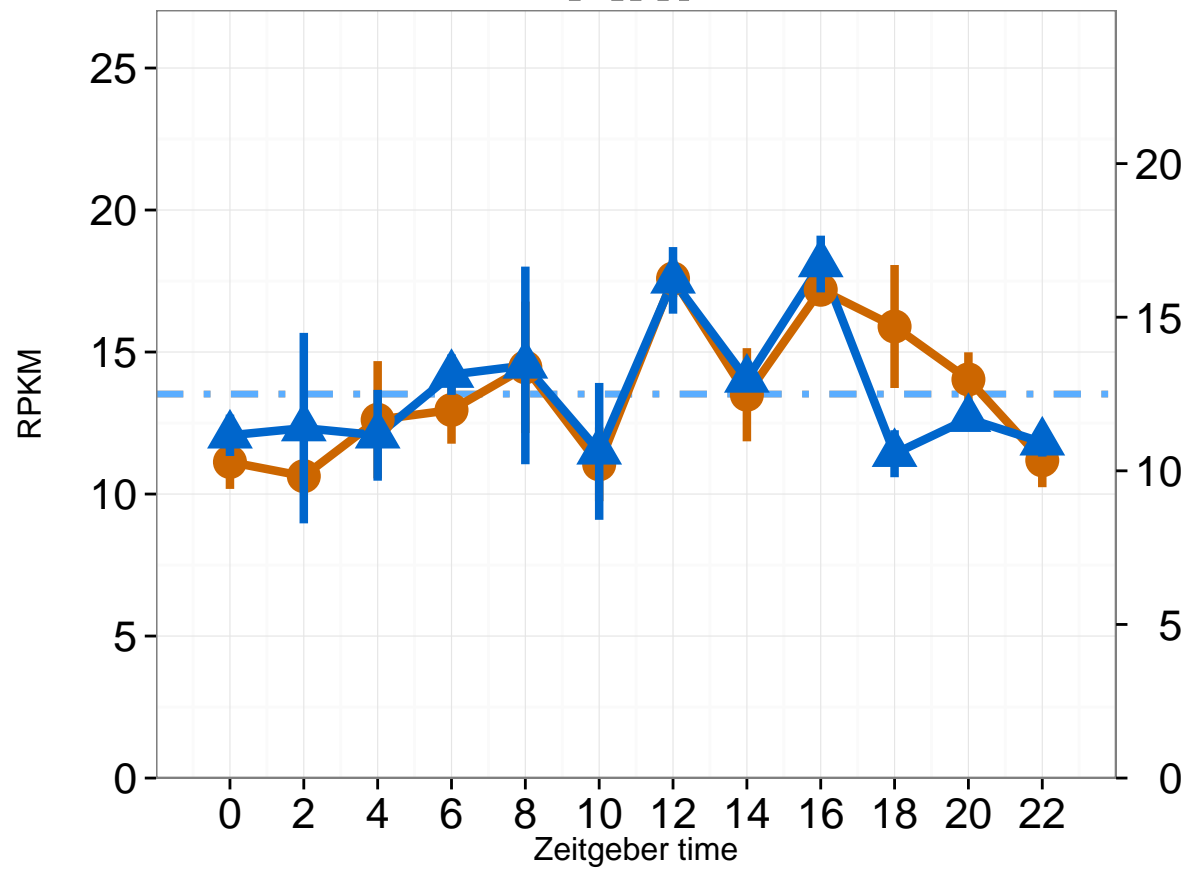

# Ahr

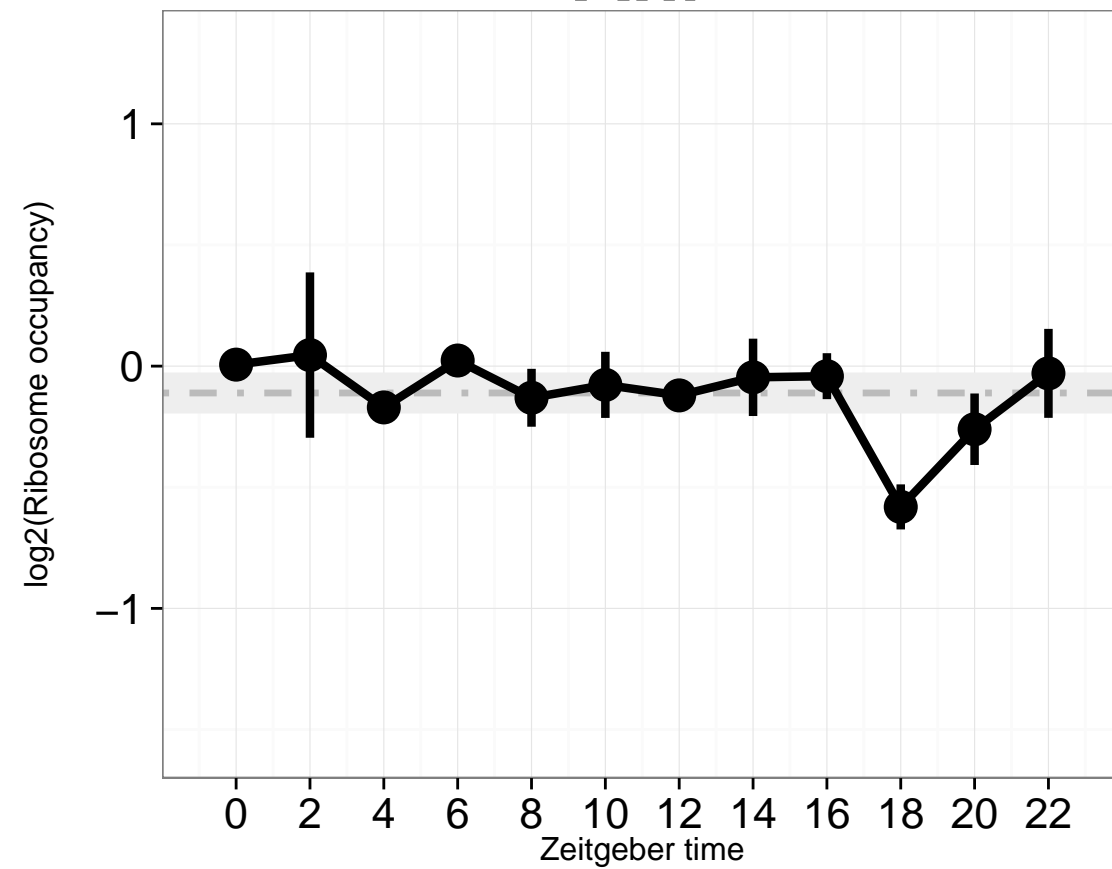

Supplement: SuppDataset_1.zip [file Ahr_set_A.pdf › Supplemental Dataset 1/A-mRNA_nonrhyth_translation_nonrhyth/Ahr_set_A.pdf]

## Ahsg

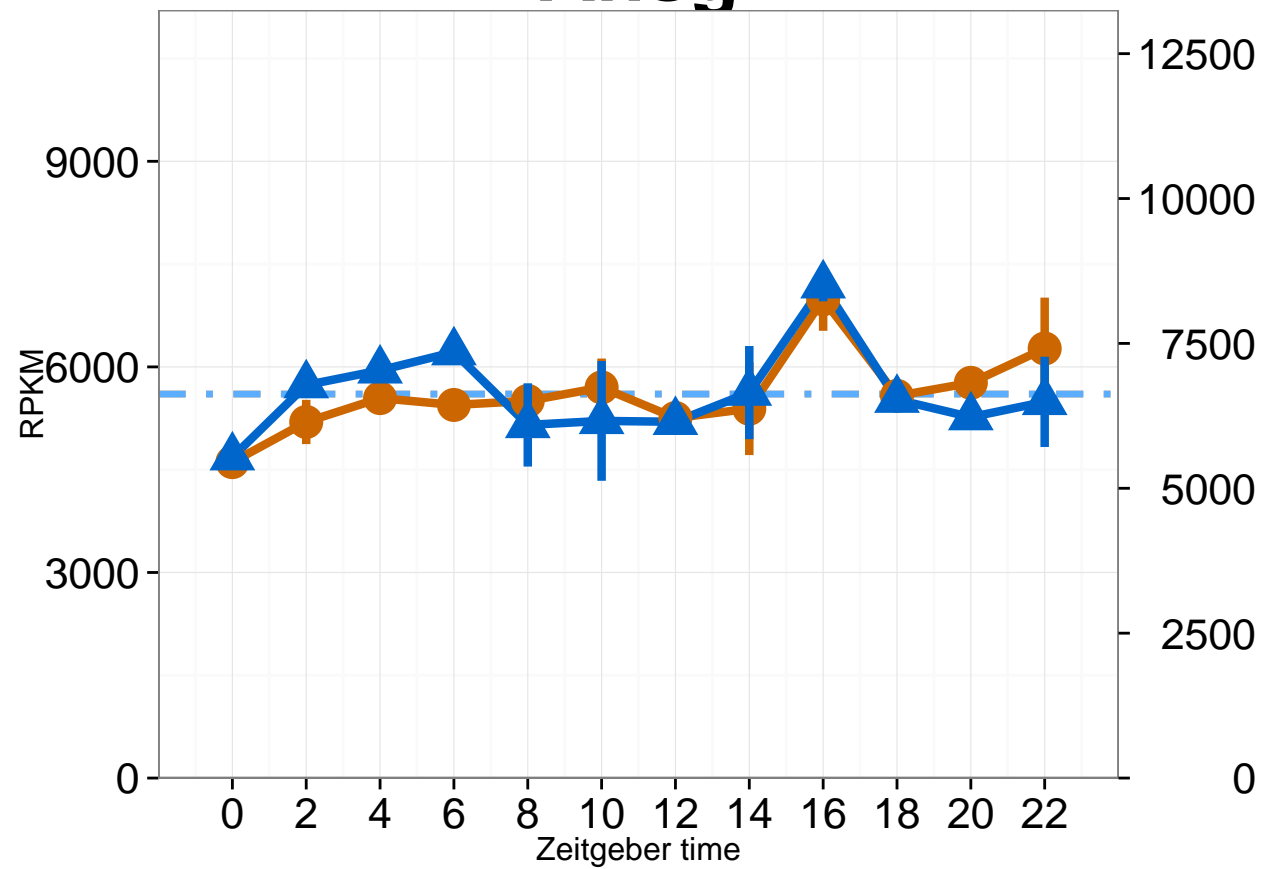

## Ahsg

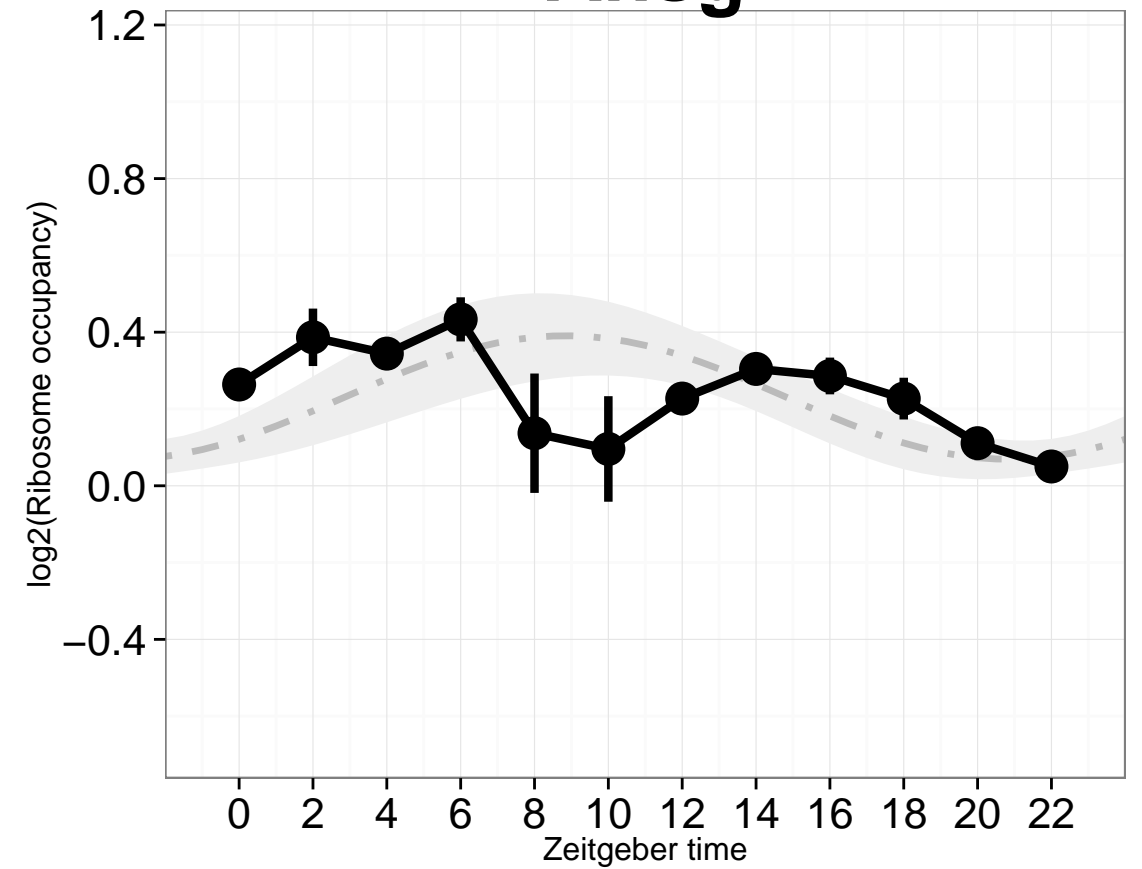

Supplement: SuppDataset_1.zip [file Ahsg_set_A.pdf › Supplemental Dataset 1/A-mRNA_nonrhyth_translation_nonrhyth/Ahsg_set_A.pdf]

## Aida

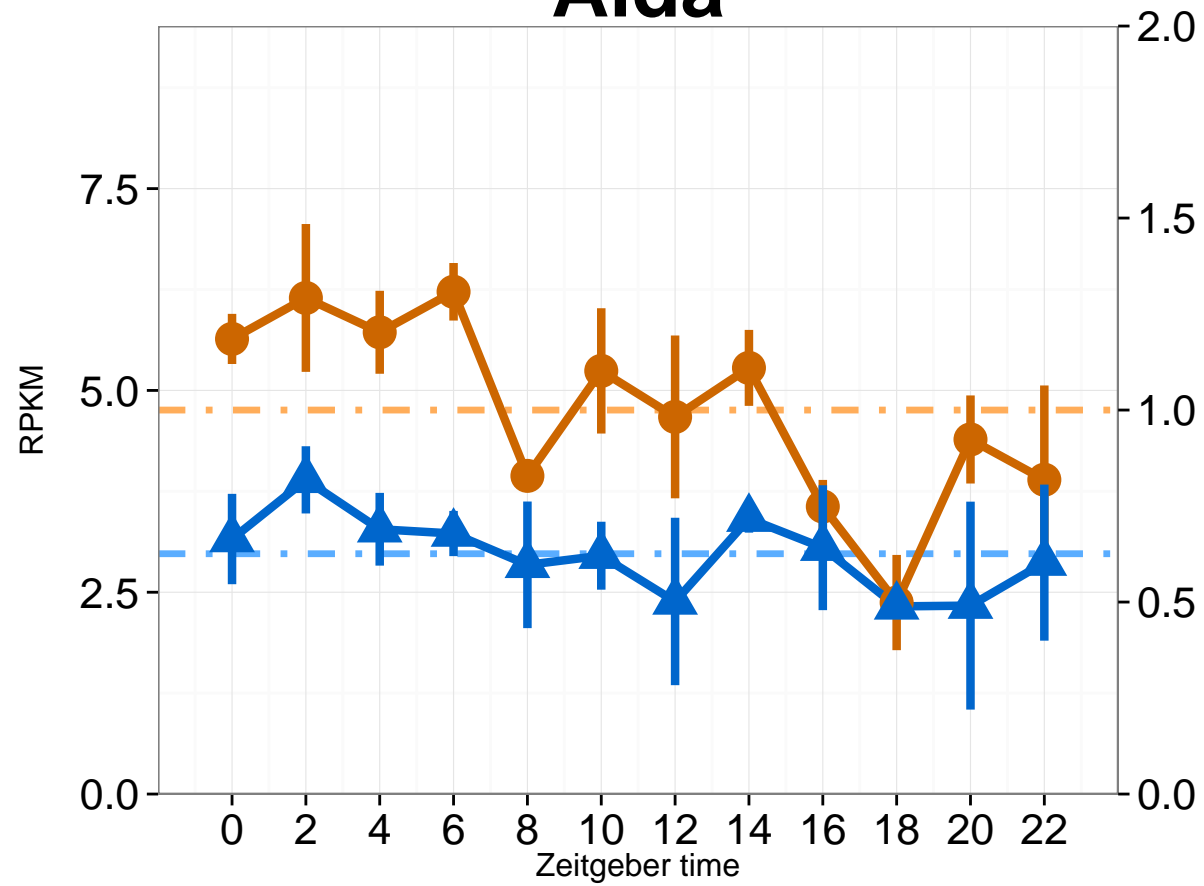

## Aida

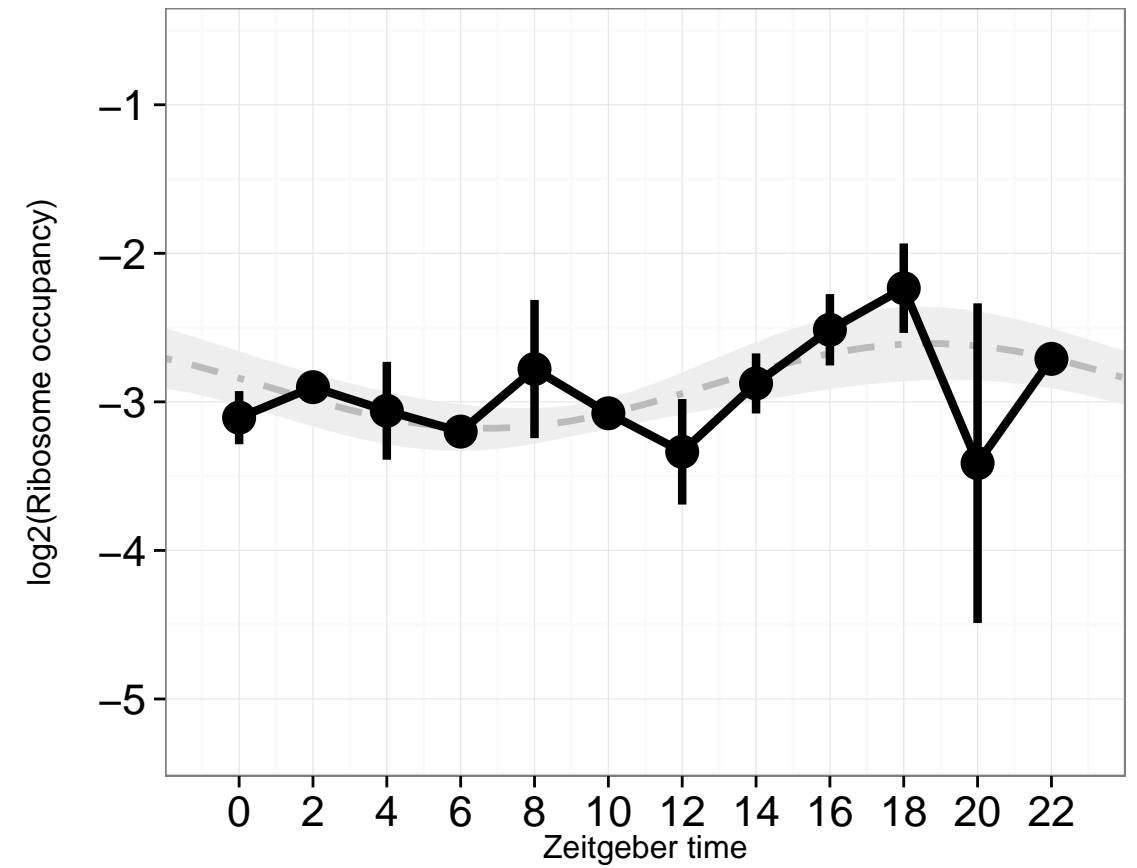

Supplement: SuppDataset_1.zip [file Aida_set_A.pdf › Supplemental Dataset 1/A-mRNA_nonrhyth_translation_nonrhyth/Aida_set_A.pdf]

## Aif1

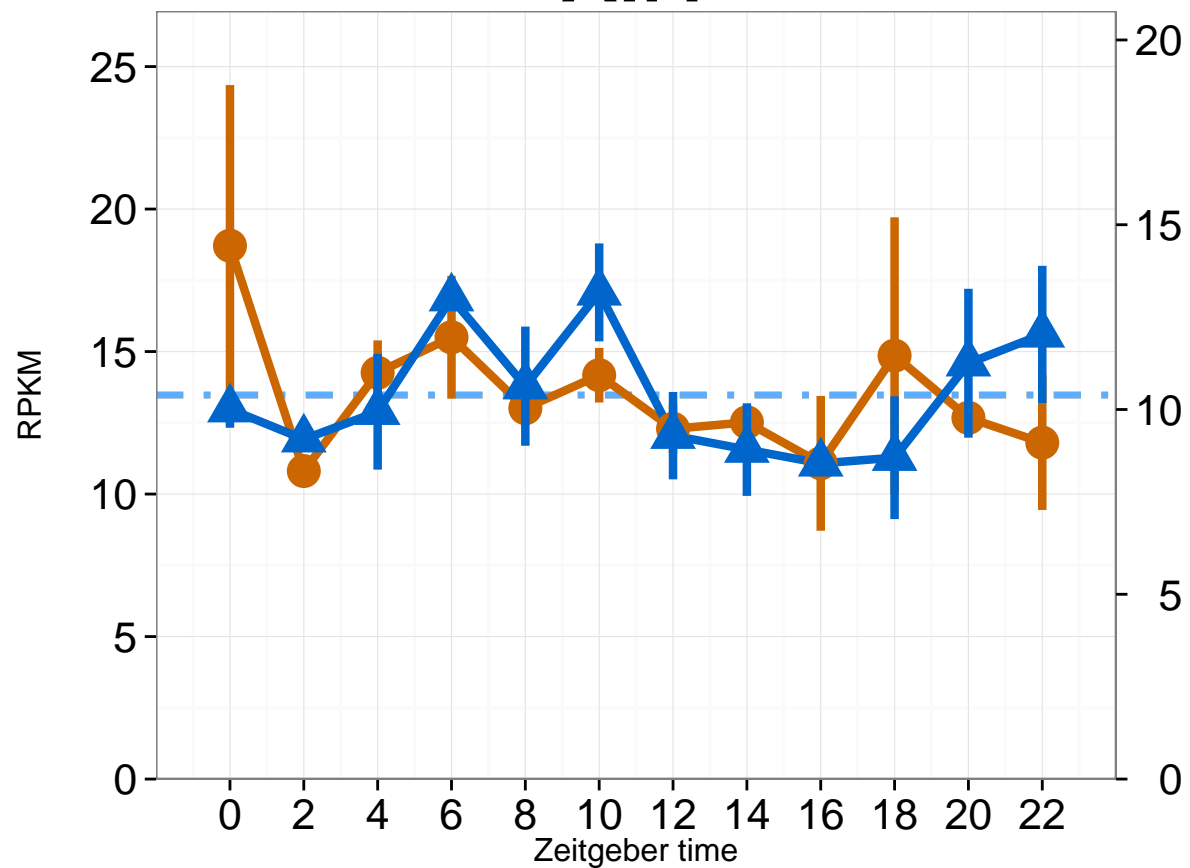

## Aif1

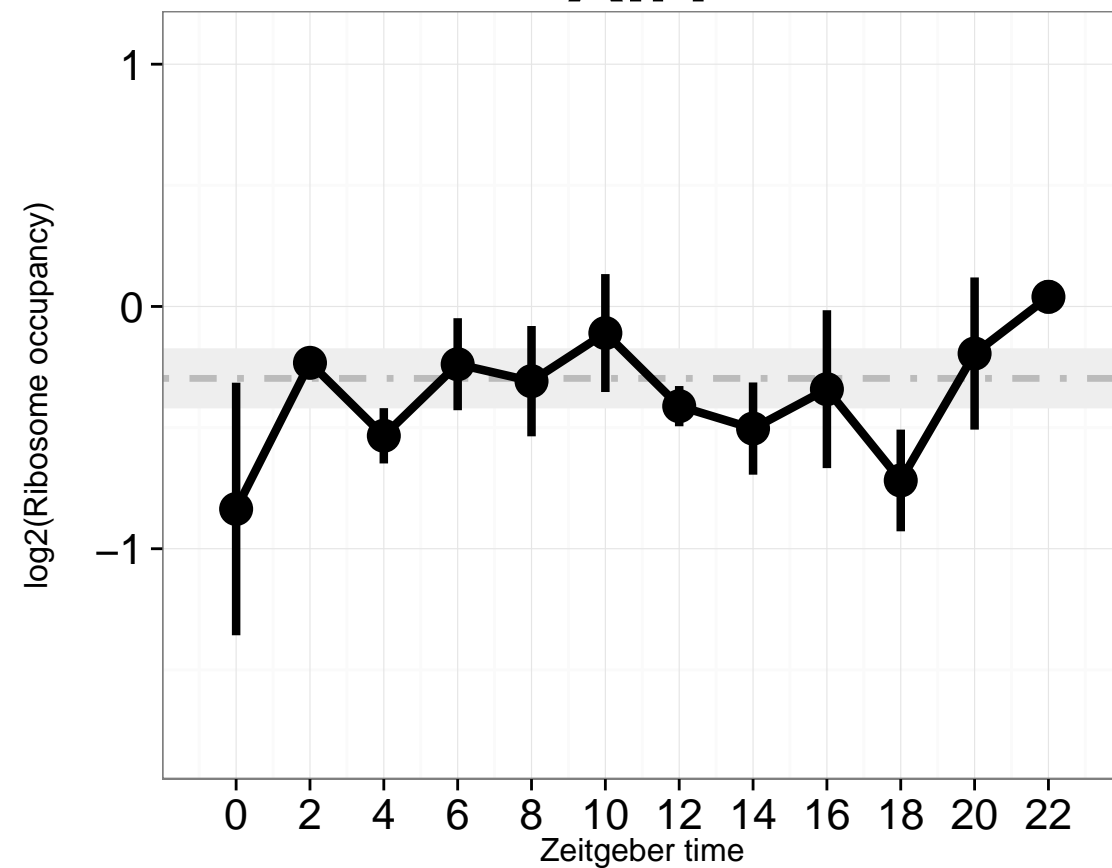

Supplement: SuppDataset_1.zip [file Aif1_set_A.pdf › Supplemental Dataset 1/A-mRNA_nonrhyth_translation_nonrhyth/Aif1_set_A.pdf]

## Aifm1

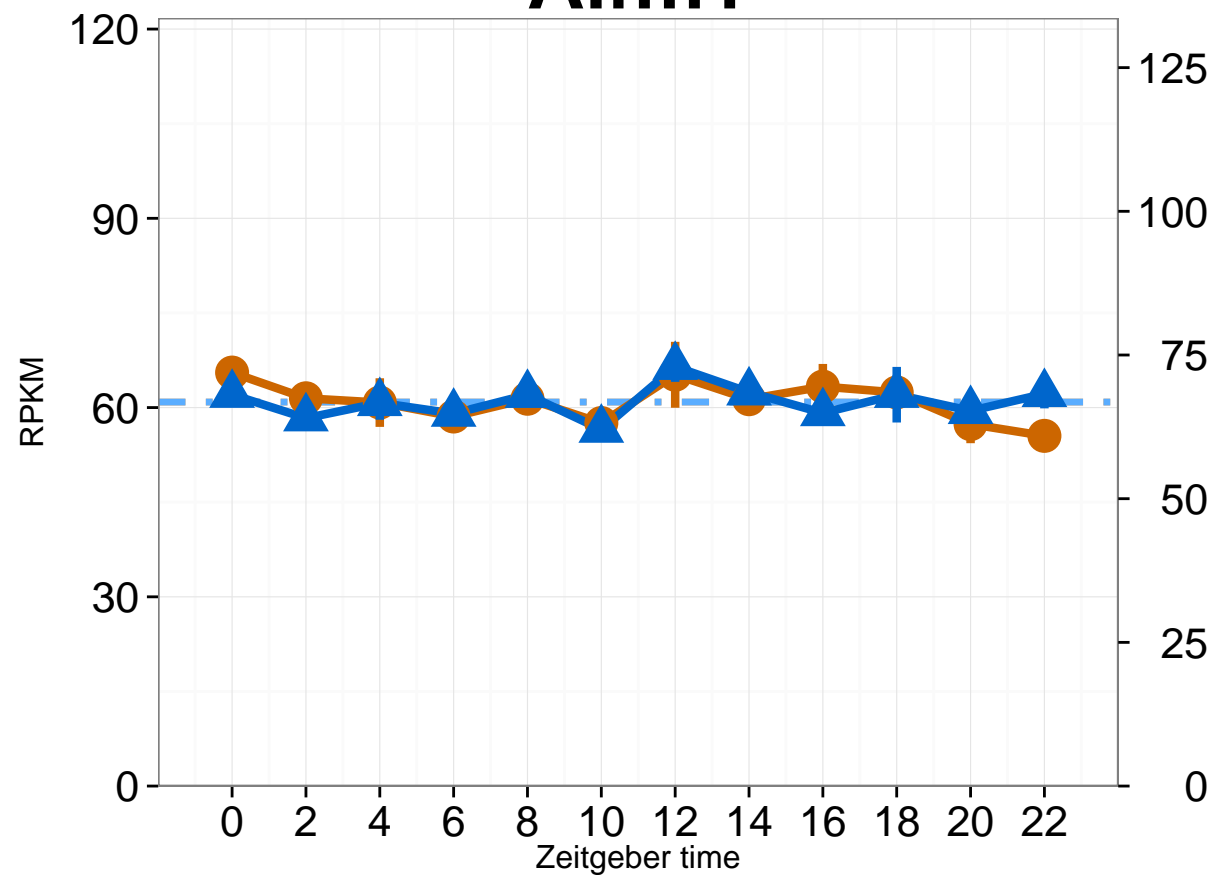

## Aifm1

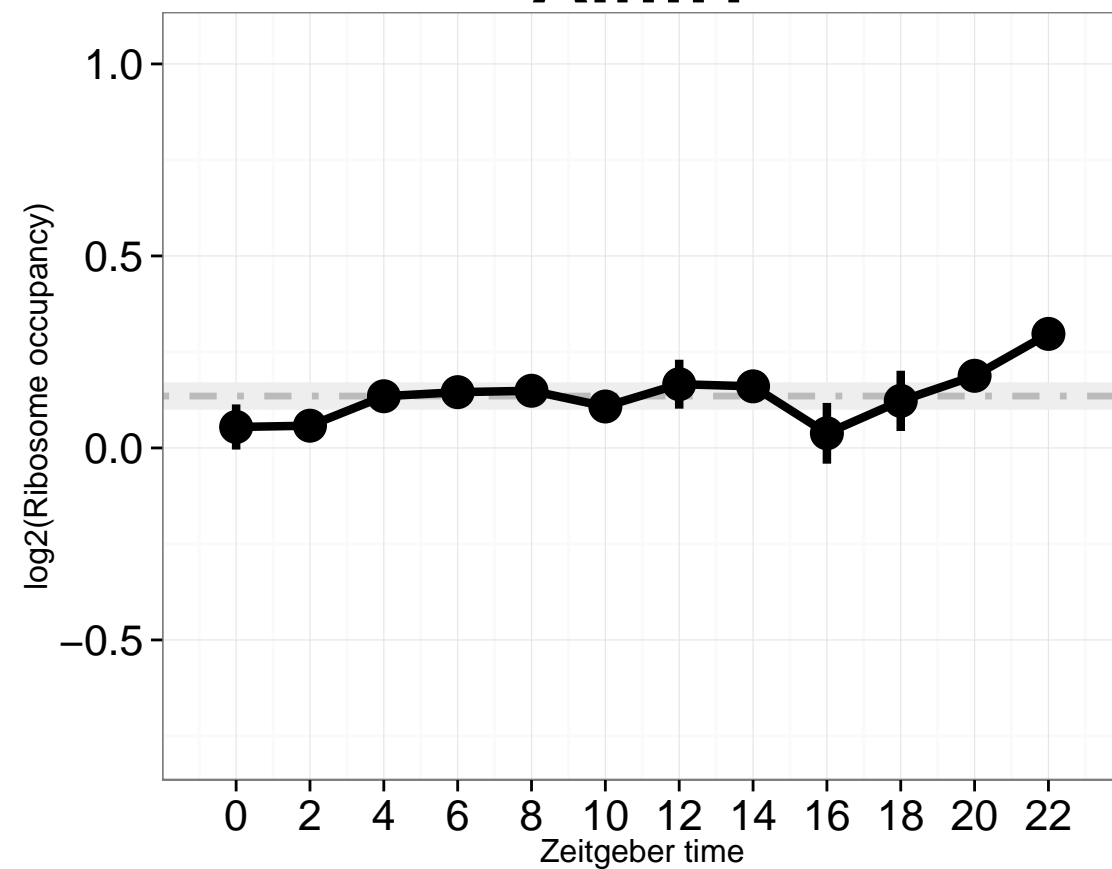

Supplement: SuppDataset_1.zip [file Aifm1_set_A.pdf › Supplemental Dataset 1/A-mRNA_nonrhyth_translation_nonrhyth/Aifm1_set_A.pdf]

# Aifm3

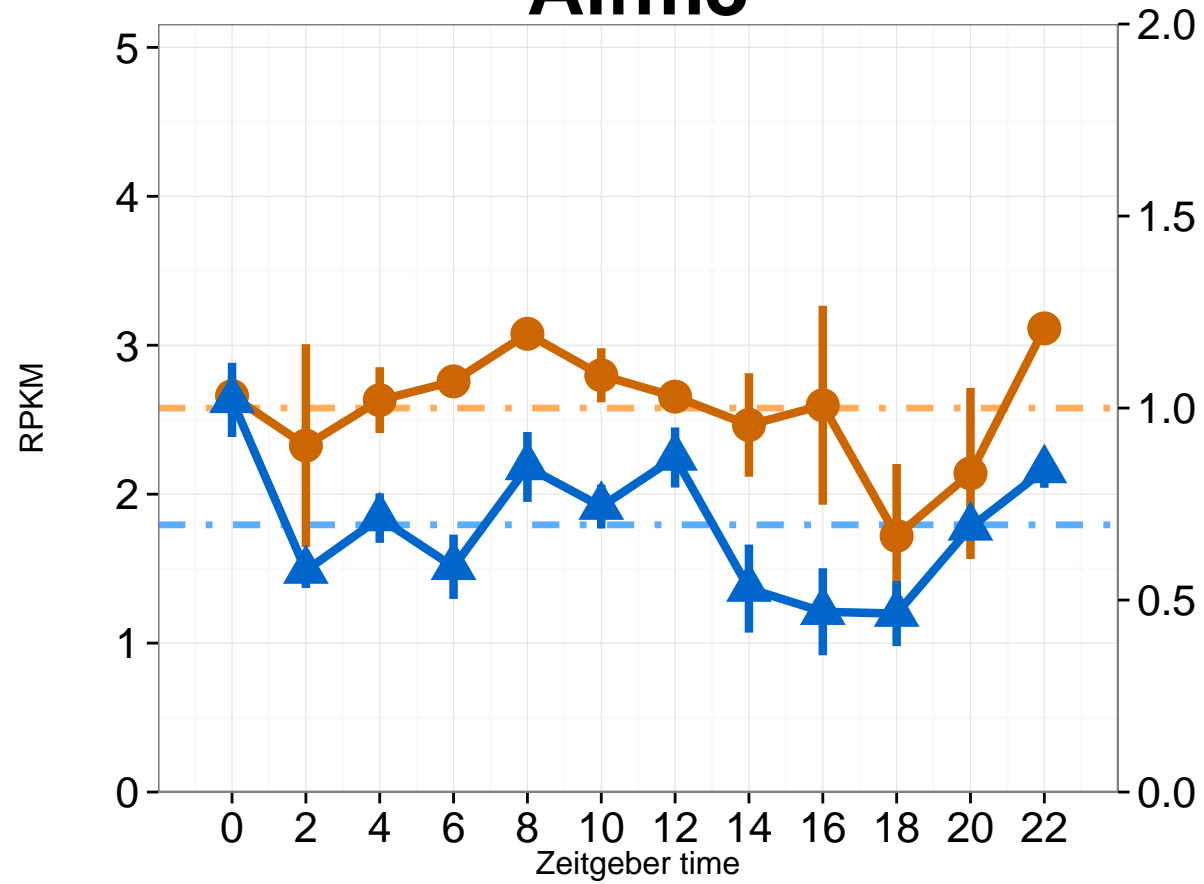

# Aifm3

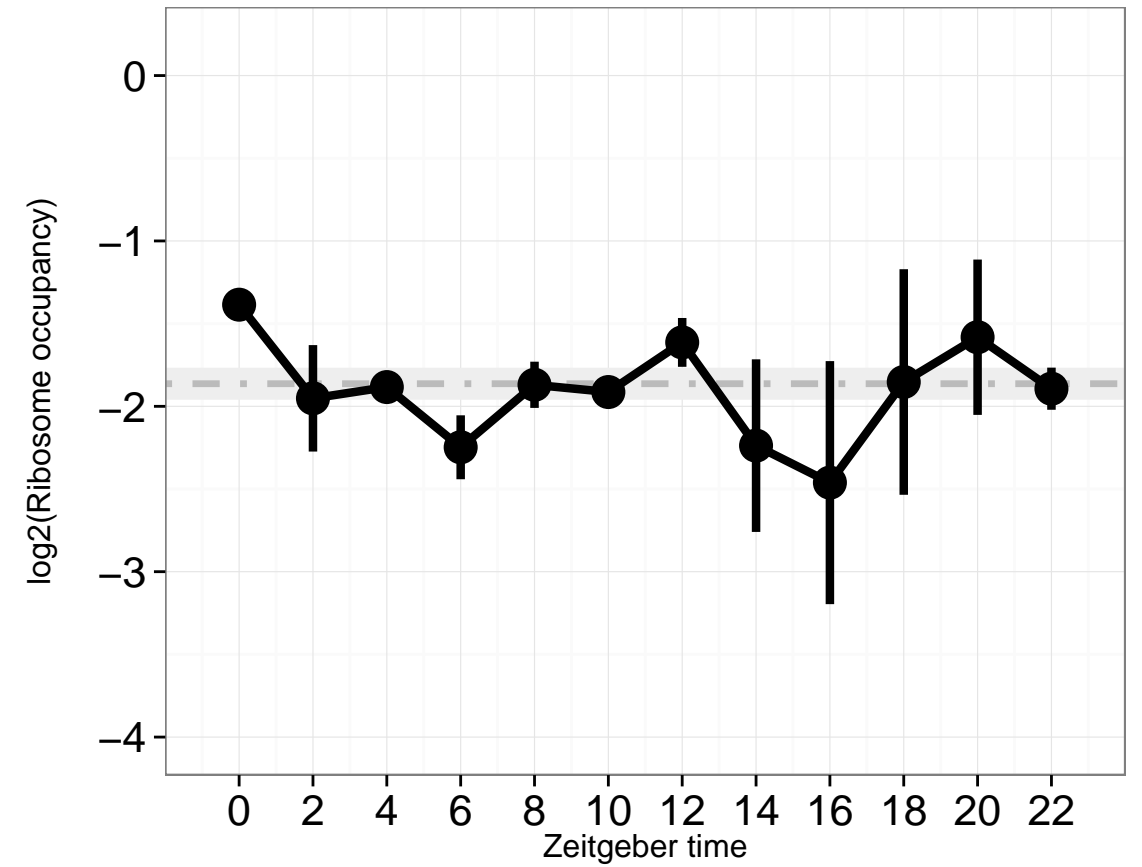

Supplement: SuppDataset_1.zip [file Aifm3_set_A.pdf › Supplemental Dataset 1/A-mRNA_nonrhyth_translation_nonrhyth/Aifm3_set_A.pdf]

# Aig1

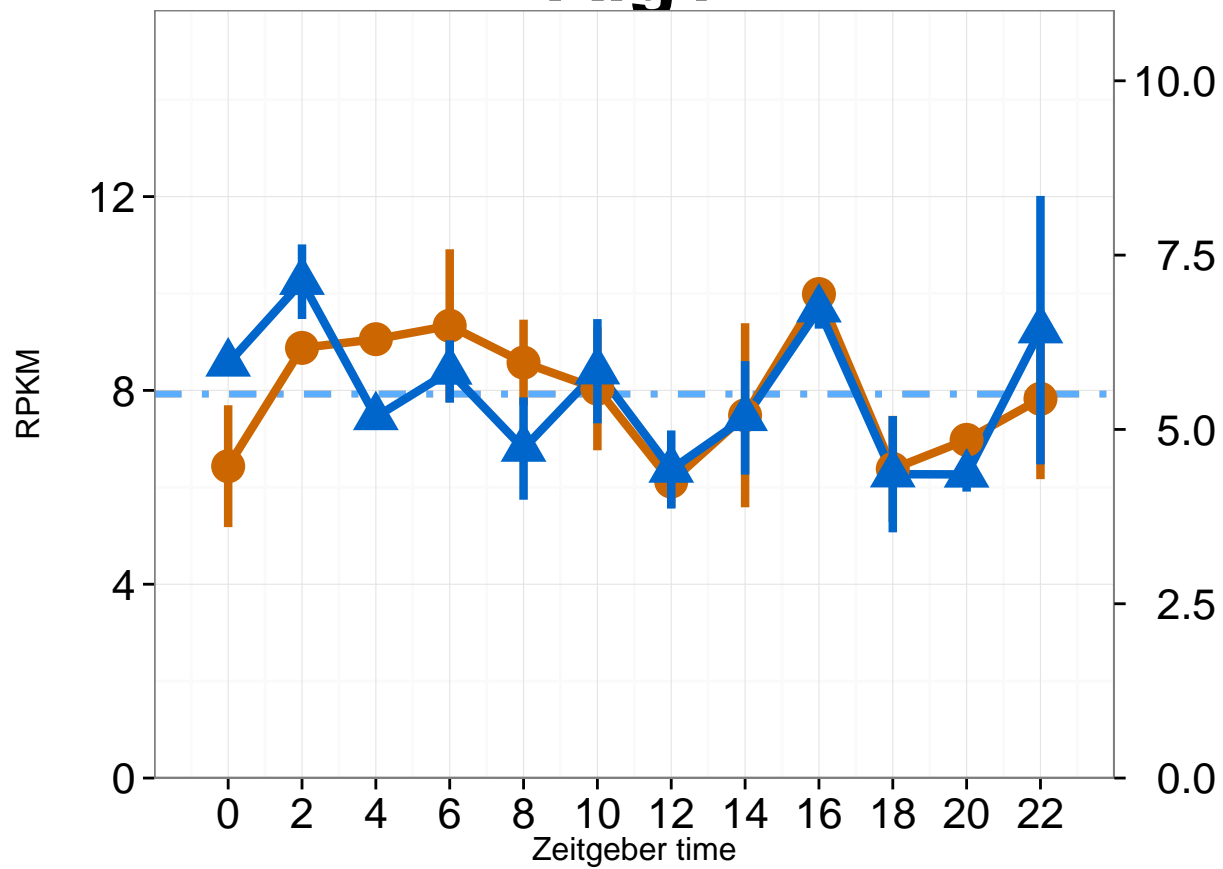

# Aig1

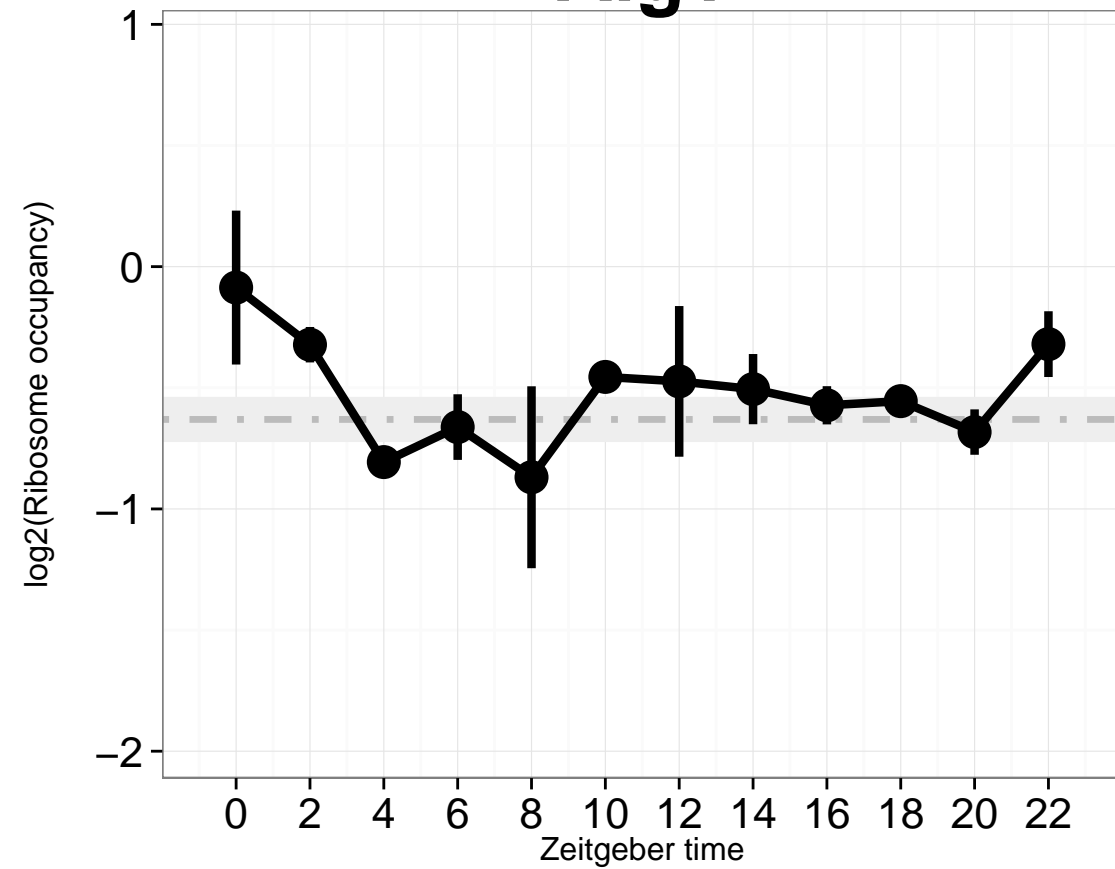

Supplement: SuppDataset_1.zip [file Aig1_set_A.pdf › Supplemental Dataset 1/A-mRNA_nonrhyth_translation_nonrhyth/Aig1_set_A.pdf]

# Aim1

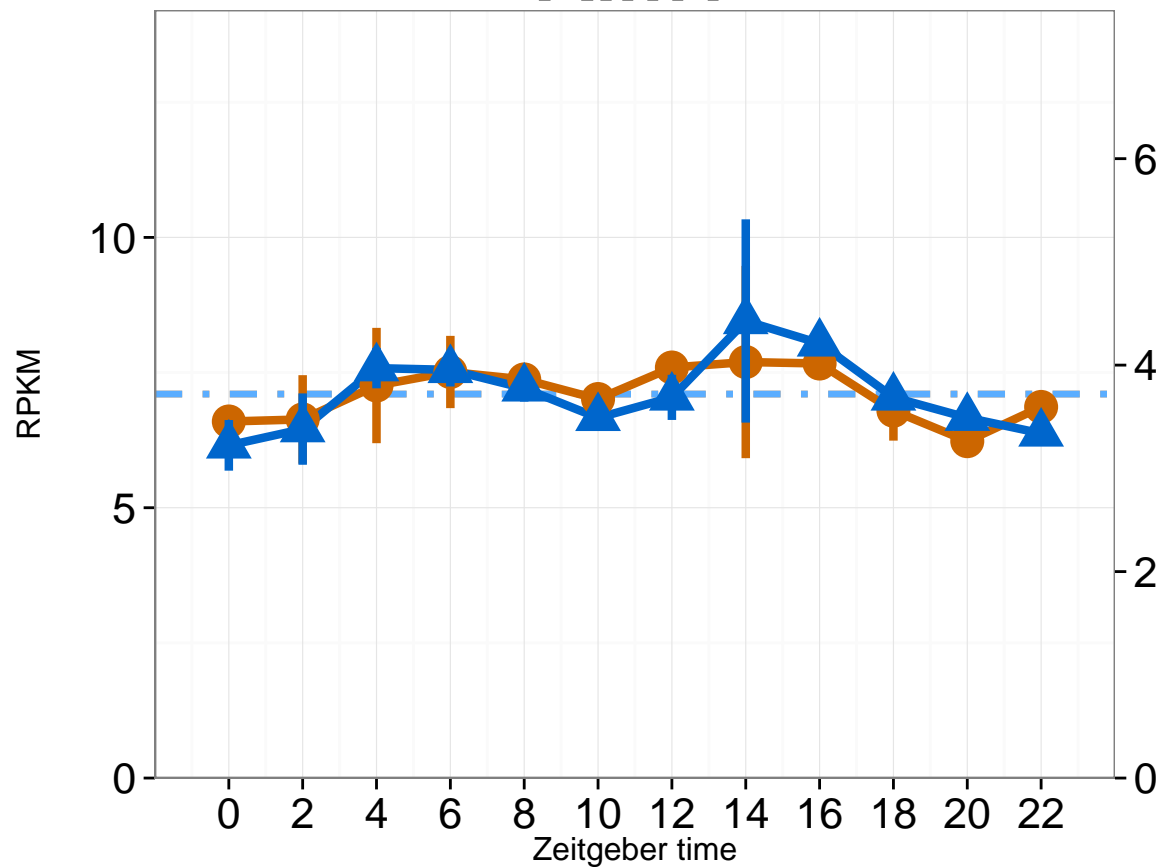

# Aim1

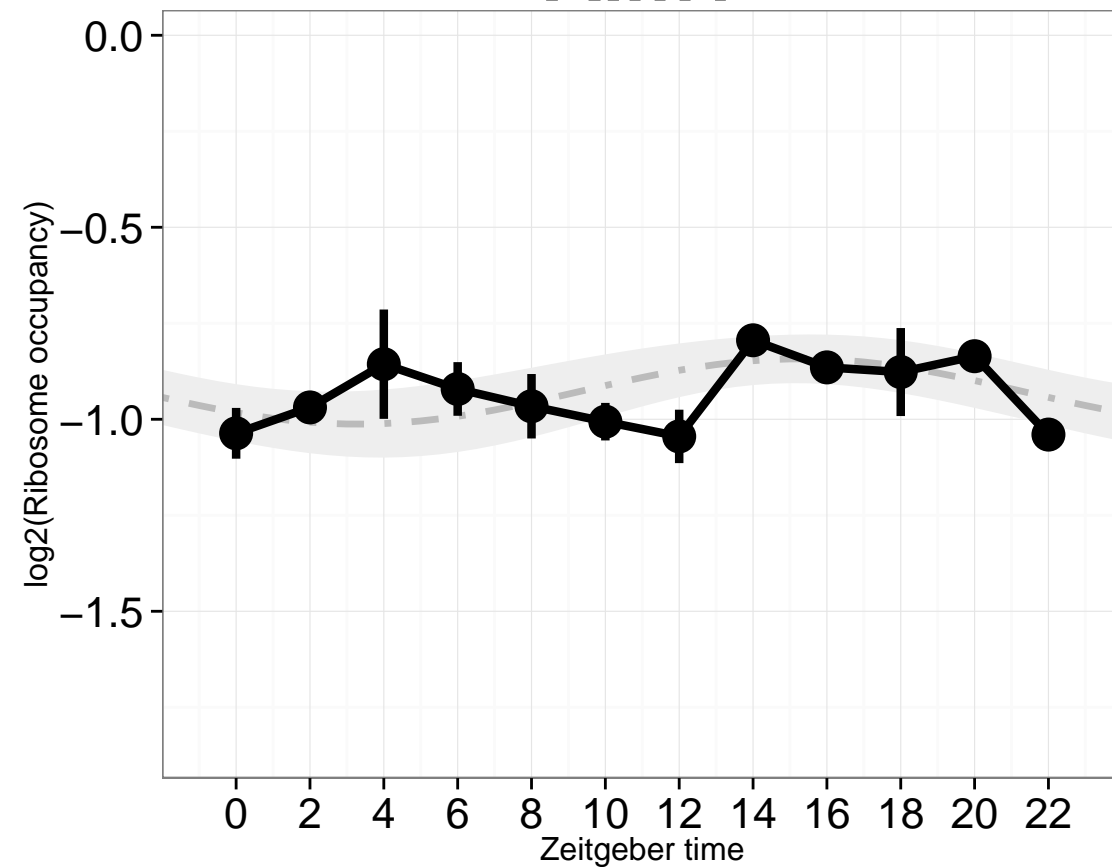

Supplement: SuppDataset_1.zip [file Aim1_set_A.pdf › Supplemental Dataset 1/A-mRNA_nonrhyth_translation_nonrhyth/Aim1_set_A.pdf]

## Aim2

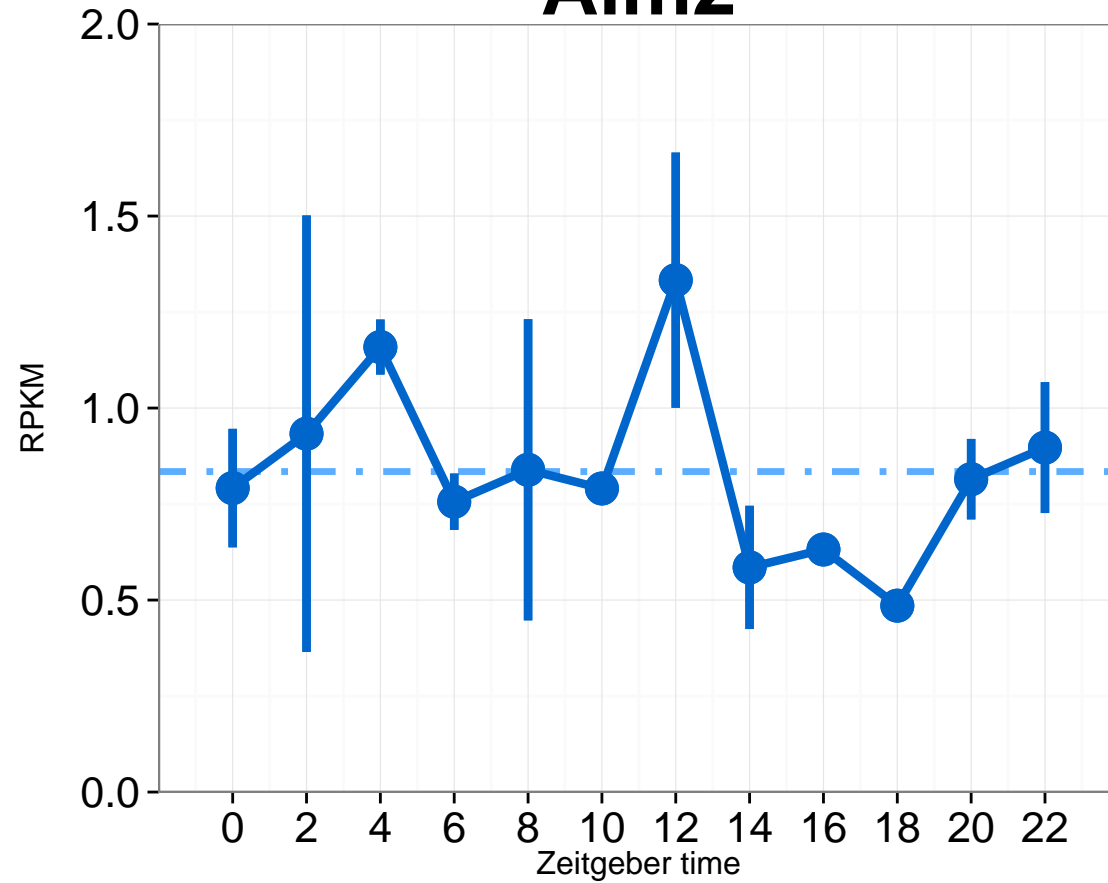

## Aim2 log2(Ribosome occupancy)

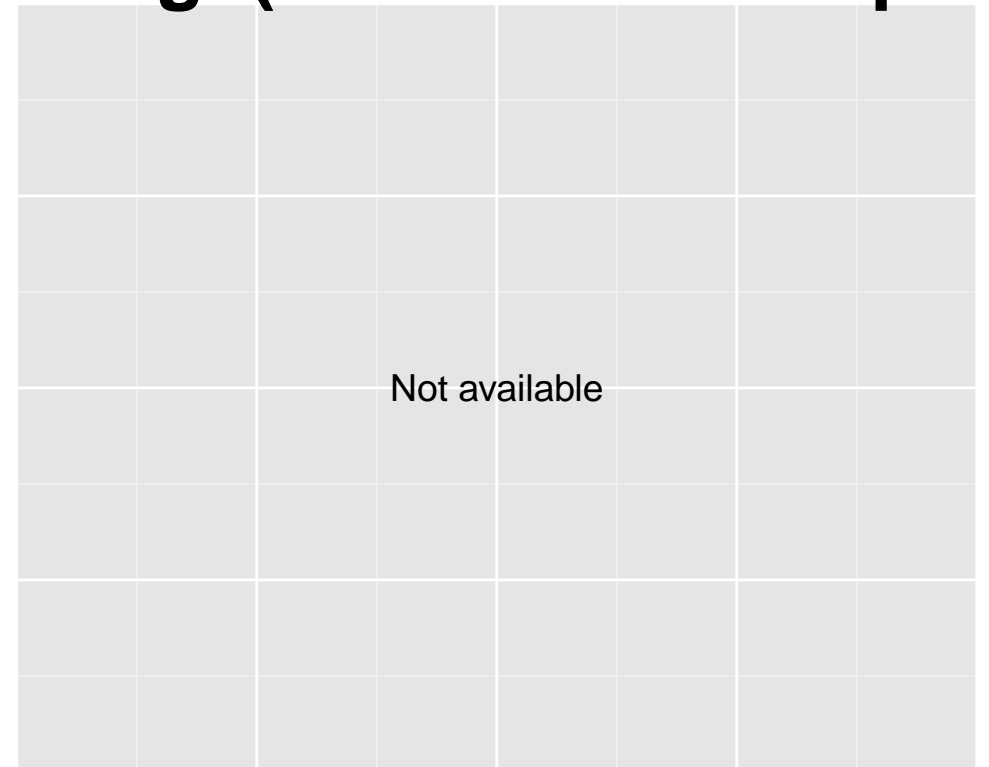

Supplement: SuppDataset_1.zip [file Aim2_set_A.pdf › Supplemental Dataset 1/A-mRNA_nonrhyth_translation_nonrhyth/Aim2_set_A.pdf]

# Aimp1

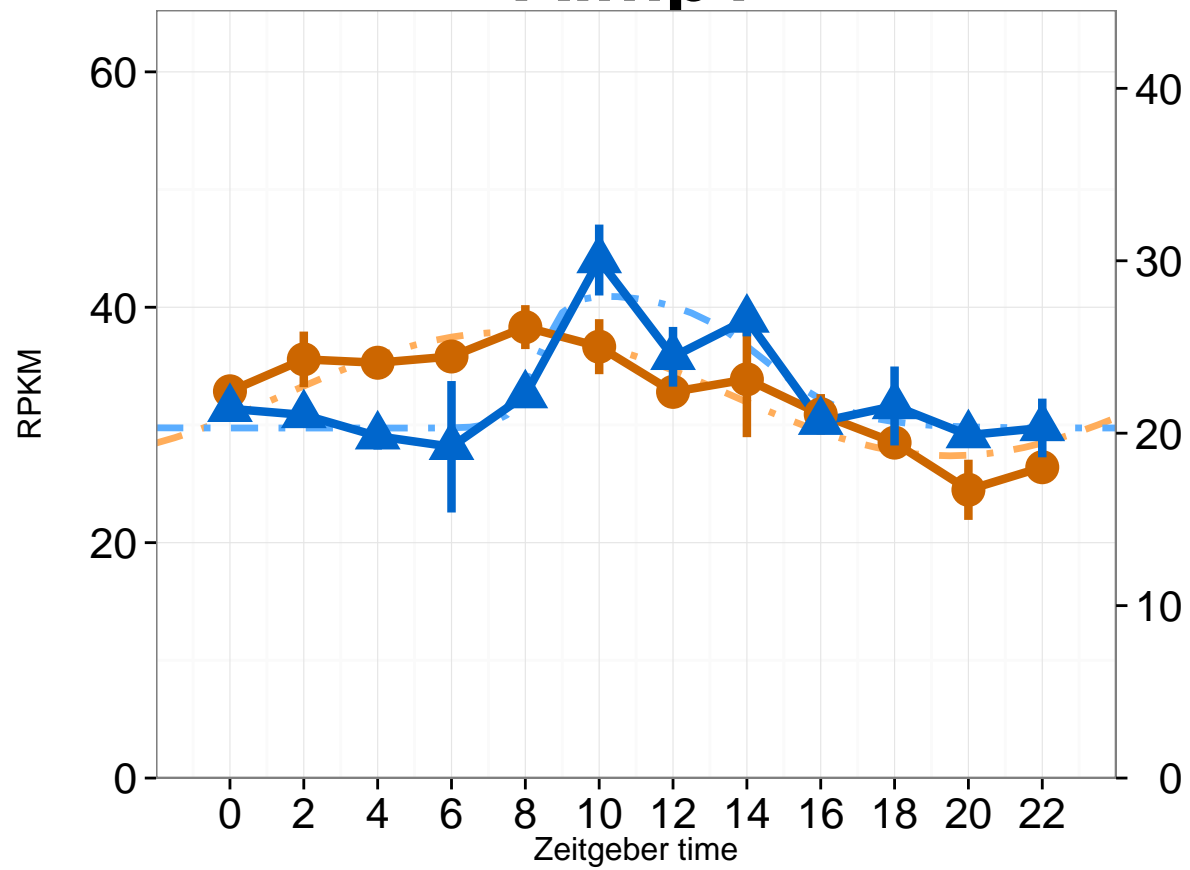

# Aimp1

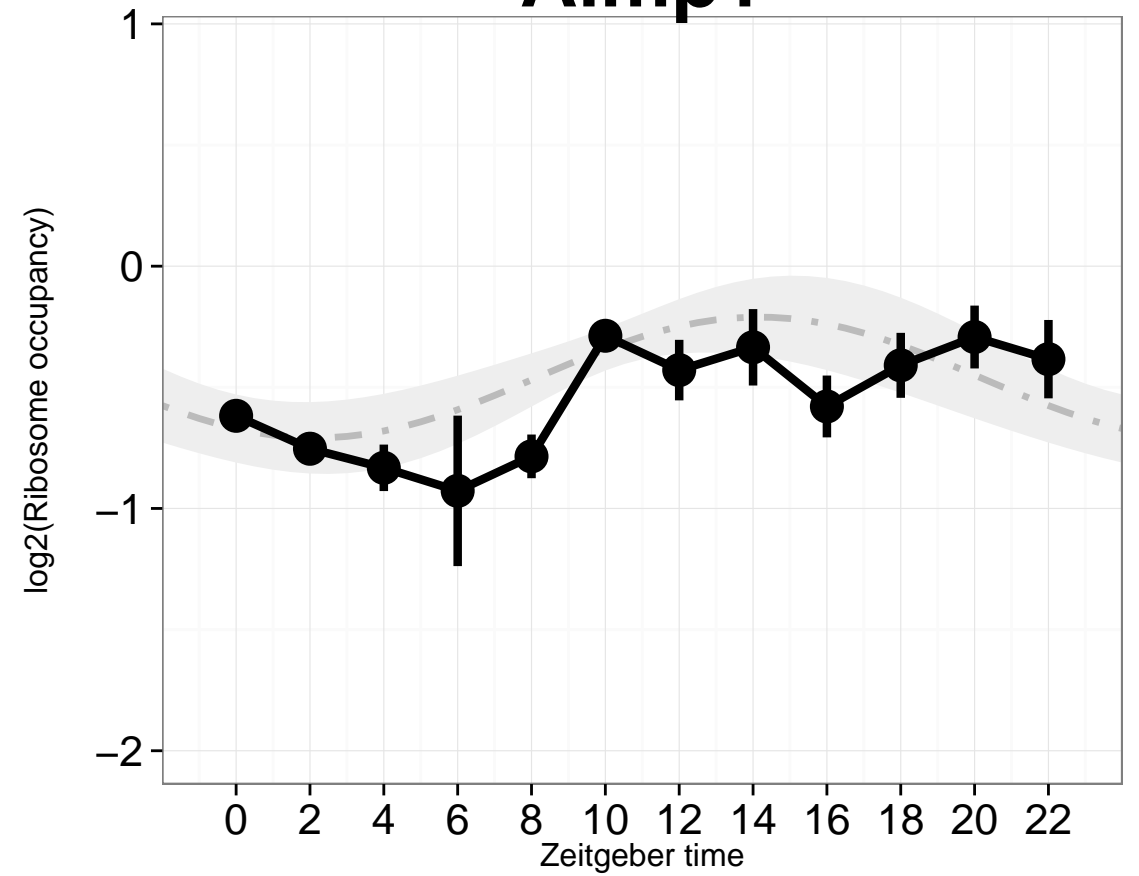

Supplement: SuppDataset_1.zip [file Aimp1_set_A.pdf › Supplemental Dataset 1/A-mRNA_nonrhyth_translation_nonrhyth/Aimp1_set_A.pdf]

## Aimp2

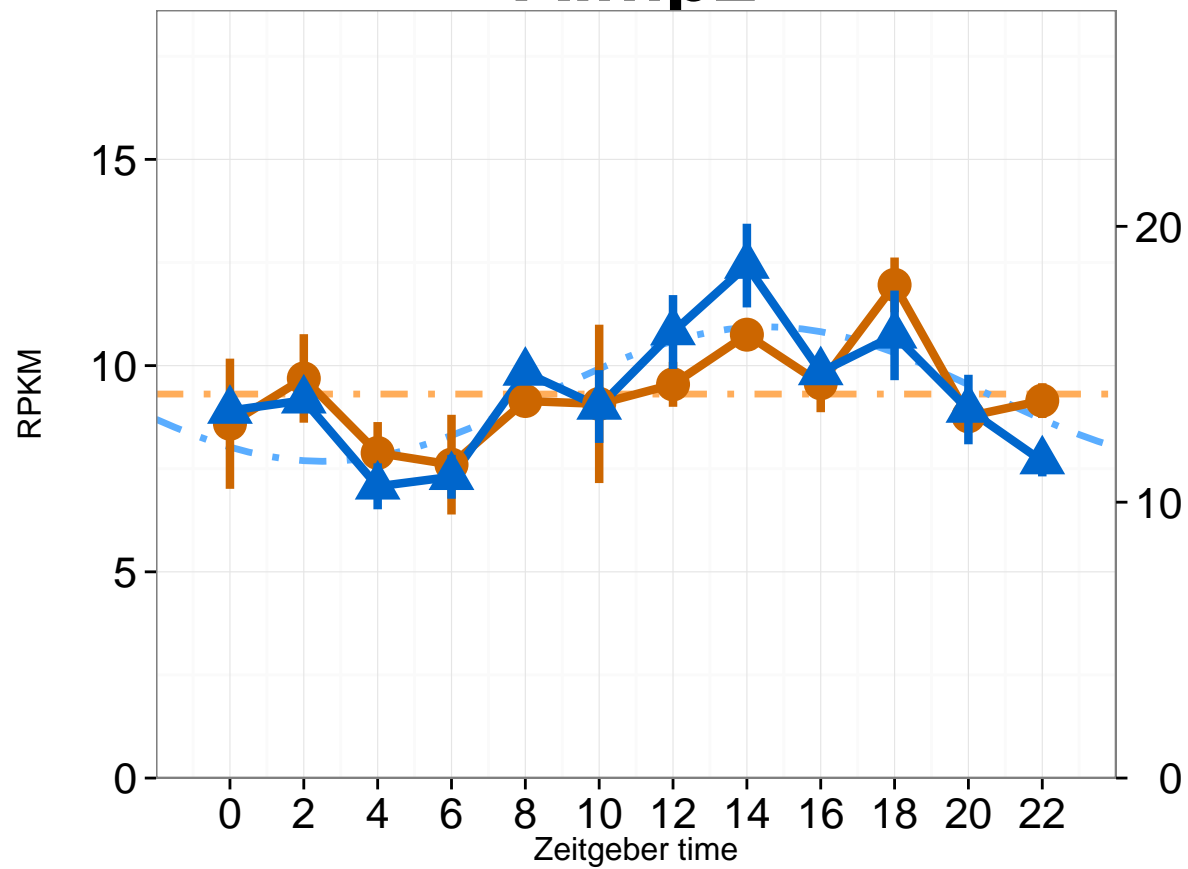

## Aimp2

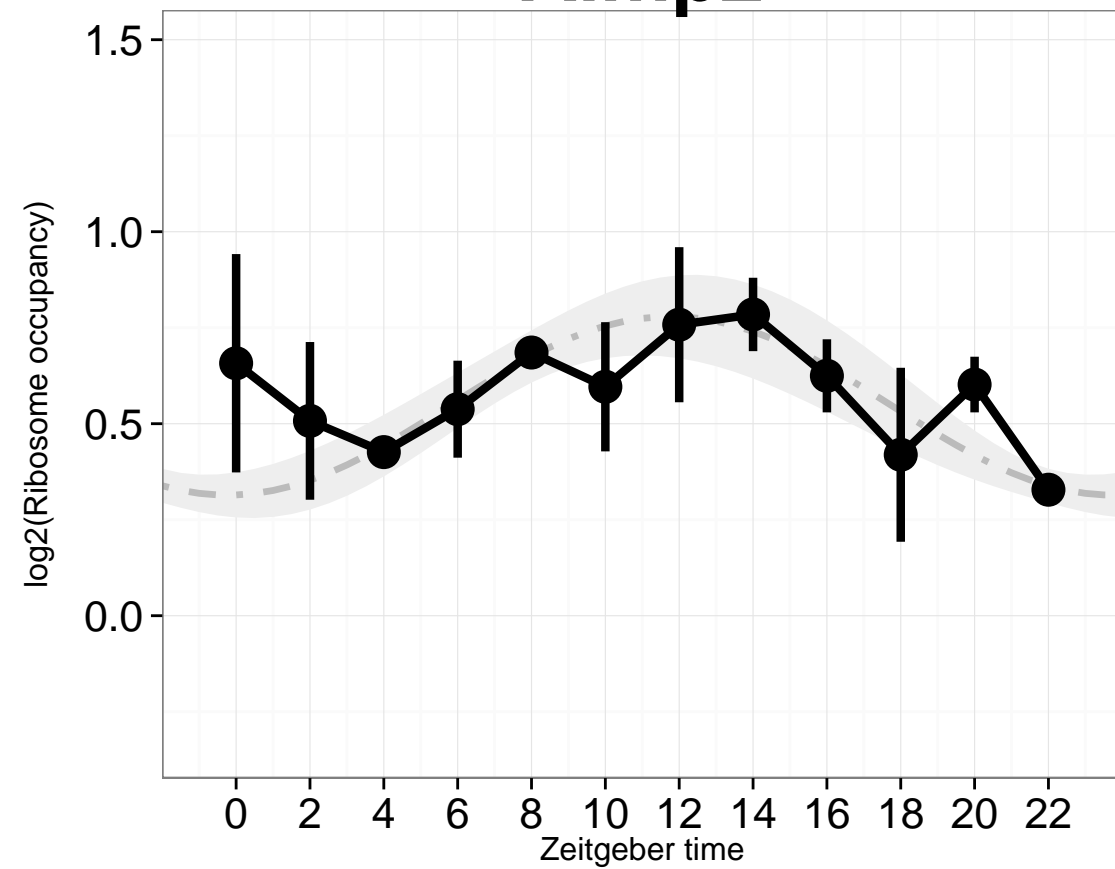

Supplement: SuppDataset_1.zip [file Aimp2_set_A.pdf › Supplemental Dataset 1/A-mRNA_nonrhyth_translation_nonrhyth/Aimp2_set_A.pdf]

## Ak3

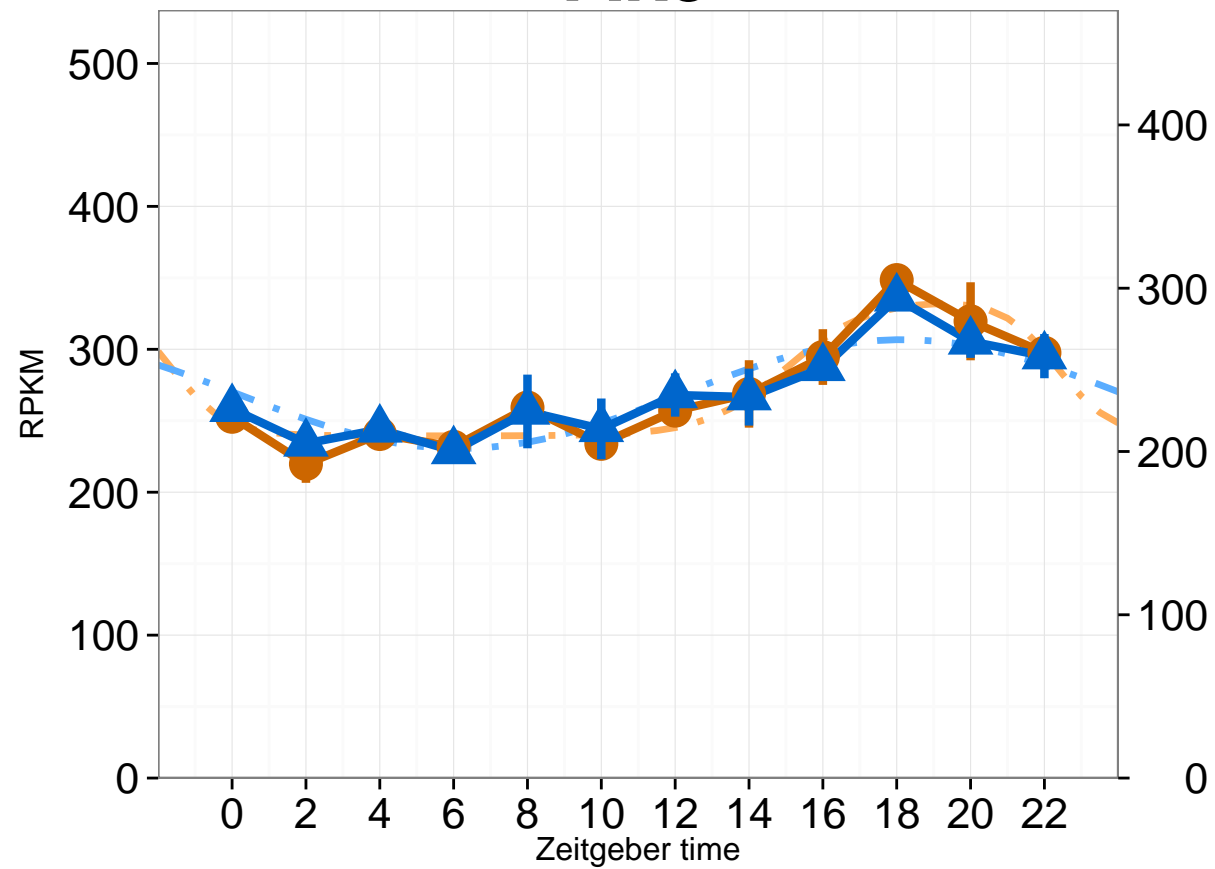

## Ak3

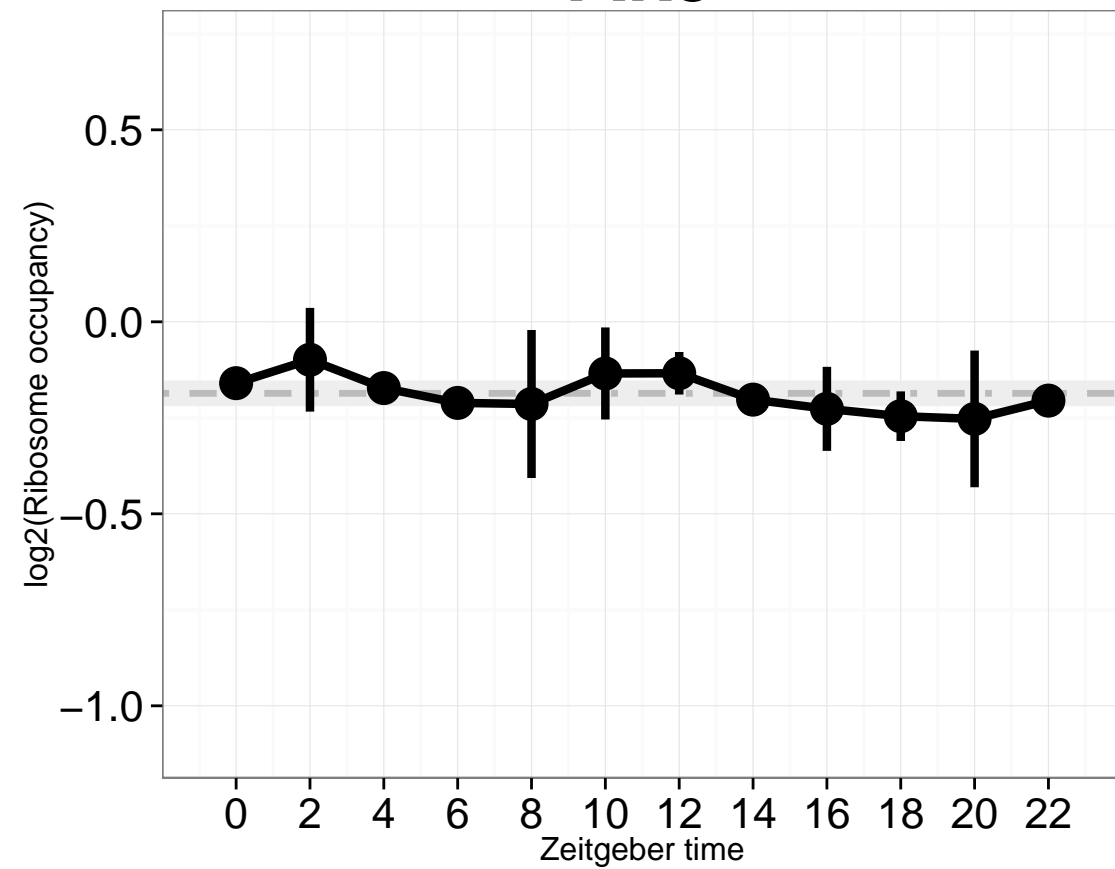

Supplement: SuppDataset_1.zip [file Ak3_set_A.pdf › Supplemental Dataset 1/A-mRNA_nonrhyth_translation_nonrhyth/Ak3_set_A.pdf]

# Akap10

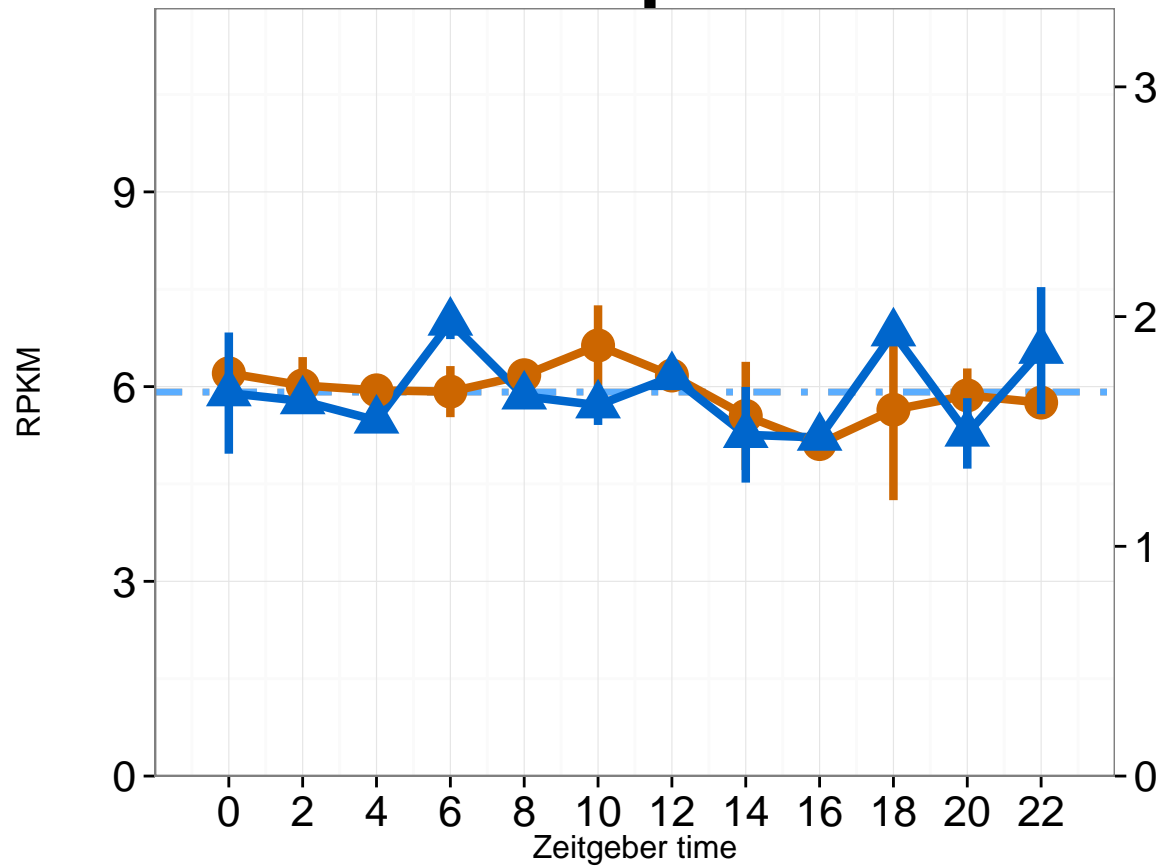

# Akap10

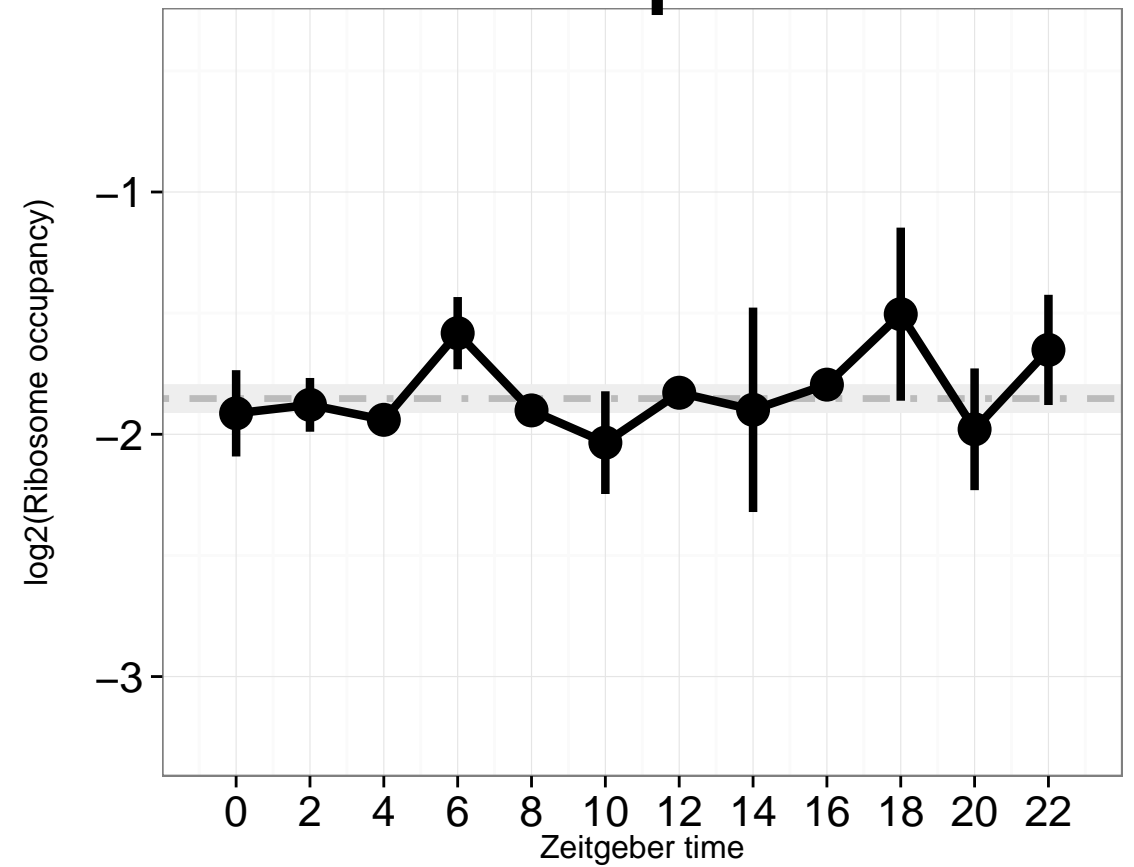

Supplement: SuppDataset_1.zip [file Akap10_set_A.pdf › Supplemental Dataset 1/A-mRNA_nonrhyth_translation_nonrhyth/Akap10_set_A.pdf]

# Akap11

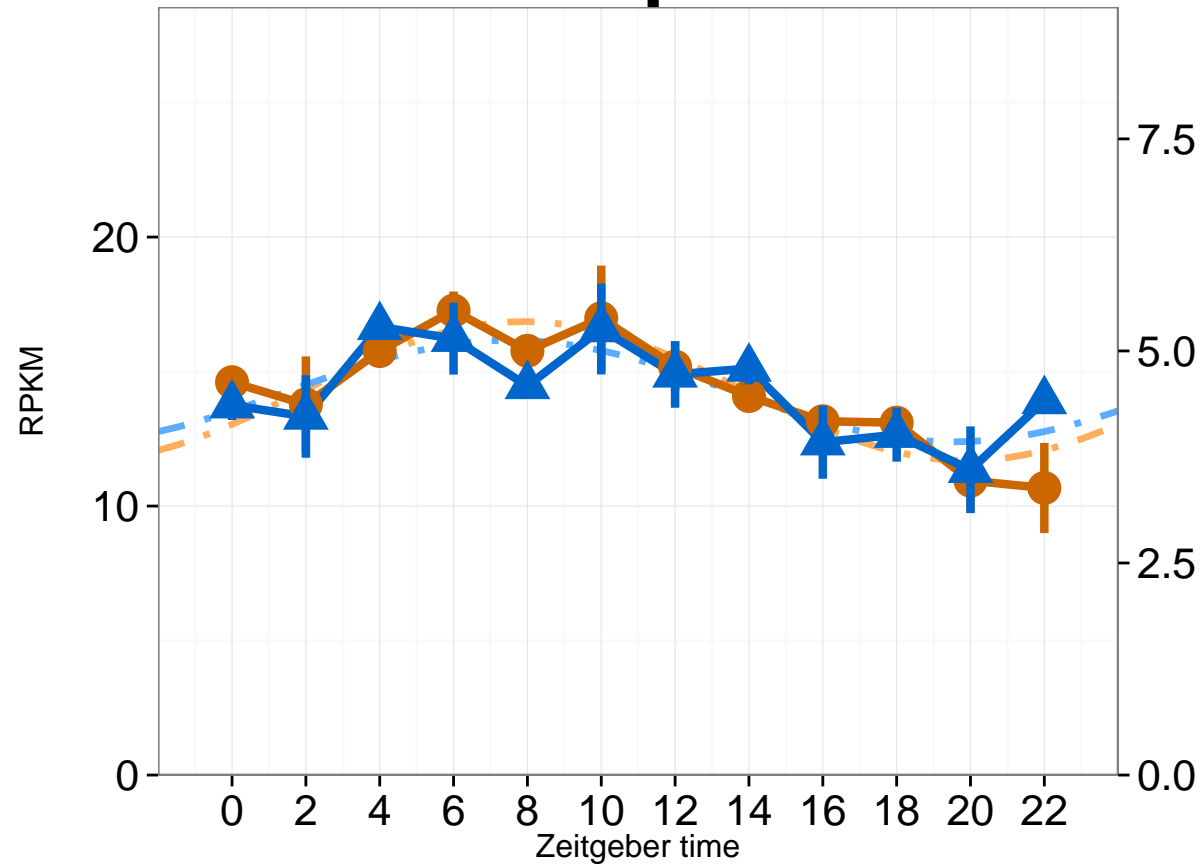

# Akap11

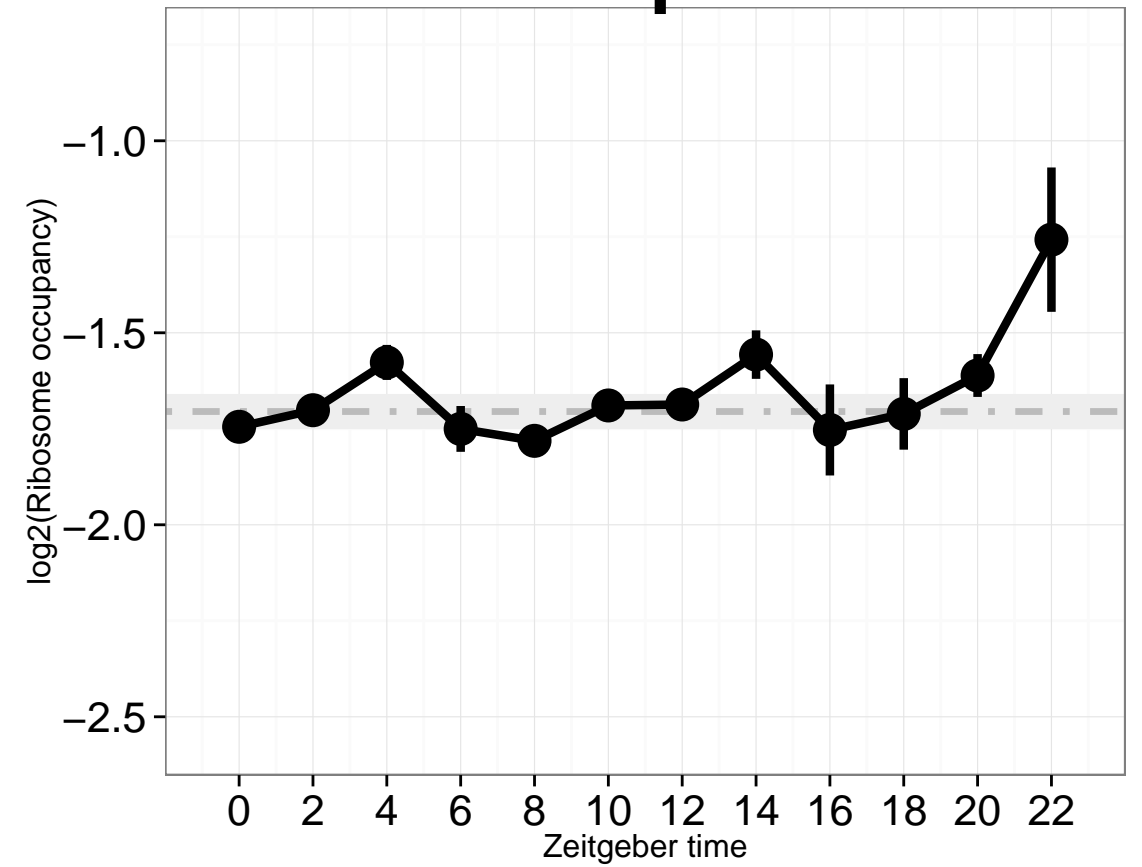

Supplement: SuppDataset_1.zip [file Akap11_set_A.pdf › Supplemental Dataset 1/A-mRNA_nonrhyth_translation_nonrhyth/Akap11_set_A.pdf]

# Akap13

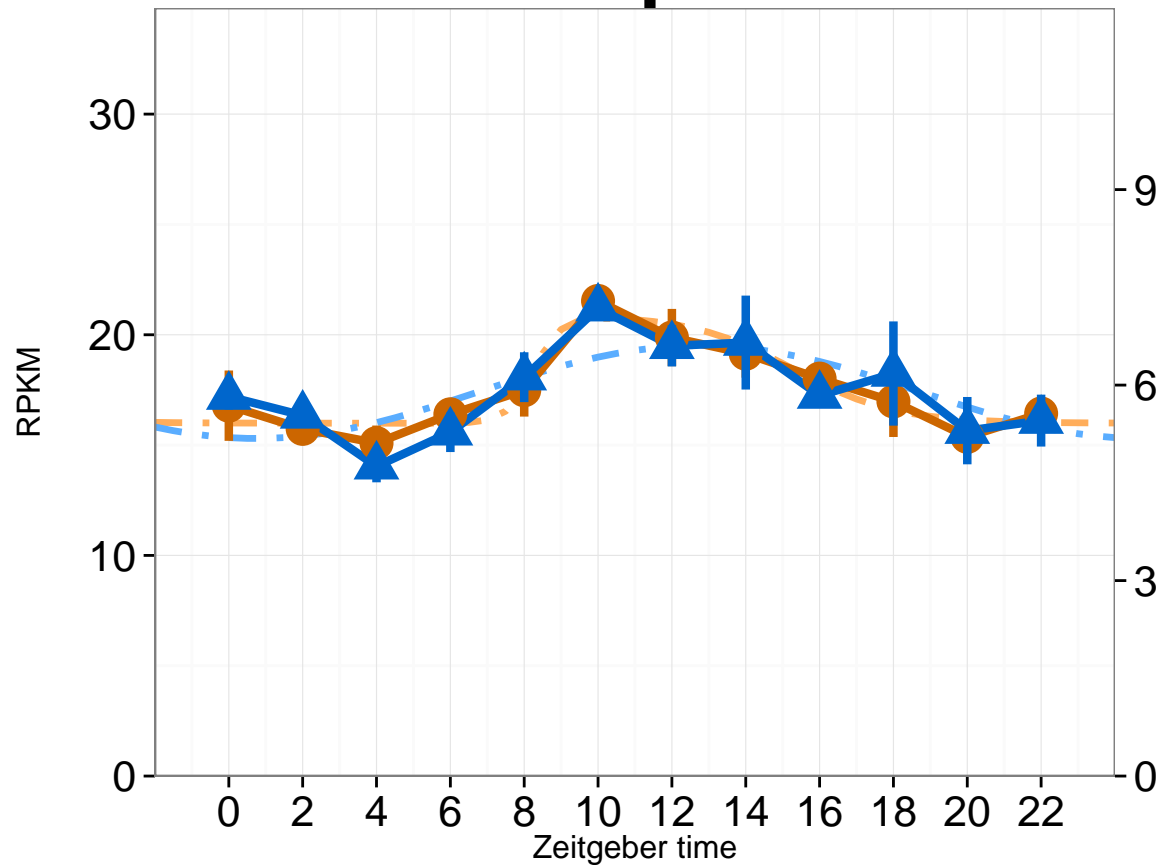

# Akap13

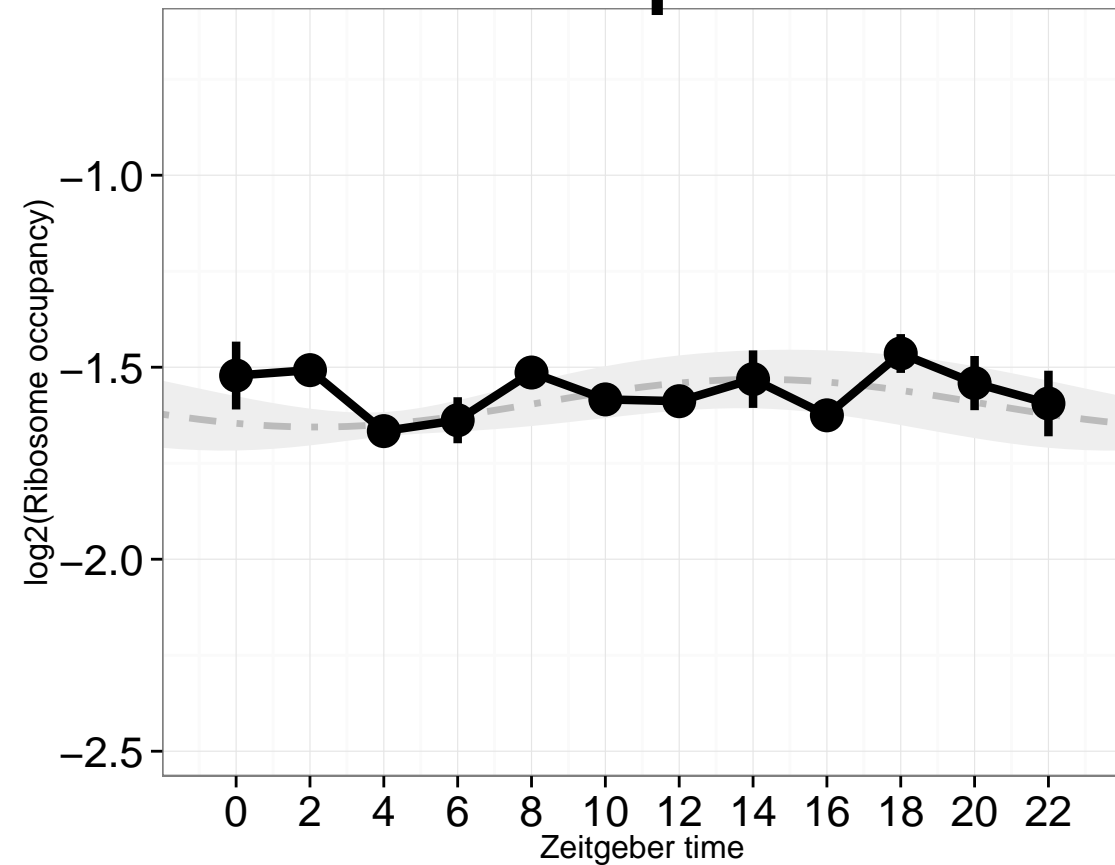

Supplement: SuppDataset_1.zip [file Akap13_set_A.pdf › Supplemental Dataset 1/A-mRNA_nonrhyth_translation_nonrhyth/Akap13_set_A.pdf]

# Akap1

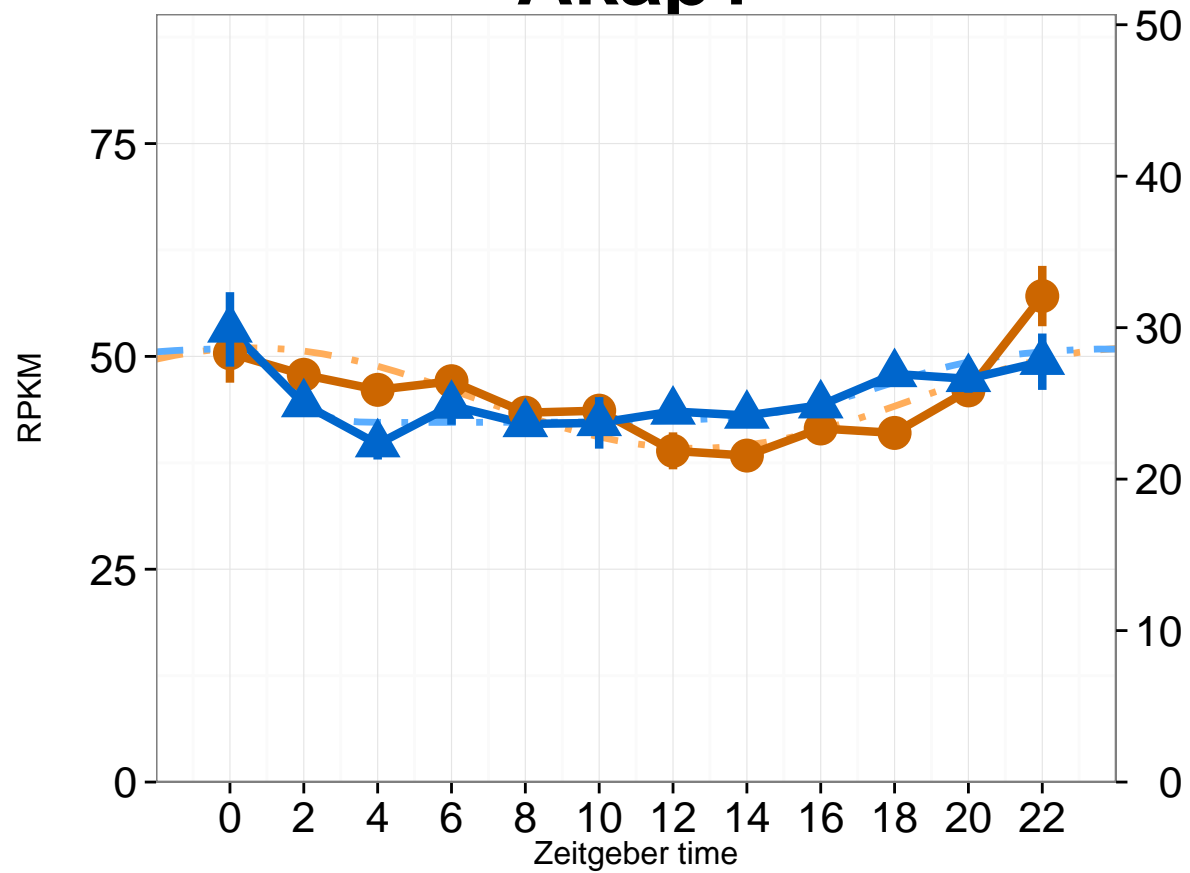

# Akap1

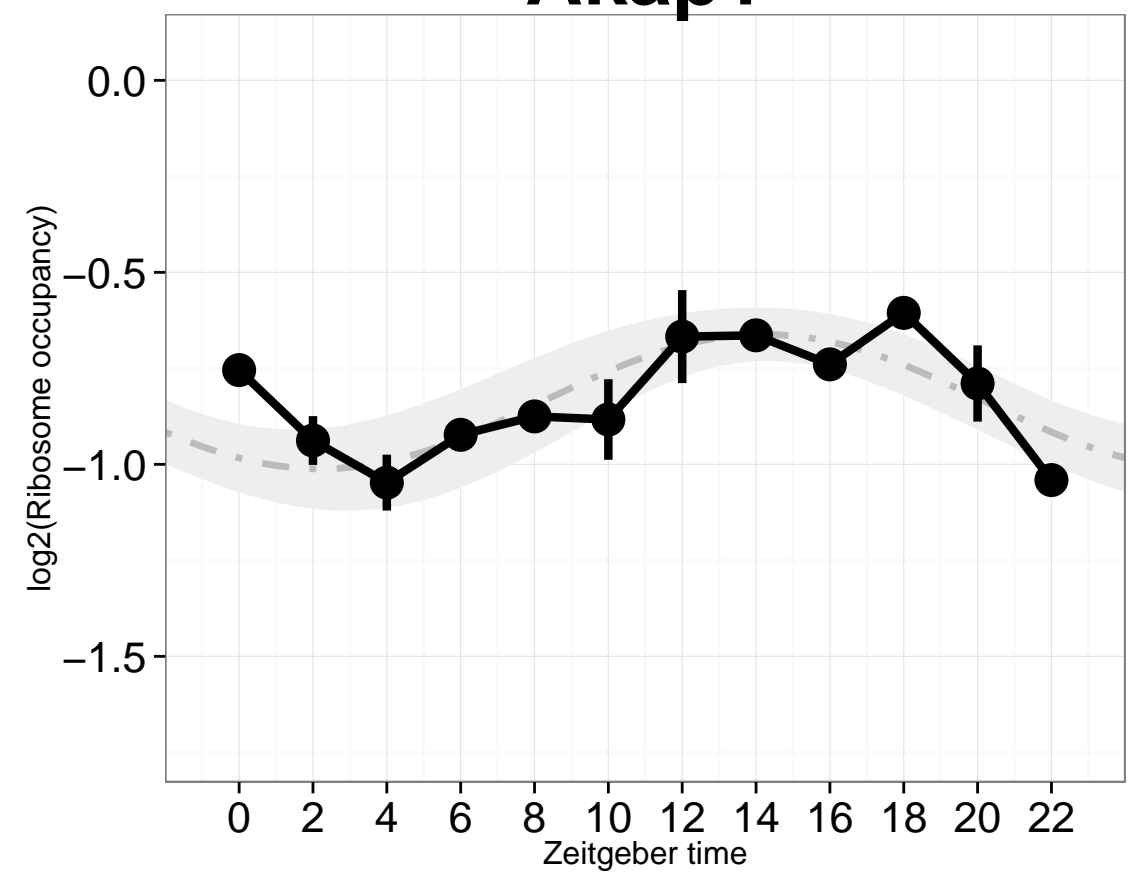

Supplement: SuppDataset_1.zip [file Akap1_set_A.pdf › Supplemental Dataset 1/A-mRNA_nonrhyth_translation_nonrhyth/Akap1_set_A.pdf]

# Akap2

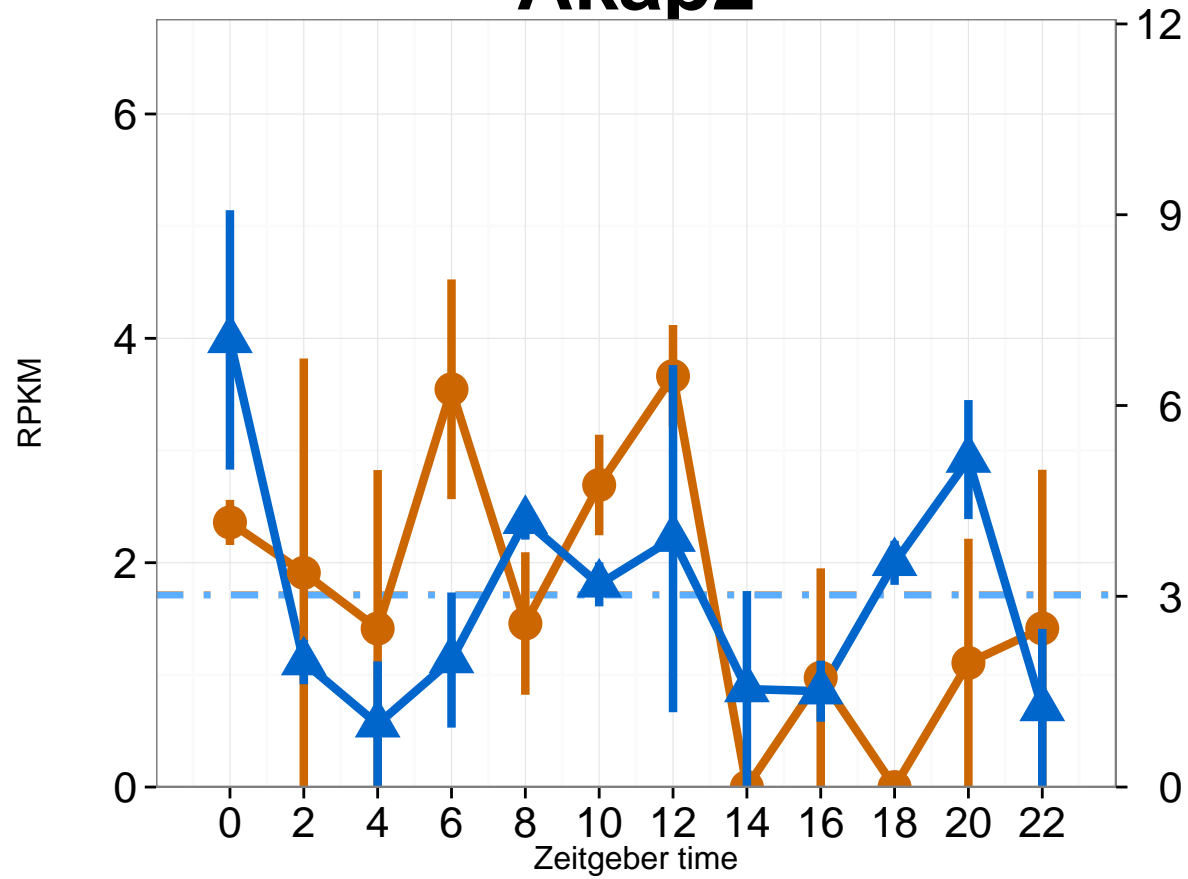

# Akap2

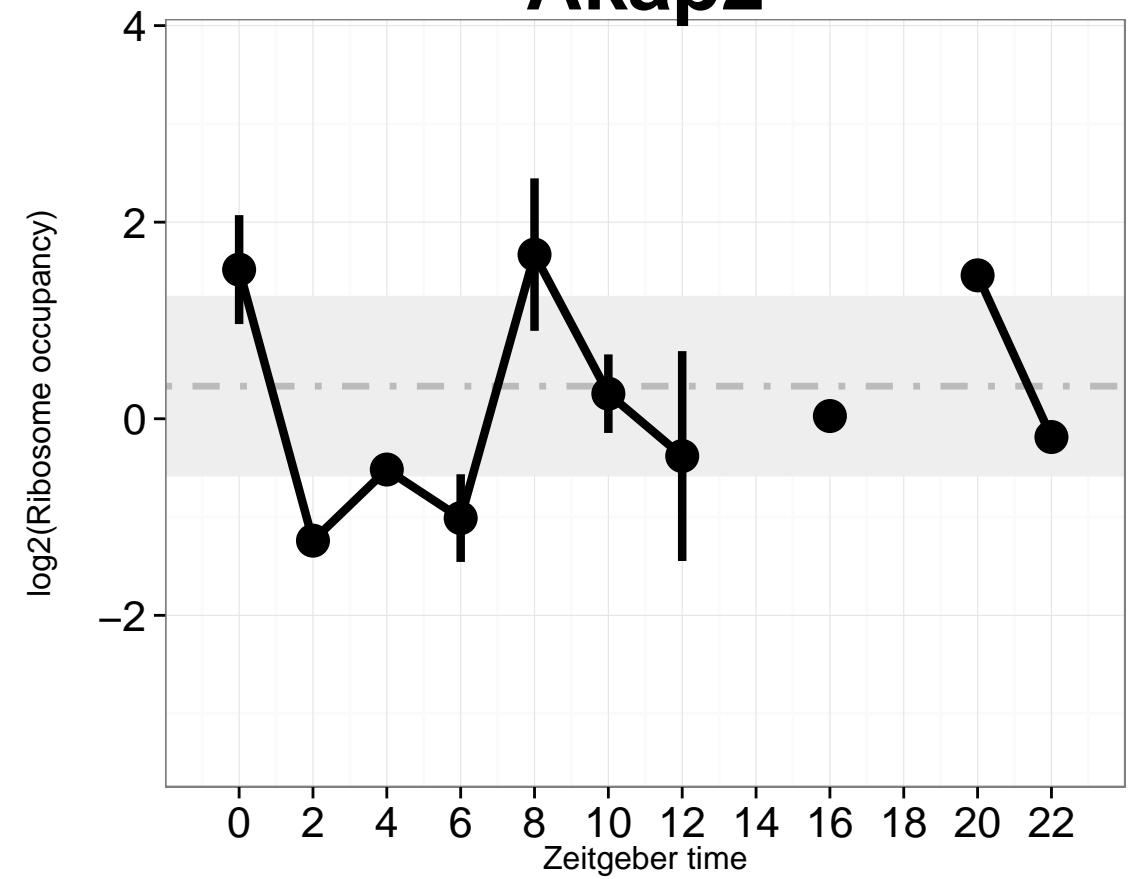

Supplement: SuppDataset_1.zip [file Akap2_set_A.pdf › Supplemental Dataset 1/A-mRNA_nonrhyth_translation_nonrhyth/Akap2_set_A.pdf]

# Akap7

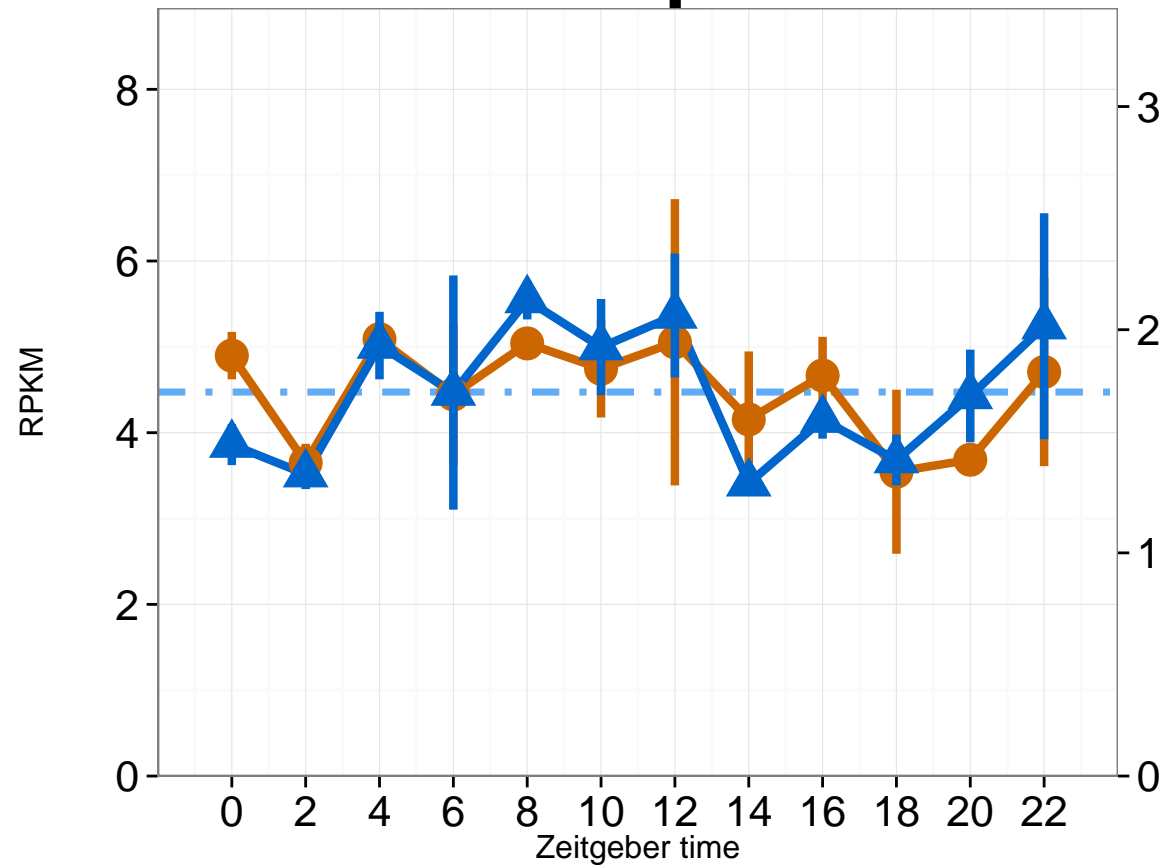

# Akap7

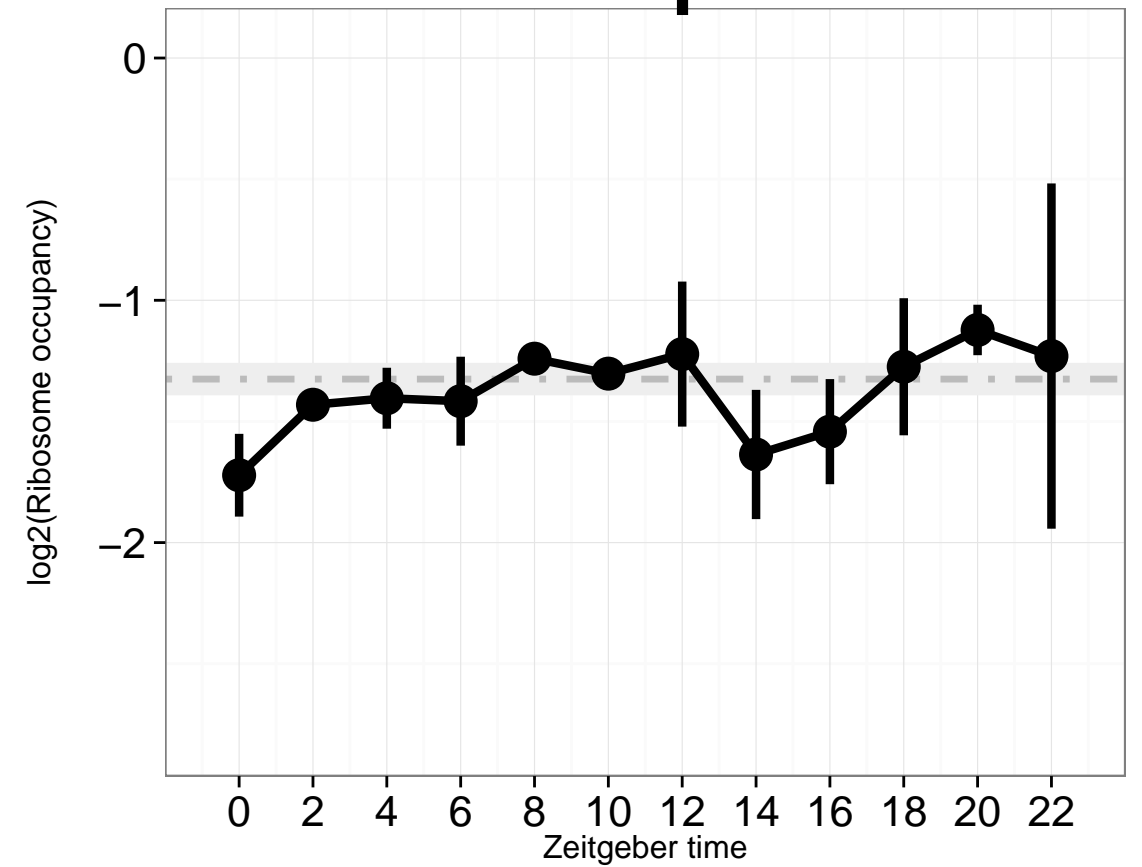

Supplement: SuppDataset_1.zip [file Akap7_set_A.pdf › Supplemental Dataset 1/A-mRNA_nonrhyth_translation_nonrhyth/Akap7_set_A.pdf]

## Akap8

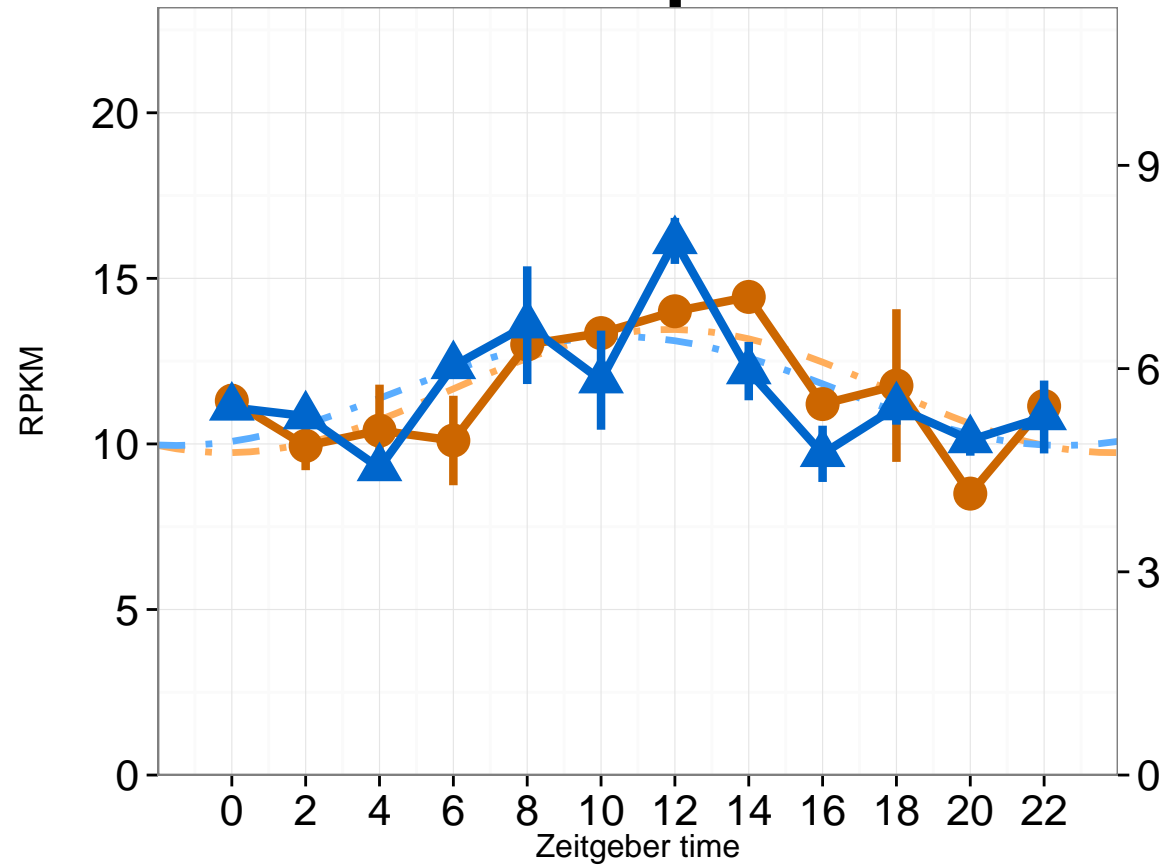

## Akap8

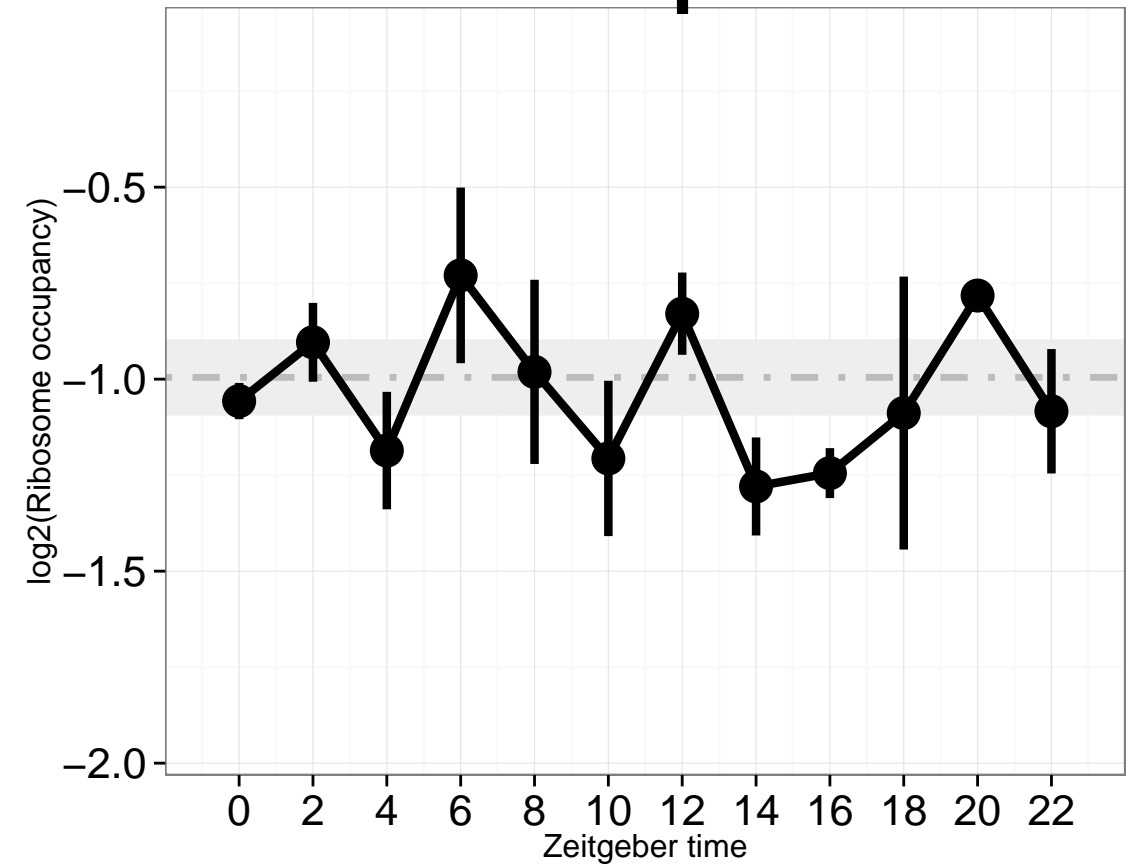

Supplement: SuppDataset_1.zip [file Akap8_set_A.pdf › Supplemental Dataset 1/A-mRNA_nonrhyth_translation_nonrhyth/Akap8_set_A.pdf]

# Akap8l

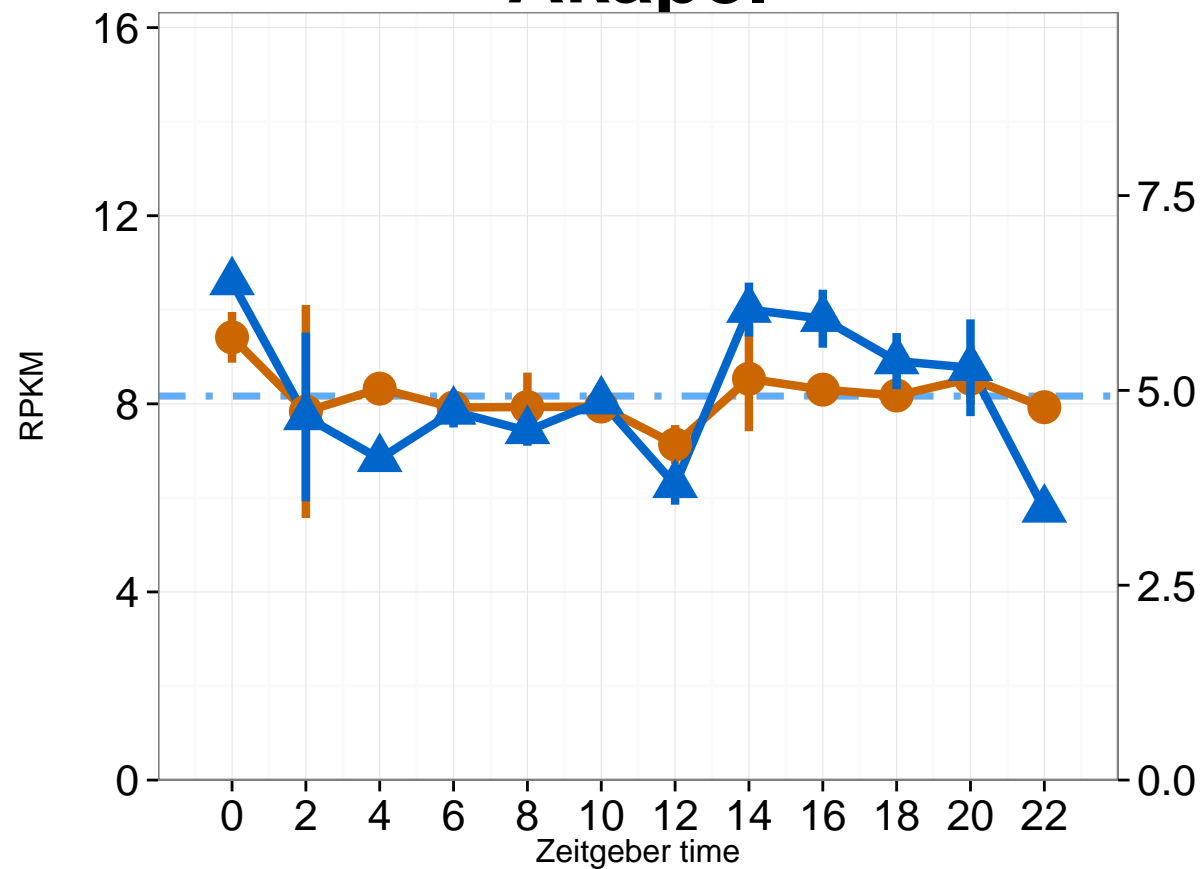

# Akap8l

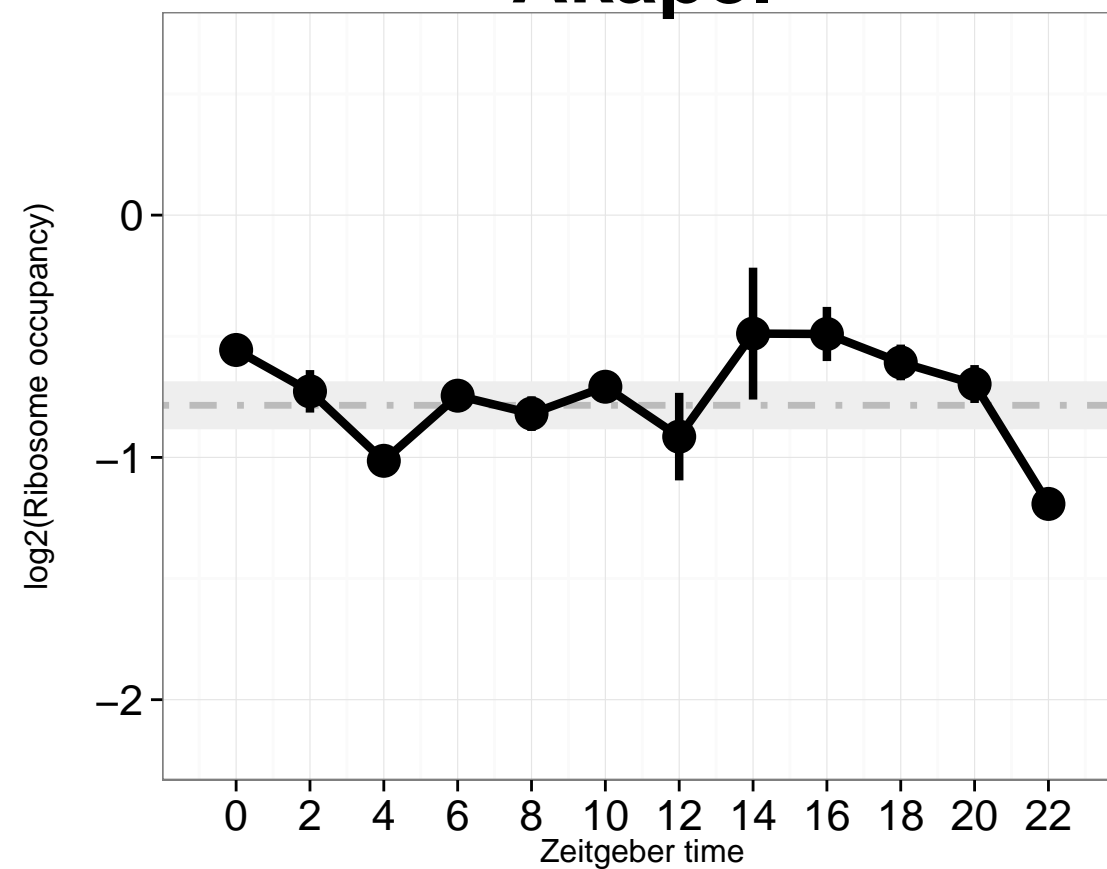

Supplement: SuppDataset_1.zip [file Akap8l_set_A.pdf › Supplemental Dataset 1/A-mRNA_nonrhyth_translation_nonrhyth/Akap8l_set_A.pdf]

## Akap9

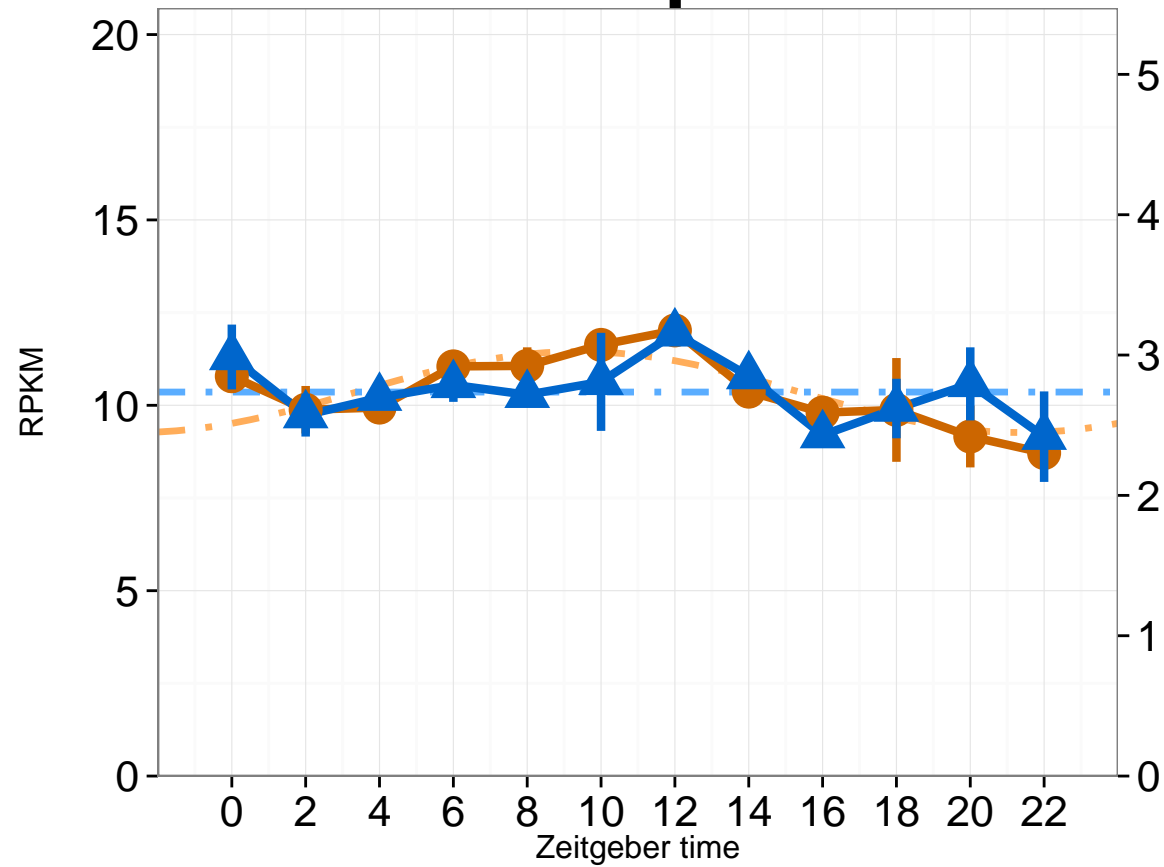

## Akap9

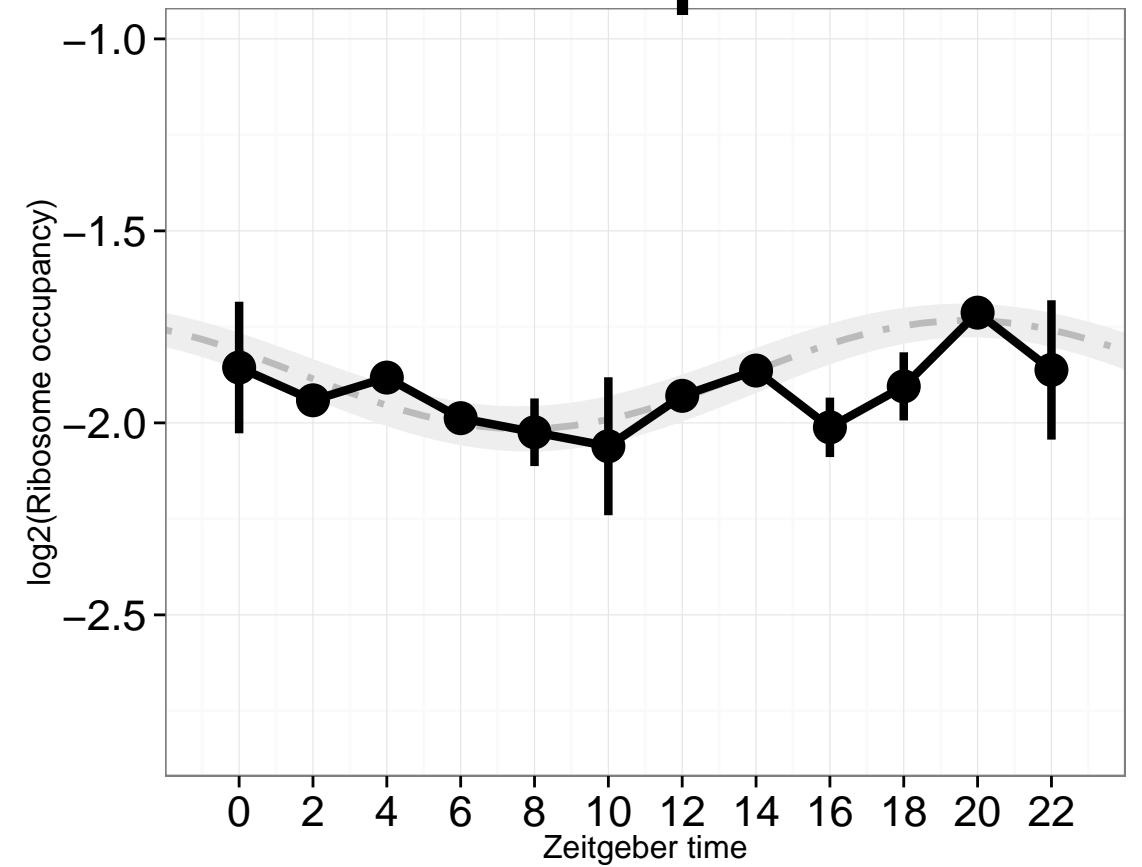

Supplement: SuppDataset_1.zip [file Akap9_set_A.pdf › Supplemental Dataset 1/A-mRNA_nonrhyth_translation_nonrhyth/Akap9_set_A.pdf]

## Akip1

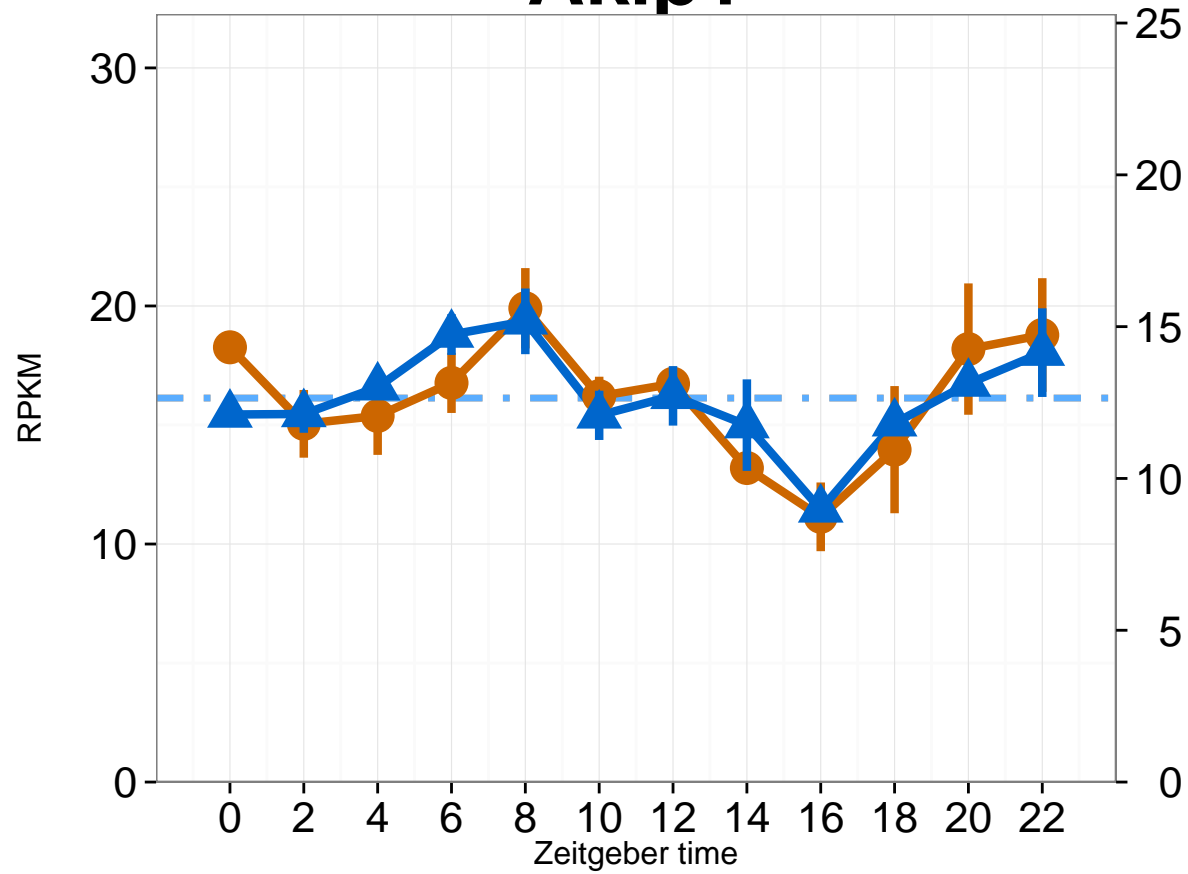

## Akip1

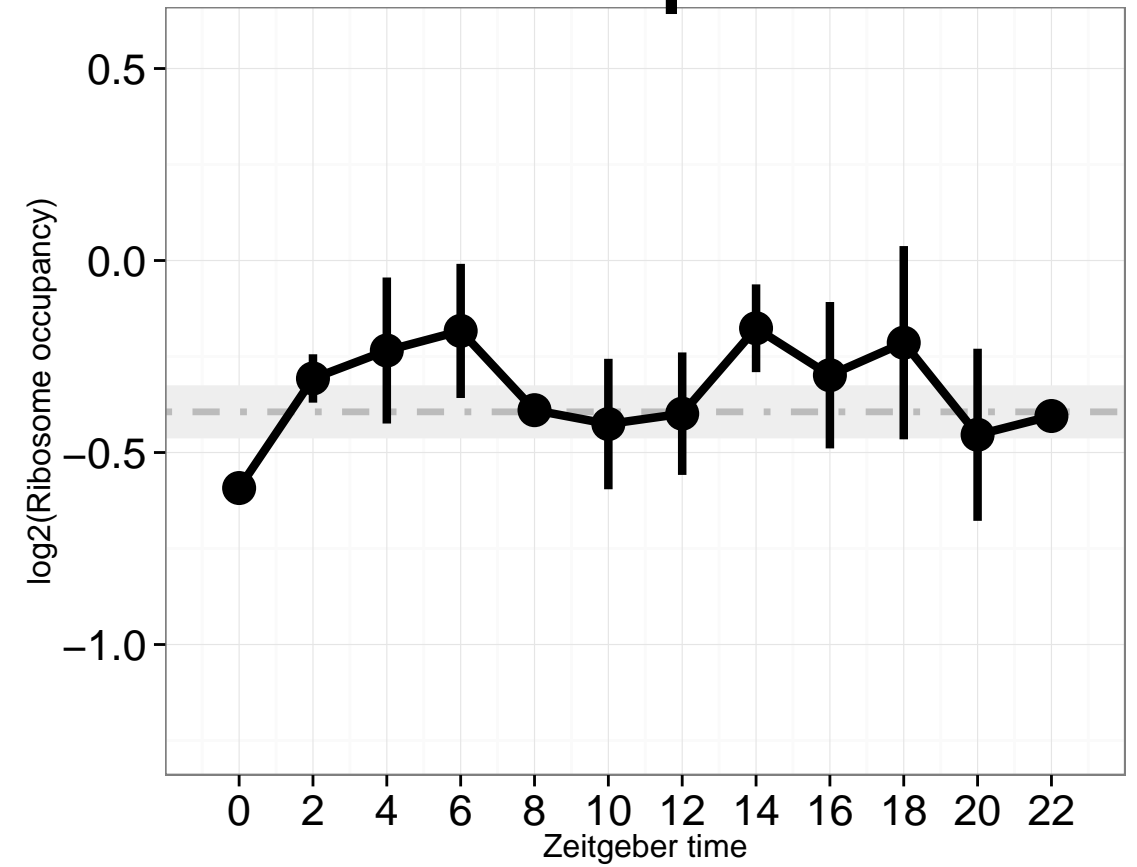

Supplement: SuppDataset_1.zip [file Akip1_set_A.pdf › Supplemental Dataset 1/A-mRNA_nonrhyth_translation_nonrhyth/Akip1_set_A.pdf]

## Akirin1

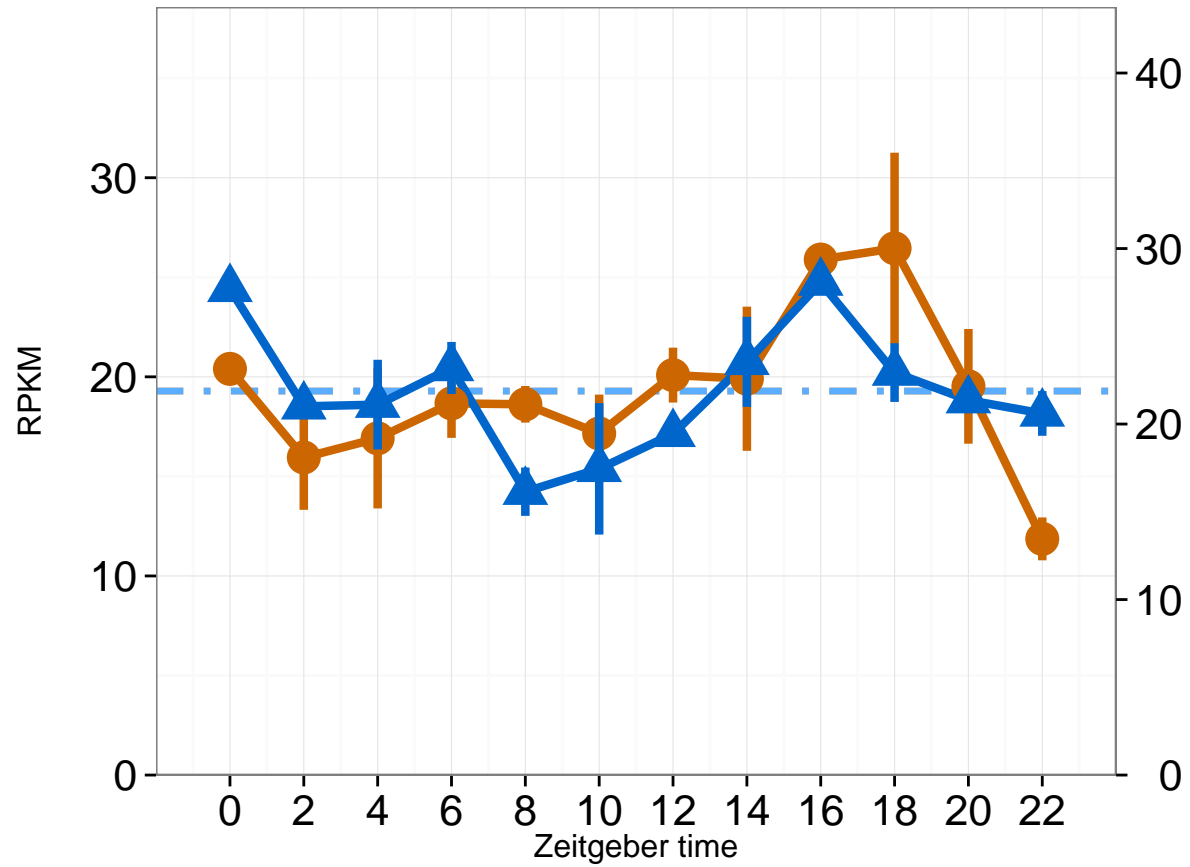

## Akirin1

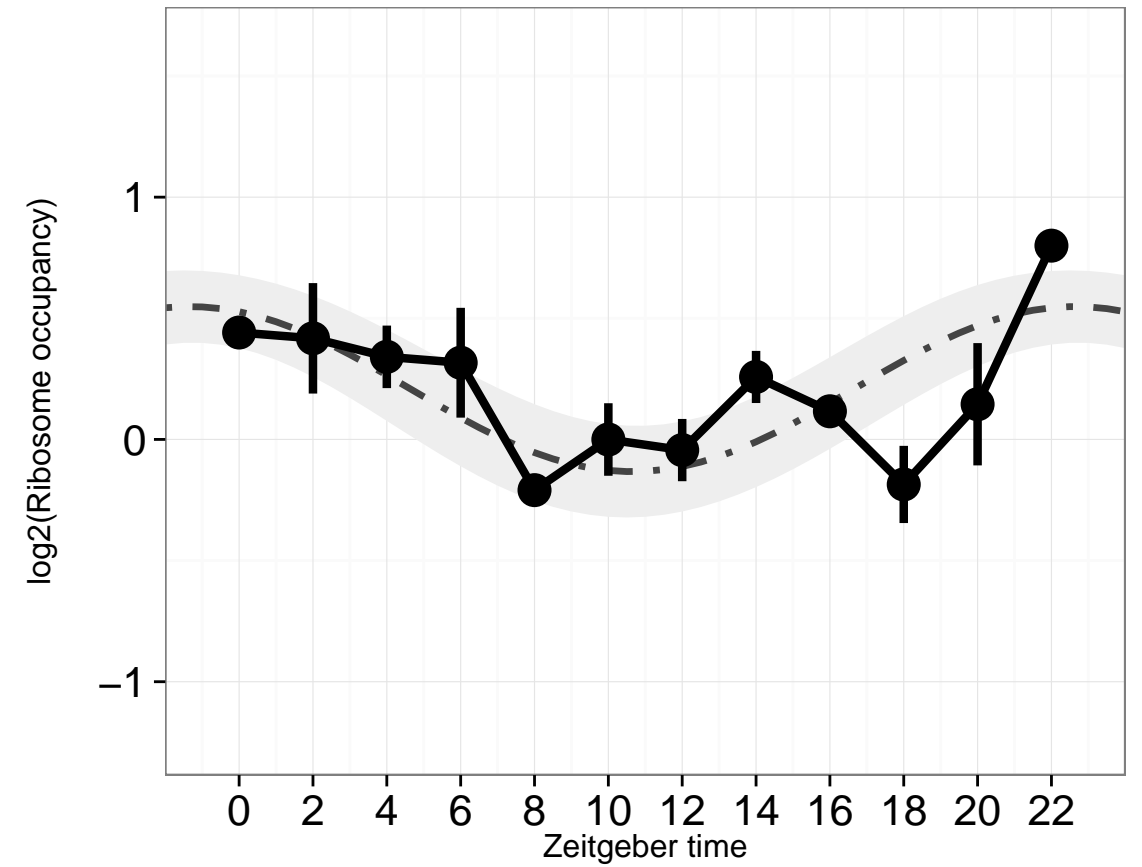

Supplement: SuppDataset_1.zip [file Akirin1_set_A.pdf › Supplemental Dataset 1/A-mRNA_nonrhyth_translation_nonrhyth/Akirin1_set_A.pdf]

## Akirin2

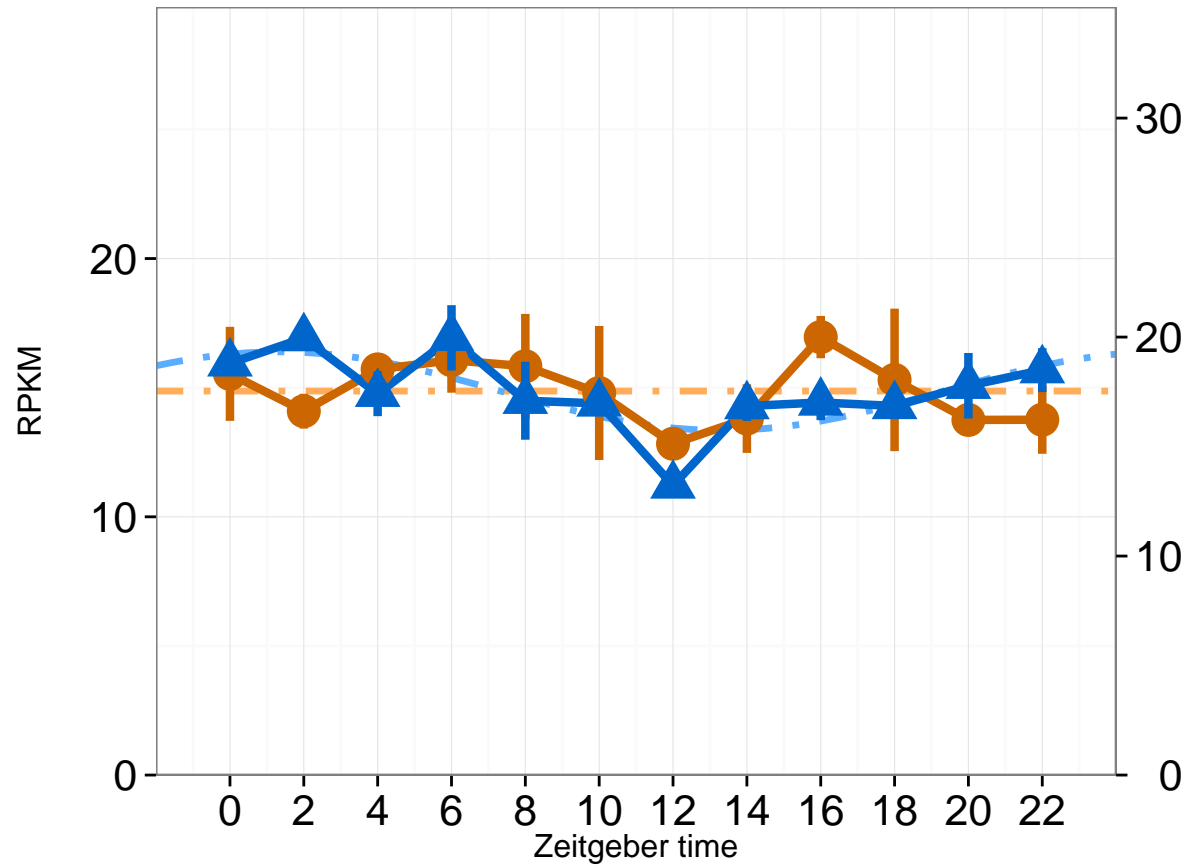

## Akirin2

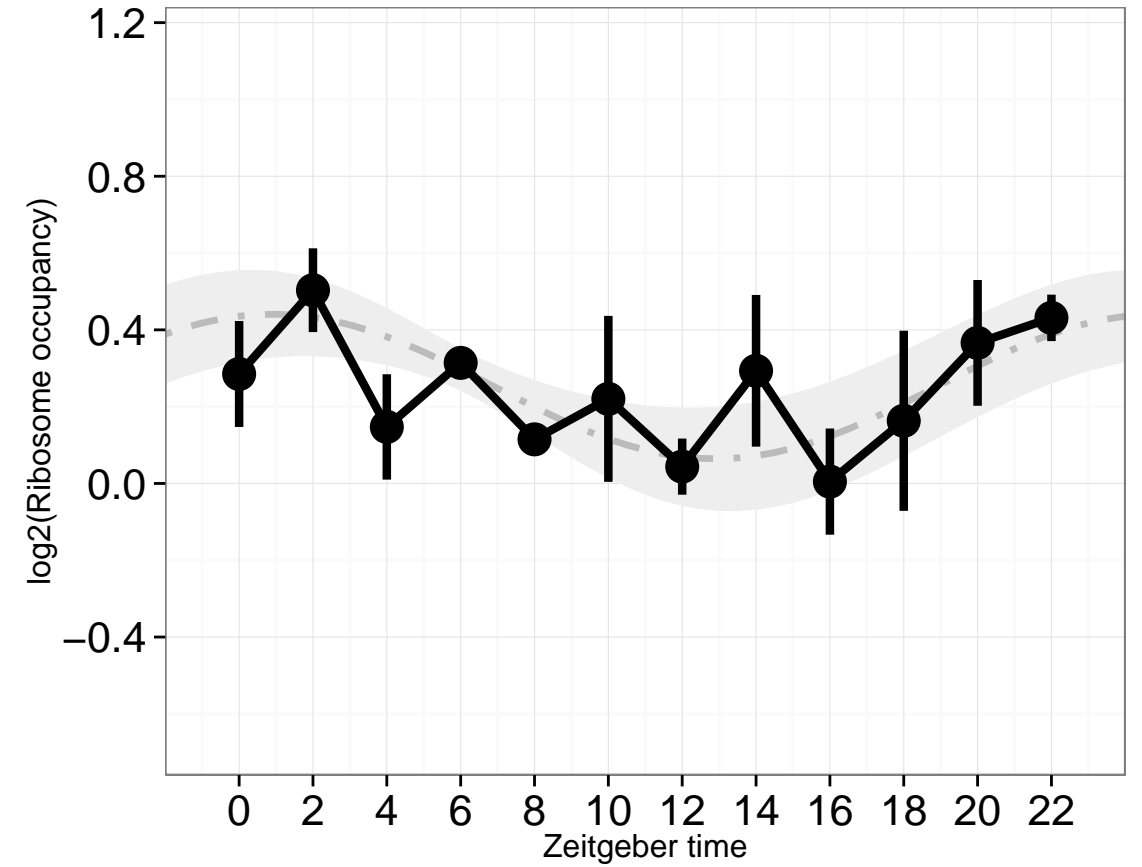

Supplement: SuppDataset_1.zip [file Akirin2_set_A.pdf › Supplemental Dataset 1/A-mRNA_nonrhyth_translation_nonrhyth/Akirin2_set_A.pdf]

## Akna

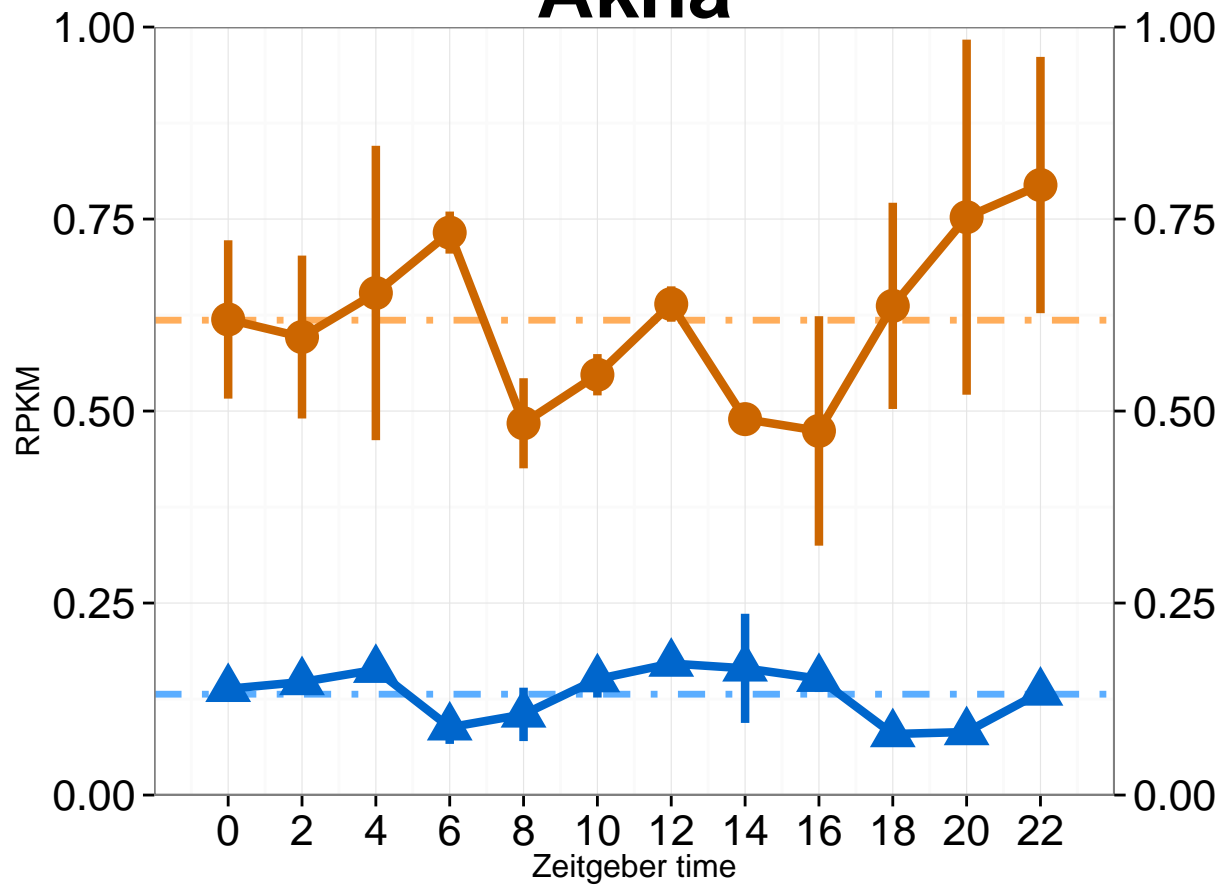

## Akna

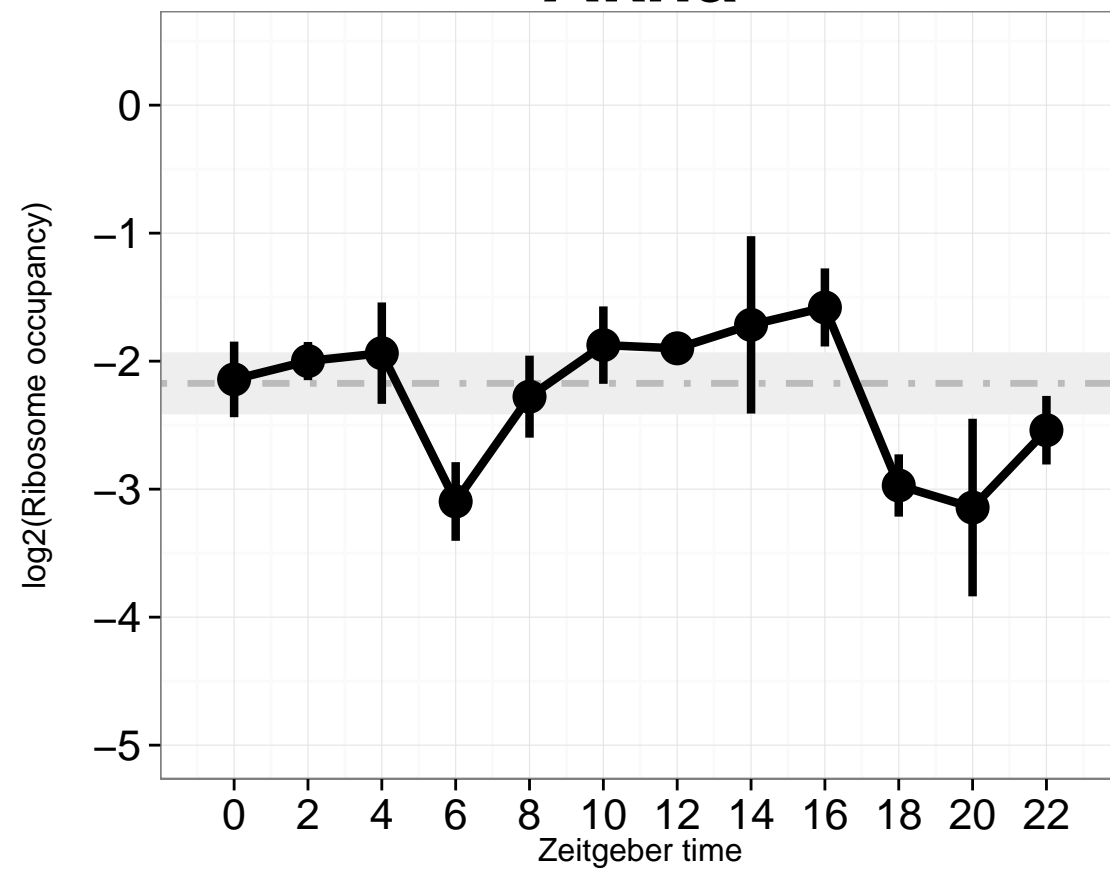

Supplement: SuppDataset_1.zip [file Akna_set_A.pdf › Supplemental Dataset 1/A-mRNA_nonrhyth_translation_nonrhyth/Akna_set_A.pdf]

# Akr1a1

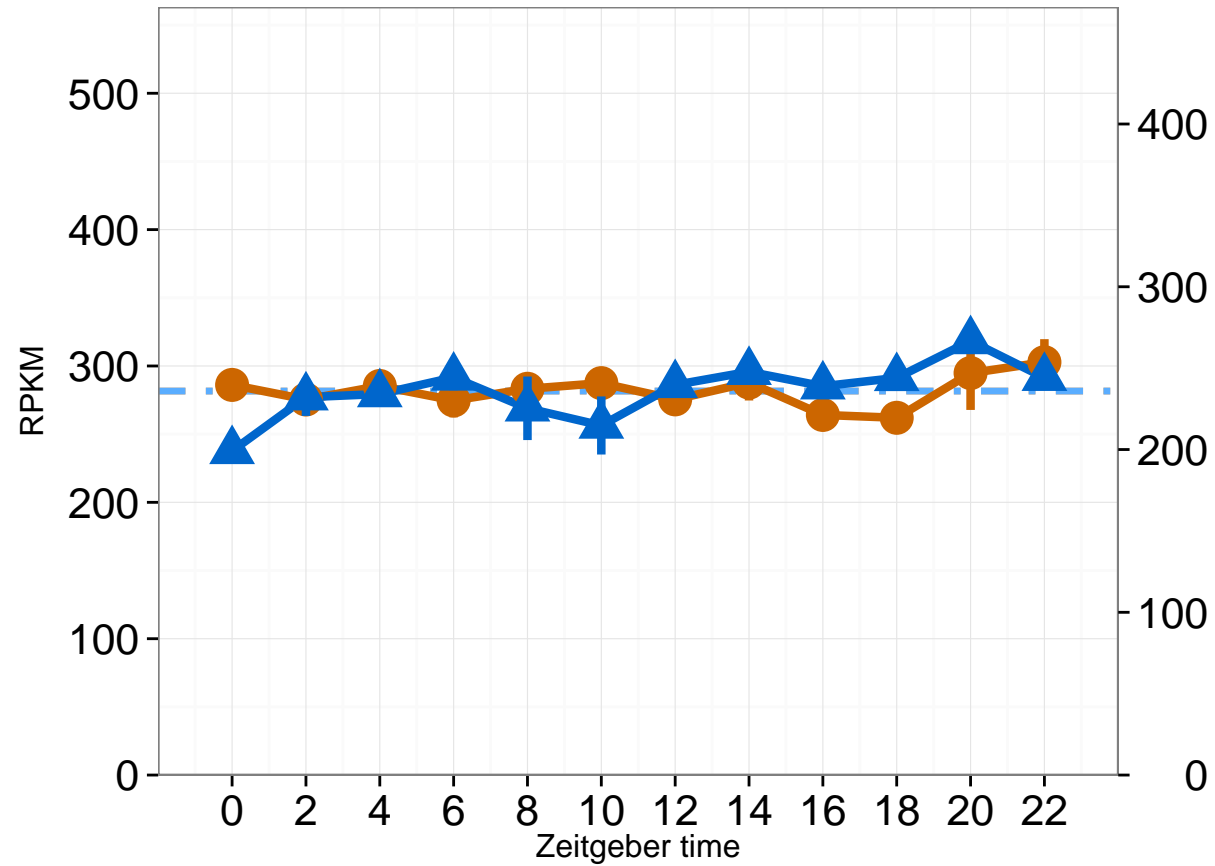

# Akr1a1

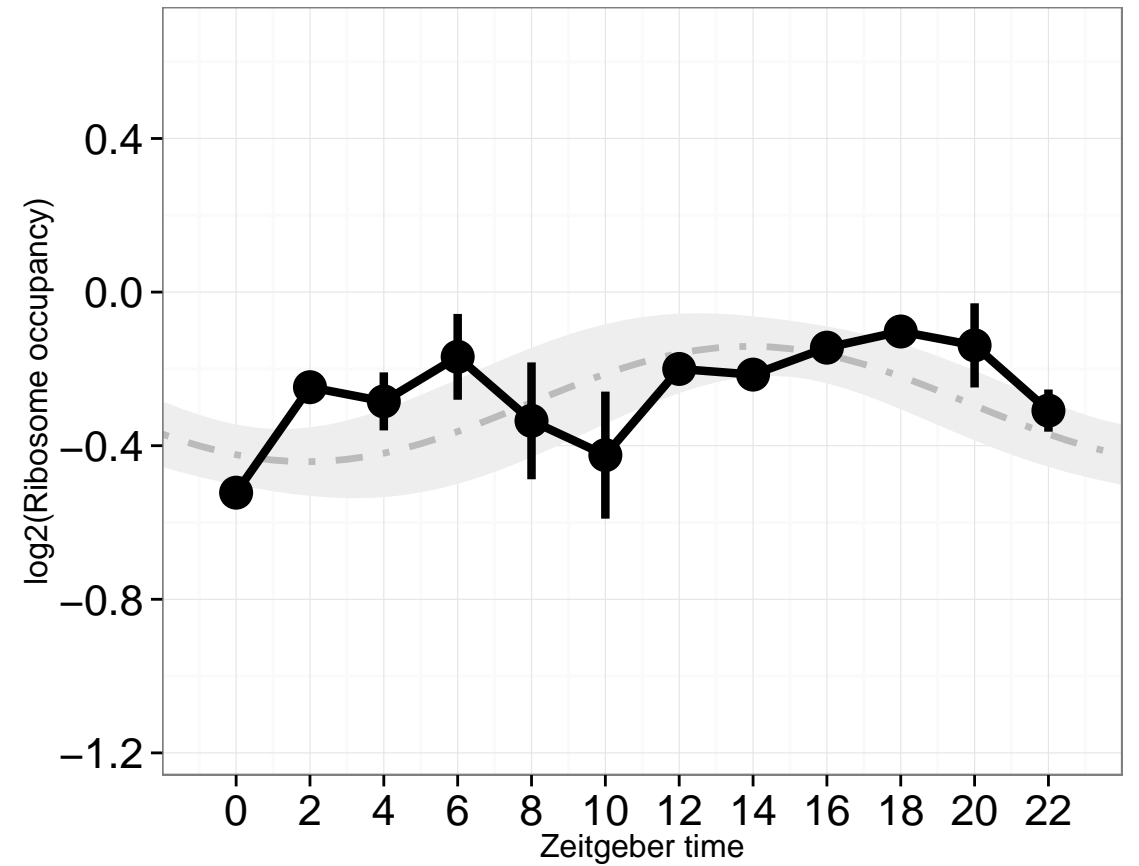

Supplement: SuppDataset_1.zip [file Akr1a1_set_A.pdf › Supplemental Dataset 1/A-mRNA_nonrhyth_translation_nonrhyth/Akr1a1_set_A.pdf]

# Akr1b10

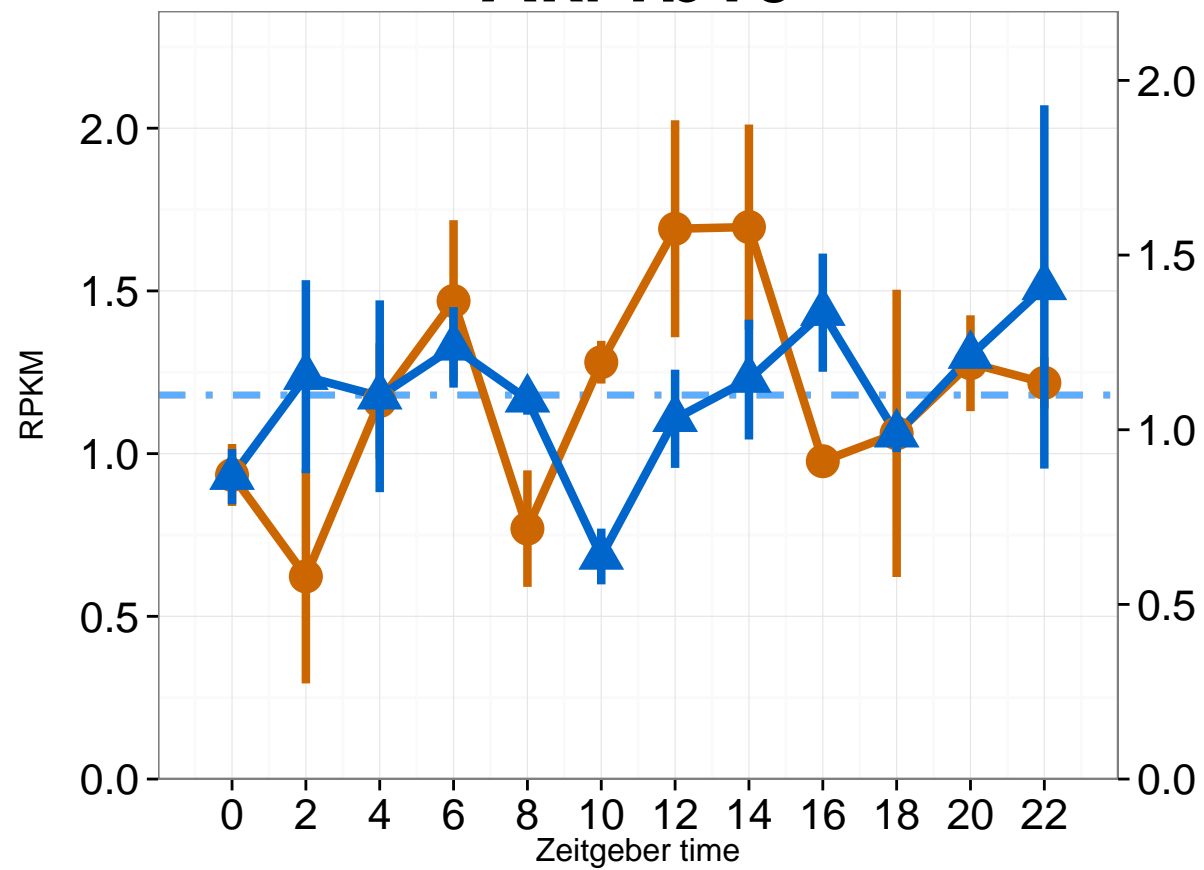

# Akr1b10

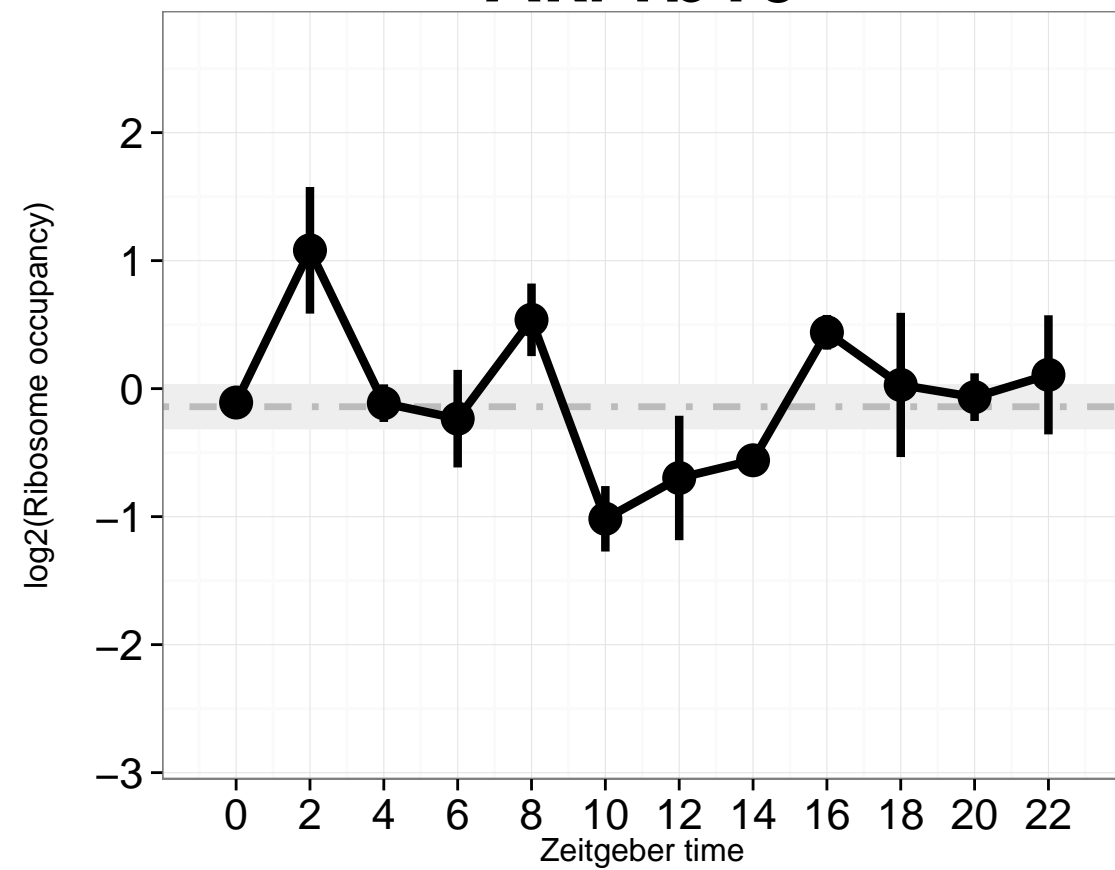

Supplement: SuppDataset_1.zip [file Akr1b10_set_A.pdf › Supplemental Dataset 1/A-mRNA_nonrhyth_translation_nonrhyth/Akr1b10_set_A.pdf]

# Akr1b3

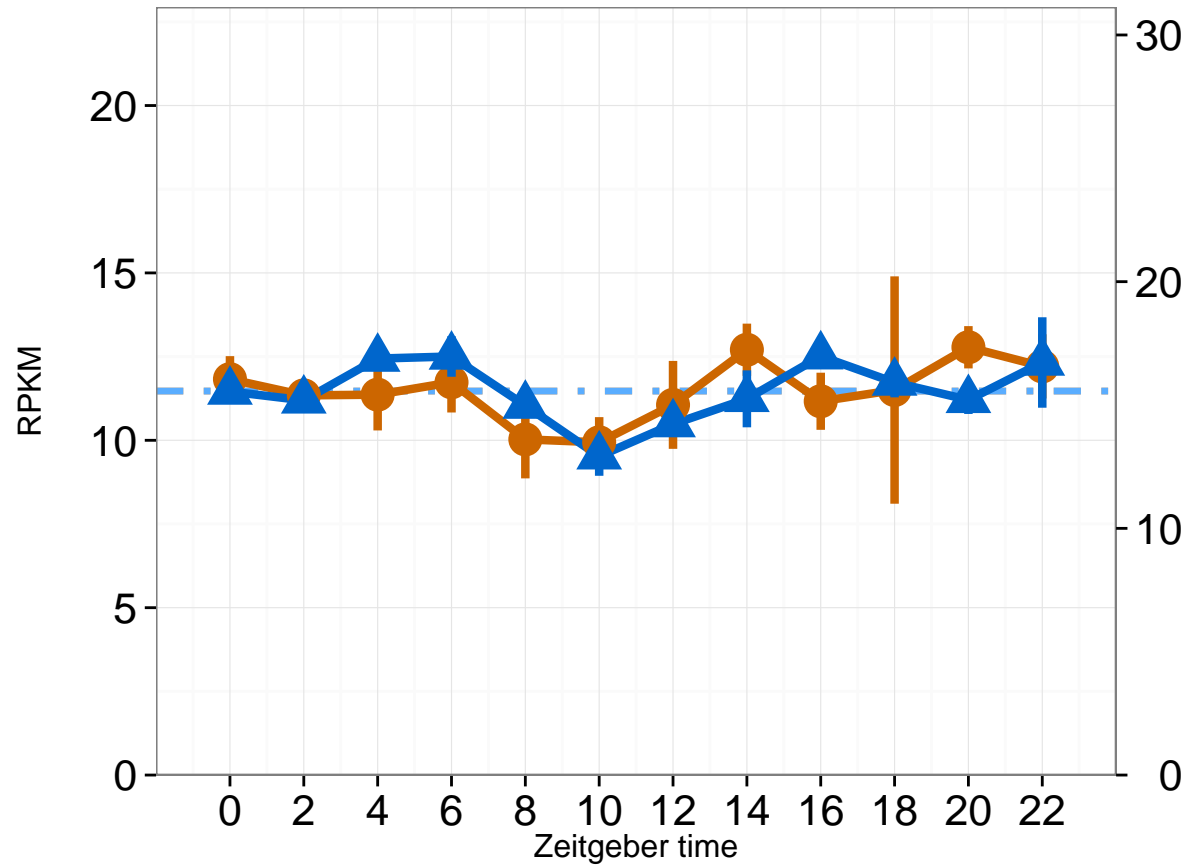

# Akr1b3

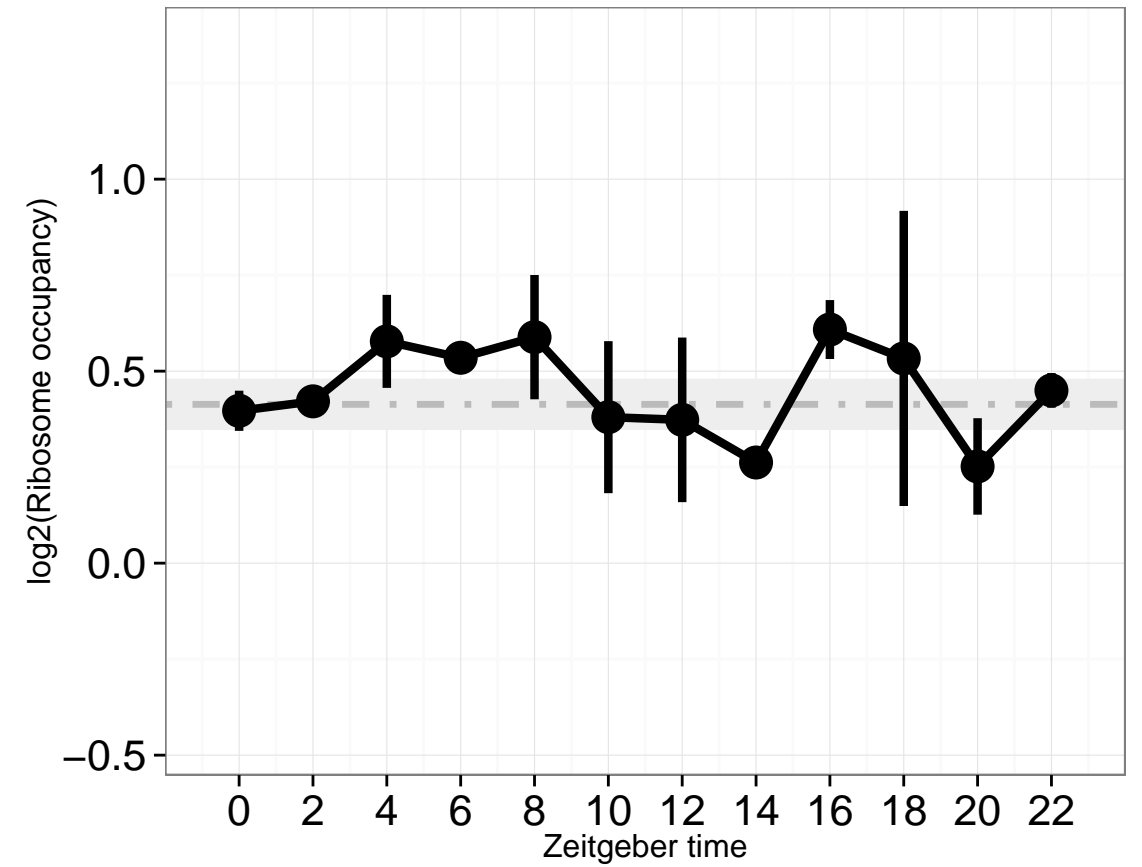

Supplement: SuppDataset_1.zip [file Akr1b3_set_A.pdf › Supplemental Dataset 1/A-mRNA_nonrhyth_translation_nonrhyth/Akr1b3_set_A.pdf]

# Akr1b8

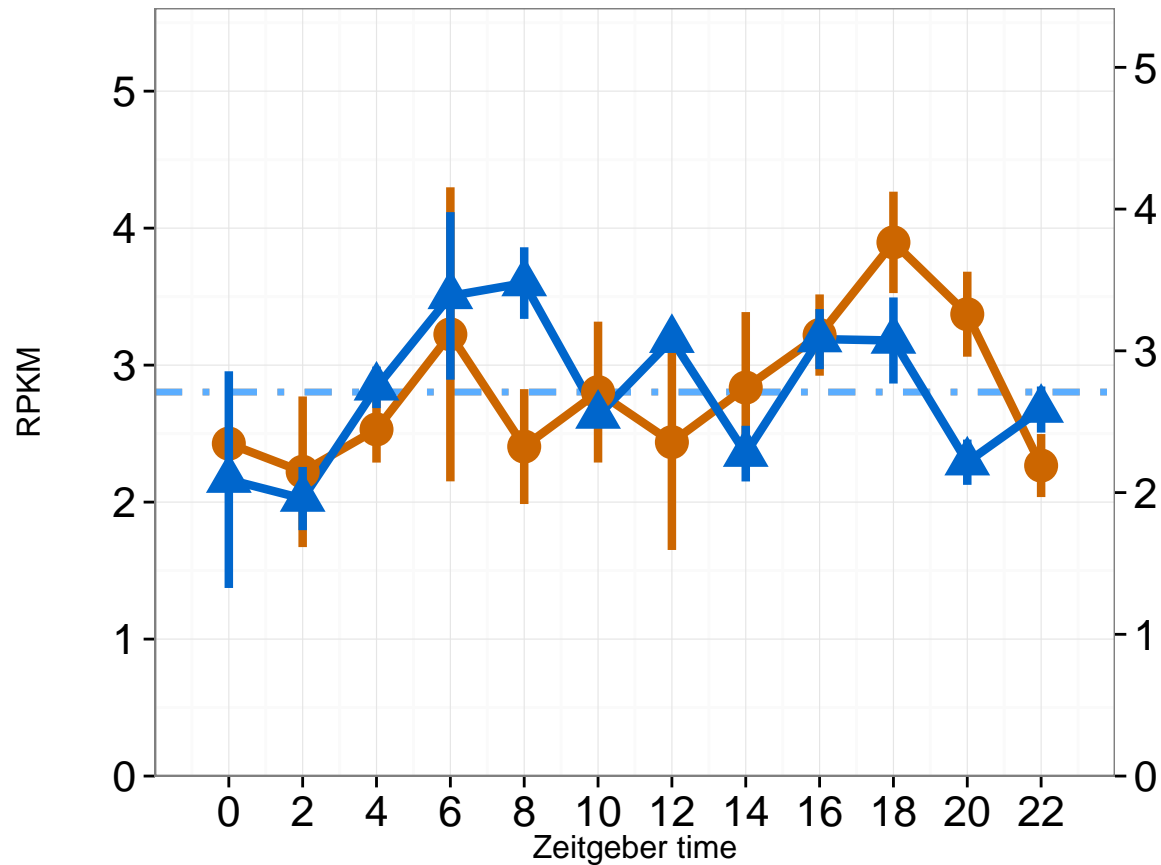

# Akr1b8

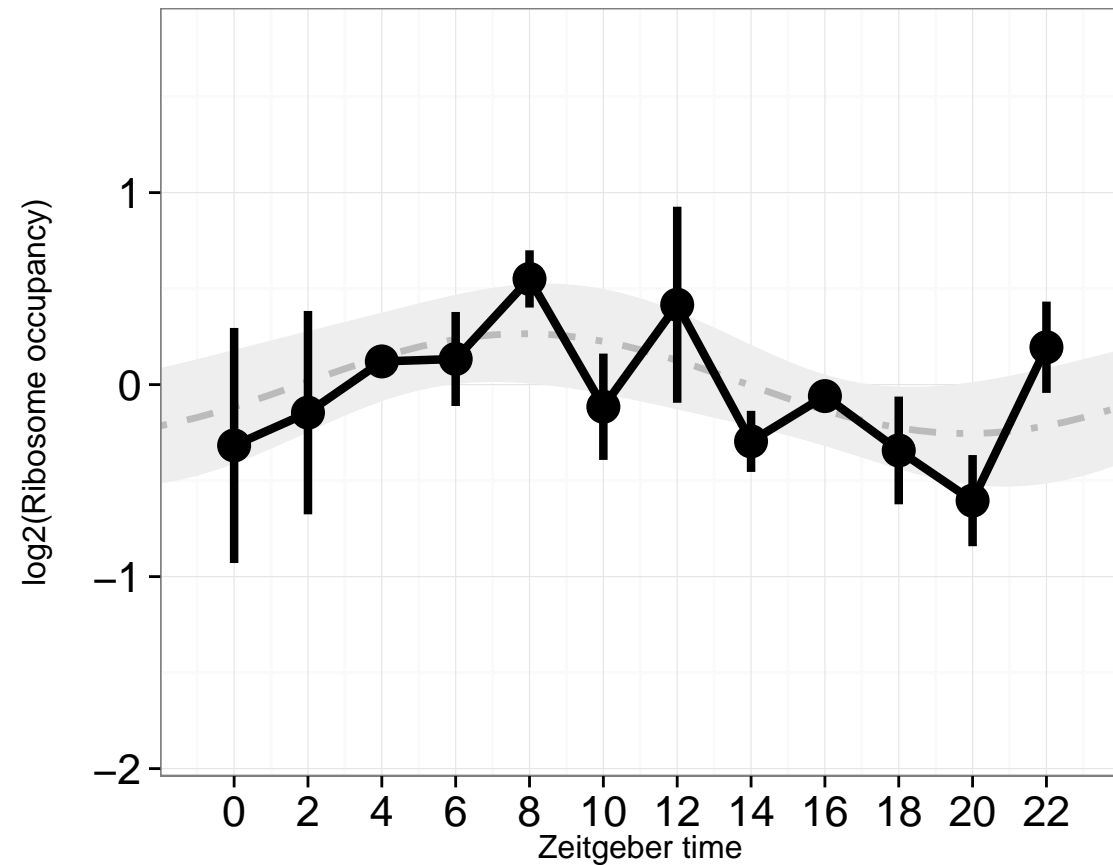

Supplement: SuppDataset_1.zip [file Akr1b8_set_A.pdf › Supplemental Dataset 1/A-mRNA_nonrhyth_translation_nonrhyth/Akr1b8_set_A.pdf]

# Akr1c12

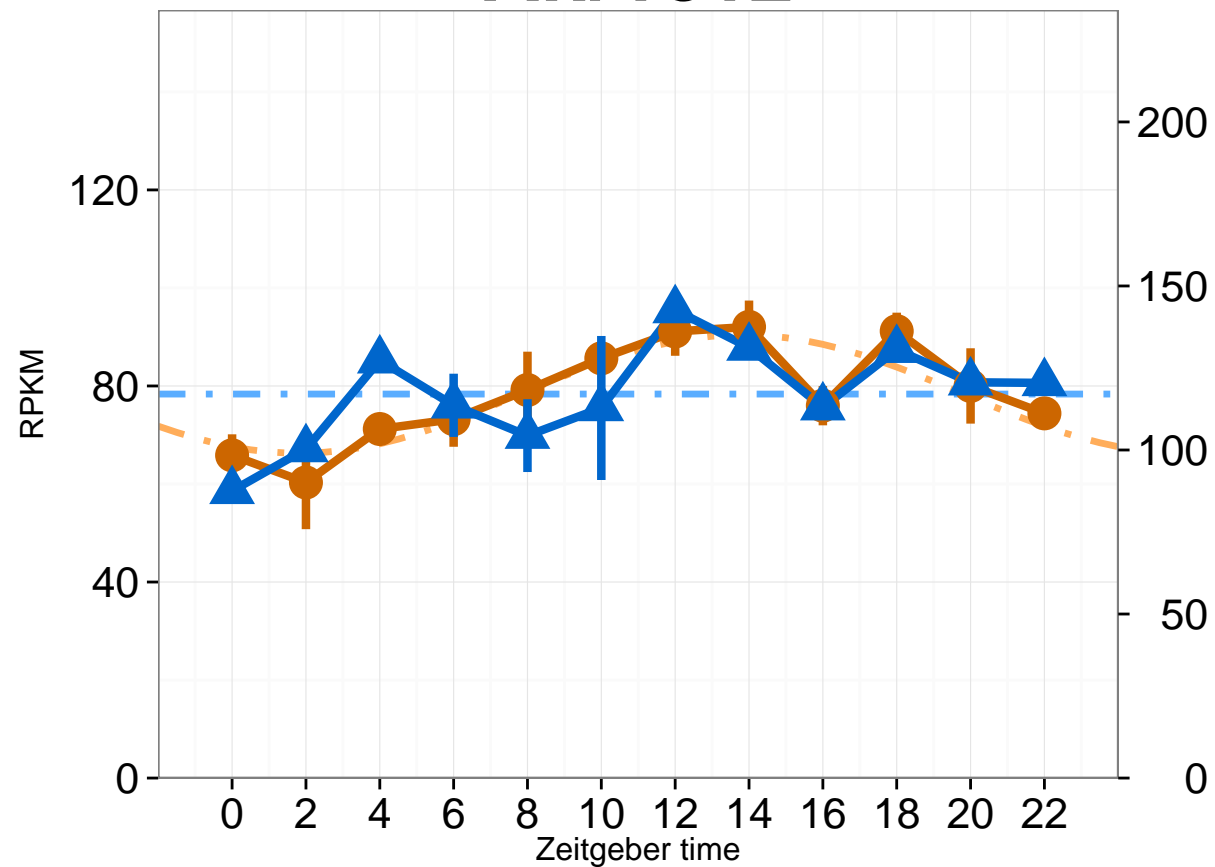

# Akr1c12

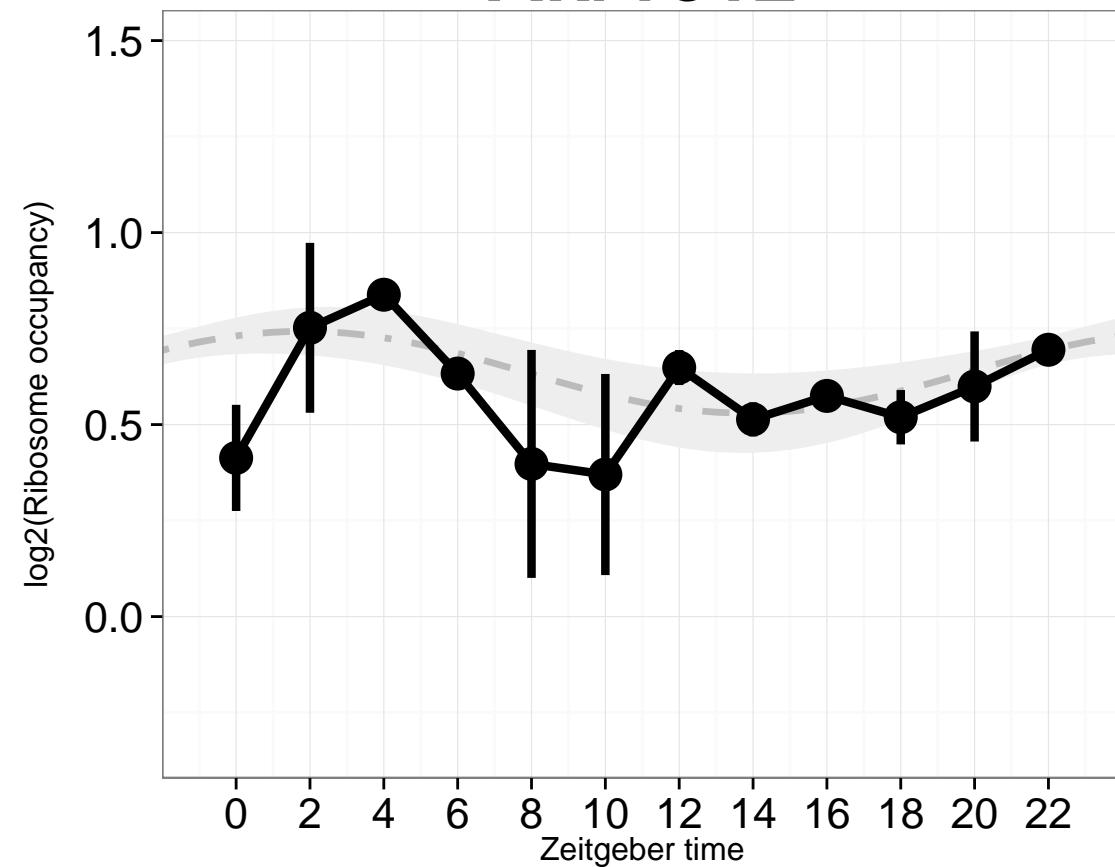

Supplement: SuppDataset_1.zip [file Akr1c12_set_A.pdf › Supplemental Dataset 1/A-mRNA_nonrhyth_translation_nonrhyth/Akr1c12_set_A.pdf]

# Akr1c13

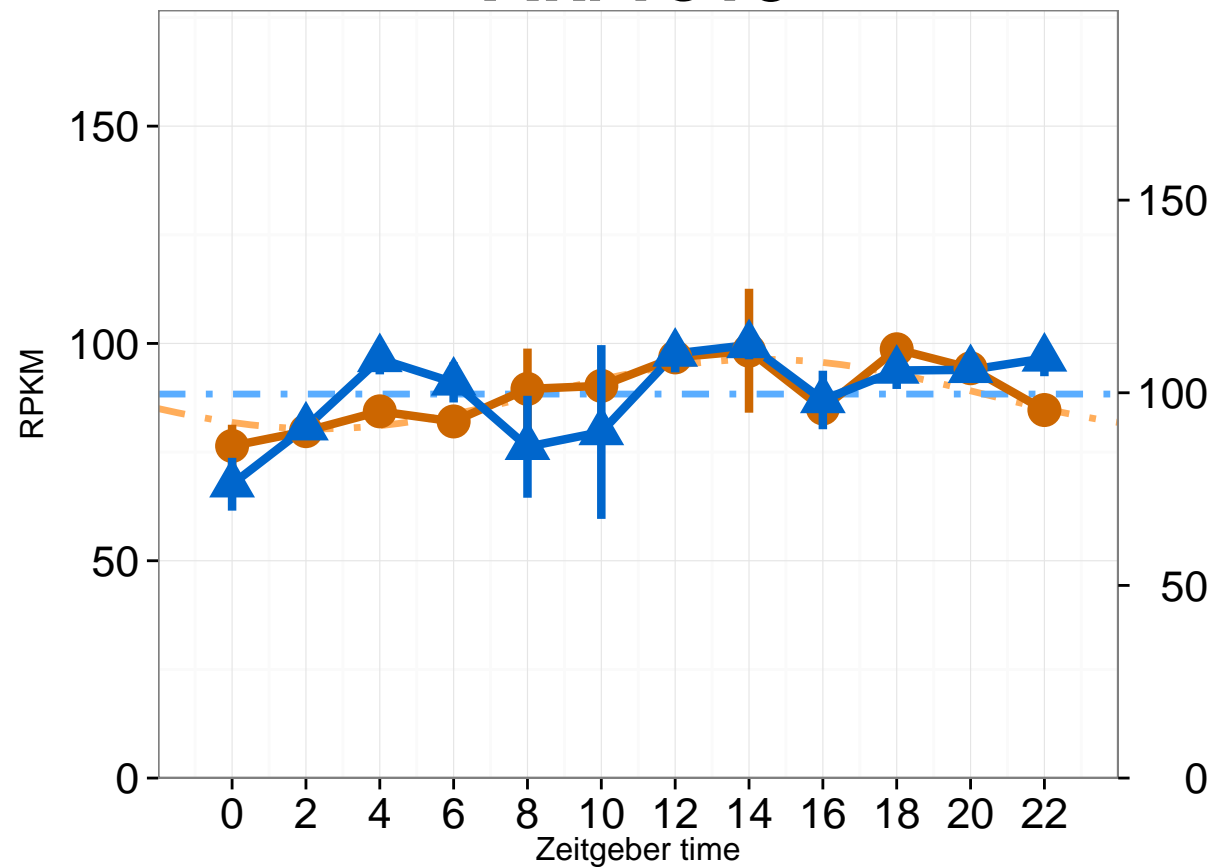

# Akr1c13

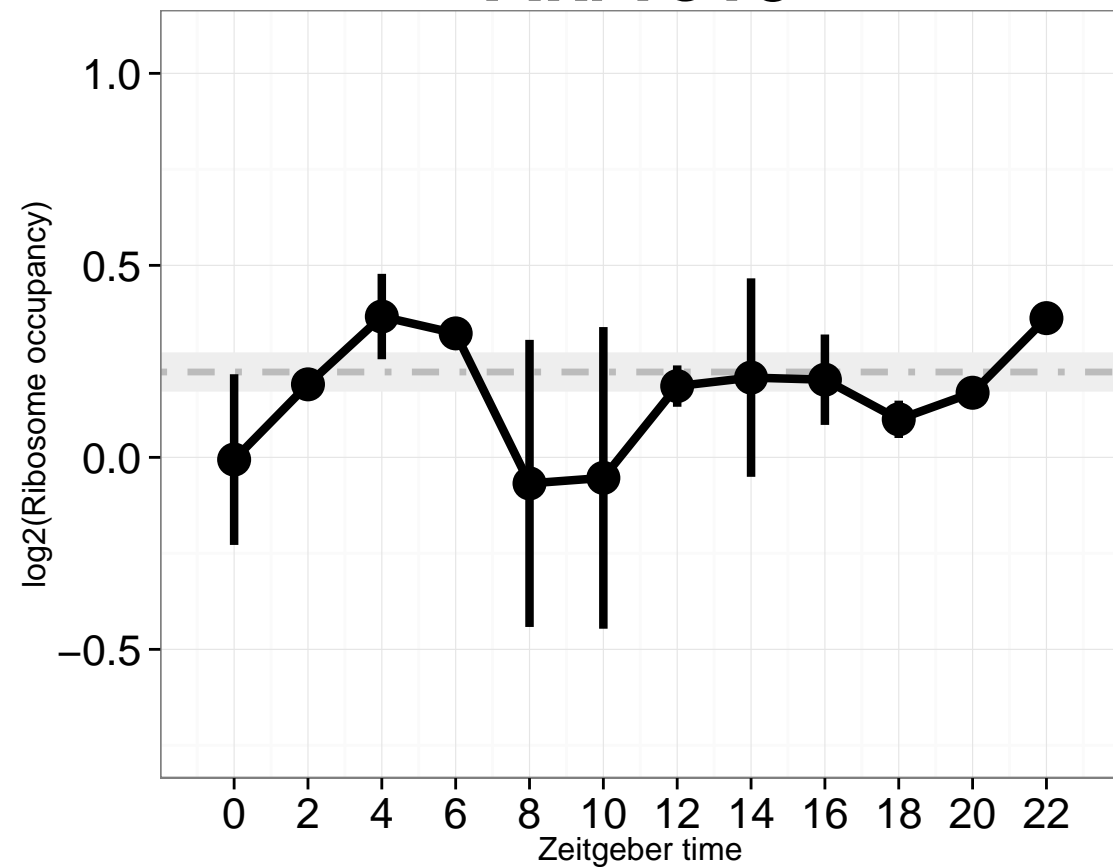

Supplement: SuppDataset_1.zip [file Akr1c13_set_A.pdf › Supplemental Dataset 1/A-mRNA_nonrhyth_translation_nonrhyth/Akr1c13_set_A.pdf]

# Akr1c20

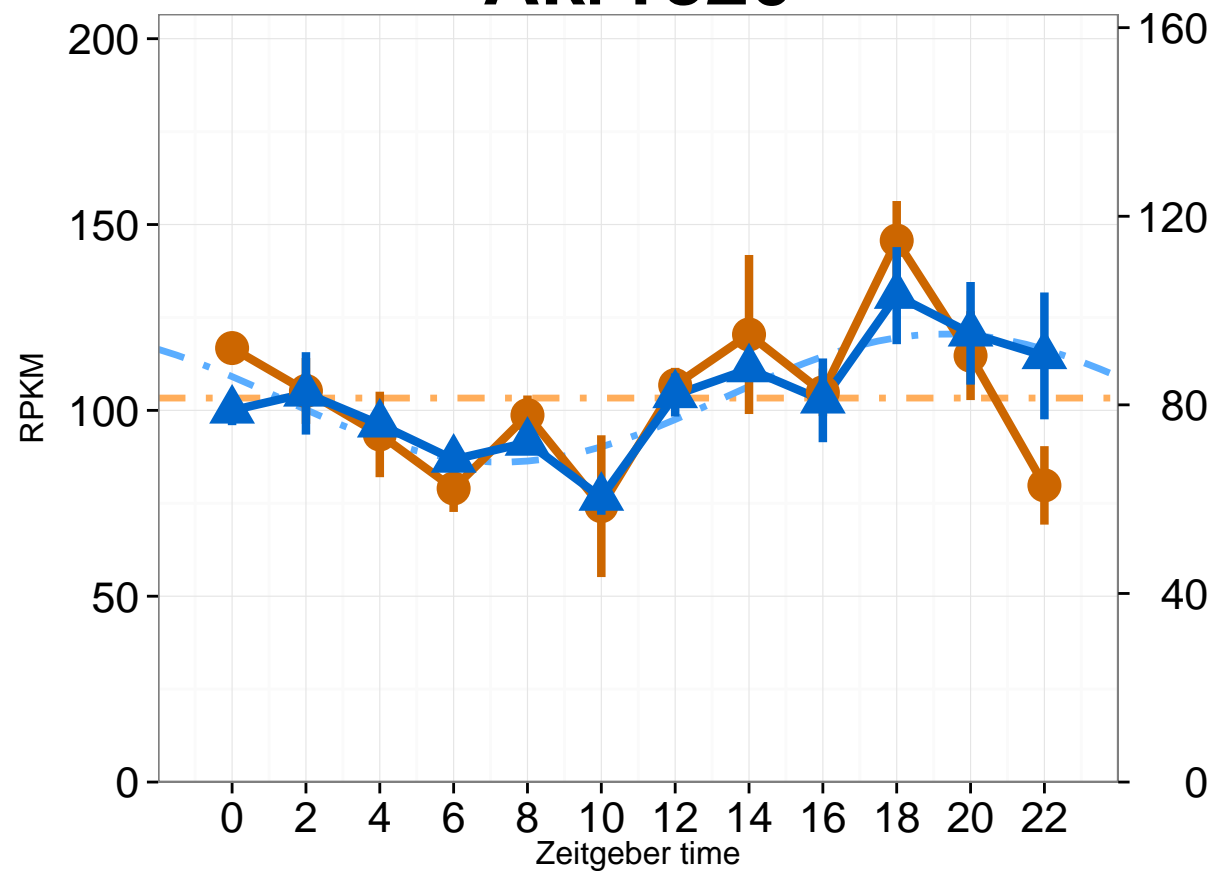

# Akr1c20

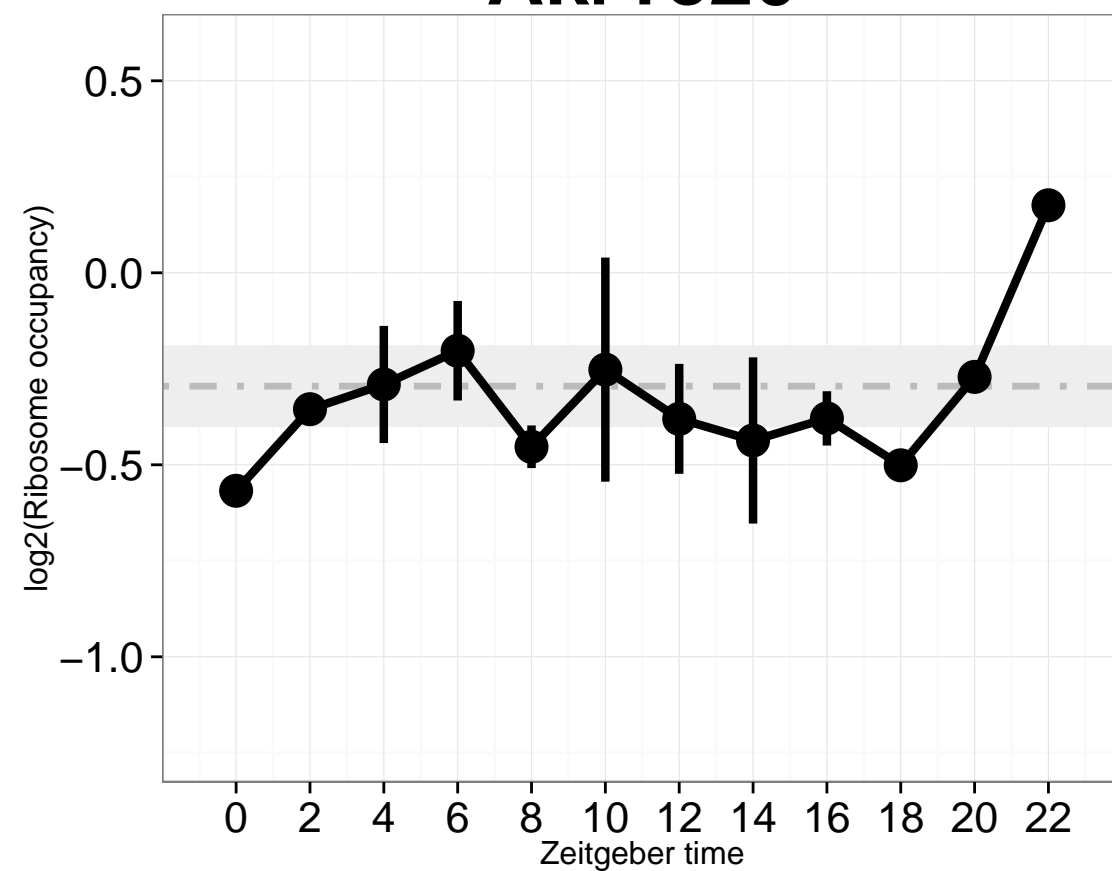

Supplement: SuppDataset_1.zip [file Akr1c20_set_A.pdf › Supplemental Dataset 1/A-mRNA_nonrhyth_translation_nonrhyth/Akr1c20_set_A.pdf]

# Akr1c6

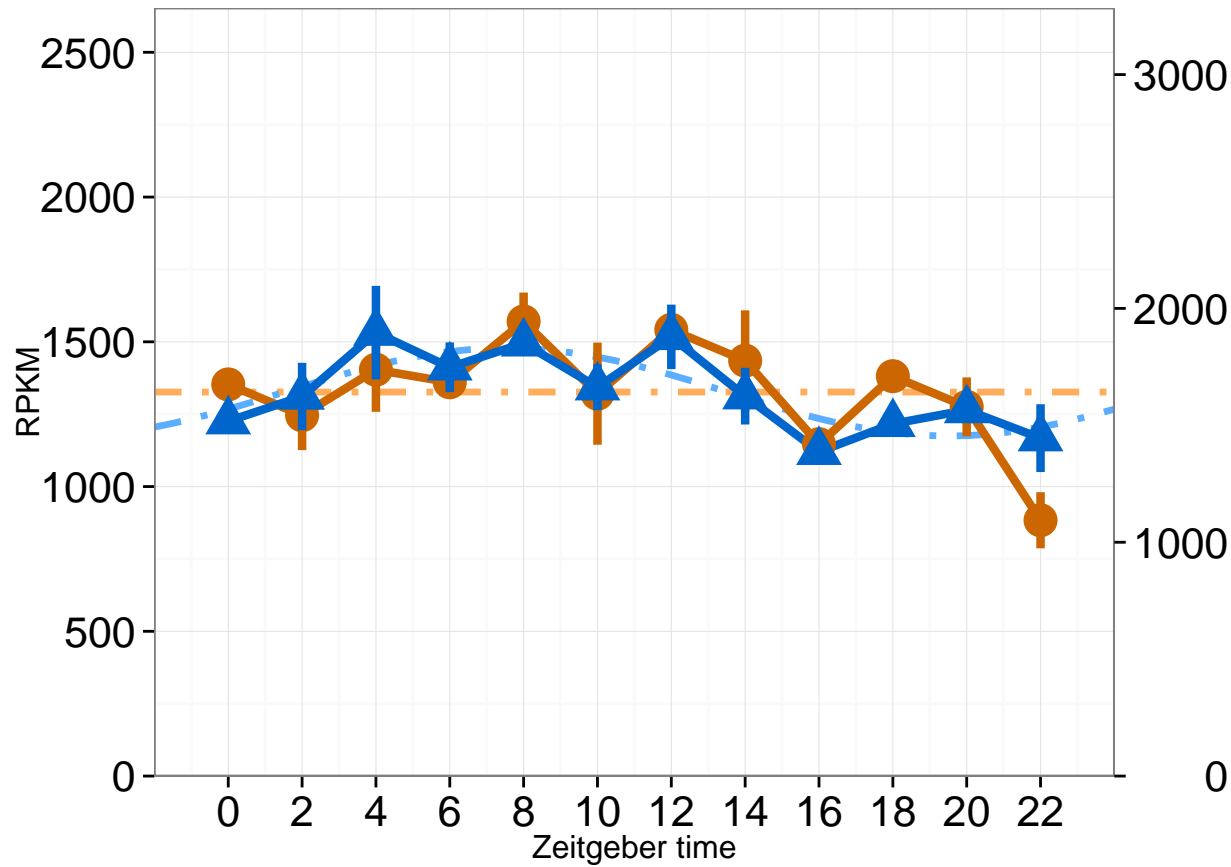

# Akr1c6

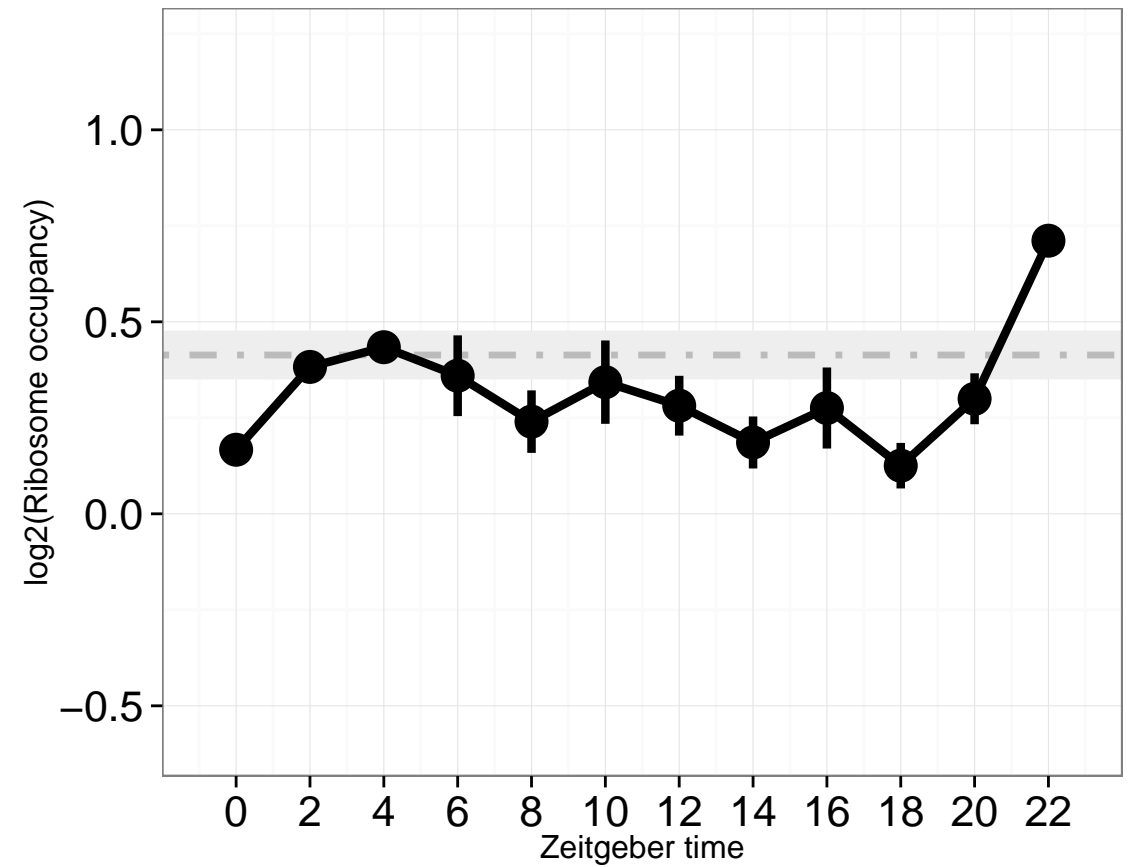

Supplement: SuppDataset_1.zip [file Akr1c6_set_A.pdf › Supplemental Dataset 1/A-mRNA_nonrhyth_translation_nonrhyth/Akr1c6_set_A.pdf]

## Akr1e1

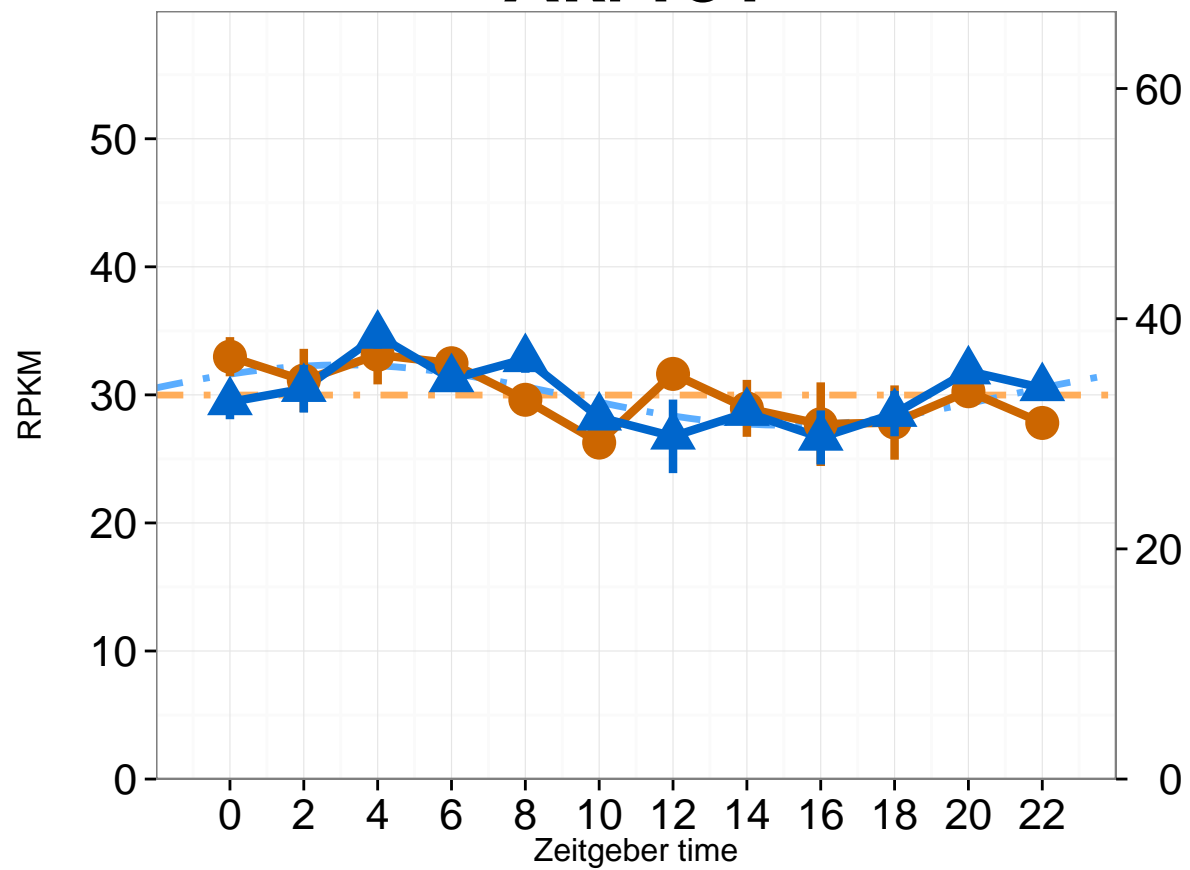

## Akr1e1

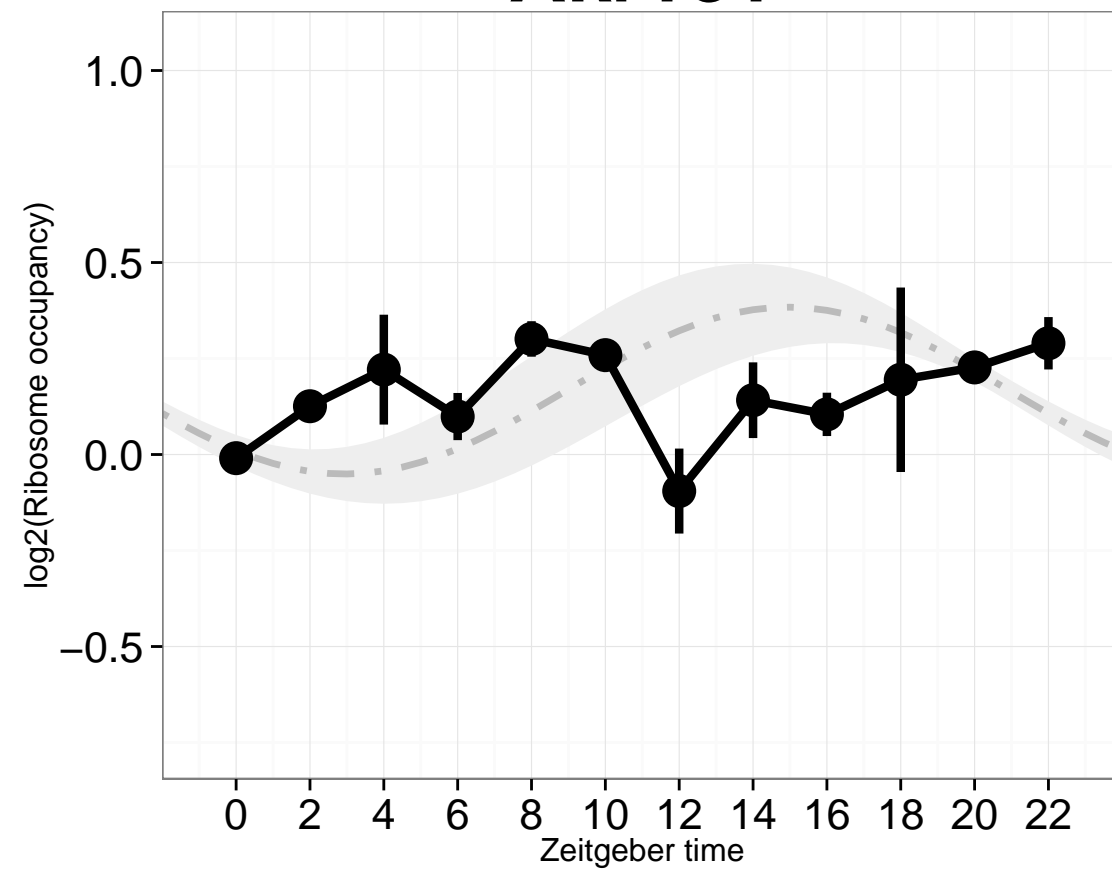

Supplement: SuppDataset_1.zip [file Akr1e1_set_A.pdf › Supplemental Dataset 1/A-mRNA_nonrhyth_translation_nonrhyth/Akr1e1_set_A.pdf]

# Akr7a5

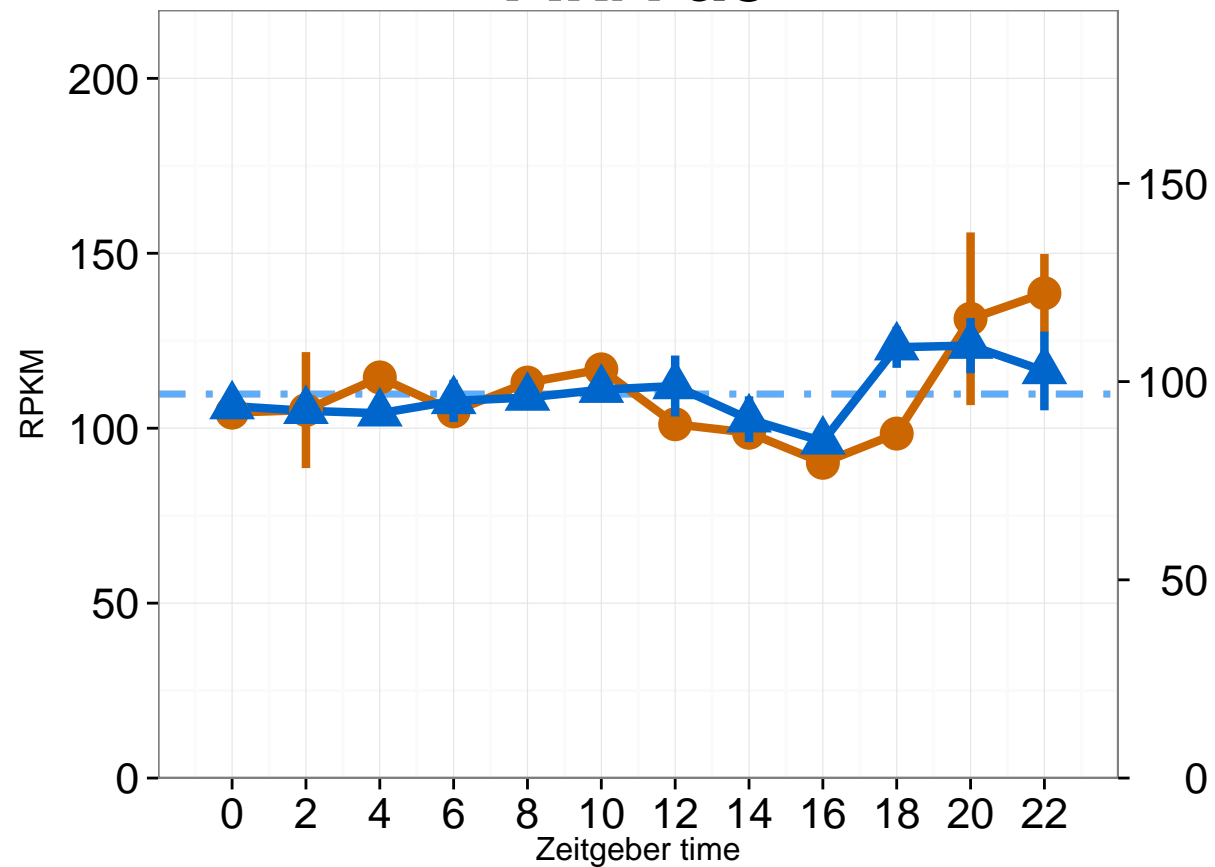

# Akr7a5

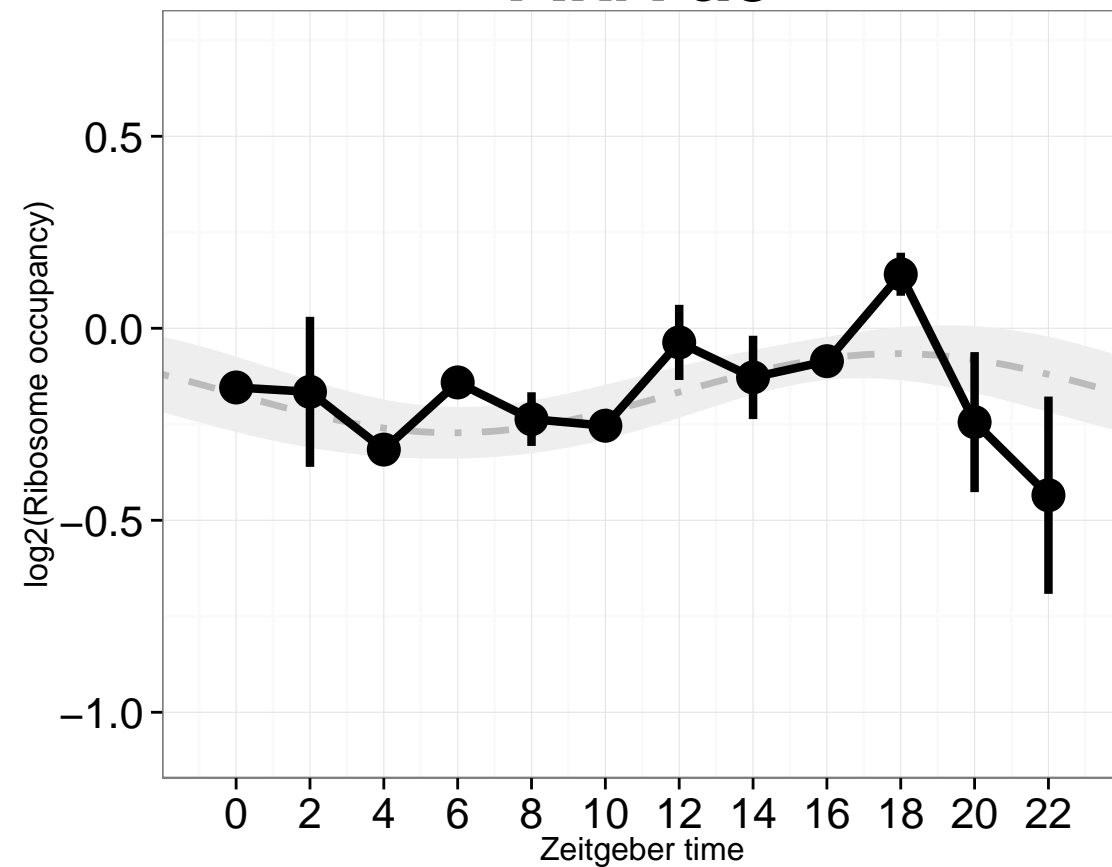

Supplement: SuppDataset_1.zip [file Akr7a5_set_A.pdf › Supplemental Dataset 1/A-mRNA_nonrhyth_translation_nonrhyth/Akr7a5_set_A.pdf]

## Akt1

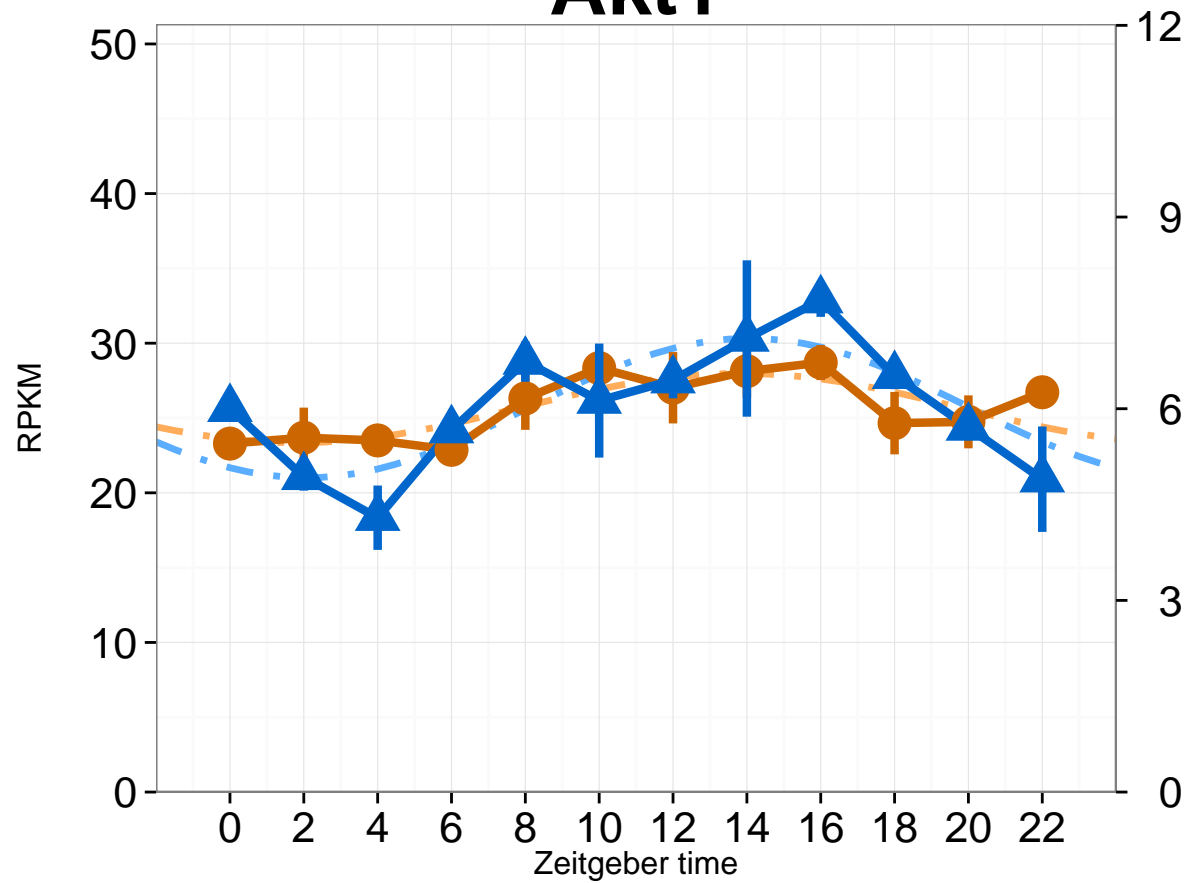

## Akt1

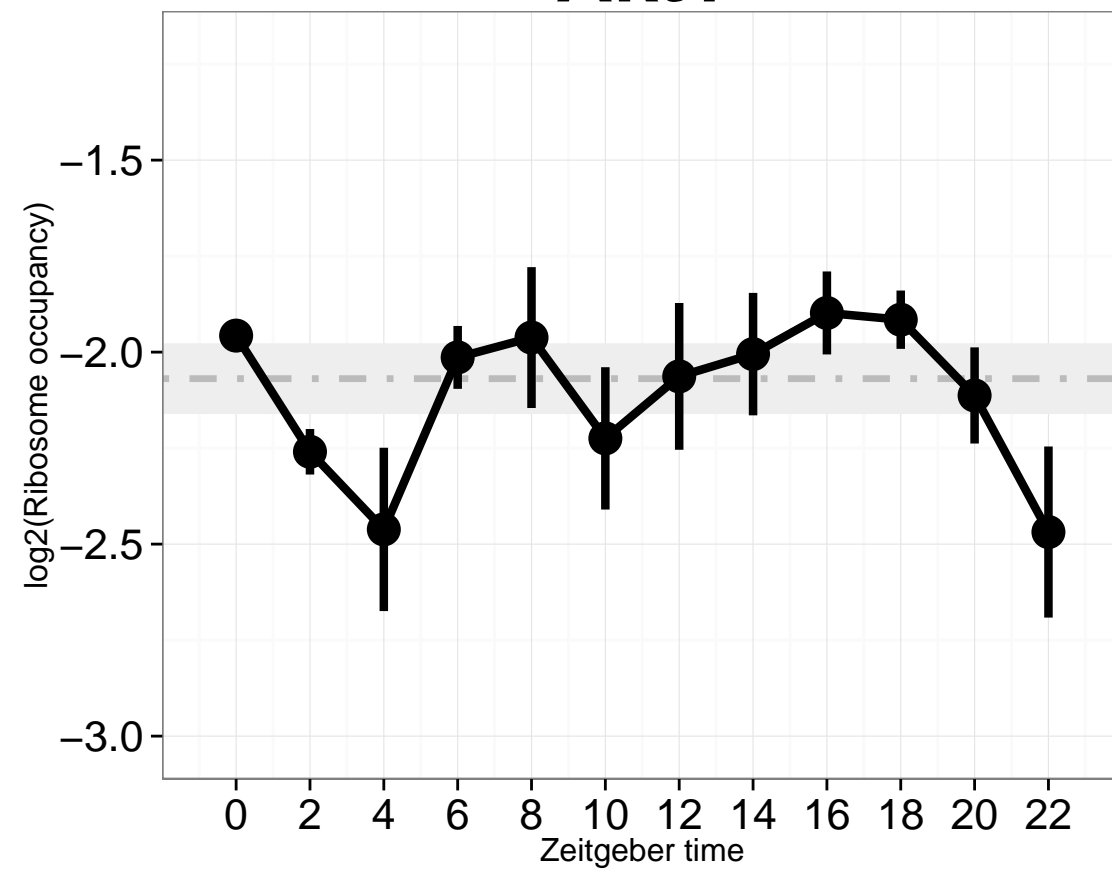

Supplement: SuppDataset_1.zip [file Akt1_set_A.pdf › Supplemental Dataset 1/A-mRNA_nonrhyth_translation_nonrhyth/Akt1_set_A.pdf]

# Akt1s1

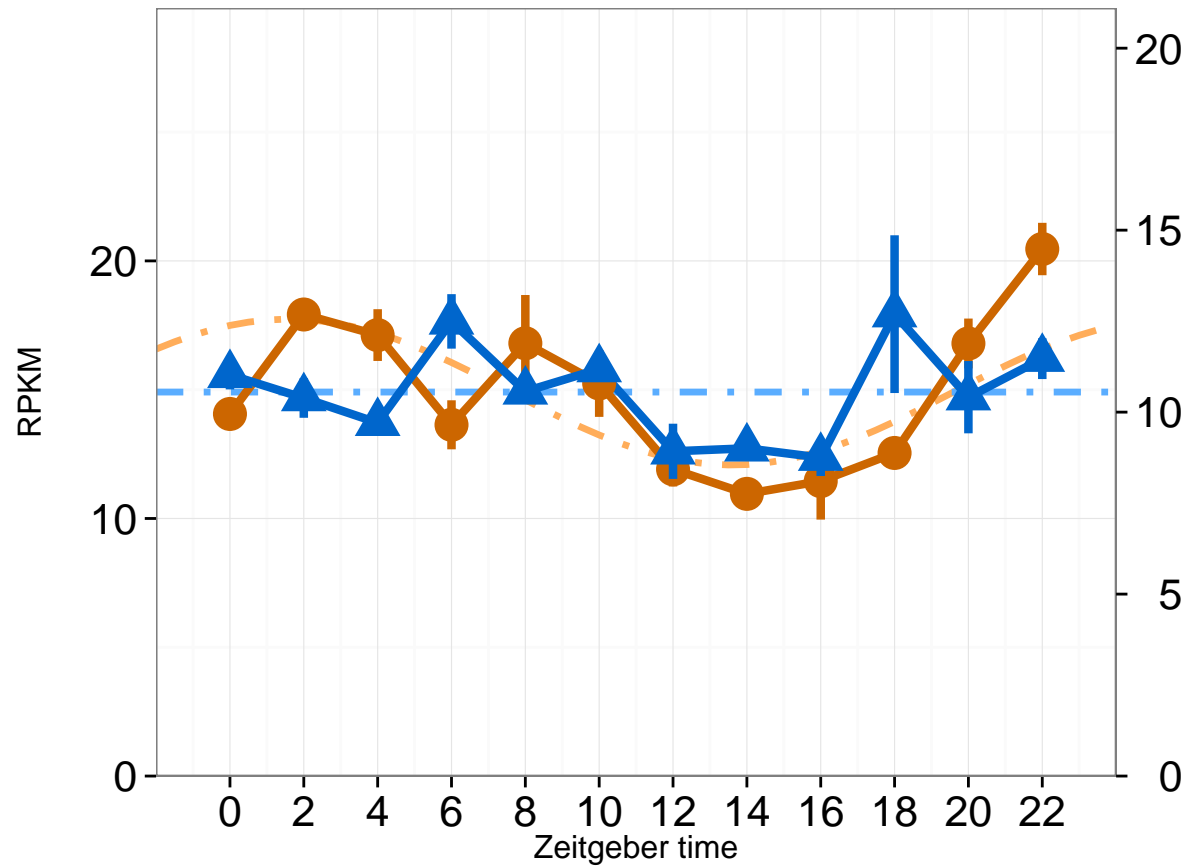

# Akt1s1

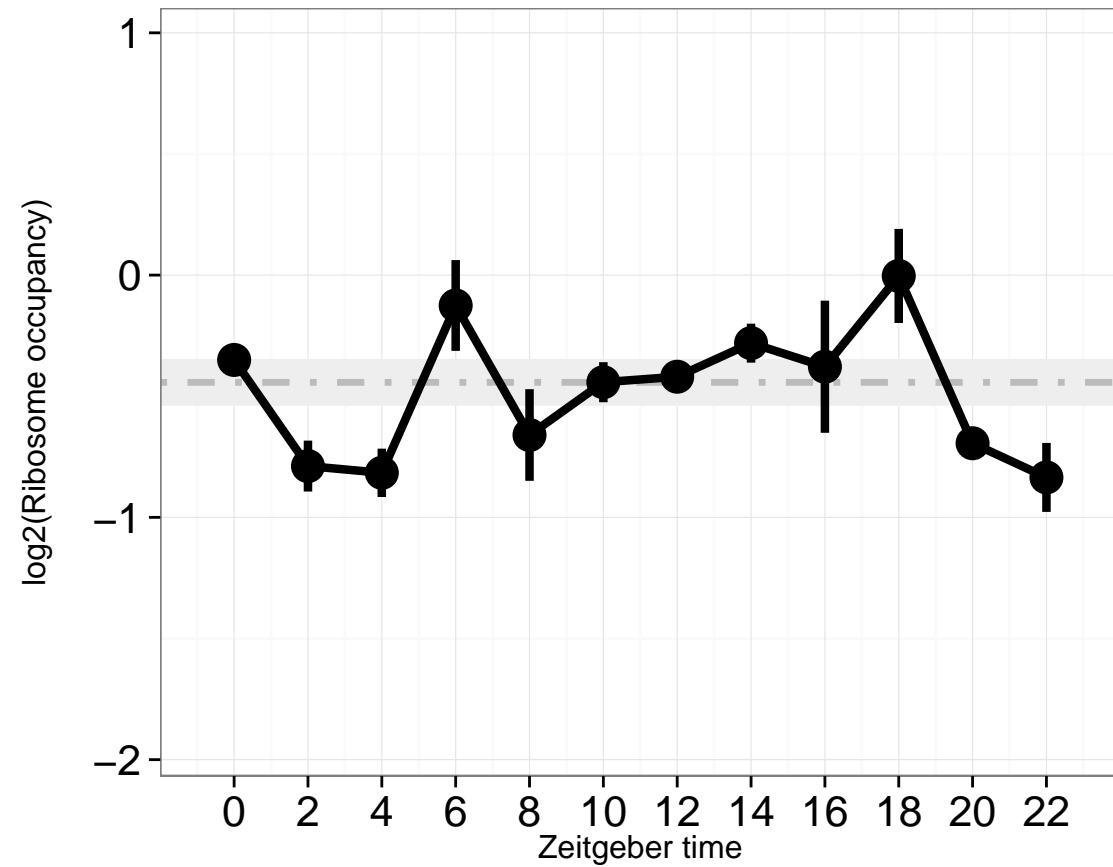

Supplement: SuppDataset_1.zip [file Akt1s1_set_A.pdf › Supplemental Dataset 1/A-mRNA_nonrhyth_translation_nonrhyth/Akt1s1_set_A.pdf]

## Akt2

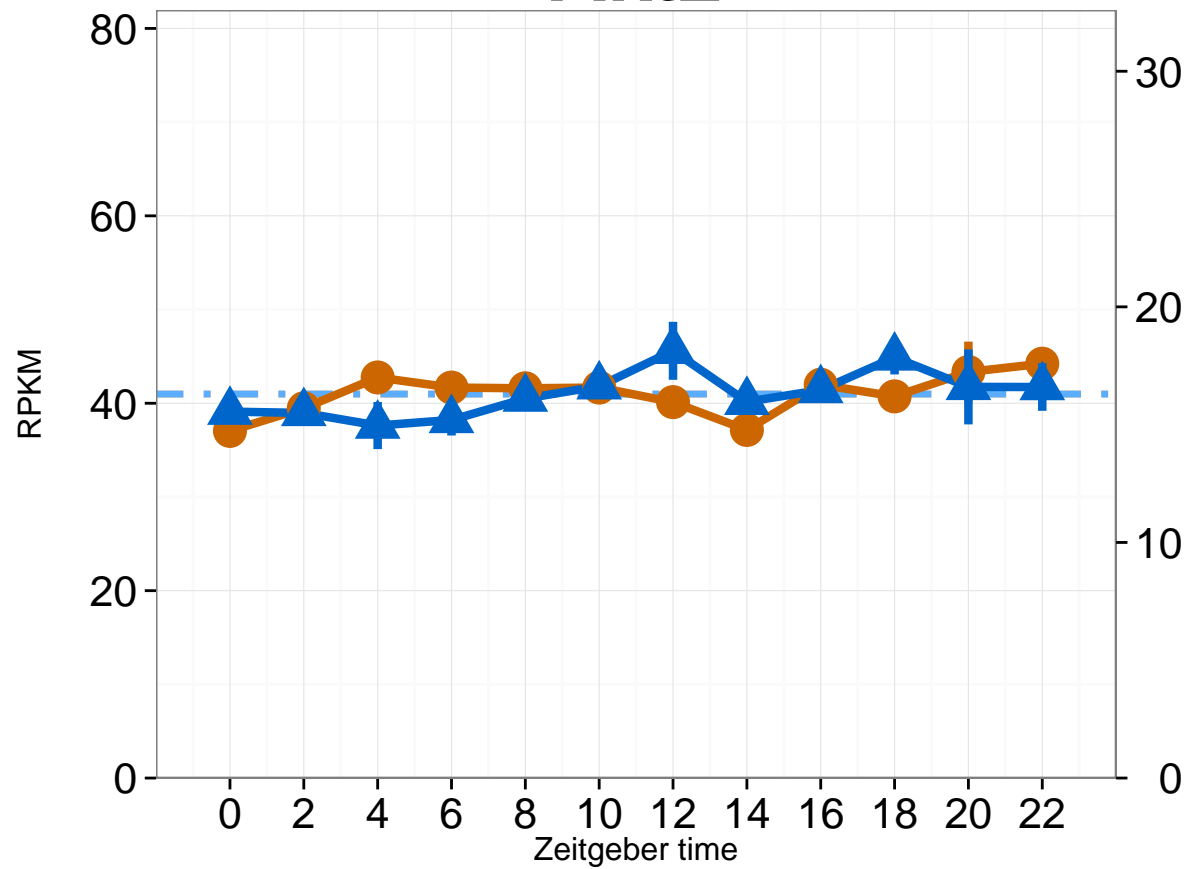

## Akt2

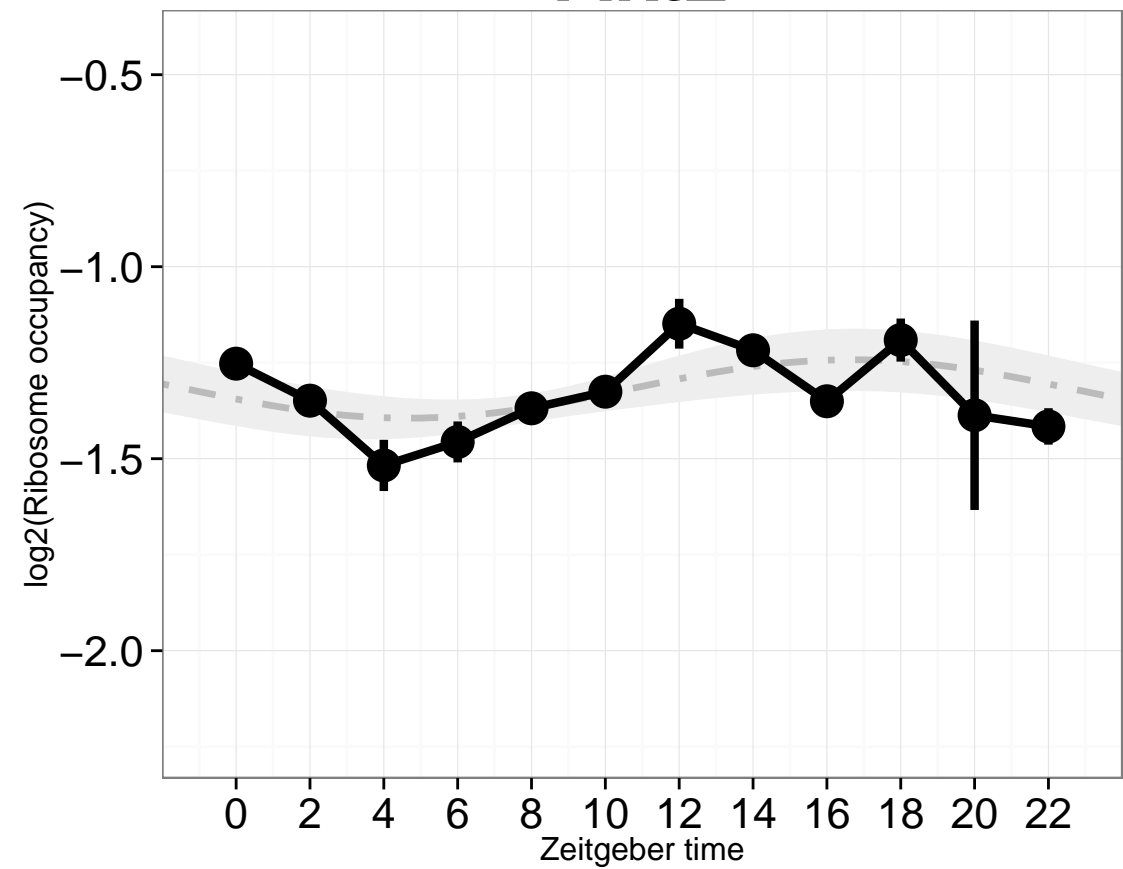

Supplement: SuppDataset_1.zip [file Akt2_set_A.pdf › Supplemental Dataset 1/A-mRNA_nonrhyth_translation_nonrhyth/Akt2_set_A.pdf]

## Akt3

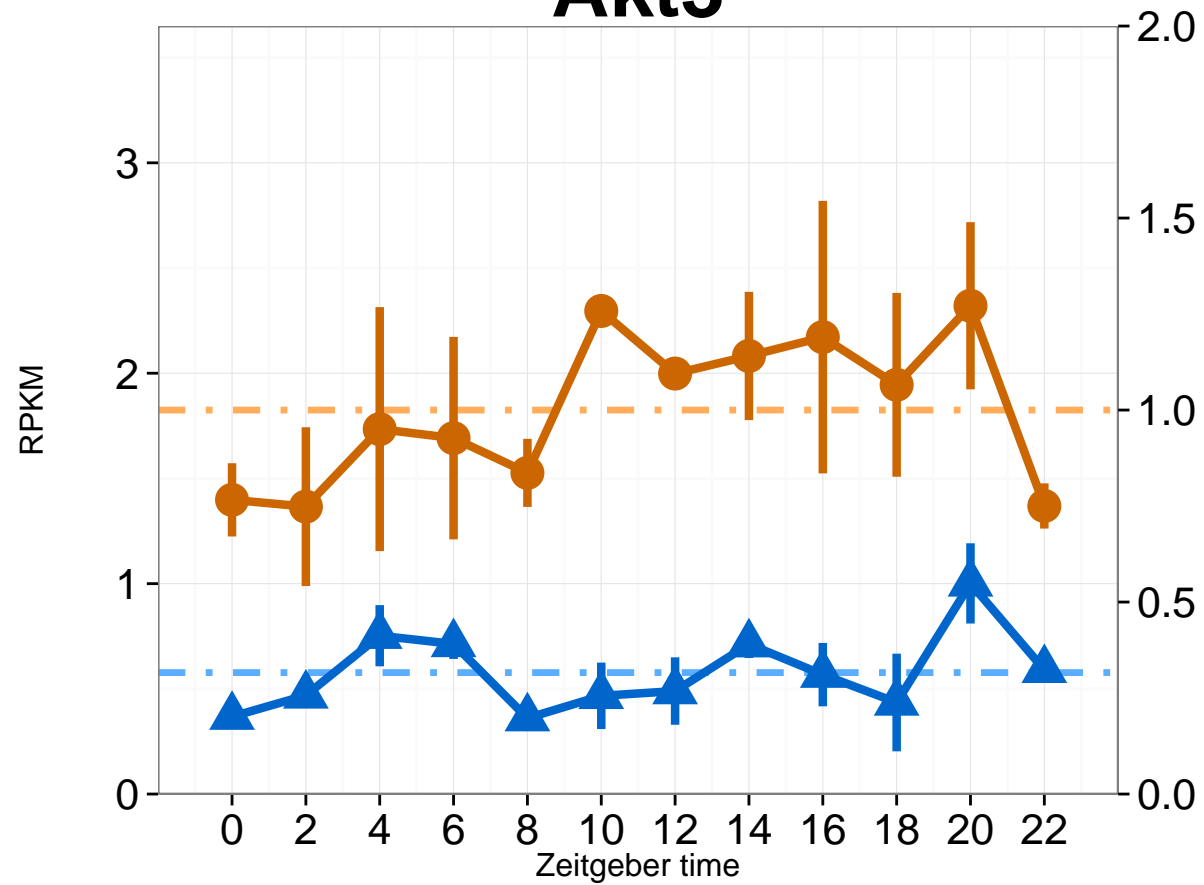

## Akt3

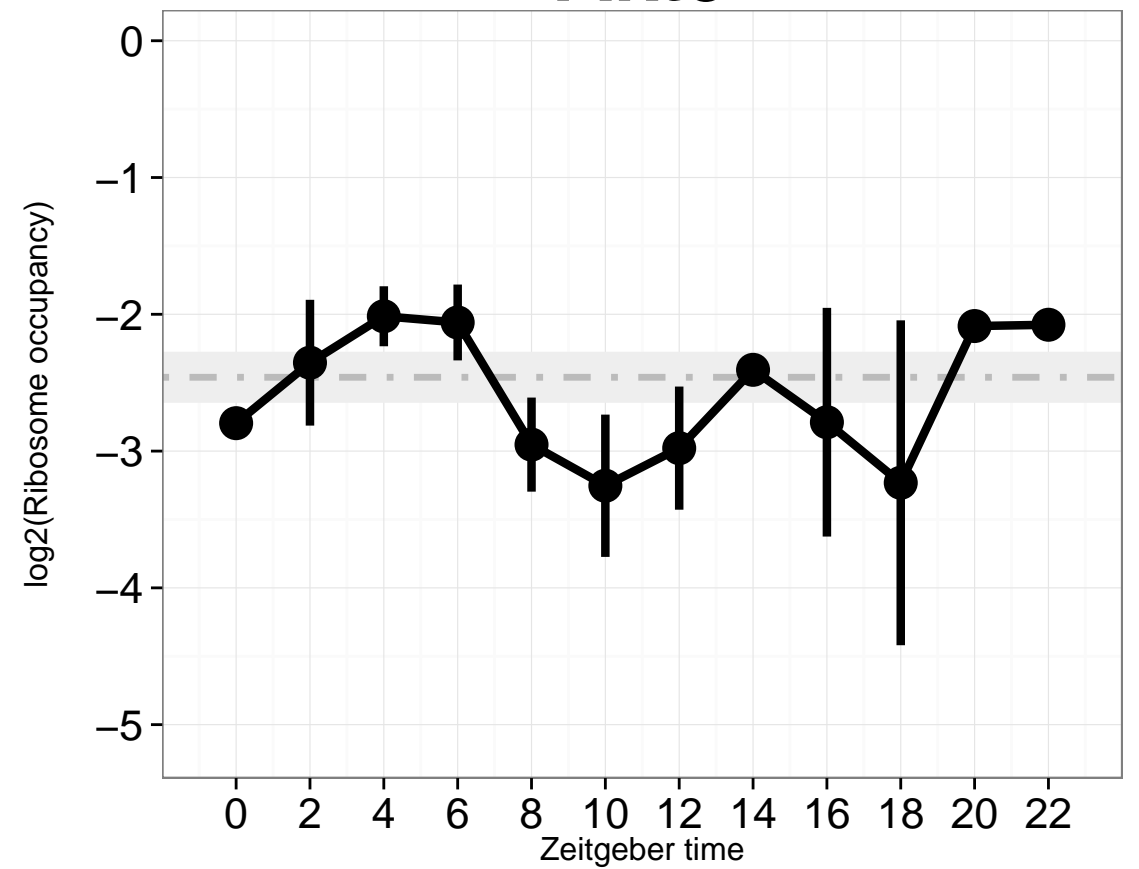

Supplement: SuppDataset_1.zip [file Akt3_set_A.pdf › Supplemental Dataset 1/A-mRNA_nonrhyth_translation_nonrhyth/Akt3_set_A.pdf]

## Aktip

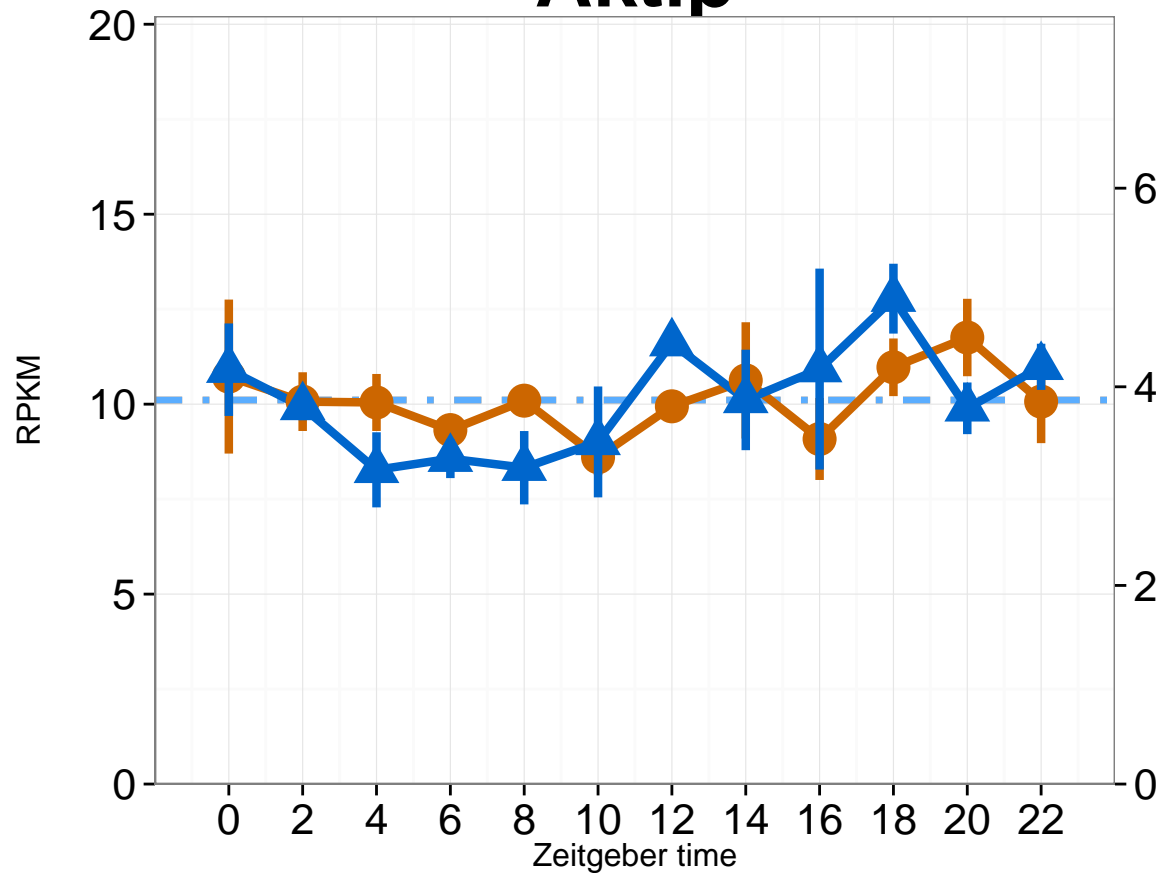

## Aktip

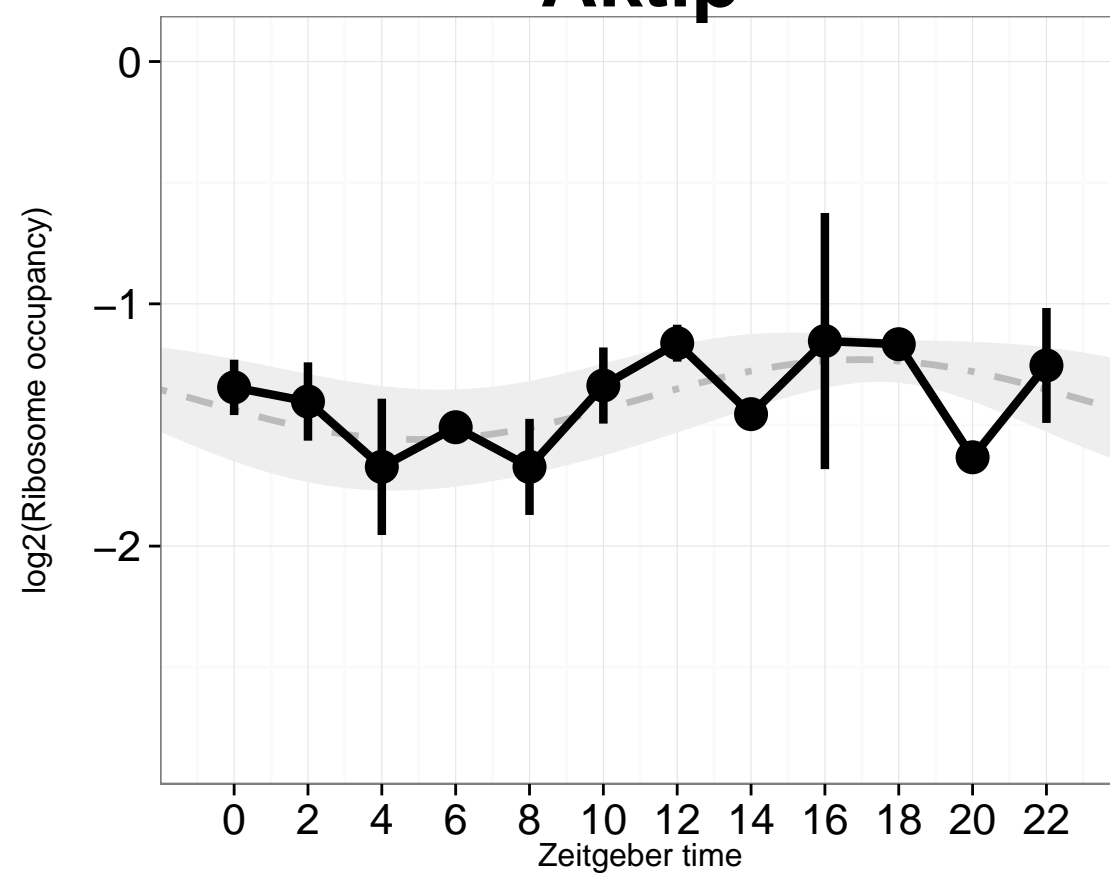

Supplement: SuppDataset_1.zip [file Aktip_set_A.pdf › Supplemental Dataset 1/A-mRNA_nonrhyth_translation_nonrhyth/Aktip_set_A.pdf]

## Alad

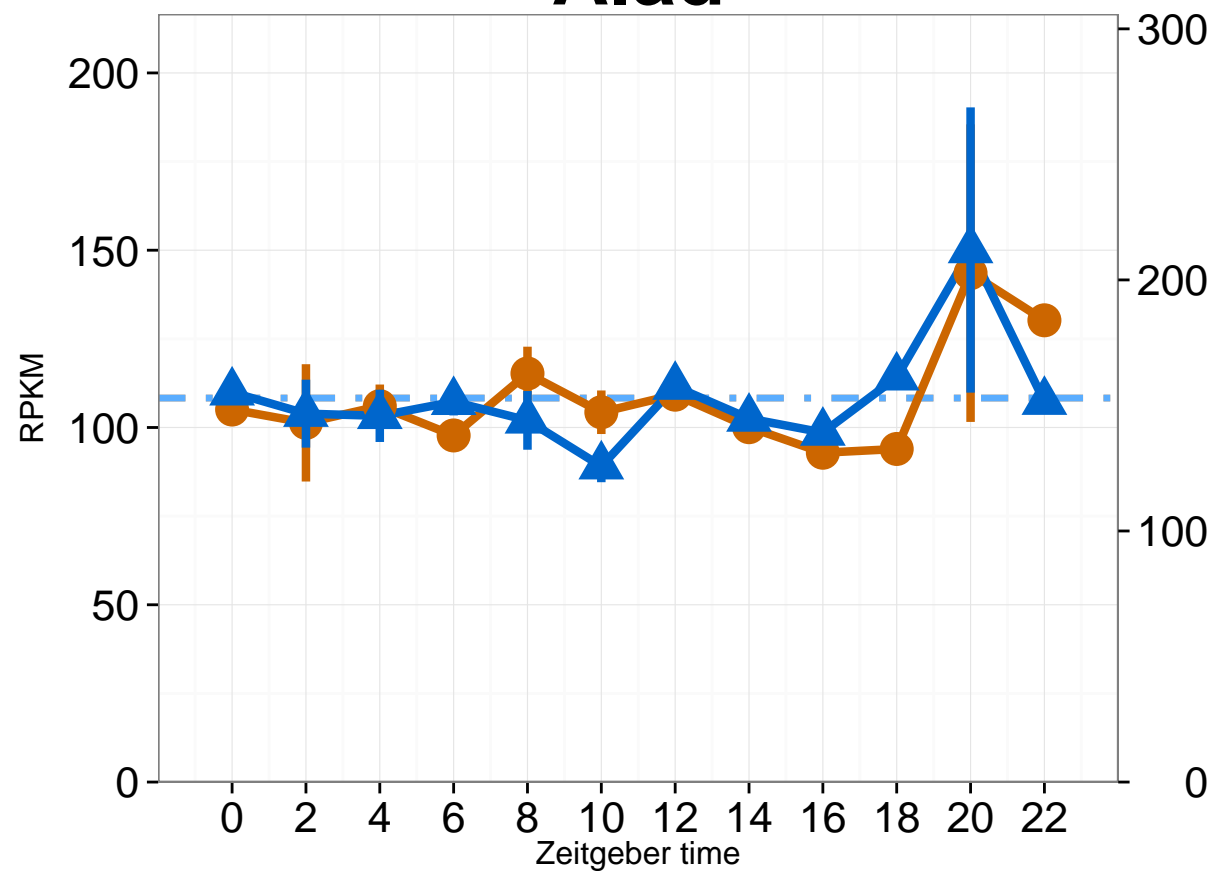

## Alad

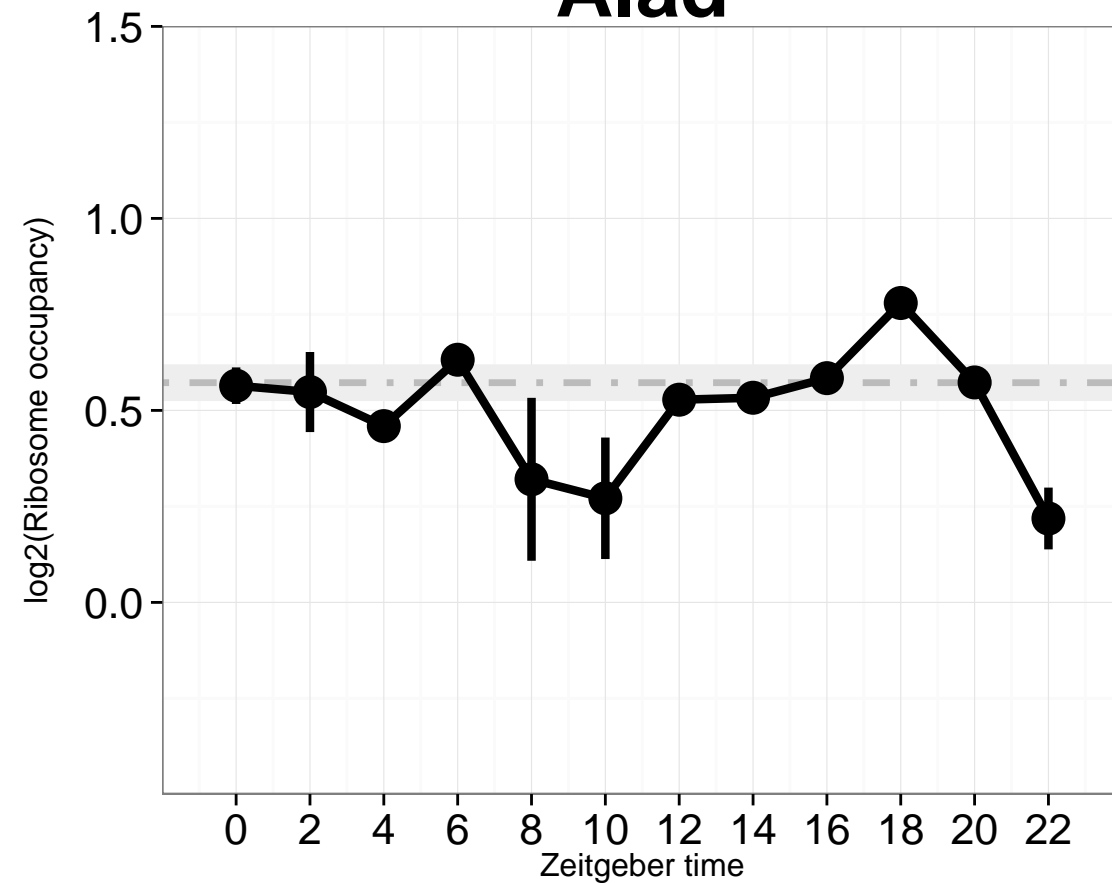

Supplement: SuppDataset_1.zip [file Alad_set_A.pdf › Supplemental Dataset 1/A-mRNA_nonrhyth_translation_nonrhyth/Alad_set_A.pdf]

## Alb

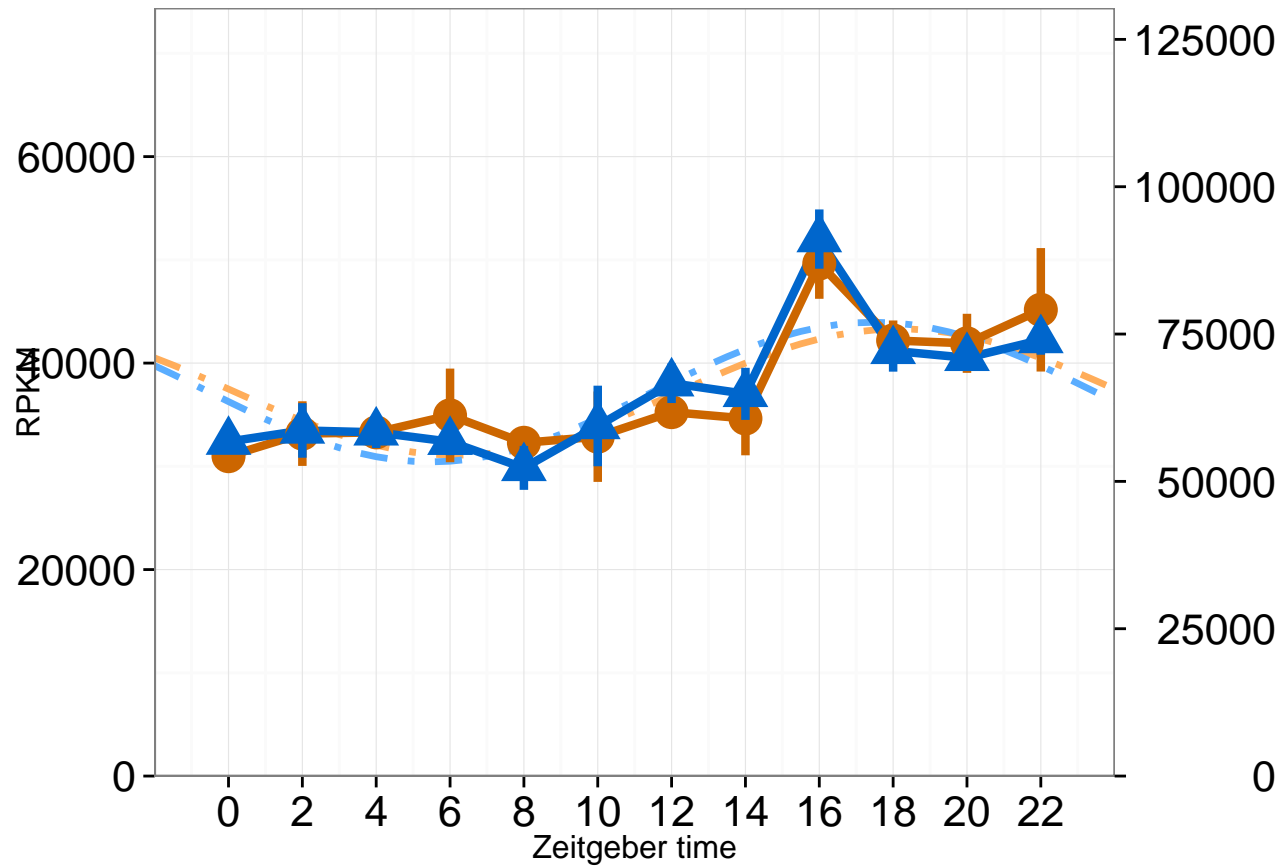

## Alb

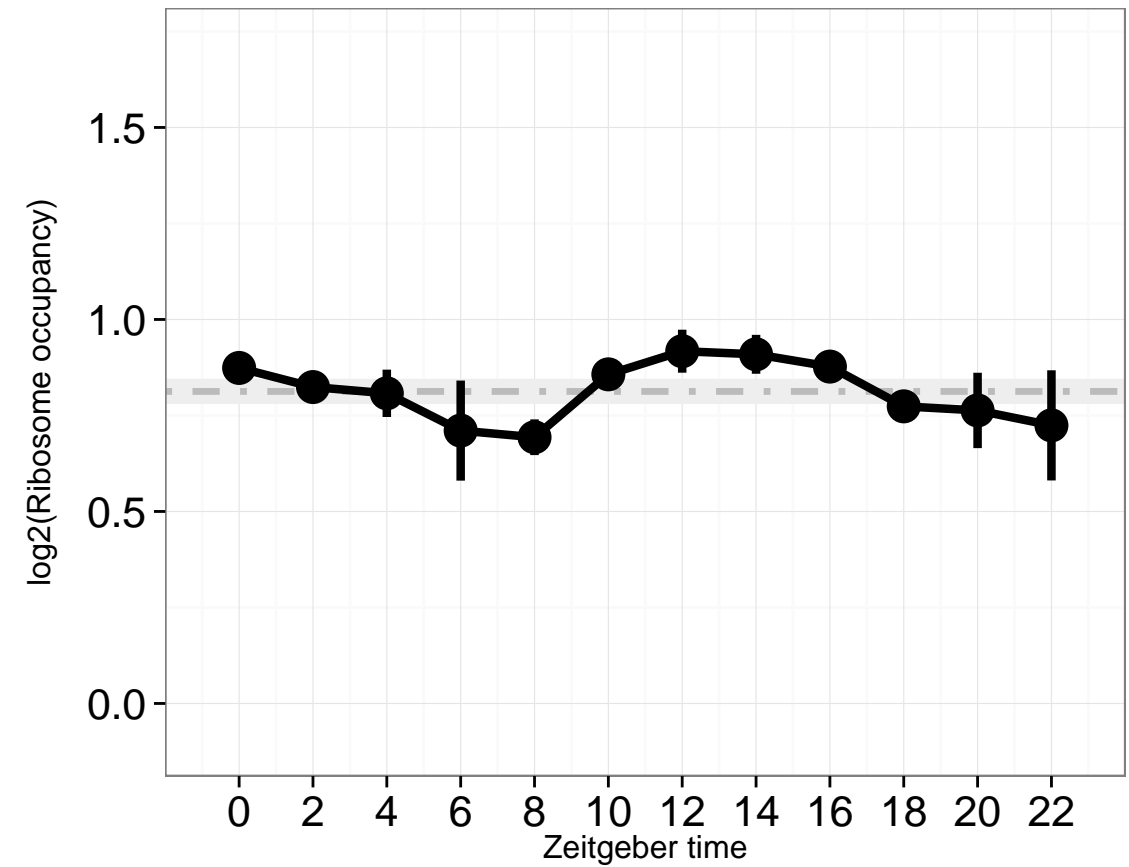

Supplement: SuppDataset_1.zip [file Alb_set_A.pdf › Supplemental Dataset 1/A-mRNA_nonrhyth_translation_nonrhyth/Alb_set_A.pdf]

## Alcam

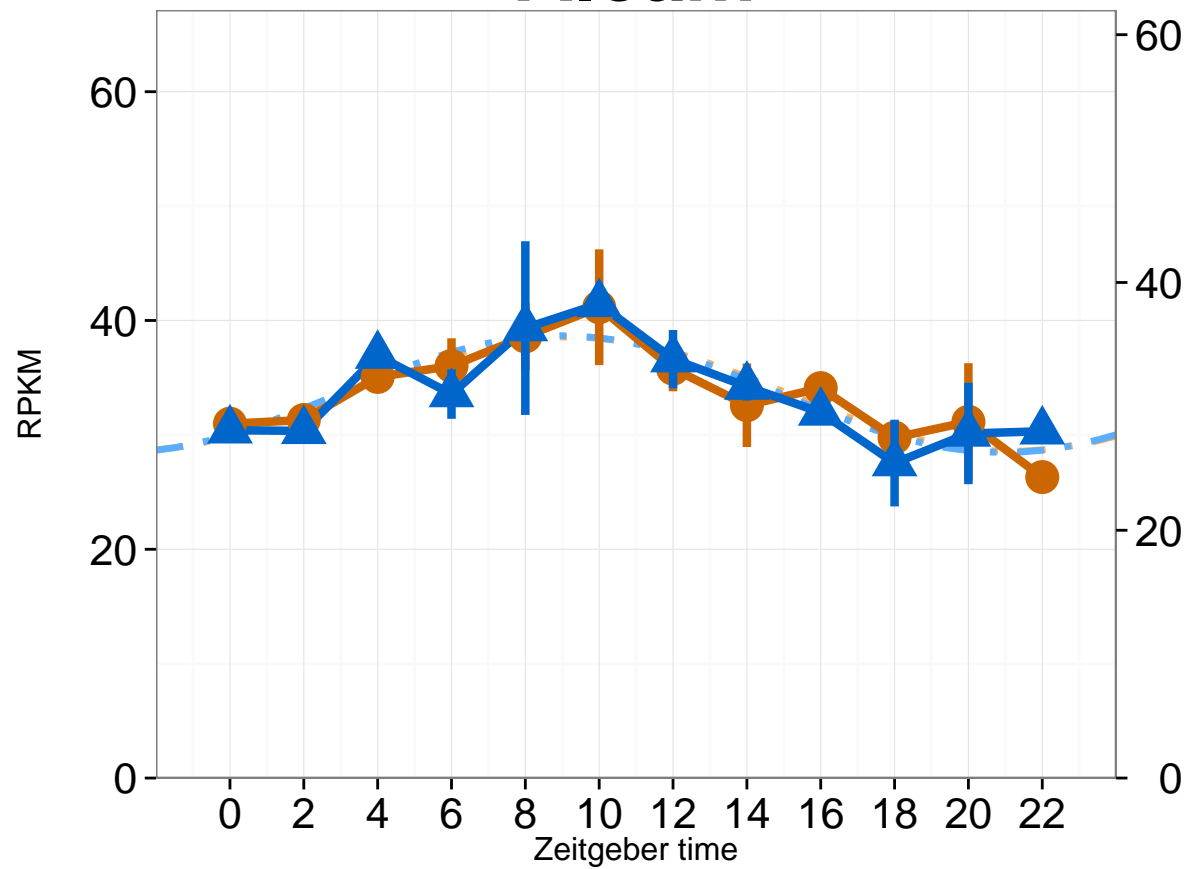

## Alcam

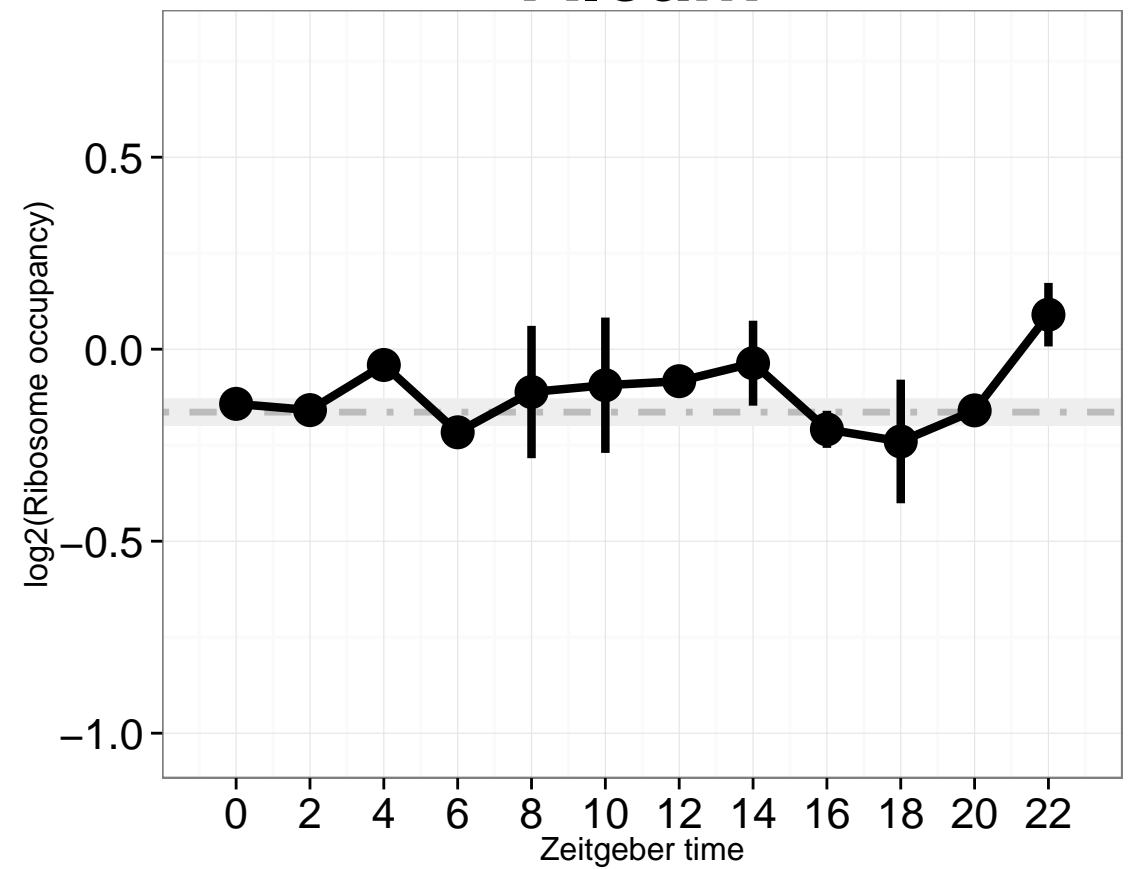

Supplement: SuppDataset_1.zip [file Alcam_set_A.pdf › Supplemental Dataset 1/A-mRNA_nonrhyth_translation_nonrhyth/Alcam_set_A.pdf]

## Aldh16a1

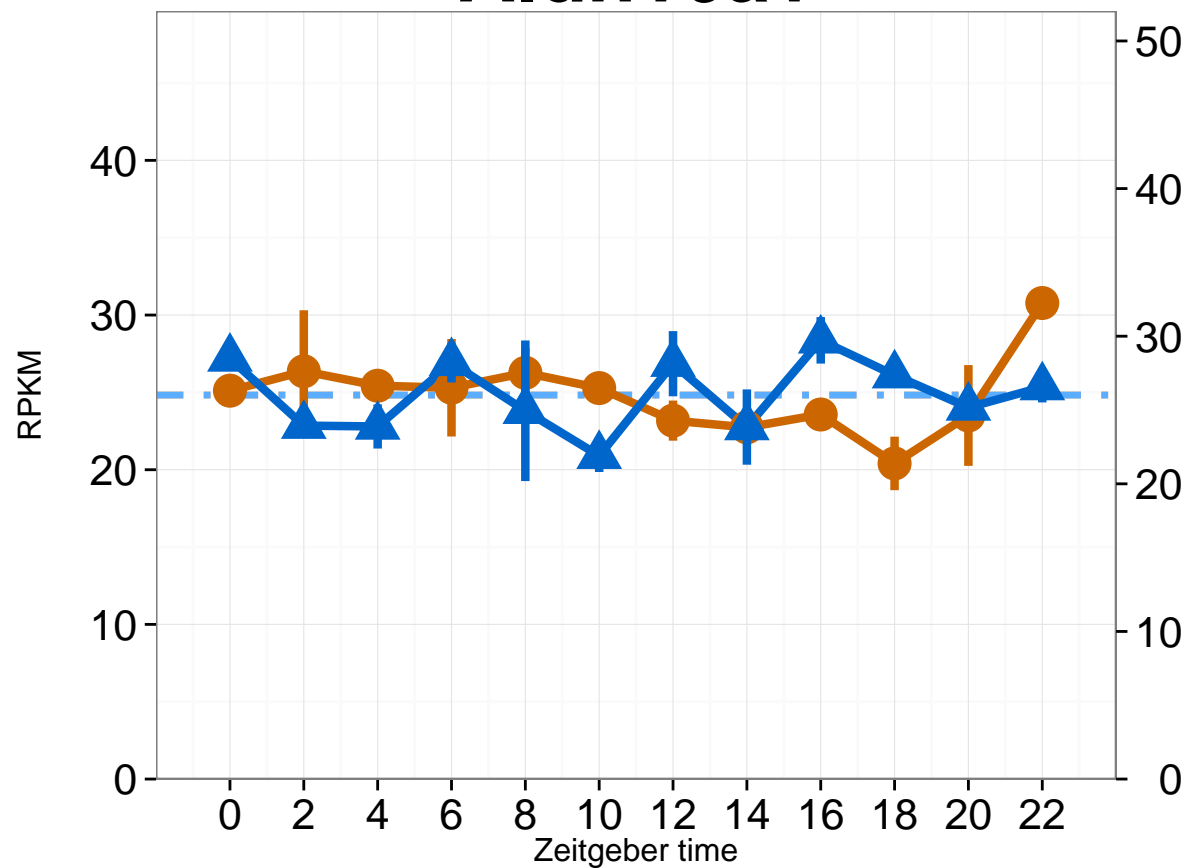

## Aldh16a1

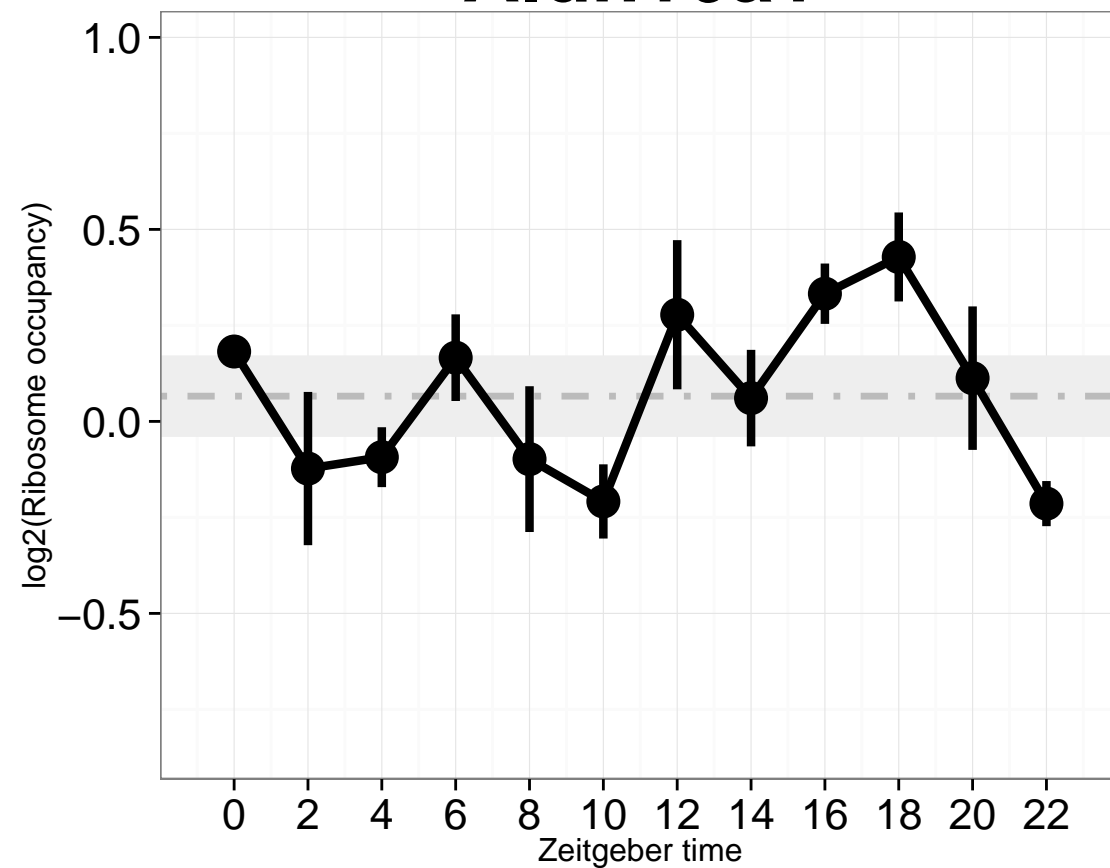

Supplement: SuppDataset_1.zip [file Aldh16a1_set_A.pdf › Supplemental Dataset 1/A-mRNA_nonrhyth_translation_nonrhyth/Aldh16a1_set_A.pdf]

## Aldh1a1

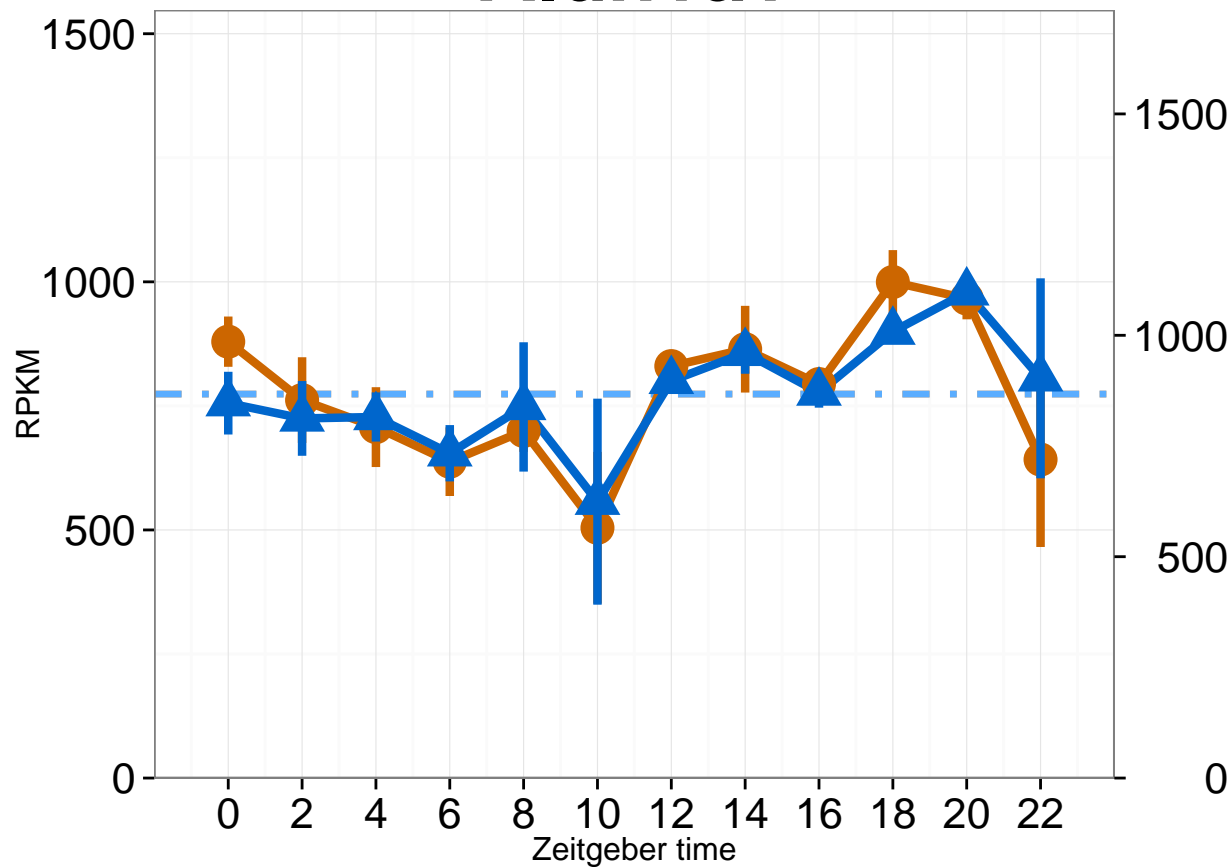

## Aldh1a1

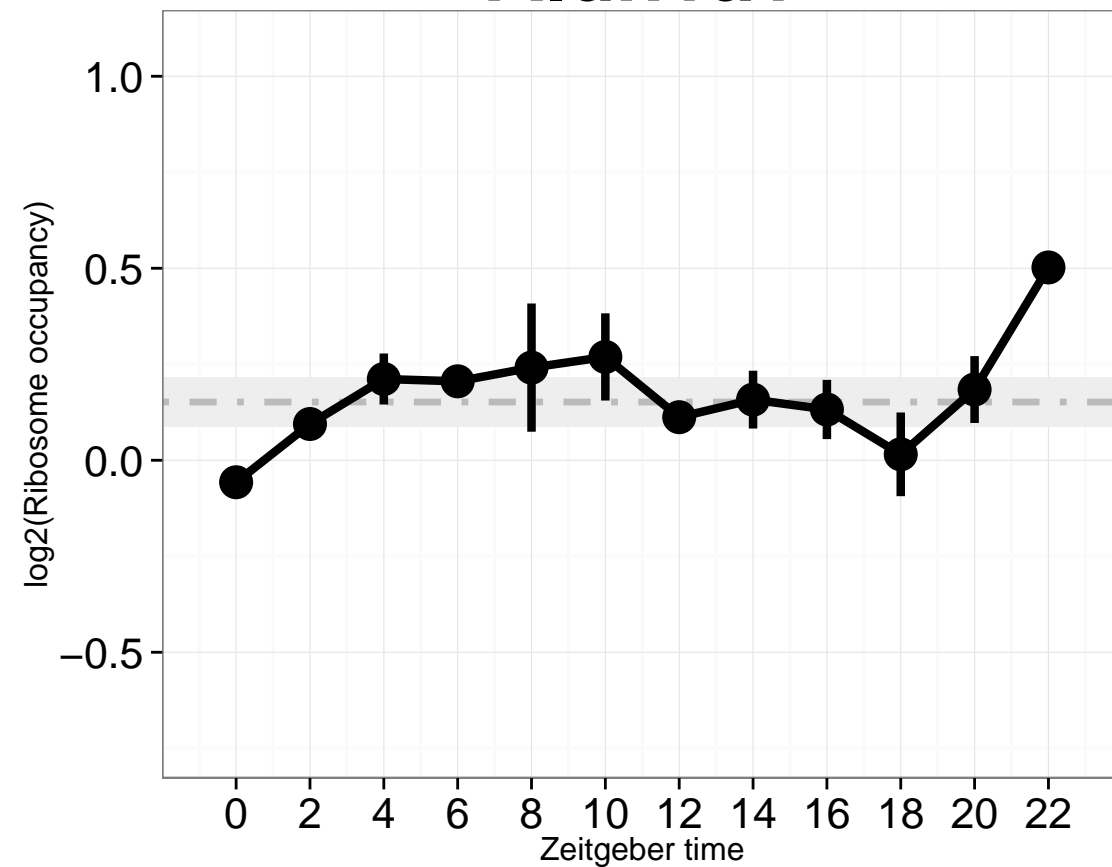

Supplement: SuppDataset_1.zip [file Aldh1a1_set_A.pdf › Supplemental Dataset 1/A-mRNA_nonrhyth_translation_nonrhyth/Aldh1a1_set_A.pdf]

# Aldh1a3 TR

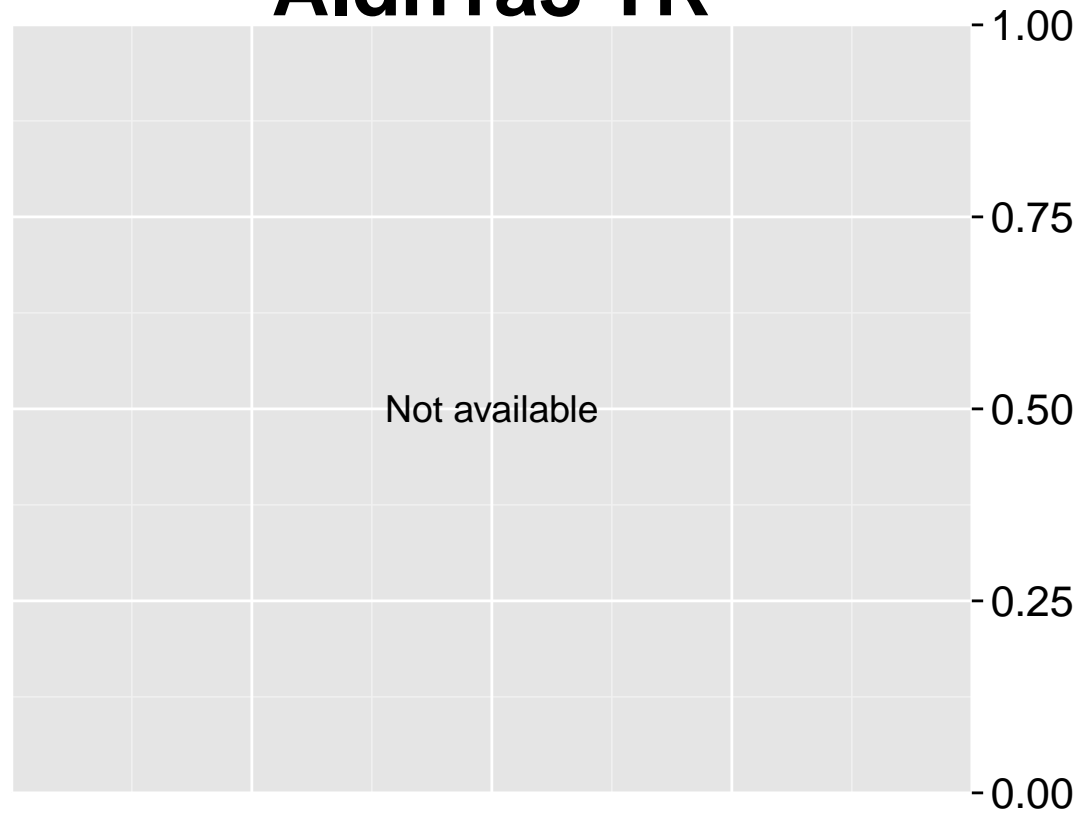

# Aldh1a3 log2(Ribosome occupanc

Supplement: SuppDataset_1.zip [file Aldh1a3_set_A.pdf › Supplemental Dataset 1/A-mRNA_nonrhyth_translation_nonrhyth/Aldh1a3_set_A.pdf]

## Aldh1a7

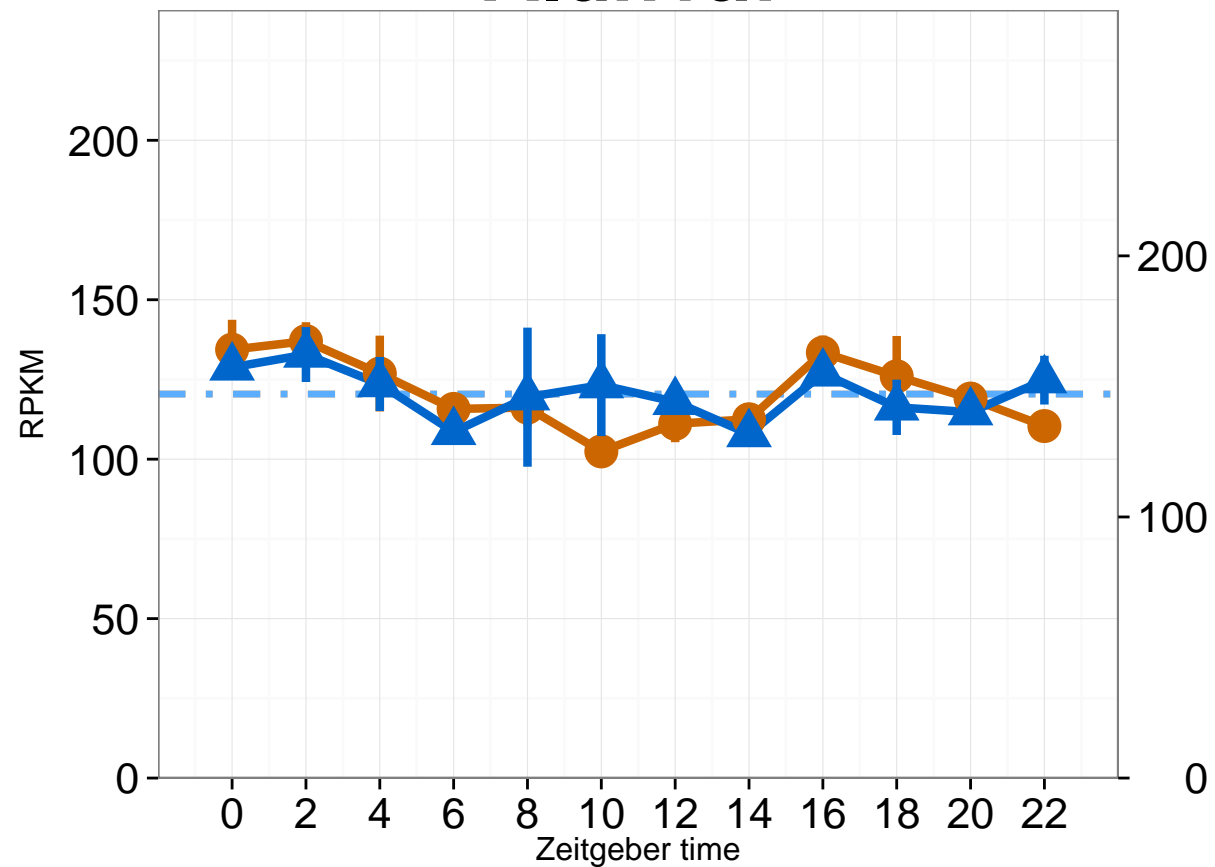

## Aldh1a7

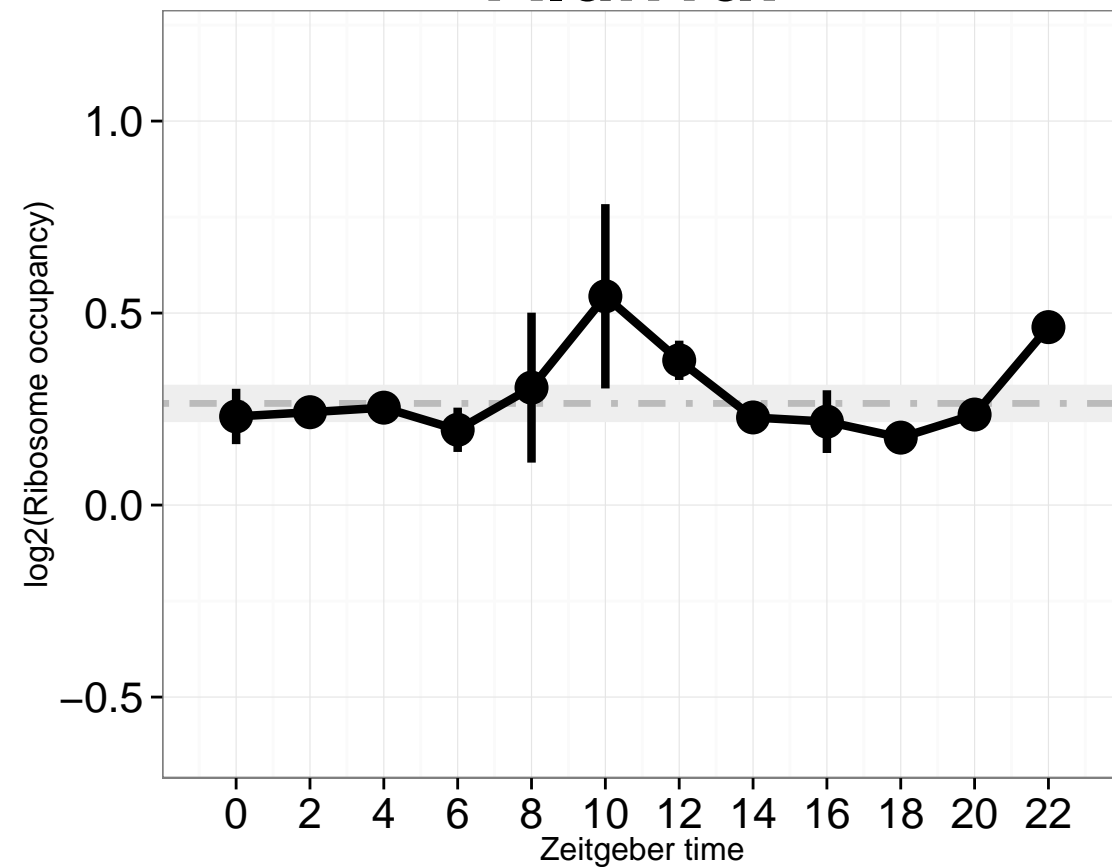

Supplement: SuppDataset_1.zip [file Aldh1a7_set_A.pdf › Supplemental Dataset 1/A-mRNA_nonrhyth_translation_nonrhyth/Aldh1a7_set_A.pdf]

## Aldh1b1

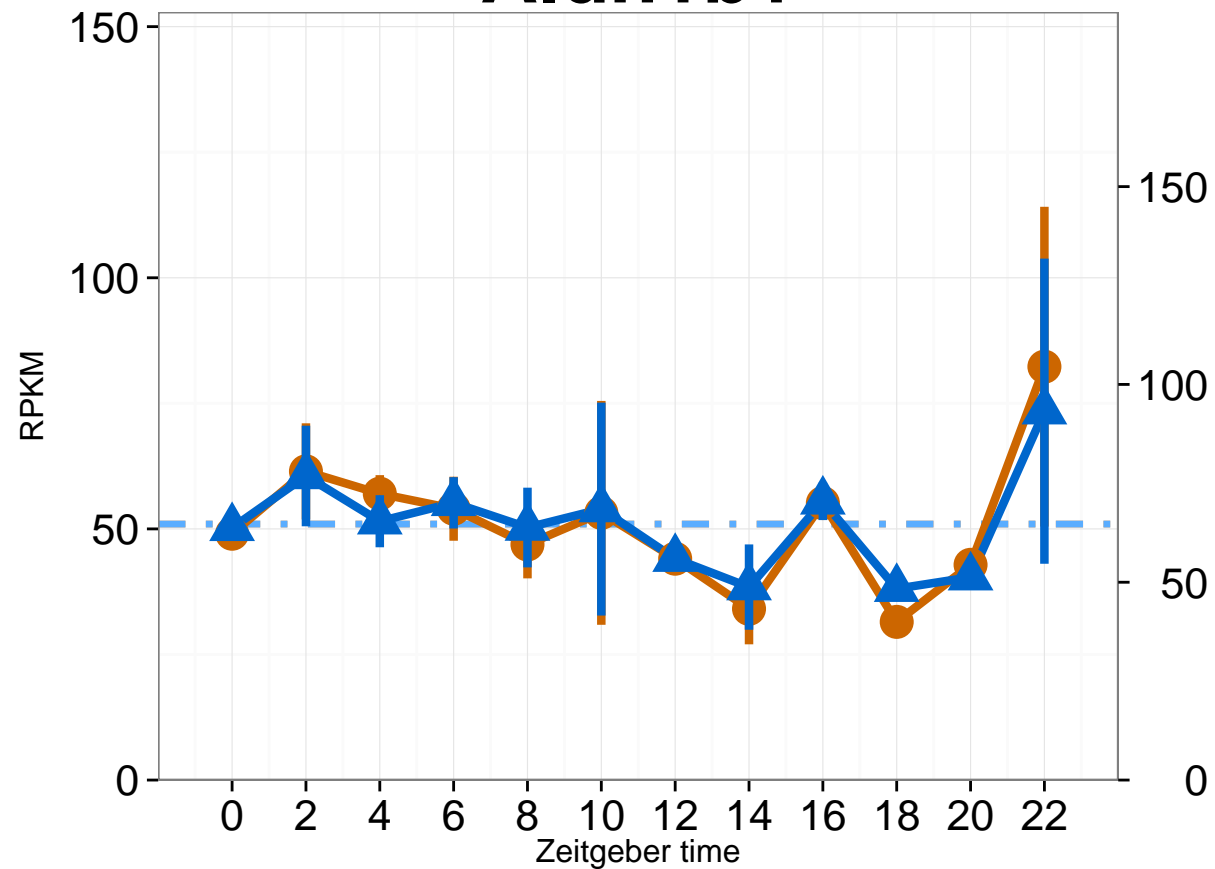

## Aldh1b1

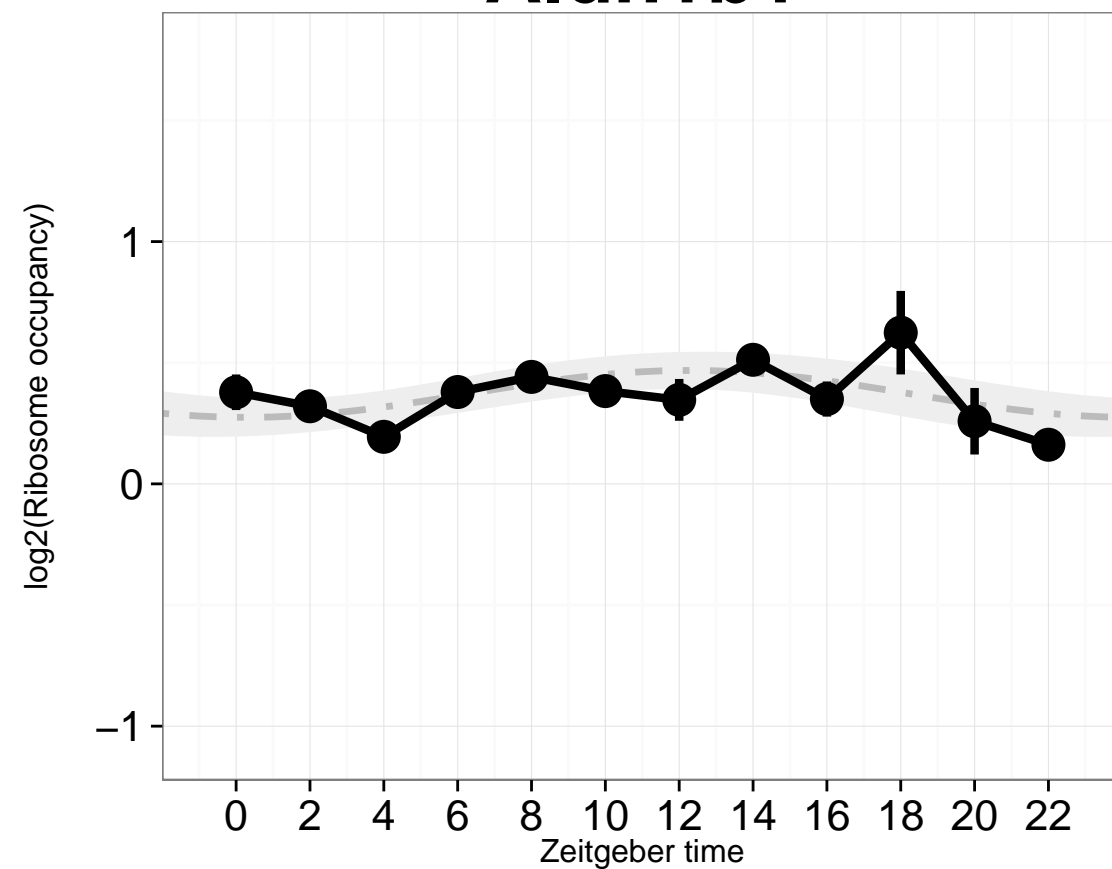

Supplement: SuppDataset_1.zip [file Aldh1b1_set_A.pdf › Supplemental Dataset 1/A-mRNA_nonrhyth_translation_nonrhyth/Aldh1b1_set_A.pdf]

## Aldh1l1

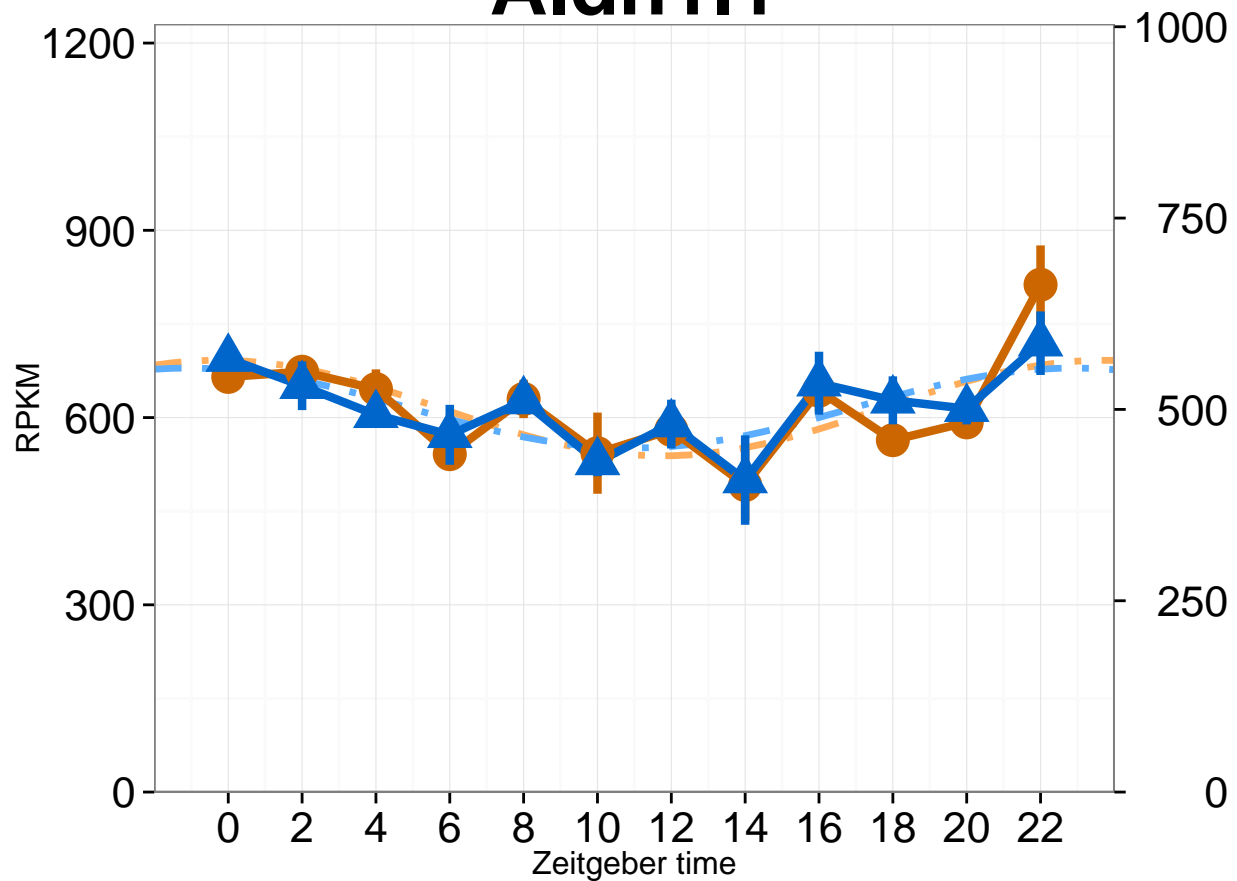

## Aldh1l1

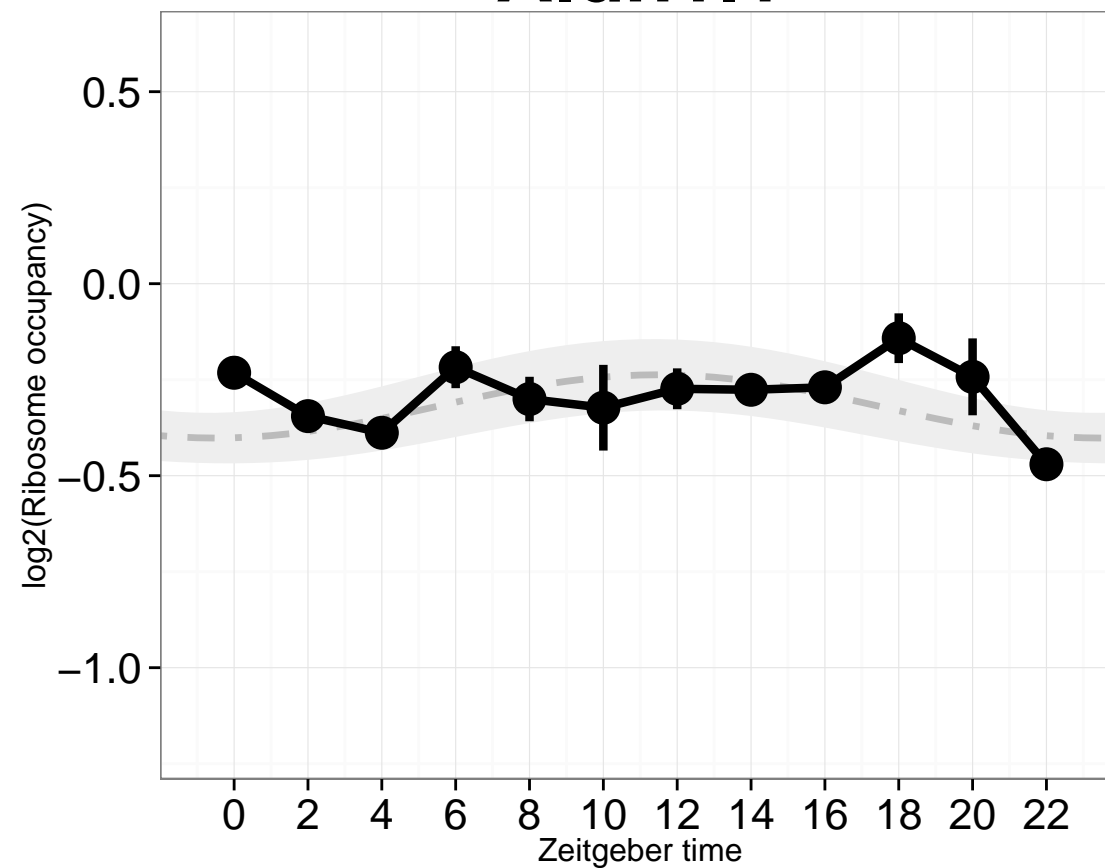

Supplement: SuppDataset_1.zip [file Aldh1l1_set_A.pdf › Supplemental Dataset 1/A-mRNA_nonrhyth_translation_nonrhyth/Aldh1l1_set_A.pdf]

## Aldh2

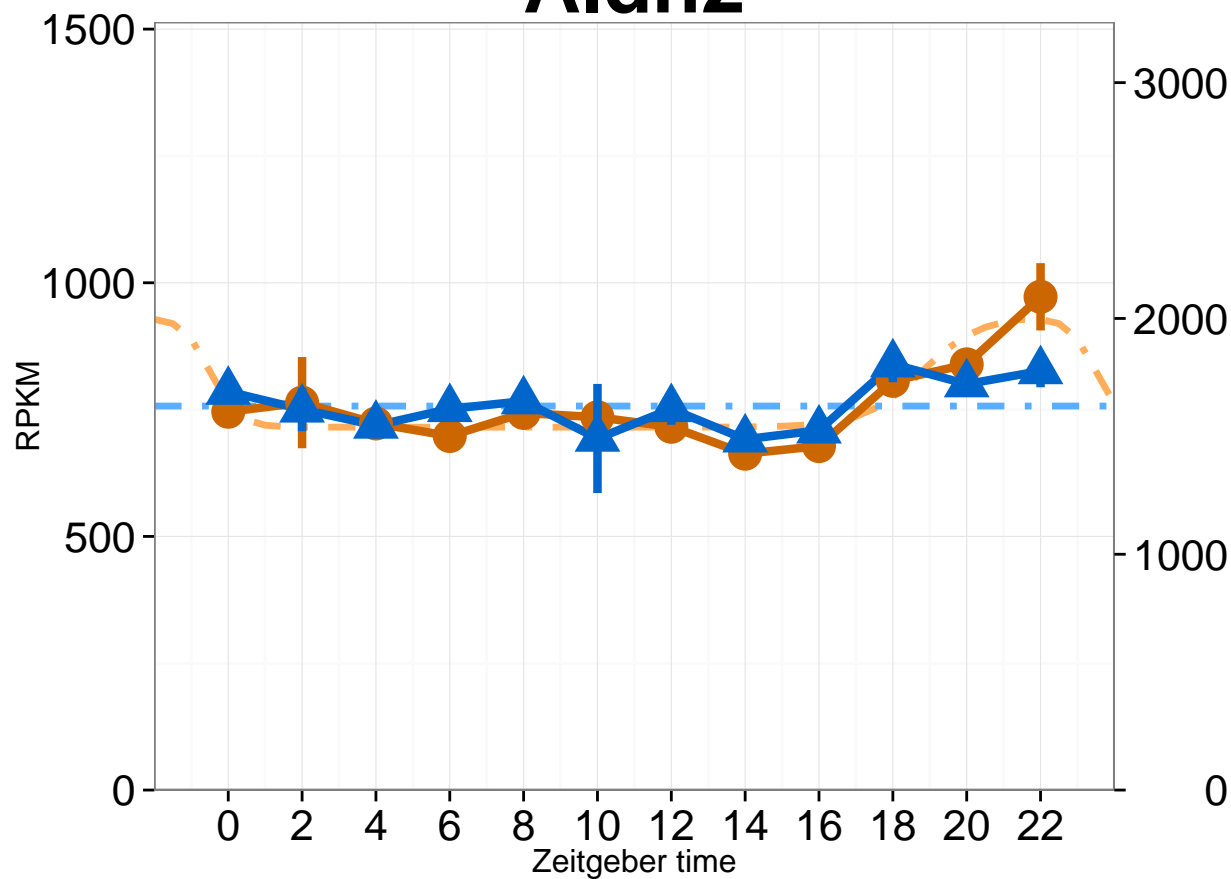

## Aldh2

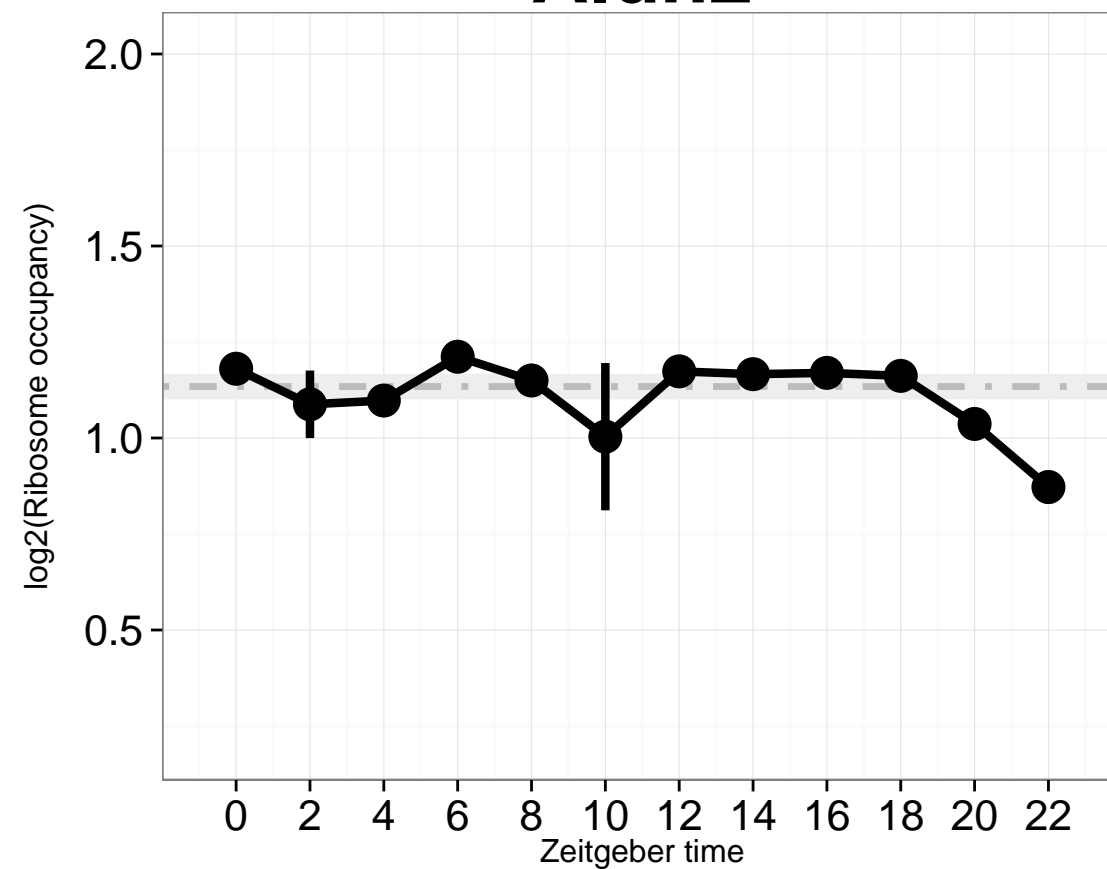

Supplement: SuppDataset_1.zip [file Aldh2_set_A.pdf › Supplemental Dataset 1/A-mRNA_nonrhyth_translation_nonrhyth/Aldh2_set_A.pdf]

## Aldh3a2

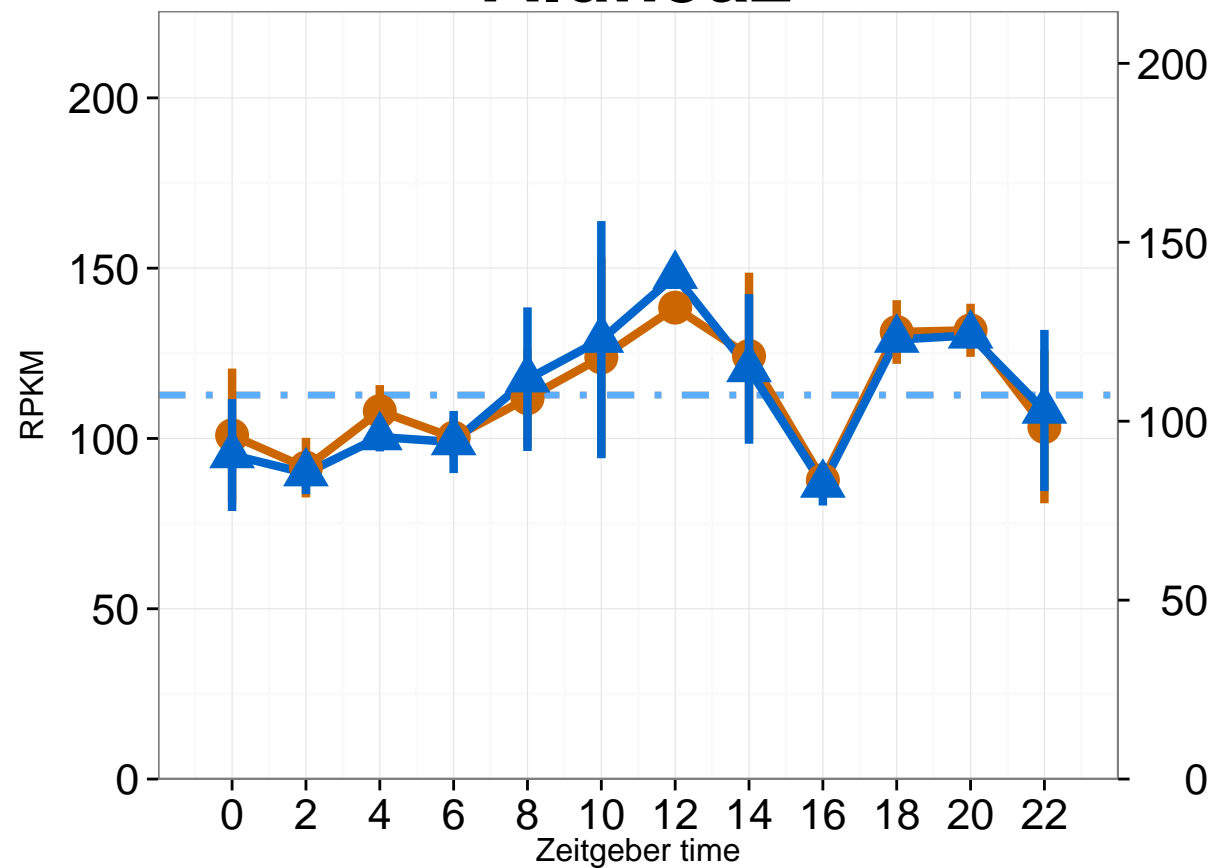

## Aldh3a2

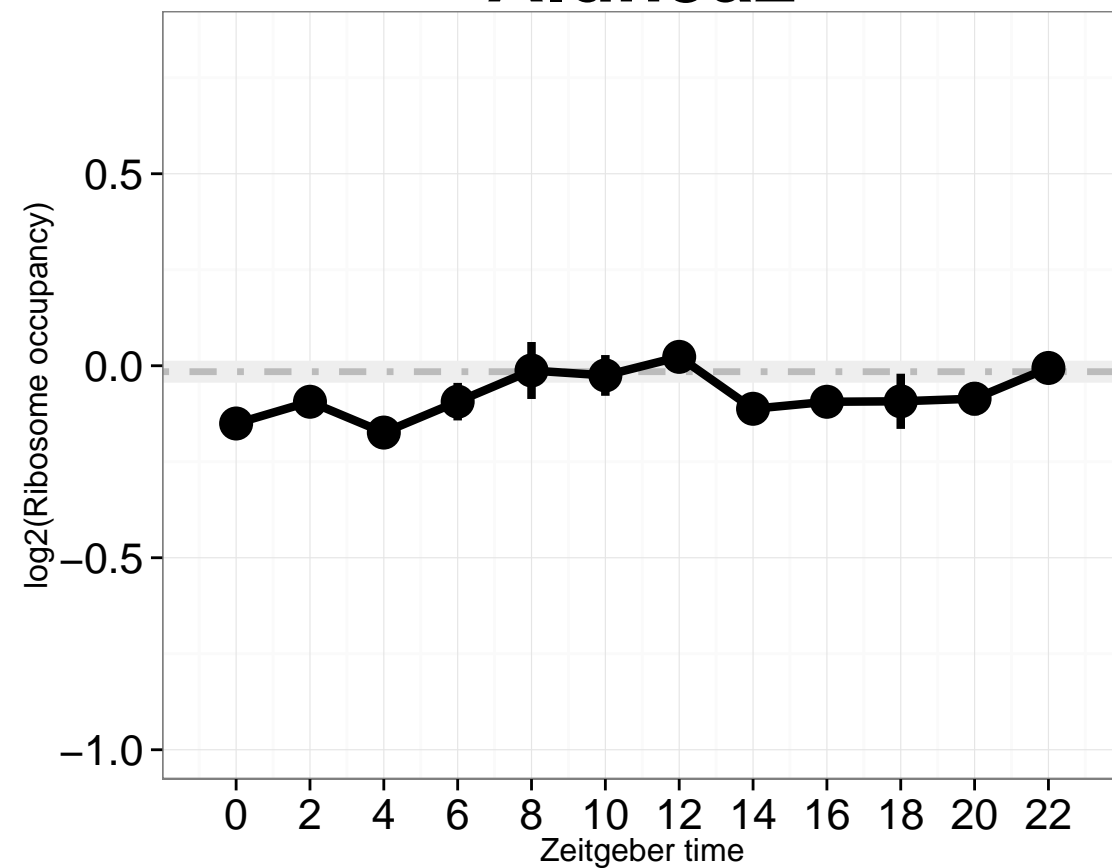

Supplement: SuppDataset_1.zip [file Aldh3a2_set_A.pdf › Supplemental Dataset 1/A-mRNA_nonrhyth_translation_nonrhyth/Aldh3a2_set_A.pdf]

## Aldh3b1

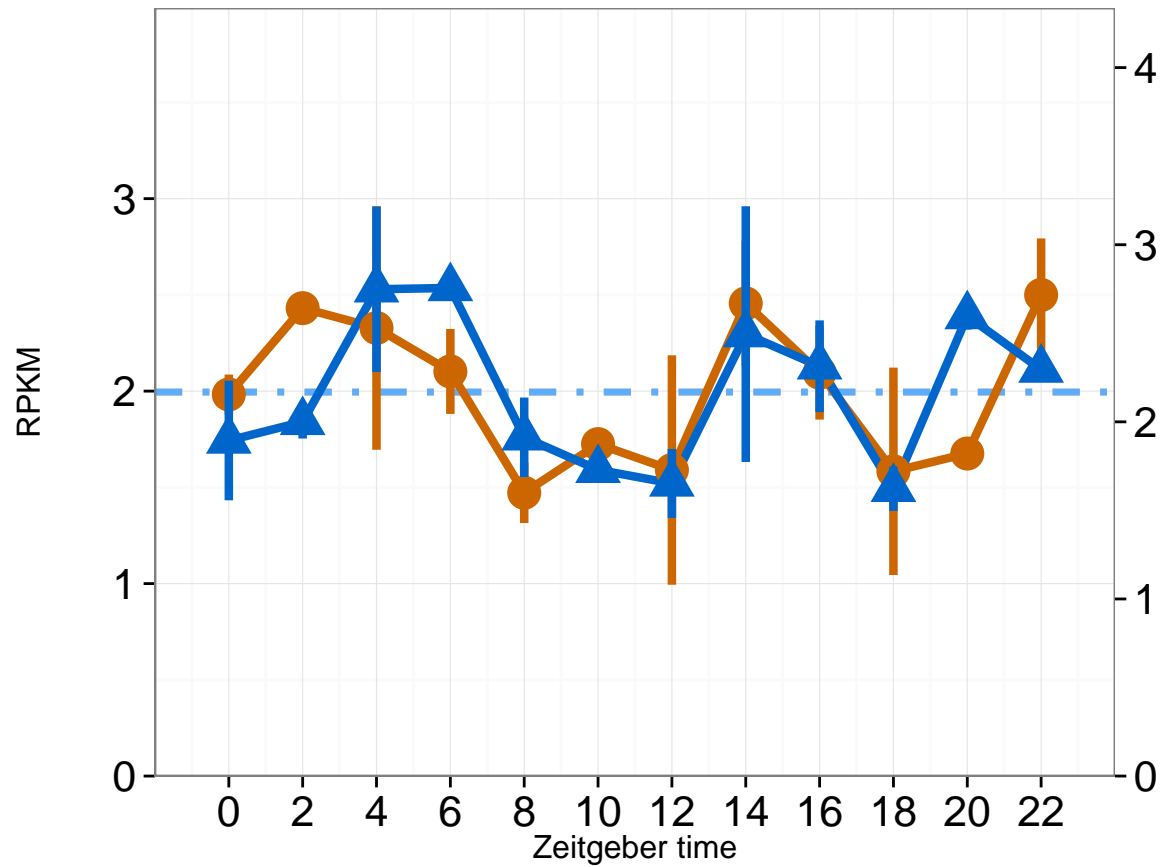

## Aldh3b1

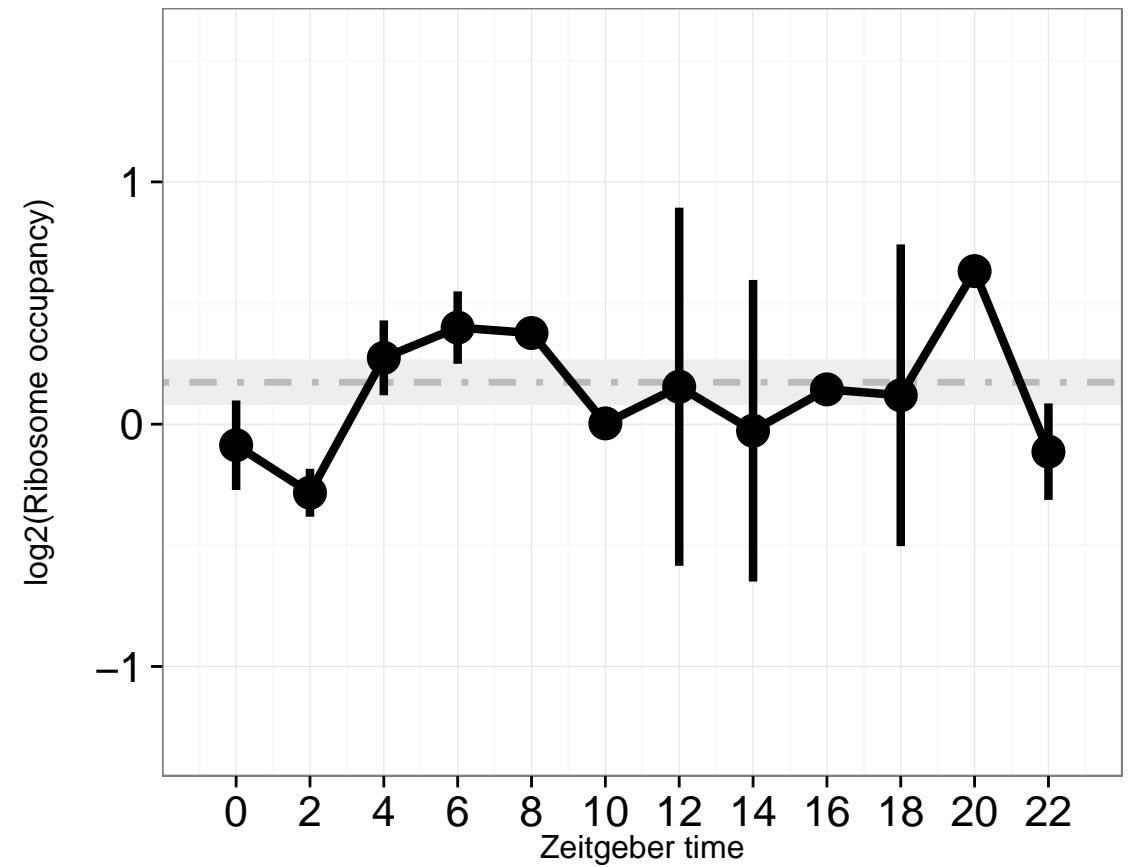

Supplement: SuppDataset_1.zip [file Aldh3b1_set_A.pdf › Supplemental Dataset 1/A-mRNA_nonrhyth_translation_nonrhyth/Aldh3b1_set_A.pdf]

## Aldh4a1

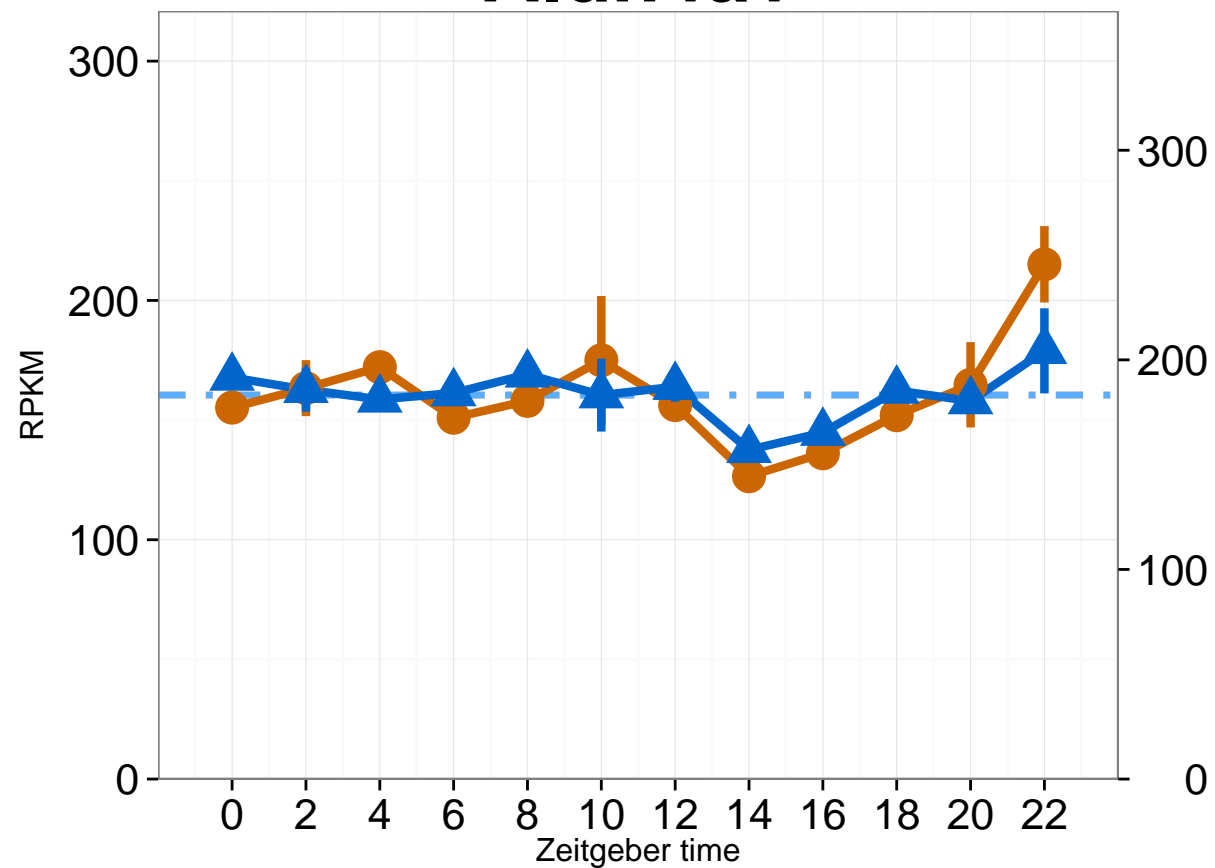

## Aldh4a1

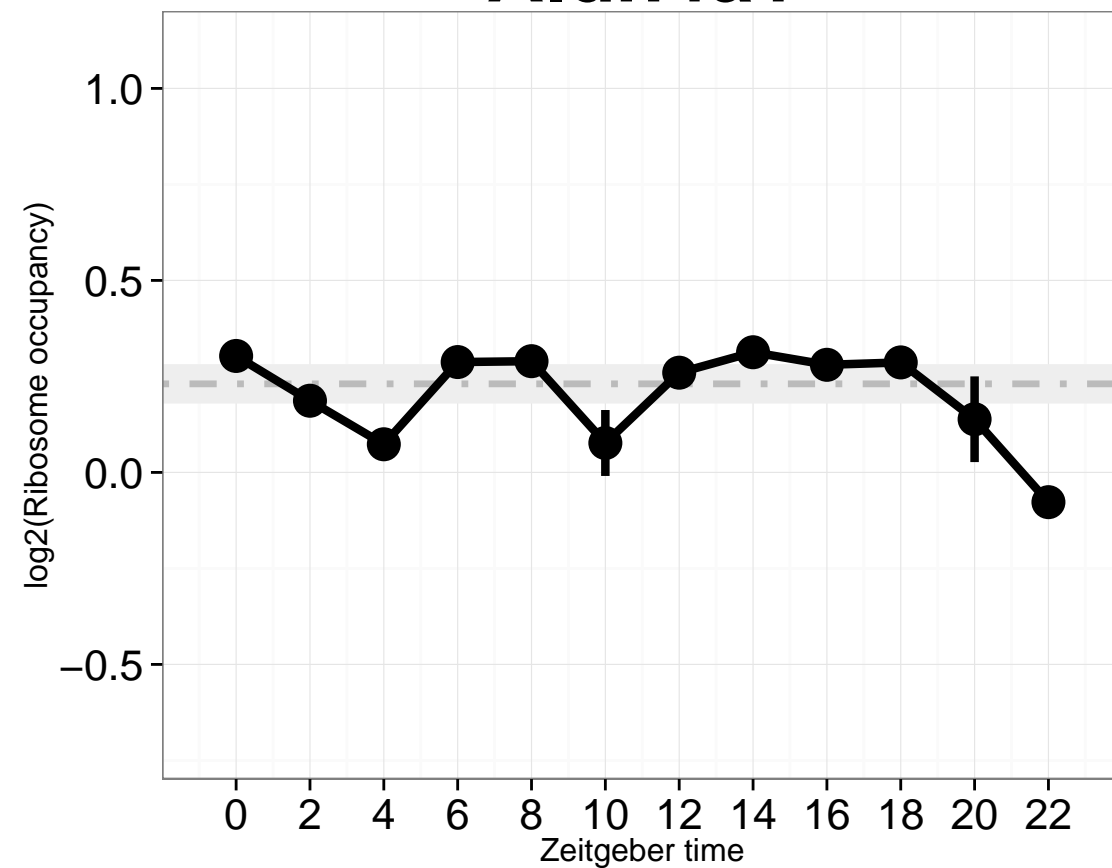

Supplement: SuppDataset_1.zip [file Aldh4a1_set_A.pdf › Supplemental Dataset 1/A-mRNA_nonrhyth_translation_nonrhyth/Aldh4a1_set_A.pdf]

## Aldh5a1

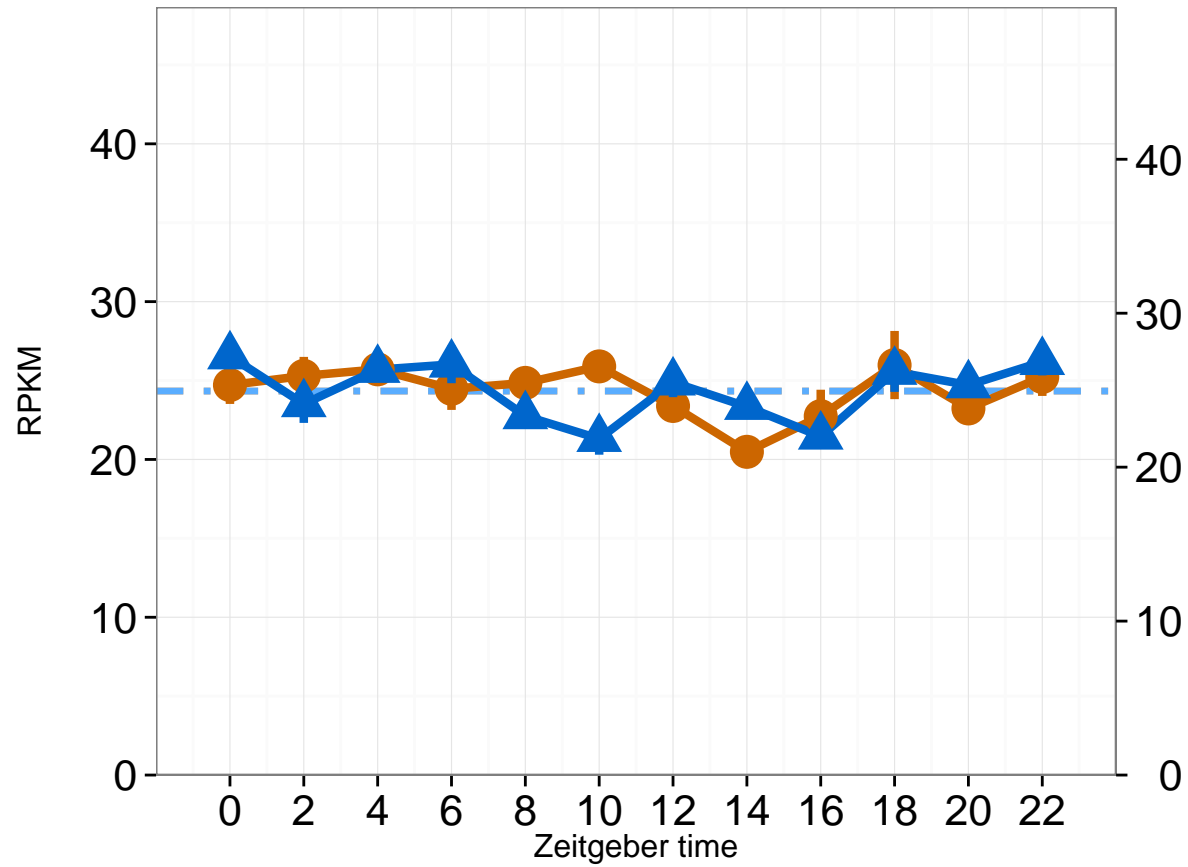

## Aldh5a1

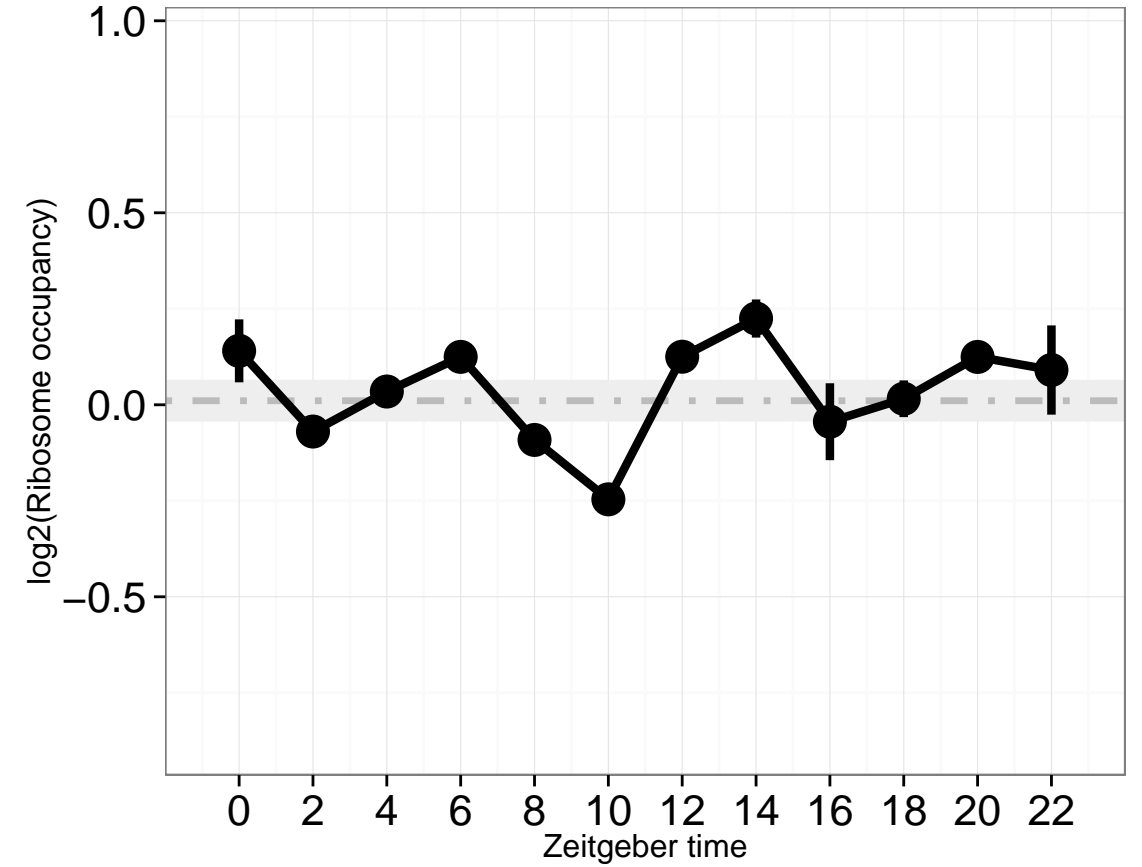

Supplement: SuppDataset_1.zip [file Aldh5a1_set_A.pdf › Supplemental Dataset 1/A-mRNA_nonrhyth_translation_nonrhyth/Aldh5a1_set_A.pdf]

## Aldh6a1

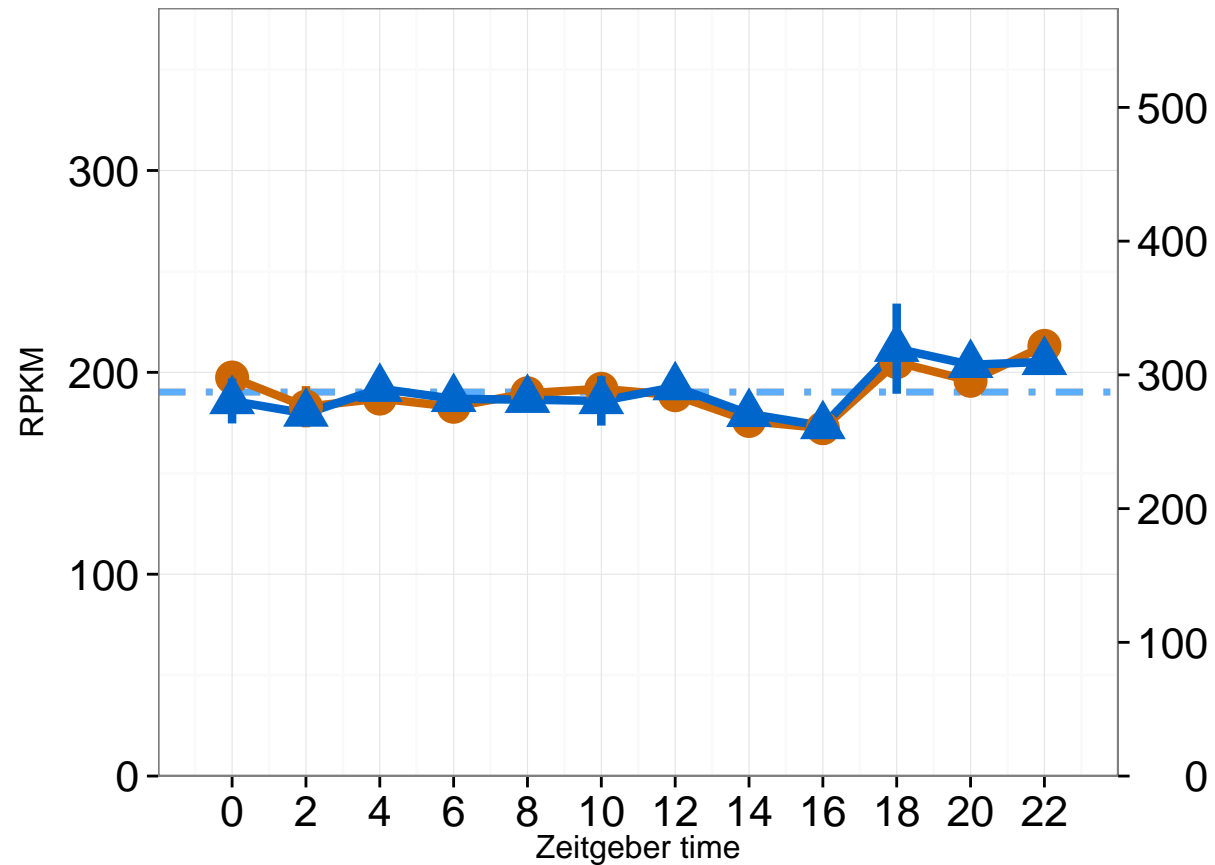

## Aldh6a1

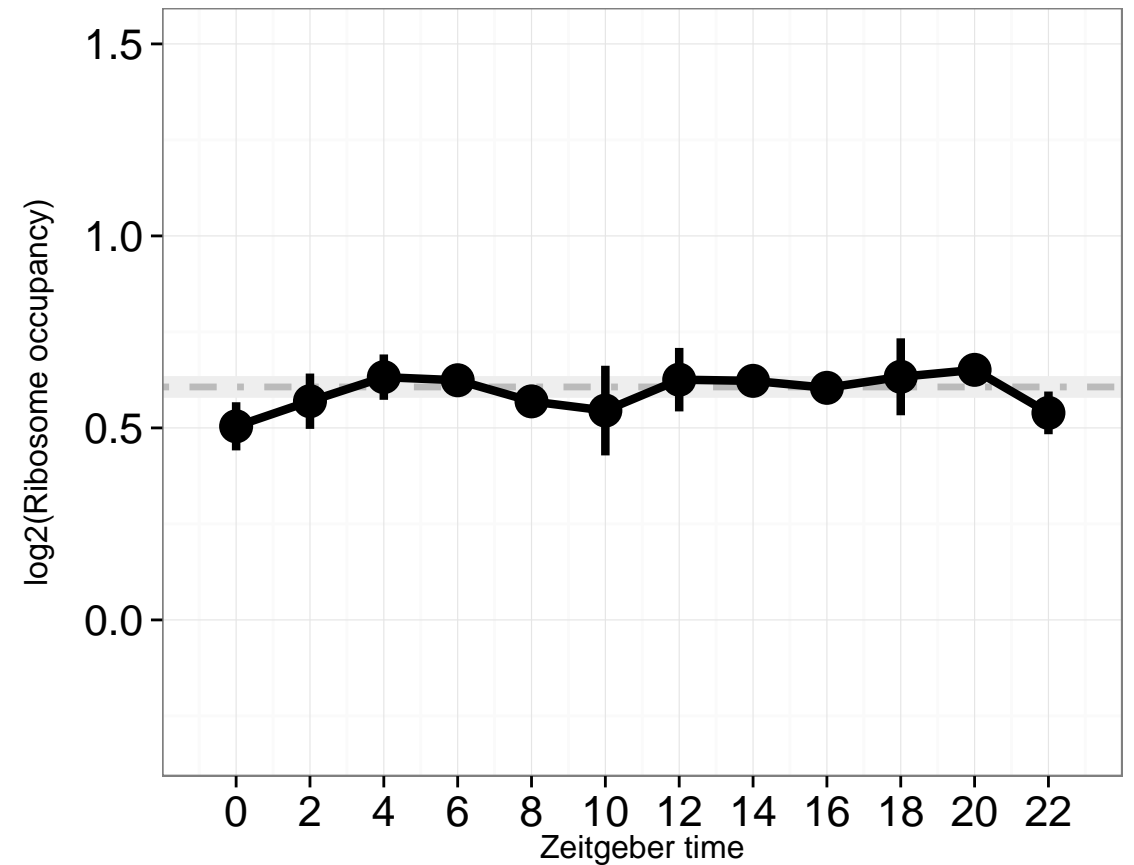

Supplement: SuppDataset_1.zip [file Aldh6a1_set_A.pdf › Supplemental Dataset 1/A-mRNA_nonrhyth_translation_nonrhyth/Aldh6a1_set_A.pdf]

## Aldh7a1

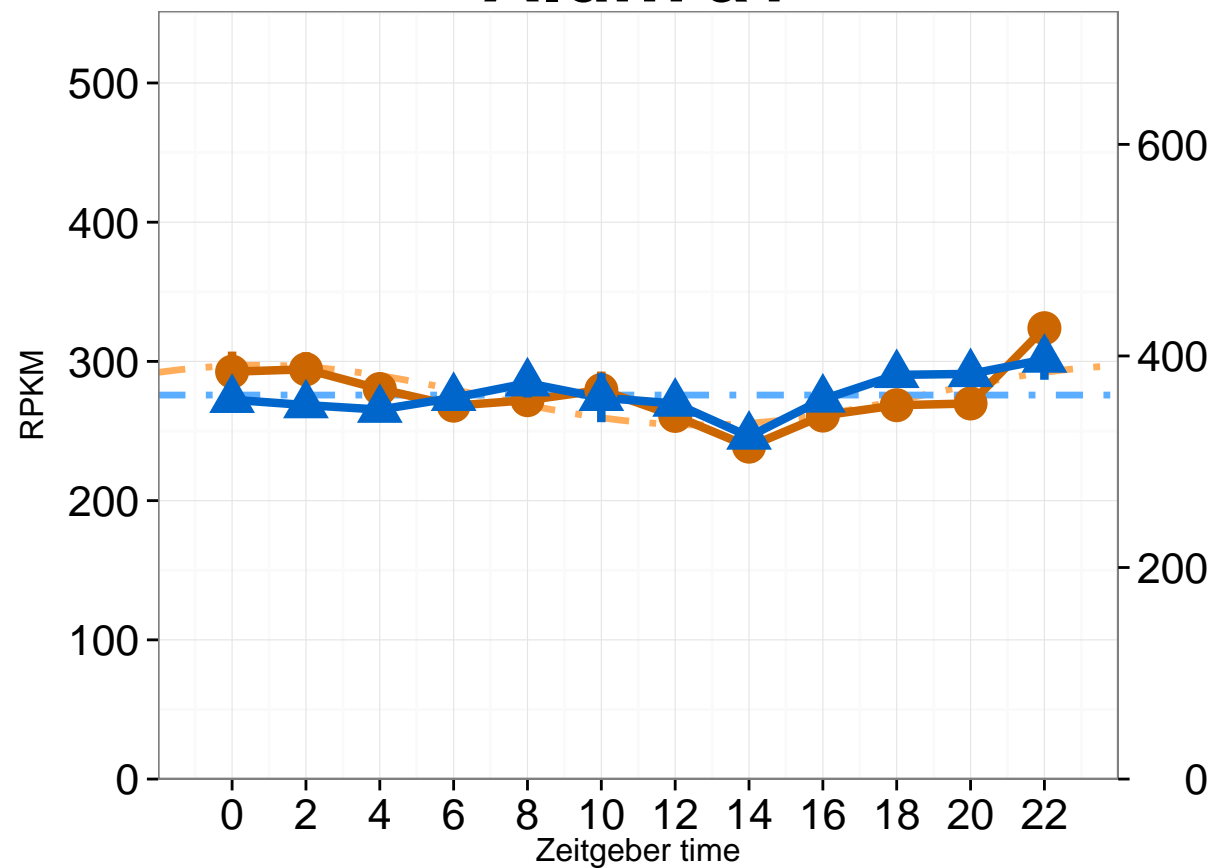

## Aldh7a1

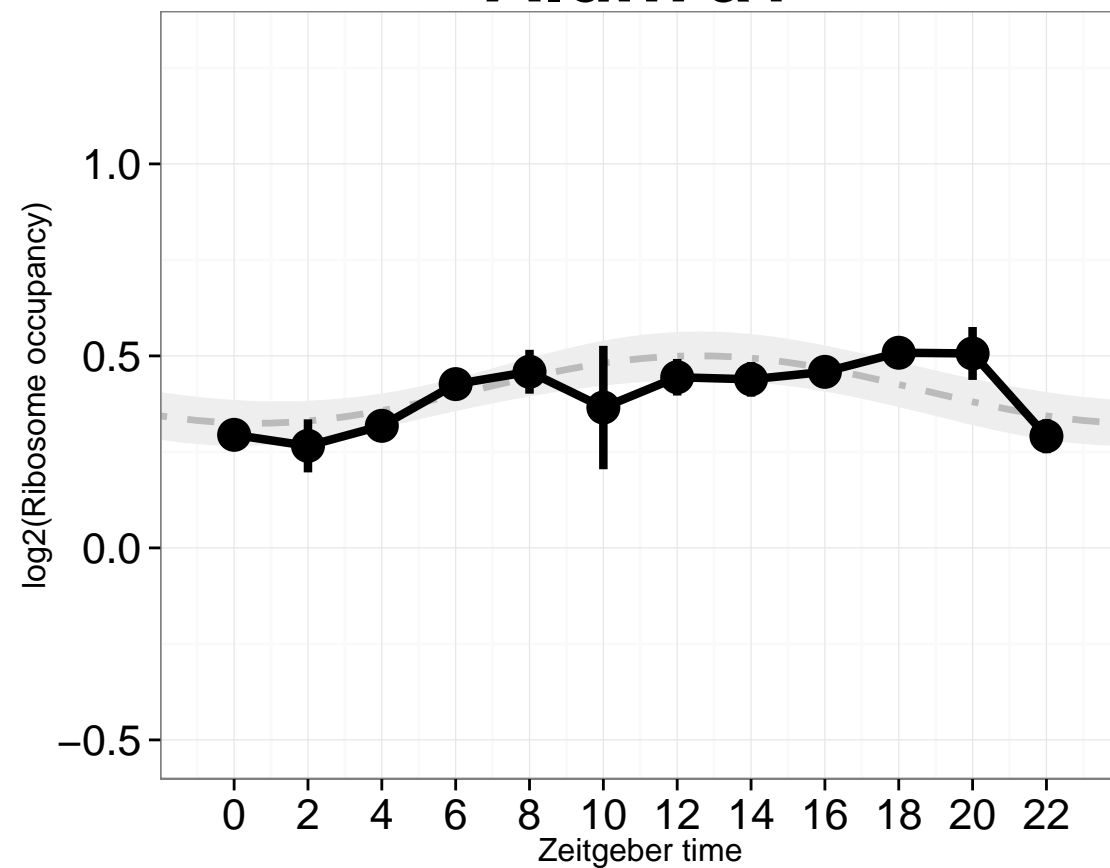

Supplement: SuppDataset_1.zip [file Aldh7a1_set_A.pdf › Supplemental Dataset 1/A-mRNA_nonrhyth_translation_nonrhyth/Aldh7a1_set_A.pdf]

## Aldh8a1

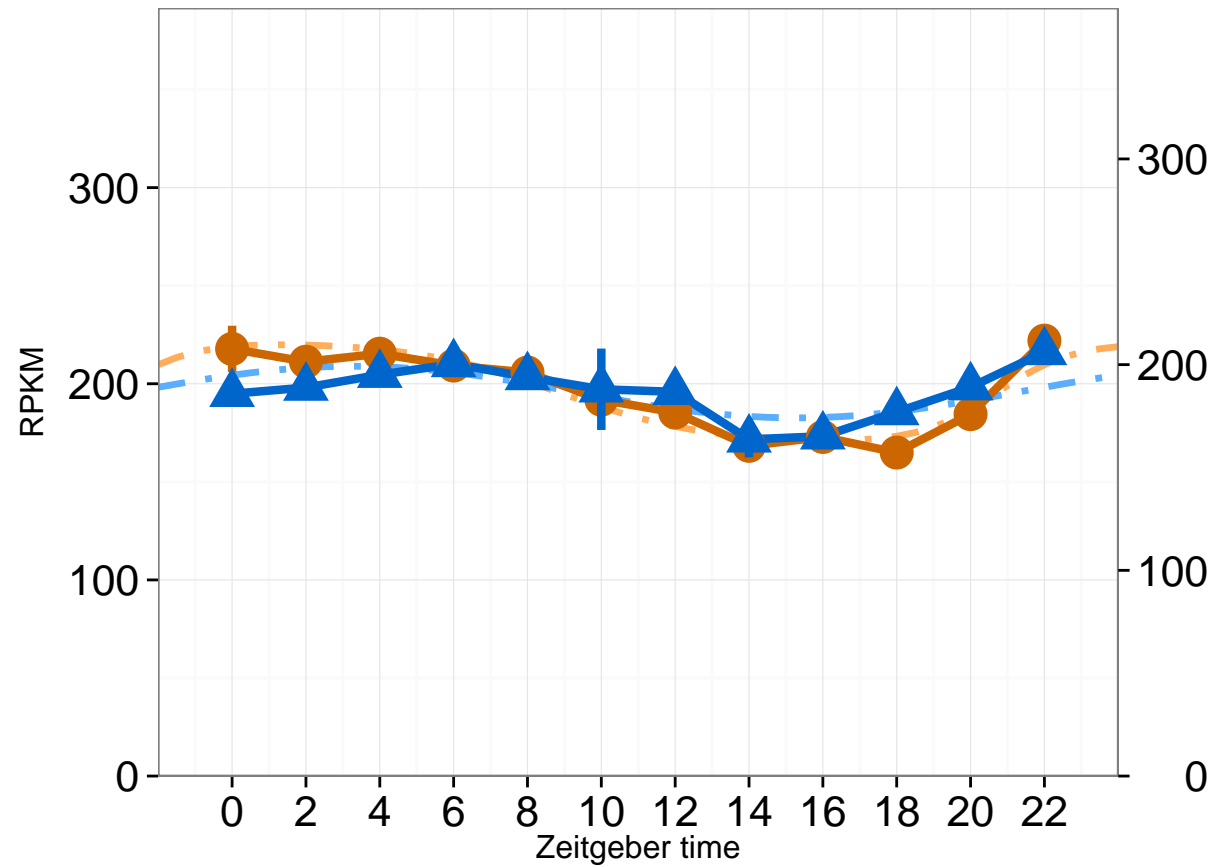

## Aldh8a1

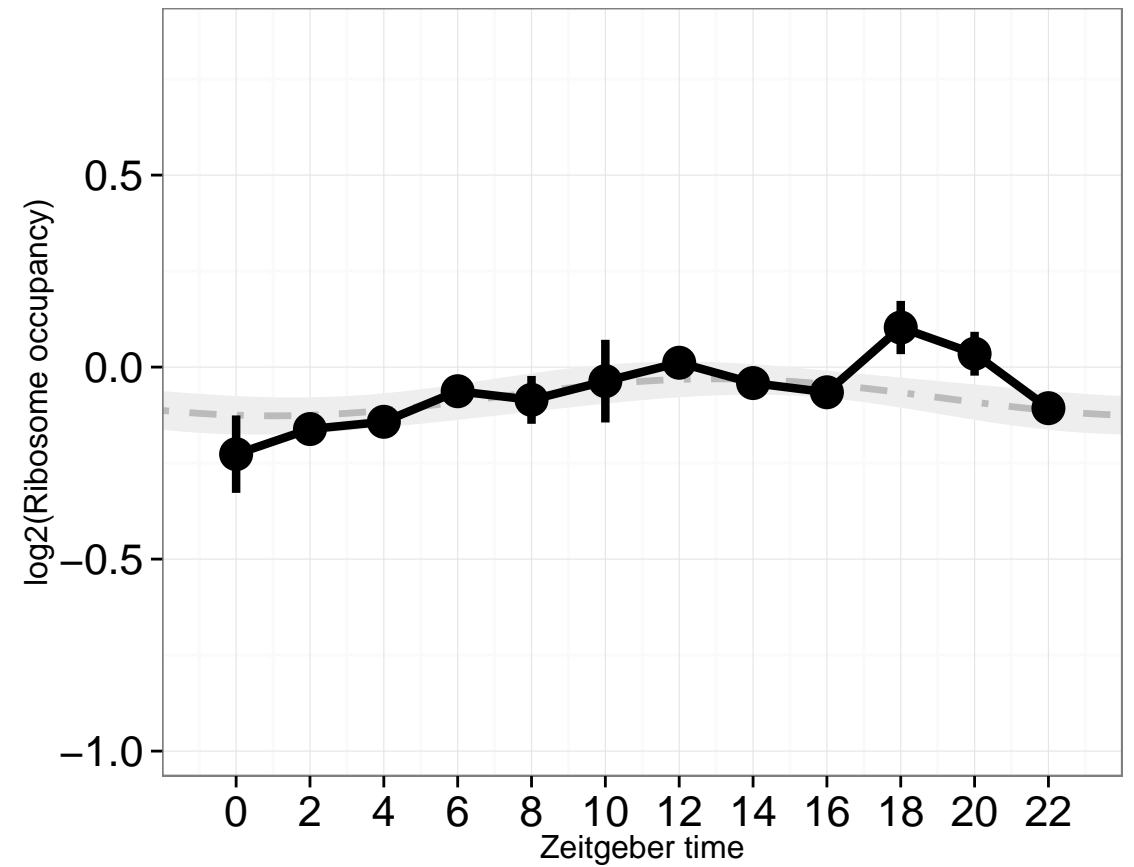

Supplement: SuppDataset_1.zip [file Aldh8a1_set_A.pdf › Supplemental Dataset 1/A-mRNA_nonrhyth_translation_nonrhyth/Aldh8a1_set_A.pdf]

## Aldh9a1

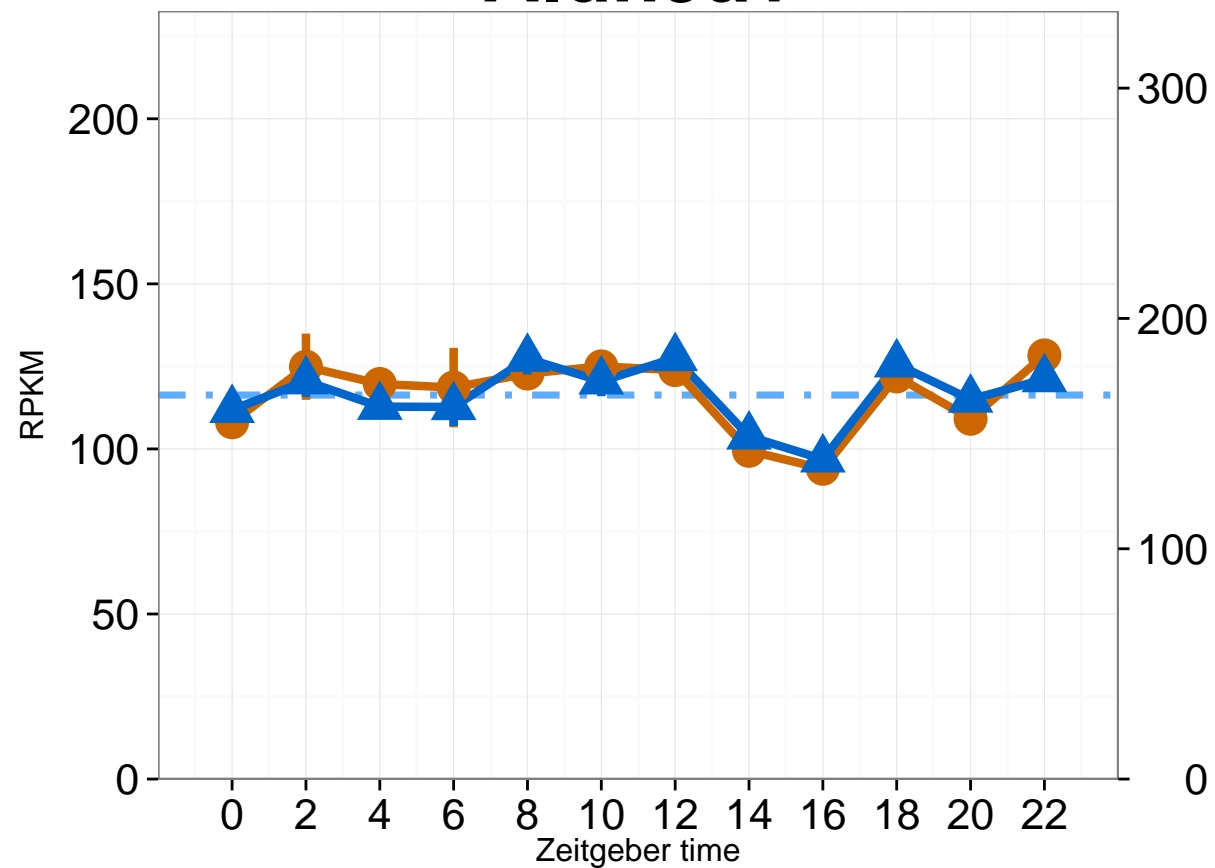

## Aldh9a1

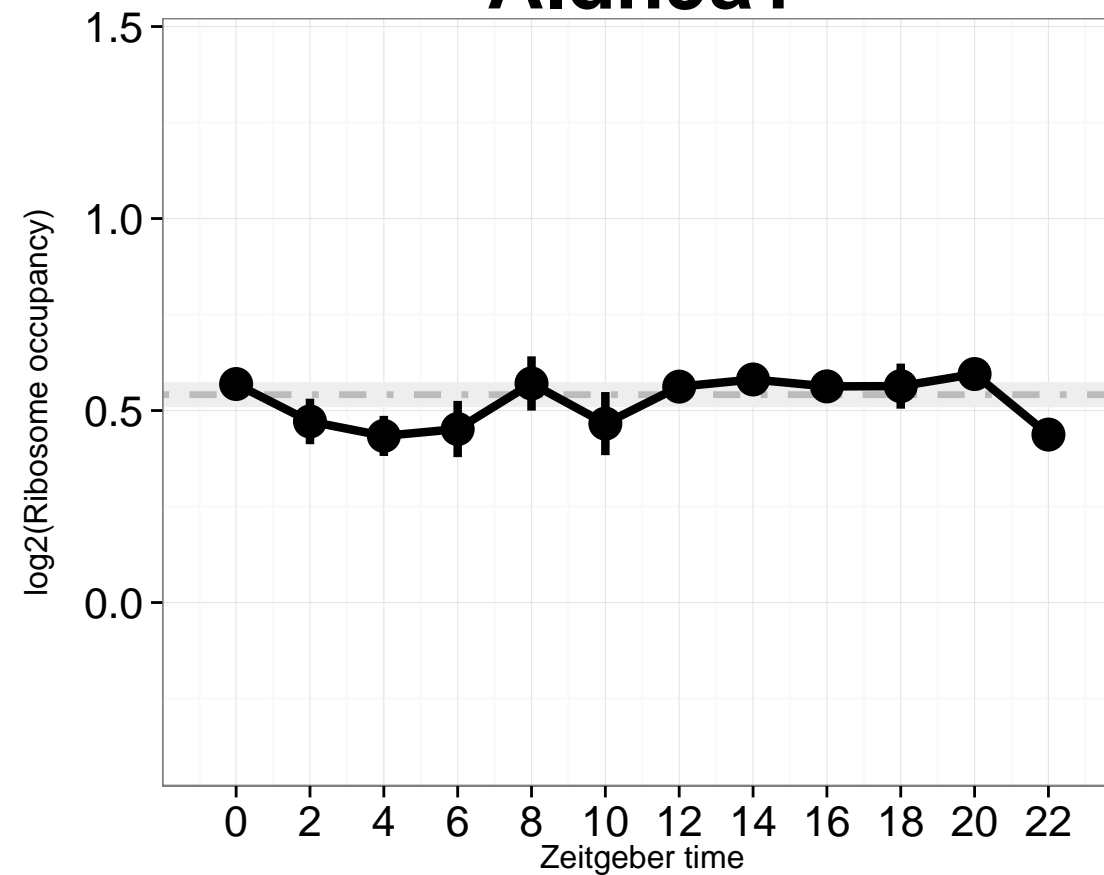

Supplement: SuppDataset_1.zip [file Aldh9a1_set_A.pdf › Supplemental Dataset 1/A-mRNA_nonrhyth_translation_nonrhyth/Aldh9a1_set_A.pdf]

## Aldoa

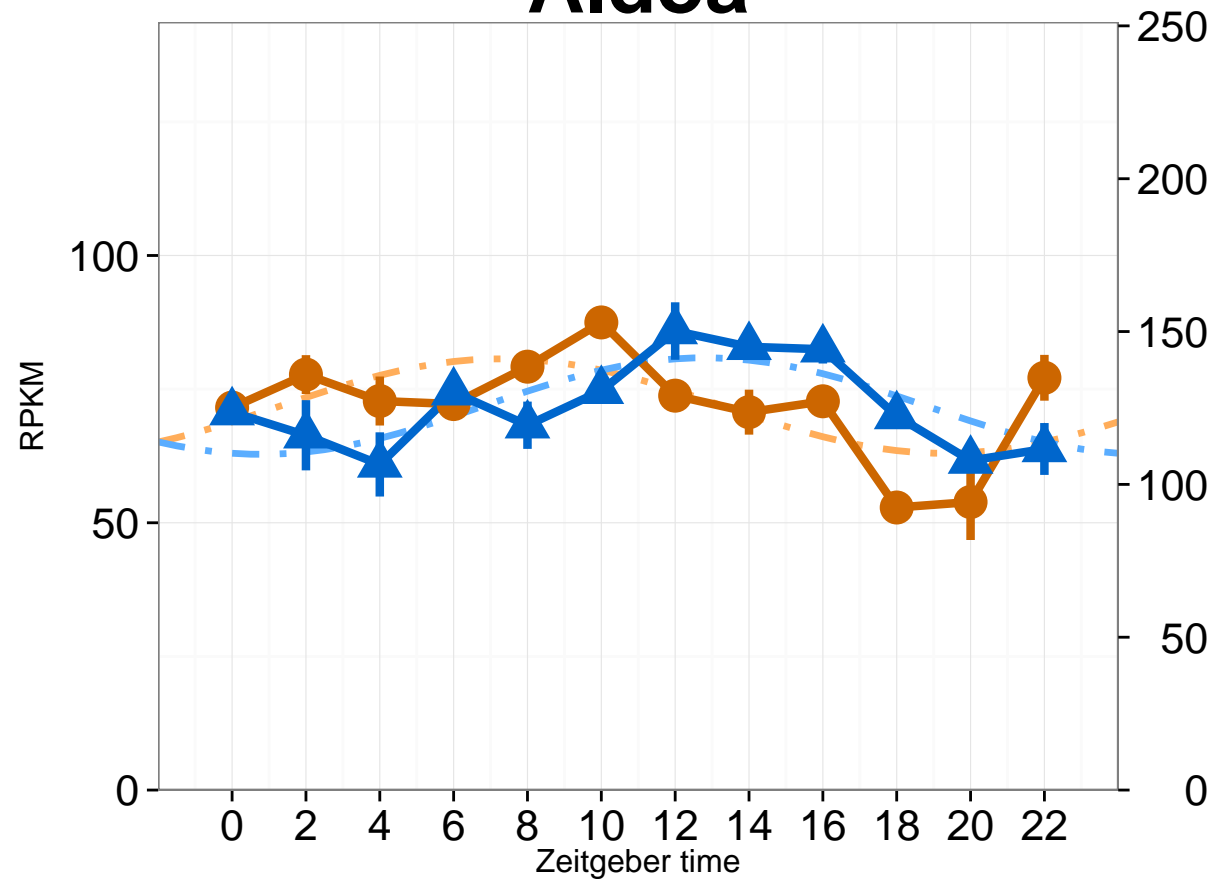

## Aldoa

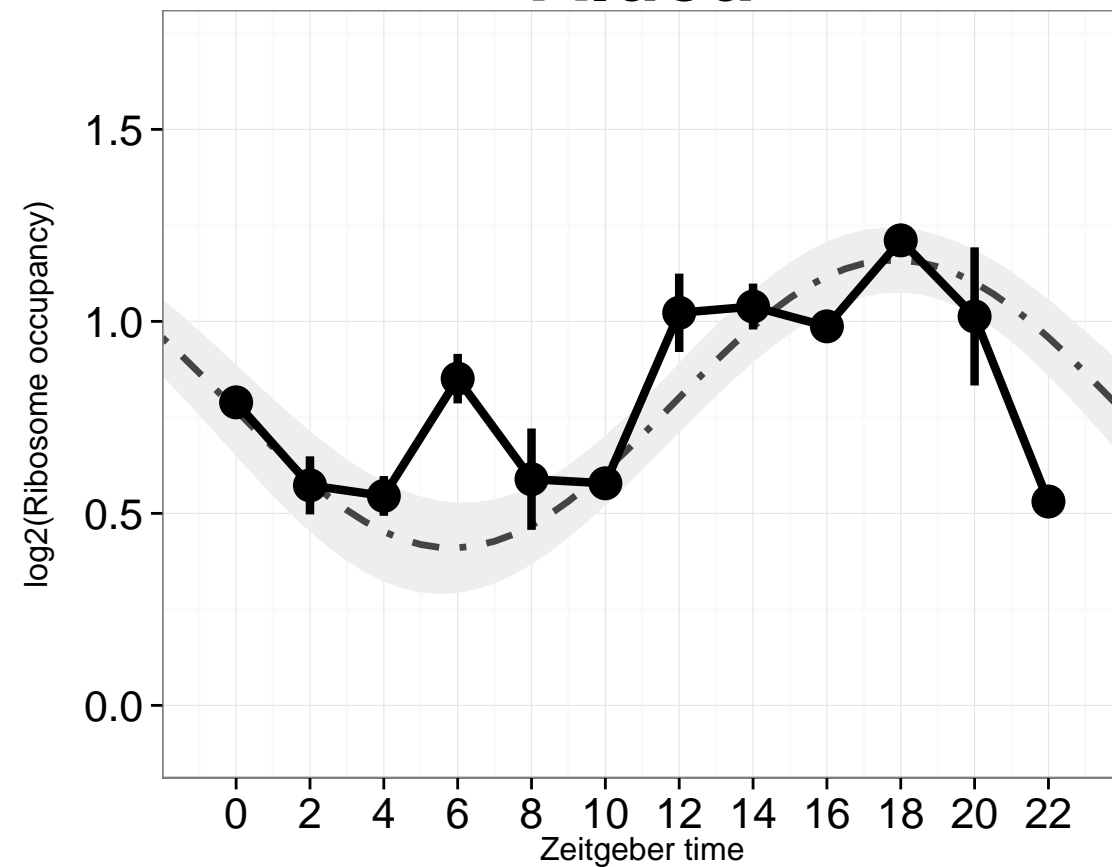

Supplement: SuppDataset_1.zip [file Aldoa_set_A.pdf › Supplemental Dataset 1/A-mRNA_nonrhyth_translation_nonrhyth/Aldoa_set_A.pdf]

## Aldoc

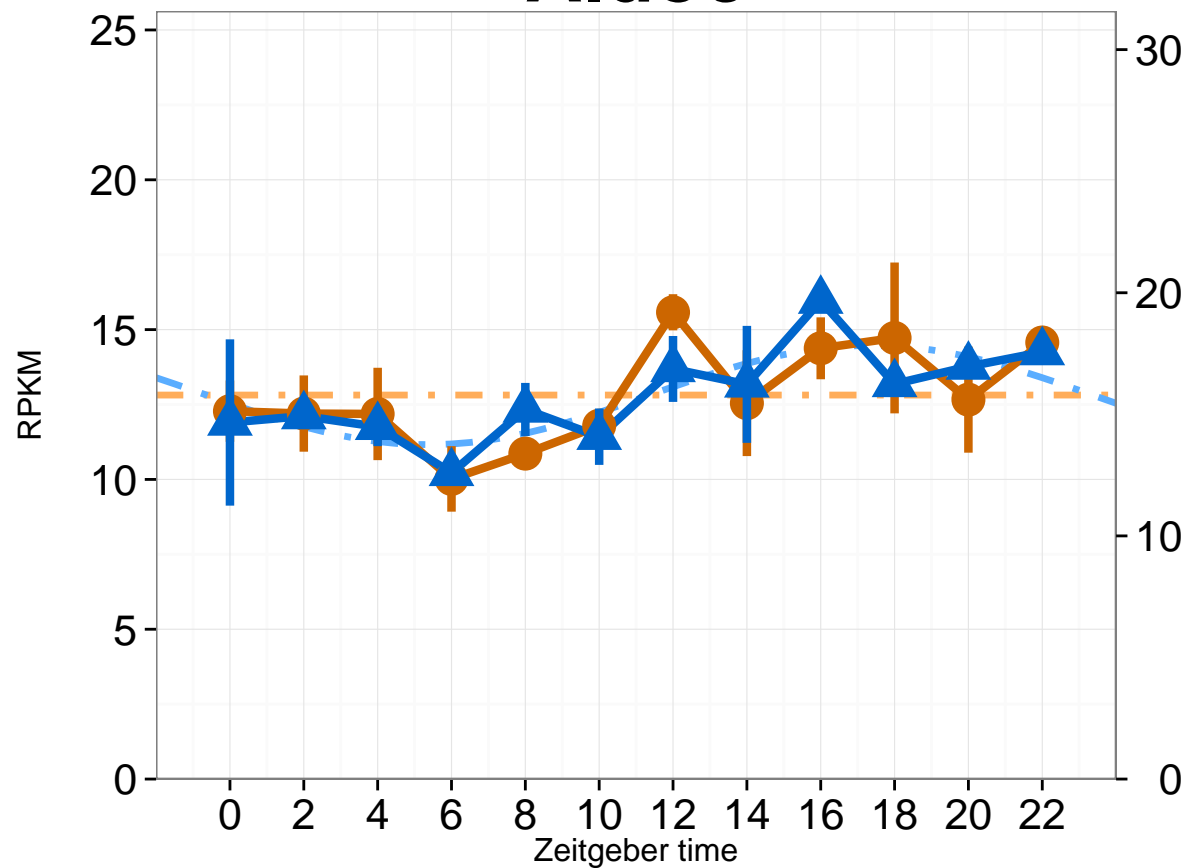

## Aldoc

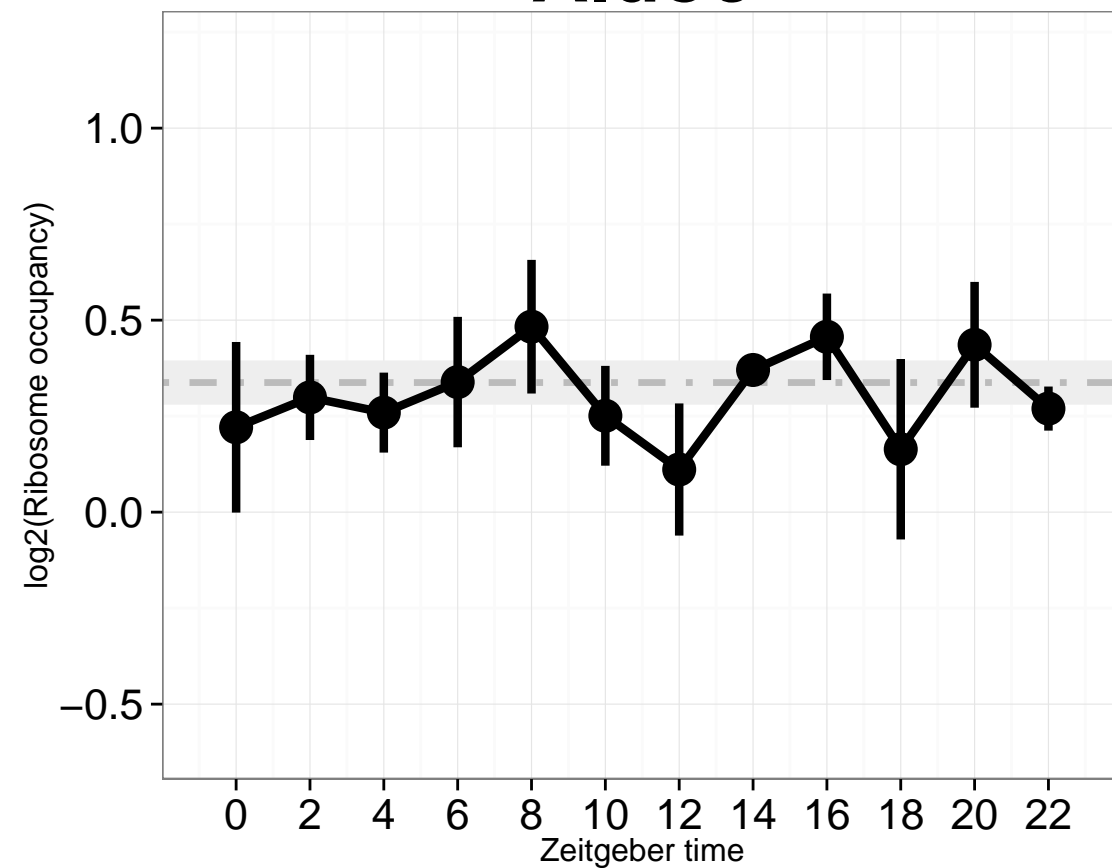

Supplement: SuppDataset_1.zip [file Aldoc_set_A.pdf › Supplemental Dataset 1/A-mRNA_nonrhyth_translation_nonrhyth/Aldoc_set_A.pdf]

# Alg11

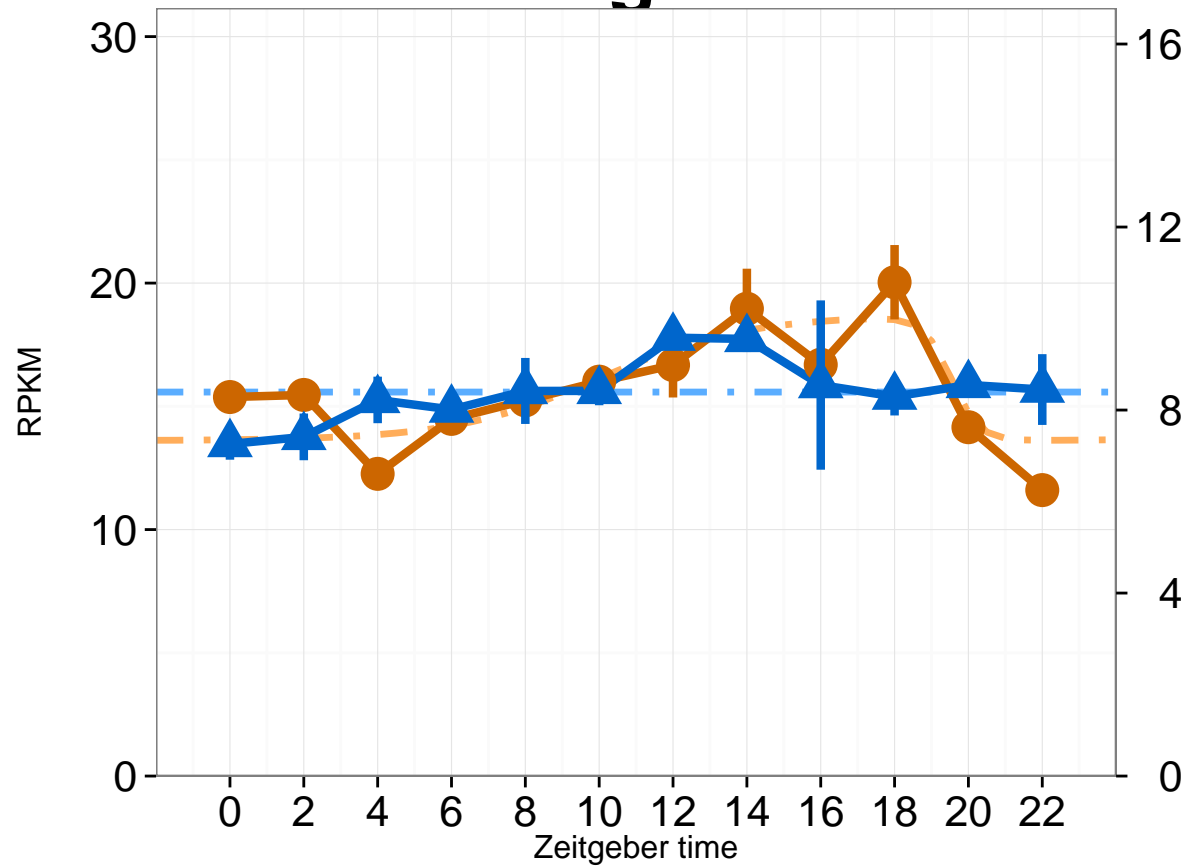

# Alg11

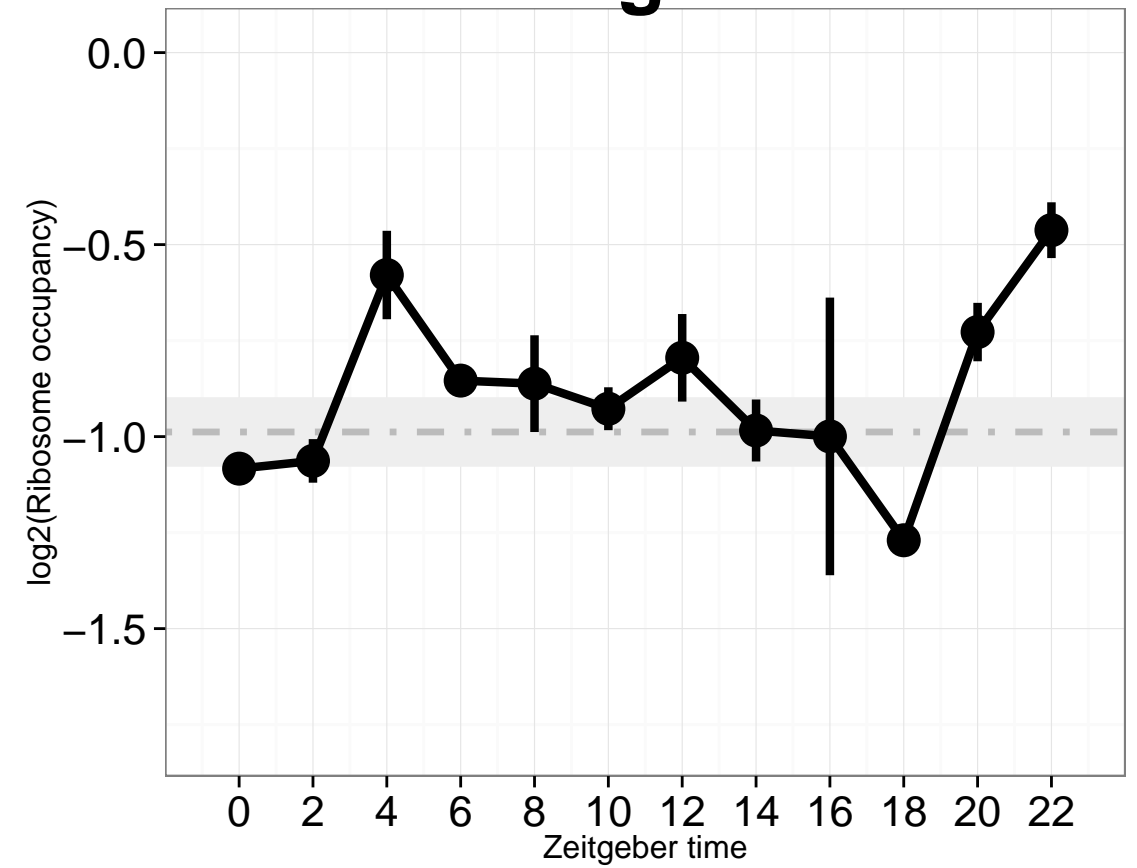

Supplement: SuppDataset_1.zip [file Alg11_set_A.pdf › Supplemental Dataset 1/A-mRNA_nonrhyth_translation_nonrhyth/Alg11_set_A.pdf]

# Alg13

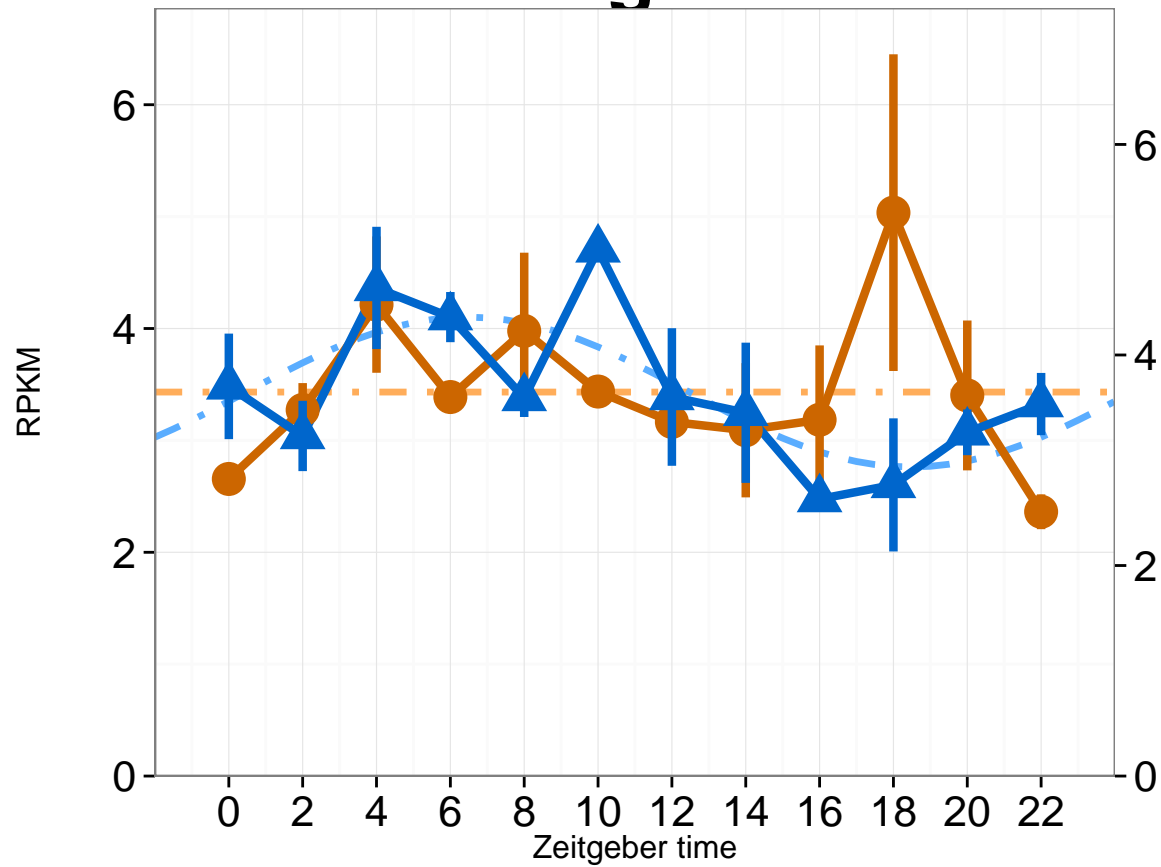

# Alg13

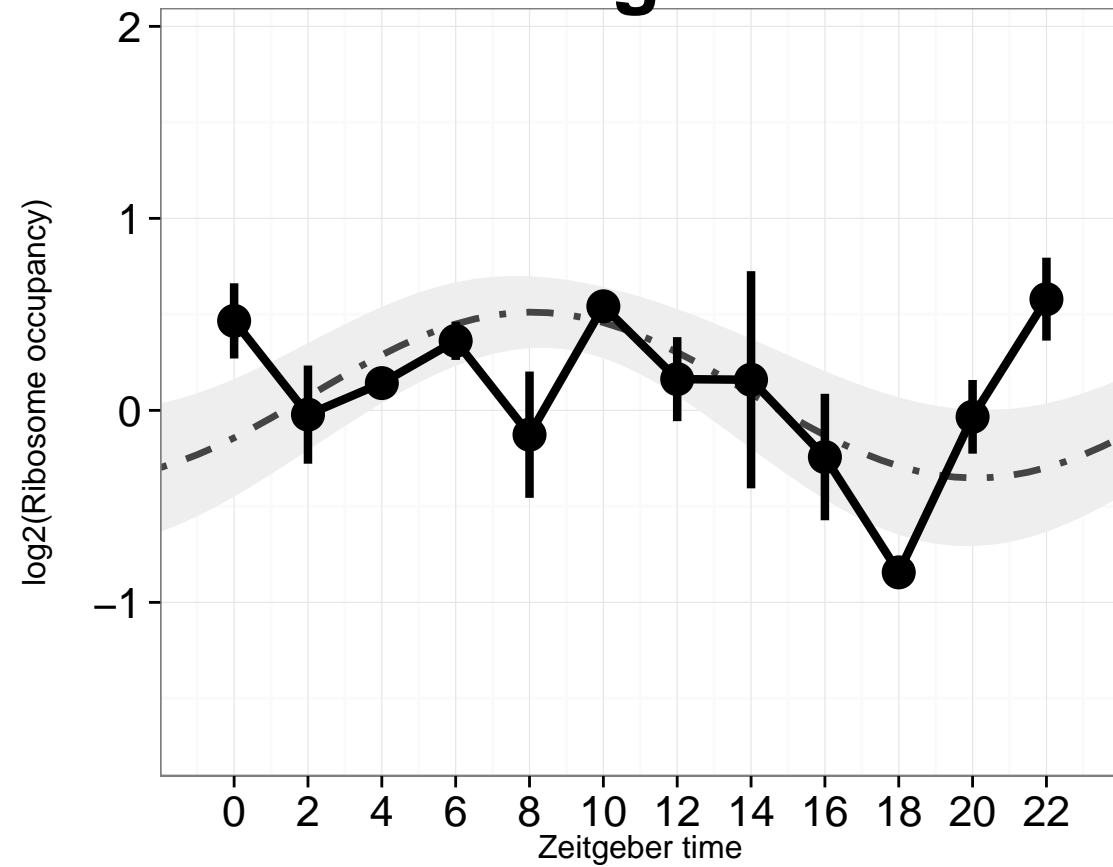

Supplement: SuppDataset_1.zip [file Alg13_set_A.pdf › Supplemental Dataset 1/A-mRNA_nonrhyth_translation_nonrhyth/Alg13_set_A.pdf]

# Alg14

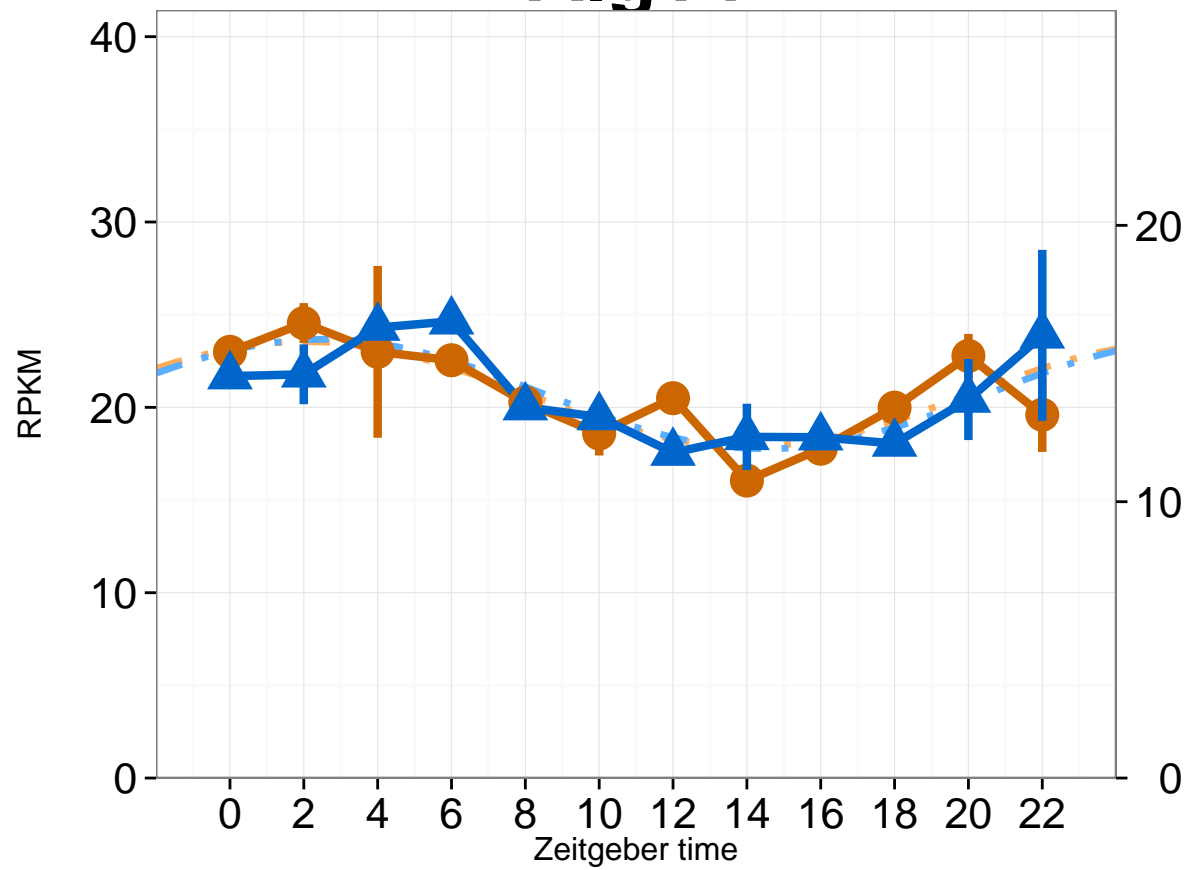

# Alg14

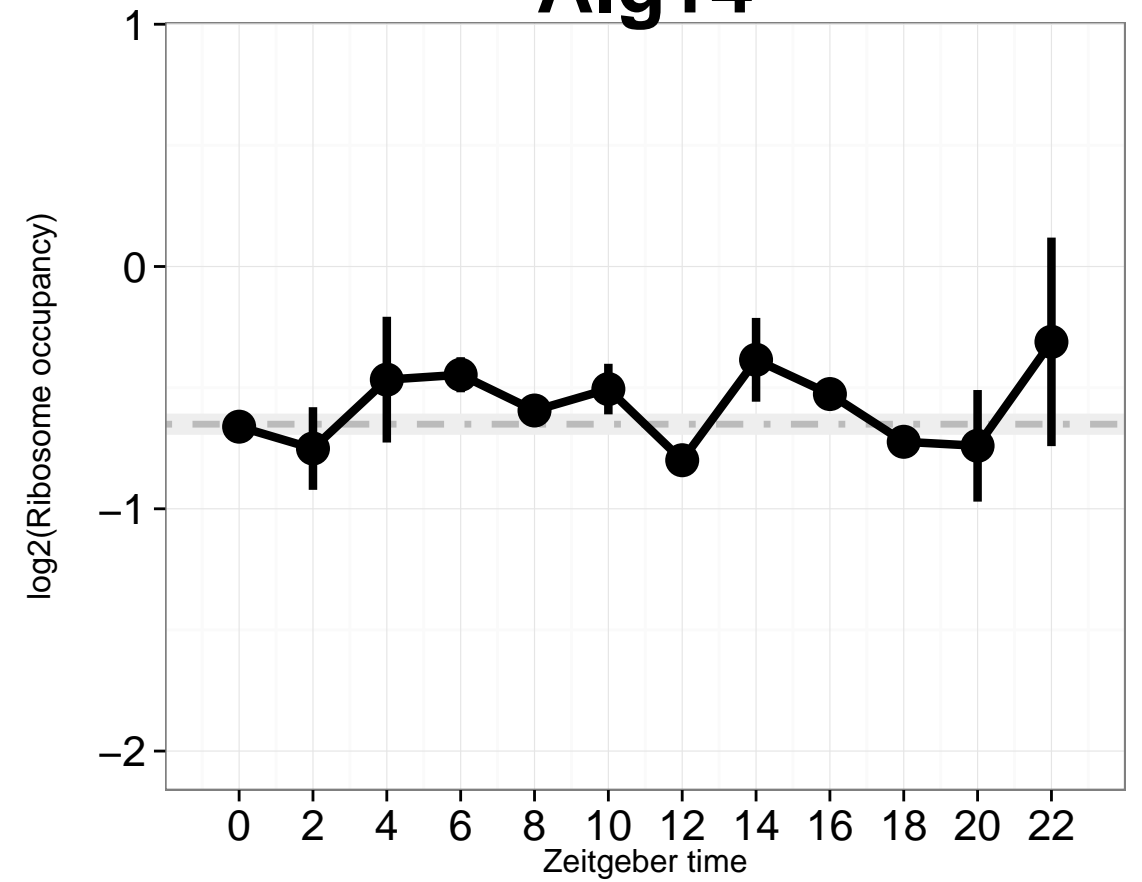

Supplement: SuppDataset_1.zip [file Alg14_set_A.pdf › Supplemental Dataset 1/A-mRNA_nonrhyth_translation_nonrhyth/Alg14_set_A.pdf]

# Alg2

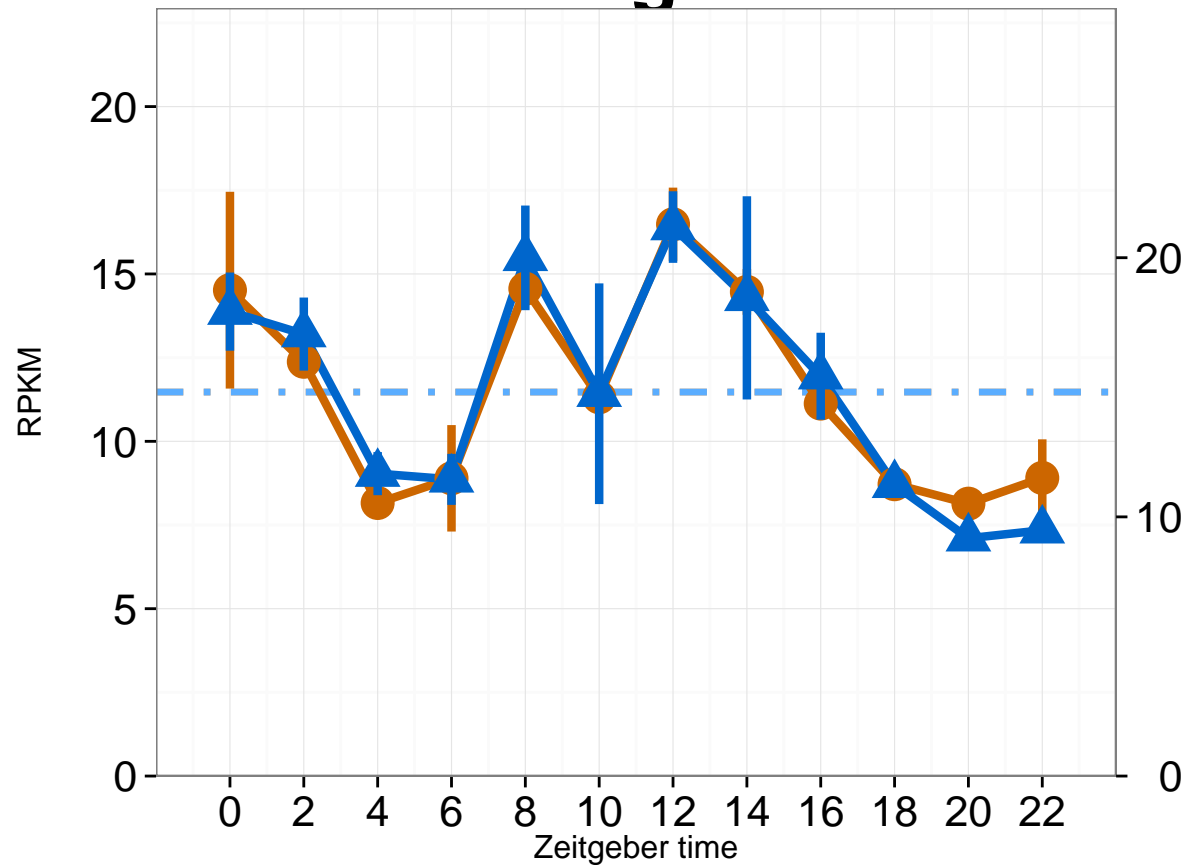

# Alg2

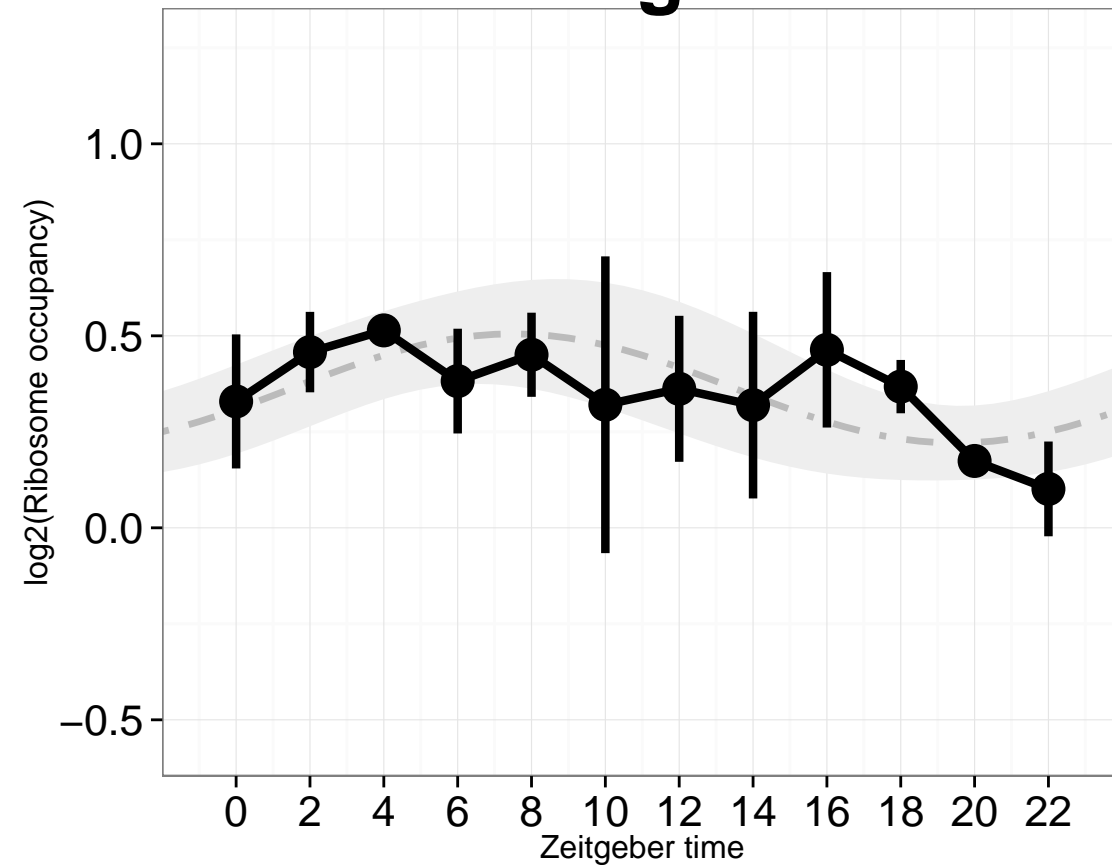

Supplement: SuppDataset_1.zip [file Alg2_set_A.pdf › Supplemental Dataset 1/A-mRNA_nonrhyth_translation_nonrhyth/Alg2_set_A.pdf]

# Alg3

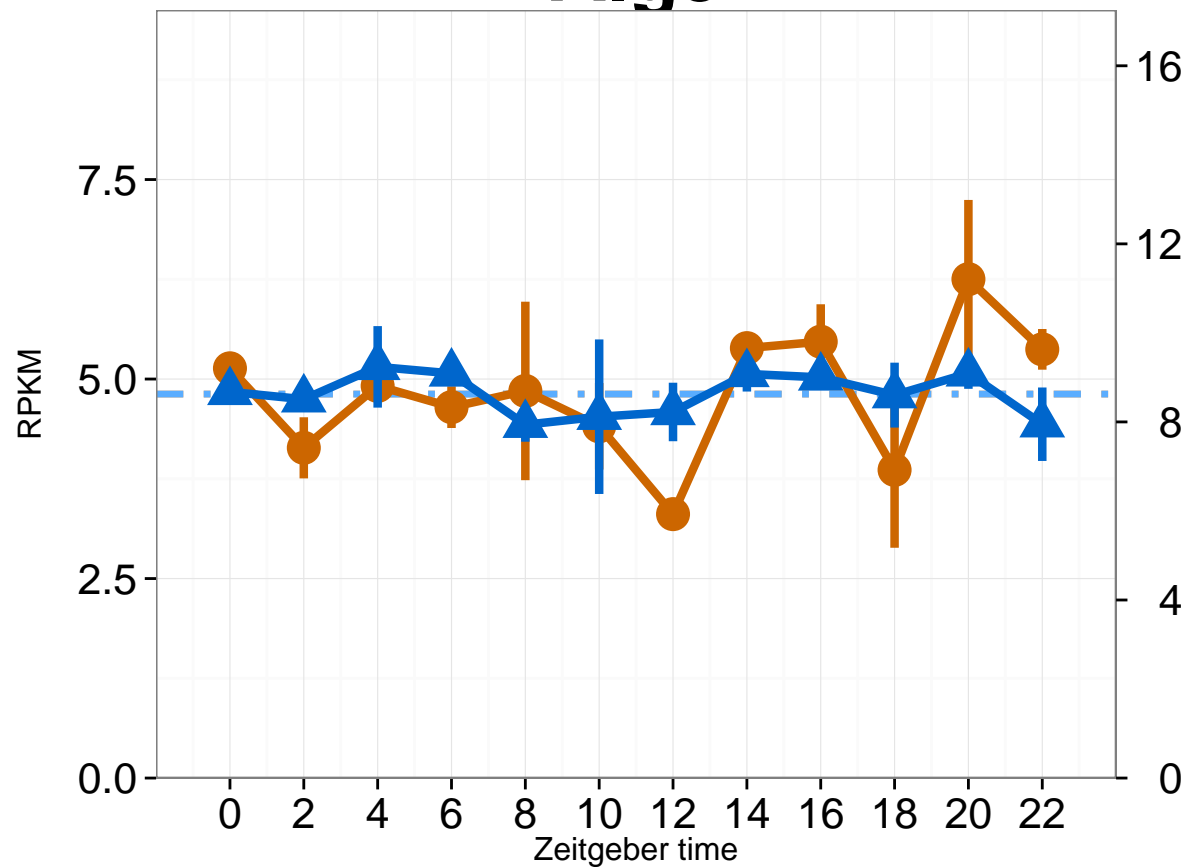

# Alg3

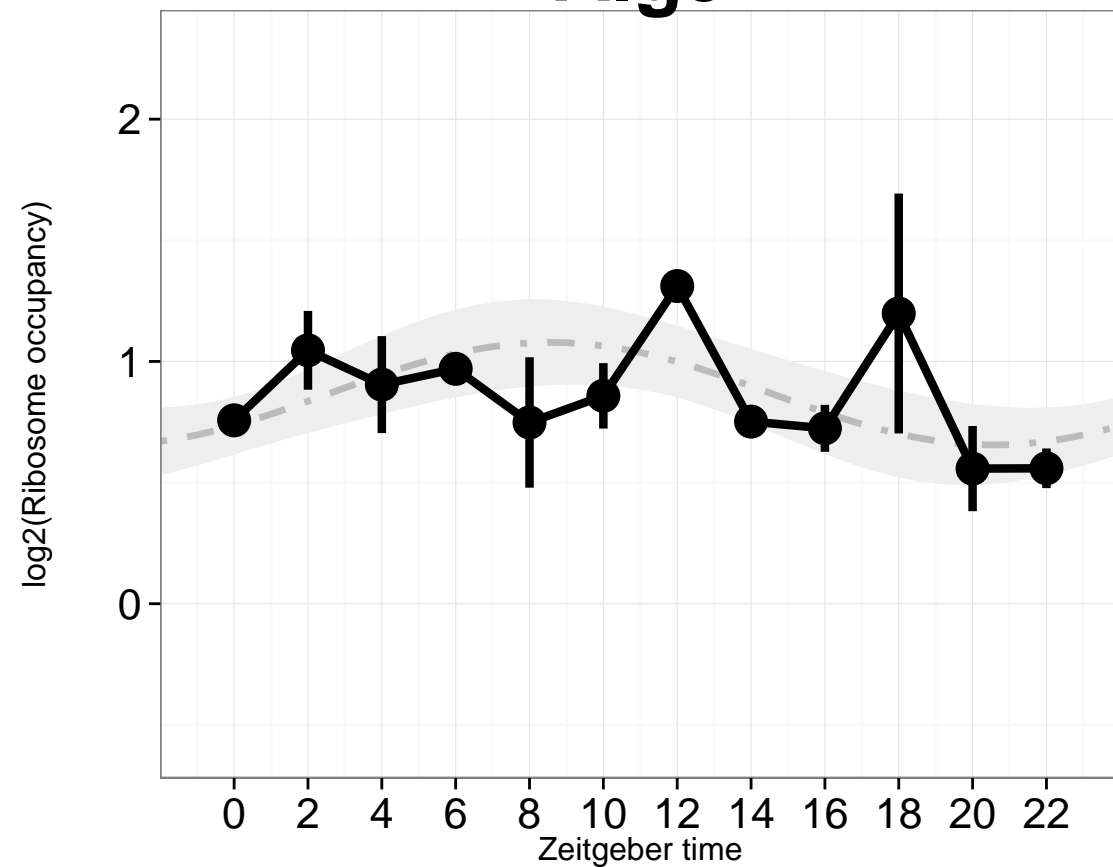

Supplement: SuppDataset_1.zip [file Alg3_set_A.pdf › Supplemental Dataset 1/A-mRNA_nonrhyth_translation_nonrhyth/Alg3_set_A.pdf]

# Alg5

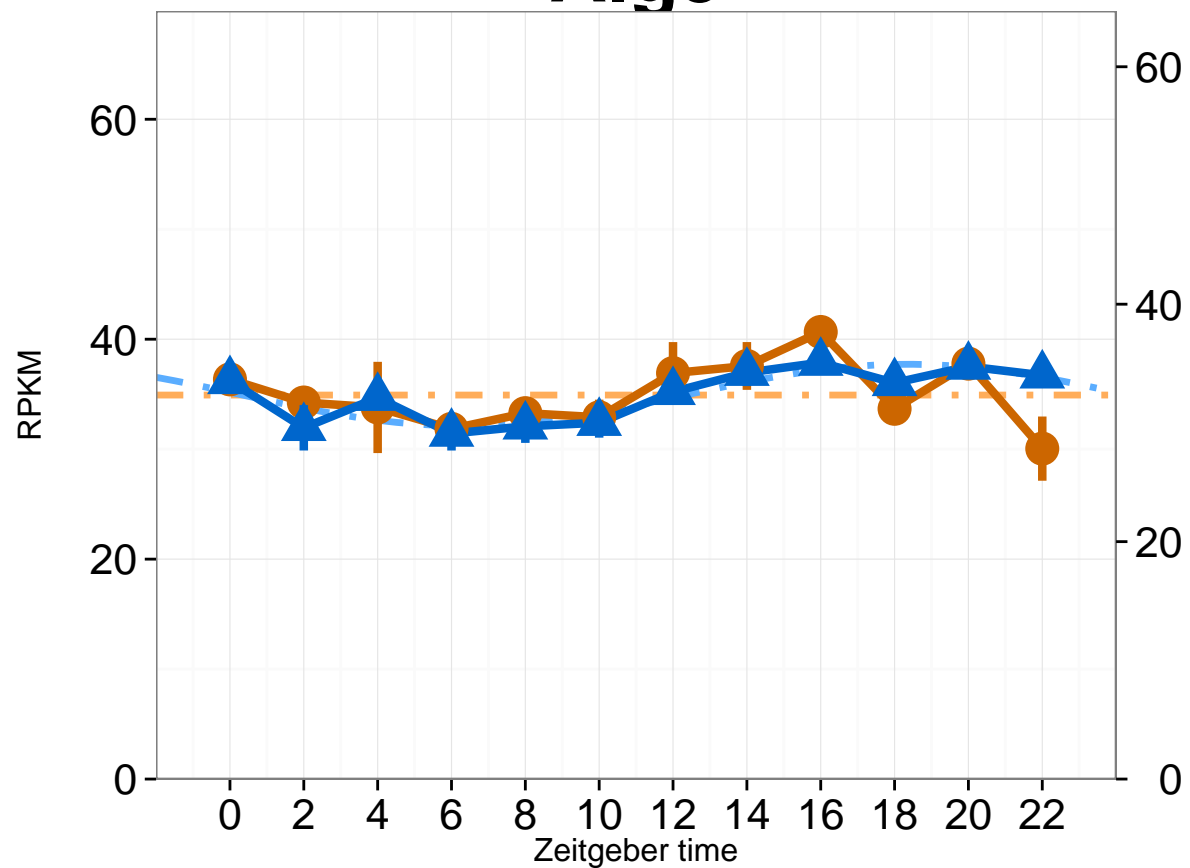

# Alg5

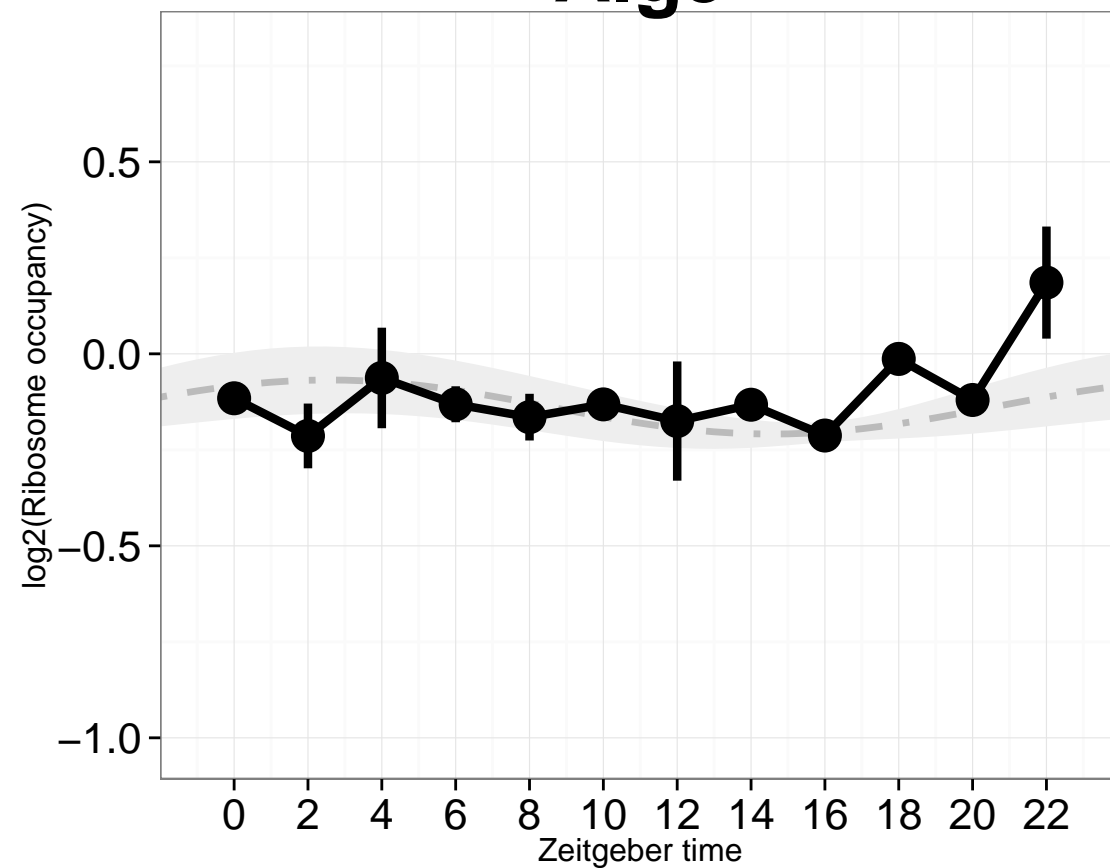

Supplement: SuppDataset_1.zip [file Alg5_set_A.pdf › Supplemental Dataset 1/A-mRNA_nonrhyth_translation_nonrhyth/Alg5_set_A.pdf]

# Alg6

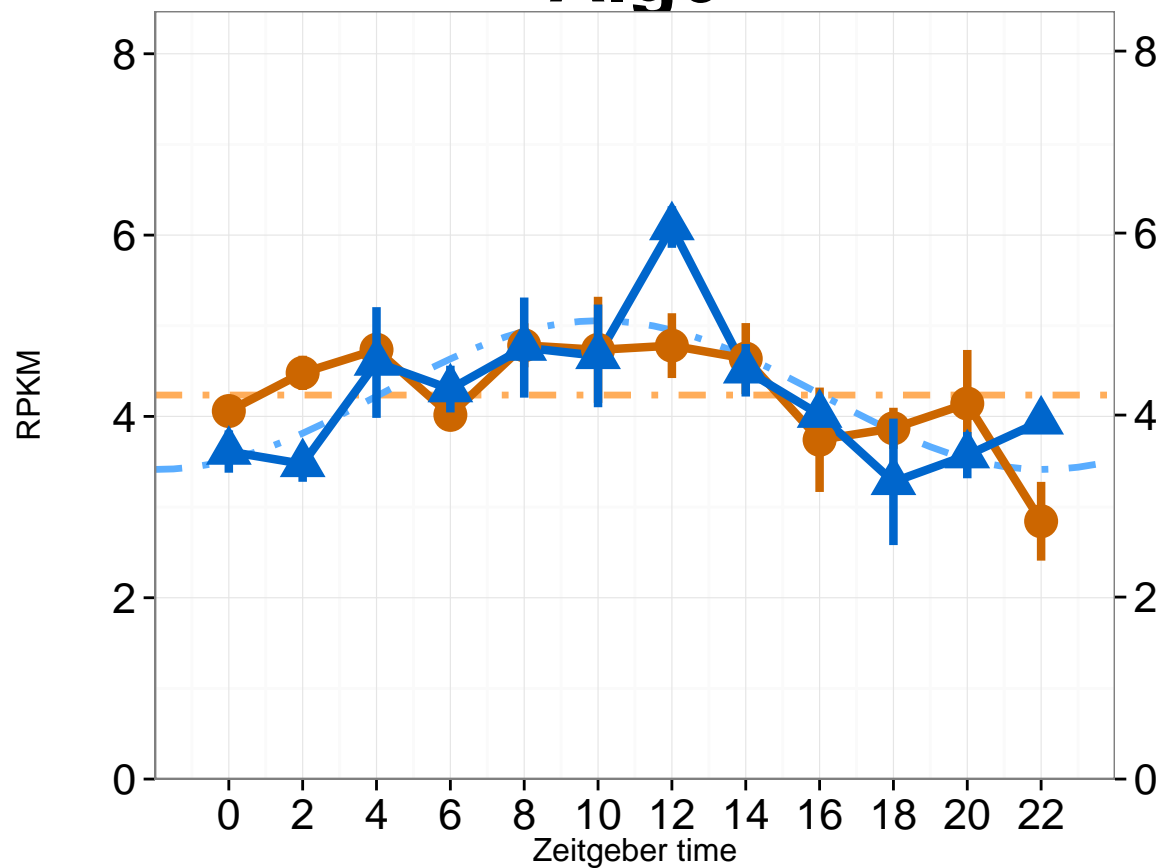

# Alg6

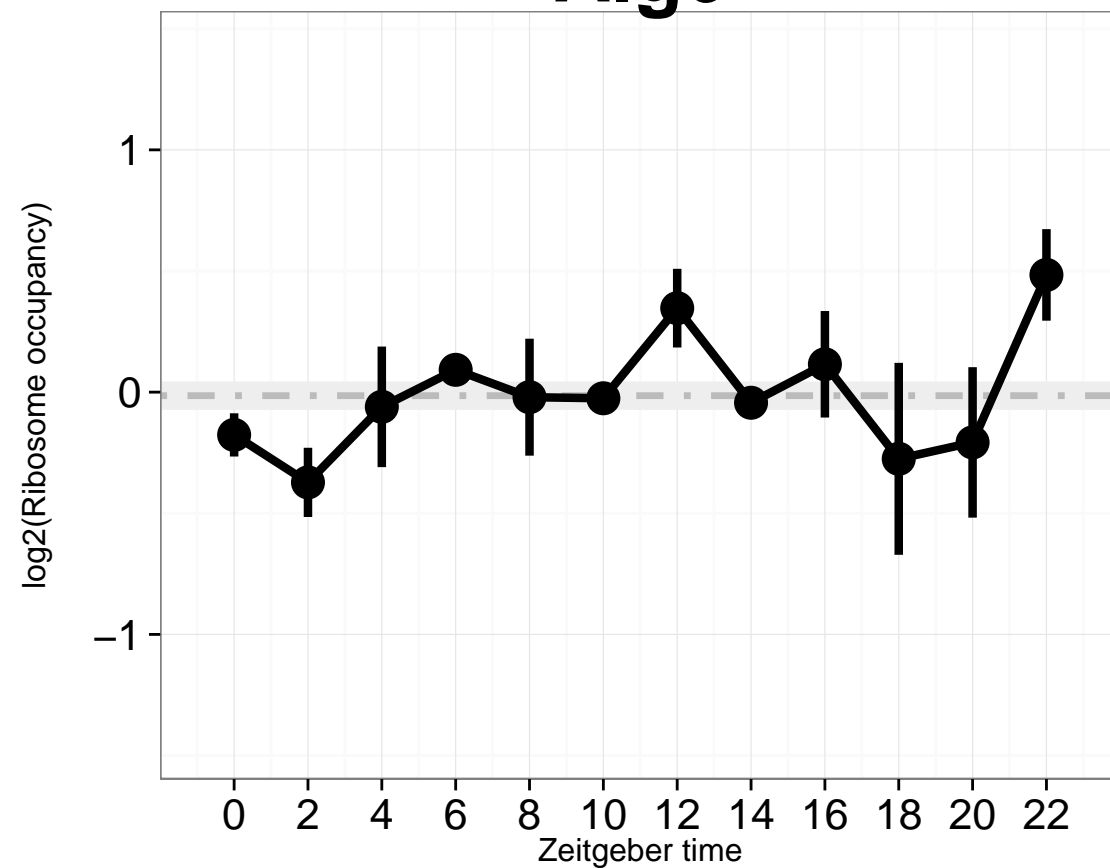

Supplement: SuppDataset_1.zip [file Alg6_set_A.pdf › Supplemental Dataset 1/A-mRNA_nonrhyth_translation_nonrhyth/Alg6_set_A.pdf]

# Alg8

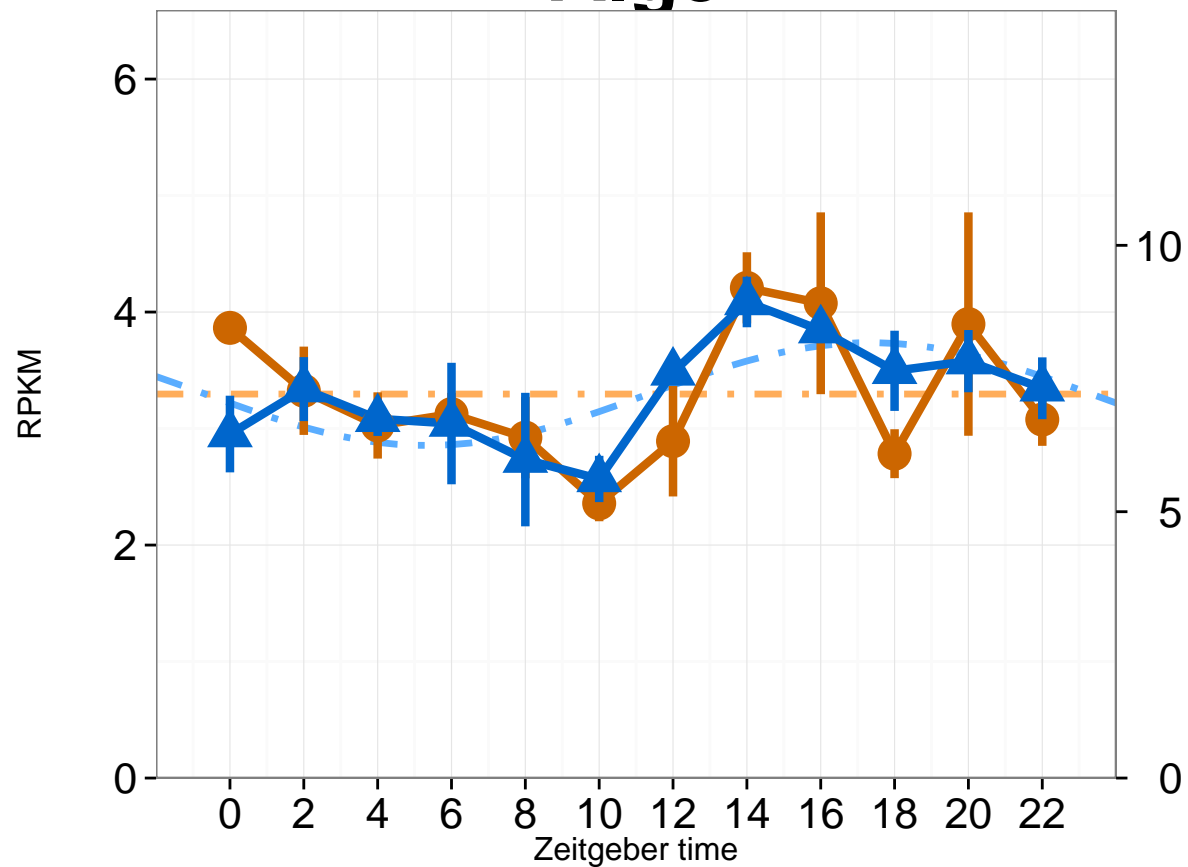

# Alg8

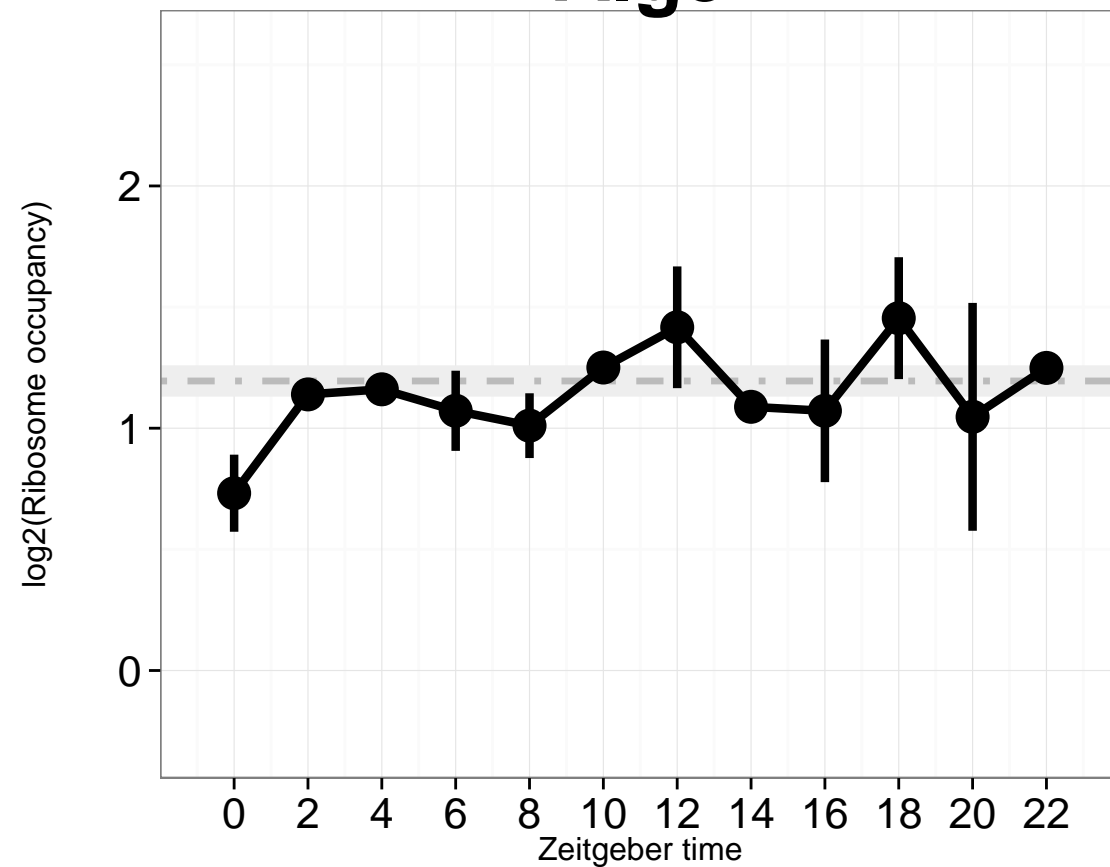

Supplement: SuppDataset_1.zip [file Alg8_set_A.pdf › Supplemental Dataset 1/A-mRNA_nonrhyth_translation_nonrhyth/Alg8_set_A.pdf]

# Alg9

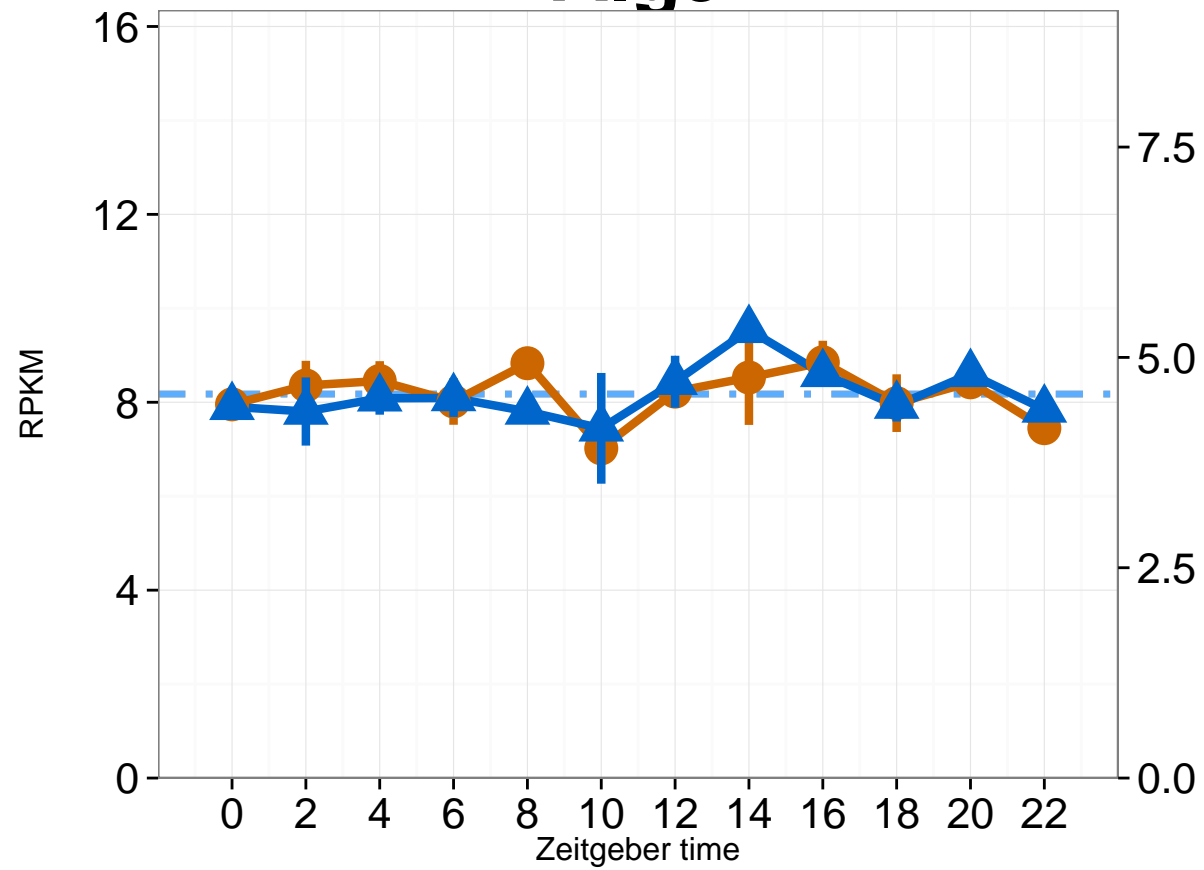

# Alg9

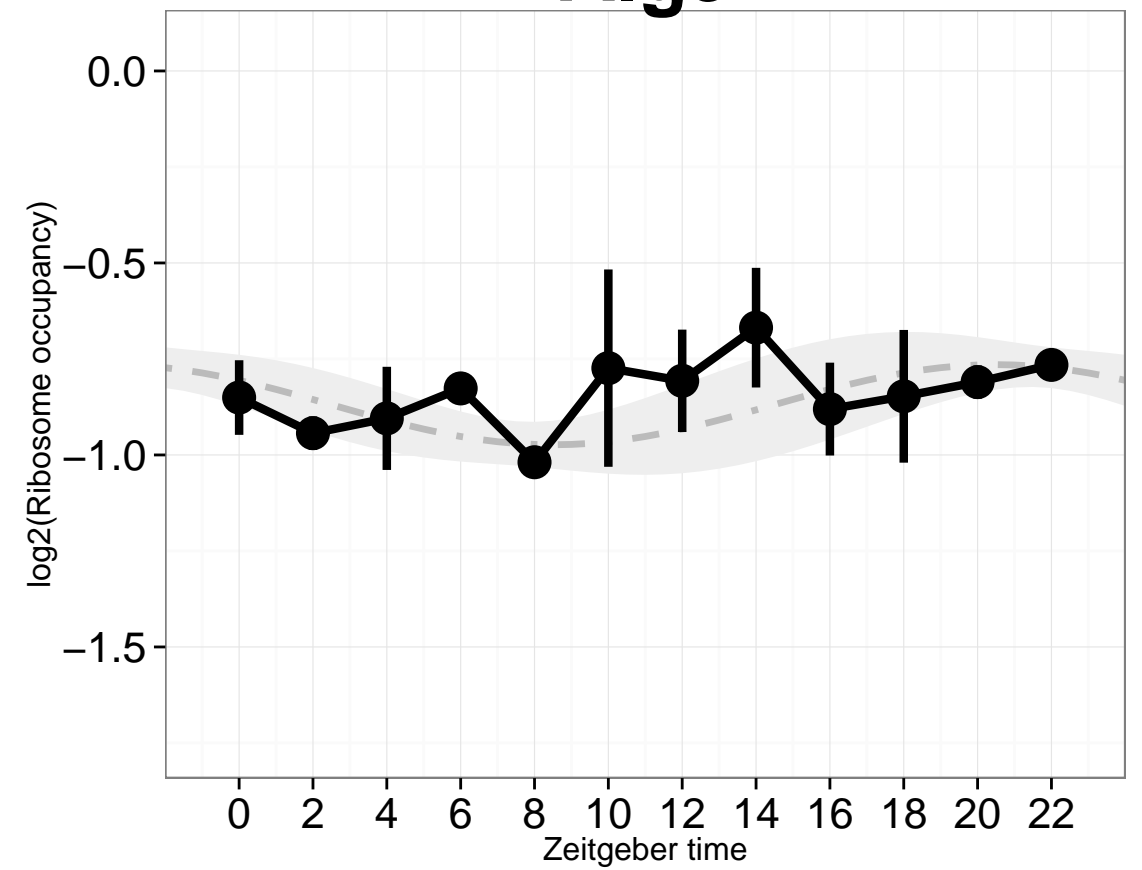

Supplement: SuppDataset_1.zip [file Alg9_set_A.pdf › Supplemental Dataset 1/A-mRNA_nonrhyth_translation_nonrhyth/Alg9_set_A.pdf]

## Alkbh1

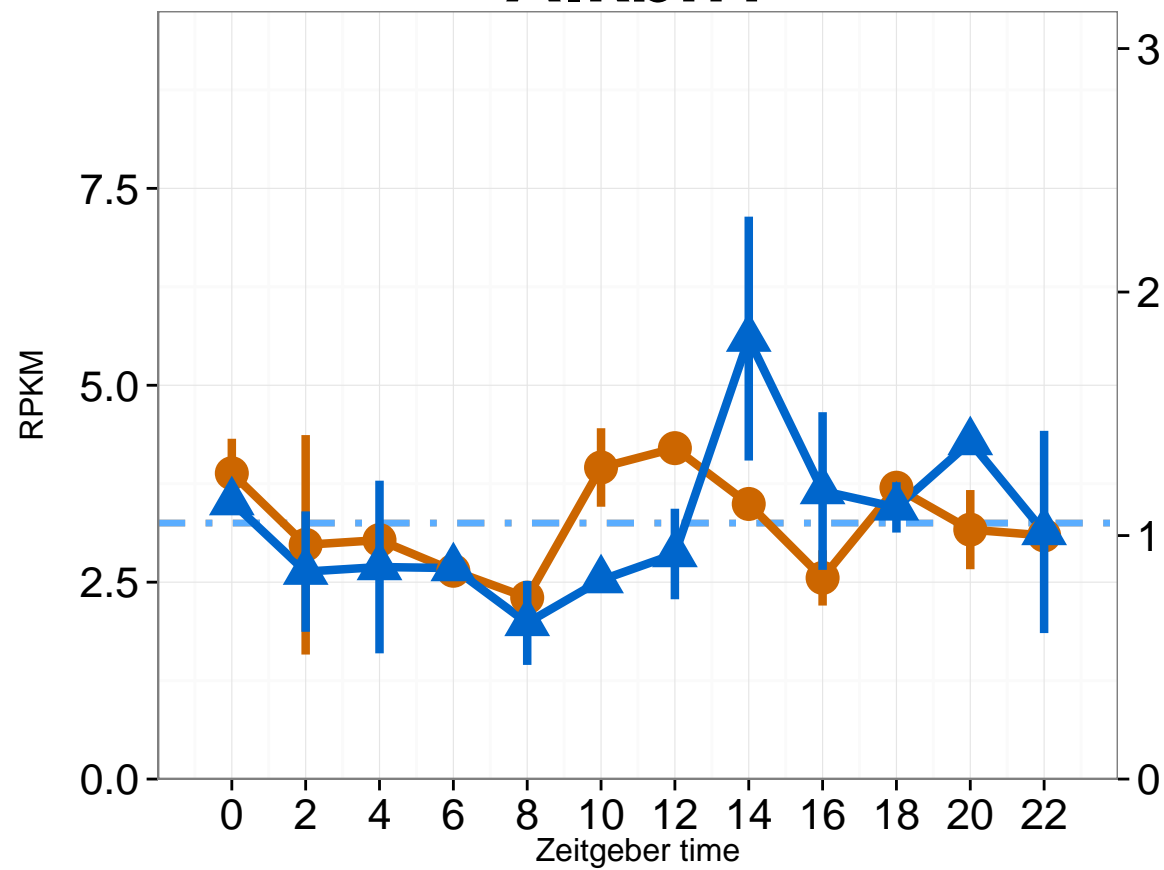

## Alkbh1

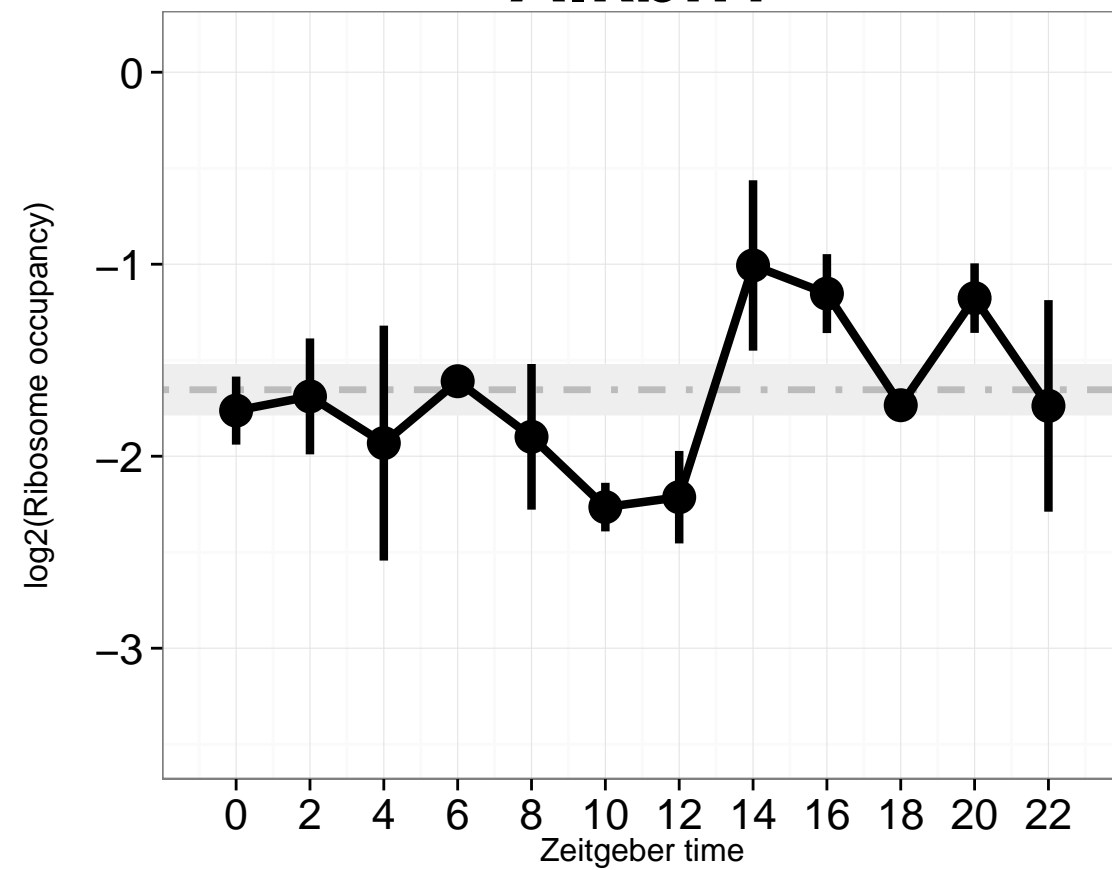

Supplement: SuppDataset_1.zip [file Alkbh1_set_A.pdf › Supplemental Dataset 1/A-mRNA_nonrhyth_translation_nonrhyth/Alkbh1_set_A.pdf]

## Alkbh2

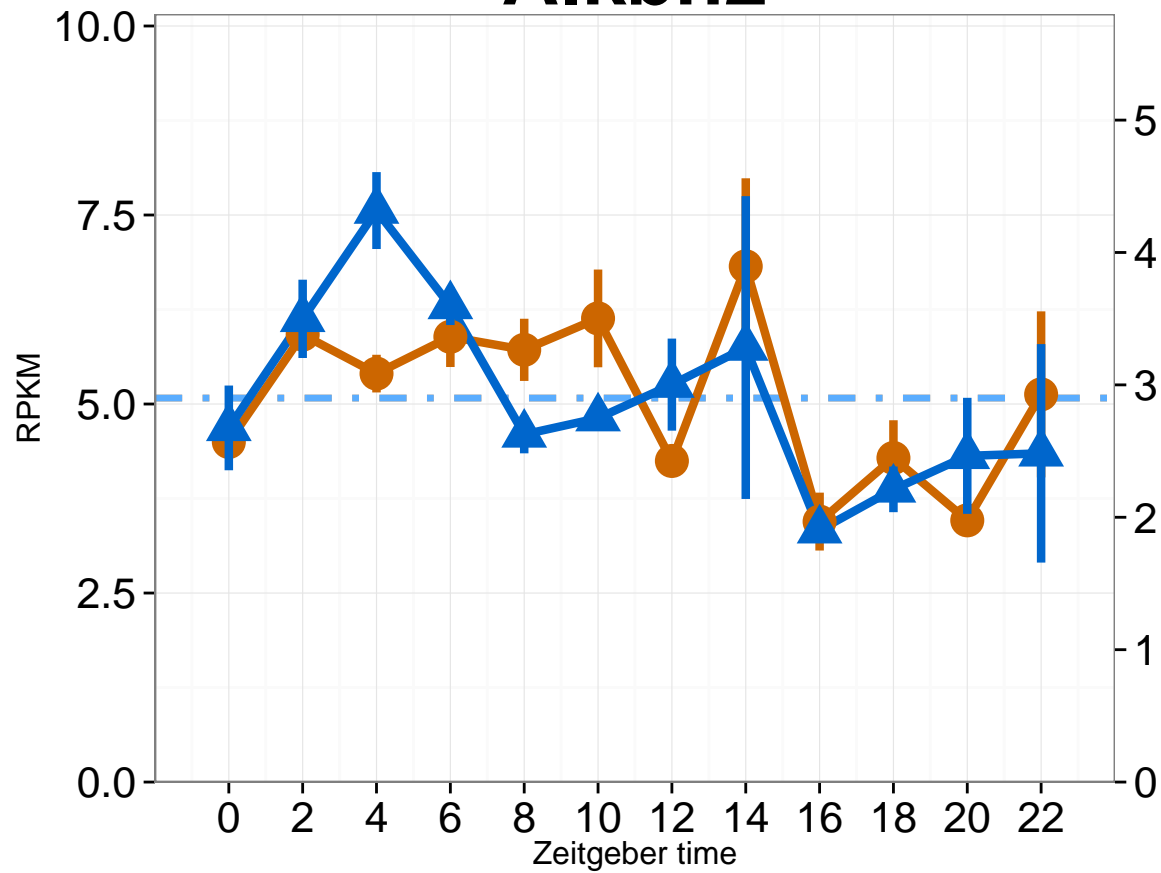

## Alkbh2

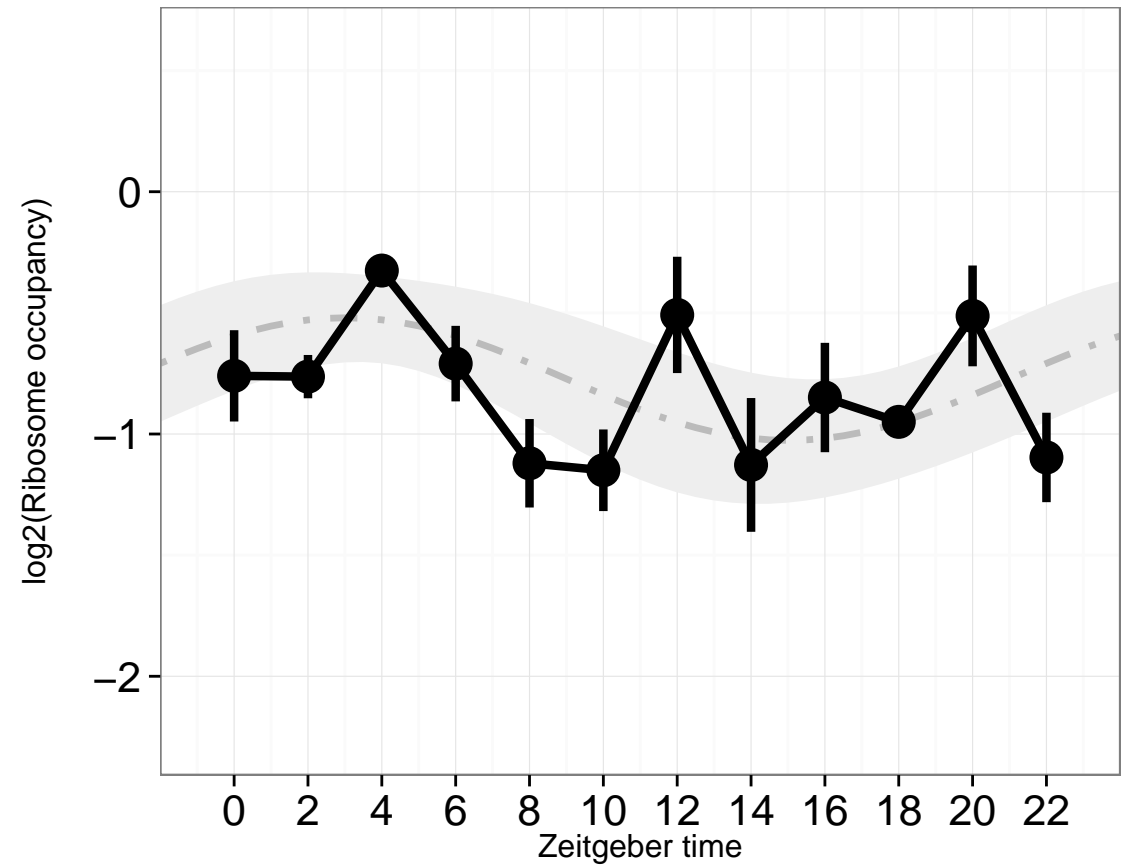

Supplement: SuppDataset_1.zip [file Alkbh2_set_A.pdf › Supplemental Dataset 1/A-mRNA_nonrhyth_translation_nonrhyth/Alkbh2_set_A.pdf]

## Alkbh3

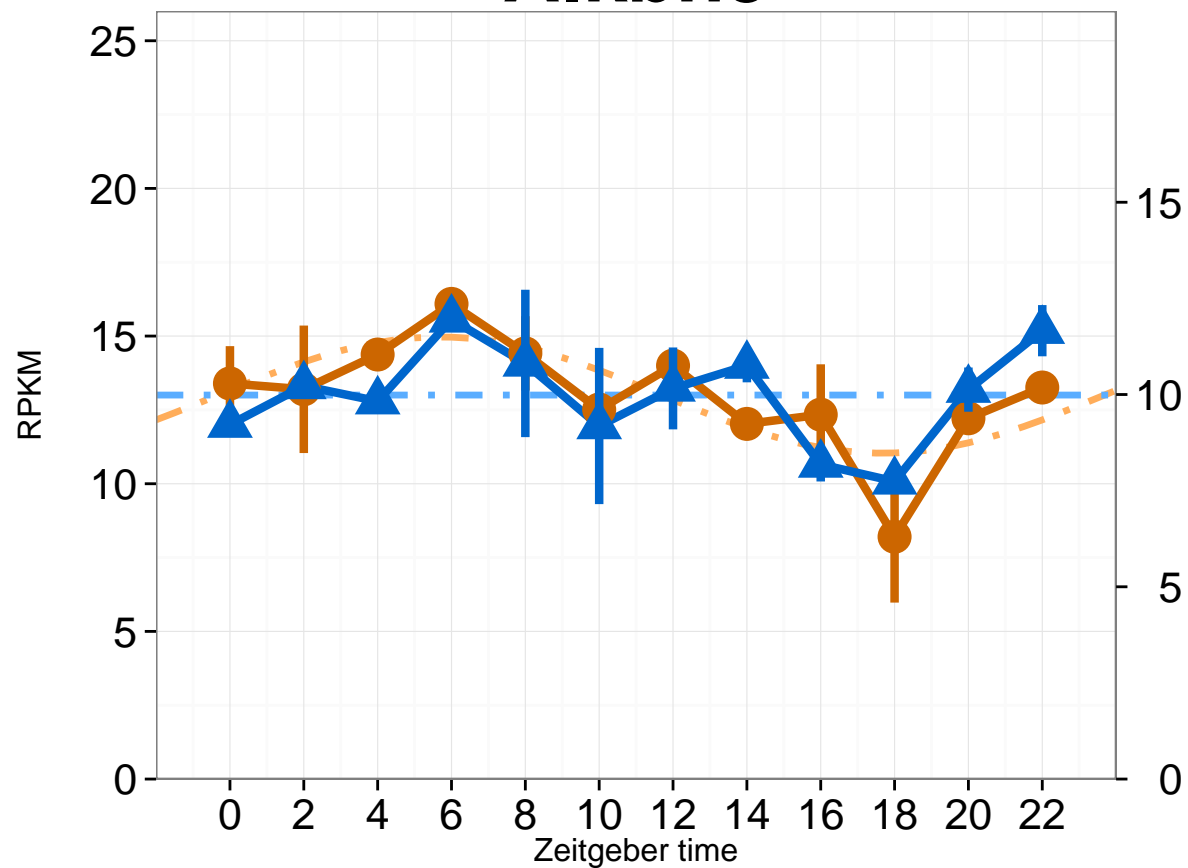

## Alkbh3

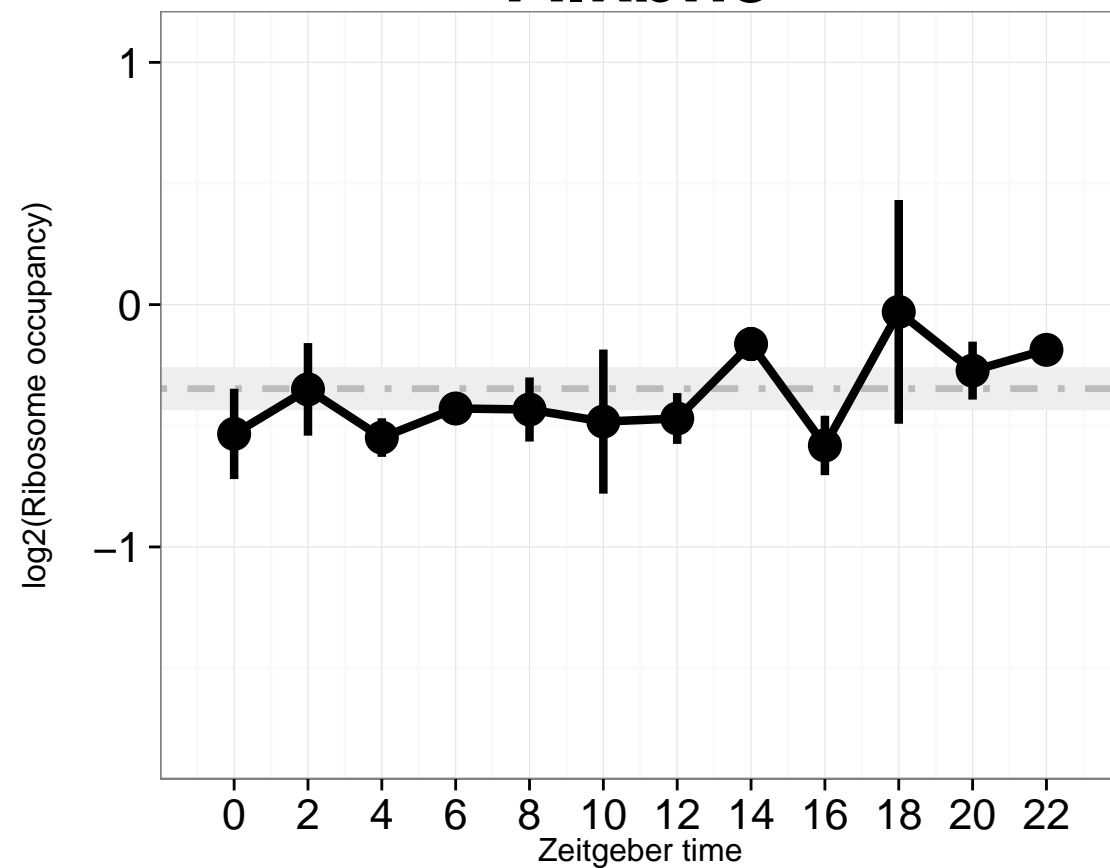

Supplement: SuppDataset_1.zip [file Alkbh3_set_A.pdf › Supplemental Dataset 1/A-mRNA_nonrhyth_translation_nonrhyth/Alkbh3_set_A.pdf]

## Alkbh4

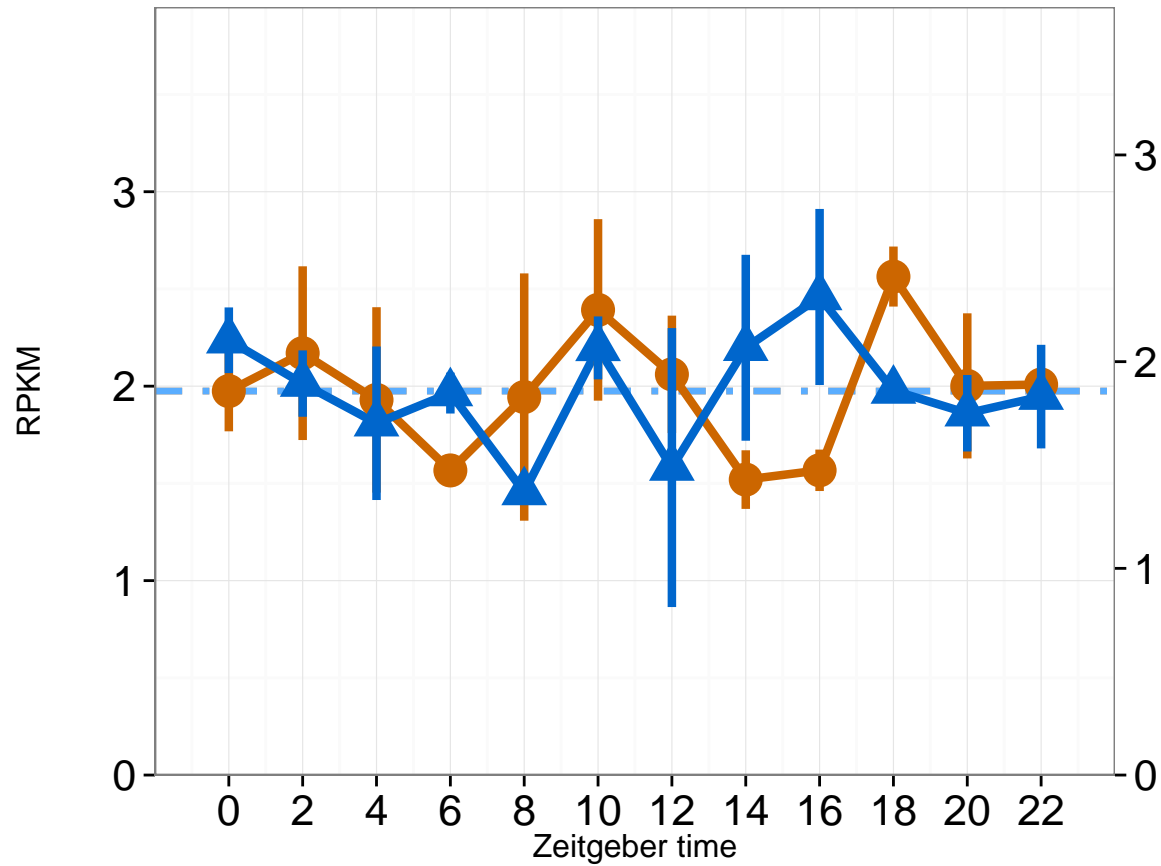

## Alkbh4

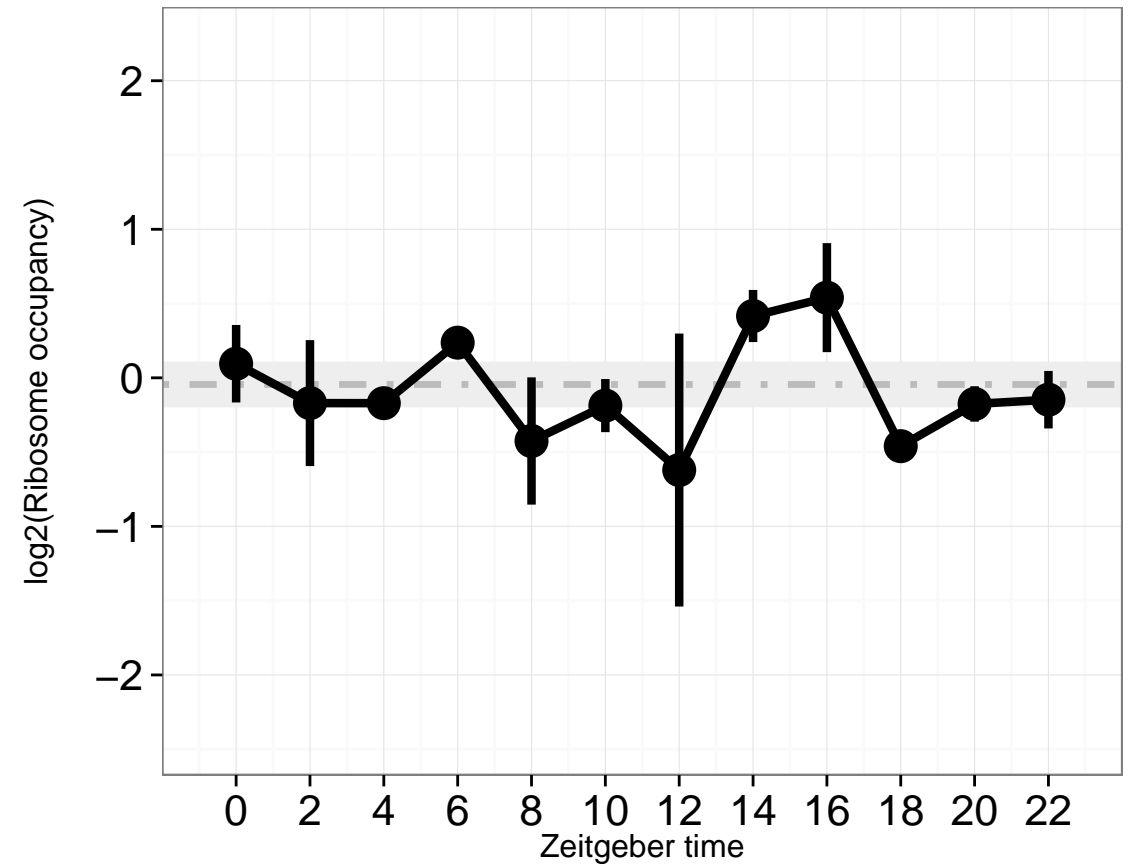

Supplement: SuppDataset_1.zip [file Alkbh4_set_A.pdf › Supplemental Dataset 1/A-mRNA_nonrhyth_translation_nonrhyth/Alkbh4_set_A.pdf]

## Alkbh5

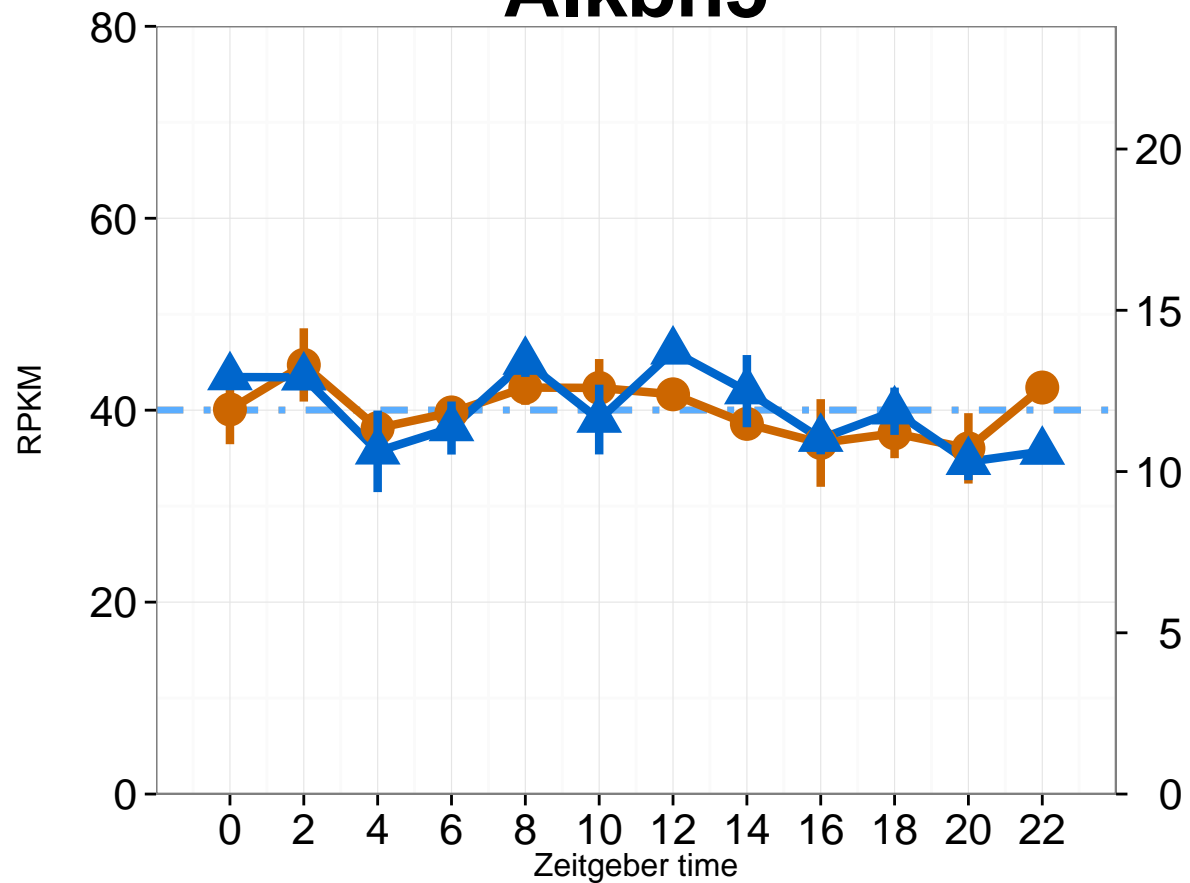

## Alkbh5

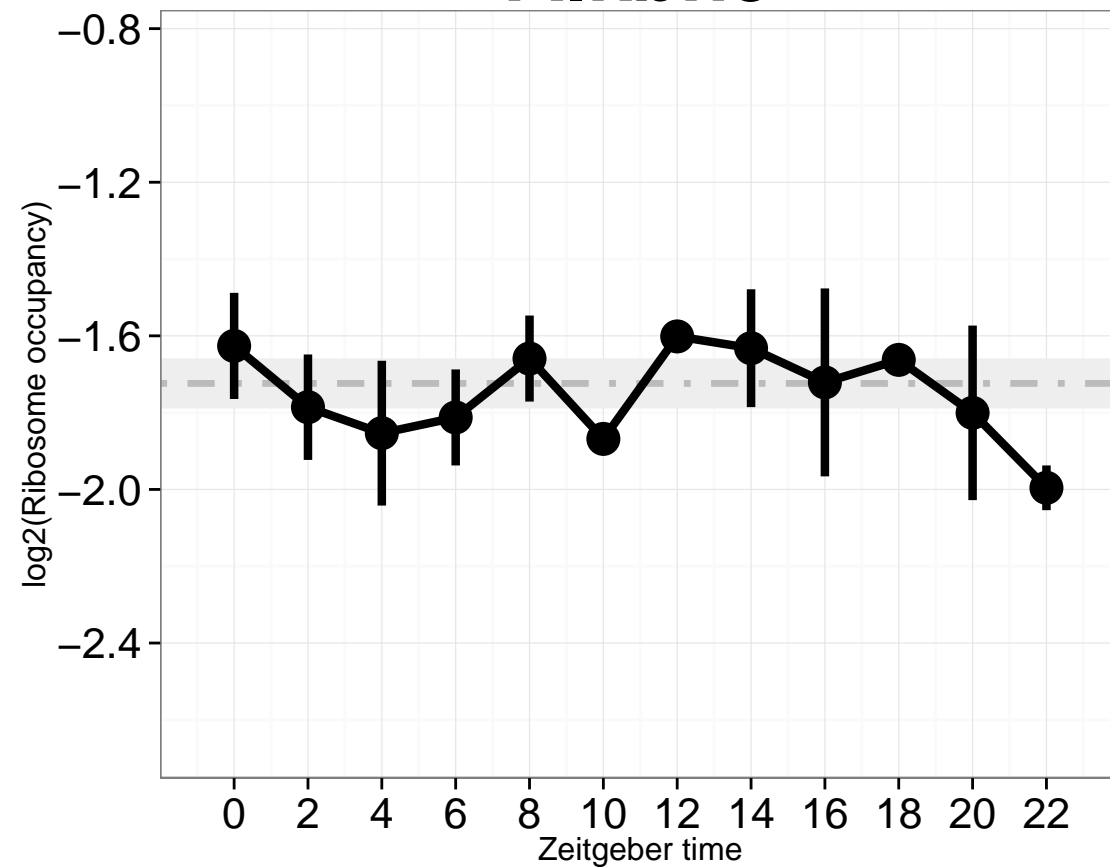

Supplement: SuppDataset_1.zip [file Alkbh5_set_A.pdf › Supplemental Dataset 1/A-mRNA_nonrhyth_translation_nonrhyth/Alkbh5_set_A.pdf]

## Alkbh6

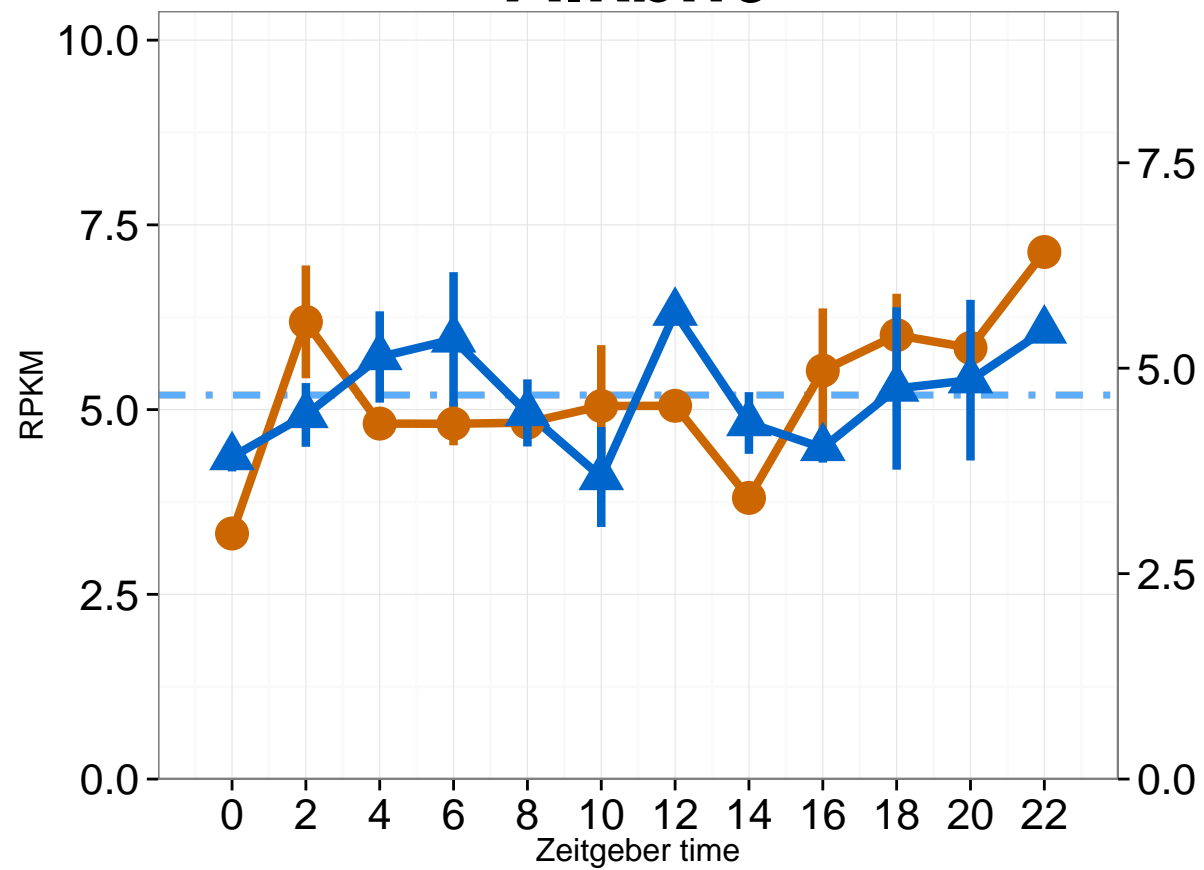

## Alkbh6

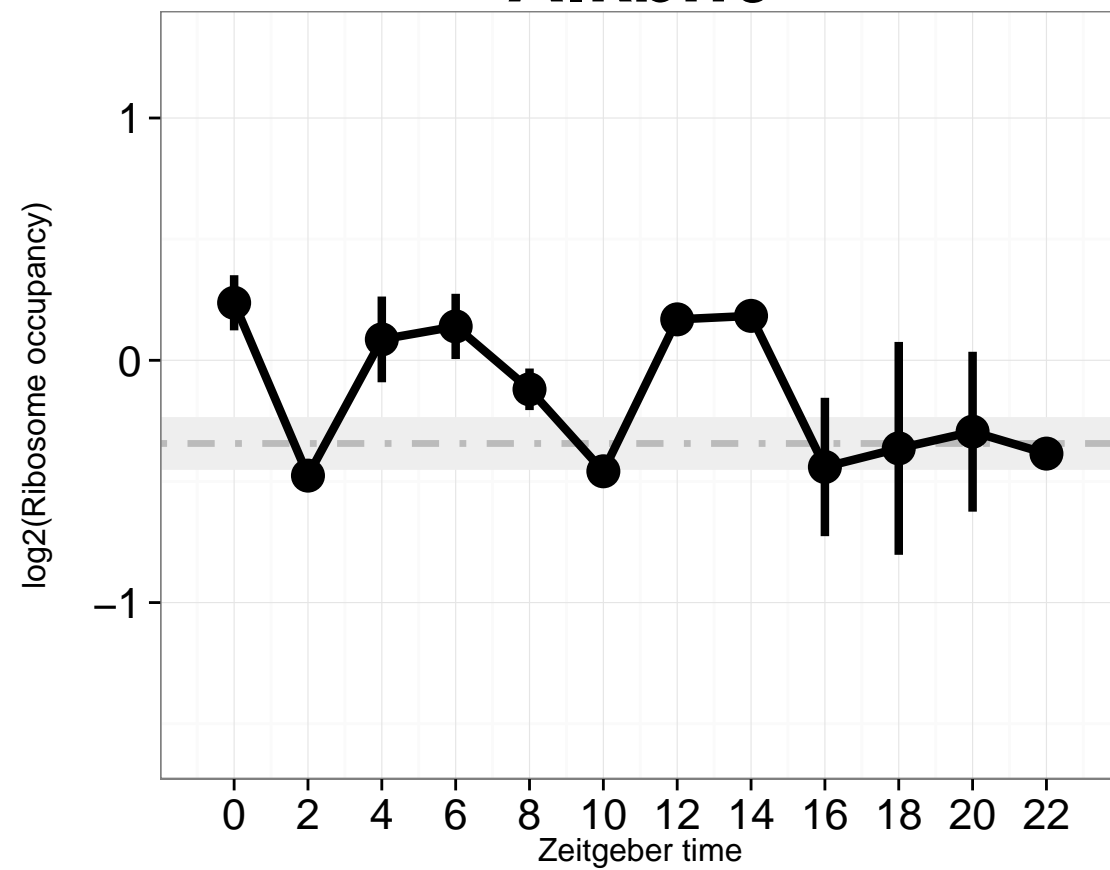

Supplement: SuppDataset_1.zip [file Alkbh6_set_A.pdf › Supplemental Dataset 1/A-mRNA_nonrhyth_translation_nonrhyth/Alkbh6_set_A.pdf]

## Alkbh8

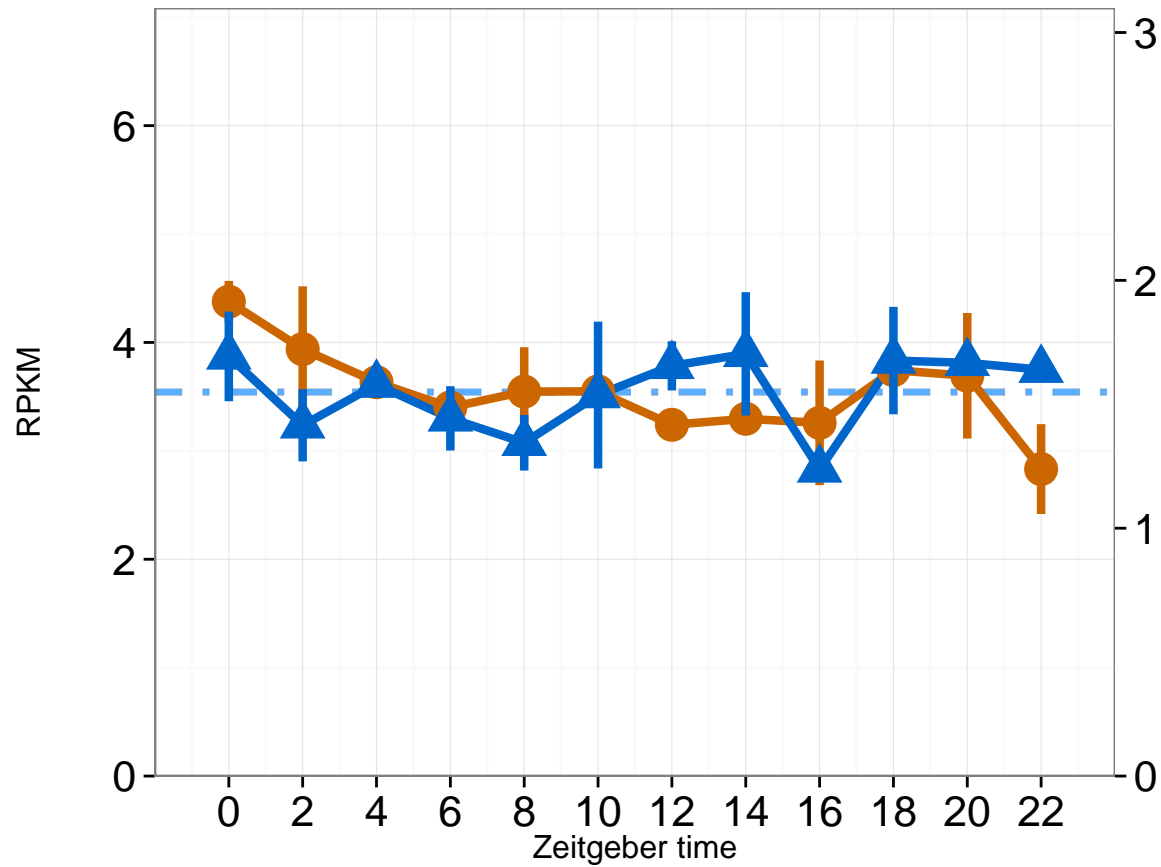

## Alkbh8

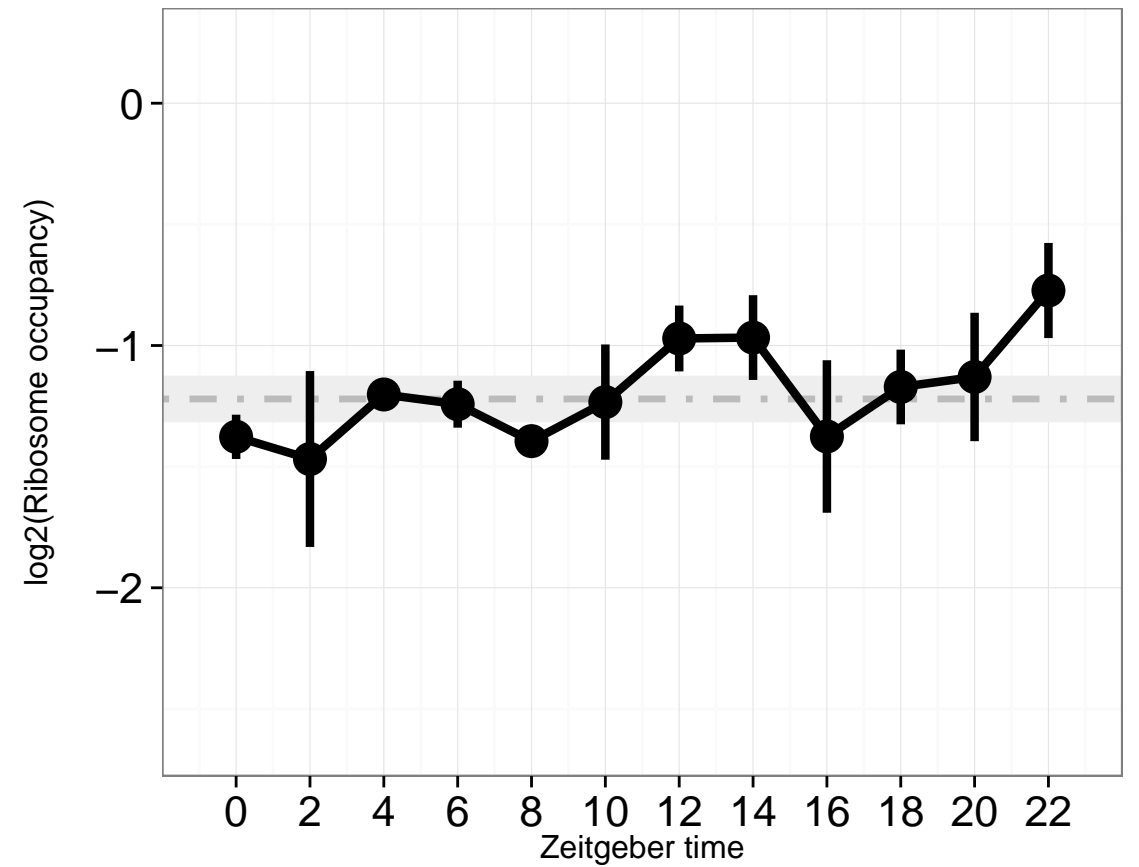

Supplement: SuppDataset_1.zip [file Alkbh8_set_A.pdf › Supplemental Dataset 1/A-mRNA_nonrhyth_translation_nonrhyth/Alkbh8_set_A.pdf]

# Alox12

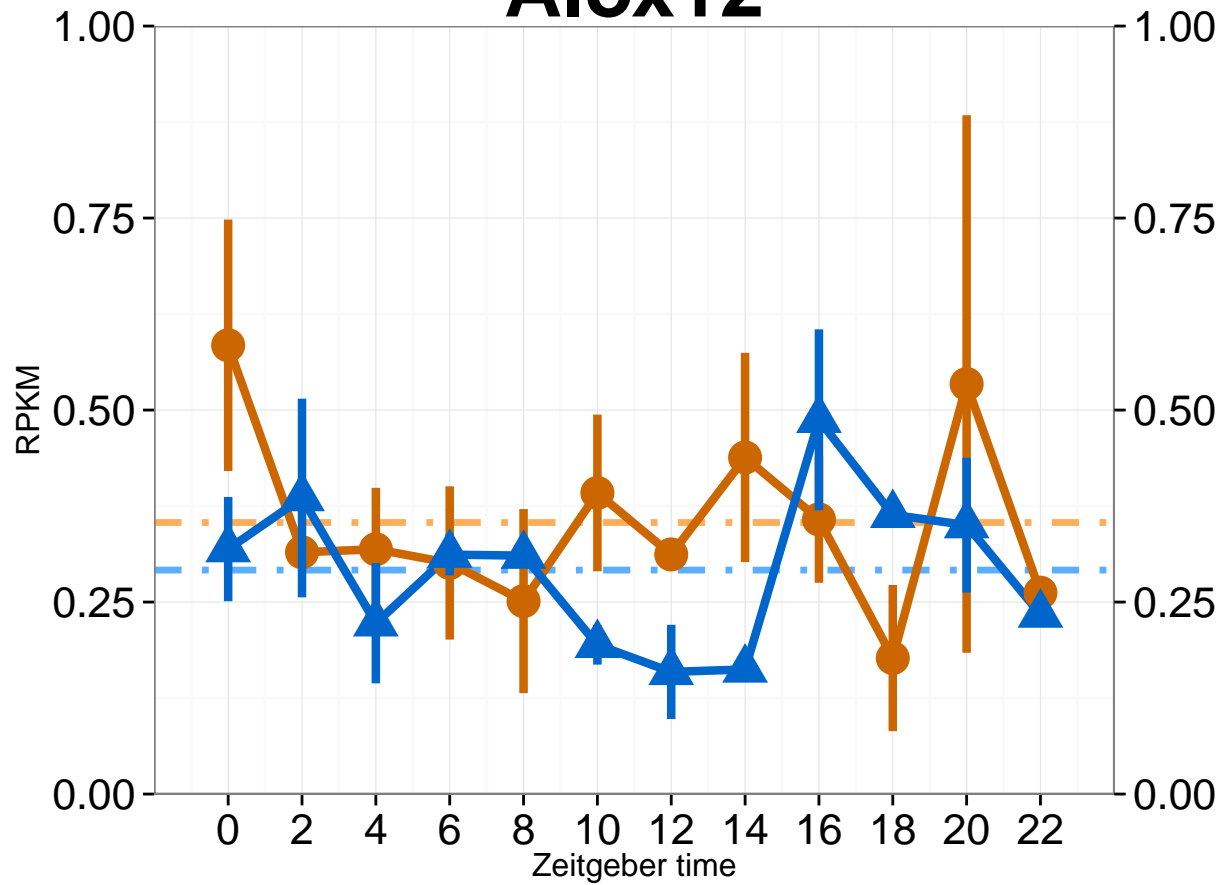

# Alox12

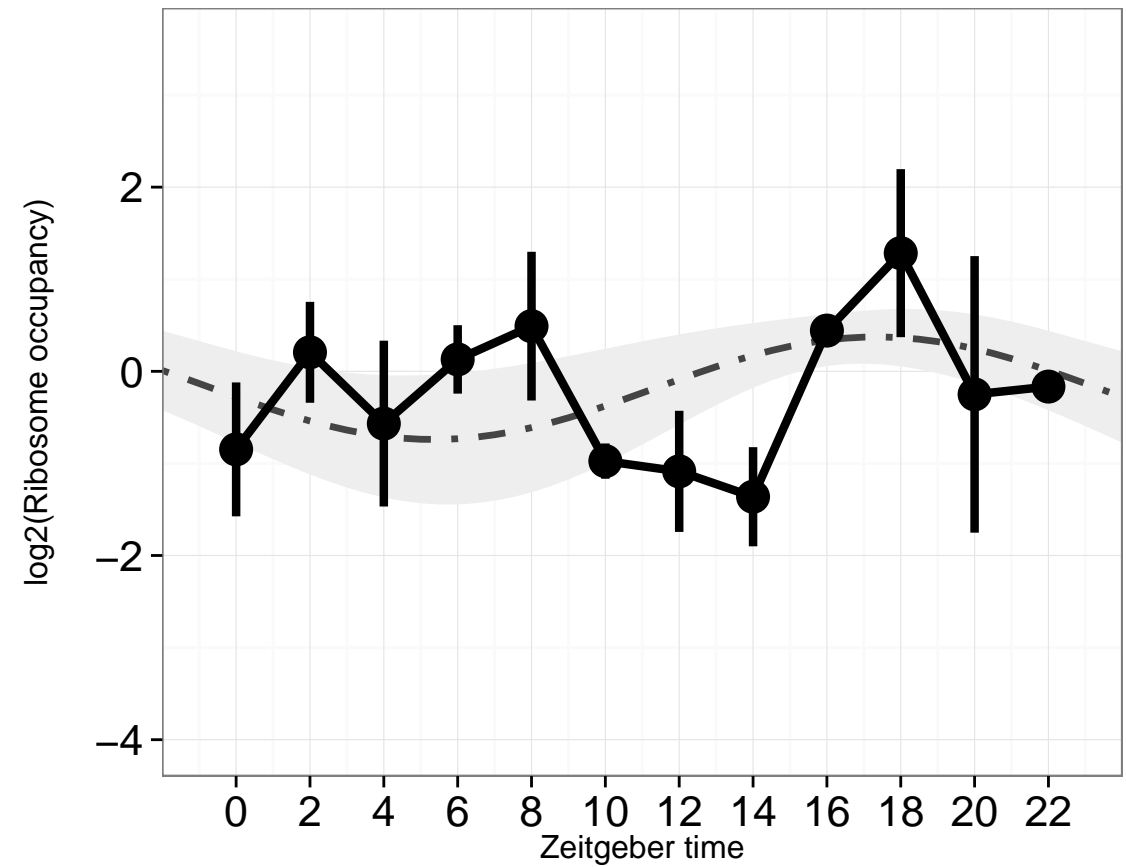

Supplement: SuppDataset_1.zip [file Alox12_set_A.pdf › Supplemental Dataset 1/A-mRNA_nonrhyth_translation_nonrhyth/Alox12_set_A.pdf]

## Als2

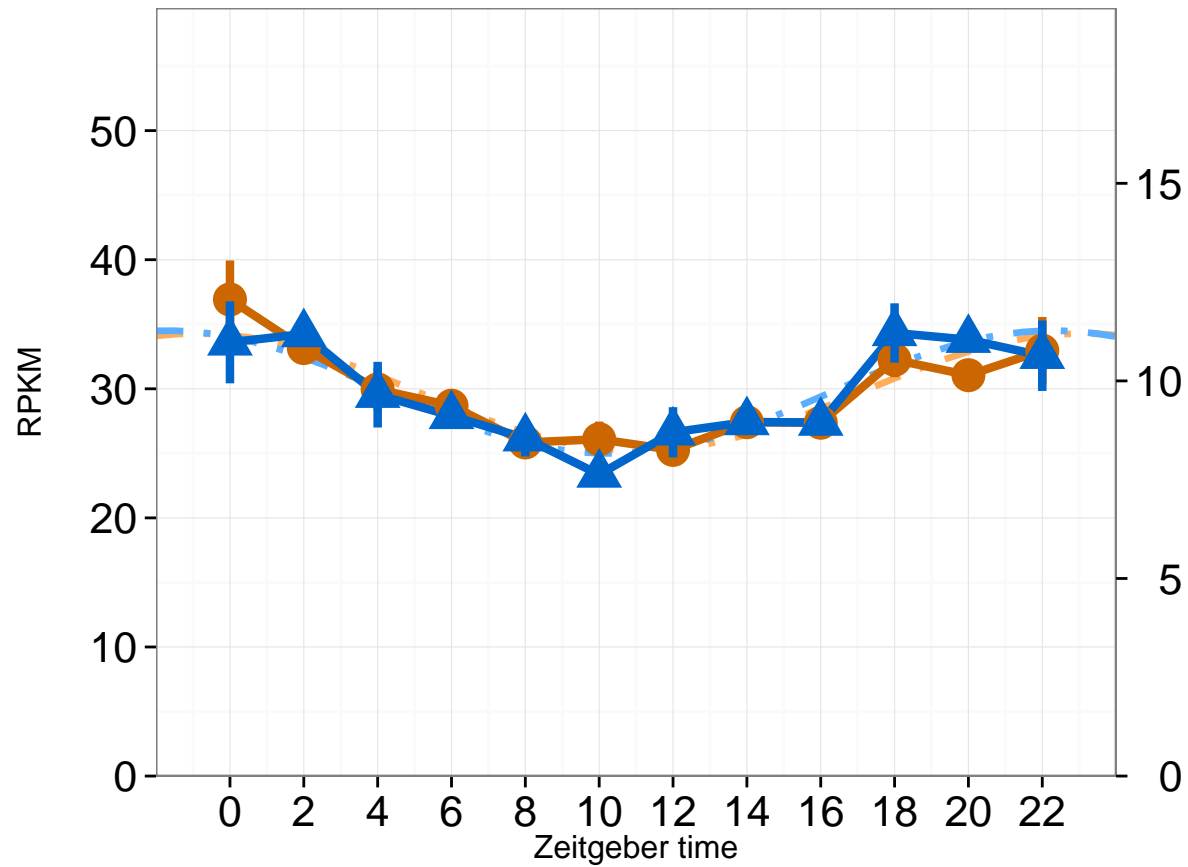

## Als2

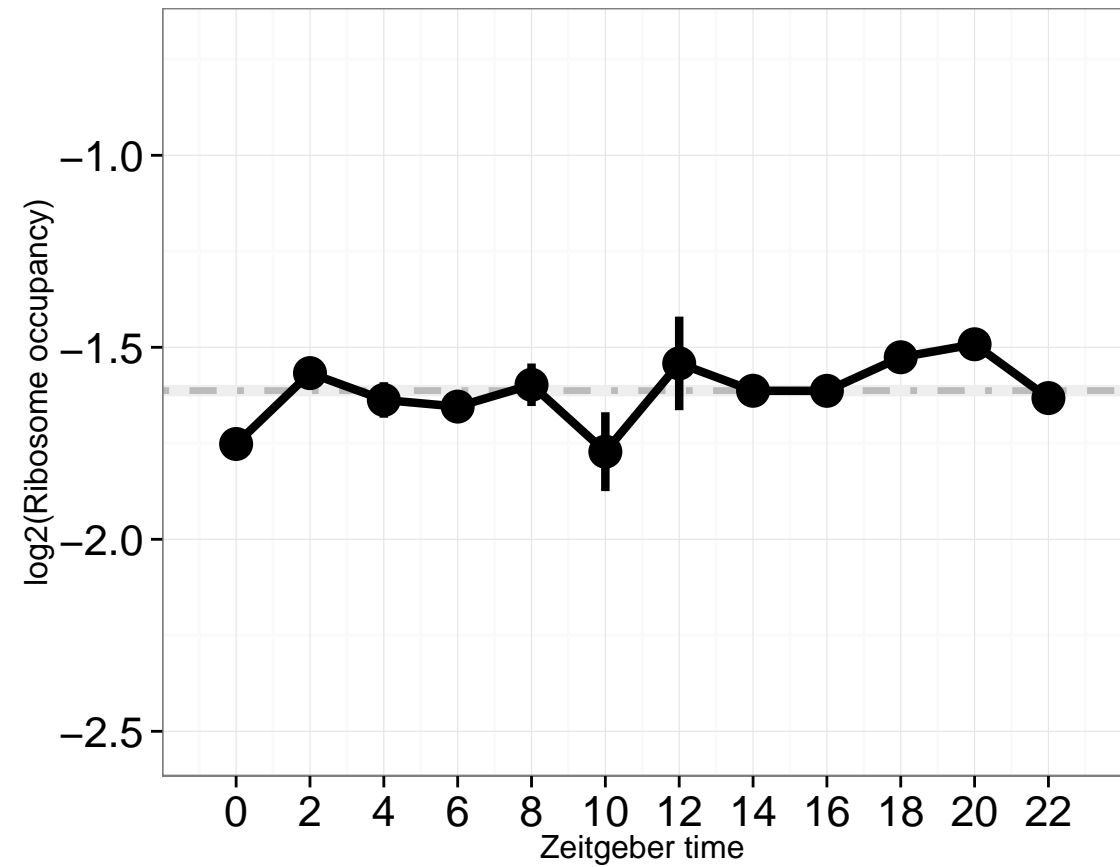

Supplement: SuppDataset_1.zip [file Als2_set_A.pdf › Supplemental Dataset 1/A-mRNA_nonrhyth_translation_nonrhyth/Als2_set_A.pdf]

## Als2cl

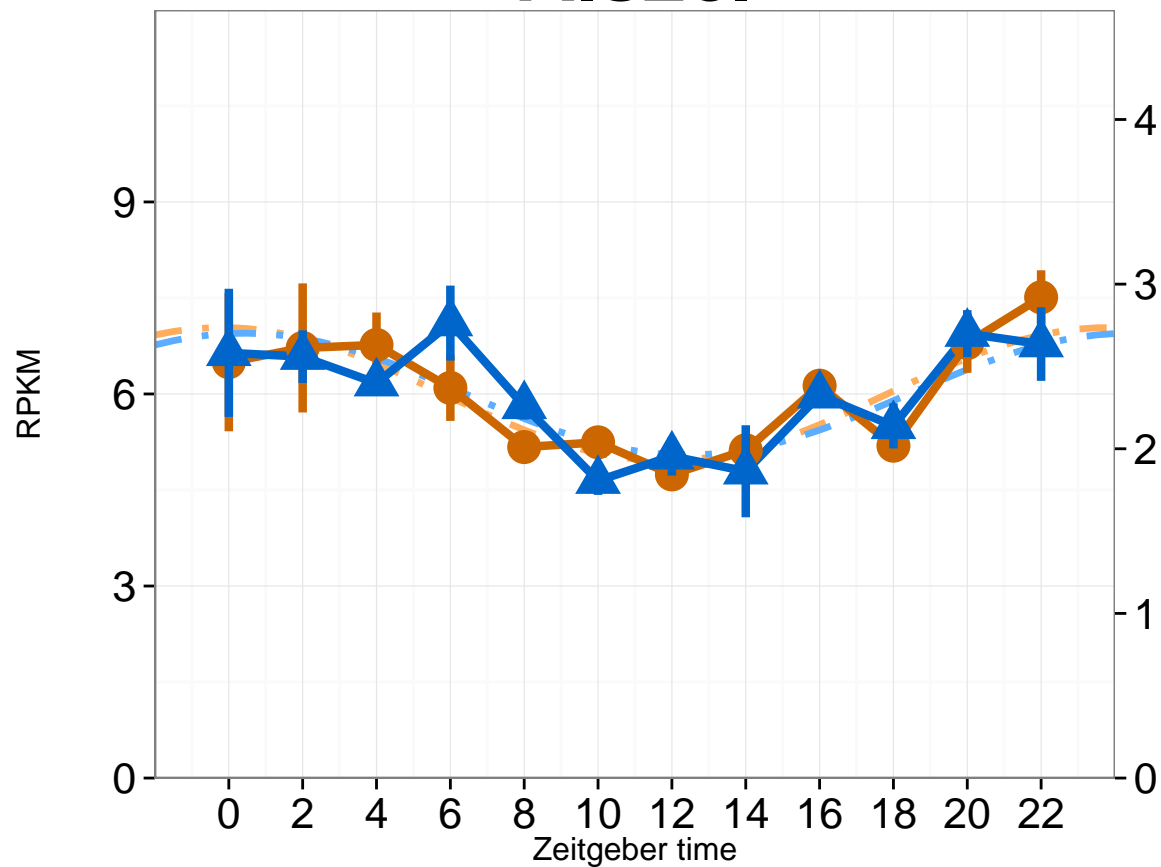

## Als2cl

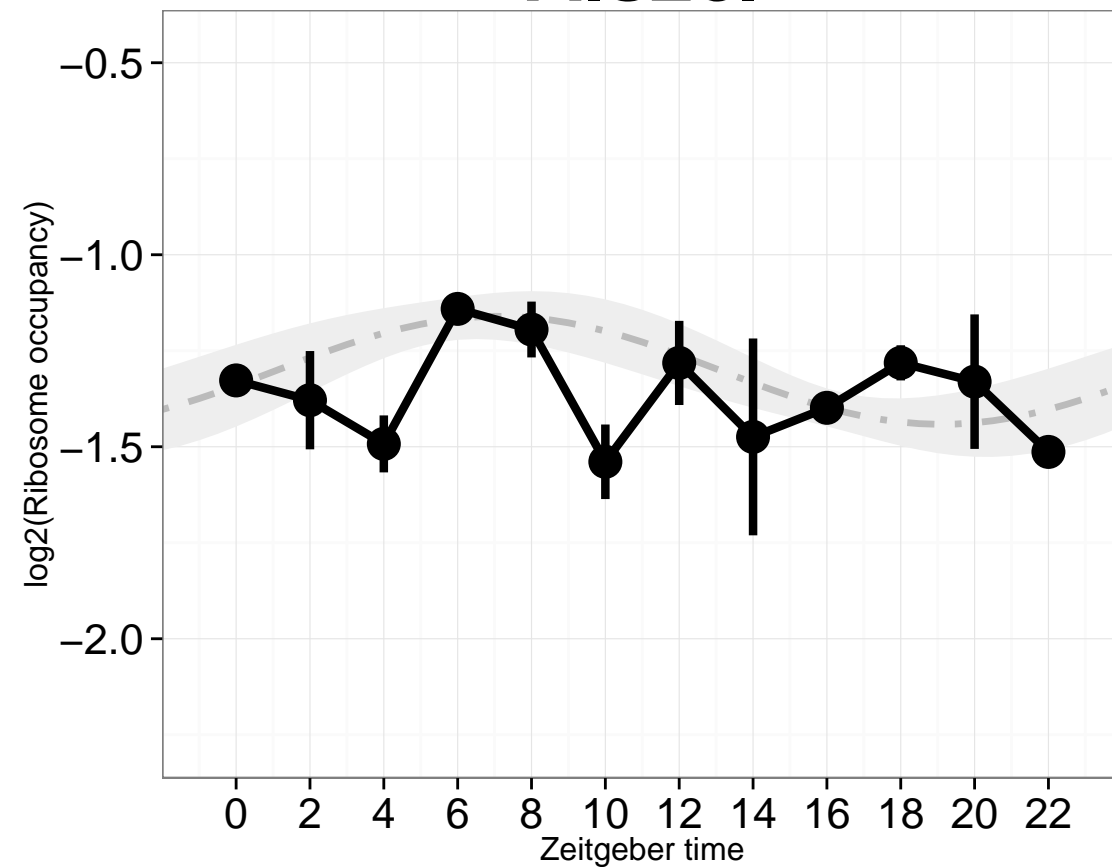

Supplement: SuppDataset_1.zip [file Als2cl_set_A.pdf › Supplemental Dataset 1/A-mRNA_nonrhyth_translation_nonrhyth/Als2cl_set_A.pdf]

# Alyref2

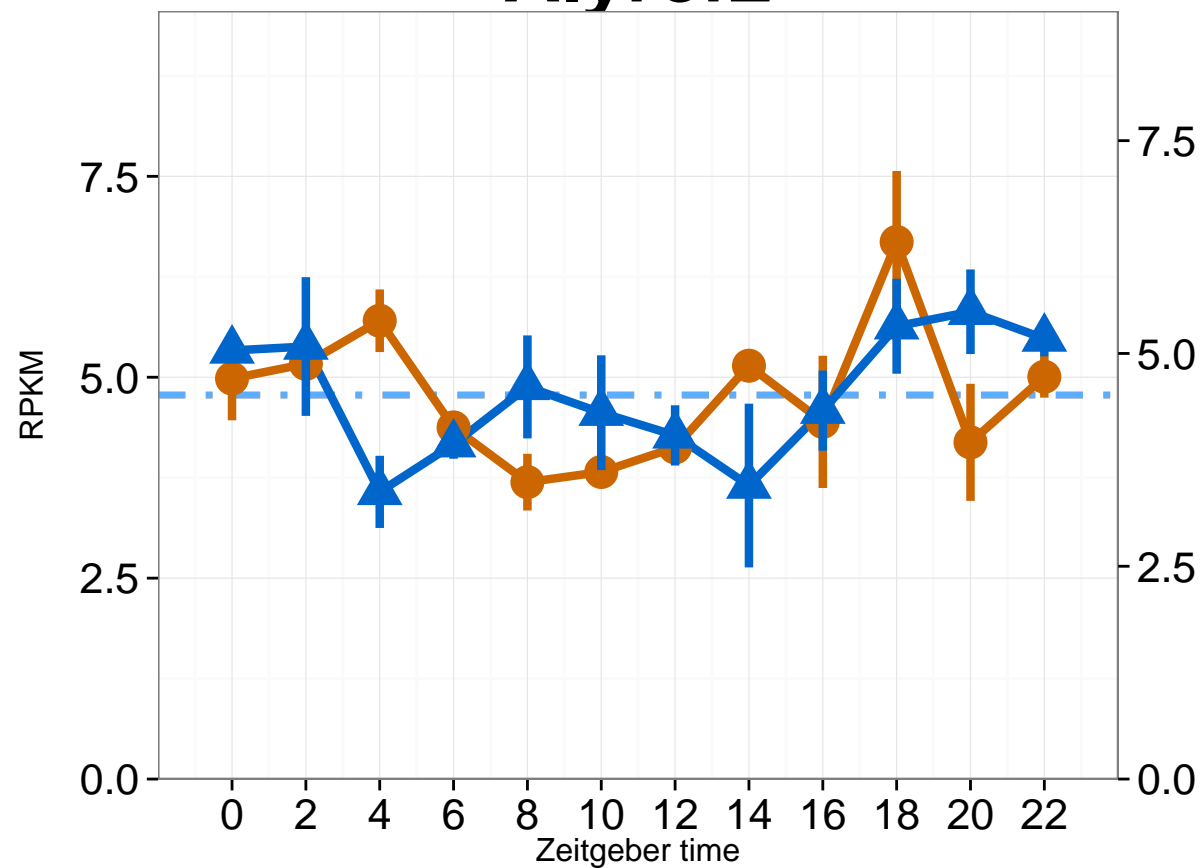

# Alyref2

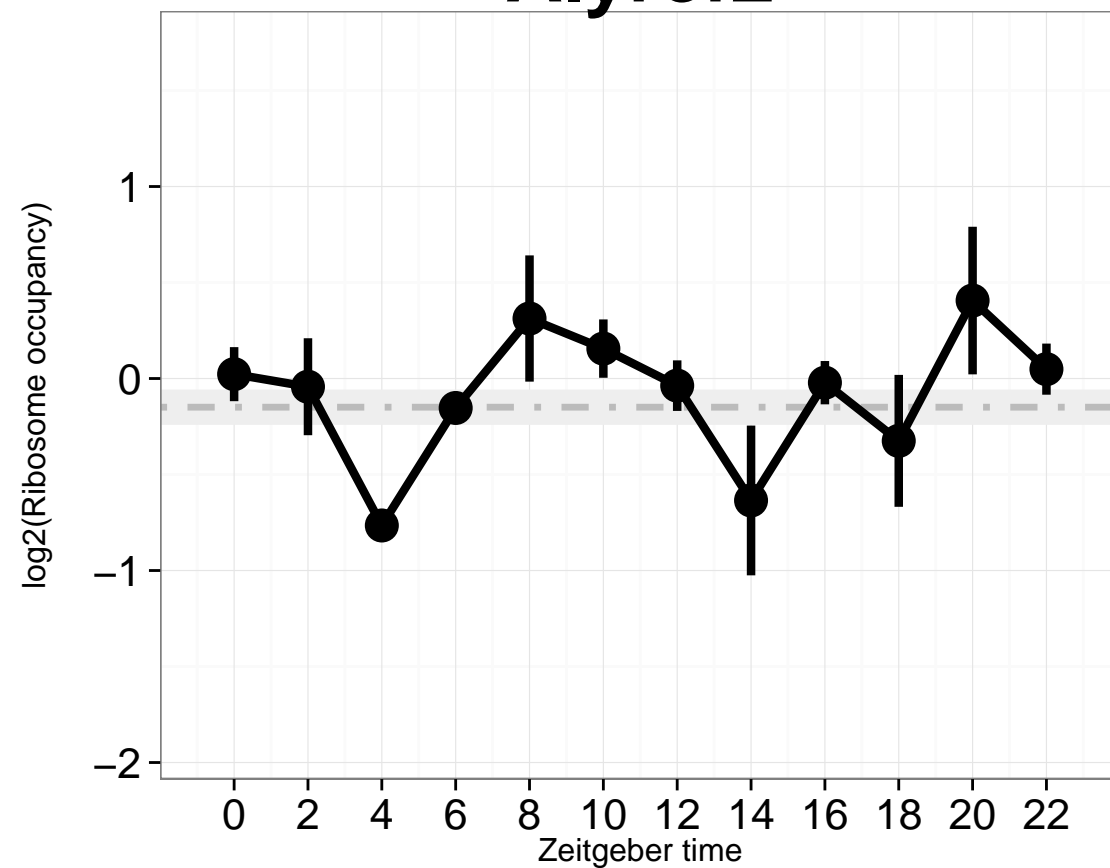

Supplement: SuppDataset_1.zip [file Alyref2_set_A.pdf › Supplemental Dataset 1/A-mRNA_nonrhyth_translation_nonrhyth/Alyref2_set_A.pdf]

# Alyref

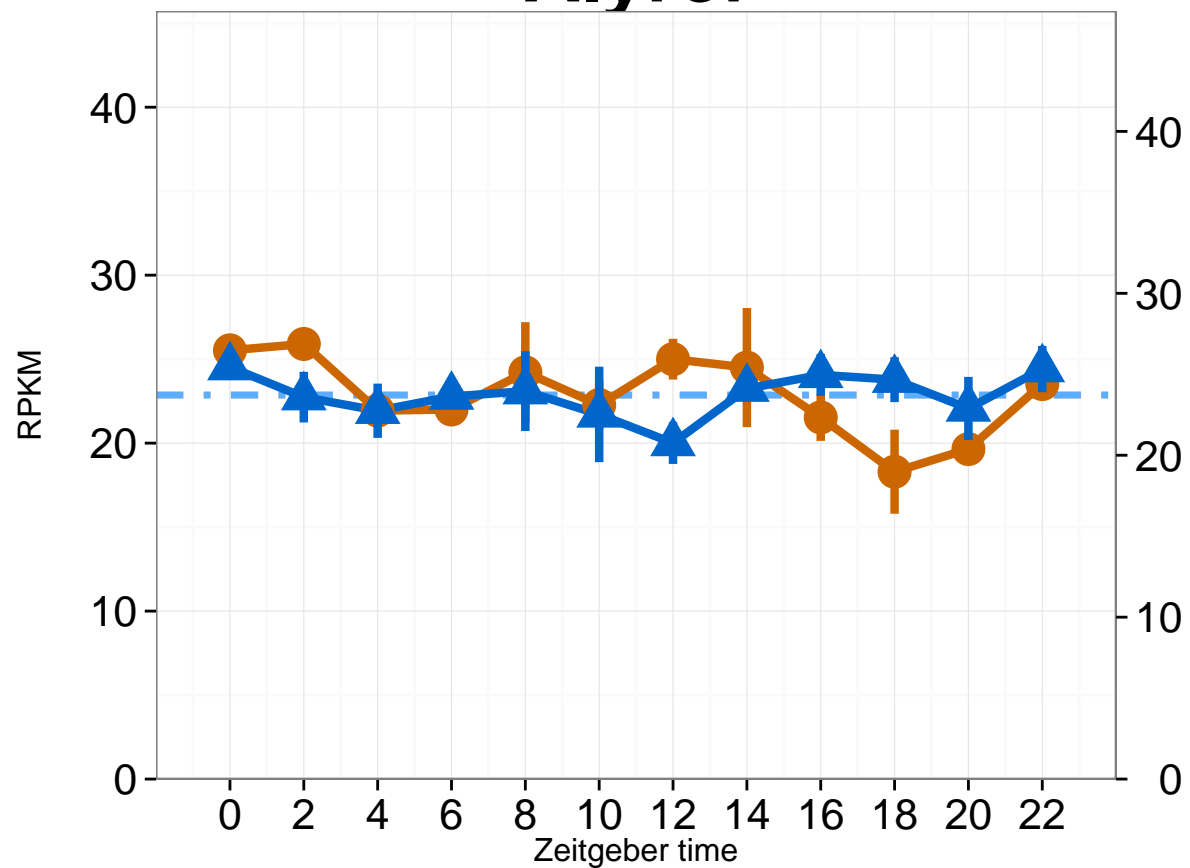

# Alyref

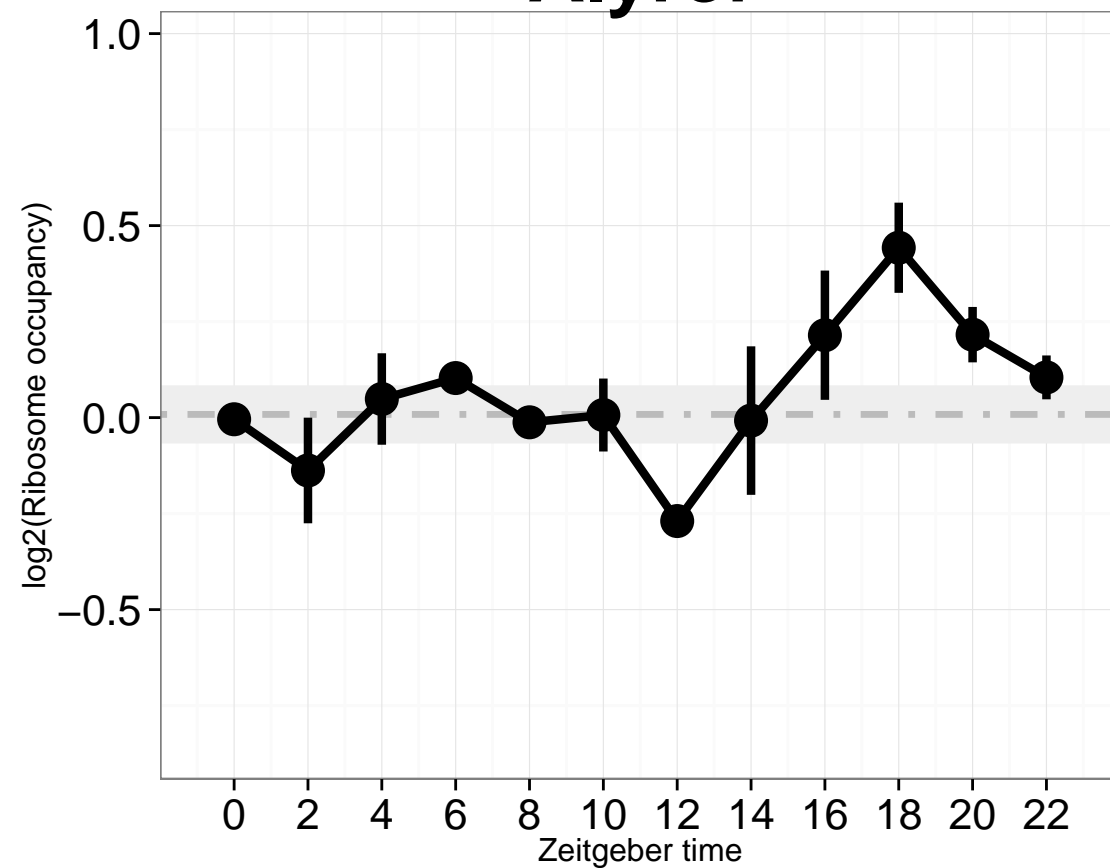

Supplement: SuppDataset_1.zip [file Alyref_set_A.pdf › Supplemental Dataset 1/A-mRNA_nonrhyth_translation_nonrhyth/Alyref_set_A.pdf]

## Ambra1

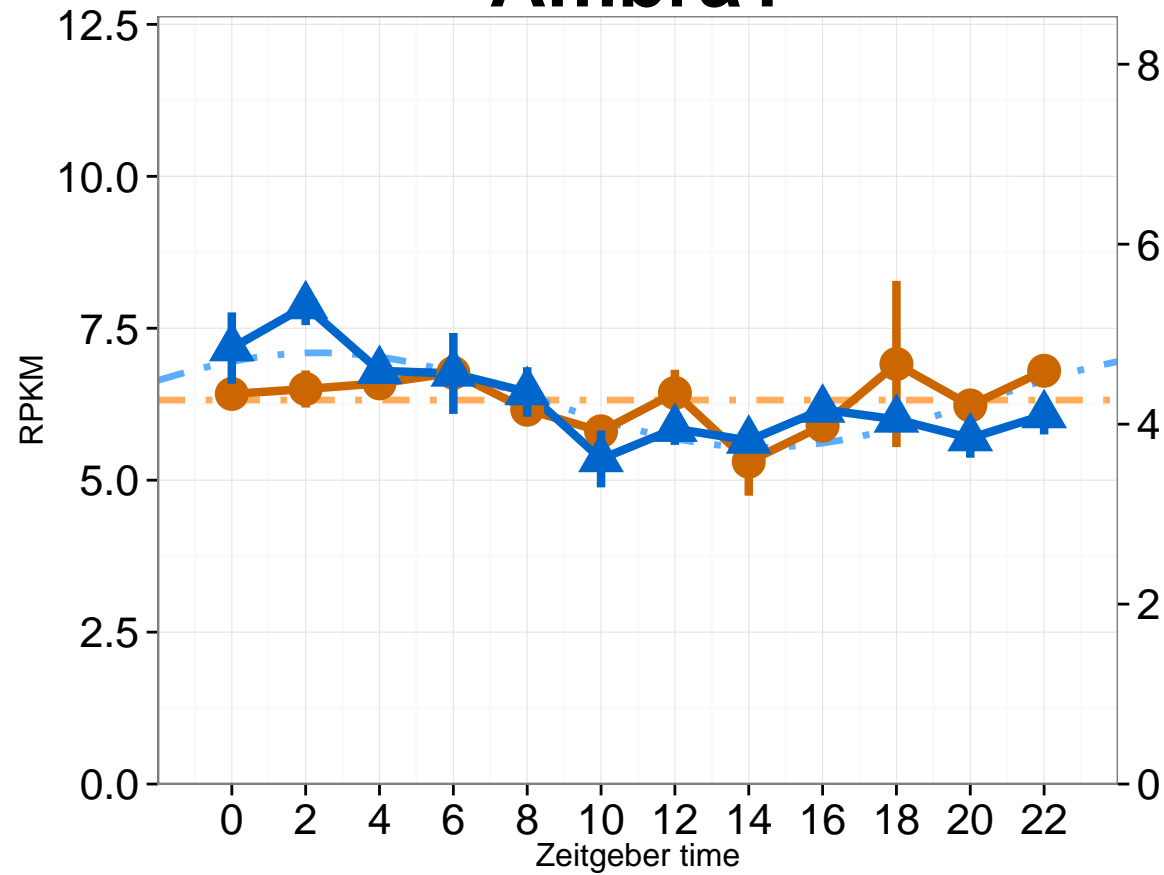

## Ambra1

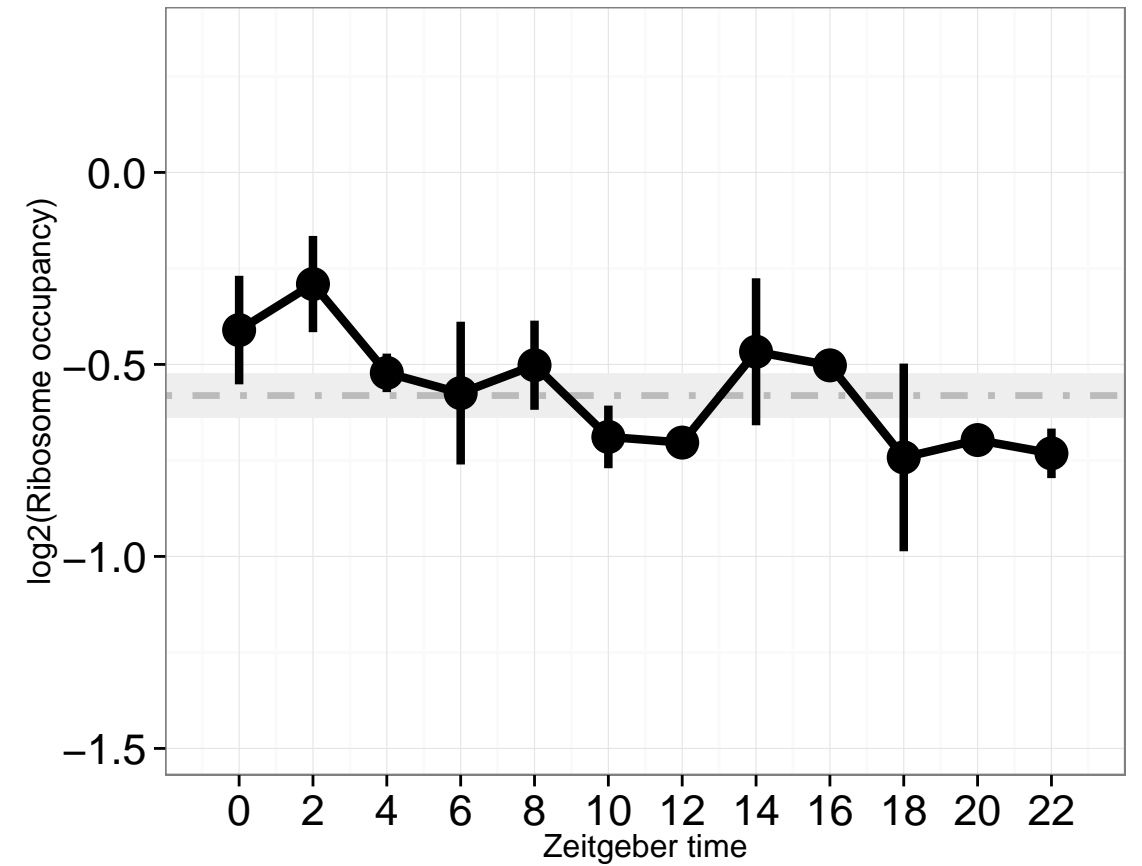

Supplement: SuppDataset_1.zip [file Ambra1_set_A.pdf › Supplemental Dataset 1/A-mRNA_nonrhyth_translation_nonrhyth/Ambra1_set_A.pdf]

## Amdhd2

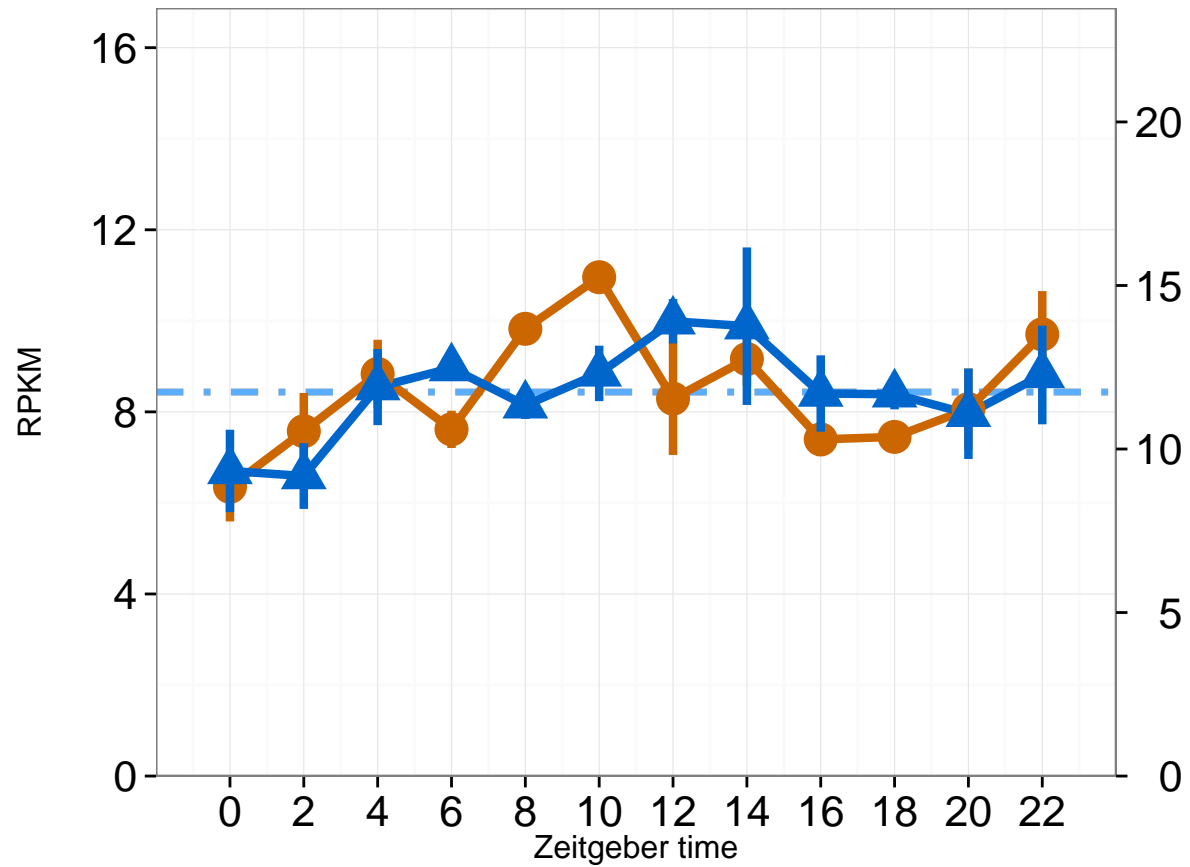

## Amdhd2

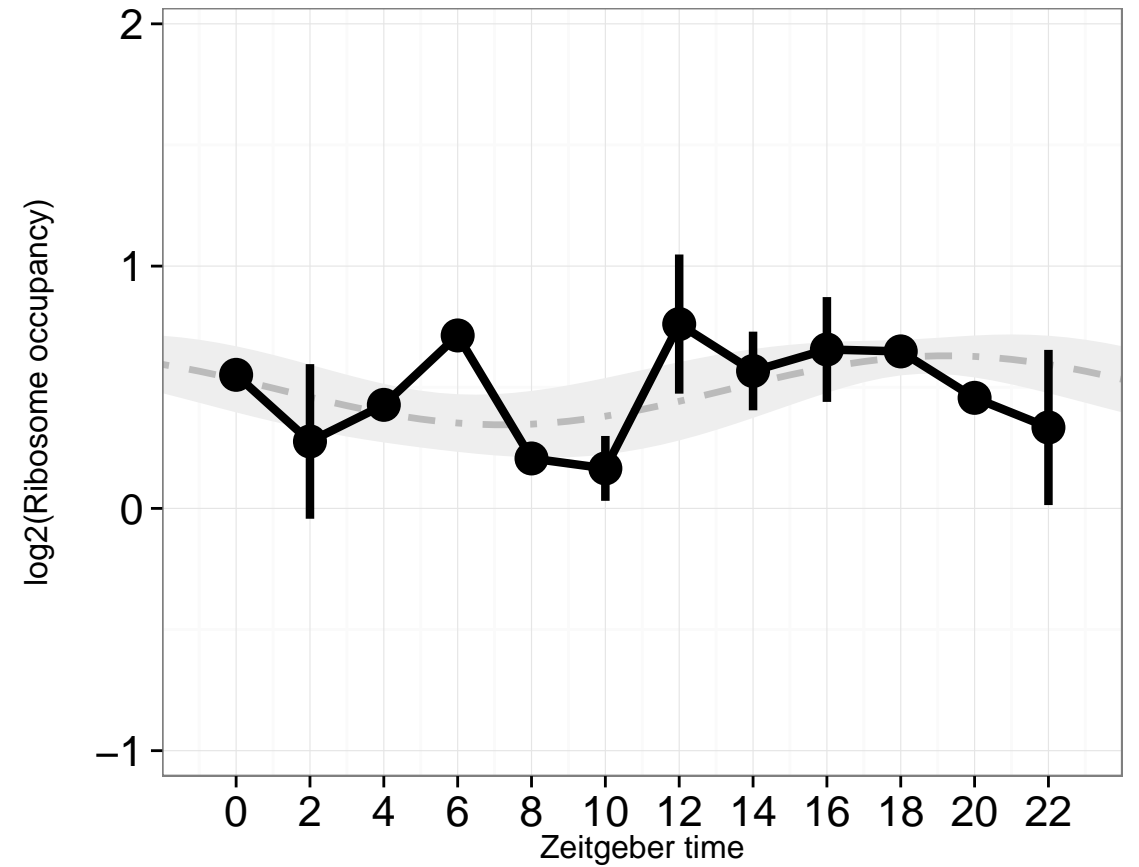

Supplement: SuppDataset_1.zip [file Amdhd2_set_A.pdf › Supplemental Dataset 1/A-mRNA_nonrhyth_translation_nonrhyth/Amdhd2_set_A.pdf]

# Amer1

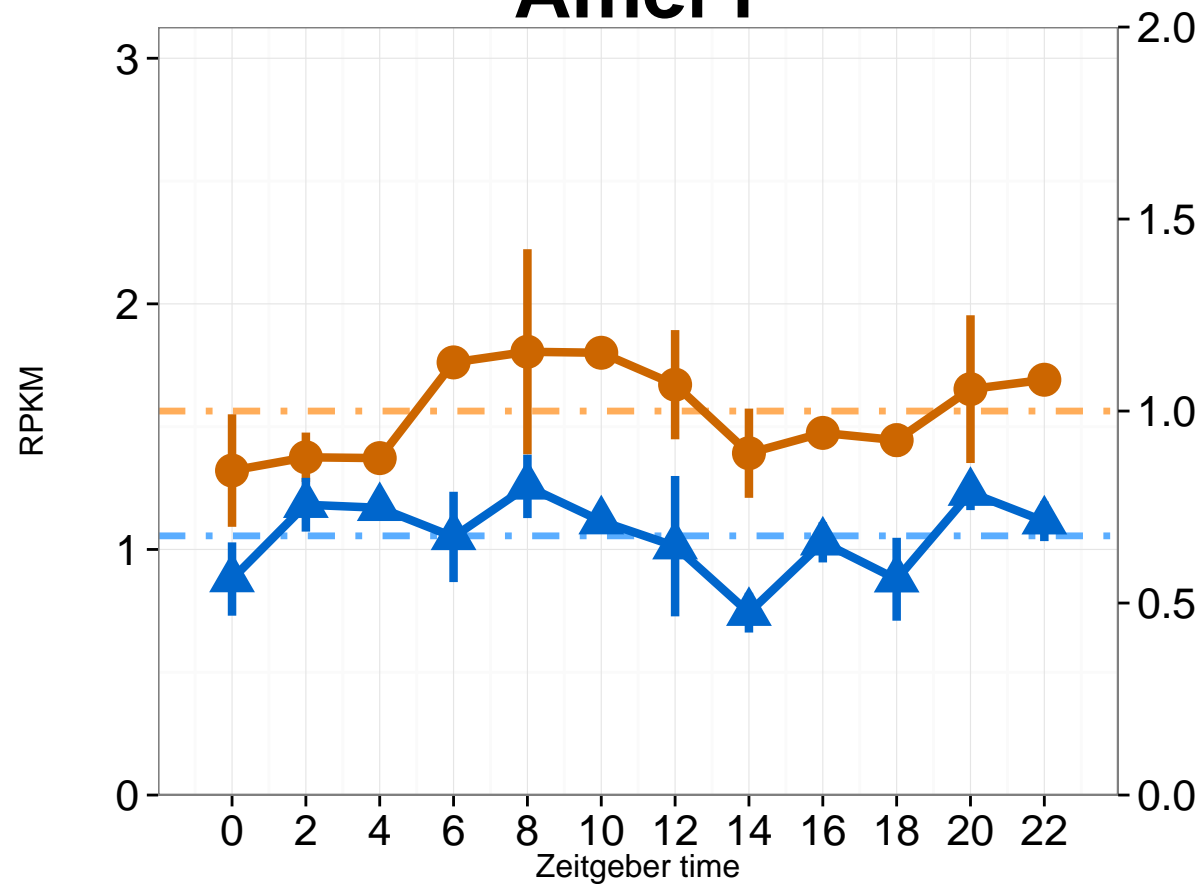

# Amer1

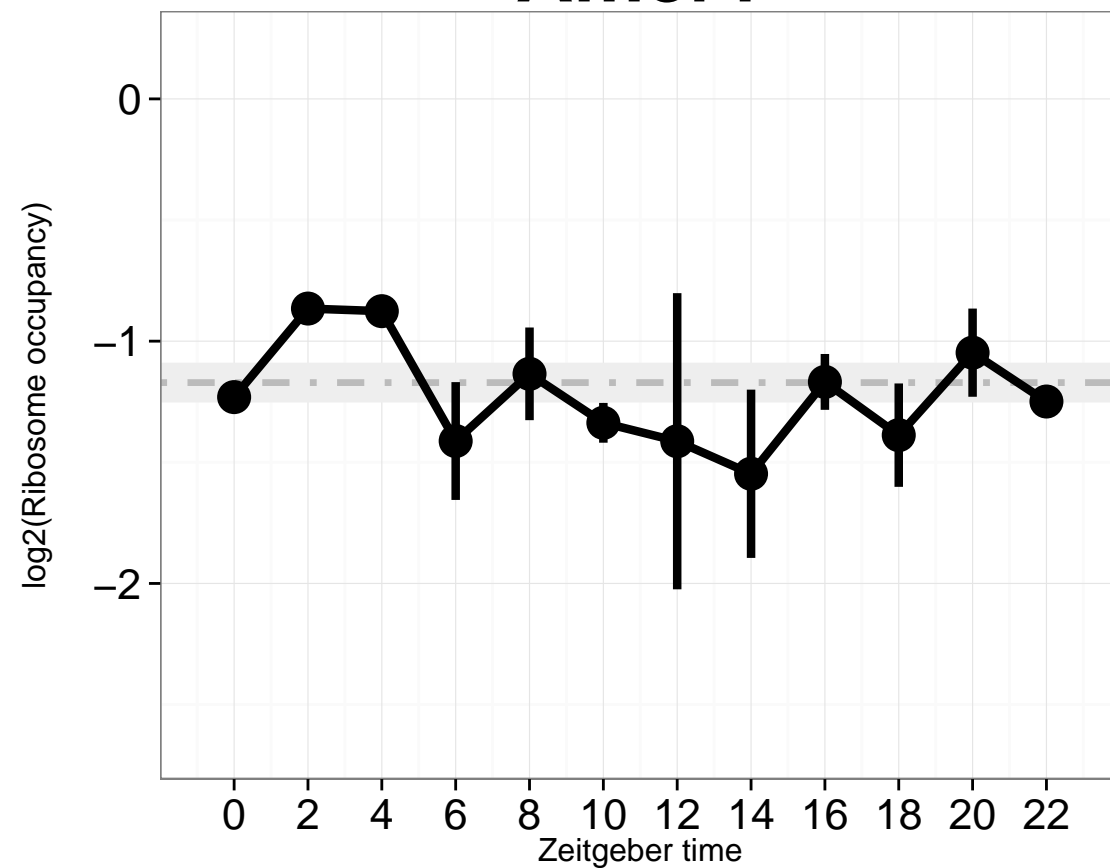

Supplement: SuppDataset_1.zip [file Amer1_set_A.pdf › Supplemental Dataset 1/A-mRNA_nonrhyth_translation_nonrhyth/Amer1_set_A.pdf]

## Amfr

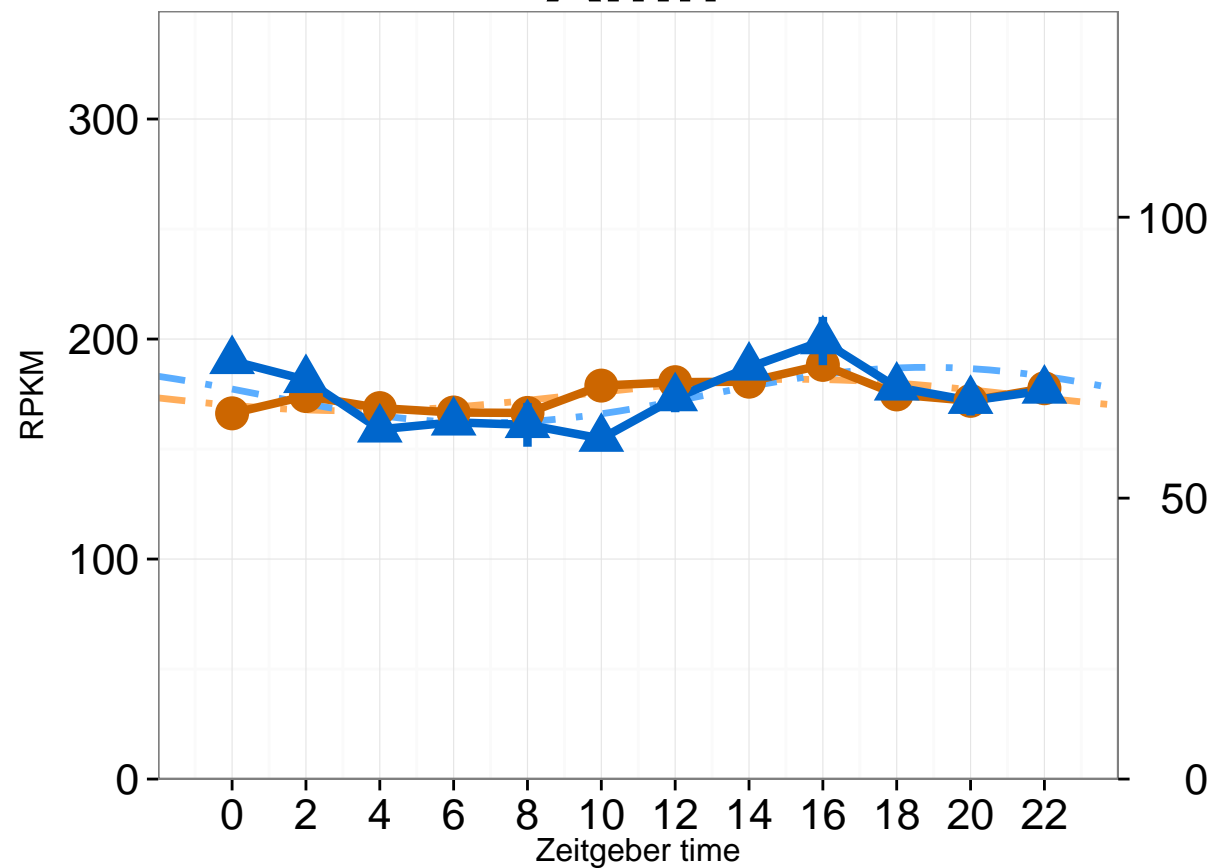

## Amfr

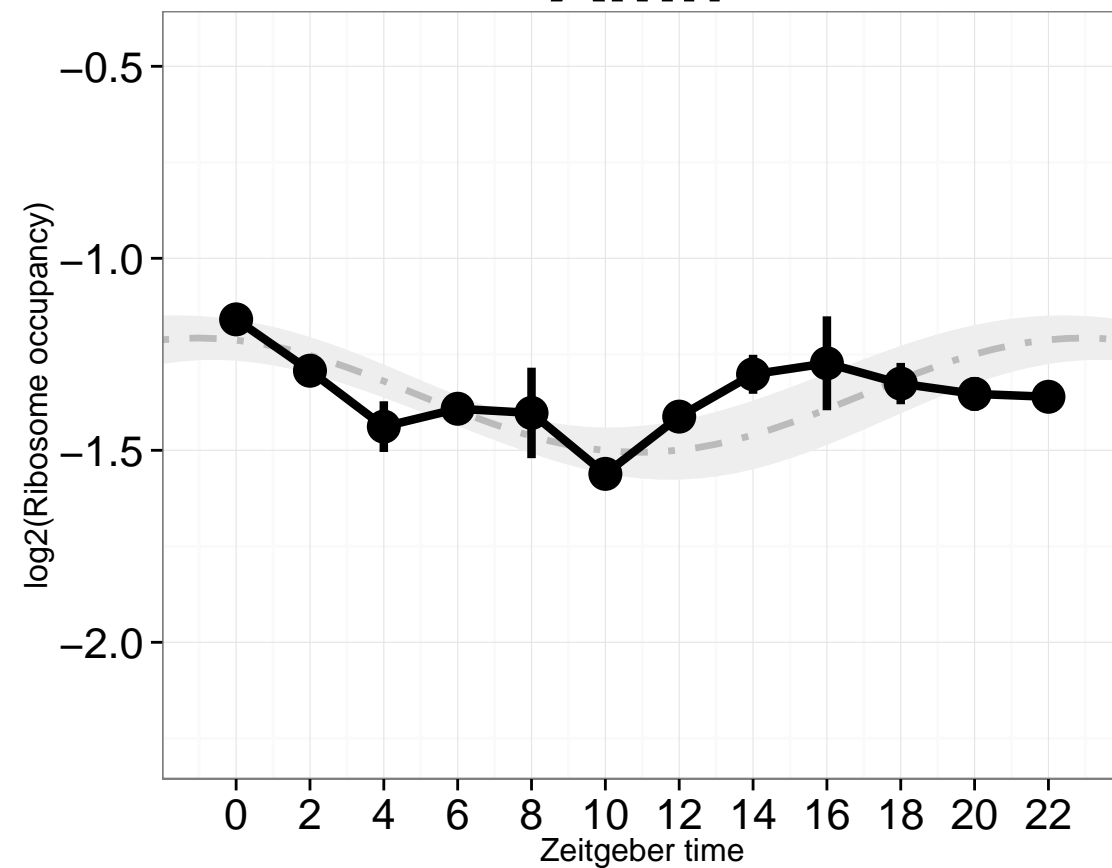

Supplement: SuppDataset_1.zip [file Amfr_set_A.pdf › Supplemental Dataset 1/A-mRNA_nonrhyth_translation_nonrhyth/Amfr_set_A.pdf]
