# Supplementary figures and images for: Ribosome profiling reveals the rhythmic liver translatome and circadian clock regulation by upstream open reading frames (part 95 of 113)
Source: HighWire-hosted journal article supplement (doi:10.1101/gr.195404.115), 2015-10-20

# Agpat1

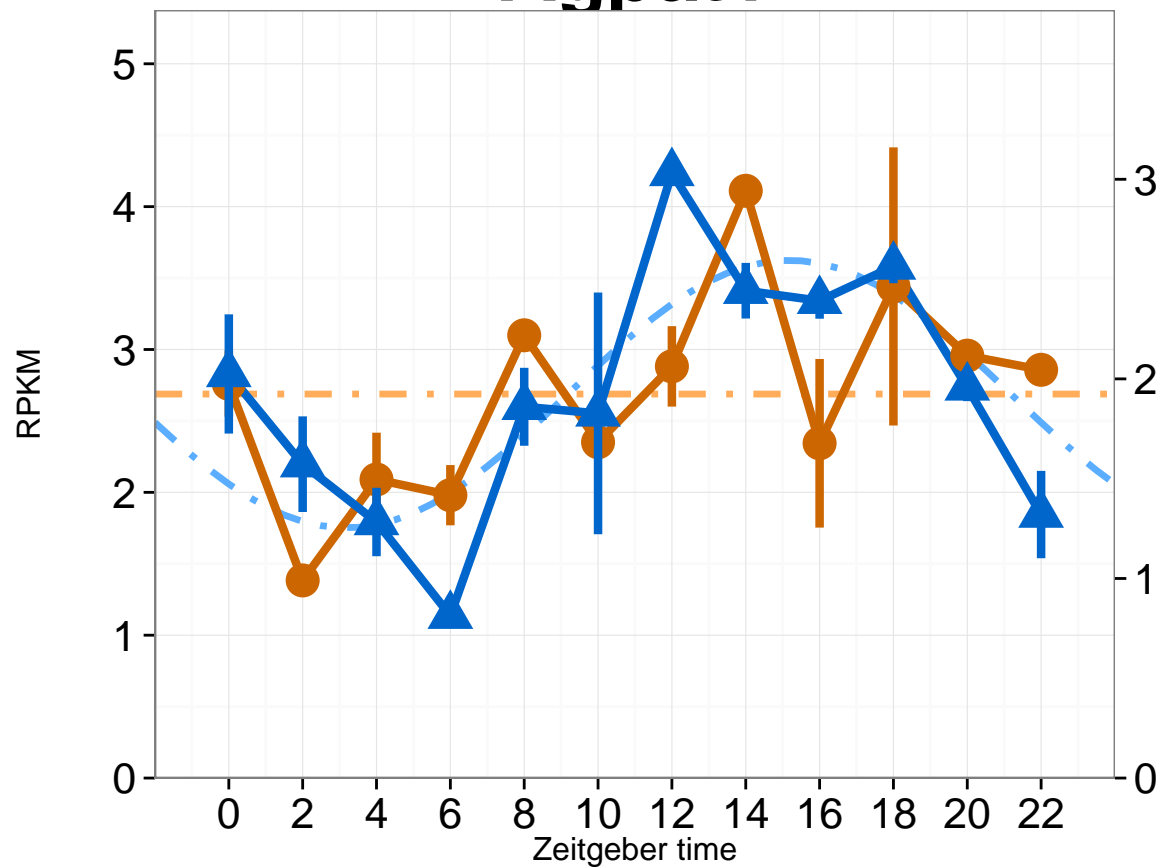

# Agpat1

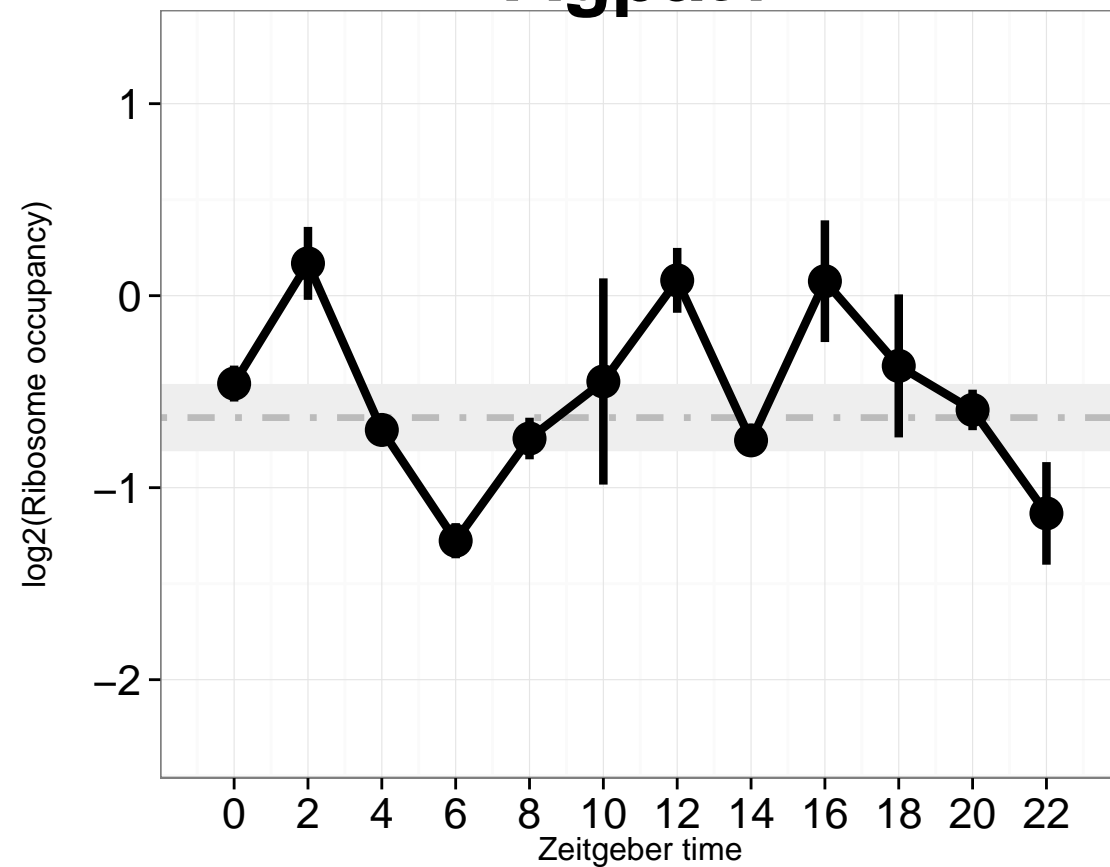

Supplement: SuppDataset_1.zip [file Agpat1_set_C.pdf › Supplemental Dataset 1/C-mRNA_nonrhythm_translation_rhyth/Agpat1_set_C.pdf]

# Agpat6

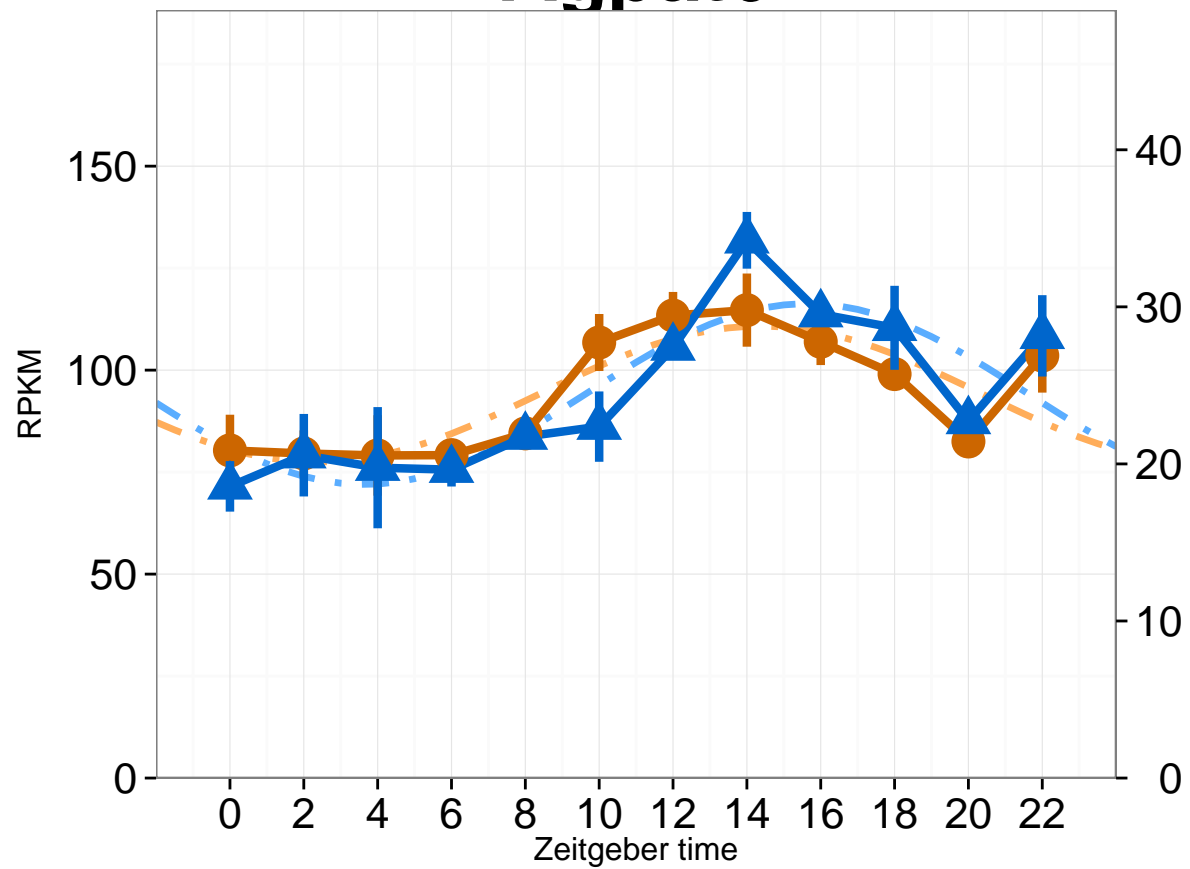

# Agpat6

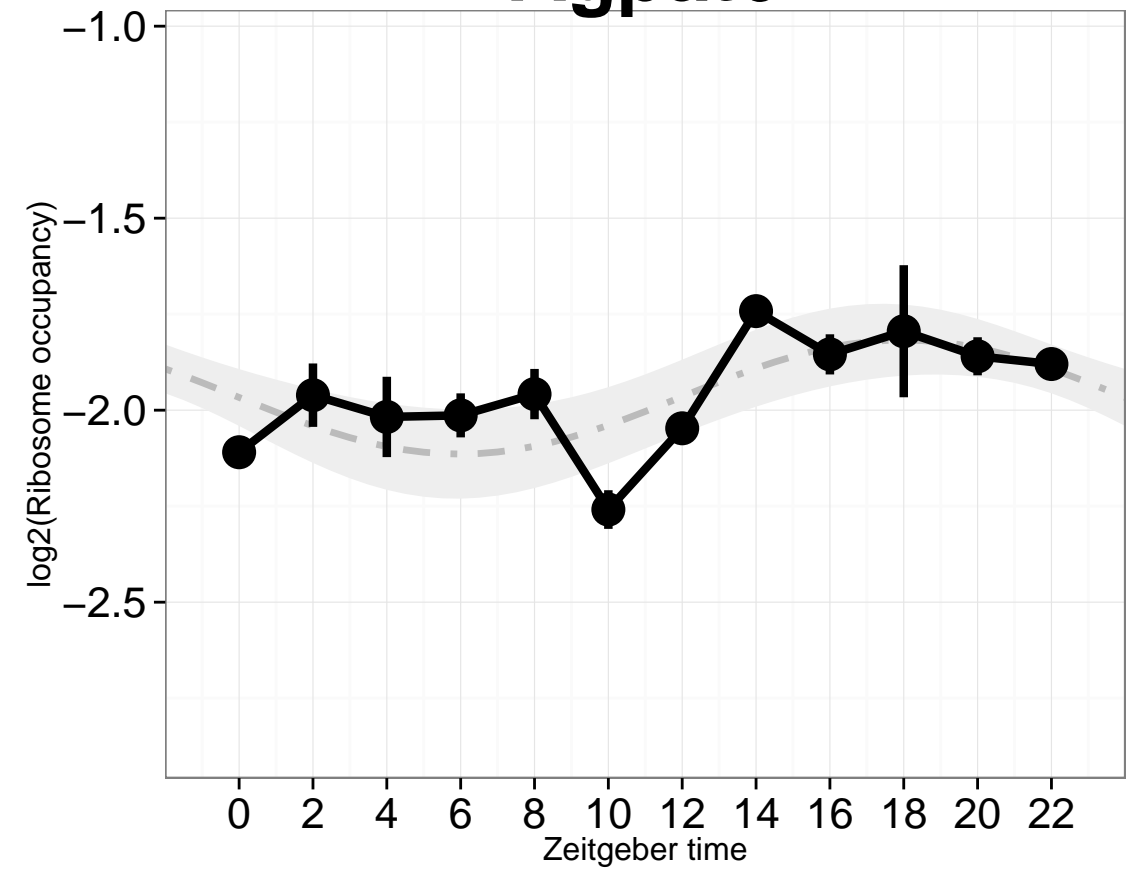

Supplement: SuppDataset_1.zip [file Agpat6_set_C.pdf › Supplemental Dataset 1/C-mRNA_nonrhythm_translation_rhyth/Agpat6_set_C.pdf]

# Agtpbp1

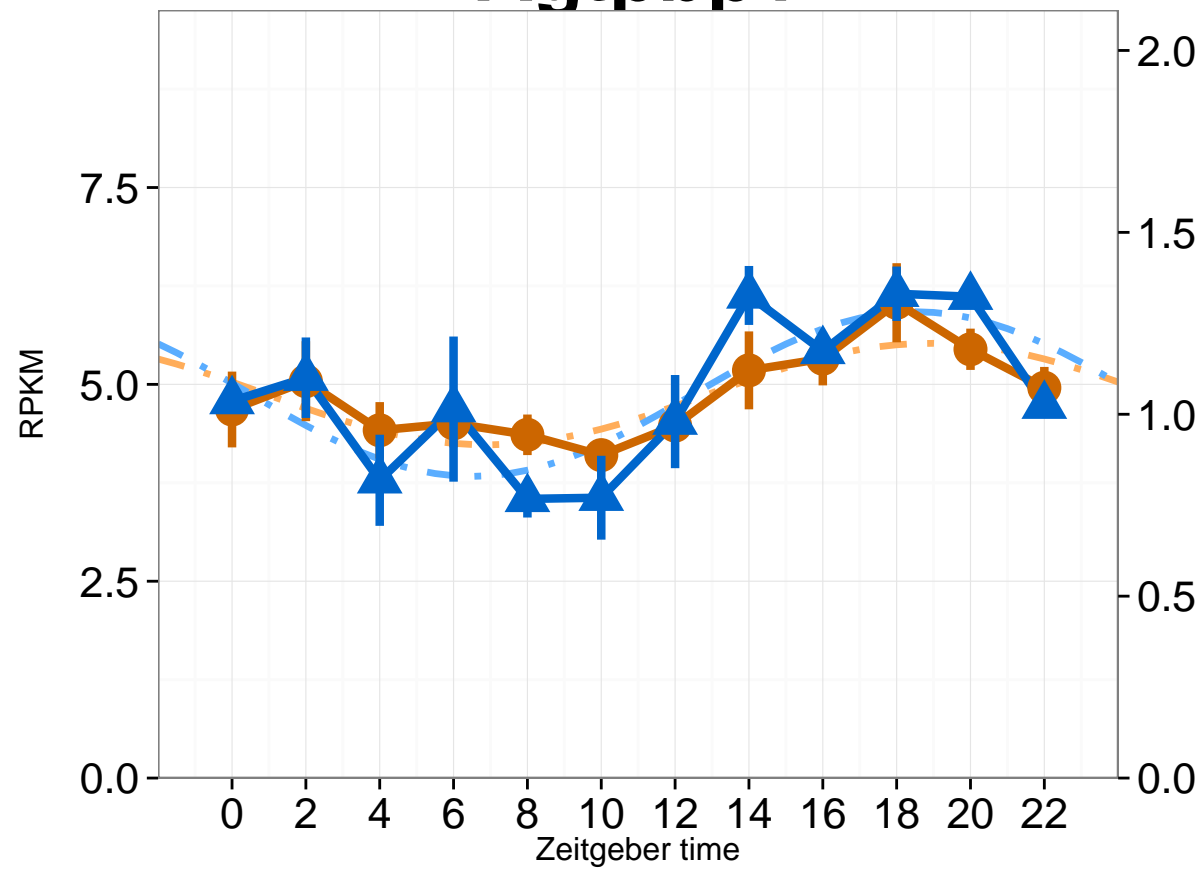

# Agtpbp1

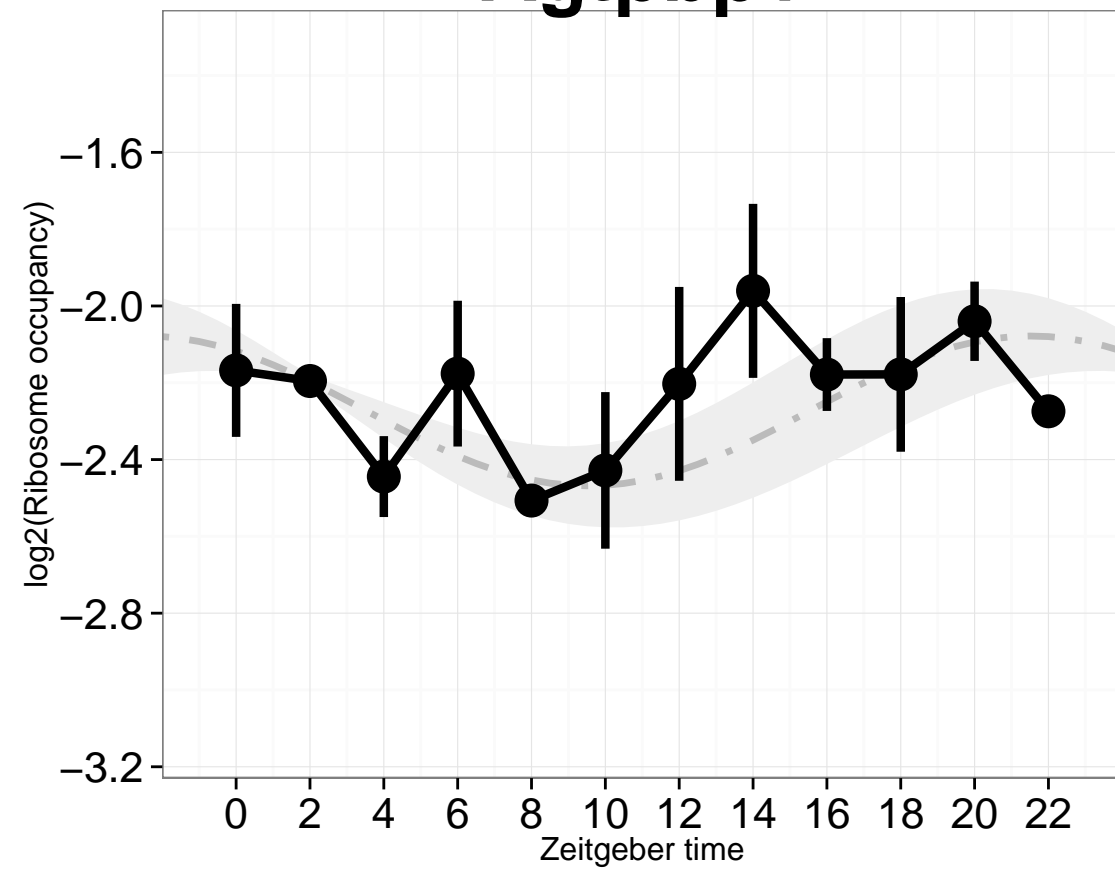

Supplement: SuppDataset_1.zip [file Agtpbp1_set_C.pdf › Supplemental Dataset 1/C-mRNA_nonrhythm_translation_rhyth/Agtpbp1_set_C.pdf]

# Ahcyl2

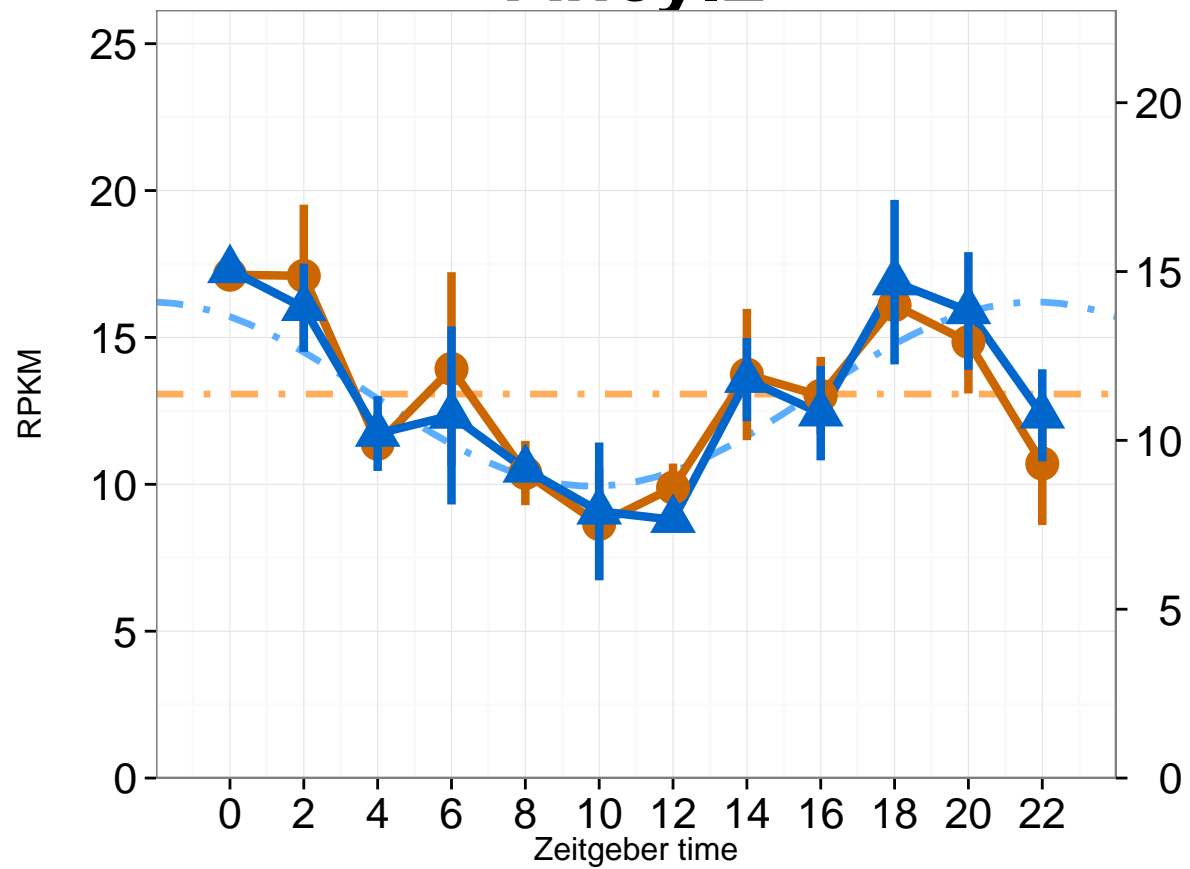

# Ahcyl2

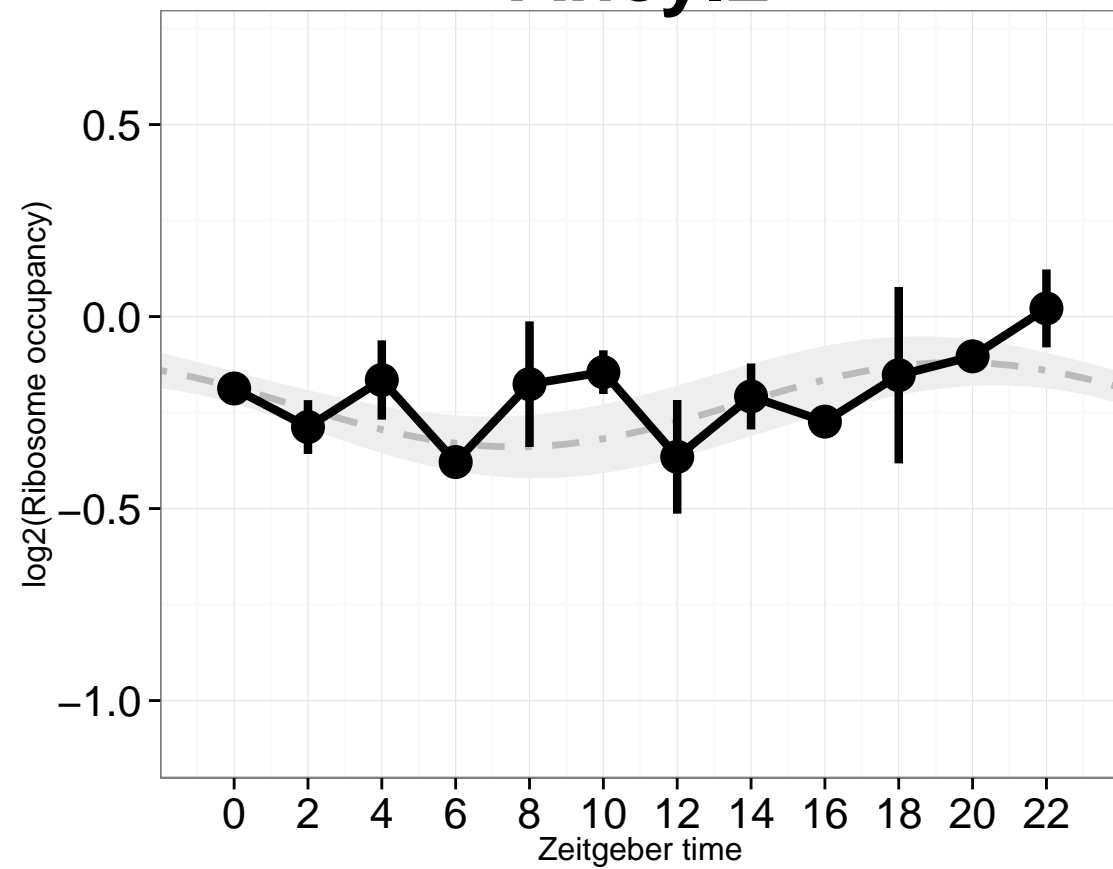

Supplement: SuppDataset_1.zip [file Ahcyl2_set_C.pdf › Supplemental Dataset 1/C-mRNA_nonrhythm_translation_rhyth/Ahcyl2_set_C.pdf]

## Ahsa1

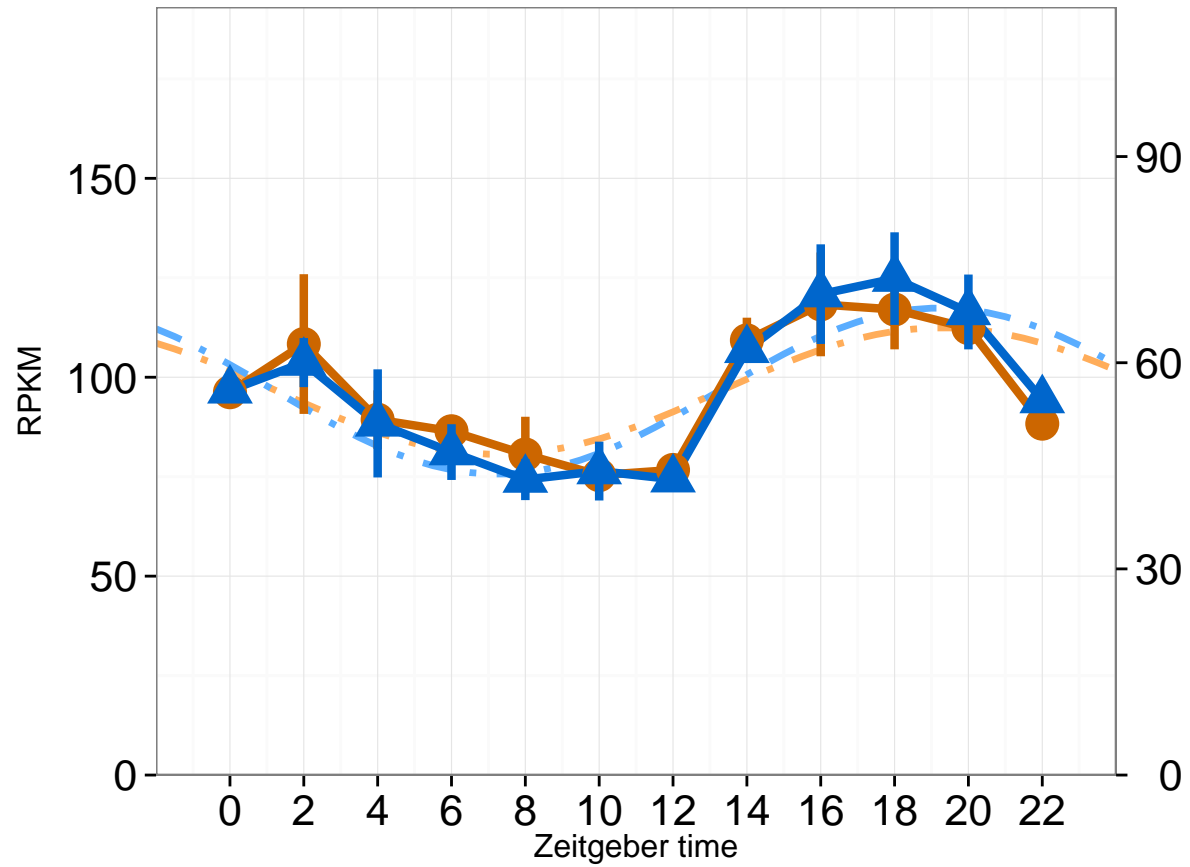

## Ahsa1

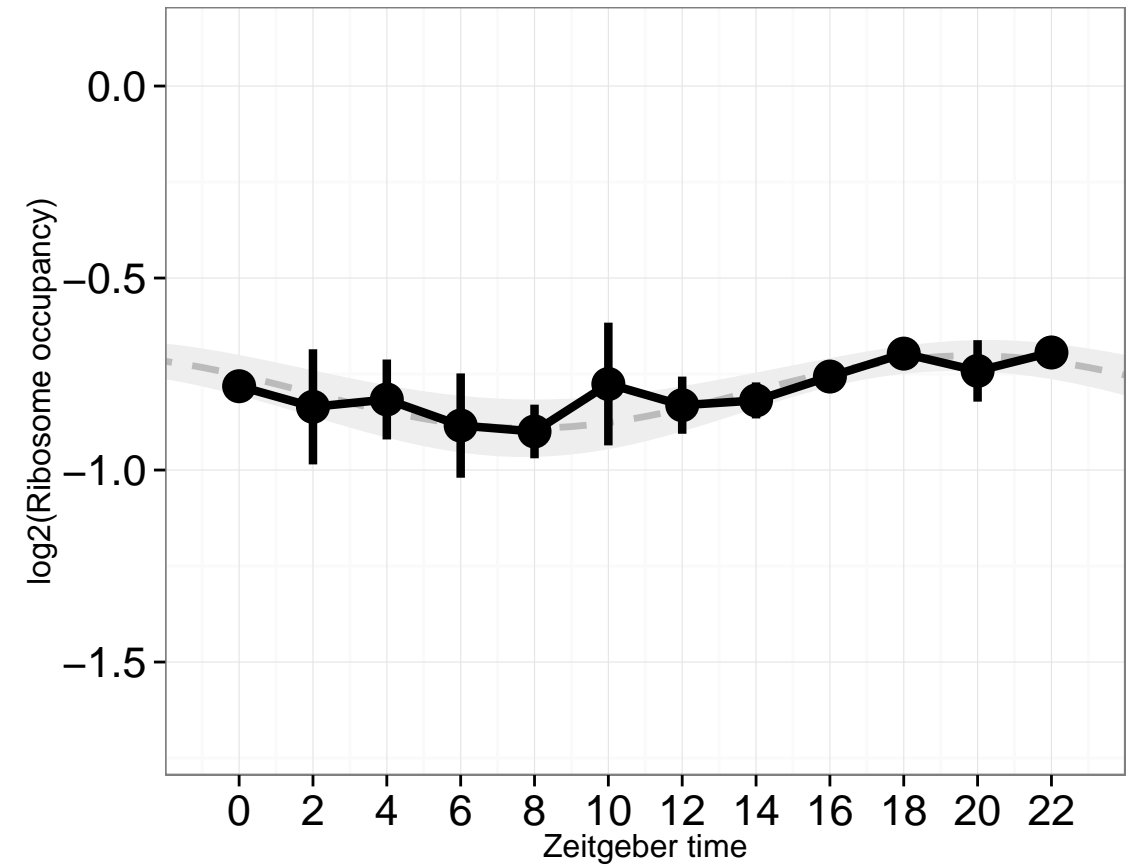

Supplement: SuppDataset_1.zip [file Ahsa1_set_C.pdf › Supplemental Dataset 1/C-mRNA_nonrhythm_translation_rhyth/Ahsa1_set_C.pdf]

## Alas2

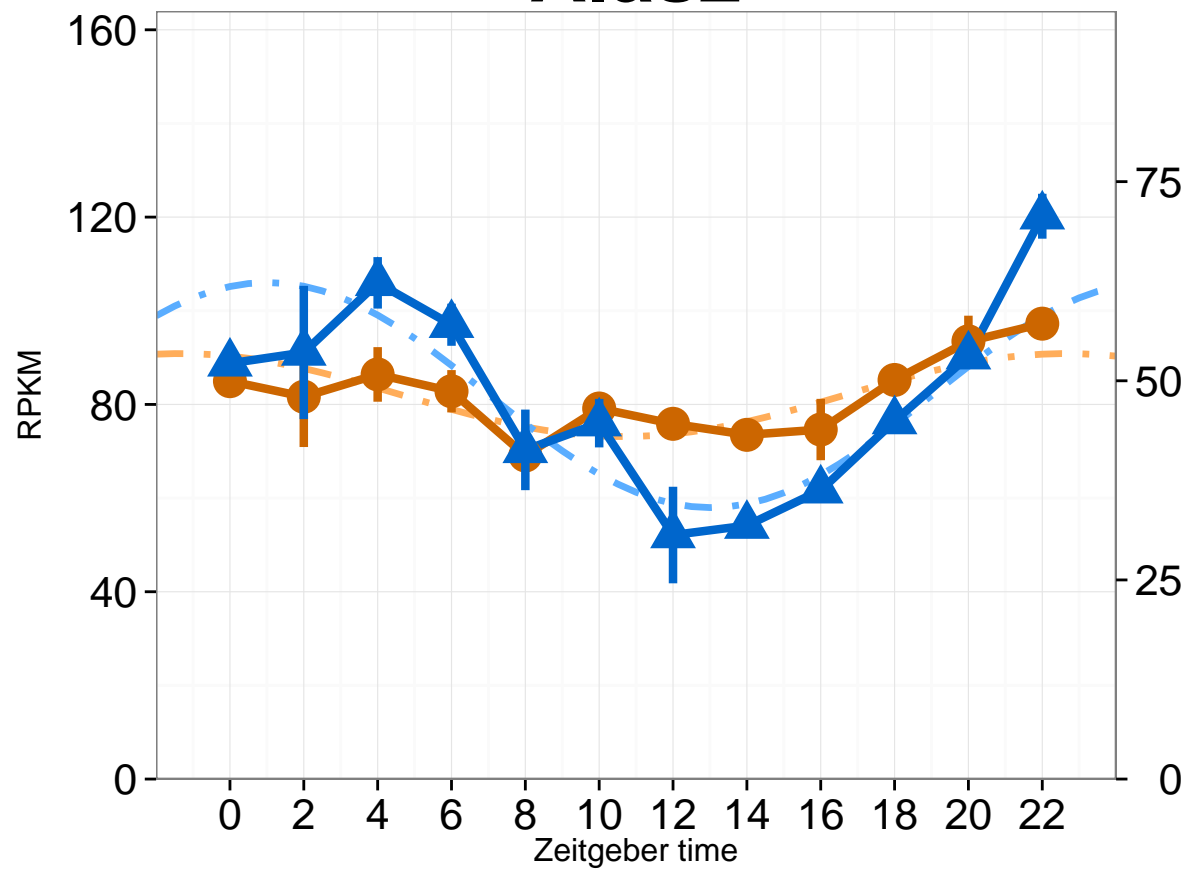

## Alas2

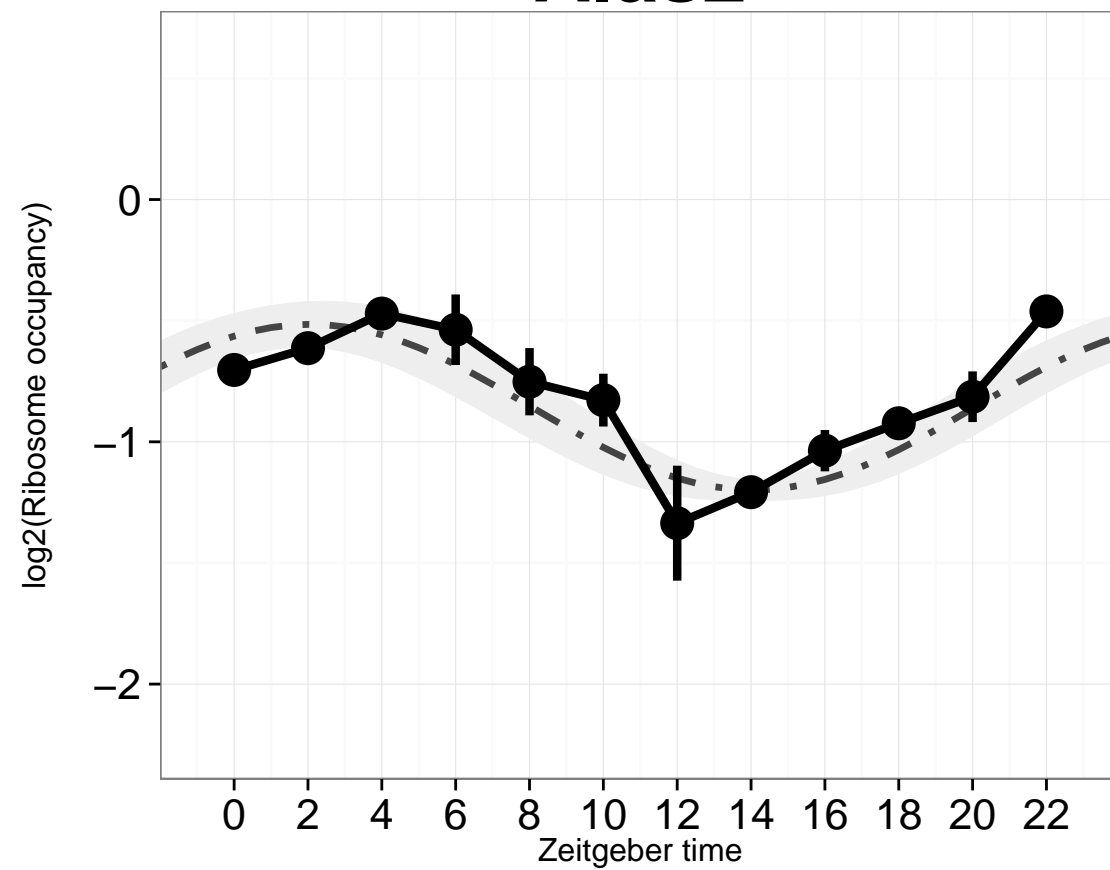

Supplement: SuppDataset_1.zip [file Alas2_set_C.pdf › Supplemental Dataset 1/C-mRNA_nonrhythm_translation_rhyth/Alas2_set_C.pdf]

# Aldh18a1

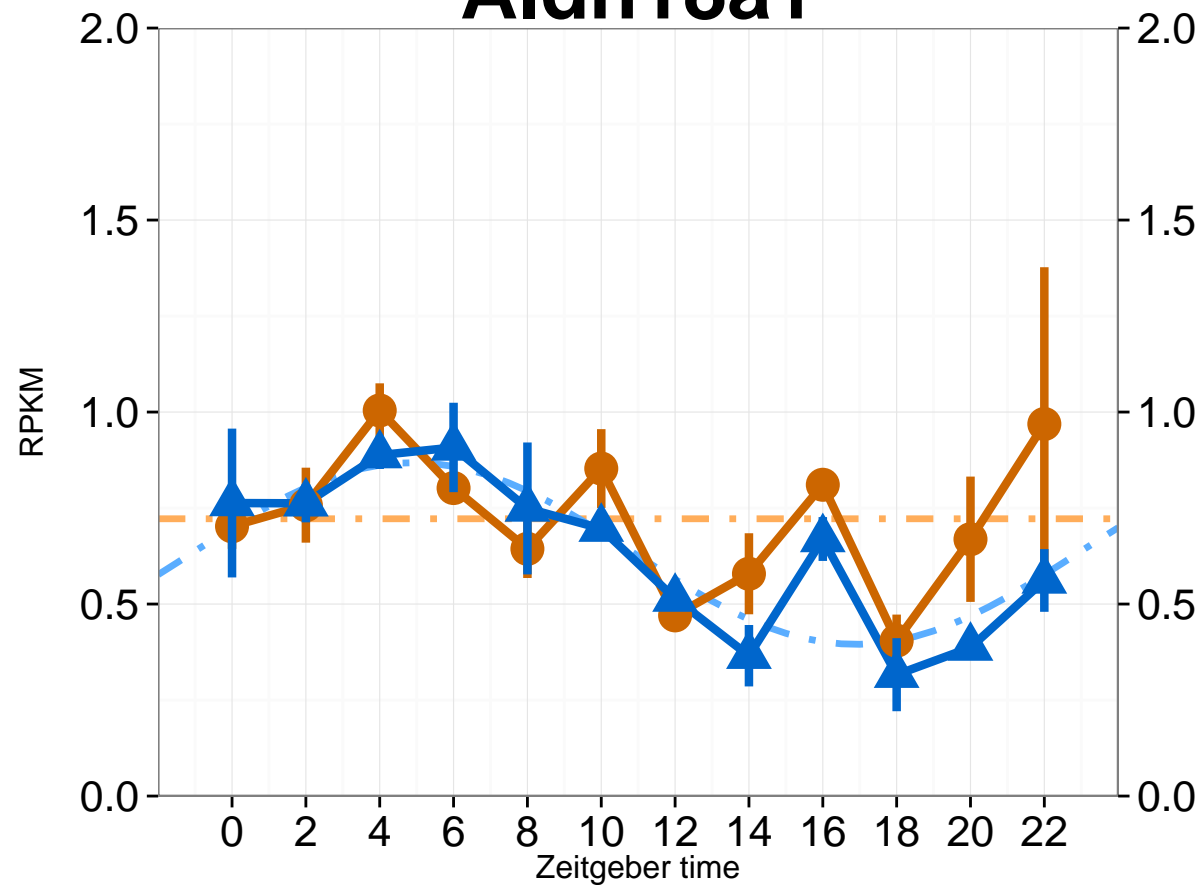

# Aldh18a1

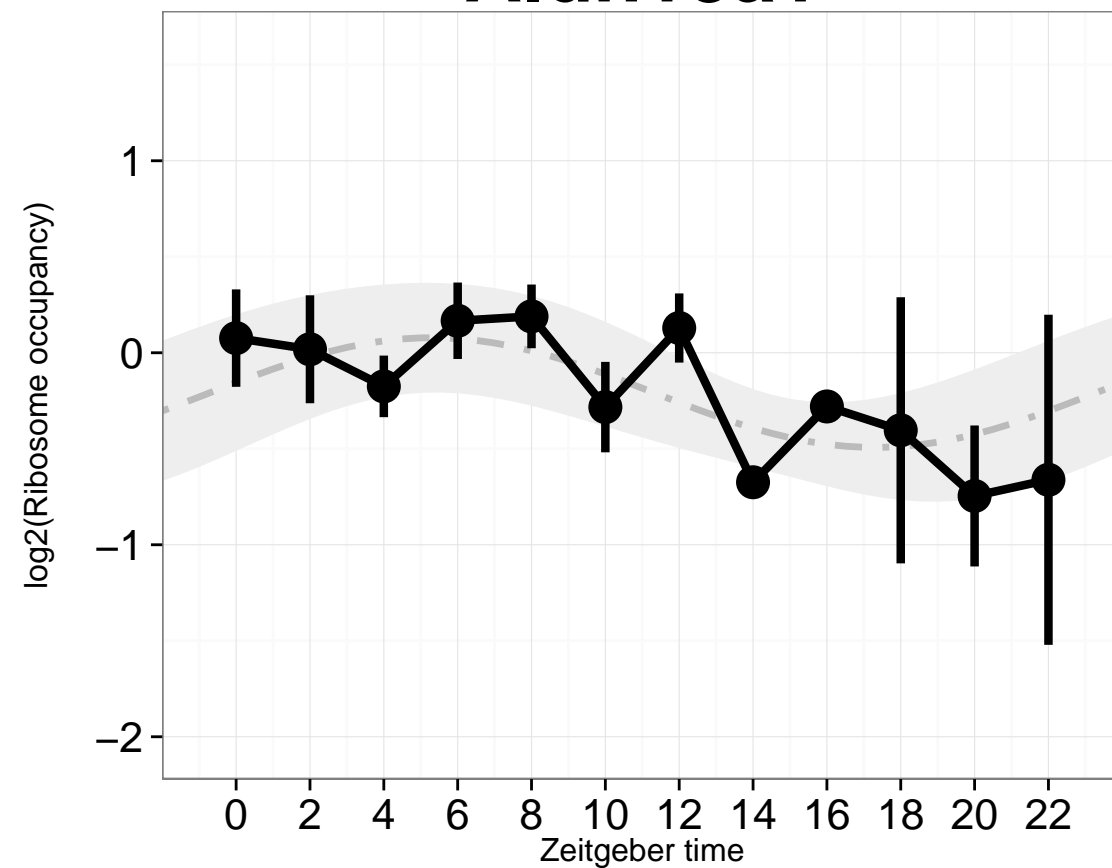

Supplement: SuppDataset_1.zip [file Aldh18a1_set_C.pdf › Supplemental Dataset 1/C-mRNA_nonrhythm_translation_rhyth/Aldh18a1_set_C.pdf]

# Alg10b

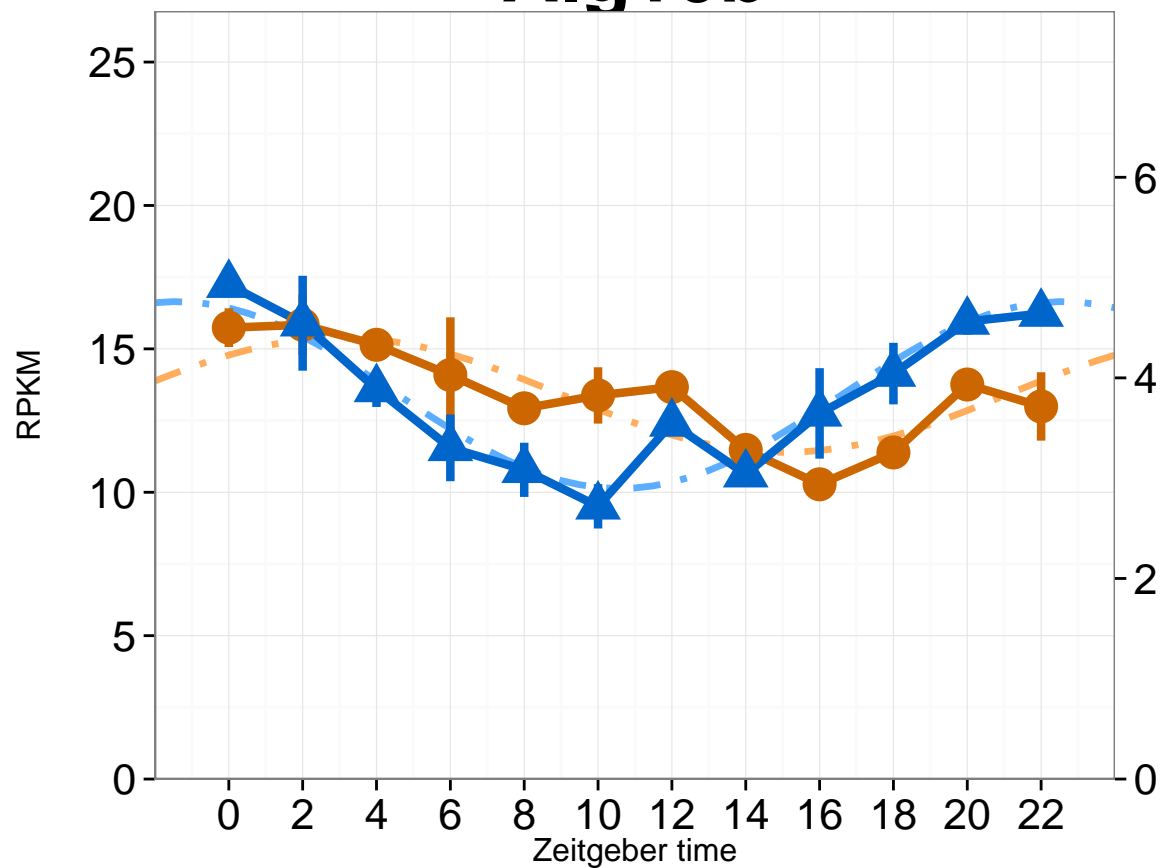

# Alg10b

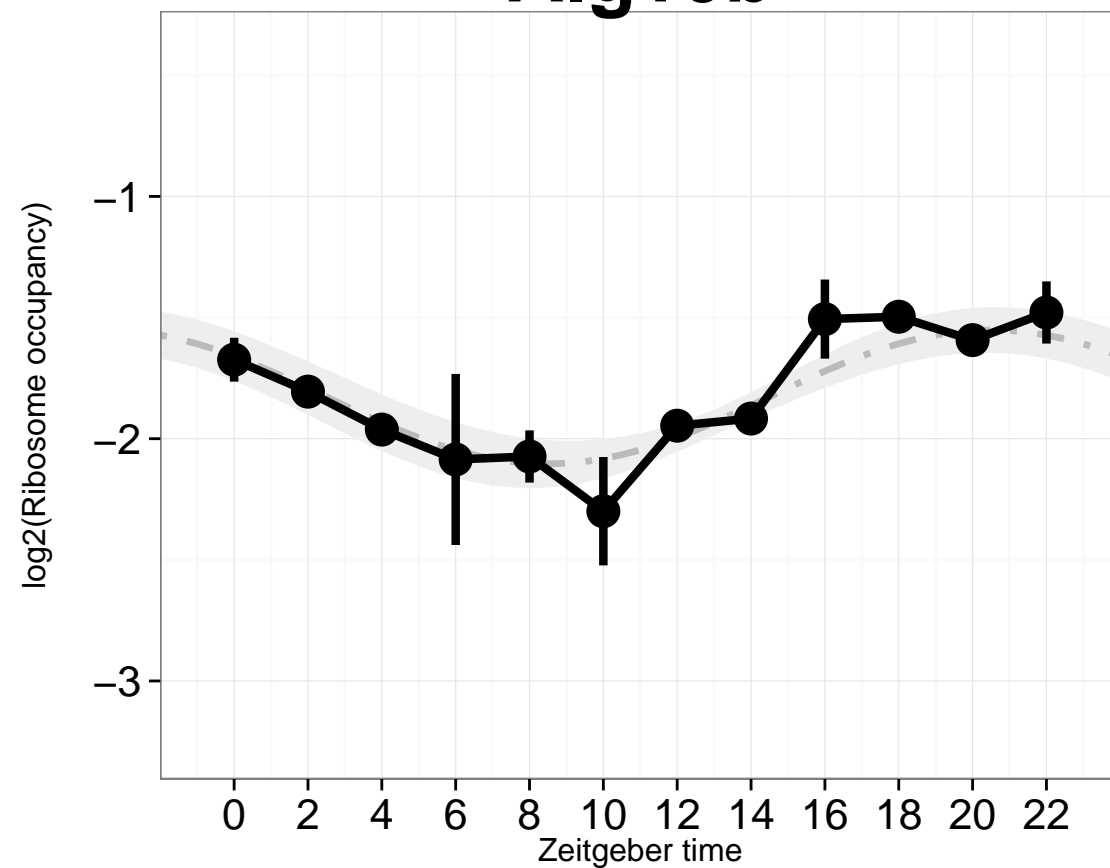

Supplement: SuppDataset_1.zip [file Alg10b_set_C.pdf › Supplemental Dataset 1/C-mRNA_nonrhythm_translation_rhyth/Alg10b_set_C.pdf]

## Alms1

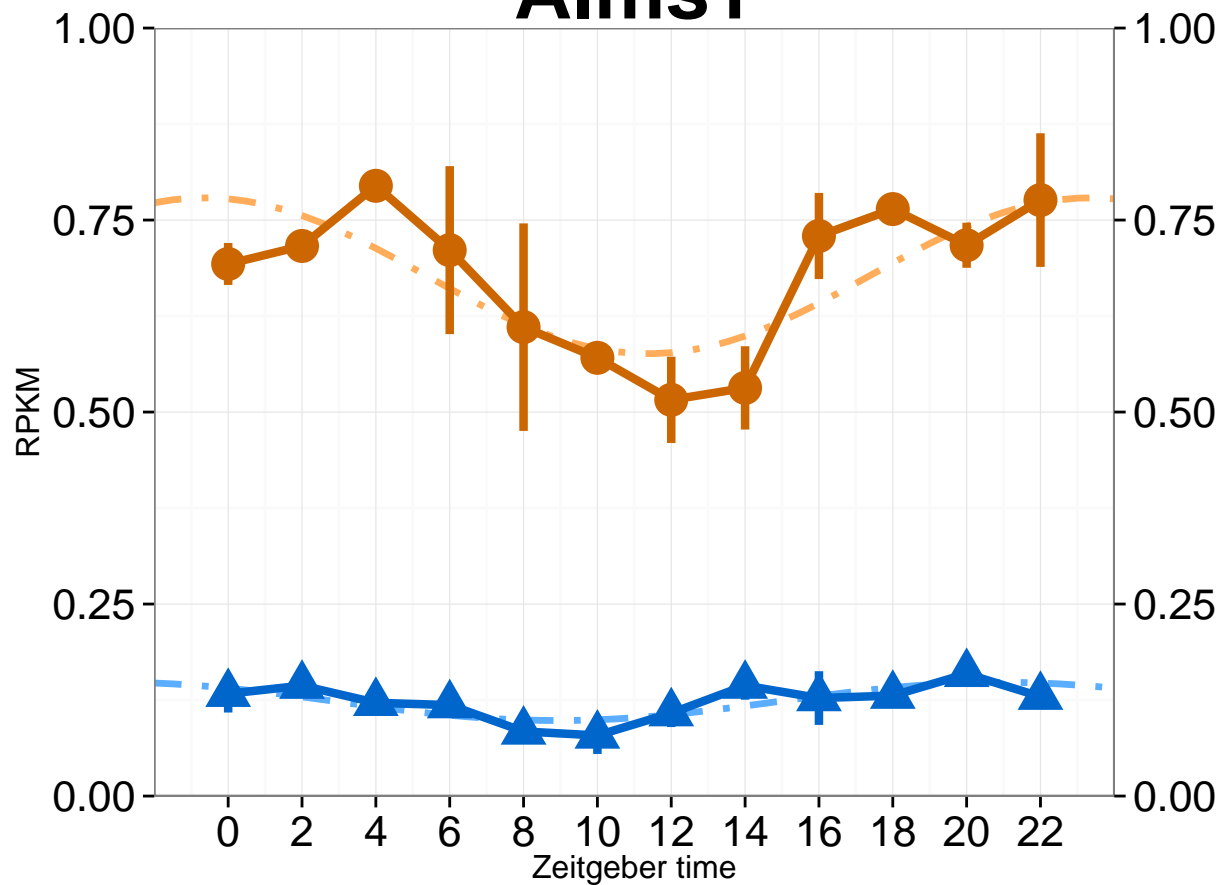

## Alms1

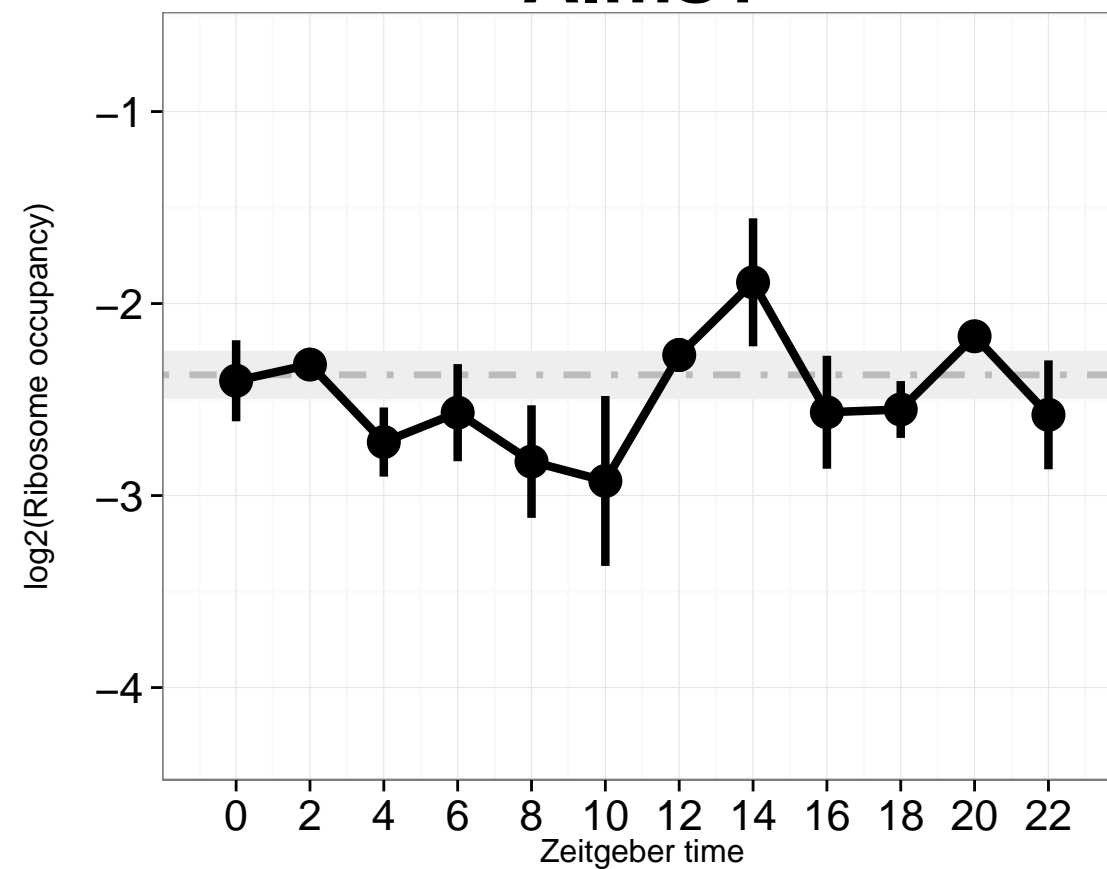

Supplement: SuppDataset_1.zip [file Alms1_set_C.pdf › Supplemental Dataset 1/C-mRNA_nonrhythm_translation_rhyth/Alms1_set_C.pdf]

## Amigo1

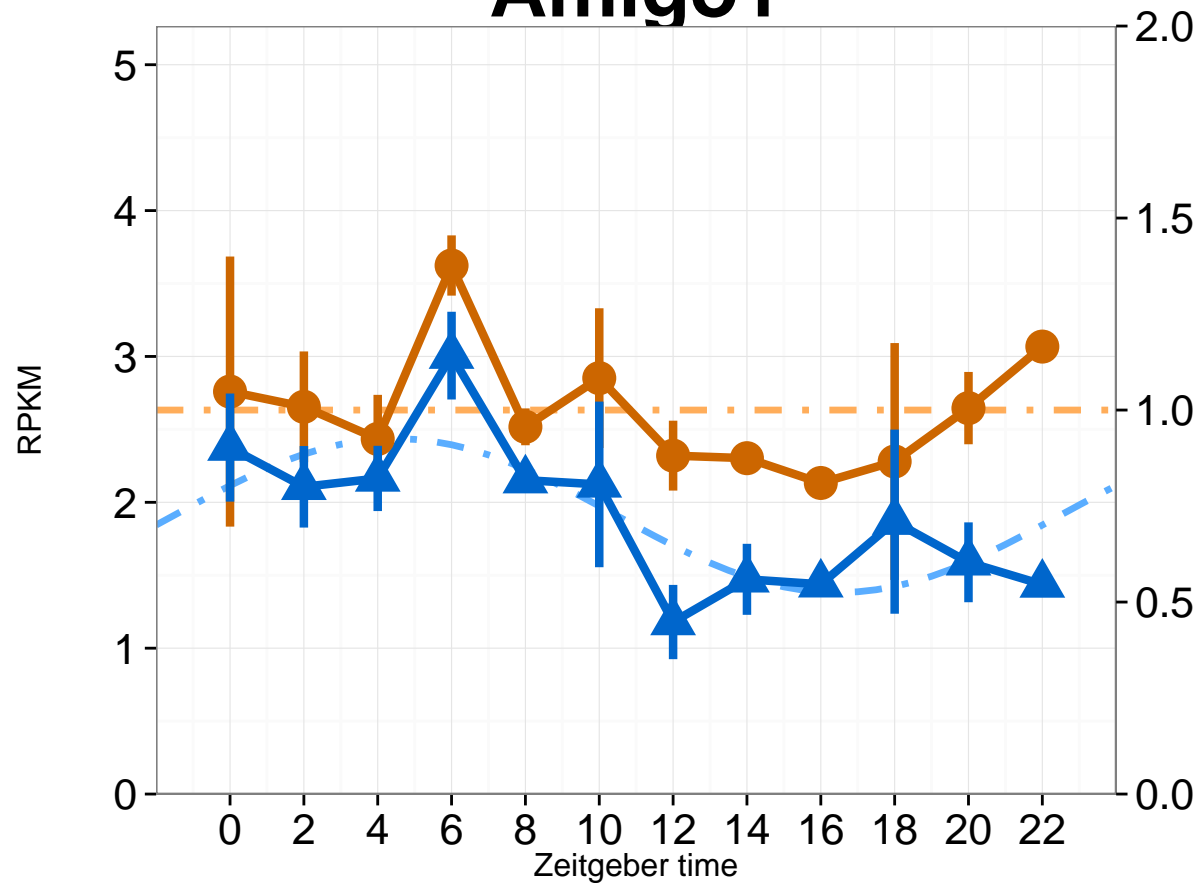

## Amigo1

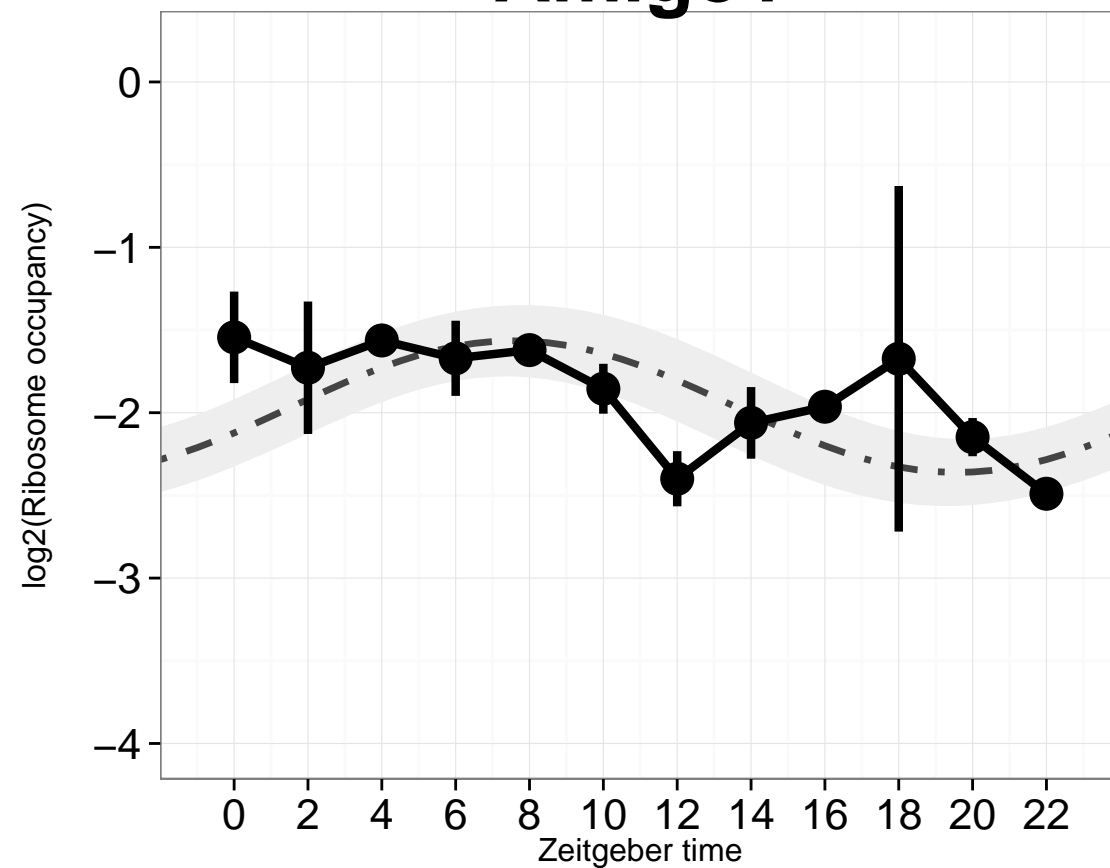

Supplement: SuppDataset_1.zip [file Amigo1_set_C.pdf › Supplemental Dataset 1/C-mRNA_nonrhythm_translation_rhyth/Amigo1_set_C.pdf]

## Amigo2

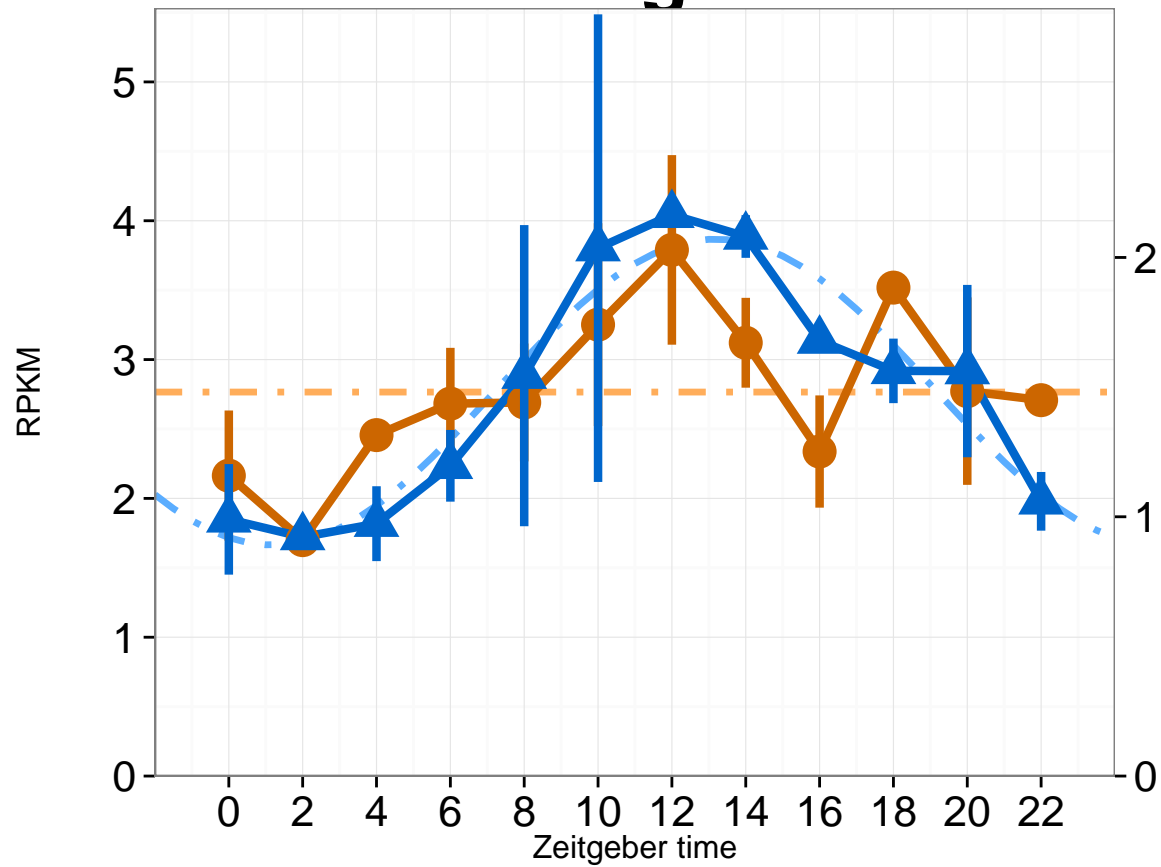

## Amigo2

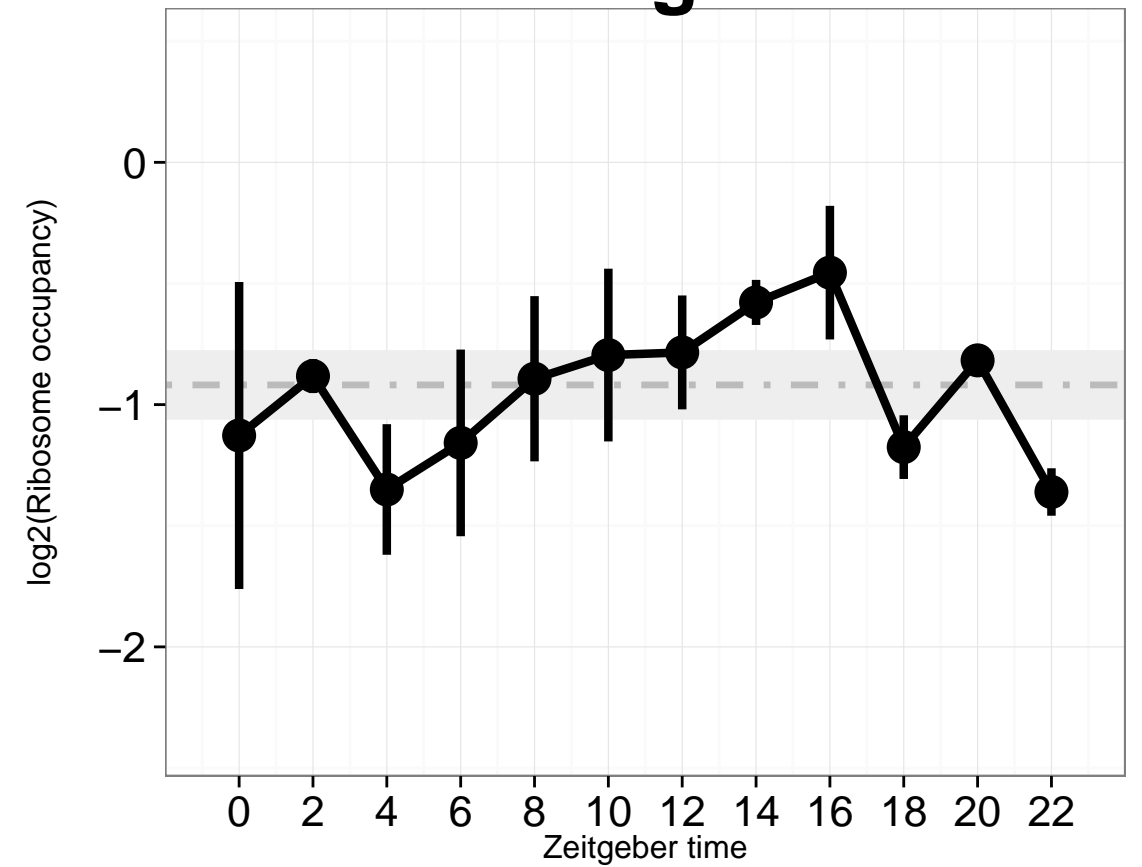

Supplement: SuppDataset_1.zip [file Amigo2_set_C.pdf › Supplemental Dataset 1/C-mRNA_nonrhythm_translation_rhyth/Amigo2_set_C.pdf]

## Ang

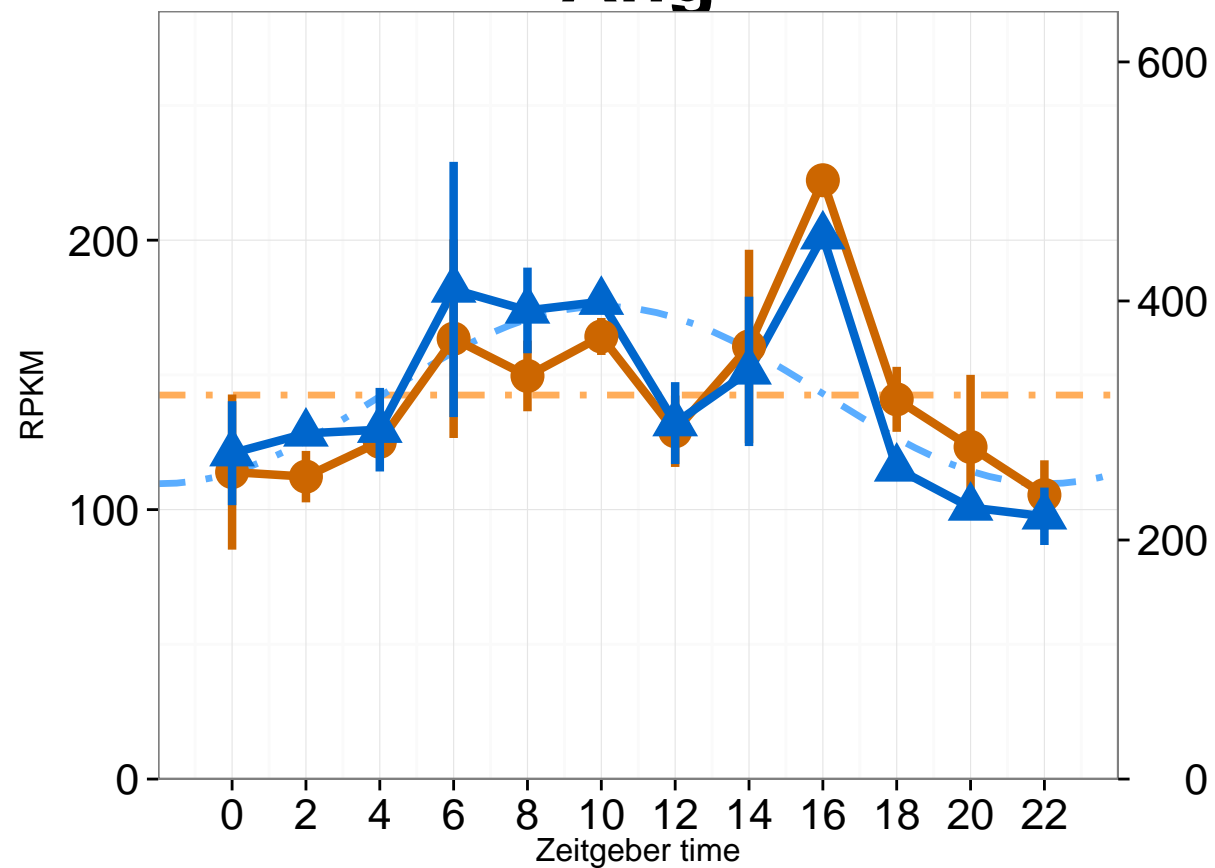

## Ang

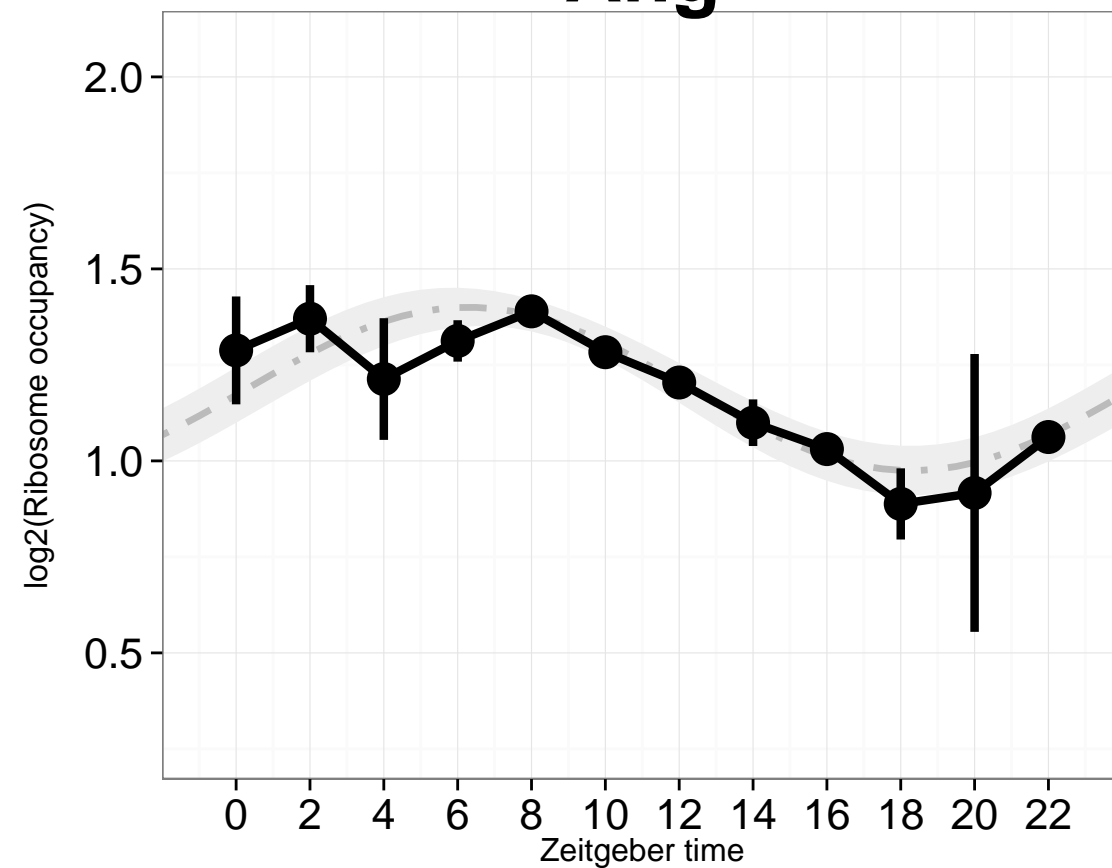

Supplement: SuppDataset_1.zip [file Ang_set_C.pdf › Supplemental Dataset 1/C-mRNA_nonrhythm_translation_rhyth/Ang_set_C.pdf]

# Angel1

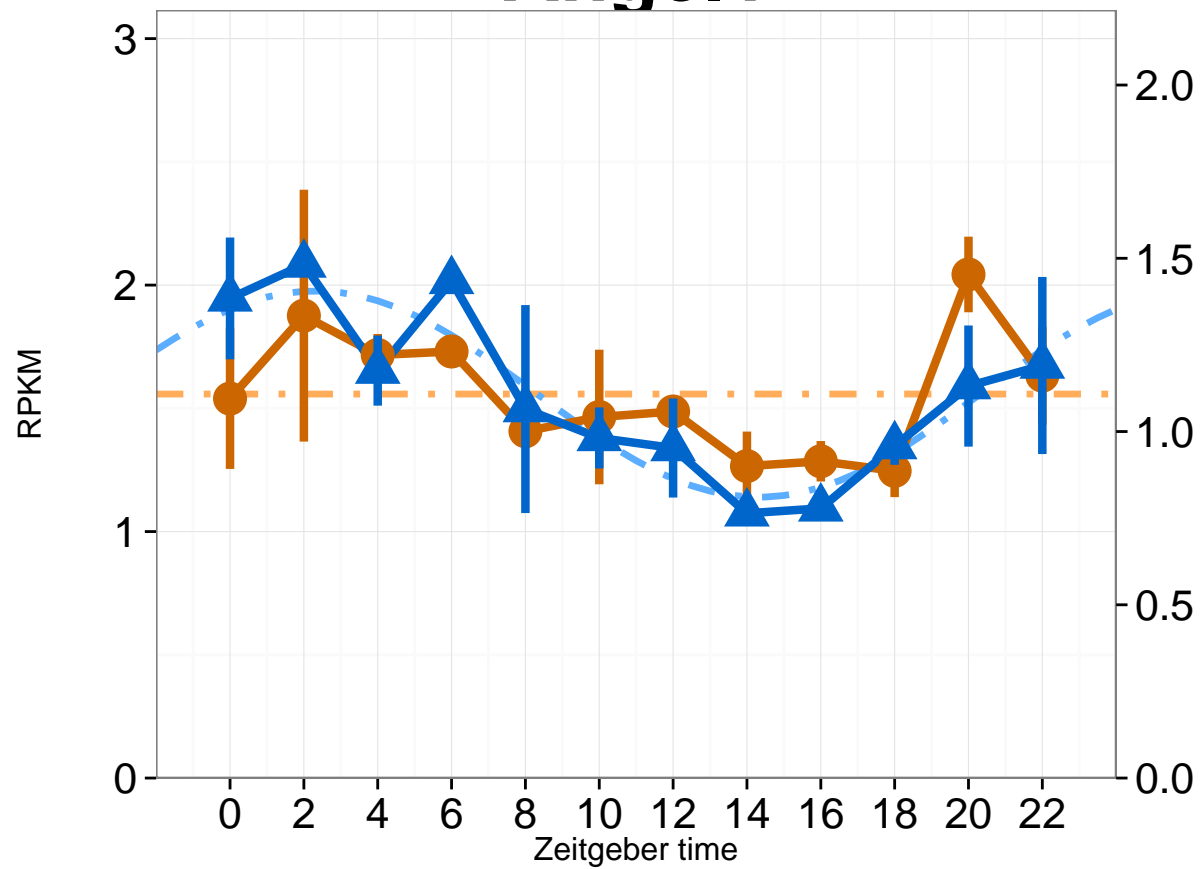

# Angel1

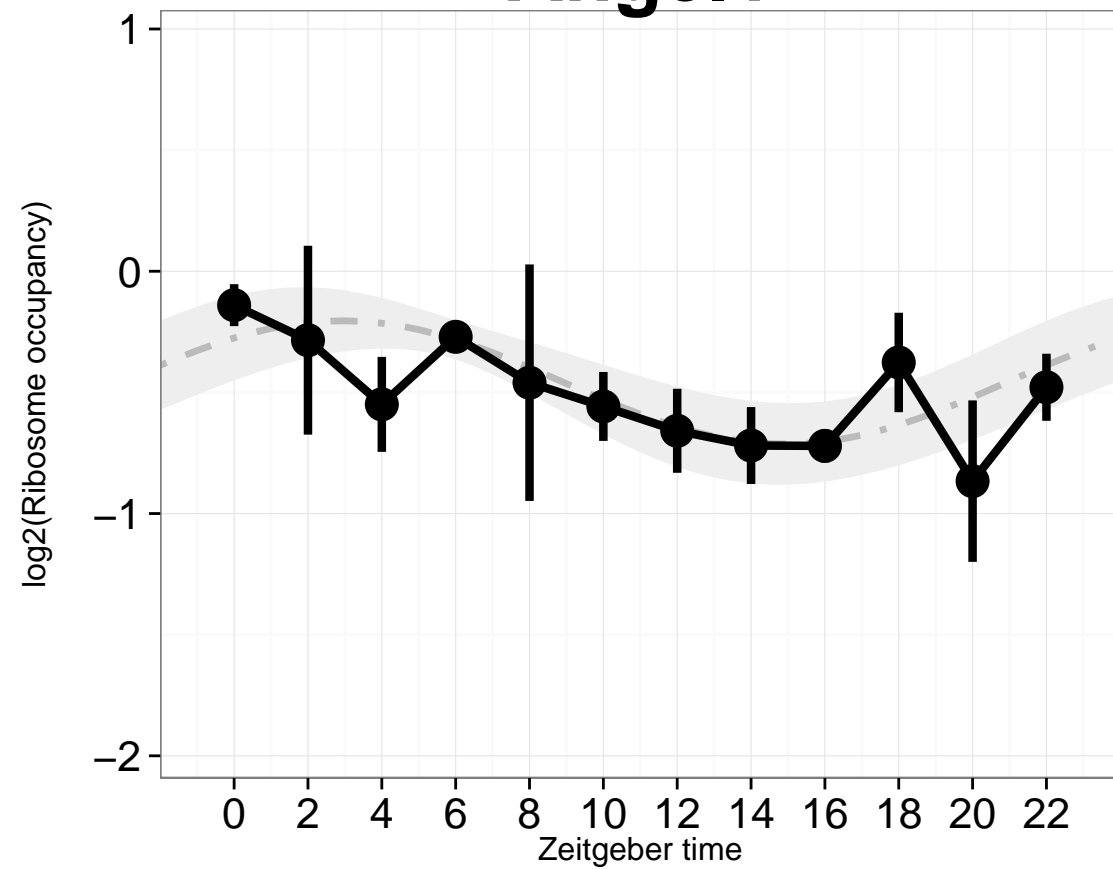

Supplement: SuppDataset_1.zip [file Angel1_set_C.pdf › Supplemental Dataset 1/C-mRNA_nonrhythm_translation_rhyth/Angel1_set_C.pdf]

## Angptl2

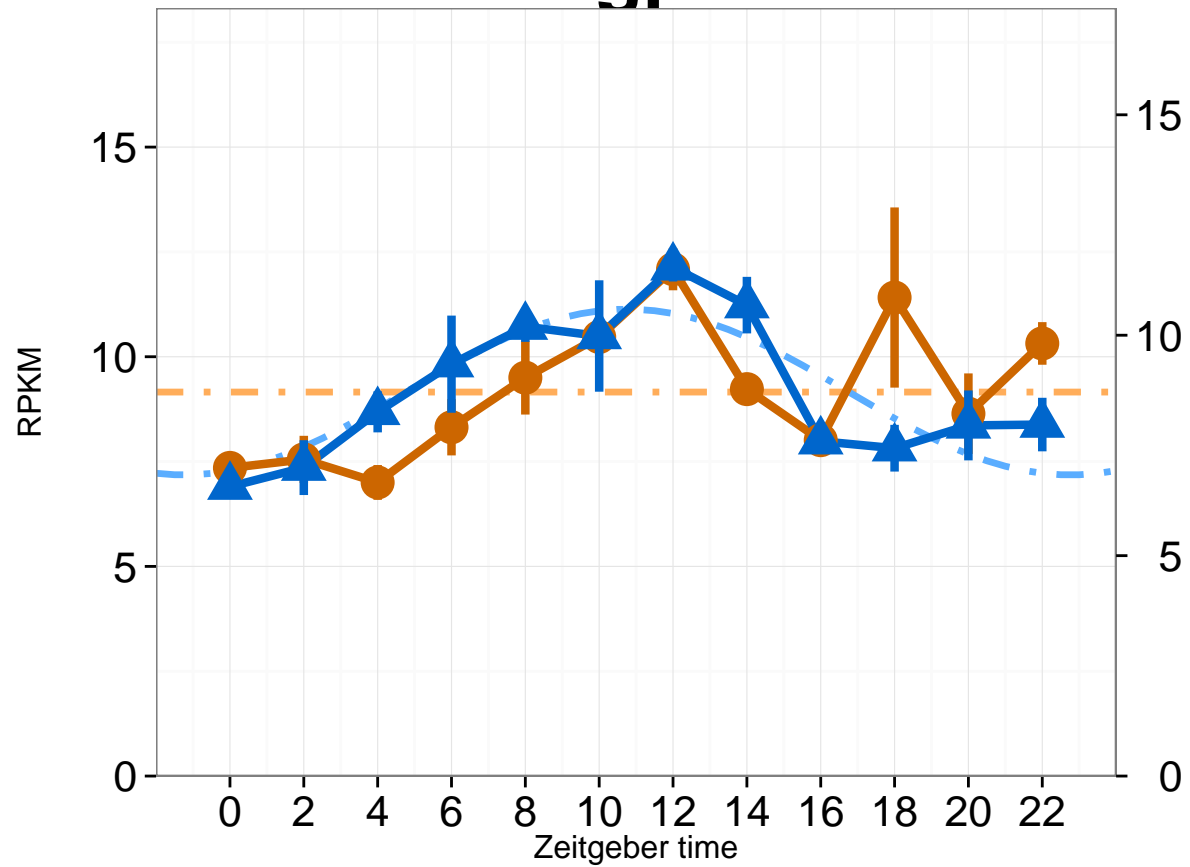

## Angptl2

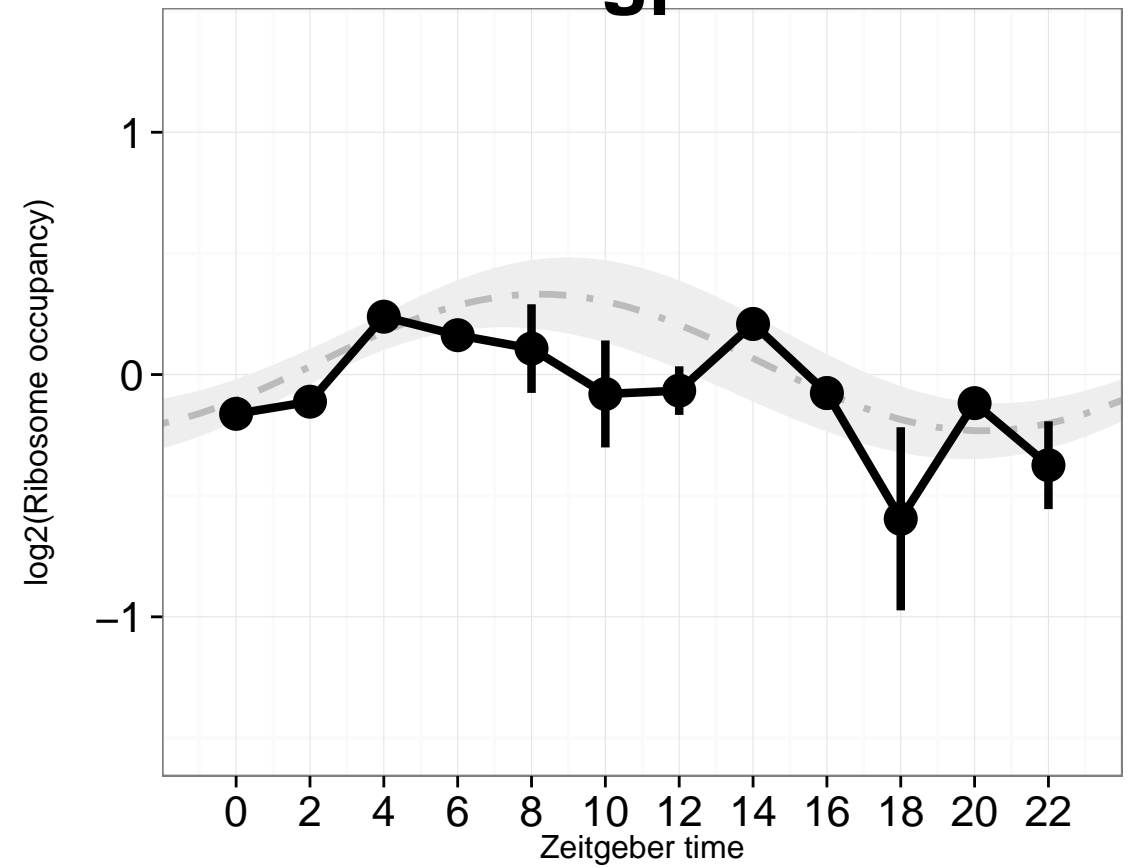

Supplement: SuppDataset_1.zip [file Angptl2_set_C.pdf › Supplemental Dataset 1/C-mRNA_nonrhythm_translation_rhyth/Angptl2_set_C.pdf]

# Ank3

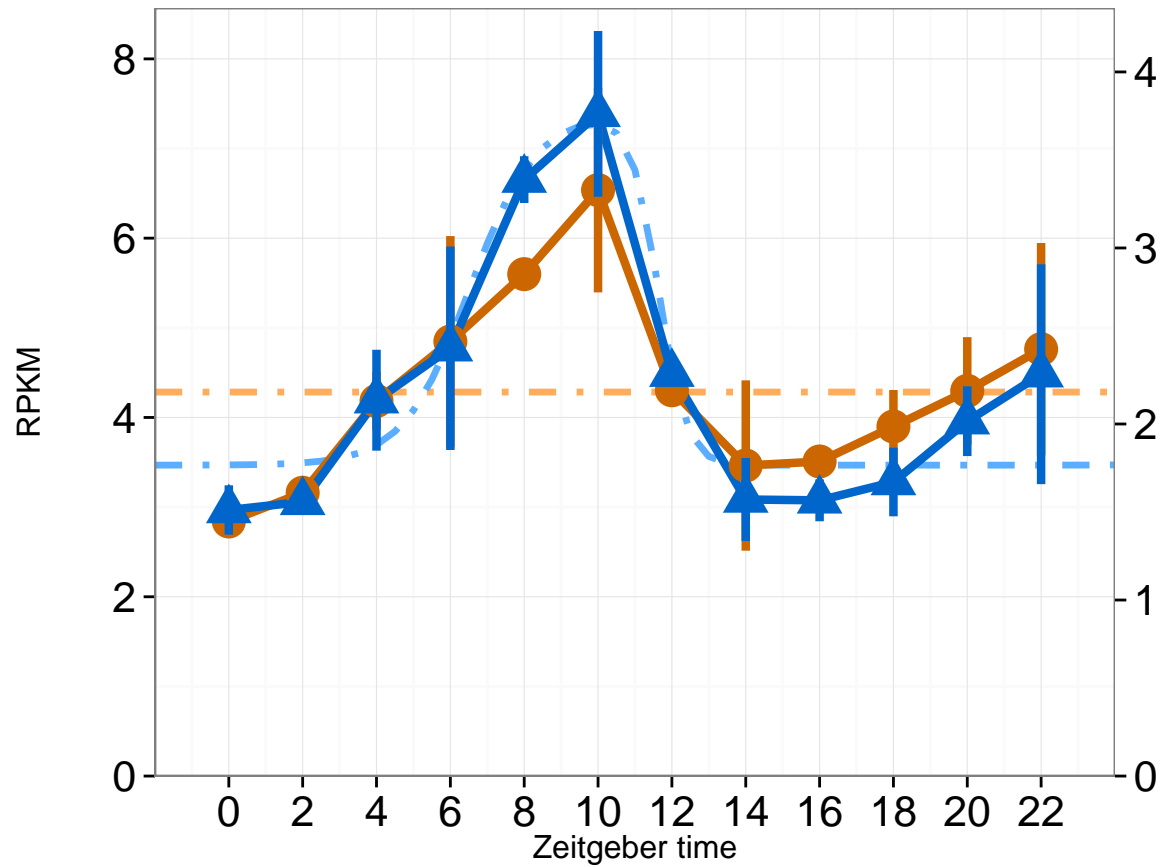

# Ank3

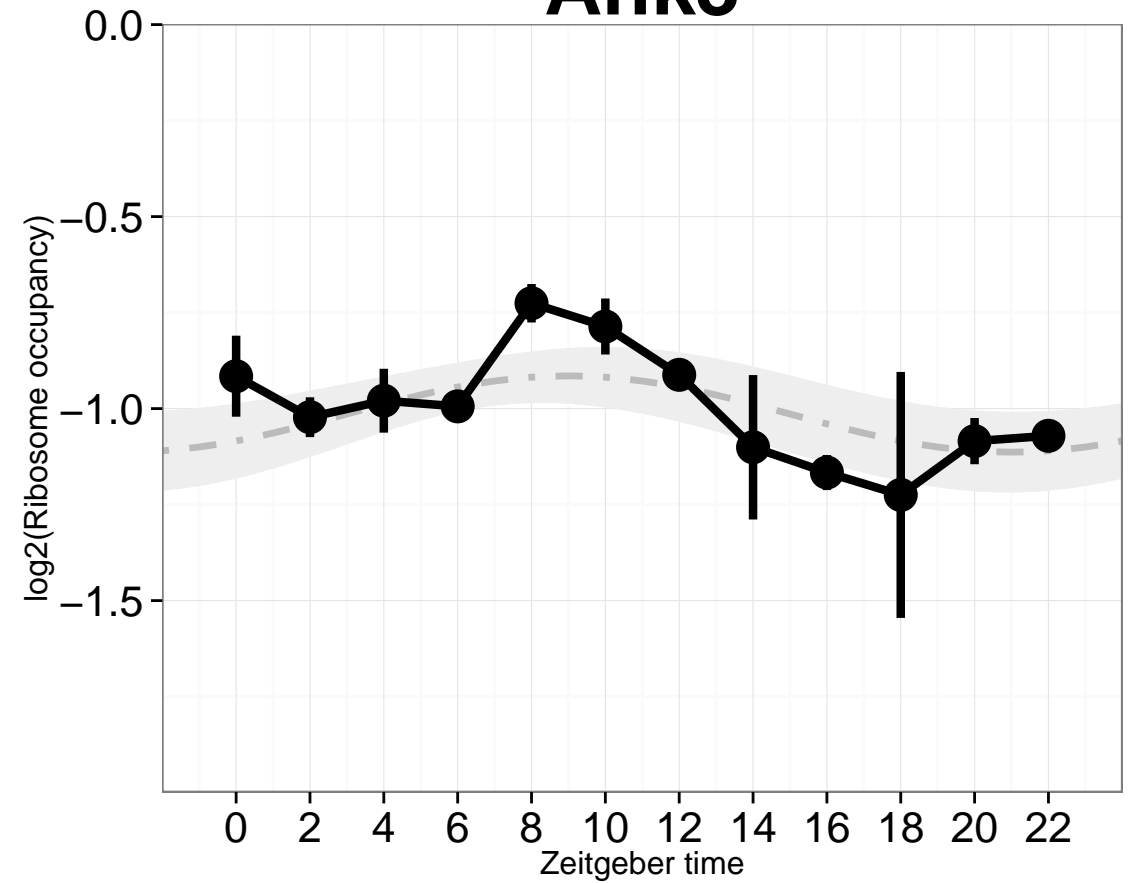

Supplement: SuppDataset_1.zip [file Ank3_set_C.pdf › Supplemental Dataset 1/C-mRNA_nonrhythm_translation_rhyth/Ank3_set_C.pdf]

# Ankrd10

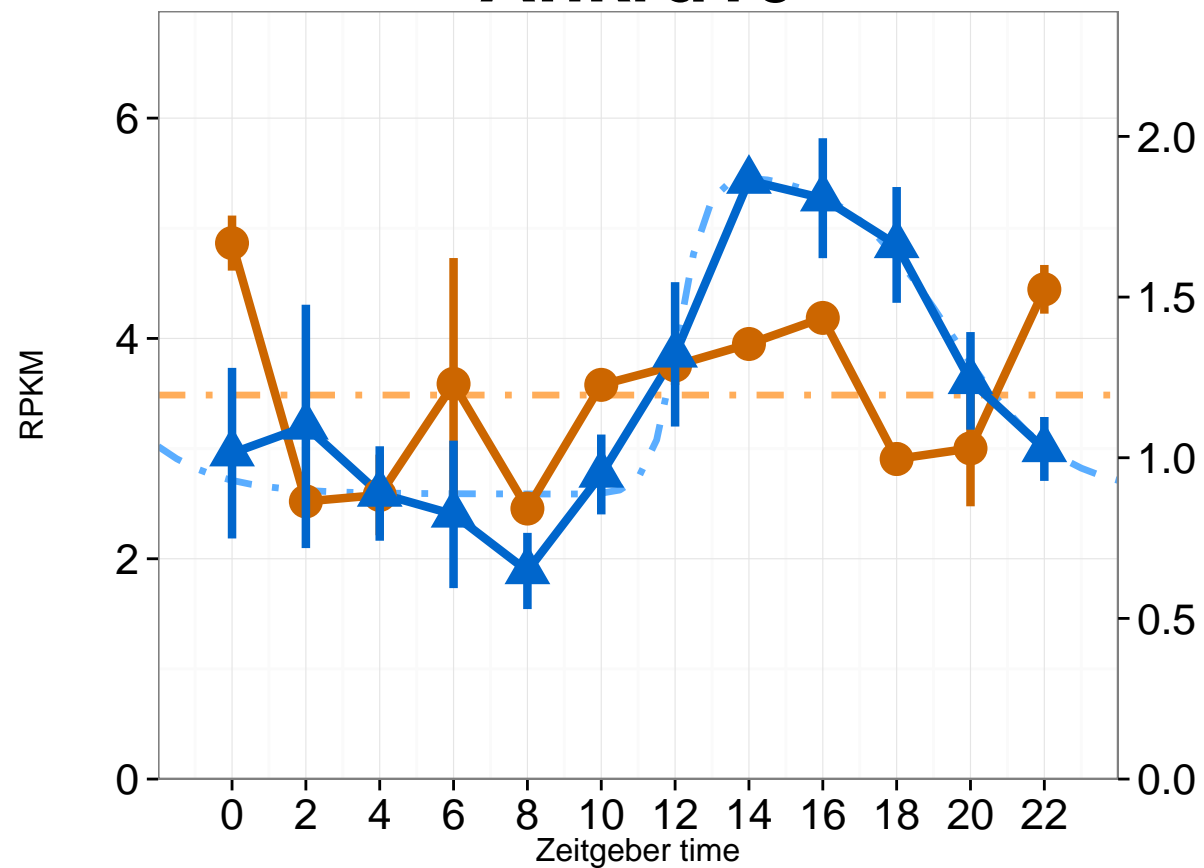

# Ankrd10

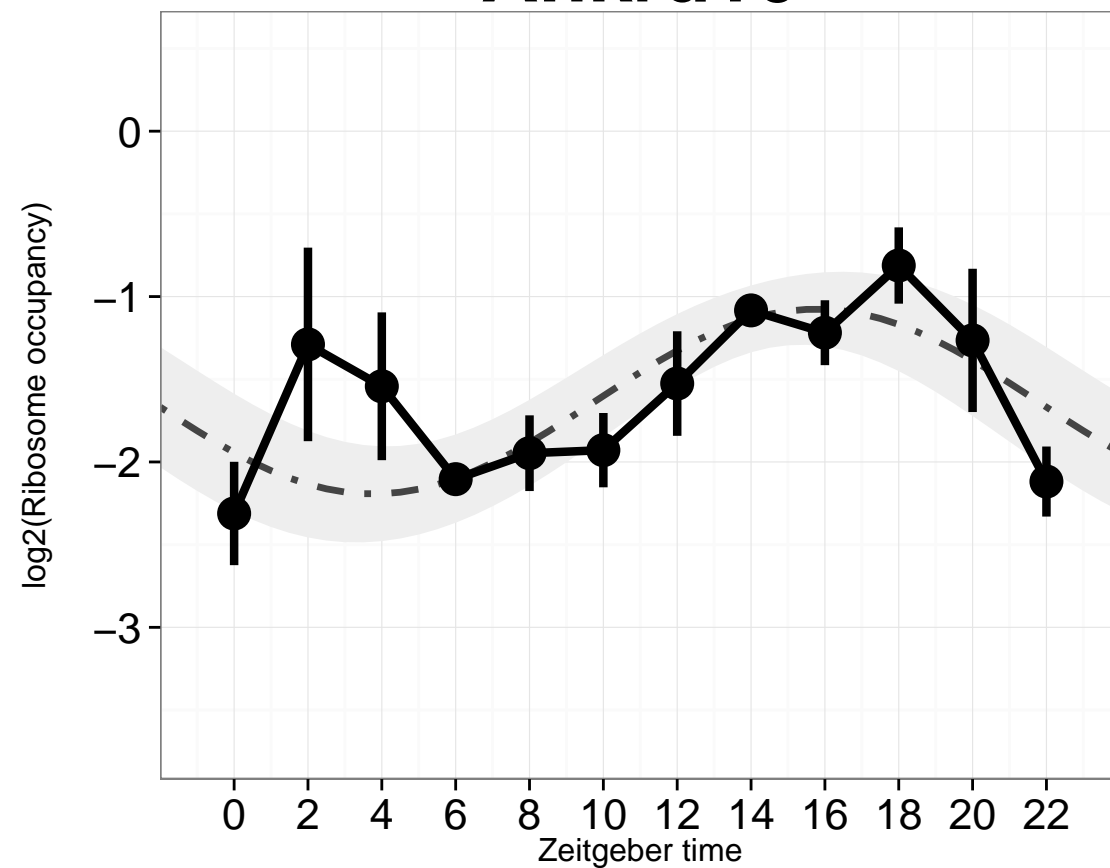

Supplement: SuppDataset_1.zip [file Ankrd10_set_C.pdf › Supplemental Dataset 1/C-mRNA_nonrhythm_translation_rhyth/Ankrd10_set_C.pdf]

# Ankrd16

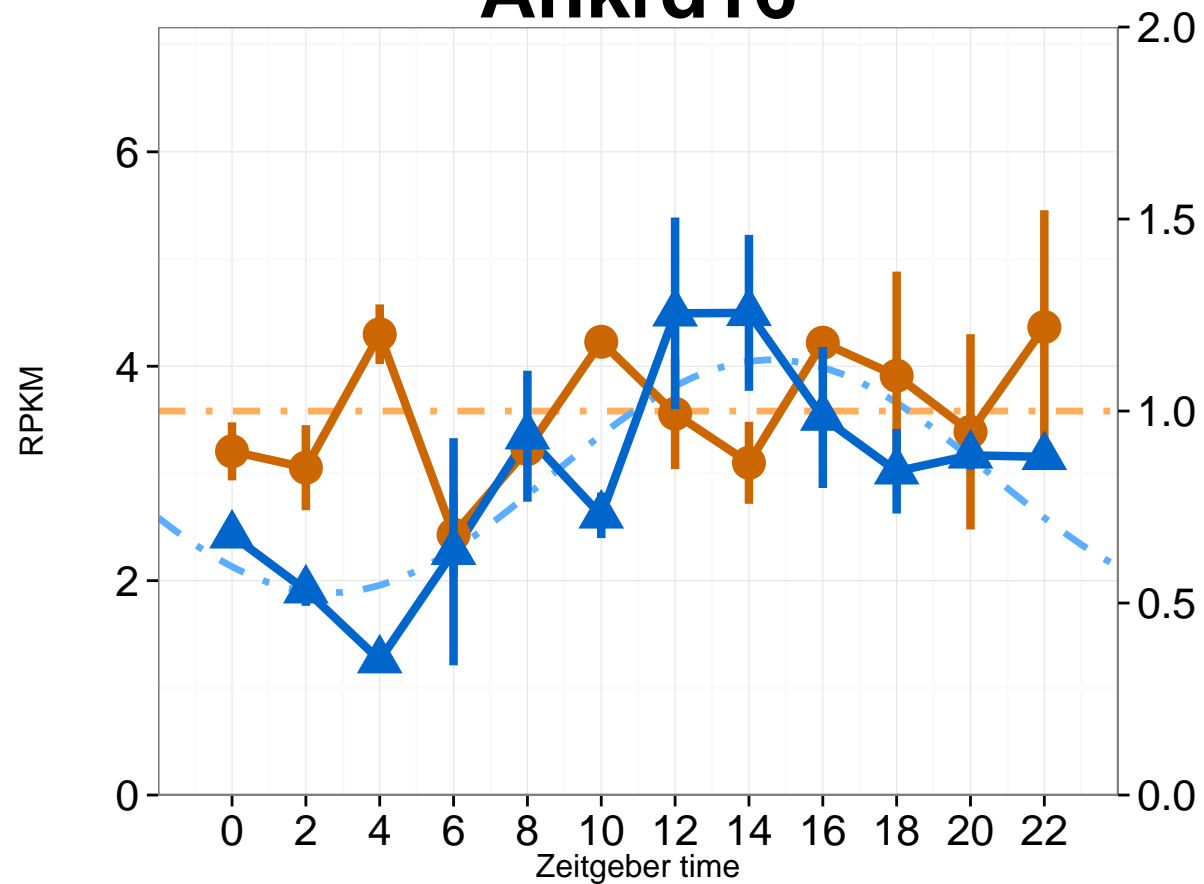

# Ankrd16

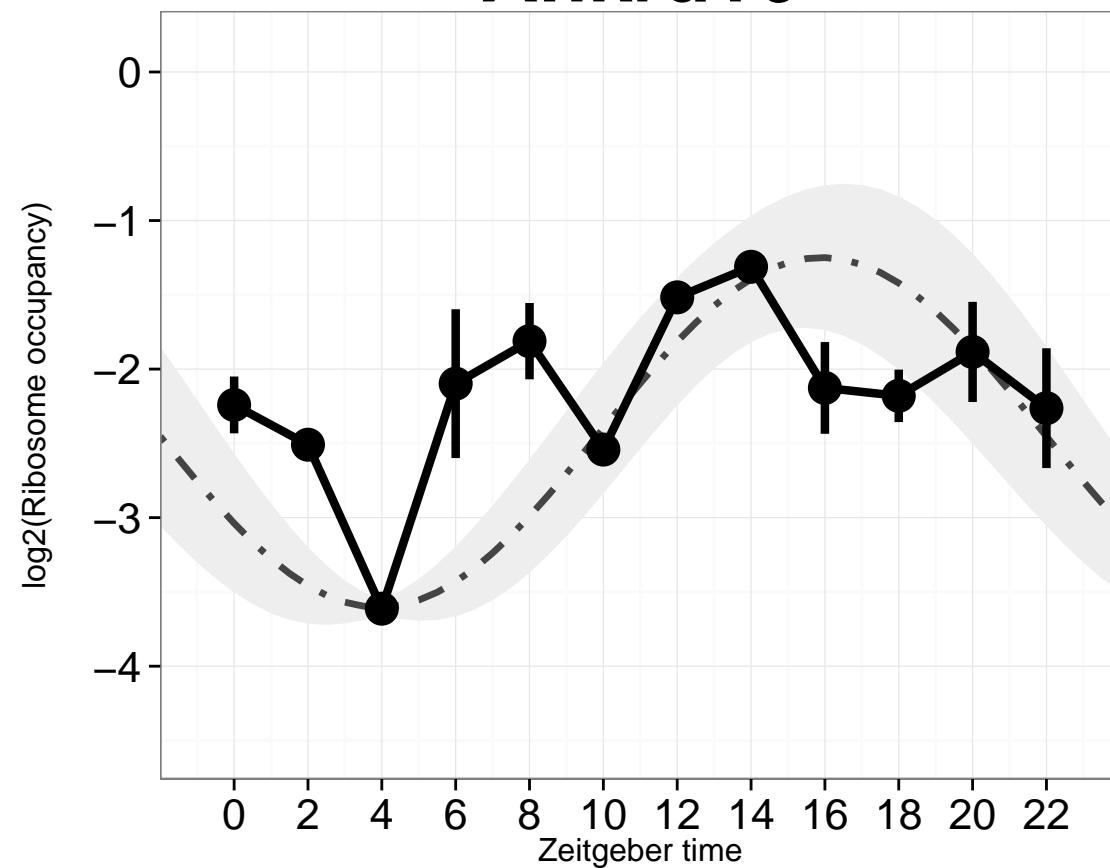

Supplement: SuppDataset_1.zip [file Ankrd16_set_C.pdf › Supplemental Dataset 1/C-mRNA_nonrhythm_translation_rhyth/Ankrd16_set_C.pdf]

## Ankrd54

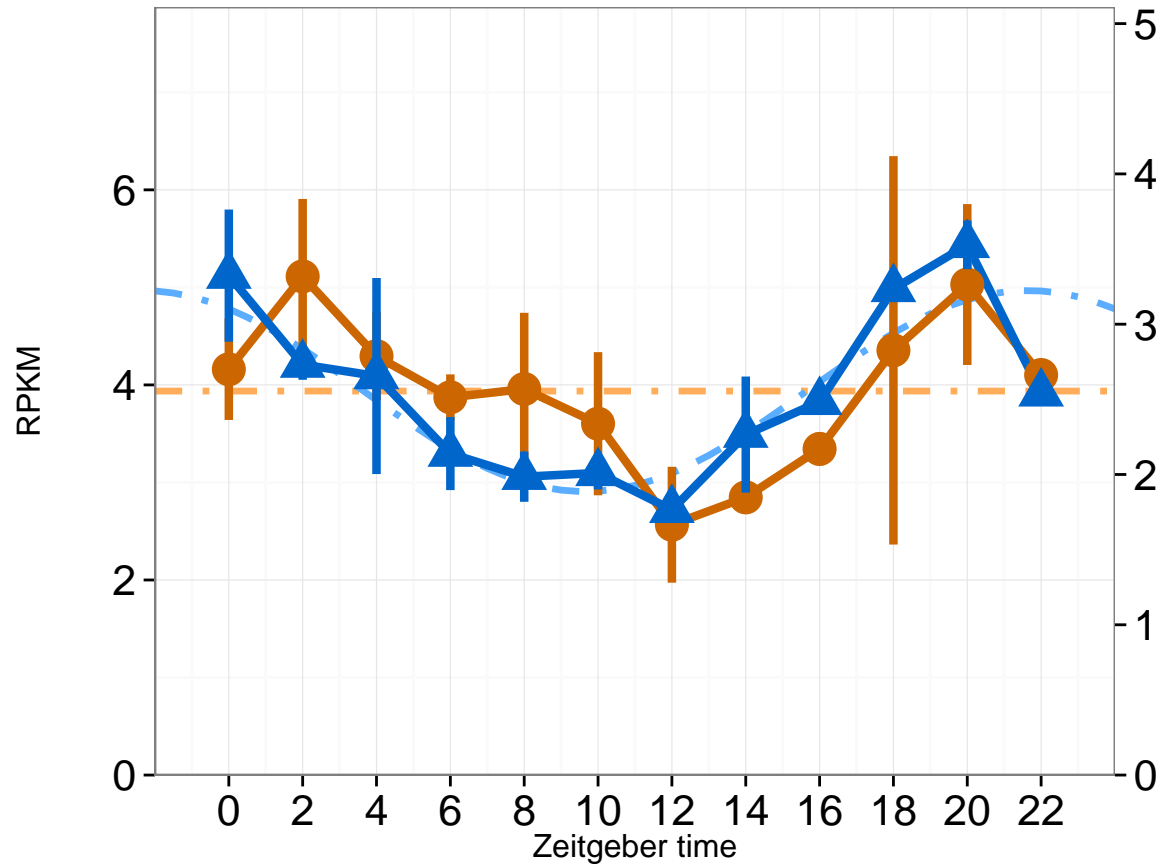

## Ankrd54

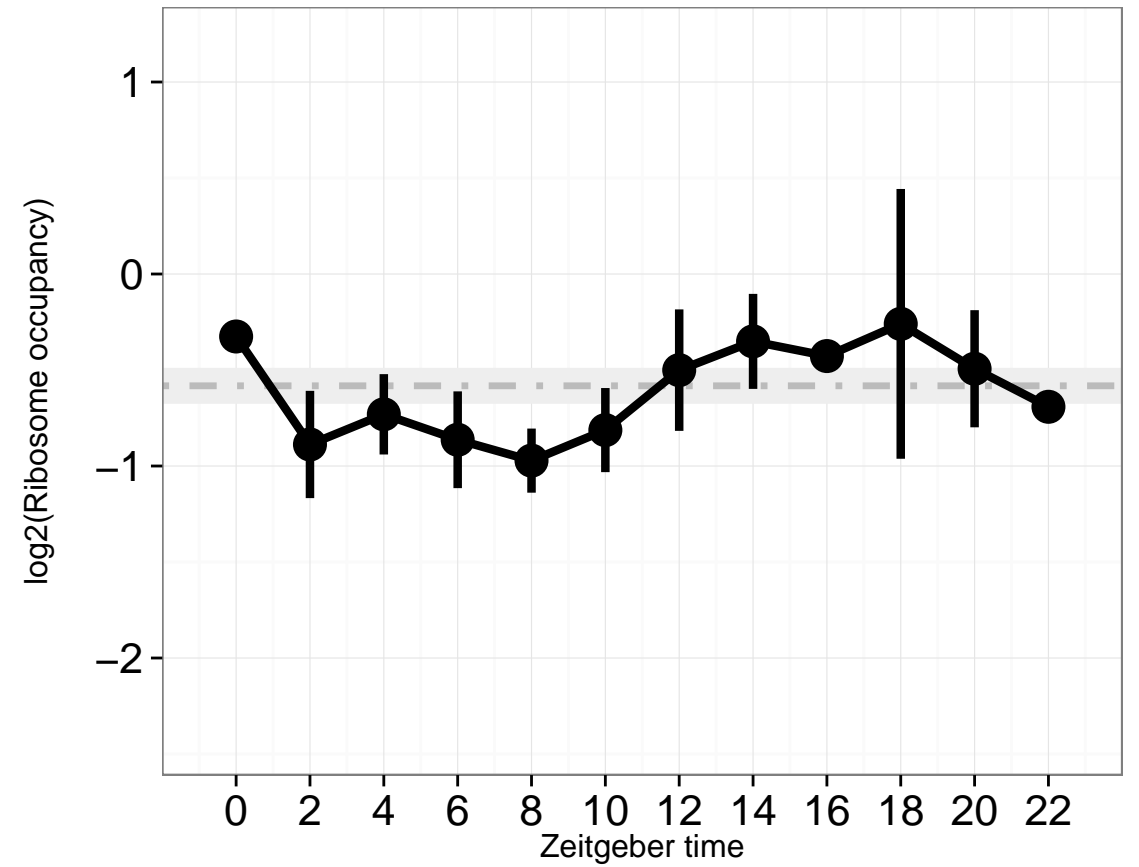

Supplement: SuppDataset_1.zip [file Ankrd54_set_C.pdf › Supplemental Dataset 1/C-mRNA_nonrhythm_translation_rhyth/Ankrd54_set_C.pdf]

# Arfip2

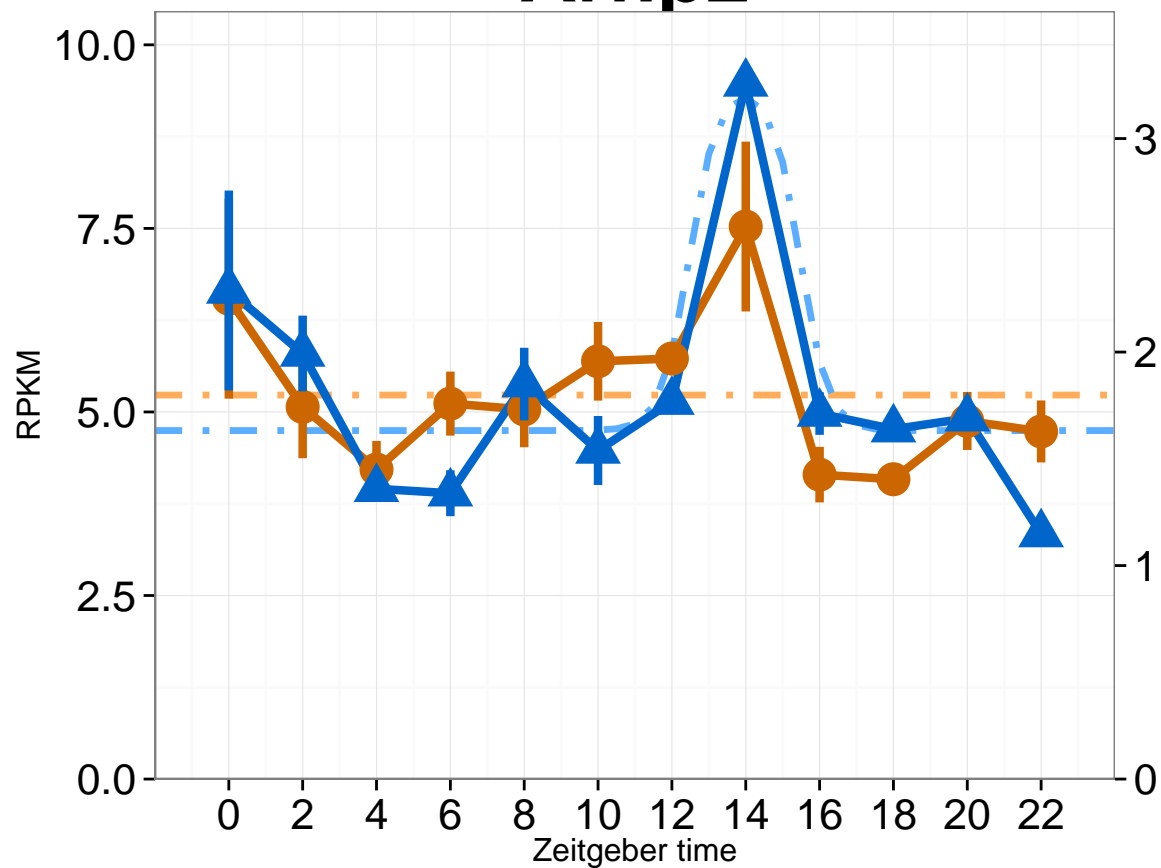

# Arfip2

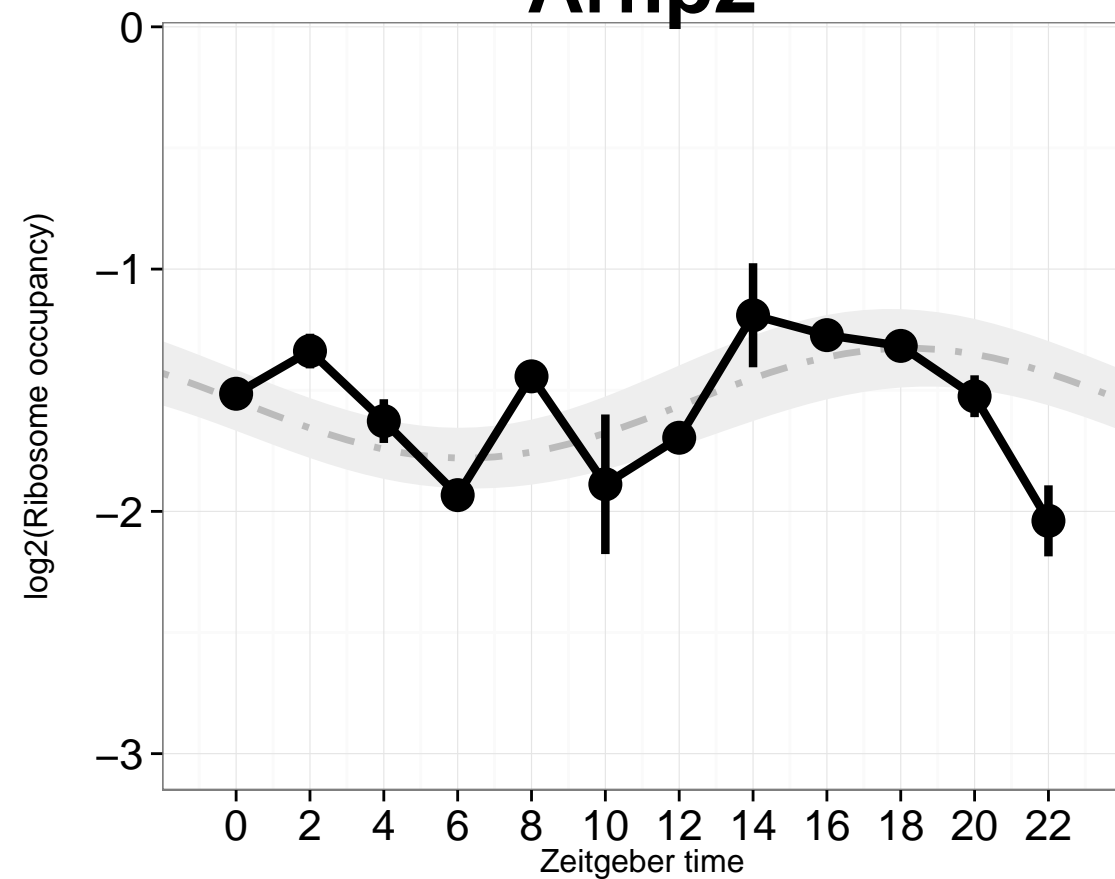

Supplement: SuppDataset_1.zip [file Arfip2_set_C.pdf › Supplemental Dataset 1/C-mRNA_nonrhythm_translation_rhyth/Arfip2_set_C.pdf]

## Arg1

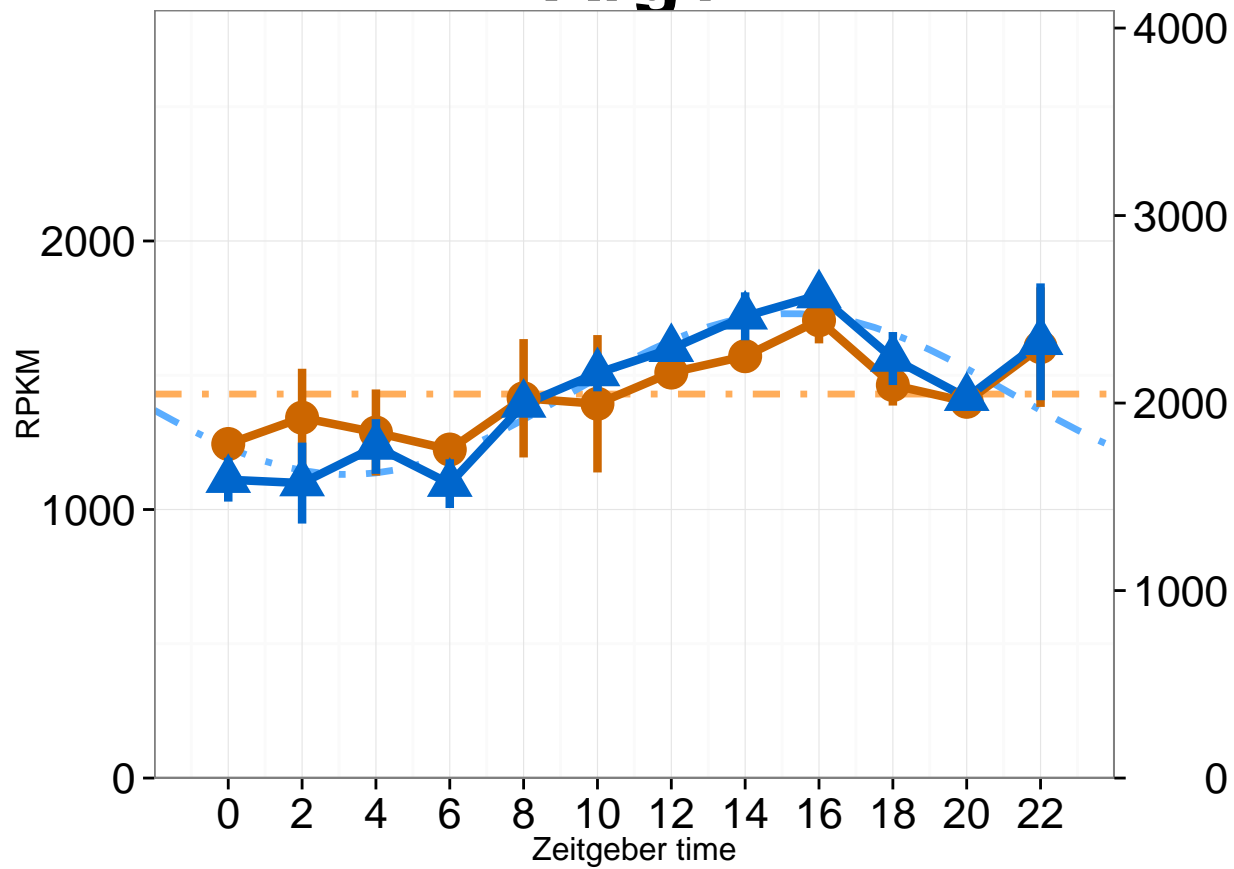

## Arg1

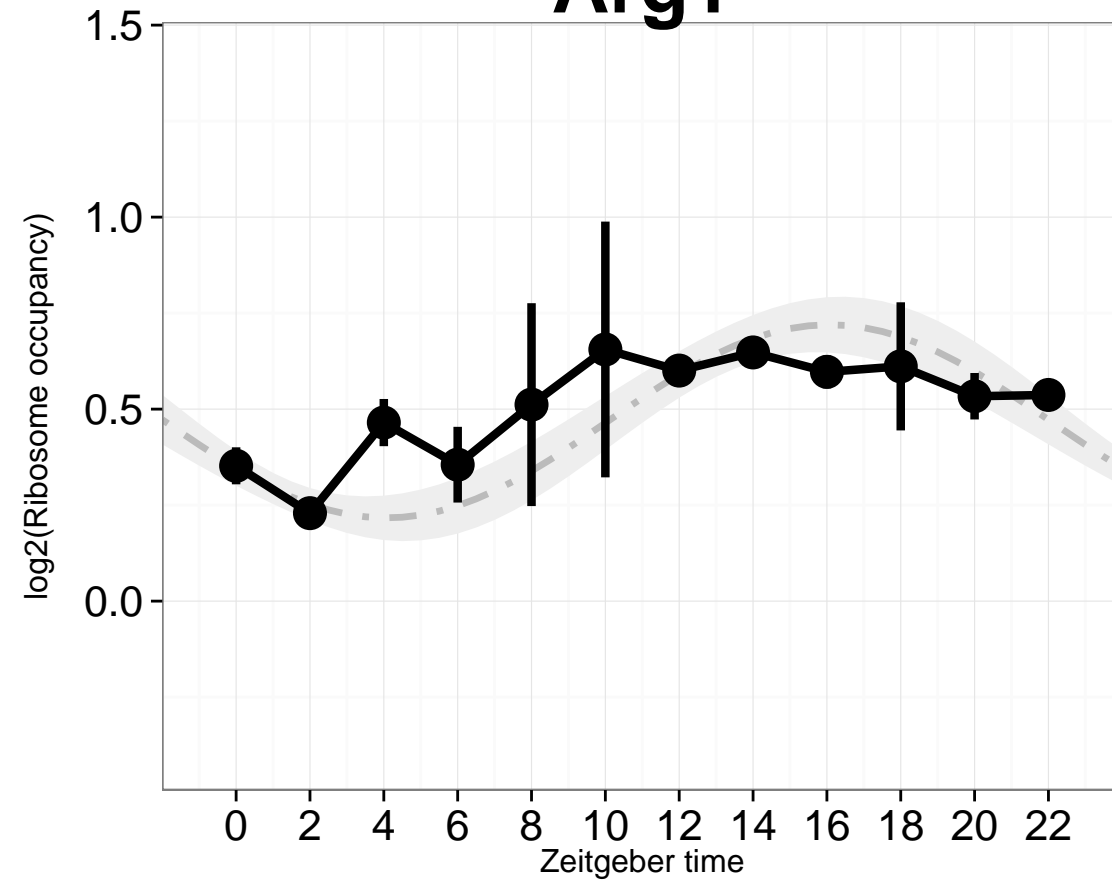

Supplement: SuppDataset_1.zip [file Arg1_set_C.pdf › Supplemental Dataset 1/C-mRNA_nonrhythm_translation_rhyth/Arg1_set_C.pdf]

# Arhgap18

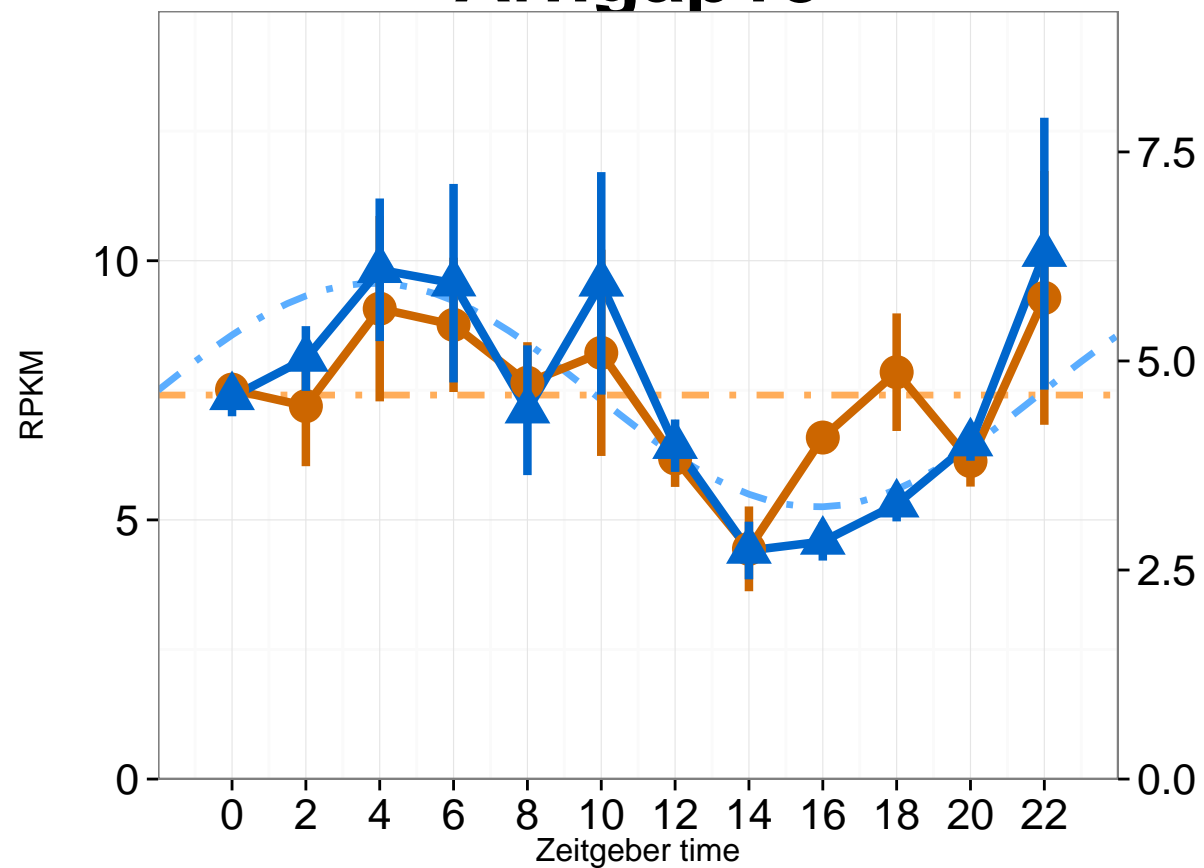

# Arhgap18

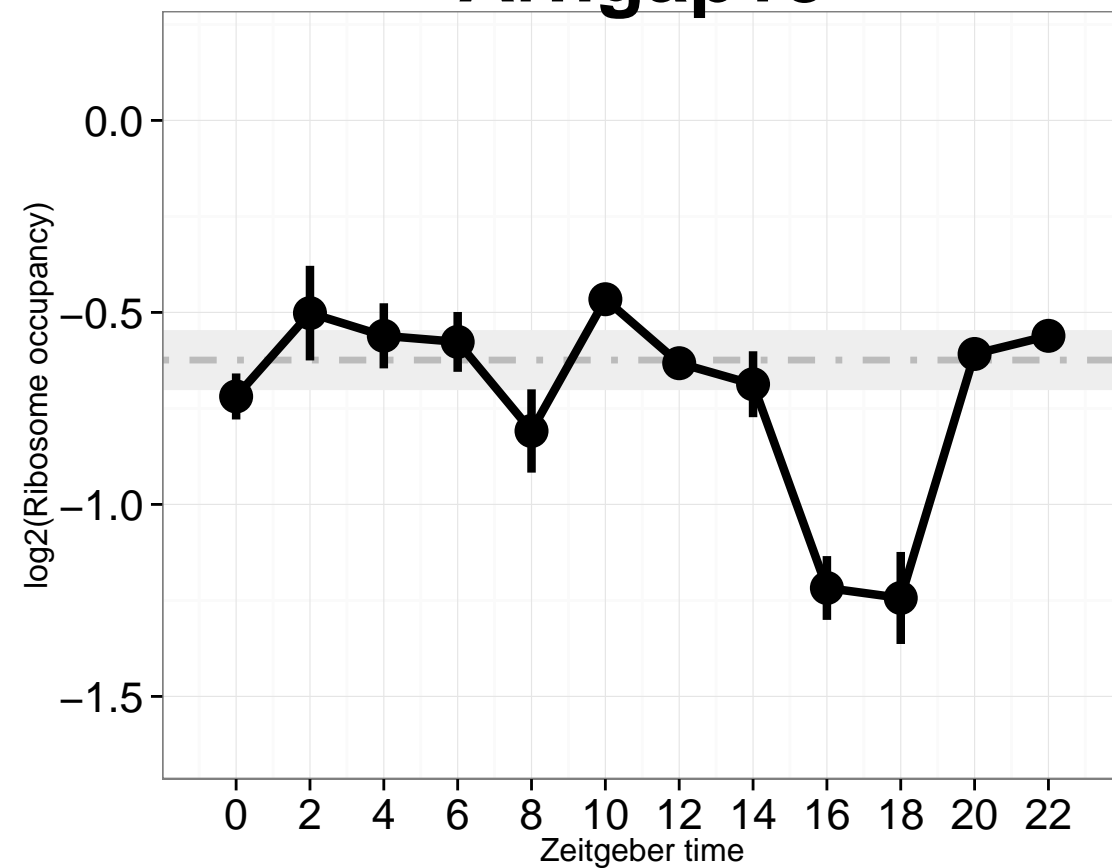

Supplement: SuppDataset_1.zip [file Arhgap18_set_C.pdf › Supplemental Dataset 1/C-mRNA_nonrhythm_translation_rhyth/Arhgap18_set_C.pdf]

# Arhgap26

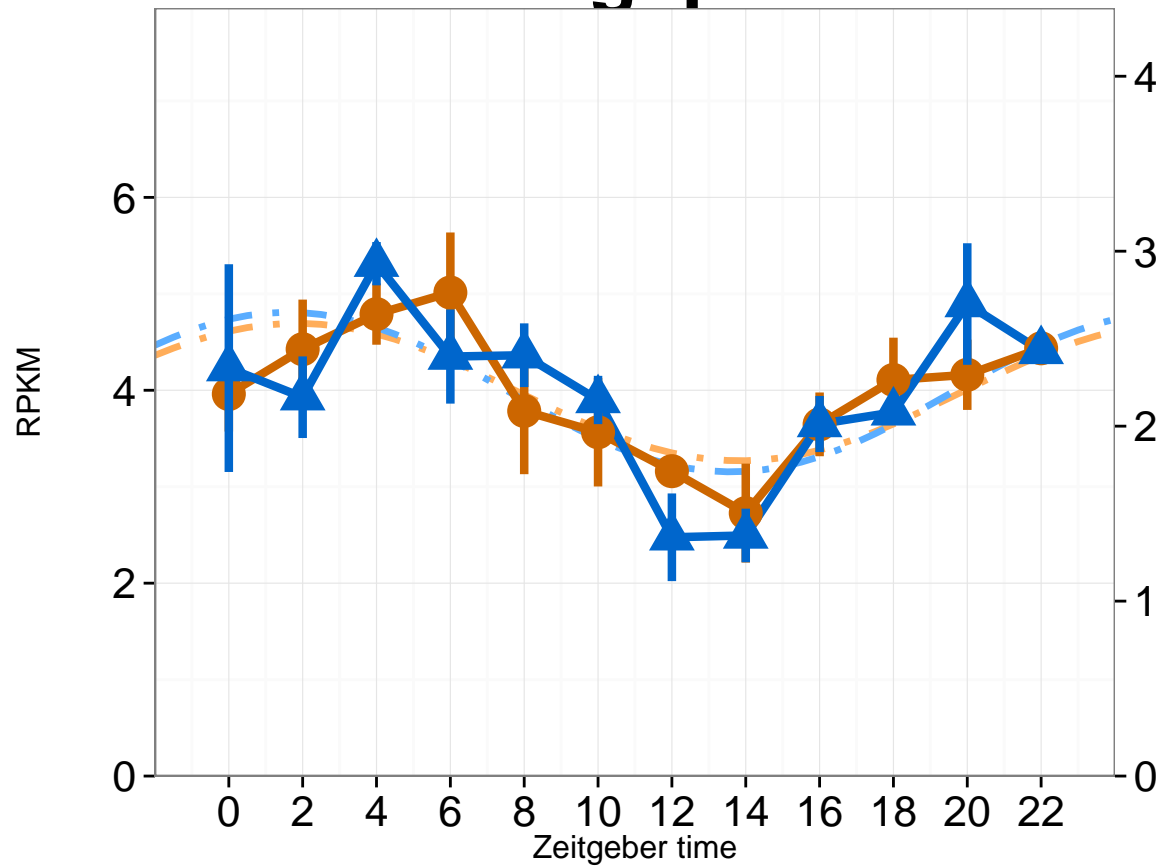

# Arhgap26

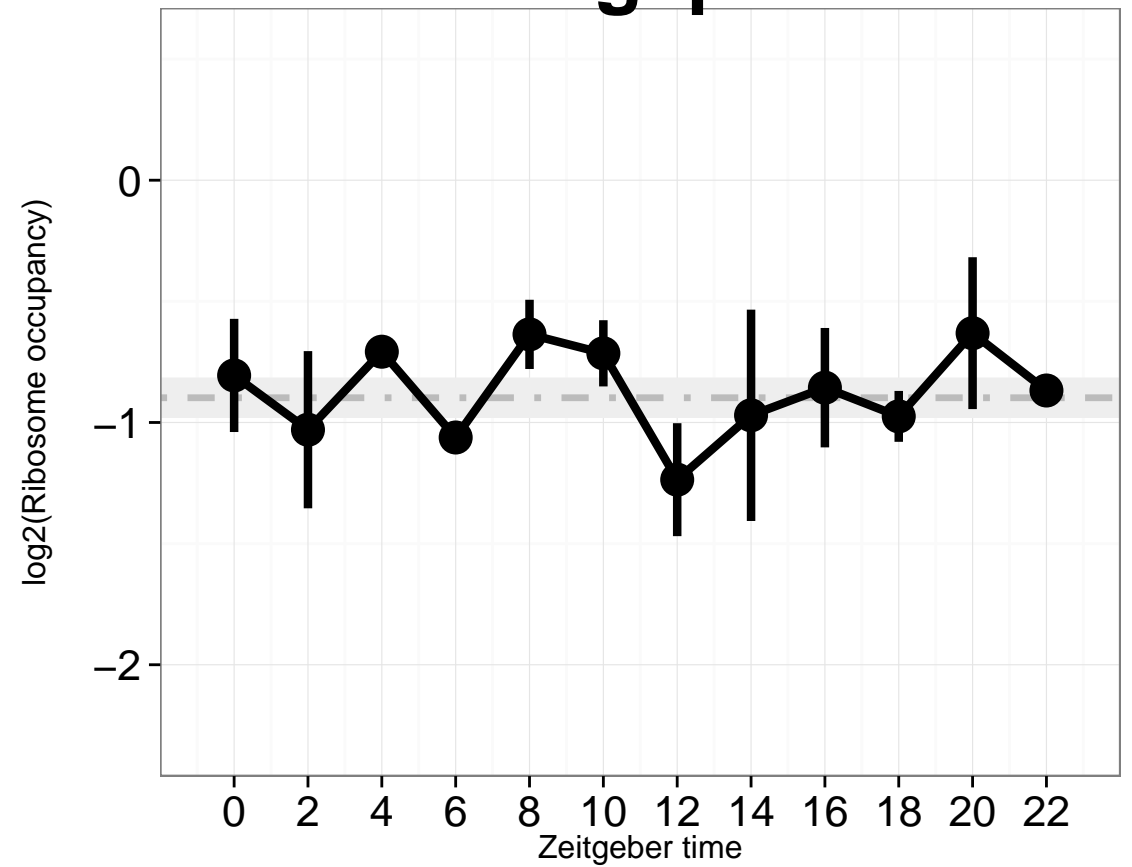

Supplement: SuppDataset_1.zip [file Arhgap26_set_C.pdf › Supplemental Dataset 1/C-mRNA_nonrhythm_translation_rhyth/Arhgap26_set_C.pdf]

# Arhgef18

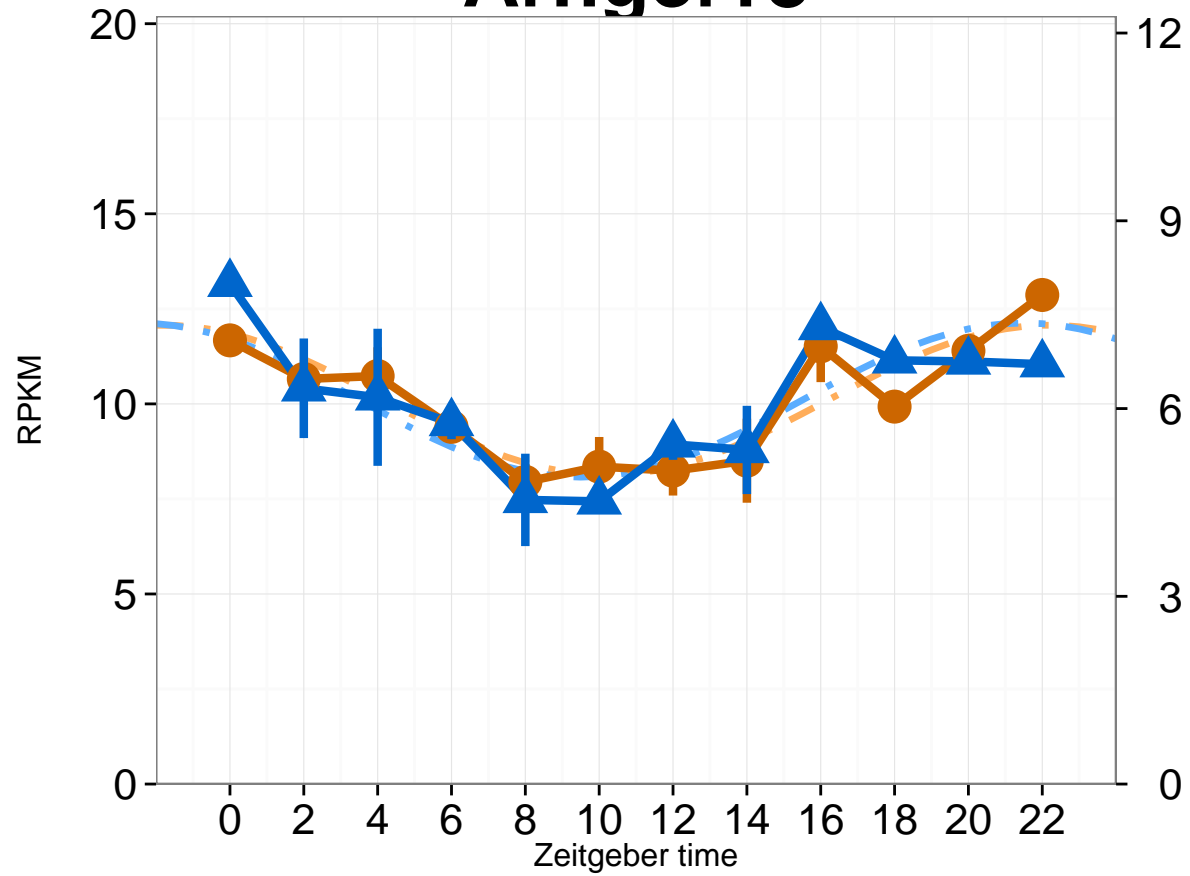

# Arhgef18

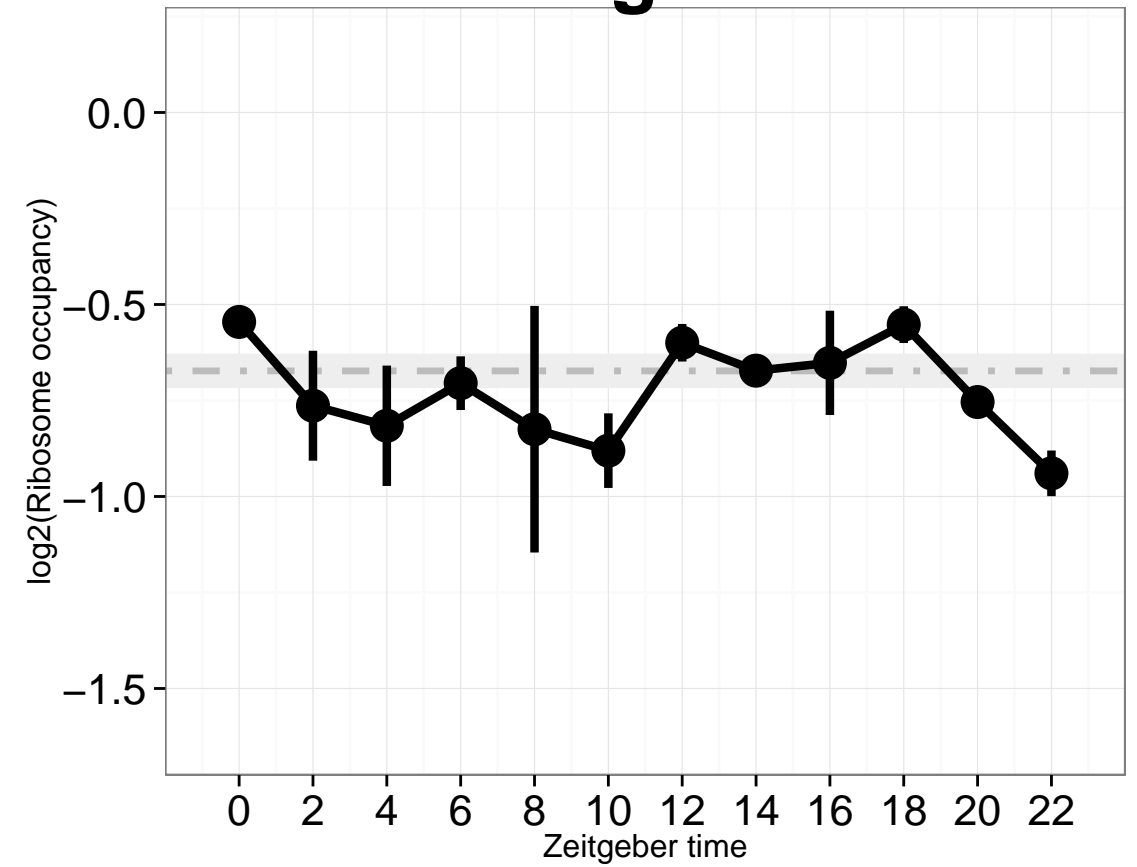

Supplement: SuppDataset_1.zip [file Arhgef18_set_C.pdf › Supplemental Dataset 1/C-mRNA_nonrhythm_translation_rhyth/Arhgef18_set_C.pdf]

# Arl16

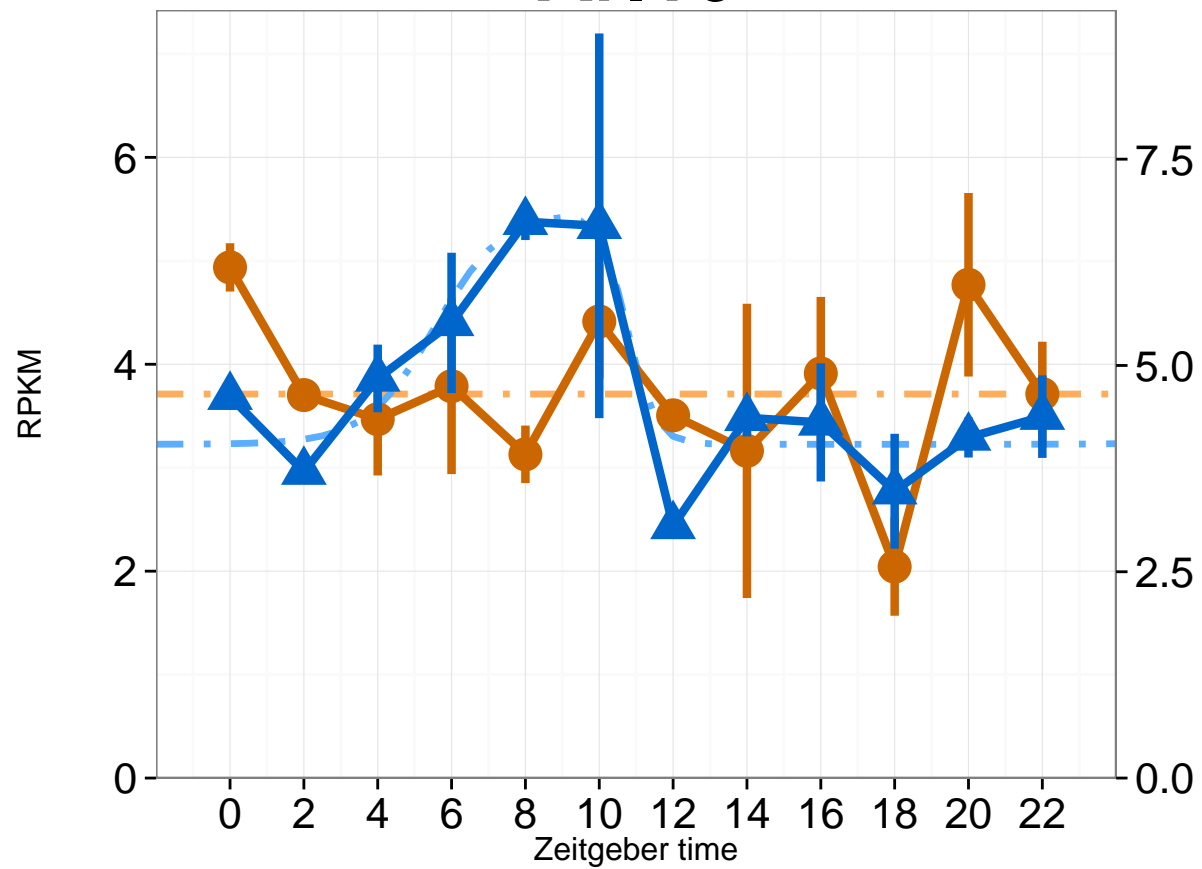

# Arl16

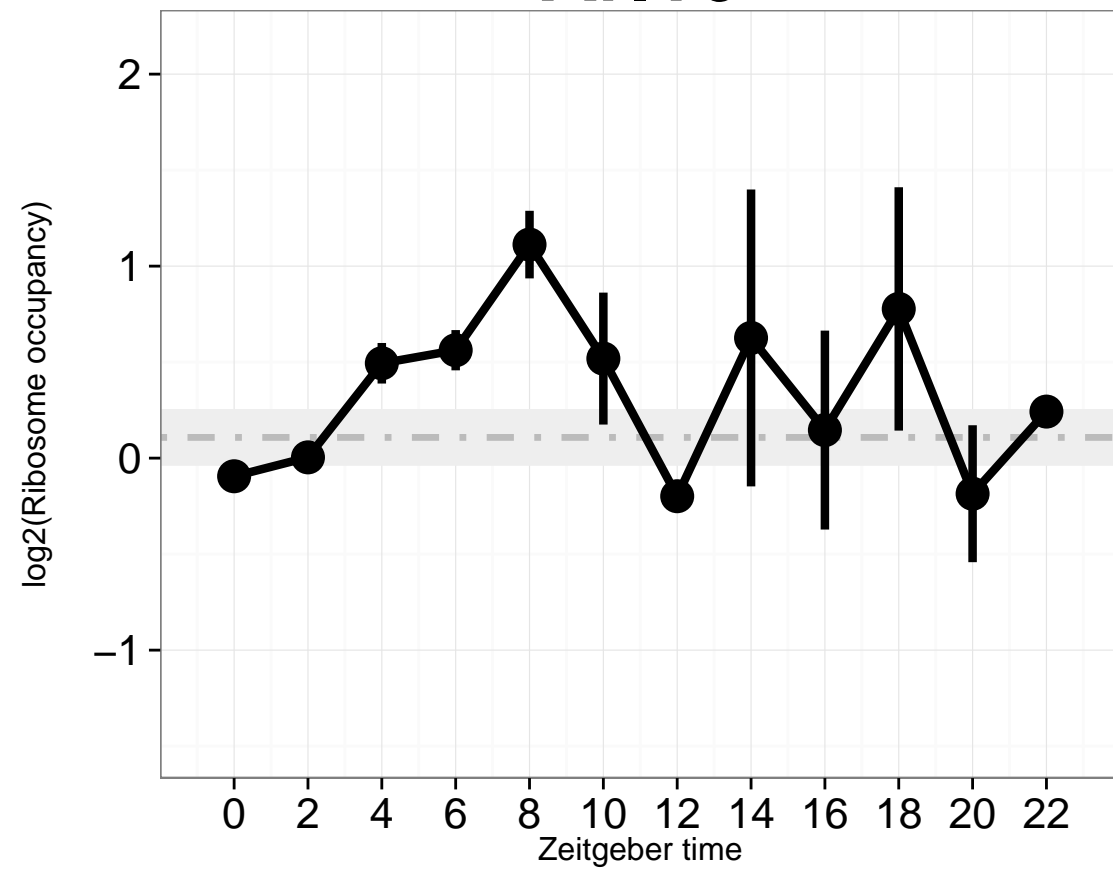

Supplement: SuppDataset_1.zip [file Arl16_set_C.pdf › Supplemental Dataset 1/C-mRNA_nonrhythm_translation_rhyth/Arl16_set_C.pdf]

# Arl2bp

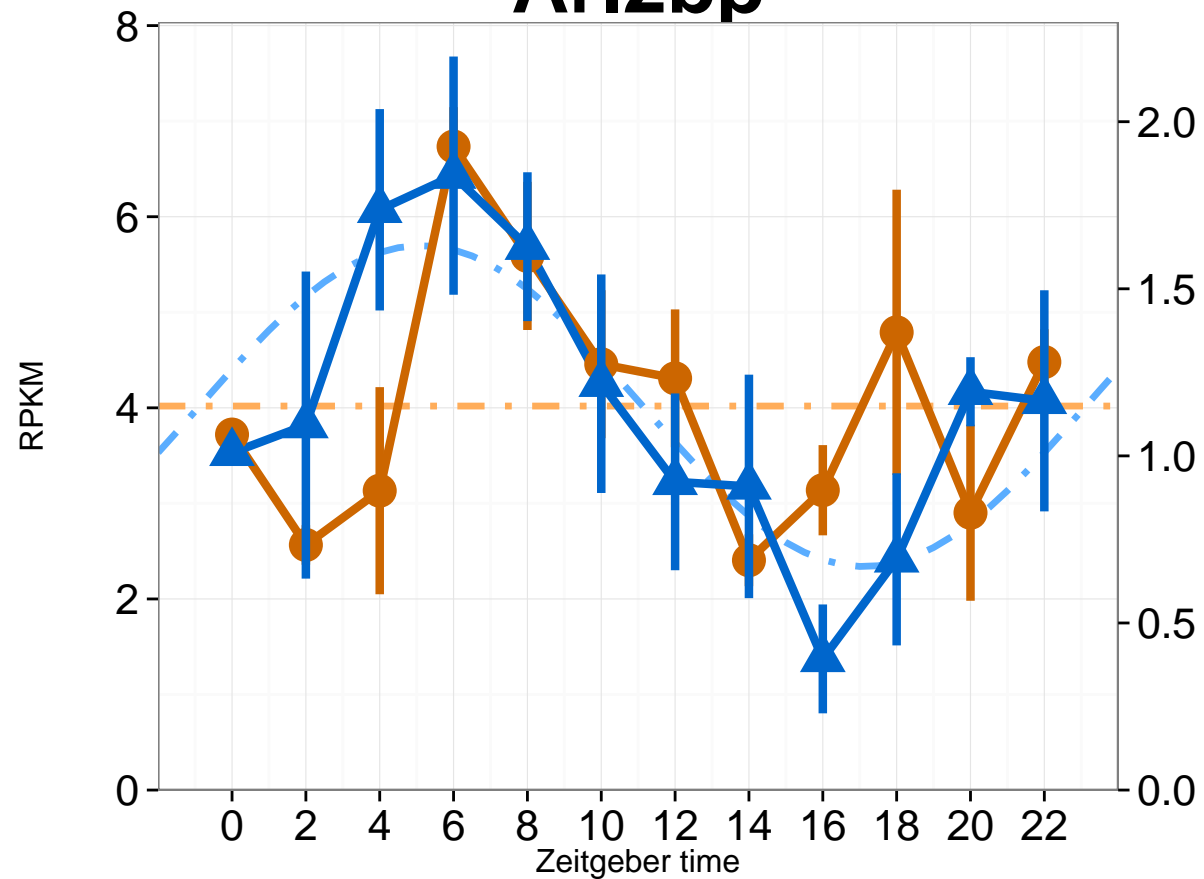

# Arl2bp

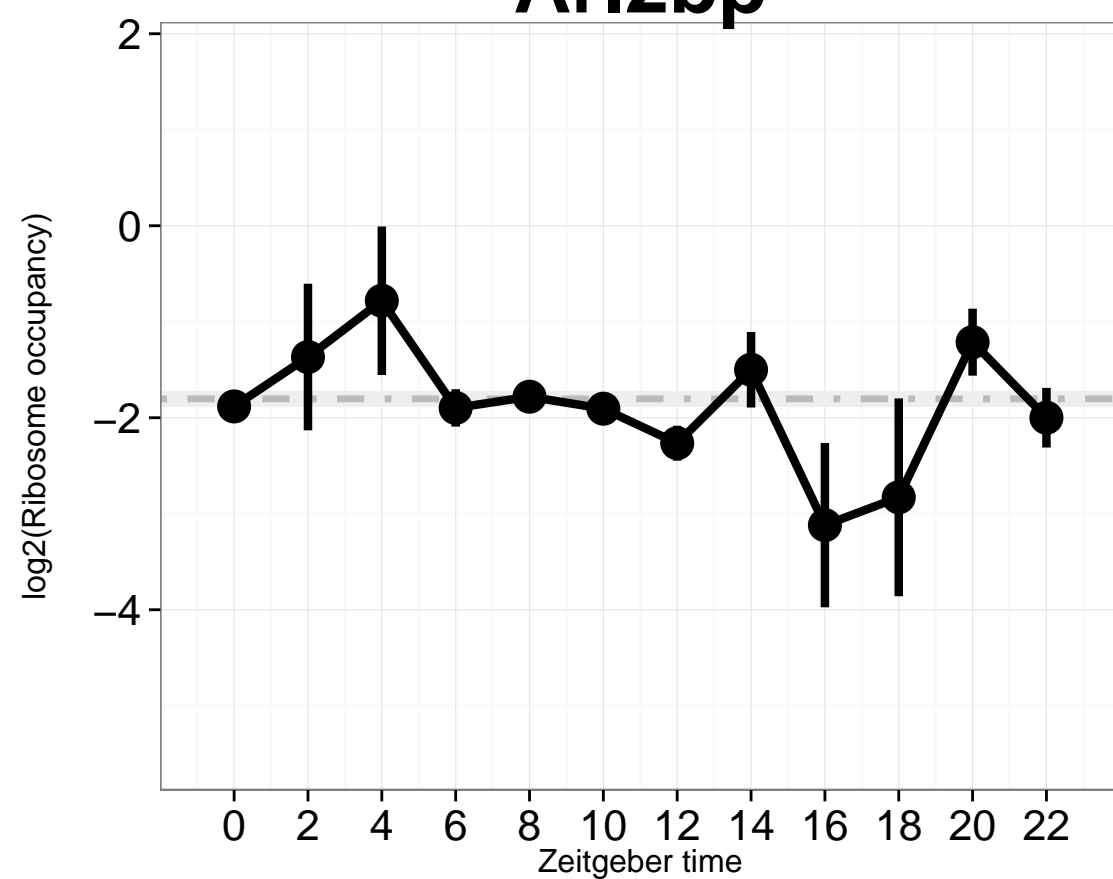

Supplement: SuppDataset_1.zip [file Arl2bp_set_C.pdf › Supplemental Dataset 1/C-mRNA_nonrhythm_translation_rhyth/Arl2bp_set_C.pdf]

## Asrgl1

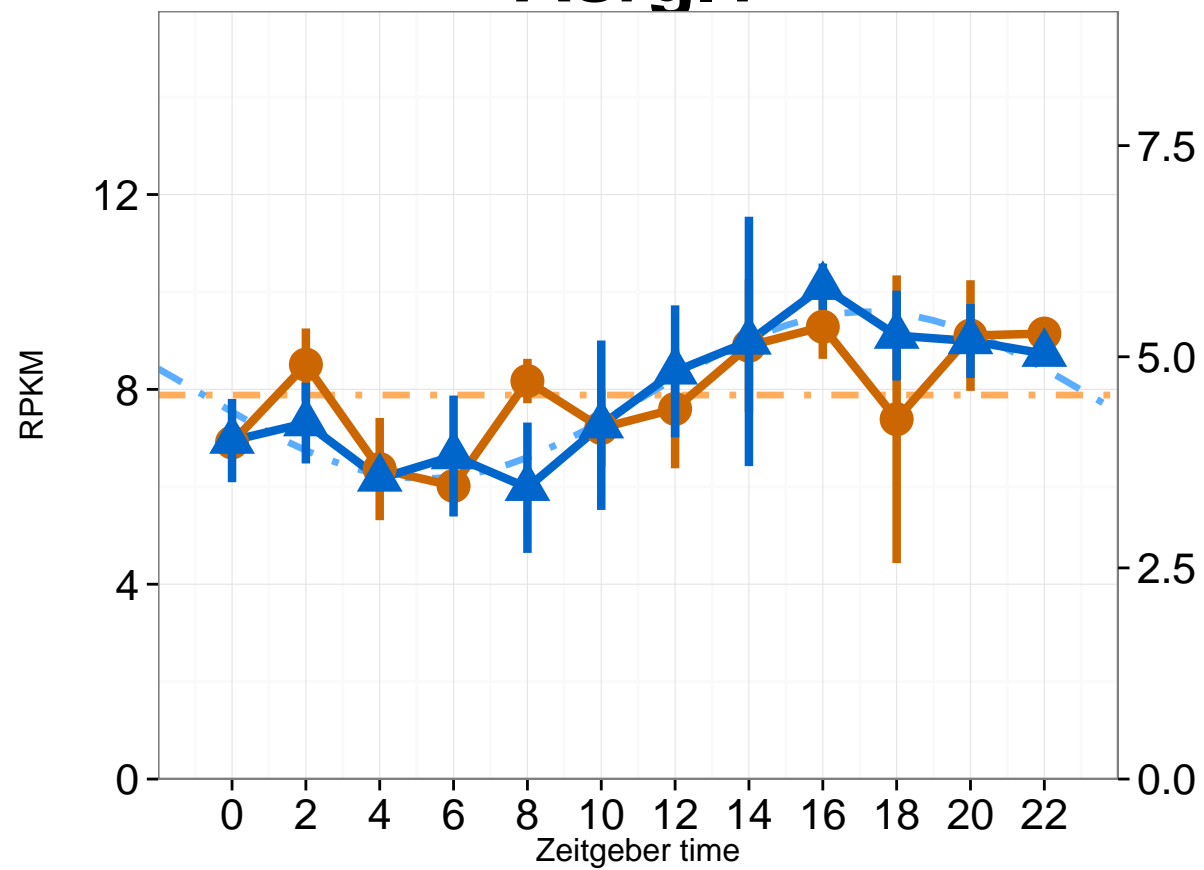

## Asrgl1

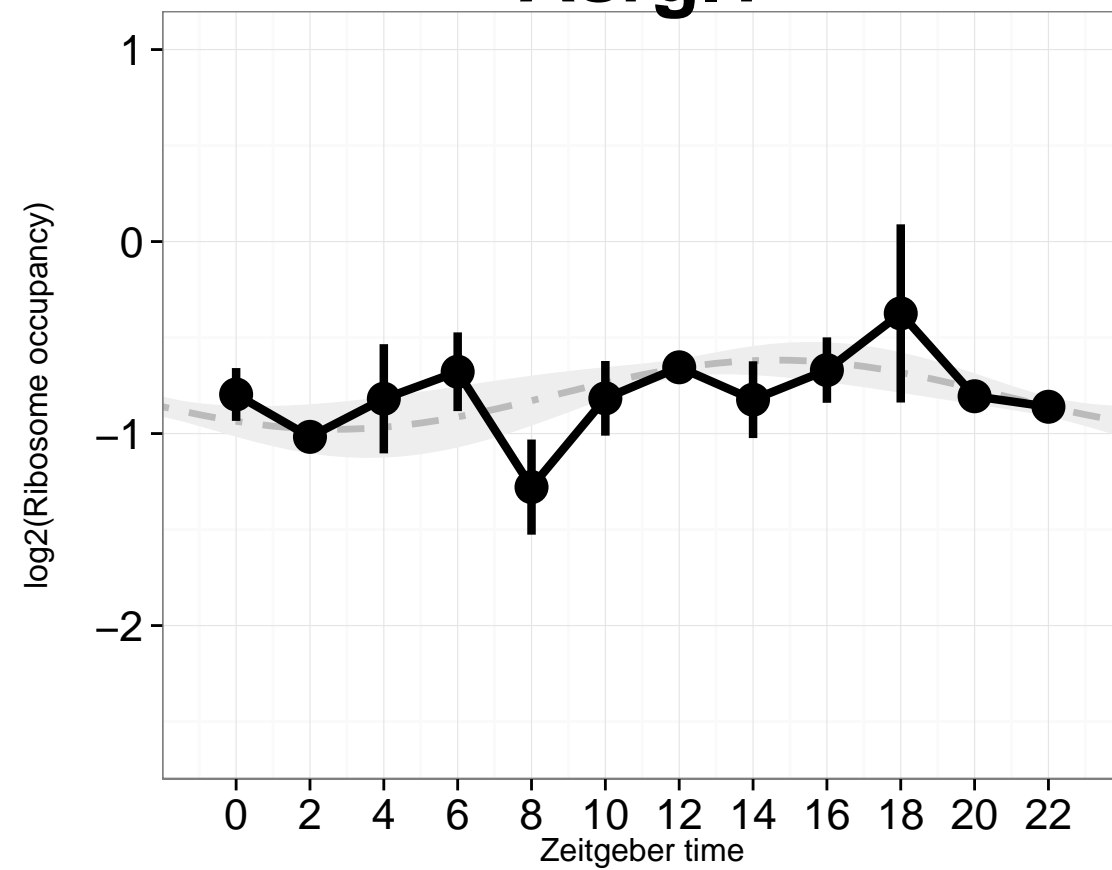

Supplement: SuppDataset_1.zip [file Asrgl1_set_C.pdf › Supplemental Dataset 1/C-mRNA_nonrhythm_translation_rhyth/Asrgl1_set_C.pdf]

# Aste1

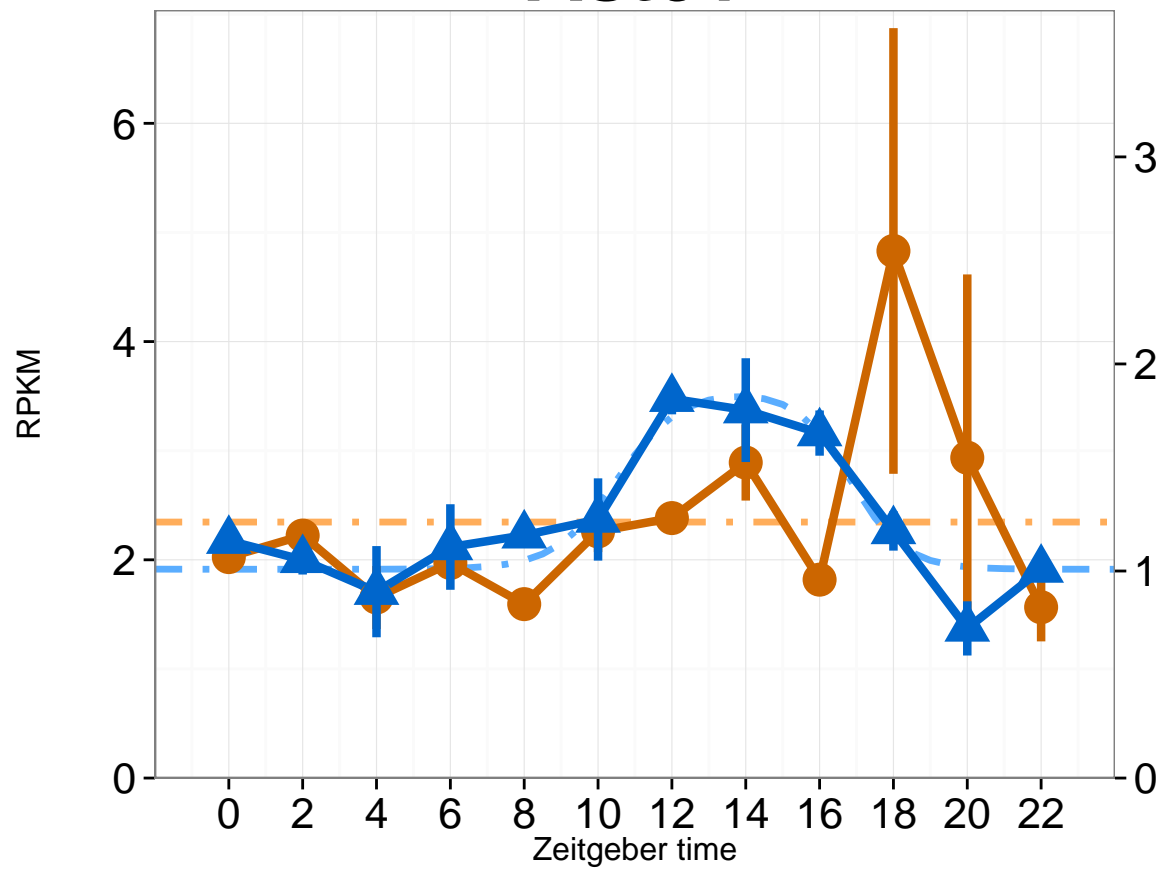

# Aste1

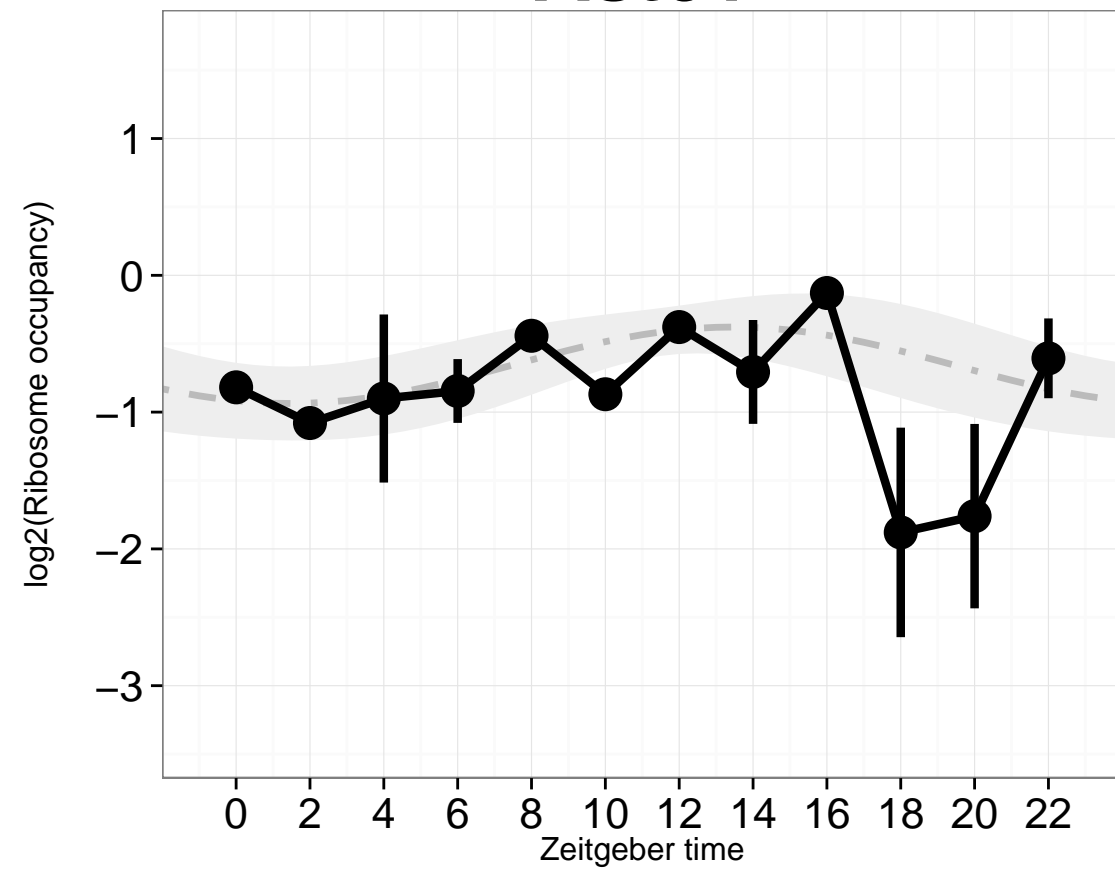

Supplement: SuppDataset_1.zip [file Aste1_set_C.pdf › Supplemental Dataset 1/C-mRNA_nonrhythm_translation_rhyth/Aste1_set_C.pdf]

# Atg2a

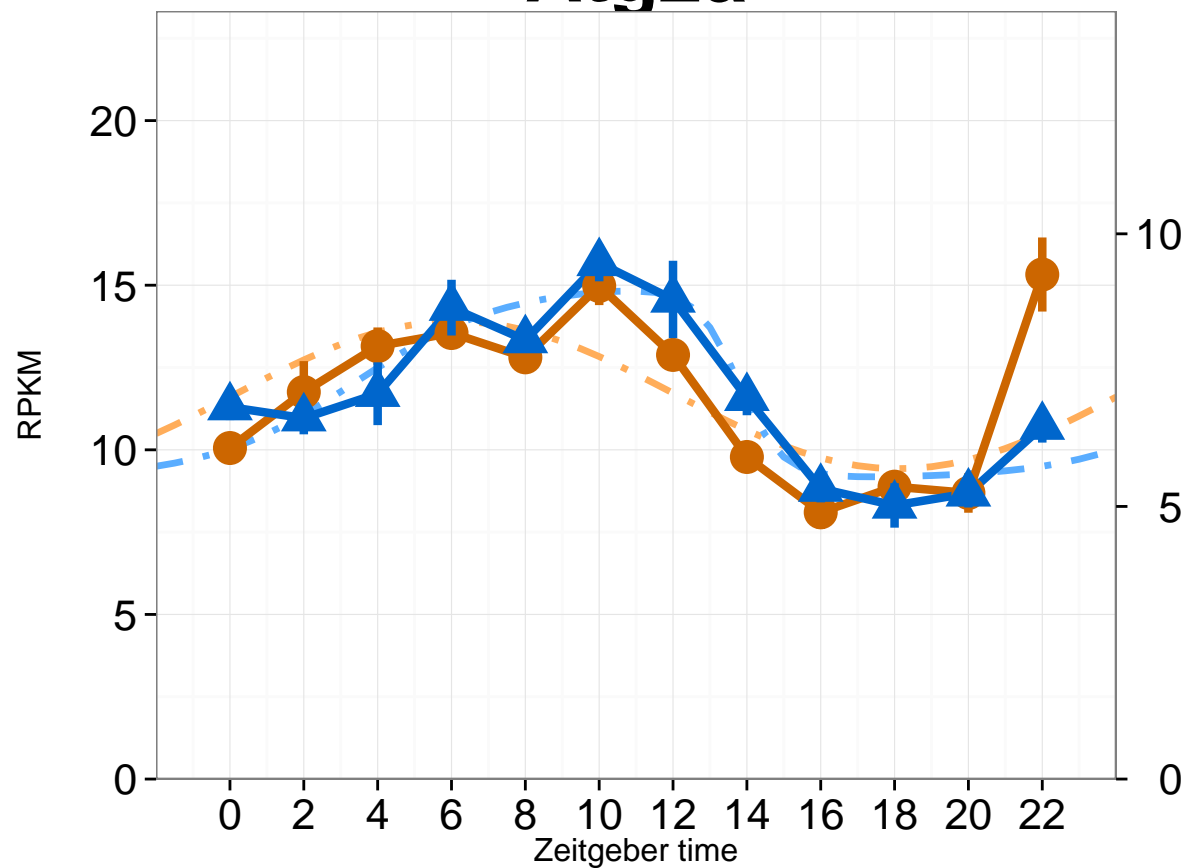

# Atg2a

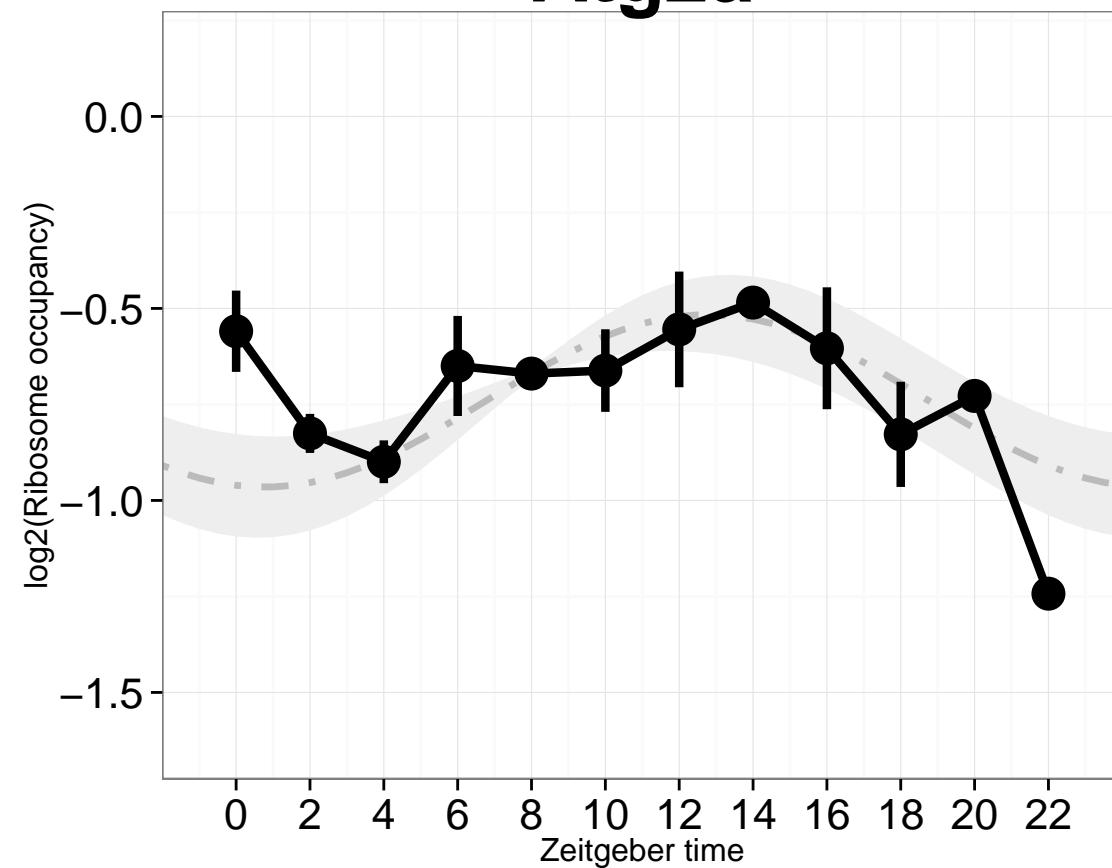

Supplement: SuppDataset_1.zip [file Atg2a_set_C.pdf › Supplemental Dataset 1/C-mRNA_nonrhythm_translation_rhyth/Atg2a_set_C.pdf]

## Atoh8

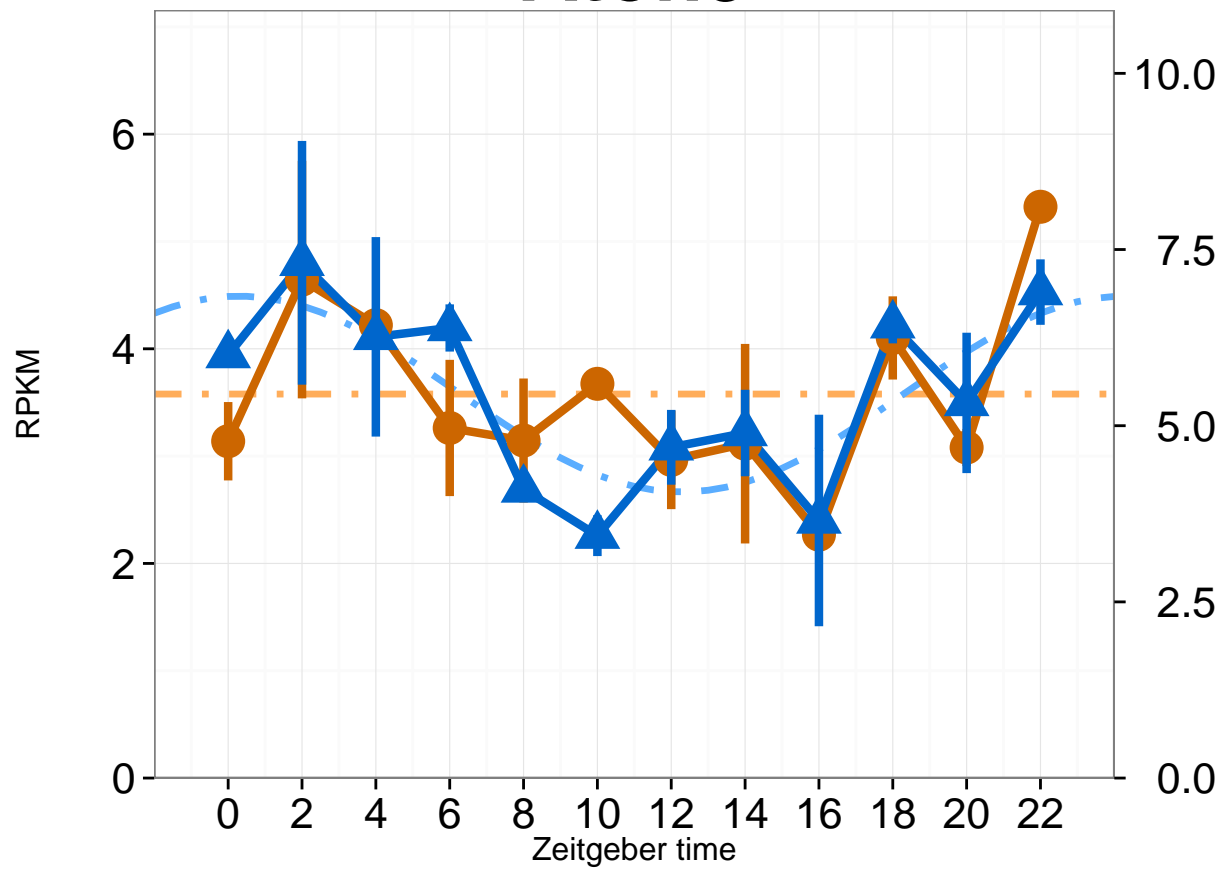

## Atoh8

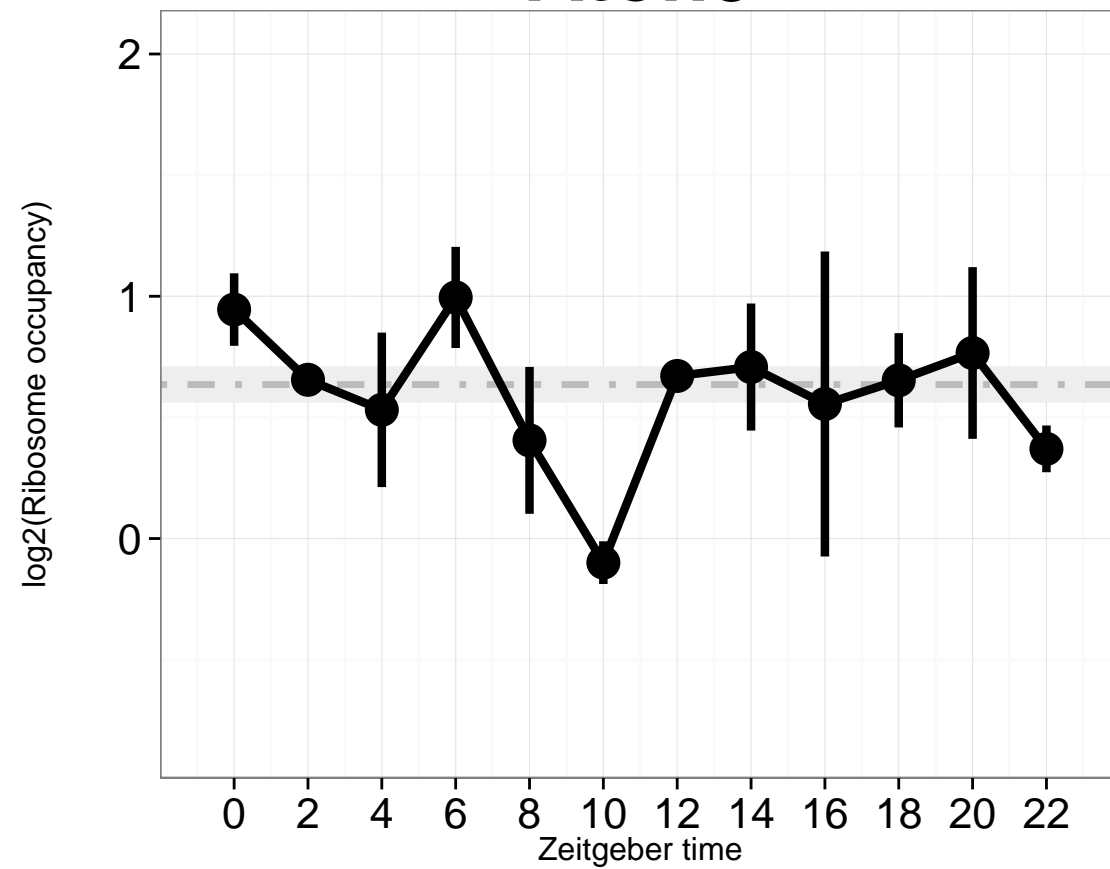

Supplement: SuppDataset_1.zip [file Atoh8_set_C.pdf › Supplemental Dataset 1/C-mRNA_nonrhythm_translation_rhyth/Atoh8_set_C.pdf]

# Atp8b4

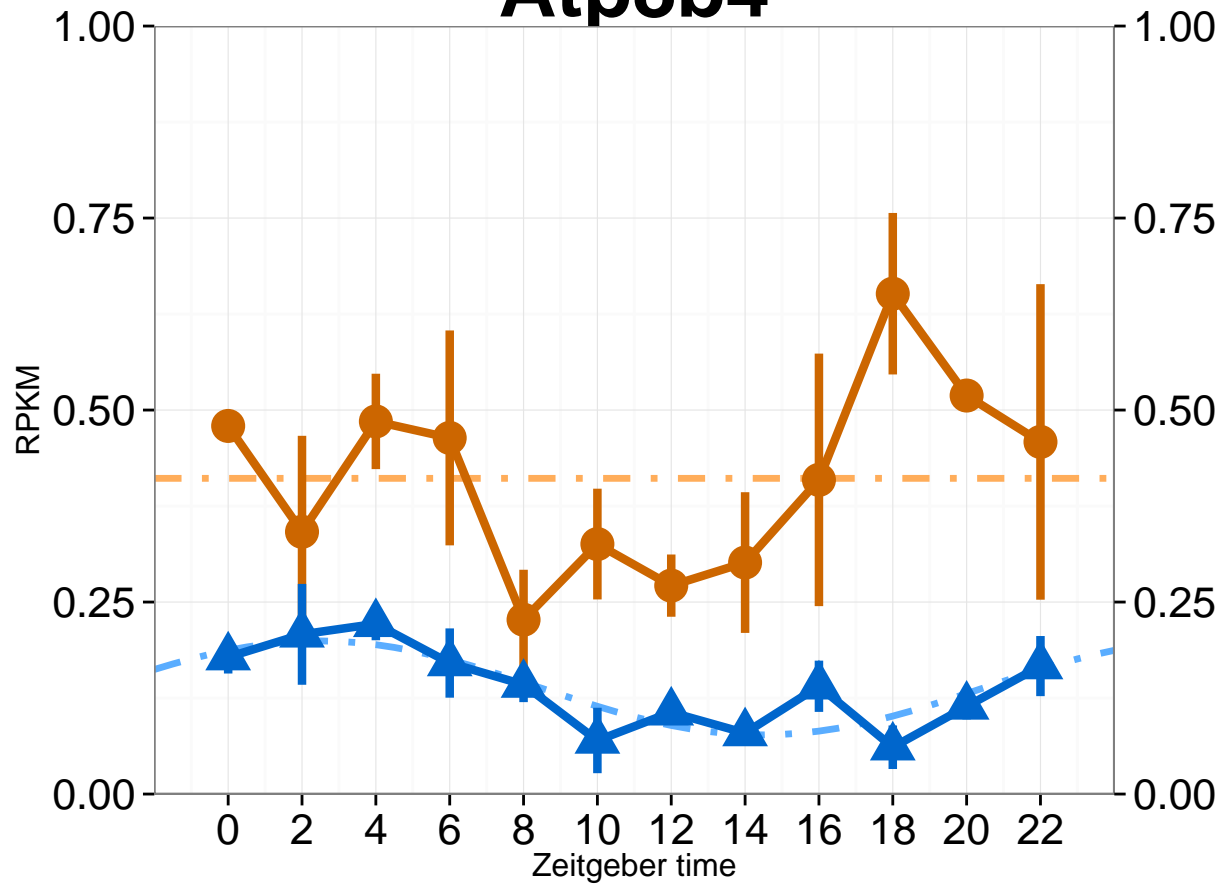

# Atp8b4

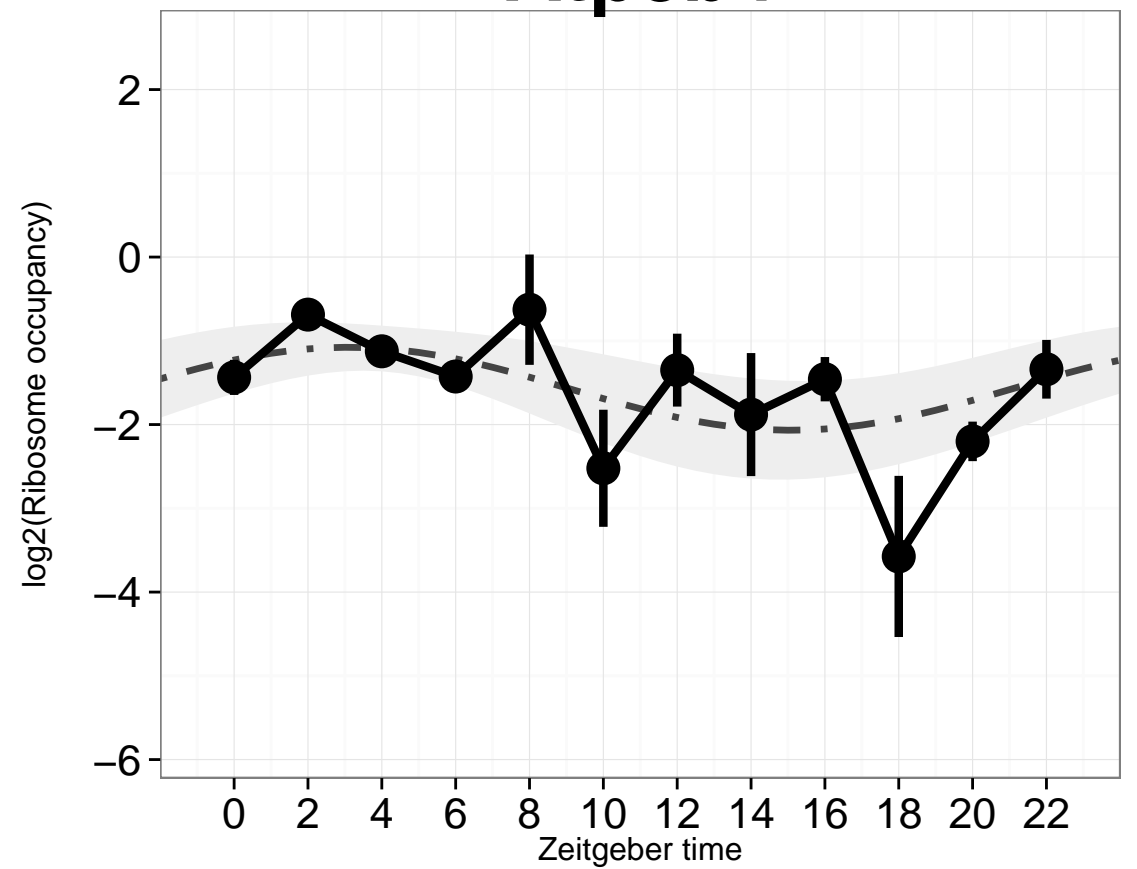

Supplement: SuppDataset_1.zip [file Atp8b4_set_C.pdf › Supplemental Dataset 1/C-mRNA_nonrhythm_translation_rhyth/Atp8b4_set_C.pdf]

# Atxn7

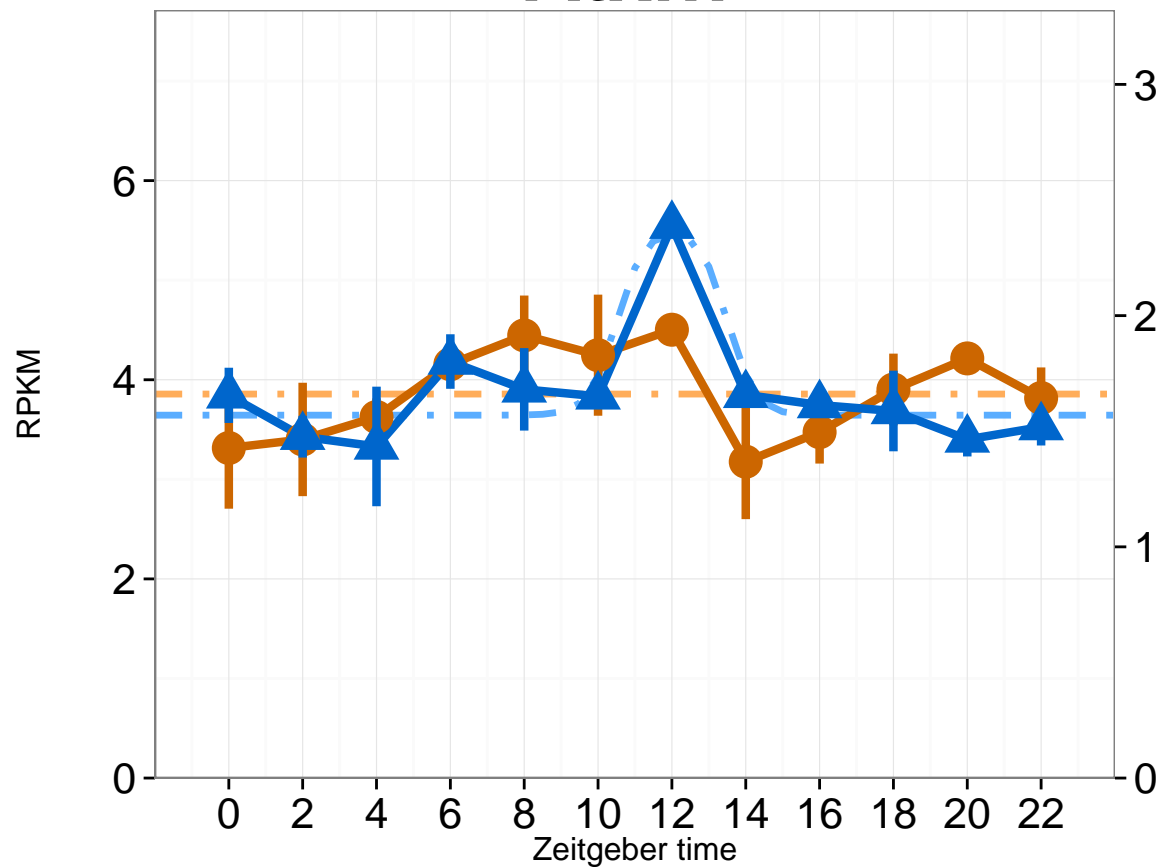

# Atxn7

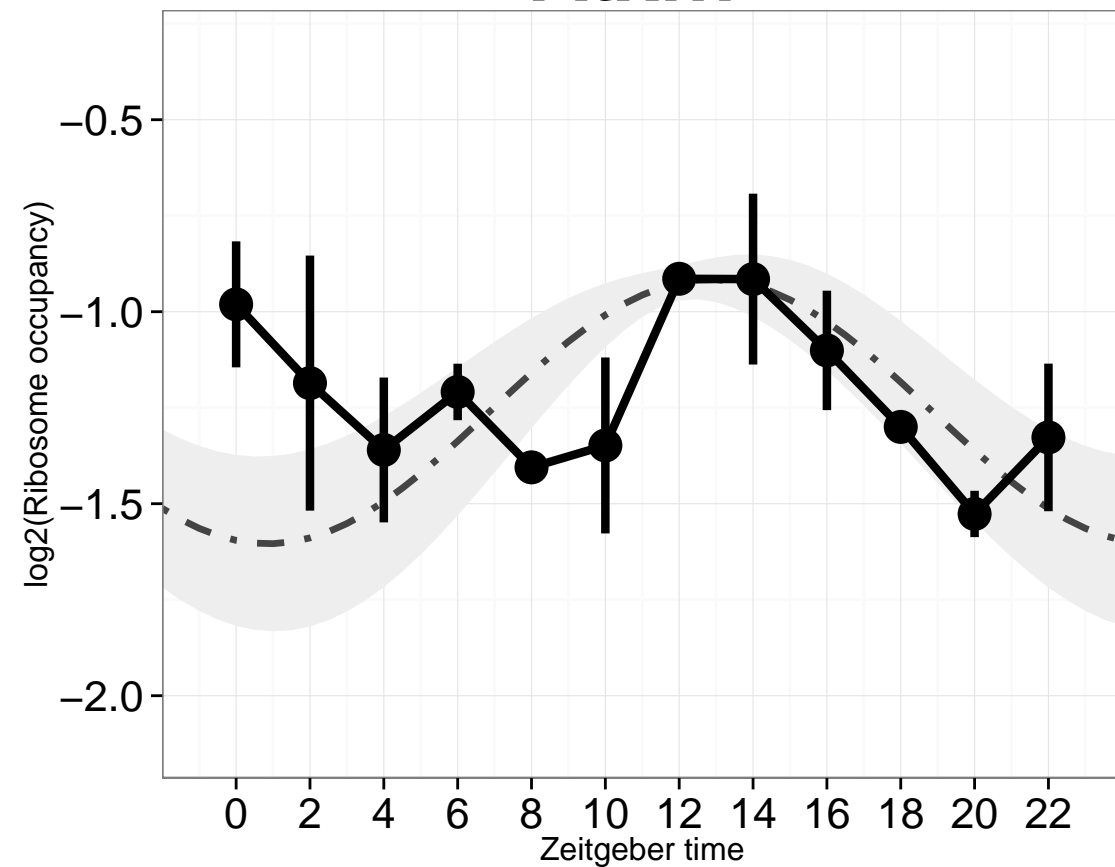

Supplement: SuppDataset_1.zip [file Atxn7_set_C.pdf › Supplemental Dataset 1/C-mRNA_nonrhythm_translation_rhyth/Atxn7_set_C.pdf]

# B4galt1

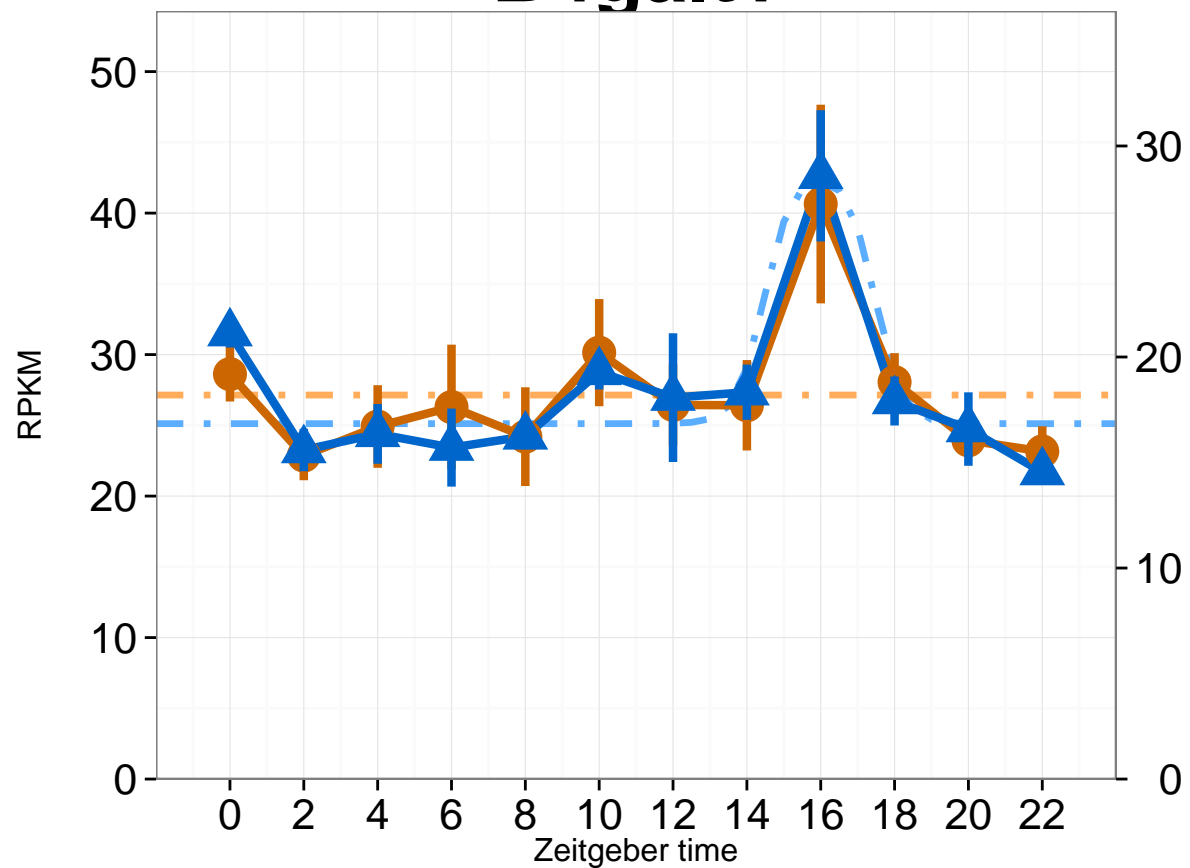

# B4galt1

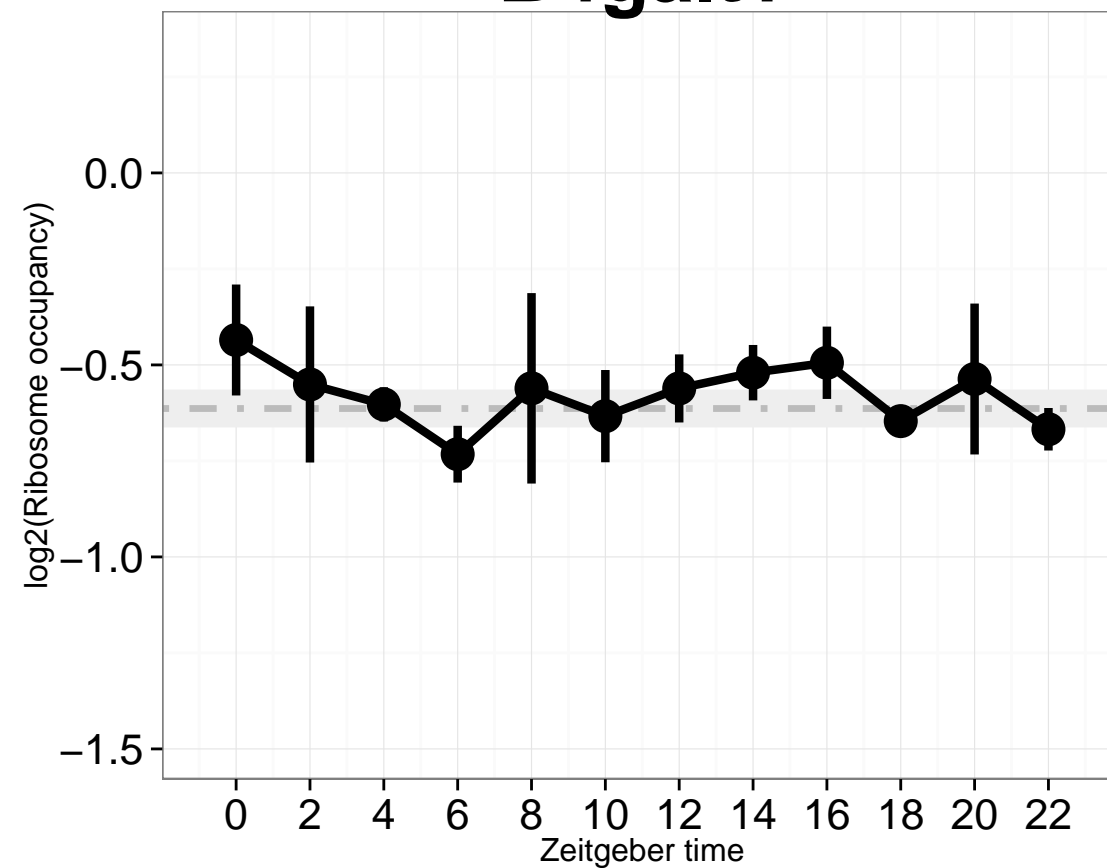

Supplement: SuppDataset_1.zip [file B4galt1_set_C.pdf › Supplemental Dataset 1/C-mRNA_nonrhythm_translation_rhyth/B4galt1_set_C.pdf]

# B4galt3

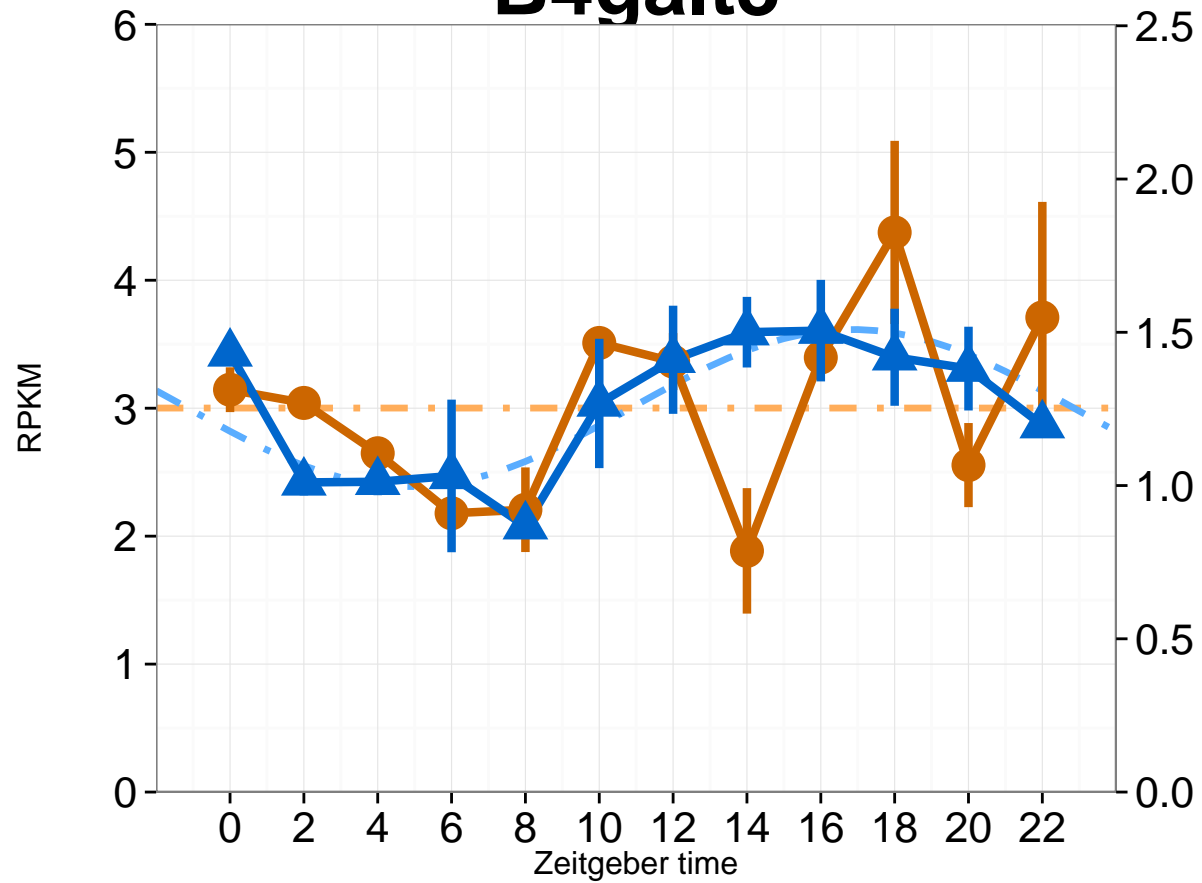

# B4galt3

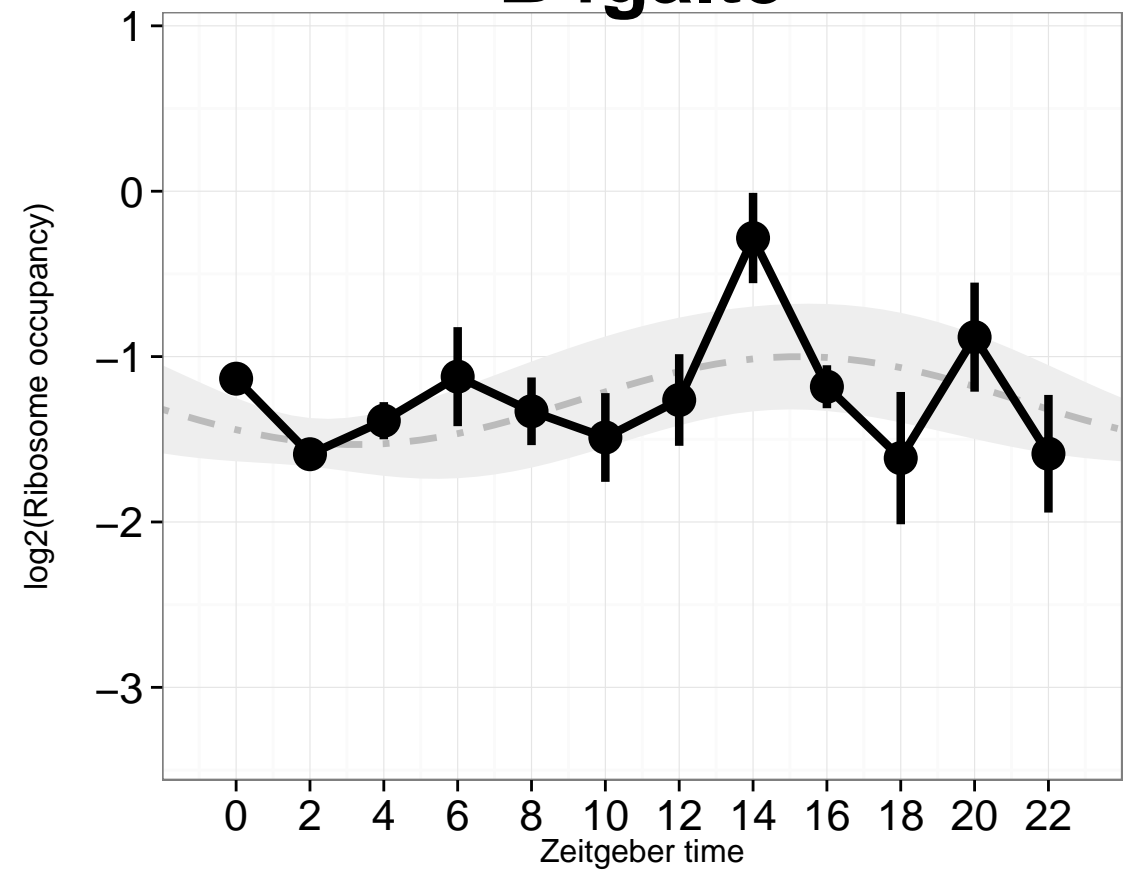

Supplement: SuppDataset_1.zip [file B4galt3_set_C.pdf › Supplemental Dataset 1/C-mRNA_nonrhythm_translation_rhyth/B4galt3_set_C.pdf]

# BC005537

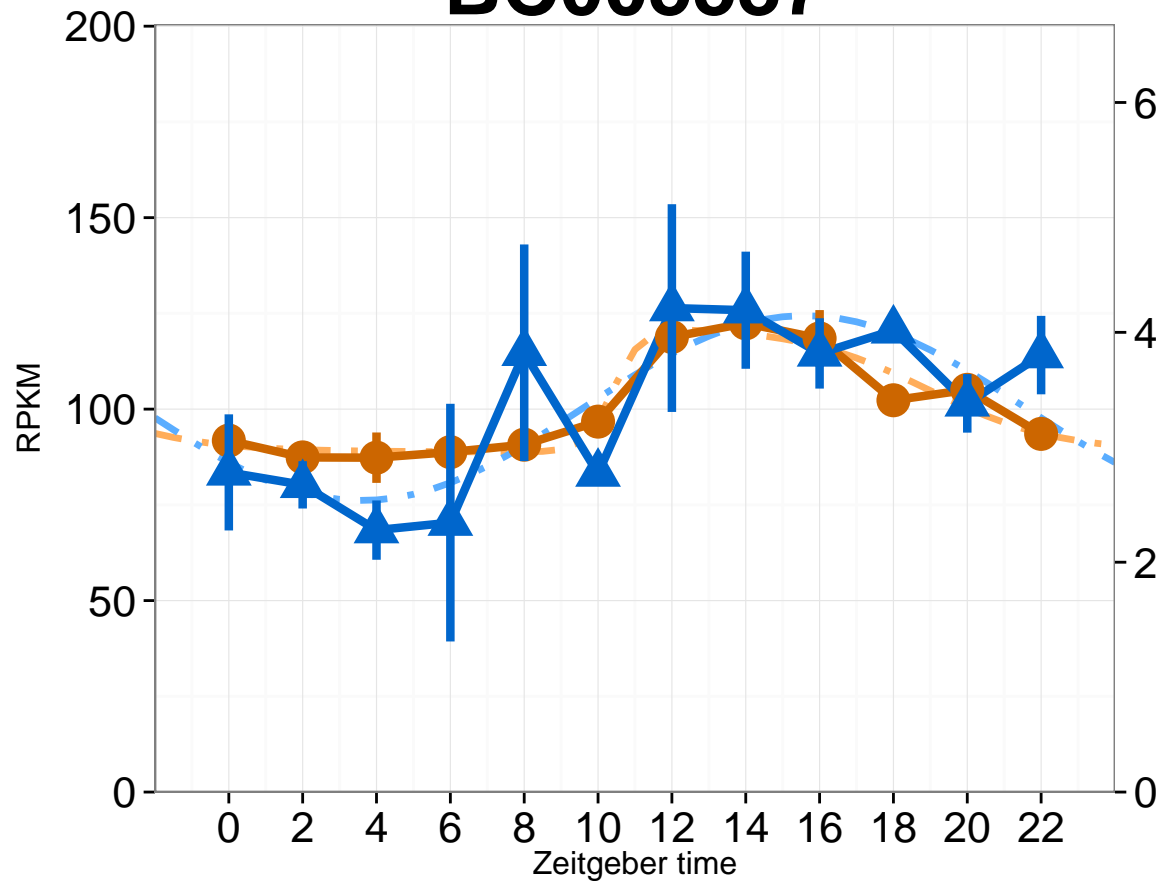

# BC005537

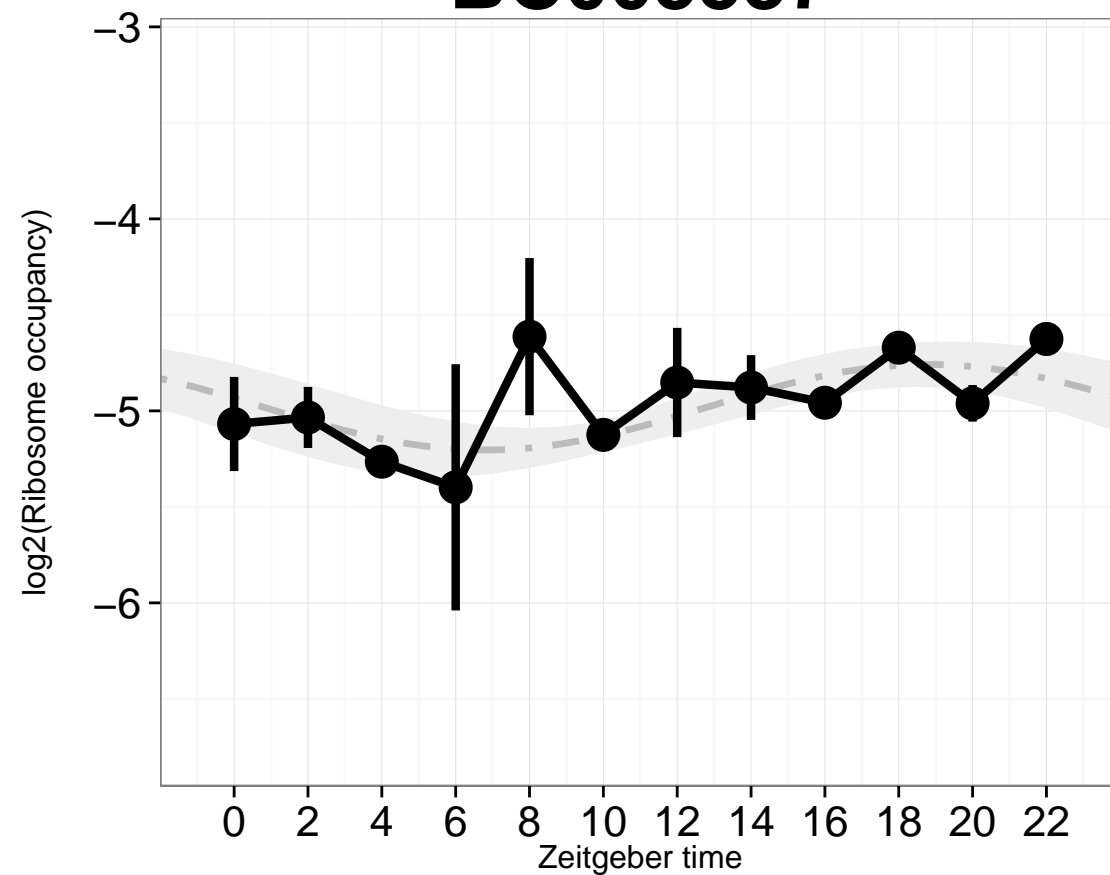

Supplement: SuppDataset_1.zip [file BC005537_set_C.pdf › Supplemental Dataset 1/C-mRNA_nonrhythm_translation_rhyth/BC005537_set_C.pdf]

# BC026590

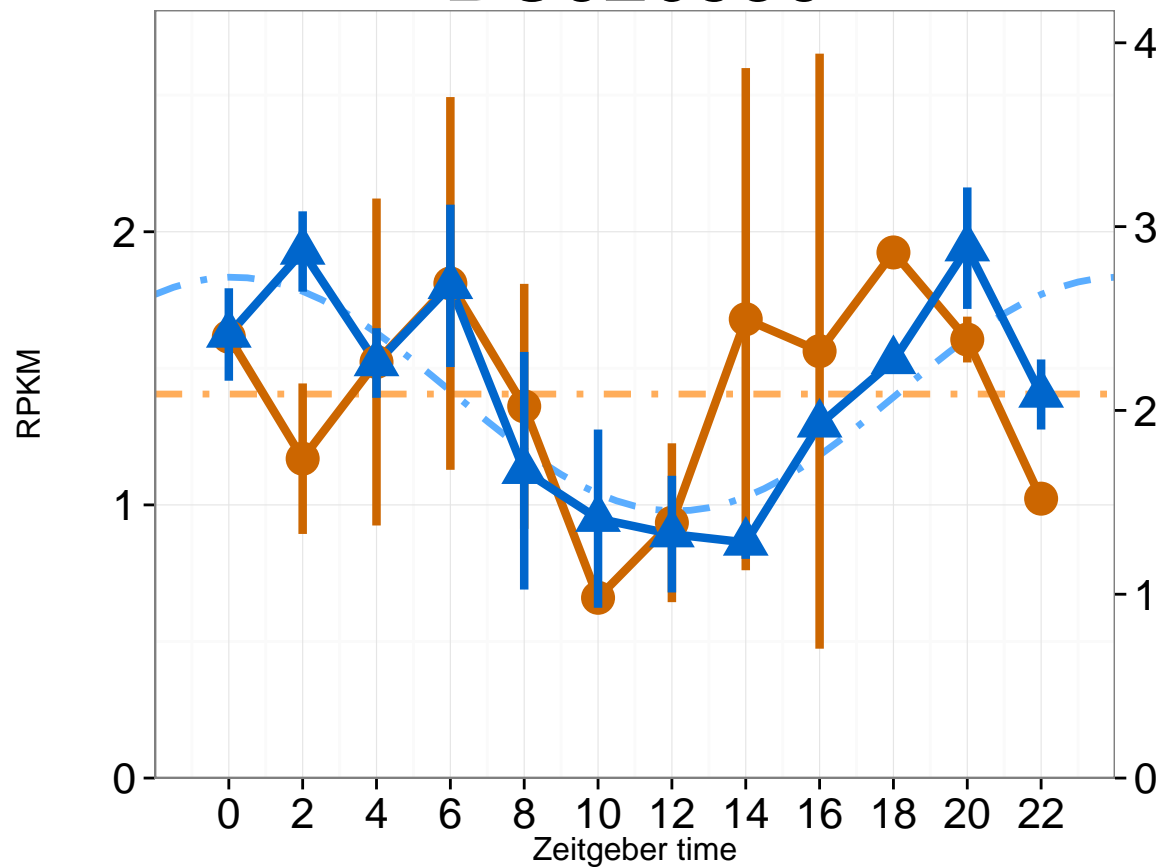

# BC026590

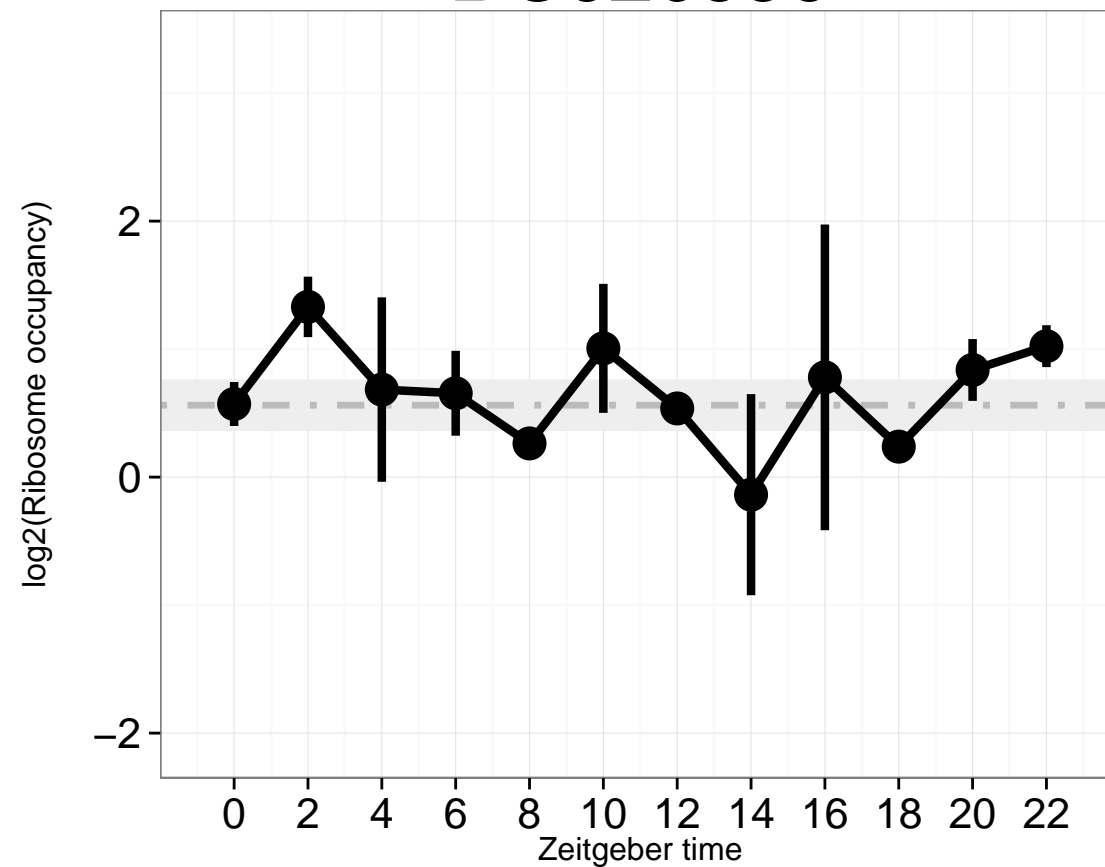

Supplement: SuppDataset_1.zip [file BC026590_set_C.pdf › Supplemental Dataset 1/C-mRNA_nonrhythm_translation_rhyth/BC026590_set_C.pdf]

# BC052040

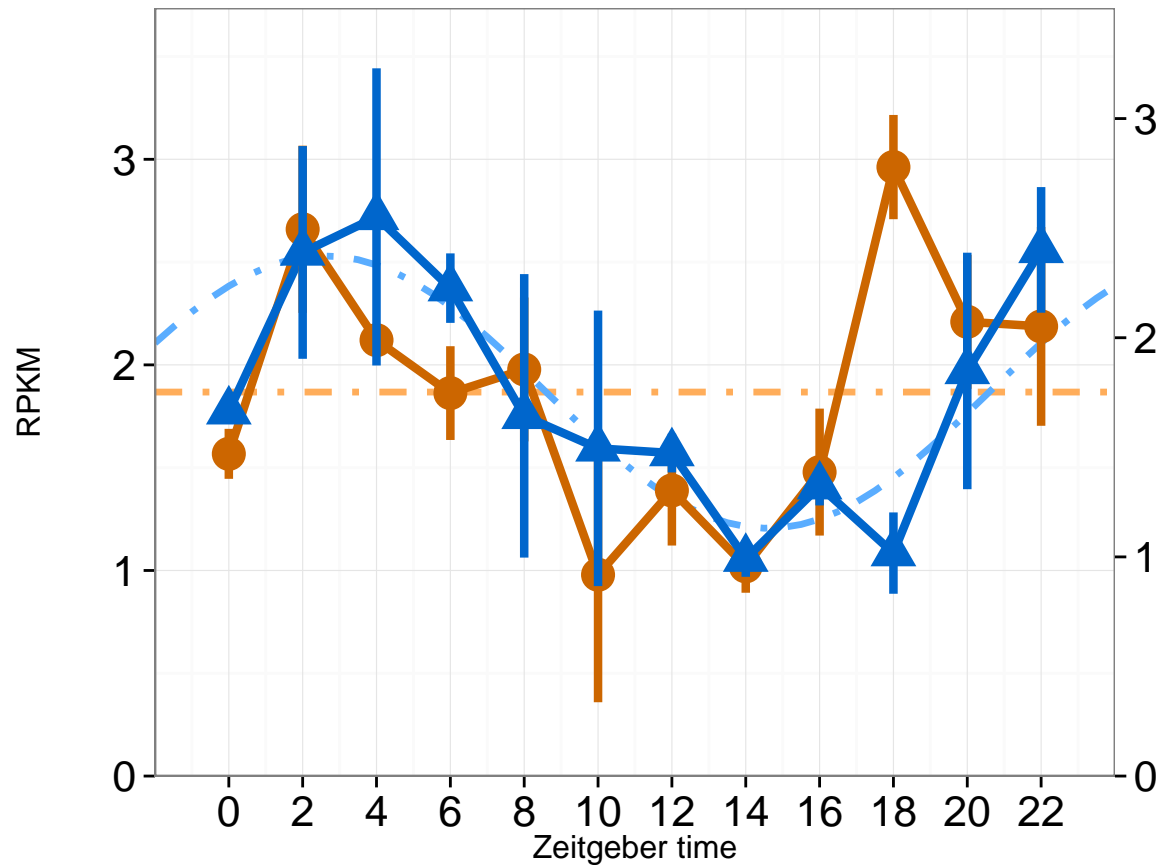

# BC052040

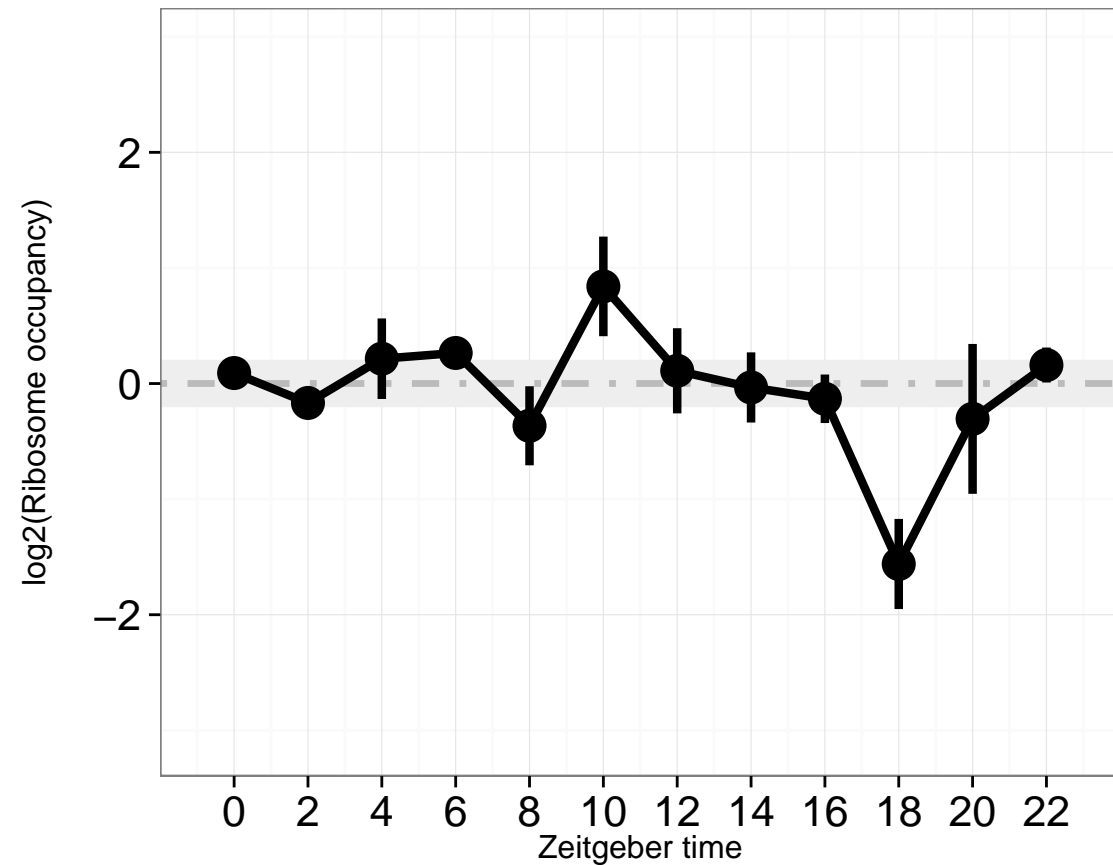

Supplement: SuppDataset_1.zip [file BC052040_set_C.pdf › Supplemental Dataset 1/C-mRNA_nonrhythm_translation_rhyth/BC052040_set_C.pdf]

**Basp1 TR**

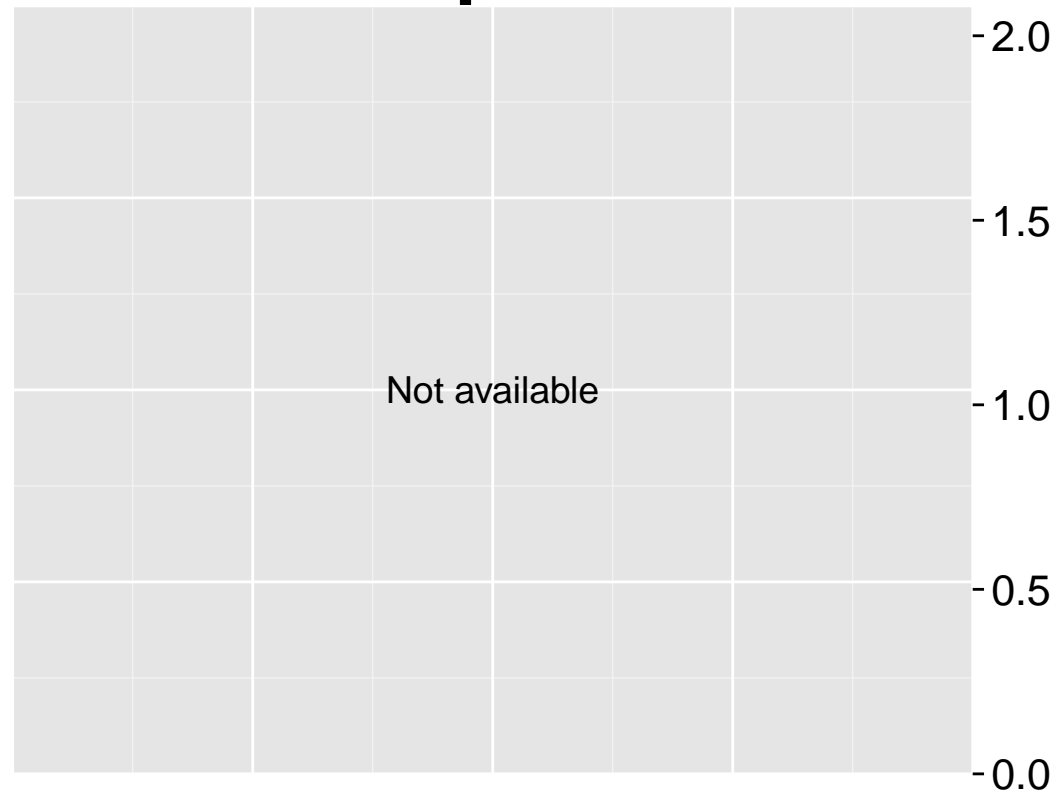

**Basp1 log2(Ribosome occupancy**

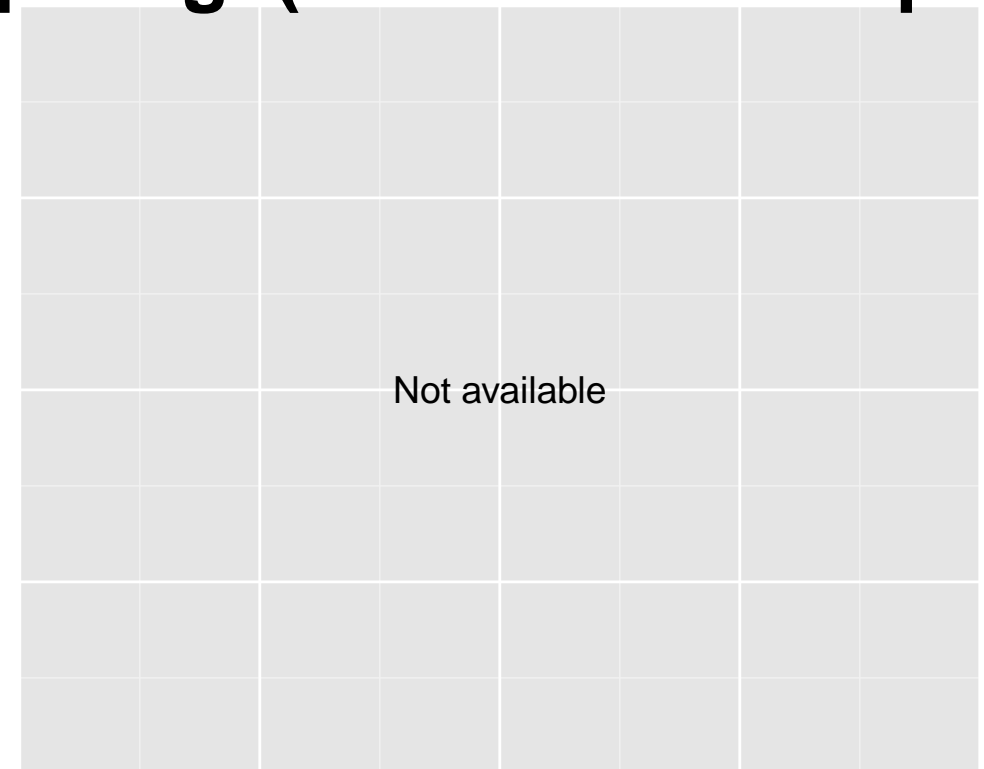

Supplement: SuppDataset_1.zip [file Basp1_set_C.pdf › Supplemental Dataset 1/C-mRNA_nonrhythm_translation_rhyth/Basp1_set_C.pdf]

## Bcas3

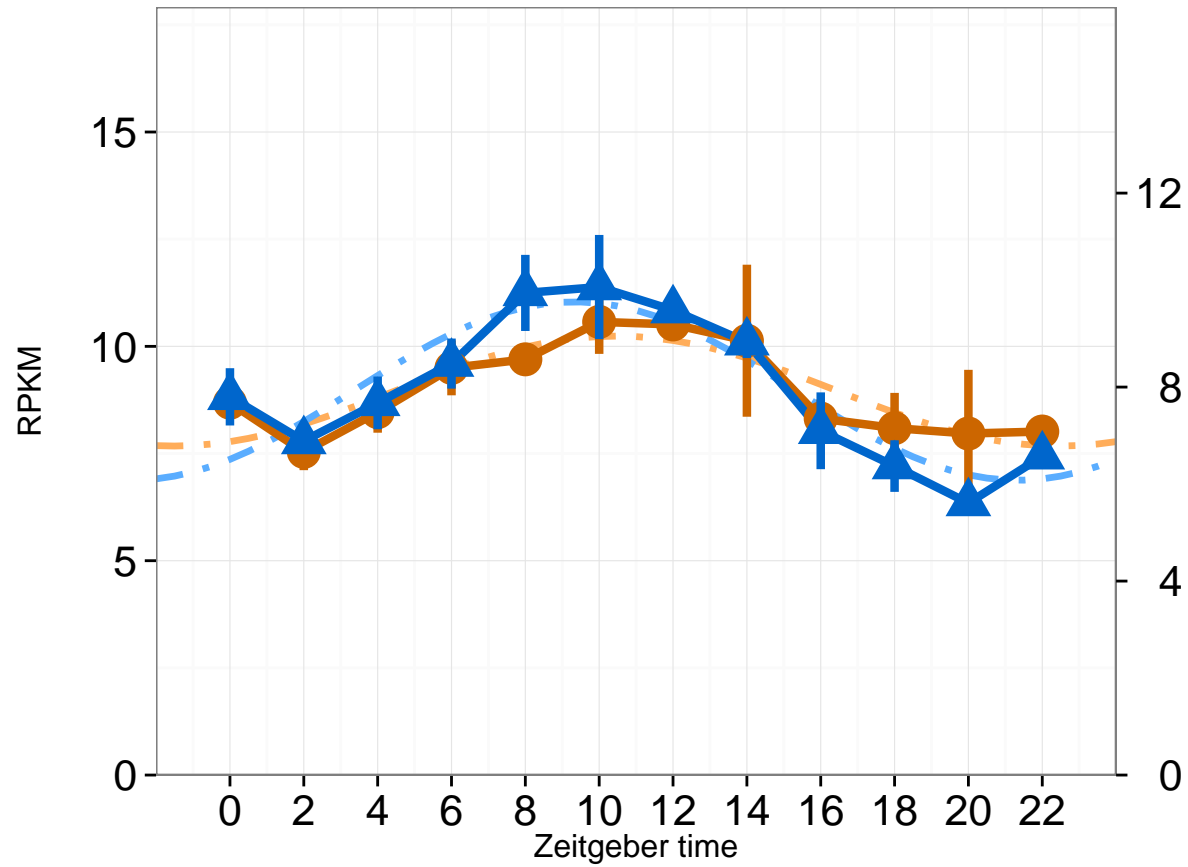

## Bcas3

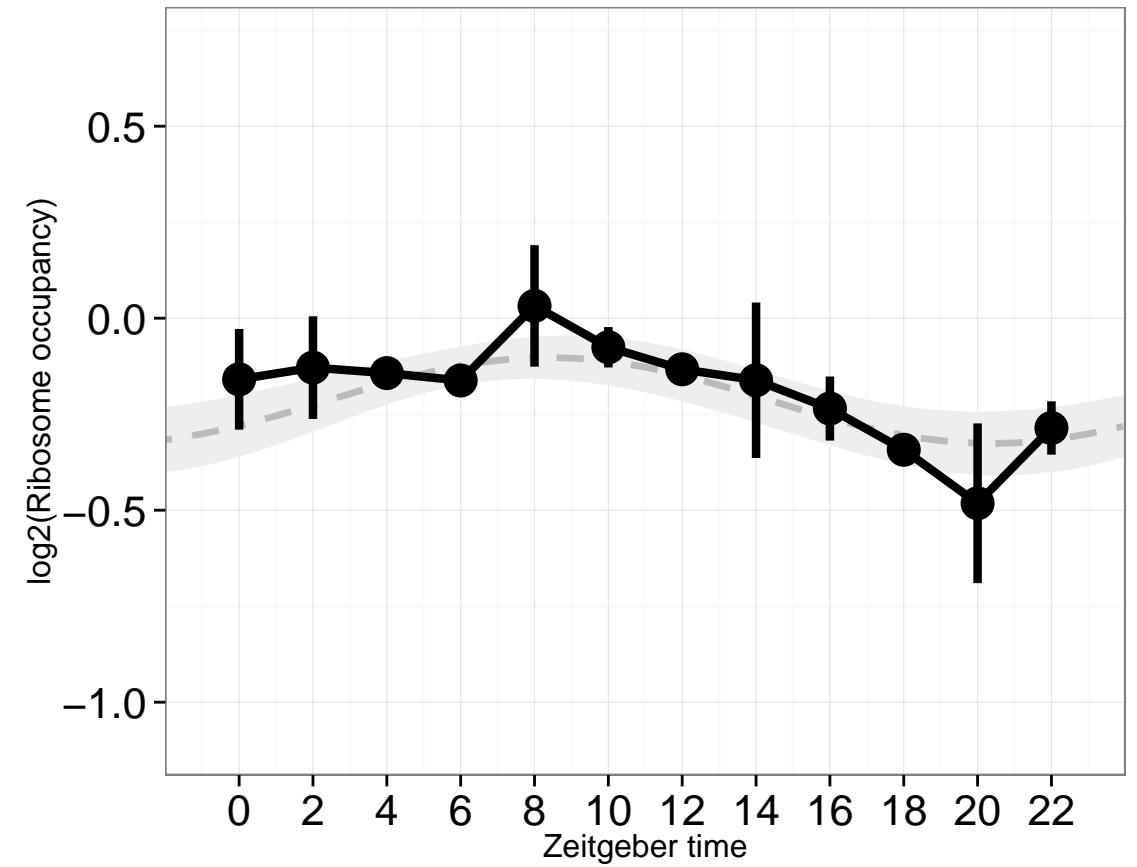

Supplement: SuppDataset_1.zip [file Bcas3_set_C.pdf › Supplemental Dataset 1/C-mRNA_nonrhythm_translation_rhyth/Bcas3_set_C.pdf]

## Bcl2l12

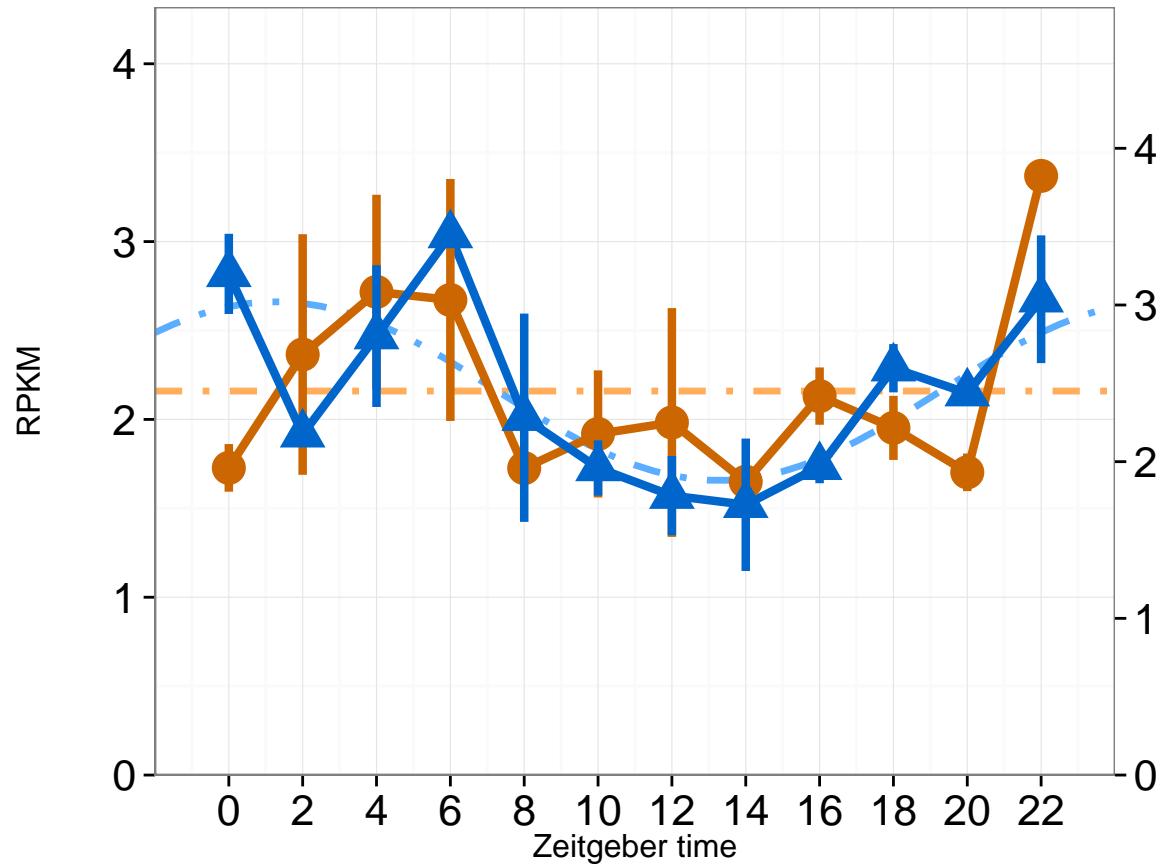

## Bcl2l12

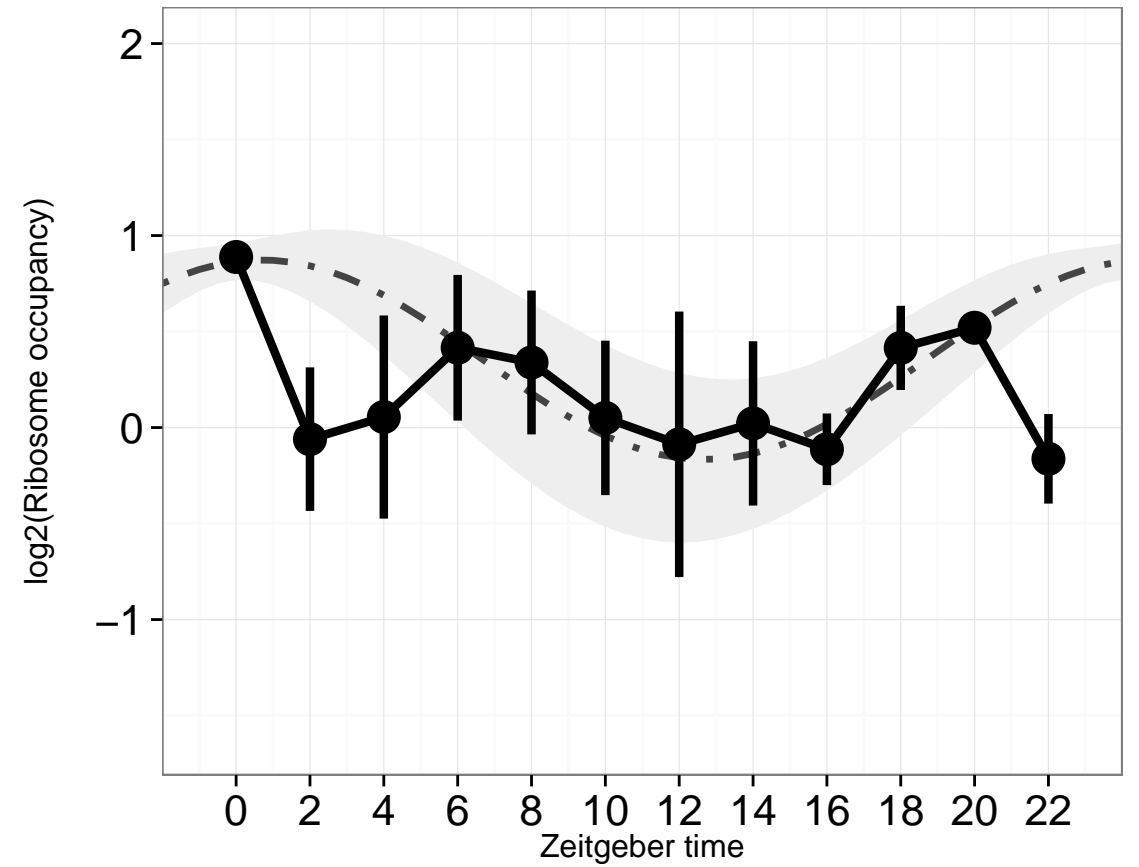

Supplement: SuppDataset_1.zip [file Bcl2l12_set_C.pdf › Supplemental Dataset 1/C-mRNA_nonrhythm_translation_rhyth/Bcl2l12_set_C.pdf]

# Bcmo1

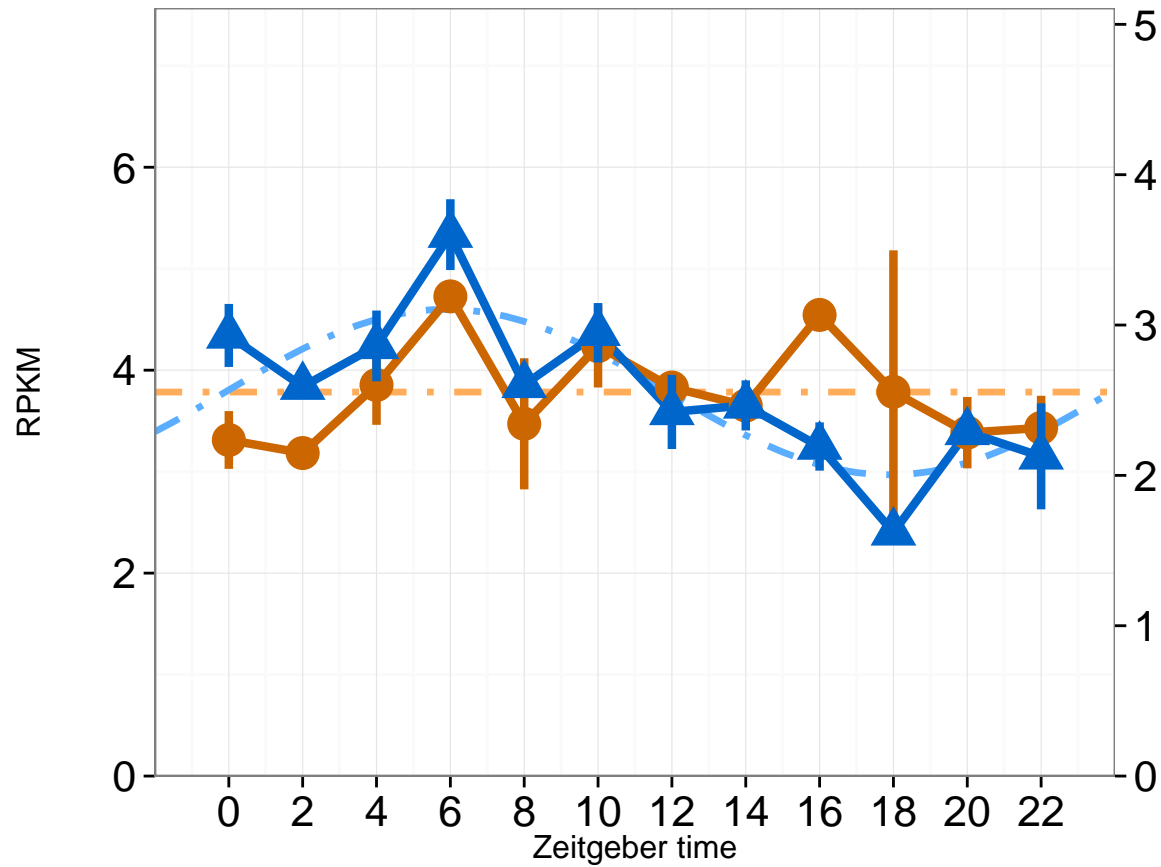

# Bcmo1

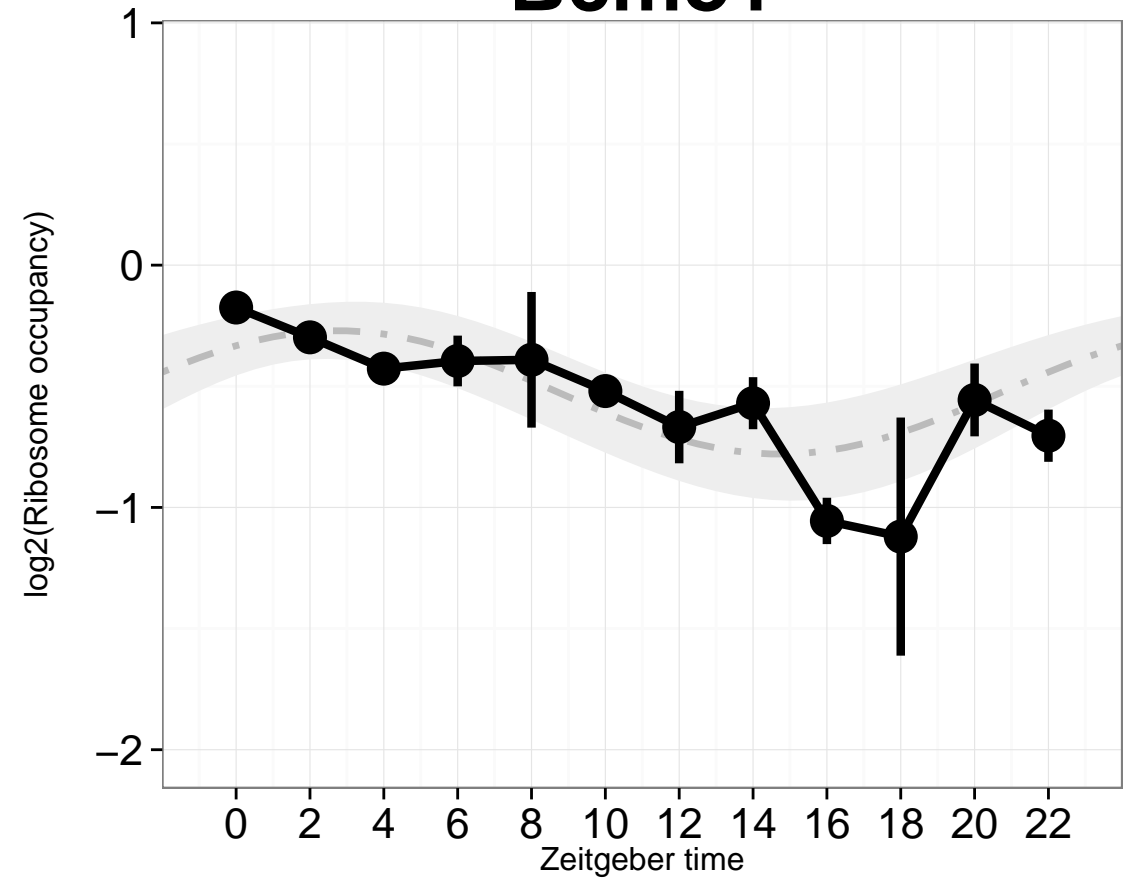

Supplement: SuppDataset_1.zip [file Bcmo1_set_C.pdf › Supplemental Dataset 1/C-mRNA_nonrhythm_translation_rhyth/Bcmo1_set_C.pdf]

## Bdh1

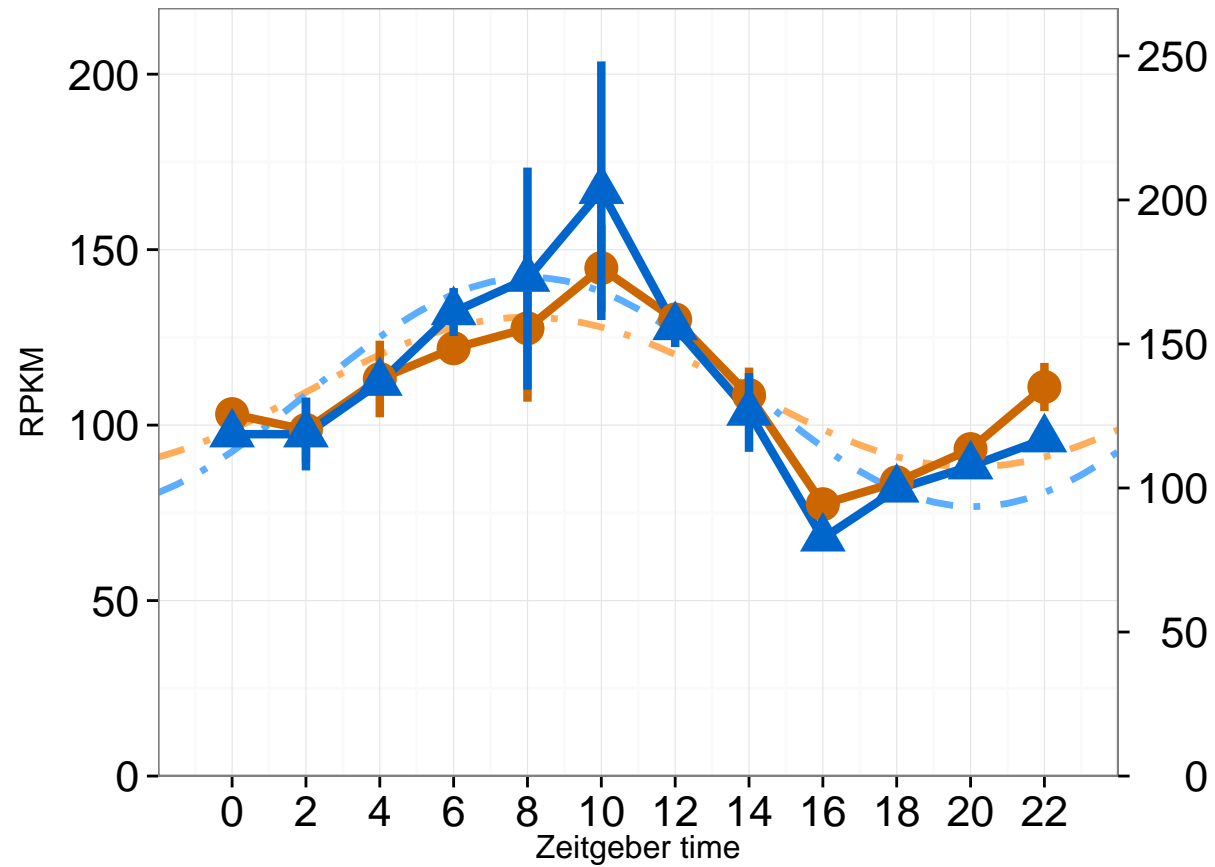

## Bdh1

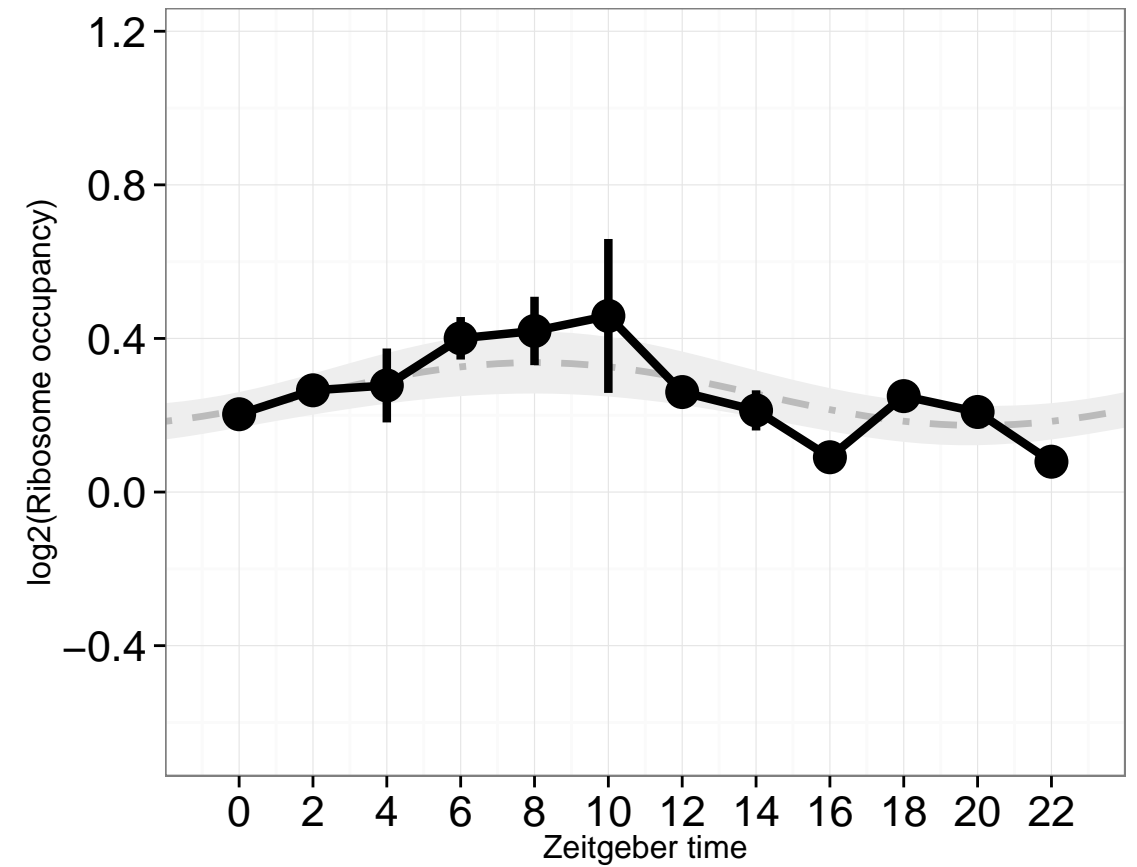

Supplement: SuppDataset_1.zip [file Bdh1_set_C.pdf › Supplemental Dataset 1/C-mRNA_nonrhythm_translation_rhyth/Bdh1_set_C.pdf]

## Bdnf

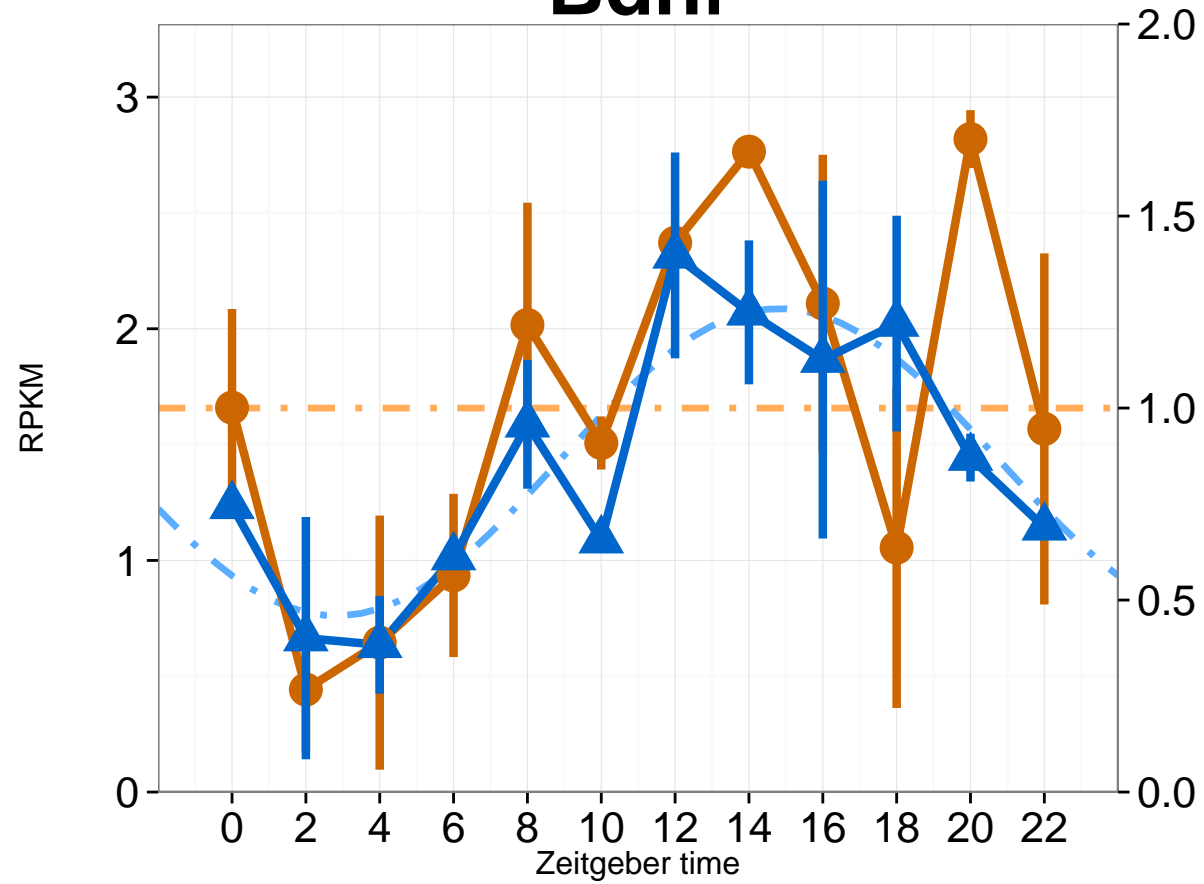

## Bdnf

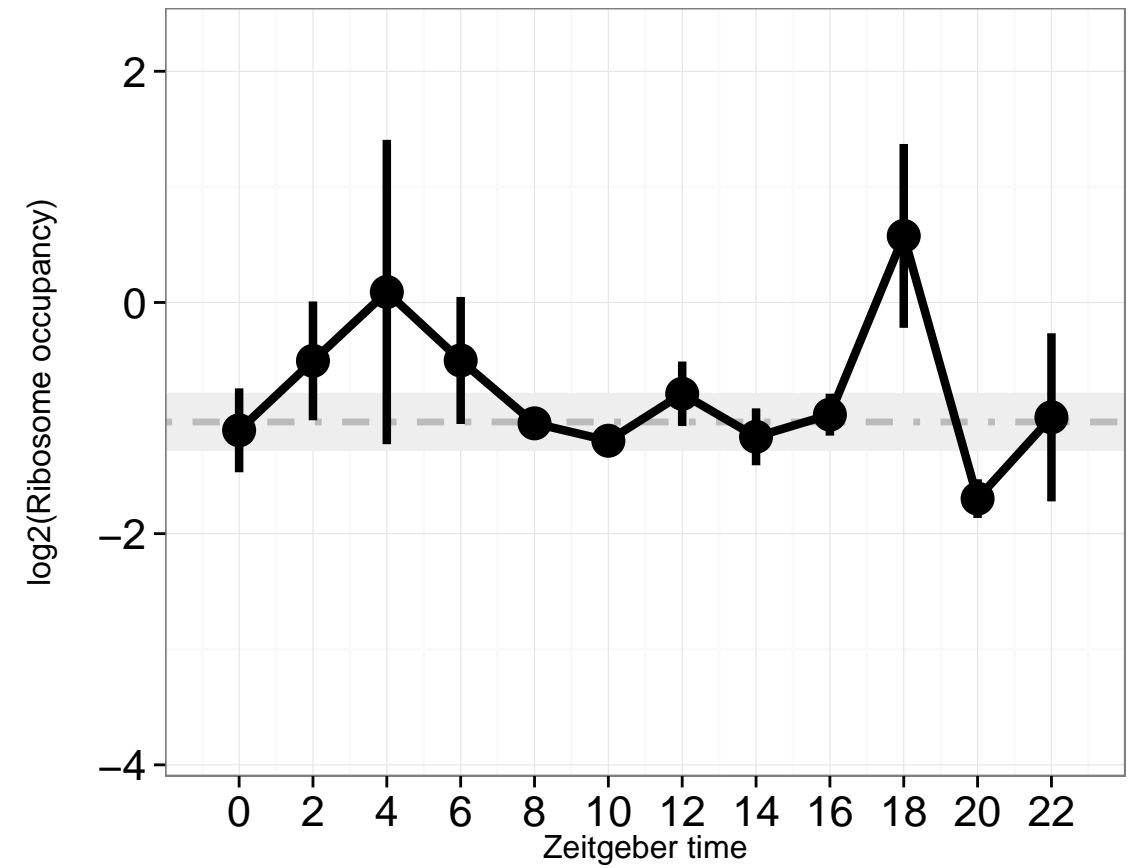

Supplement: SuppDataset_1.zip [file Bdnf_set_C.pdf › Supplemental Dataset 1/C-mRNA_nonrhythm_translation_rhyth/Bdnf_set_C.pdf]

## Blcap

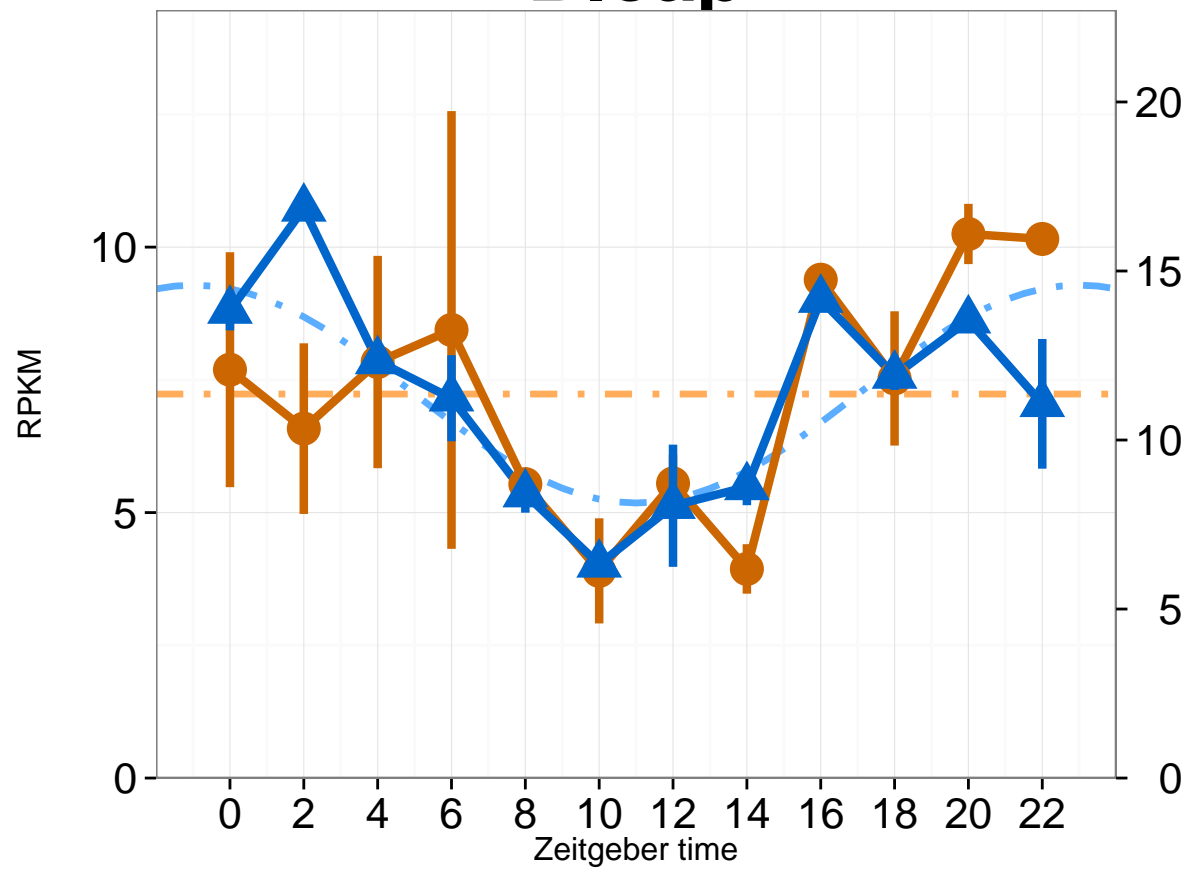

## Blcap

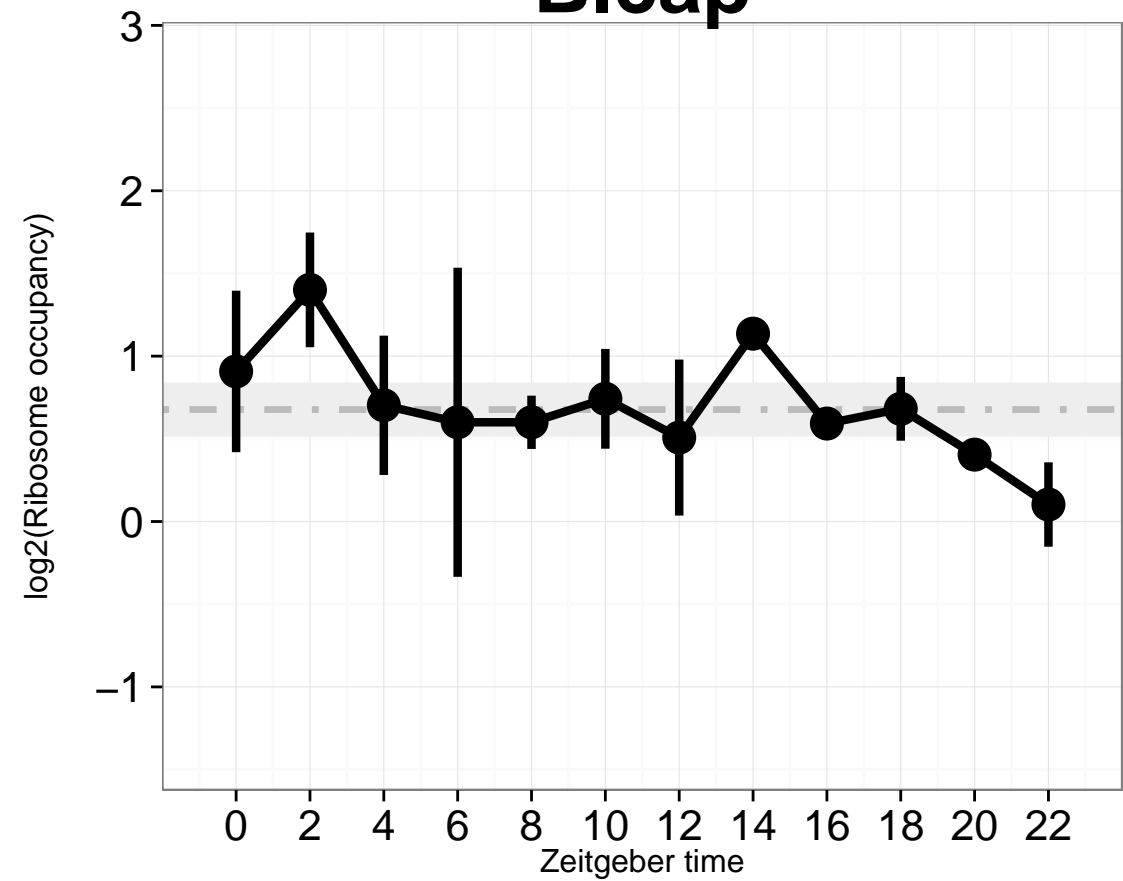

Supplement: SuppDataset_1.zip [file Blcap_set_C.pdf › Supplemental Dataset 1/C-mRNA_nonrhythm_translation_rhyth/Blcap_set_C.pdf]

# Bmp10

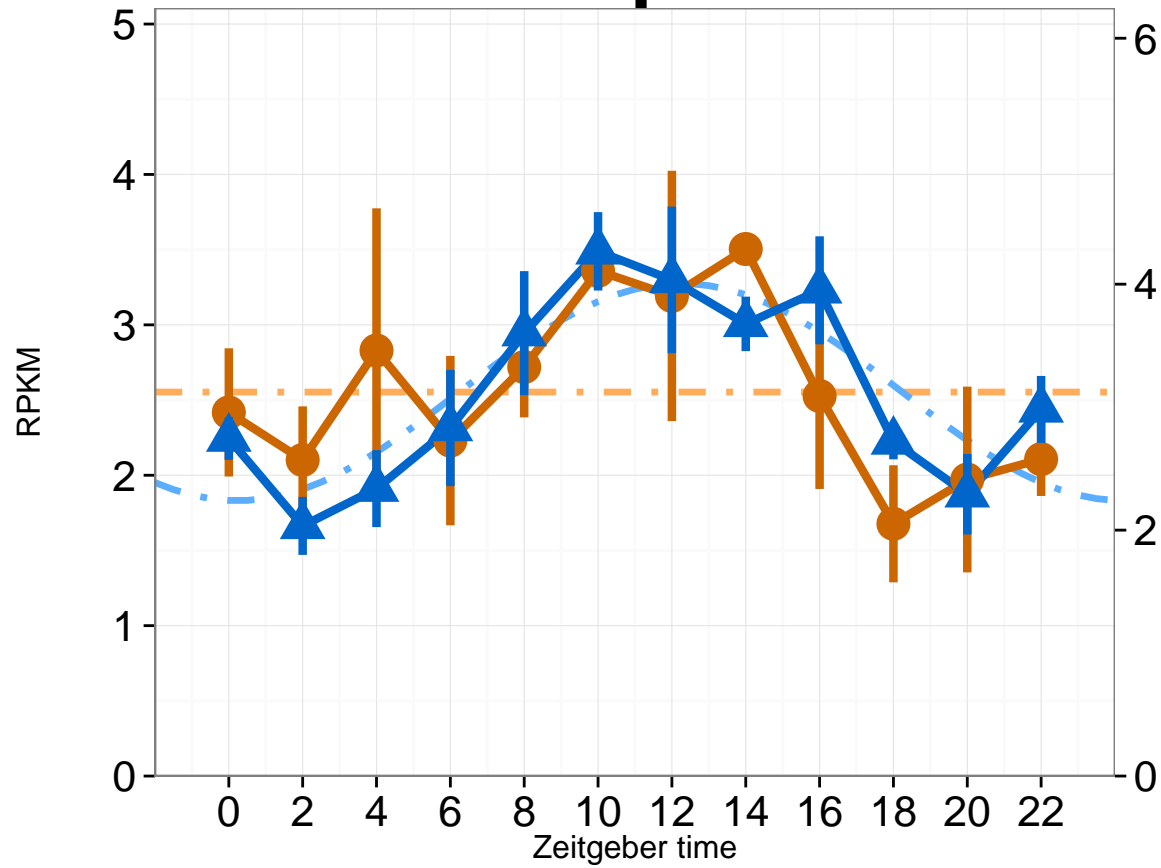

# Bmp10

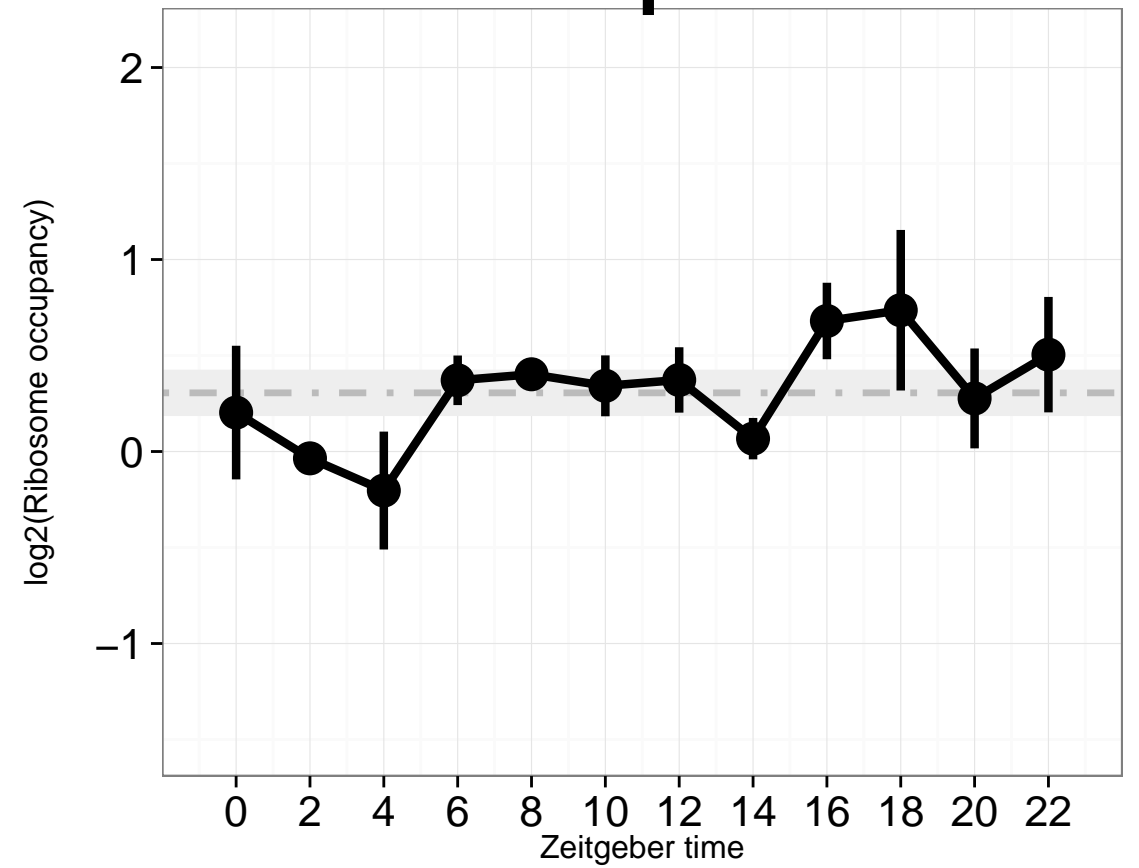

Supplement: SuppDataset_1.zip [file Bmp10_set_C.pdf › Supplemental Dataset 1/C-mRNA_nonrhythm_translation_rhyth/Bmp10_set_C.pdf]

## Bola3

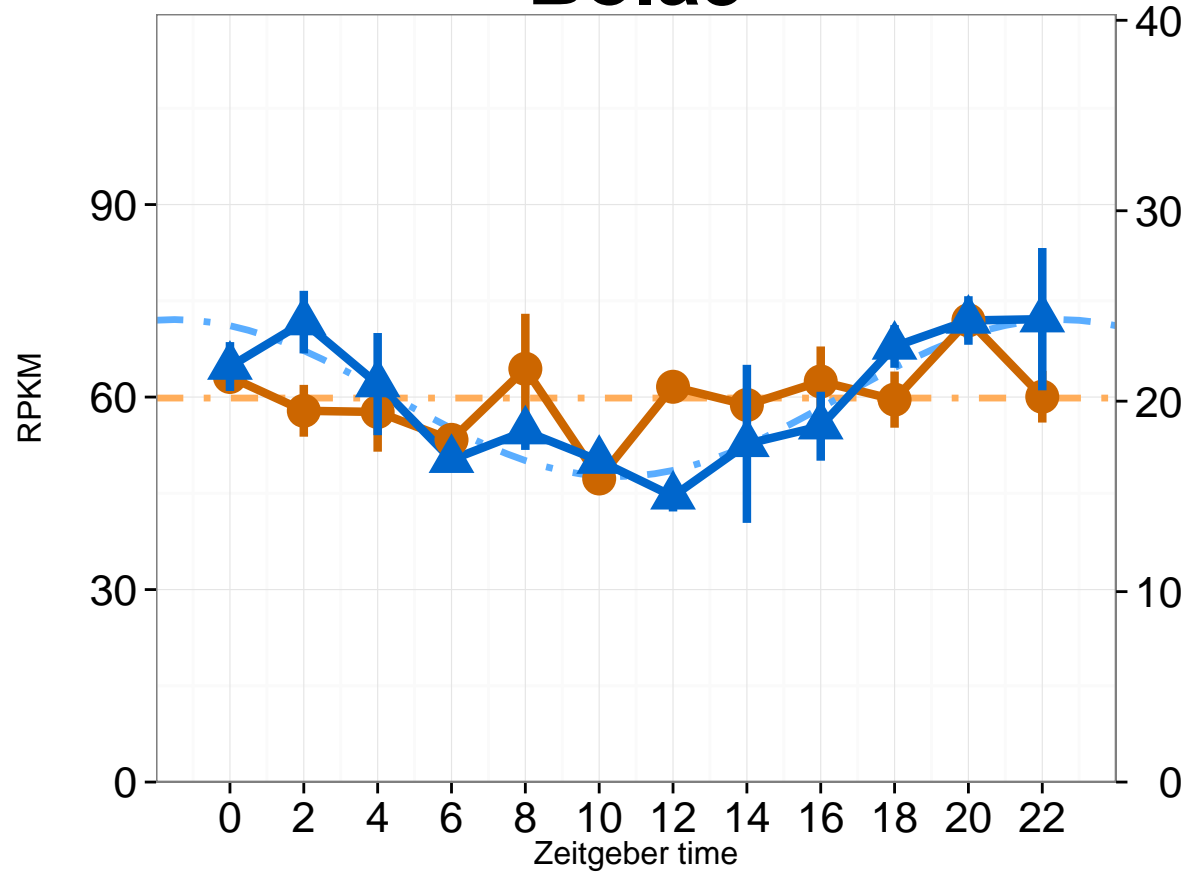

## Bola3

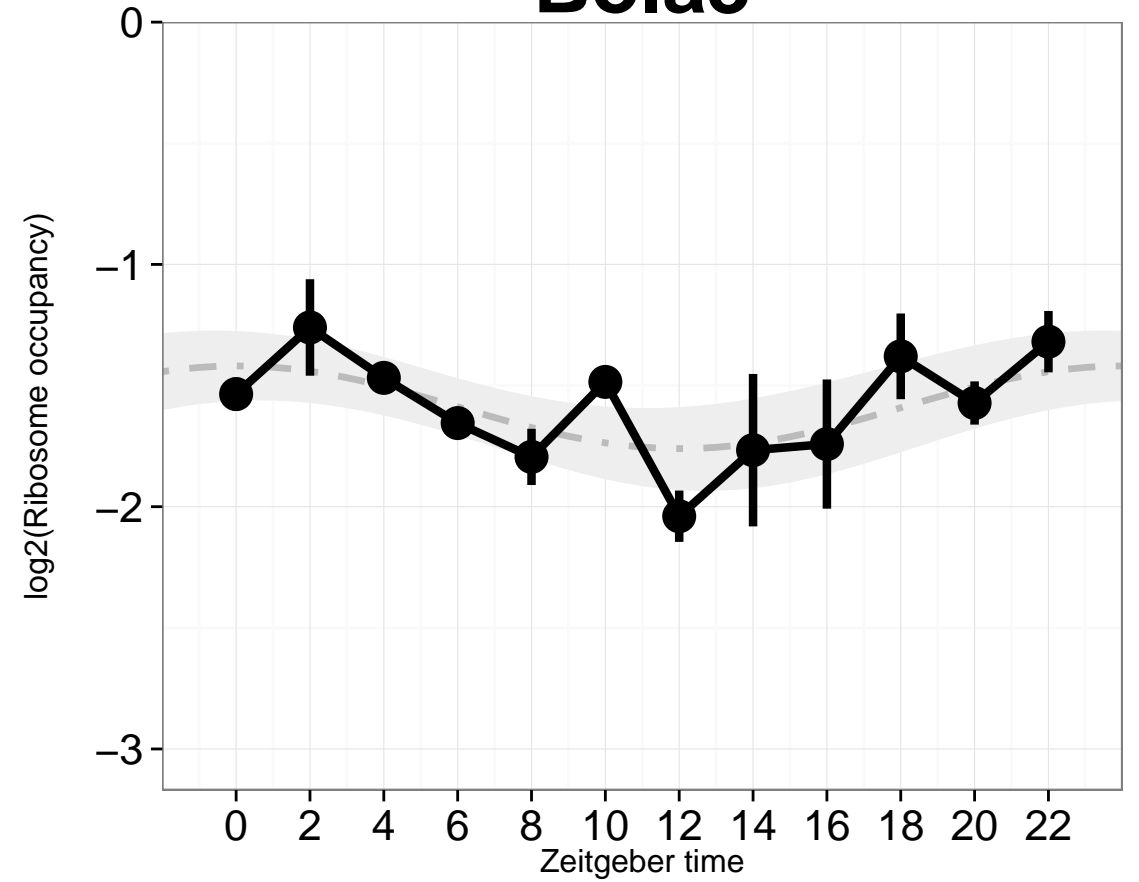

Supplement: SuppDataset_1.zip [file Bola3_set_C.pdf › Supplemental Dataset 1/C-mRNA_nonrhythm_translation_rhyth/Bola3_set_C.pdf]

## Brd9

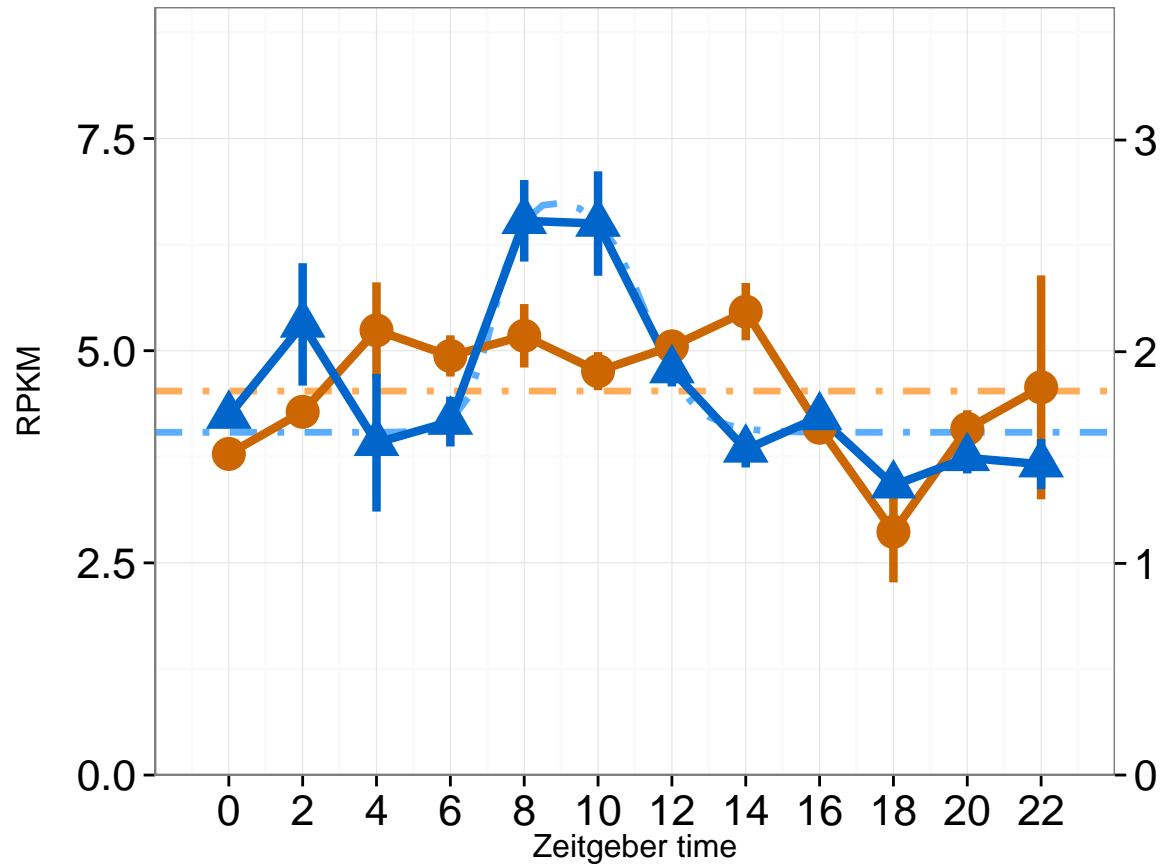

## Brd9

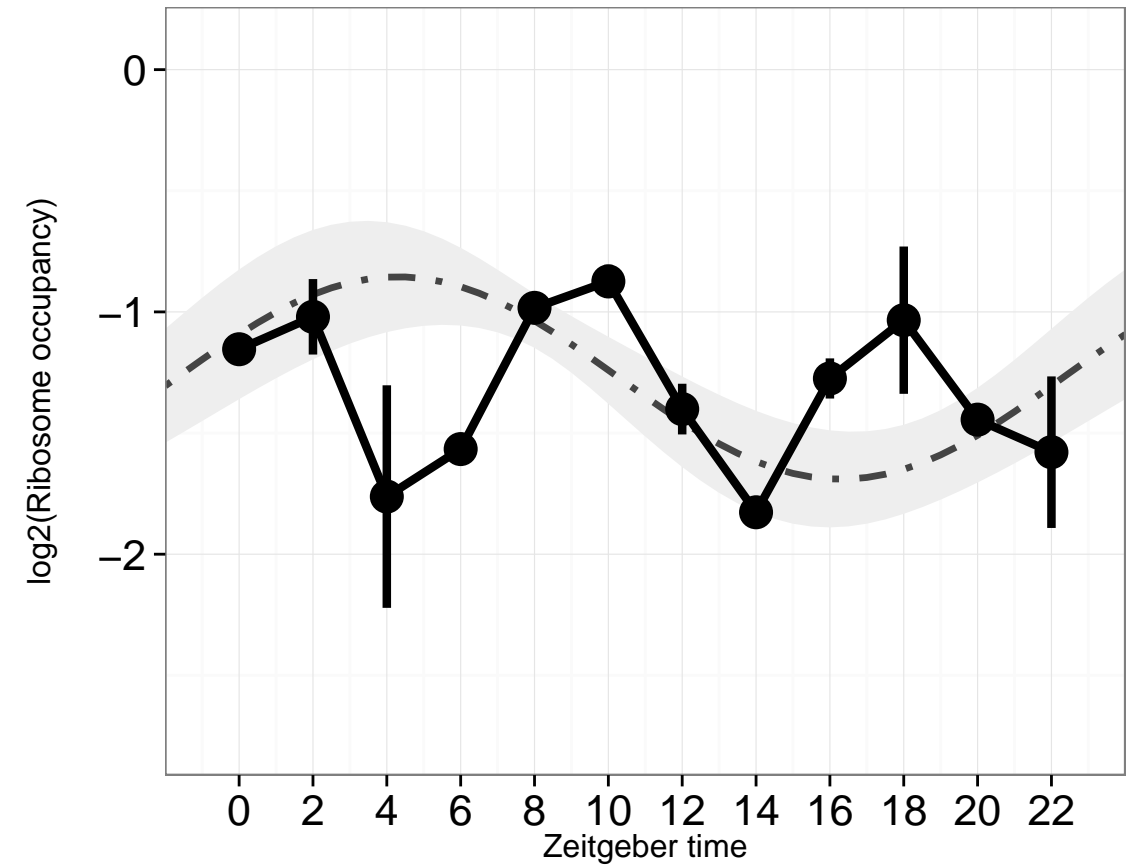

Supplement: SuppDataset_1.zip [file Brd9_set_C.pdf › Supplemental Dataset 1/C-mRNA_nonrhythm_translation_rhyth/Brd9_set_C.pdf]

## Brdt

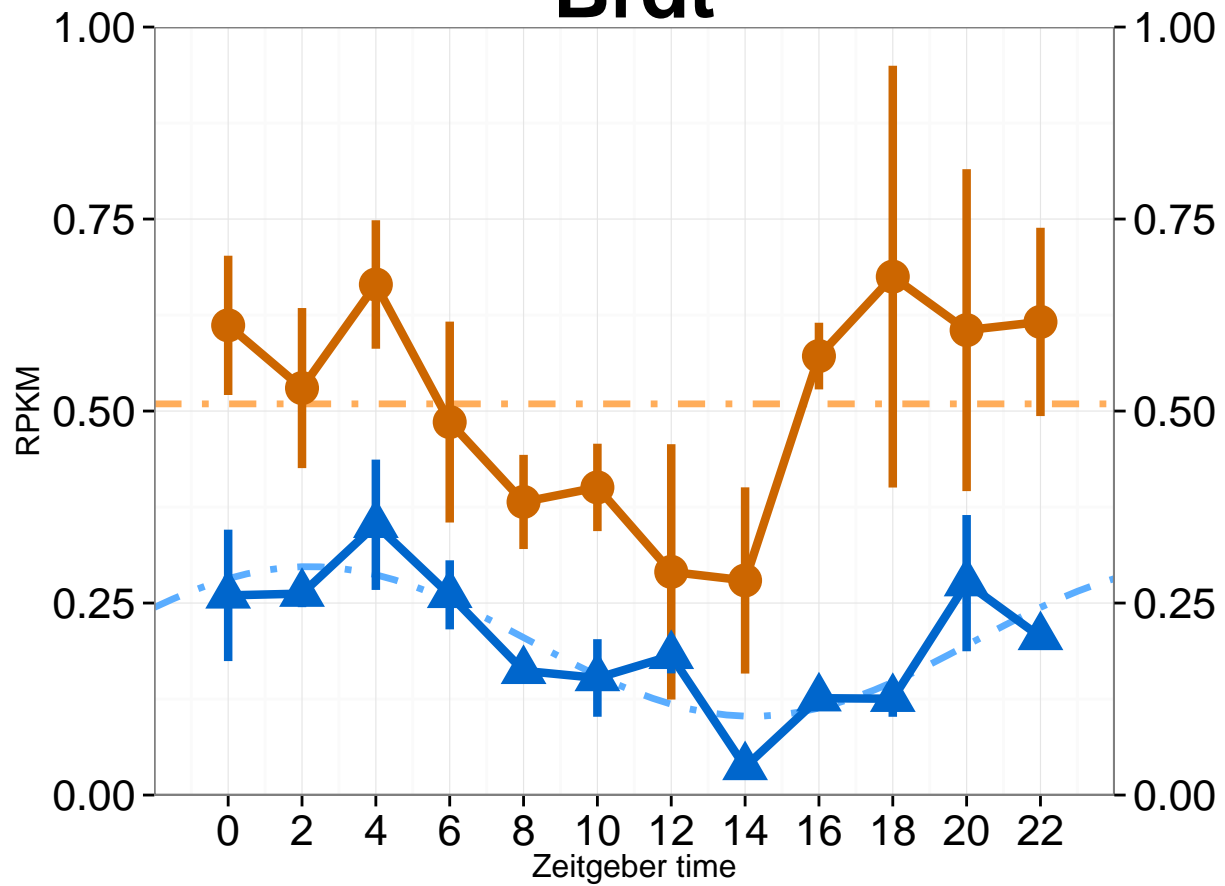

## Brdt

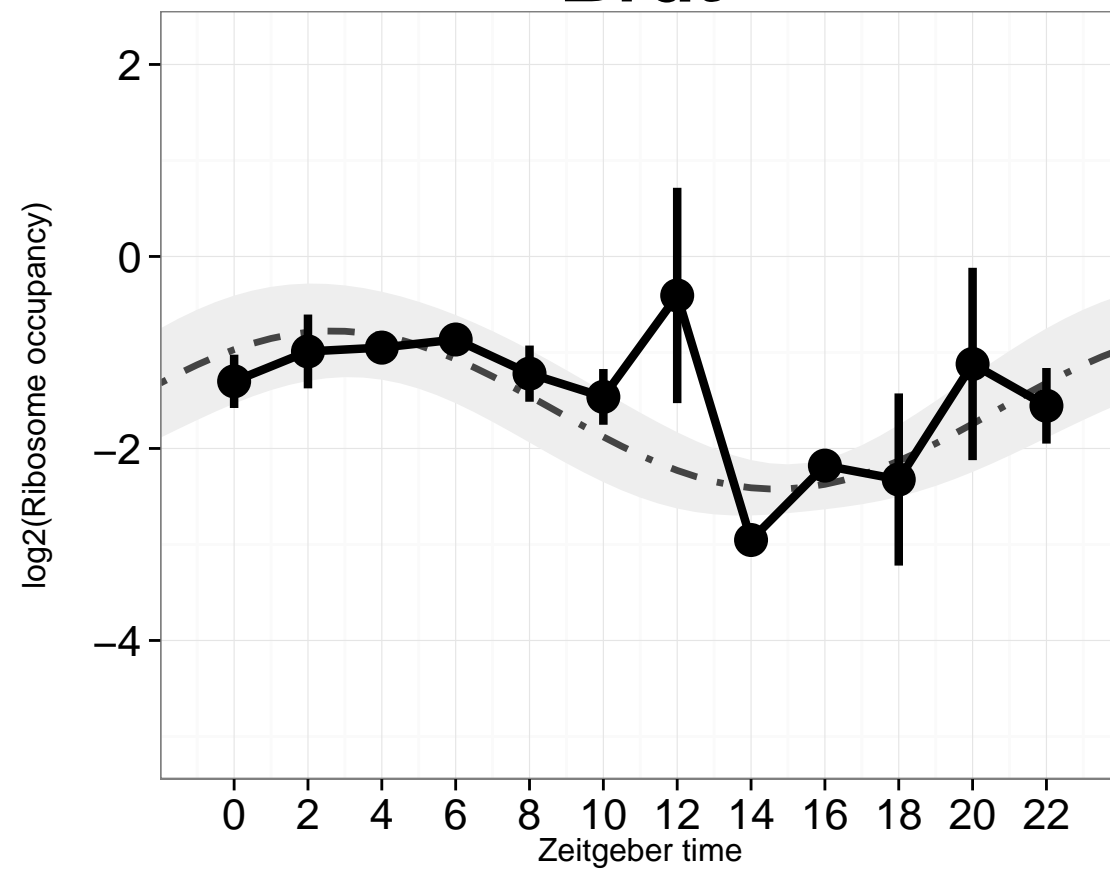

Supplement: SuppDataset_1.zip [file Brdt_set_C.pdf › Supplemental Dataset 1/C-mRNA_nonrhythm_translation_rhyth/Brdt_set_C.pdf]

## Bri3

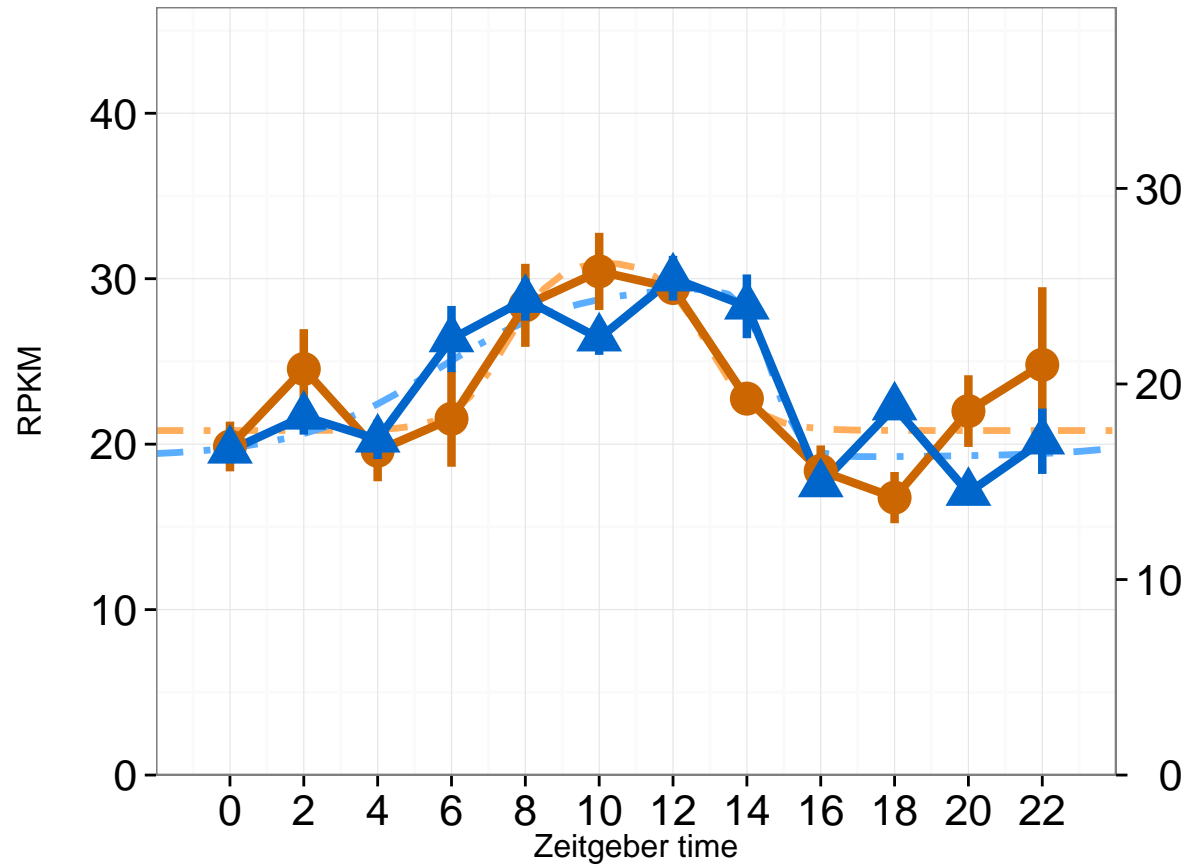

## Bri3

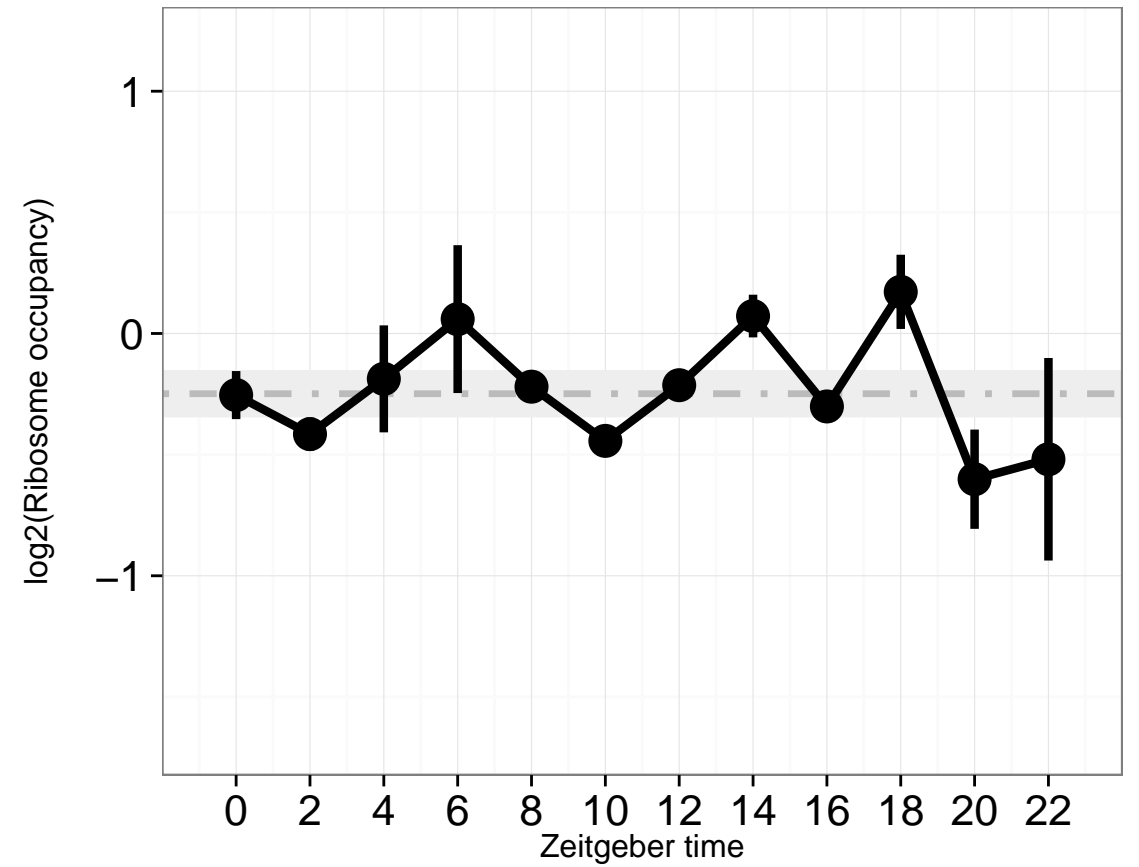

Supplement: SuppDataset_1.zip [file Bri3_set_C.pdf › Supplemental Dataset 1/C-mRNA_nonrhythm_translation_rhyth/Bri3_set_C.pdf]

## Bzw2

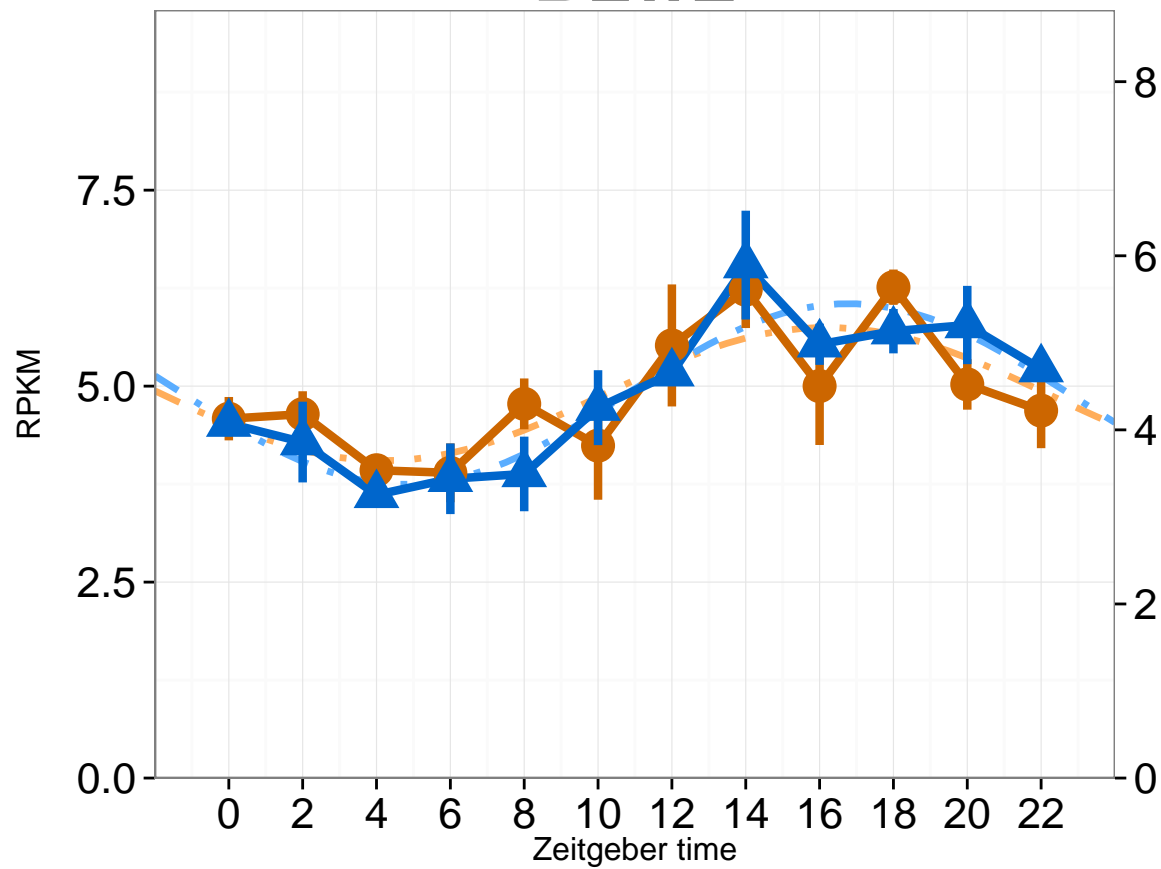

## Bzw2

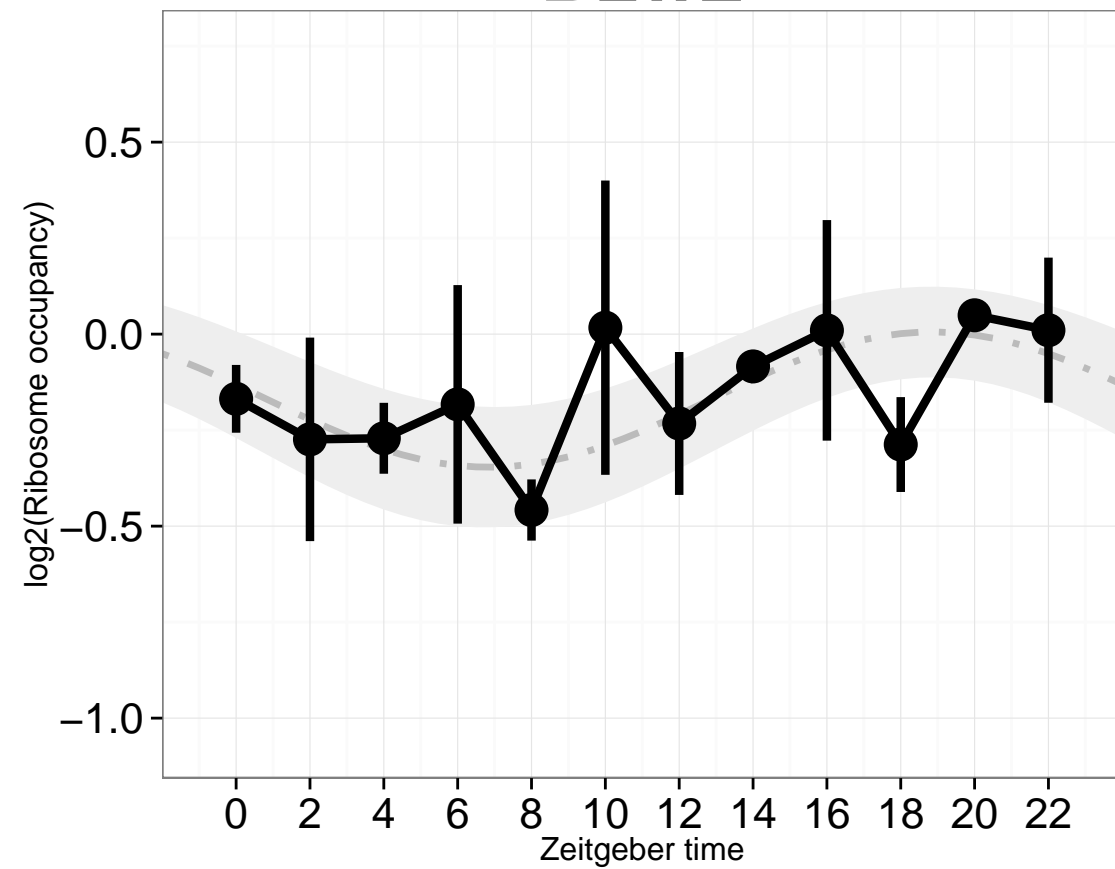

Supplement: SuppDataset_1.zip [file Bzw2_set_C.pdf › Supplemental Dataset 1/C-mRNA_nonrhythm_translation_rhyth/Bzw2_set_C.pdf]

## C1qbp

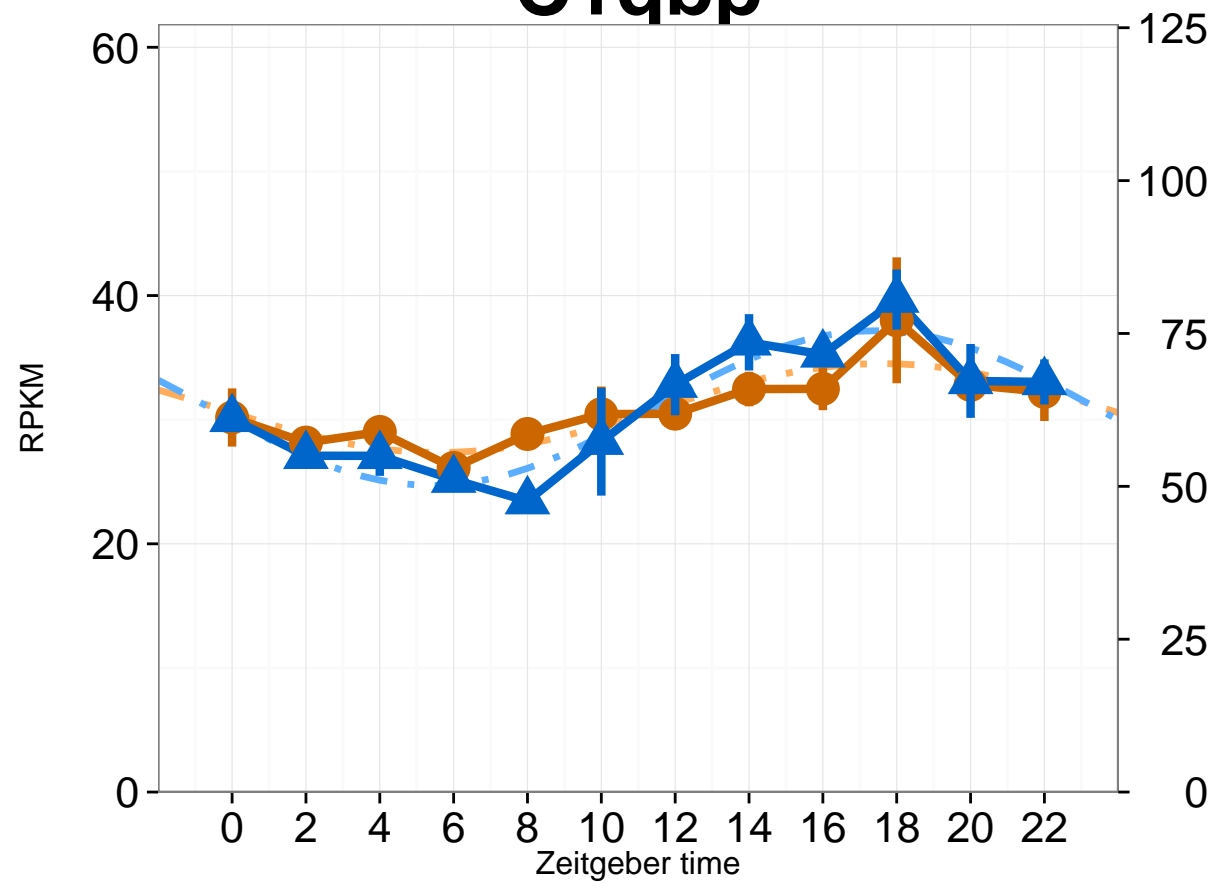

## C1qbp

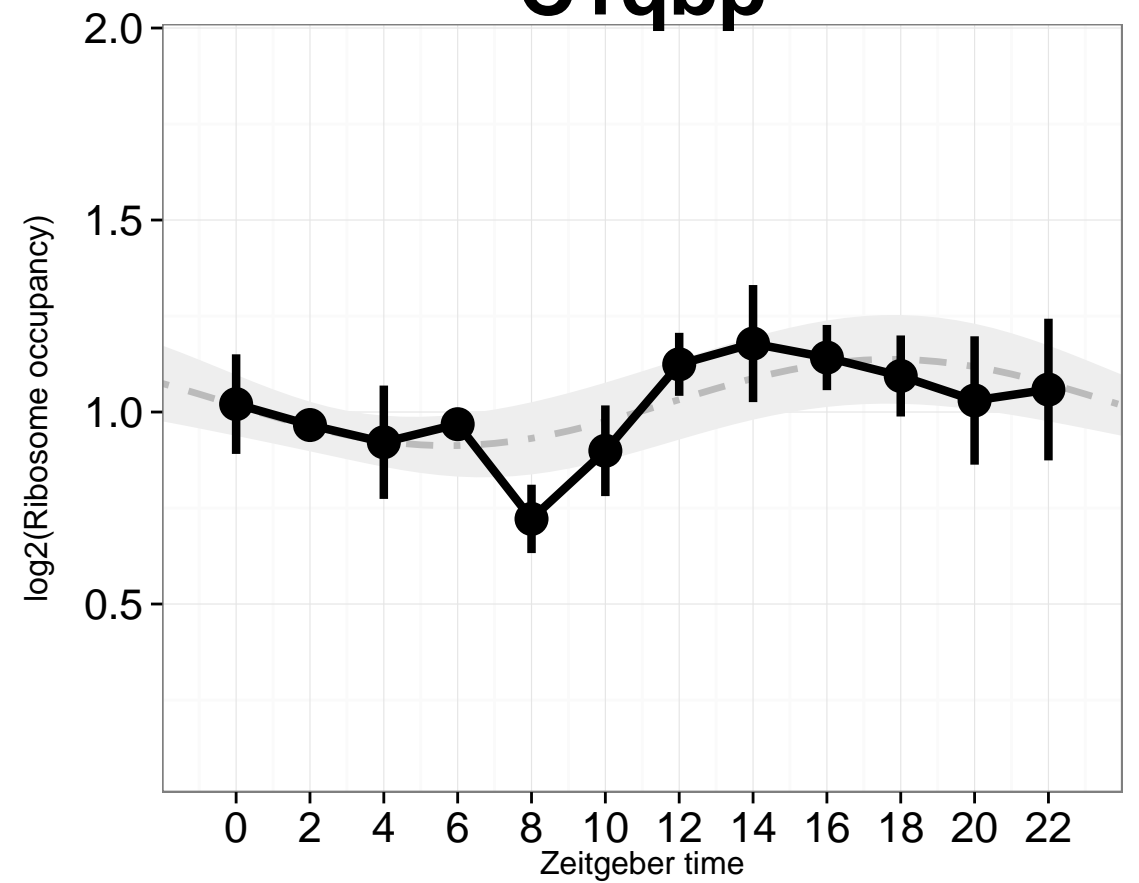

Supplement: SuppDataset_1.zip [file C1qbp_set_C.pdf › Supplemental Dataset 1/C-mRNA_nonrhythm_translation_rhyth/C1qbp_set_C.pdf]

# C2cd2l

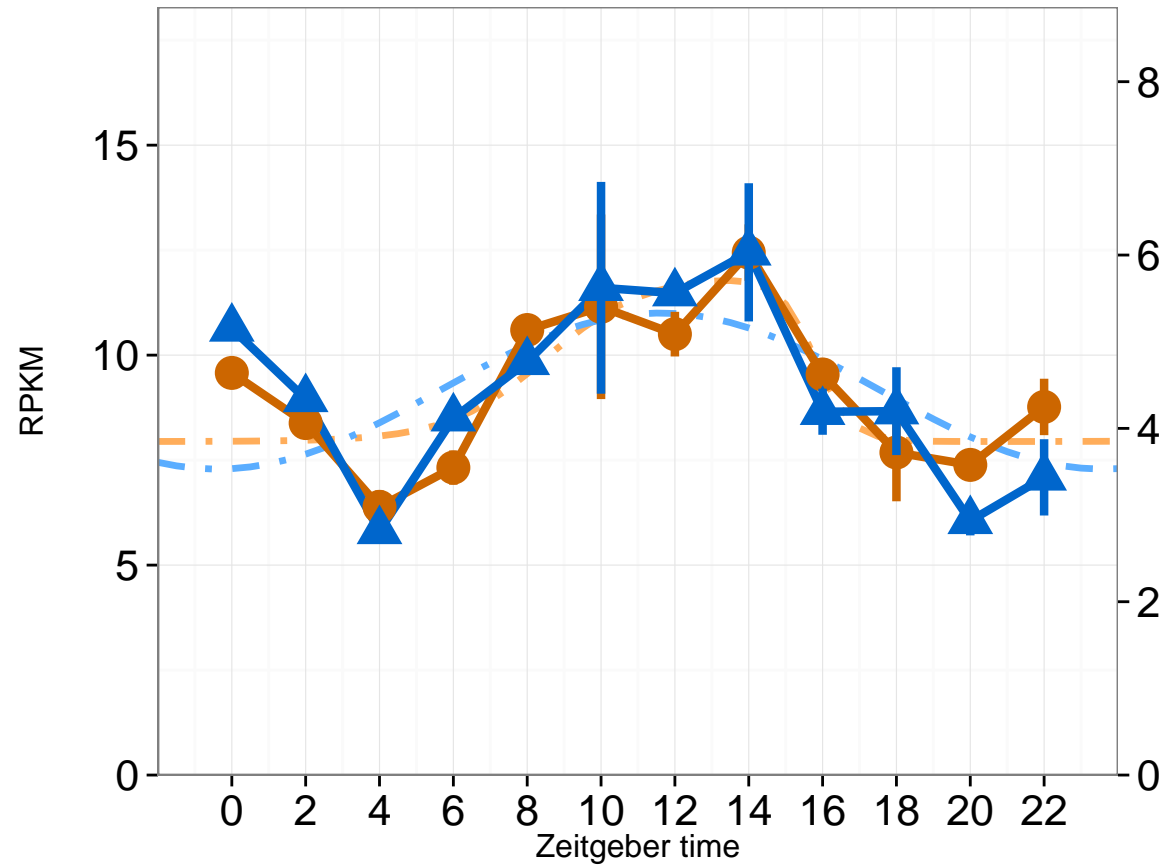

# C2cd2l

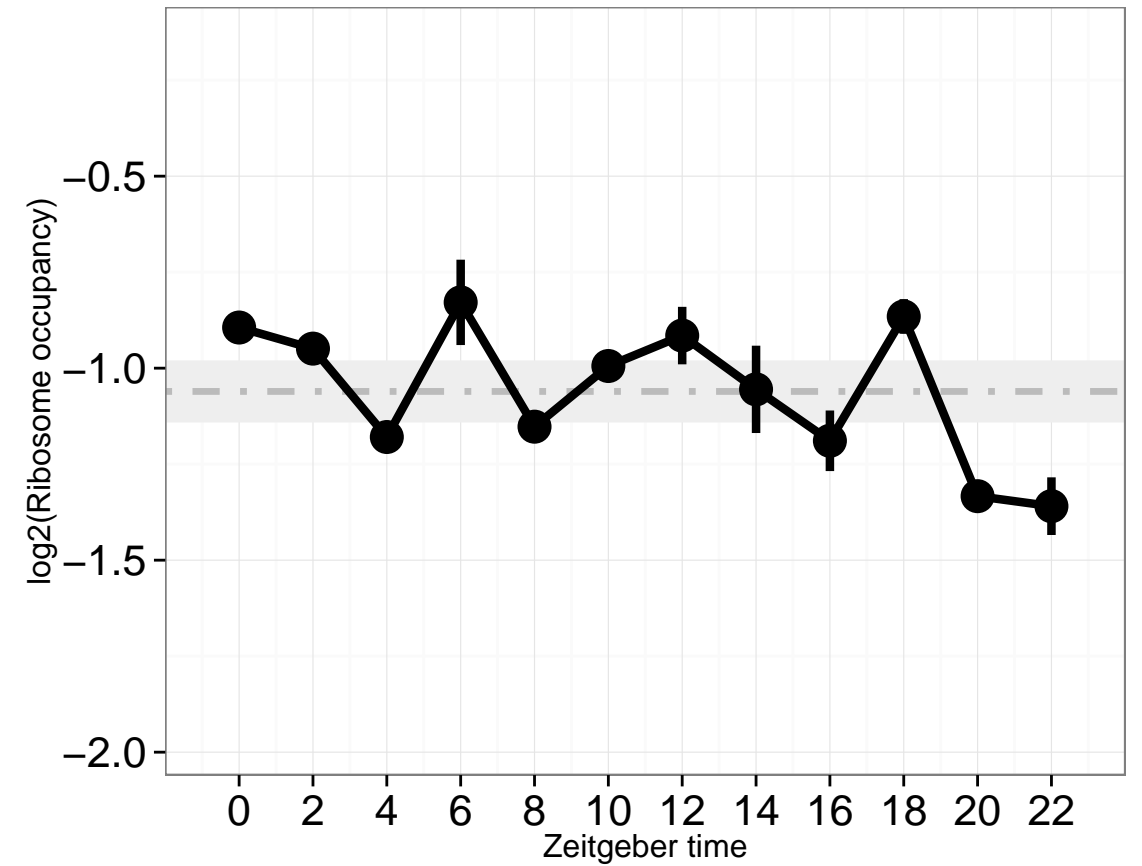

Supplement: SuppDataset_1.zip [file C2cd2l_set_C.pdf › Supplemental Dataset 1/C-mRNA_nonrhythm_translation_rhyth/C2cd2l_set_C.pdf]

# C5ar1

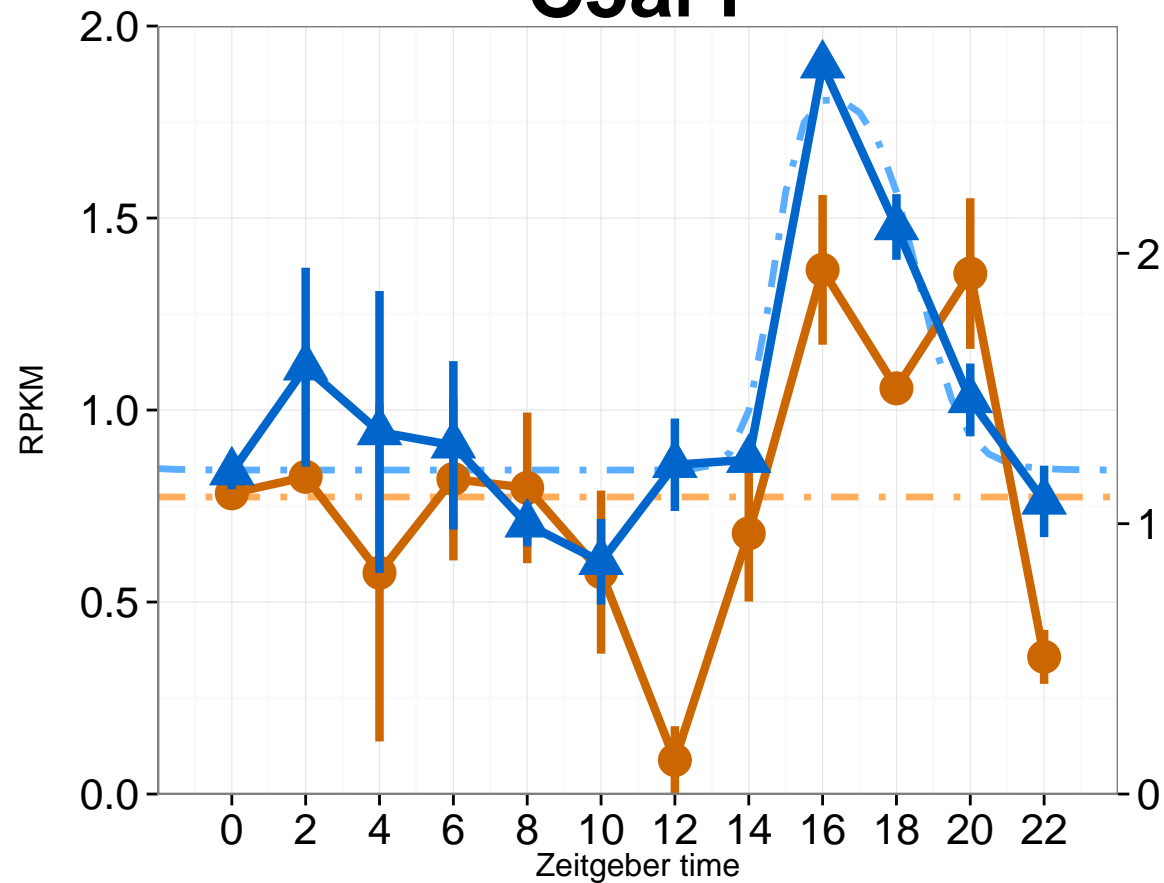

# C5ar1

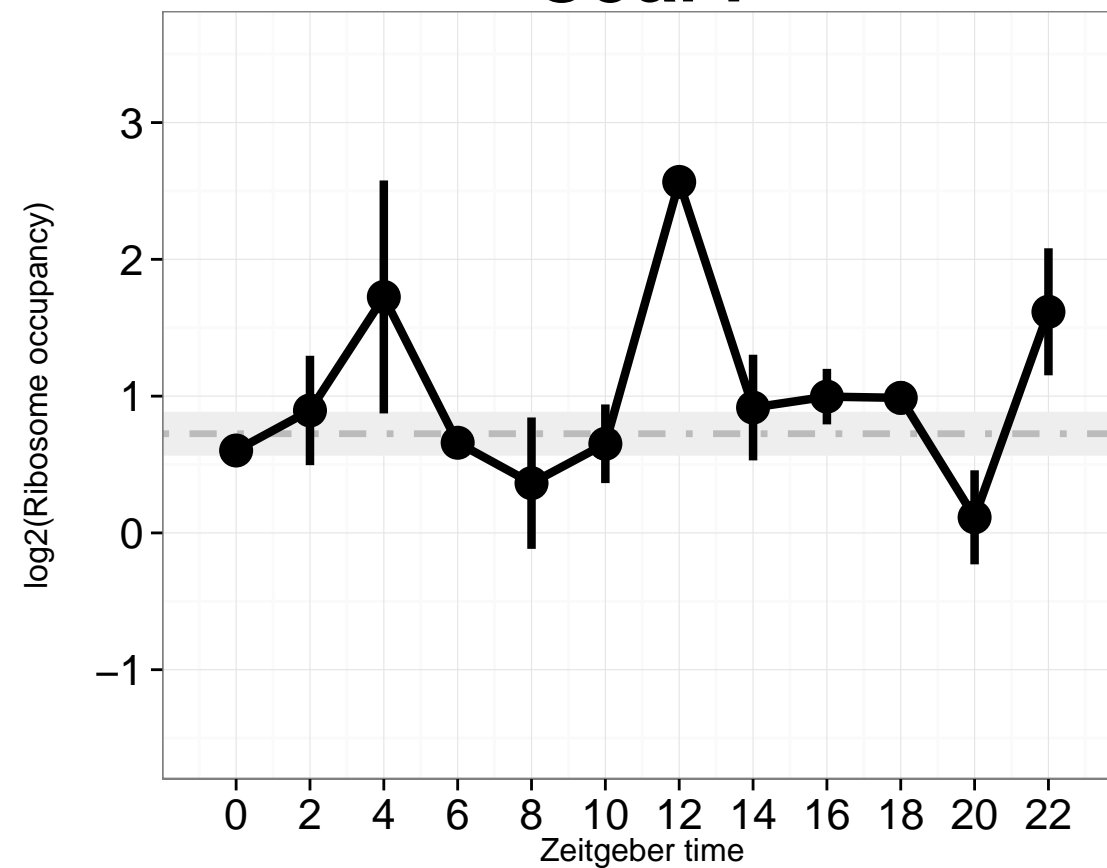

Supplement: SuppDataset_1.zip [file C5ar1_set_C.pdf › Supplemental Dataset 1/C-mRNA_nonrhythm_translation_rhyth/C5ar1_set_C.pdf]

## Cab39l

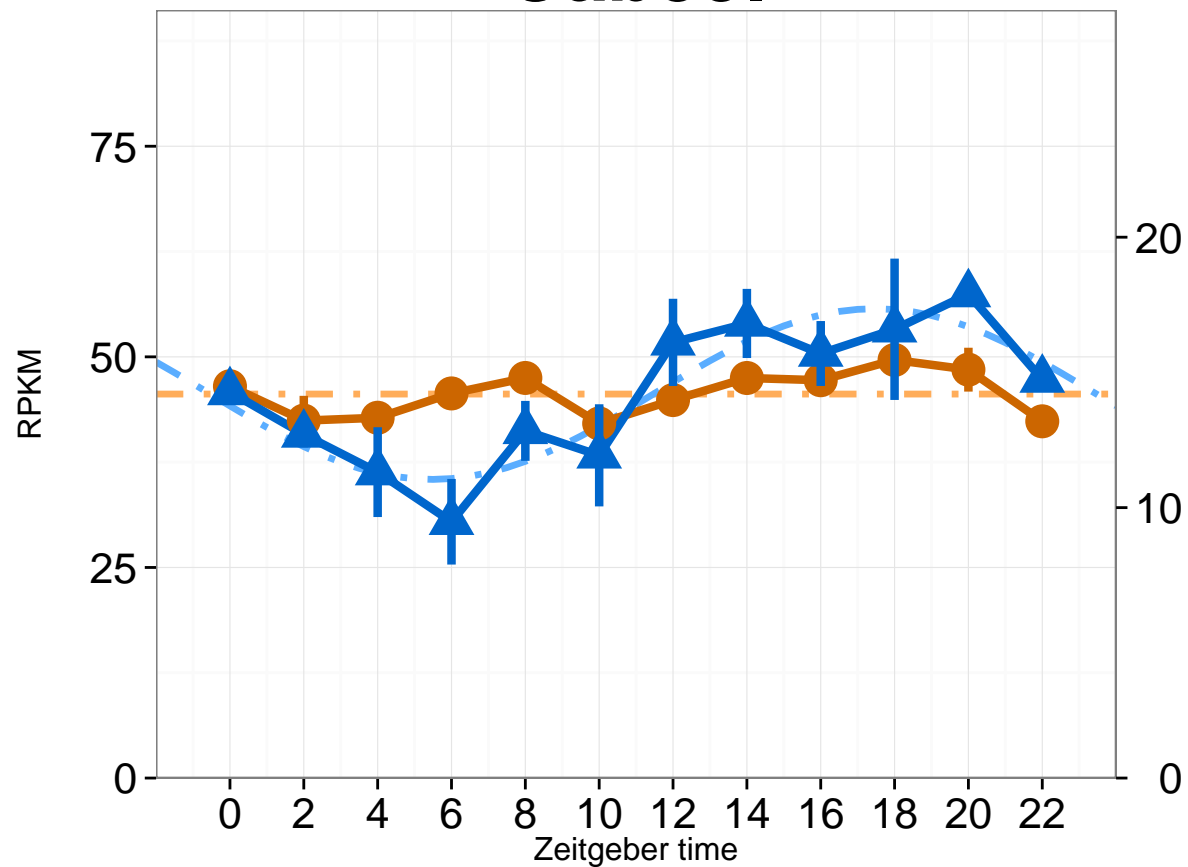

## Cab39l

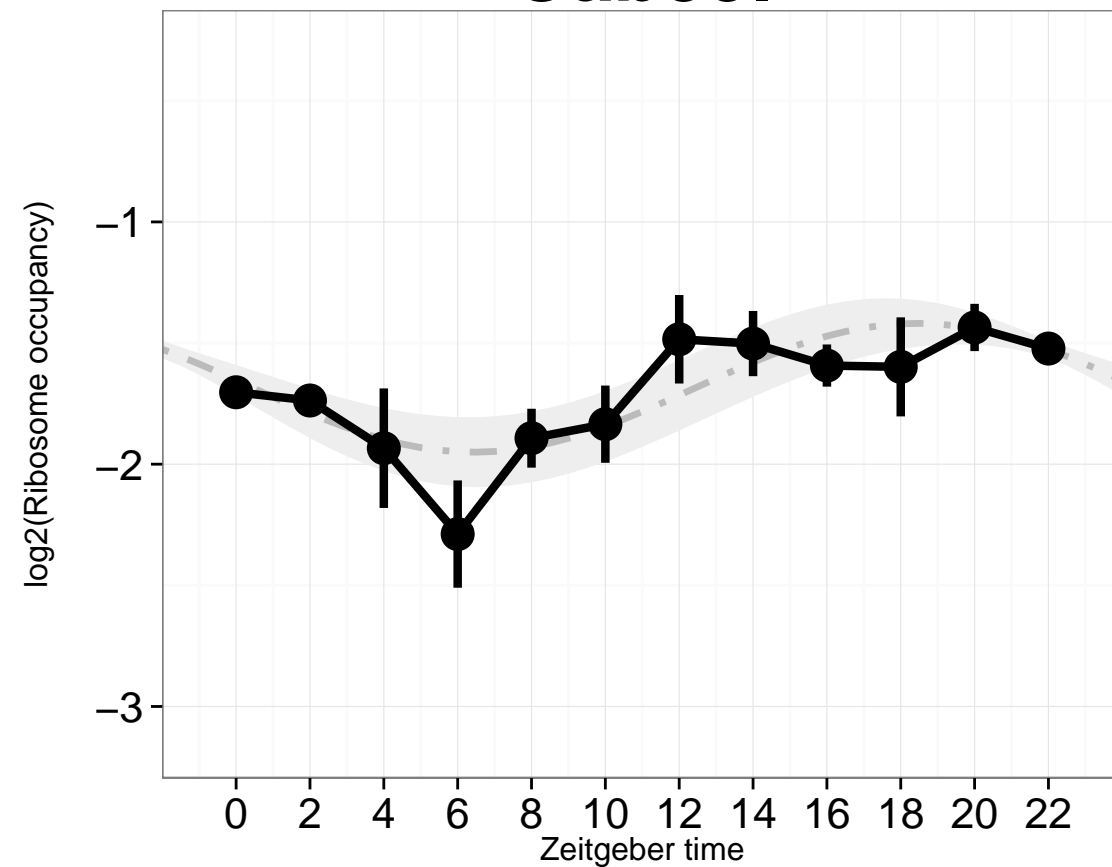

Supplement: SuppDataset_1.zip [file Cab39l_set_C.pdf › Supplemental Dataset 1/C-mRNA_nonrhythm_translation_rhyth/Cab39l_set_C.pdf]

# Cabin1

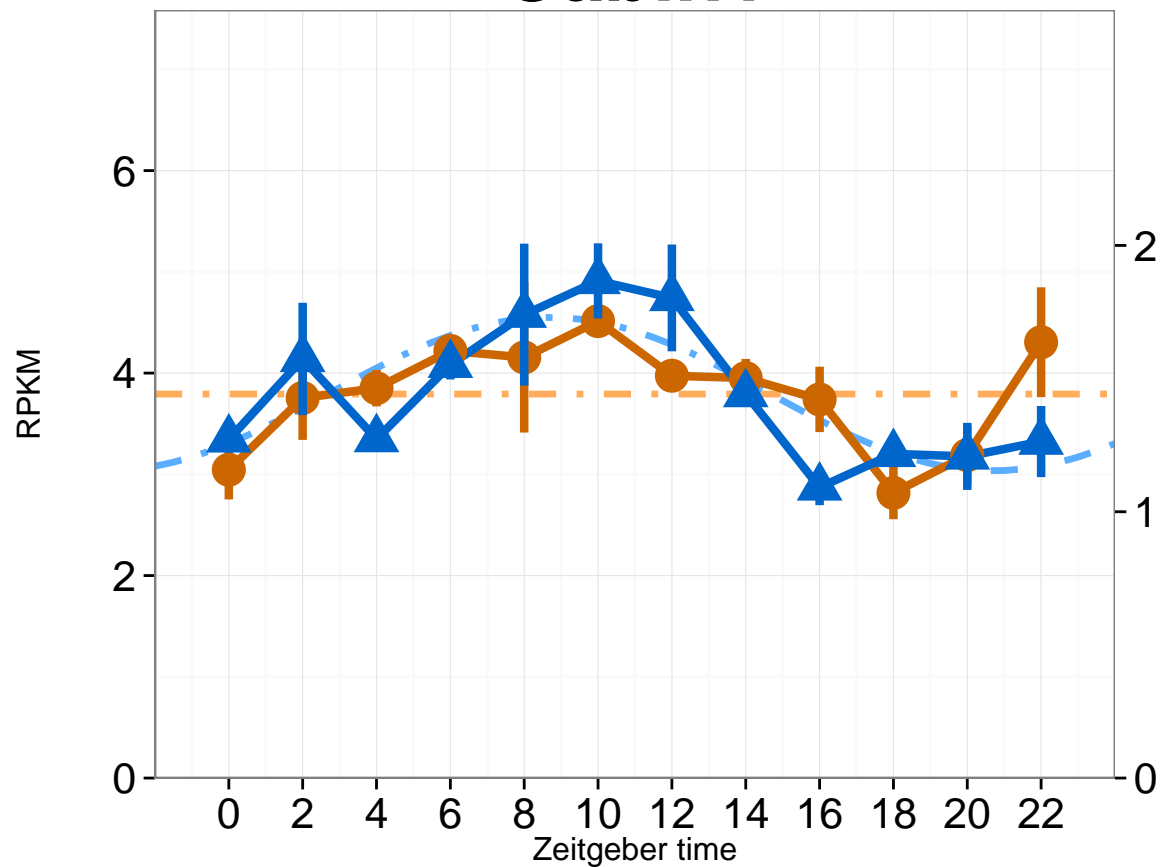

# Cabin1

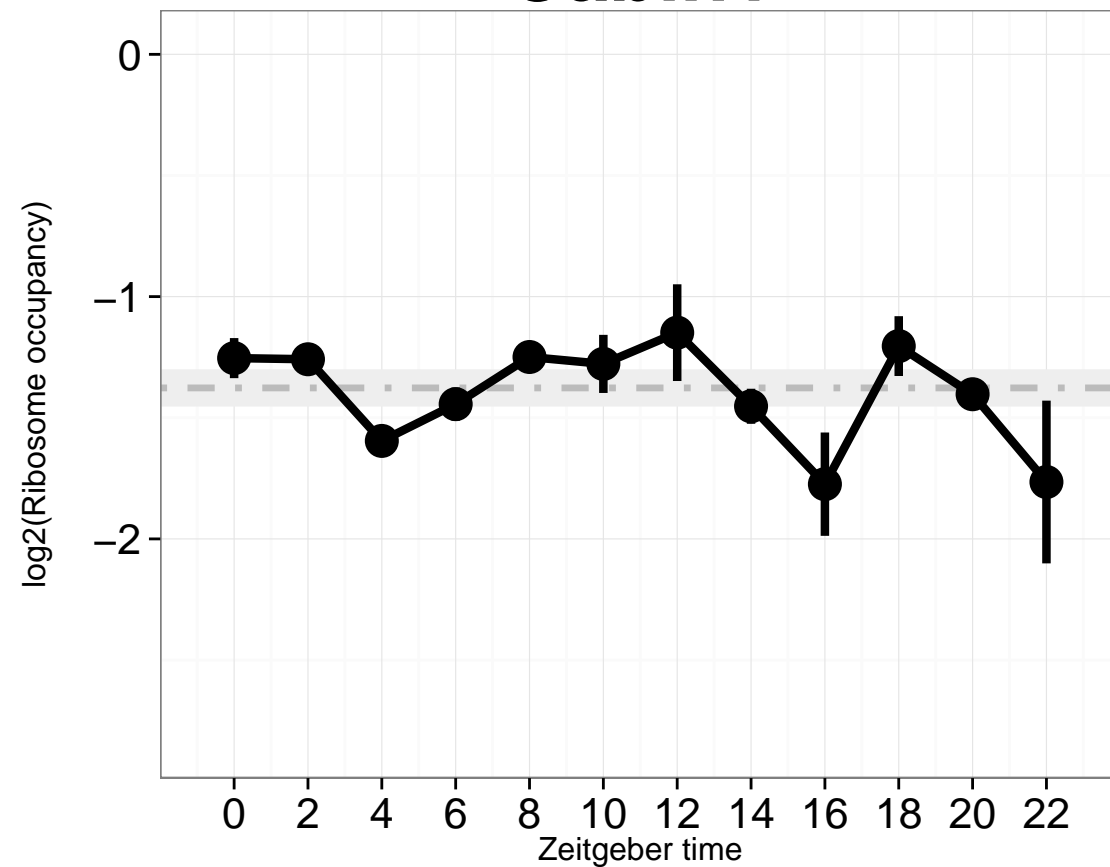

Supplement: SuppDataset_1.zip [file Cabin1_set_C.pdf › Supplemental Dataset 1/C-mRNA_nonrhythm_translation_rhyth/Cabin1_set_C.pdf]

## Cadm4

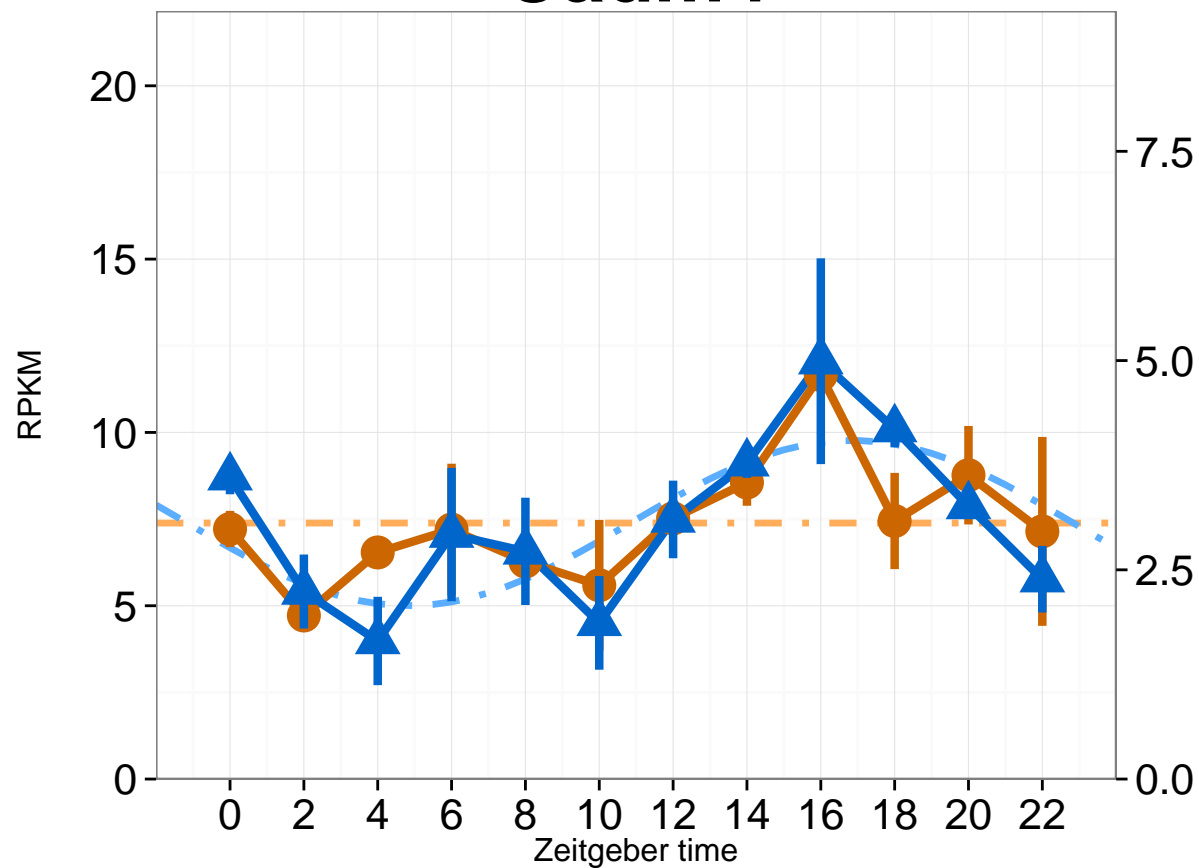

## Cadm4

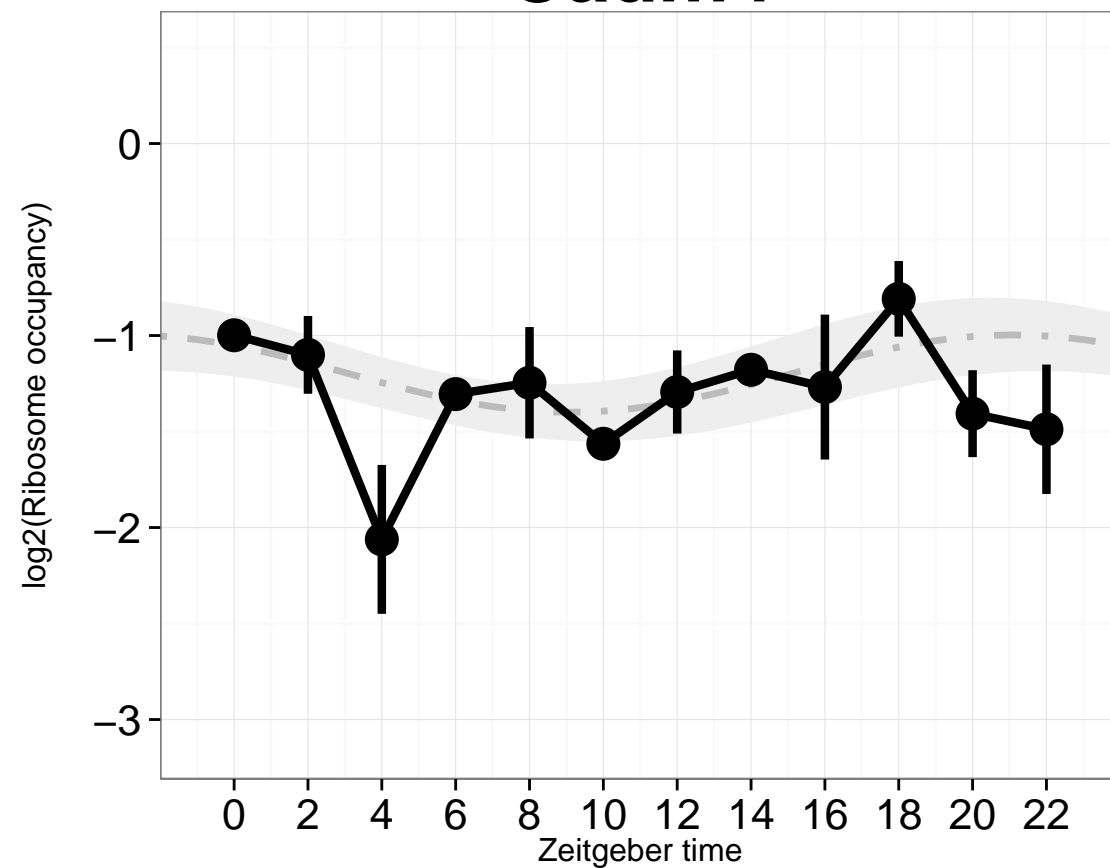

Supplement: SuppDataset_1.zip [file Cadm4_set_C.pdf › Supplemental Dataset 1/C-mRNA_nonrhythm_translation_rhyth/Cadm4_set_C.pdf]

## Calr3

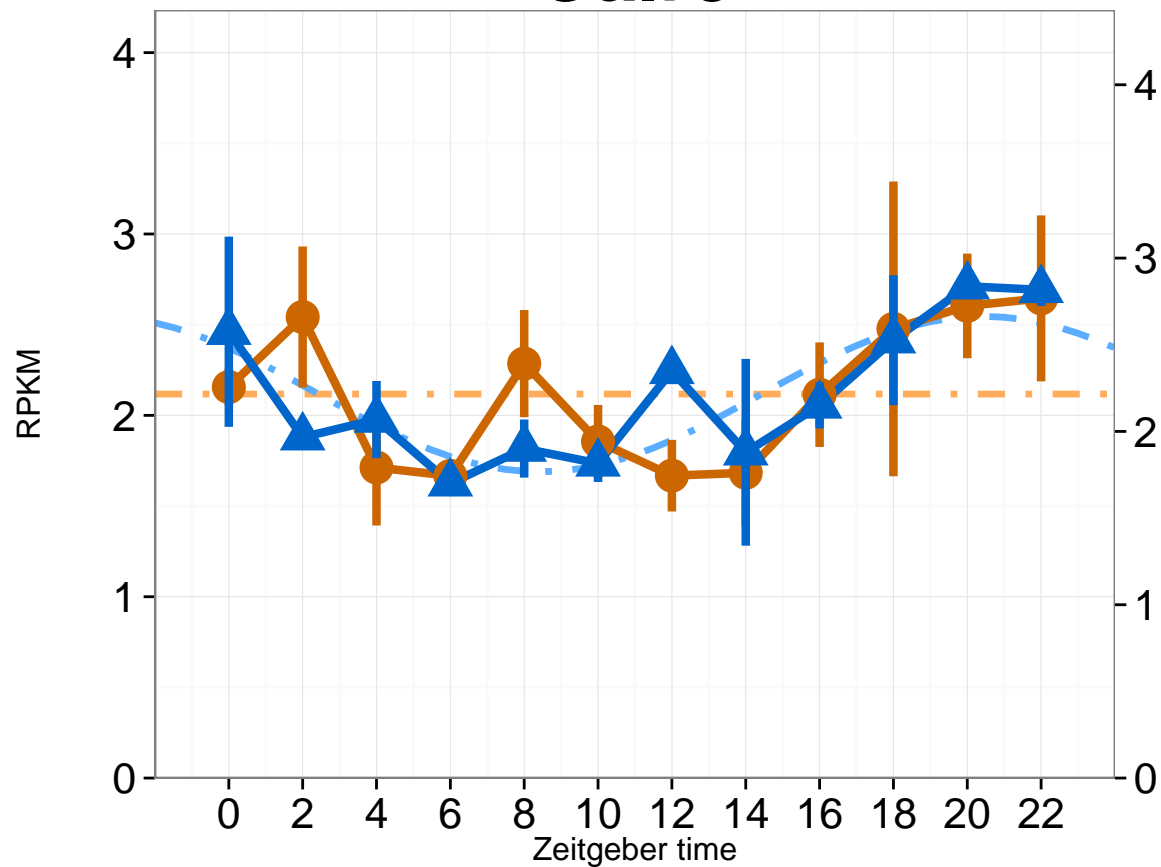

## Calr3

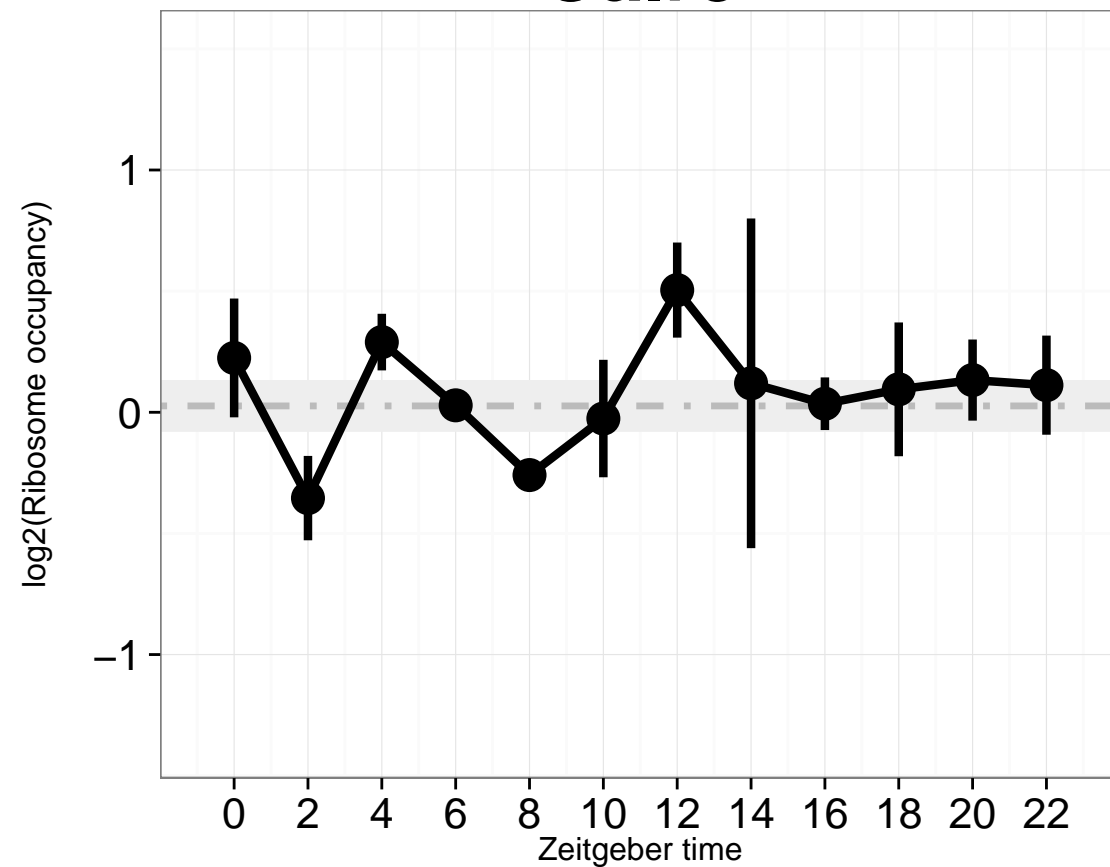

Supplement: SuppDataset_1.zip [file Calr3_set_C.pdf › Supplemental Dataset 1/C-mRNA_nonrhythm_translation_rhyth/Calr3_set_C.pdf]

# Capn3

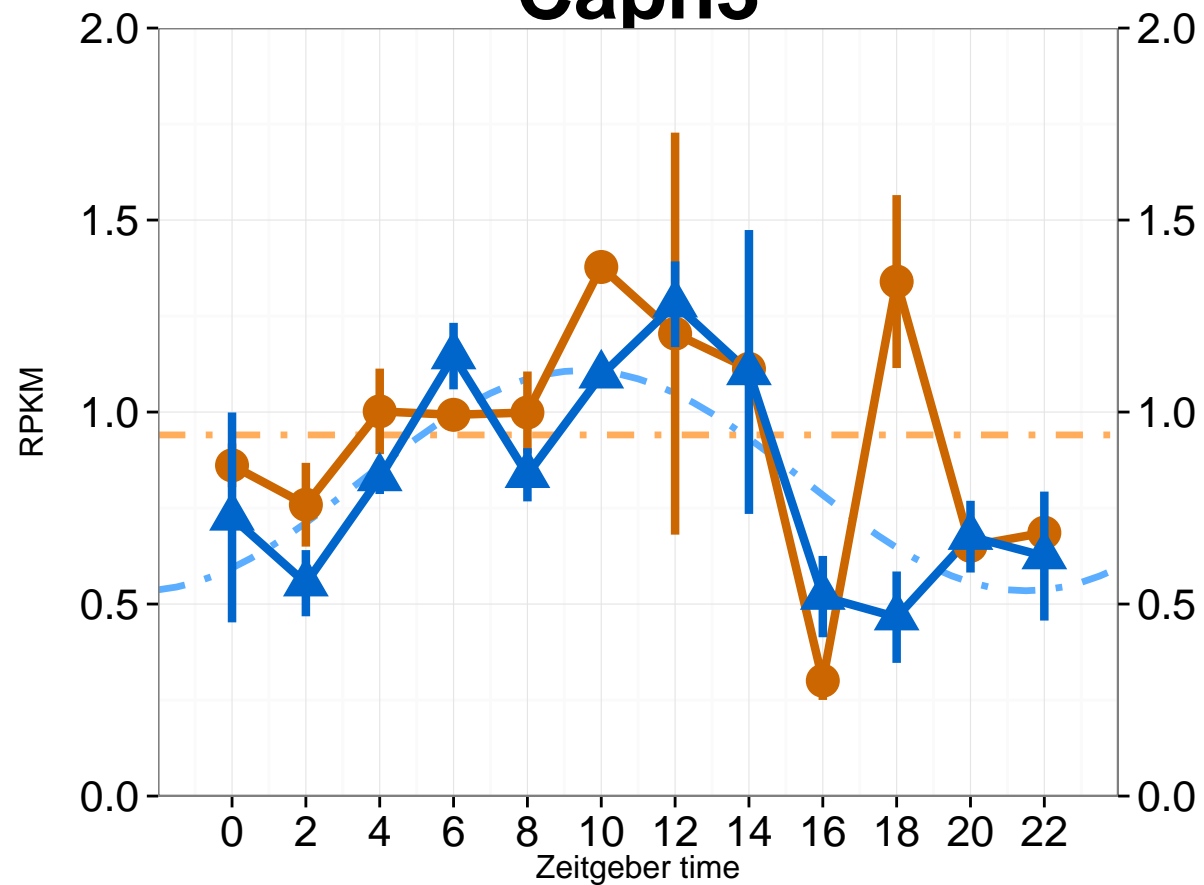

# Capn3

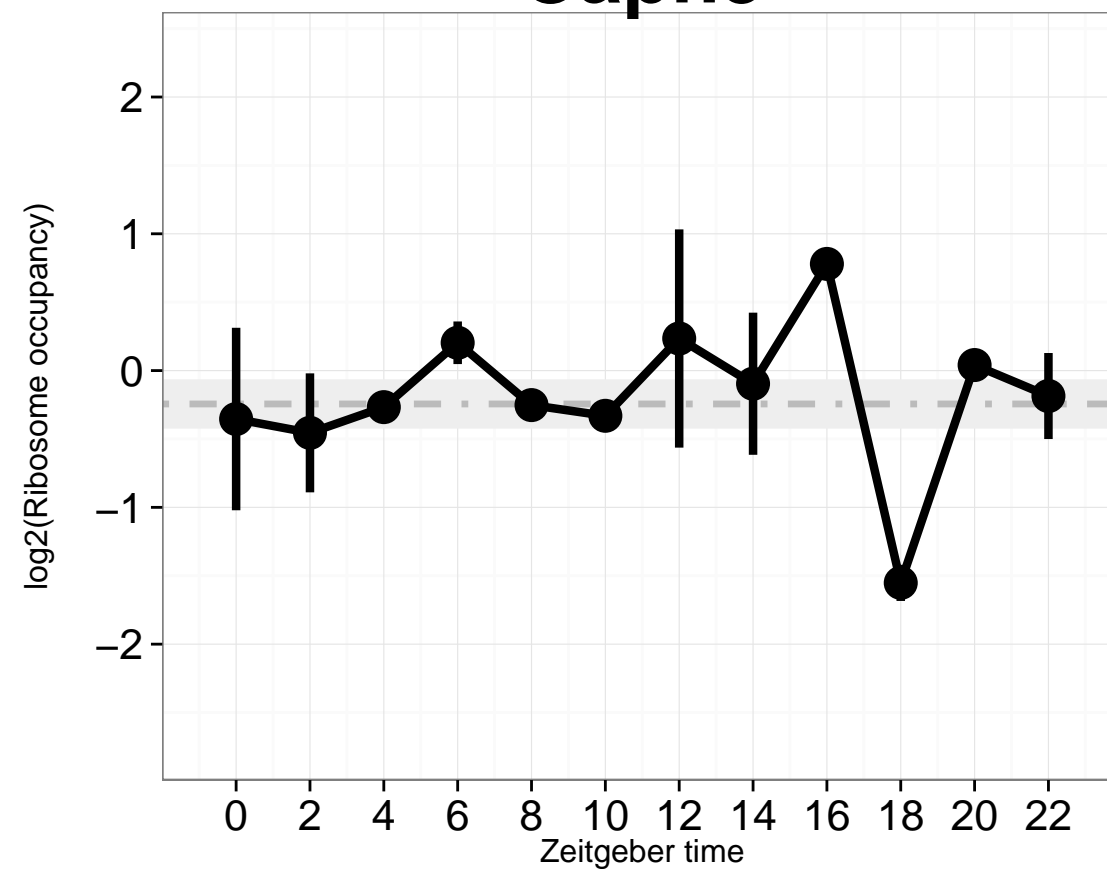

Supplement: SuppDataset_1.zip [file Capn3_set_C.pdf › Supplemental Dataset 1/C-mRNA_nonrhythm_translation_rhyth/Capn3_set_C.pdf]

## Car2

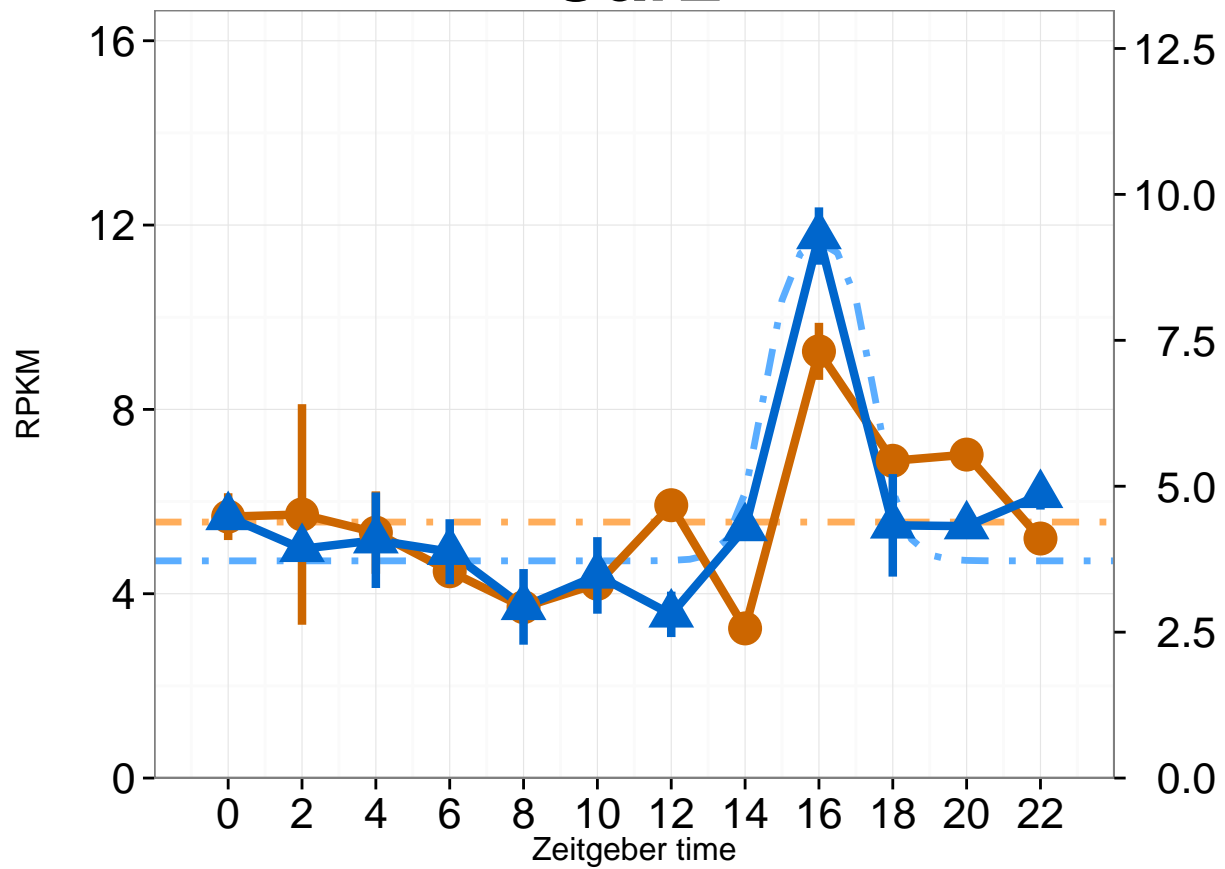

## Car2

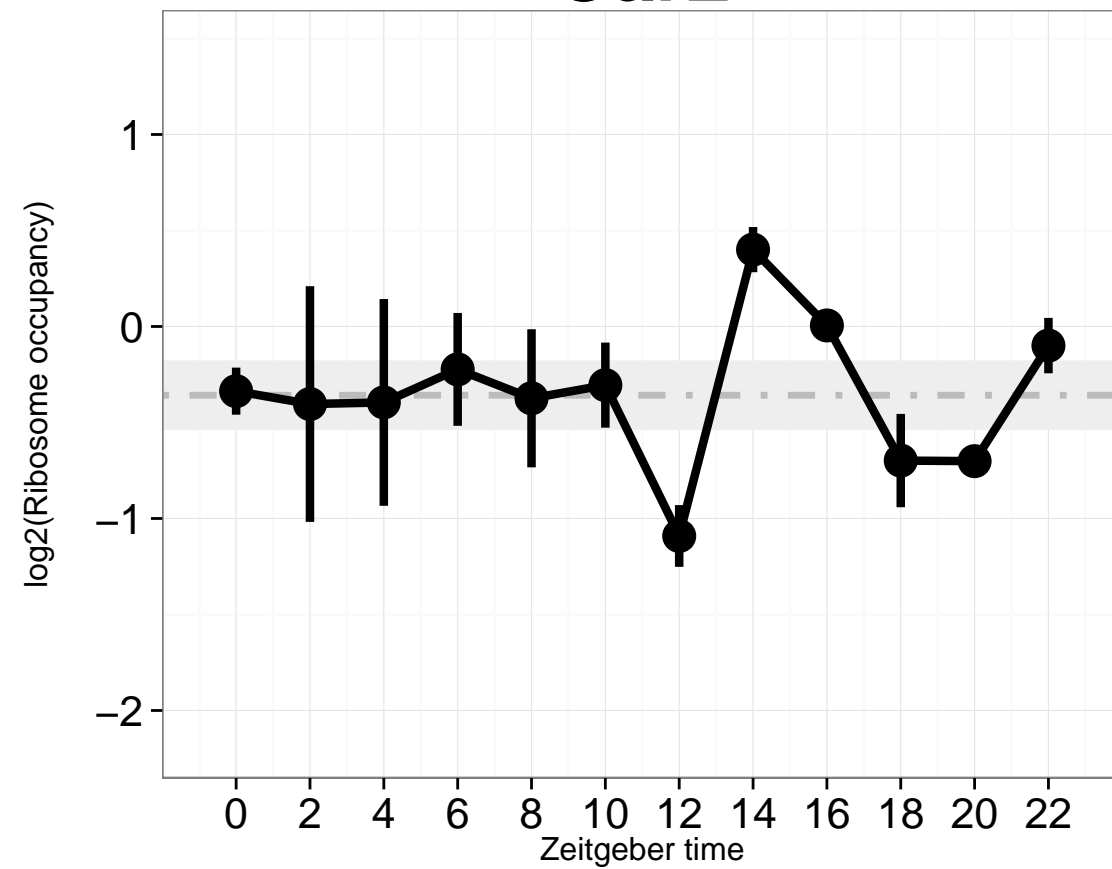

Supplement: SuppDataset_1.zip [file Car2_set_C.pdf › Supplemental Dataset 1/C-mRNA_nonrhythm_translation_rhyth/Car2_set_C.pdf]

## Car3

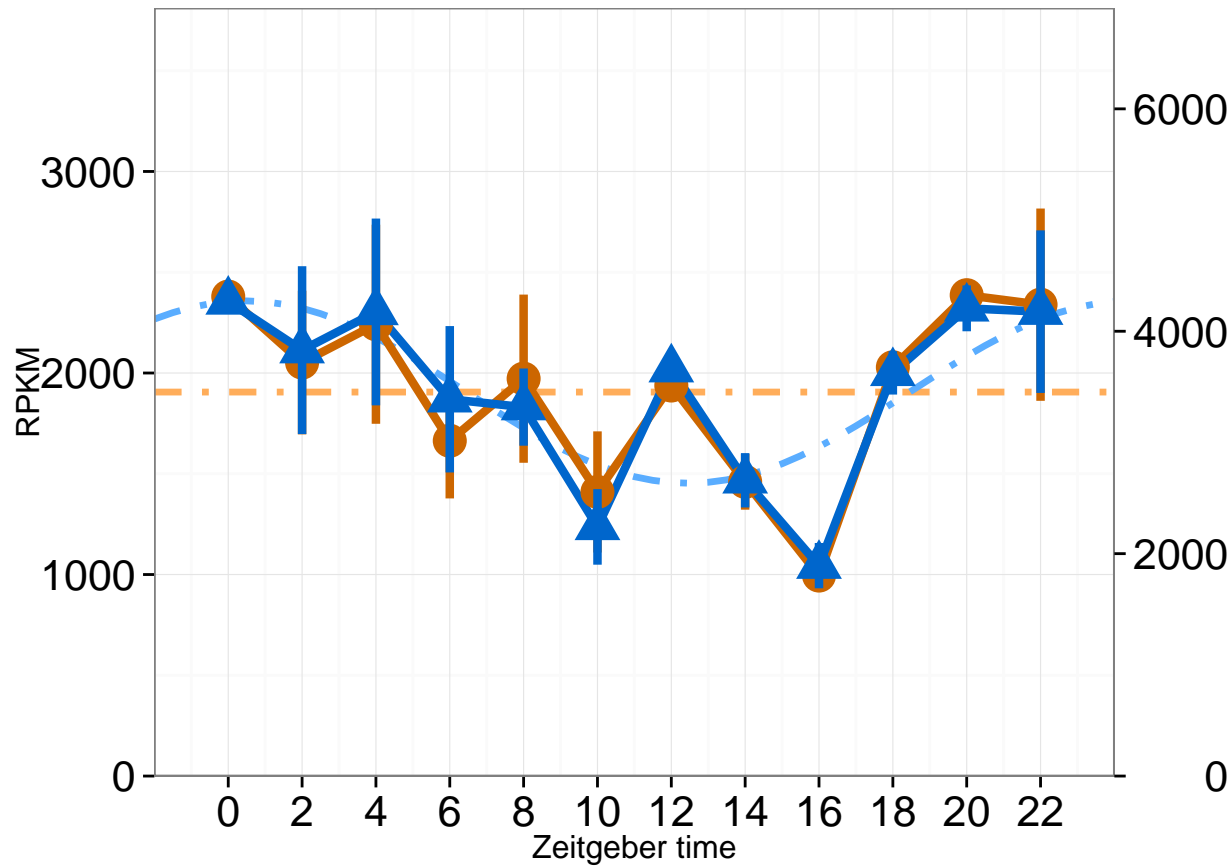

## Car3

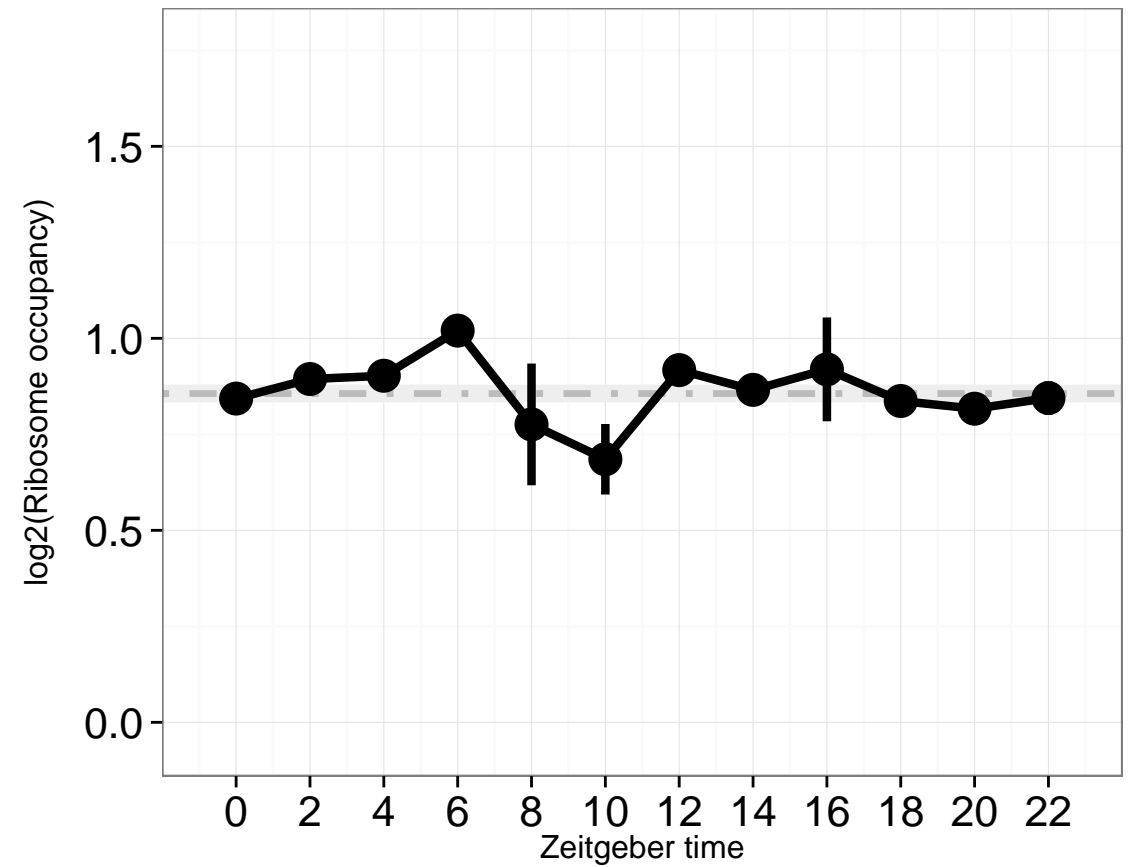

Supplement: SuppDataset_1.zip [file Car3_set_C.pdf › Supplemental Dataset 1/C-mRNA_nonrhythm_translation_rhyth/Car3_set_C.pdf]

## Caskin2

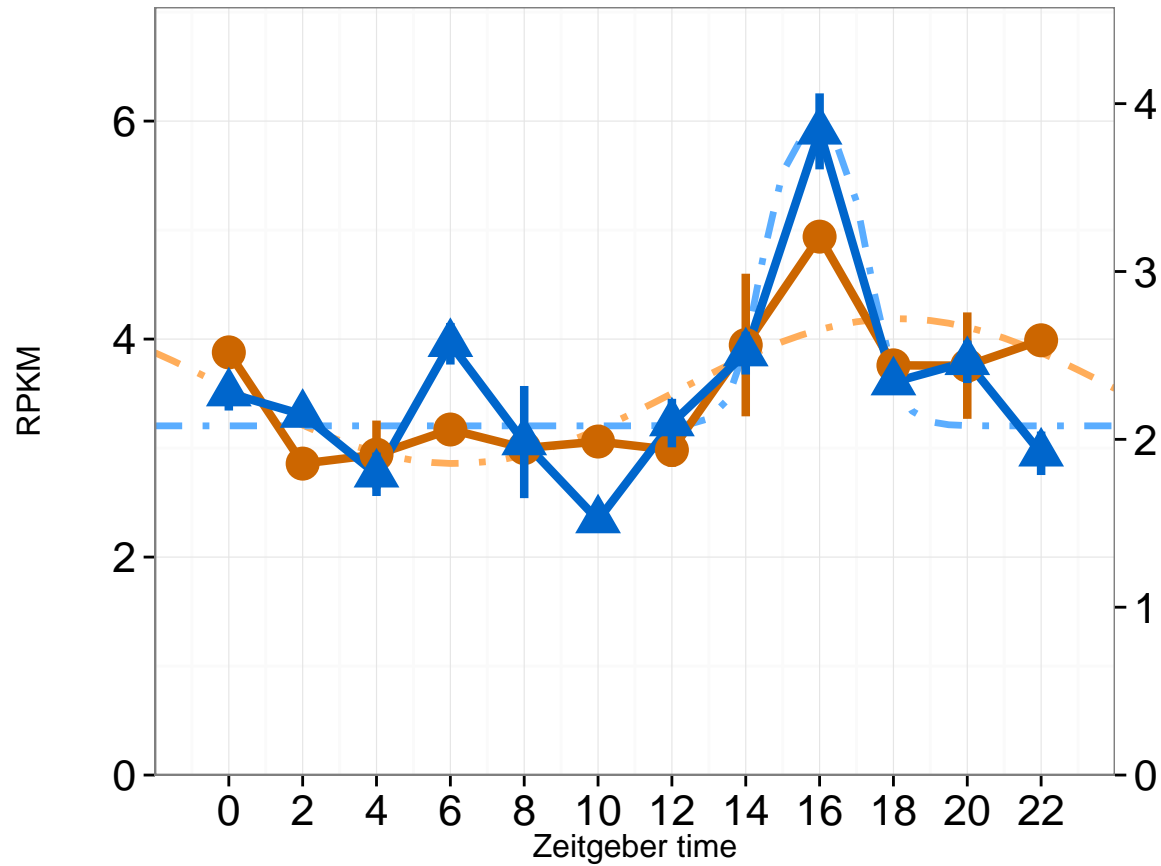

## Caskin2

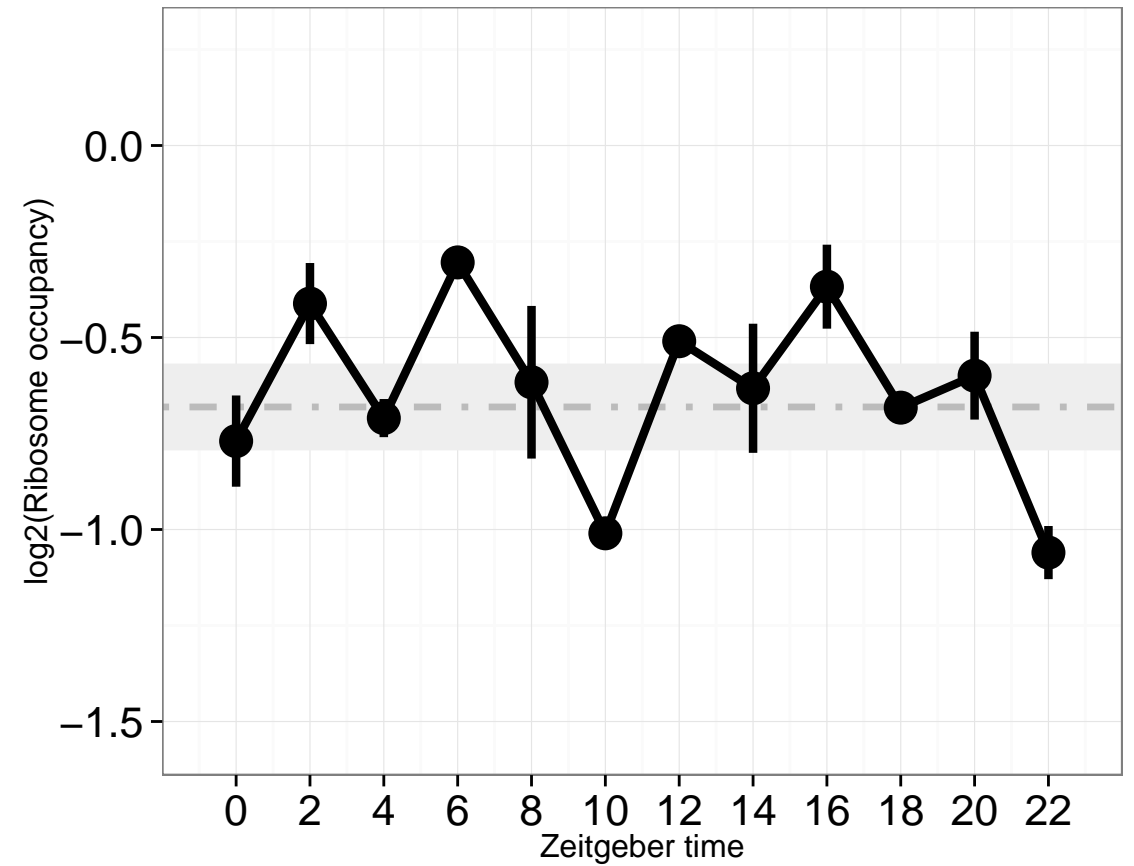

Supplement: SuppDataset_1.zip [file Caskin2_set_C.pdf › Supplemental Dataset 1/C-mRNA_nonrhythm_translation_rhyth/Caskin2_set_C.pdf]

## Ccar1

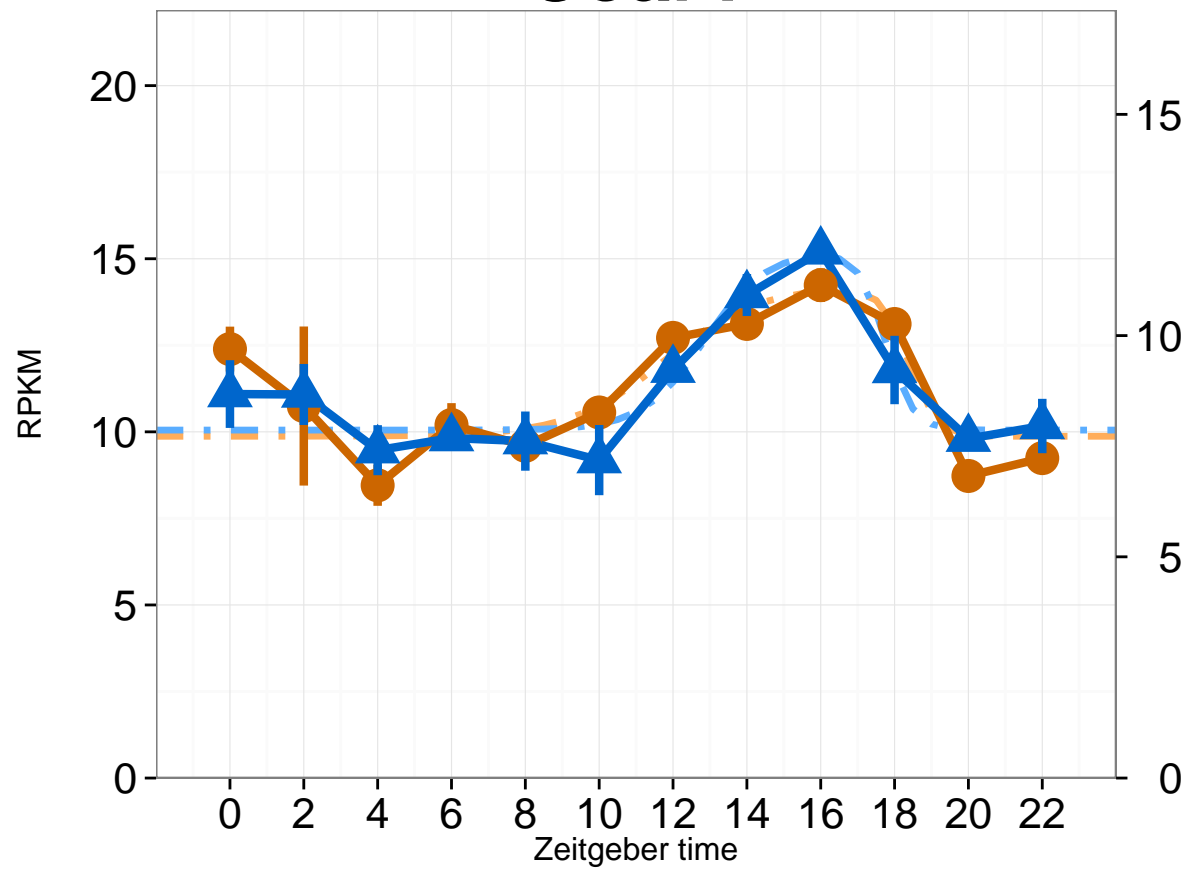

## Ccar1

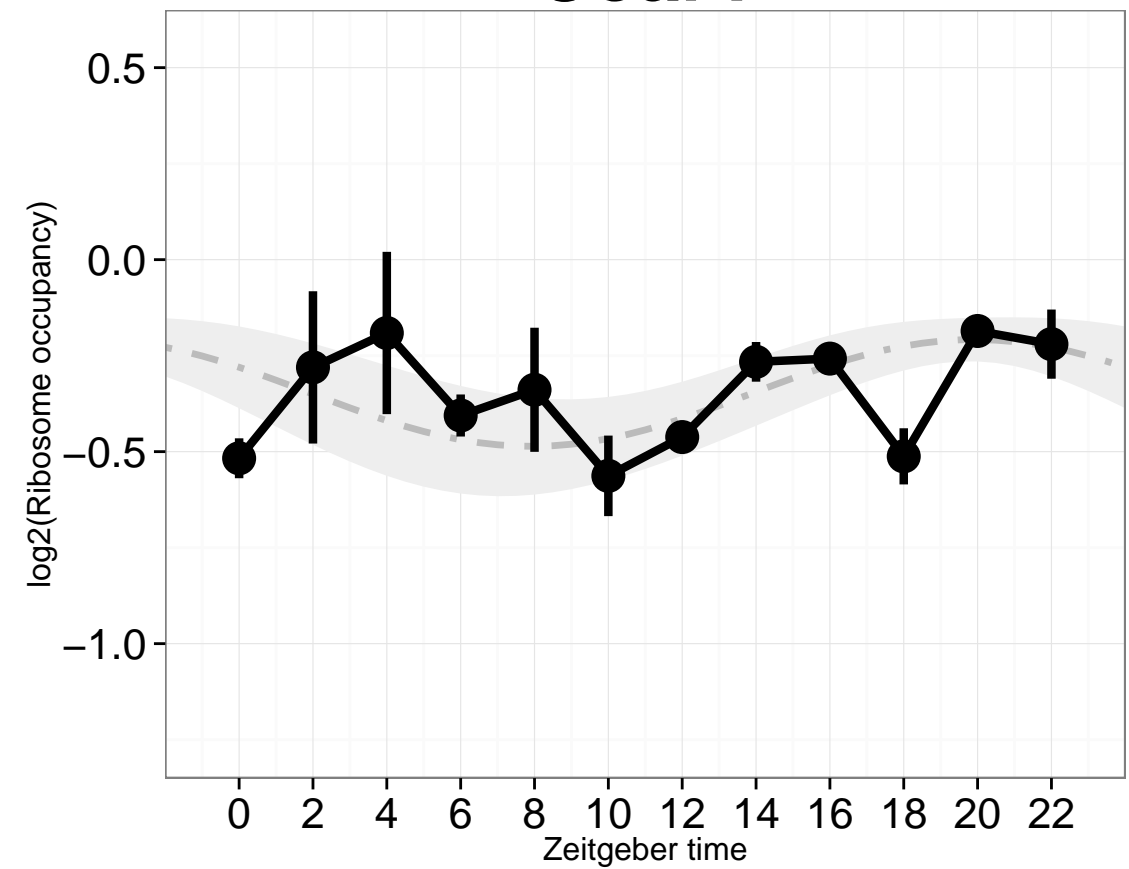

Supplement: SuppDataset_1.zip [file Ccar1_set_C.pdf › Supplemental Dataset 1/C-mRNA_nonrhythm_translation_rhyth/Ccar1_set_C.pdf]

Ccdc126

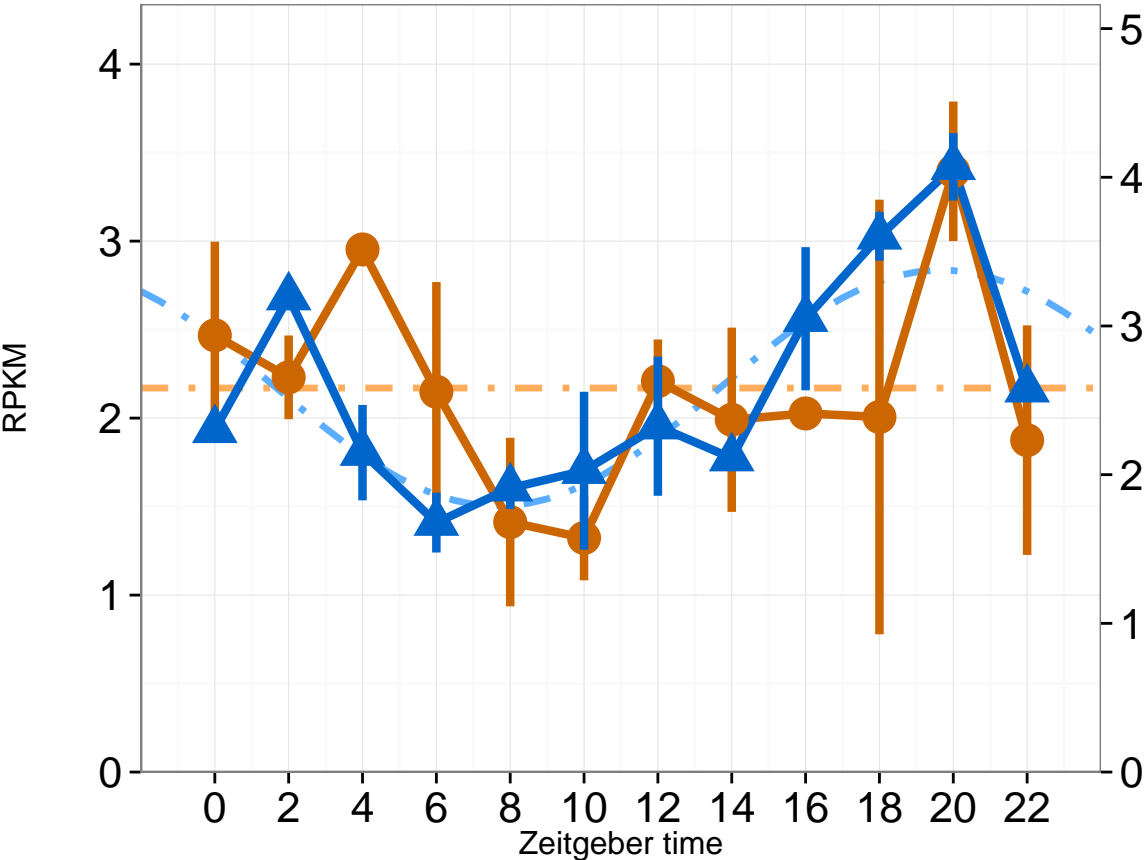

Ccdc126

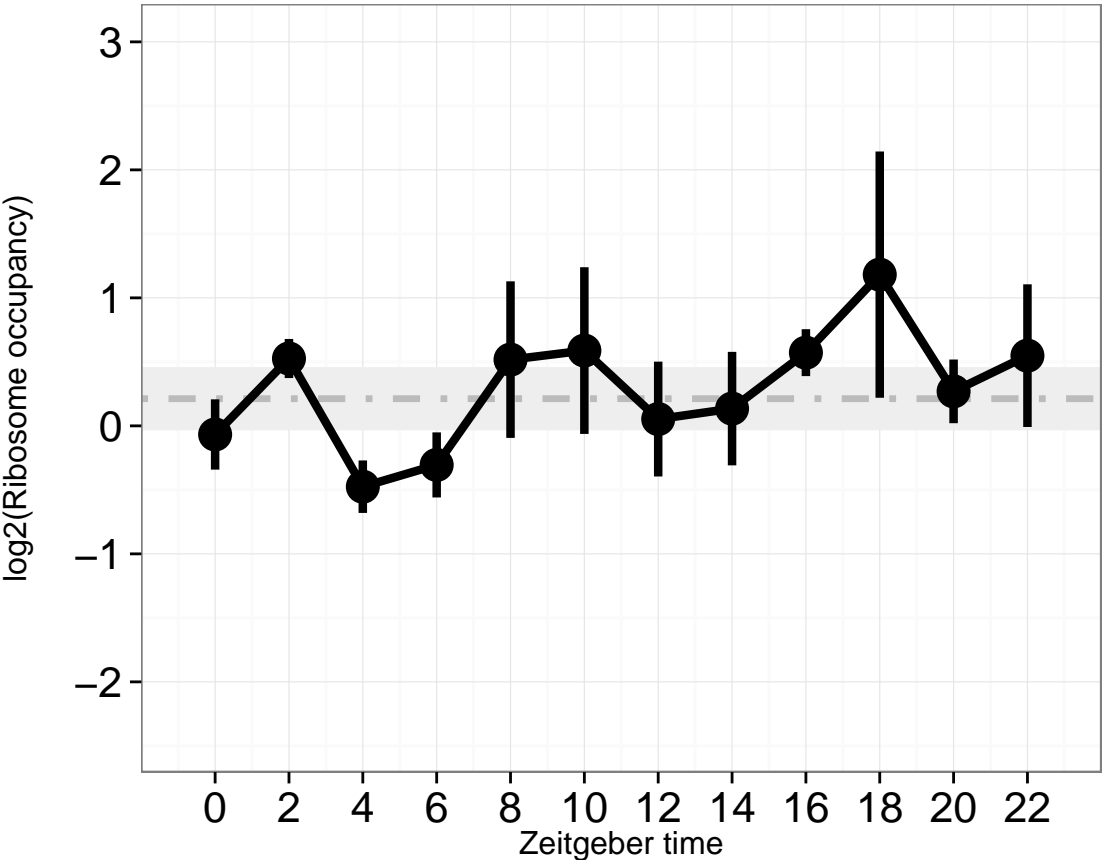

Supplement: SuppDataset_1.zip [file Ccdc126_set_C.pdf › Supplemental Dataset 1/C-mRNA_nonrhythm_translation_rhyth/Ccdc126_set_C.pdf]

## Ccdc23

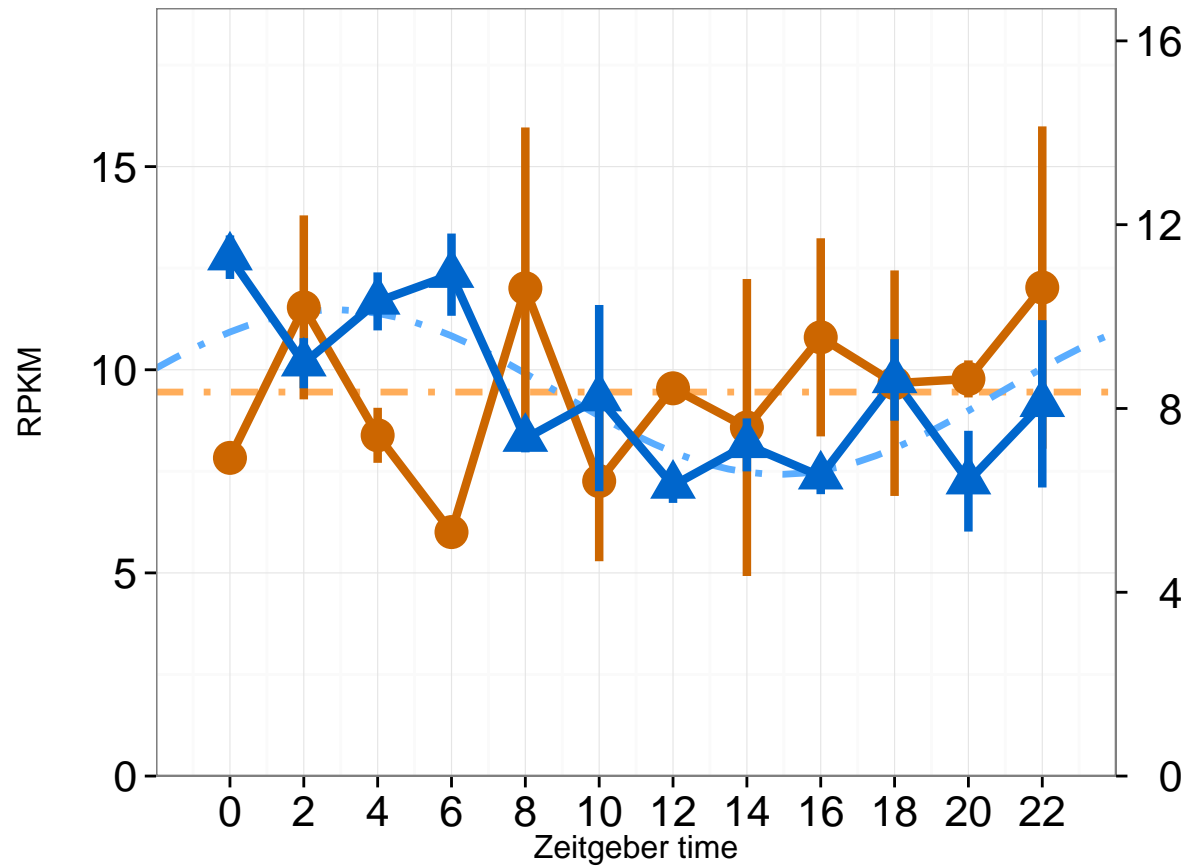

## Ccdc23

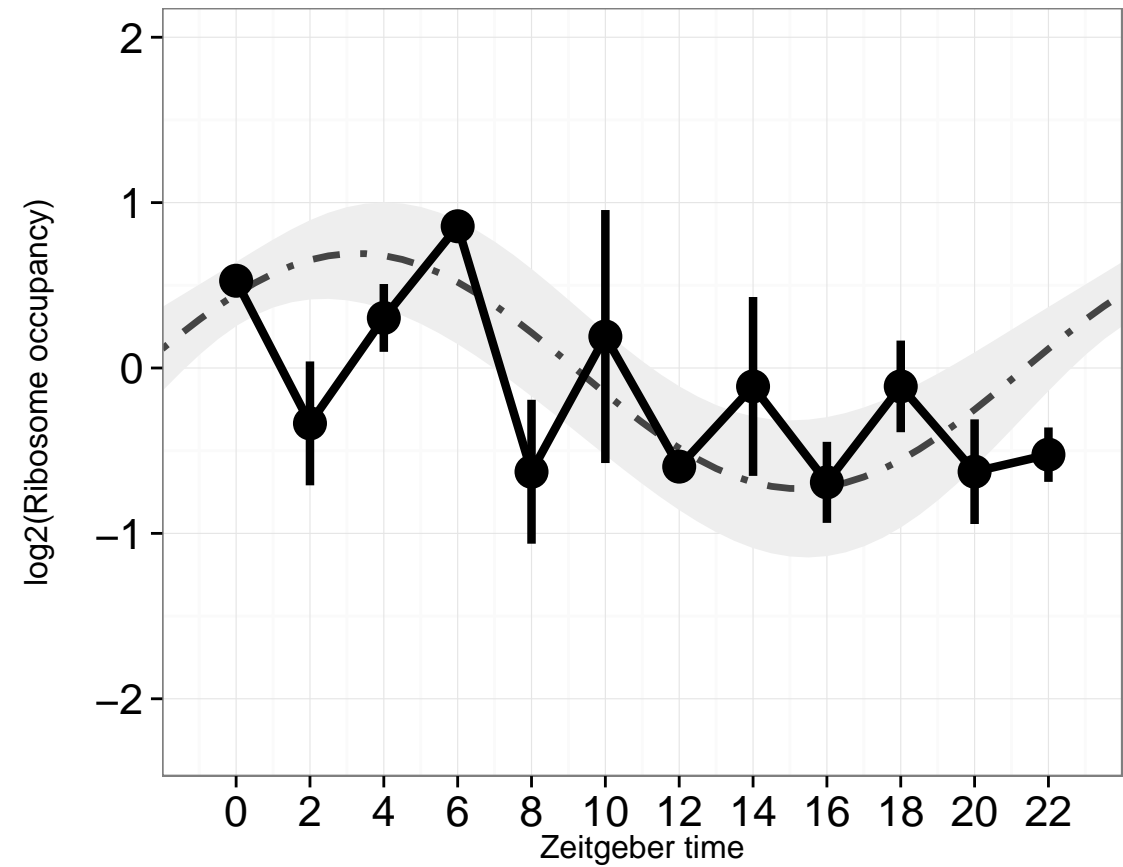

Supplement: SuppDataset_1.zip [file Ccdc23_set_C.pdf › Supplemental Dataset 1/C-mRNA_nonrhythm_translation_rhyth/Ccdc23_set_C.pdf]

# Ccdc61

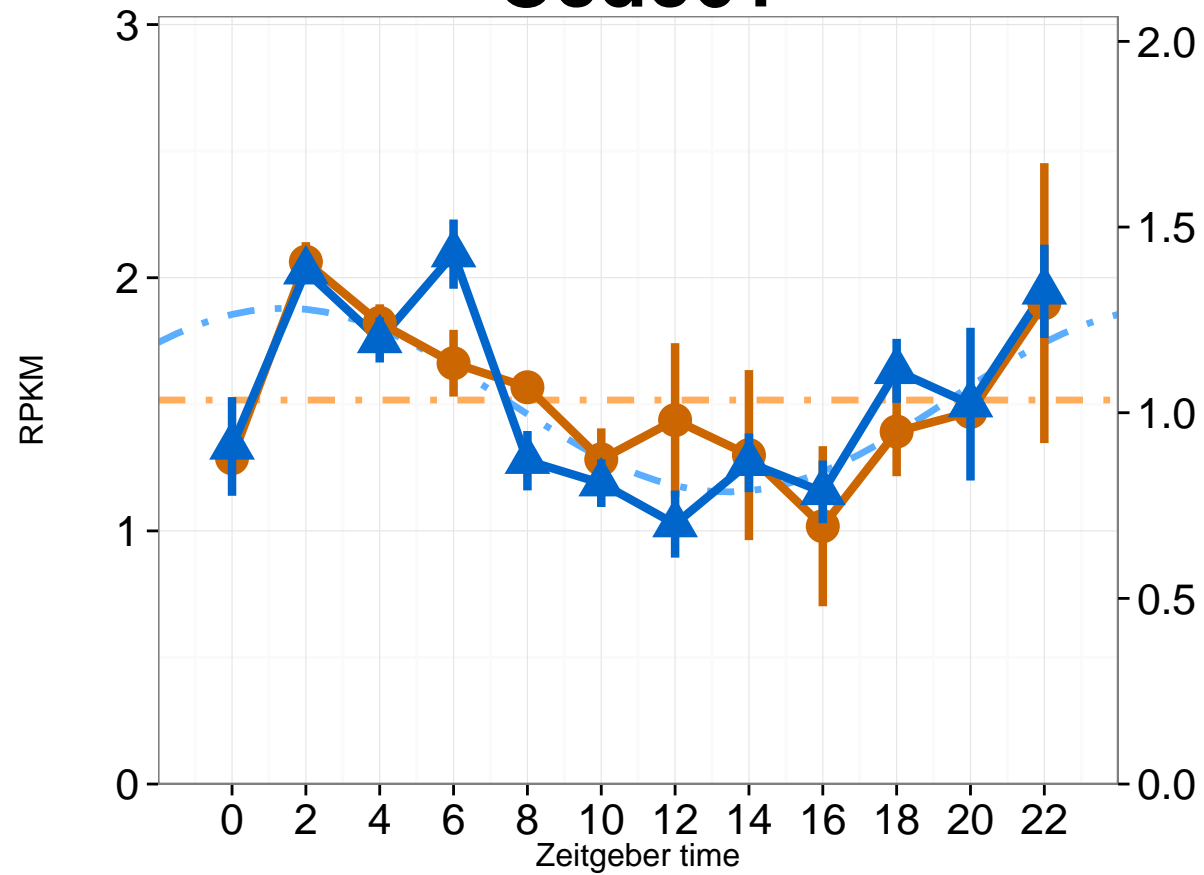

# Ccdc61

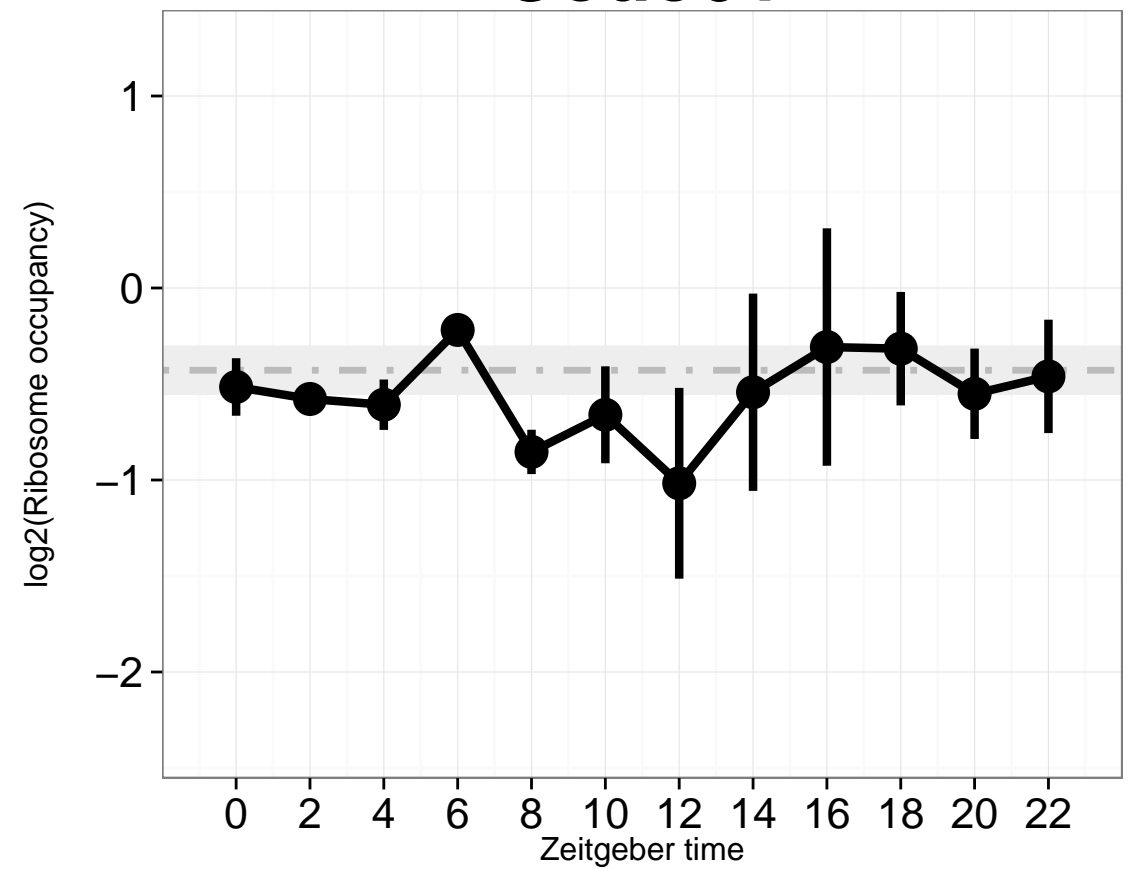

Supplement: SuppDataset_1.zip [file Ccdc61_set_C.pdf › Supplemental Dataset 1/C-mRNA_nonrhythm_translation_rhyth/Ccdc61_set_C.pdf]

# Ccdc66

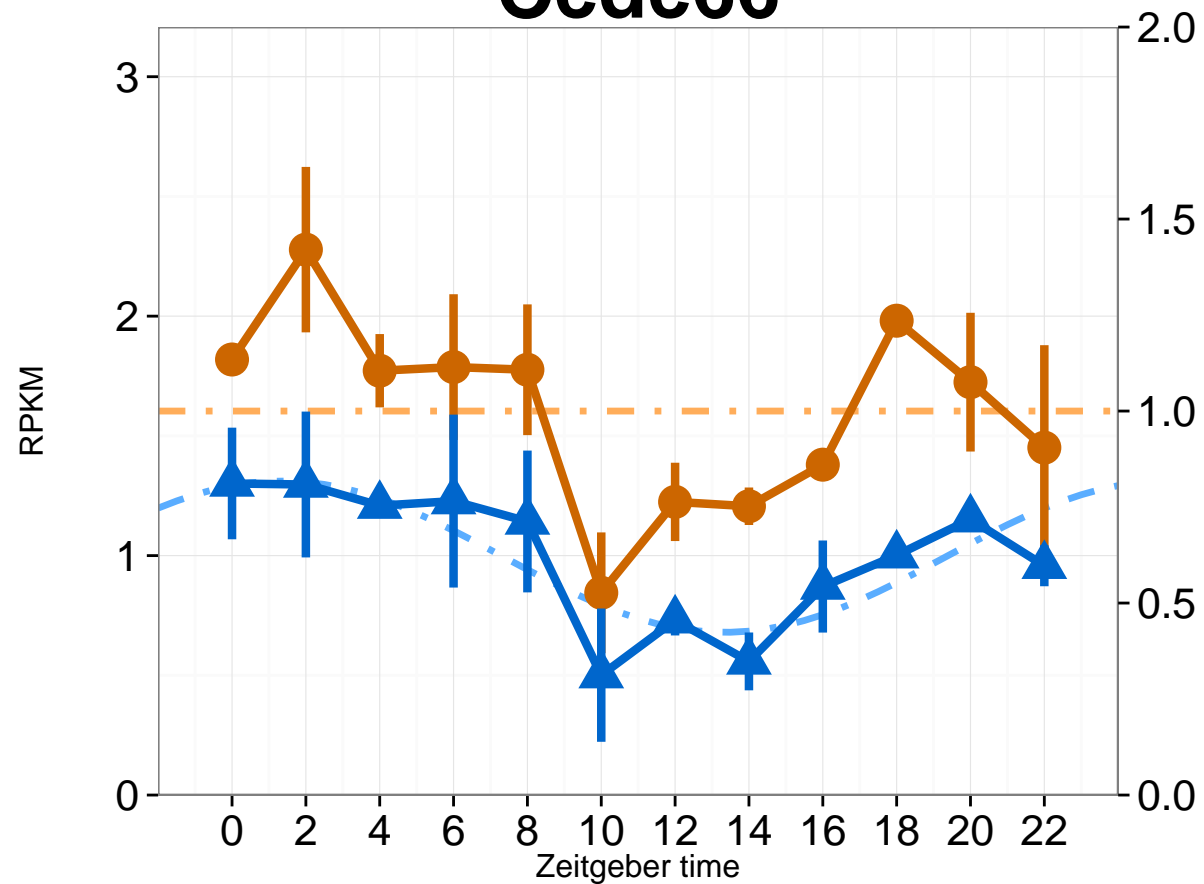

# Ccdc66

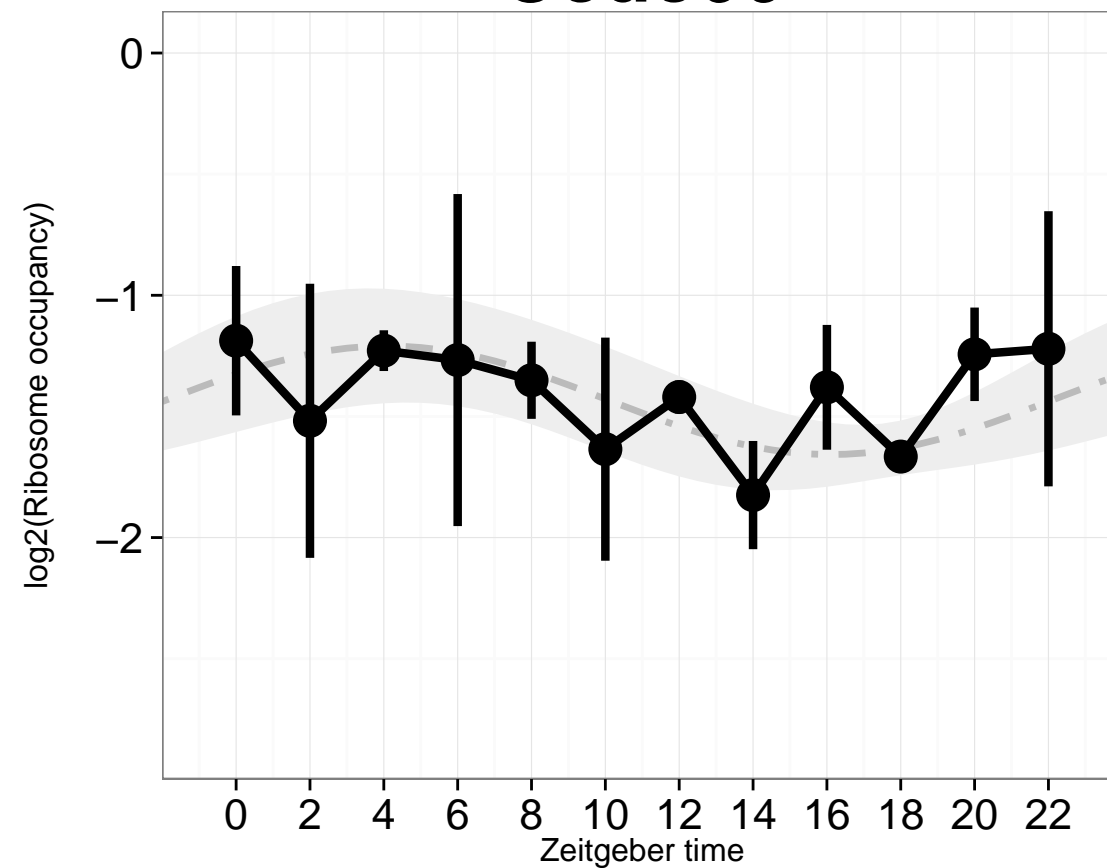

Supplement: SuppDataset_1.zip [file Ccdc66_set_C.pdf › Supplemental Dataset 1/C-mRNA_nonrhythm_translation_rhyth/Ccdc66_set_C.pdf]

## Ccdc90b

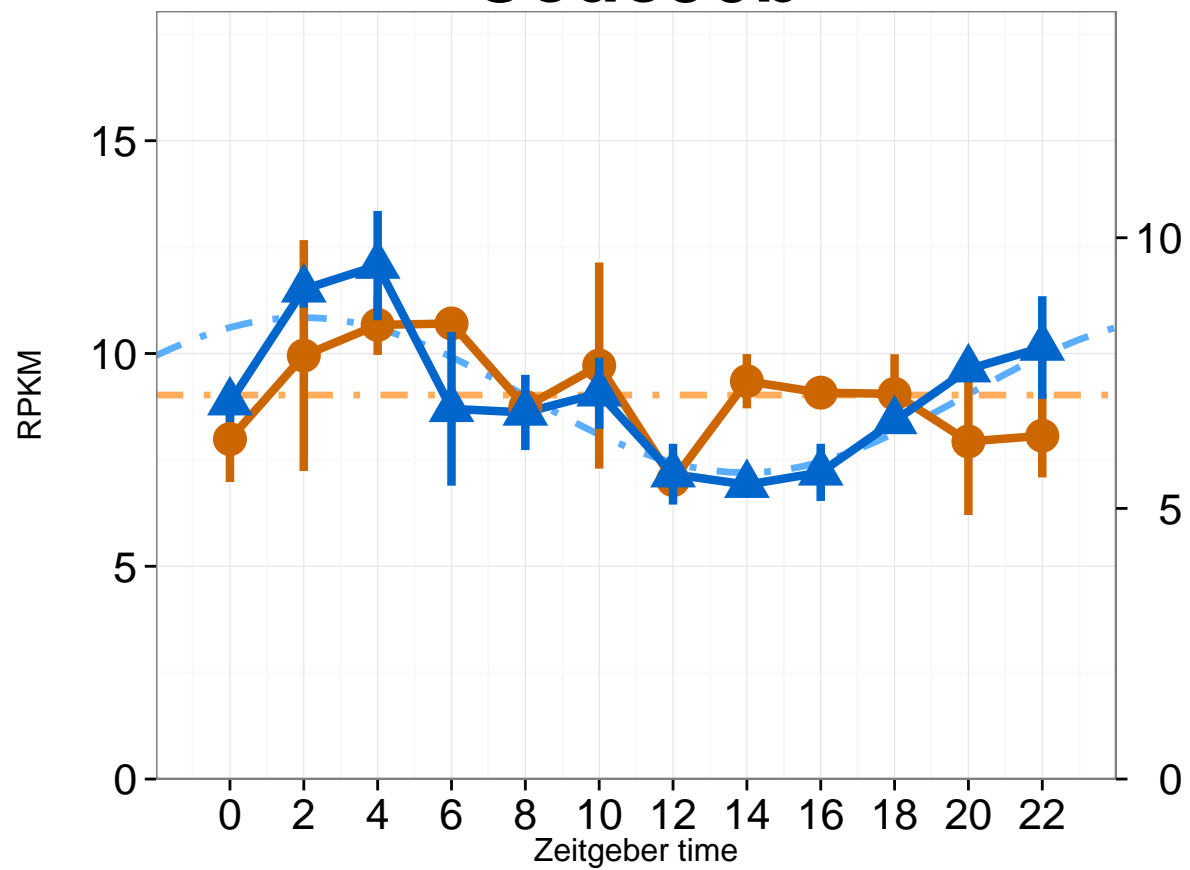

## Ccdc90b

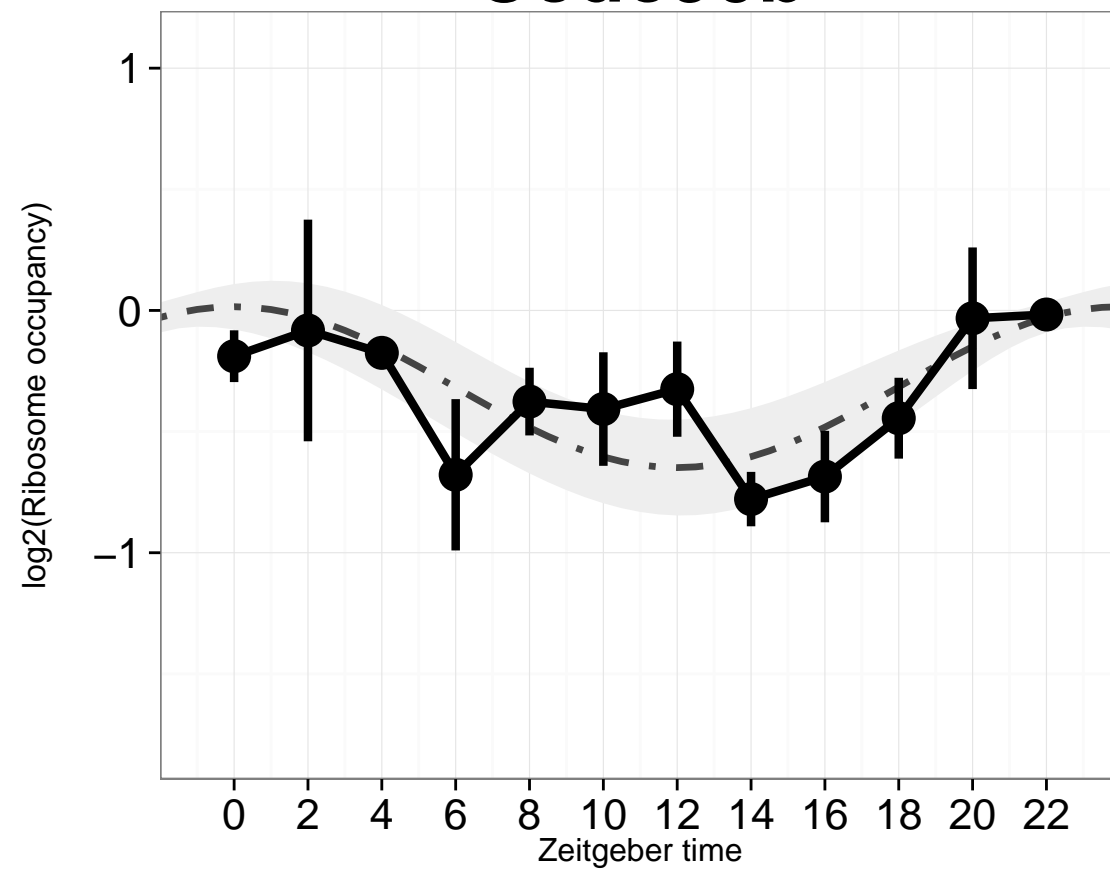

Supplement: SuppDataset_1.zip [file Ccdc90b_set_C.pdf › Supplemental Dataset 1/C-mRNA_nonrhythm_translation_rhyth/Ccdc90b_set_C.pdf]

# Cchcr1

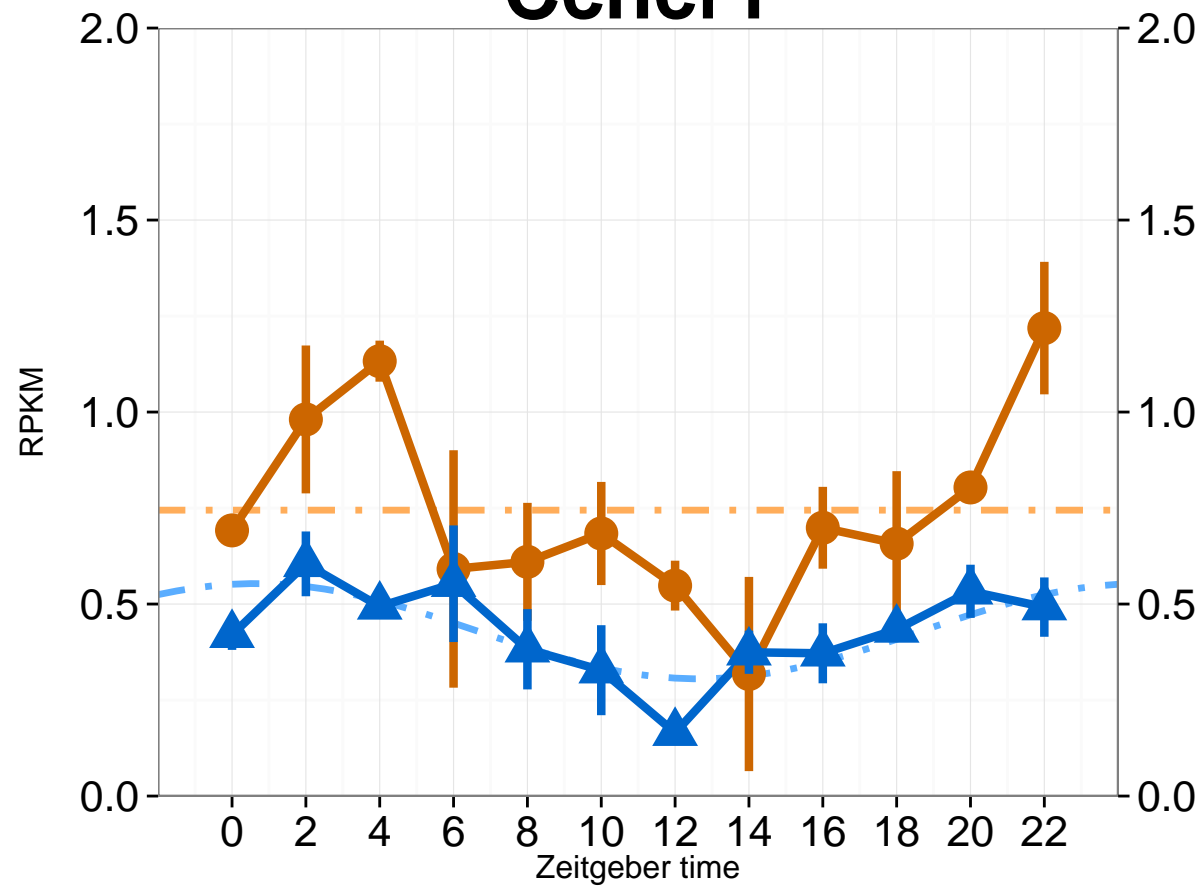

# Cchcr1

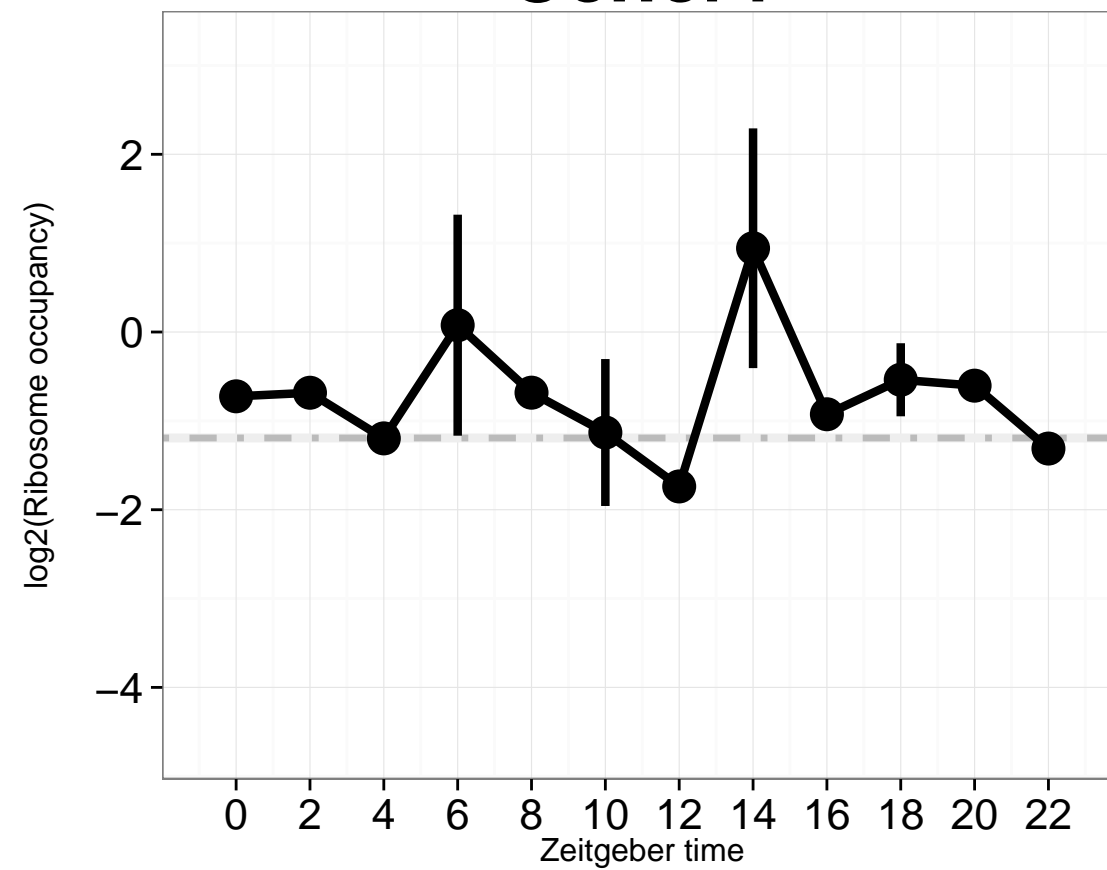

Supplement: SuppDataset_1.zip [file Cchcr1_set_C.pdf › Supplemental Dataset 1/C-mRNA_nonrhythm_translation_rhyth/Cchcr1_set_C.pdf]

**Ccl2 TR**

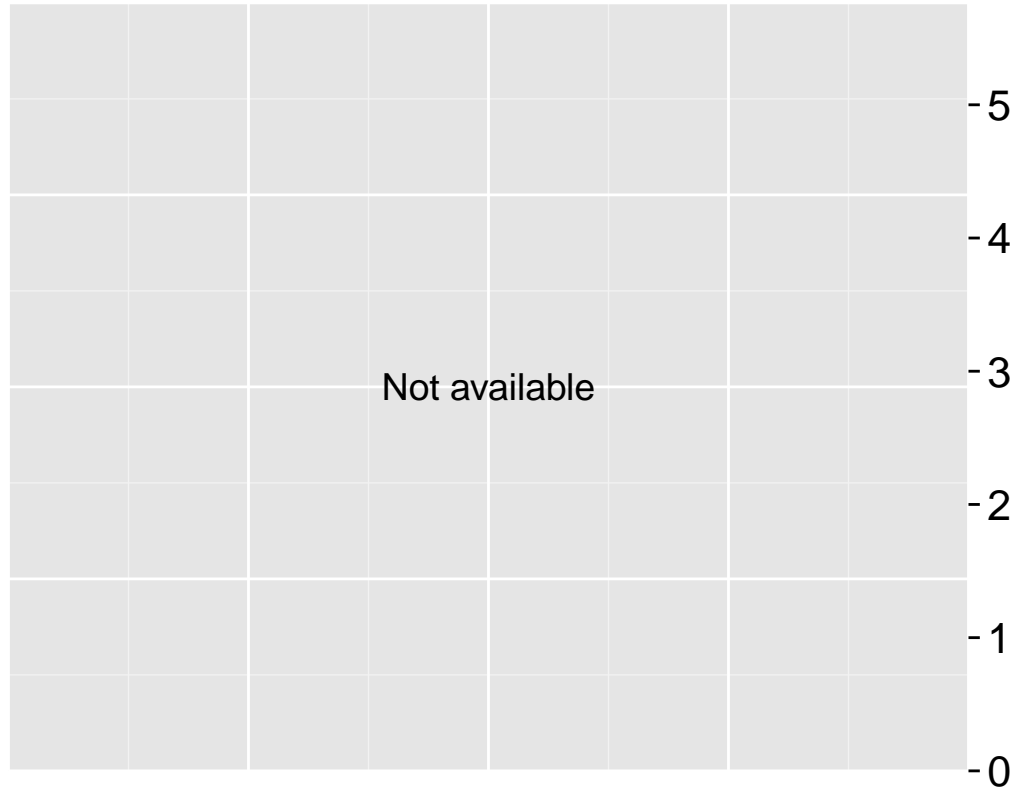

**Ccl2 log2(Ribosome occupancy)**

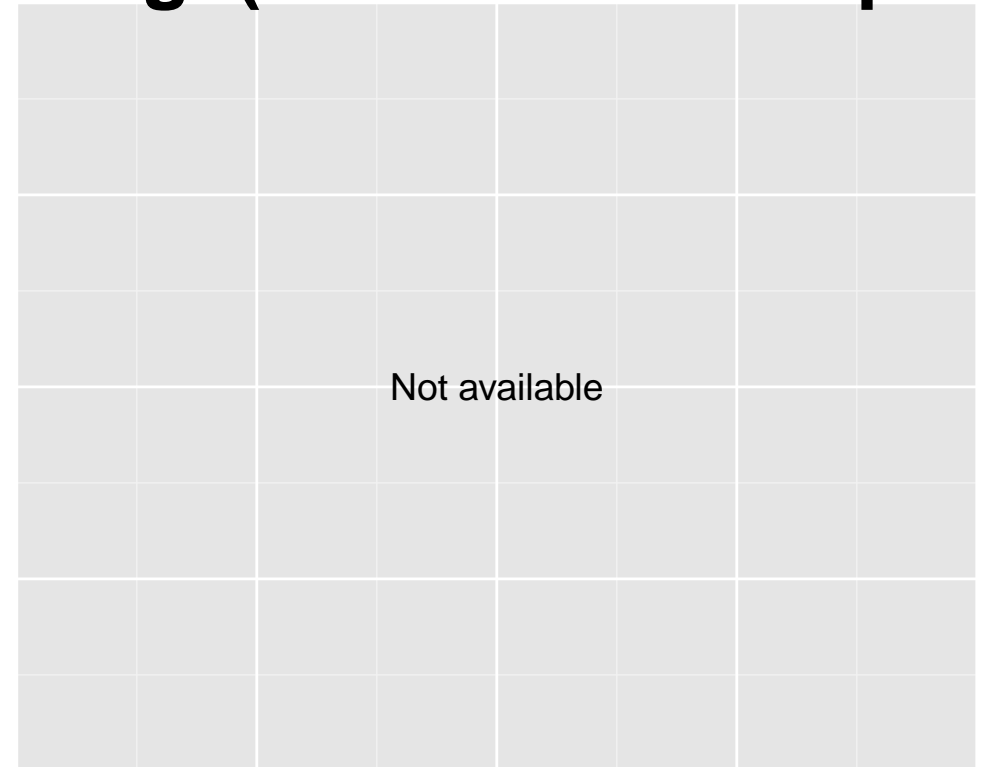

Supplement: SuppDataset_1.zip [file Ccl2_set_C.pdf › Supplemental Dataset 1/C-mRNA_nonrhythm_translation_rhyth/Ccl2_set_C.pdf]

# Ccnd1

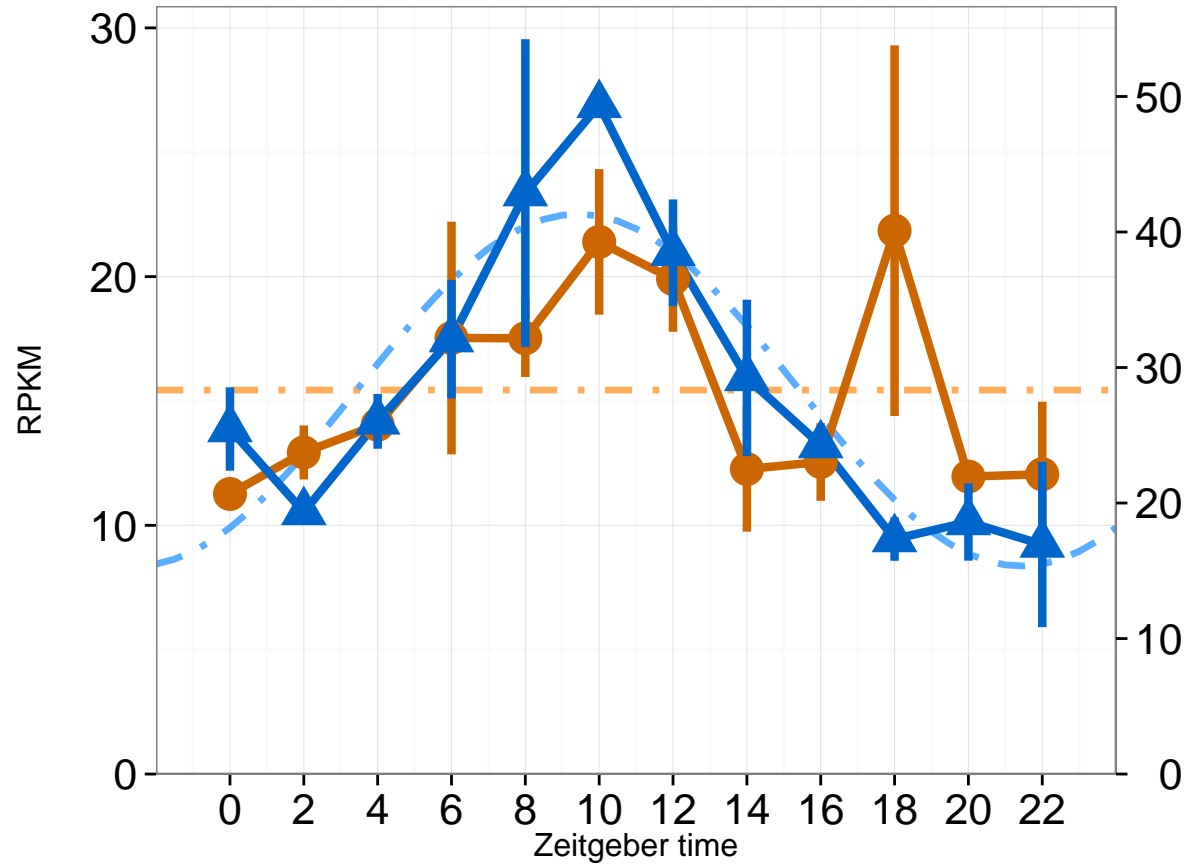

# Ccnd1

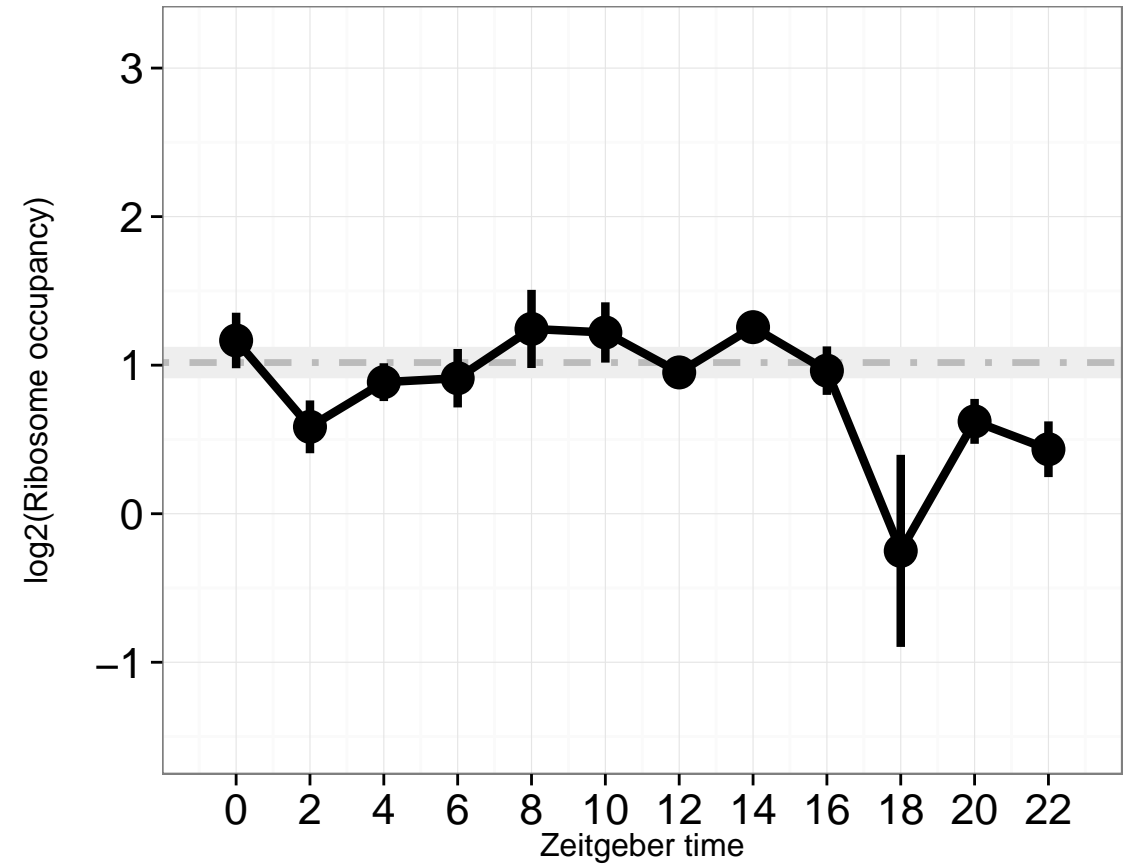

Supplement: SuppDataset_1.zip [file Ccnd1_set_C.pdf › Supplemental Dataset 1/C-mRNA_nonrhythm_translation_rhyth/Ccnd1_set_C.pdf]

## Ccni

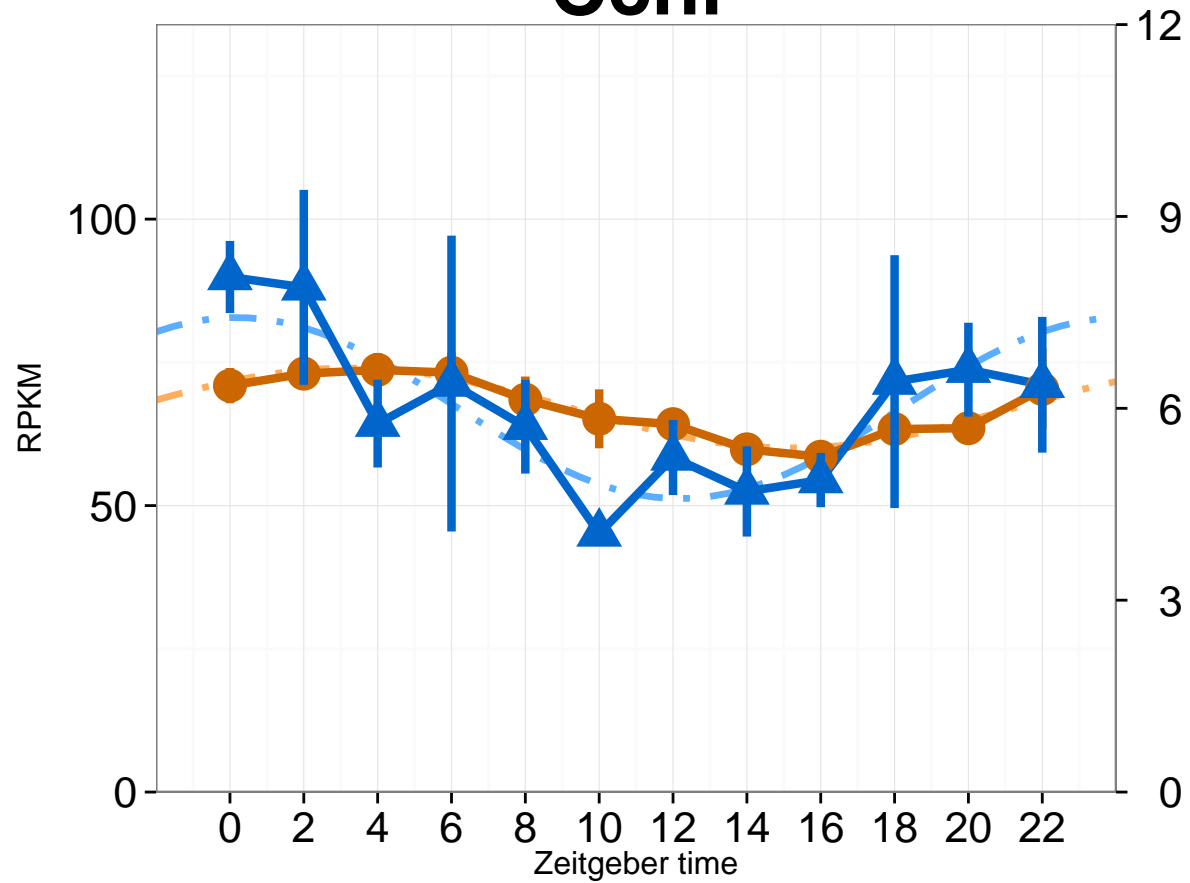

## Ccni

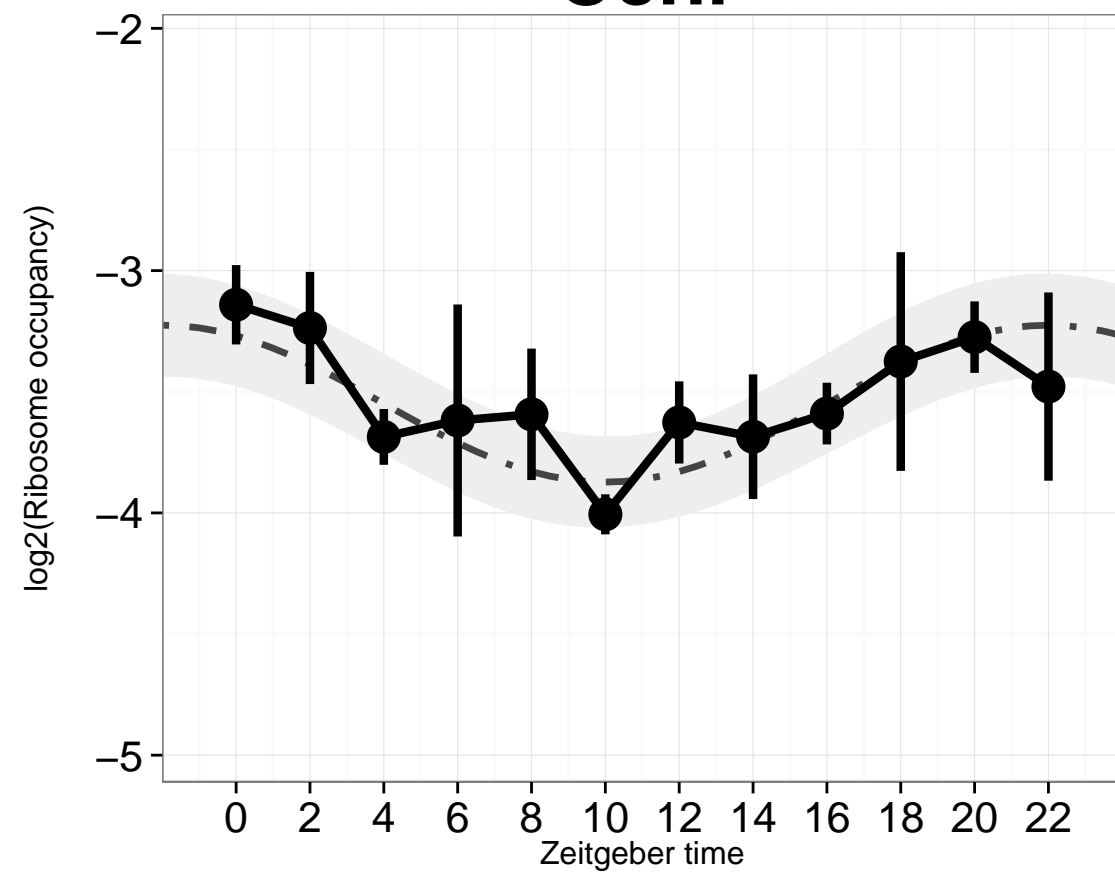

Supplement: SuppDataset_1.zip [file Ccni_set_C.pdf › Supplemental Dataset 1/C-mRNA_nonrhythm_translation_rhyth/Ccni_set_C.pdf]

## Cd180

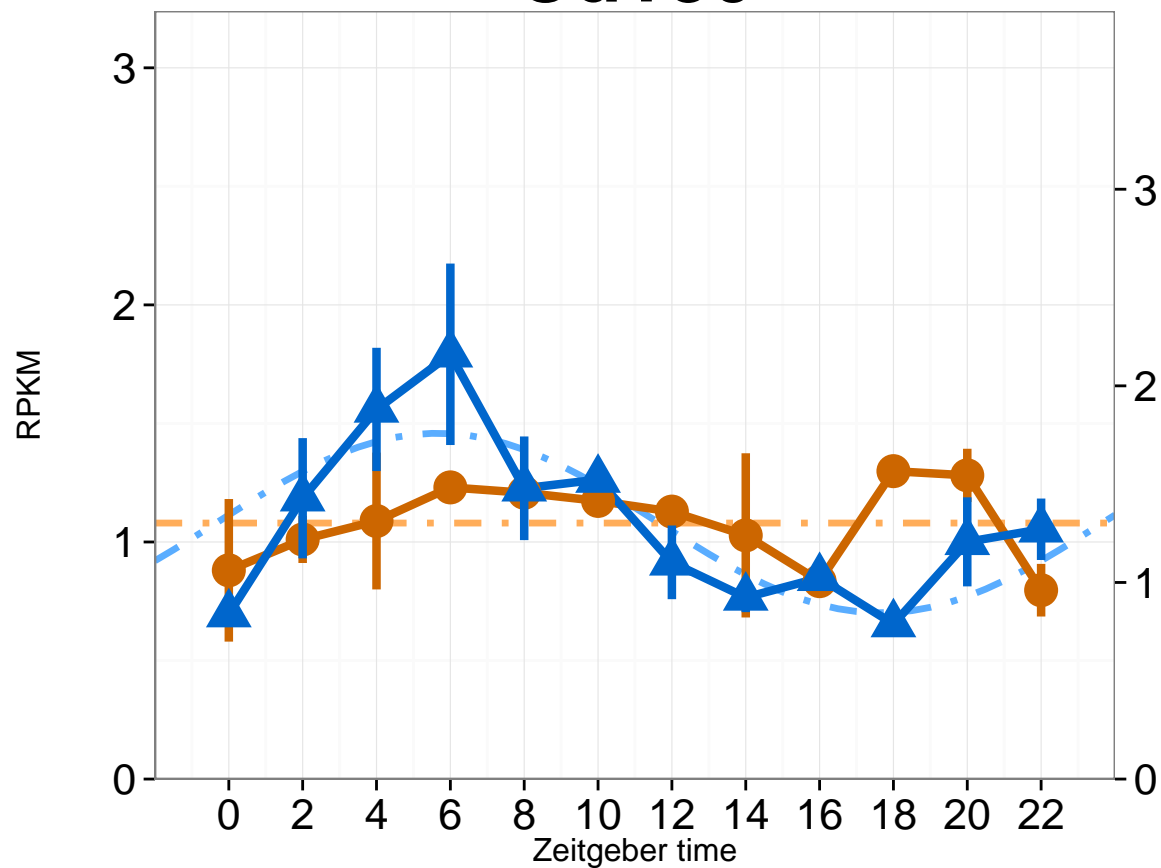

## Cd180

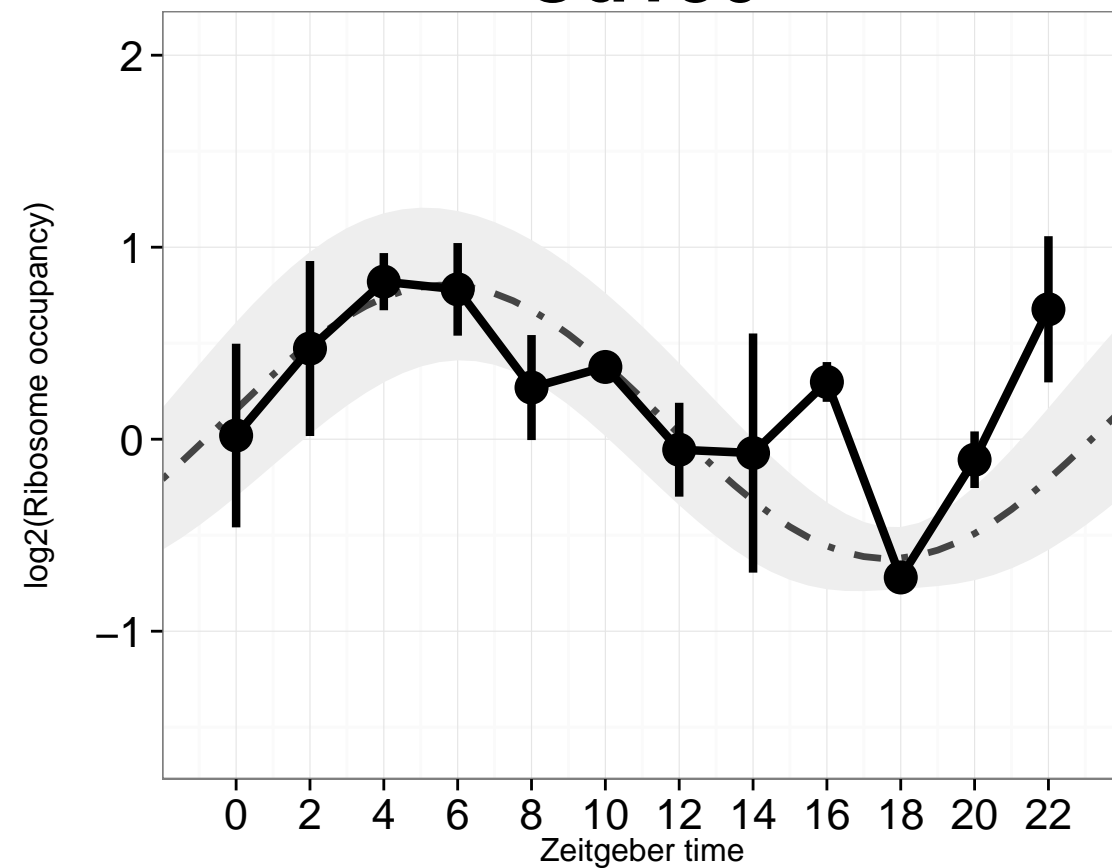

Supplement: SuppDataset_1.zip [file Cd180_set_C.pdf › Supplemental Dataset 1/C-mRNA_nonrhythm_translation_rhyth/Cd180_set_C.pdf]

## Cda

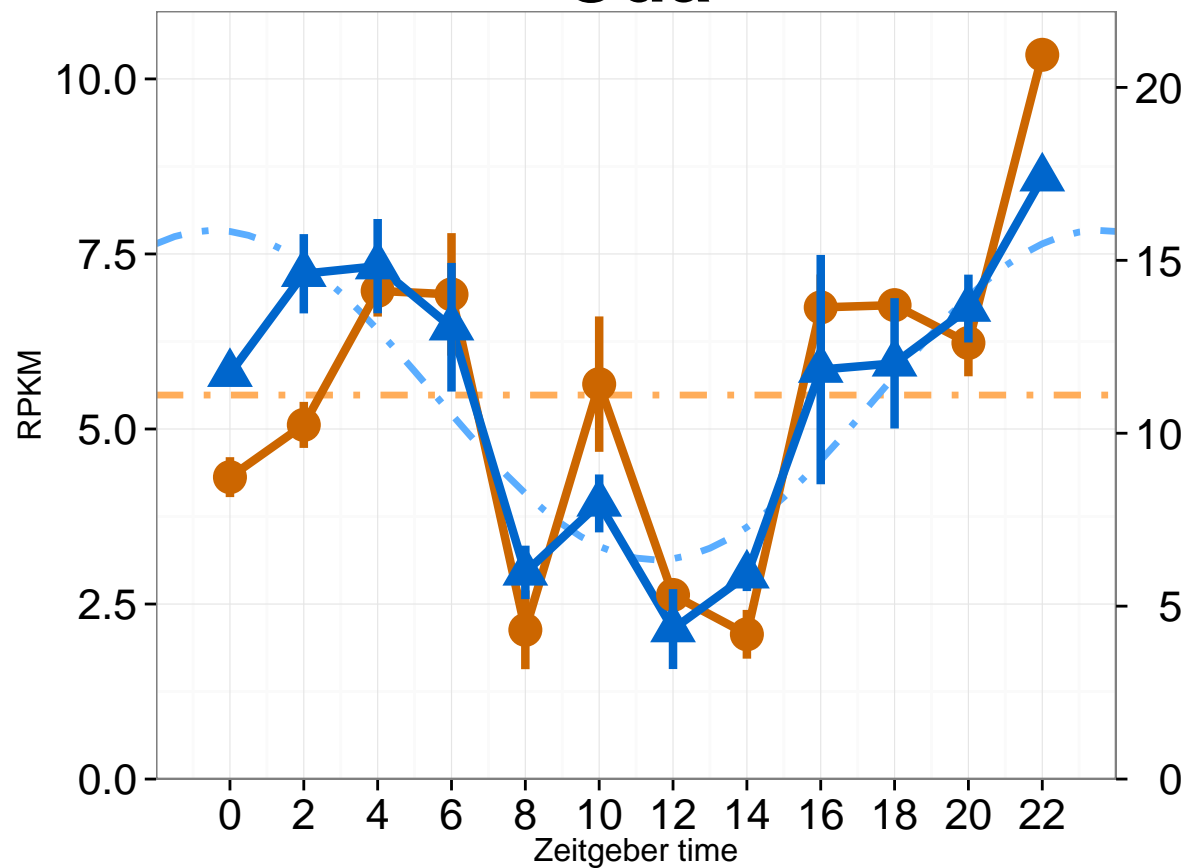

## Cda

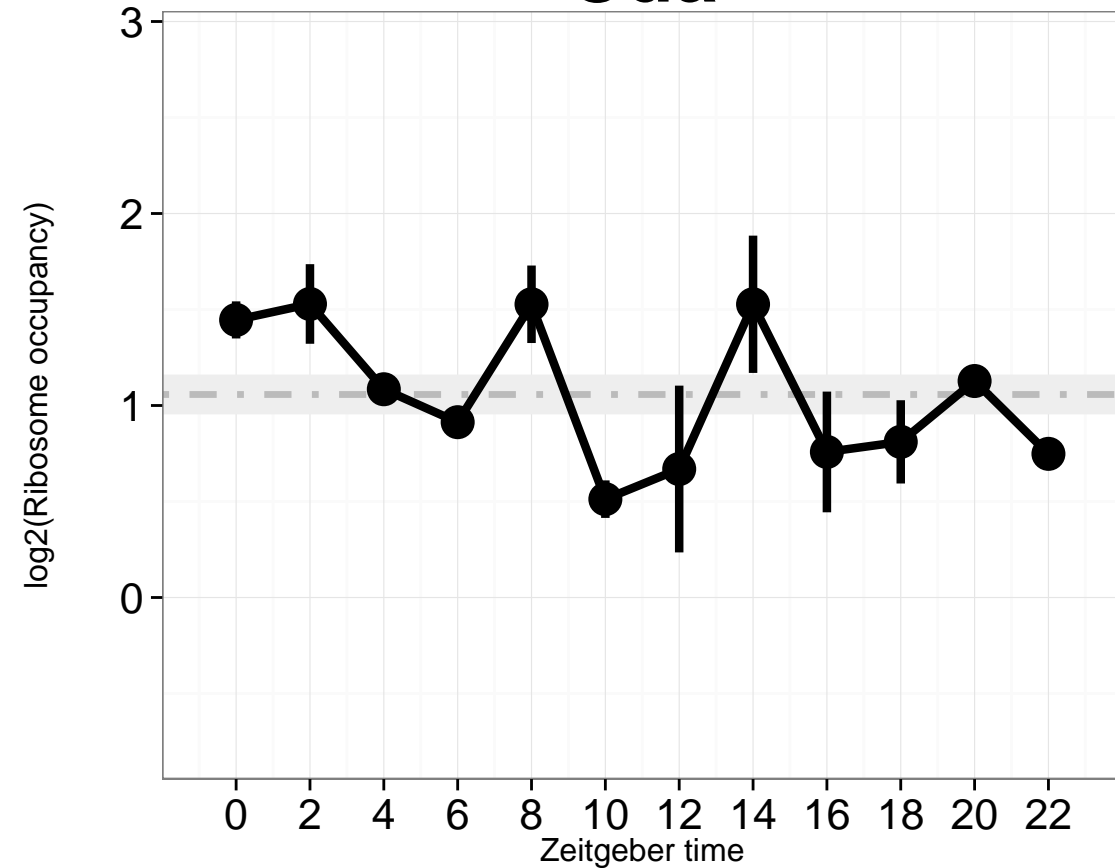

Supplement: SuppDataset_1.zip [file Cda_set_C.pdf › Supplemental Dataset 1/C-mRNA_nonrhythm_translation_rhyth/Cda_set_C.pdf]

# Cdc14b

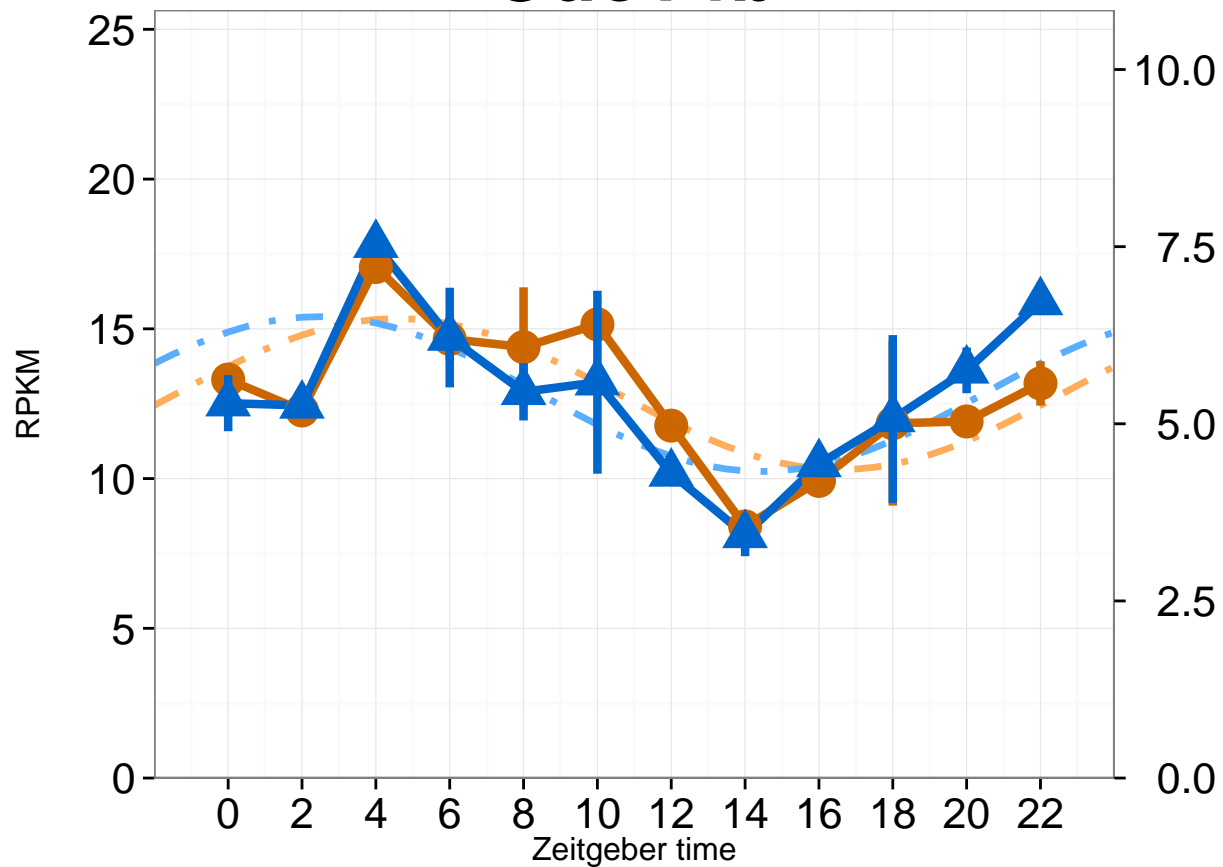

# Cdc14b

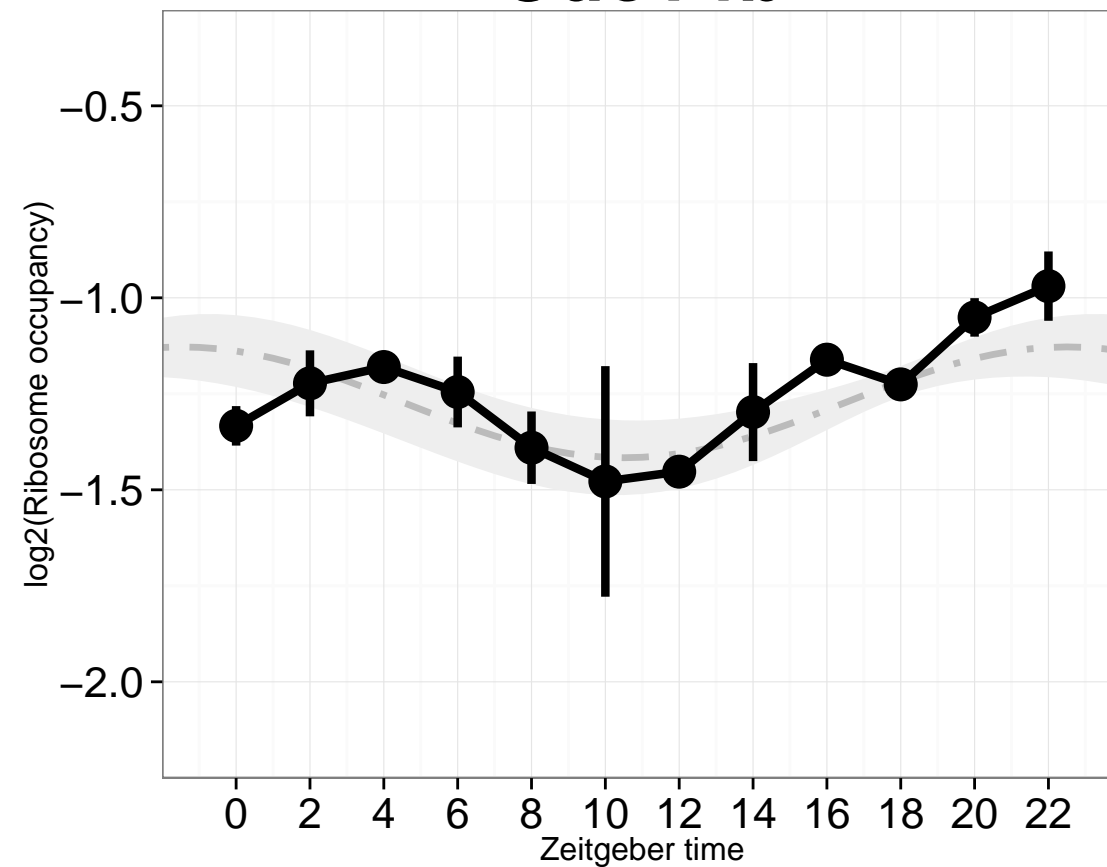

Supplement: SuppDataset_1.zip [file Cdc14b_set_C.pdf › Supplemental Dataset 1/C-mRNA_nonrhythm_translation_rhyth/Cdc14b_set_C.pdf]

# Cdc25a

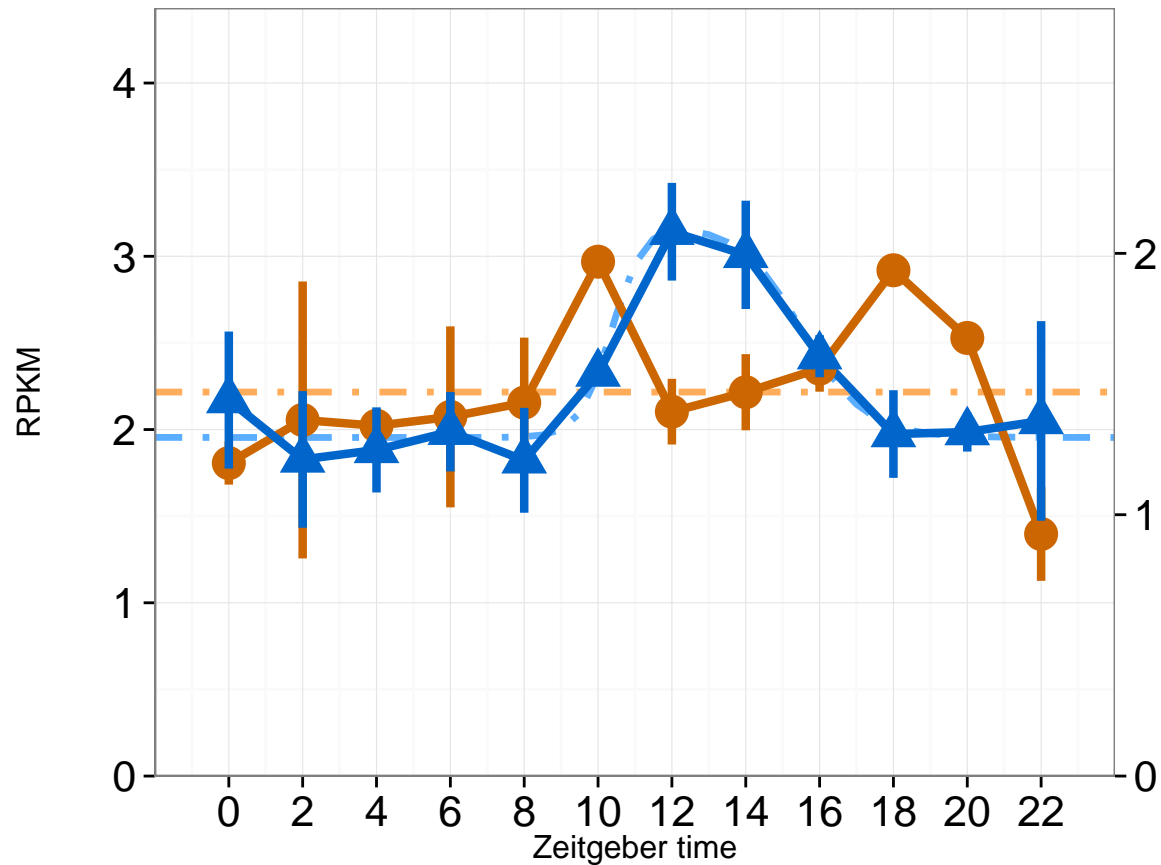

# Cdc25a

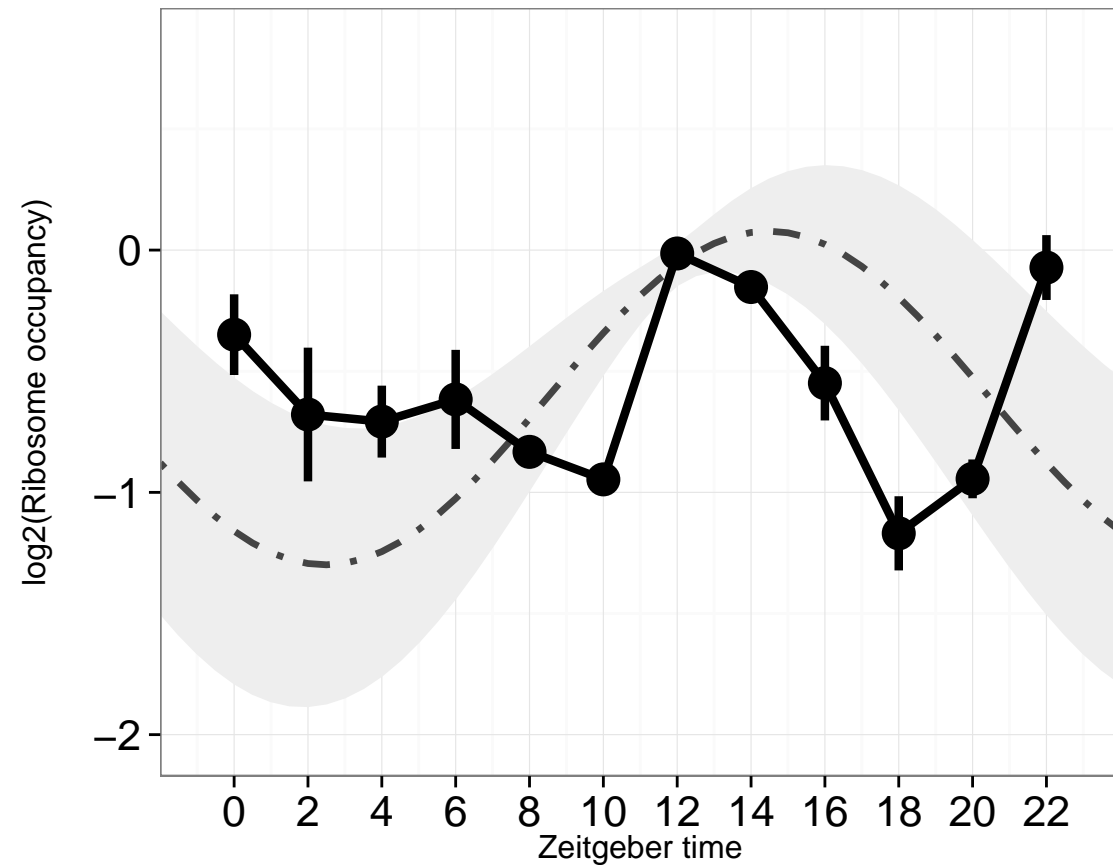

Supplement: SuppDataset_1.zip [file Cdc25a_set_C.pdf › Supplemental Dataset 1/C-mRNA_nonrhythm_translation_rhyth/Cdc25a_set_C.pdf]

## Cdk2

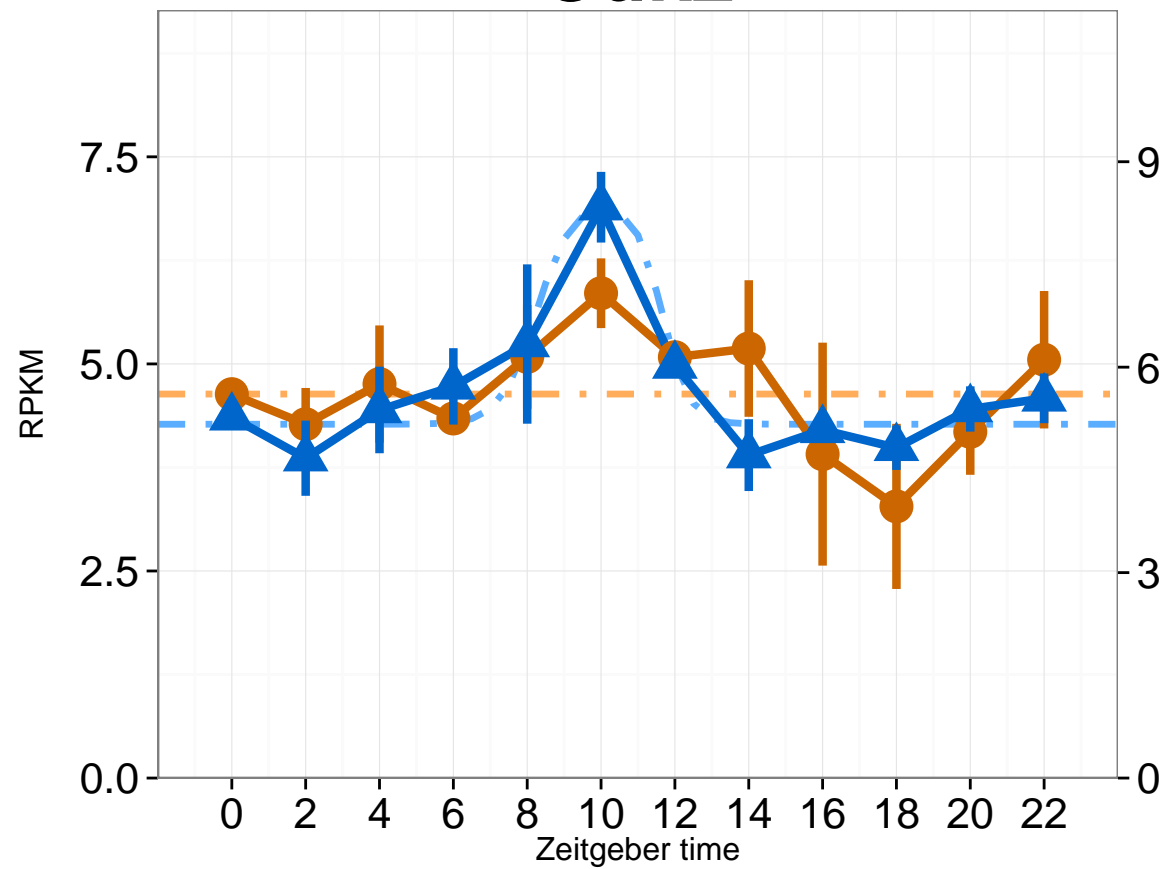

## Cdk2

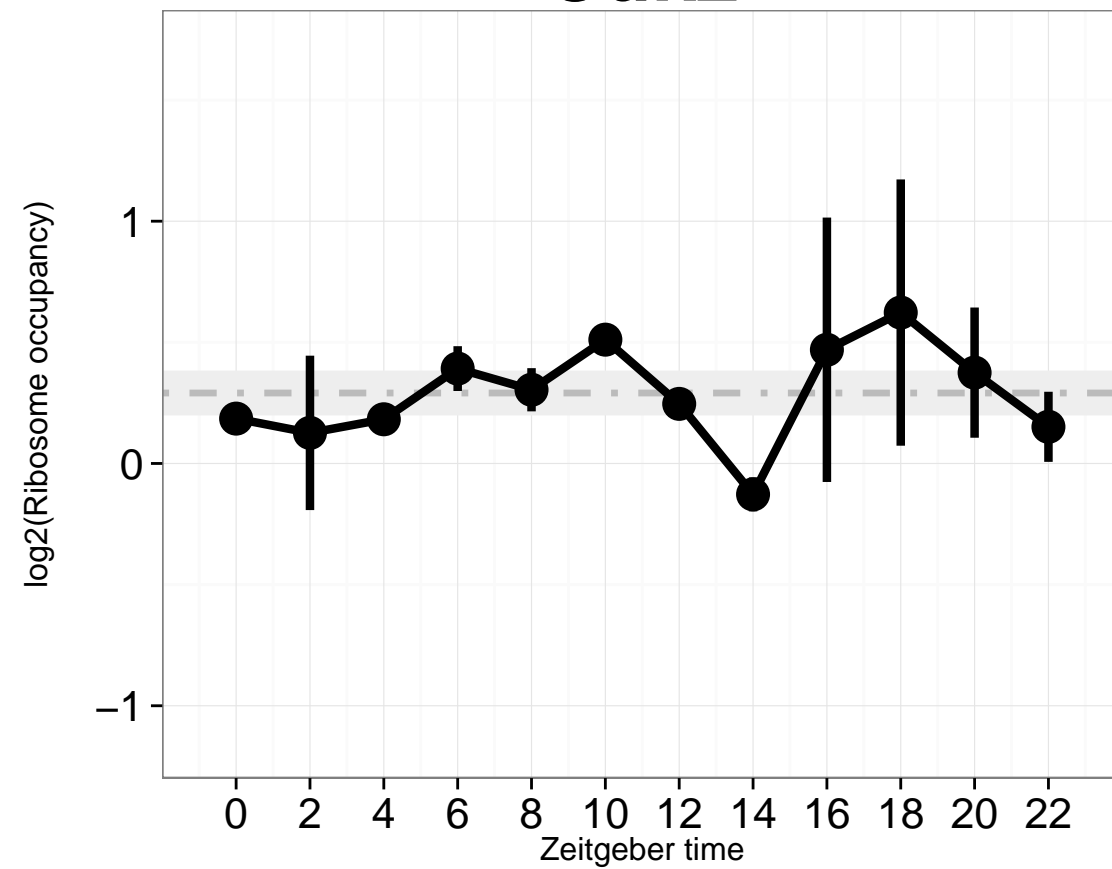

Supplement: SuppDataset_1.zip [file Cdk2_set_C.pdf › Supplemental Dataset 1/C-mRNA_nonrhythm_translation_rhyth/Cdk2_set_C.pdf]

# Cdk5rap2

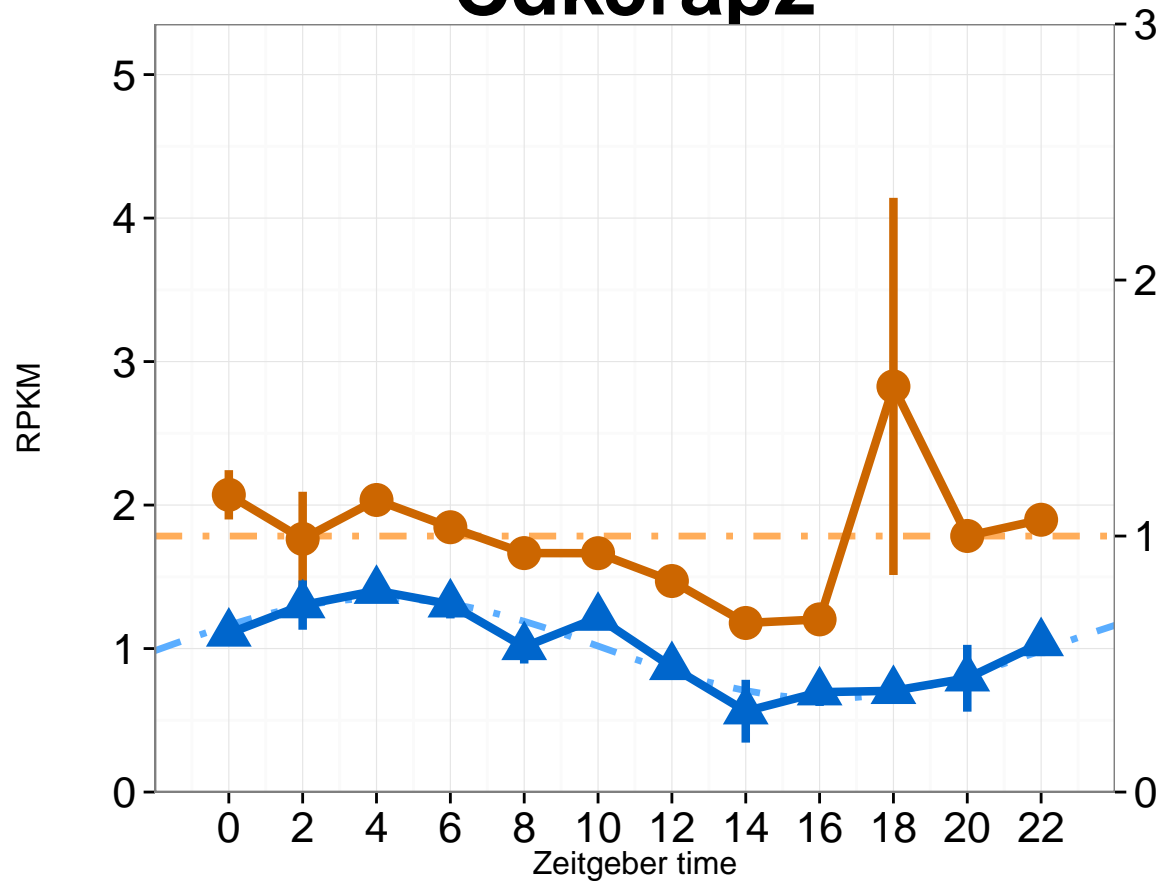

# Cdk5rap2

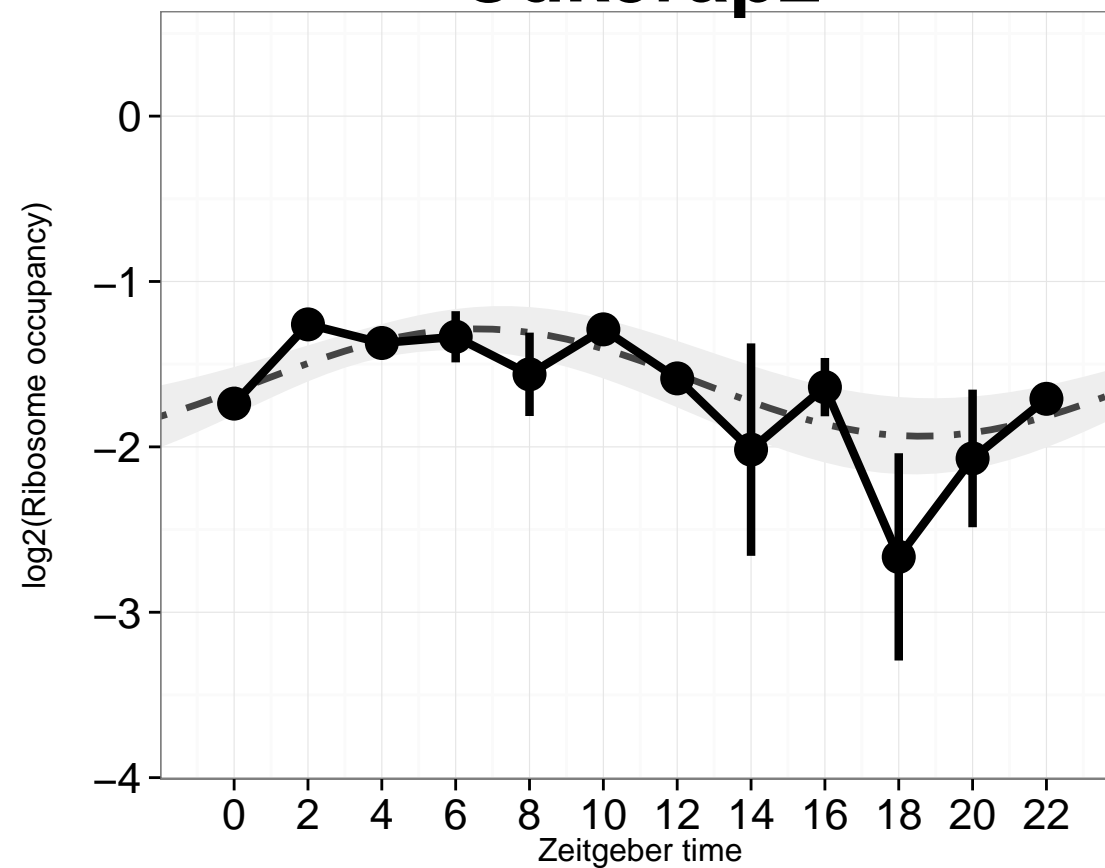

Supplement: SuppDataset_1.zip [file Cdk5rap2_set_C.pdf › Supplemental Dataset 1/C-mRNA_nonrhythm_translation_rhyth/Cdk5rap2_set_C.pdf]

## Cebpe

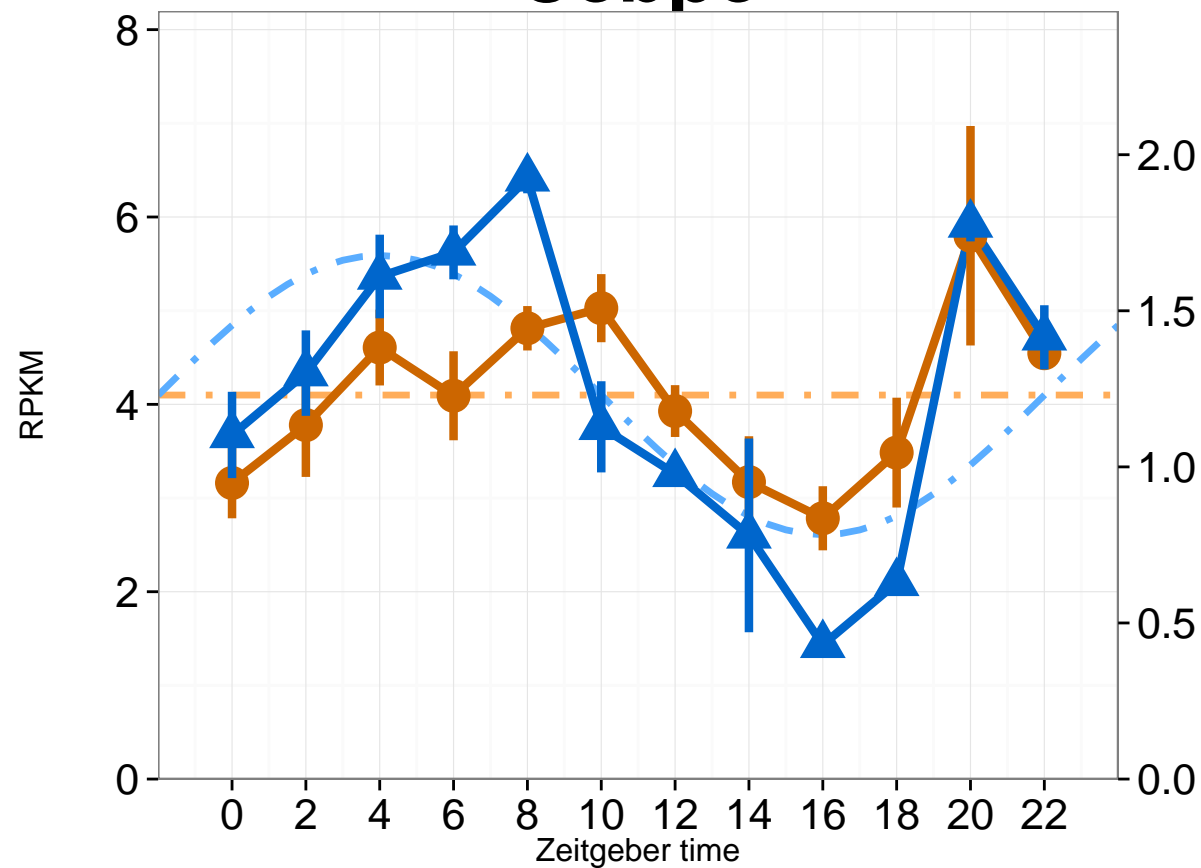

## Cebpe

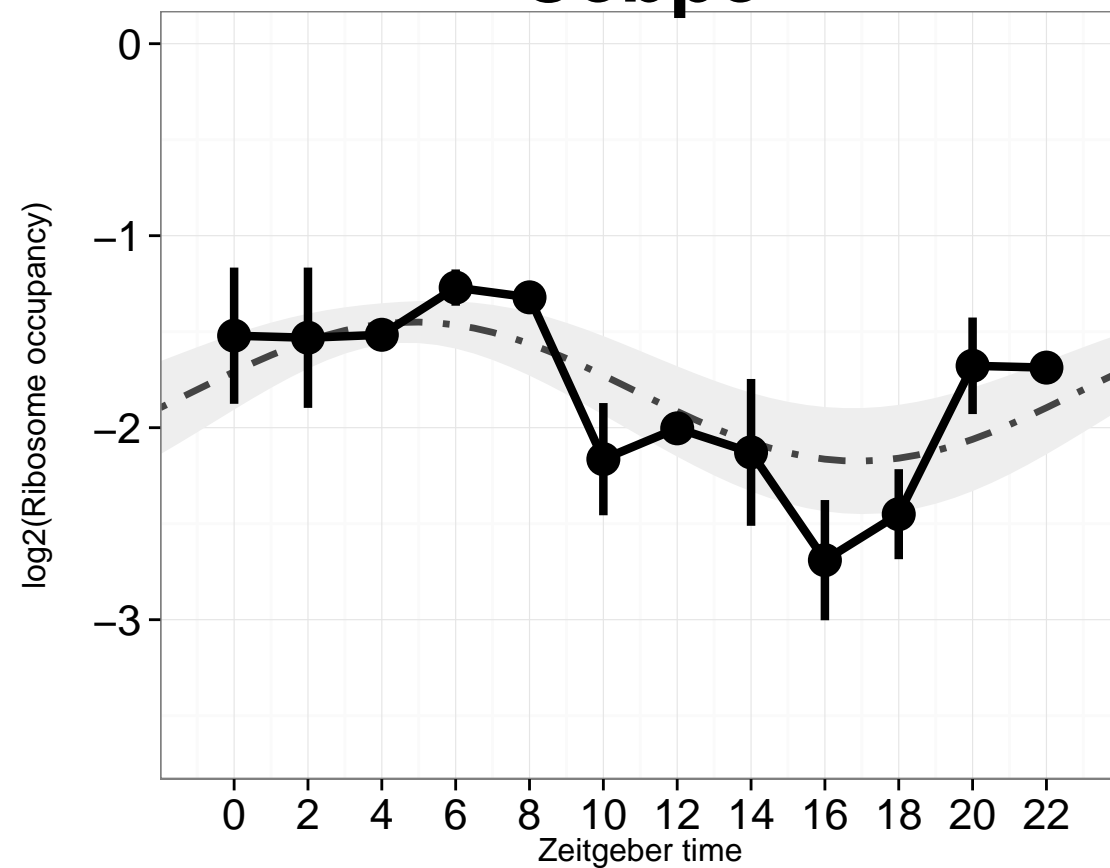

Supplement: SuppDataset_1.zip [file Cebpe_set_C.pdf › Supplemental Dataset 1/C-mRNA_nonrhythm_translation_rhyth/Cebpe_set_C.pdf]

## Cenpe

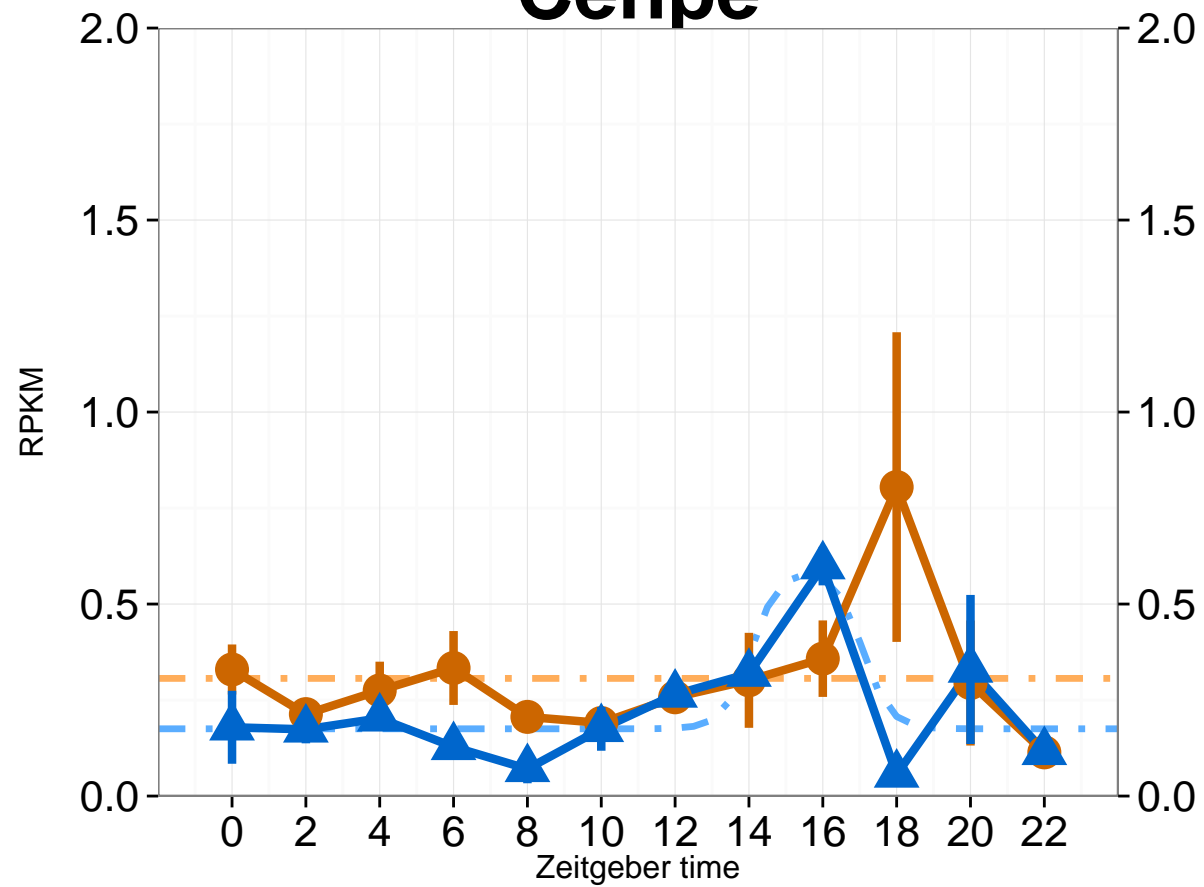

## Cenpe

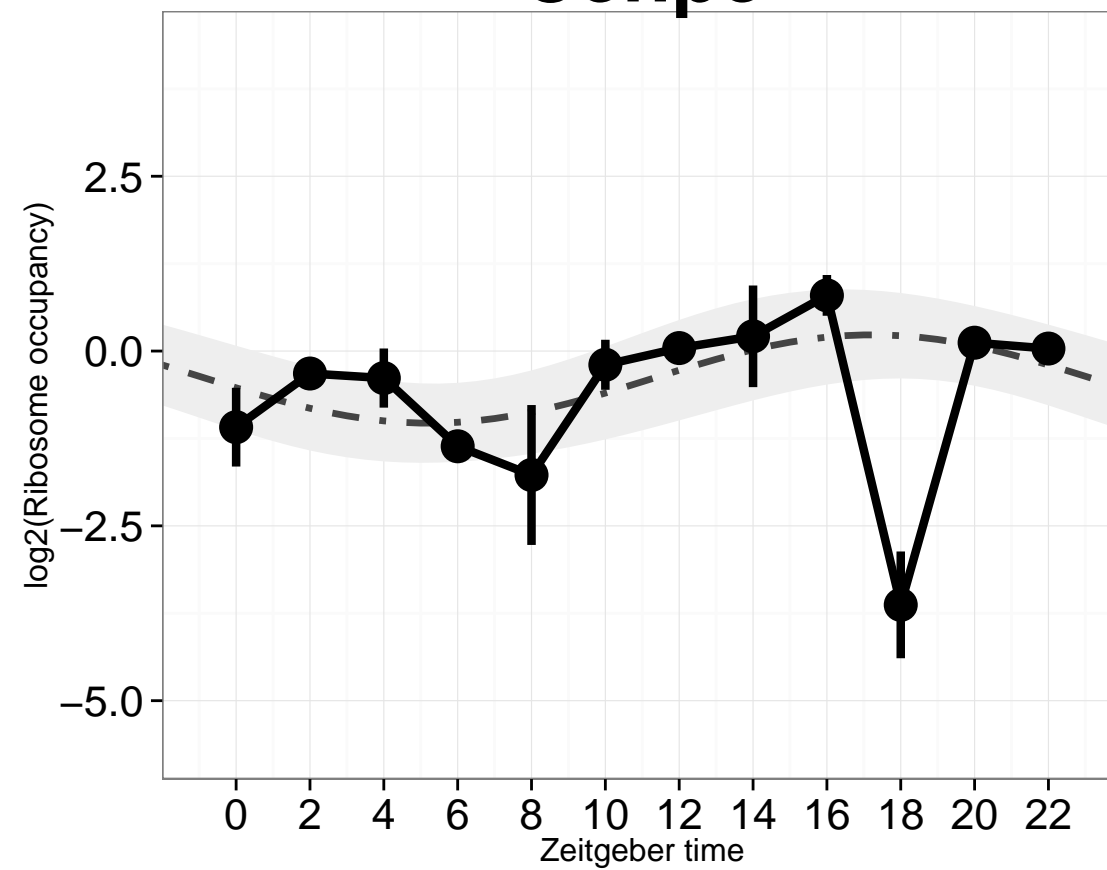

Supplement: SuppDataset_1.zip [file Cenpe_set_C.pdf › Supplemental Dataset 1/C-mRNA_nonrhythm_translation_rhyth/Cenpe_set_C.pdf]

# Cep57l1

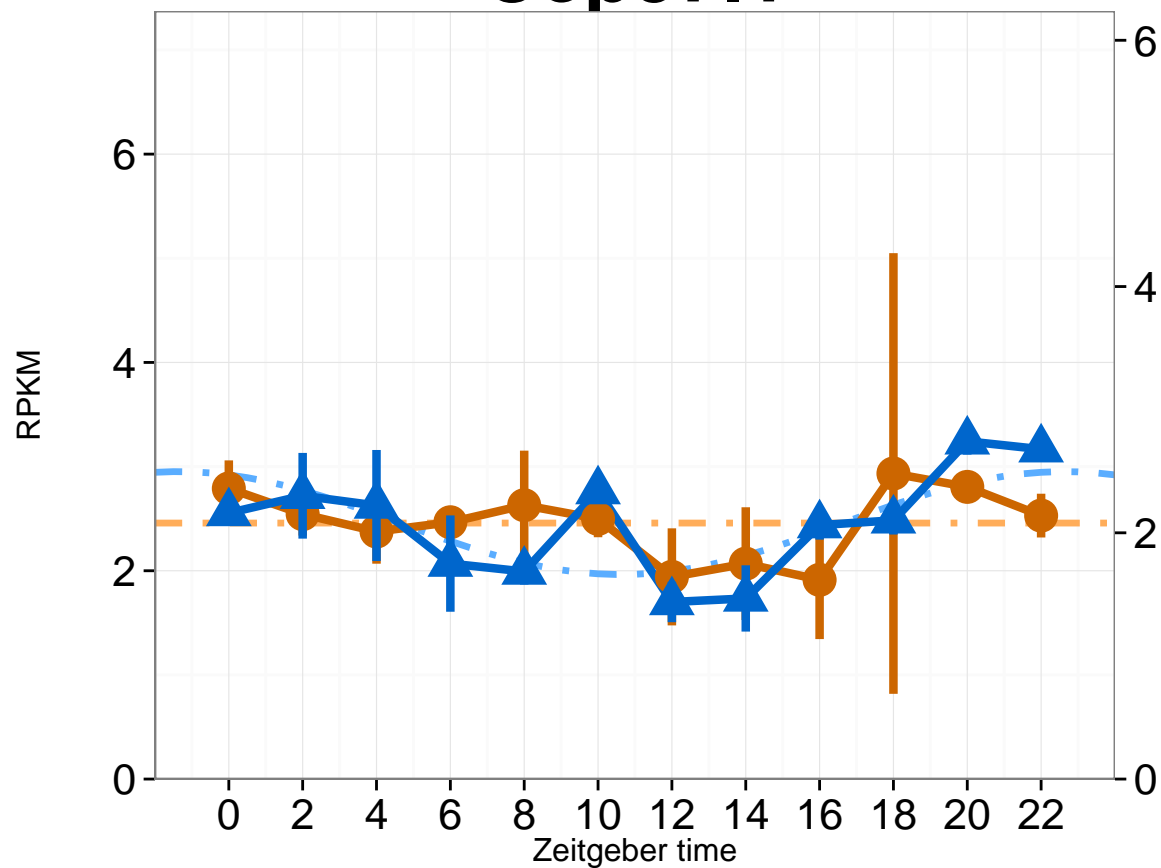

# Cep57l1

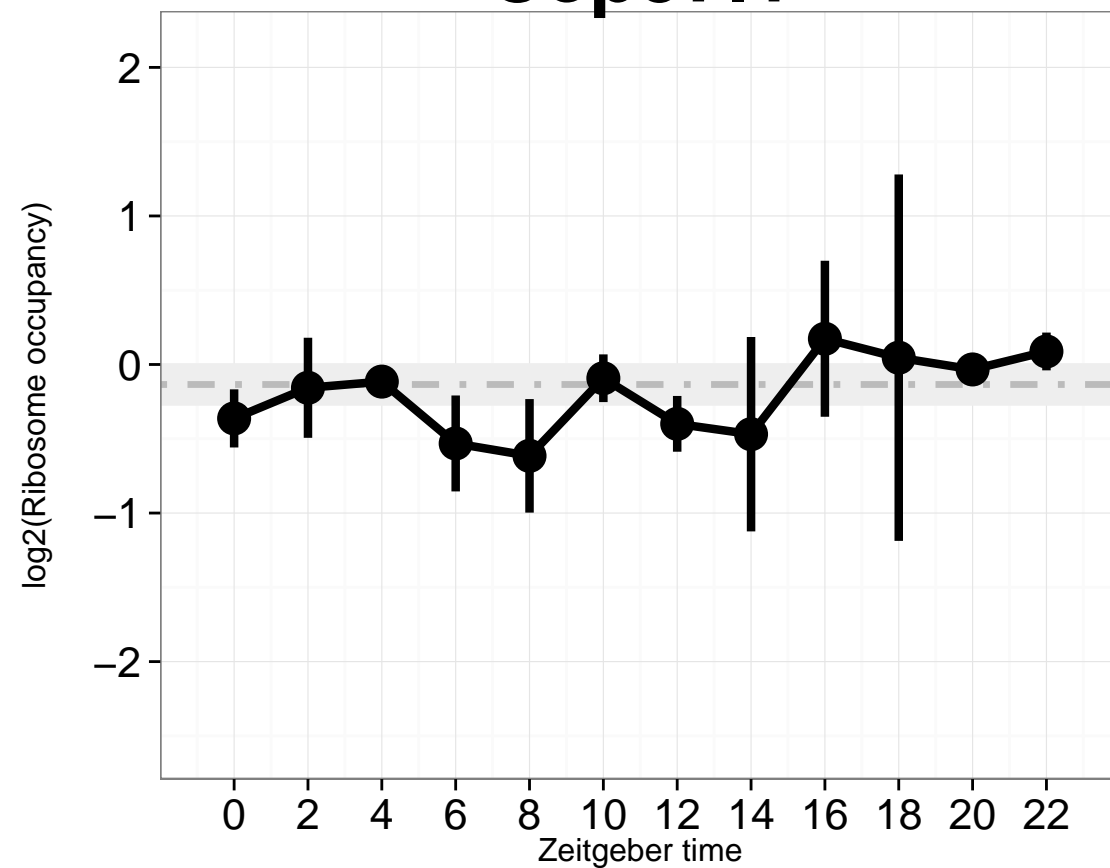

Supplement: SuppDataset_1.zip [file Cep57l1_set_C.pdf › Supplemental Dataset 1/C-mRNA_nonrhythm_translation_rhyth/Cep57l1_set_C.pdf]

# Cep97

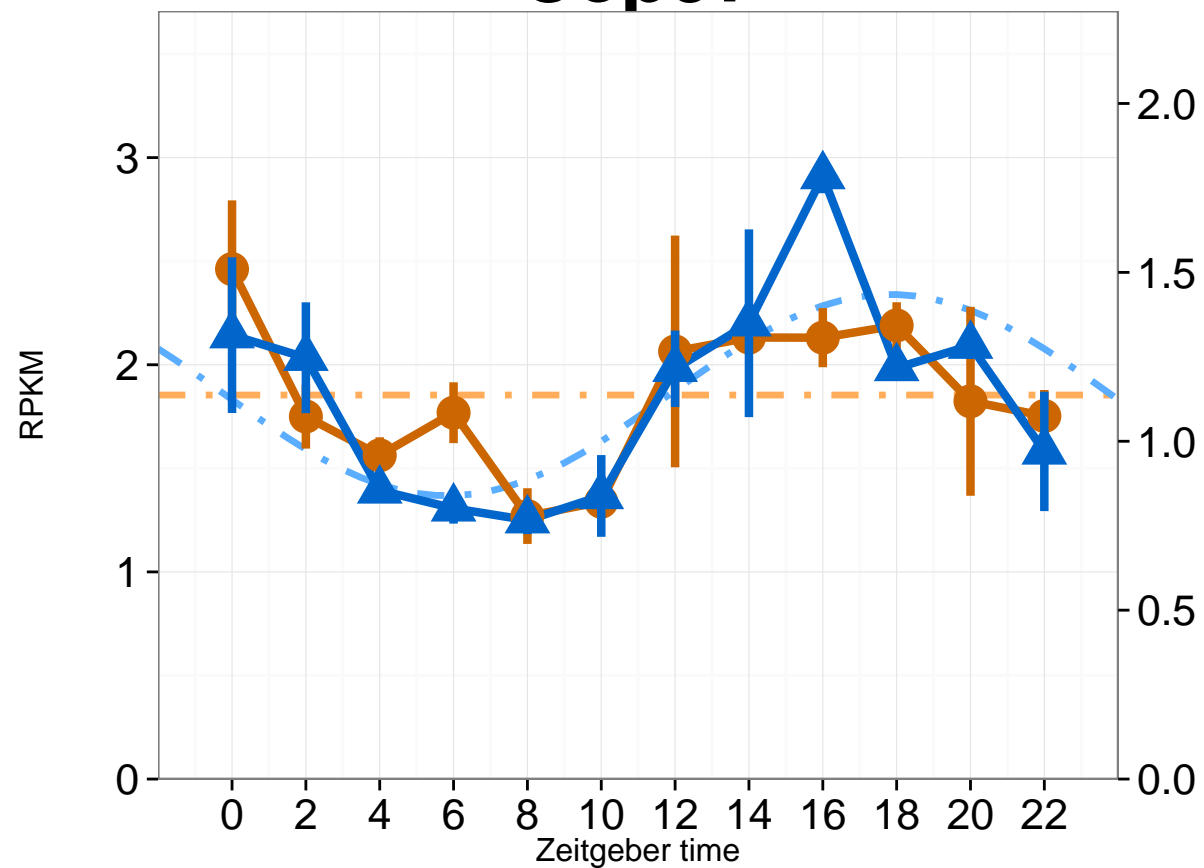

# Cep97

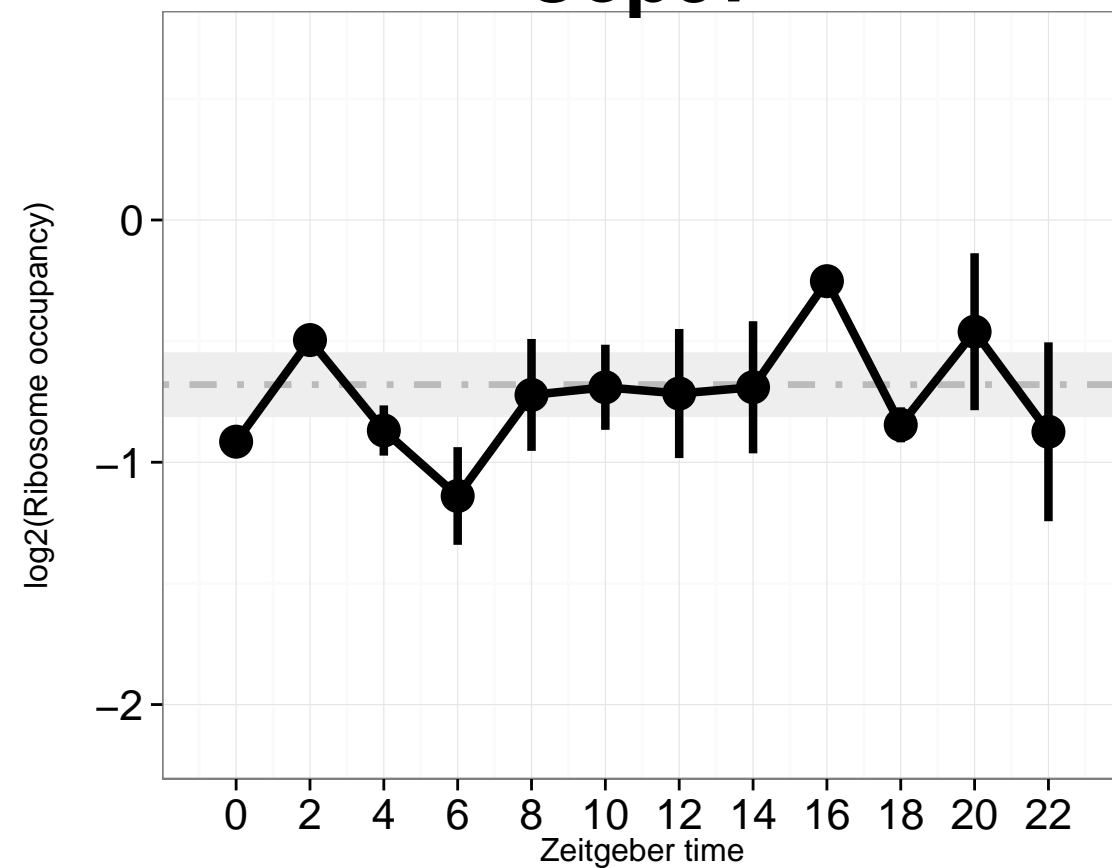

Supplement: SuppDataset_1.zip [file Cep97_set_C.pdf › Supplemental Dataset 1/C-mRNA_nonrhythm_translation_rhyth/Cep97_set_C.pdf]

# Cfhr3

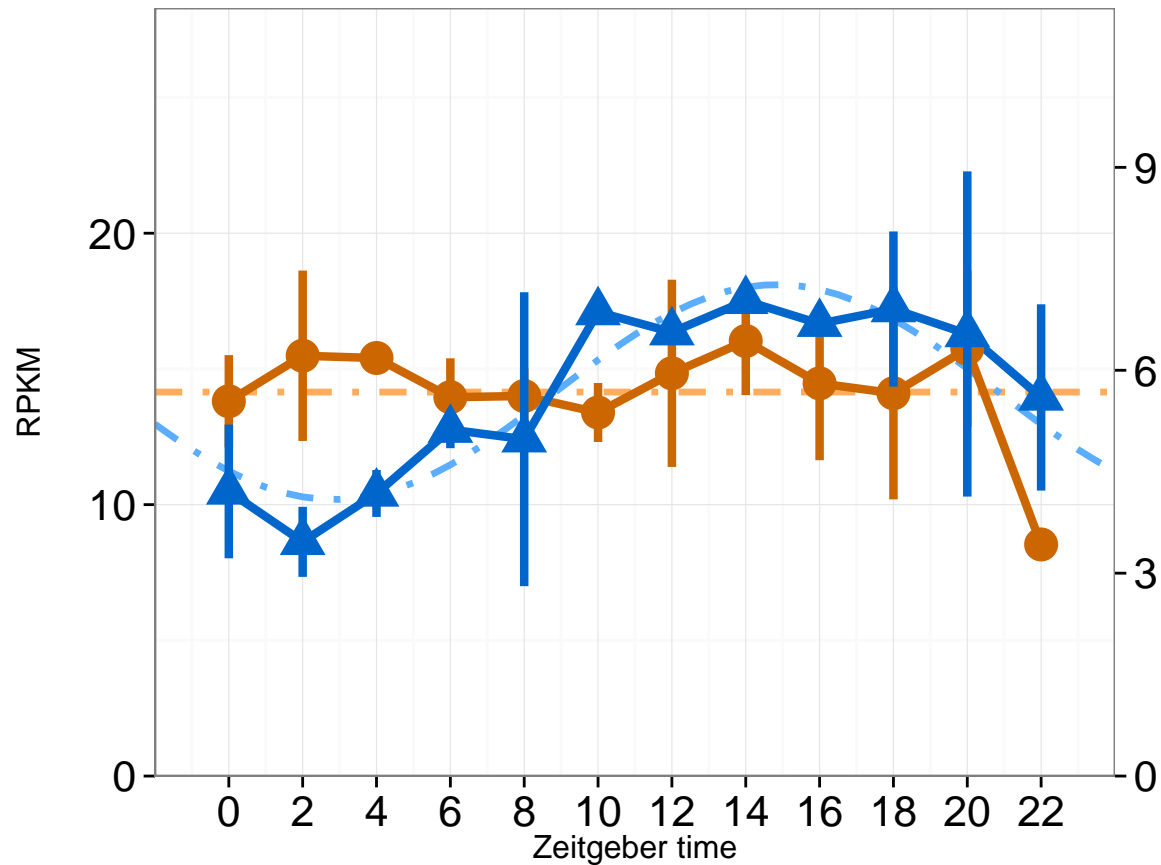

# Cfhr3

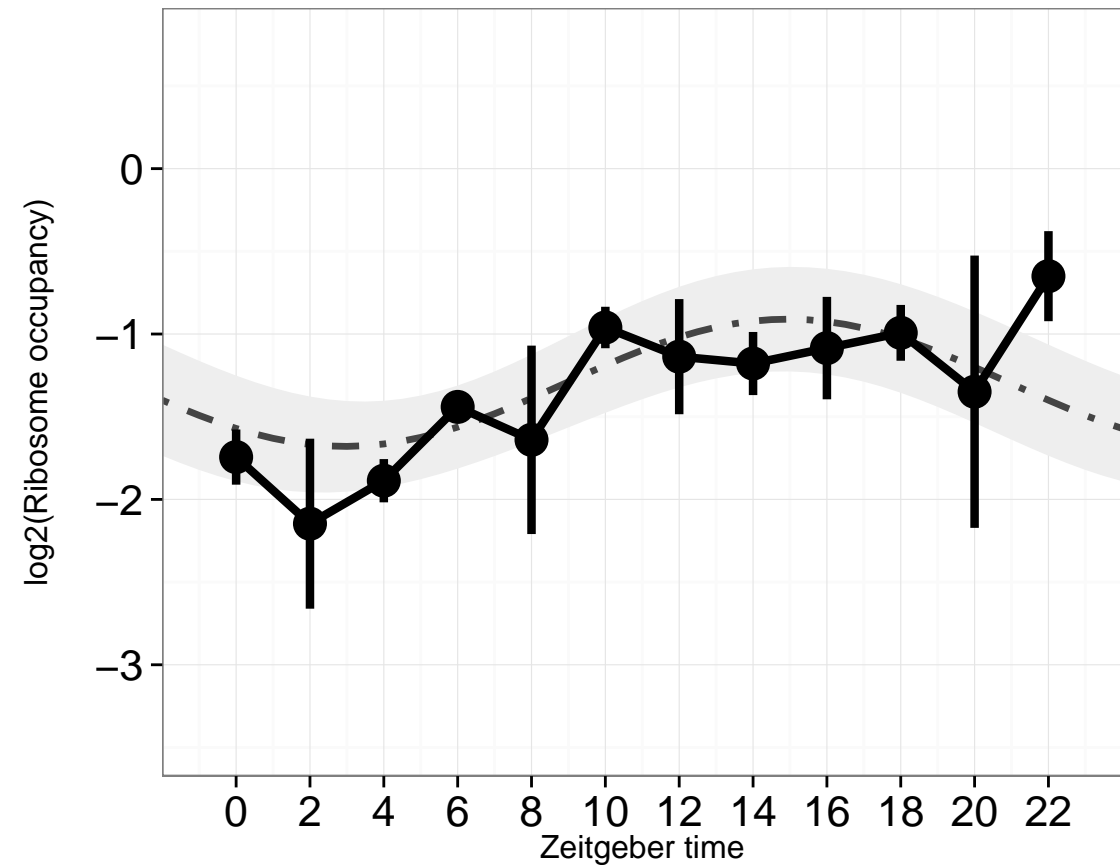

Supplement: SuppDataset_1.zip [file Cfhr3_set_C.pdf › Supplemental Dataset 1/C-mRNA_nonrhythm_translation_rhyth/Cfhr3_set_C.pdf]

## Cfi

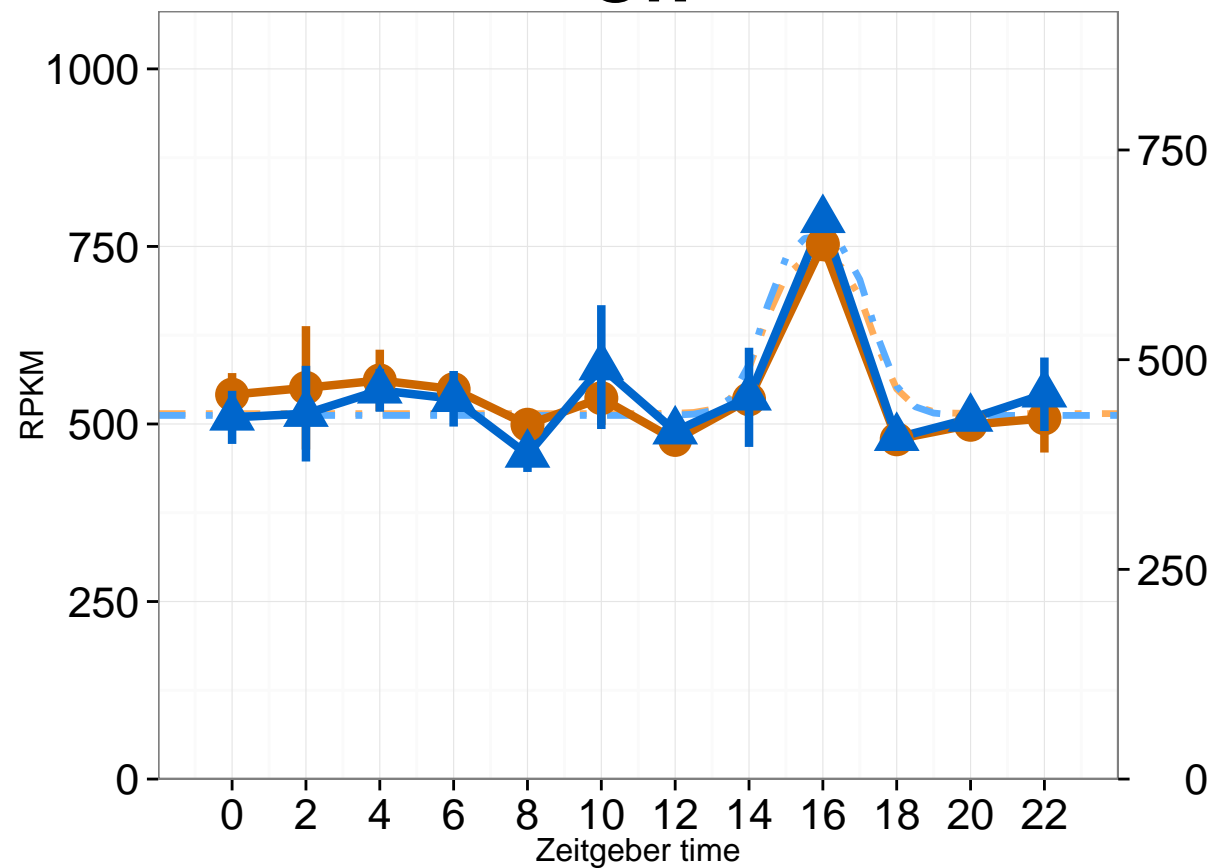

## Cfi

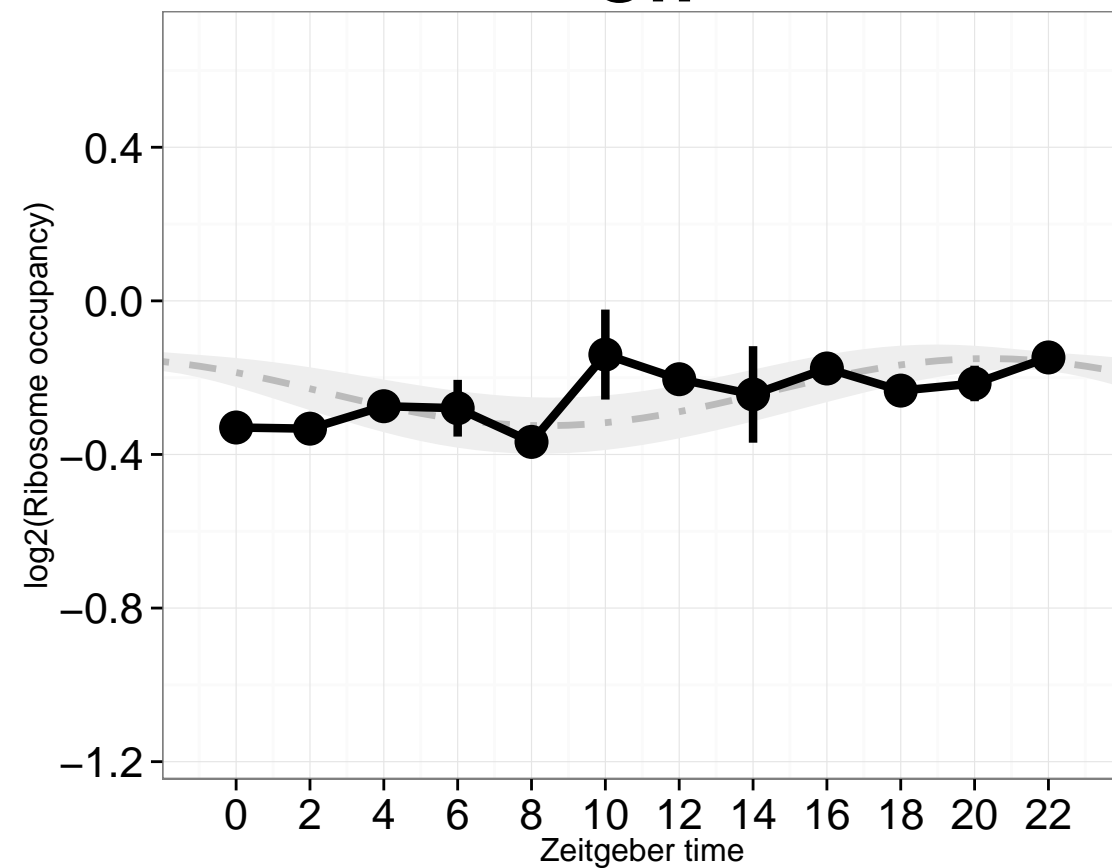

Supplement: SuppDataset_1.zip [file Cfi_set_C.pdf › Supplemental Dataset 1/C-mRNA_nonrhythm_translation_rhyth/Cfi_set_C.pdf]

# Cflar

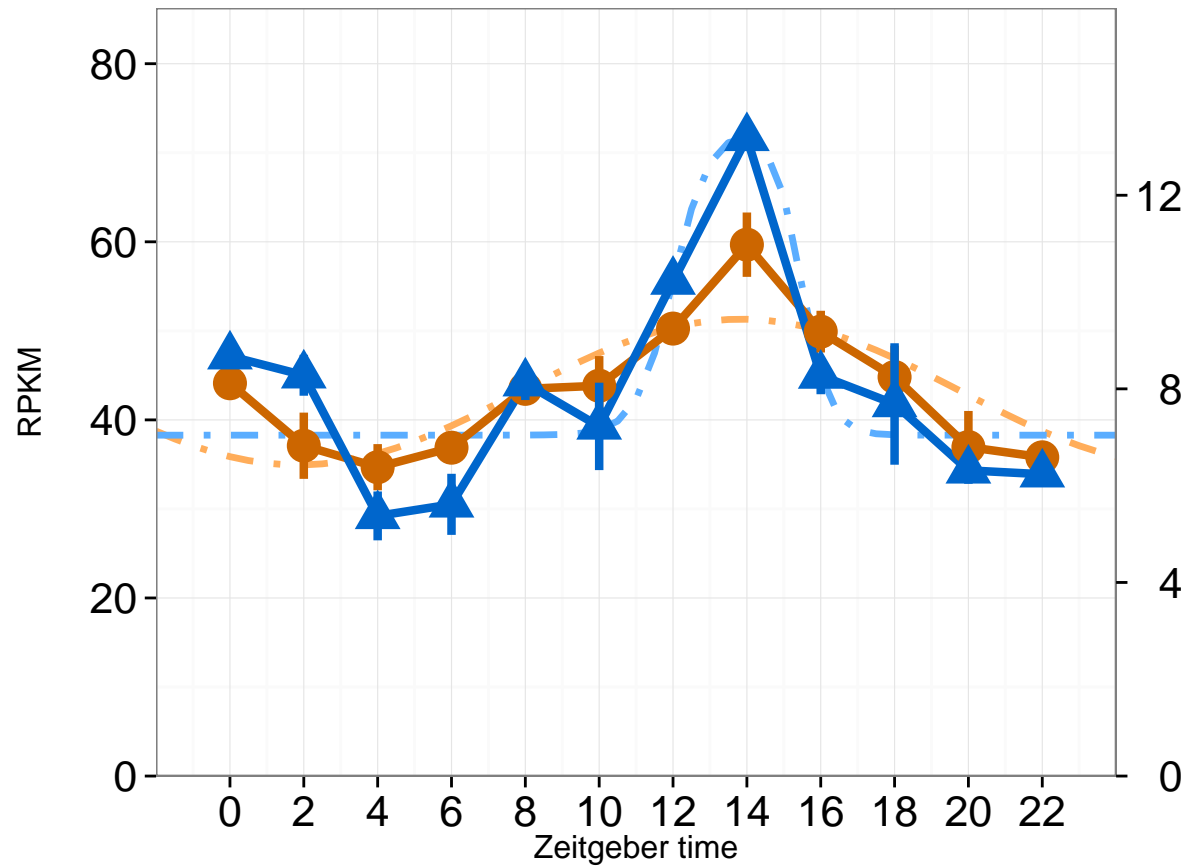

# Cflar

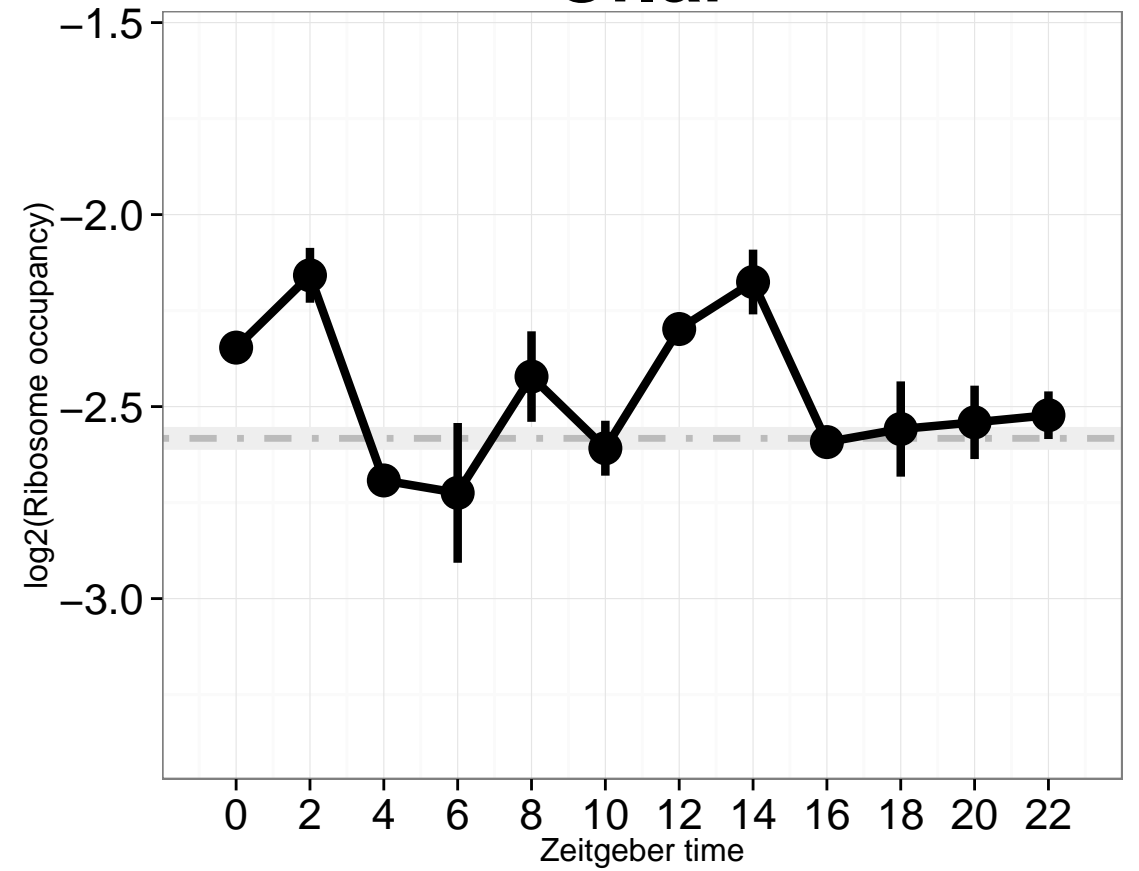

Supplement: SuppDataset_1.zip [file Cflar_set_C.pdf › Supplemental Dataset 1/C-mRNA_nonrhythm_translation_rhyth/Cflar_set_C.pdf]

# Cgrrf1

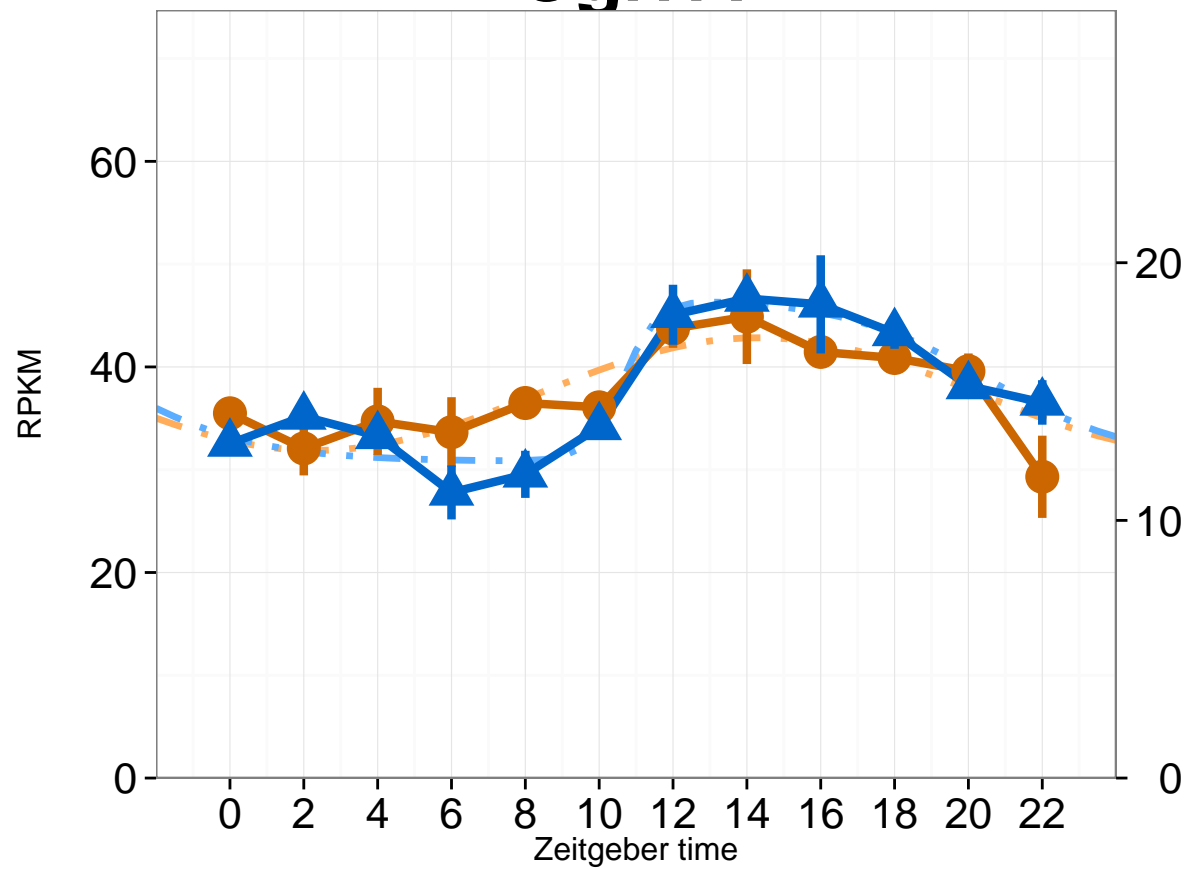

# Cgrrf1

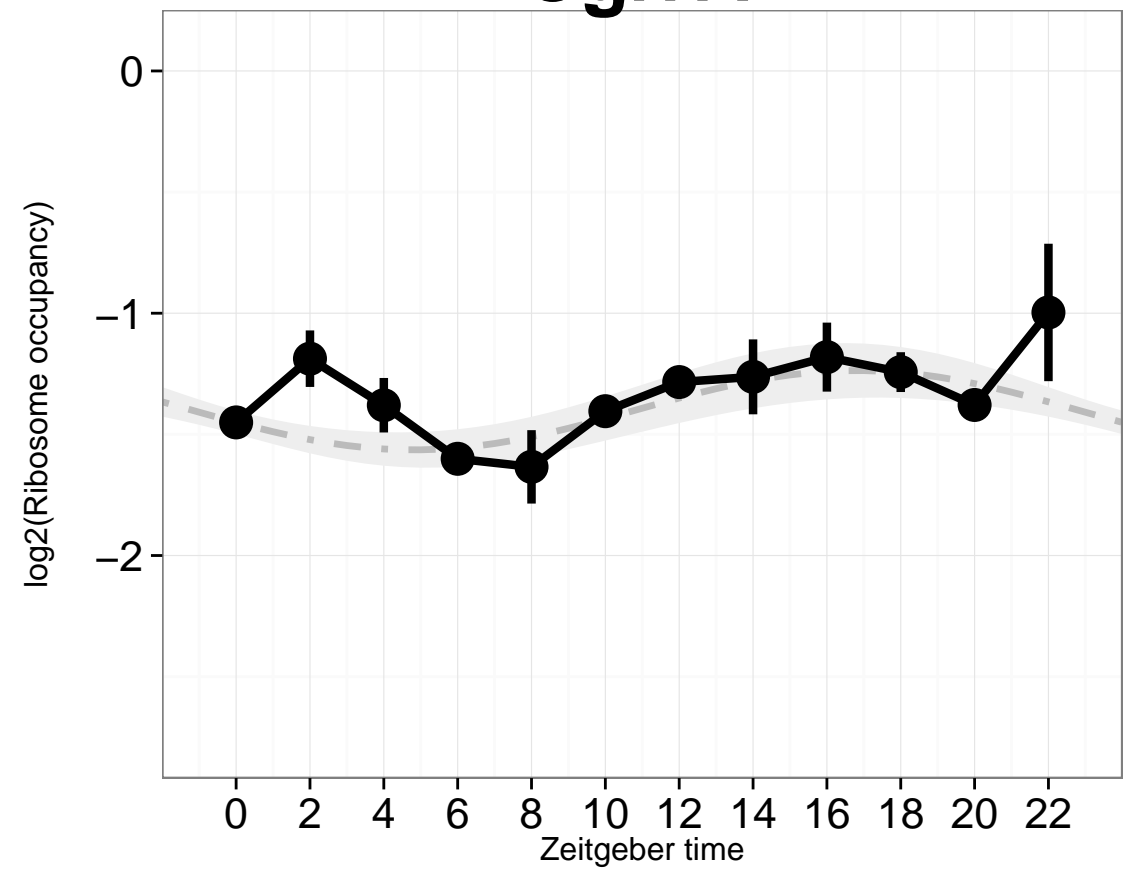

Supplement: SuppDataset_1.zip [file Cgrrf1_set_C.pdf › Supplemental Dataset 1/C-mRNA_nonrhythm_translation_rhyth/Cgrrf1_set_C.pdf]

# Chmp6

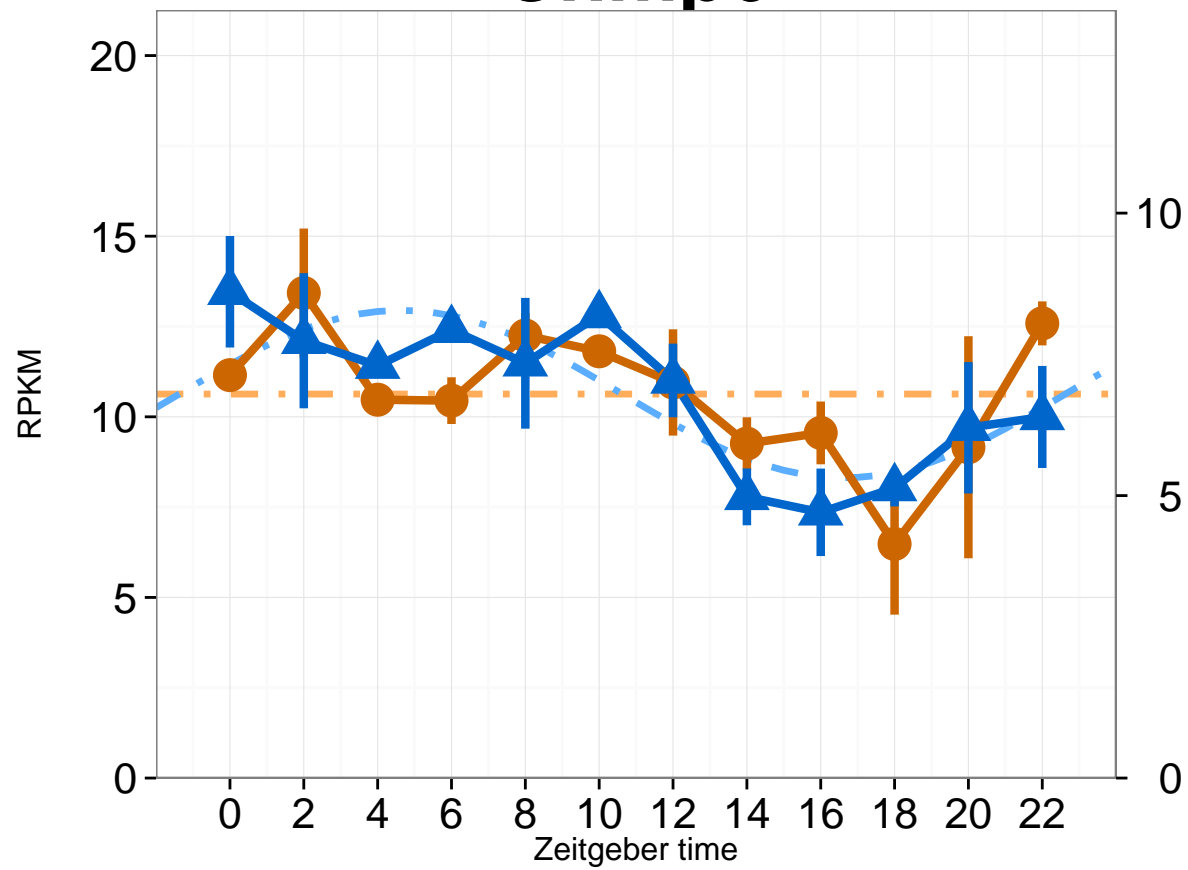

# Chmp6

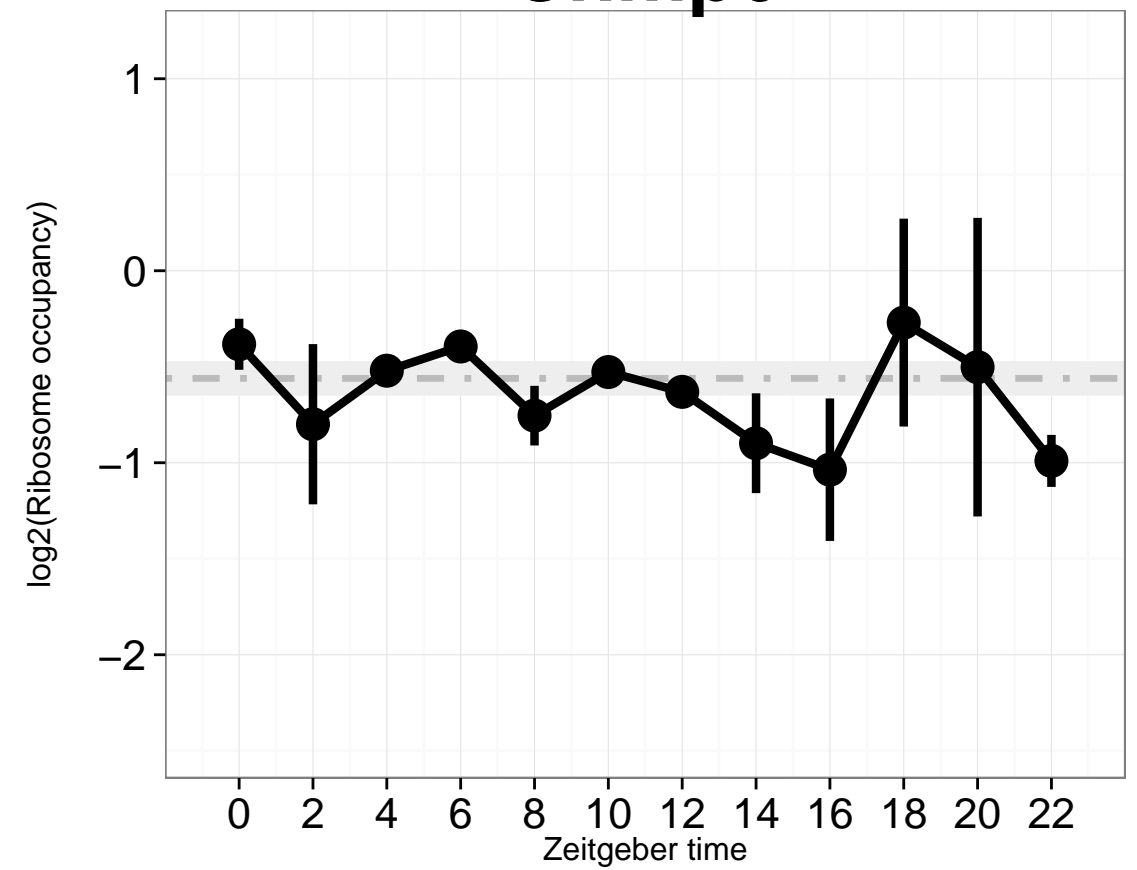

Supplement: SuppDataset_1.zip [file Chmp6_set_C.pdf › Supplemental Dataset 1/C-mRNA_nonrhythm_translation_rhyth/Chmp6_set_C.pdf]

# Chp1

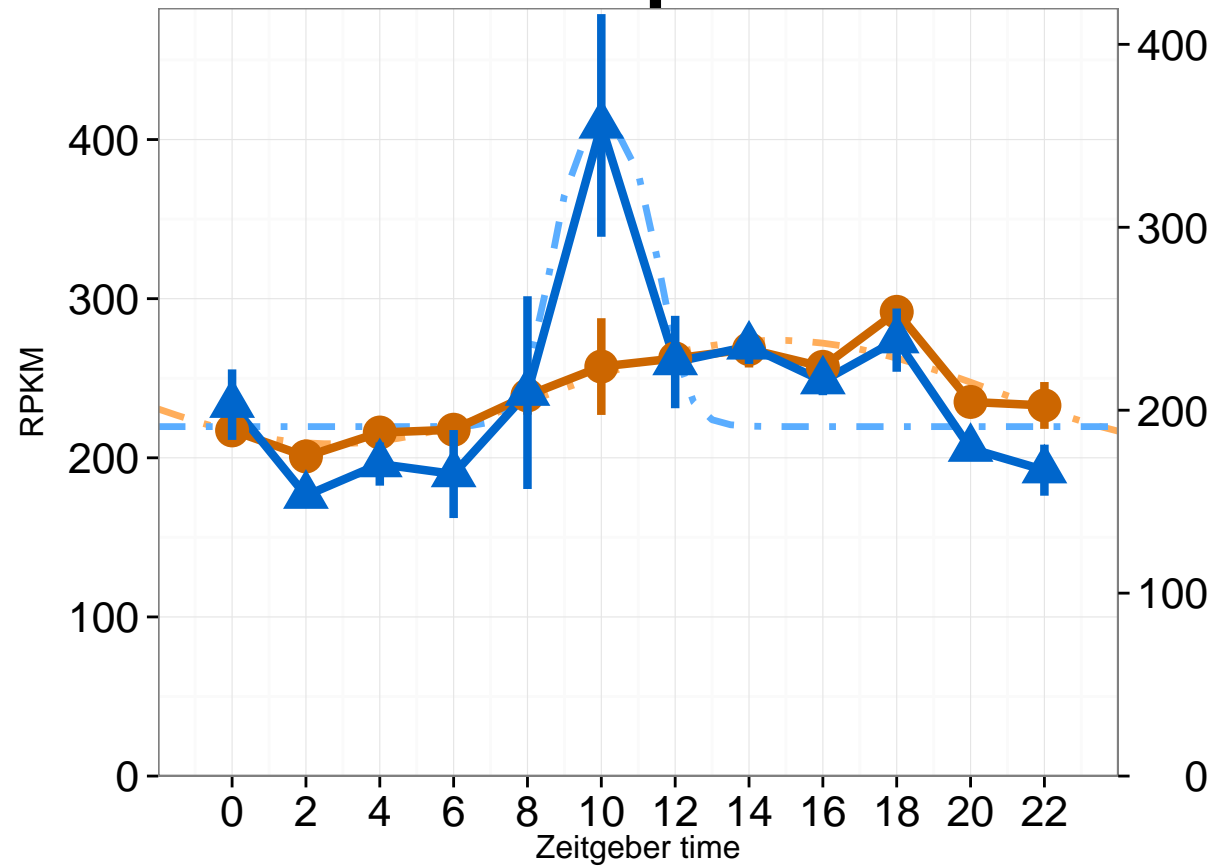

# Chp1

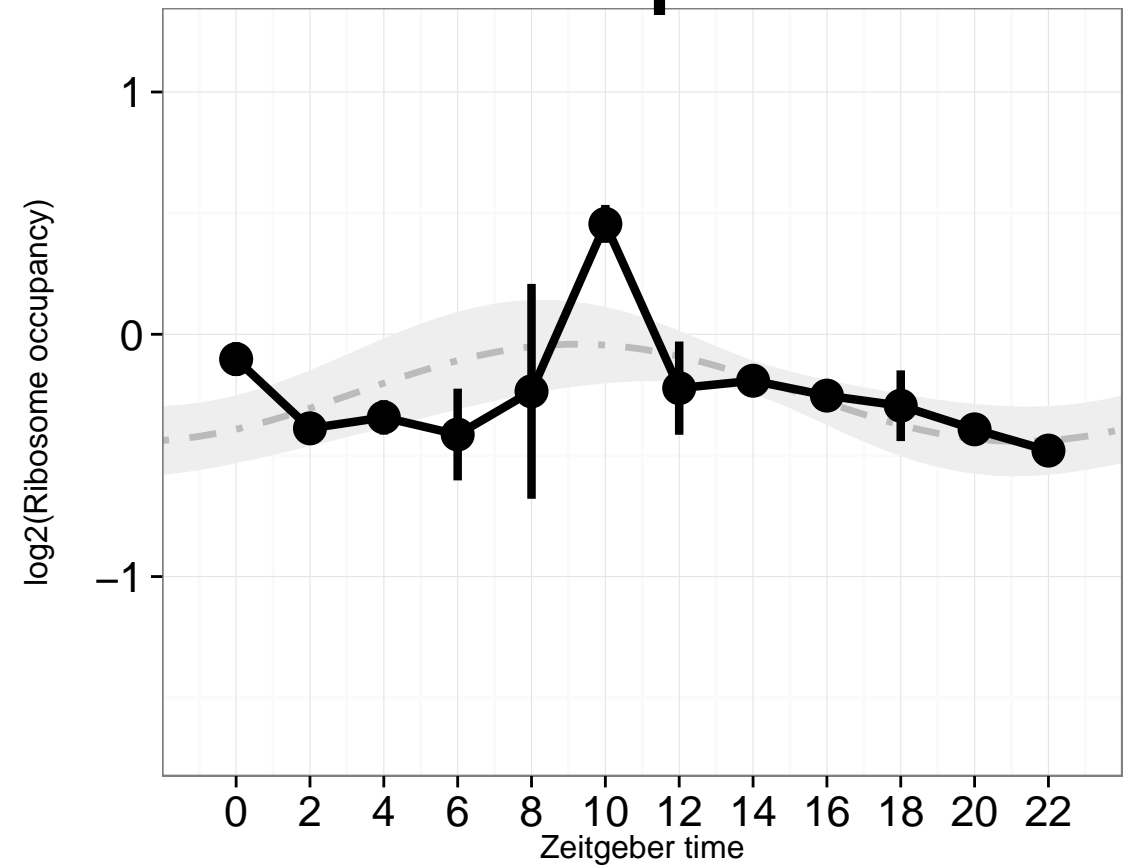

Supplement: SuppDataset_1.zip [file Chp1_set_C.pdf › Supplemental Dataset 1/C-mRNA_nonrhythm_translation_rhyth/Chp1_set_C.pdf]

## Cir1

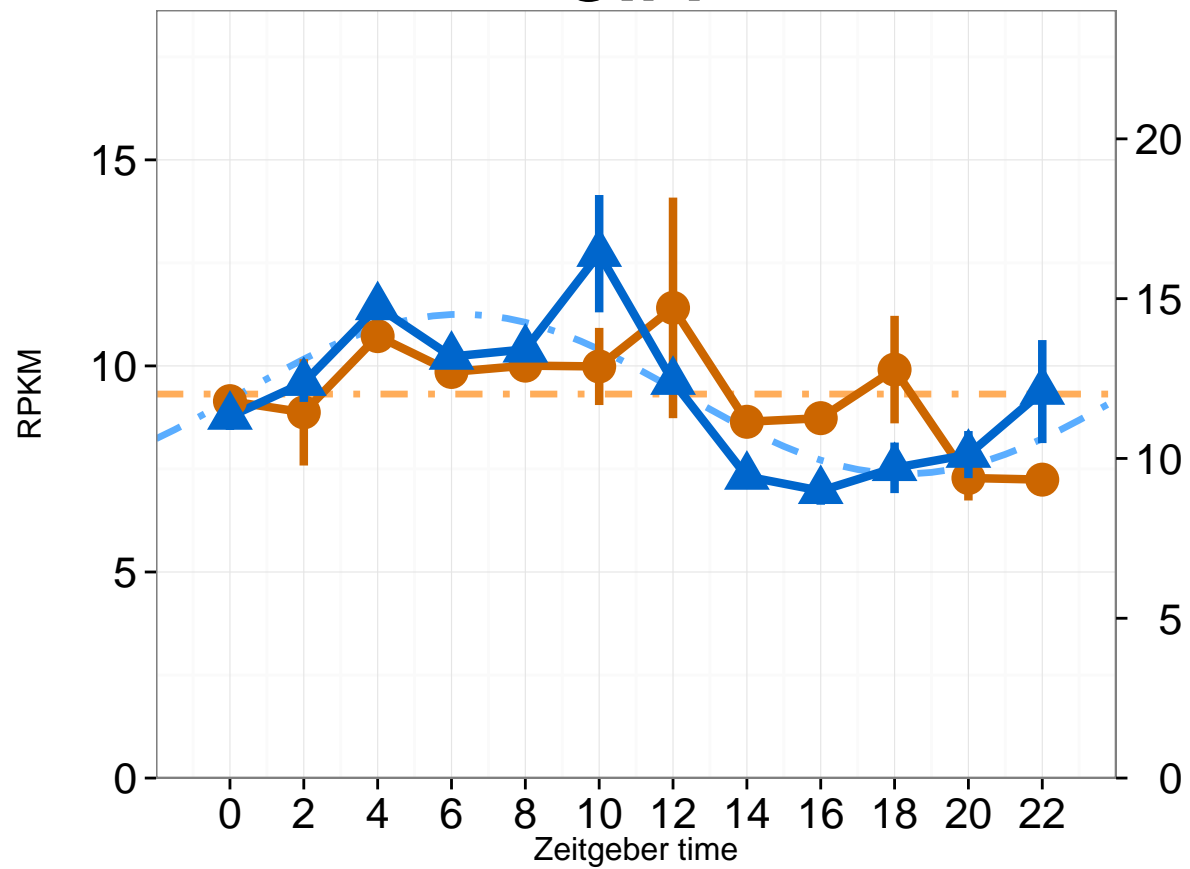

## Cir1

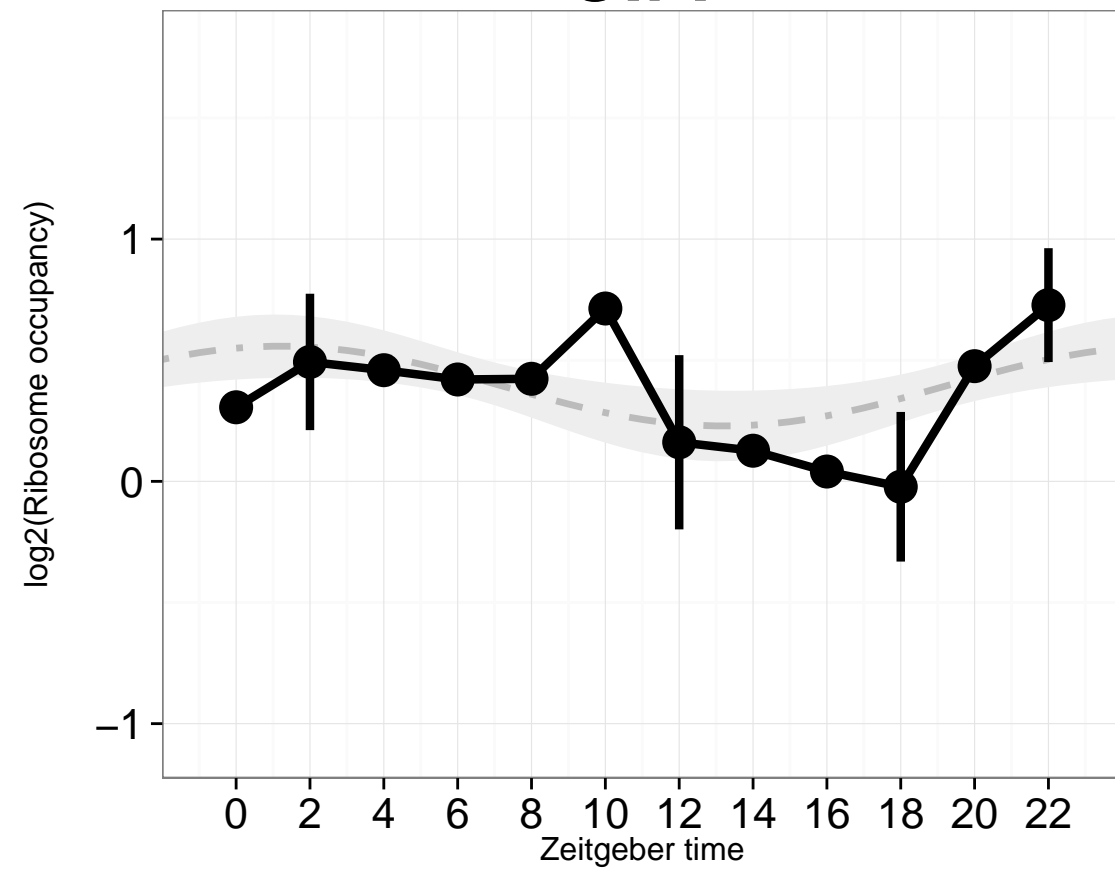

Supplement: SuppDataset_1.zip [file Cir1_set_C.pdf › Supplemental Dataset 1/C-mRNA_nonrhythm_translation_rhyth/Cir1_set_C.pdf]

## Ciz1

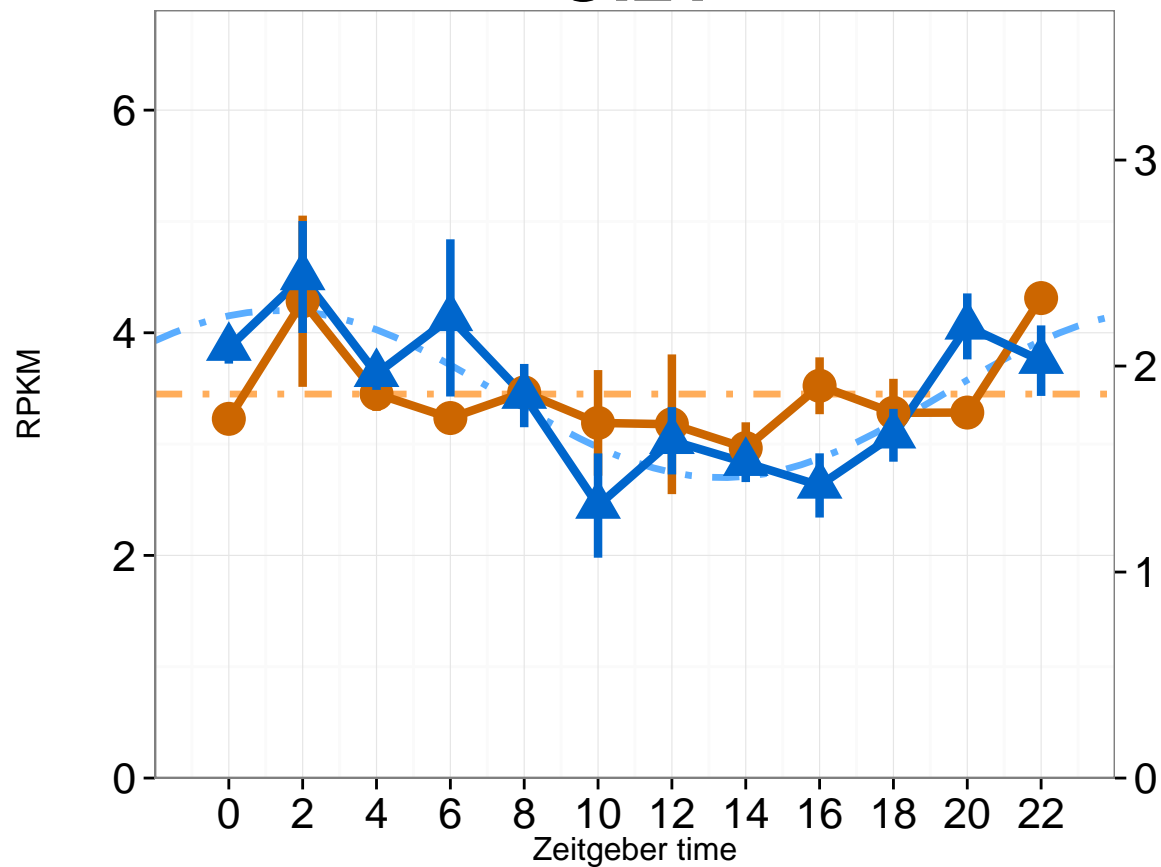

## Ciz1

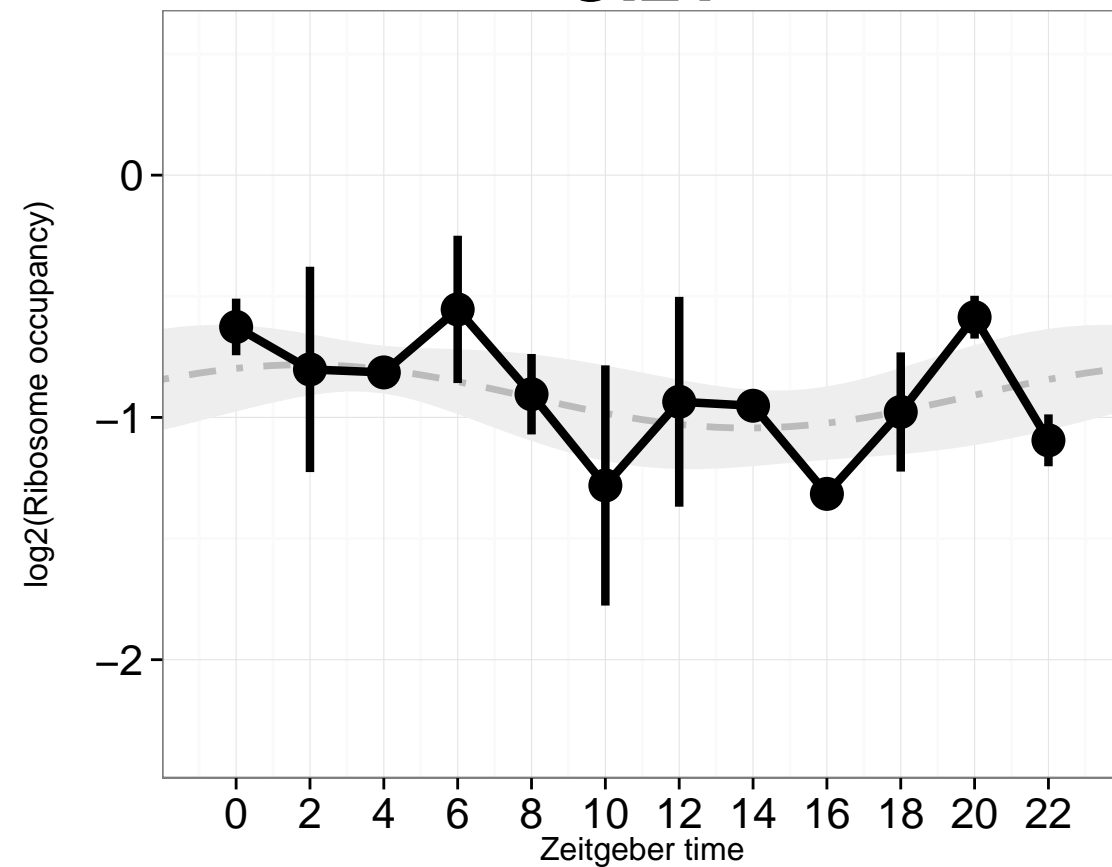

Supplement: SuppDataset_1.zip [file Ciz1_set_C.pdf › Supplemental Dataset 1/C-mRNA_nonrhythm_translation_rhyth/Ciz1_set_C.pdf]

# Cks1b

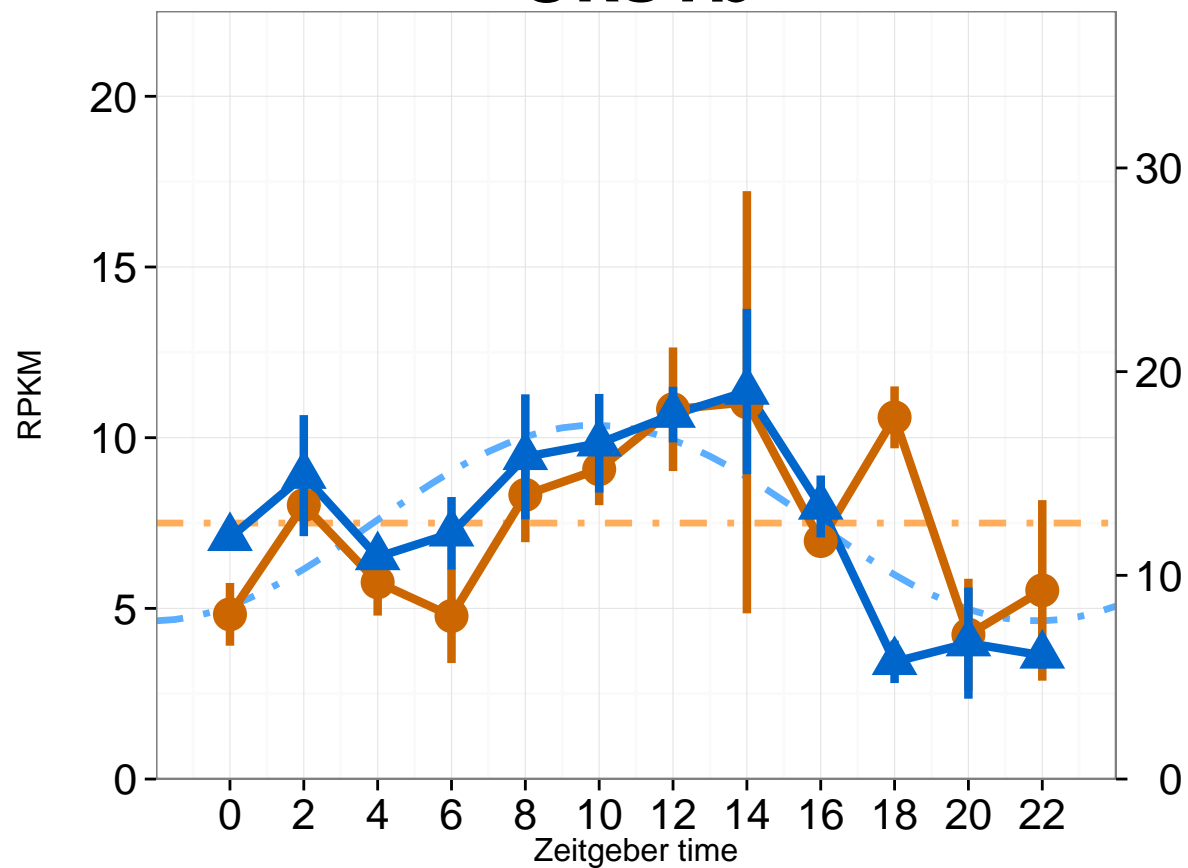

# Cks1b

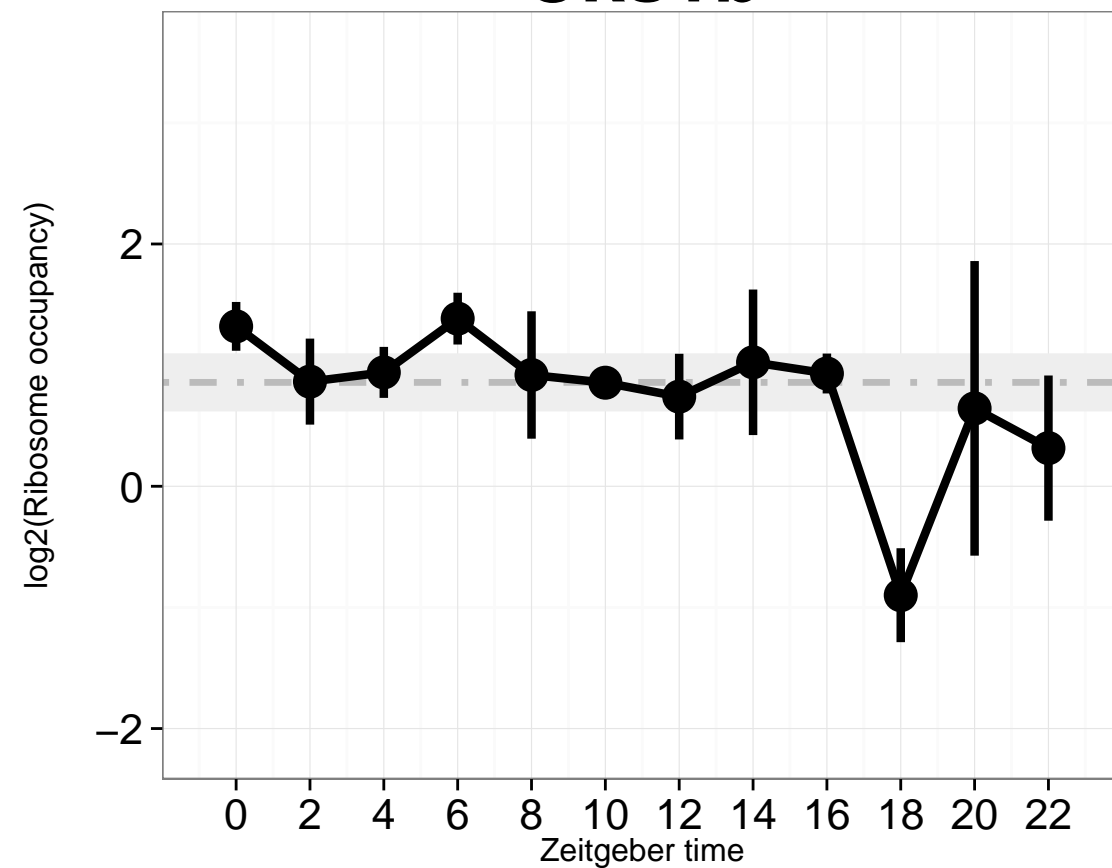

Supplement: SuppDataset_1.zip [file Cks1b_set_C.pdf › Supplemental Dataset 1/C-mRNA_nonrhythm_translation_rhyth/Cks1b_set_C.pdf]

## Clic5

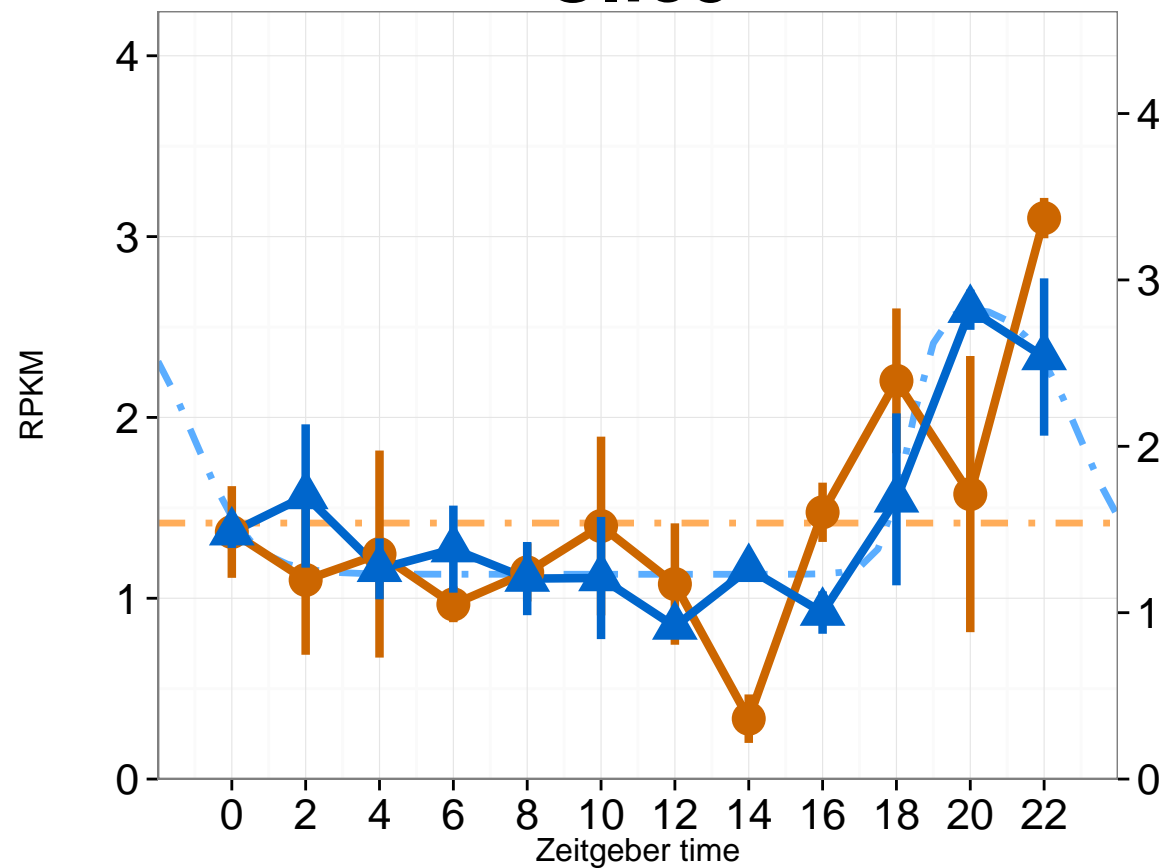

## Clic5

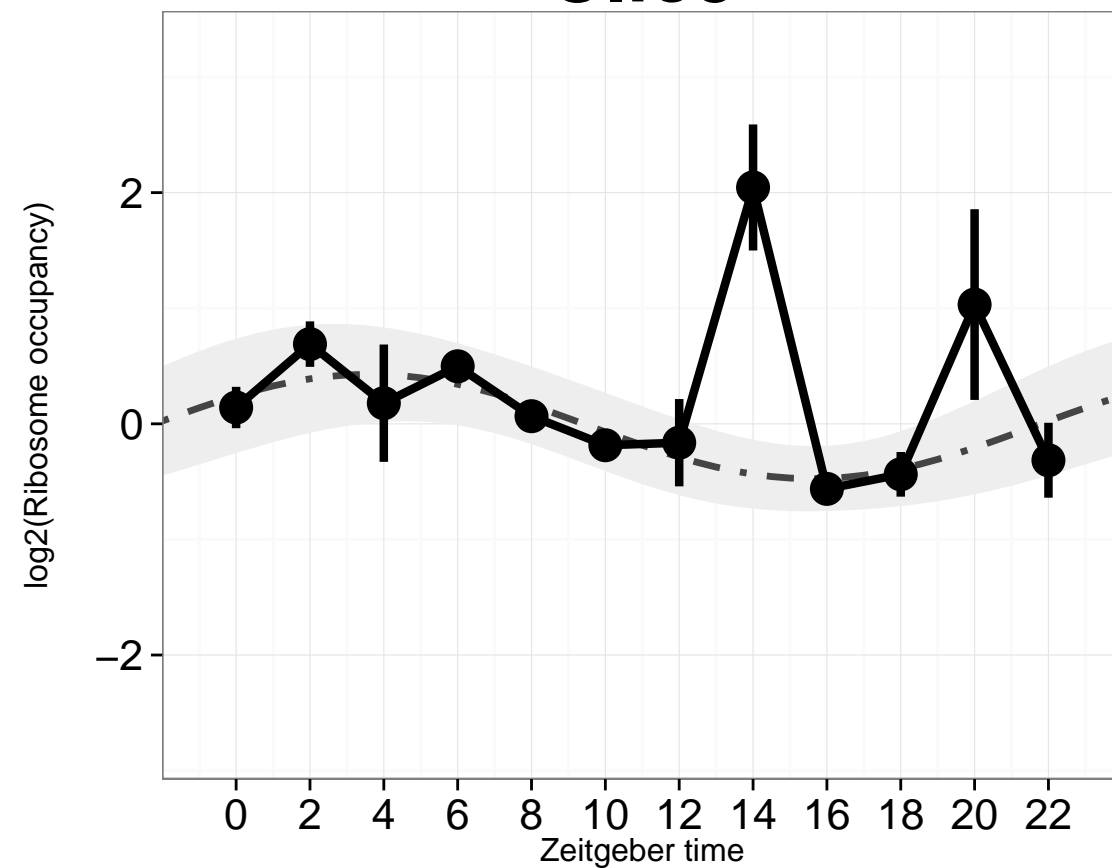

Supplement: SuppDataset_1.zip [file Clic5_set_C.pdf › Supplemental Dataset 1/C-mRNA_nonrhythm_translation_rhyth/Clic5_set_C.pdf]

## Clk4

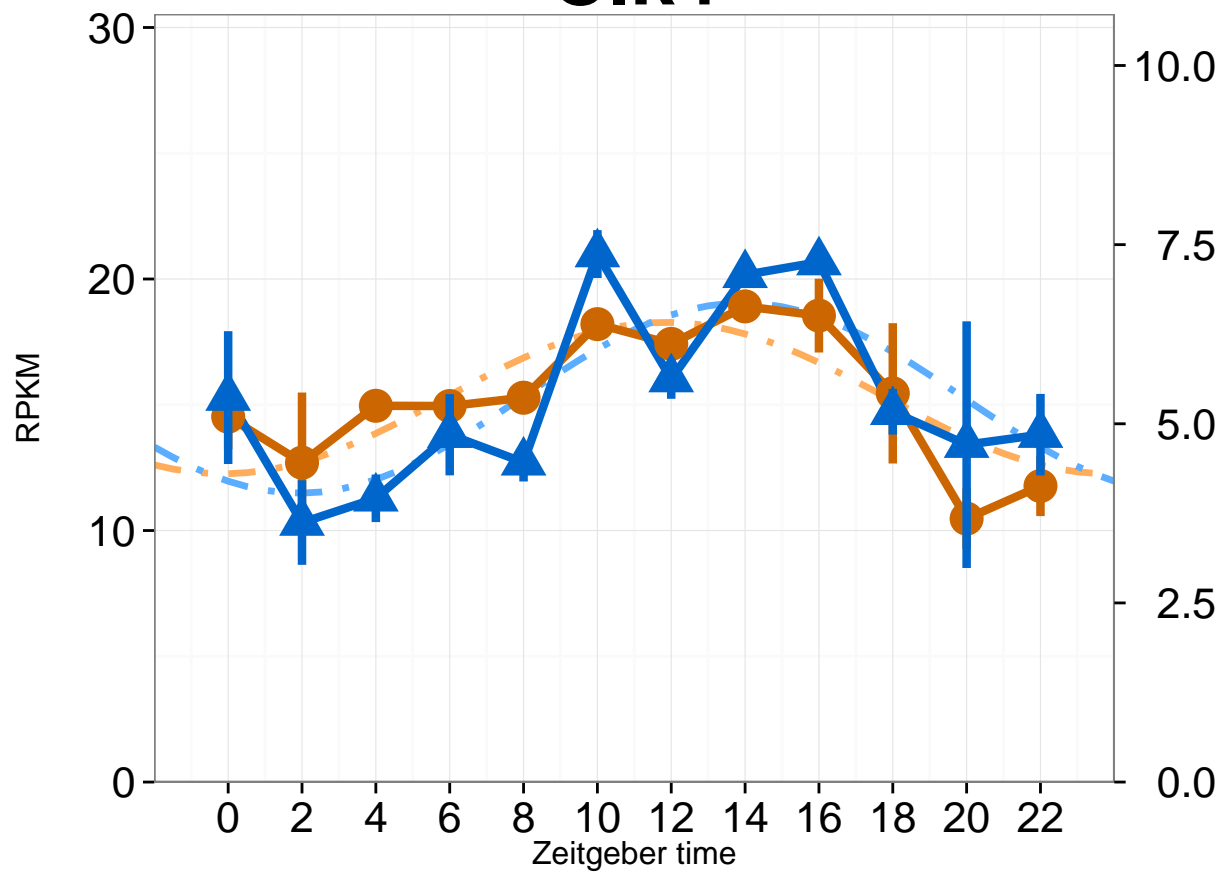

## Clk4

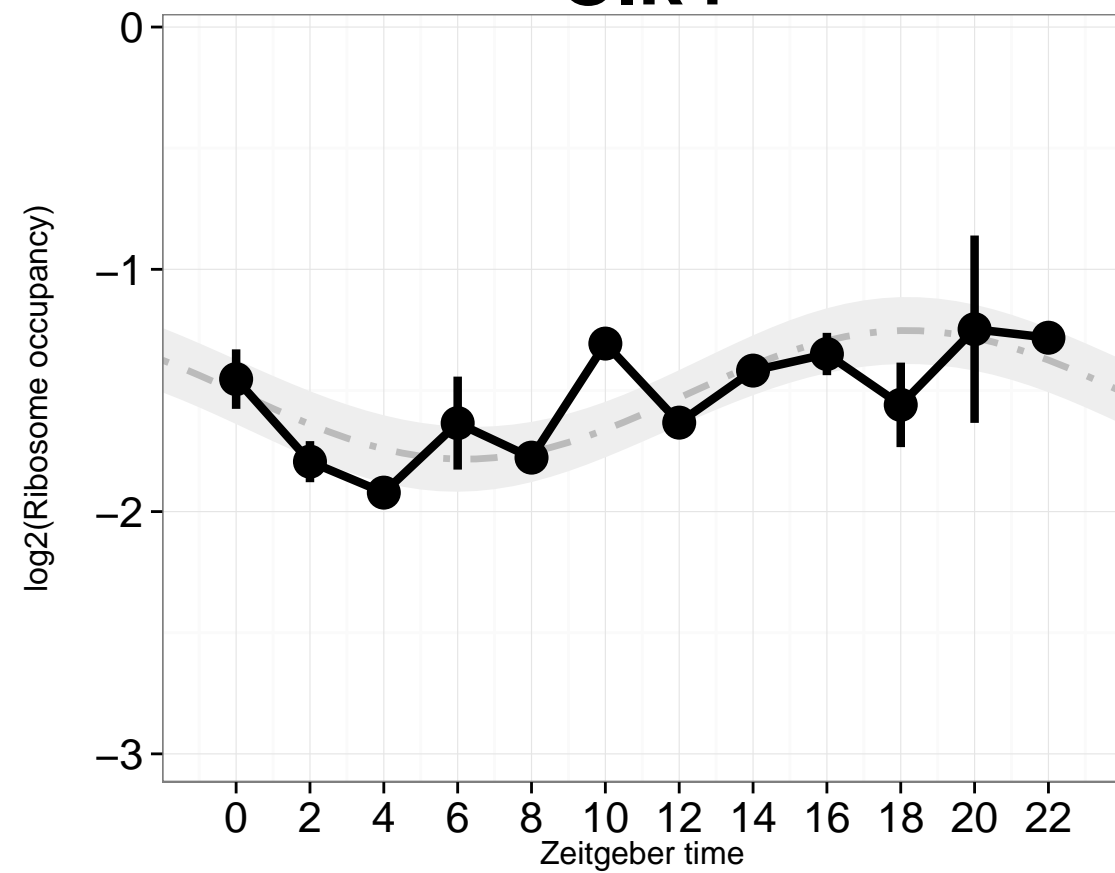

Supplement: SuppDataset_1.zip [file Clk4_set_C.pdf › Supplemental Dataset 1/C-mRNA_nonrhythm_translation_rhyth/Clk4_set_C.pdf]

## Cln5

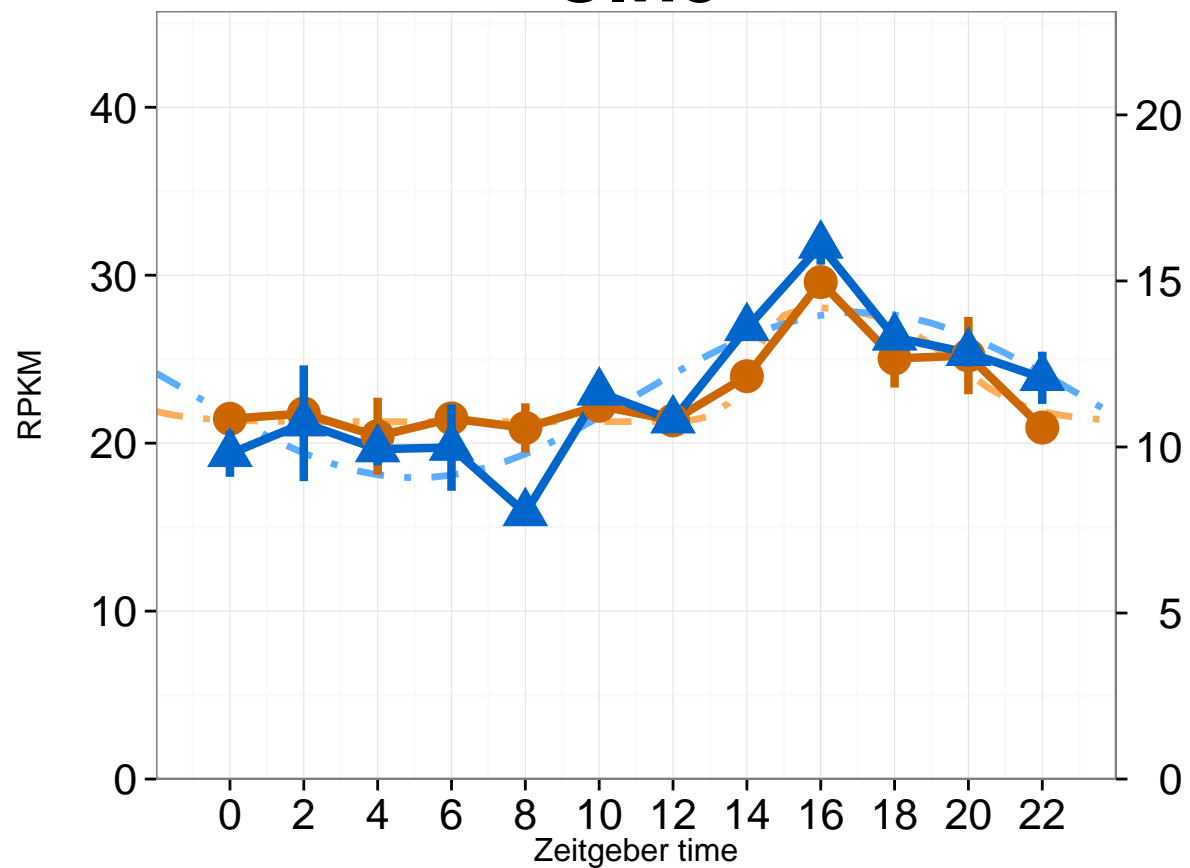

## Cln5

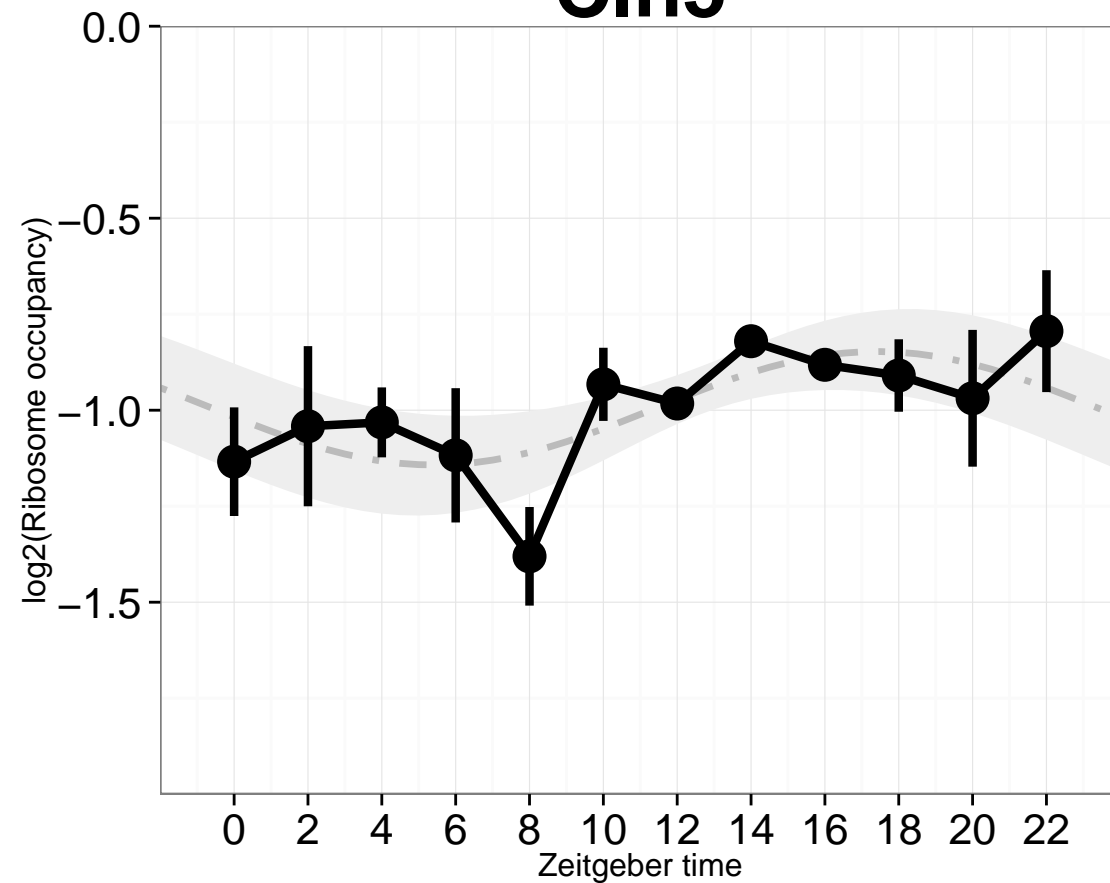

Supplement: SuppDataset_1.zip [file Cln5_set_C.pdf › Supplemental Dataset 1/C-mRNA_nonrhythm_translation_rhyth/Cln5_set_C.pdf]

## Cln8

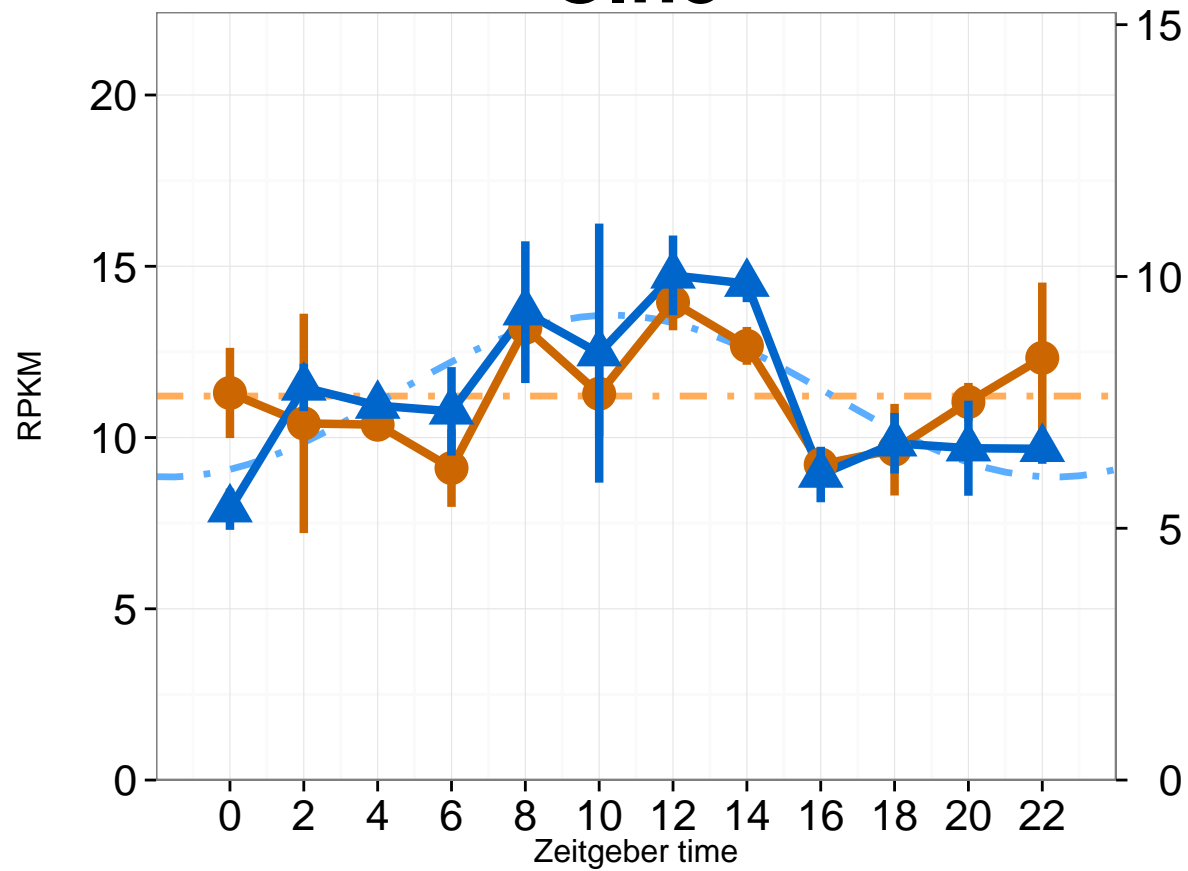

## Cln8

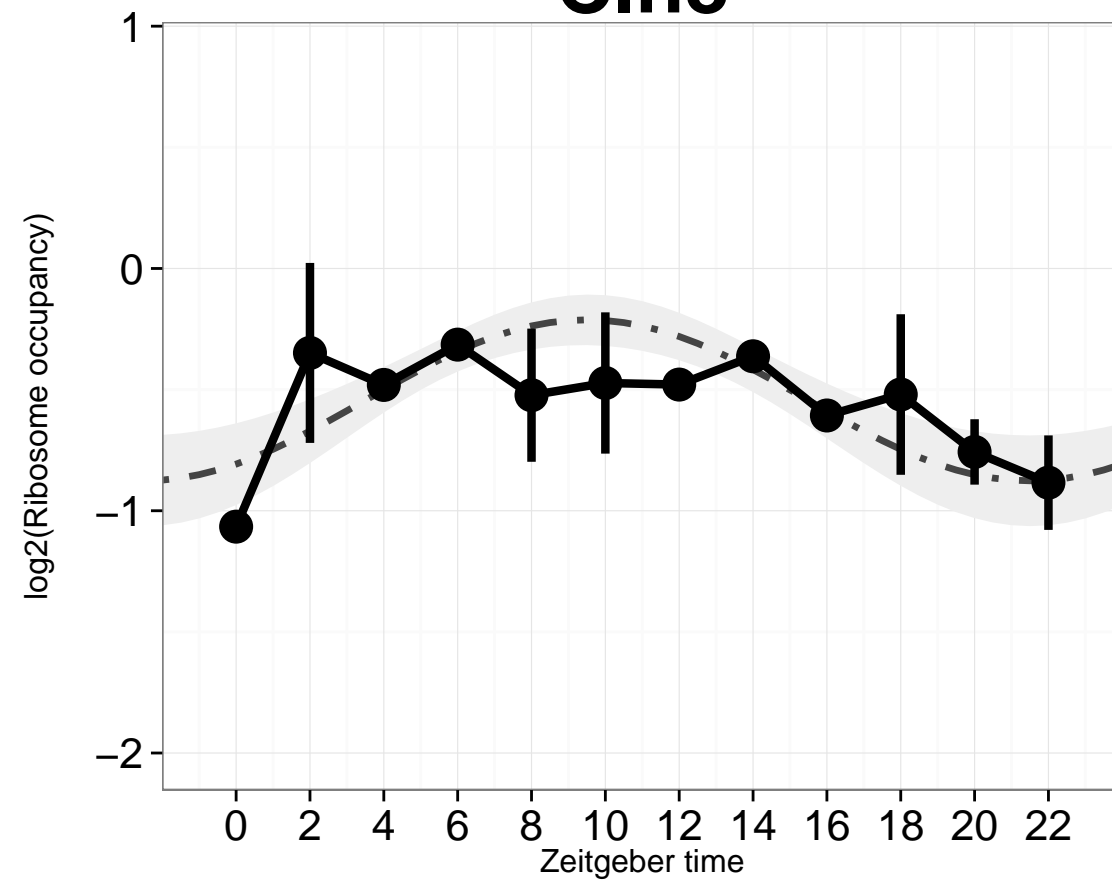

Supplement: SuppDataset_1.zip [file Cln8_set_C.pdf › Supplemental Dataset 1/C-mRNA_nonrhythm_translation_rhyth/Cln8_set_C.pdf]

# Clp1

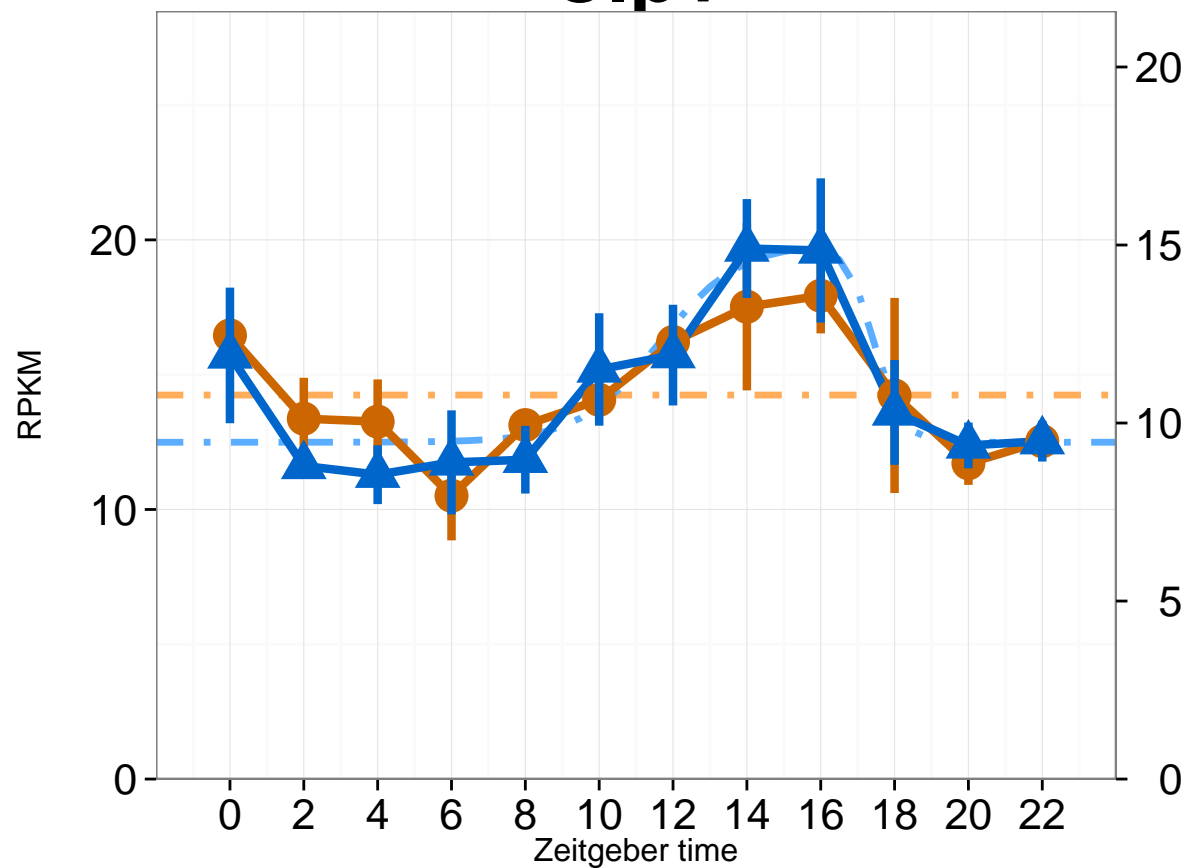

# Clp1

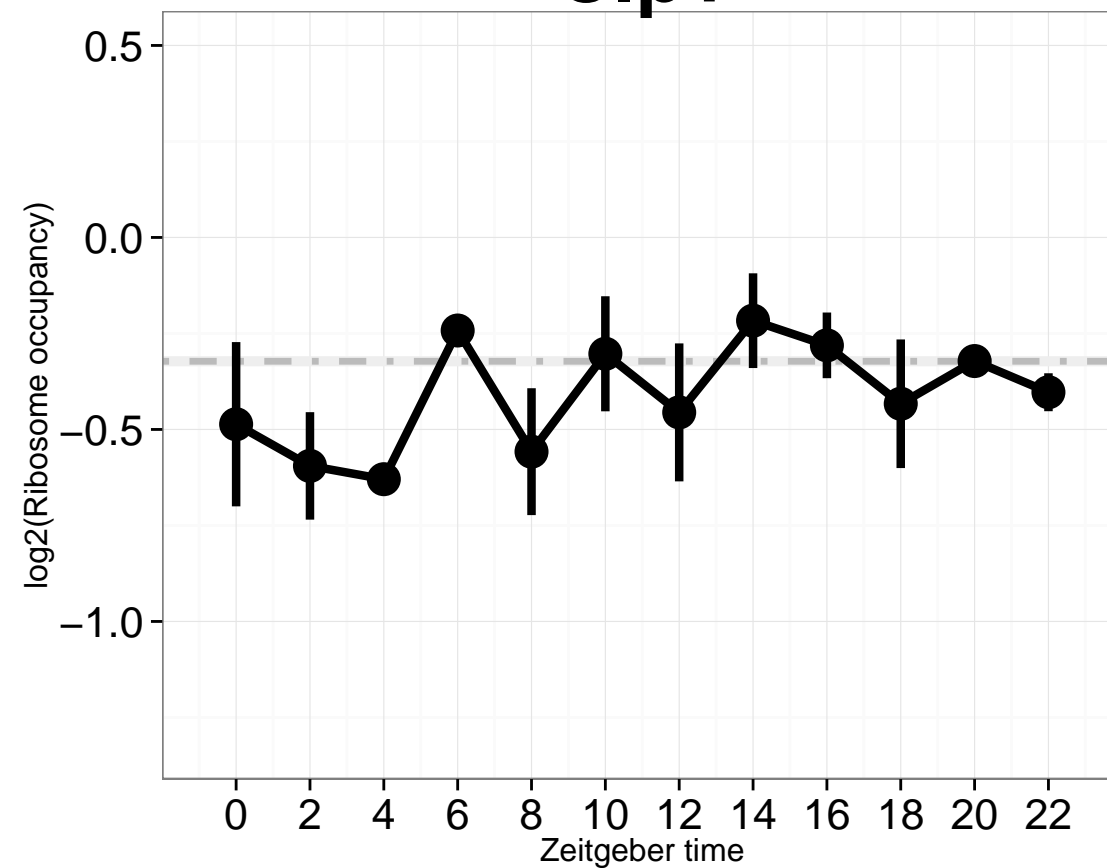

Supplement: SuppDataset_1.zip [file Clp1_set_C.pdf › Supplemental Dataset 1/C-mRNA_nonrhythm_translation_rhyth/Clp1_set_C.pdf]

# Cnn2

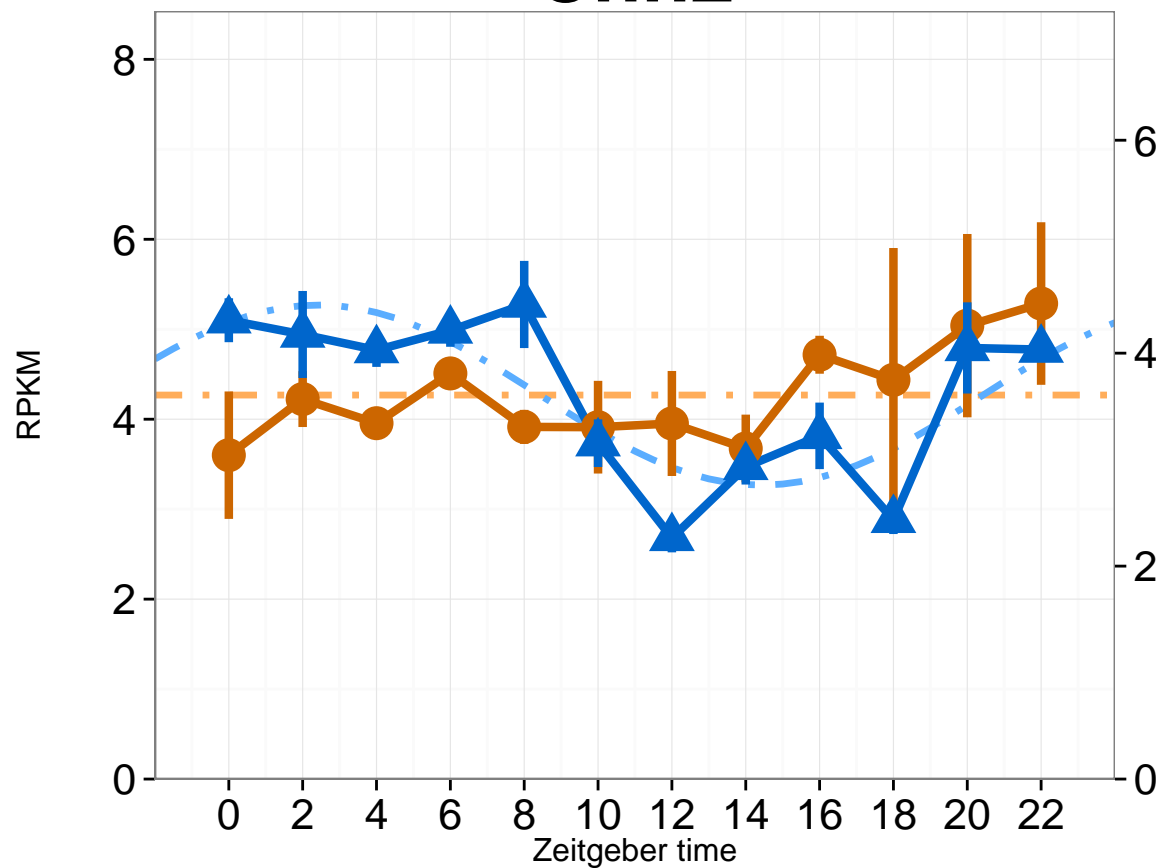

# Cnn2

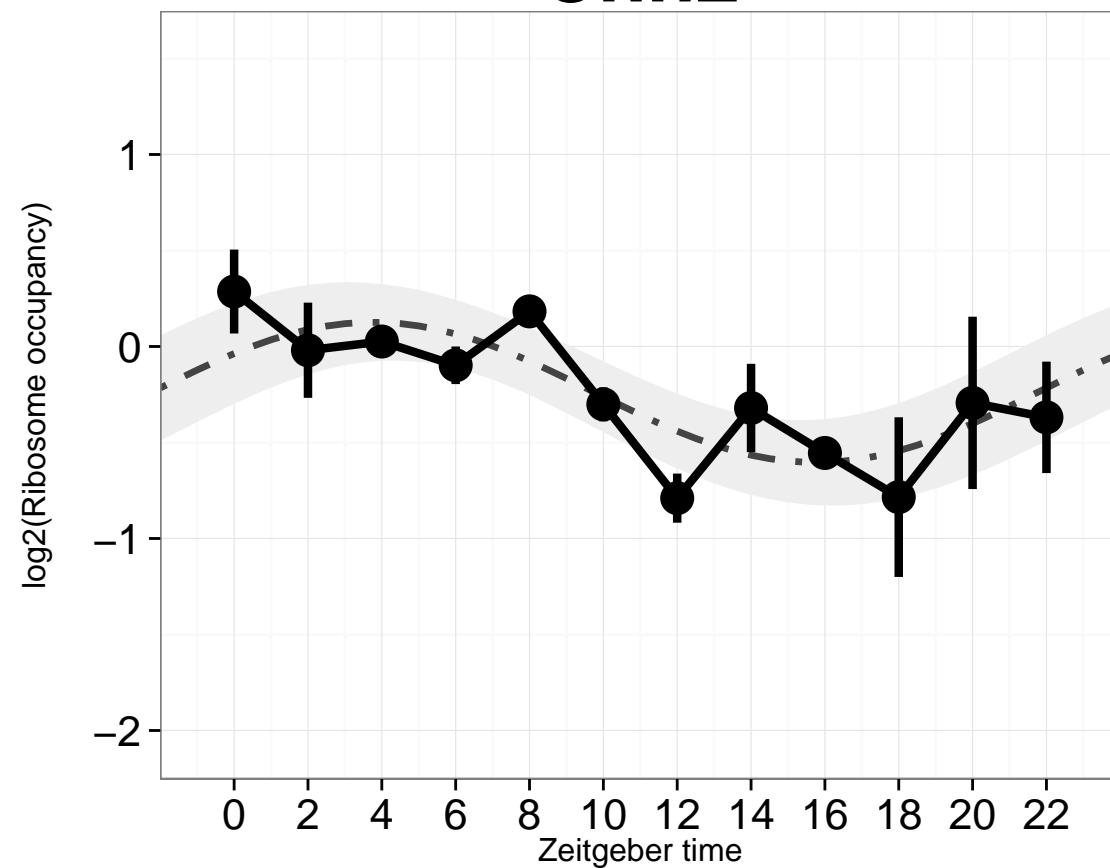

Supplement: SuppDataset_1.zip [file Cnn2_set_C.pdf › Supplemental Dataset 1/C-mRNA_nonrhythm_translation_rhyth/Cnn2_set_C.pdf]

## Cntfr

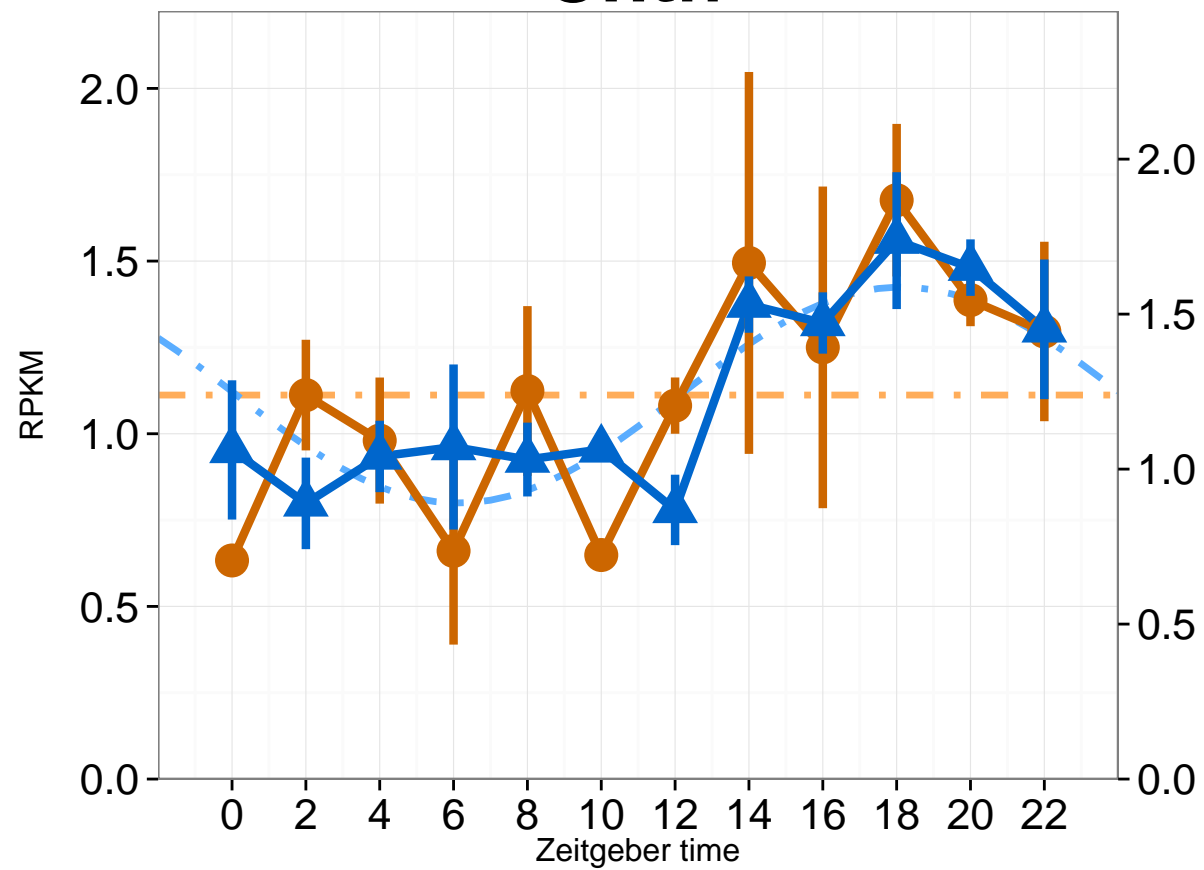

## Cntfr

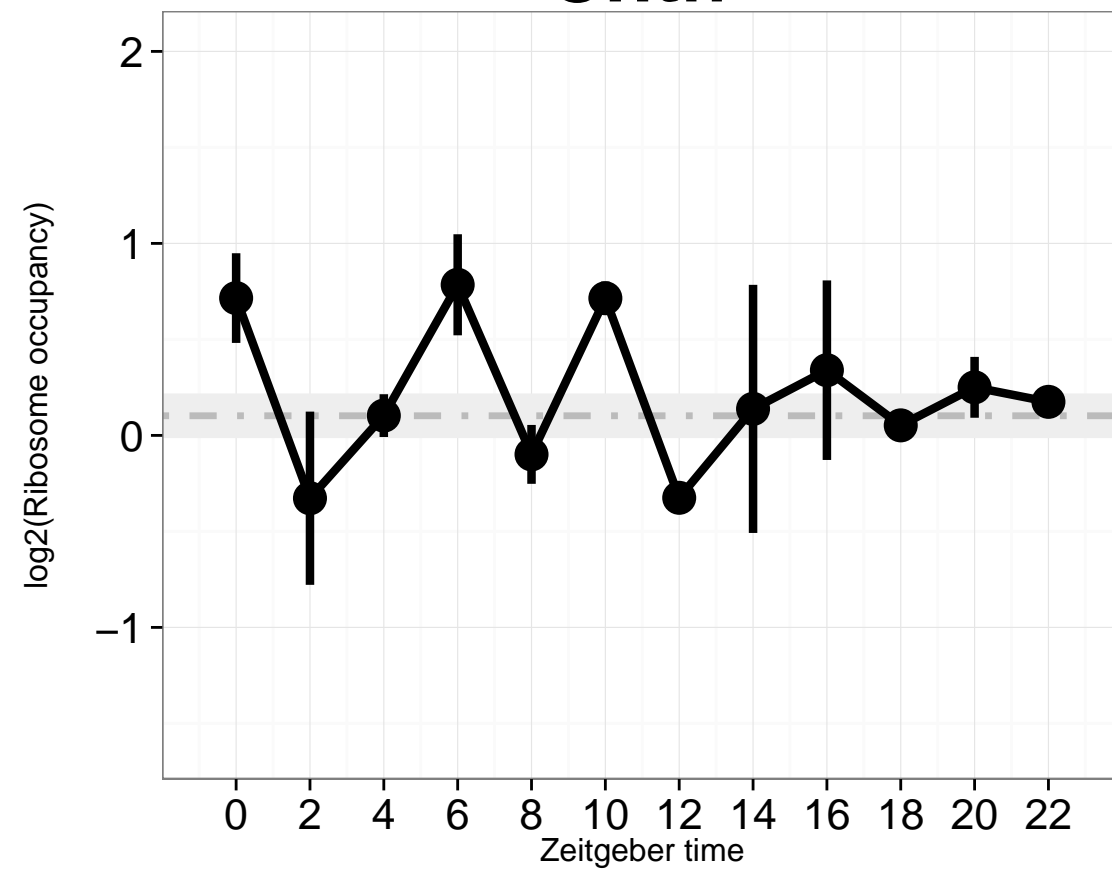

Supplement: SuppDataset_1.zip [file Cntfr_set_C.pdf › Supplemental Dataset 1/C-mRNA_nonrhythm_translation_rhyth/Cntfr_set_C.pdf]

# Coa4

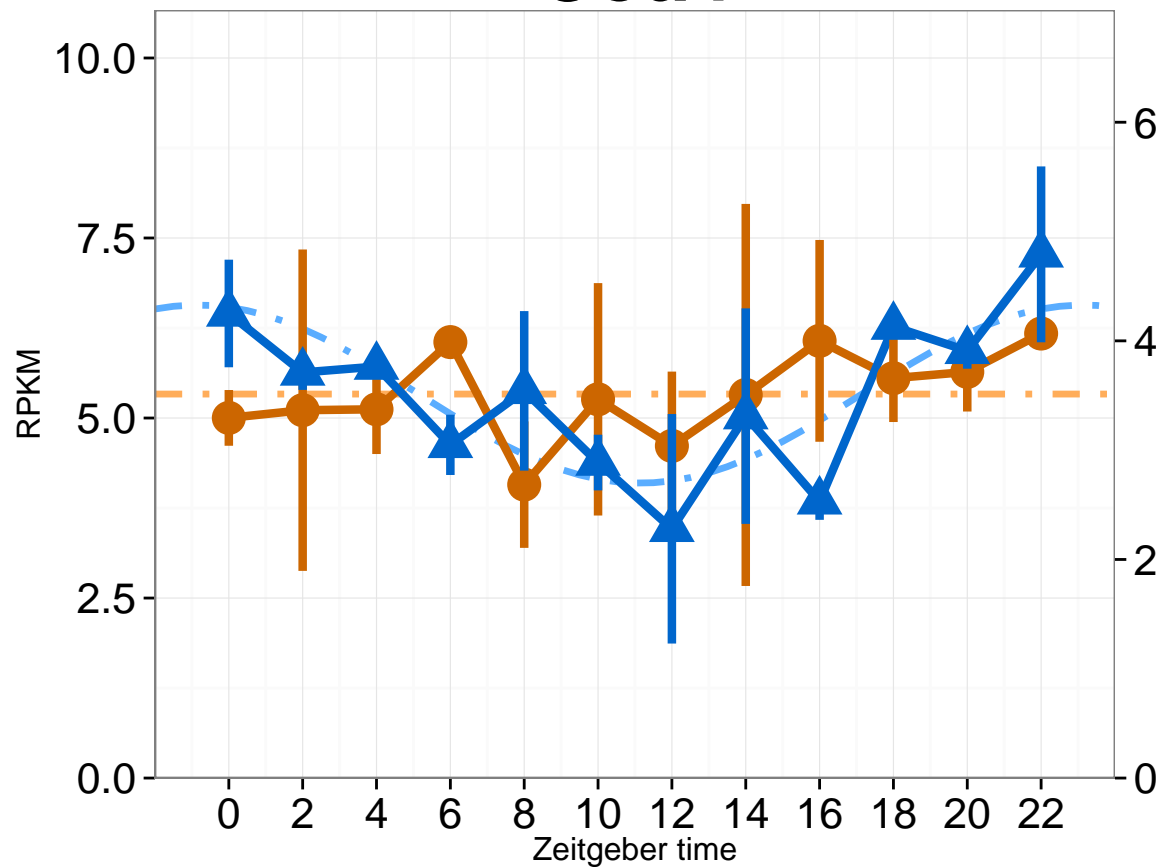

# Coa4

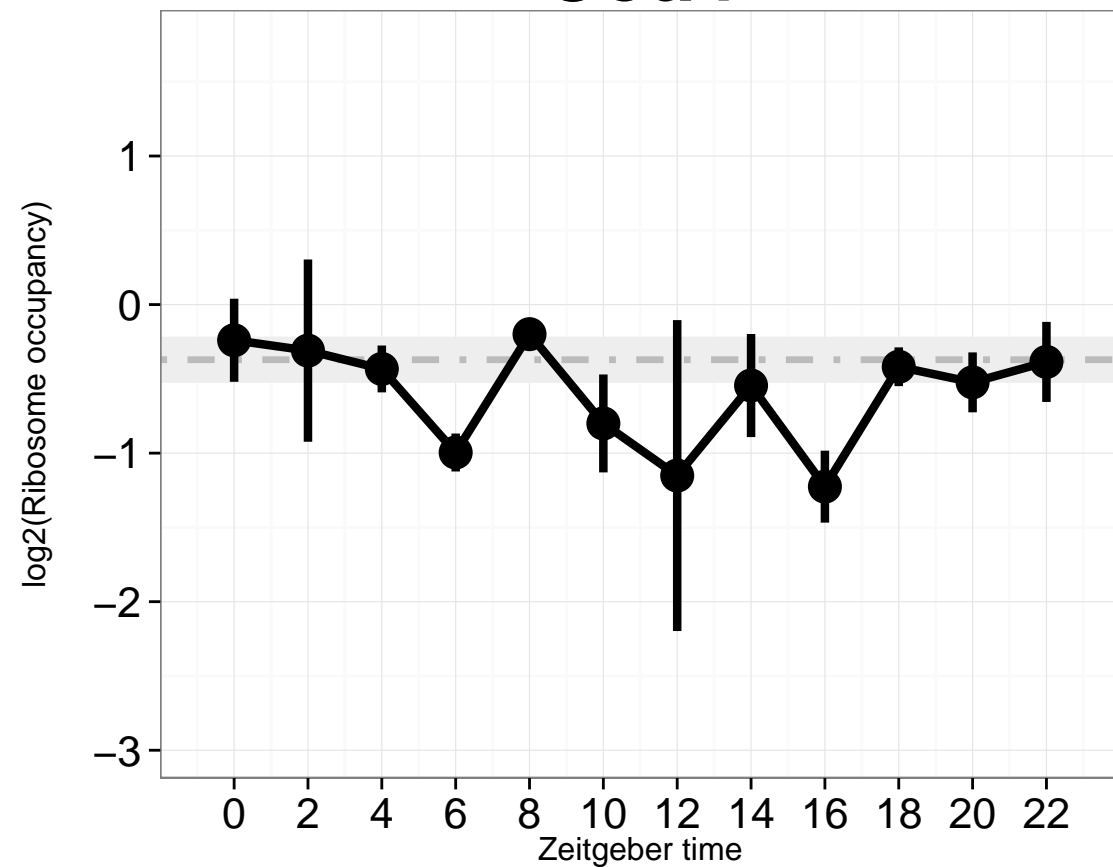

Supplement: SuppDataset_1.zip [file Coa4_set_C.pdf › Supplemental Dataset 1/C-mRNA_nonrhythm_translation_rhyth/Coa4_set_C.pdf]

# Col1a1

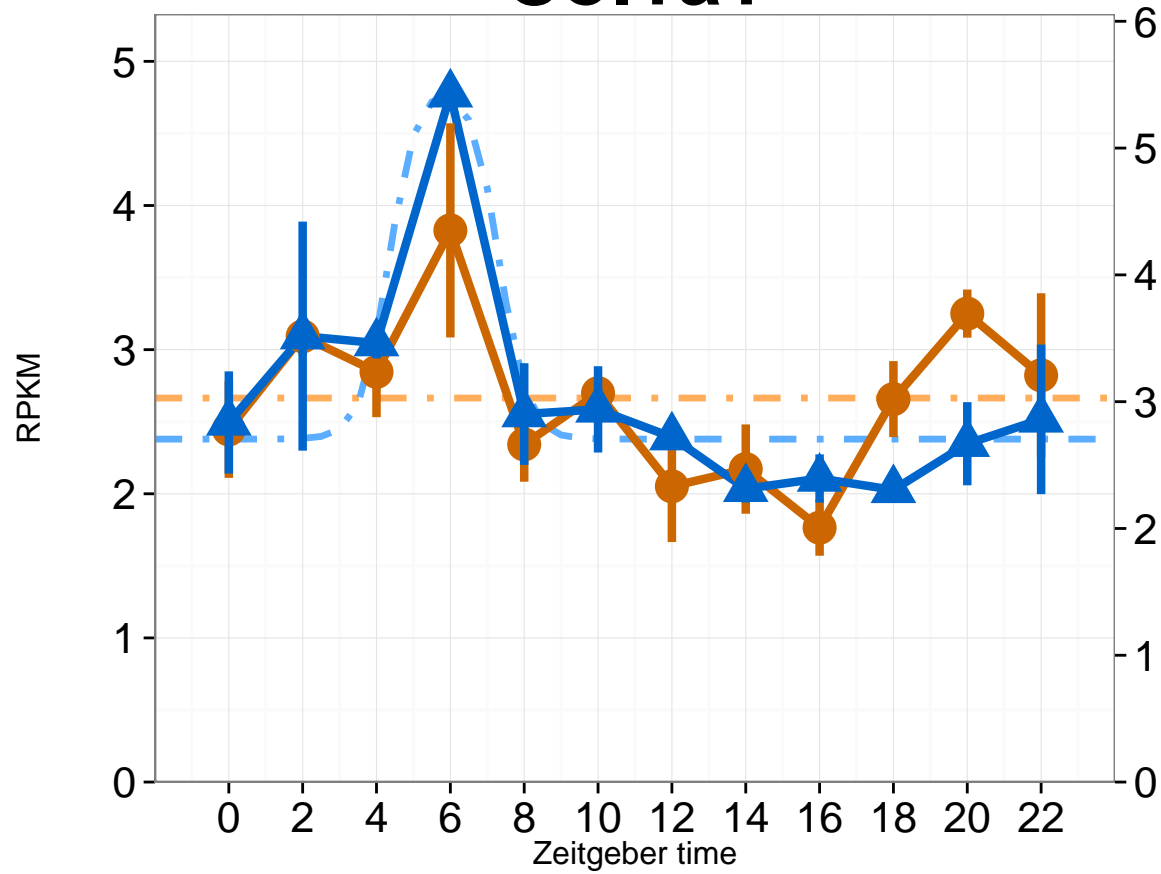

# Col1a1

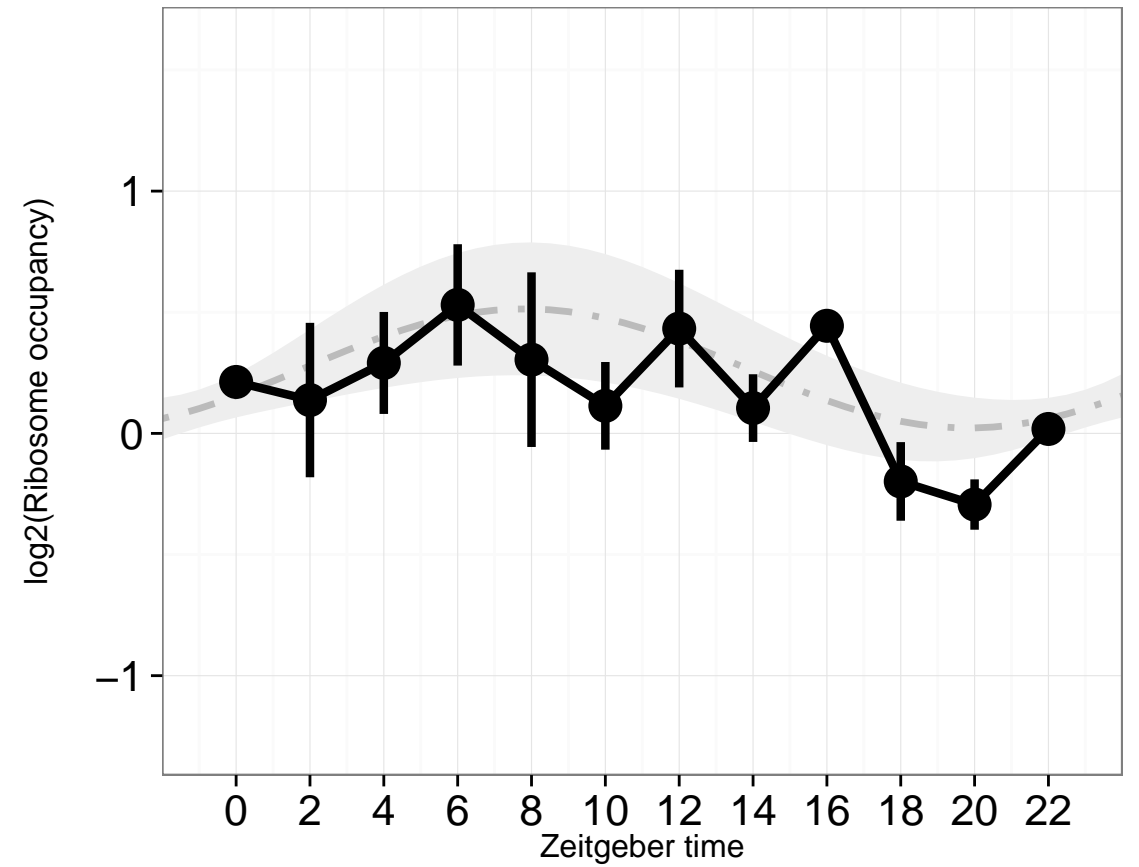

Supplement: SuppDataset_1.zip [file Col1a1_set_C.pdf › Supplemental Dataset 1/C-mRNA_nonrhythm_translation_rhyth/Col1a1_set_C.pdf]

# Col3a1

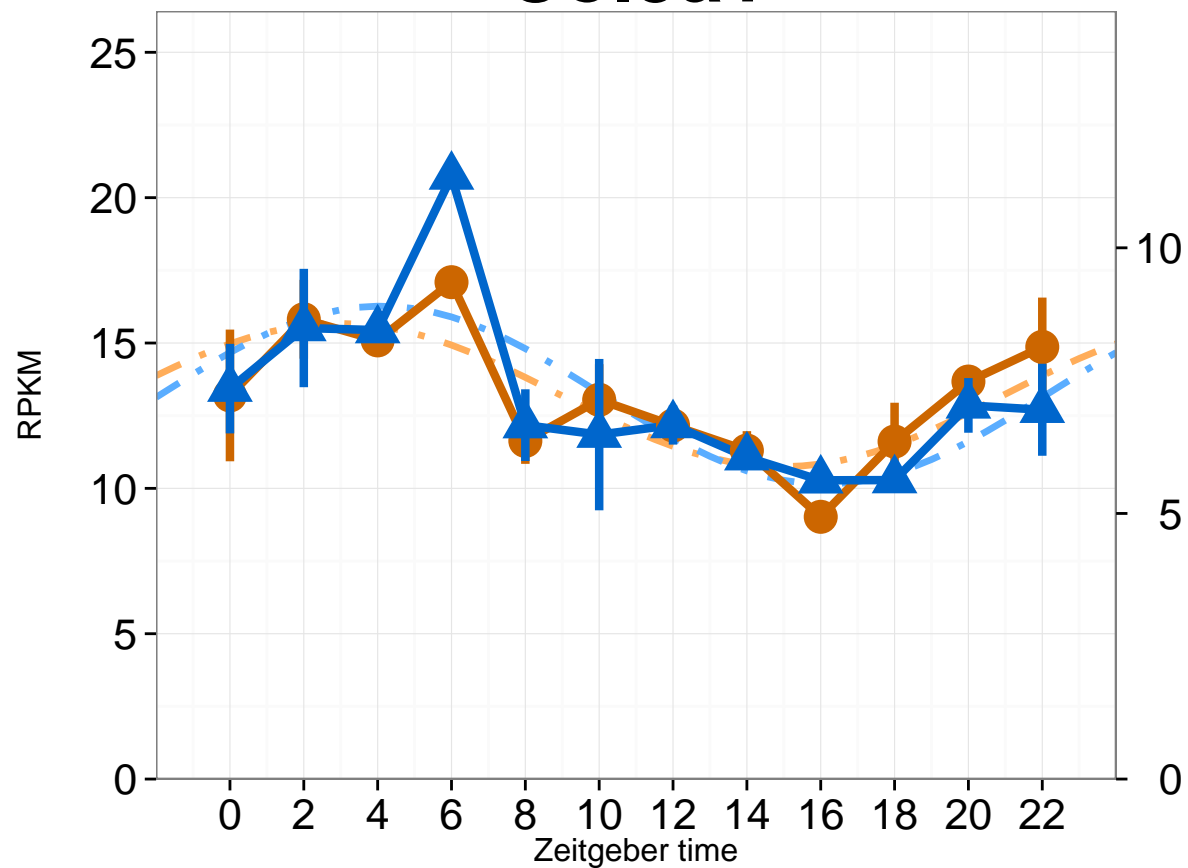

# Col3a1

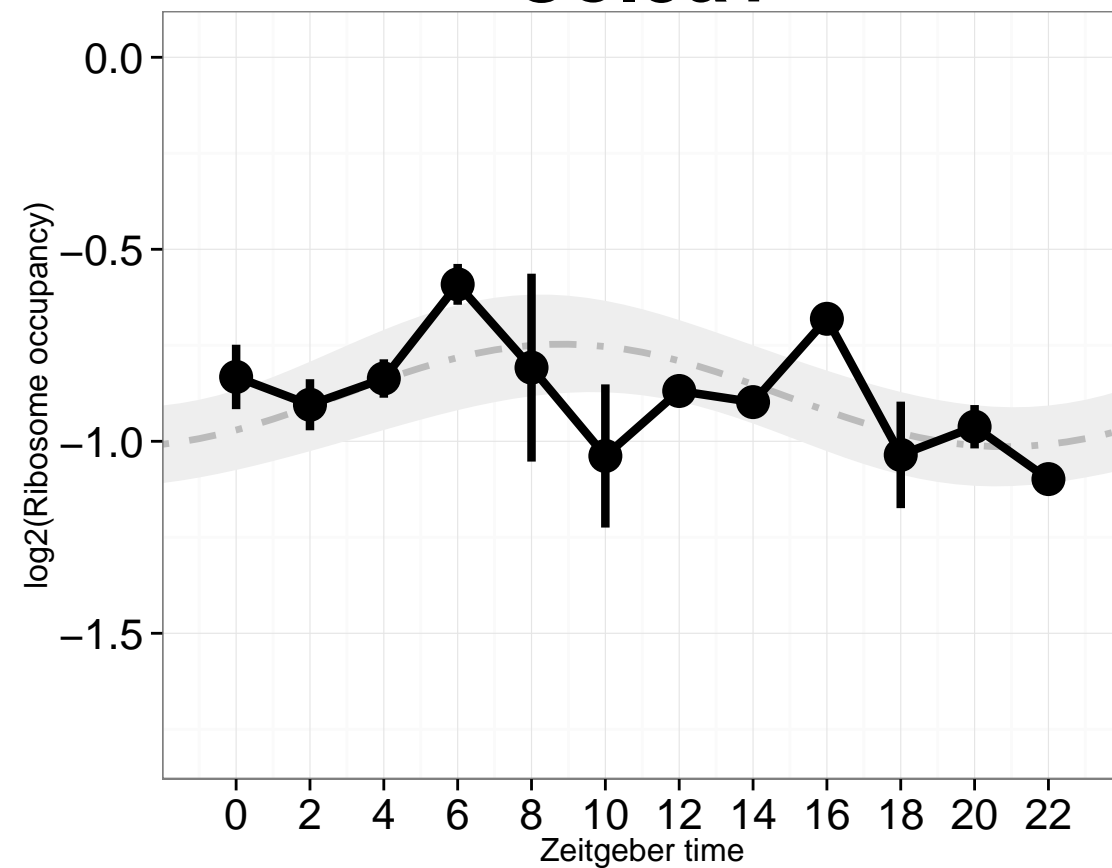

Supplement: SuppDataset_1.zip [file Col3a1_set_C.pdf › Supplemental Dataset 1/C-mRNA_nonrhythm_translation_rhyth/Col3a1_set_C.pdf]

# Col5a2

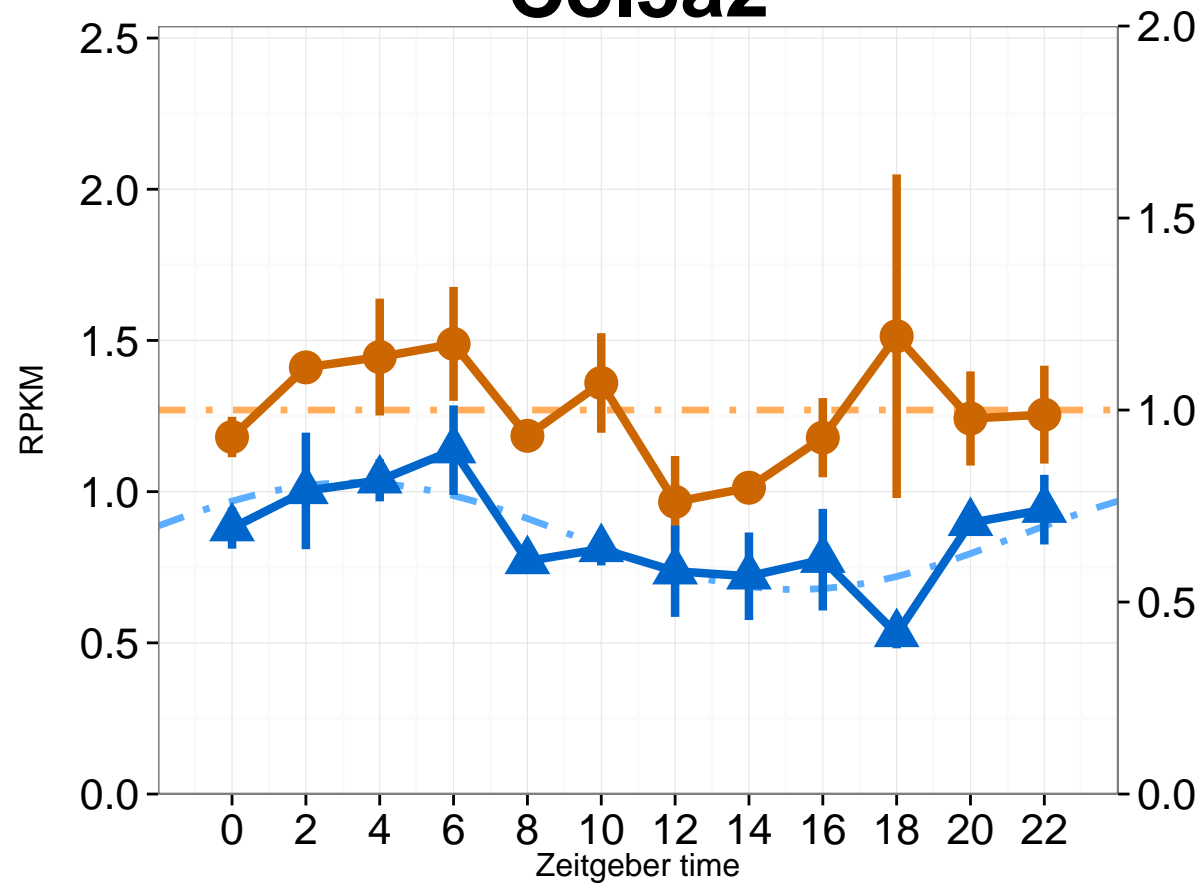

# Col5a2

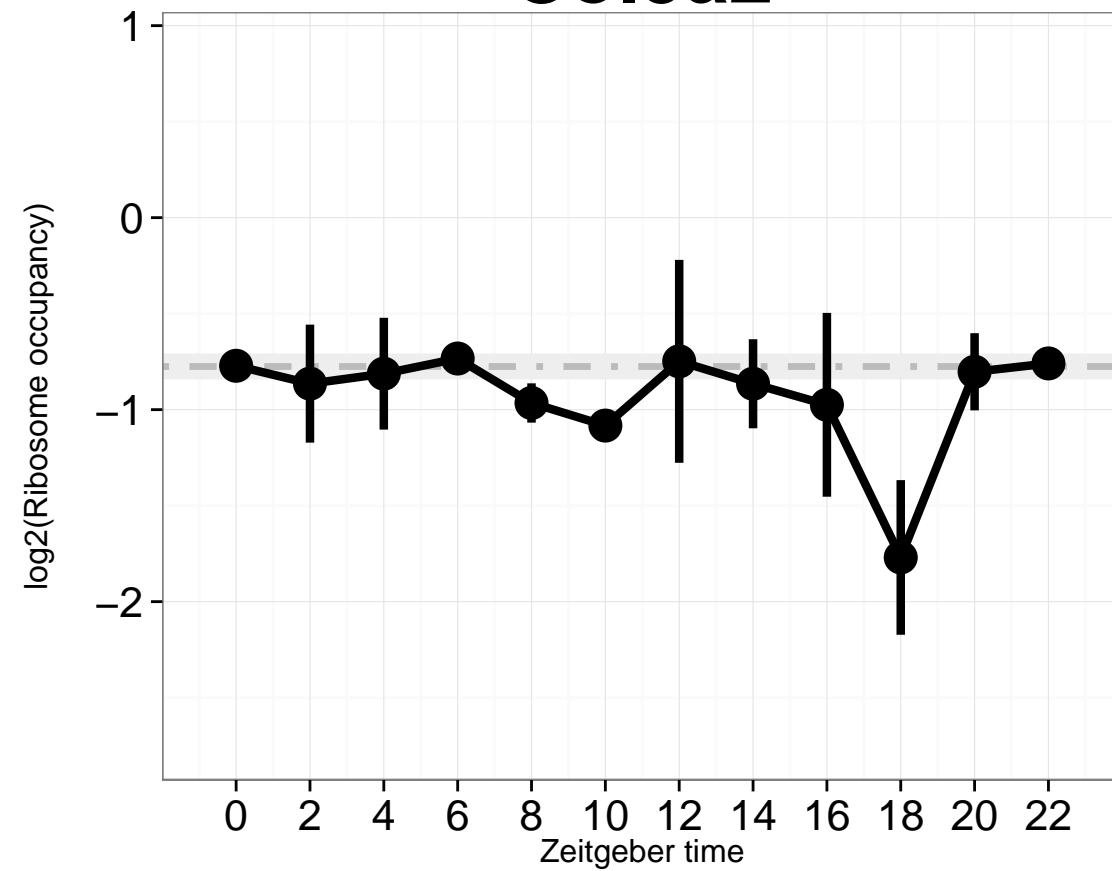

Supplement: SuppDataset_1.zip [file Col5a2_set_C.pdf › Supplemental Dataset 1/C-mRNA_nonrhythm_translation_rhyth/Col5a2_set_C.pdf]
