# Supplementary figures and images for: Ribosome profiling reveals the rhythmic liver translatome and circadian clock regulation by upstream open reading frames (part 6 of 113)
Source: HighWire-hosted journal article supplement (doi:10.1101/gr.195404.115), 2015-10-20

# Ammecr1

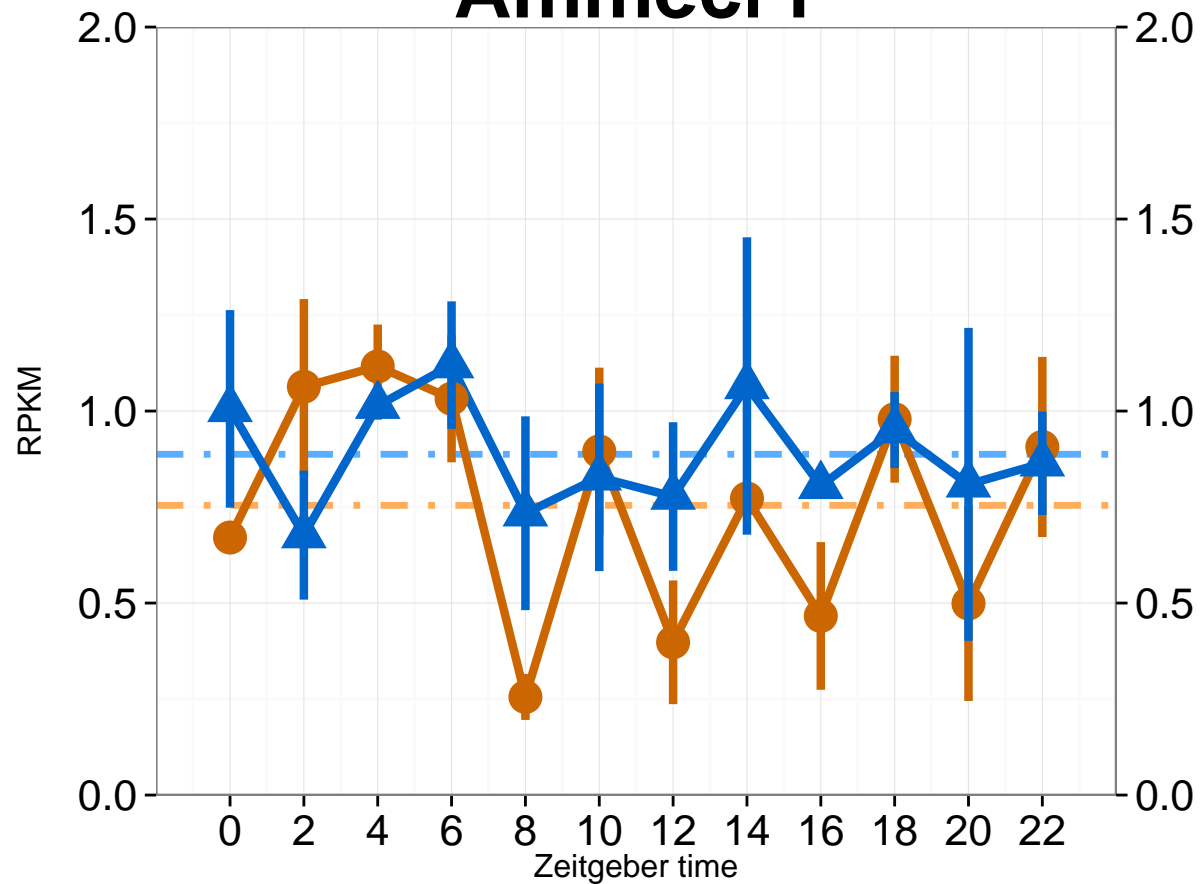

# Ammecr1

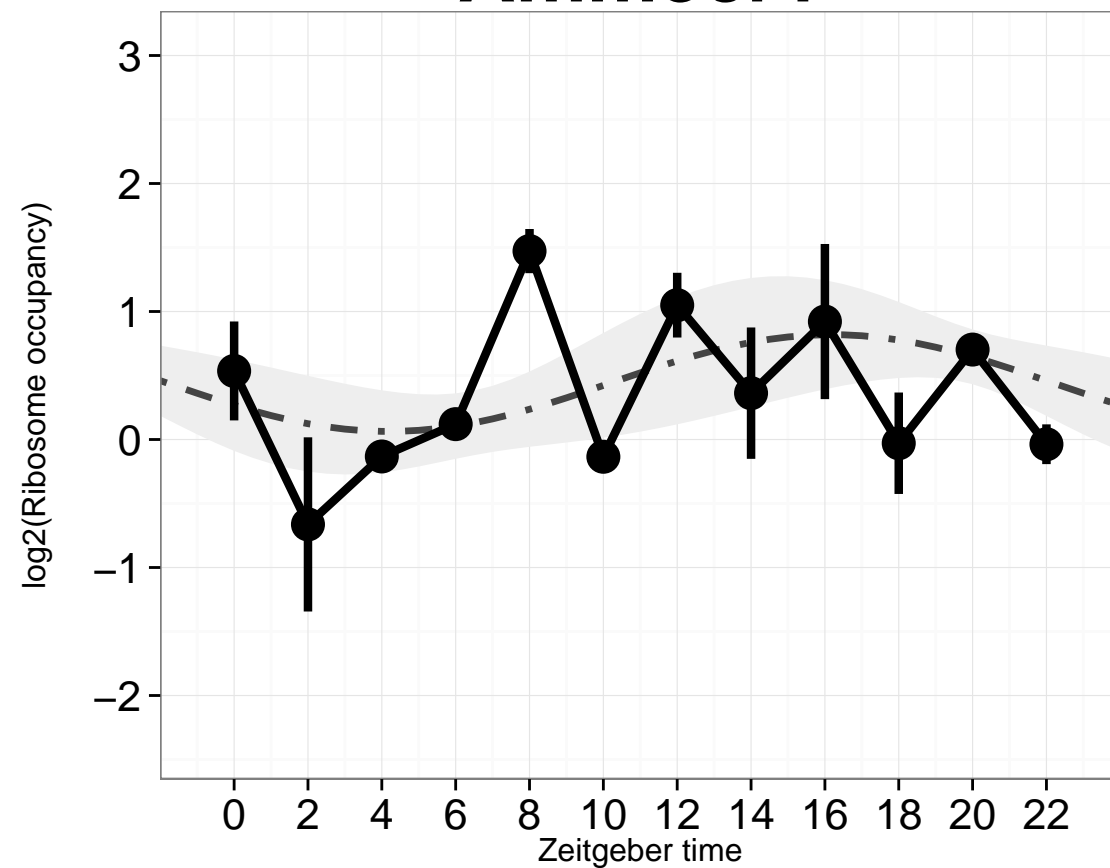

Supplement: SuppDataset_1.zip [file Ammecr1_set_A.pdf › Supplemental Dataset 1/A-mRNA_nonrhyth_translation_nonrhyth/Ammecr1_set_A.pdf]

## Ammecr1l

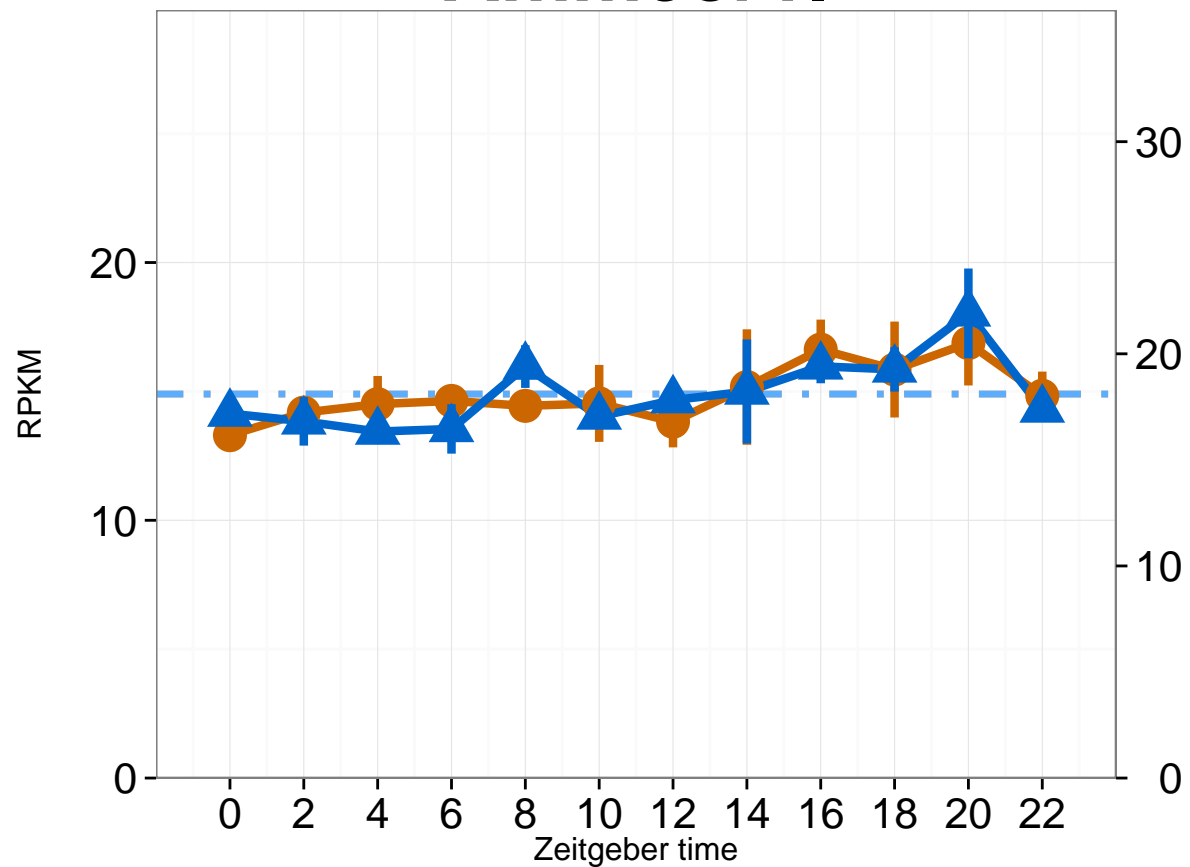

## Ammecr1l

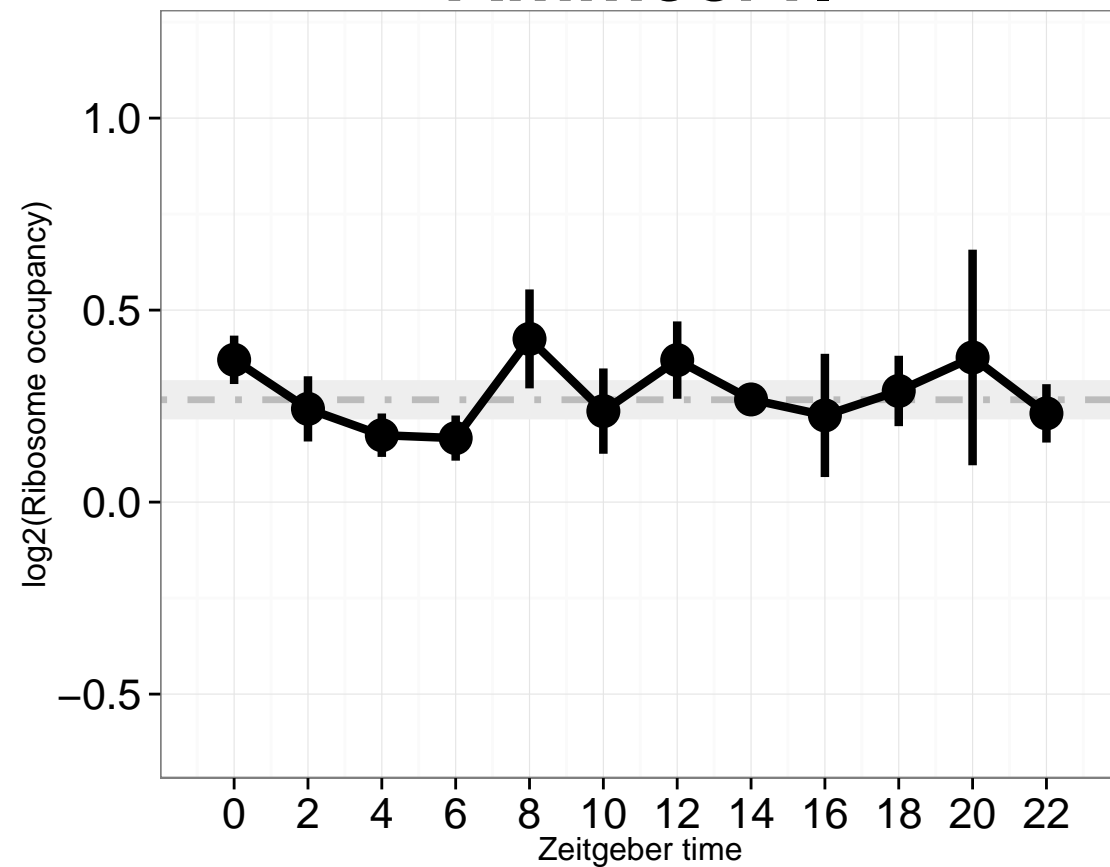

Supplement: SuppDataset_1.zip [file Ammecr1l_set_A.pdf › Supplemental Dataset 1/A-mRNA_nonrhyth_translation_nonrhyth/Ammecr1l_set_A.pdf]

# Amot

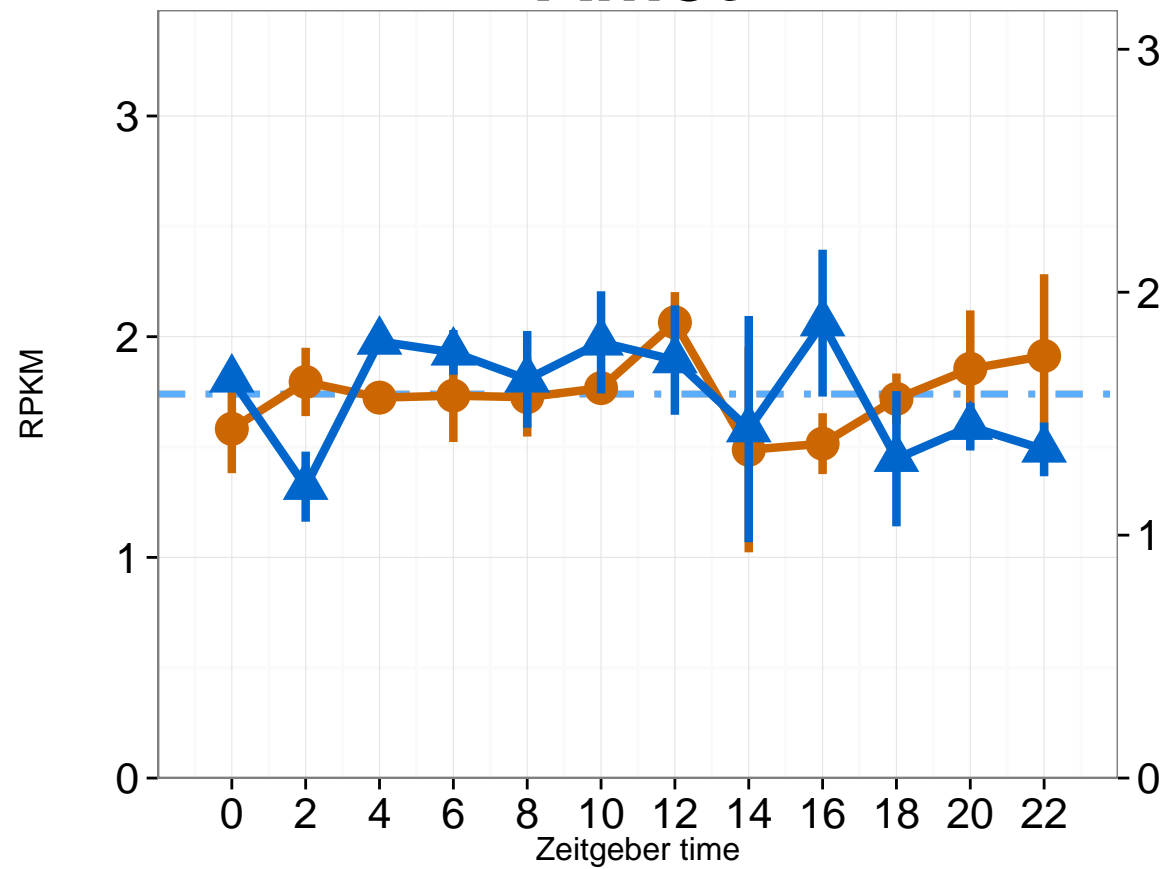

# Amot

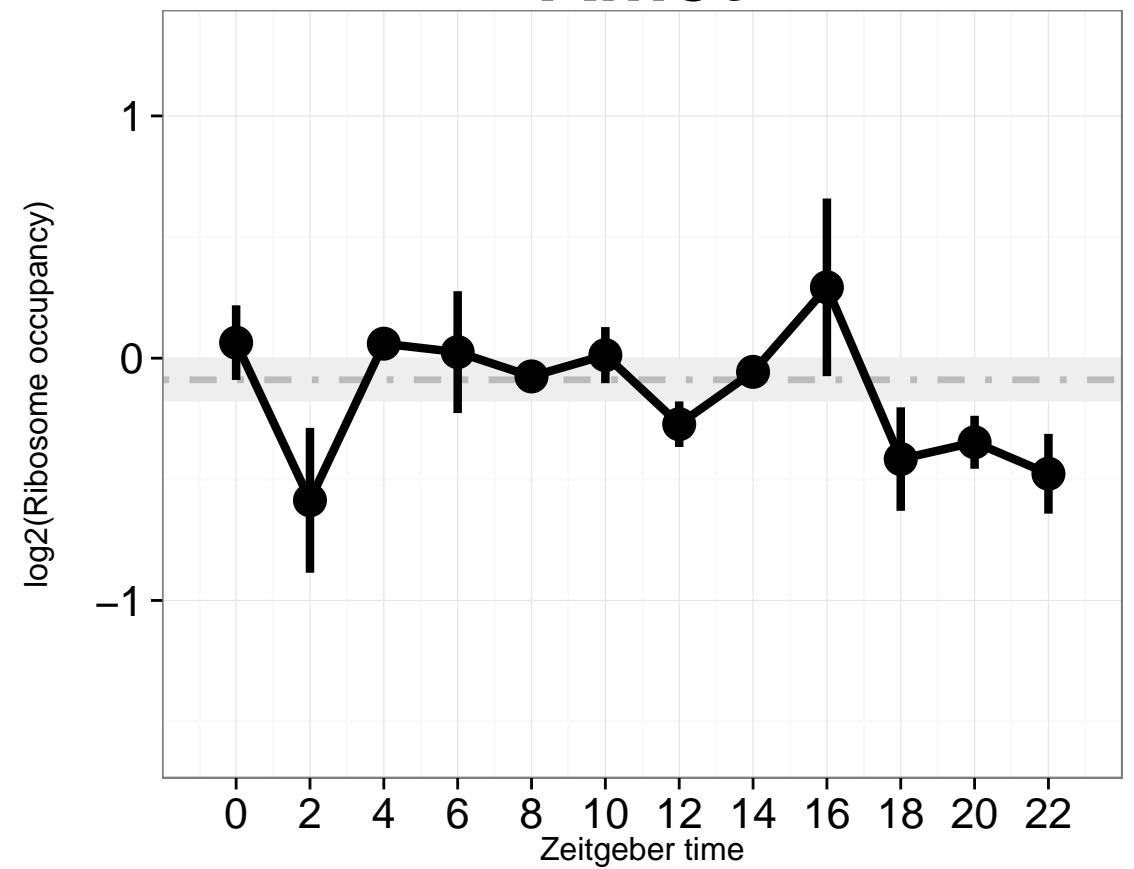

Supplement: SuppDataset_1.zip [file Amot_set_A.pdf › Supplemental Dataset 1/A-mRNA_nonrhyth_translation_nonrhyth/Amot_set_A.pdf]

## Amotl1

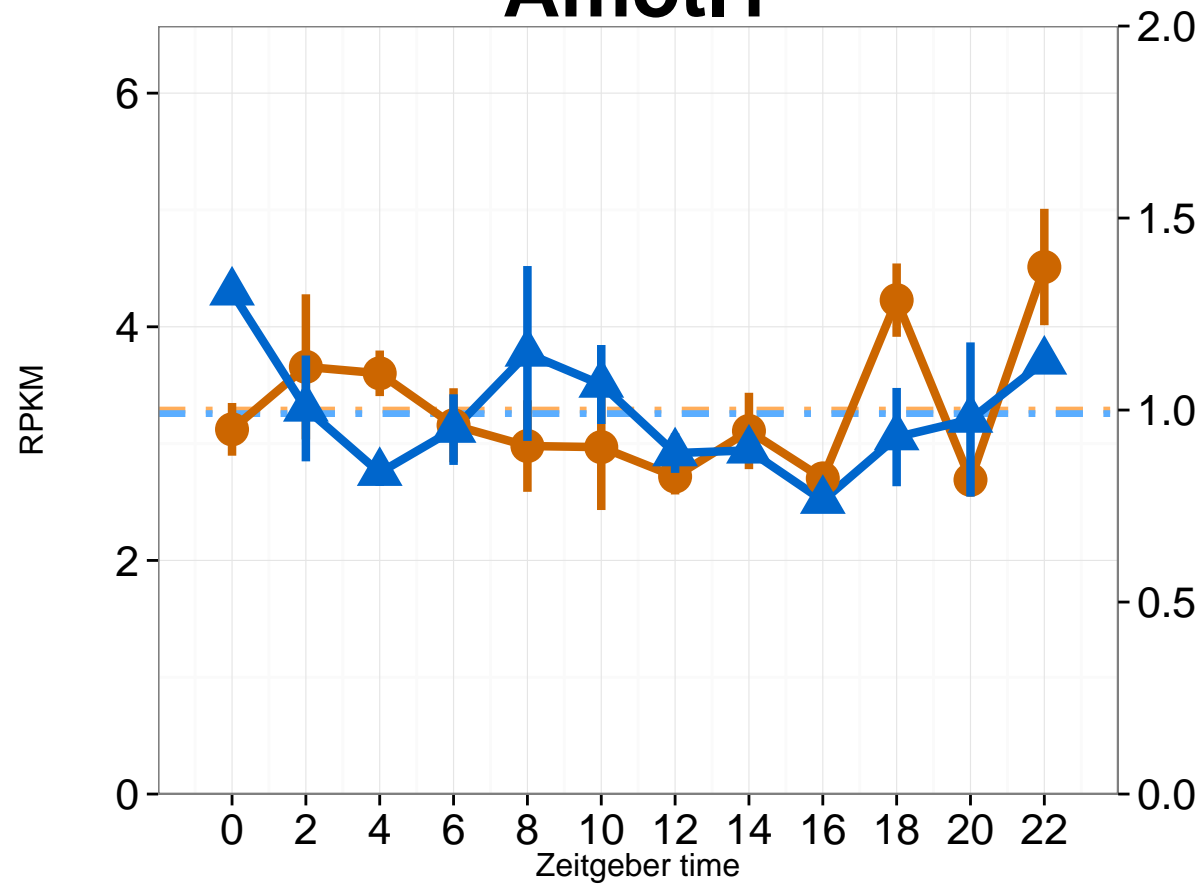

## Amotl1

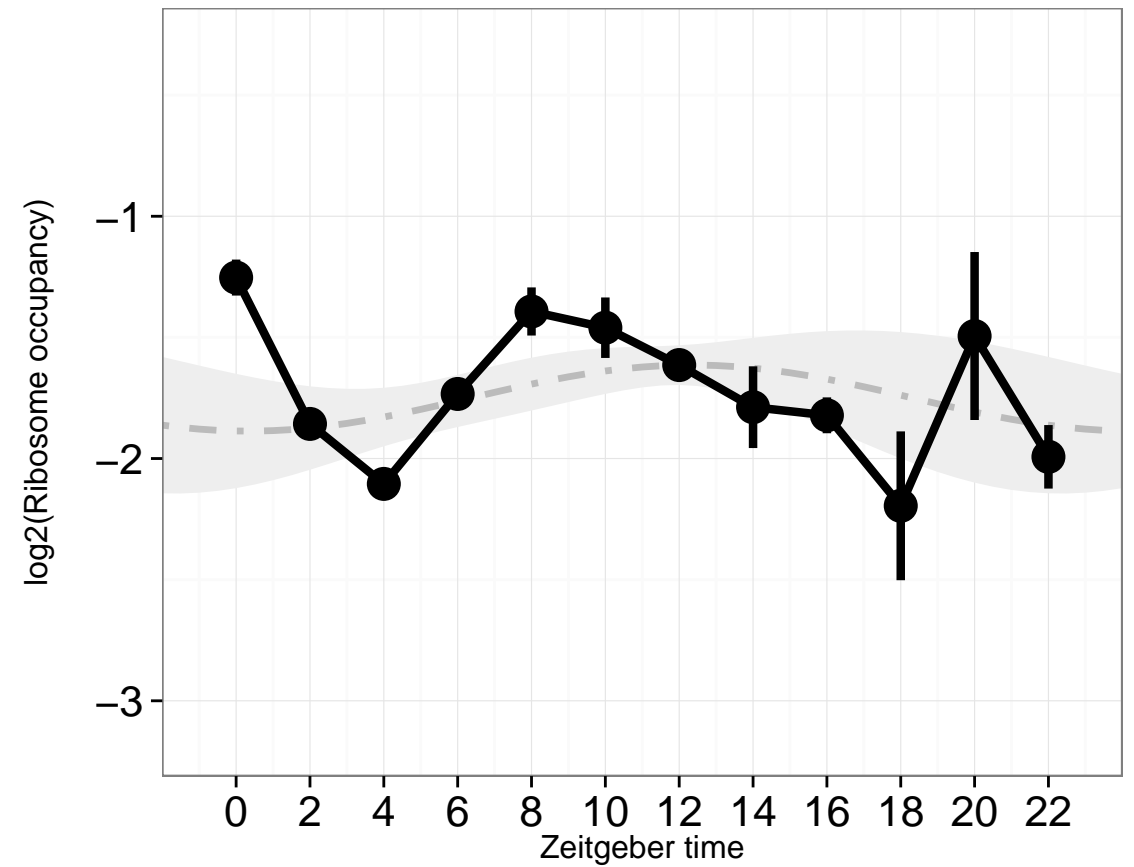

Supplement: SuppDataset_1.zip [file Amotl1_set_A.pdf › Supplemental Dataset 1/A-mRNA_nonrhyth_translation_nonrhyth/Amotl1_set_A.pdf]

## Ampd2

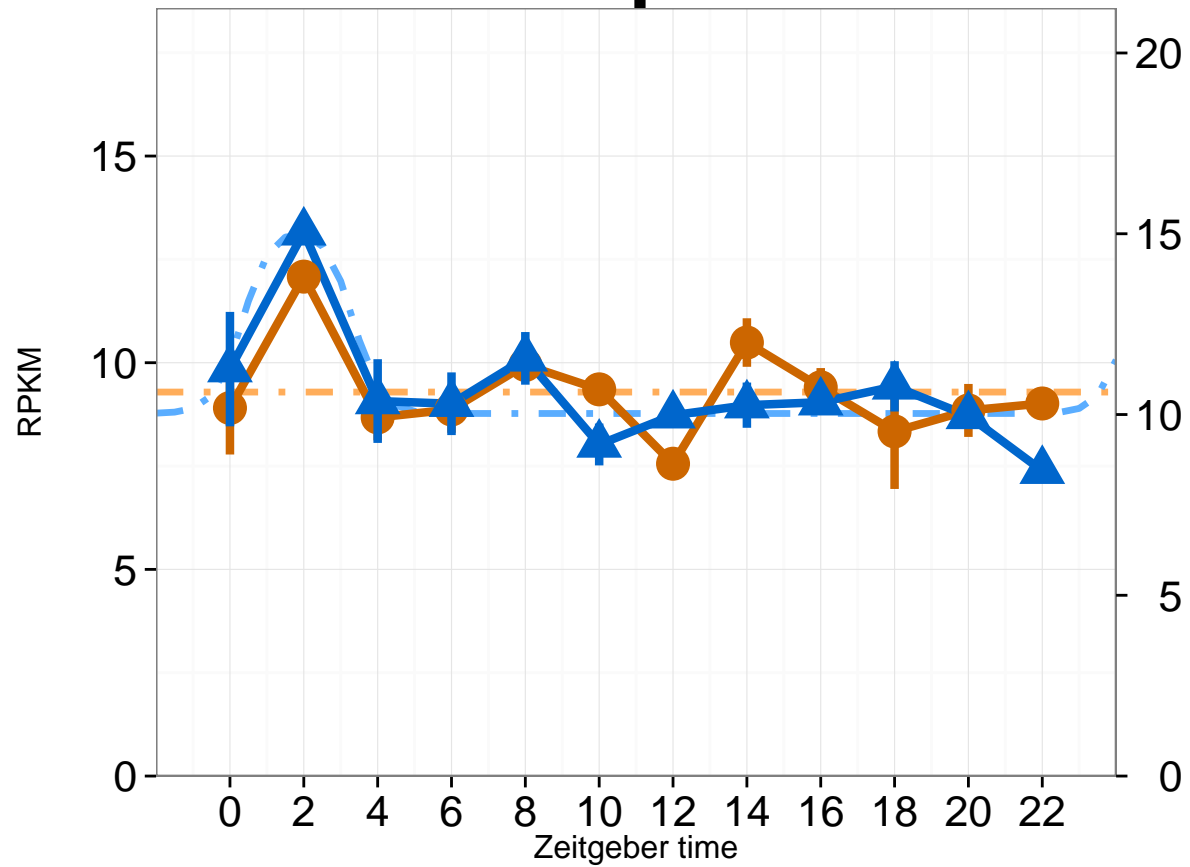

## Ampd2

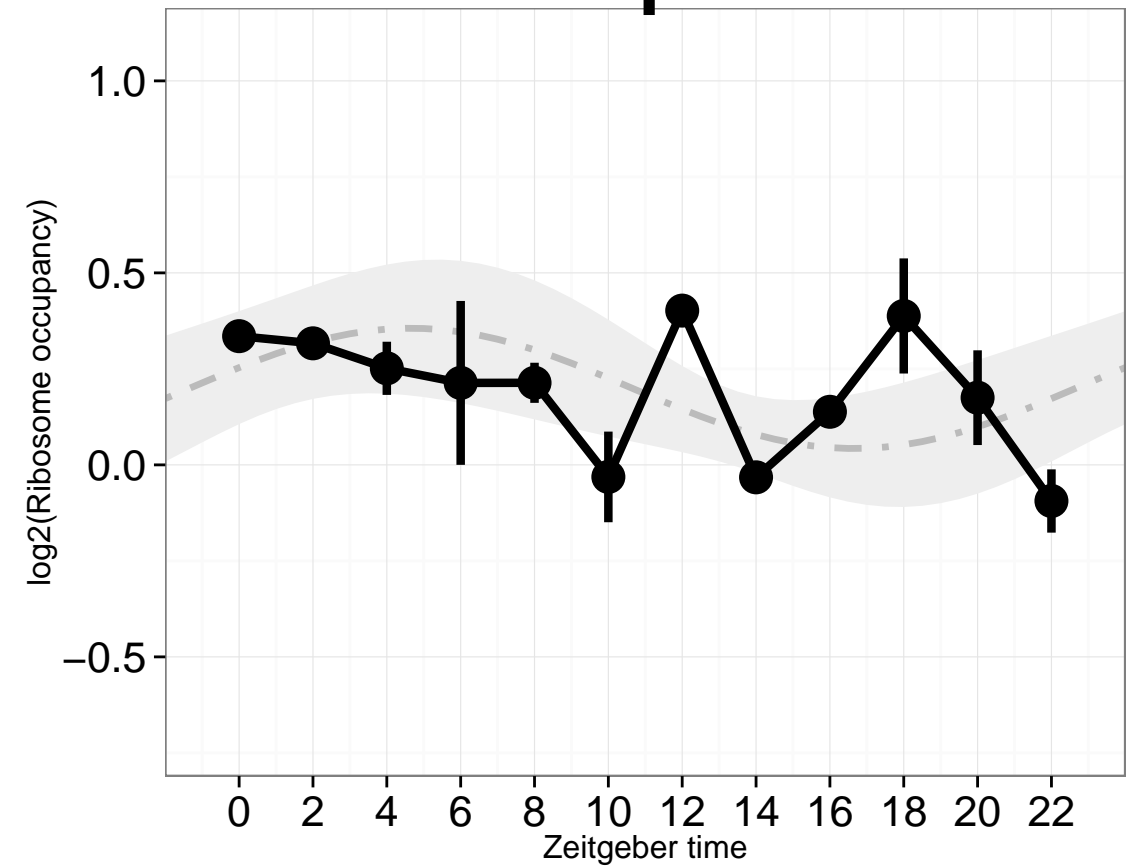

Supplement: SuppDataset_1.zip [file Ampd2_set_A.pdf › Supplemental Dataset 1/A-mRNA_nonrhyth_translation_nonrhyth/Ampd2_set_A.pdf]

# Ampd3

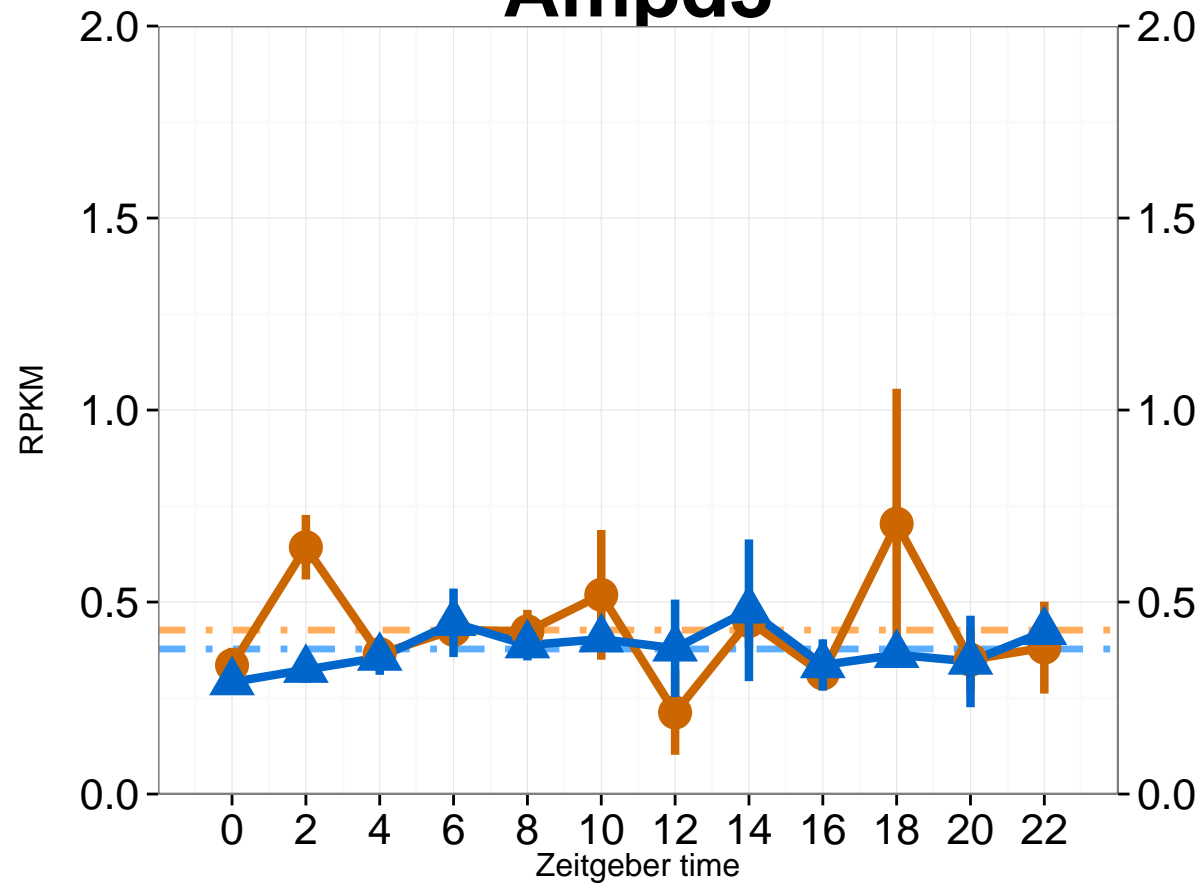

# Ampd3

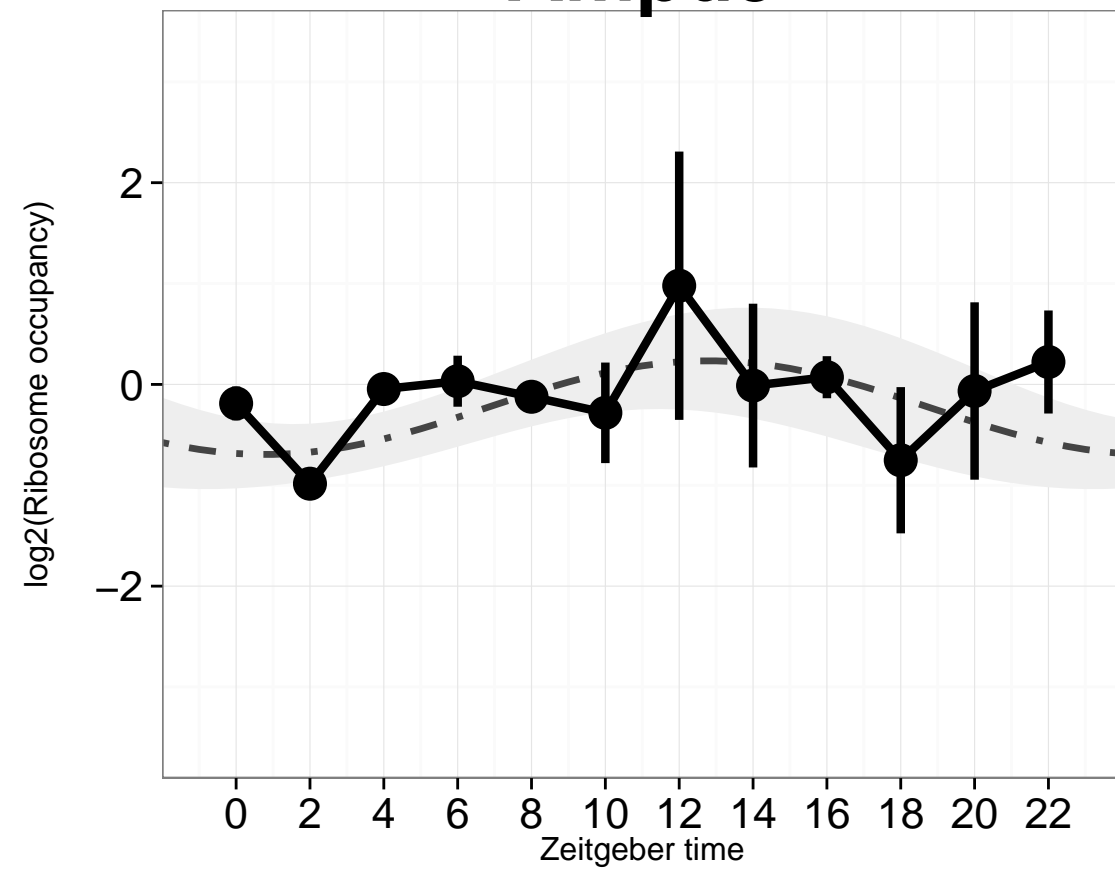

Supplement: SuppDataset_1.zip [file Ampd3_set_A.pdf › Supplemental Dataset 1/A-mRNA_nonrhyth_translation_nonrhyth/Ampd3_set_A.pdf]

# Amy1

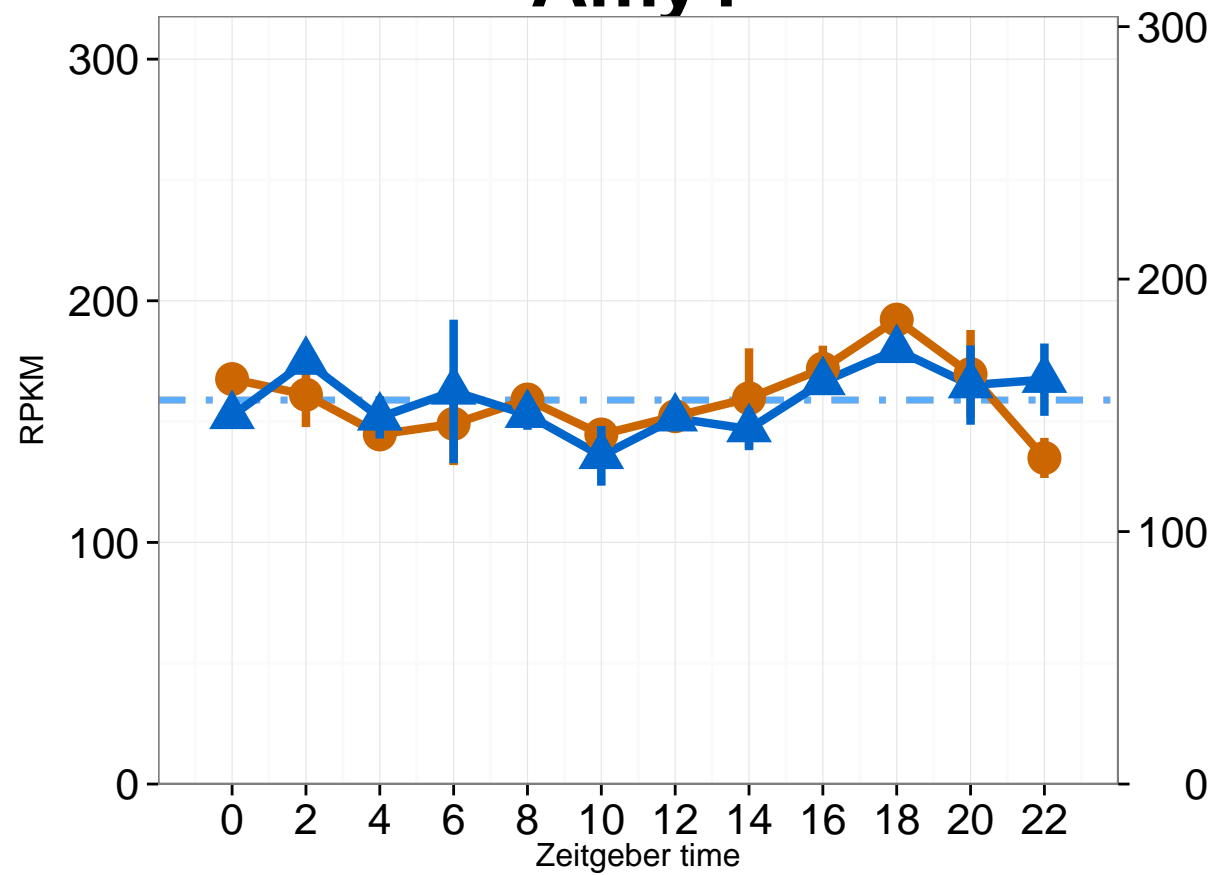

# Amy1

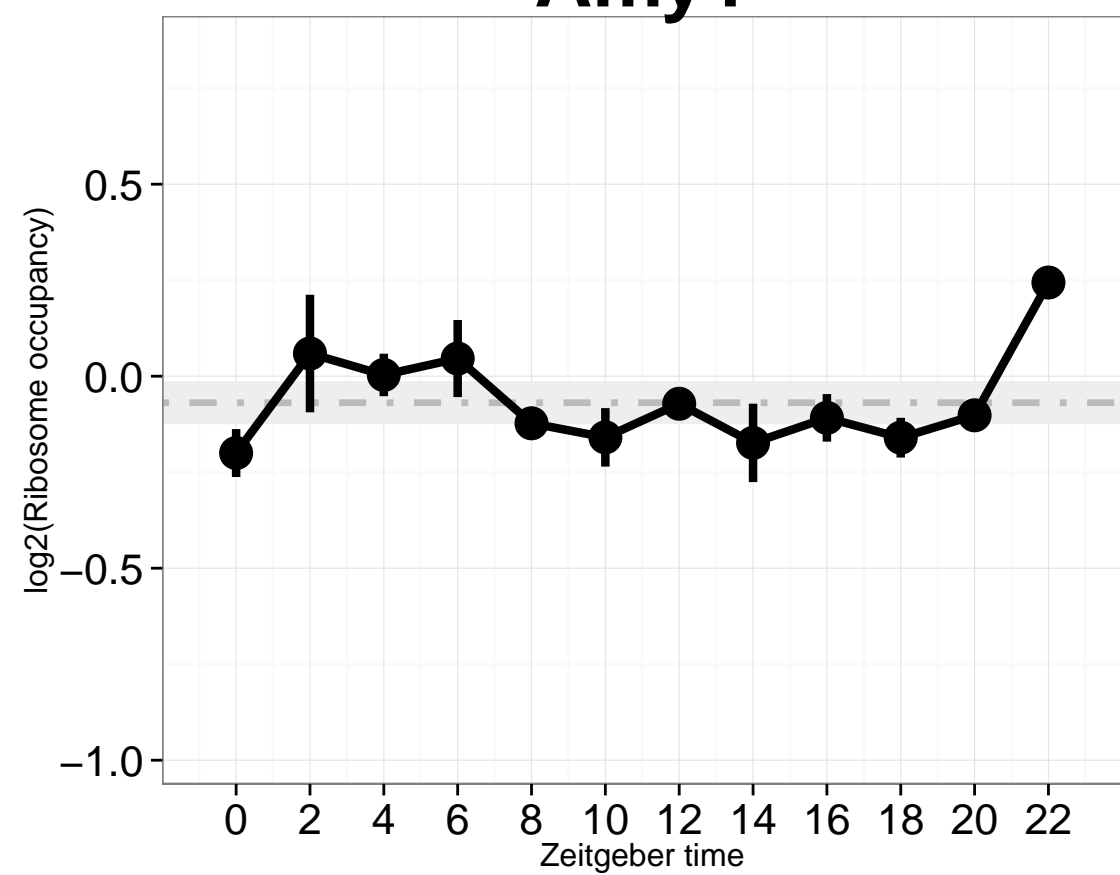

Supplement: SuppDataset_1.zip [file Amy1_set_A.pdf › Supplemental Dataset 1/A-mRNA_nonrhyth_translation_nonrhyth/Amy1_set_A.pdf]

# Amz2

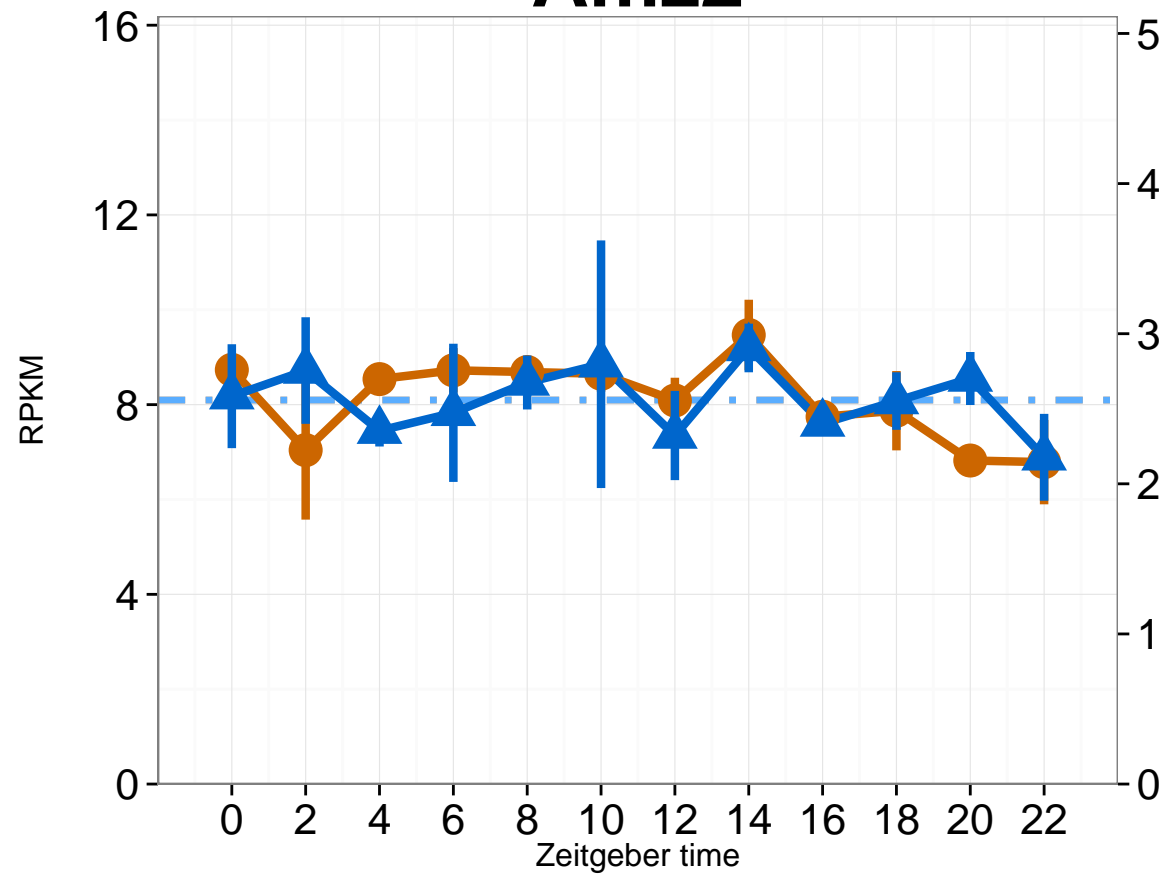

# Amz2

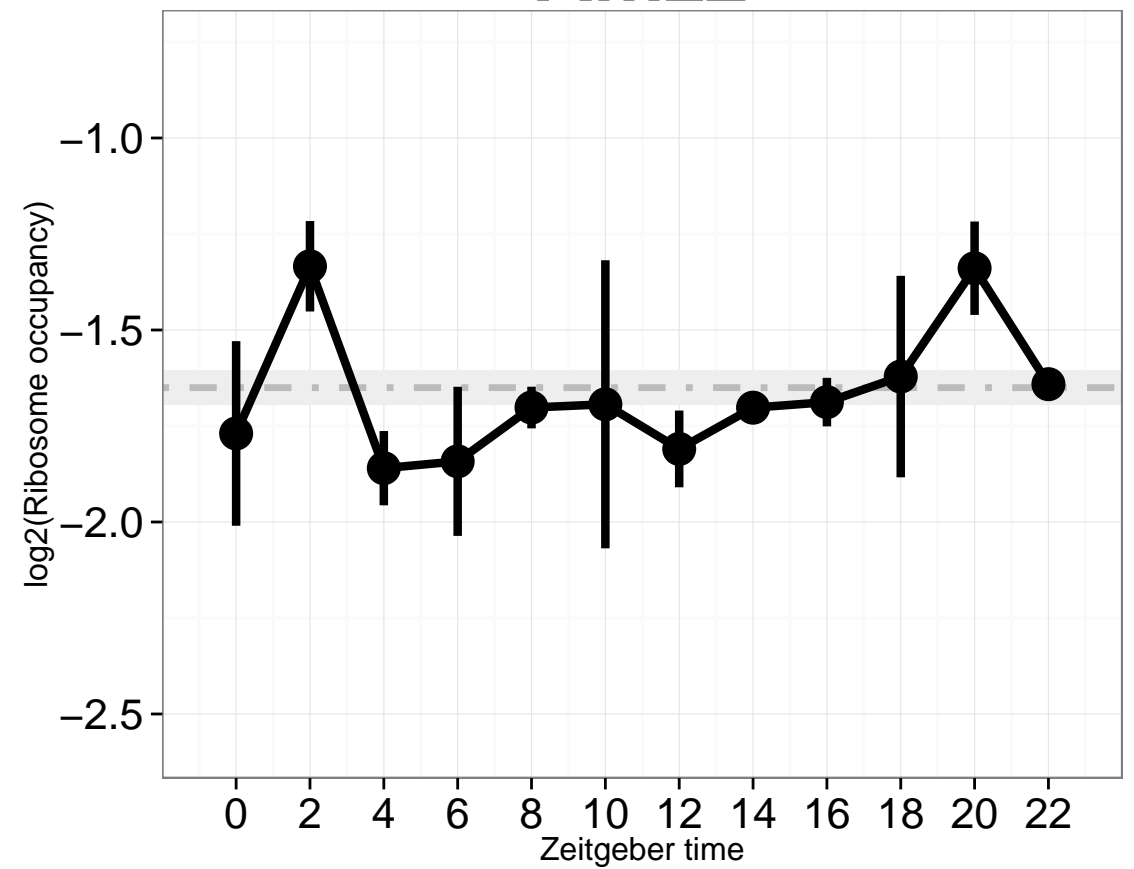

Supplement: SuppDataset_1.zip [file Amz2_set_A.pdf › Supplemental Dataset 1/A-mRNA_nonrhyth_translation_nonrhyth/Amz2_set_A.pdf]

# Anapc10

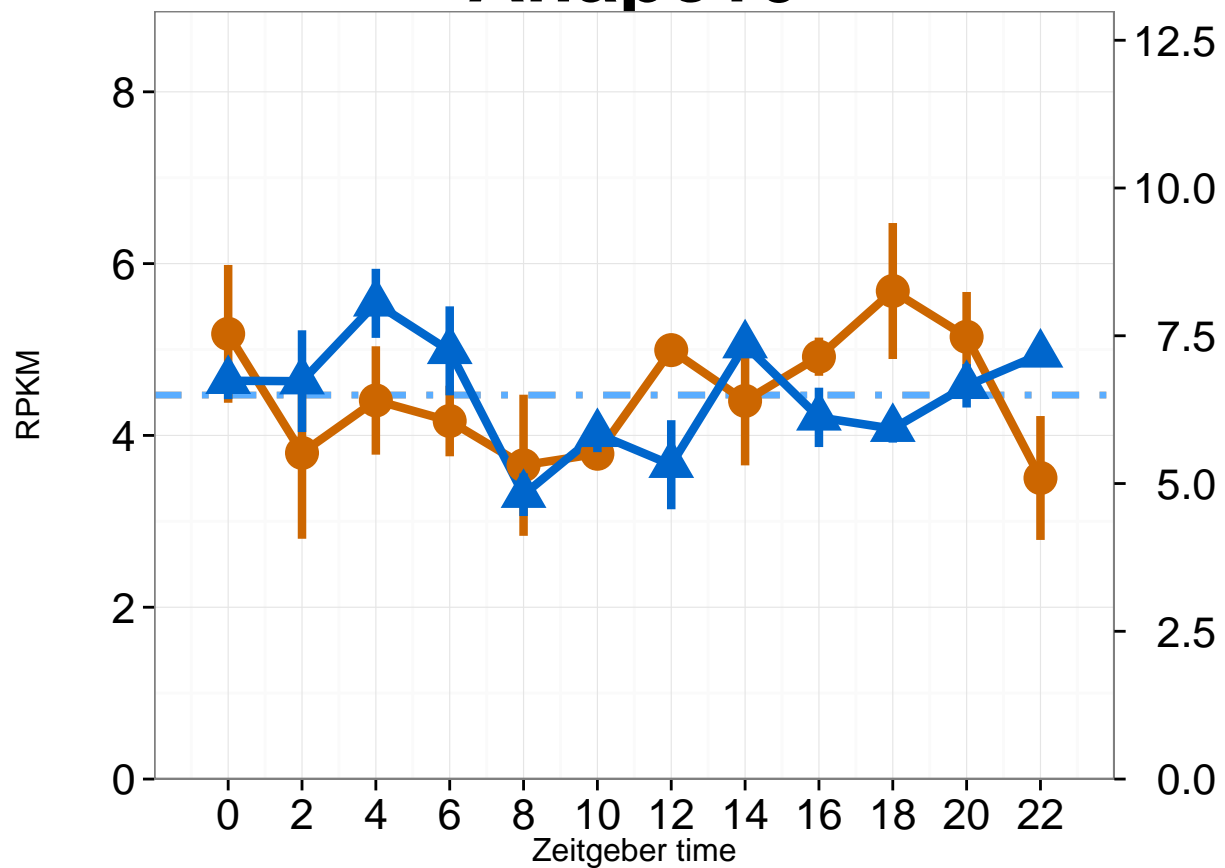

# Anapc10

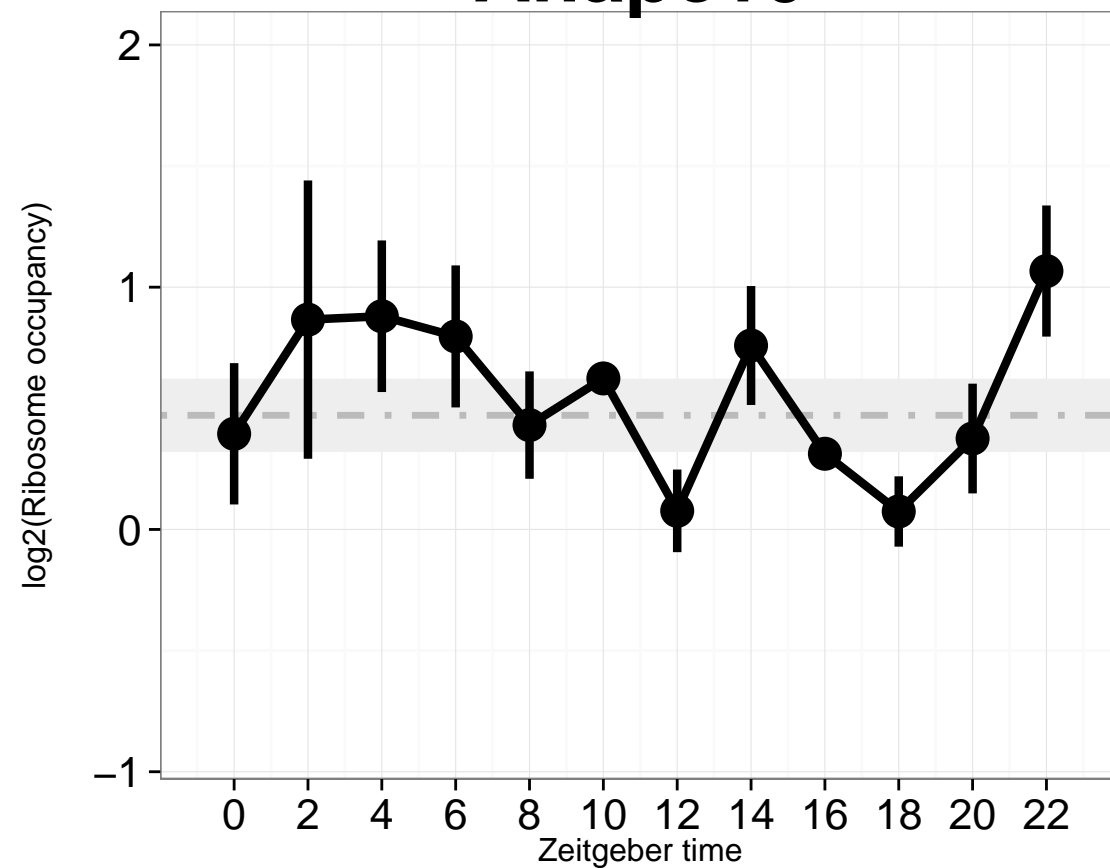

Supplement: SuppDataset_1.zip [file Anapc10_set_A.pdf › Supplemental Dataset 1/A-mRNA_nonrhyth_translation_nonrhyth/Anapc10_set_A.pdf]

# Anapc13

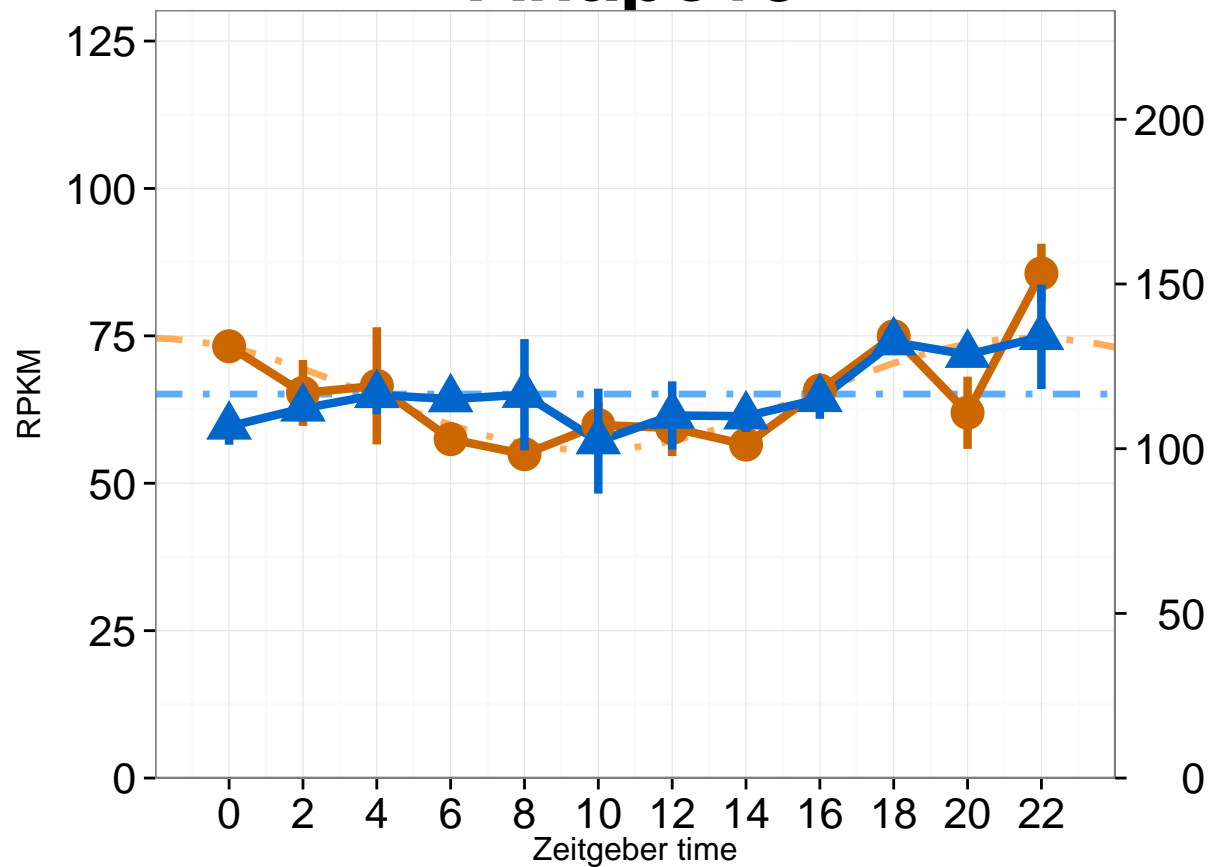

# Anapc13

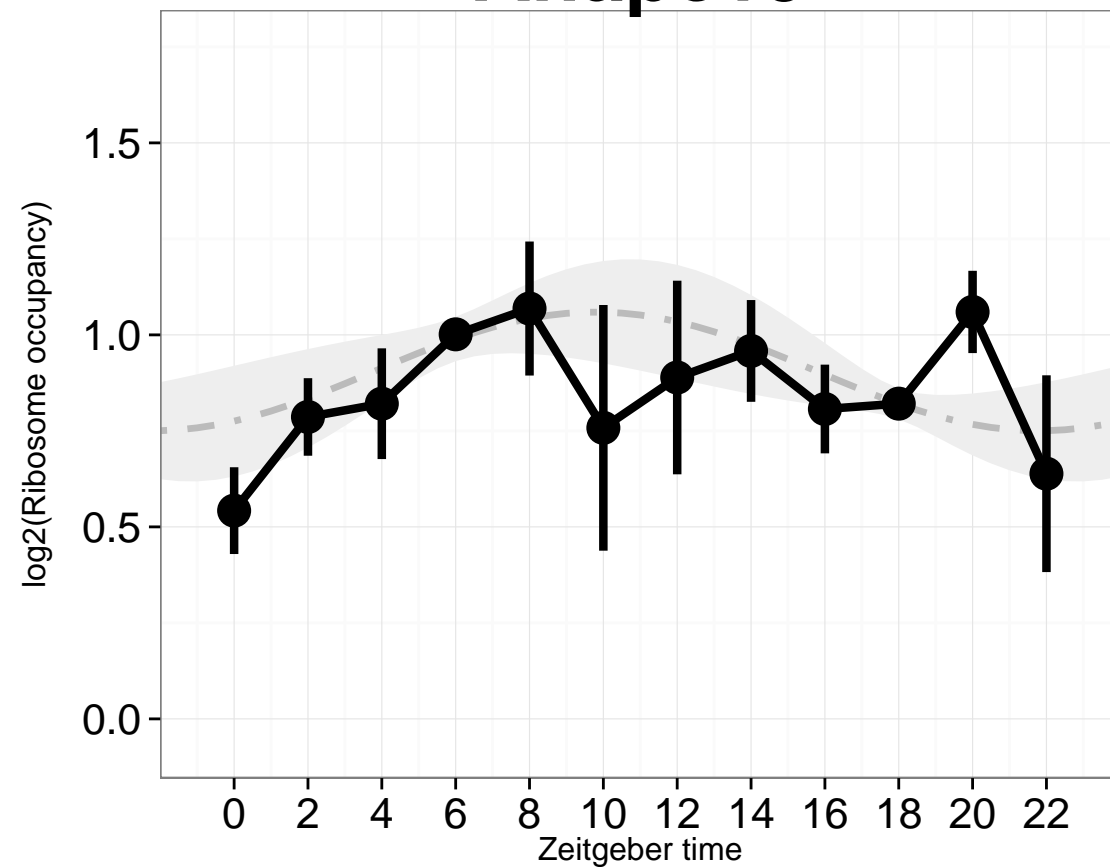

Supplement: SuppDataset_1.zip [file Anapc13_set_A.pdf › Supplemental Dataset 1/A-mRNA_nonrhyth_translation_nonrhyth/Anapc13_set_A.pdf]

## Anapc15

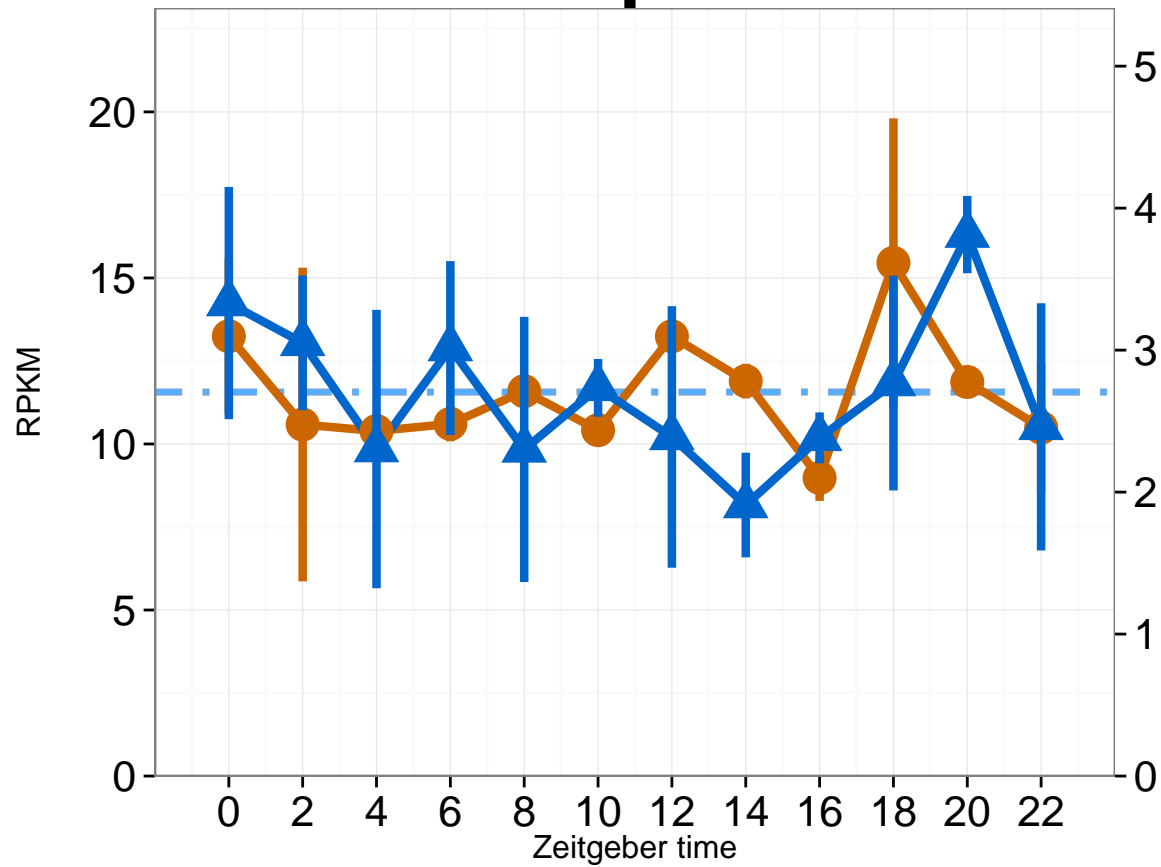

## Anapc15

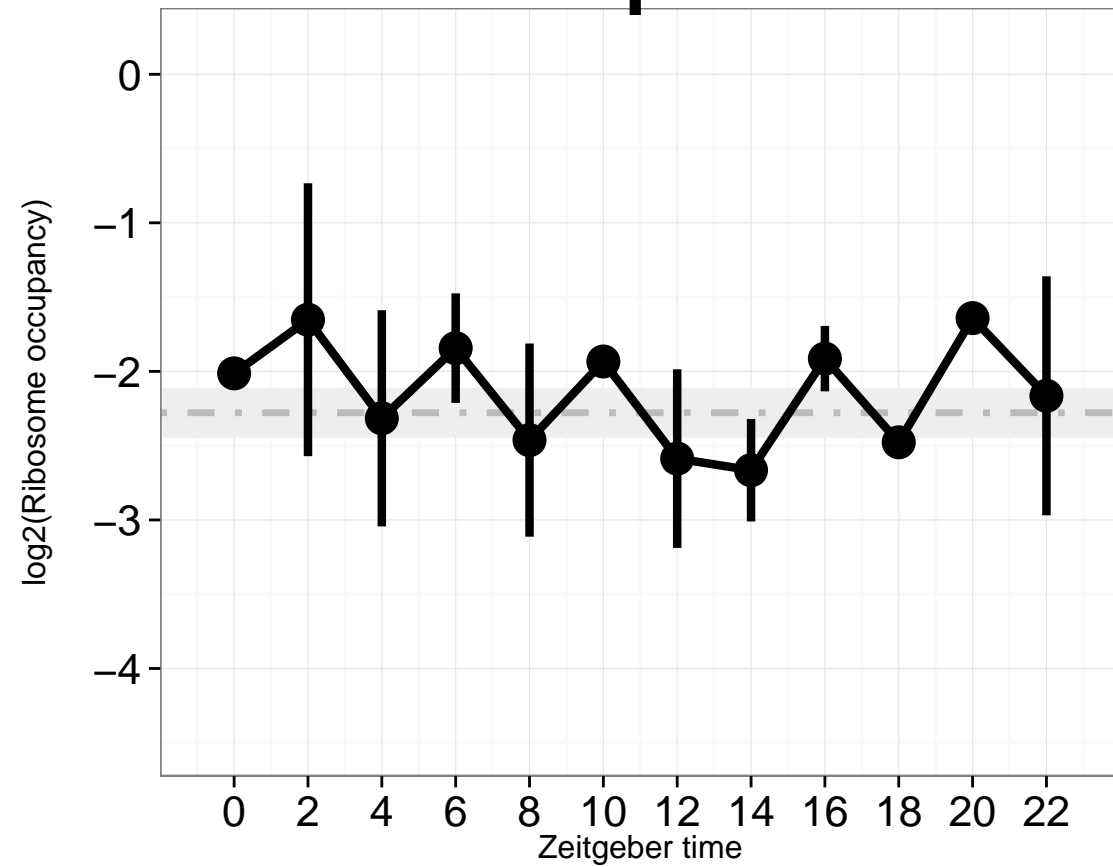

Supplement: SuppDataset_1.zip [file Anapc15_set_A.pdf › Supplemental Dataset 1/A-mRNA_nonrhyth_translation_nonrhyth/Anapc15_set_A.pdf]

## Anapc16

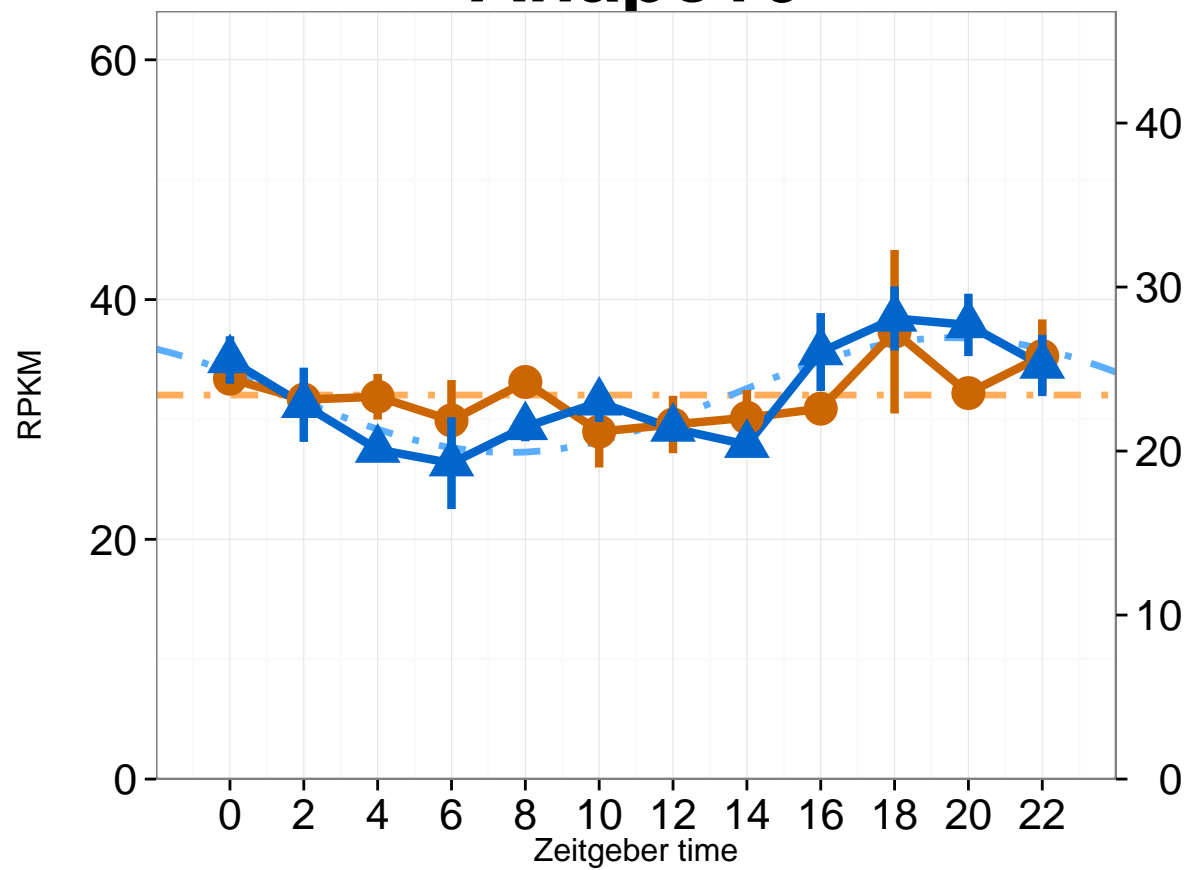

## Anapc16

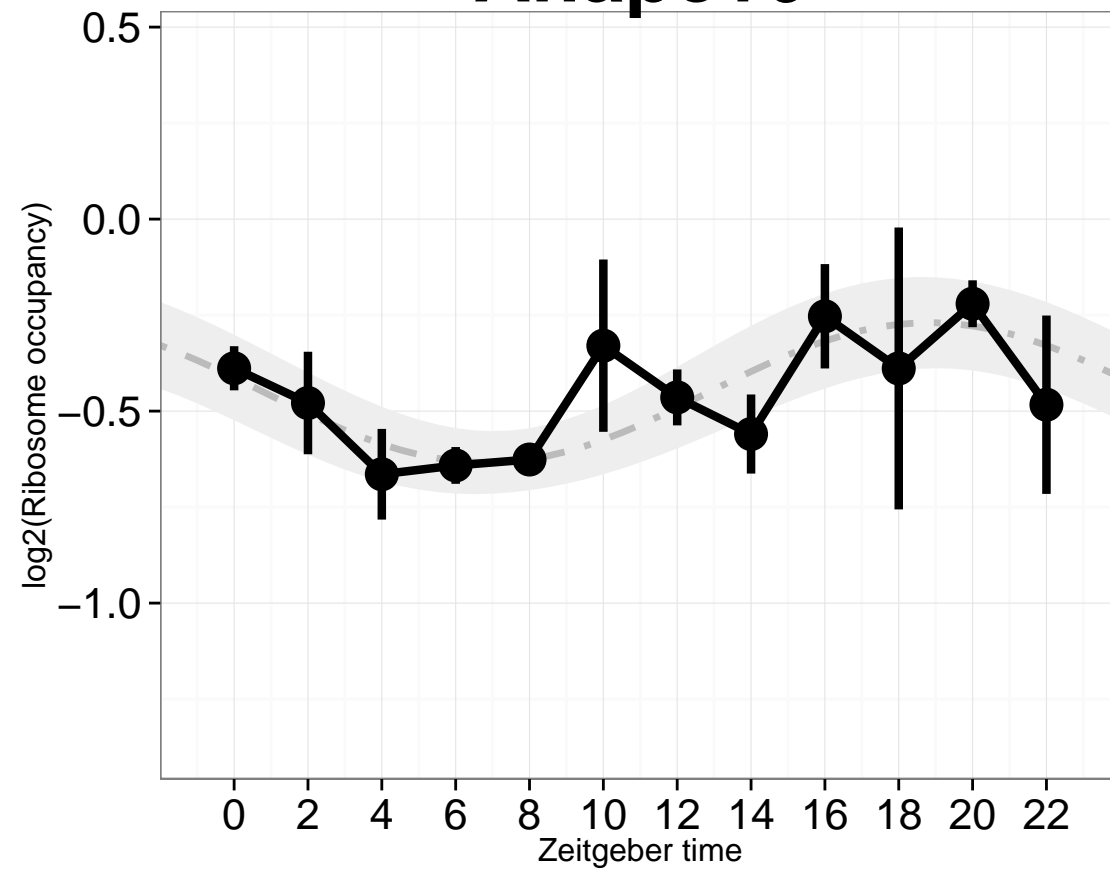

Supplement: SuppDataset_1.zip [file Anapc16_set_A.pdf › Supplemental Dataset 1/A-mRNA_nonrhyth_translation_nonrhyth/Anapc16_set_A.pdf]

## Anapc1

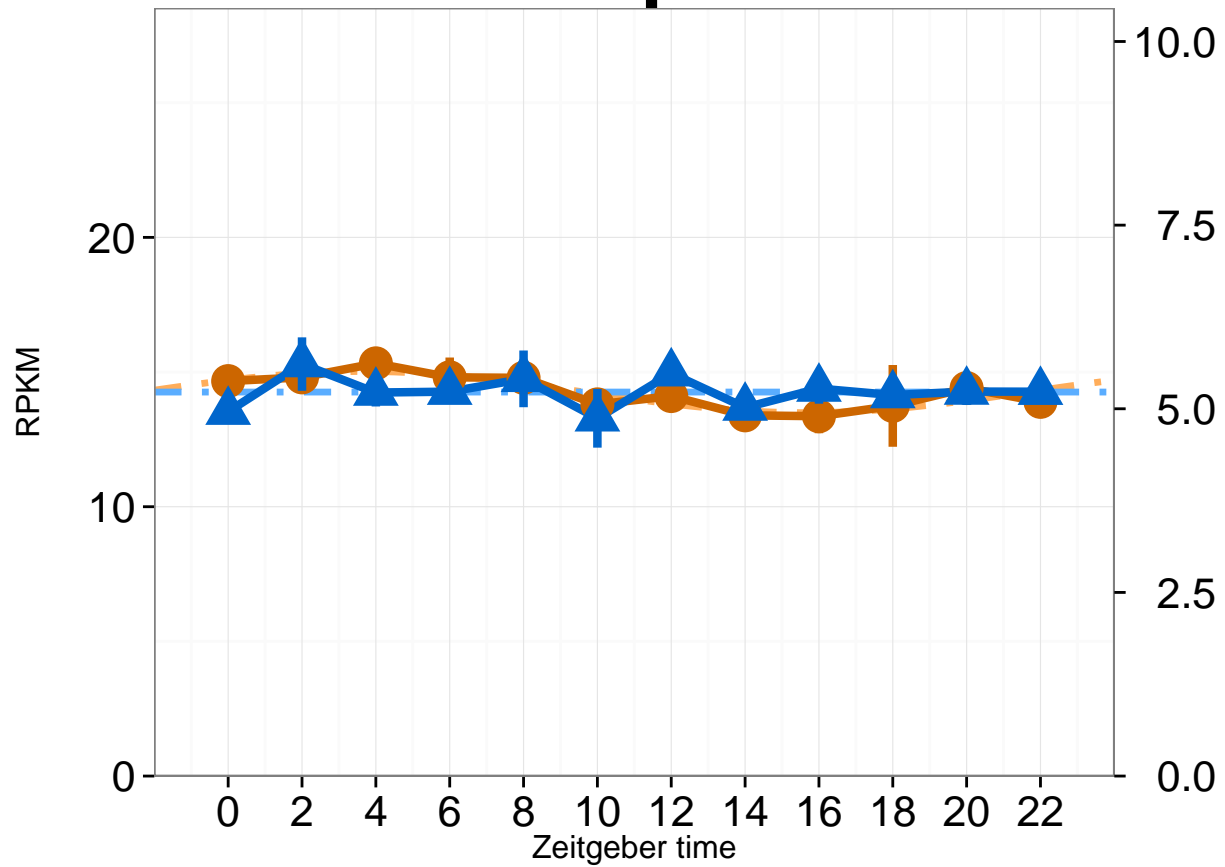

## Anapc1

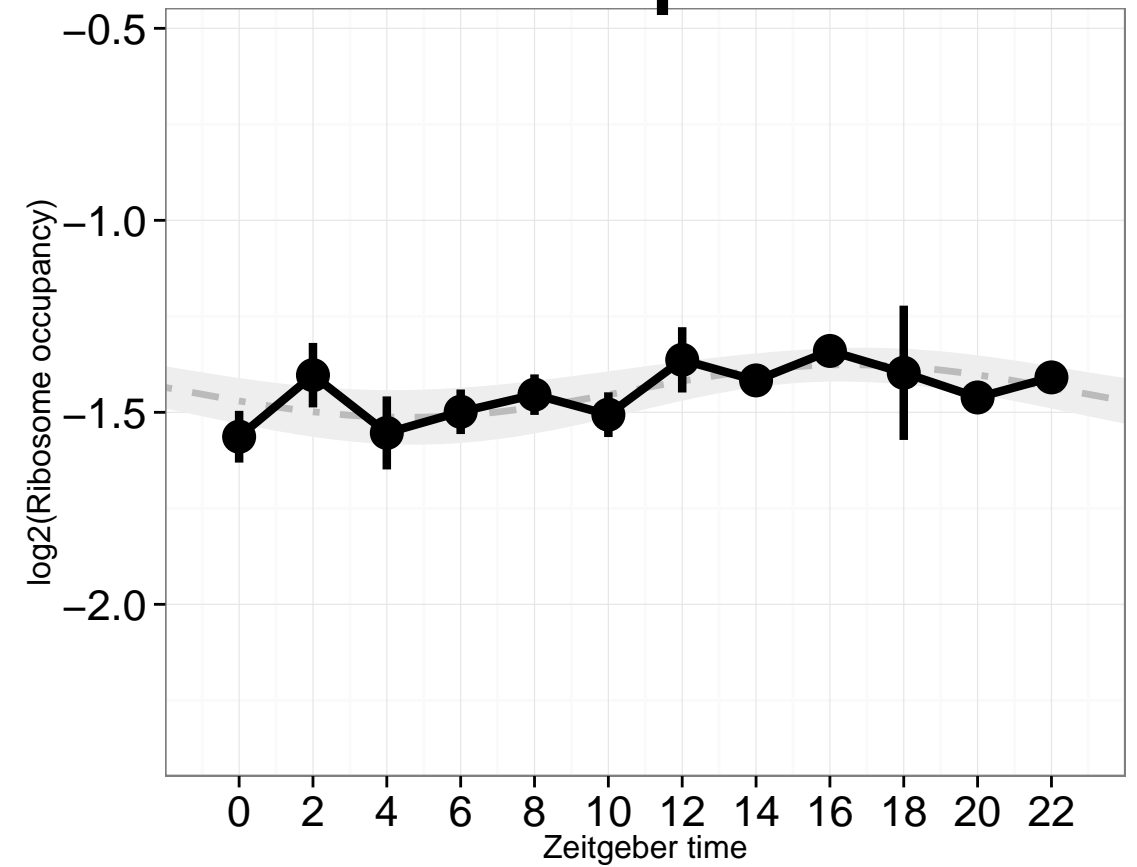

Supplement: SuppDataset_1.zip [file Anapc1_set_A.pdf › Supplemental Dataset 1/A-mRNA_nonrhyth_translation_nonrhyth/Anapc1_set_A.pdf]

# Anapc2

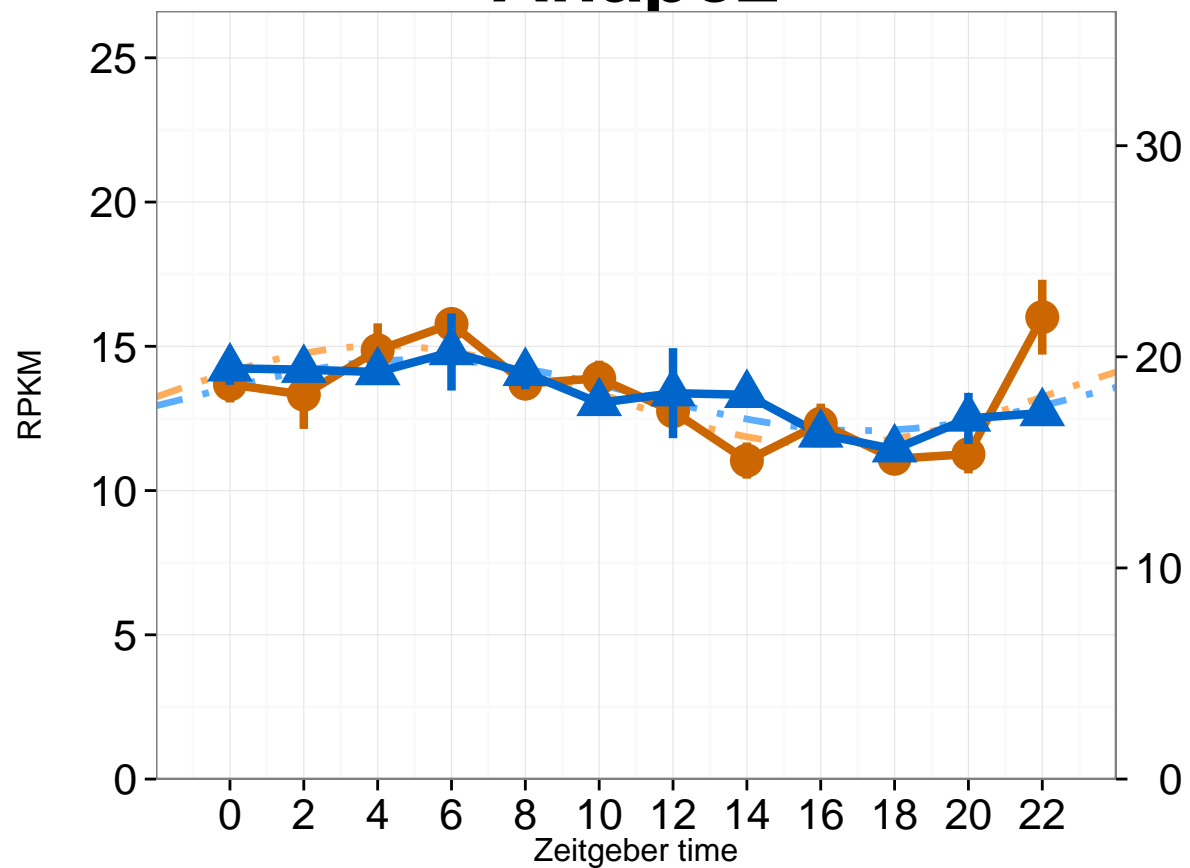

# Anapc2

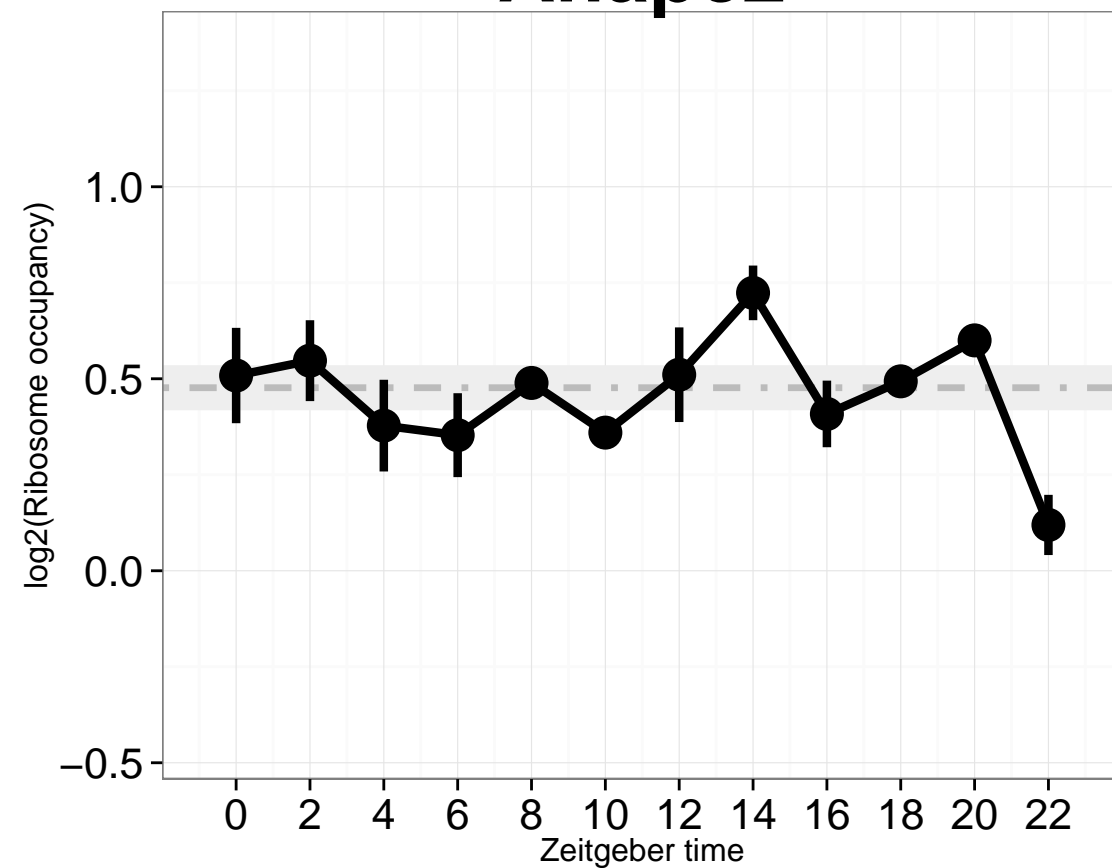

Supplement: SuppDataset_1.zip [file Anapc2_set_A.pdf › Supplemental Dataset 1/A-mRNA_nonrhyth_translation_nonrhyth/Anapc2_set_A.pdf]

# Anapc4

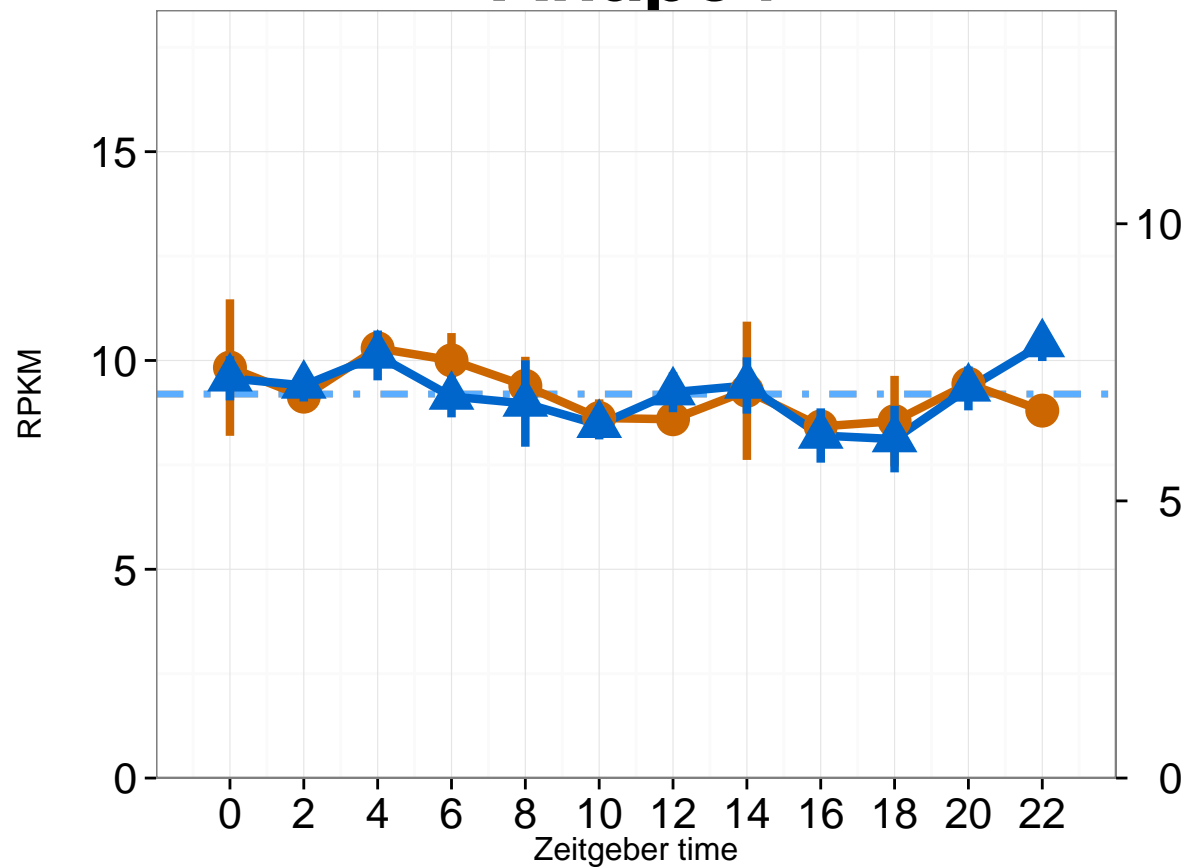

# Anapc4

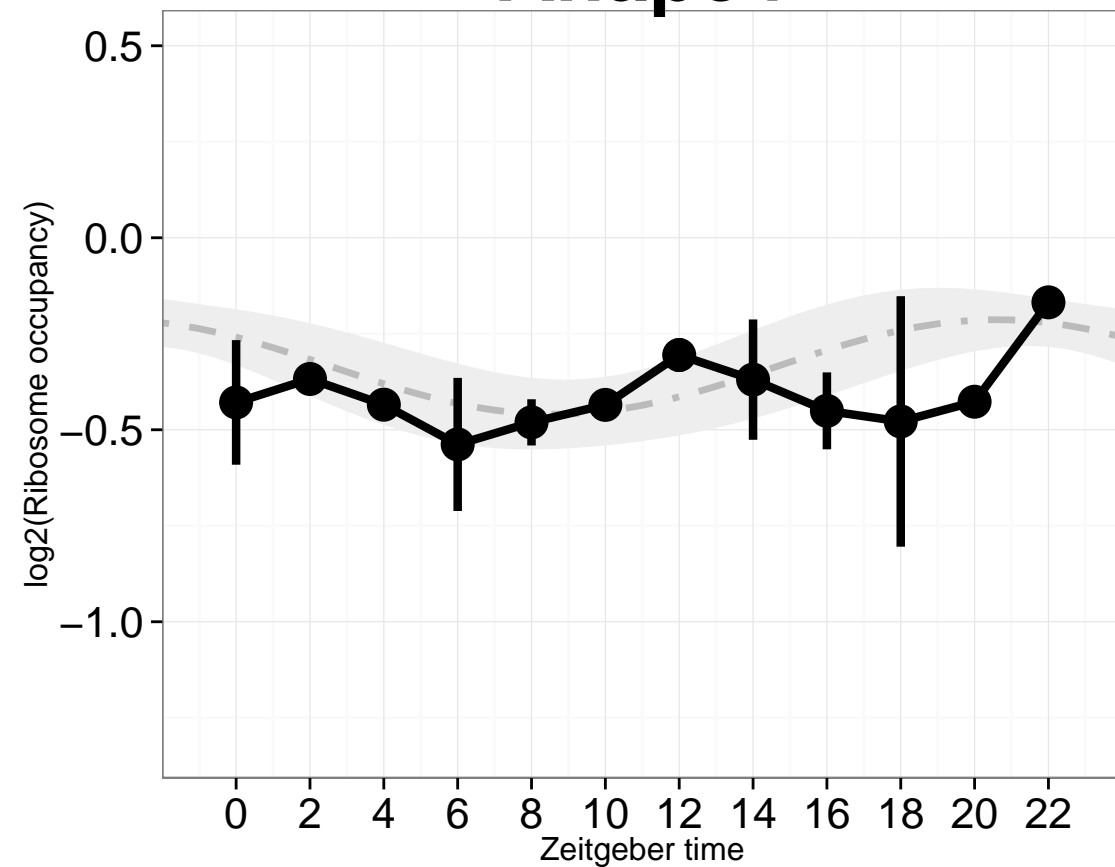

Supplement: SuppDataset_1.zip [file Anapc4_set_A.pdf › Supplemental Dataset 1/A-mRNA_nonrhyth_translation_nonrhyth/Anapc4_set_A.pdf]

# Anapc5

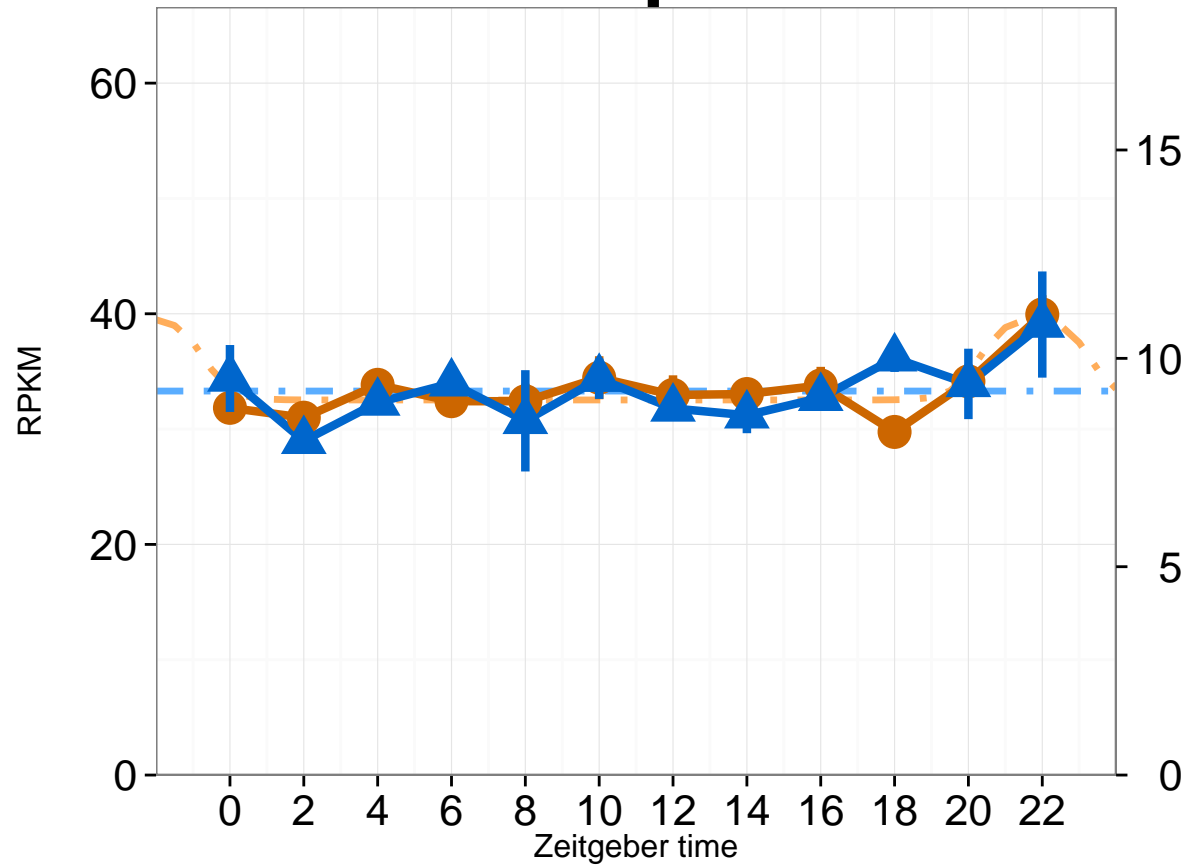

# Anapc5

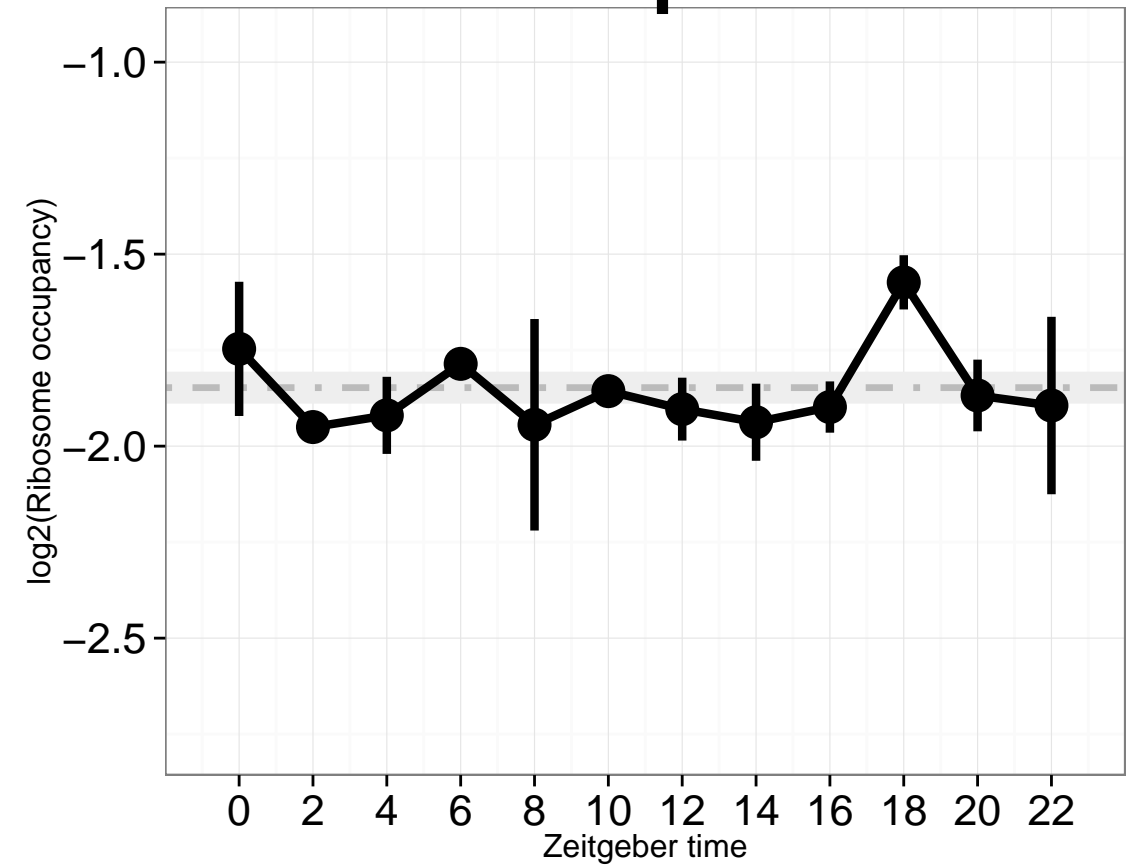

Supplement: SuppDataset_1.zip [file Anapc5_set_A.pdf › Supplemental Dataset 1/A-mRNA_nonrhyth_translation_nonrhyth/Anapc5_set_A.pdf]

## Angel2

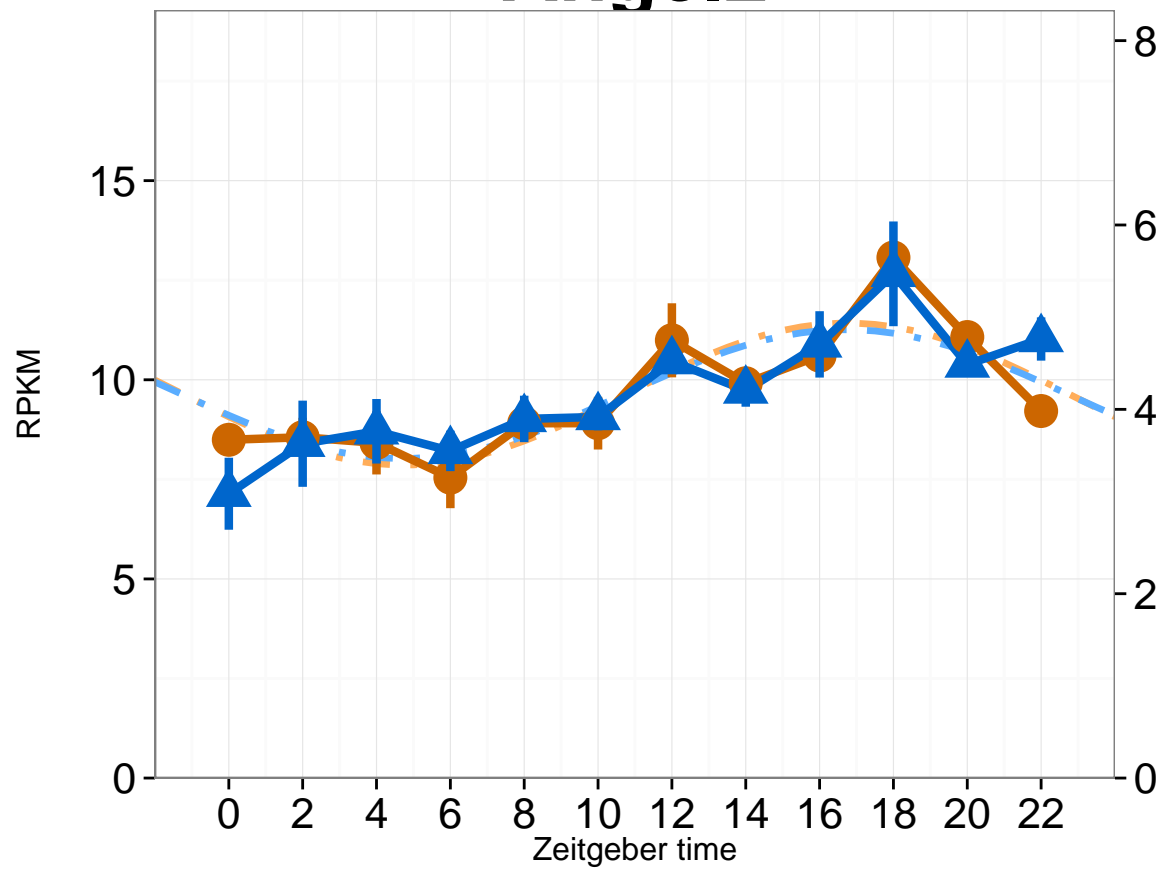

## Angel2

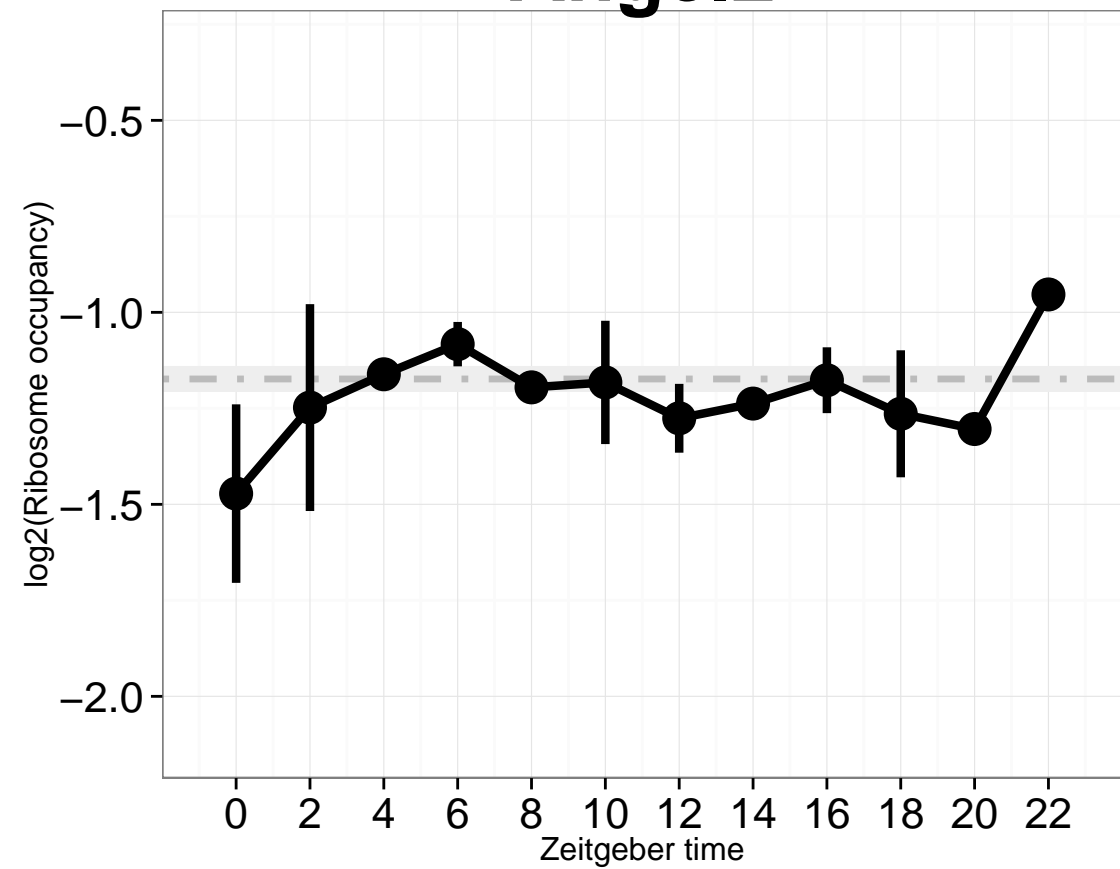

Supplement: SuppDataset_1.zip [file Angel2_set_A.pdf › Supplemental Dataset 1/A-mRNA_nonrhyth_translation_nonrhyth/Angel2_set_A.pdf]

# Angpt1 TR

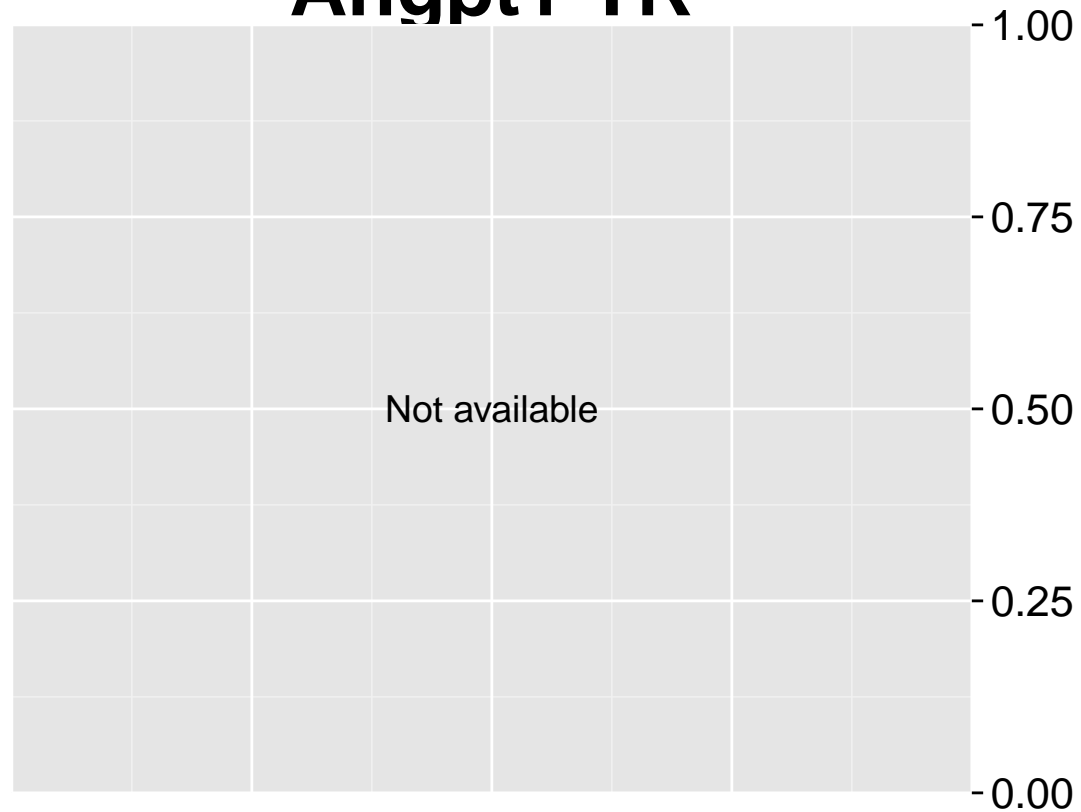

# Angpt1 log2(Ribosome occupancy)

Supplement: SuppDataset_1.zip [file Angpt1_set_A.pdf › Supplemental Dataset 1/A-mRNA_nonrhyth_translation_nonrhyth/Angpt1_set_A.pdf]

# Angpt2

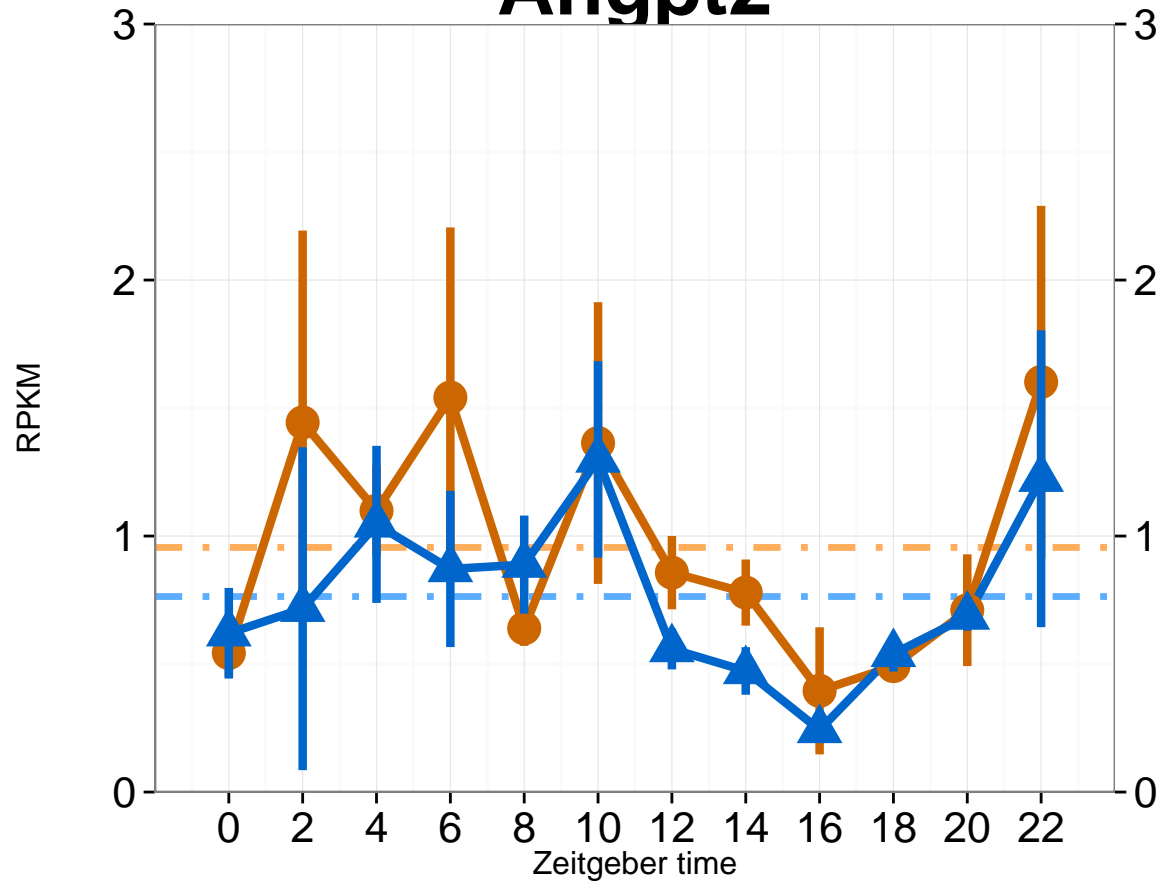

# Angpt2

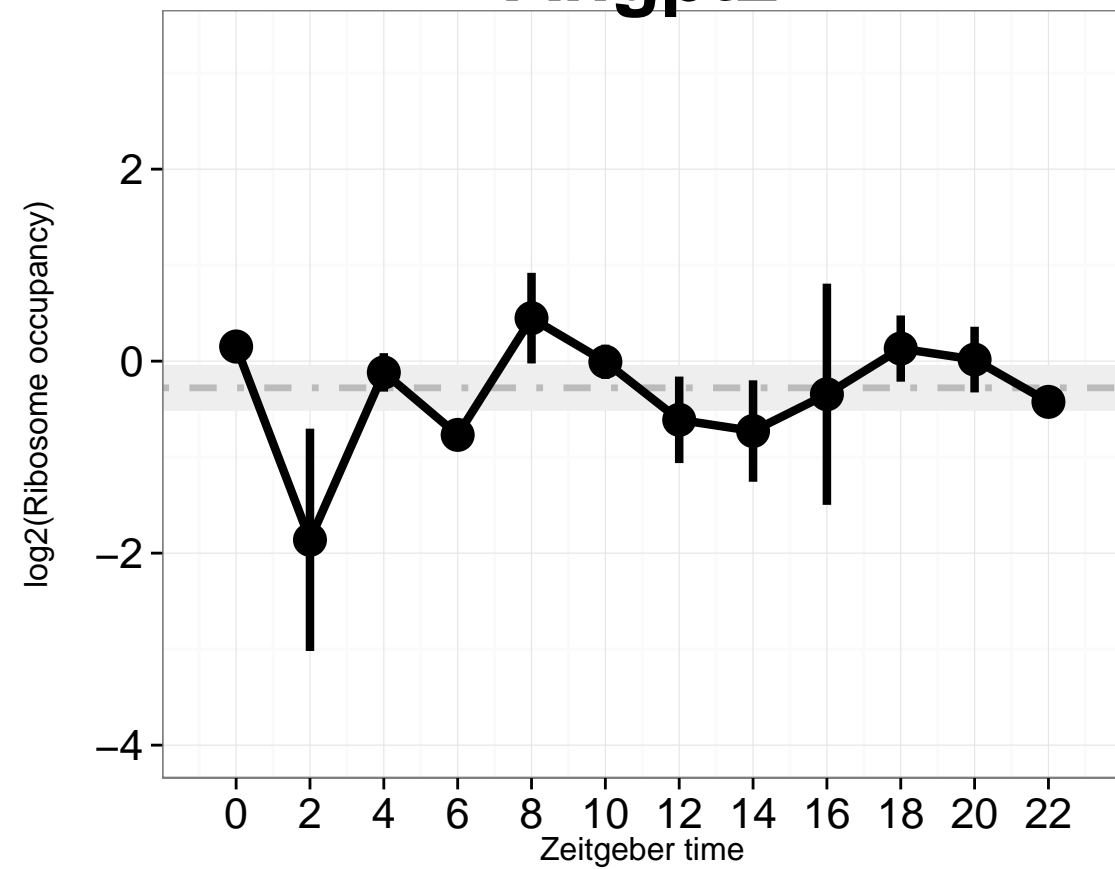

Supplement: SuppDataset_1.zip [file Angpt2_set_A.pdf › Supplemental Dataset 1/A-mRNA_nonrhyth_translation_nonrhyth/Angpt2_set_A.pdf]

# Angptl3

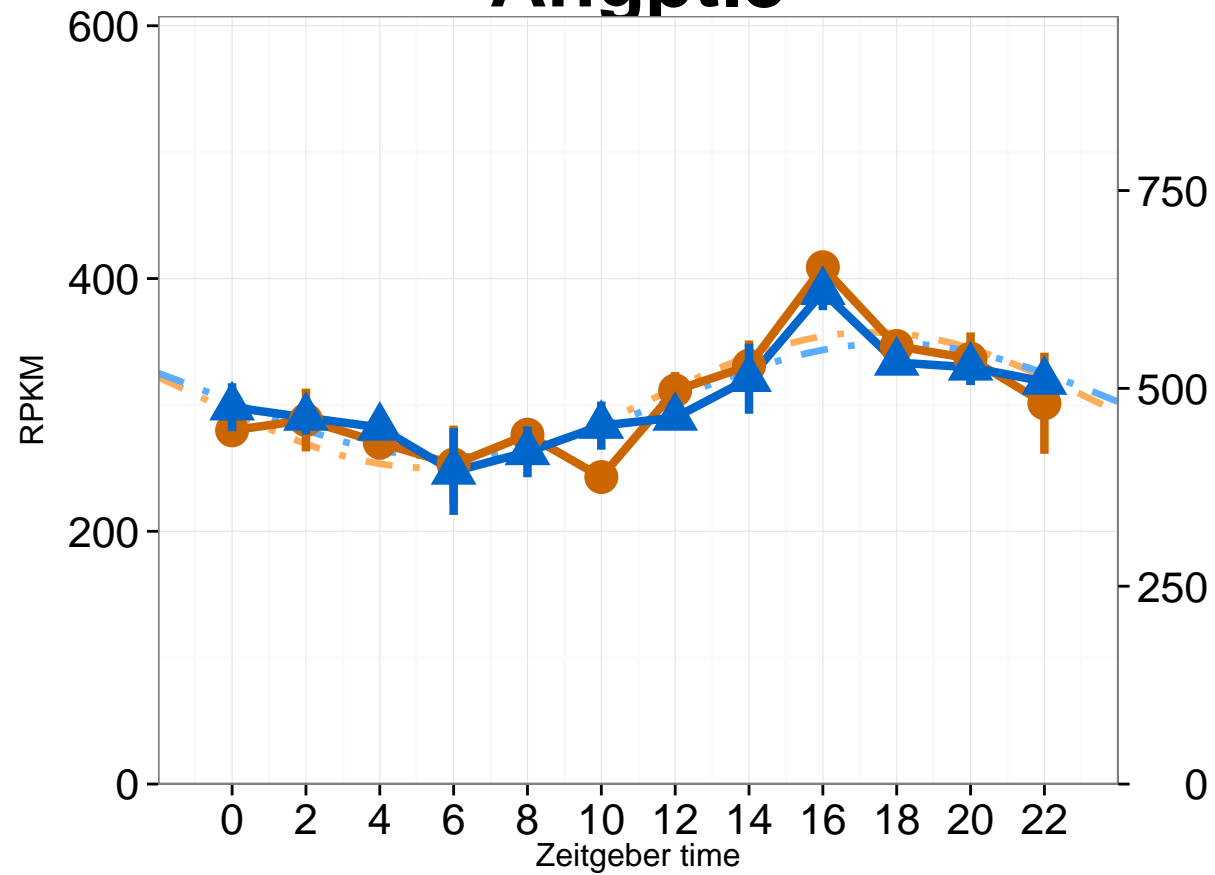

# Angptl3

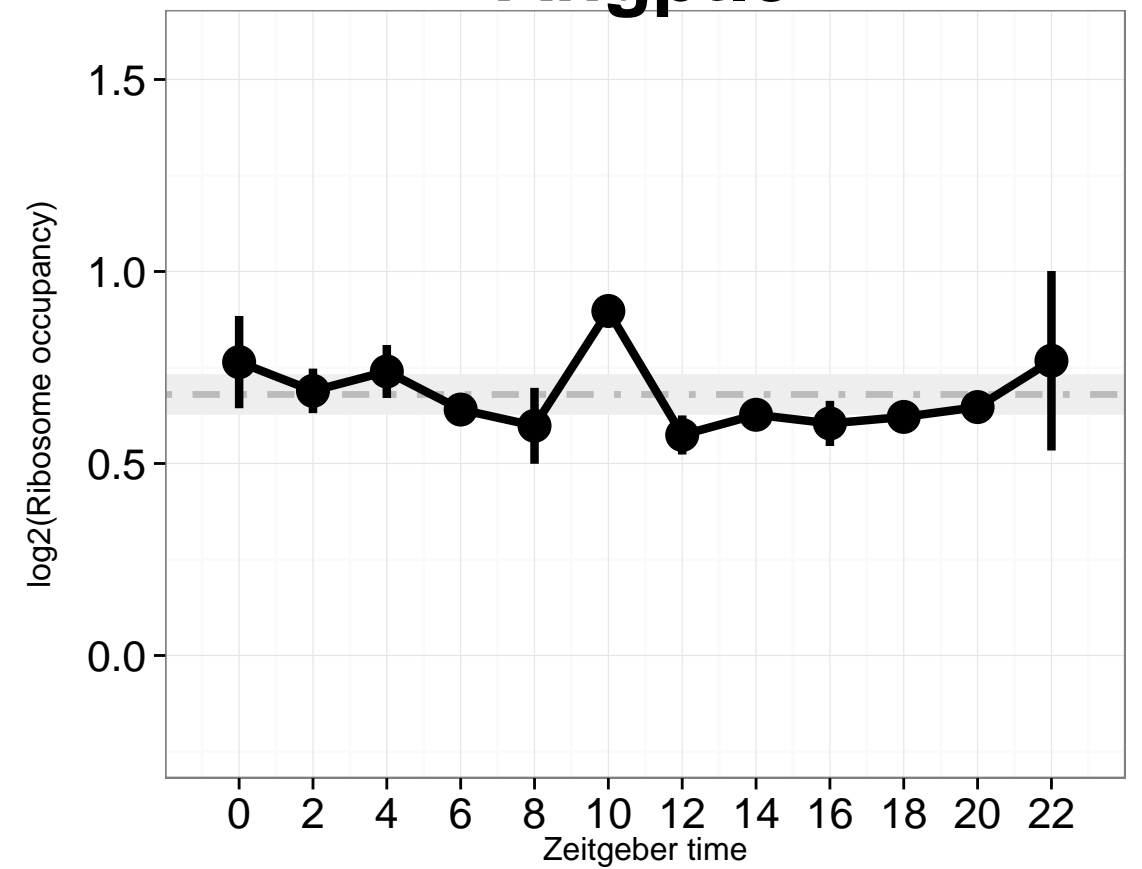

Supplement: SuppDataset_1.zip [file Angptl3_set_A.pdf › Supplemental Dataset 1/A-mRNA_nonrhyth_translation_nonrhyth/Angptl3_set_A.pdf]

# Angptl4

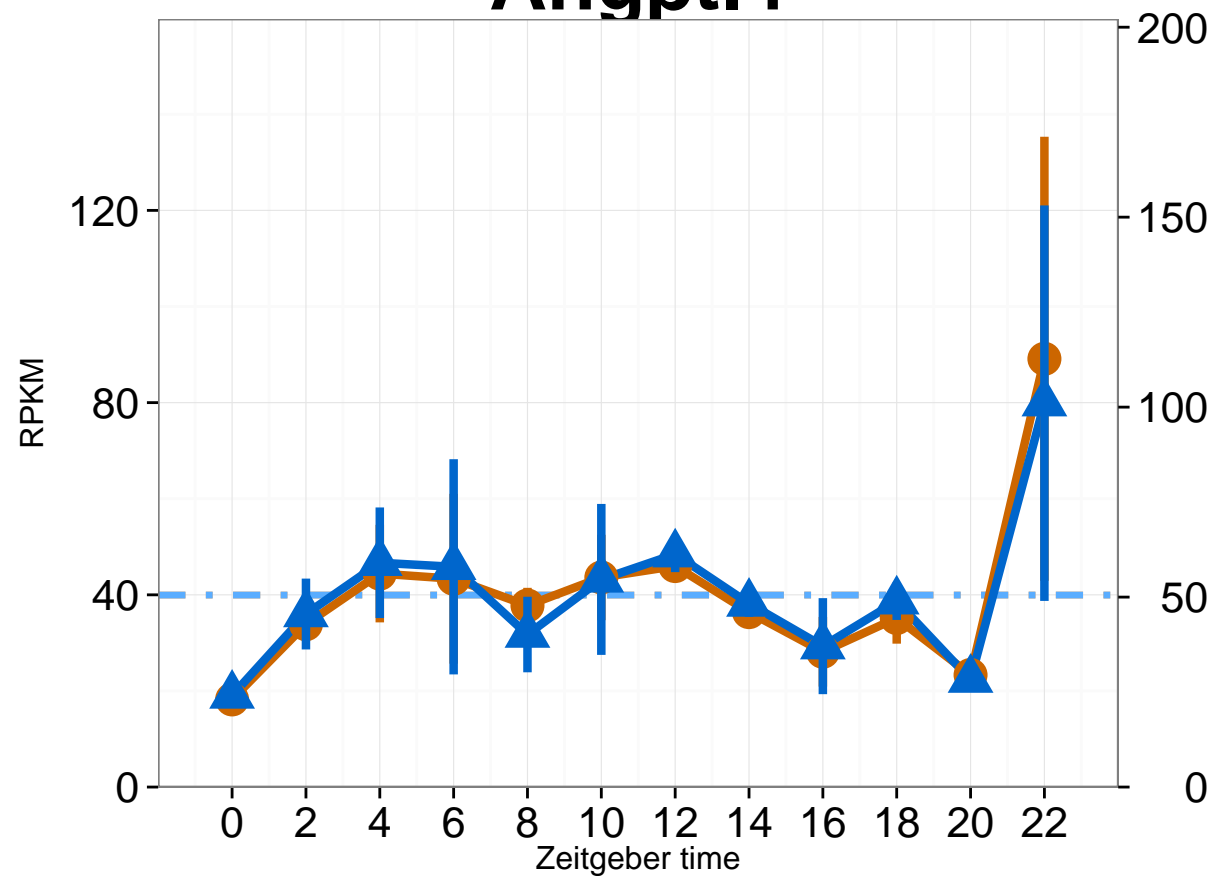

# Angptl4

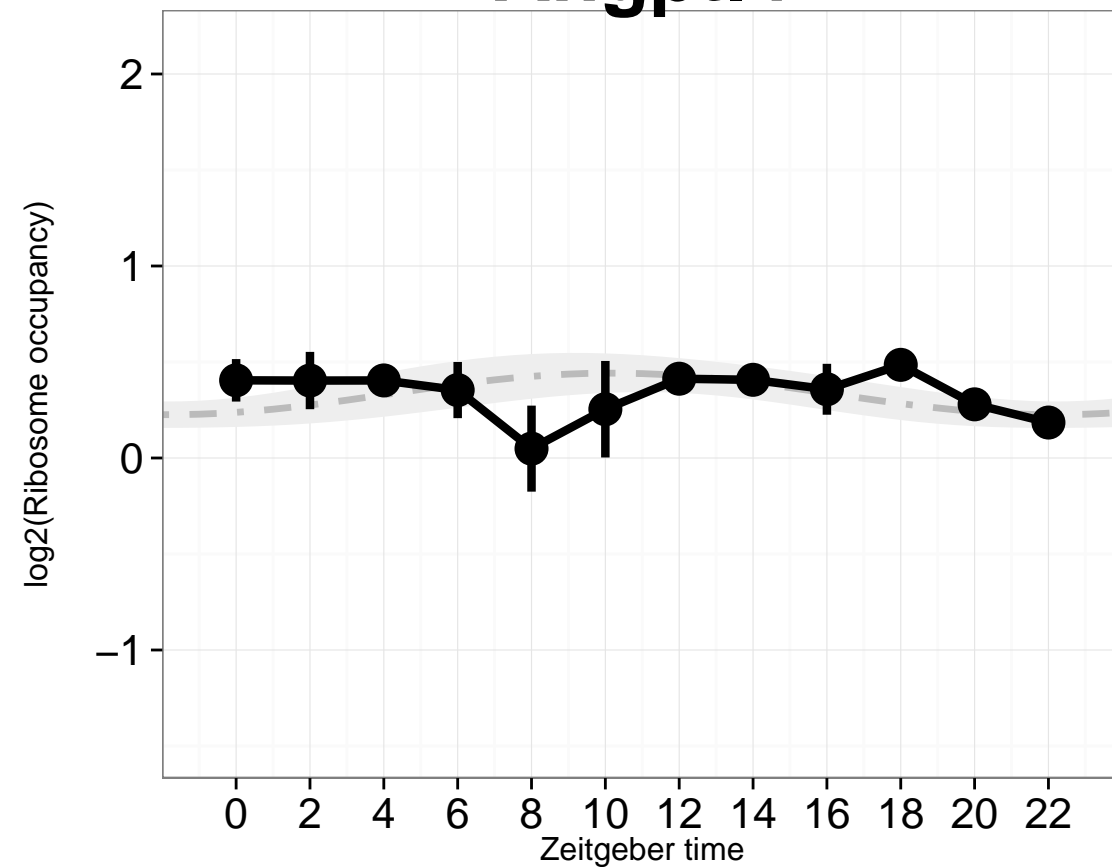

Supplement: SuppDataset_1.zip [file Angptl4_set_A.pdf › Supplemental Dataset 1/A-mRNA_nonrhyth_translation_nonrhyth/Angptl4_set_A.pdf]

# Angptl6

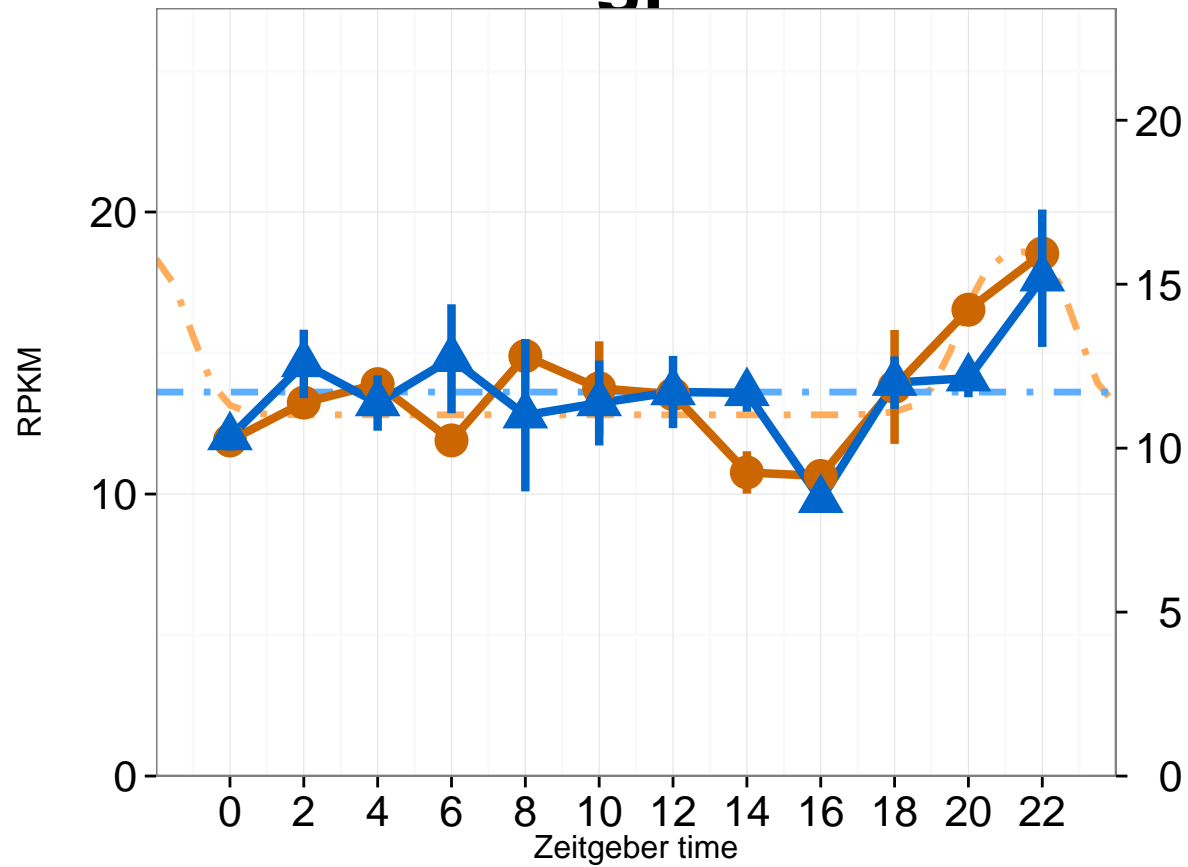

# Angptl6

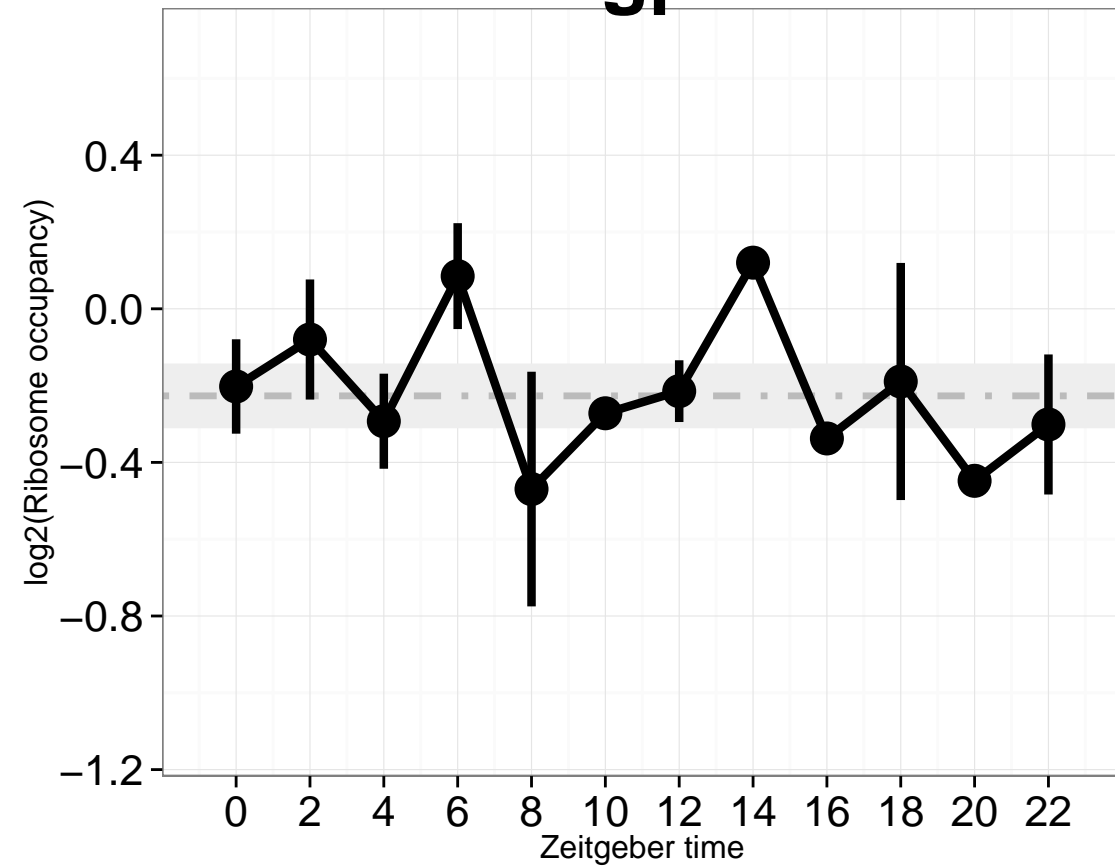

Supplement: SuppDataset_1.zip [file Angptl6_set_A.pdf › Supplemental Dataset 1/A-mRNA_nonrhyth_translation_nonrhyth/Angptl6_set_A.pdf]

**Angptl7 TR**

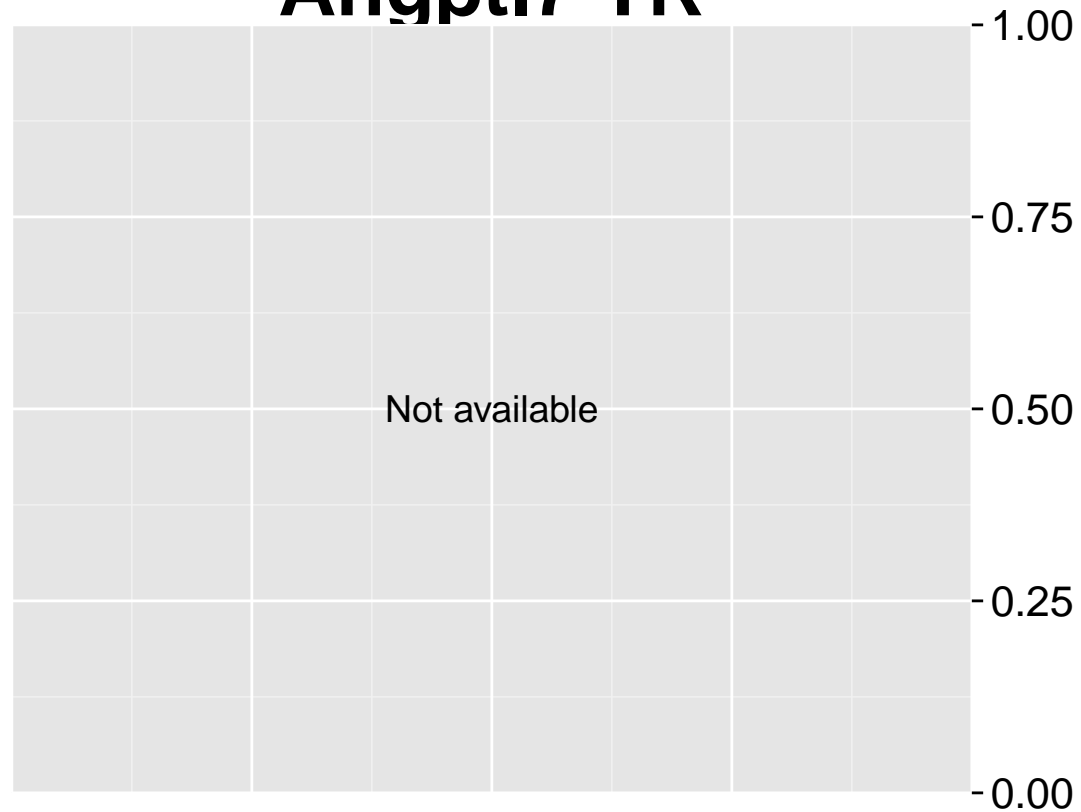

**Angptl7 log2(Ribosome occupancy**

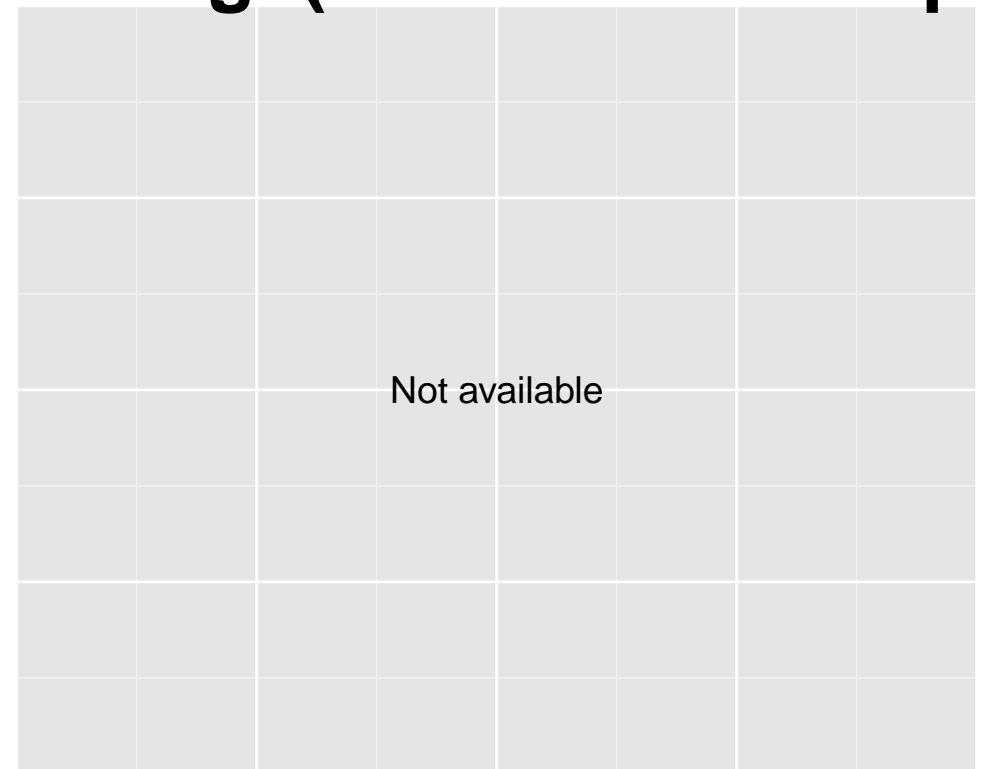

Supplement: SuppDataset_1.zip [file Angptl7_set_A.pdf › Supplemental Dataset 1/A-mRNA_nonrhyth_translation_nonrhyth/Angptl7_set_A.pdf]

## Ank

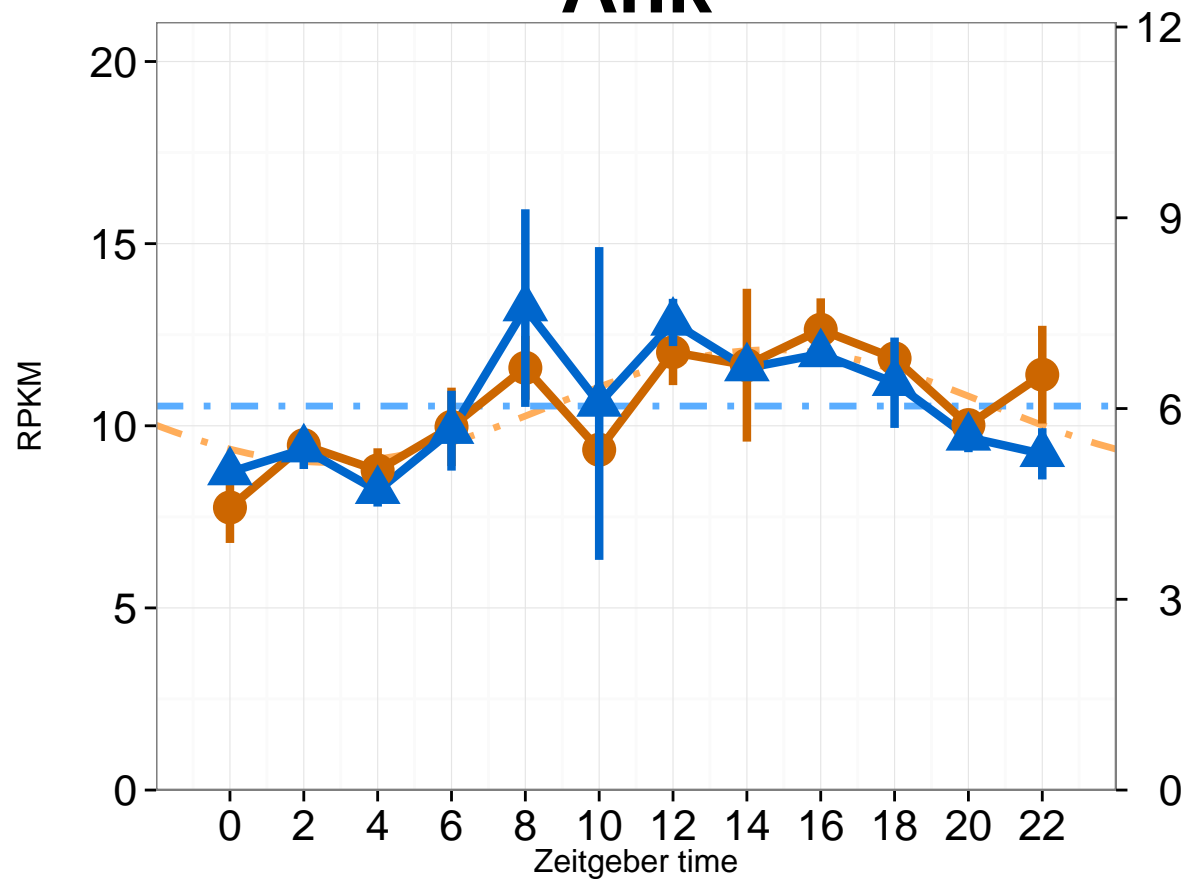

## Ank

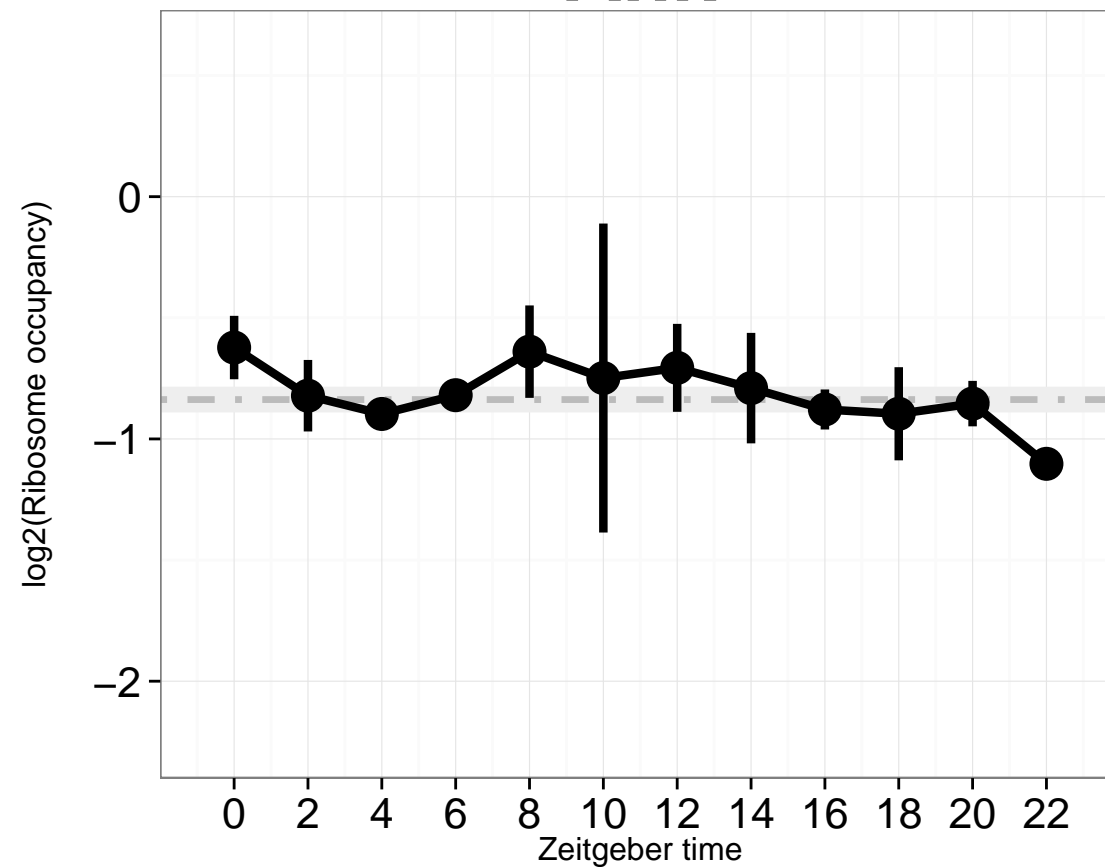

Supplement: SuppDataset_1.zip [file Ank_set_A.pdf › Supplemental Dataset 1/A-mRNA_nonrhyth_translation_nonrhyth/Ank_set_A.pdf]

# Ankfy1

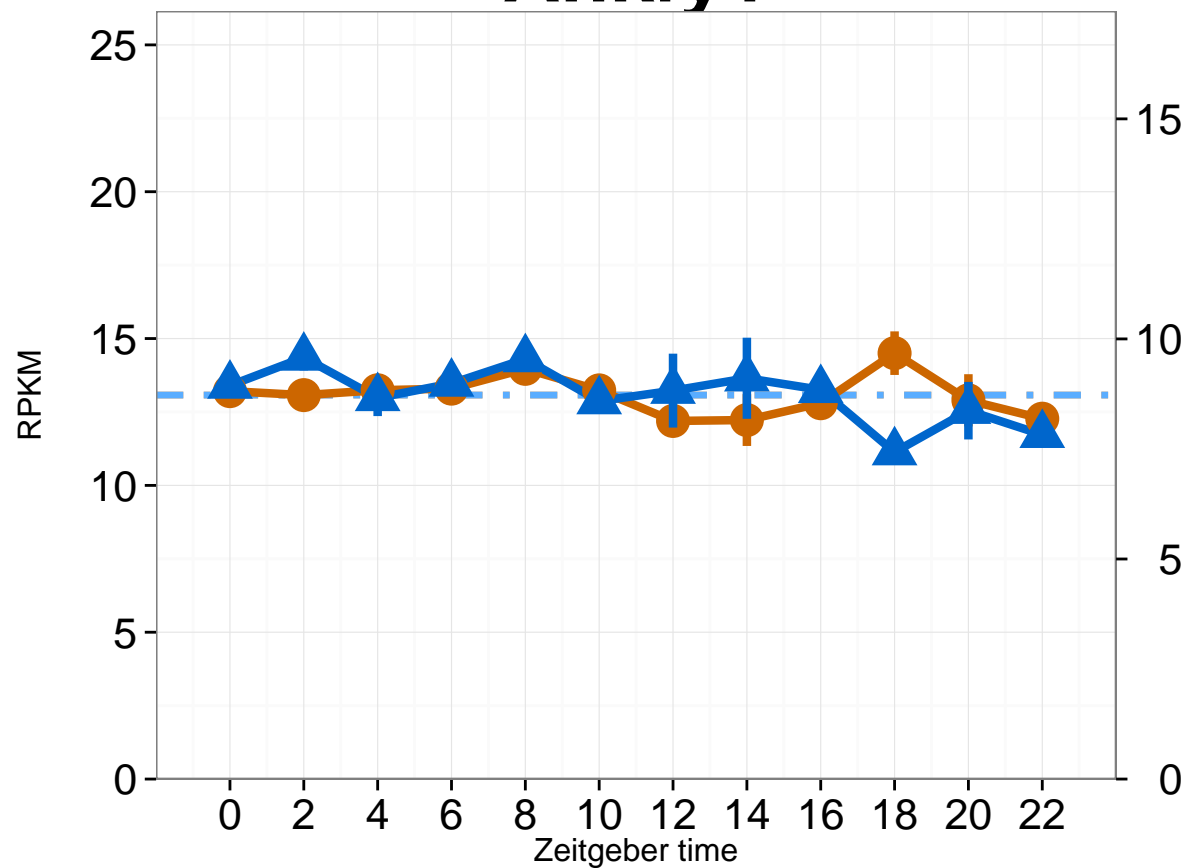

# Ankfy1

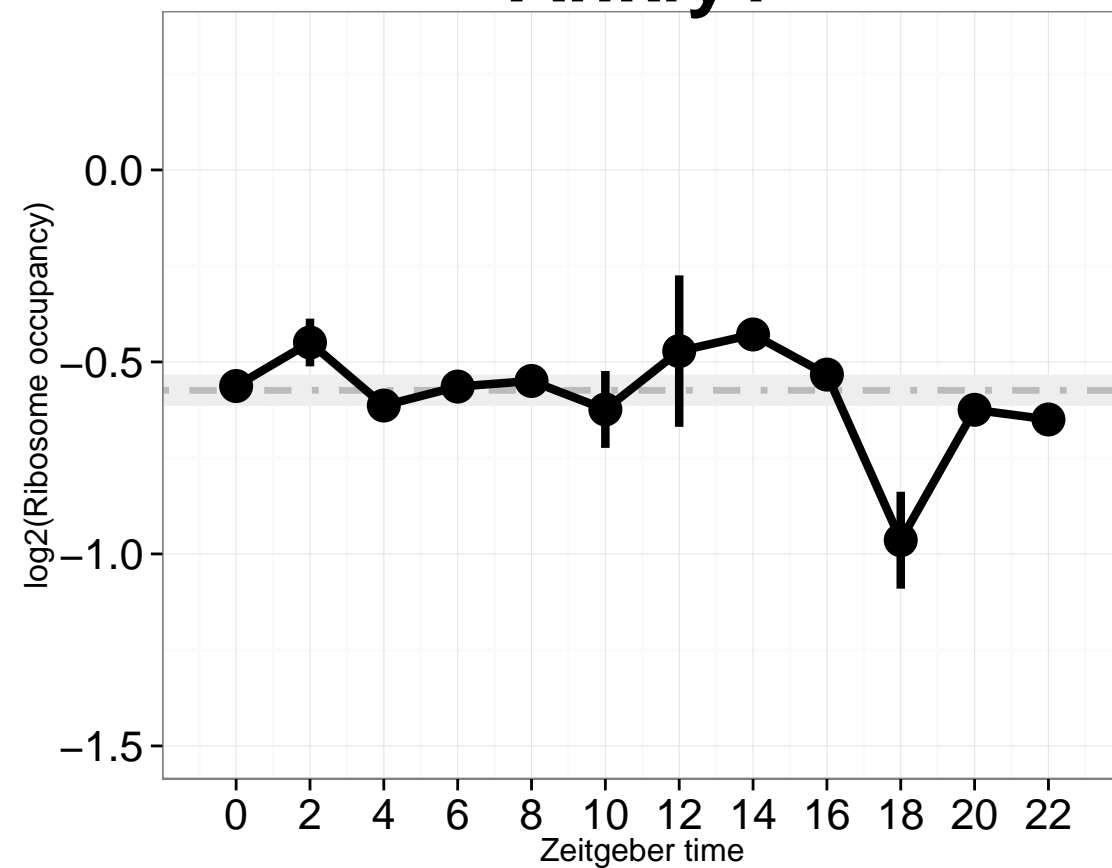

Supplement: SuppDataset_1.zip [file Ankfy1_set_A.pdf › Supplemental Dataset 1/A-mRNA_nonrhyth_translation_nonrhyth/Ankfy1_set_A.pdf]

## Ankhd1

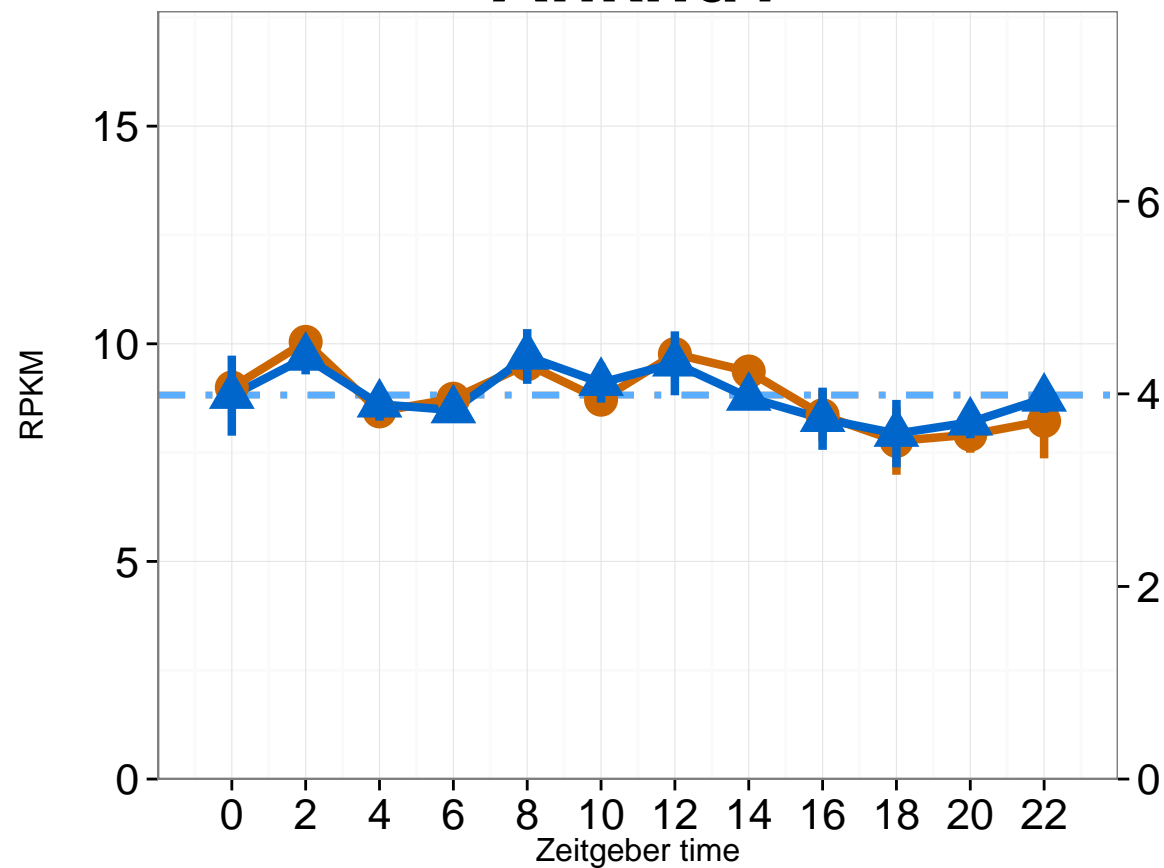

## Ankhd1

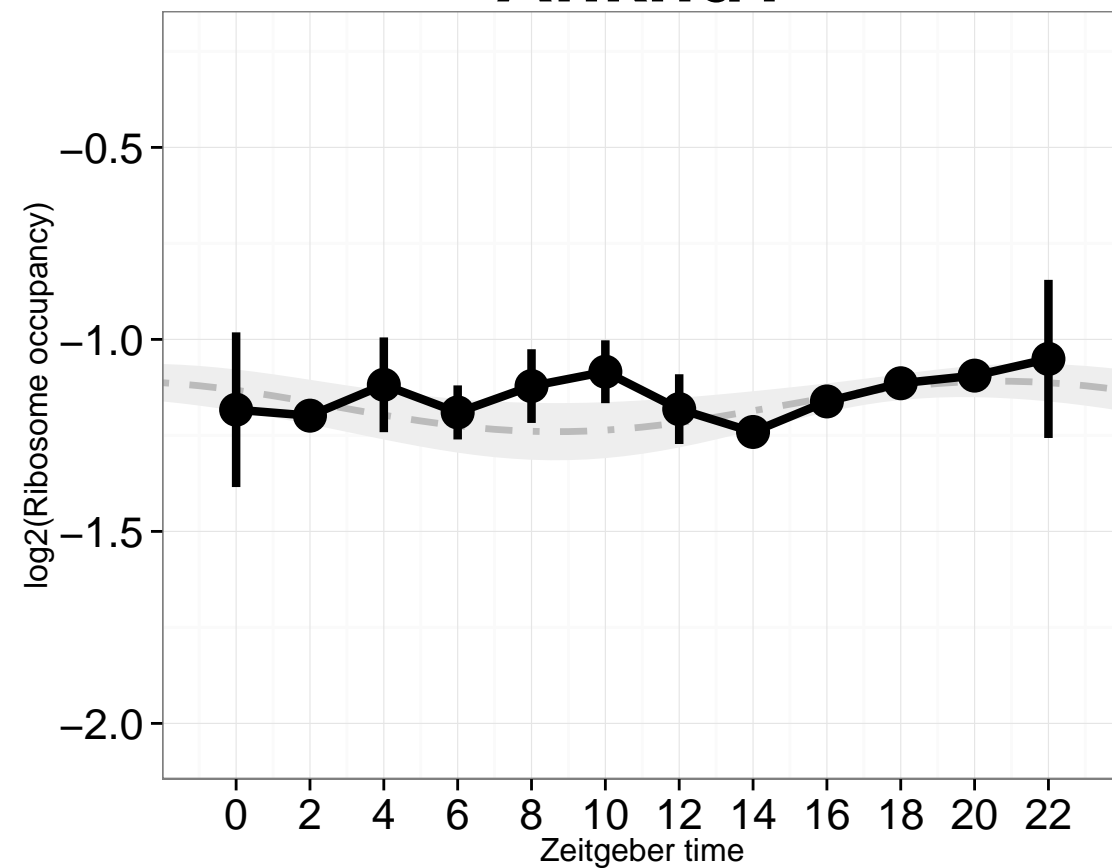

Supplement: SuppDataset_1.zip [file Ankhd1_set_A.pdf › Supplemental Dataset 1/A-mRNA_nonrhyth_translation_nonrhyth/Ankhd1_set_A.pdf]

## Ankib1

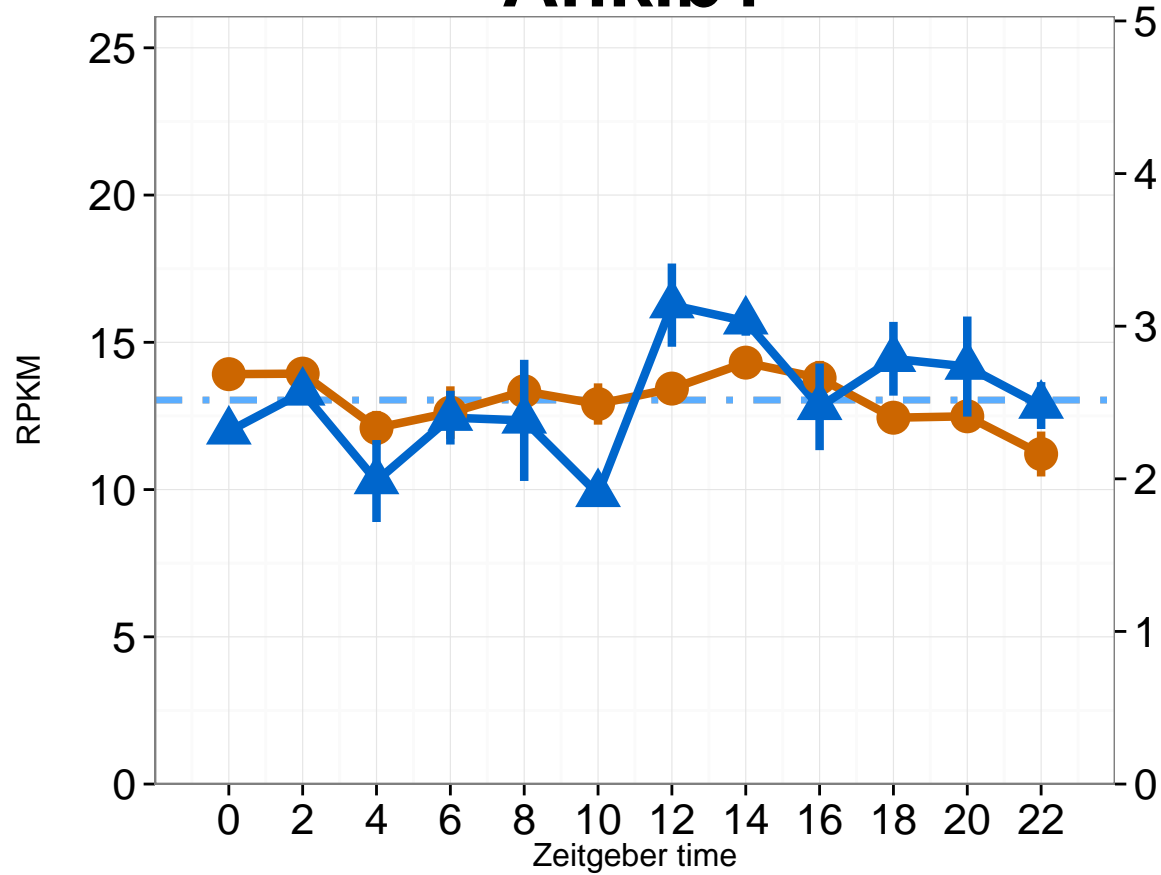

## Ankib1

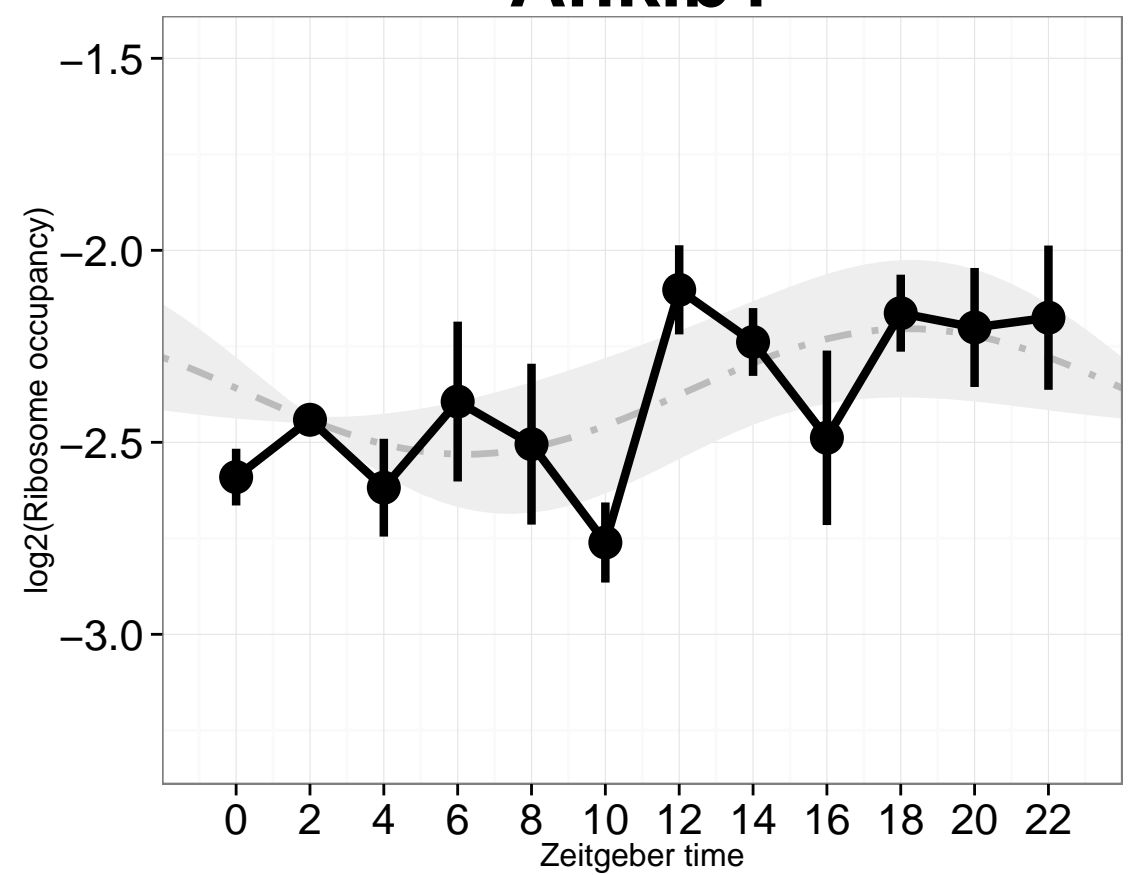

Supplement: SuppDataset_1.zip [file Ankib1_set_A.pdf › Supplemental Dataset 1/A-mRNA_nonrhyth_translation_nonrhyth/Ankib1_set_A.pdf]

## Ankle2

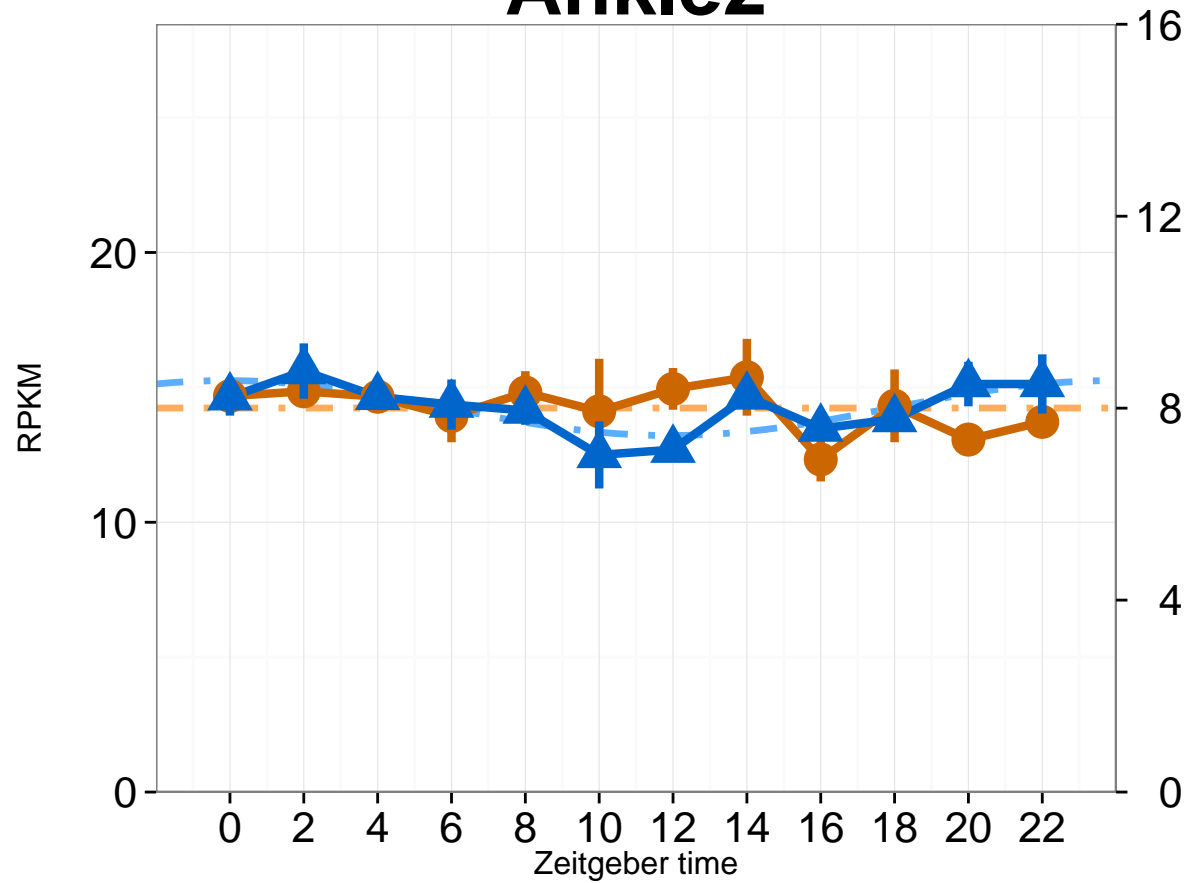

## Ankle2

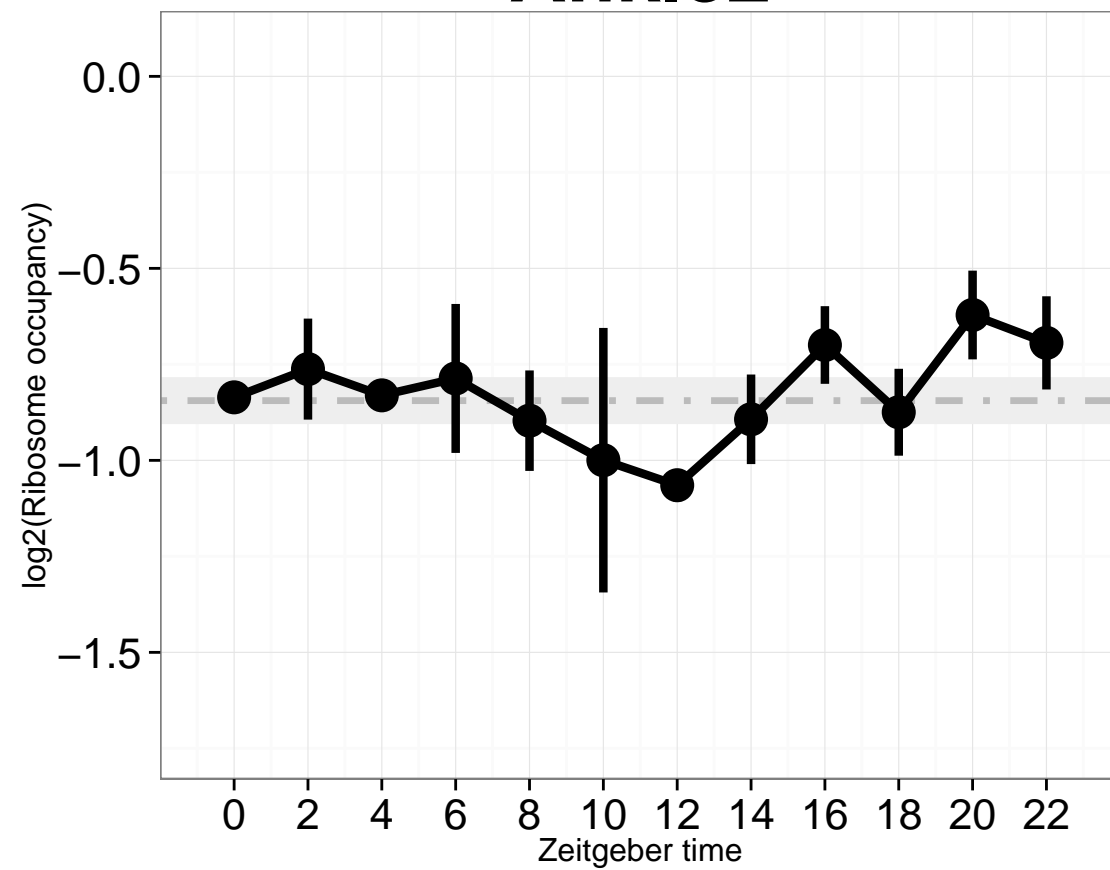

Supplement: SuppDataset_1.zip [file Ankle2_set_A.pdf › Supplemental Dataset 1/A-mRNA_nonrhyth_translation_nonrhyth/Ankle2_set_A.pdf]

## Ankmy2

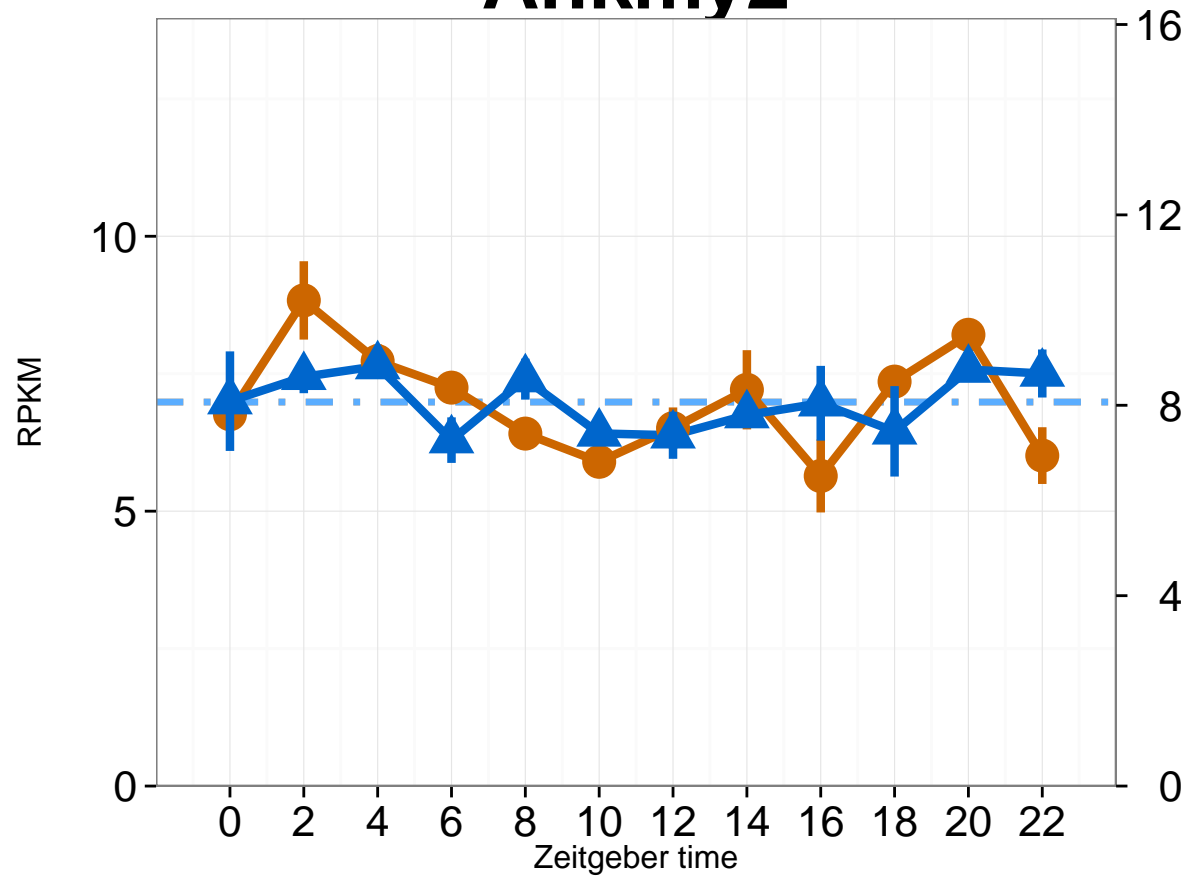

## Ankmy2

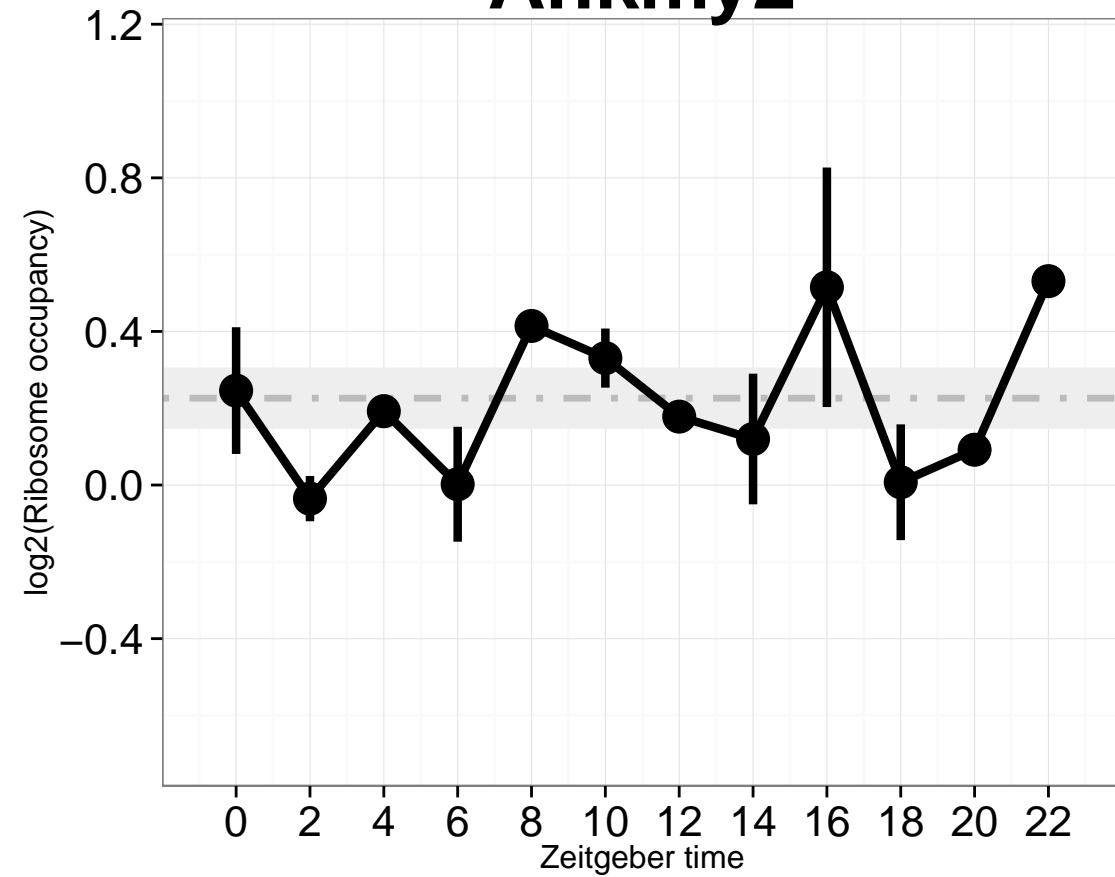

Supplement: SuppDataset_1.zip [file Ankmy2_set_A.pdf › Supplemental Dataset 1/A-mRNA_nonrhyth_translation_nonrhyth/Ankmy2_set_A.pdf]

## Ankra2

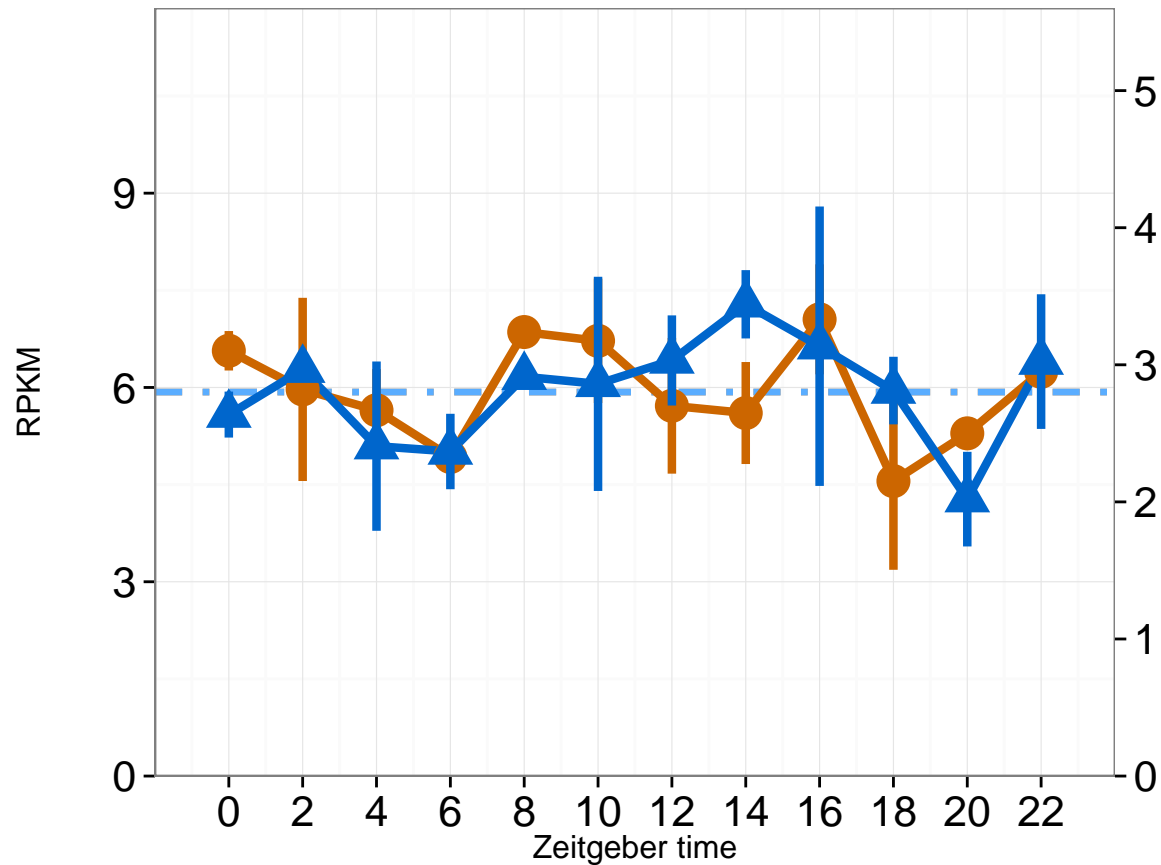

## Ankra2

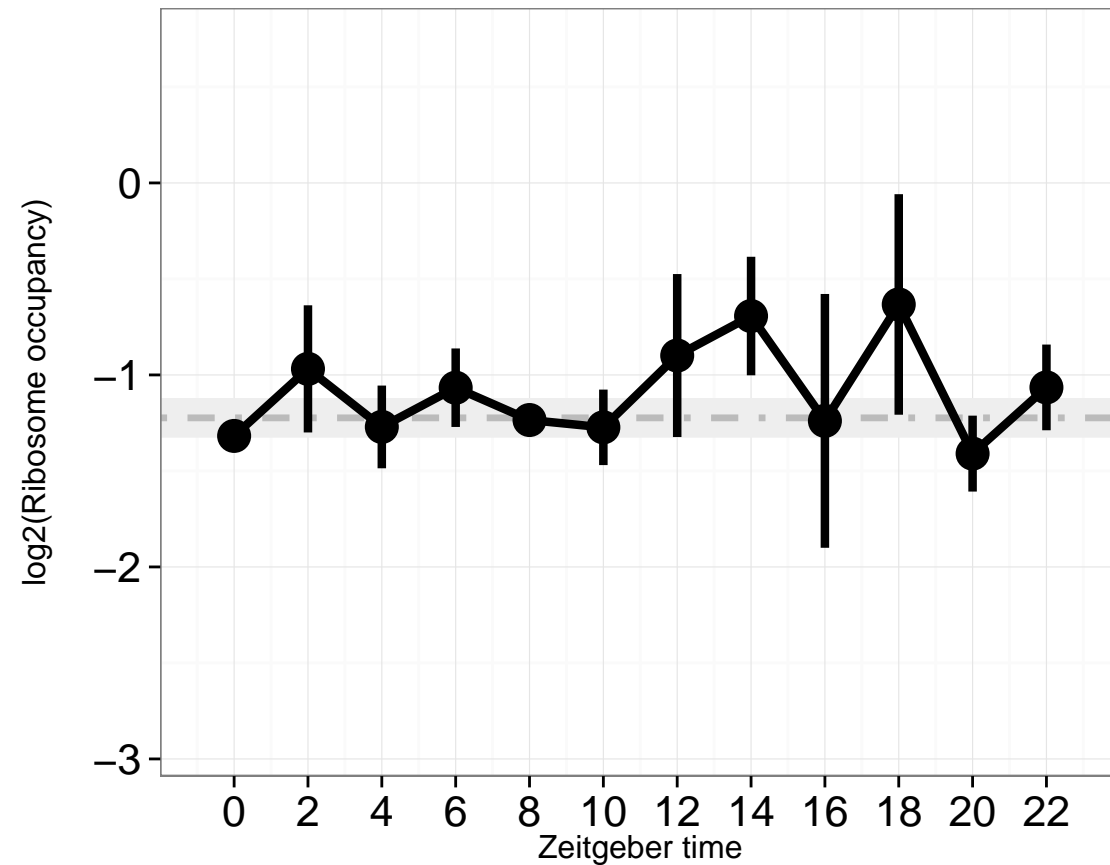

Supplement: SuppDataset_1.zip [file Ankra2_set_A.pdf › Supplemental Dataset 1/A-mRNA_nonrhyth_translation_nonrhyth/Ankra2_set_A.pdf]

# Ankrd13a

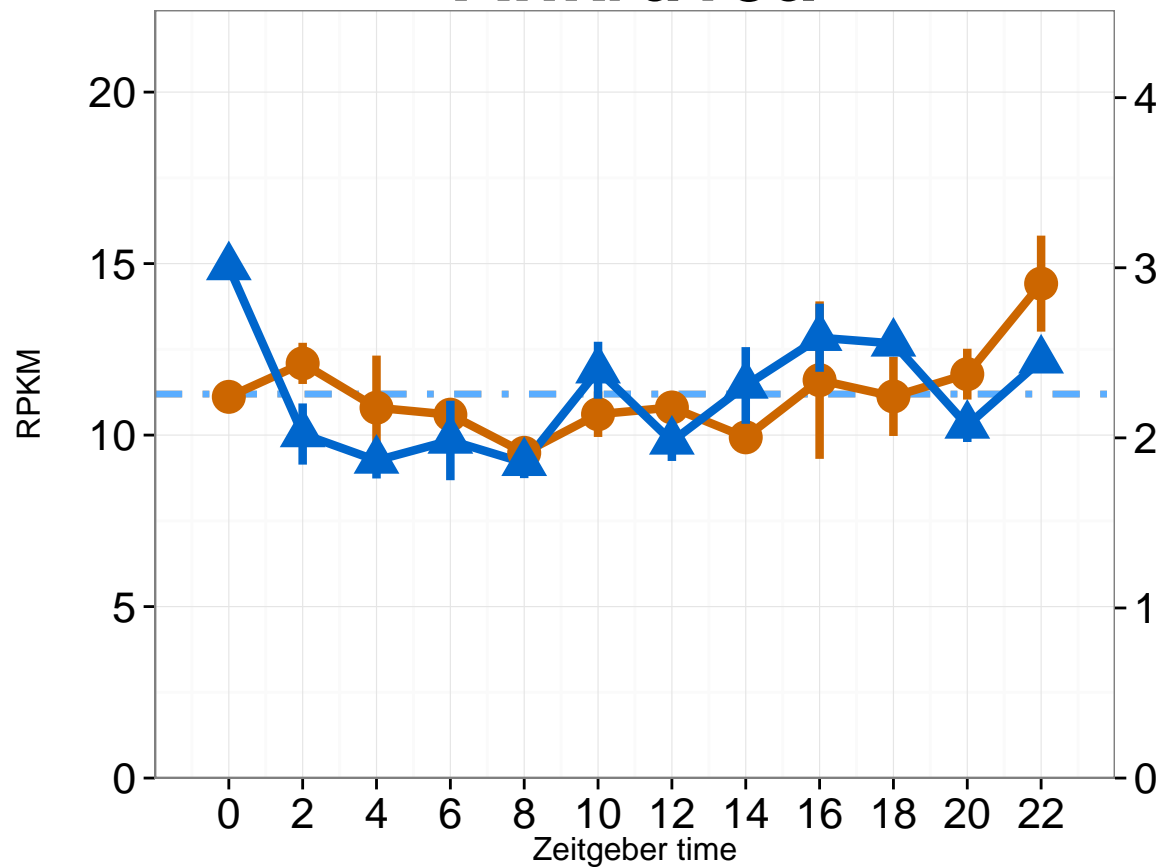

# Ankrd13a

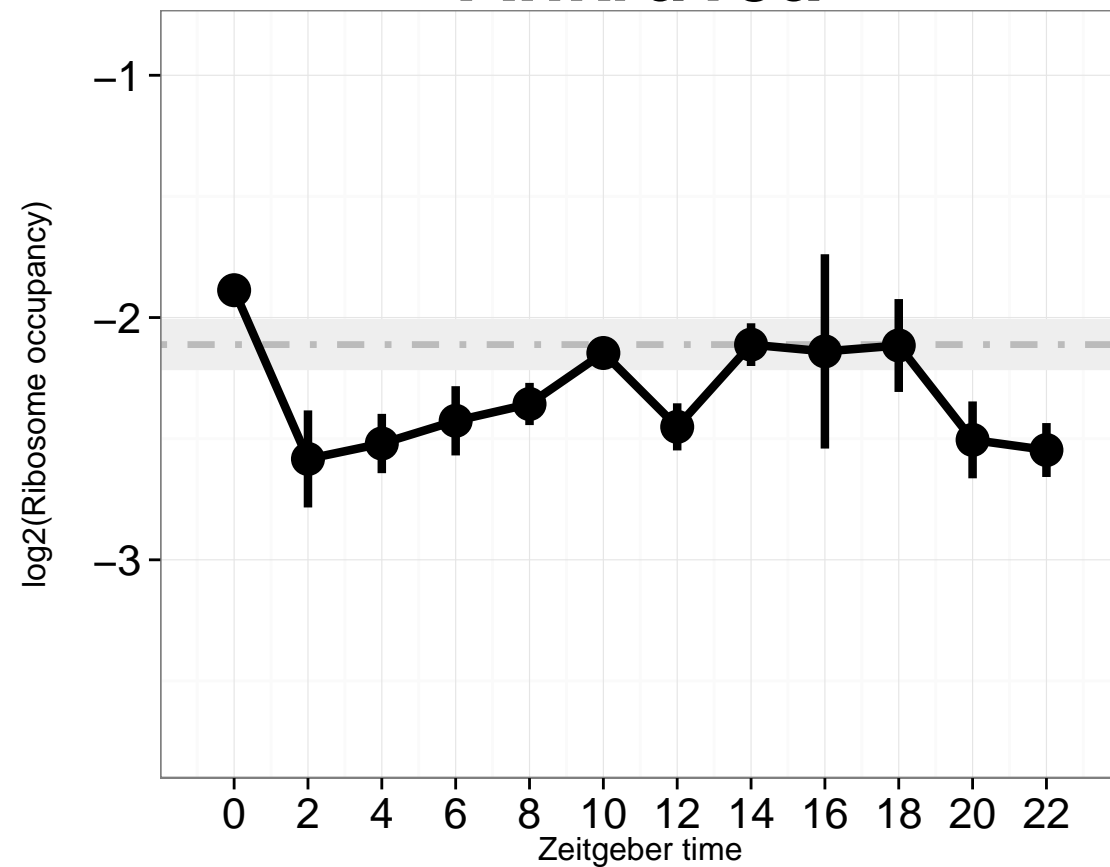

Supplement: SuppDataset_1.zip [file Ankrd13a_set_A.pdf › Supplemental Dataset 1/A-mRNA_nonrhyth_translation_nonrhyth/Ankrd13a_set_A.pdf]

# Ankrd13c

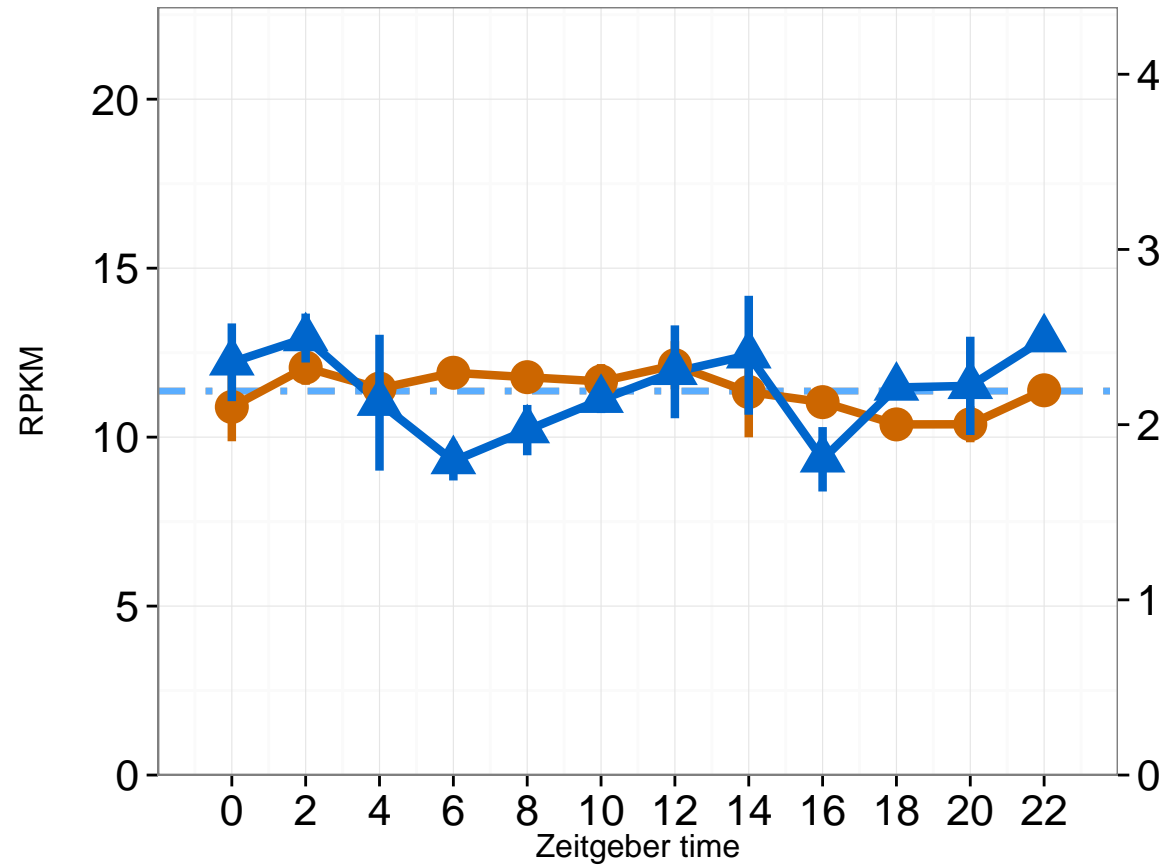

# Ankrd13c

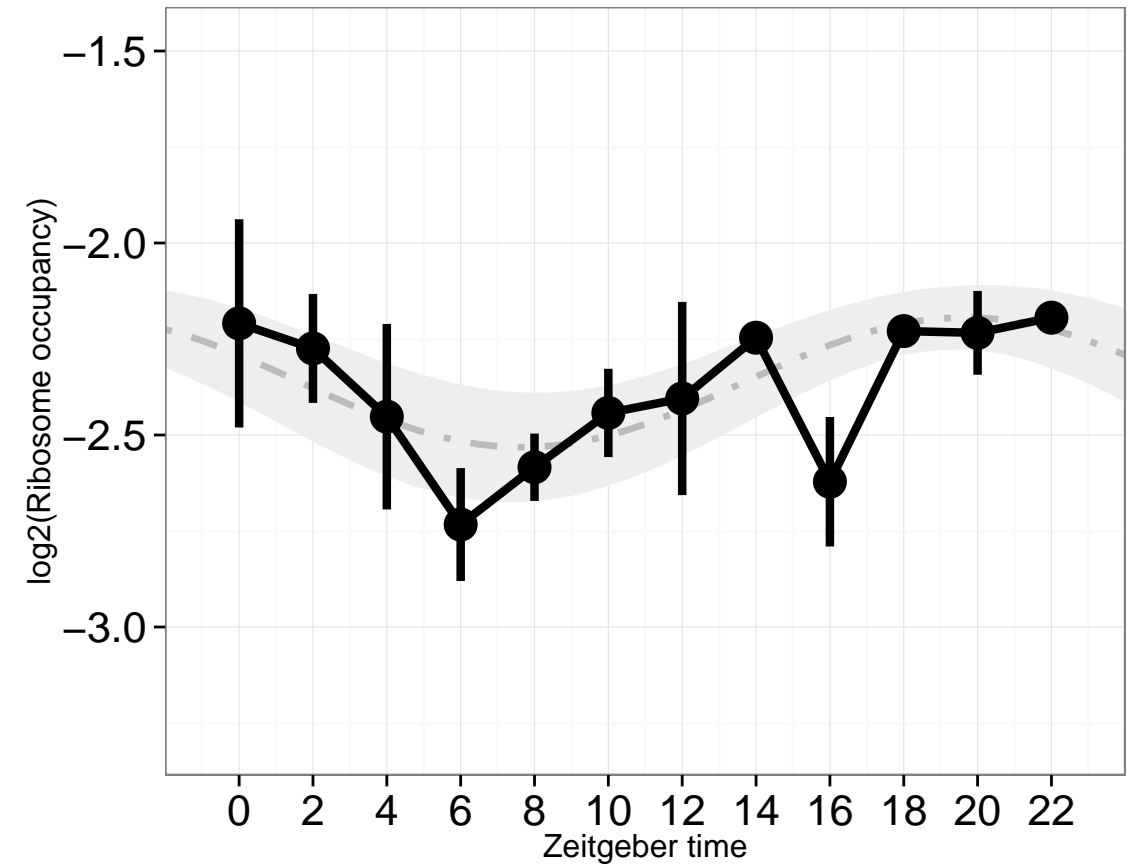

Supplement: SuppDataset_1.zip [file Ankrd13c_set_A.pdf › Supplemental Dataset 1/A-mRNA_nonrhyth_translation_nonrhyth/Ankrd13c_set_A.pdf]

## Ankrd17

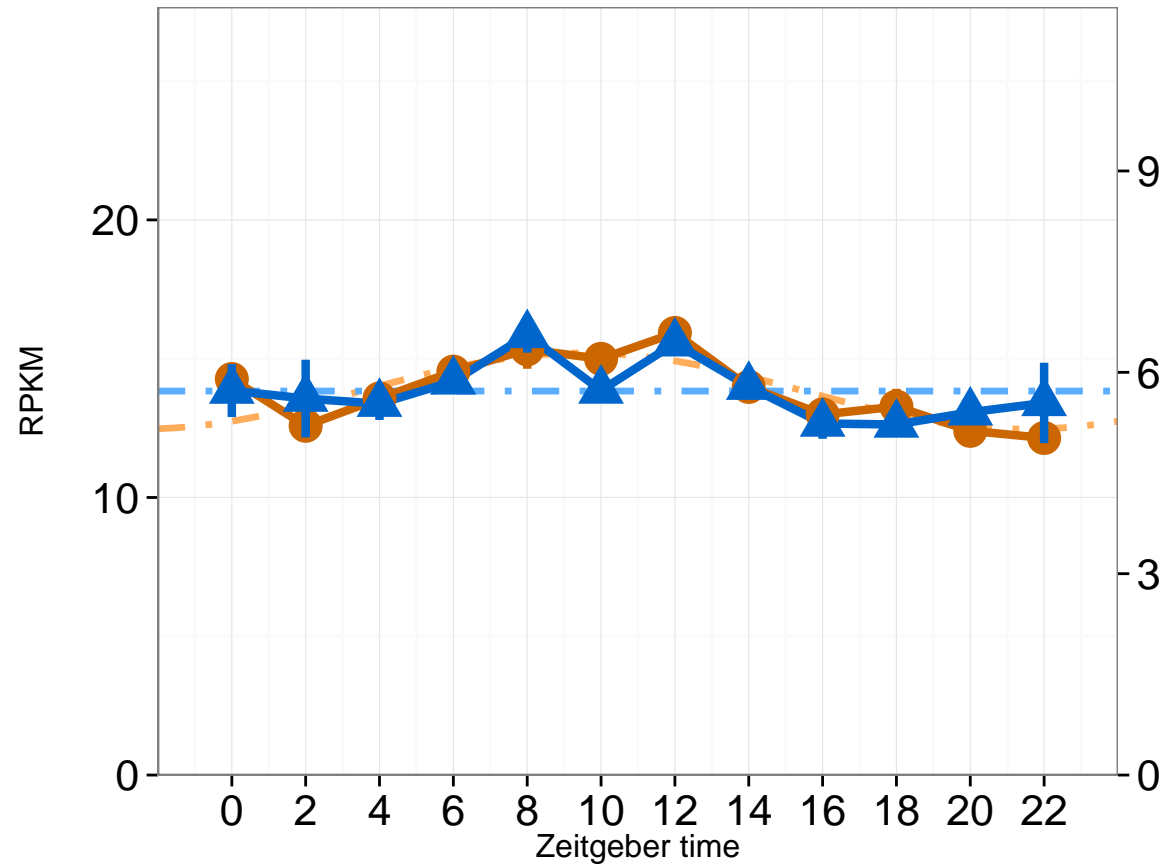

## Ankrd17

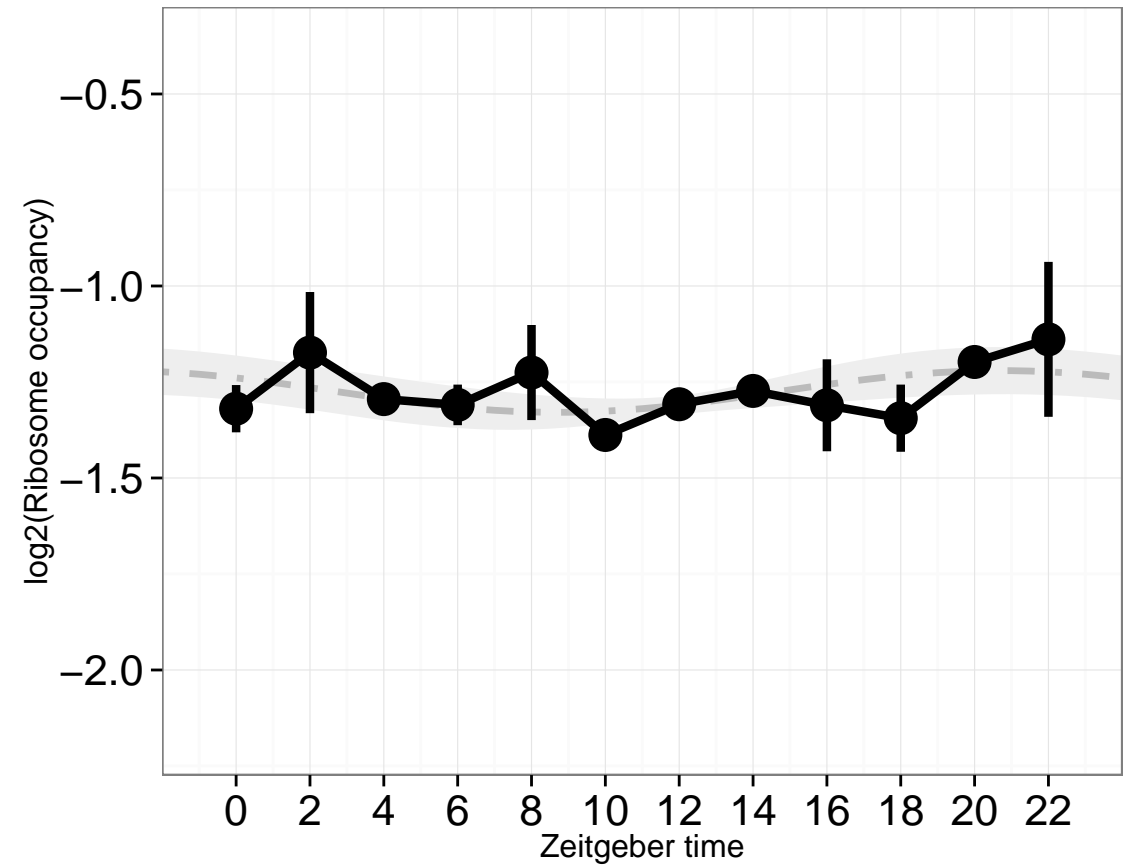

Supplement: SuppDataset_1.zip [file Ankrd17_set_A.pdf › Supplemental Dataset 1/A-mRNA_nonrhyth_translation_nonrhyth/Ankrd17_set_A.pdf]

# Ankrd26

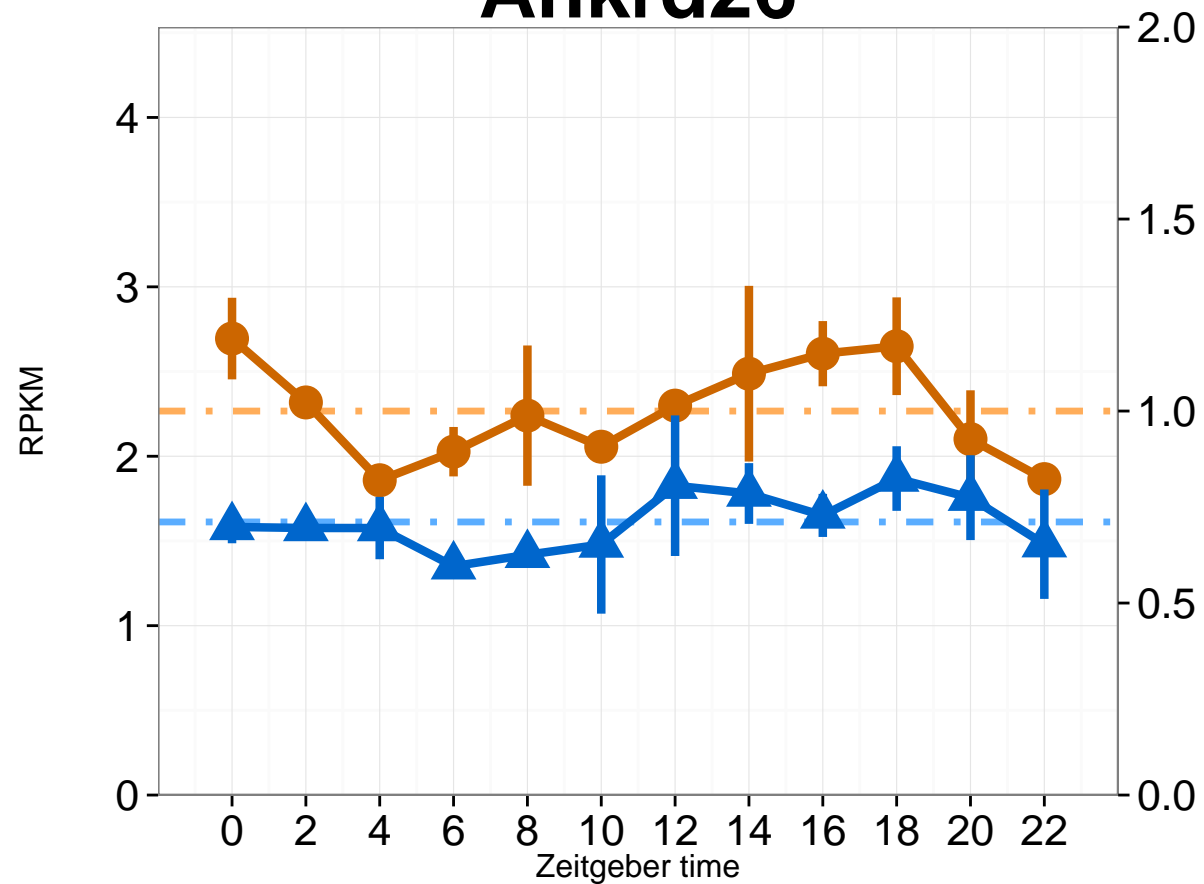

# Ankrd26

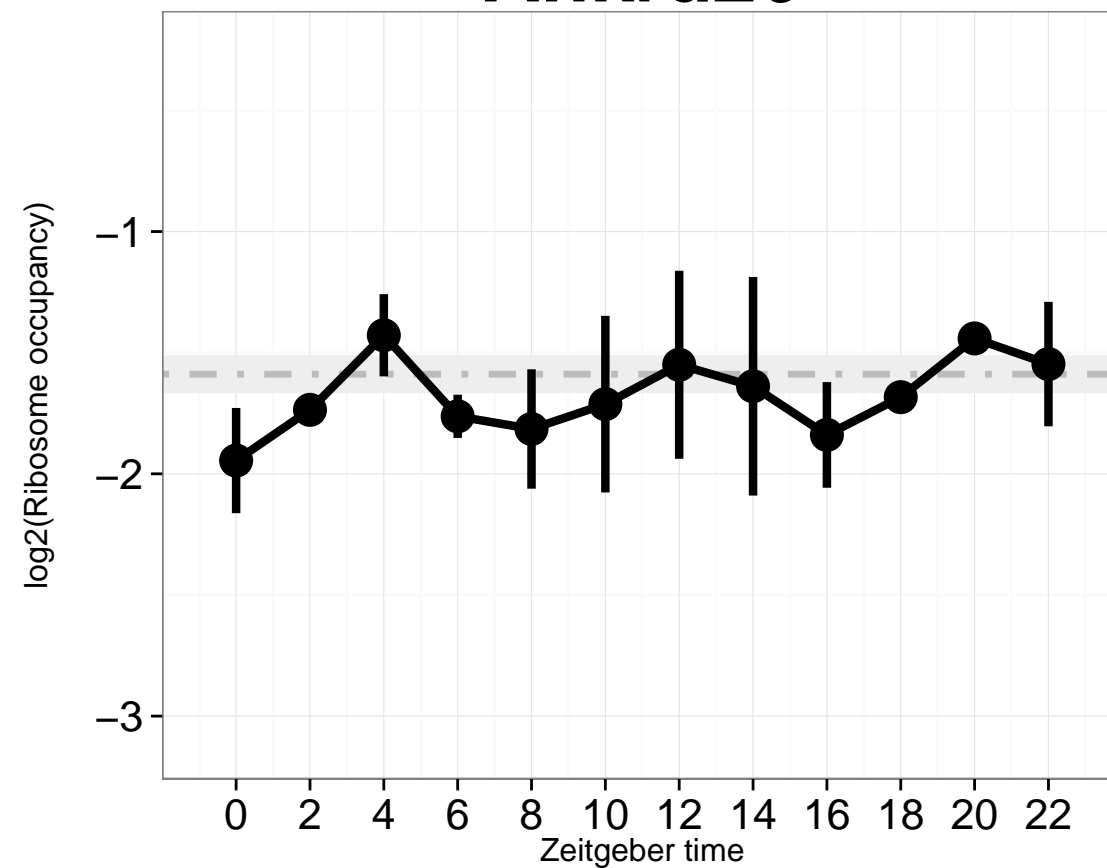

Supplement: SuppDataset_1.zip [file Ankrd26_set_A.pdf › Supplemental Dataset 1/A-mRNA_nonrhyth_translation_nonrhyth/Ankrd26_set_A.pdf]

# Ankrd27

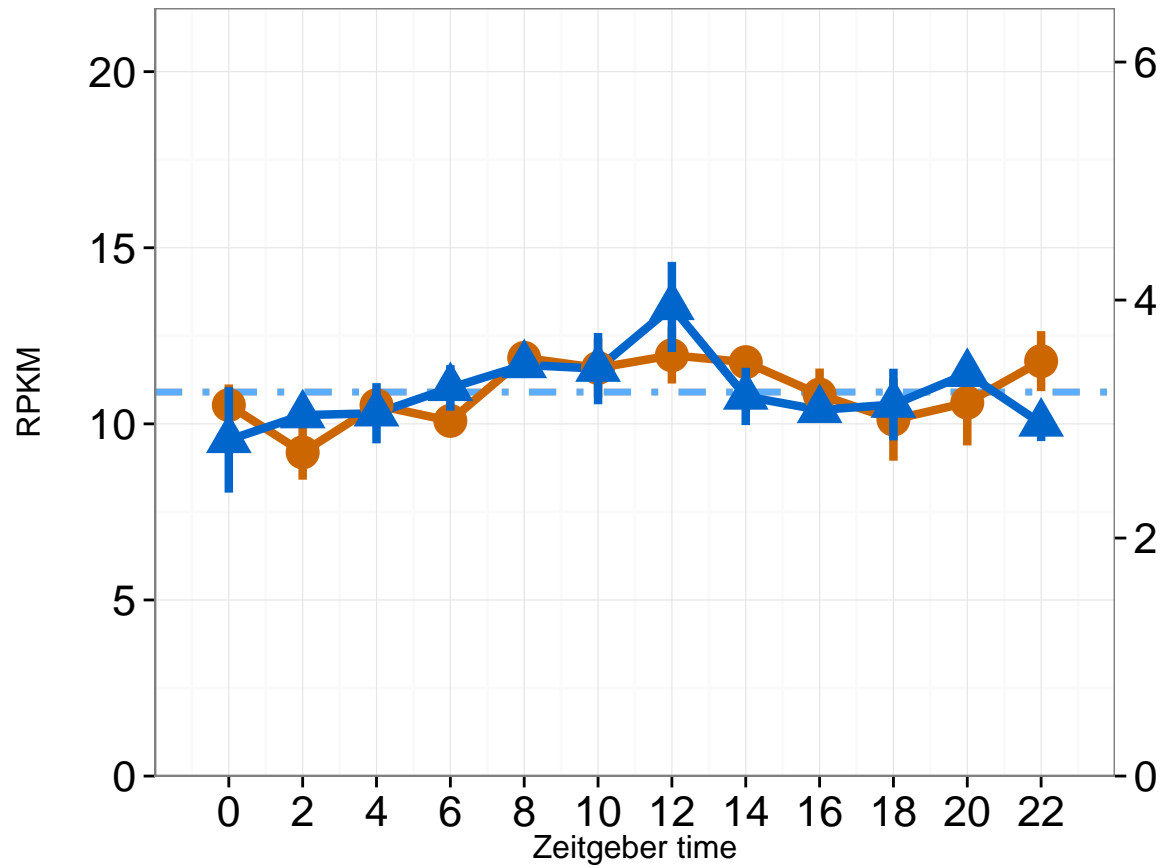

# Ankrd27

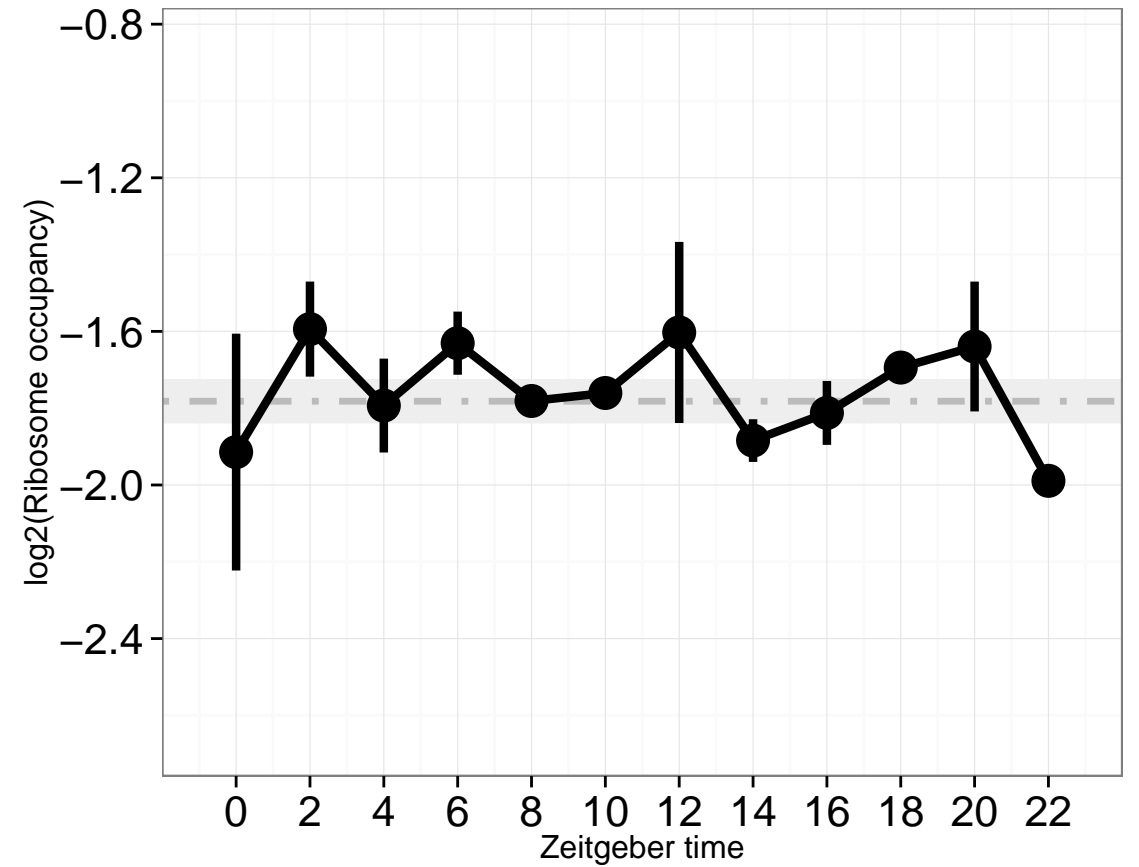

Supplement: SuppDataset_1.zip [file Ankrd27_set_A.pdf › Supplemental Dataset 1/A-mRNA_nonrhyth_translation_nonrhyth/Ankrd27_set_A.pdf]

## Ankrd28

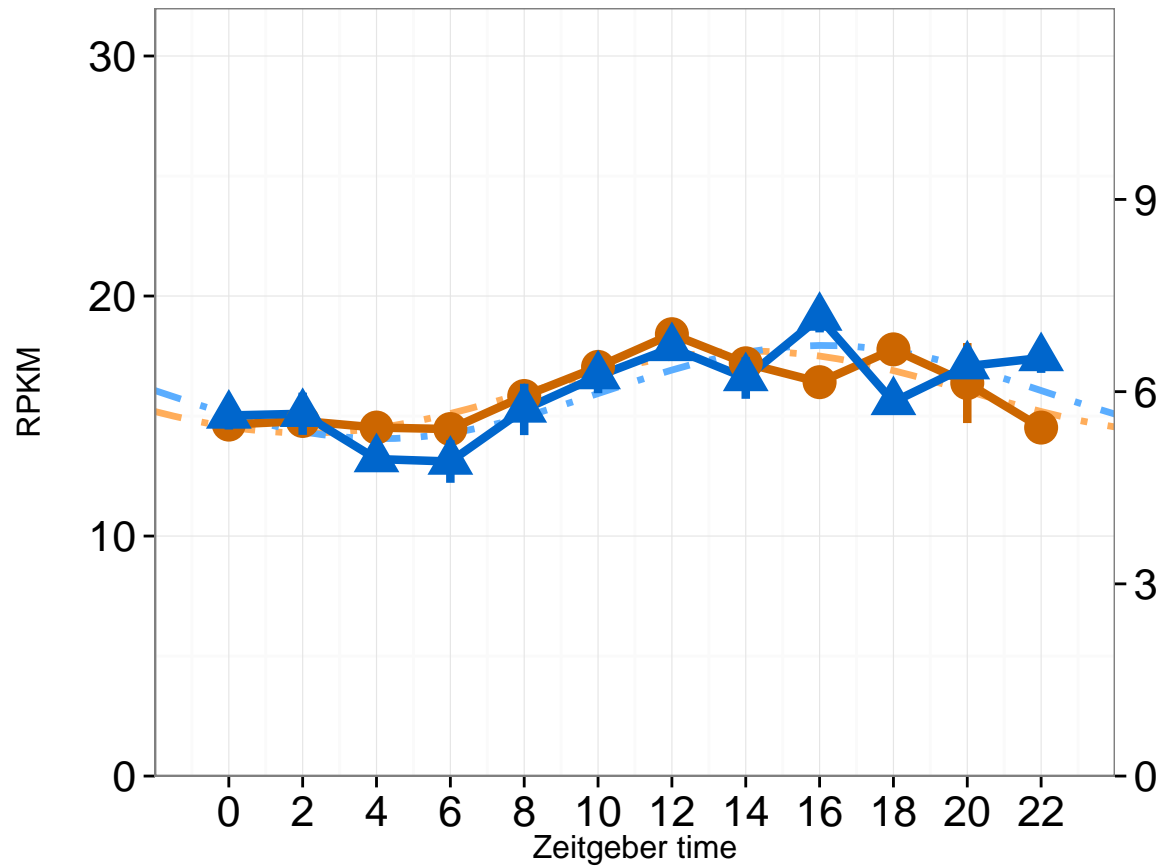

## Ankrd28

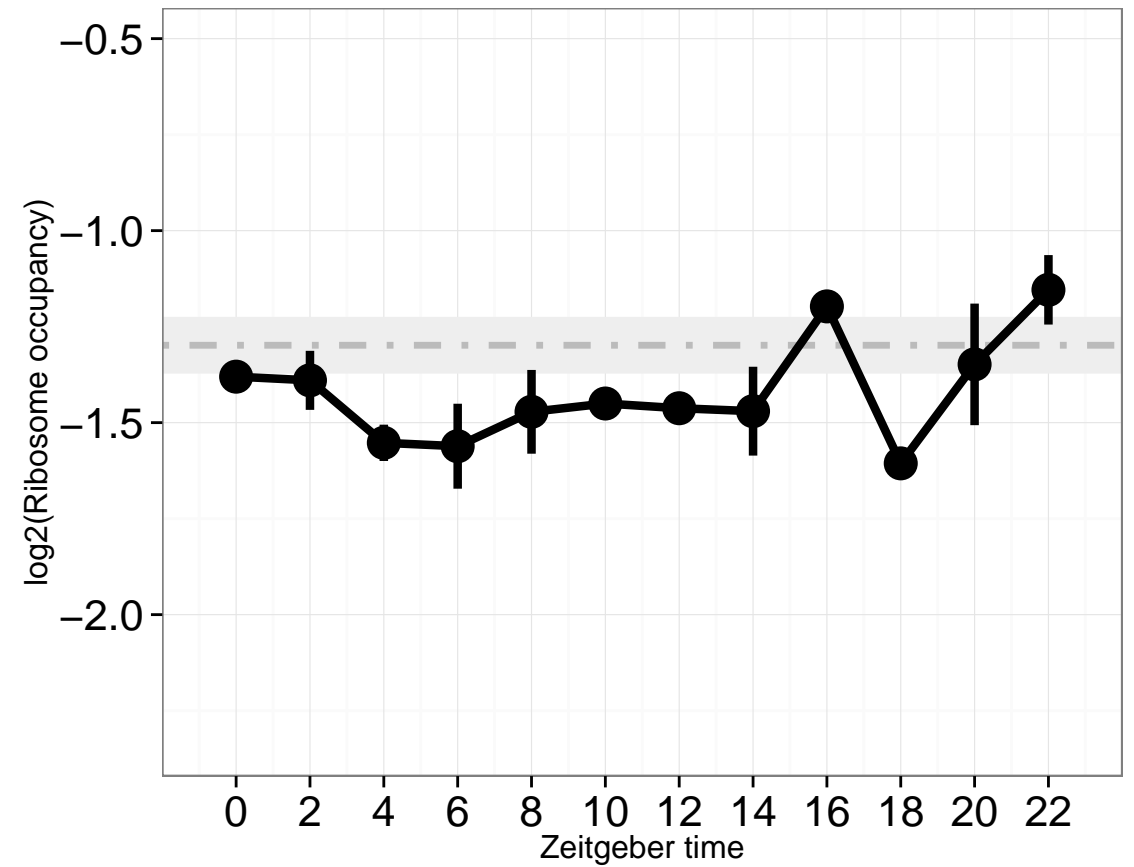

Supplement: SuppDataset_1.zip [file Ankrd28_set_A.pdf › Supplemental Dataset 1/A-mRNA_nonrhyth_translation_nonrhyth/Ankrd28_set_A.pdf]

## Ankrd32

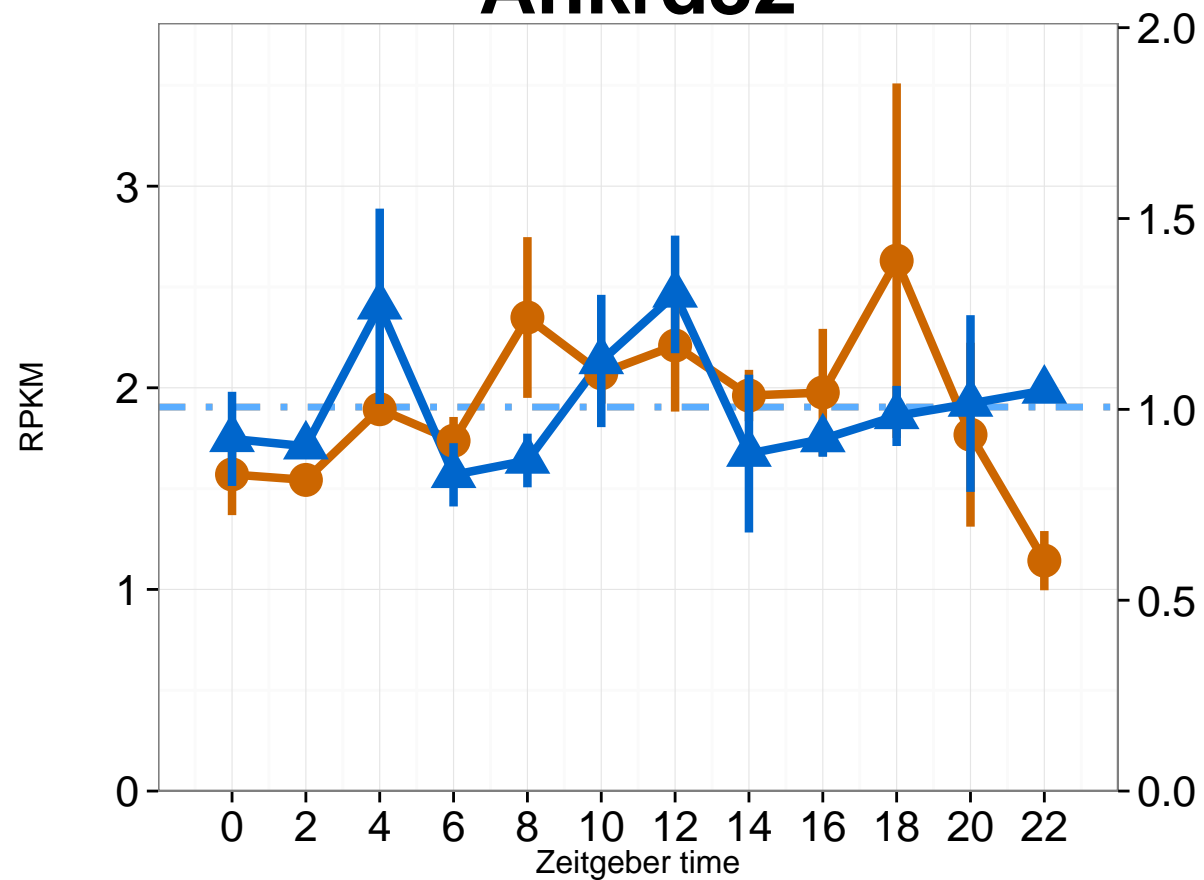

## Ankrd32

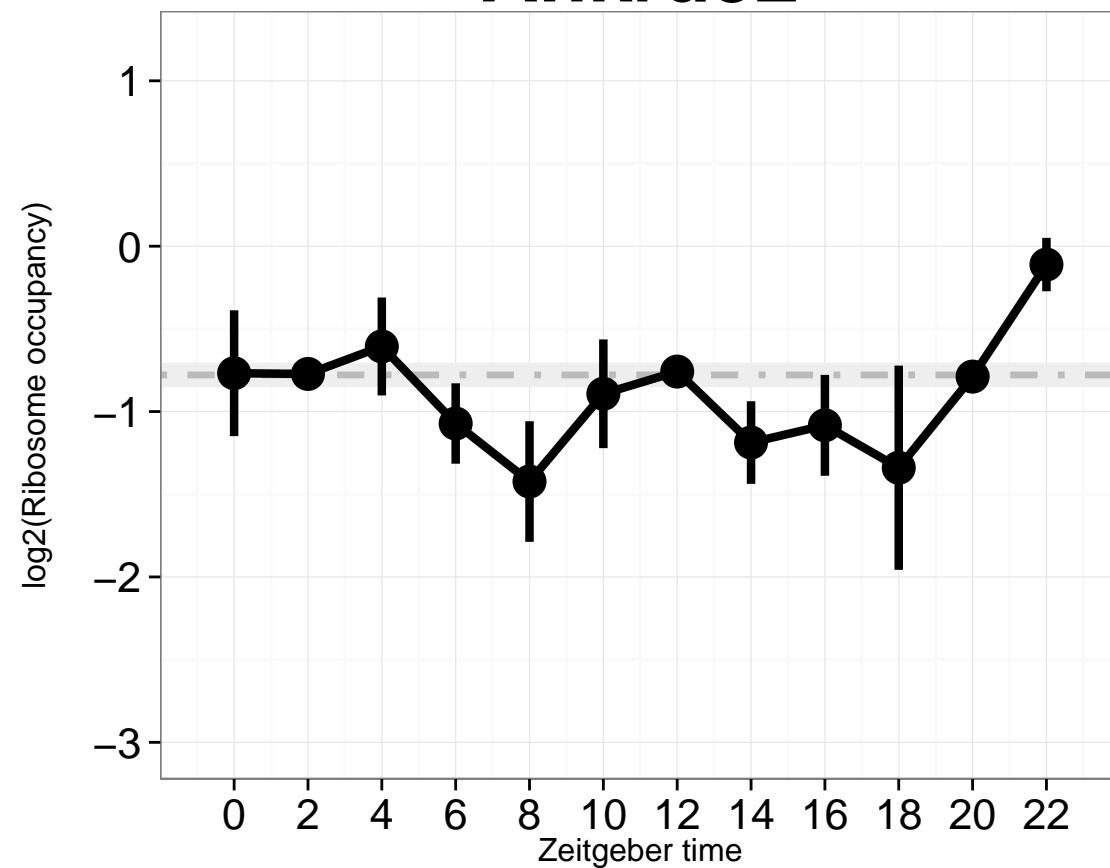

Supplement: SuppDataset_1.zip [file Ankrd32_set_A.pdf › Supplemental Dataset 1/A-mRNA_nonrhyth_translation_nonrhyth/Ankrd32_set_A.pdf]

# Ankrd33b

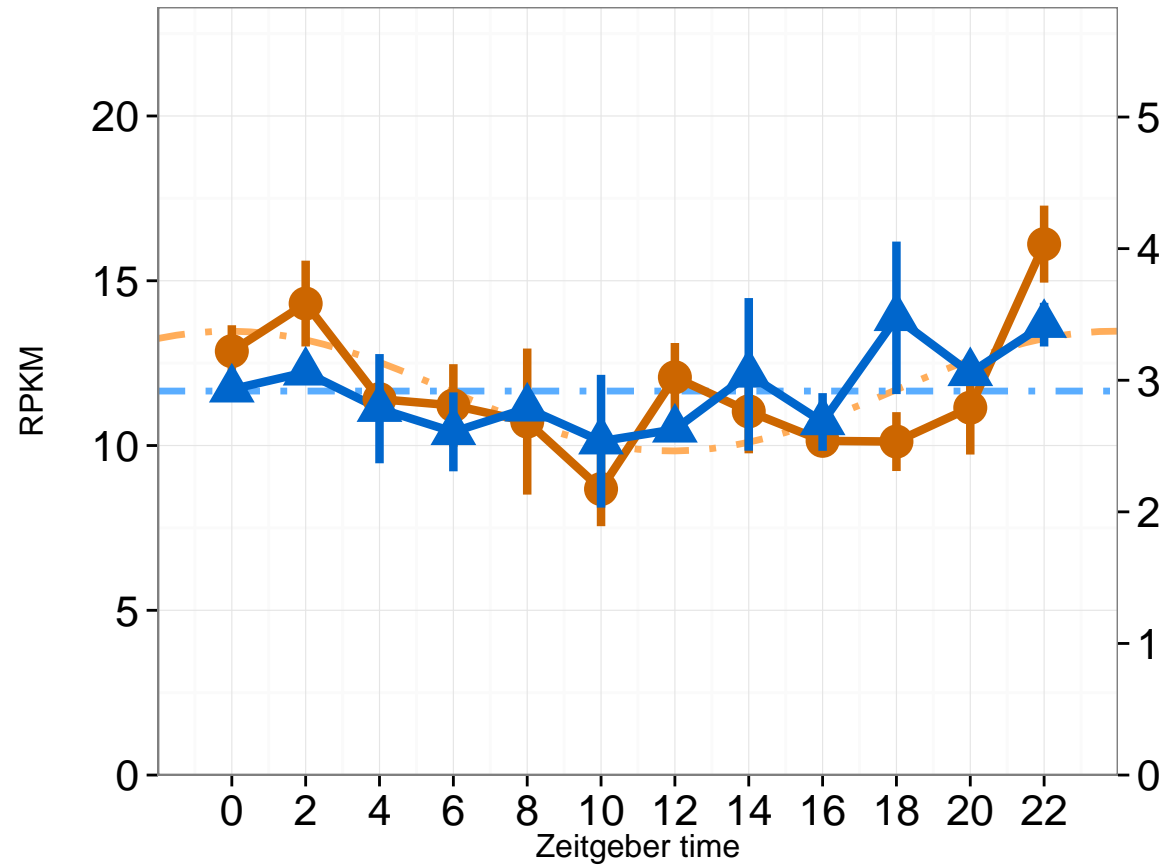

# Ankrd33b

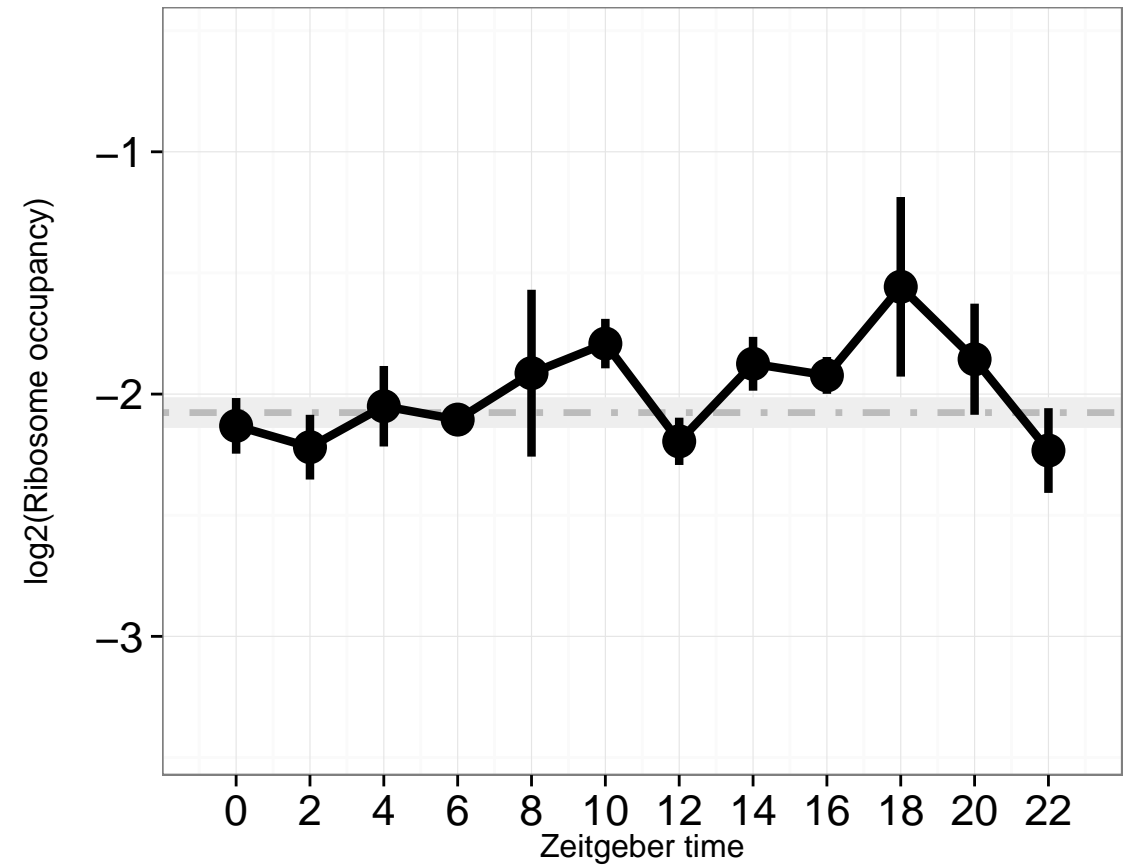

Supplement: SuppDataset_1.zip [file Ankrd33b_set_A.pdf › Supplemental Dataset 1/A-mRNA_nonrhyth_translation_nonrhyth/Ankrd33b_set_A.pdf]

## Ankrd37

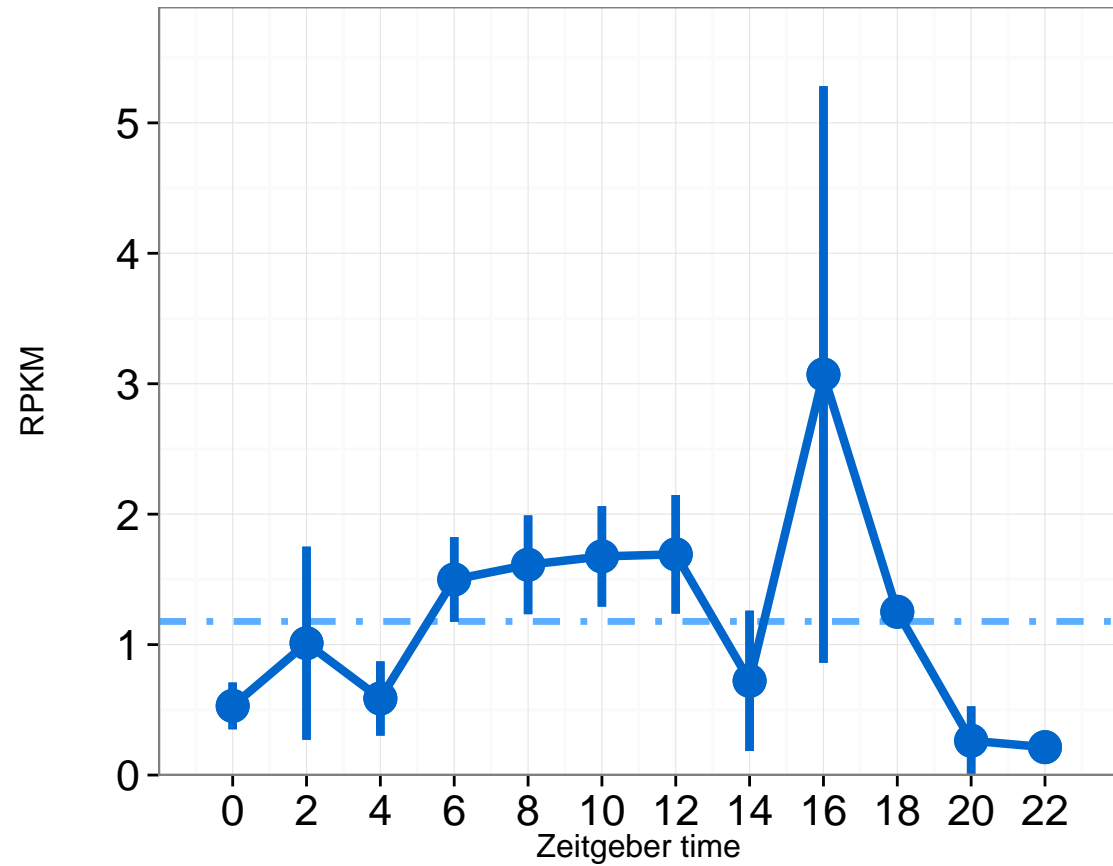

## Ankrd37 log<sub>2</sub>(Ribosome occupanc

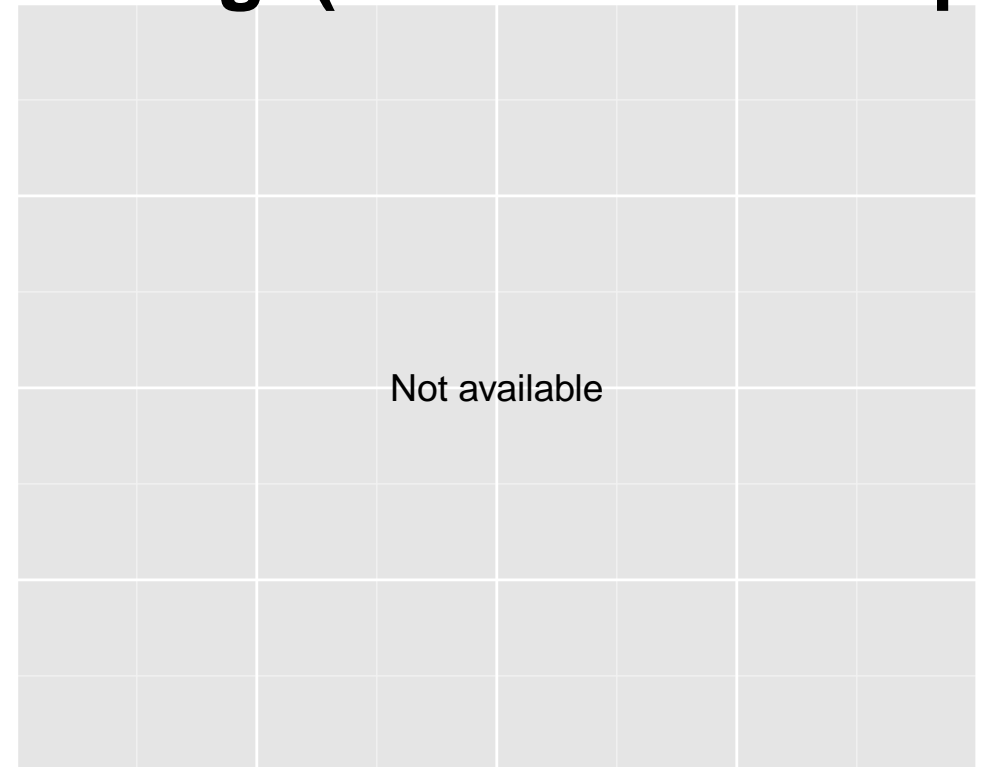

Supplement: SuppDataset_1.zip [file Ankrd37_set_A.pdf › Supplemental Dataset 1/A-mRNA_nonrhyth_translation_nonrhyth/Ankrd37_set_A.pdf]

# Ankrd39

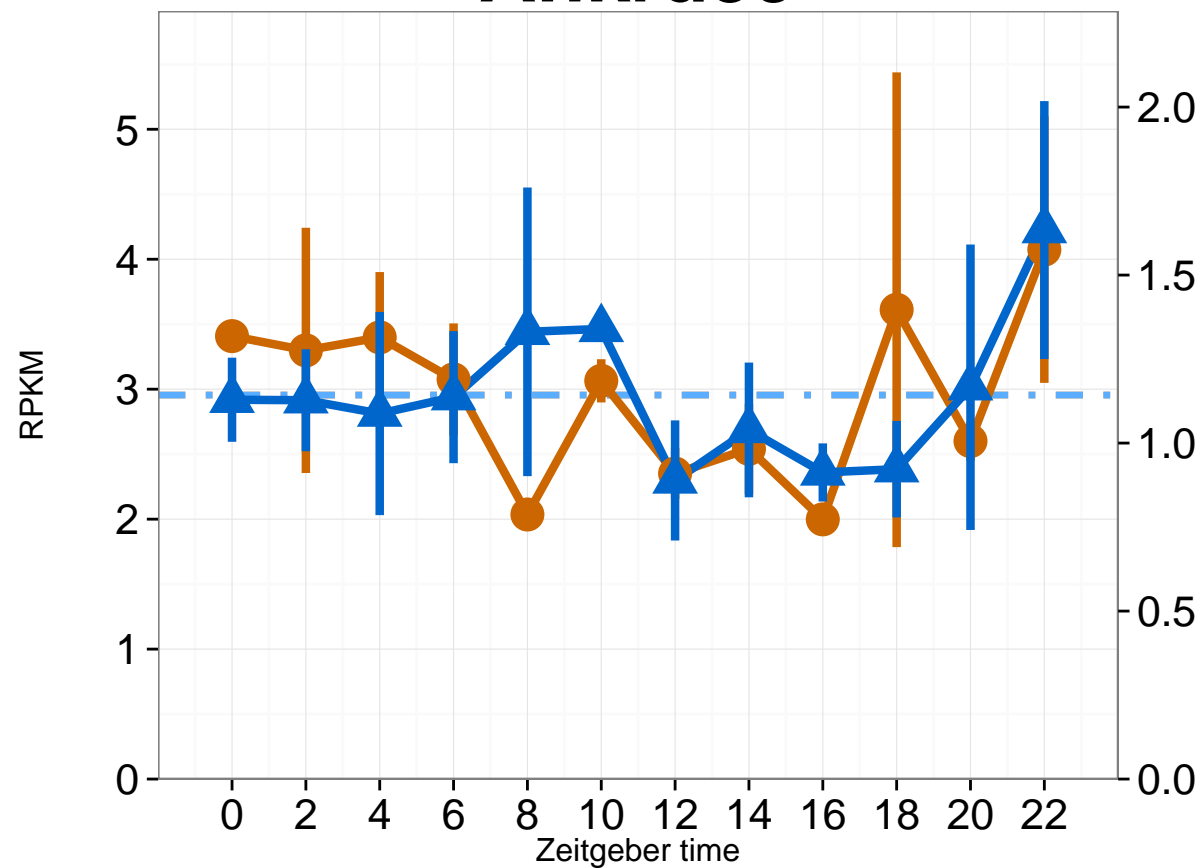

# Ankrd39

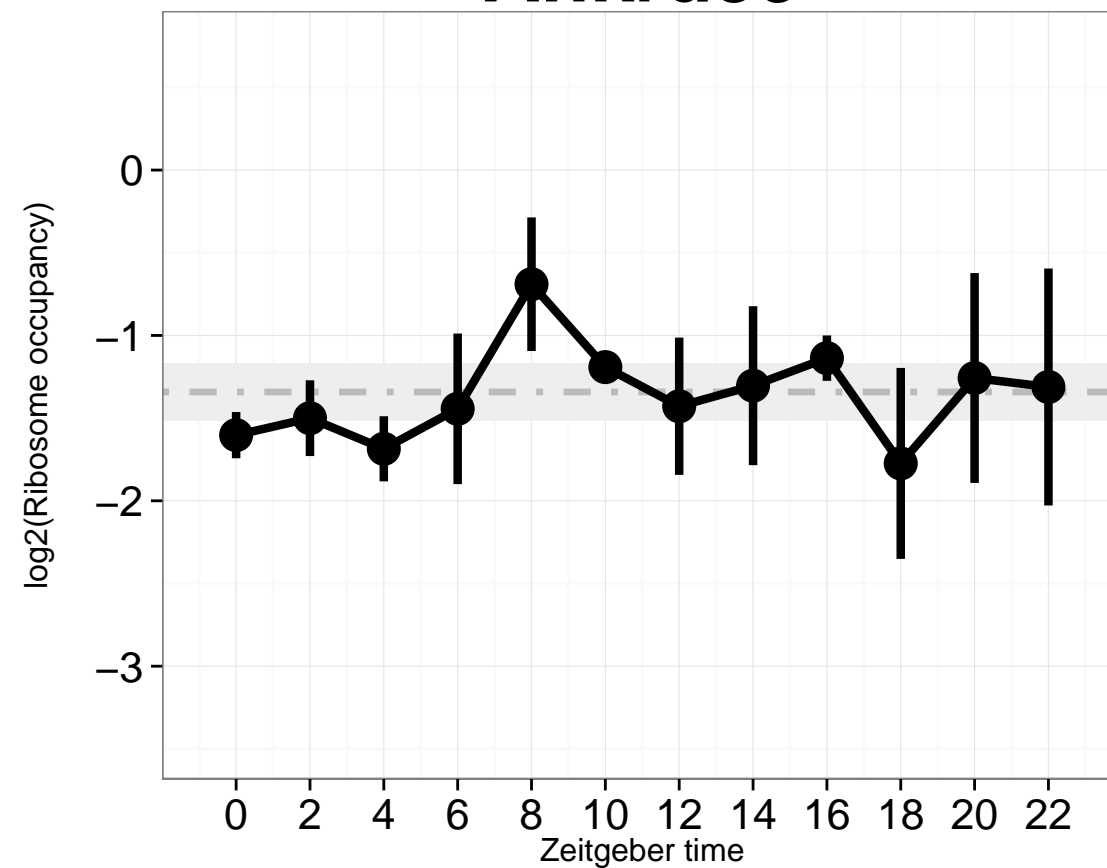

Supplement: SuppDataset_1.zip [file Ankrd39_set_A.pdf › Supplemental Dataset 1/A-mRNA_nonrhyth_translation_nonrhyth/Ankrd39_set_A.pdf]

## Ankrd40

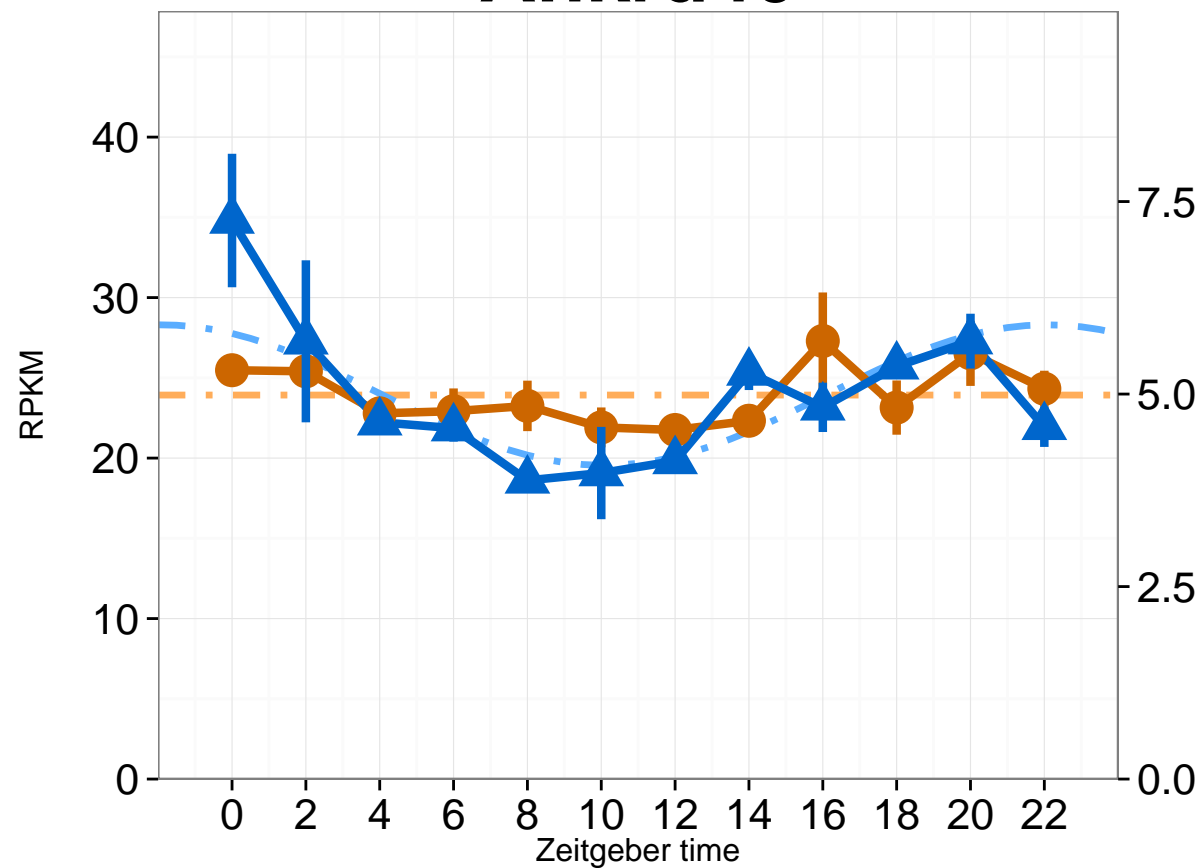

## Ankrd40

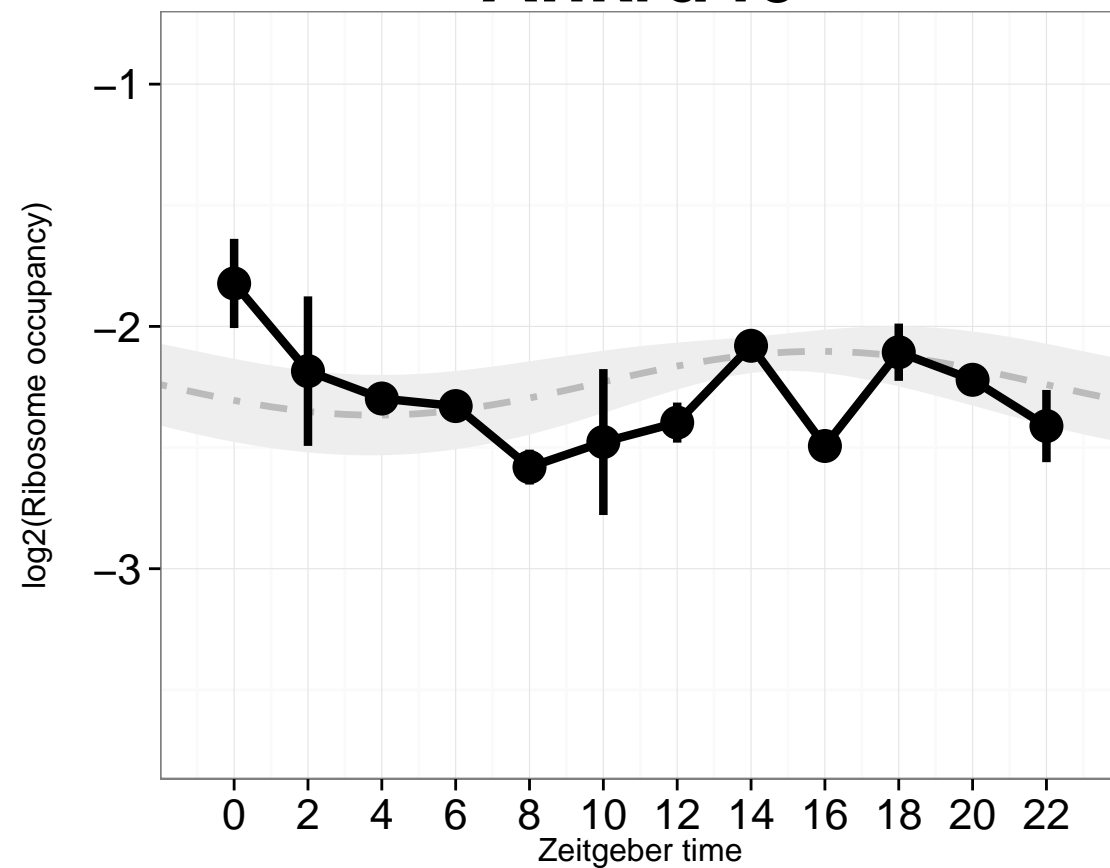

Supplement: SuppDataset_1.zip [file Ankrd40_set_A.pdf › Supplemental Dataset 1/A-mRNA_nonrhyth_translation_nonrhyth/Ankrd40_set_A.pdf]

## Ankrd44

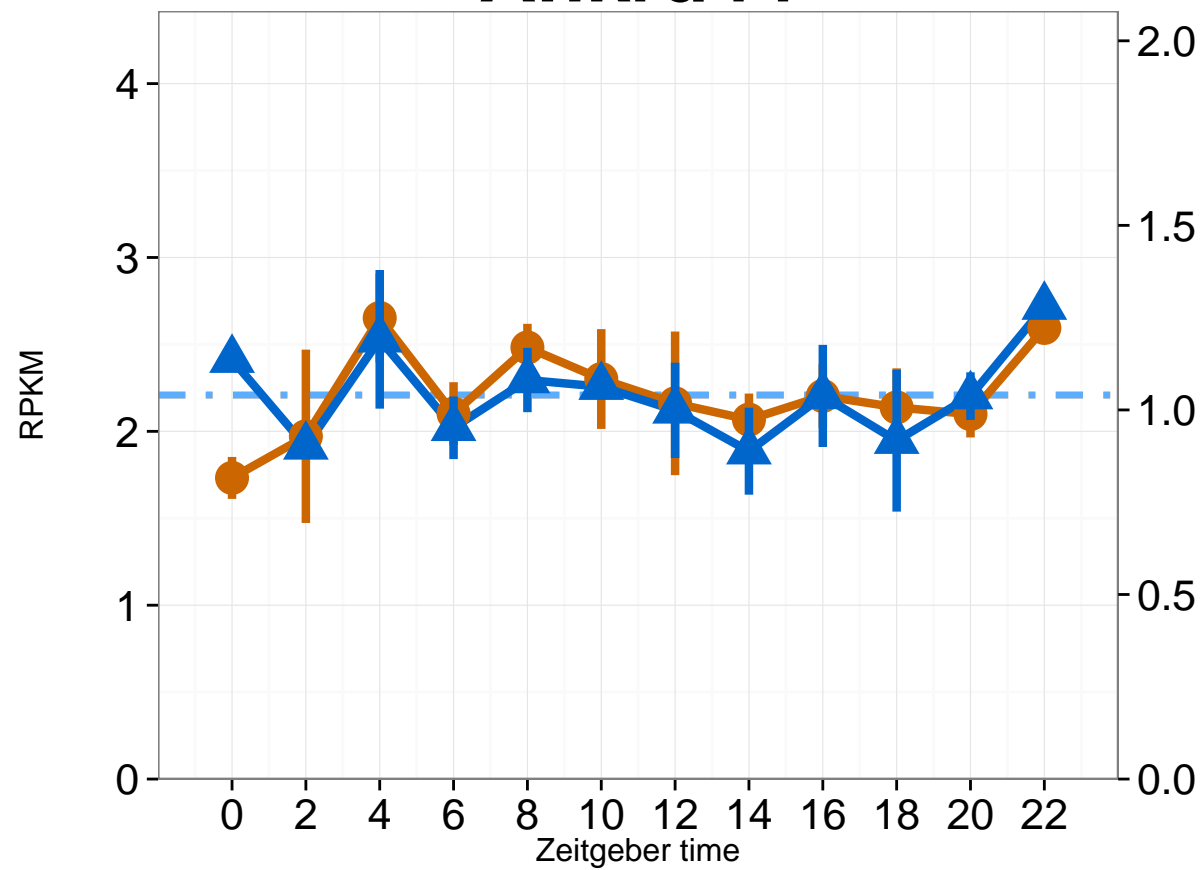

## Ankrd44

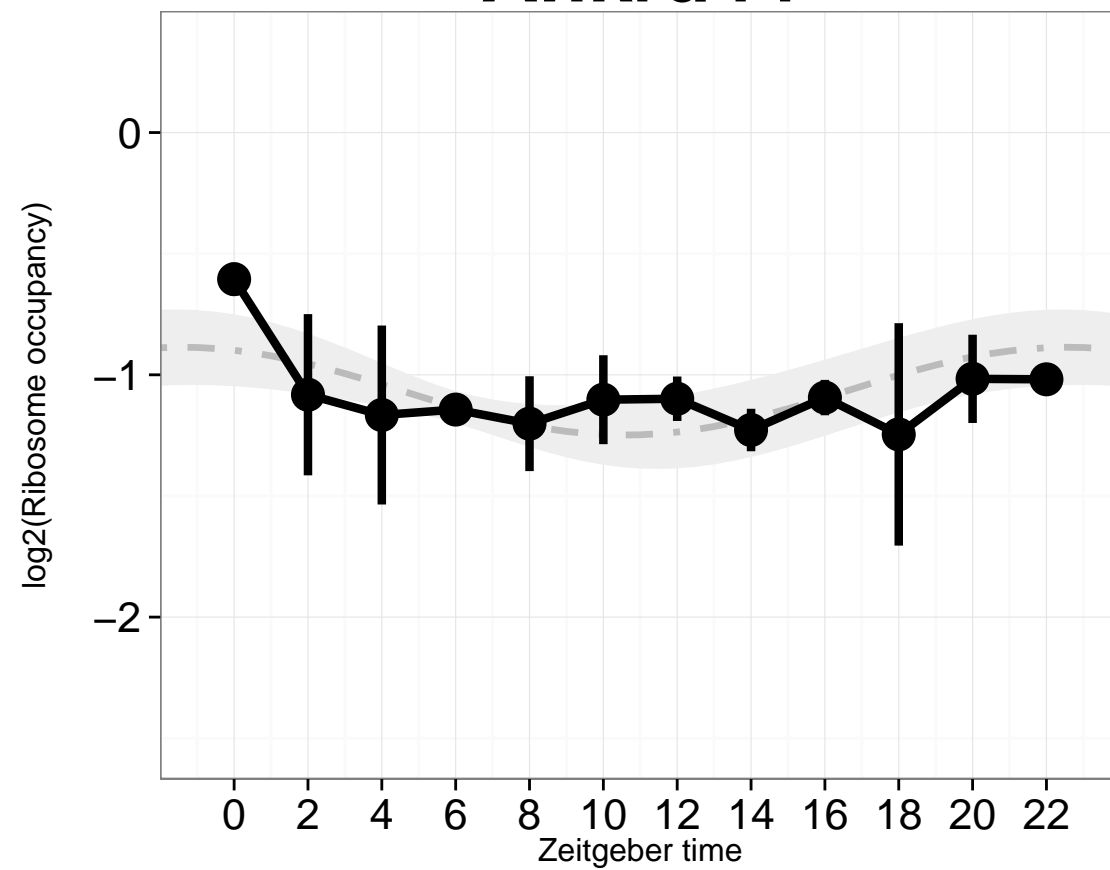

Supplement: SuppDataset_1.zip [file Ankrd44_set_A.pdf › Supplemental Dataset 1/A-mRNA_nonrhyth_translation_nonrhyth/Ankrd44_set_A.pdf]

## Ankrd46

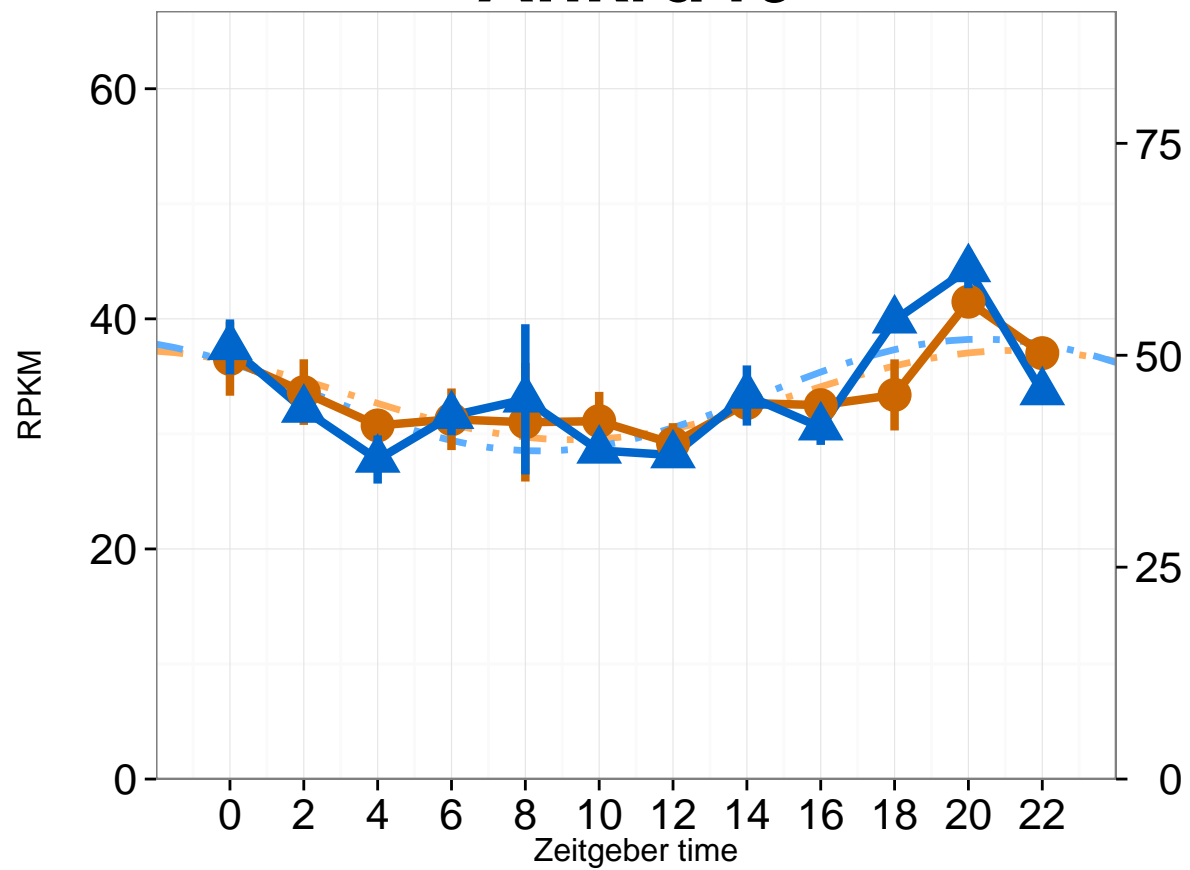

## Ankrd46

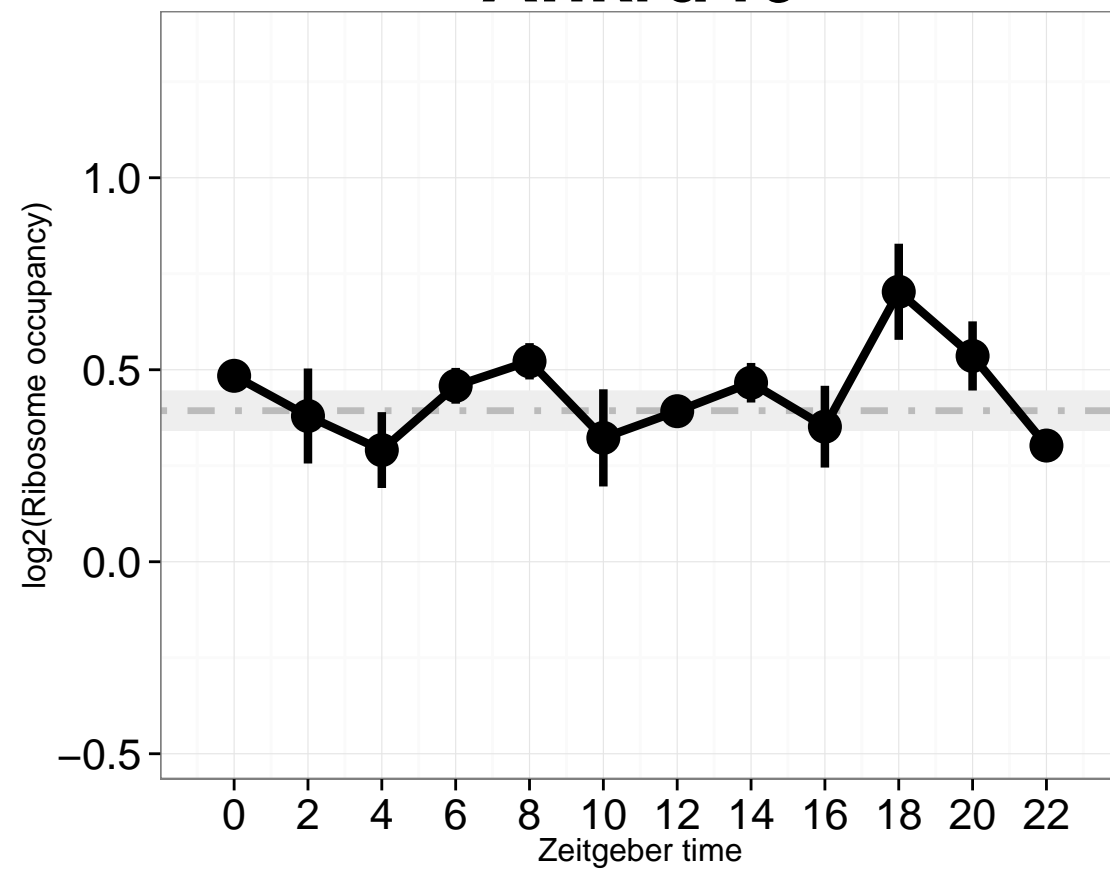

Supplement: SuppDataset_1.zip [file Ankrd46_set_A.pdf › Supplemental Dataset 1/A-mRNA_nonrhyth_translation_nonrhyth/Ankrd46_set_A.pdf]

## Ankrd49

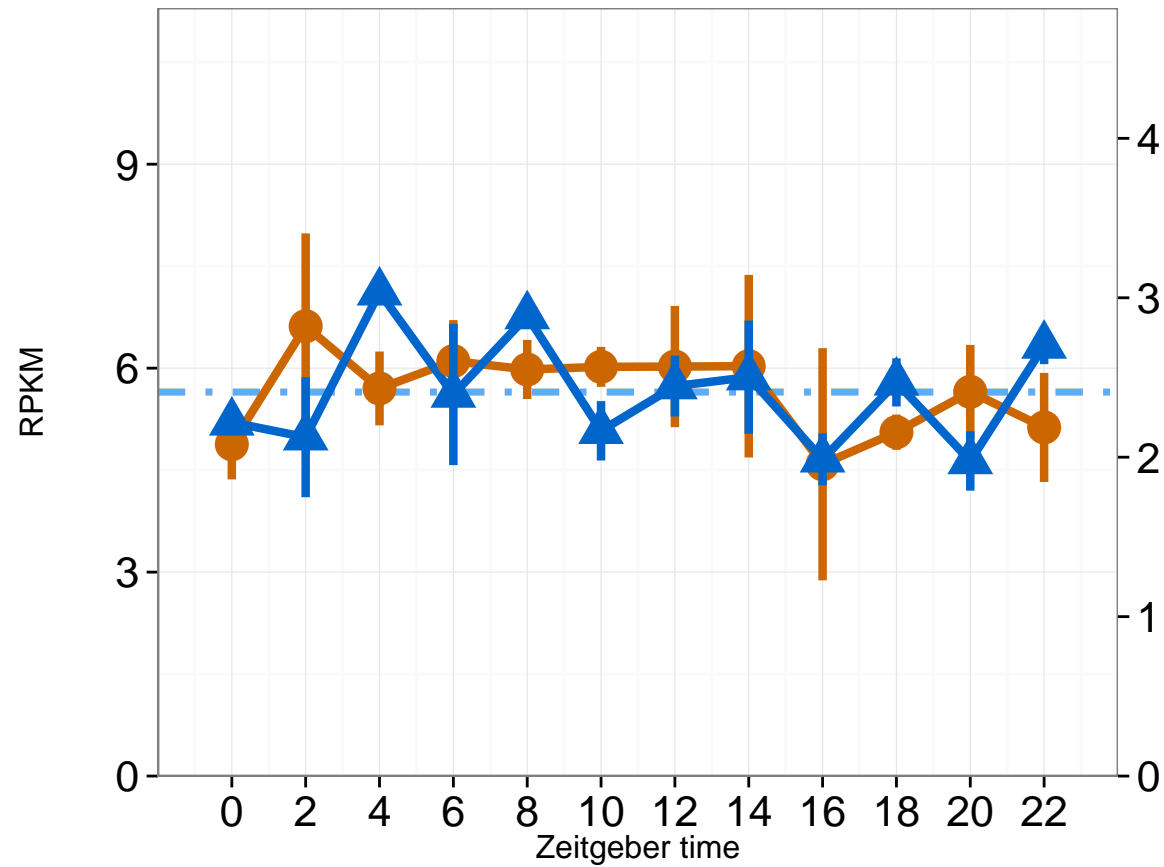

## Ankrd49

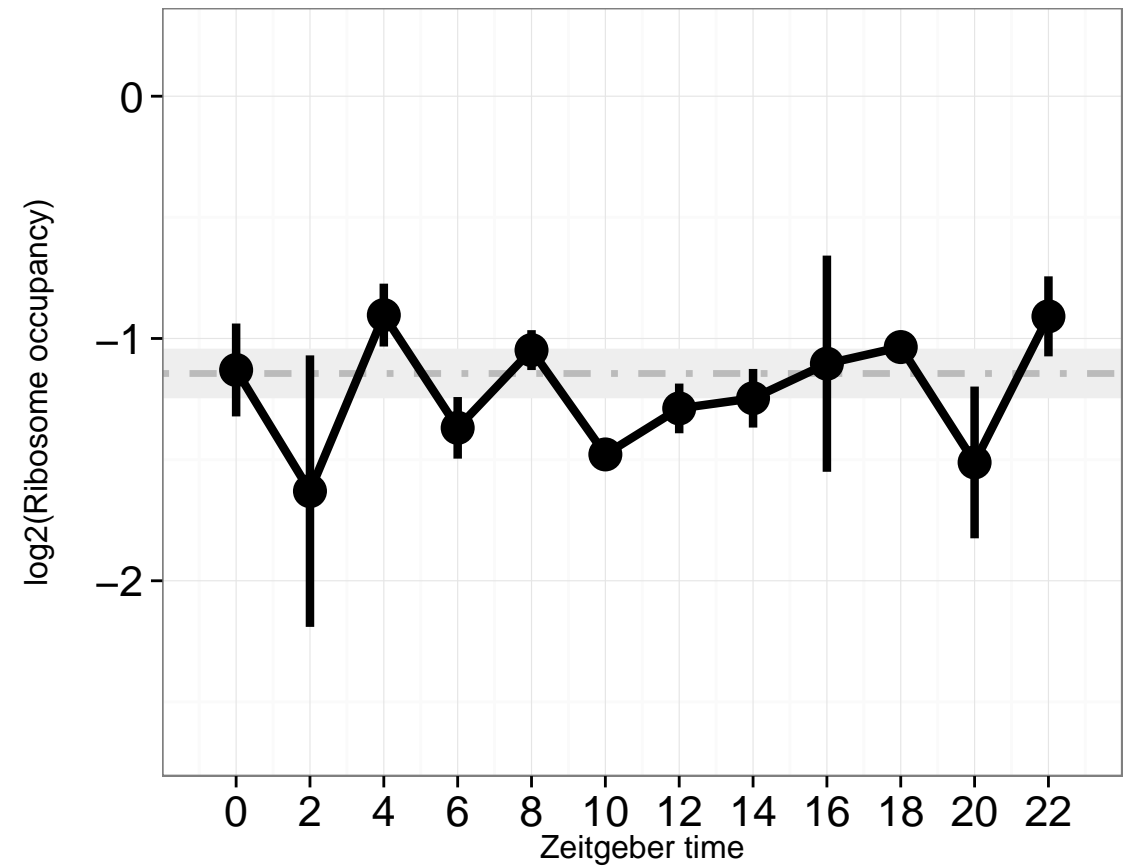

Supplement: SuppDataset_1.zip [file Ankrd49_set_A.pdf › Supplemental Dataset 1/A-mRNA_nonrhyth_translation_nonrhyth/Ankrd49_set_A.pdf]

## Ankrd52

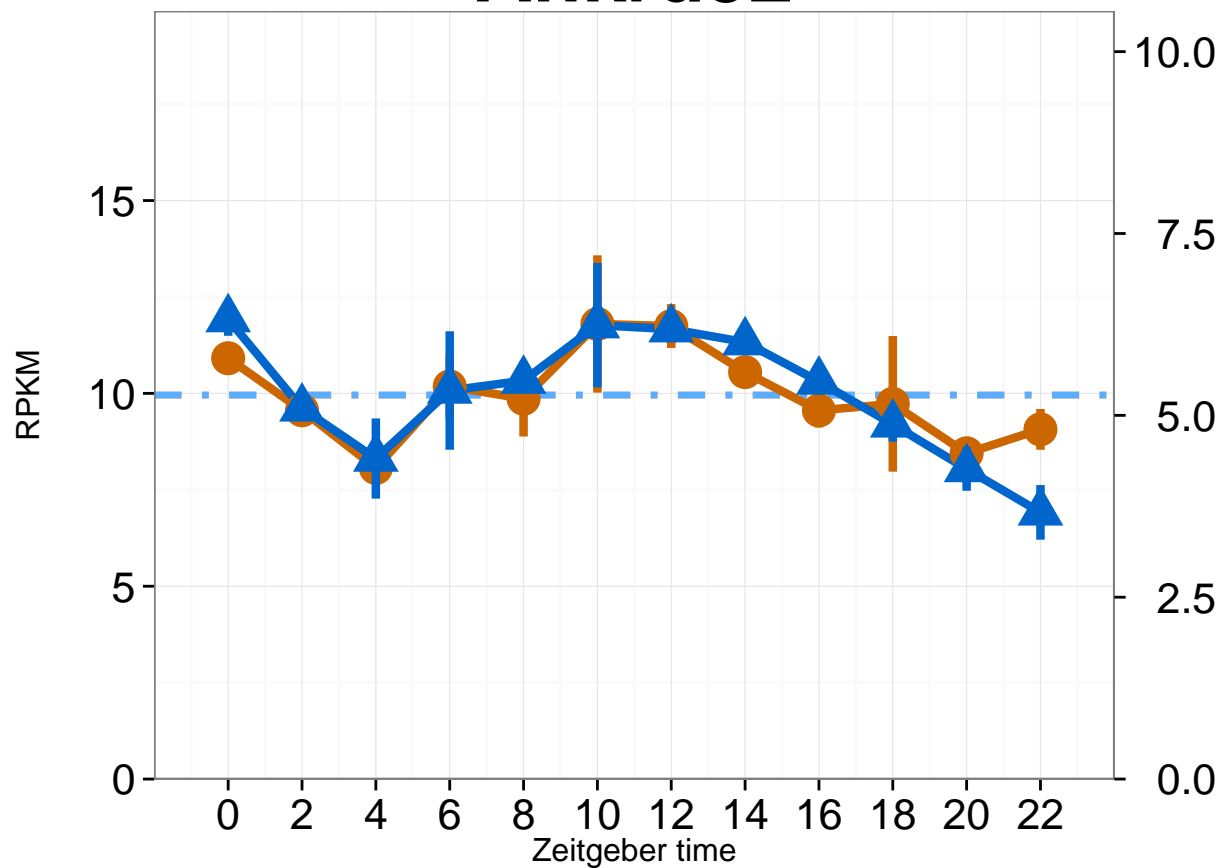

## Ankrd52

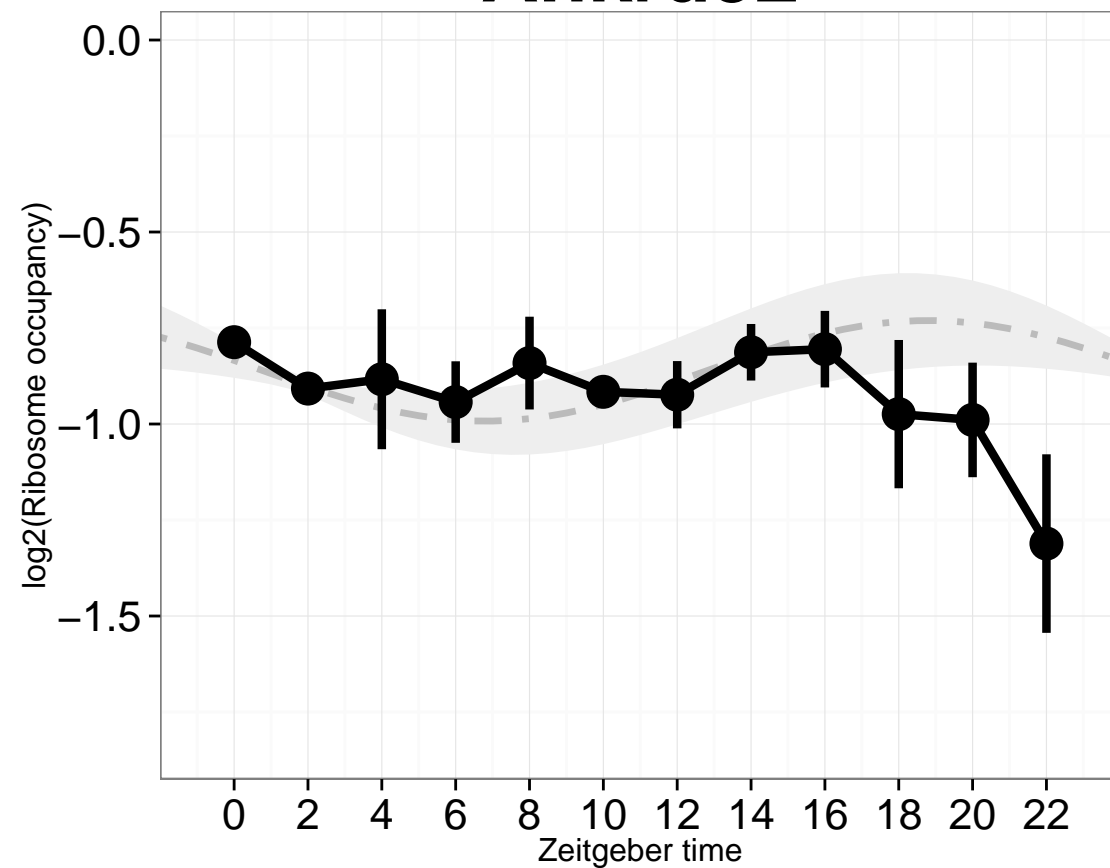

Supplement: SuppDataset_1.zip [file Ankrd52_set_A.pdf › Supplemental Dataset 1/A-mRNA_nonrhyth_translation_nonrhyth/Ankrd52_set_A.pdf]

## Anks1

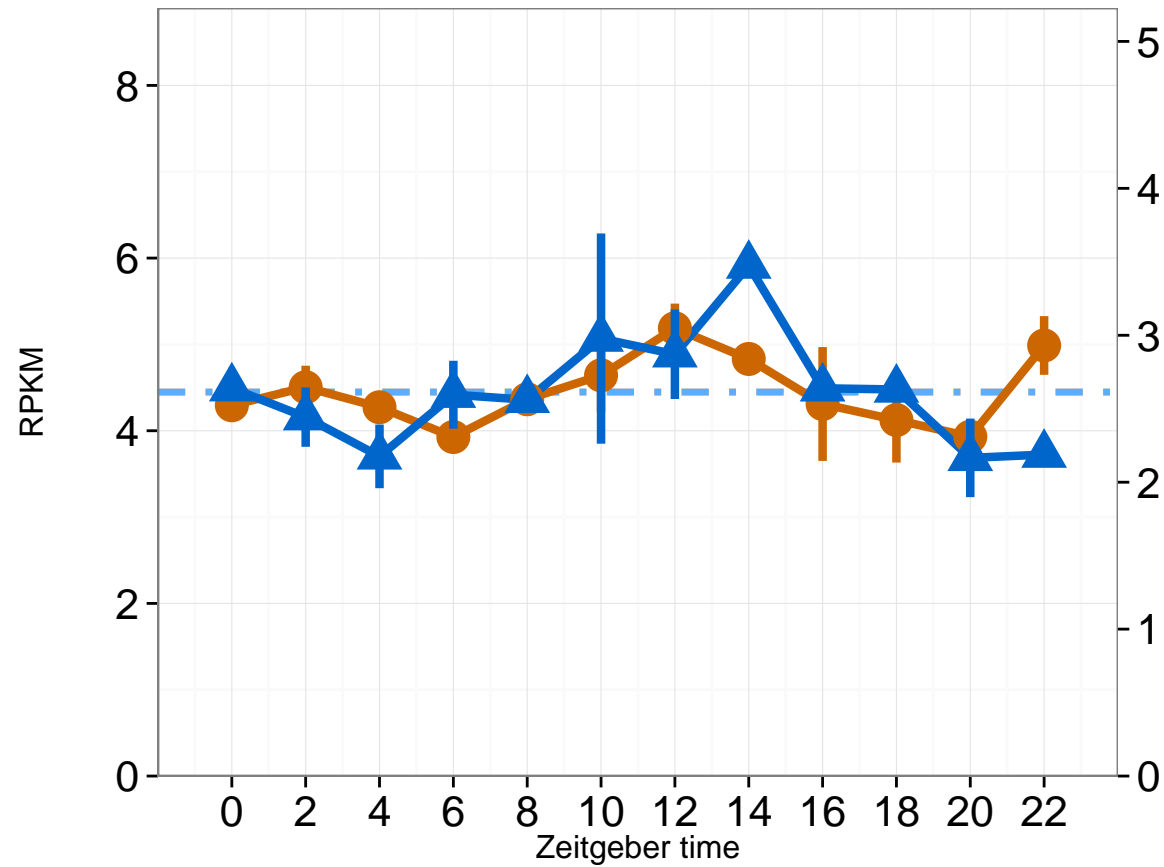

## Anks1

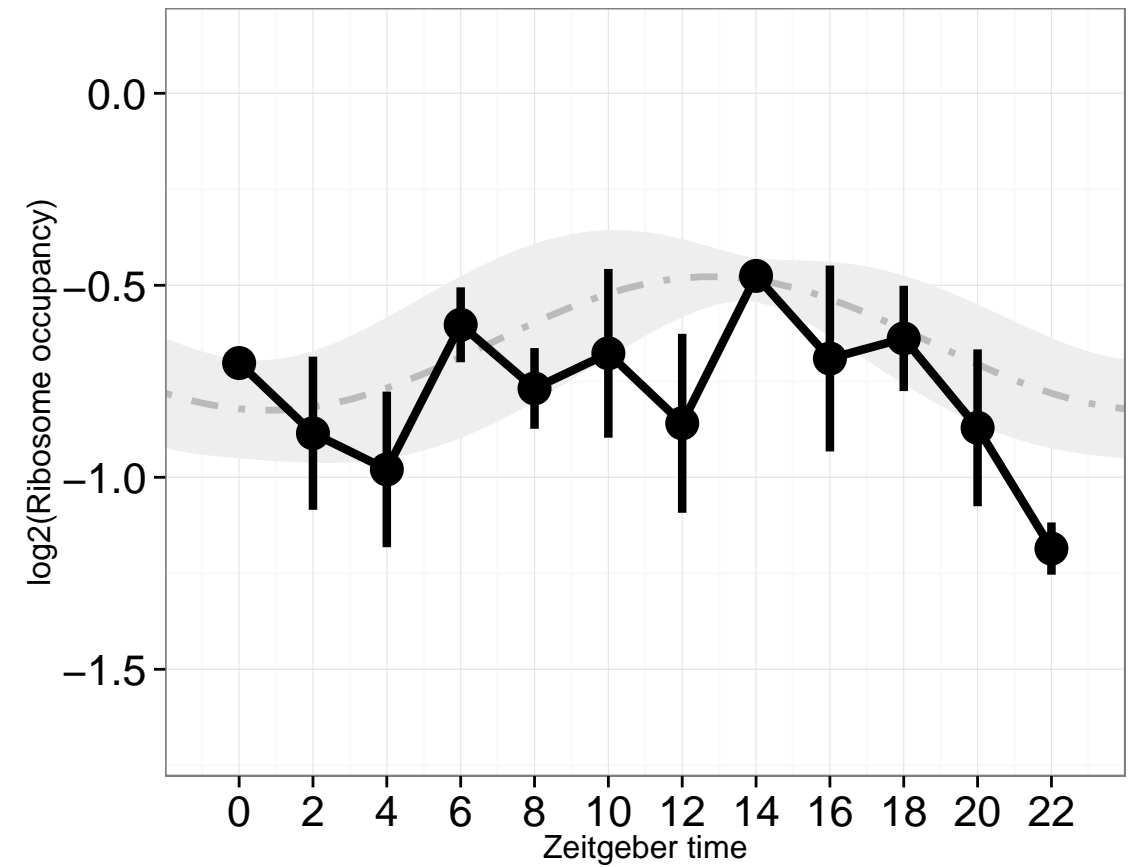

Supplement: SuppDataset_1.zip [file Anks1_set_A.pdf › Supplemental Dataset 1/A-mRNA_nonrhyth_translation_nonrhyth/Anks1_set_A.pdf]

## Anks3

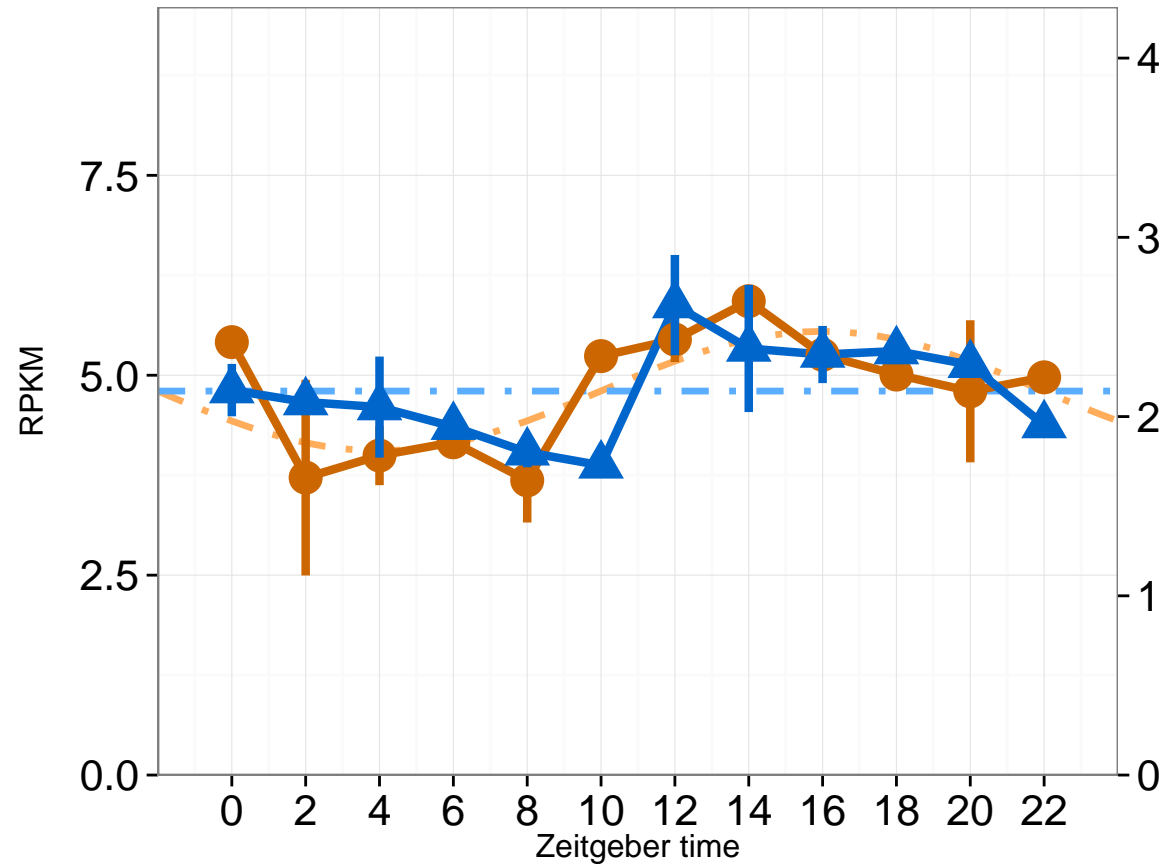

## Anks3

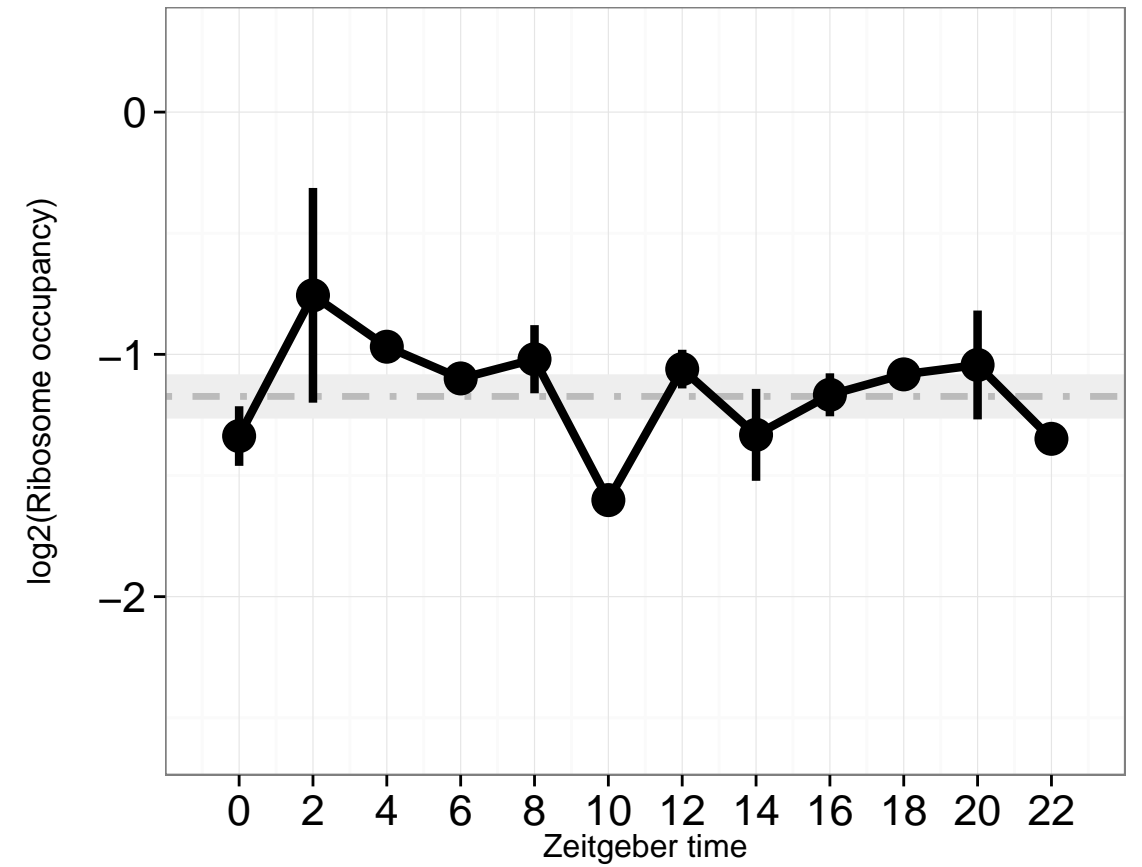

Supplement: SuppDataset_1.zip [file Anks3_set_A.pdf › Supplemental Dataset 1/A-mRNA_nonrhyth_translation_nonrhyth/Anks3_set_A.pdf]

## Ankzf1

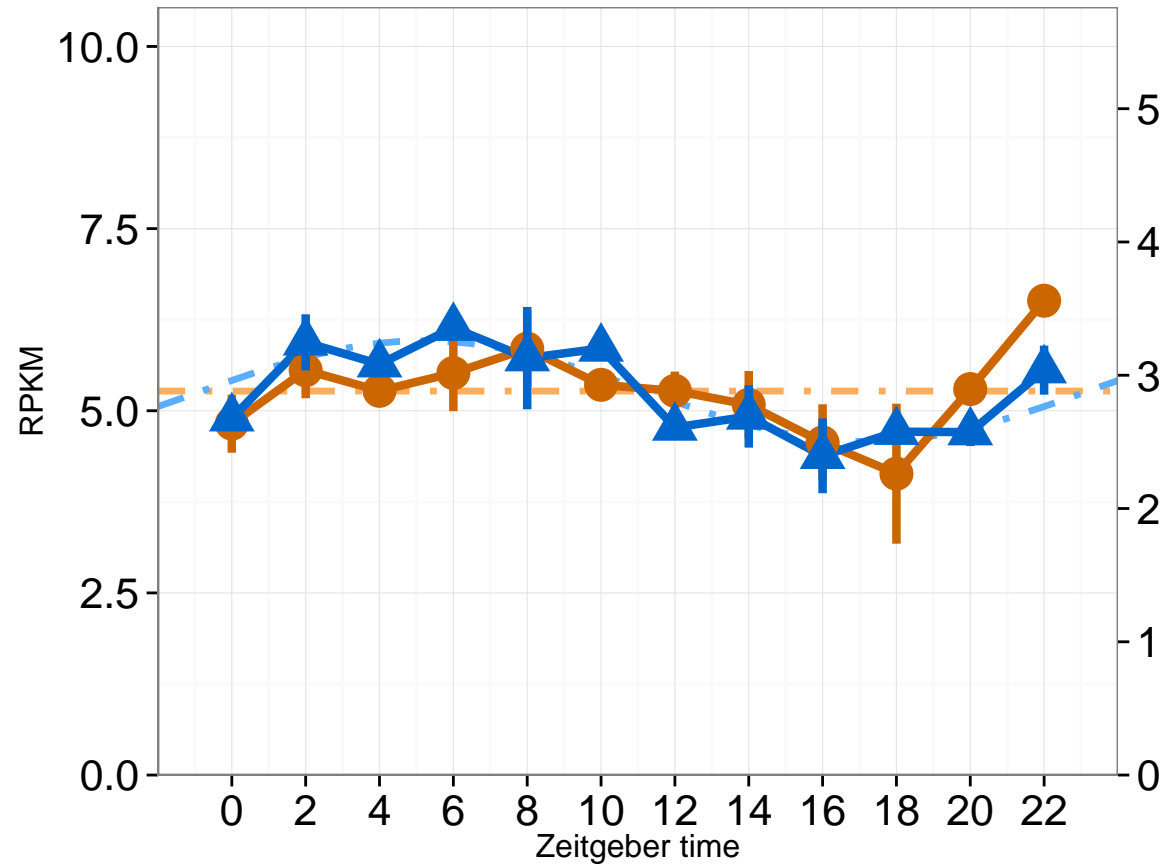

## Ankzf1

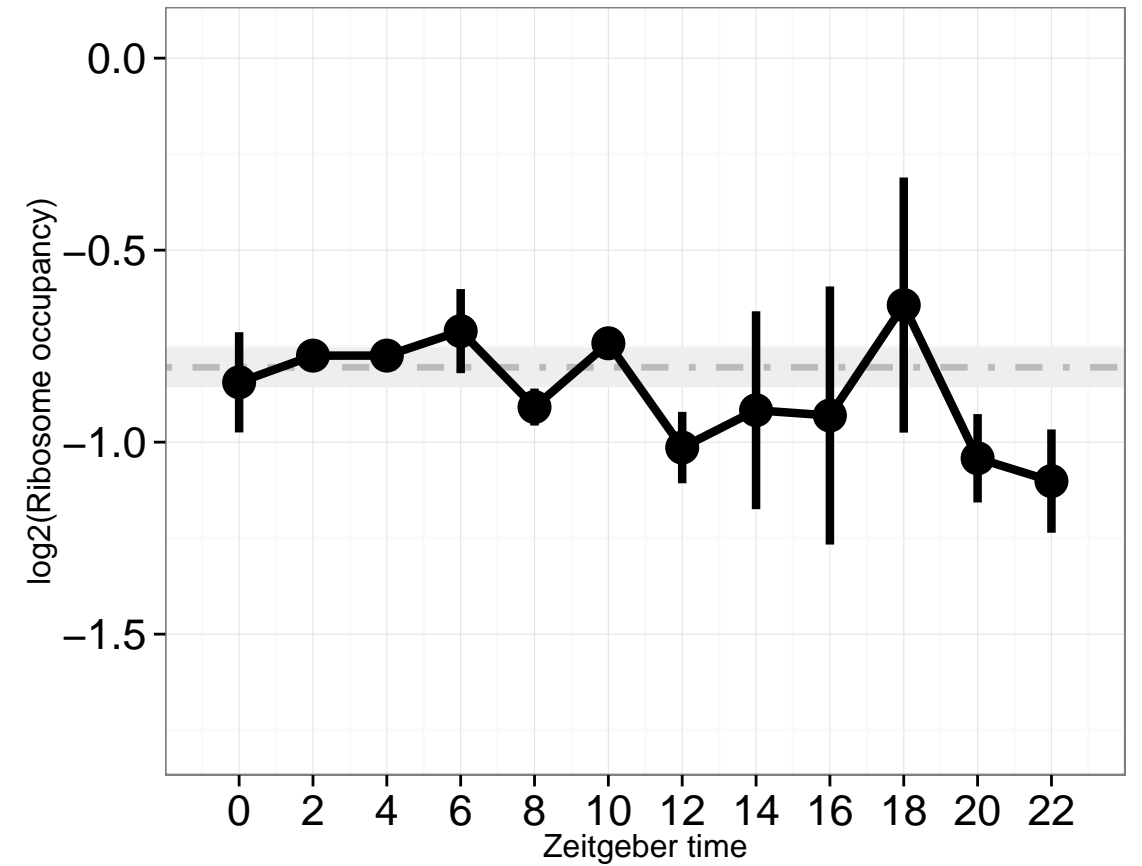

Supplement: SuppDataset_1.zip [file Ankzf1_set_A.pdf › Supplemental Dataset 1/A-mRNA_nonrhyth_translation_nonrhyth/Ankzf1_set_A.pdf]

## AnIn

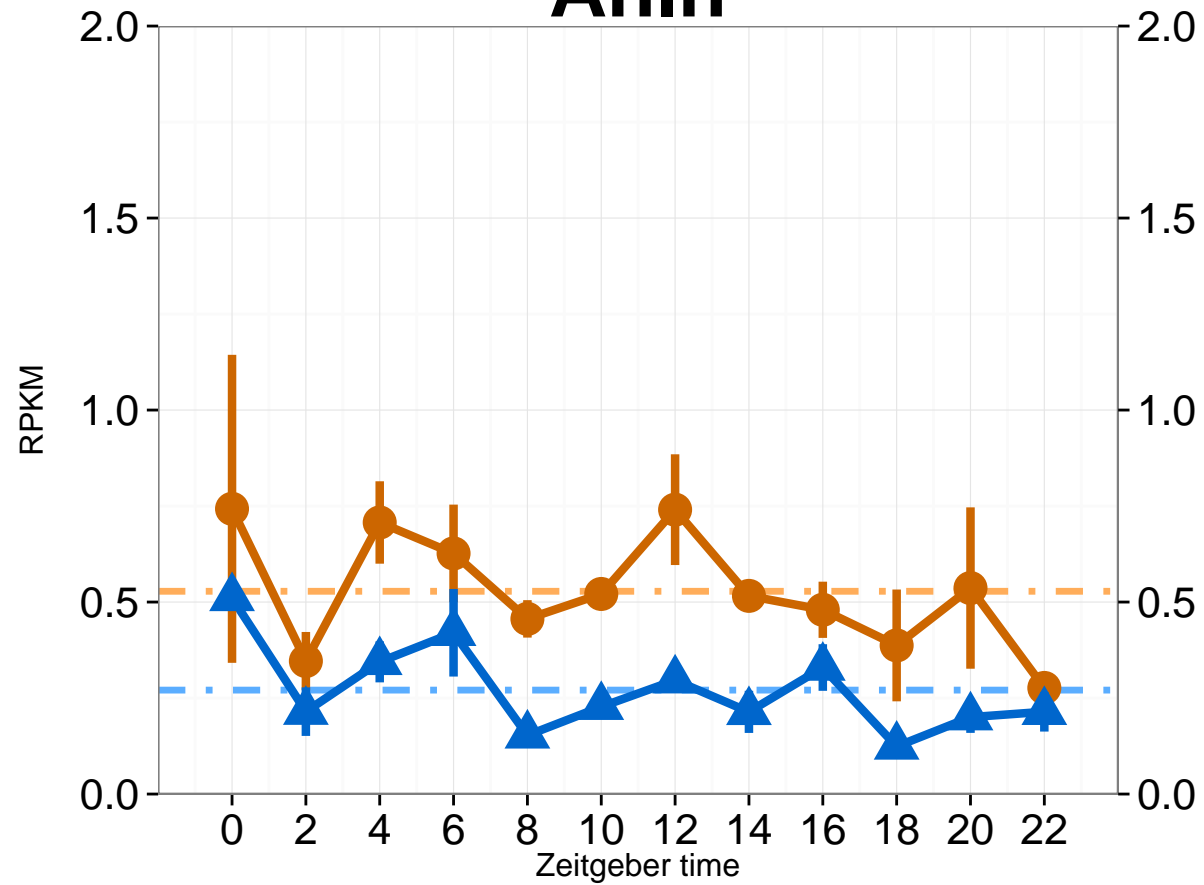

## AnIn

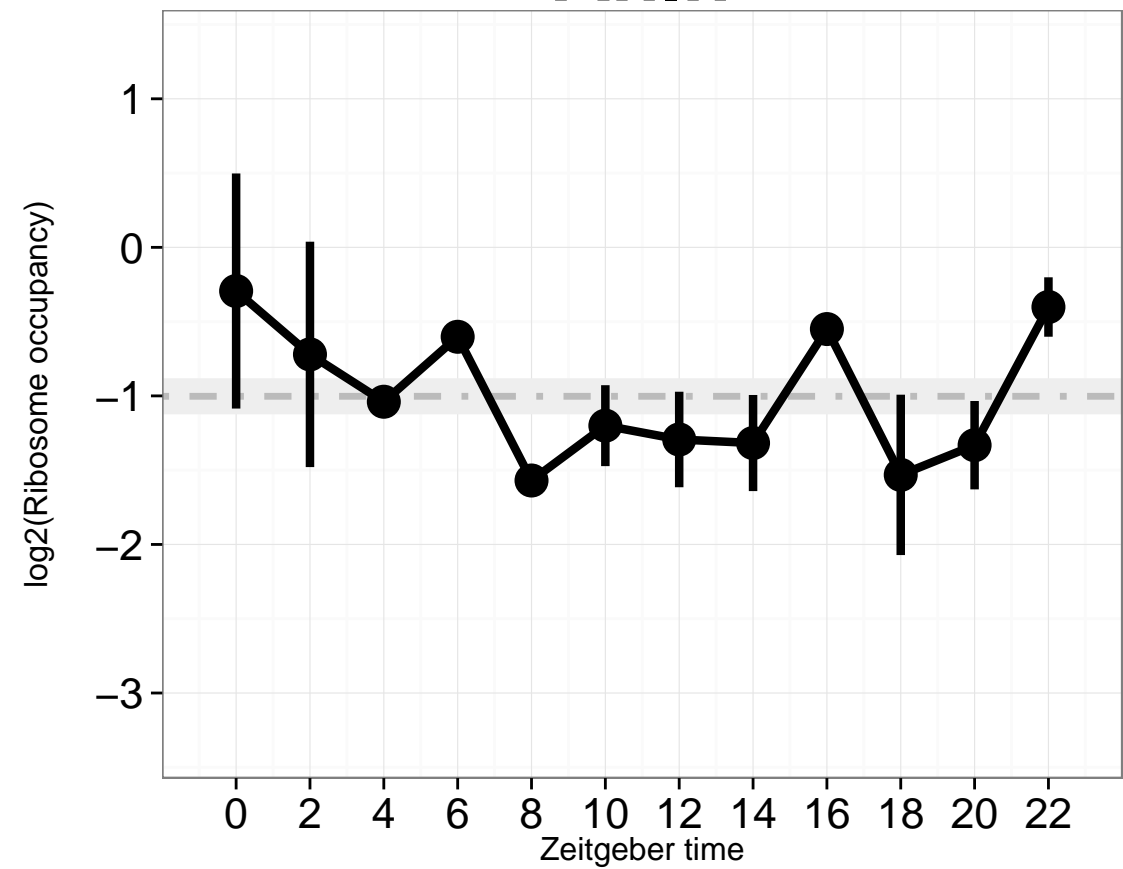

Supplement: SuppDataset_1.zip [file Anln_set_A.pdf › Supplemental Dataset 1/A-mRNA_nonrhyth_translation_nonrhyth/Anln_set_A.pdf]

## Ano10

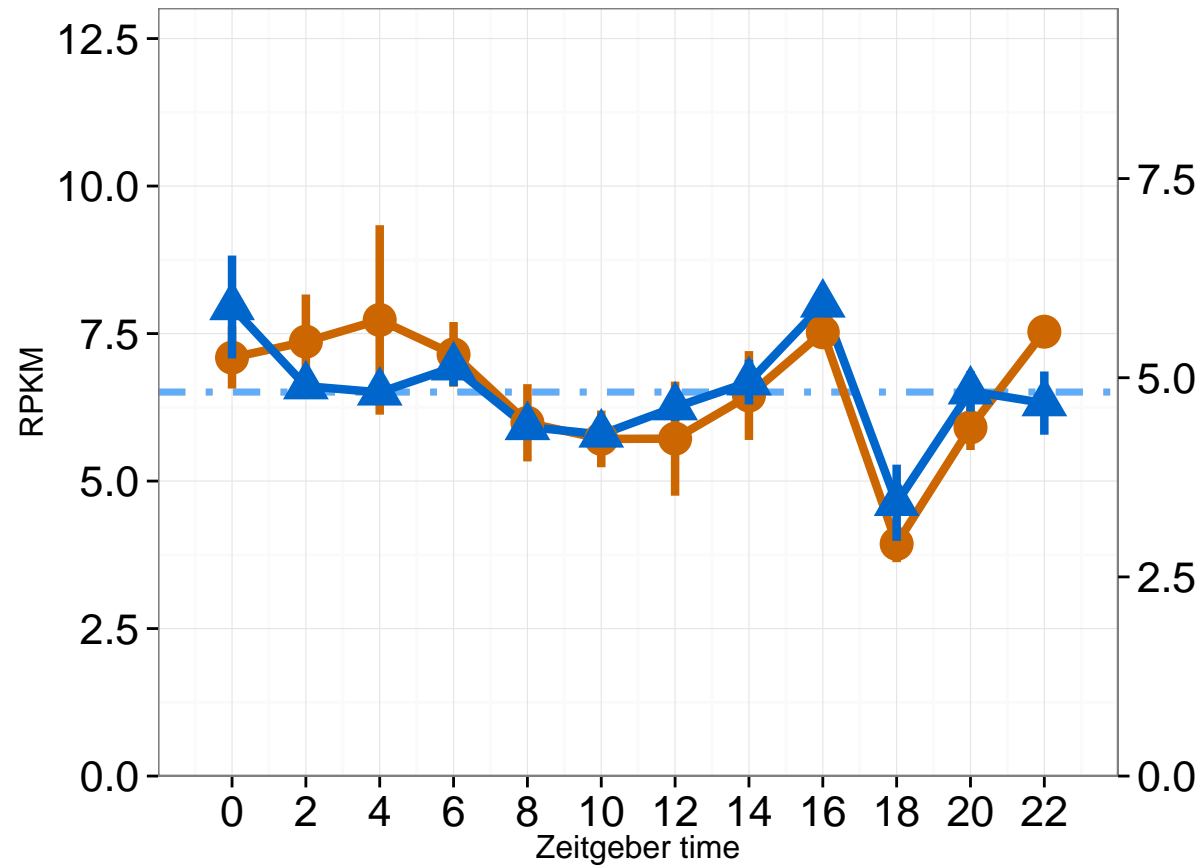

## Ano10

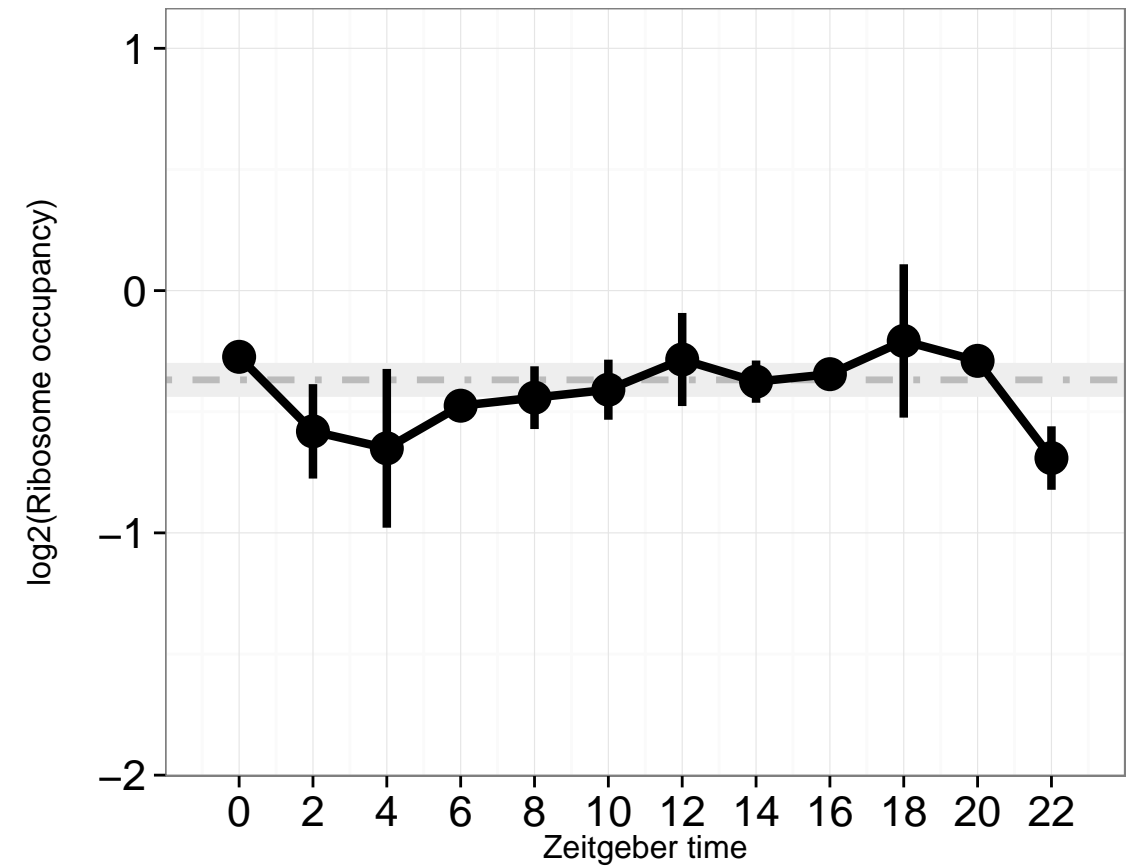

Supplement: SuppDataset_1.zip [file Ano10_set_A.pdf › Supplemental Dataset 1/A-mRNA_nonrhyth_translation_nonrhyth/Ano10_set_A.pdf]

## Ano1

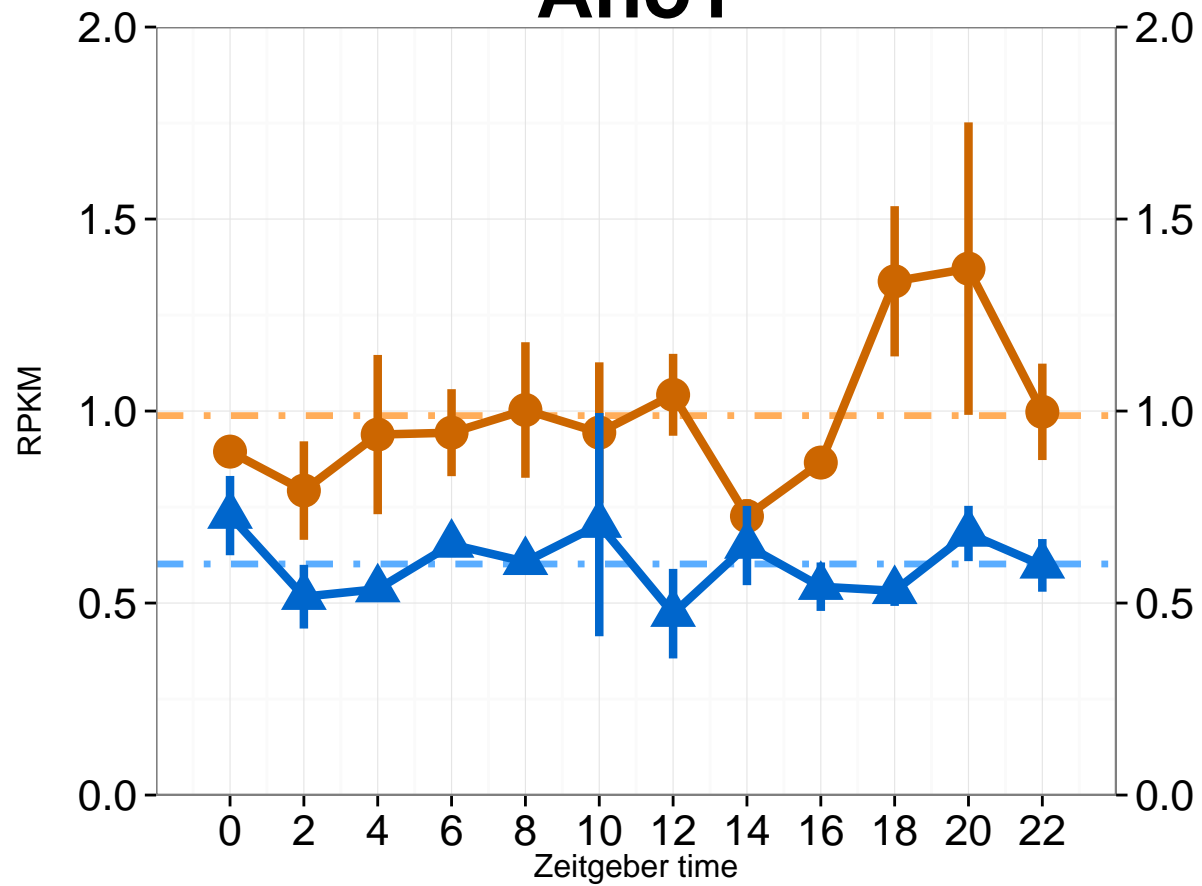

## Ano1

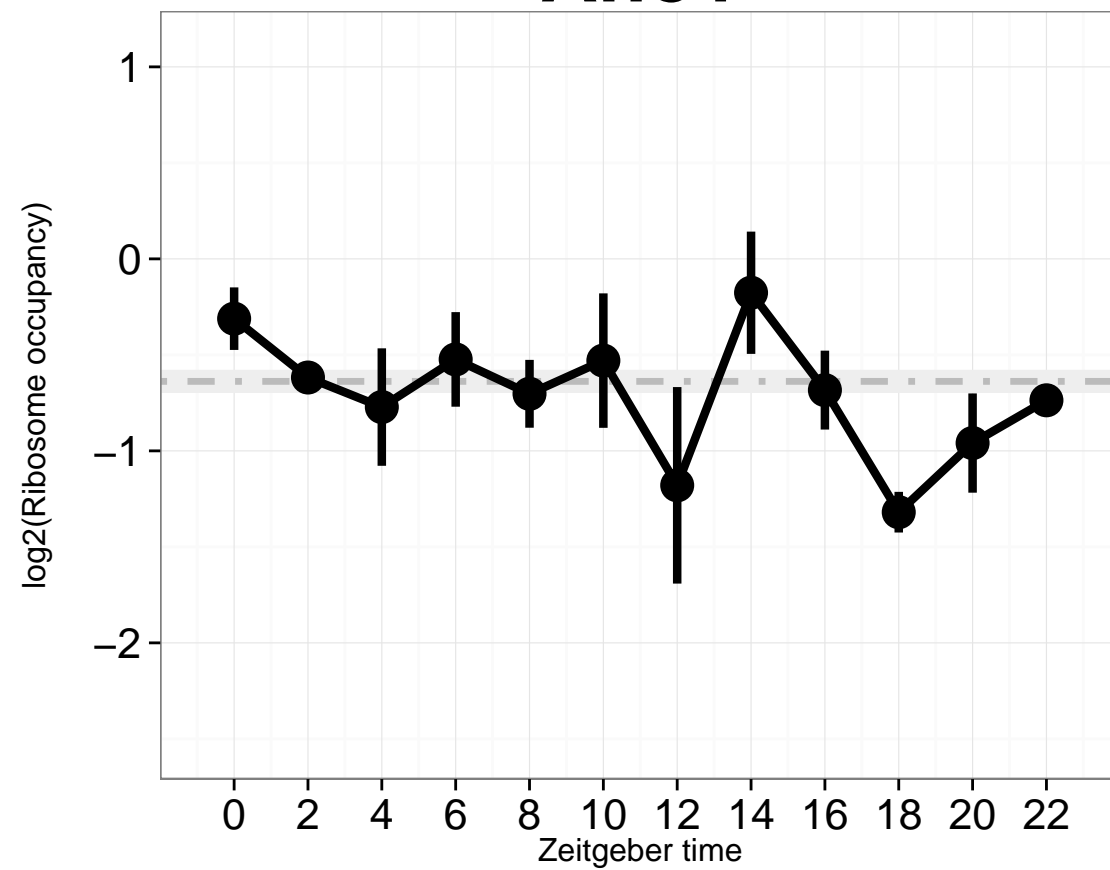

Supplement: SuppDataset_1.zip [file Ano1_set_A.pdf › Supplemental Dataset 1/A-mRNA_nonrhyth_translation_nonrhyth/Ano1_set_A.pdf]

# Ano6

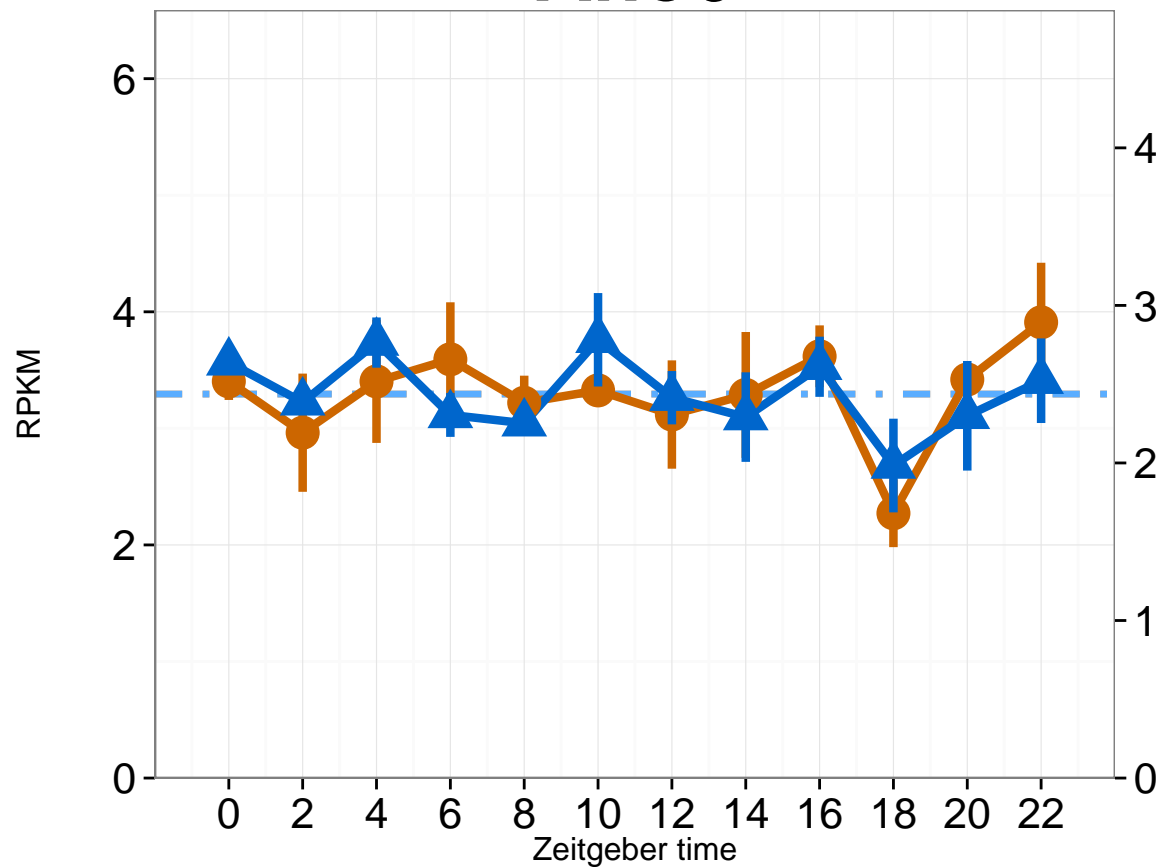

# Ano6

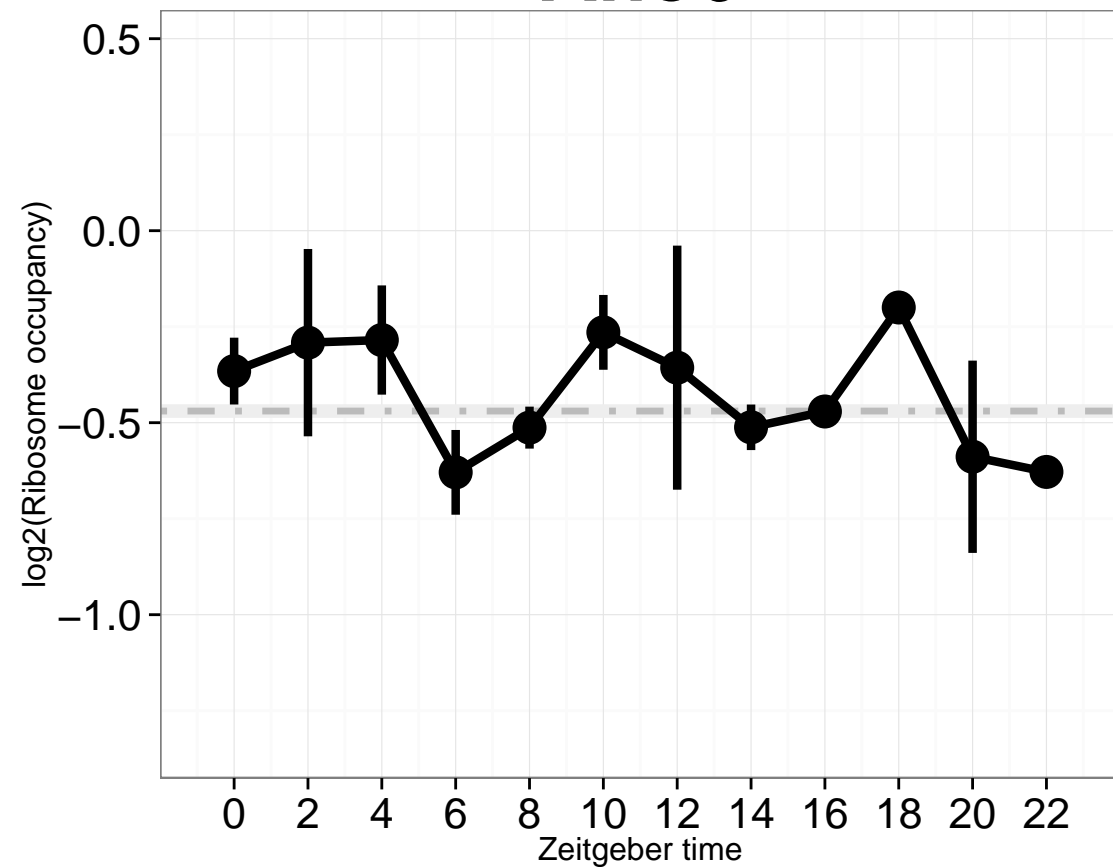

Supplement: SuppDataset_1.zip [file Ano6_set_A.pdf › Supplemental Dataset 1/A-mRNA_nonrhyth_translation_nonrhyth/Ano6_set_A.pdf]

## Ano8

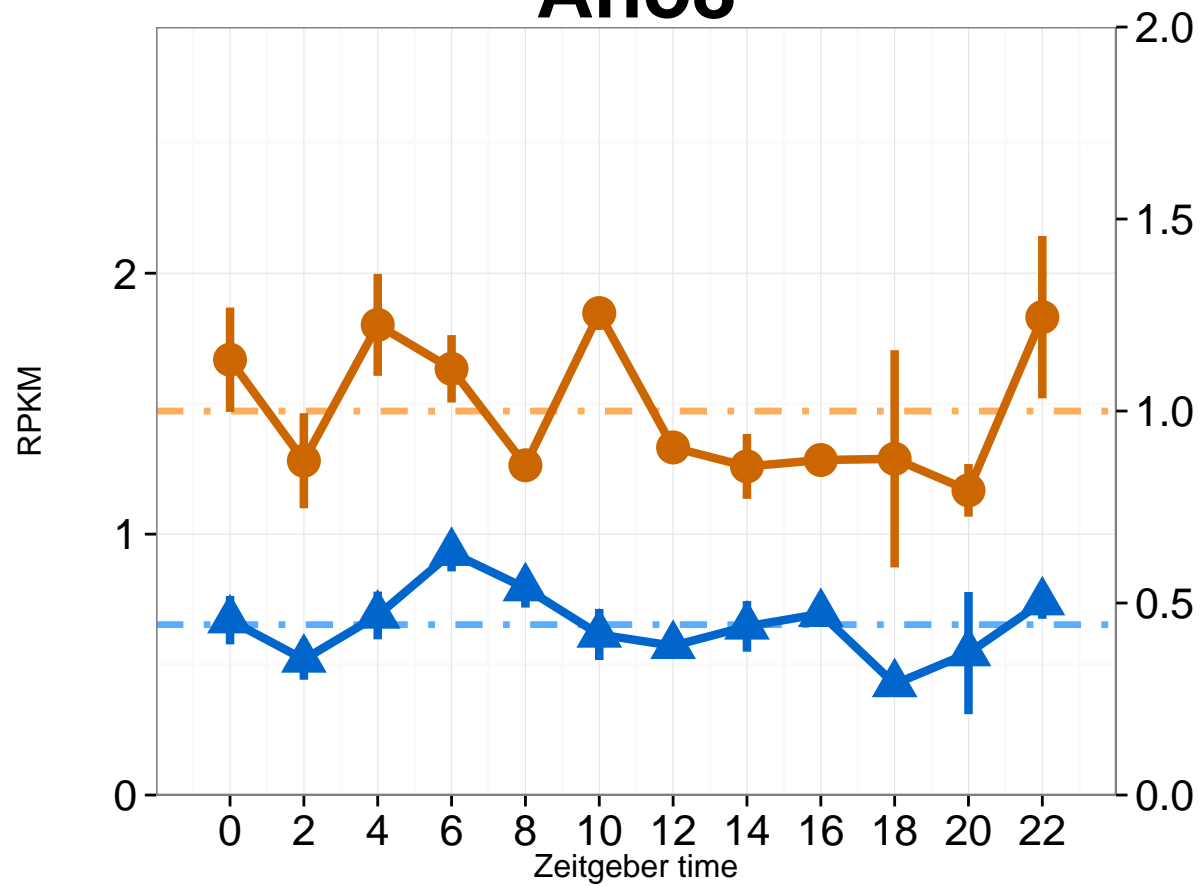

## Ano8

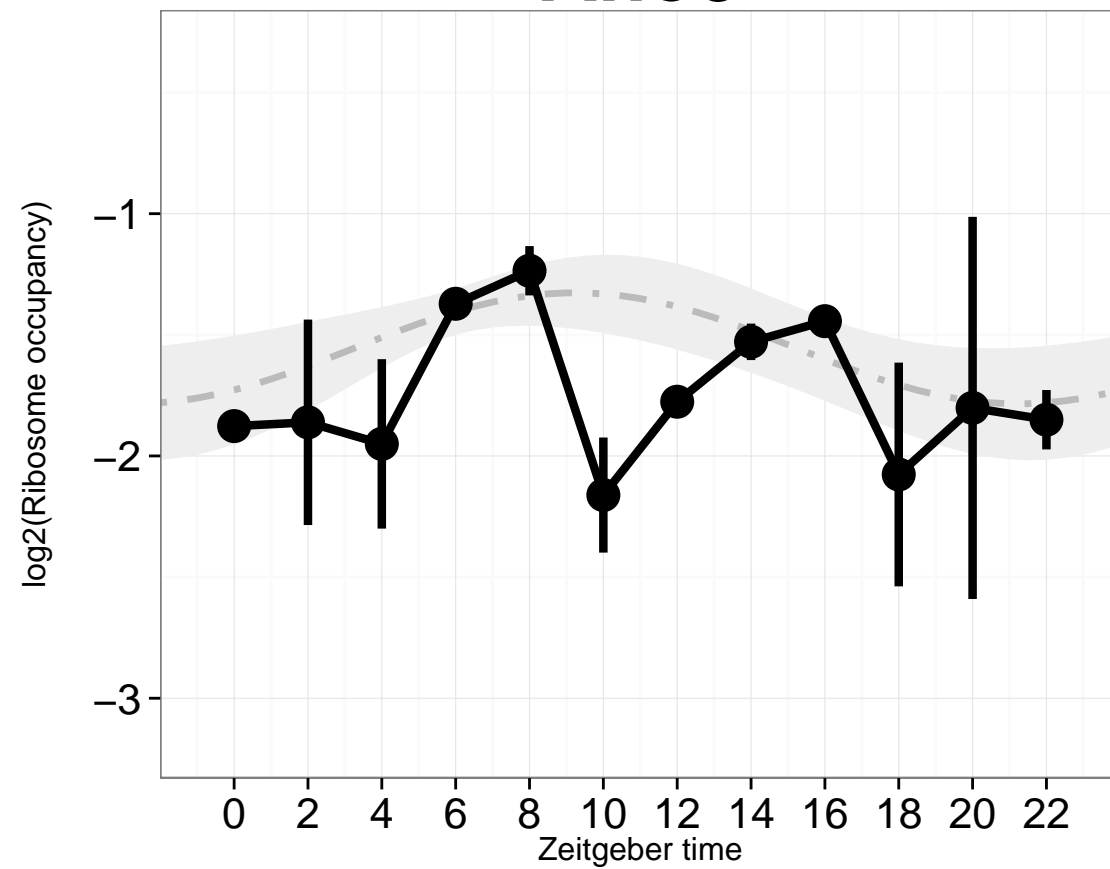

Supplement: SuppDataset_1.zip [file Ano8_set_A.pdf › Supplemental Dataset 1/A-mRNA_nonrhyth_translation_nonrhyth/Ano8_set_A.pdf]

# Anp32b

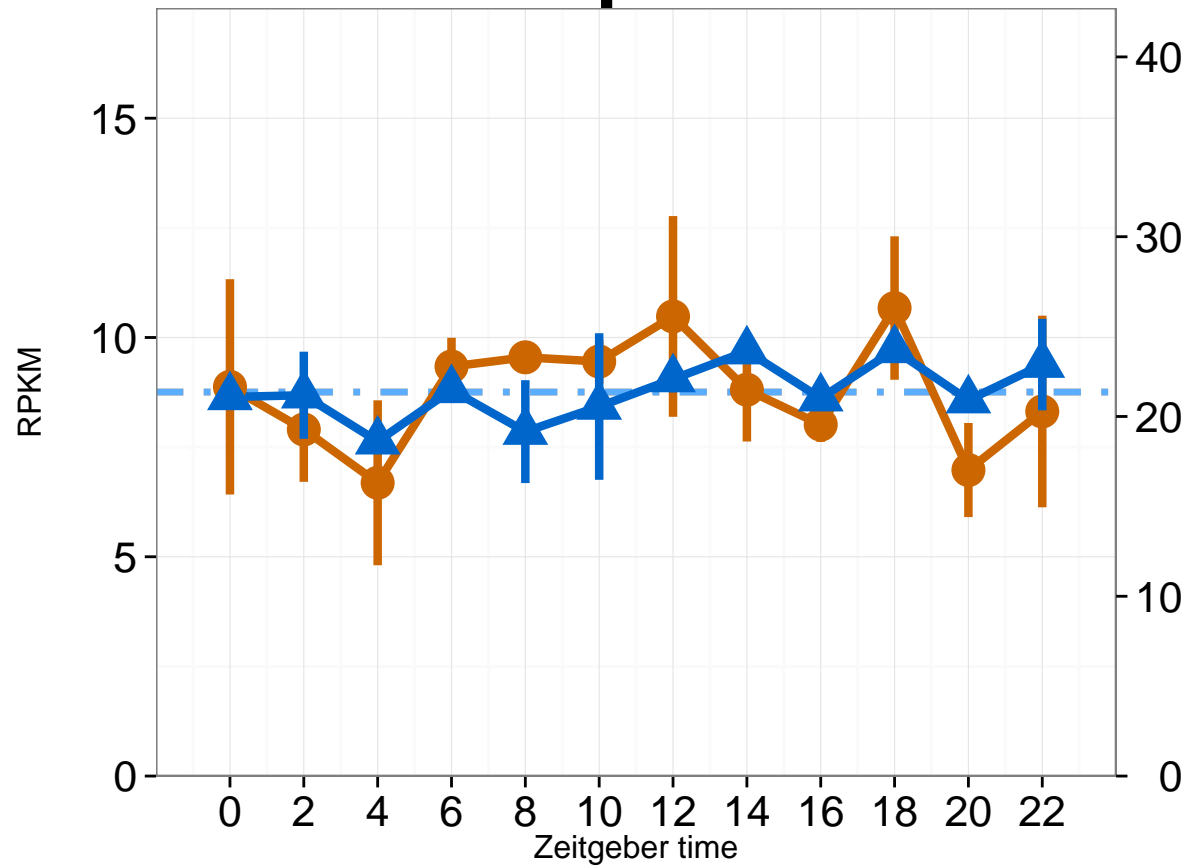

# Anp32b

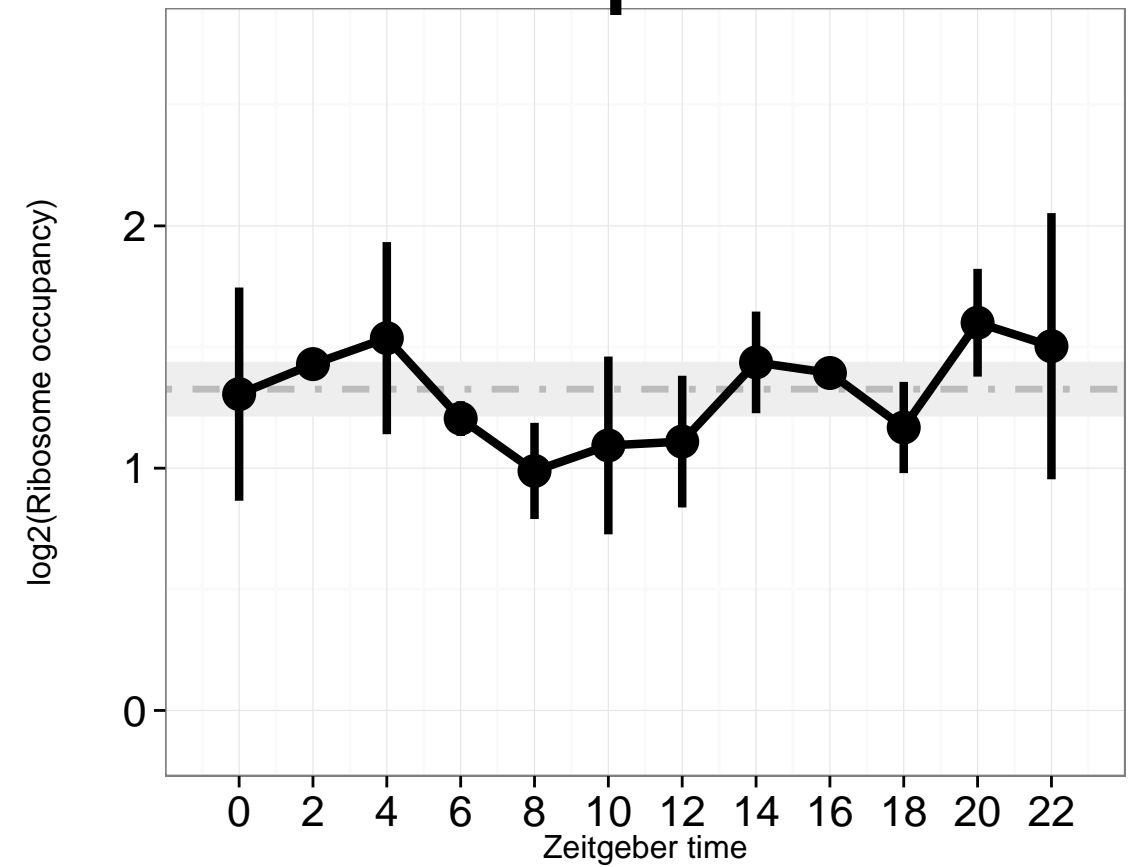

Supplement: SuppDataset_1.zip [file Anp32b_set_A.pdf › Supplemental Dataset 1/A-mRNA_nonrhyth_translation_nonrhyth/Anp32b_set_A.pdf]

## Anpep

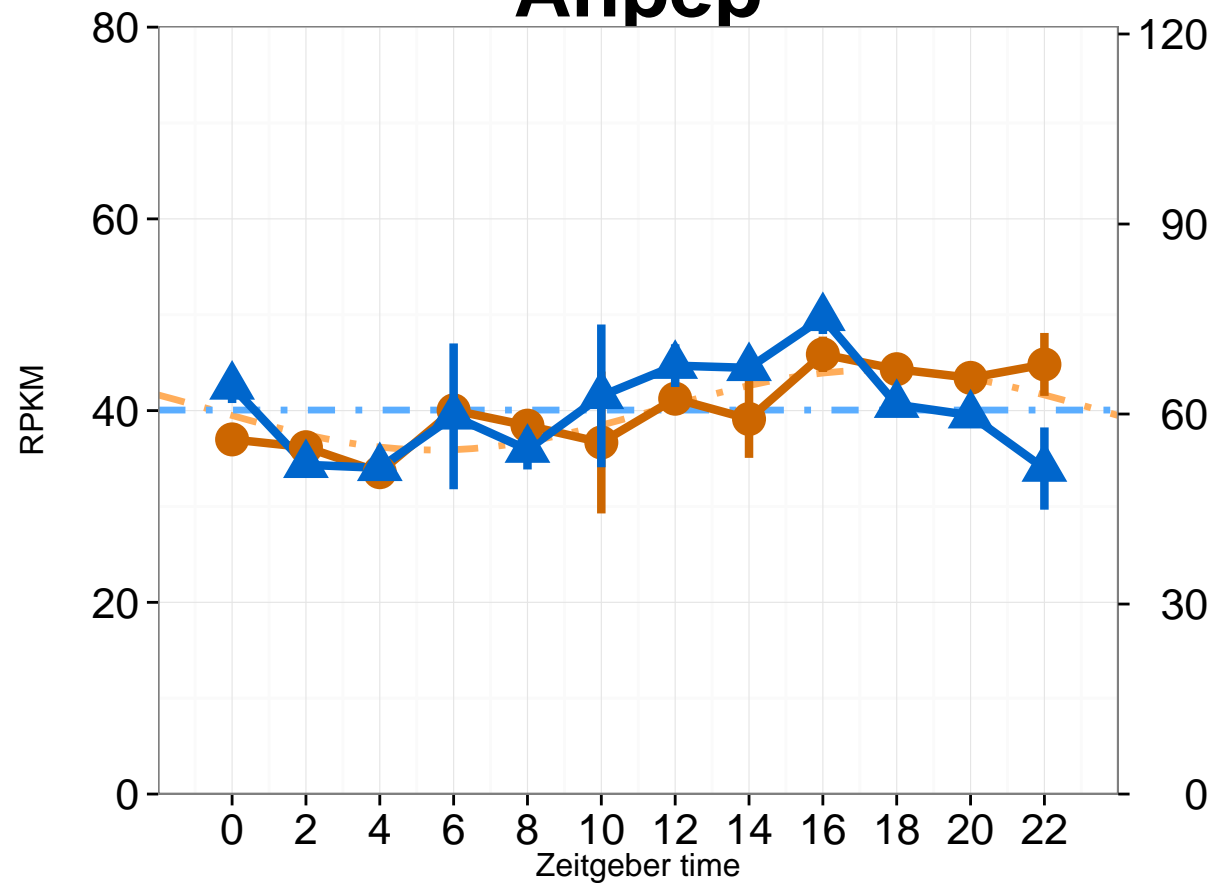

## Anpep

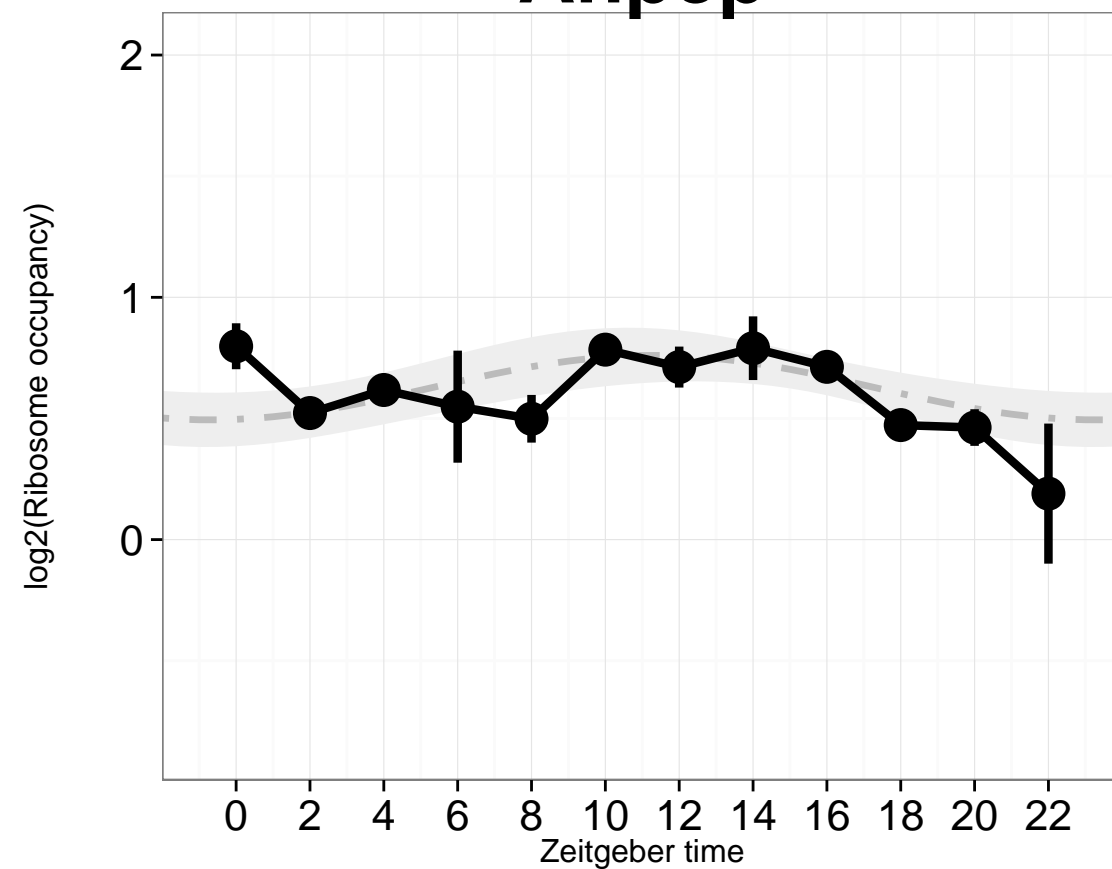

Supplement: SuppDataset_1.zip [file Anpep_set_A.pdf › Supplemental Dataset 1/A-mRNA_nonrhyth_translation_nonrhyth/Anpep_set_A.pdf]

## Antxr2

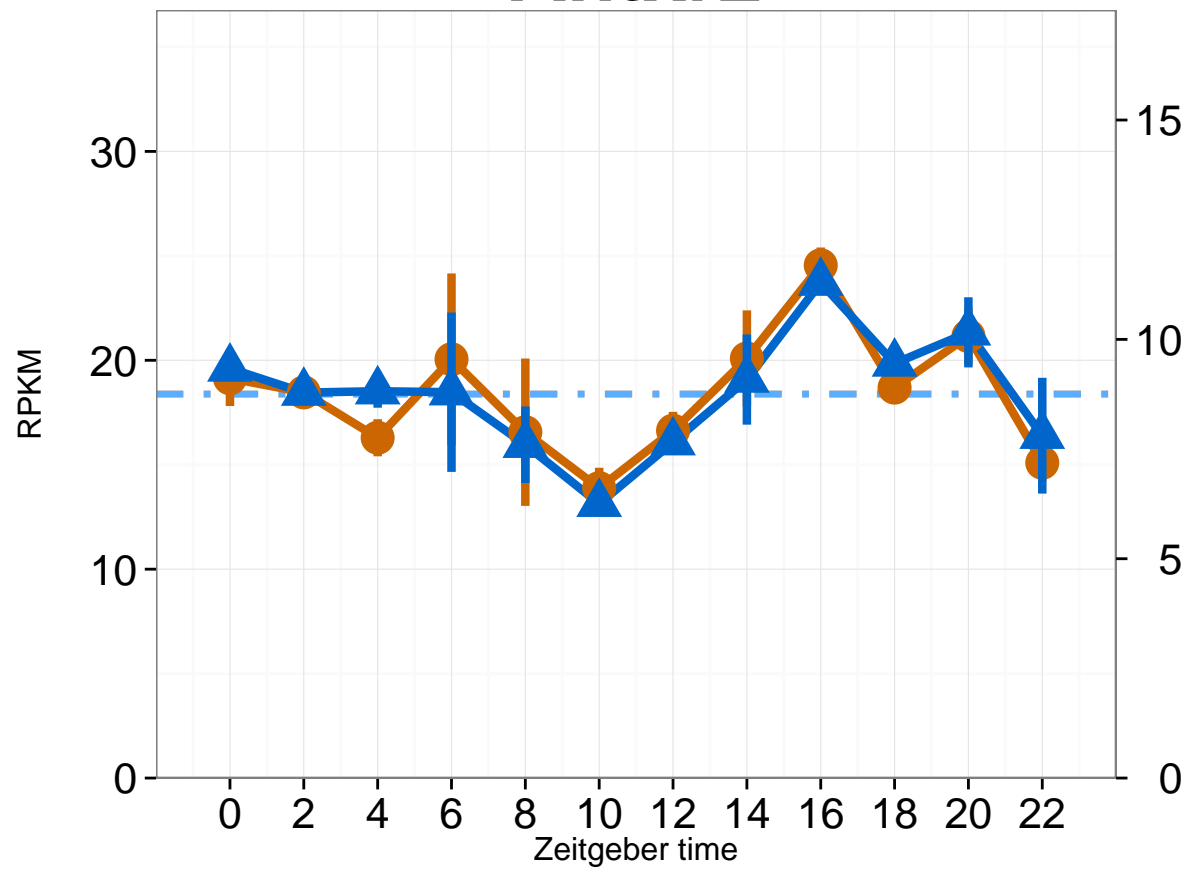

## Antxr2

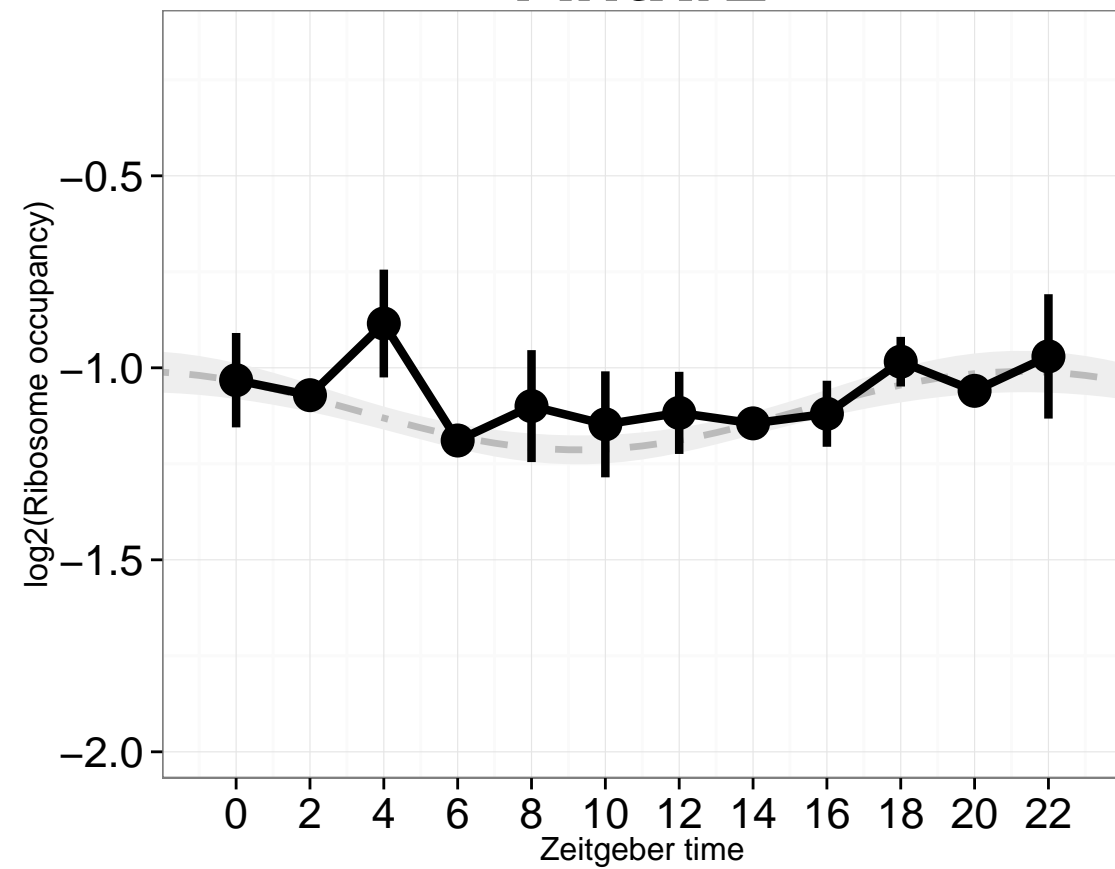

Supplement: SuppDataset_1.zip [file Antxr2_set_A.pdf › Supplemental Dataset 1/A-mRNA_nonrhyth_translation_nonrhyth/Antxr2_set_A.pdf]

# Anxa1

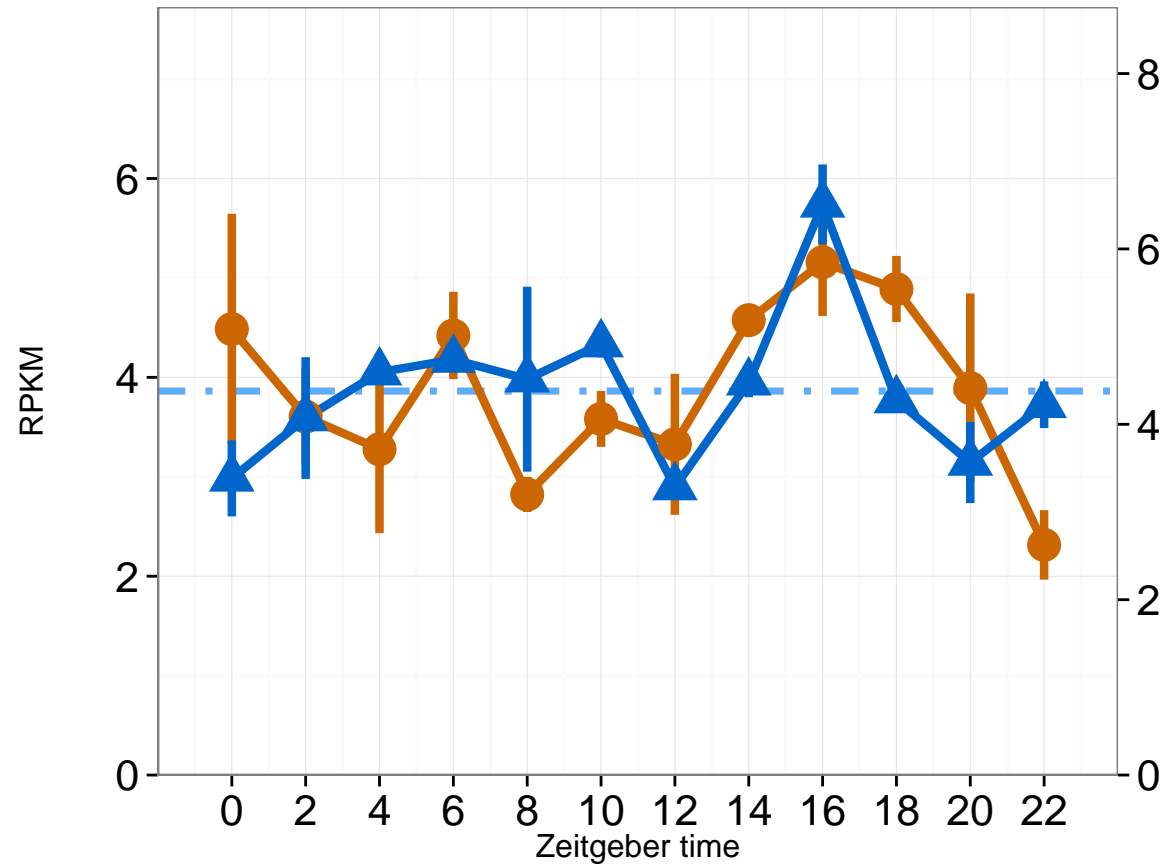

# Anxa1

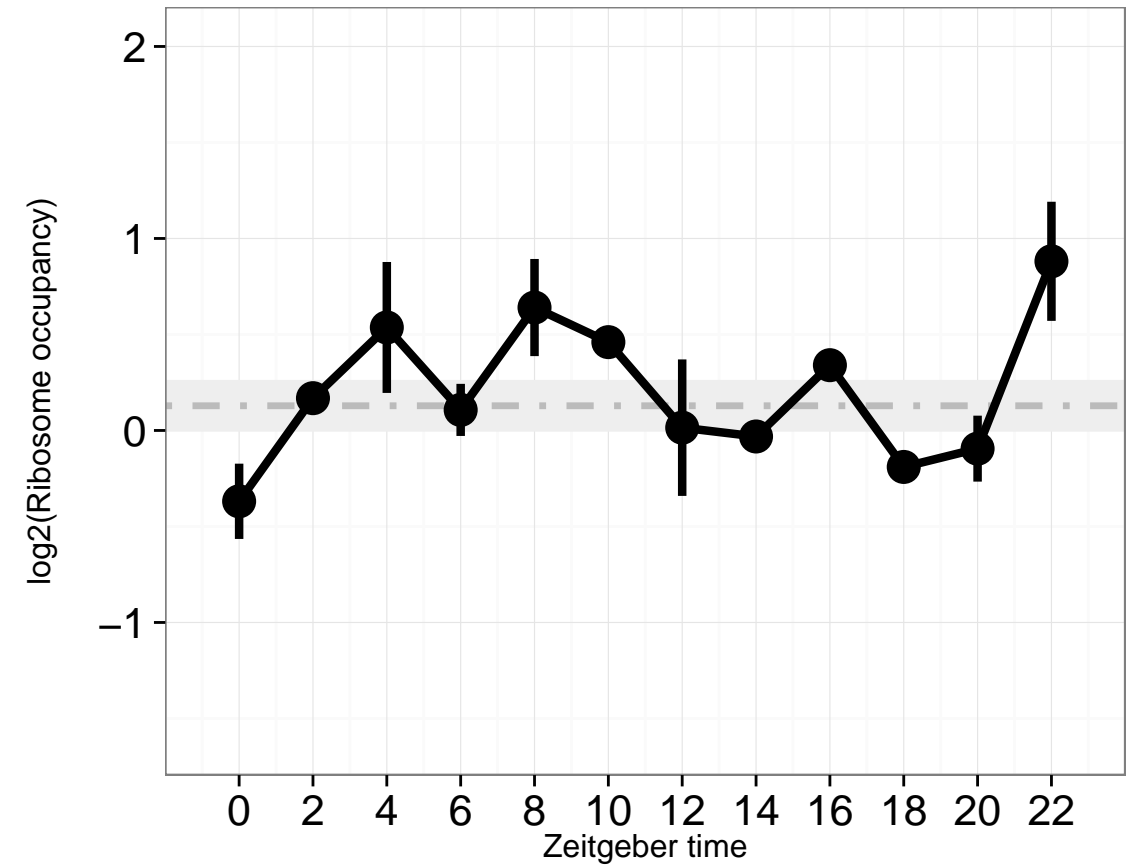

Supplement: SuppDataset_1.zip [file Anxa1_set_A.pdf › Supplemental Dataset 1/A-mRNA_nonrhyth_translation_nonrhyth/Anxa1_set_A.pdf]

## Anxa2

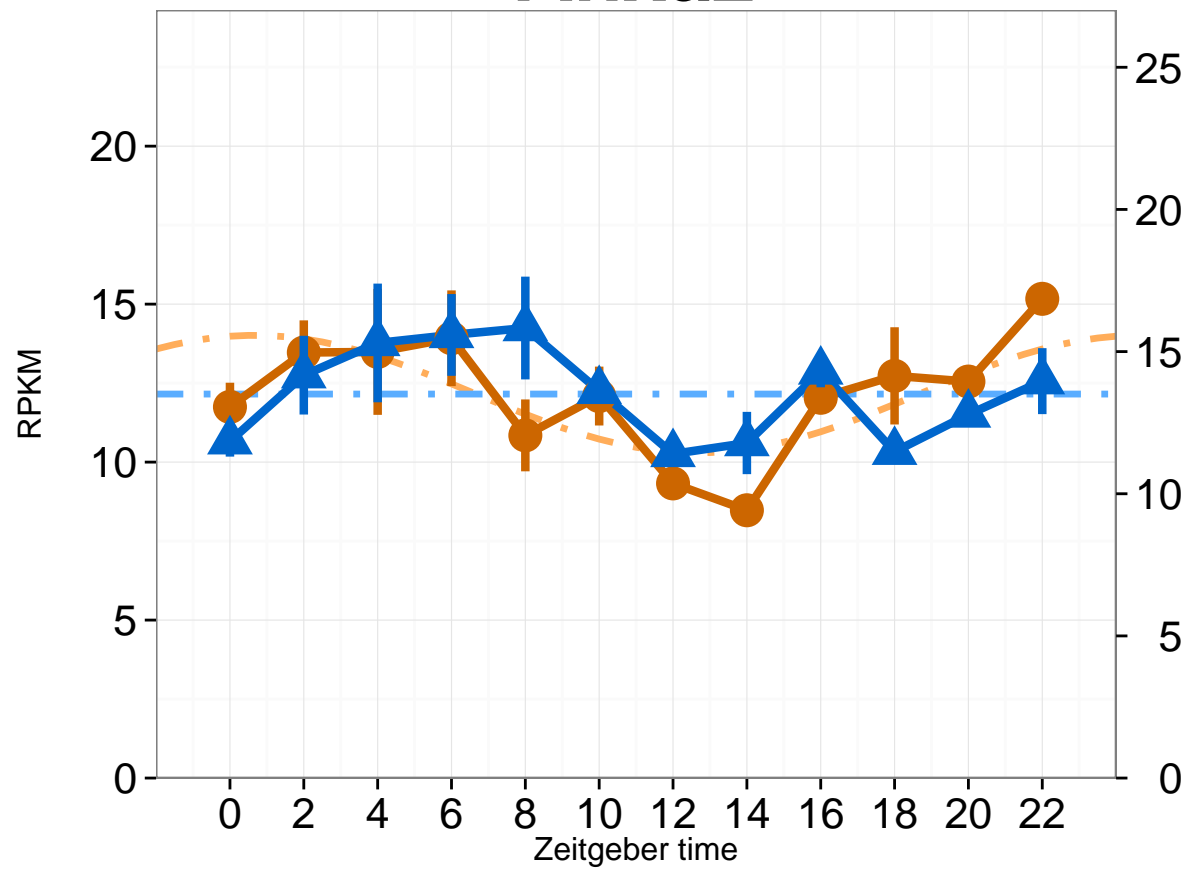

## Anxa2

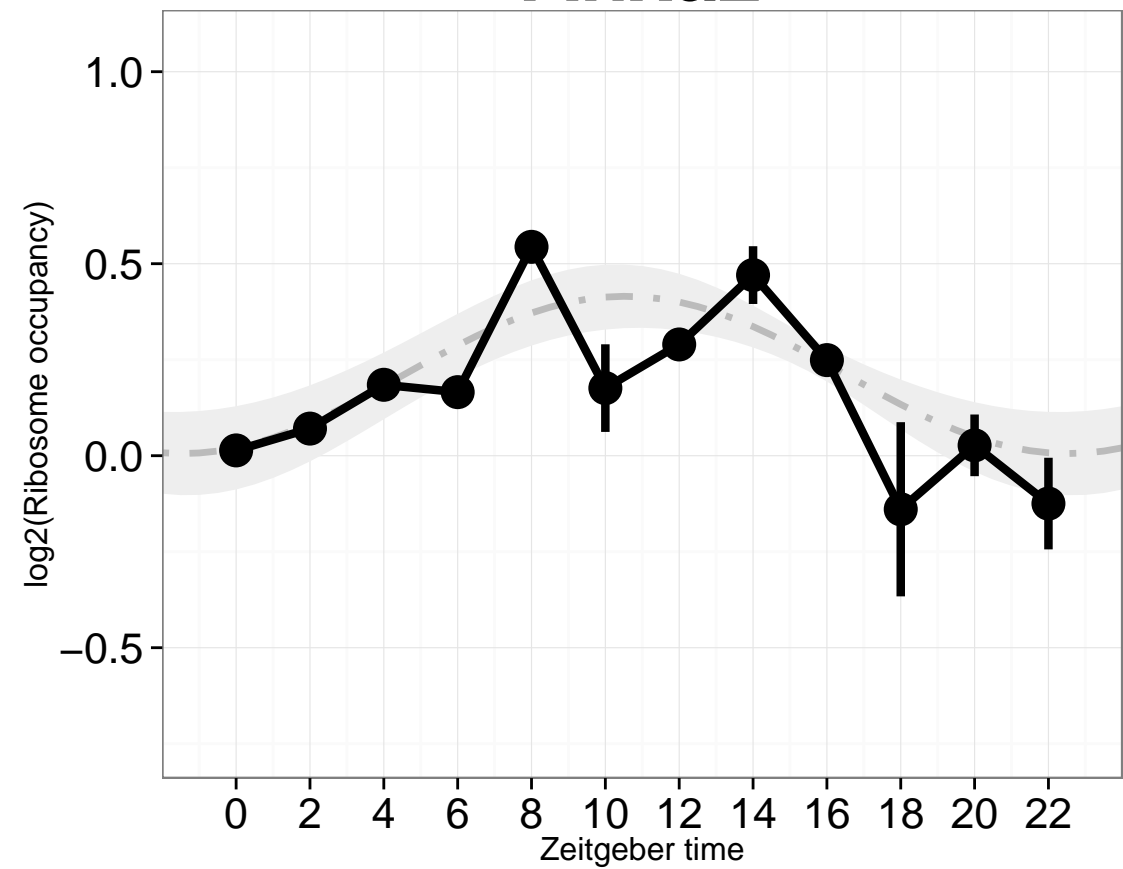

Supplement: SuppDataset_1.zip [file Anxa2_set_A.pdf › Supplemental Dataset 1/A-mRNA_nonrhyth_translation_nonrhyth/Anxa2_set_A.pdf]

## Anxa3

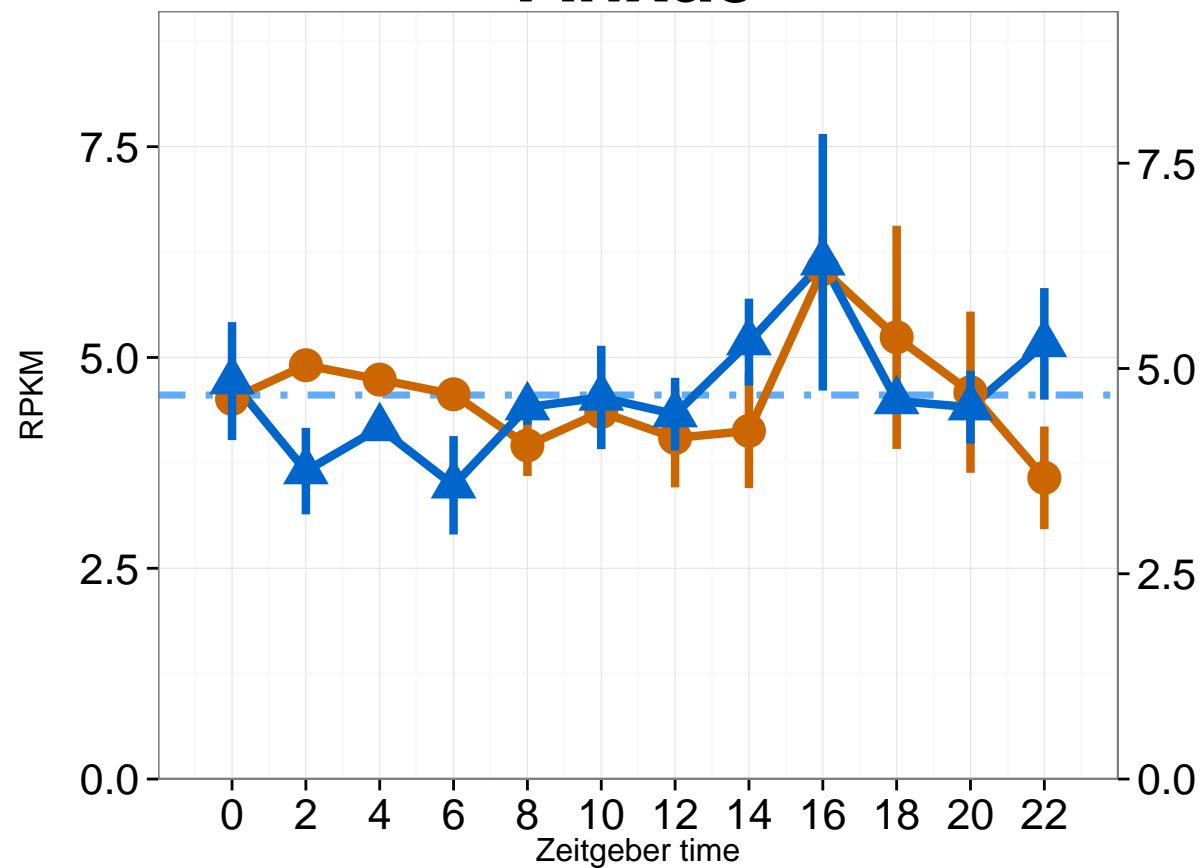

## Anxa3

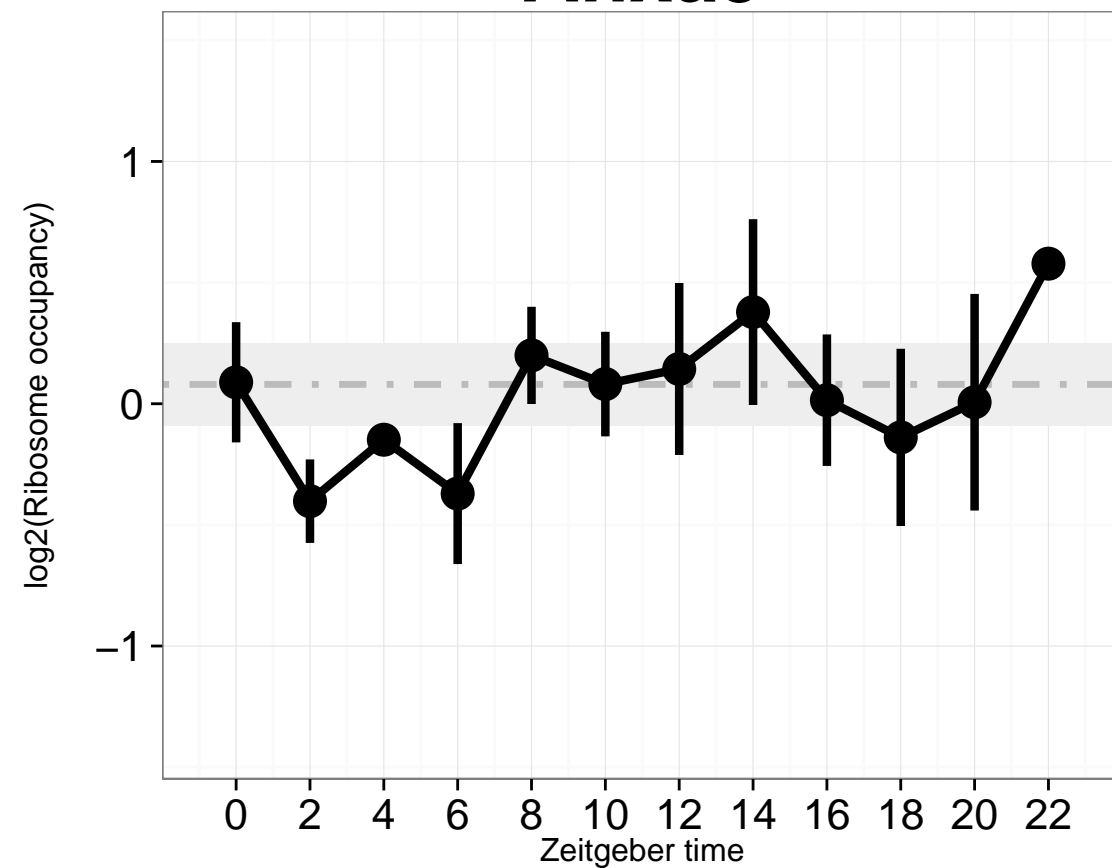

Supplement: SuppDataset_1.zip [file Anxa3_set_A.pdf › Supplemental Dataset 1/A-mRNA_nonrhyth_translation_nonrhyth/Anxa3_set_A.pdf]

## Anxa4

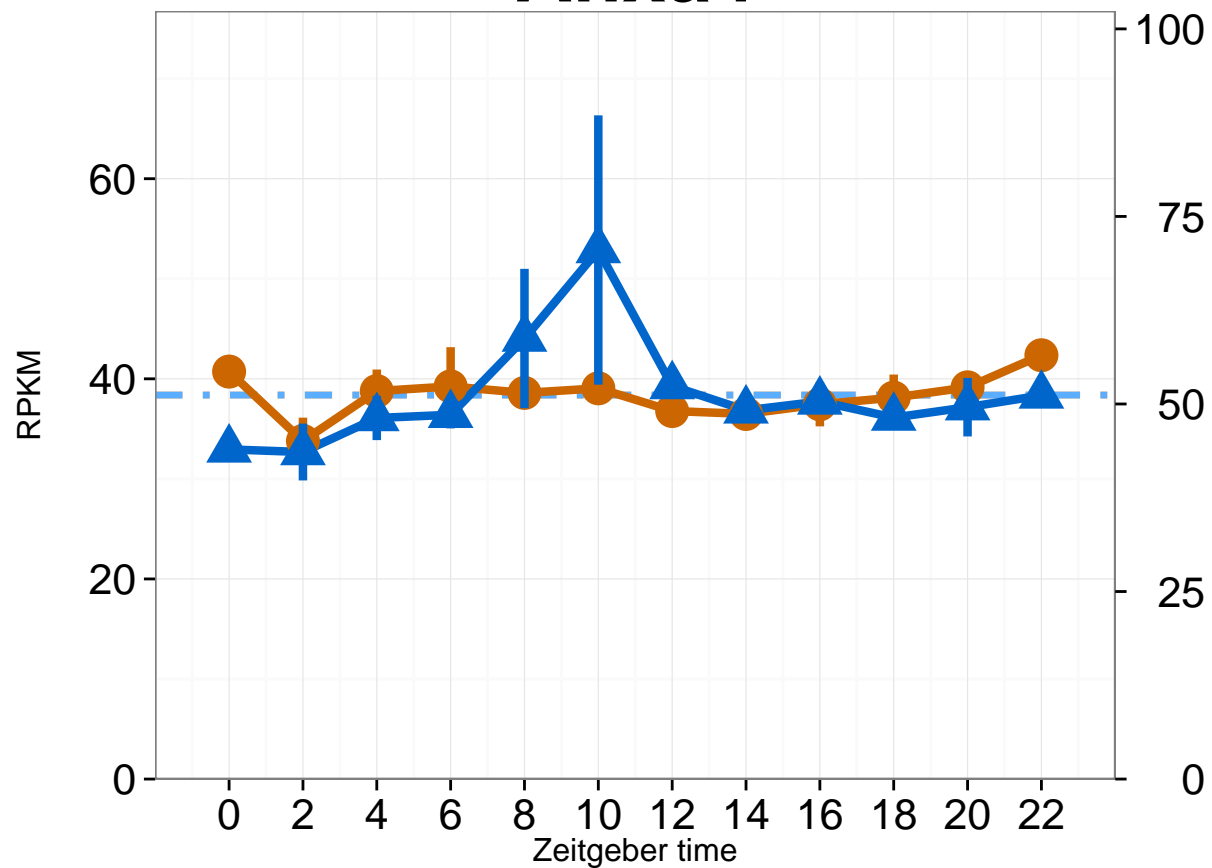

## Anxa4

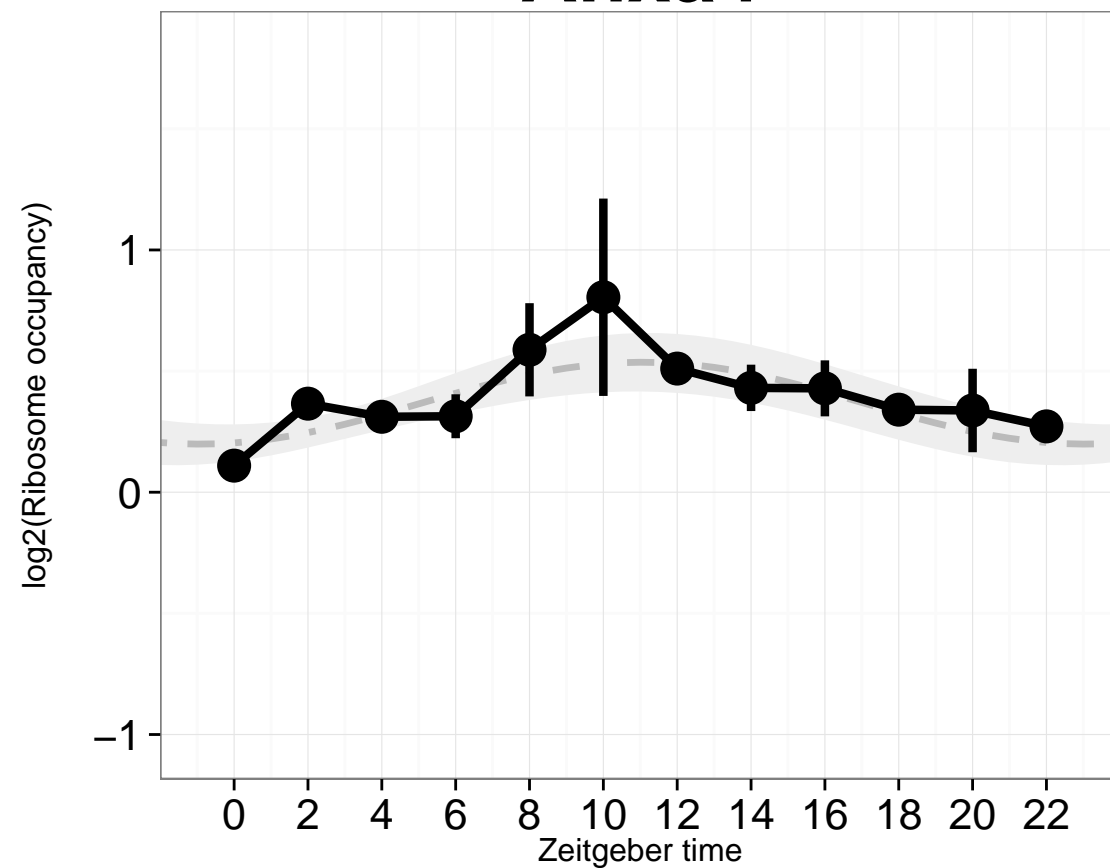

Supplement: SuppDataset_1.zip [file Anxa4_set_A.pdf › Supplemental Dataset 1/A-mRNA_nonrhyth_translation_nonrhyth/Anxa4_set_A.pdf]

## Anxa5

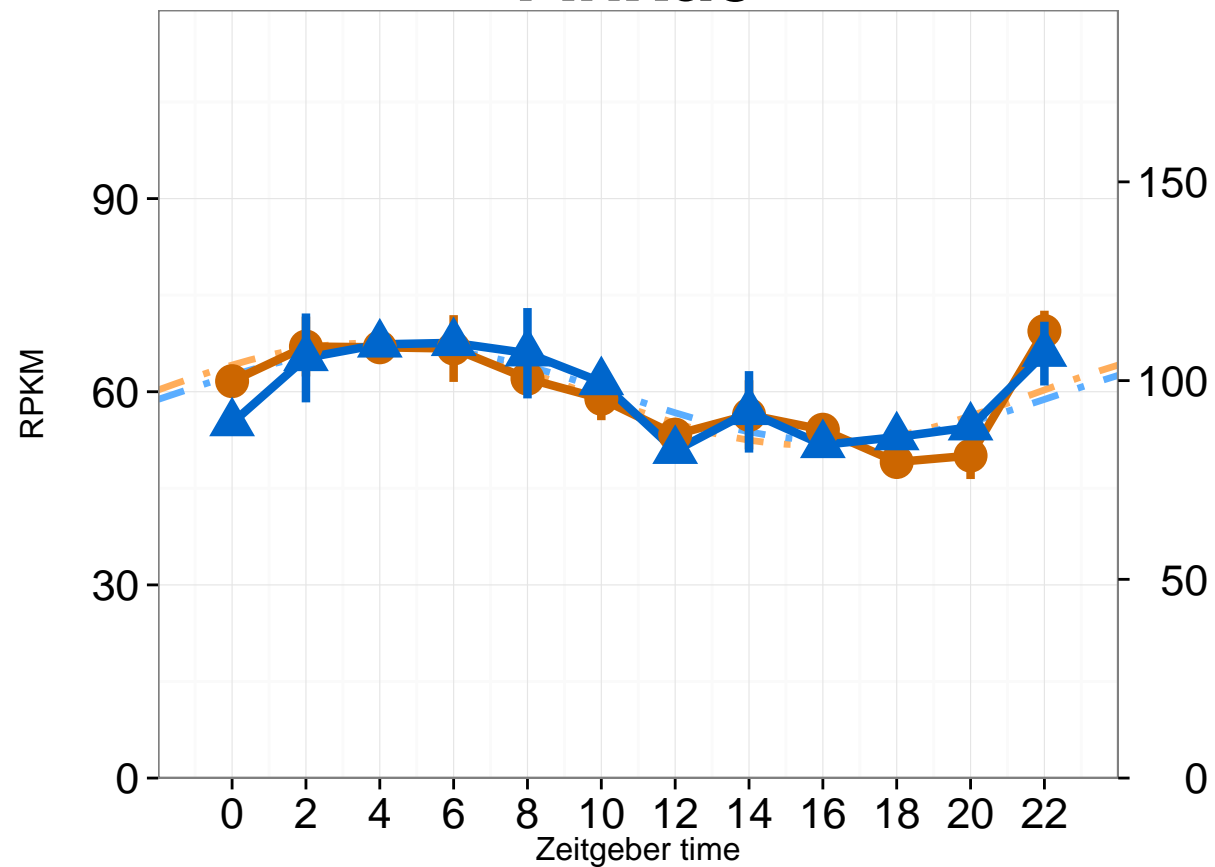

## Anxa5

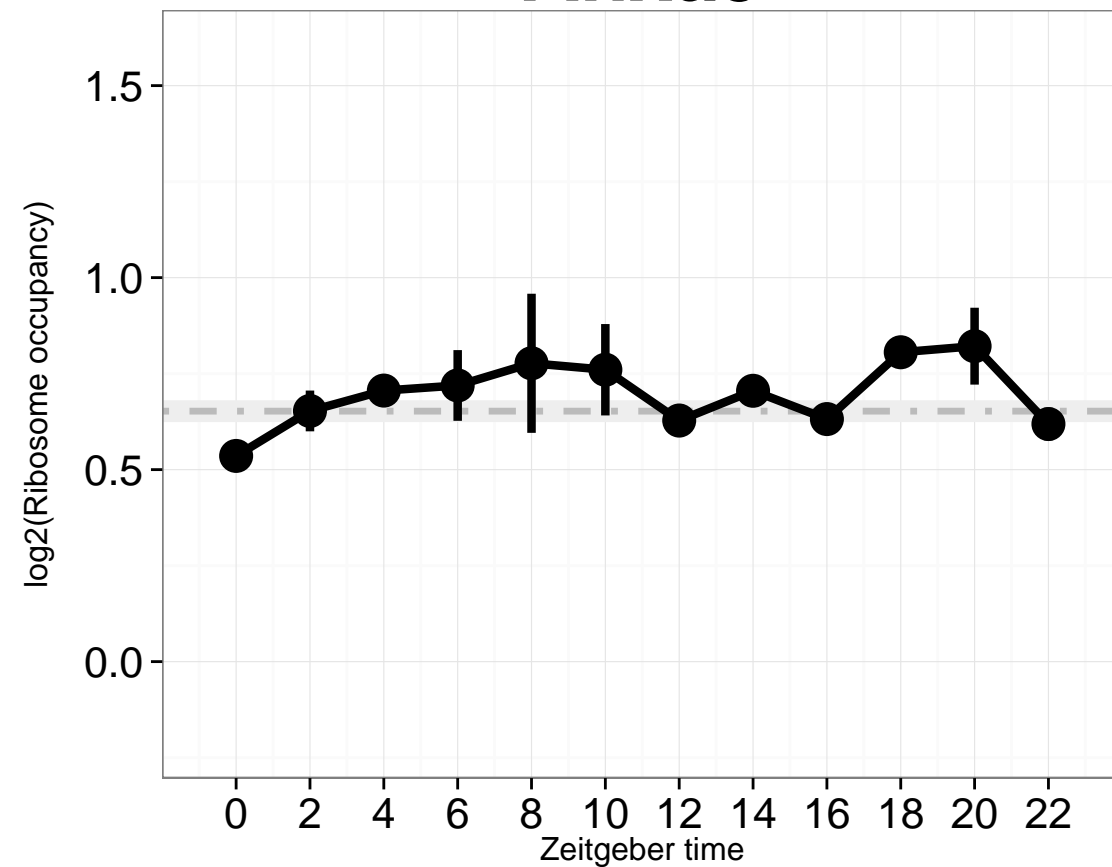

Supplement: SuppDataset_1.zip [file Anxa5_set_A.pdf › Supplemental Dataset 1/A-mRNA_nonrhyth_translation_nonrhyth/Anxa5_set_A.pdf]

## Anxa6

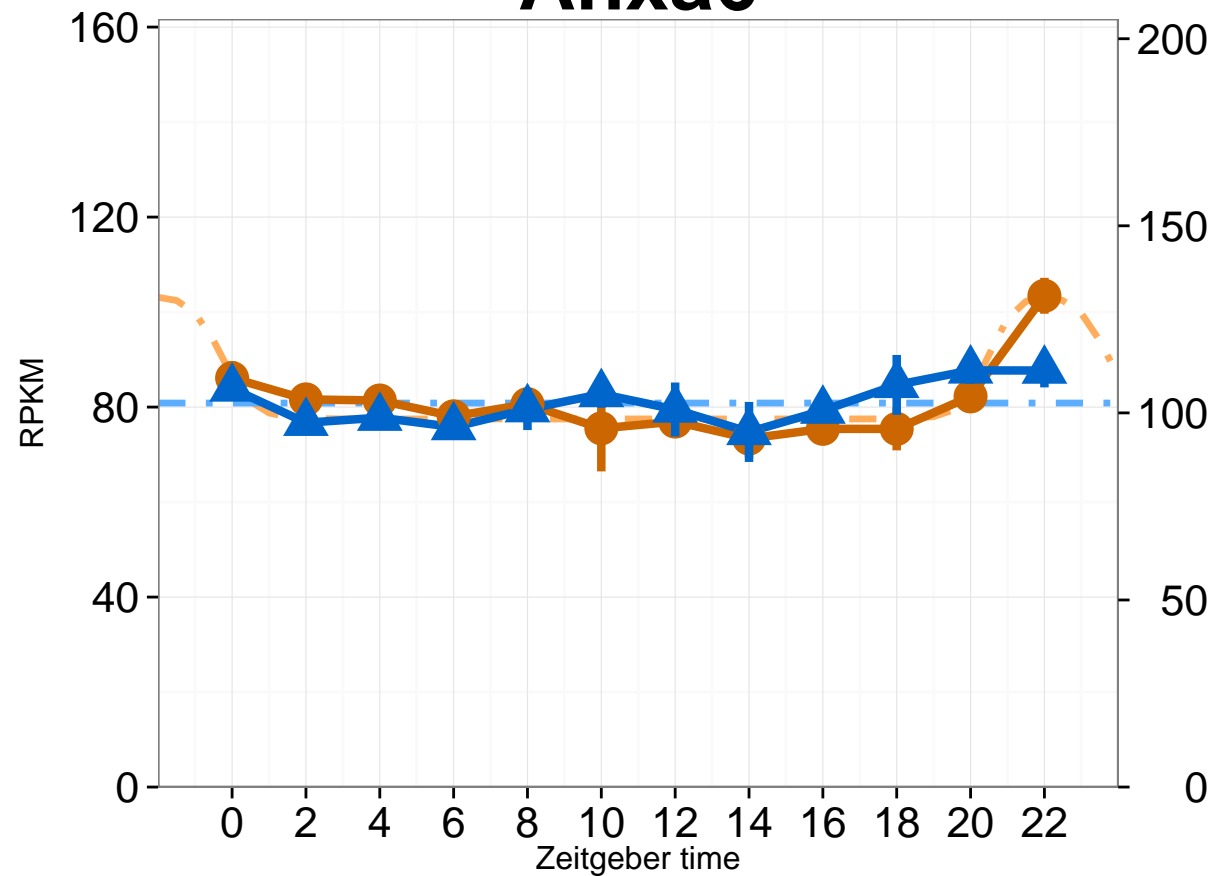

## Anxa6

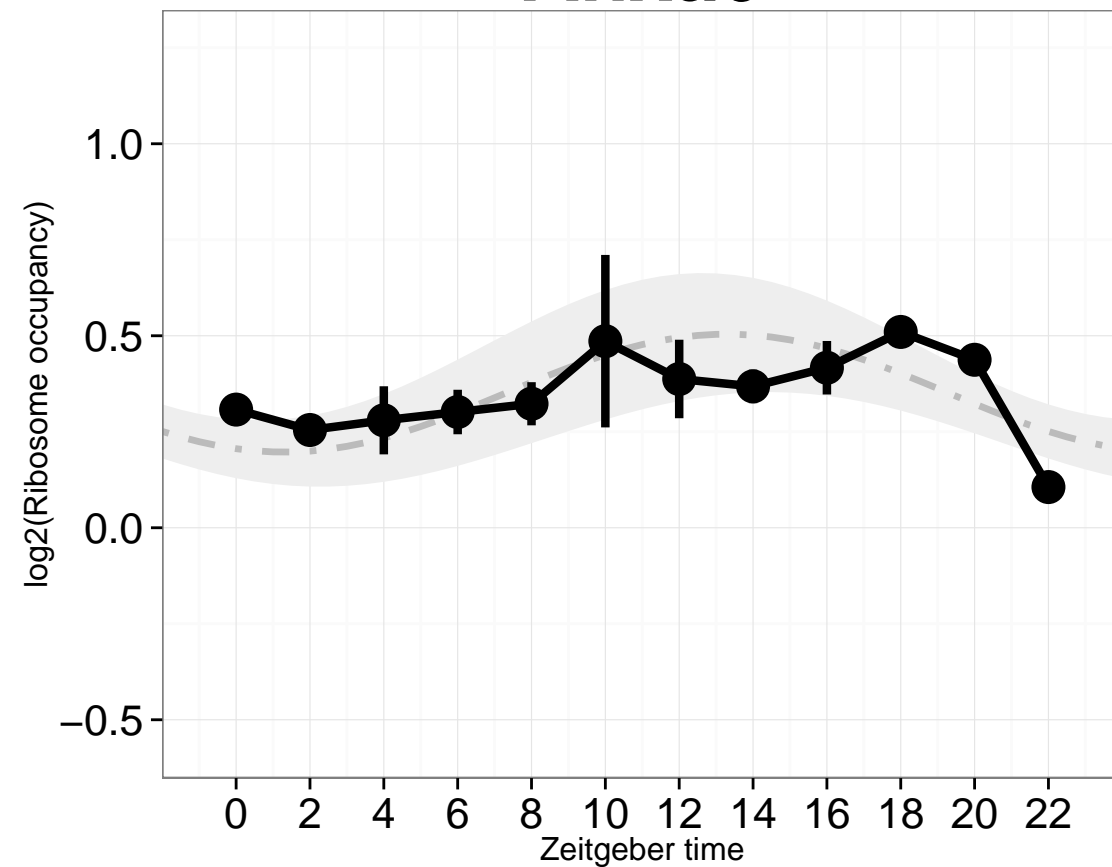

Supplement: SuppDataset_1.zip [file Anxa6_set_A.pdf › Supplemental Dataset 1/A-mRNA_nonrhyth_translation_nonrhyth/Anxa6_set_A.pdf]

## Aoah

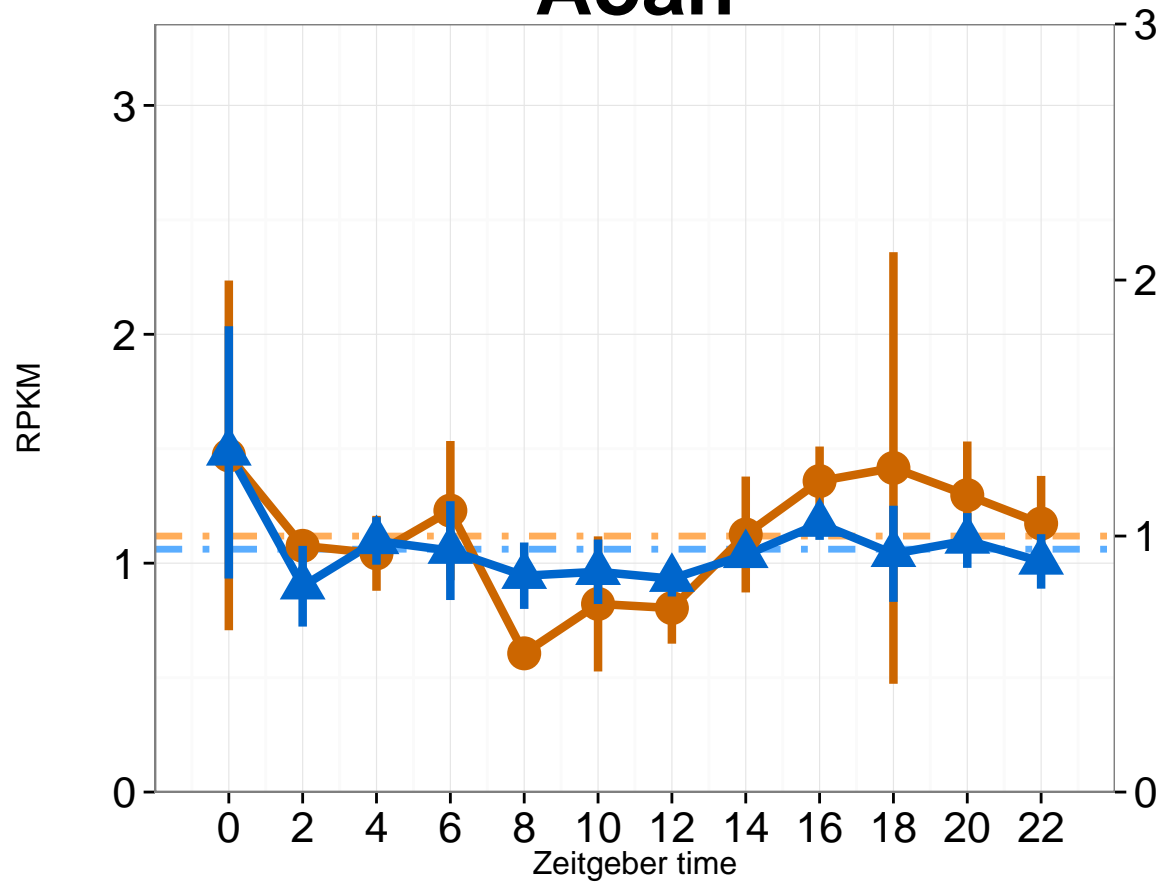

## Aoah

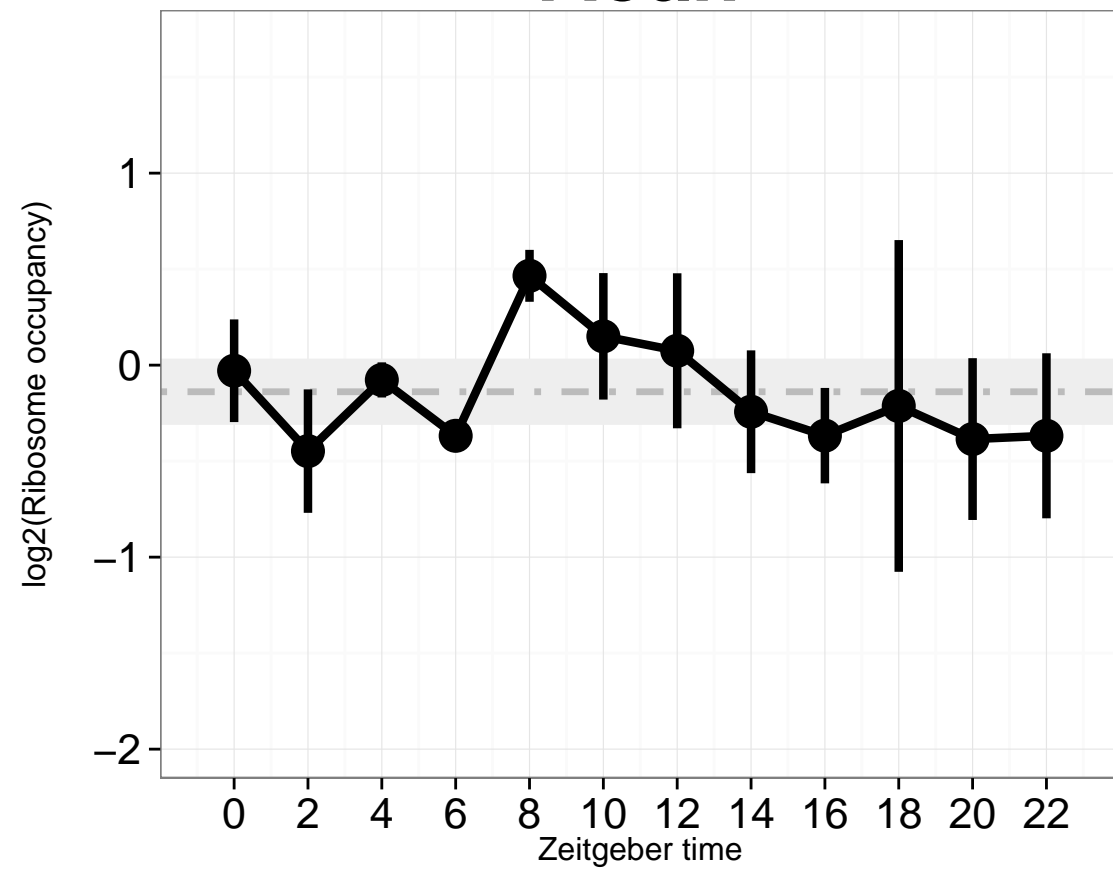

Supplement: SuppDataset_1.zip [file Aoah_set_A.pdf › Supplemental Dataset 1/A-mRNA_nonrhyth_translation_nonrhyth/Aoah_set_A.pdf]

## Aox1

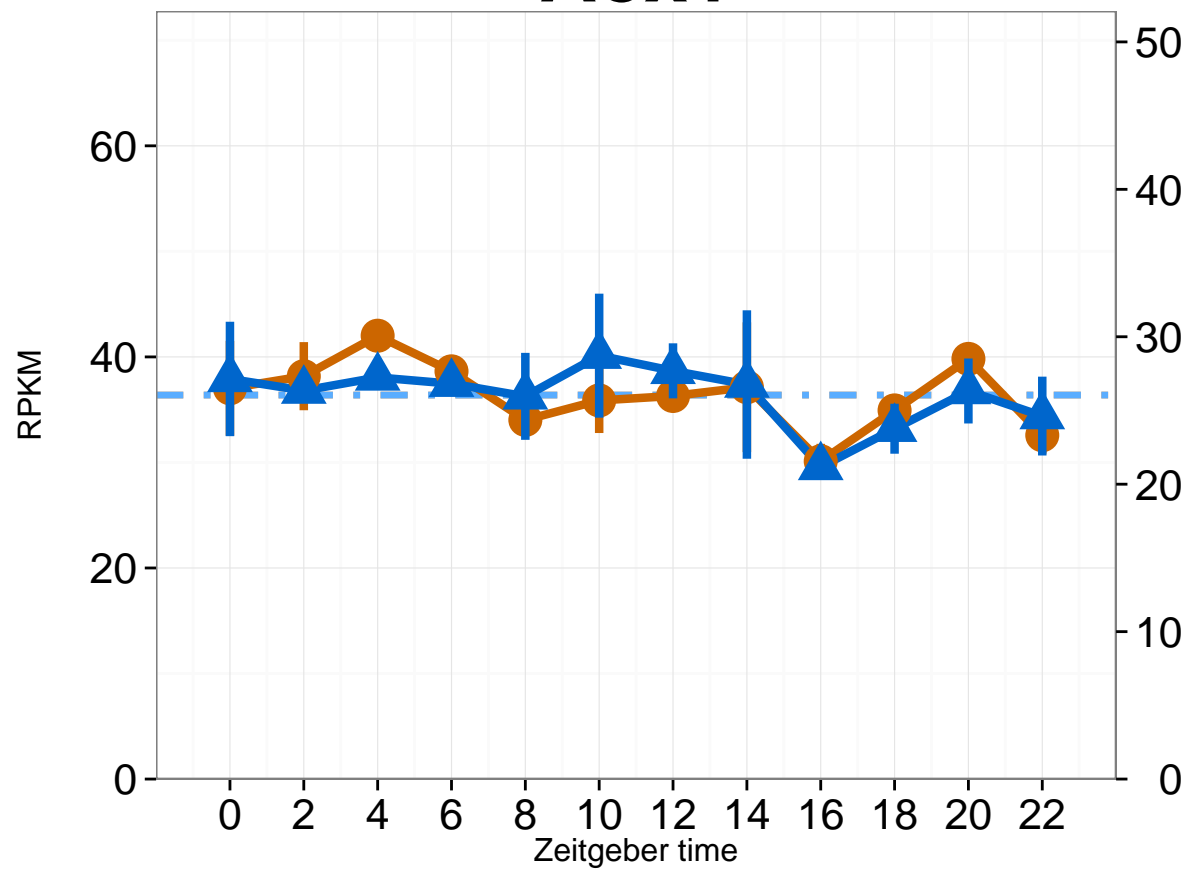

## Aox1

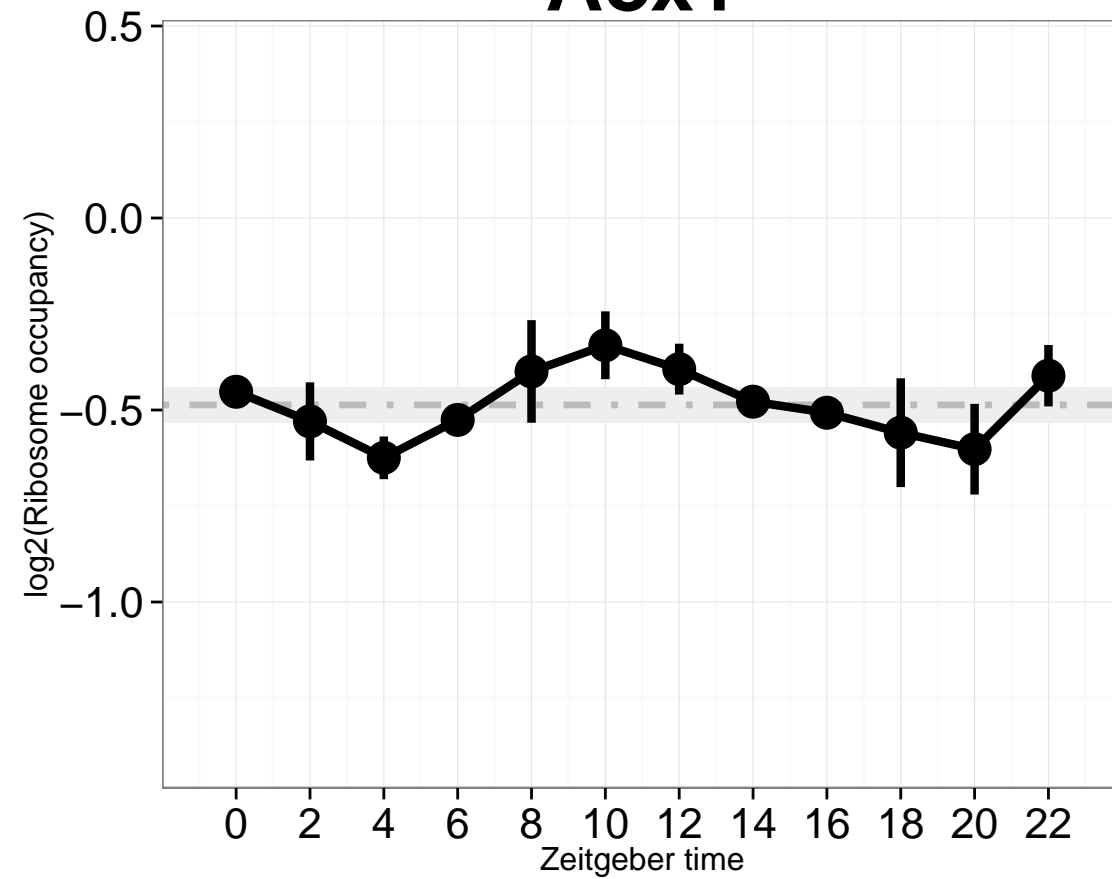

Supplement: SuppDataset_1.zip [file Aox1_set_A.pdf › Supplemental Dataset 1/A-mRNA_nonrhyth_translation_nonrhyth/Aox1_set_A.pdf]

# Ap1ar

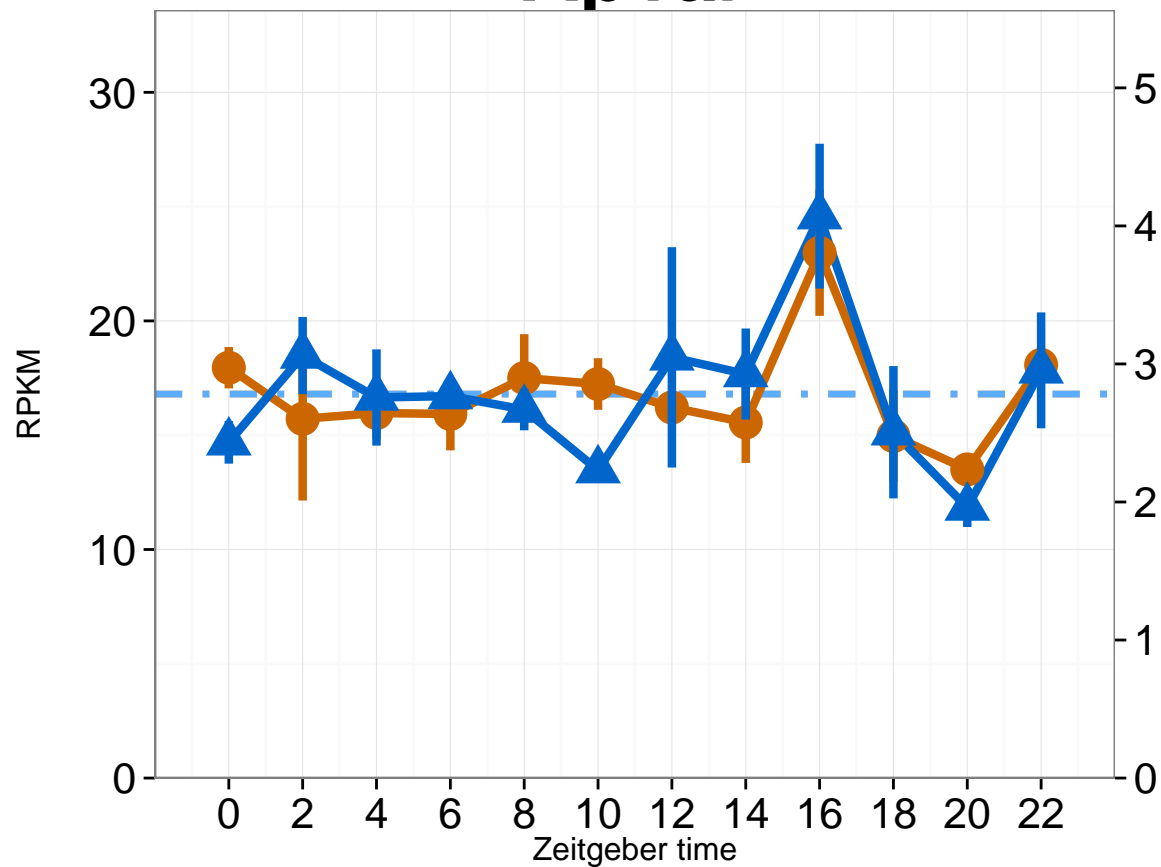

# Ap1ar

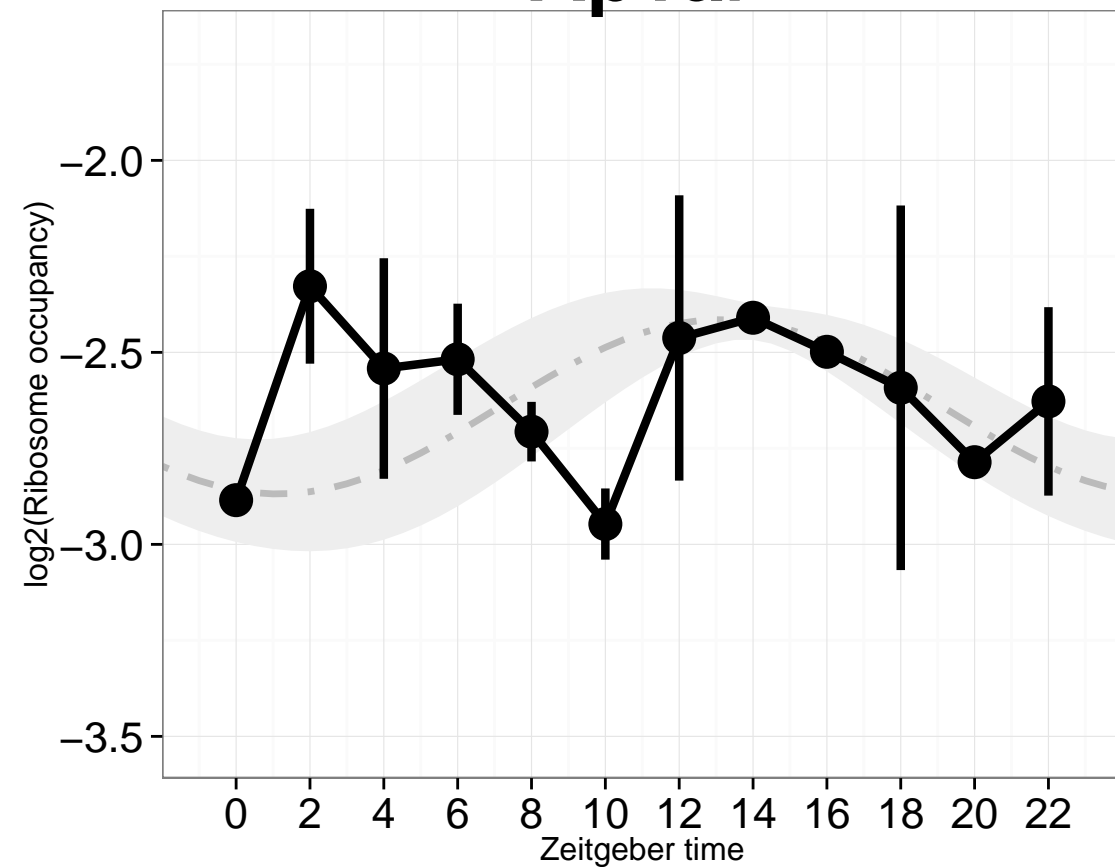

Supplement: SuppDataset_1.zip [file Ap1ar_set_A.pdf › Supplemental Dataset 1/A-mRNA_nonrhyth_translation_nonrhyth/Ap1ar_set_A.pdf]

# Ap1b1

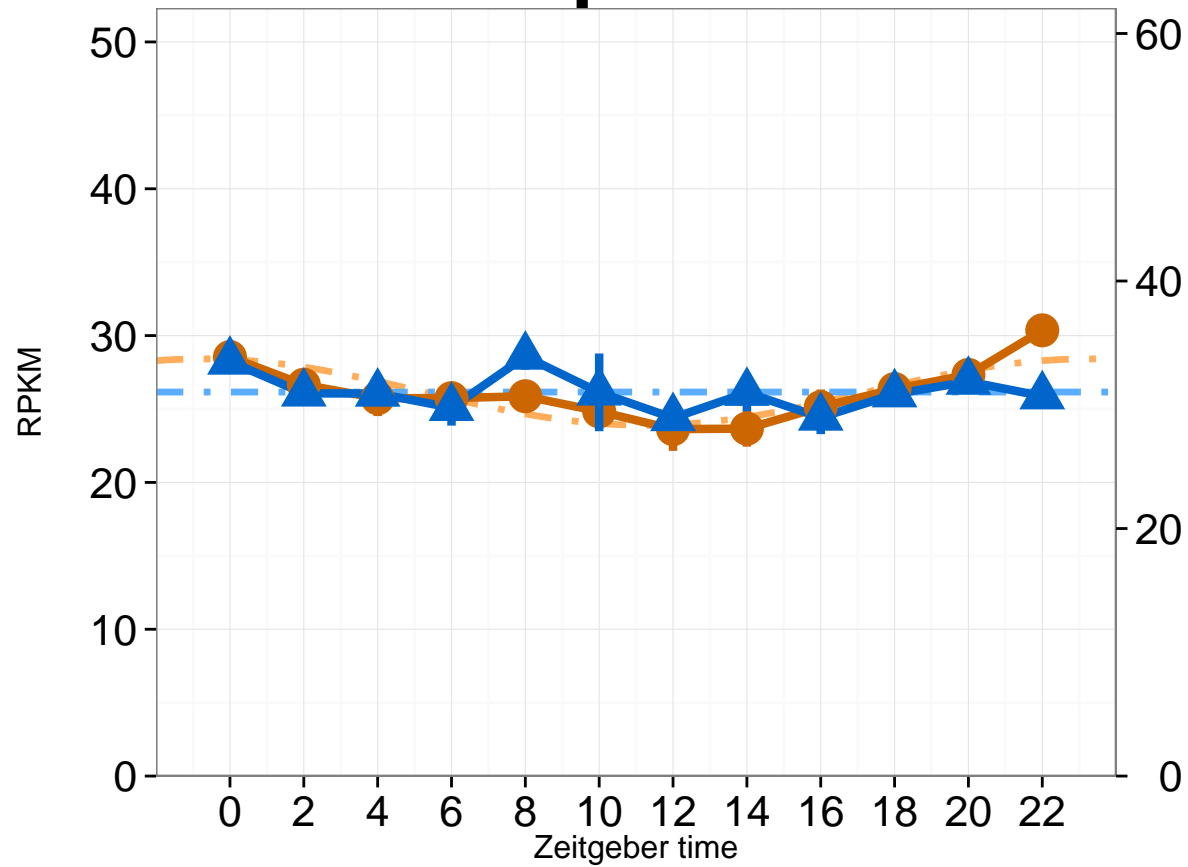

# Ap1b1

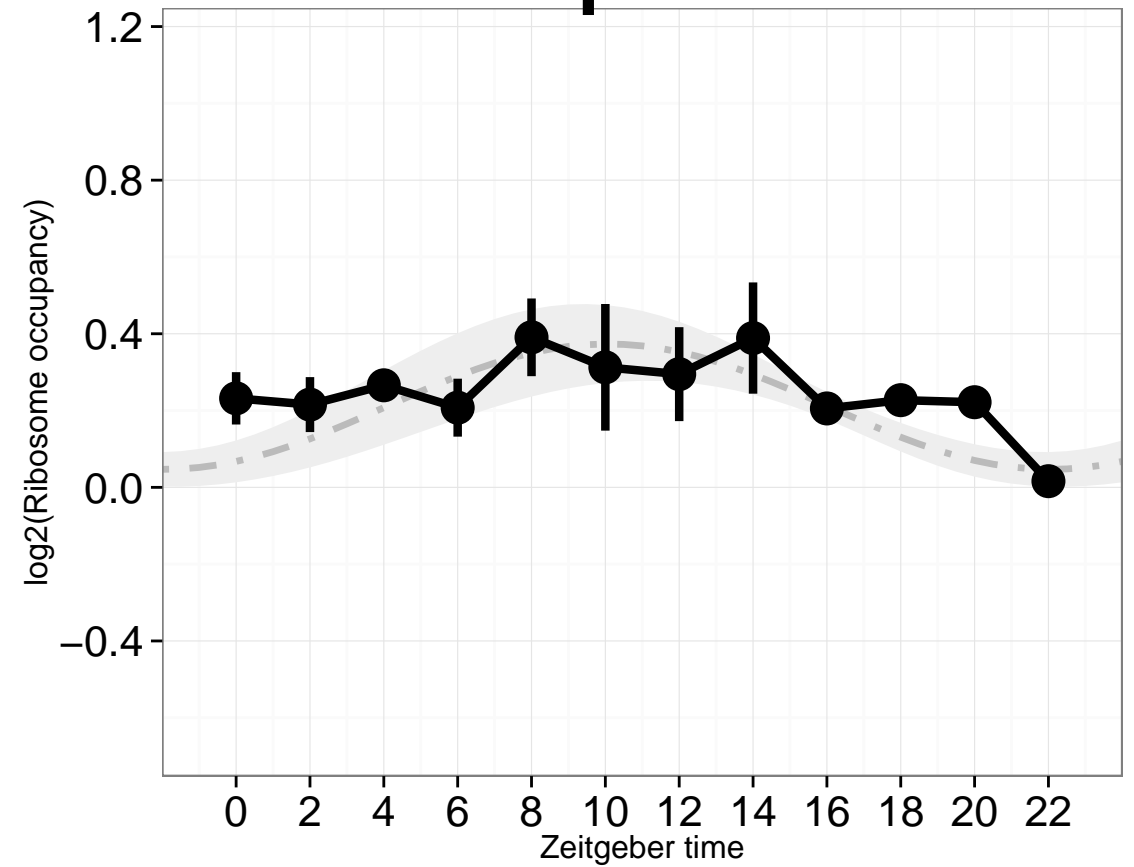

Supplement: SuppDataset_1.zip [file Ap1b1_set_A.pdf › Supplemental Dataset 1/A-mRNA_nonrhyth_translation_nonrhyth/Ap1b1_set_A.pdf]

## Ap1g1

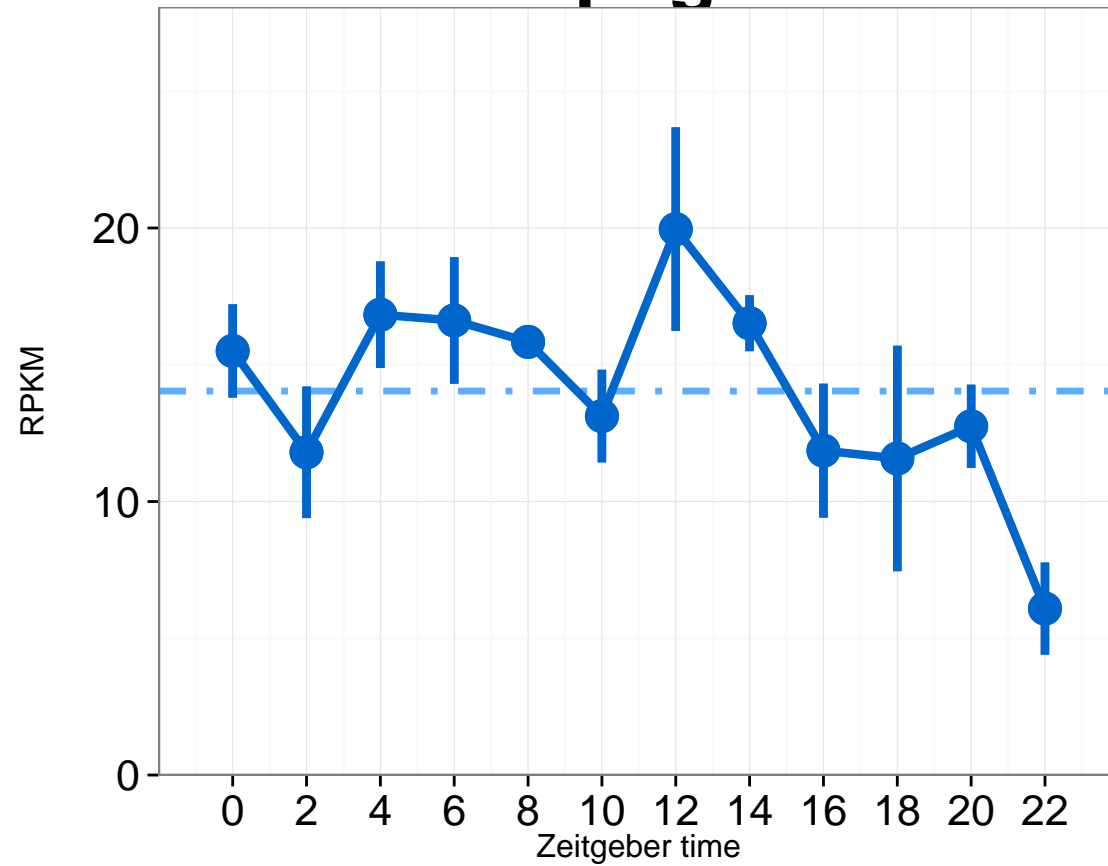

## Ap1g1 log2(Ribosome occupancy

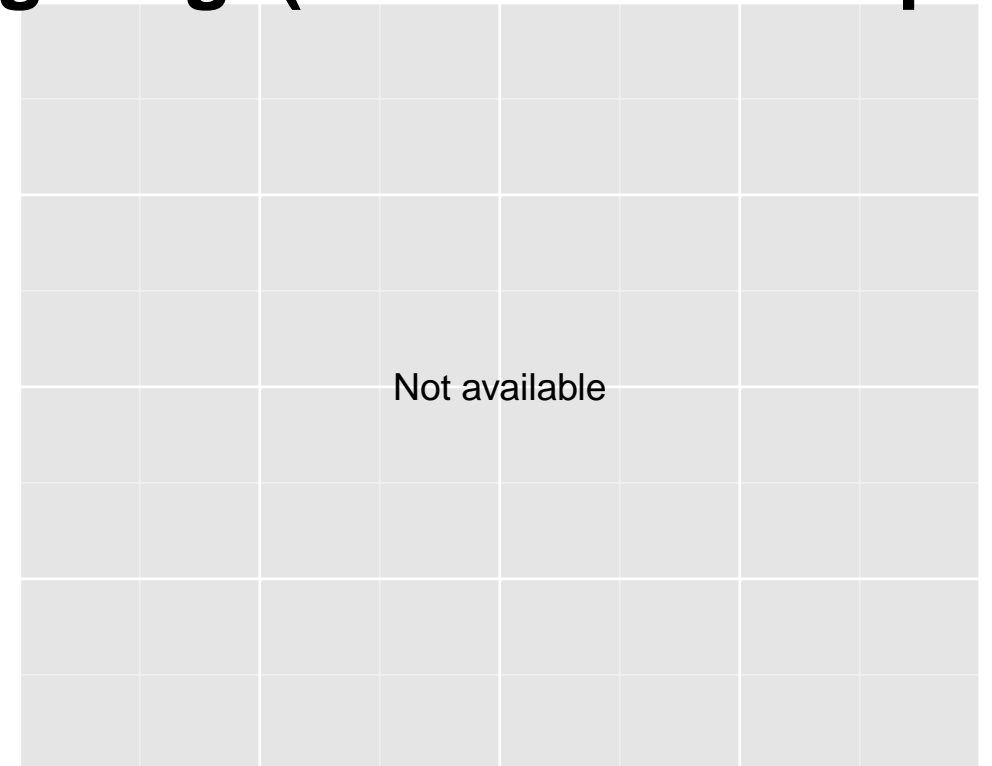

Supplement: SuppDataset_1.zip [file Ap1g1_set_A.pdf › Supplemental Dataset 1/A-mRNA_nonrhyth_translation_nonrhyth/Ap1g1_set_A.pdf]

# Ap1g2

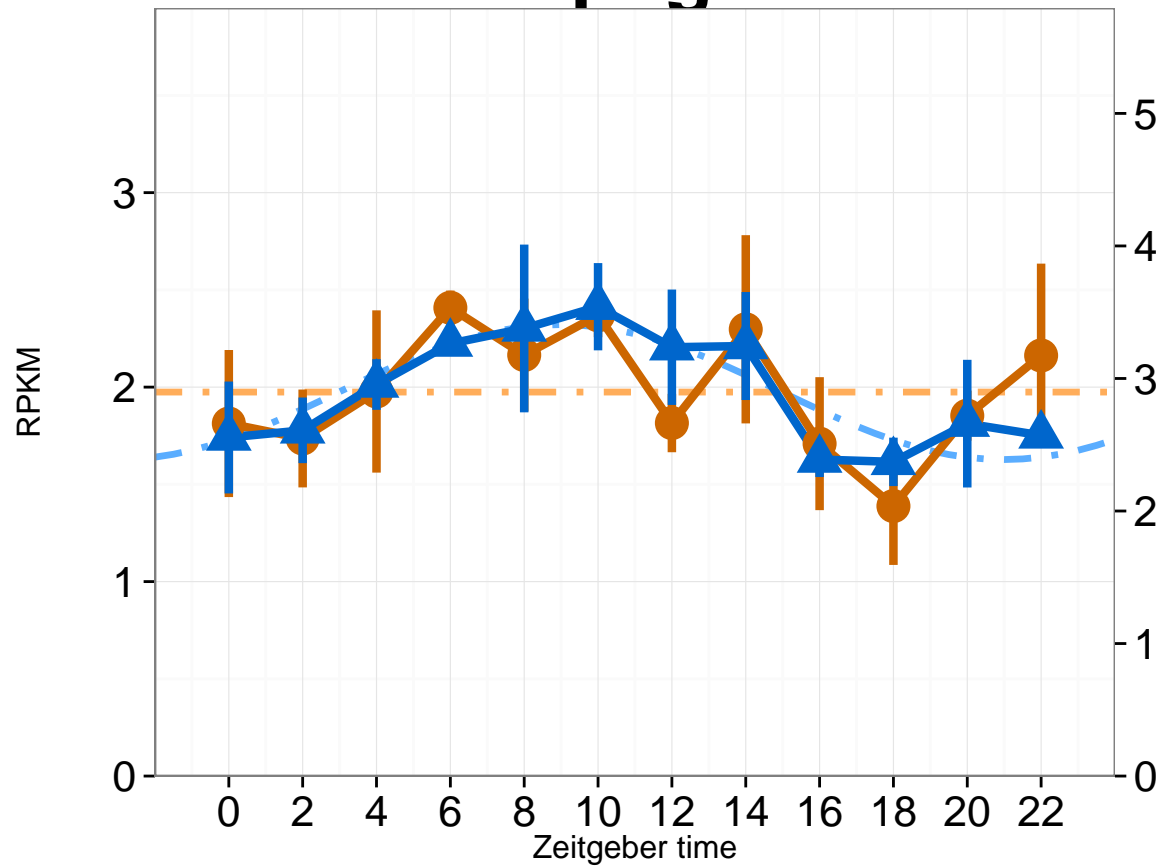

# Ap1g2

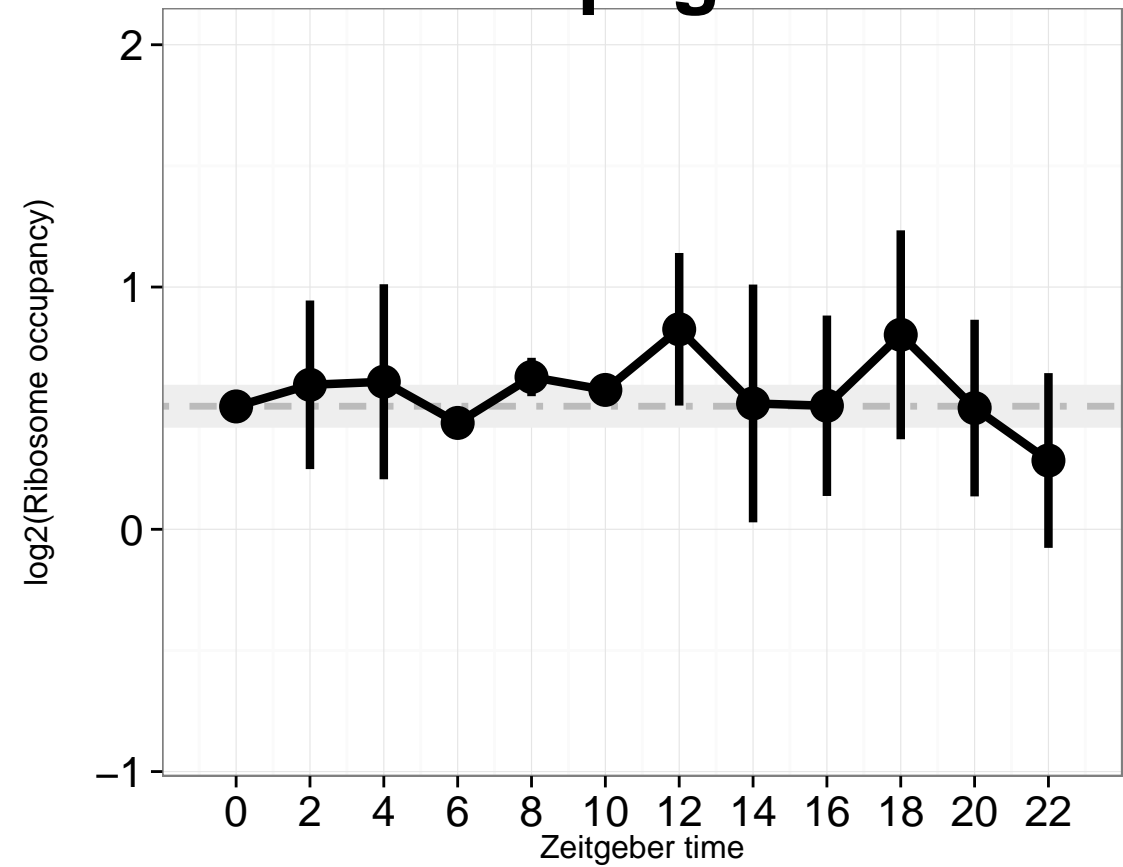

Supplement: SuppDataset_1.zip [file Ap1g2_set_A.pdf › Supplemental Dataset 1/A-mRNA_nonrhyth_translation_nonrhyth/Ap1g2_set_A.pdf]

# Ap1m1

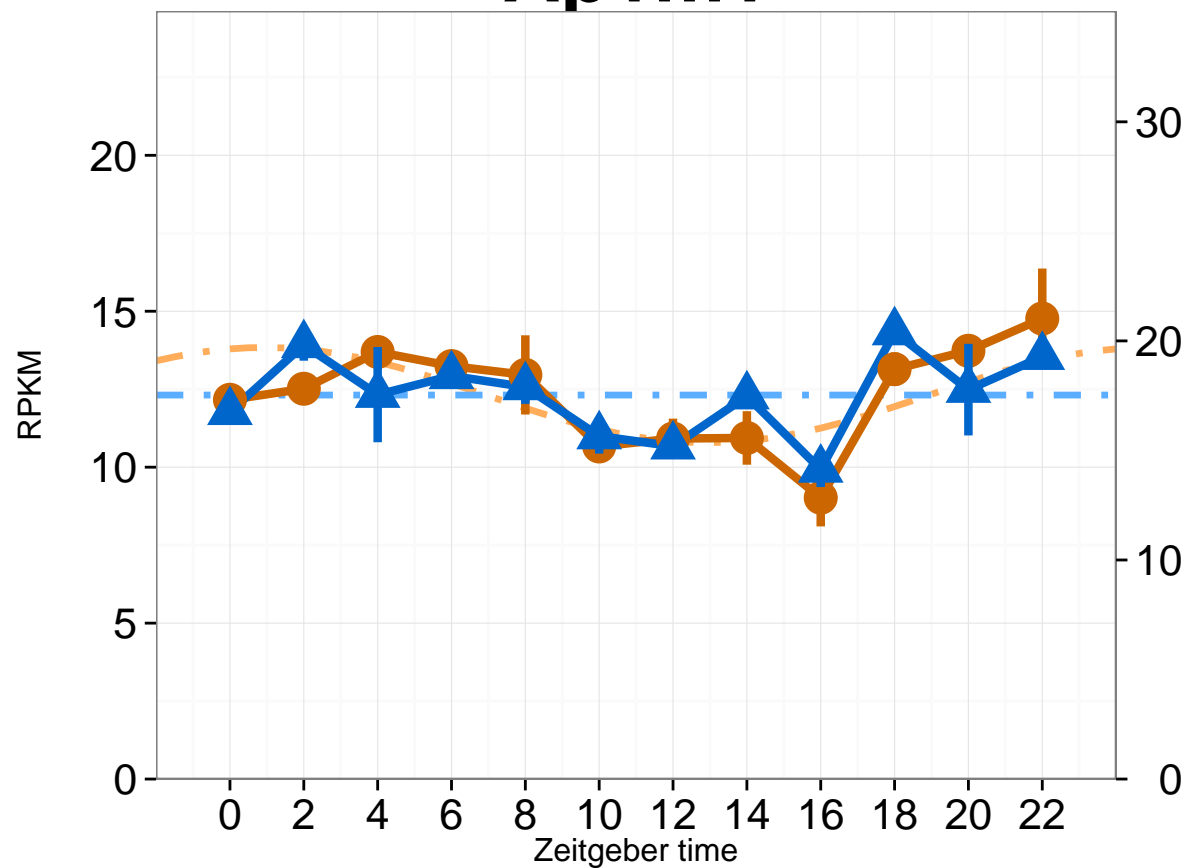

# Ap1m1

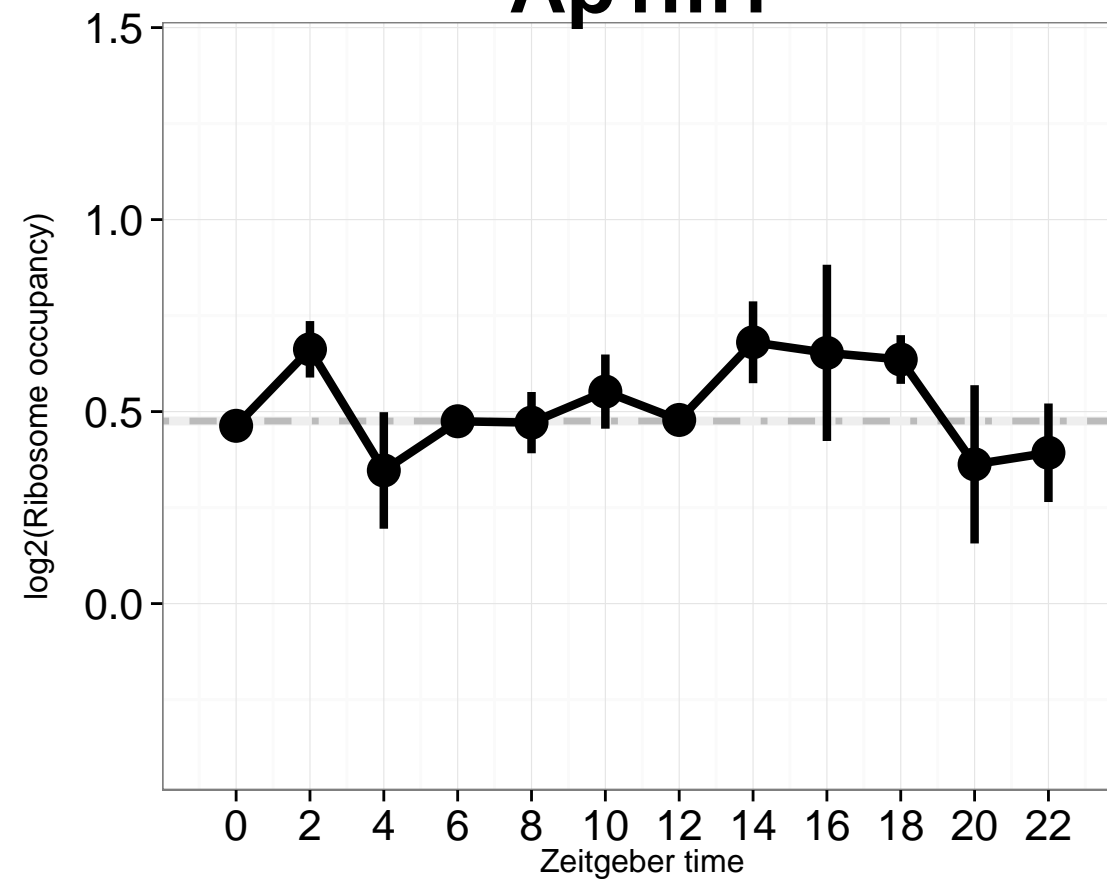

Supplement: SuppDataset_1.zip [file Ap1m1_set_A.pdf › Supplemental Dataset 1/A-mRNA_nonrhyth_translation_nonrhyth/Ap1m1_set_A.pdf]

## Ap1s1

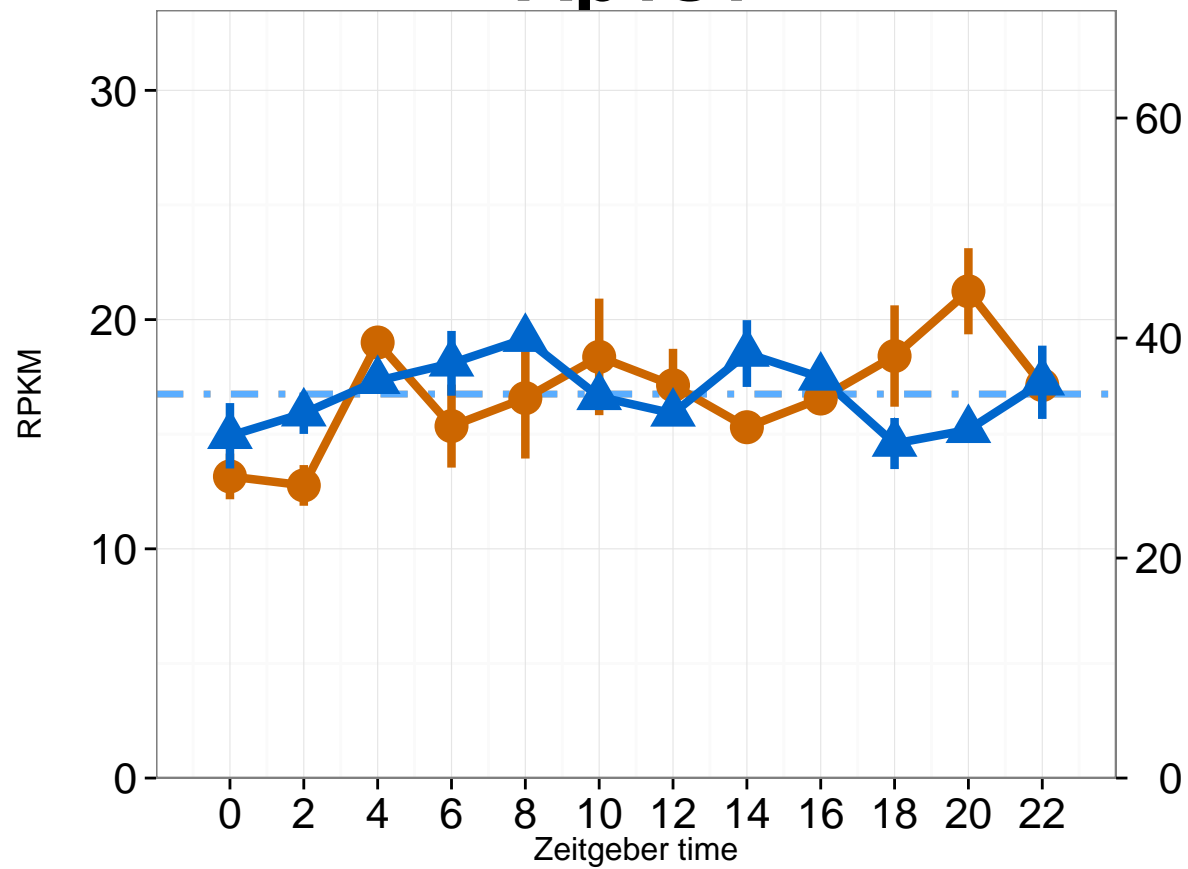

## Ap1s1

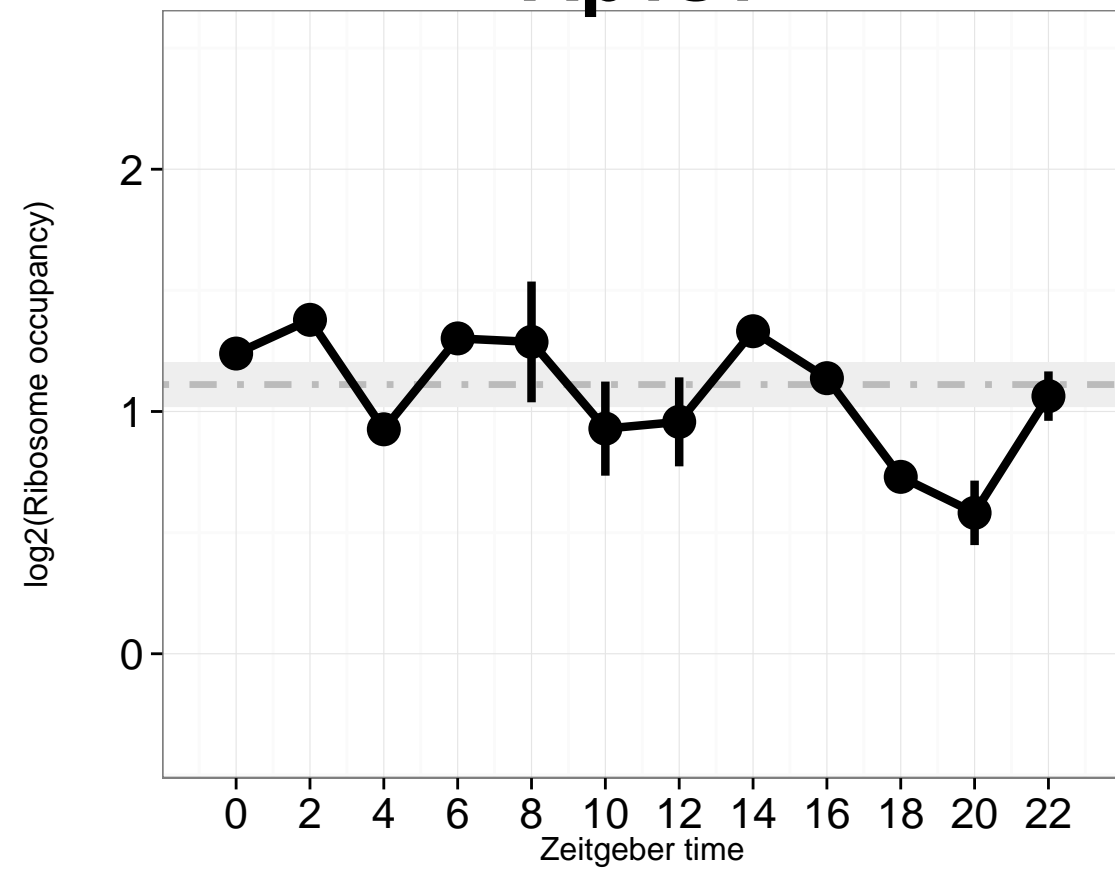

Supplement: SuppDataset_1.zip [file Ap1s1_set_A.pdf › Supplemental Dataset 1/A-mRNA_nonrhyth_translation_nonrhyth/Ap1s1_set_A.pdf]

# Ap1s2

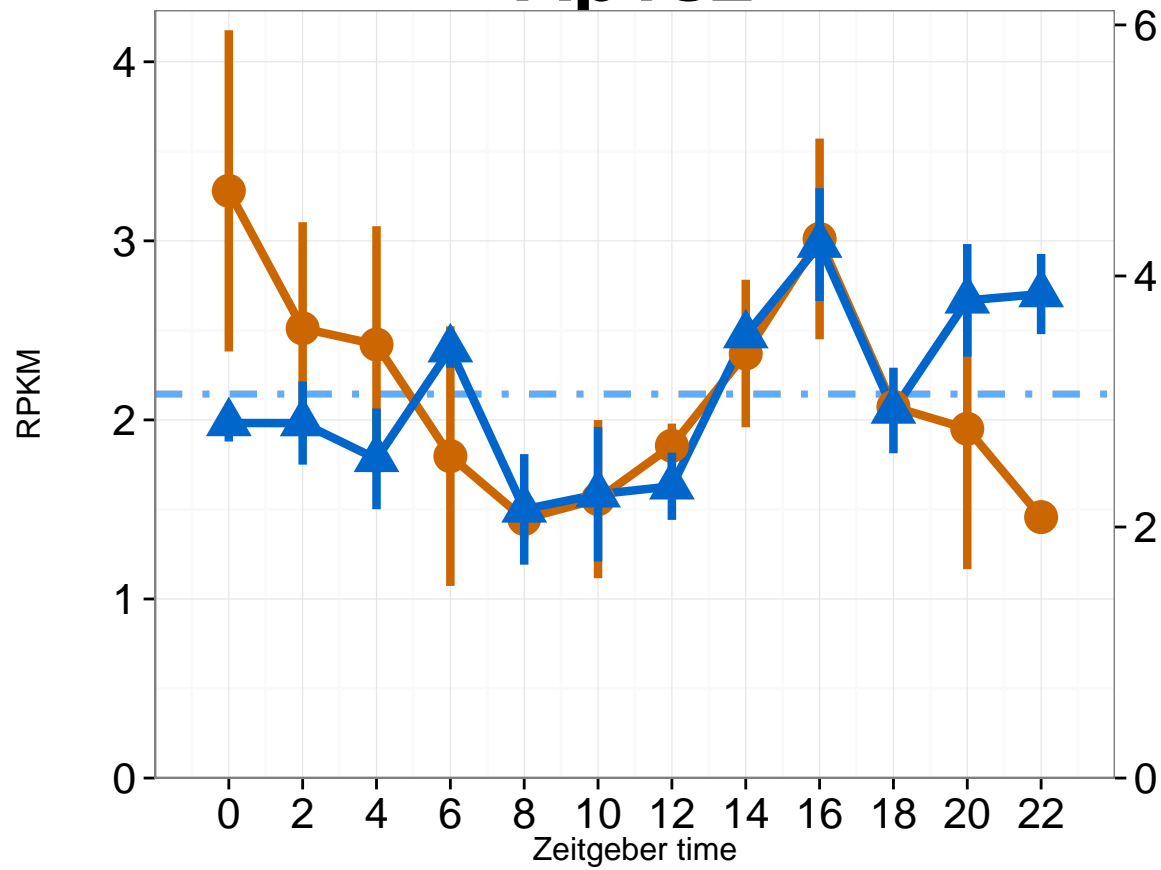

# Ap1s2

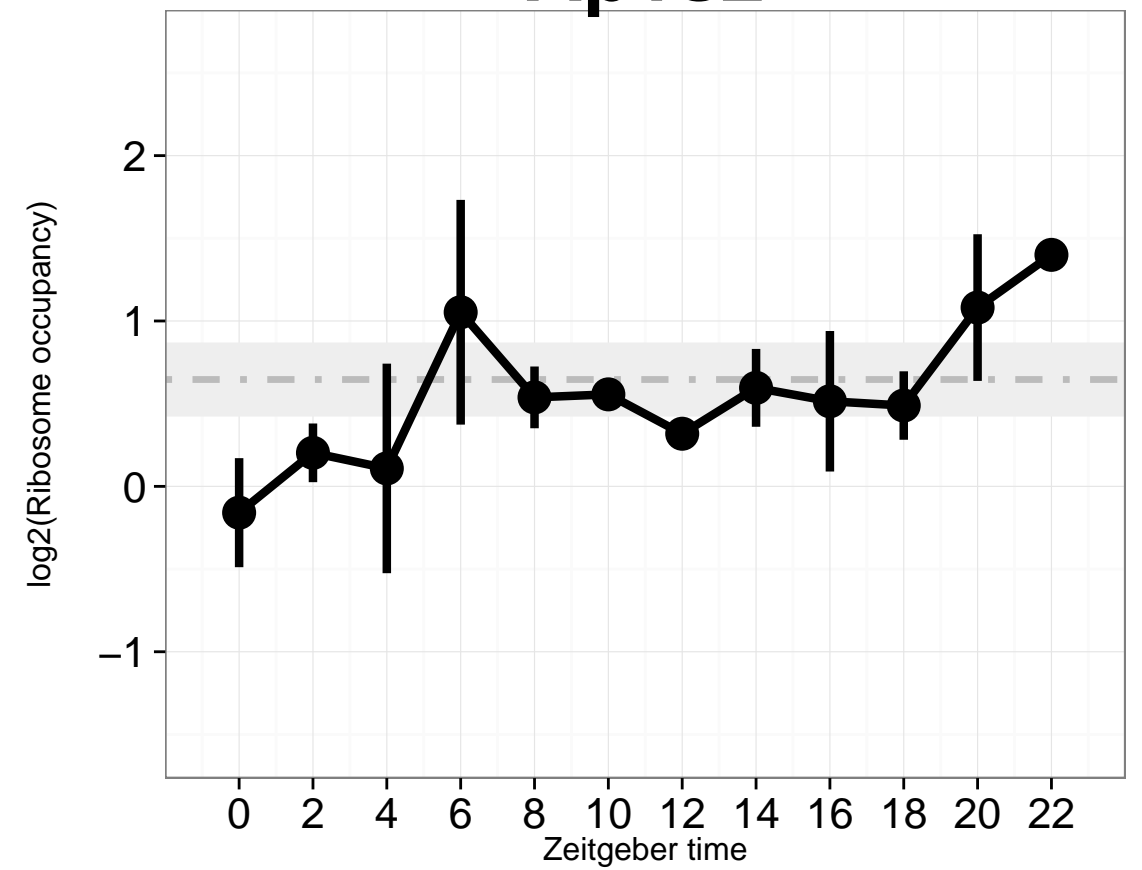

Supplement: SuppDataset_1.zip [file Ap1s2_set_A.pdf › Supplemental Dataset 1/A-mRNA_nonrhyth_translation_nonrhyth/Ap1s2_set_A.pdf]

# Ap2a1

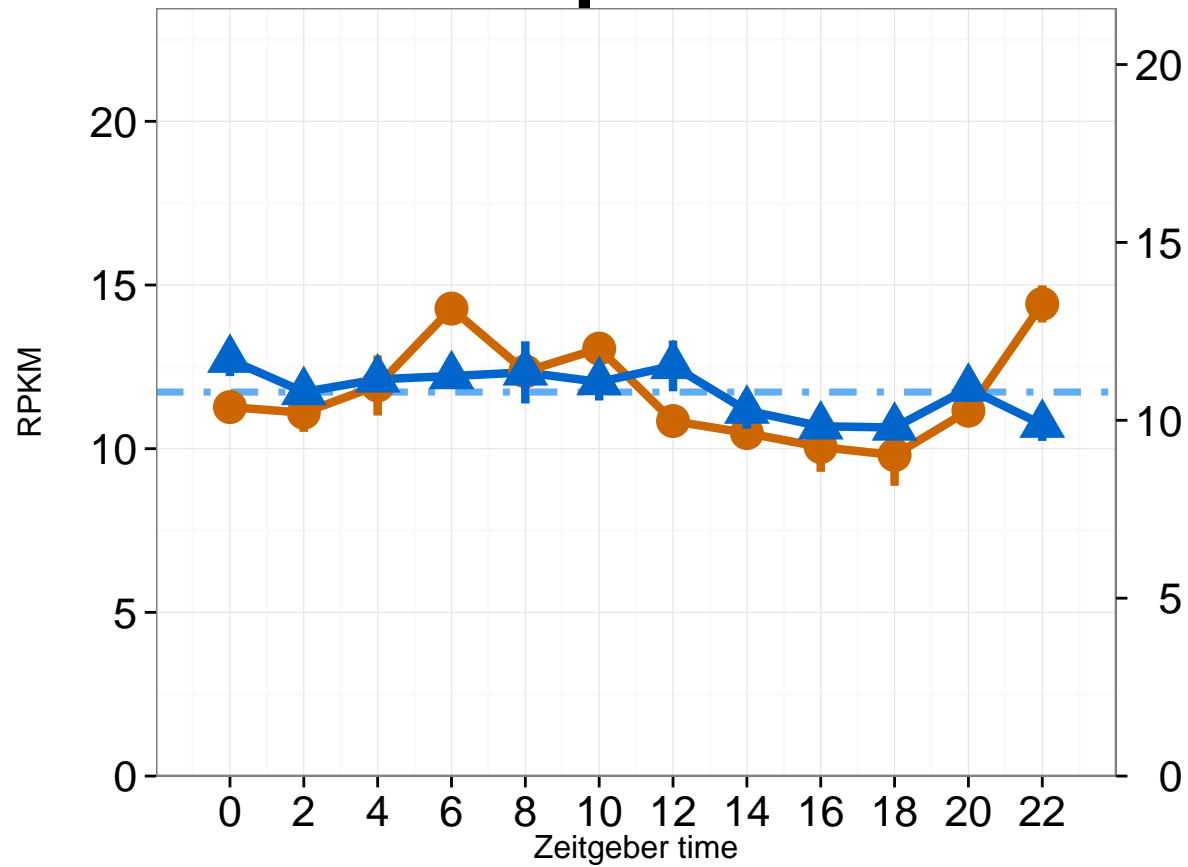

# Ap2a1

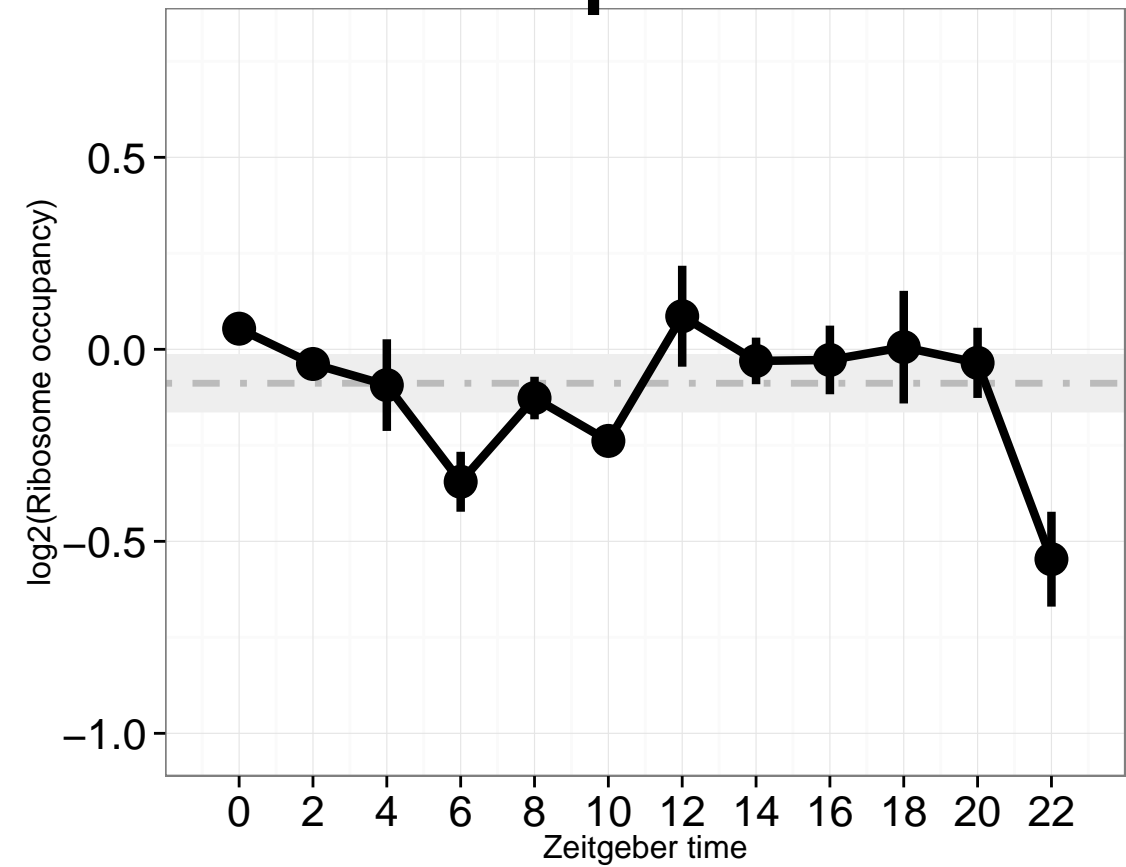

Supplement: SuppDataset_1.zip [file Ap2a1_set_A.pdf › Supplemental Dataset 1/A-mRNA_nonrhyth_translation_nonrhyth/Ap2a1_set_A.pdf]

# Ap2b1

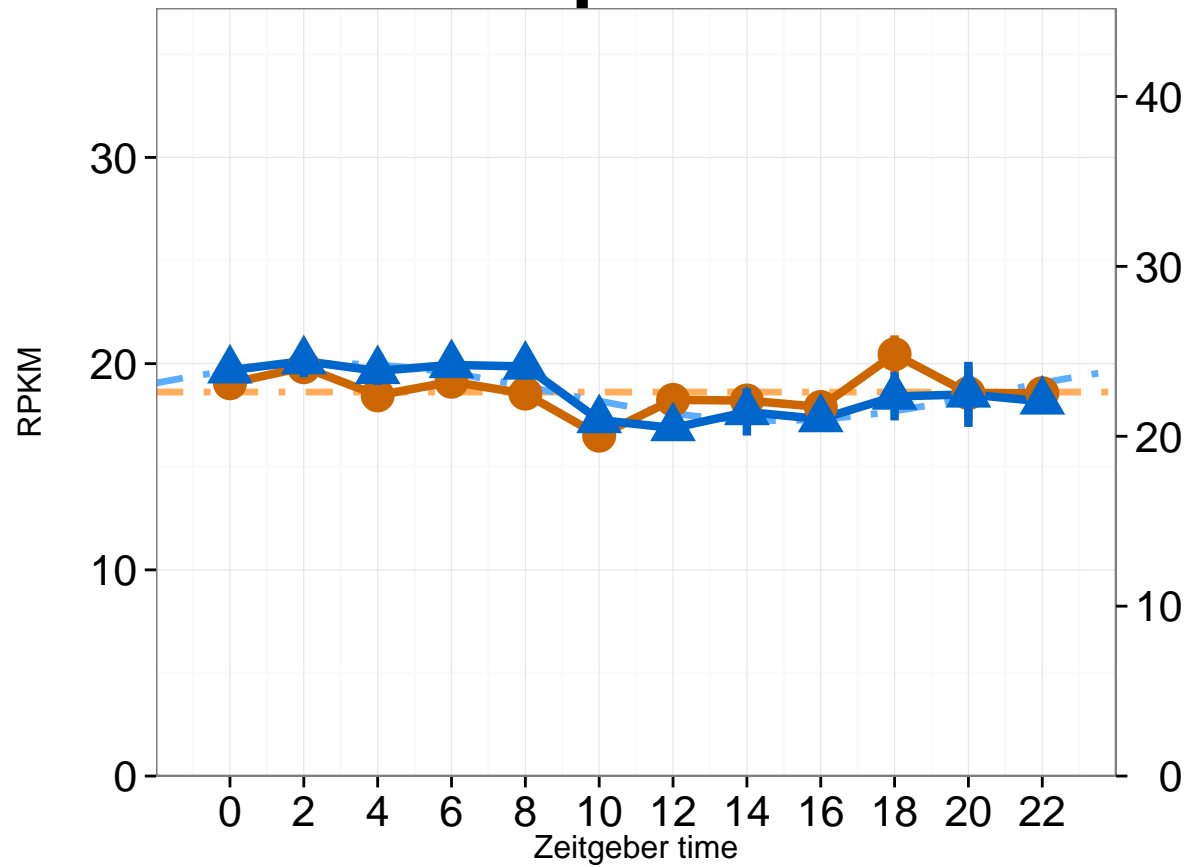

# Ap2b1

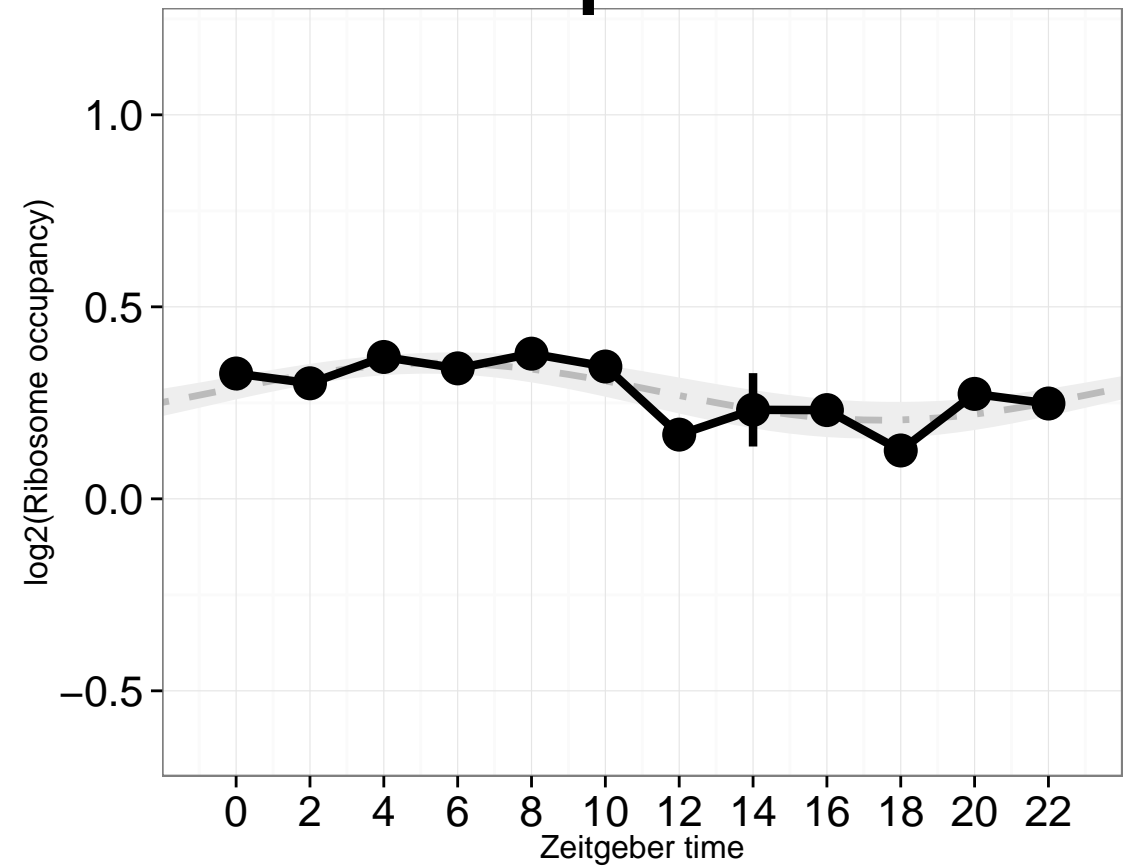

Supplement: SuppDataset_1.zip [file Ap2b1_set_A.pdf › Supplemental Dataset 1/A-mRNA_nonrhyth_translation_nonrhyth/Ap2b1_set_A.pdf]

# Ap2m1

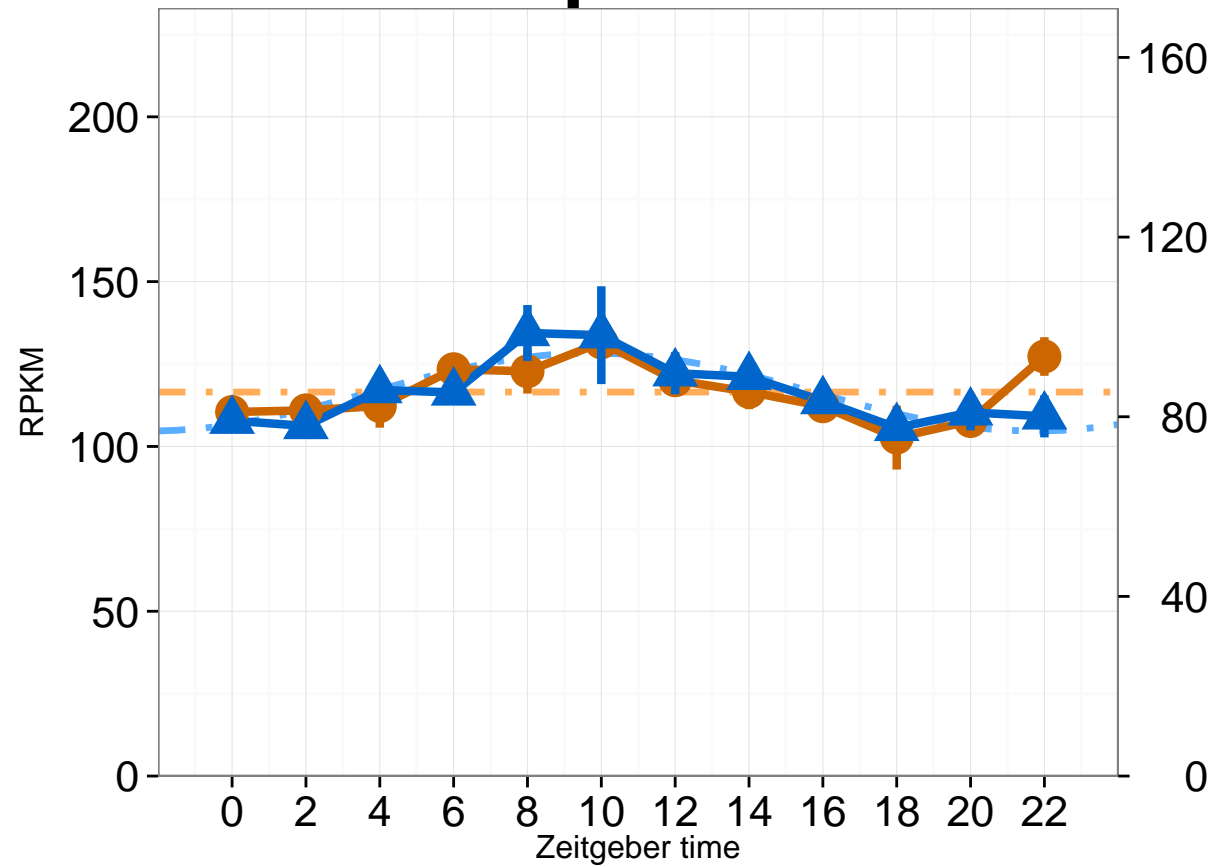

# Ap2m1

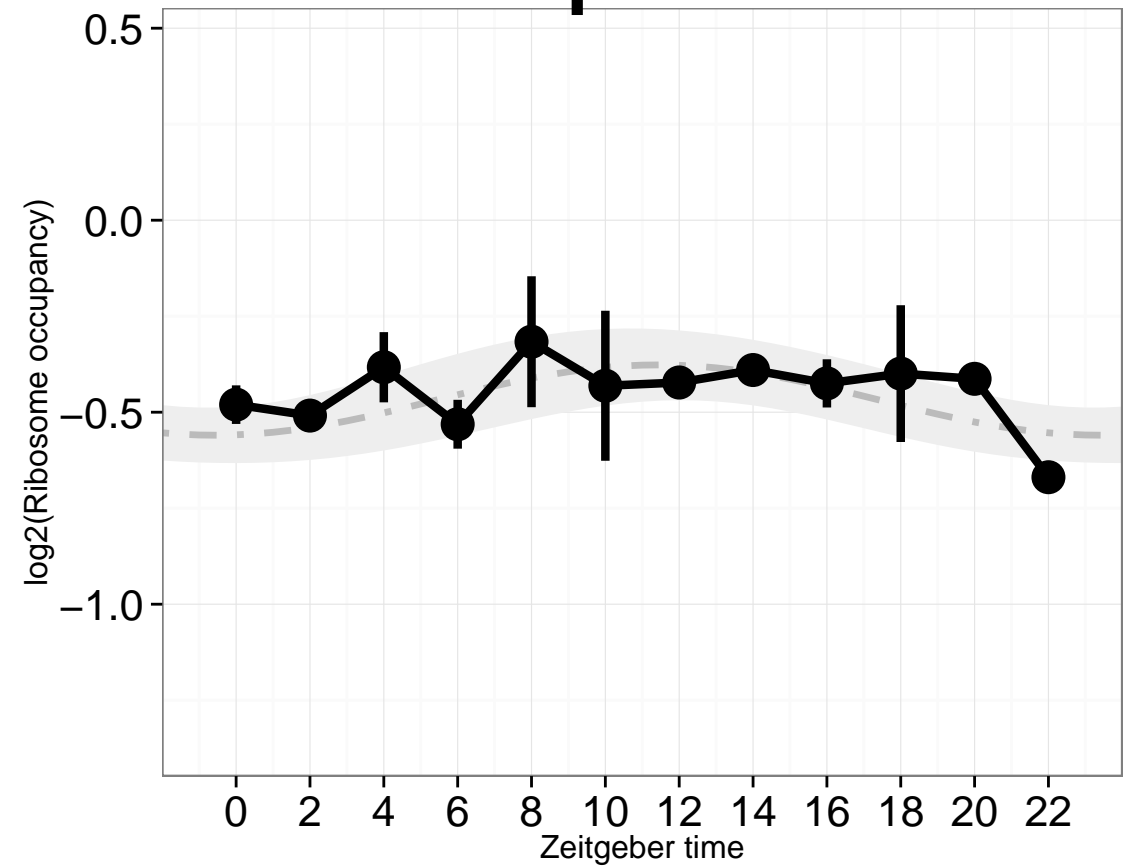

Supplement: SuppDataset_1.zip [file Ap2m1_set_A.pdf › Supplemental Dataset 1/A-mRNA_nonrhyth_translation_nonrhyth/Ap2m1_set_A.pdf]

# Ap2s1

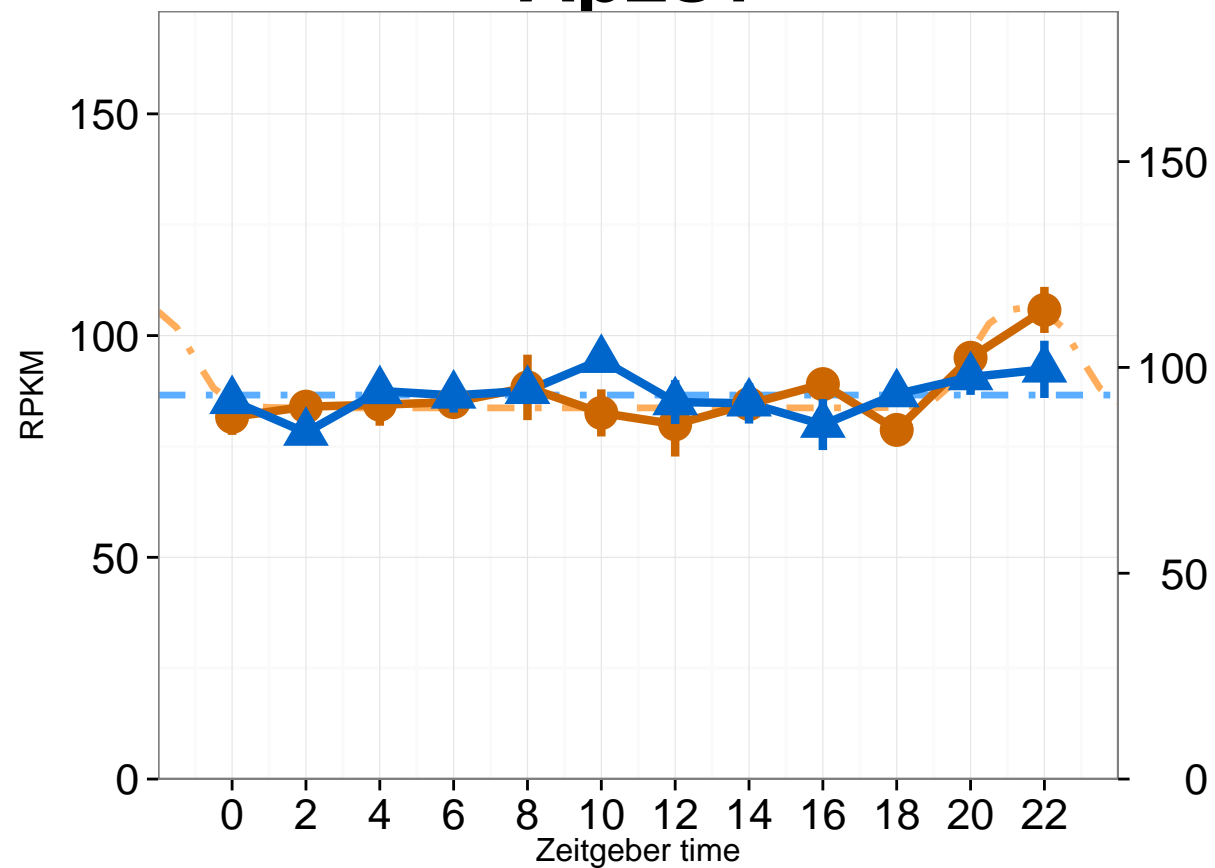

# Ap2s1

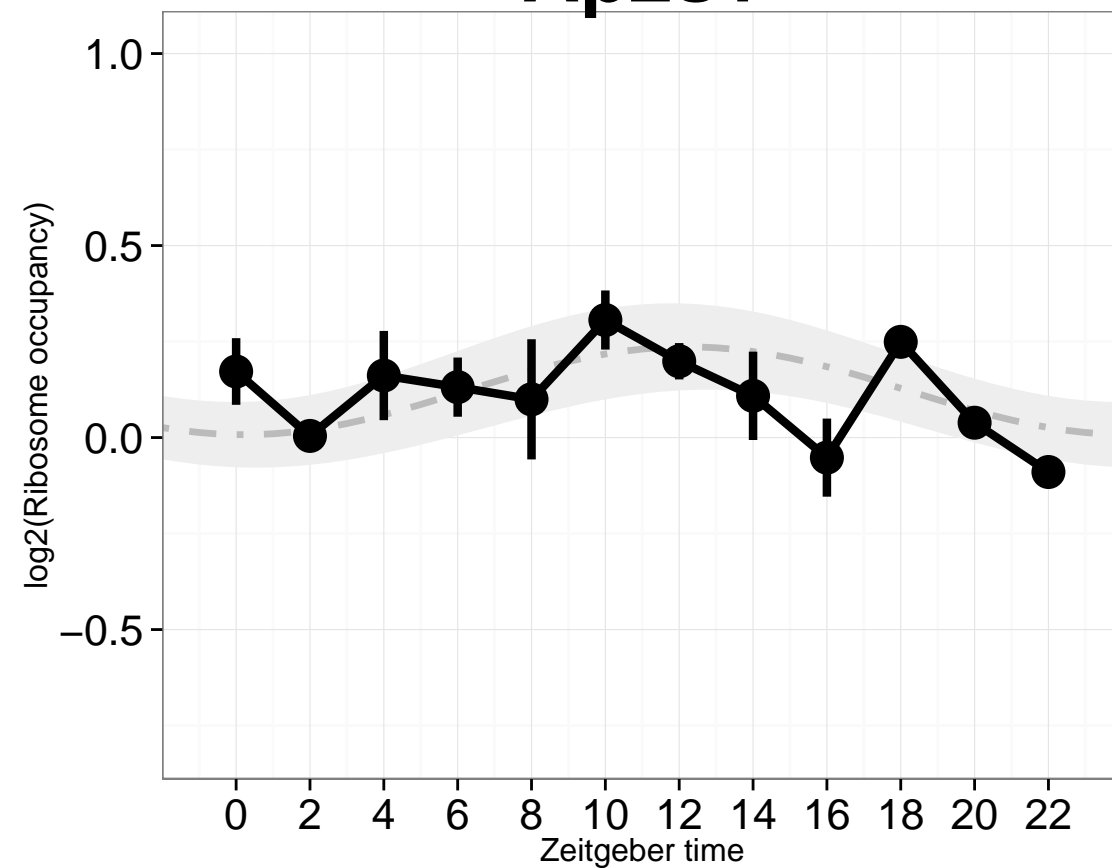

Supplement: SuppDataset_1.zip [file Ap2s1_set_A.pdf › Supplemental Dataset 1/A-mRNA_nonrhyth_translation_nonrhyth/Ap2s1_set_A.pdf]

# Ap3b1

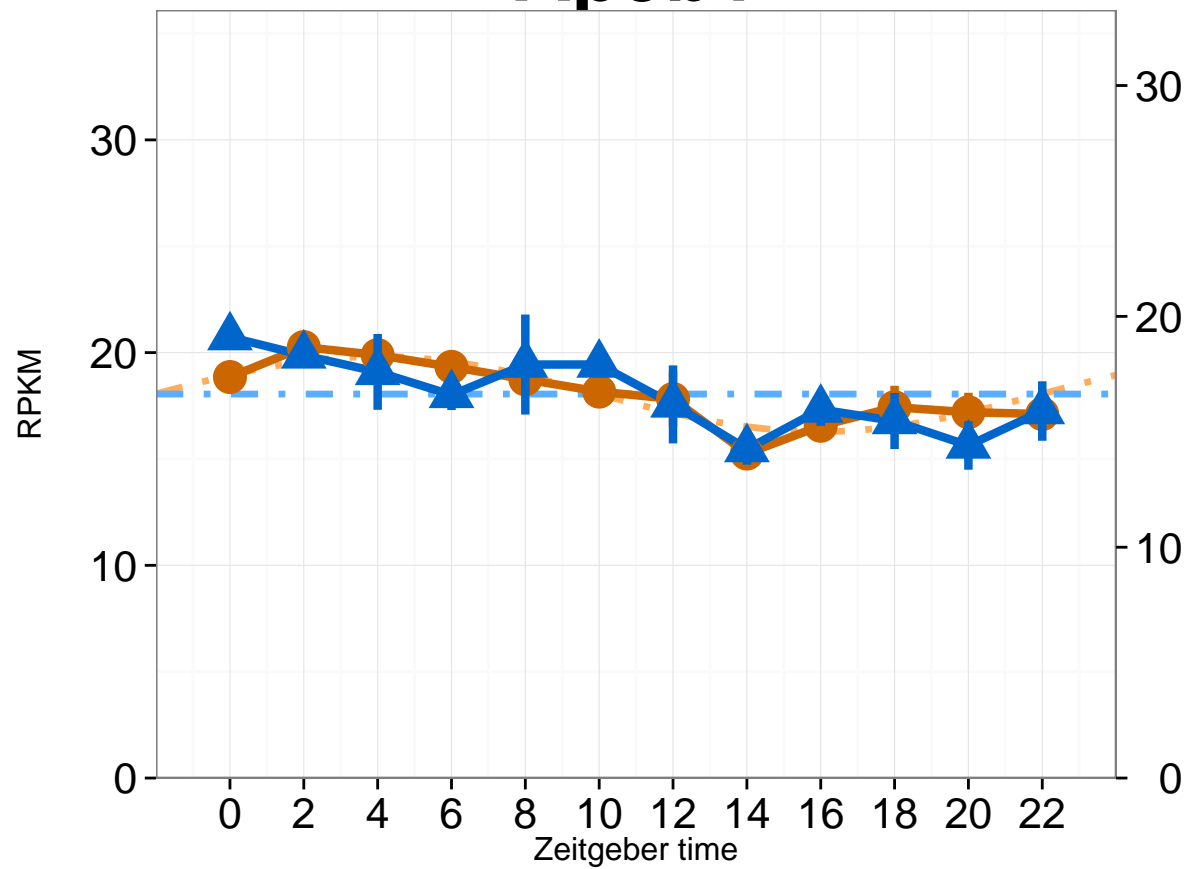

# Ap3b1

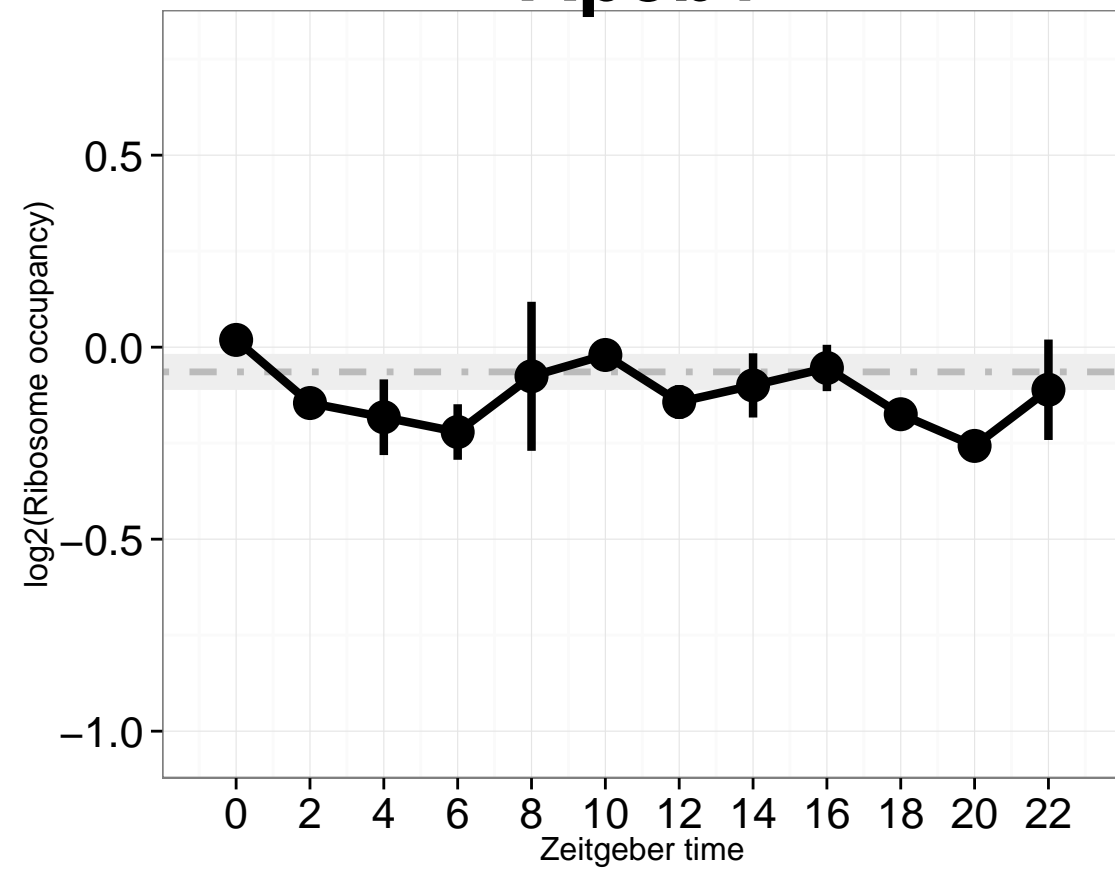

Supplement: SuppDataset_1.zip [file Ap3b1_set_A.pdf › Supplemental Dataset 1/A-mRNA_nonrhyth_translation_nonrhyth/Ap3b1_set_A.pdf]

# Ap3d1

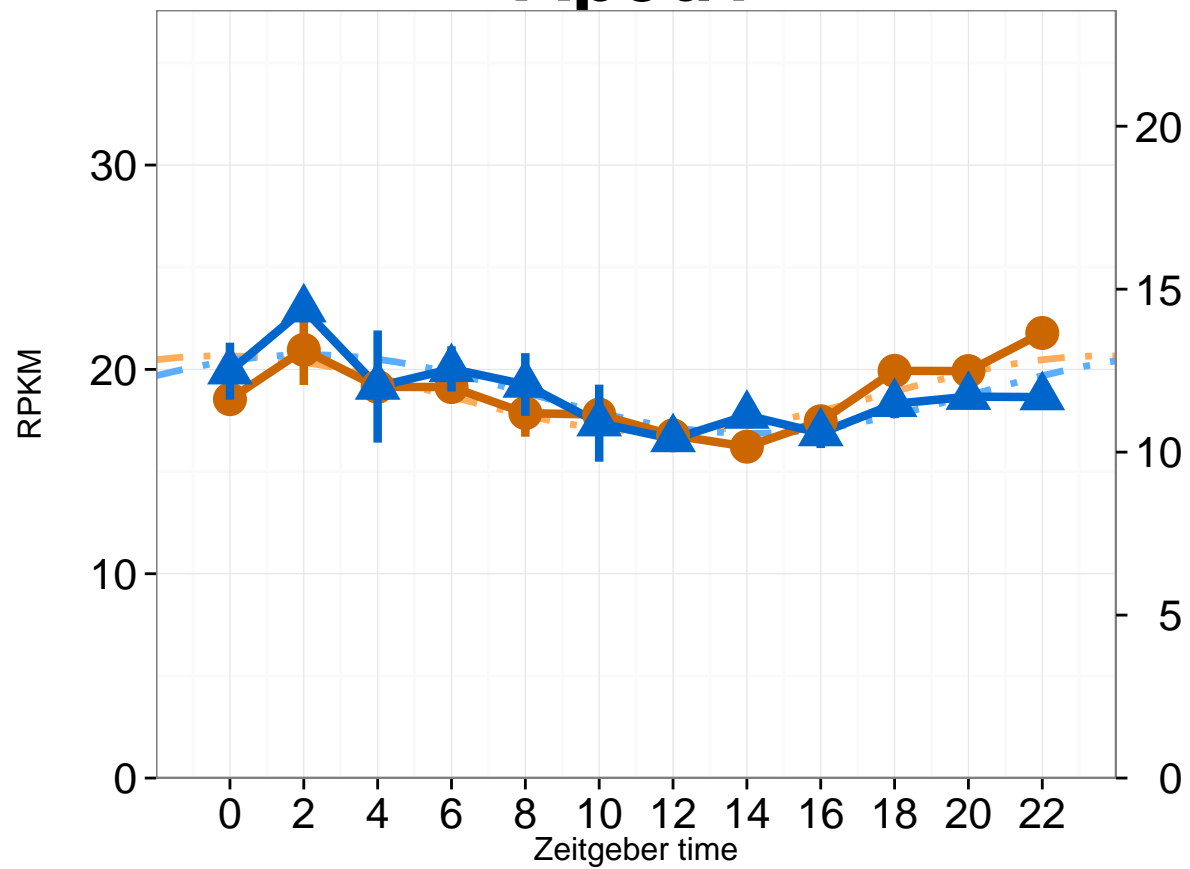

# Ap3d1

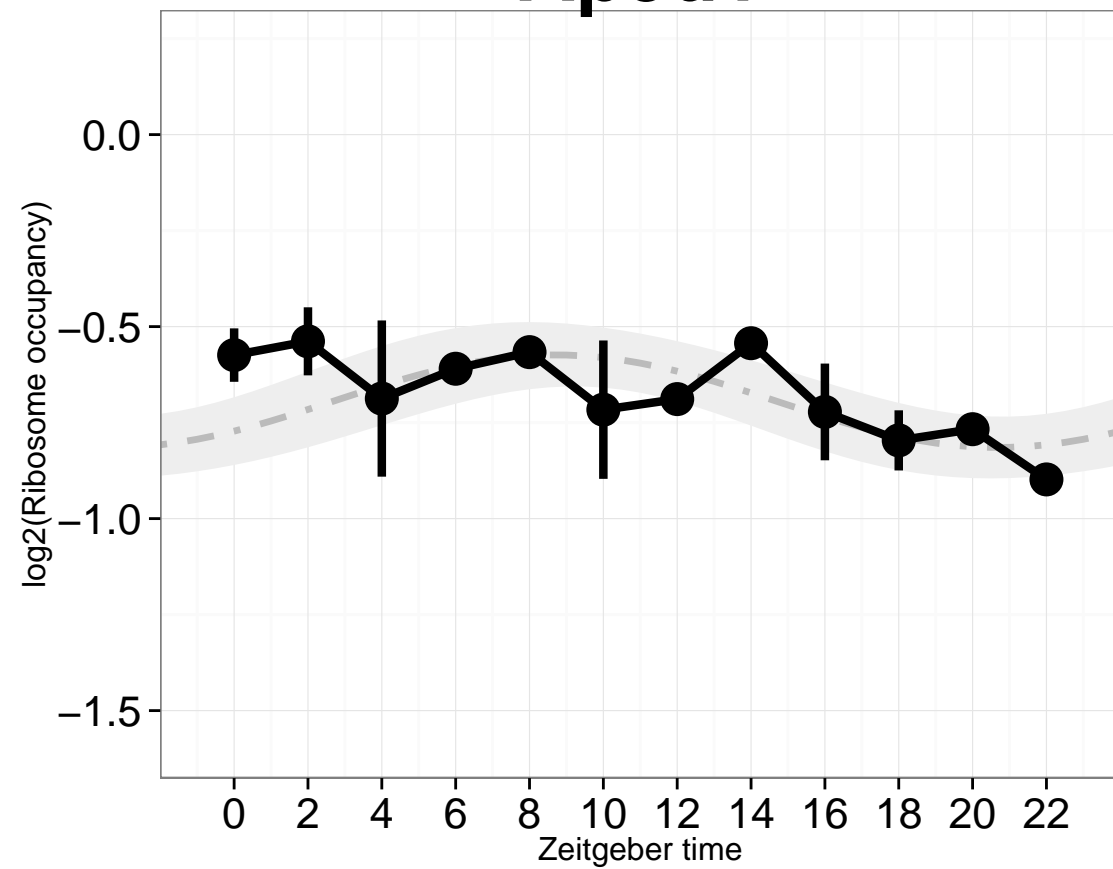

Supplement: SuppDataset_1.zip [file Ap3d1_set_A.pdf › Supplemental Dataset 1/A-mRNA_nonrhyth_translation_nonrhyth/Ap3d1_set_A.pdf]

# Ap3m2

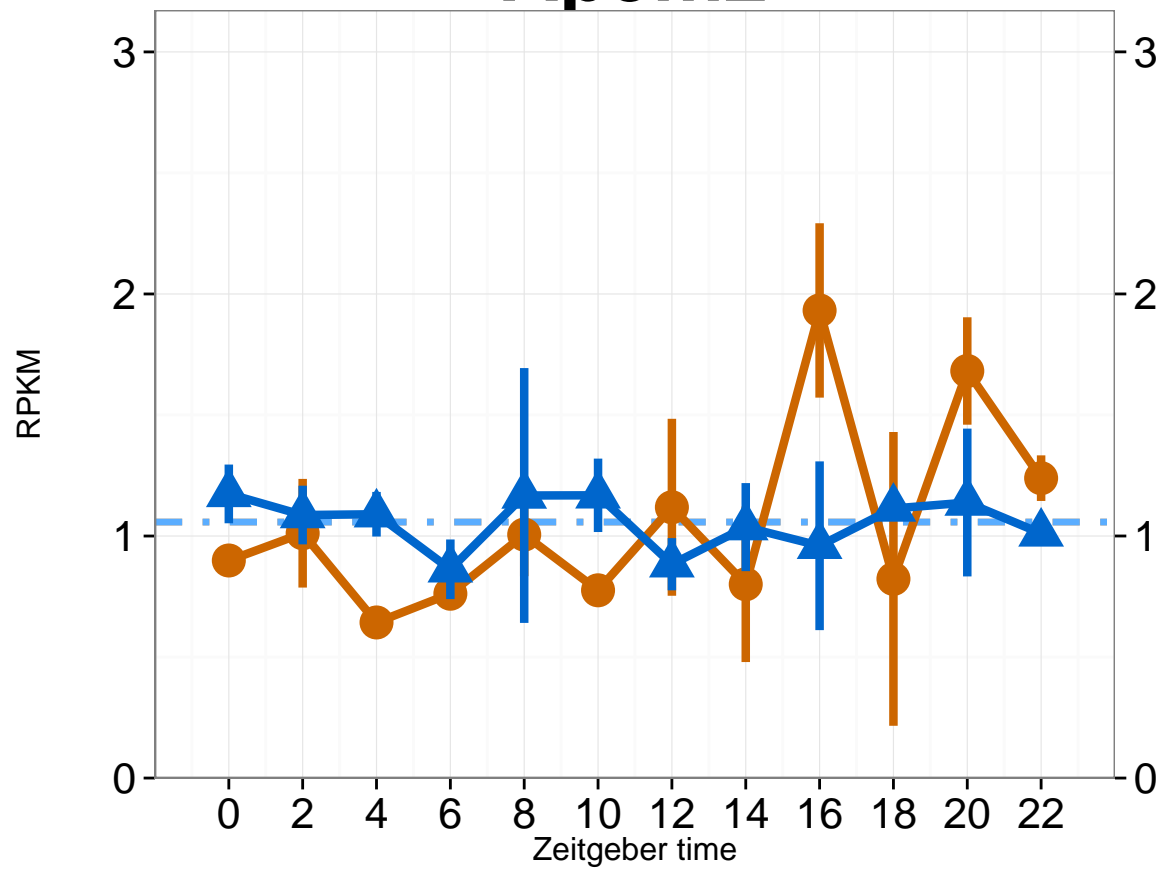

# Ap3m2

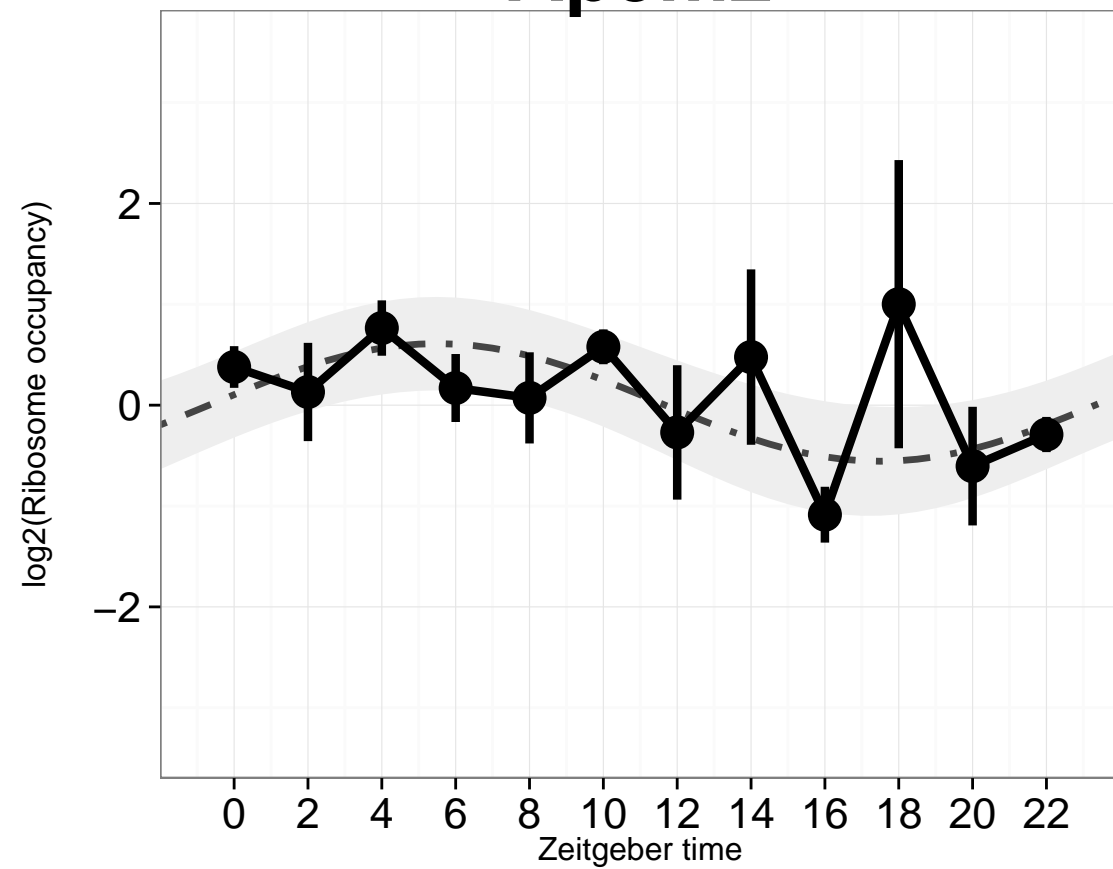

Supplement: SuppDataset_1.zip [file Ap3m2_set_A.pdf › Supplemental Dataset 1/A-mRNA_nonrhyth_translation_nonrhyth/Ap3m2_set_A.pdf]

## Ap3s1

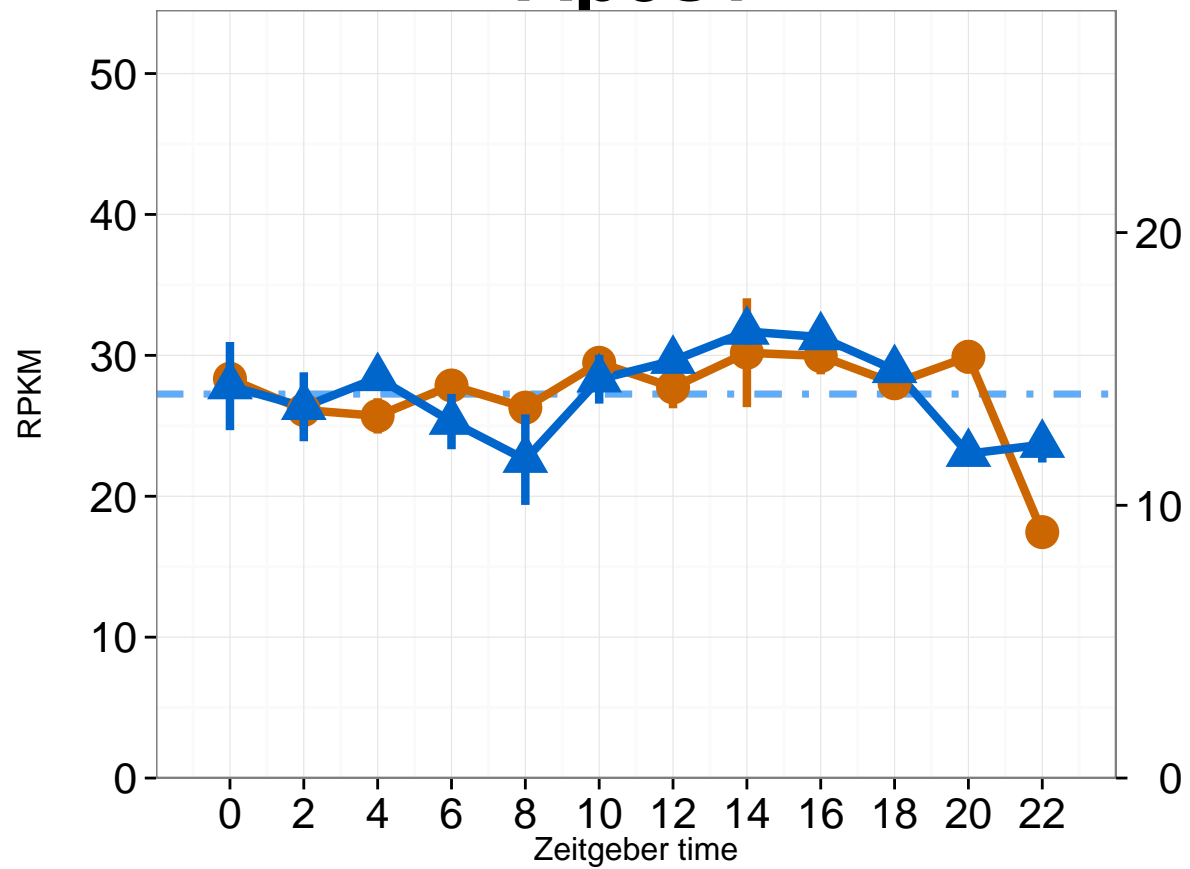

## Ap3s1

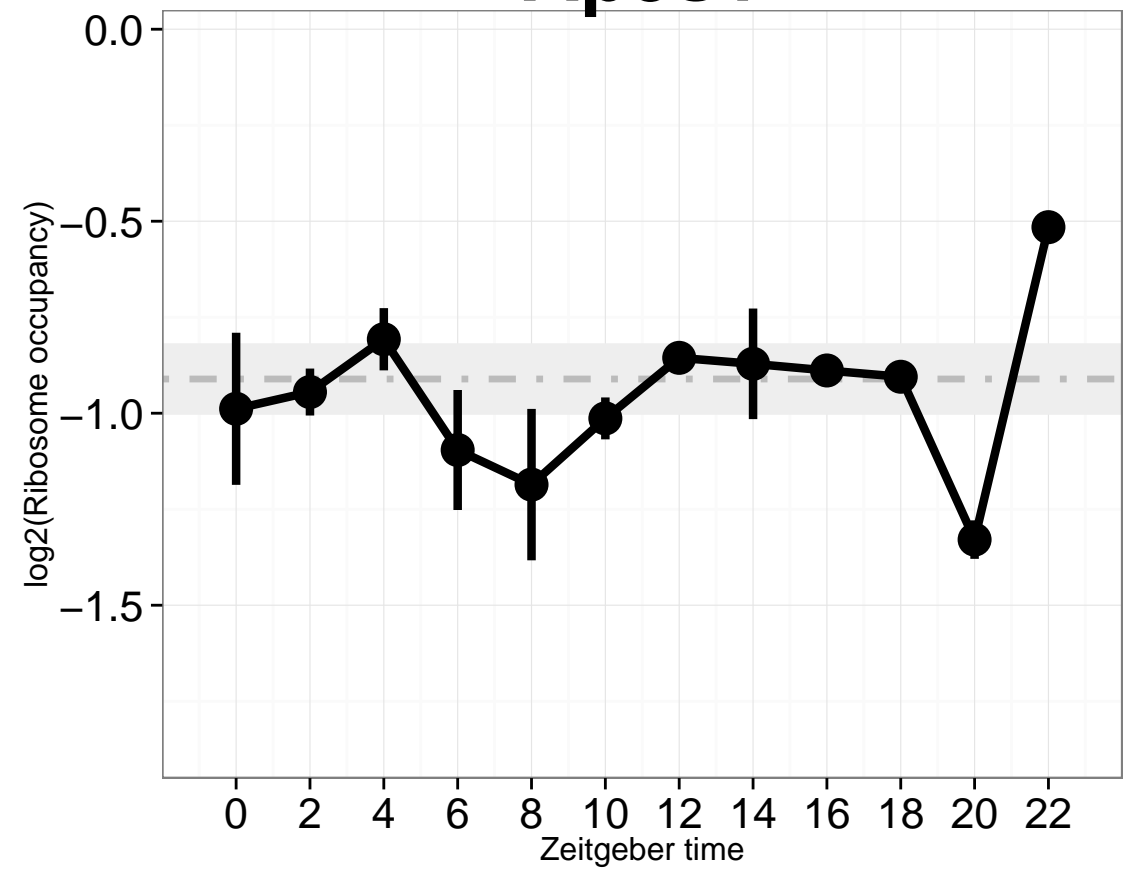

Supplement: SuppDataset_1.zip [file Ap3s1_set_A.pdf › Supplemental Dataset 1/A-mRNA_nonrhyth_translation_nonrhyth/Ap3s1_set_A.pdf]

# Ap3s2

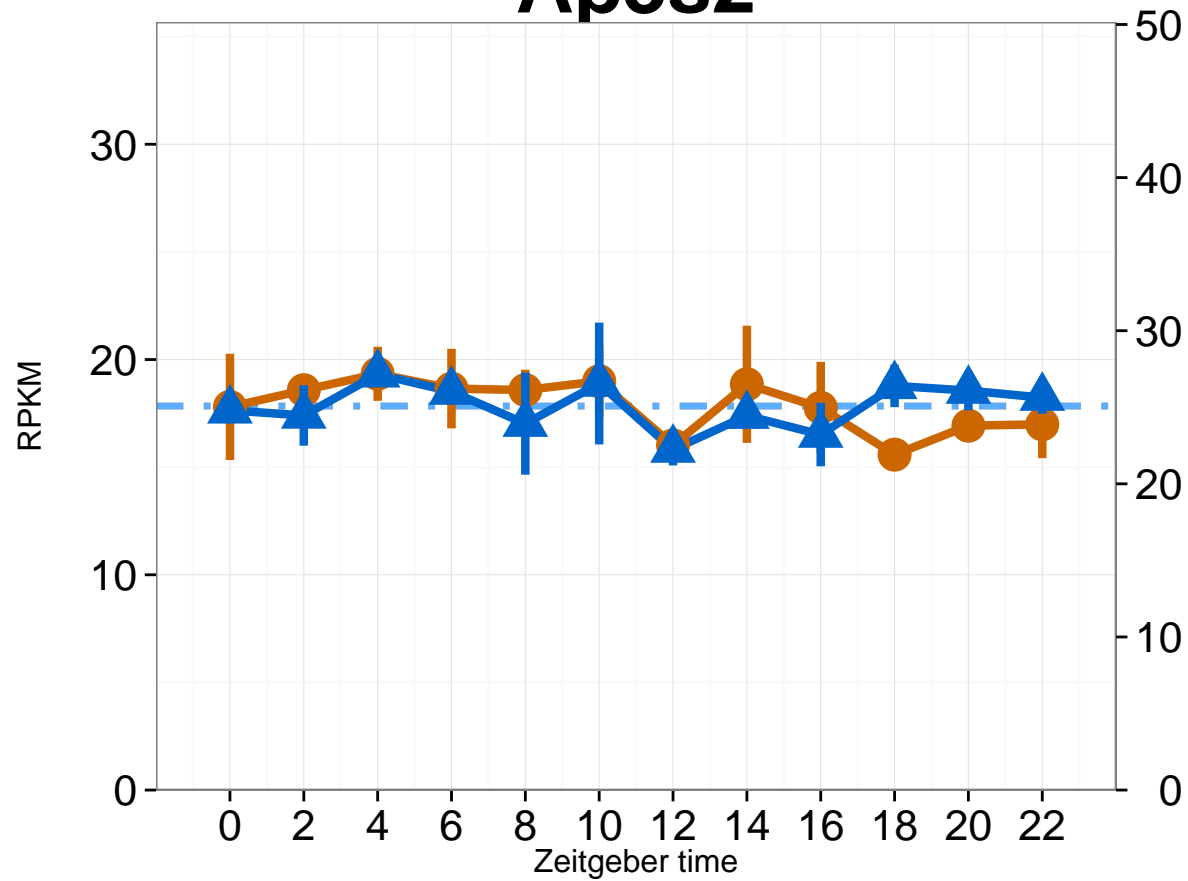

# Ap3s2

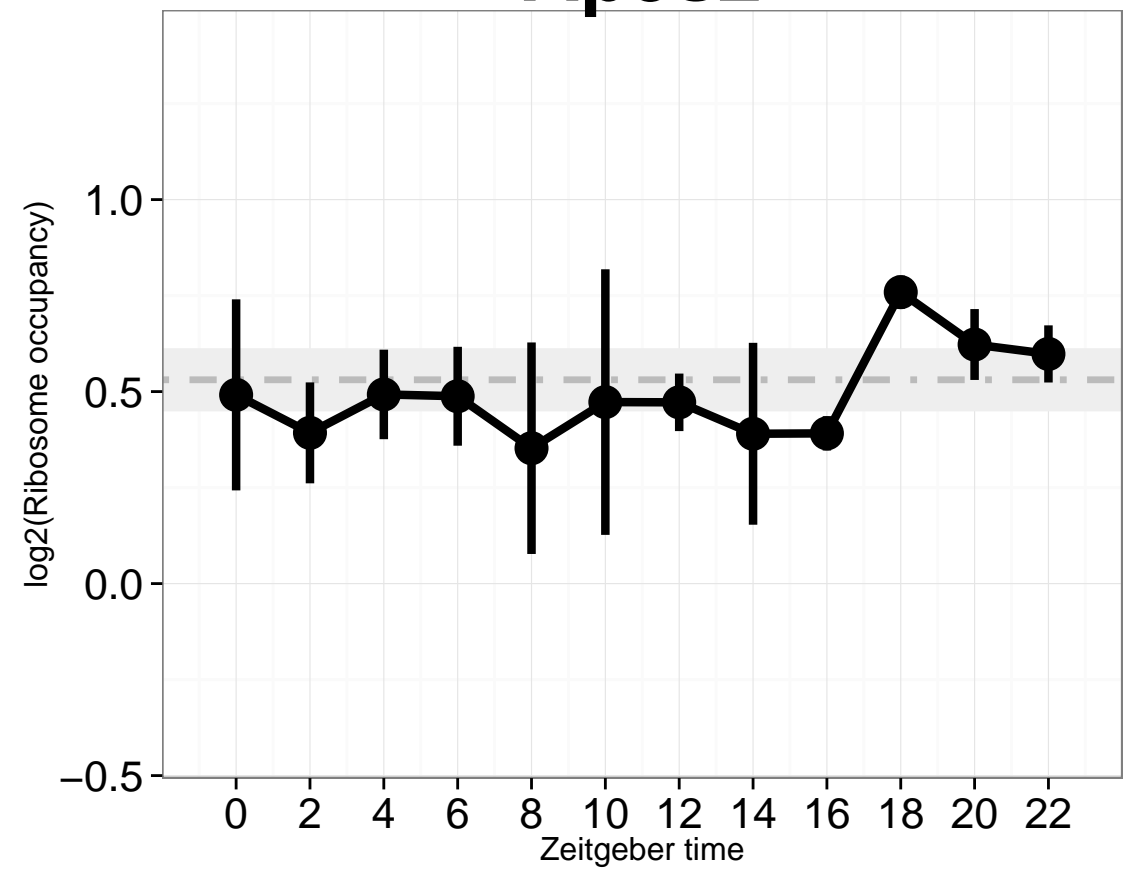

Supplement: SuppDataset_1.zip [file Ap3s2_set_A.pdf › Supplemental Dataset 1/A-mRNA_nonrhyth_translation_nonrhyth/Ap3s2_set_A.pdf]

# Ap4b1

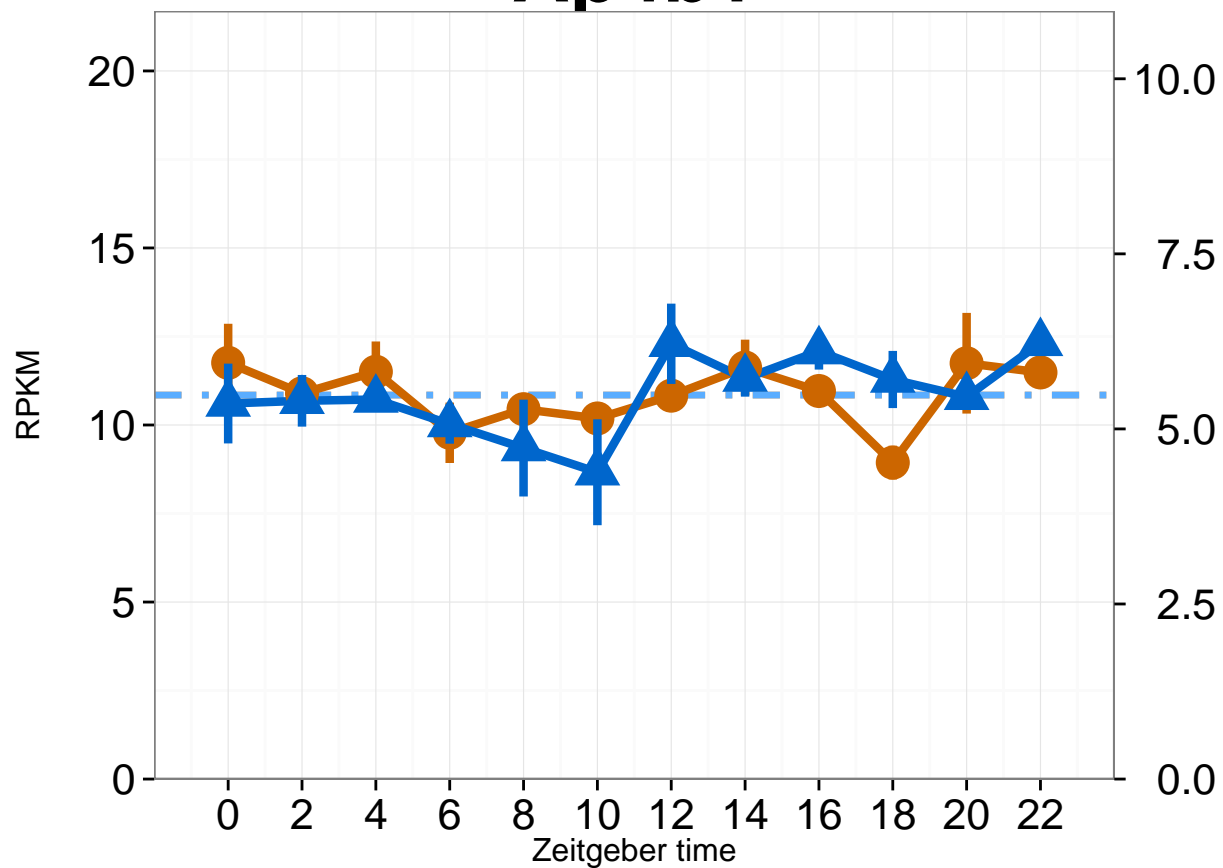

# Ap4b1

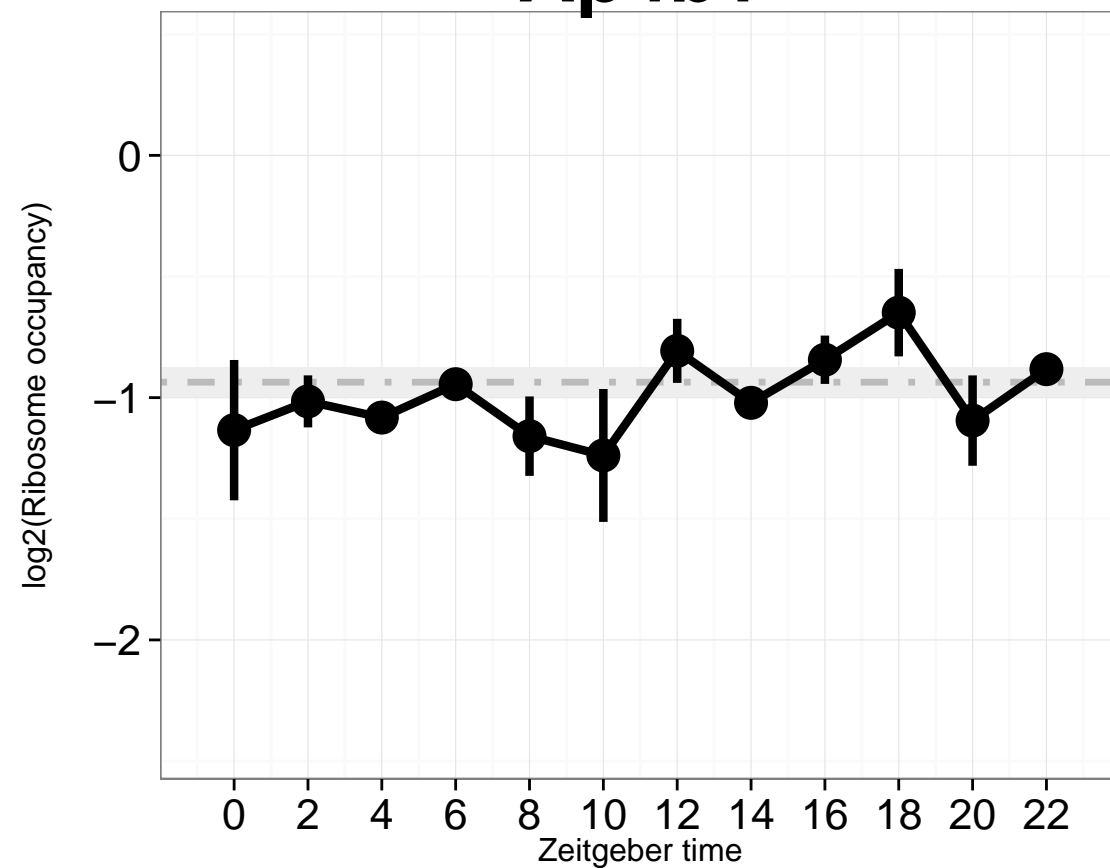

Supplement: SuppDataset_1.zip [file Ap4b1_set_A.pdf › Supplemental Dataset 1/A-mRNA_nonrhyth_translation_nonrhyth/Ap4b1_set_A.pdf]

# Ap4e1

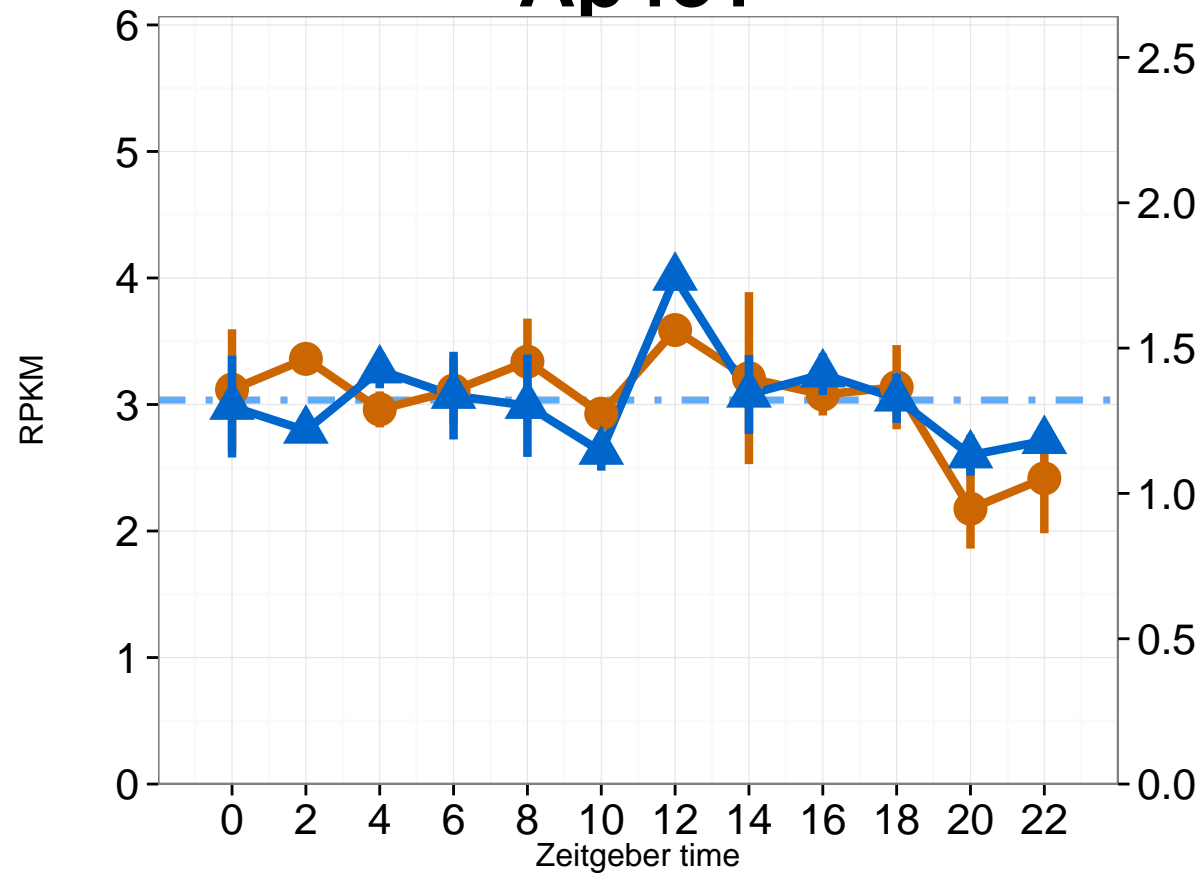

# Ap4e1

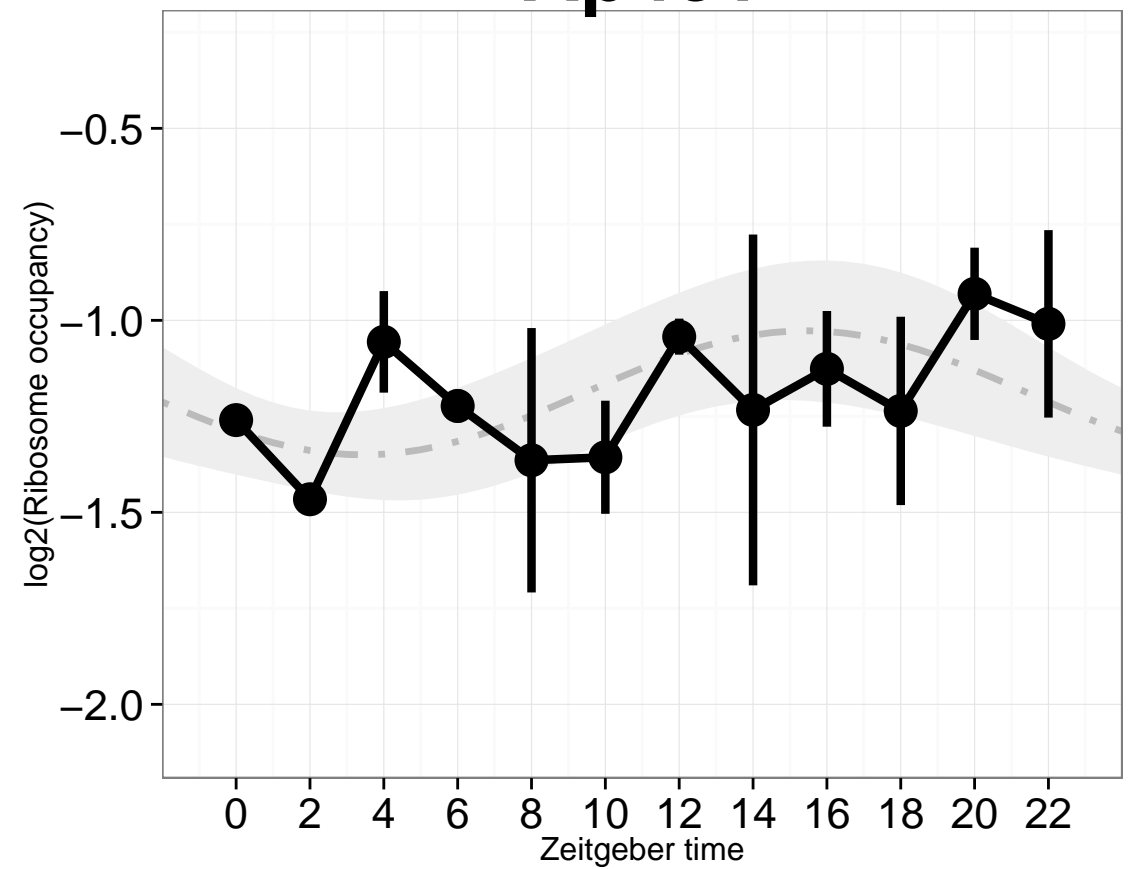

Supplement: SuppDataset_1.zip [file Ap4e1_set_A.pdf › Supplemental Dataset 1/A-mRNA_nonrhyth_translation_nonrhyth/Ap4e1_set_A.pdf]

# Ap4m1

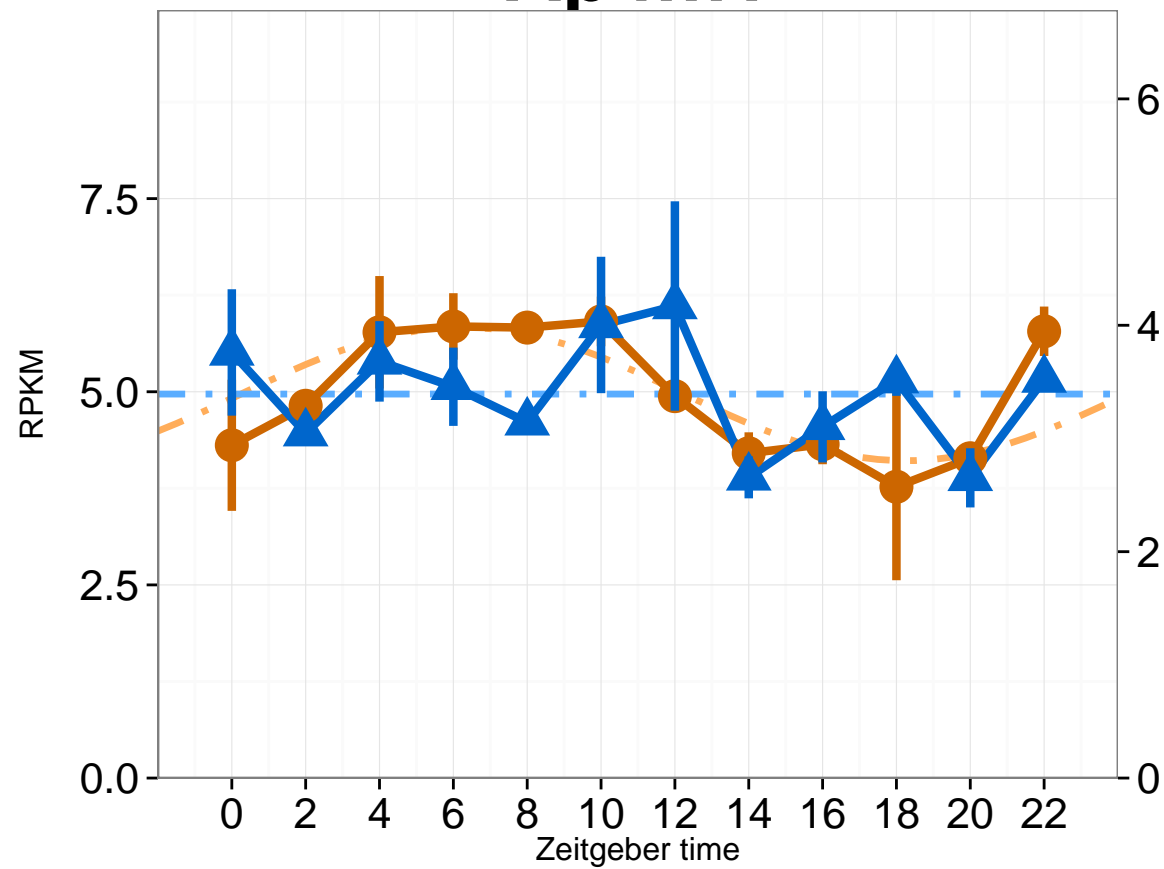

# Ap4m1

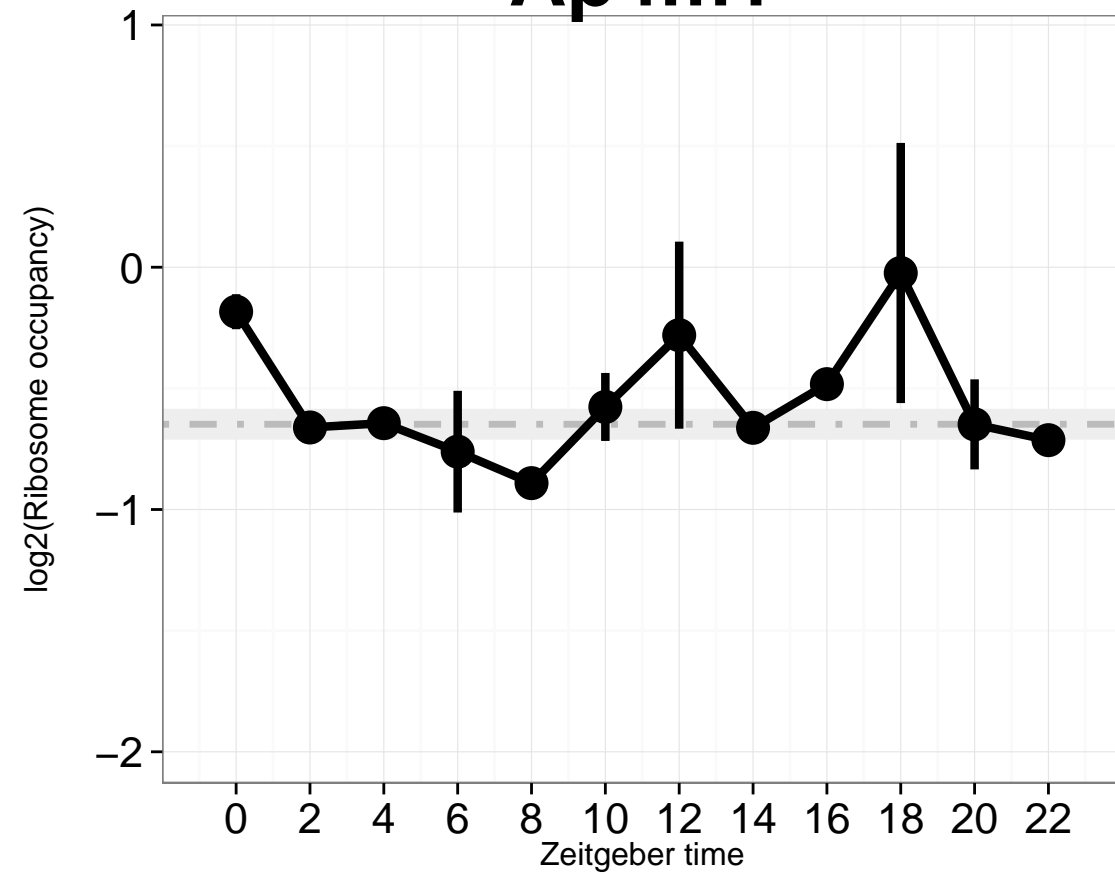

Supplement: SuppDataset_1.zip [file Ap4m1_set_A.pdf › Supplemental Dataset 1/A-mRNA_nonrhyth_translation_nonrhyth/Ap4m1_set_A.pdf]

# Ap4s1

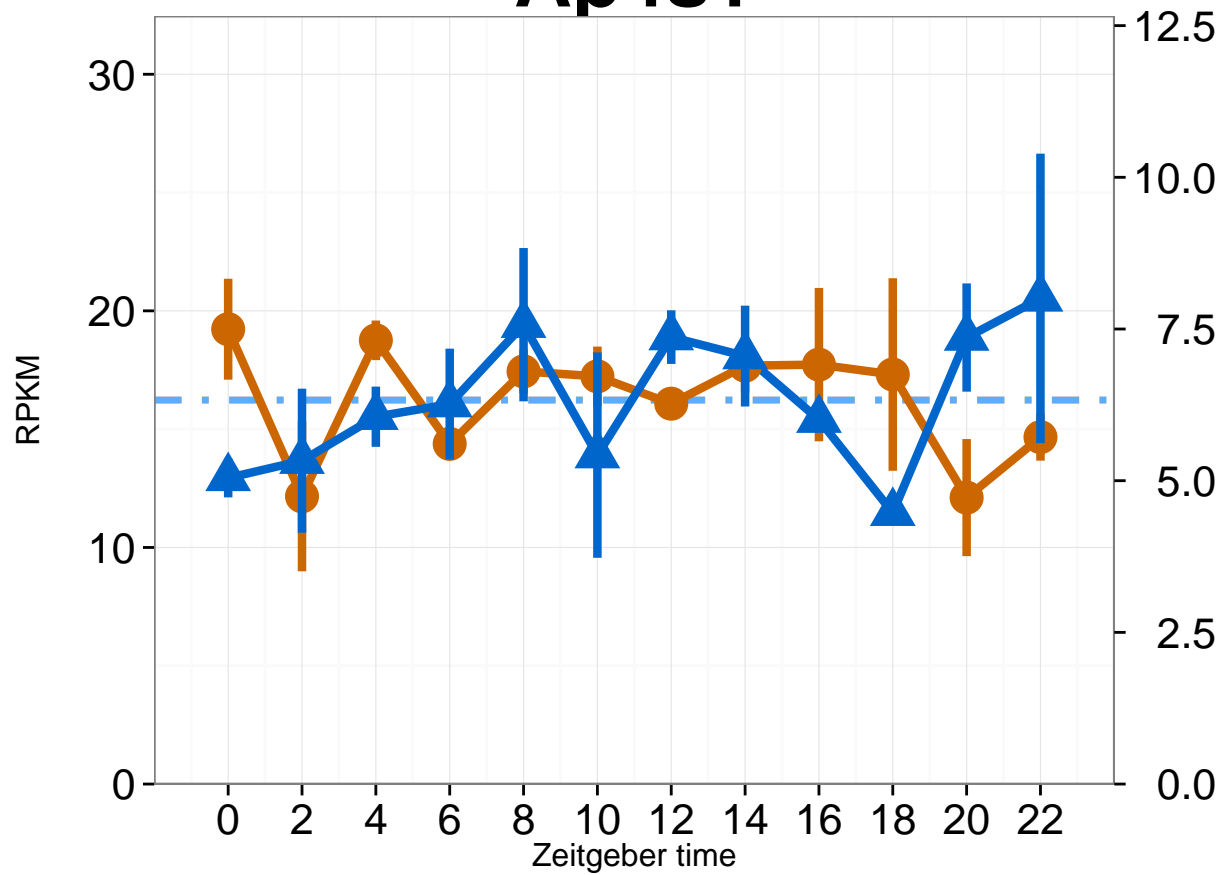

# Ap4s1

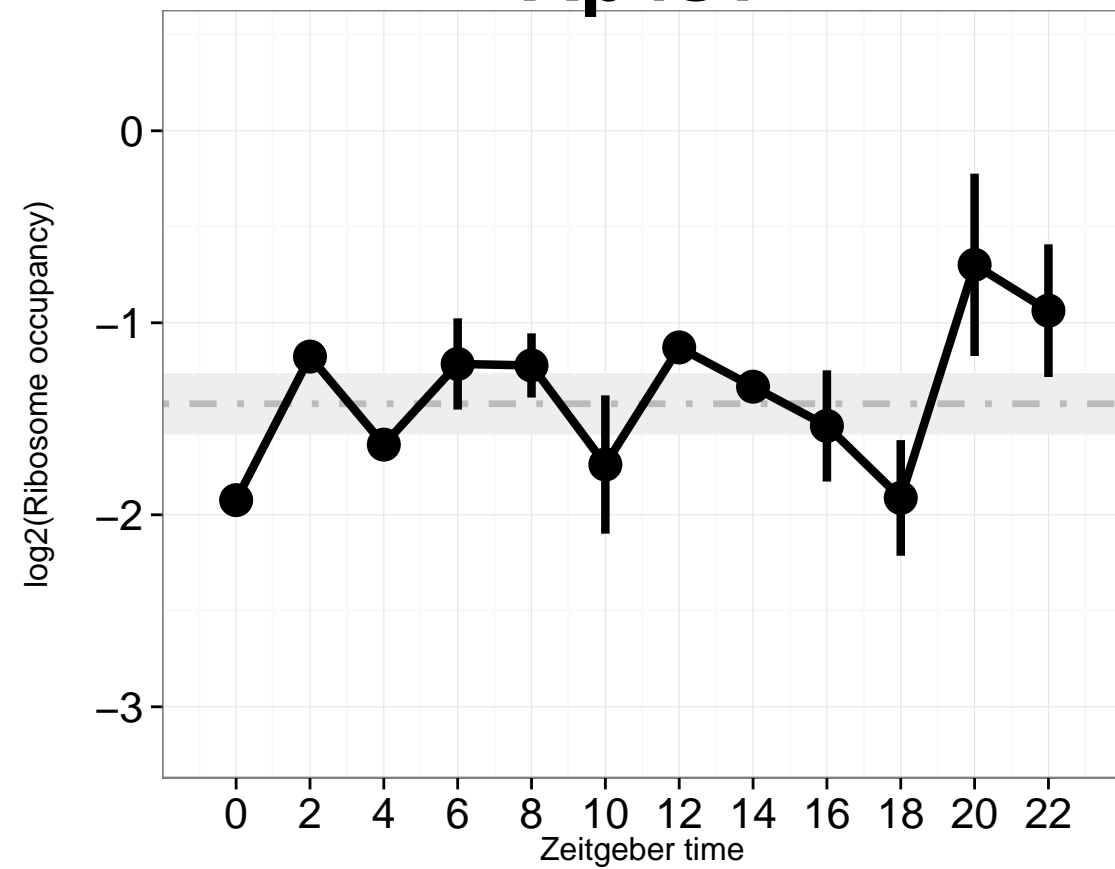

Supplement: SuppDataset_1.zip [file Ap4s1_set_A.pdf › Supplemental Dataset 1/A-mRNA_nonrhyth_translation_nonrhyth/Ap4s1_set_A.pdf]

# Ap5b1

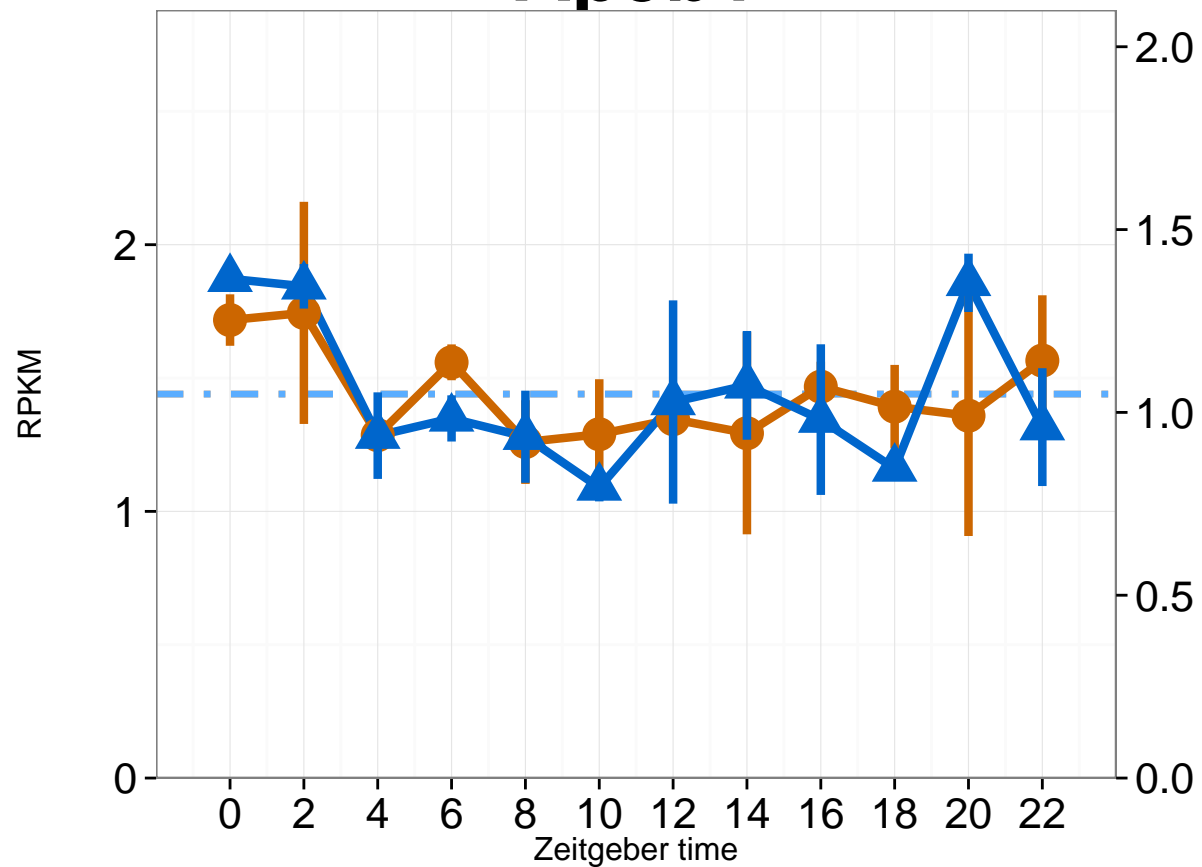

# Ap5b1

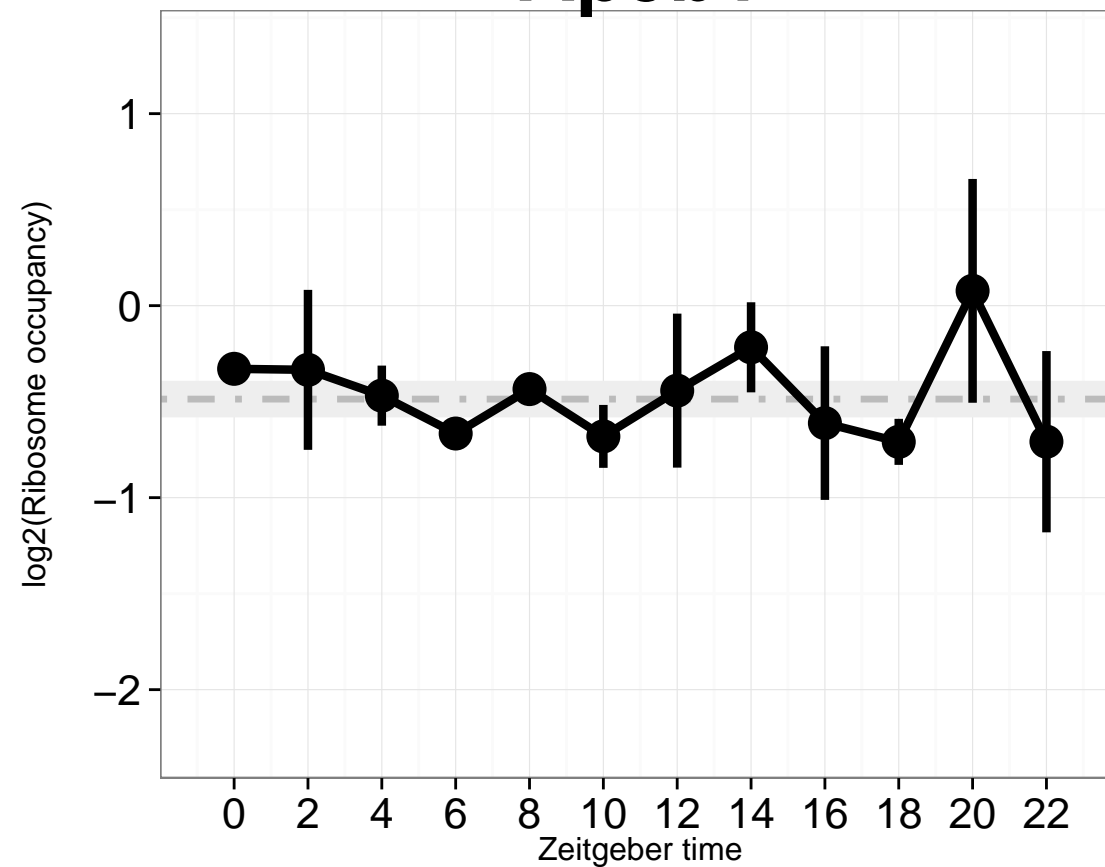

Supplement: SuppDataset_1.zip [file Ap5b1_set_A.pdf › Supplemental Dataset 1/A-mRNA_nonrhyth_translation_nonrhyth/Ap5b1_set_A.pdf]

# Ap5m1

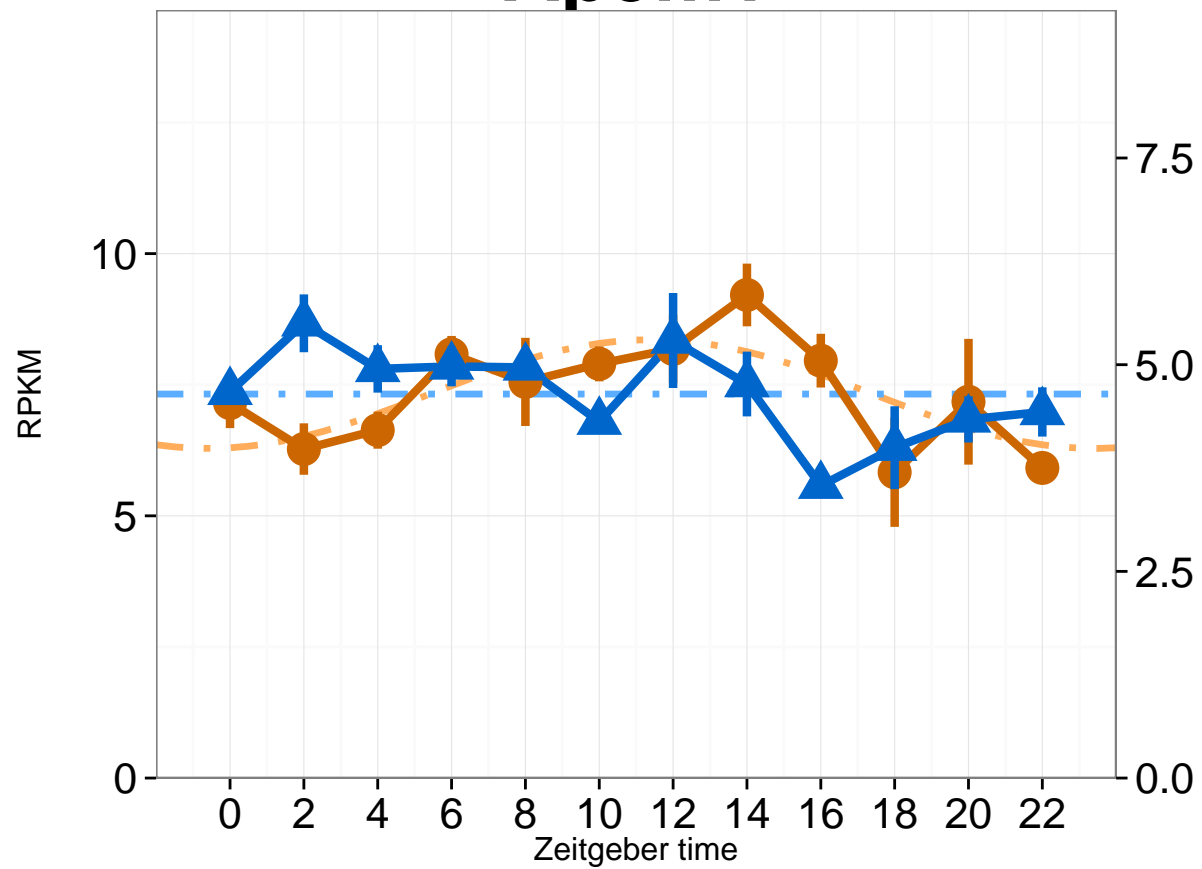

# Ap5m1

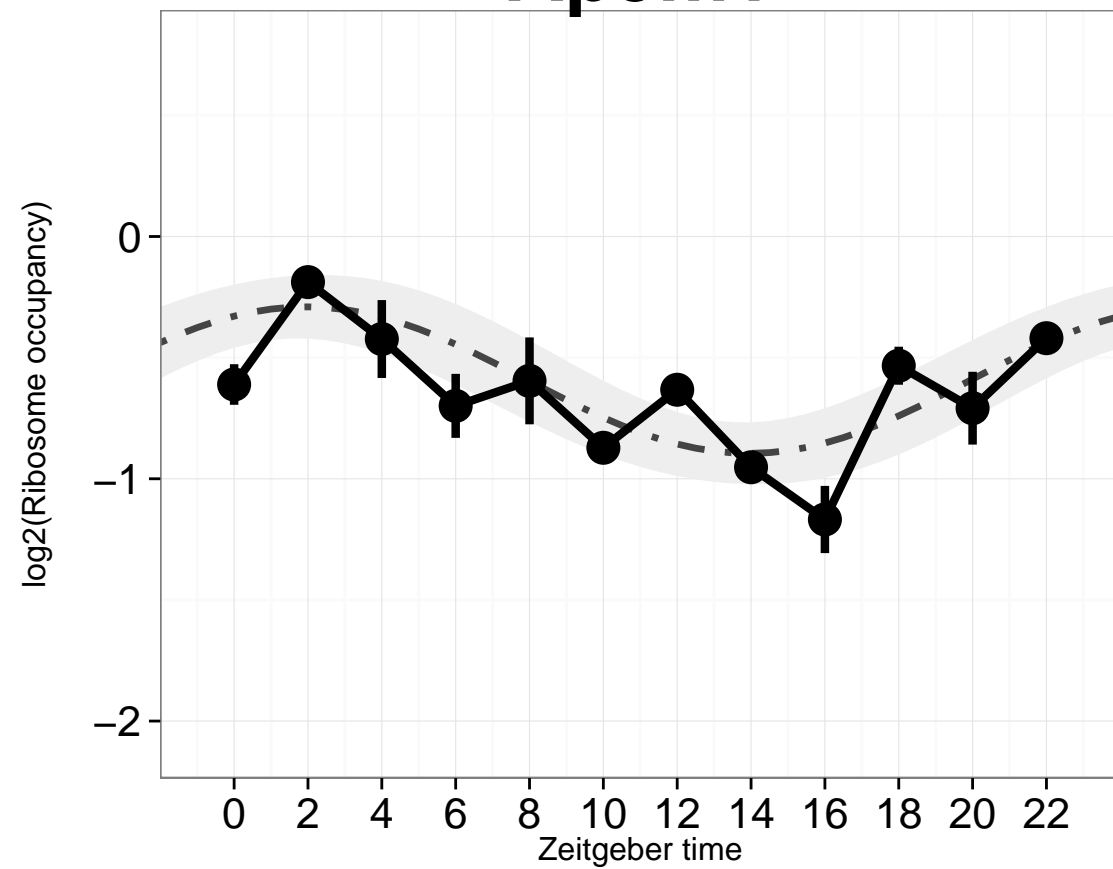

Supplement: SuppDataset_1.zip [file Ap5m1_set_A.pdf › Supplemental Dataset 1/A-mRNA_nonrhyth_translation_nonrhyth/Ap5m1_set_A.pdf]

# Ap5s1

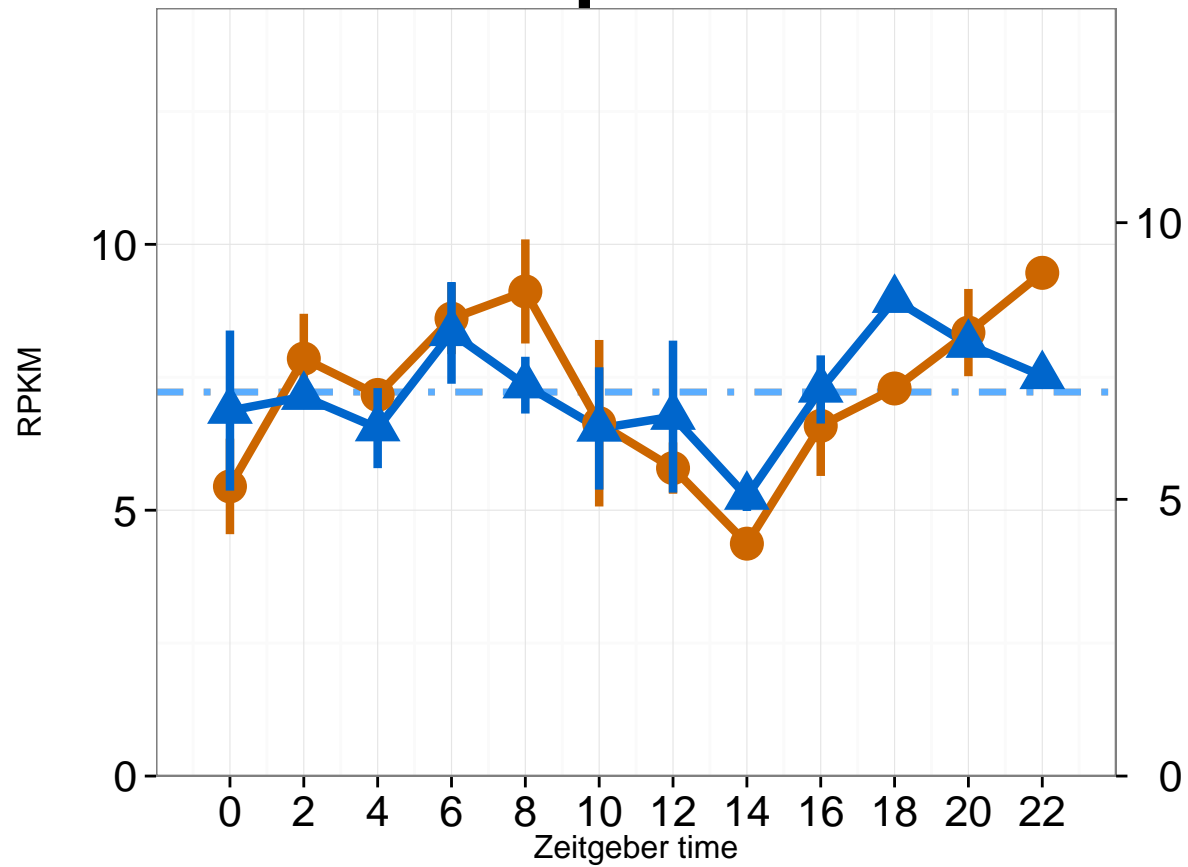

# Ap5s1

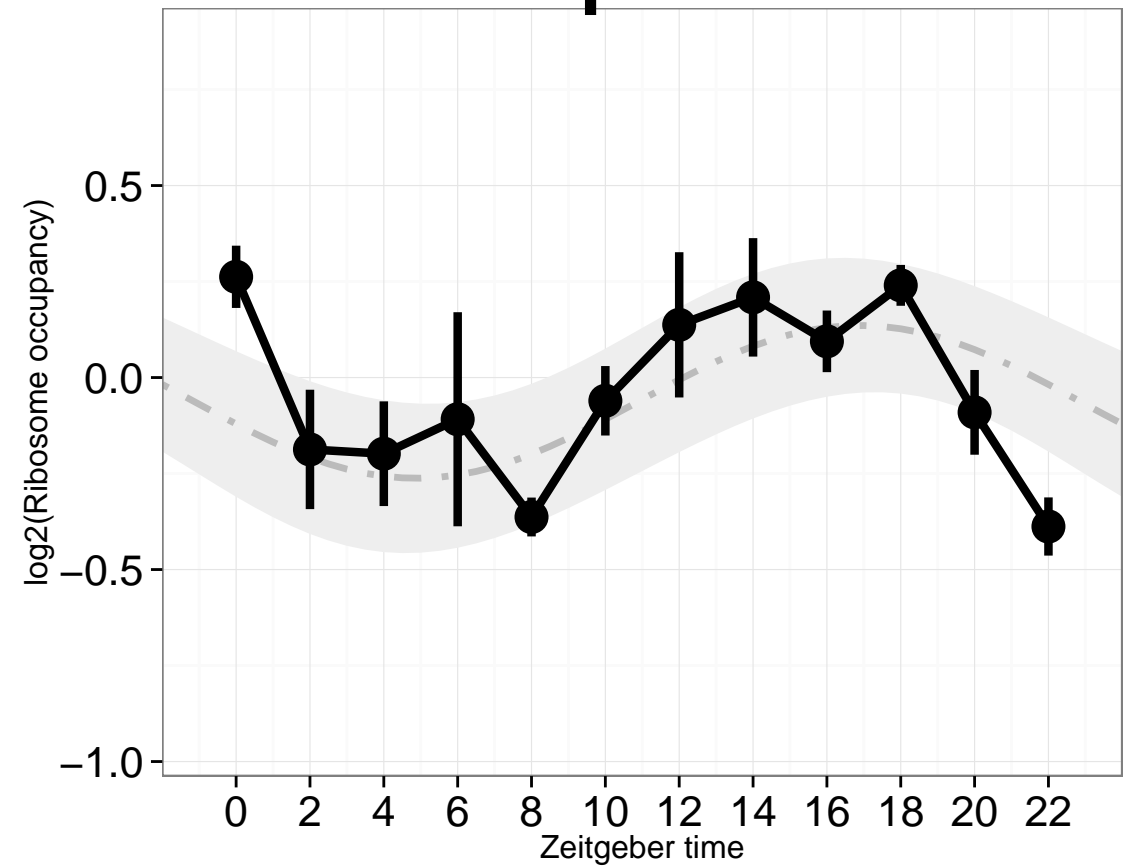

Supplement: SuppDataset_1.zip [file Ap5s1_set_A.pdf › Supplemental Dataset 1/A-mRNA_nonrhyth_translation_nonrhyth/Ap5s1_set_A.pdf]

# Ap5z1

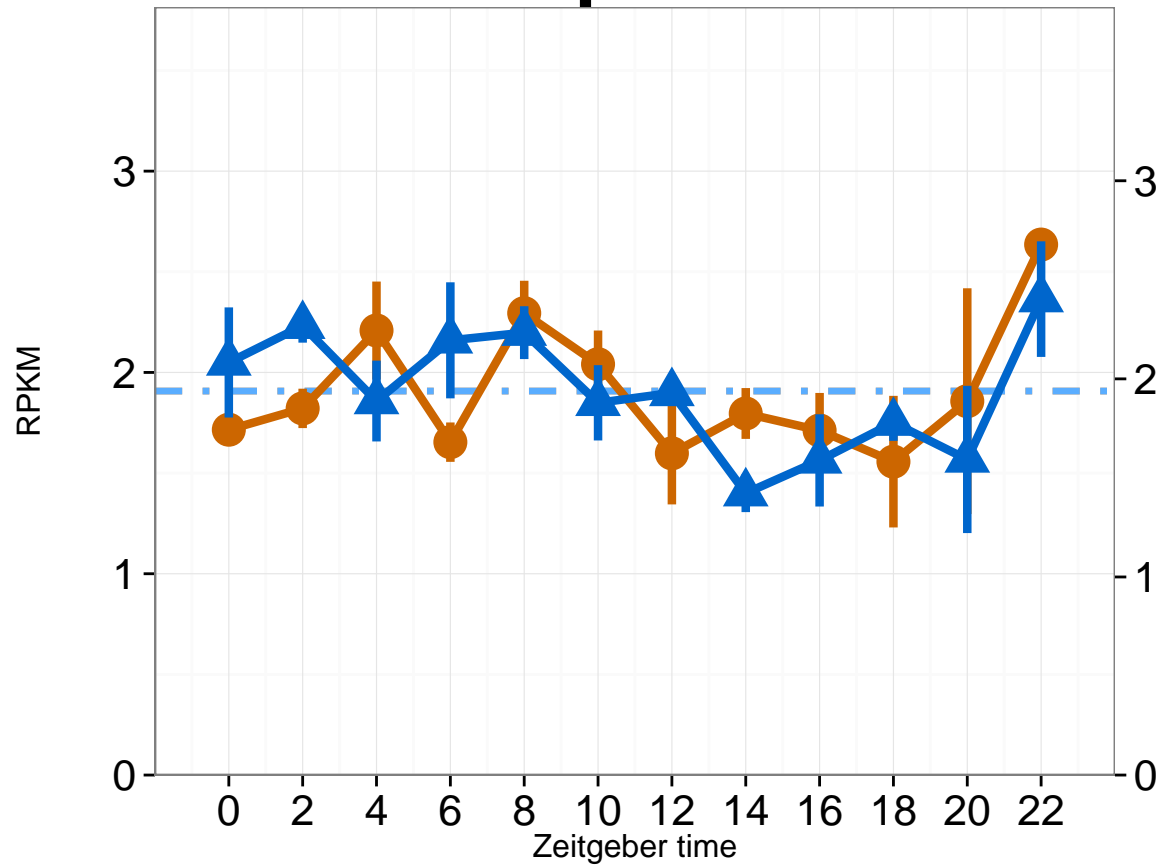

# Ap5z1

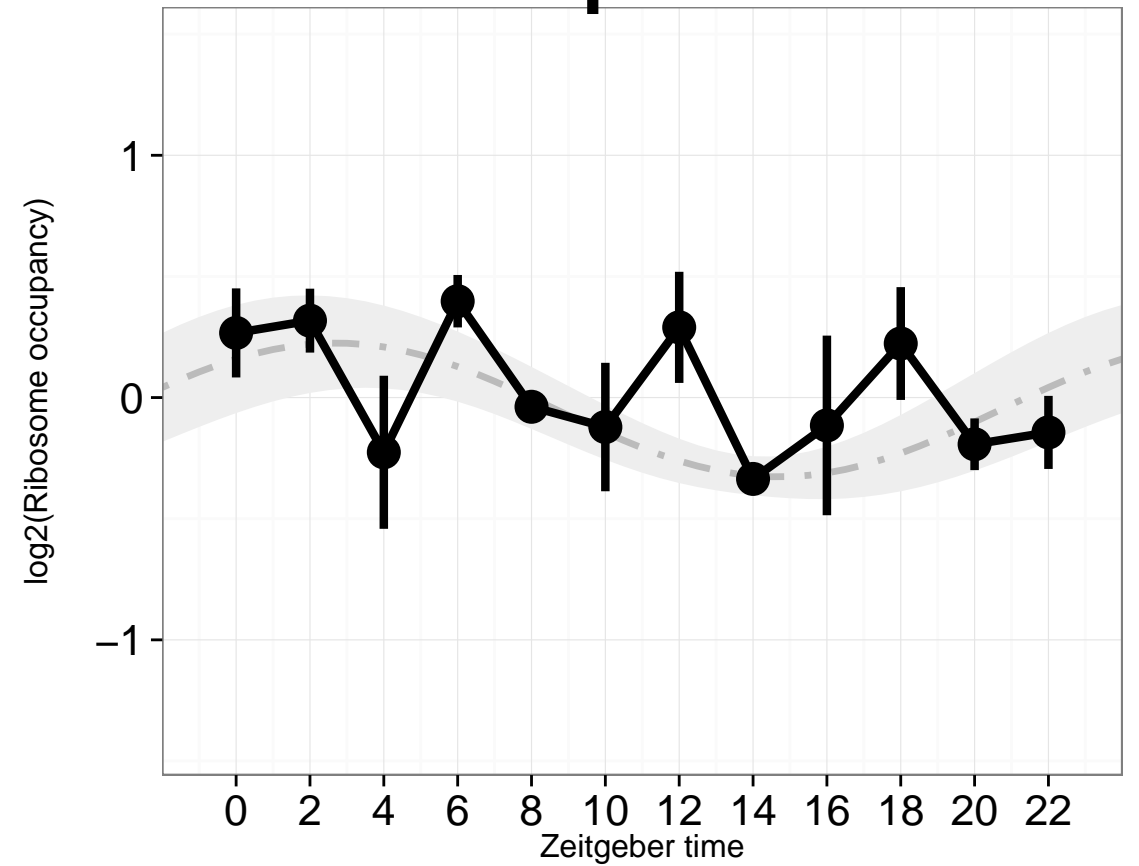

Supplement: SuppDataset_1.zip [file Ap5z1_set_A.pdf › Supplemental Dataset 1/A-mRNA_nonrhyth_translation_nonrhyth/Ap5z1_set_A.pdf]

## Apaf1

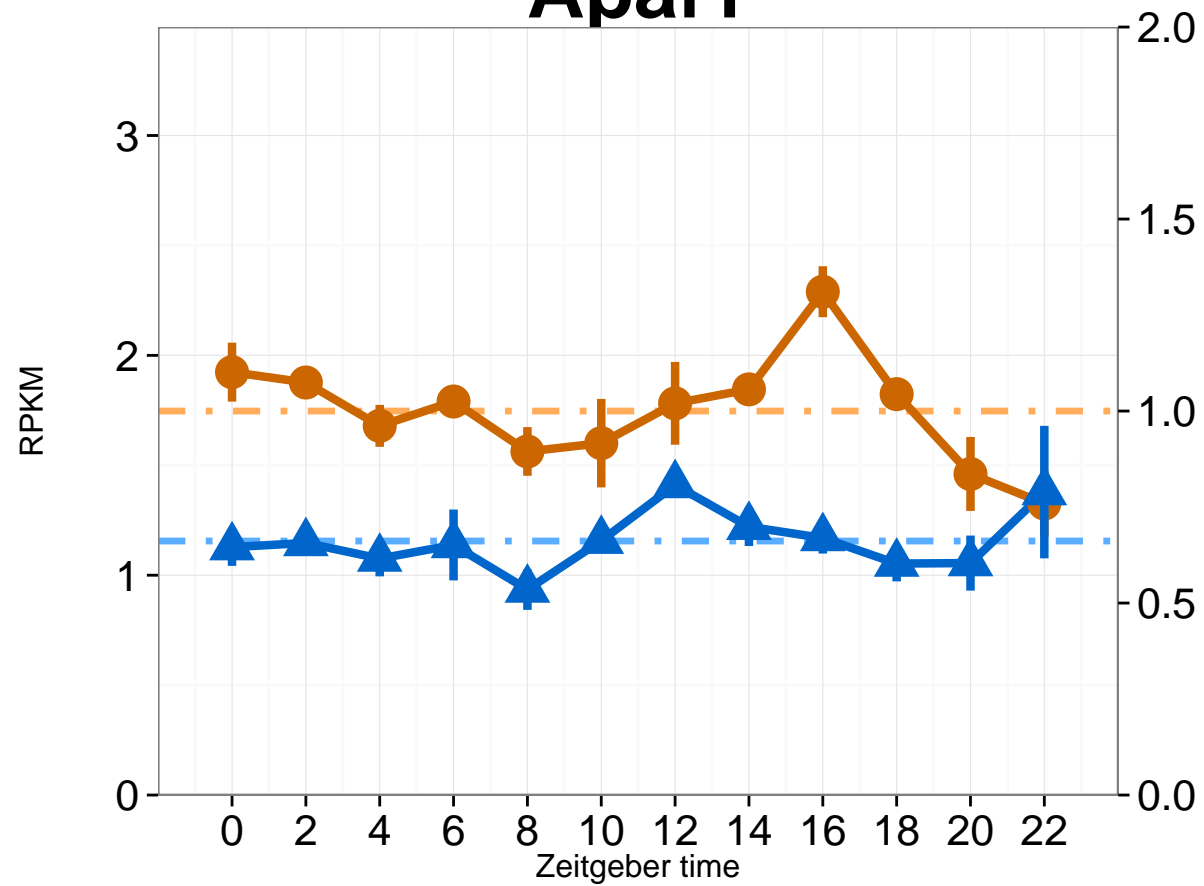

## Apaf1

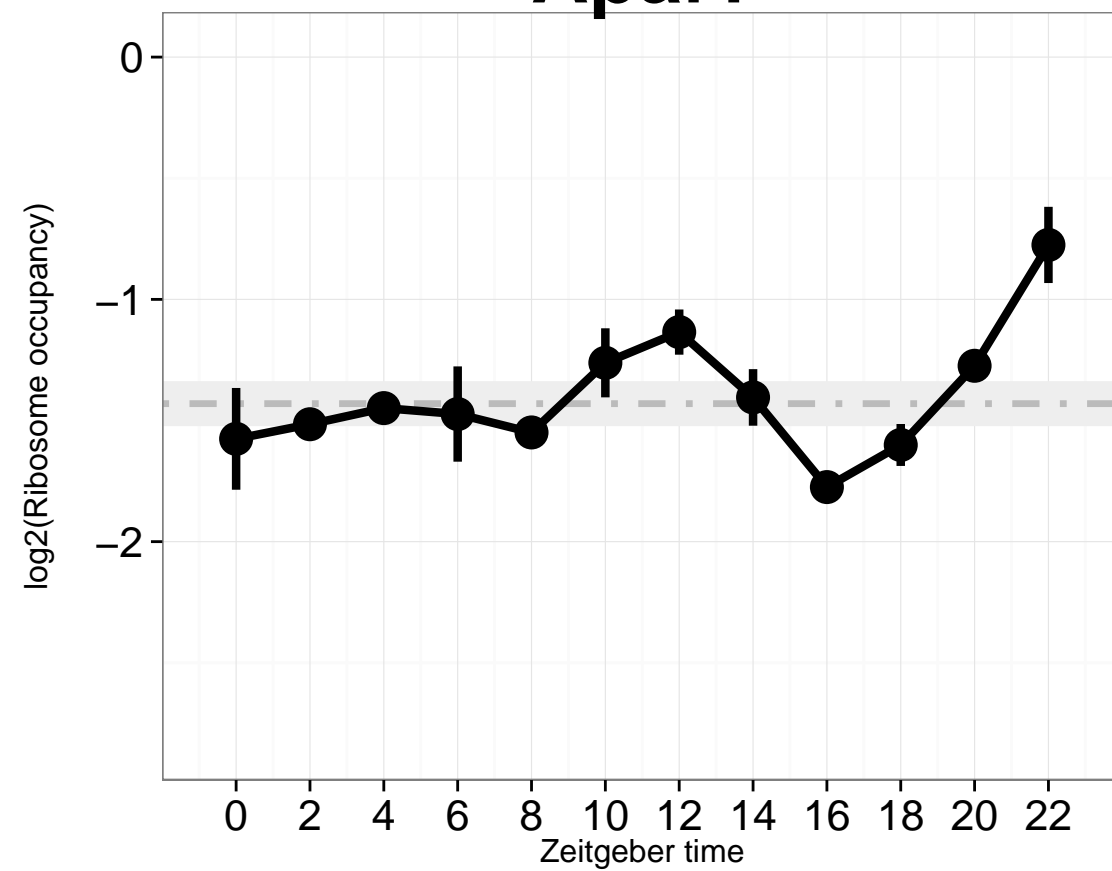

Supplement: SuppDataset_1.zip [file Apaf1_set_A.pdf › Supplemental Dataset 1/A-mRNA_nonrhyth_translation_nonrhyth/Apaf1_set_A.pdf]

## Apba3

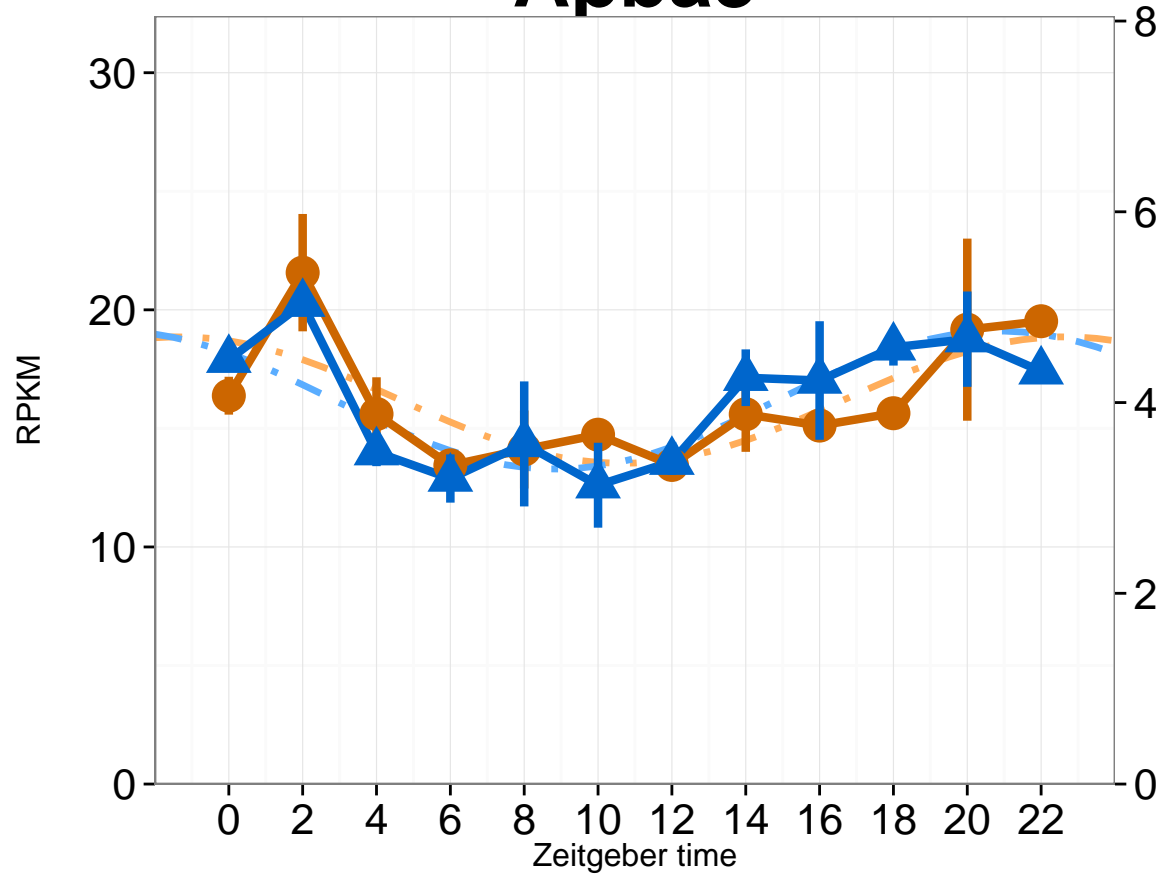

## Apba3

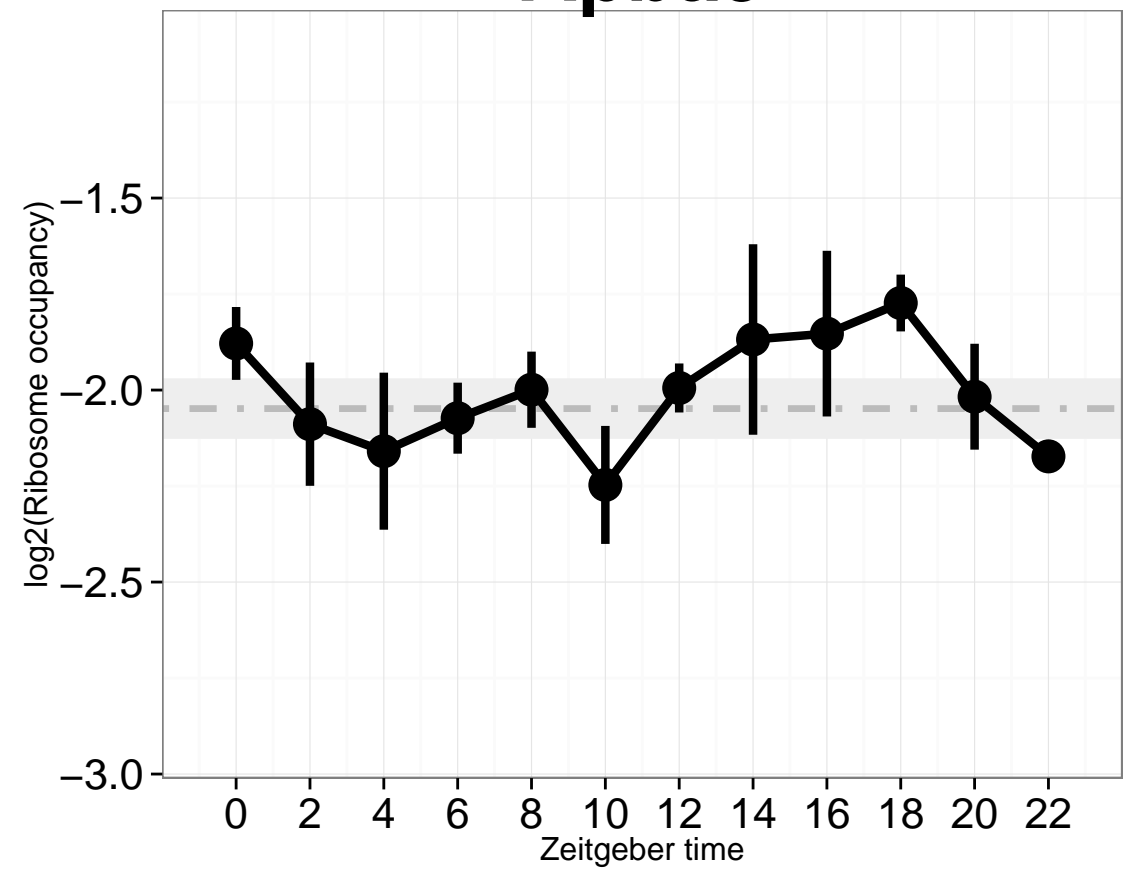

Supplement: SuppDataset_1.zip [file Apba3_set_A.pdf › Supplemental Dataset 1/A-mRNA_nonrhyth_translation_nonrhyth/Apba3_set_A.pdf]

# Apbb1

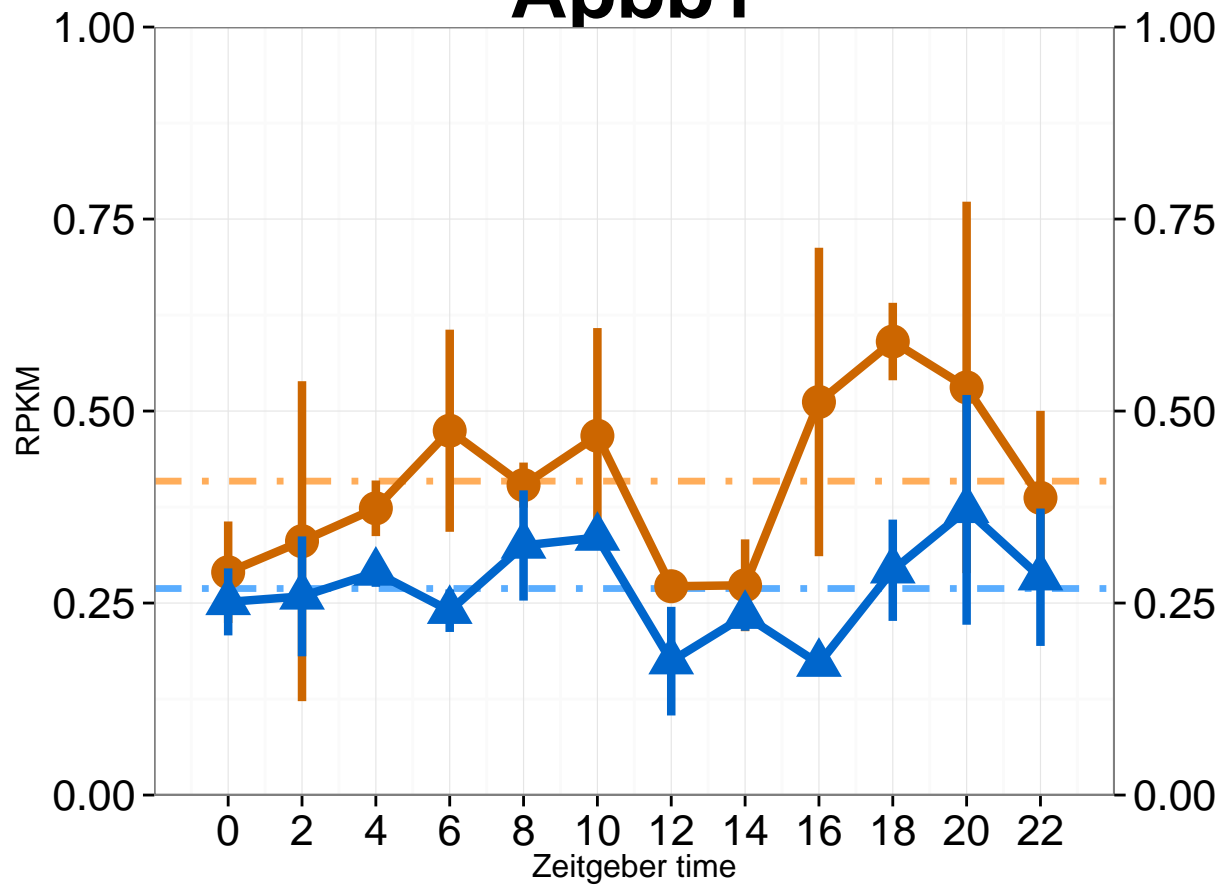

# Apbb1

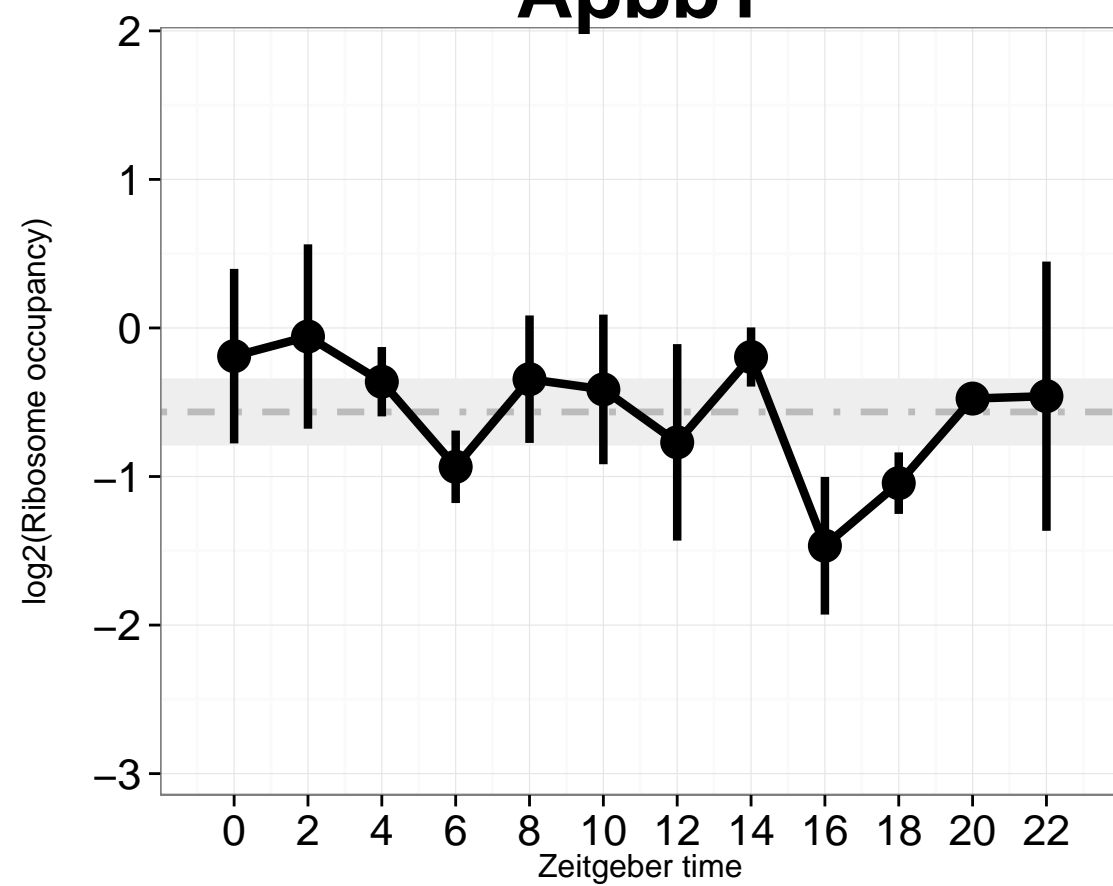

Supplement: SuppDataset_1.zip [file Apbb1_set_A.pdf › Supplemental Dataset 1/A-mRNA_nonrhyth_translation_nonrhyth/Apbb1_set_A.pdf]

# Apbb1ip

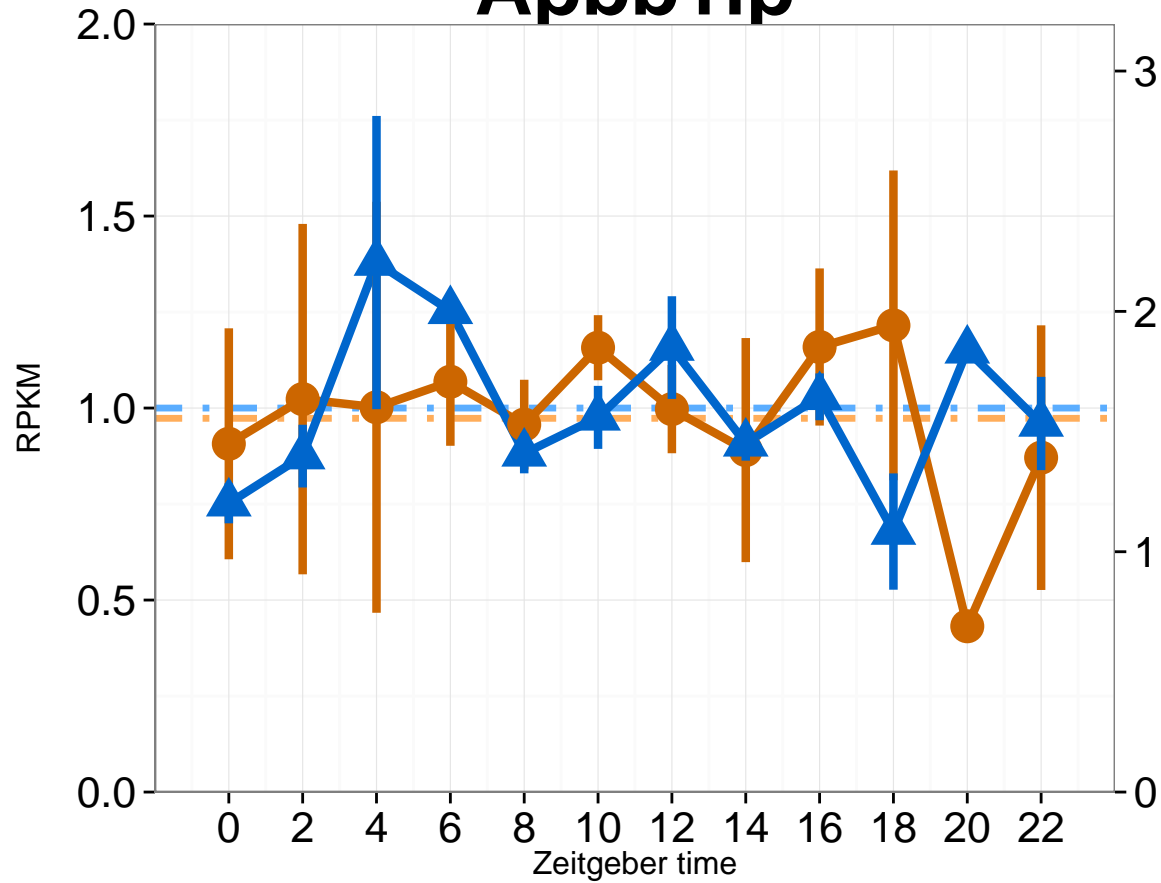

# Apbb1ip

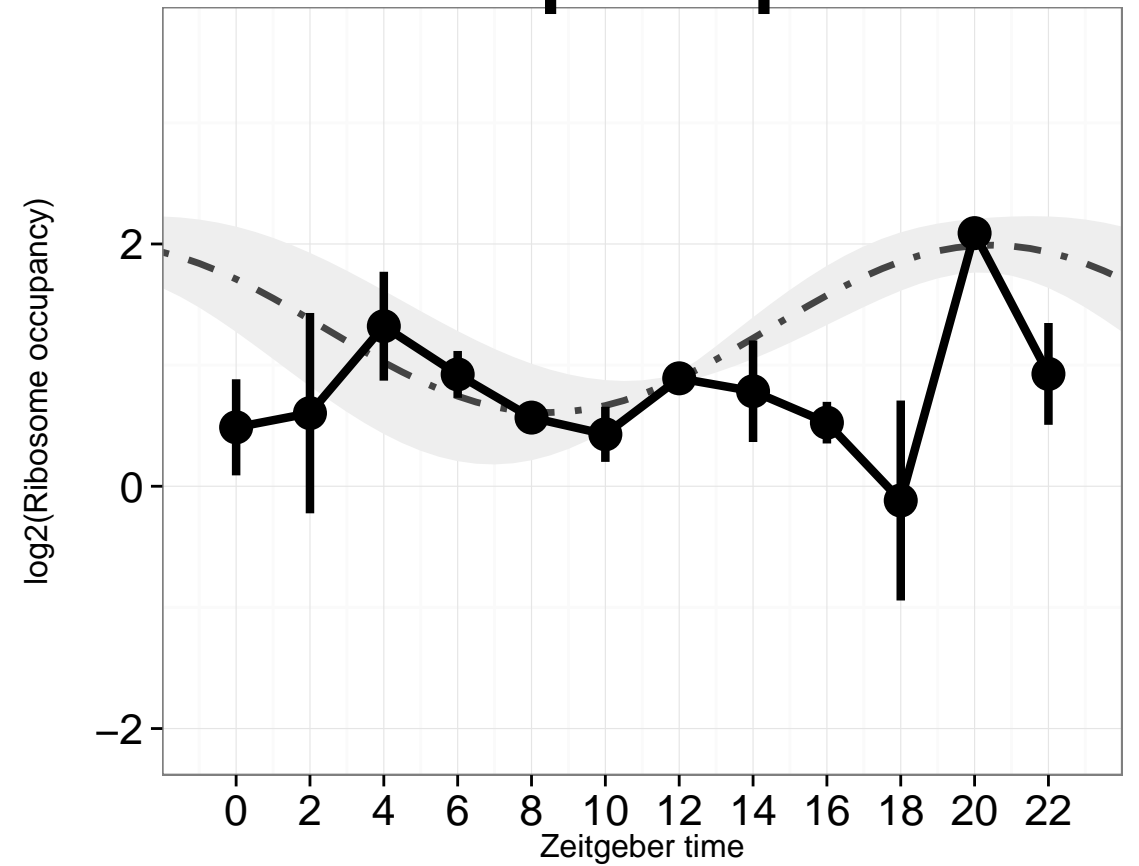

Supplement: SuppDataset_1.zip [file Apbb1ip_set_A.pdf › Supplemental Dataset 1/A-mRNA_nonrhyth_translation_nonrhyth/Apbb1ip_set_A.pdf]

# Apbb2

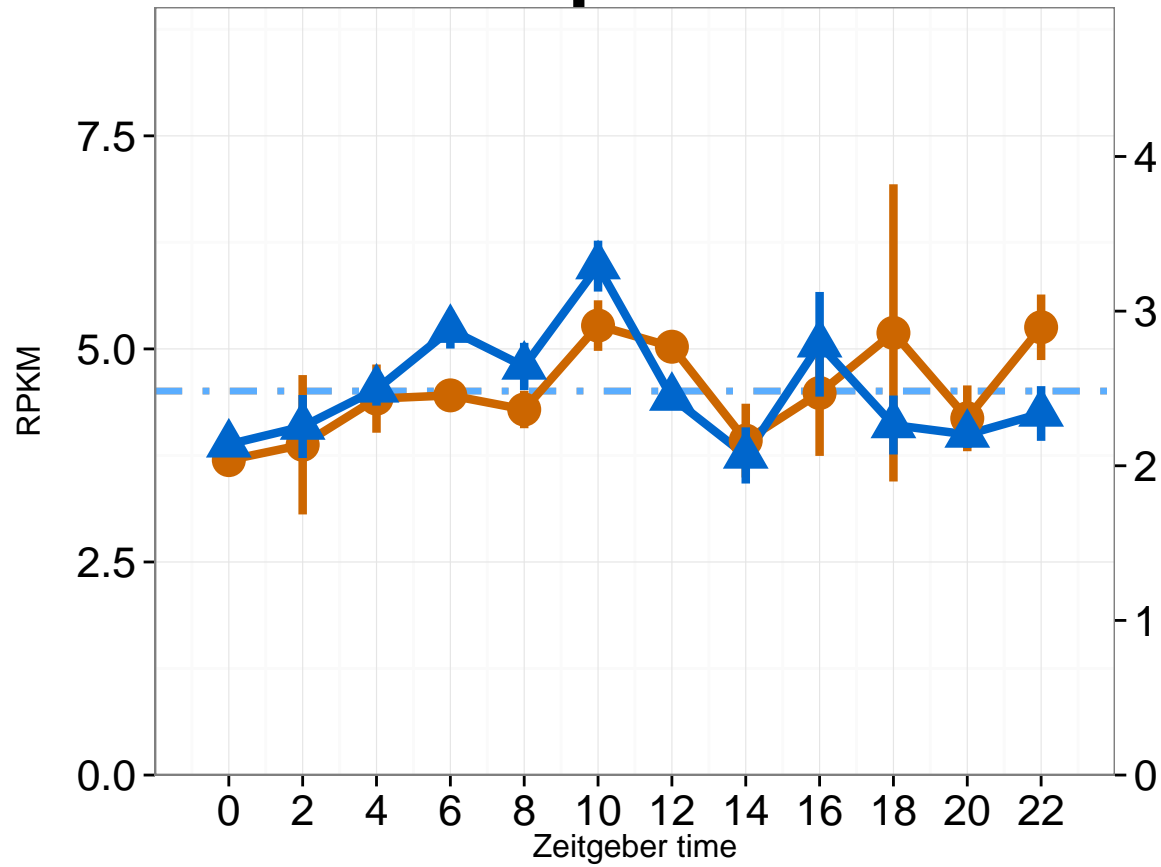

# Apbb2

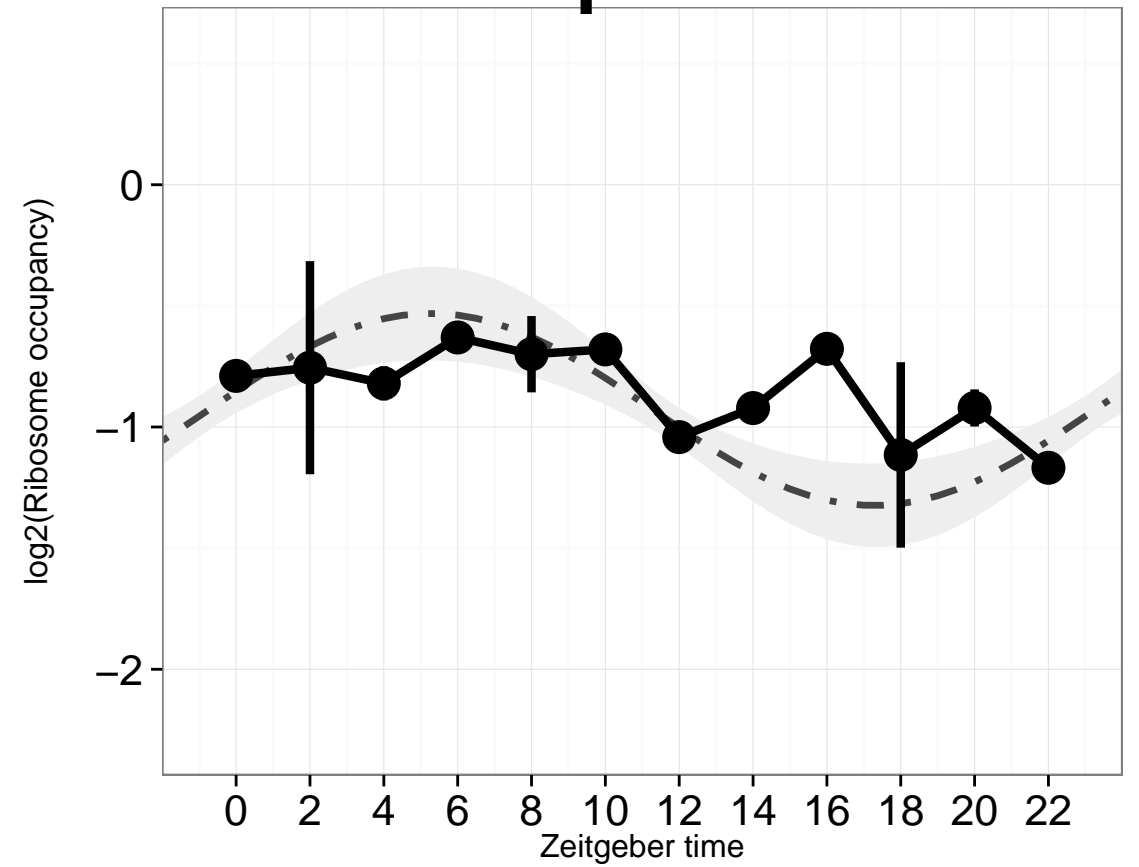

Supplement: SuppDataset_1.zip [file Apbb2_set_A.pdf › Supplemental Dataset 1/A-mRNA_nonrhyth_translation_nonrhyth/Apbb2_set_A.pdf]

## Apc

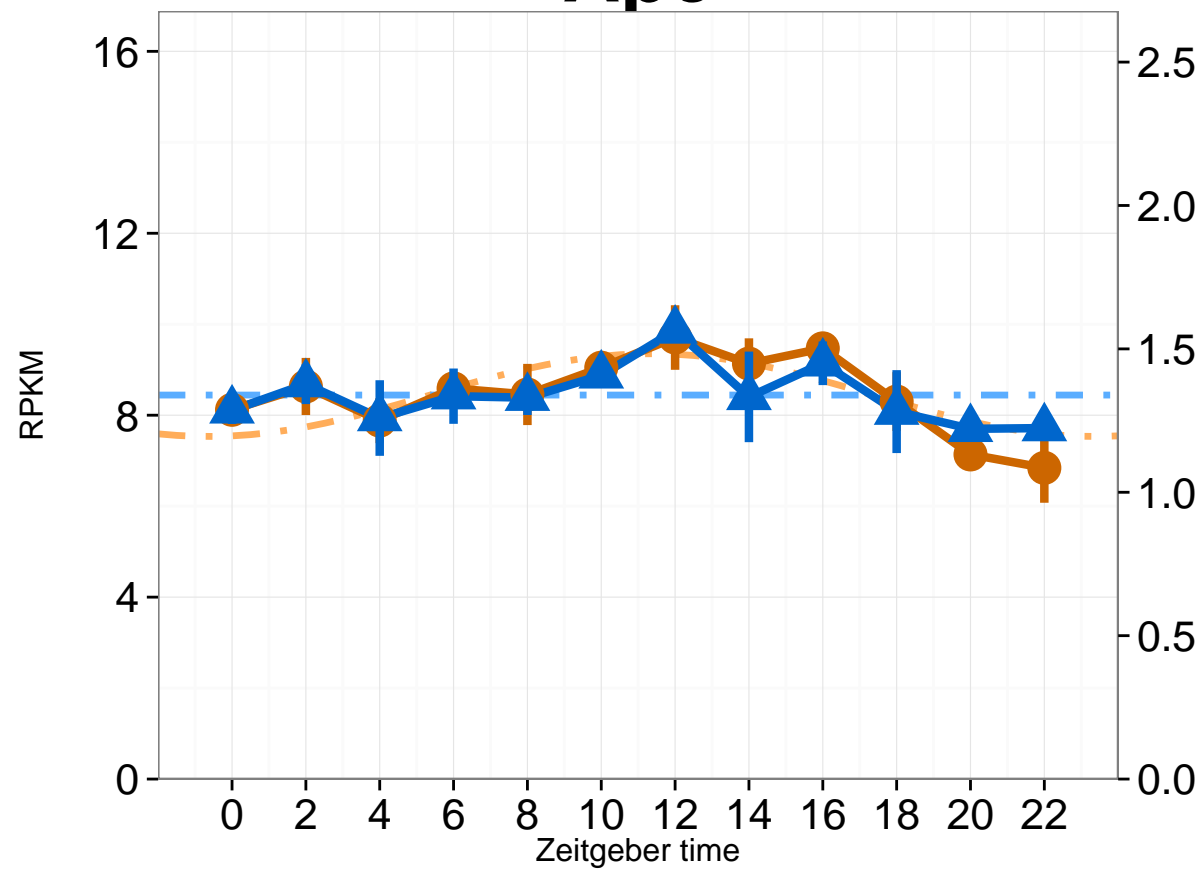

## Apc

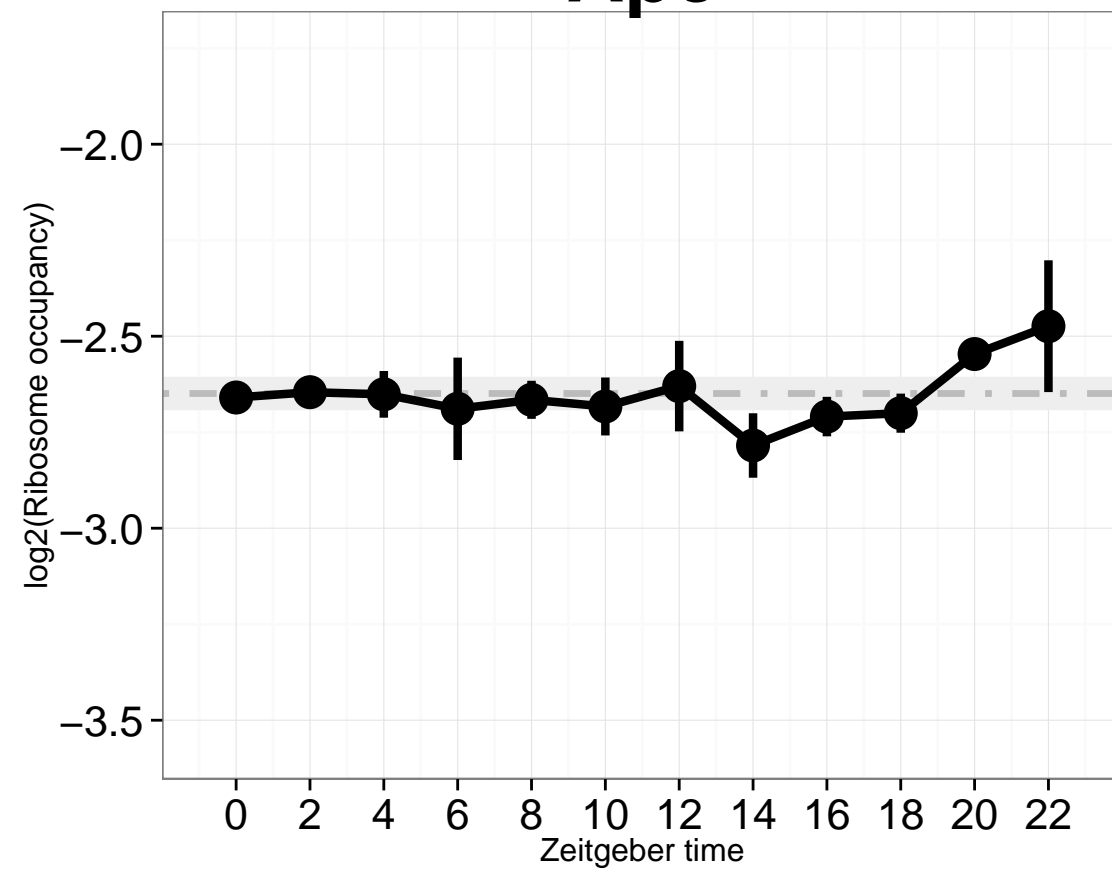

Supplement: SuppDataset_1.zip [file Apc_set_A.pdf › Supplemental Dataset 1/A-mRNA_nonrhyth_translation_nonrhyth/Apc_set_A.pdf]

## Apeh

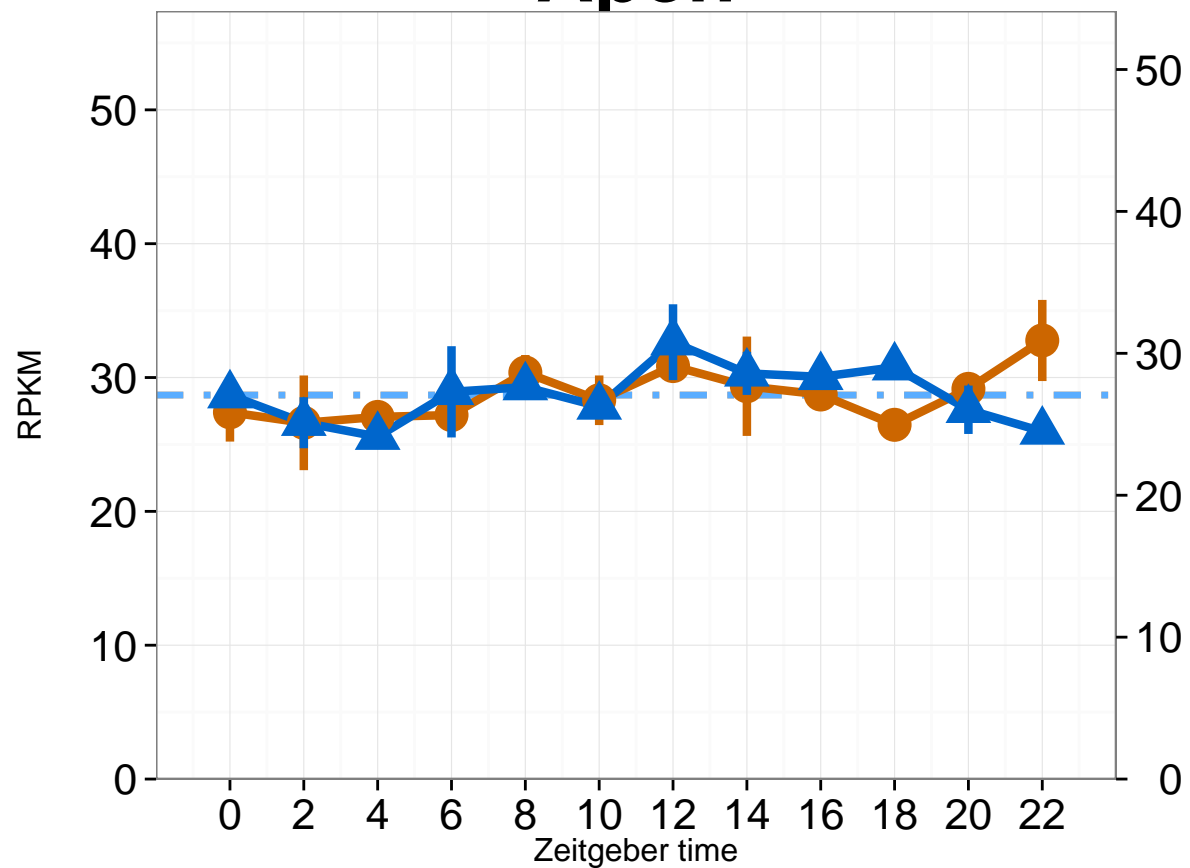

## Apeh

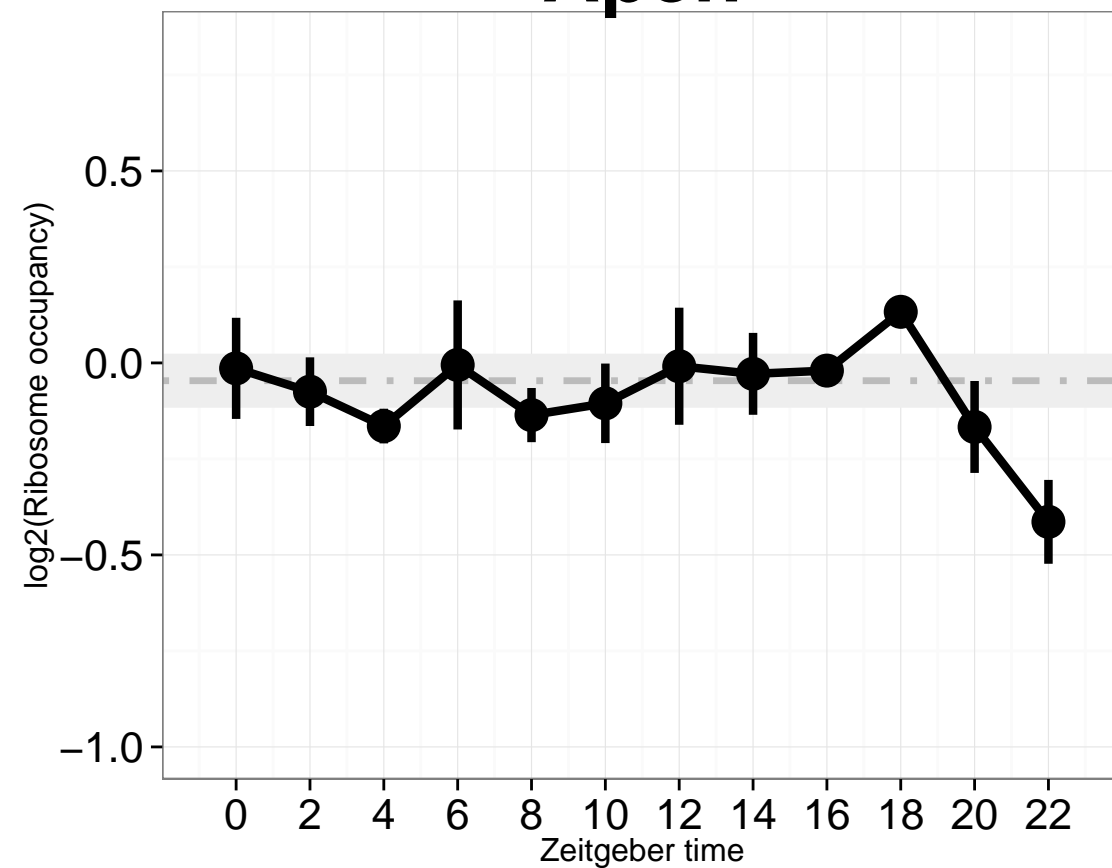

Supplement: SuppDataset_1.zip [file Apeh_set_A.pdf › Supplemental Dataset 1/A-mRNA_nonrhyth_translation_nonrhyth/Apeh_set_A.pdf]

## Apex1

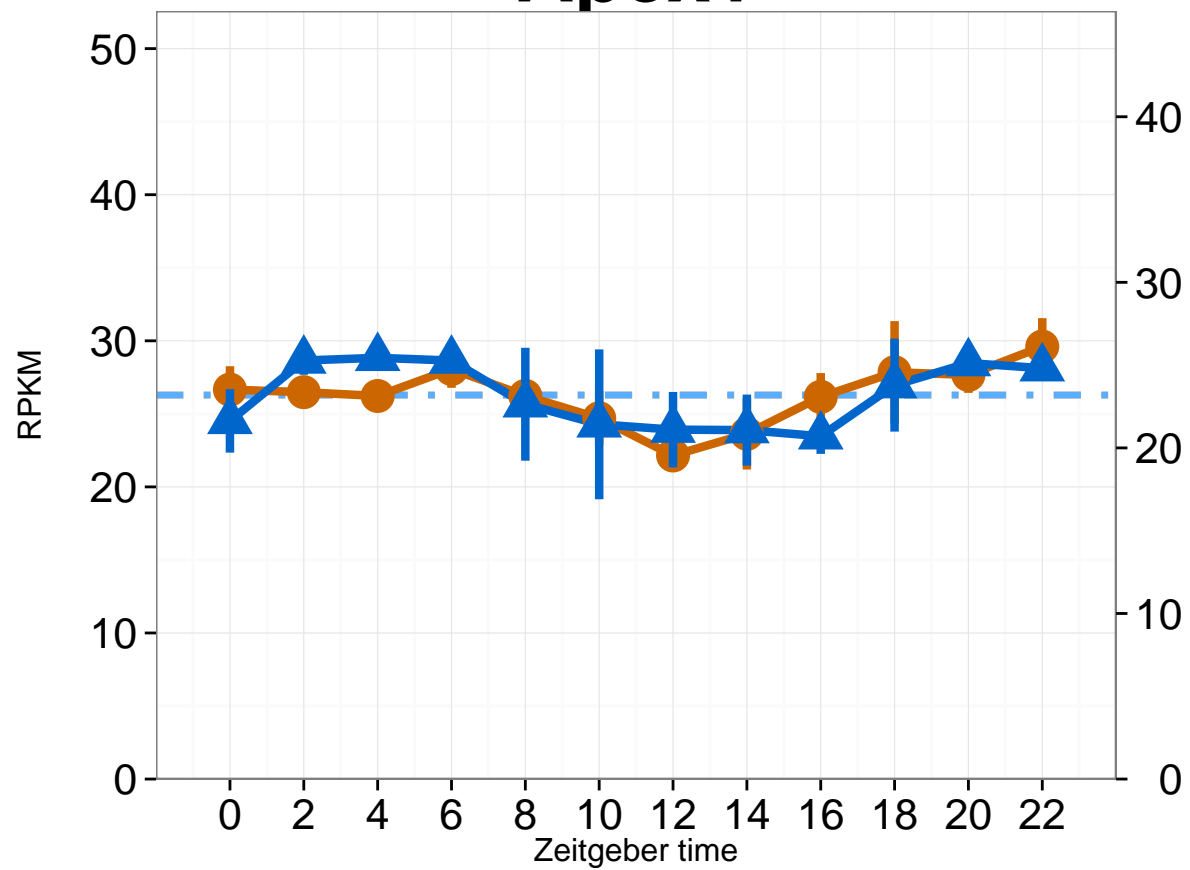

## Apex1

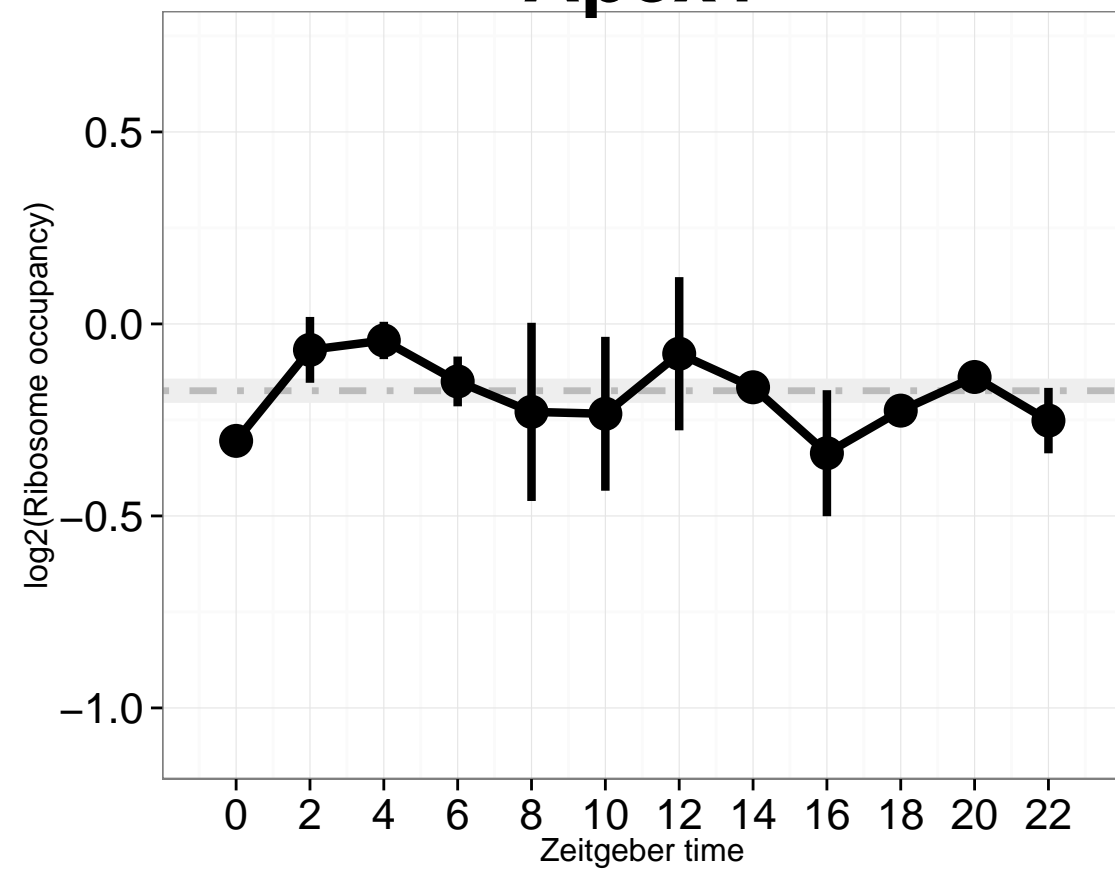

Supplement: SuppDataset_1.zip [file Apex1_set_A.pdf › Supplemental Dataset 1/A-mRNA_nonrhyth_translation_nonrhyth/Apex1_set_A.pdf]

## Apex2

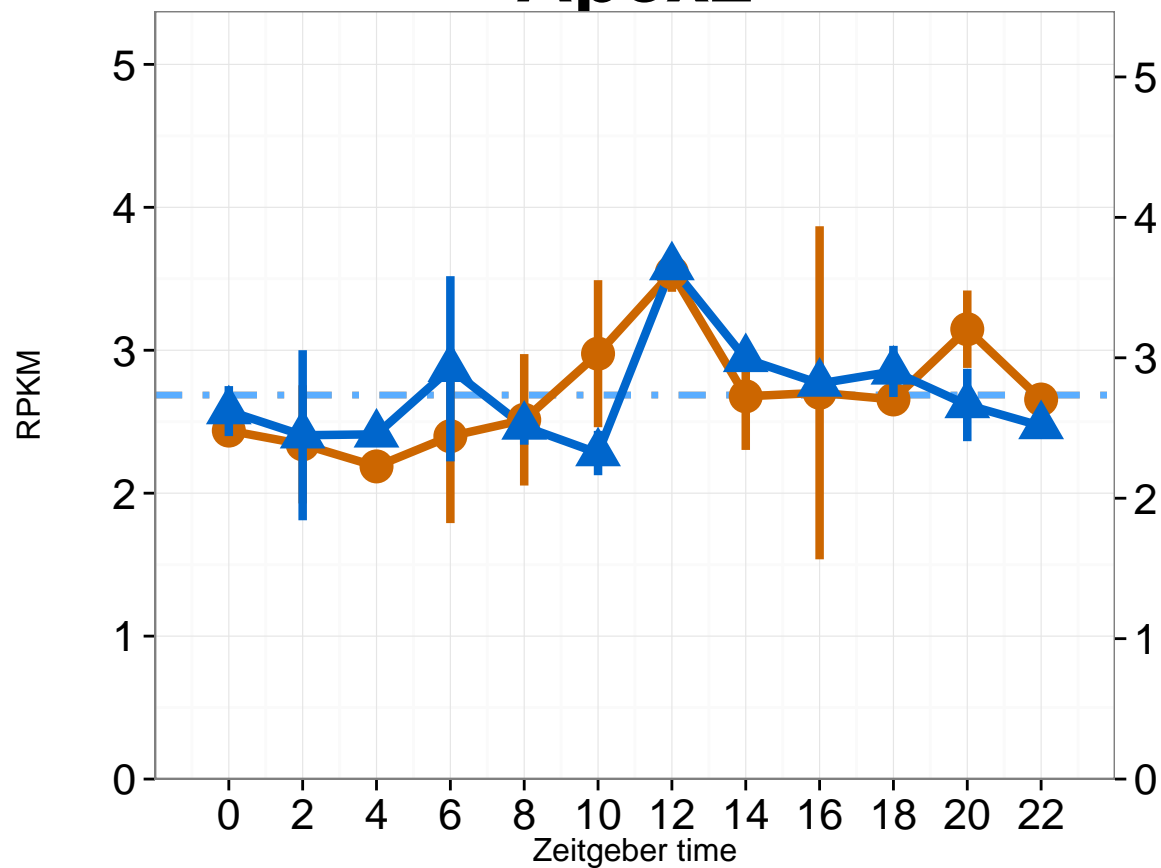

## Apex2

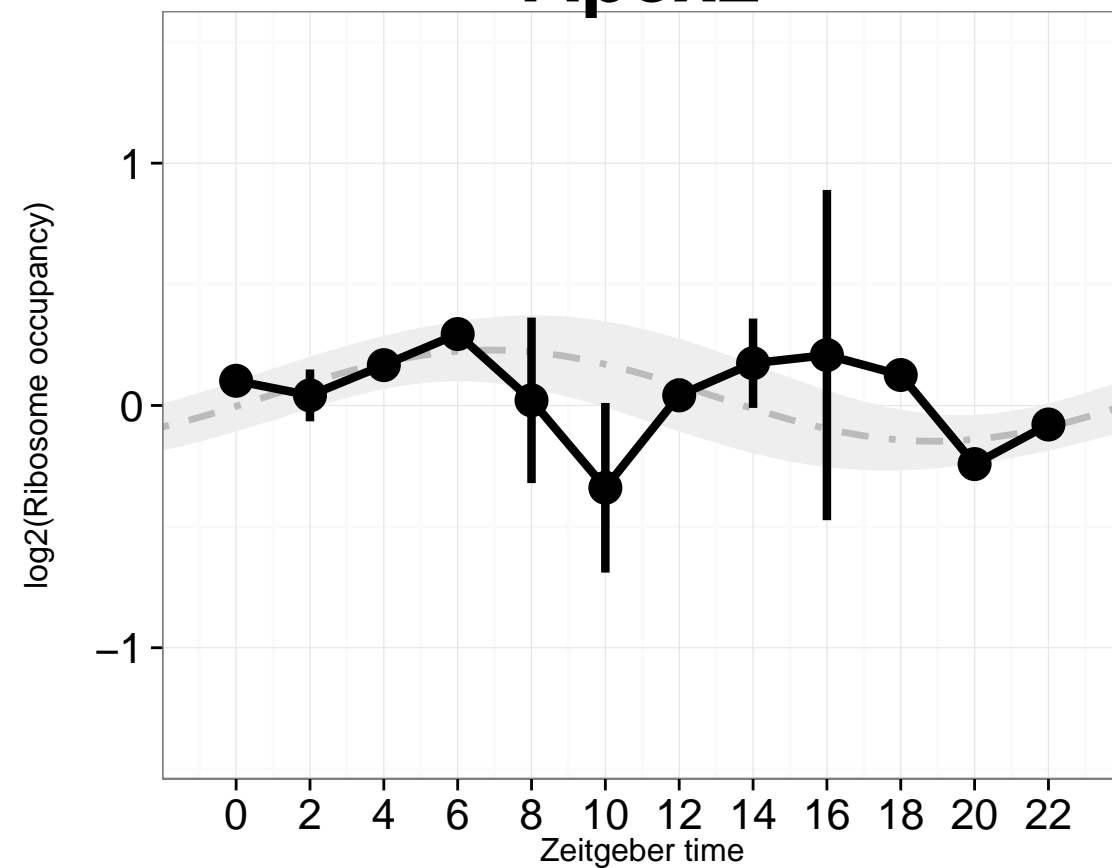

Supplement: SuppDataset_1.zip [file Apex2_set_A.pdf › Supplemental Dataset 1/A-mRNA_nonrhyth_translation_nonrhyth/Apex2_set_A.pdf]

# Aph1a

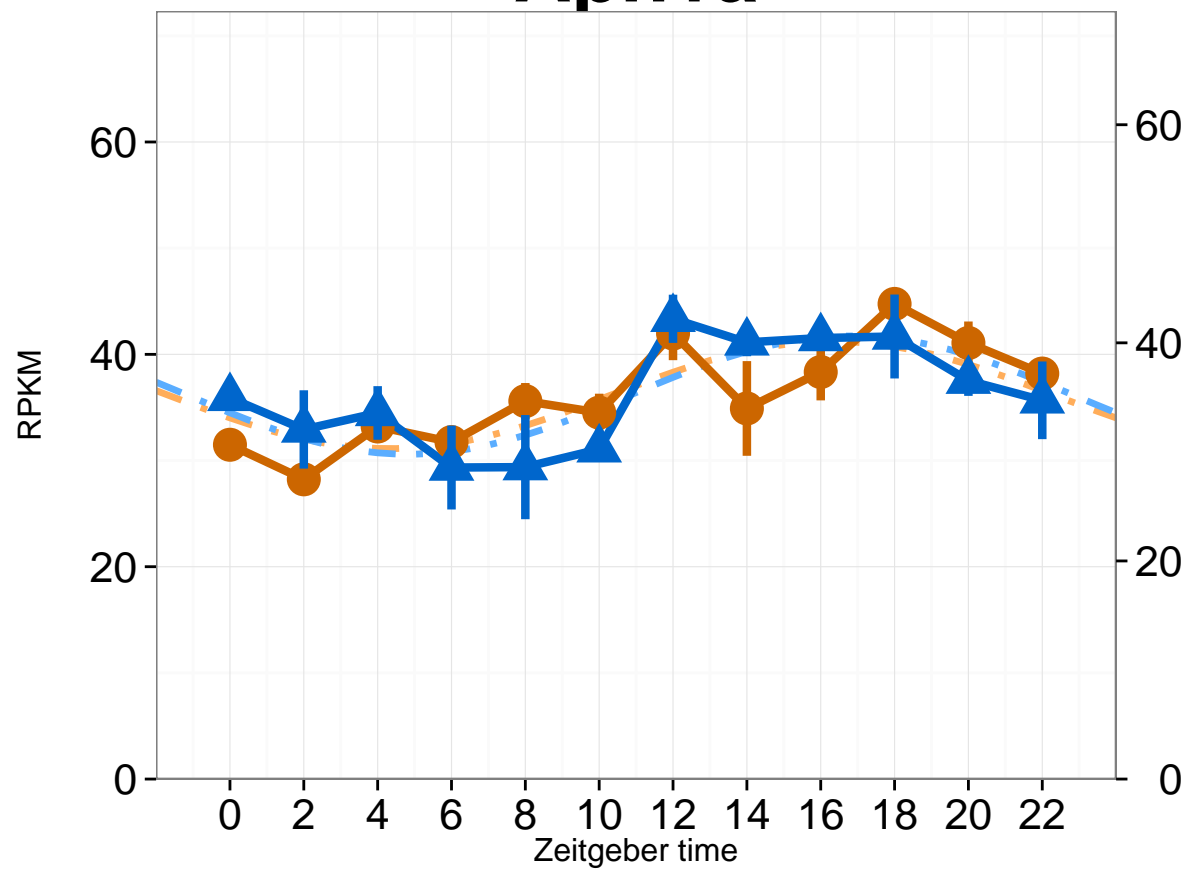

# Aph1a

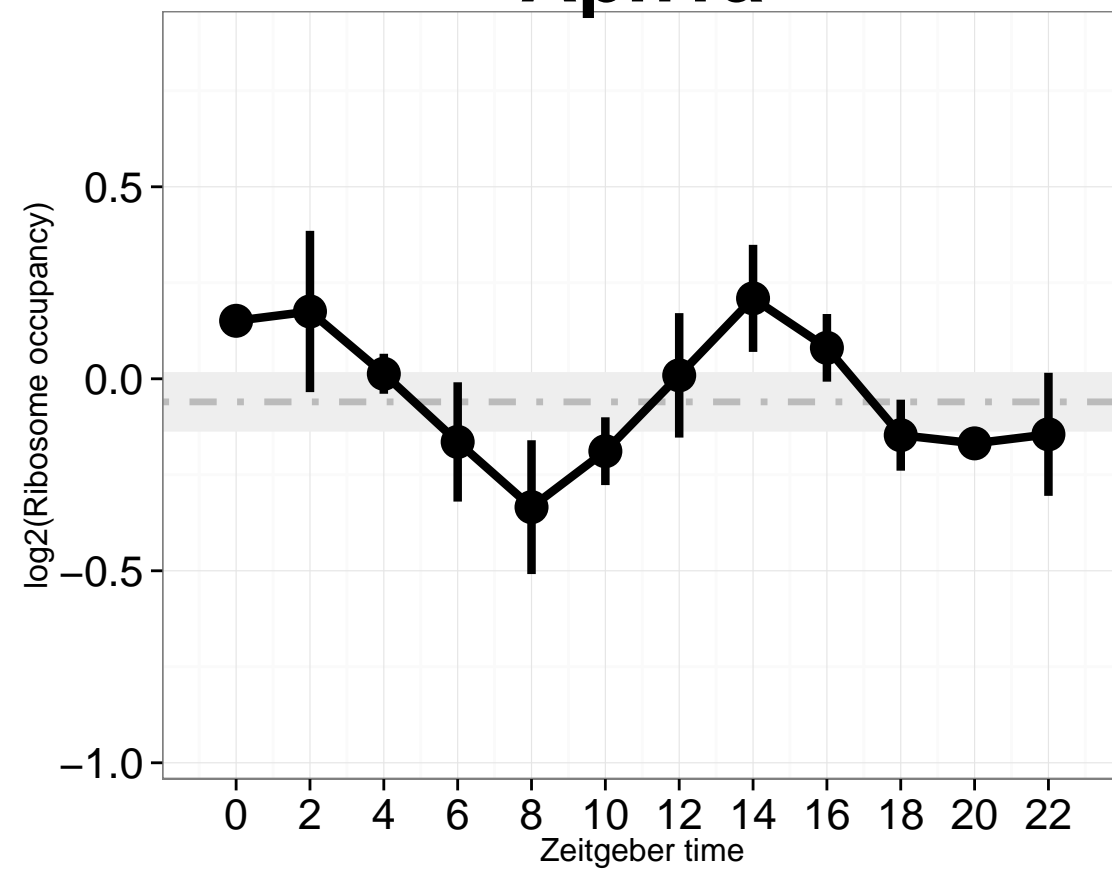

Supplement: SuppDataset_1.zip [file Aph1a_set_A.pdf › Supplemental Dataset 1/A-mRNA_nonrhyth_translation_nonrhyth/Aph1a_set_A.pdf]

## Aph1b

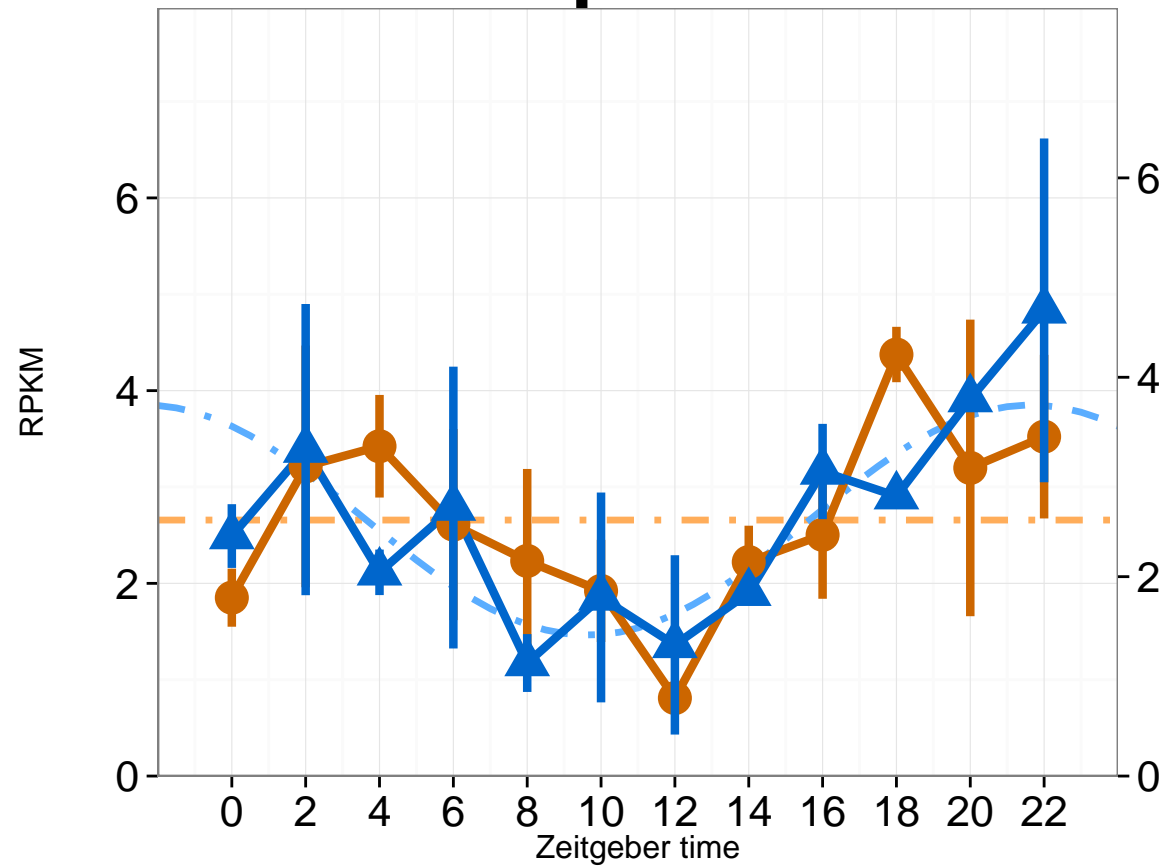

## Aph1b

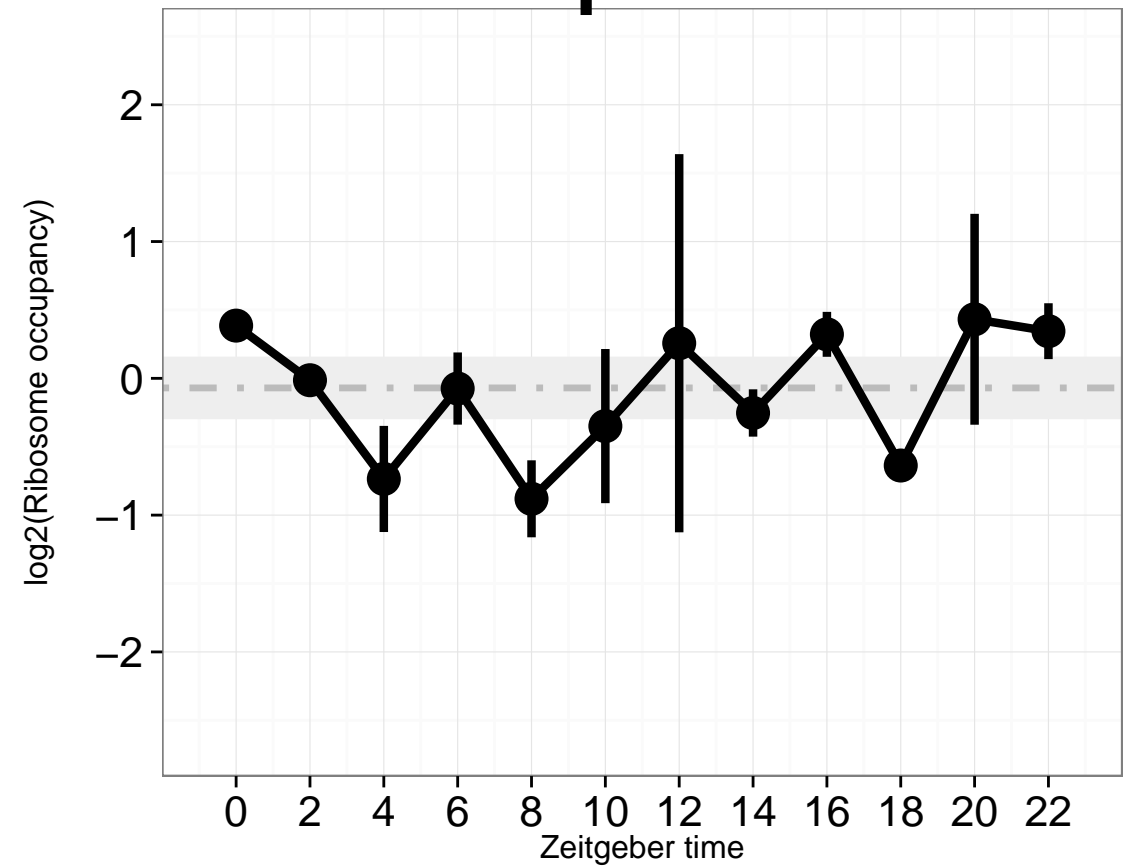

Supplement: SuppDataset_1.zip [file Aph1b_set_A.pdf › Supplemental Dataset 1/A-mRNA_nonrhyth_translation_nonrhyth/Aph1b_set_A.pdf]

# Aph1c

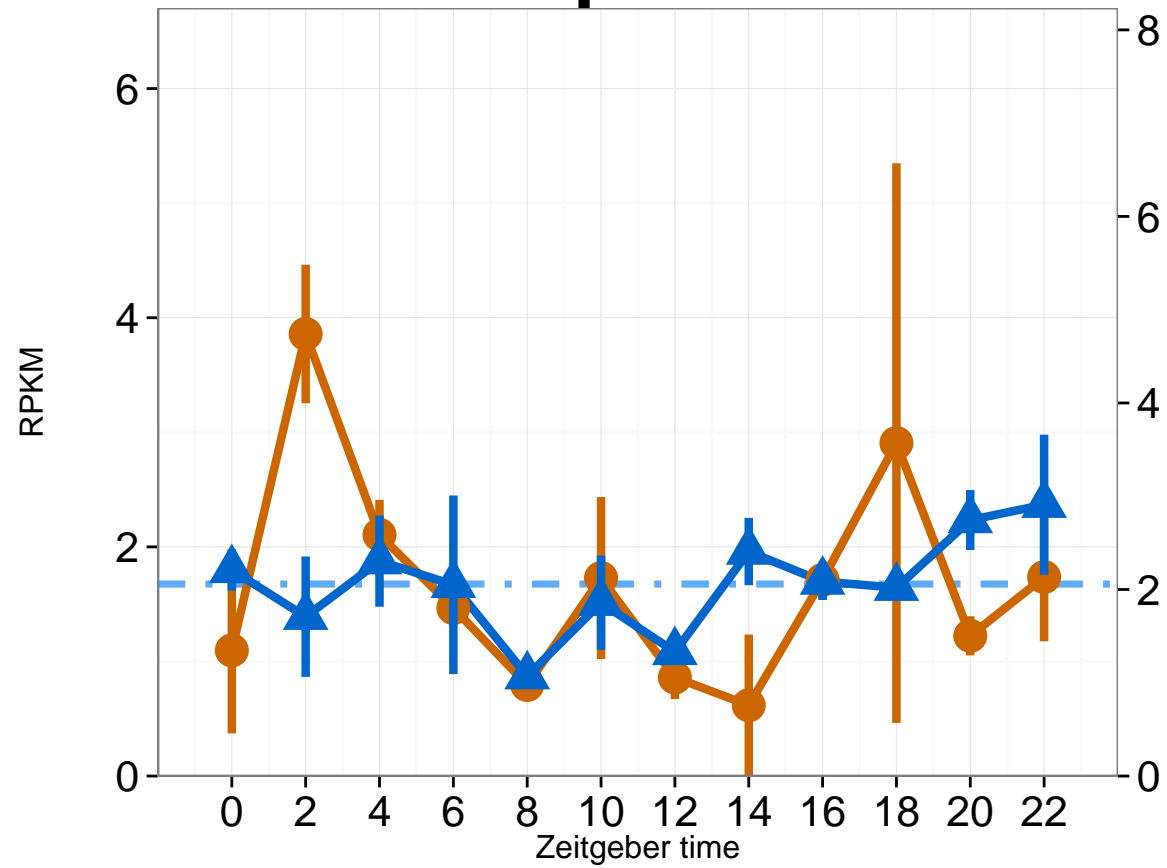

# Aph1c

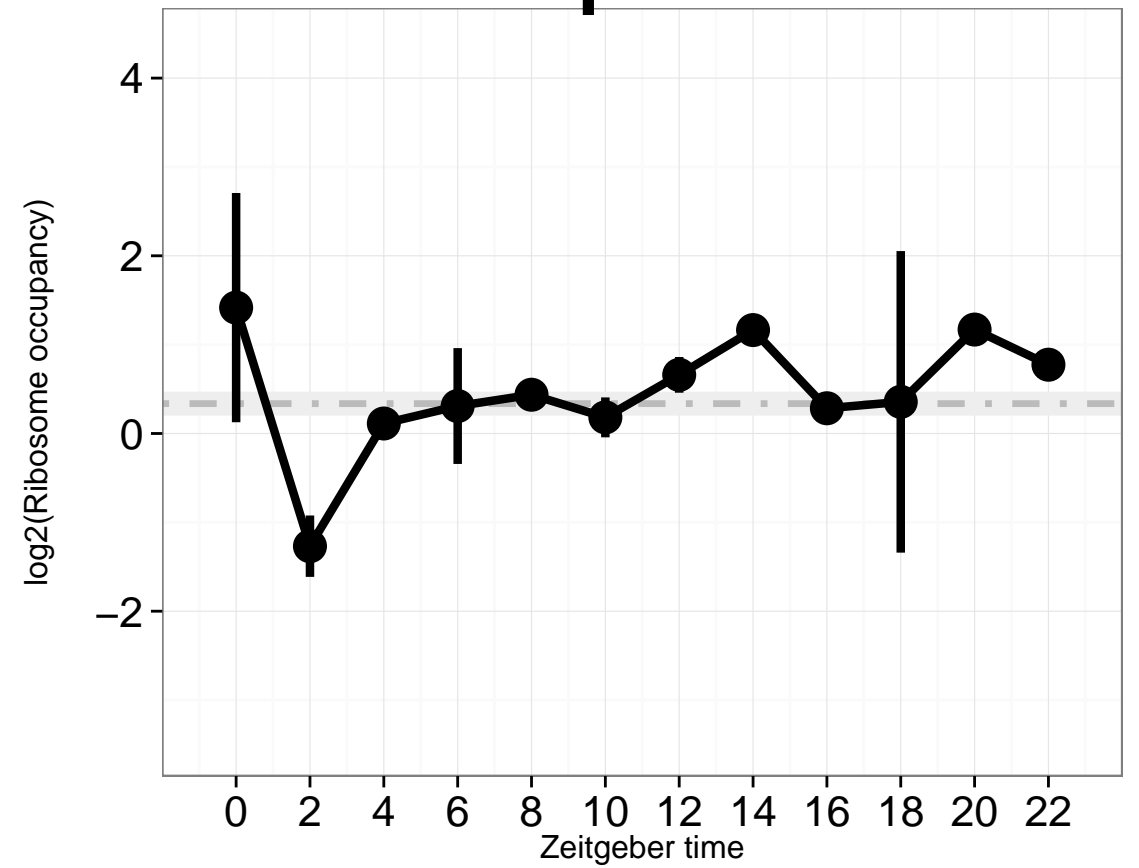

Supplement: SuppDataset_1.zip [file Aph1c_set_A.pdf › Supplemental Dataset 1/A-mRNA_nonrhyth_translation_nonrhyth/Aph1c_set_A.pdf]
