# Supplementary figures and images for: Ribosome profiling reveals the rhythmic liver translatome and circadian clock regulation by upstream open reading frames (part 7 of 113)
Source: HighWire-hosted journal article supplement (doi:10.1101/gr.195404.115), 2015-10-20

## Api5

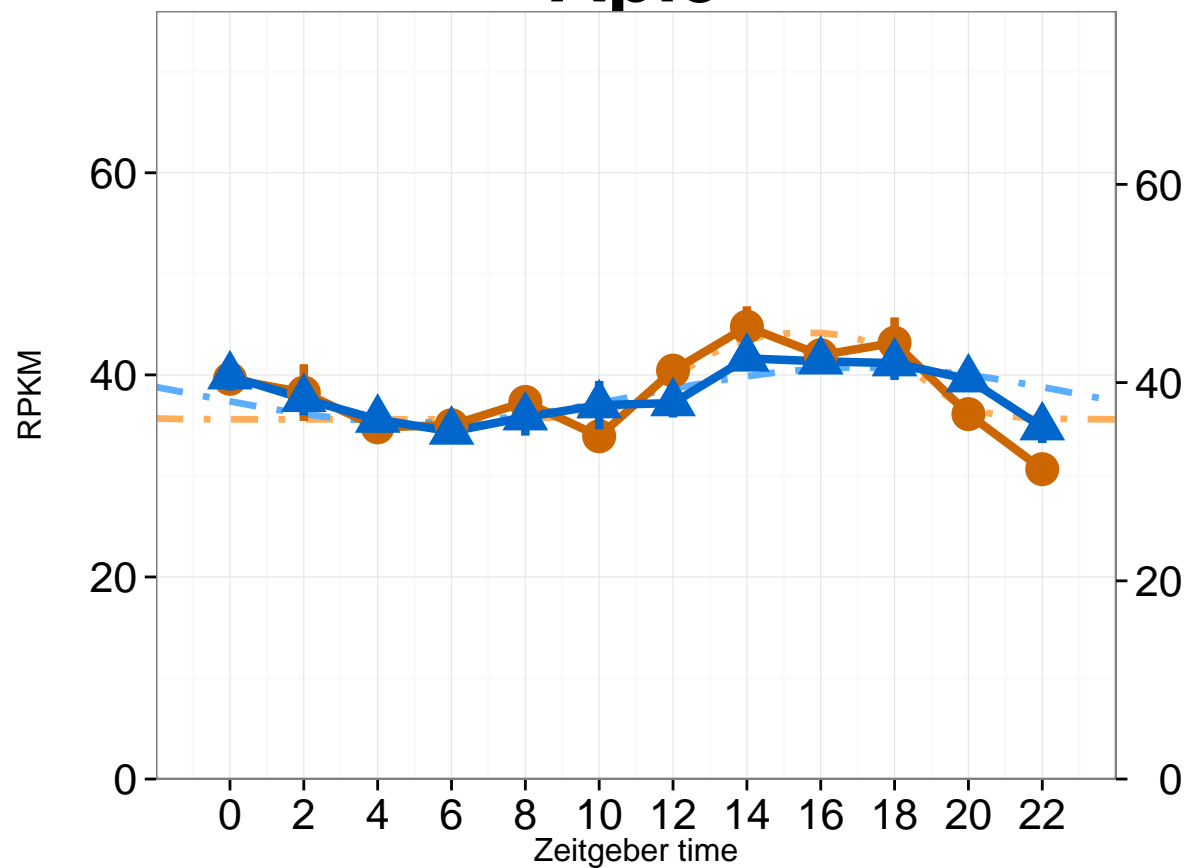

## Api5

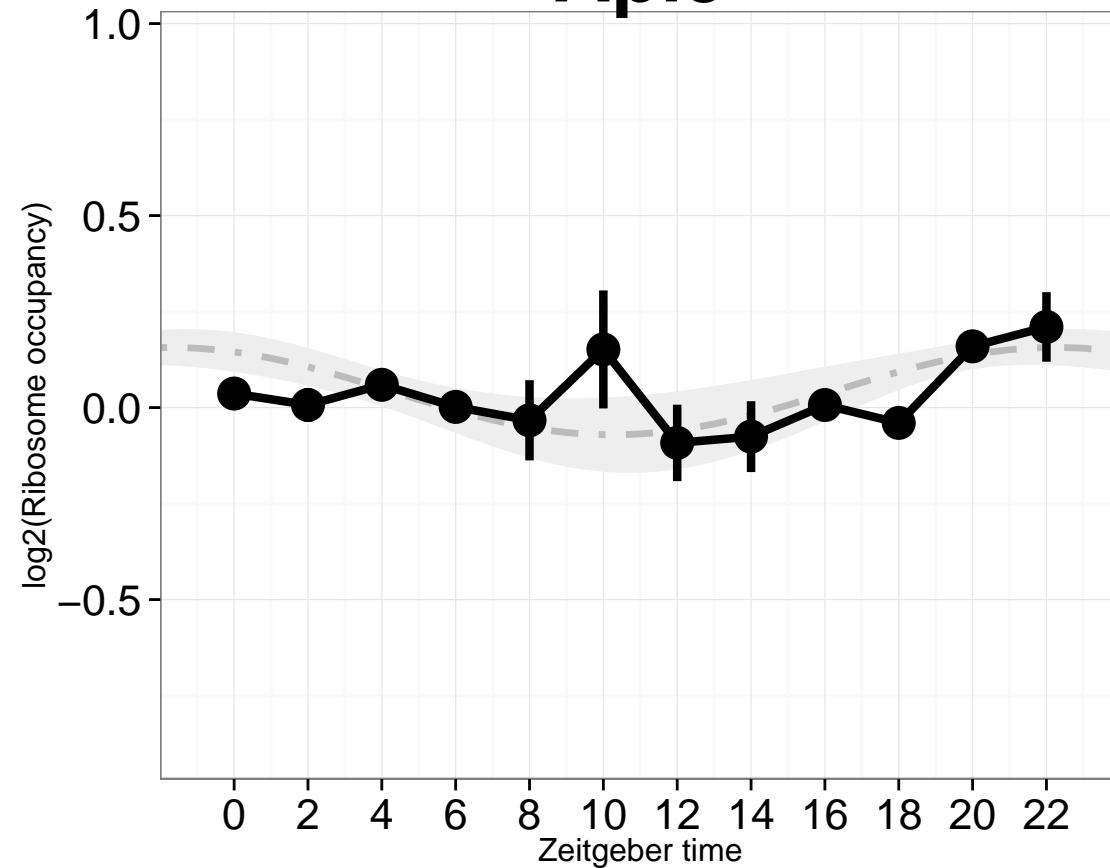

Supplement: SuppDataset_1.zip [file Api5_set_A.pdf › Supplemental Dataset 1/A-mRNA_nonrhyth_translation_nonrhyth/Api5_set_A.pdf]

## Apip

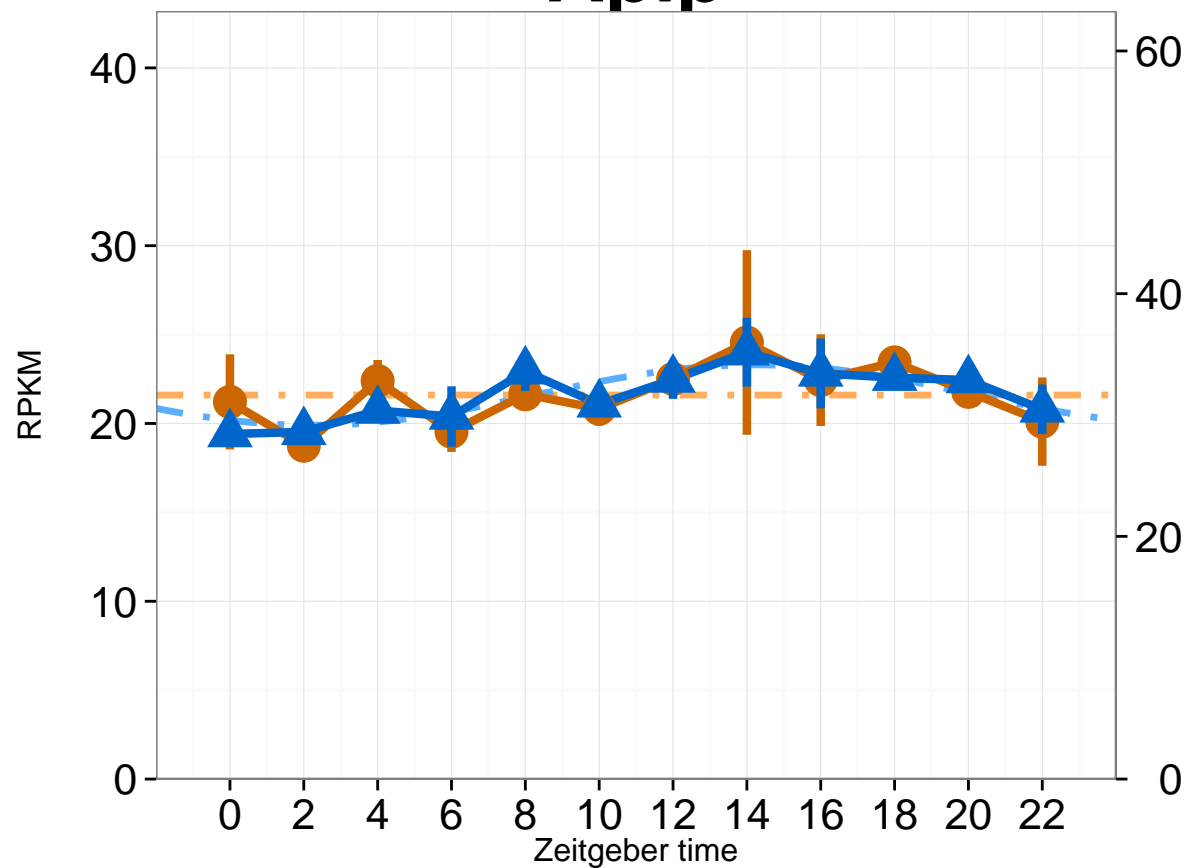

## Apip

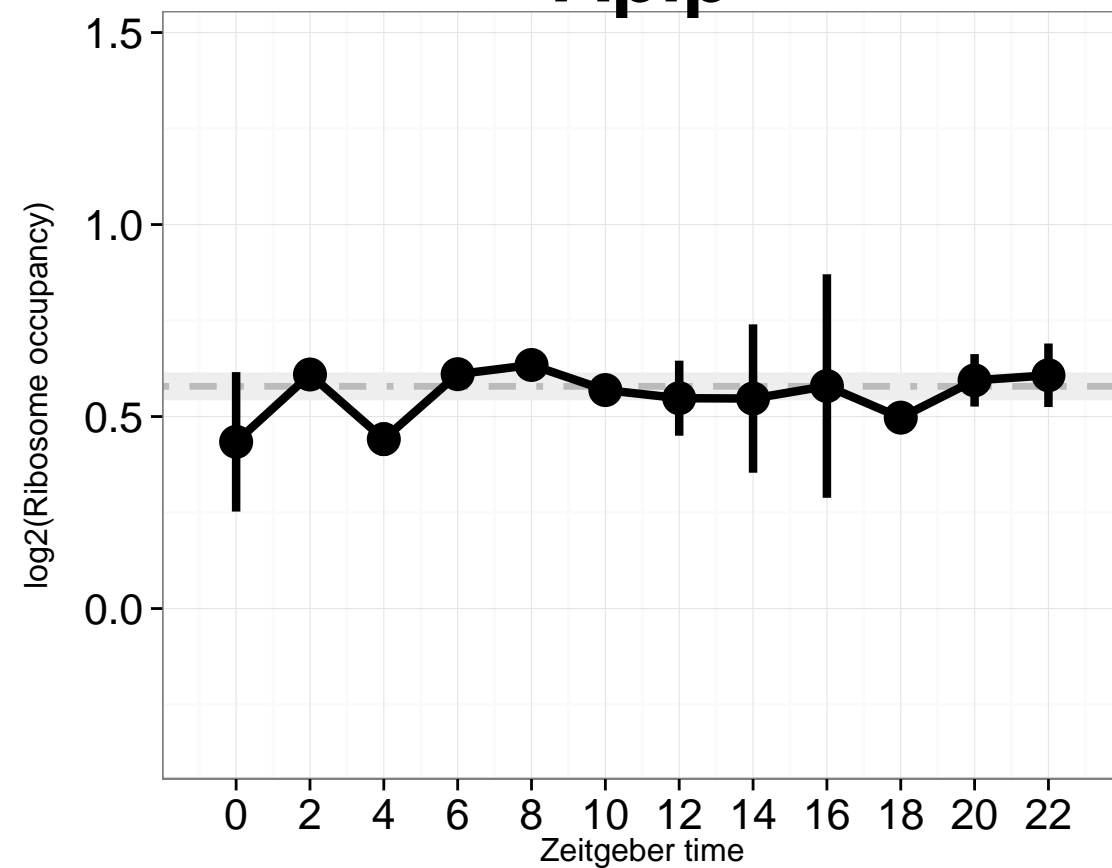

Supplement: SuppDataset_1.zip [file Apip_set_A.pdf › Supplemental Dataset 1/A-mRNA_nonrhyth_translation_nonrhyth/Apip_set_A.pdf]

## Ap1f

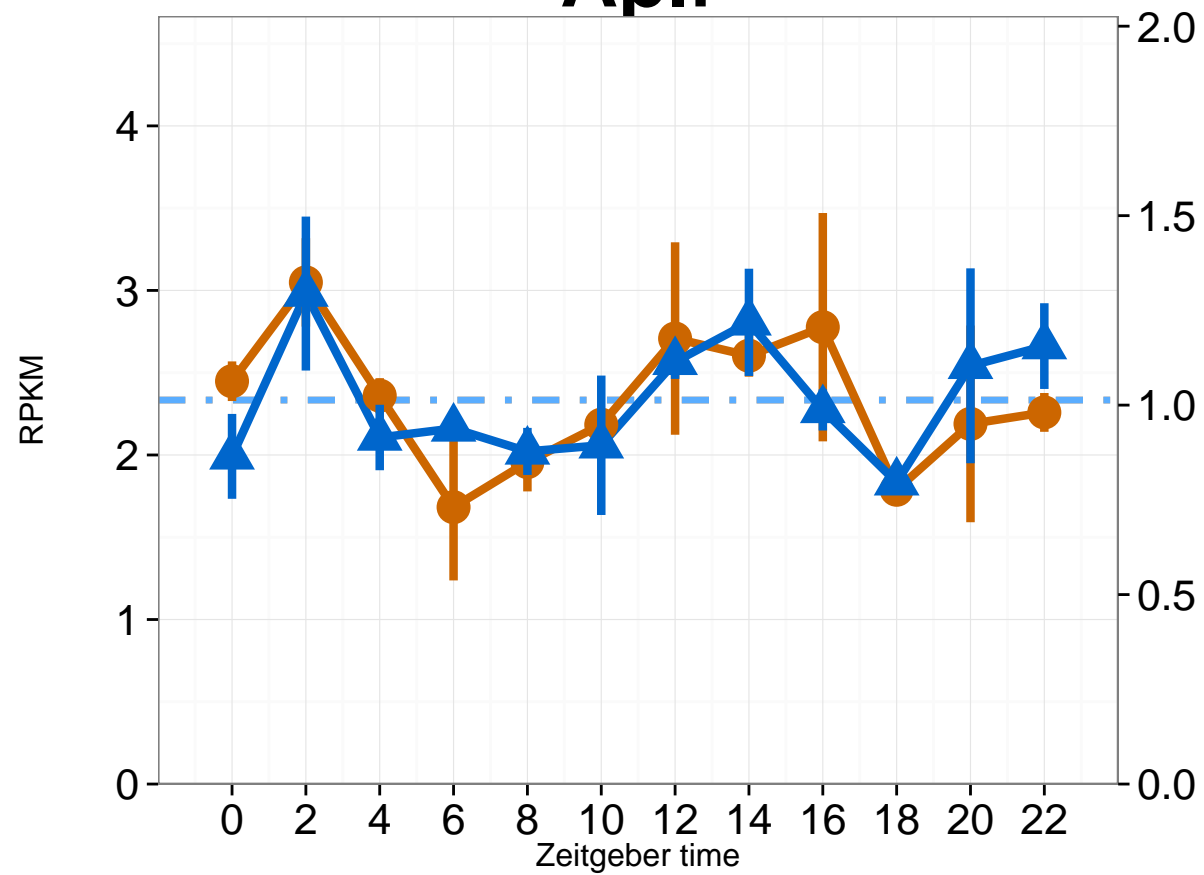

## Ap1f

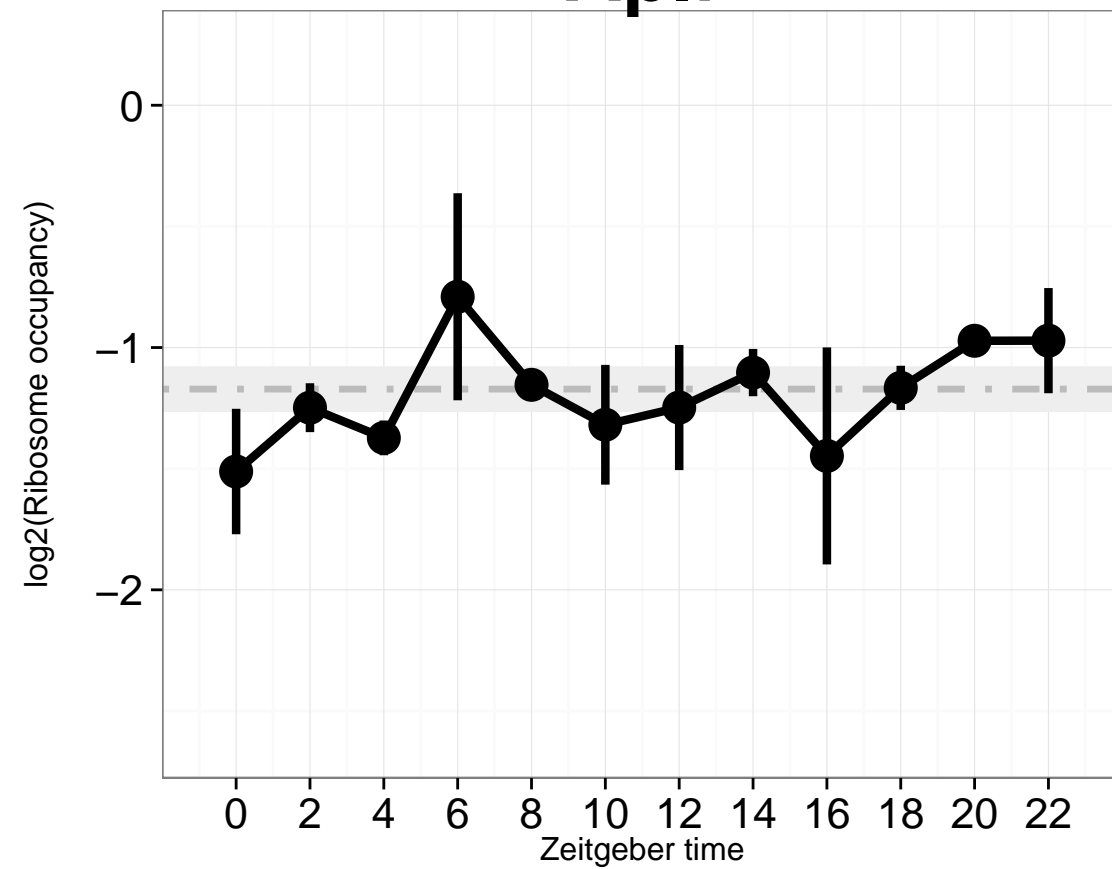

Supplement: SuppDataset_1.zip [file Aplf_set_A.pdf › Supplemental Dataset 1/A-mRNA_nonrhyth_translation_nonrhyth/Aplf_set_A.pdf]

## Aplp2

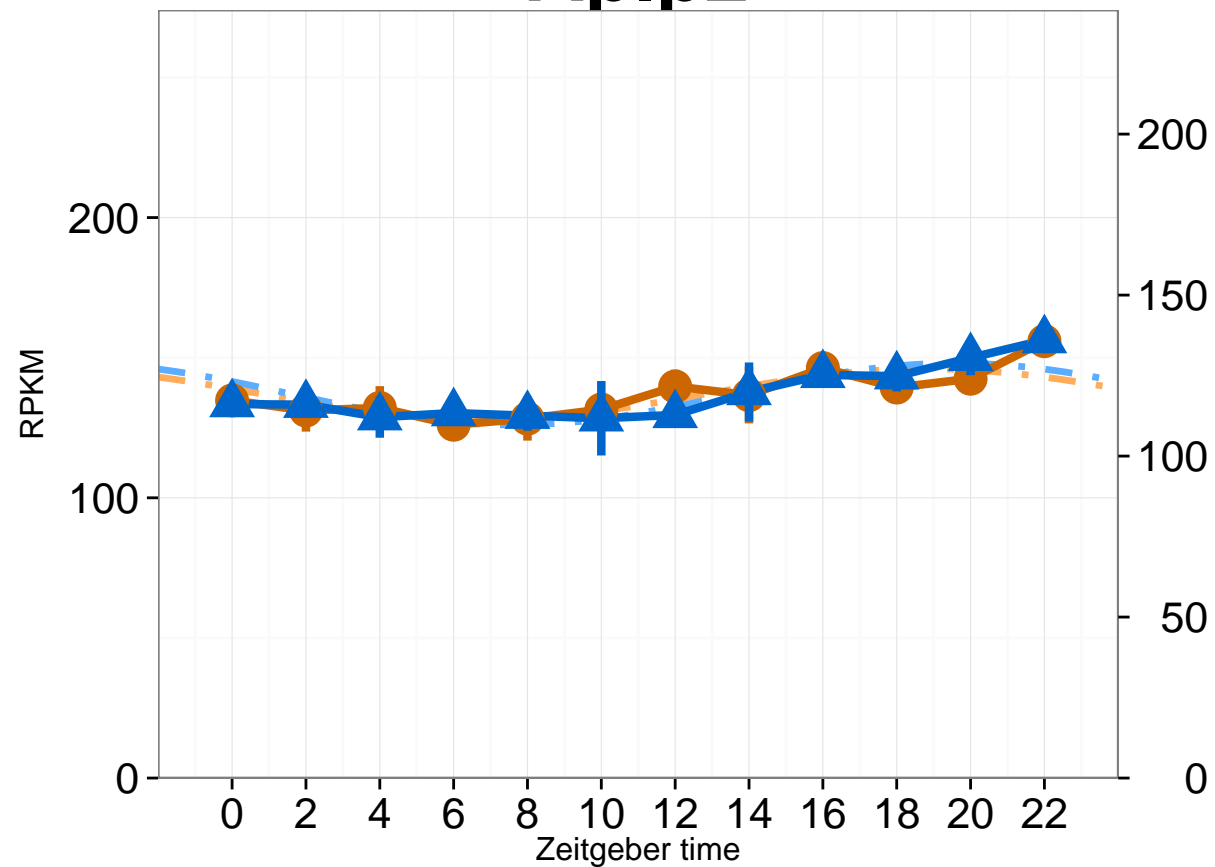

## Aplp2

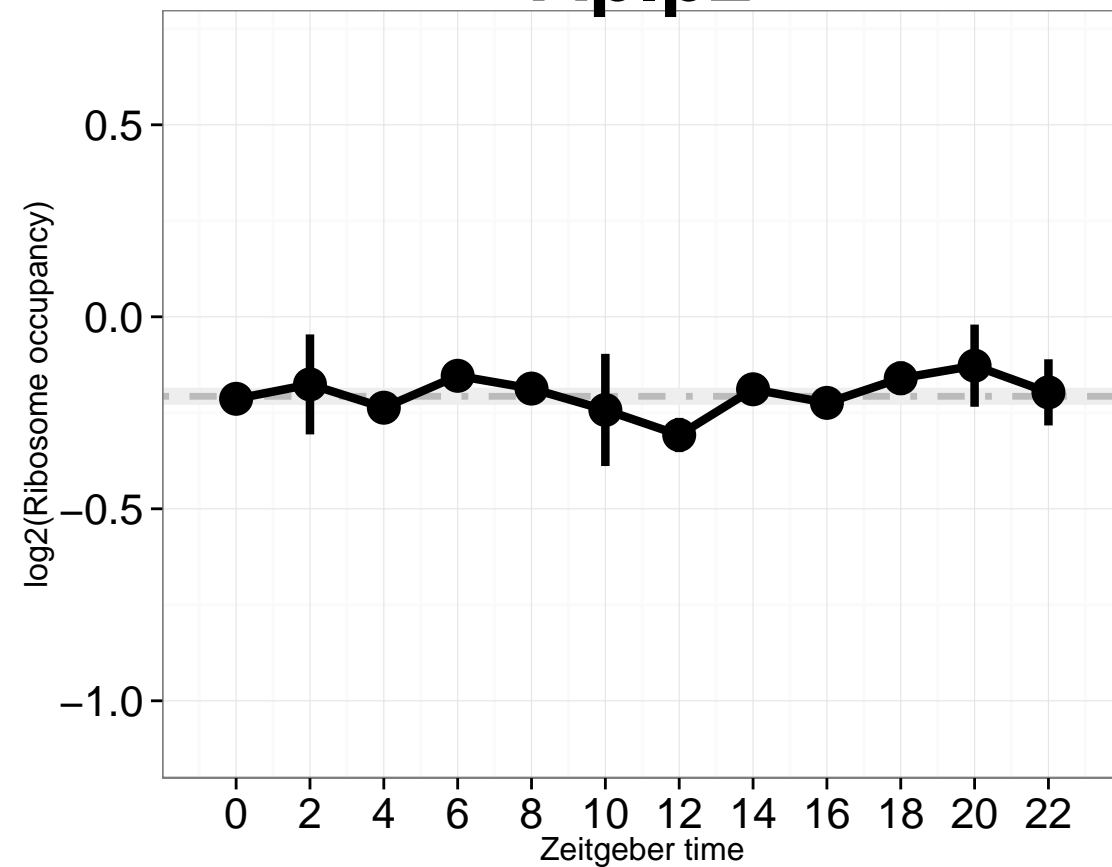

Supplement: SuppDataset_1.zip [file Aplp2_set_A.pdf › Supplemental Dataset 1/A-mRNA_nonrhyth_translation_nonrhyth/Aplp2_set_A.pdf]

# Apmap

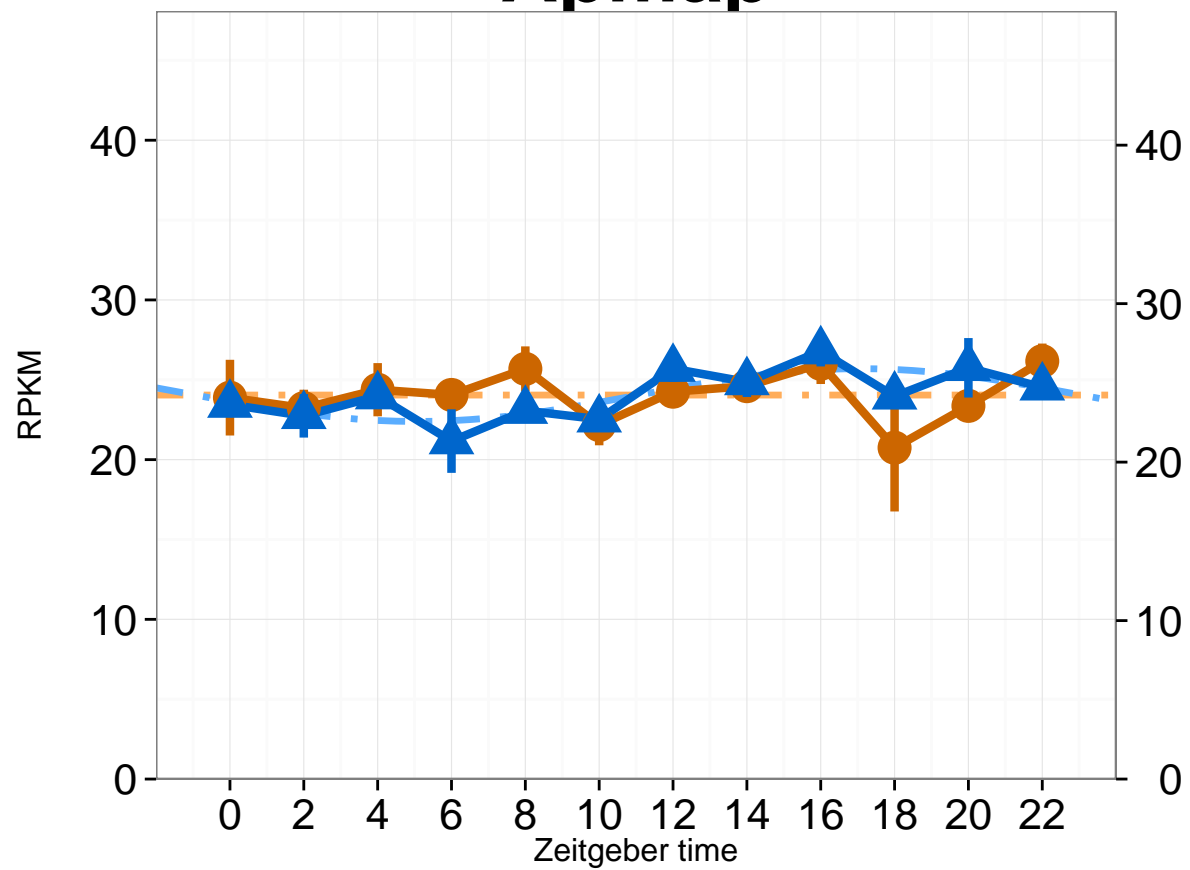

# Apmap

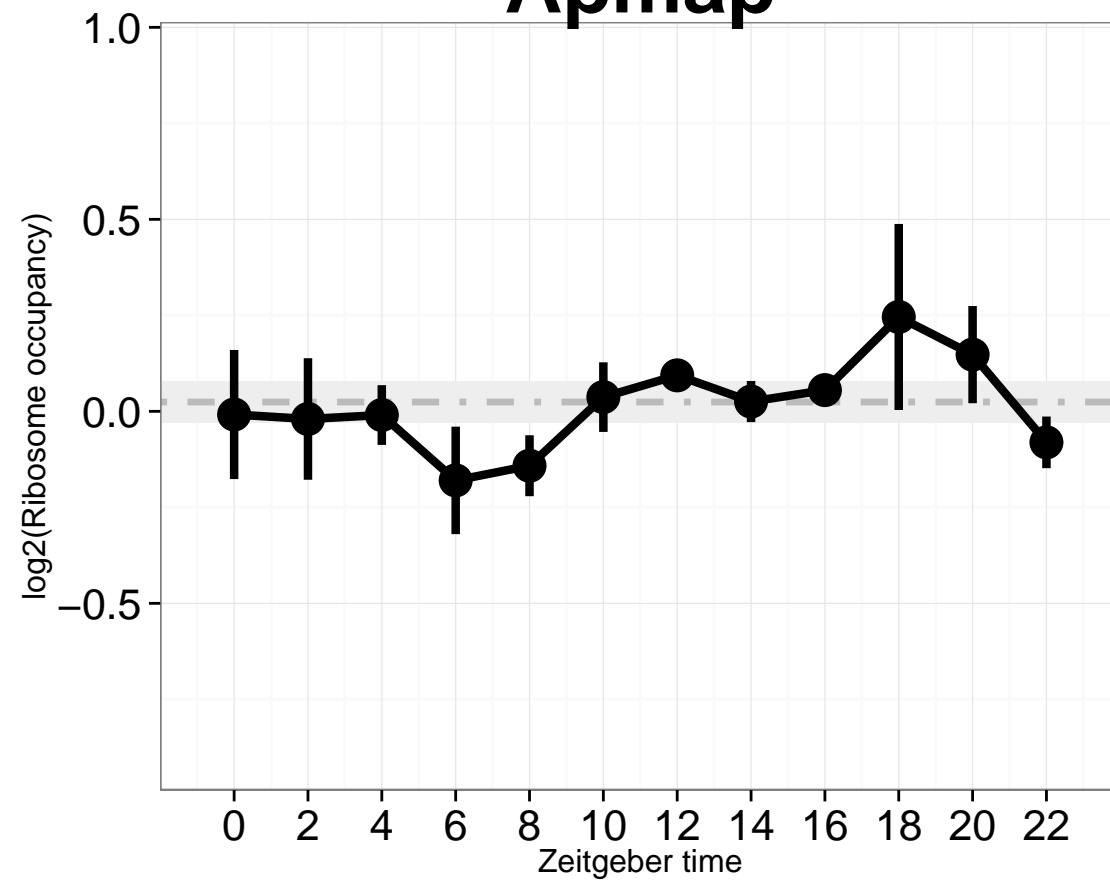

Supplement: SuppDataset_1.zip [file Apmap_set_A.pdf › Supplemental Dataset 1/A-mRNA_nonrhyth_translation_nonrhyth/Apmap_set_A.pdf]

# Apoa1

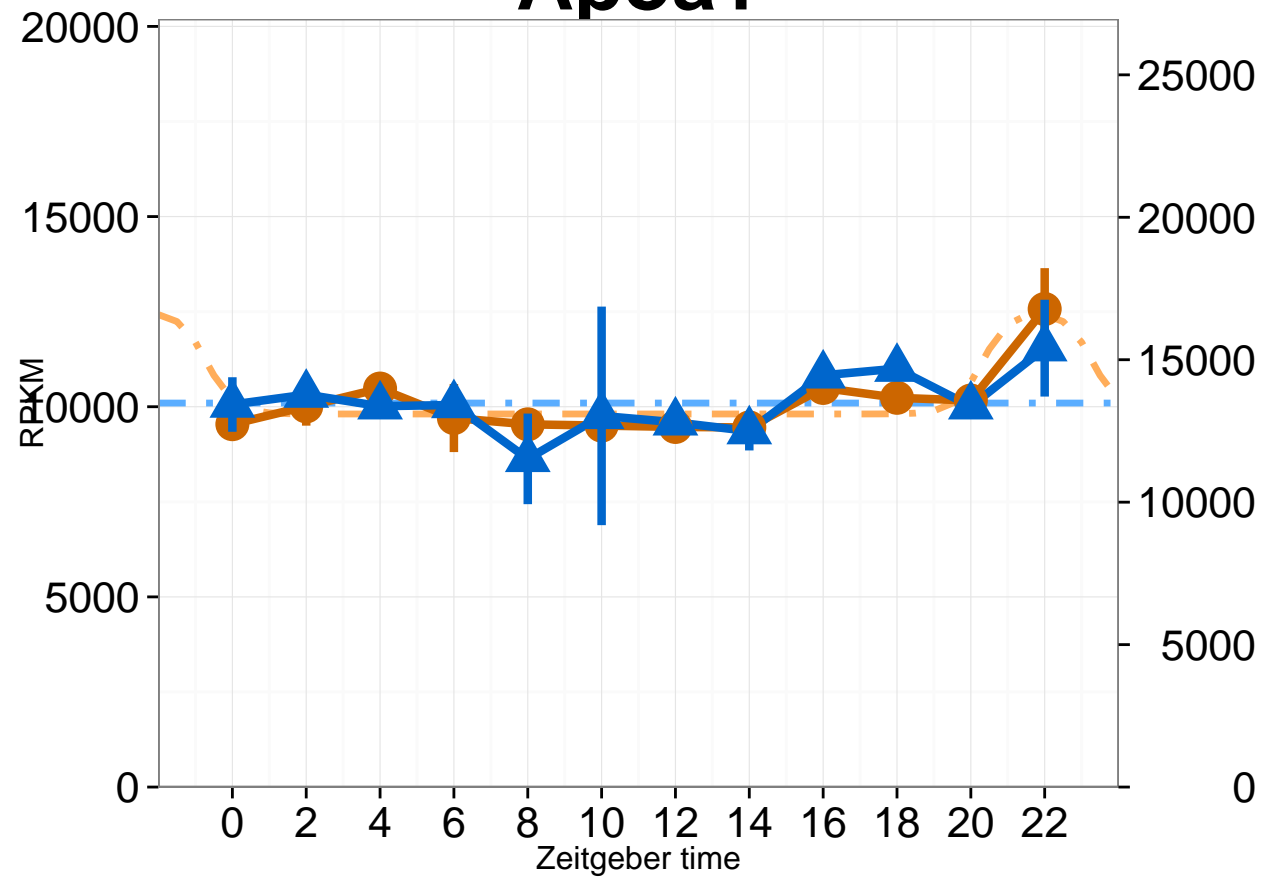

# Apoa1

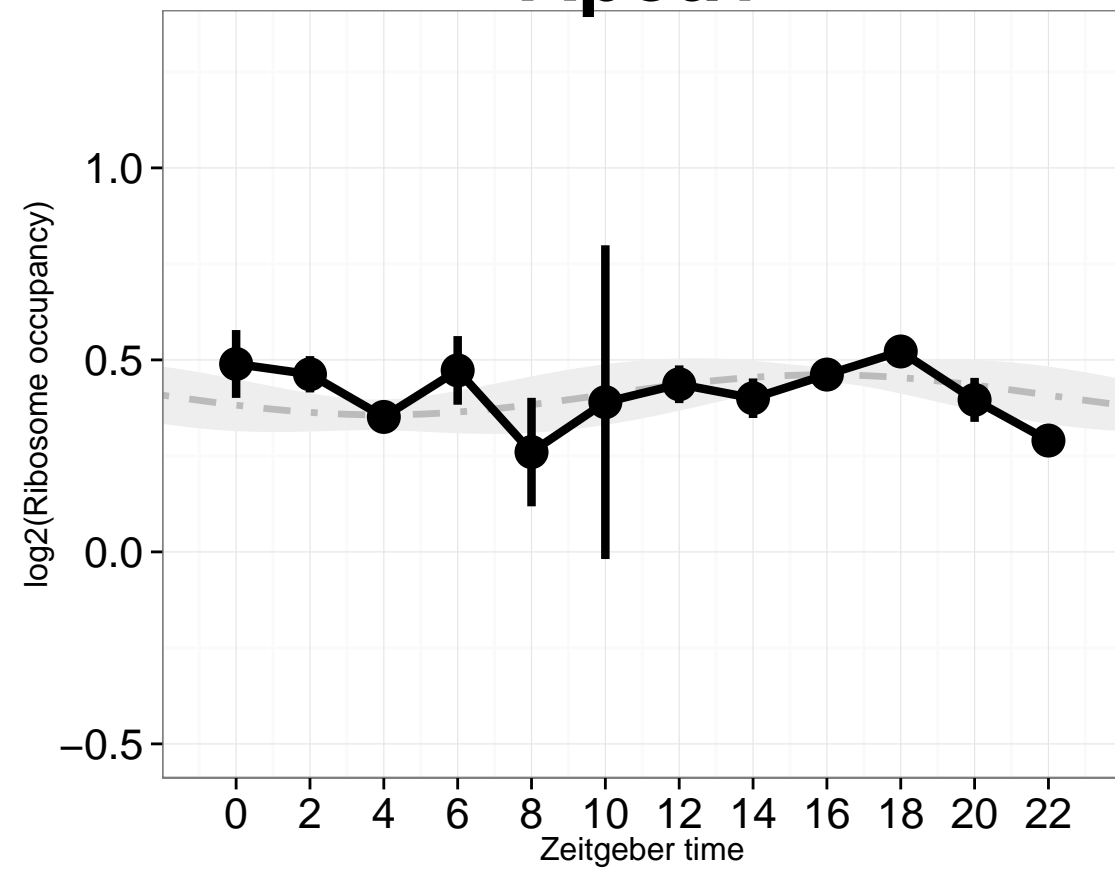

Supplement: SuppDataset_1.zip [file Apoa1_set_A.pdf › Supplemental Dataset 1/A-mRNA_nonrhyth_translation_nonrhyth/Apoa1_set_A.pdf]

# Apoa1bp

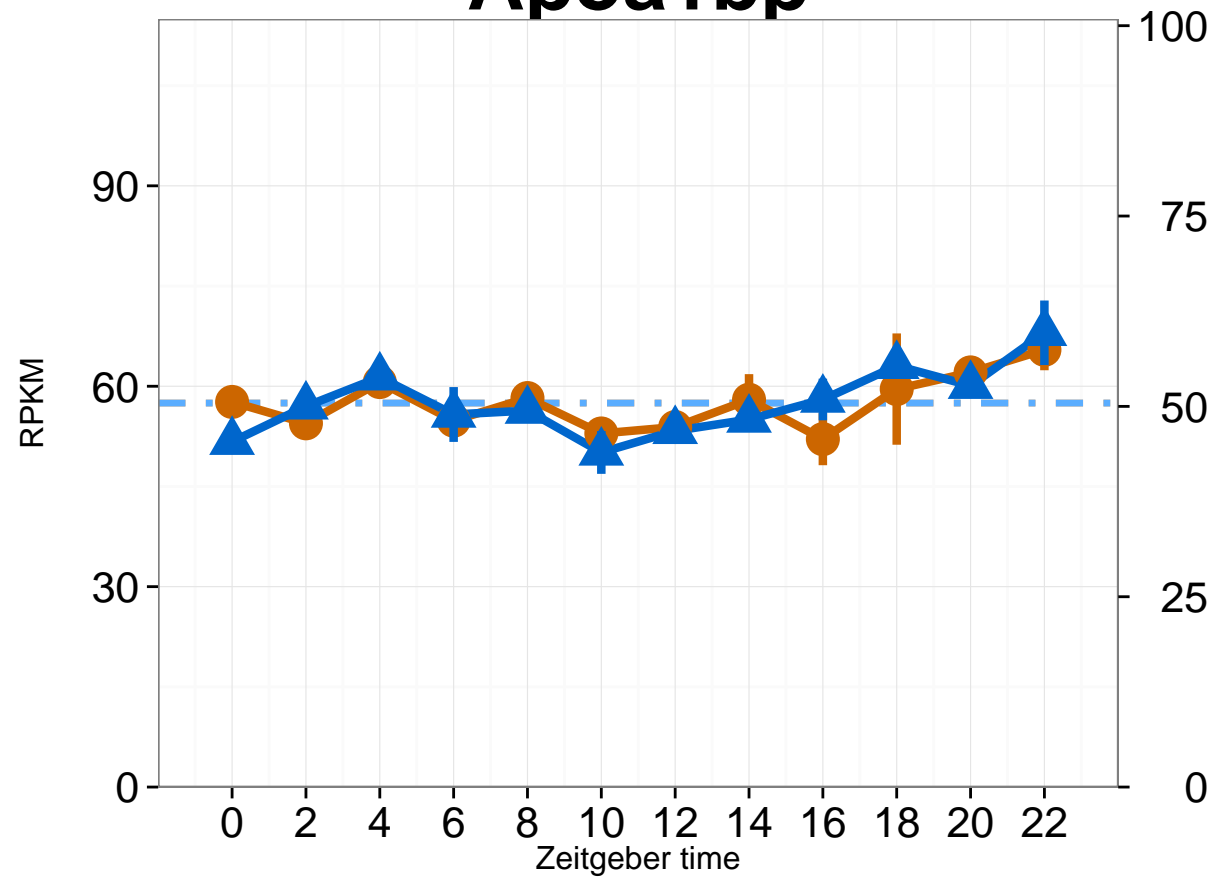

# Apoa1bp

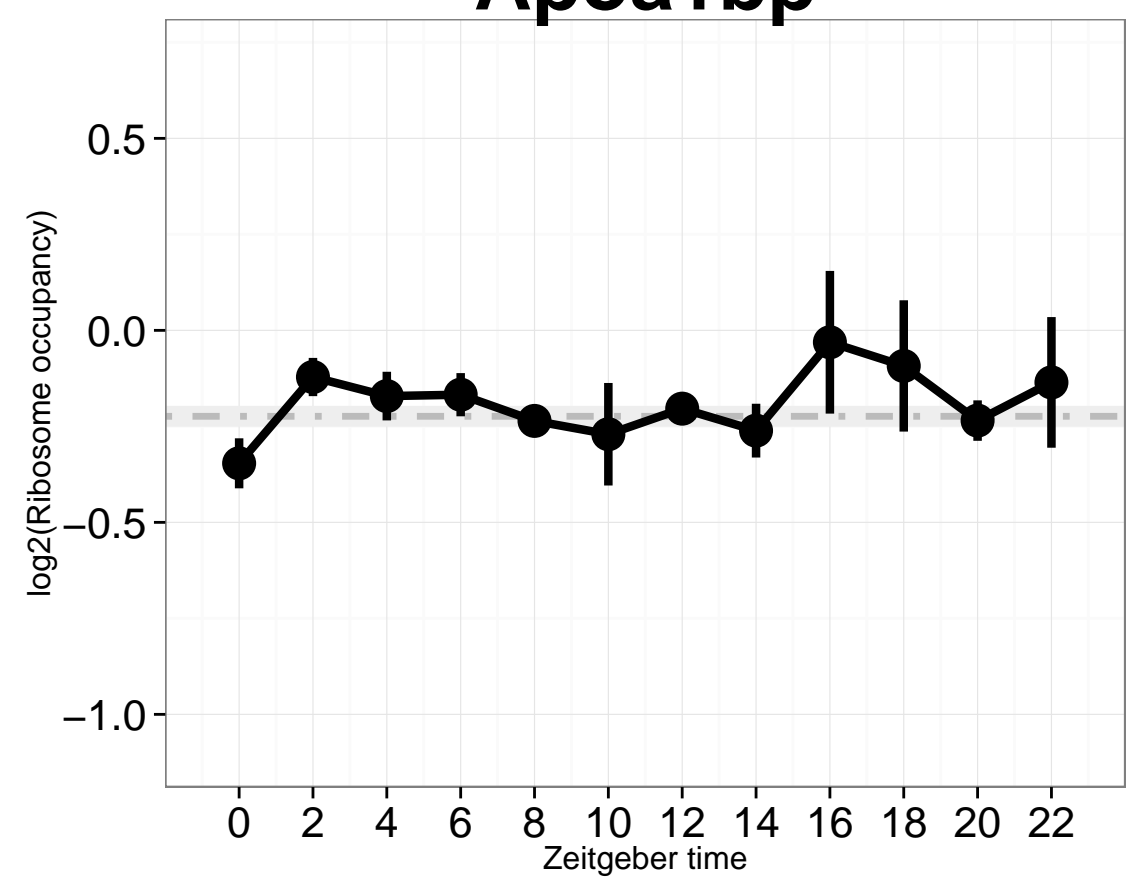

Supplement: SuppDataset_1.zip [file Apoa1bp_set_A.pdf › Supplemental Dataset 1/A-mRNA_nonrhyth_translation_nonrhyth/Apoa1bp_set_A.pdf]

# Apoa2

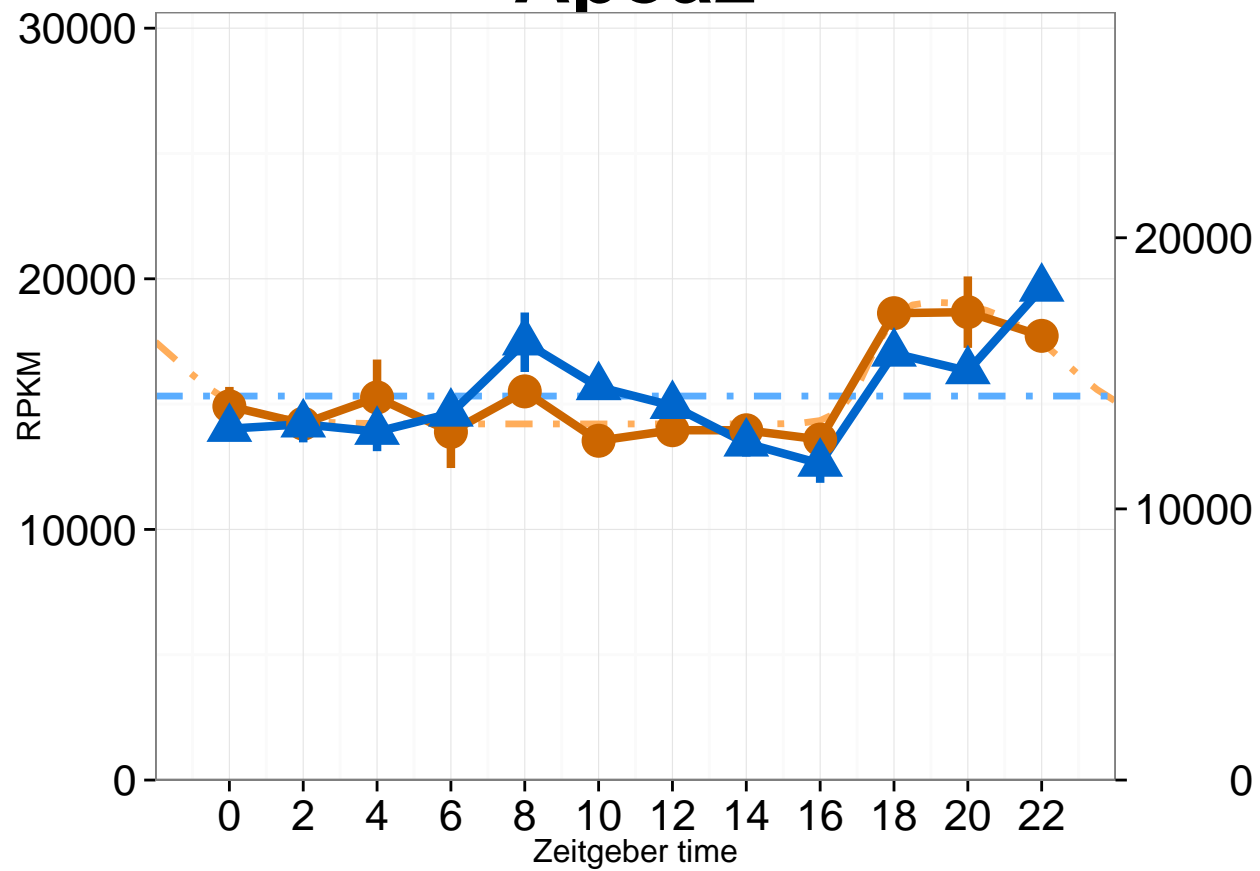

# Apoa2

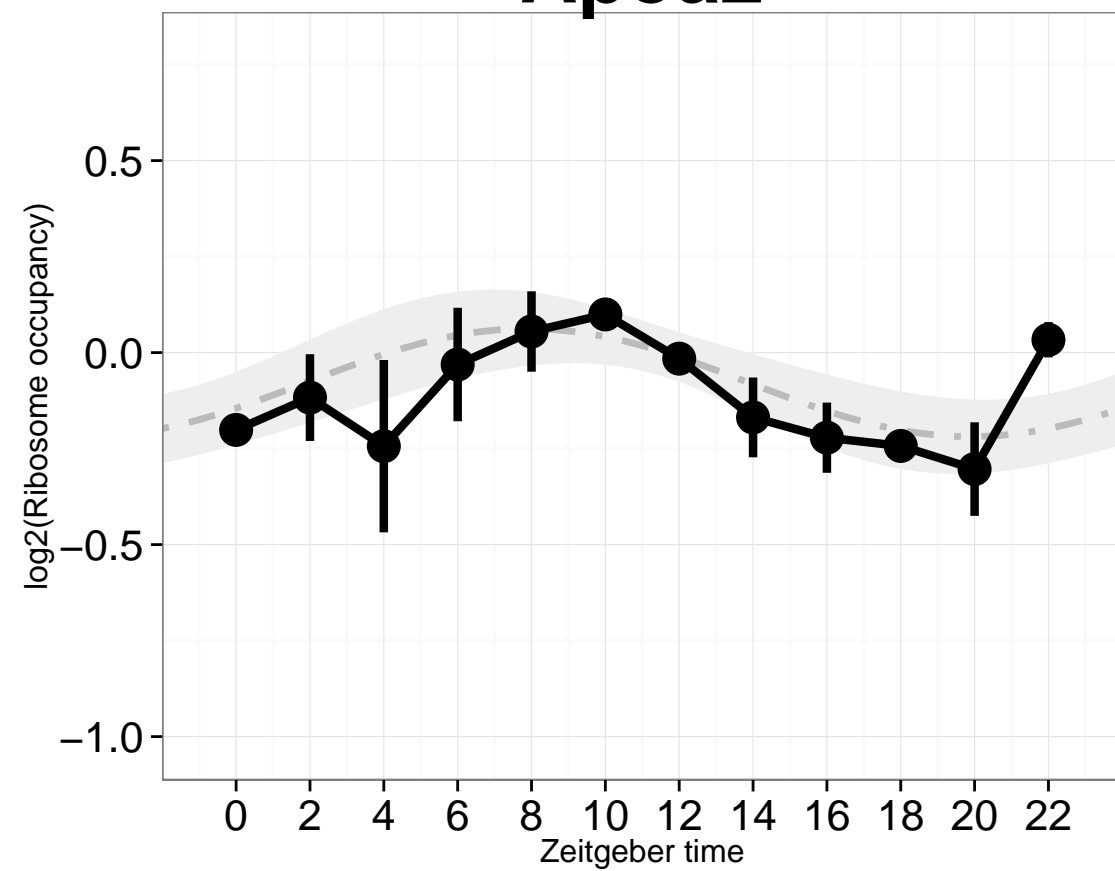

Supplement: SuppDataset_1.zip [file Apoa2_set_A.pdf › Supplemental Dataset 1/A-mRNA_nonrhyth_translation_nonrhyth/Apoa2_set_A.pdf]

# Apoa4

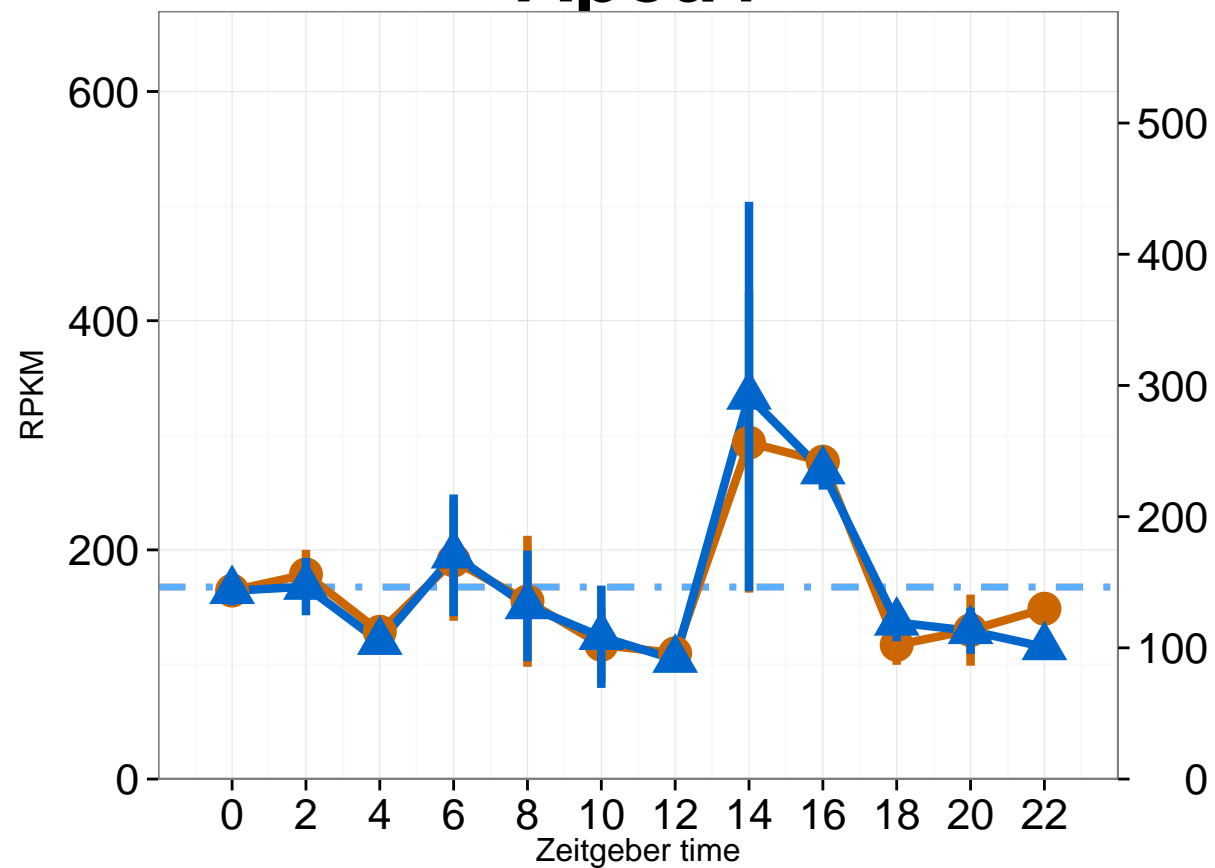

# Apoa4

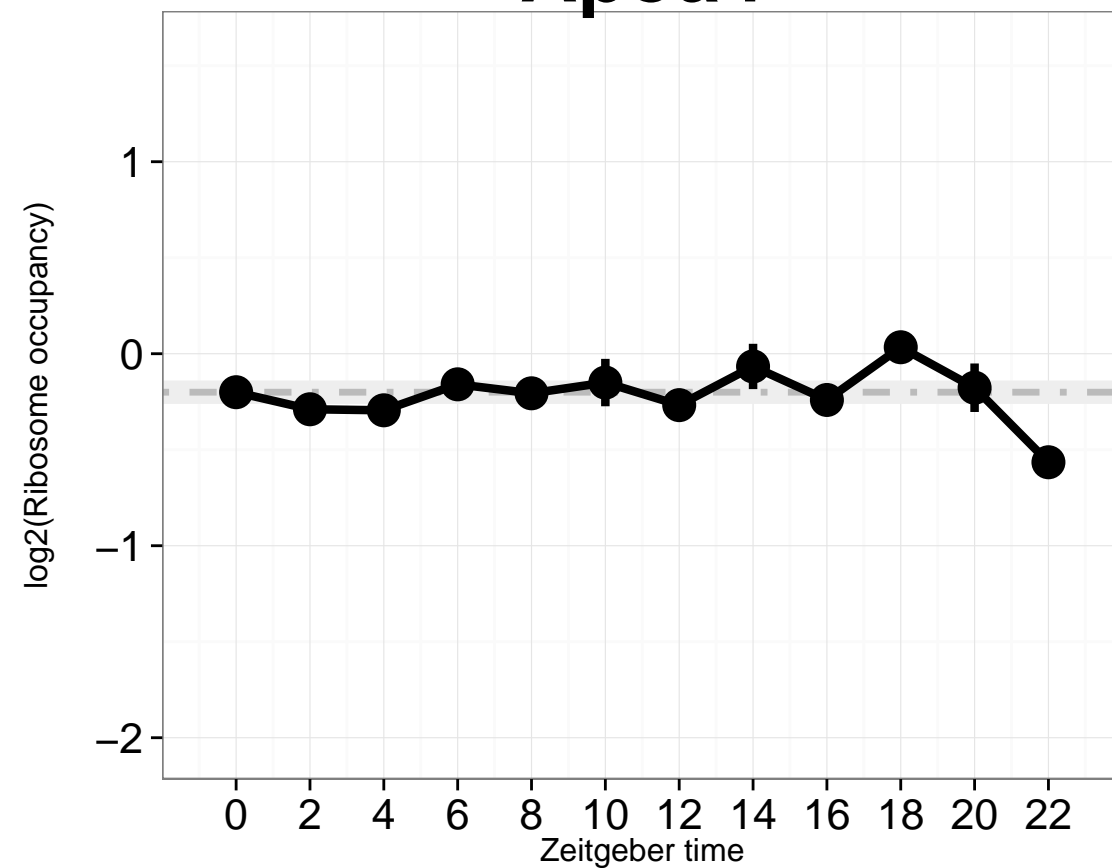

Supplement: SuppDataset_1.zip [file Apoa4_set_A.pdf › Supplemental Dataset 1/A-mRNA_nonrhyth_translation_nonrhyth/Apoa4_set_A.pdf]

# Apoa5

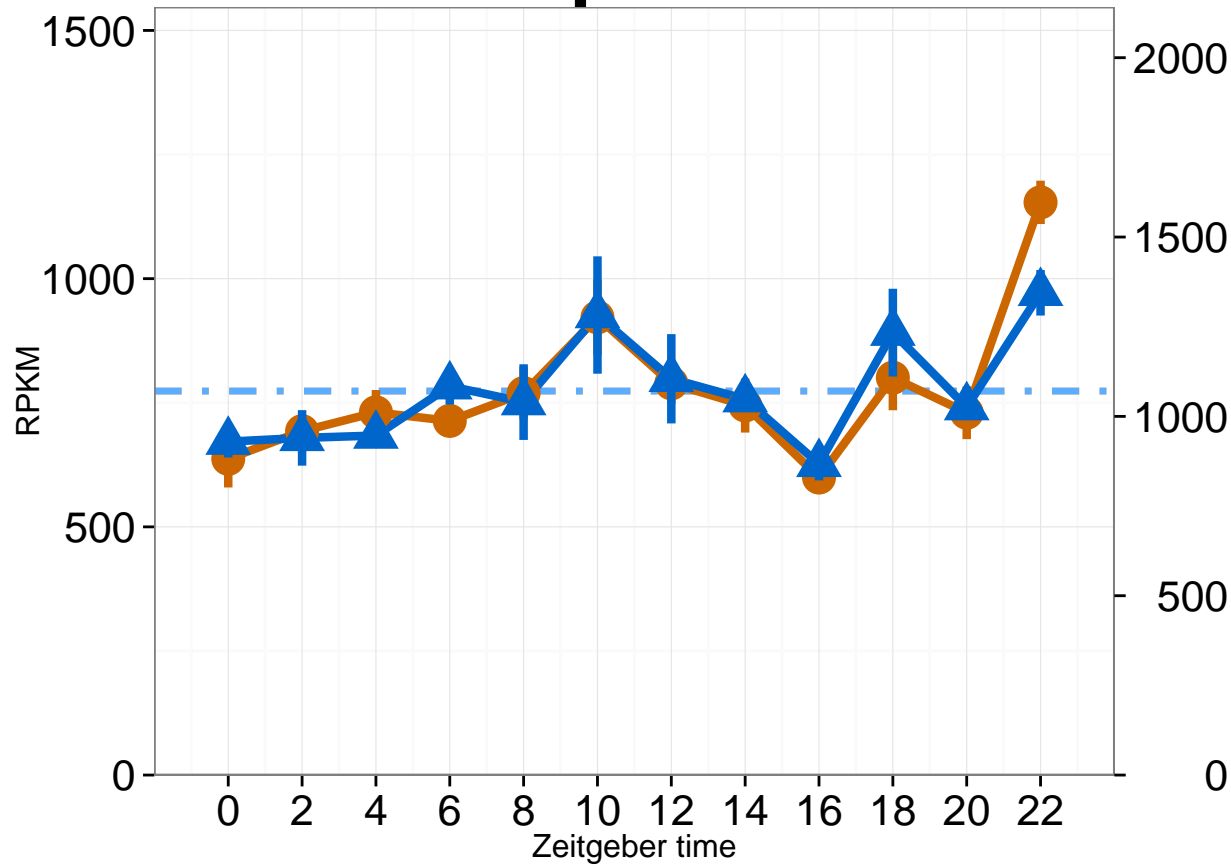

# Apoa5

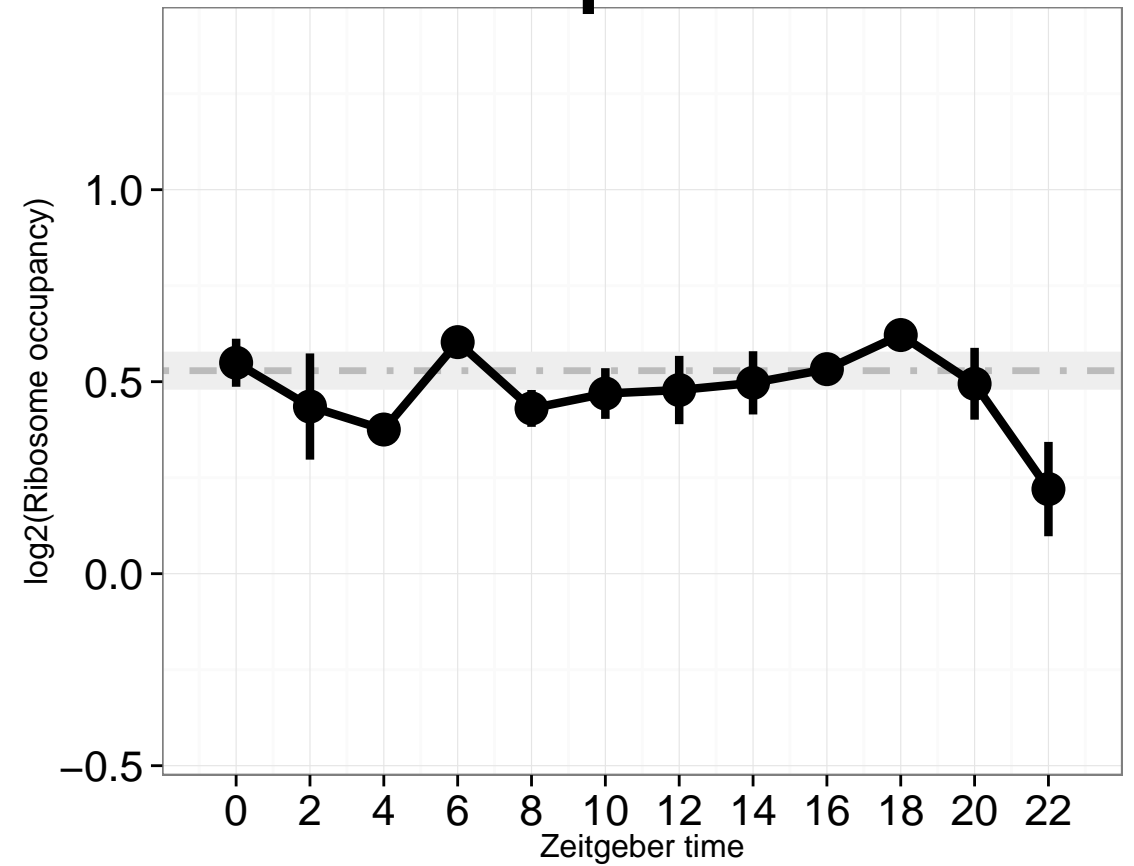

Supplement: SuppDataset_1.zip [file Apoa5_set_A.pdf › Supplemental Dataset 1/A-mRNA_nonrhyth_translation_nonrhyth/Apoa5_set_A.pdf]

## Apob

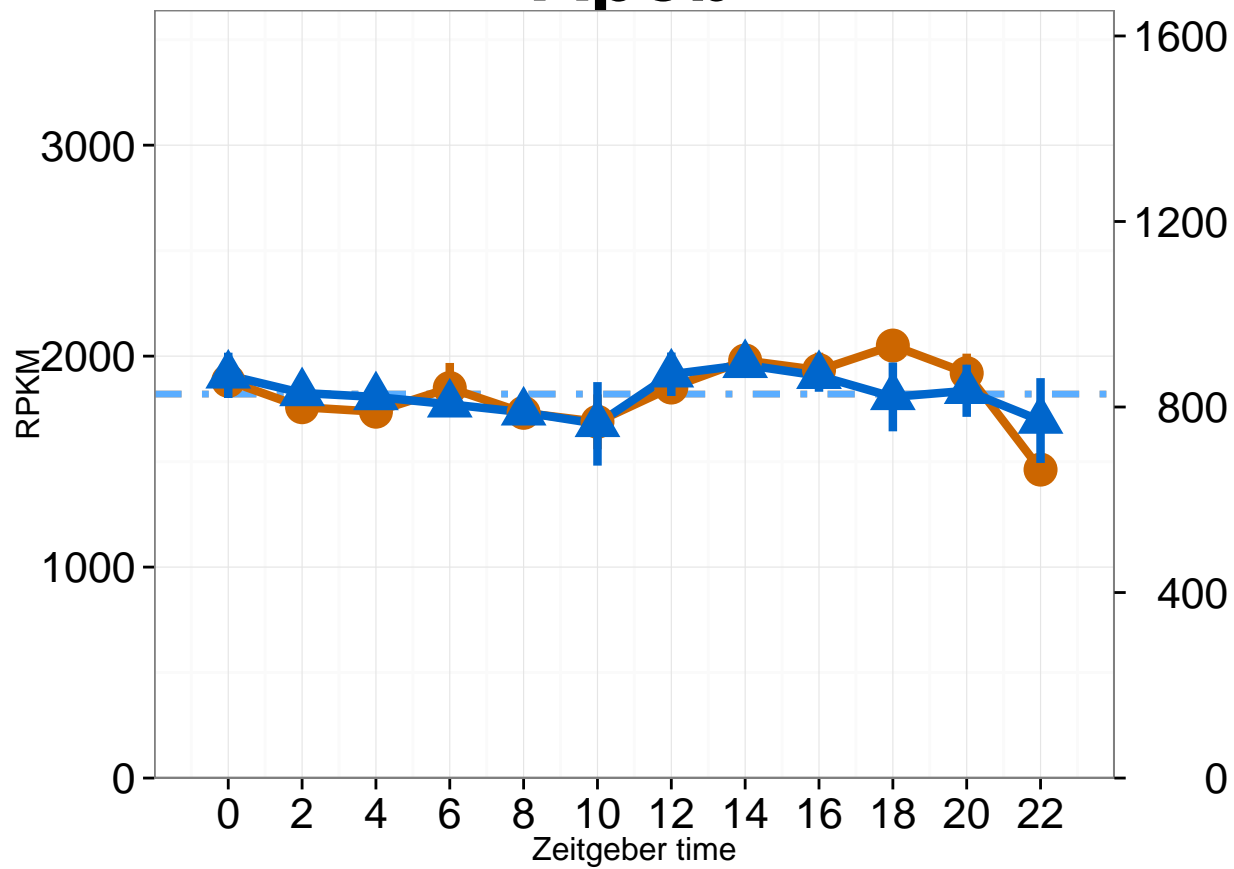

## Apob

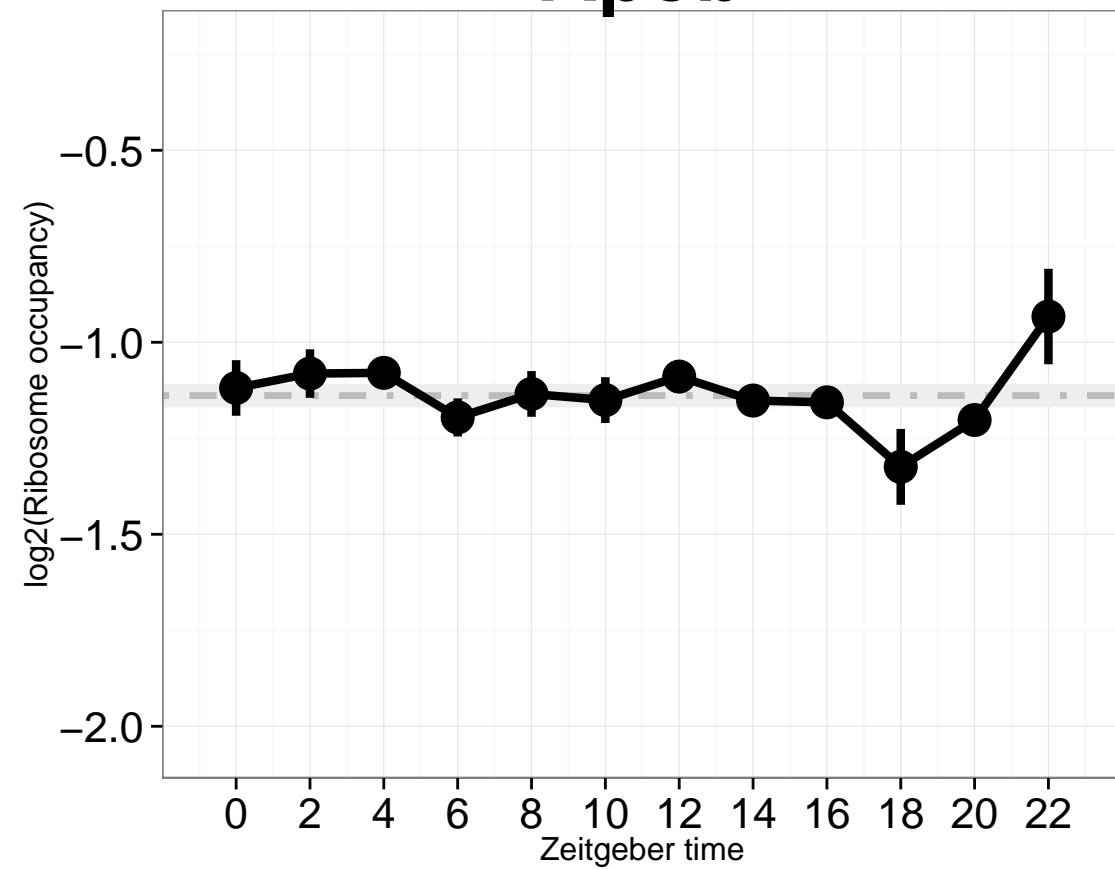

Supplement: SuppDataset_1.zip [file Apob_set_A.pdf › Supplemental Dataset 1/A-mRNA_nonrhyth_translation_nonrhyth/Apob_set_A.pdf]

## Apobec1

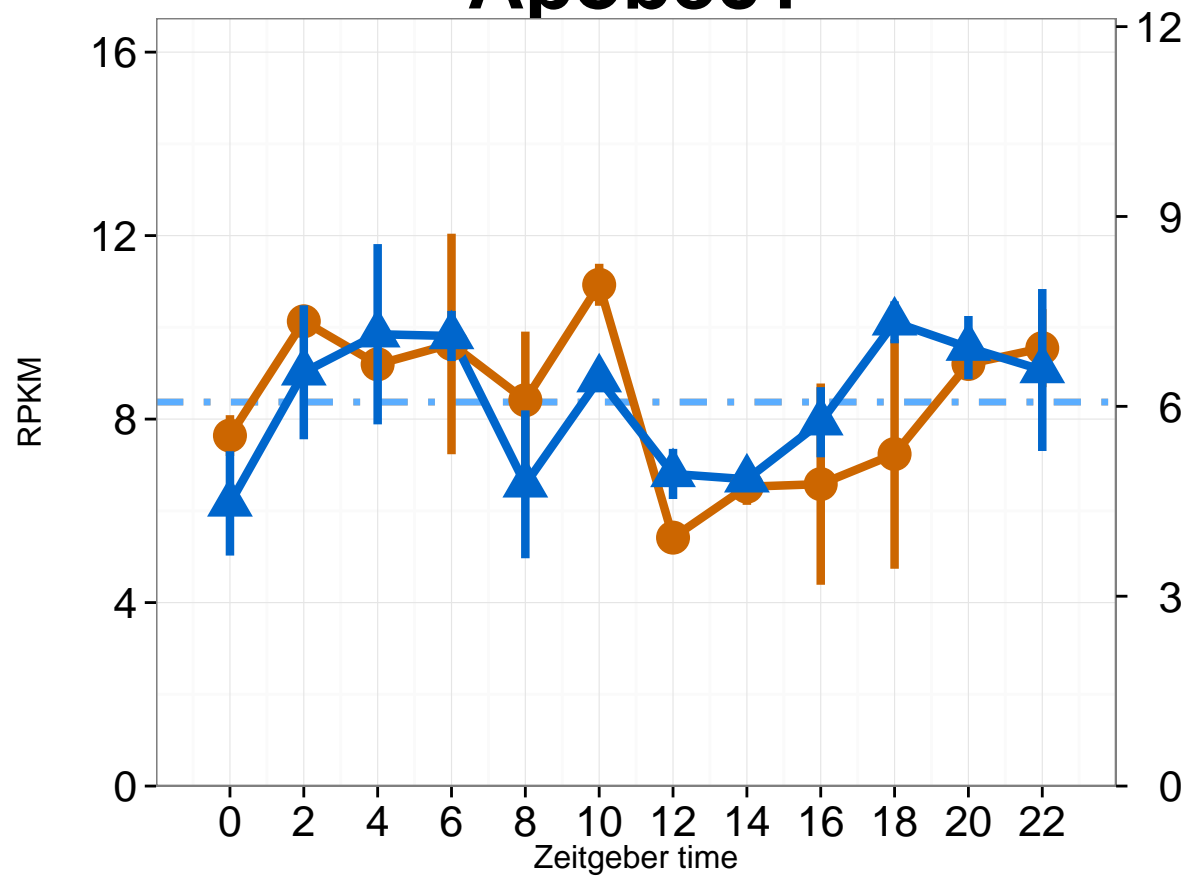

## Apobec1

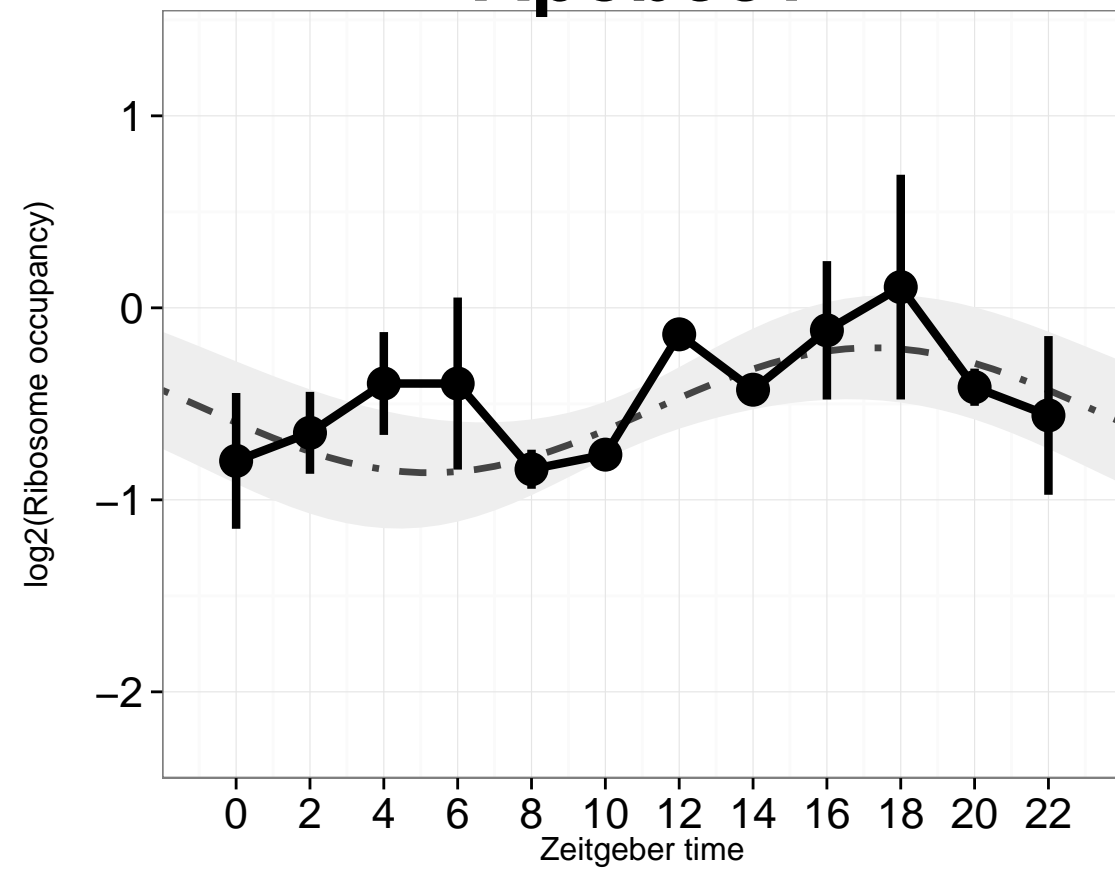

Supplement: SuppDataset_1.zip [file Apobec1_set_A.pdf › Supplemental Dataset 1/A-mRNA_nonrhyth_translation_nonrhyth/Apobec1_set_A.pdf]

## Apobec3

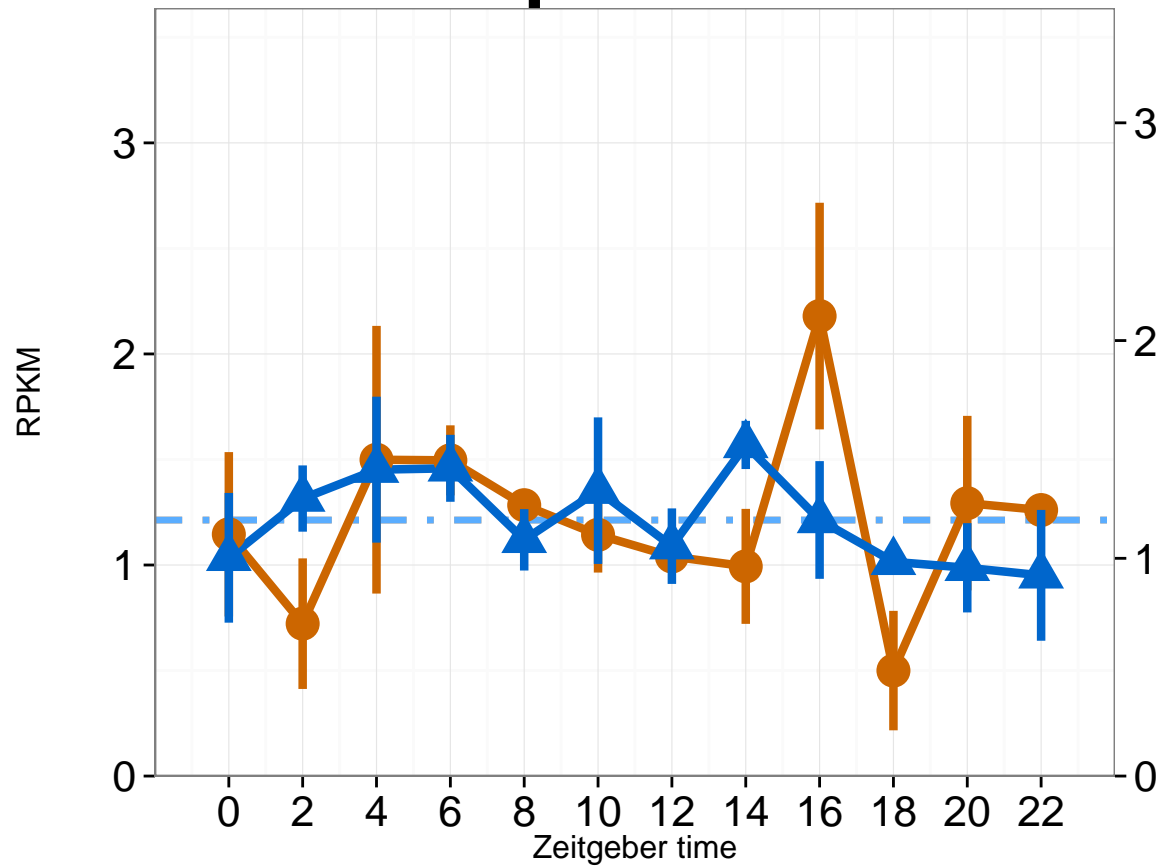

## Apobec3

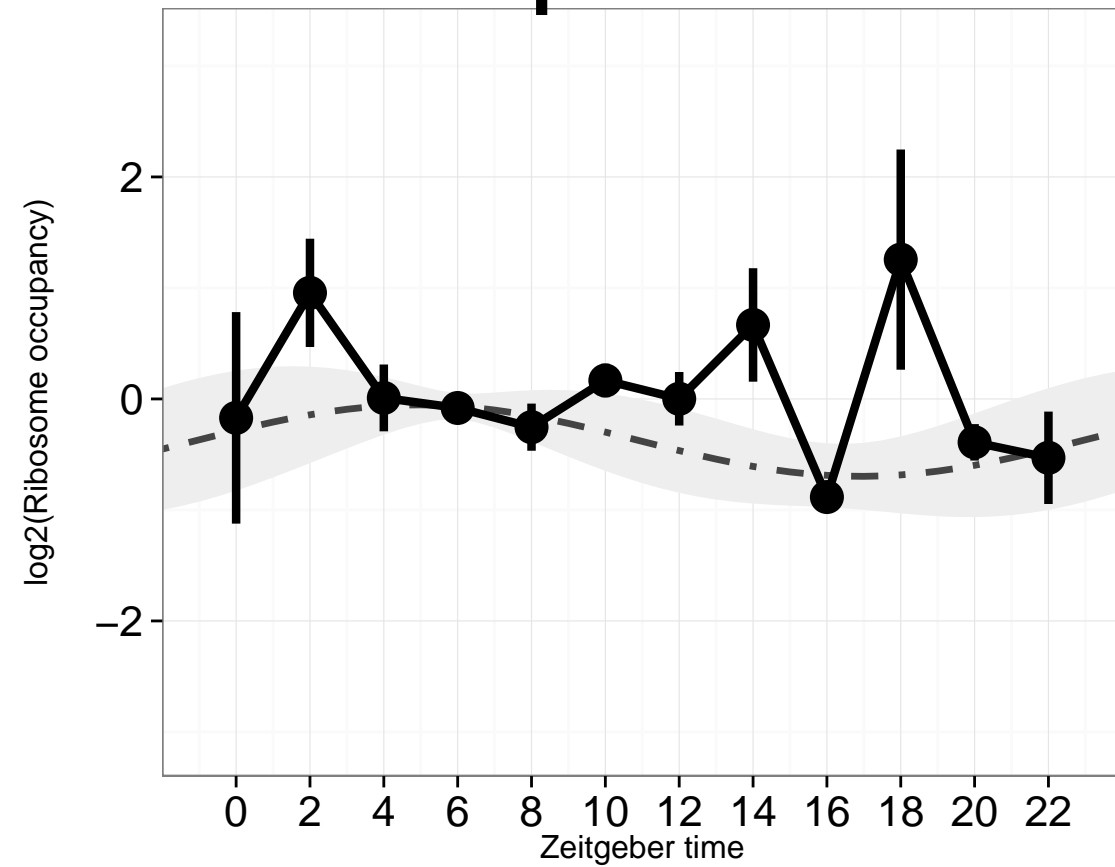

Supplement: SuppDataset_1.zip [file Apobec3_set_A.pdf › Supplemental Dataset 1/A-mRNA_nonrhyth_translation_nonrhyth/Apobec3_set_A.pdf]

## Apobr

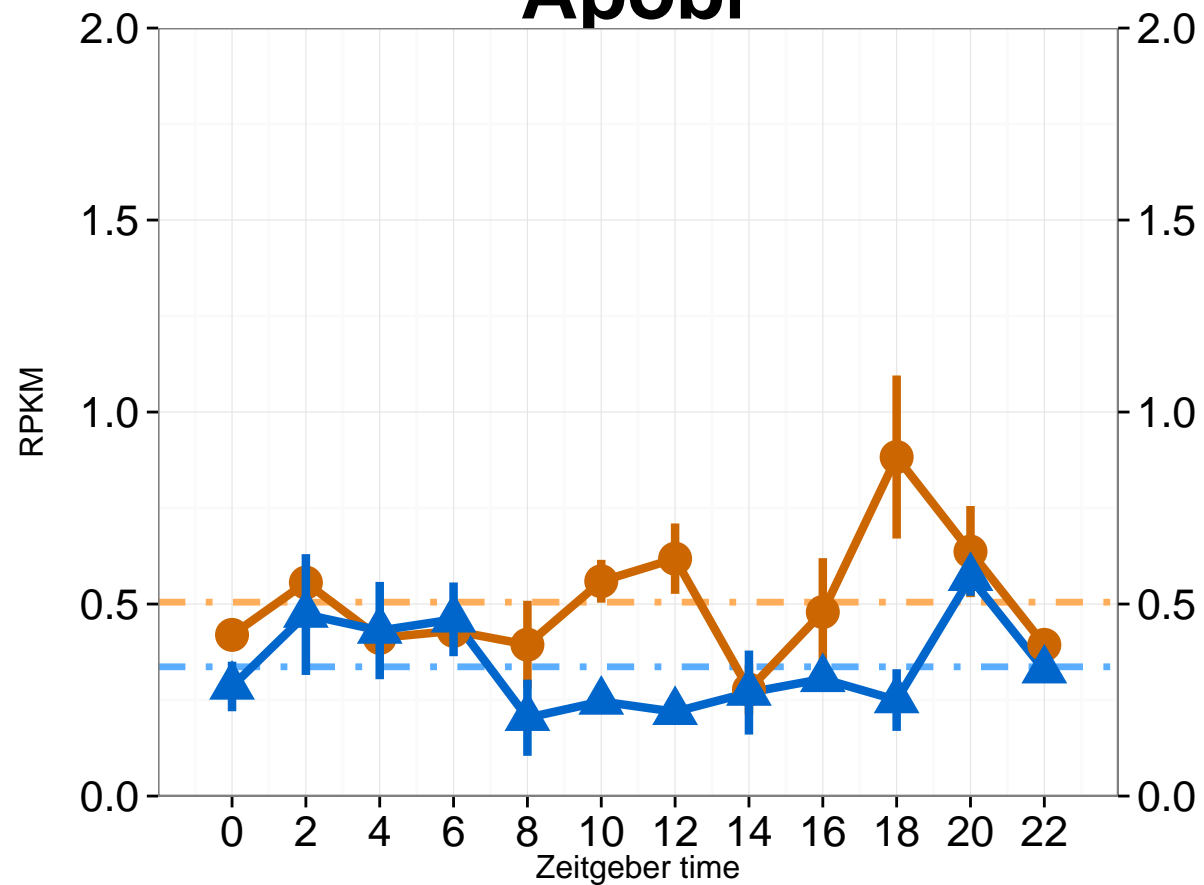

## Apobr

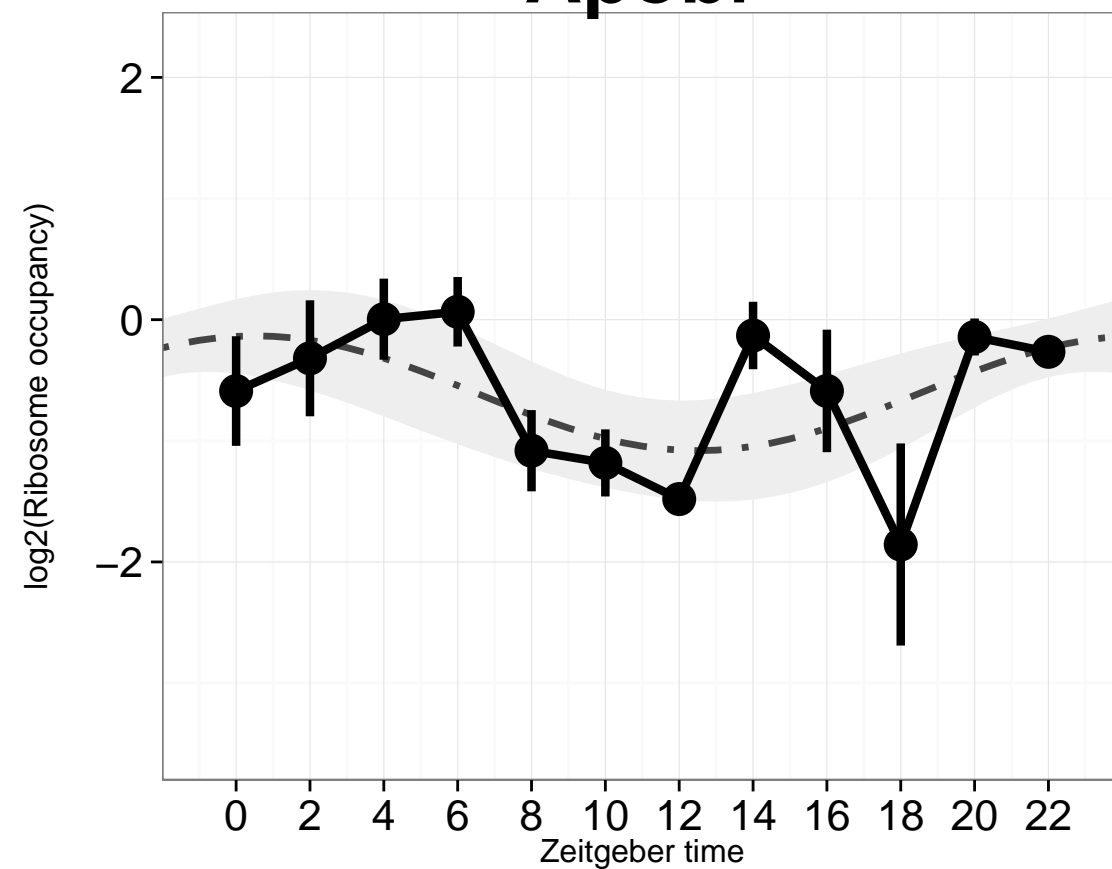

Supplement: SuppDataset_1.zip [file Apobr_set_A.pdf › Supplemental Dataset 1/A-mRNA_nonrhyth_translation_nonrhyth/Apobr_set_A.pdf]

# Apoc1

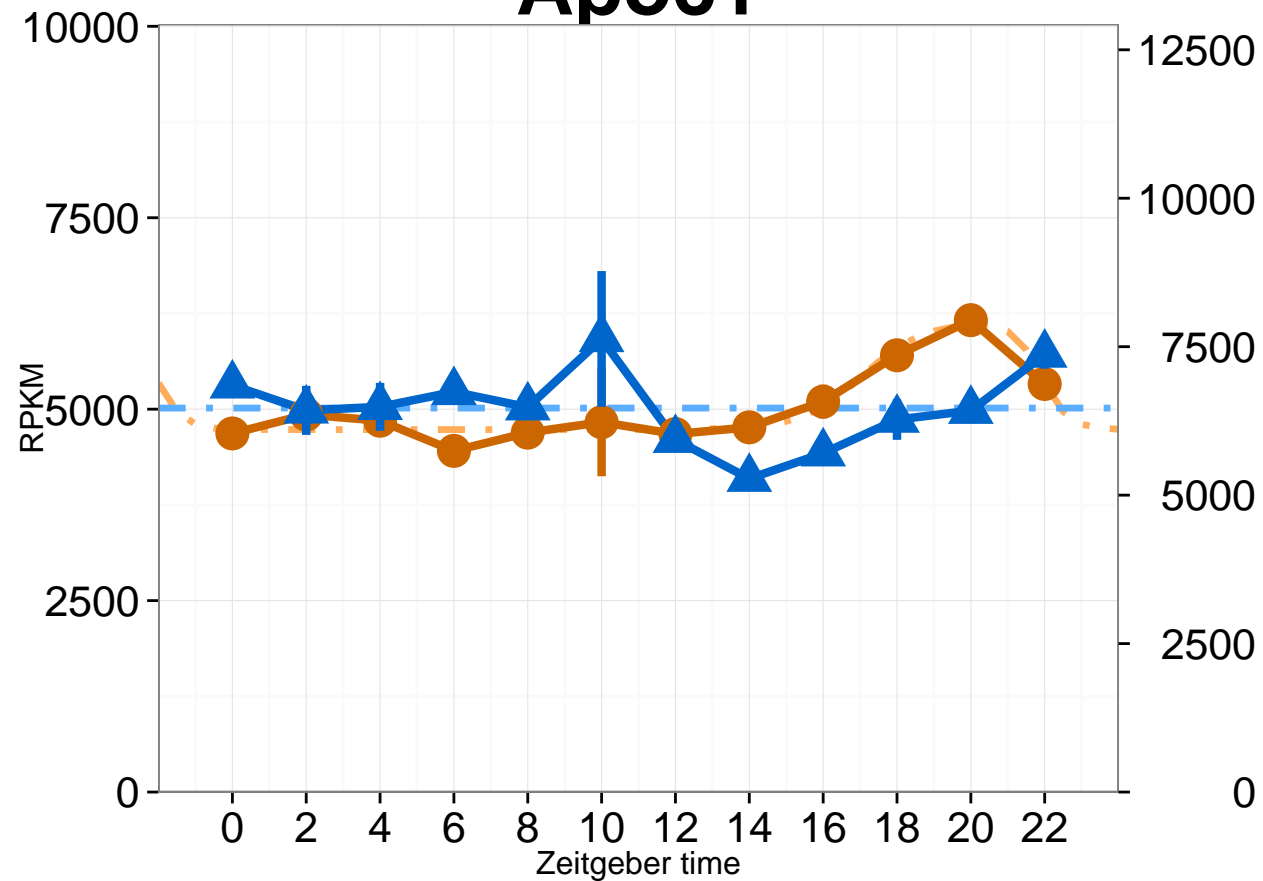

# Apoc1

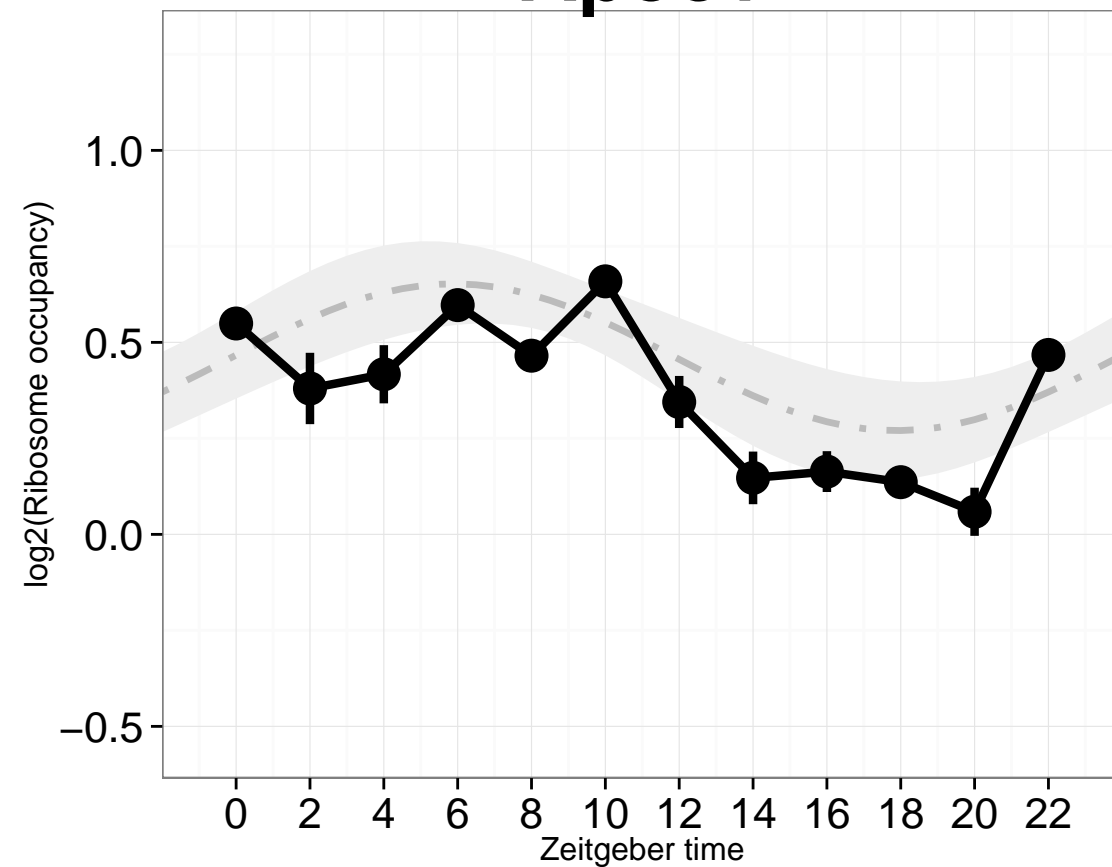

Supplement: SuppDataset_1.zip [file Apoc1_set_A.pdf › Supplemental Dataset 1/A-mRNA_nonrhyth_translation_nonrhyth/Apoc1_set_A.pdf]

## Apoc2

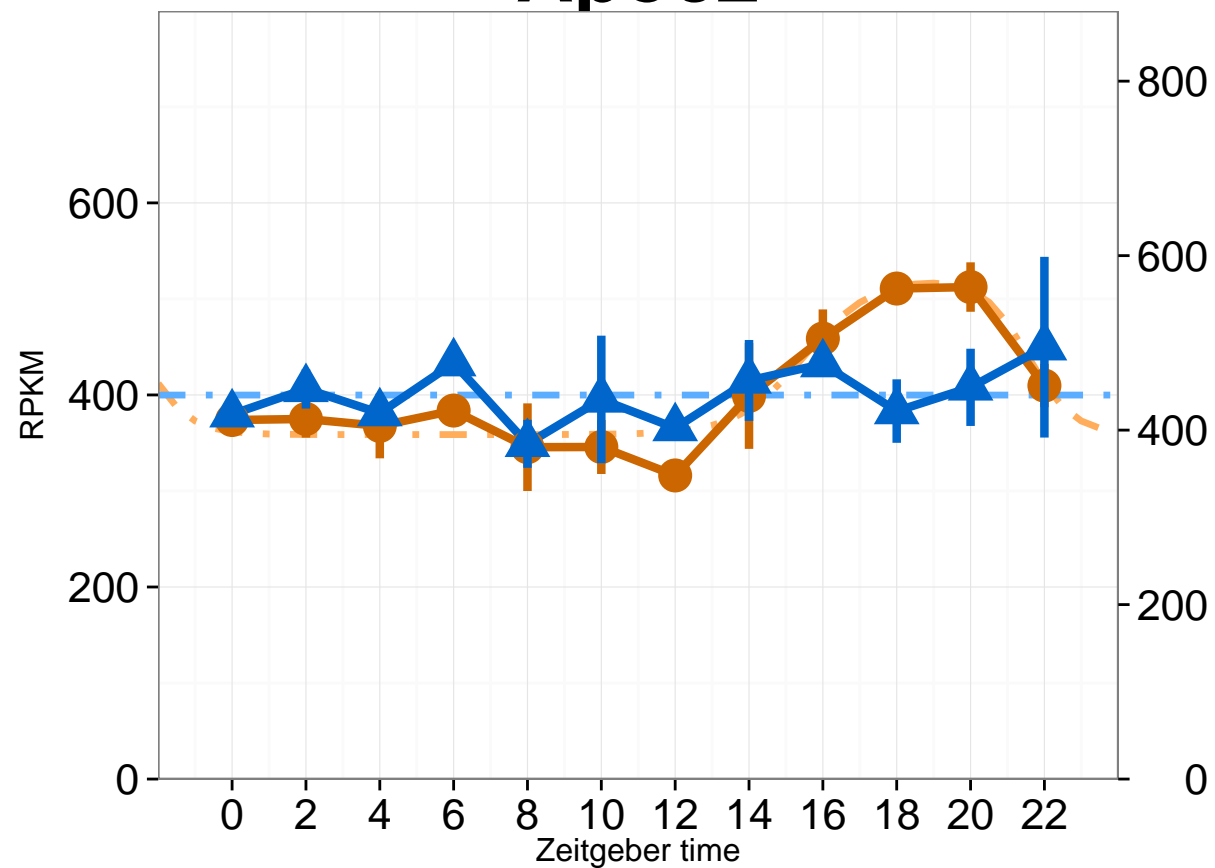

## Apoc2

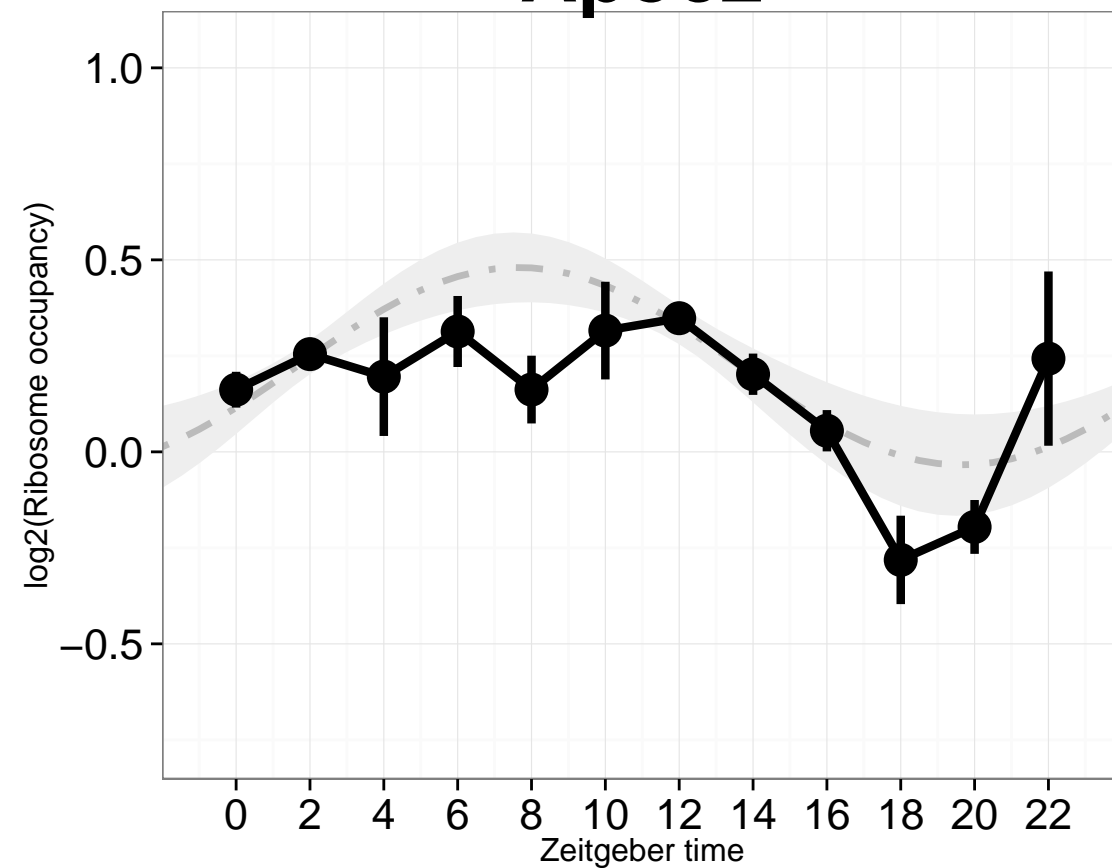

Supplement: SuppDataset_1.zip [file Apoc2_set_A.pdf › Supplemental Dataset 1/A-mRNA_nonrhyth_translation_nonrhyth/Apoc2_set_A.pdf]

## Apoc4

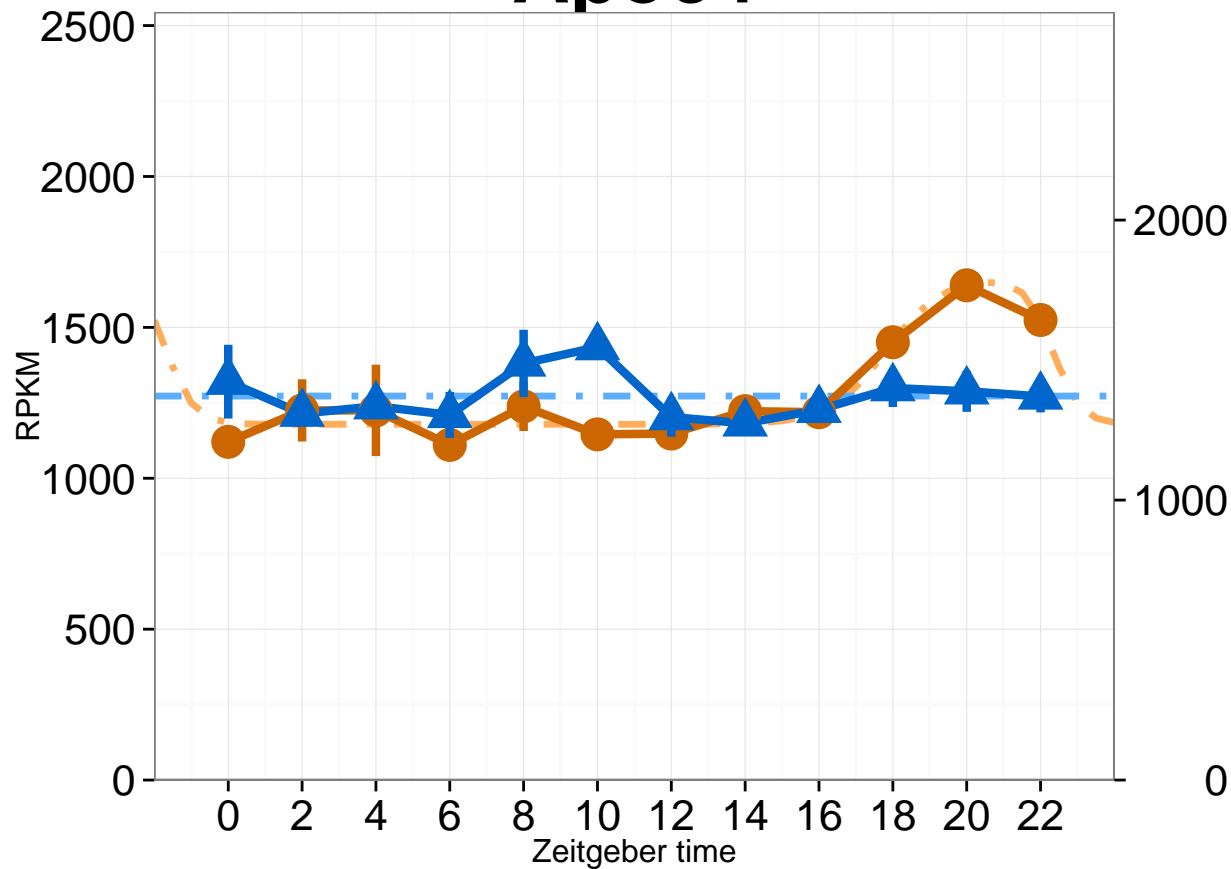

## Apoc4

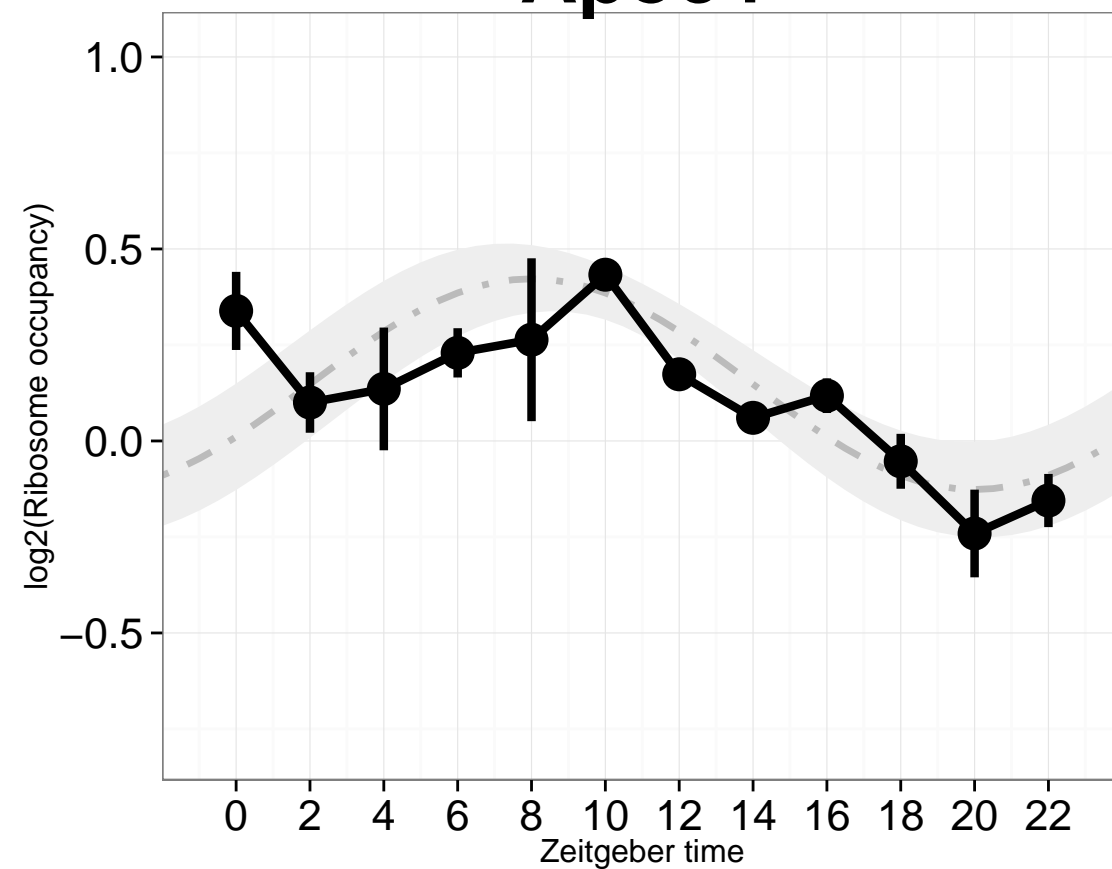

Supplement: SuppDataset_1.zip [file Apoc4_set_A.pdf › Supplemental Dataset 1/A-mRNA_nonrhyth_translation_nonrhyth/Apoc4_set_A.pdf]

## Apoe

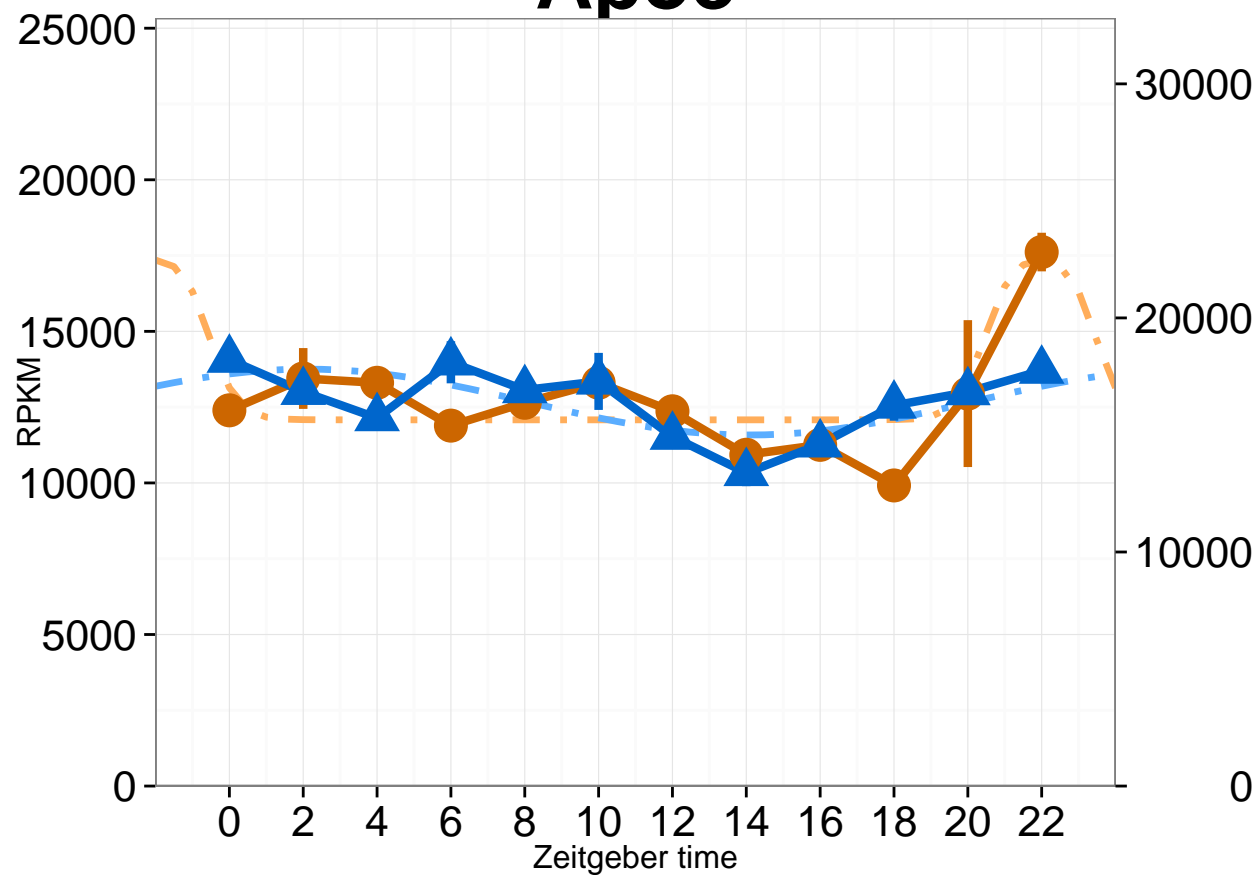

## Apoe

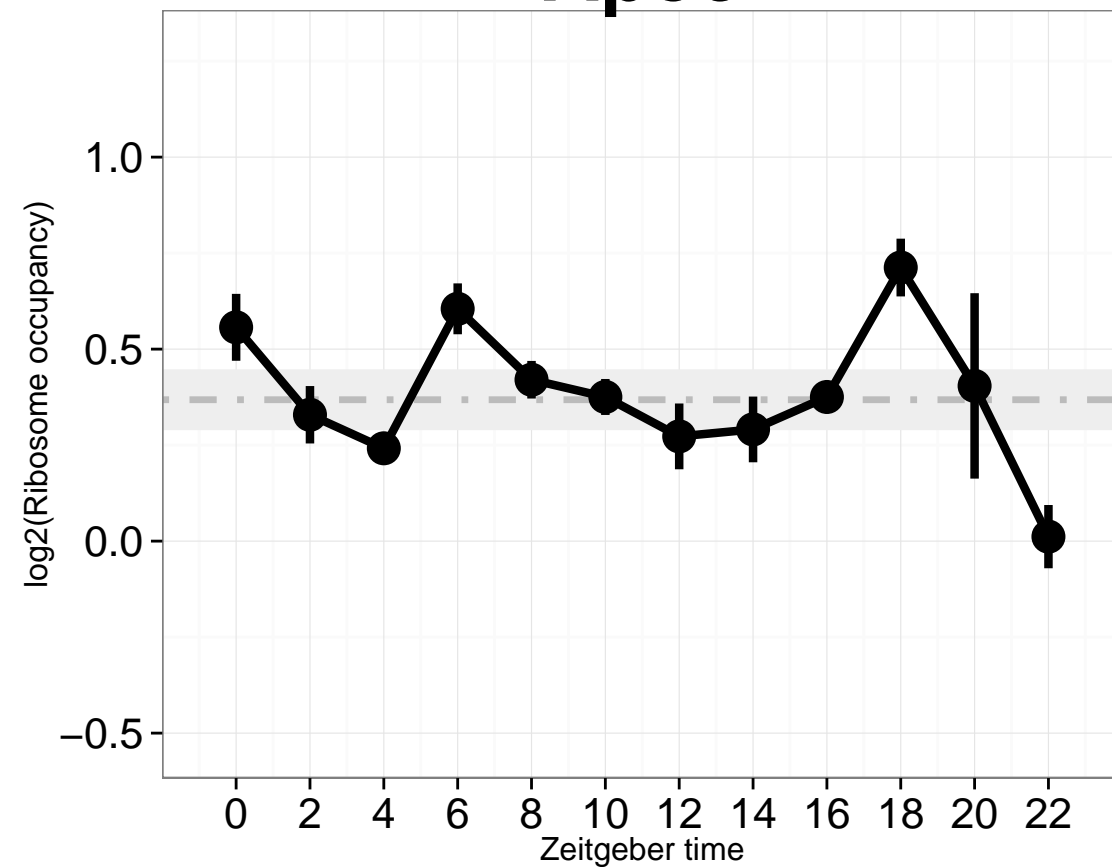

Supplement: SuppDataset_1.zip [file Apoe_set_A.pdf › Supplemental Dataset 1/A-mRNA_nonrhyth_translation_nonrhyth/Apoe_set_A.pdf]

## Apof

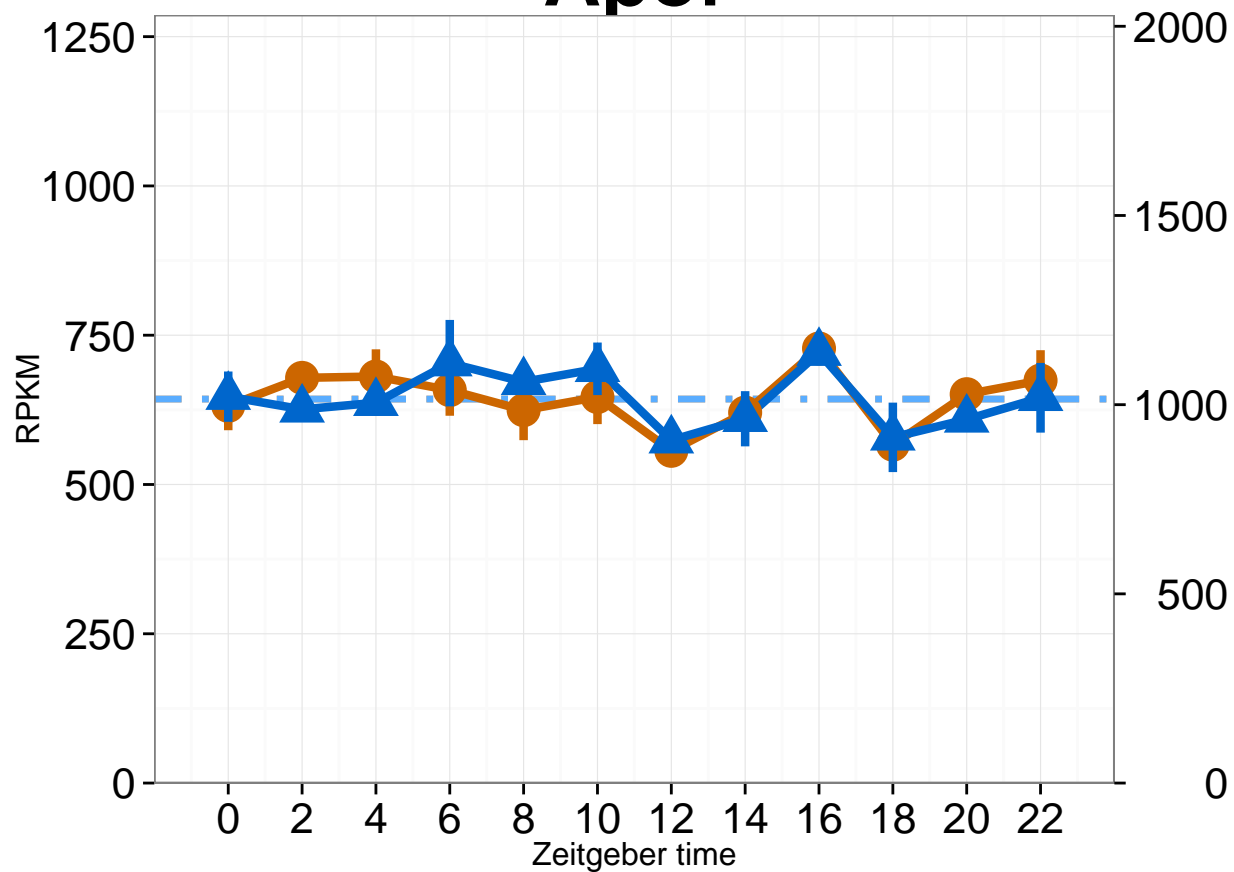

## Apof

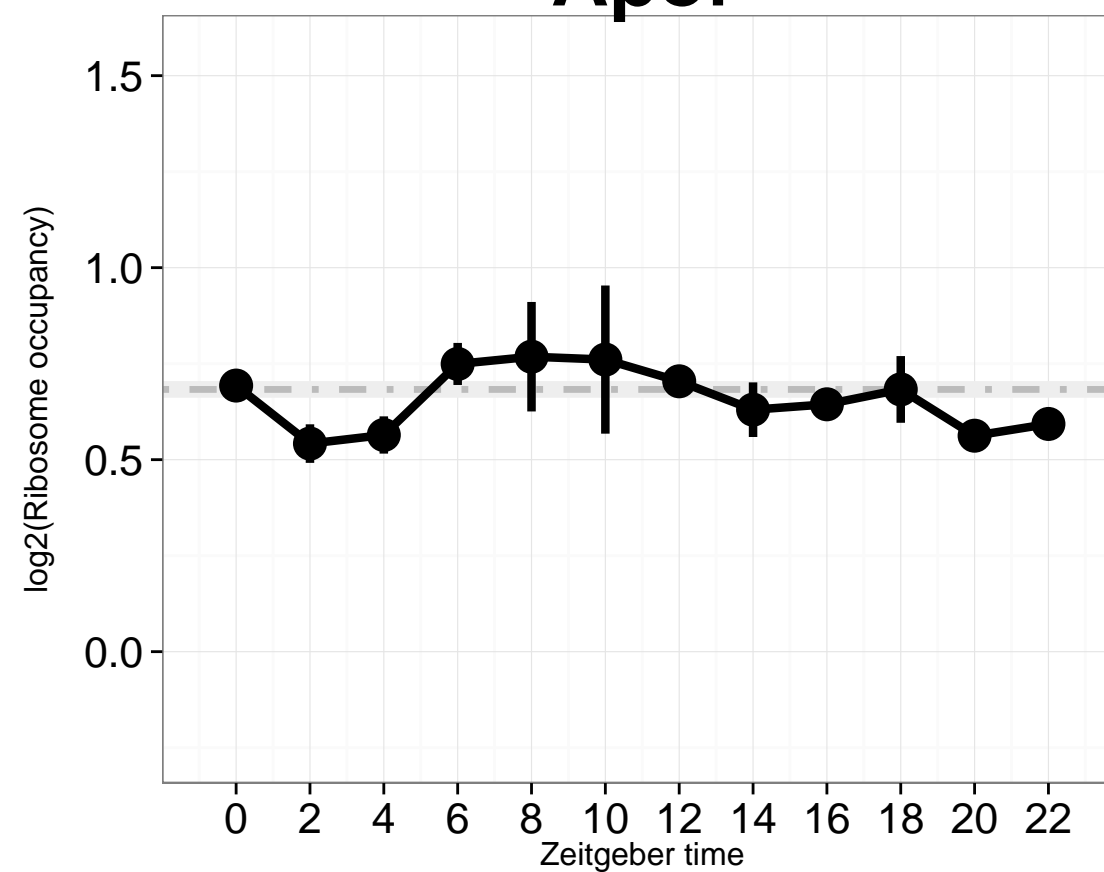

Supplement: SuppDataset_1.zip [file Apof_set_A.pdf › Supplemental Dataset 1/A-mRNA_nonrhyth_translation_nonrhyth/Apof_set_A.pdf]

## Apo

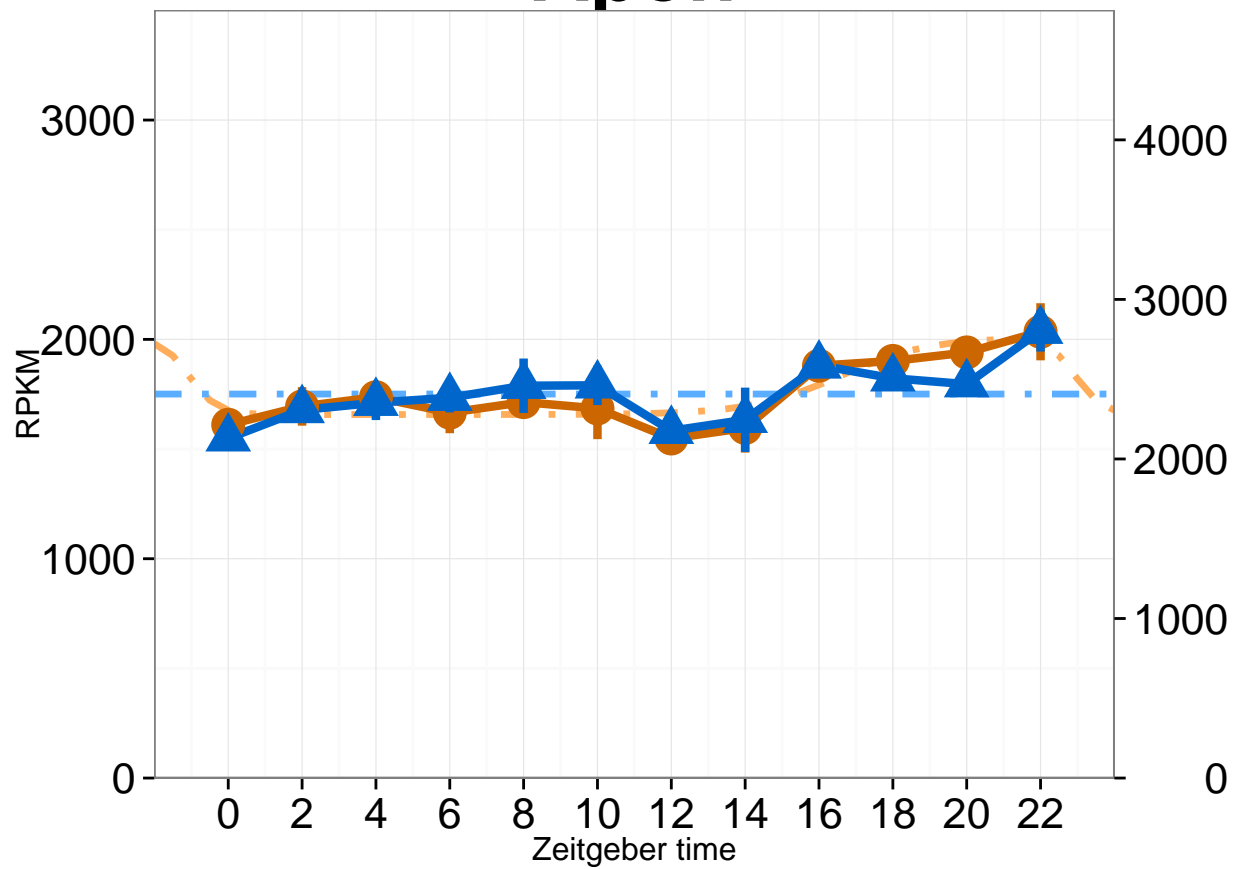

## Apo

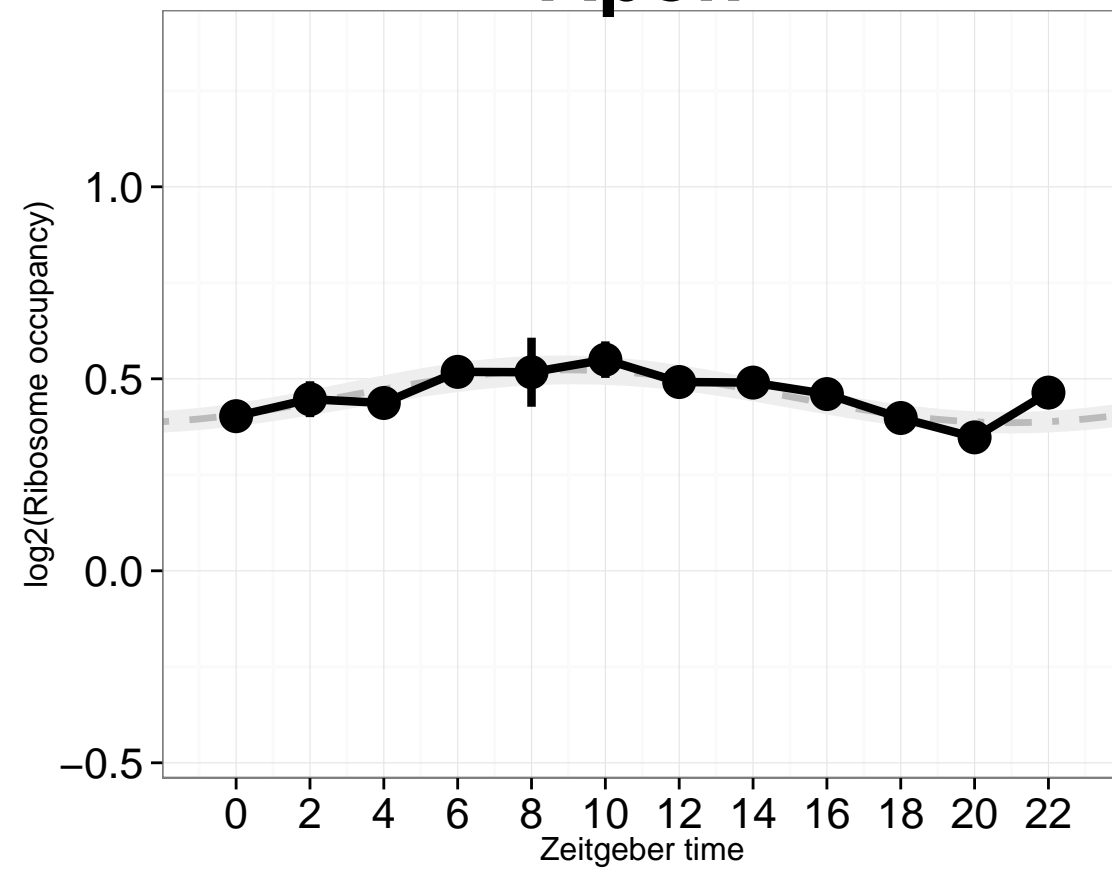

Supplement: SuppDataset_1.zip [file Apoh_set_A.pdf › Supplemental Dataset 1/A-mRNA_nonrhyth_translation_nonrhyth/Apoh_set_A.pdf]

# Apol7a

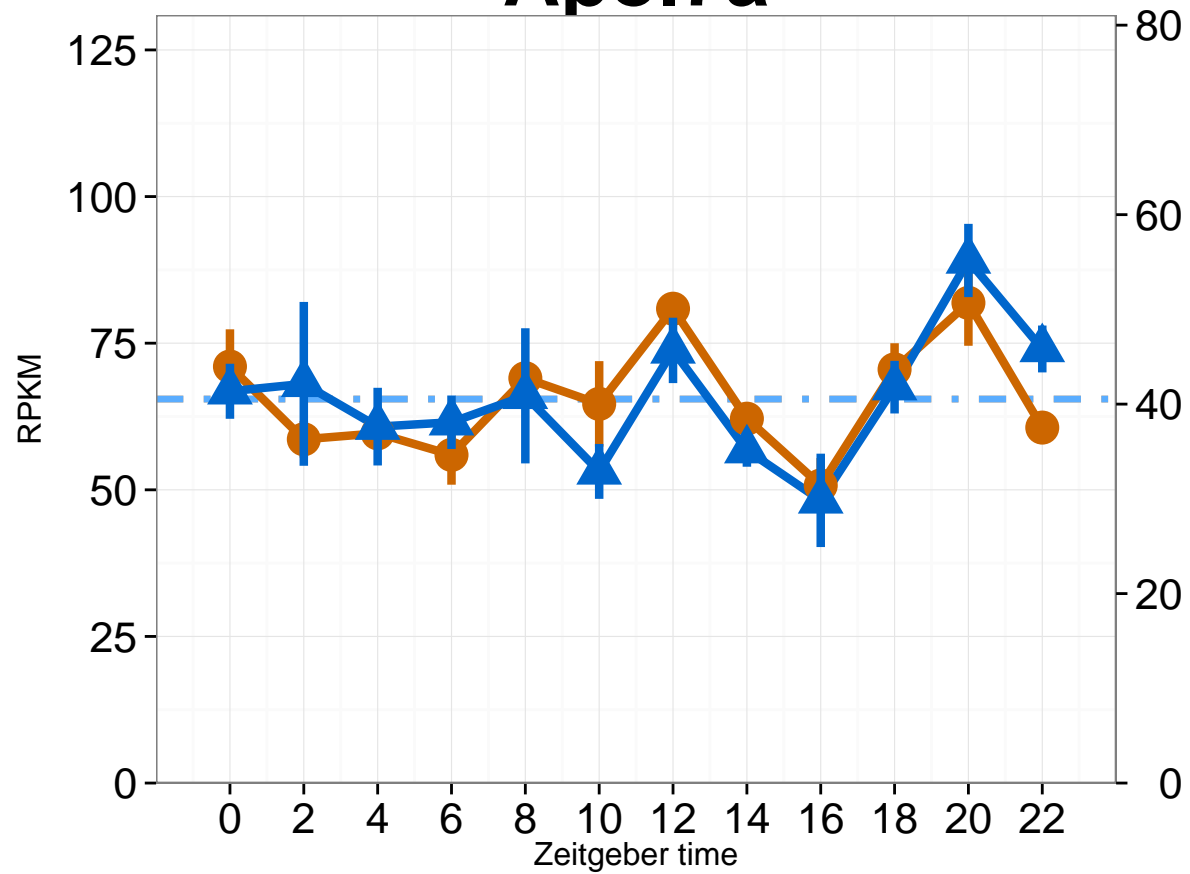

# Apol7a

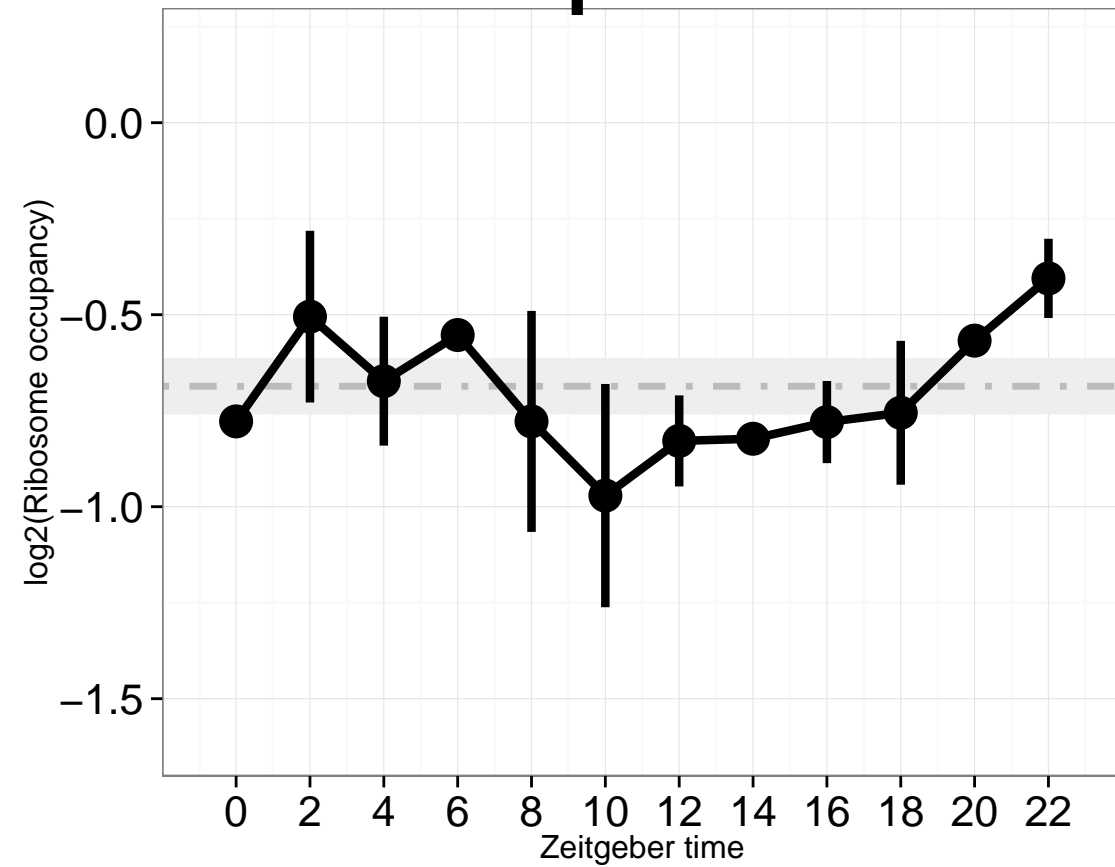

Supplement: SuppDataset_1.zip [file Apol7a_set_A.pdf › Supplemental Dataset 1/A-mRNA_nonrhyth_translation_nonrhyth/Apol7a_set_A.pdf]

## Apol9a

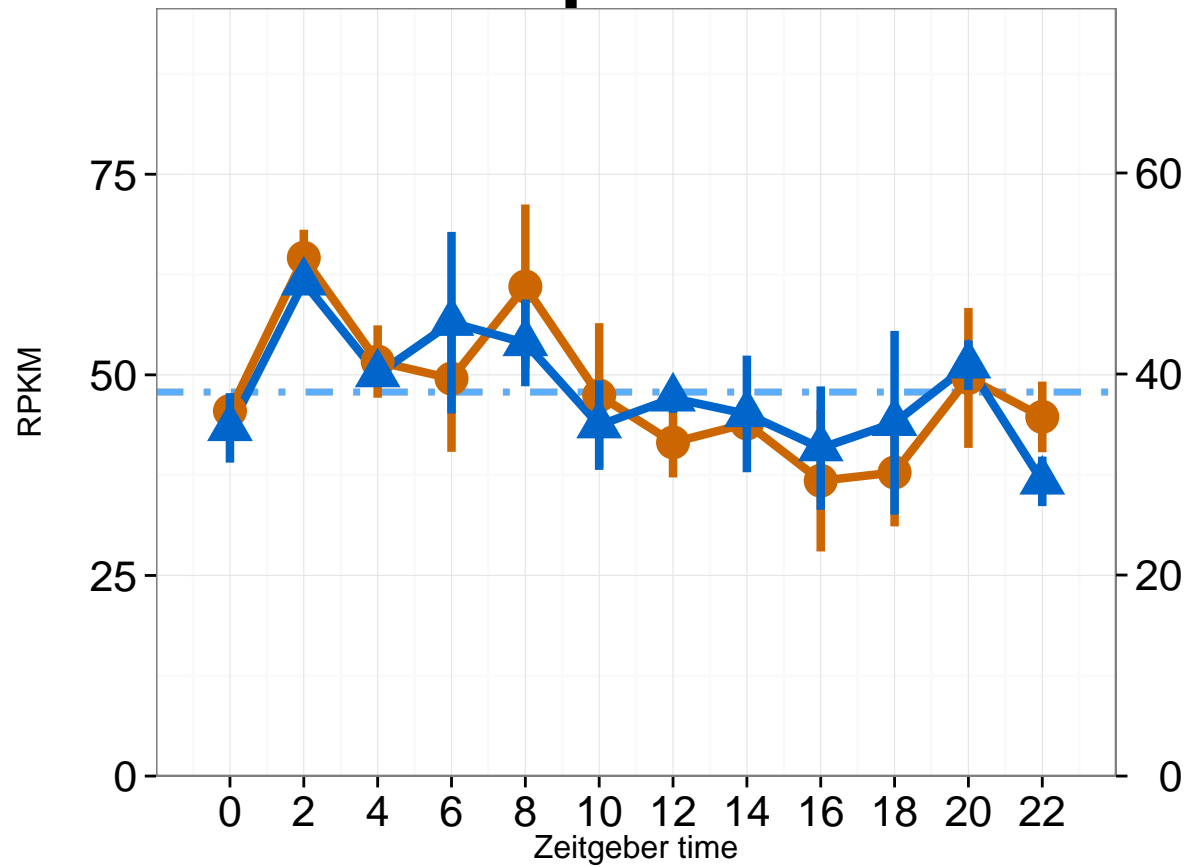

## Apol9a

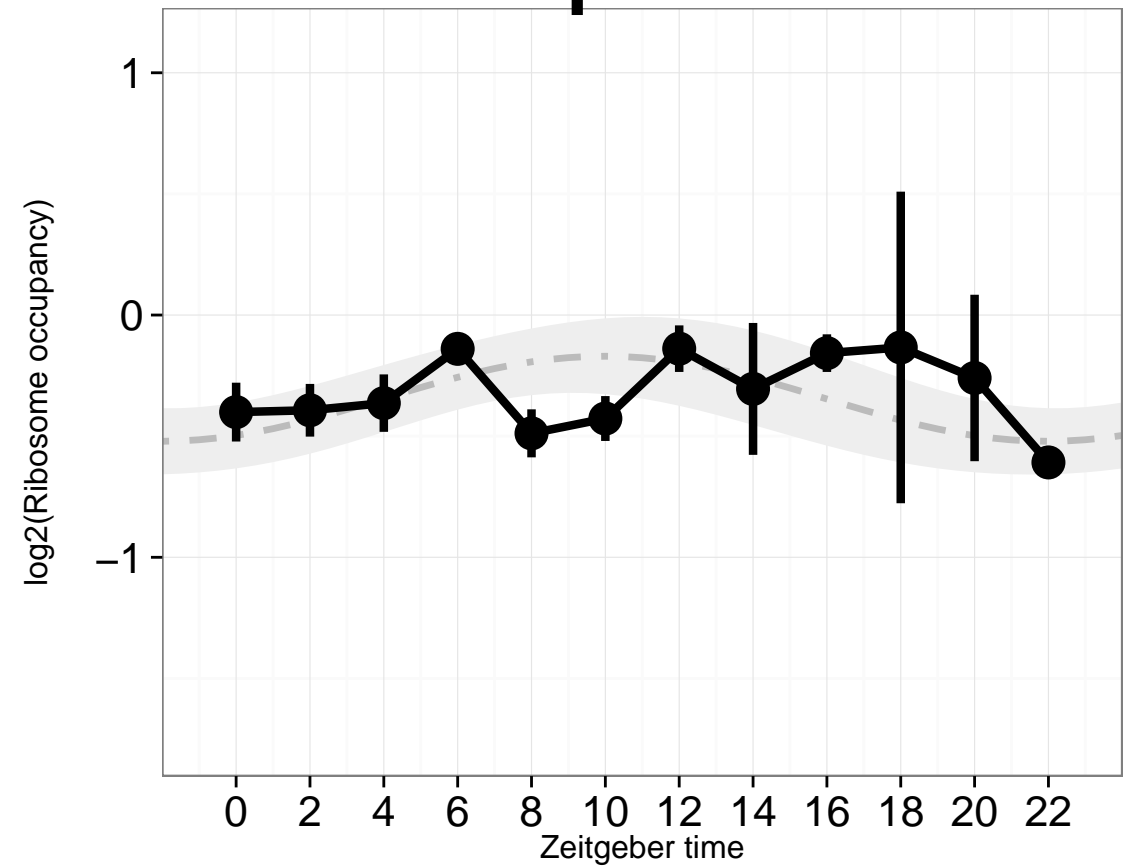

Supplement: SuppDataset_1.zip [file Apol9a_set_A.pdf › Supplemental Dataset 1/A-mRNA_nonrhyth_translation_nonrhyth/Apol9a_set_A.pdf]

# Apol9b

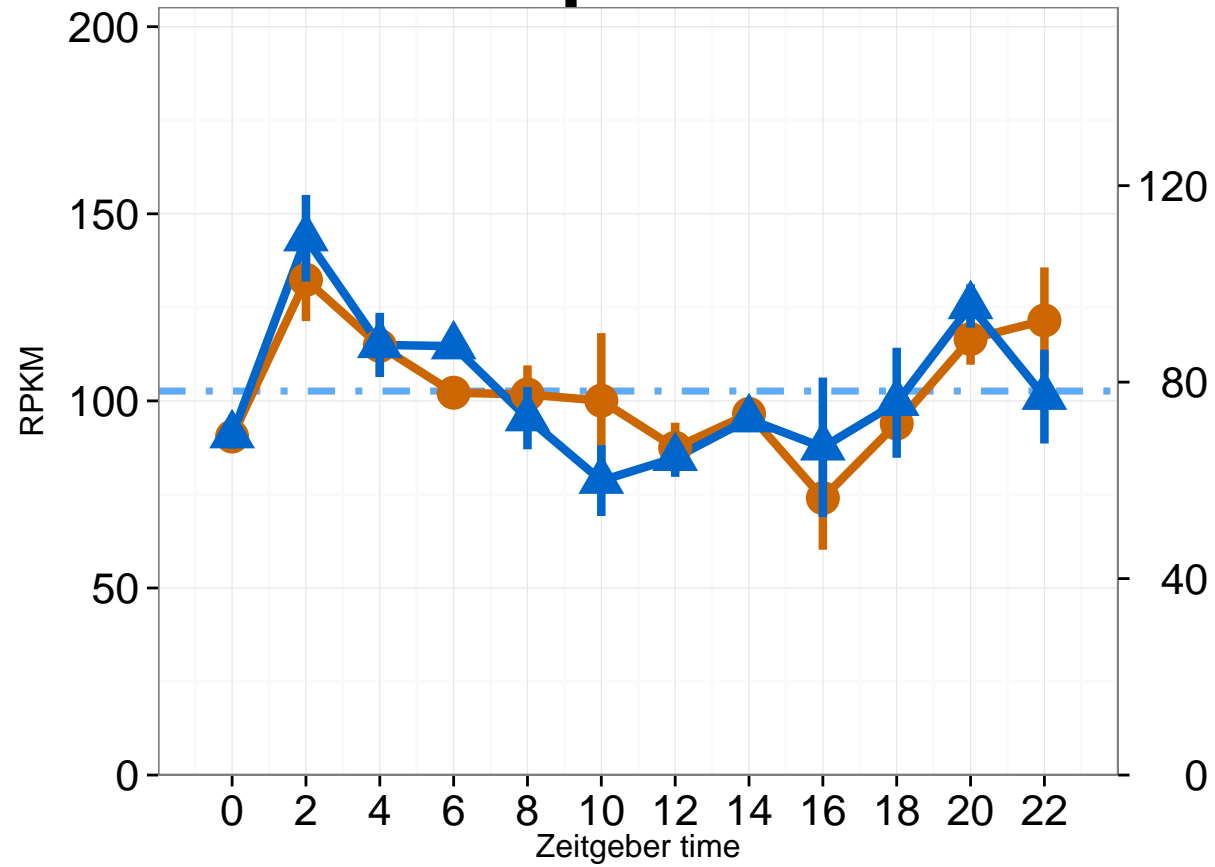

# Apol9b

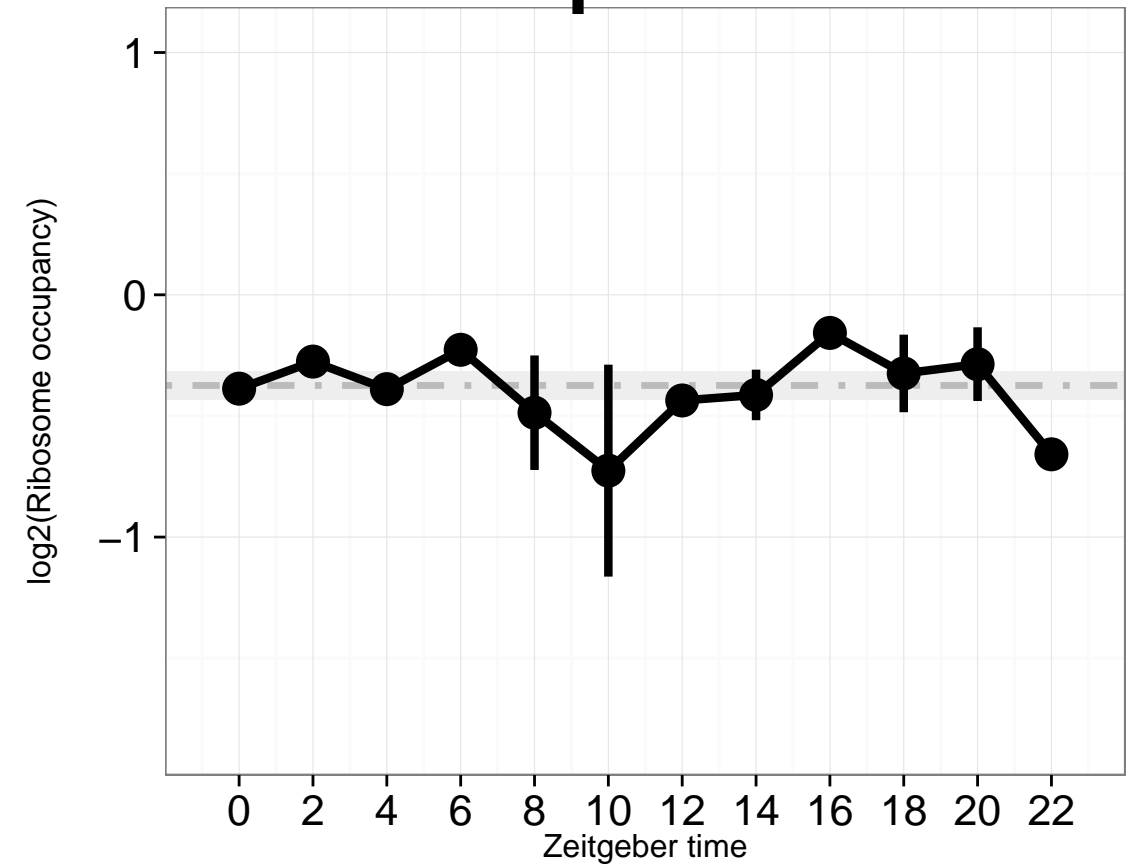

Supplement: SuppDataset_1.zip [file Apol9b_set_A.pdf › Supplemental Dataset 1/A-mRNA_nonrhyth_translation_nonrhyth/Apol9b_set_A.pdf]

## Apom

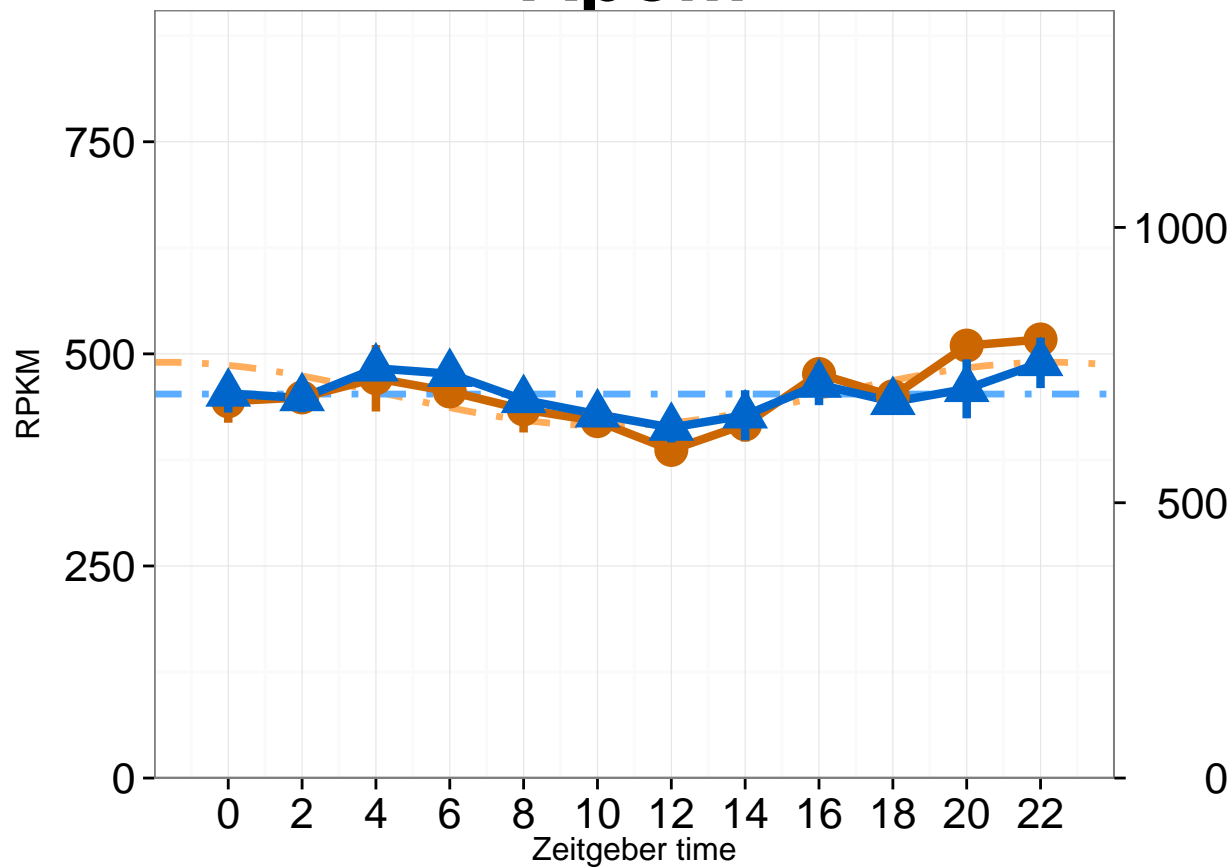

## Apom

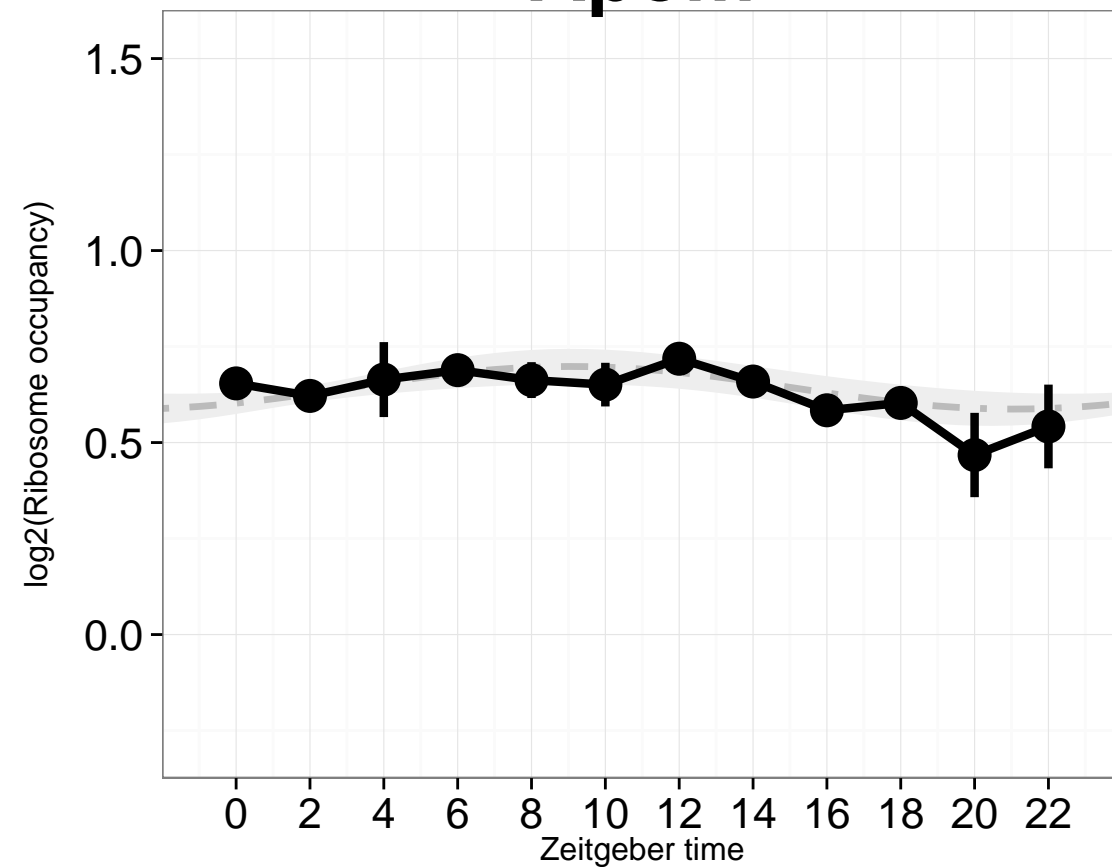

Supplement: SuppDataset_1.zip [file Apom_set_A.pdf › Supplemental Dataset 1/A-mRNA_nonrhyth_translation_nonrhyth/Apom_set_A.pdf]

## Apon

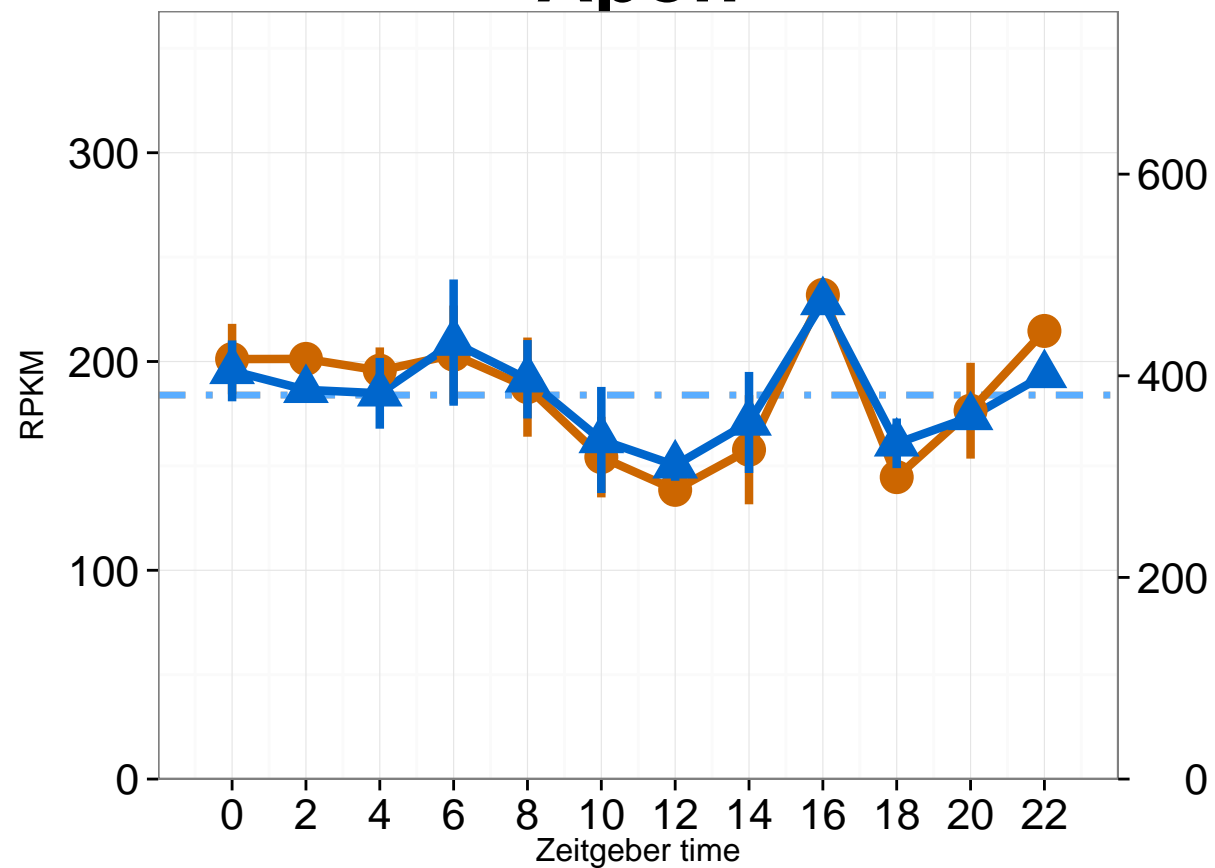

## Apon

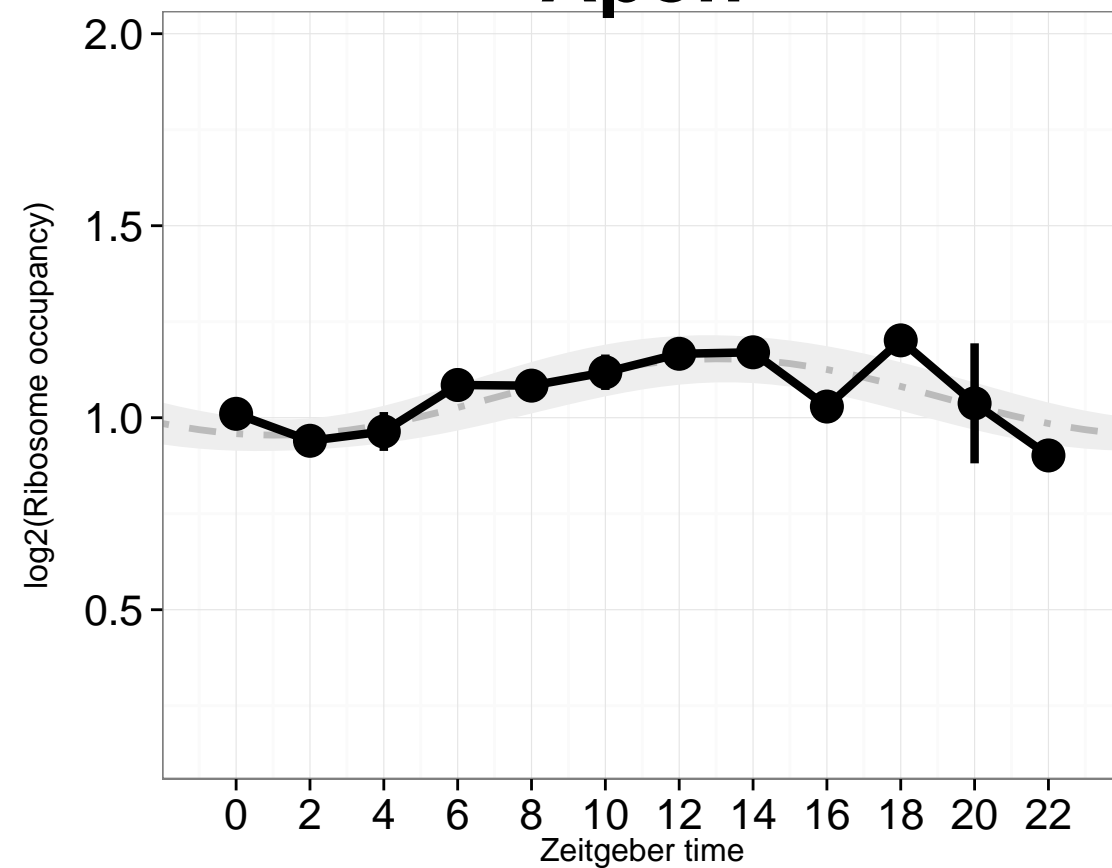

Supplement: SuppDataset_1.zip [file Apon_set_A.pdf › Supplemental Dataset 1/A-mRNA_nonrhyth_translation_nonrhyth/Apon_set_A.pdf]

## Apool

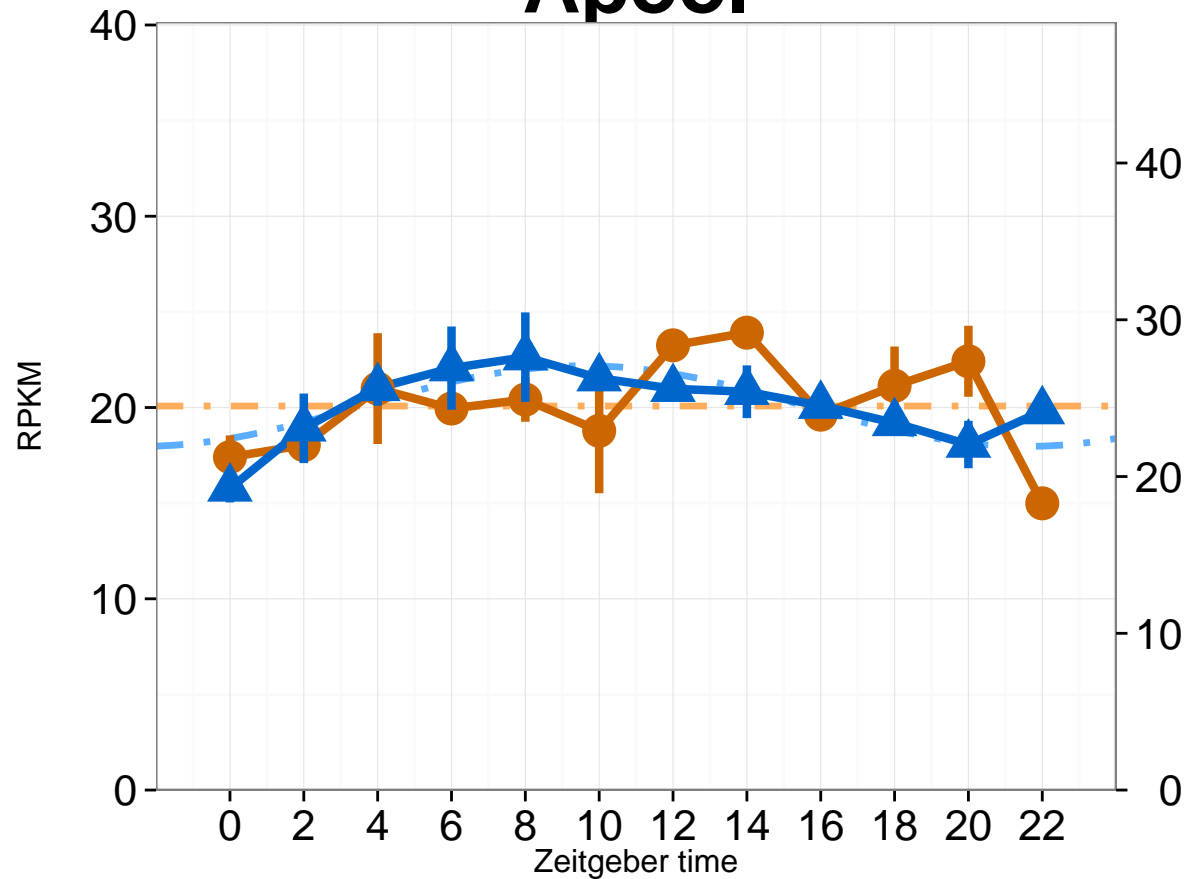

## Apool

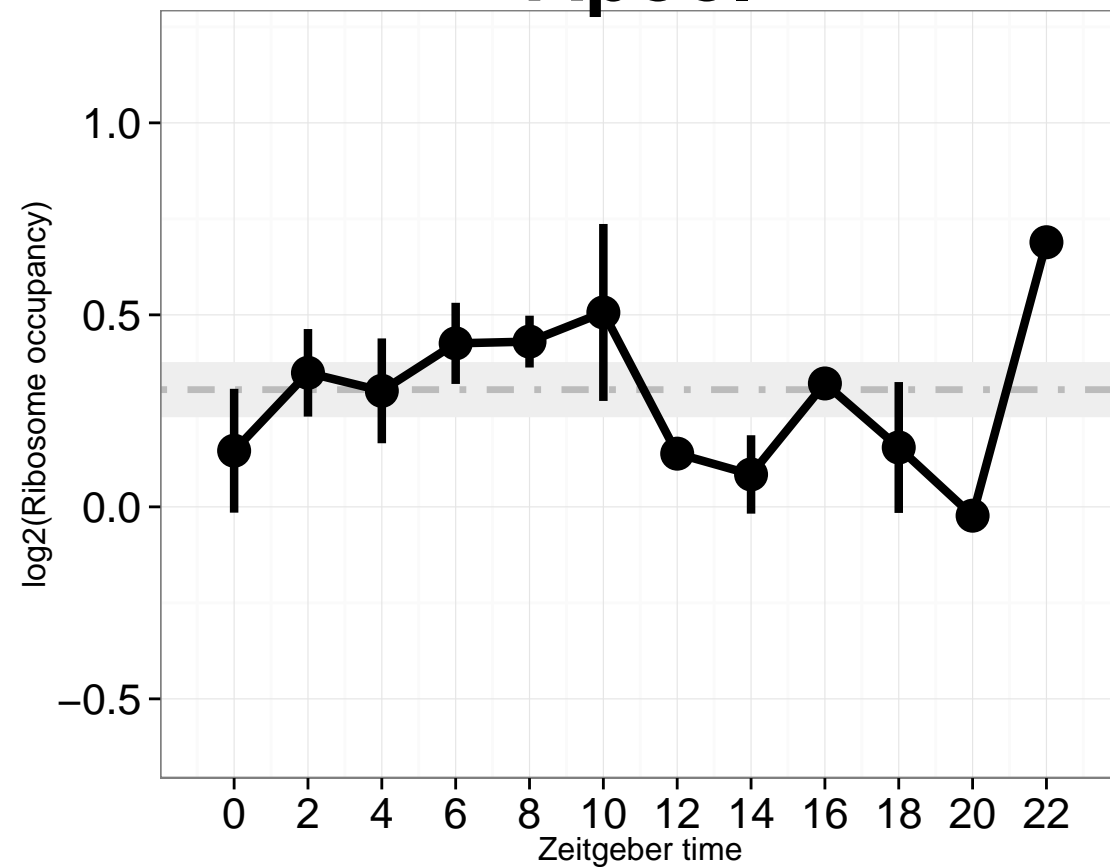

Supplement: SuppDataset_1.zip [file Apool_set_A.pdf › Supplemental Dataset 1/A-mRNA_nonrhyth_translation_nonrhyth/Apool_set_A.pdf]

# Apopt1

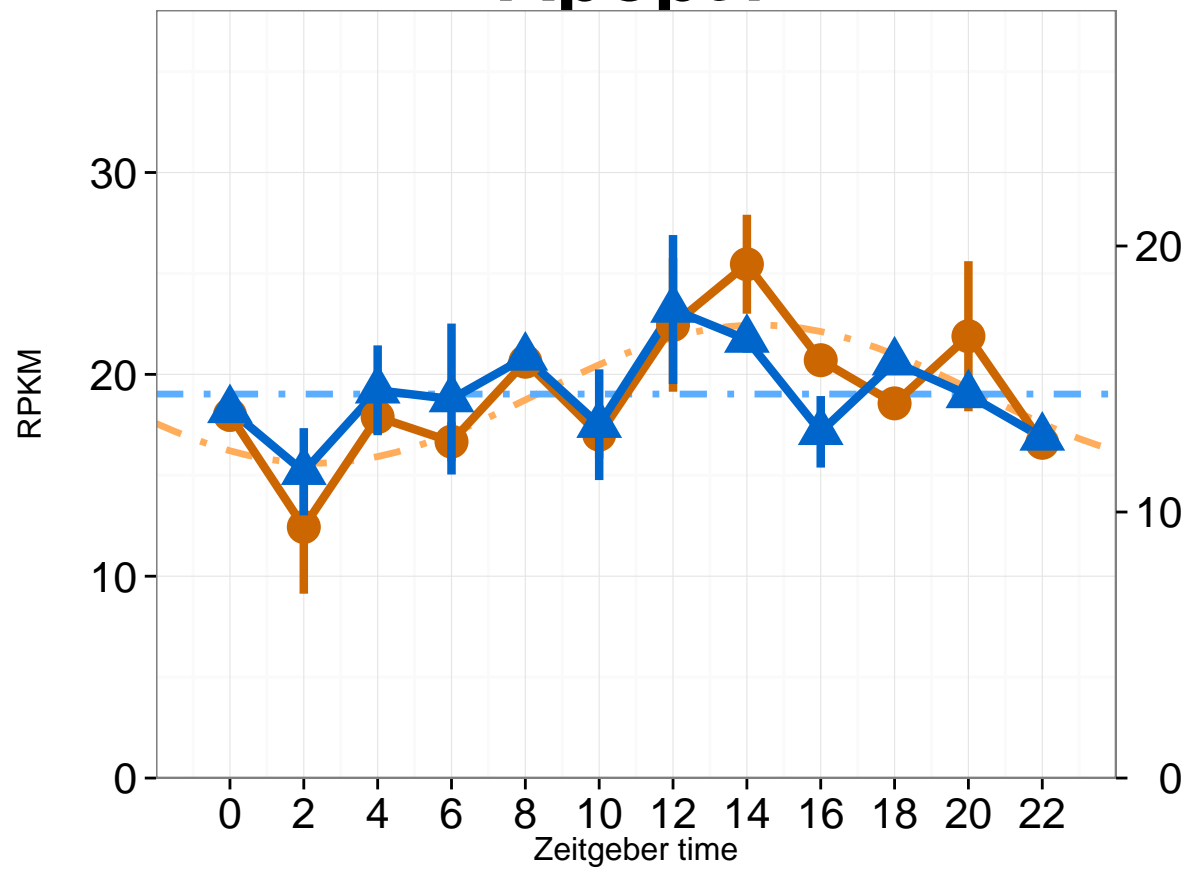

# Apopt1

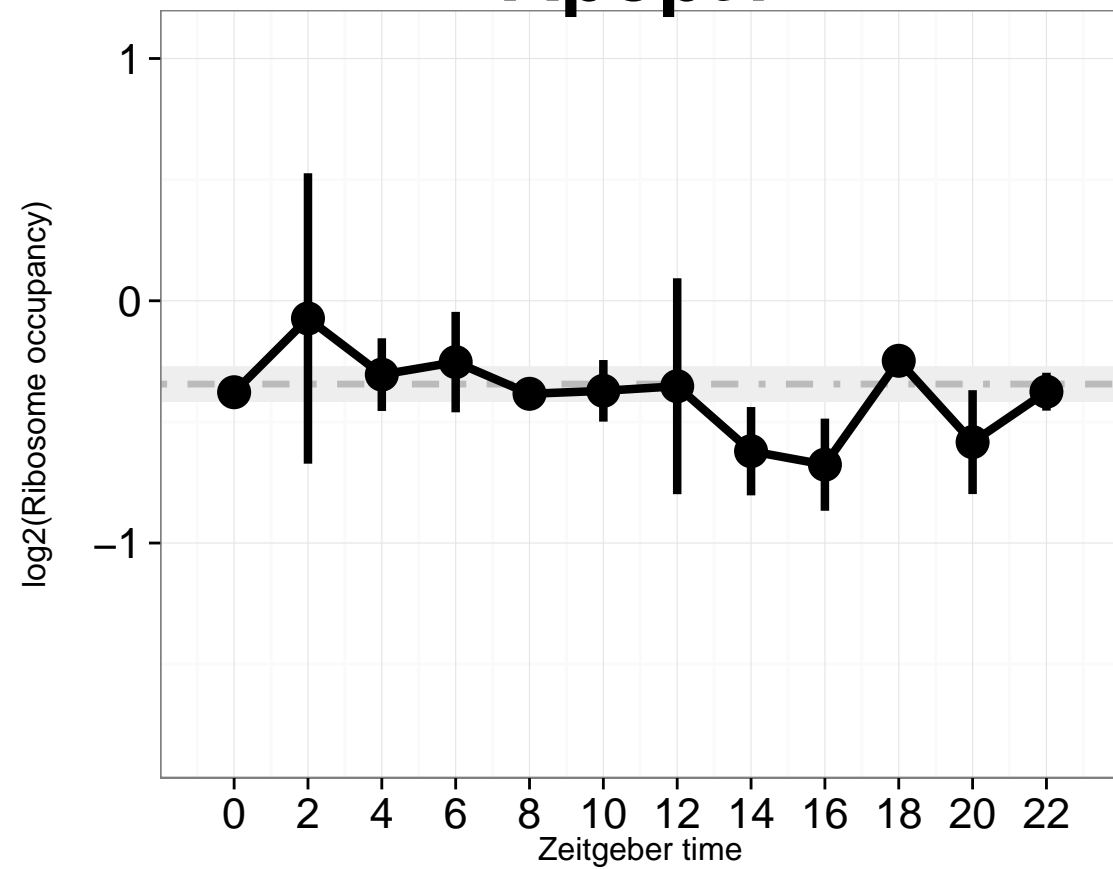

Supplement: SuppDataset_1.zip [file Apopt1_set_A.pdf › Supplemental Dataset 1/A-mRNA_nonrhyth_translation_nonrhyth/Apopt1_set_A.pdf]

## App

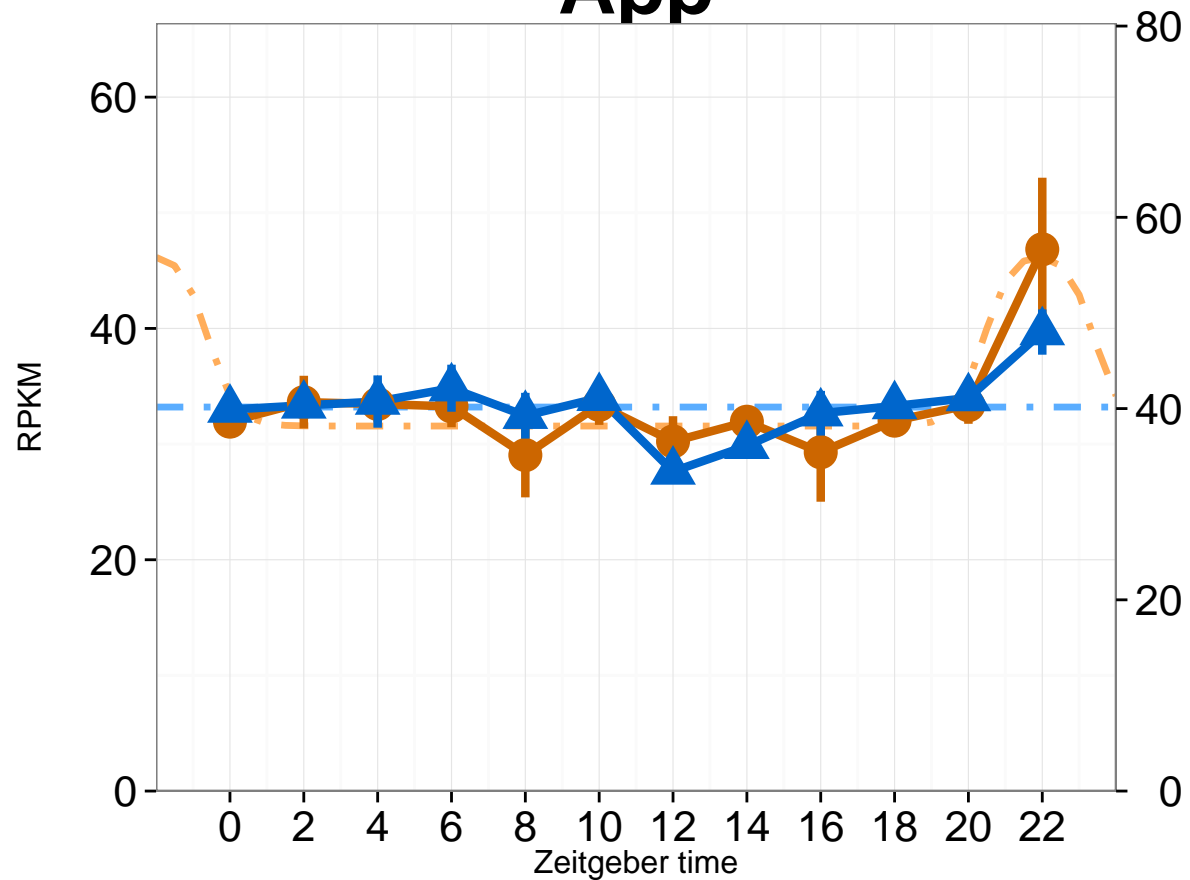

## App

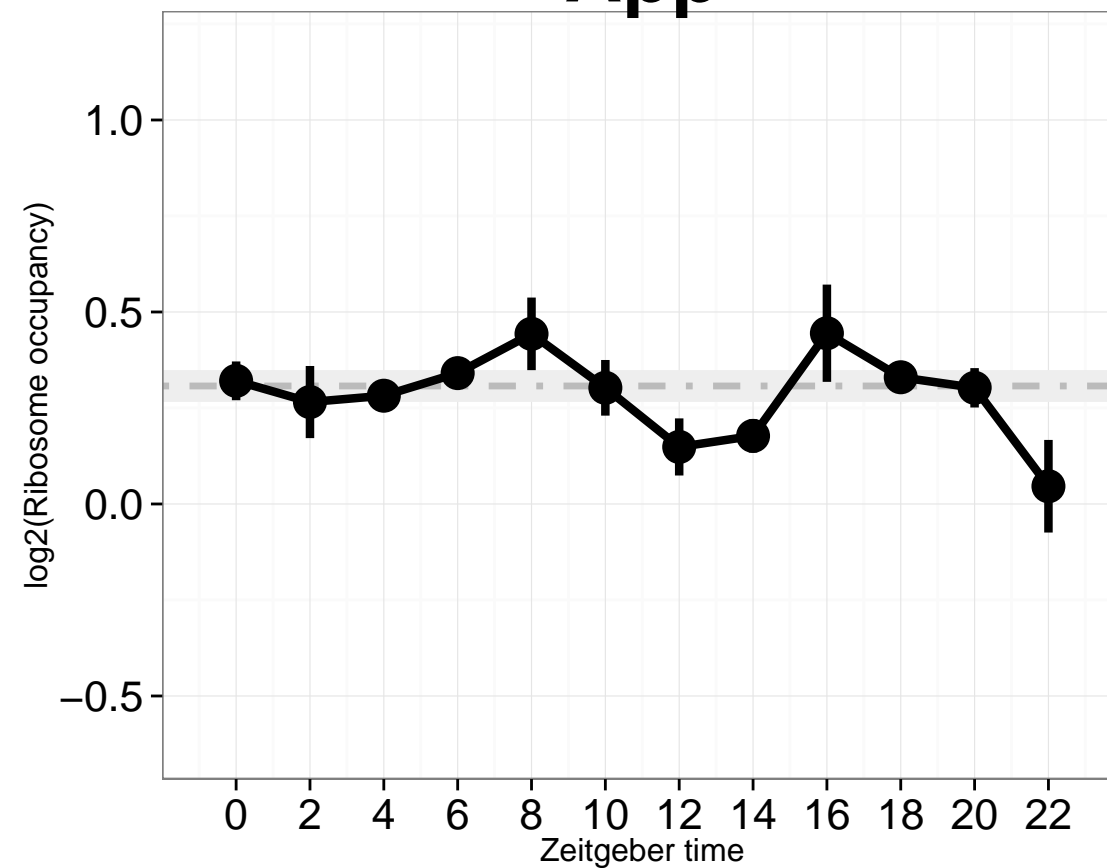

Supplement: SuppDataset_1.zip [file App_set_A.pdf › Supplemental Dataset 1/A-mRNA_nonrhyth_translation_nonrhyth/App_set_A.pdf]

## Appbp2

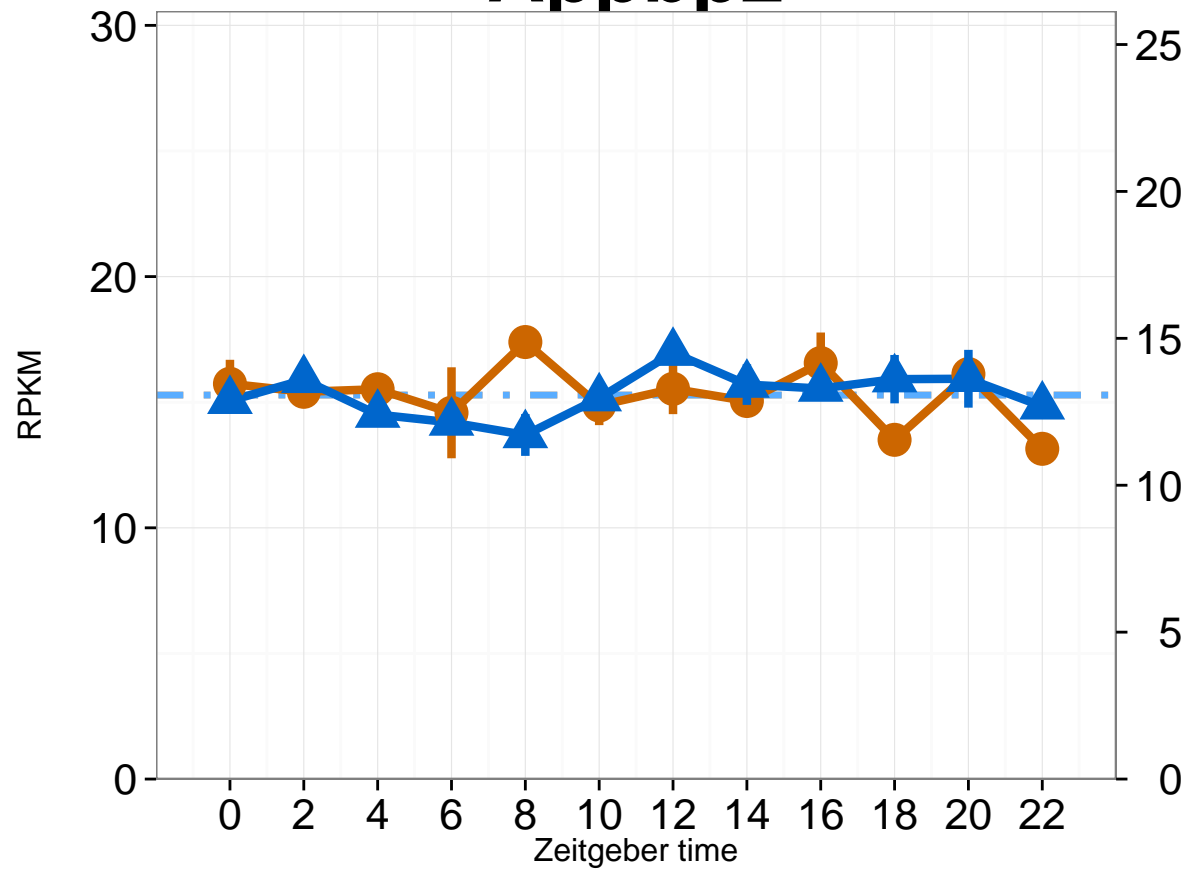

## Appbp2

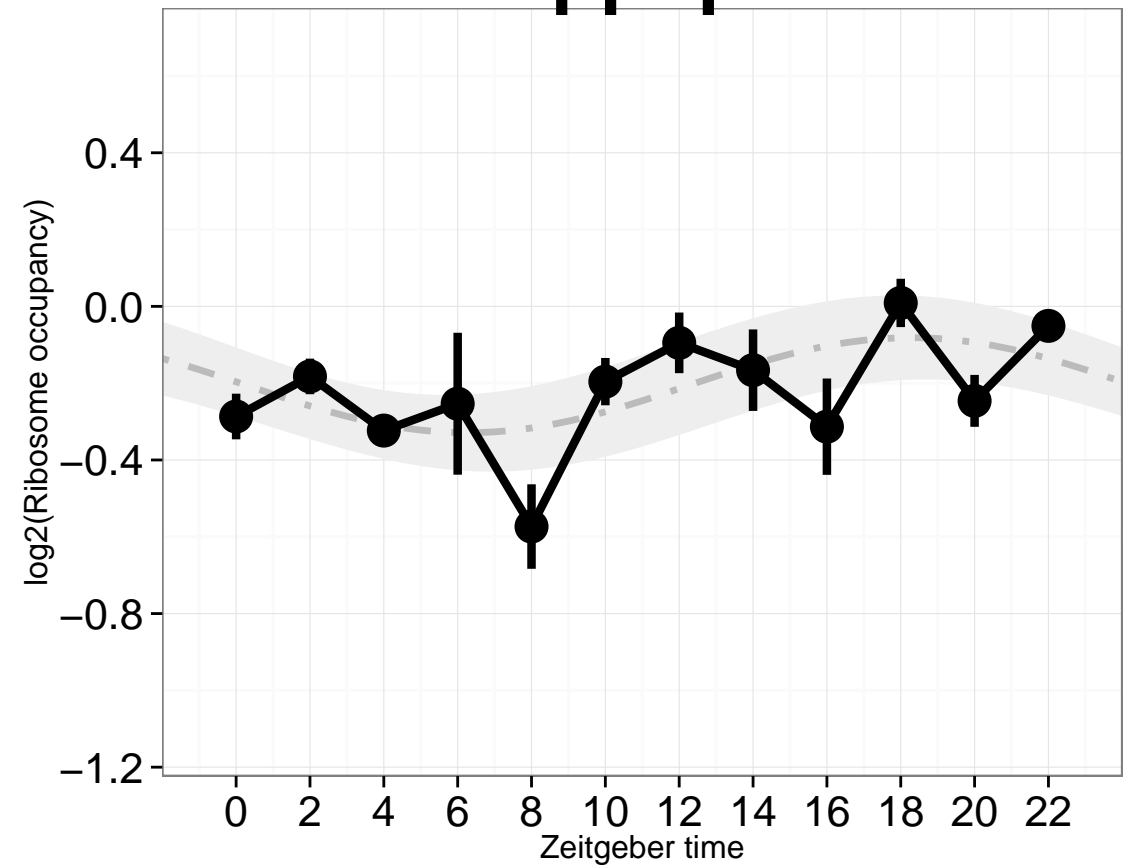

Supplement: SuppDataset_1.zip [file Appbp2_set_A.pdf › Supplemental Dataset 1/A-mRNA_nonrhyth_translation_nonrhyth/Appbp2_set_A.pdf]

# Aqp1

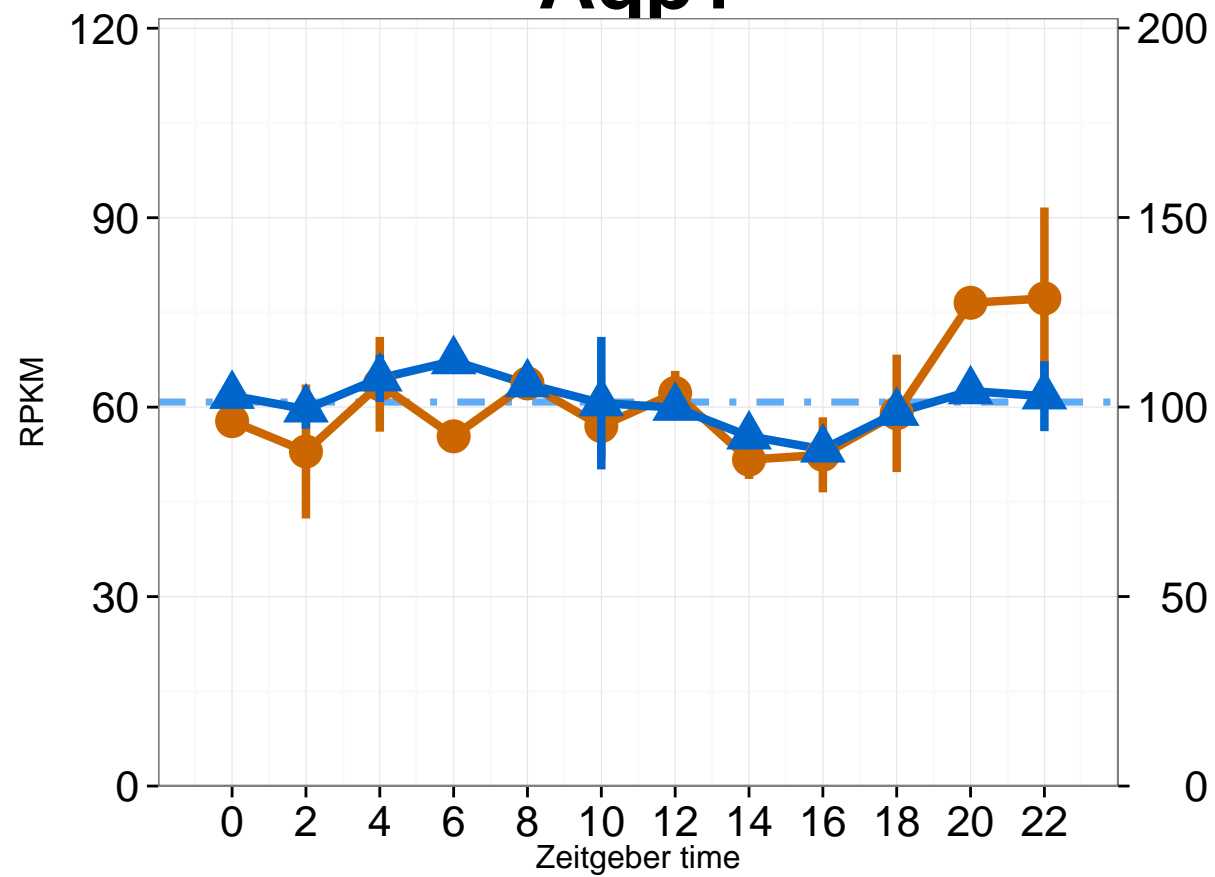

# Aqp1

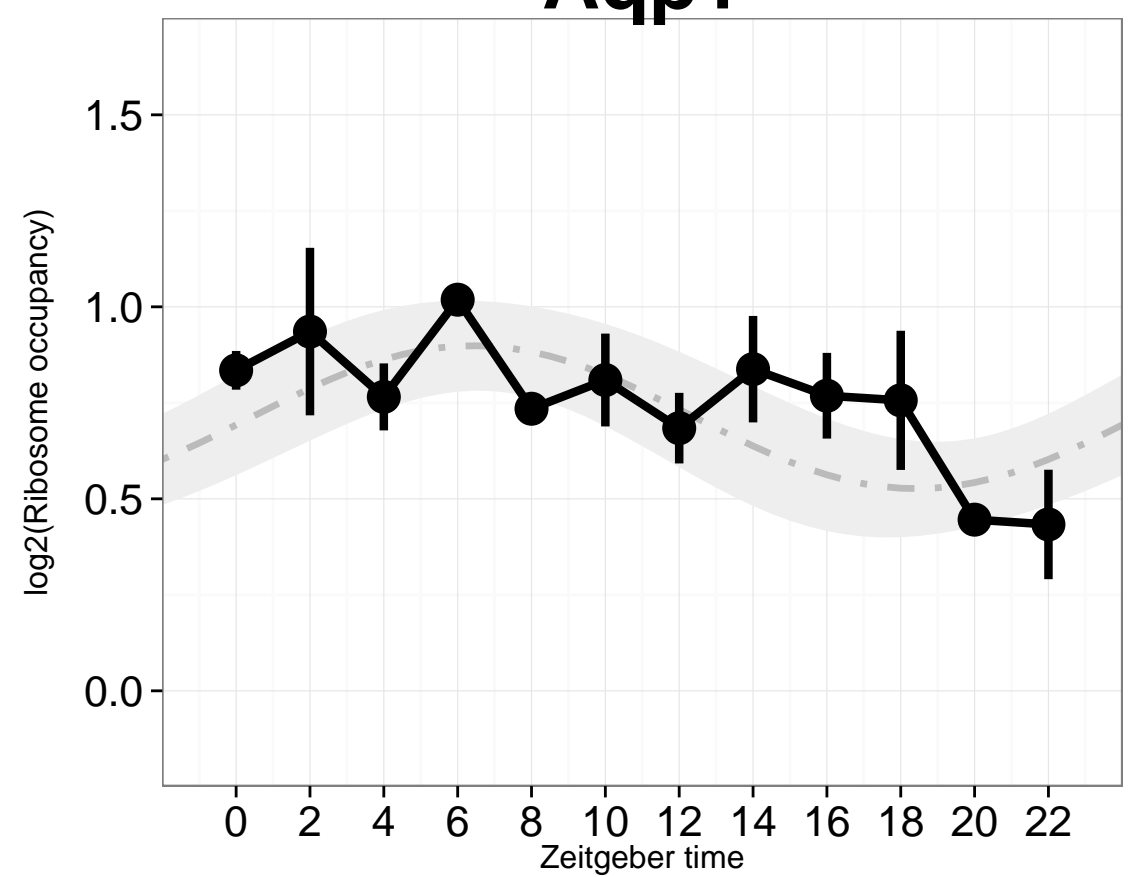

Supplement: SuppDataset_1.zip [file Aqp1_set_A.pdf › Supplemental Dataset 1/A-mRNA_nonrhyth_translation_nonrhyth/Aqp1_set_A.pdf]

# Aqp4

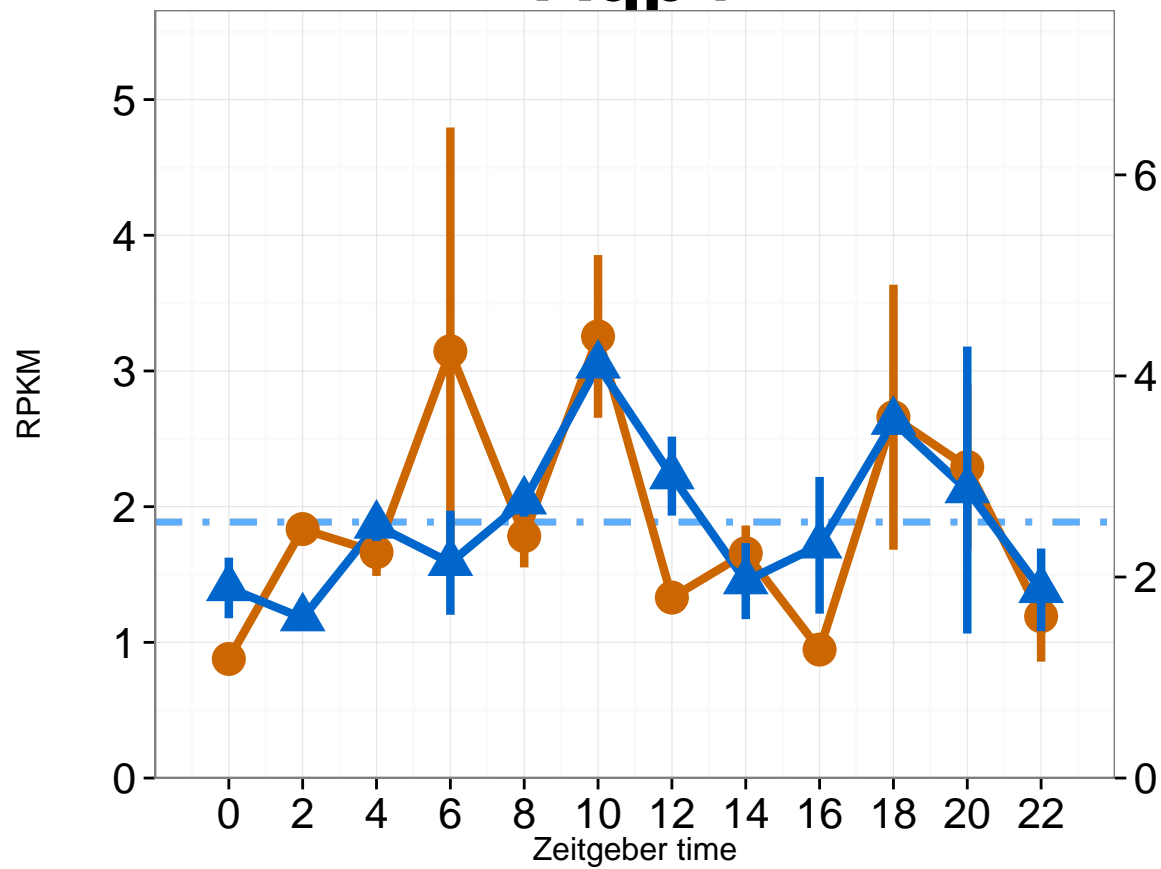

# Aqp4

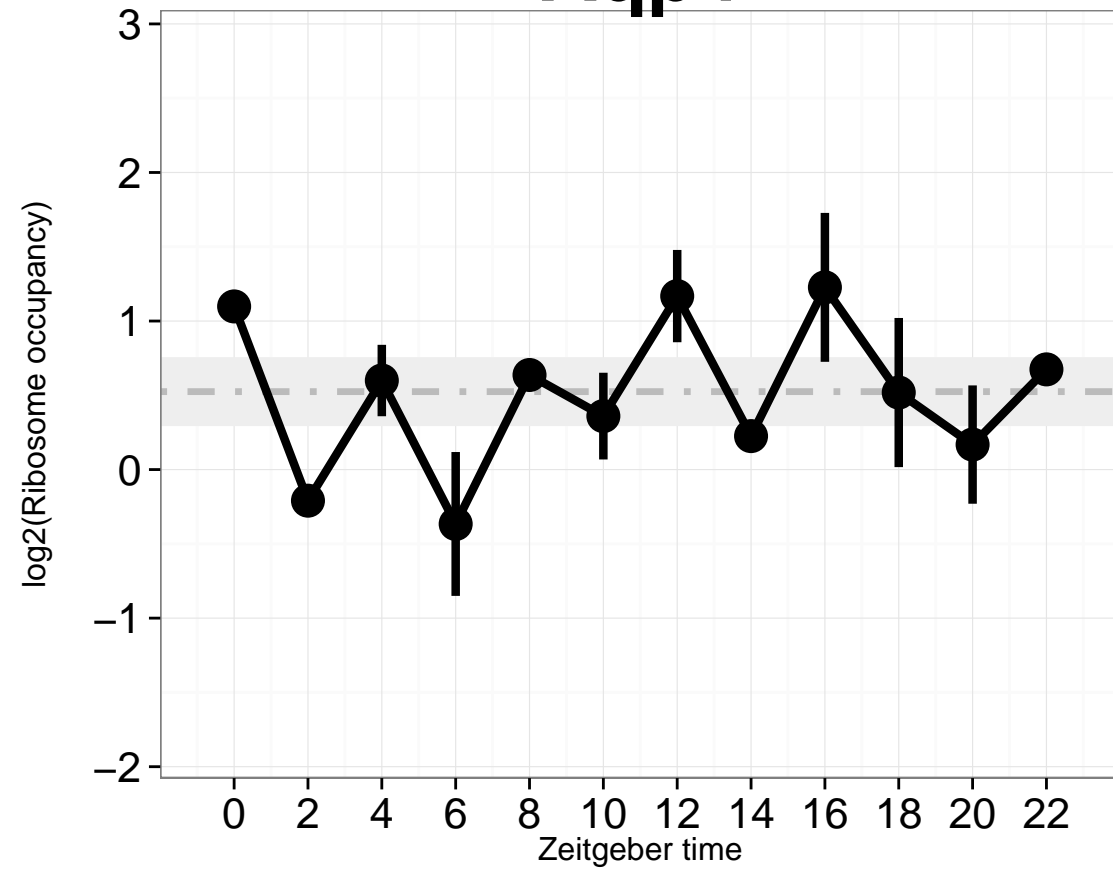

Supplement: SuppDataset_1.zip [file Aqp4_set_A.pdf › Supplemental Dataset 1/A-mRNA_nonrhyth_translation_nonrhyth/Aqp4_set_A.pdf]

## Aqr

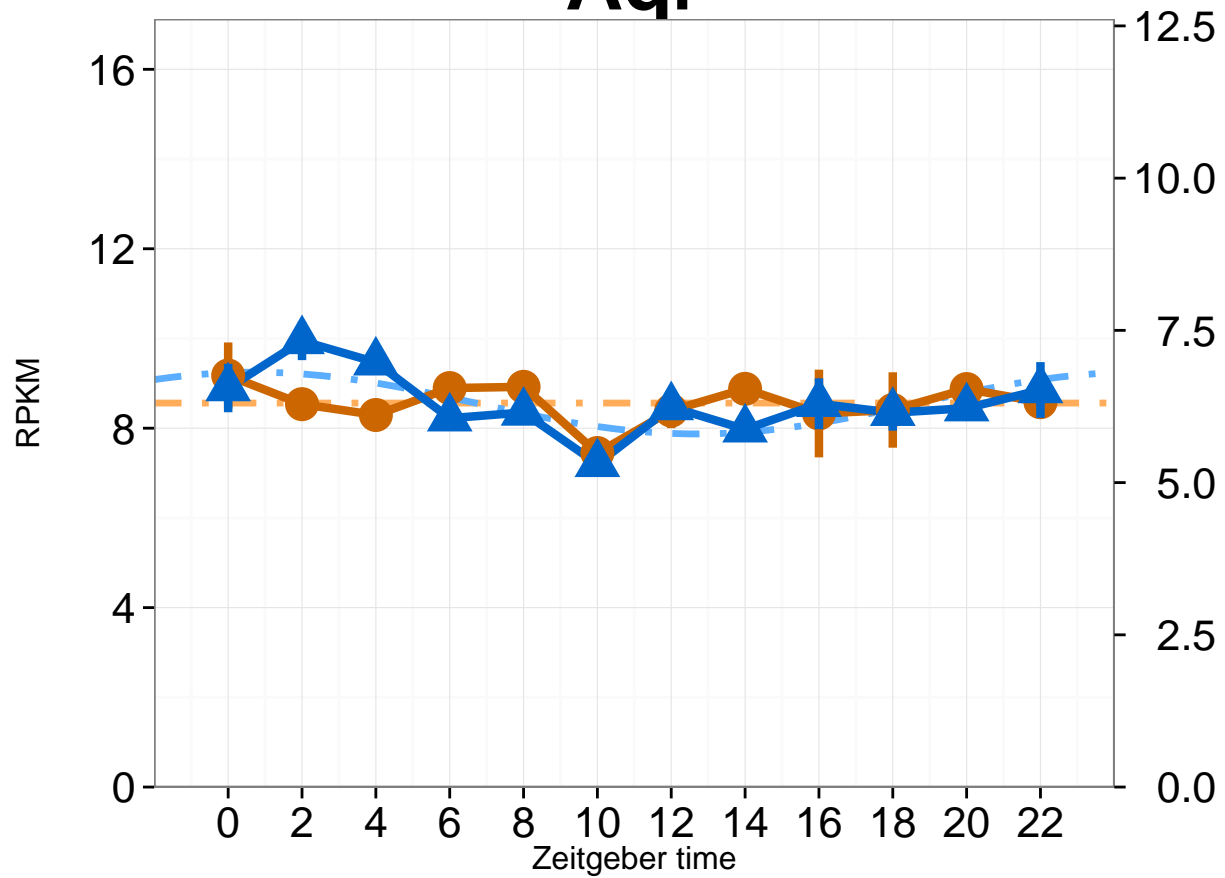

## Aqr

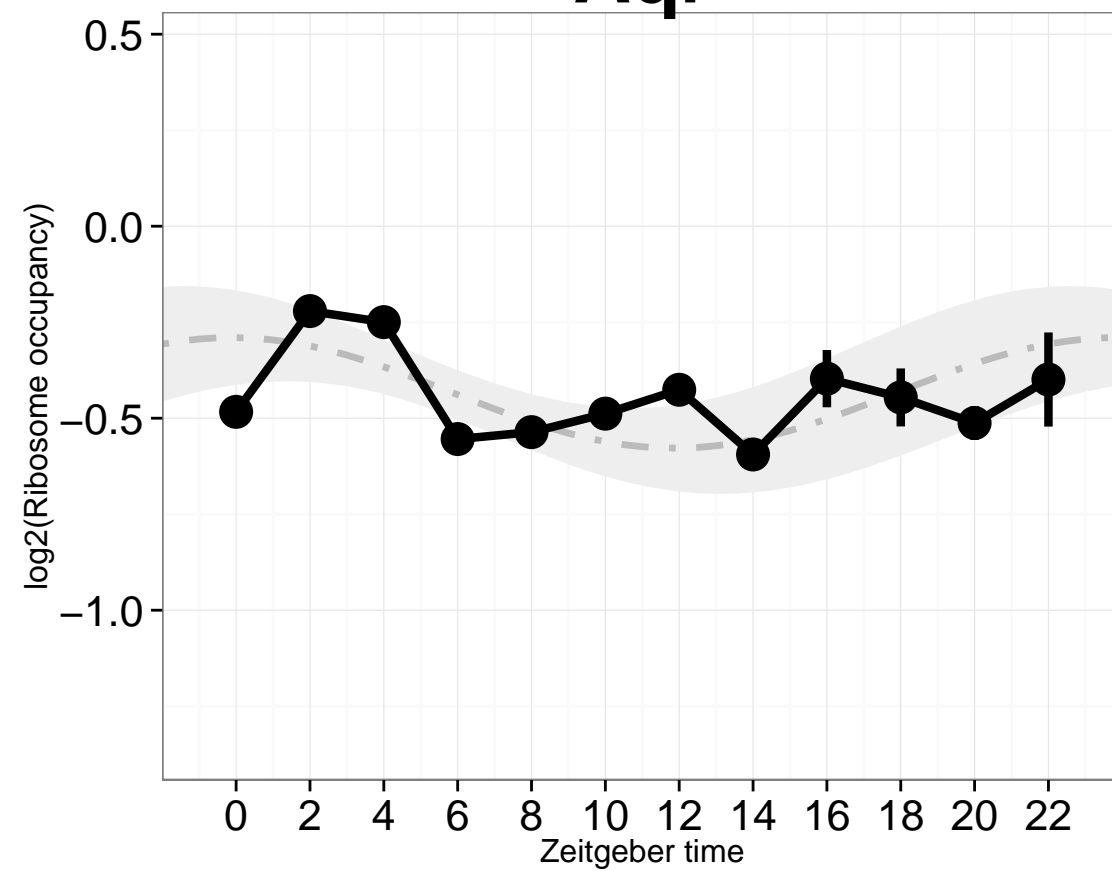

Supplement: SuppDataset_1.zip [file Aqr_set_A.pdf › Supplemental Dataset 1/A-mRNA_nonrhyth_translation_nonrhyth/Aqr_set_A.pdf]

## Araf

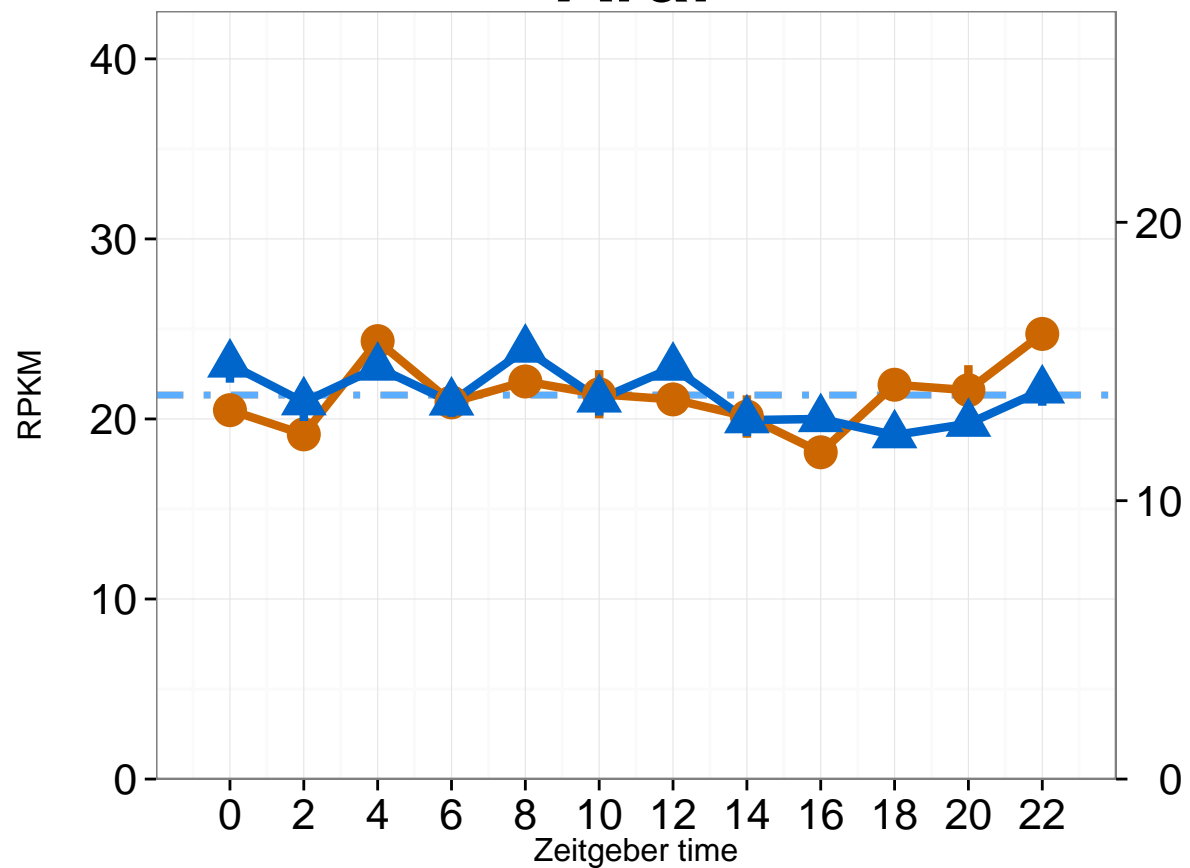

## Araf

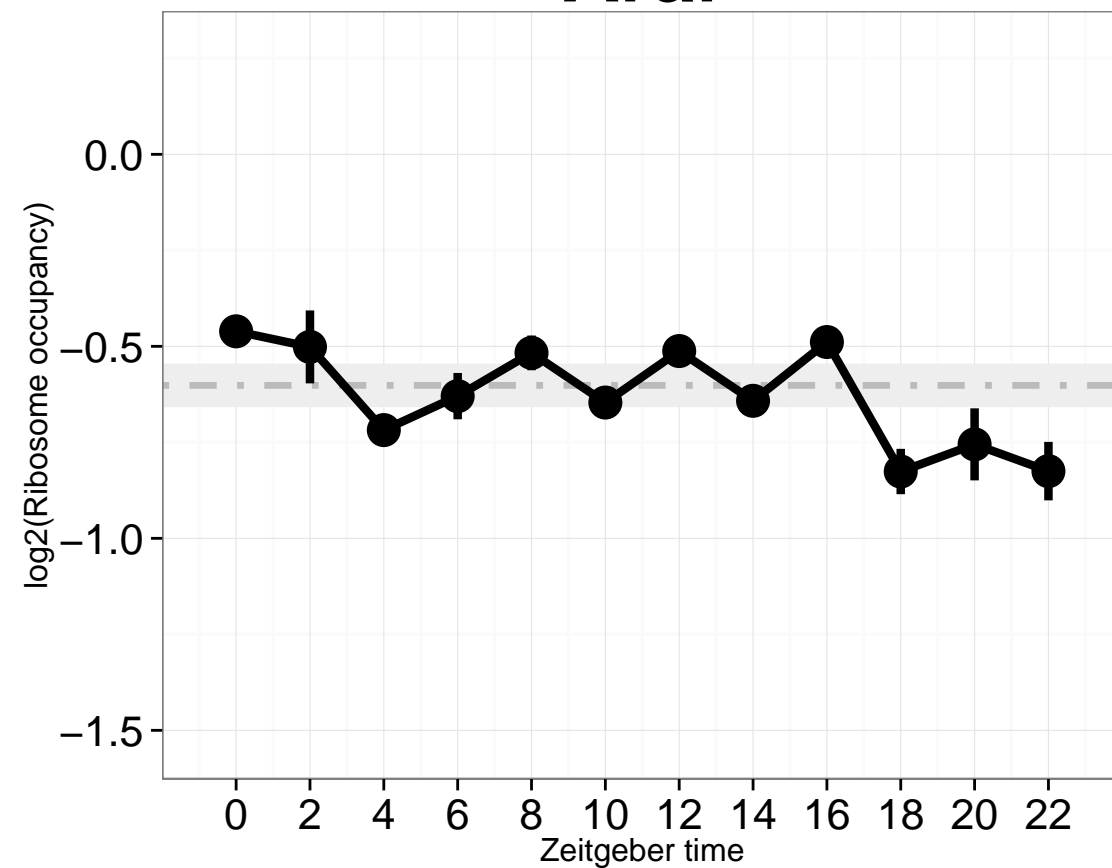

Supplement: SuppDataset_1.zip [file Araf_set_A.pdf › Supplemental Dataset 1/A-mRNA_nonrhyth_translation_nonrhyth/Araf_set_A.pdf]

# Arap2

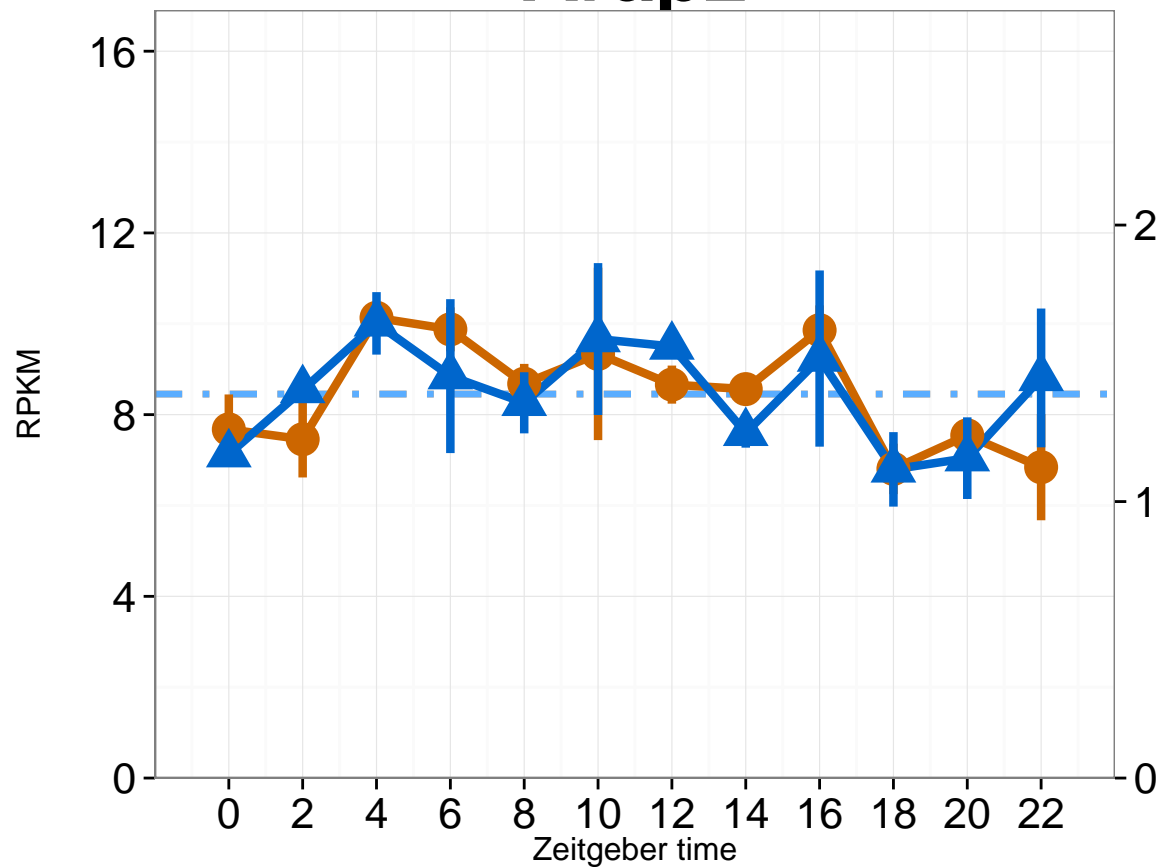

# Arap2

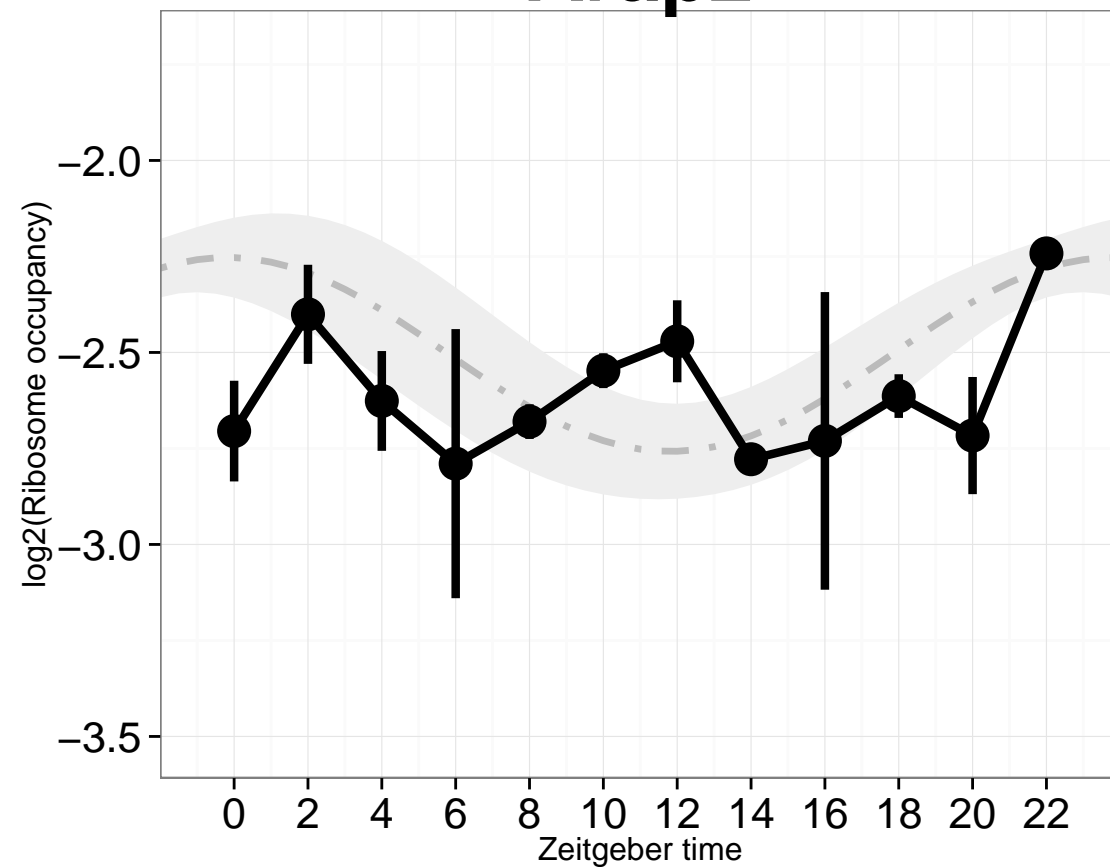

Supplement: SuppDataset_1.zip [file Arap2_set_A.pdf › Supplemental Dataset 1/A-mRNA_nonrhyth_translation_nonrhyth/Arap2_set_A.pdf]

# Arap3

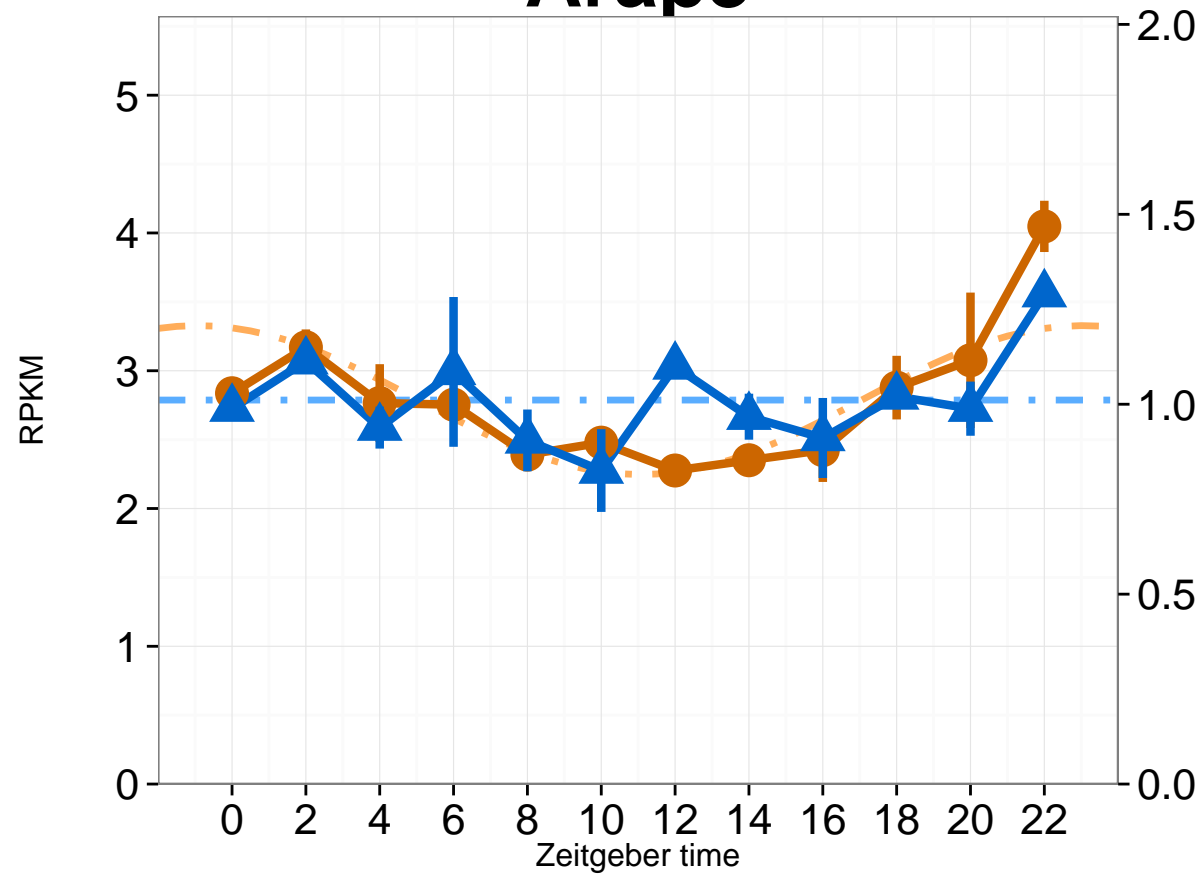

# Arap3

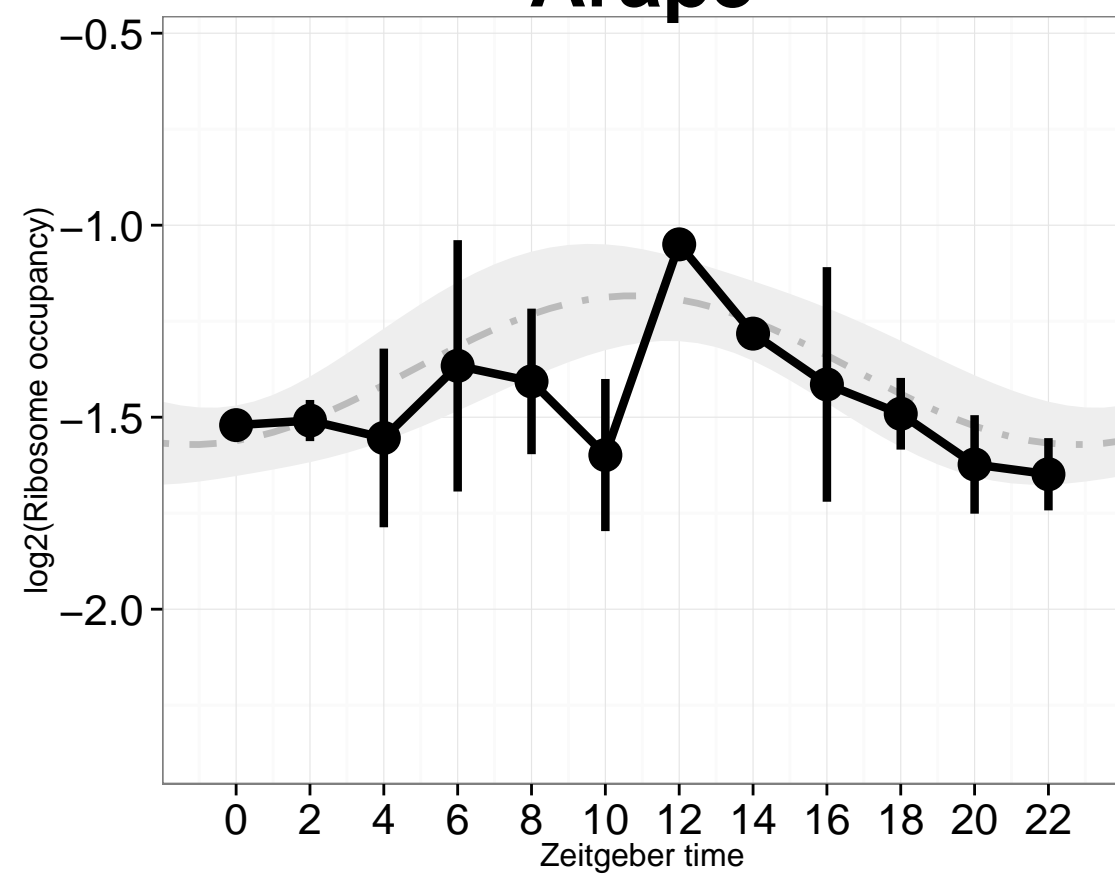

Supplement: SuppDataset_1.zip [file Arap3_set_A.pdf › Supplemental Dataset 1/A-mRNA_nonrhyth_translation_nonrhyth/Arap3_set_A.pdf]

# Arcn1

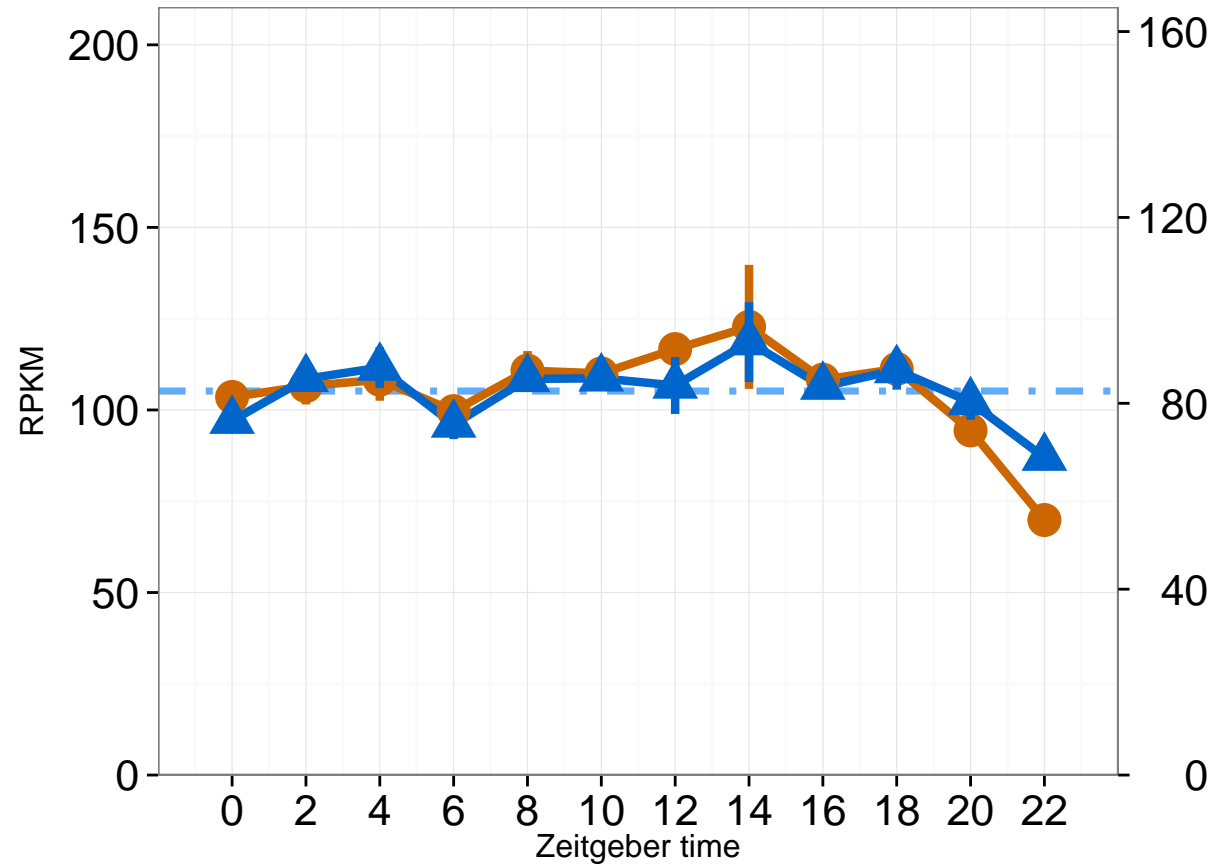

# Arcn1

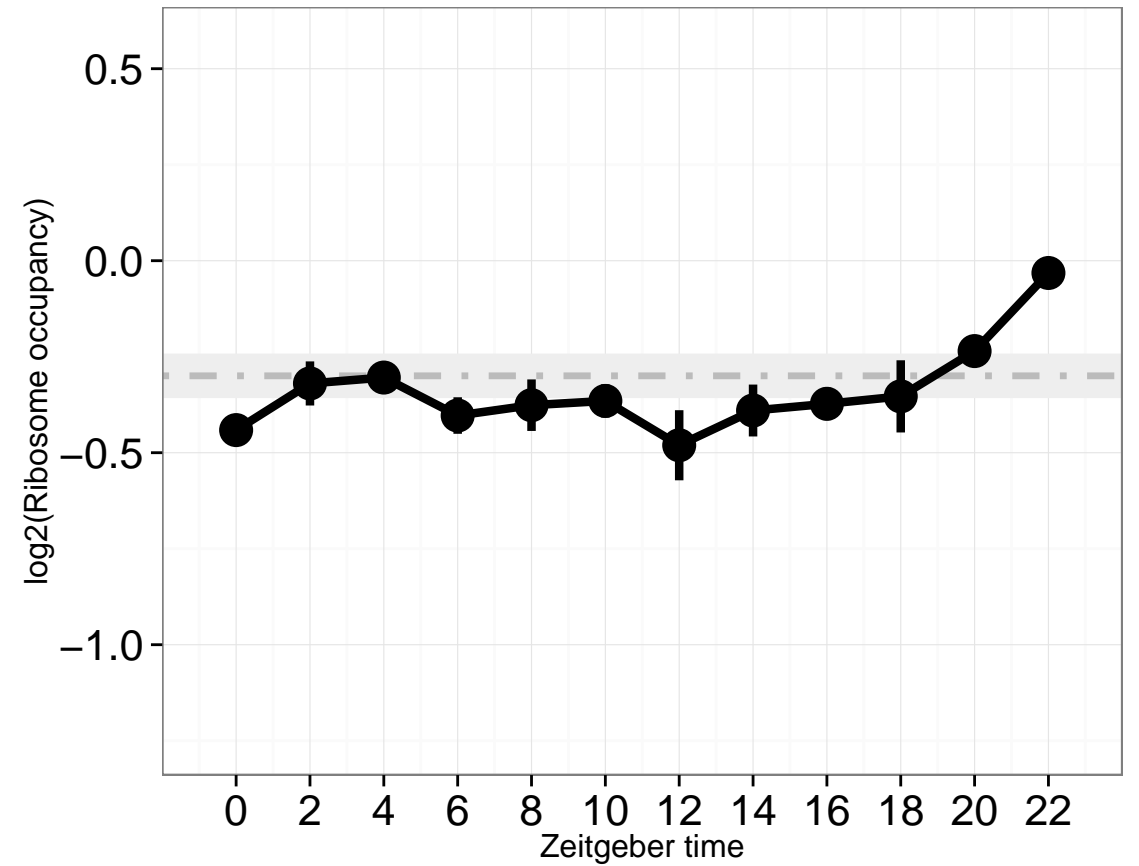

Supplement: SuppDataset_1.zip [file Arcn1_set_A.pdf › Supplemental Dataset 1/A-mRNA_nonrhyth_translation_nonrhyth/Arcn1_set_A.pdf]

# Arel1

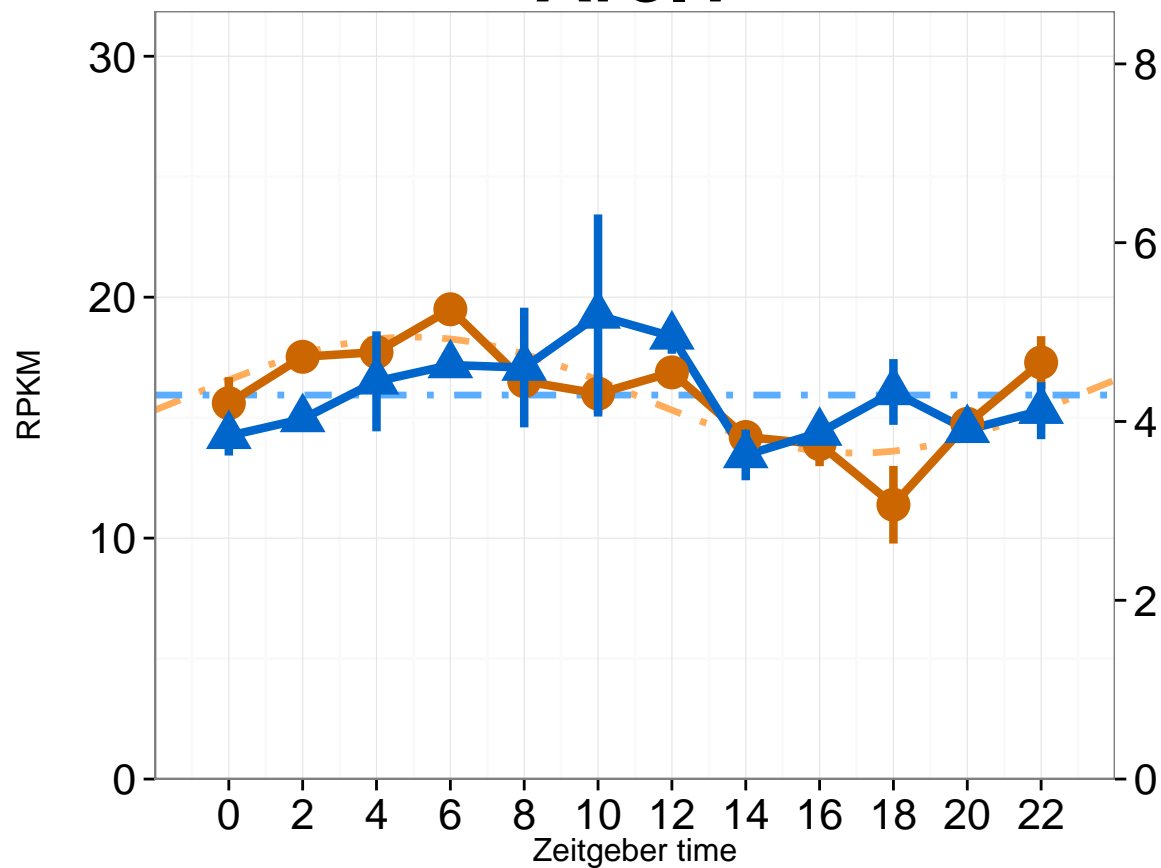

# Arel1

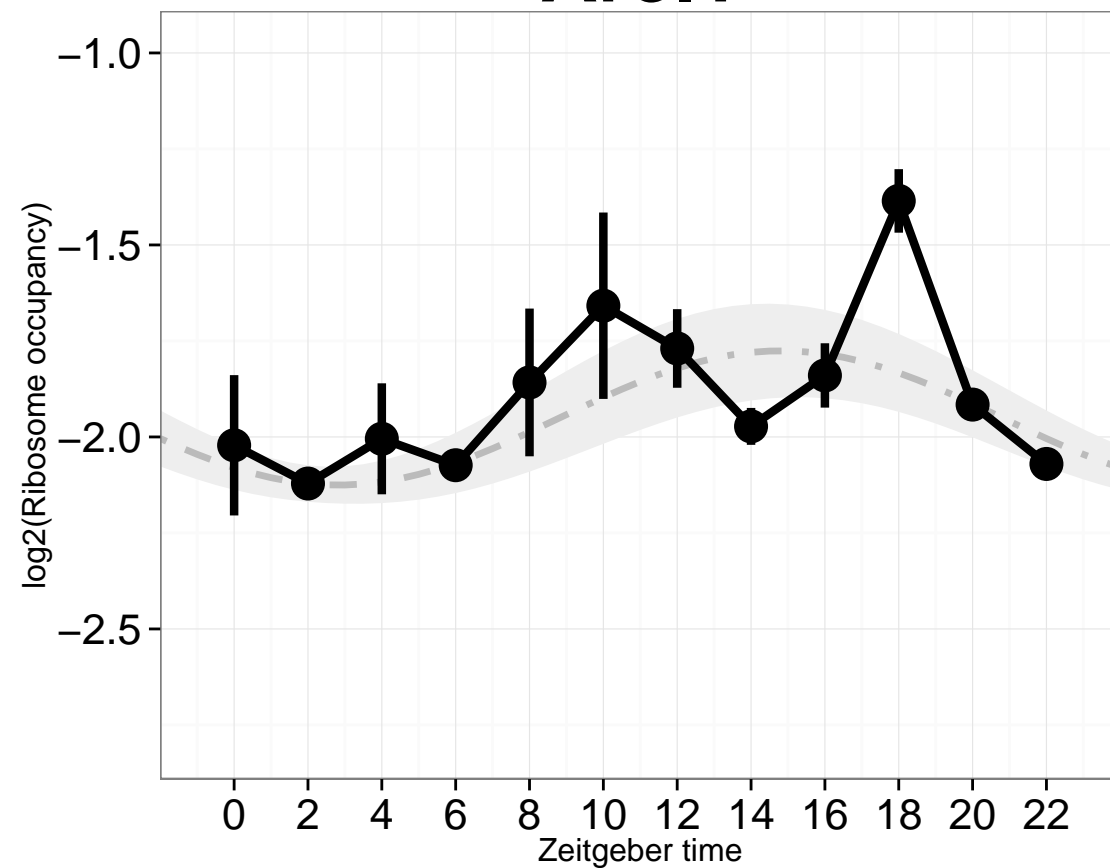

Supplement: SuppDataset_1.zip [file Arel1_set_A.pdf › Supplemental Dataset 1/A-mRNA_nonrhyth_translation_nonrhyth/Arel1_set_A.pdf]

## Arf1

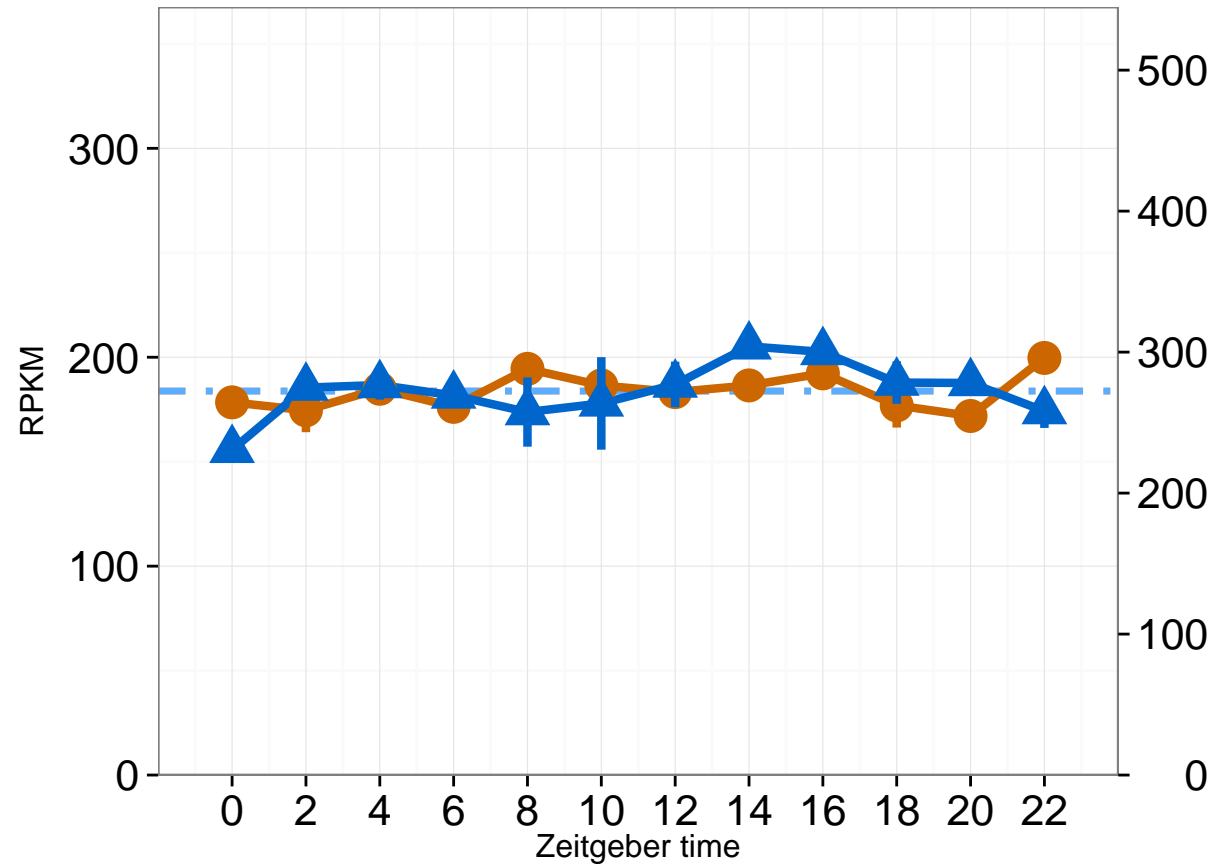

## Arf1

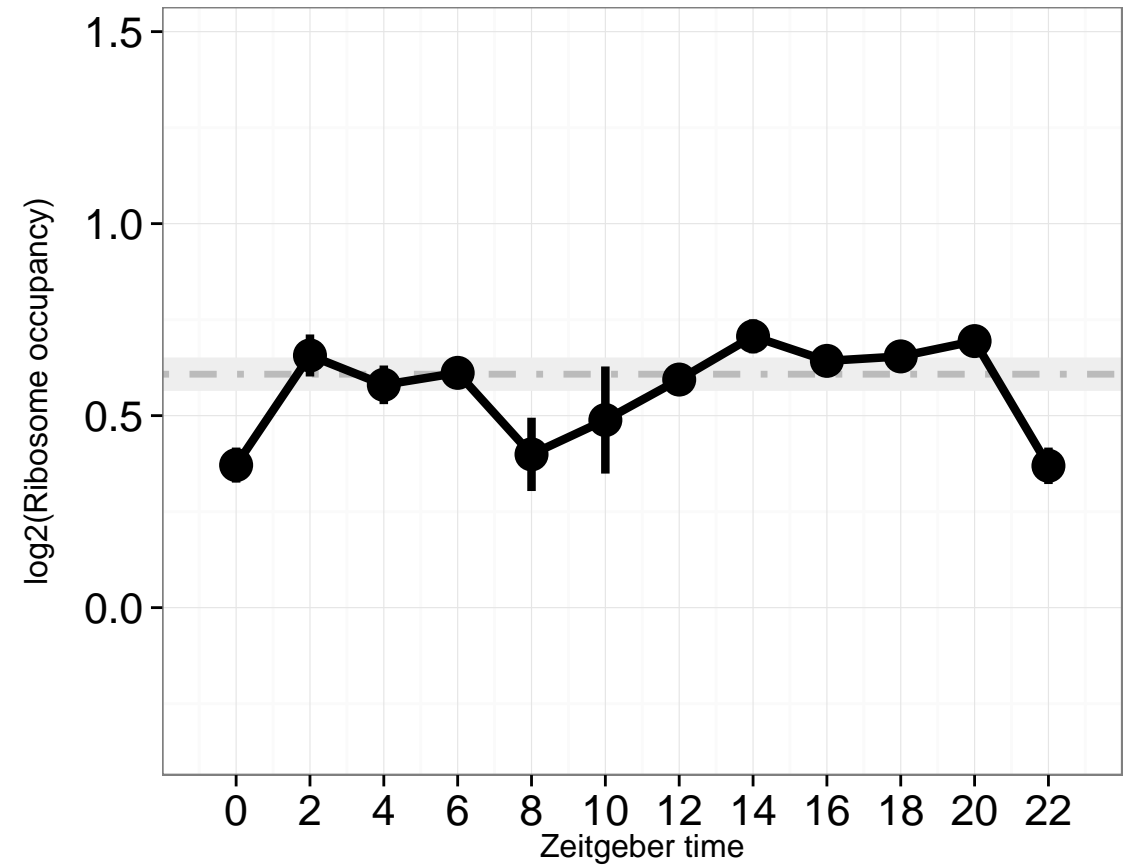

Supplement: SuppDataset_1.zip [file Arf1_set_A.pdf › Supplemental Dataset 1/A-mRNA_nonrhyth_translation_nonrhyth/Arf1_set_A.pdf]

## Arf2

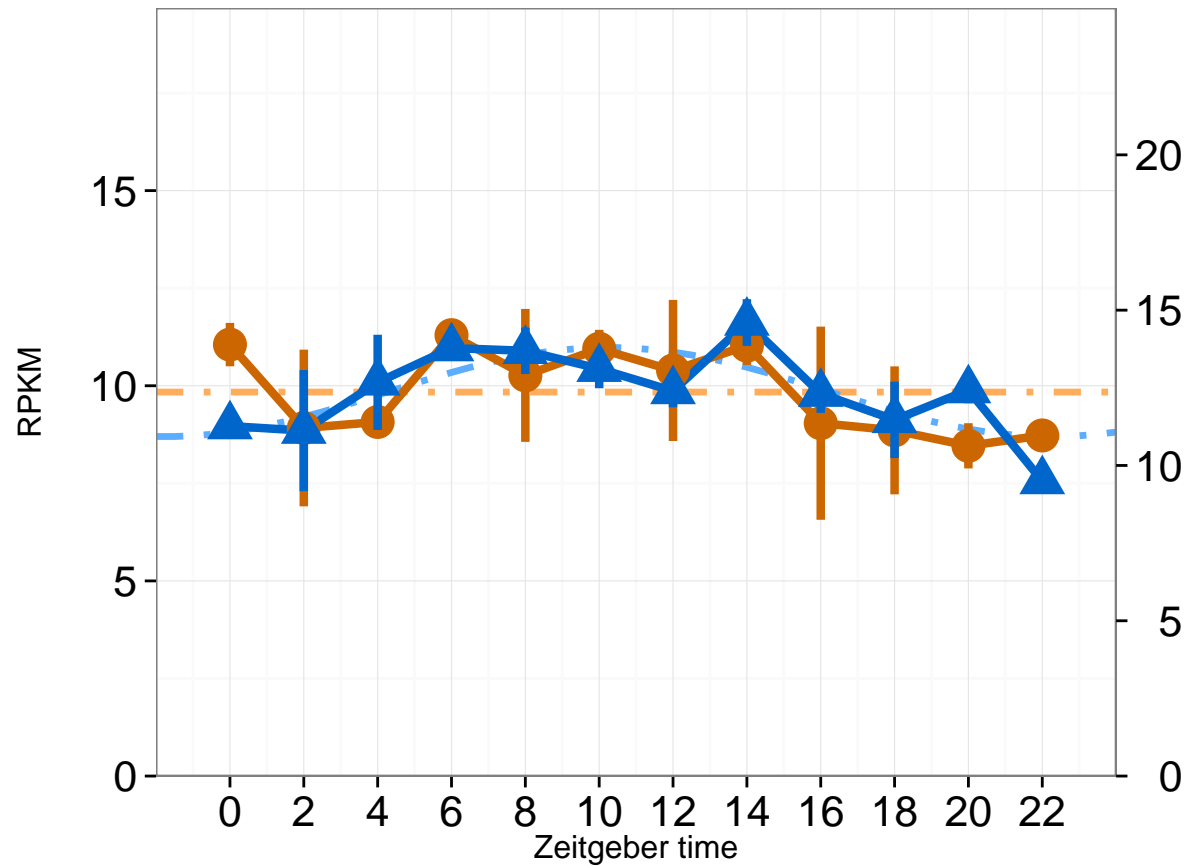

## Arf2

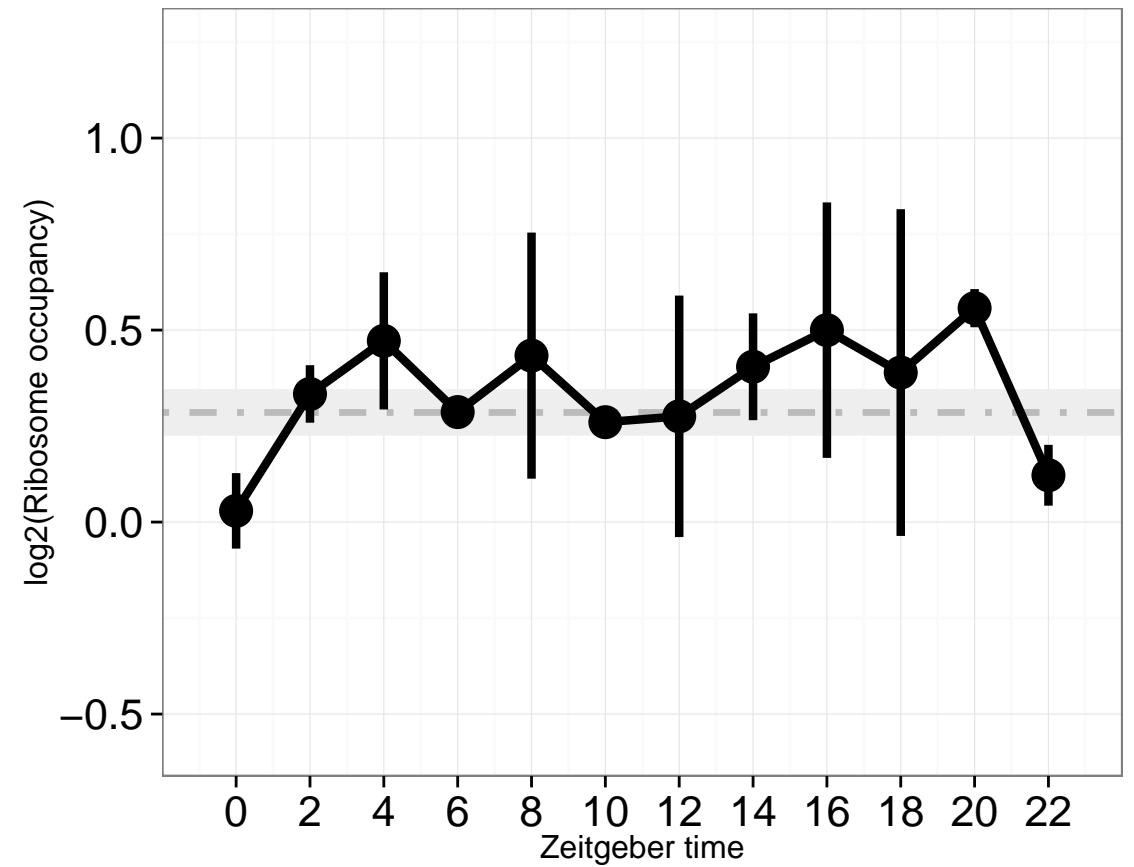

Supplement: SuppDataset_1.zip [file Arf2_set_A.pdf › Supplemental Dataset 1/A-mRNA_nonrhyth_translation_nonrhyth/Arf2_set_A.pdf]

## Arf4

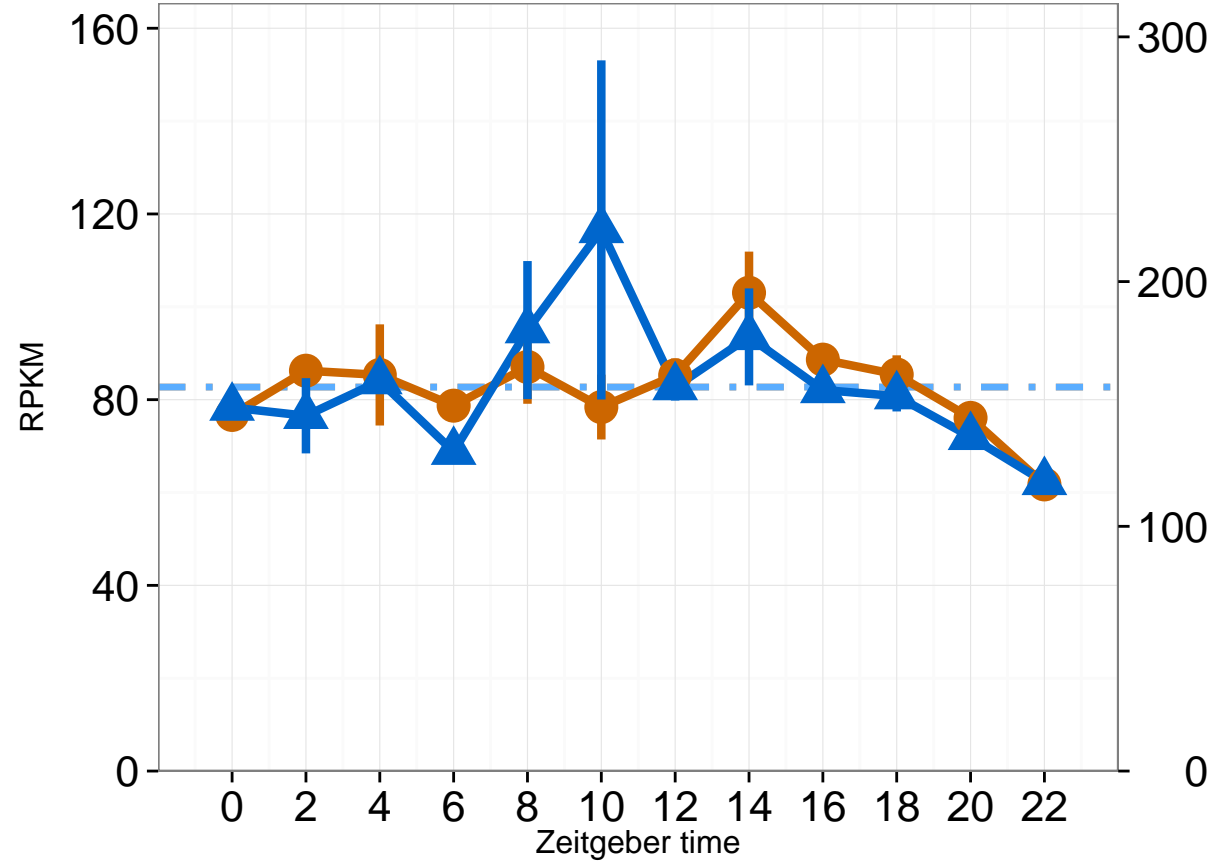

## Arf4

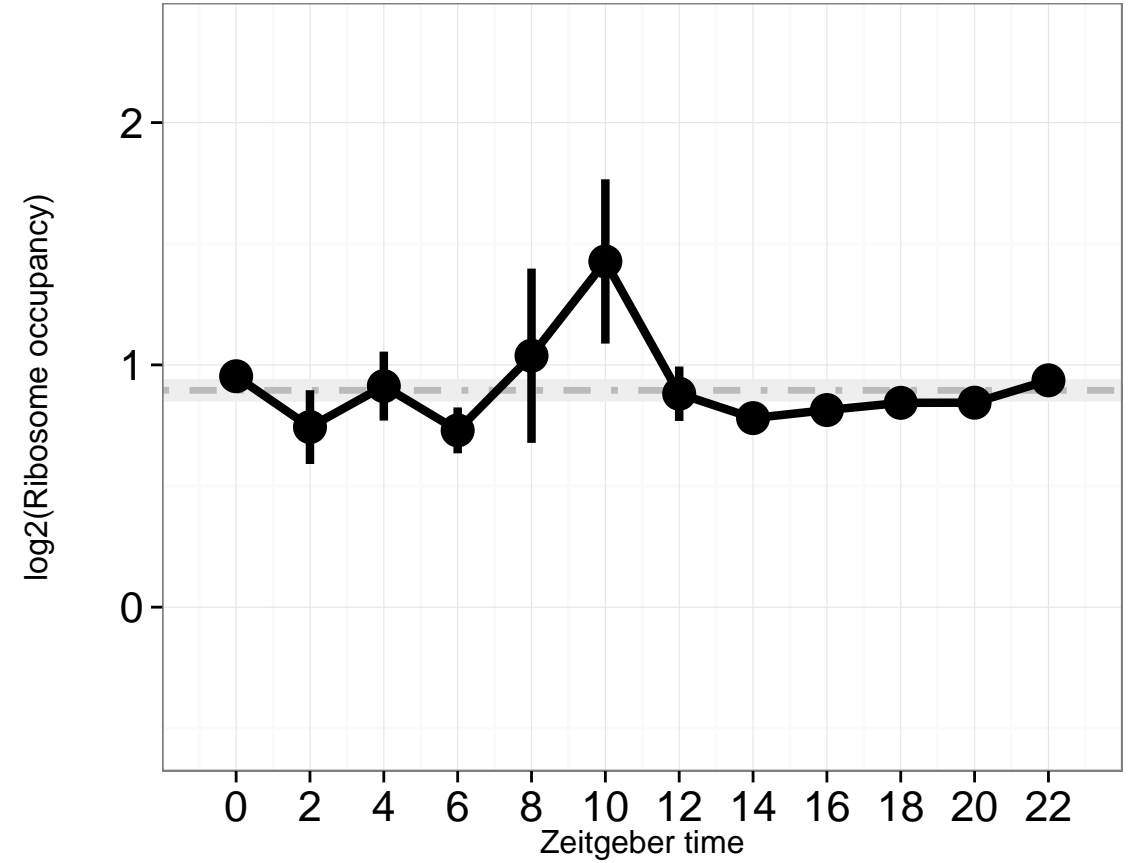

Supplement: SuppDataset_1.zip [file Arf4_set_A.pdf › Supplemental Dataset 1/A-mRNA_nonrhyth_translation_nonrhyth/Arf4_set_A.pdf]

## Arf5

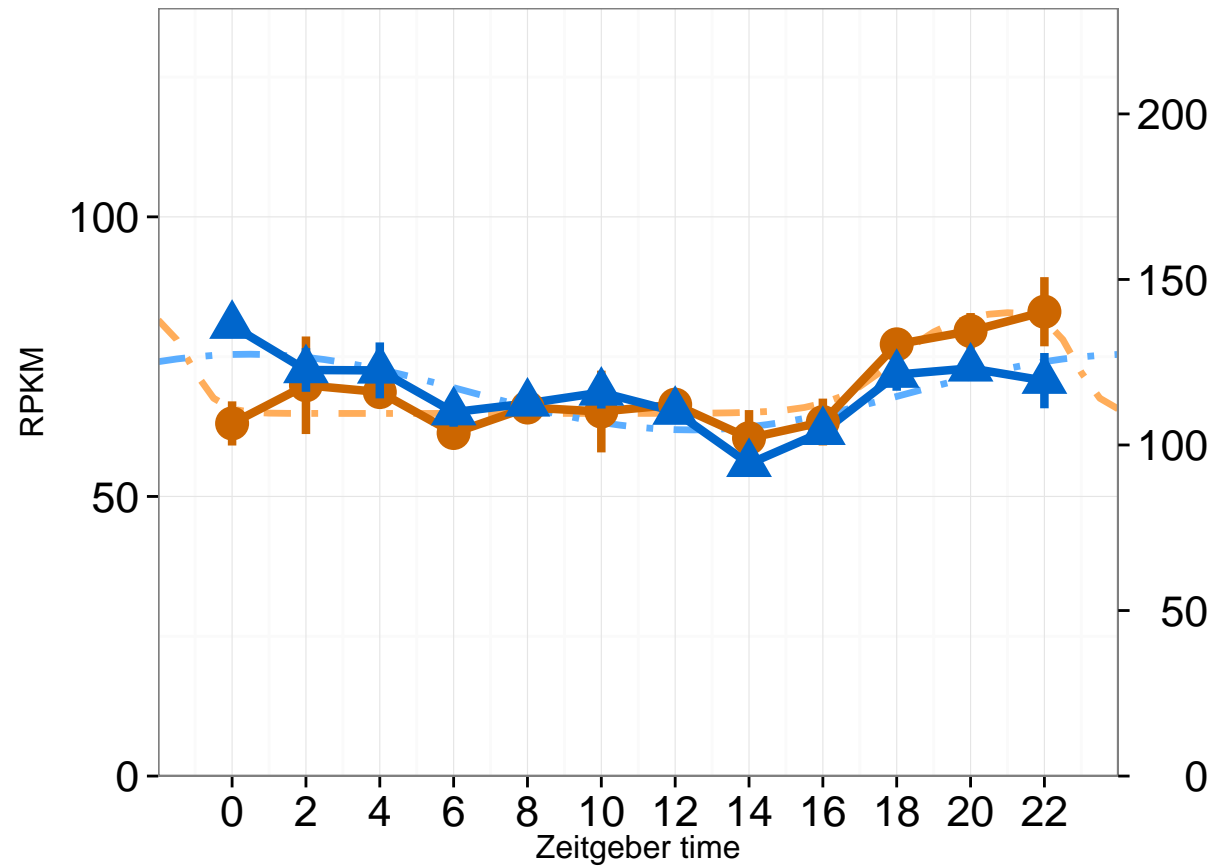

## Arf5

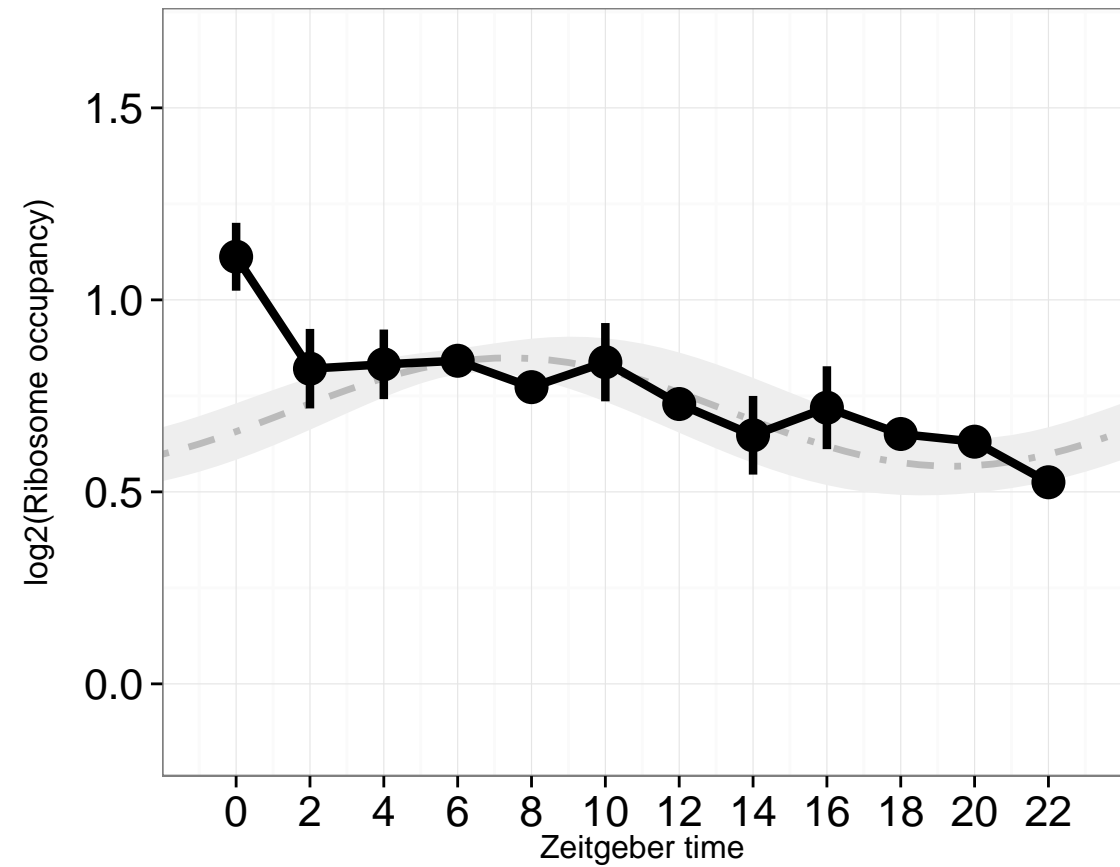

Supplement: SuppDataset_1.zip [file Arf5_set_A.pdf › Supplemental Dataset 1/A-mRNA_nonrhyth_translation_nonrhyth/Arf5_set_A.pdf]

## Arf6

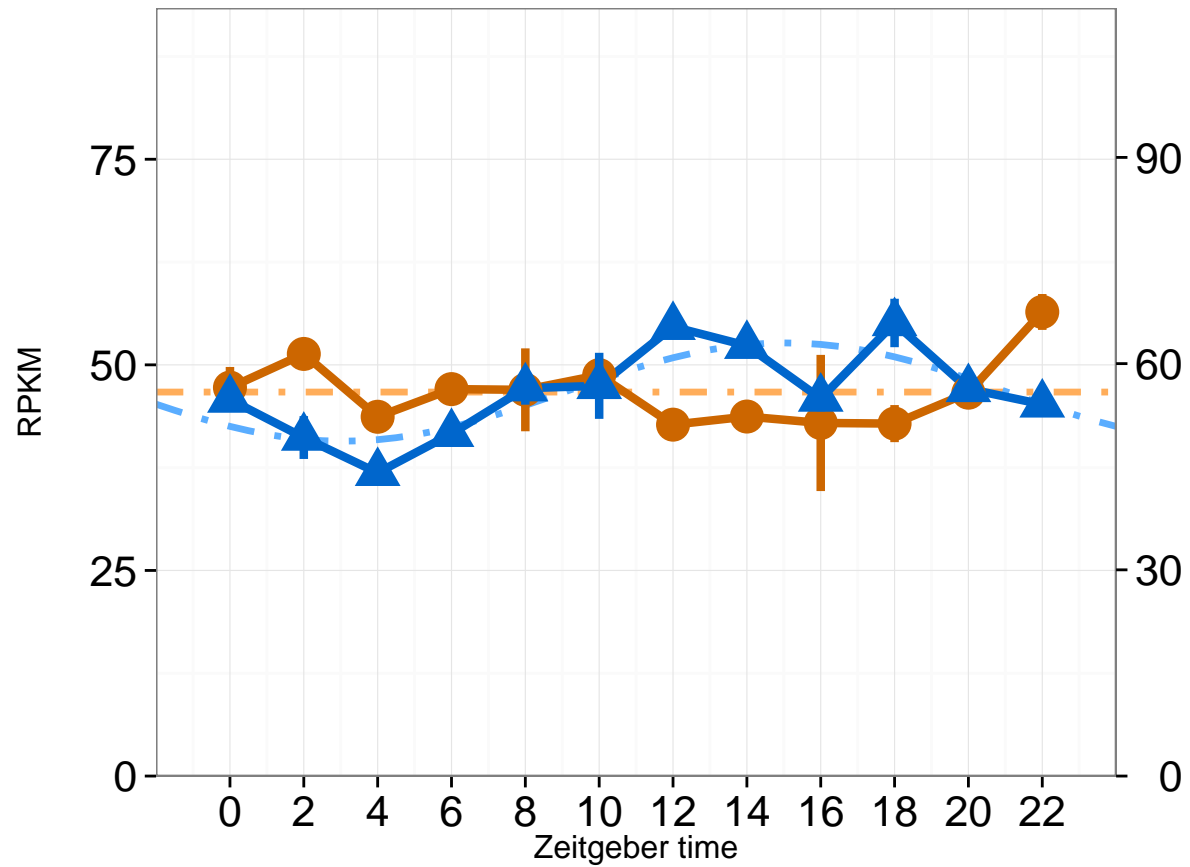

## Arf6

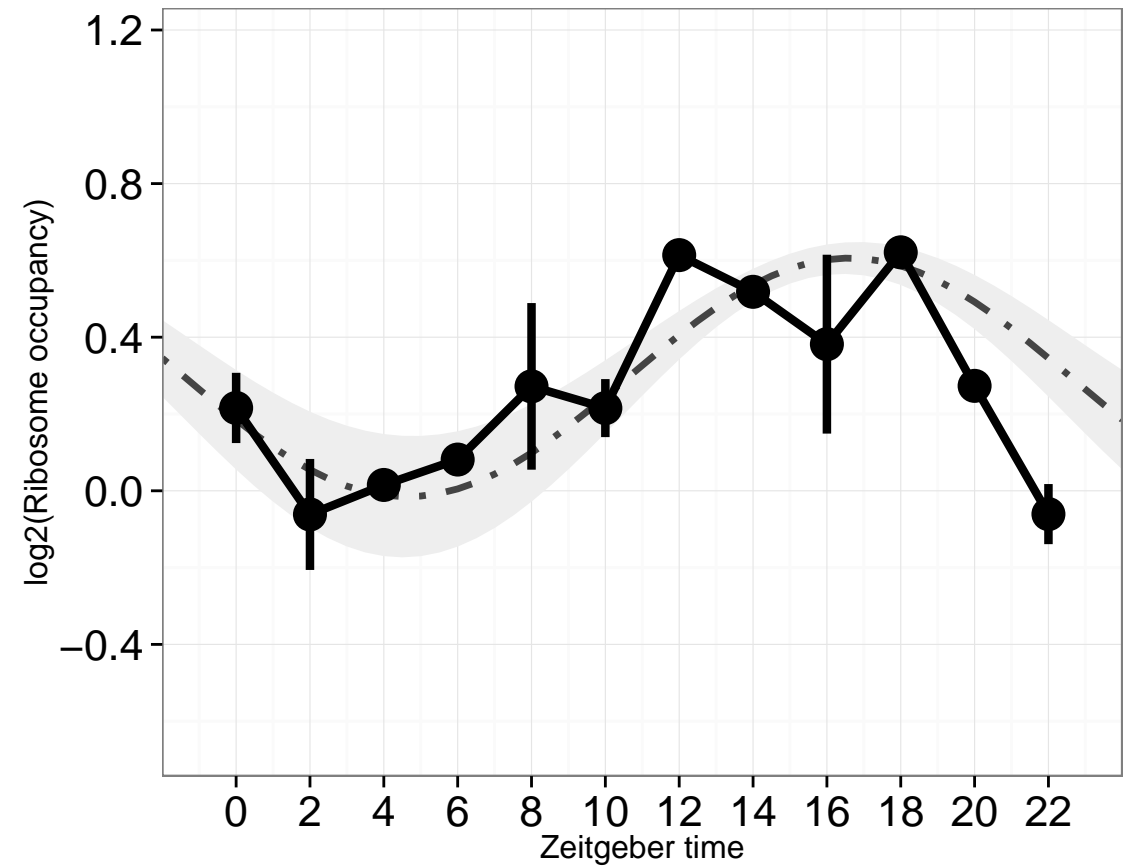

Supplement: SuppDataset_1.zip [file Arf6_set_A.pdf › Supplemental Dataset 1/A-mRNA_nonrhyth_translation_nonrhyth/Arf6_set_A.pdf]

# Arfgap1

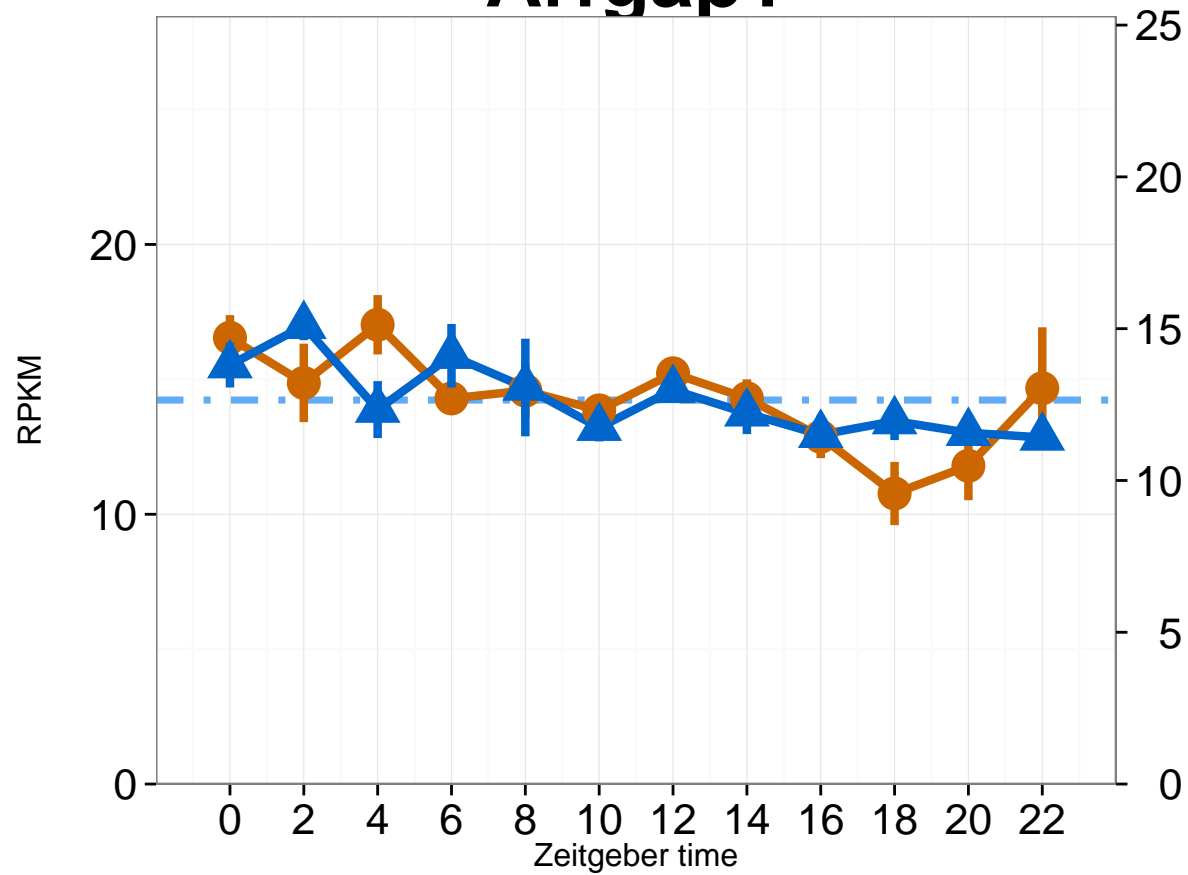

# Arfgap1

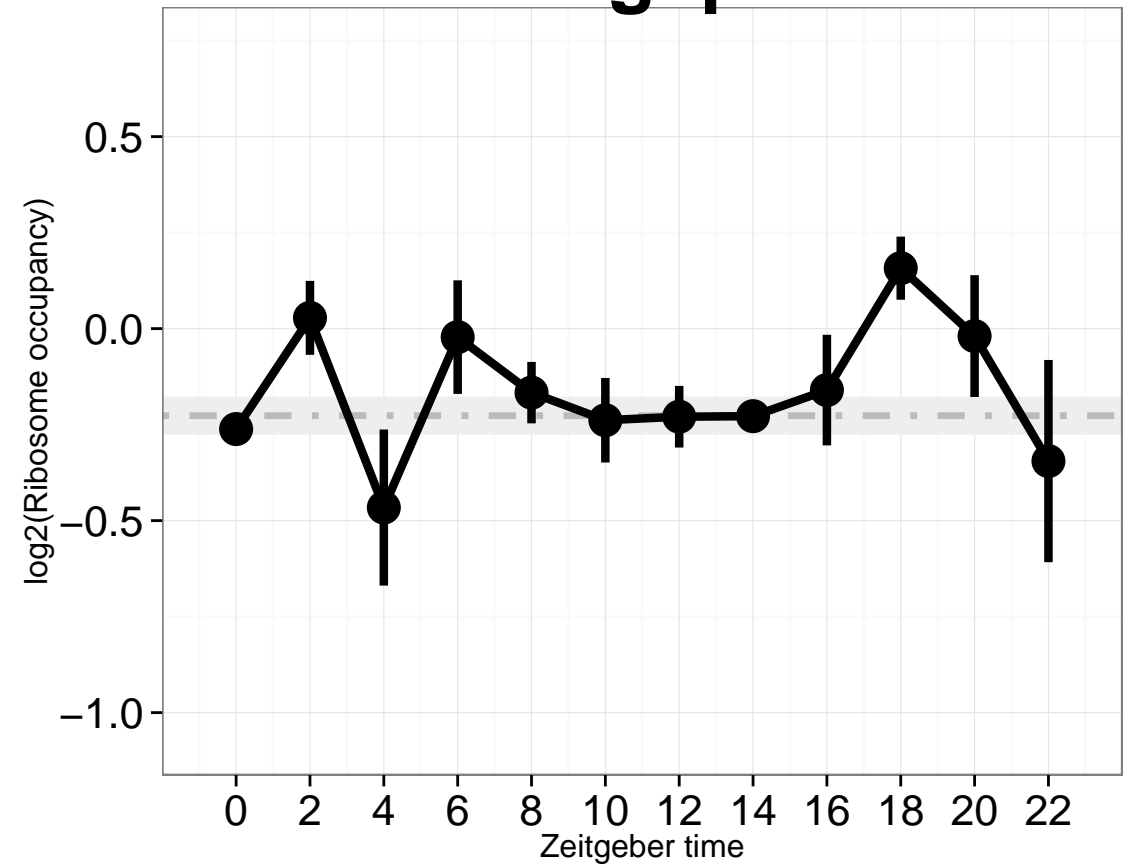

Supplement: SuppDataset_1.zip [file Arfgap1_set_A.pdf › Supplemental Dataset 1/A-mRNA_nonrhyth_translation_nonrhyth/Arfgap1_set_A.pdf]

## Arfgap2

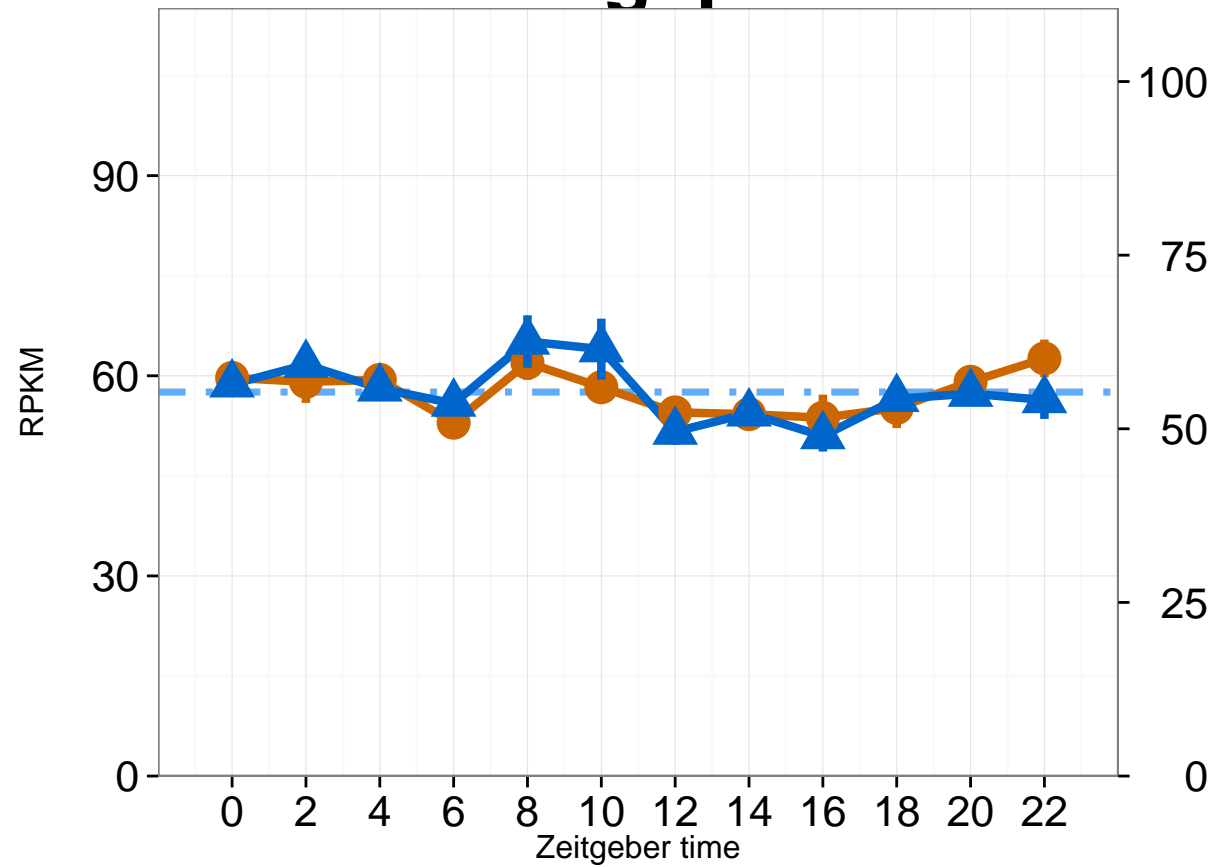

## Arfgap2

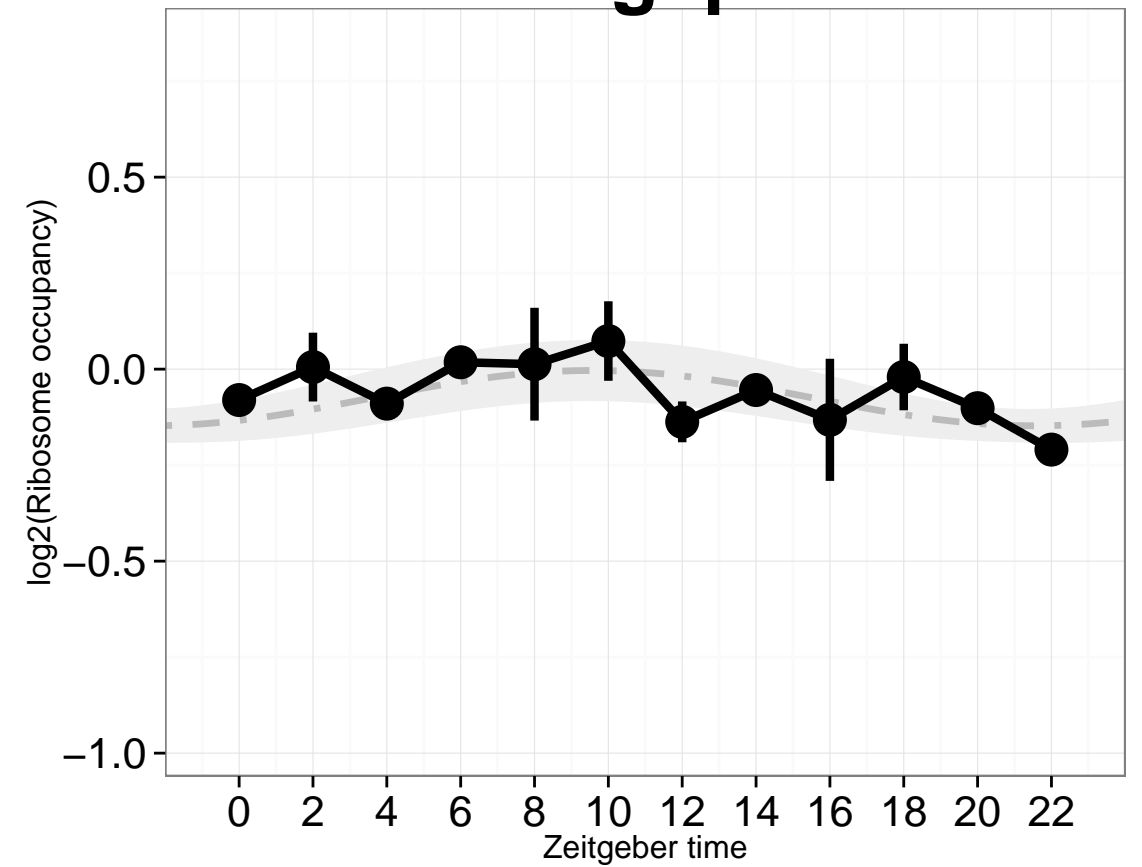

Supplement: SuppDataset_1.zip [file Arfgap2_set_A.pdf › Supplemental Dataset 1/A-mRNA_nonrhyth_translation_nonrhyth/Arfgap2_set_A.pdf]

# Arfgap3

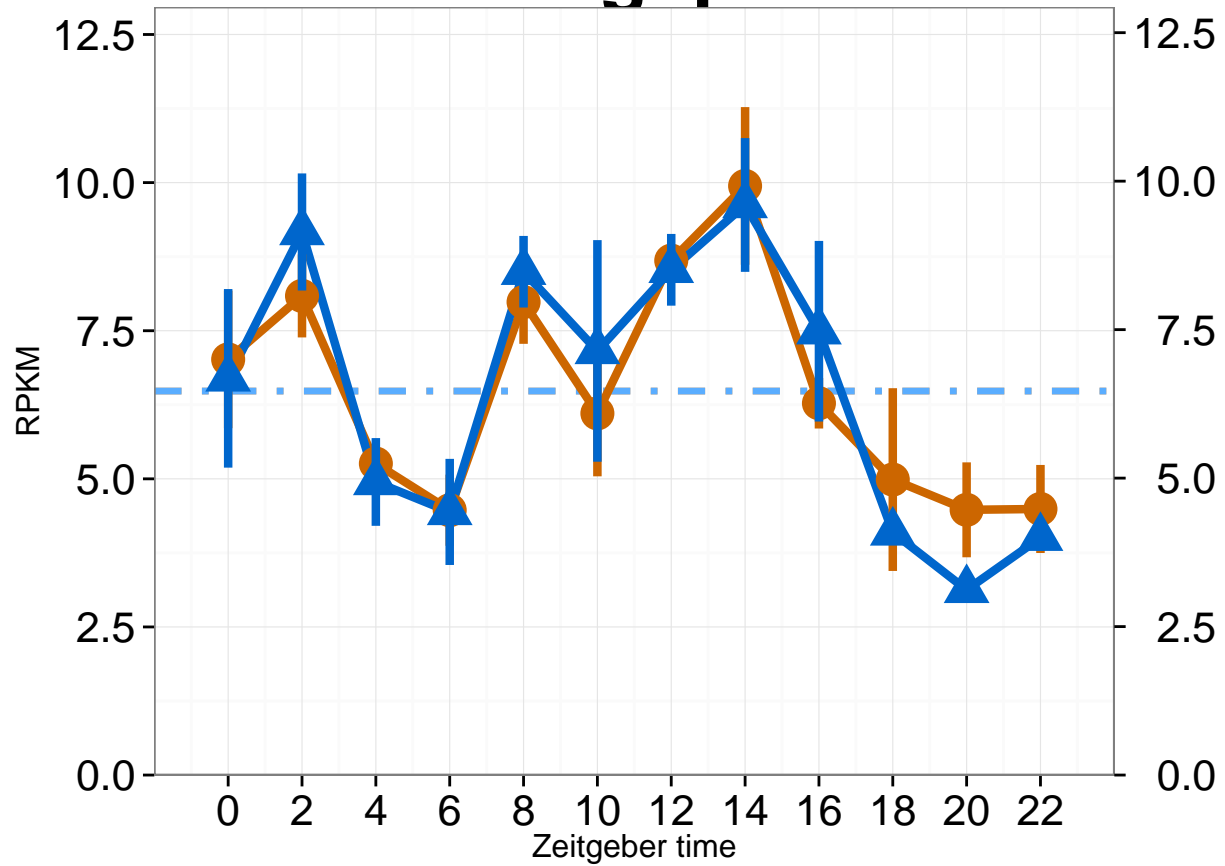

# Arfgap3

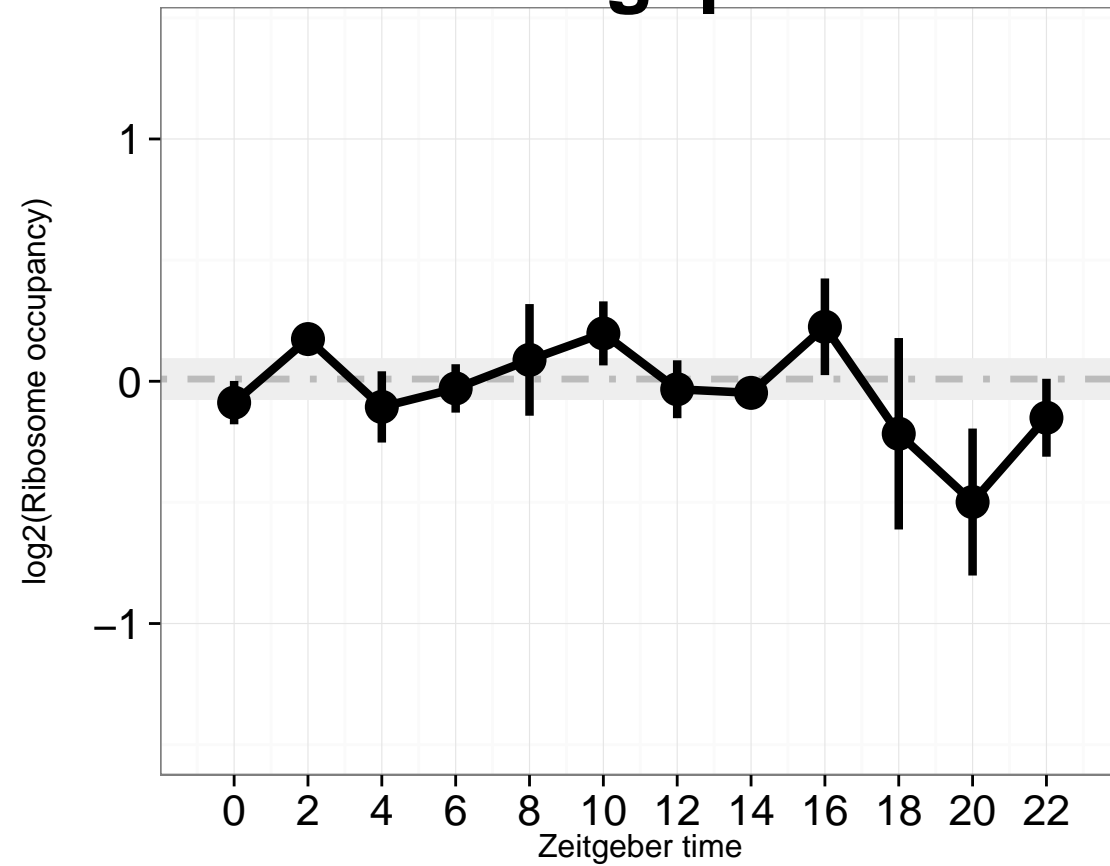

Supplement: SuppDataset_1.zip [file Arfgap3_set_A.pdf › Supplemental Dataset 1/A-mRNA_nonrhyth_translation_nonrhyth/Arfgap3_set_A.pdf]

# Arfgef1

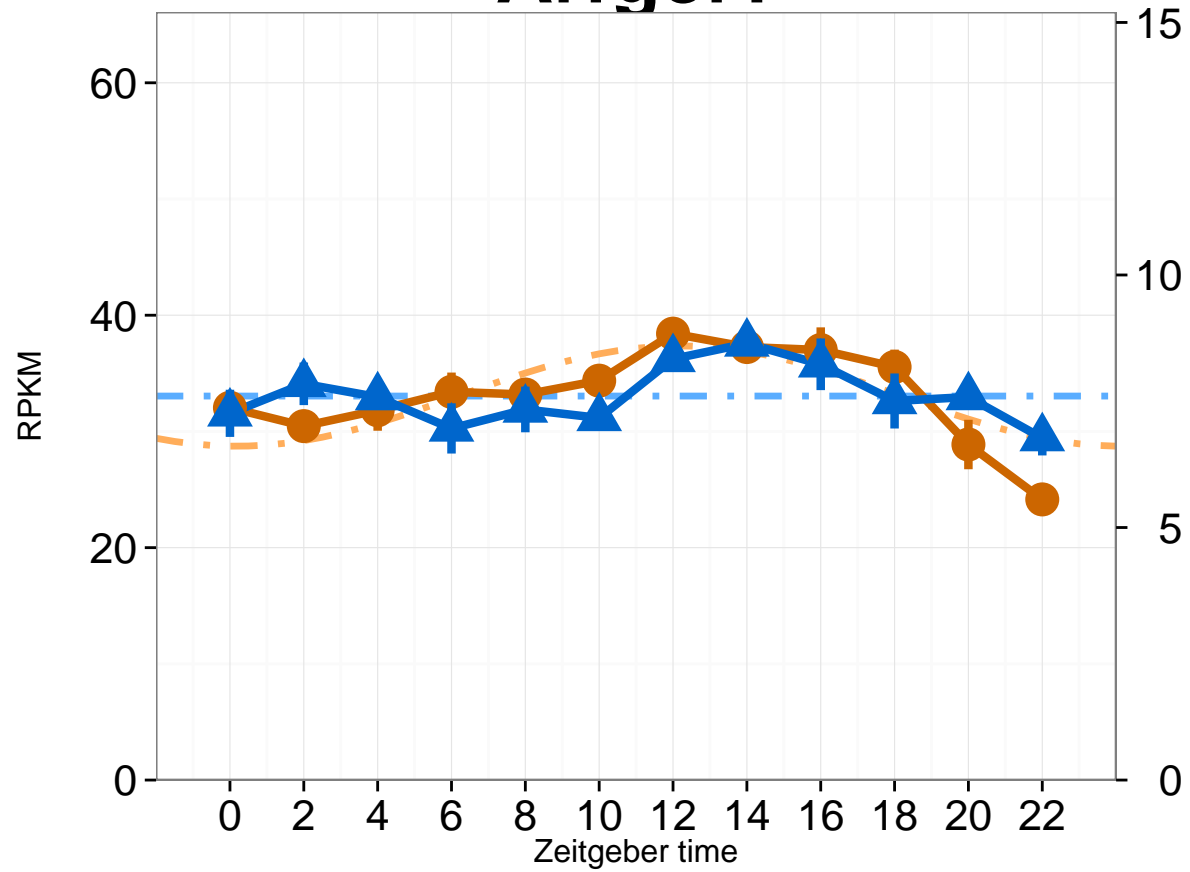

# Arfgef1

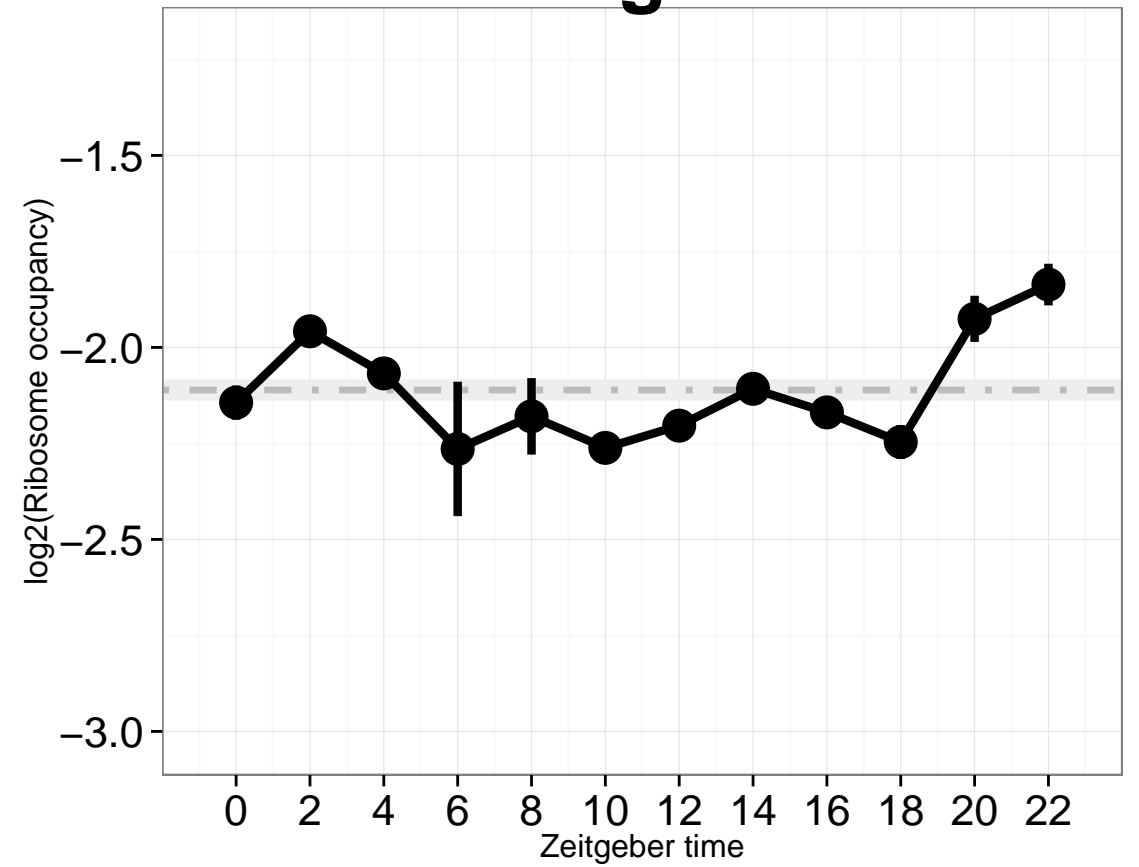

Supplement: SuppDataset_1.zip [file Arfgef1_set_A.pdf › Supplemental Dataset 1/A-mRNA_nonrhyth_translation_nonrhyth/Arfgef1_set_A.pdf]

# Arfgef2

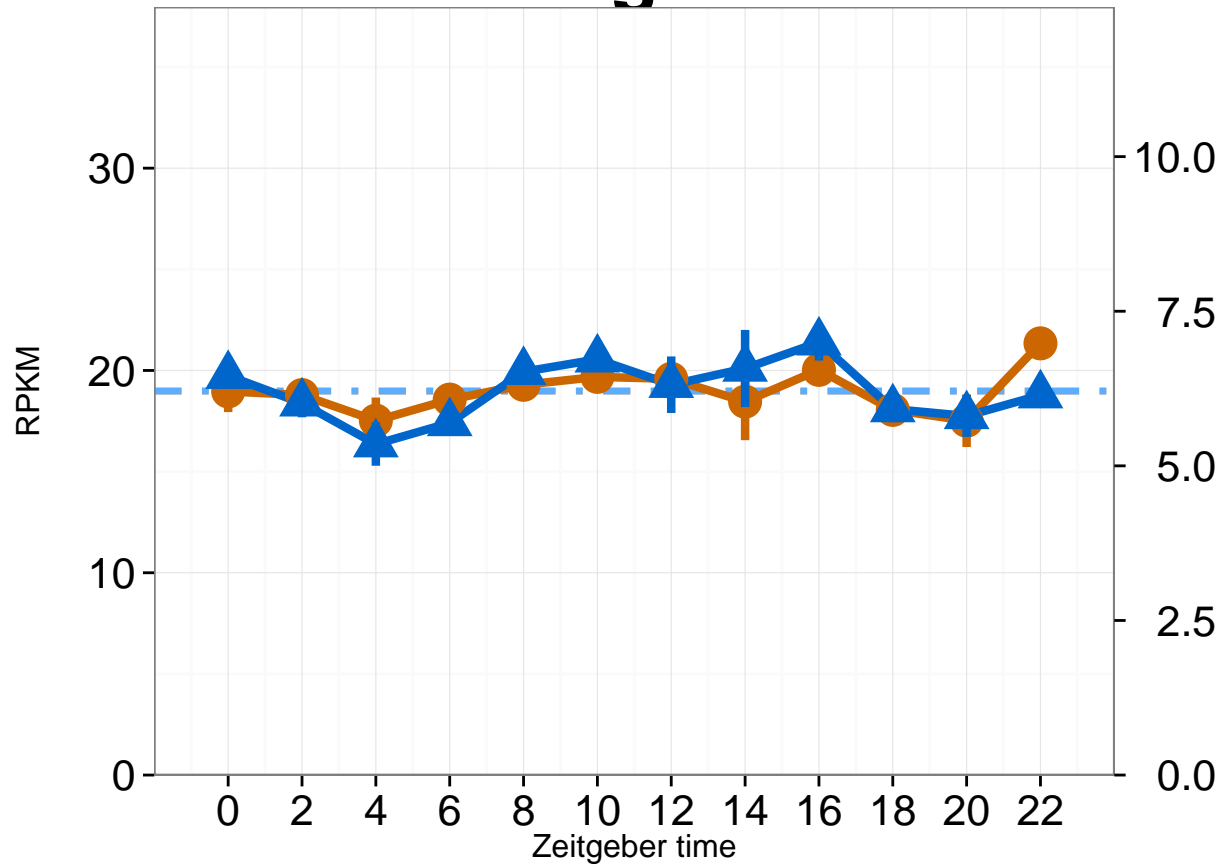

# Arfgef2

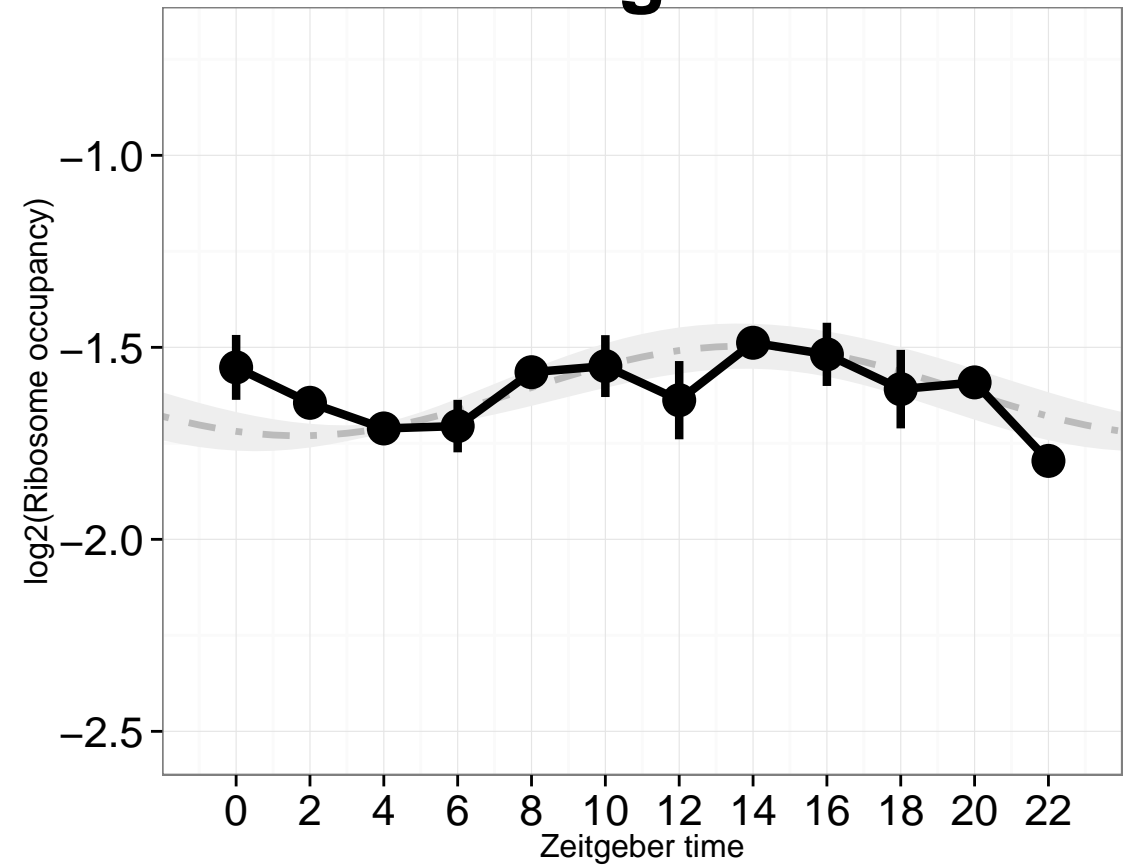

Supplement: SuppDataset_1.zip [file Arfgef2_set_A.pdf › Supplemental Dataset 1/A-mRNA_nonrhyth_translation_nonrhyth/Arfgef2_set_A.pdf]

# Arfip1

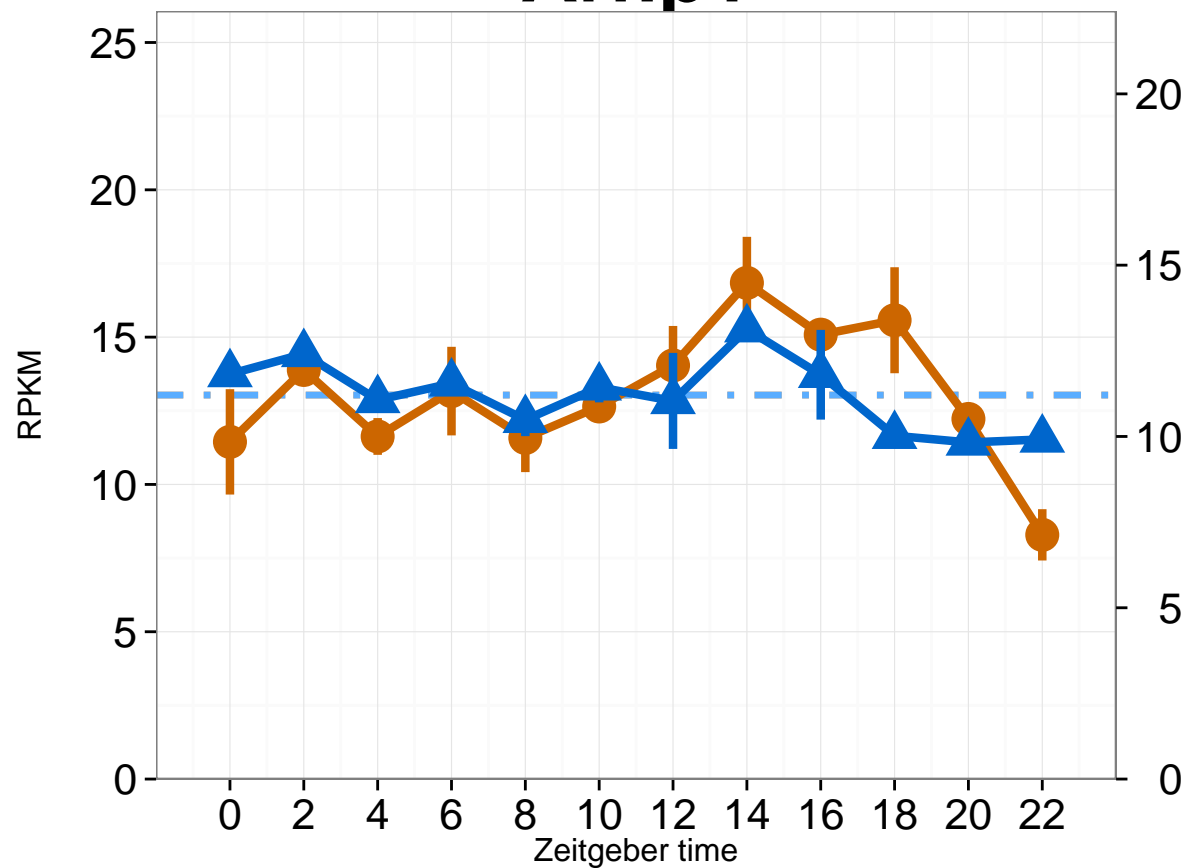

# Arfip1

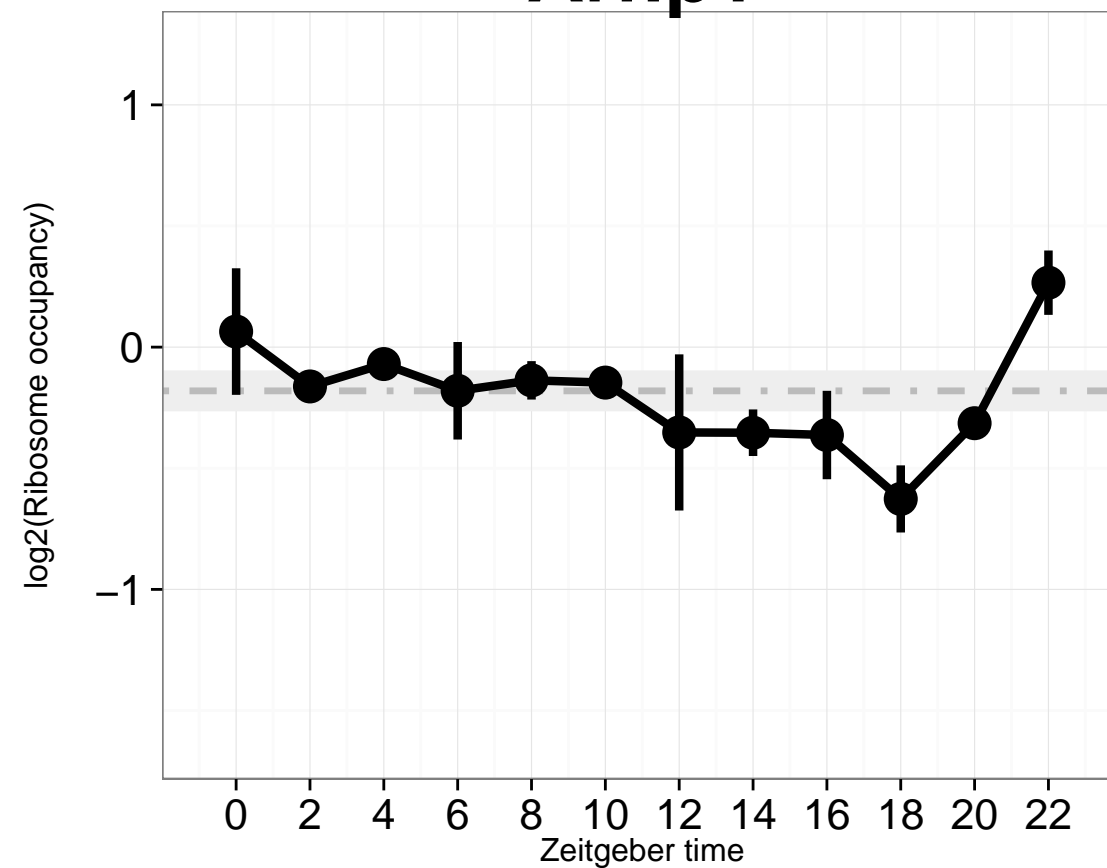

Supplement: SuppDataset_1.zip [file Arfip1_set_A.pdf › Supplemental Dataset 1/A-mRNA_nonrhyth_translation_nonrhyth/Arfip1_set_A.pdf]

## Arfrp1

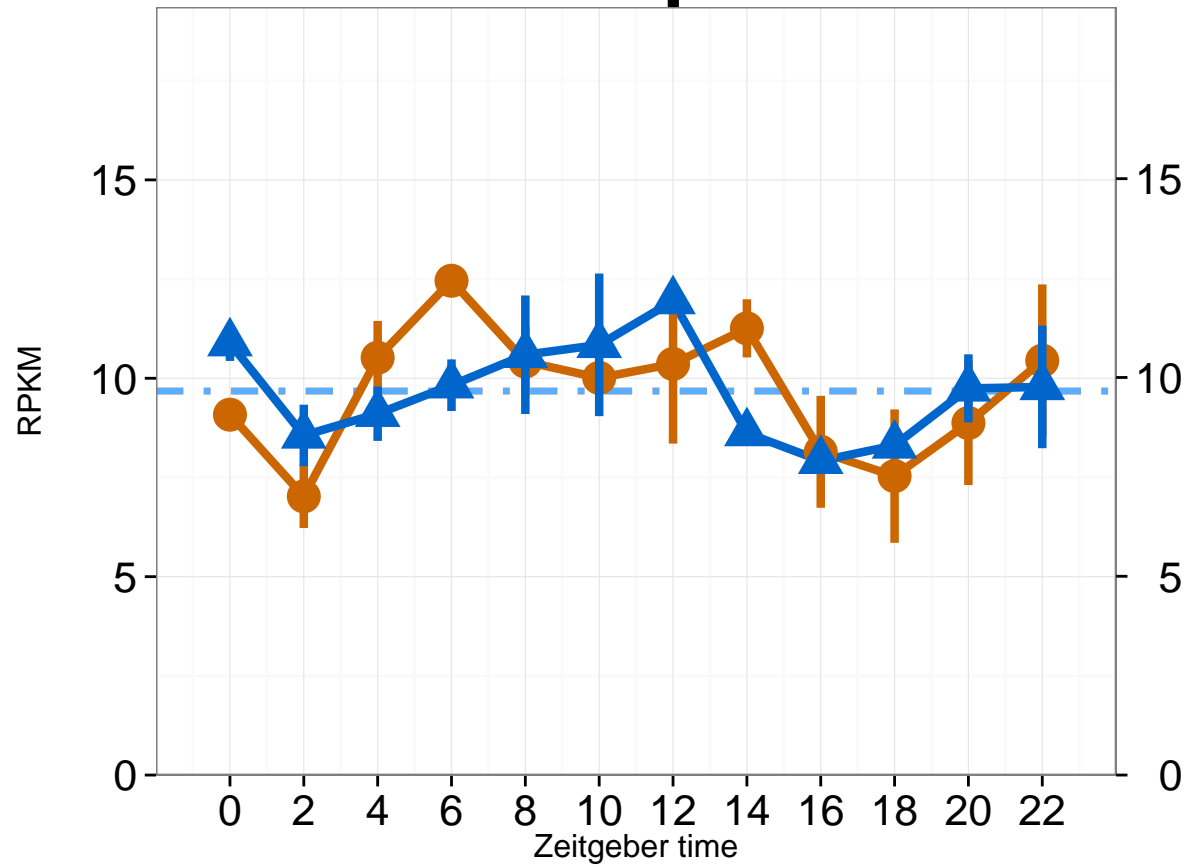

## Arfrp1

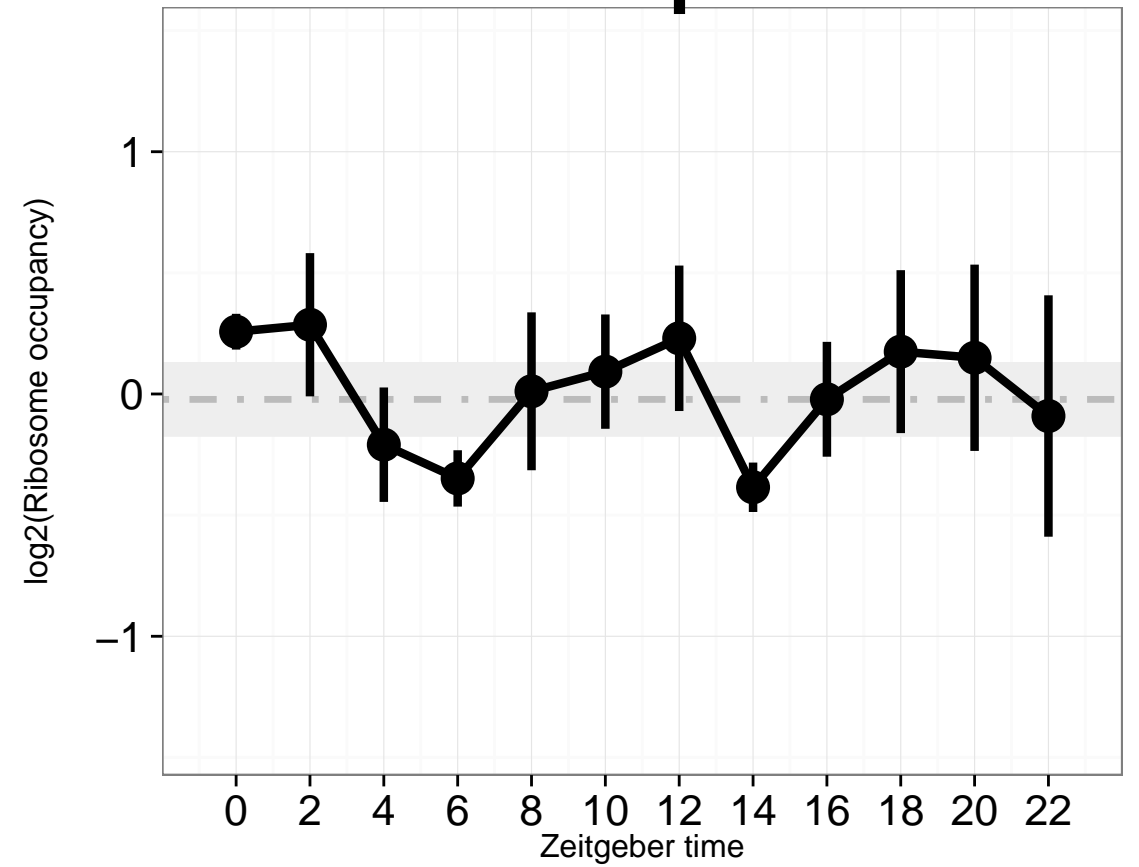

Supplement: SuppDataset_1.zip [file Arfrp1_set_A.pdf › Supplemental Dataset 1/A-mRNA_nonrhyth_translation_nonrhyth/Arfrp1_set_A.pdf]

# Arglu1

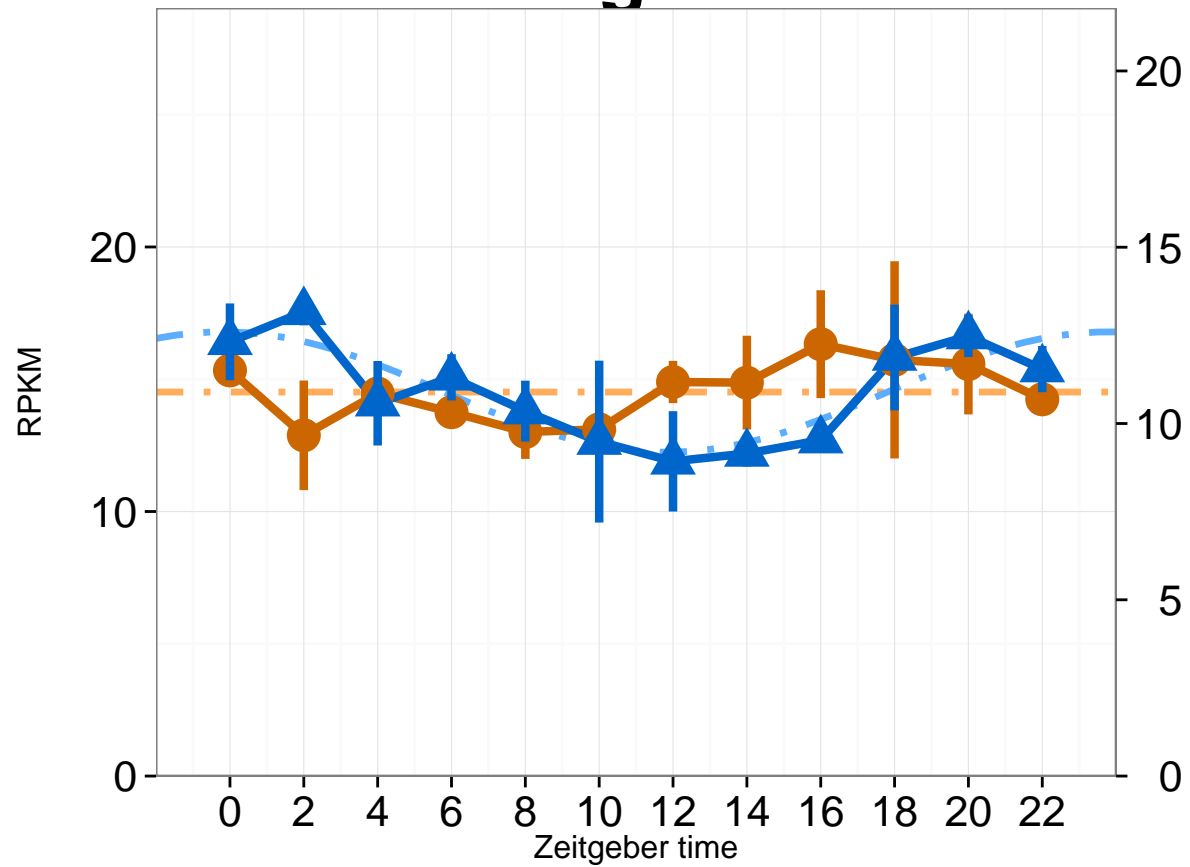

# Arglu1

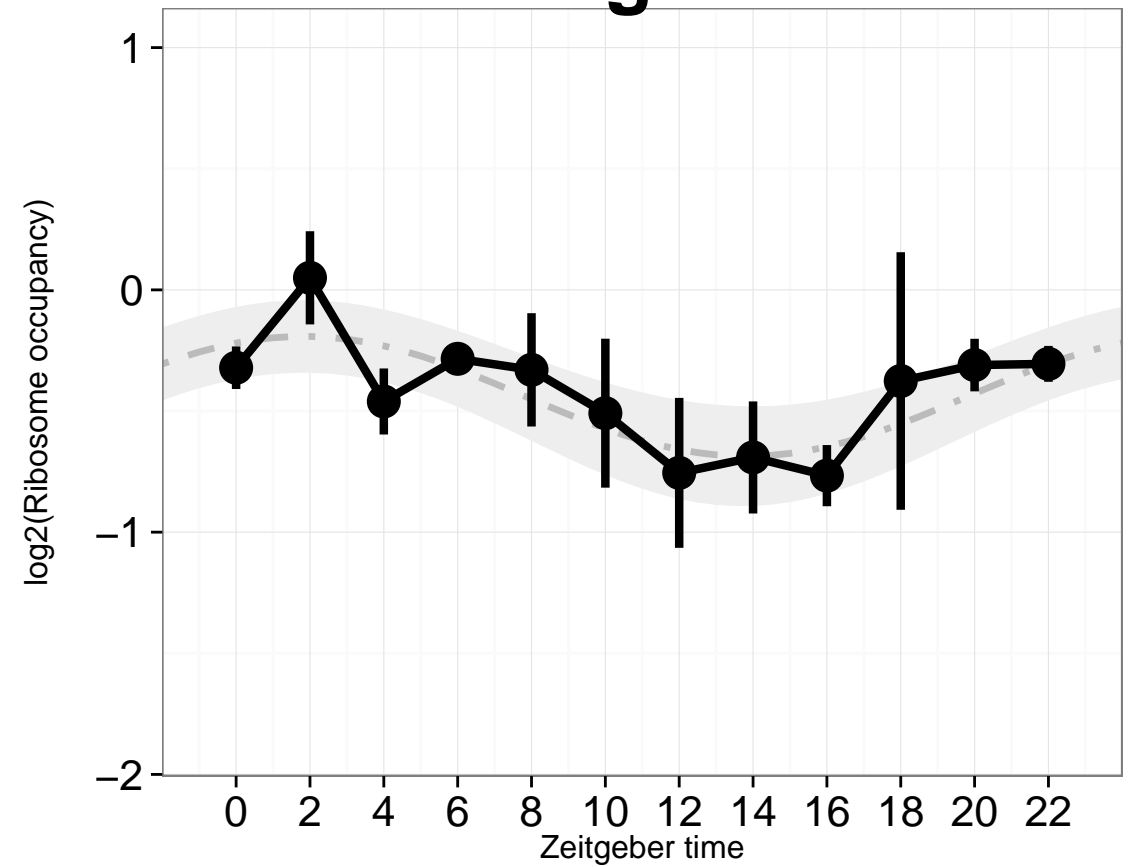

Supplement: SuppDataset_1.zip [file Arglu1_set_A.pdf › Supplemental Dataset 1/A-mRNA_nonrhyth_translation_nonrhyth/Arglu1_set_A.pdf]

# Arhgap11a

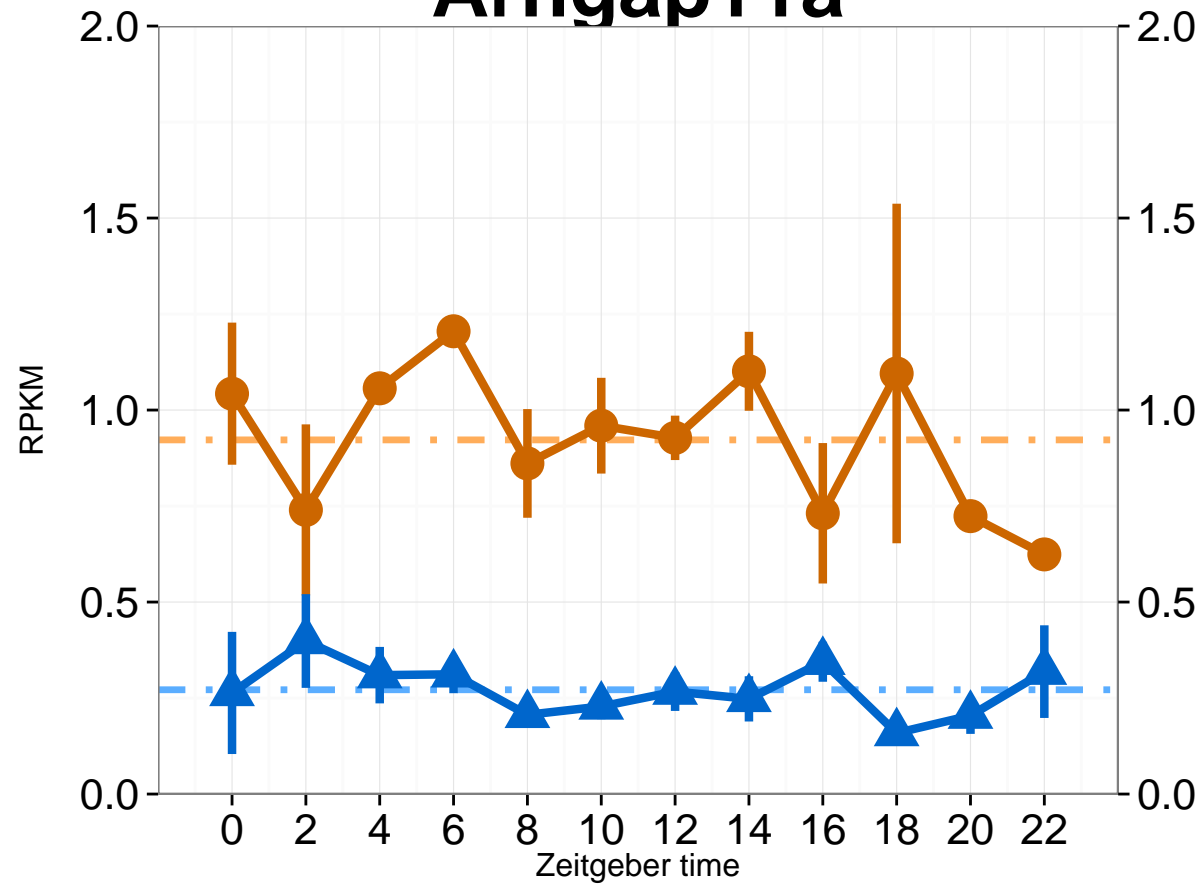

# Arhgap11a

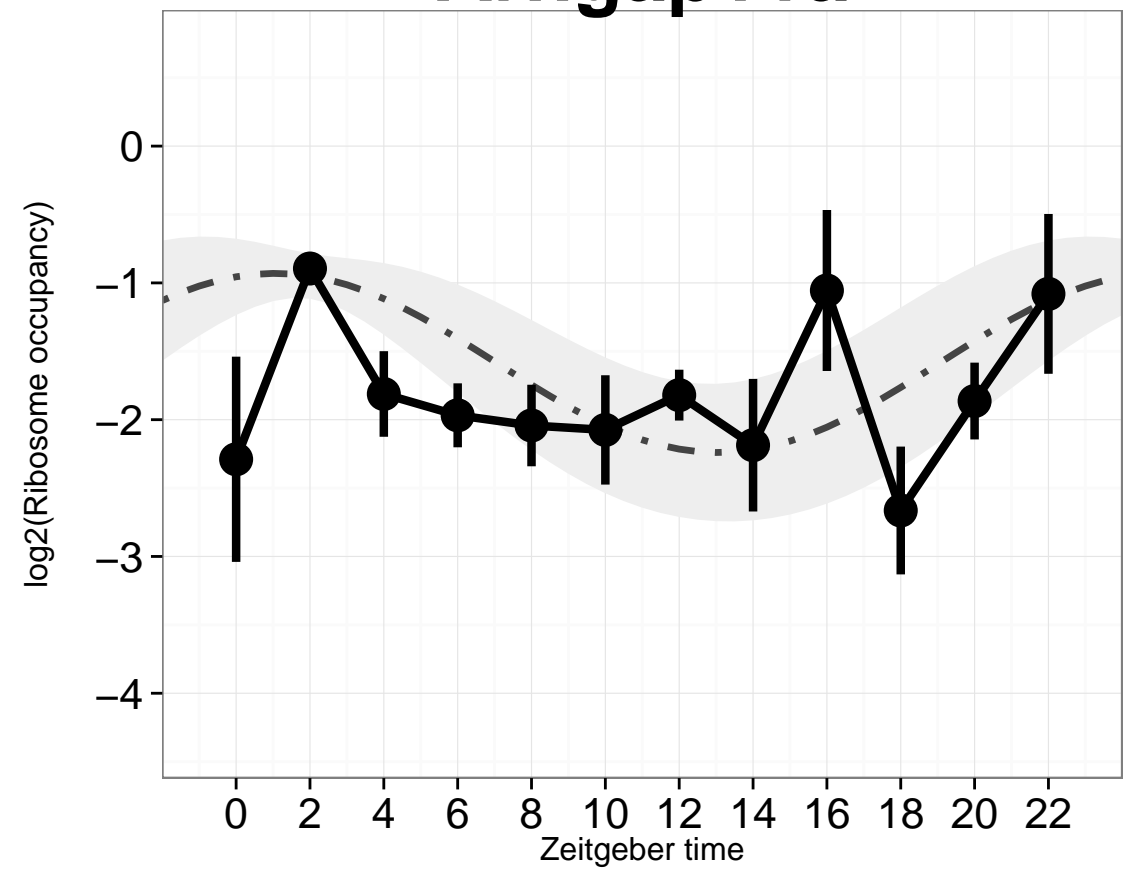

Supplement: SuppDataset_1.zip [file Arhgap11a_set_A.pdf › Supplemental Dataset 1/A-mRNA_nonrhyth_translation_nonrhyth/Arhgap11a_set_A.pdf]

# Arhgap12

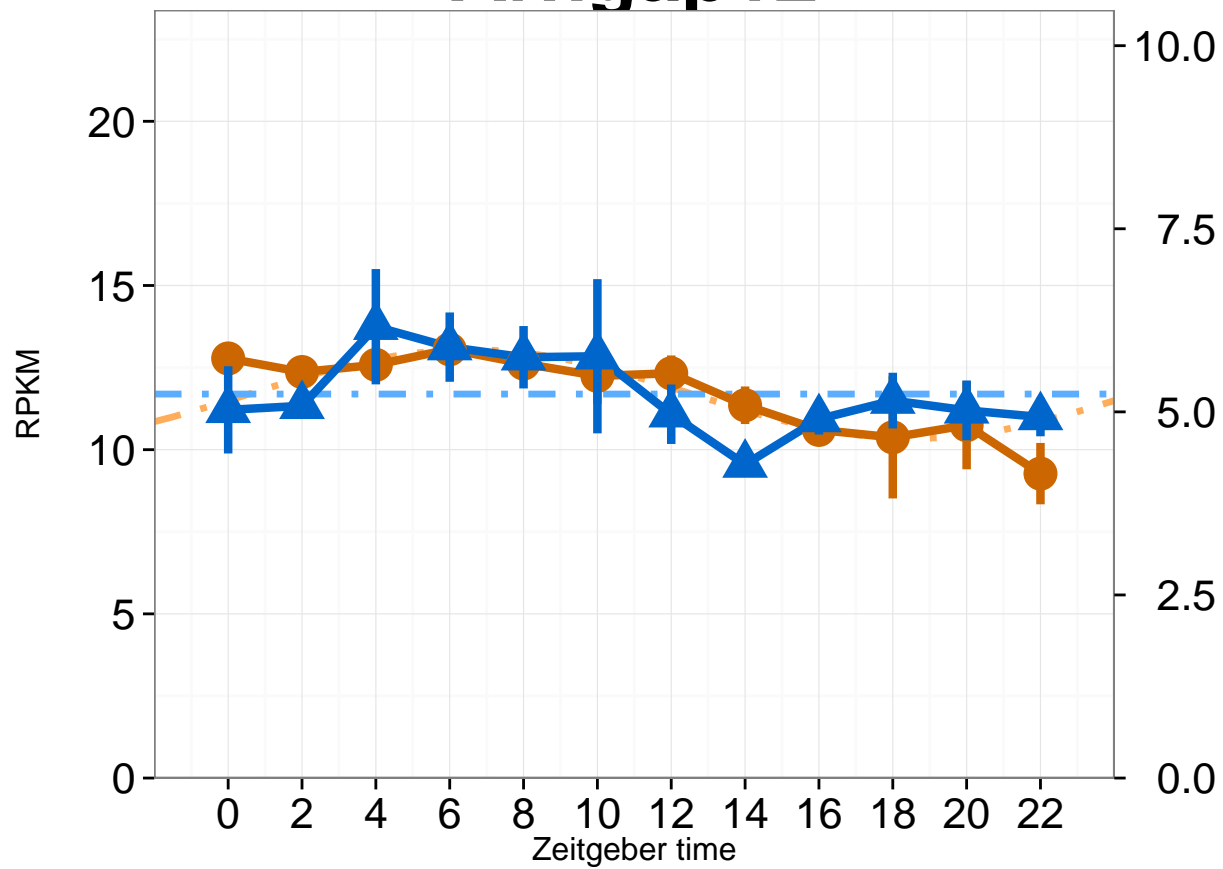

# Arhgap12

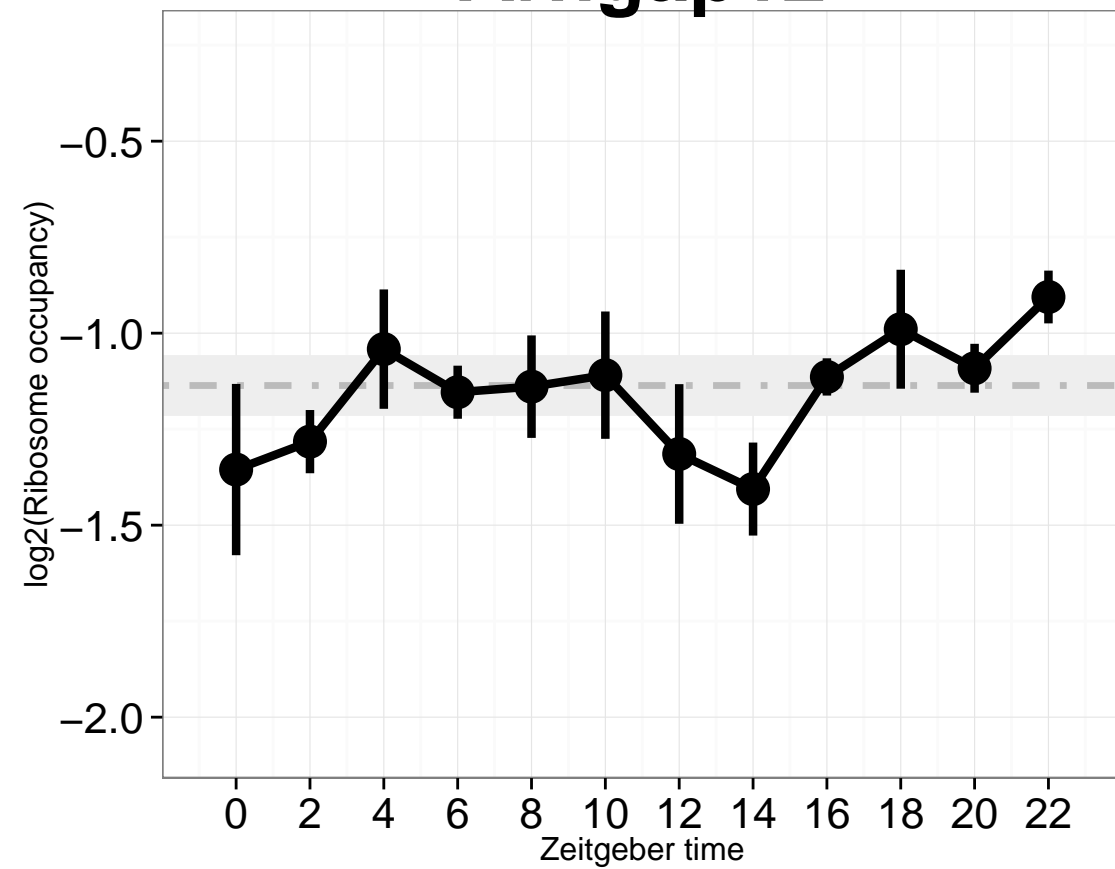

Supplement: SuppDataset_1.zip [file Arhgap12_set_A.pdf › Supplemental Dataset 1/A-mRNA_nonrhyth_translation_nonrhyth/Arhgap12_set_A.pdf]

# Arhgap15

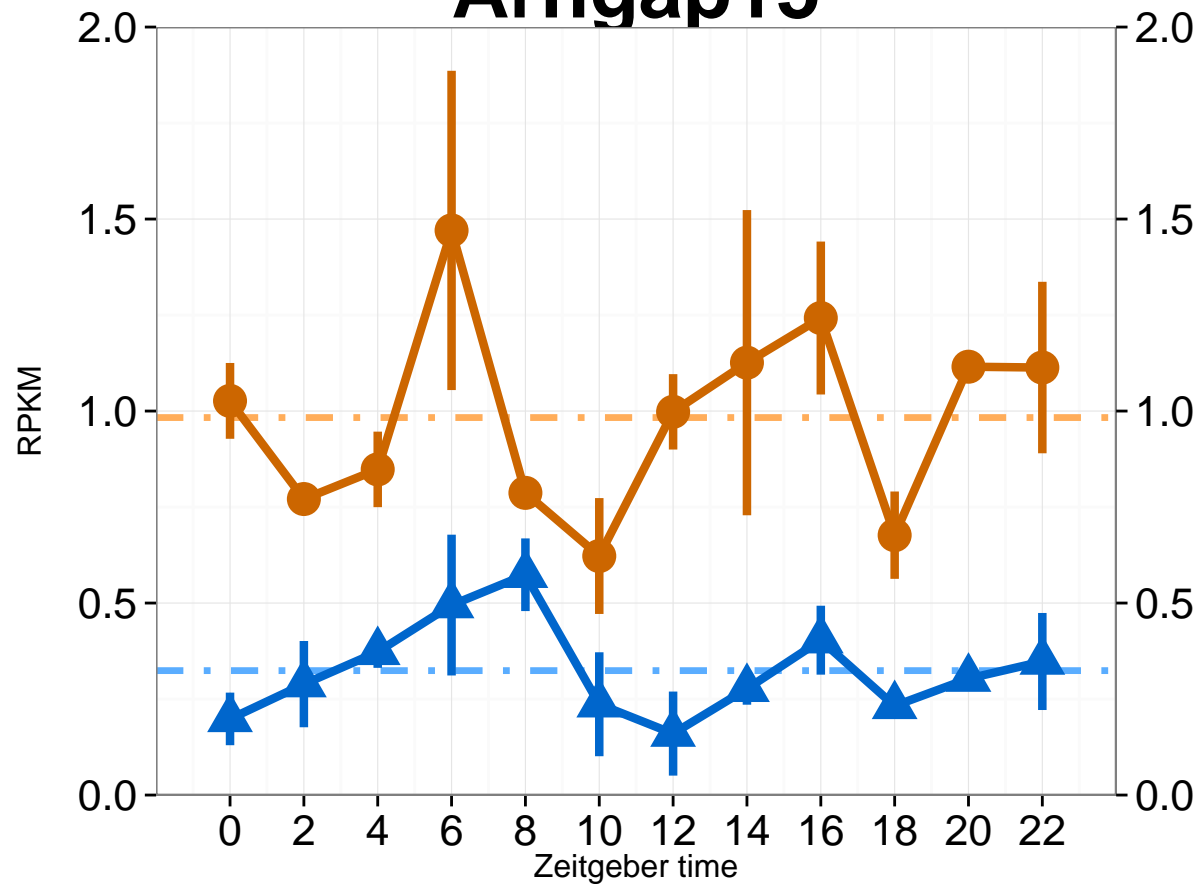

# Arhgap15

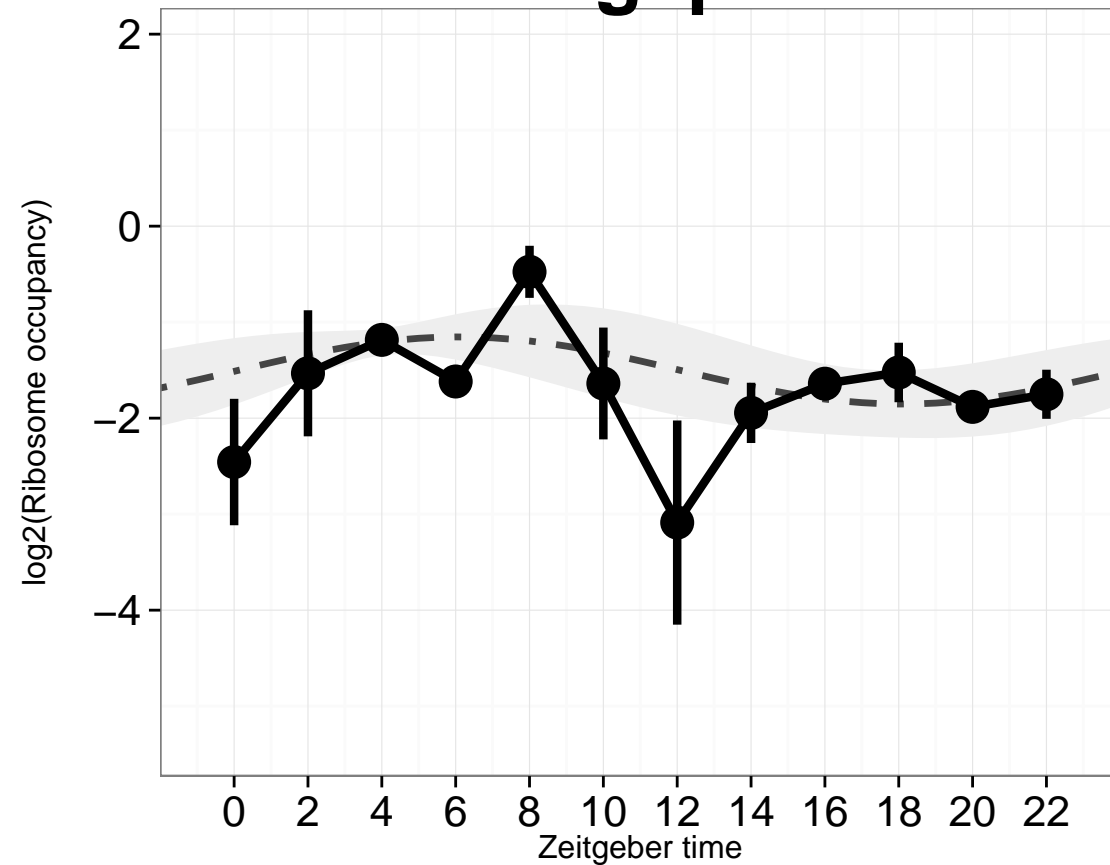

Supplement: SuppDataset_1.zip [file Arhgap15_set_A.pdf › Supplemental Dataset 1/A-mRNA_nonrhyth_translation_nonrhyth/Arhgap15_set_A.pdf]

# Arhgap17

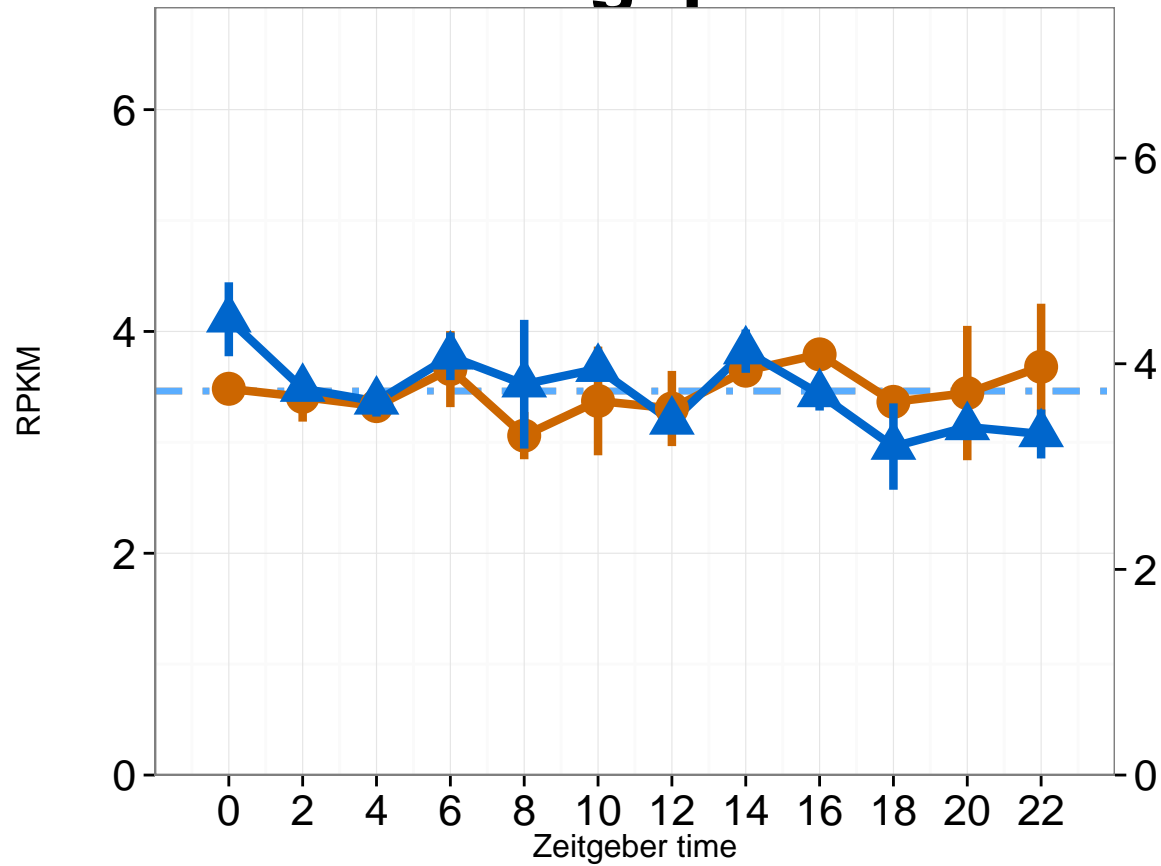

# Arhgap17

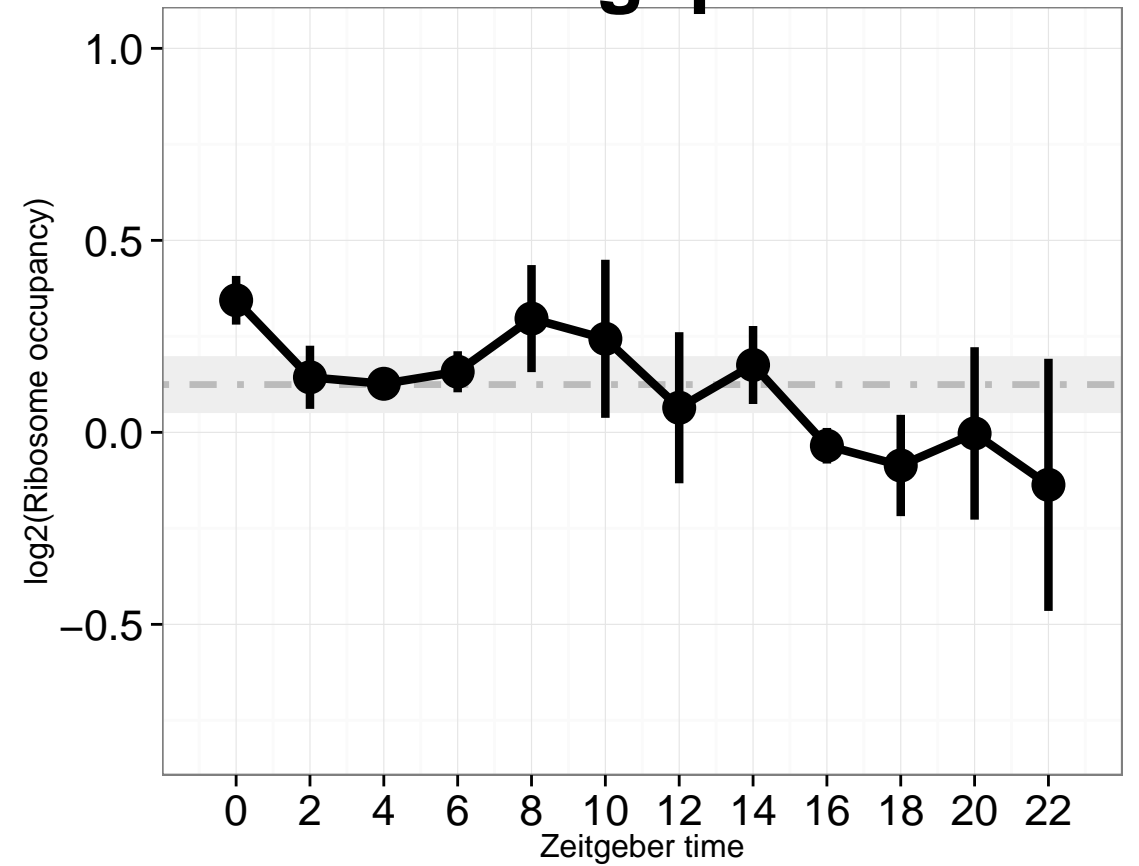

Supplement: SuppDataset_1.zip [file Arhgap17_set_A.pdf › Supplemental Dataset 1/A-mRNA_nonrhyth_translation_nonrhyth/Arhgap17_set_A.pdf]

# Arhgap19

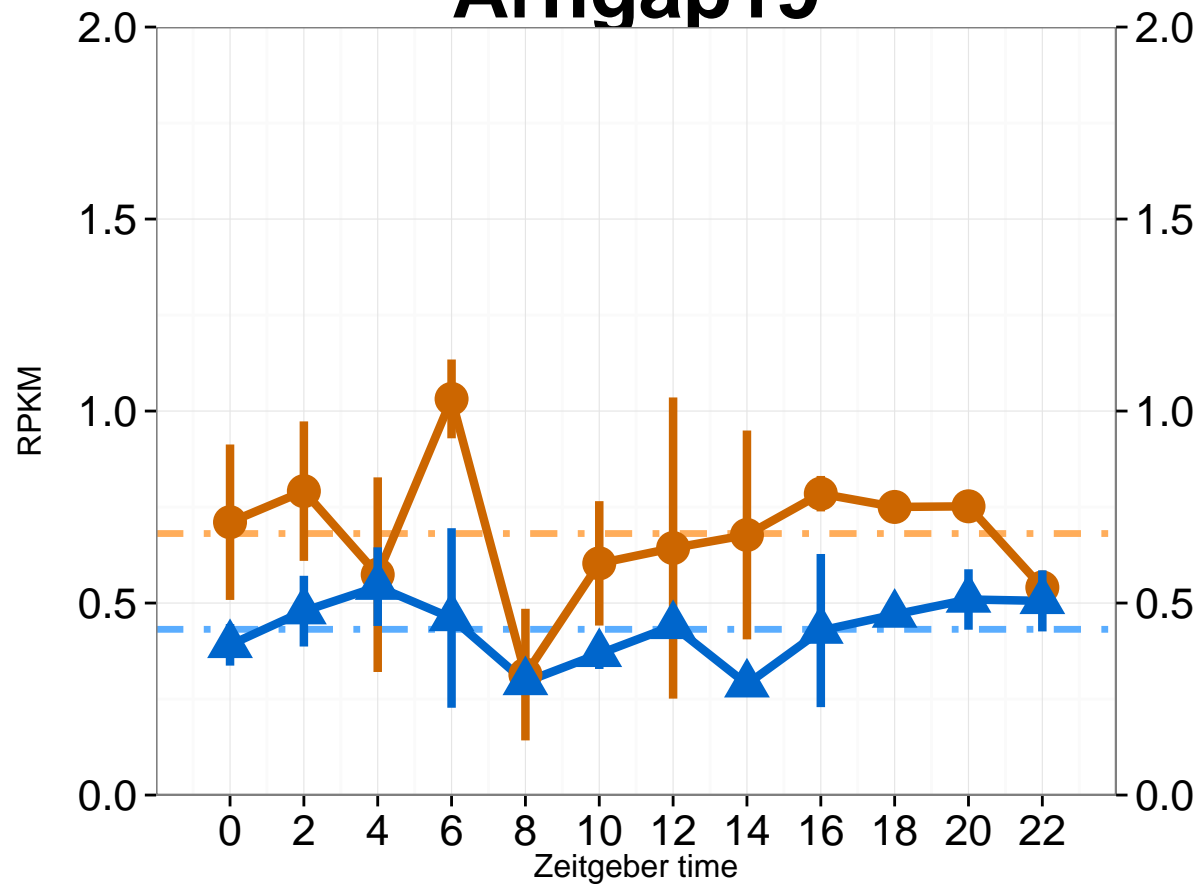

# Arhgap19

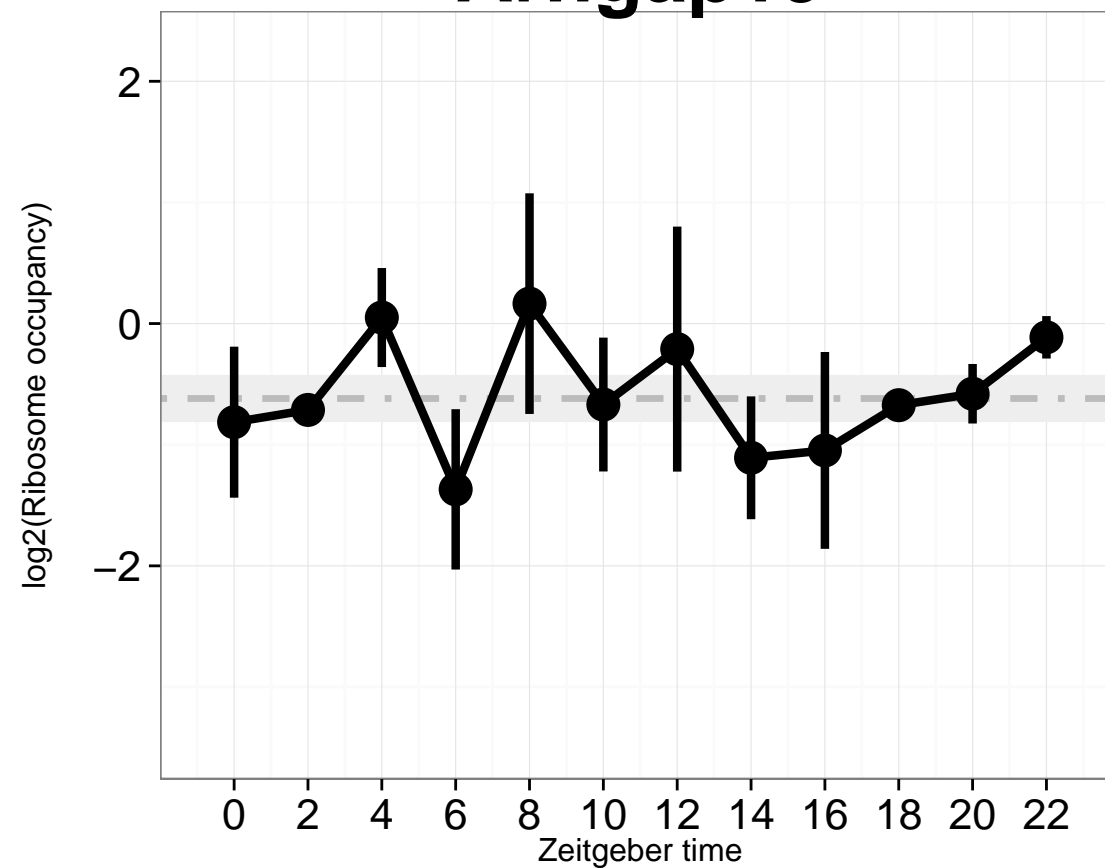

Supplement: SuppDataset_1.zip [file Arhgap19_set_A.pdf › Supplemental Dataset 1/A-mRNA_nonrhyth_translation_nonrhyth/Arhgap19_set_A.pdf]

# Arhgap1

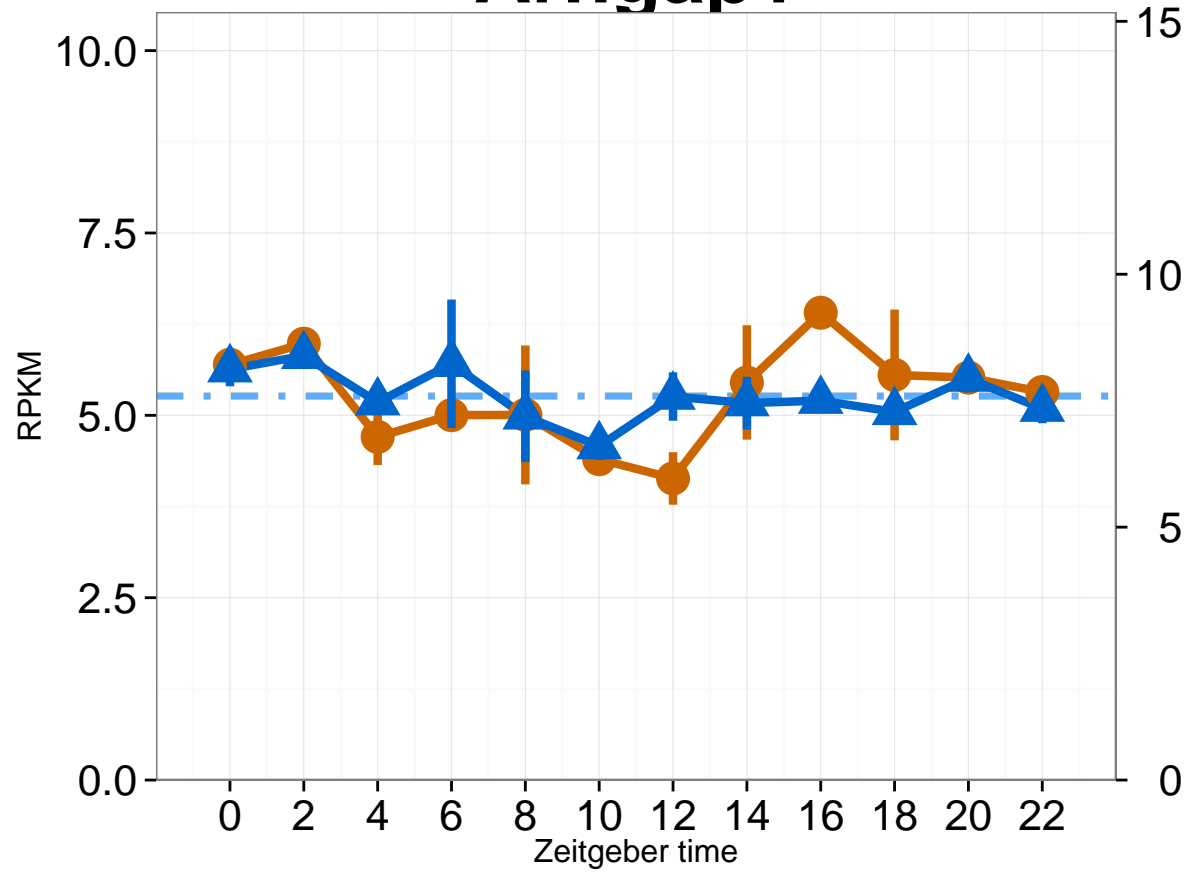

# Arhgap1

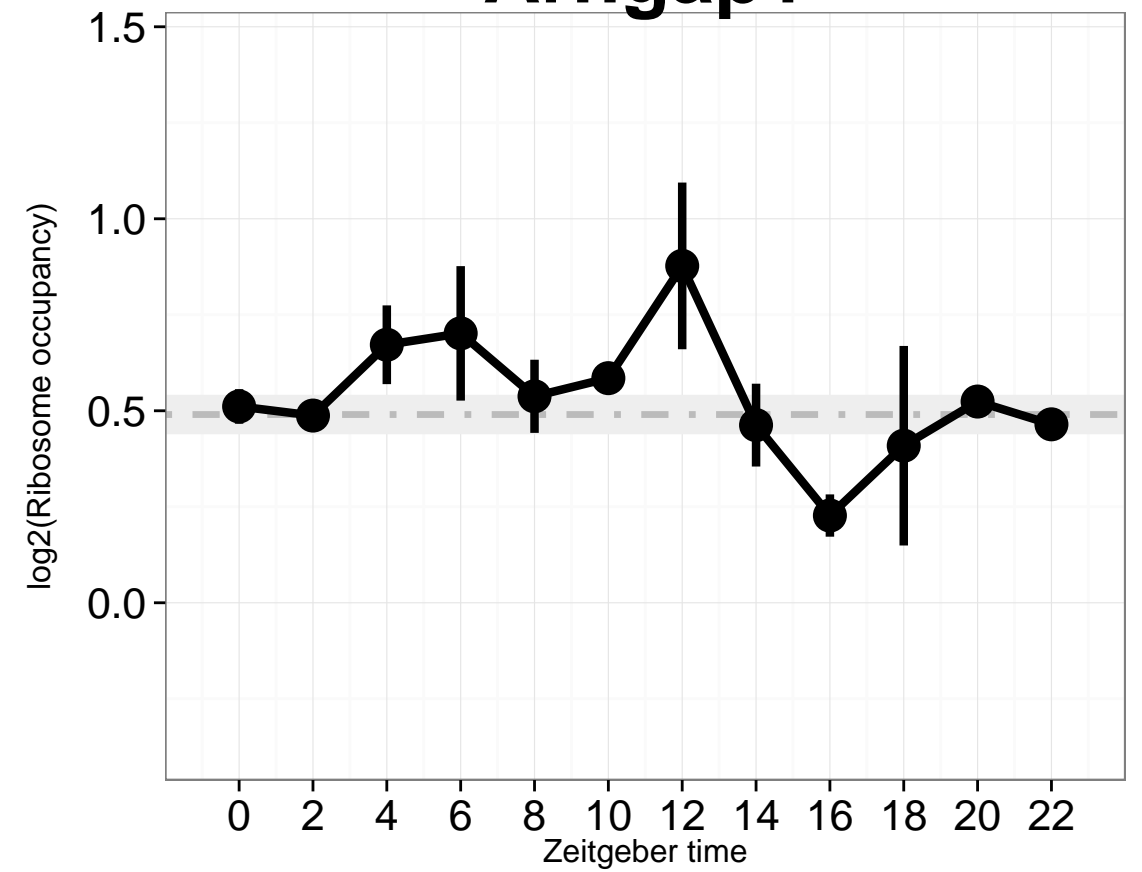

Supplement: SuppDataset_1.zip [file Arhgap1_set_A.pdf › Supplemental Dataset 1/A-mRNA_nonrhyth_translation_nonrhyth/Arhgap1_set_A.pdf]

# Arhgap23

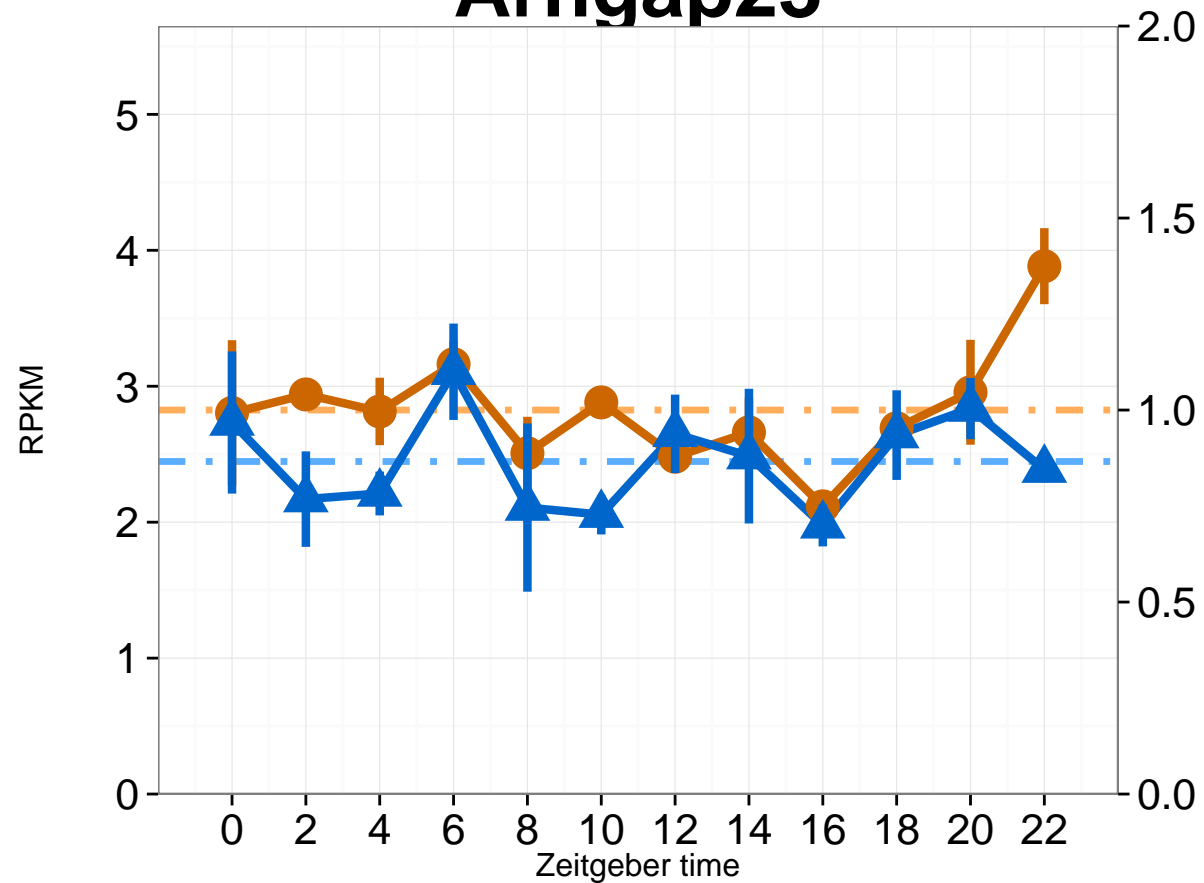

# Arhgap23

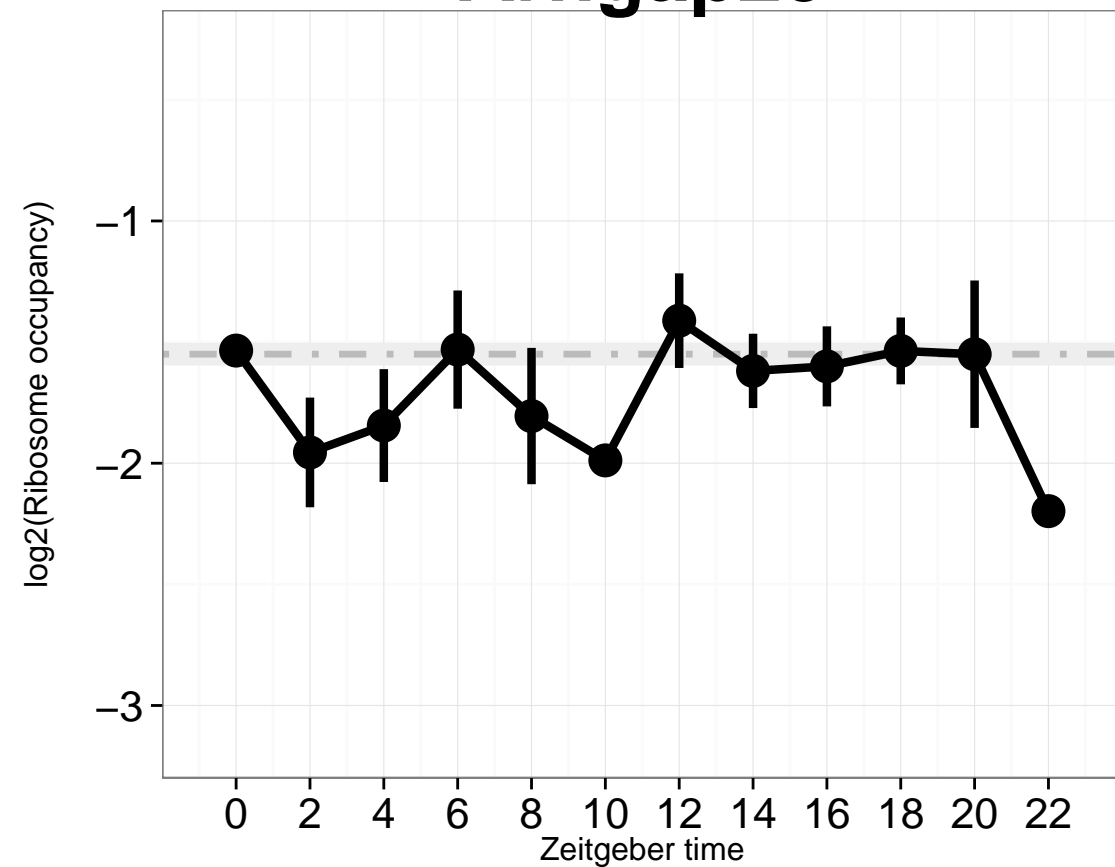

Supplement: SuppDataset_1.zip [file Arhgap23_set_A.pdf › Supplemental Dataset 1/A-mRNA_nonrhyth_translation_nonrhyth/Arhgap23_set_A.pdf]

# Arhgap25

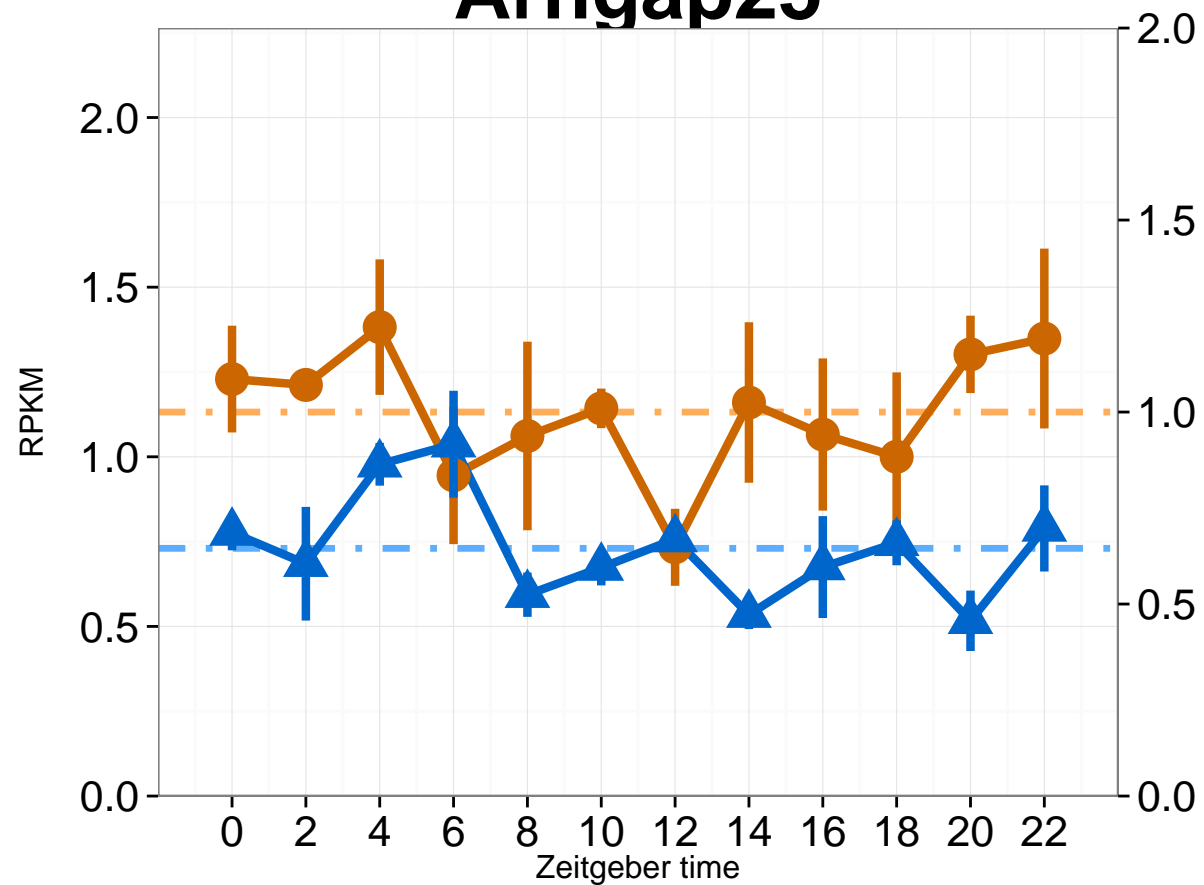

# Arhgap25

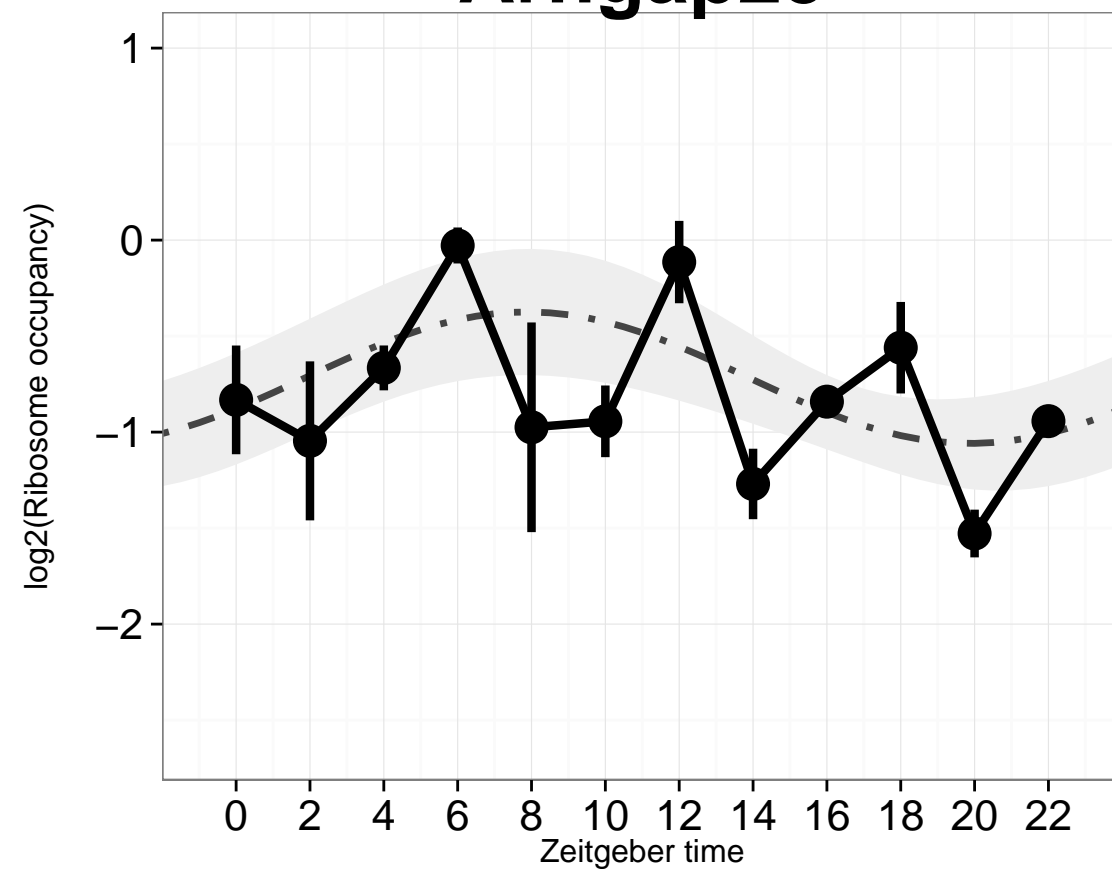

Supplement: SuppDataset_1.zip [file Arhgap25_set_A.pdf › Supplemental Dataset 1/A-mRNA_nonrhyth_translation_nonrhyth/Arhgap25_set_A.pdf]

# Arhgap27

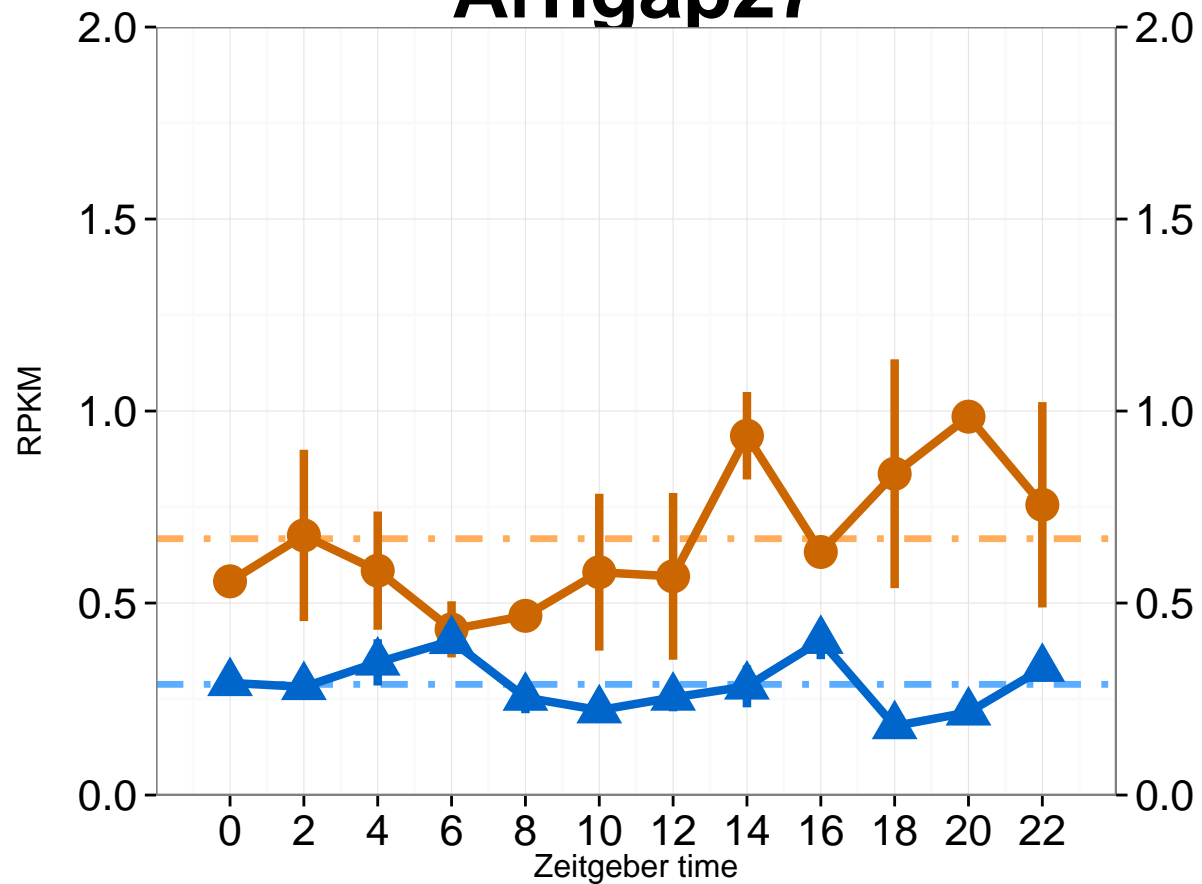

# Arhgap27

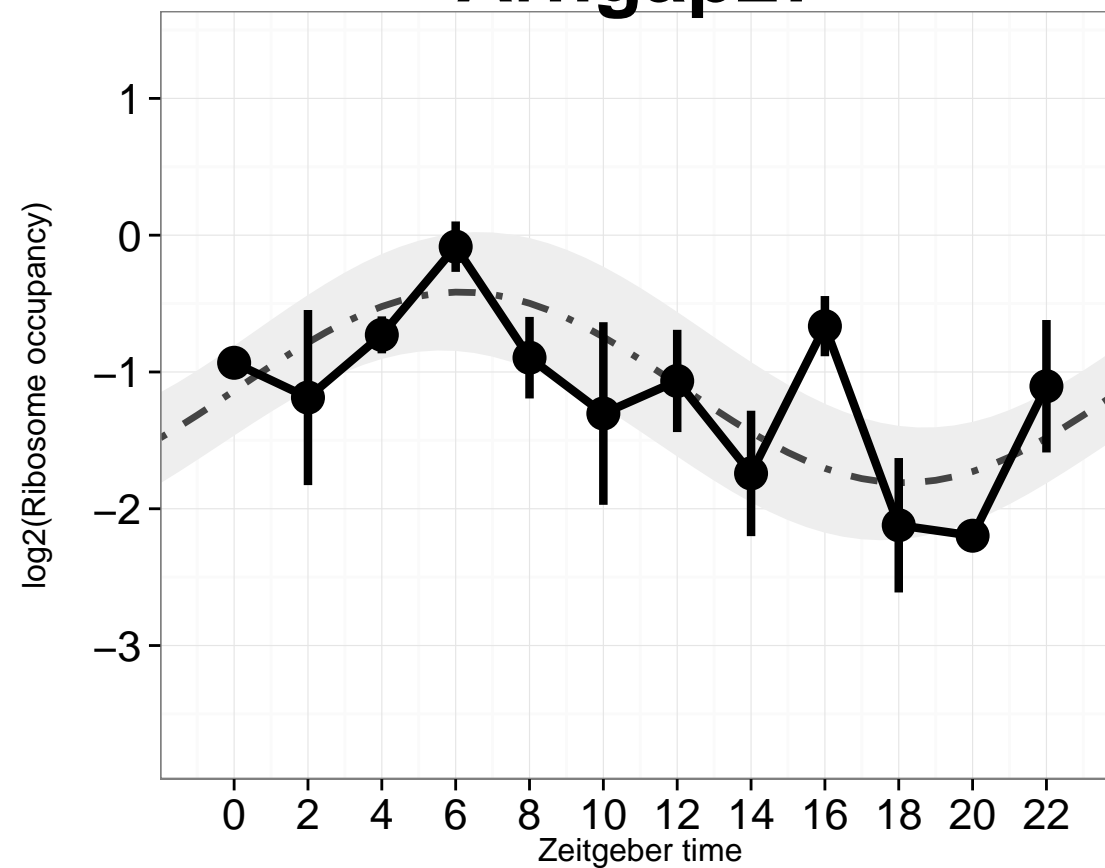

Supplement: SuppDataset_1.zip [file Arhgap27_set_A.pdf › Supplemental Dataset 1/A-mRNA_nonrhyth_translation_nonrhyth/Arhgap27_set_A.pdf]

# Arhgap29

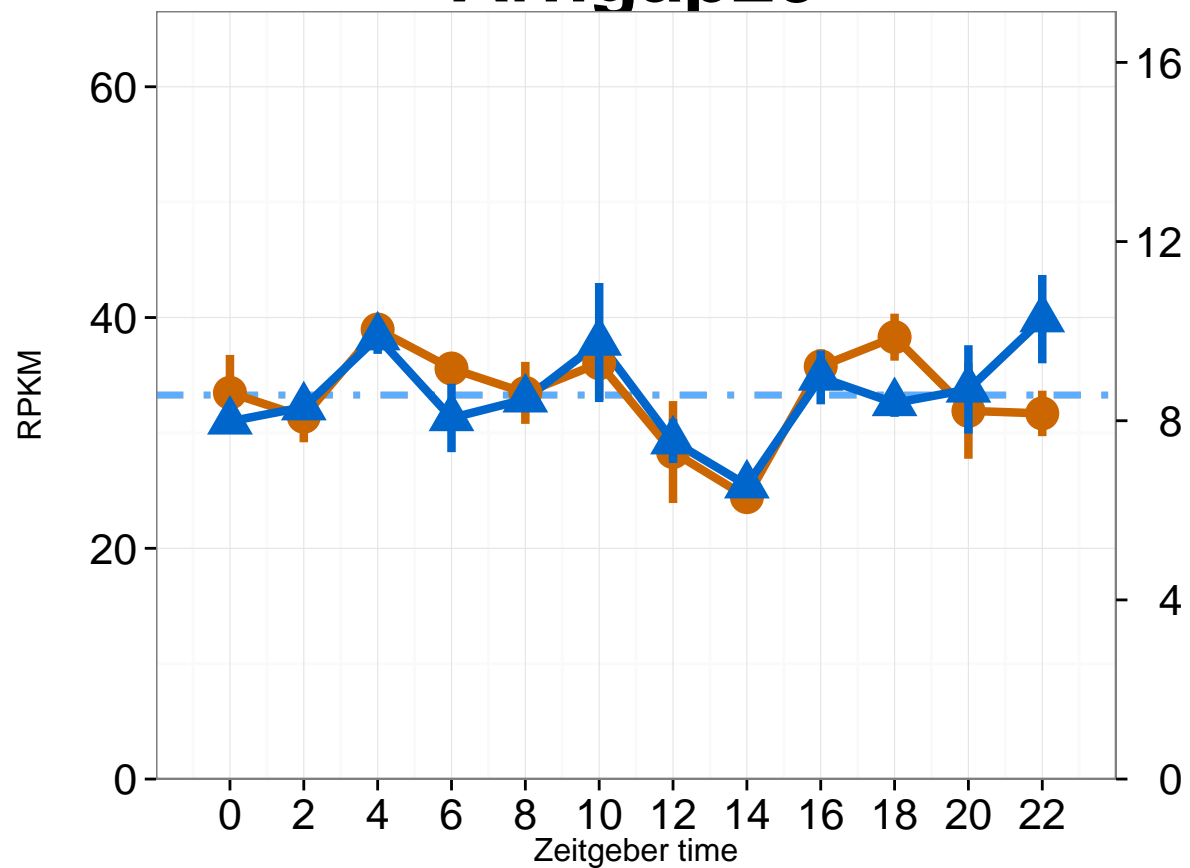

# Arhgap29

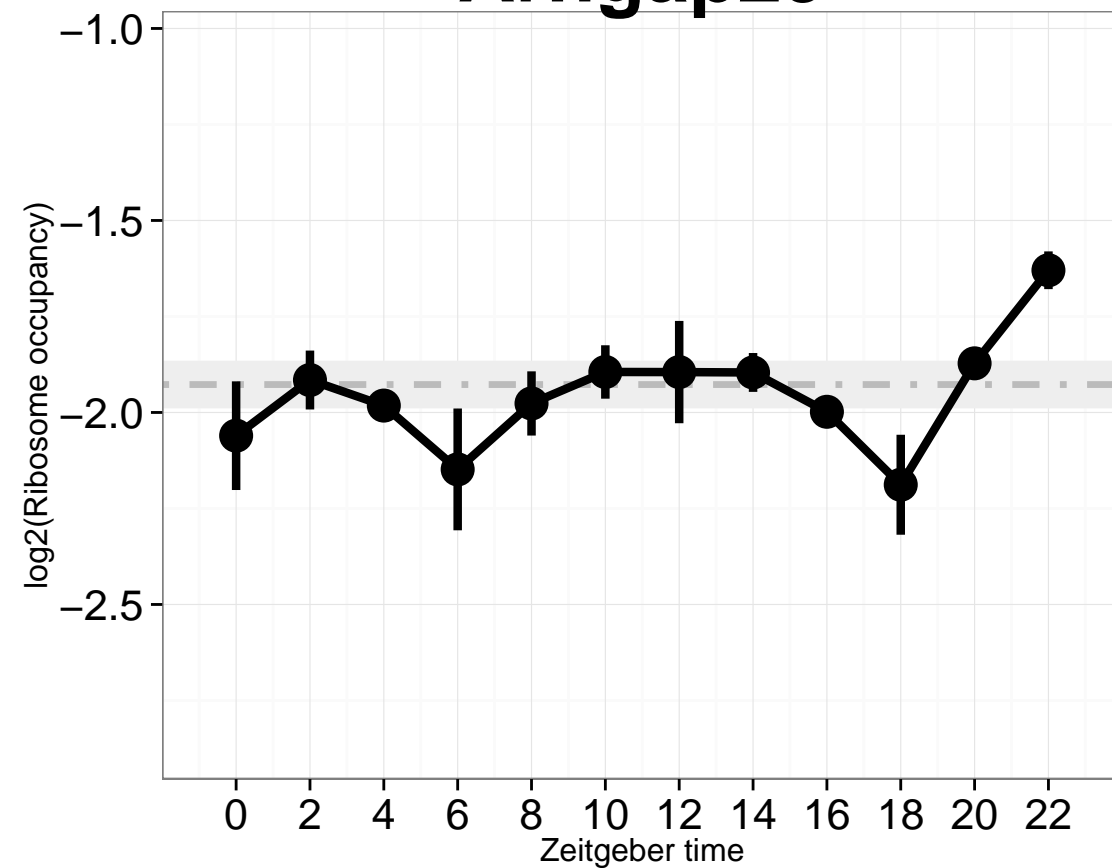

Supplement: SuppDataset_1.zip [file Arhgap29_set_A.pdf › Supplemental Dataset 1/A-mRNA_nonrhyth_translation_nonrhyth/Arhgap29_set_A.pdf]

# Arhgap30

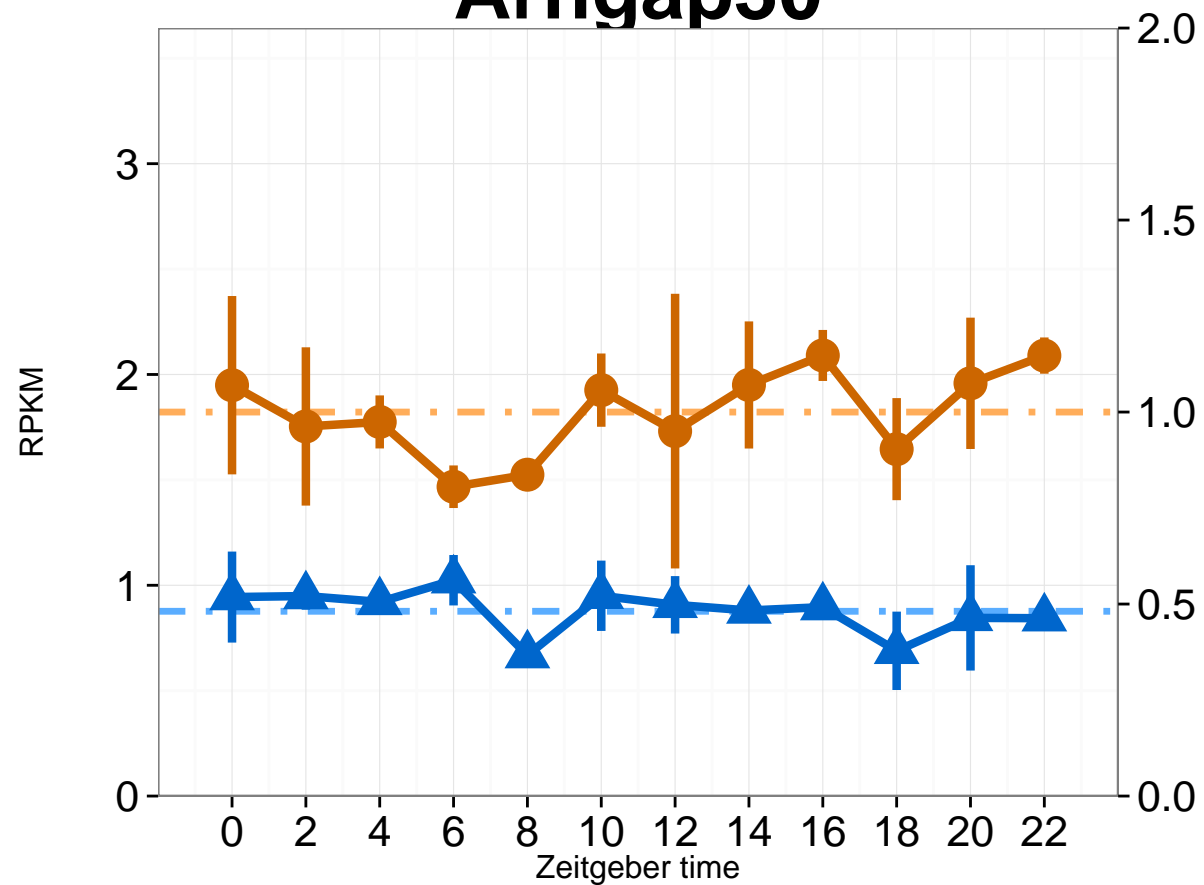

# Arhgap30

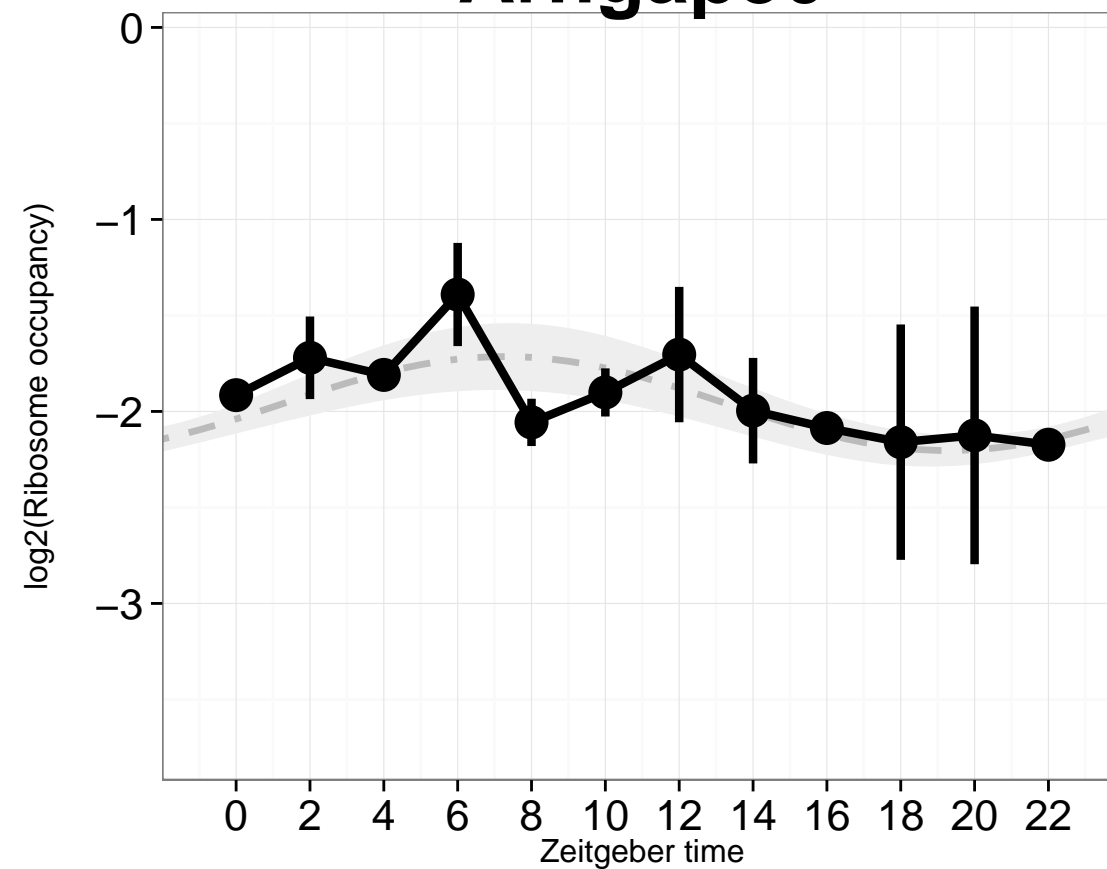

Supplement: SuppDataset_1.zip [file Arhgap30_set_A.pdf › Supplemental Dataset 1/A-mRNA_nonrhyth_translation_nonrhyth/Arhgap30_set_A.pdf]

# Arhgap31

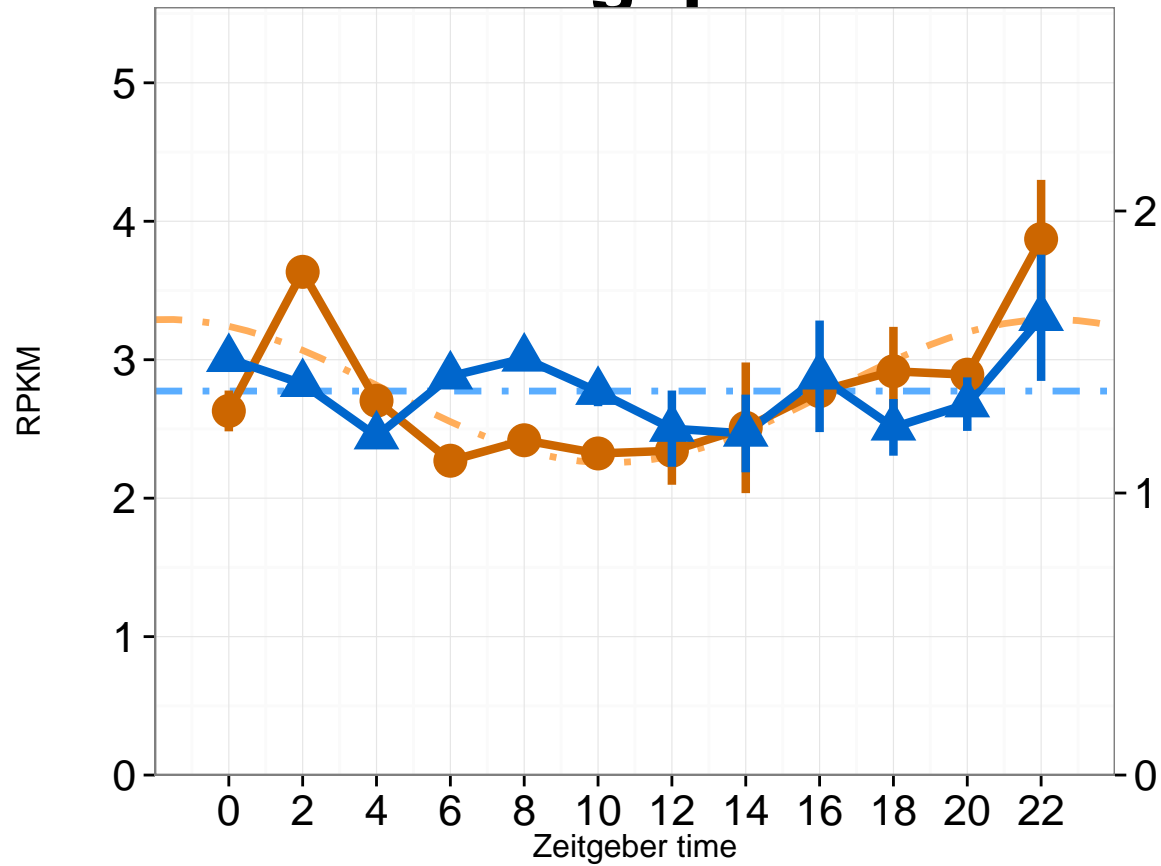

# Arhgap31

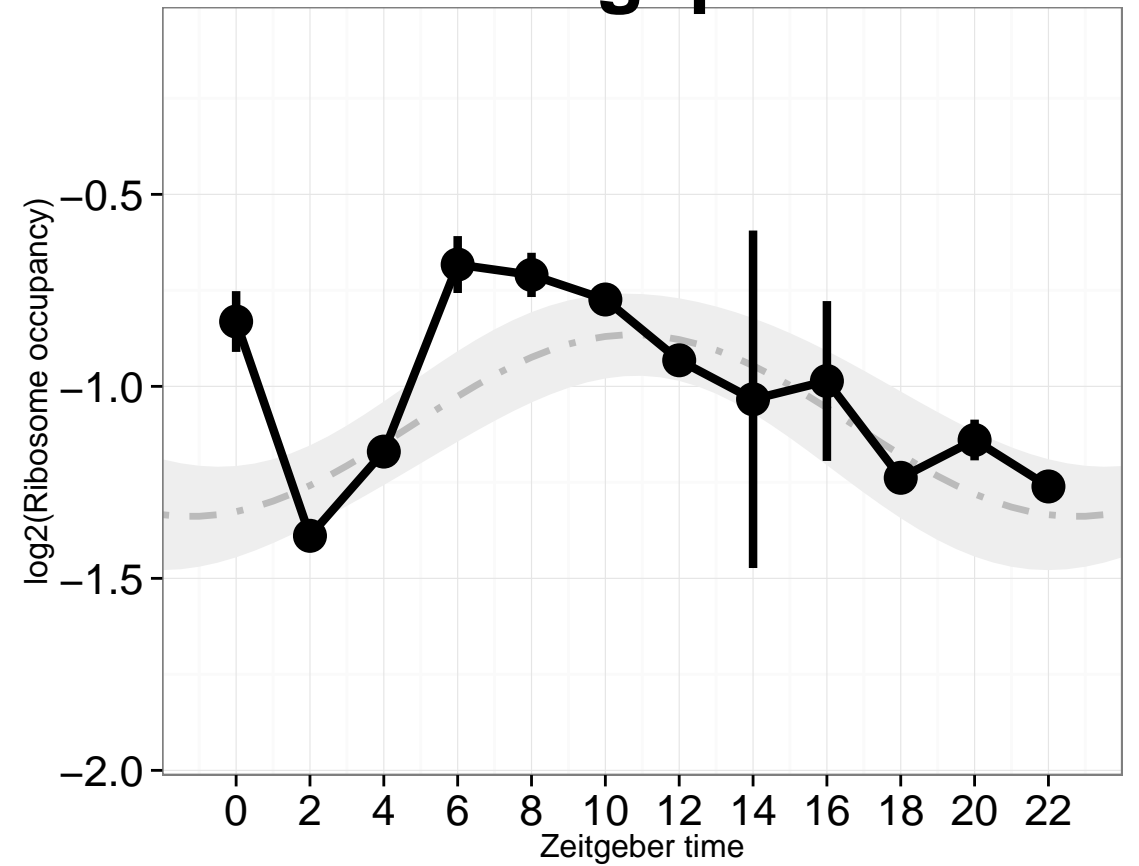

Supplement: SuppDataset_1.zip [file Arhgap31_set_A.pdf › Supplemental Dataset 1/A-mRNA_nonrhyth_translation_nonrhyth/Arhgap31_set_A.pdf]

## Arhgap32

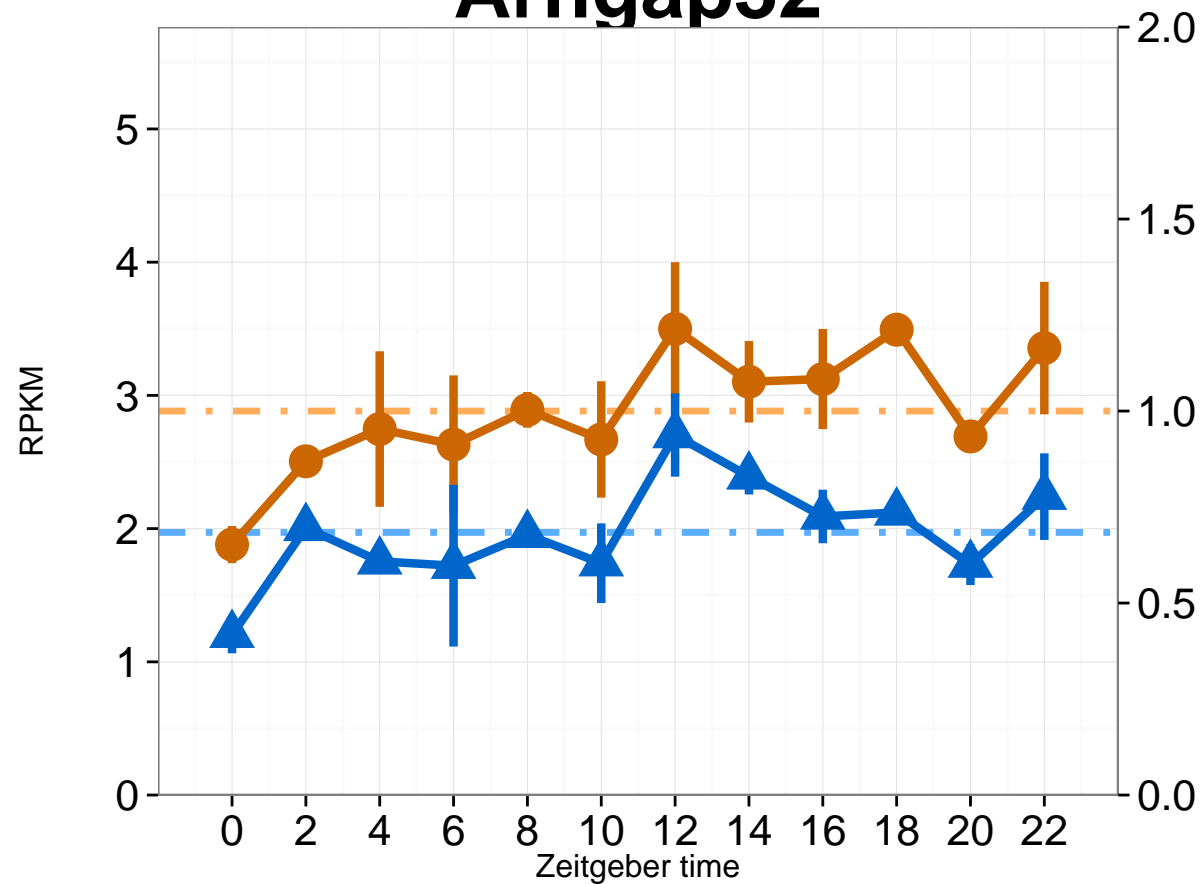

## Arhgap32

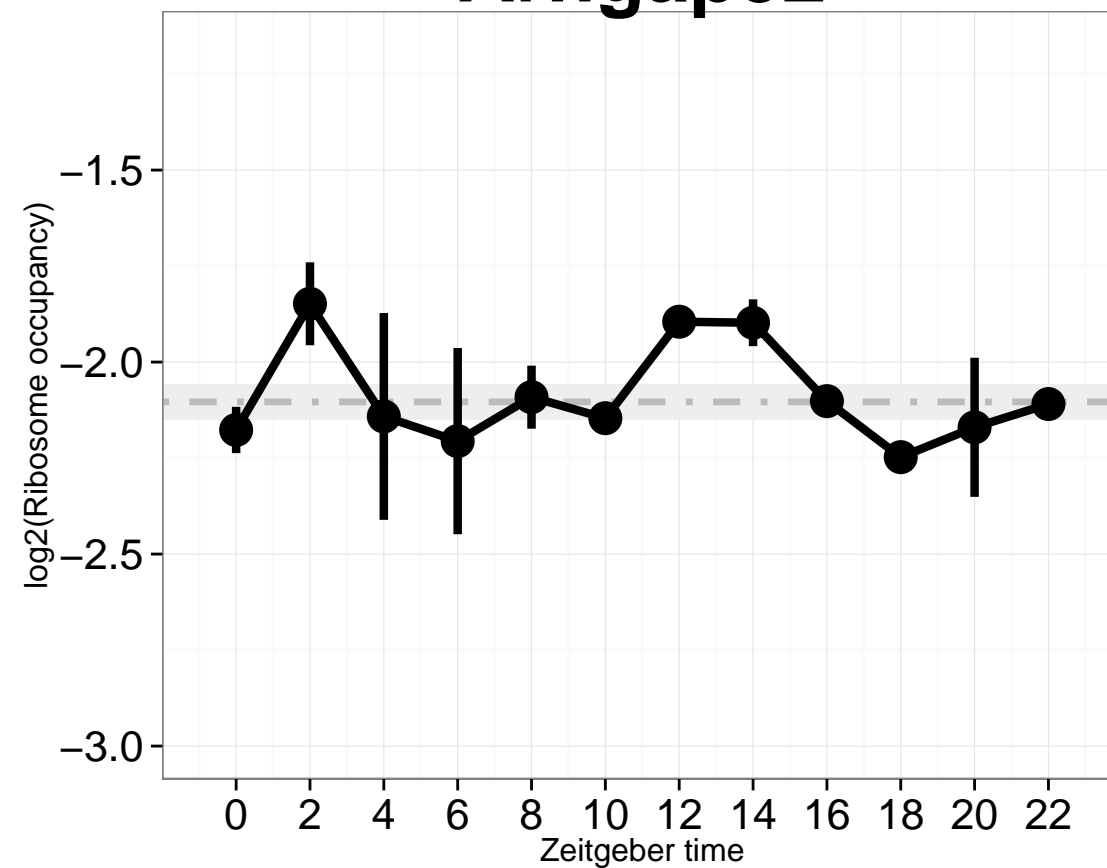

Supplement: SuppDataset_1.zip [file Arhgap32_set_A.pdf › Supplemental Dataset 1/A-mRNA_nonrhyth_translation_nonrhyth/Arhgap32_set_A.pdf]

# Arhgap39

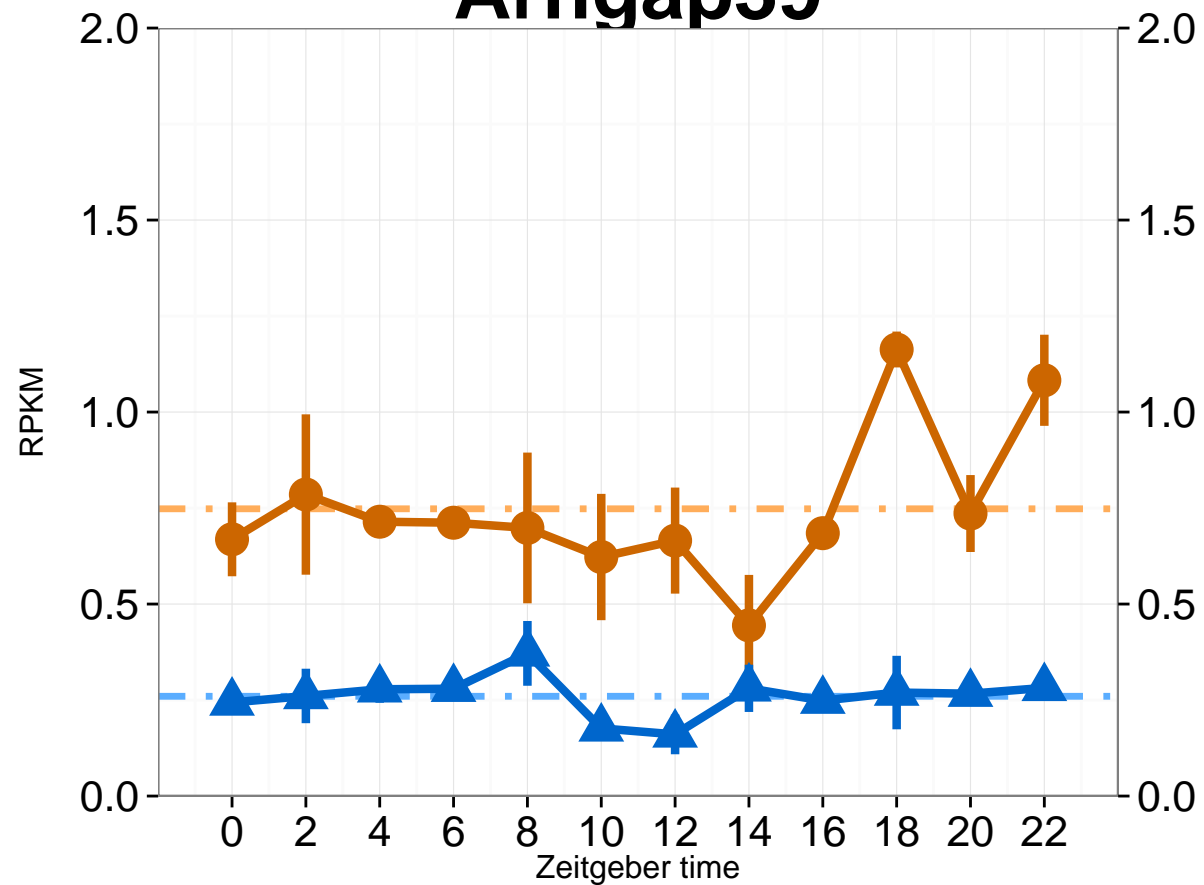

# Arhgap39

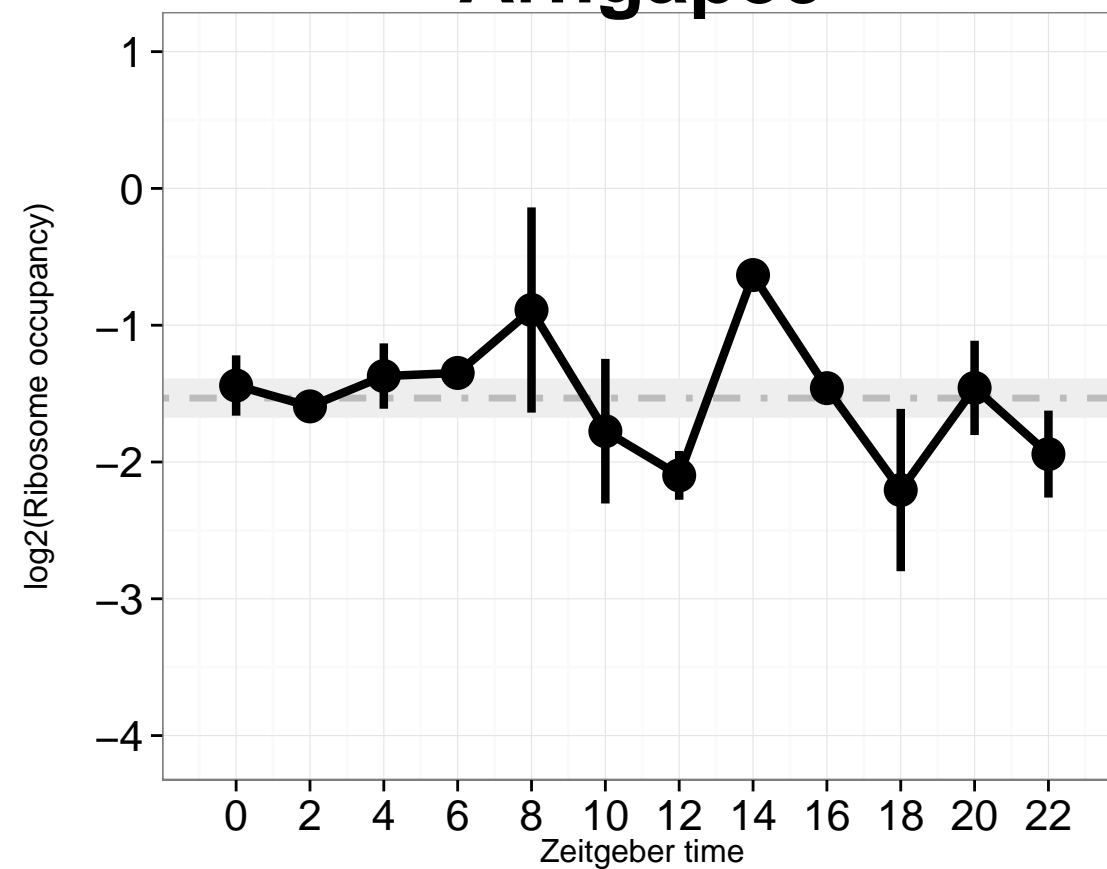

Supplement: SuppDataset_1.zip [file Arhgap39_set_A.pdf › Supplemental Dataset 1/A-mRNA_nonrhyth_translation_nonrhyth/Arhgap39_set_A.pdf]

## Arhgap42

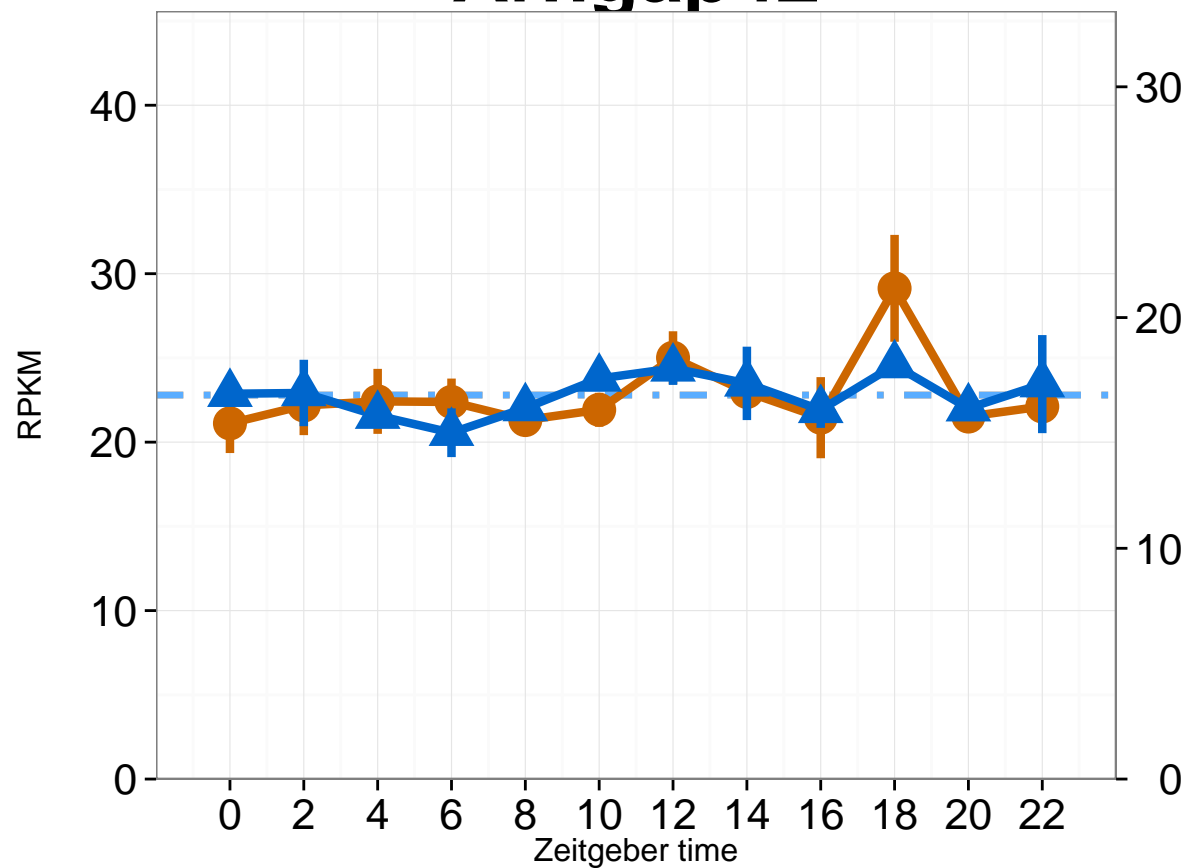

## Arhgap42

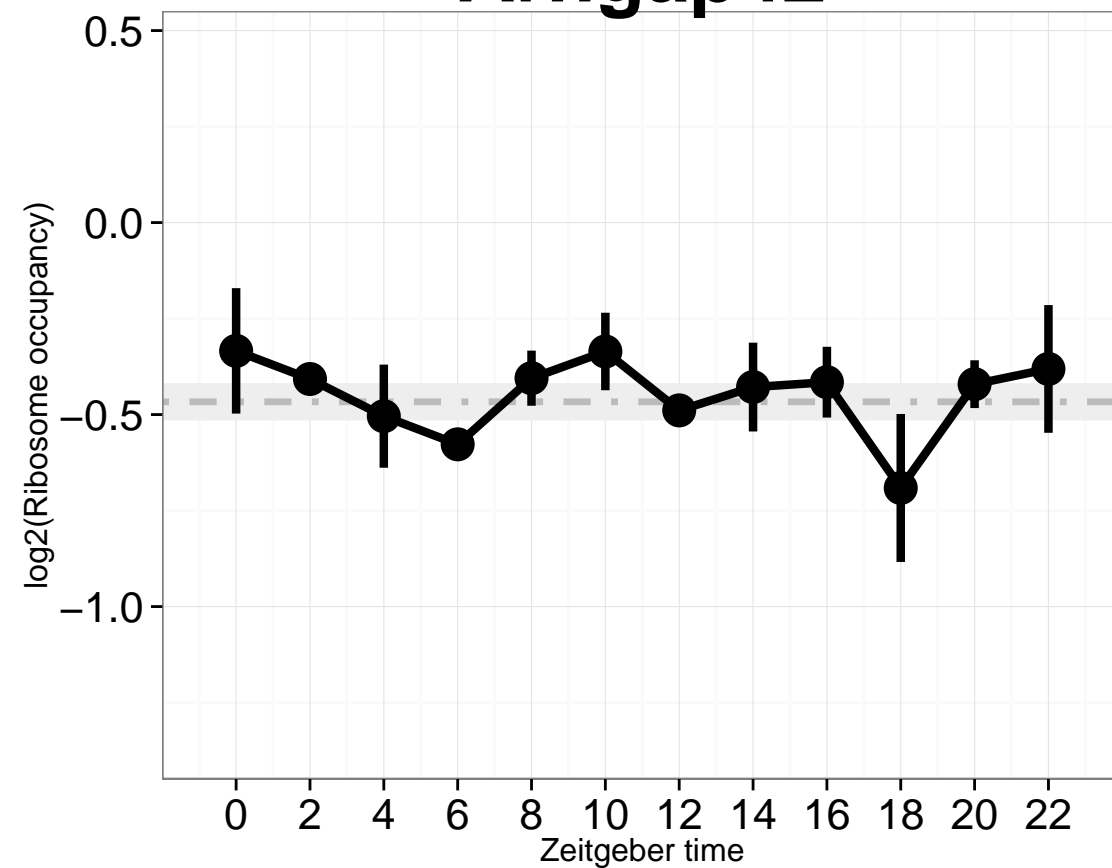

Supplement: SuppDataset_1.zip [file Arhgap42_set_A.pdf › Supplemental Dataset 1/A-mRNA_nonrhyth_translation_nonrhyth/Arhgap42_set_A.pdf]

# Arhgap5

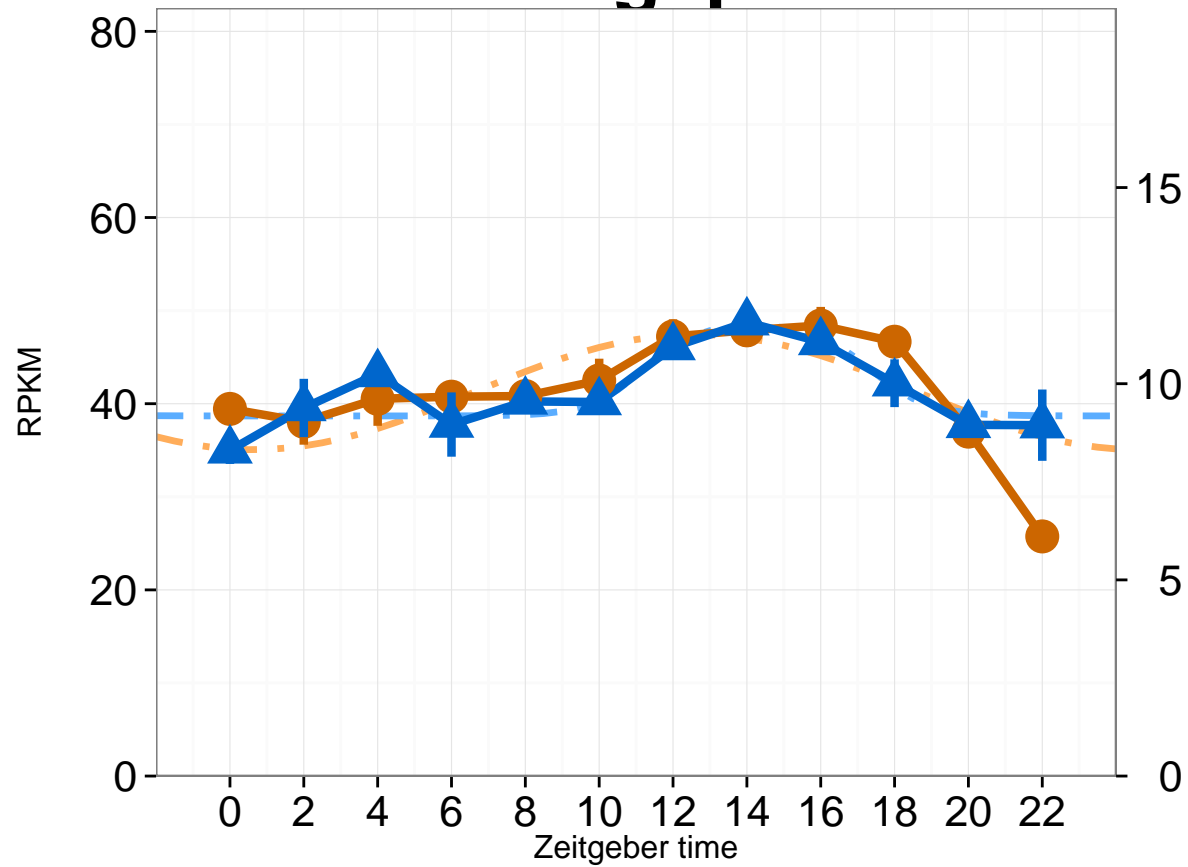

# Arhgap5

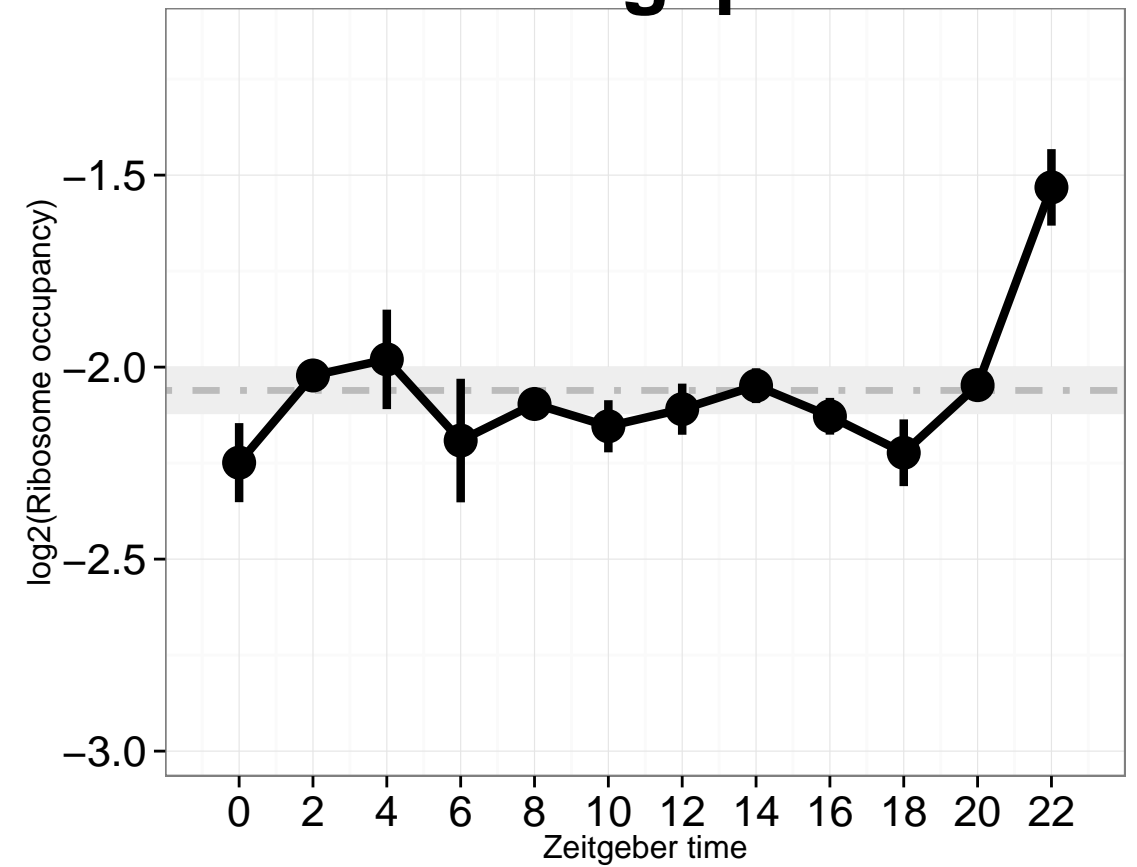

Supplement: SuppDataset_1.zip [file Arhgap5_set_A.pdf › Supplemental Dataset 1/A-mRNA_nonrhyth_translation_nonrhyth/Arhgap5_set_A.pdf]

# Arhgap6

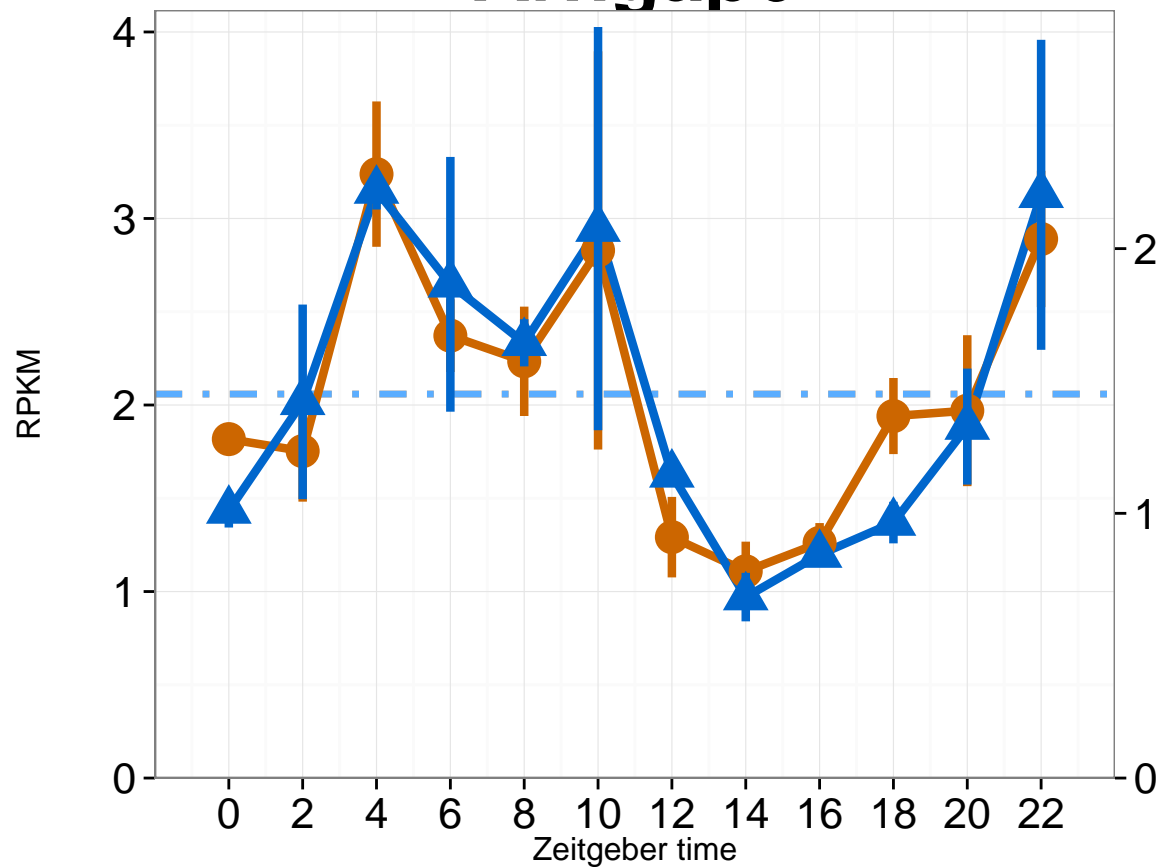

# Arhgap6

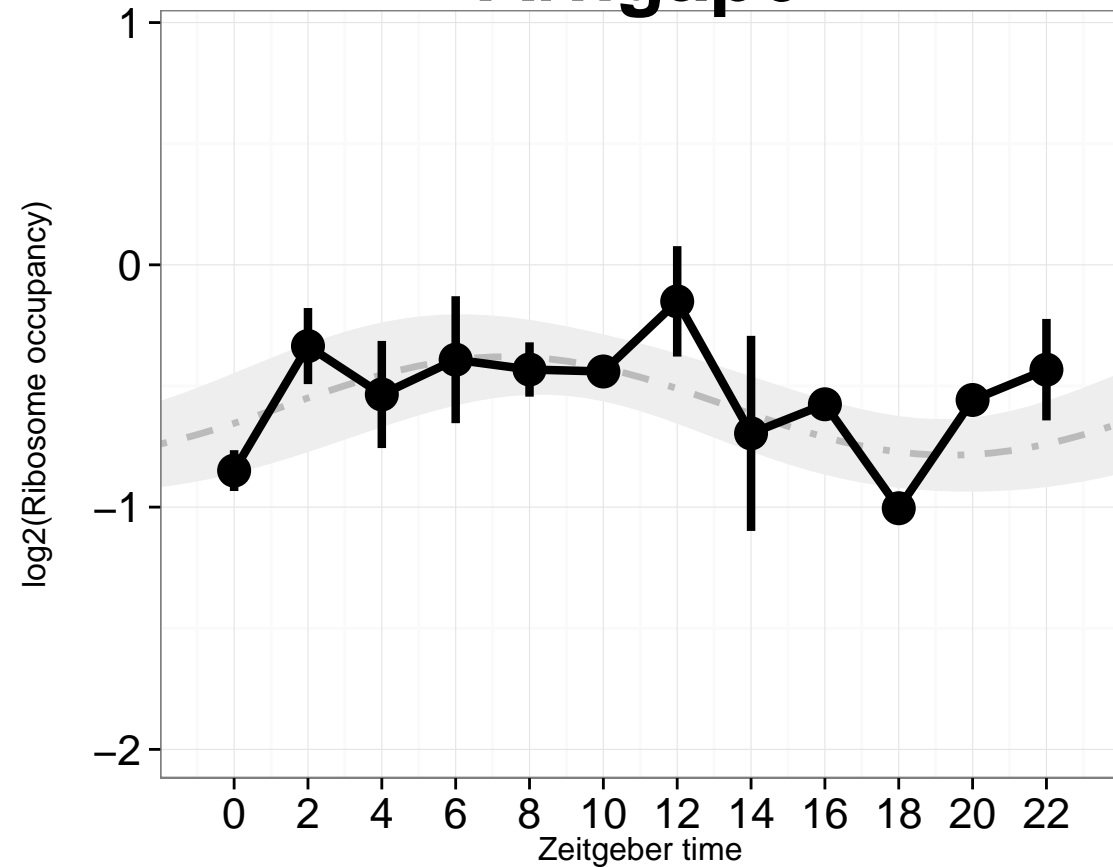

Supplement: SuppDataset_1.zip [file Arhgap6_set_A.pdf › Supplemental Dataset 1/A-mRNA_nonrhyth_translation_nonrhyth/Arhgap6_set_A.pdf]

# Arhgap9

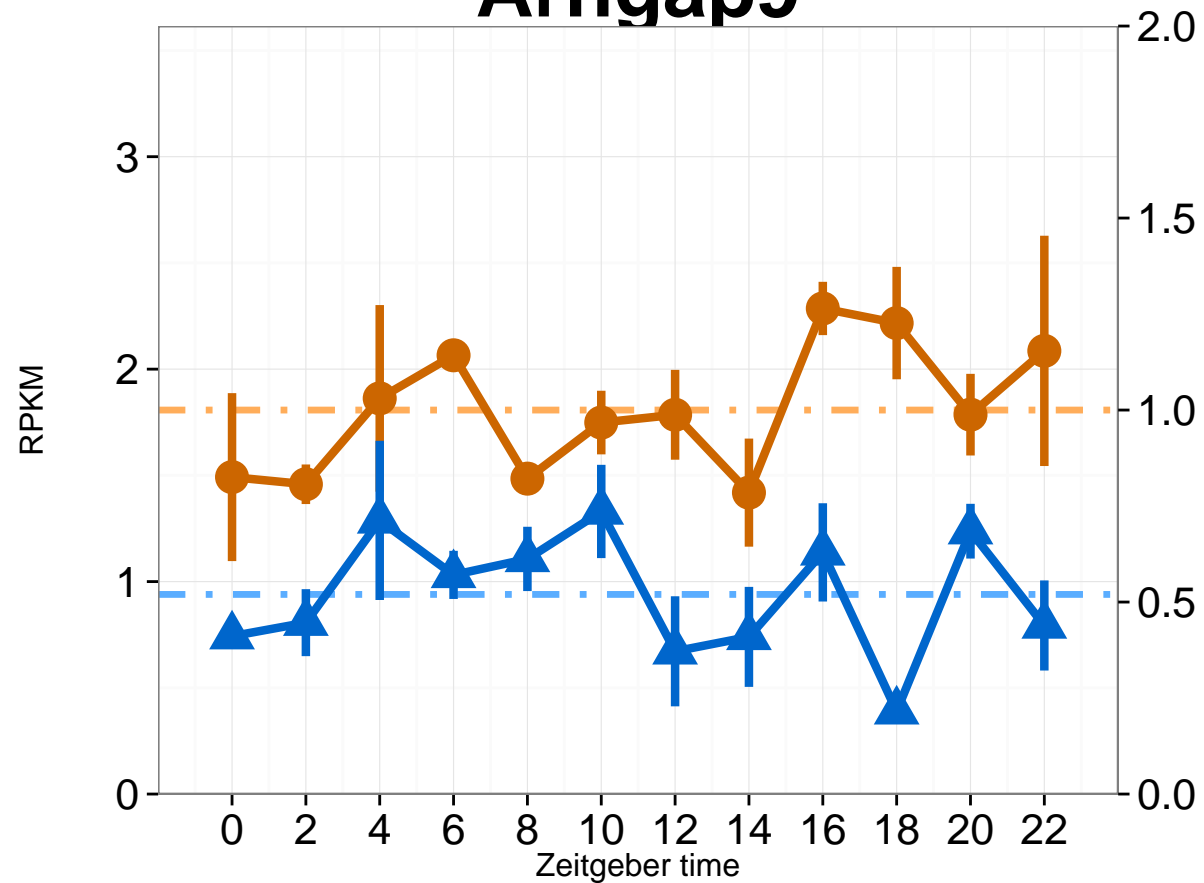

# Arhgap9

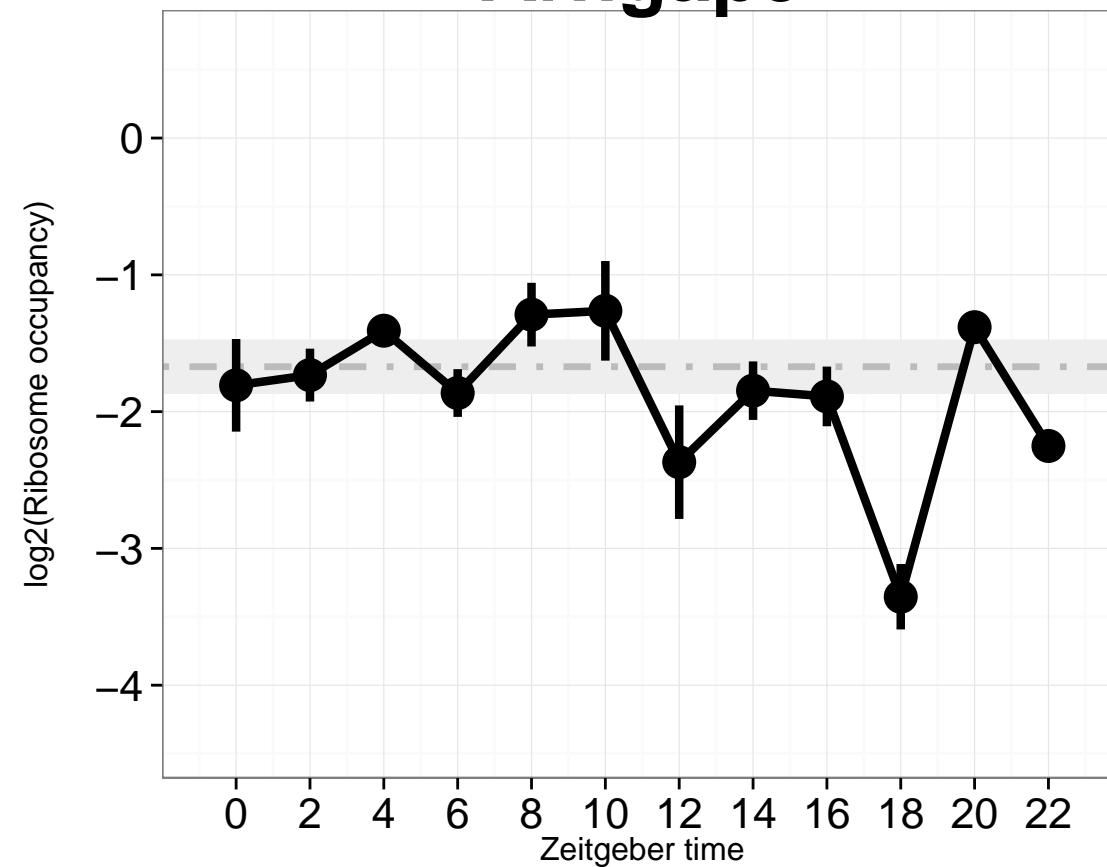

Supplement: SuppDataset_1.zip [file Arhgap9_set_A.pdf › Supplemental Dataset 1/A-mRNA_nonrhyth_translation_nonrhyth/Arhgap9_set_A.pdf]

## Arhgdia

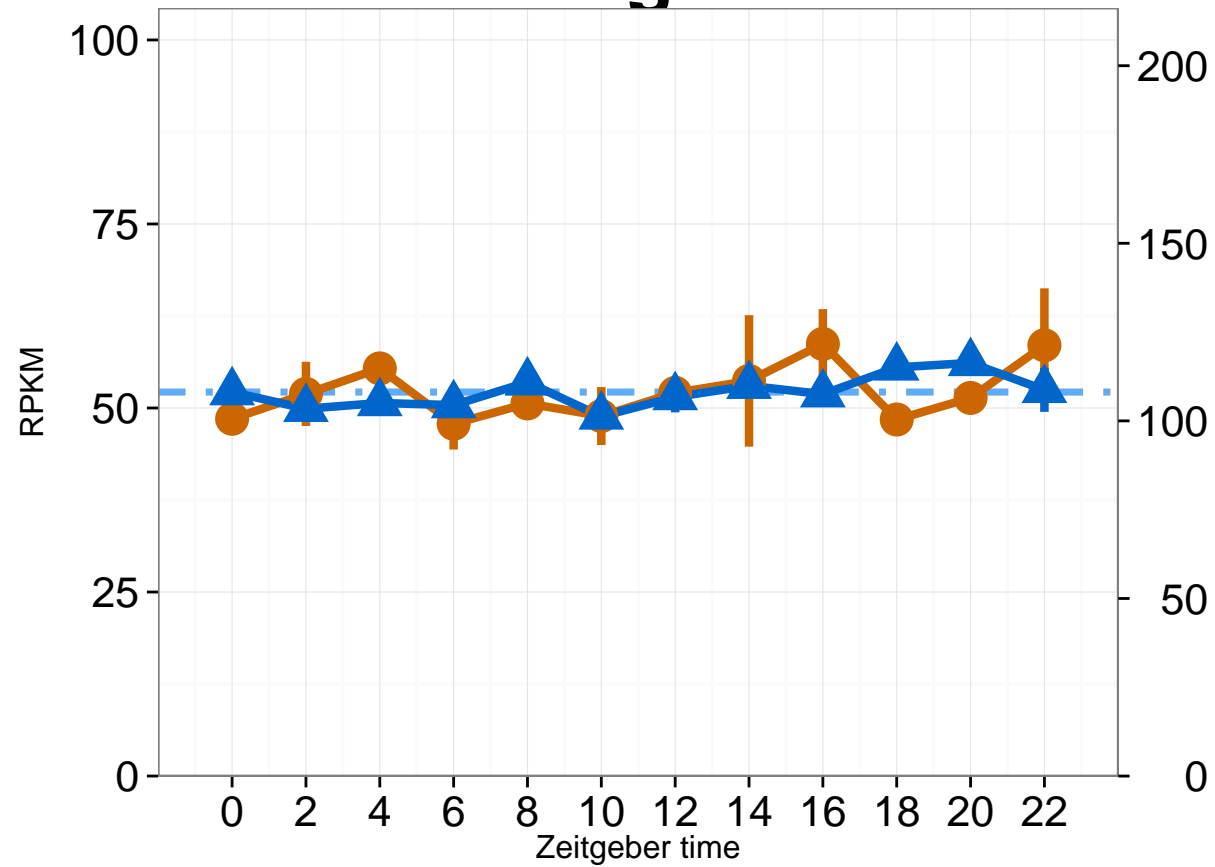

## Arhgdia

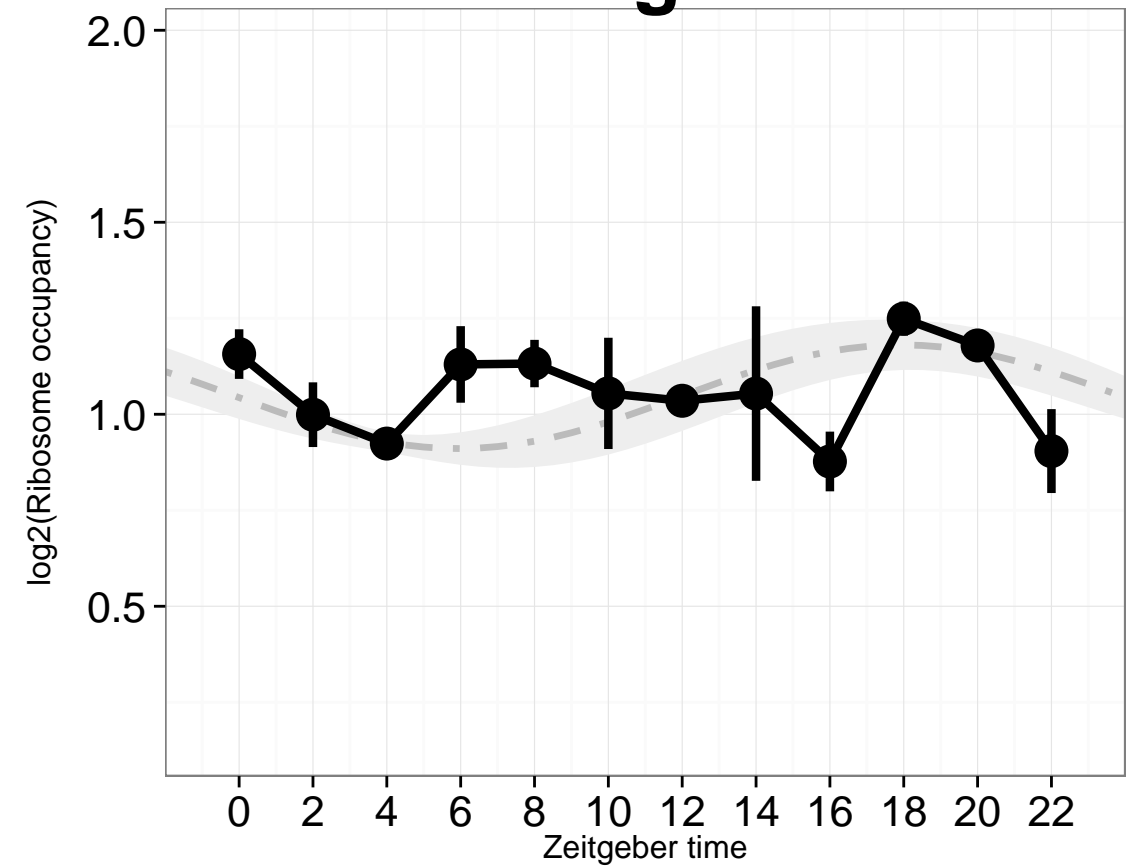

Supplement: SuppDataset_1.zip [file Arhgdia_set_A.pdf › Supplemental Dataset 1/A-mRNA_nonrhyth_translation_nonrhyth/Arhgdia_set_A.pdf]

# Arhgdib

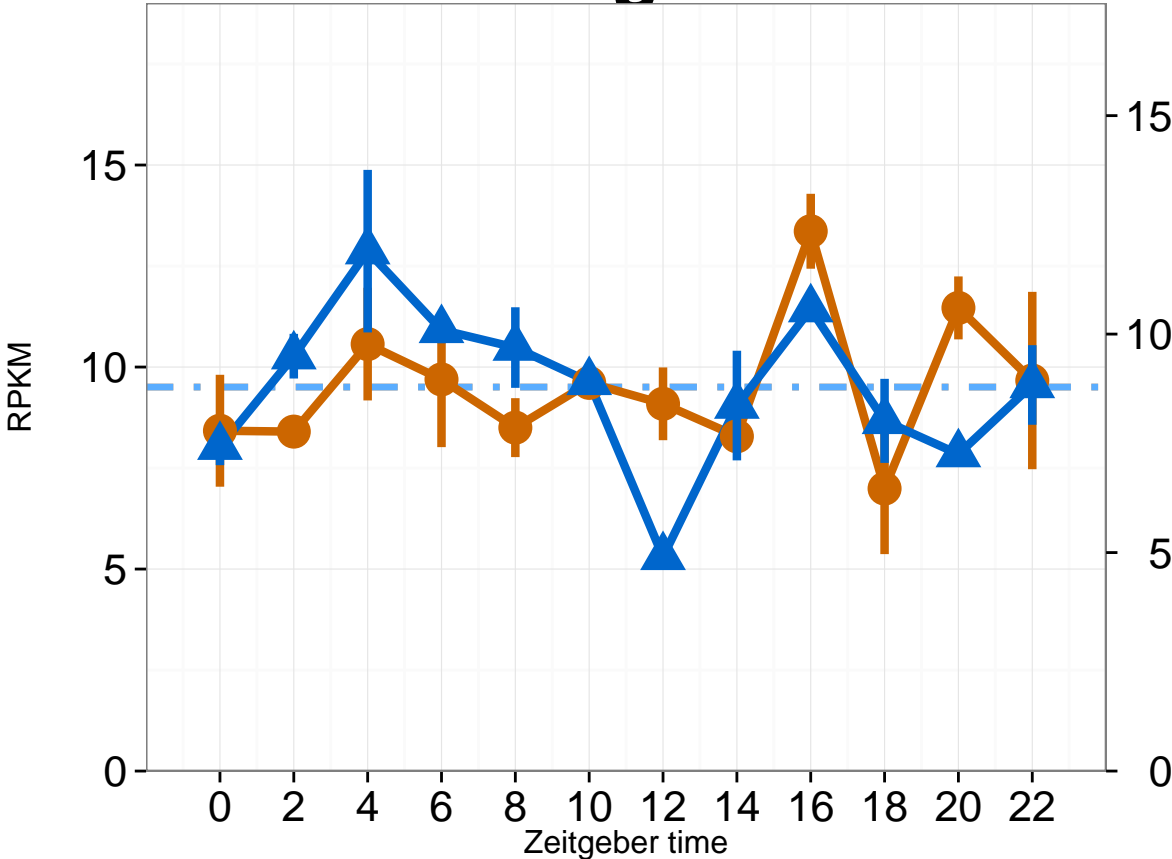

# Arhgdib

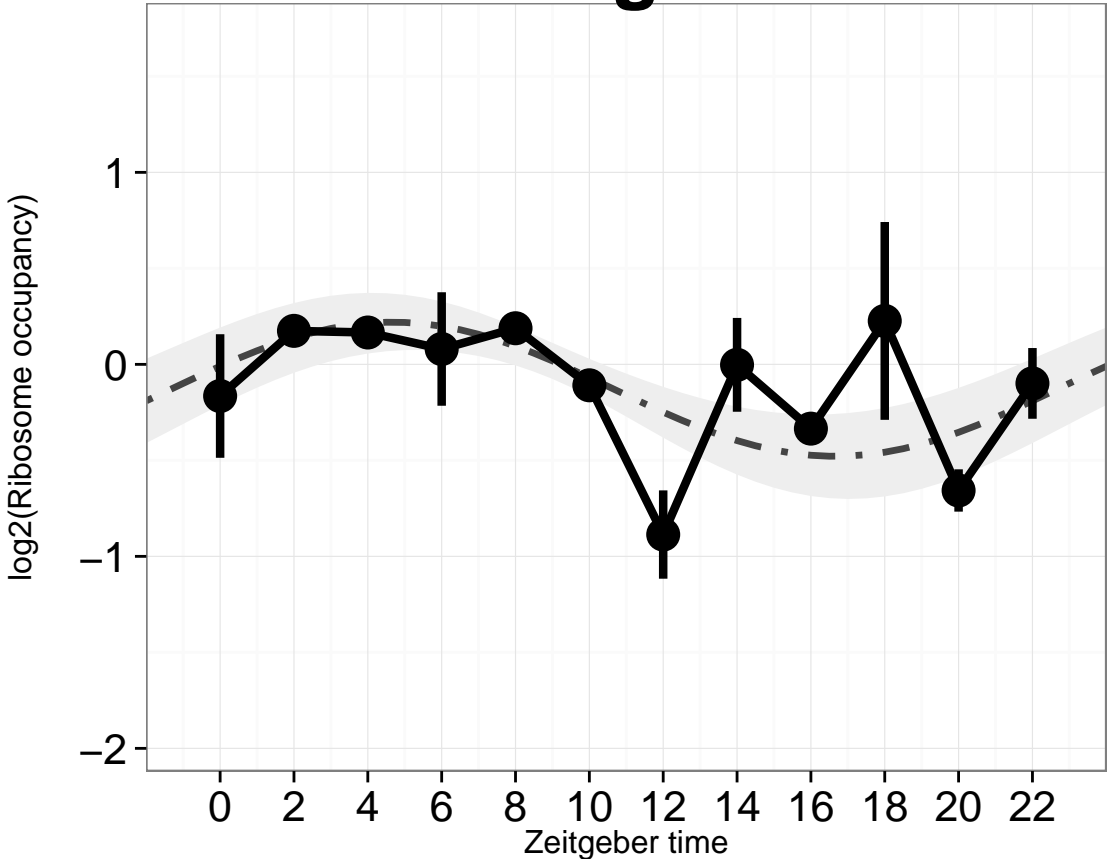

Supplement: SuppDataset_1.zip [file Arhgdib_set_A.pdf › Supplemental Dataset 1/A-mRNA_nonrhyth_translation_nonrhyth/Arhgdib_set_A.pdf]

# Arhgef11

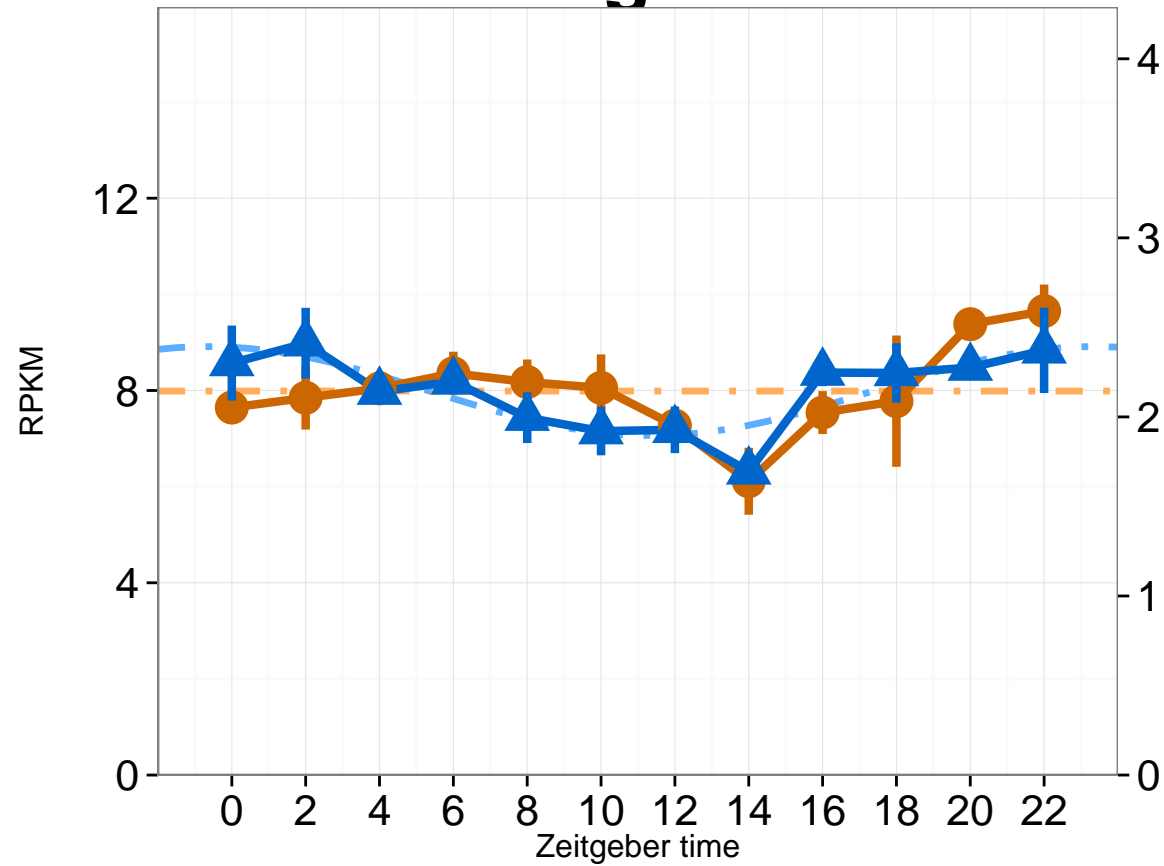

# Arhgef11

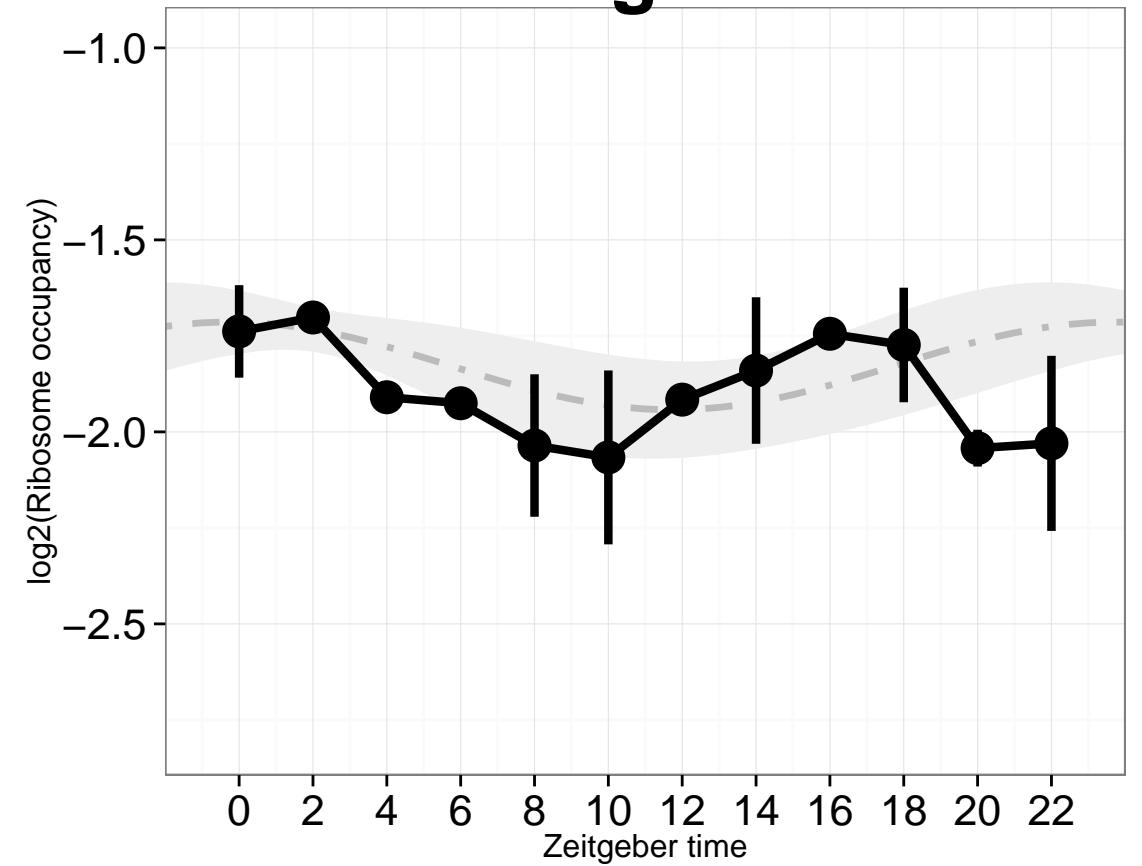

Supplement: SuppDataset_1.zip [file Arhgef11_set_A.pdf › Supplemental Dataset 1/A-mRNA_nonrhyth_translation_nonrhyth/Arhgef11_set_A.pdf]

## Arhgef12

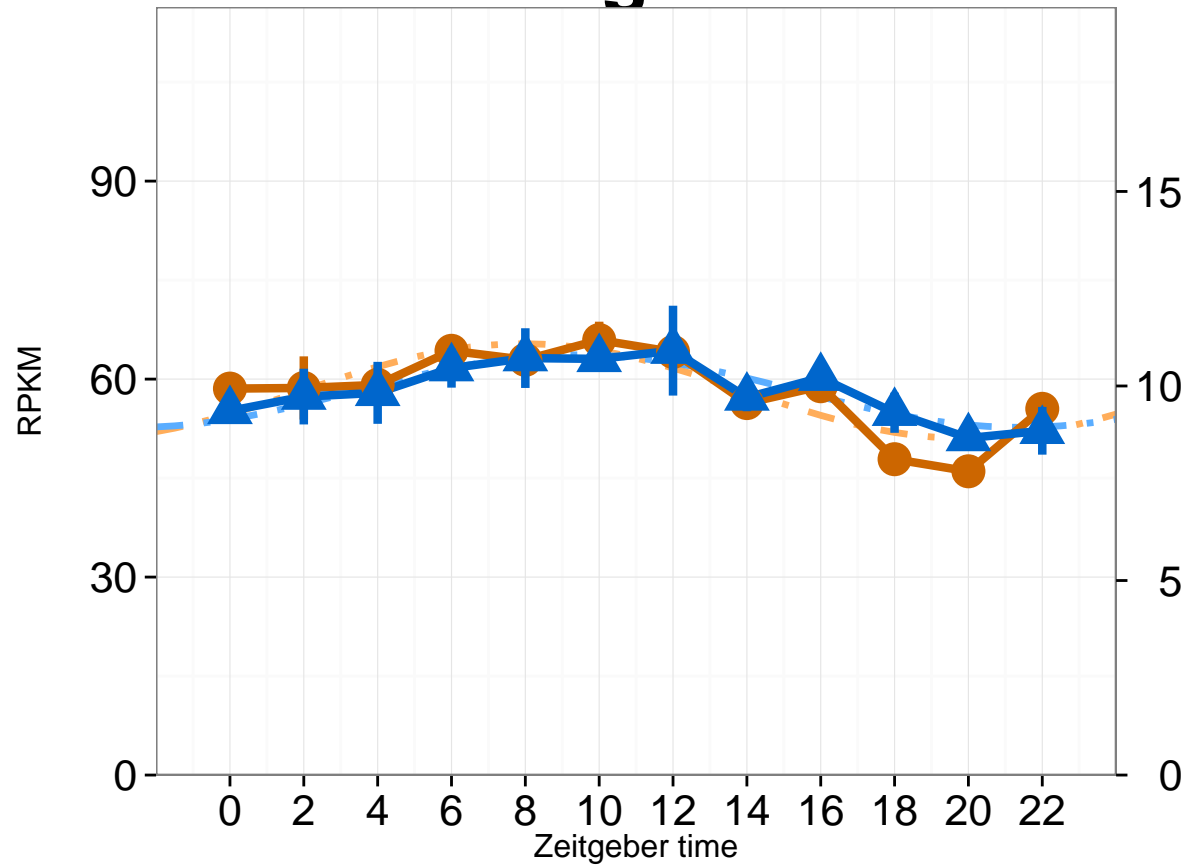

## Arhgef12

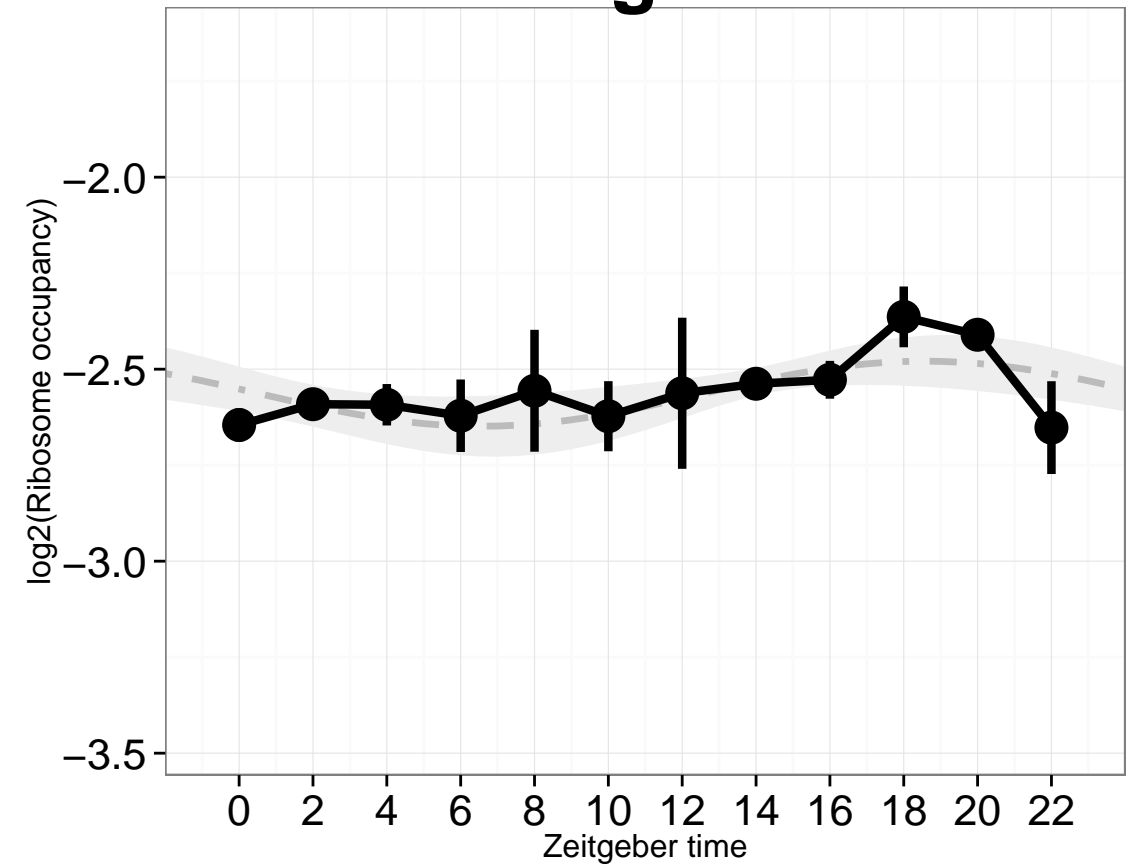

Supplement: SuppDataset_1.zip [file Arhgef12_set_A.pdf › Supplemental Dataset 1/A-mRNA_nonrhyth_translation_nonrhyth/Arhgef12_set_A.pdf]

# Arhgef15

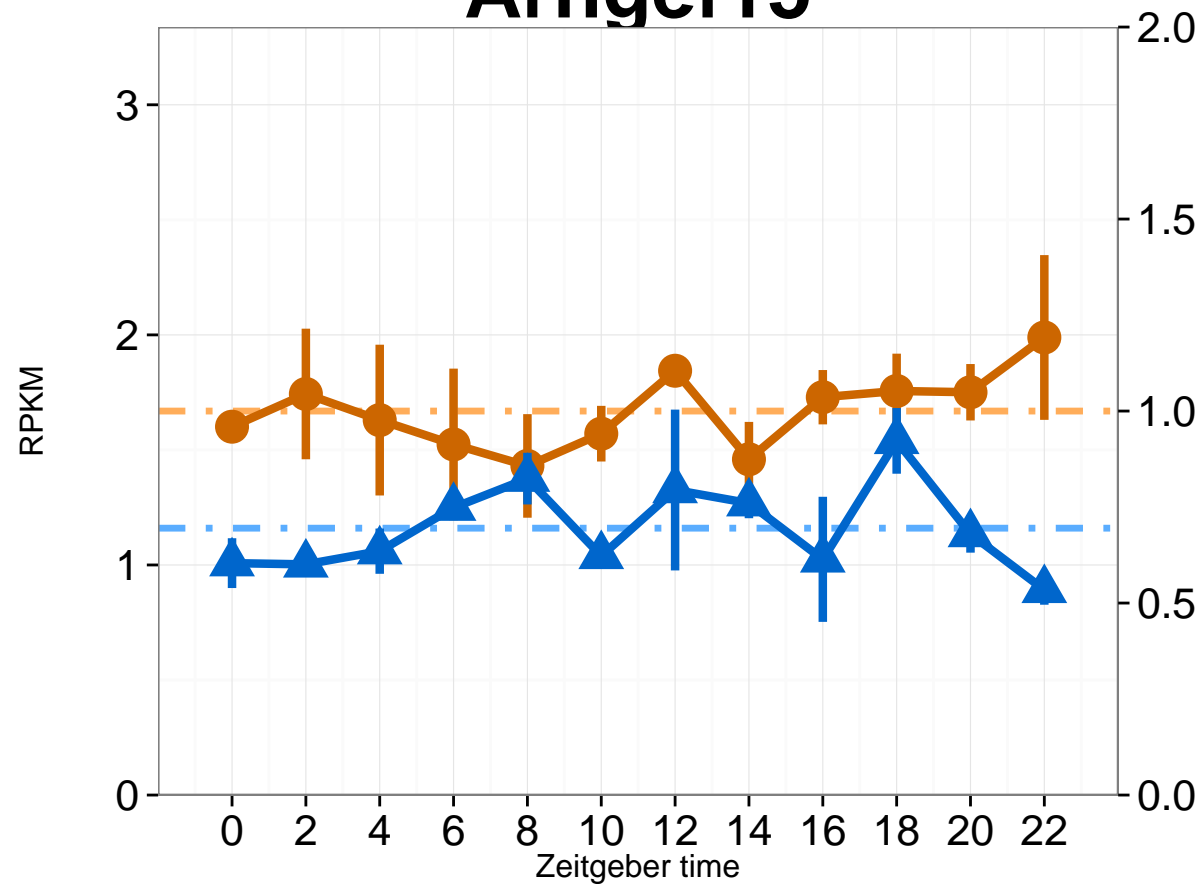

# Arhgef15

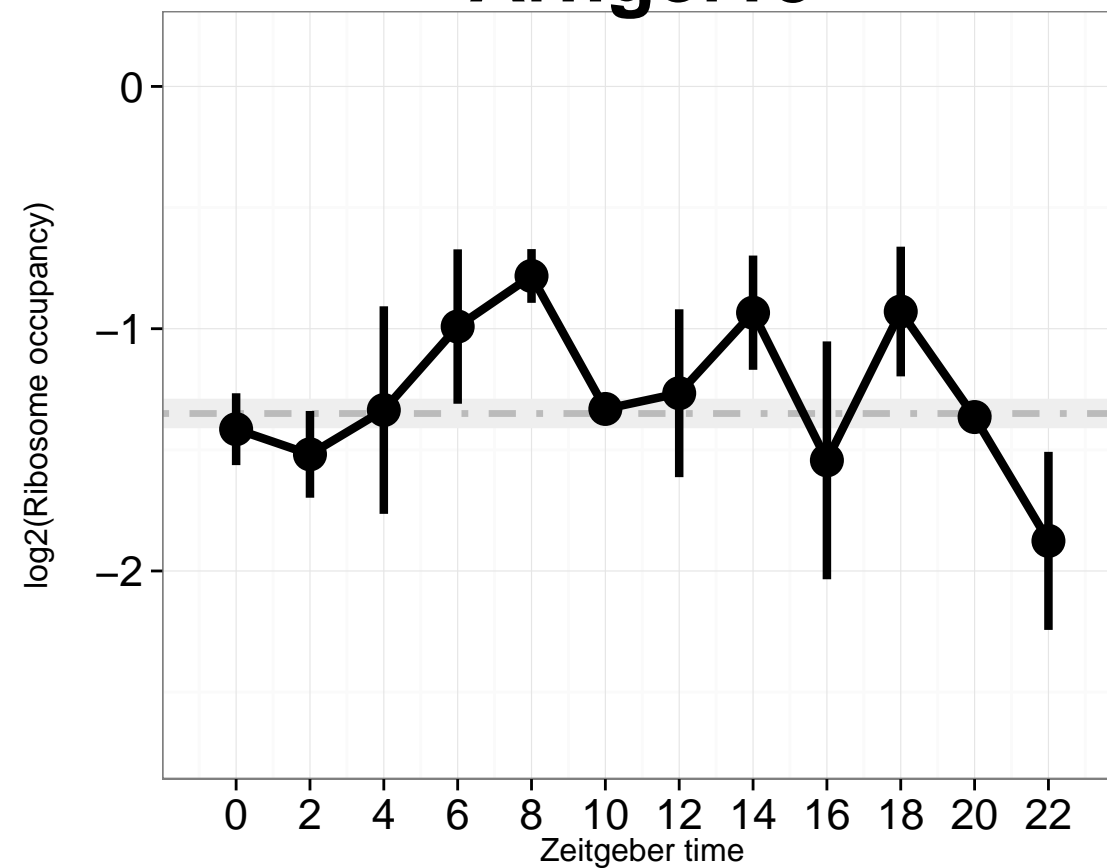

Supplement: SuppDataset_1.zip [file Arhgef15_set_A.pdf › Supplemental Dataset 1/A-mRNA_nonrhyth_translation_nonrhyth/Arhgef15_set_A.pdf]

# Arhgef16

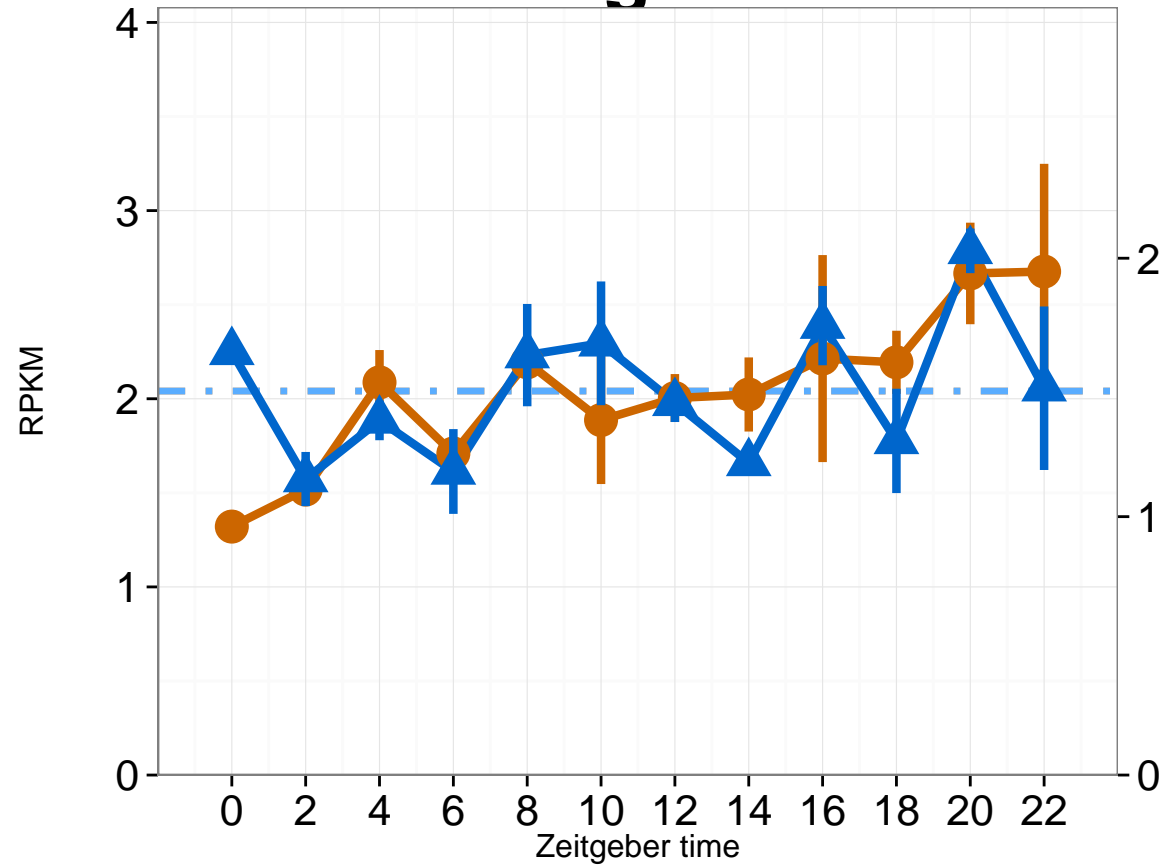

# Arhgef16

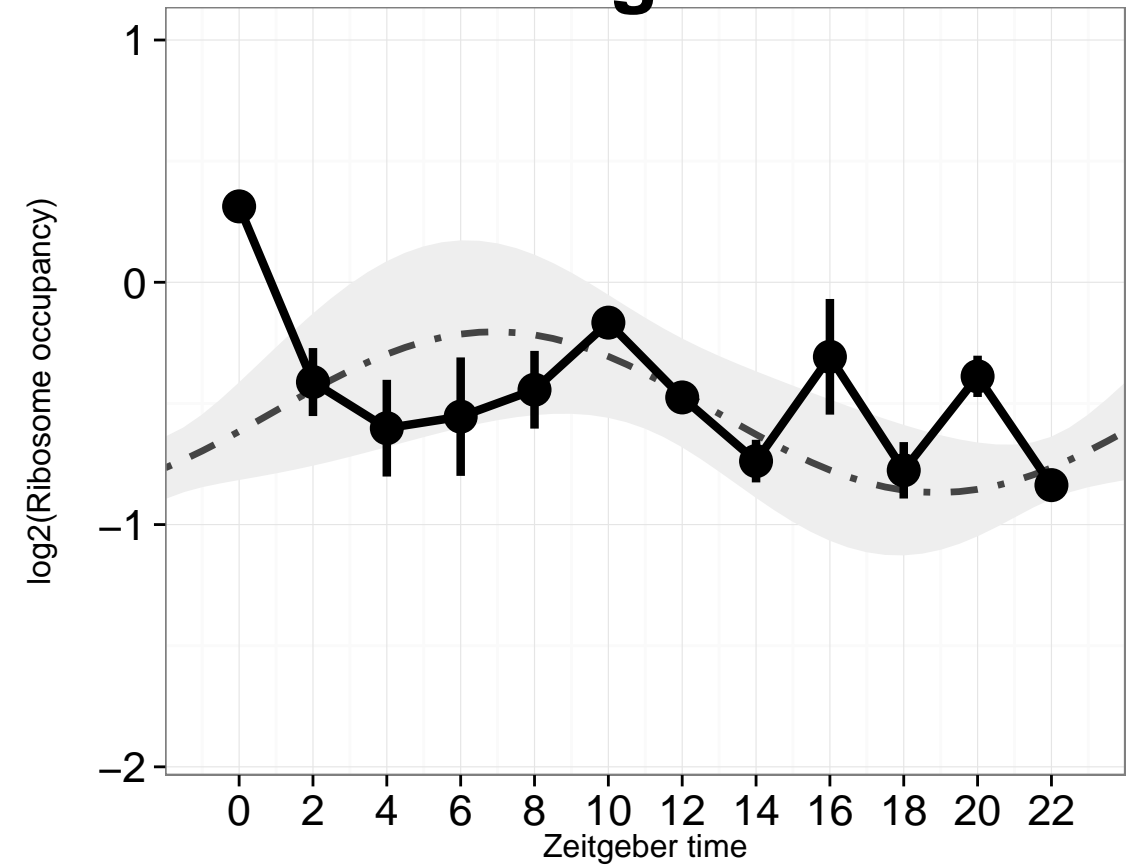

Supplement: SuppDataset_1.zip [file Arhgef16_set_A.pdf › Supplemental Dataset 1/A-mRNA_nonrhyth_translation_nonrhyth/Arhgef16_set_A.pdf]

# Arhgef17

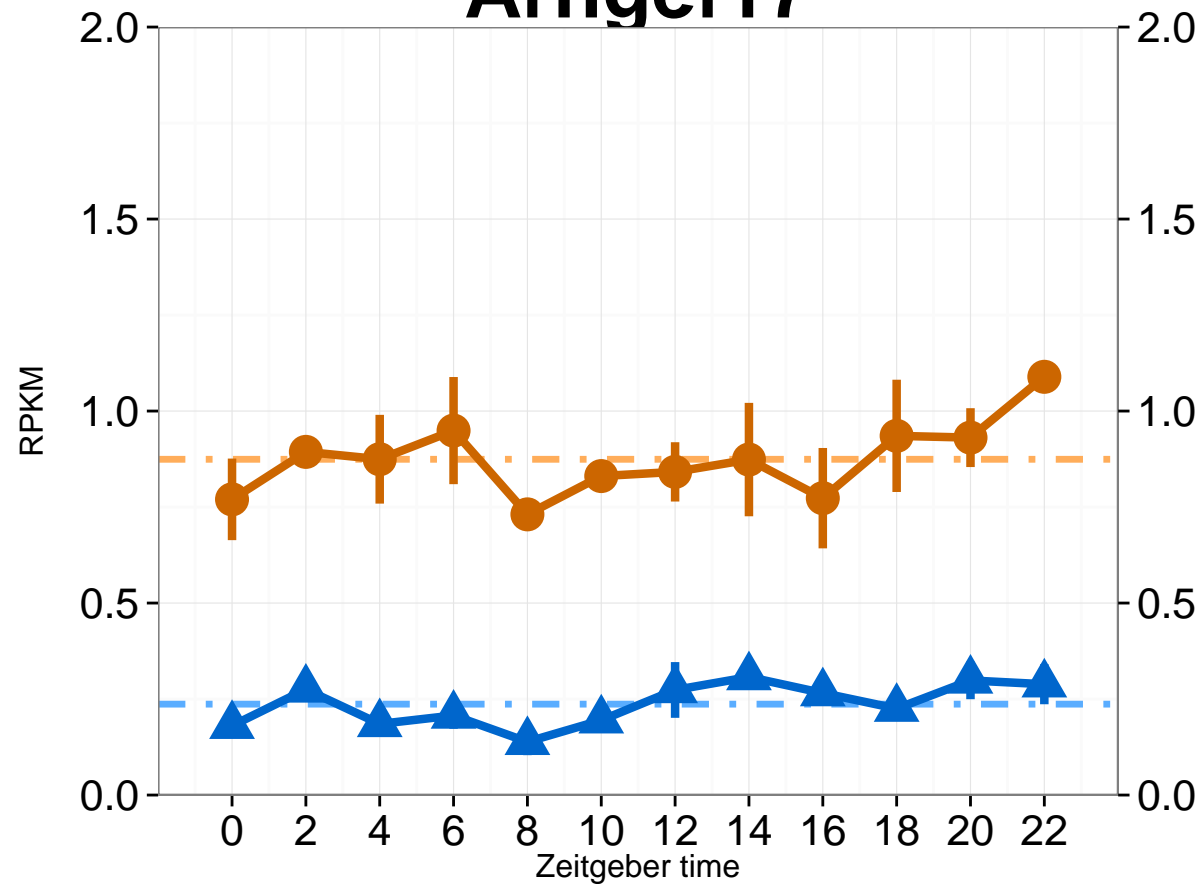

# Arhgef17

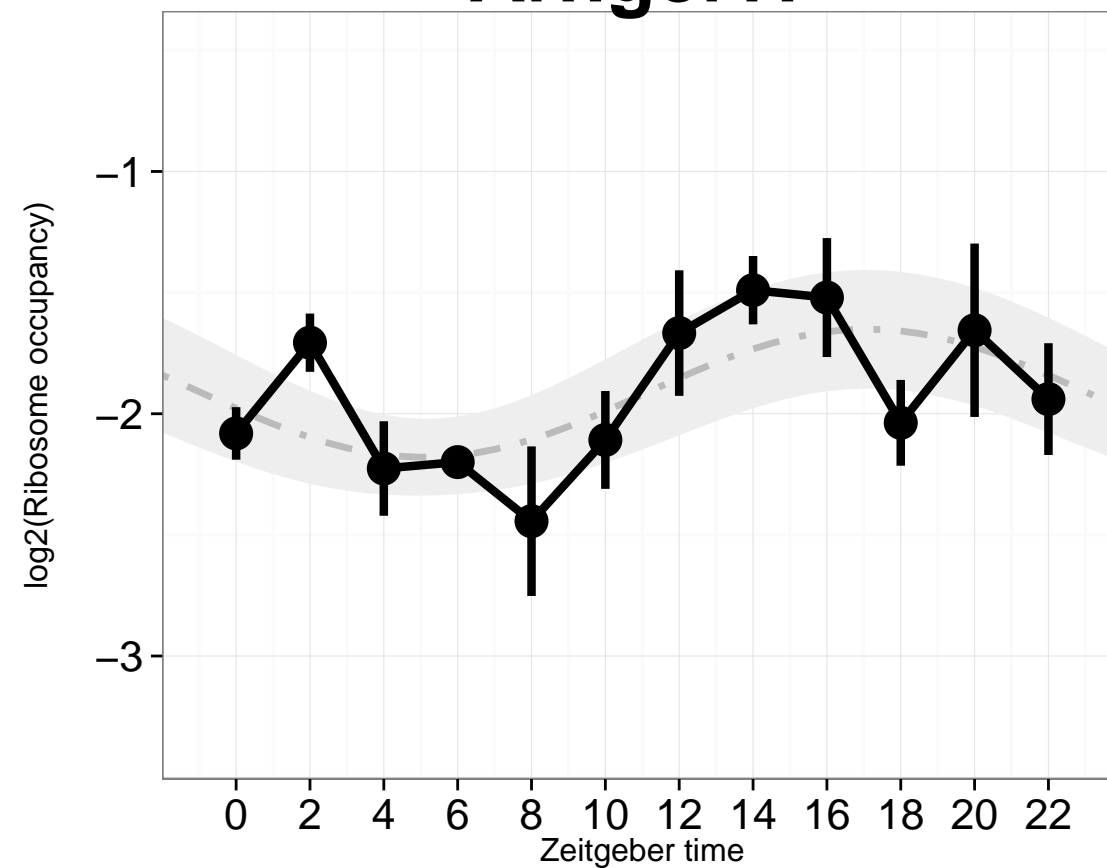

Supplement: SuppDataset_1.zip [file Arhgef17_set_A.pdf › Supplemental Dataset 1/A-mRNA_nonrhyth_translation_nonrhyth/Arhgef17_set_A.pdf]

# Arhgef1

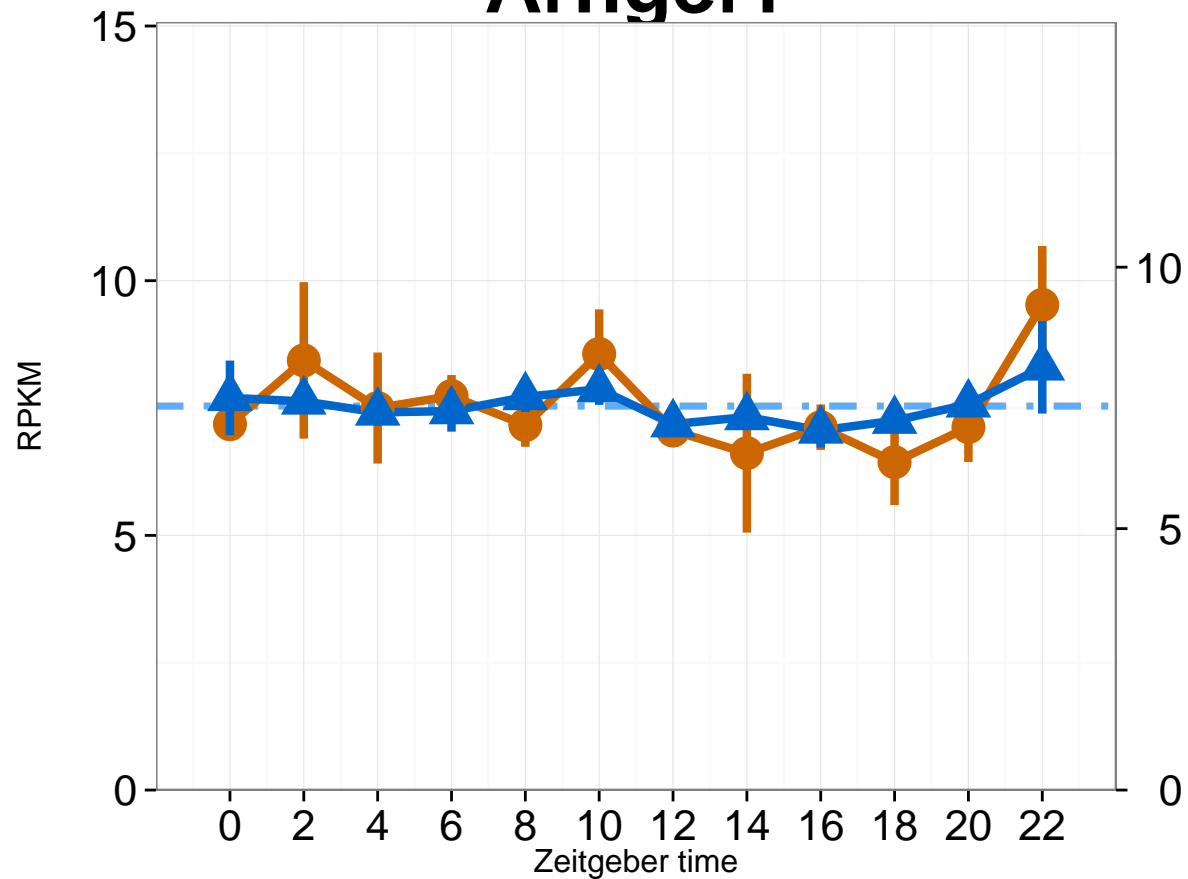

# Arhgef1

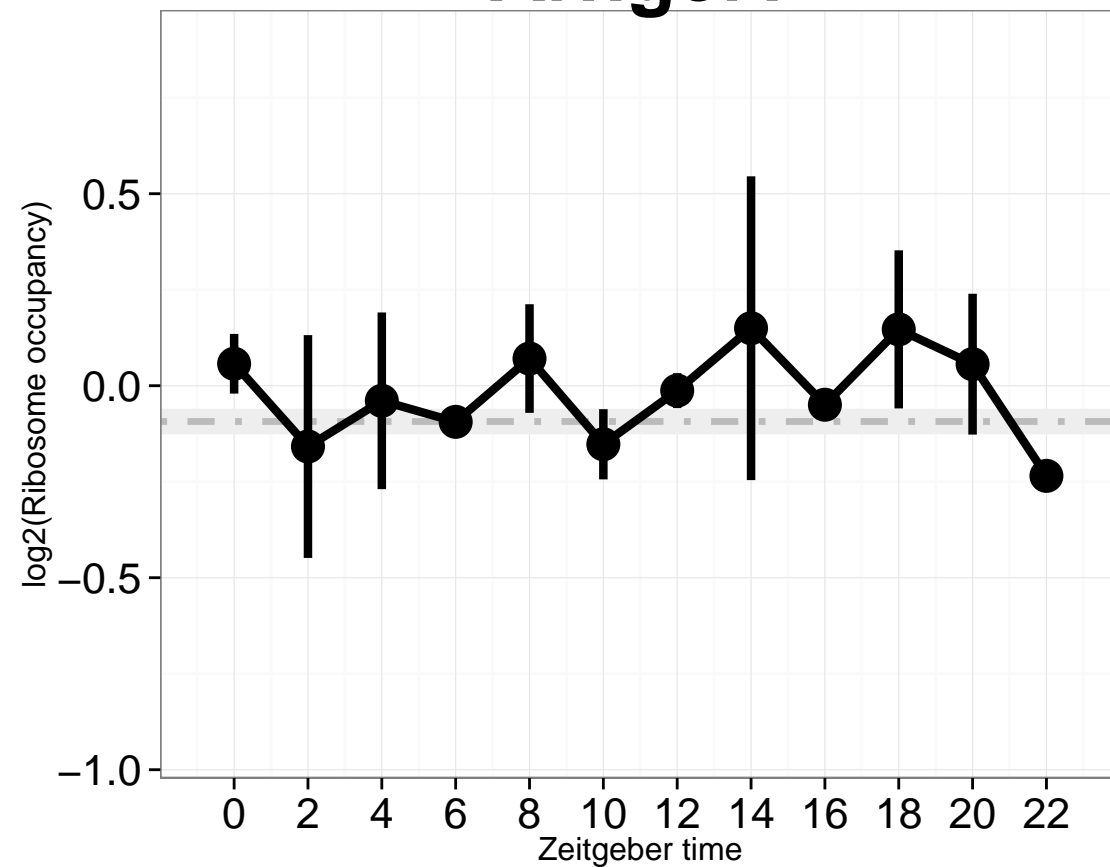

Supplement: SuppDataset_1.zip [file Arhgef1_set_A.pdf › Supplemental Dataset 1/A-mRNA_nonrhyth_translation_nonrhyth/Arhgef1_set_A.pdf]

## Arhgef25

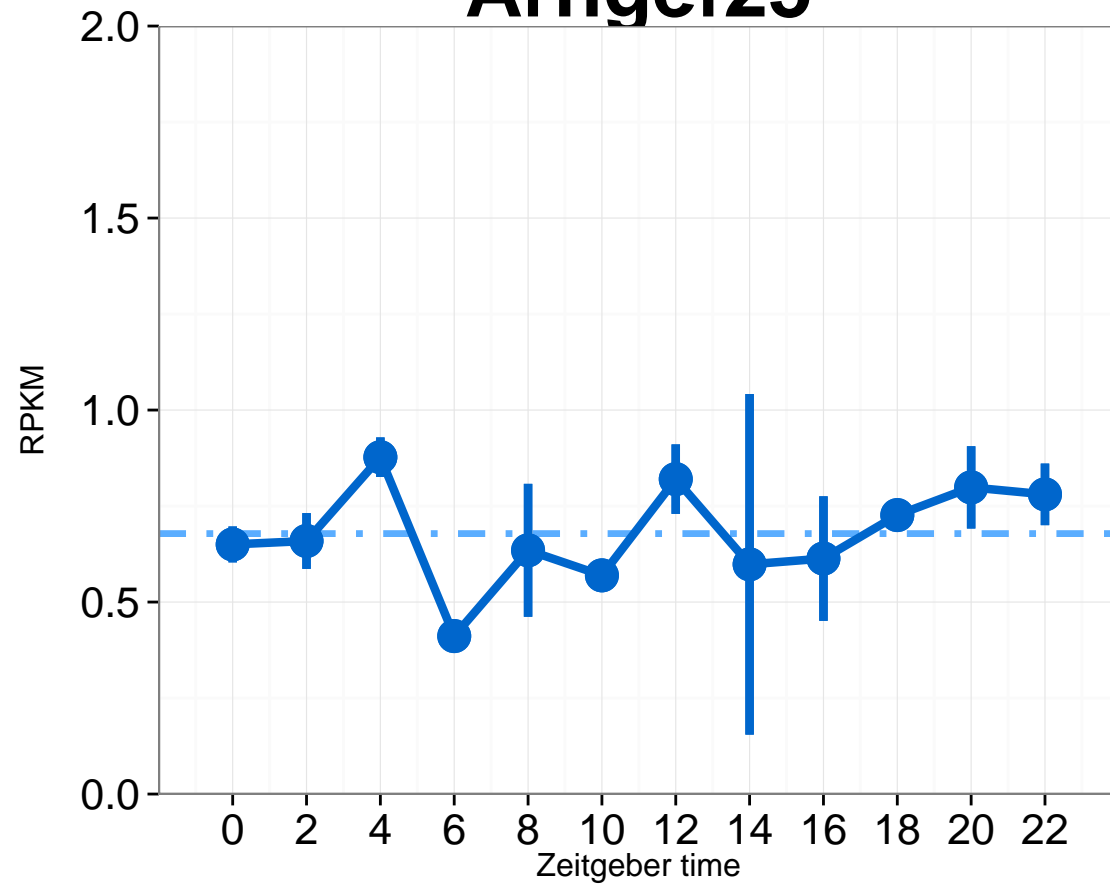

## Arhgef25 log2(Ribosome occupancy)

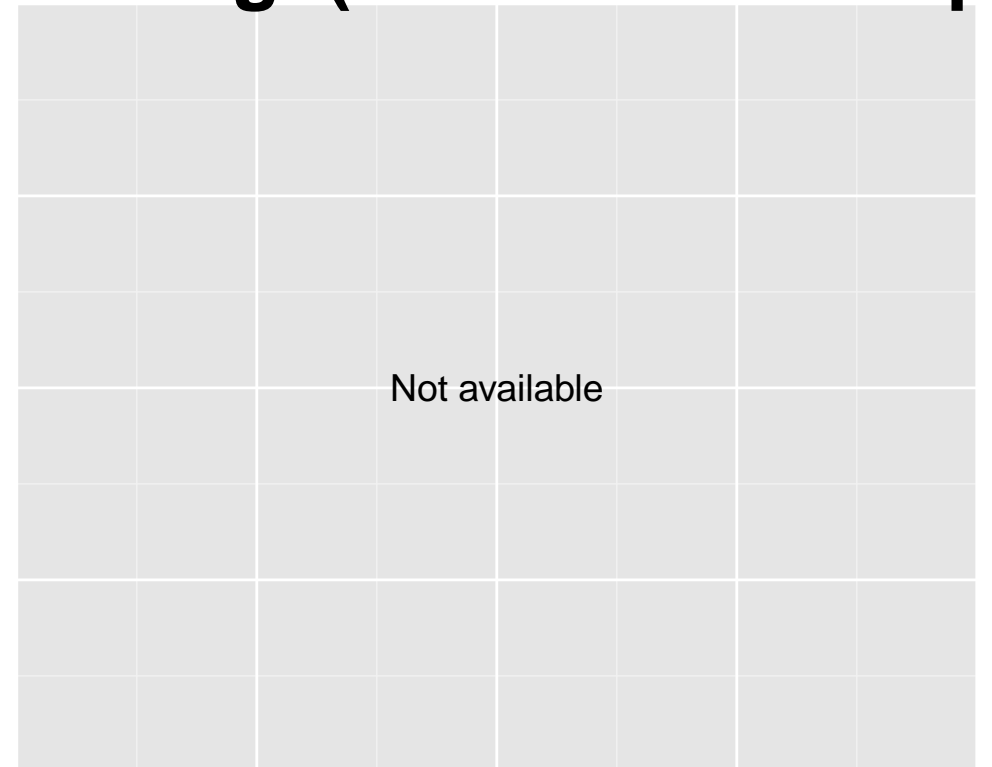

Supplement: SuppDataset_1.zip [file Arhgef25_set_A.pdf › Supplemental Dataset 1/A-mRNA_nonrhyth_translation_nonrhyth/Arhgef25_set_A.pdf]

# Arhgef2

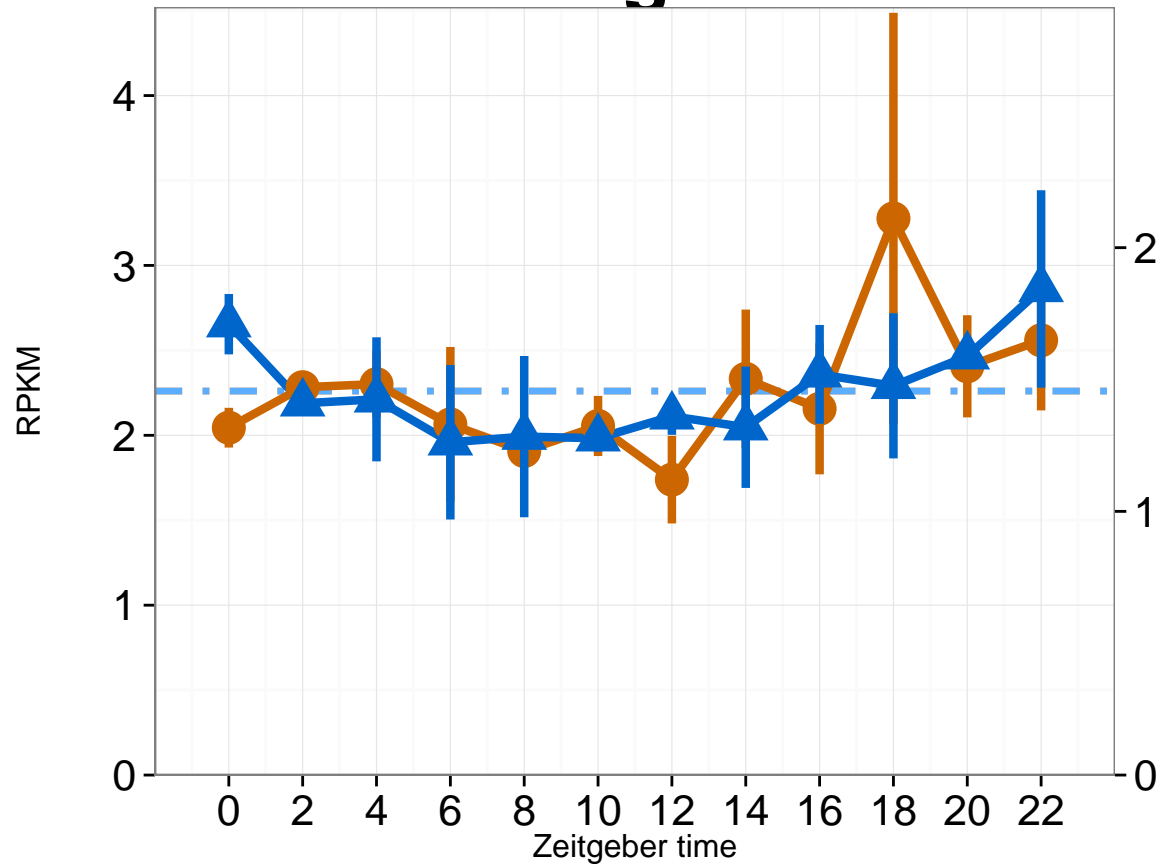

# Arhgef2

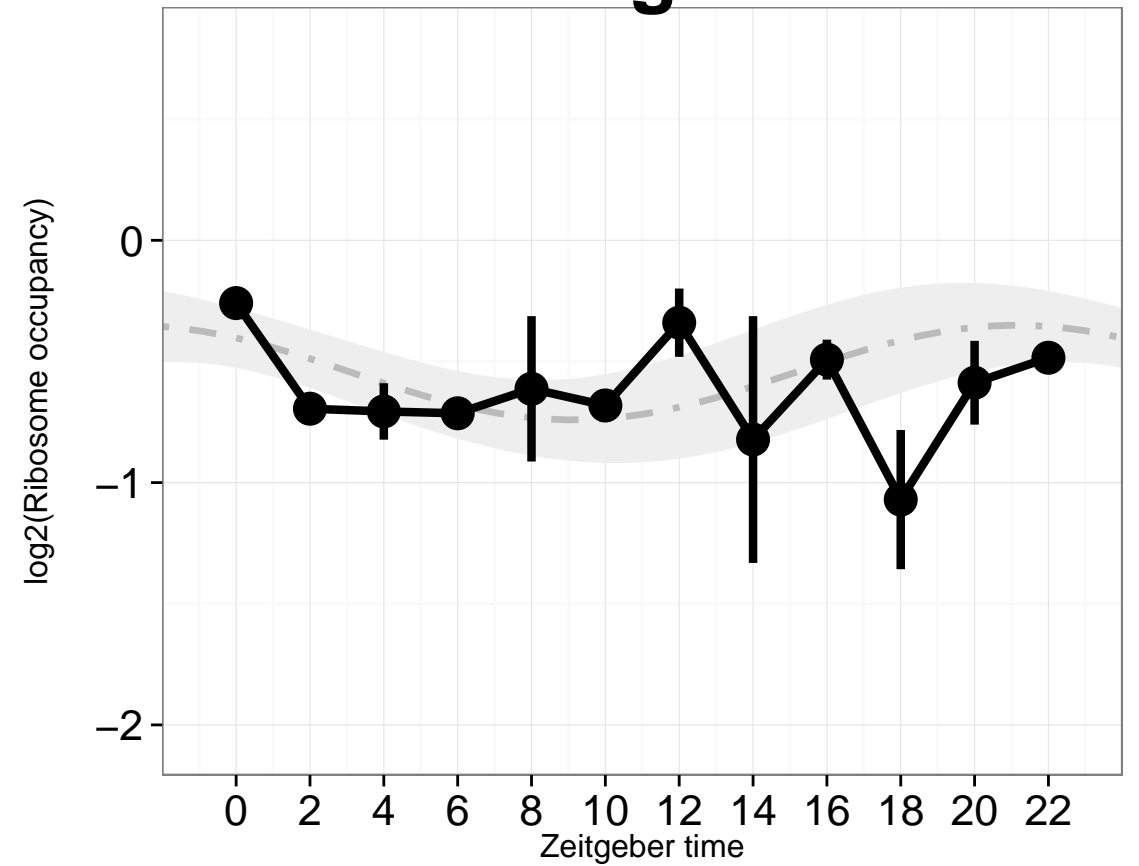

Supplement: SuppDataset_1.zip [file Arhgef2_set_A.pdf › Supplemental Dataset 1/A-mRNA_nonrhyth_translation_nonrhyth/Arhgef2_set_A.pdf]

## Arhgef3

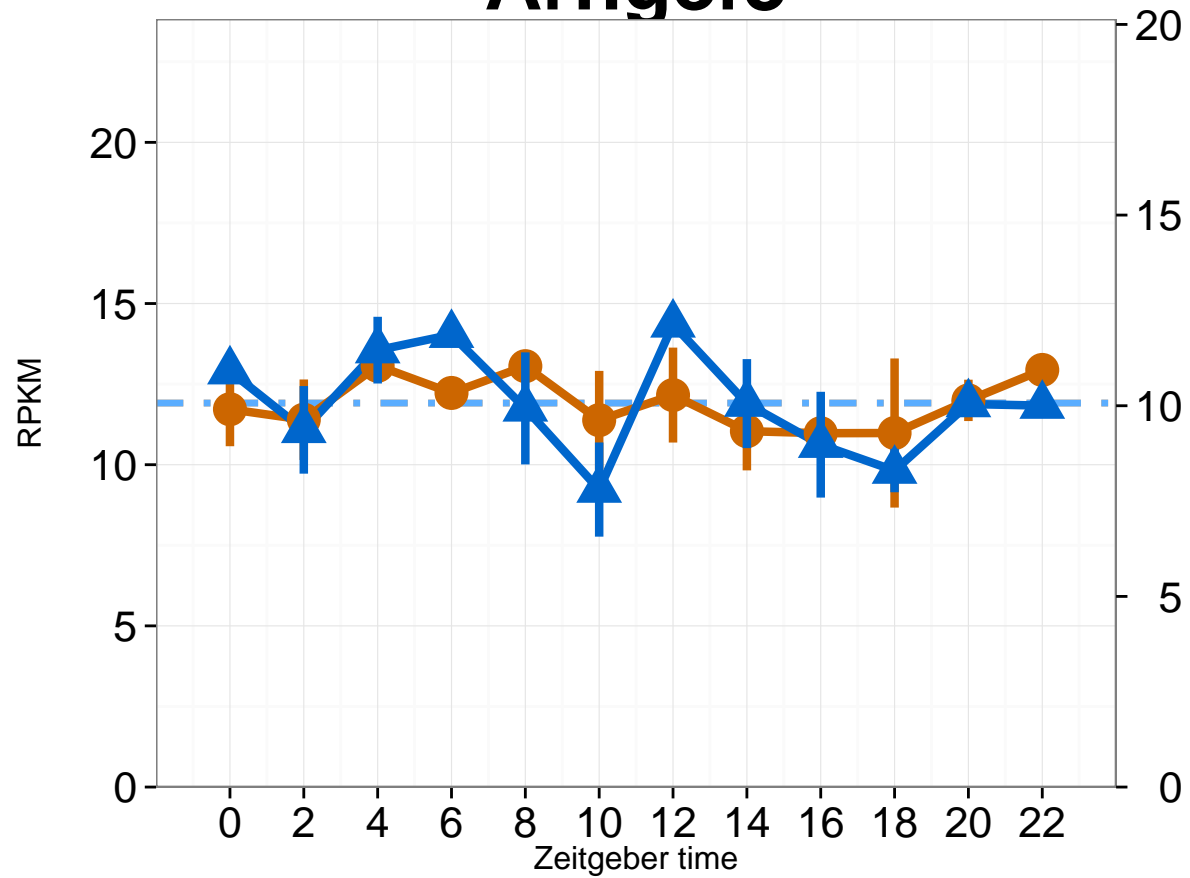

## Arhgef3

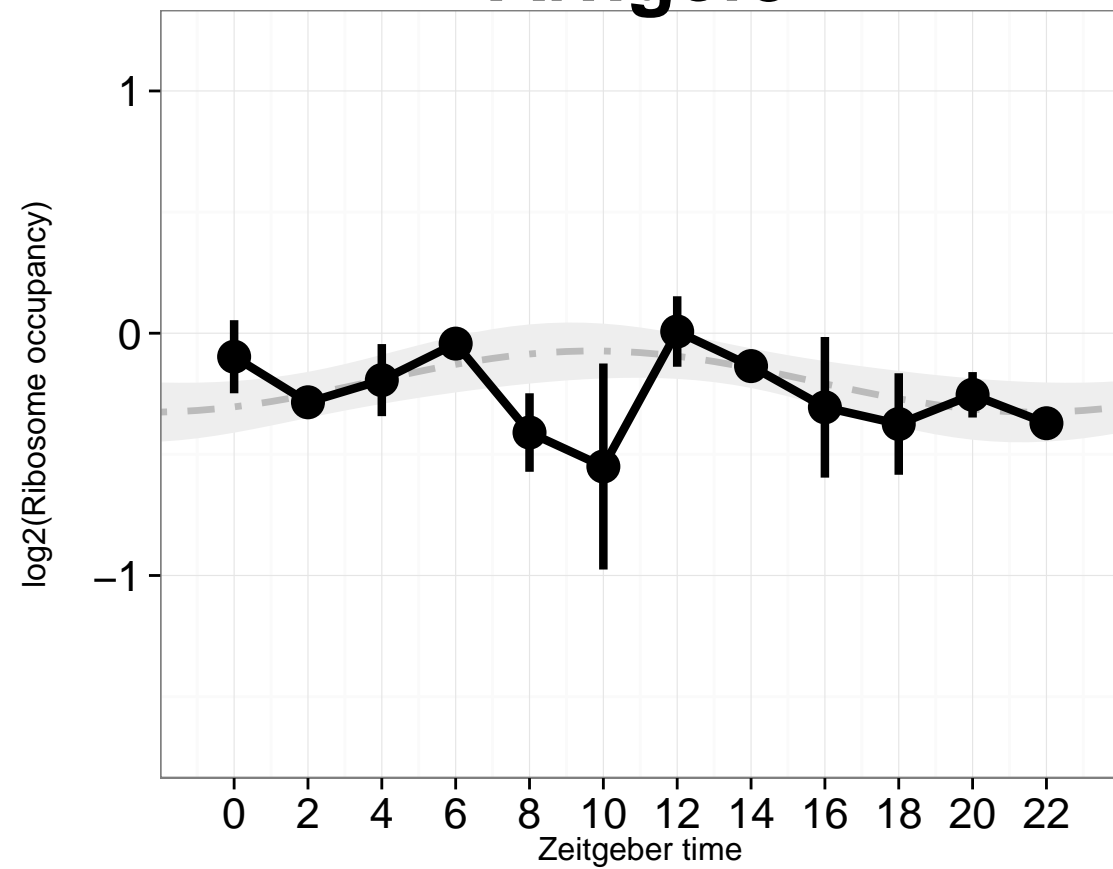

Supplement: SuppDataset_1.zip [file Arhgef3_set_A.pdf › Supplemental Dataset 1/A-mRNA_nonrhyth_translation_nonrhyth/Arhgef3_set_A.pdf]

## Arhgef40

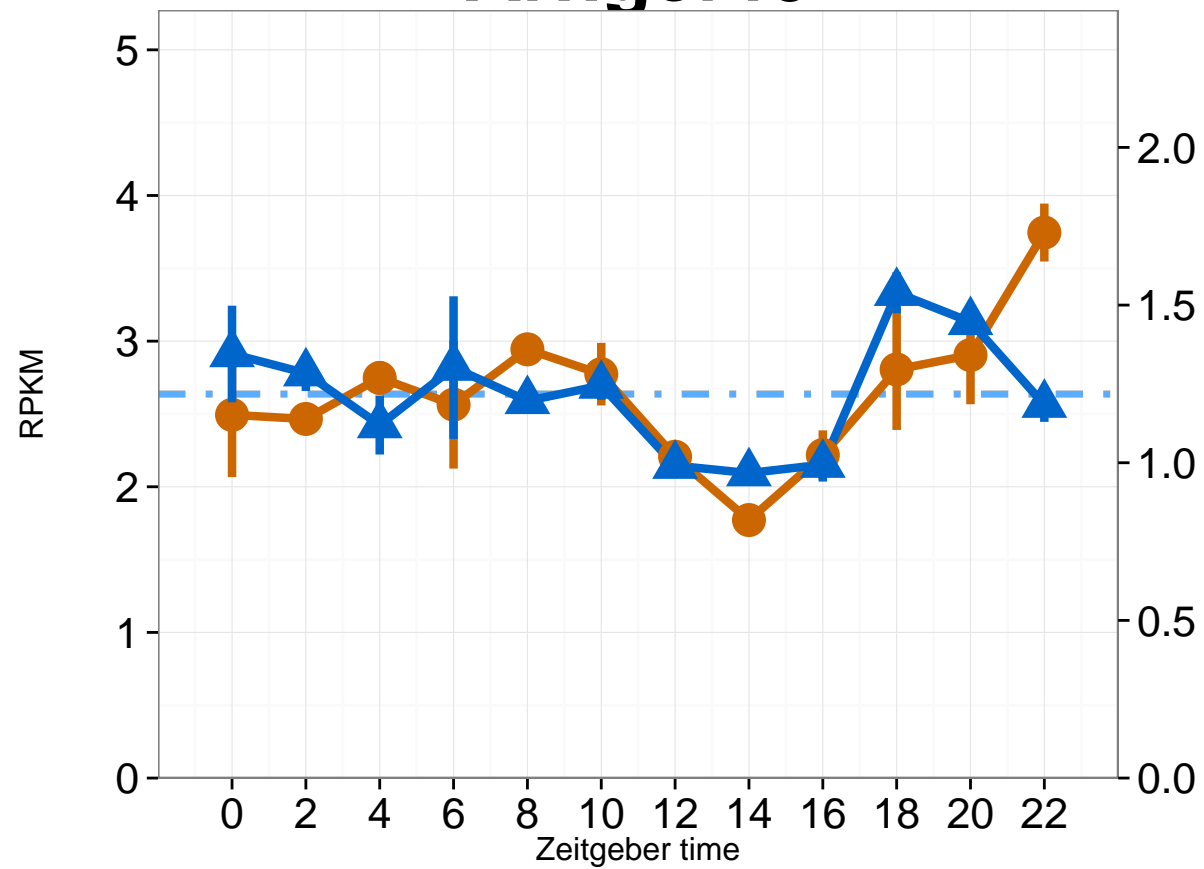

## Arhgef40

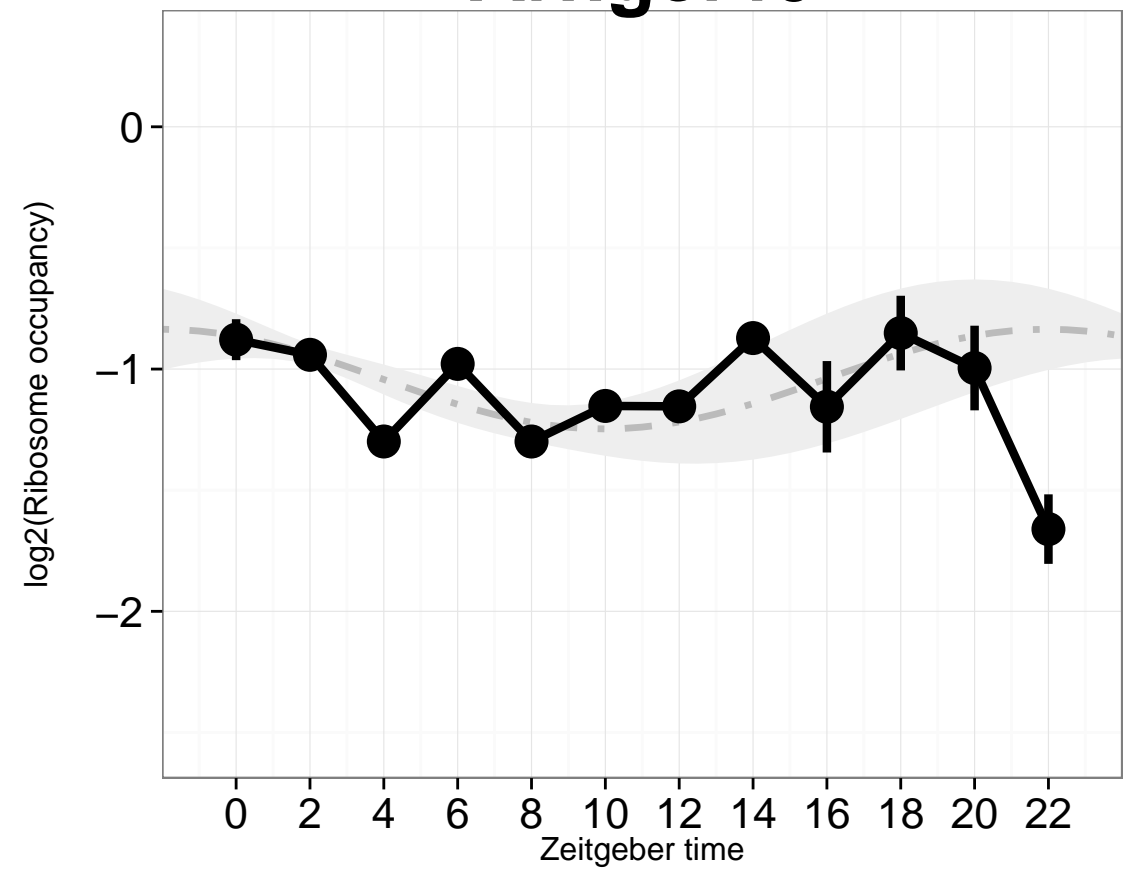

Supplement: SuppDataset_1.zip [file Arhgef40_set_A.pdf › Supplemental Dataset 1/A-mRNA_nonrhyth_translation_nonrhyth/Arhgef40_set_A.pdf]

## Arhgef5

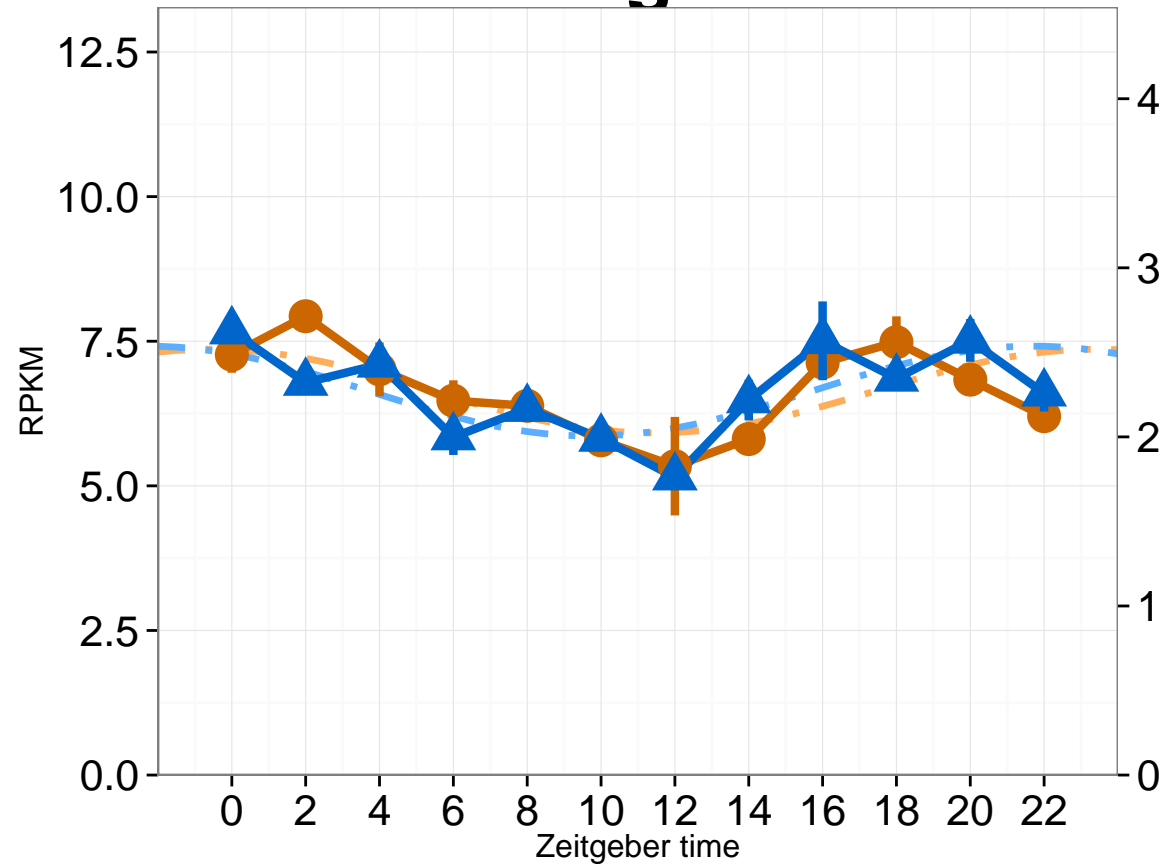

## Arhgef5

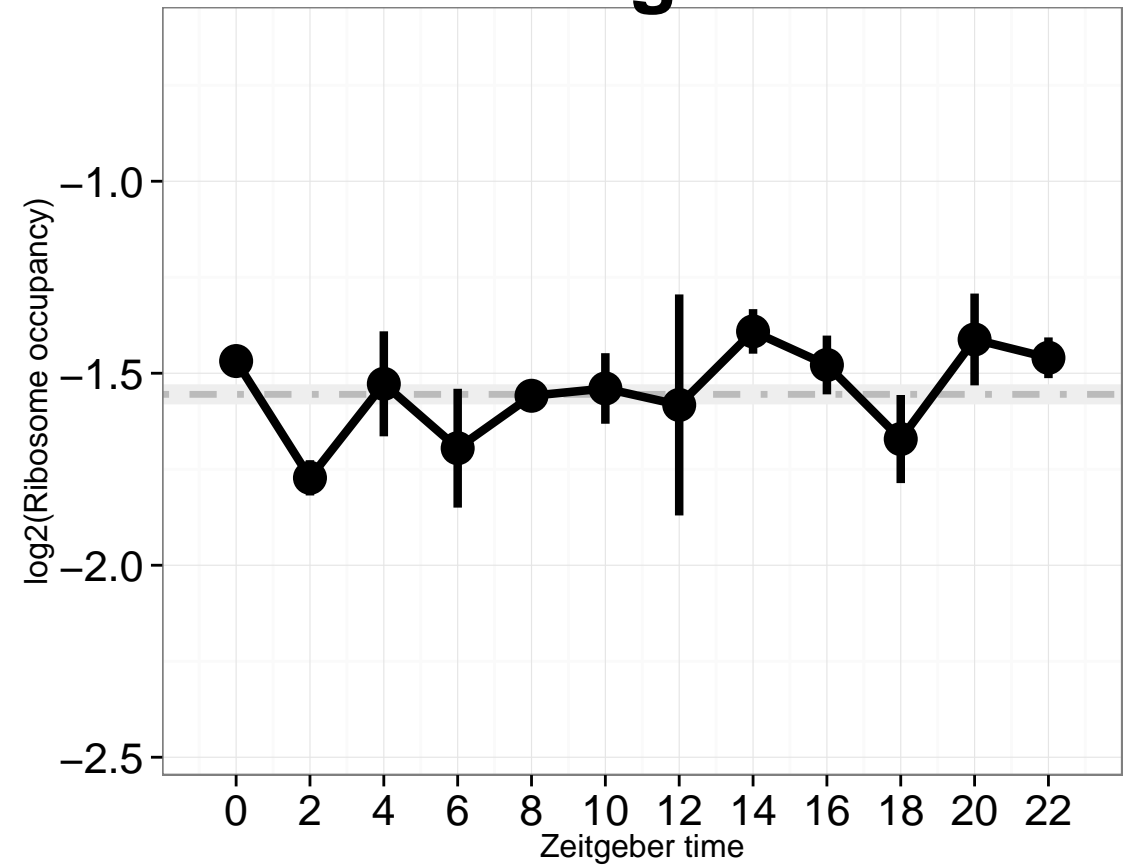

Supplement: SuppDataset_1.zip [file Arhgef5_set_A.pdf › Supplemental Dataset 1/A-mRNA_nonrhyth_translation_nonrhyth/Arhgef5_set_A.pdf]

# Arhgef6

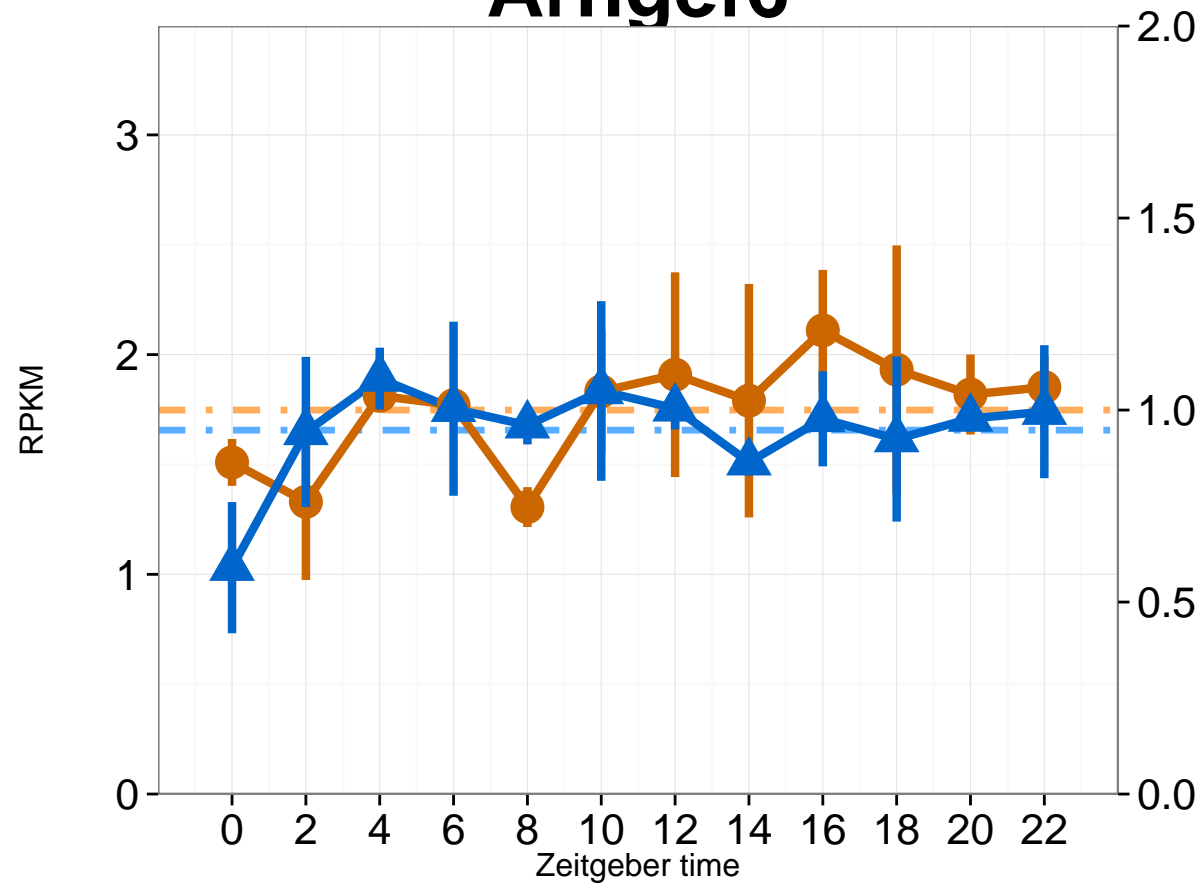

# Arhgef6

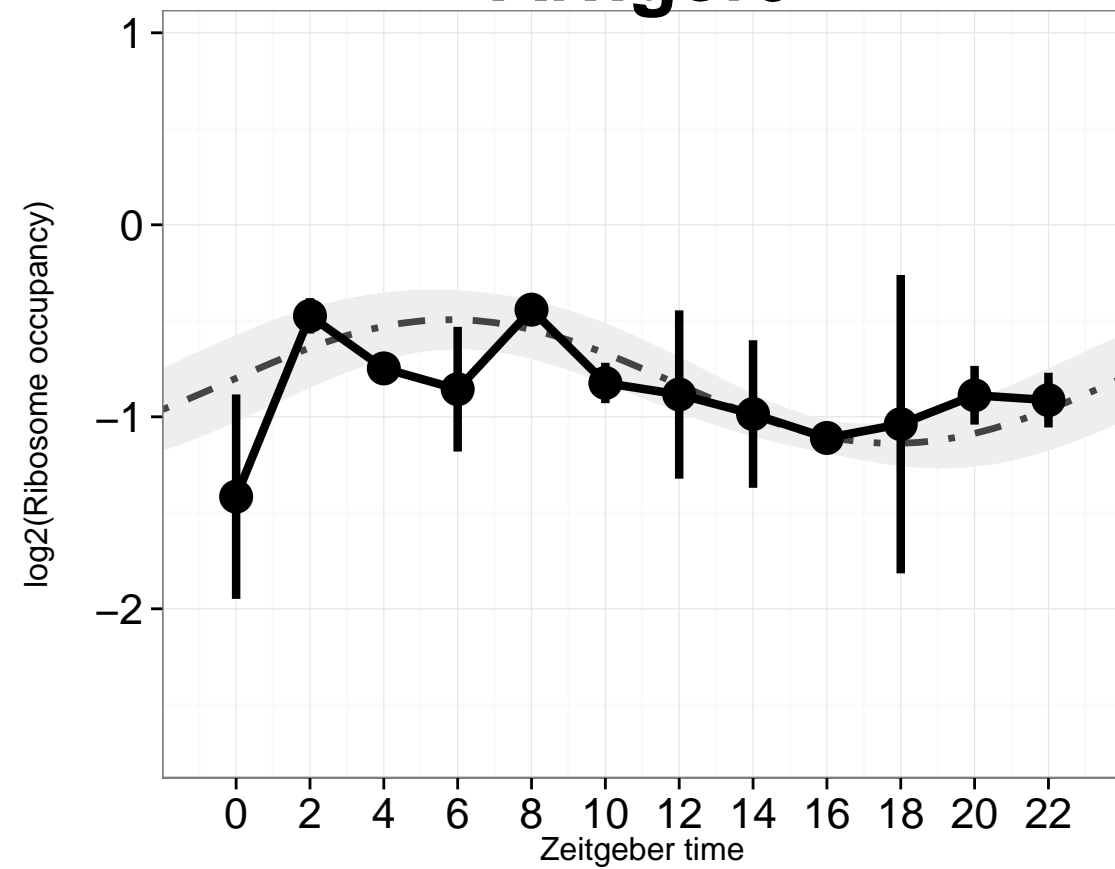

Supplement: SuppDataset_1.zip [file Arhgef6_set_A.pdf › Supplemental Dataset 1/A-mRNA_nonrhyth_translation_nonrhyth/Arhgef6_set_A.pdf]

## Arhgef7

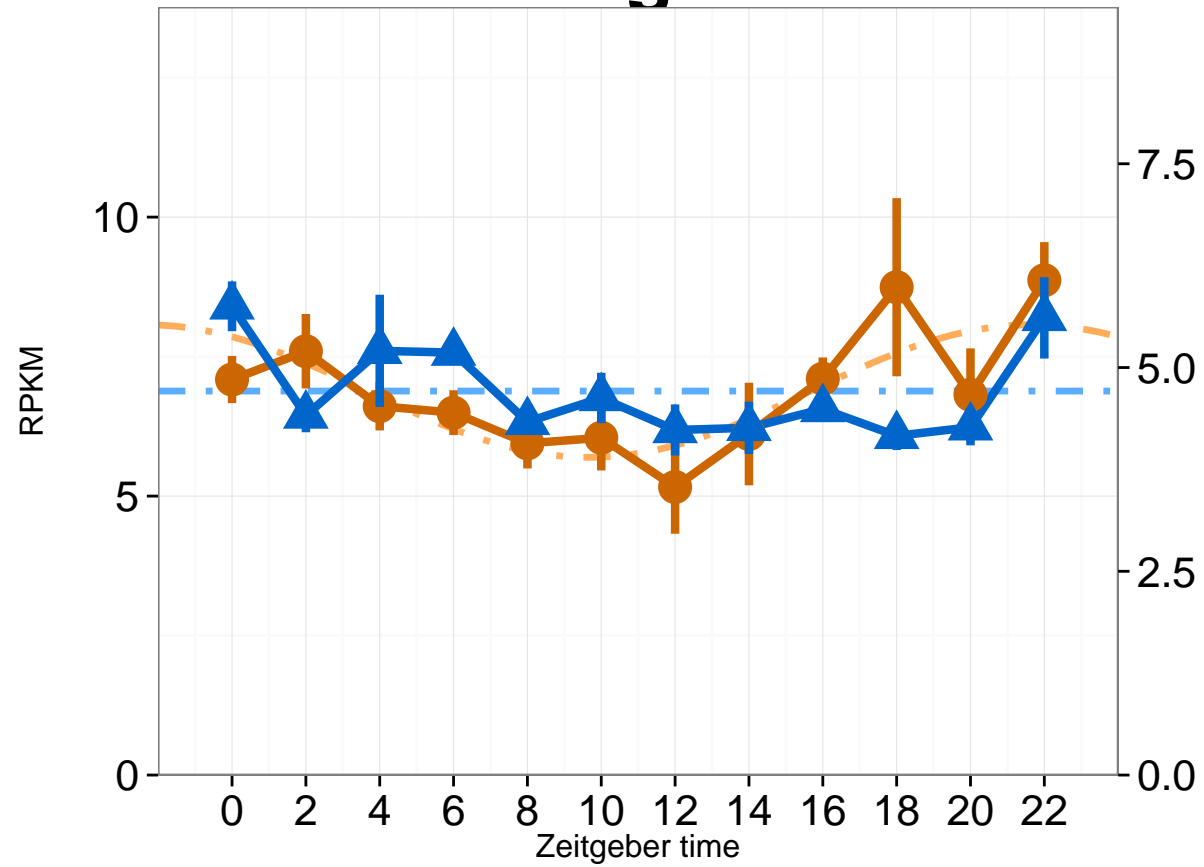

## Arhgef7

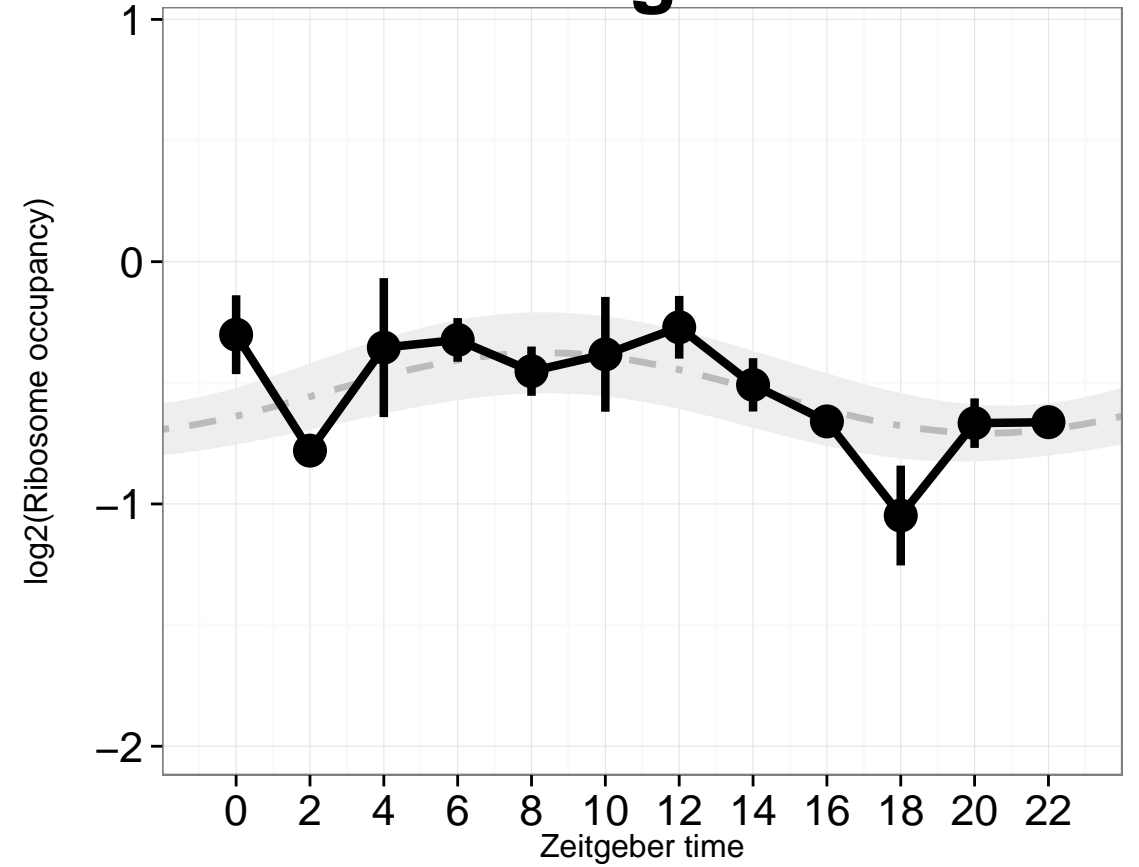

Supplement: SuppDataset_1.zip [file Arhgef7_set_A.pdf › Supplemental Dataset 1/A-mRNA_nonrhyth_translation_nonrhyth/Arhgef7_set_A.pdf]

# Arid1a

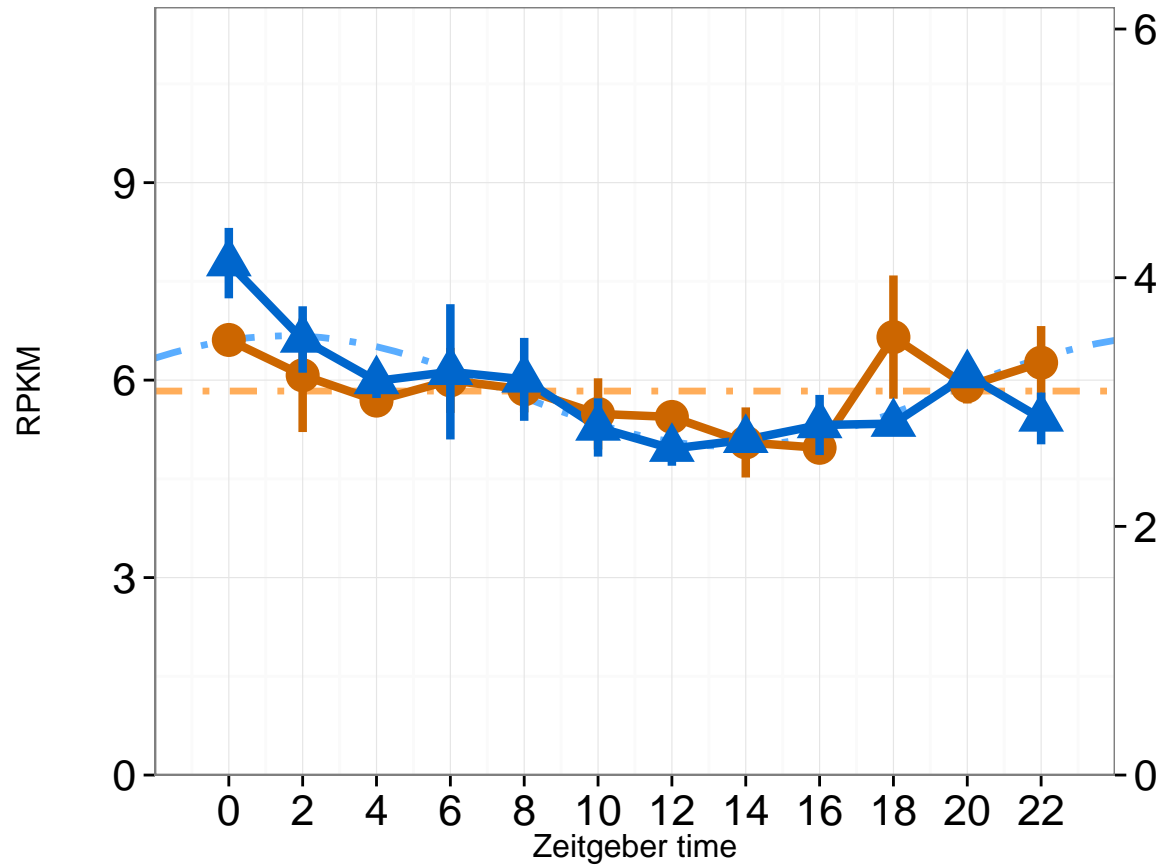

# Arid1a

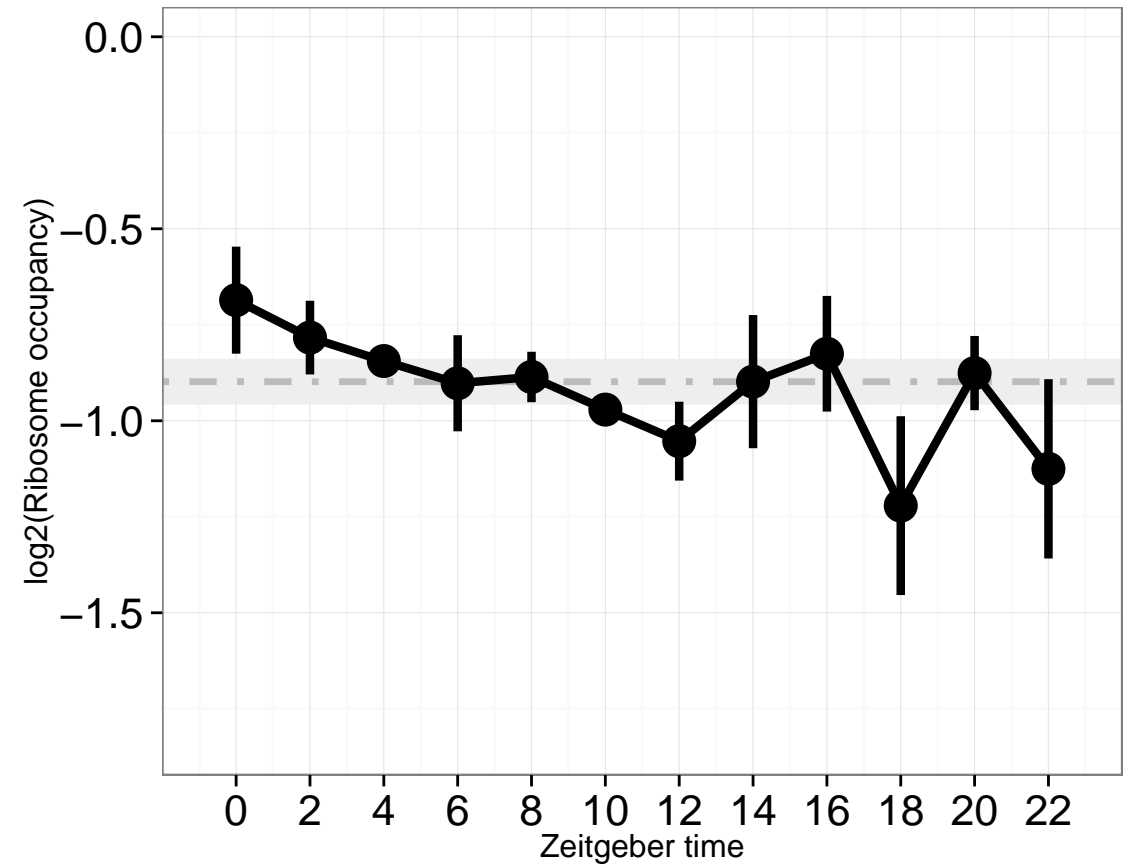

Supplement: SuppDataset_1.zip [file Arid1a_set_A.pdf › Supplemental Dataset 1/A-mRNA_nonrhyth_translation_nonrhyth/Arid1a_set_A.pdf]

## Arid1b

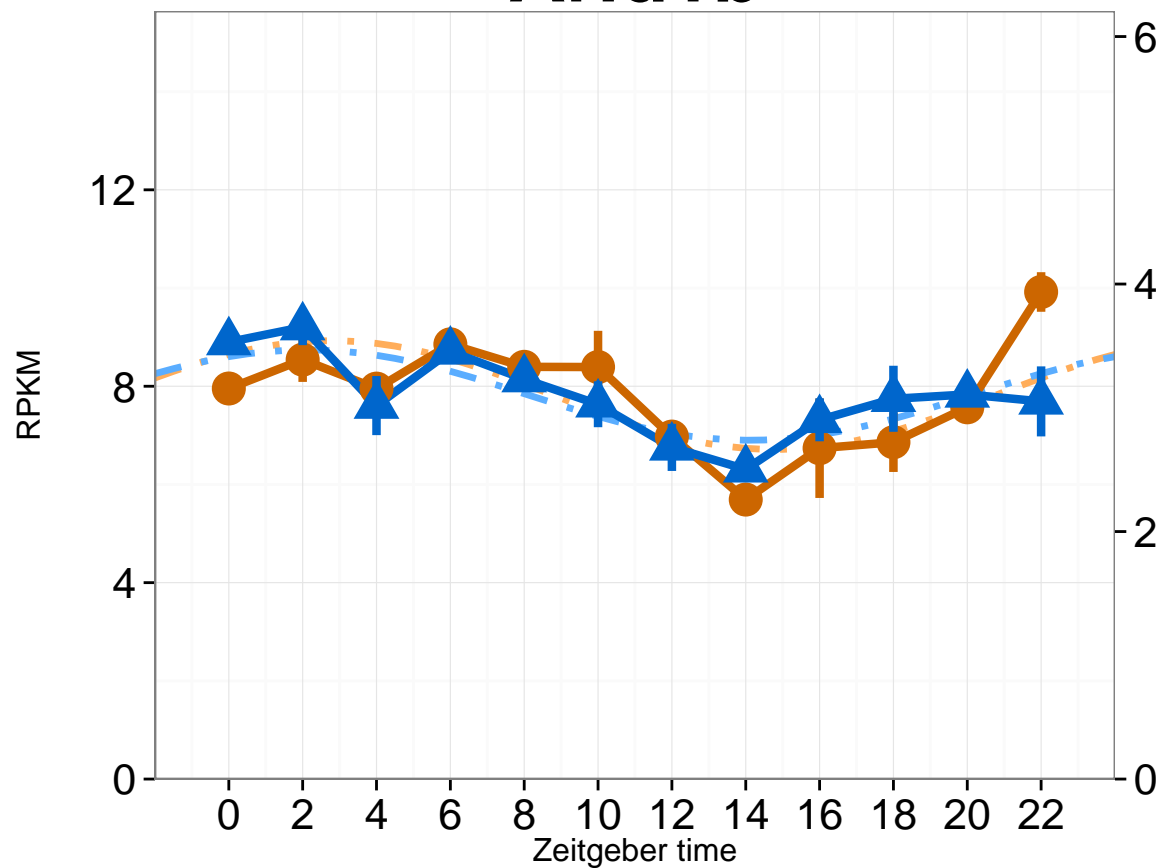

## Arid1b

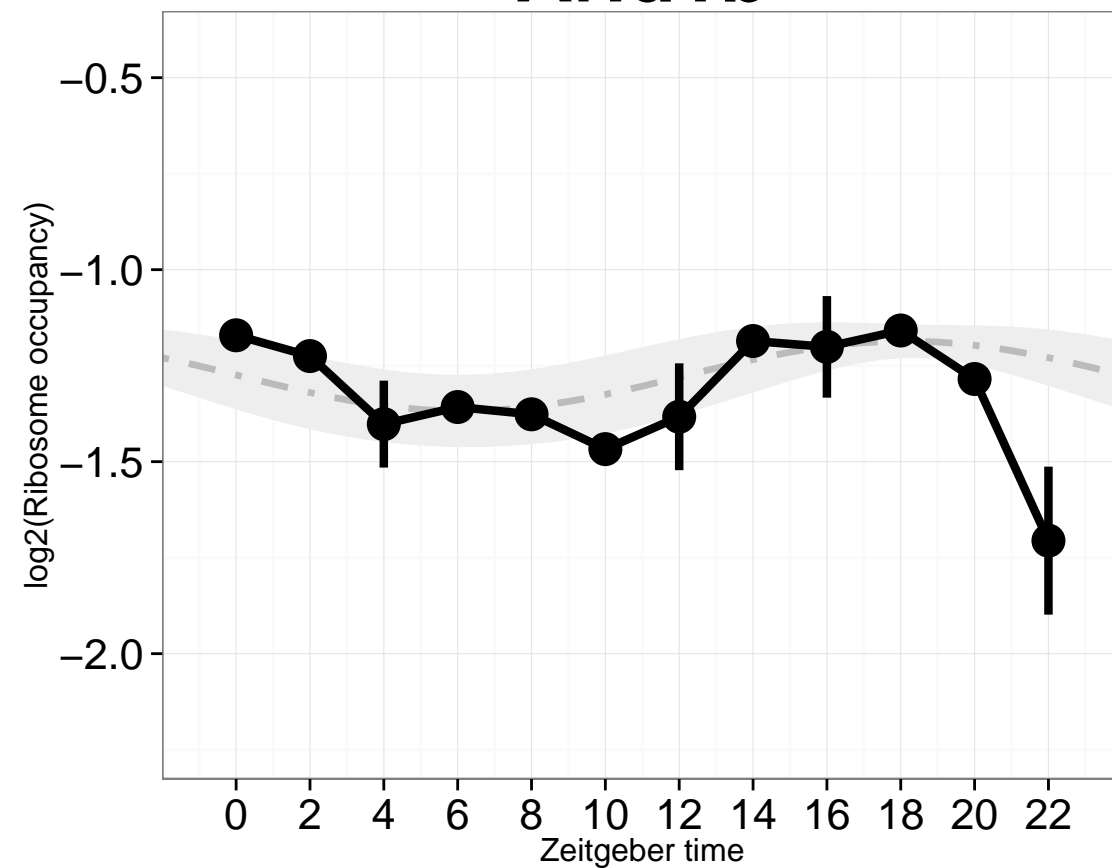

Supplement: SuppDataset_1.zip [file Arid1b_set_A.pdf › Supplemental Dataset 1/A-mRNA_nonrhyth_translation_nonrhyth/Arid1b_set_A.pdf]

## Arid2

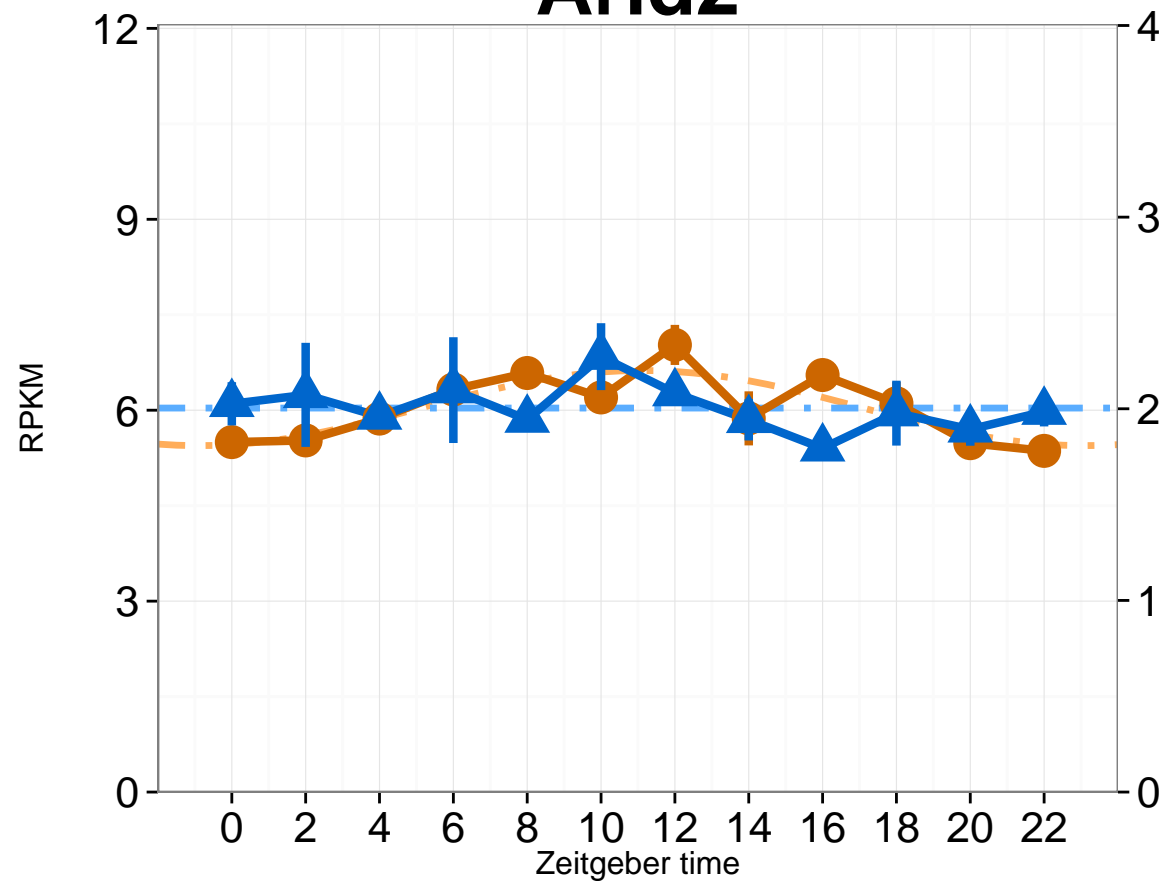

## Arid2

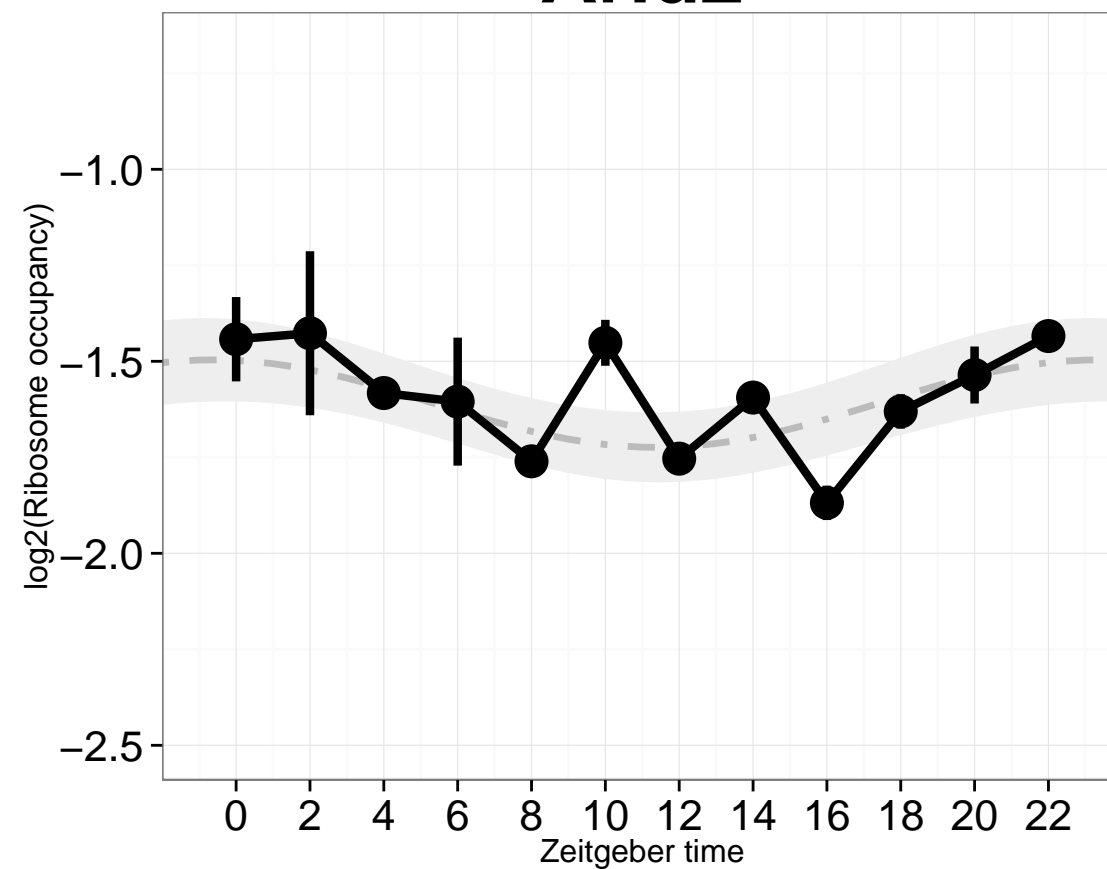

Supplement: SuppDataset_1.zip [file Arid2_set_A.pdf › Supplemental Dataset 1/A-mRNA_nonrhyth_translation_nonrhyth/Arid2_set_A.pdf]

## Arid3b

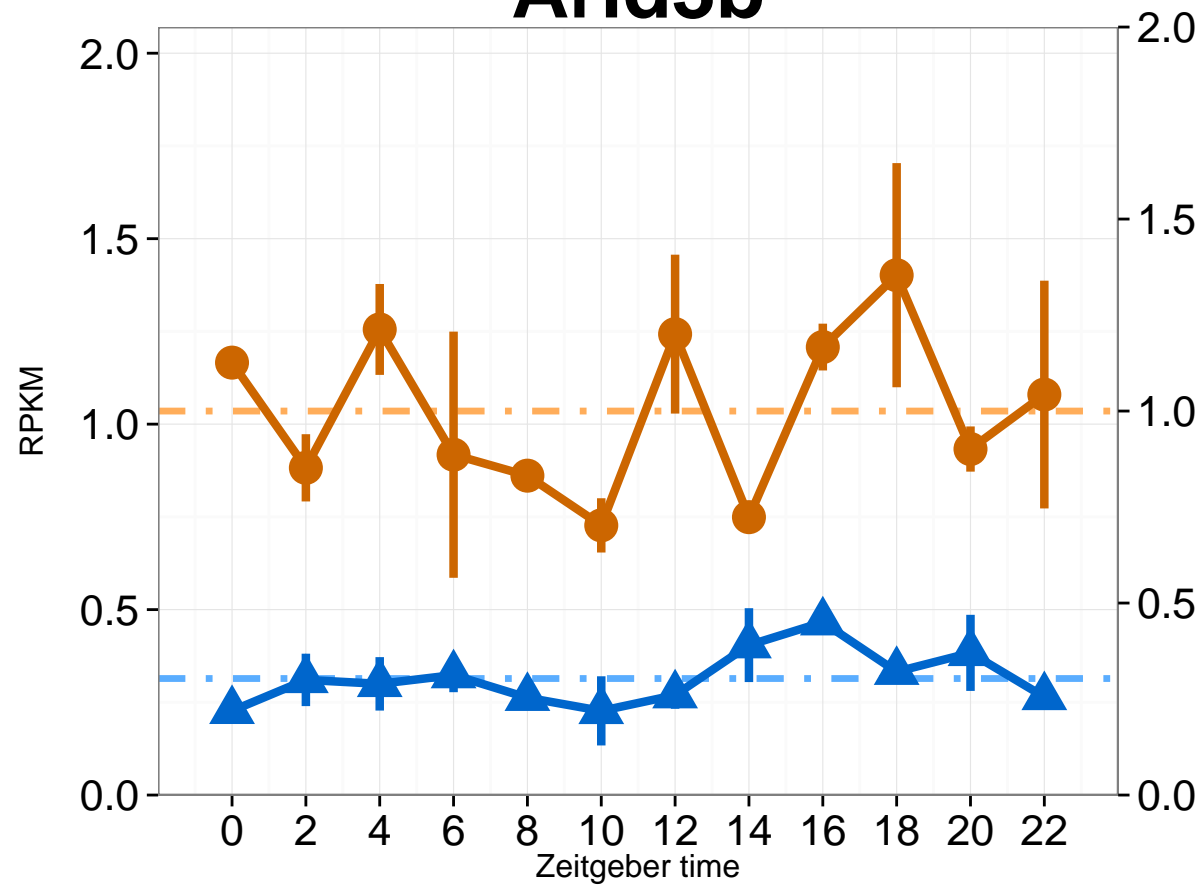

## Arid3b

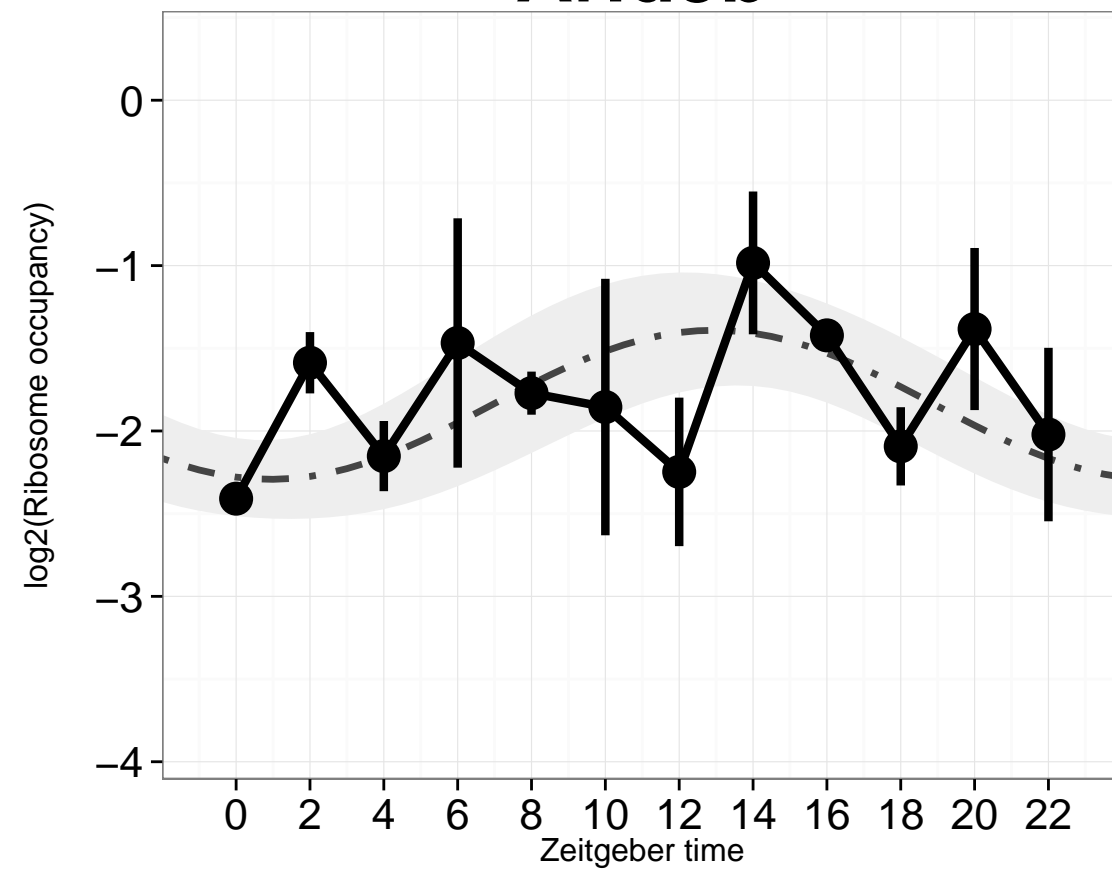

Supplement: SuppDataset_1.zip [file Arid3b_set_A.pdf › Supplemental Dataset 1/A-mRNA_nonrhyth_translation_nonrhyth/Arid3b_set_A.pdf]

# Arid4a

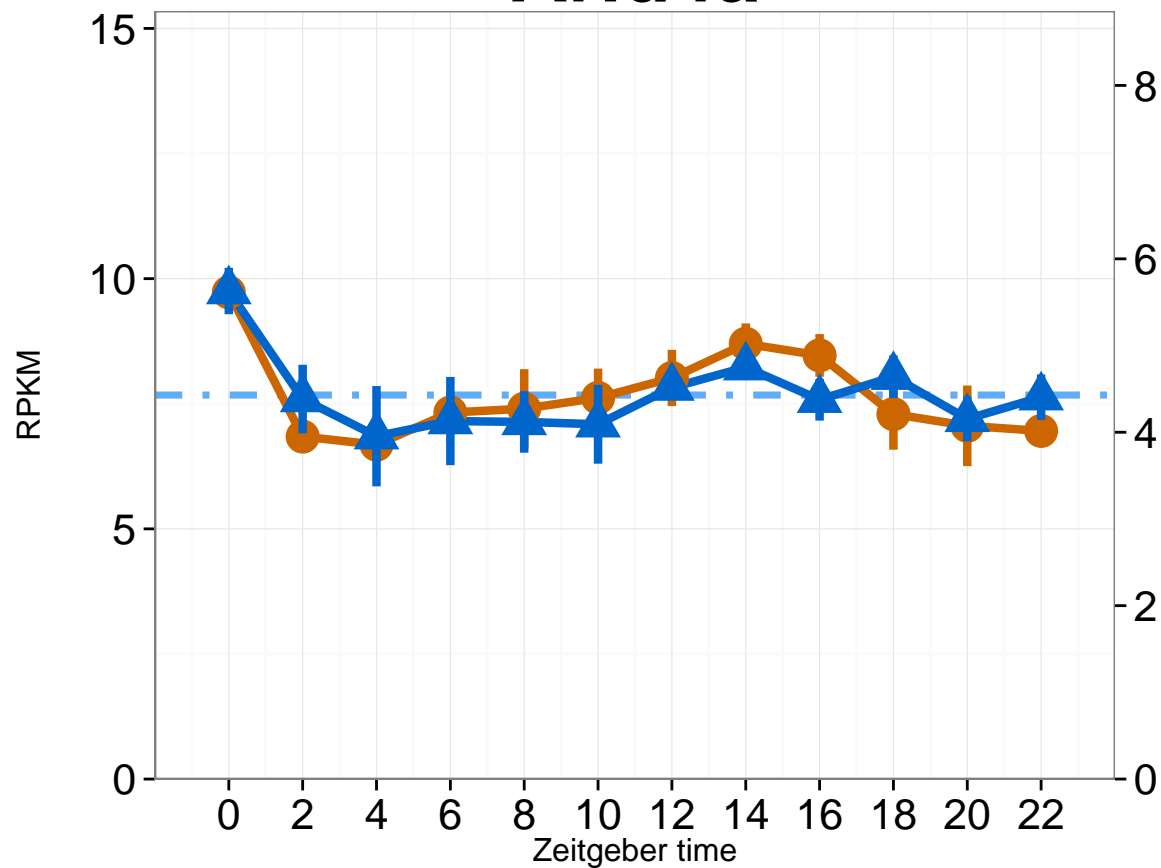

# Arid4a

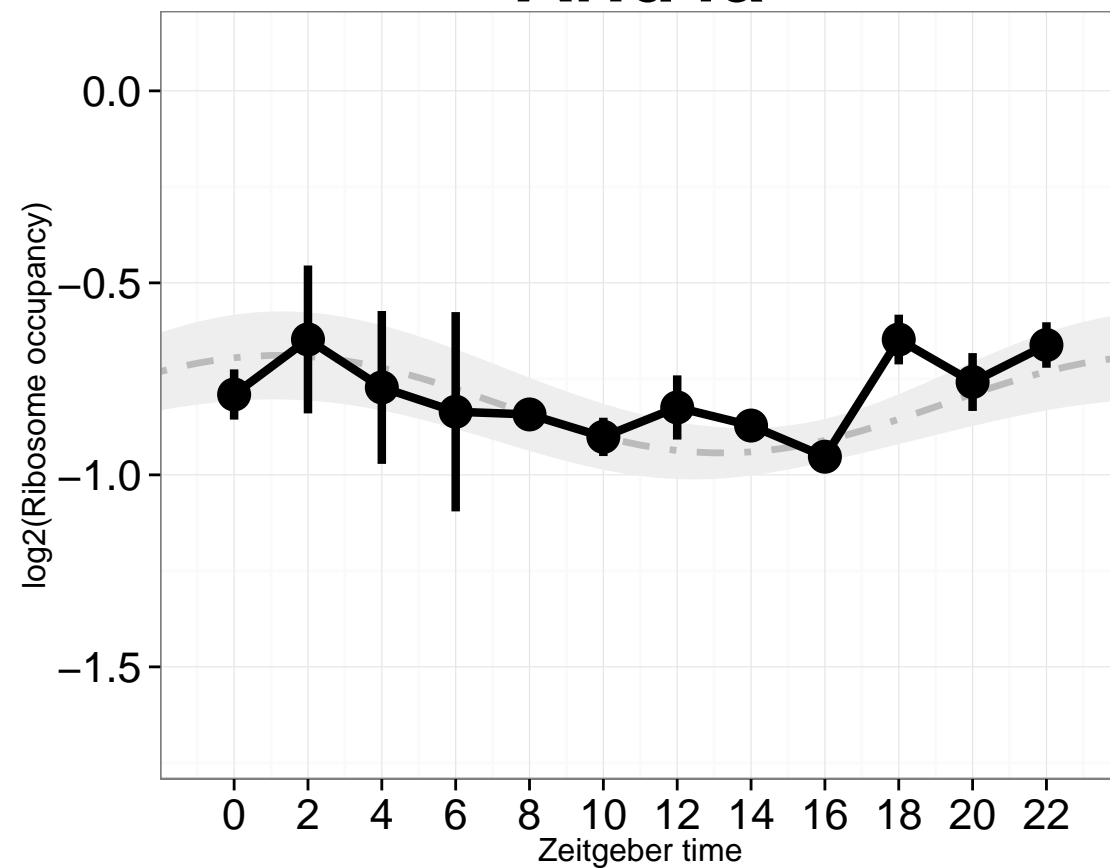

Supplement: SuppDataset_1.zip [file Arid4a_set_A.pdf › Supplemental Dataset 1/A-mRNA_nonrhyth_translation_nonrhyth/Arid4a_set_A.pdf]

# Arid4b

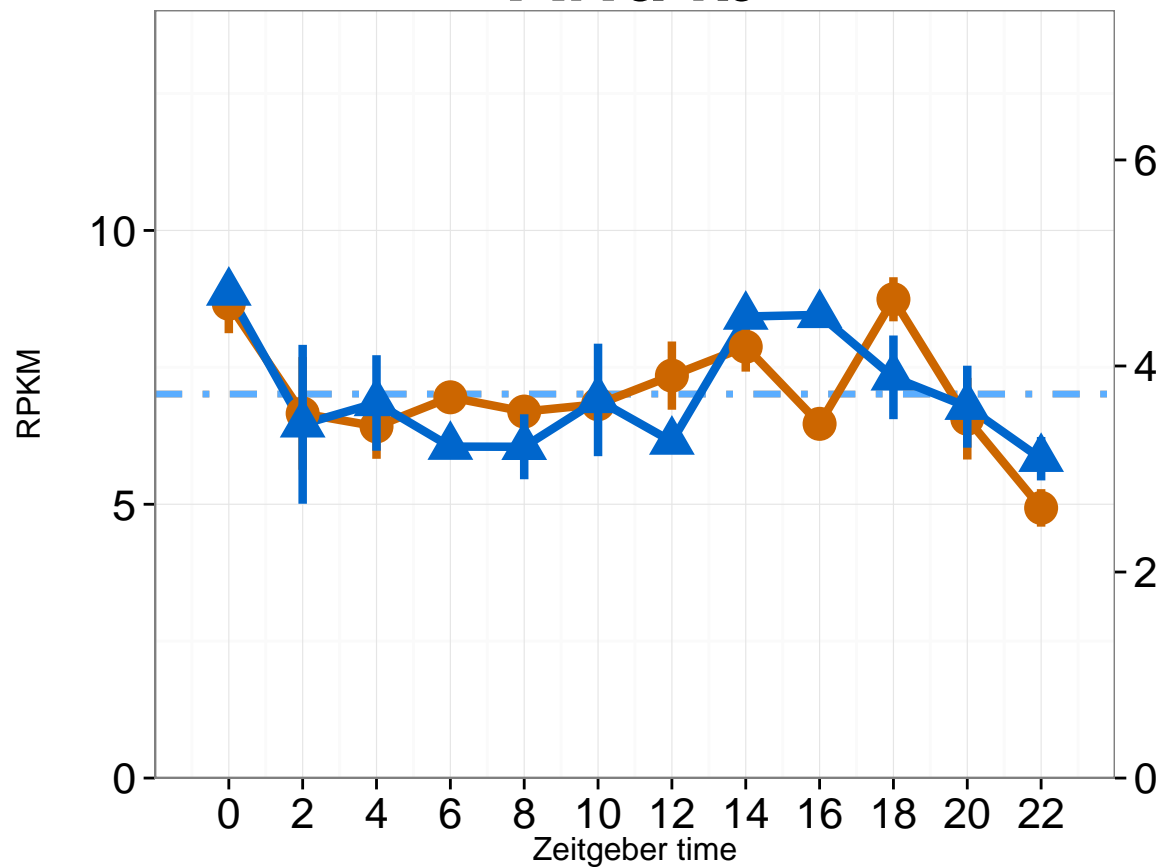

# Arid4b

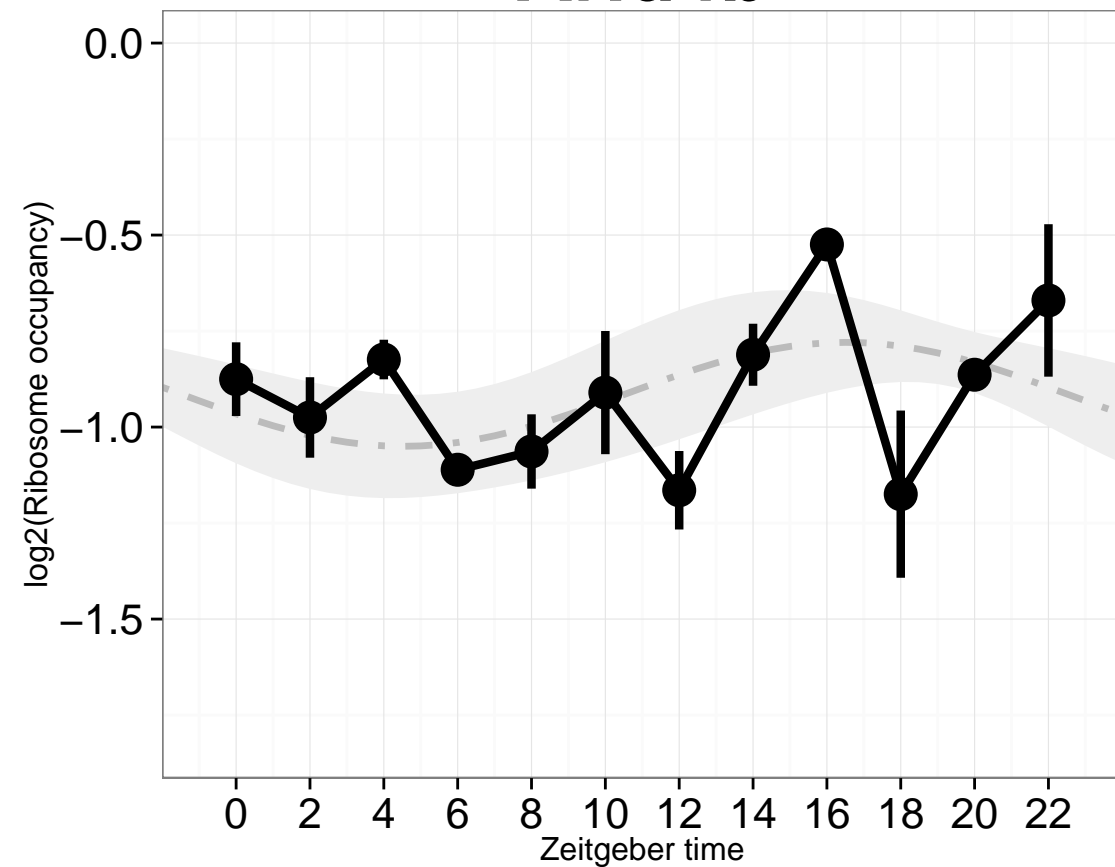

Supplement: SuppDataset_1.zip [file Arid4b_set_A.pdf › Supplemental Dataset 1/A-mRNA_nonrhyth_translation_nonrhyth/Arid4b_set_A.pdf]

# Arid5b

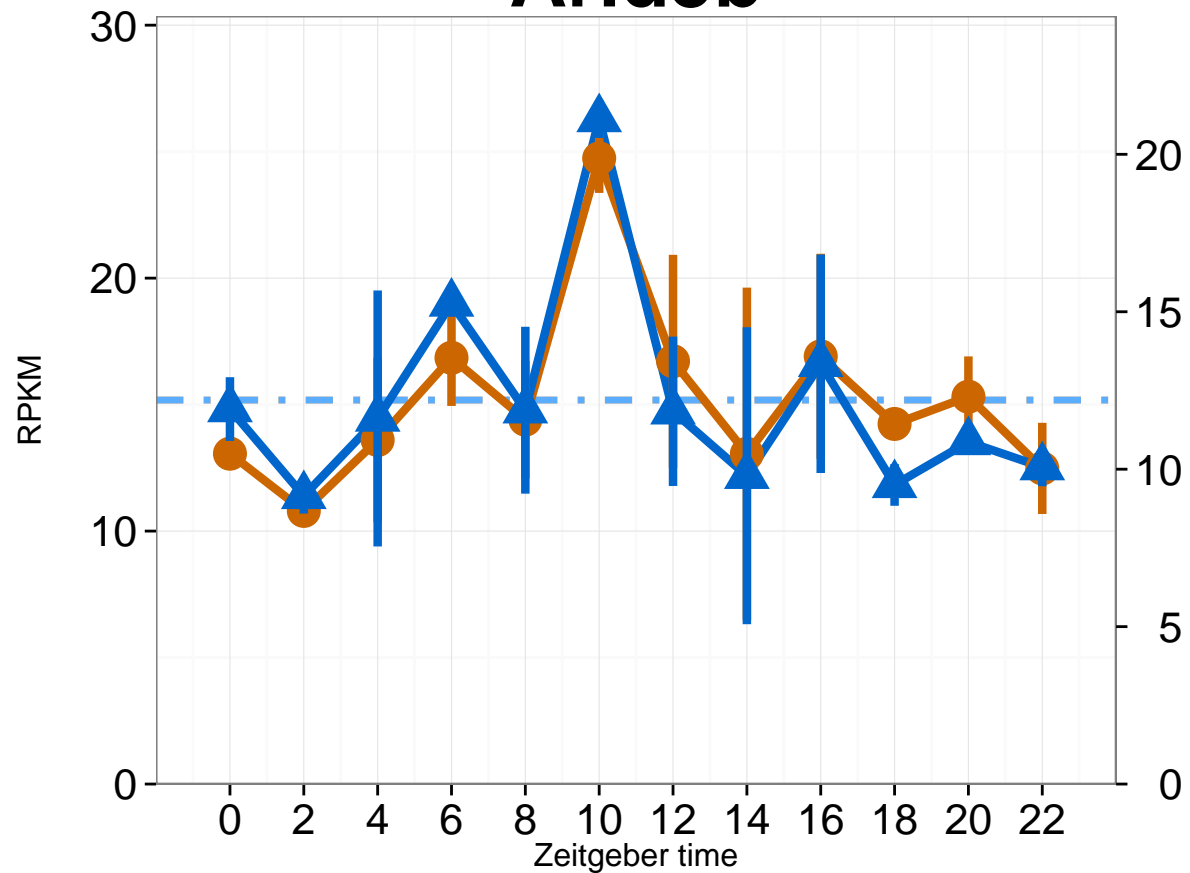

# Arid5b

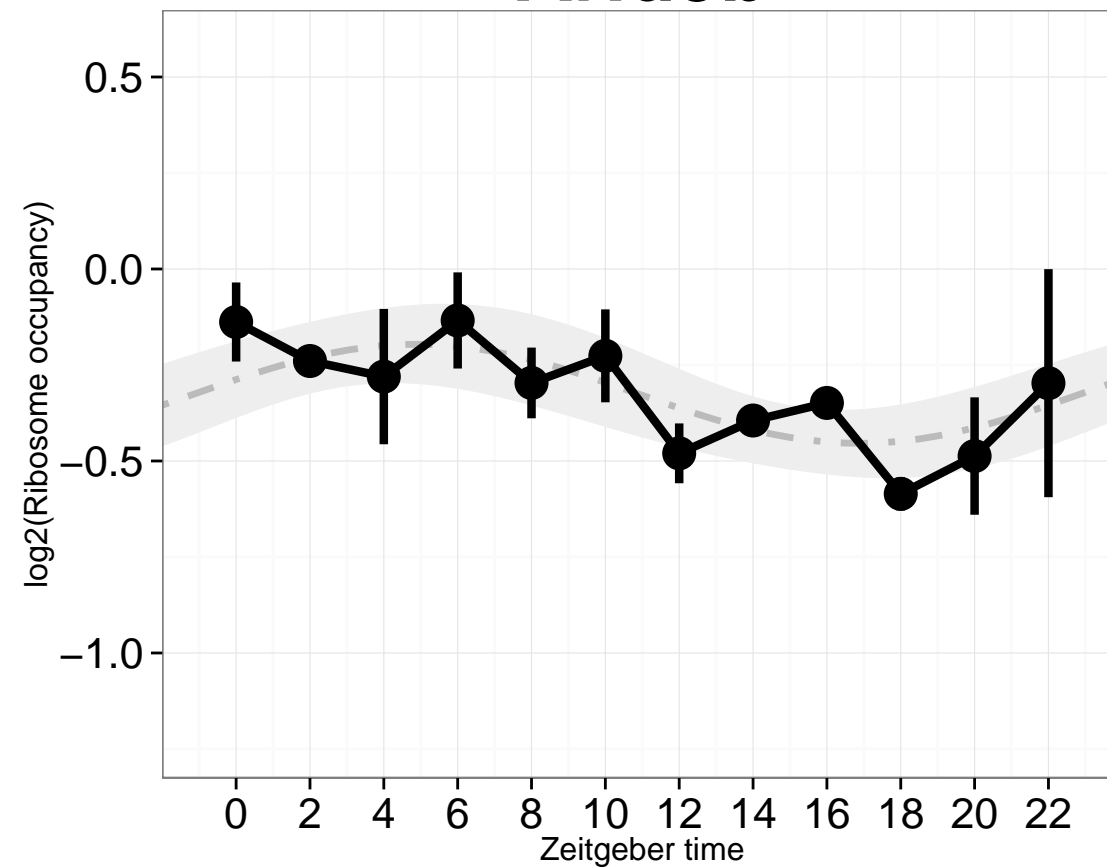

Supplement: SuppDataset_1.zip [file Arid5b_set_A.pdf › Supplemental Dataset 1/A-mRNA_nonrhyth_translation_nonrhyth/Arid5b_set_A.pdf]

## Arih1

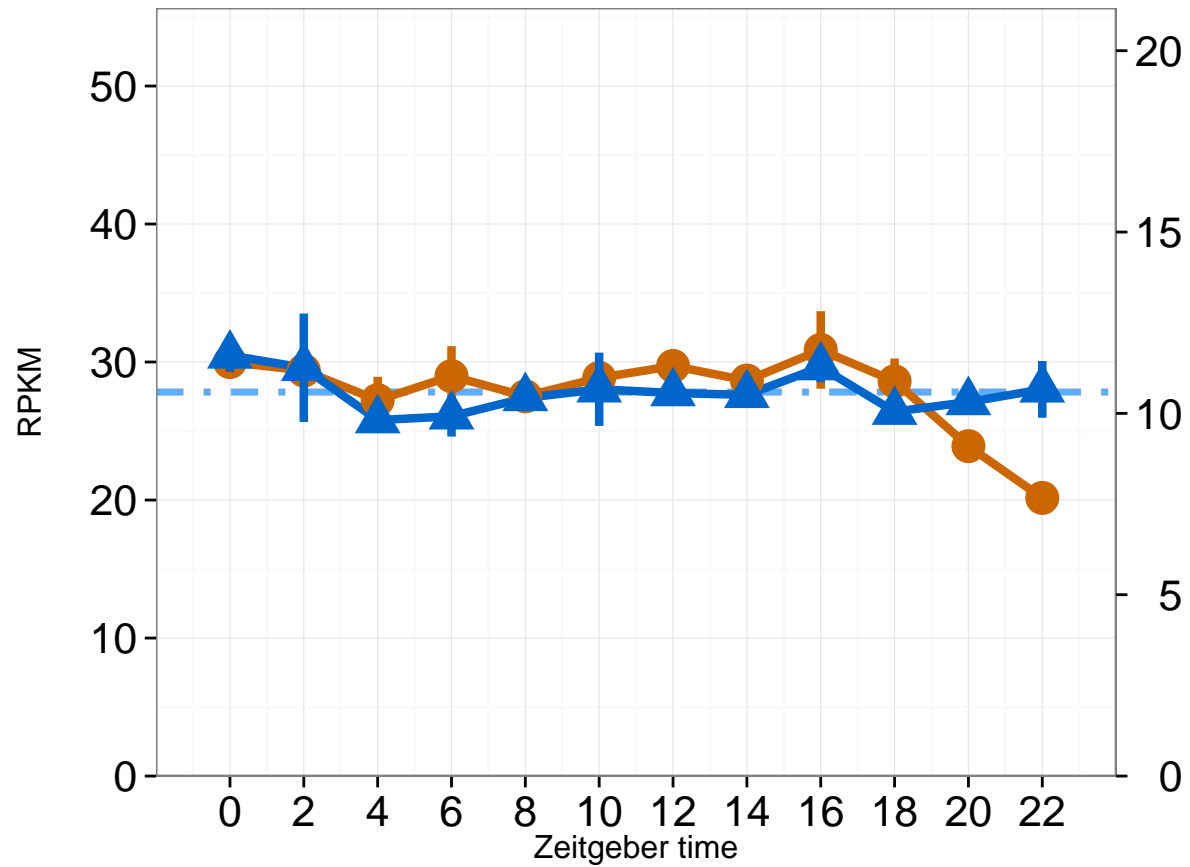

## Arih1

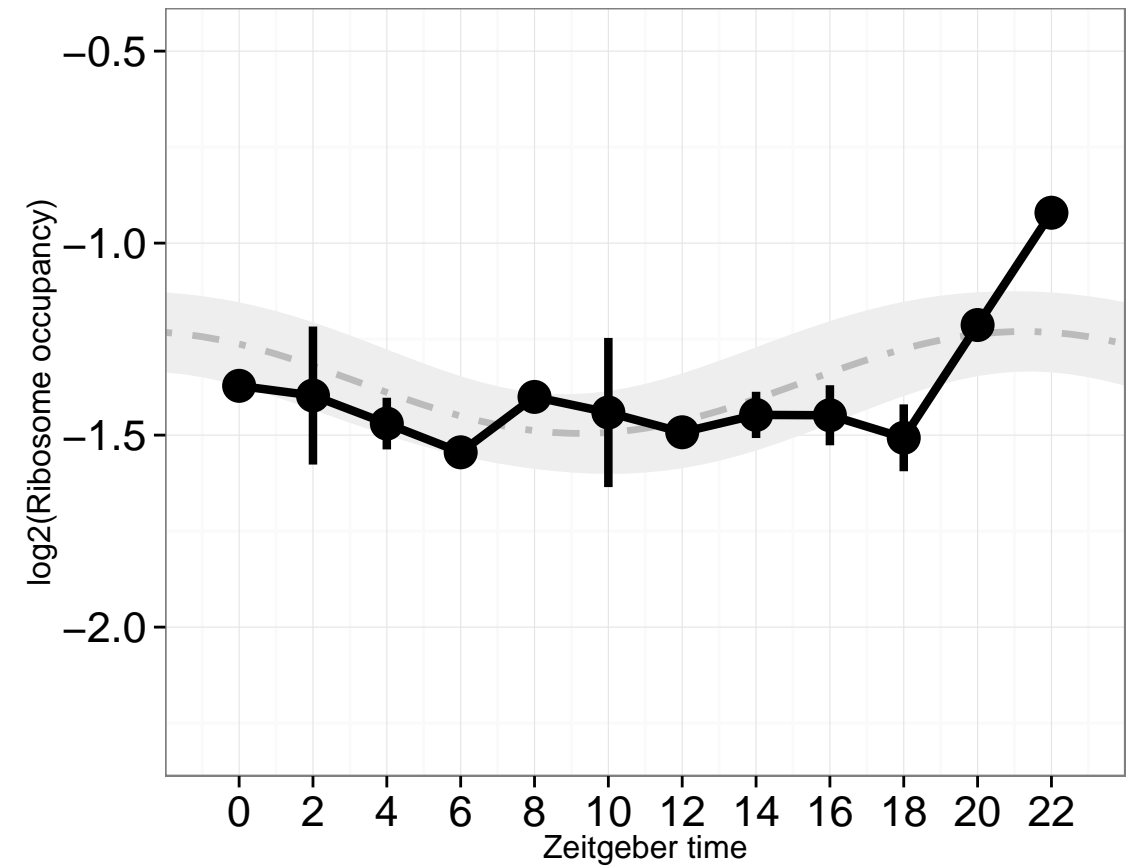

Supplement: SuppDataset_1.zip [file Arih1_set_A.pdf › Supplemental Dataset 1/A-mRNA_nonrhyth_translation_nonrhyth/Arih1_set_A.pdf]

## Arih2

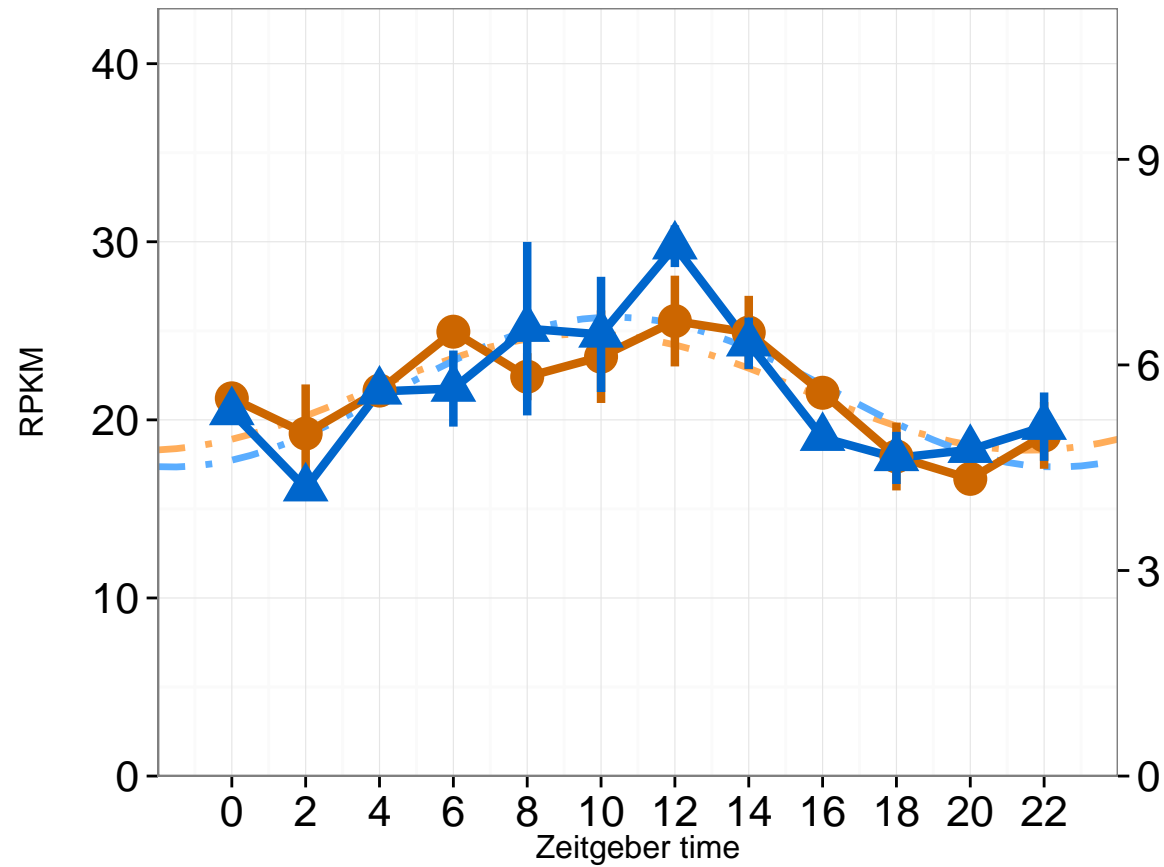

## Arih2

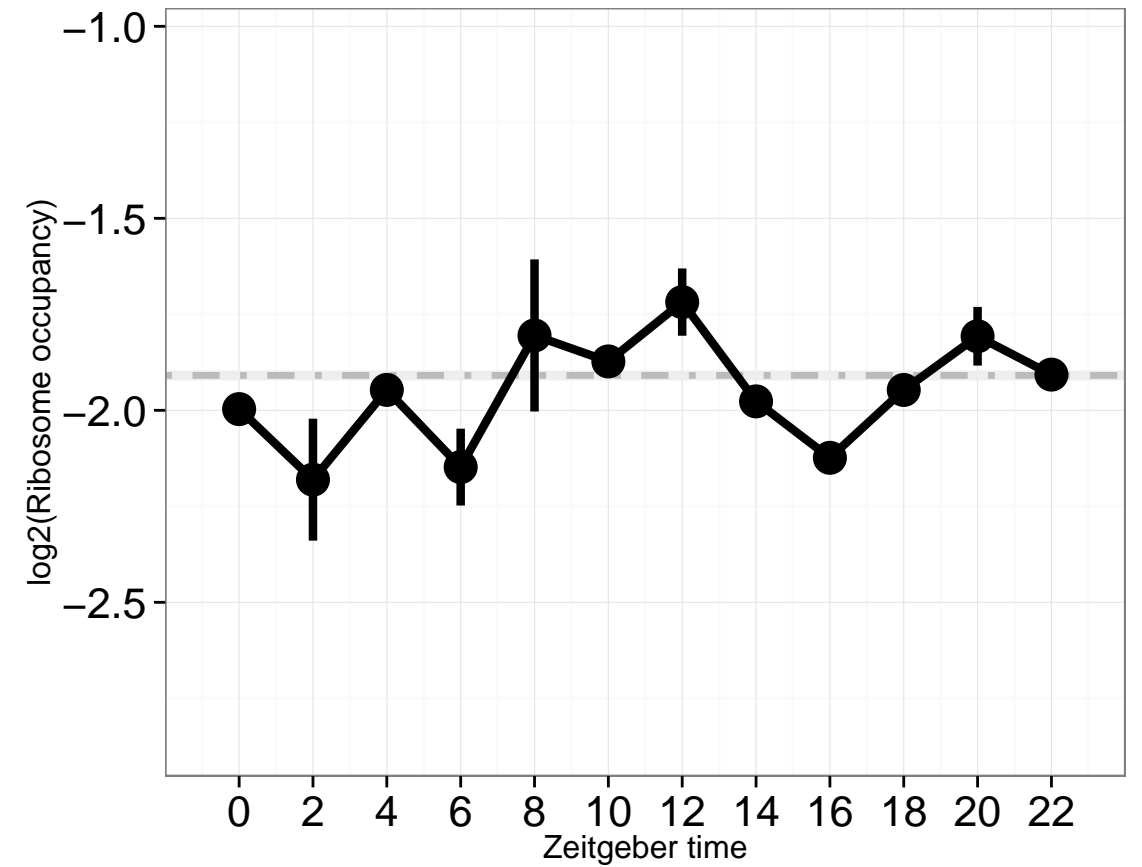

Supplement: SuppDataset_1.zip [file Arih2_set_A.pdf › Supplemental Dataset 1/A-mRNA_nonrhyth_translation_nonrhyth/Arih2_set_A.pdf]

## Arl10

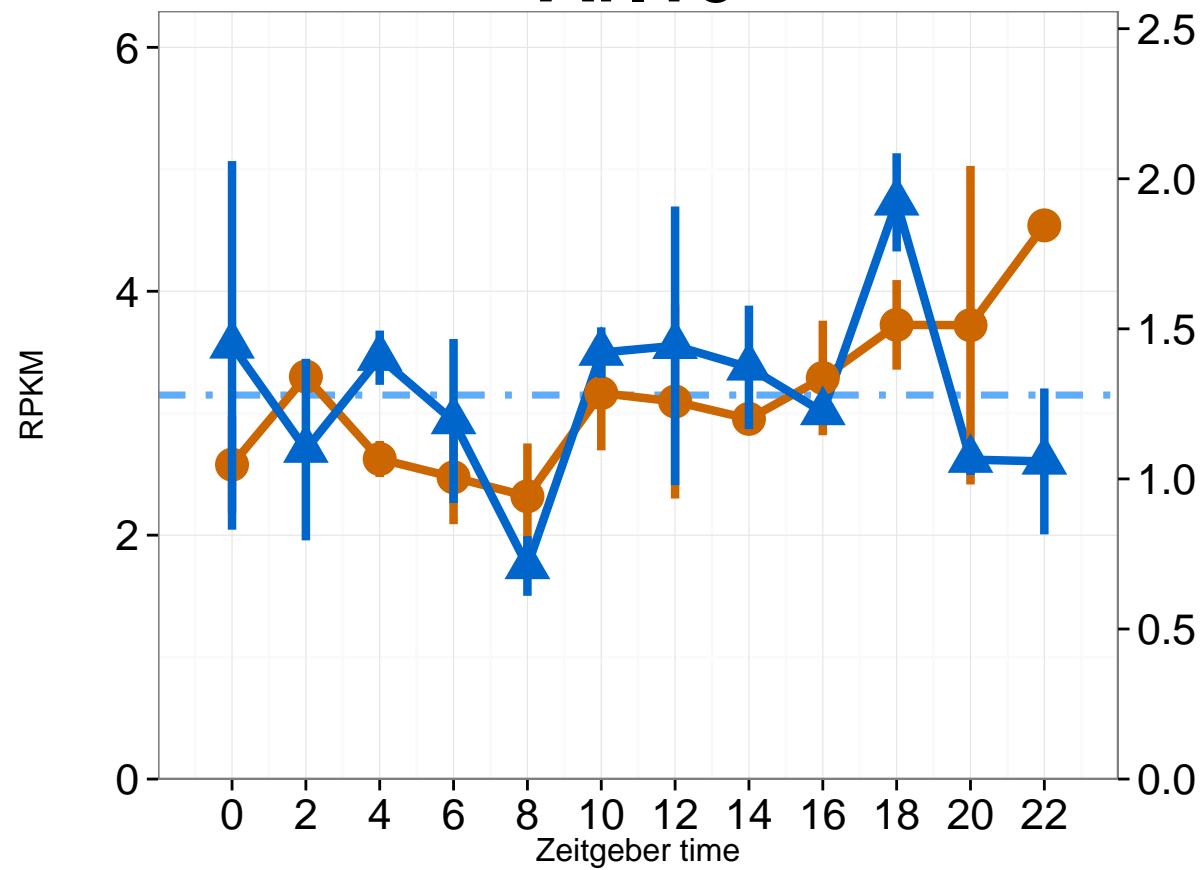

## Arl10

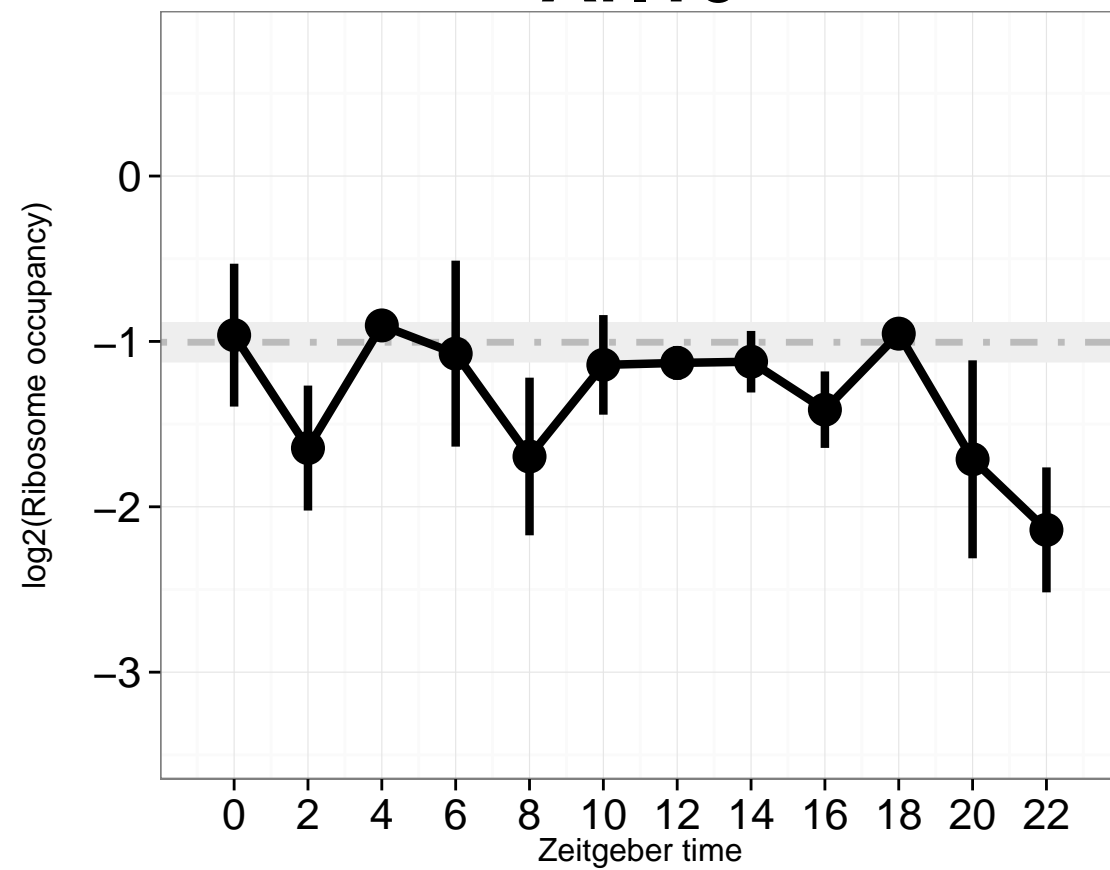

Supplement: SuppDataset_1.zip [file Arl10_set_A.pdf › Supplemental Dataset 1/A-mRNA_nonrhyth_translation_nonrhyth/Arl10_set_A.pdf]

## Arl13b

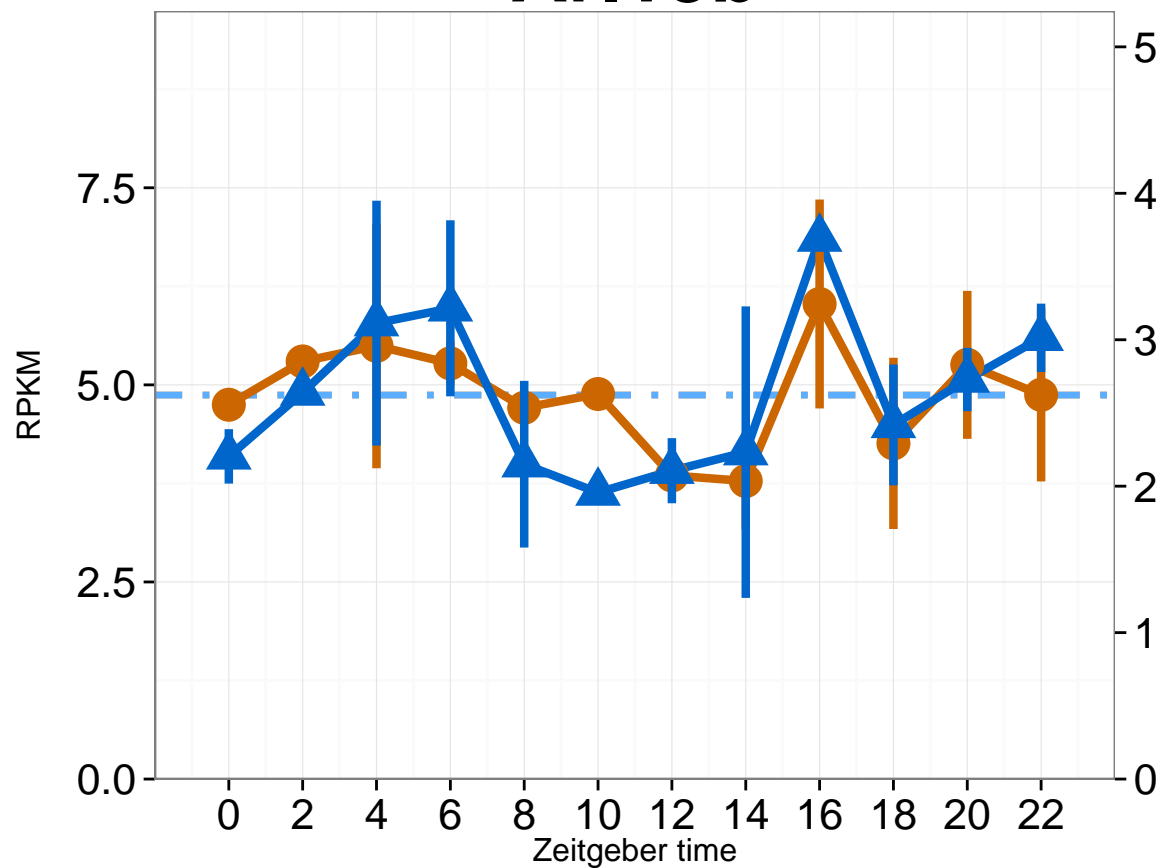

## Arl13b

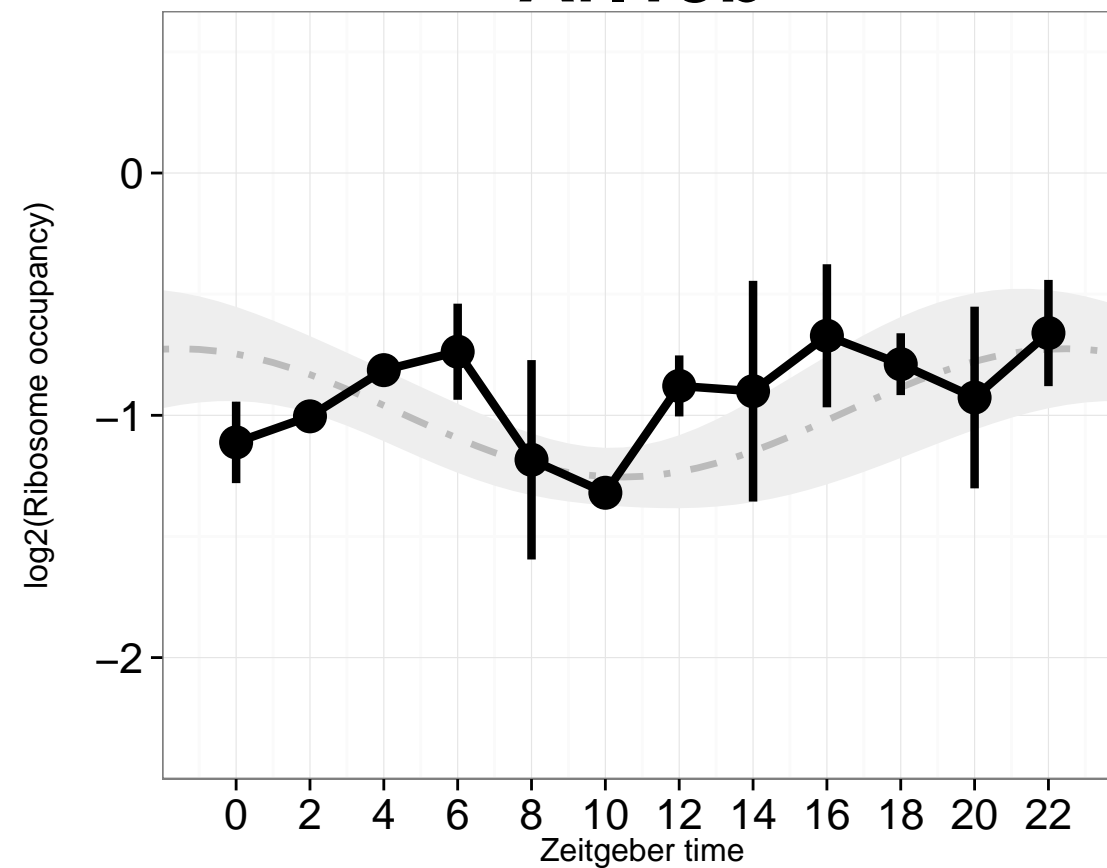

Supplement: SuppDataset_1.zip [file Arl13b_set_A.pdf › Supplemental Dataset 1/A-mRNA_nonrhyth_translation_nonrhyth/Arl13b_set_A.pdf]

# Arl14ep

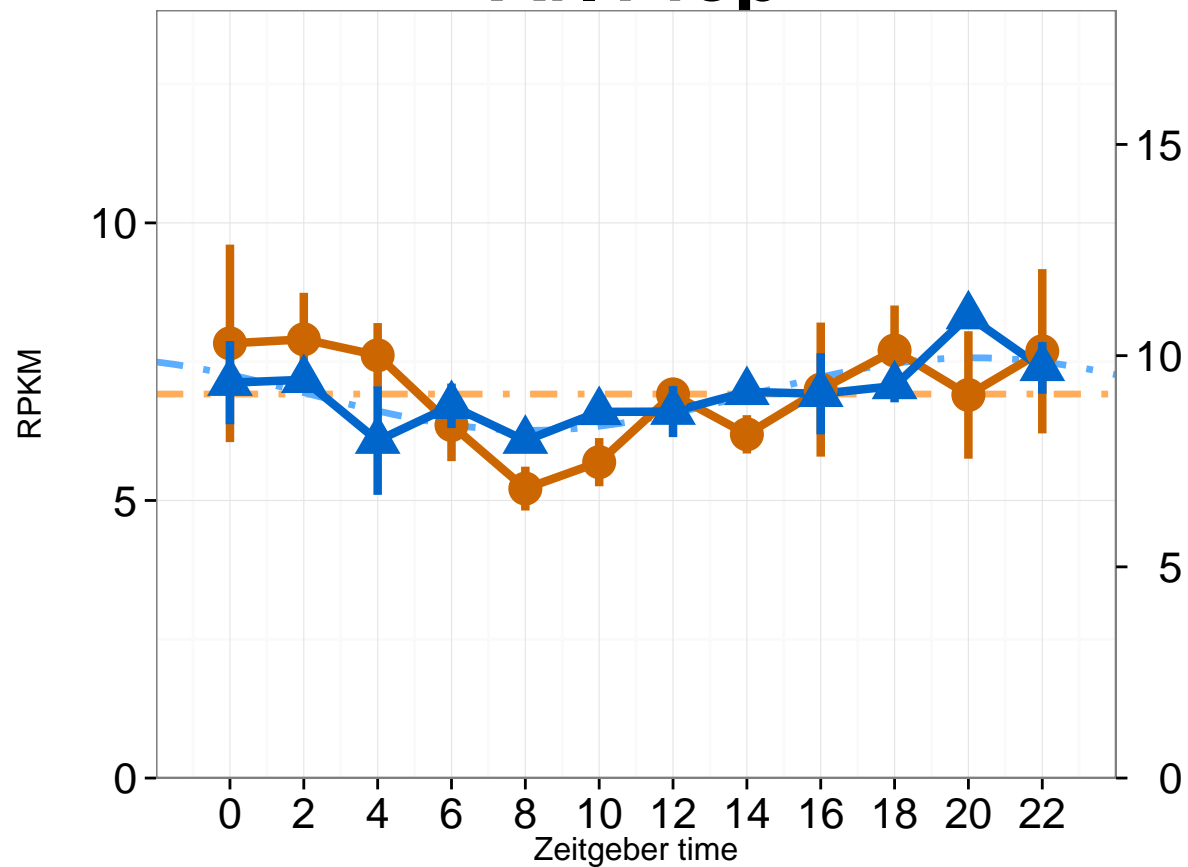

# Arl14ep

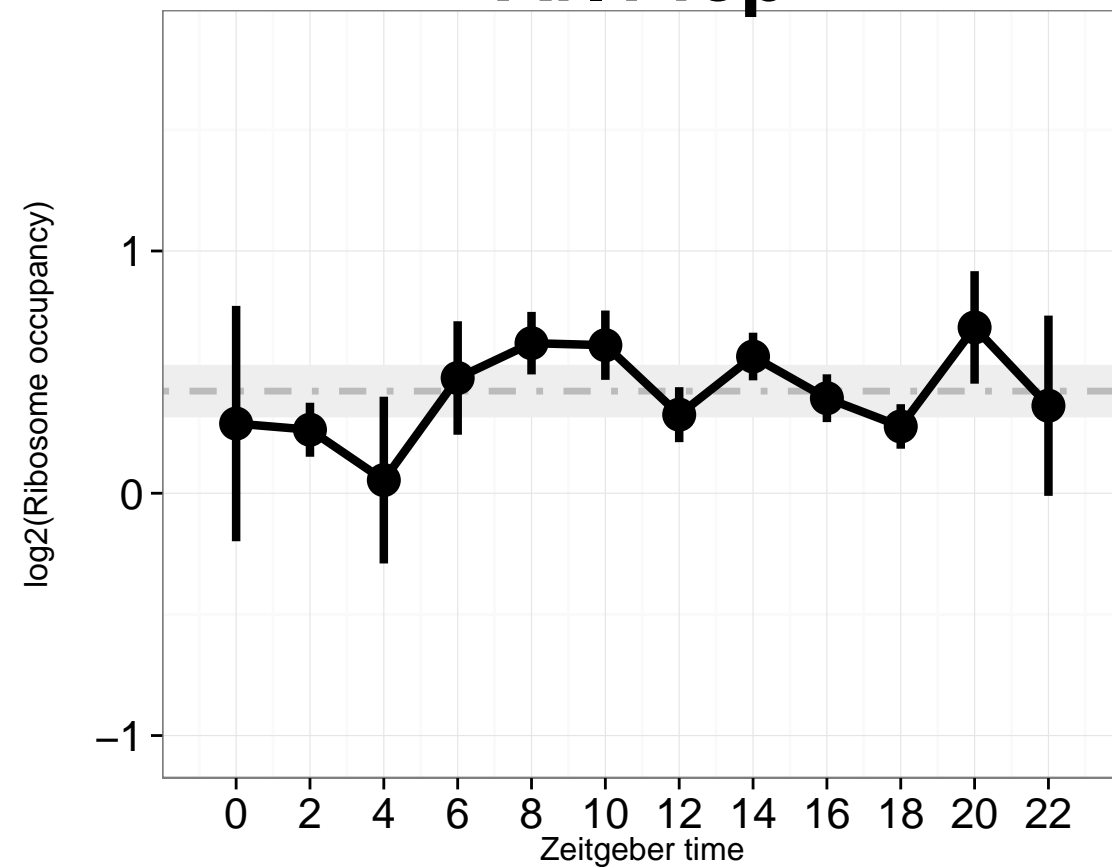

Supplement: SuppDataset_1.zip [file Arl14ep_set_A.pdf › Supplemental Dataset 1/A-mRNA_nonrhyth_translation_nonrhyth/Arl14ep_set_A.pdf]

## Ar15

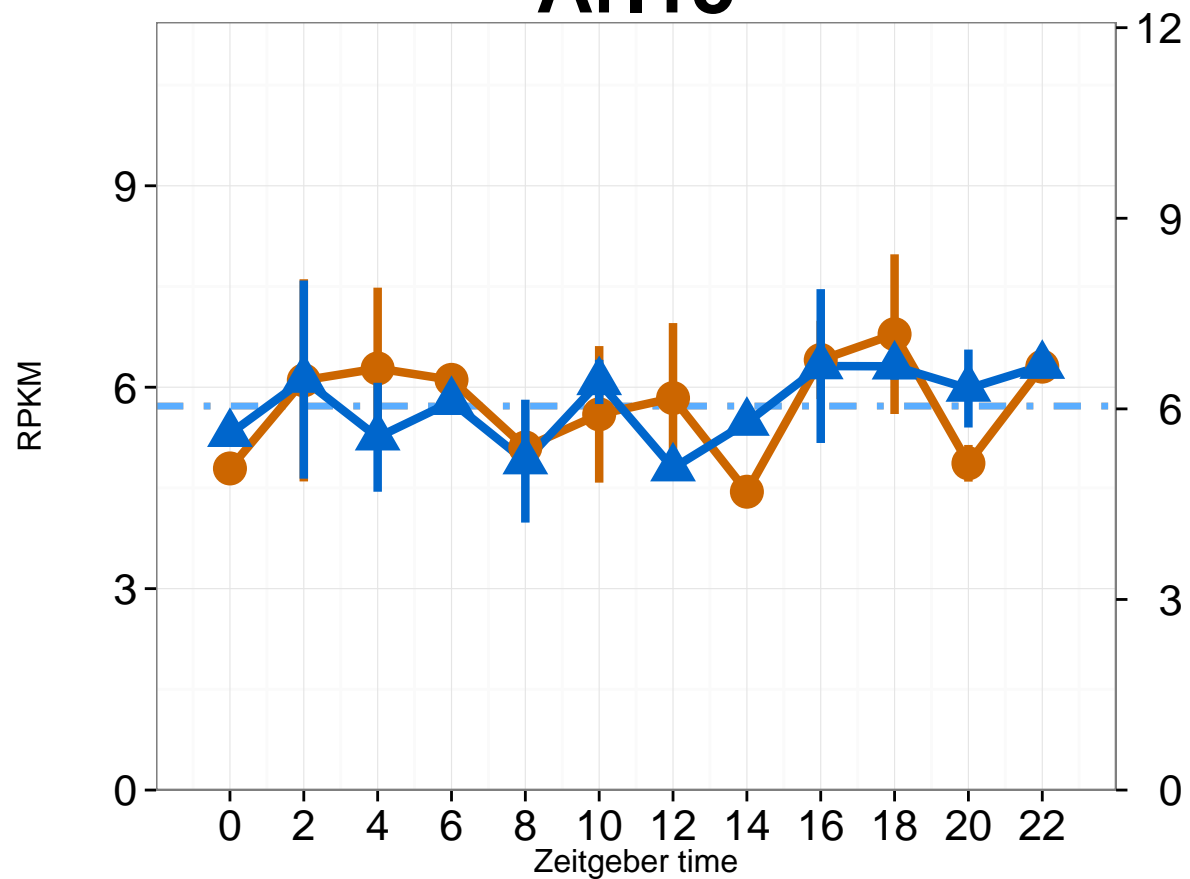

## Ar15

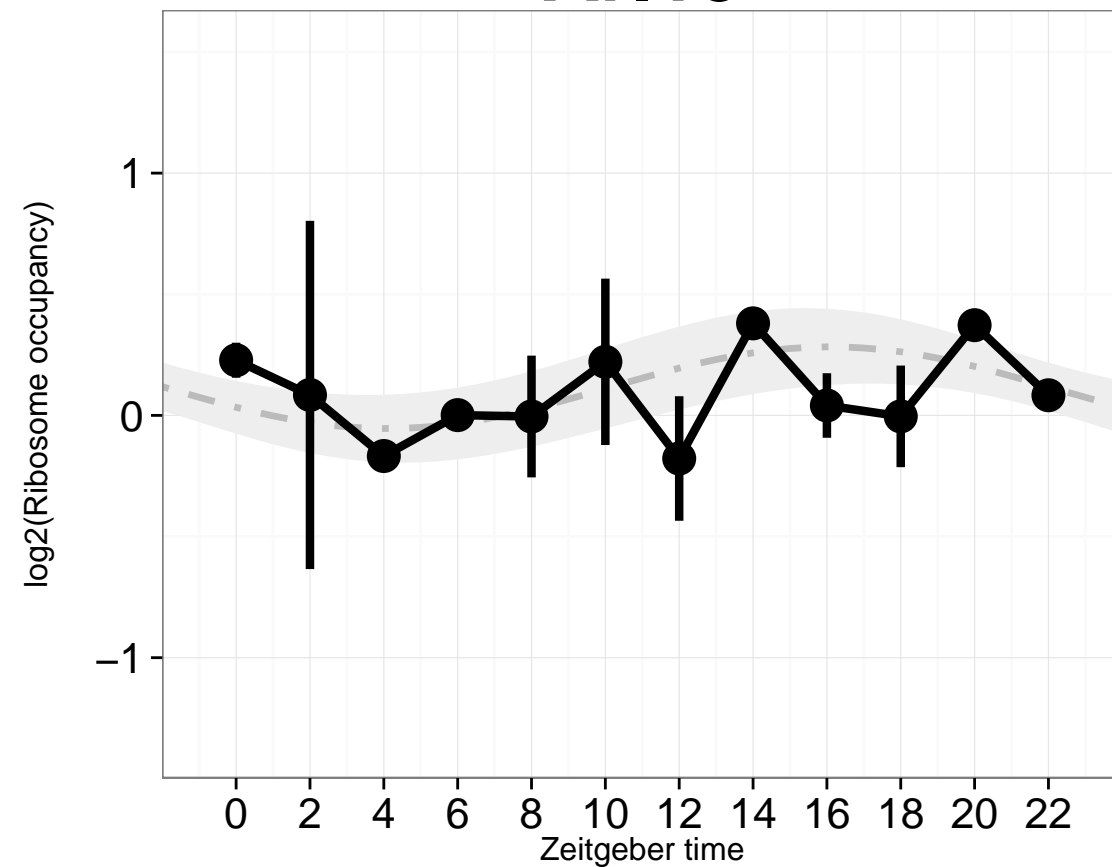

Supplement: SuppDataset_1.zip [file Arl15_set_A.pdf › Supplemental Dataset 1/A-mRNA_nonrhyth_translation_nonrhyth/Arl15_set_A.pdf]

## Arl1

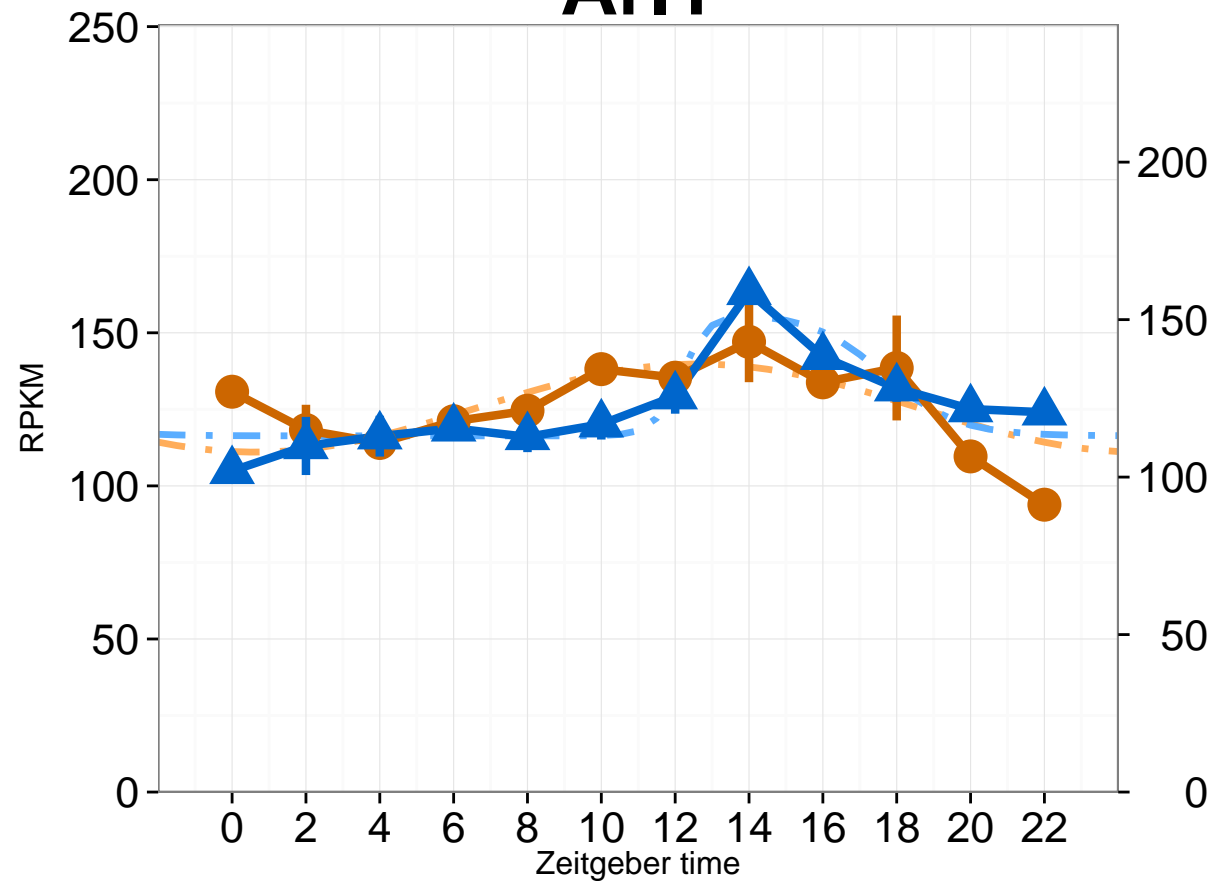

## Arl1

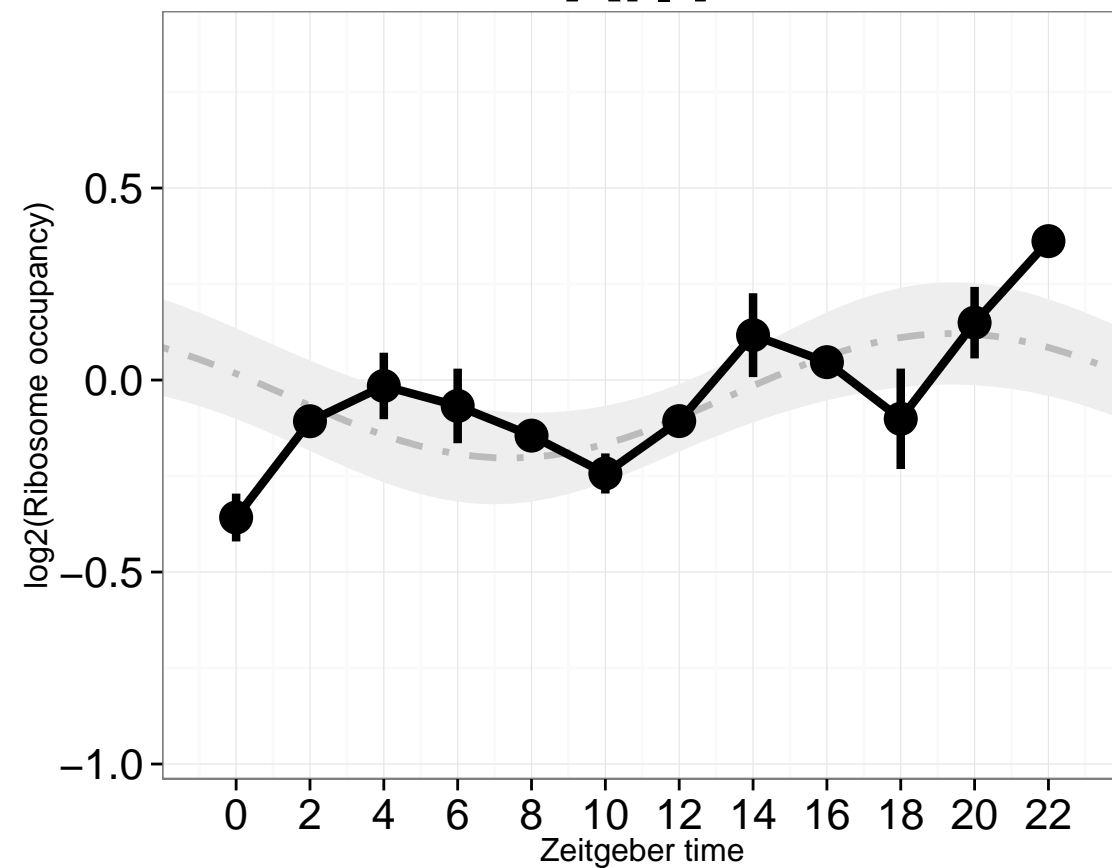

Supplement: SuppDataset_1.zip [file Arl1_set_A.pdf › Supplemental Dataset 1/A-mRNA_nonrhyth_translation_nonrhyth/Arl1_set_A.pdf]

## Arl2

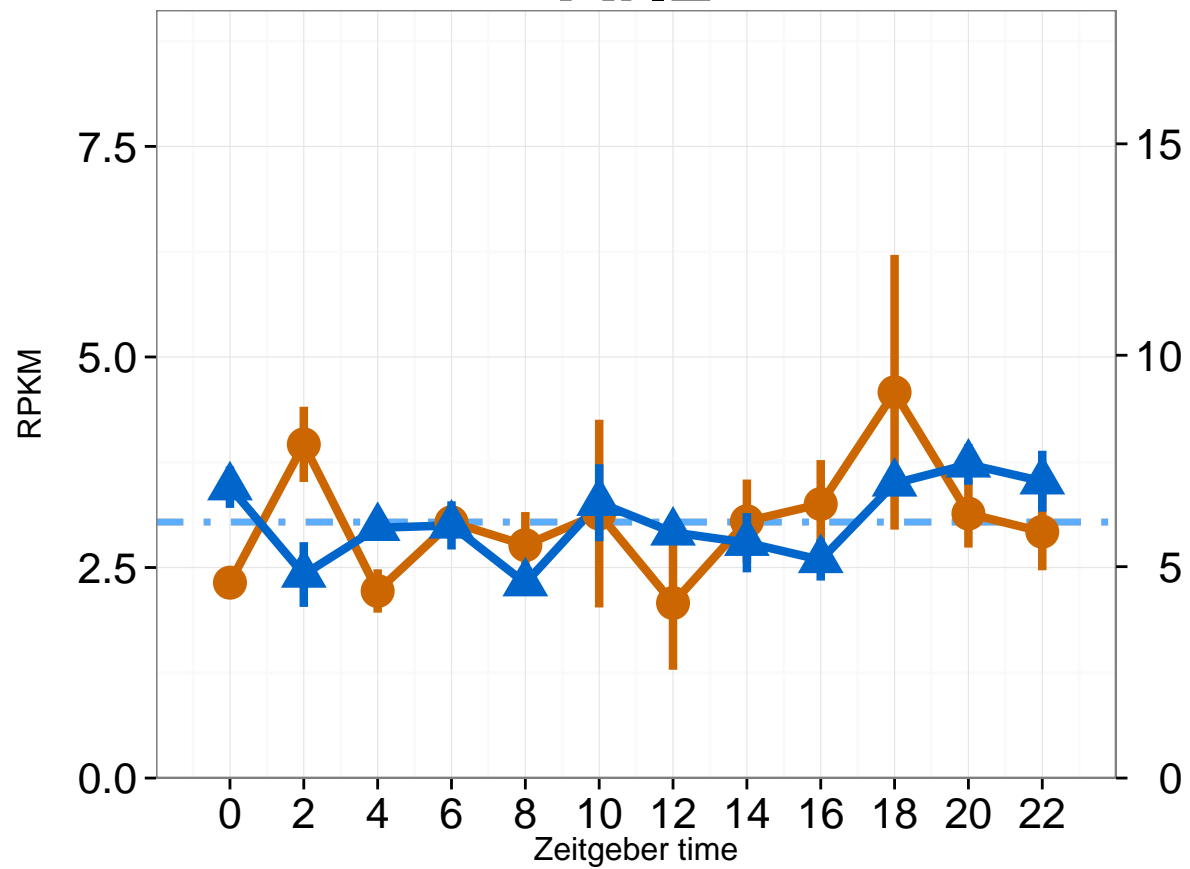

## Arl2

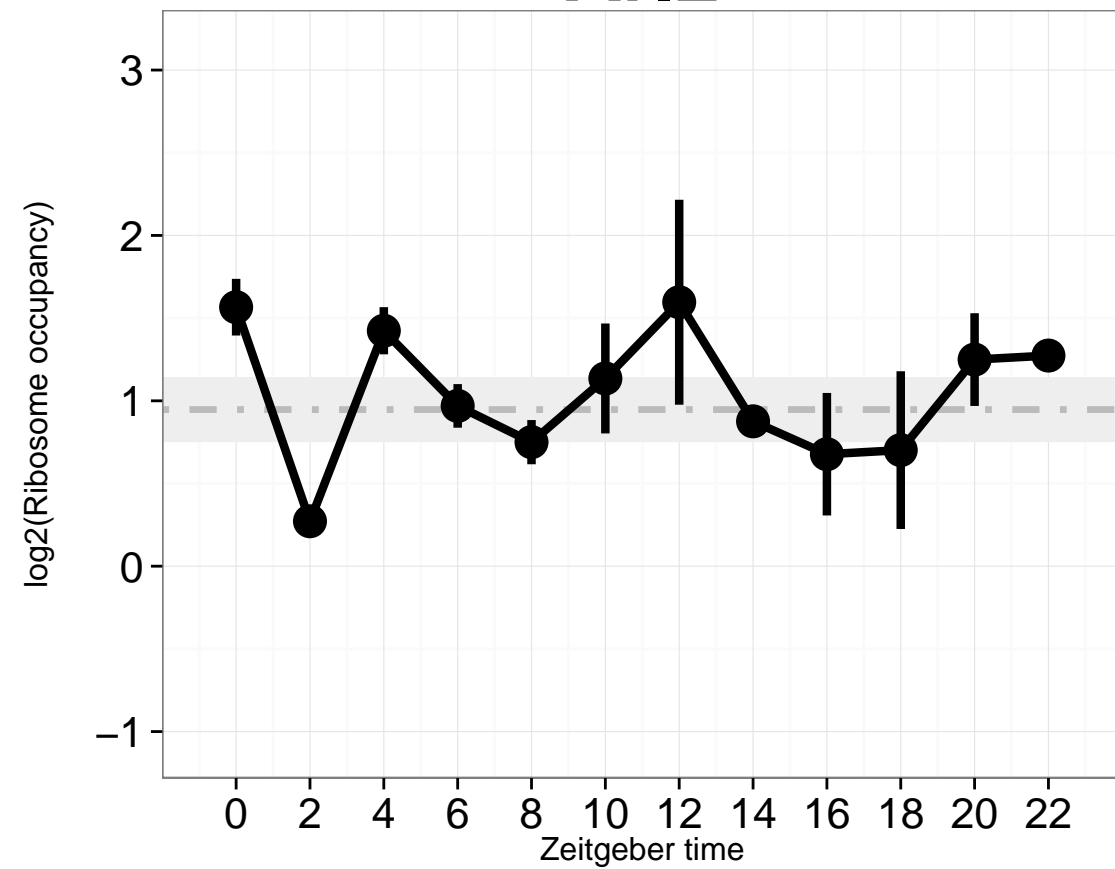

Supplement: SuppDataset_1.zip [file Arl2_set_A.pdf › Supplemental Dataset 1/A-mRNA_nonrhyth_translation_nonrhyth/Arl2_set_A.pdf]

## Arl3

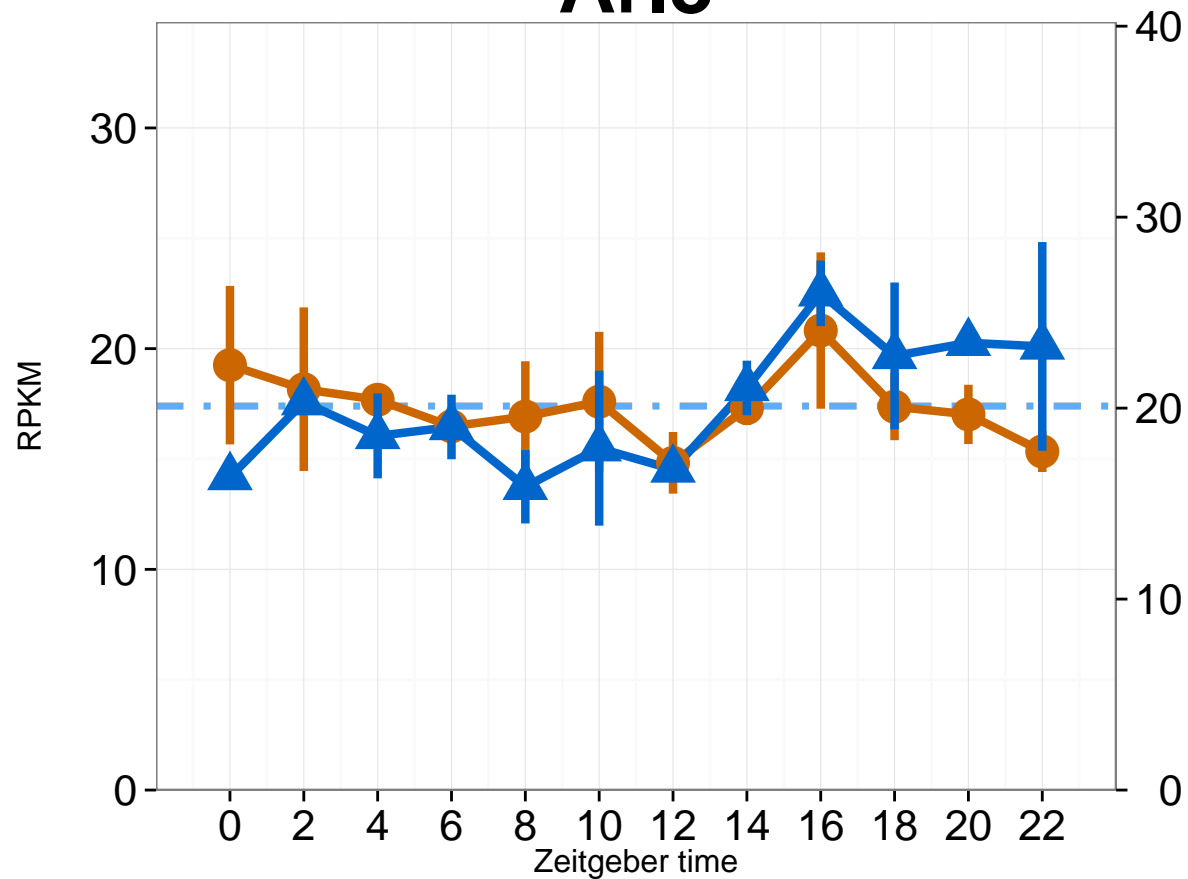

## Arl3

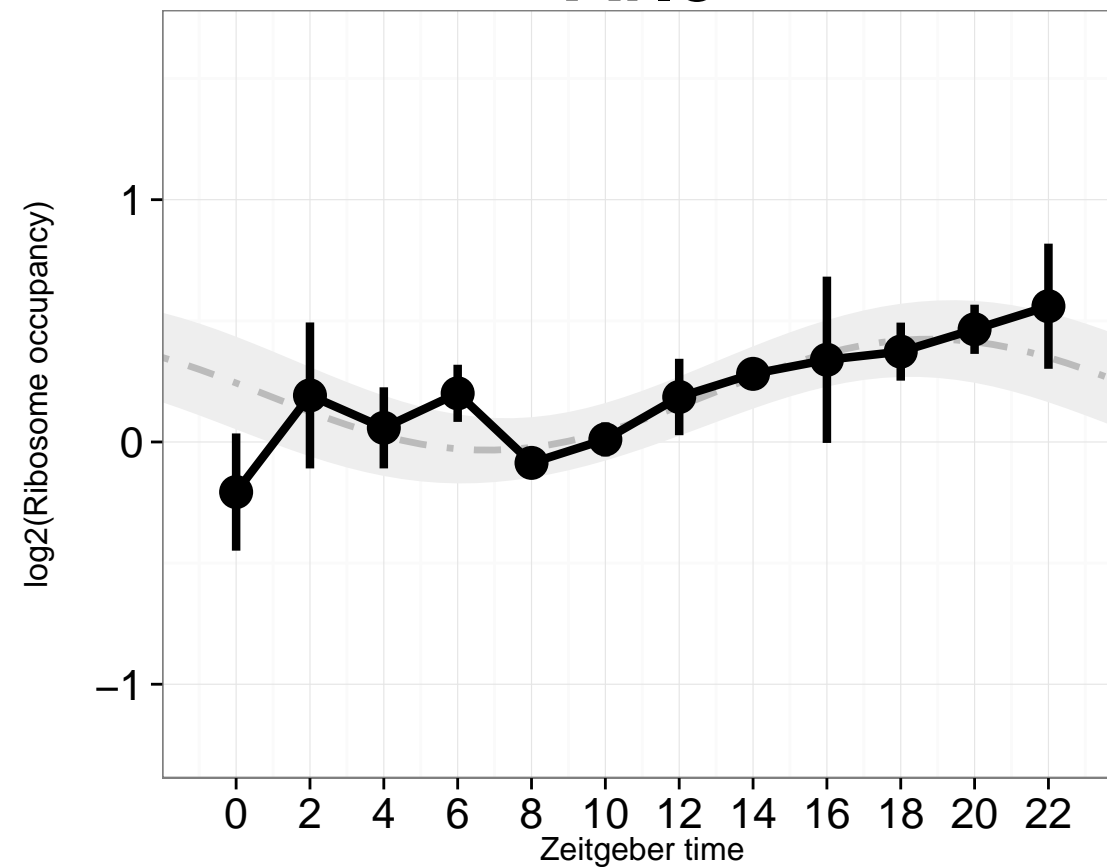

Supplement: SuppDataset_1.zip [file Arl3_set_A.pdf › Supplemental Dataset 1/A-mRNA_nonrhyth_translation_nonrhyth/Arl3_set_A.pdf]

# Arl4d

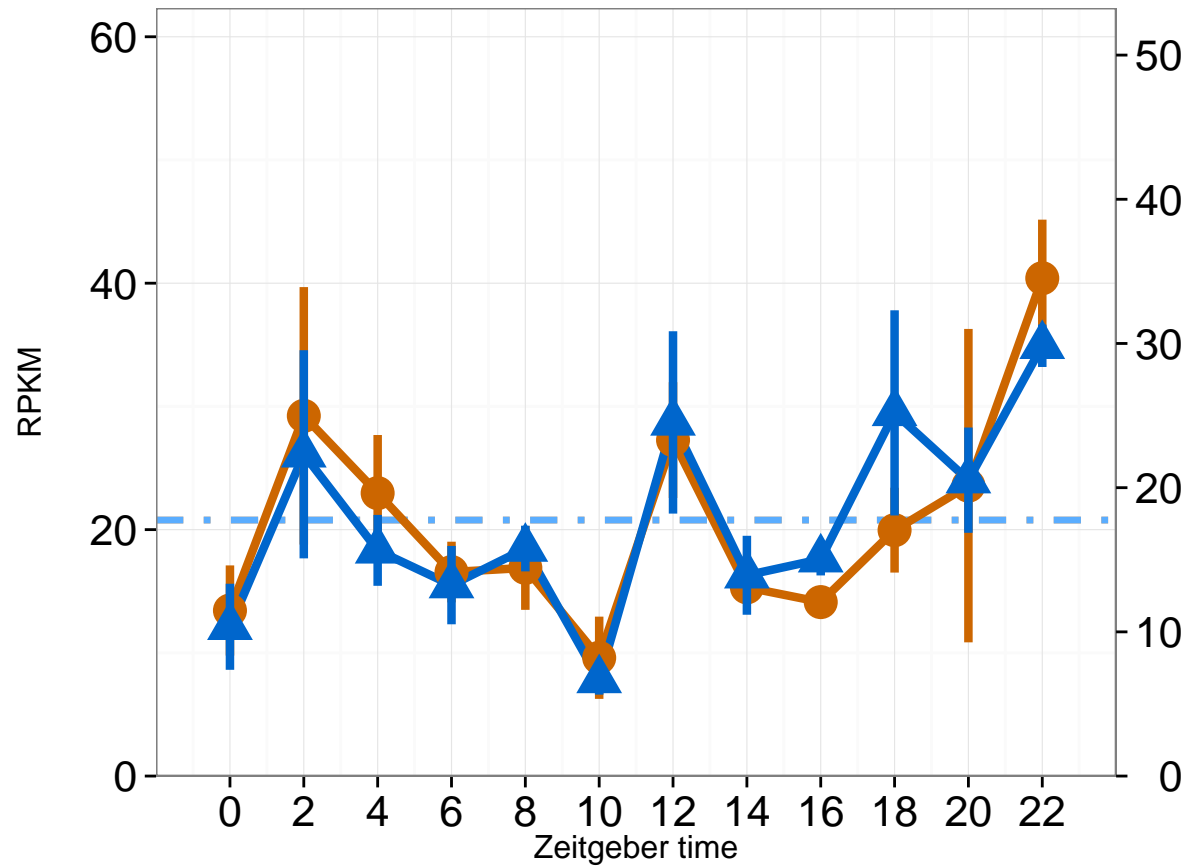

# Arl4d

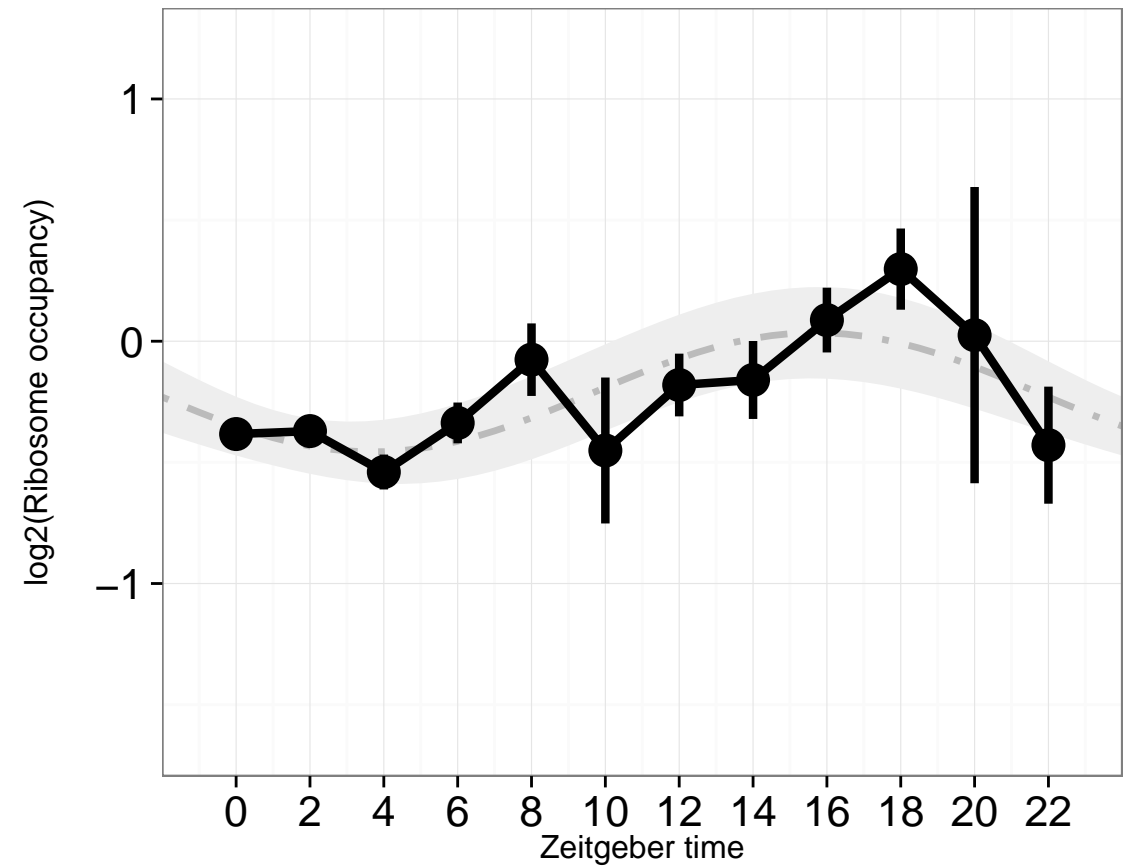

Supplement: SuppDataset_1.zip [file Arl4d_set_A.pdf › Supplemental Dataset 1/A-mRNA_nonrhyth_translation_nonrhyth/Arl4d_set_A.pdf]
