# Supplementary figures and images for: Ribosome profiling reveals the rhythmic liver translatome and circadian clock regulation by upstream open reading frames (part 8 of 113)
Source: HighWire-hosted journal article supplement (doi:10.1101/gr.195404.115), 2015-10-20

# Arl5a

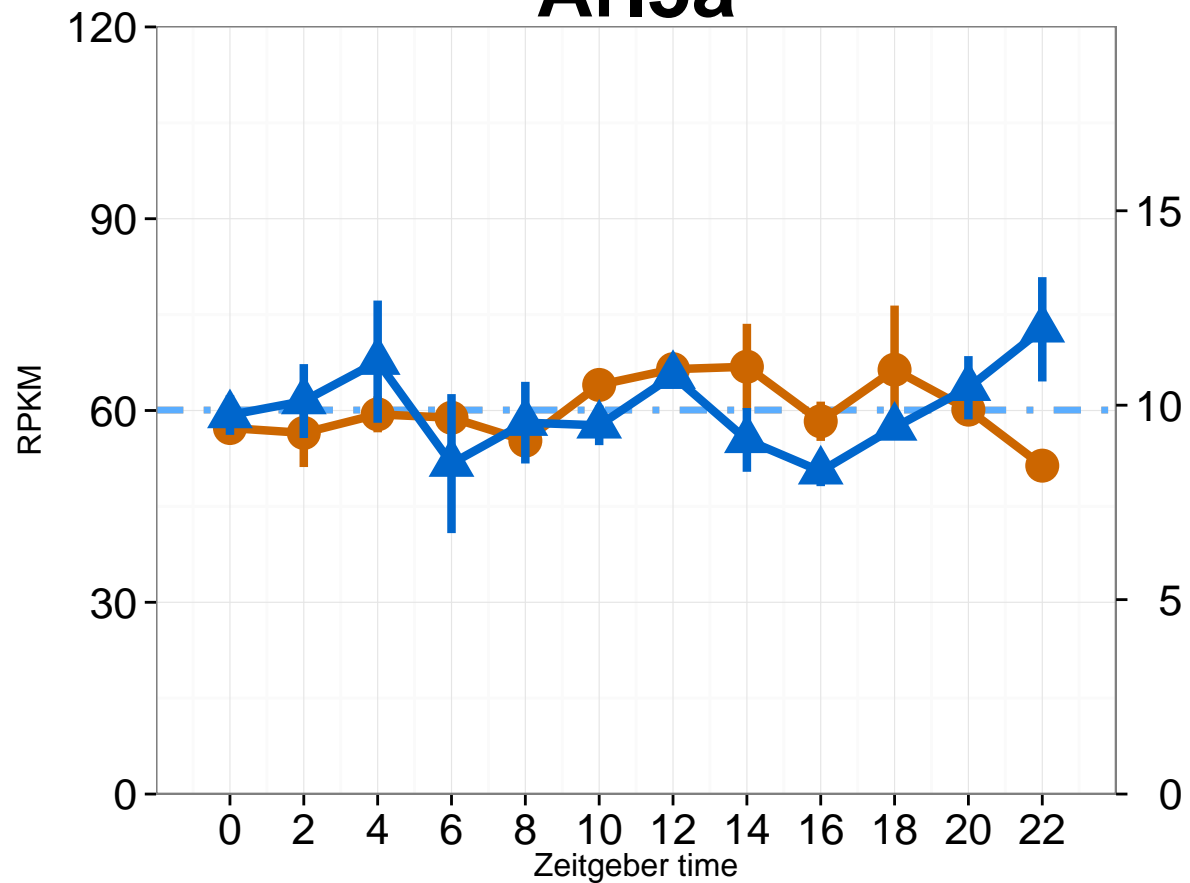

# Arl5a

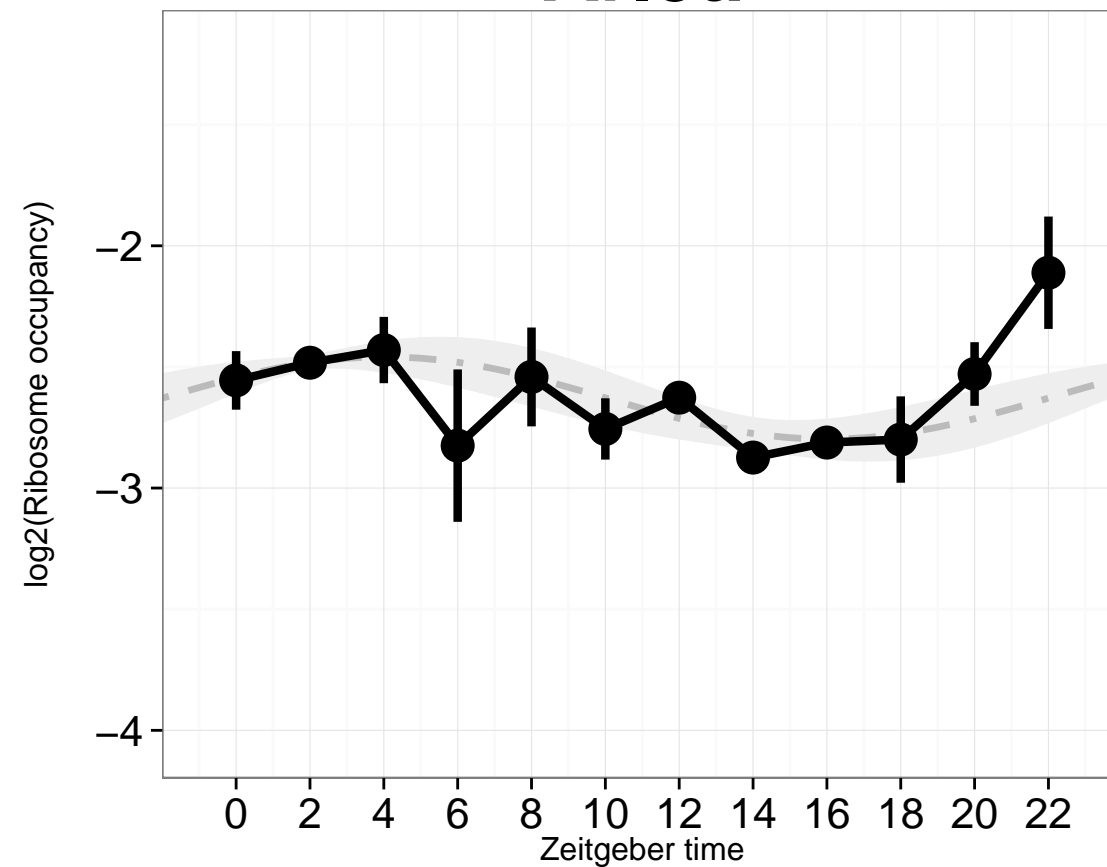

Supplement: SuppDataset_1.zip [file Arl5a_set_A.pdf › Supplemental Dataset 1/A-mRNA_nonrhyth_translation_nonrhyth/Arl5a_set_A.pdf]

## Arl6

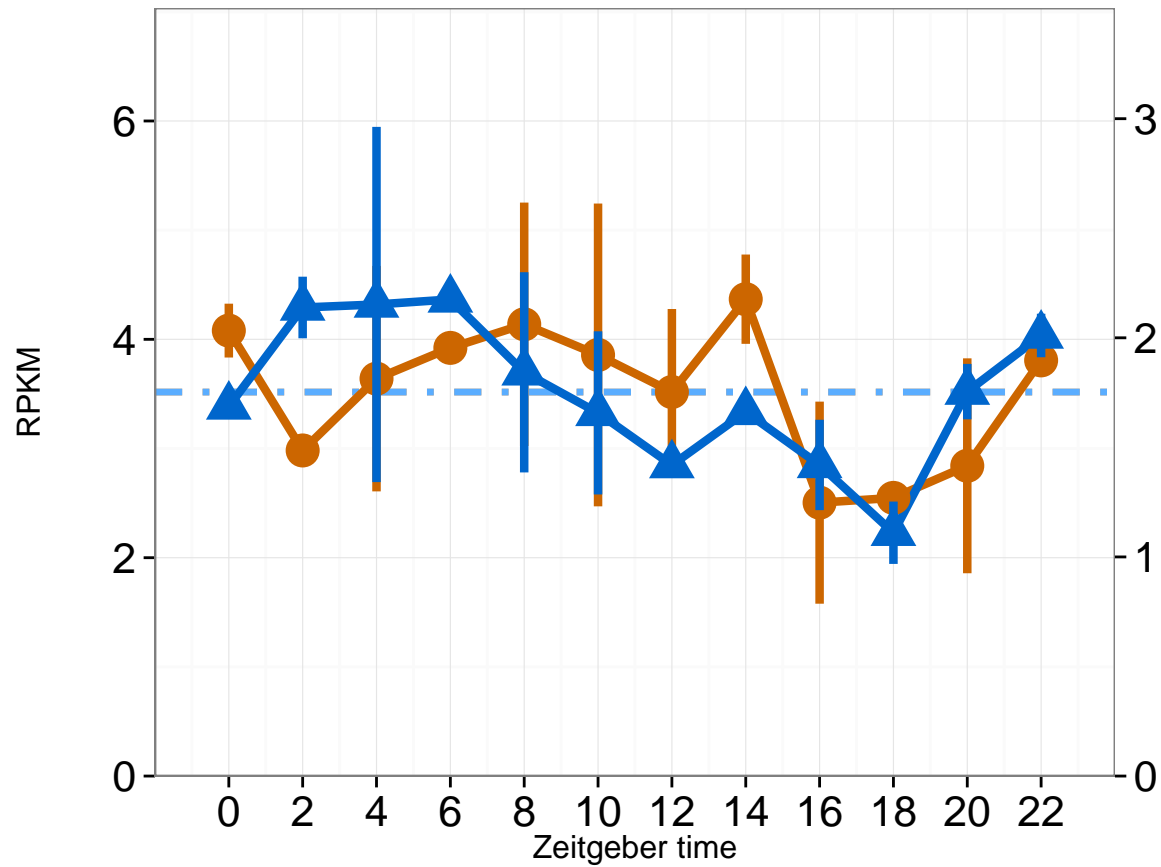

## Arl6

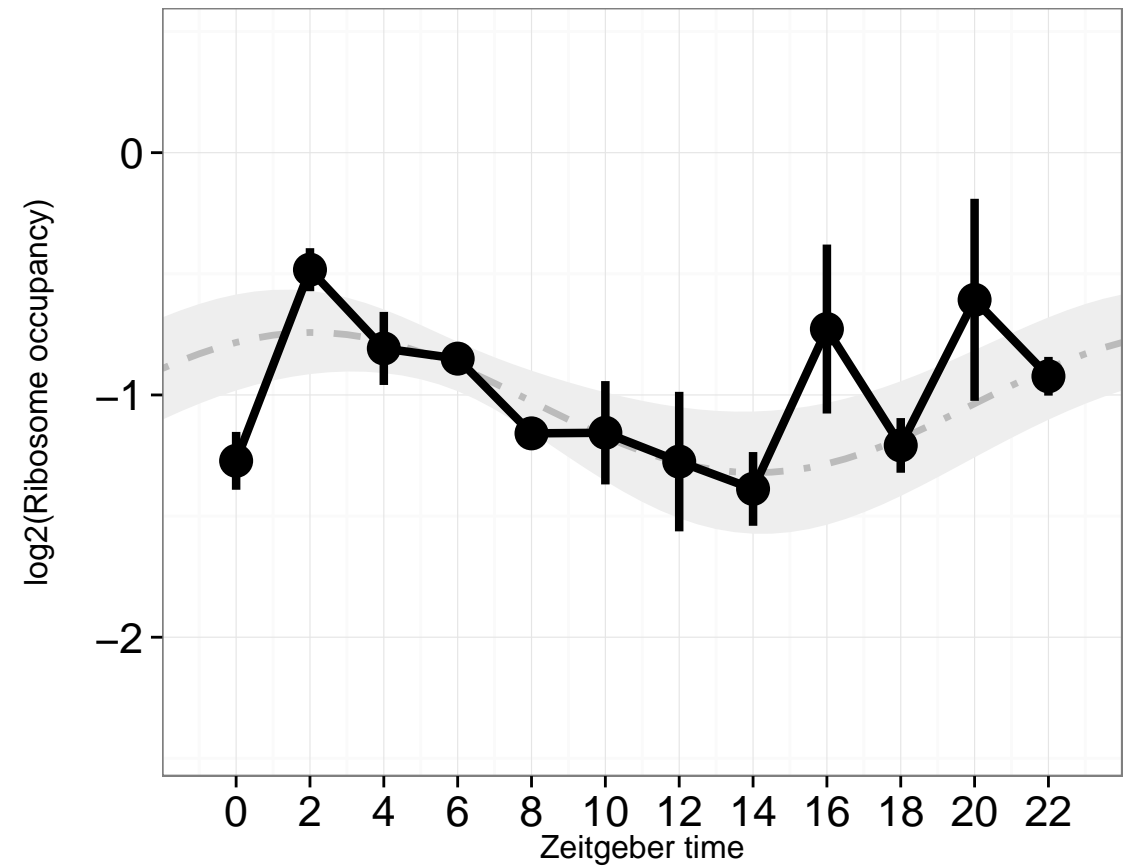

Supplement: SuppDataset_1.zip [file Arl6_set_A.pdf › Supplemental Dataset 1/A-mRNA_nonrhyth_translation_nonrhyth/Arl6_set_A.pdf]

## Arl6ip1

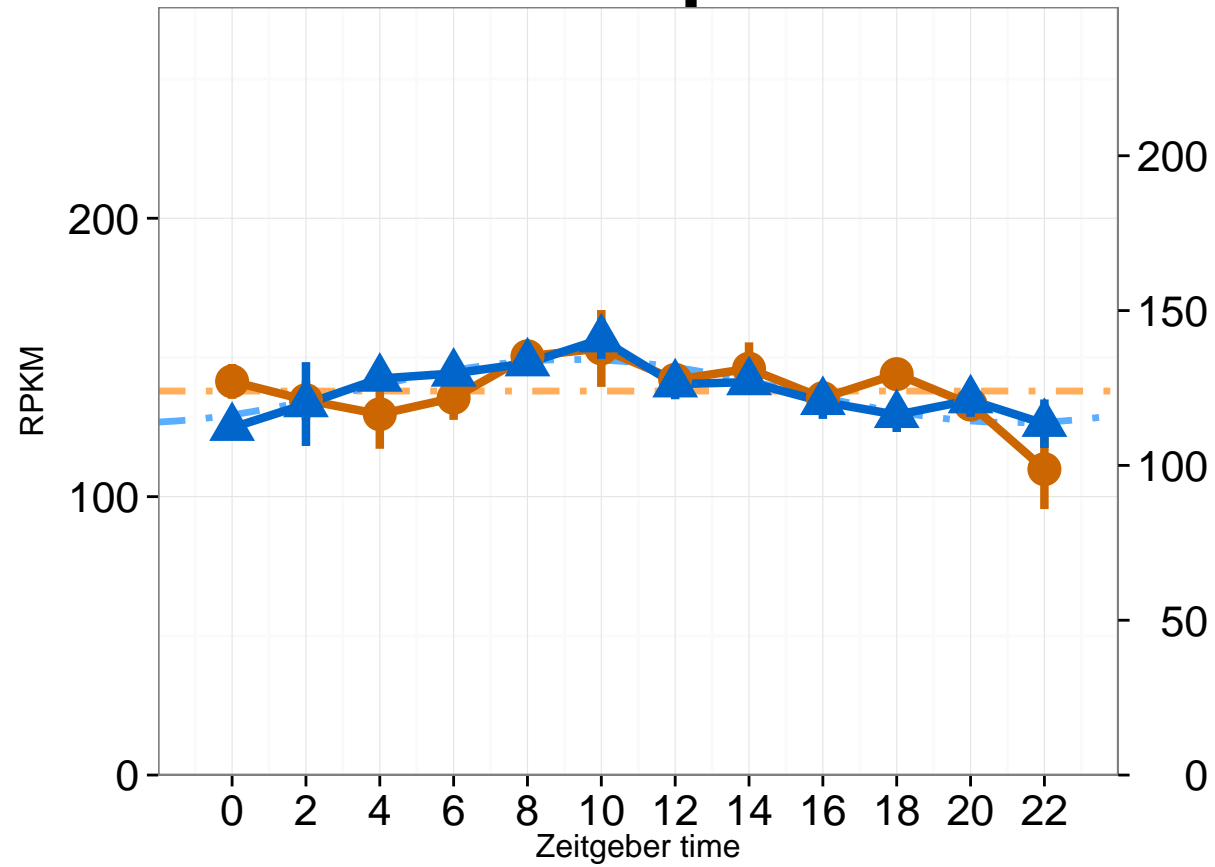

## Arl6ip1

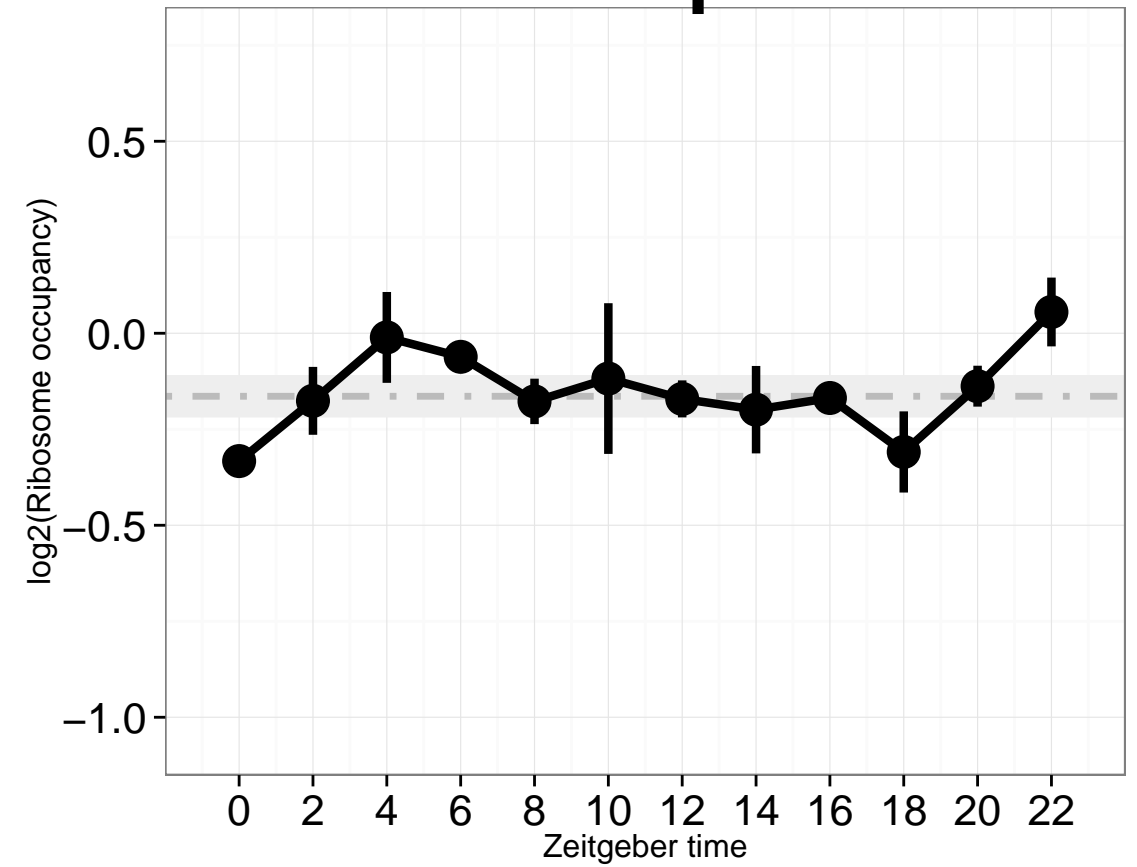

Supplement: SuppDataset_1.zip [file Arl6ip1_set_A.pdf › Supplemental Dataset 1/A-mRNA_nonrhyth_translation_nonrhyth/Arl6ip1_set_A.pdf]

# Arl6ip4

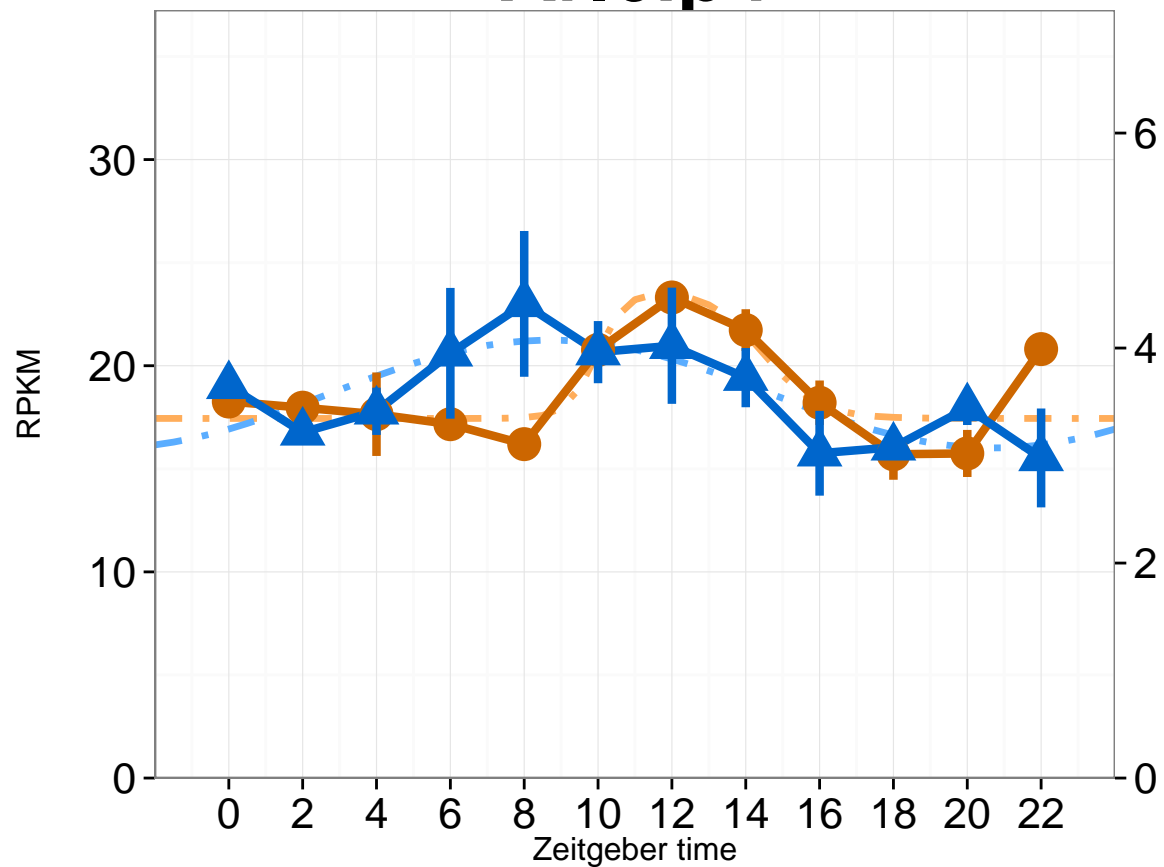

# Arl6ip4

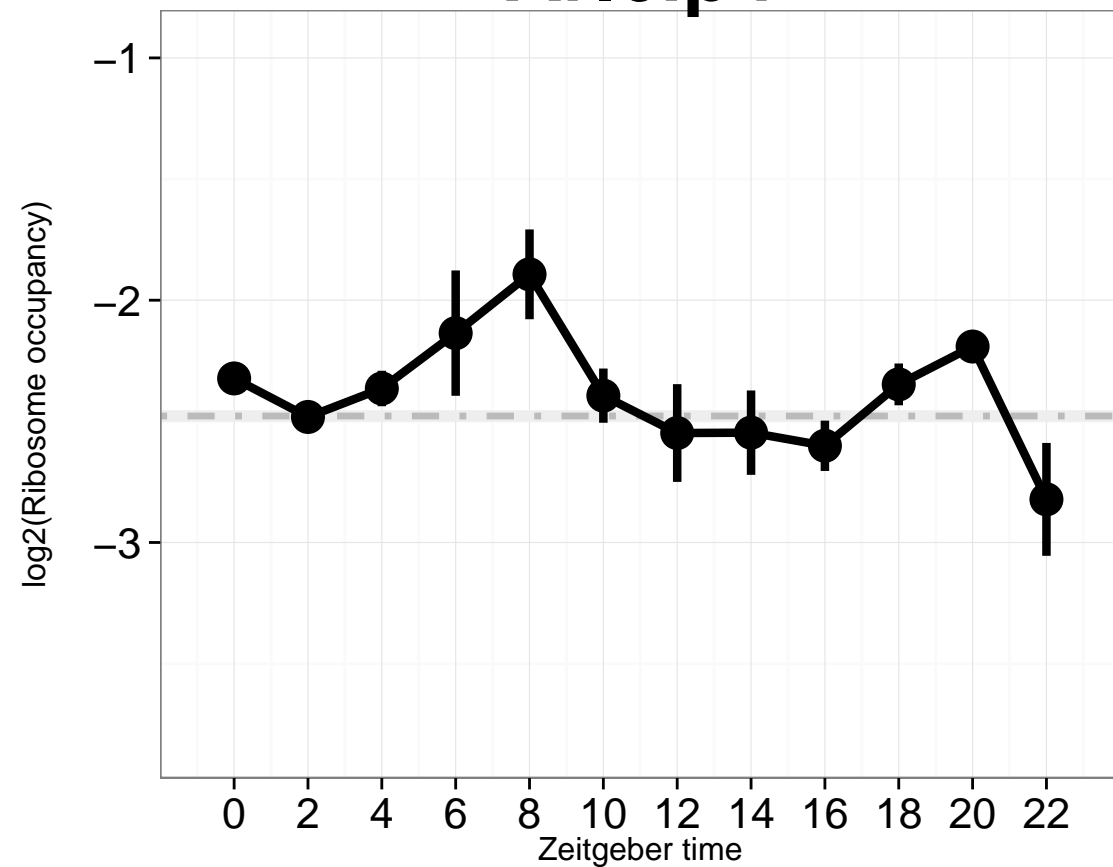

Supplement: SuppDataset_1.zip [file Arl6ip4_set_A.pdf › Supplemental Dataset 1/A-mRNA_nonrhyth_translation_nonrhyth/Arl6ip4_set_A.pdf]

## Arl6ip6

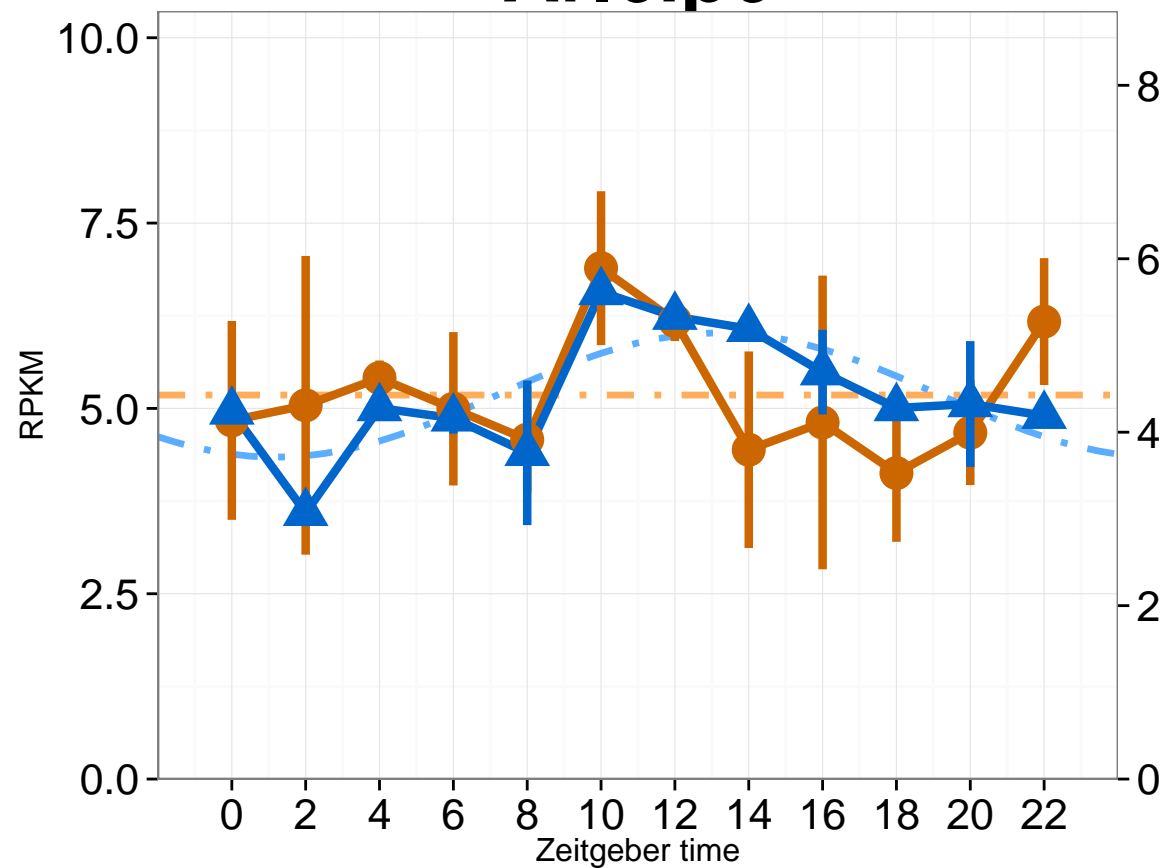

## Arl6ip6

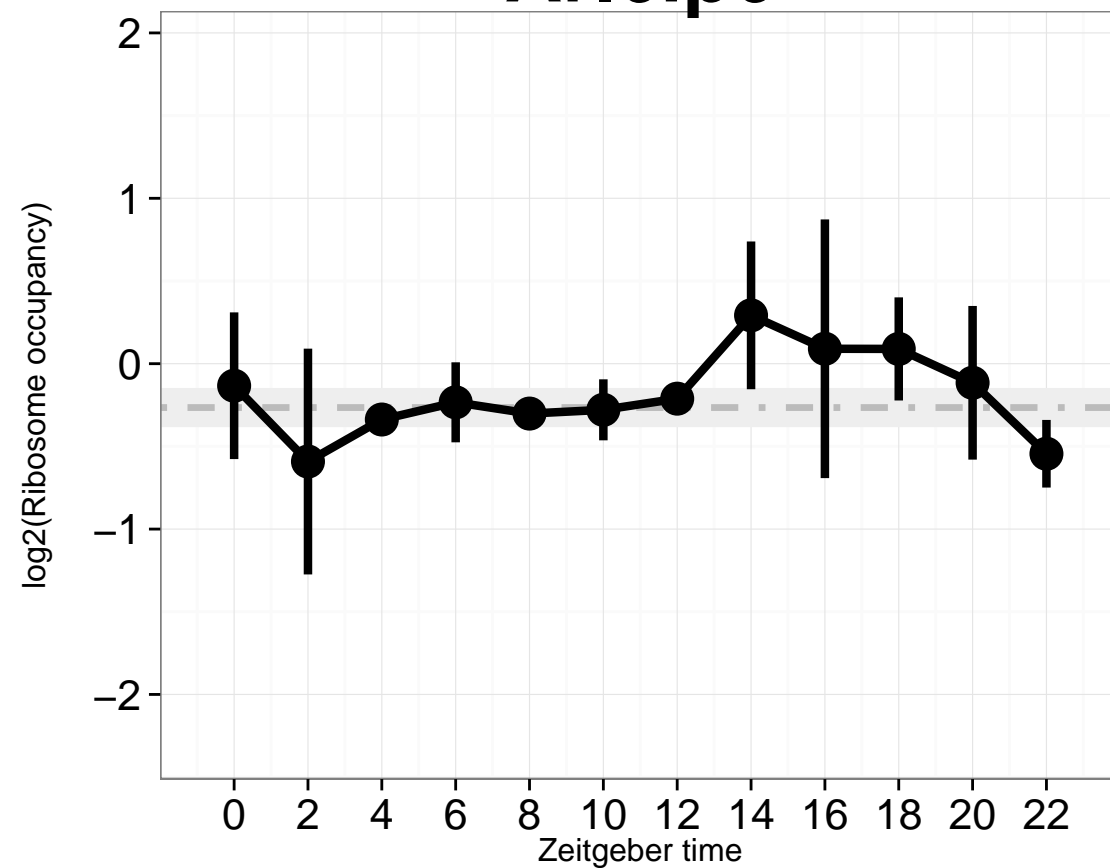

Supplement: SuppDataset_1.zip [file Arl6ip6_set_A.pdf › Supplemental Dataset 1/A-mRNA_nonrhyth_translation_nonrhyth/Arl6ip6_set_A.pdf]

# Arl8a

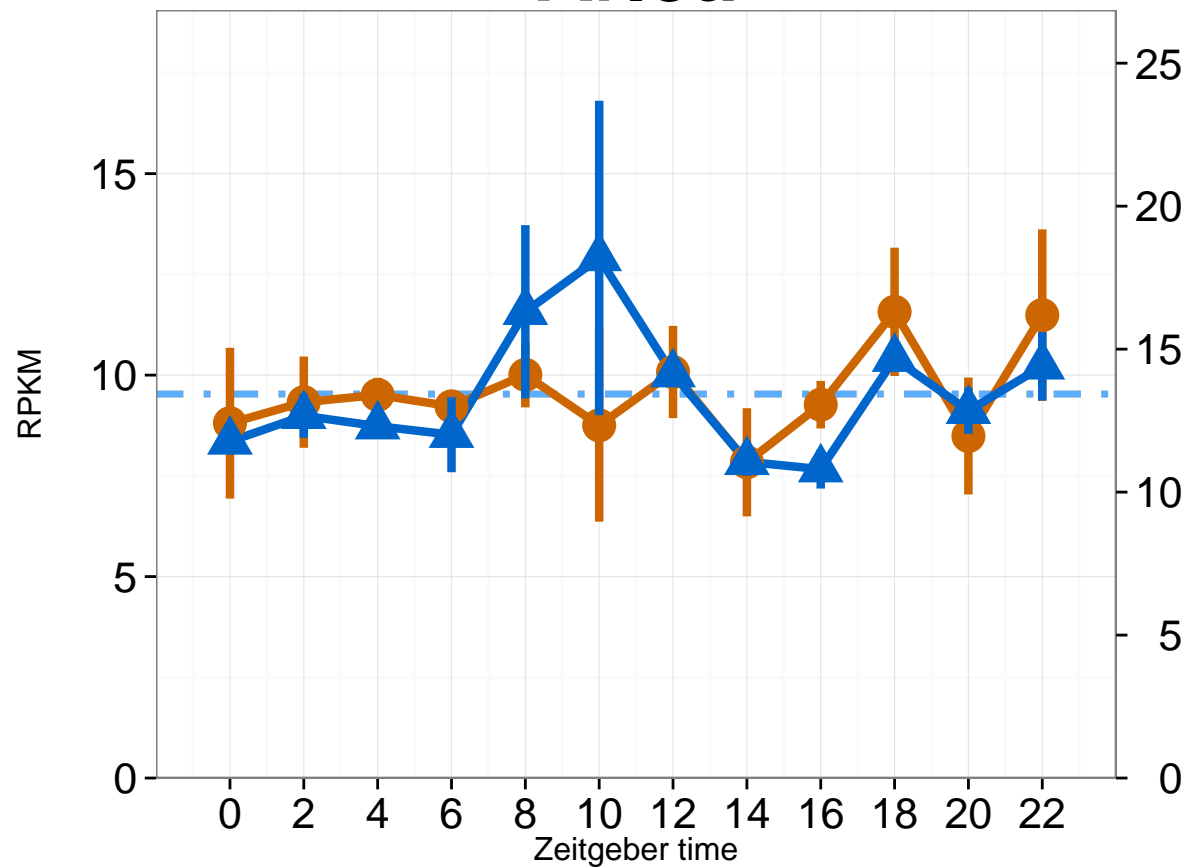

# Arl8a

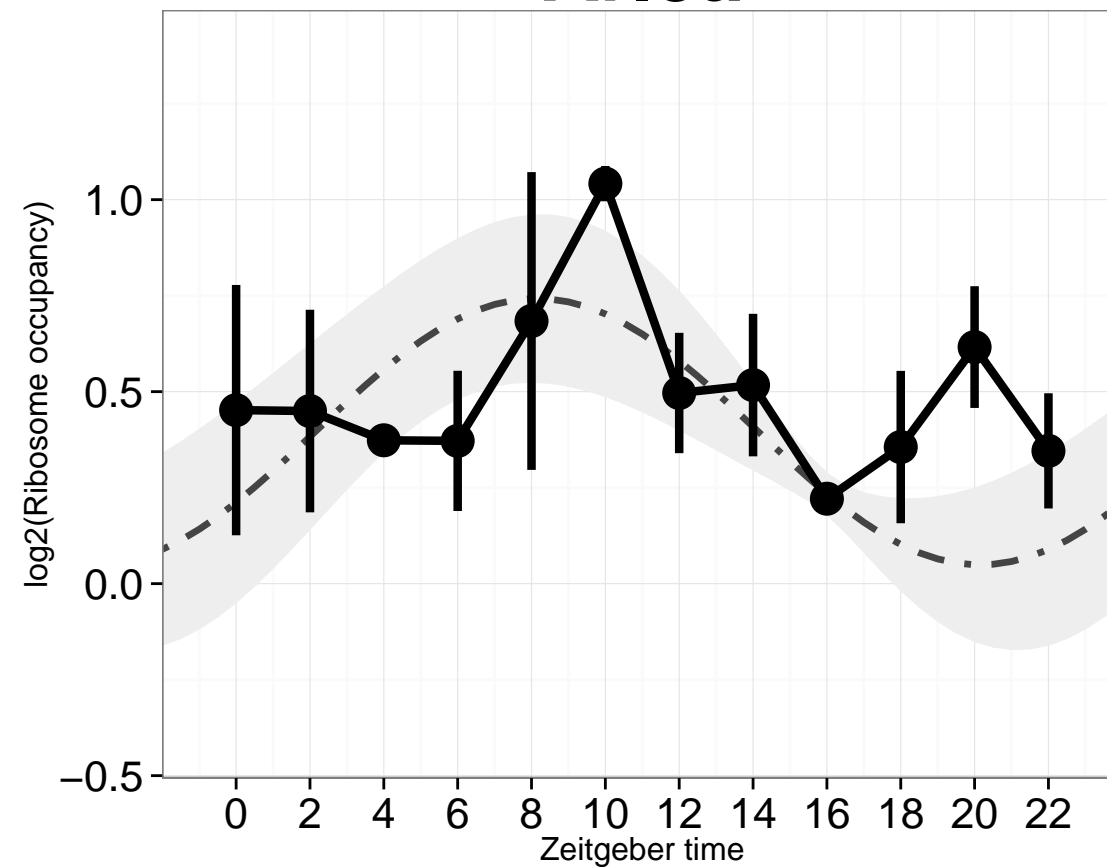

Supplement: SuppDataset_1.zip [file Arl8a_set_A.pdf › Supplemental Dataset 1/A-mRNA_nonrhyth_translation_nonrhyth/Arl8a_set_A.pdf]

# Arl8b

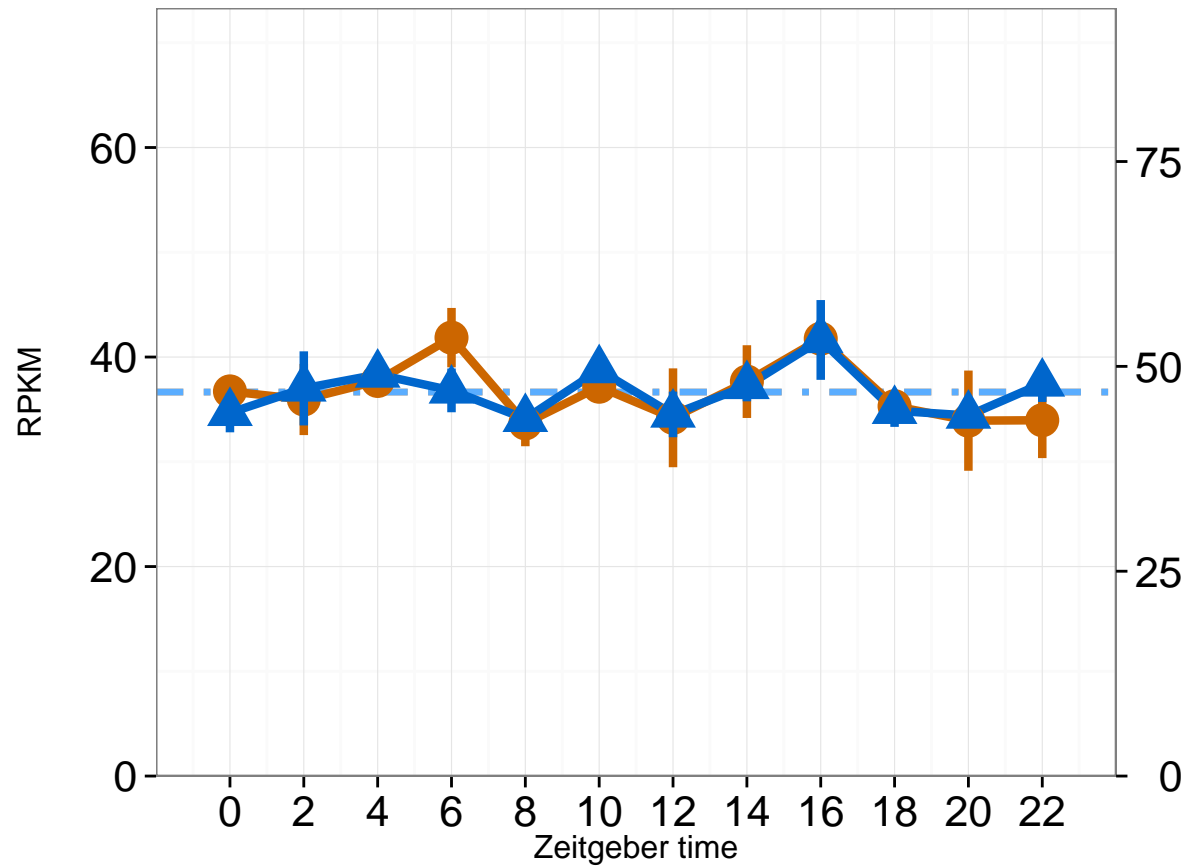

# Arl8b

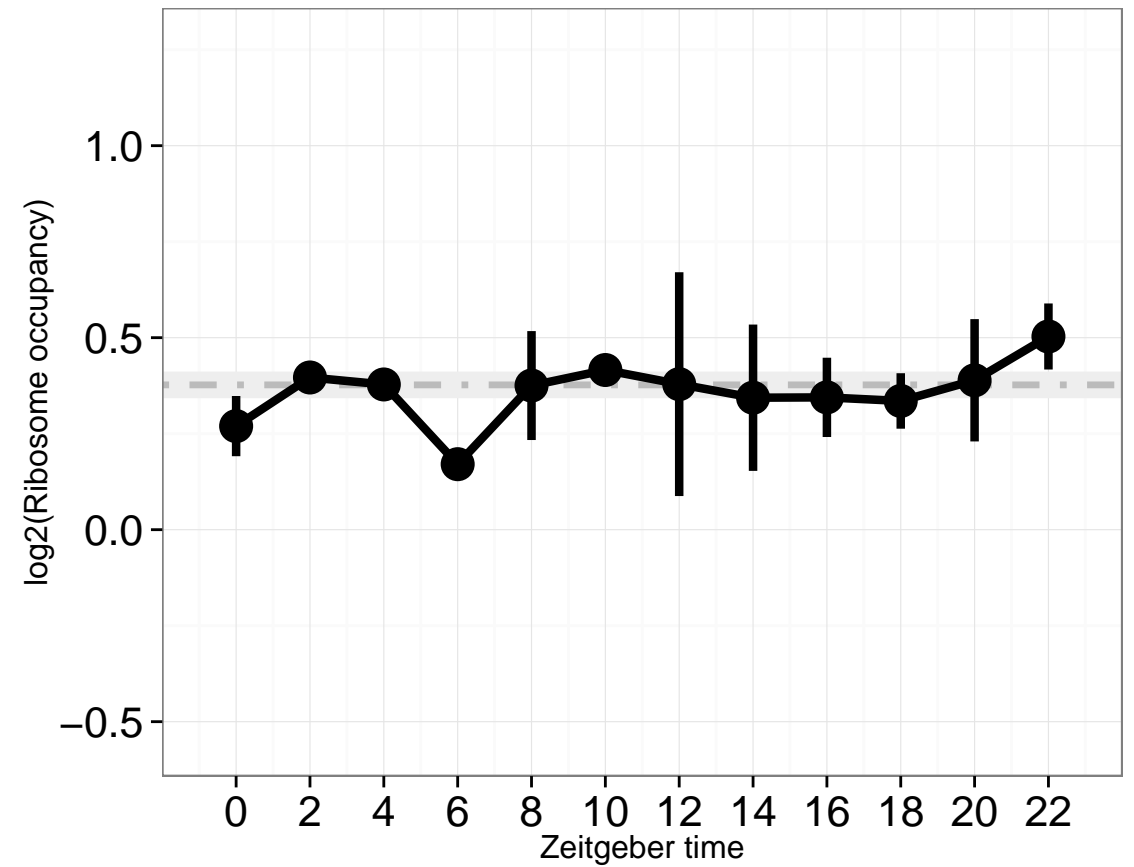

Supplement: SuppDataset_1.zip [file Arl8b_set_A.pdf › Supplemental Dataset 1/A-mRNA_nonrhyth_translation_nonrhyth/Arl8b_set_A.pdf]

## Armc10

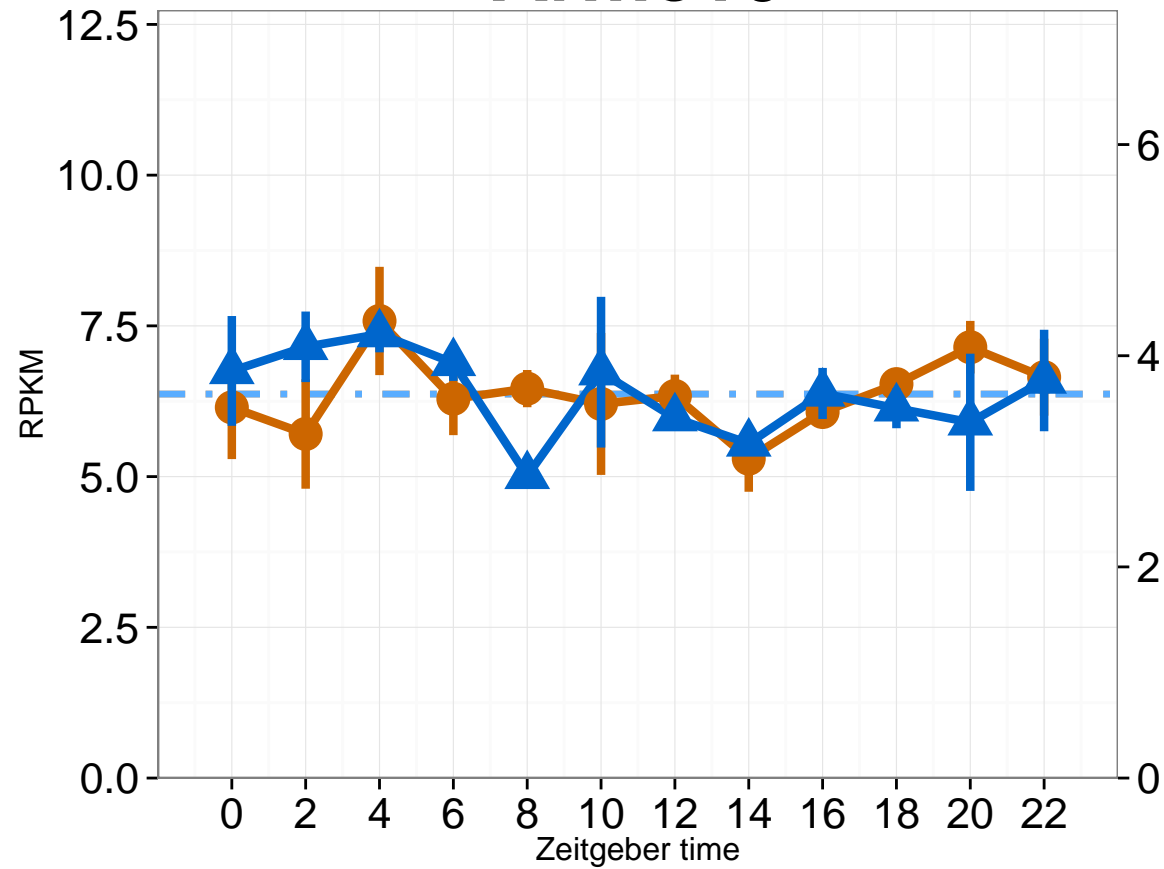

## Armc10

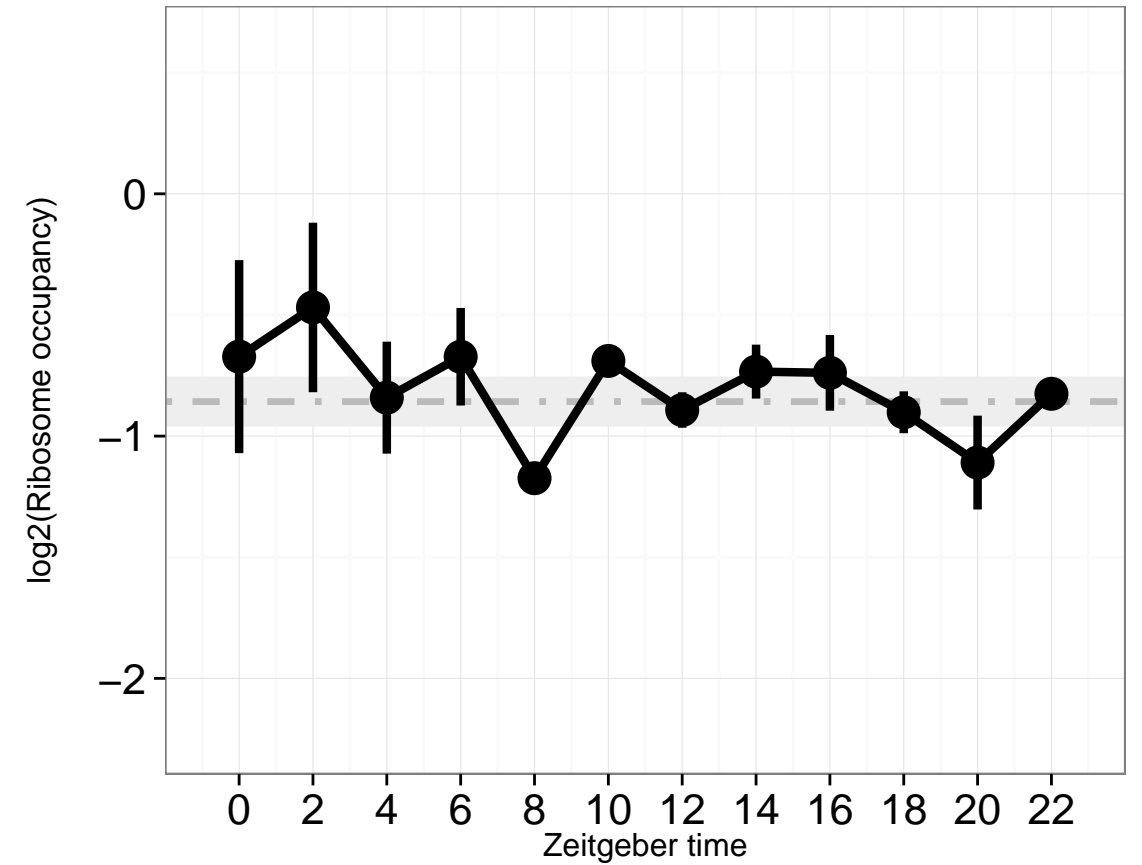

Supplement: SuppDataset_1.zip [file Armc10_set_A.pdf › Supplemental Dataset 1/A-mRNA_nonrhyth_translation_nonrhyth/Armc10_set_A.pdf]

# Armc1

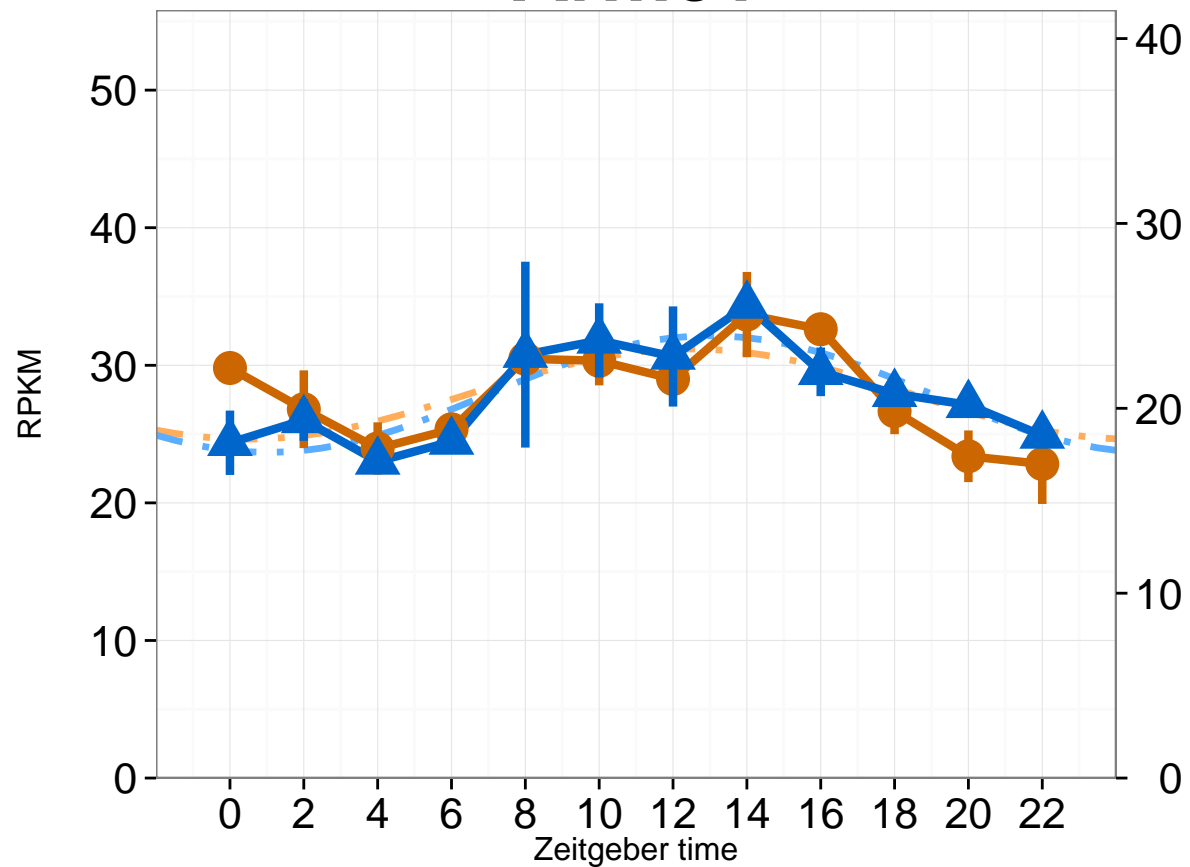

# Armc1

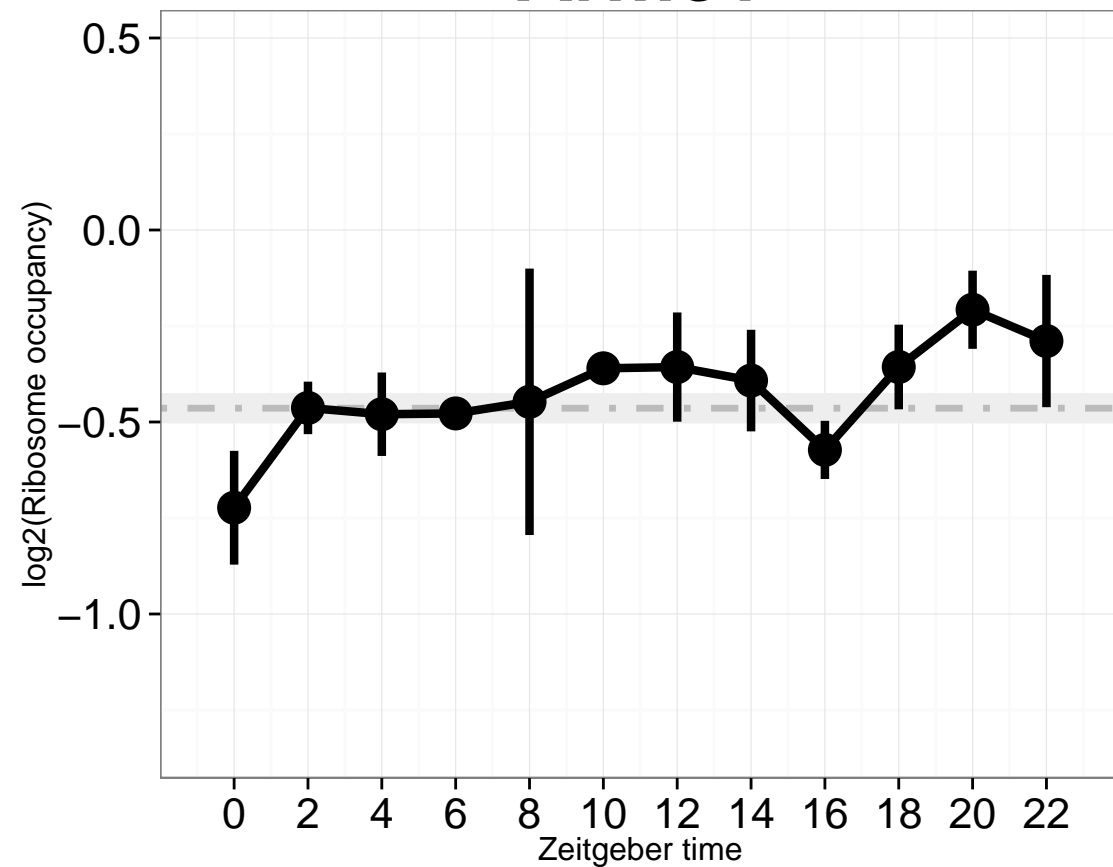

Supplement: SuppDataset_1.zip [file Armc1_set_A.pdf › Supplemental Dataset 1/A-mRNA_nonrhyth_translation_nonrhyth/Armc1_set_A.pdf]

# Armc5

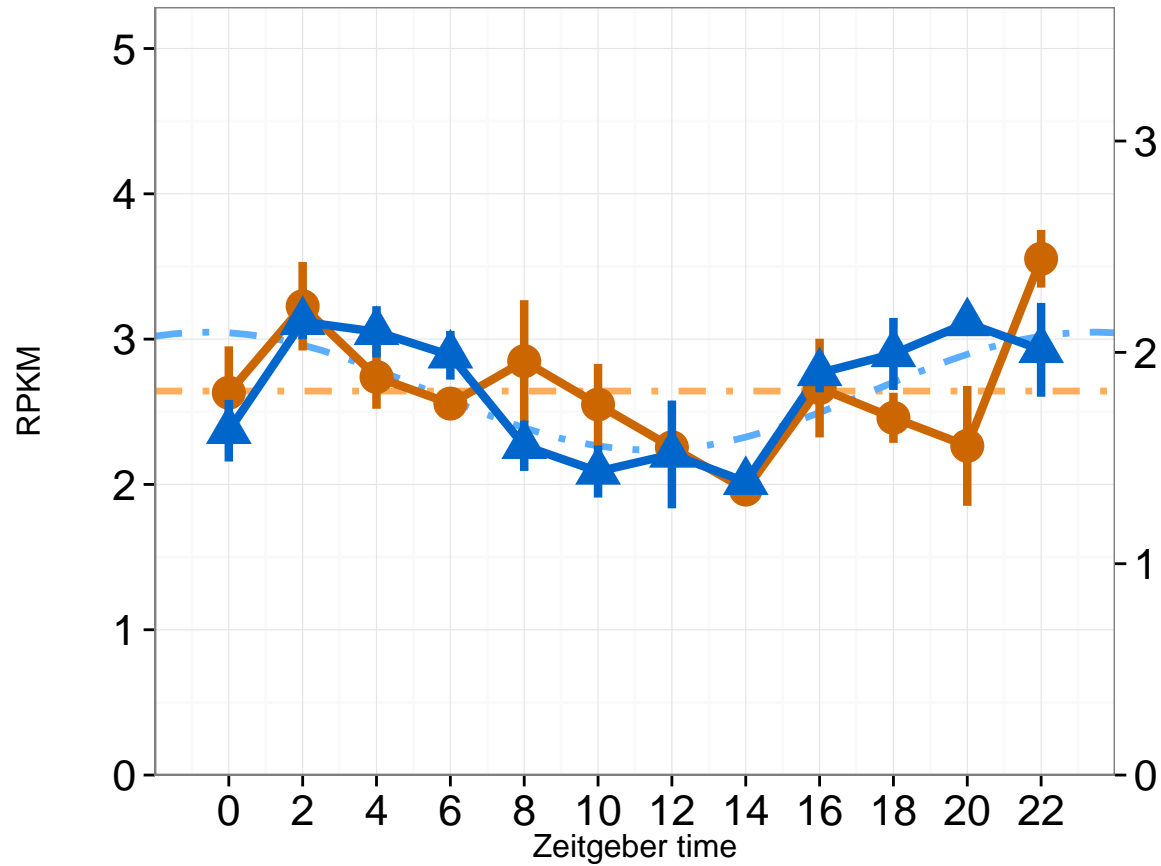

# Armc5

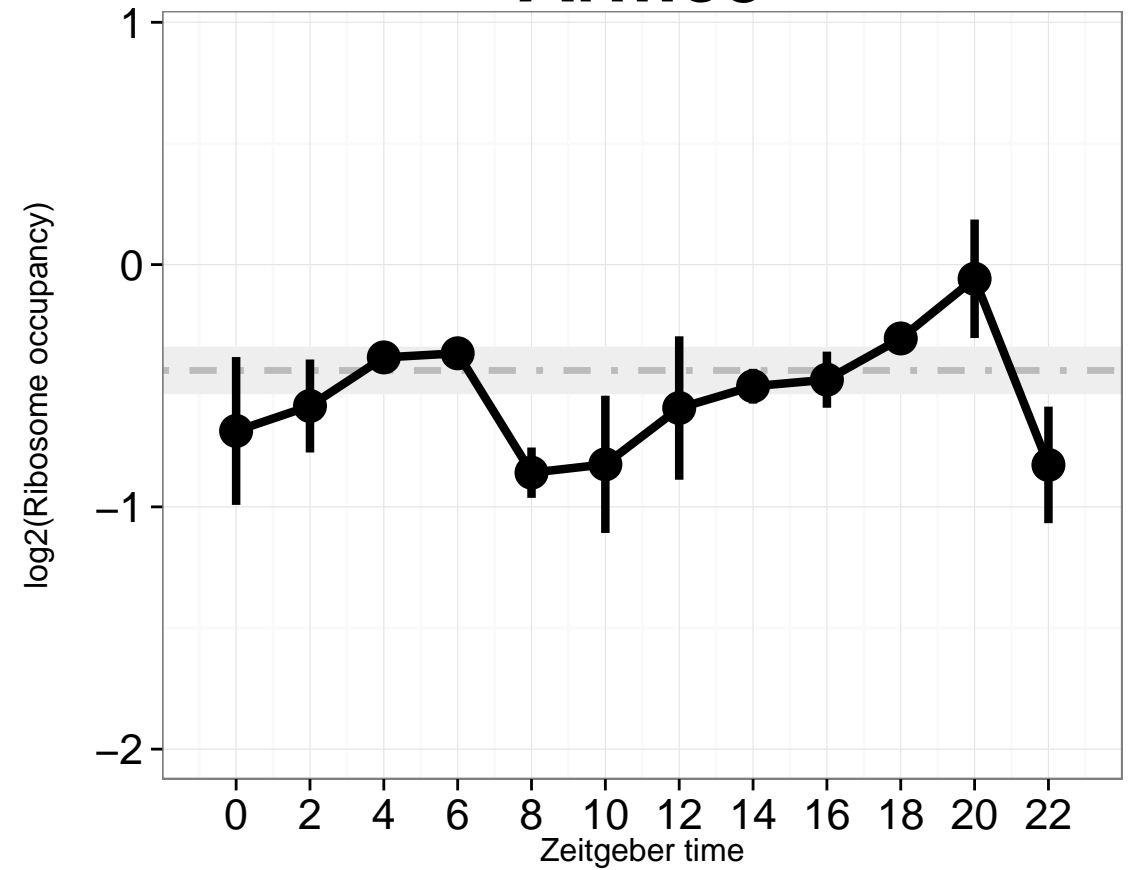

Supplement: SuppDataset_1.zip [file Armc5_set_A.pdf › Supplemental Dataset 1/A-mRNA_nonrhyth_translation_nonrhyth/Armc5_set_A.pdf]

**Armc7 TR**

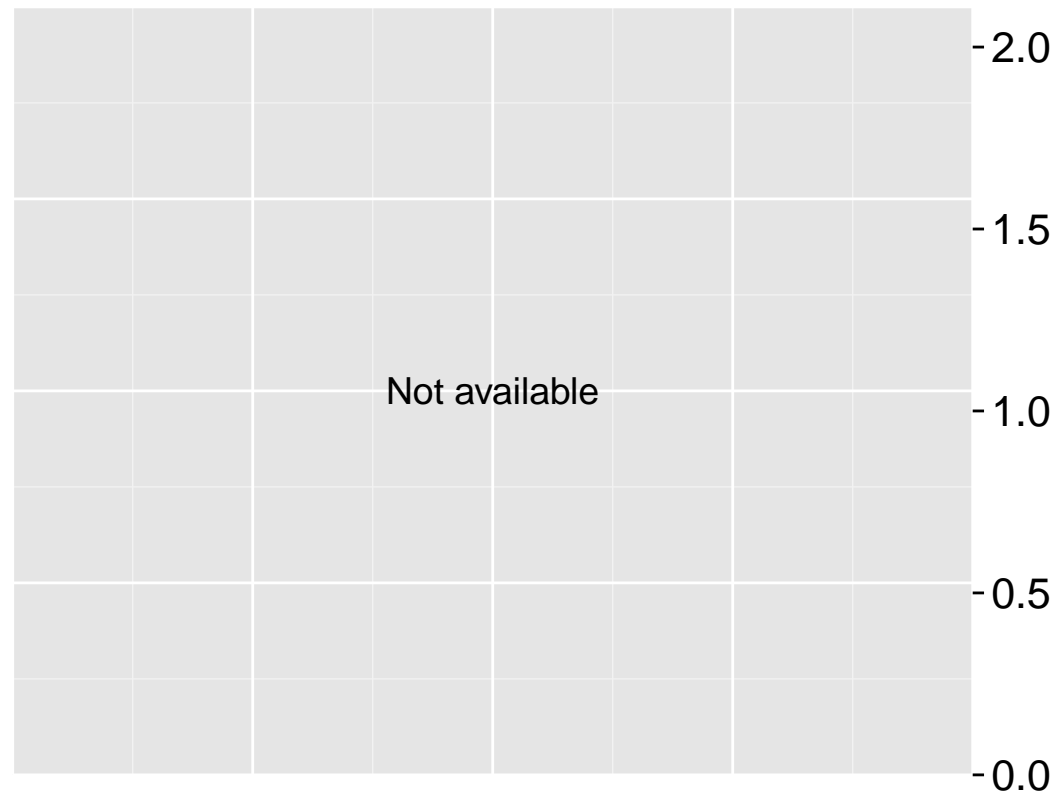

**Armc7 log2(Ribosome occupancy**

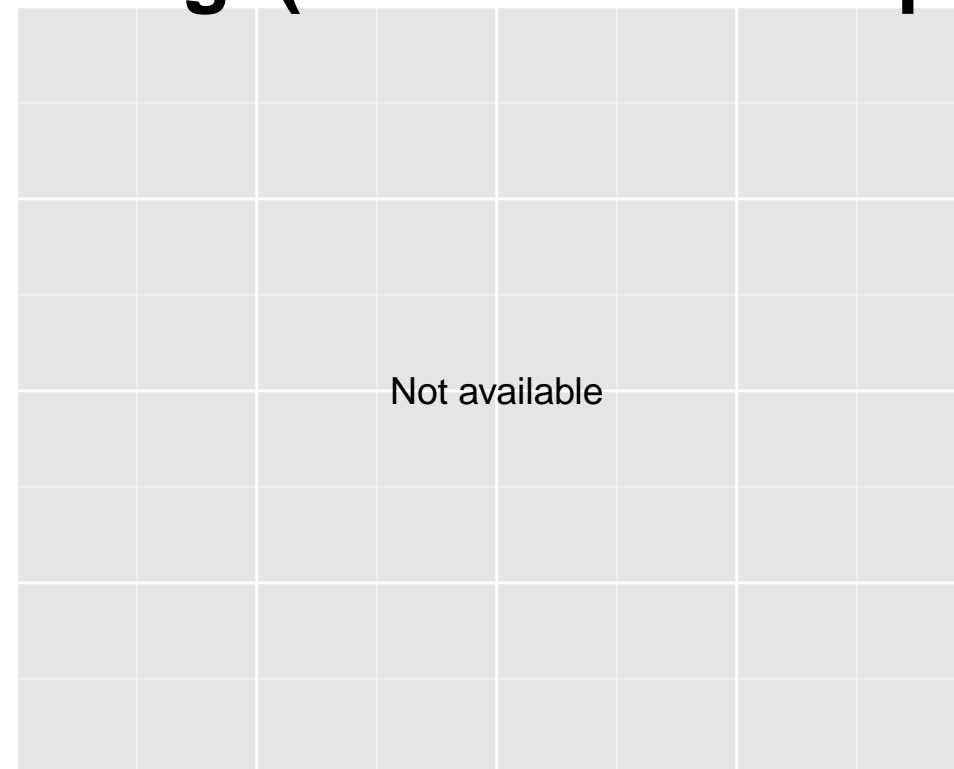

Supplement: SuppDataset_1.zip [file Armc7_set_A.pdf › Supplemental Dataset 1/A-mRNA_nonrhyth_translation_nonrhyth/Armc7_set_A.pdf]

# Armc8

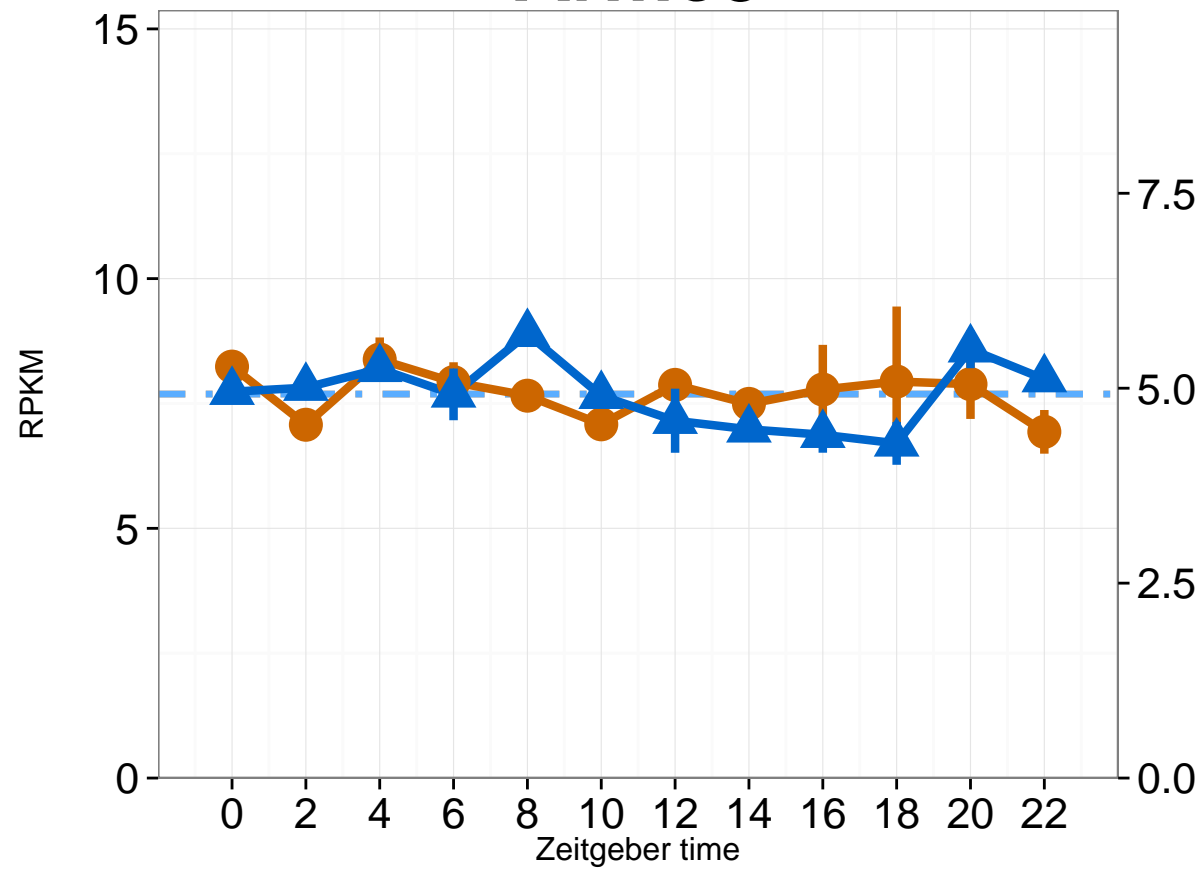

# Armc8

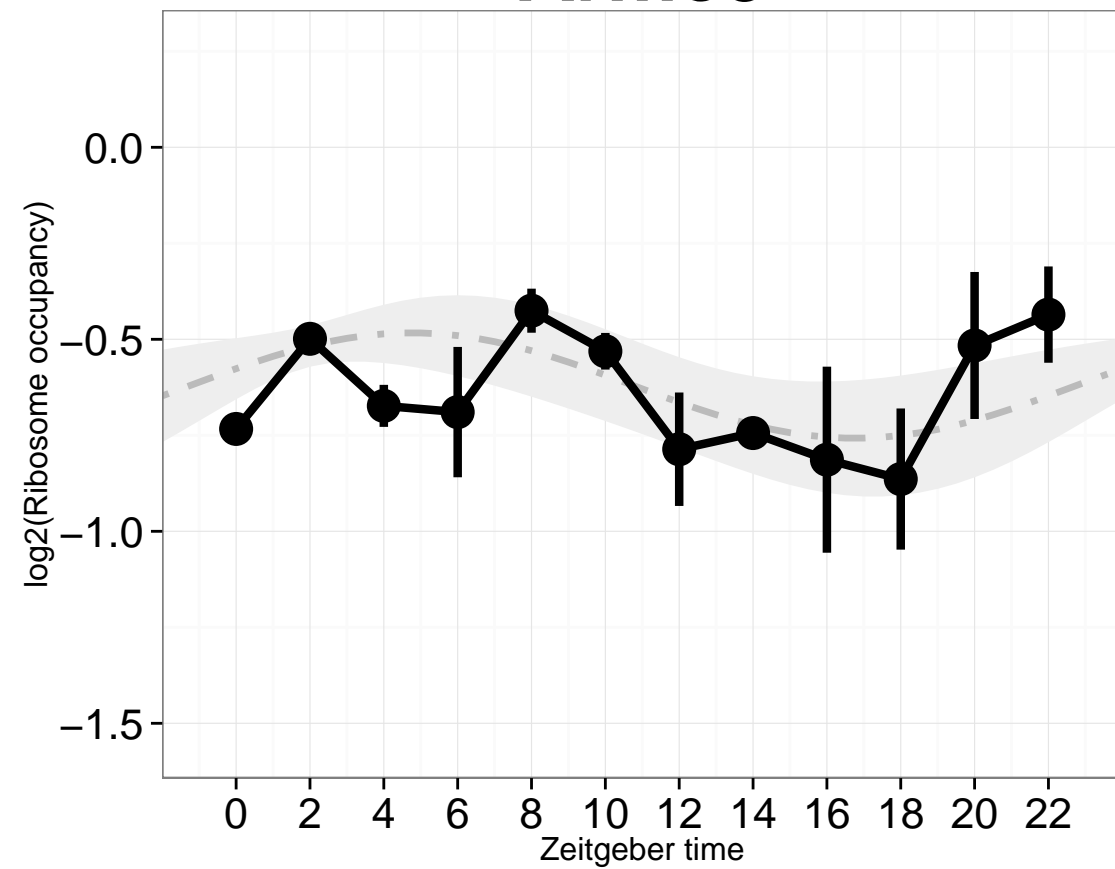

Supplement: SuppDataset_1.zip [file Armc8_set_A.pdf › Supplemental Dataset 1/A-mRNA_nonrhyth_translation_nonrhyth/Armc8_set_A.pdf]

# Armxc1

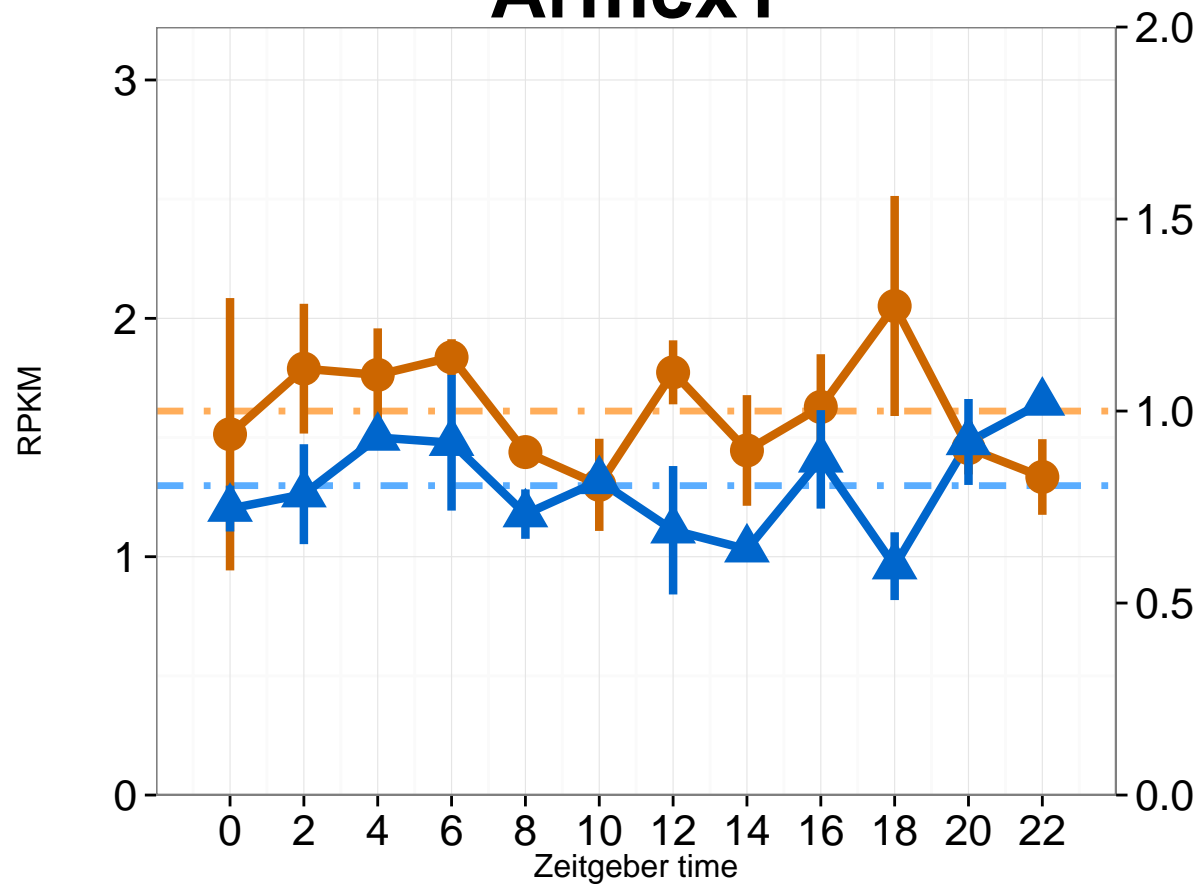

# Armxc1

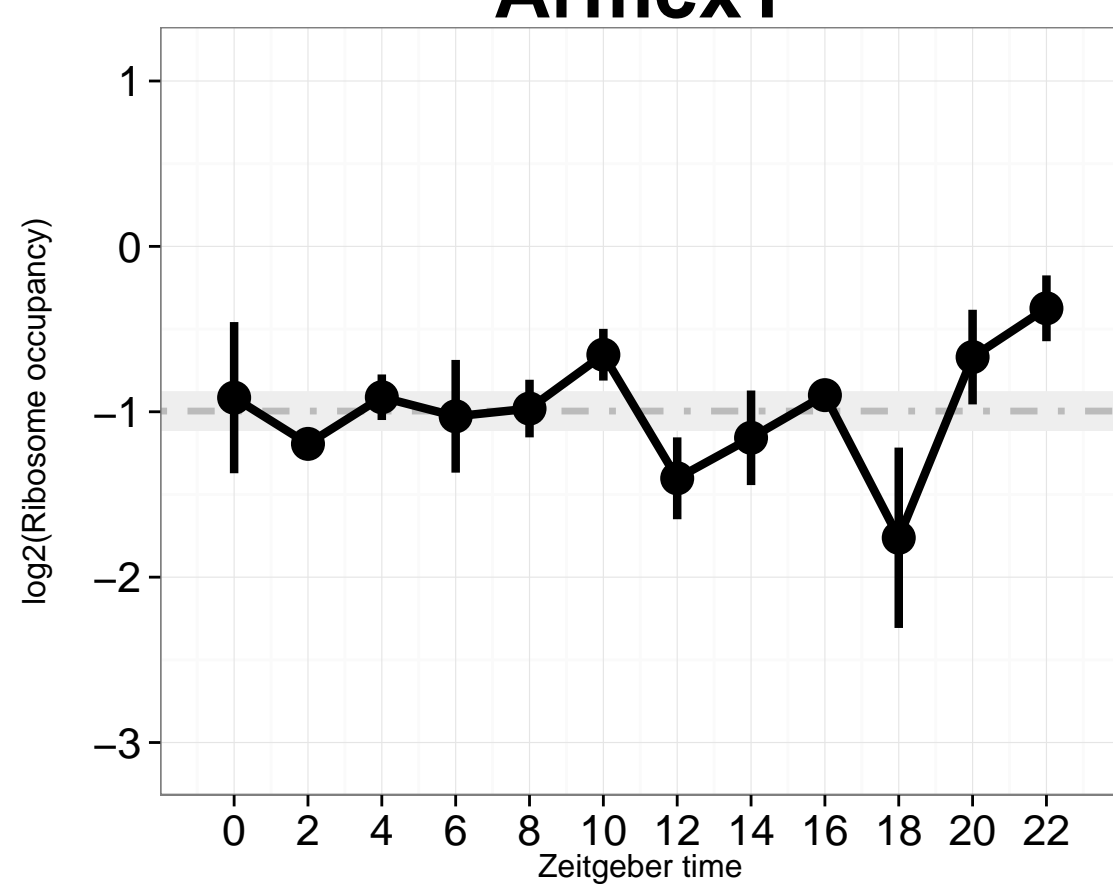

Supplement: SuppDataset_1.zip [file Armcx1_set_A.pdf › Supplemental Dataset 1/A-mRNA_nonrhyth_translation_nonrhyth/Armcx1_set_A.pdf]

# Armxc2

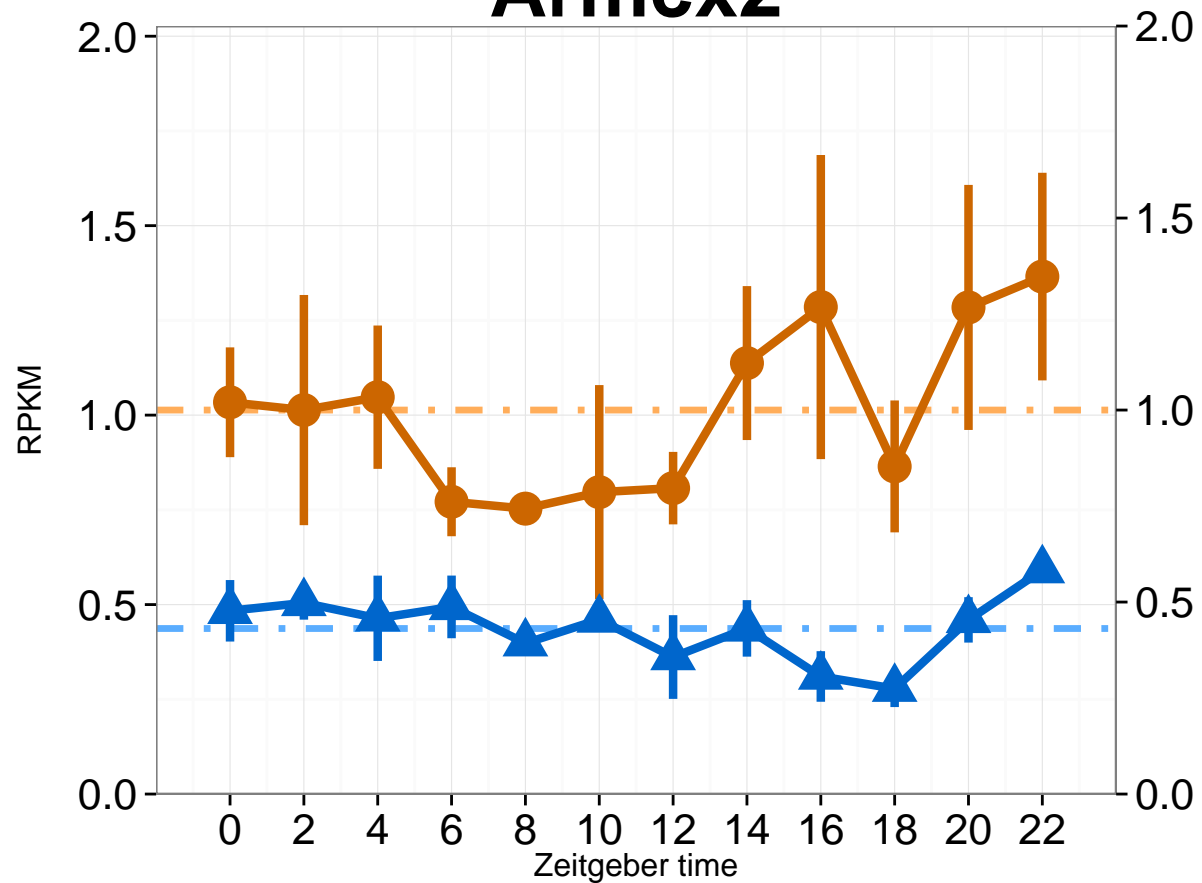

# Armxc2

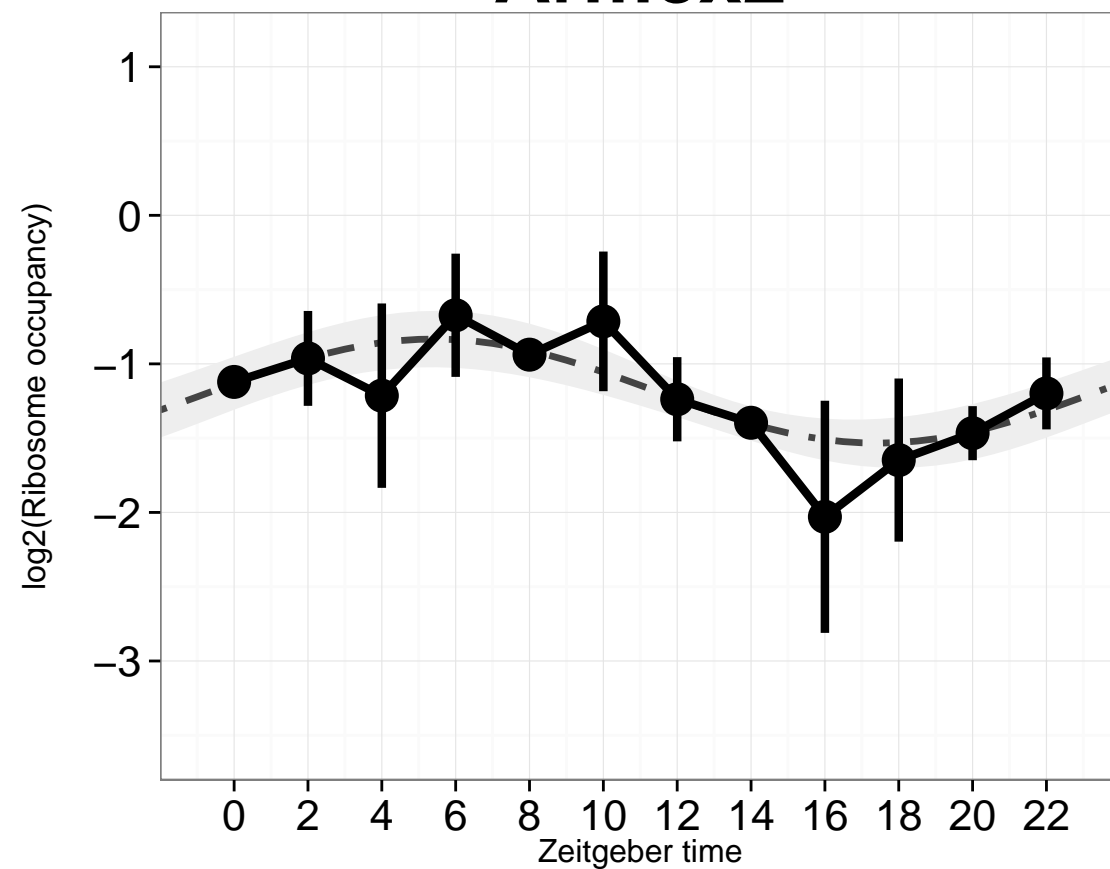

Supplement: SuppDataset_1.zip [file Armcx2_set_A.pdf › Supplemental Dataset 1/A-mRNA_nonrhyth_translation_nonrhyth/Armcx2_set_A.pdf]

## Armex3

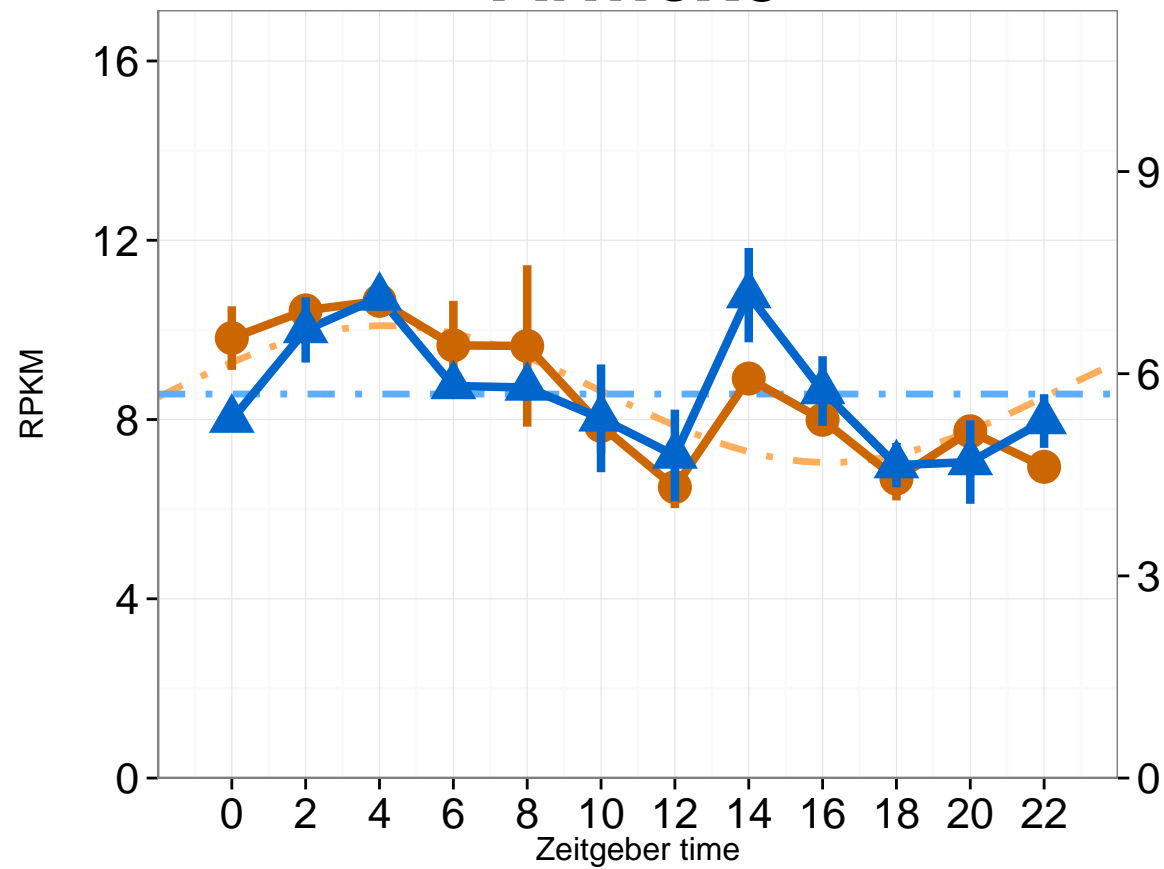

## Armex3

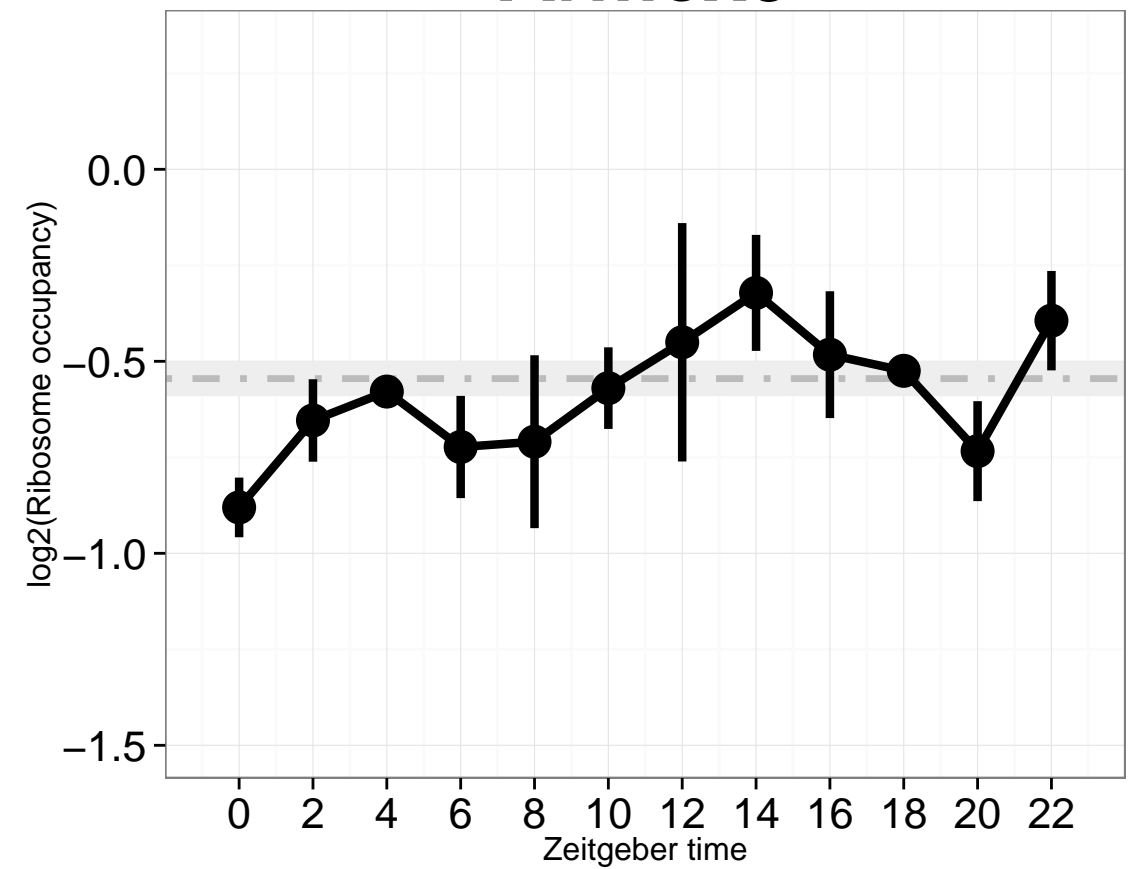

Supplement: SuppDataset_1.zip [file Armcx3_set_A.pdf › Supplemental Dataset 1/A-mRNA_nonrhyth_translation_nonrhyth/Armcx3_set_A.pdf]

# Armxc5

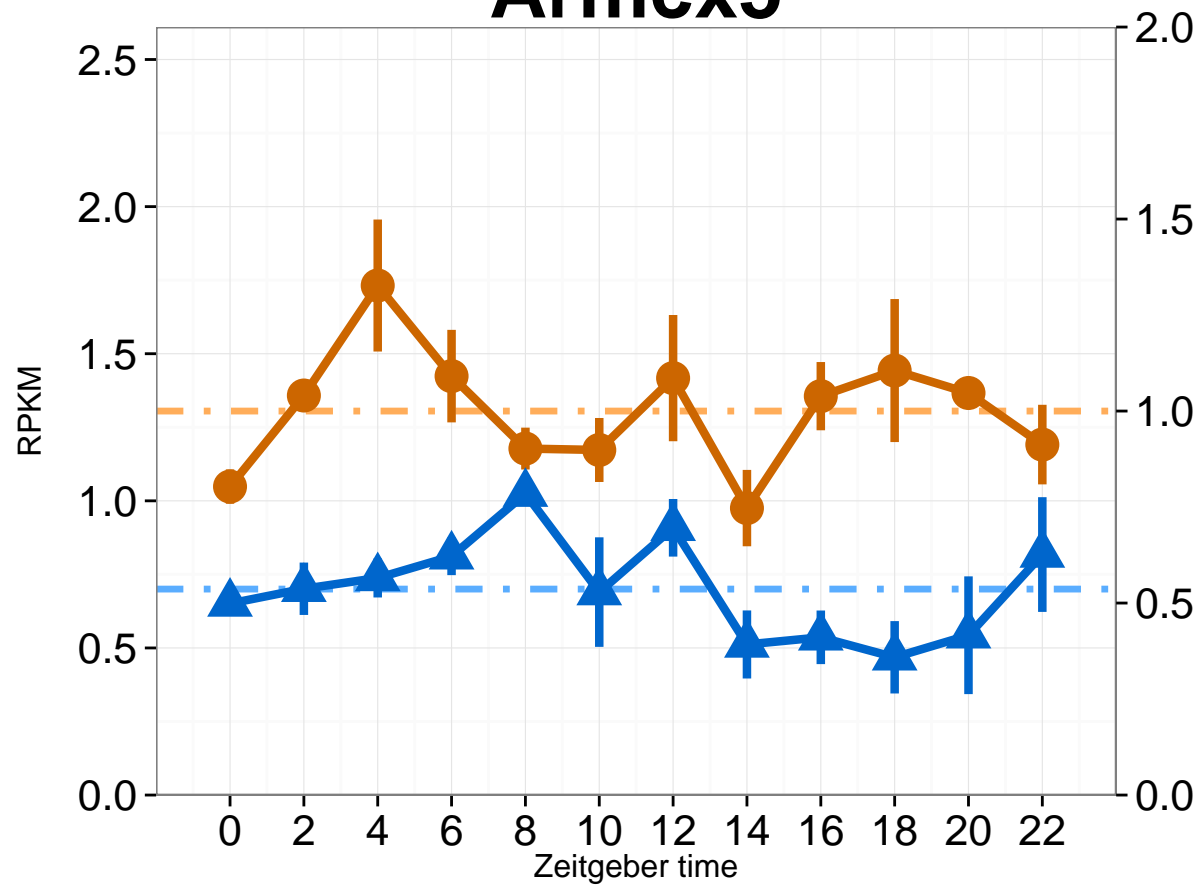

# Armxc5

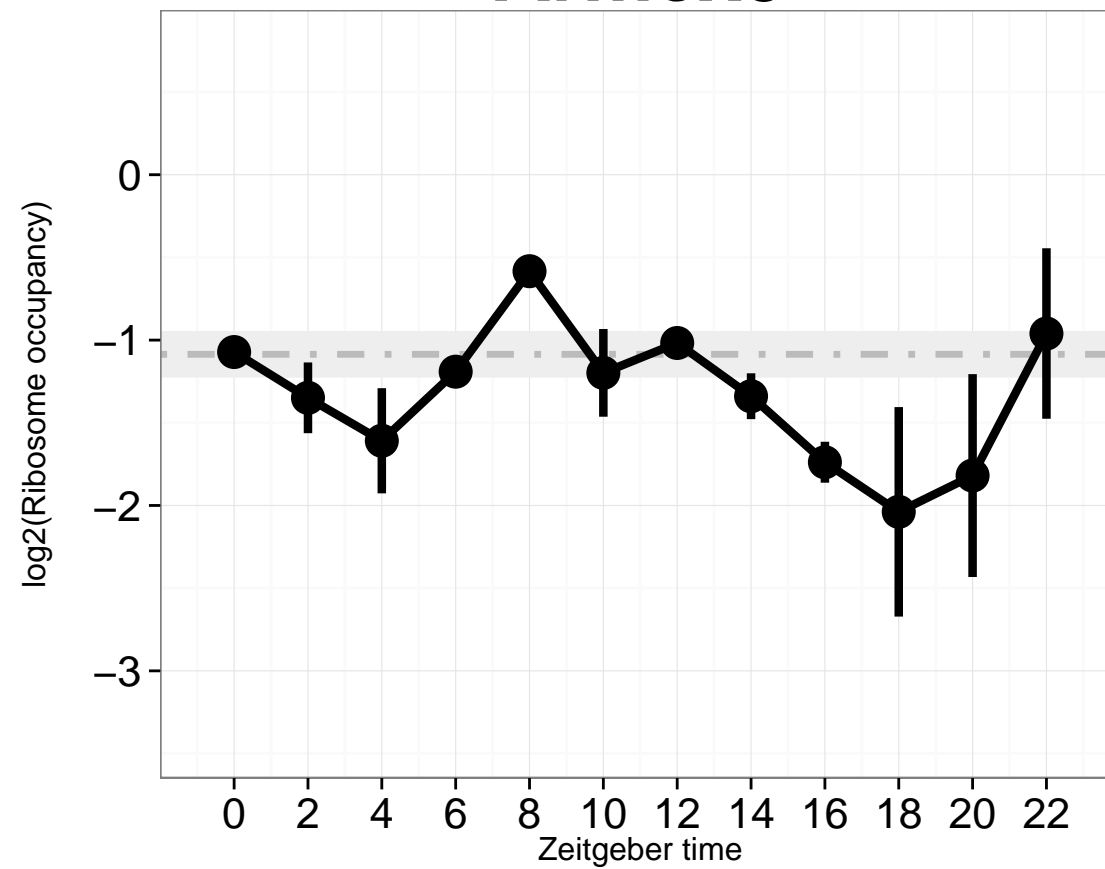

Supplement: SuppDataset_1.zip [file Armcx5_set_A.pdf › Supplemental Dataset 1/A-mRNA_nonrhyth_translation_nonrhyth/Armcx5_set_A.pdf]

## Arnt

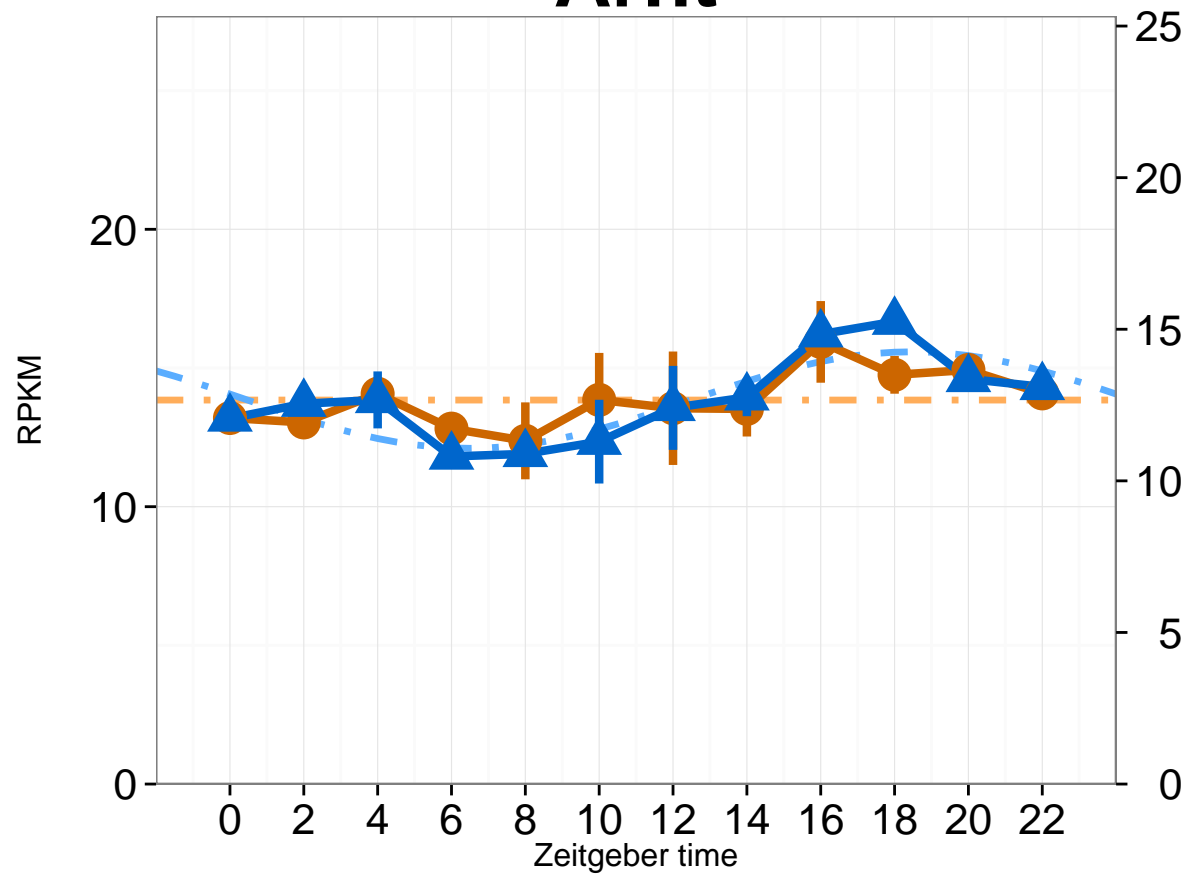

## Arnt

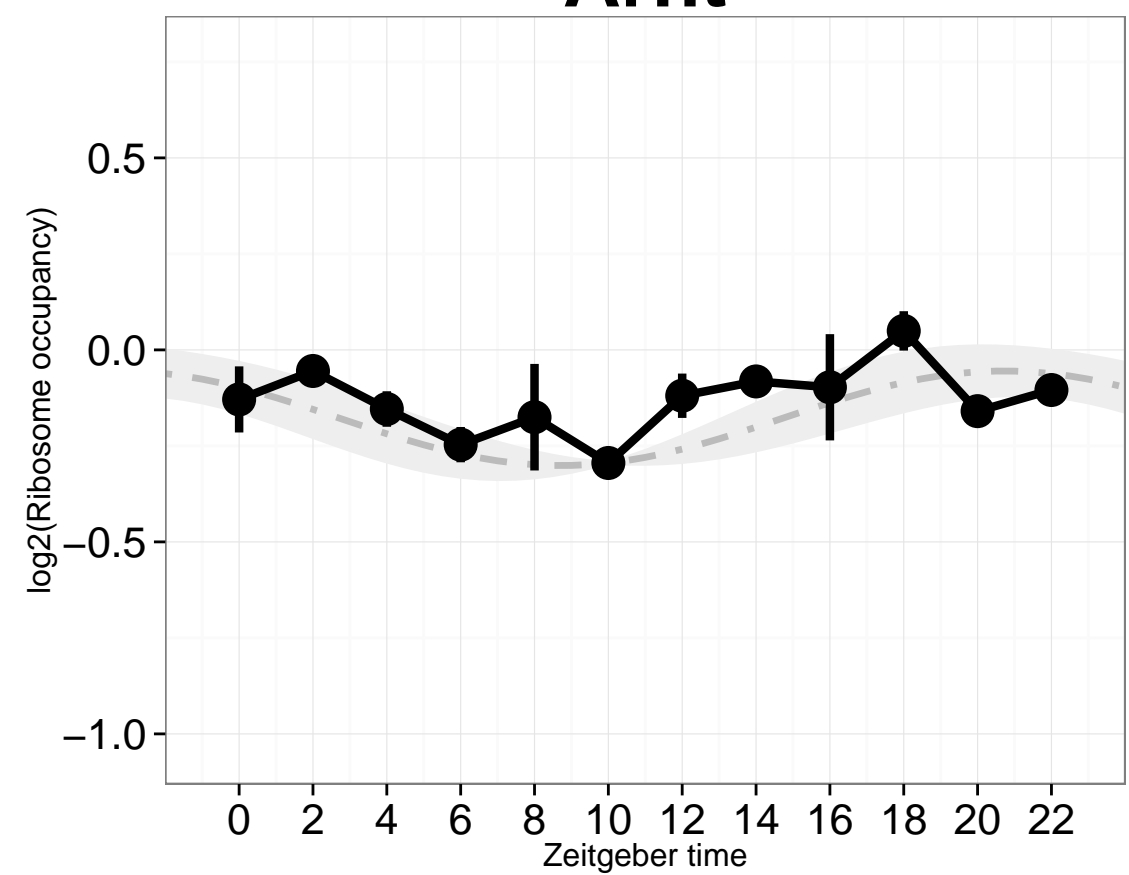

Supplement: SuppDataset_1.zip [file Arnt_set_A.pdf › Supplemental Dataset 1/A-mRNA_nonrhyth_translation_nonrhyth/Arnt_set_A.pdf]

# Arpc1a

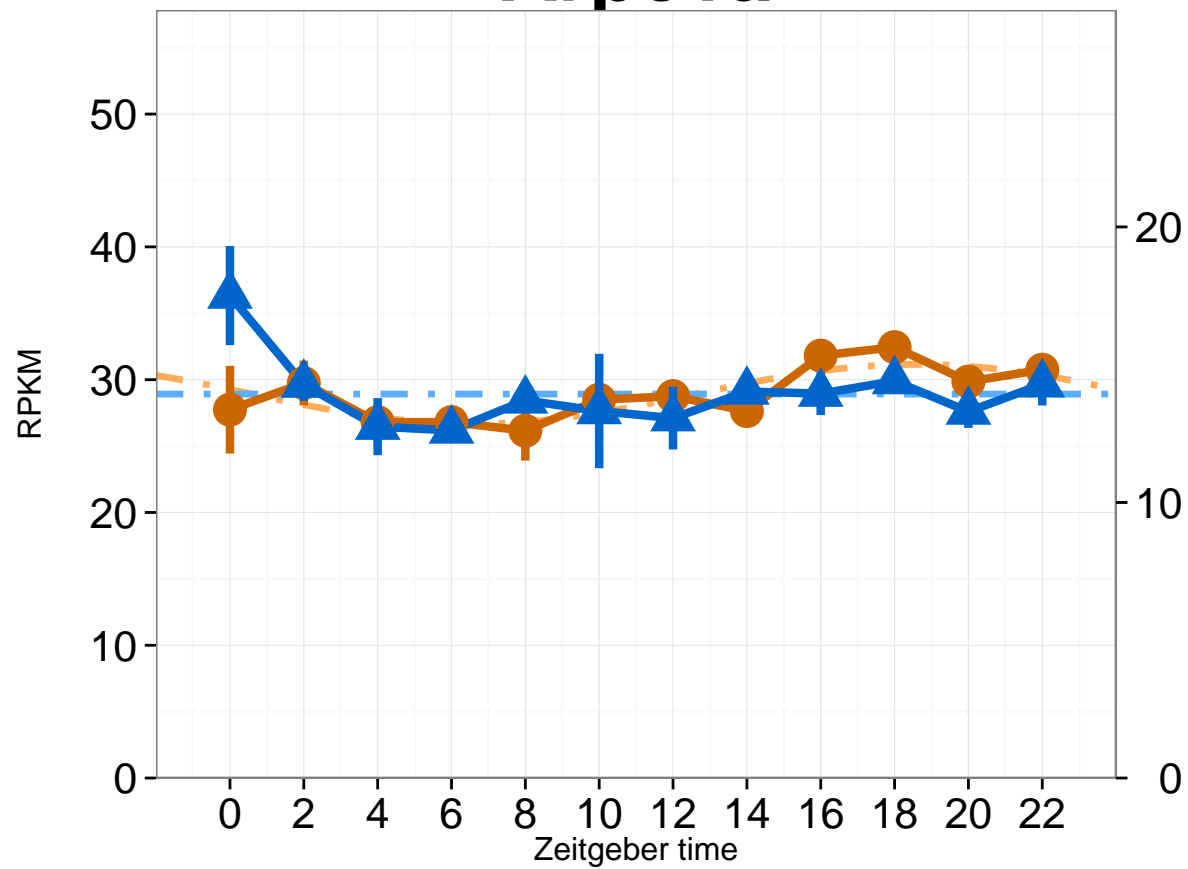

# Arpc1a

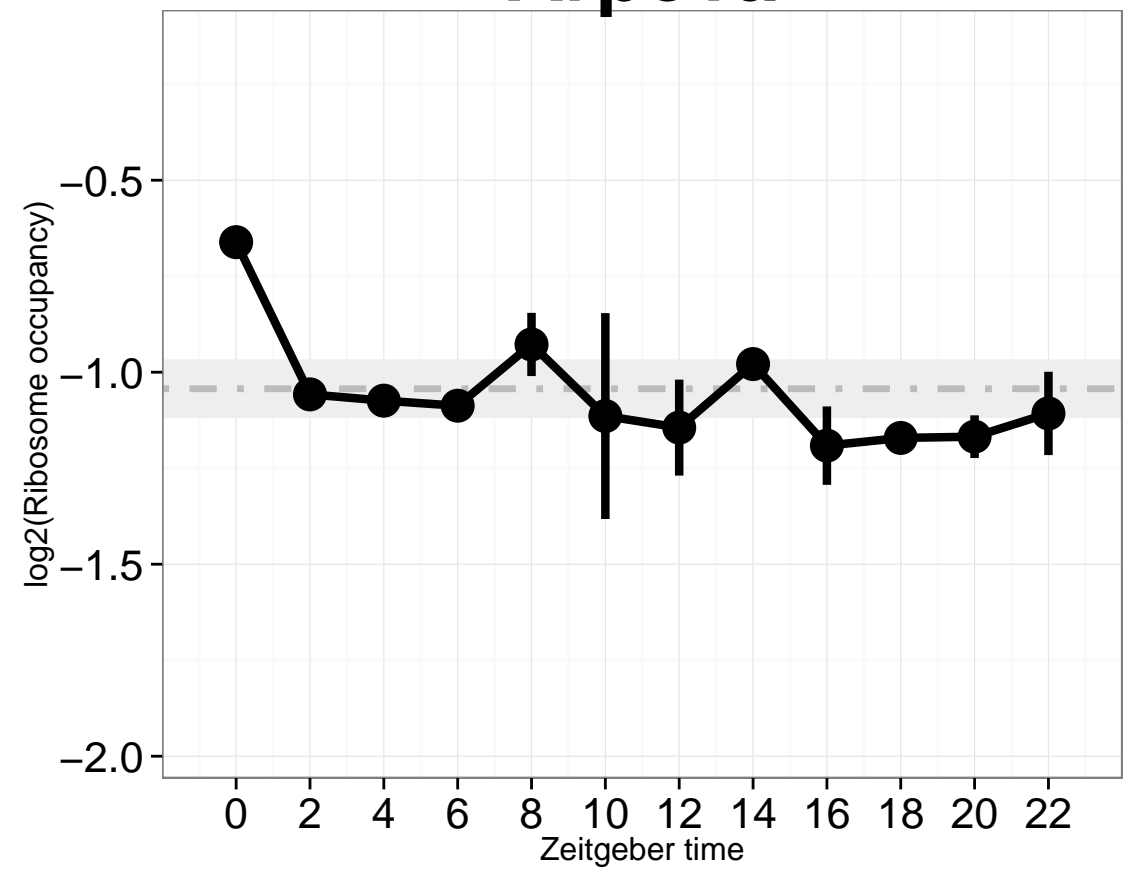

Supplement: SuppDataset_1.zip [file Arpc1a_set_A.pdf › Supplemental Dataset 1/A-mRNA_nonrhyth_translation_nonrhyth/Arpc1a_set_A.pdf]

# Arpc1b

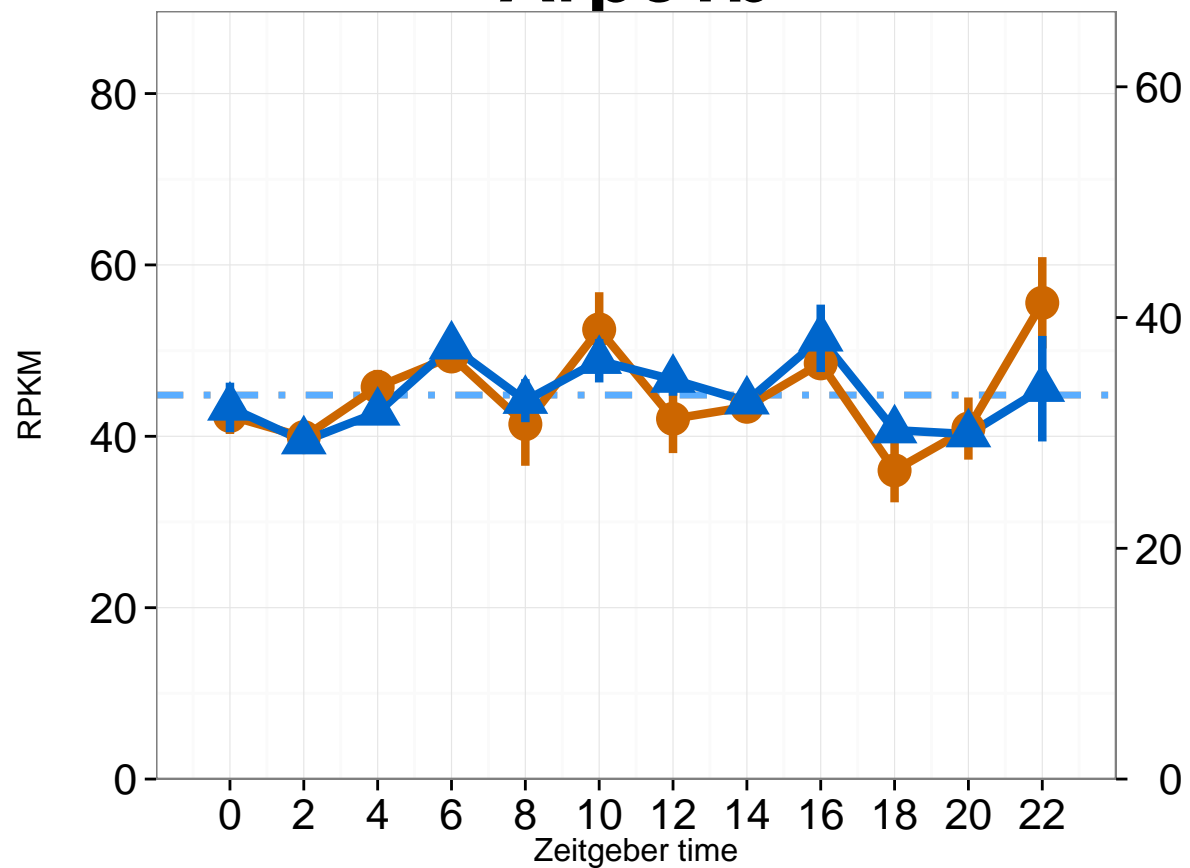

# Arpc1b

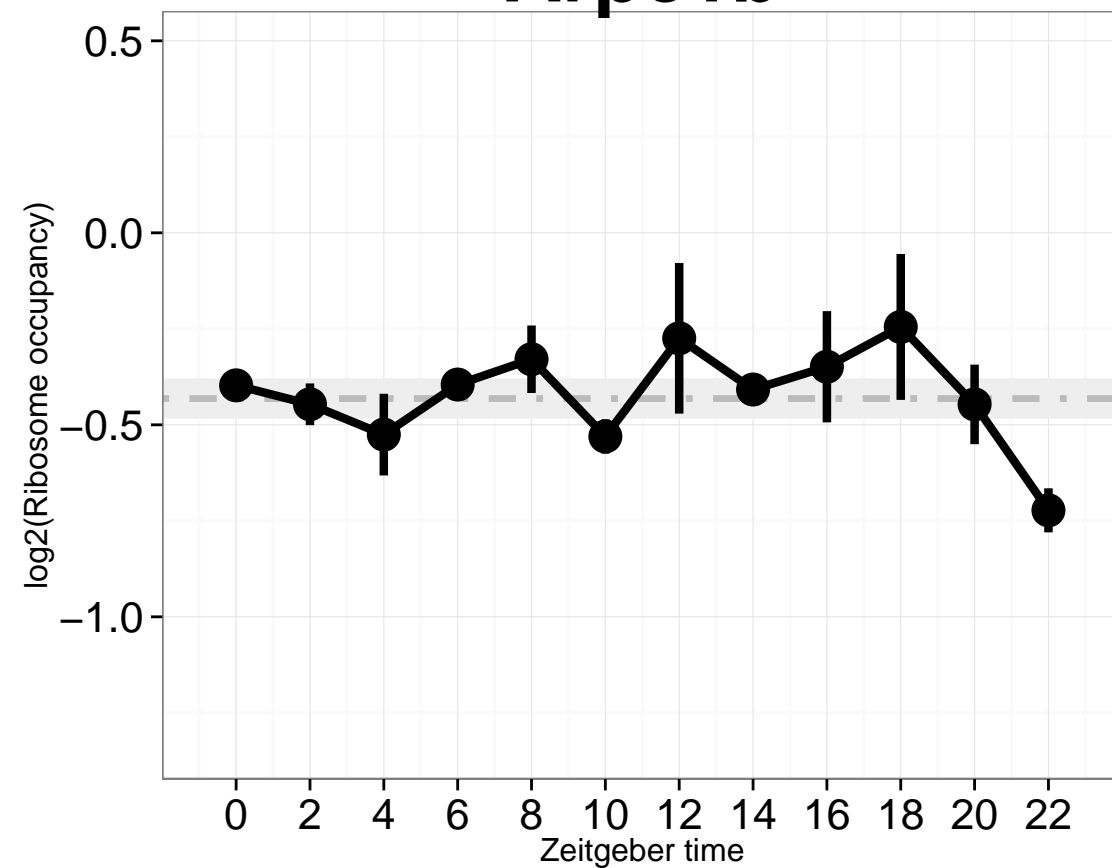

Supplement: SuppDataset_1.zip [file Arpc1b_set_A.pdf › Supplemental Dataset 1/A-mRNA_nonrhyth_translation_nonrhyth/Arpc1b_set_A.pdf]

# Arpc3

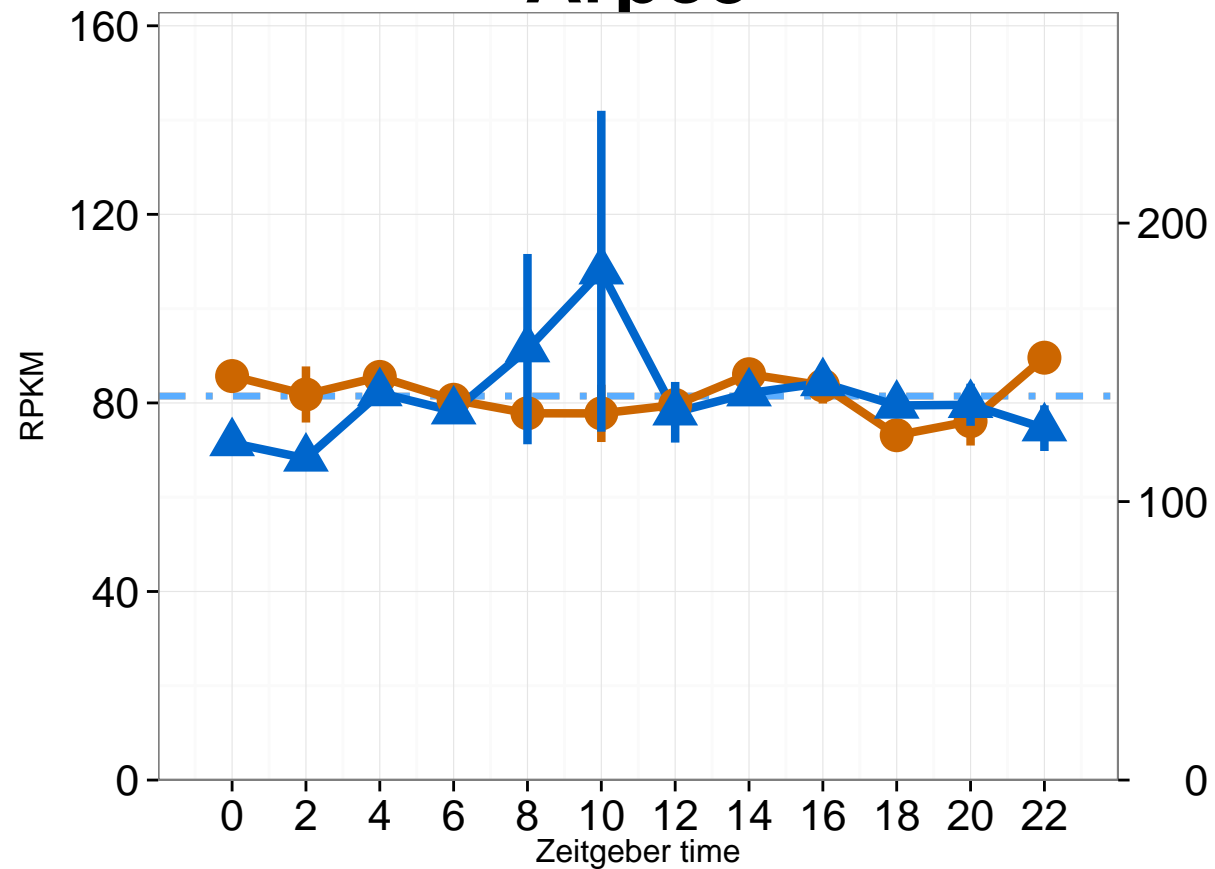

# Arpc3

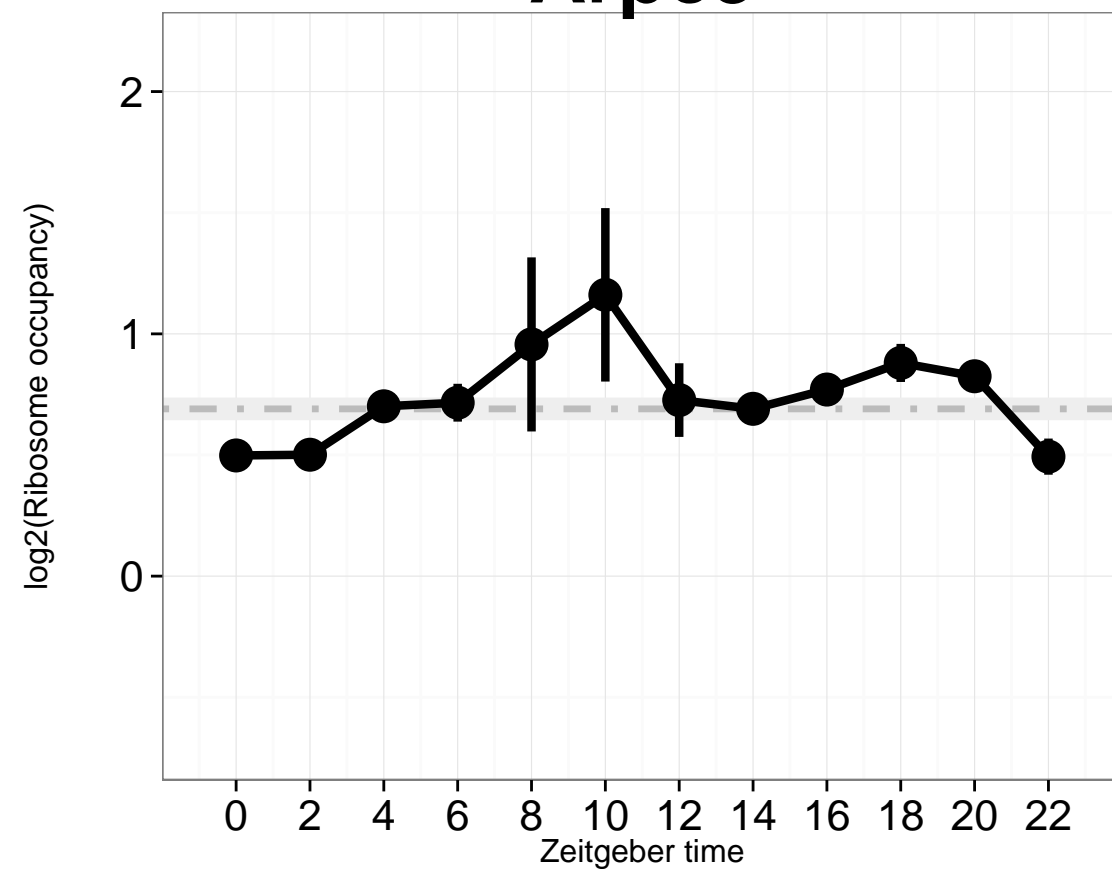

Supplement: SuppDataset_1.zip [file Arpc3_set_A.pdf › Supplemental Dataset 1/A-mRNA_nonrhyth_translation_nonrhyth/Arpc3_set_A.pdf]

# Arpc4

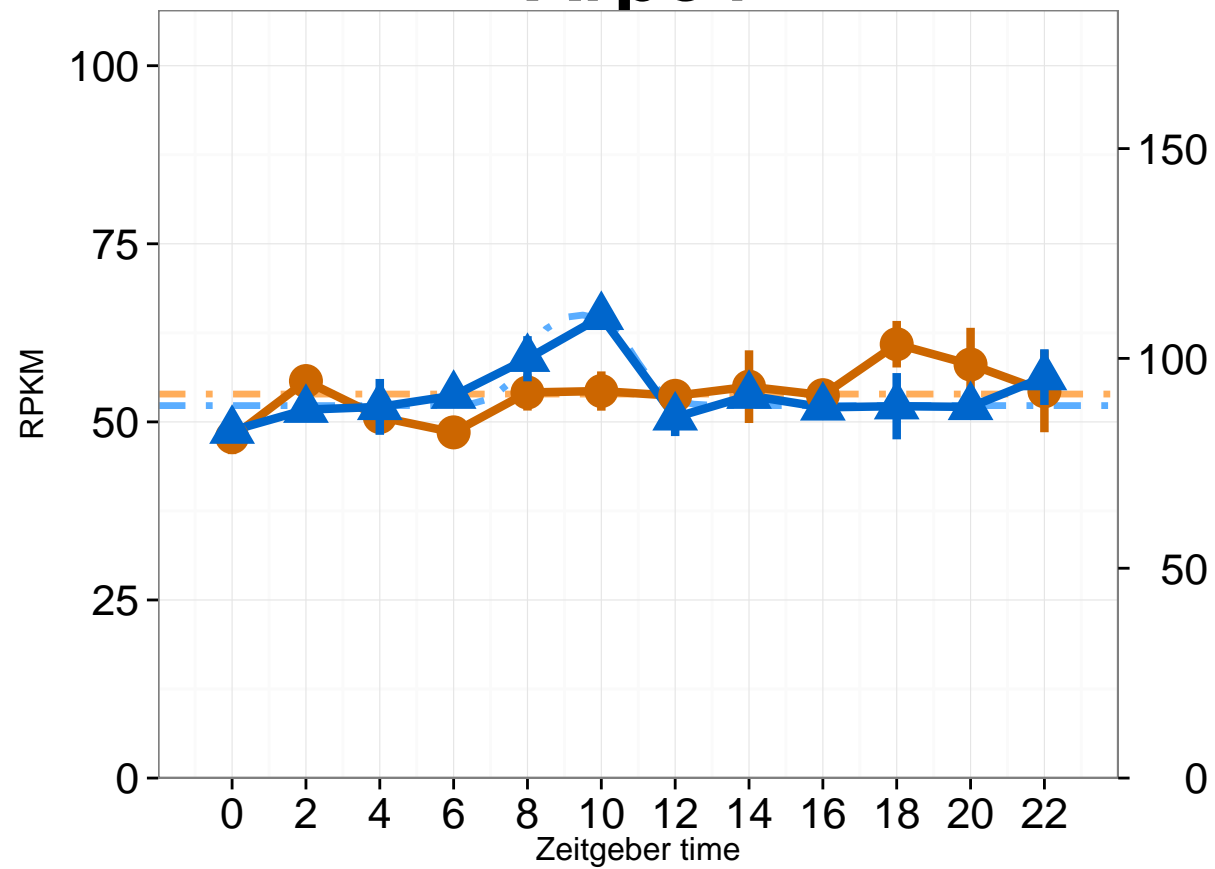

# Arpc4

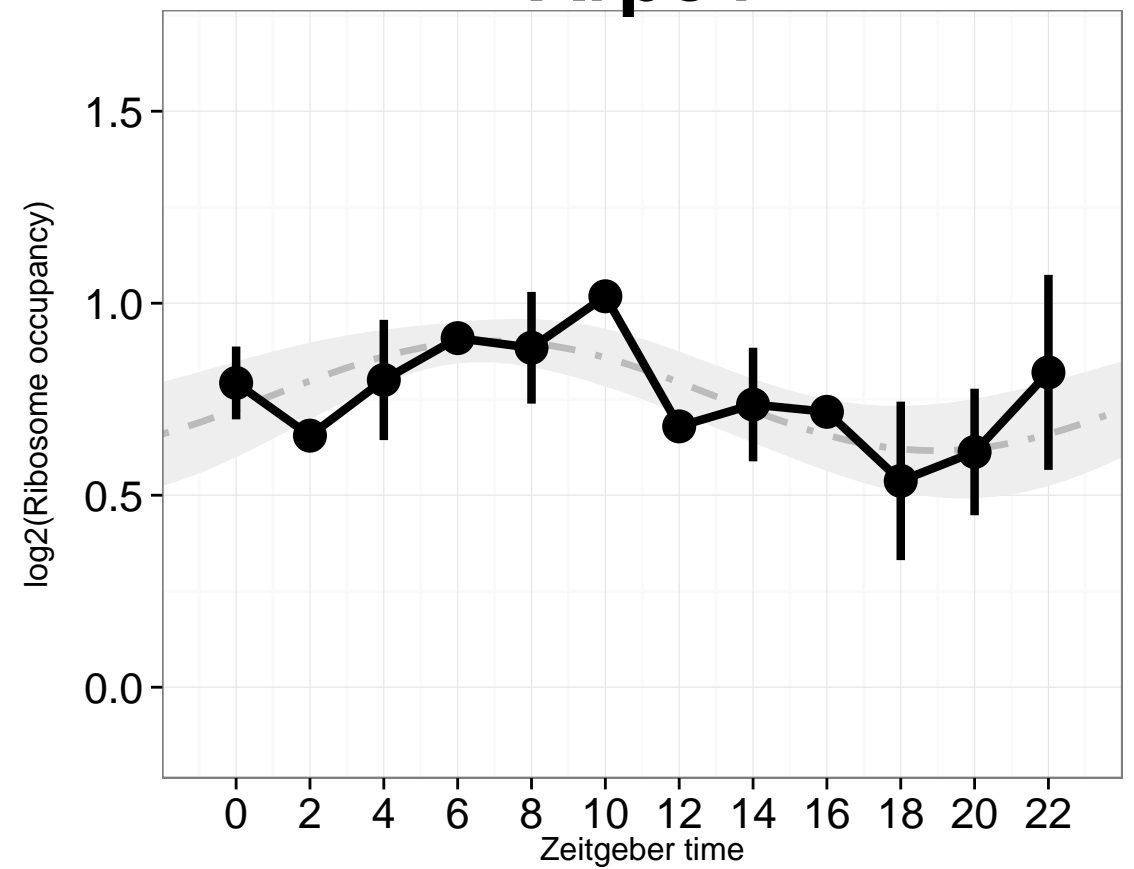

Supplement: SuppDataset_1.zip [file Arpc4_set_A.pdf › Supplemental Dataset 1/A-mRNA_nonrhyth_translation_nonrhyth/Arpc4_set_A.pdf]

# Arpc5

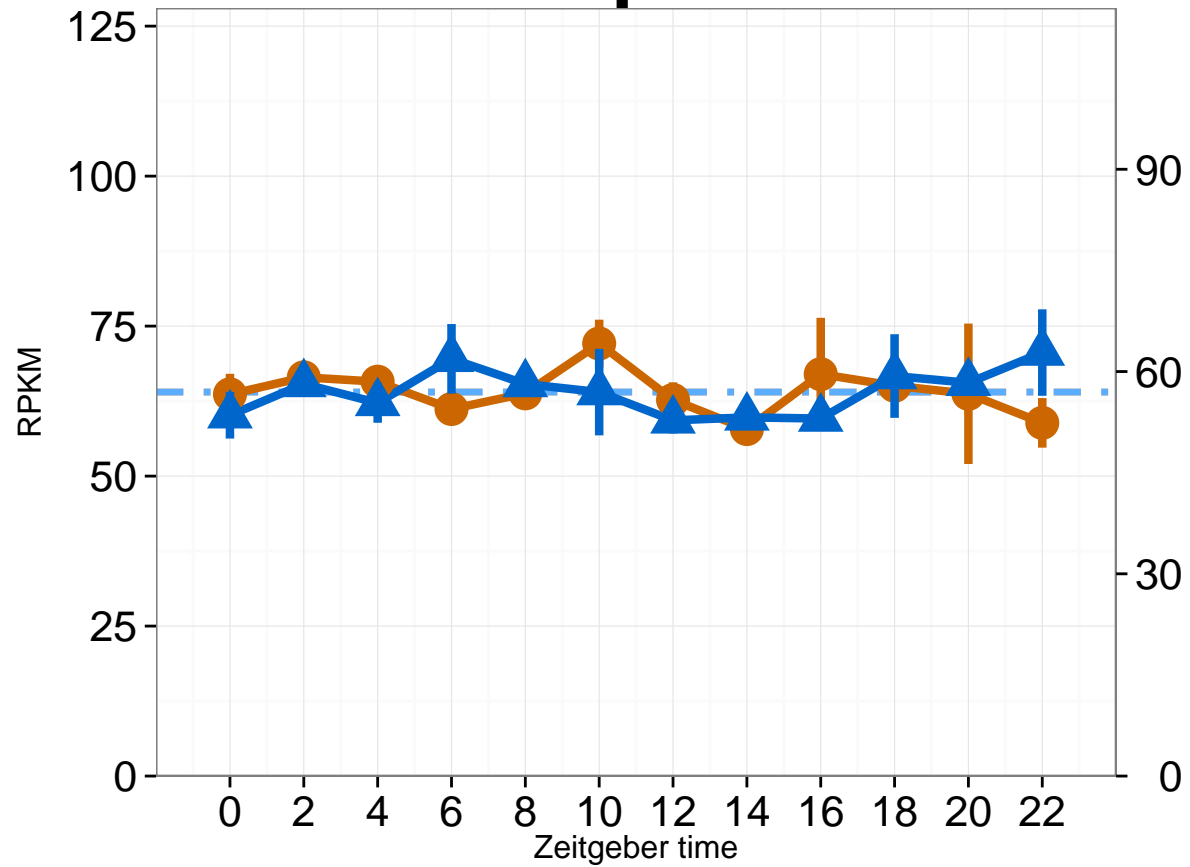

# Arpc5

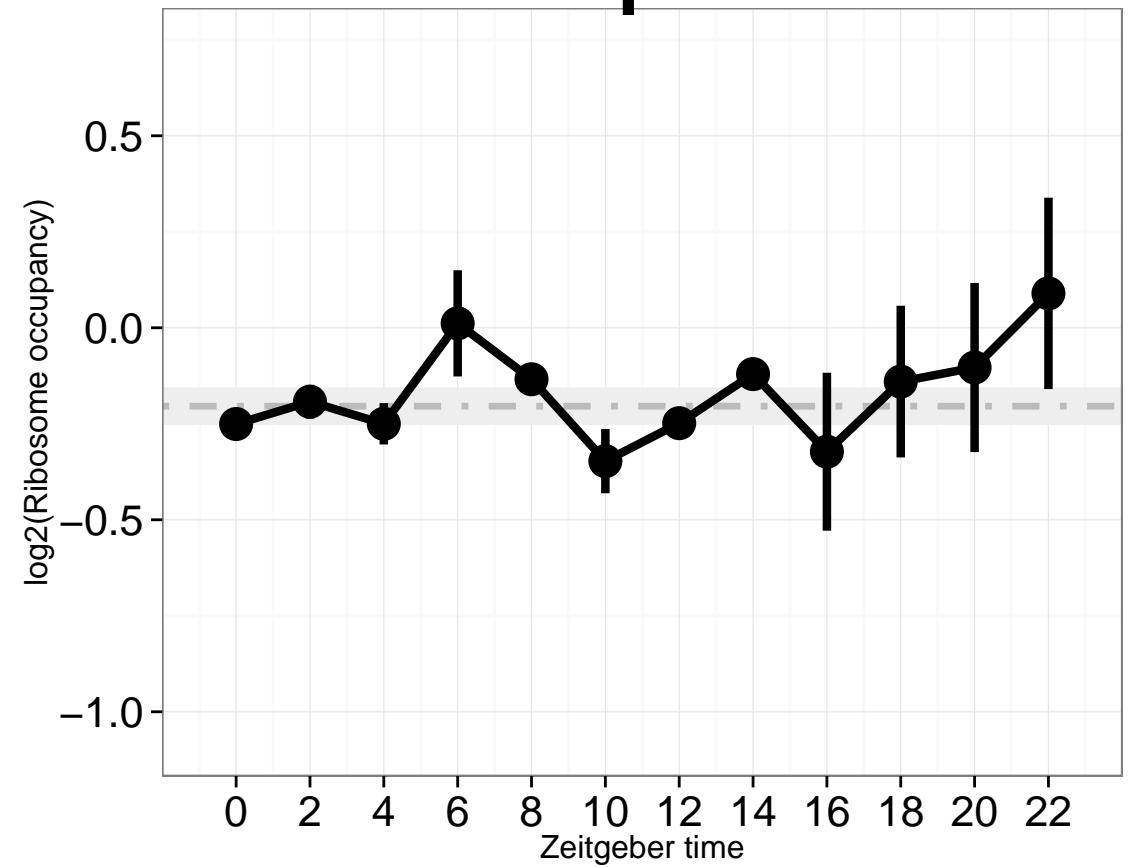

Supplement: SuppDataset_1.zip [file Arpc5_set_A.pdf › Supplemental Dataset 1/A-mRNA_nonrhyth_translation_nonrhyth/Arpc5_set_A.pdf]

# Arpc5l

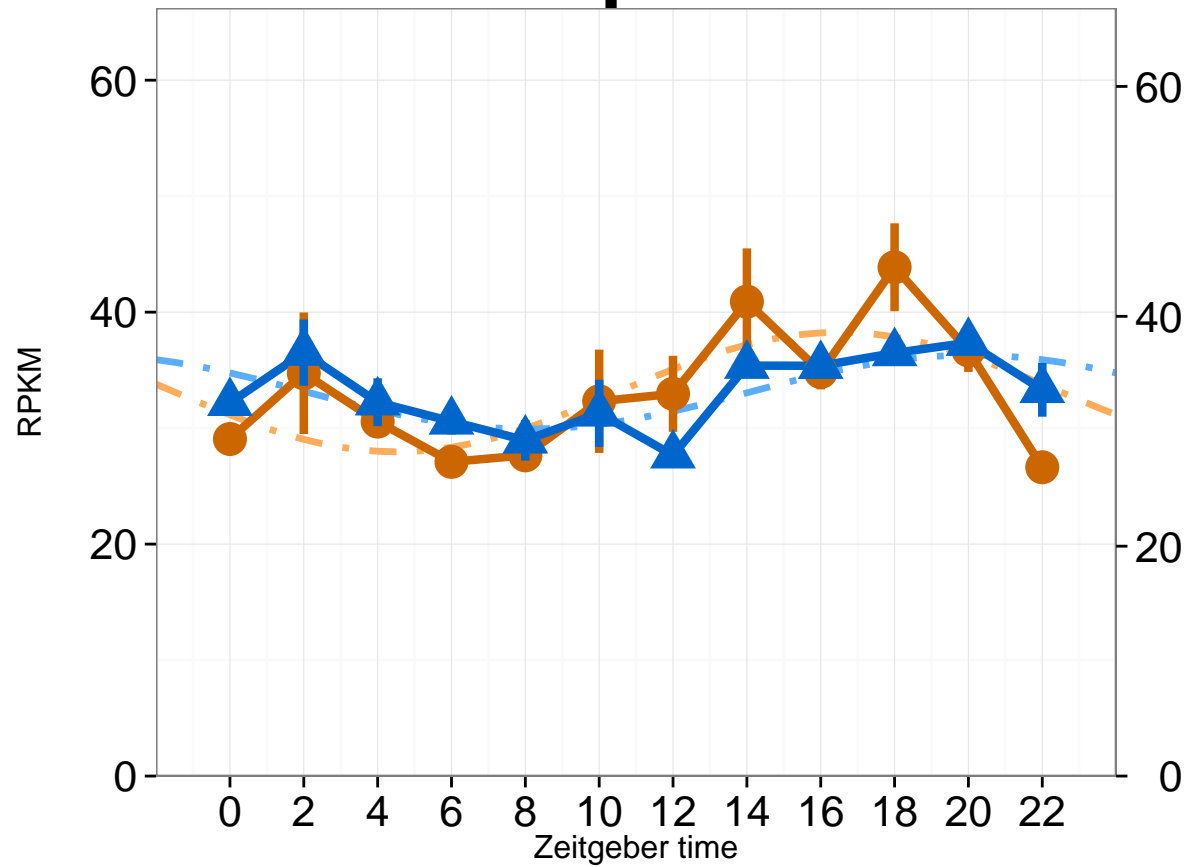

# Arpc5l

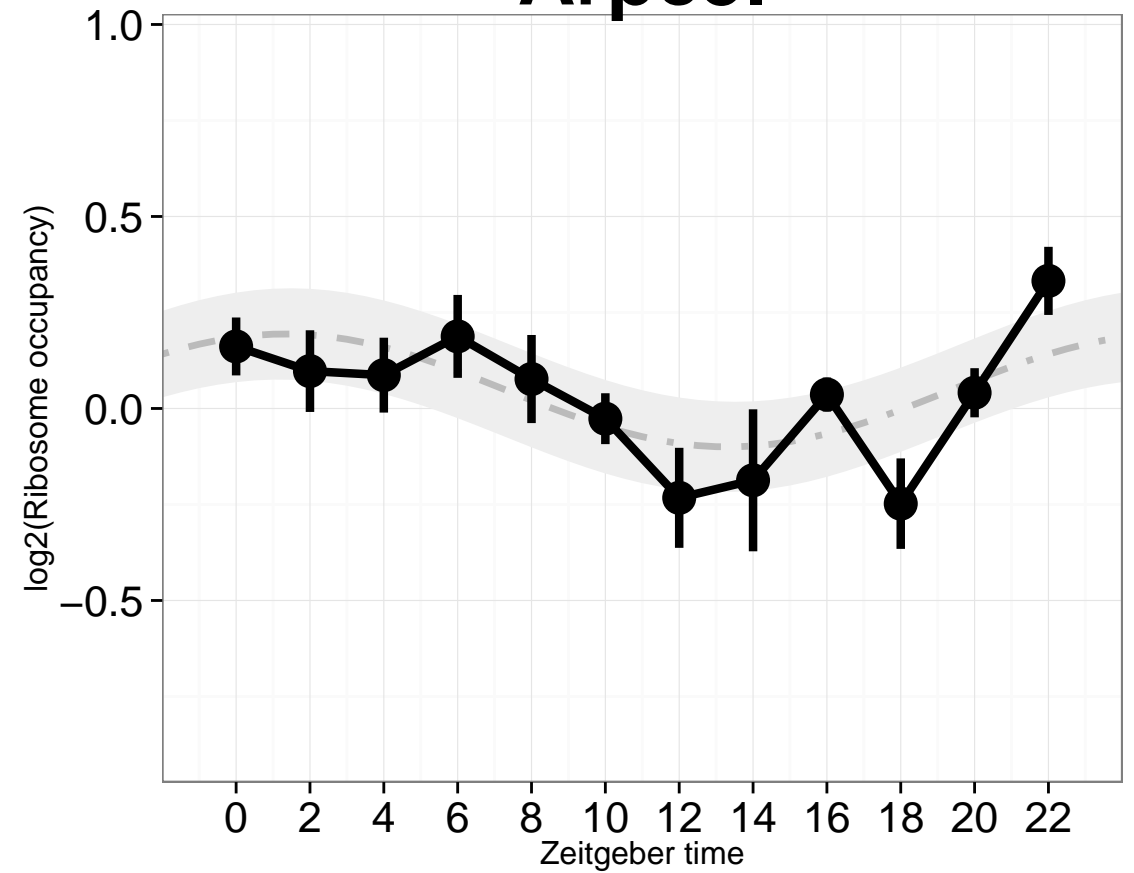

Supplement: SuppDataset_1.zip [file Arpc5l_set_A.pdf › Supplemental Dataset 1/A-mRNA_nonrhyth_translation_nonrhyth/Arpc5l_set_A.pdf]

# Arpp19

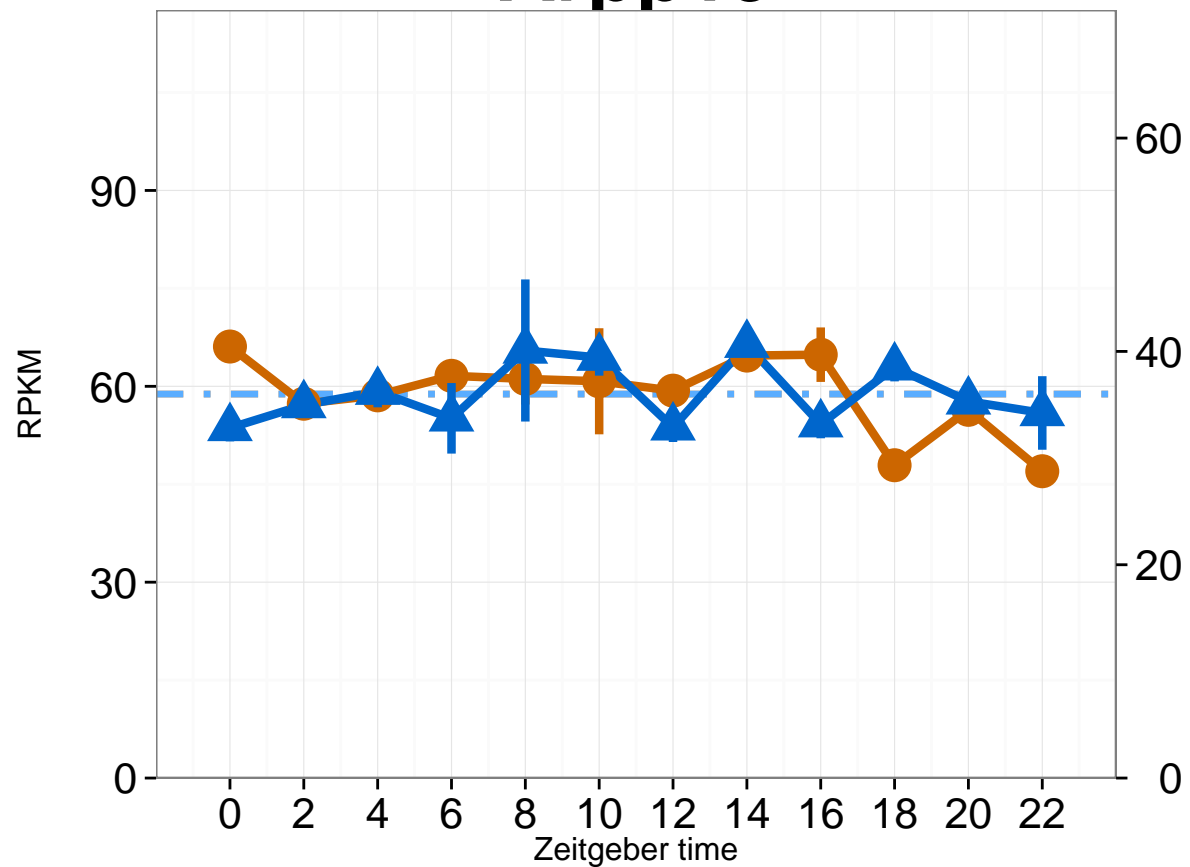

# Arpp19

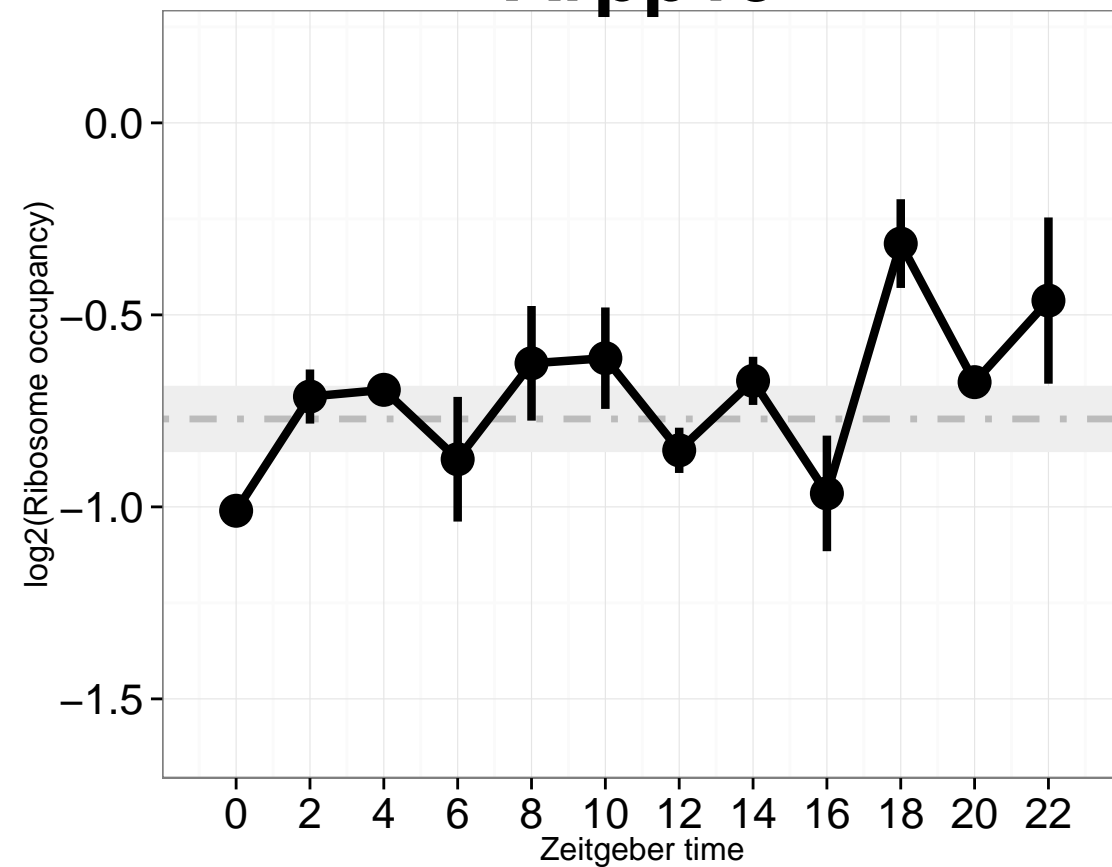

Supplement: SuppDataset_1.zip [file Arpp19_set_A.pdf › Supplemental Dataset 1/A-mRNA_nonrhyth_translation_nonrhyth/Arpp19_set_A.pdf]

# Arrb1

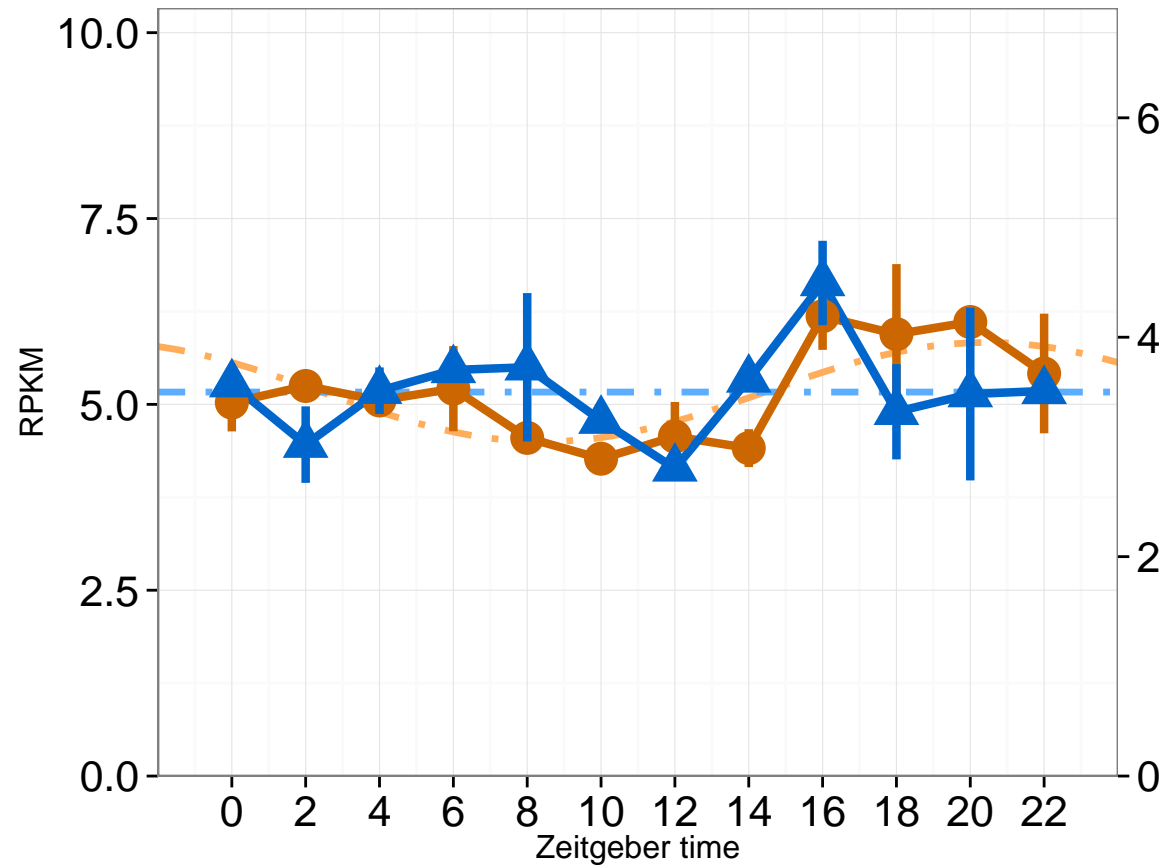

# Arrb1

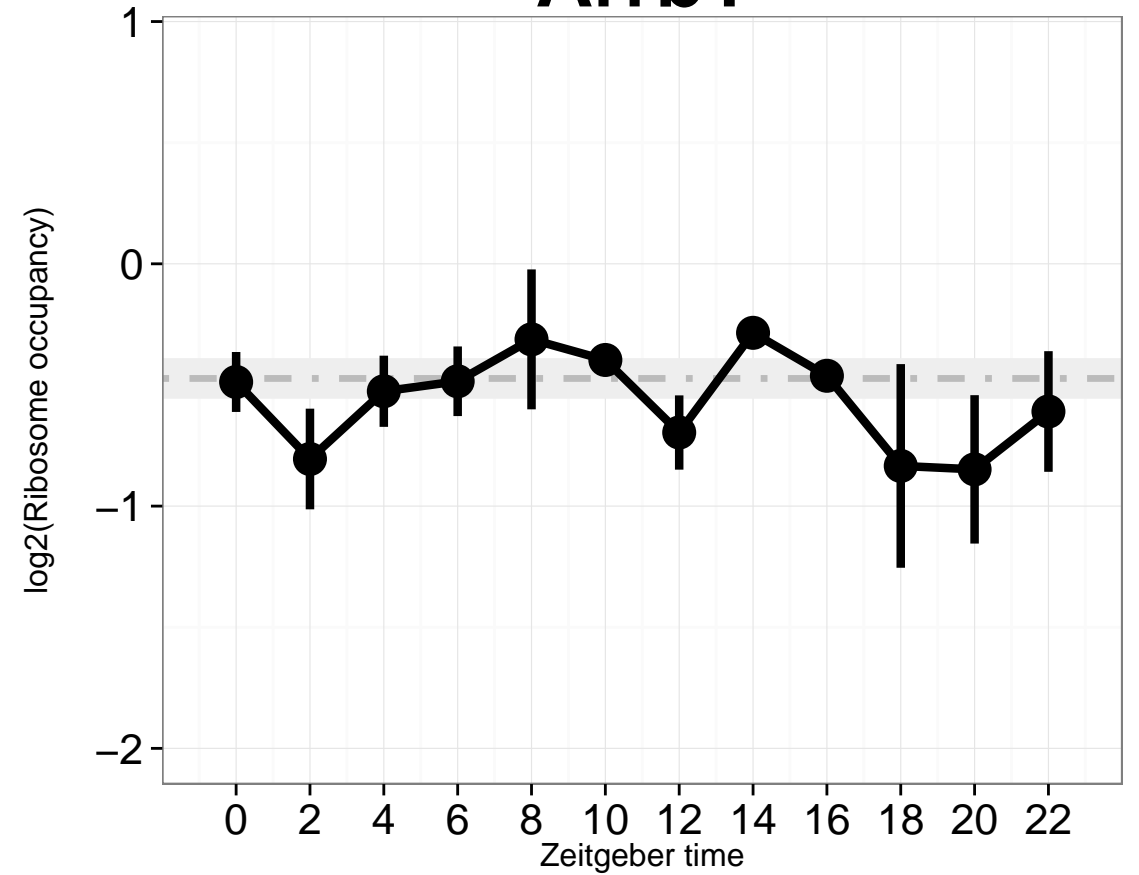

Supplement: SuppDataset_1.zip [file Arrb1_set_A.pdf › Supplemental Dataset 1/A-mRNA_nonrhyth_translation_nonrhyth/Arrb1_set_A.pdf]

## Arrb2

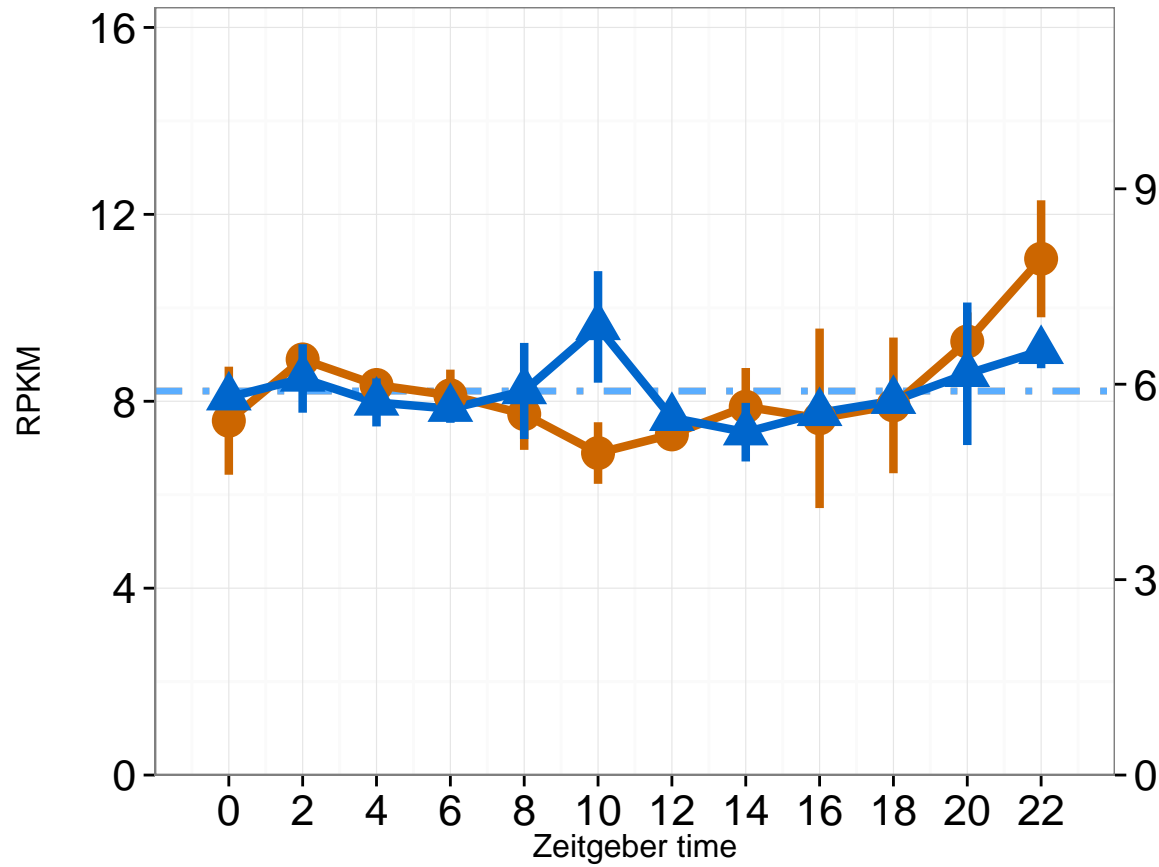

## Arrb2

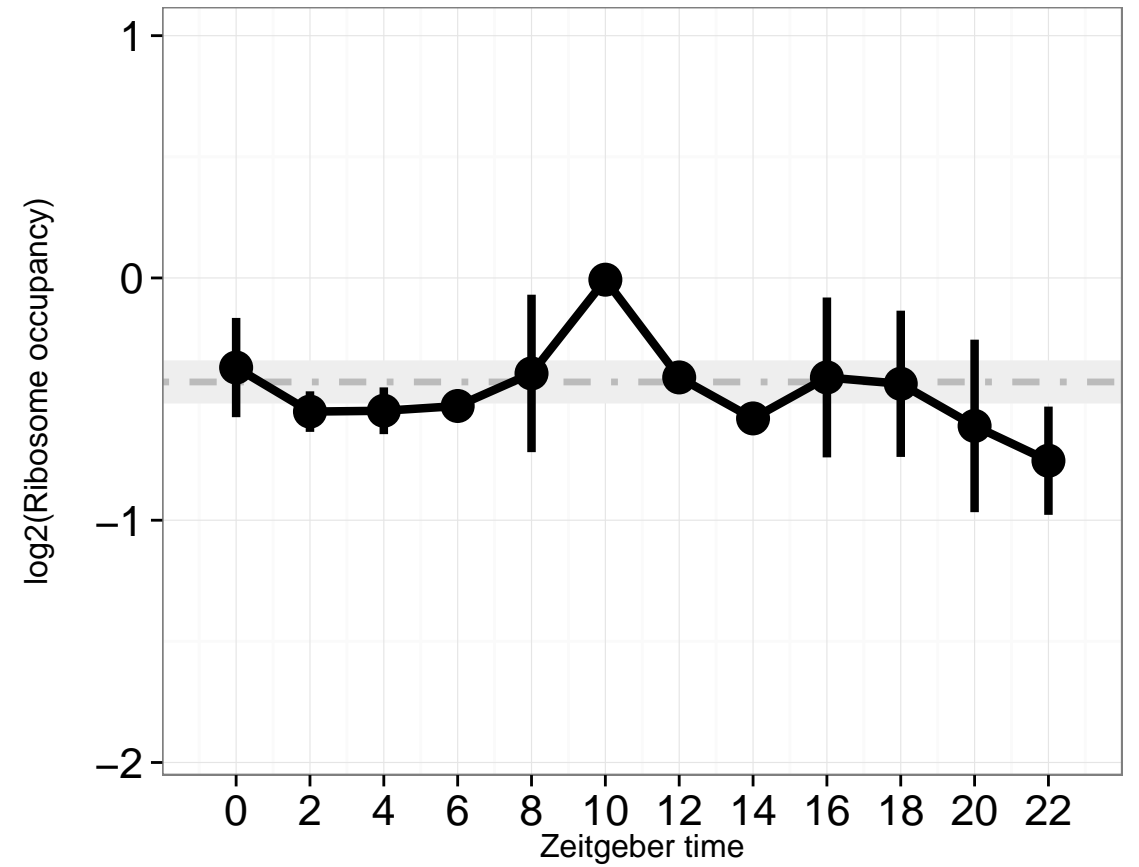

Supplement: SuppDataset_1.zip [file Arrb2_set_A.pdf › Supplemental Dataset 1/A-mRNA_nonrhyth_translation_nonrhyth/Arrb2_set_A.pdf]

# Arrdc1

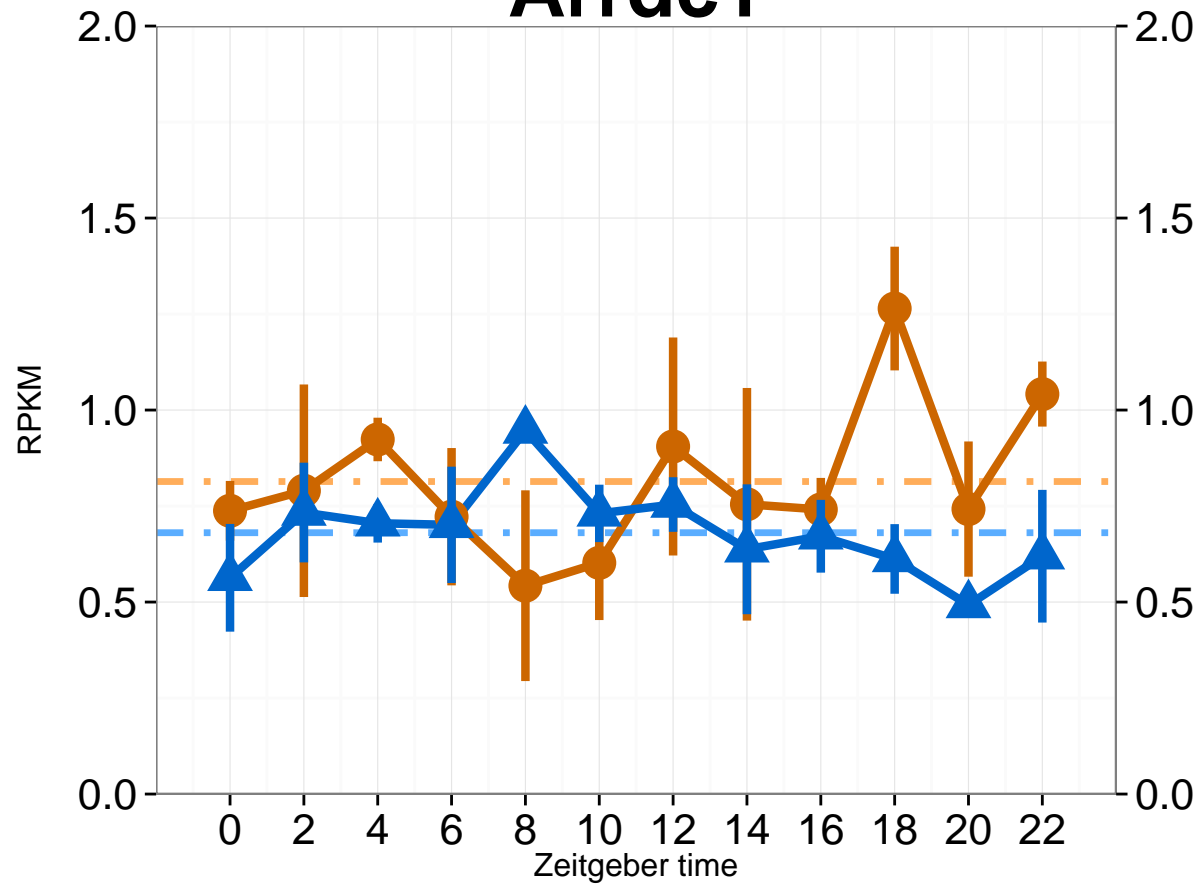

# Arrdc1

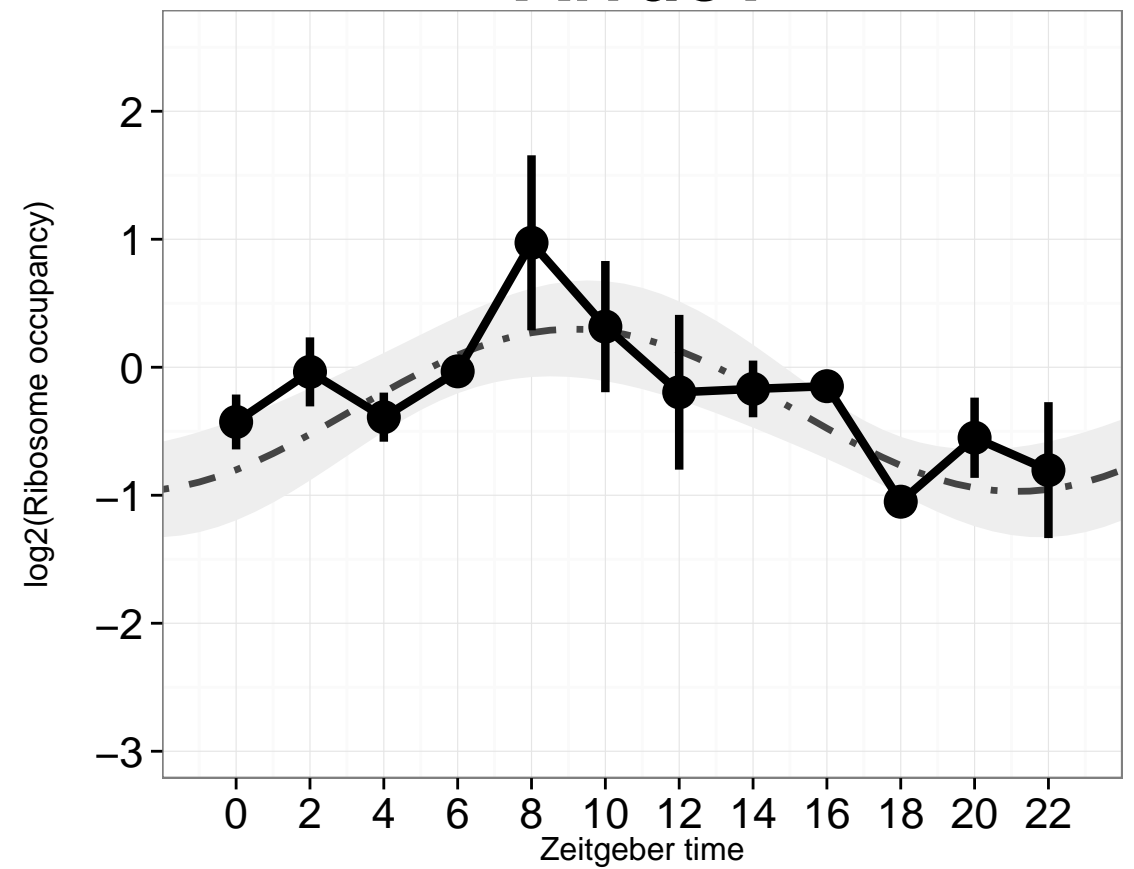

Supplement: SuppDataset_1.zip [file Arrdc1_set_A.pdf › Supplemental Dataset 1/A-mRNA_nonrhyth_translation_nonrhyth/Arrdc1_set_A.pdf]

# Arrdc2

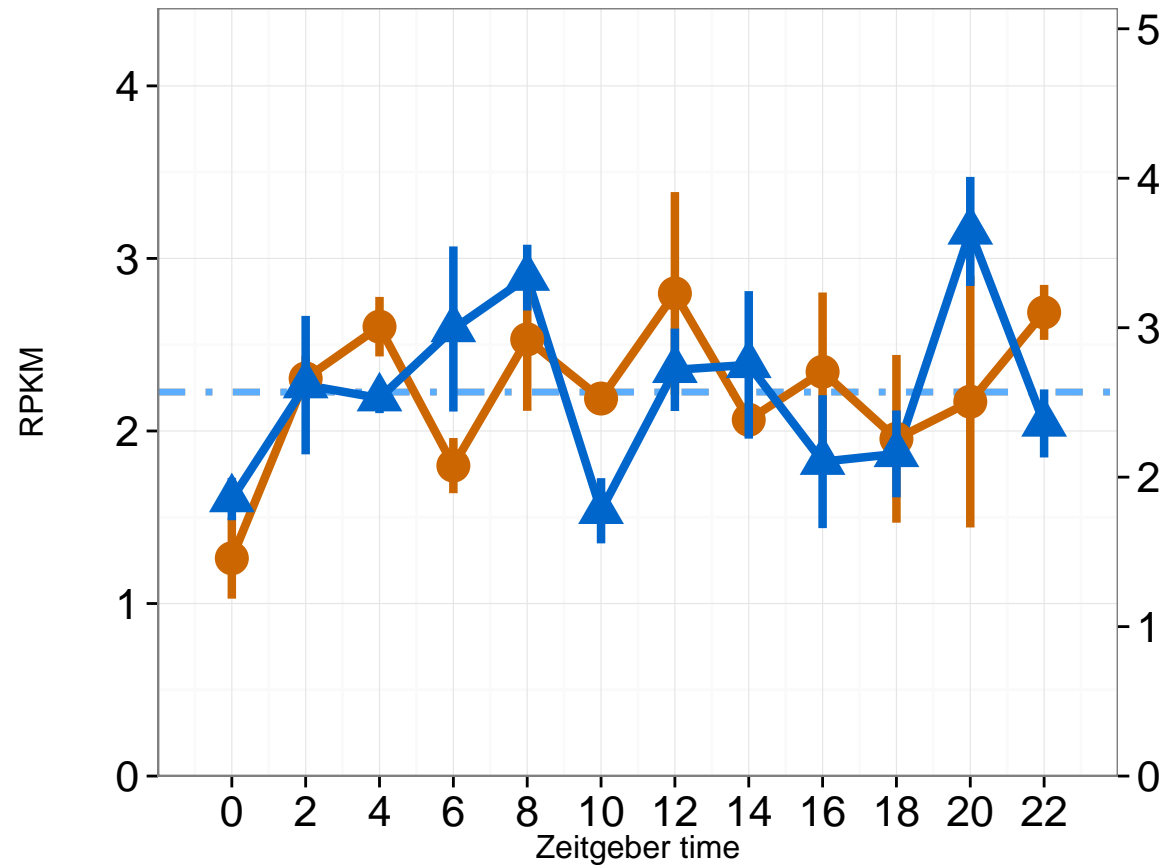

# Arrdc2

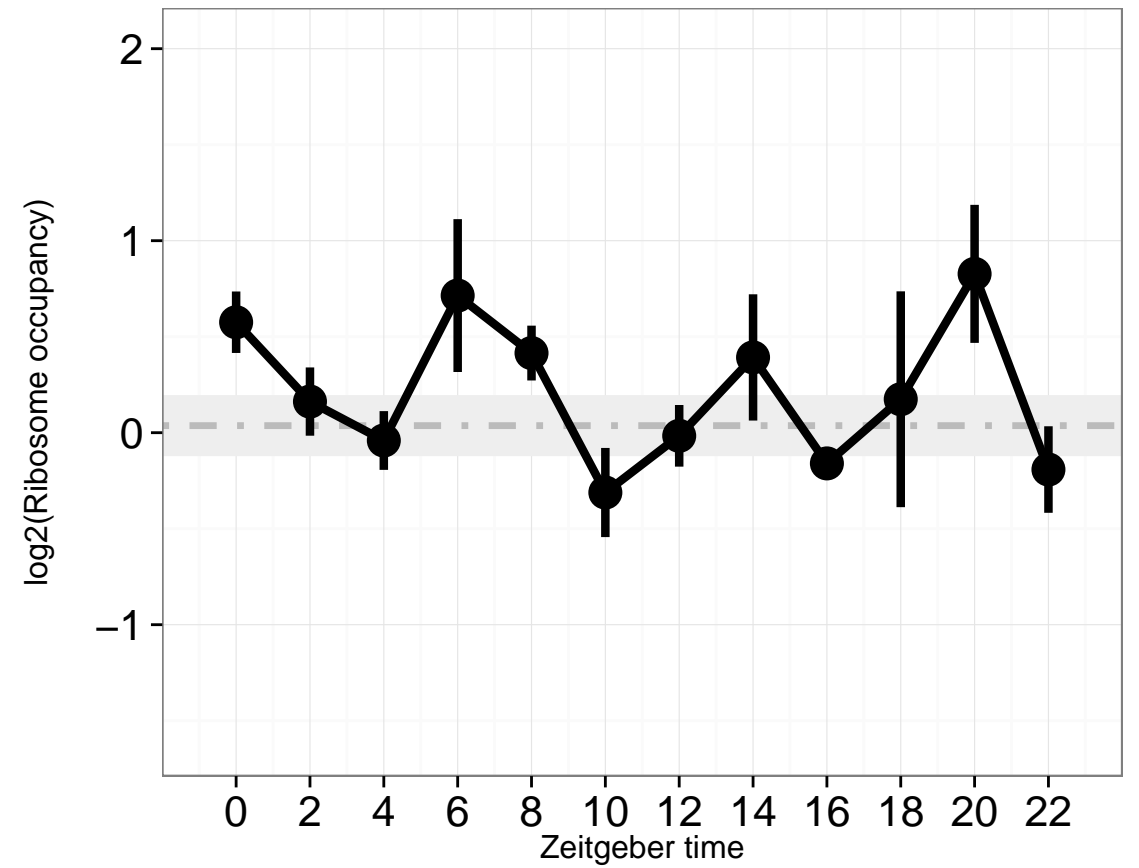

Supplement: SuppDataset_1.zip [file Arrdc2_set_A.pdf › Supplemental Dataset 1/A-mRNA_nonrhyth_translation_nonrhyth/Arrdc2_set_A.pdf]

# Arrdc4

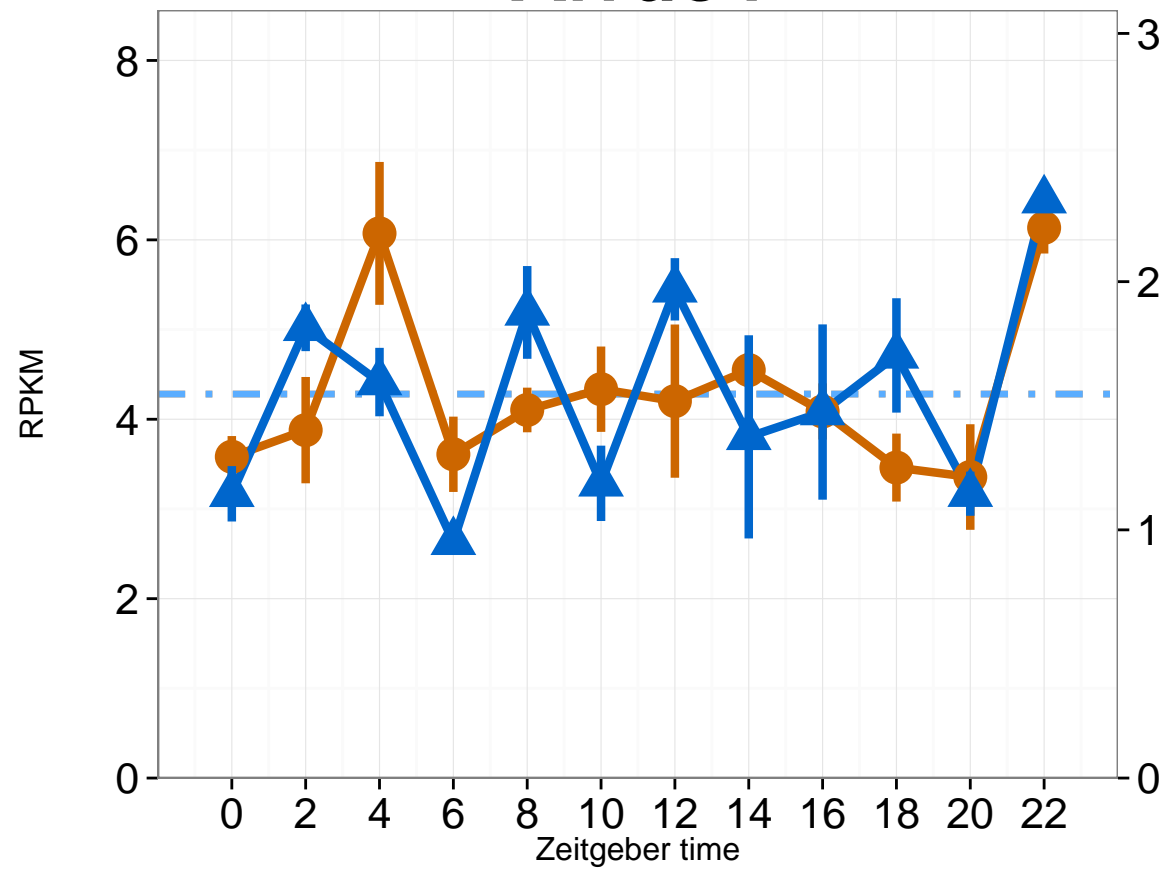

# Arrdc4

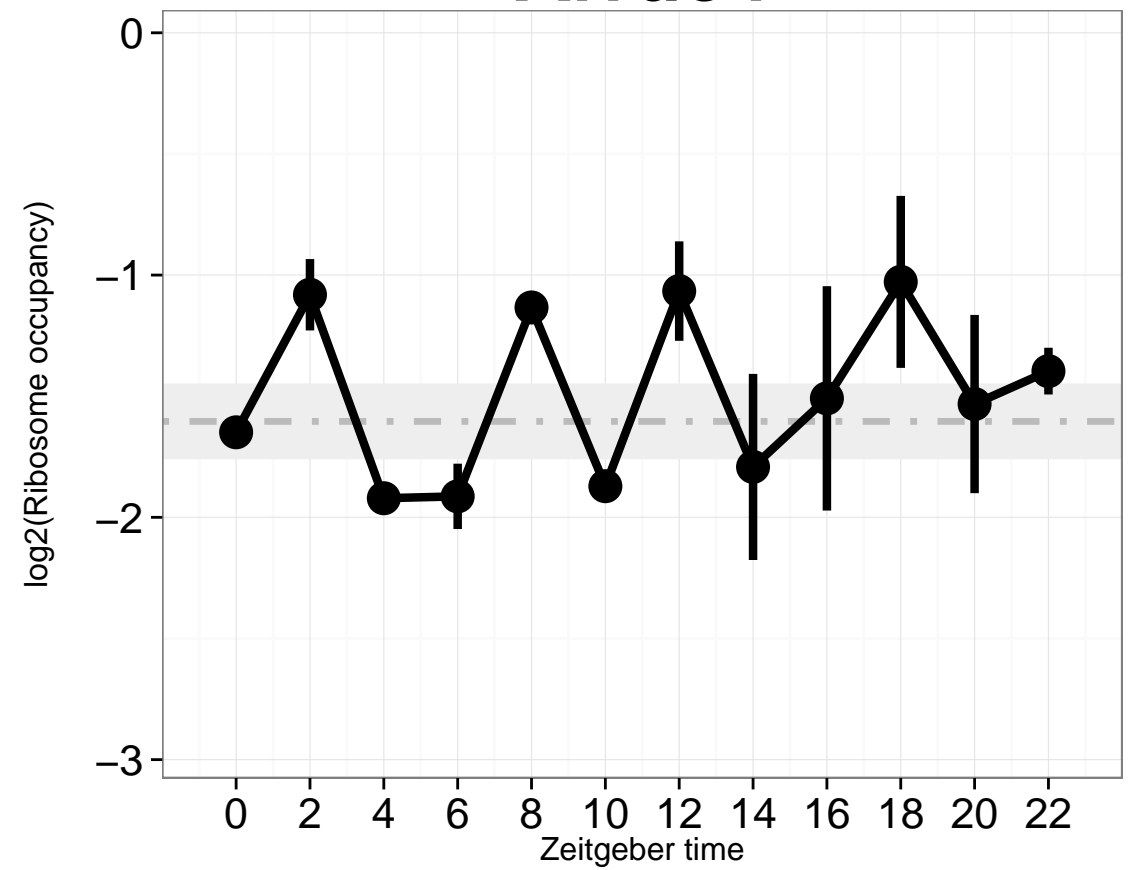

Supplement: SuppDataset_1.zip [file Arrdc4_set_A.pdf › Supplemental Dataset 1/A-mRNA_nonrhyth_translation_nonrhyth/Arrdc4_set_A.pdf]

## Arsb

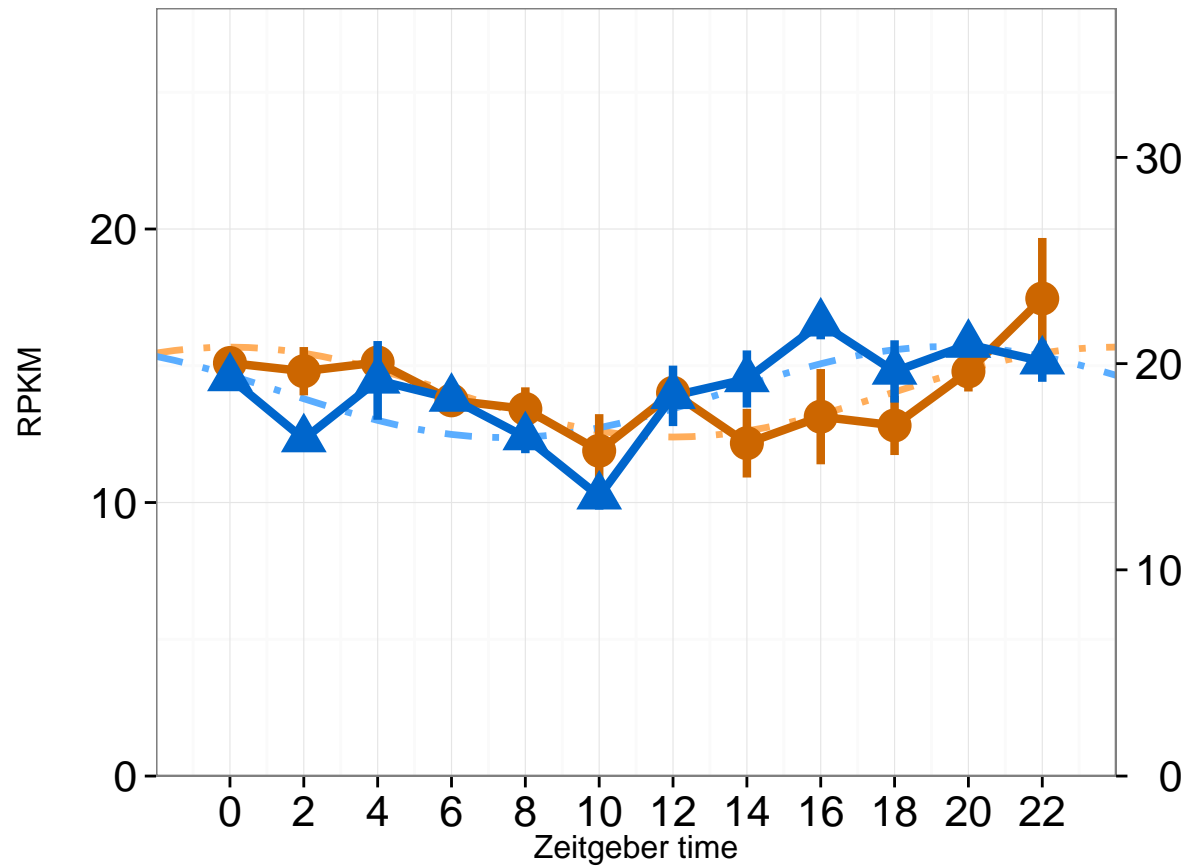

## Arsb

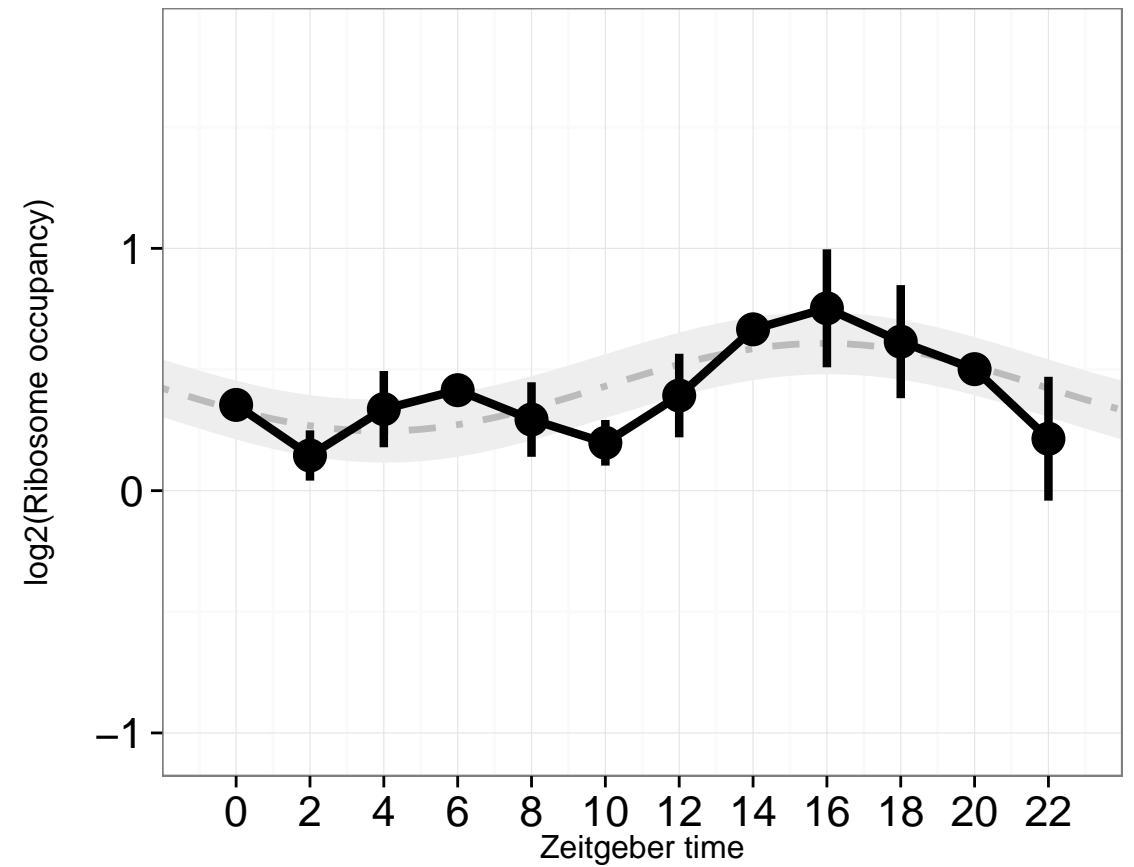

Supplement: SuppDataset_1.zip [file Arsb_set_A.pdf › Supplemental Dataset 1/A-mRNA_nonrhyth_translation_nonrhyth/Arsb_set_A.pdf]

## Arsk

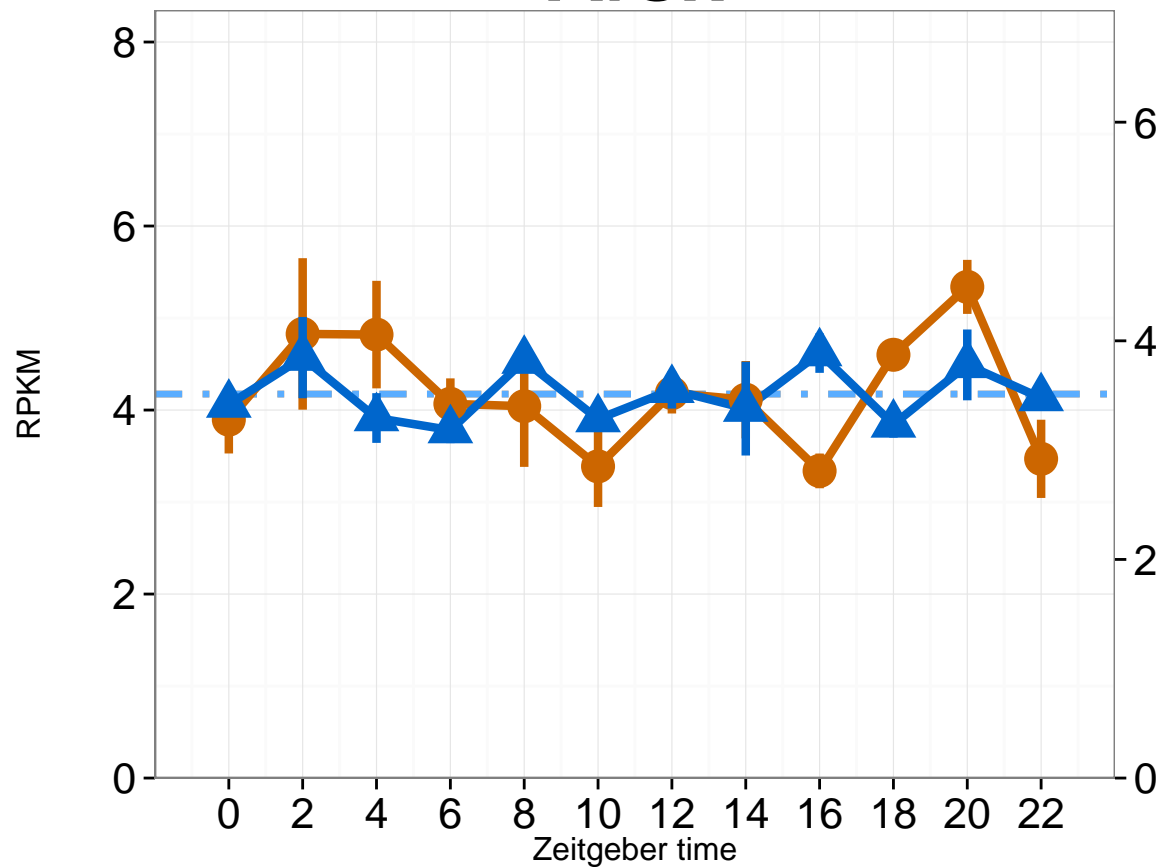

## Arsk

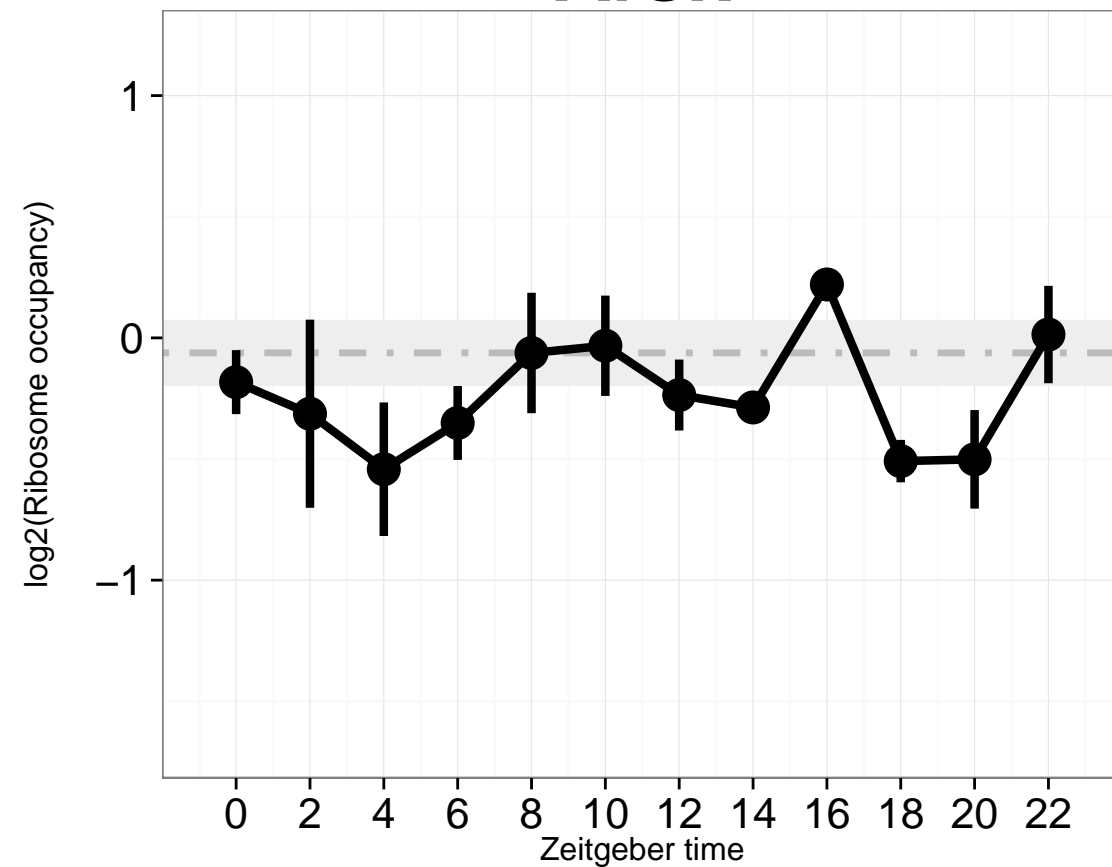

Supplement: SuppDataset_1.zip [file Arsk_set_A.pdf › Supplemental Dataset 1/A-mRNA_nonrhyth_translation_nonrhyth/Arsk_set_A.pdf]

## Art3

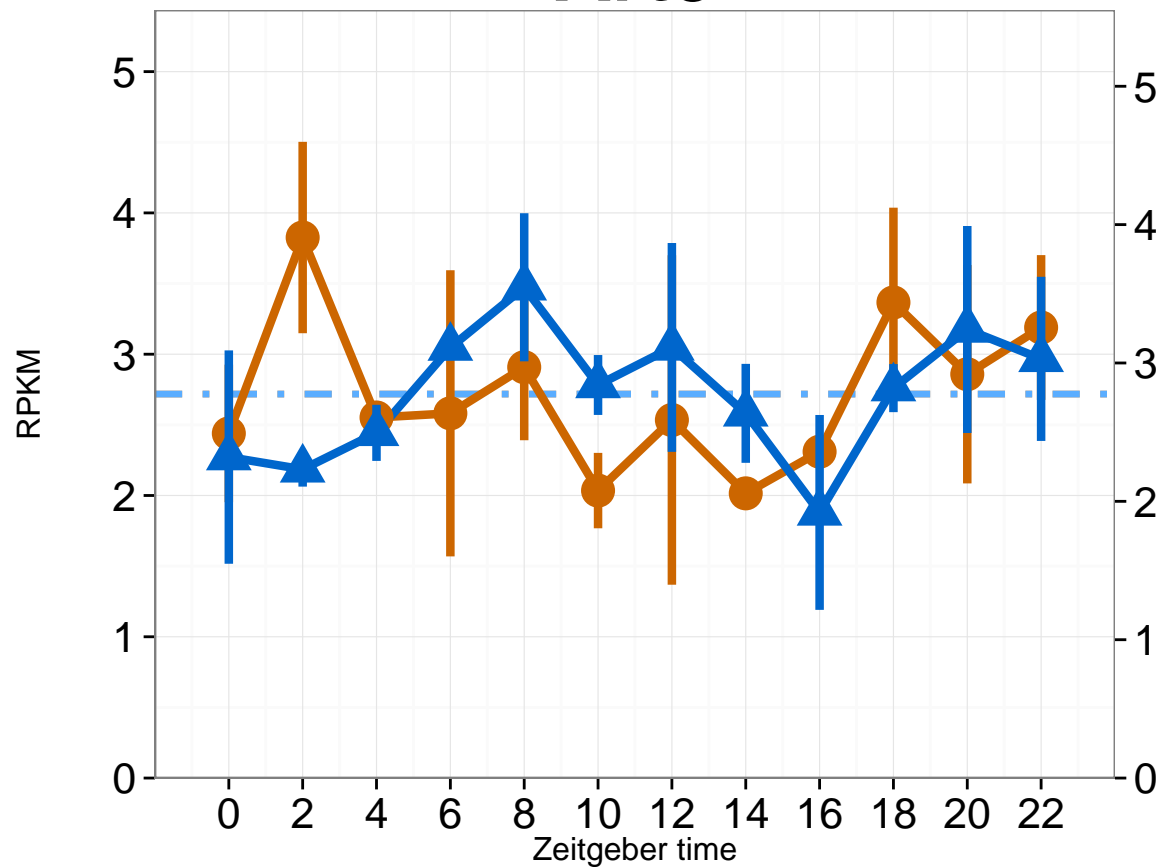

## Art3

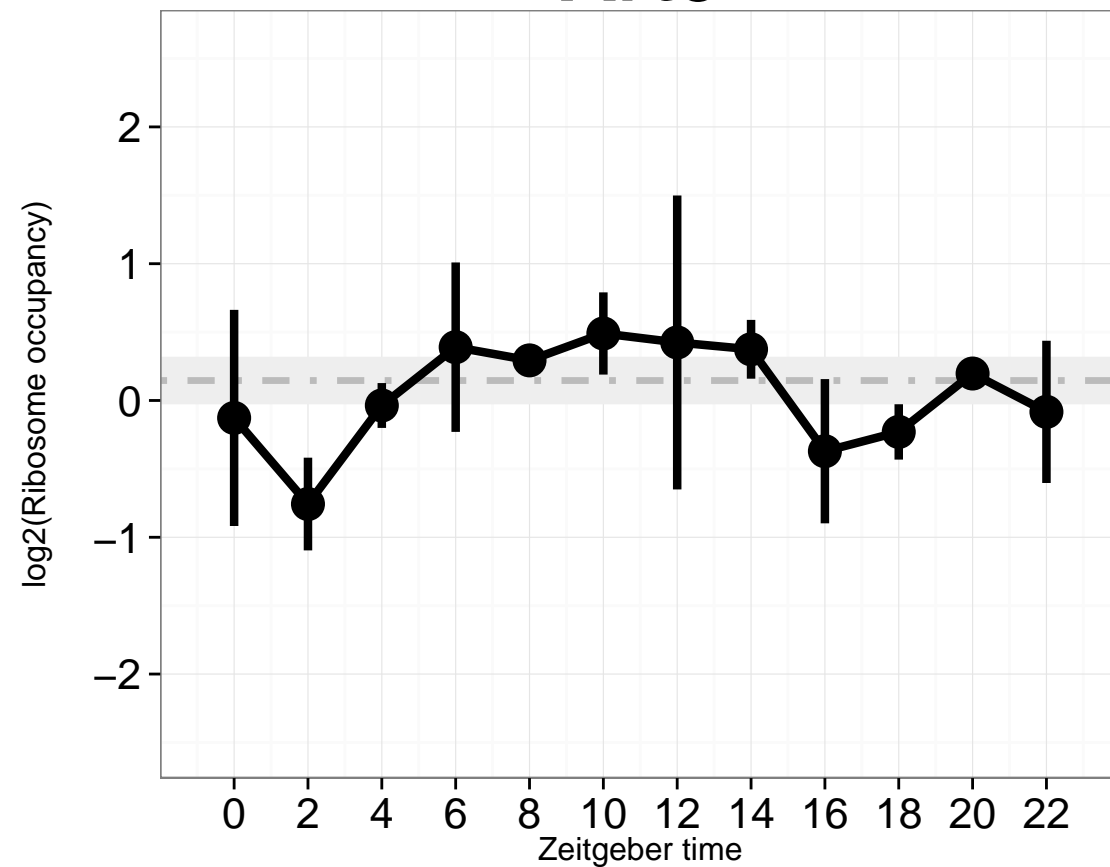

Supplement: SuppDataset_1.zip [file Art3_set_A.pdf › Supplemental Dataset 1/A-mRNA_nonrhyth_translation_nonrhyth/Art3_set_A.pdf]

# Art4

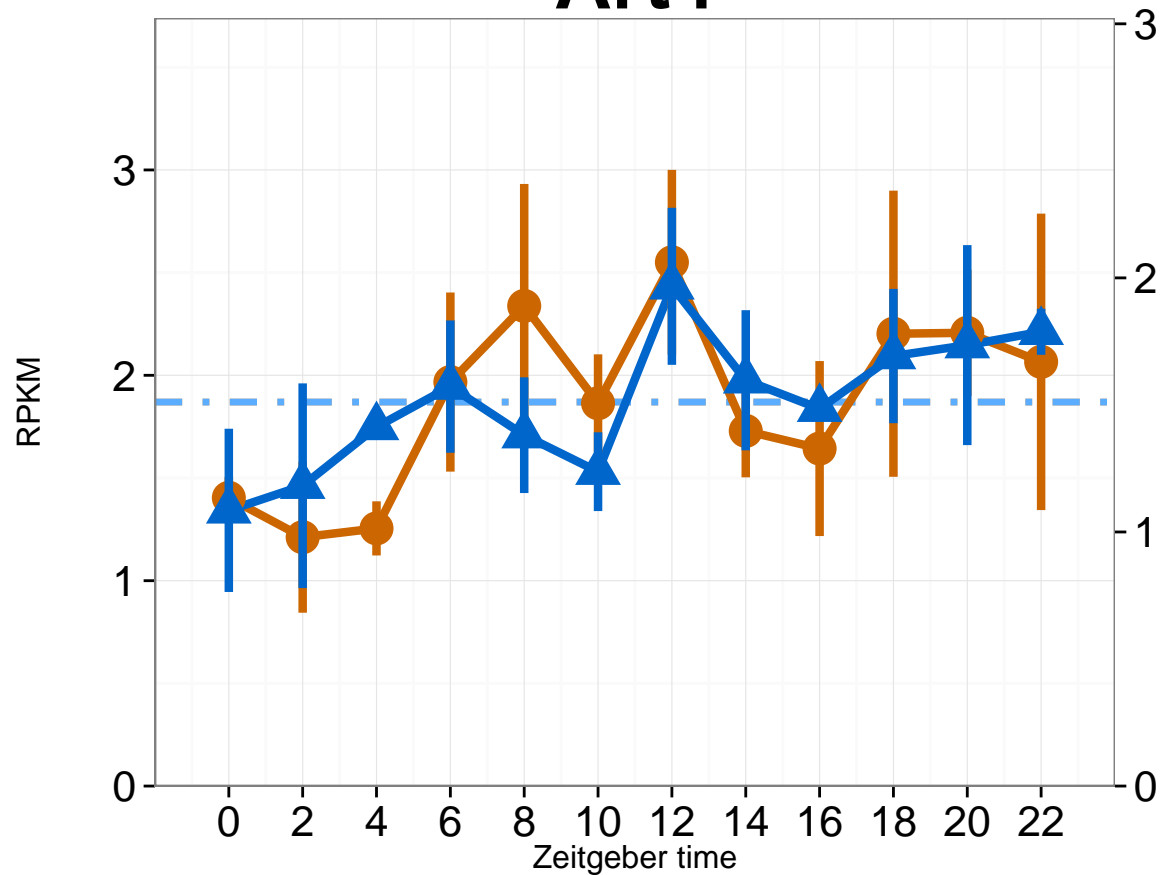

# Art4

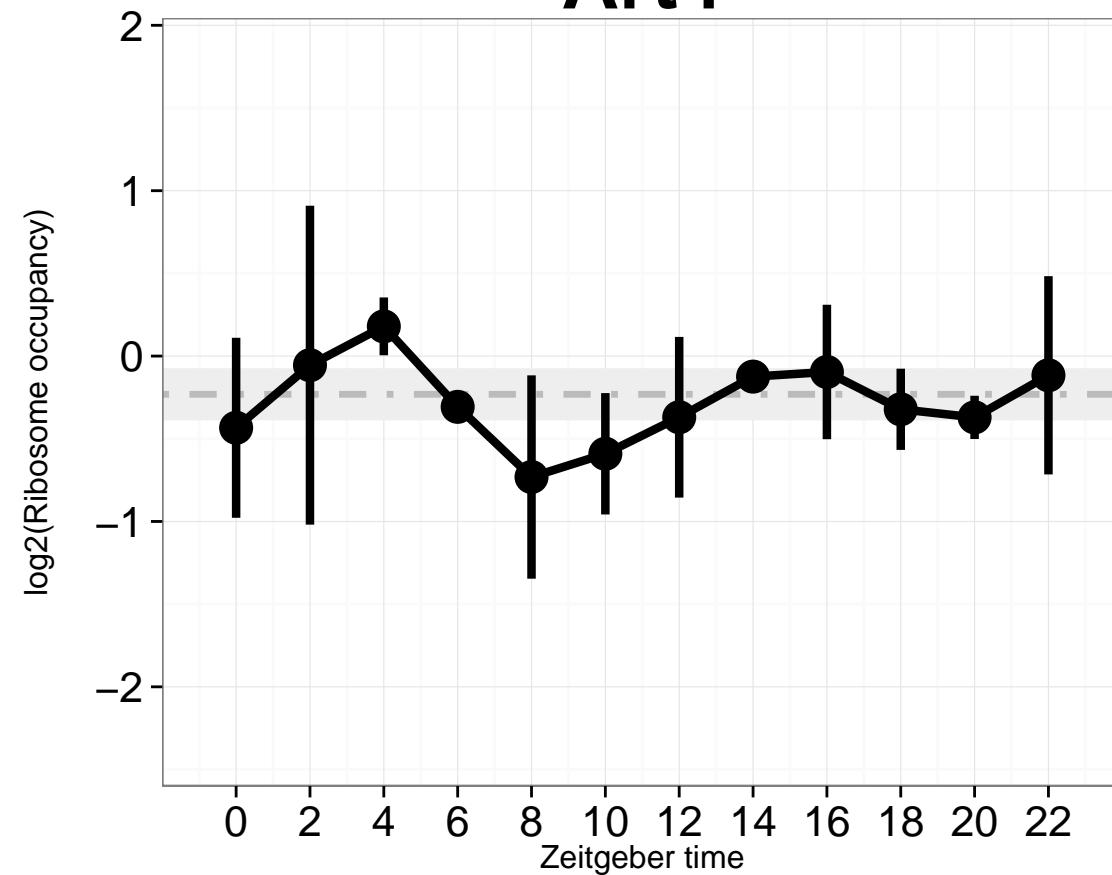

Supplement: SuppDataset_1.zip [file Art4_set_A.pdf › Supplemental Dataset 1/A-mRNA_nonrhyth_translation_nonrhyth/Art4_set_A.pdf]

# Arv1

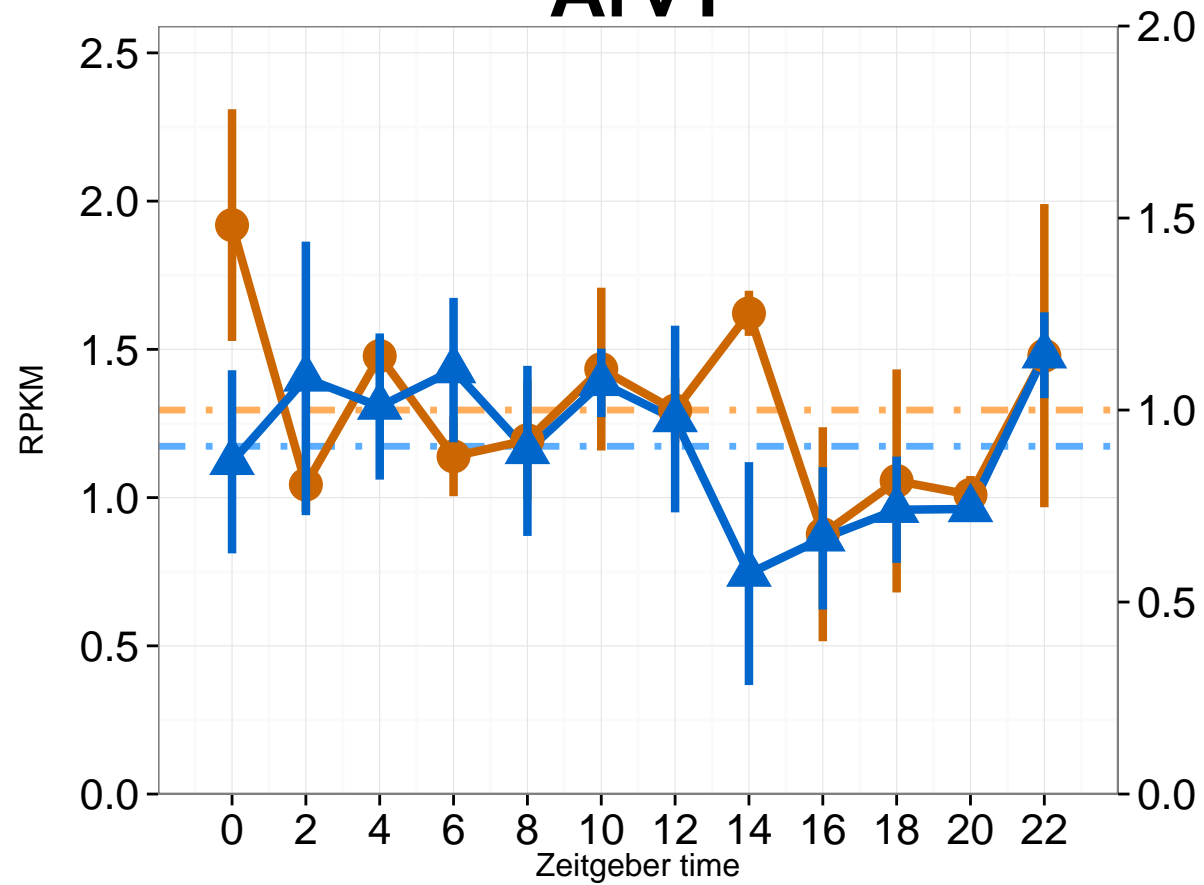

# Arv1

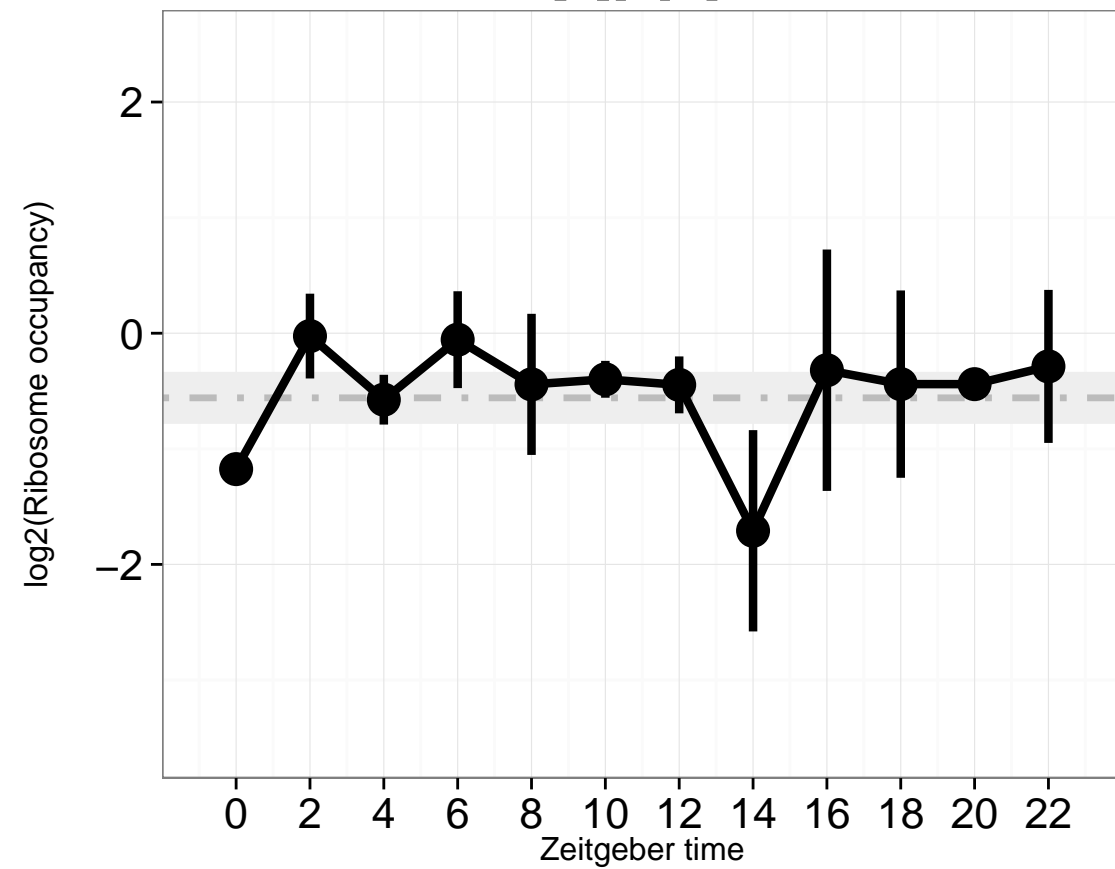

Supplement: SuppDataset_1.zip [file Arv1_set_A.pdf › Supplemental Dataset 1/A-mRNA_nonrhyth_translation_nonrhyth/Arv1_set_A.pdf]

# Asah1

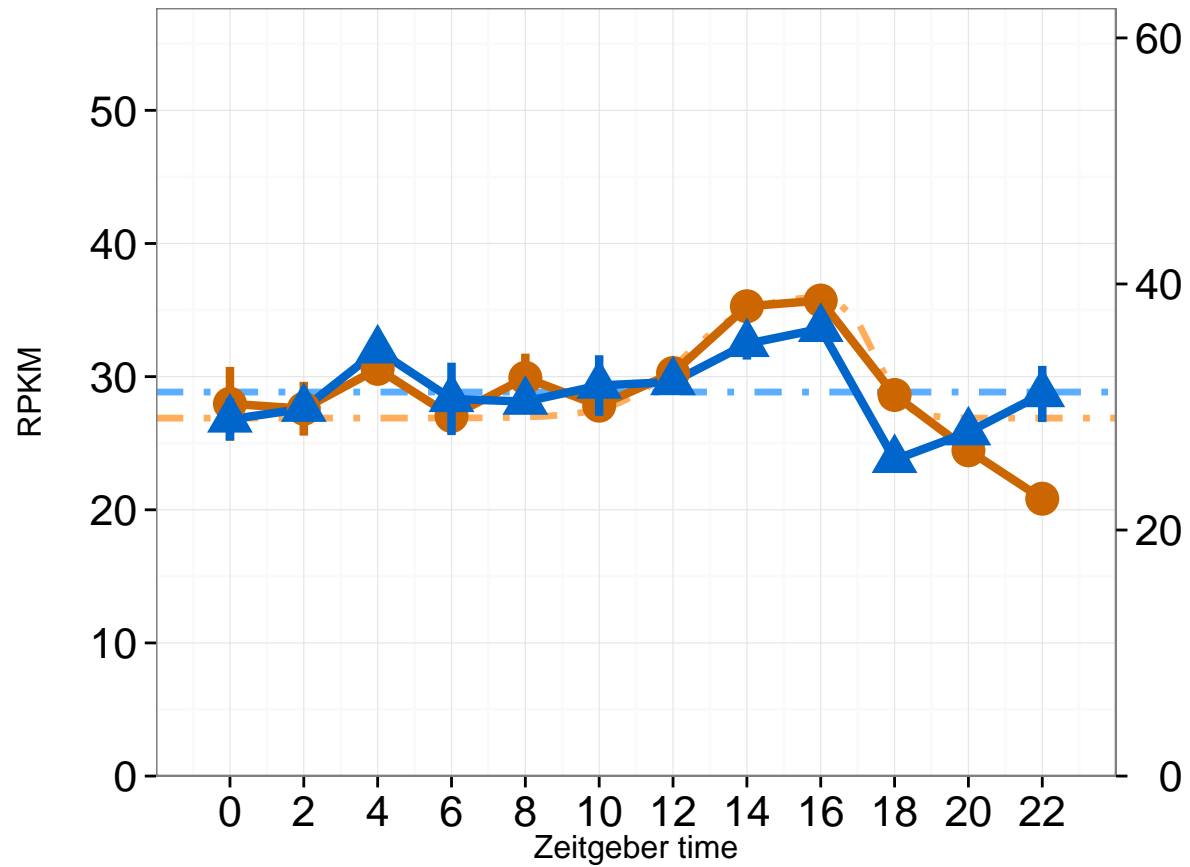

# Asah1

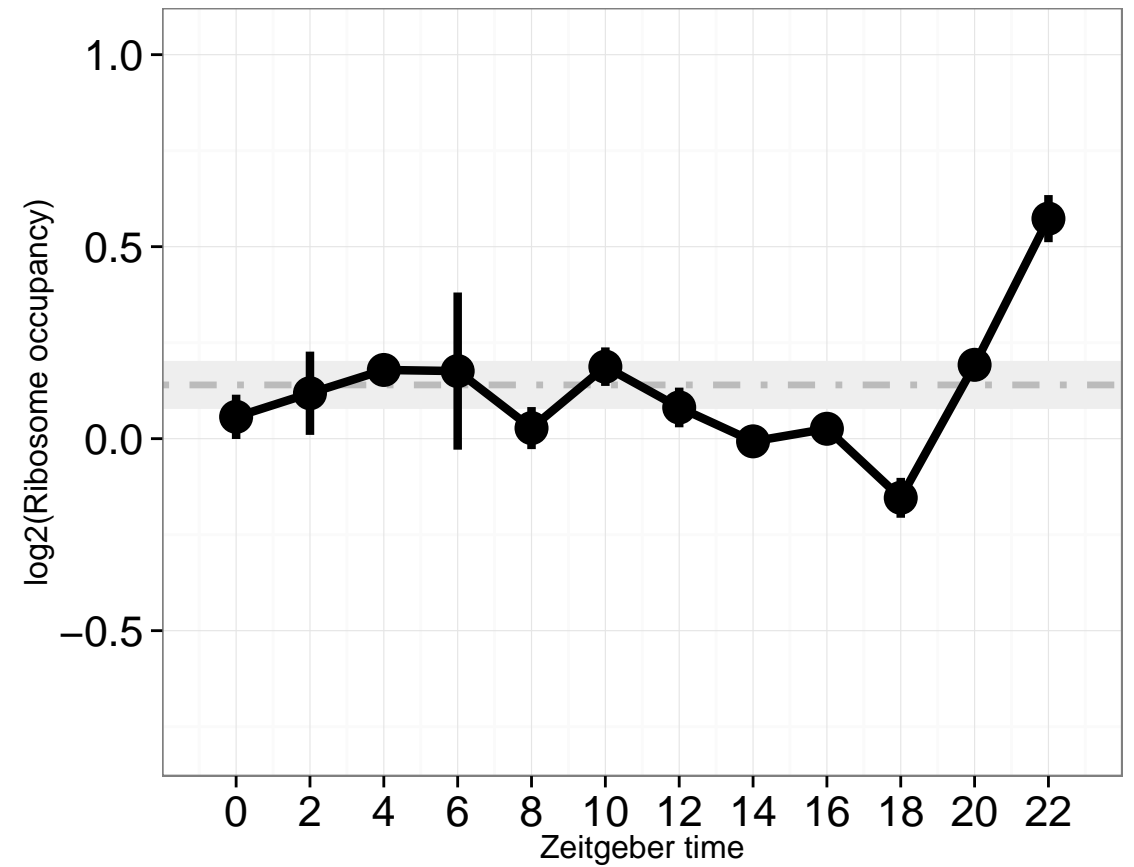

Supplement: SuppDataset_1.zip [file Asah1_set_A.pdf › Supplemental Dataset 1/A-mRNA_nonrhyth_translation_nonrhyth/Asah1_set_A.pdf]

## Asah2

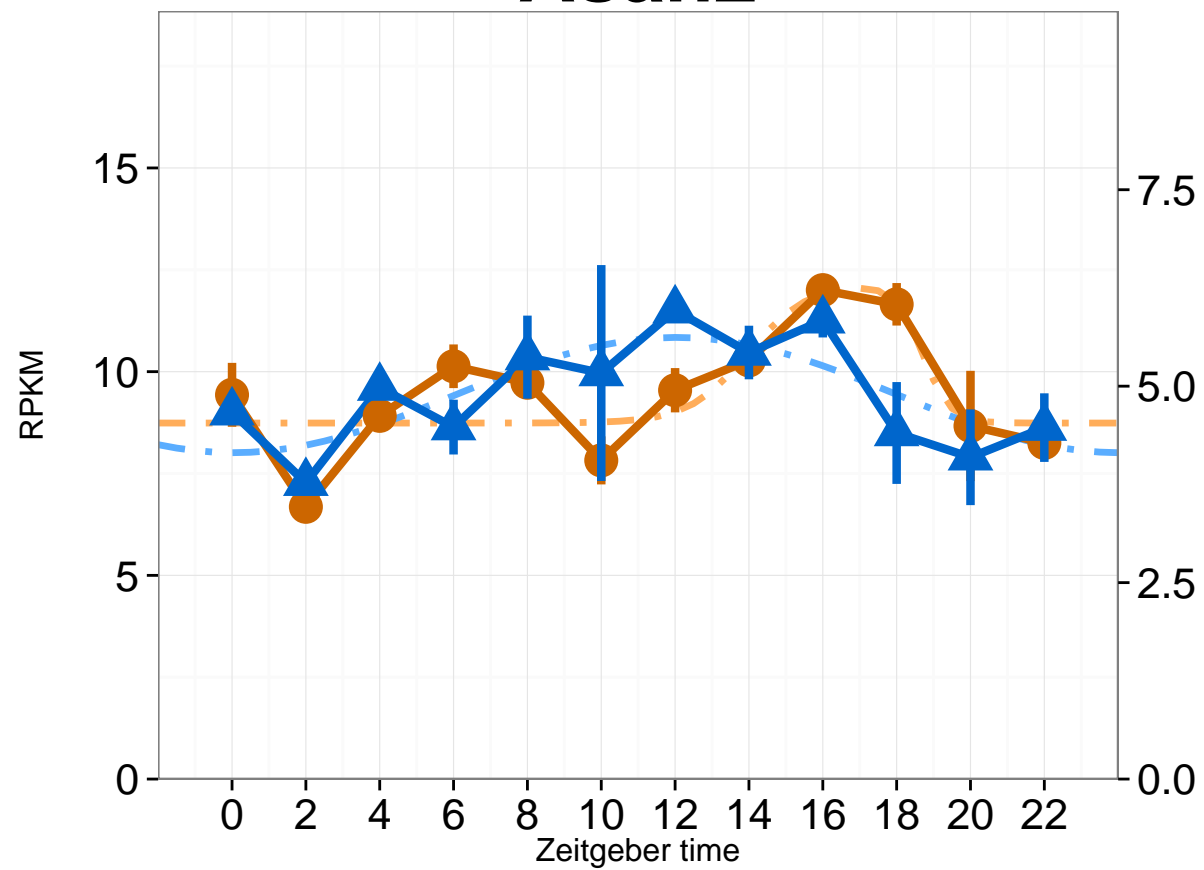

## Asah2

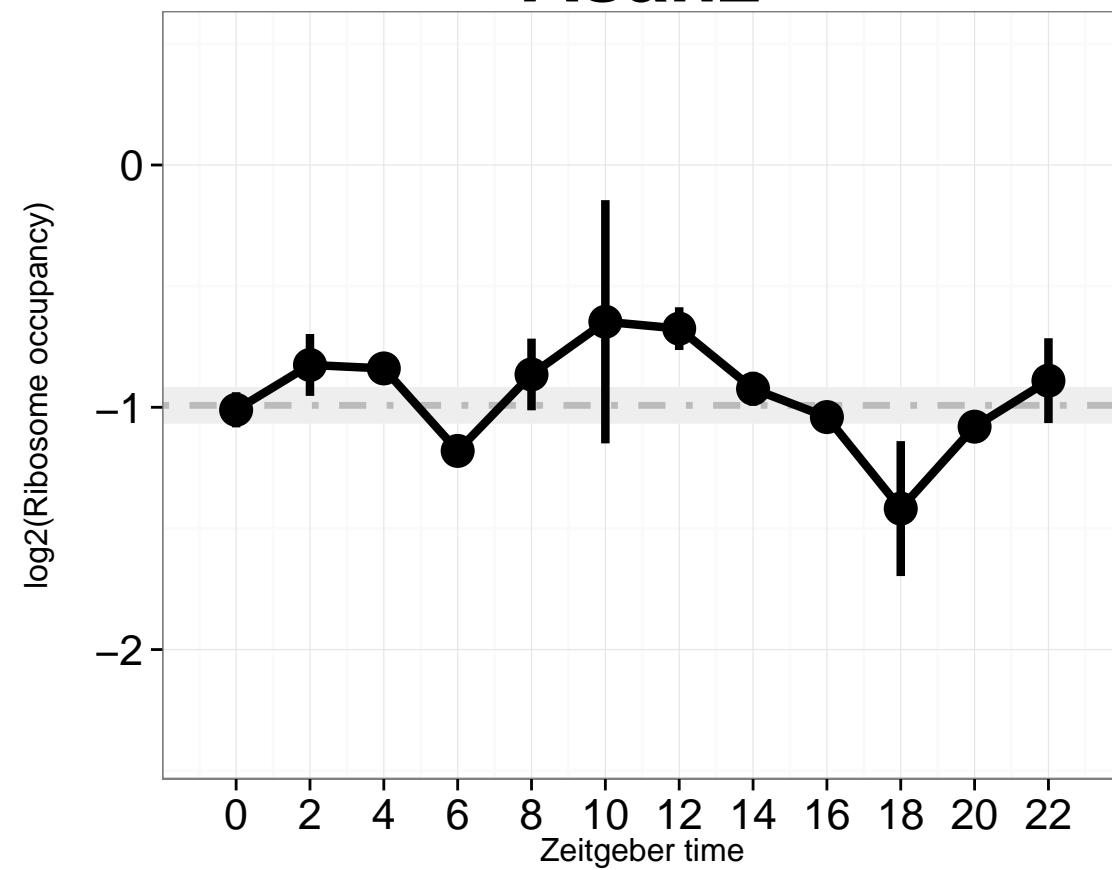

Supplement: SuppDataset_1.zip [file Asah2_set_A.pdf › Supplemental Dataset 1/A-mRNA_nonrhyth_translation_nonrhyth/Asah2_set_A.pdf]

# Asap1

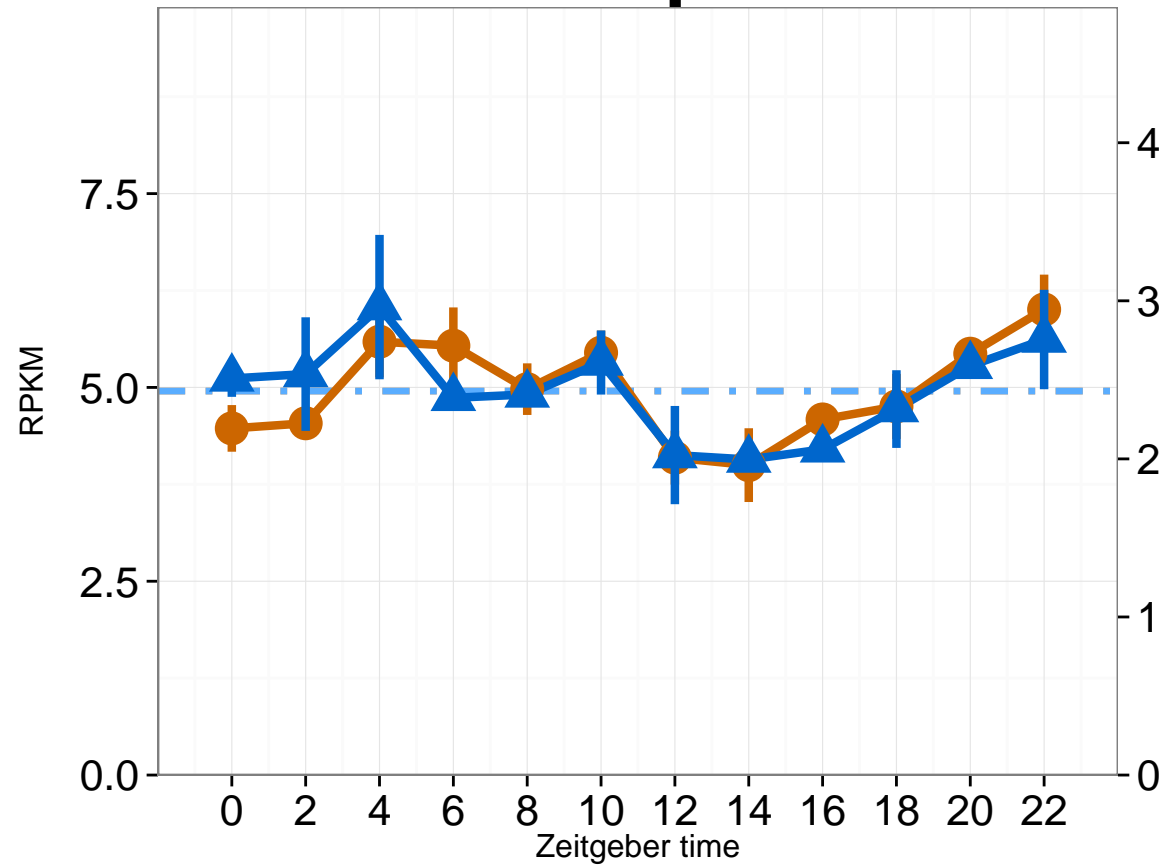

# Asap1

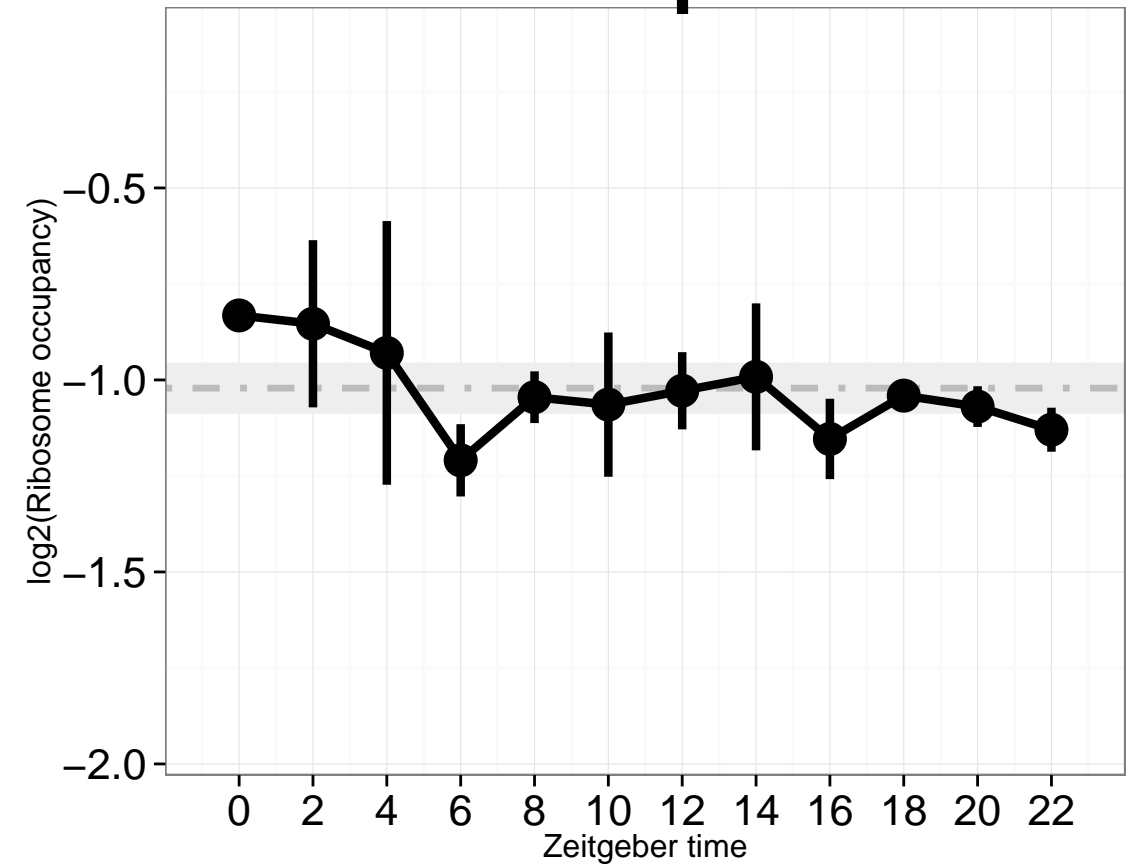

Supplement: SuppDataset_1.zip [file Asap1_set_A.pdf › Supplemental Dataset 1/A-mRNA_nonrhyth_translation_nonrhyth/Asap1_set_A.pdf]

# Asap3

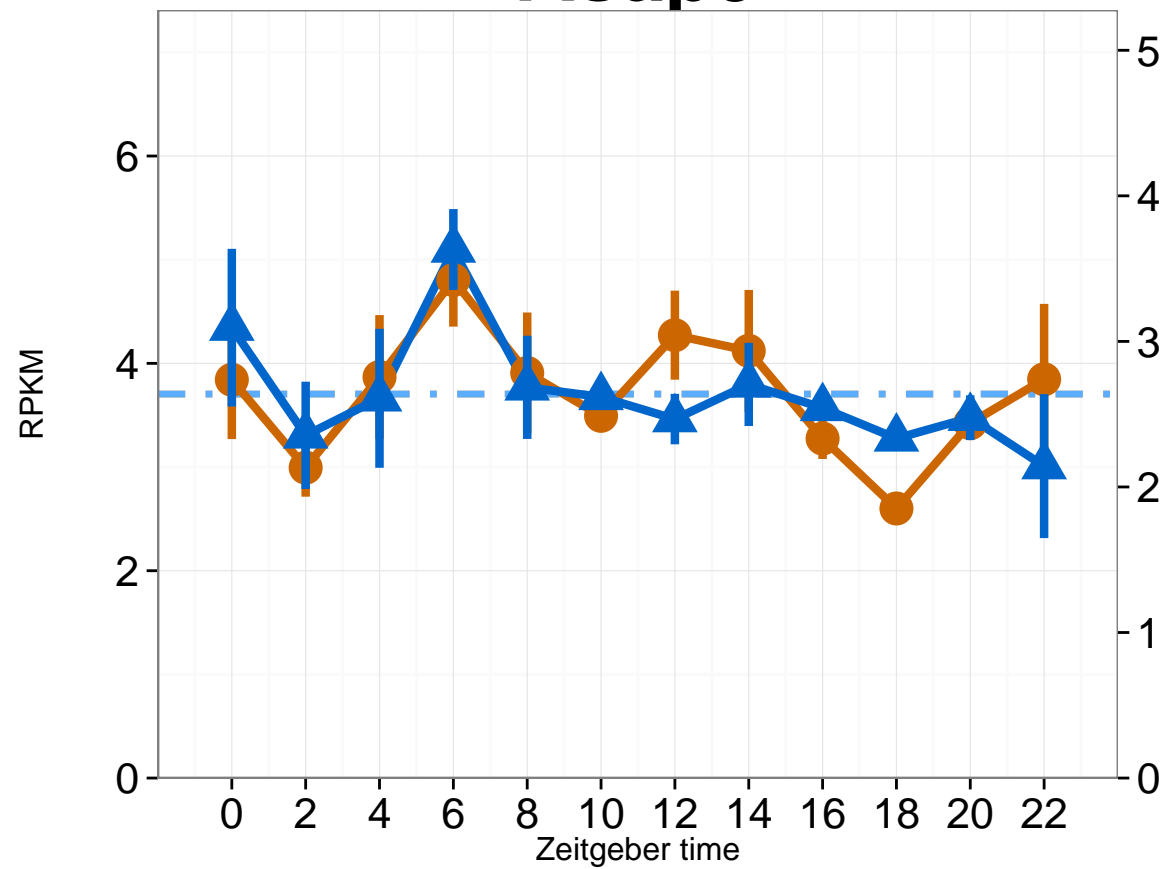

# Asap3

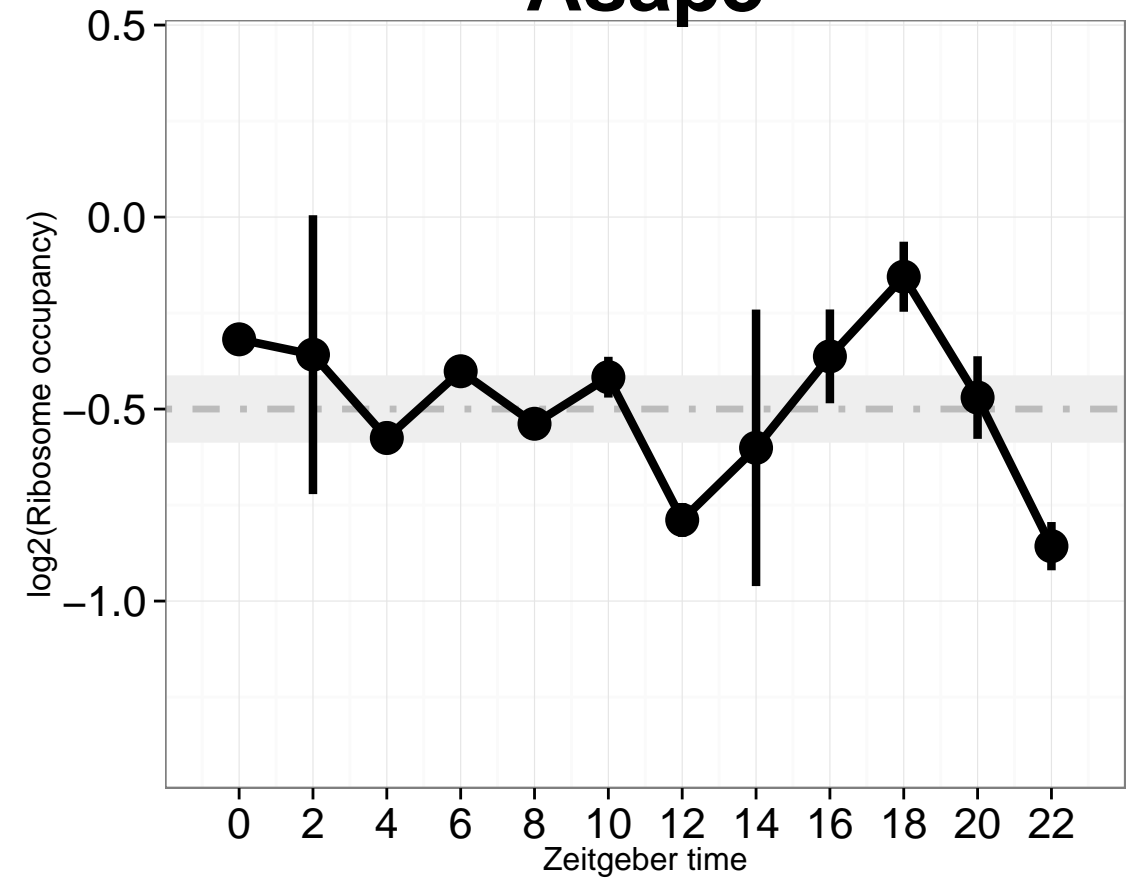

Supplement: SuppDataset_1.zip [file Asap3_set_A.pdf › Supplemental Dataset 1/A-mRNA_nonrhyth_translation_nonrhyth/Asap3_set_A.pdf]

## Asb1

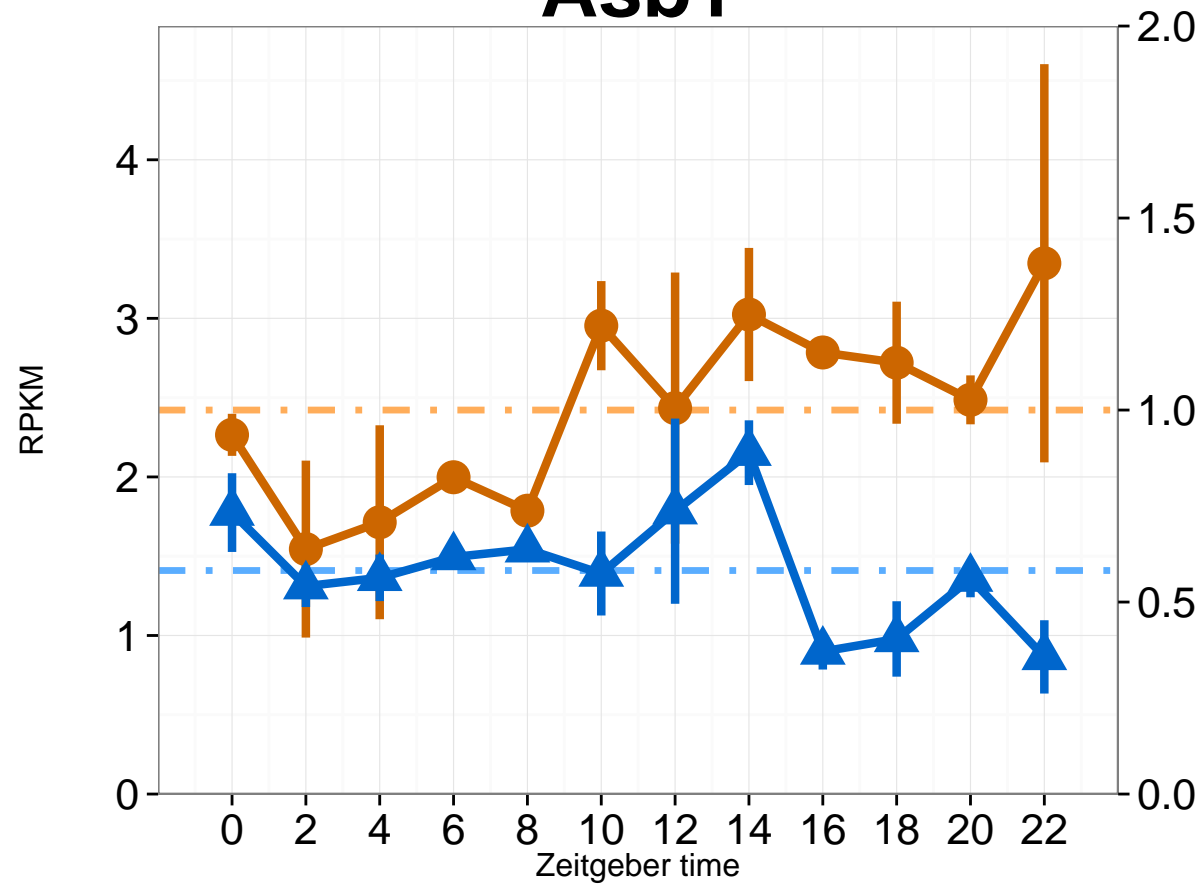

## Asb1

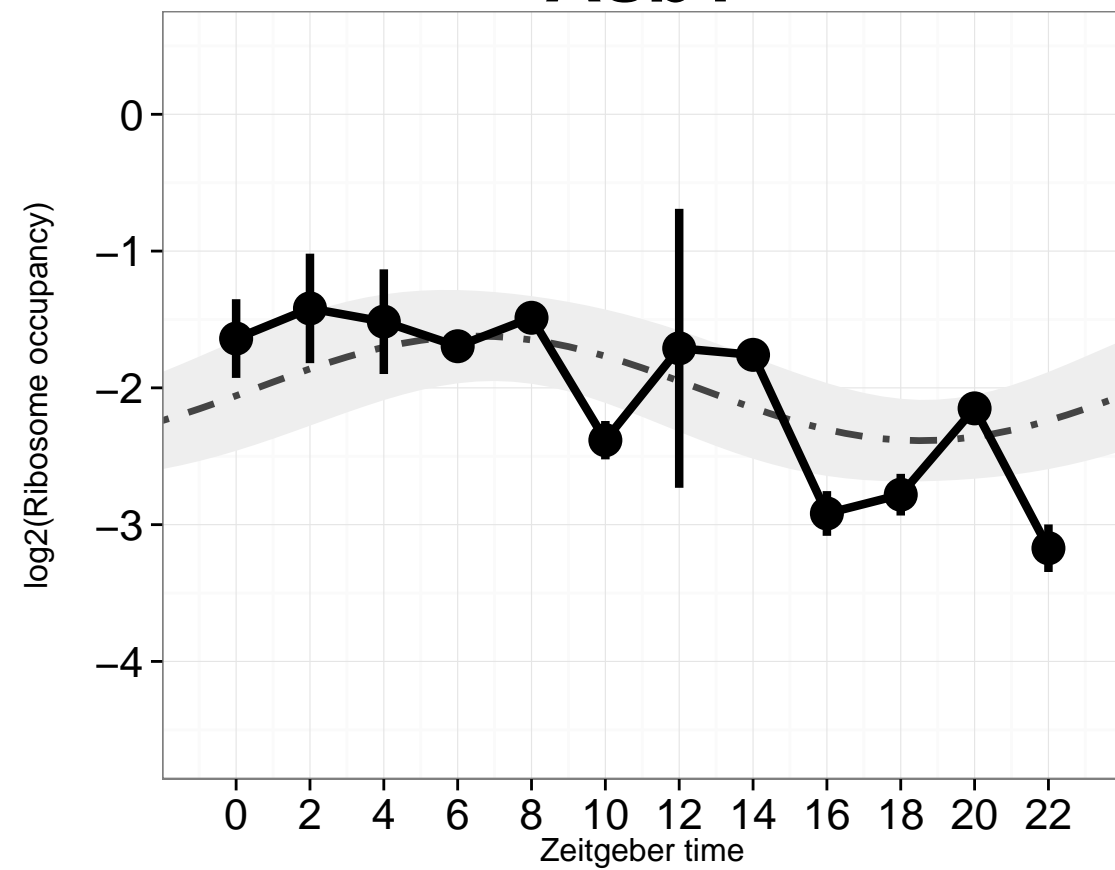

Supplement: SuppDataset_1.zip [file Asb1_set_A.pdf › Supplemental Dataset 1/A-mRNA_nonrhyth_translation_nonrhyth/Asb1_set_A.pdf]

## Asb2

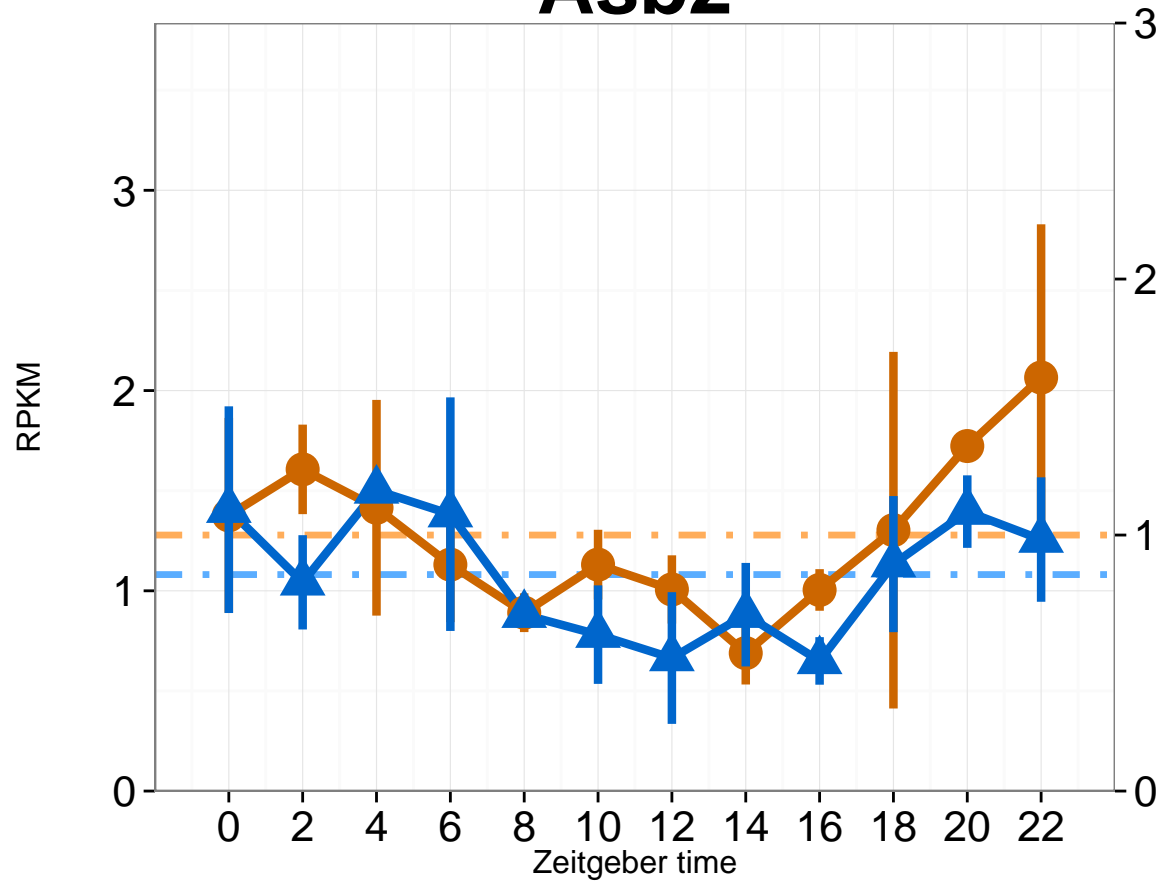

## Asb2

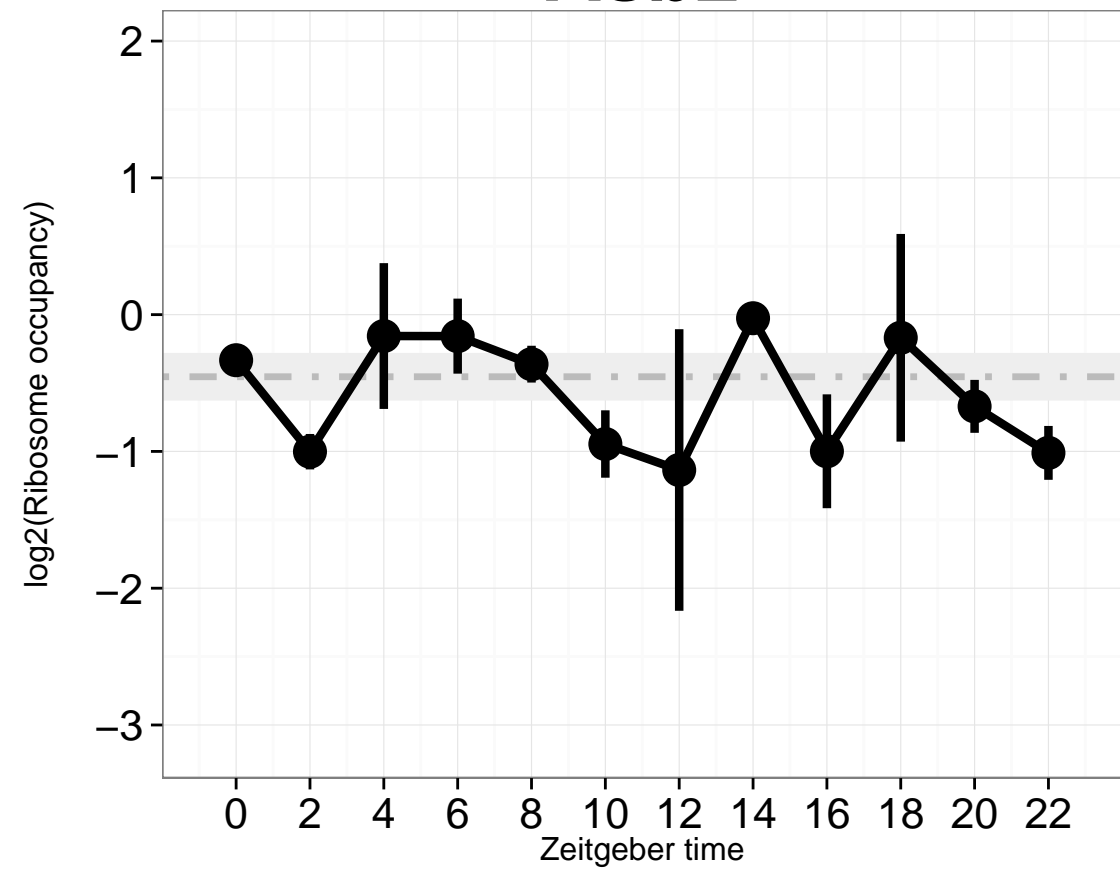

Supplement: SuppDataset_1.zip [file Asb2_set_A.pdf › Supplemental Dataset 1/A-mRNA_nonrhyth_translation_nonrhyth/Asb2_set_A.pdf]

## Asb3

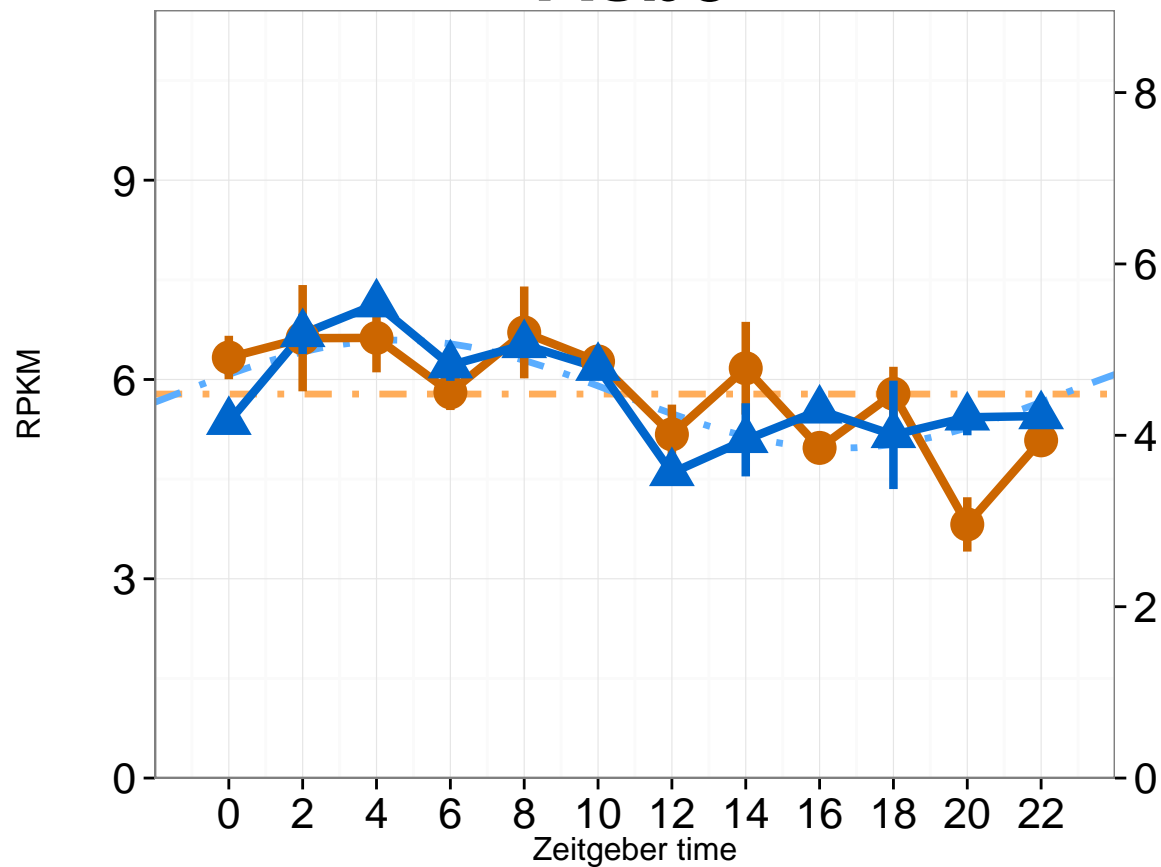

## Asb3

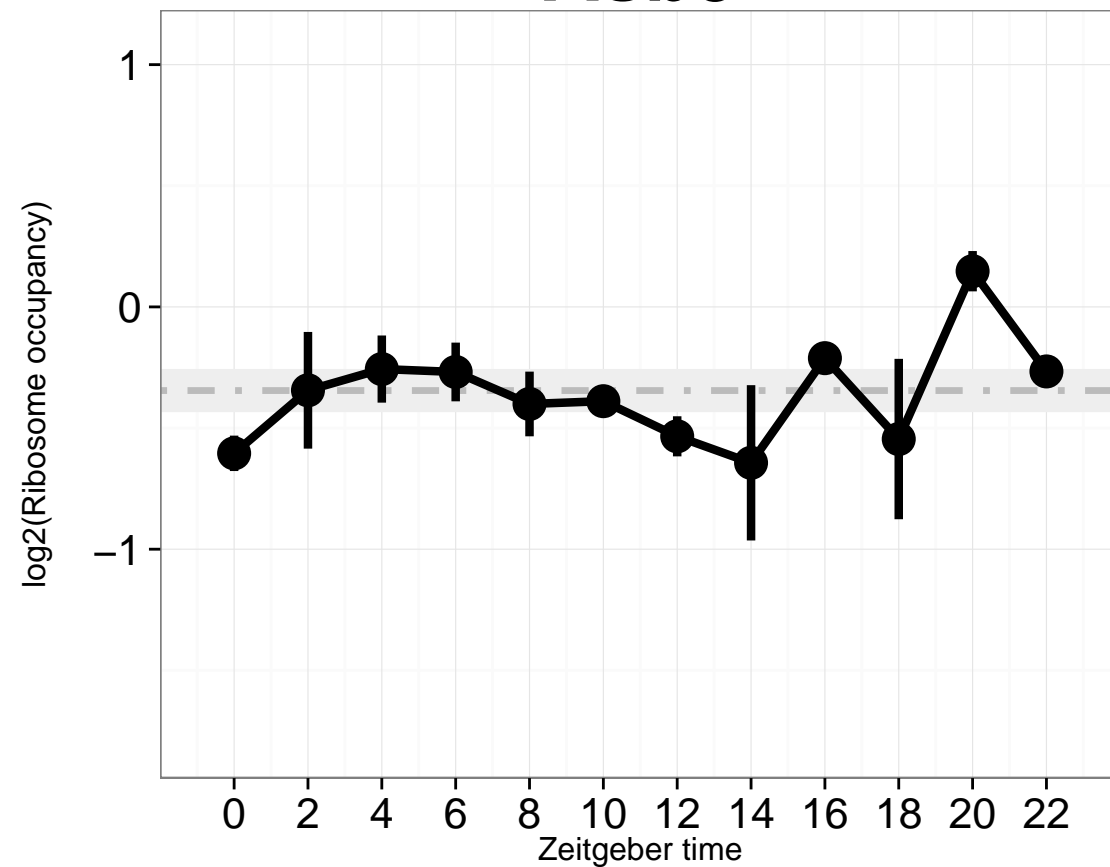

Supplement: SuppDataset_1.zip [file Asb3_set_A.pdf › Supplemental Dataset 1/A-mRNA_nonrhyth_translation_nonrhyth/Asb3_set_A.pdf]

## Asb6

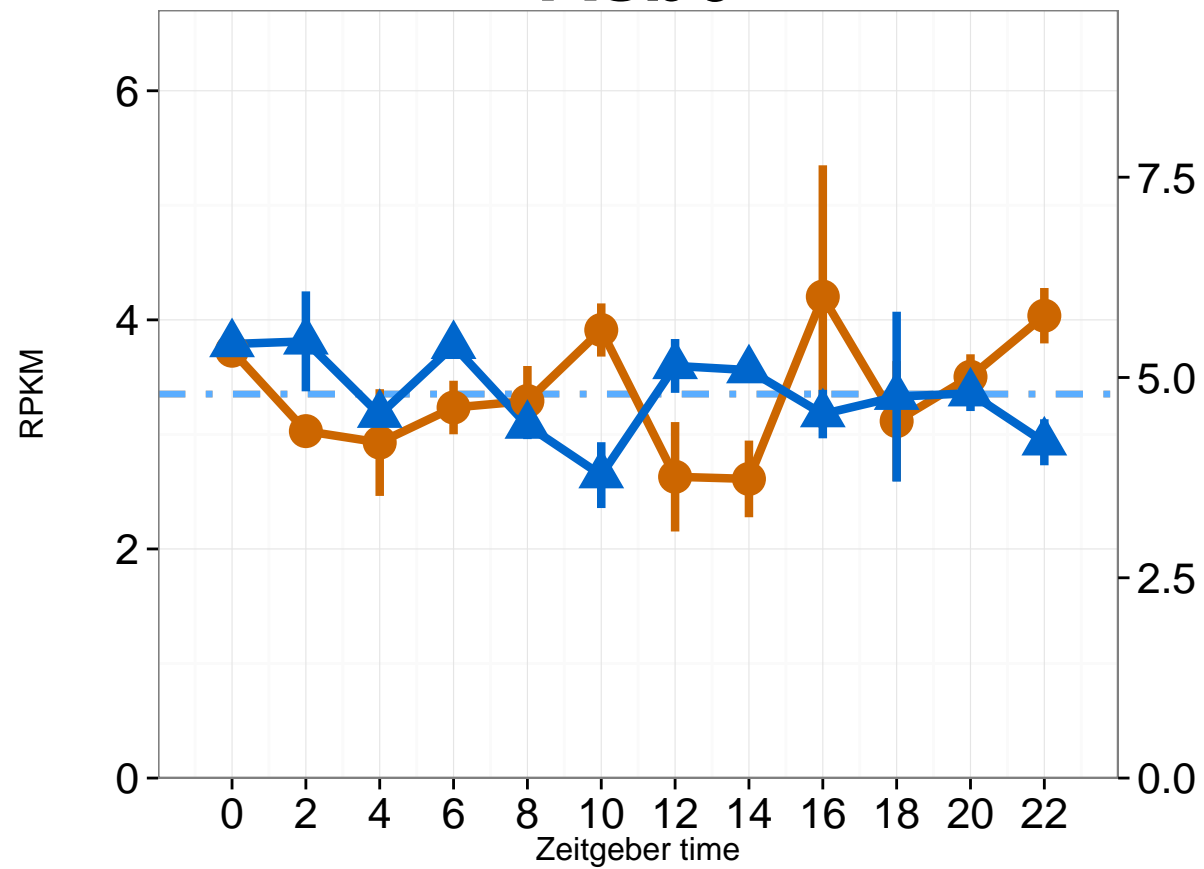

## Asb6

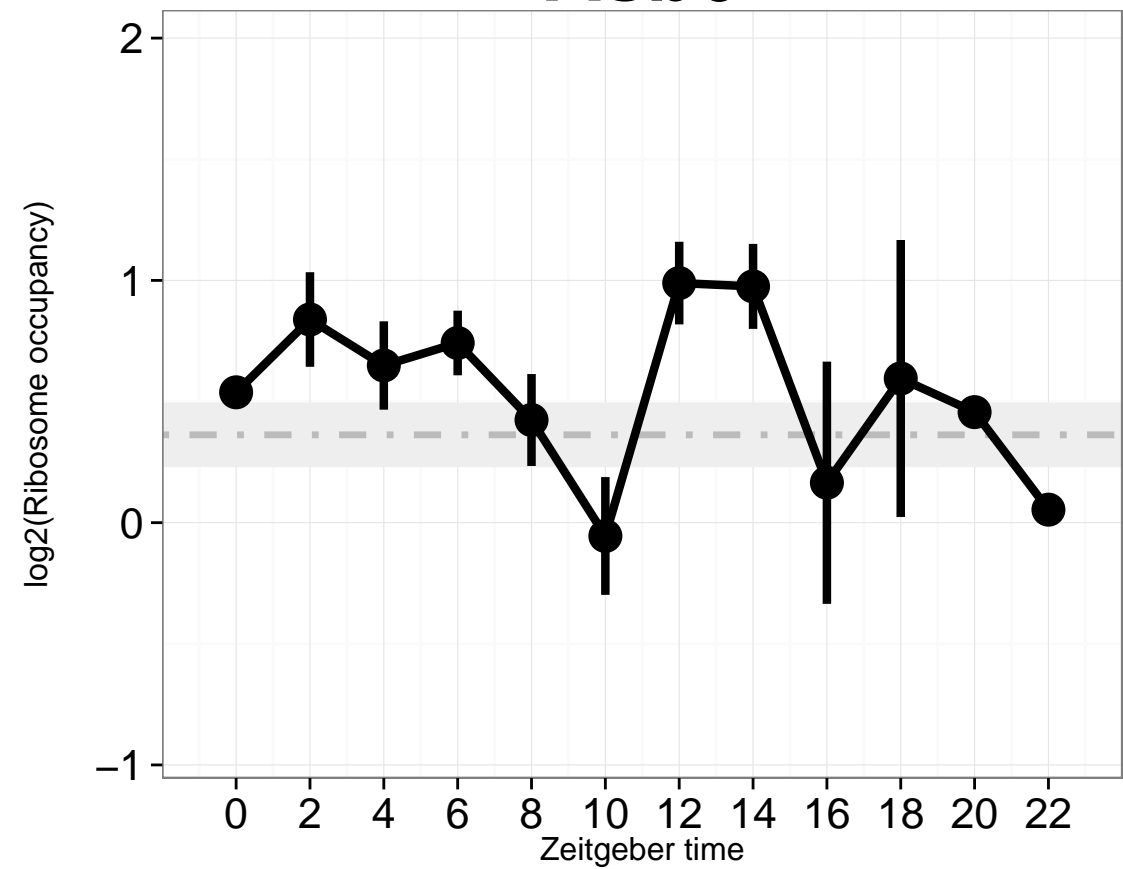

Supplement: SuppDataset_1.zip [file Asb6_set_A.pdf › Supplemental Dataset 1/A-mRNA_nonrhyth_translation_nonrhyth/Asb6_set_A.pdf]

# Asb7

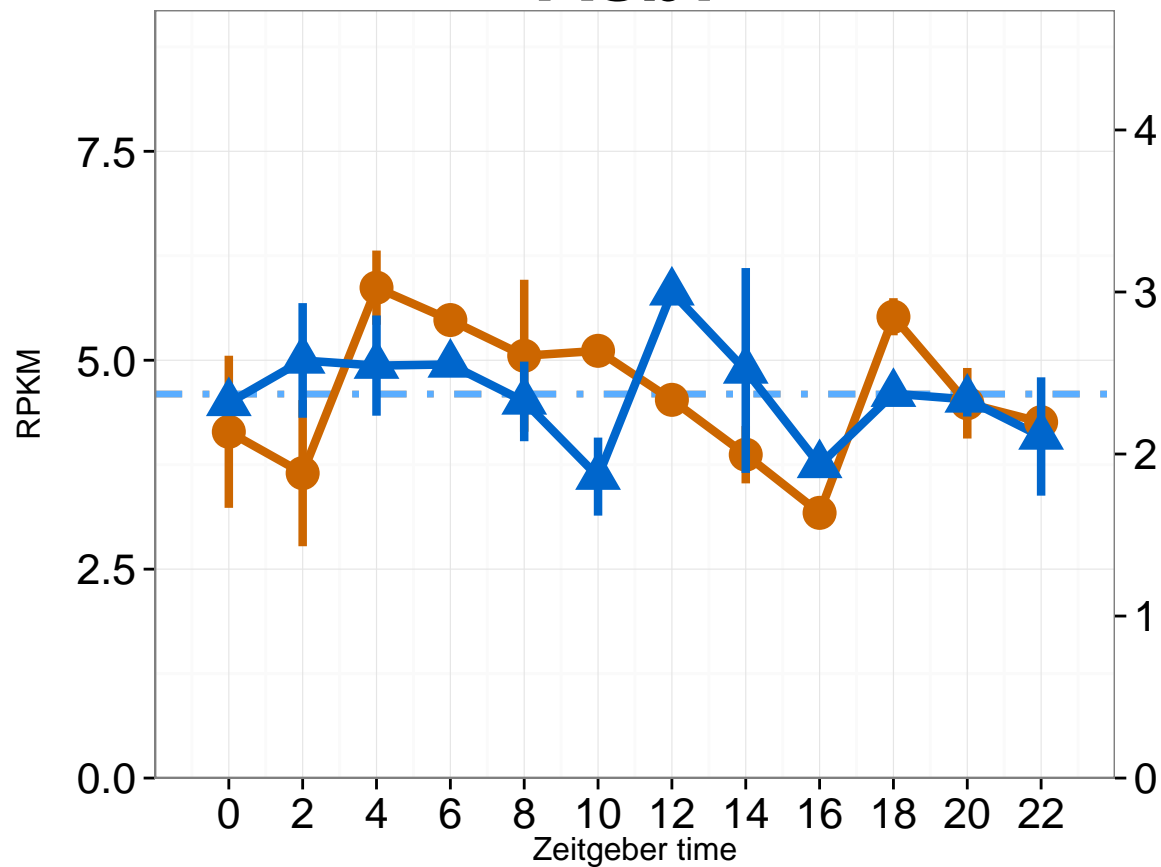

# Asb7

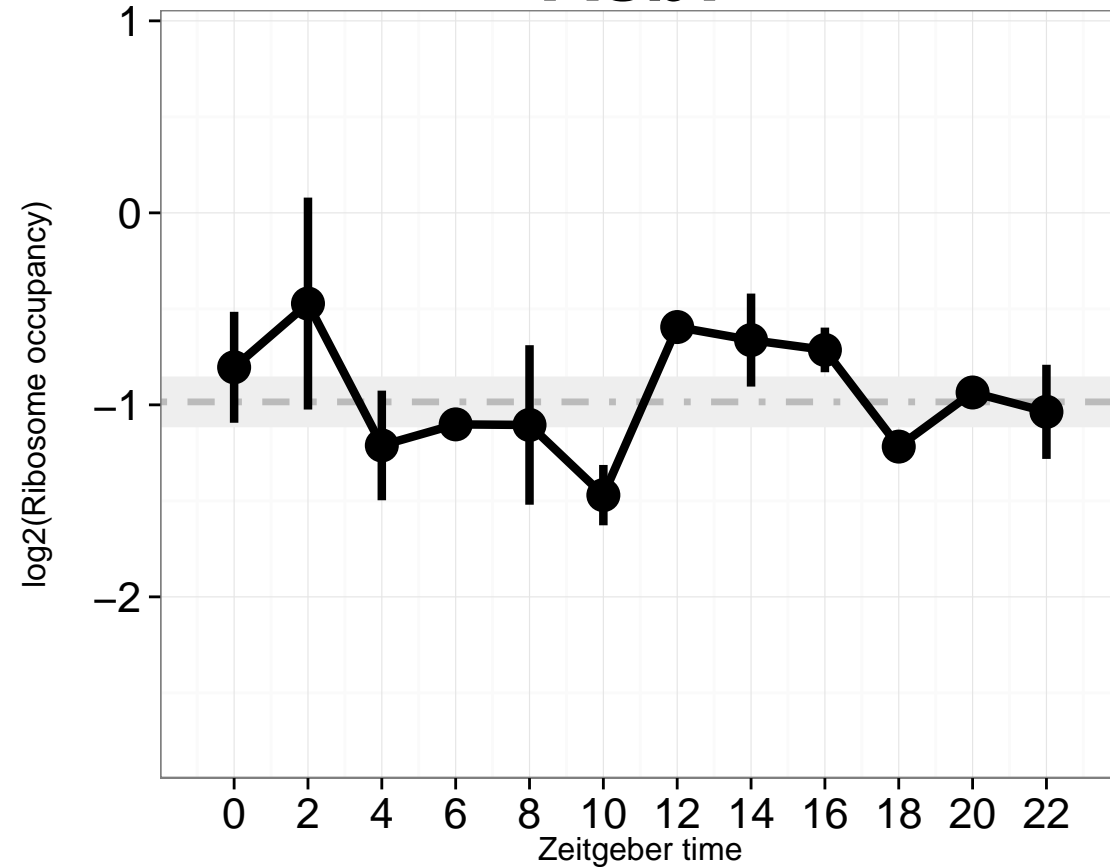

Supplement: SuppDataset_1.zip [file Asb7_set_A.pdf › Supplemental Dataset 1/A-mRNA_nonrhyth_translation_nonrhyth/Asb7_set_A.pdf]

## Asb8

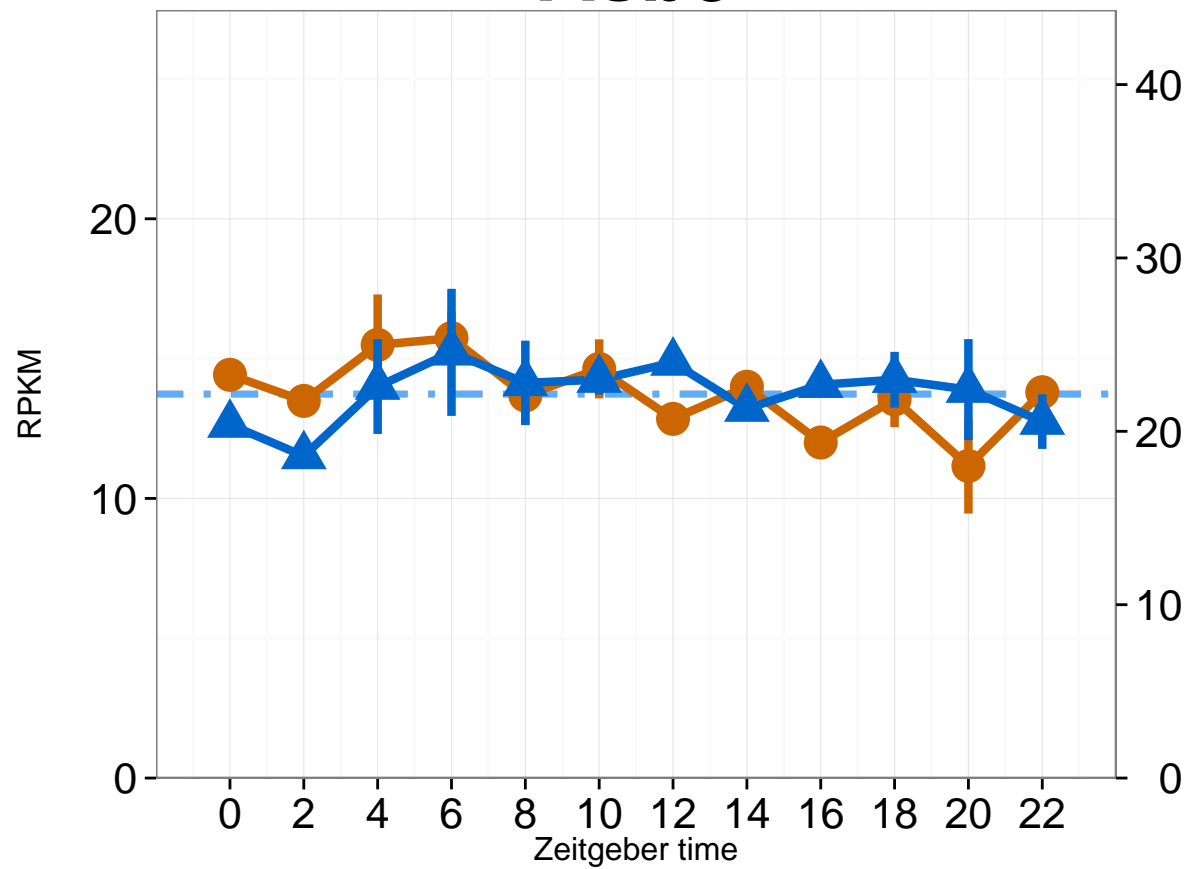

## Asb8

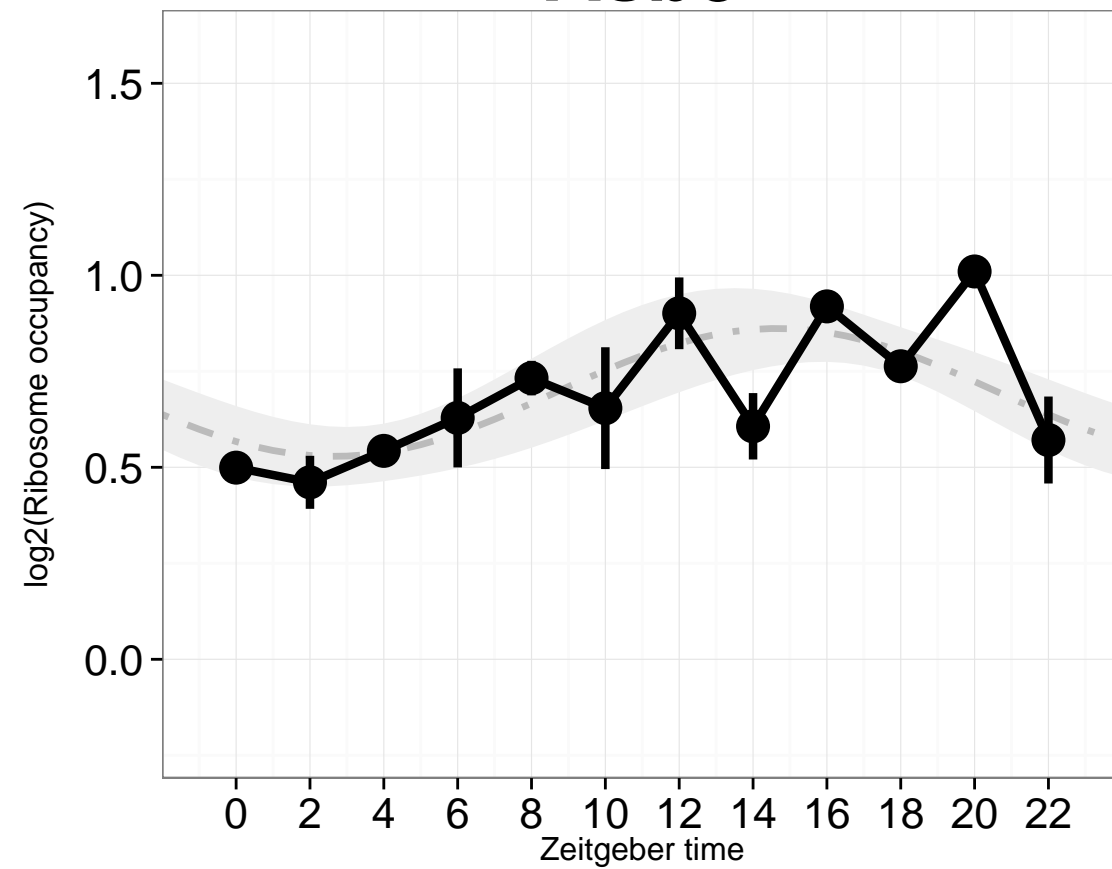

Supplement: SuppDataset_1.zip [file Asb8_set_A.pdf › Supplemental Dataset 1/A-mRNA_nonrhyth_translation_nonrhyth/Asb8_set_A.pdf]

# Ascc1

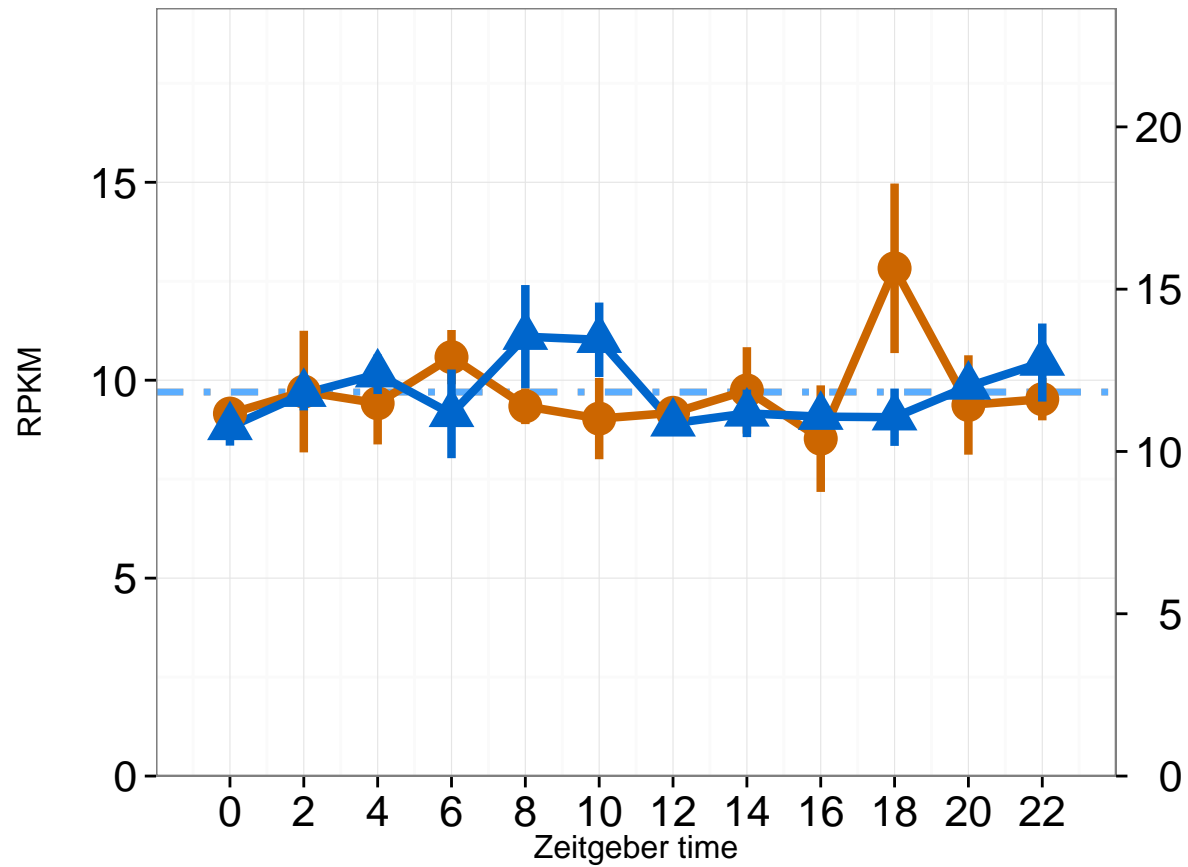

# Ascc1

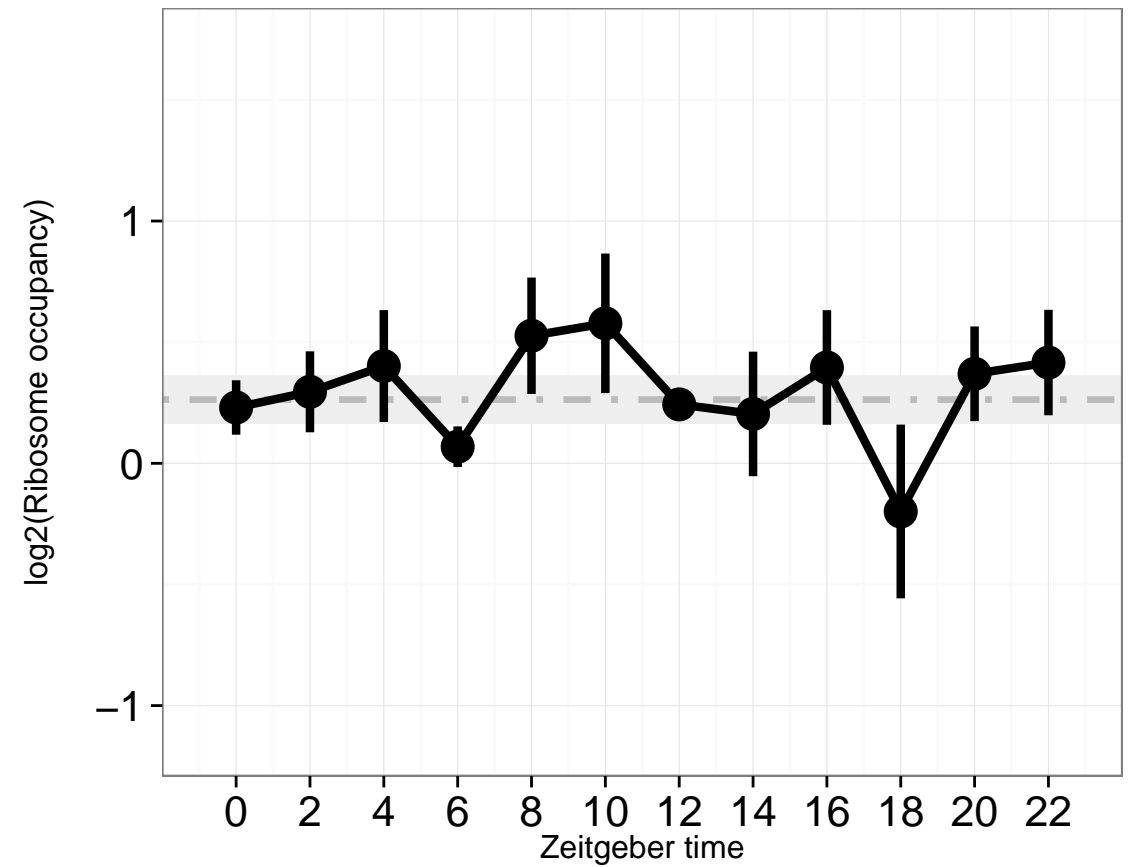

Supplement: SuppDataset_1.zip [file Ascc1_set_A.pdf › Supplemental Dataset 1/A-mRNA_nonrhyth_translation_nonrhyth/Ascc1_set_A.pdf]

## Ascc2

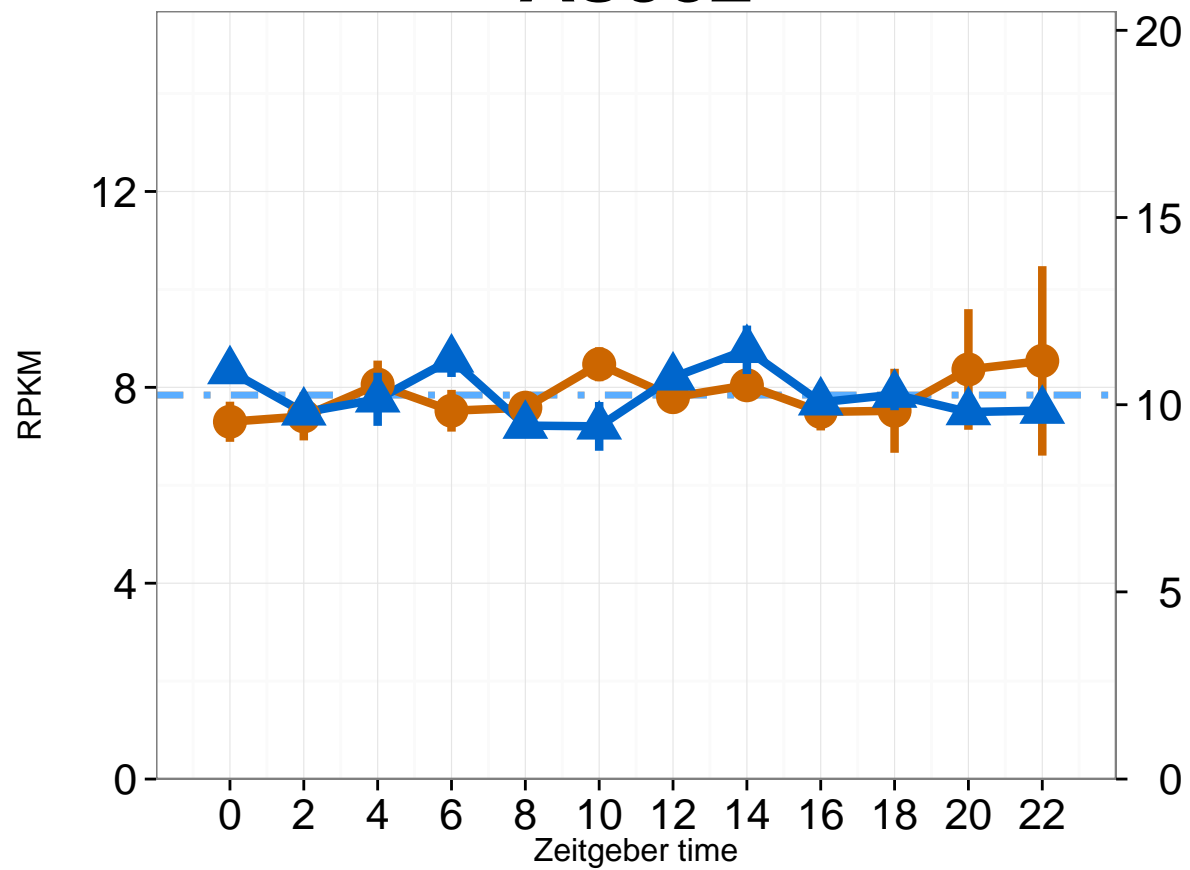

## Ascc2

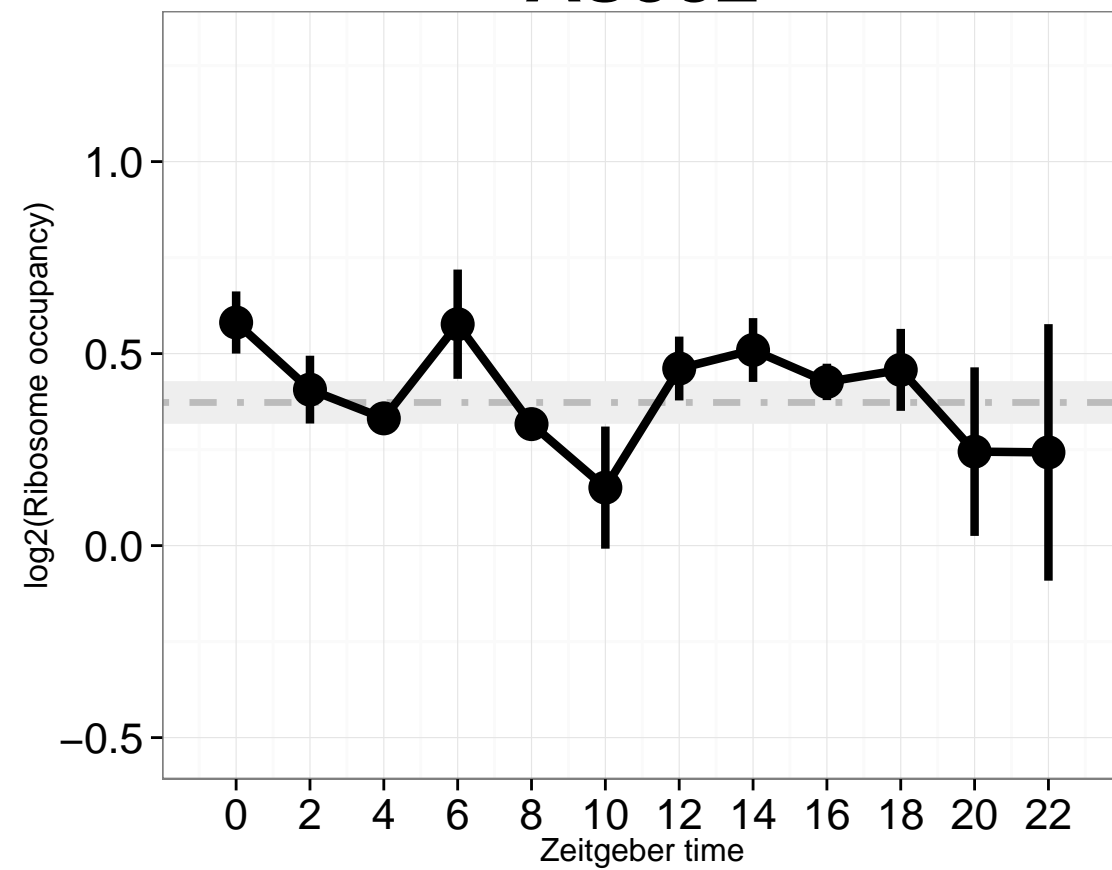

Supplement: SuppDataset_1.zip [file Ascc2_set_A.pdf › Supplemental Dataset 1/A-mRNA_nonrhyth_translation_nonrhyth/Ascc2_set_A.pdf]

## Ascc3

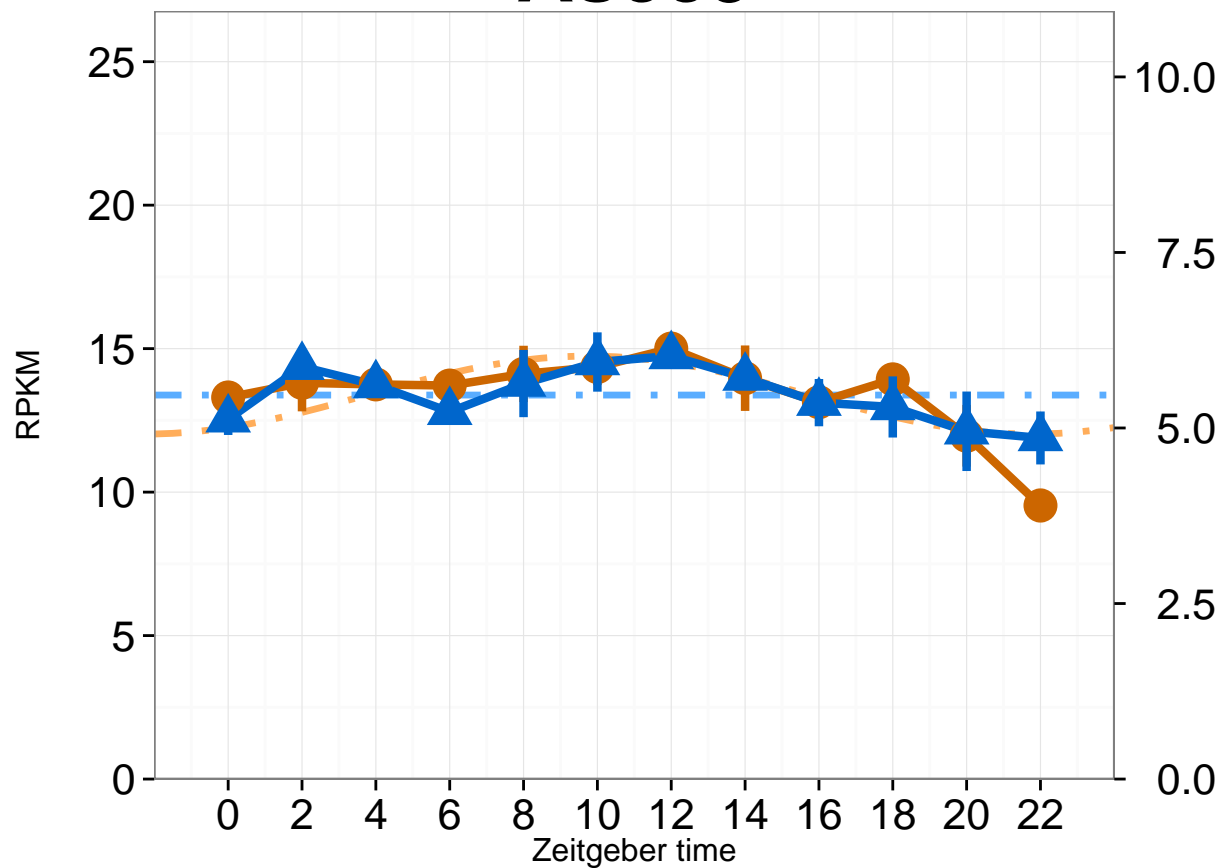

## Ascc3

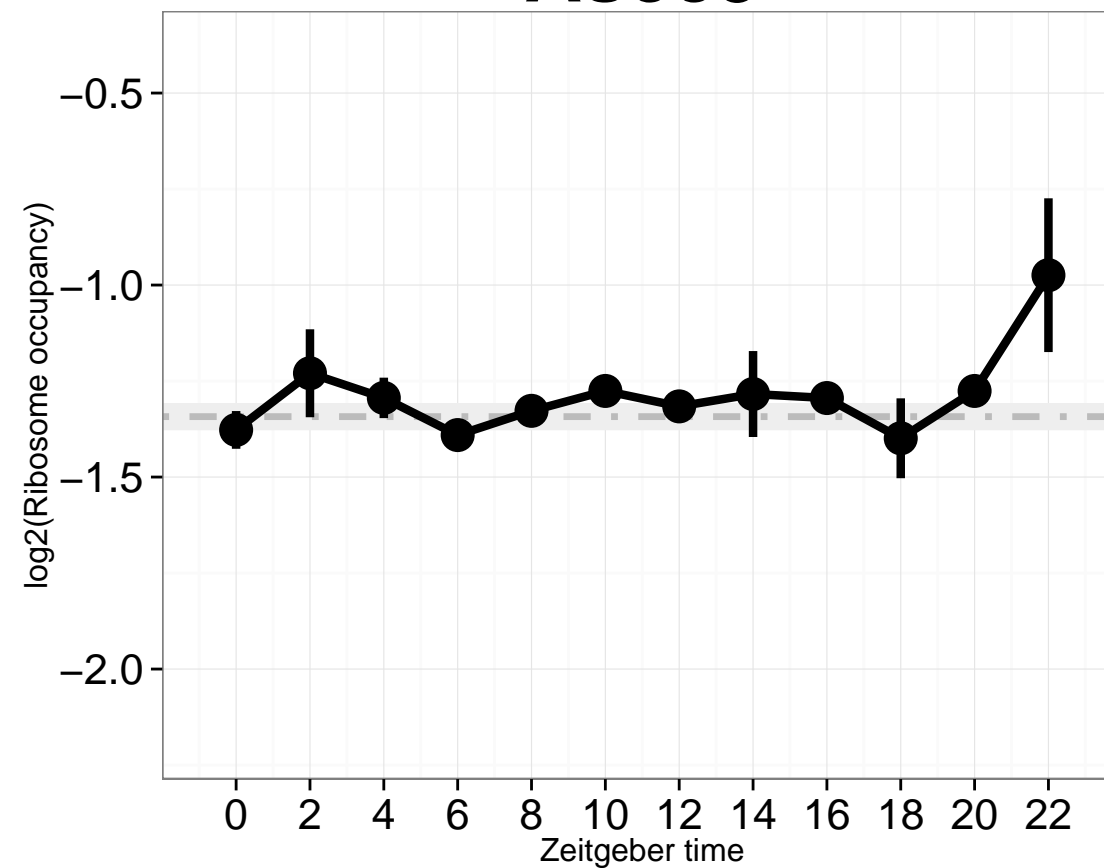

Supplement: SuppDataset_1.zip [file Ascc3_set_A.pdf › Supplemental Dataset 1/A-mRNA_nonrhyth_translation_nonrhyth/Ascc3_set_A.pdf]

# Asf1a

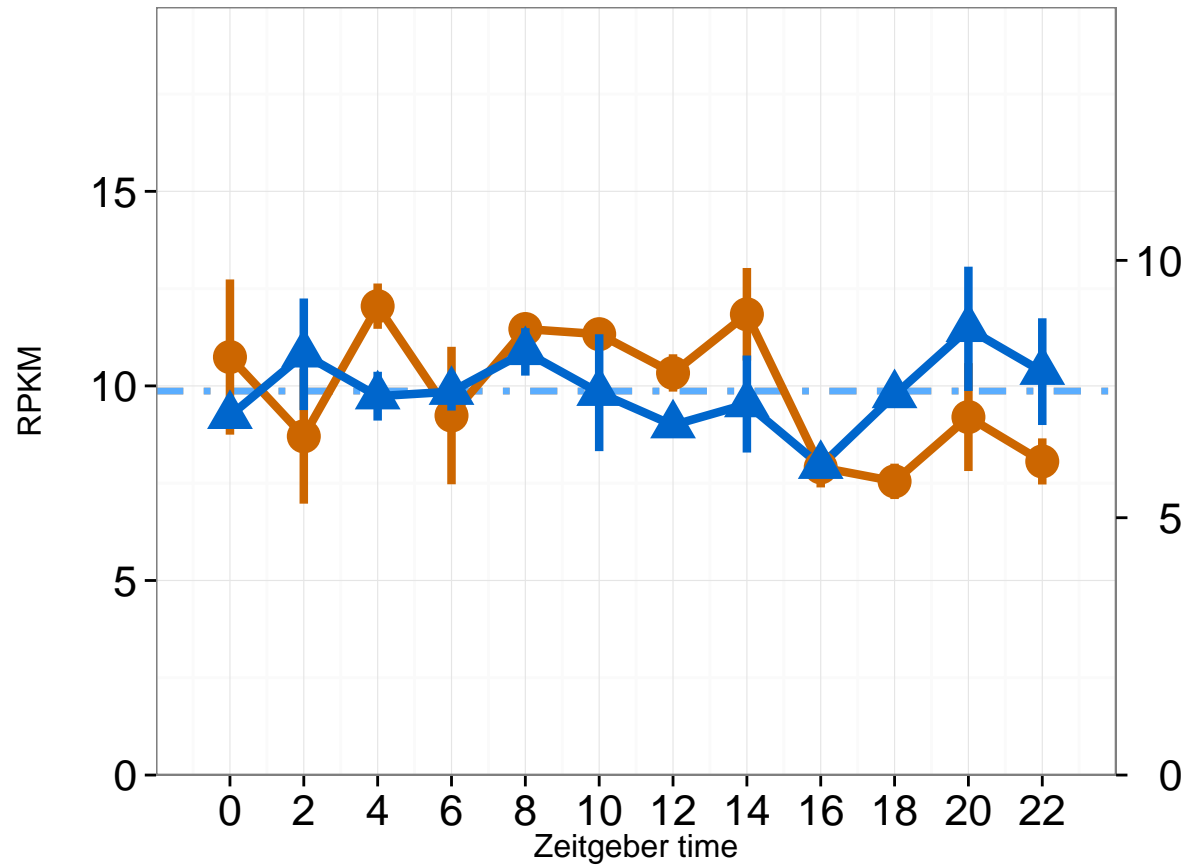

# Asf1a

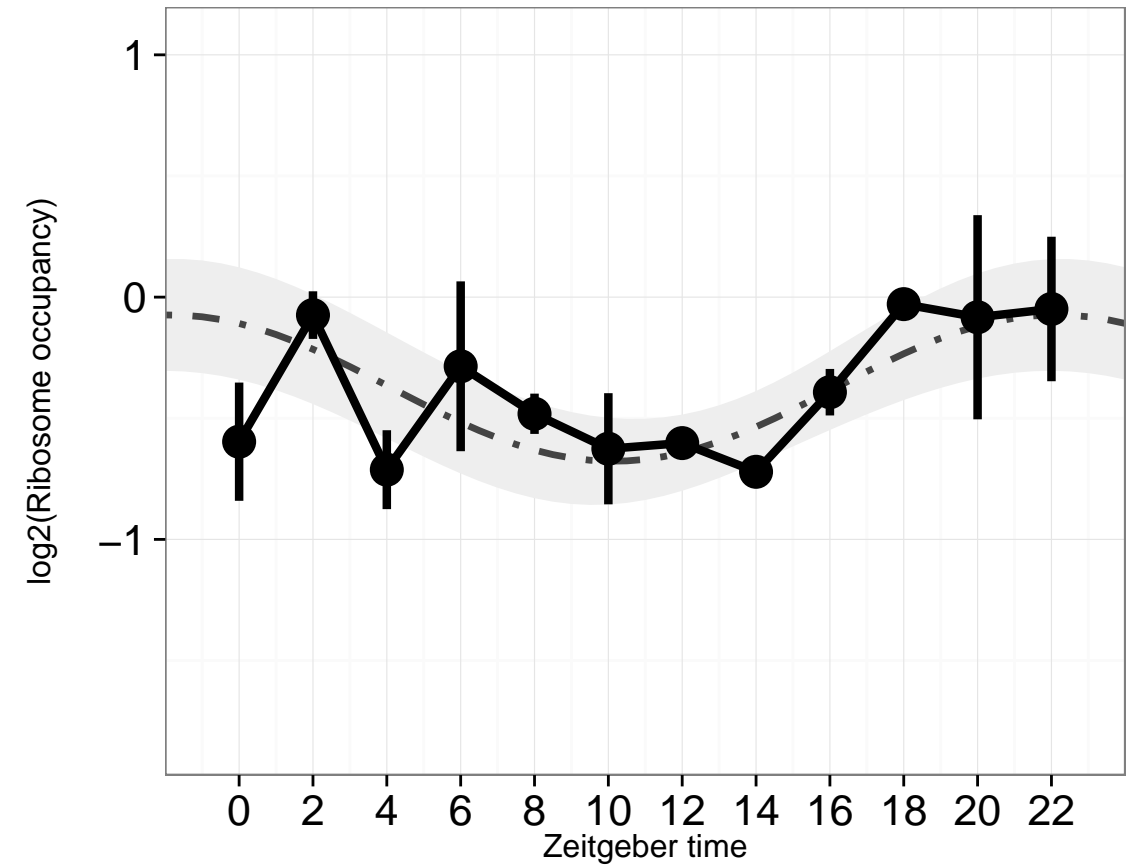

Supplement: SuppDataset_1.zip [file Asf1a_set_A.pdf › Supplemental Dataset 1/A-mRNA_nonrhyth_translation_nonrhyth/Asf1a_set_A.pdf]

## Asgr1

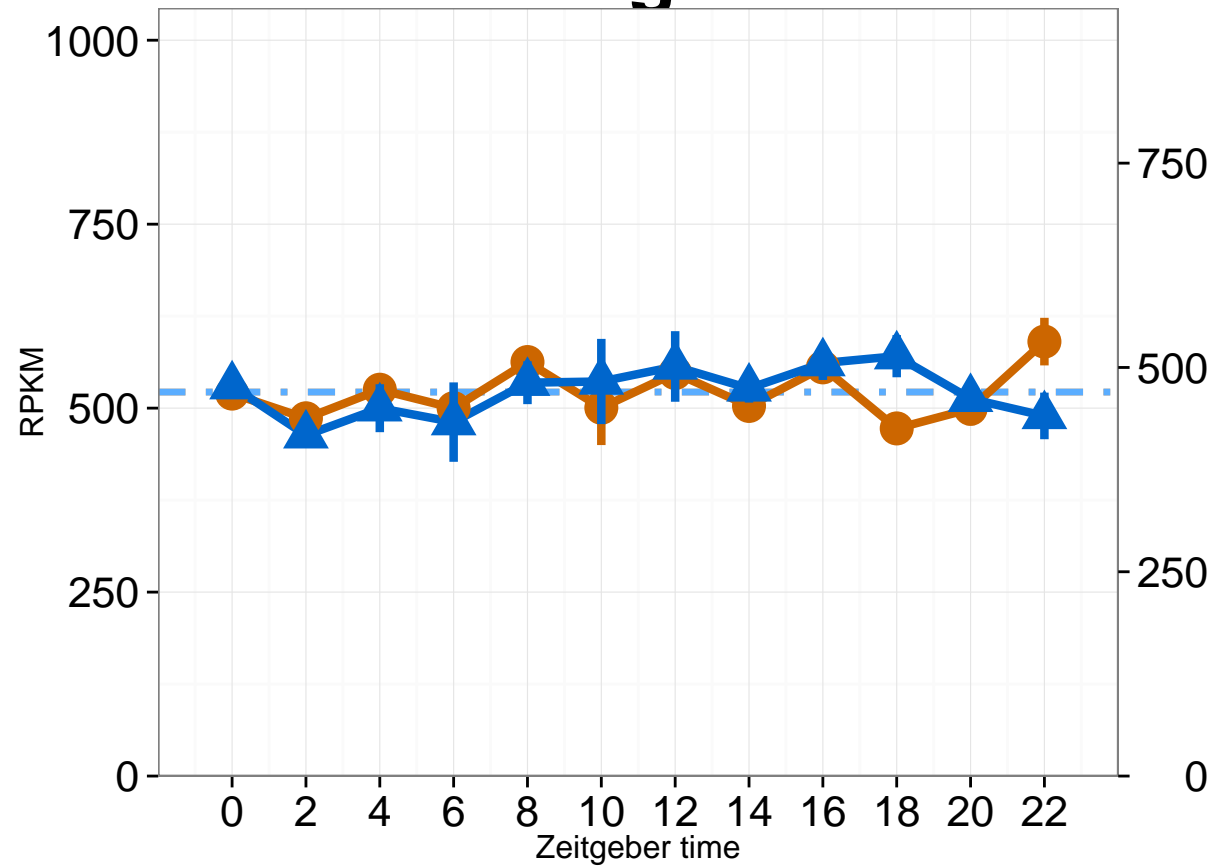

## Asgr1

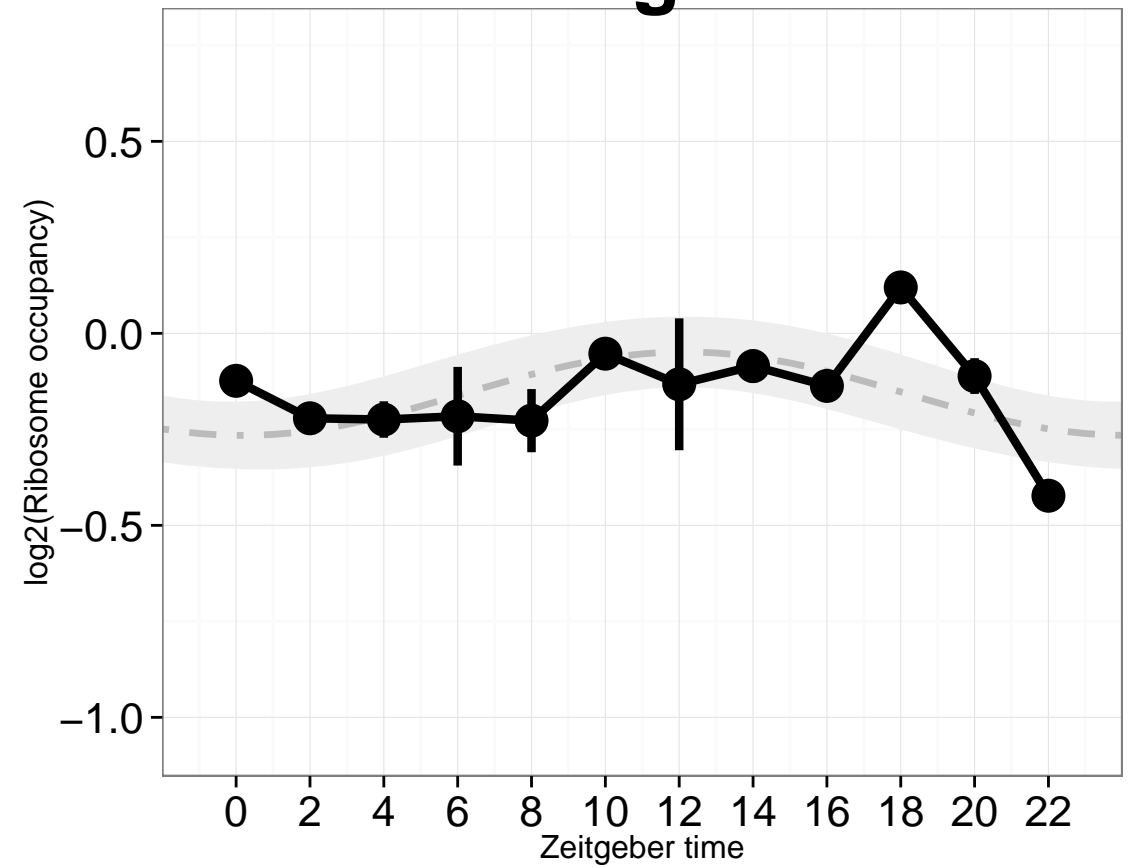

Supplement: SuppDataset_1.zip [file Asgr1_set_A.pdf › Supplemental Dataset 1/A-mRNA_nonrhyth_translation_nonrhyth/Asgr1_set_A.pdf]

## Asgr2

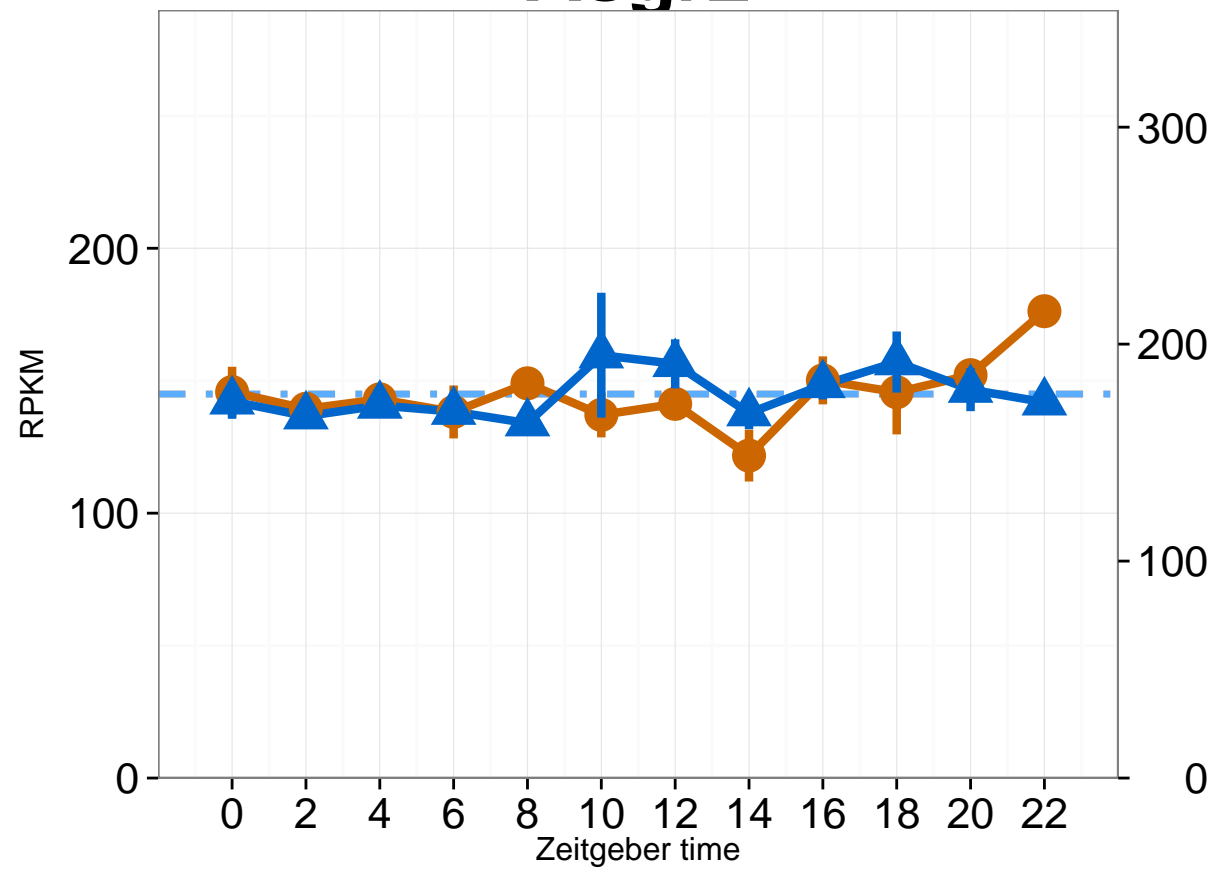

## Asgr2

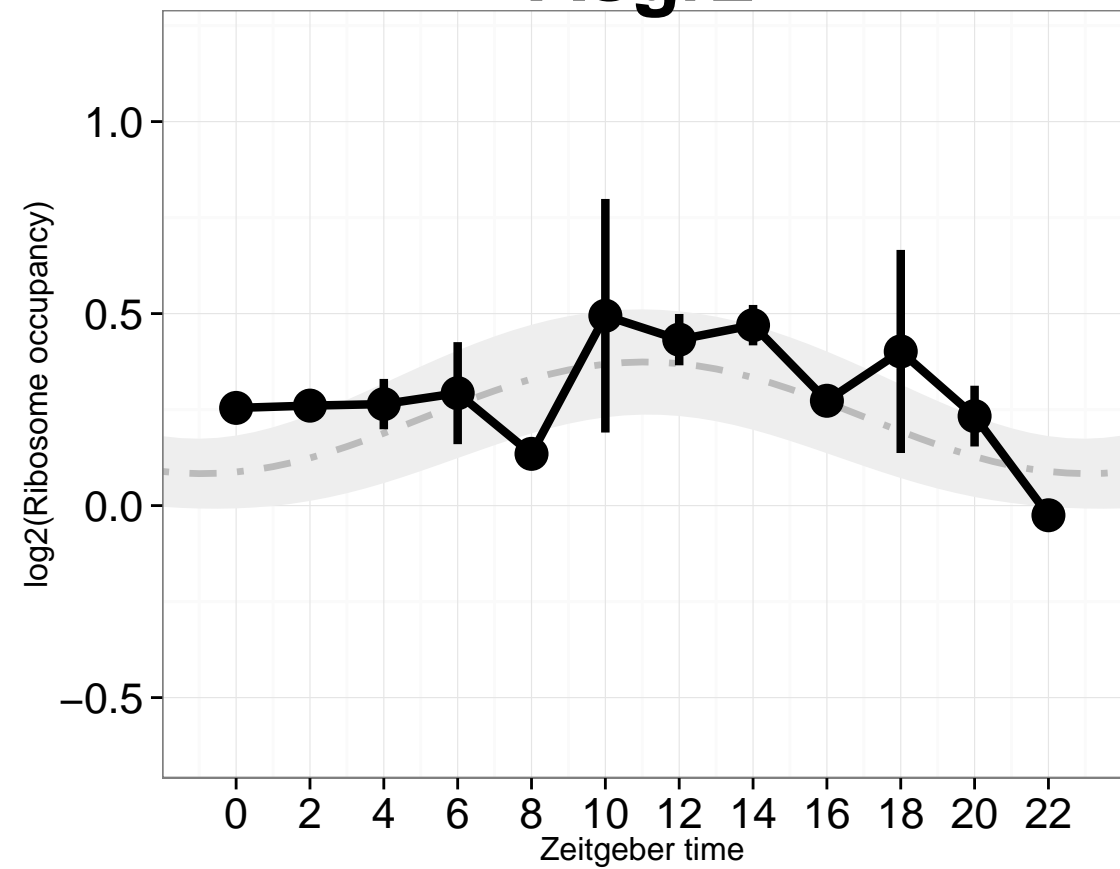

Supplement: SuppDataset_1.zip [file Asgr2_set_A.pdf › Supplemental Dataset 1/A-mRNA_nonrhyth_translation_nonrhyth/Asgr2_set_A.pdf]

## Ash1l

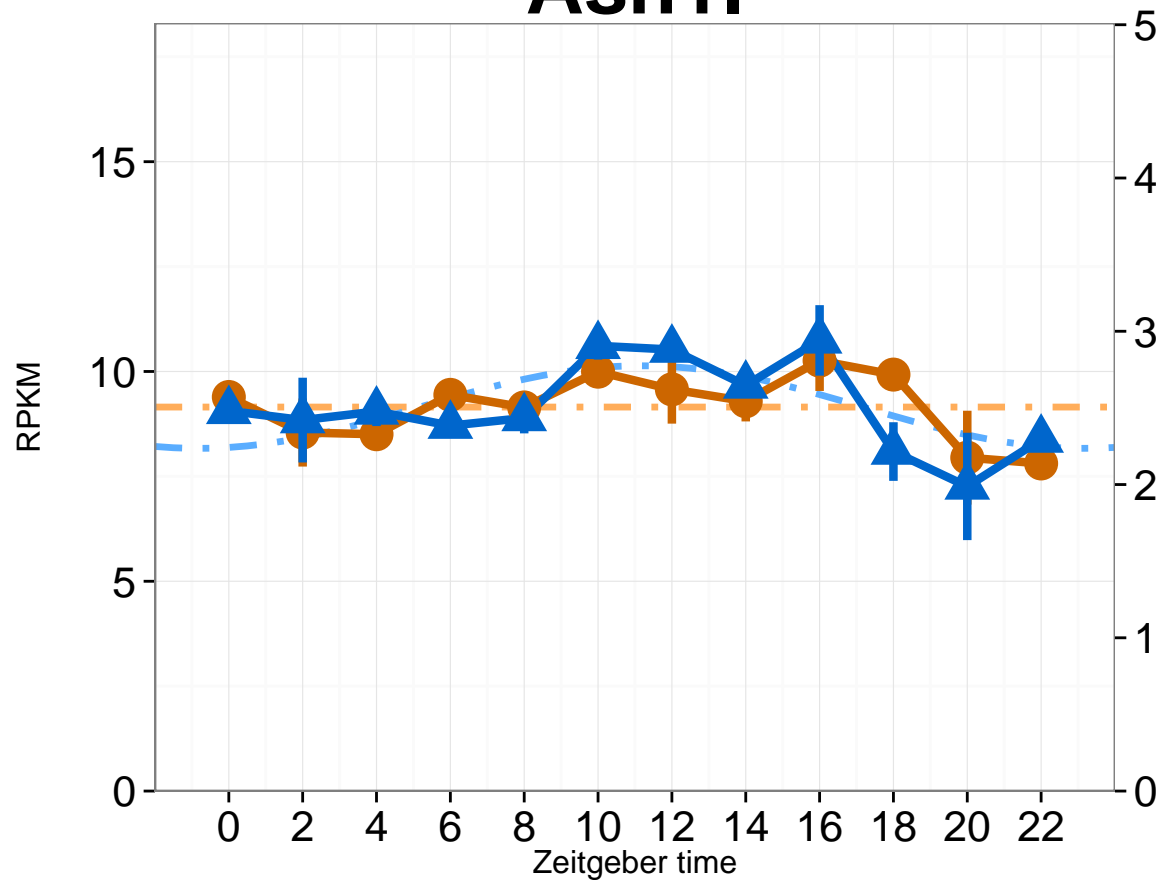

## Ash1l

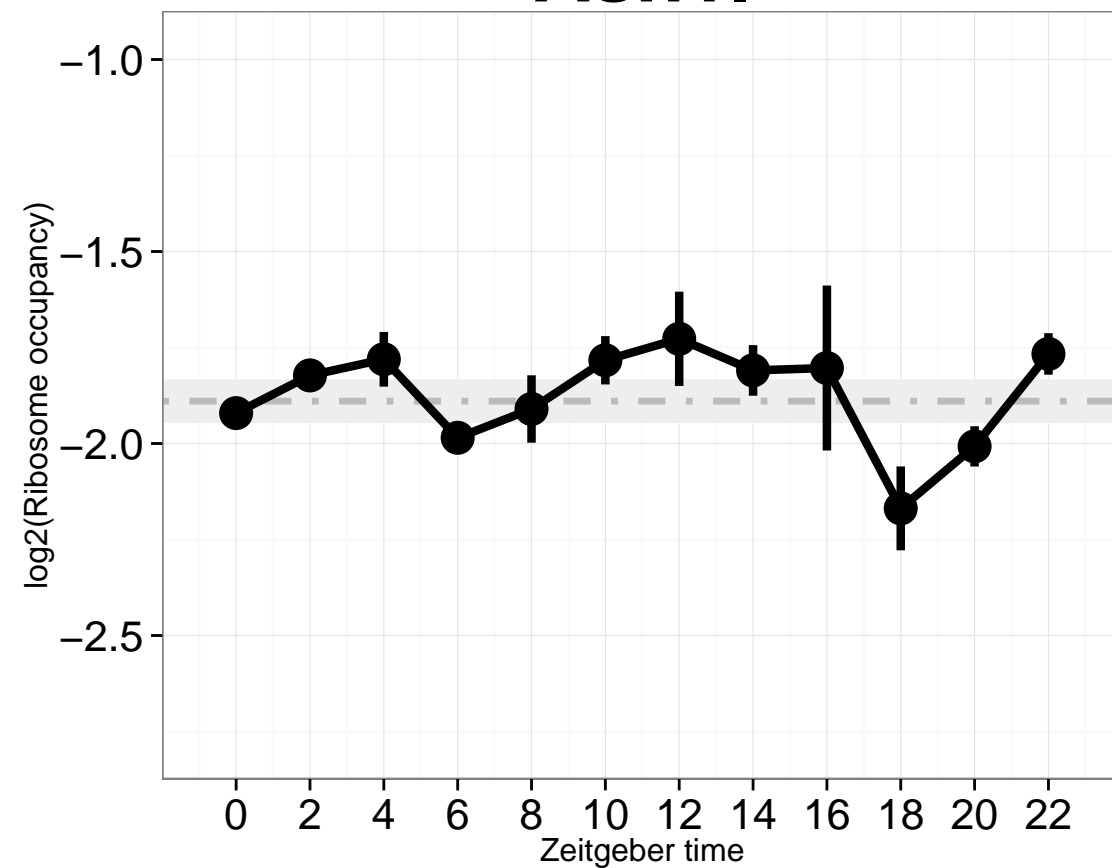

Supplement: SuppDataset_1.zip [file Ash1l_set_A.pdf › Supplemental Dataset 1/A-mRNA_nonrhyth_translation_nonrhyth/Ash1l_set_A.pdf]

## Ash2l

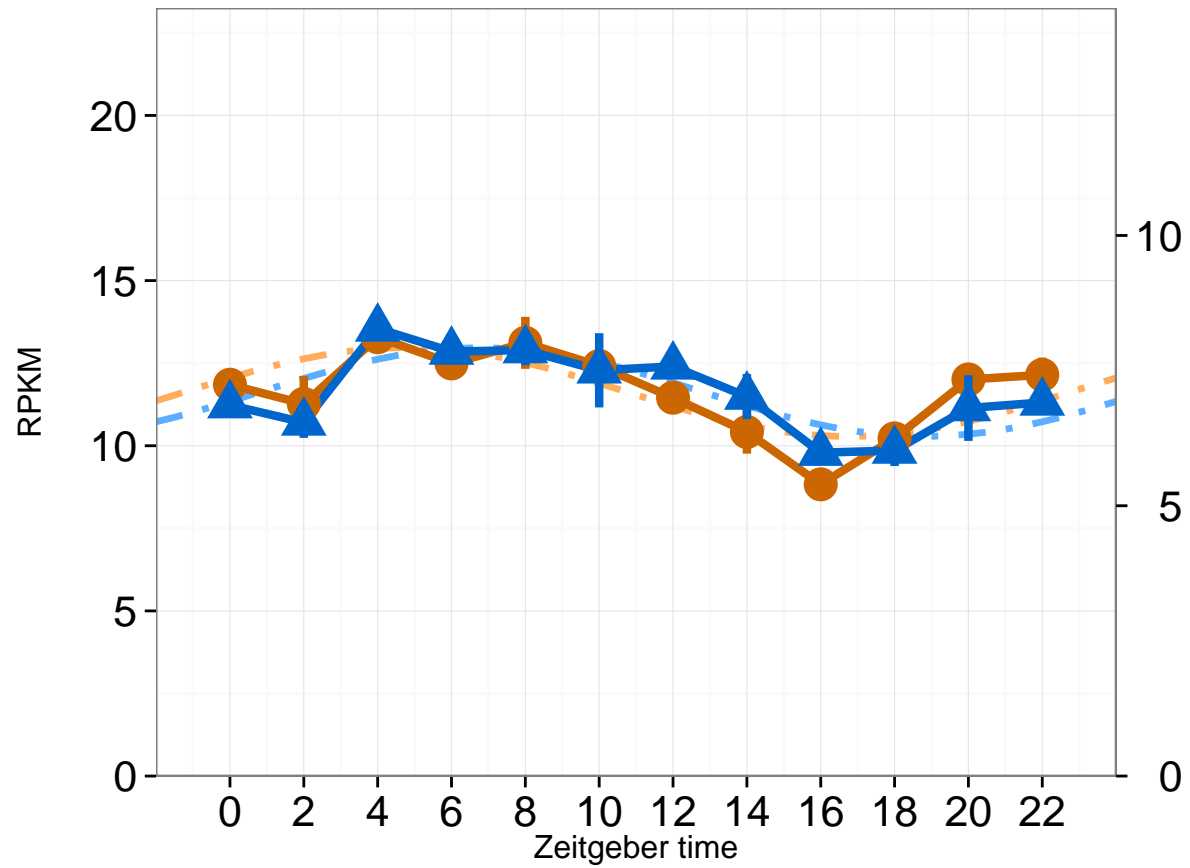

## Ash2l

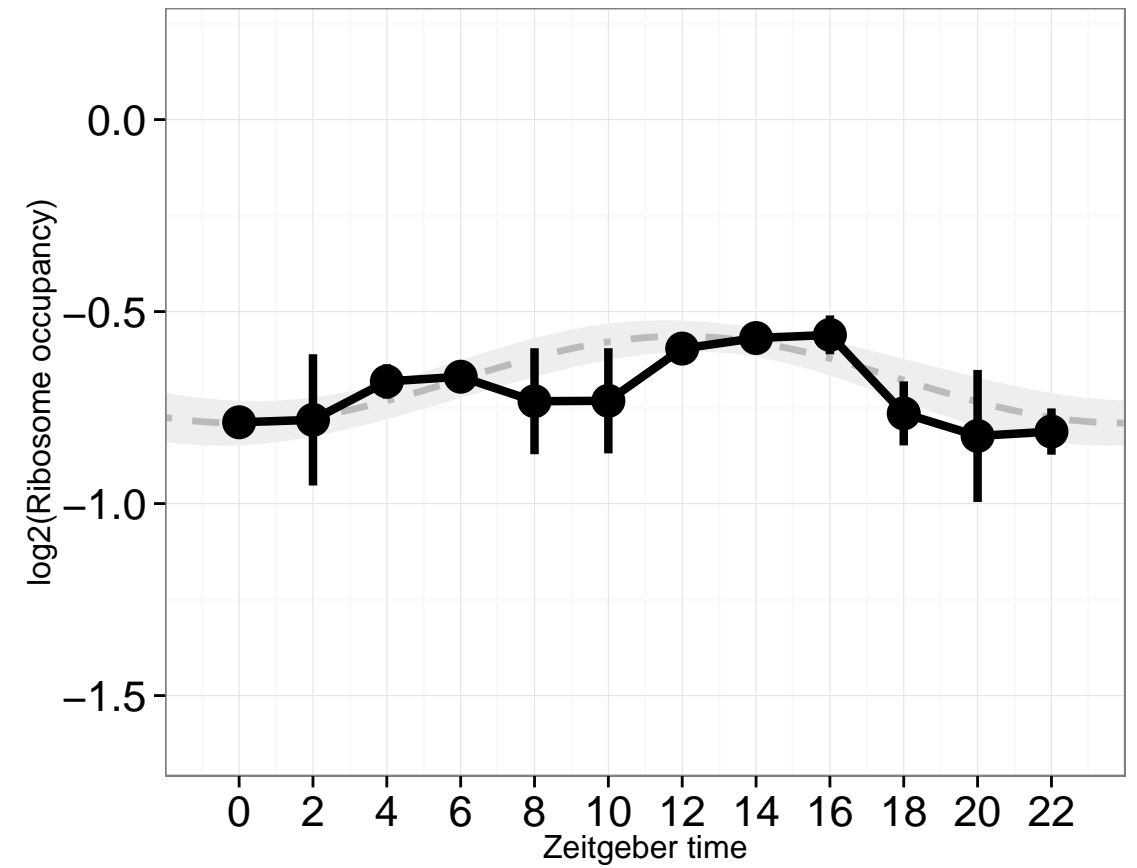

Supplement: SuppDataset_1.zip [file Ash2l_set_A.pdf › Supplemental Dataset 1/A-mRNA_nonrhyth_translation_nonrhyth/Ash2l_set_A.pdf]

## Asic5

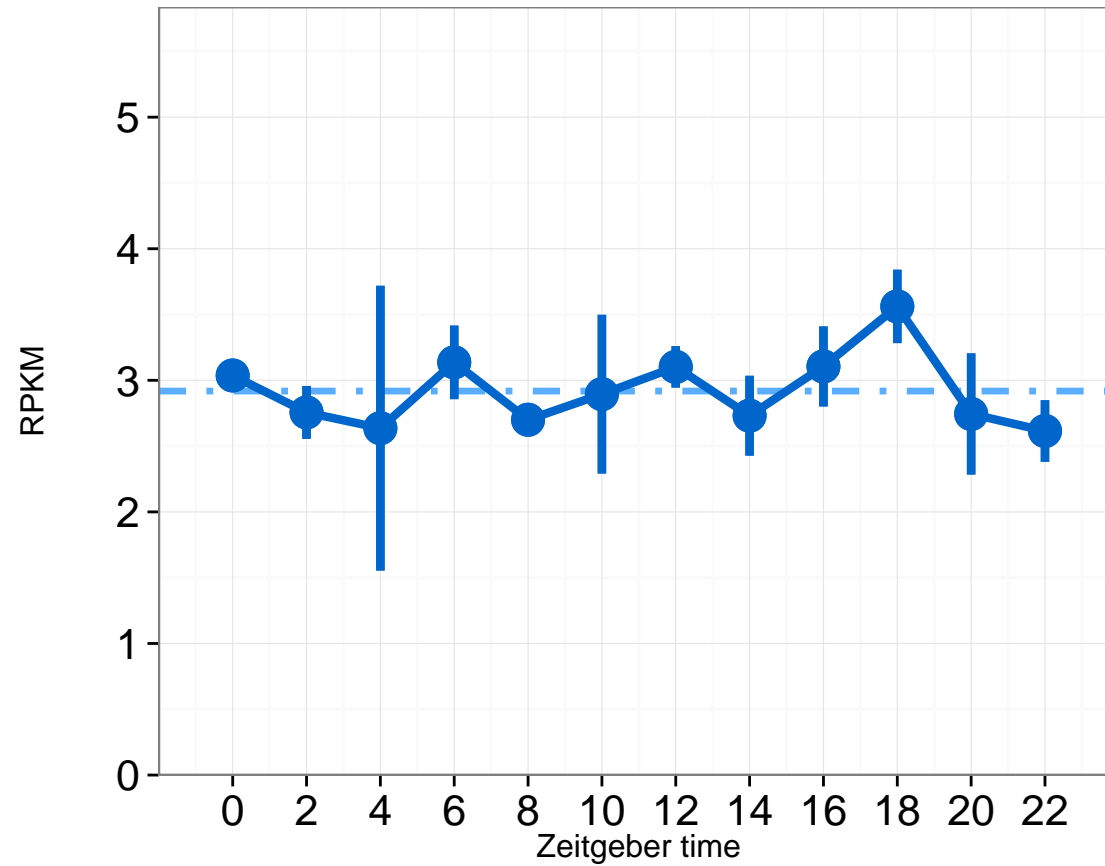

## Asic5 log2(Ribosome occupancy)

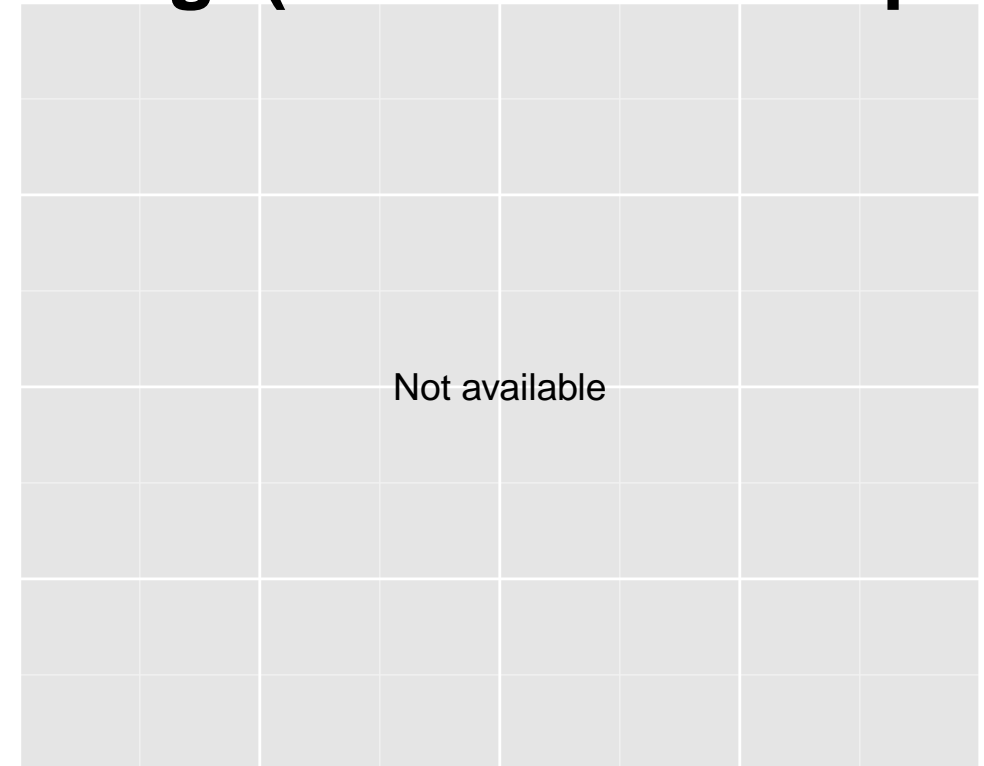

Supplement: SuppDataset_1.zip [file Asic5_set_A.pdf › Supplemental Dataset 1/A-mRNA_nonrhyth_translation_nonrhyth/Asic5_set_A.pdf]

# Asna1

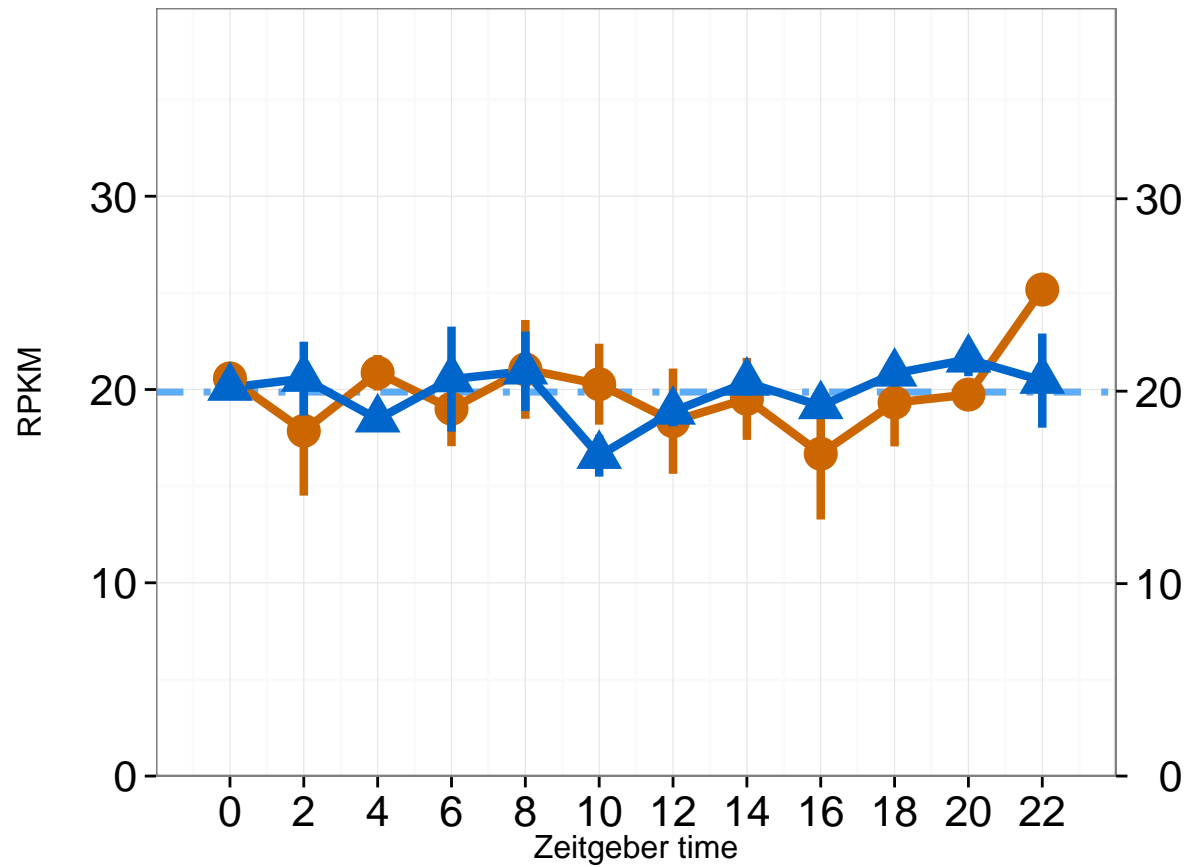

# Asna1

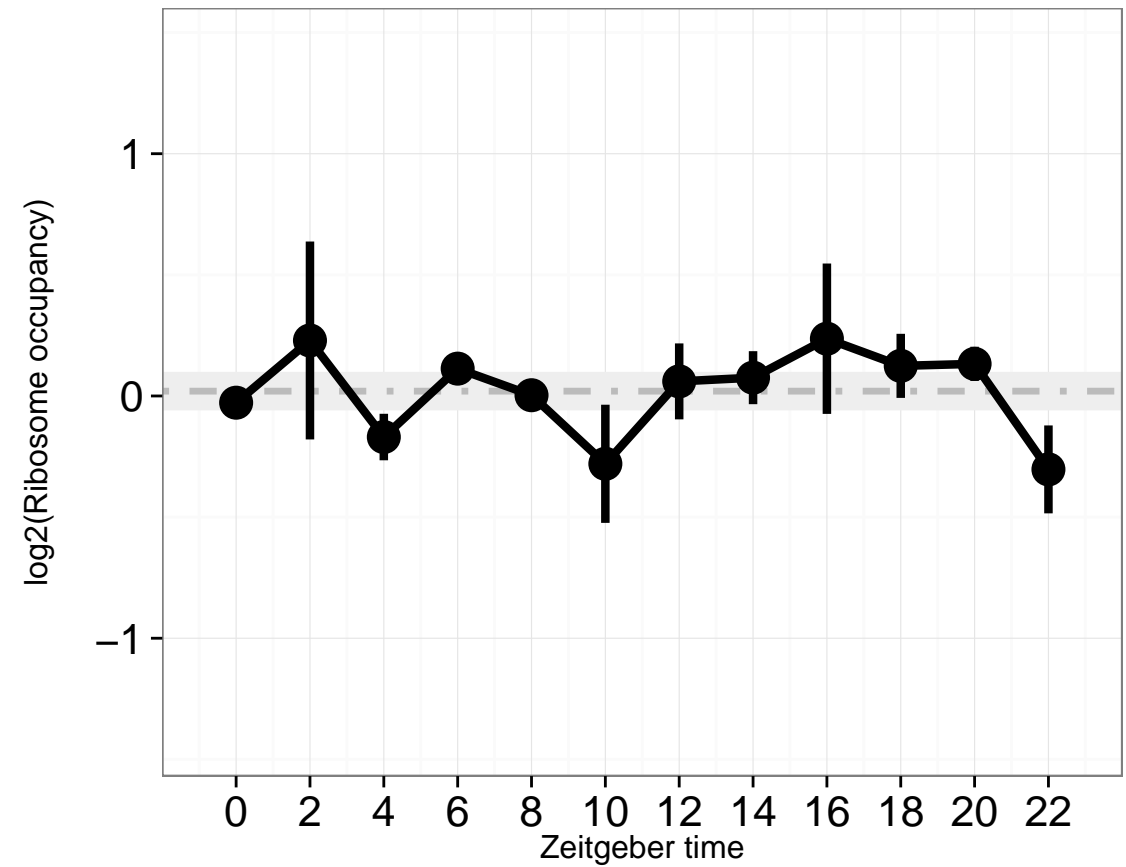

Supplement: SuppDataset_1.zip [file Asna1_set_A.pdf › Supplemental Dataset 1/A-mRNA_nonrhyth_translation_nonrhyth/Asna1_set_A.pdf]

## Asns

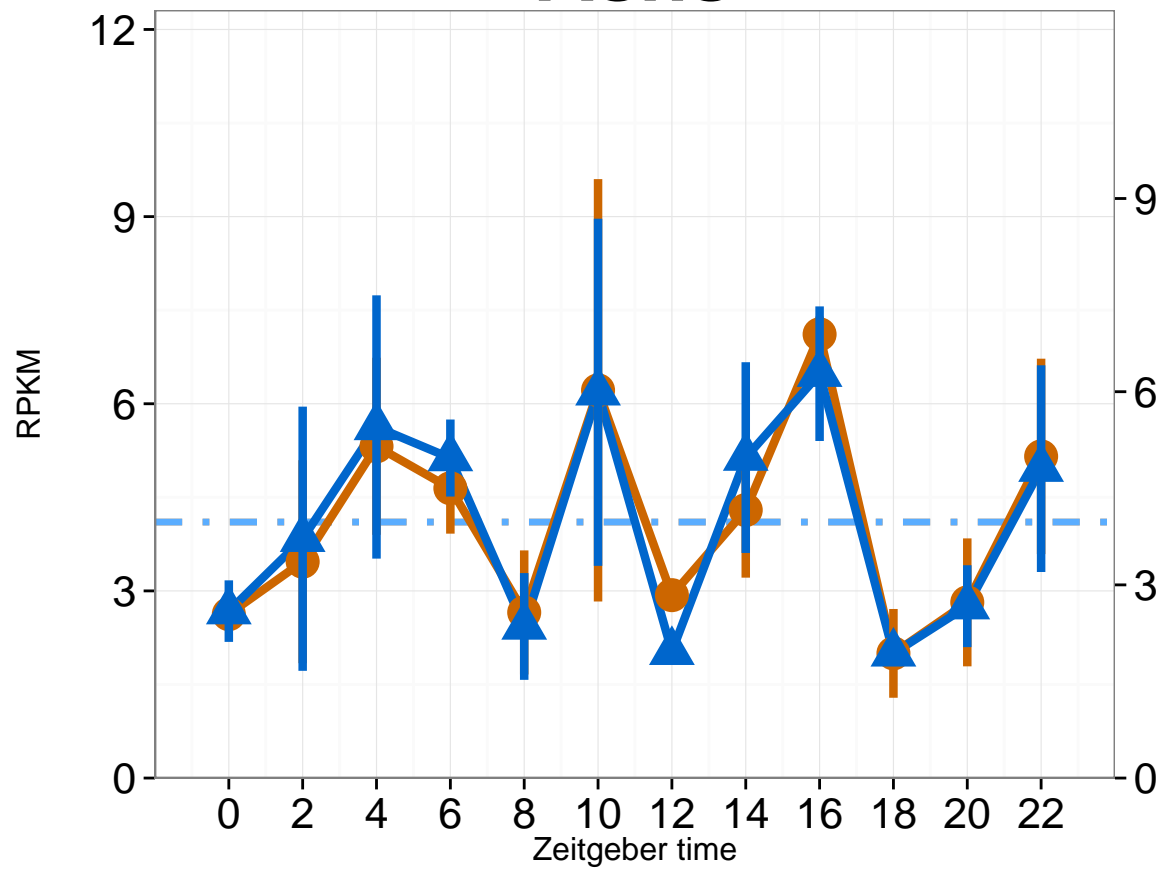

## Asns

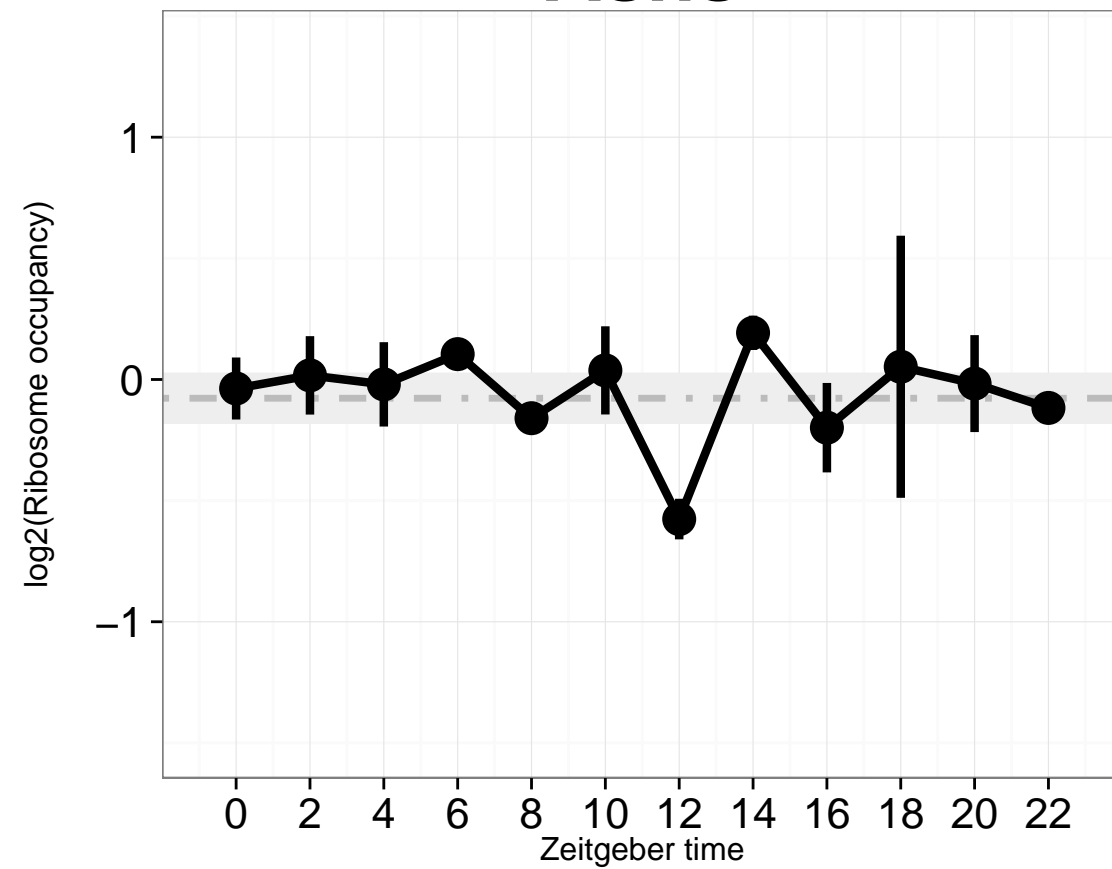

Supplement: SuppDataset_1.zip [file Asns_set_A.pdf › Supplemental Dataset 1/A-mRNA_nonrhyth_translation_nonrhyth/Asns_set_A.pdf]

## Asnsd1

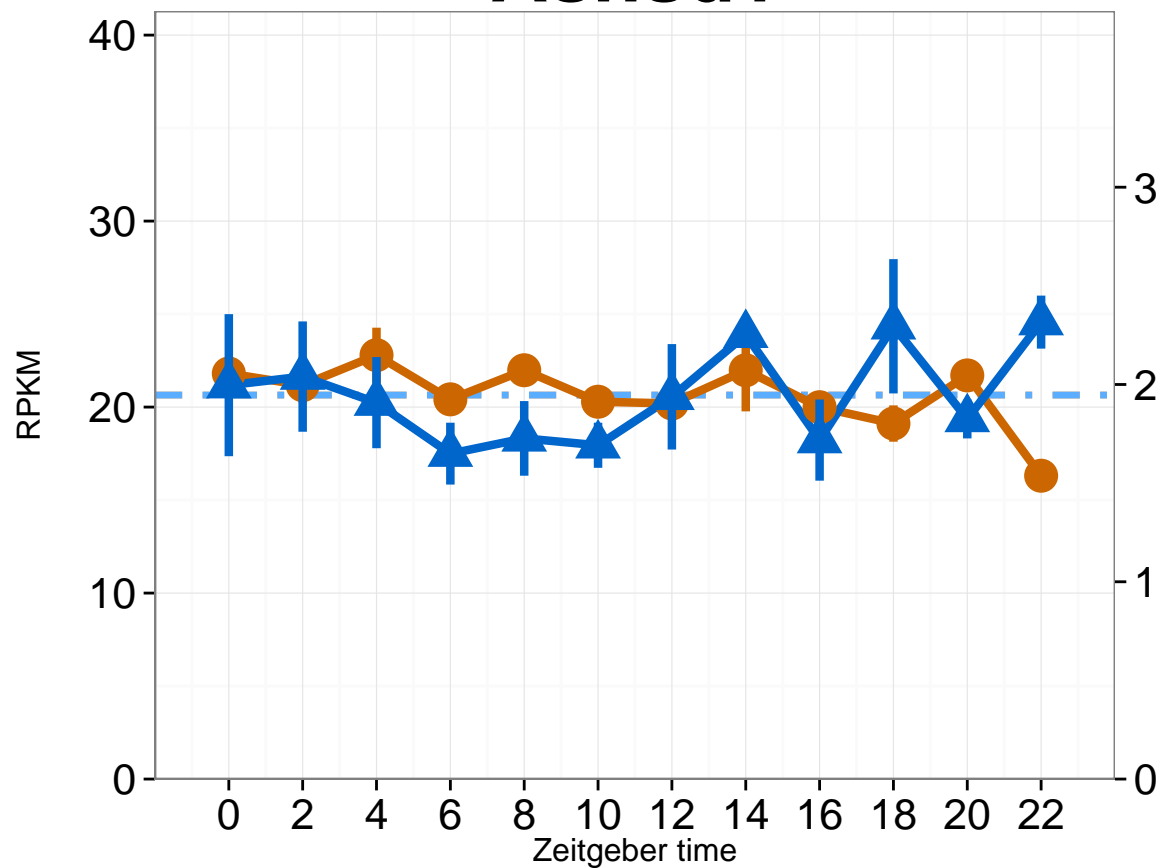

## Asnsd1

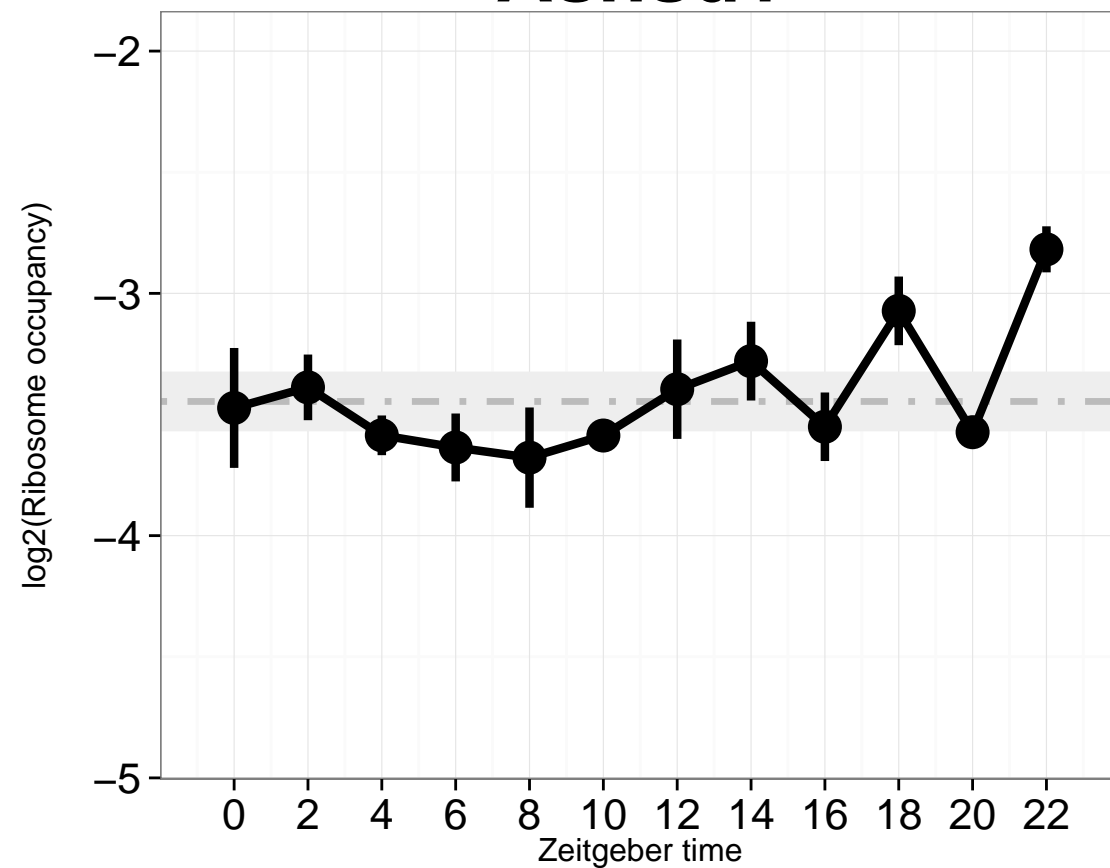

Supplement: SuppDataset_1.zip [file Asnsd1_set_A.pdf › Supplemental Dataset 1/A-mRNA_nonrhyth_translation_nonrhyth/Asnsd1_set_A.pdf]

## Aspdh

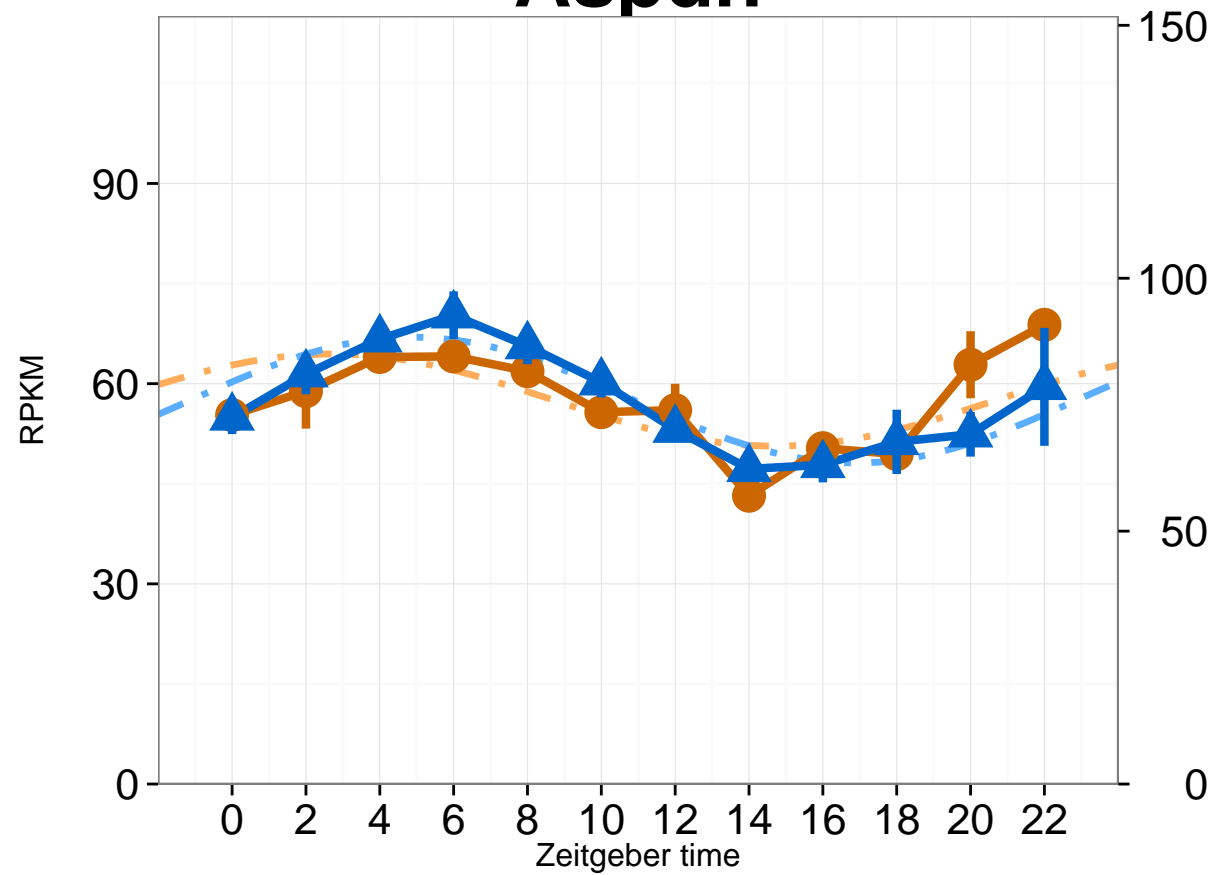

## Aspdh

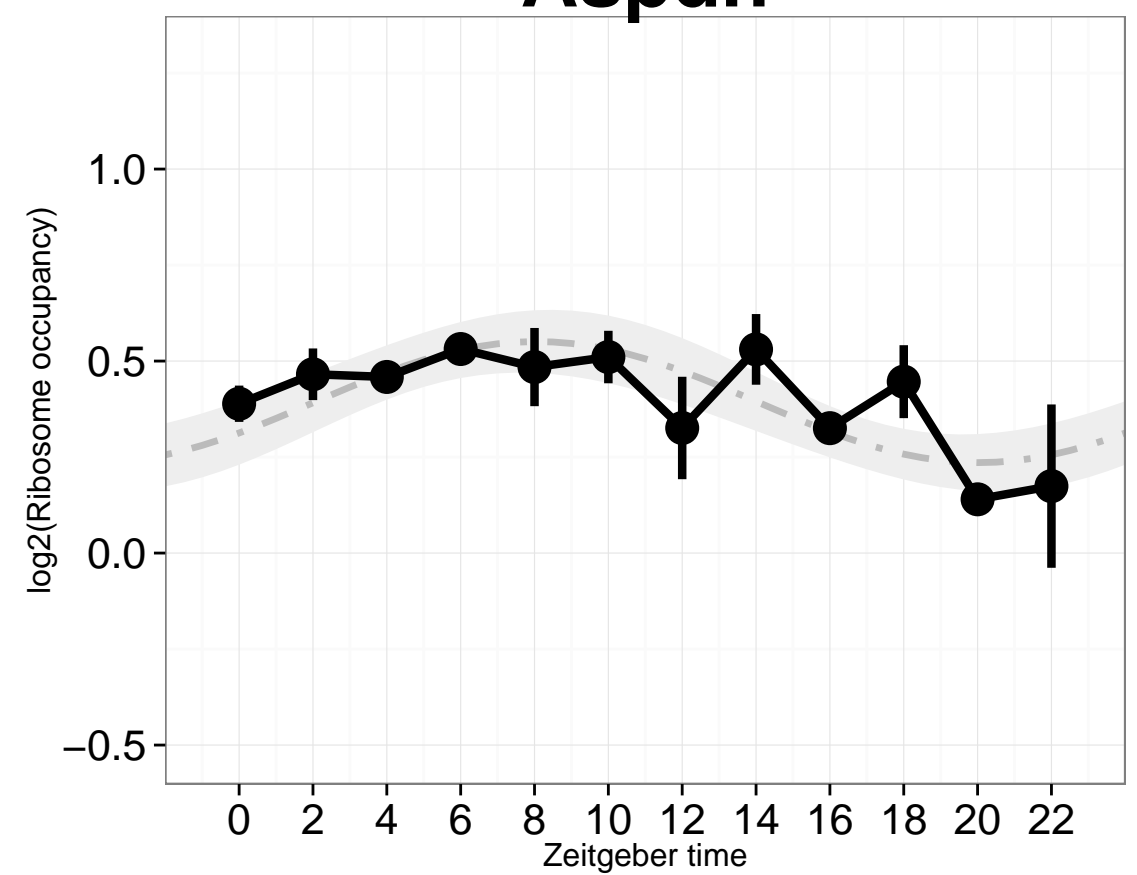

Supplement: SuppDataset_1.zip [file Aspdh_set_A.pdf › Supplemental Dataset 1/A-mRNA_nonrhyth_translation_nonrhyth/Aspdh_set_A.pdf]

## Asph

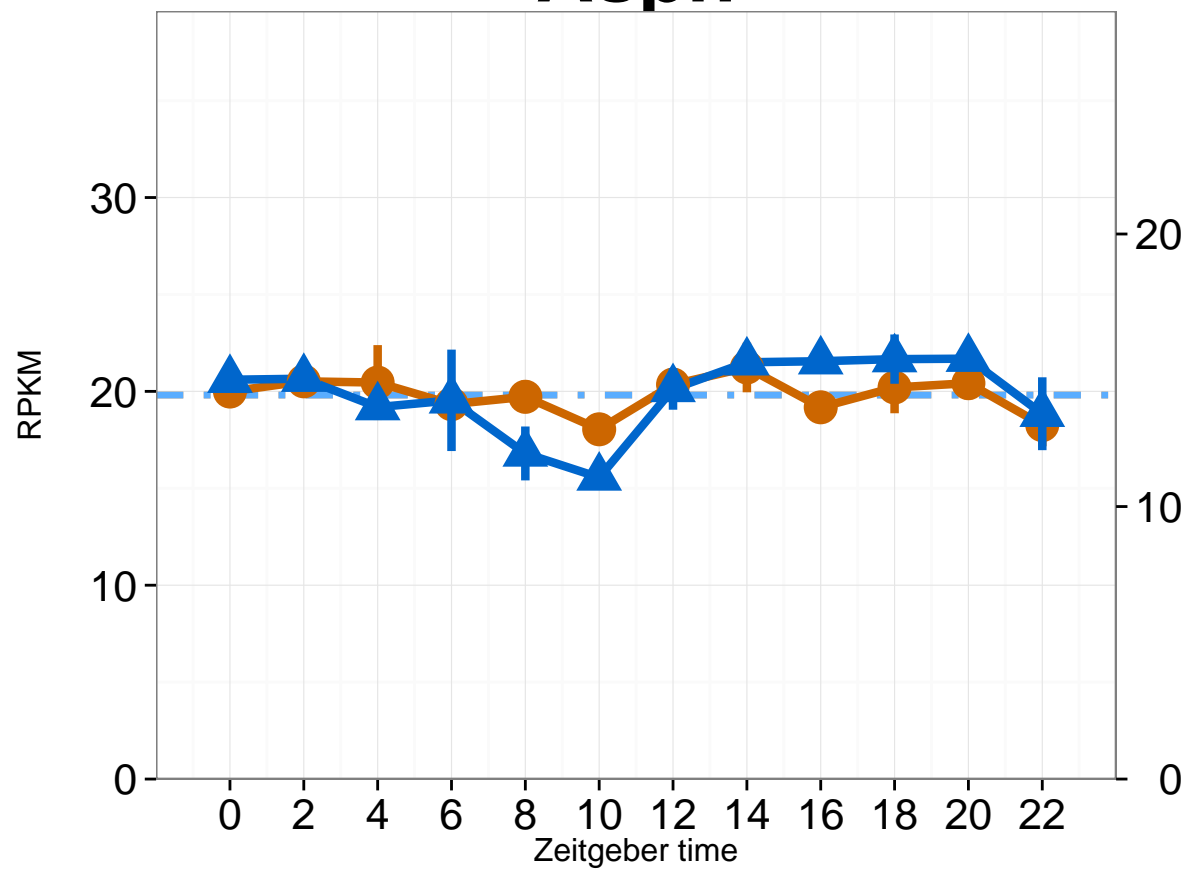

## Asph

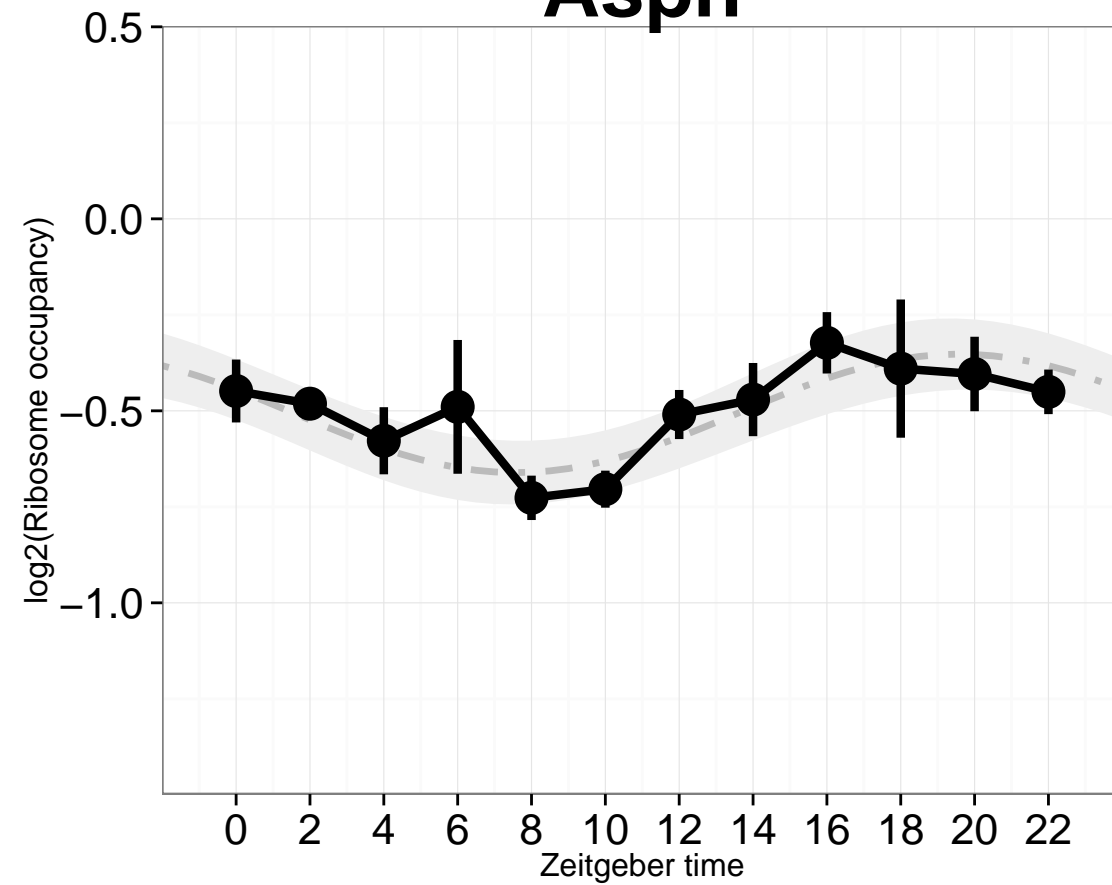

Supplement: SuppDataset_1.zip [file Asph_set_A.pdf › Supplemental Dataset 1/A-mRNA_nonrhyth_translation_nonrhyth/Asph_set_A.pdf]

## Aspm

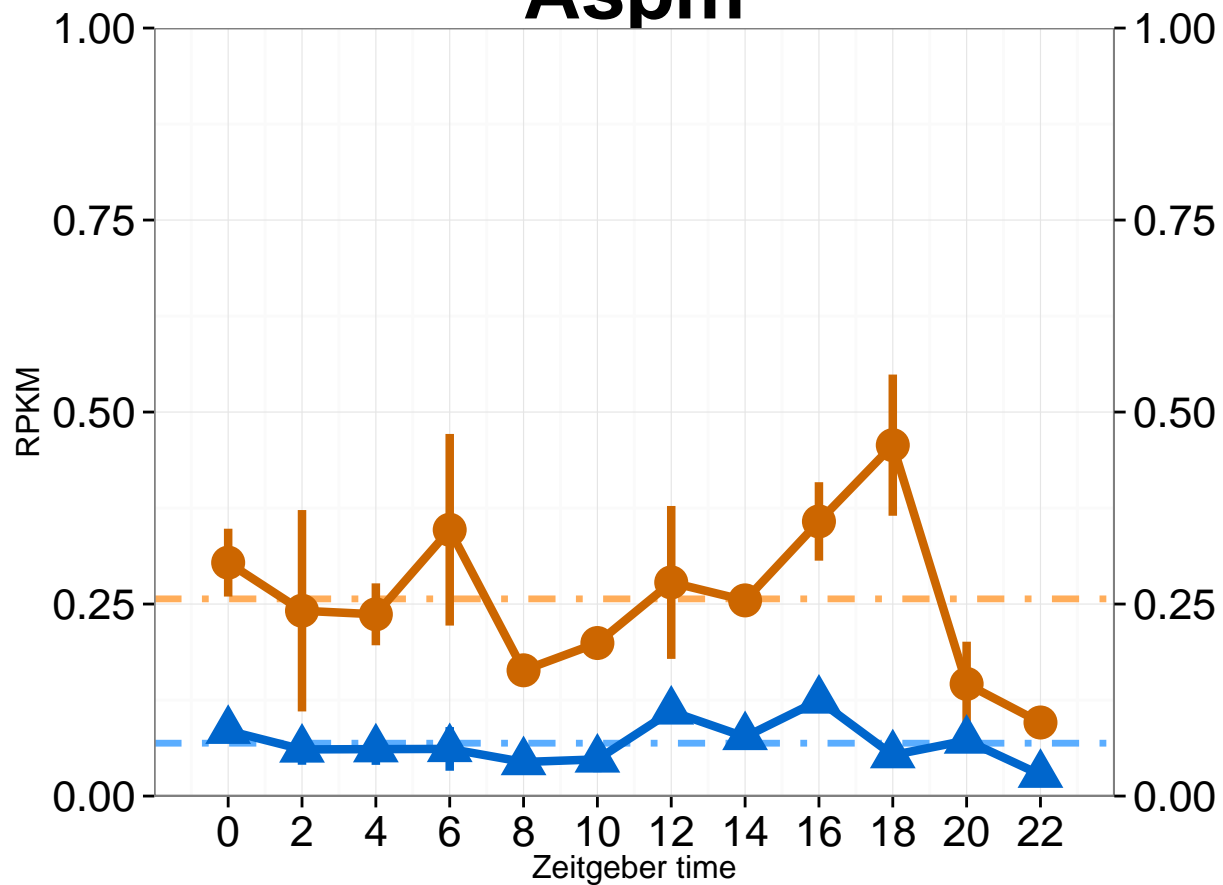

## Aspm

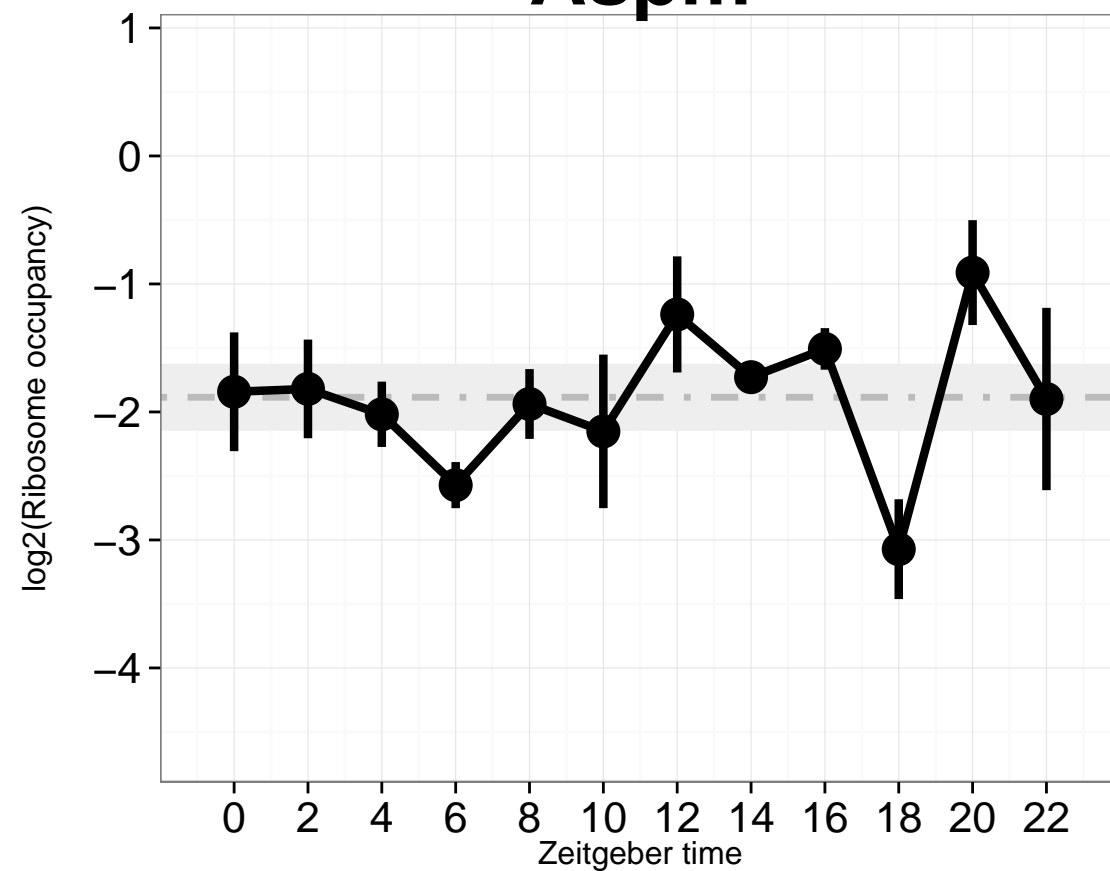

Supplement: SuppDataset_1.zip [file Aspm_set_A.pdf › Supplemental Dataset 1/A-mRNA_nonrhyth_translation_nonrhyth/Aspm_set_A.pdf]

## Aspscr1

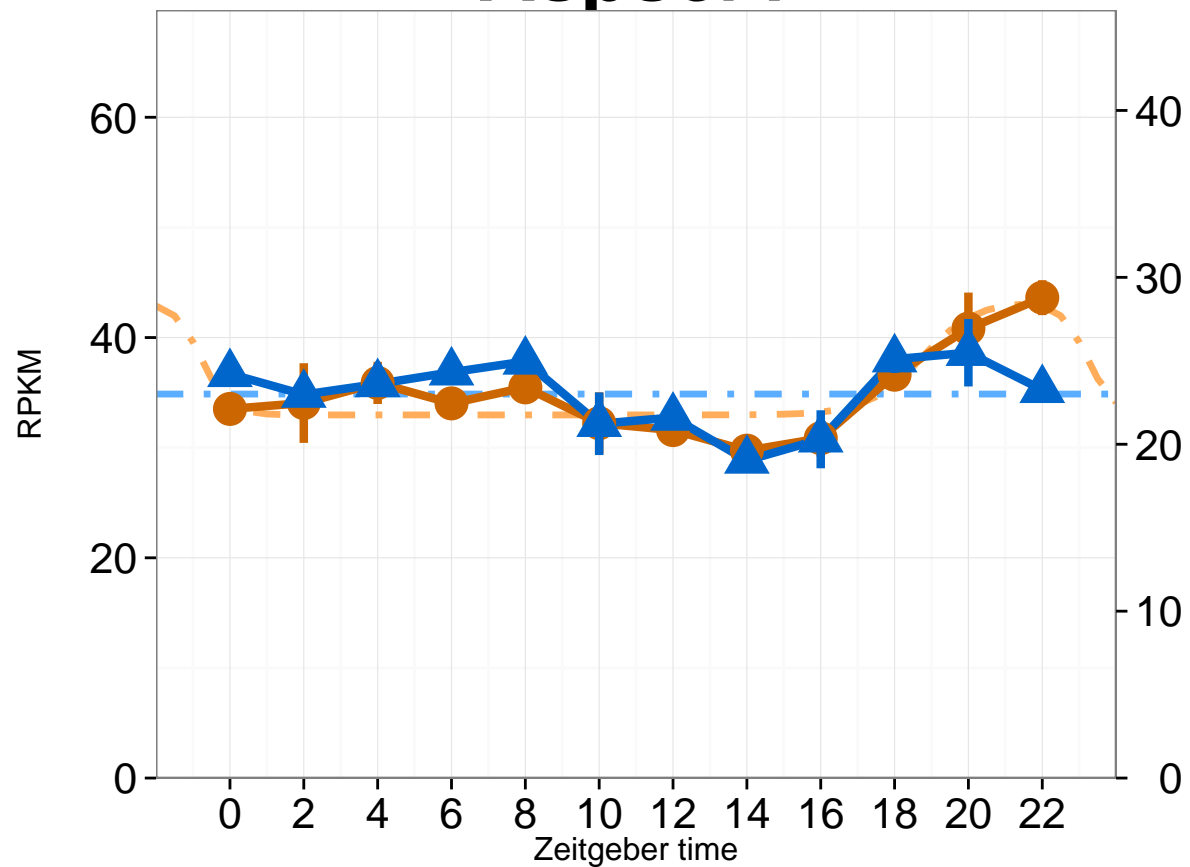

## Aspscr1

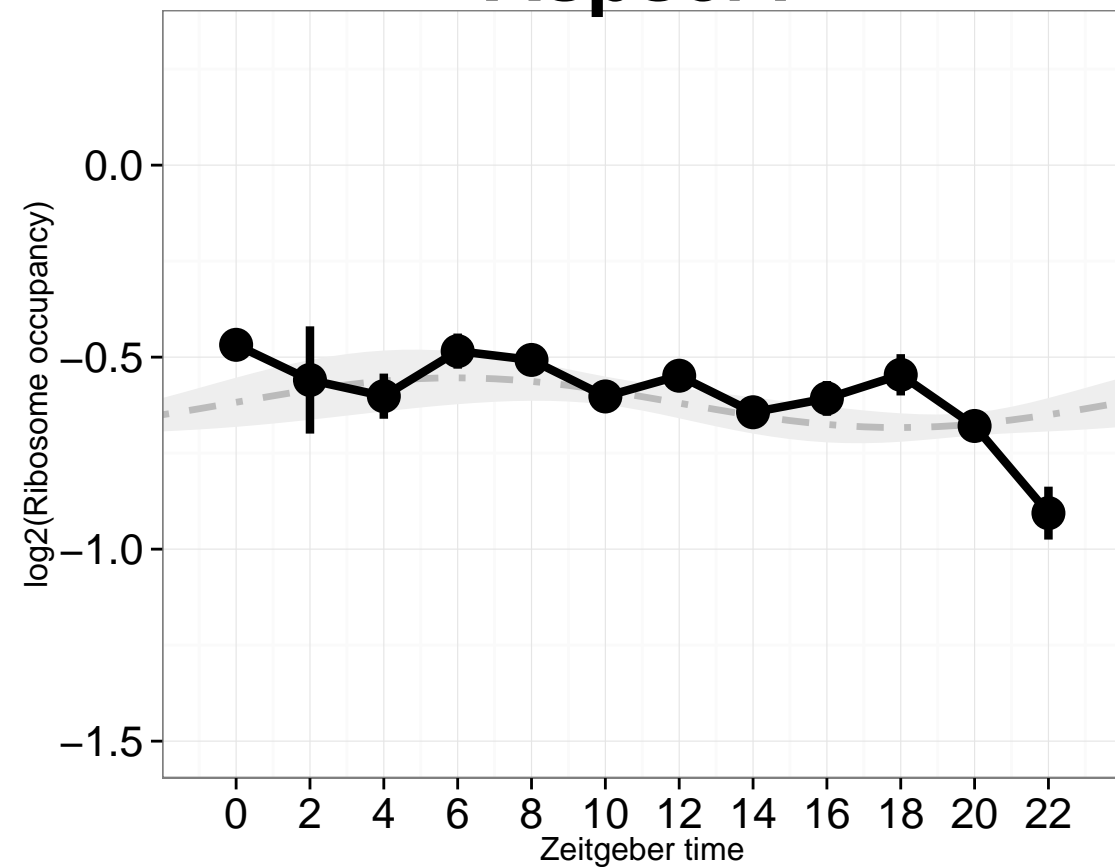

Supplement: SuppDataset_1.zip [file Aspscr1_set_A.pdf › Supplemental Dataset 1/A-mRNA_nonrhyth_translation_nonrhyth/Aspscr1_set_A.pdf]

## Ass1

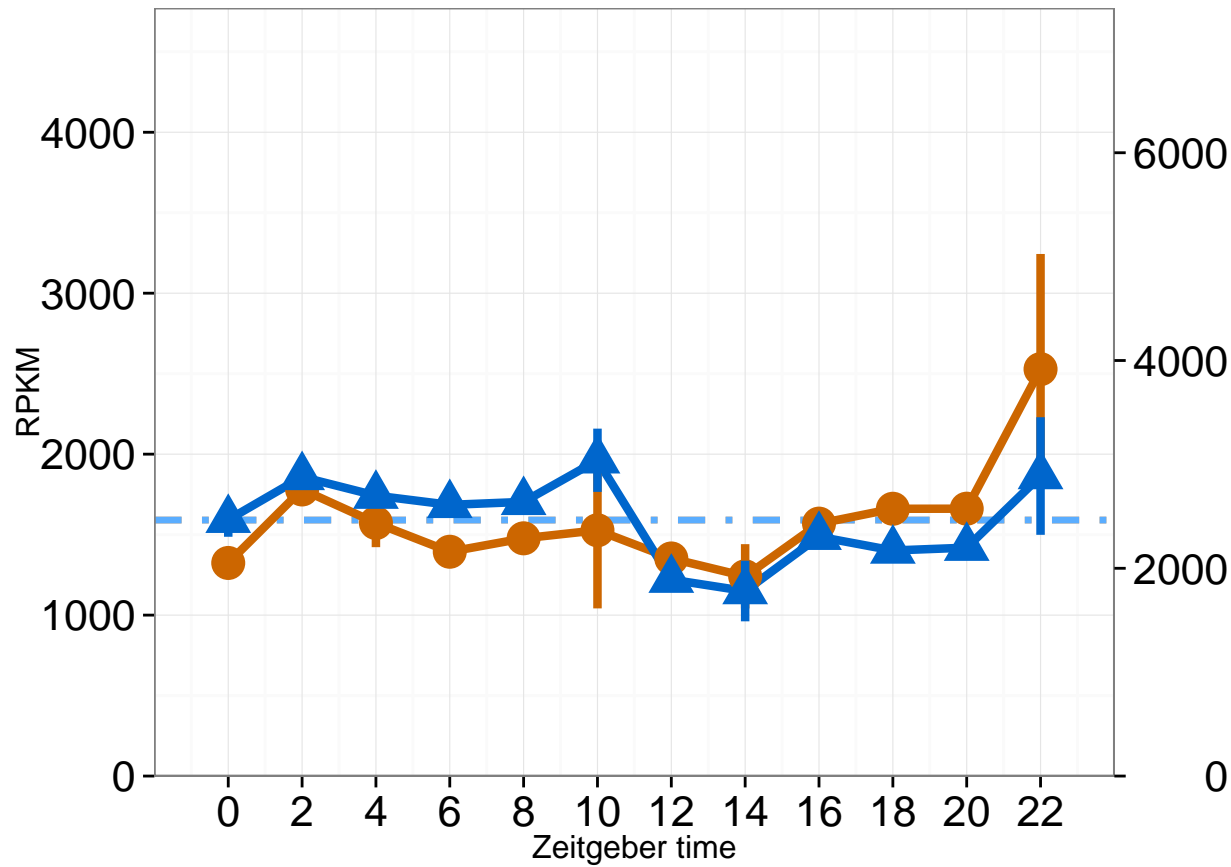

## Ass1

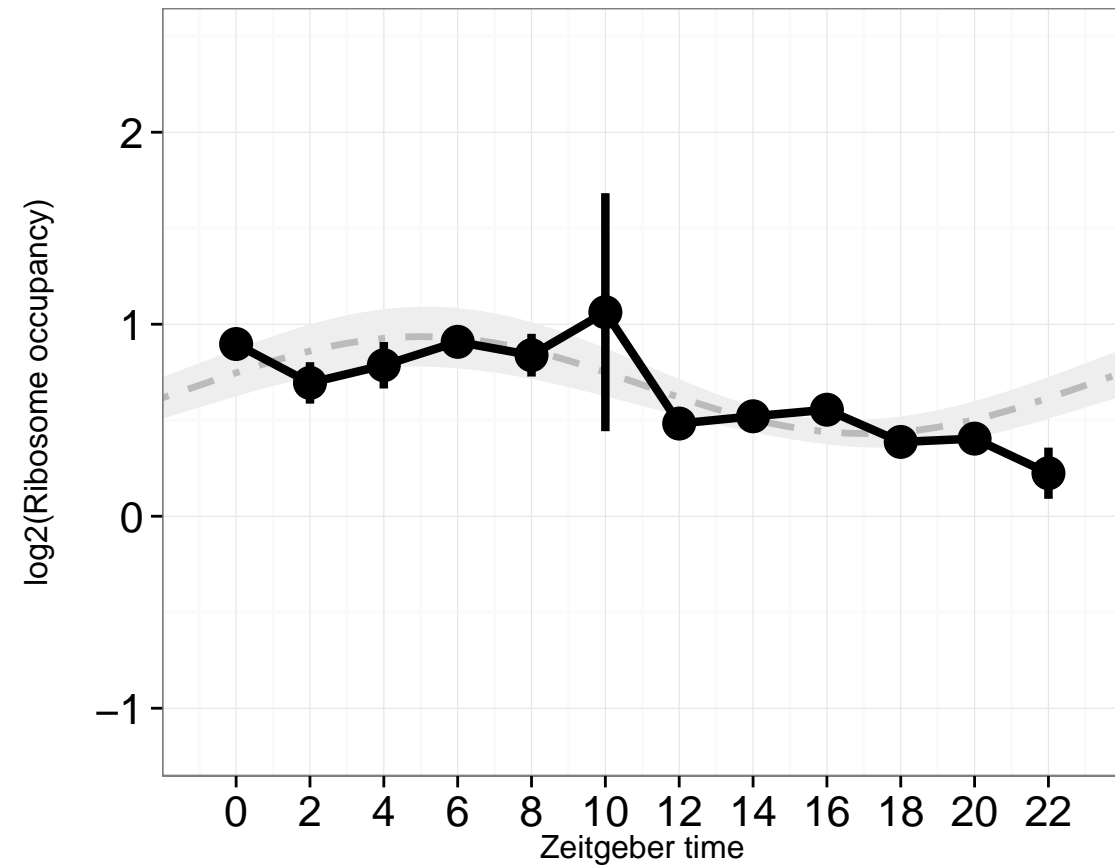

Supplement: SuppDataset_1.zip [file Ass1_set_A.pdf › Supplemental Dataset 1/A-mRNA_nonrhyth_translation_nonrhyth/Ass1_set_A.pdf]

# Astn2

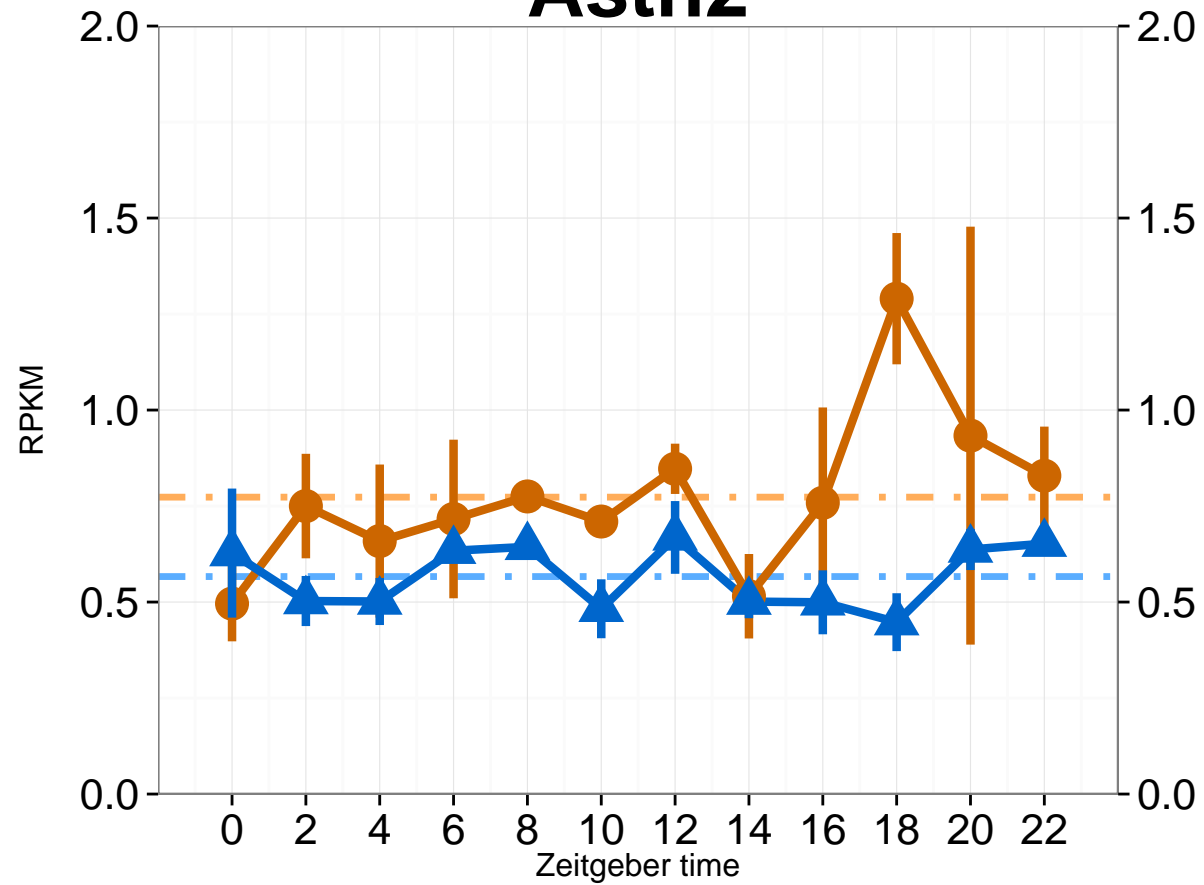

# Astn2

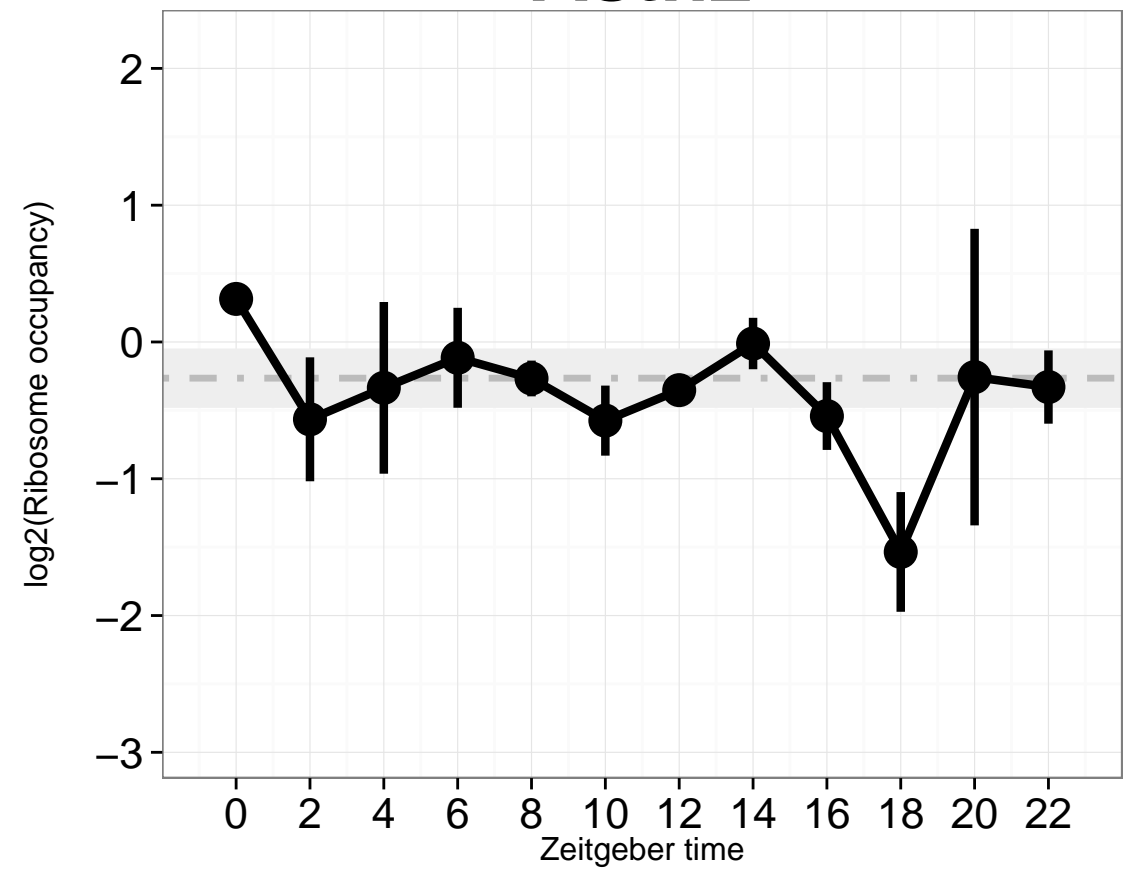

Supplement: SuppDataset_1.zip [file Astn2_set_A.pdf › Supplemental Dataset 1/A-mRNA_nonrhyth_translation_nonrhyth/Astn2_set_A.pdf]

## Asun

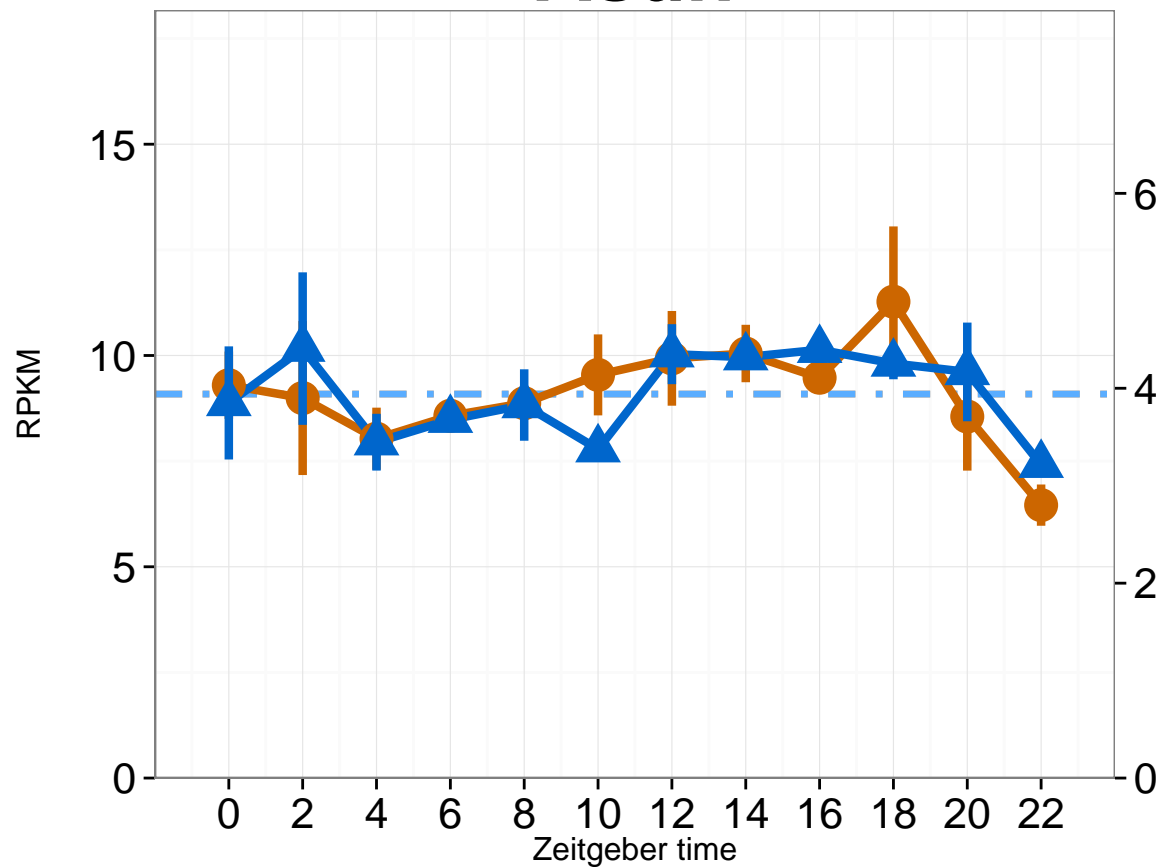

## Asun

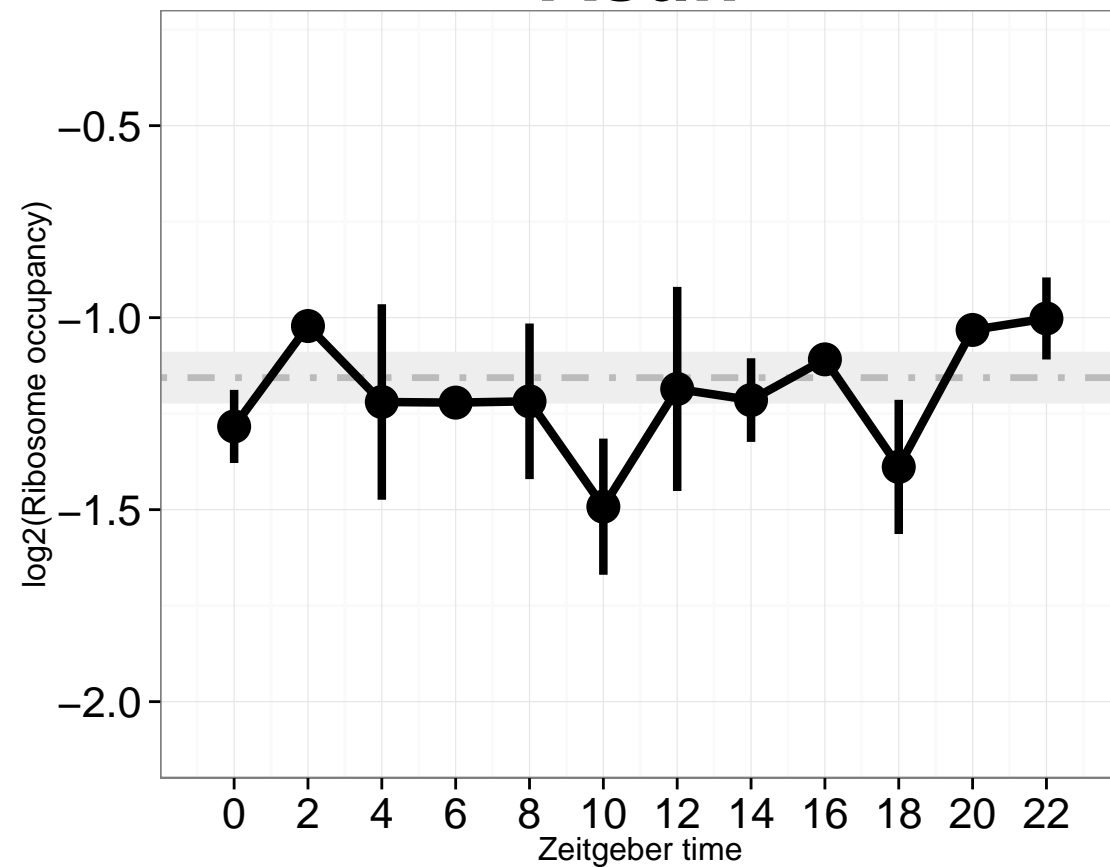

Supplement: SuppDataset_1.zip [file Asun_set_A.pdf › Supplemental Dataset 1/A-mRNA_nonrhyth_translation_nonrhyth/Asun_set_A.pdf]

## Asx1l

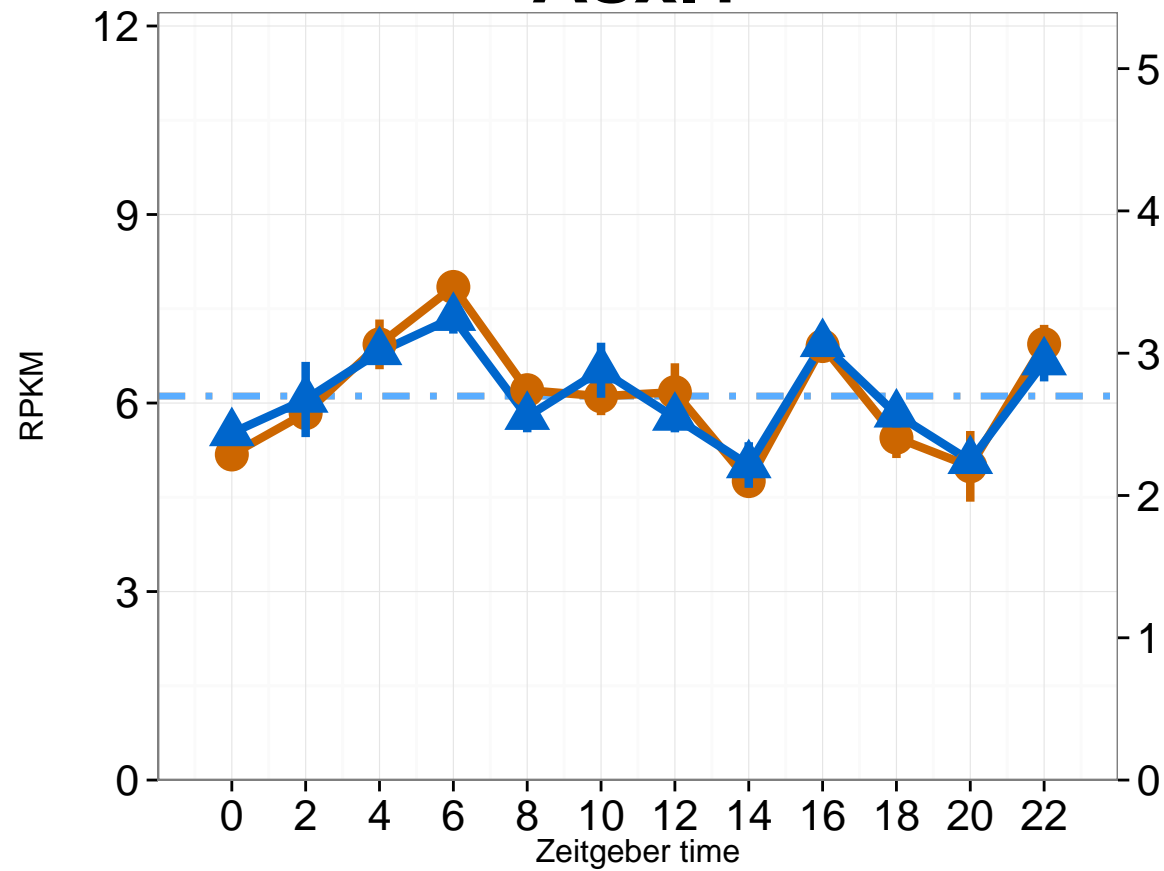

## Asx1l

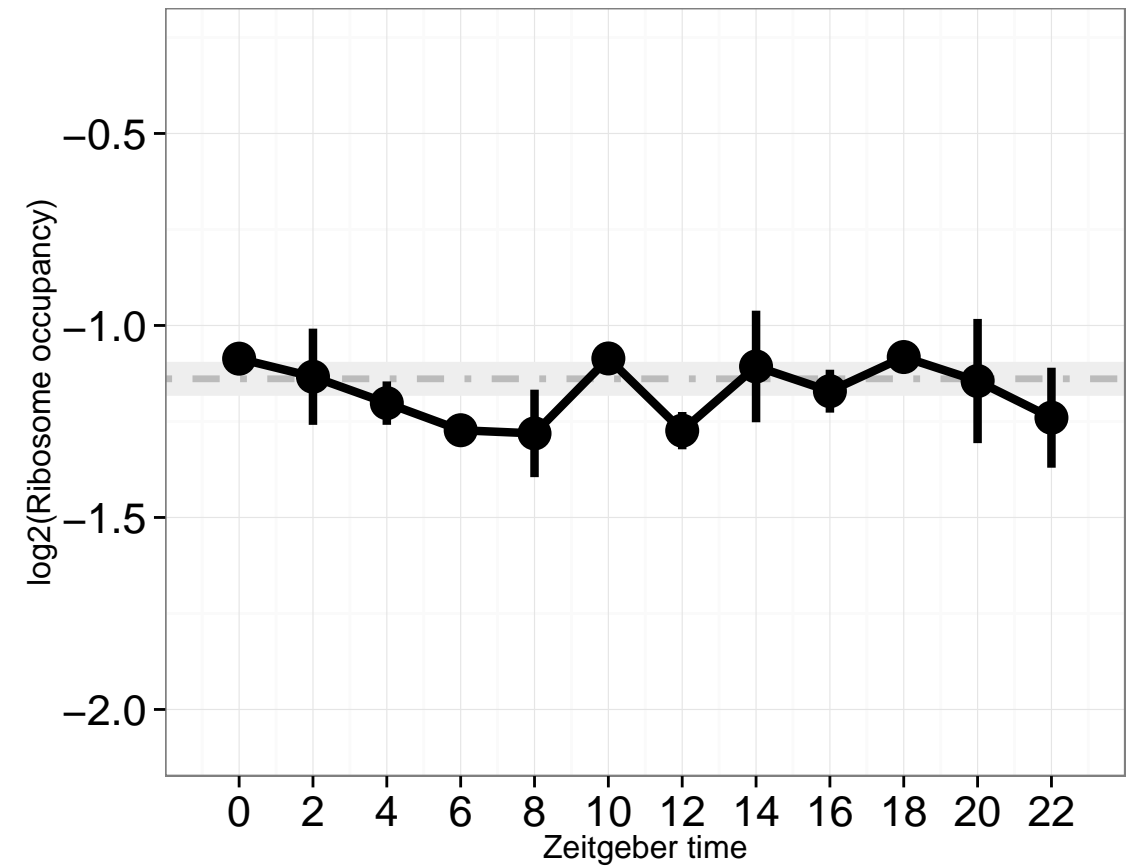

Supplement: SuppDataset_1.zip [file Asxl1_set_A.pdf › Supplemental Dataset 1/A-mRNA_nonrhyth_translation_nonrhyth/Asxl1_set_A.pdf]

## Asx12

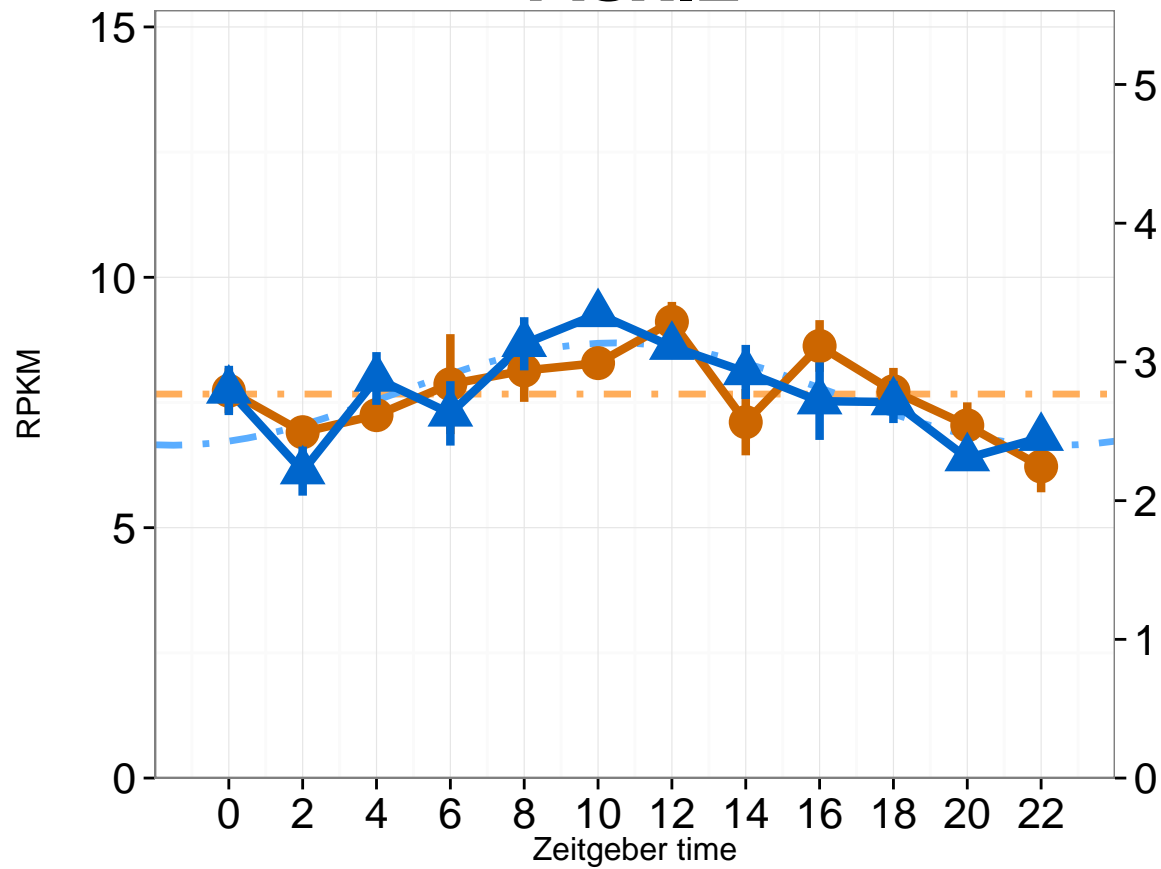

## Asx12

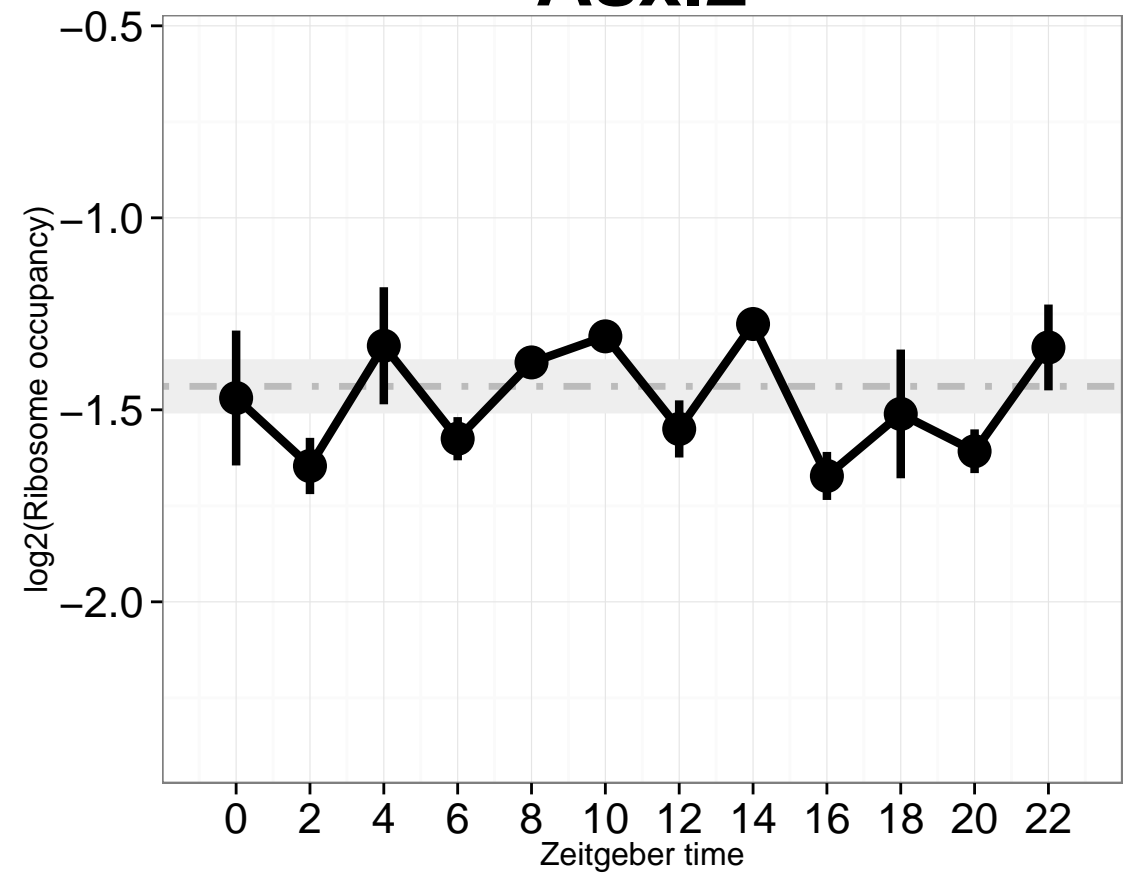

Supplement: SuppDataset_1.zip [file Asxl2_set_A.pdf › Supplemental Dataset 1/A-mRNA_nonrhyth_translation_nonrhyth/Asxl2_set_A.pdf]

## Atad1

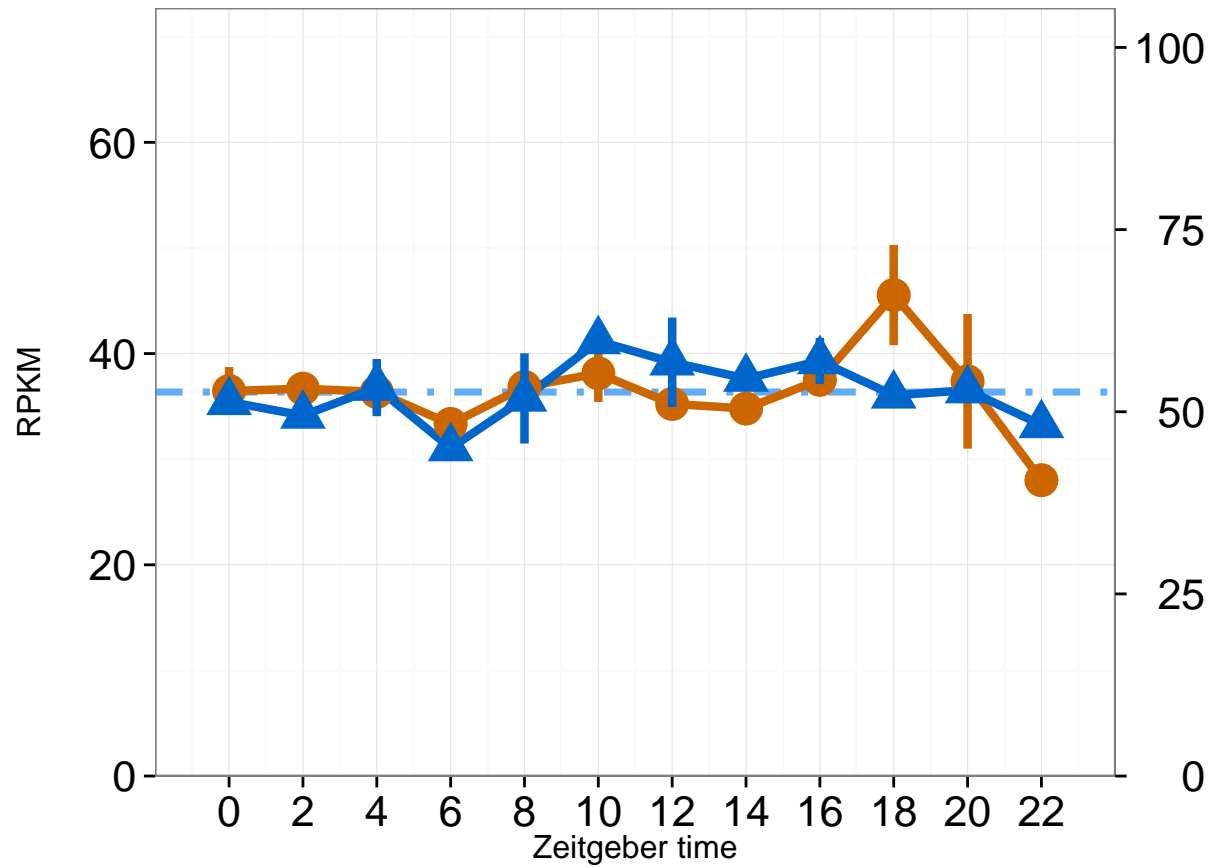

## Atad1

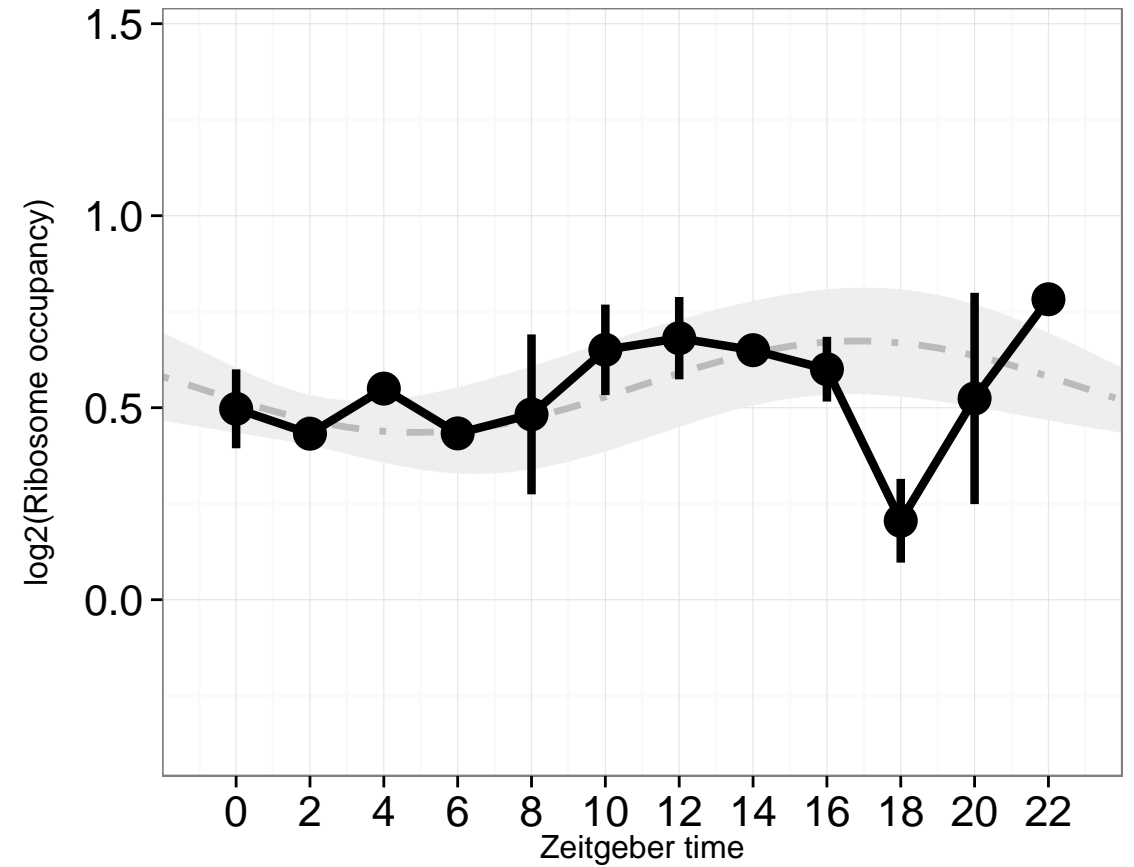

Supplement: SuppDataset_1.zip [file Atad1_set_A.pdf › Supplemental Dataset 1/A-mRNA_nonrhyth_translation_nonrhyth/Atad1_set_A.pdf]

# Atad2b

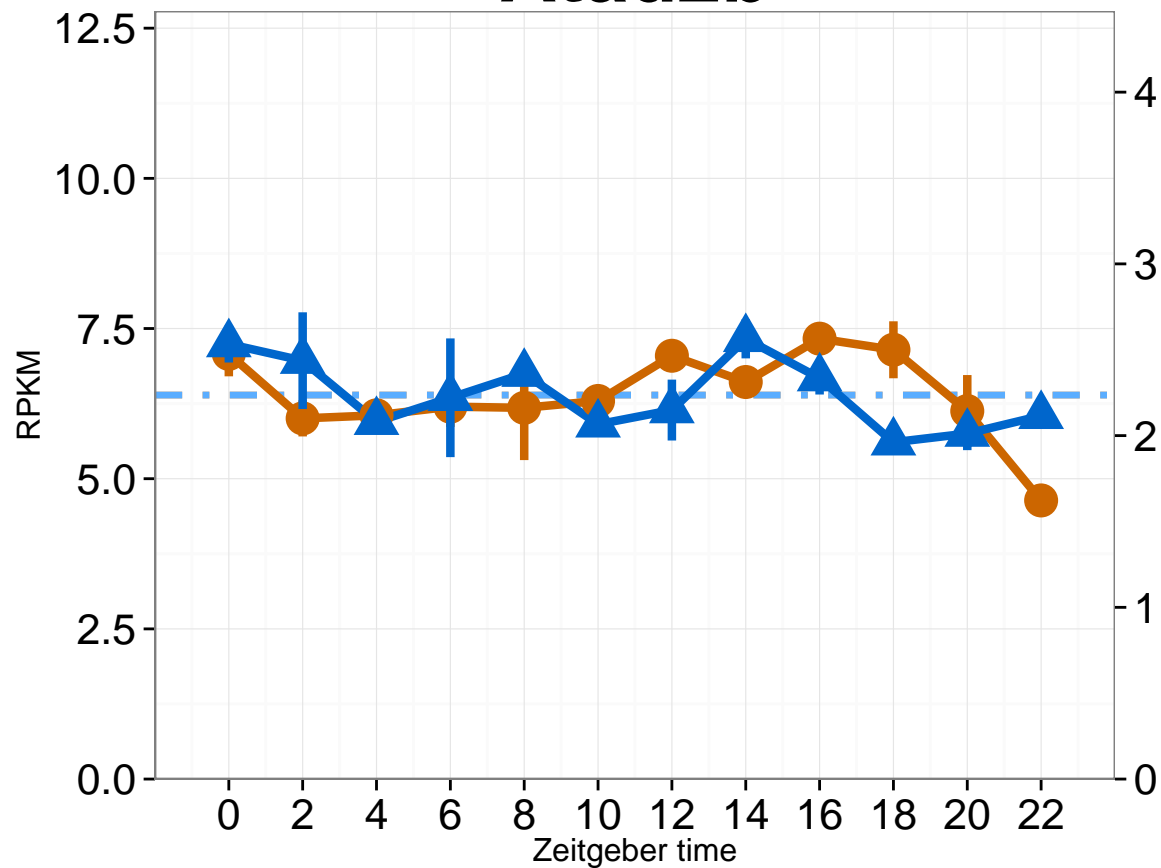

# Atad2b

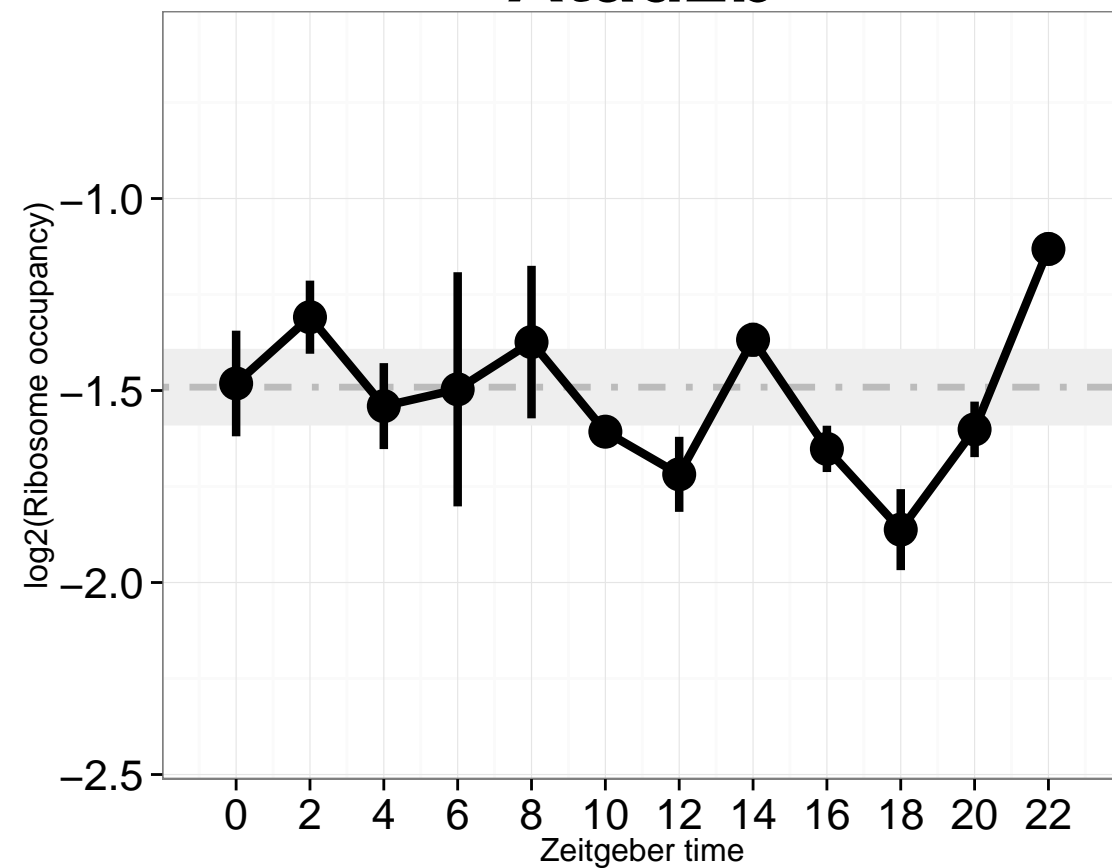

Supplement: SuppDataset_1.zip [file Atad2b_set_A.pdf › Supplemental Dataset 1/A-mRNA_nonrhyth_translation_nonrhyth/Atad2b_set_A.pdf]

# Atad3a

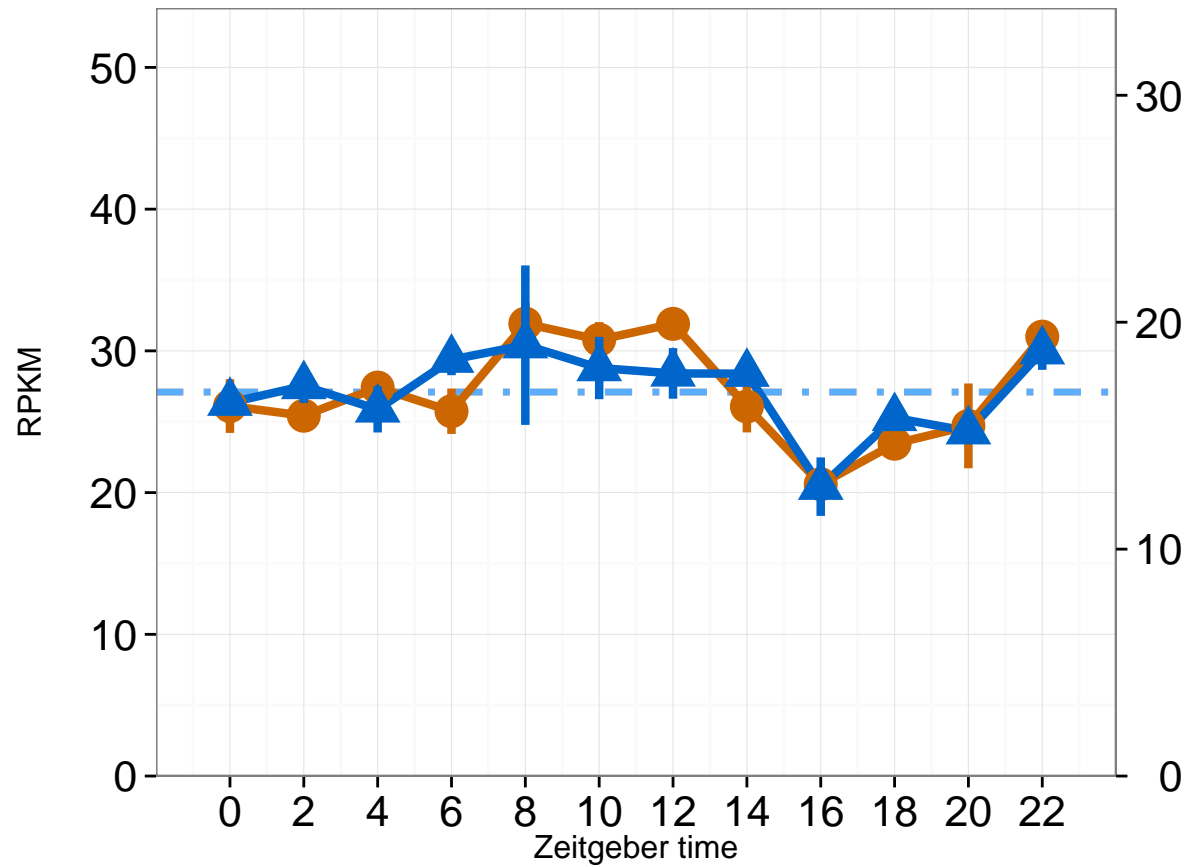

# Atad3a

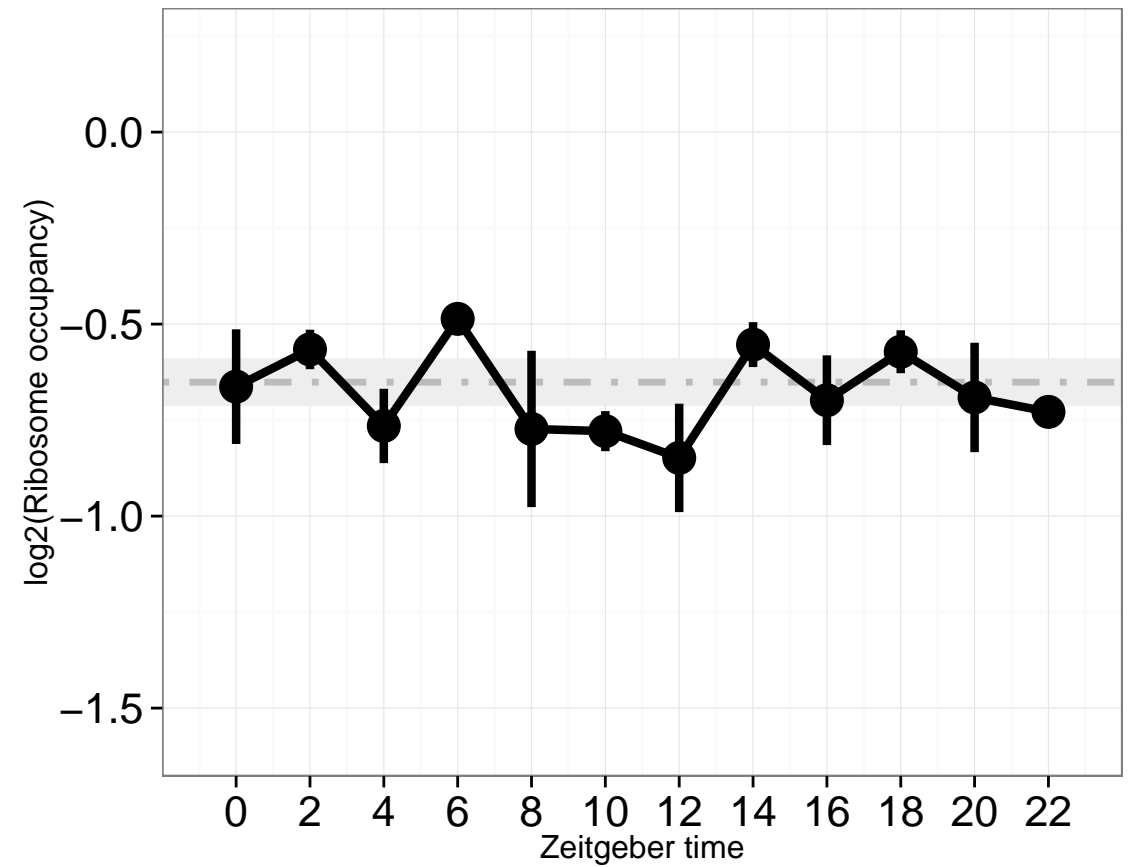

Supplement: SuppDataset_1.zip [file Atad3a_set_A.pdf › Supplemental Dataset 1/A-mRNA_nonrhyth_translation_nonrhyth/Atad3a_set_A.pdf]

# Atad5

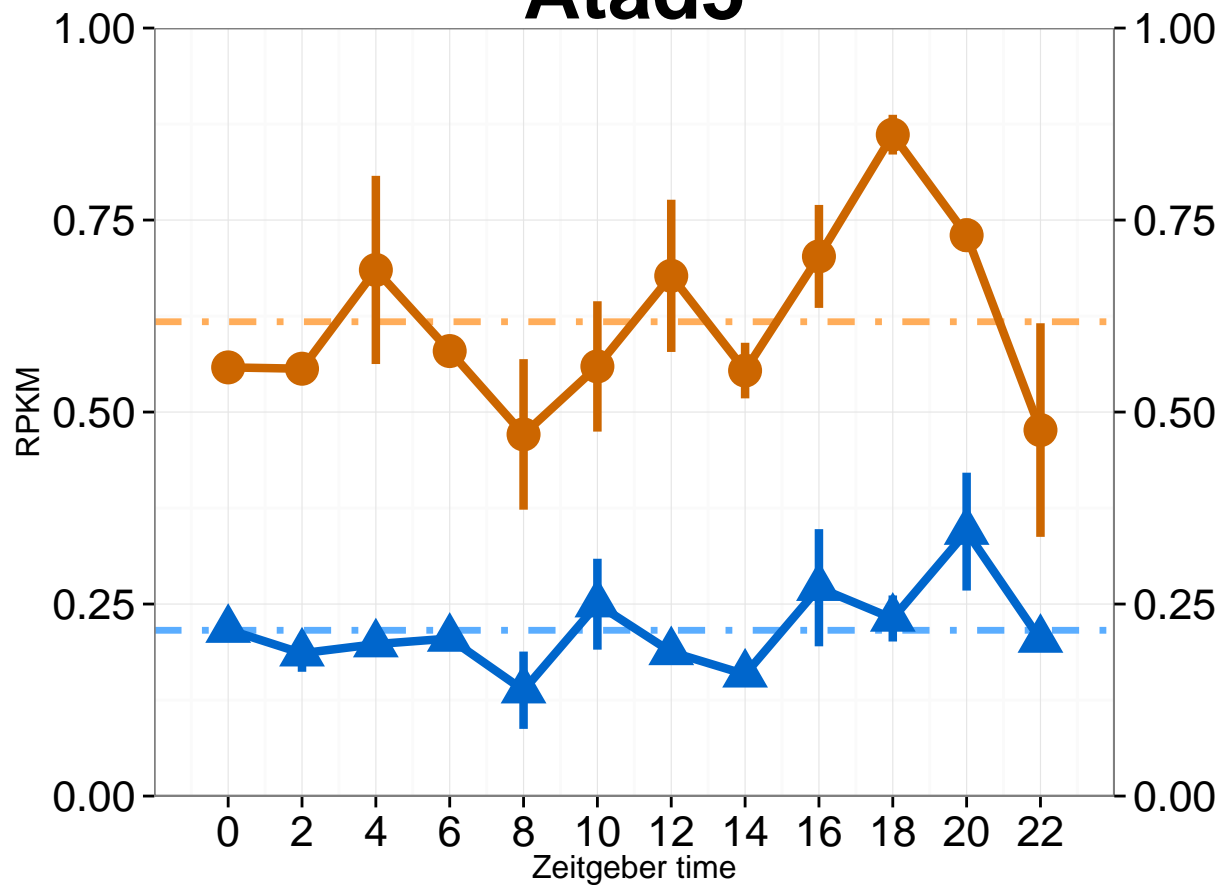

# Atad5

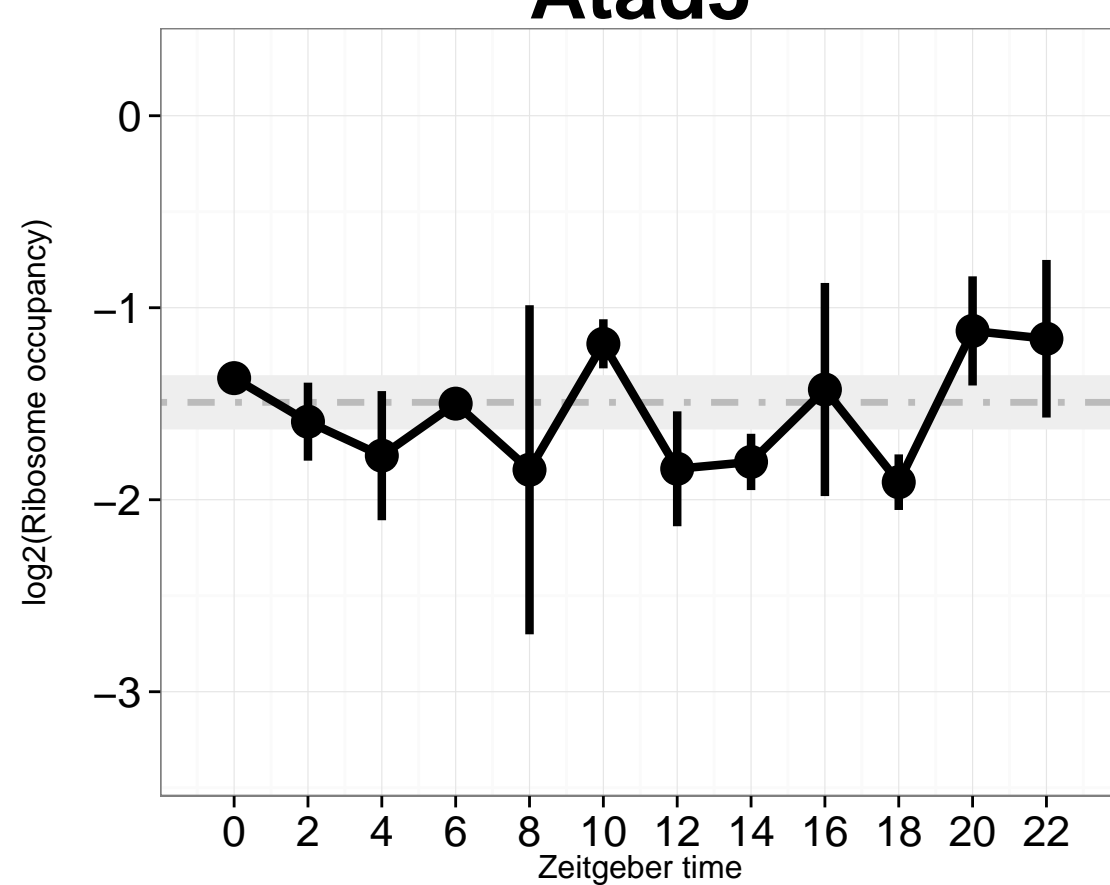

Supplement: SuppDataset_1.zip [file Atad5_set_A.pdf › Supplemental Dataset 1/A-mRNA_nonrhyth_translation_nonrhyth/Atad5_set_A.pdf]

## Ate1

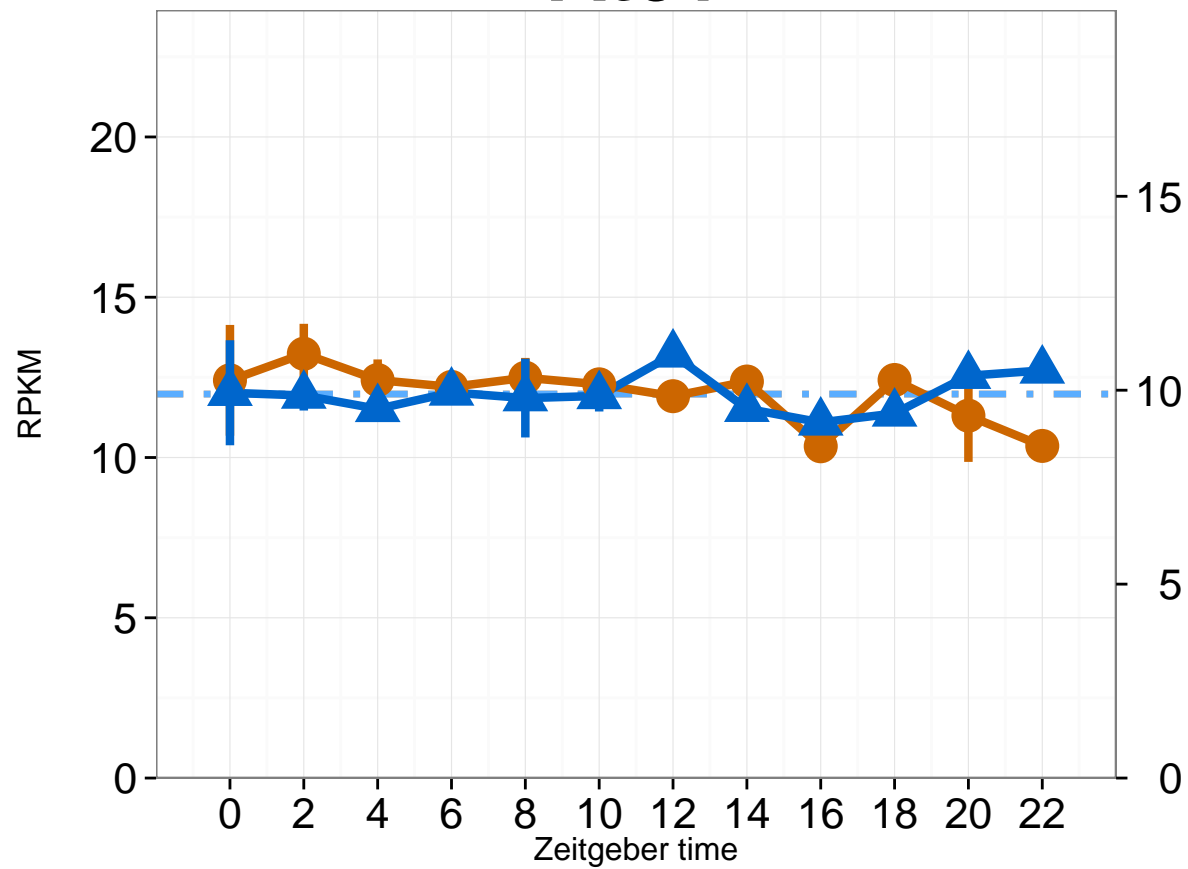

## Ate1

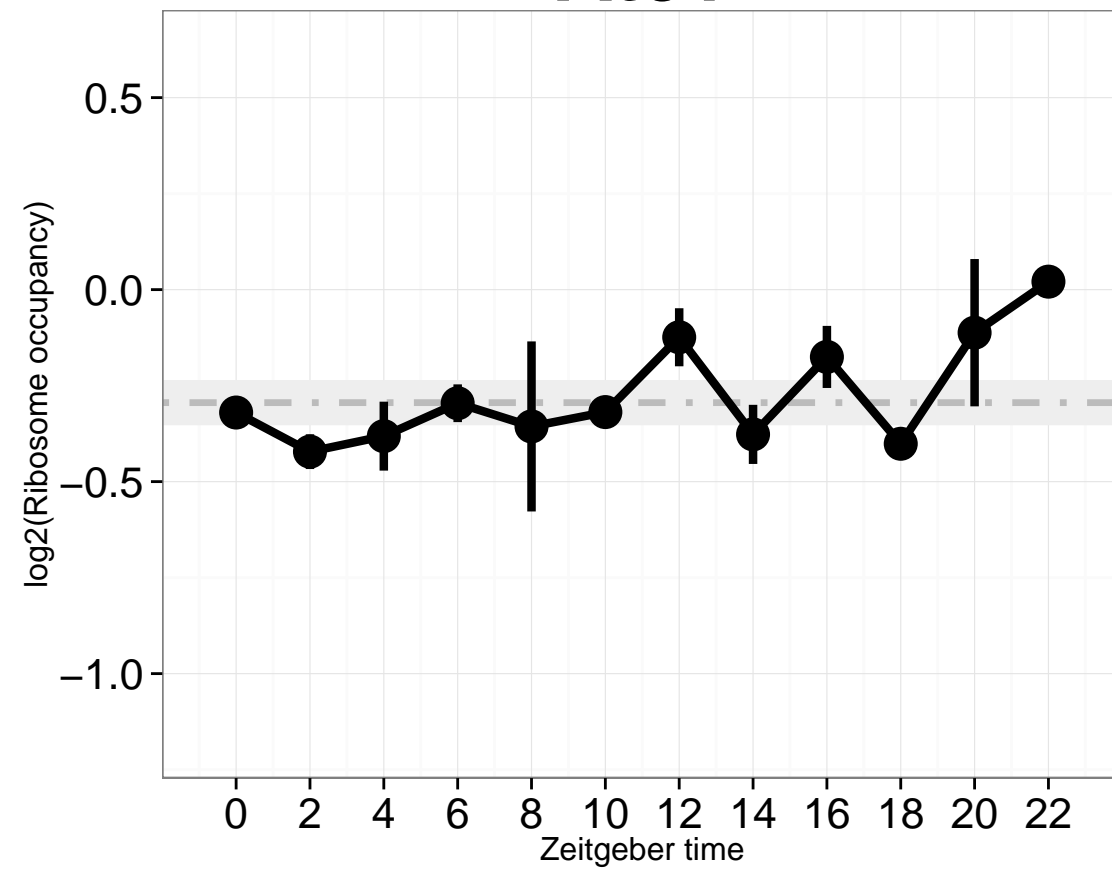

Supplement: SuppDataset_1.zip [file Ate1_set_A.pdf › Supplemental Dataset 1/A-mRNA_nonrhyth_translation_nonrhyth/Ate1_set_A.pdf]

## Atf1

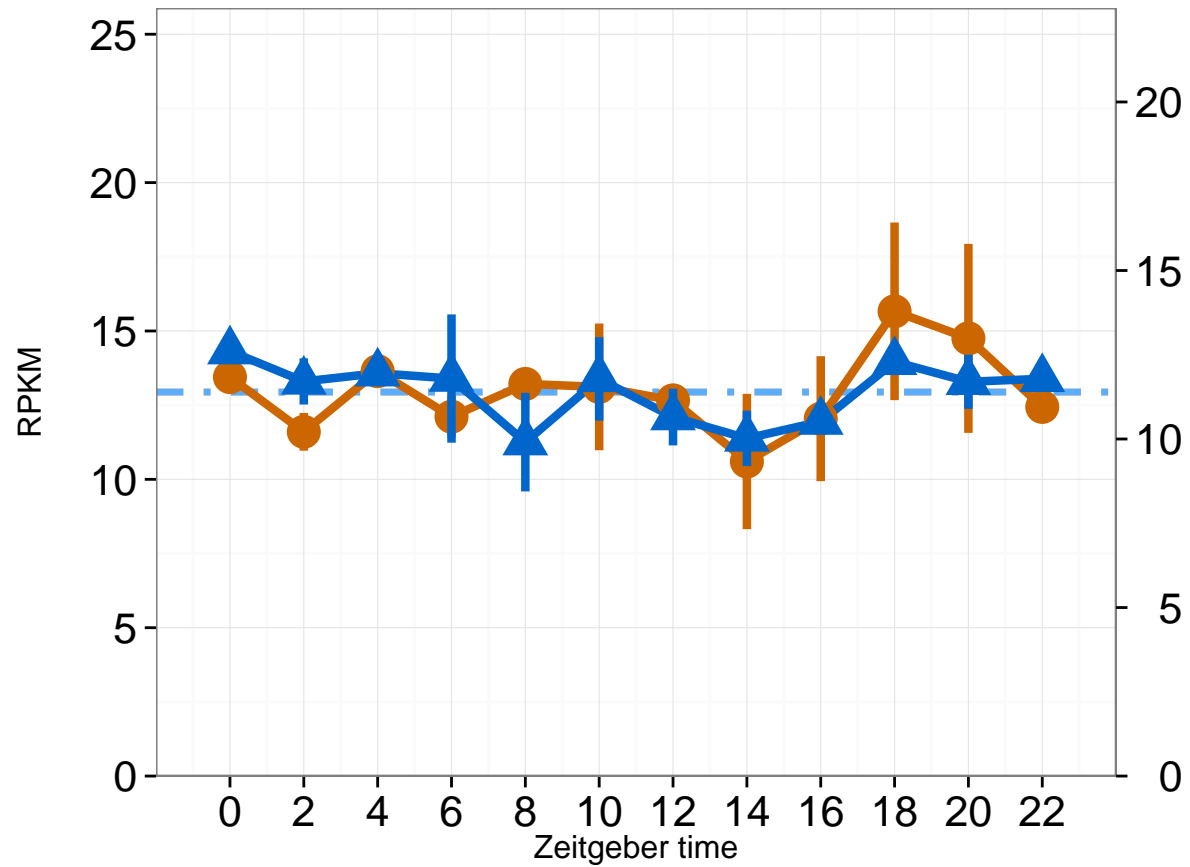

## Atf1

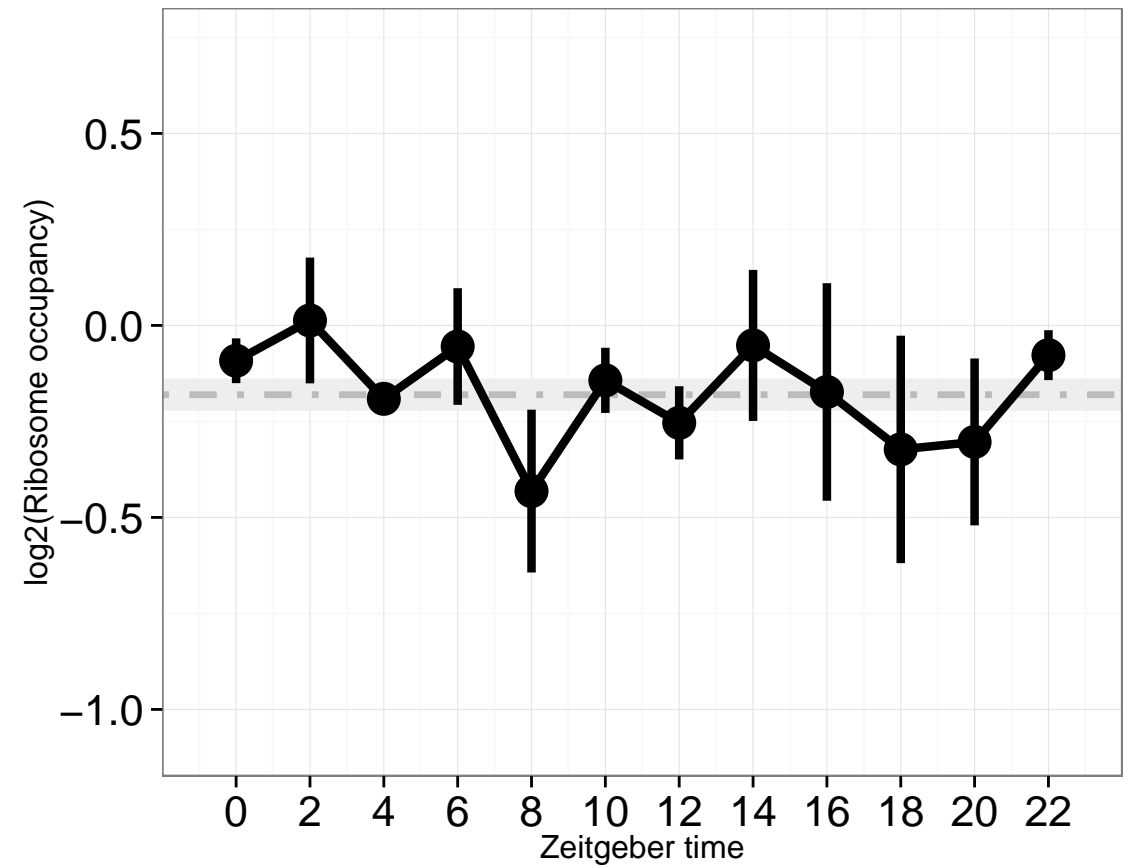

Supplement: SuppDataset_1.zip [file Atf1_set_A.pdf › Supplemental Dataset 1/A-mRNA_nonrhyth_translation_nonrhyth/Atf1_set_A.pdf]

## Atf2

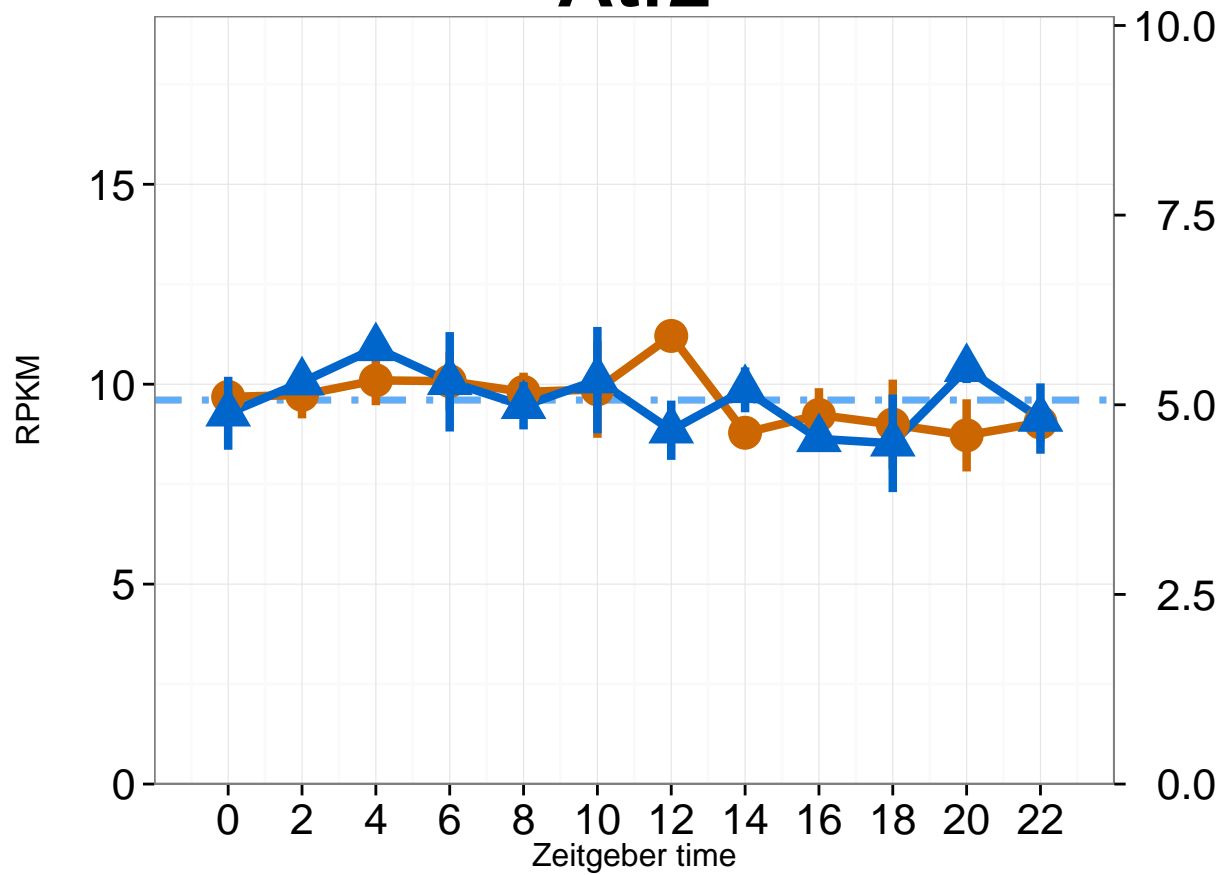

## Atf2

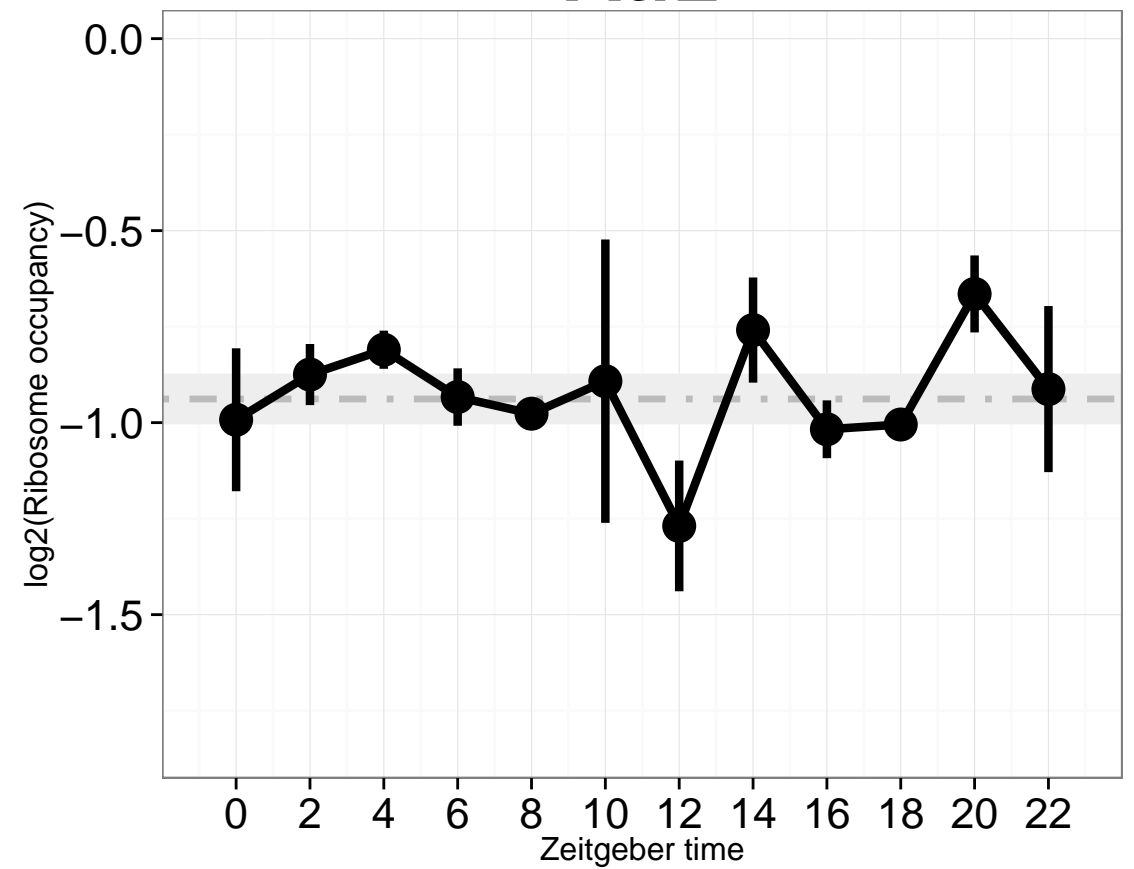

Supplement: SuppDataset_1.zip [file Atf2_set_A.pdf › Supplemental Dataset 1/A-mRNA_nonrhyth_translation_nonrhyth/Atf2_set_A.pdf]

## Atf4

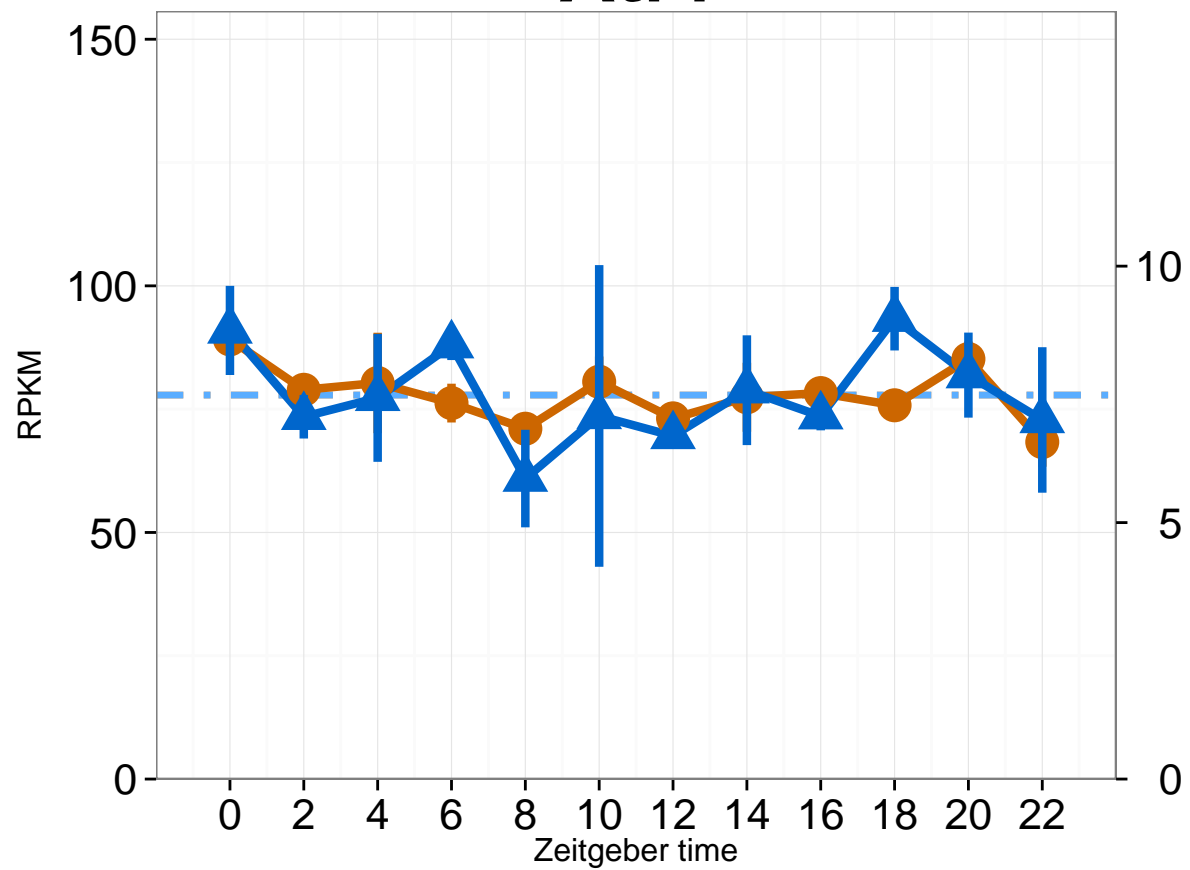

## Atf4

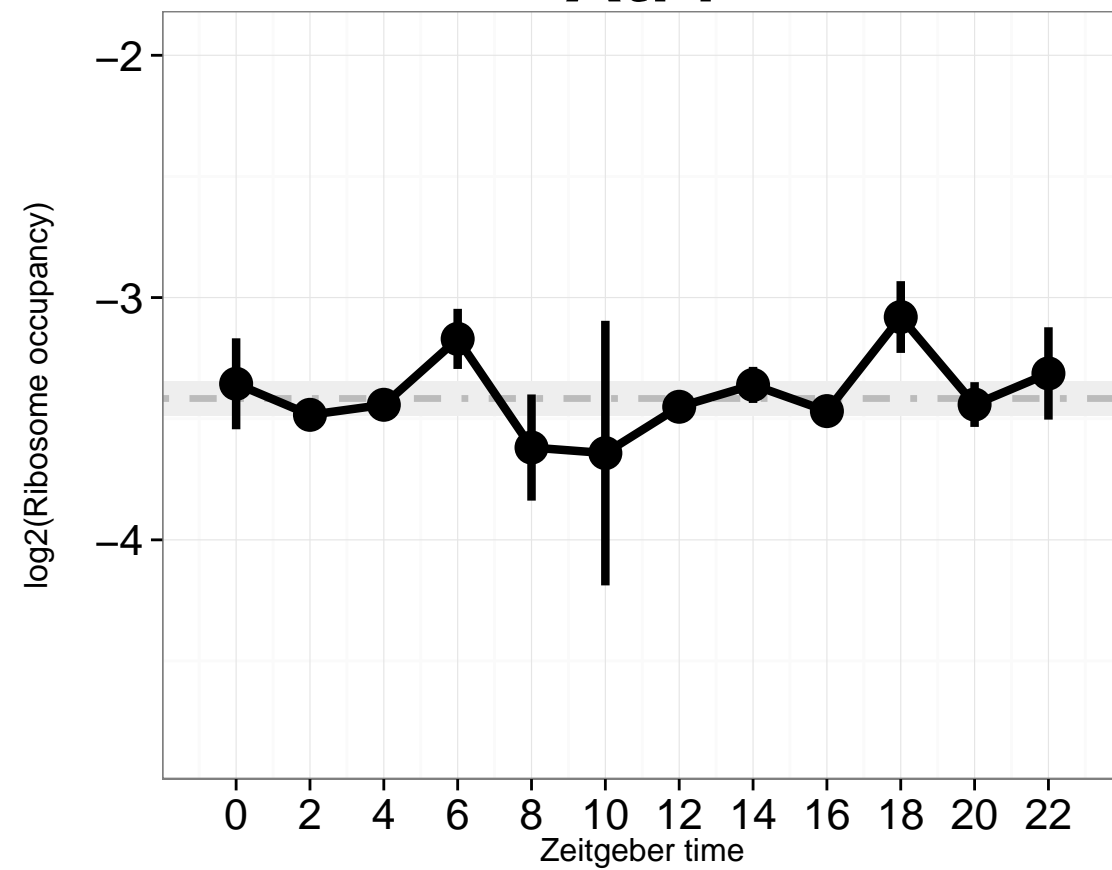

Supplement: SuppDataset_1.zip [file Atf4_set_A.pdf › Supplemental Dataset 1/A-mRNA_nonrhyth_translation_nonrhyth/Atf4_set_A.pdf]

## Atf6

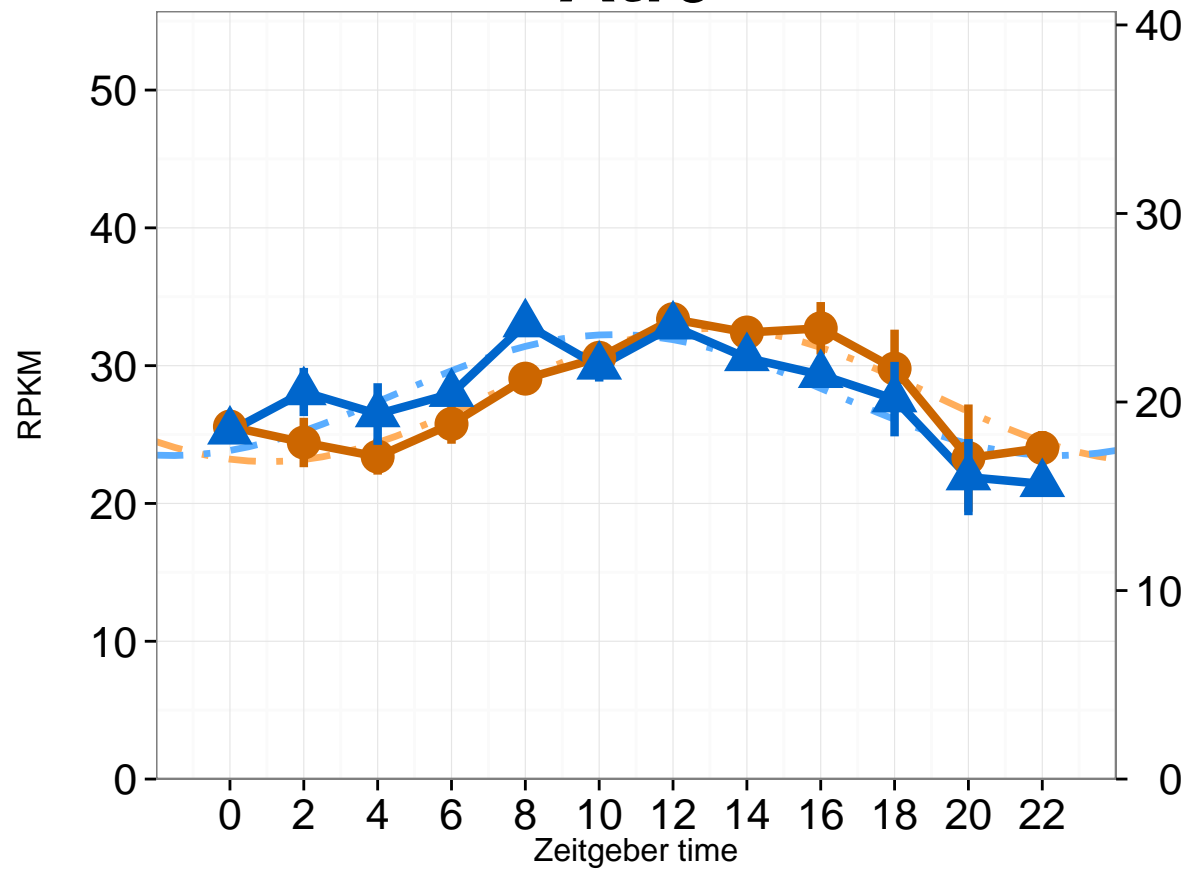

## Atf6

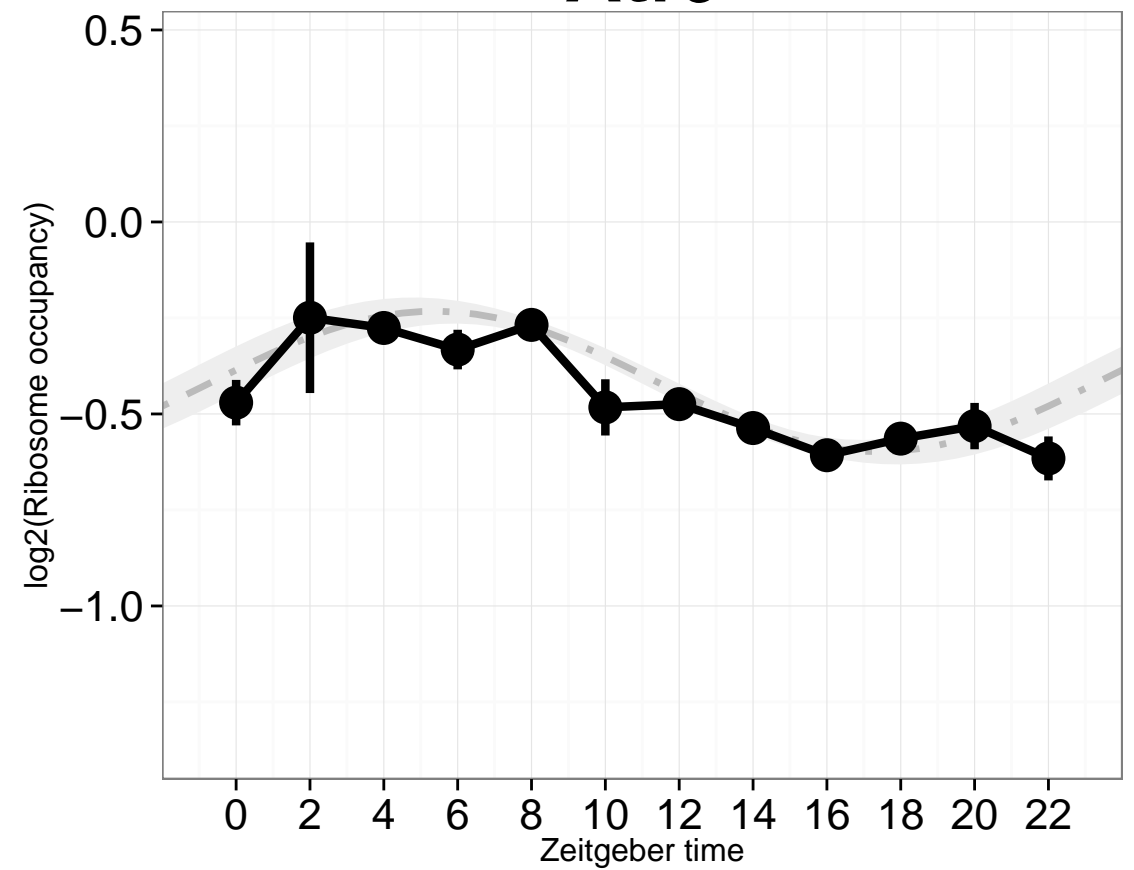

Supplement: SuppDataset_1.zip [file Atf6_set_A.pdf › Supplemental Dataset 1/A-mRNA_nonrhyth_translation_nonrhyth/Atf6_set_A.pdf]

## Atf7ip

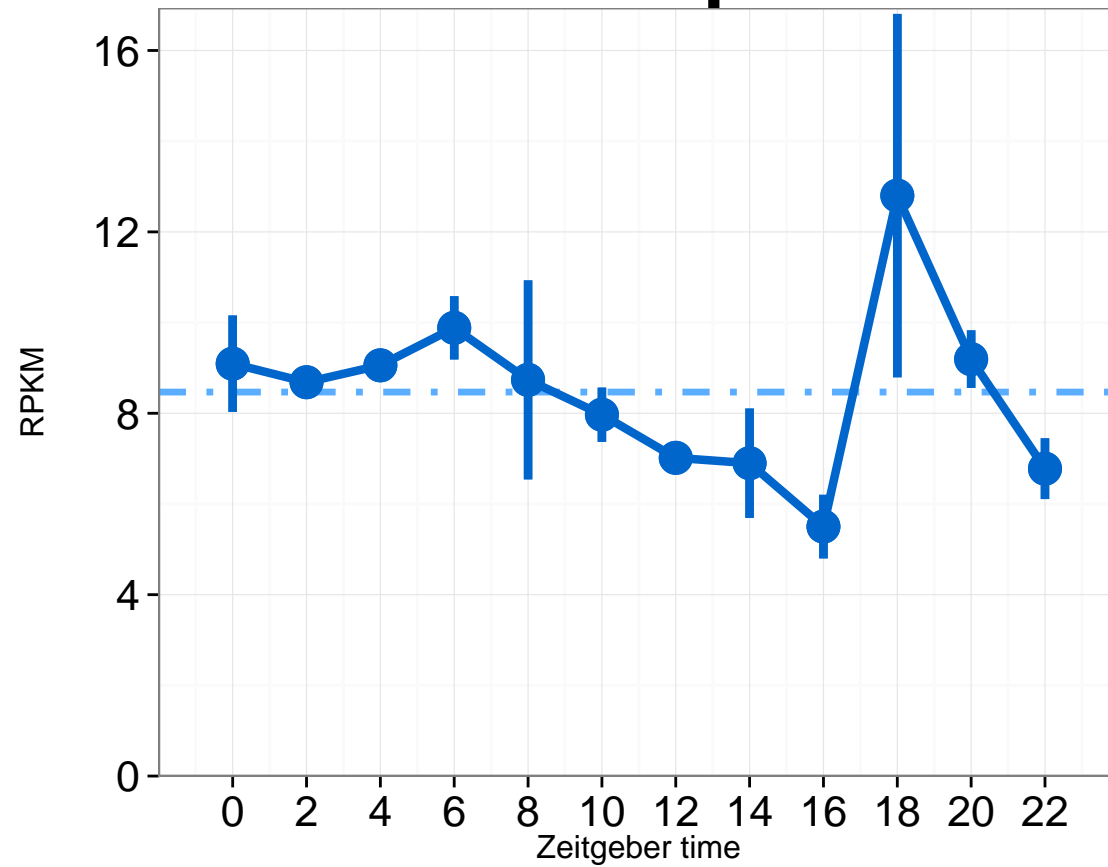

## Atf7ip log2(Ribosome occupancy

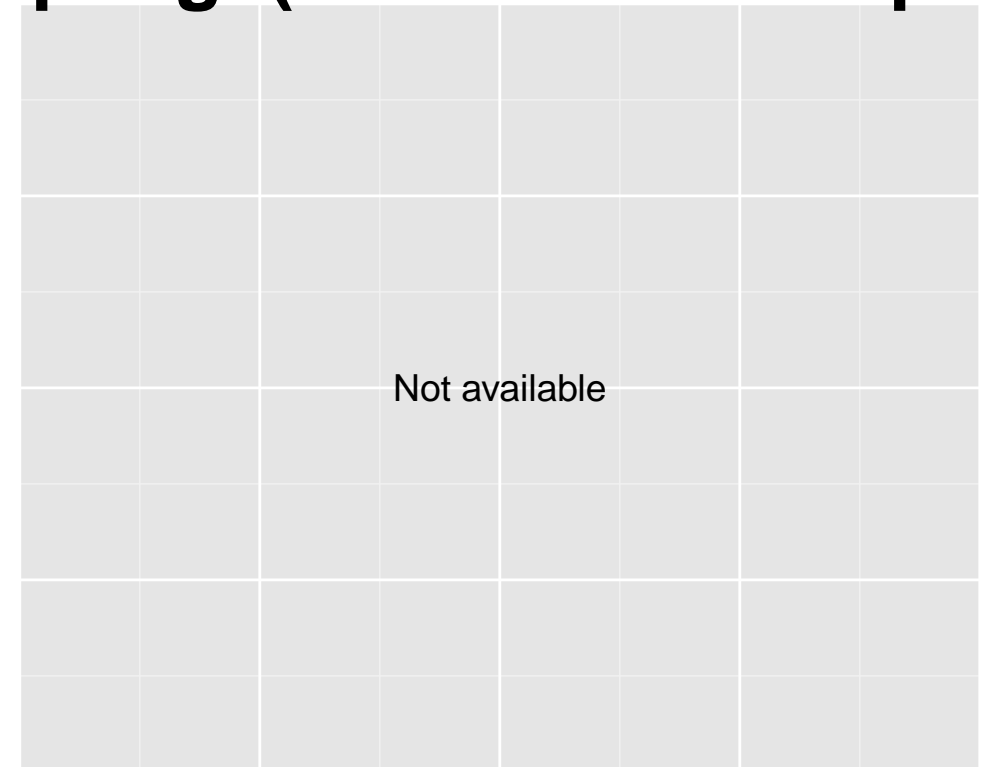

Supplement: SuppDataset_1.zip [file Atf7ip_set_A.pdf › Supplemental Dataset 1/A-mRNA_nonrhyth_translation_nonrhyth/Atf7ip_set_A.pdf]

# Atg10

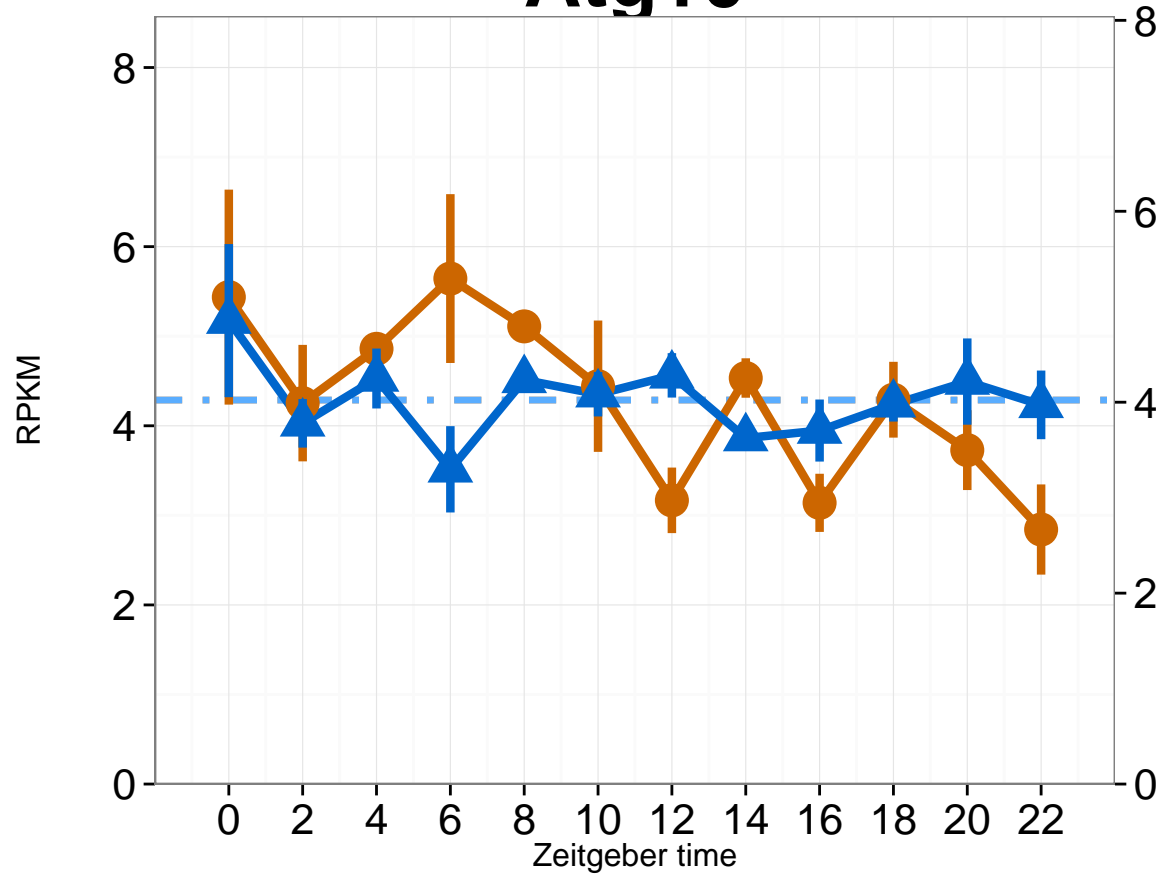

# Atg10

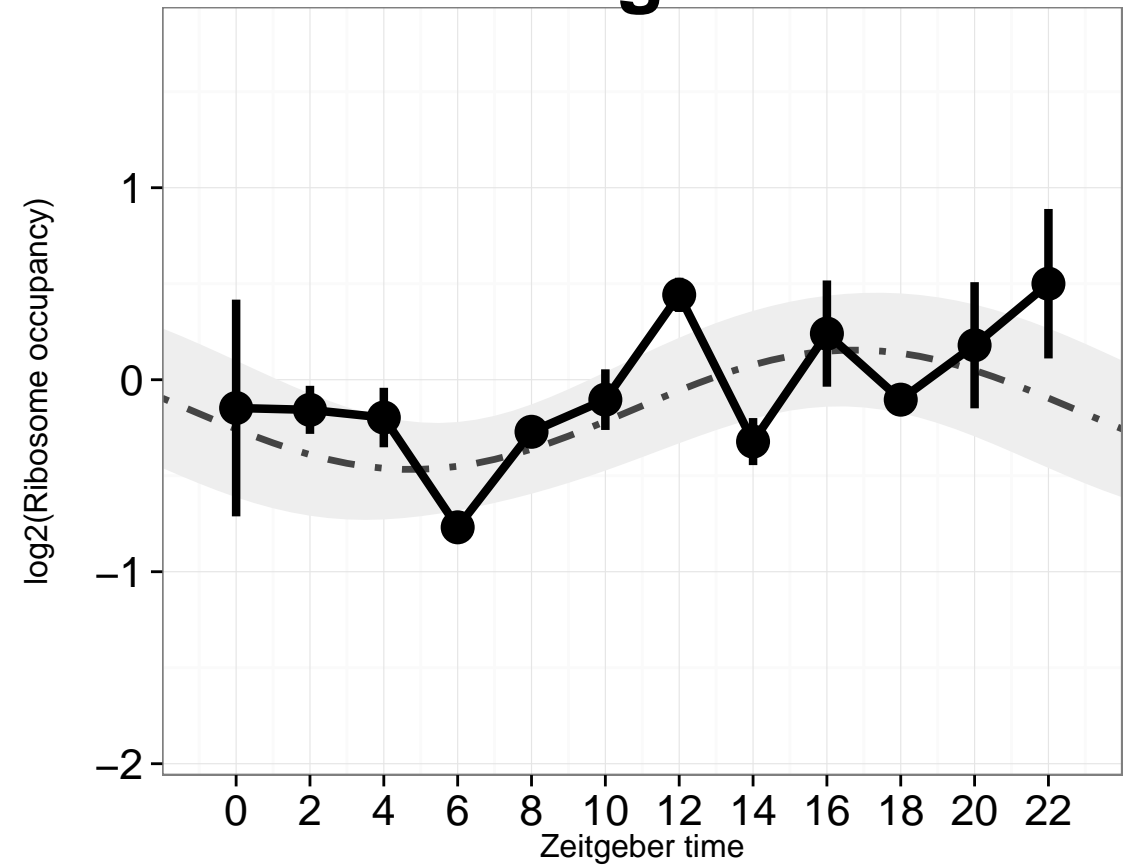

Supplement: SuppDataset_1.zip [file Atg10_set_A.pdf › Supplemental Dataset 1/A-mRNA_nonrhyth_translation_nonrhyth/Atg10_set_A.pdf]

# Atg13

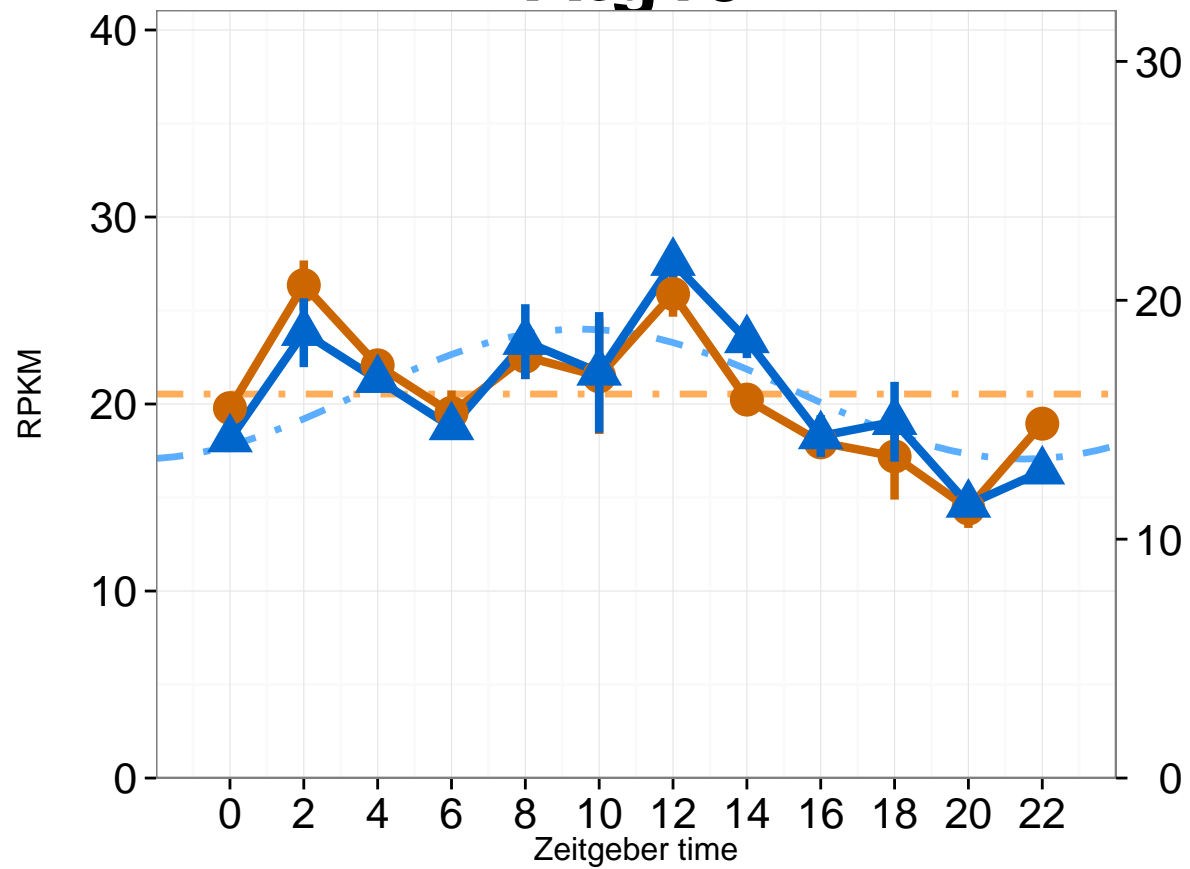

# Atg13

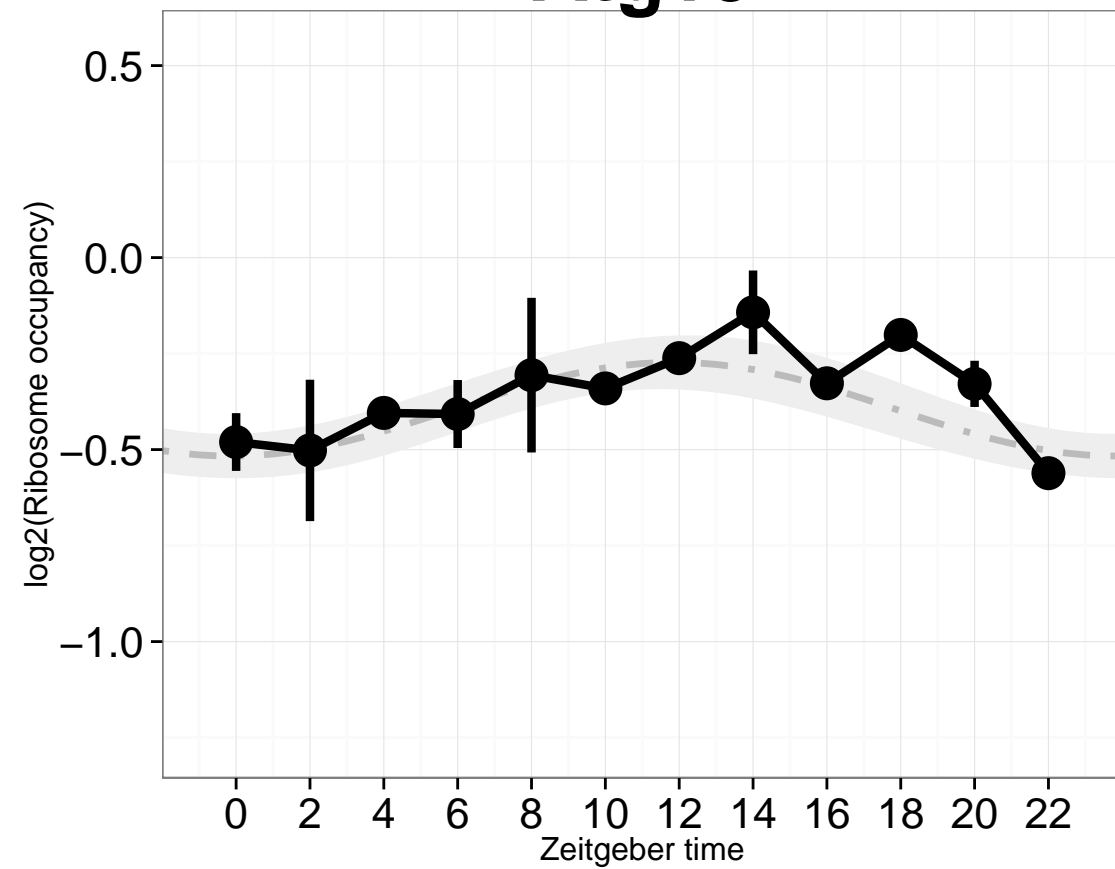

Supplement: SuppDataset_1.zip [file Atg13_set_A.pdf › Supplemental Dataset 1/A-mRNA_nonrhyth_translation_nonrhyth/Atg13_set_A.pdf]

# Atg14

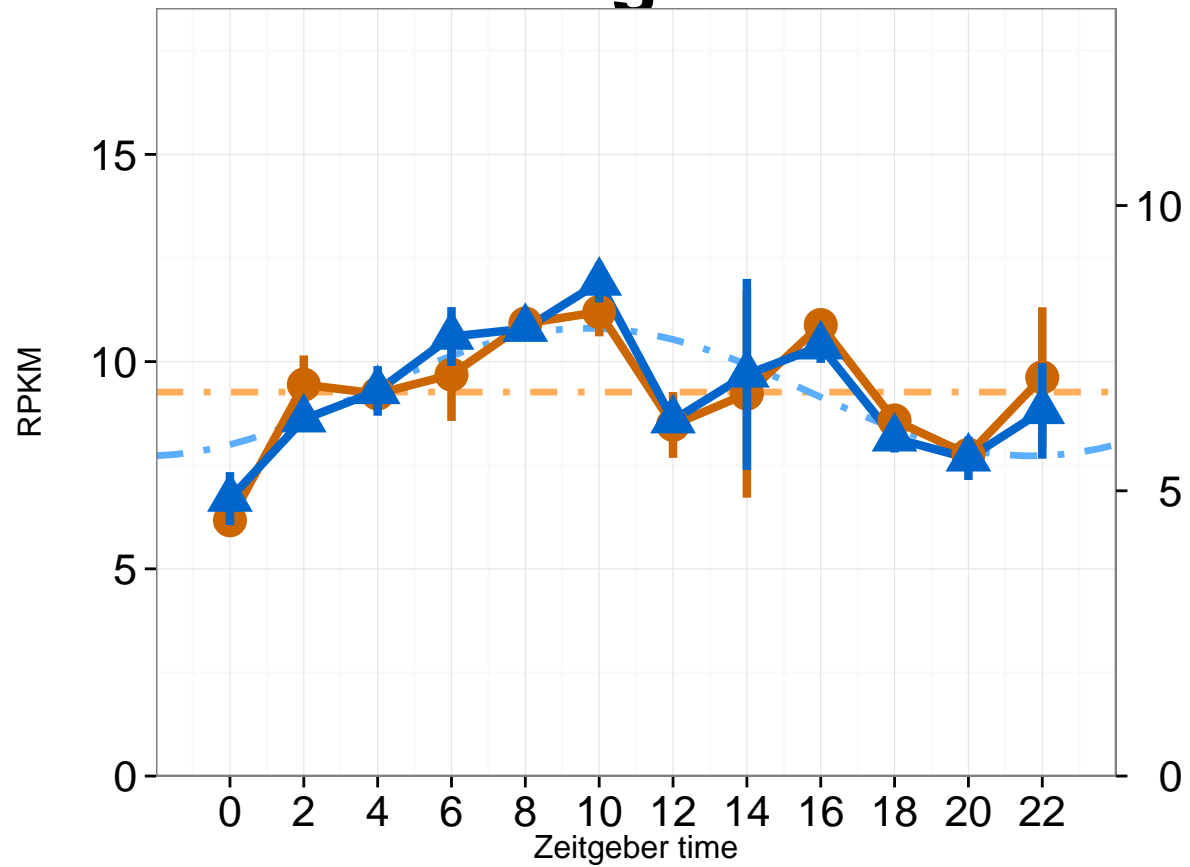

# Atg14

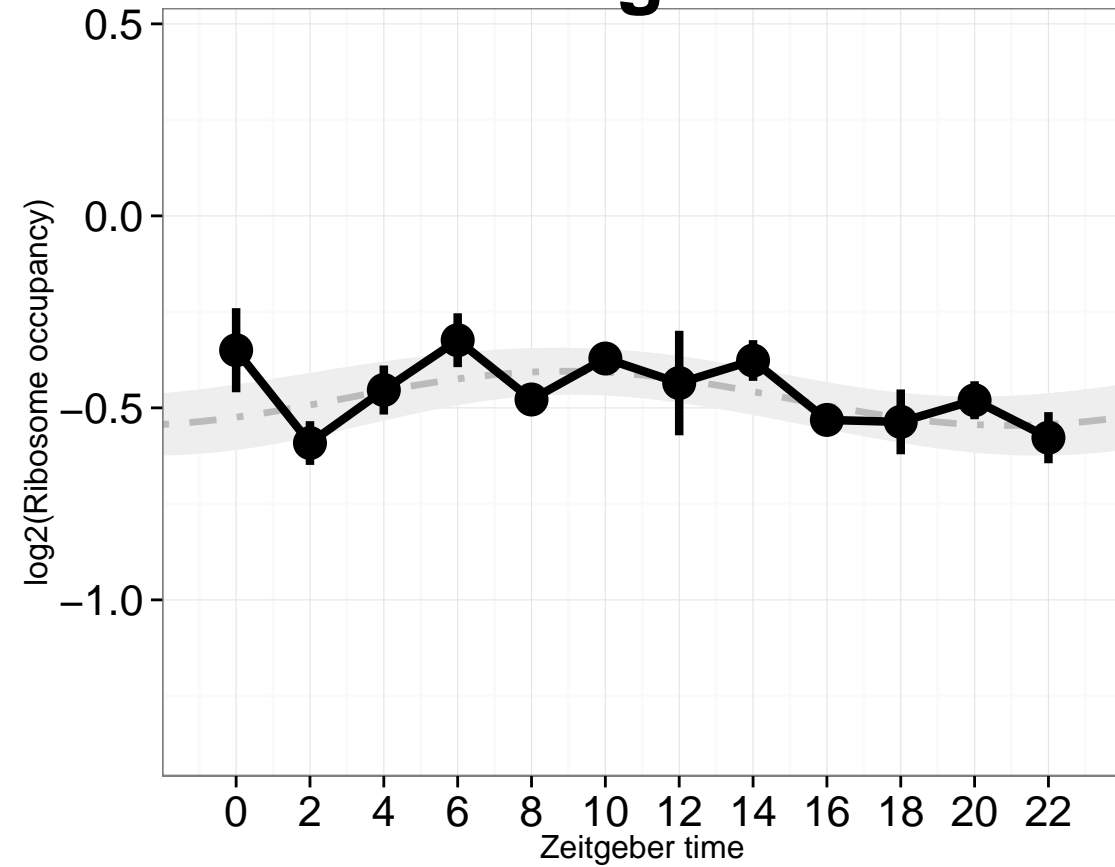

Supplement: SuppDataset_1.zip [file Atg14_set_A.pdf › Supplemental Dataset 1/A-mRNA_nonrhyth_translation_nonrhyth/Atg14_set_A.pdf]

# Atg16I1

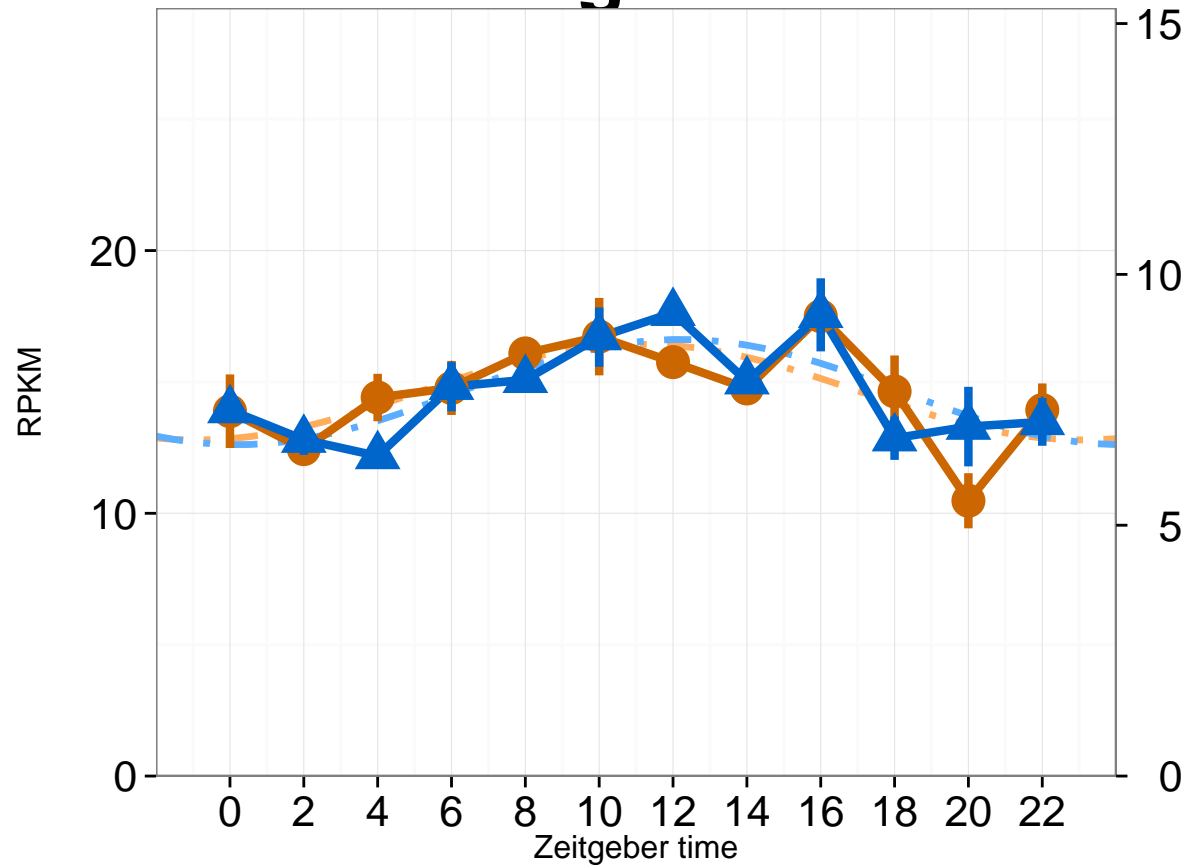

# Atg16I1

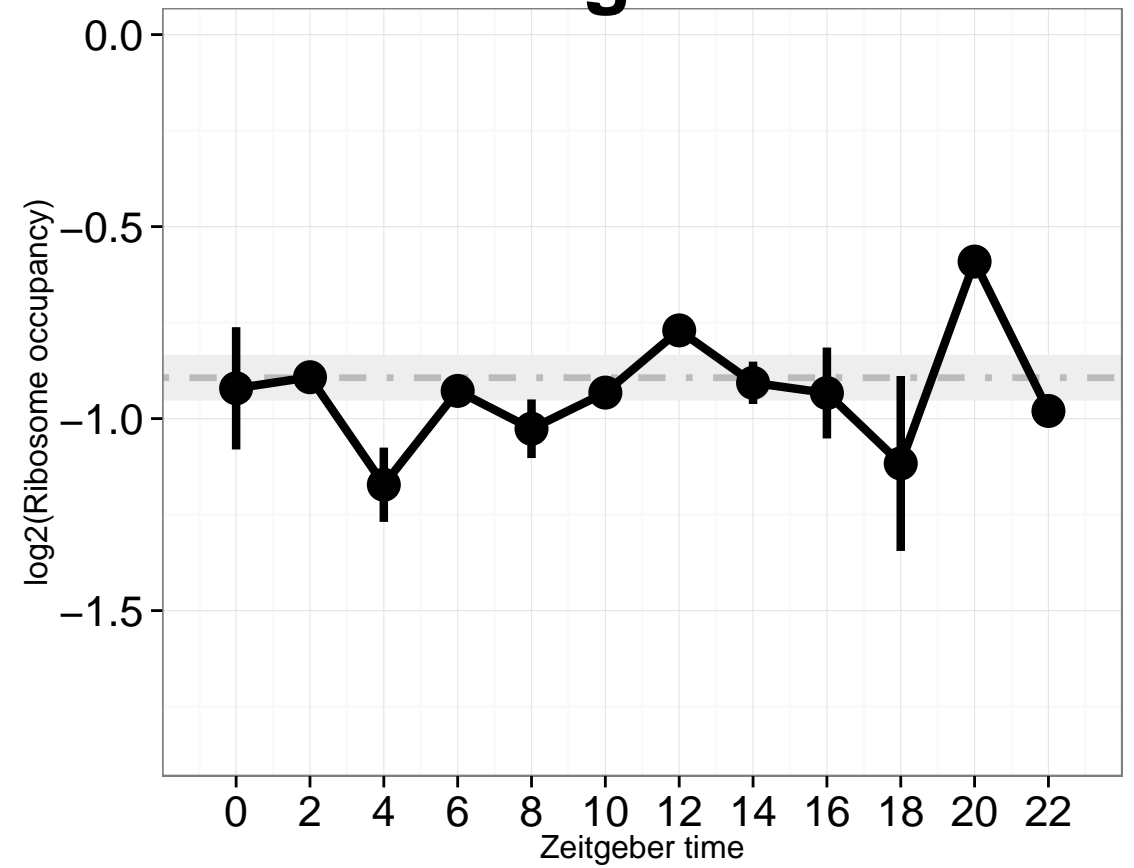

Supplement: SuppDataset_1.zip [file Atg16l1_set_A.pdf › Supplemental Dataset 1/A-mRNA_nonrhyth_translation_nonrhyth/Atg16l1_set_A.pdf]

# Atg2b

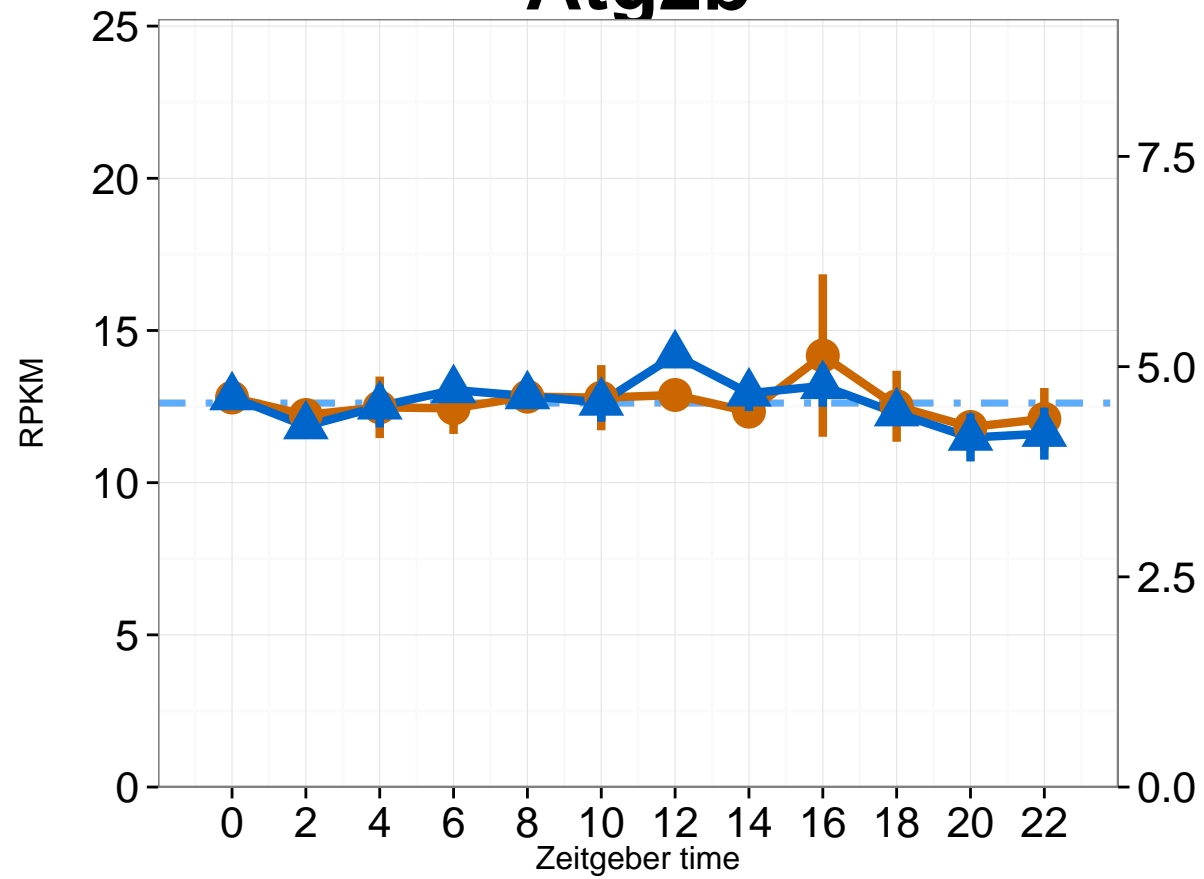

# Atg2b

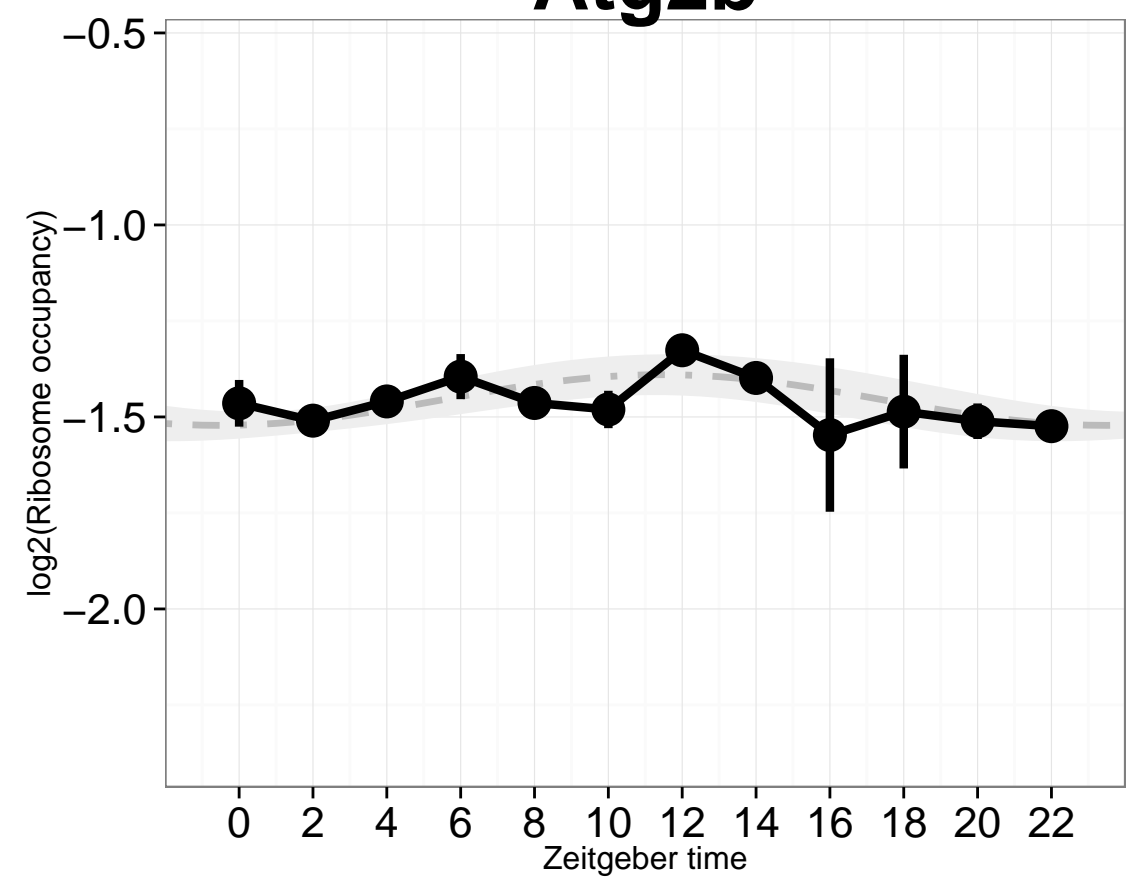

Supplement: SuppDataset_1.zip [file Atg2b_set_A.pdf › Supplemental Dataset 1/A-mRNA_nonrhyth_translation_nonrhyth/Atg2b_set_A.pdf]

## Atg3

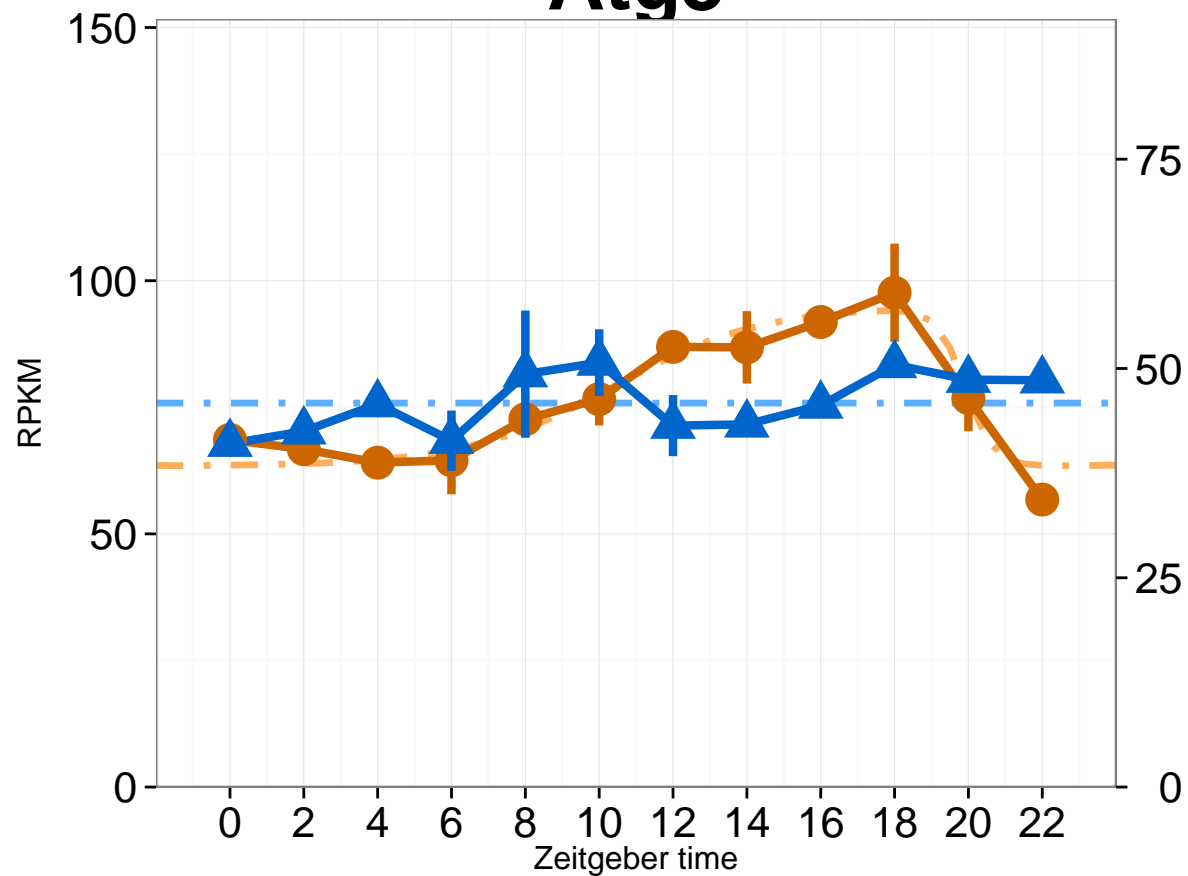

## Atg3

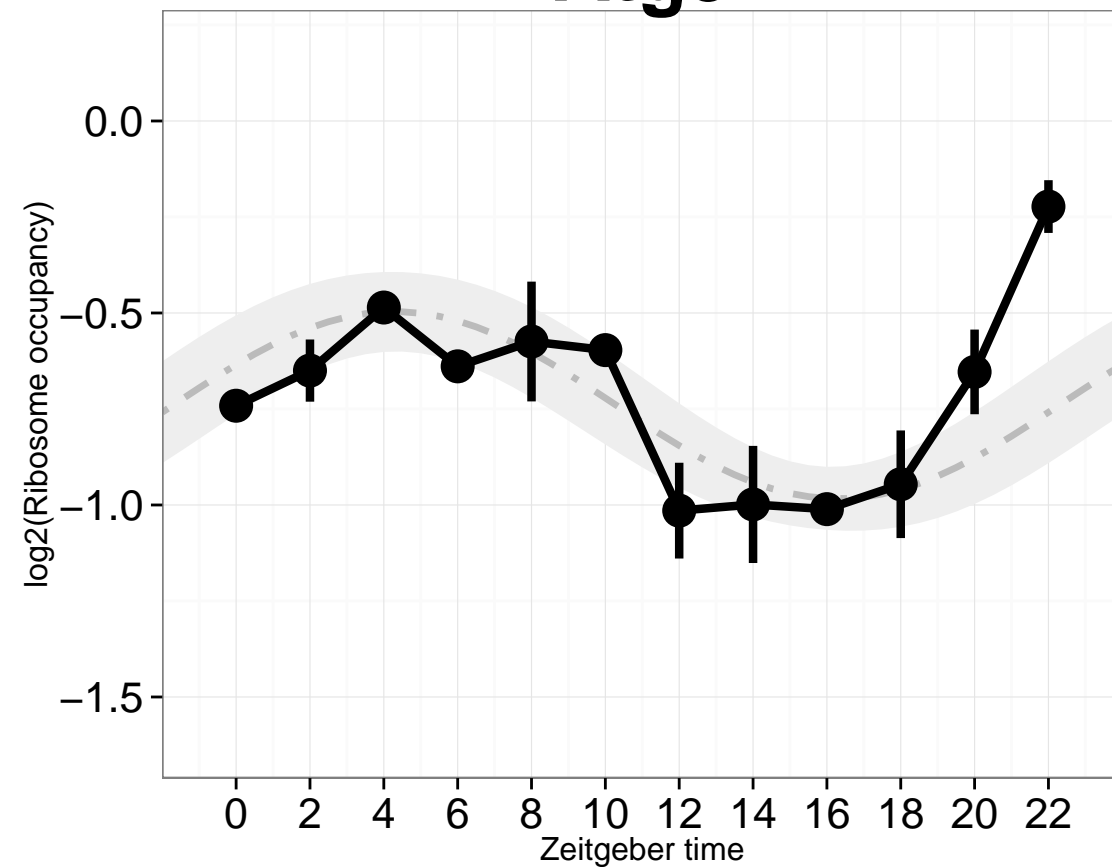

Supplement: SuppDataset_1.zip [file Atg3_set_A.pdf › Supplemental Dataset 1/A-mRNA_nonrhyth_translation_nonrhyth/Atg3_set_A.pdf]

# Atg4a

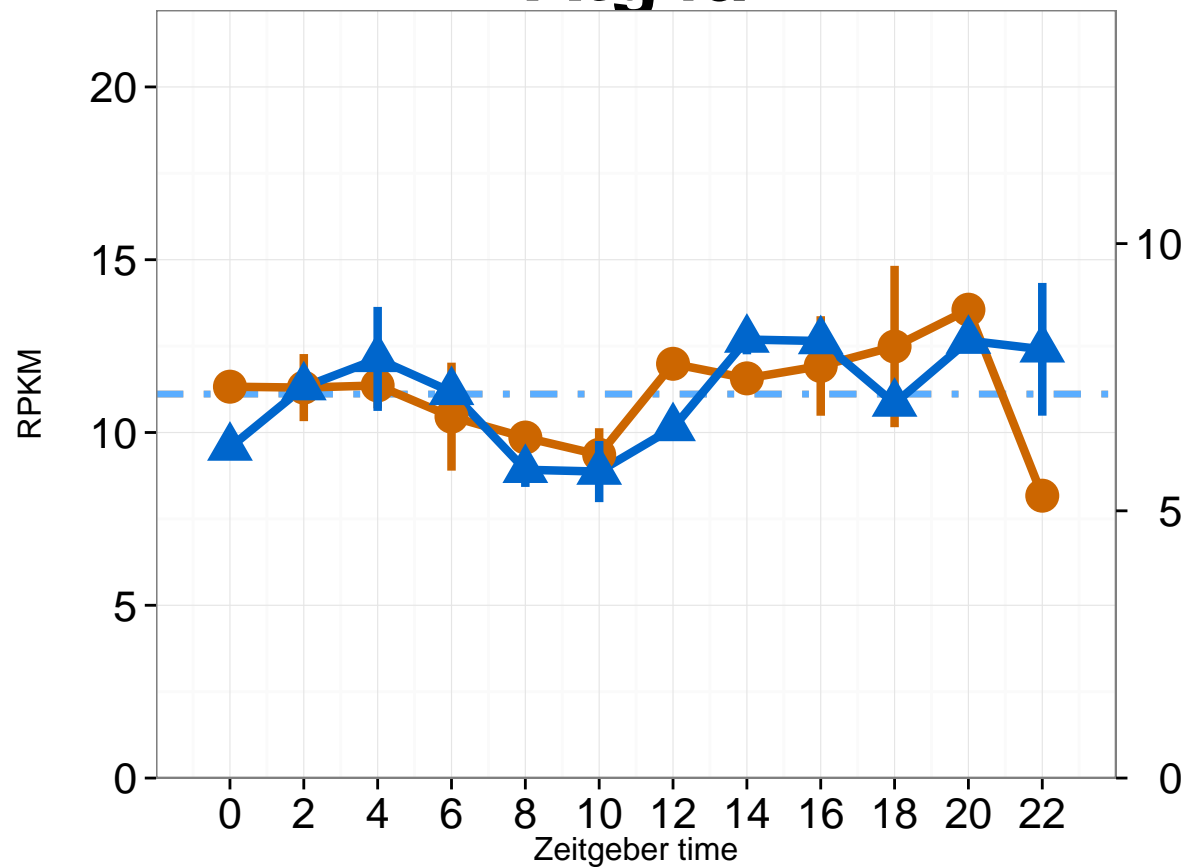

# Atg4a

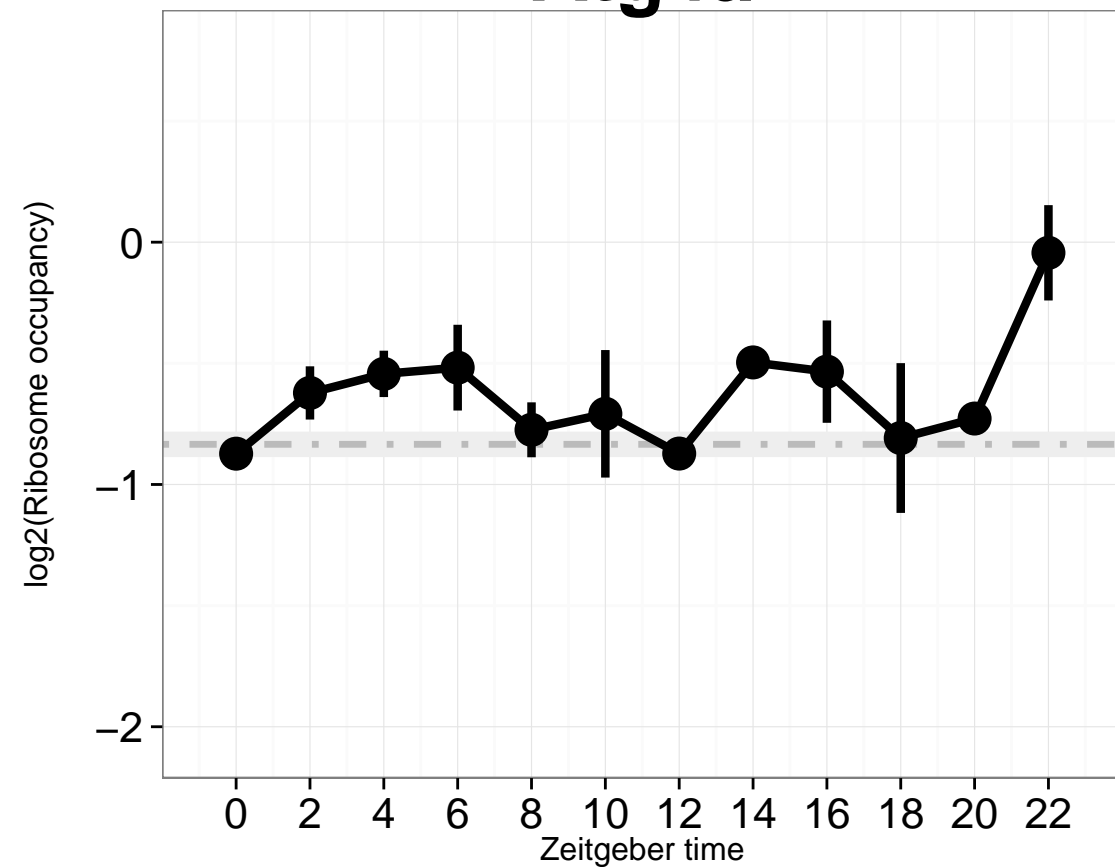

Supplement: SuppDataset_1.zip [file Atg4a_set_A.pdf › Supplemental Dataset 1/A-mRNA_nonrhyth_translation_nonrhyth/Atg4a_set_A.pdf]

# Atg4b

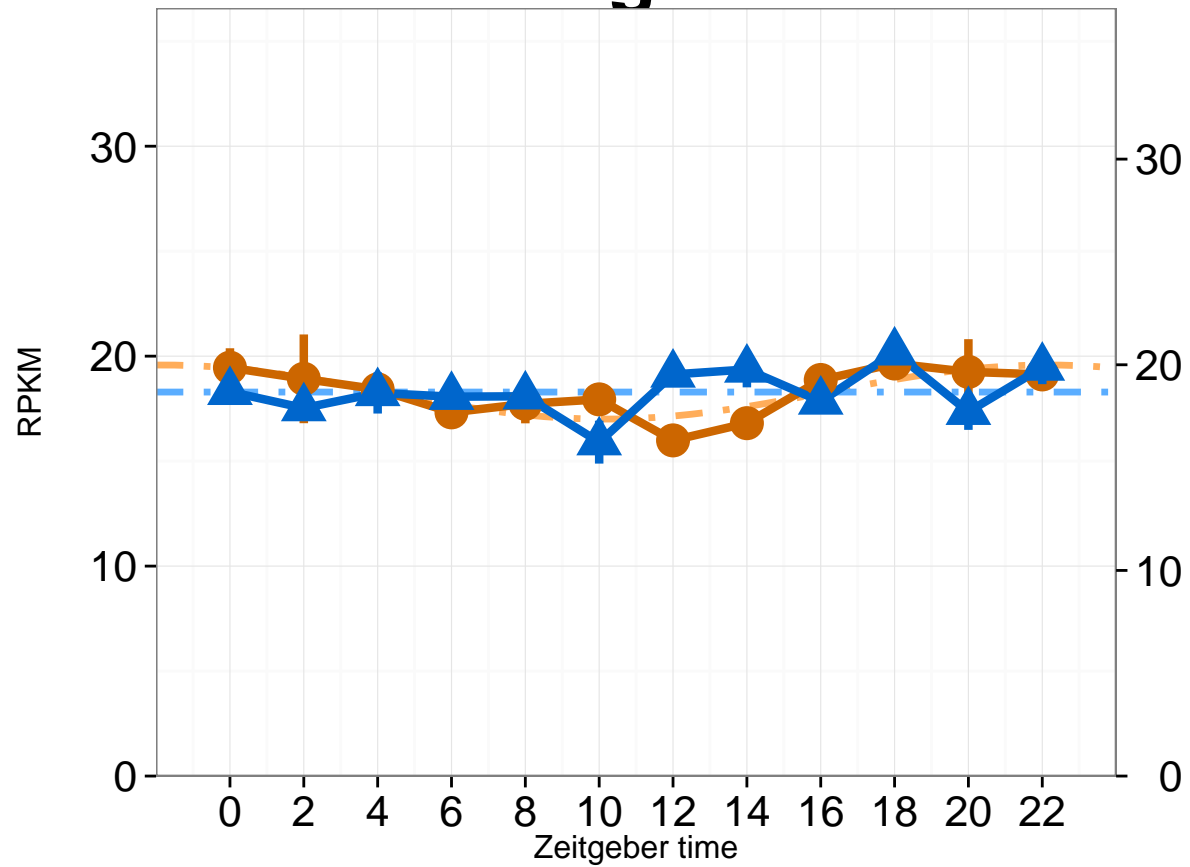

# Atg4b

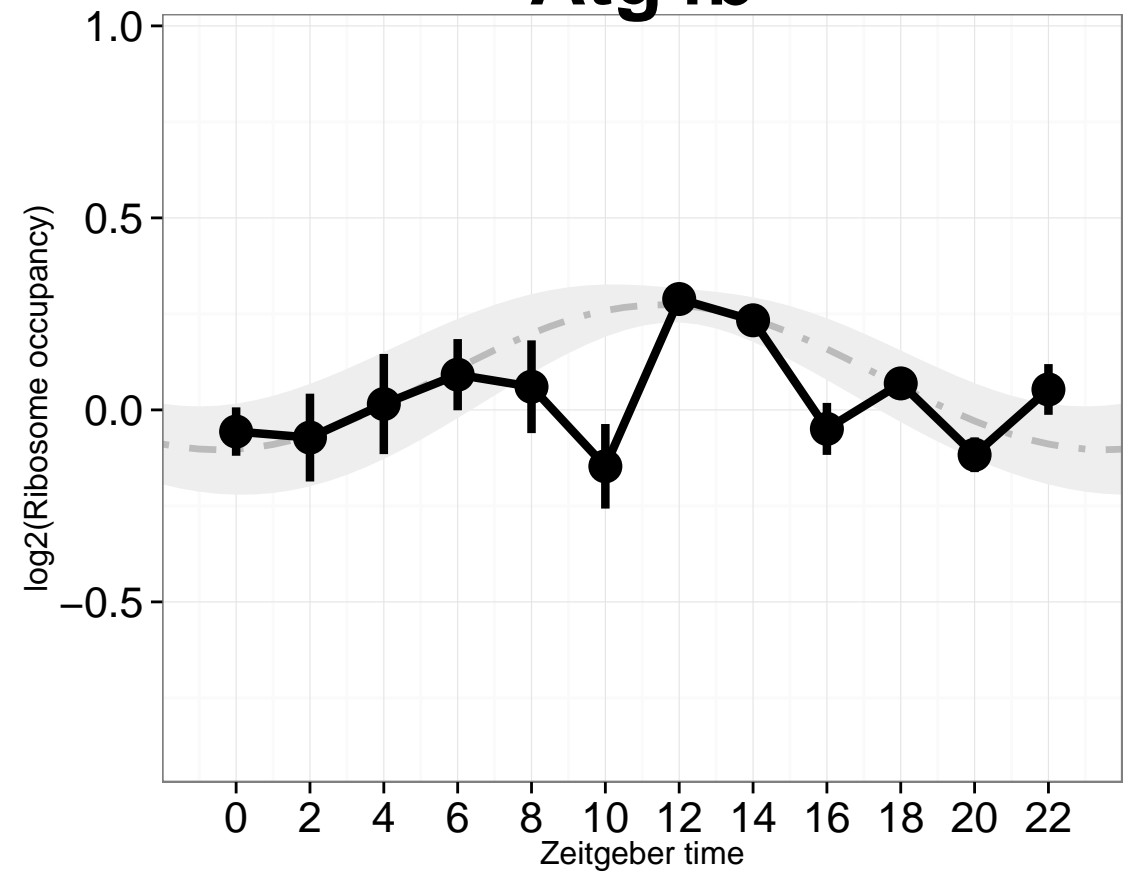

Supplement: SuppDataset_1.zip [file Atg4b_set_A.pdf › Supplemental Dataset 1/A-mRNA_nonrhyth_translation_nonrhyth/Atg4b_set_A.pdf]

# Atg4d

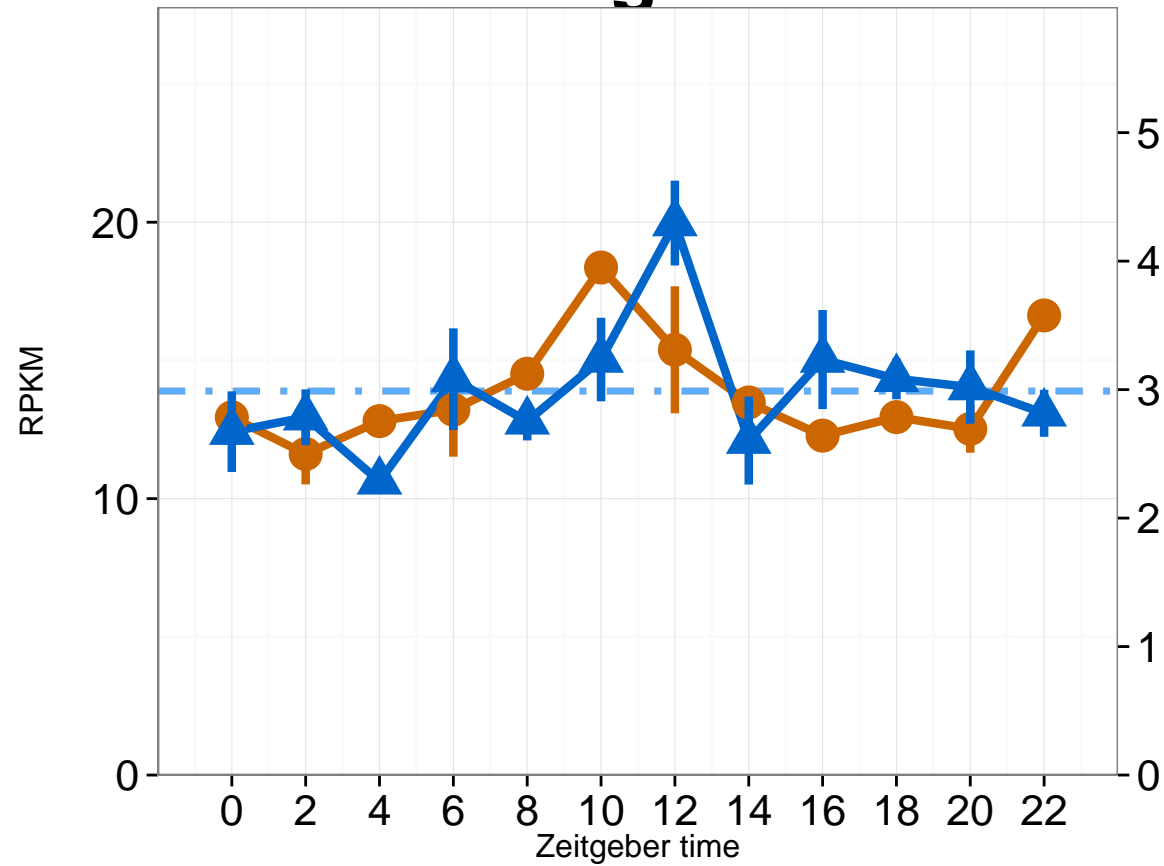

# Atg4d

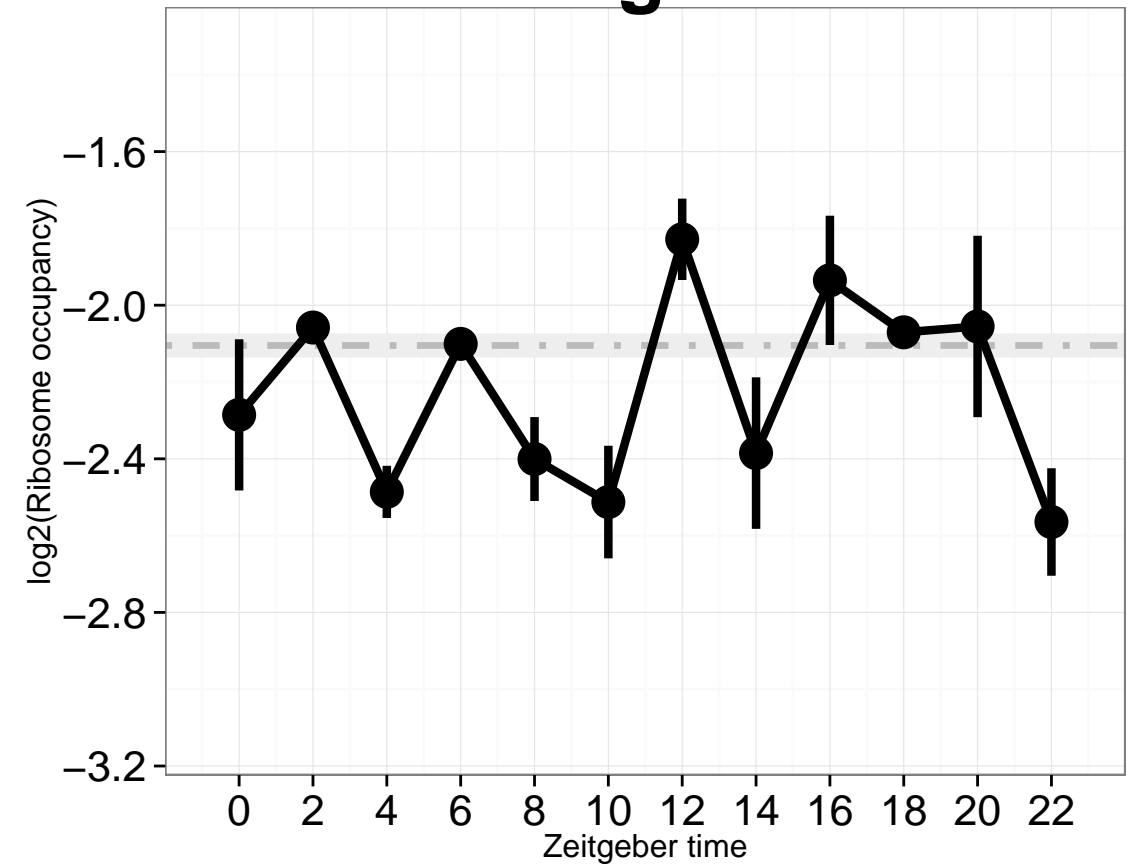

Supplement: SuppDataset_1.zip [file Atg4d_set_A.pdf › Supplemental Dataset 1/A-mRNA_nonrhyth_translation_nonrhyth/Atg4d_set_A.pdf]

## Atg5

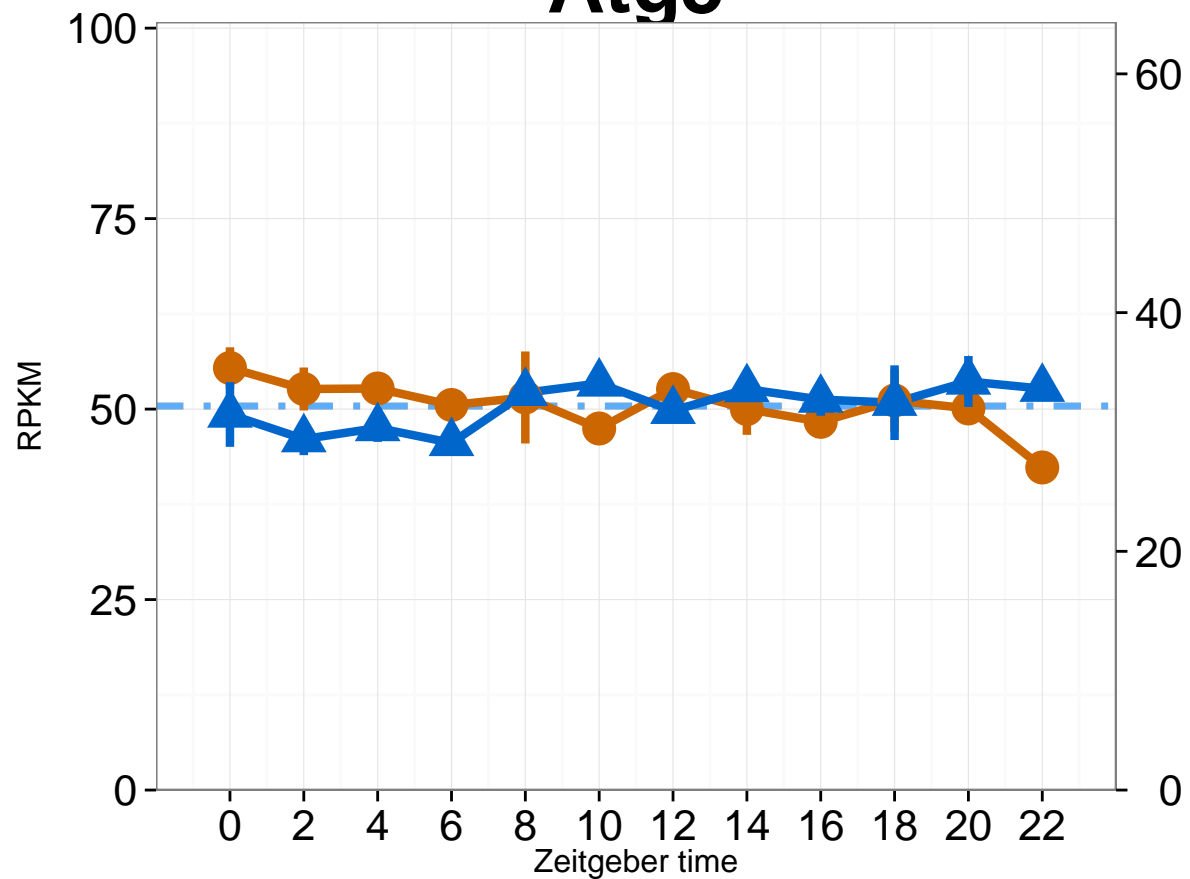

## Atg5

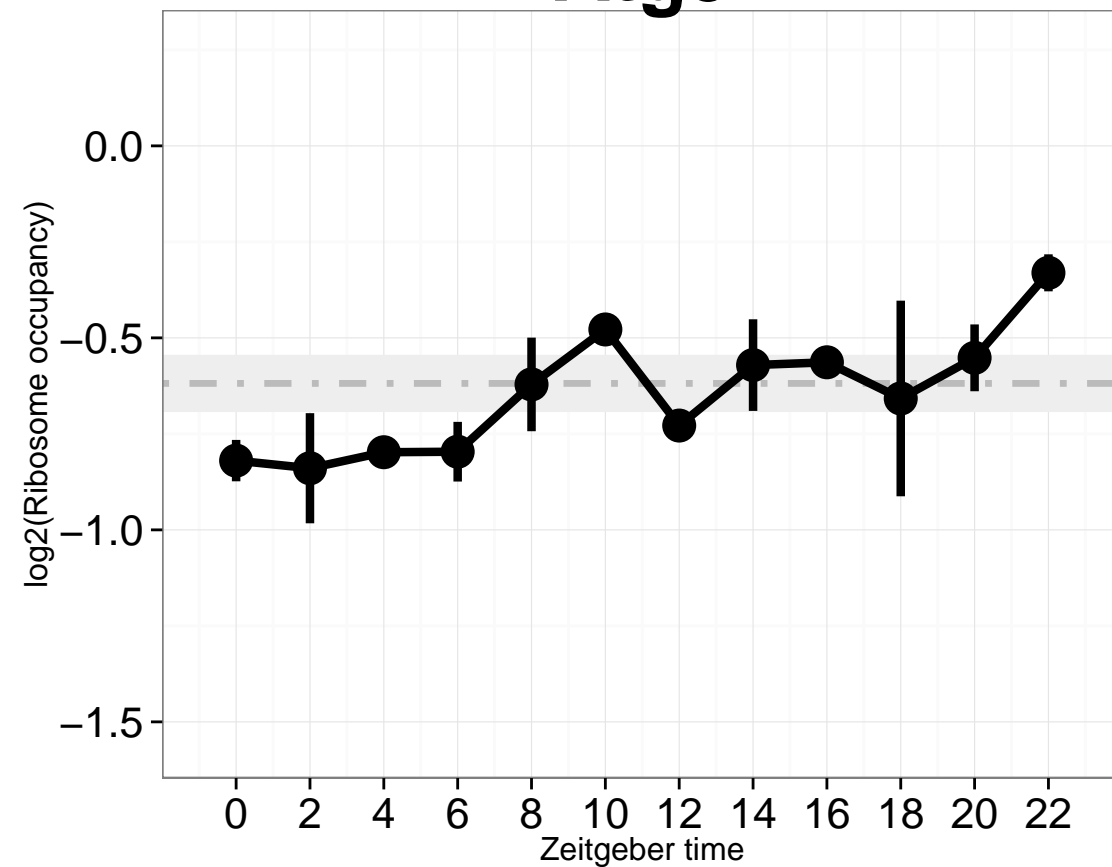

Supplement: SuppDataset_1.zip [file Atg5_set_A.pdf › Supplemental Dataset 1/A-mRNA_nonrhyth_translation_nonrhyth/Atg5_set_A.pdf]

## Atg7

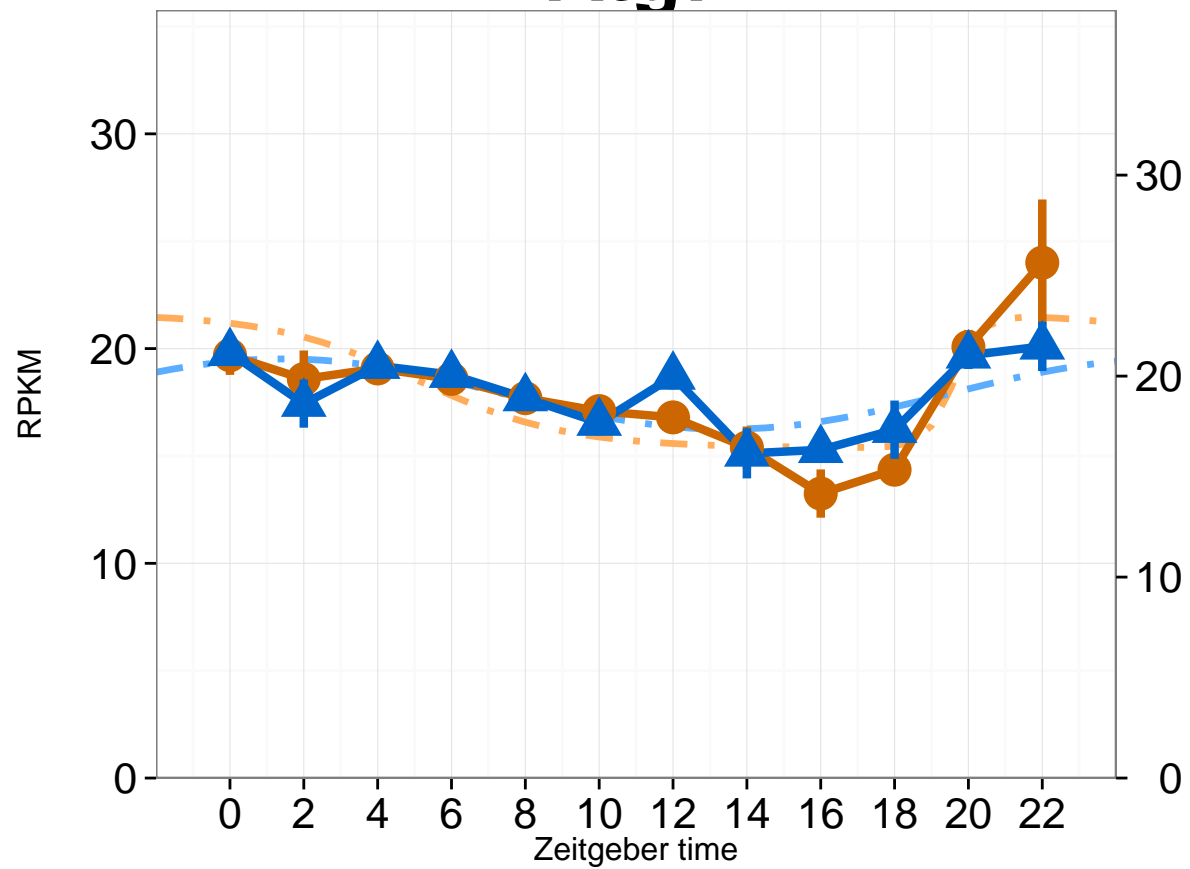

## Atg7

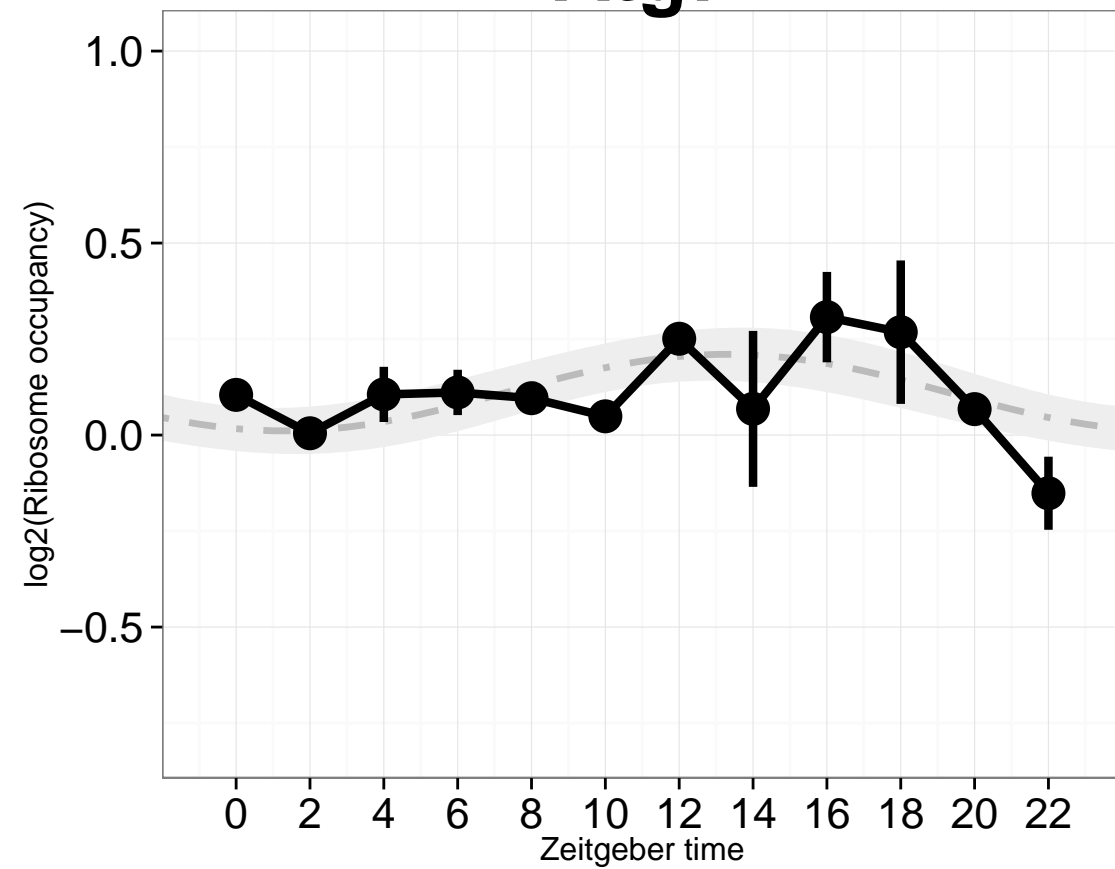

Supplement: SuppDataset_1.zip [file Atg7_set_A.pdf › Supplemental Dataset 1/A-mRNA_nonrhyth_translation_nonrhyth/Atg7_set_A.pdf]

# Atg9a

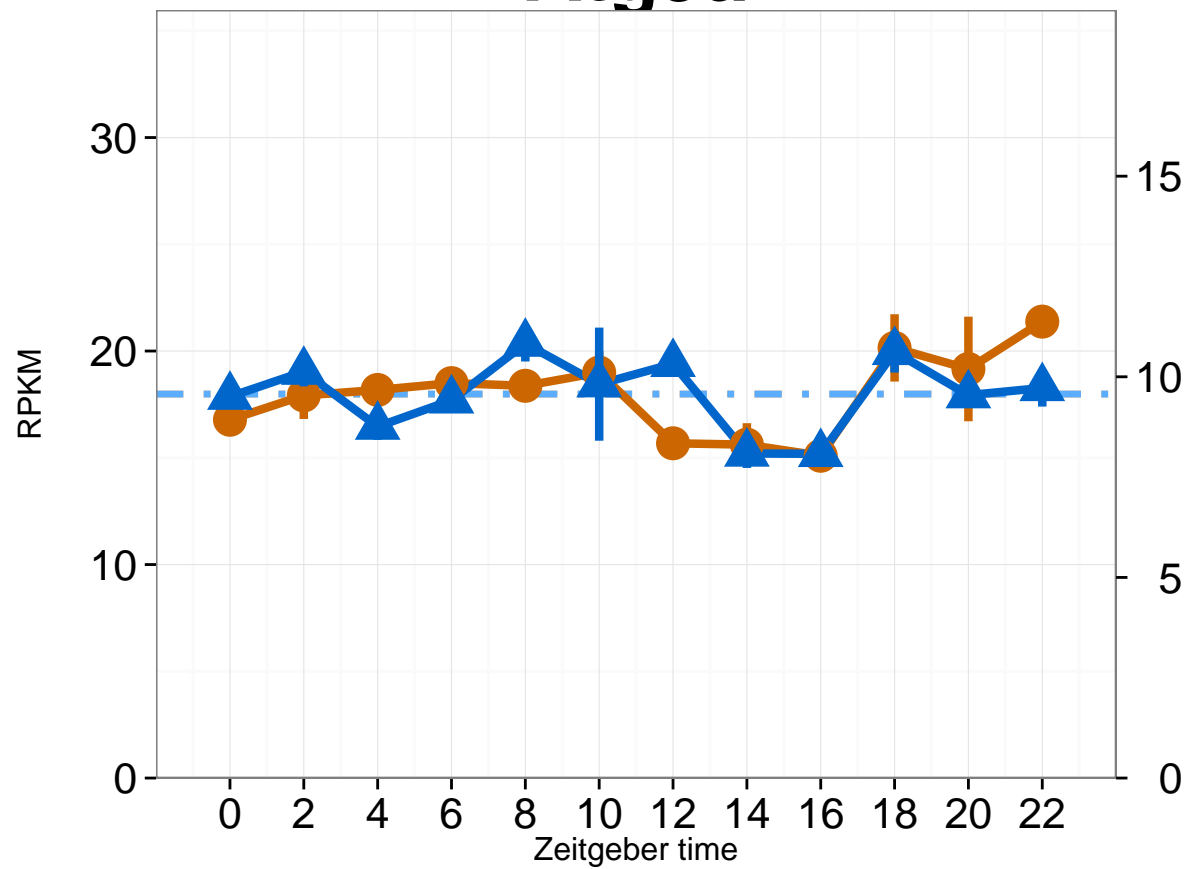

# Atg9a

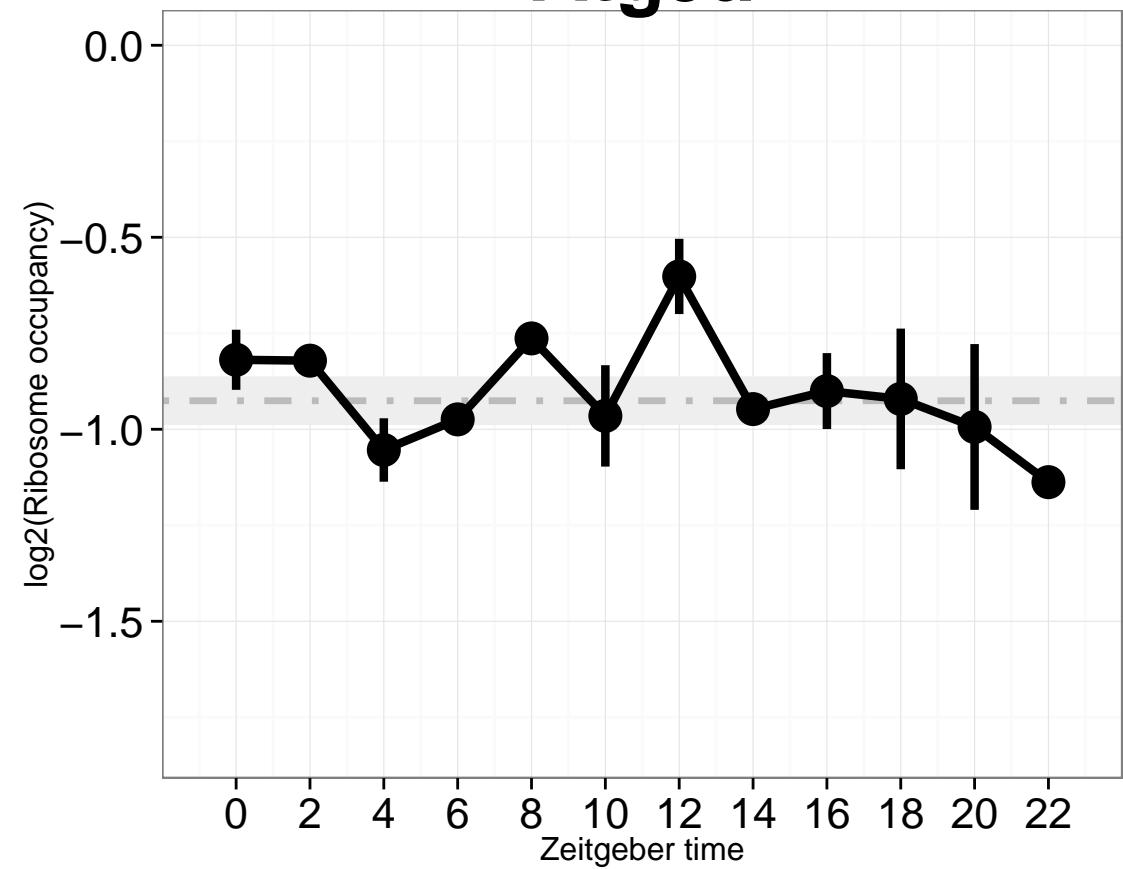

Supplement: SuppDataset_1.zip [file Atg9a_set_A.pdf › Supplemental Dataset 1/A-mRNA_nonrhyth_translation_nonrhyth/Atg9a_set_A.pdf]

## Ath11

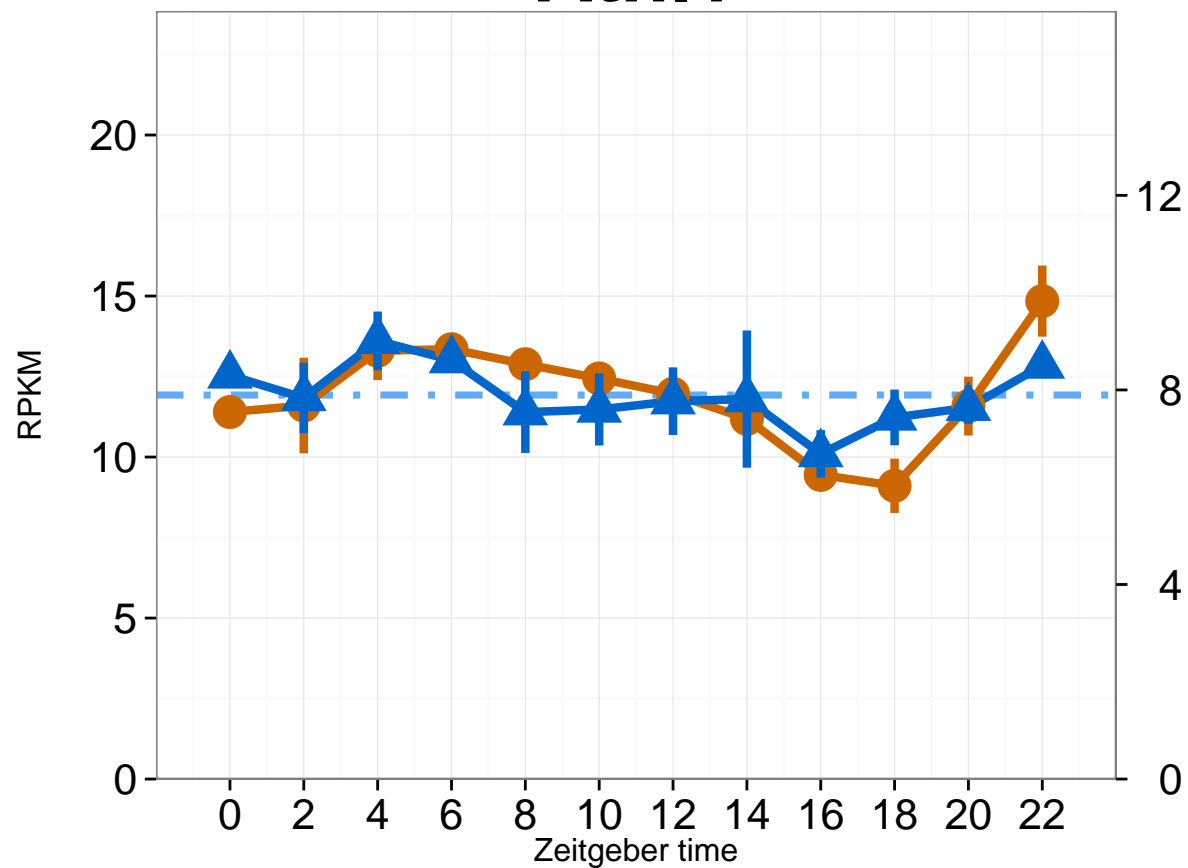

## Ath11

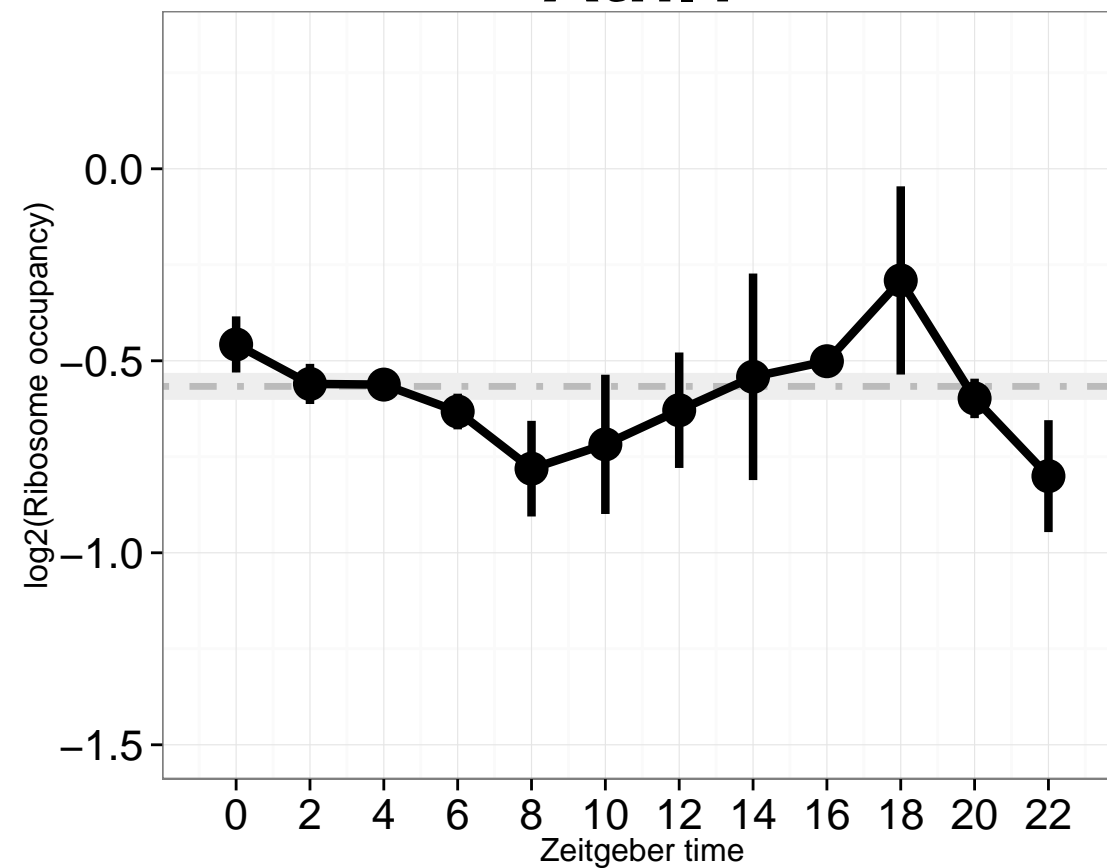

Supplement: SuppDataset_1.zip [file Athl1_set_A.pdf › Supplemental Dataset 1/A-mRNA_nonrhyth_translation_nonrhyth/Athl1_set_A.pdf]

## Atic

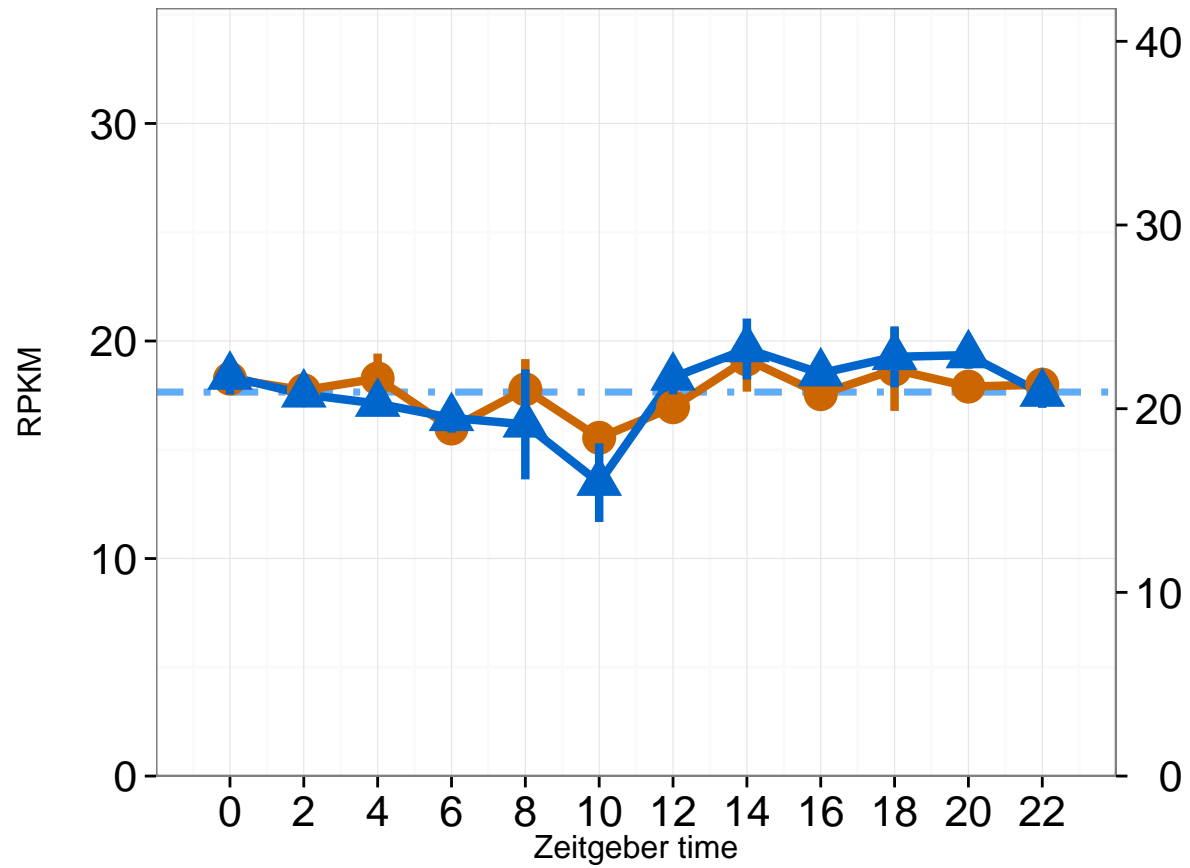

## Atic

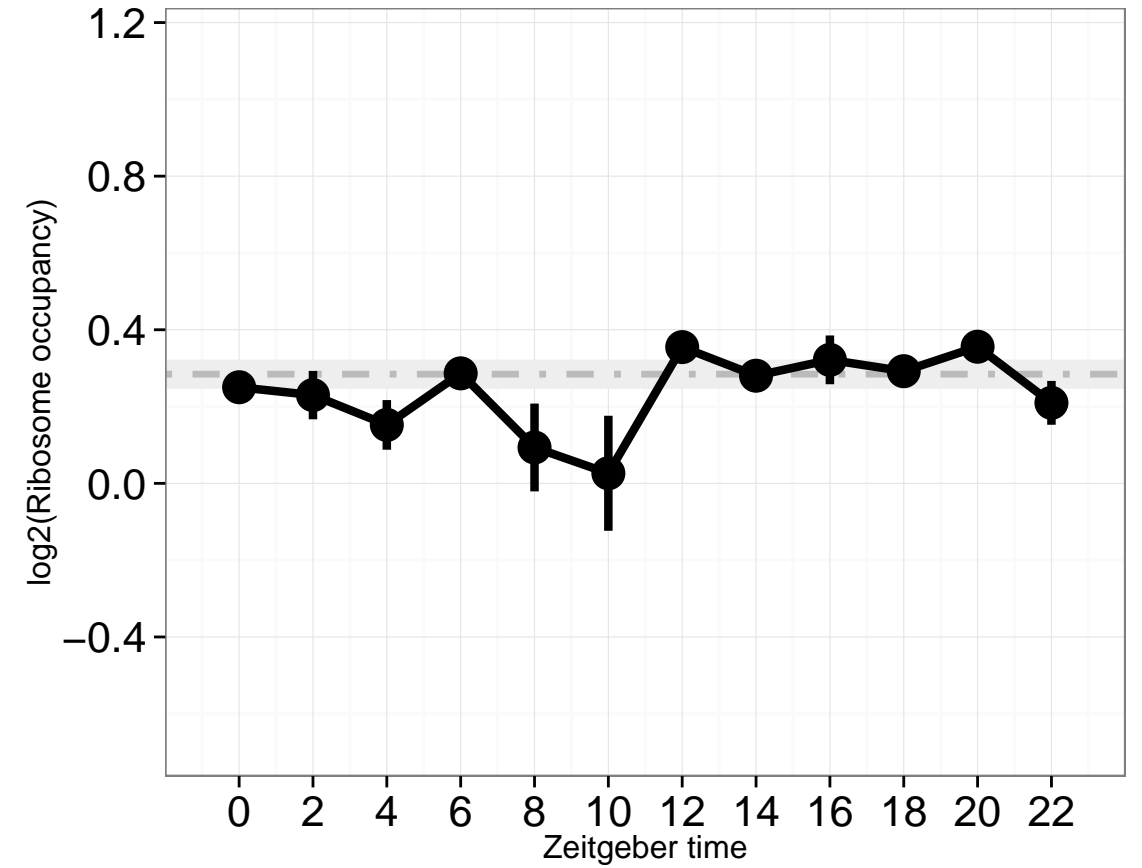

Supplement: SuppDataset_1.zip [file Atic_set_A.pdf › Supplemental Dataset 1/A-mRNA_nonrhyth_translation_nonrhyth/Atic_set_A.pdf]

## AtI1

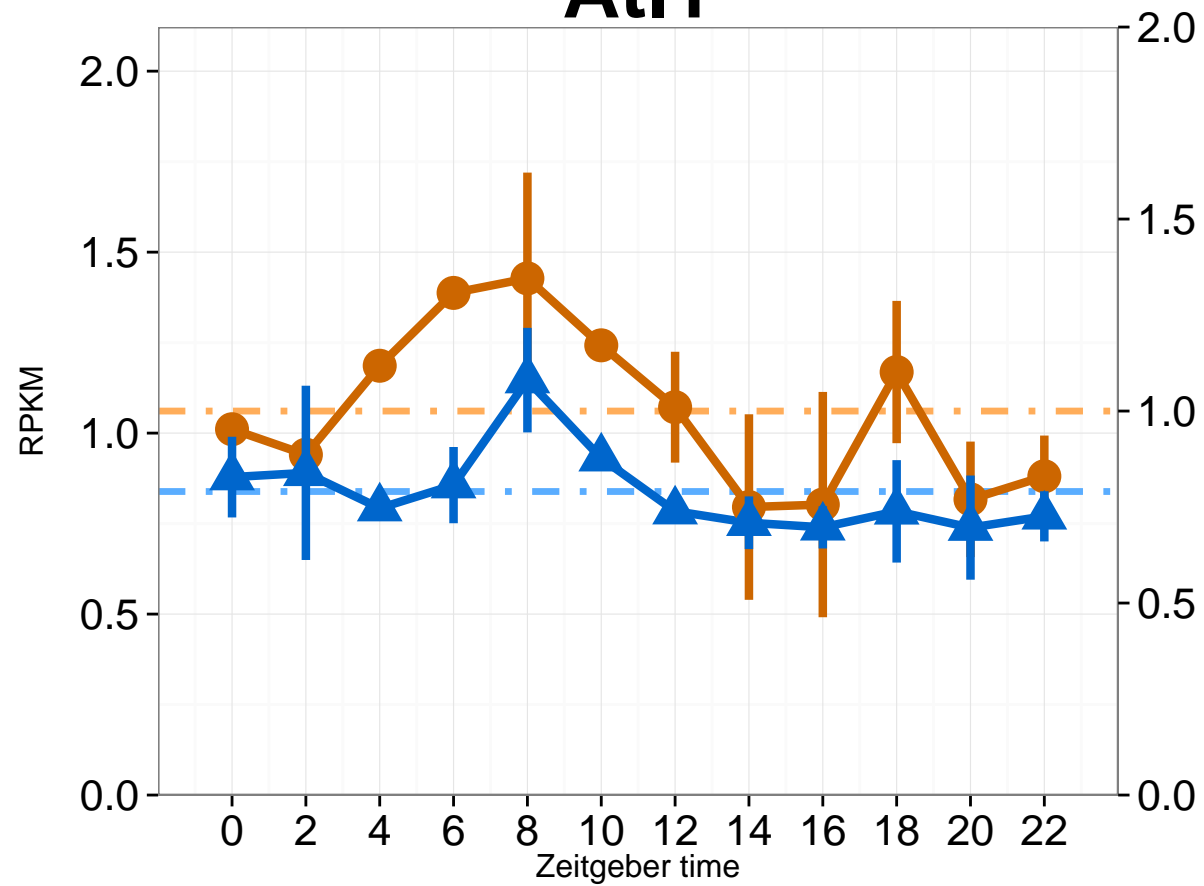

## AtI1

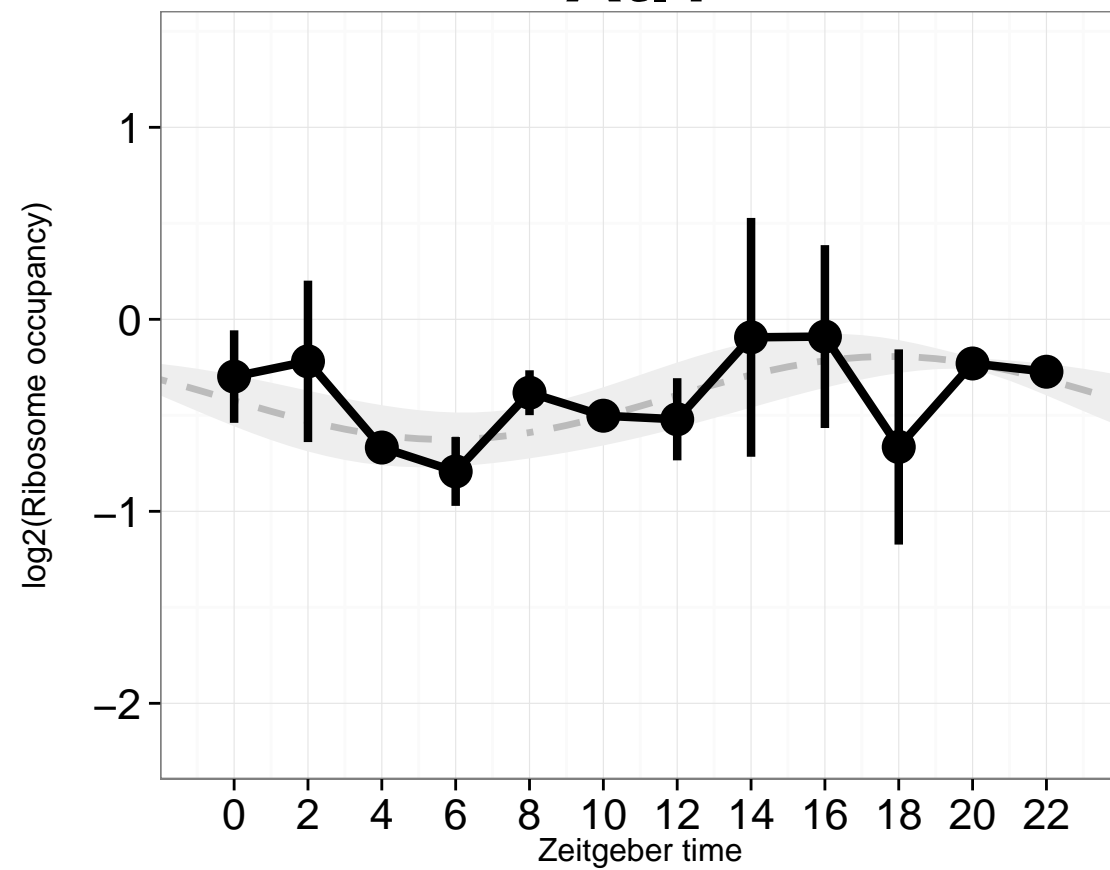

Supplement: SuppDataset_1.zip [file Atl1_set_A.pdf › Supplemental Dataset 1/A-mRNA_nonrhyth_translation_nonrhyth/Atl1_set_A.pdf]

## AtI2

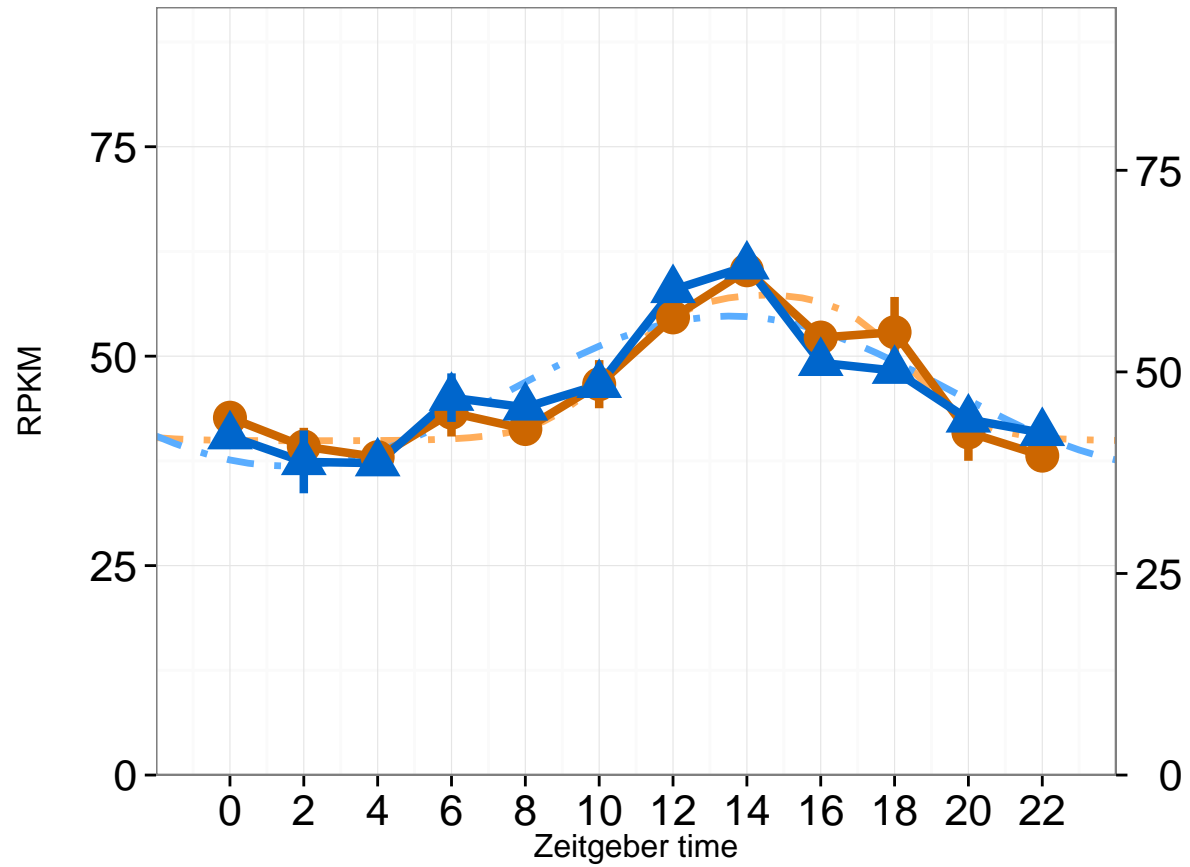

## AtI2

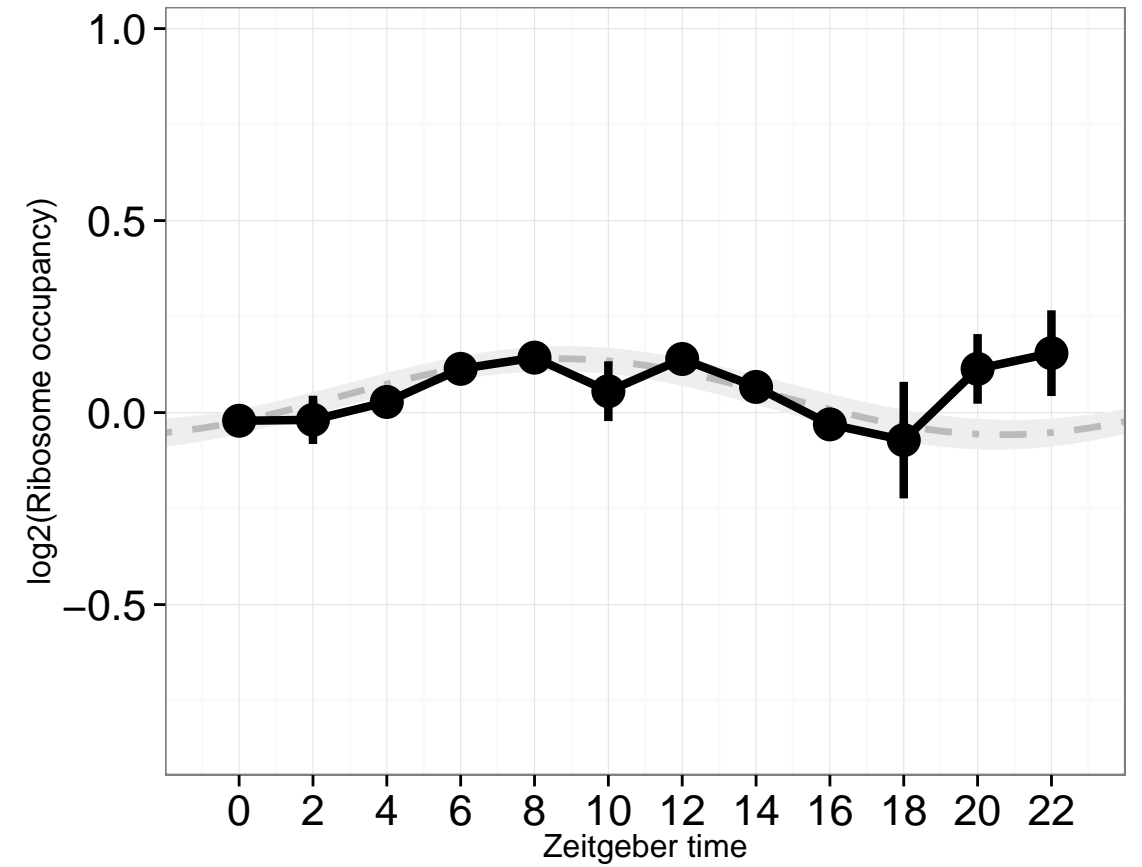

Supplement: SuppDataset_1.zip [file Atl2_set_A.pdf › Supplemental Dataset 1/A-mRNA_nonrhyth_translation_nonrhyth/Atl2_set_A.pdf]

## AtI3

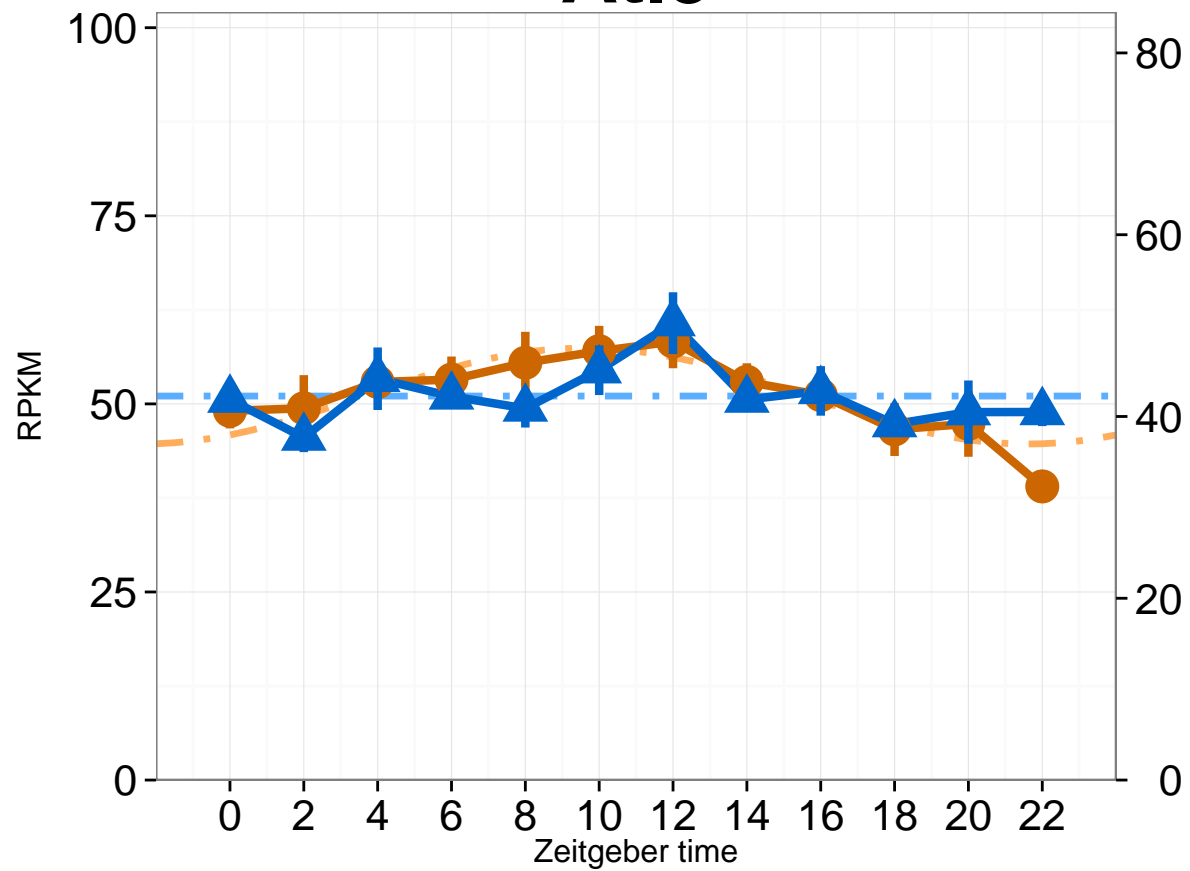

## AtI3

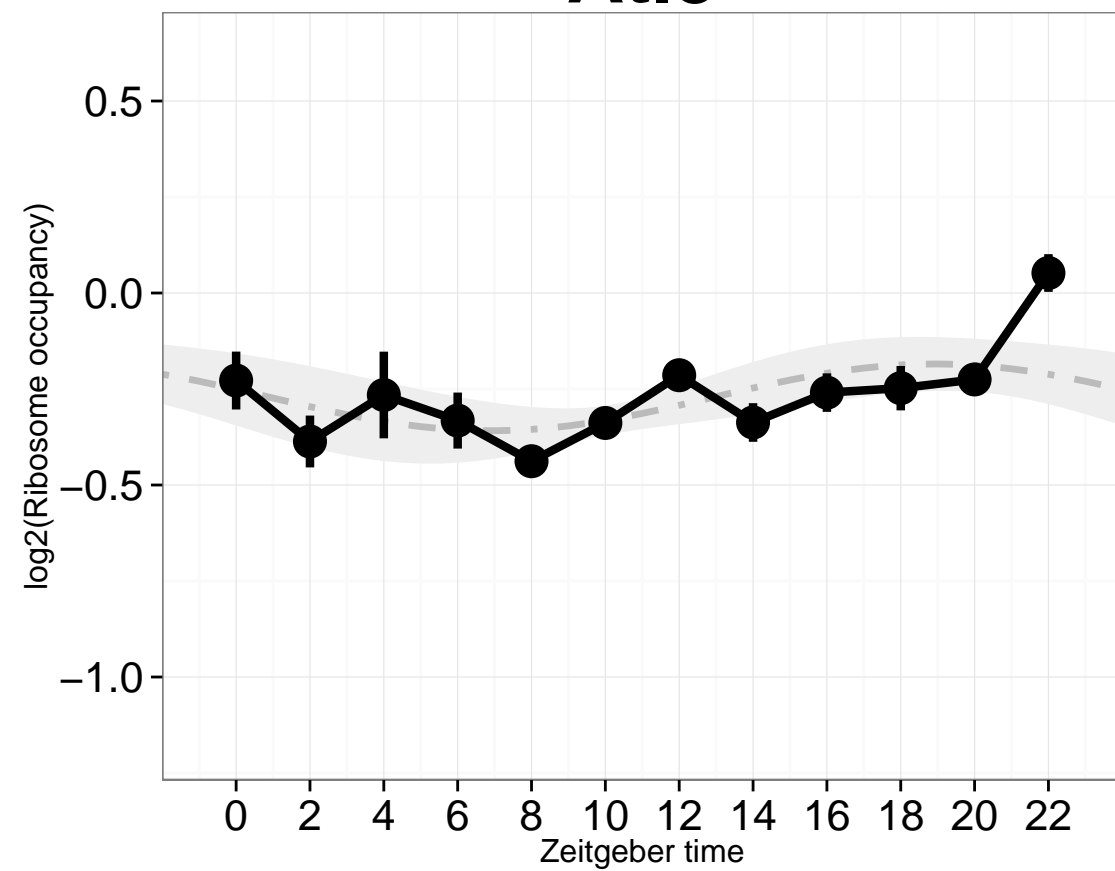

Supplement: SuppDataset_1.zip [file Atl3_set_A.pdf › Supplemental Dataset 1/A-mRNA_nonrhyth_translation_nonrhyth/Atl3_set_A.pdf]

## Atm

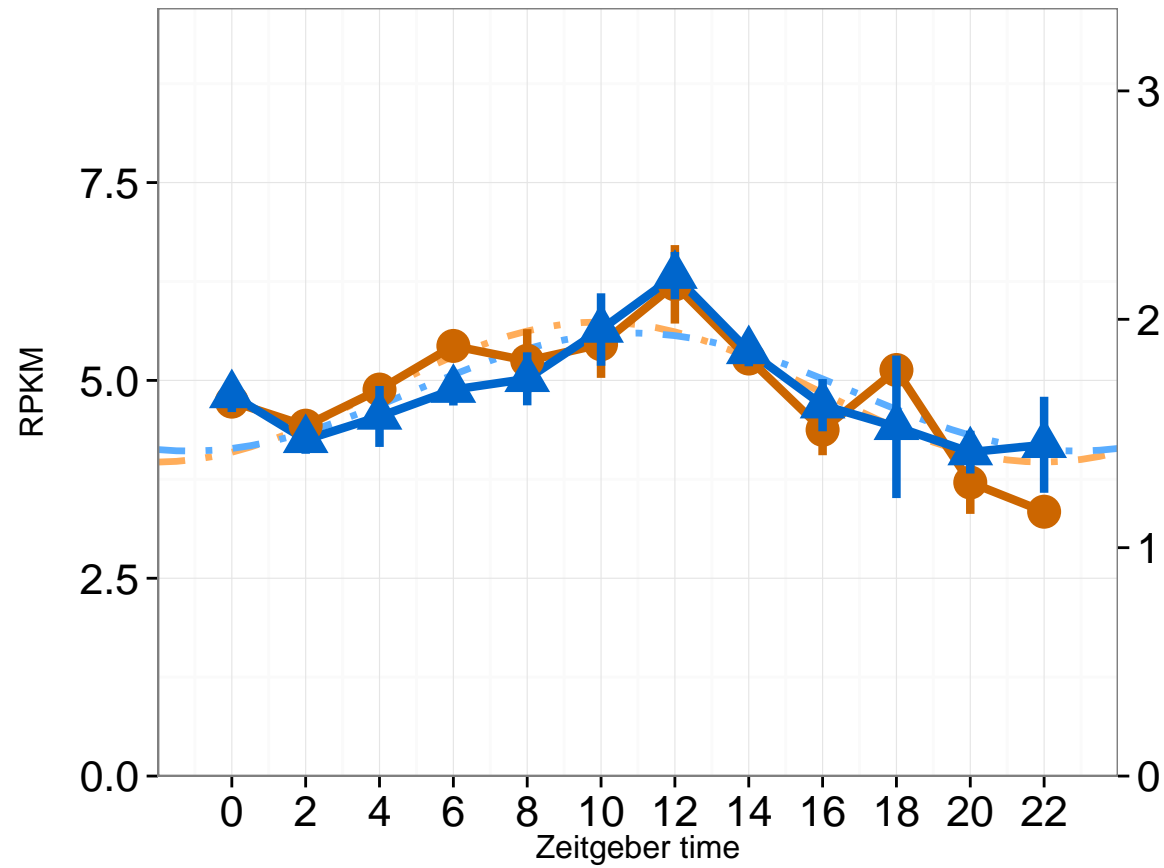

## Atm

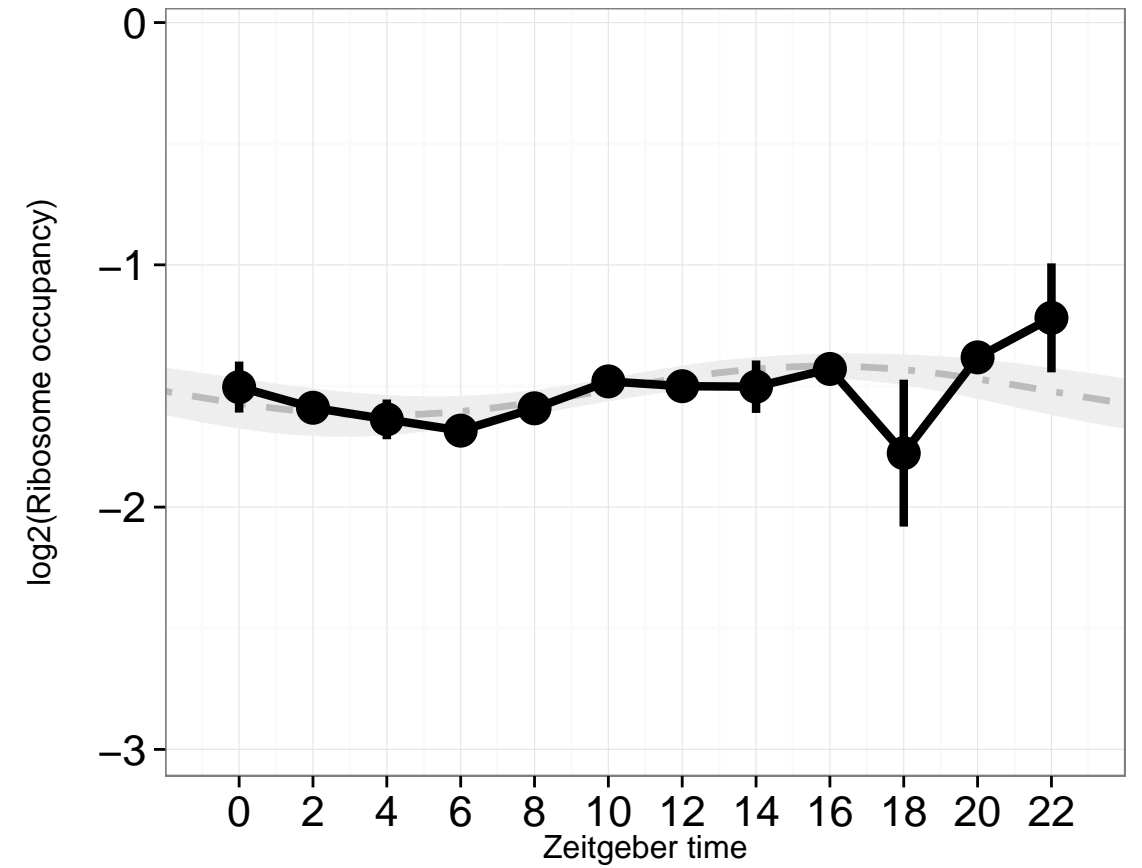

Supplement: SuppDataset_1.zip [file Atm_set_A.pdf › Supplemental Dataset 1/A-mRNA_nonrhyth_translation_nonrhyth/Atm_set_A.pdf]

## Atmin

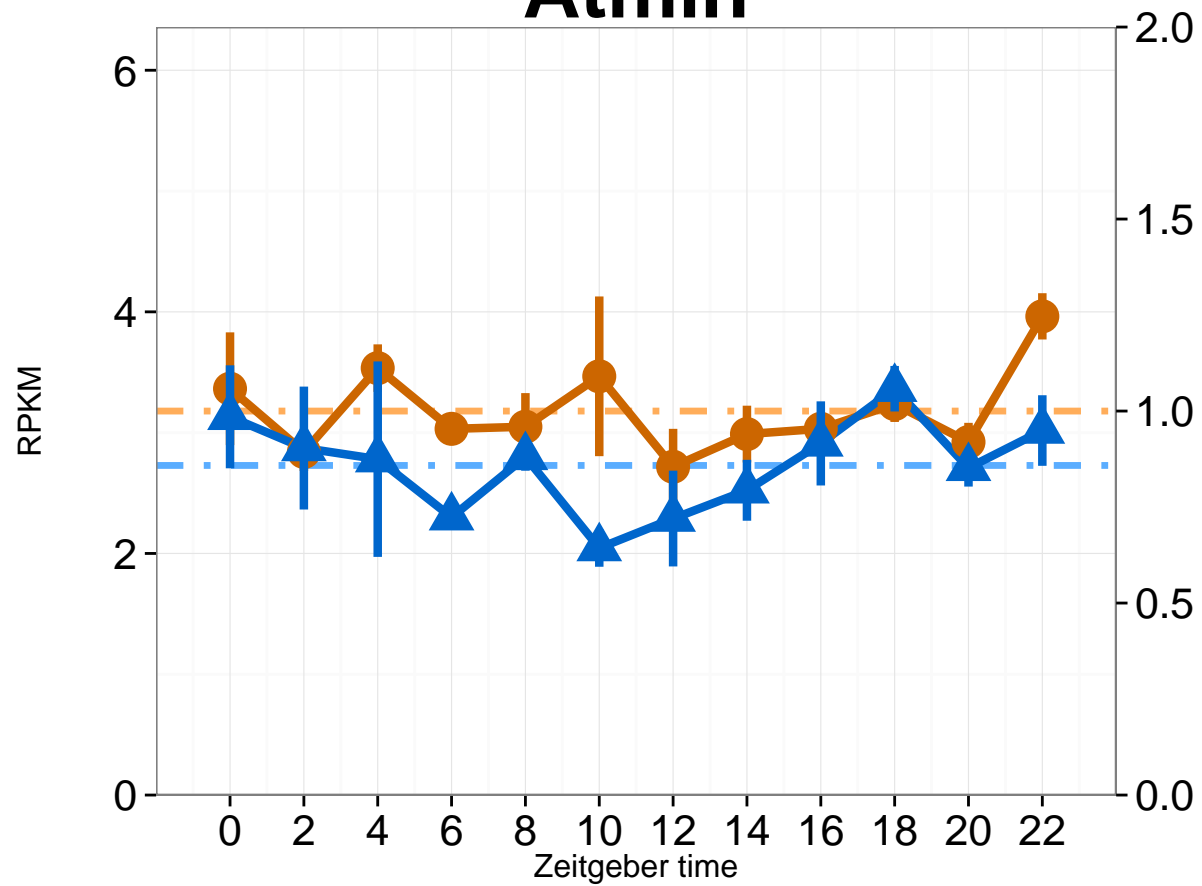

## Atmin

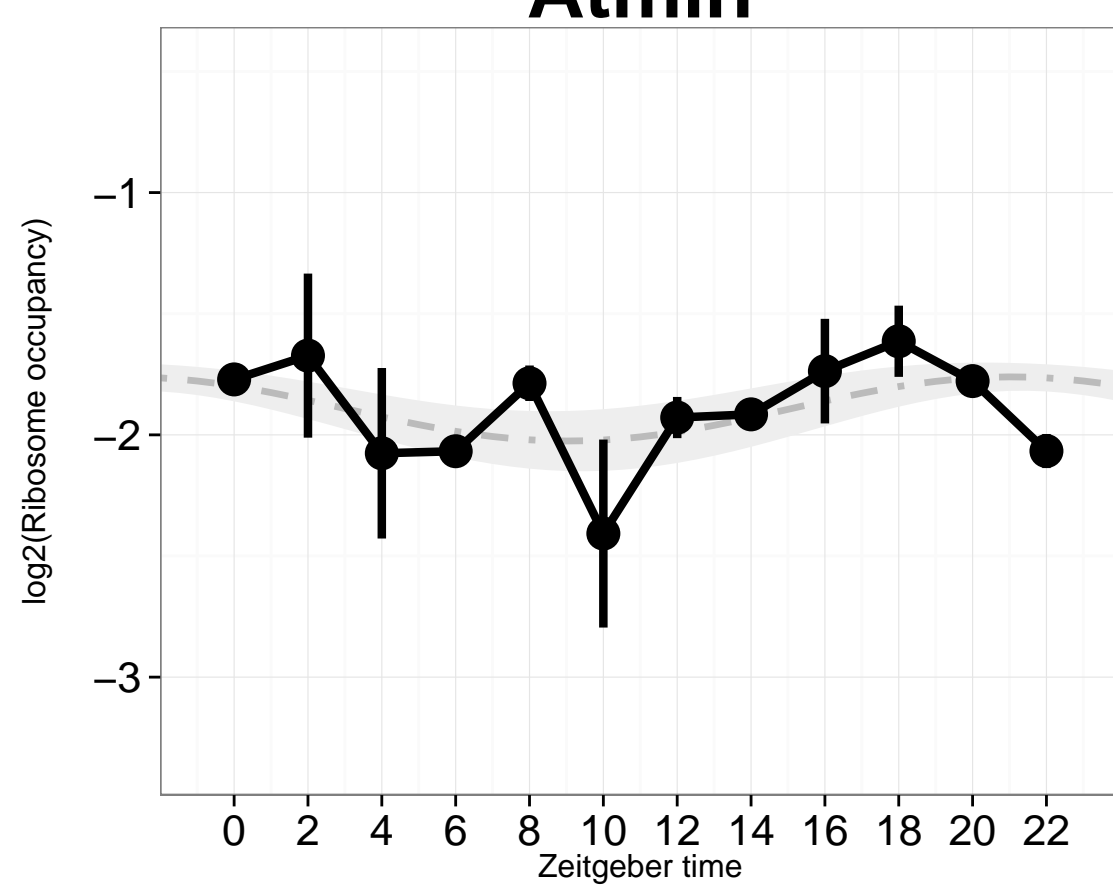

Supplement: SuppDataset_1.zip [file Atmin_set_A.pdf › Supplemental Dataset 1/A-mRNA_nonrhyth_translation_nonrhyth/Atmin_set_A.pdf]

# Atn1

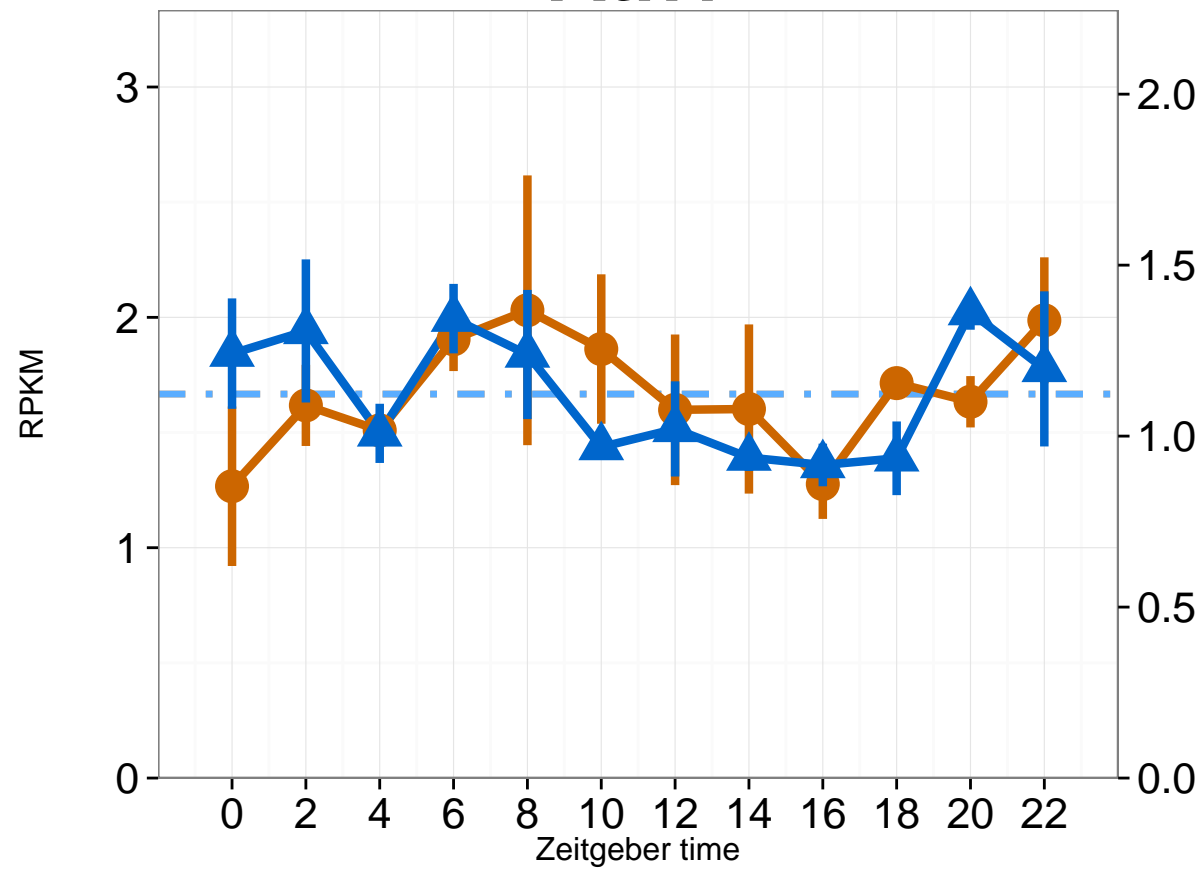

# Atn1

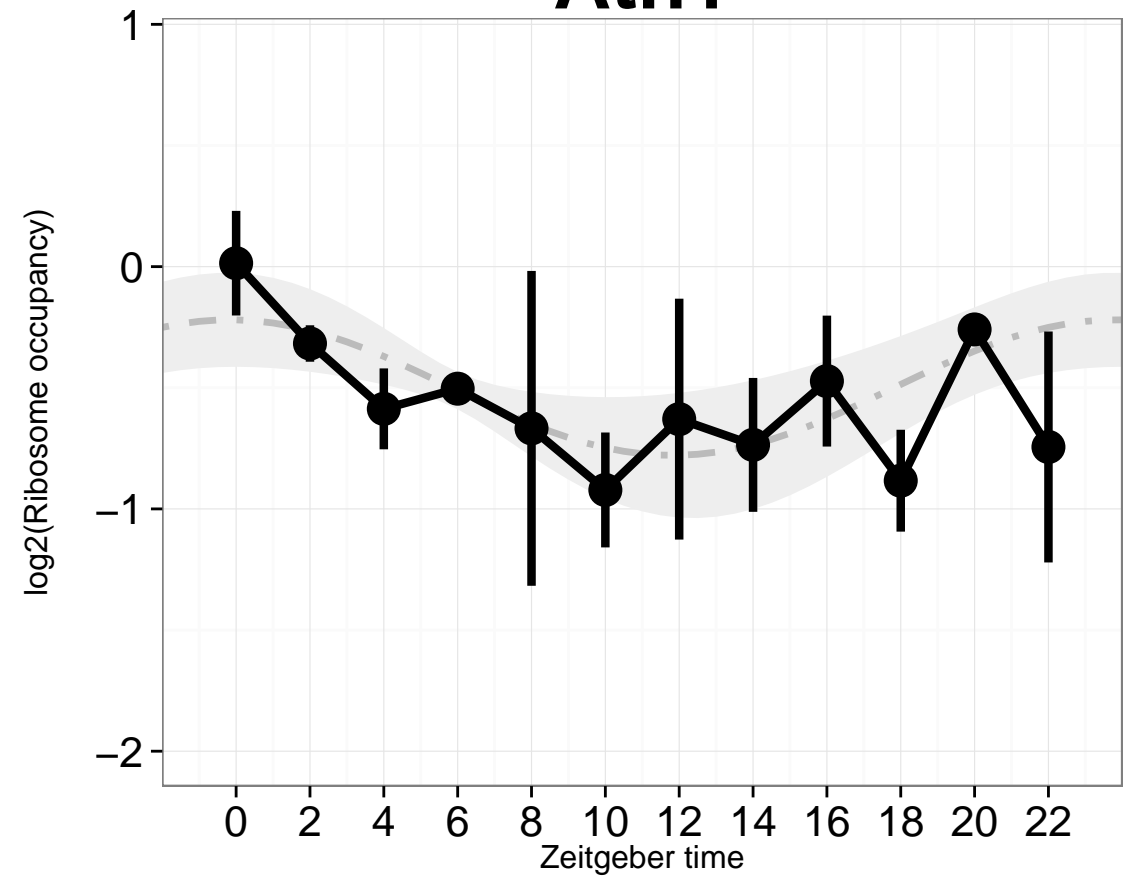

Supplement: SuppDataset_1.zip [file Atn1_set_A.pdf › Supplemental Dataset 1/A-mRNA_nonrhyth_translation_nonrhyth/Atn1_set_A.pdf]

# Atp11a

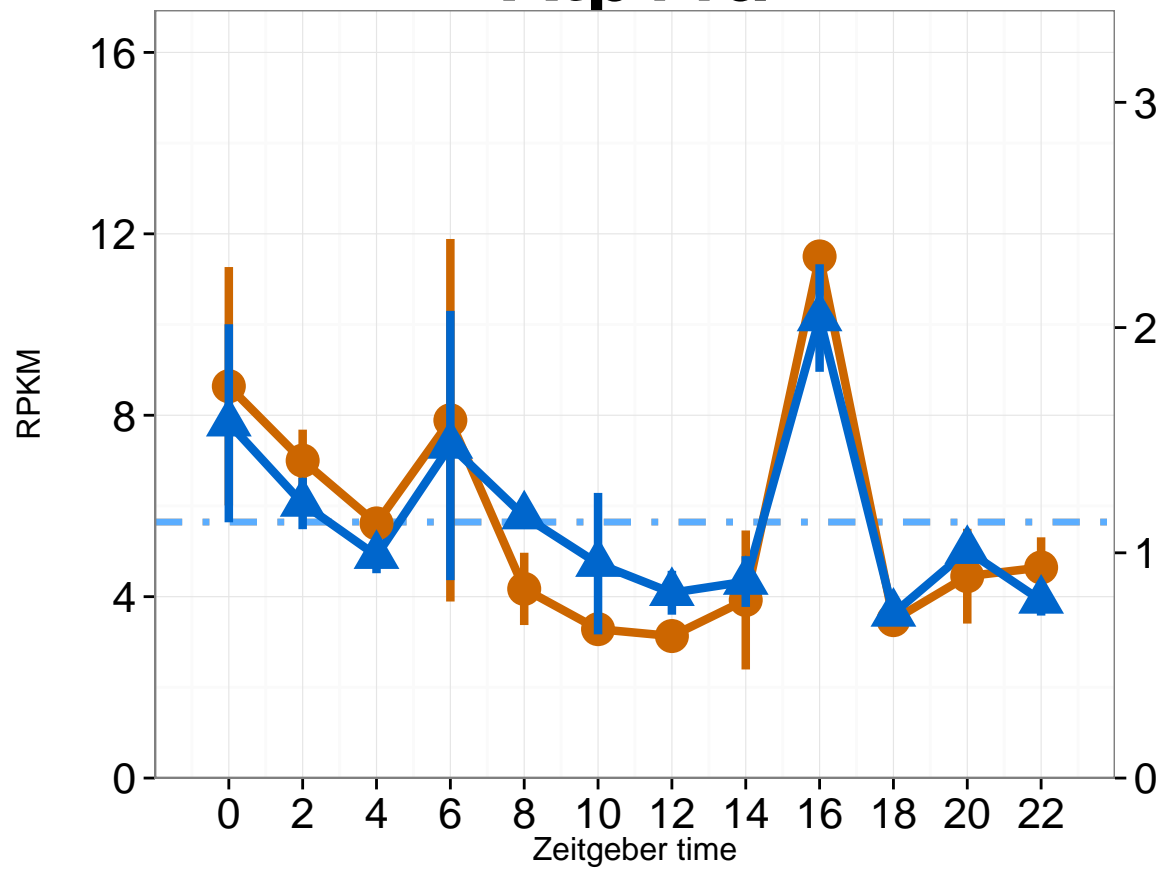

# Atp11a

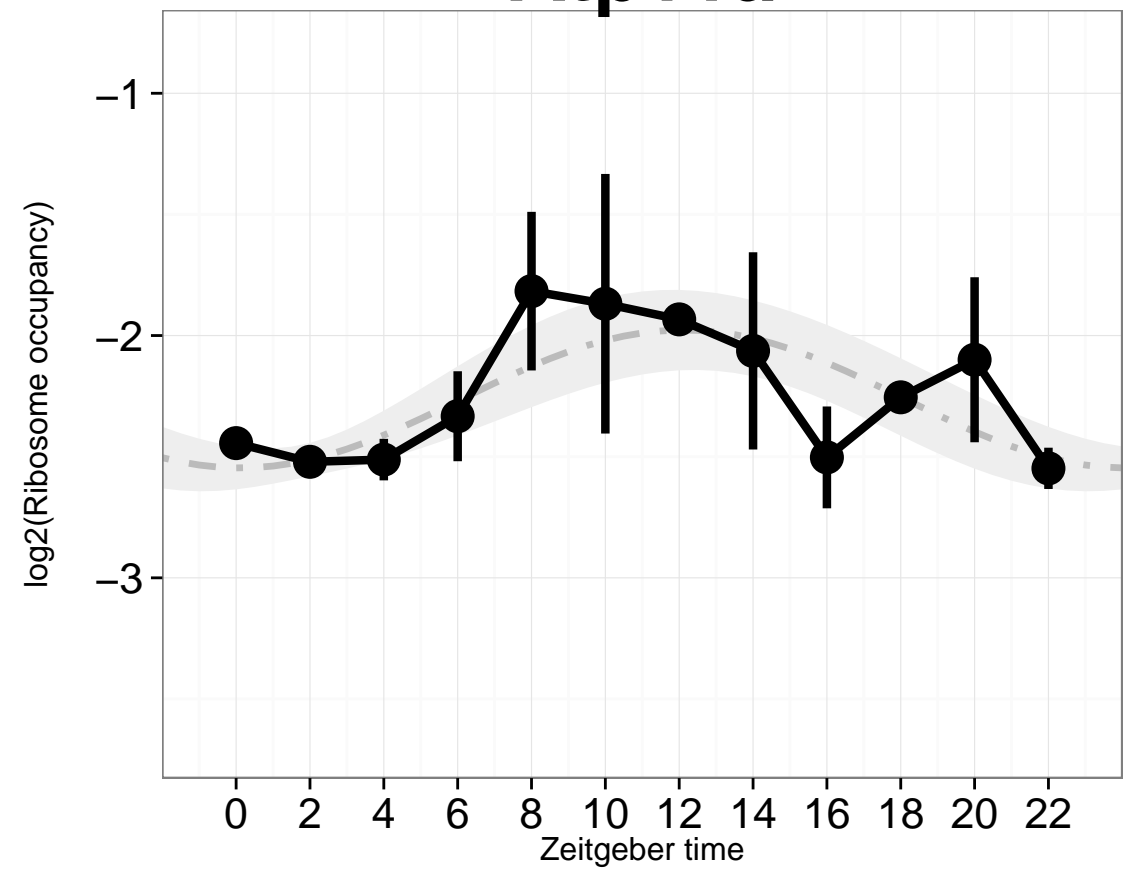

Supplement: SuppDataset_1.zip [file Atp11a_set_A.pdf › Supplemental Dataset 1/A-mRNA_nonrhyth_translation_nonrhyth/Atp11a_set_A.pdf]

# Atp11b

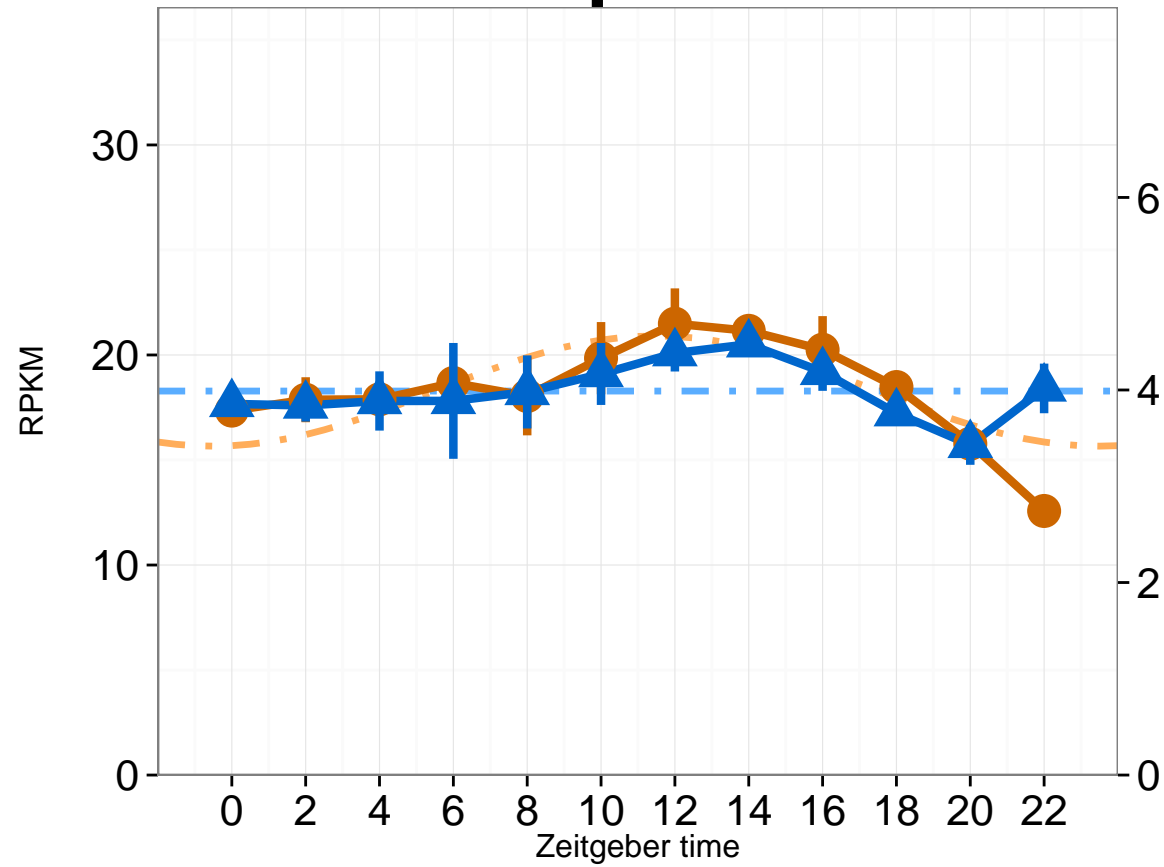

# Atp11b

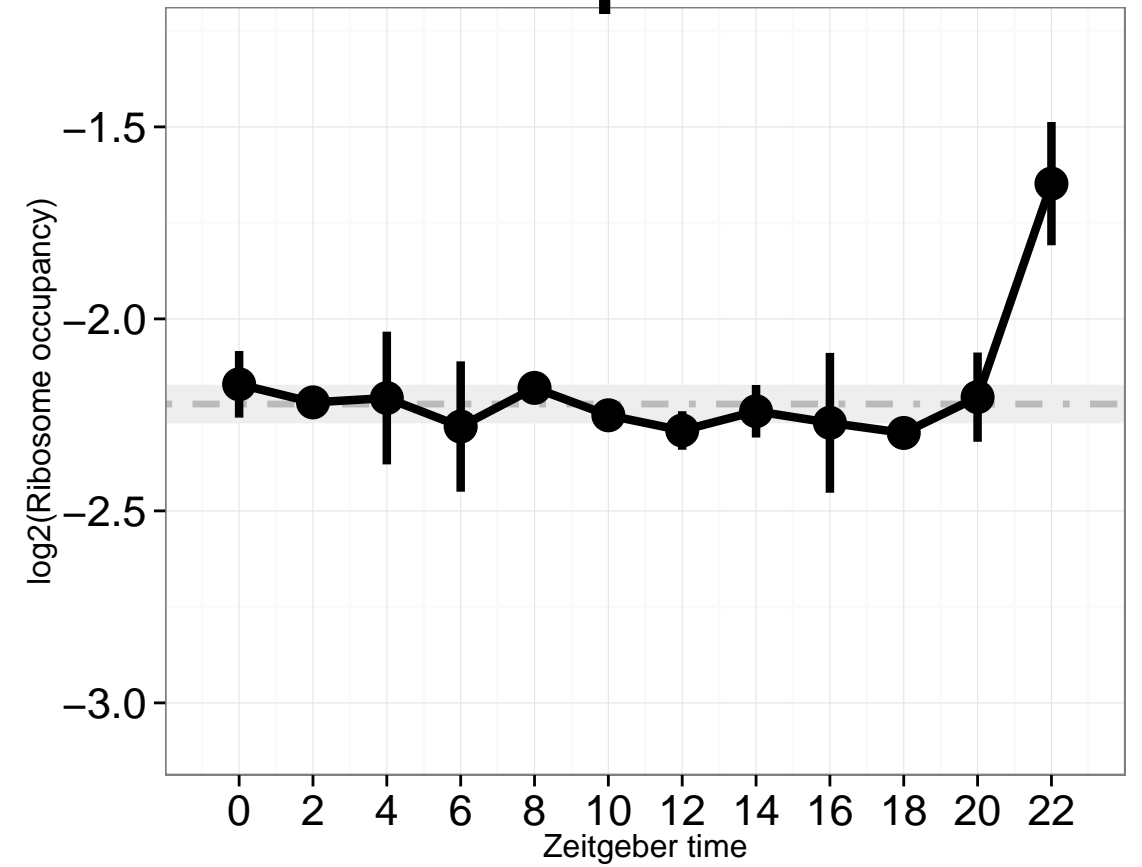

Supplement: SuppDataset_1.zip [file Atp11b_set_A.pdf › Supplemental Dataset 1/A-mRNA_nonrhyth_translation_nonrhyth/Atp11b_set_A.pdf]

# Atp13a1

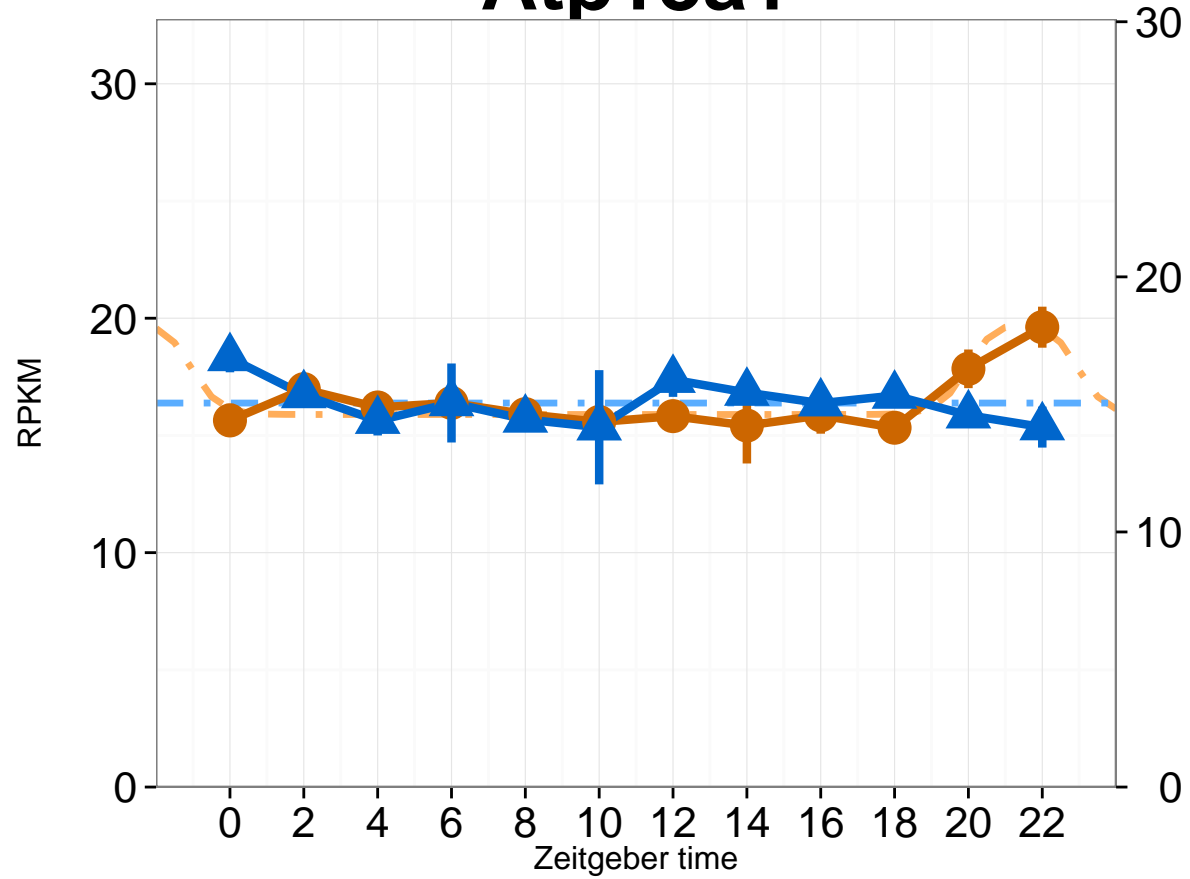

# Atp13a1

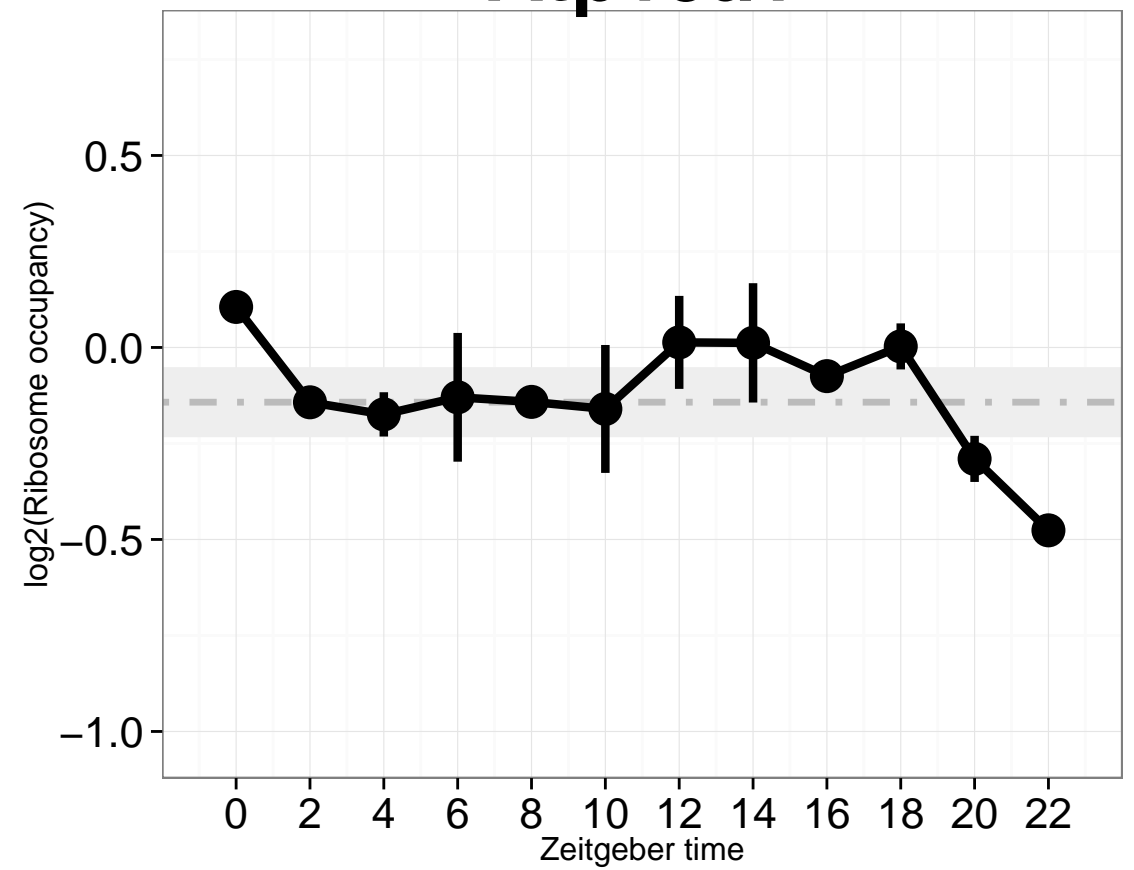

Supplement: SuppDataset_1.zip [file Atp13a1_set_A.pdf › Supplemental Dataset 1/A-mRNA_nonrhyth_translation_nonrhyth/Atp13a1_set_A.pdf]

# Atp13a2

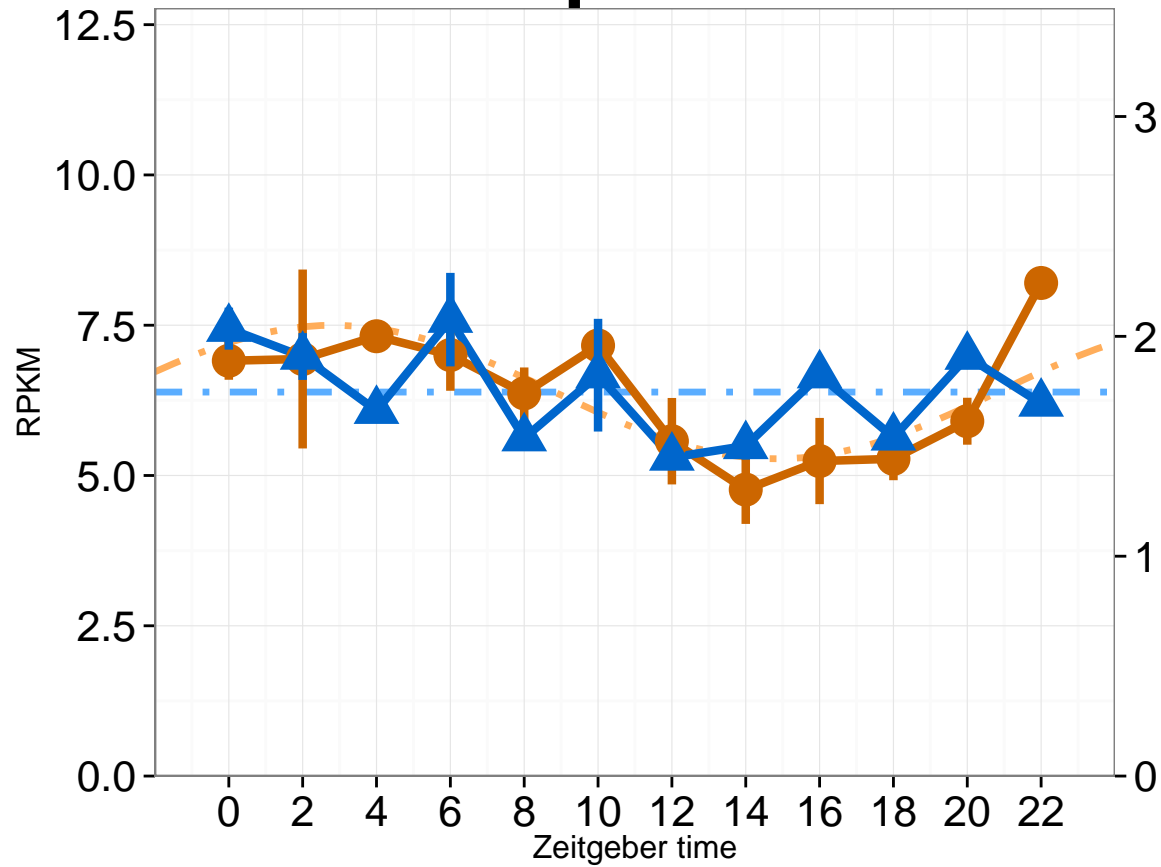

# Atp13a2

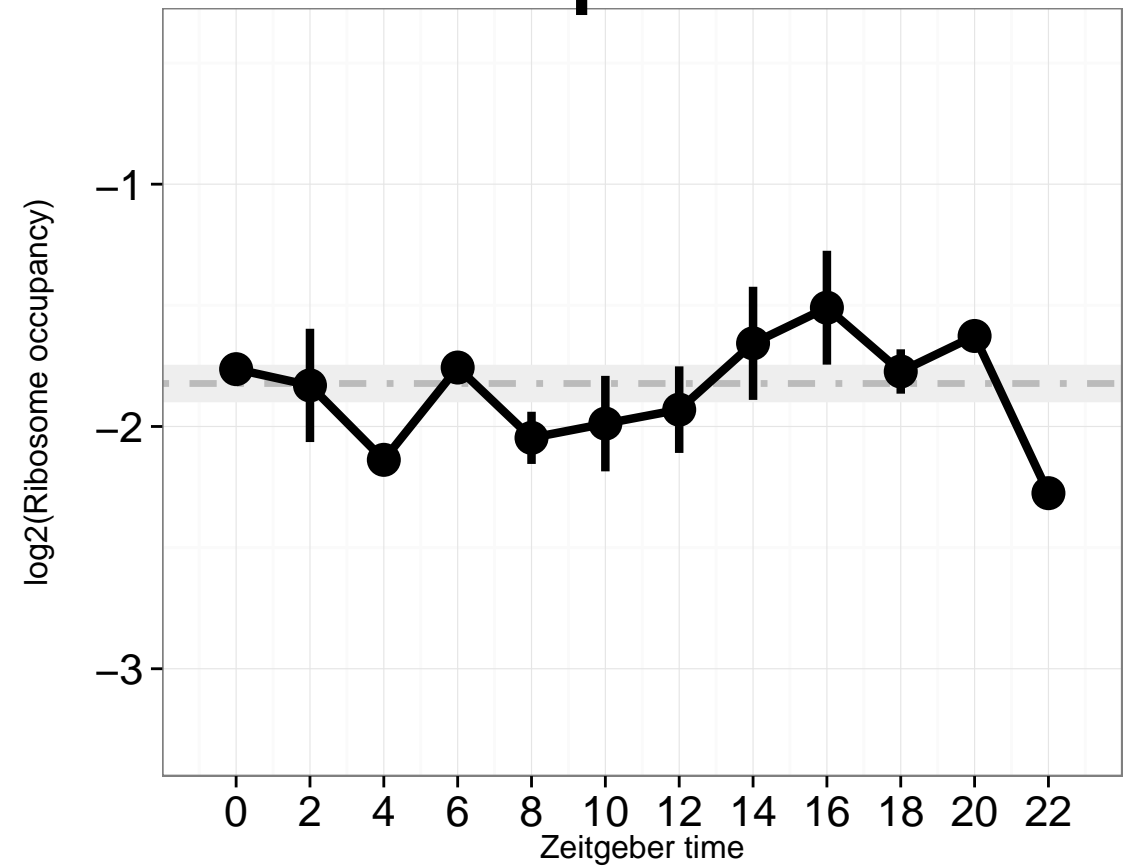

Supplement: SuppDataset_1.zip [file Atp13a2_set_A.pdf › Supplemental Dataset 1/A-mRNA_nonrhyth_translation_nonrhyth/Atp13a2_set_A.pdf]

# Atp13a3

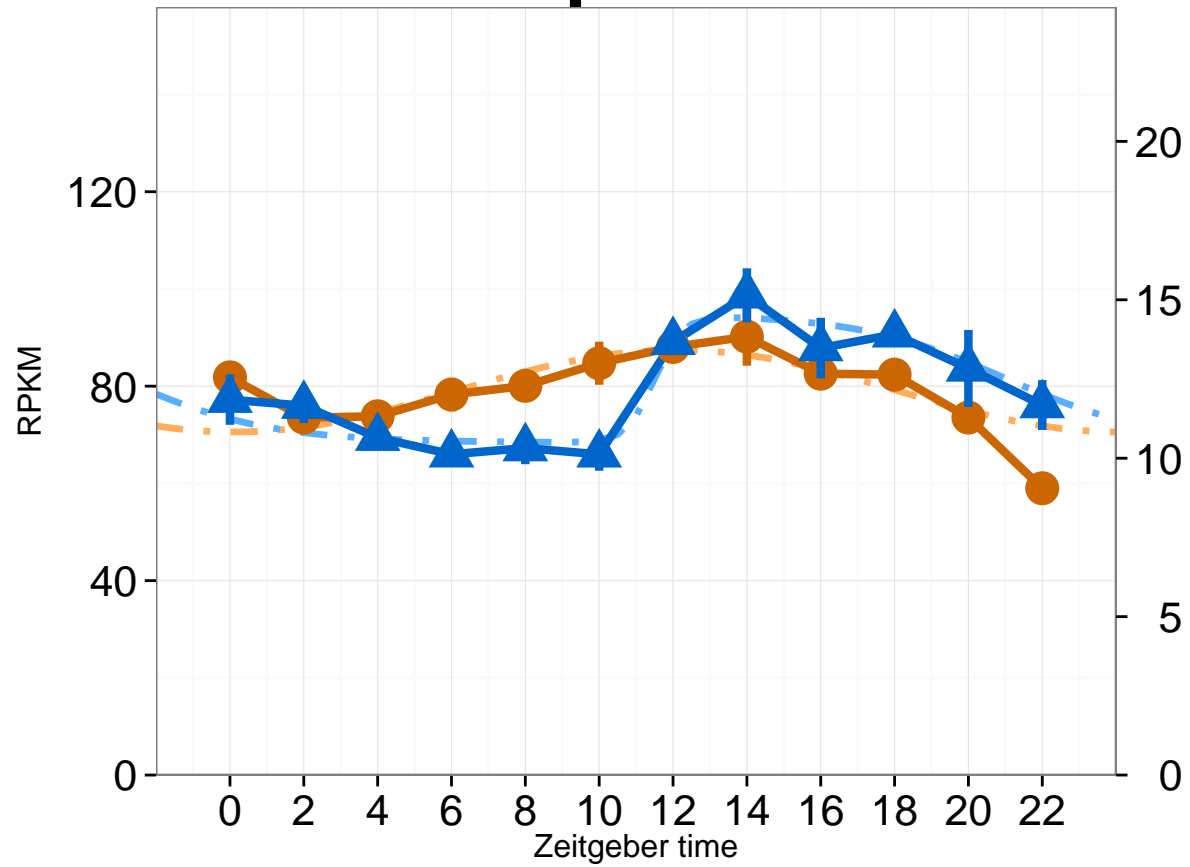

# Atp13a3

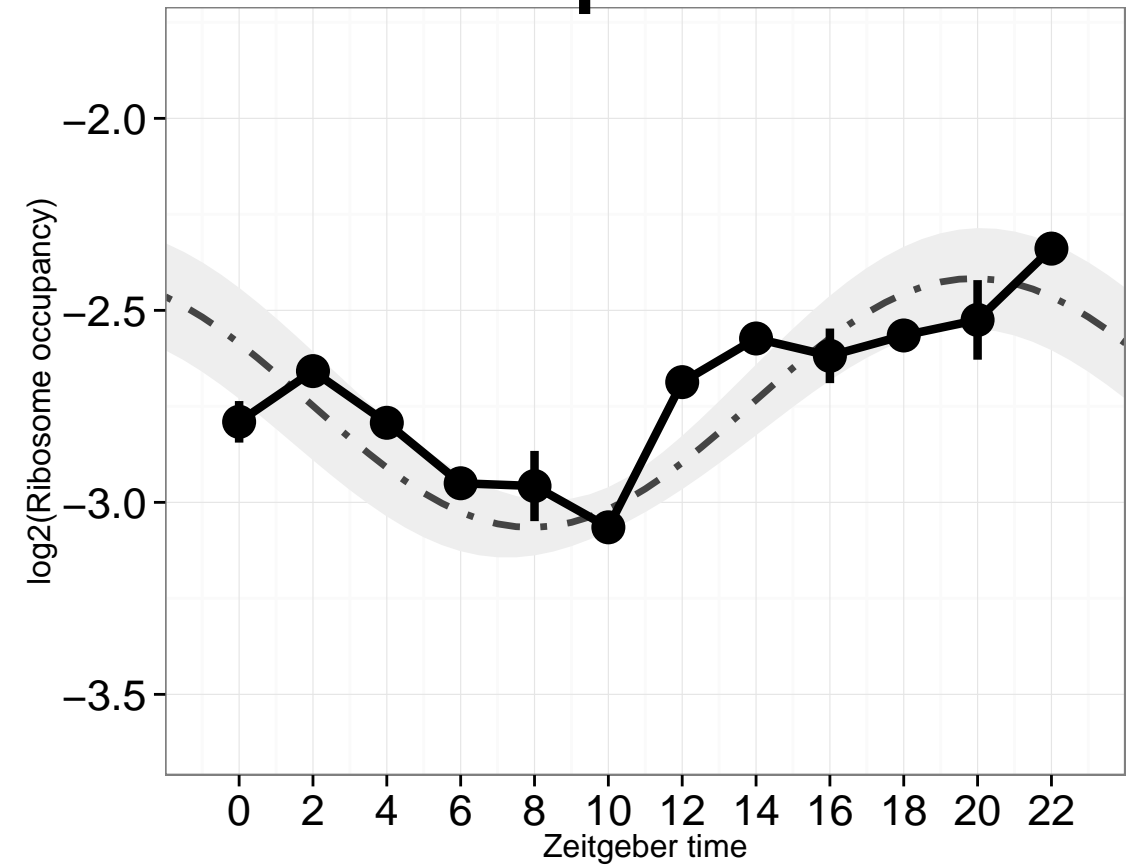

Supplement: SuppDataset_1.zip [file Atp13a3_set_A.pdf › Supplemental Dataset 1/A-mRNA_nonrhyth_translation_nonrhyth/Atp13a3_set_A.pdf]
