# Supplementary figures and images for: Ribosome profiling reveals the rhythmic liver translatome and circadian clock regulation by upstream open reading frames (part 9 of 113)
Source: HighWire-hosted journal article supplement (doi:10.1101/gr.195404.115), 2015-10-20

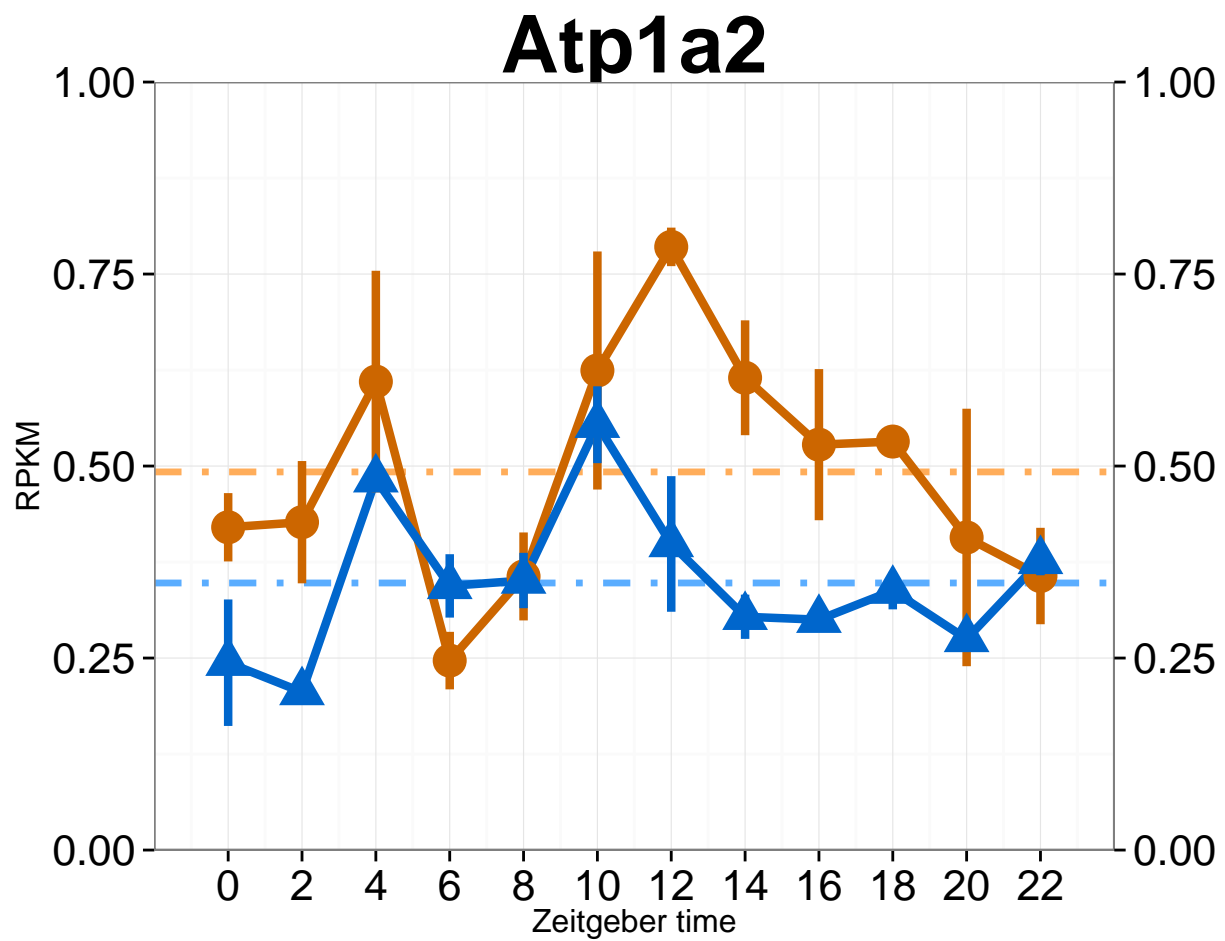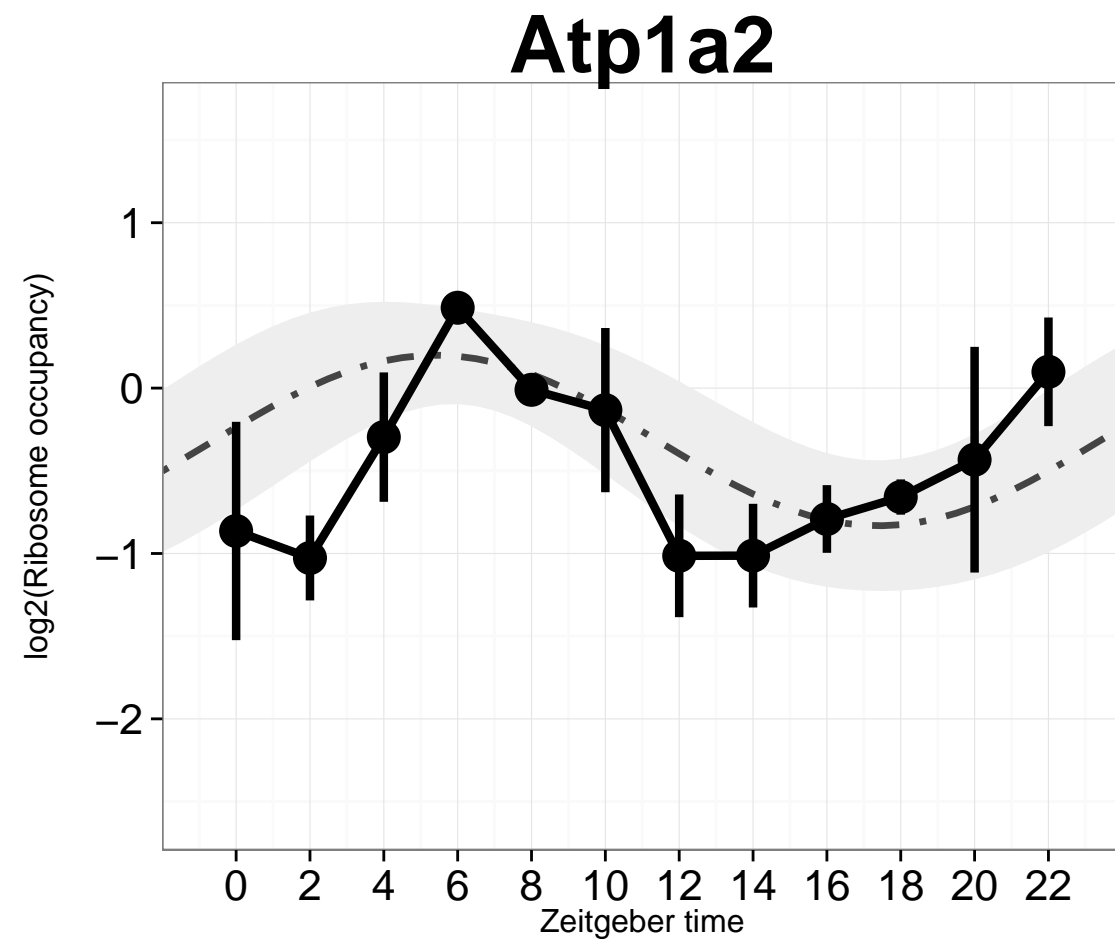

Supplement: SuppDataset_1.zip [file Atp1a2_set_A.pdf › Supplemental Dataset 1/A-mRNA_nonrhyth_translation_nonrhyth/Atp1a2_set_A.pdf]

# Atp1b1

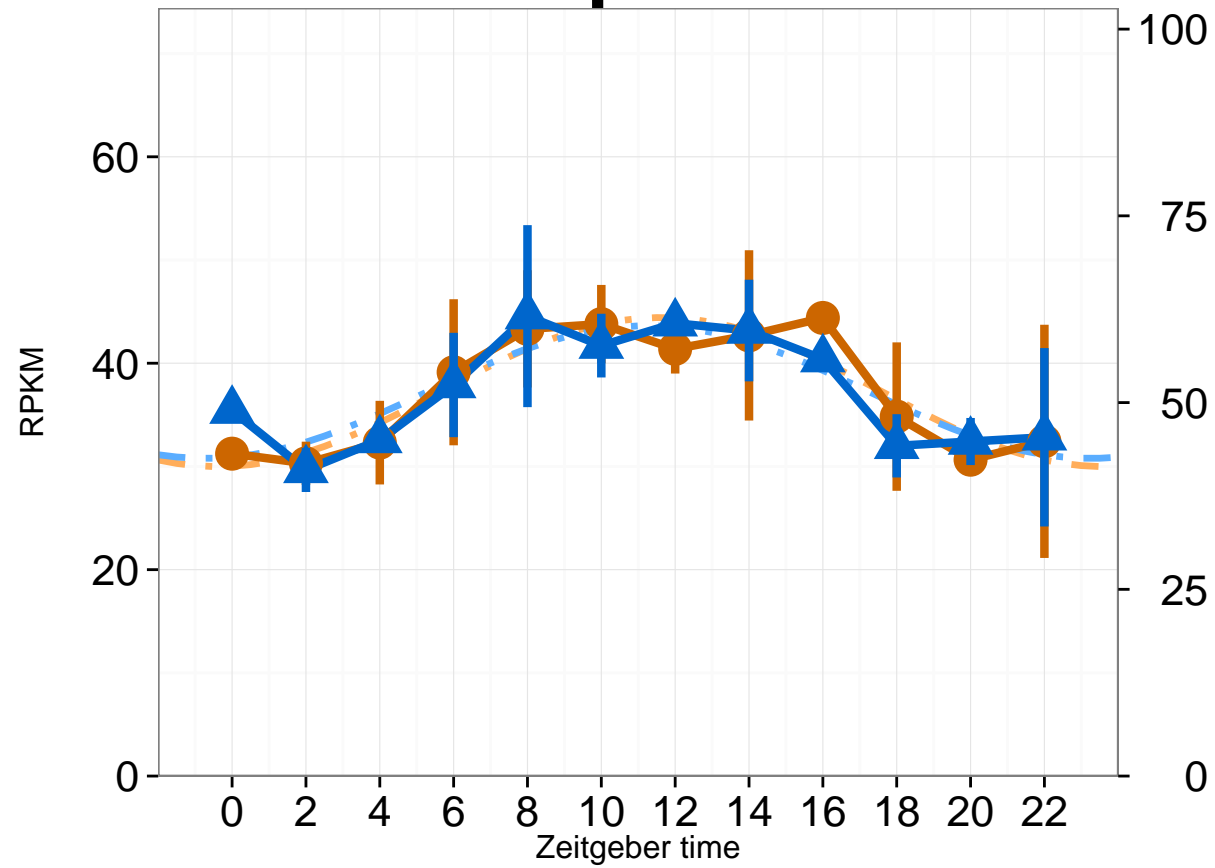

# Atp1b1

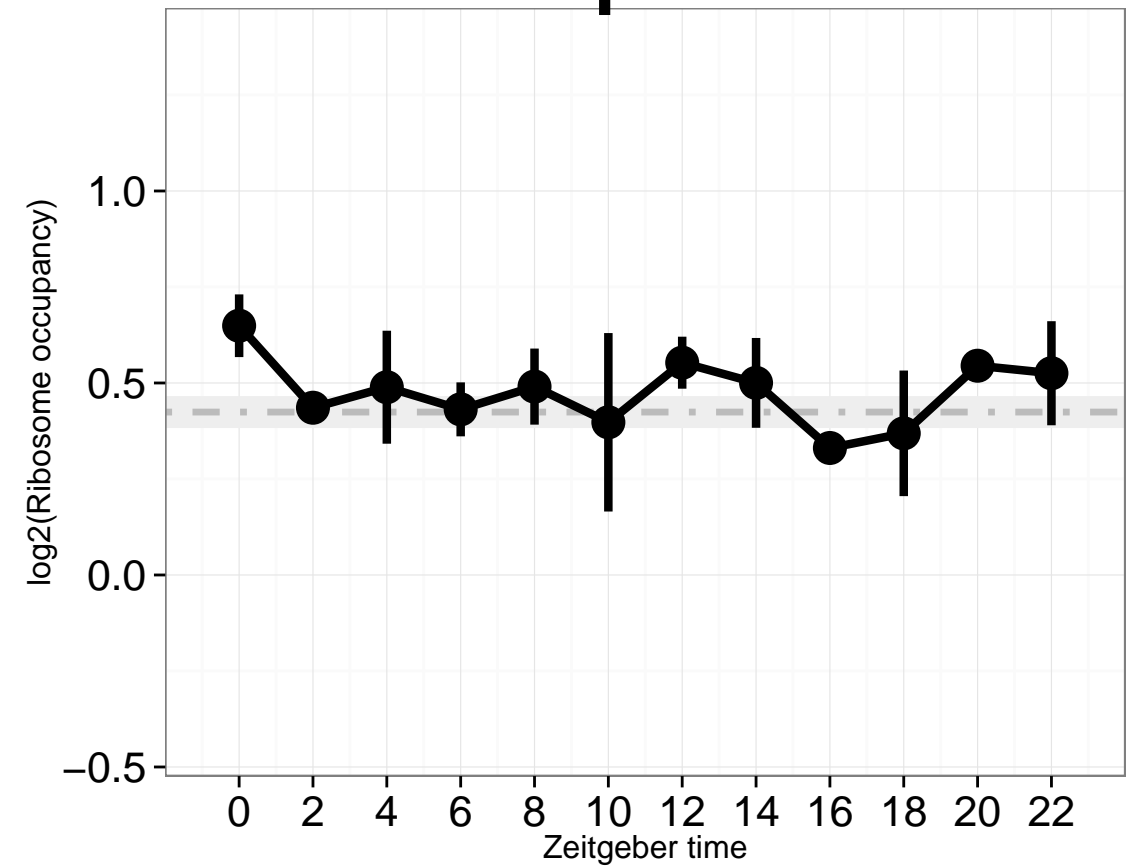

Supplement: SuppDataset_1.zip [file Atp1b1_set_A.pdf › Supplemental Dataset 1/A-mRNA_nonrhyth_translation_nonrhyth/Atp1b1_set_A.pdf]

# Atp1b3

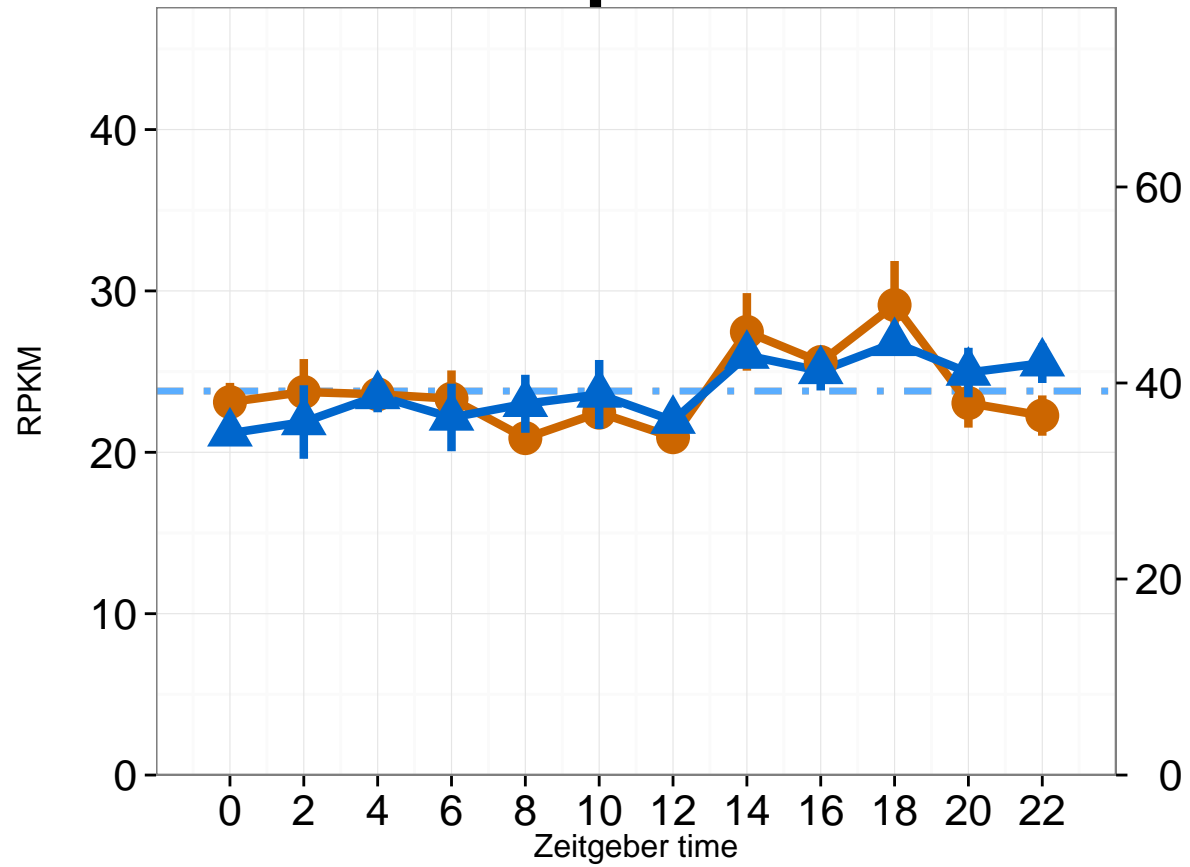

# Atp1b3

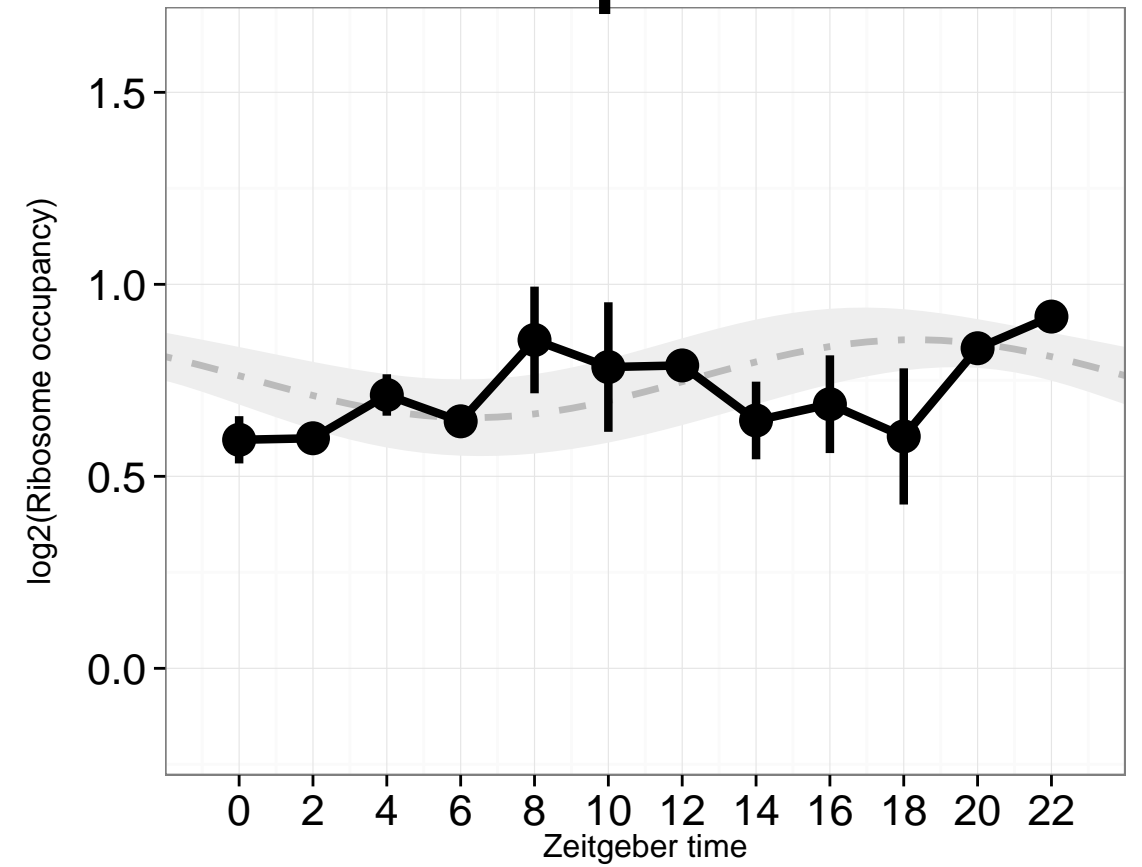

Supplement: SuppDataset_1.zip [file Atp1b3_set_A.pdf › Supplemental Dataset 1/A-mRNA_nonrhyth_translation_nonrhyth/Atp1b3_set_A.pdf]

# Atp2a2

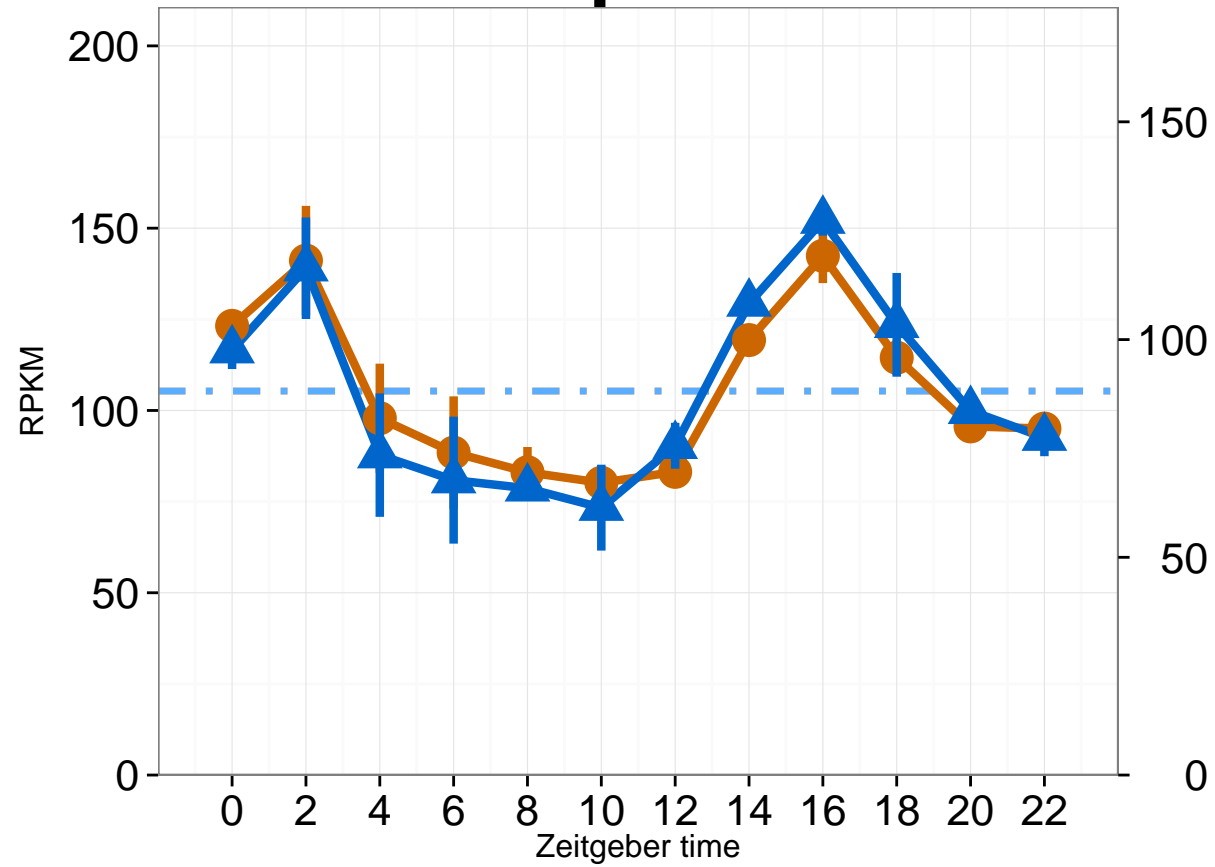

# Atp2a2

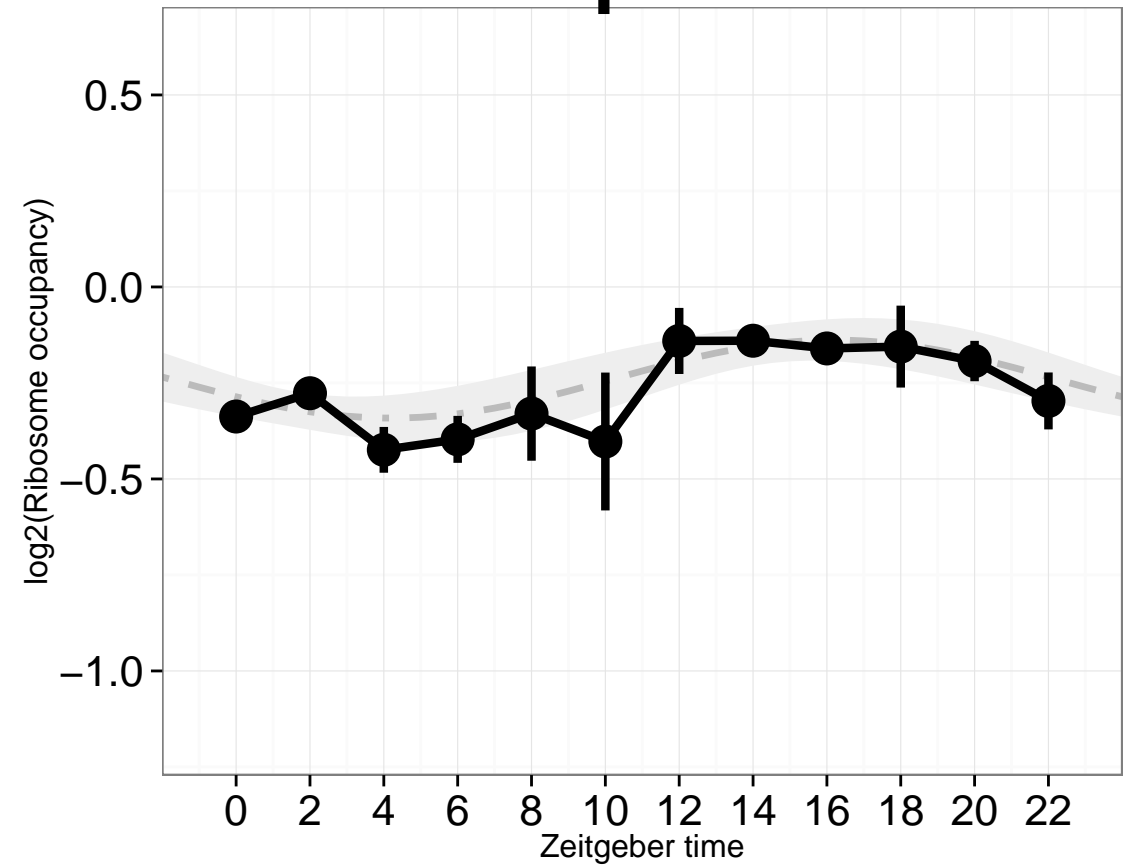

Supplement: SuppDataset_1.zip [file Atp2a2_set_A.pdf › Supplemental Dataset 1/A-mRNA_nonrhyth_translation_nonrhyth/Atp2a2_set_A.pdf]

# Atp2a3

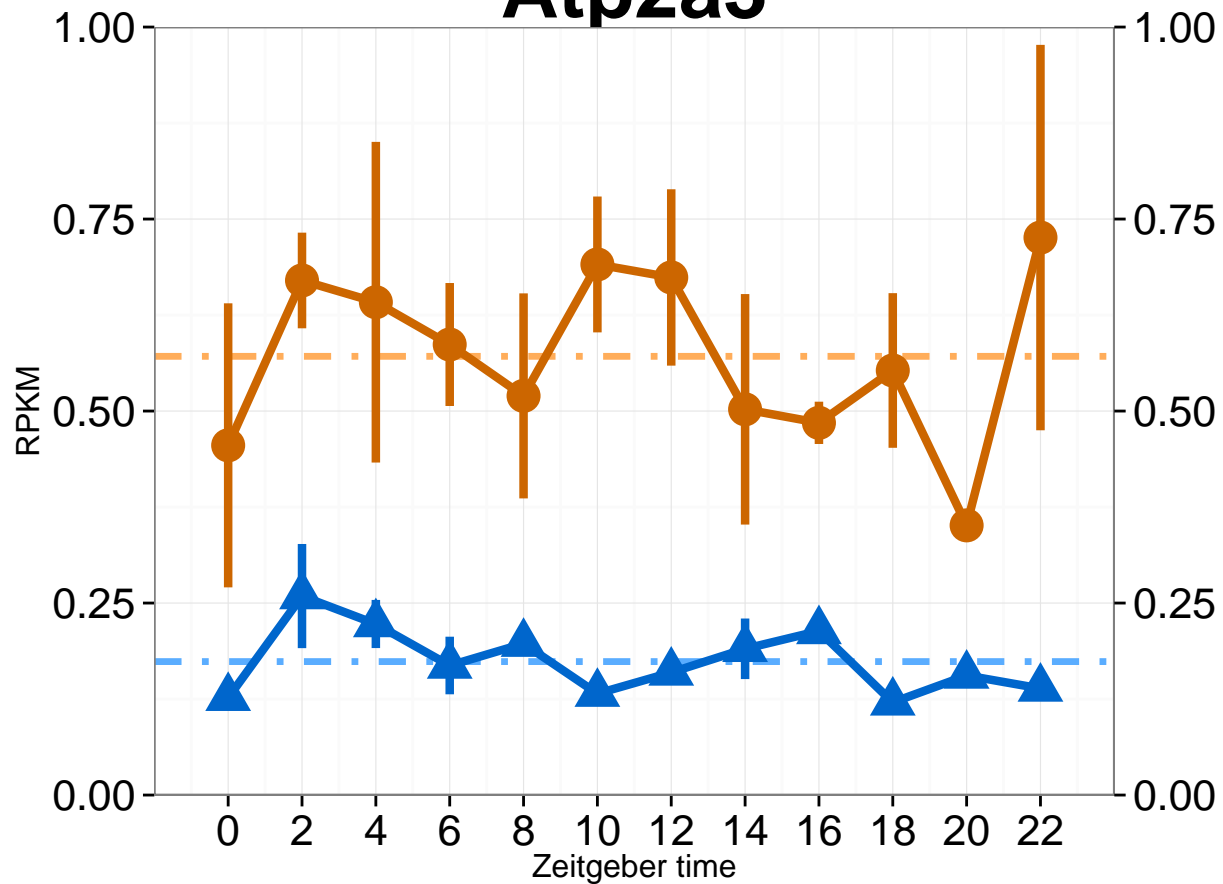

# Atp2a3

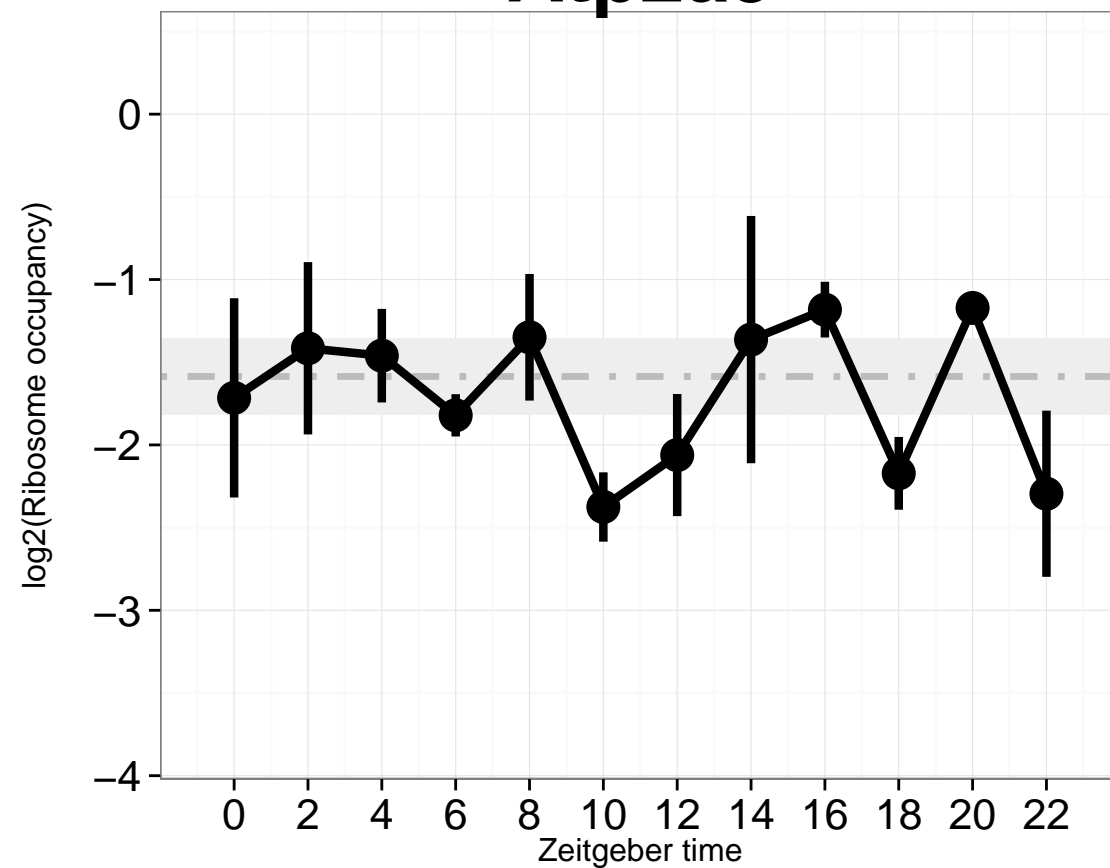

Supplement: SuppDataset_1.zip [file Atp2a3_set_A.pdf › Supplemental Dataset 1/A-mRNA_nonrhyth_translation_nonrhyth/Atp2a3_set_A.pdf]

# Atp2b1

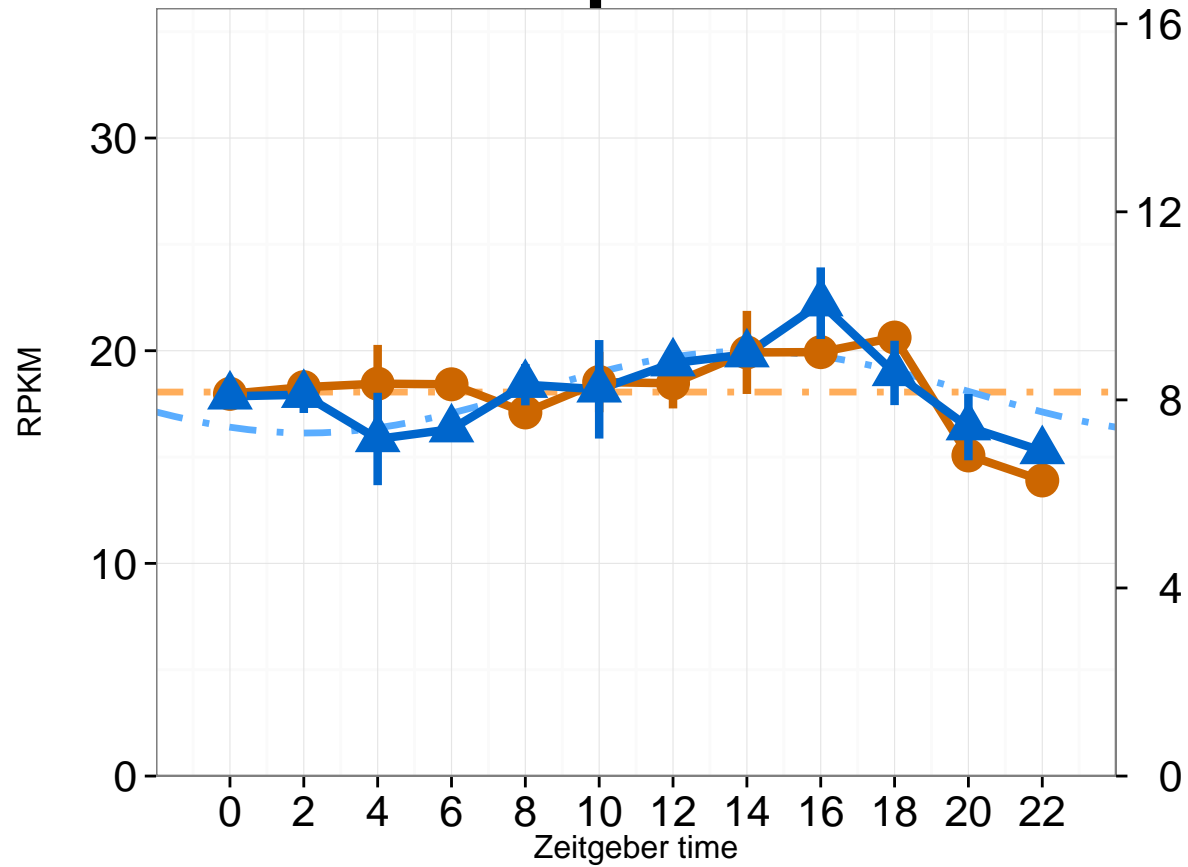

# Atp2b1

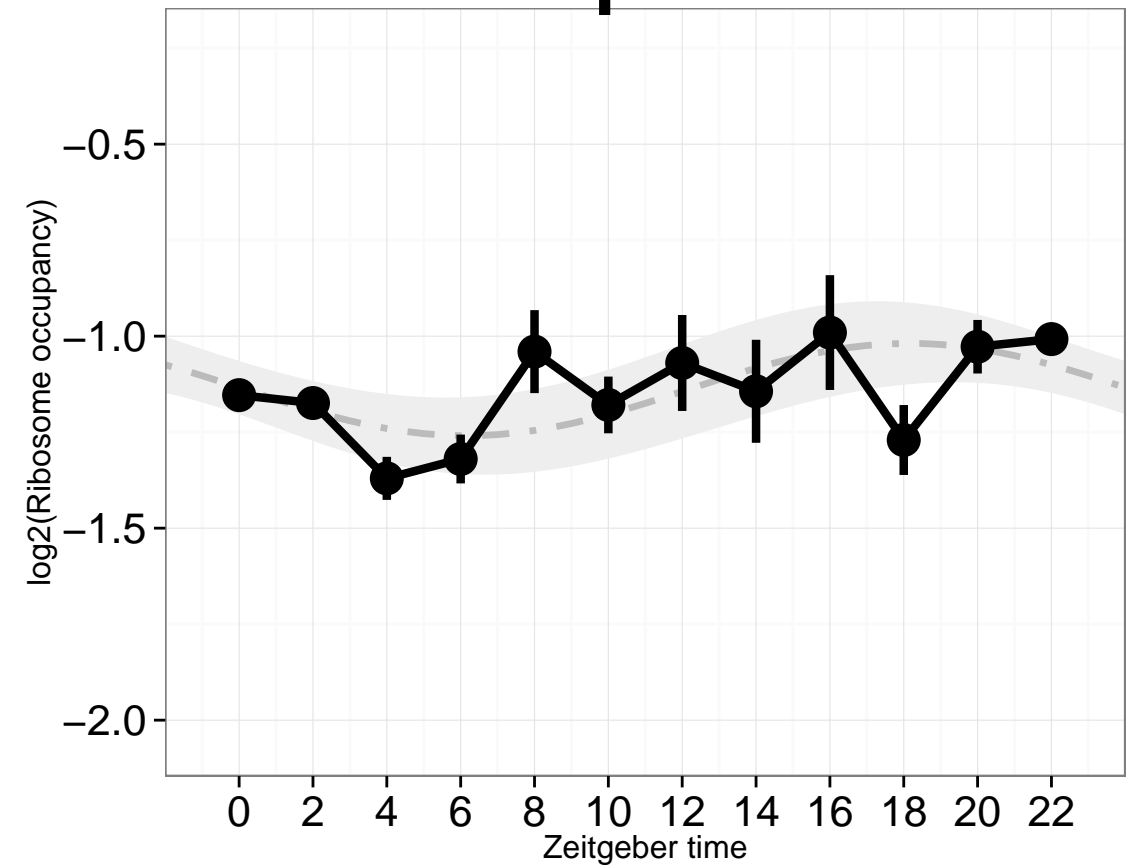

Supplement: SuppDataset_1.zip [file Atp2b1_set_A.pdf › Supplemental Dataset 1/A-mRNA_nonrhyth_translation_nonrhyth/Atp2b1_set_A.pdf]

# Atp2b4

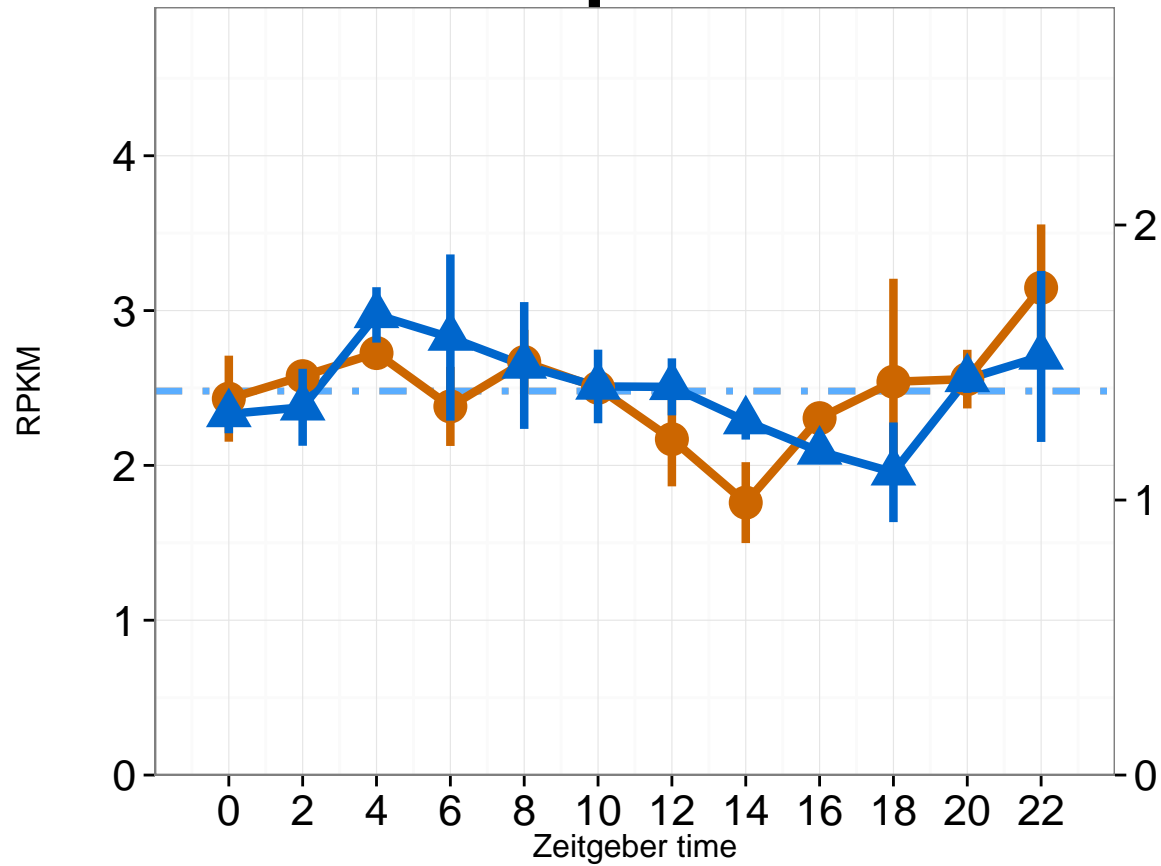

# Atp2b4

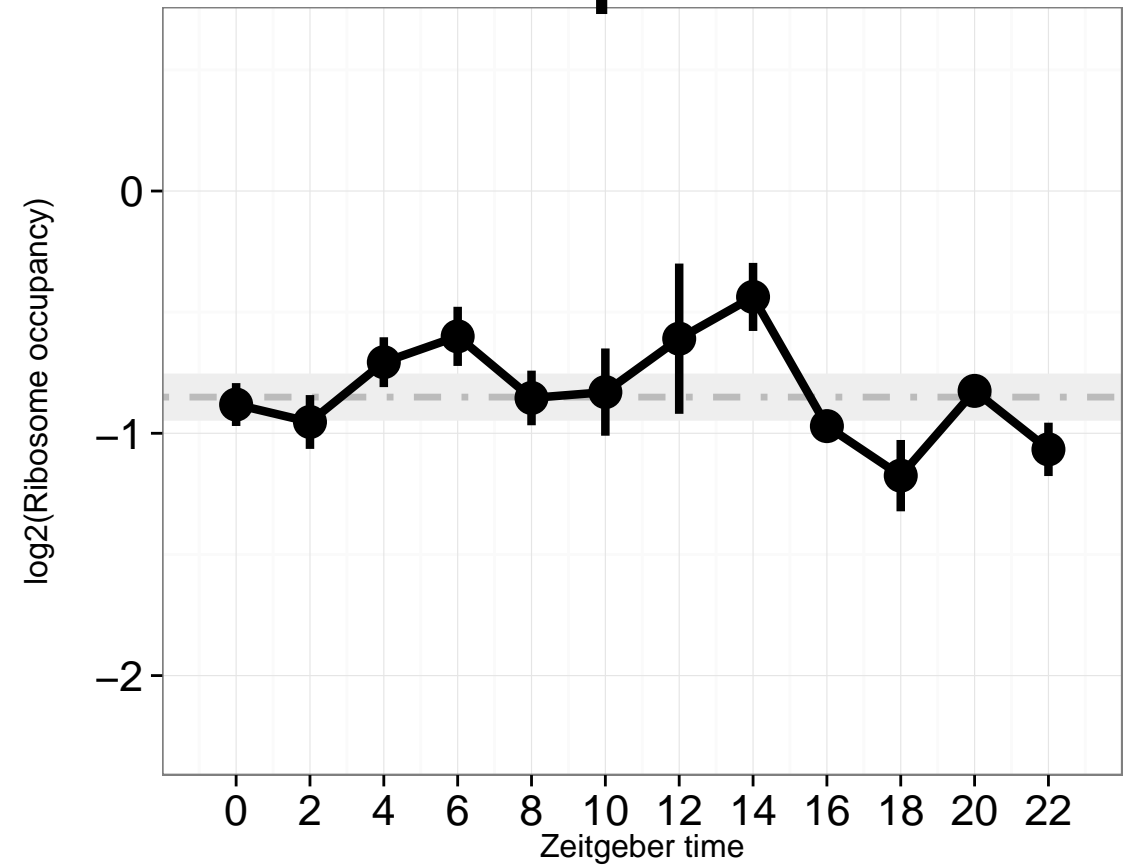

Supplement: SuppDataset_1.zip [file Atp2b4_set_A.pdf › Supplemental Dataset 1/A-mRNA_nonrhyth_translation_nonrhyth/Atp2b4_set_A.pdf]

# Atp2c1

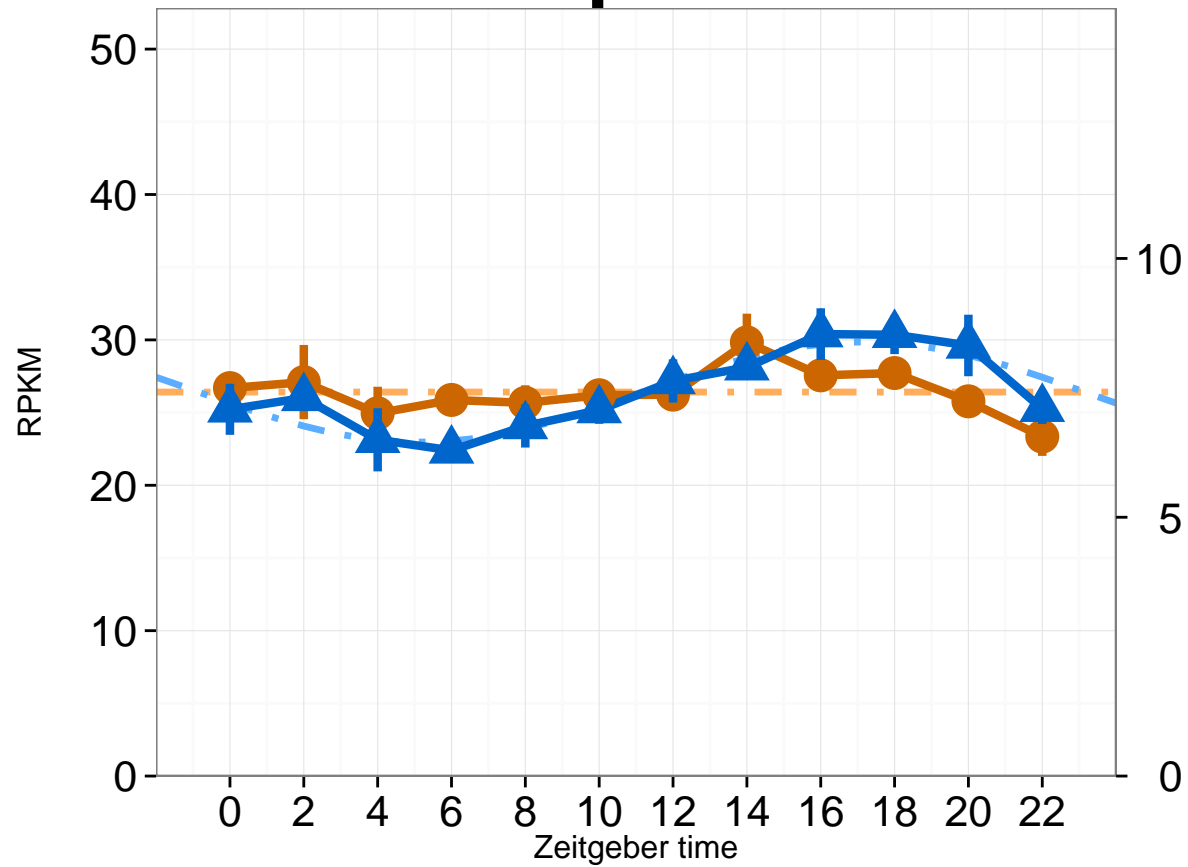

# Atp2c1

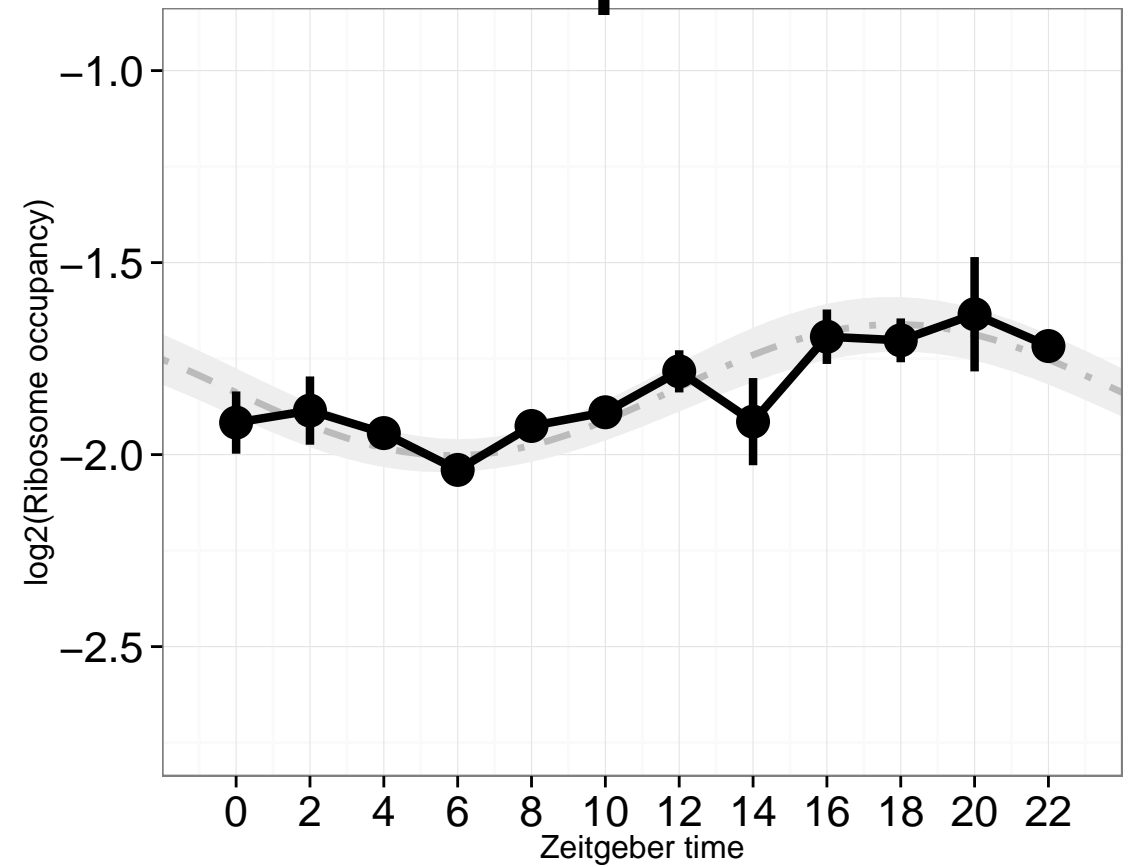

Supplement: SuppDataset_1.zip [file Atp2c1_set_A.pdf › Supplemental Dataset 1/A-mRNA_nonrhyth_translation_nonrhyth/Atp2c1_set_A.pdf]

# Atp5a1

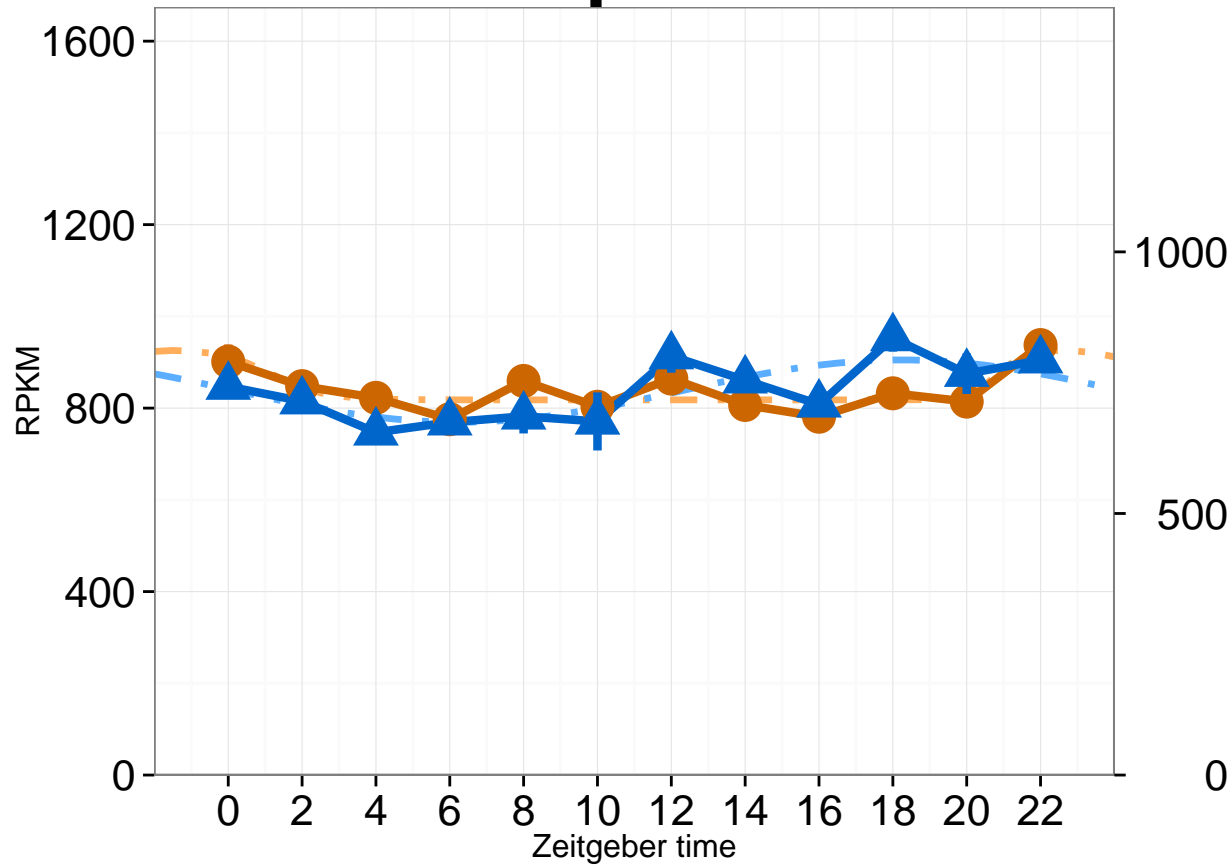

# Atp5a1

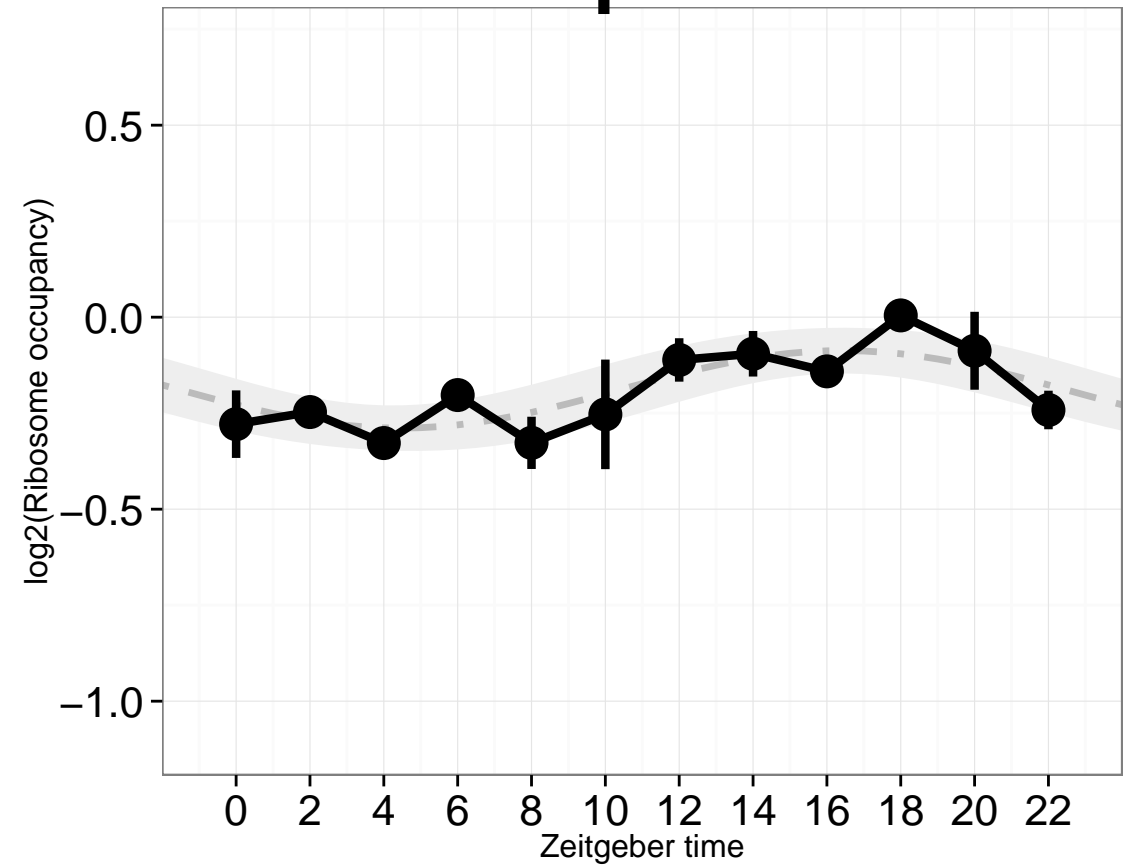

Supplement: SuppDataset_1.zip [file Atp5a1_set_A.pdf › Supplemental Dataset 1/A-mRNA_nonrhyth_translation_nonrhyth/Atp5a1_set_A.pdf]

# Atp5b

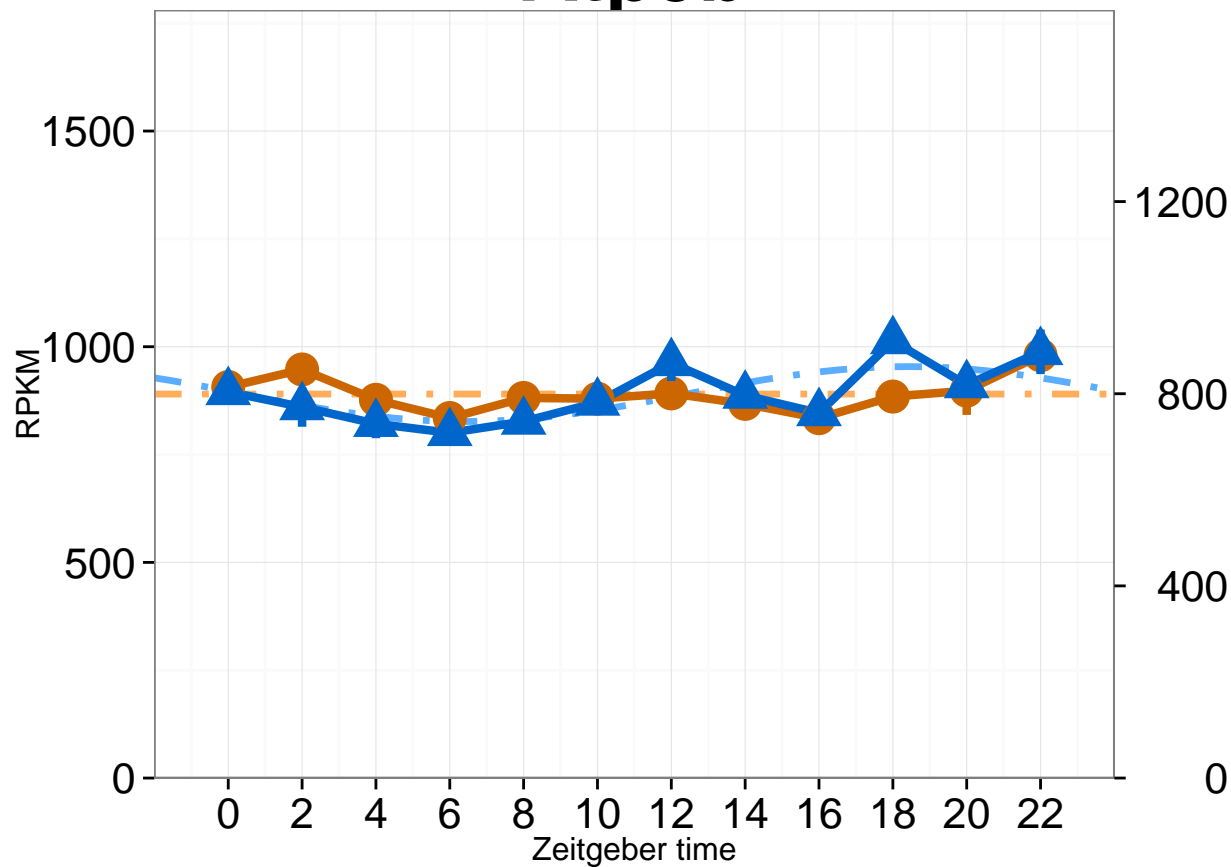

# Atp5b

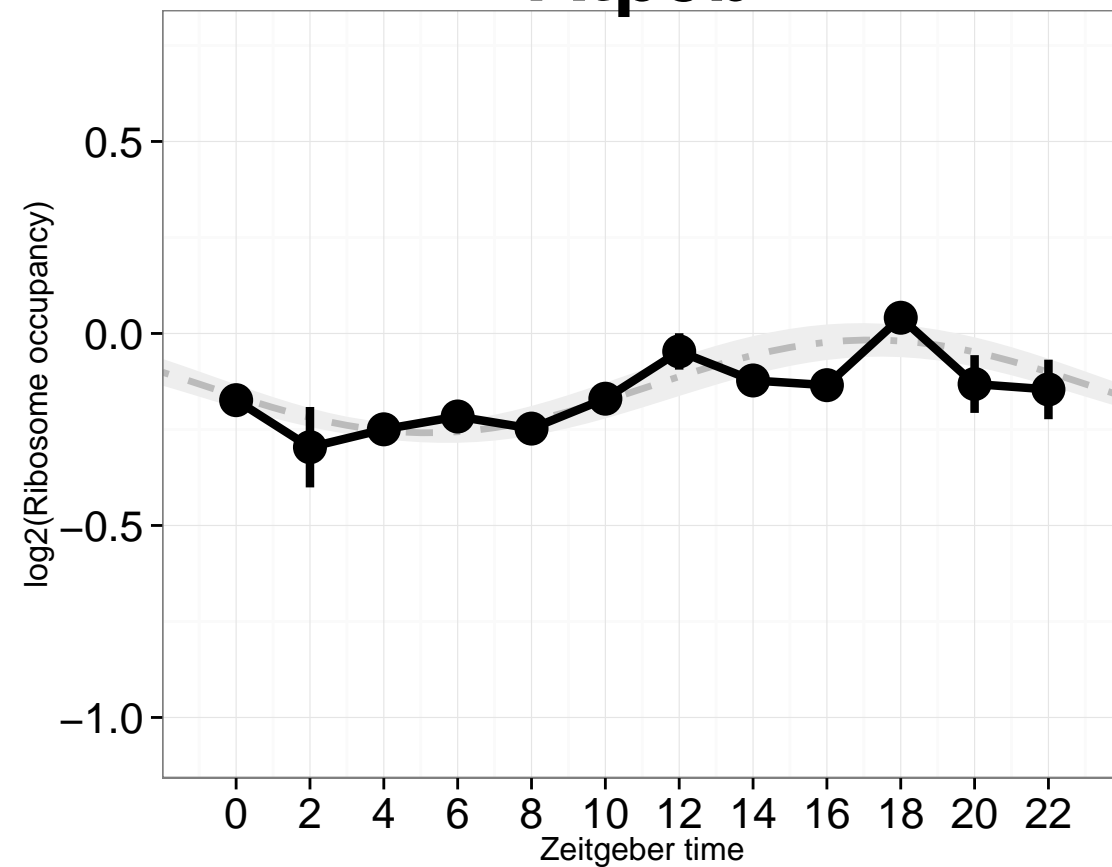

Supplement: SuppDataset_1.zip [file Atp5b_set_A.pdf › Supplemental Dataset 1/A-mRNA_nonrhyth_translation_nonrhyth/Atp5b_set_A.pdf]

# Atp5c1

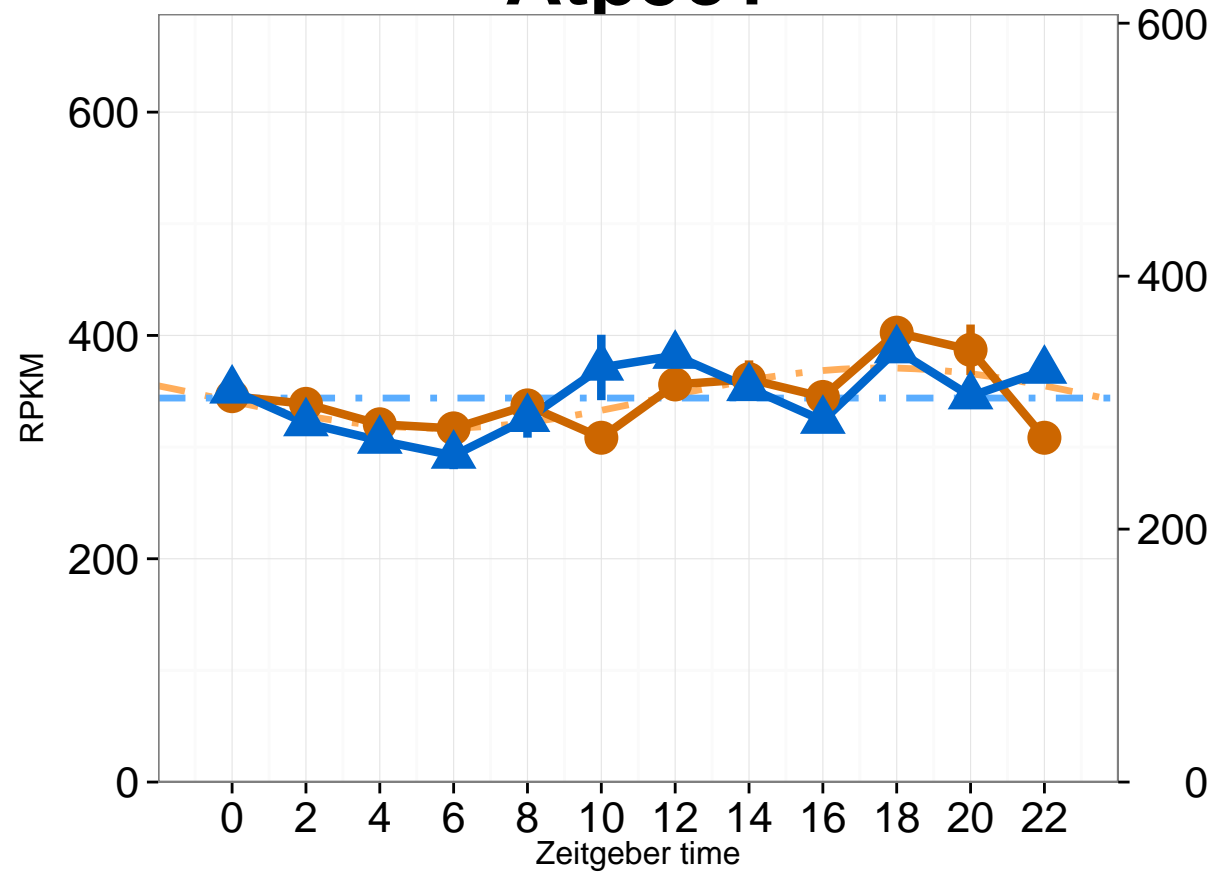

# Atp5c1

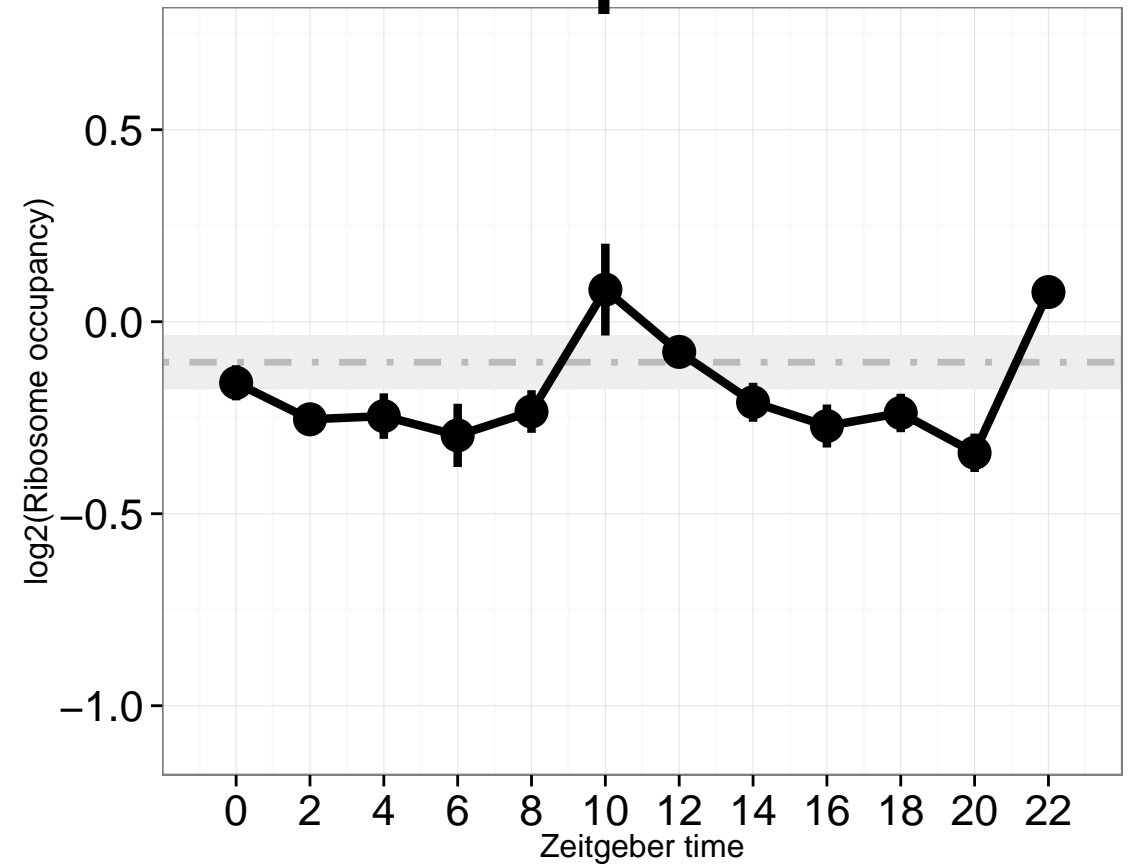

Supplement: SuppDataset_1.zip [file Atp5c1_set_A.pdf › Supplemental Dataset 1/A-mRNA_nonrhyth_translation_nonrhyth/Atp5c1_set_A.pdf]

# Atp5f1

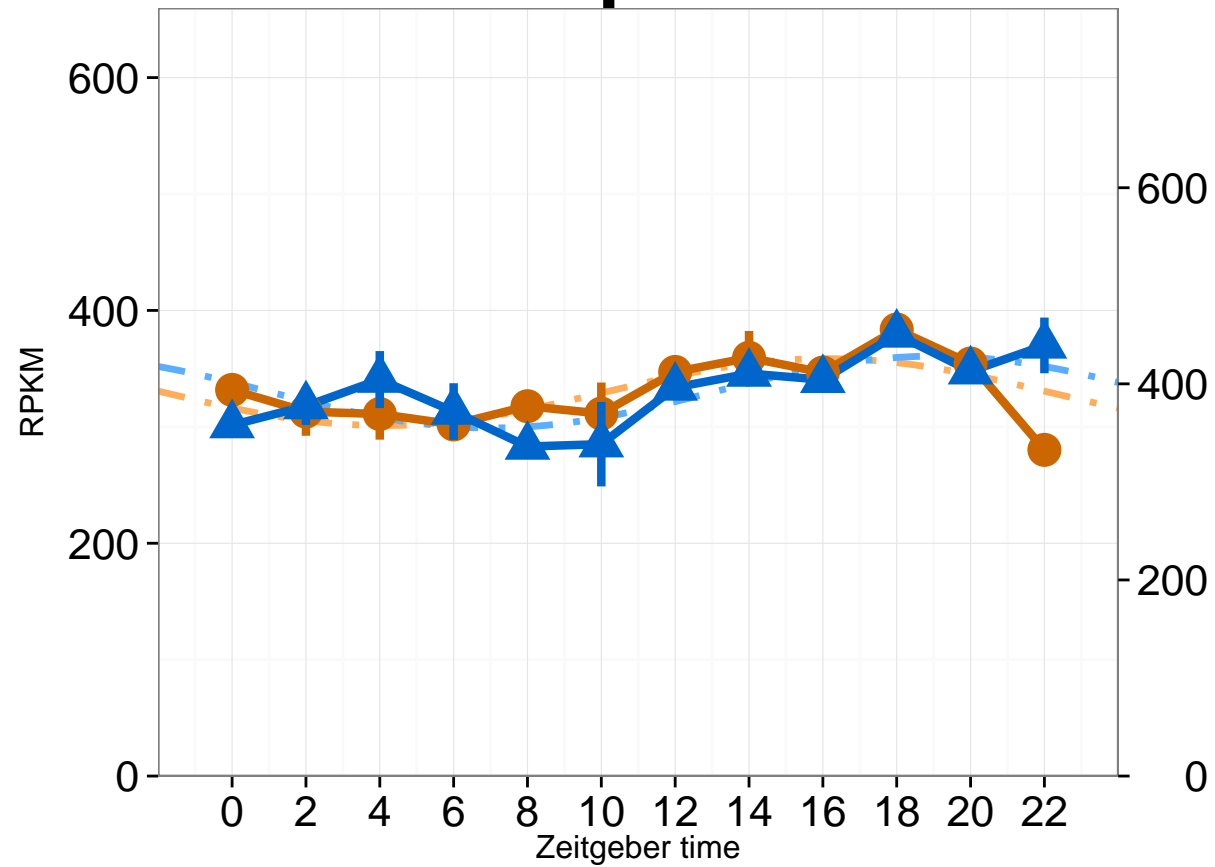

# Atp5f1

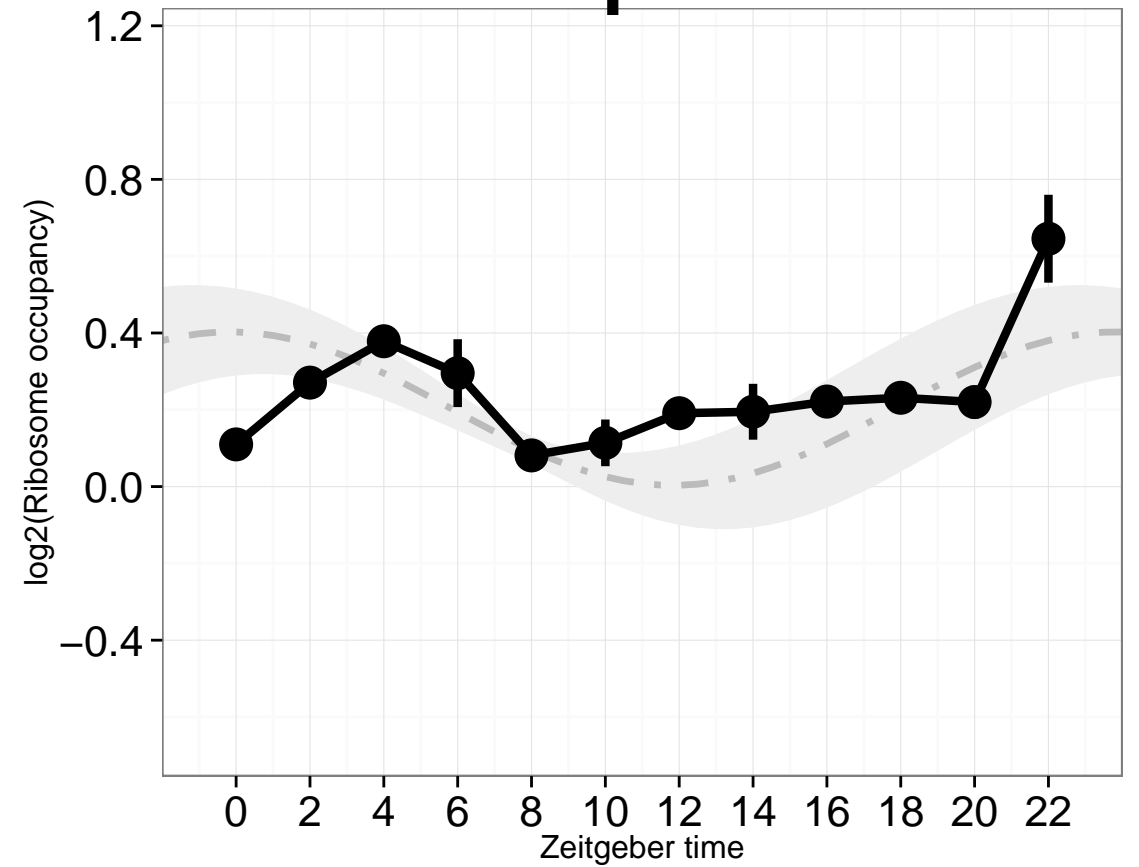

Supplement: SuppDataset_1.zip [file Atp5f1_set_A.pdf › Supplemental Dataset 1/A-mRNA_nonrhyth_translation_nonrhyth/Atp5f1_set_A.pdf]

## Atp5g2

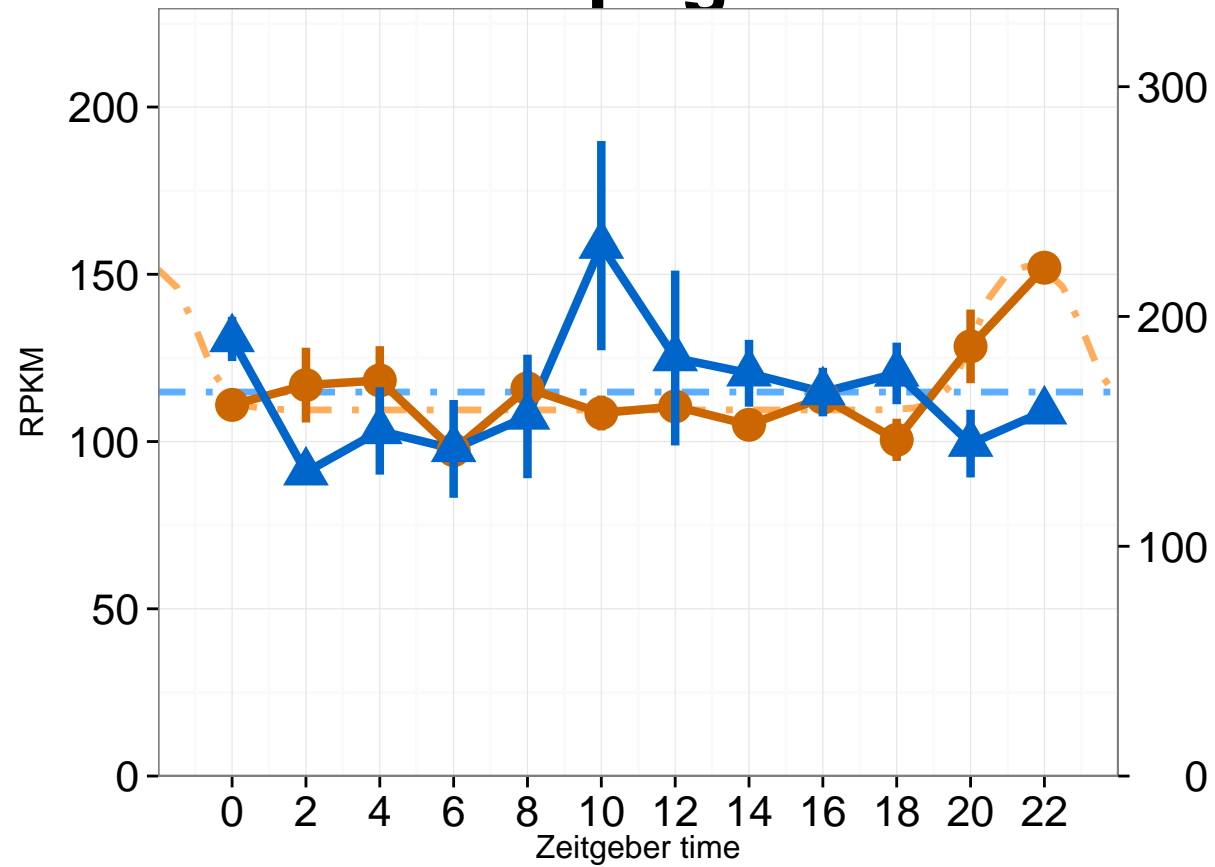

## Atp5g2

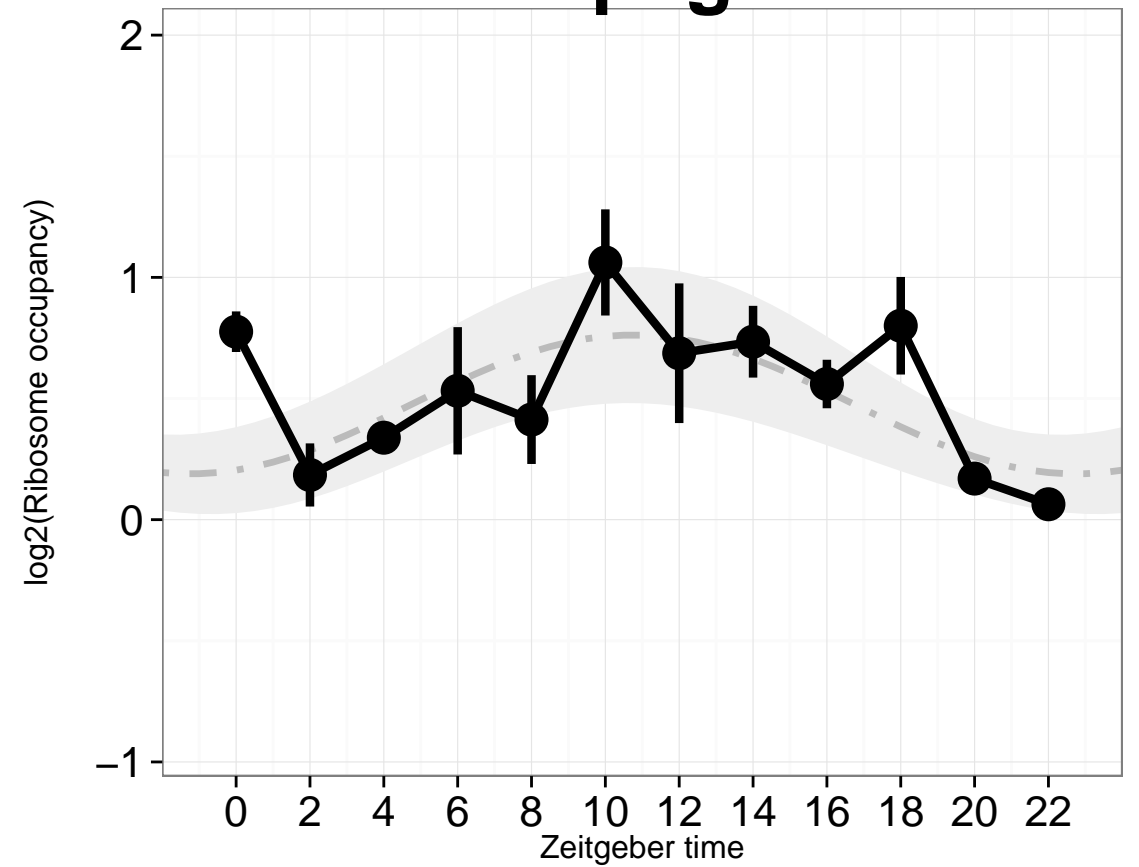

Supplement: SuppDataset_1.zip [file Atp5g2_set_A.pdf › Supplemental Dataset 1/A-mRNA_nonrhyth_translation_nonrhyth/Atp5g2_set_A.pdf]

# Atp5g3

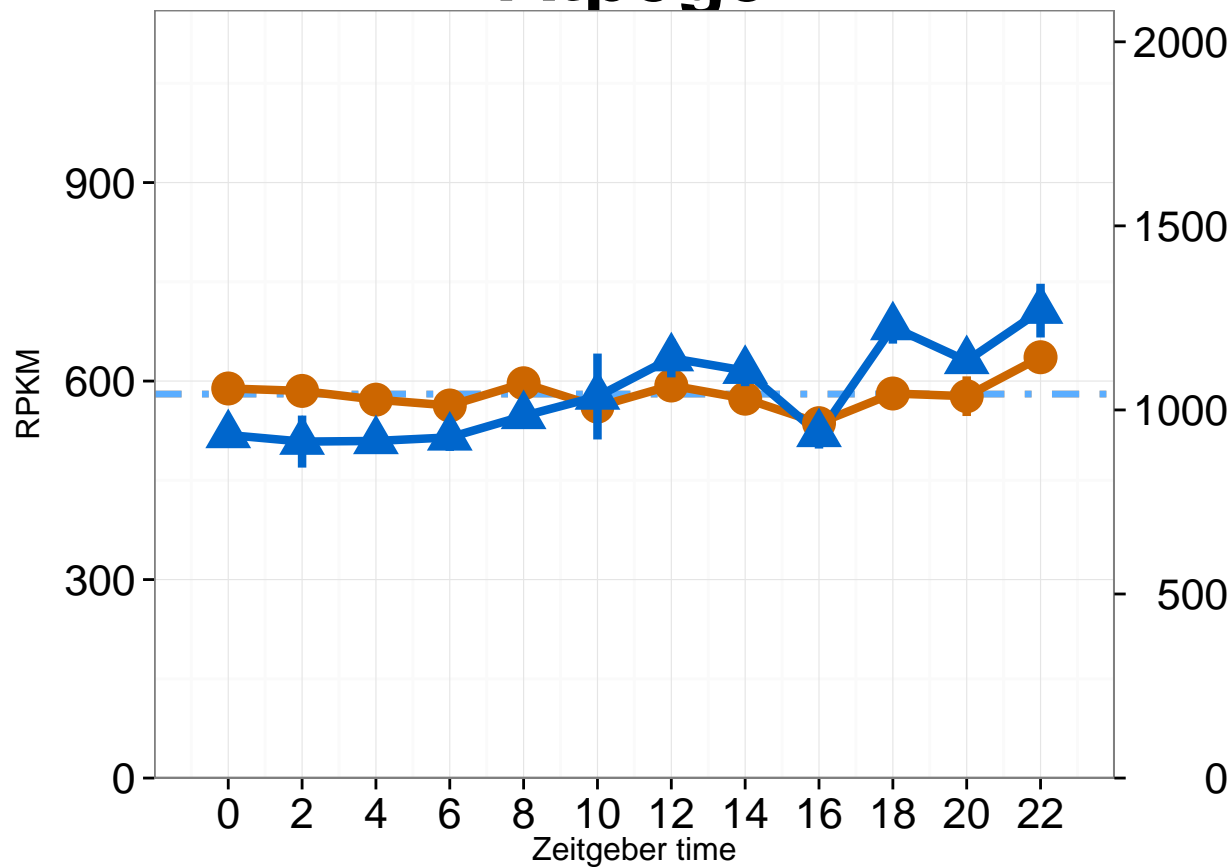

# Atp5g3

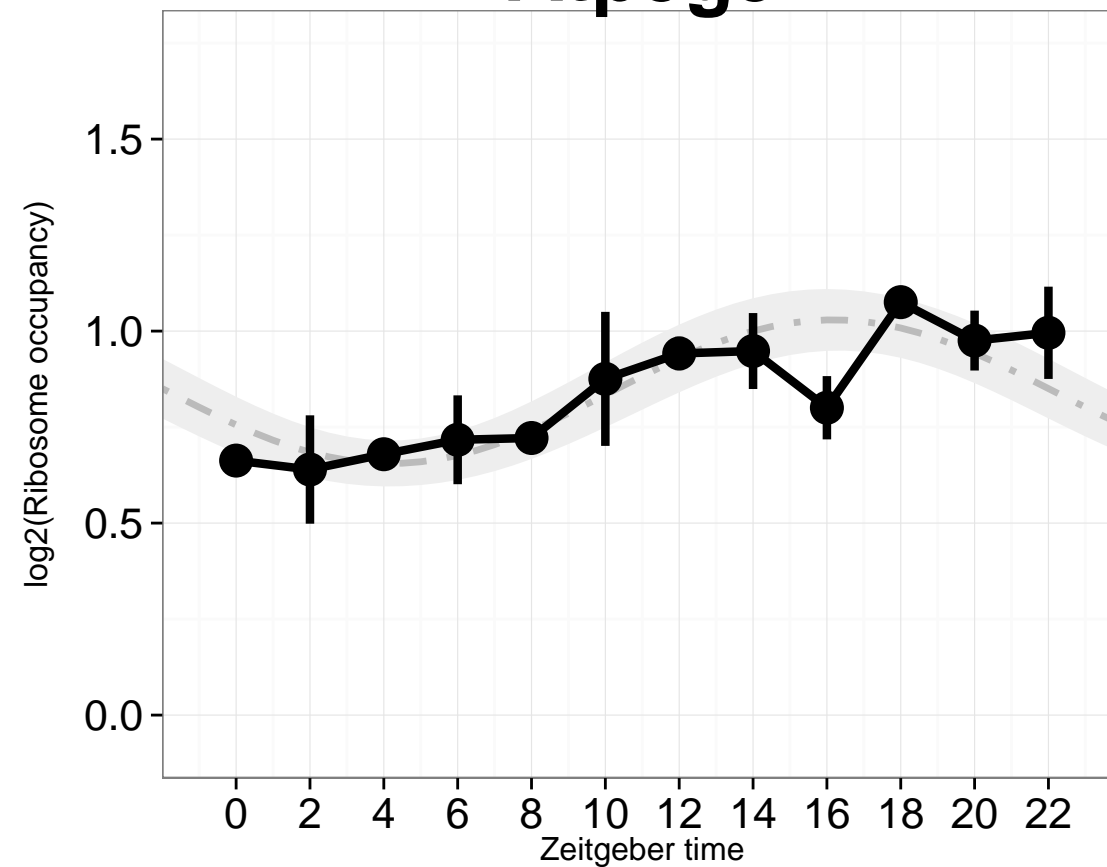

Supplement: SuppDataset_1.zip [file Atp5g3_set_A.pdf › Supplemental Dataset 1/A-mRNA_nonrhyth_translation_nonrhyth/Atp5g3_set_A.pdf]

# Atp5h

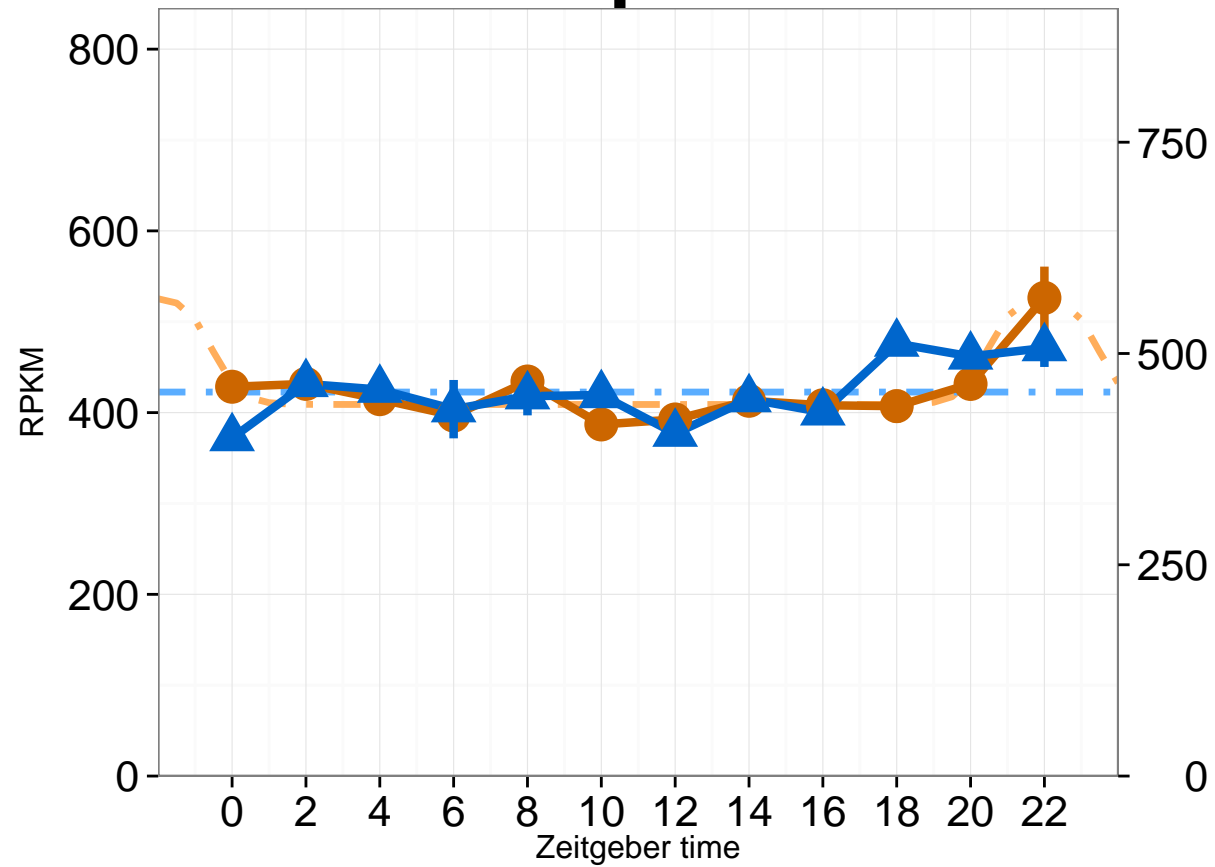

# Atp5h

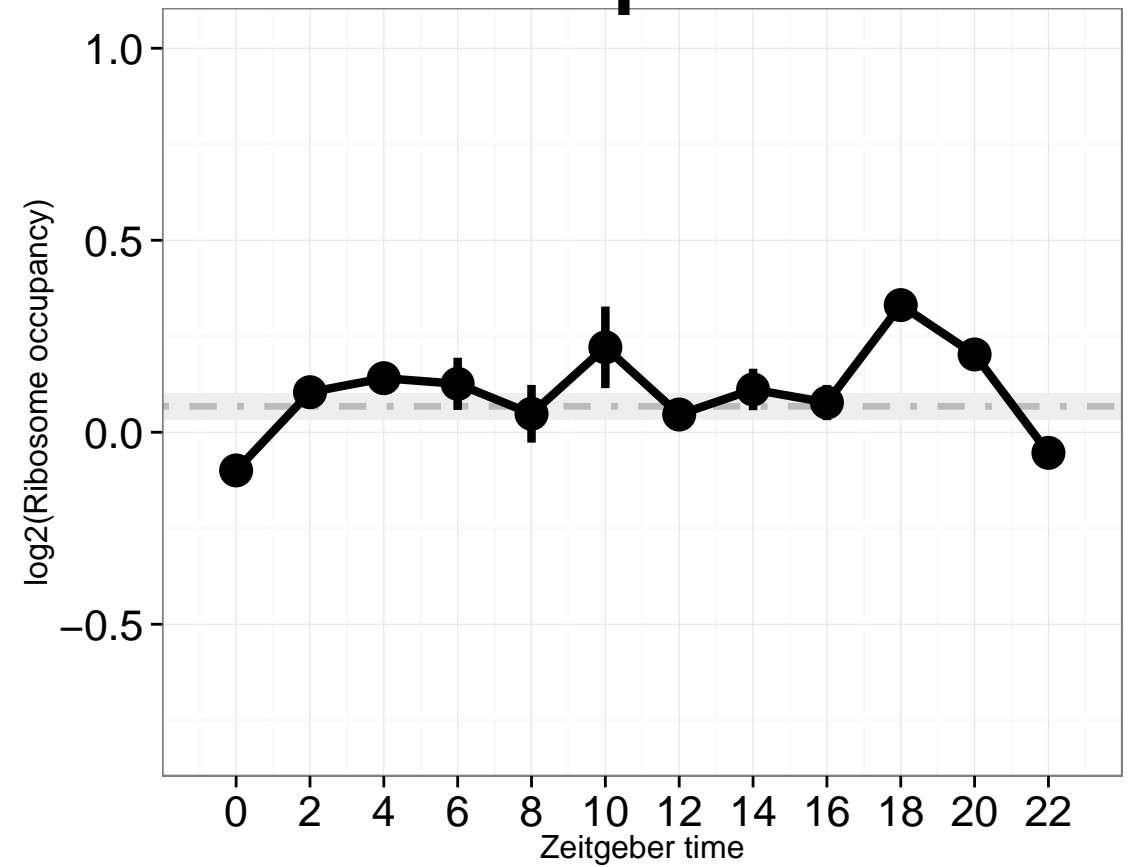

Supplement: SuppDataset_1.zip [file Atp5h_set_A.pdf › Supplemental Dataset 1/A-mRNA_nonrhyth_translation_nonrhyth/Atp5h_set_A.pdf]

# Atp5j2

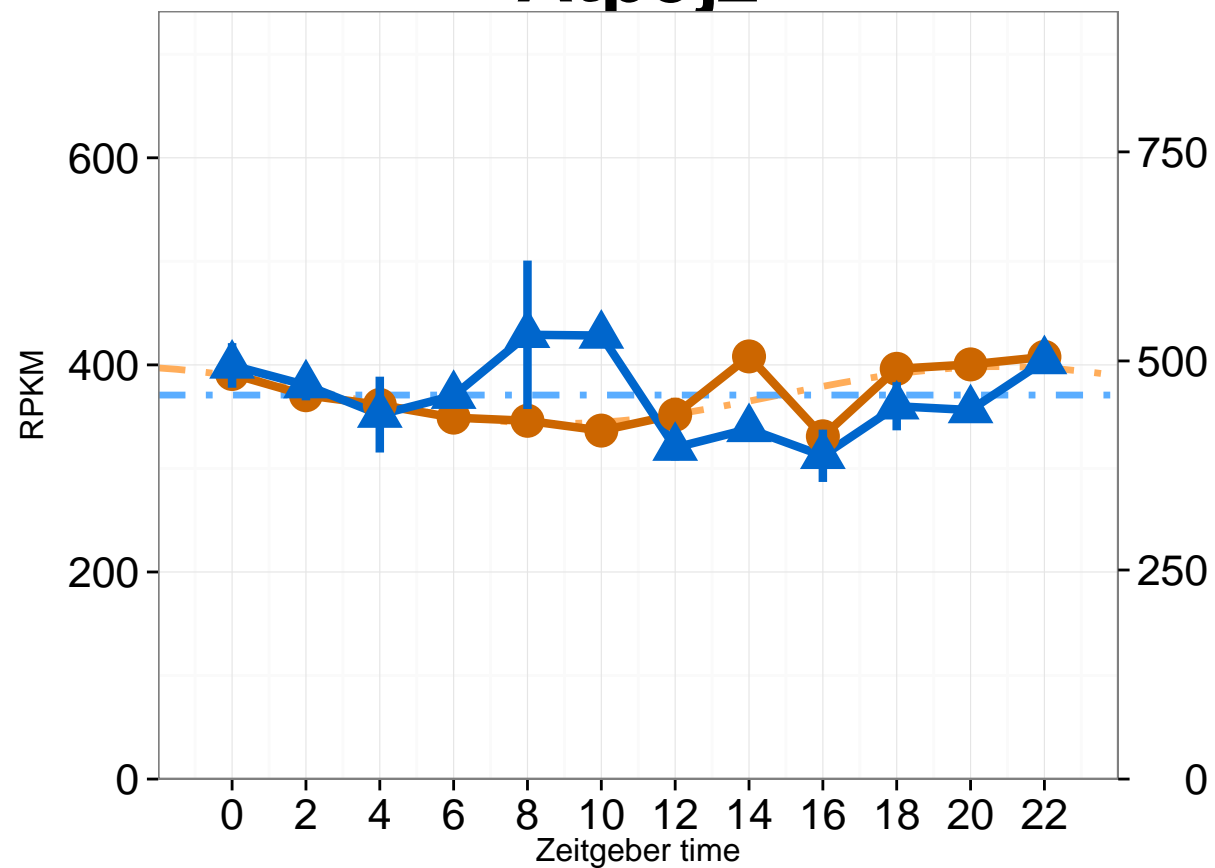

# Atp5j2

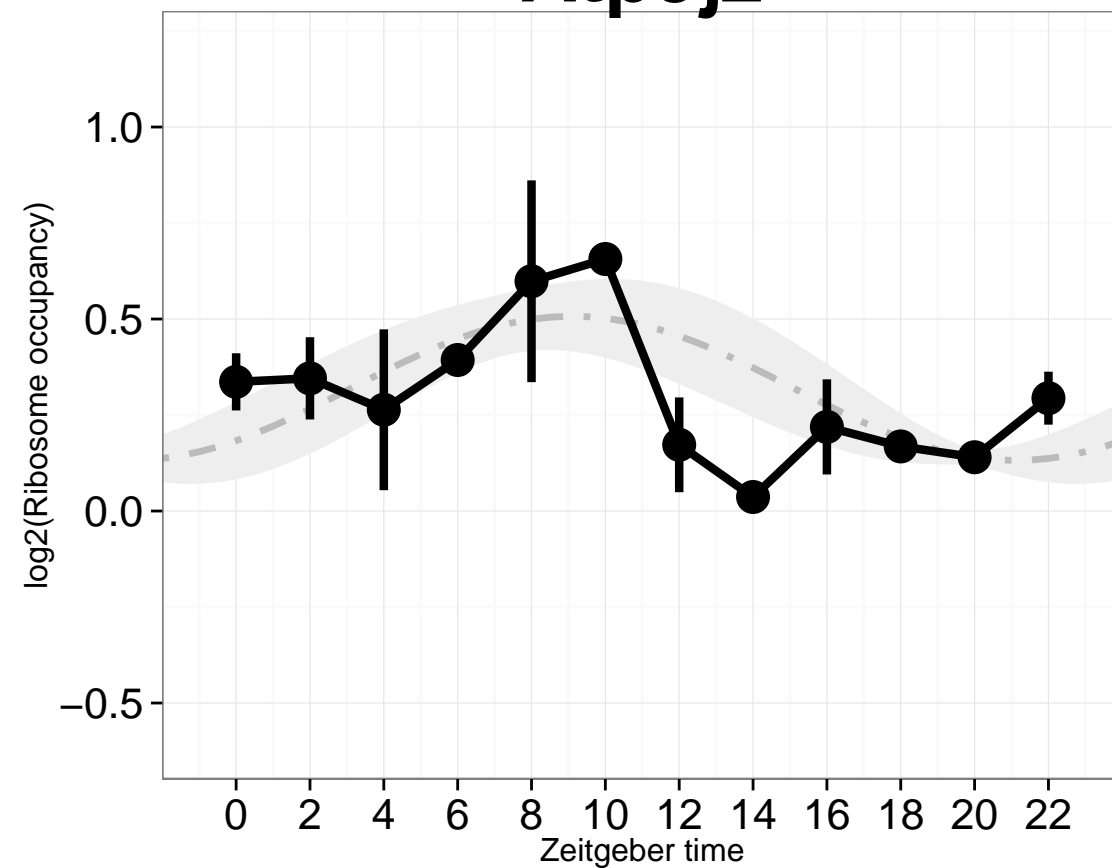

Supplement: SuppDataset_1.zip [file Atp5j2_set_A.pdf › Supplemental Dataset 1/A-mRNA_nonrhyth_translation_nonrhyth/Atp5j2_set_A.pdf]

# Atp5j

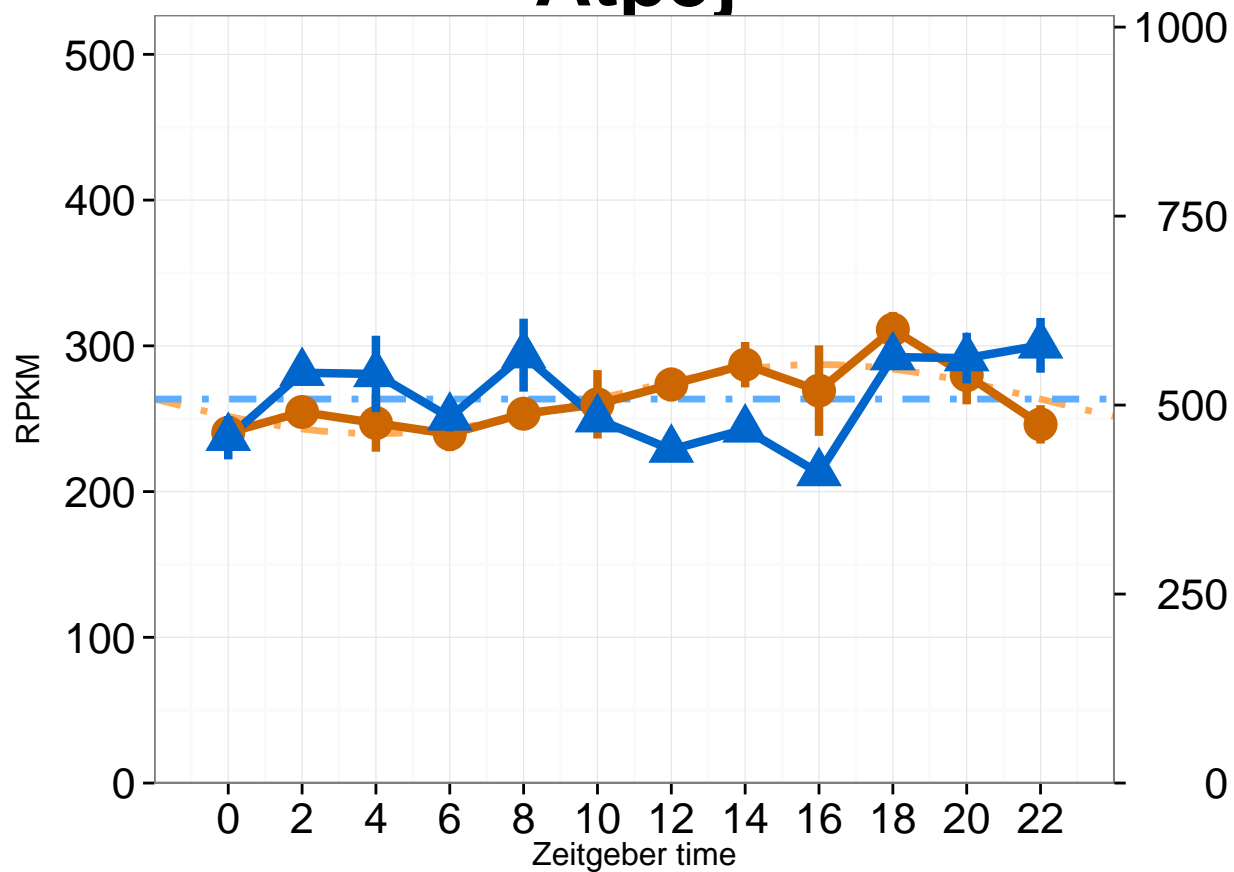

# Atp5j

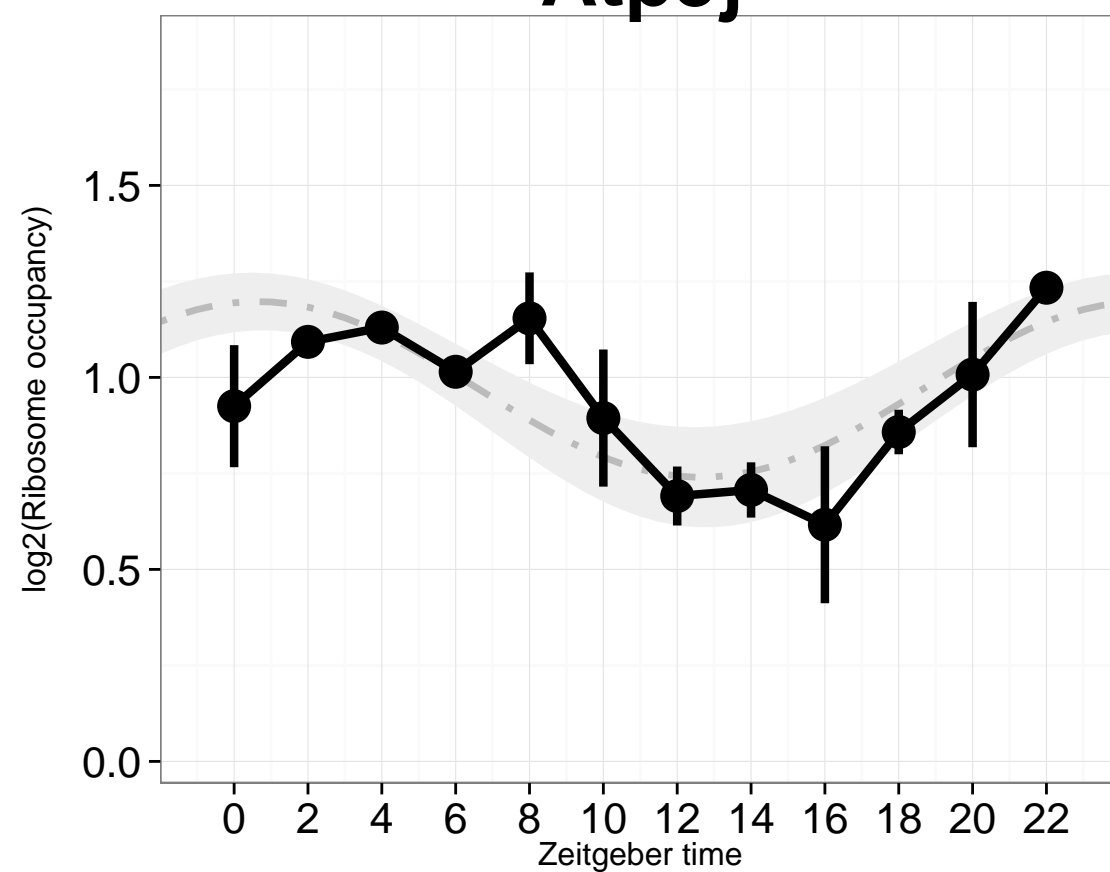

Supplement: SuppDataset_1.zip [file Atp5j_set_A.pdf › Supplemental Dataset 1/A-mRNA_nonrhyth_translation_nonrhyth/Atp5j_set_A.pdf]

# Atp5k

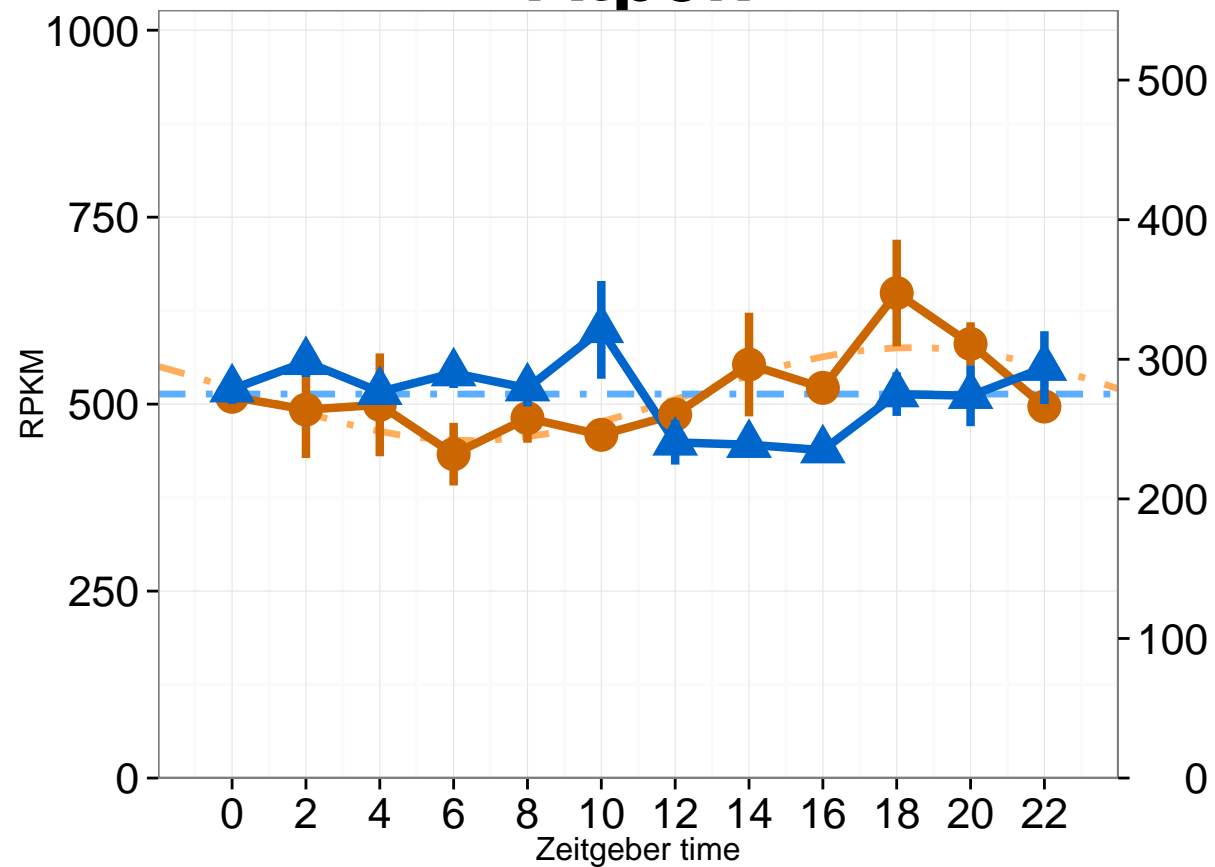

# Atp5k

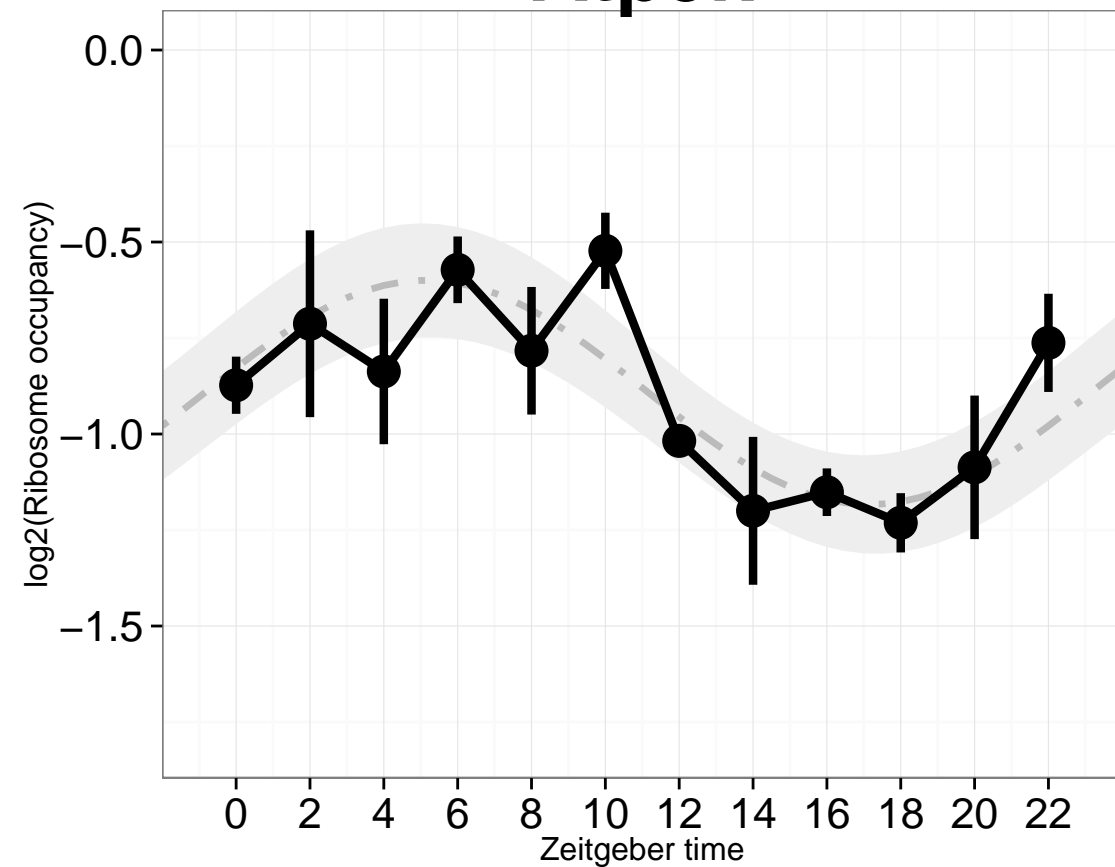

Supplement: SuppDataset_1.zip [file Atp5k_set_A.pdf › Supplemental Dataset 1/A-mRNA_nonrhyth_translation_nonrhyth/Atp5k_set_A.pdf]

# Atp5l

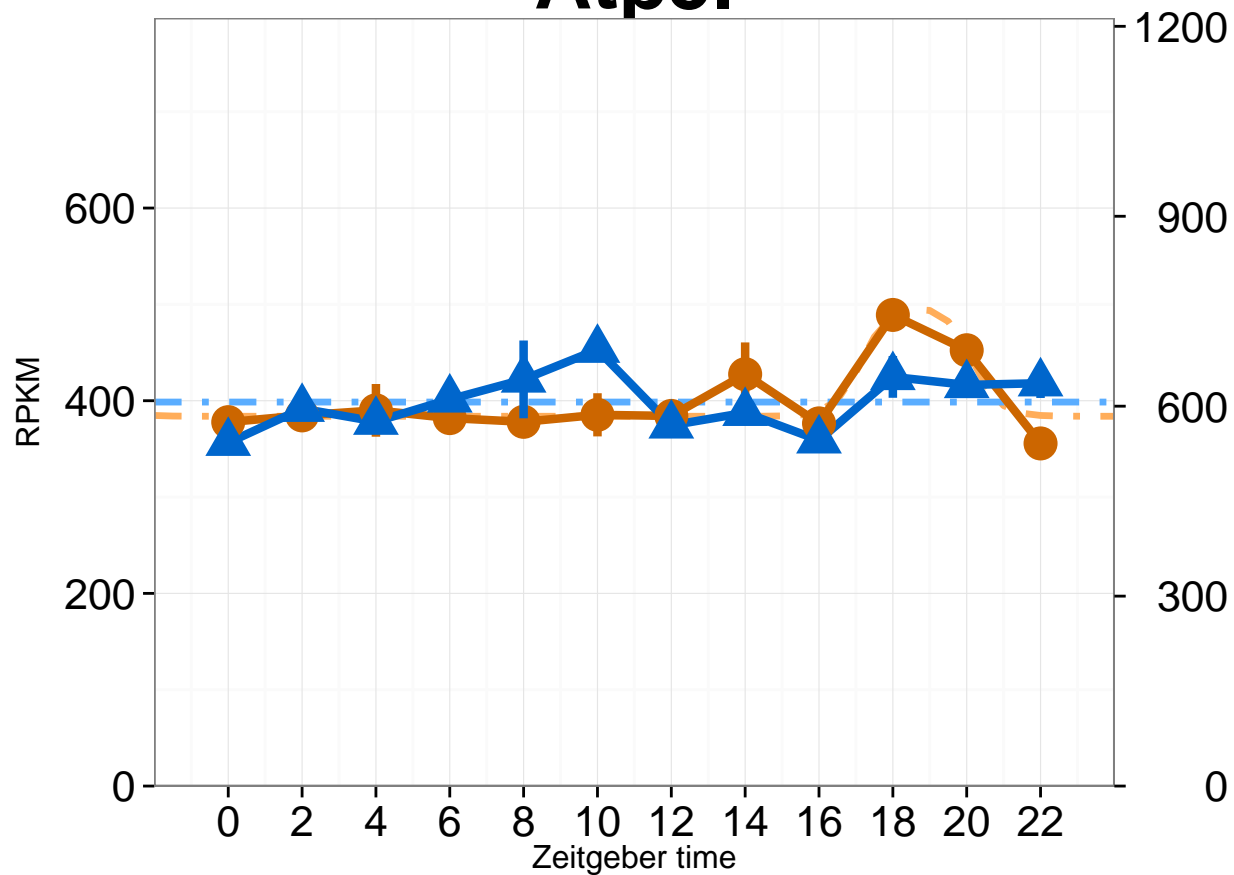

# Atp5l

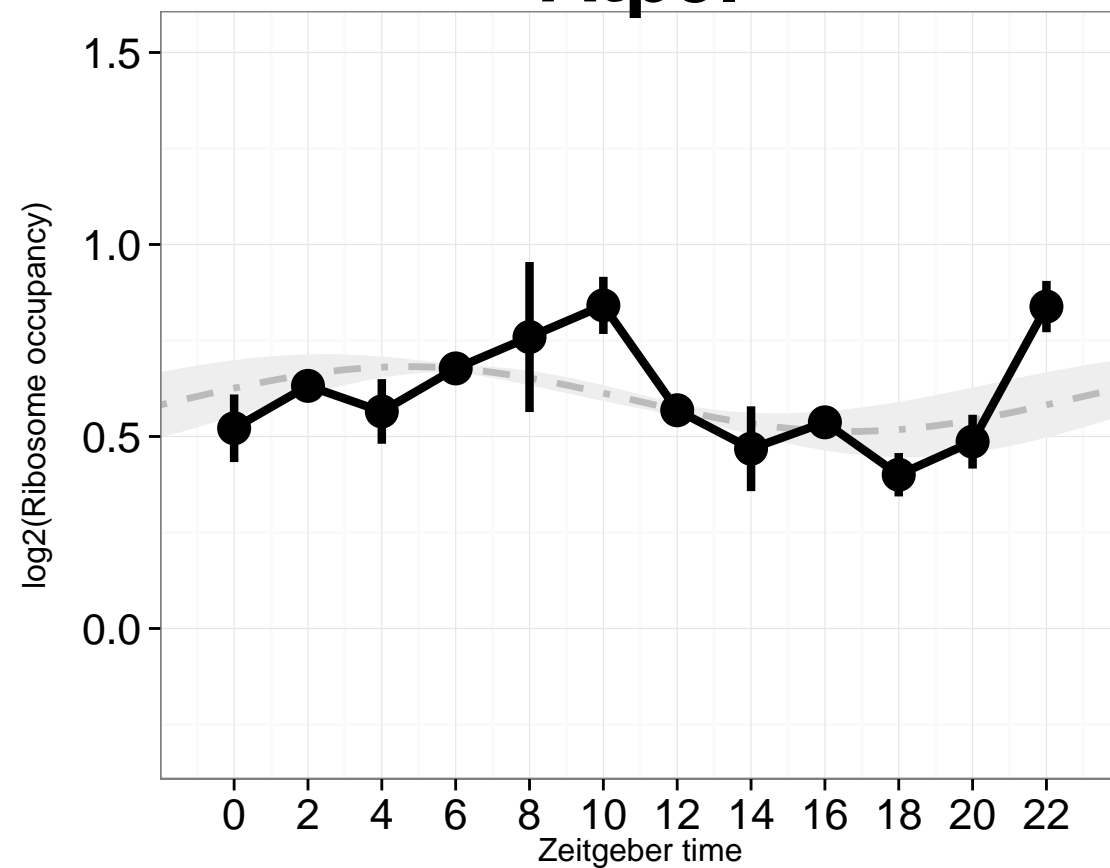

Supplement: SuppDataset_1.zip [file Atp5l_set_A.pdf › Supplemental Dataset 1/A-mRNA_nonrhyth_translation_nonrhyth/Atp5l_set_A.pdf]

# Atp5o

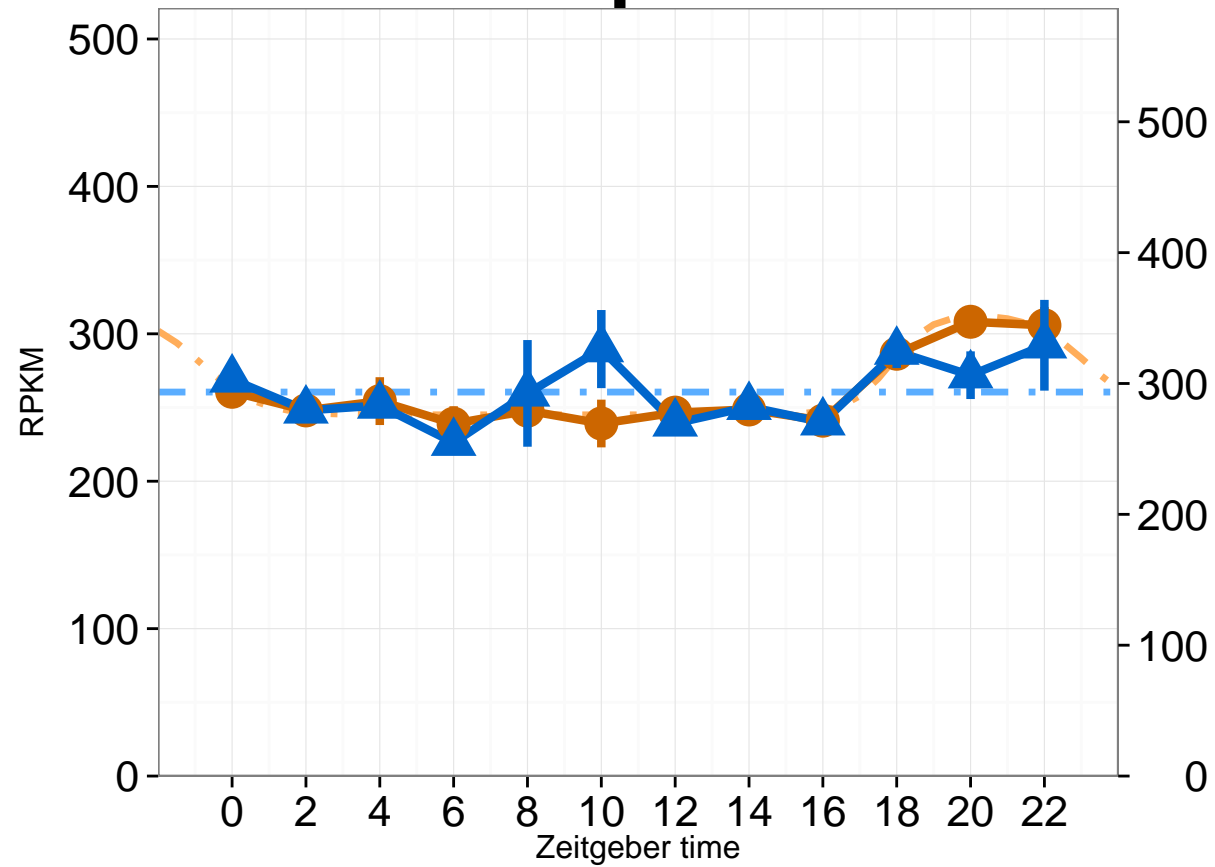

# Atp5o

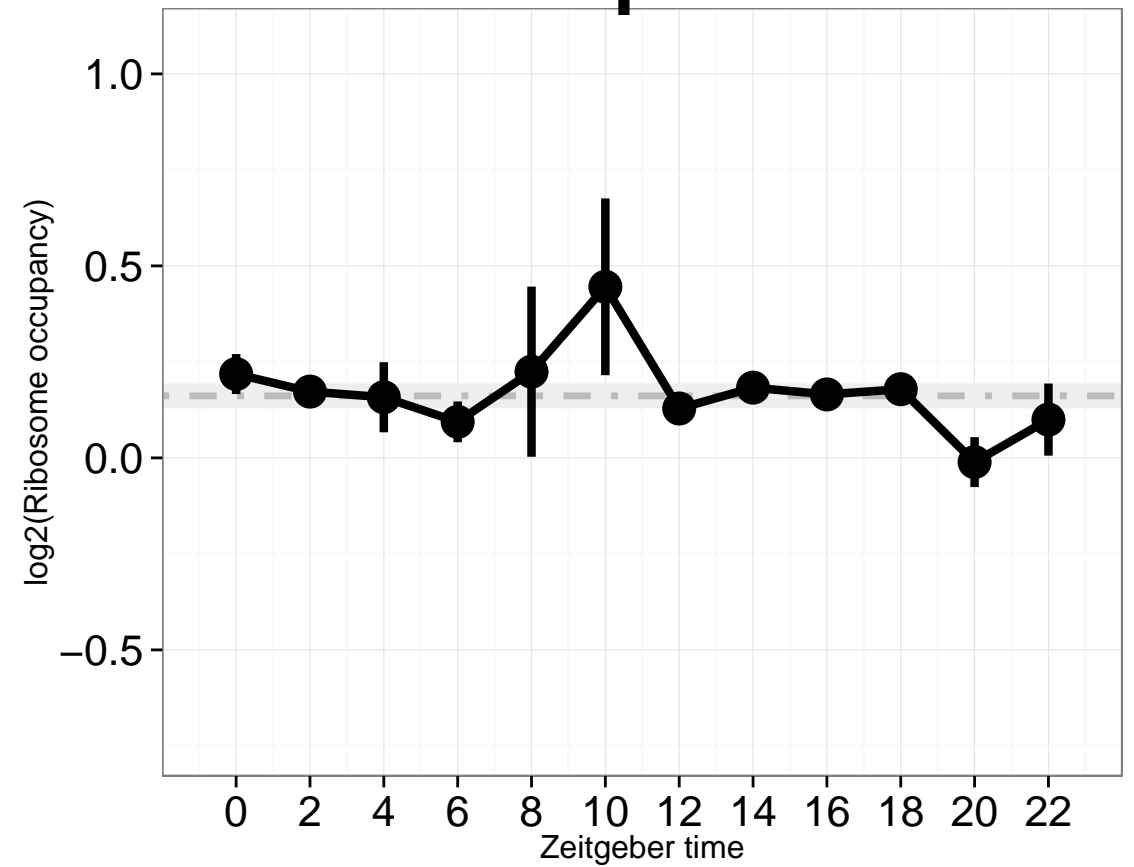

Supplement: SuppDataset_1.zip [file Atp5o_set_A.pdf › Supplemental Dataset 1/A-mRNA_nonrhyth_translation_nonrhyth/Atp5o_set_A.pdf]

# Atp5sl

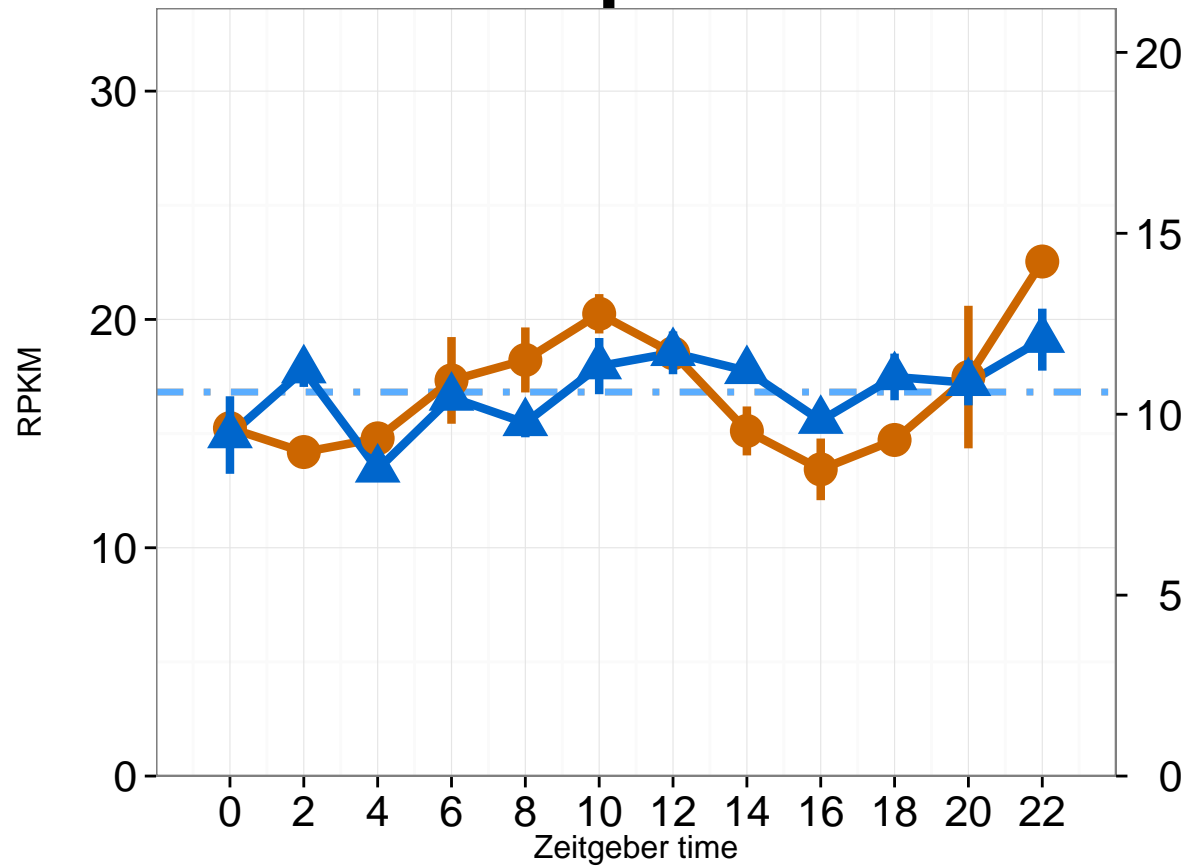

# Atp5sl

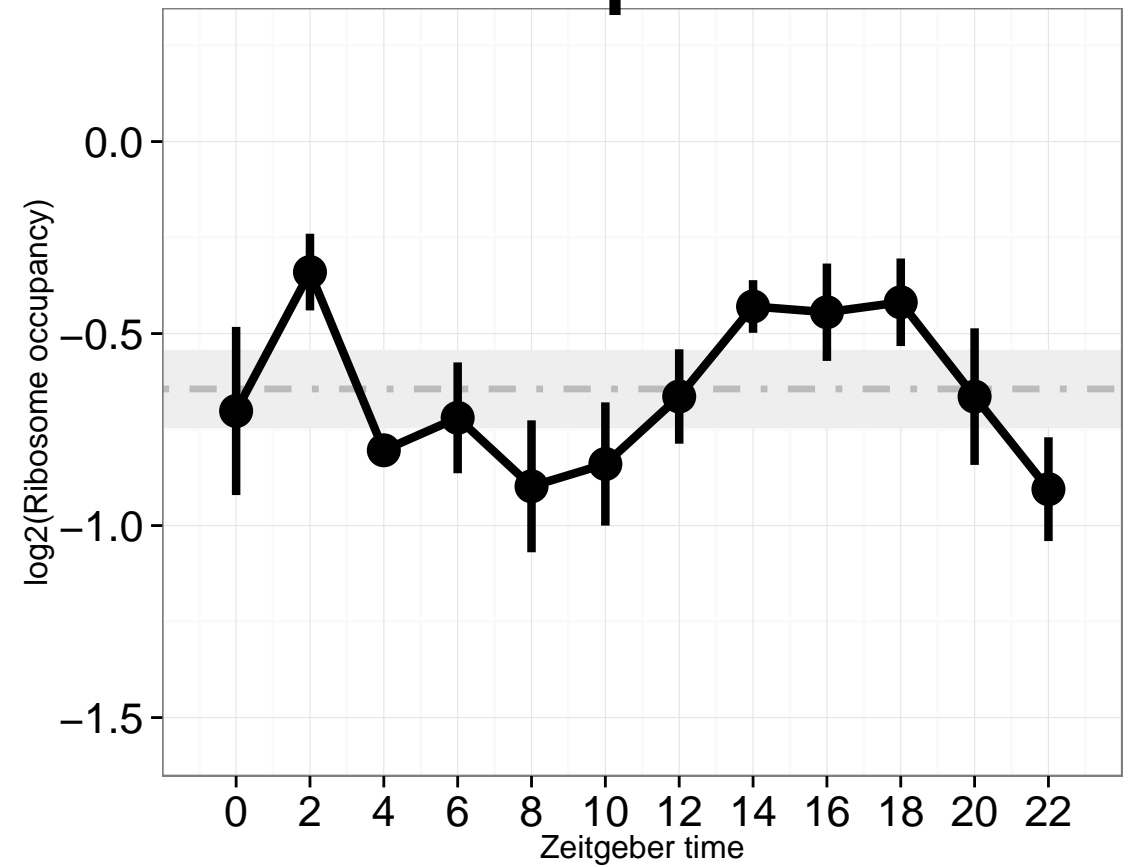

Supplement: SuppDataset_1.zip [file Atp5sl_set_A.pdf › Supplemental Dataset 1/A-mRNA_nonrhyth_translation_nonrhyth/Atp5sl_set_A.pdf]

# Atp6ap1

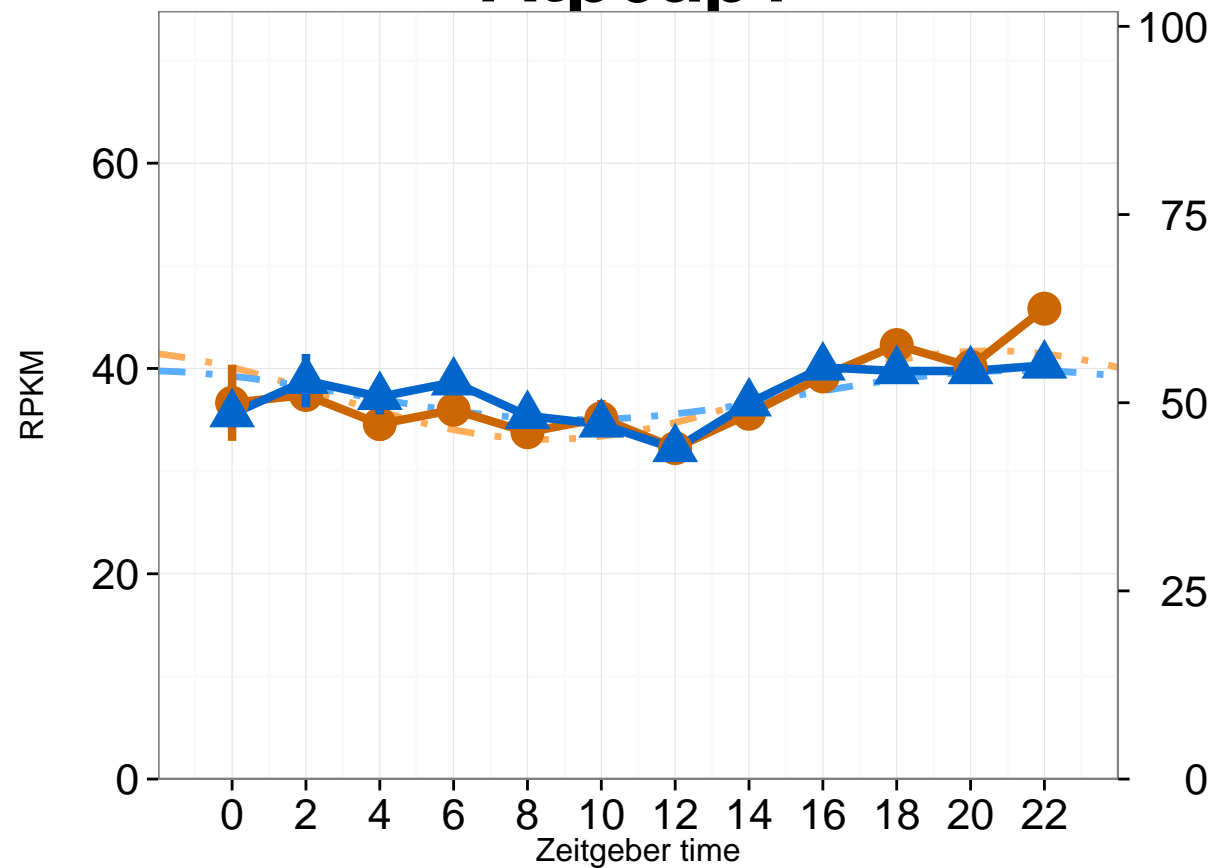

# Atp6ap1

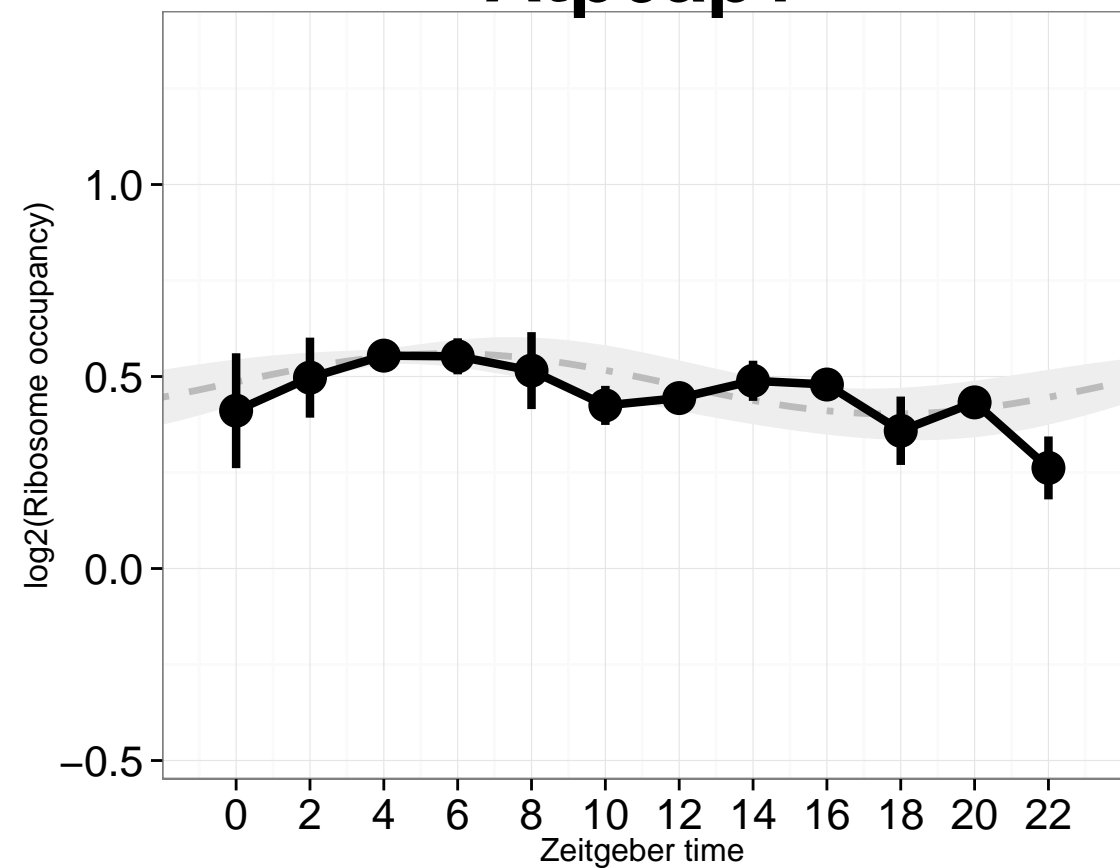

Supplement: SuppDataset_1.zip [file Atp6ap1_set_A.pdf › Supplemental Dataset 1/A-mRNA_nonrhyth_translation_nonrhyth/Atp6ap1_set_A.pdf]

# Atp6ap2

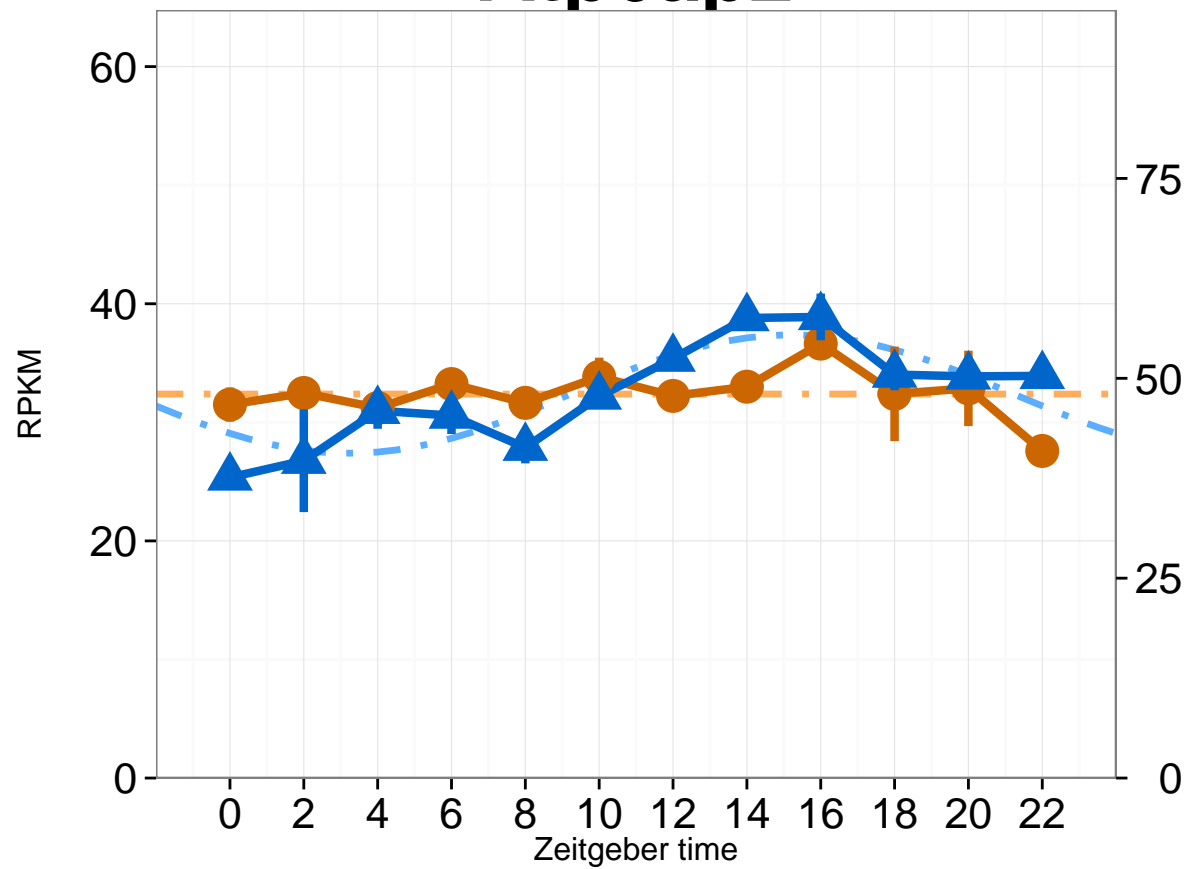

# Atp6ap2

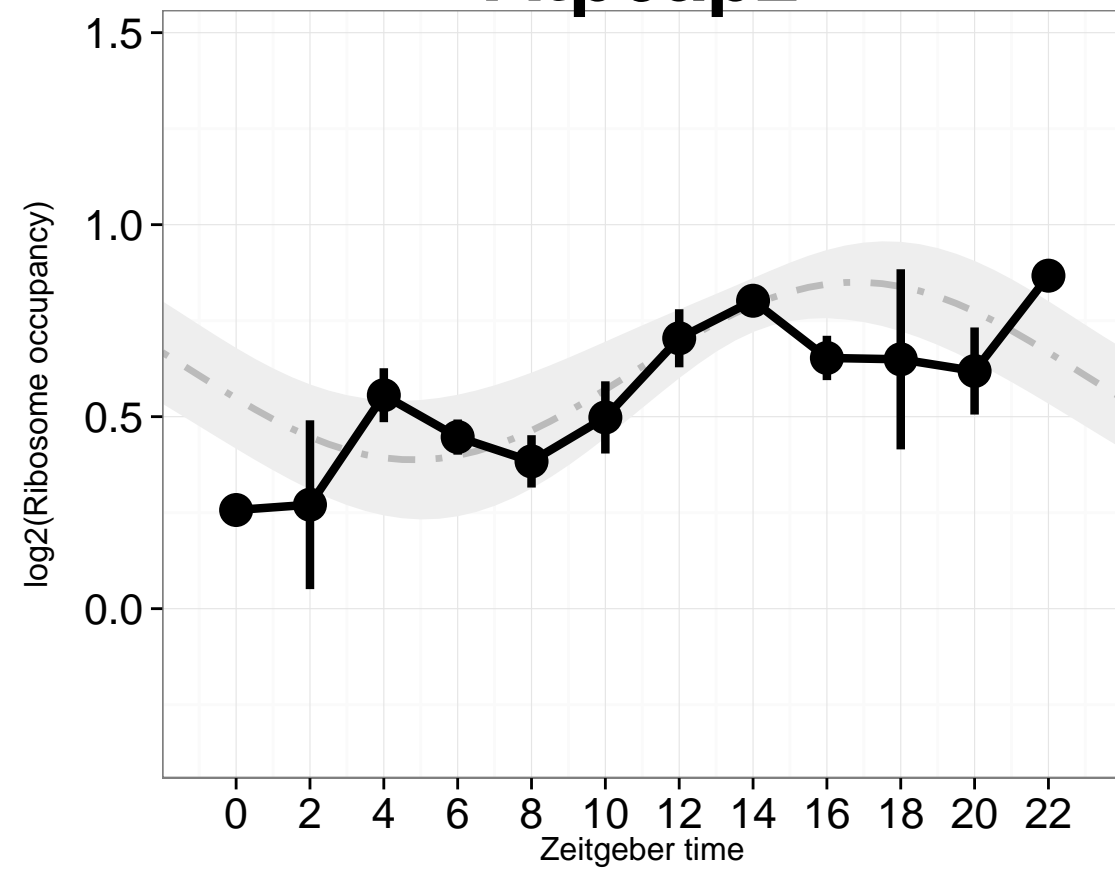

Supplement: SuppDataset_1.zip [file Atp6ap2_set_A.pdf › Supplemental Dataset 1/A-mRNA_nonrhyth_translation_nonrhyth/Atp6ap2_set_A.pdf]

# Atp6v0a1

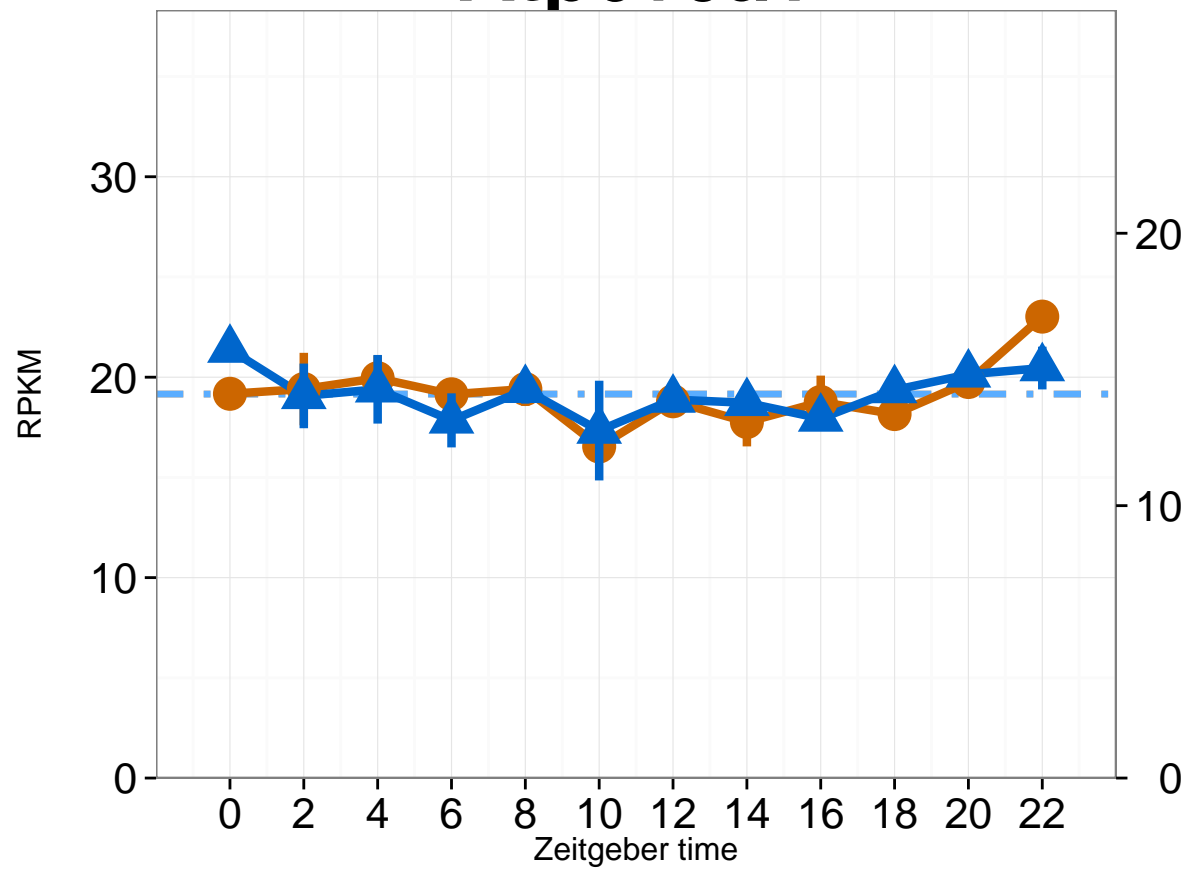

# Atp6v0a1

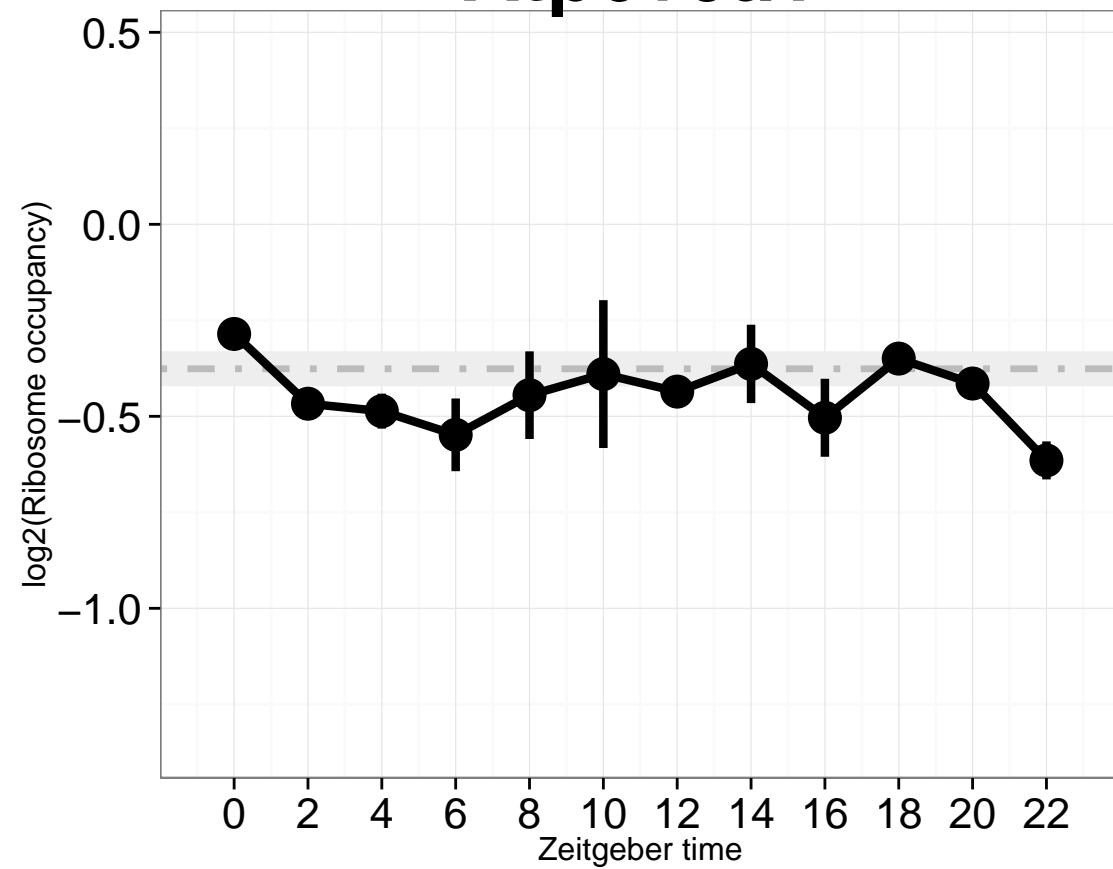

Supplement: SuppDataset_1.zip [file Atp6v0a1_set_A.pdf › Supplemental Dataset 1/A-mRNA_nonrhyth_translation_nonrhyth/Atp6v0a1_set_A.pdf]

# Atp6v0a2

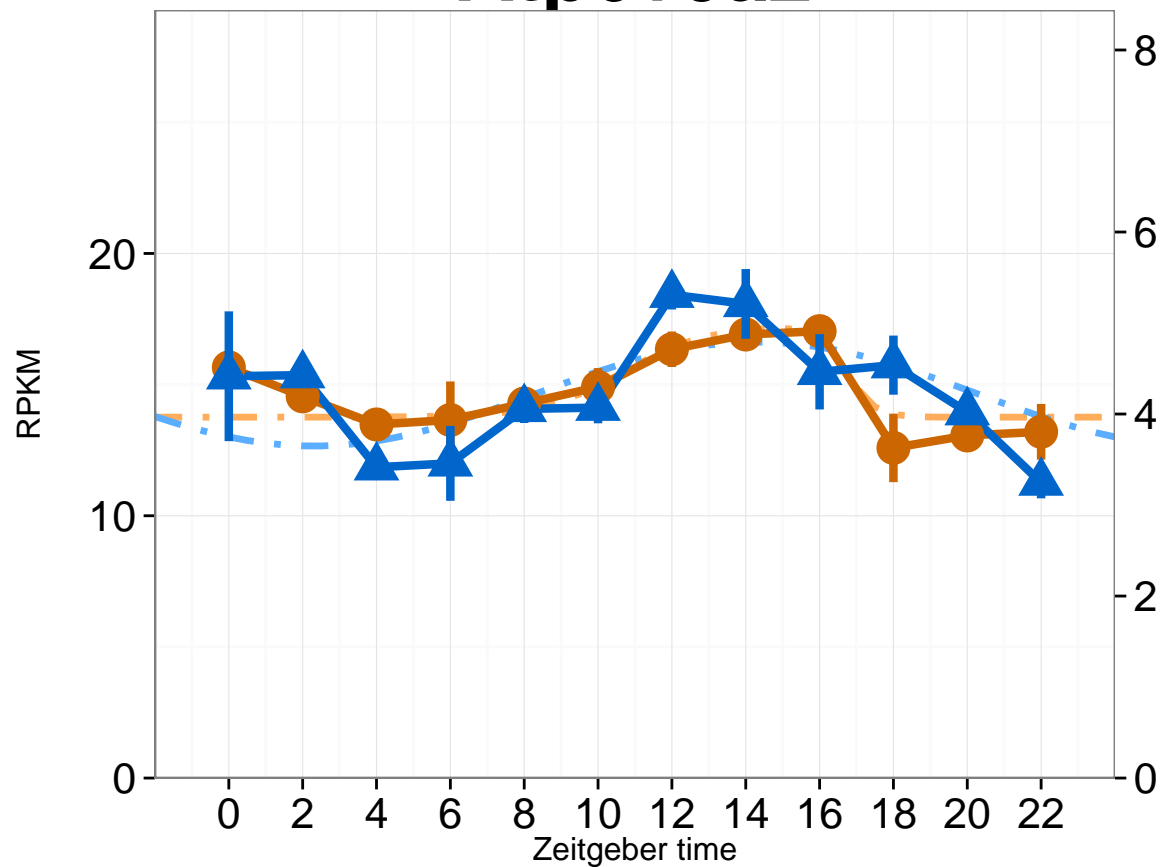

# Atp6v0a2

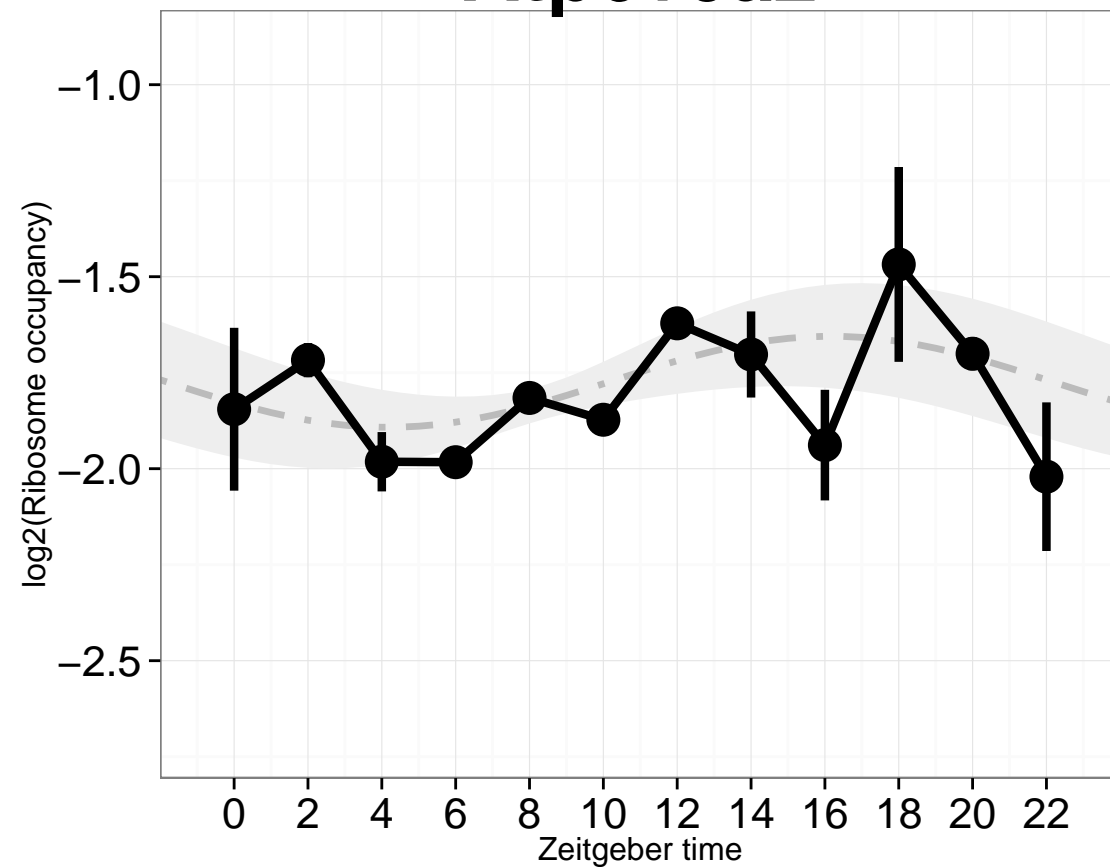

Supplement: SuppDataset_1.zip [file Atp6v0a2_set_A.pdf › Supplemental Dataset 1/A-mRNA_nonrhyth_translation_nonrhyth/Atp6v0a2_set_A.pdf]

# Atp6v0b

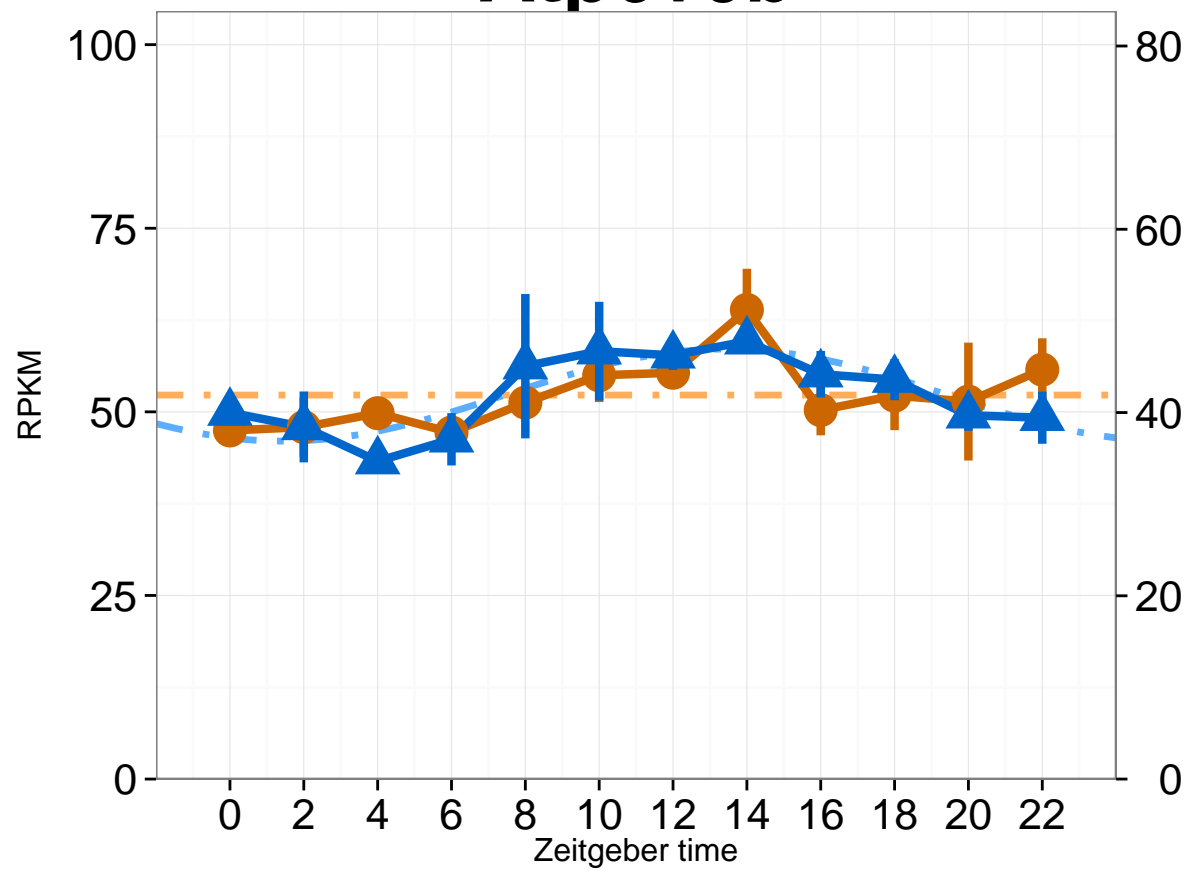

# Atp6v0b

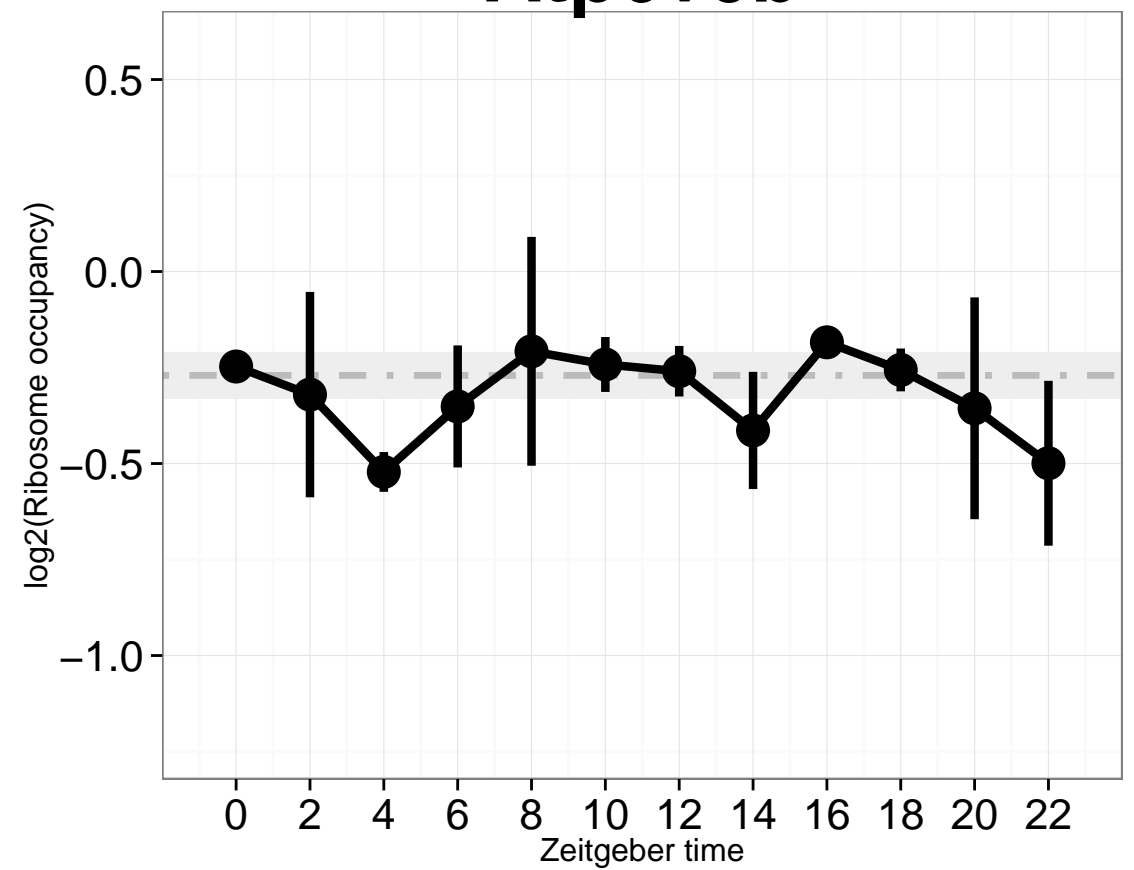

Supplement: SuppDataset_1.zip [file Atp6v0b_set_A.pdf › Supplemental Dataset 1/A-mRNA_nonrhyth_translation_nonrhyth/Atp6v0b_set_A.pdf]

# Atp6v0c

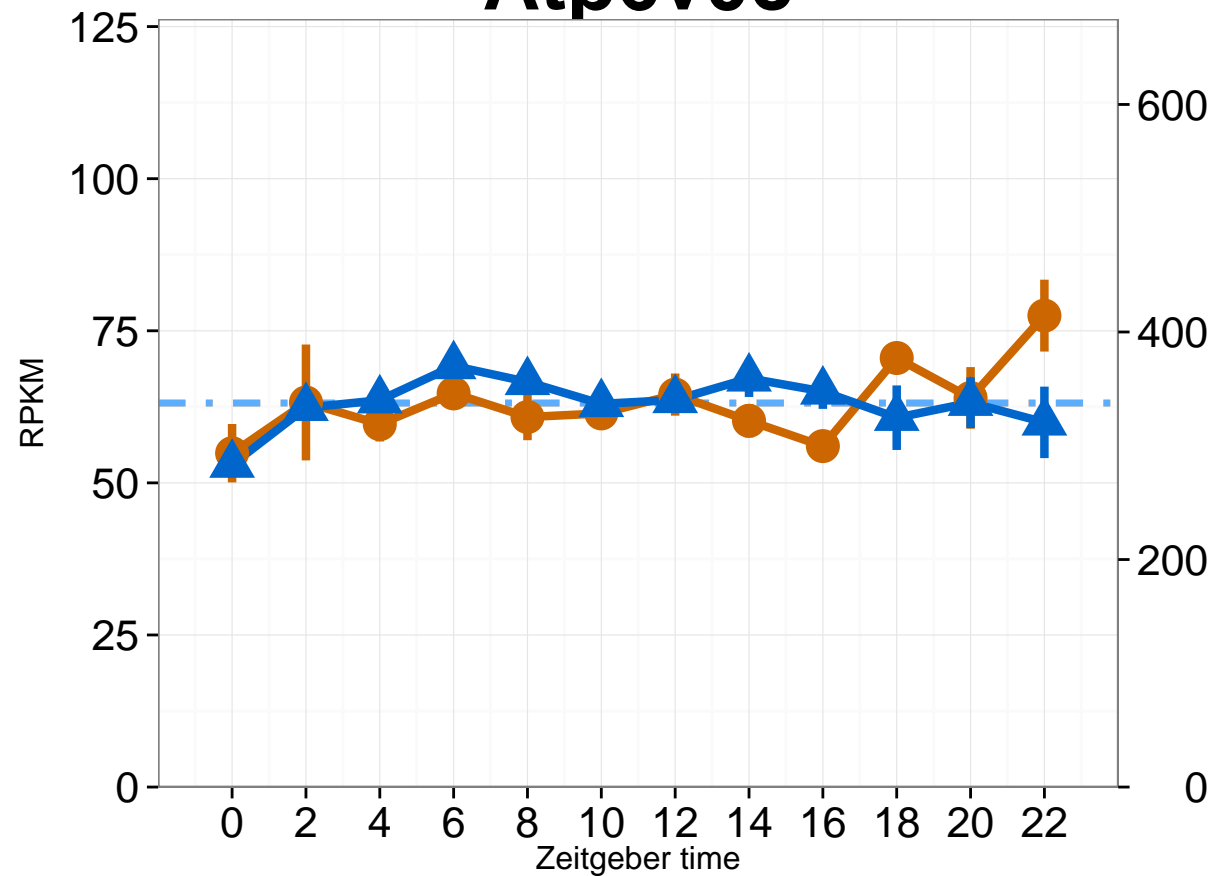

# Atp6v0c

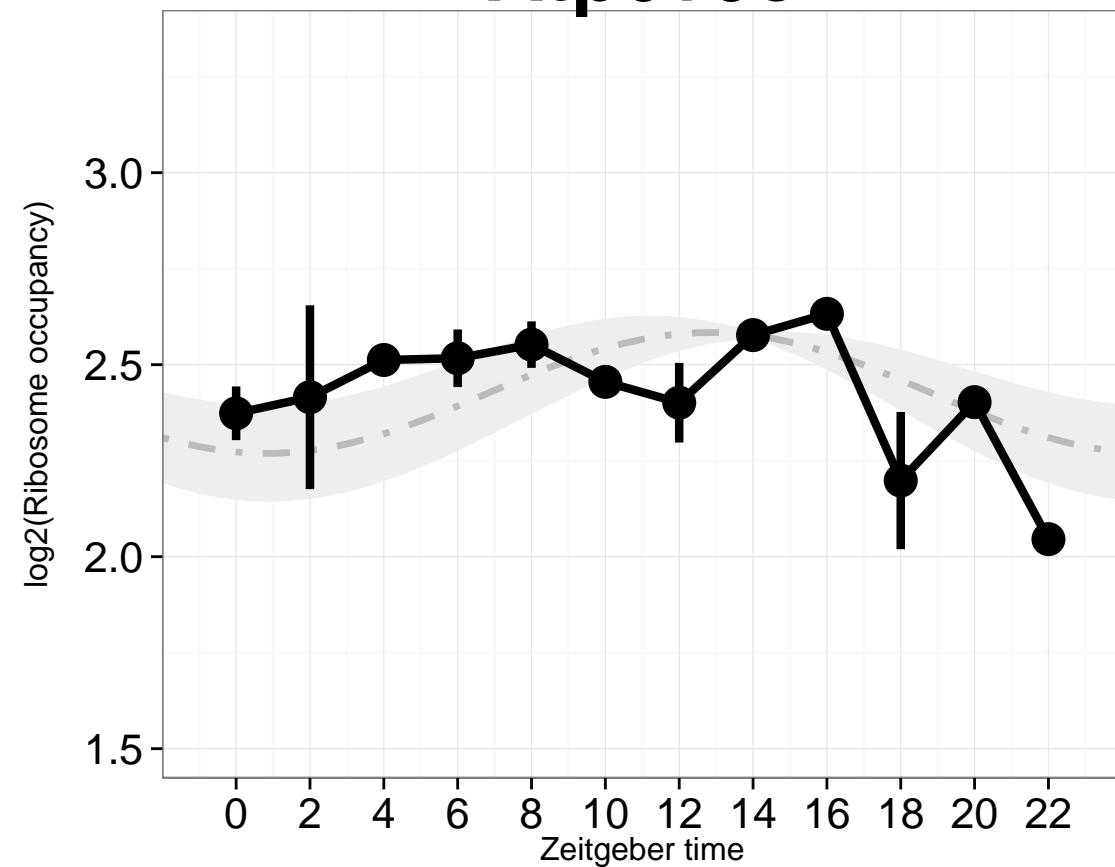

Supplement: SuppDataset_1.zip [file Atp6v0c_set_A.pdf › Supplemental Dataset 1/A-mRNA_nonrhyth_translation_nonrhyth/Atp6v0c_set_A.pdf]

# Atp6v0d1

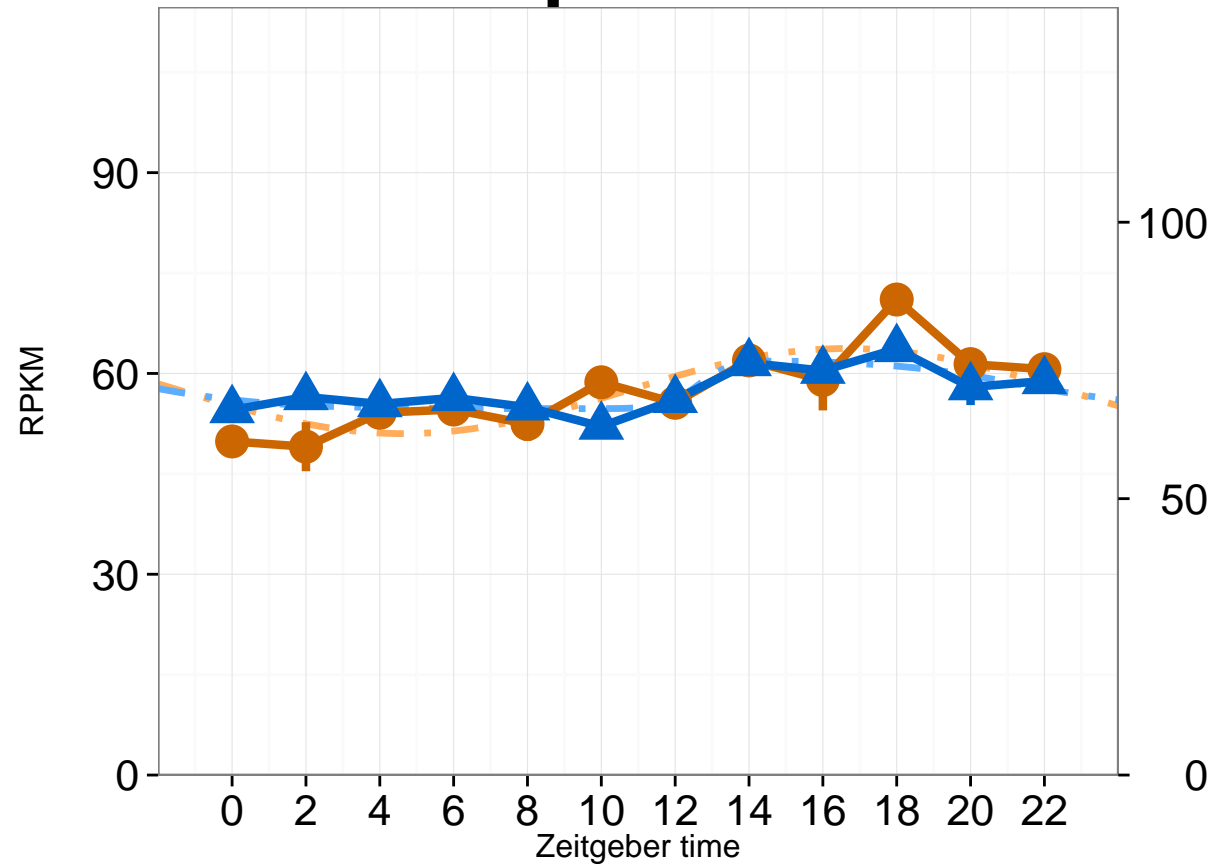

# Atp6v0d1

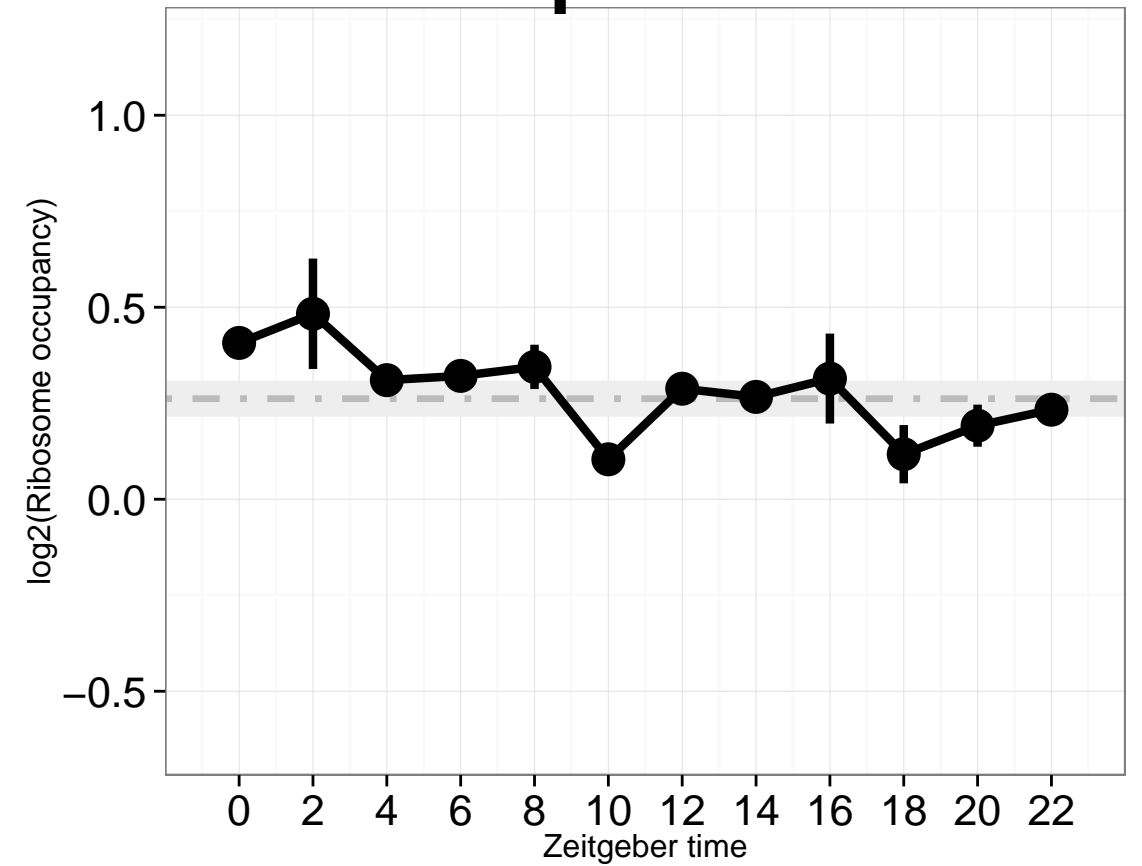

Supplement: SuppDataset_1.zip [file Atp6v0d1_set_A.pdf › Supplemental Dataset 1/A-mRNA_nonrhyth_translation_nonrhyth/Atp6v0d1_set_A.pdf]

# Atp6v0d2

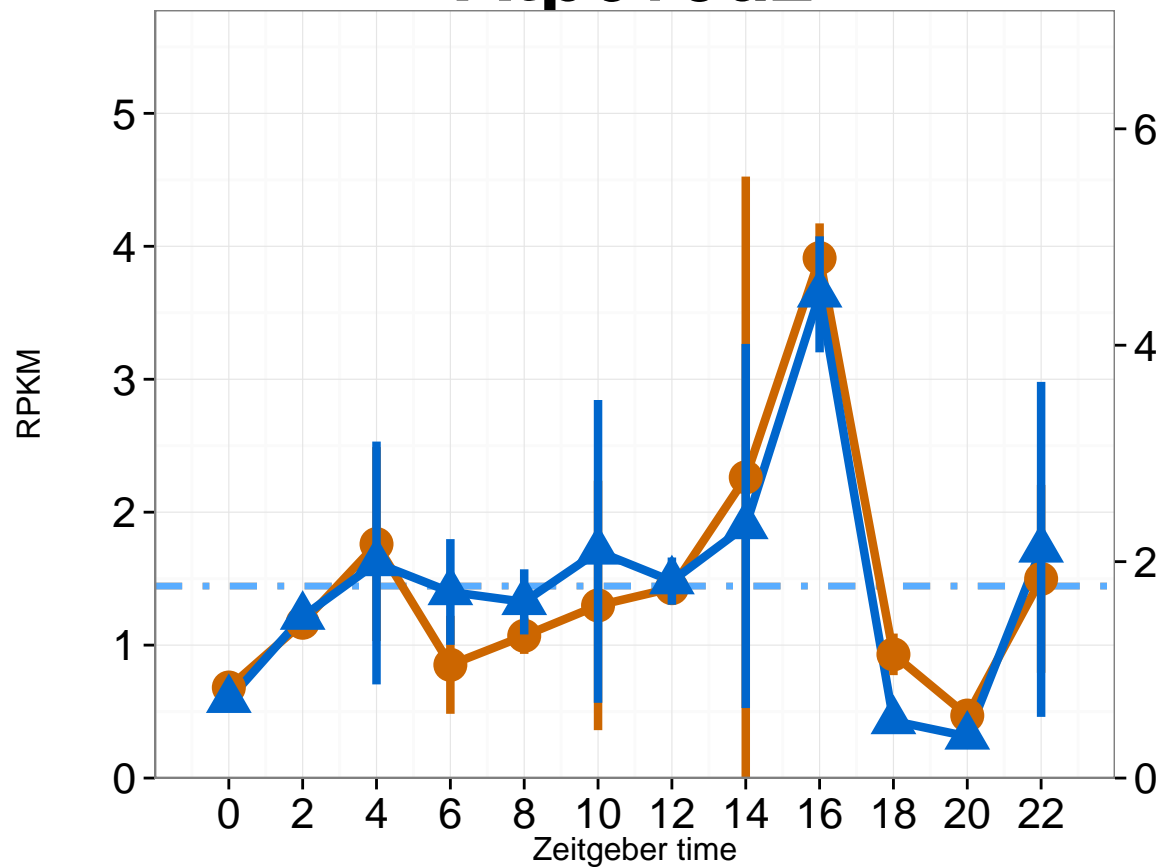

# Atp6v0d2

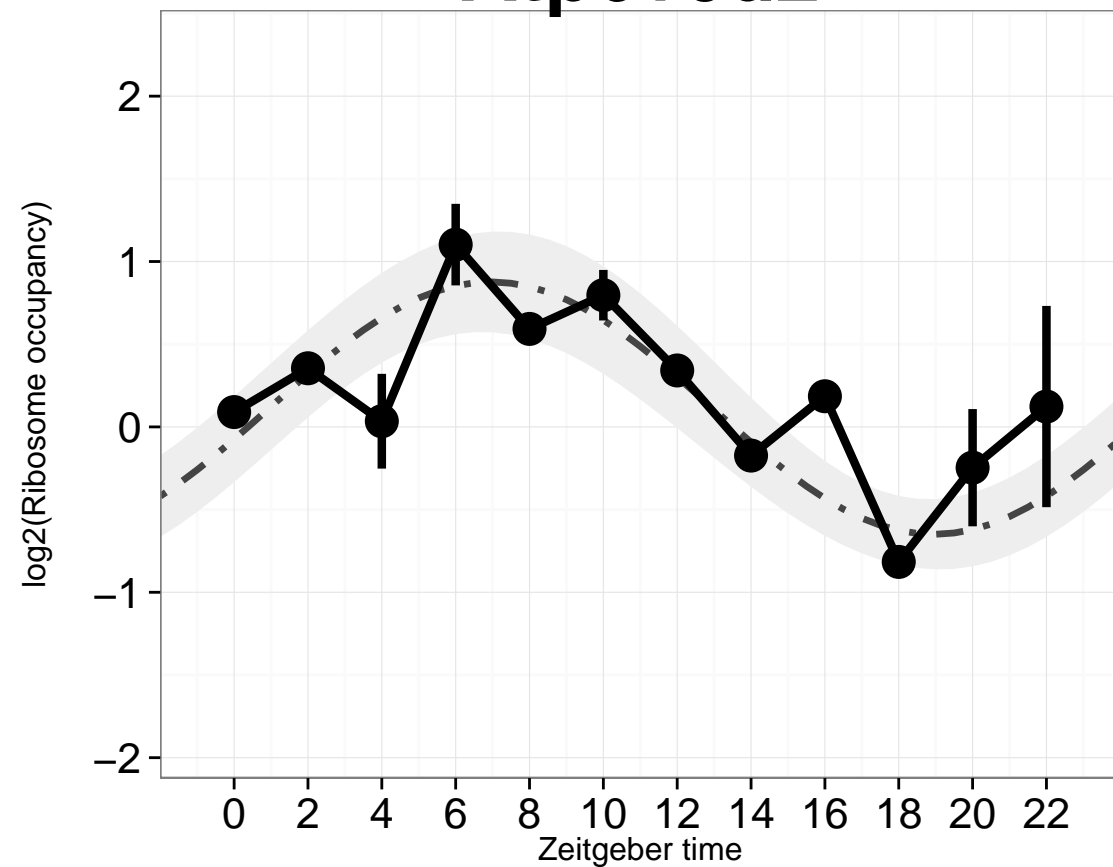

Supplement: SuppDataset_1.zip [file Atp6v0d2_set_A.pdf › Supplemental Dataset 1/A-mRNA_nonrhyth_translation_nonrhyth/Atp6v0d2_set_A.pdf]

# Atp6v0e

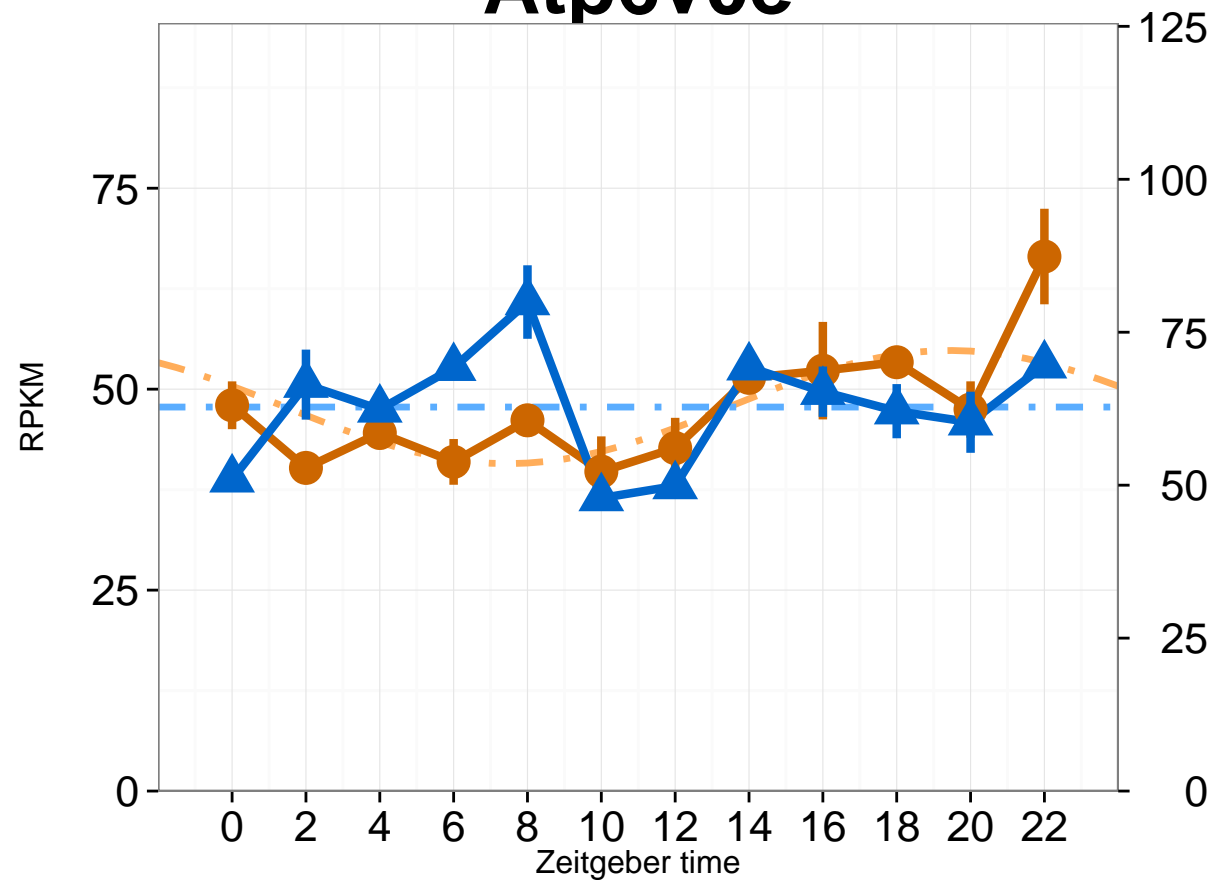

# Atp6v0e

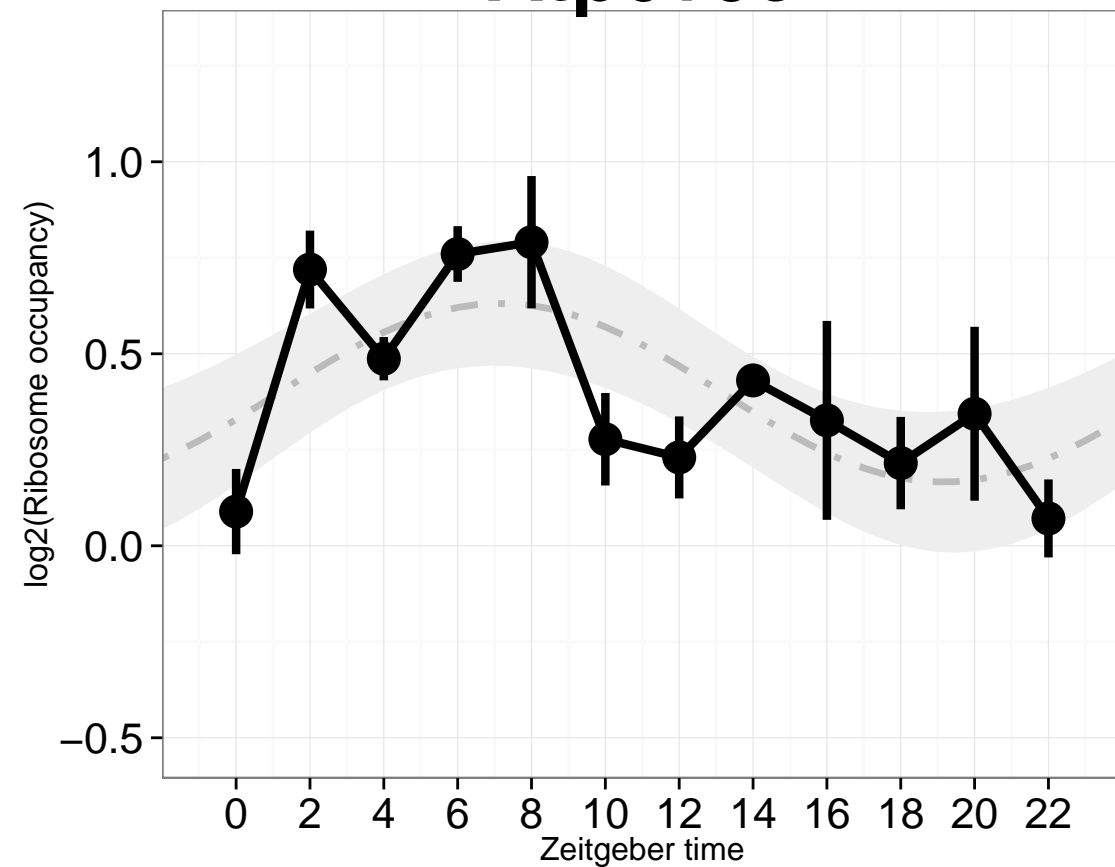

Supplement: SuppDataset_1.zip [file Atp6v0e_set_A.pdf › Supplemental Dataset 1/A-mRNA_nonrhyth_translation_nonrhyth/Atp6v0e_set_A.pdf]

# Atp6v1a

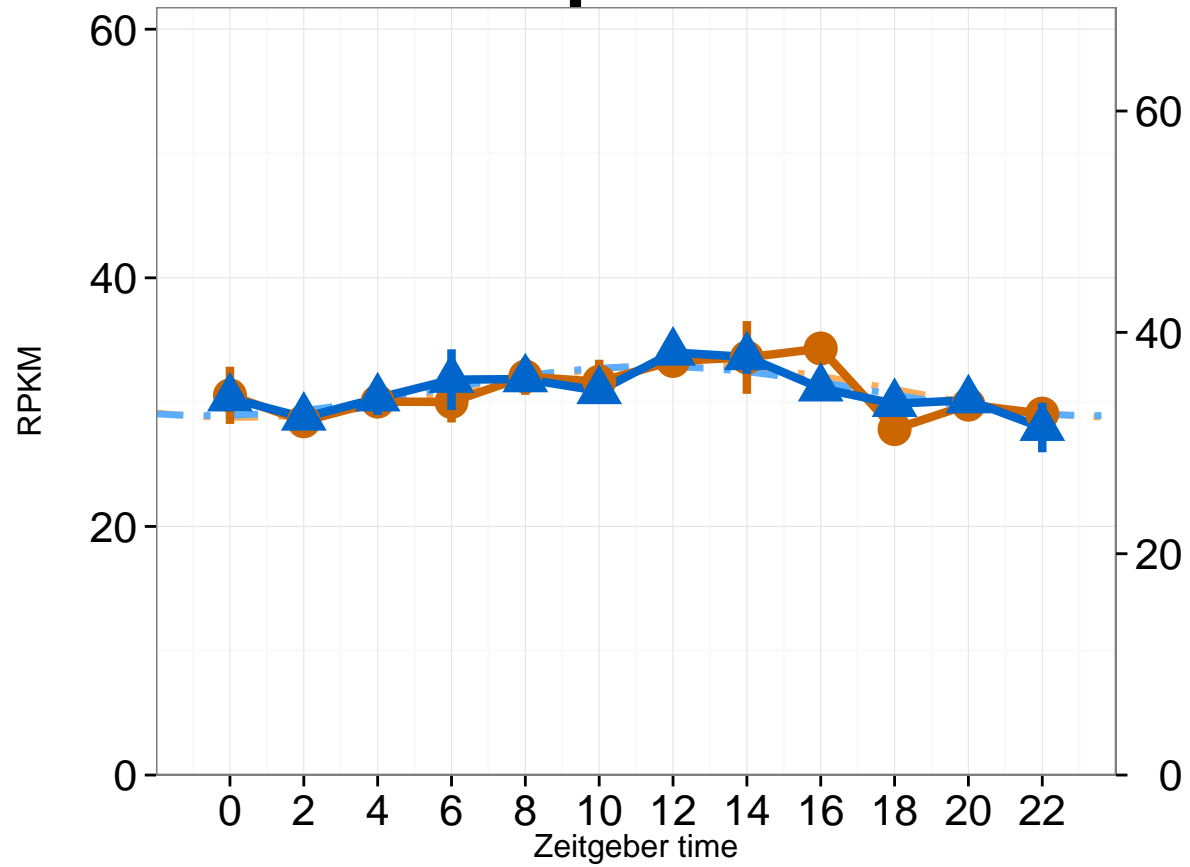

# Atp6v1a

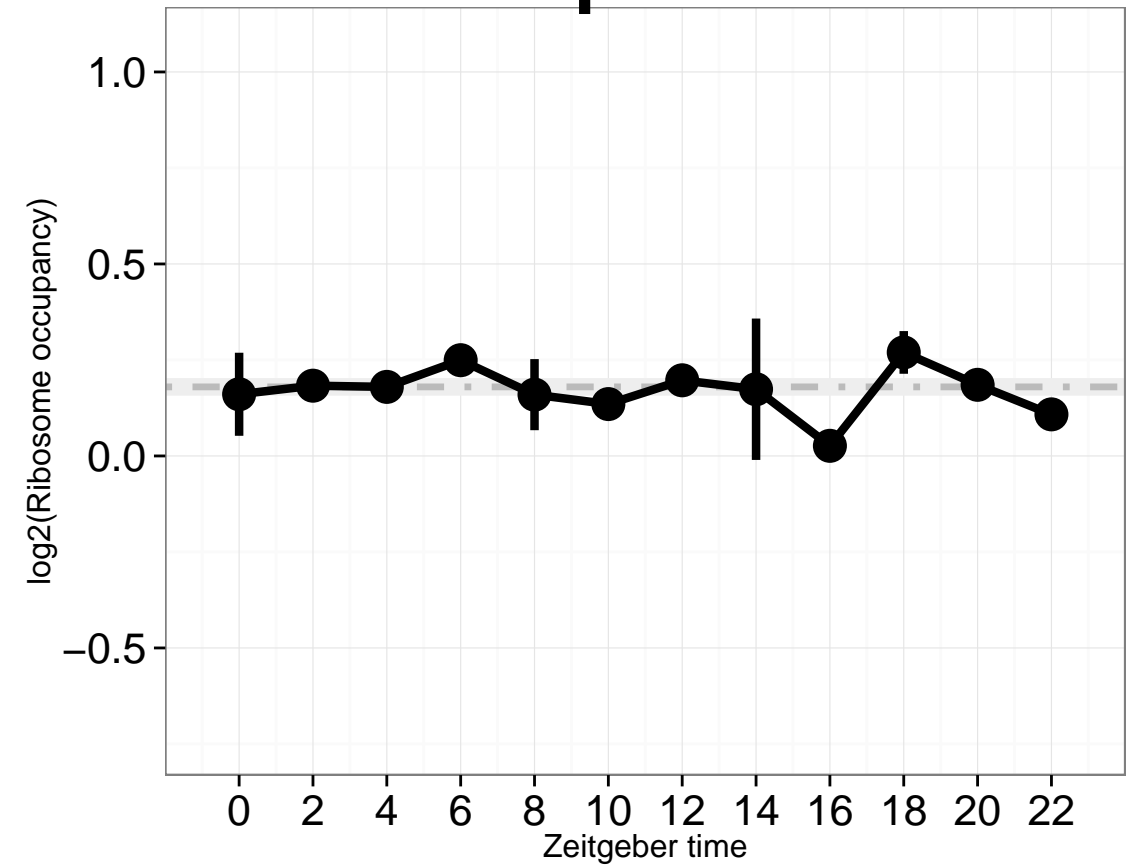

Supplement: SuppDataset_1.zip [file Atp6v1a_set_A.pdf › Supplemental Dataset 1/A-mRNA_nonrhyth_translation_nonrhyth/Atp6v1a_set_A.pdf]

# Atp6v1b2

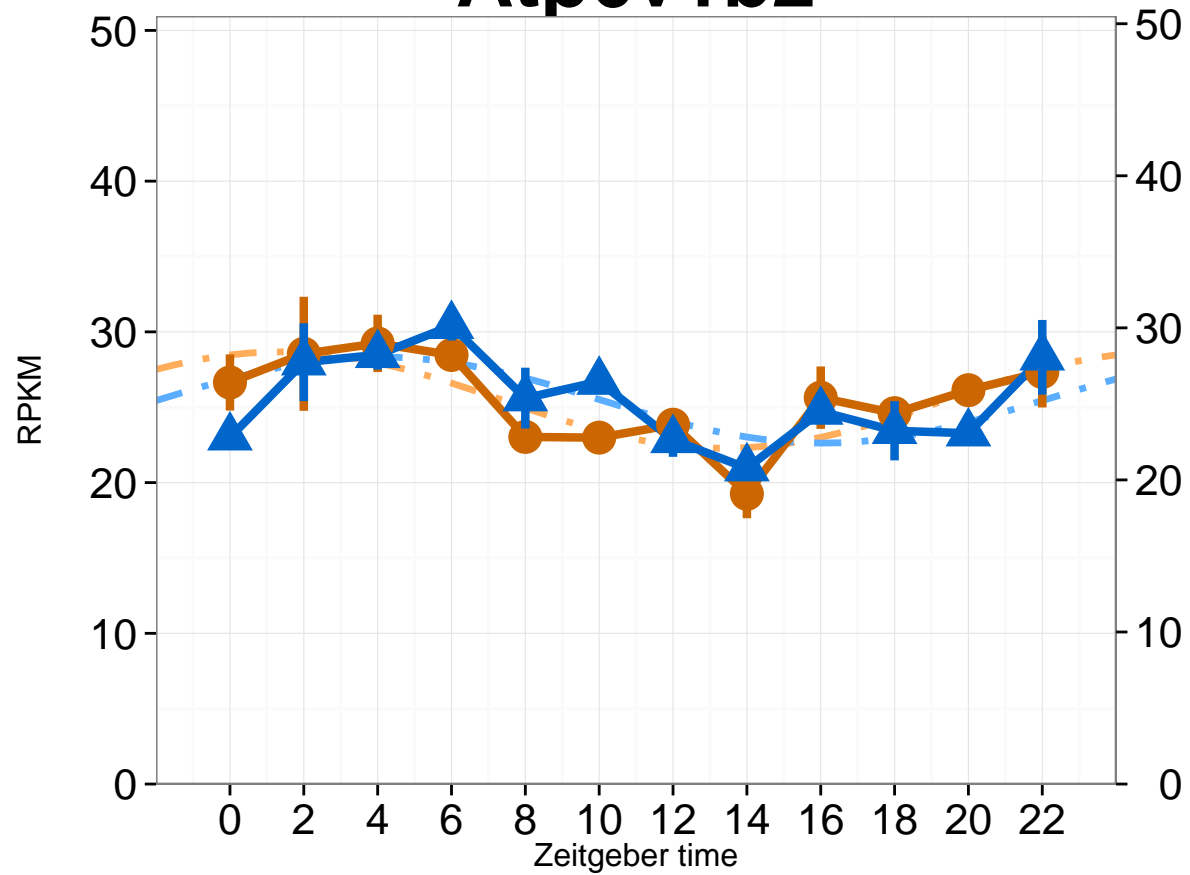

# Atp6v1b2

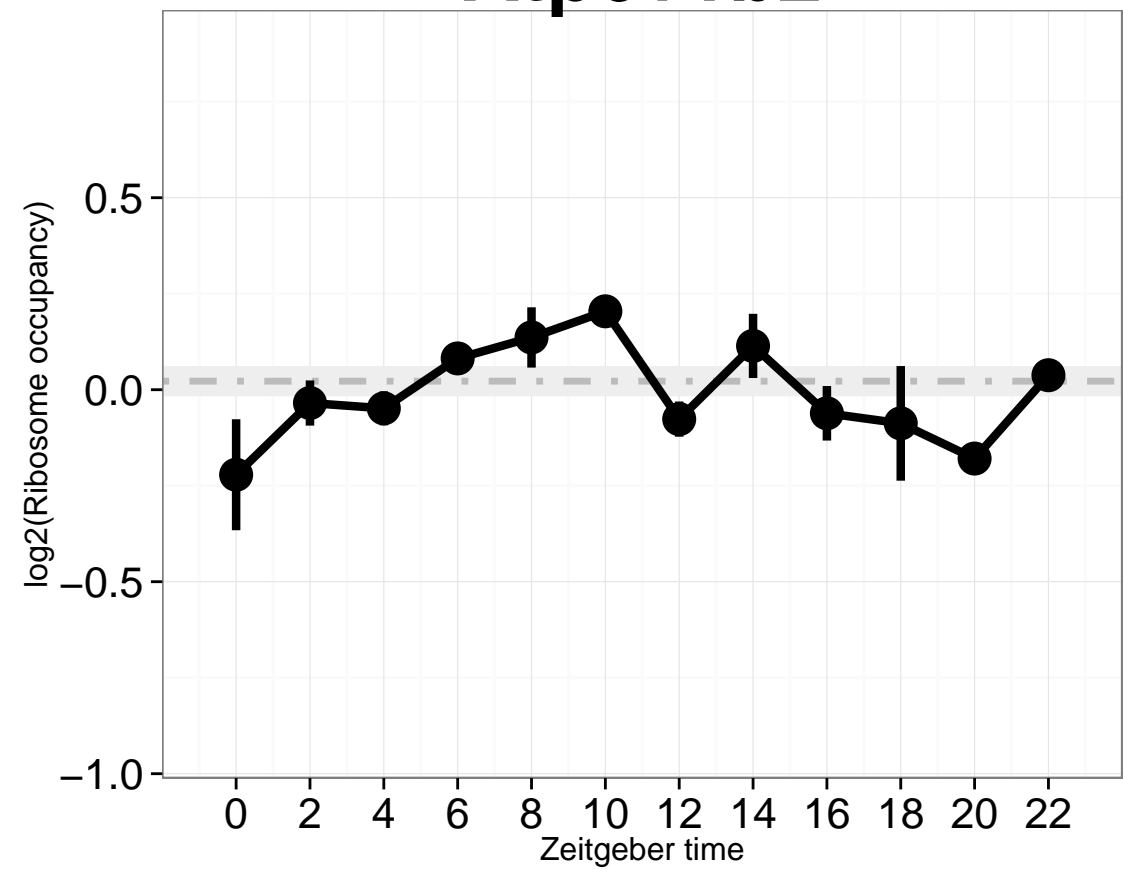

Supplement: SuppDataset_1.zip [file Atp6v1b2_set_A.pdf › Supplemental Dataset 1/A-mRNA_nonrhyth_translation_nonrhyth/Atp6v1b2_set_A.pdf]

# Atp6v1e1

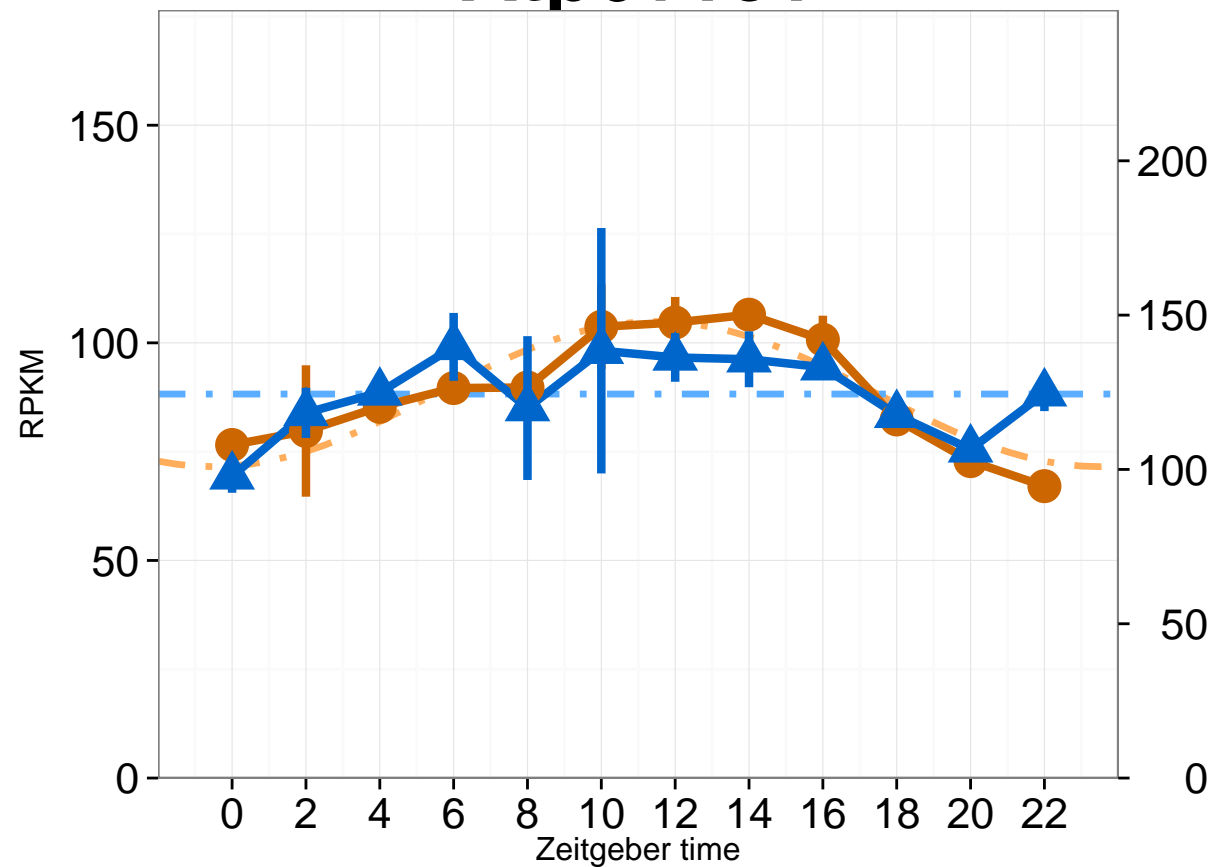

# Atp6v1e1

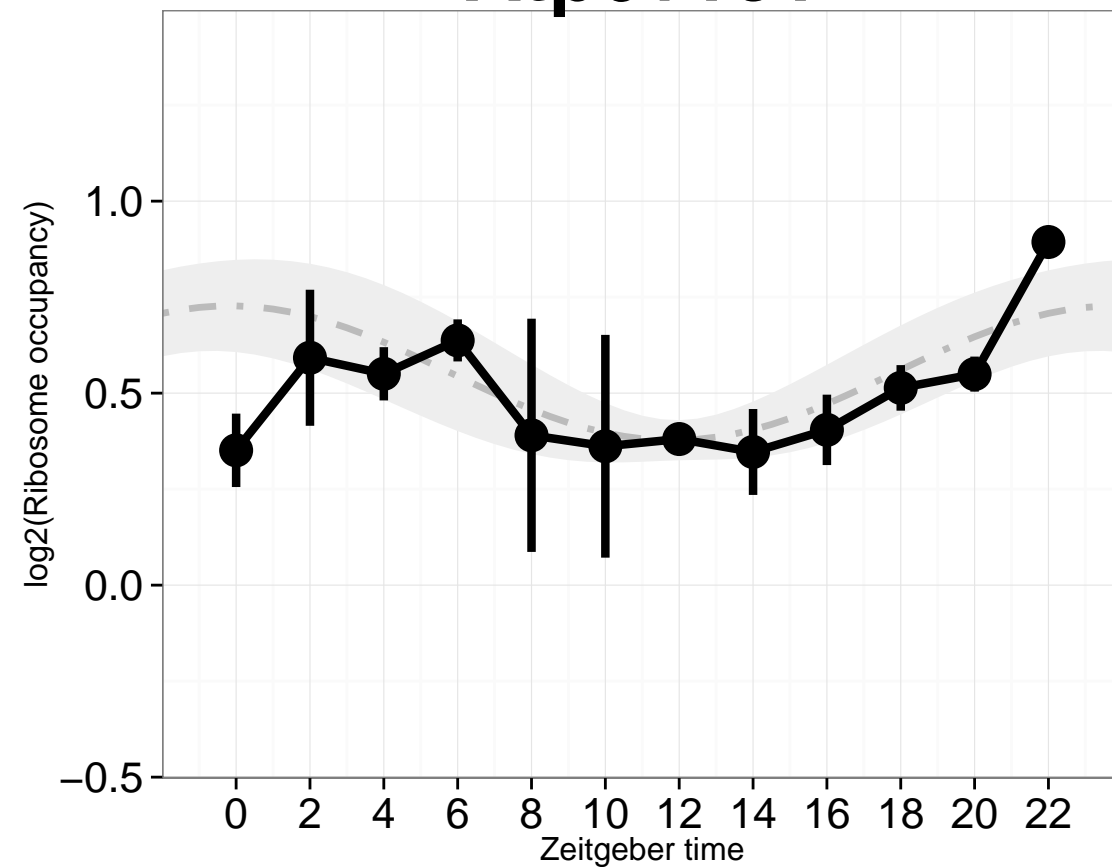

Supplement: SuppDataset_1.zip [file Atp6v1e1_set_A.pdf › Supplemental Dataset 1/A-mRNA_nonrhyth_translation_nonrhyth/Atp6v1e1_set_A.pdf]

# Atp6v1f

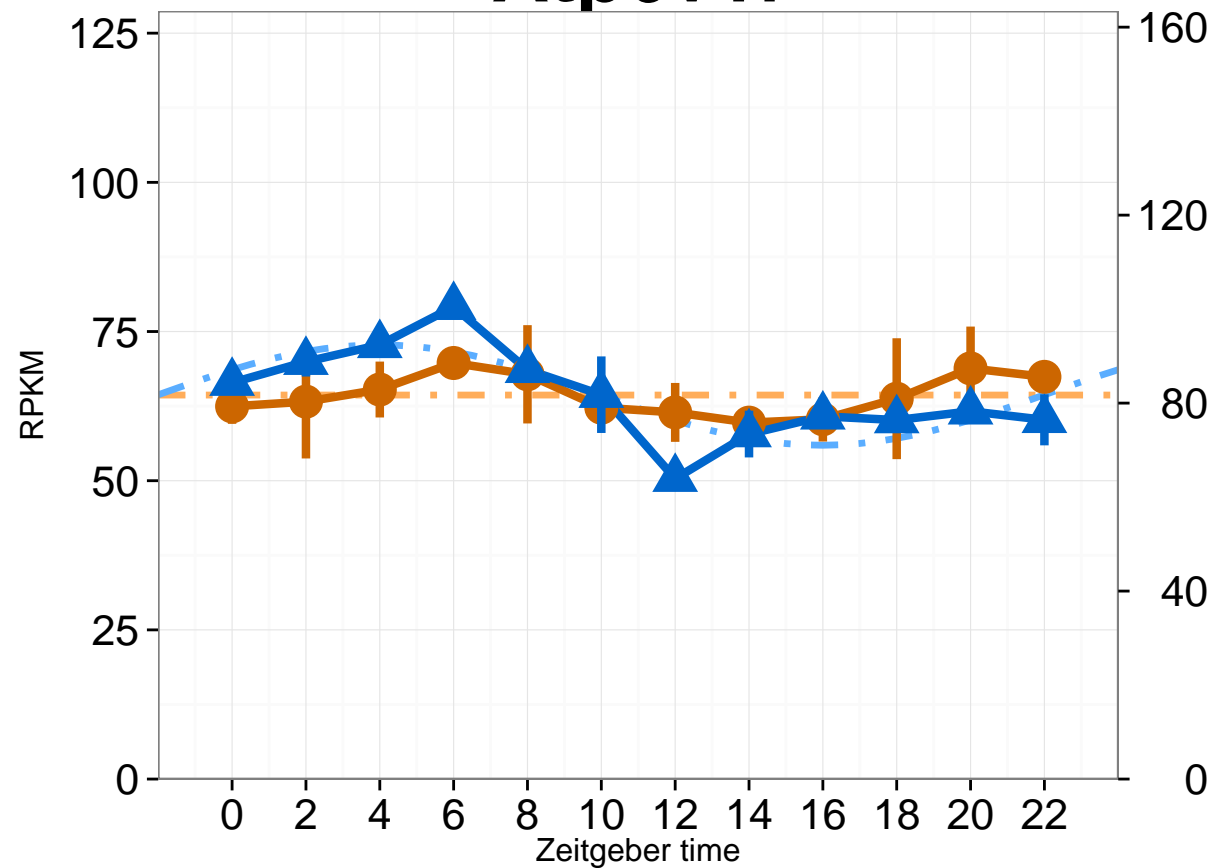

# Atp6v1f

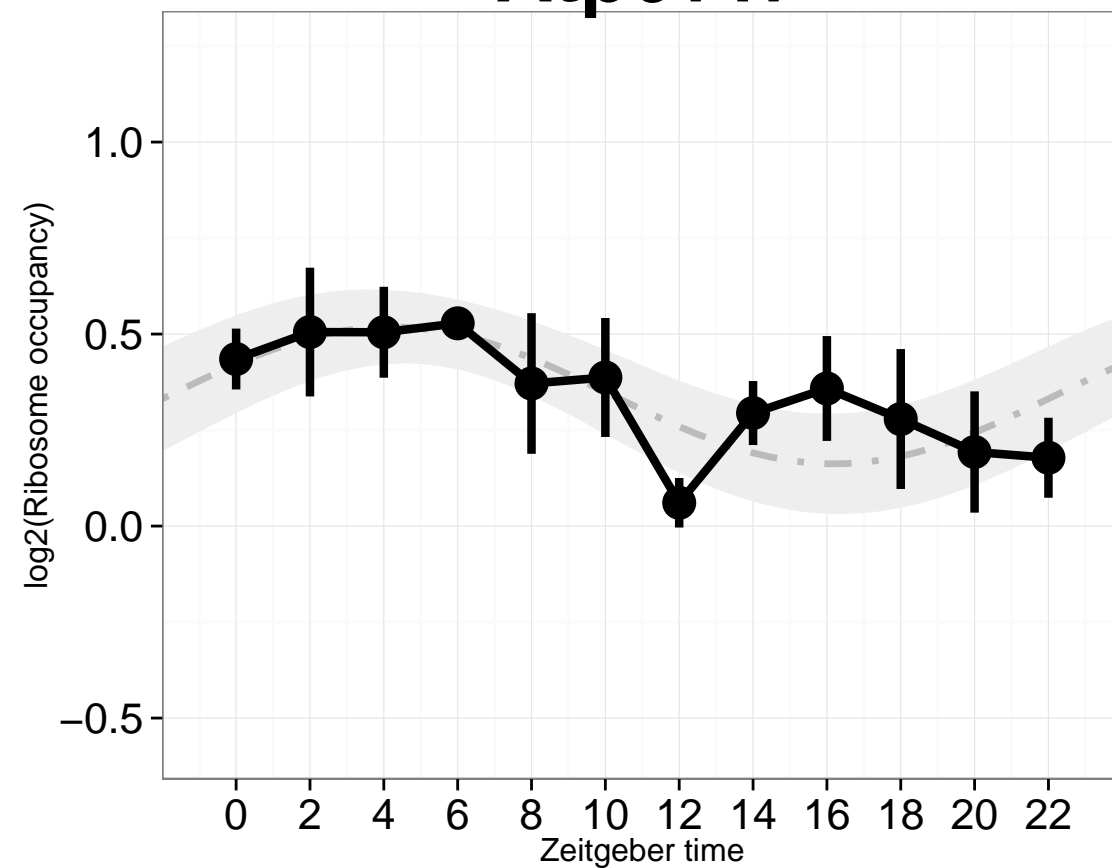

Supplement: SuppDataset_1.zip [file Atp6v1f_set_A.pdf › Supplemental Dataset 1/A-mRNA_nonrhyth_translation_nonrhyth/Atp6v1f_set_A.pdf]

# Atp6v1h

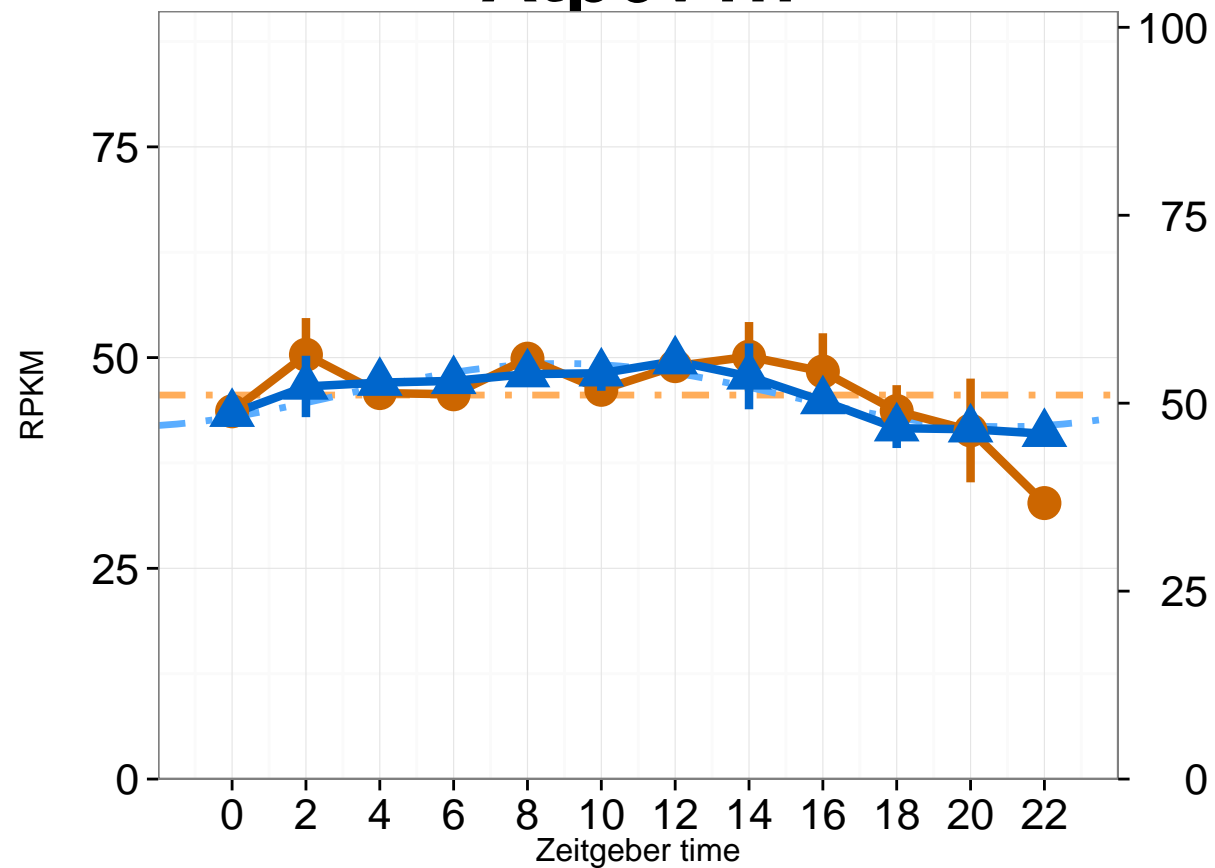

# Atp6v1h

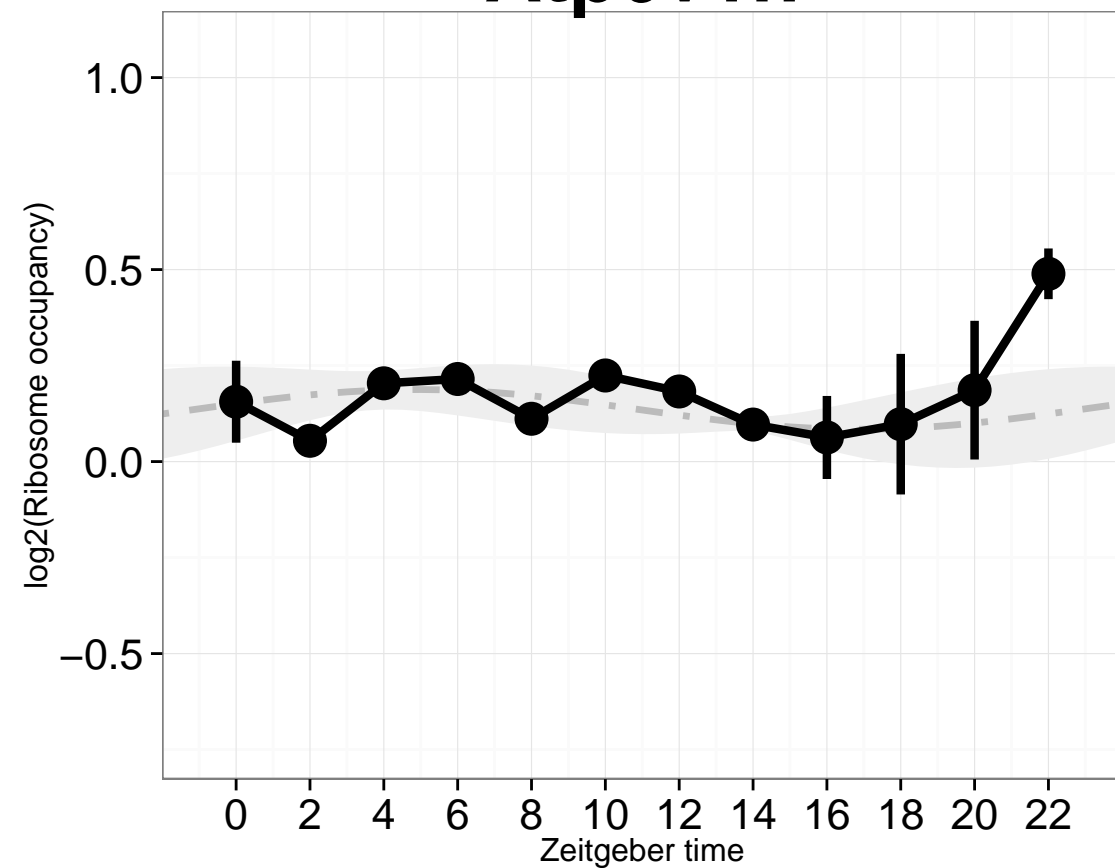

Supplement: SuppDataset_1.zip [file Atp6v1h_set_A.pdf › Supplemental Dataset 1/A-mRNA_nonrhyth_translation_nonrhyth/Atp6v1h_set_A.pdf]

# Atp7a

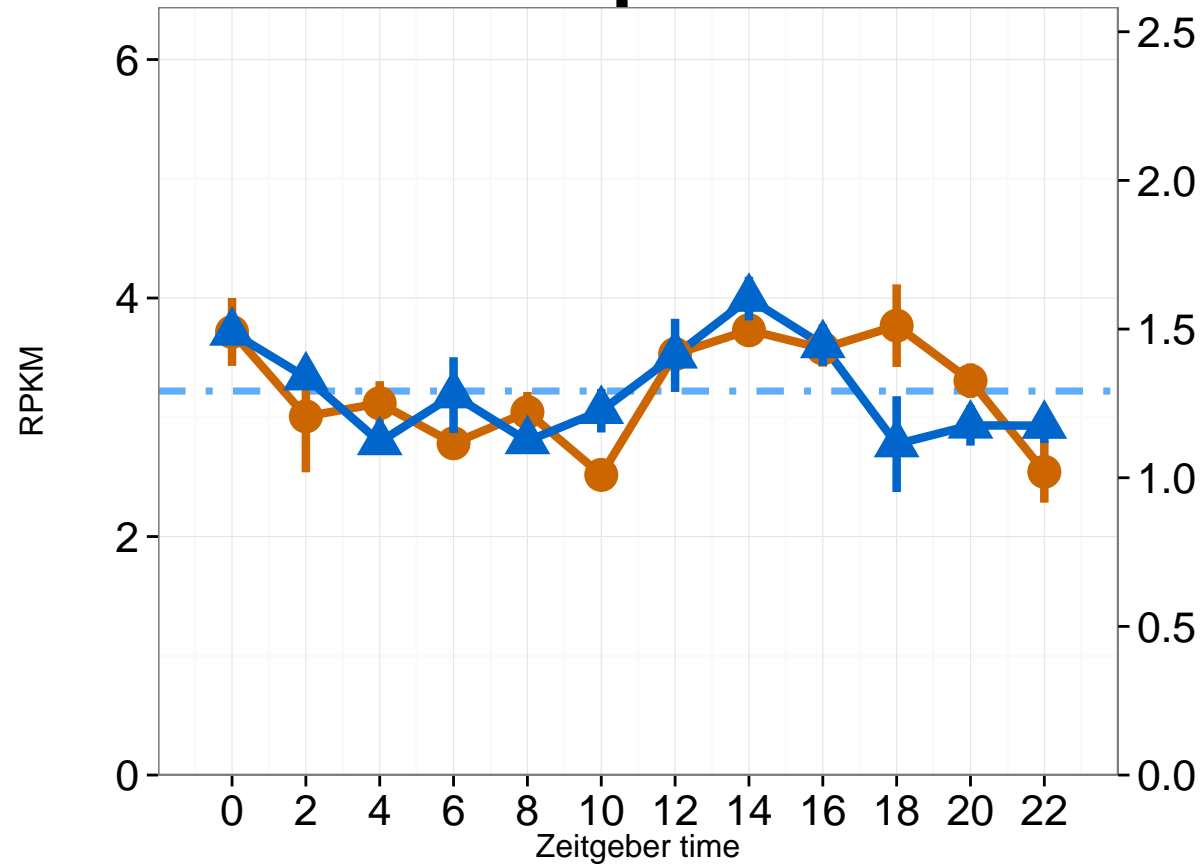

# Atp7a

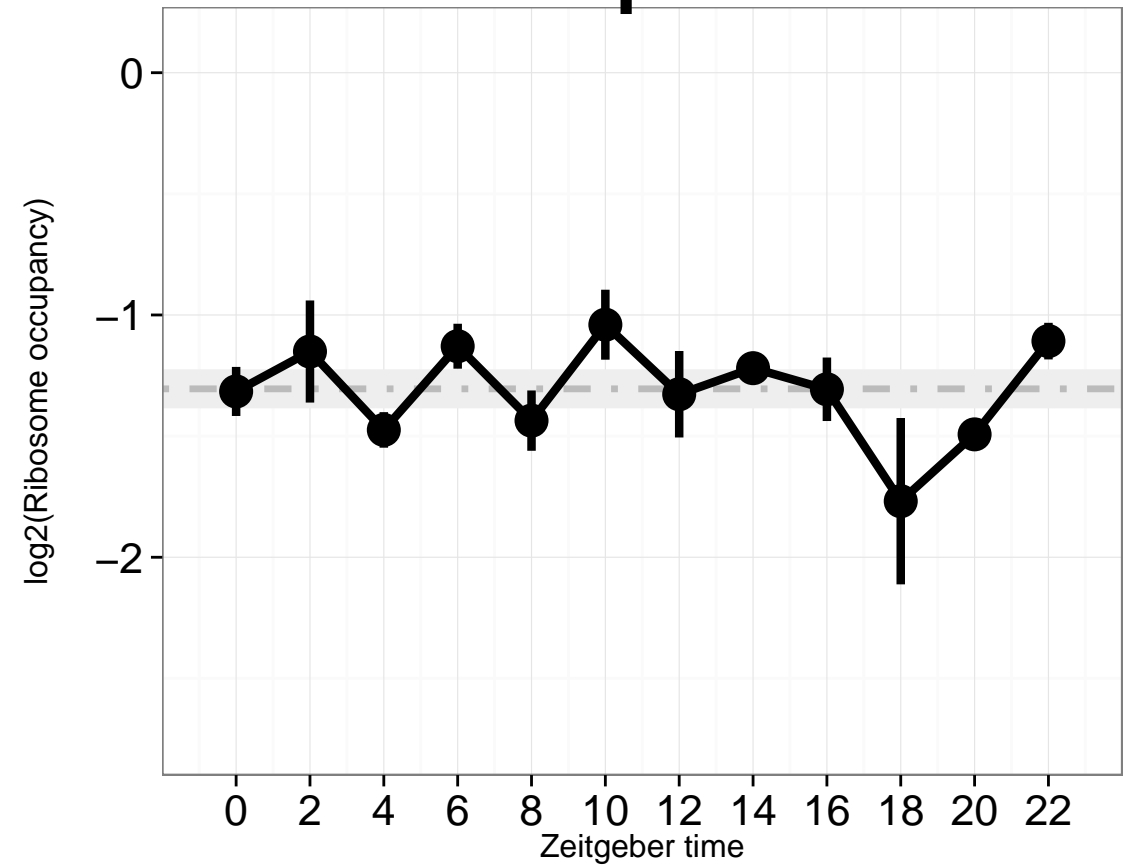

Supplement: SuppDataset_1.zip [file Atp7a_set_A.pdf › Supplemental Dataset 1/A-mRNA_nonrhyth_translation_nonrhyth/Atp7a_set_A.pdf]

# Atp7b

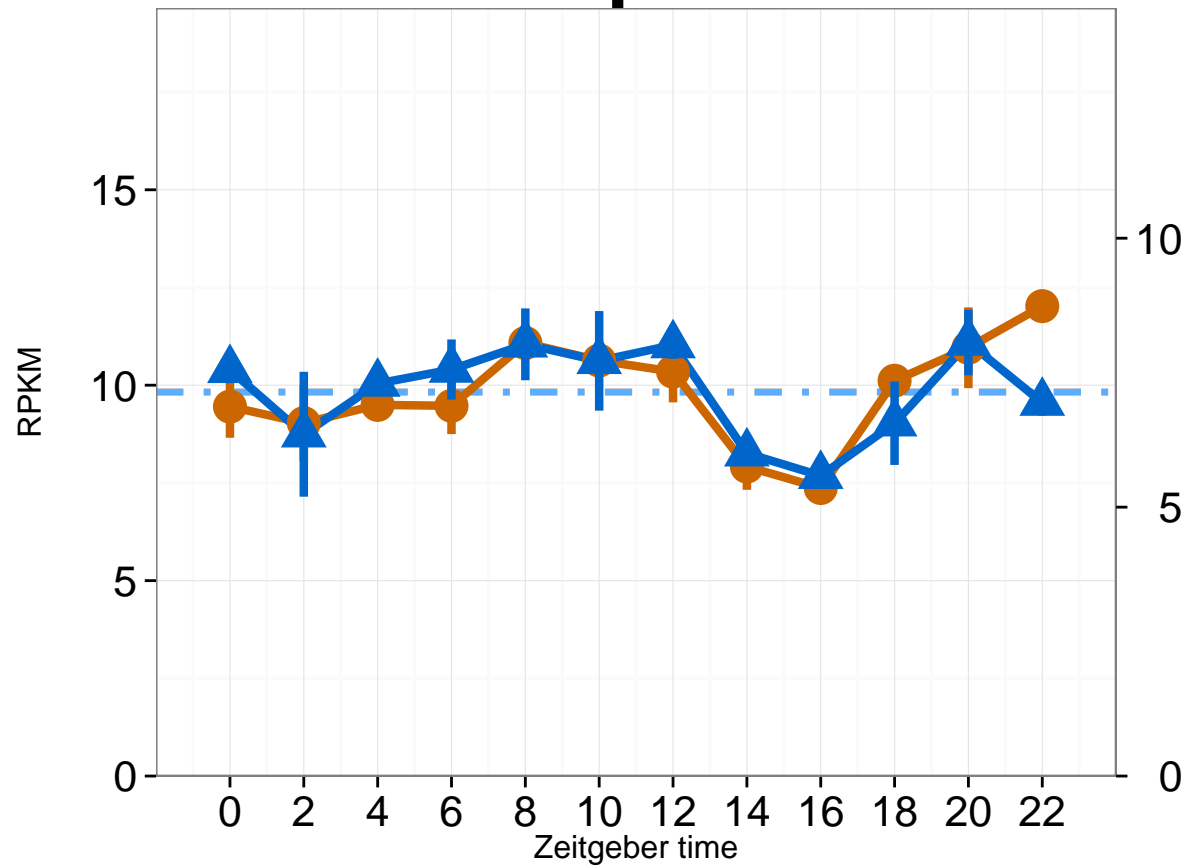

# Atp7b

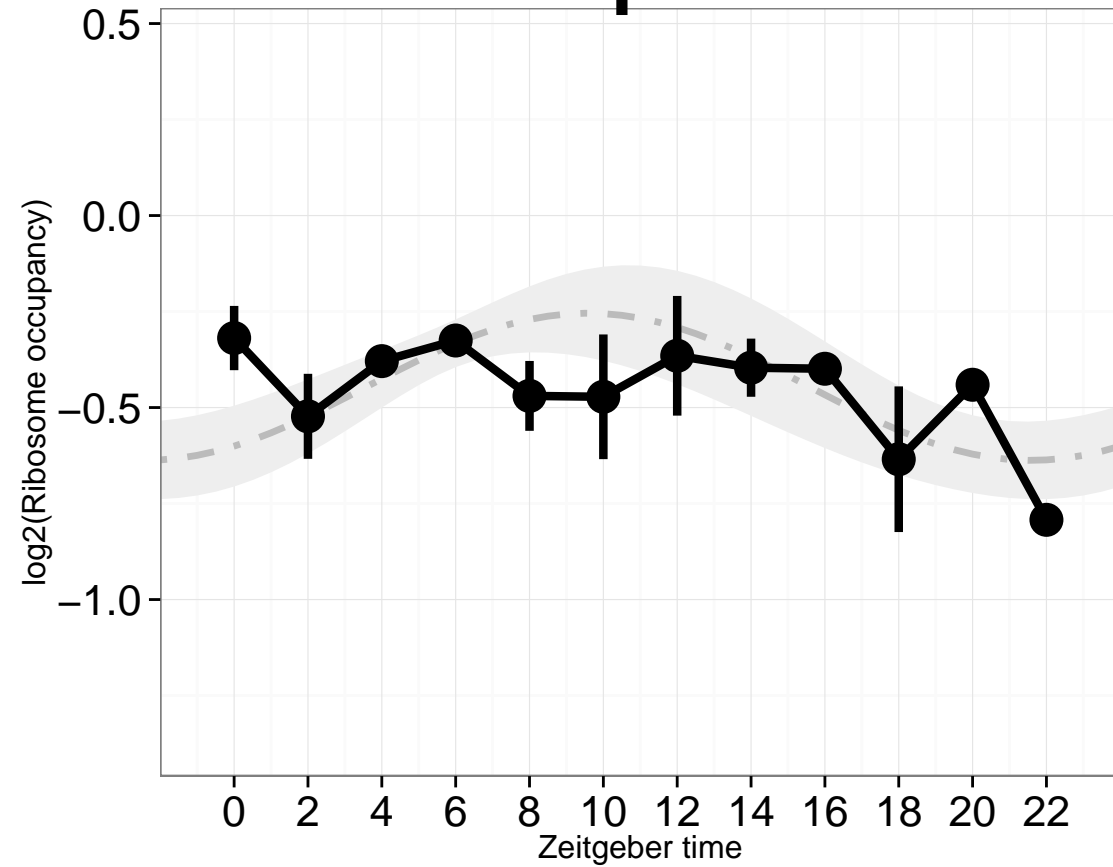

Supplement: SuppDataset_1.zip [file Atp7b_set_A.pdf › Supplemental Dataset 1/A-mRNA_nonrhyth_translation_nonrhyth/Atp7b_set_A.pdf]

# Atp8a1

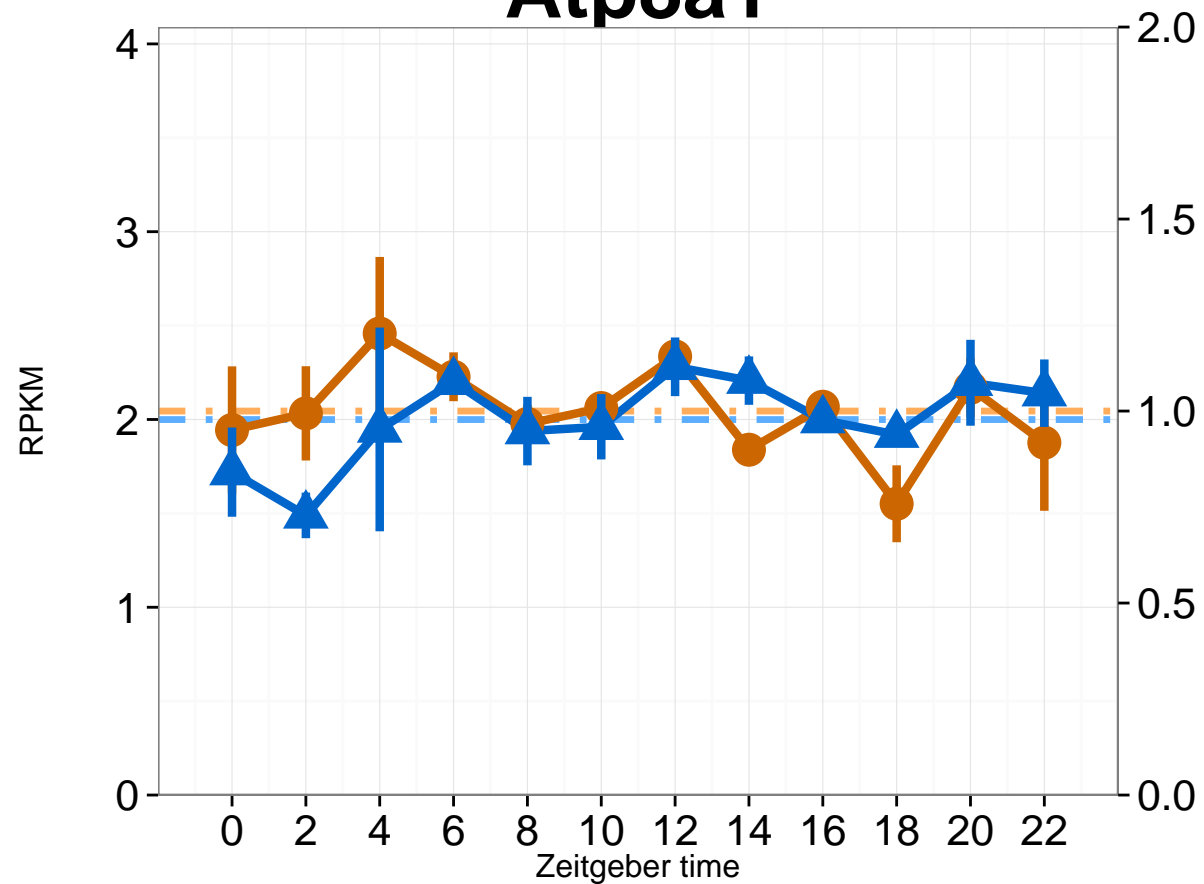

# Atp8a1

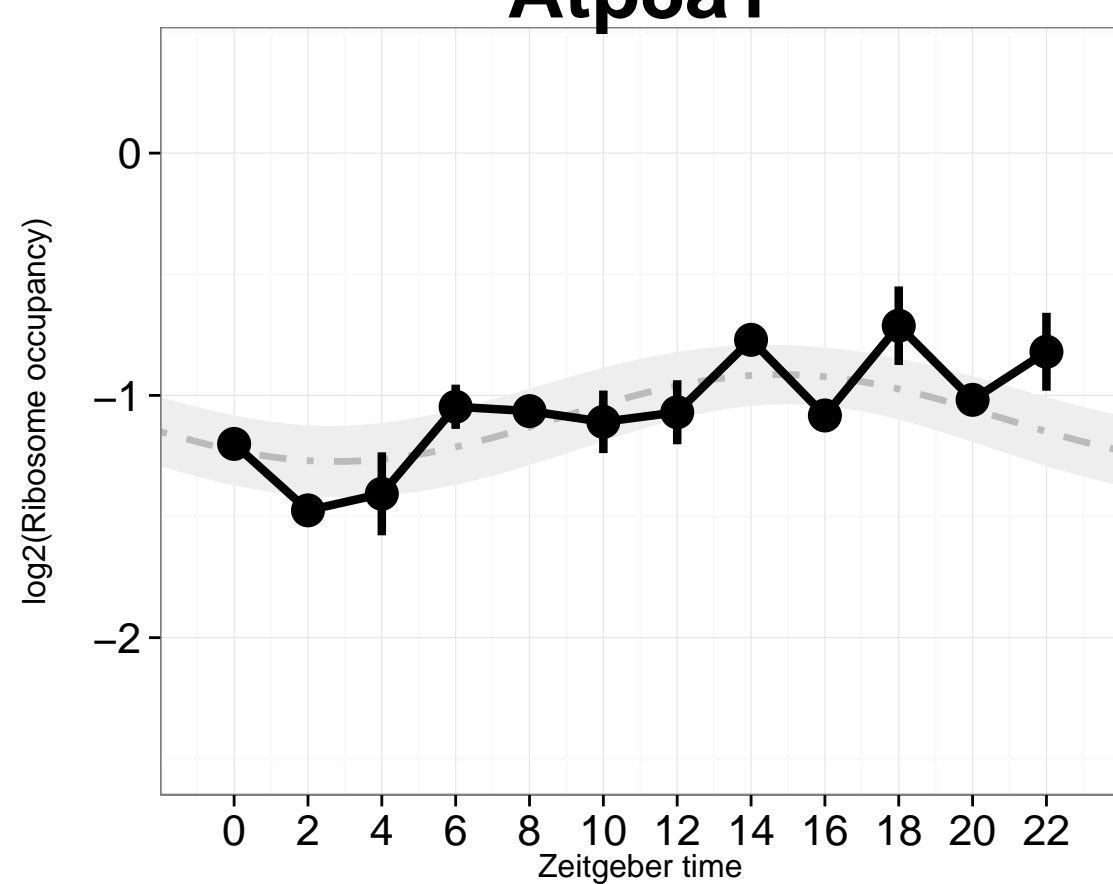

Supplement: SuppDataset_1.zip [file Atp8a1_set_A.pdf › Supplemental Dataset 1/A-mRNA_nonrhyth_translation_nonrhyth/Atp8a1_set_A.pdf]

# Atp8b1

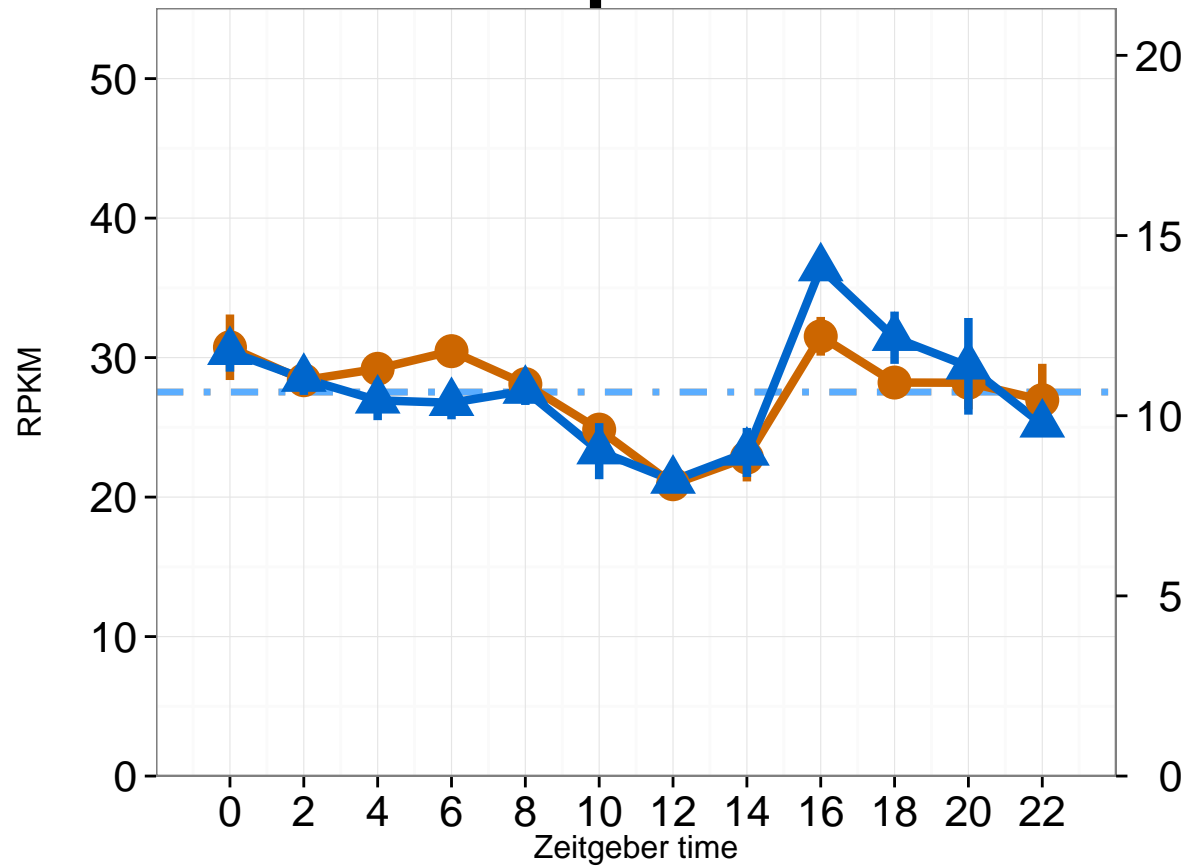

# Atp8b1

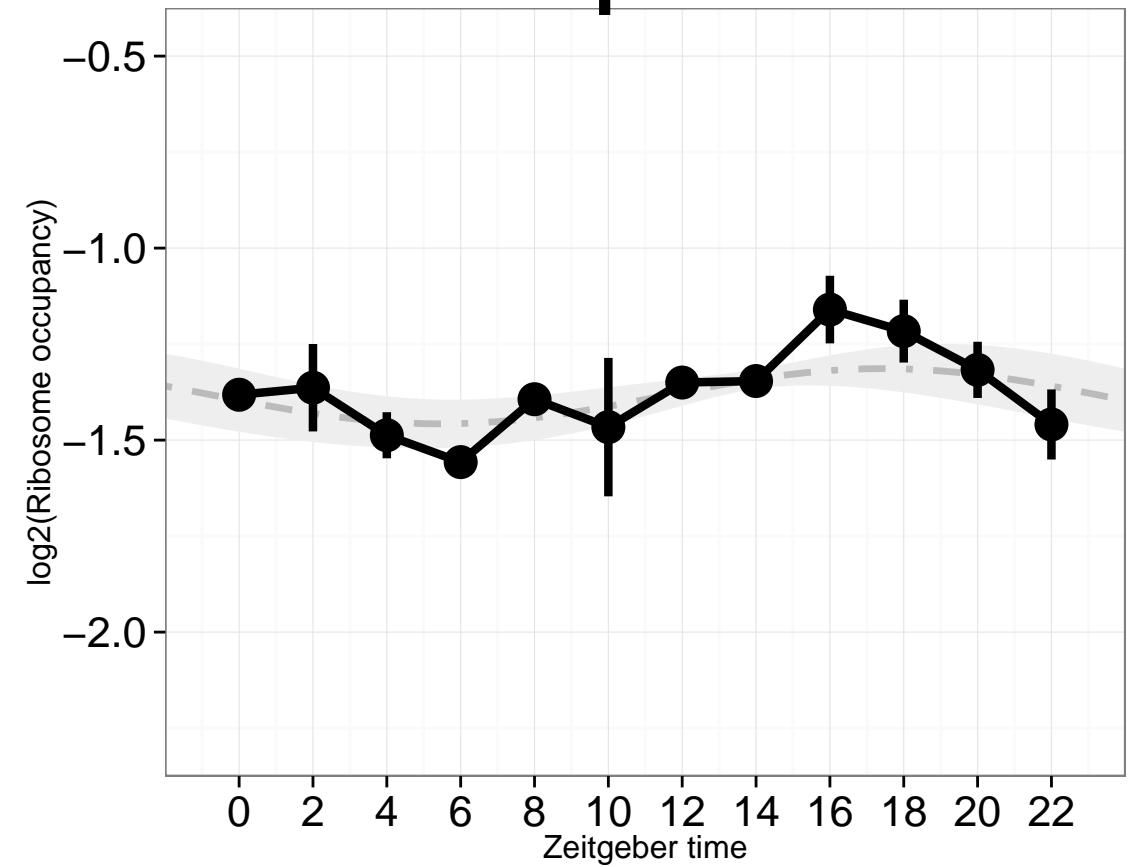

Supplement: SuppDataset_1.zip [file Atp8b1_set_A.pdf › Supplemental Dataset 1/A-mRNA_nonrhyth_translation_nonrhyth/Atp8b1_set_A.pdf]

## Atp8b2

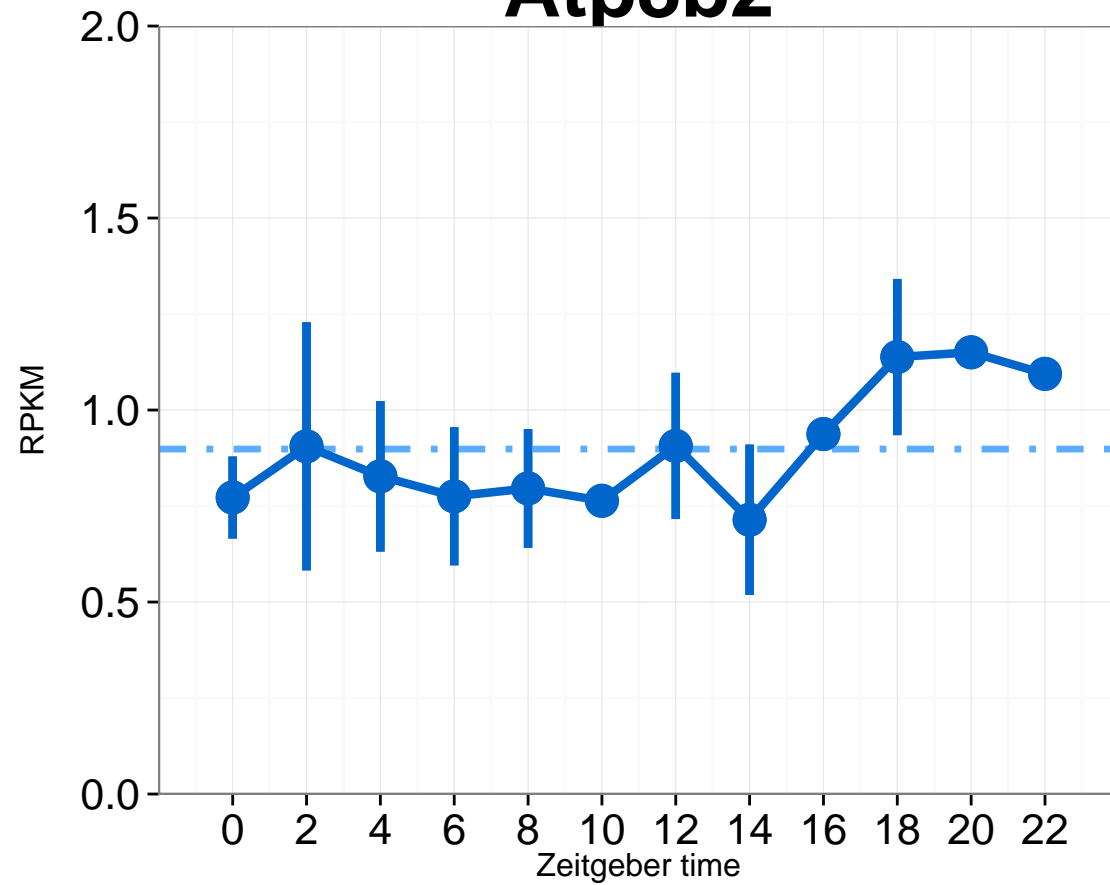

## Atp8b2 log2(Ribosome occupancy

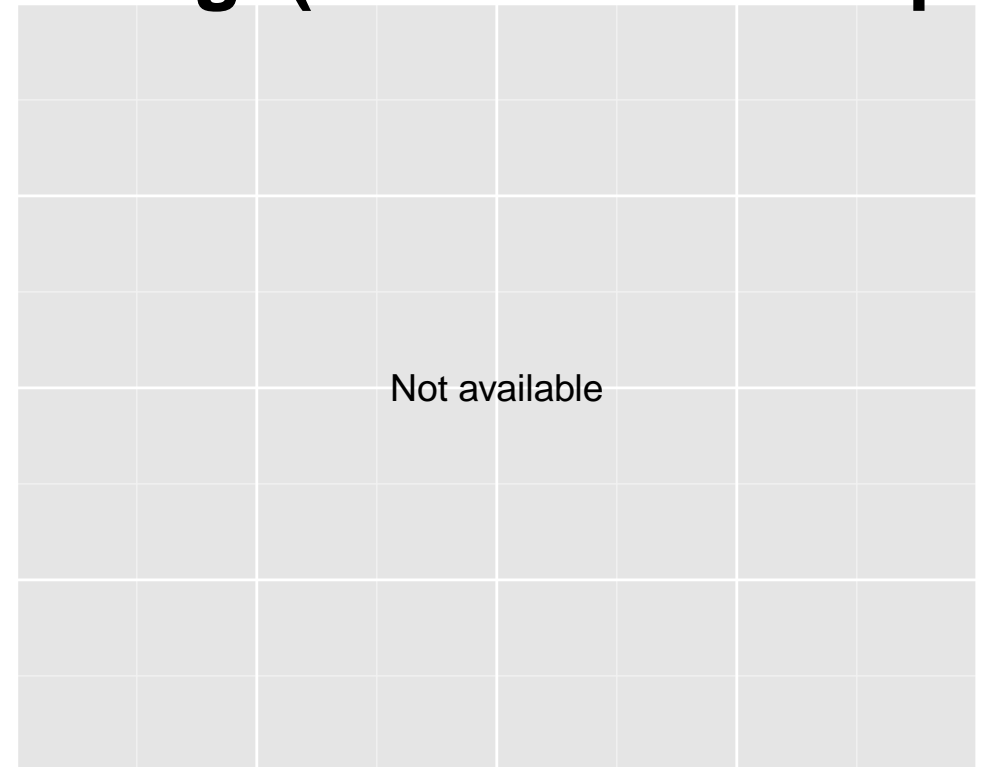

Supplement: SuppDataset_1.zip [file Atp8b2_set_A.pdf › Supplemental Dataset 1/A-mRNA_nonrhyth_translation_nonrhyth/Atp8b2_set_A.pdf]

# Atp9a

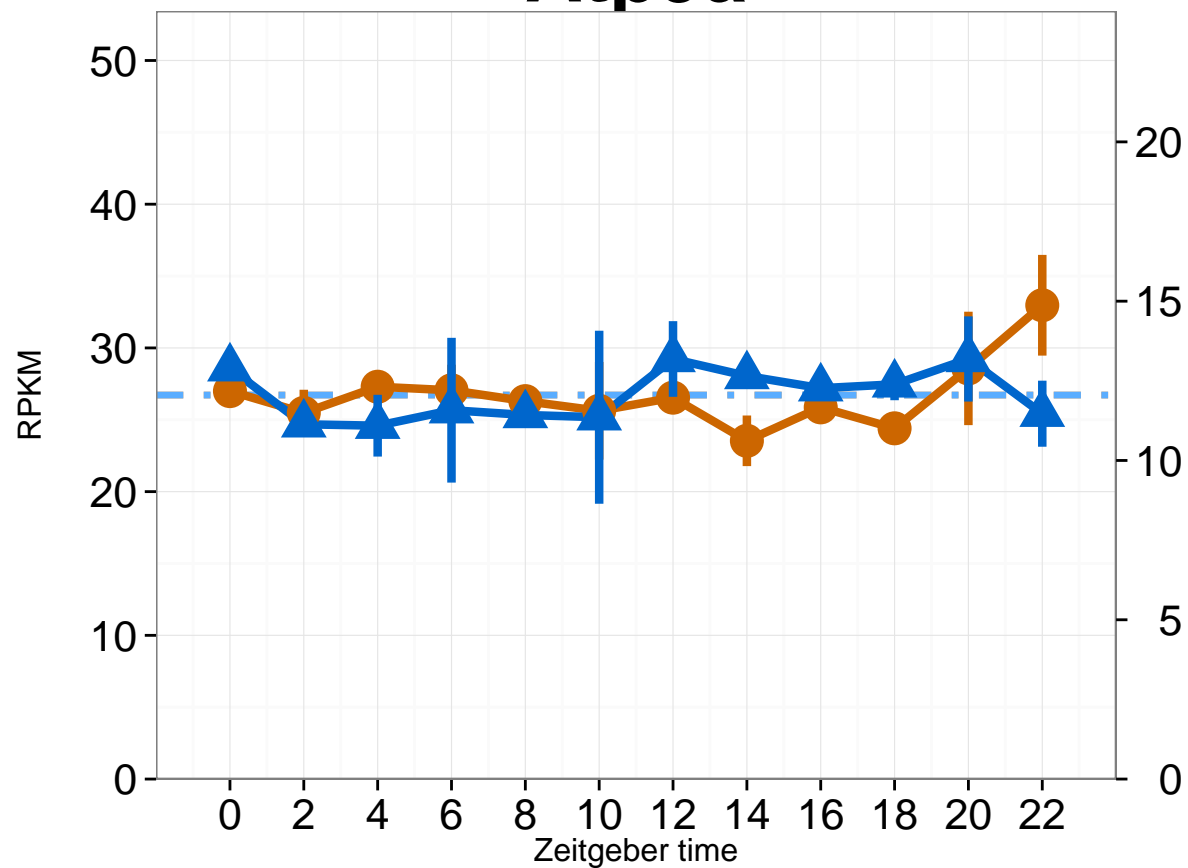

# Atp9a

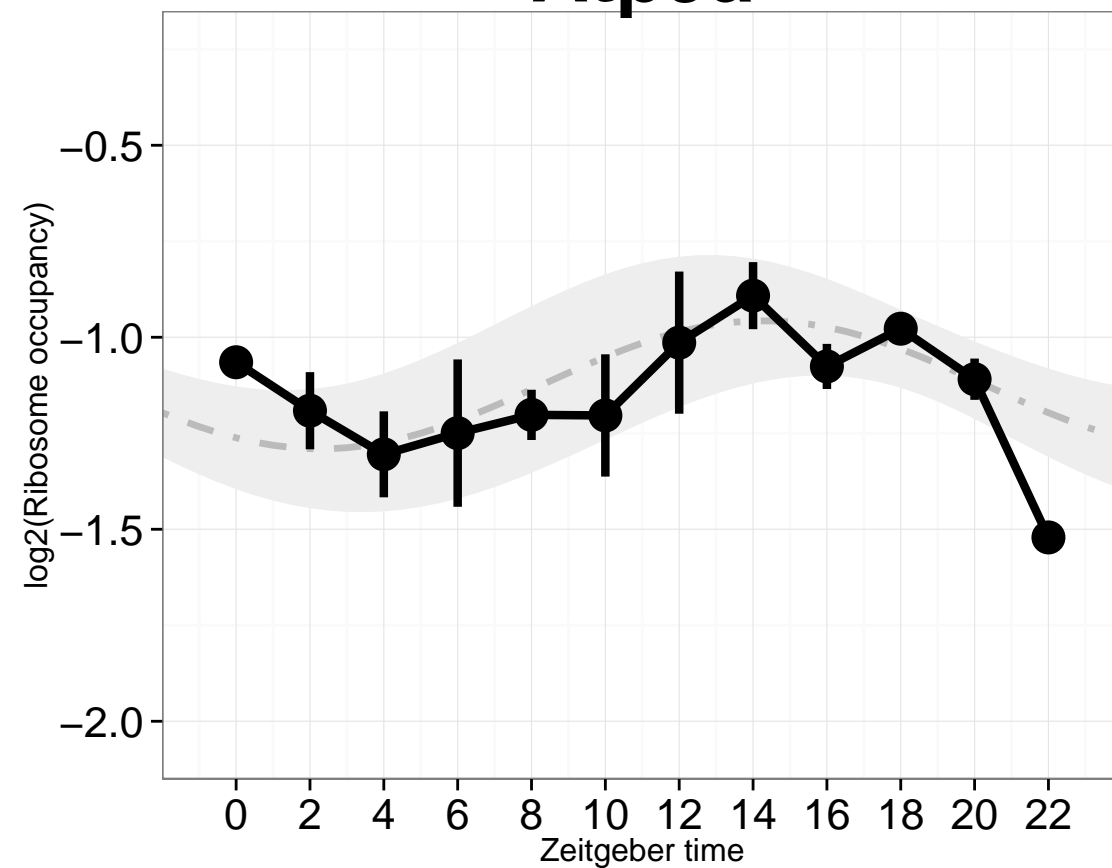

Supplement: SuppDataset_1.zip [file Atp9a_set_A.pdf › Supplemental Dataset 1/A-mRNA_nonrhyth_translation_nonrhyth/Atp9a_set_A.pdf]

# Atp9b

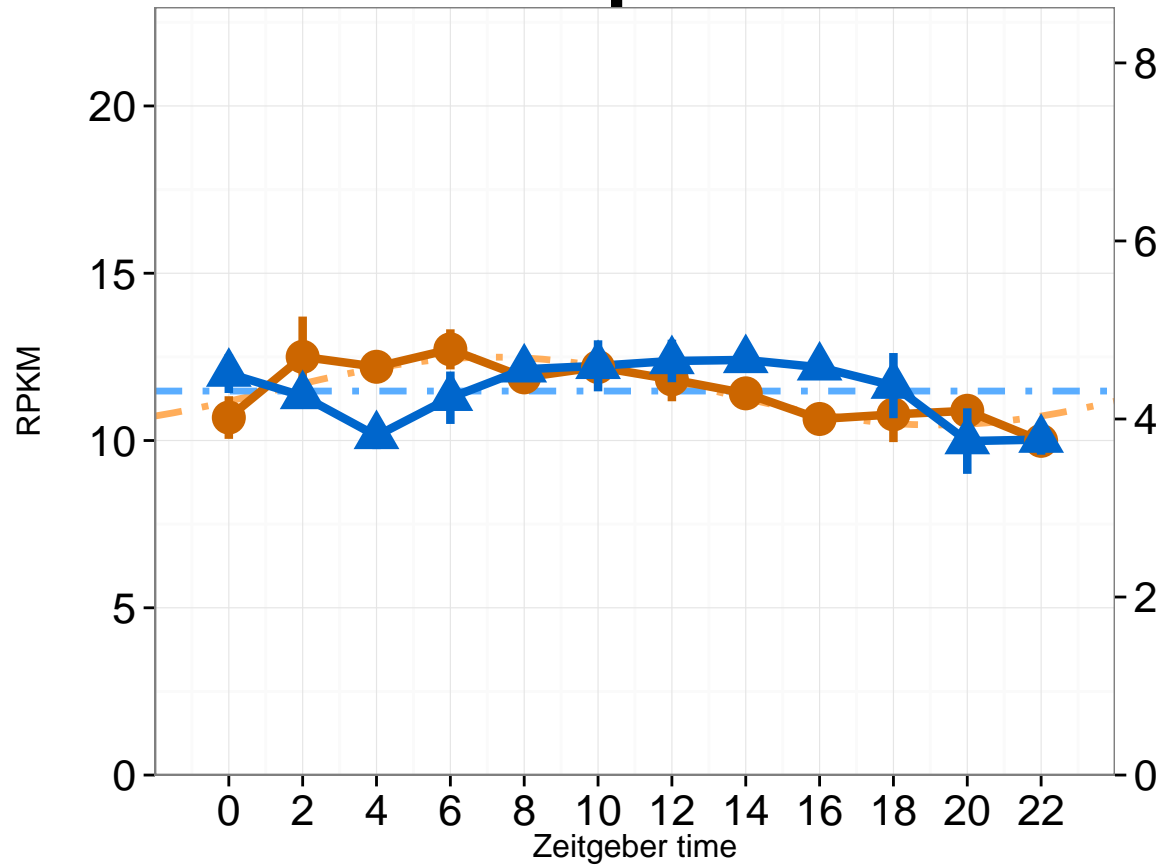

# Atp9b

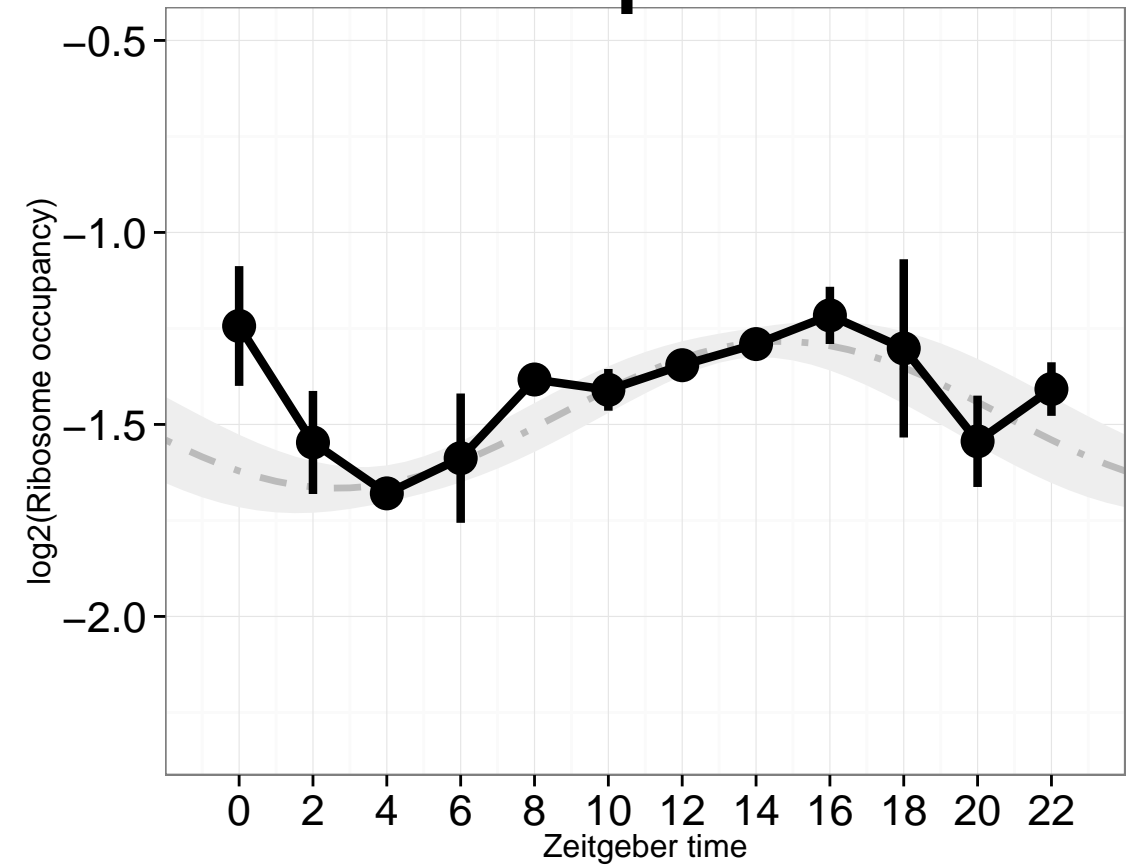

Supplement: SuppDataset_1.zip [file Atp9b_set_A.pdf › Supplemental Dataset 1/A-mRNA_nonrhyth_translation_nonrhyth/Atp9b_set_A.pdf]

# Atpaf1

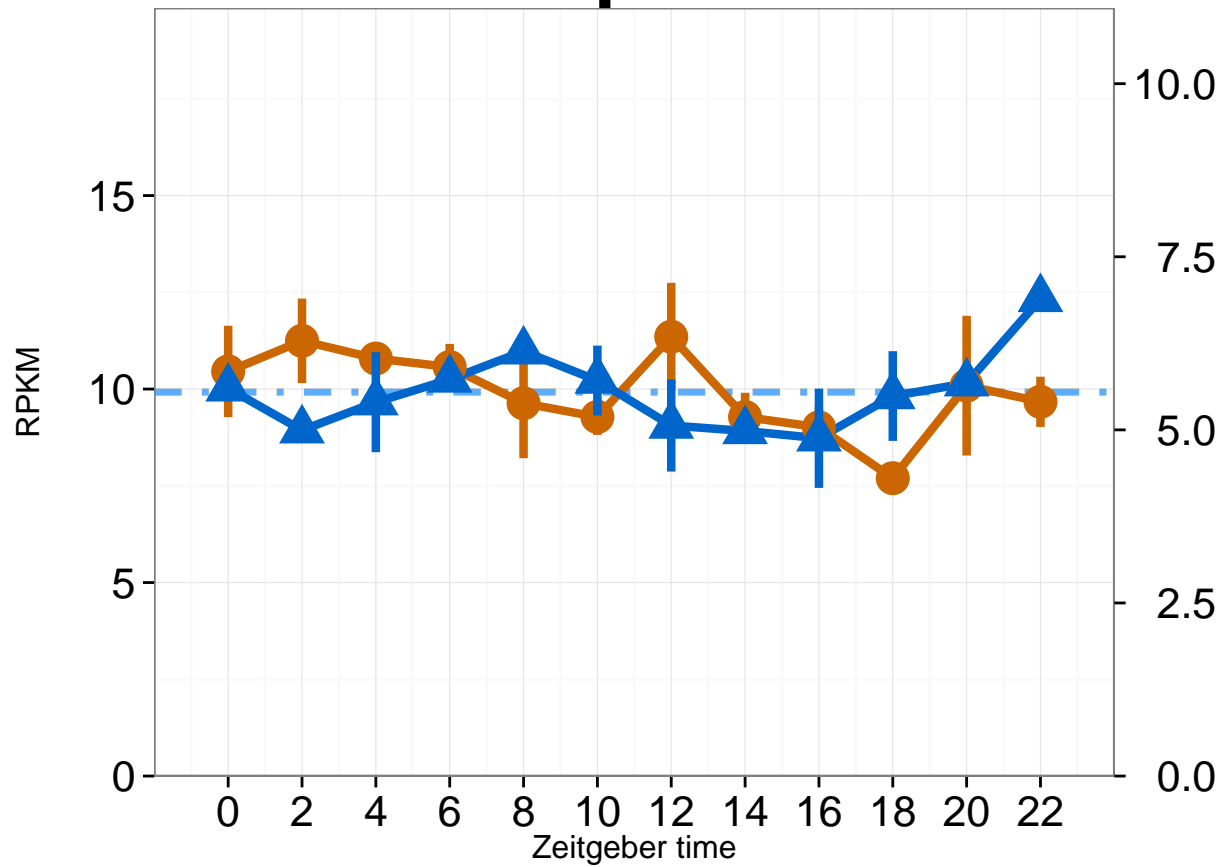

# Atpaf1

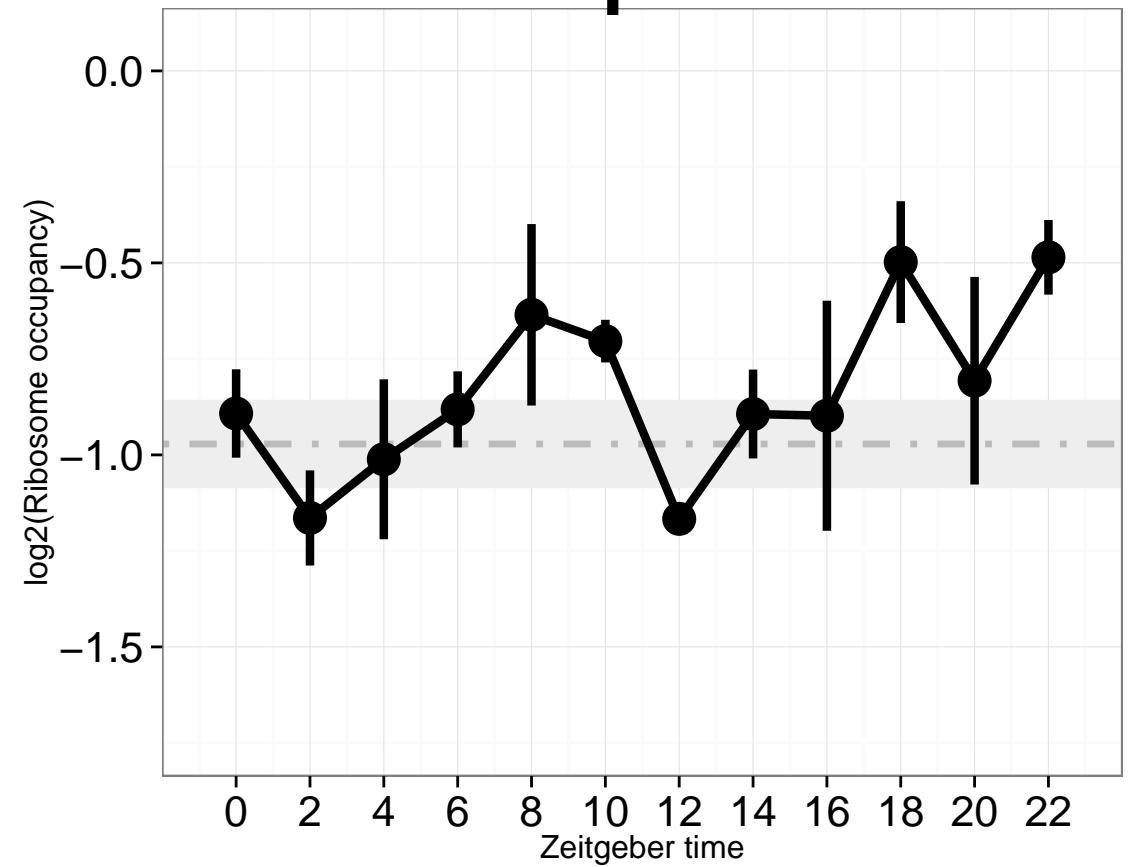

Supplement: SuppDataset_1.zip [file Atpaf1_set_A.pdf › Supplemental Dataset 1/A-mRNA_nonrhyth_translation_nonrhyth/Atpaf1_set_A.pdf]

# Atpaf2

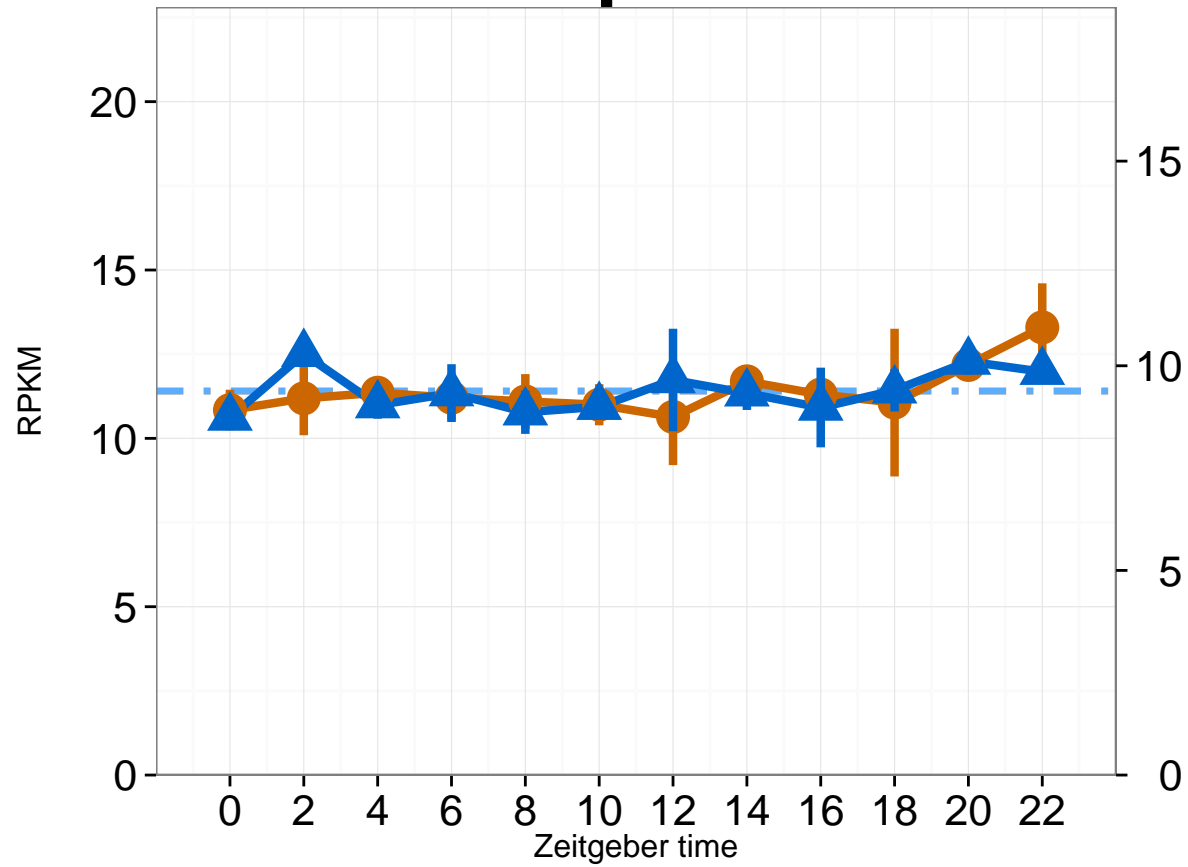

# Atpaf2

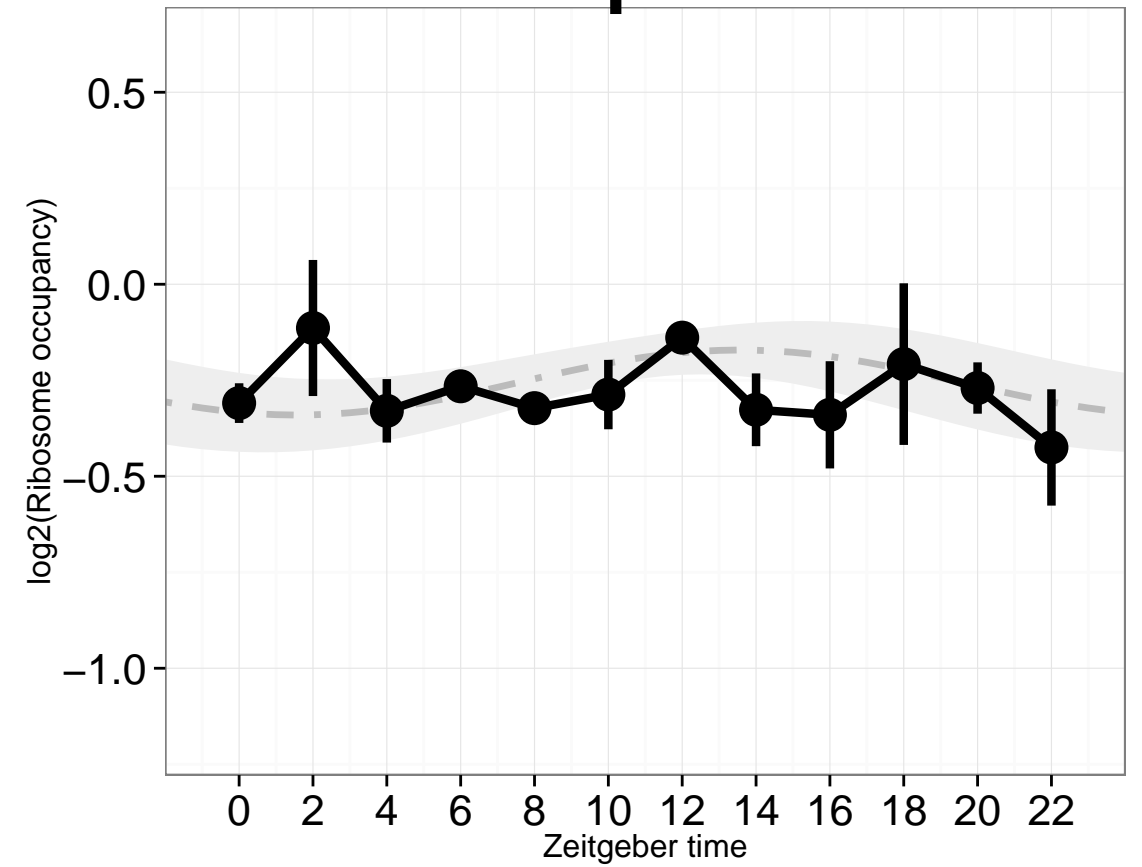

Supplement: SuppDataset_1.zip [file Atpaf2_set_A.pdf › Supplemental Dataset 1/A-mRNA_nonrhyth_translation_nonrhyth/Atpaf2_set_A.pdf]

# Atpif1

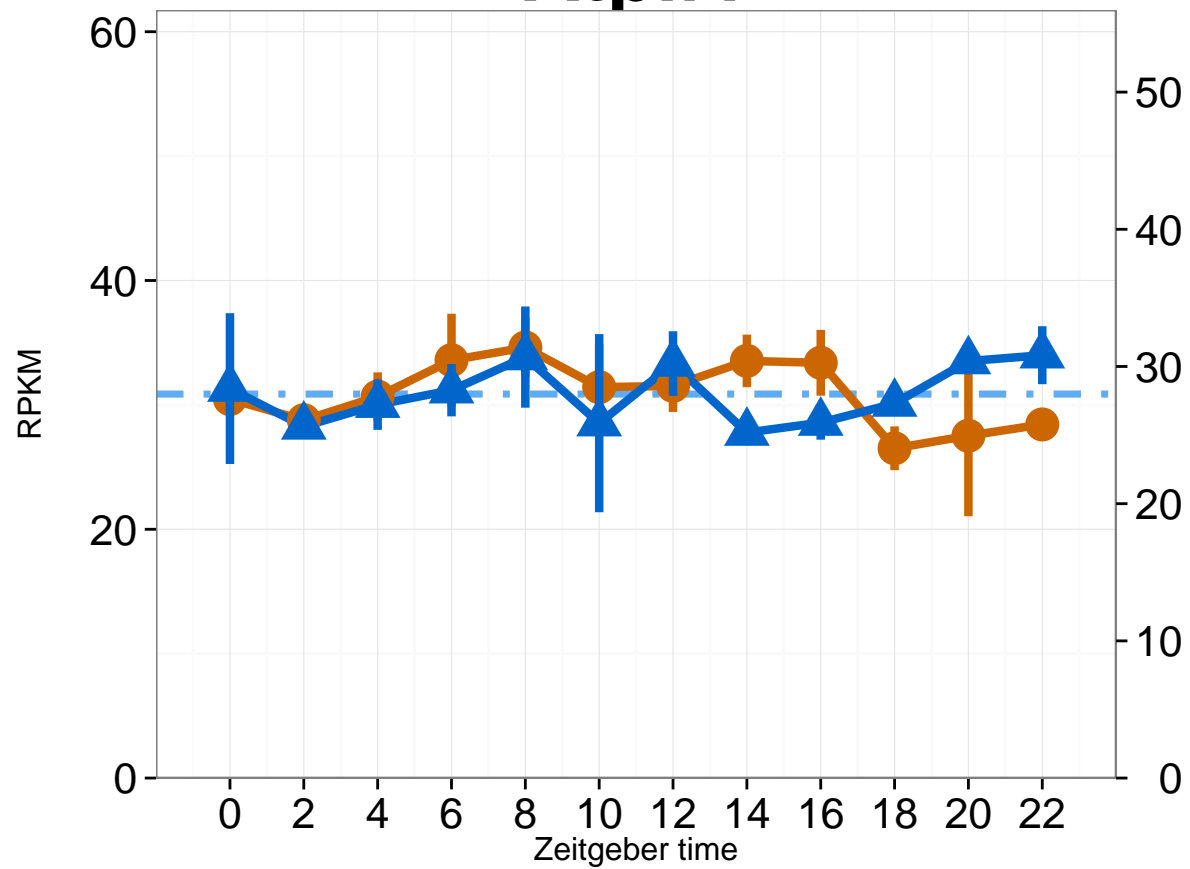

# Atpif1

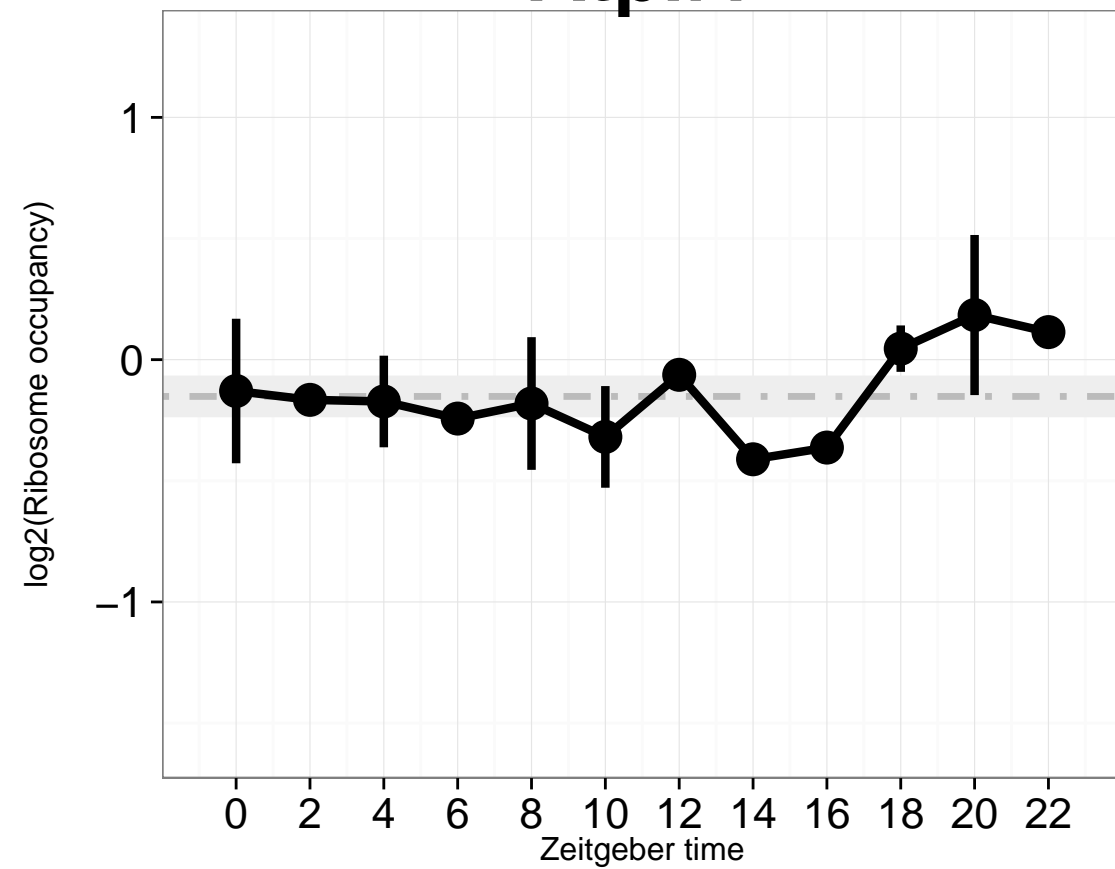

Supplement: SuppDataset_1.zip [file Atpif1_set_A.pdf › Supplemental Dataset 1/A-mRNA_nonrhyth_translation_nonrhyth/Atpif1_set_A.pdf]

## Atraid

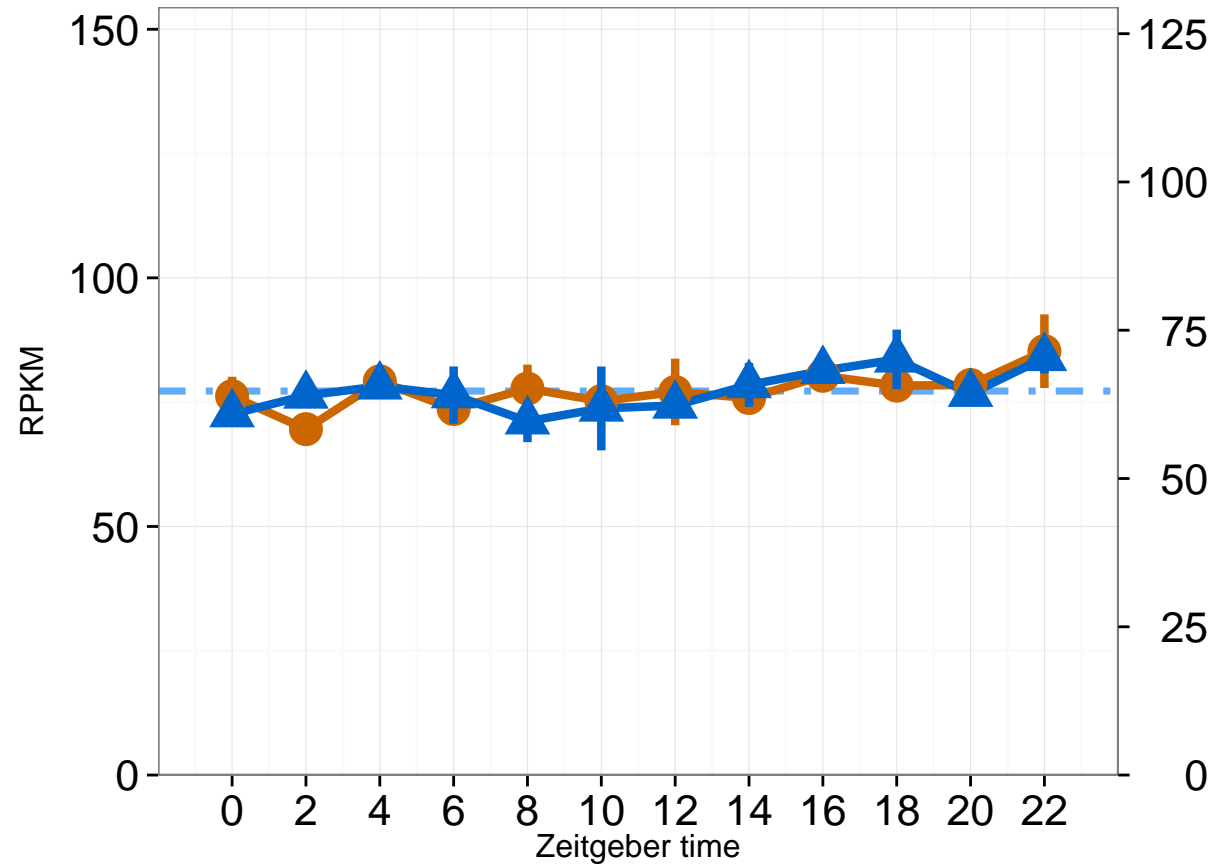

## Atraid

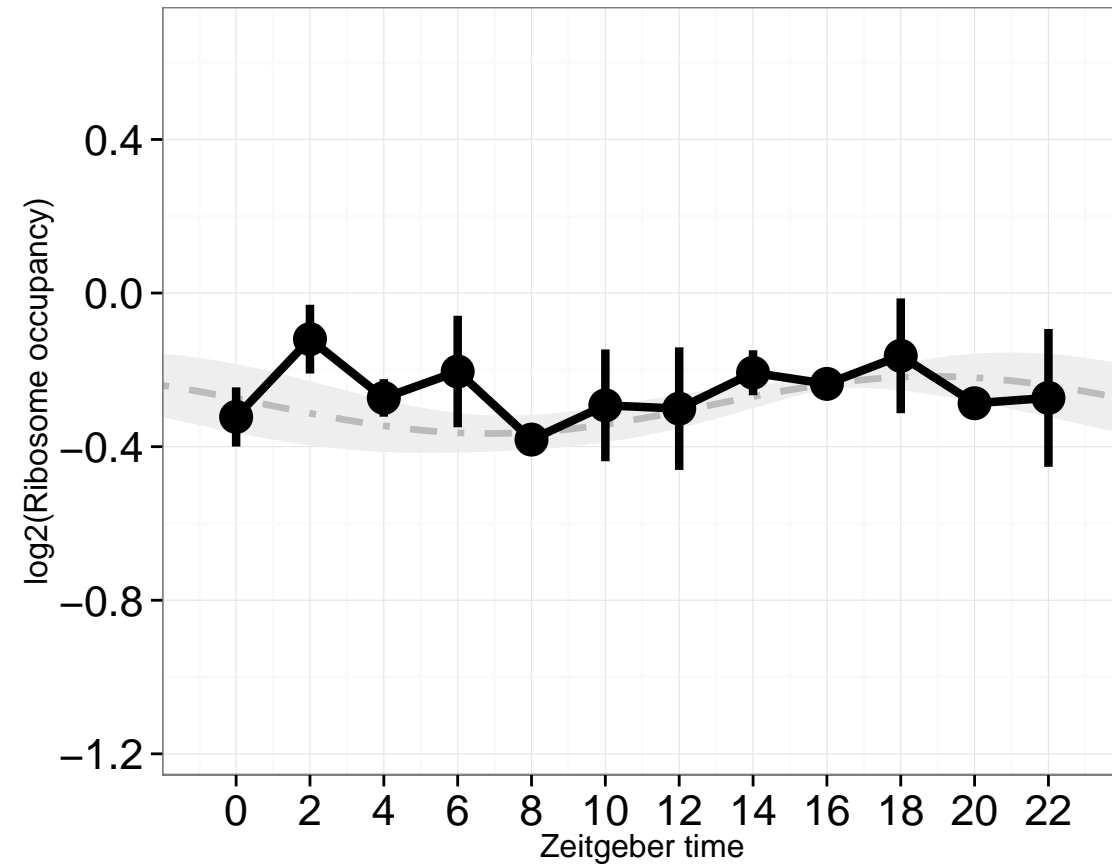

Supplement: SuppDataset_1.zip [file Atraid_set_A.pdf › Supplemental Dataset 1/A-mRNA_nonrhyth_translation_nonrhyth/Atraid_set_A.pdf]

## Atrip

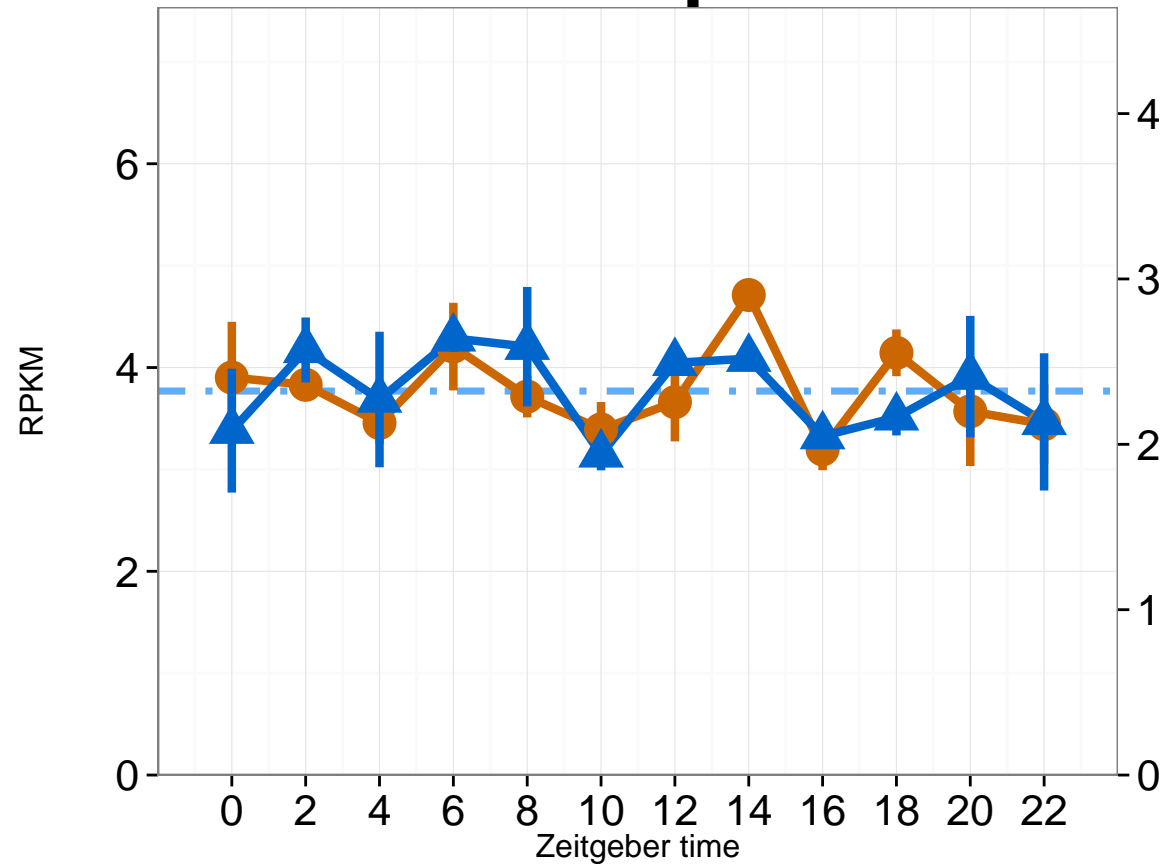

## Atrip

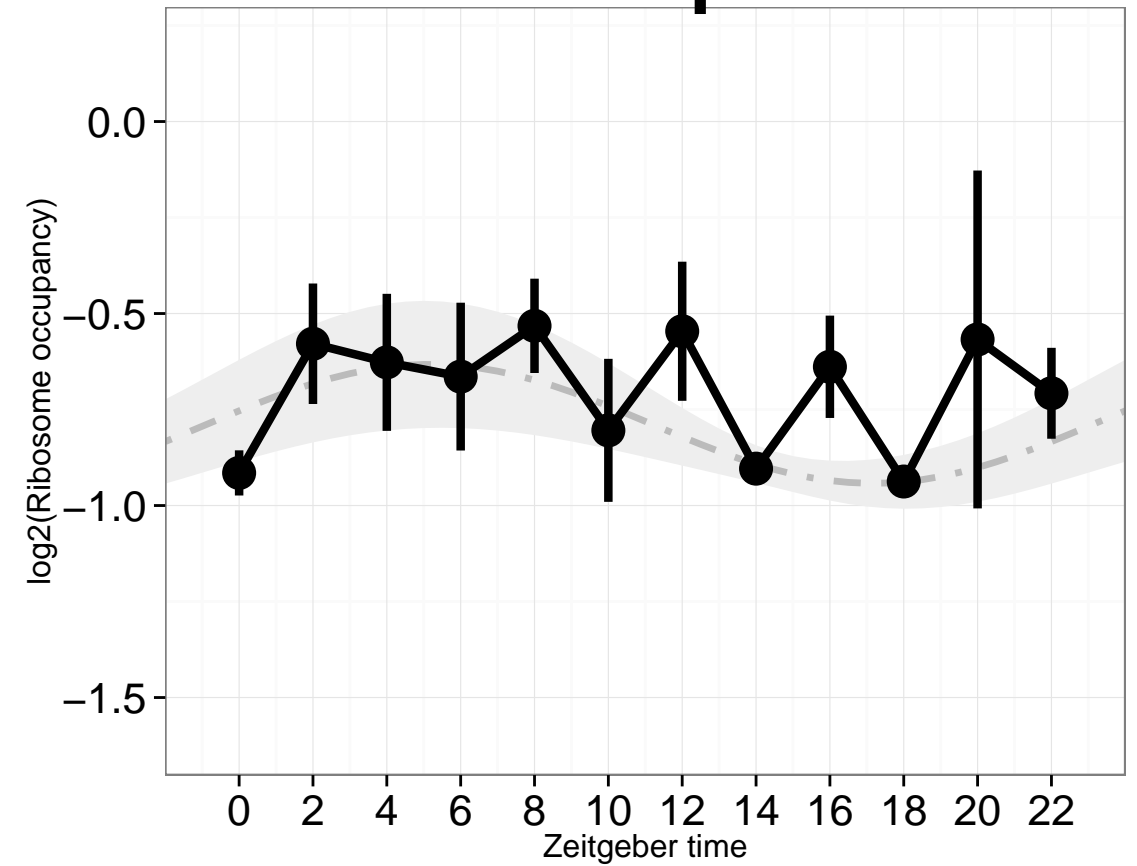

Supplement: SuppDataset_1.zip [file Atrip_set_A.pdf › Supplemental Dataset 1/A-mRNA_nonrhyth_translation_nonrhyth/Atrip_set_A.pdf]

## Atrn

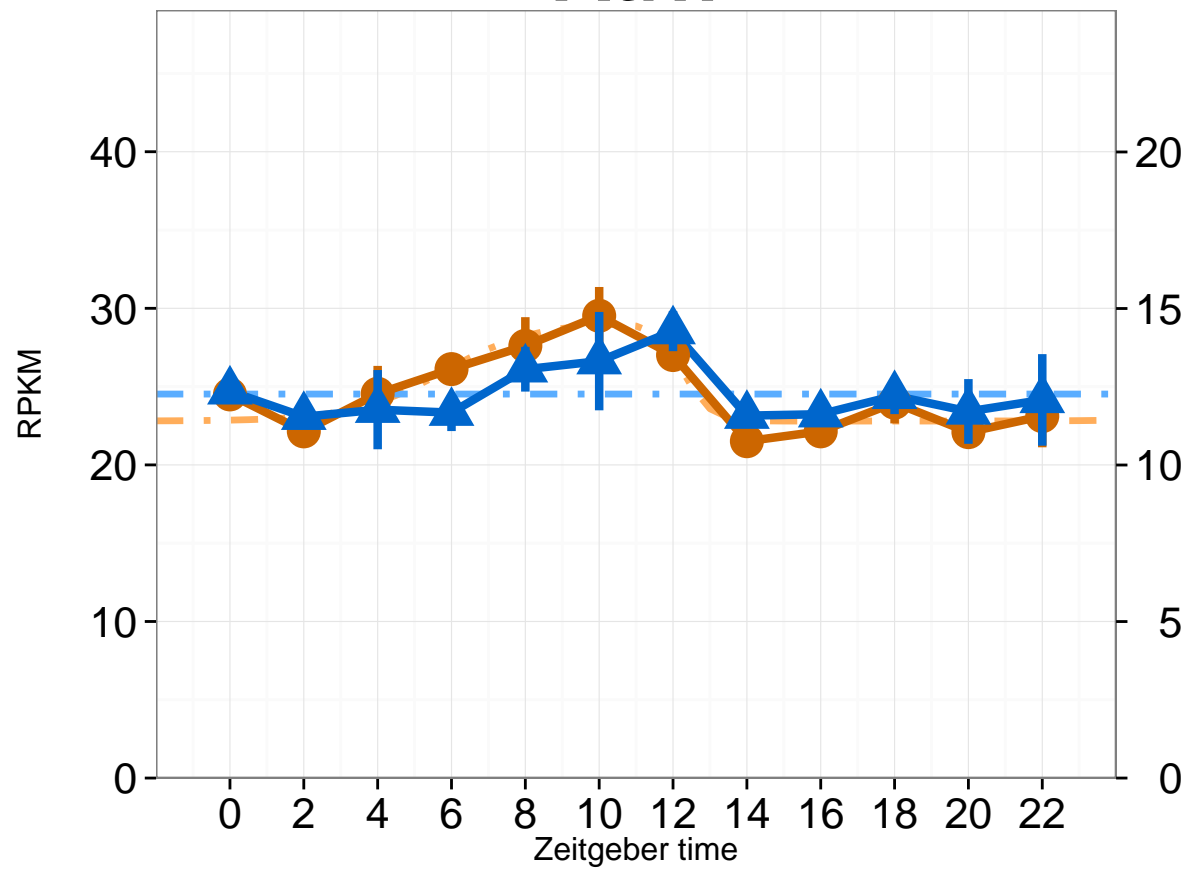

## Atrn

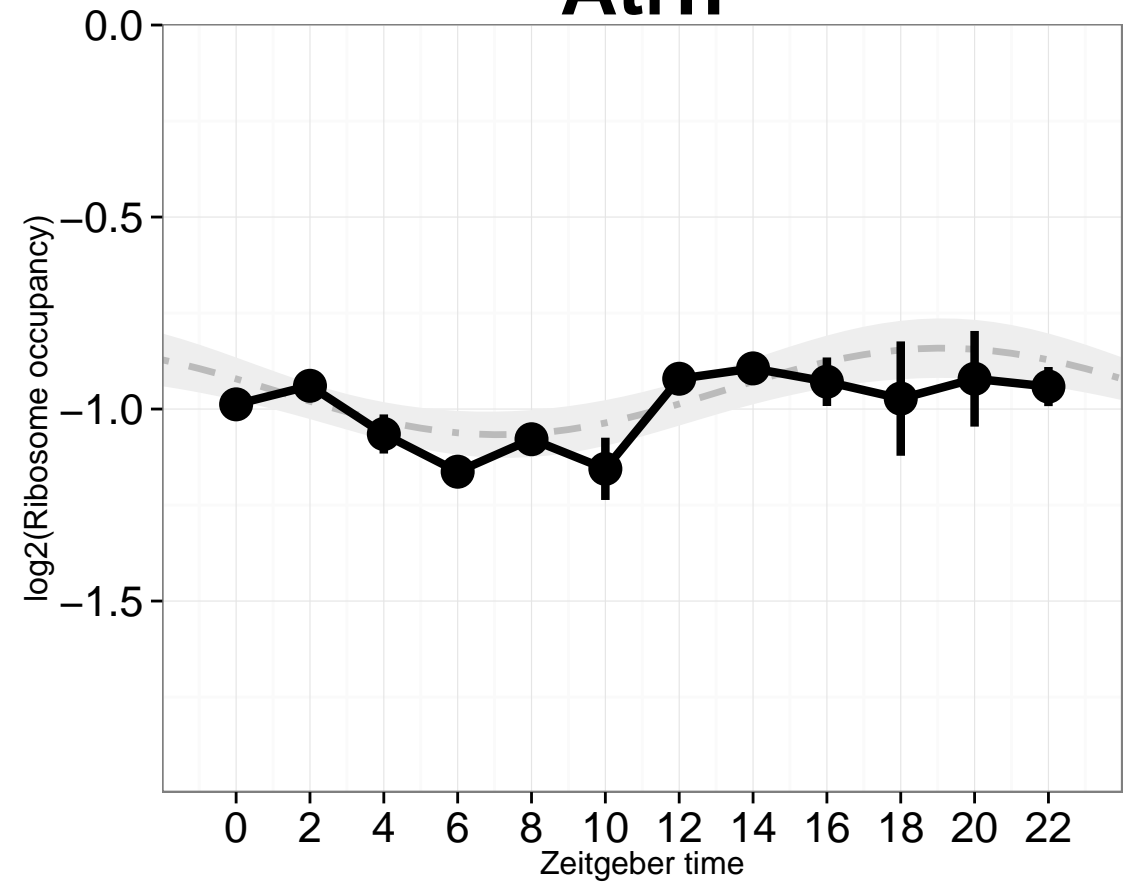

Supplement: SuppDataset_1.zip [file Atrn_set_A.pdf › Supplemental Dataset 1/A-mRNA_nonrhyth_translation_nonrhyth/Atrn_set_A.pdf]

# Atrn1

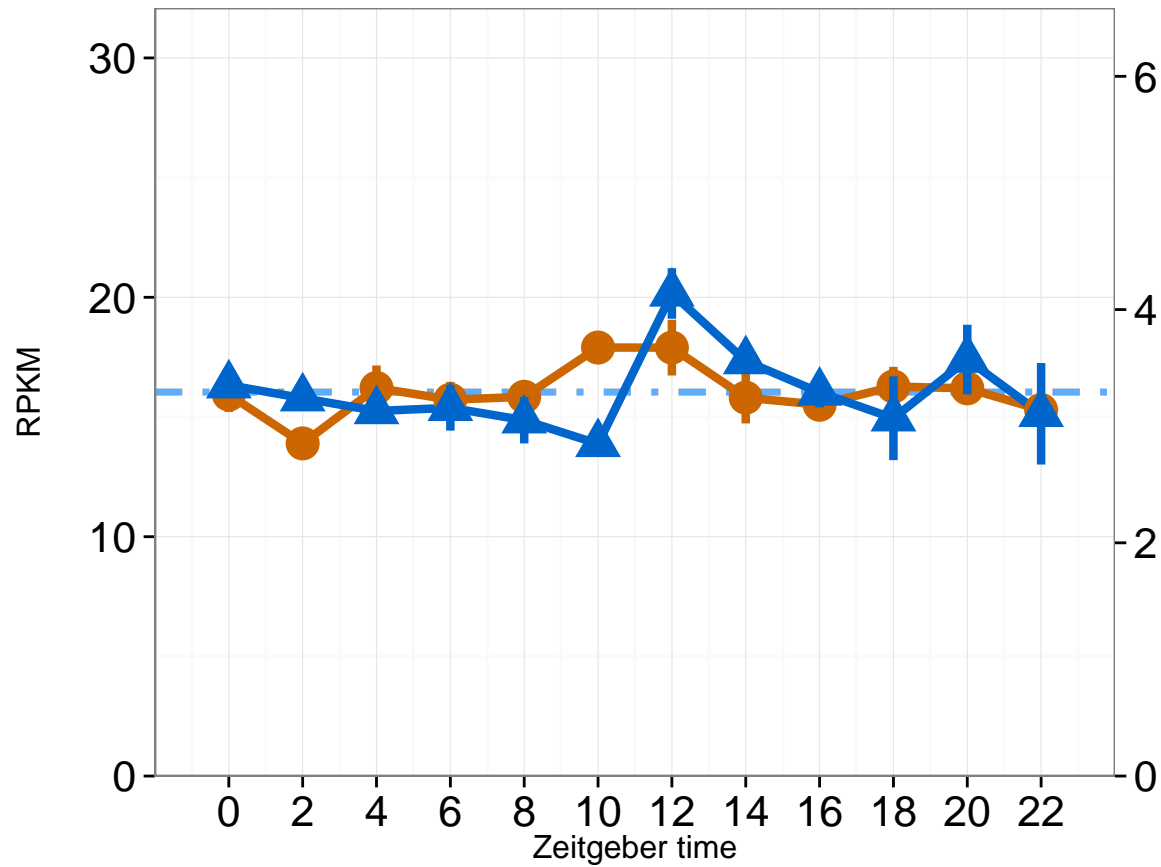

# Atrn1

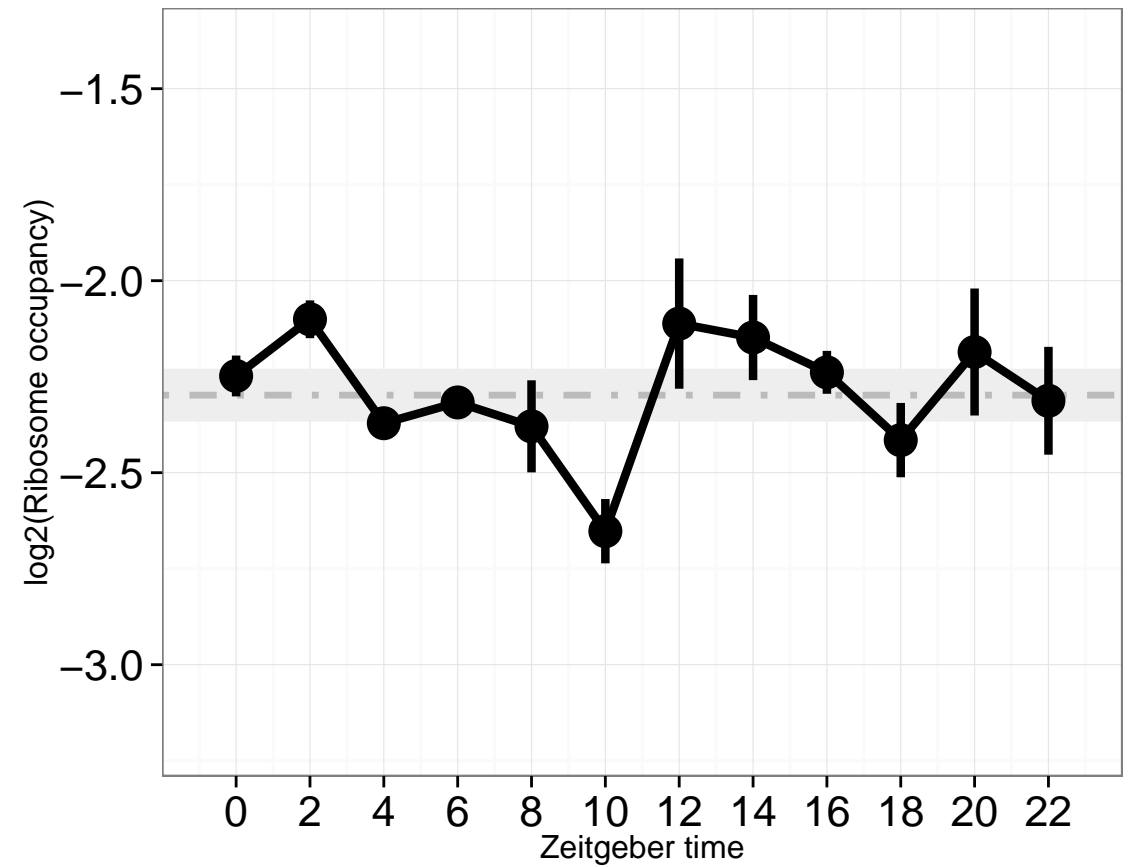

Supplement: SuppDataset_1.zip [file Atrnl1_set_A.pdf › Supplemental Dataset 1/A-mRNA_nonrhyth_translation_nonrhyth/Atrnl1_set_A.pdf]

## Atrx

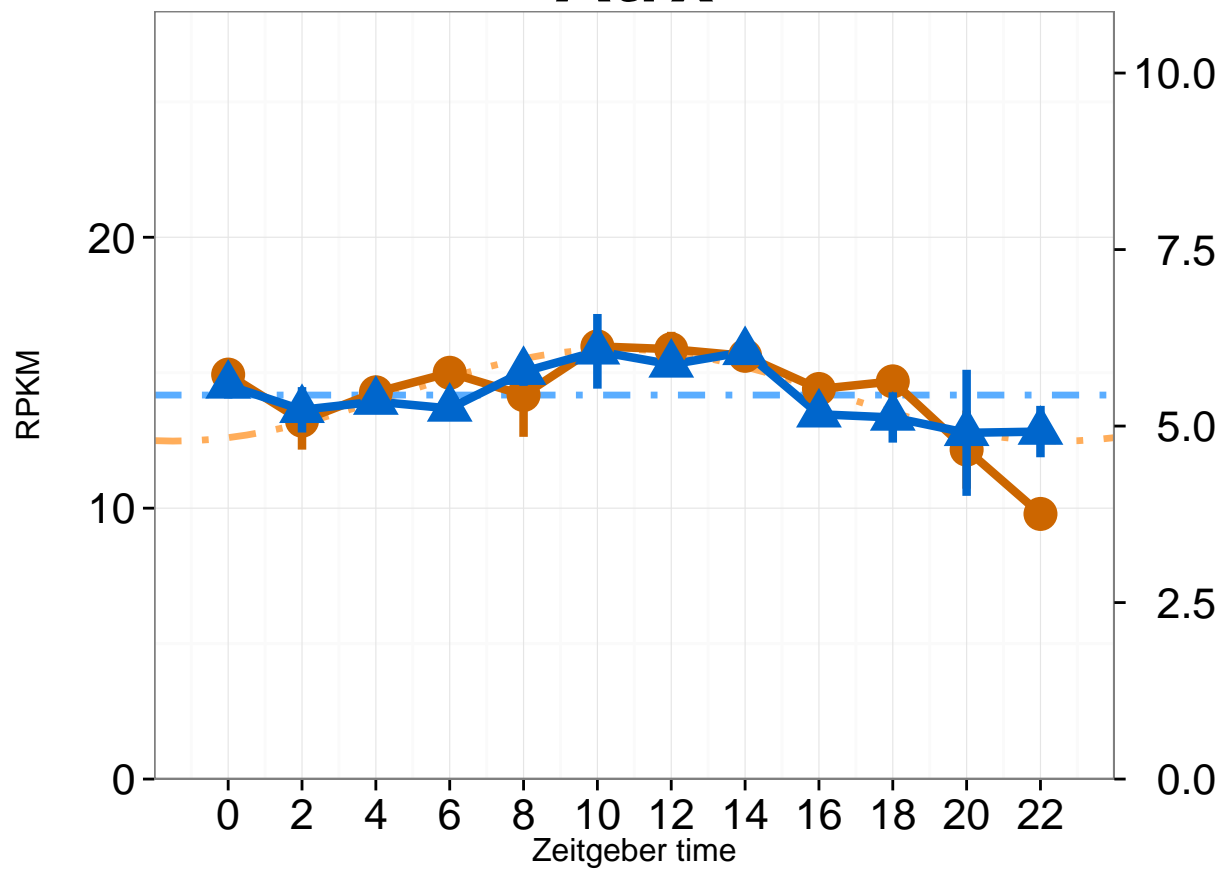

## Atrx

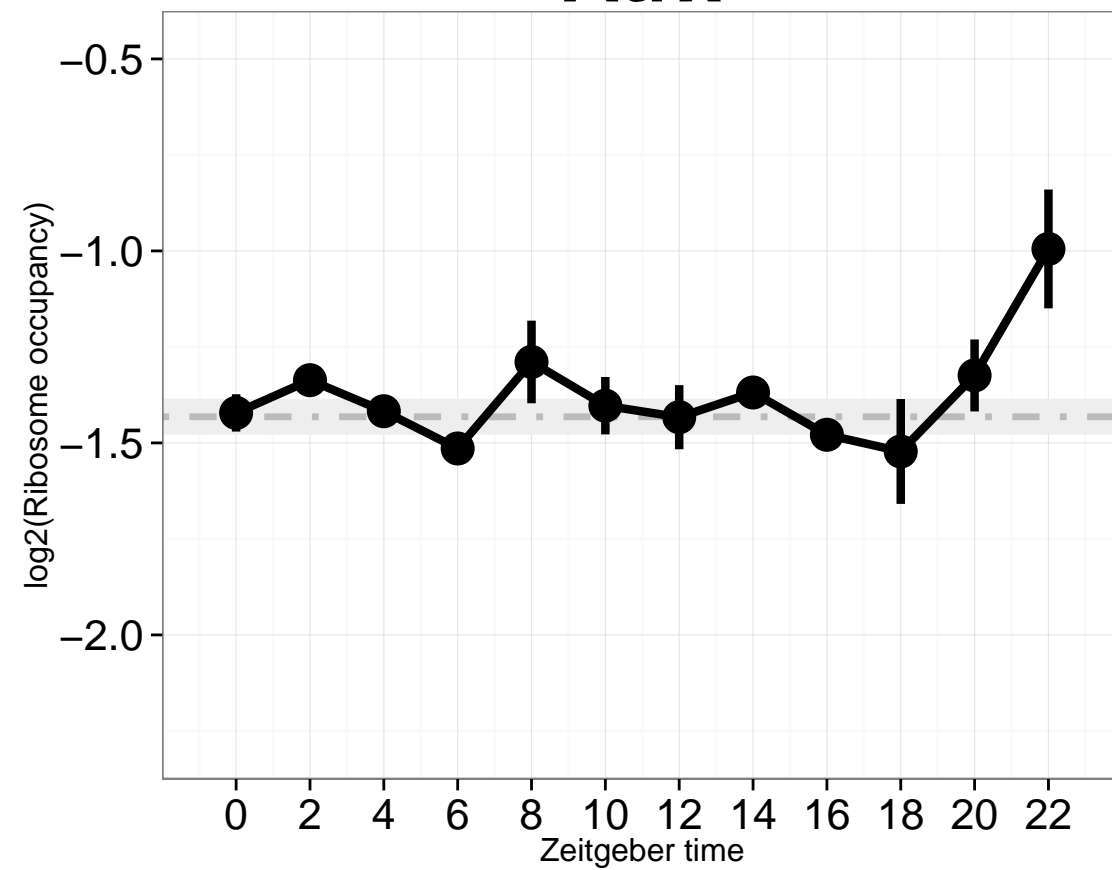

Supplement: SuppDataset_1.zip [file Atrx_set_A.pdf › Supplemental Dataset 1/A-mRNA_nonrhyth_translation_nonrhyth/Atrx_set_A.pdf]

# Atxn10

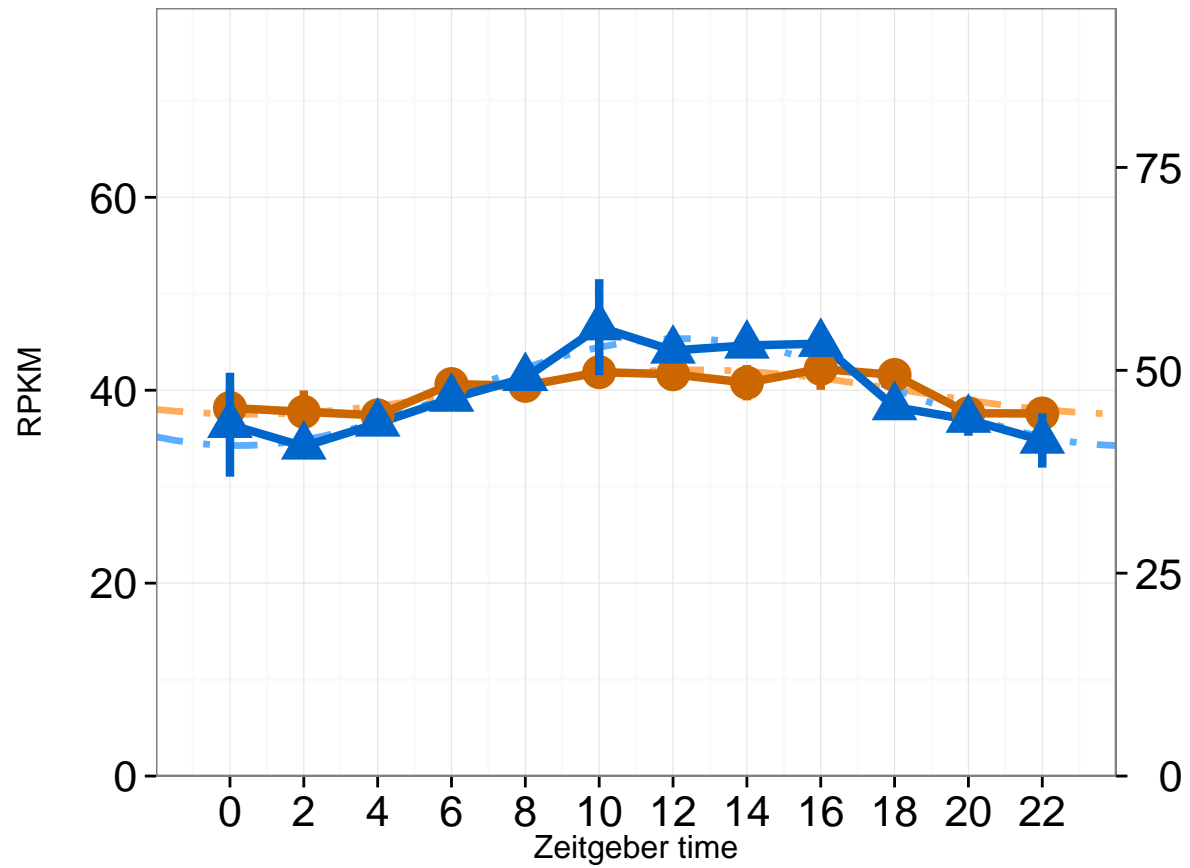

# Atxn10

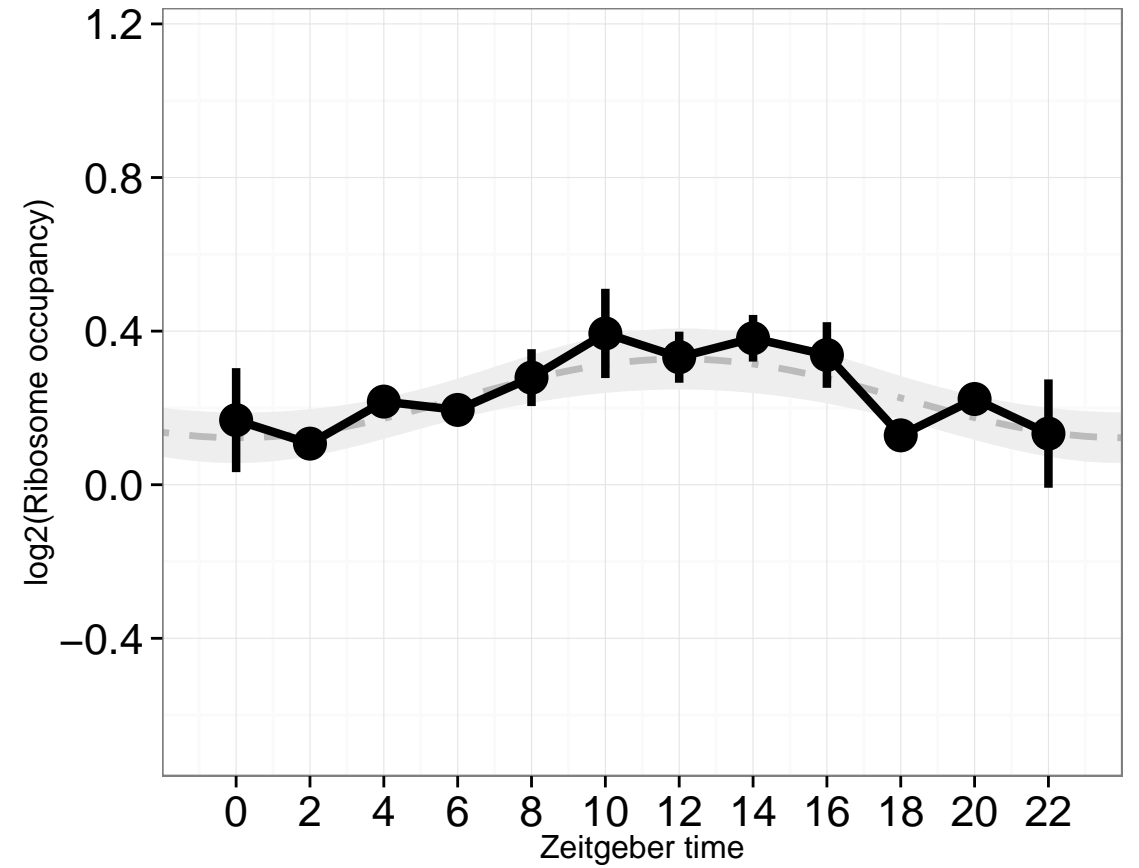

Supplement: SuppDataset_1.zip [file Atxn10_set_A.pdf › Supplemental Dataset 1/A-mRNA_nonrhyth_translation_nonrhyth/Atxn10_set_A.pdf]

# Atxn1

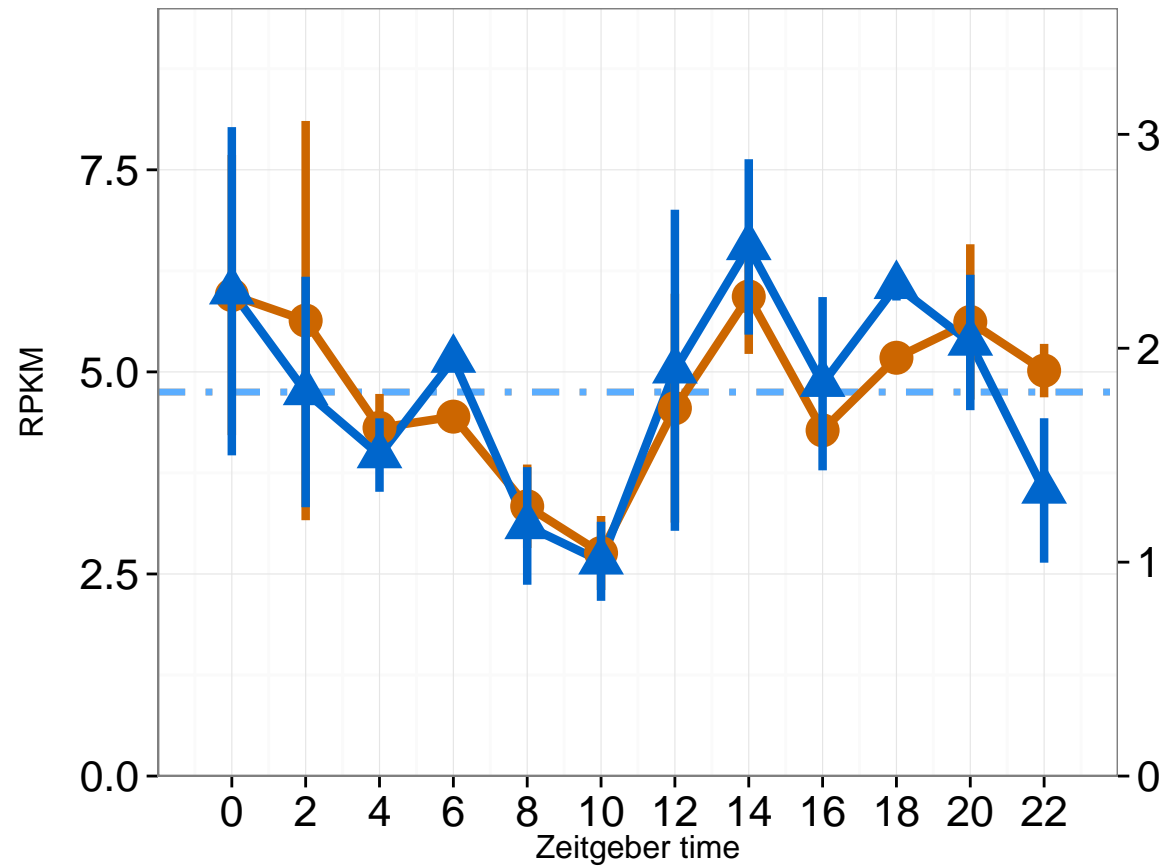

# Atxn1

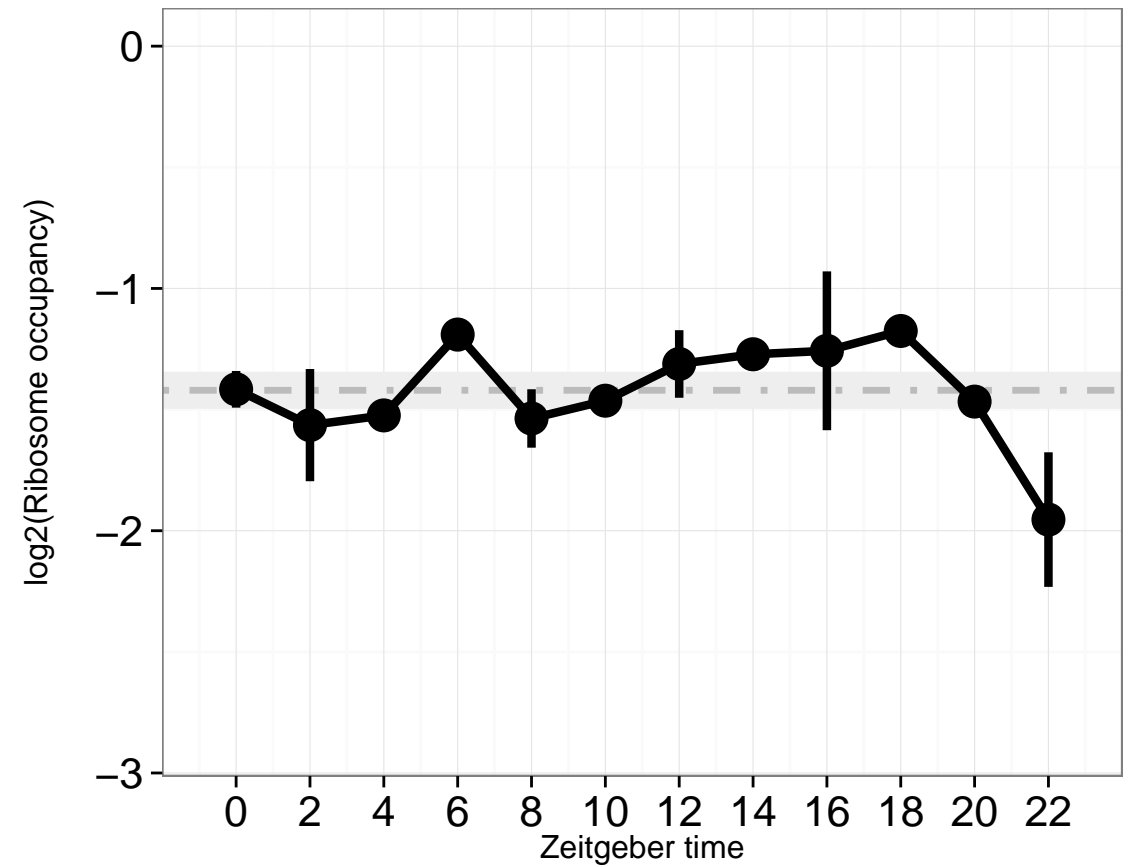

Supplement: SuppDataset_1.zip [file Atxn1_set_A.pdf › Supplemental Dataset 1/A-mRNA_nonrhyth_translation_nonrhyth/Atxn1_set_A.pdf]

# Atxn1l

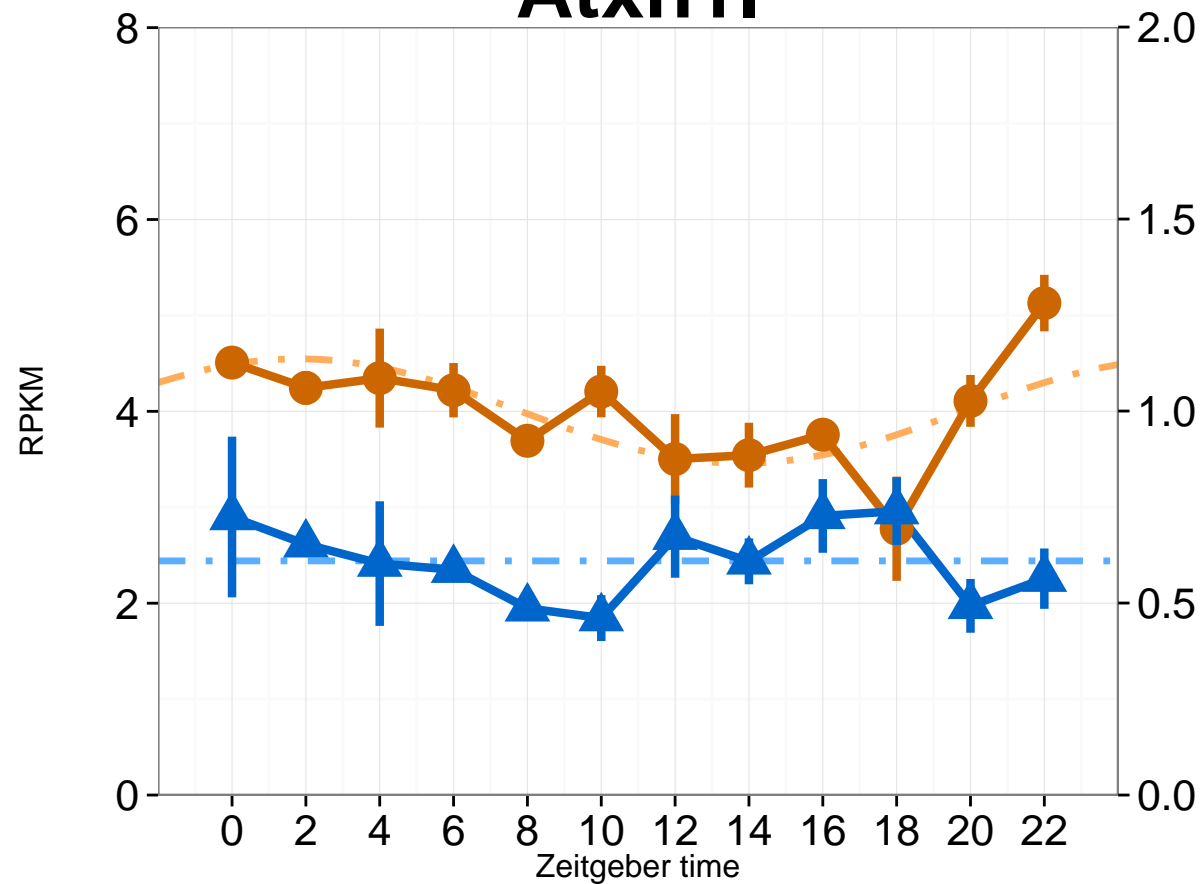

# Atxn1l

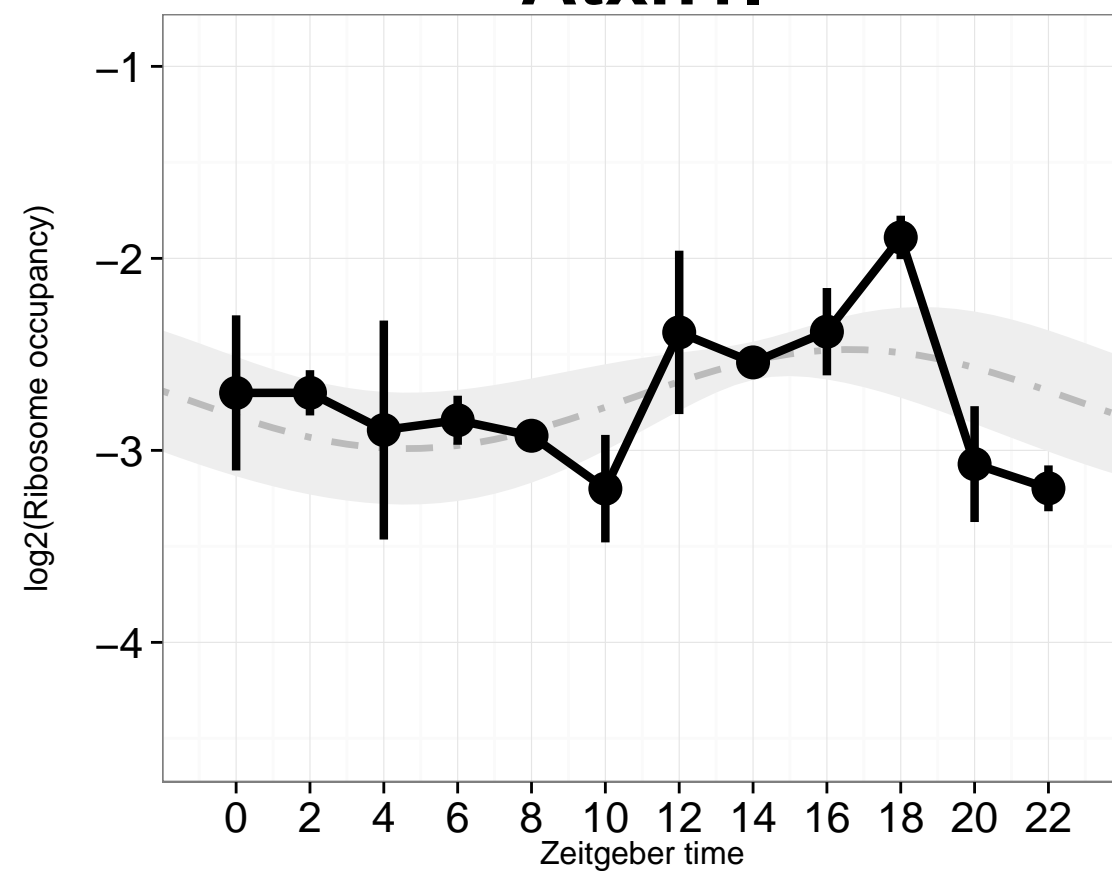

Supplement: SuppDataset_1.zip [file Atxn1l_set_A.pdf › Supplemental Dataset 1/A-mRNA_nonrhyth_translation_nonrhyth/Atxn1l_set_A.pdf]

## Atxn2

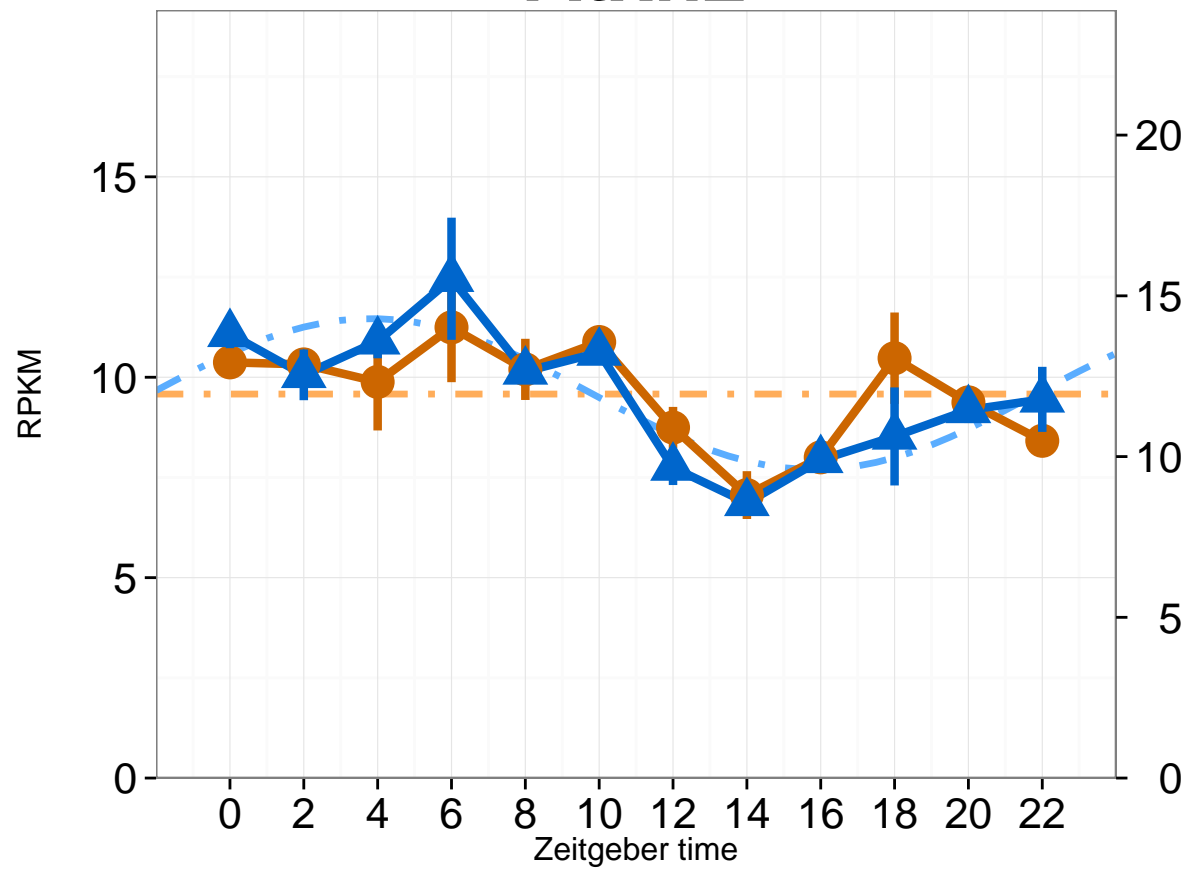

## Atxn2

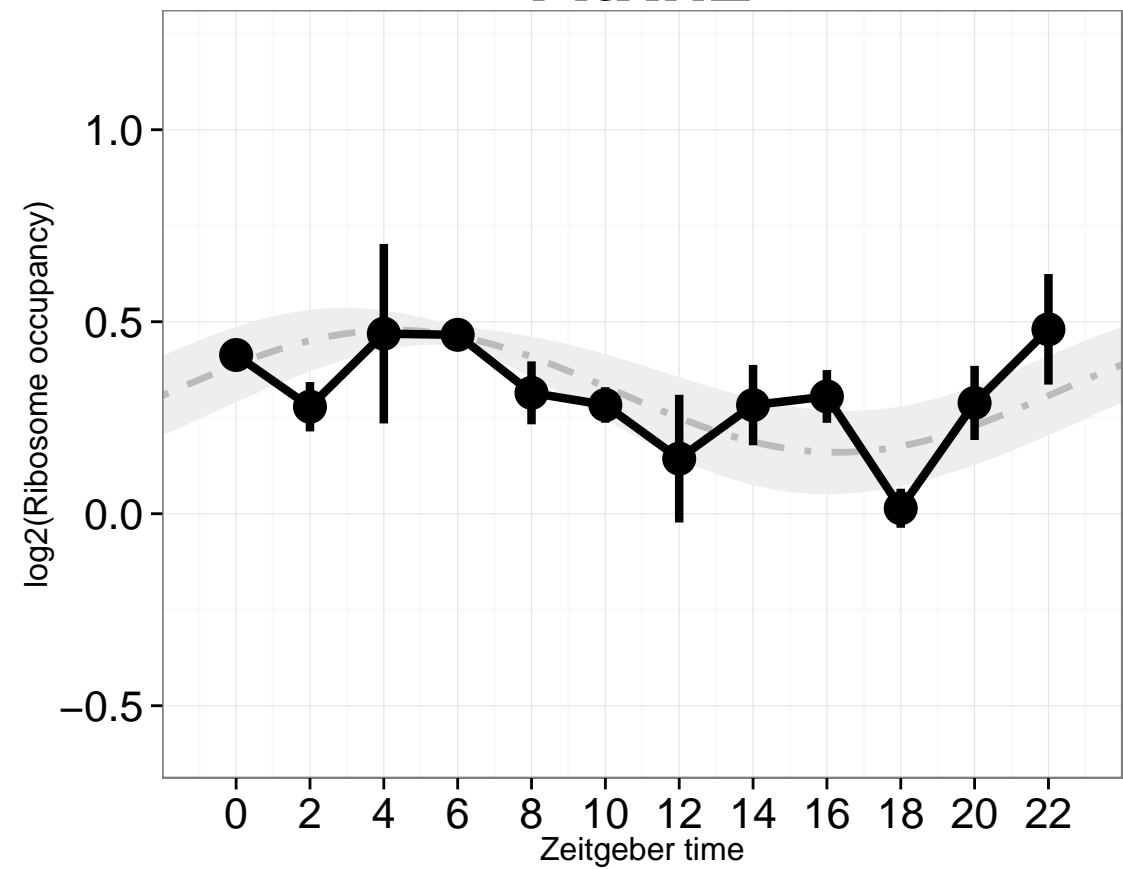

Supplement: SuppDataset_1.zip [file Atxn2_set_A.pdf › Supplemental Dataset 1/A-mRNA_nonrhyth_translation_nonrhyth/Atxn2_set_A.pdf]

# Atxn2l

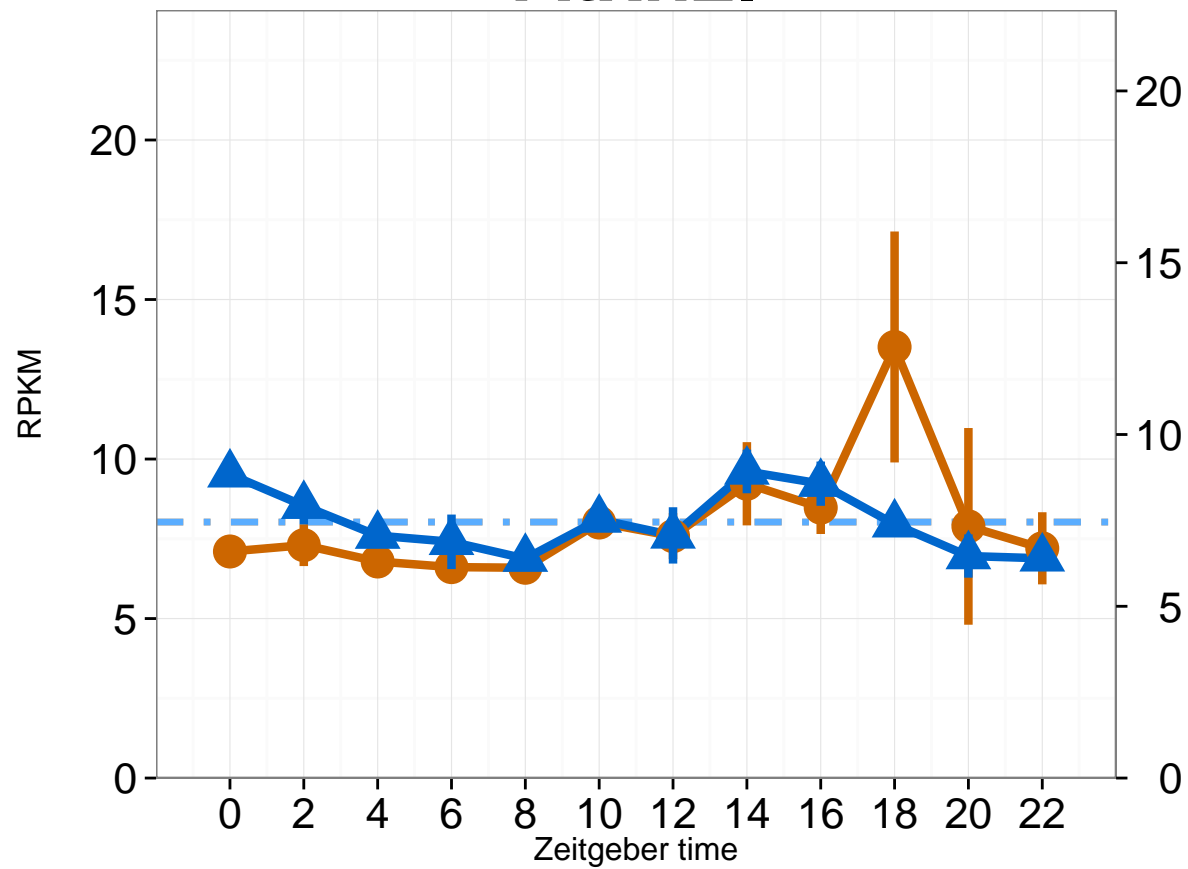

# Atxn2l

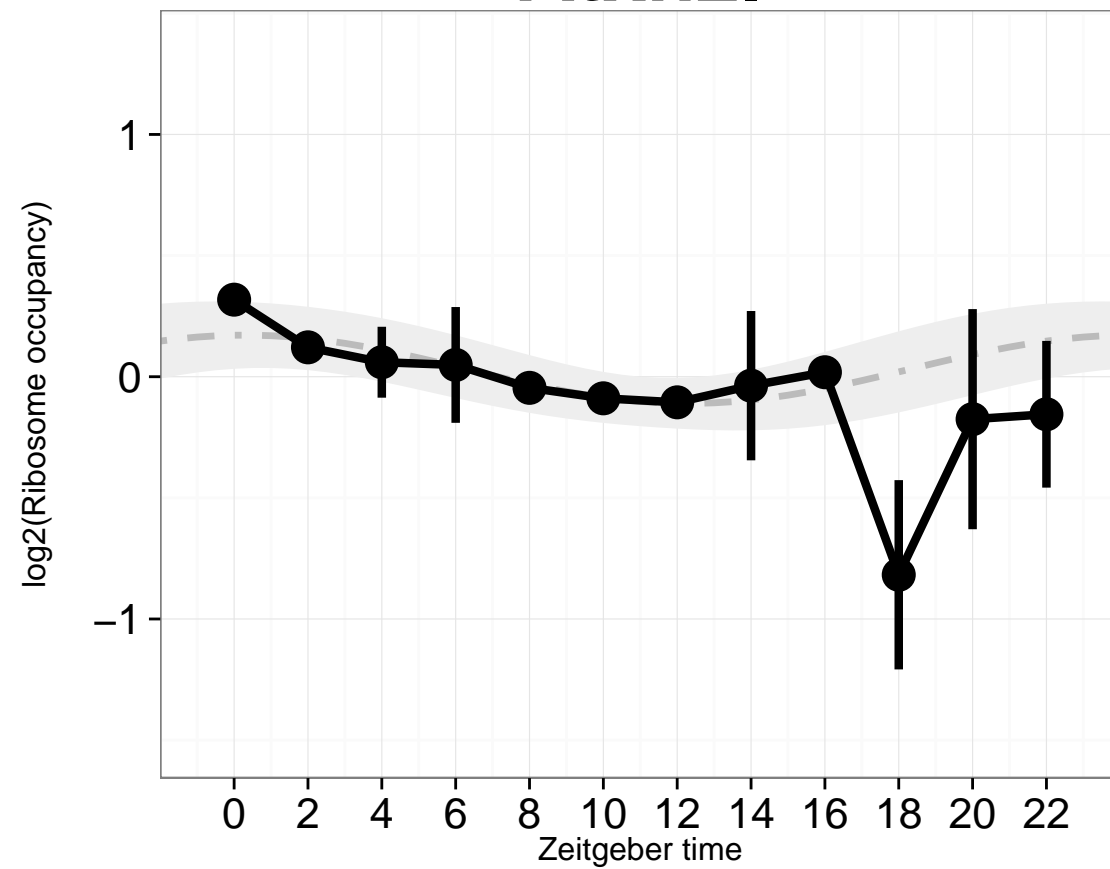

Supplement: SuppDataset_1.zip [file Atxn2l_set_A.pdf › Supplemental Dataset 1/A-mRNA_nonrhyth_translation_nonrhyth/Atxn2l_set_A.pdf]

# Atxn3

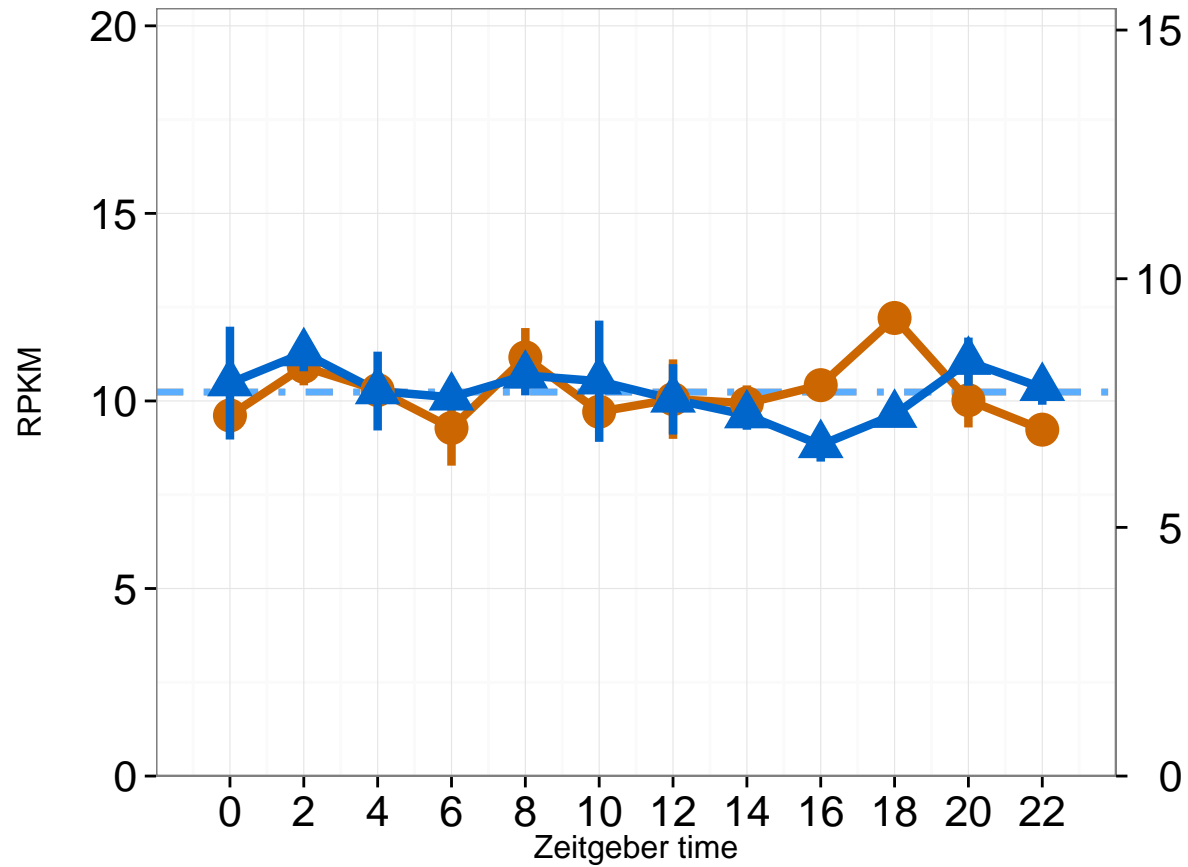

# Atxn3

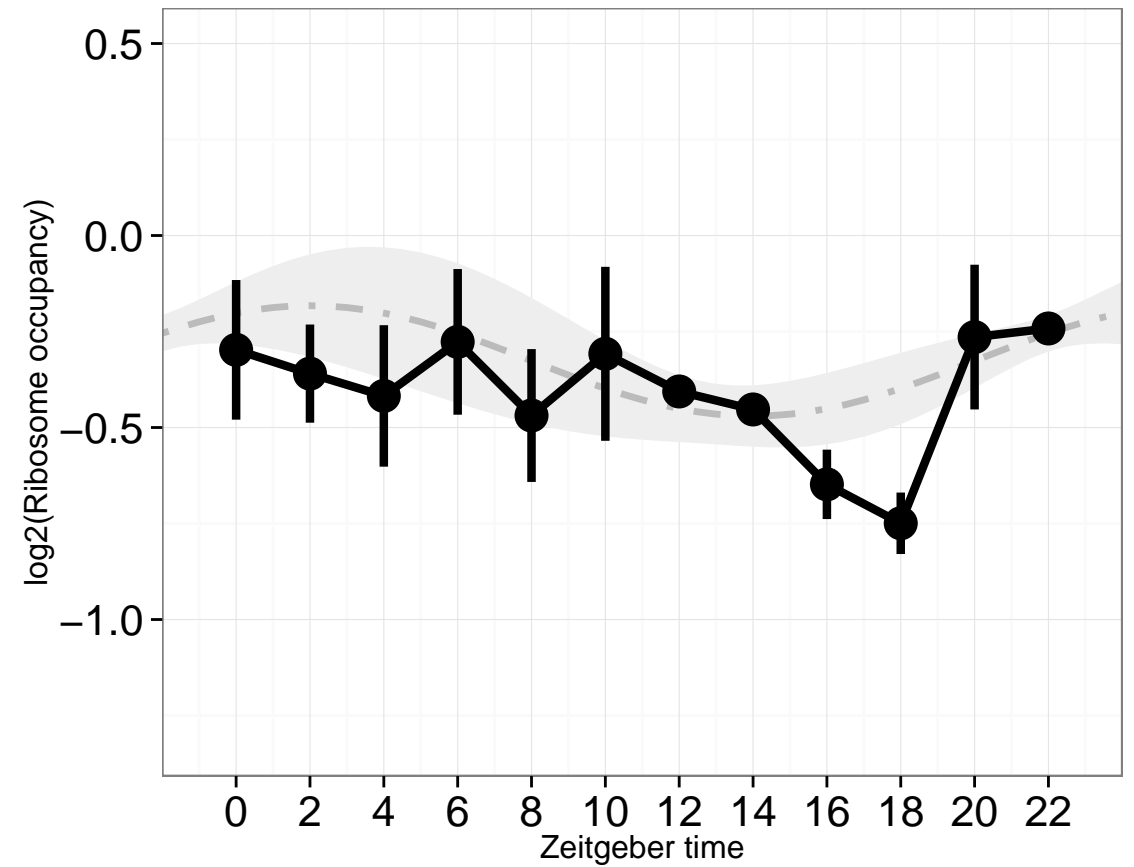

Supplement: SuppDataset_1.zip [file Atxn3_set_A.pdf › Supplemental Dataset 1/A-mRNA_nonrhyth_translation_nonrhyth/Atxn3_set_A.pdf]

# Atxn7l1

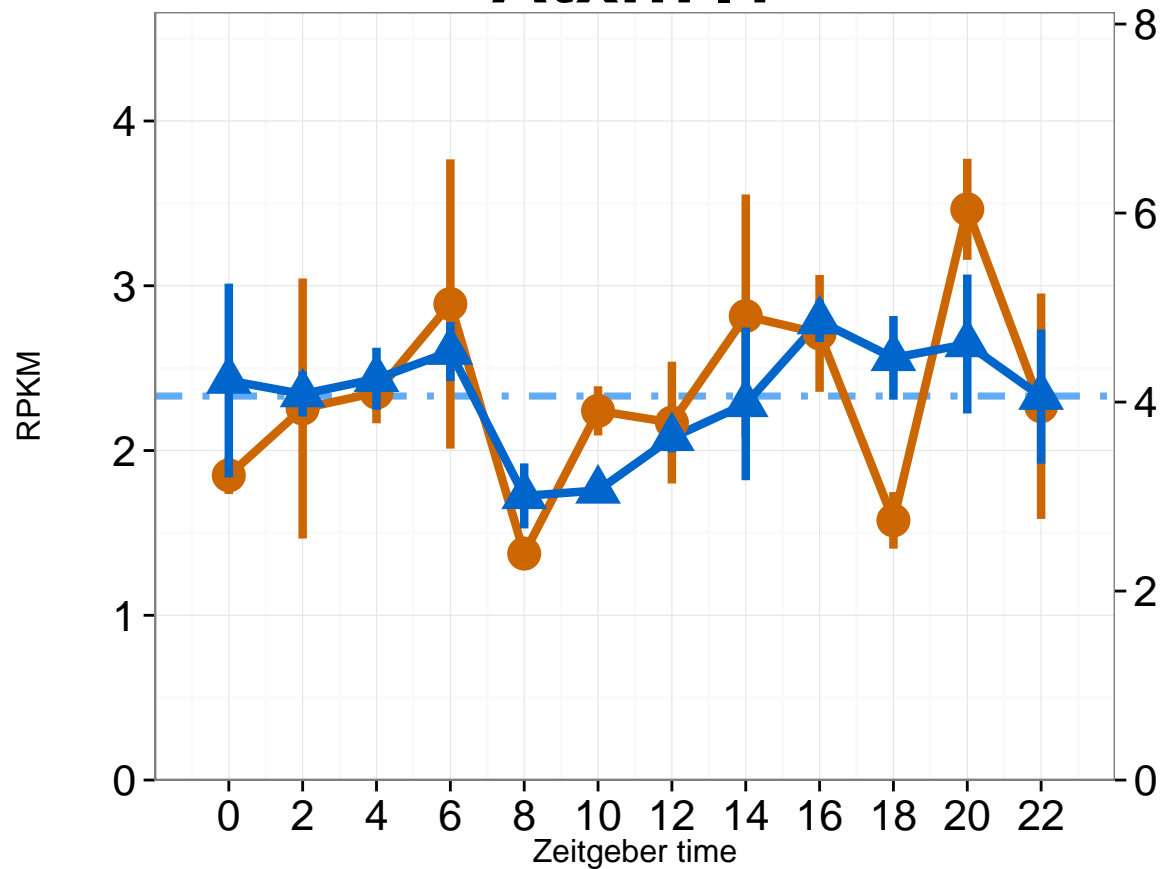

# Atxn7l1

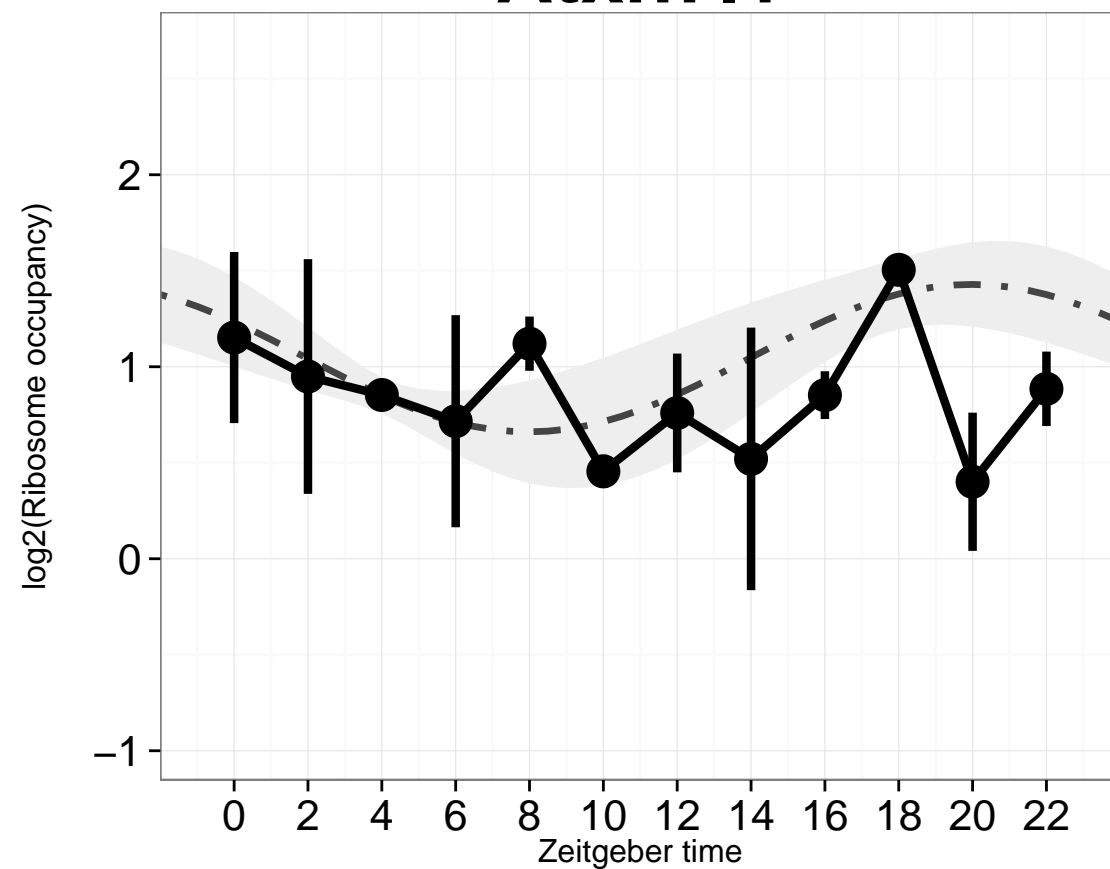

Supplement: SuppDataset_1.zip [file Atxn7l1_set_A.pdf › Supplemental Dataset 1/A-mRNA_nonrhyth_translation_nonrhyth/Atxn7l1_set_A.pdf]

# Atxn7l3

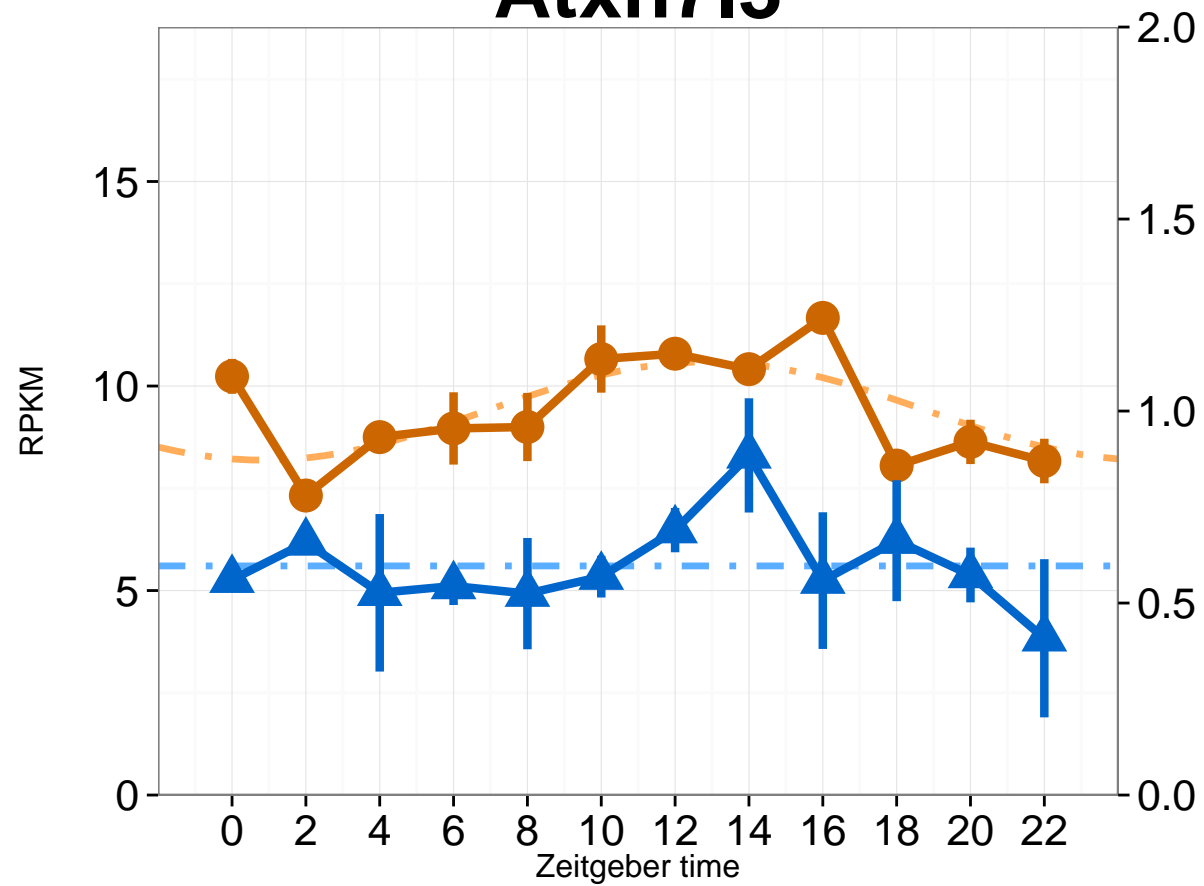

# Atxn7l3

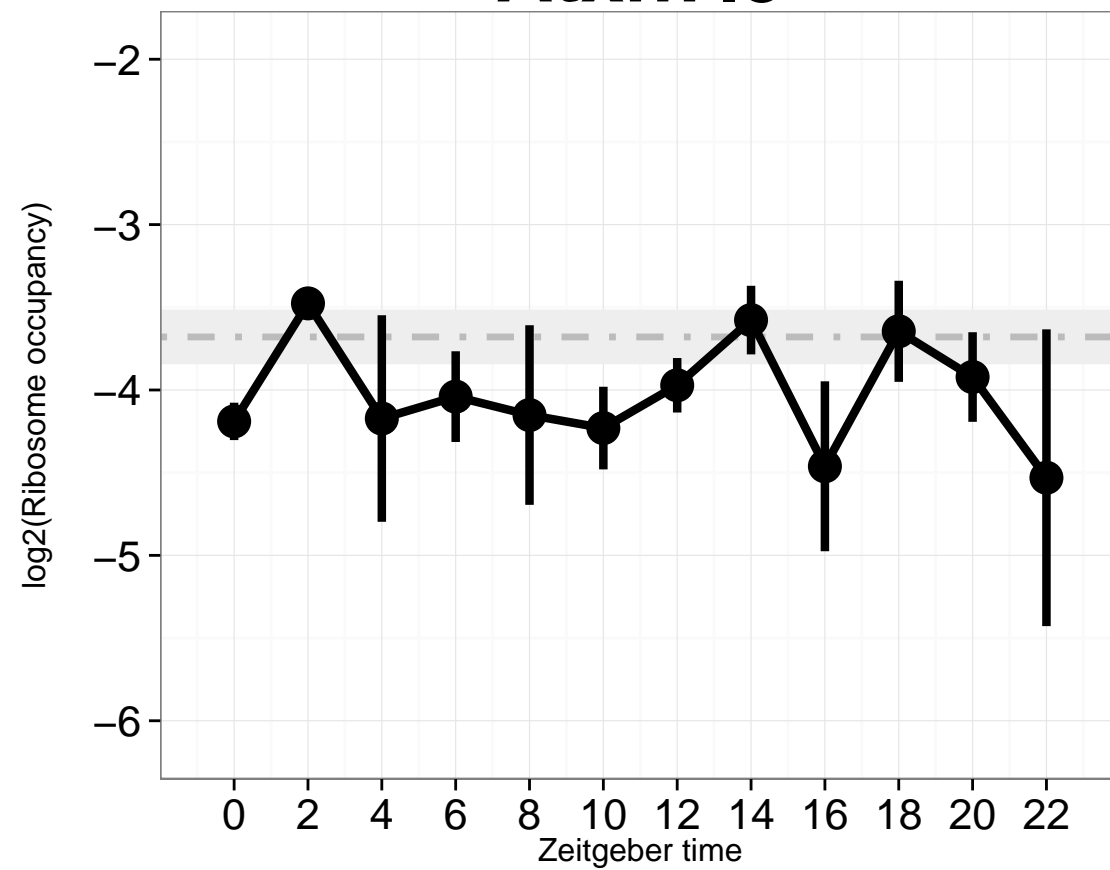

Supplement: SuppDataset_1.zip [file Atxn7l3_set_A.pdf › Supplemental Dataset 1/A-mRNA_nonrhyth_translation_nonrhyth/Atxn7l3_set_A.pdf]

## Atxn7l3b

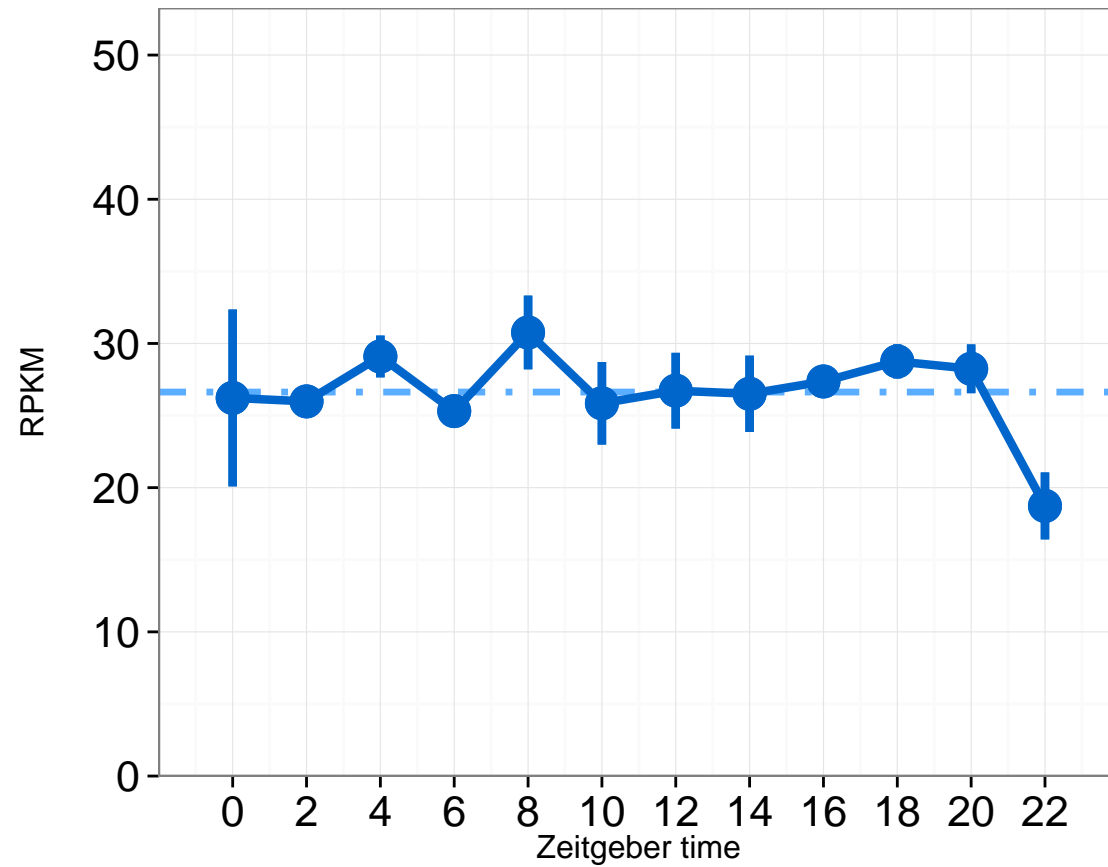

## Atxn7l3b log2(Ribosome occupancy)

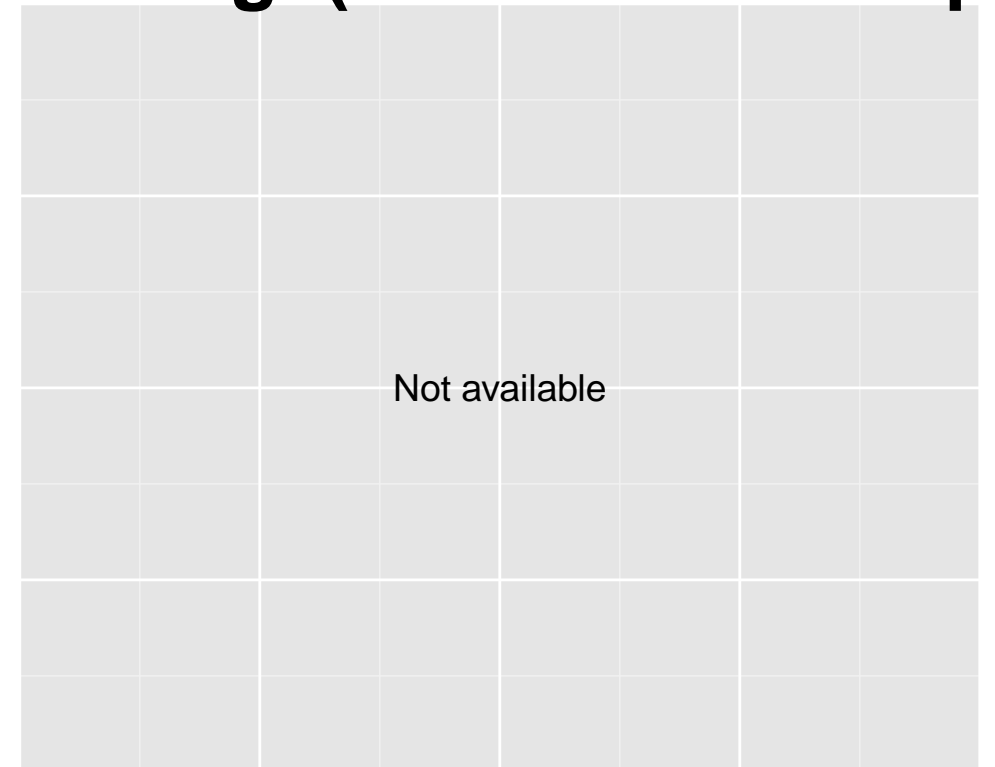

Supplement: SuppDataset_1.zip [file Atxn7l3b_set_A.pdf › Supplemental Dataset 1/A-mRNA_nonrhyth_translation_nonrhyth/Atxn7l3b_set_A.pdf]

# Auh

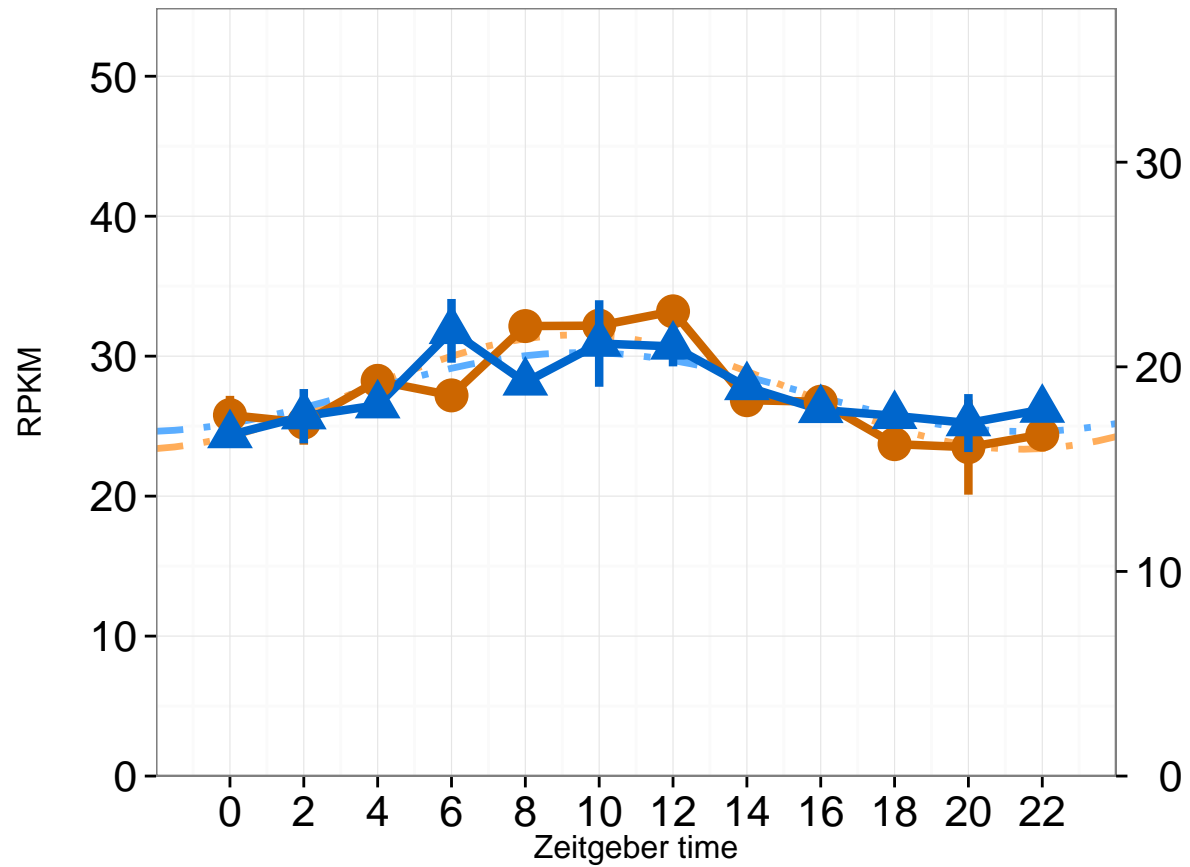

# Auh

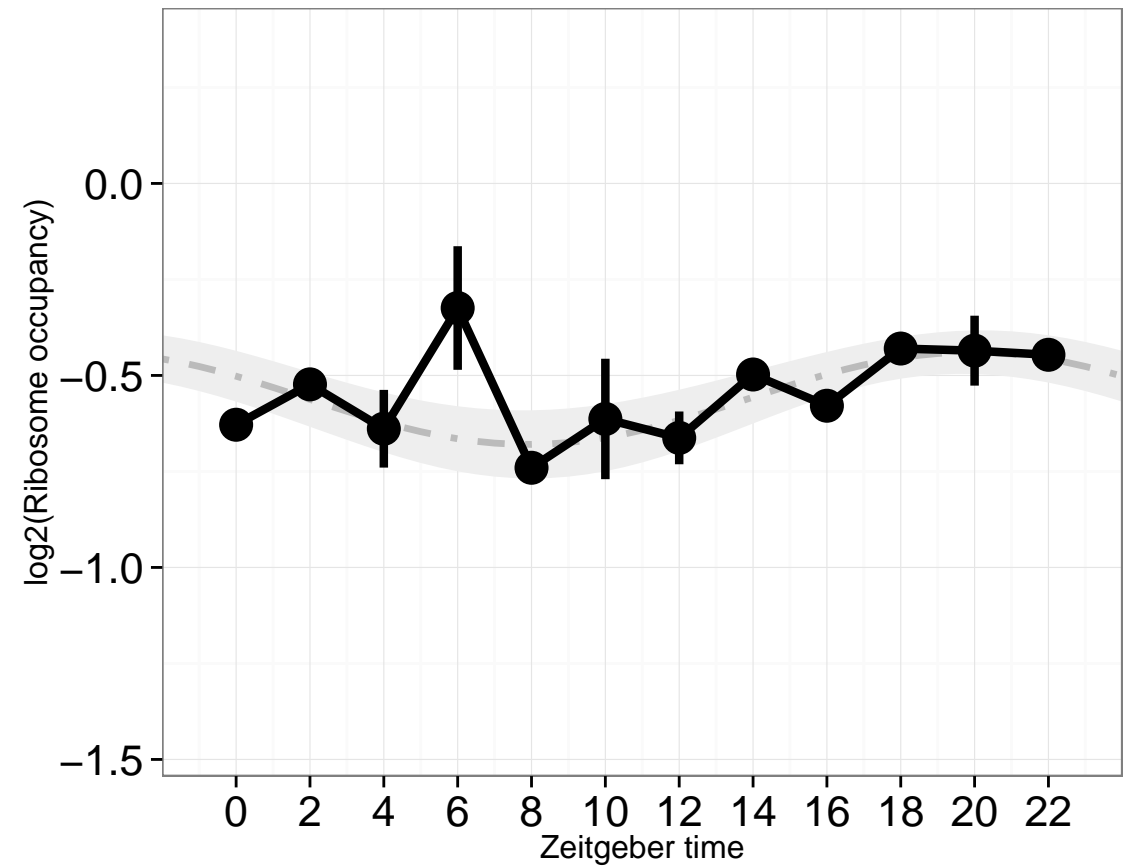

Supplement: SuppDataset_1.zip [file Auh_set_A.pdf › Supplemental Dataset 1/A-mRNA_nonrhyth_translation_nonrhyth/Auh_set_A.pdf]

# Aup1

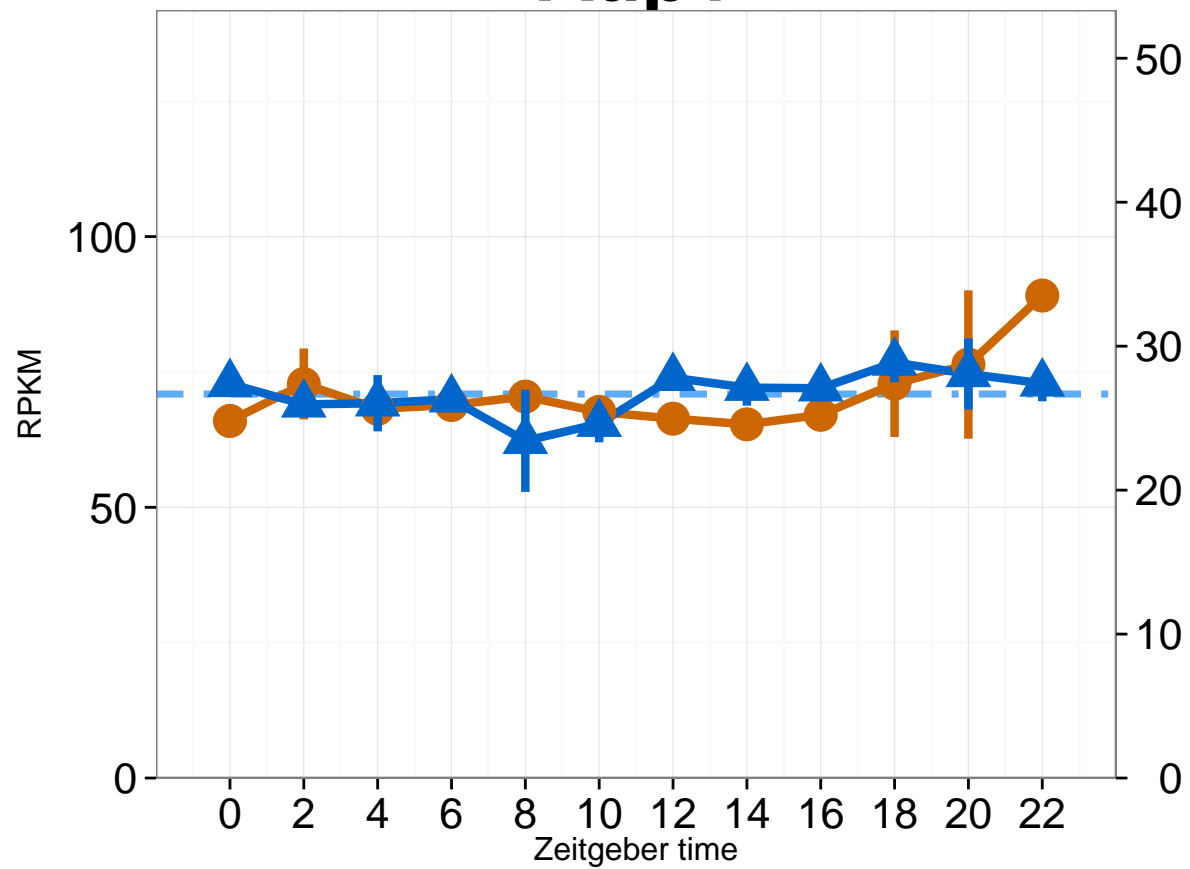

# Aup1

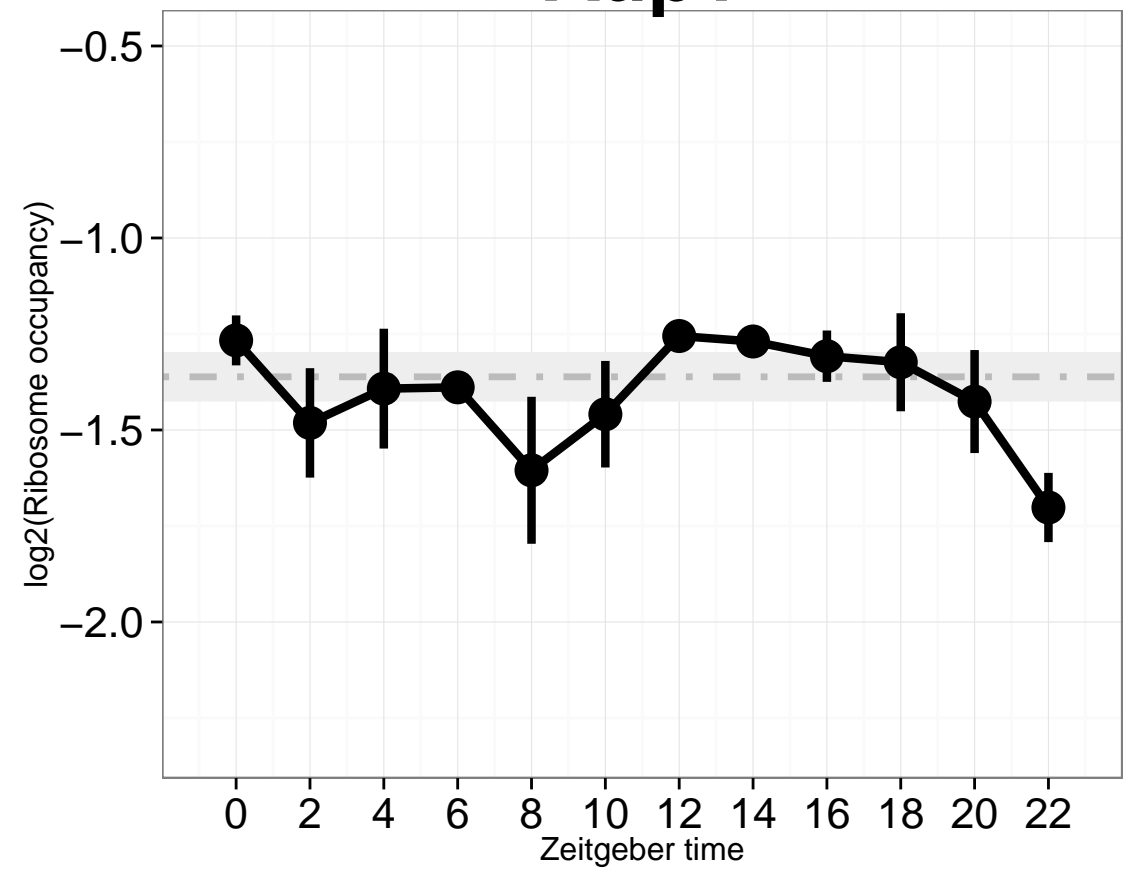

Supplement: SuppDataset_1.zip [file Aup1_set_A.pdf › Supplemental Dataset 1/A-mRNA_nonrhyth_translation_nonrhyth/Aup1_set_A.pdf]

## Aurka

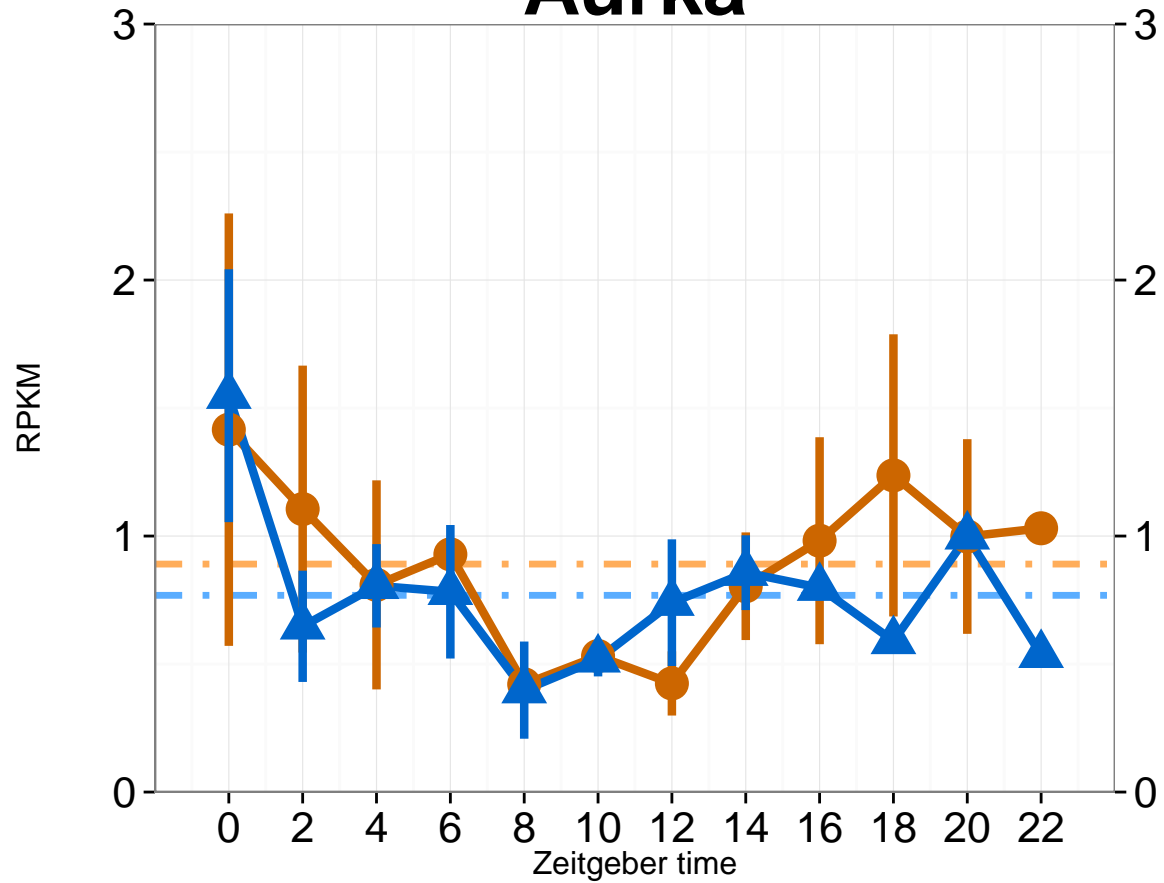

## Aurka

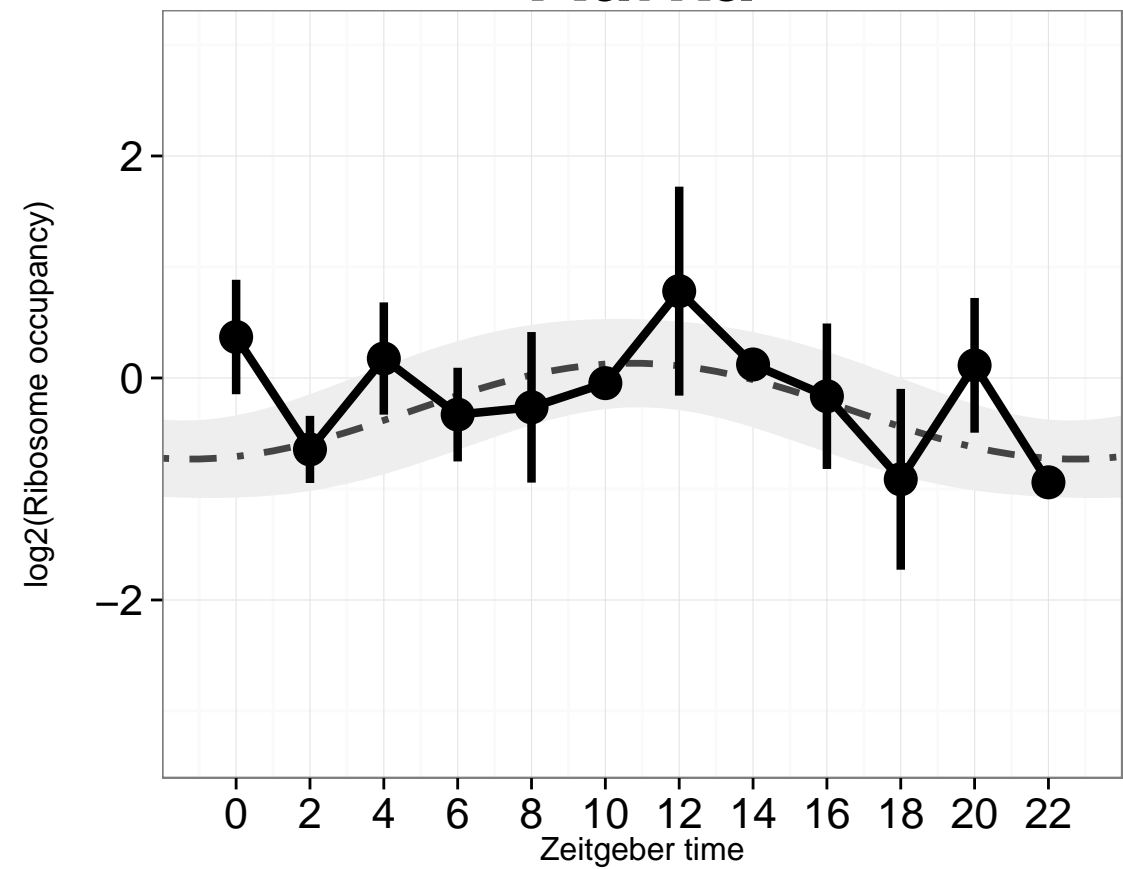

Supplement: SuppDataset_1.zip [file Aurka_set_A.pdf › Supplemental Dataset 1/A-mRNA_nonrhyth_translation_nonrhyth/Aurka_set_A.pdf]

# Aurkaip1

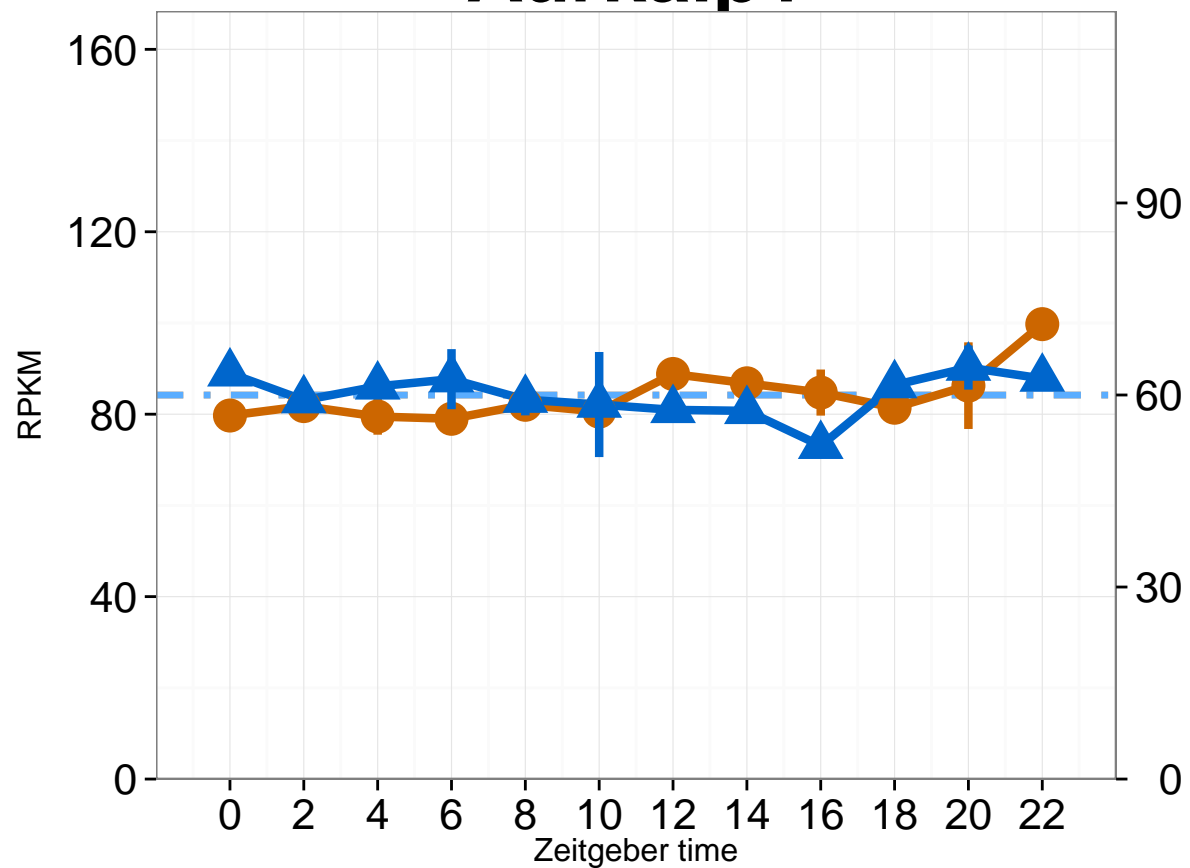

# Aurkaip1

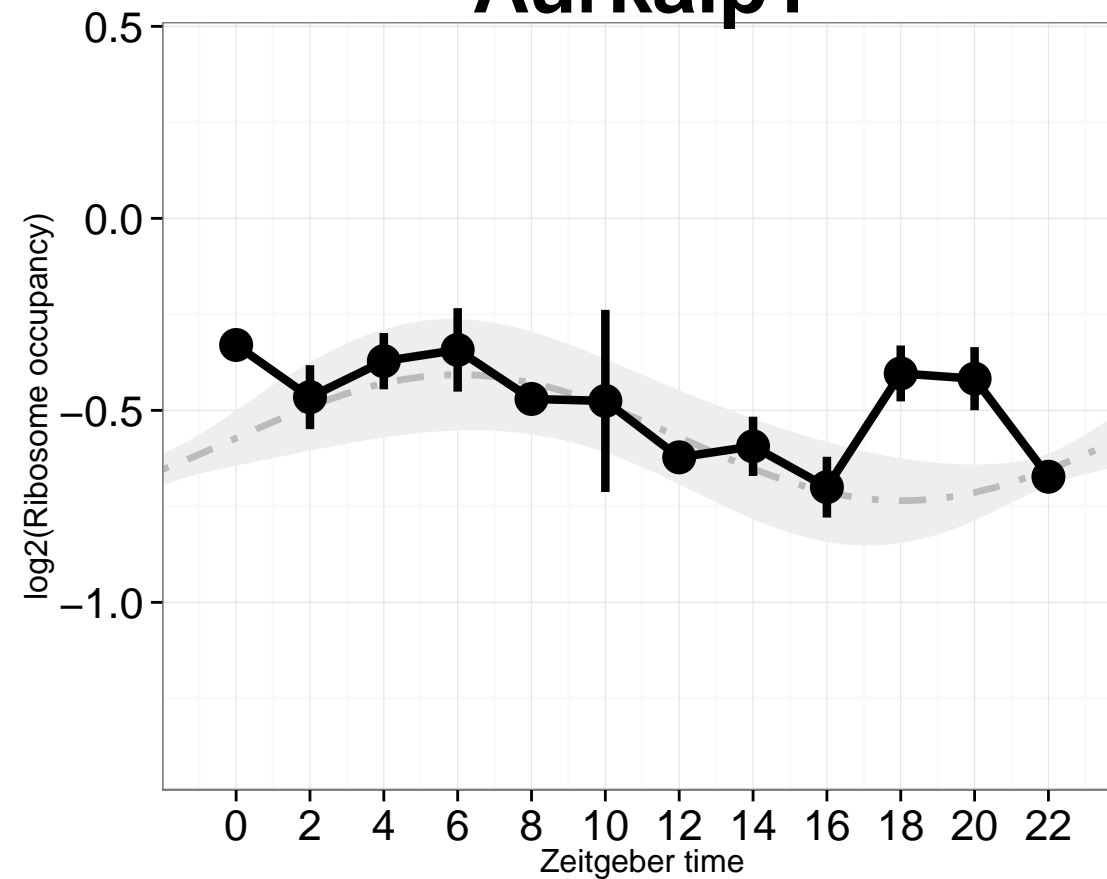

Supplement: SuppDataset_1.zip [file Aurkaip1_set_A.pdf › Supplemental Dataset 1/A-mRNA_nonrhyth_translation_nonrhyth/Aurkaip1_set_A.pdf]

## Aven

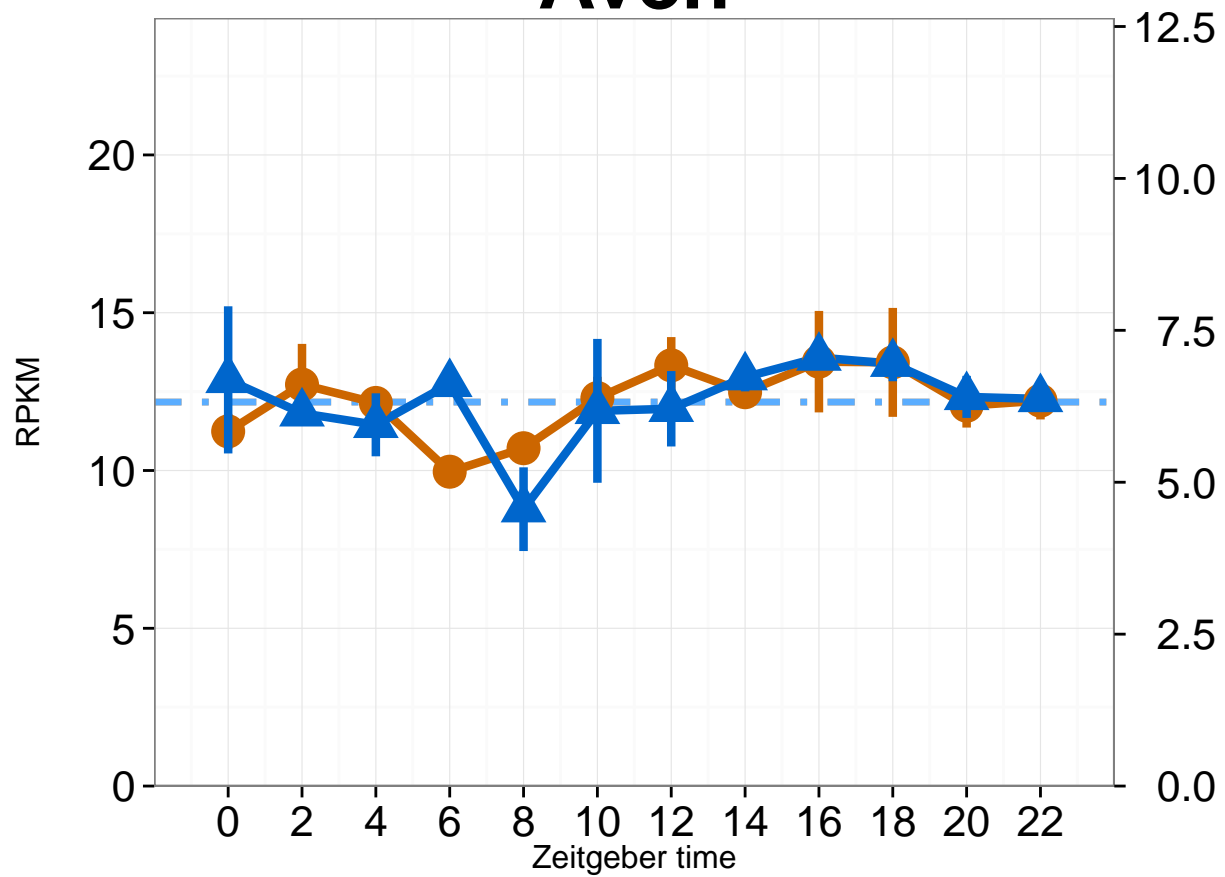

## Aven

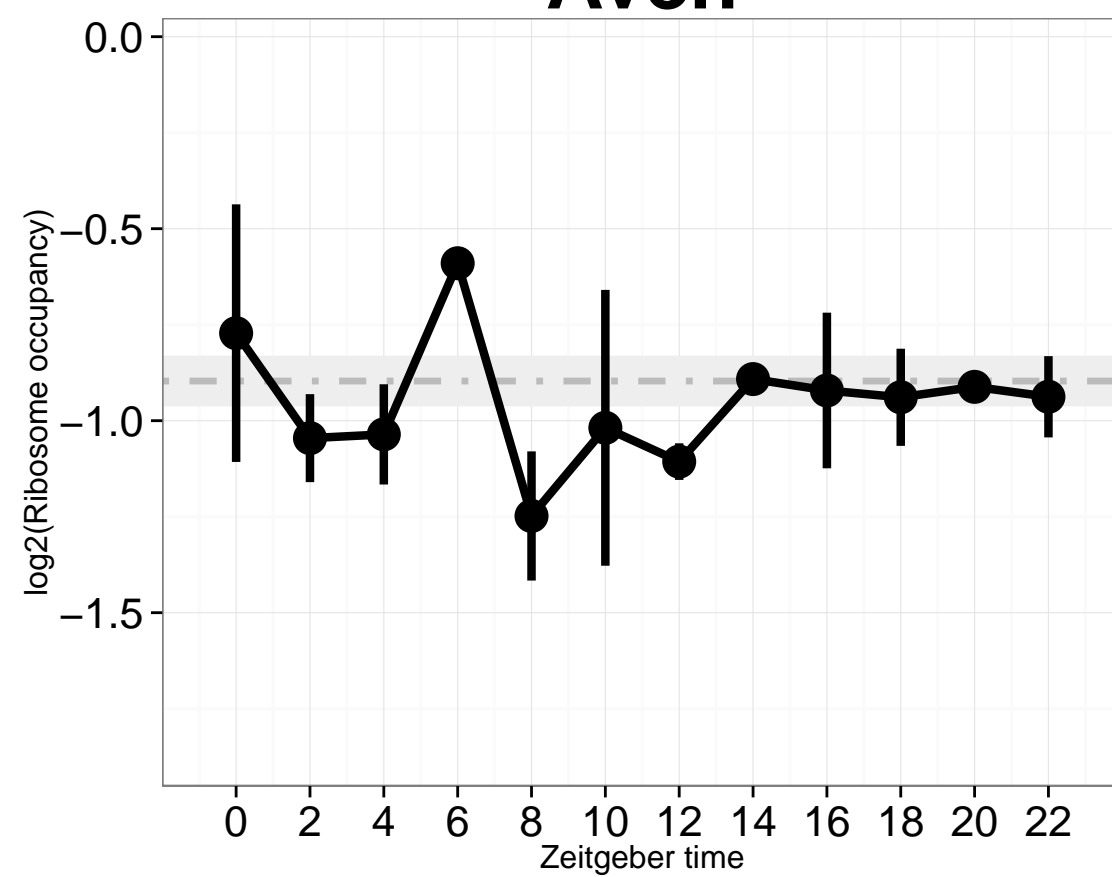

Supplement: SuppDataset_1.zip [file Aven_set_A.pdf › Supplemental Dataset 1/A-mRNA_nonrhyth_translation_nonrhyth/Aven_set_A.pdf]

## Avl9

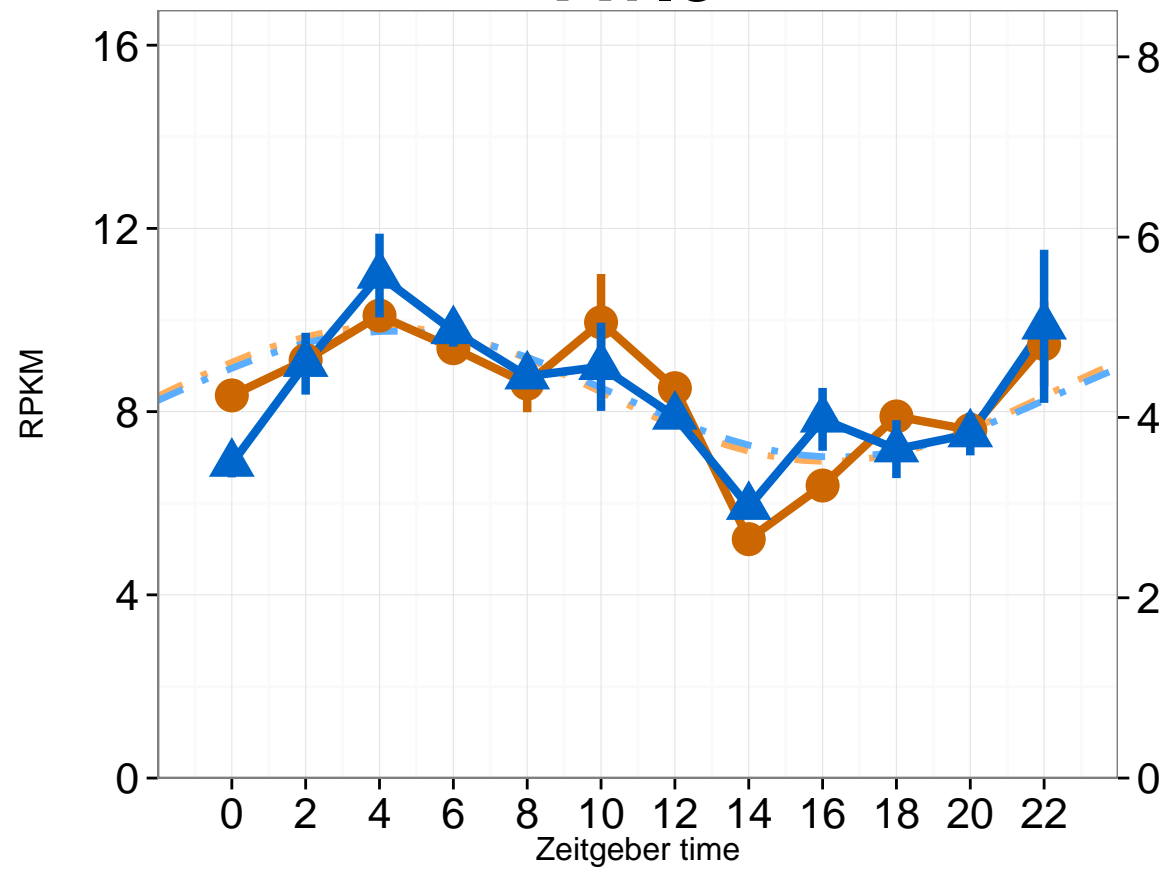

## Avl9

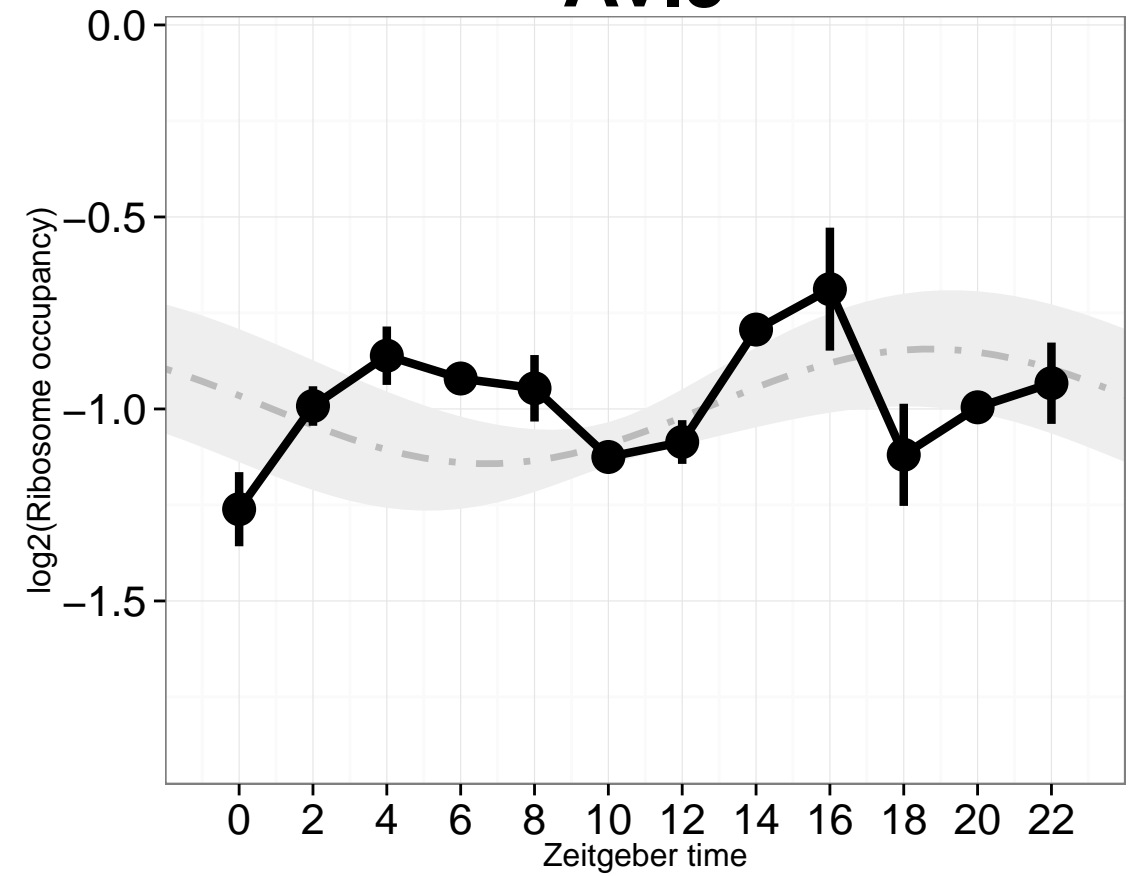

Supplement: SuppDataset_1.zip [file Avl9_set_A.pdf › Supplemental Dataset 1/A-mRNA_nonrhyth_translation_nonrhyth/Avl9_set_A.pdf]

# Avpi1

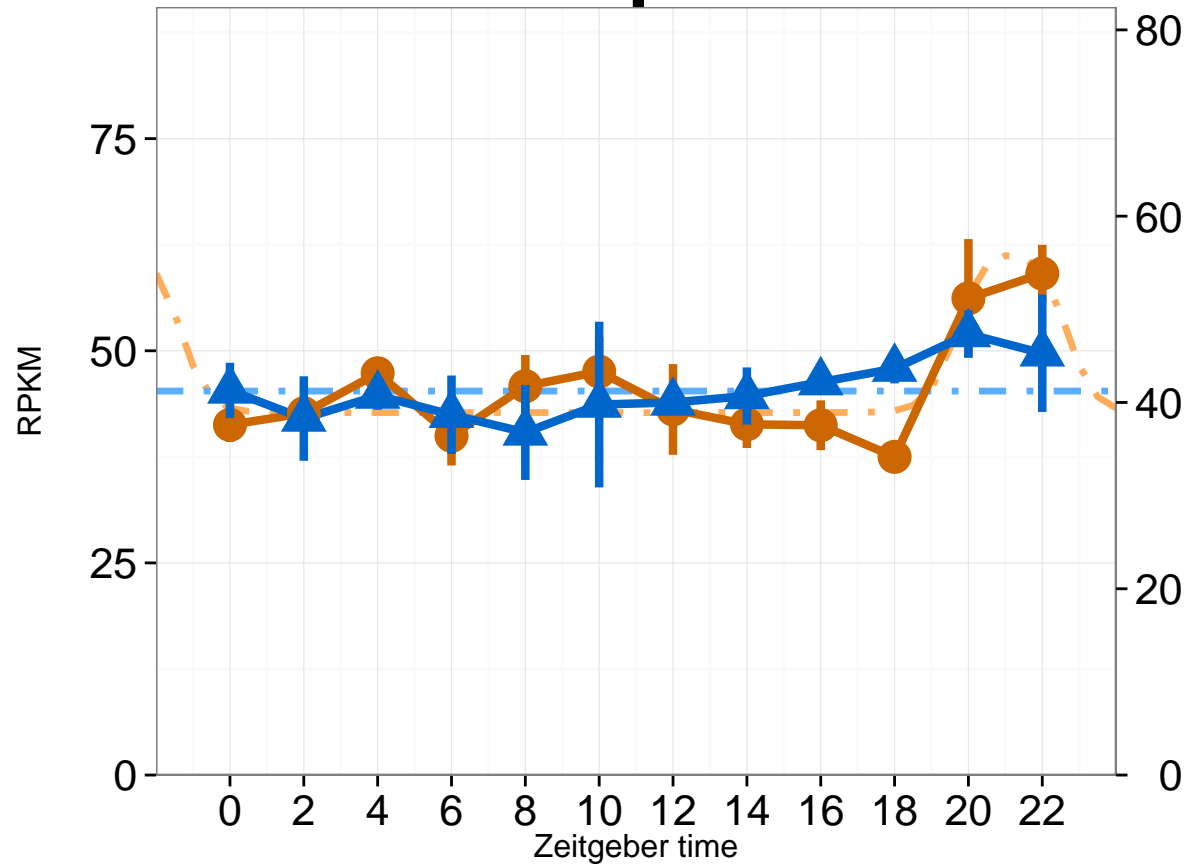

# Avpi1

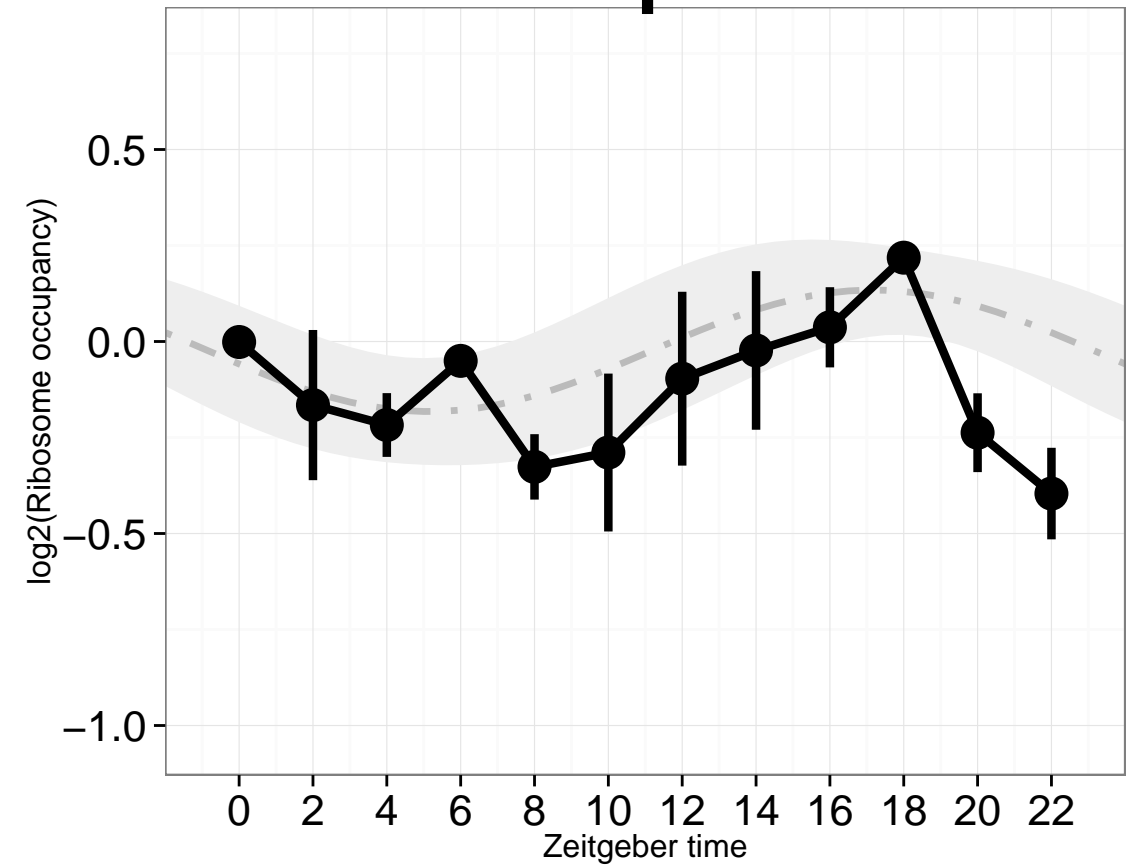

Supplement: SuppDataset_1.zip [file Avpi1_set_A.pdf › Supplemental Dataset 1/A-mRNA_nonrhyth_translation_nonrhyth/Avpi1_set_A.pdf]

## Awat2

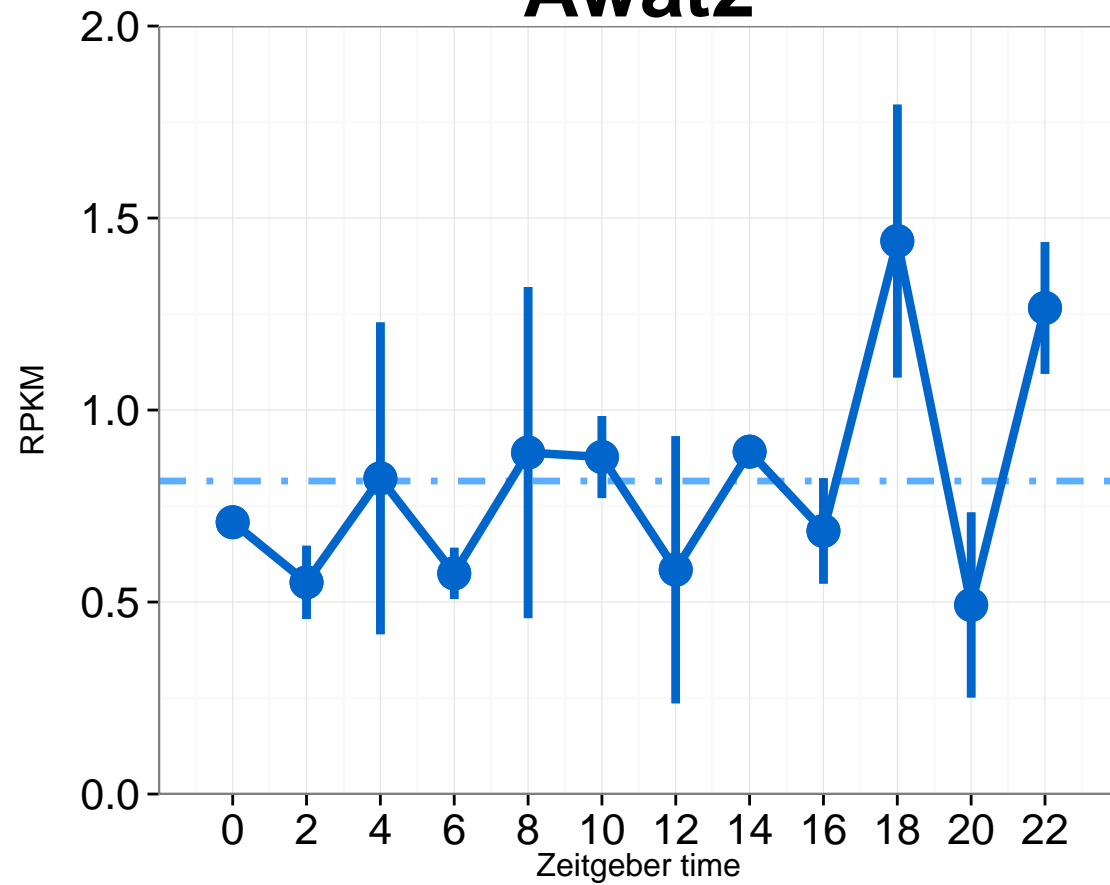

## Awat2 log2(Ribosome occupancy

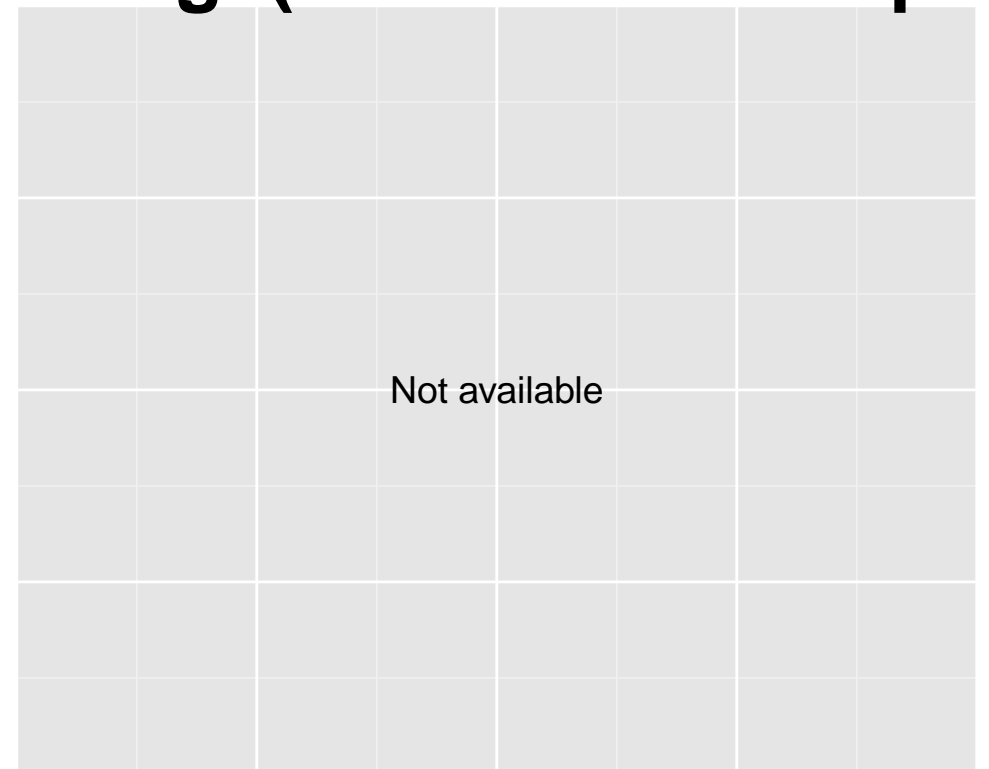

Supplement: SuppDataset_1.zip [file Awat2_set_A.pdf › Supplemental Dataset 1/A-mRNA_nonrhyth_translation_nonrhyth/Awat2_set_A.pdf]

## Axin1

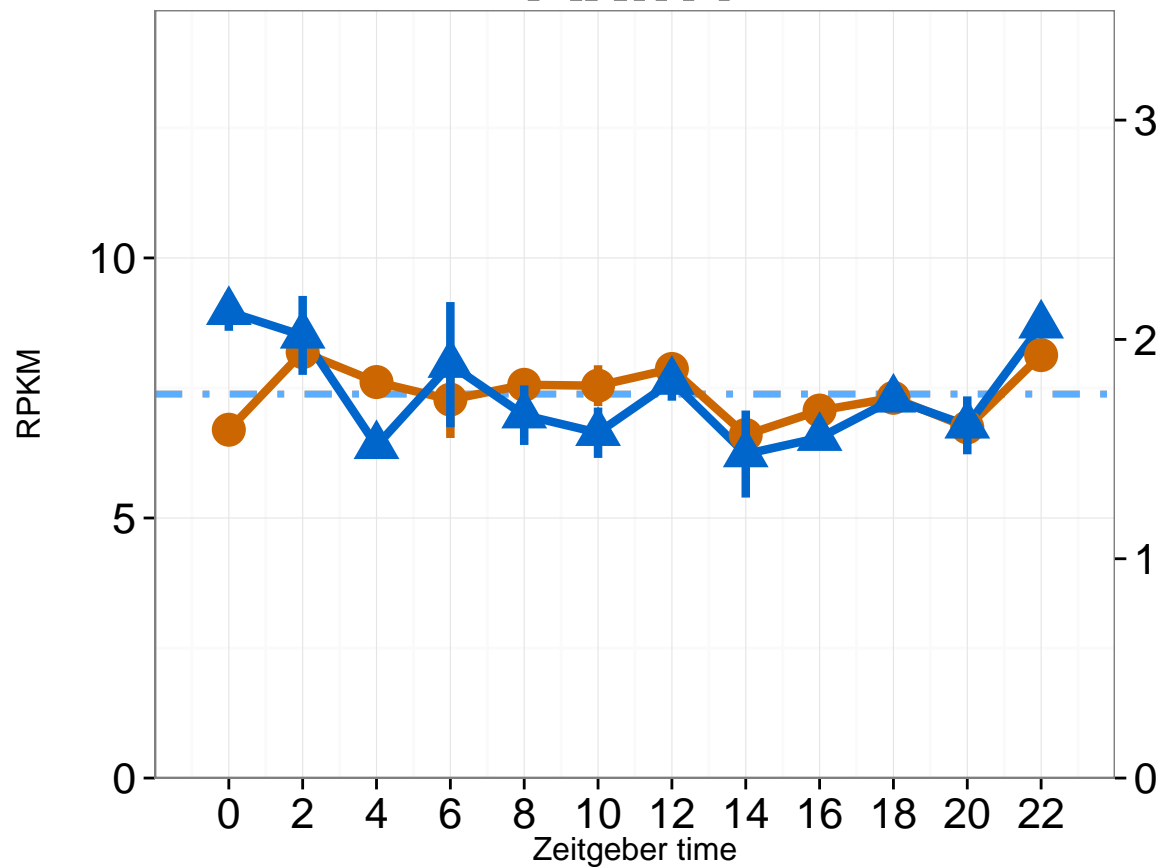

## Axin1

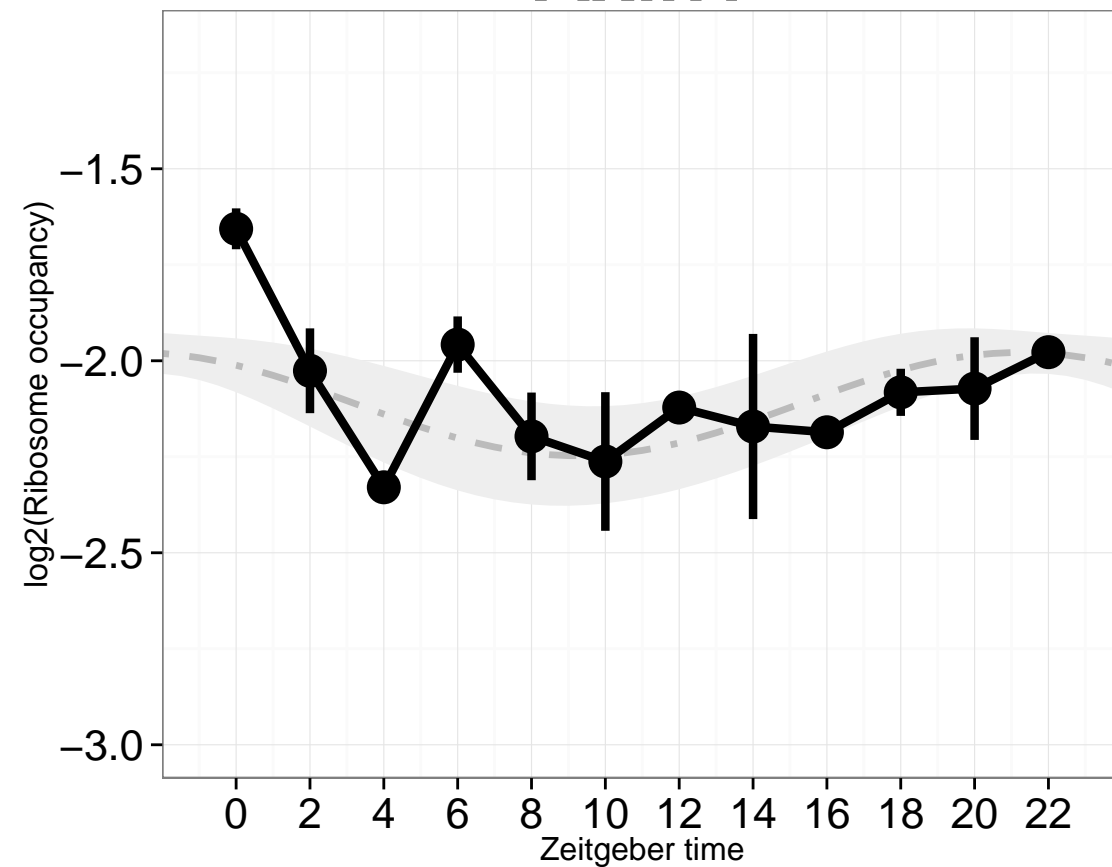

Supplement: SuppDataset_1.zip [file Axin1_set_A.pdf › Supplemental Dataset 1/A-mRNA_nonrhyth_translation_nonrhyth/Axin1_set_A.pdf]

# Axin2

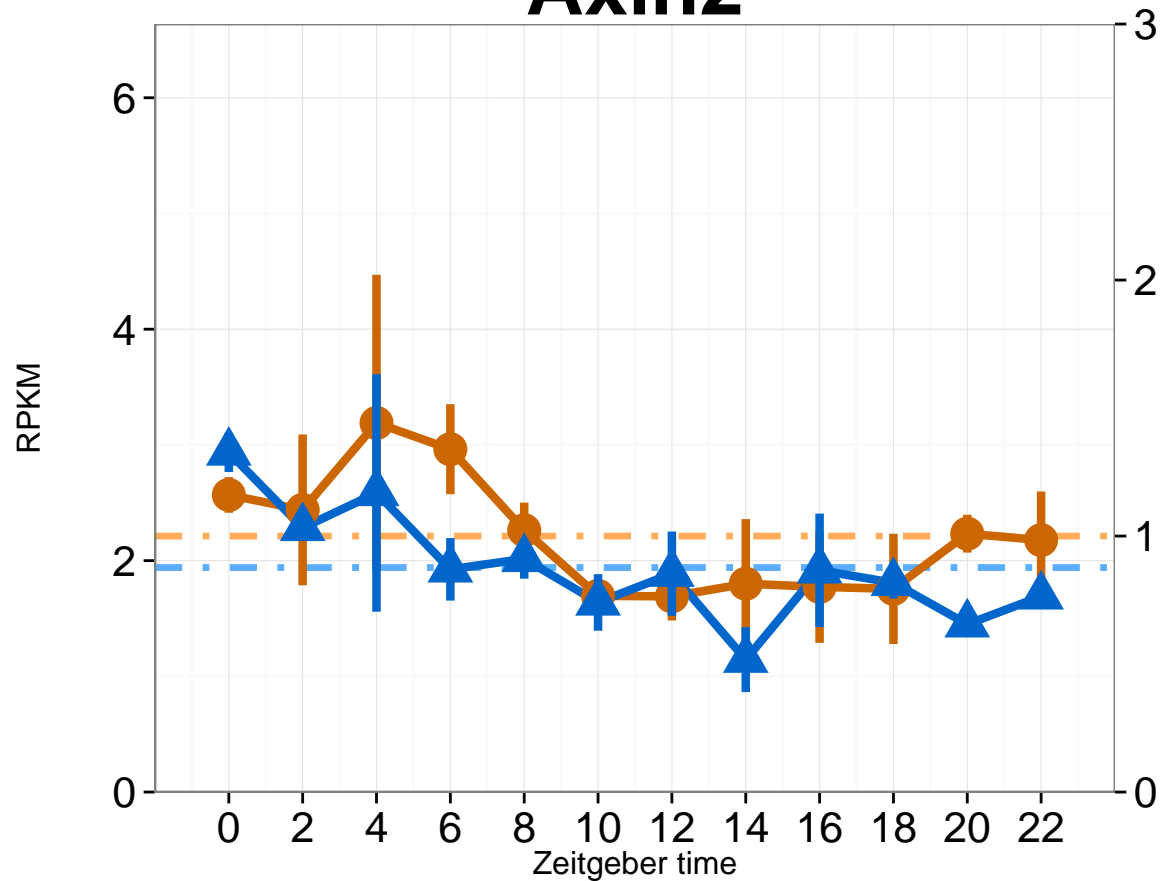

# Axin2

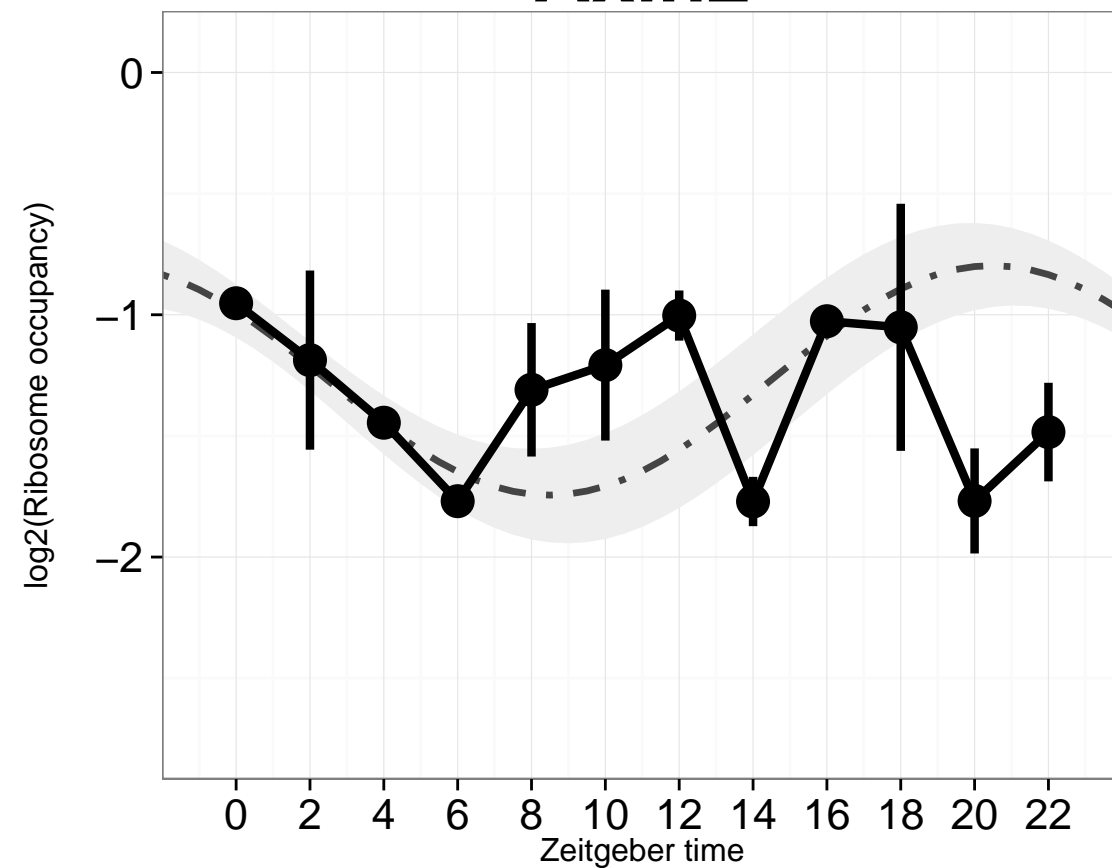

Supplement: SuppDataset_1.zip [file Axin2_set_A.pdf › Supplemental Dataset 1/A-mRNA_nonrhyth_translation_nonrhyth/Axin2_set_A.pdf]

## Axl

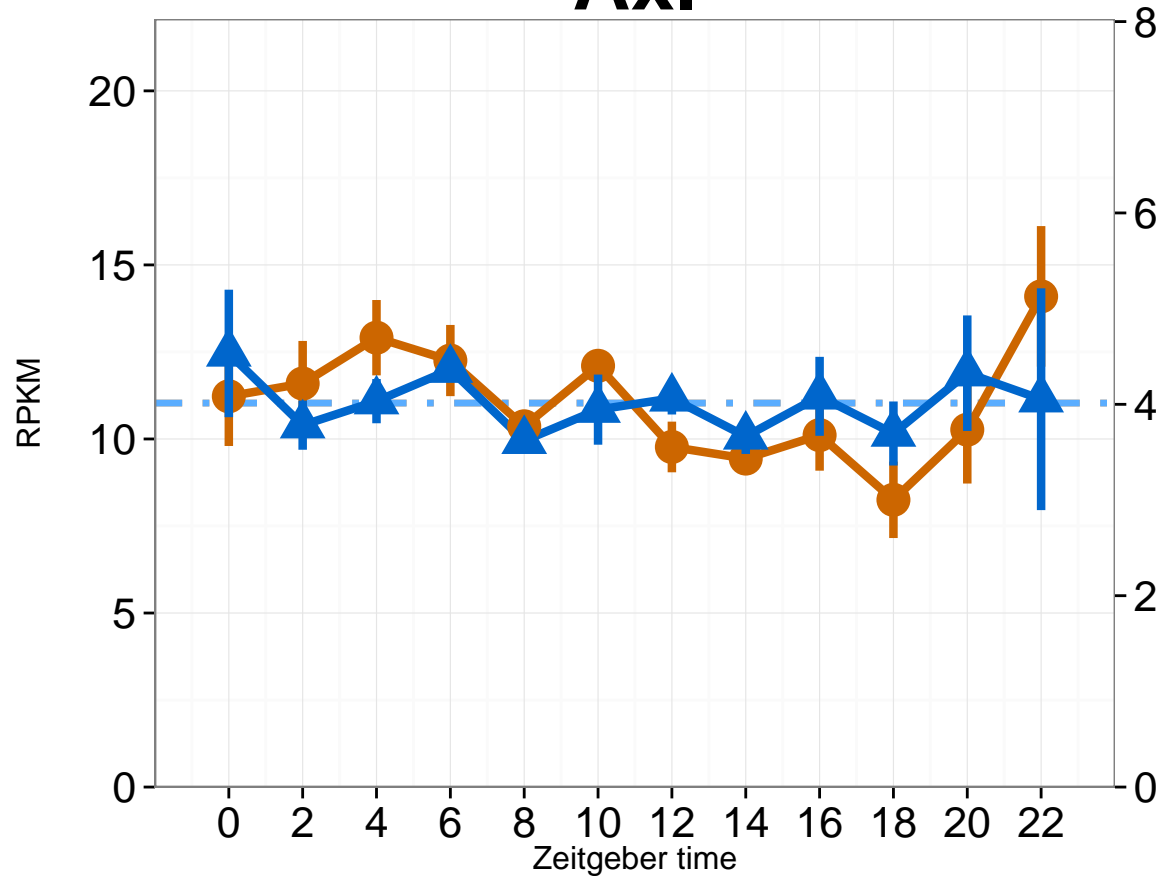

## Axl

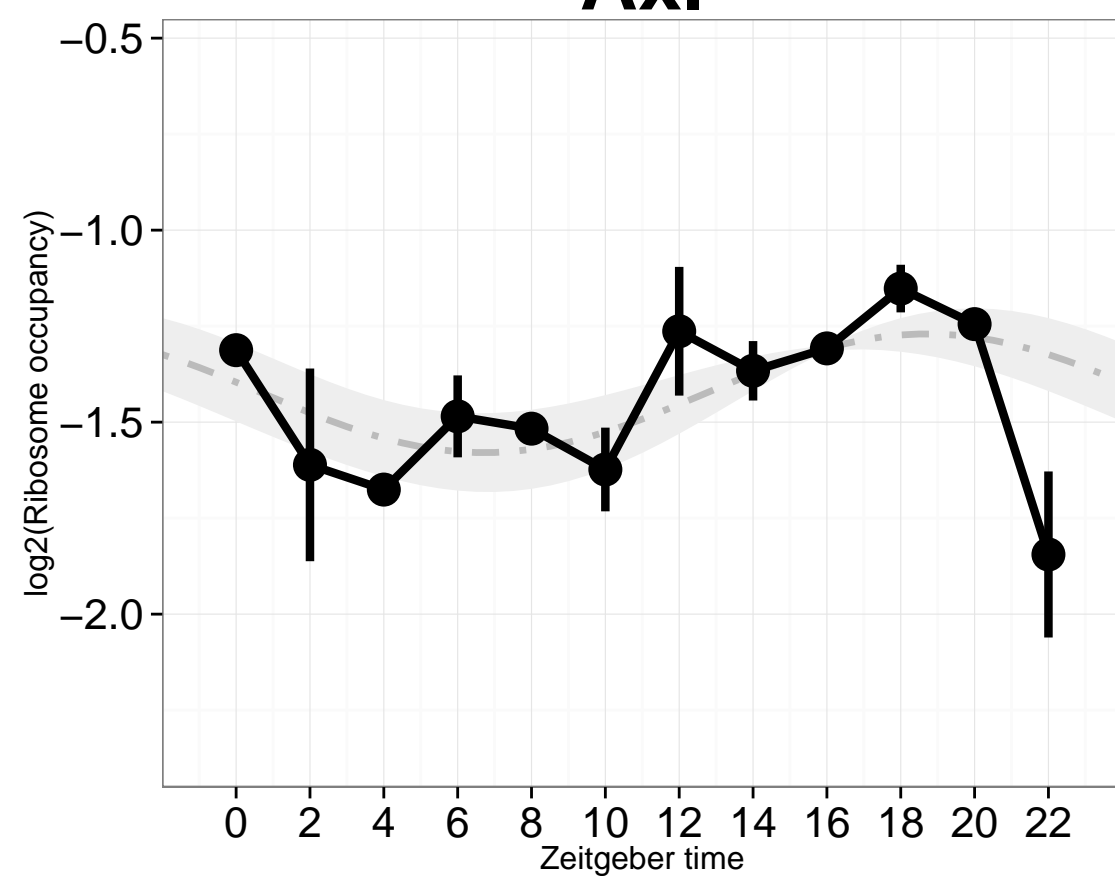

Supplement: SuppDataset_1.zip [file Axl_set_A.pdf › Supplemental Dataset 1/A-mRNA_nonrhyth_translation_nonrhyth/Axl_set_A.pdf]

# Azgp1

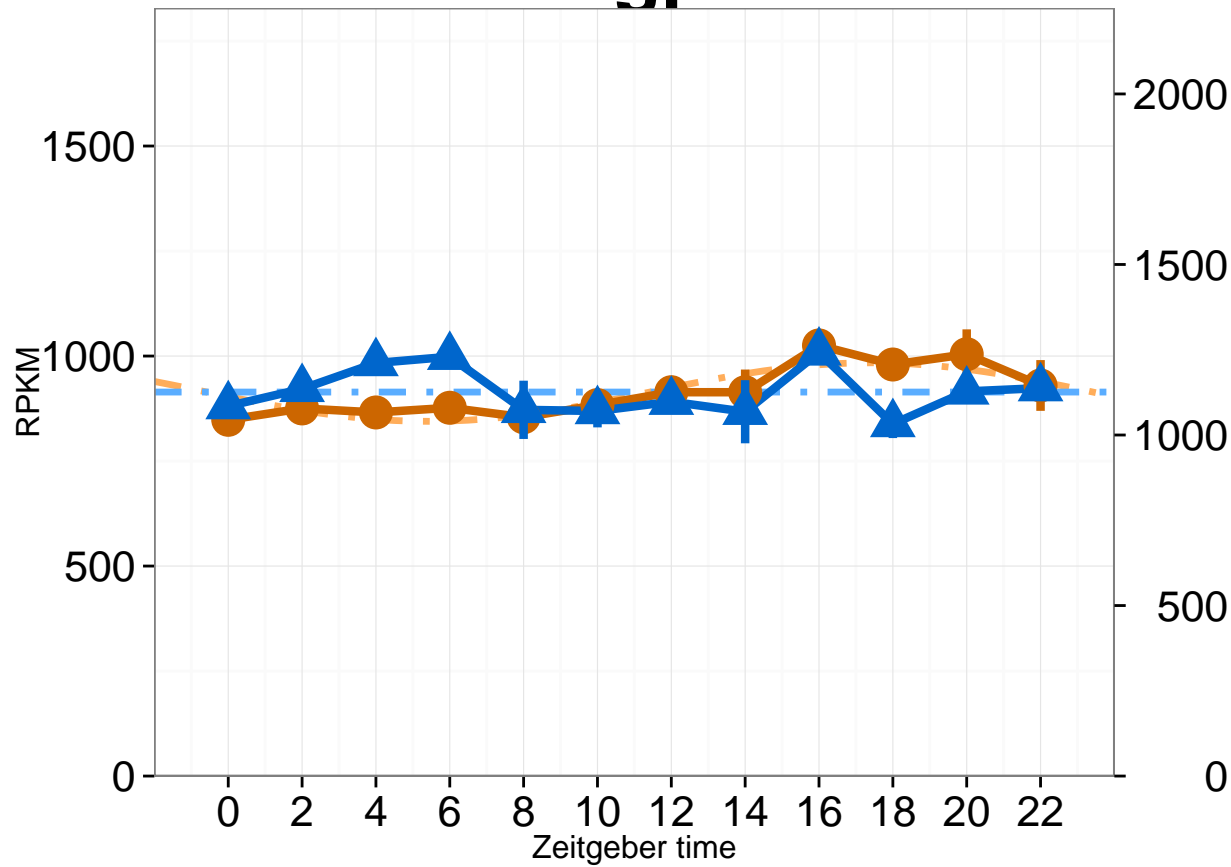

# Azgp1

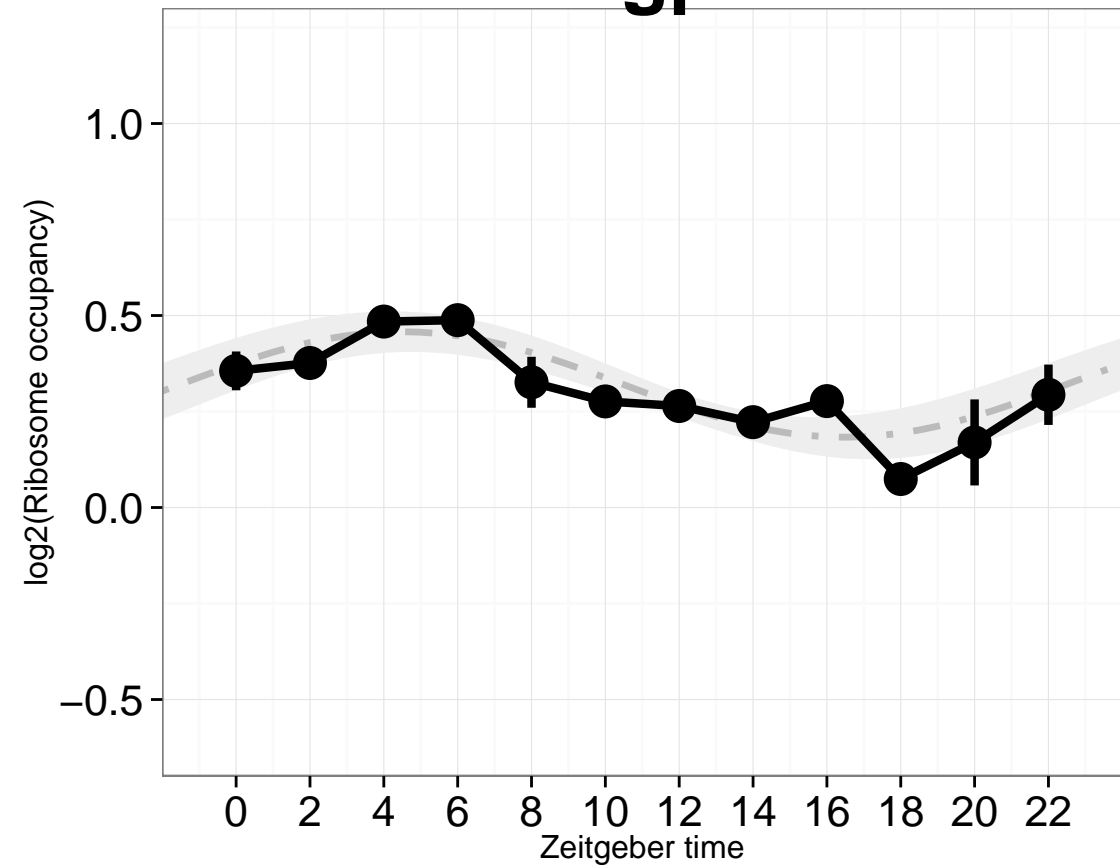

Supplement: SuppDataset_1.zip [file Azgp1_set_A.pdf › Supplemental Dataset 1/A-mRNA_nonrhyth_translation_nonrhyth/Azgp1_set_A.pdf]

## Azi1

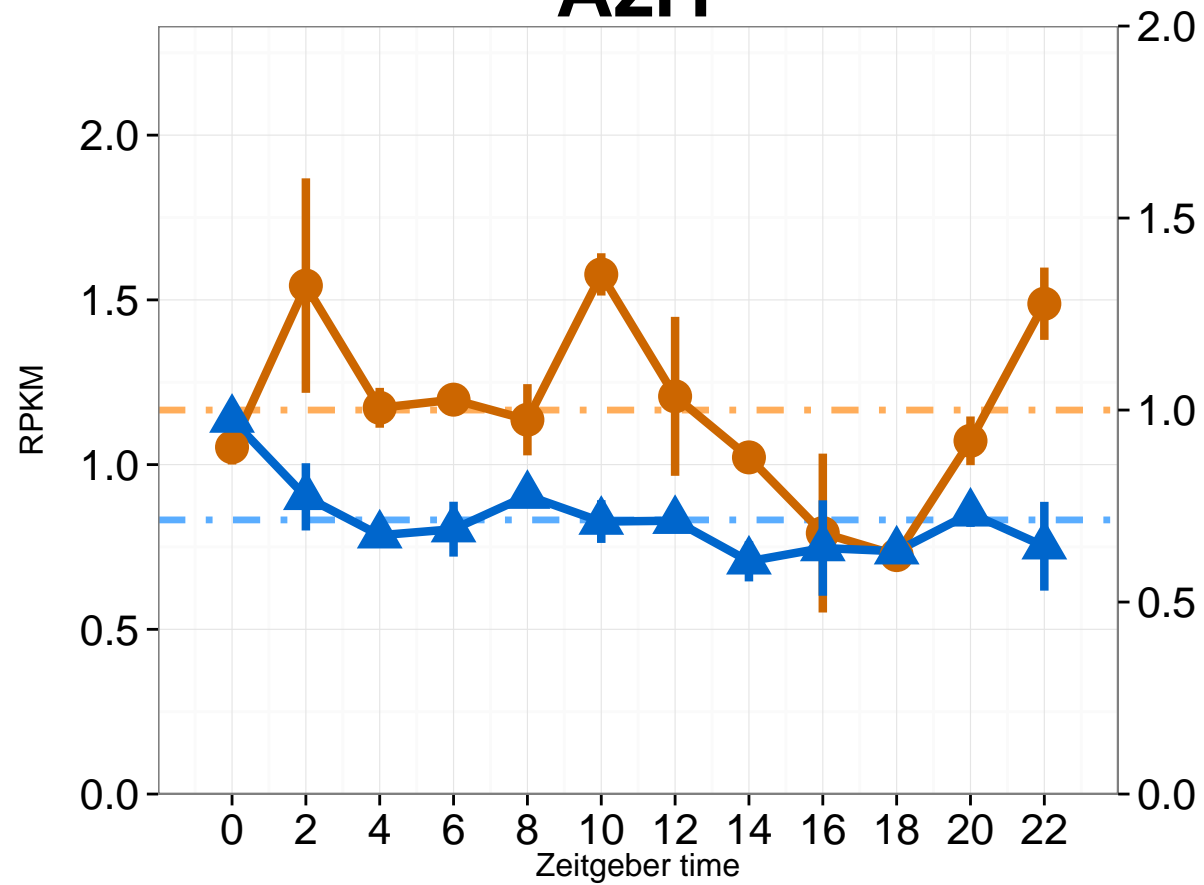

## Azi1

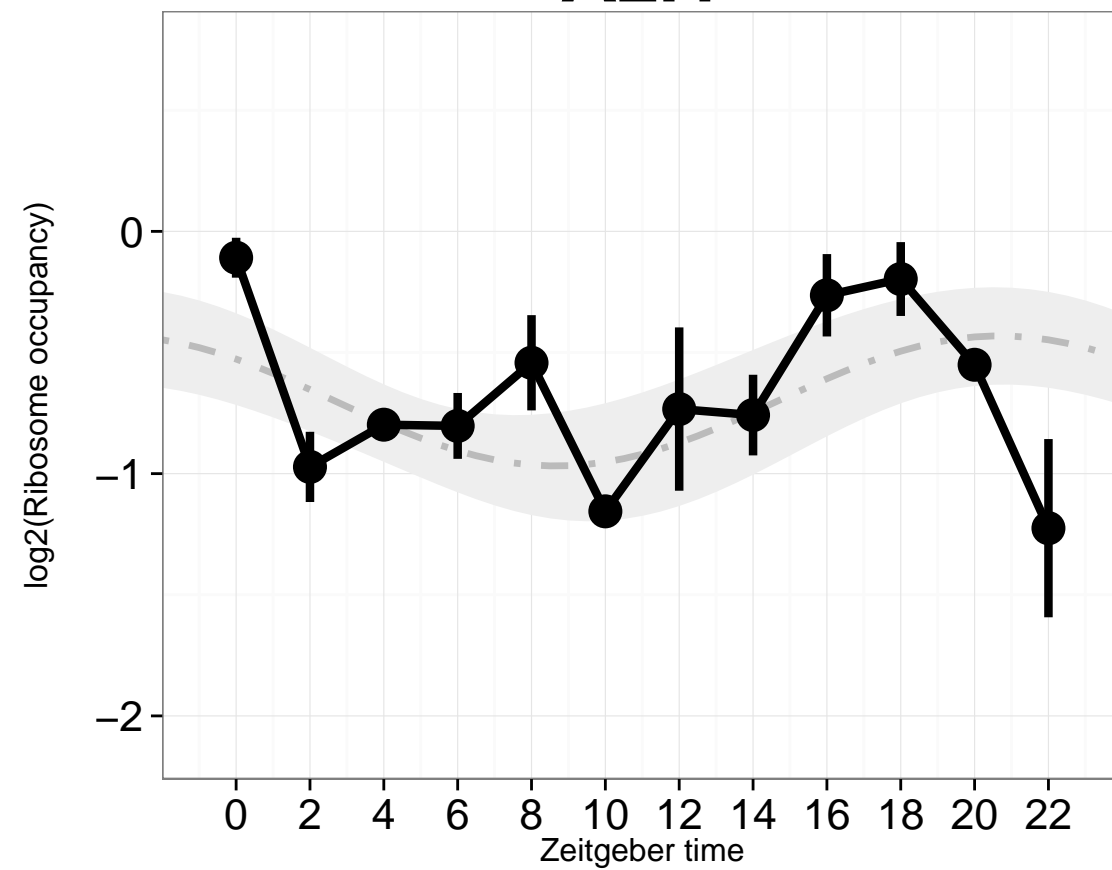

Supplement: SuppDataset_1.zip [file Azi1_set_A.pdf › Supplemental Dataset 1/A-mRNA_nonrhyth_translation_nonrhyth/Azi1_set_A.pdf]

## Azi2

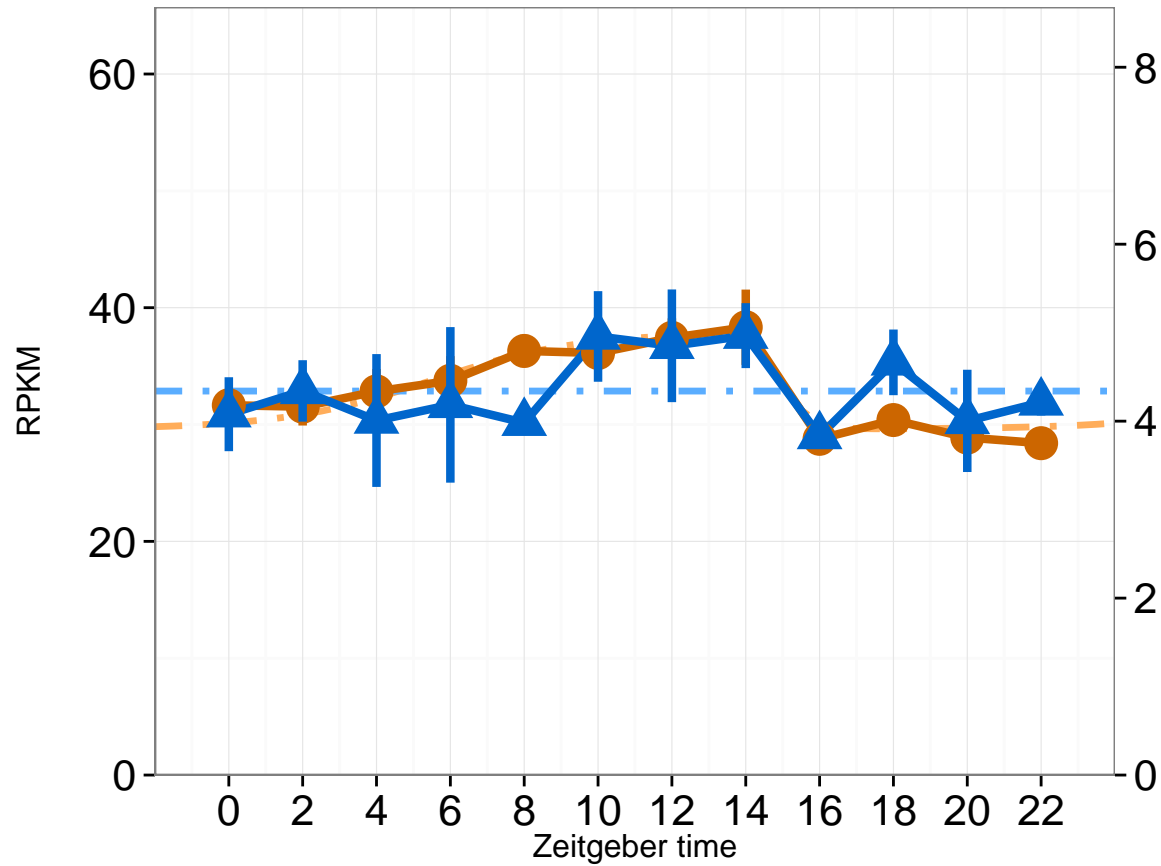

## Azi2

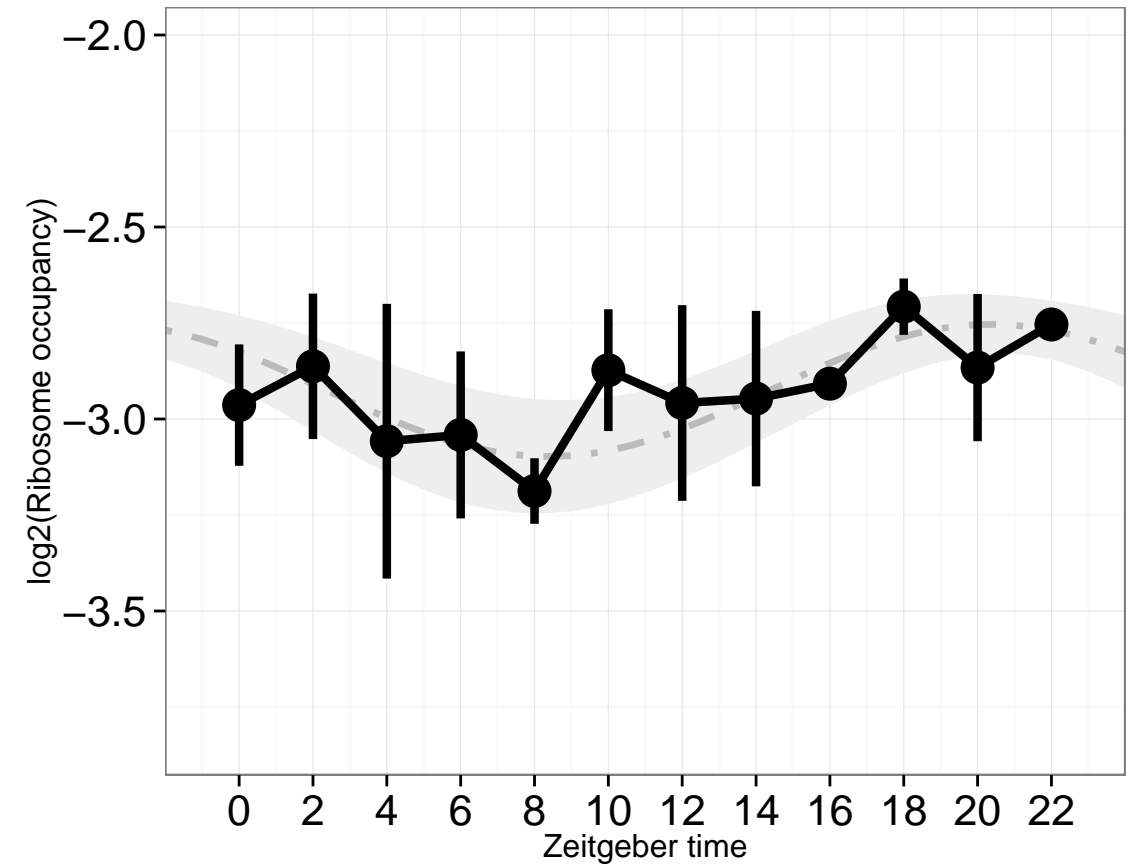

Supplement: SuppDataset_1.zip [file Azi2_set_A.pdf › Supplemental Dataset 1/A-mRNA_nonrhyth_translation_nonrhyth/Azi2_set_A.pdf]

# B230118H07Rik

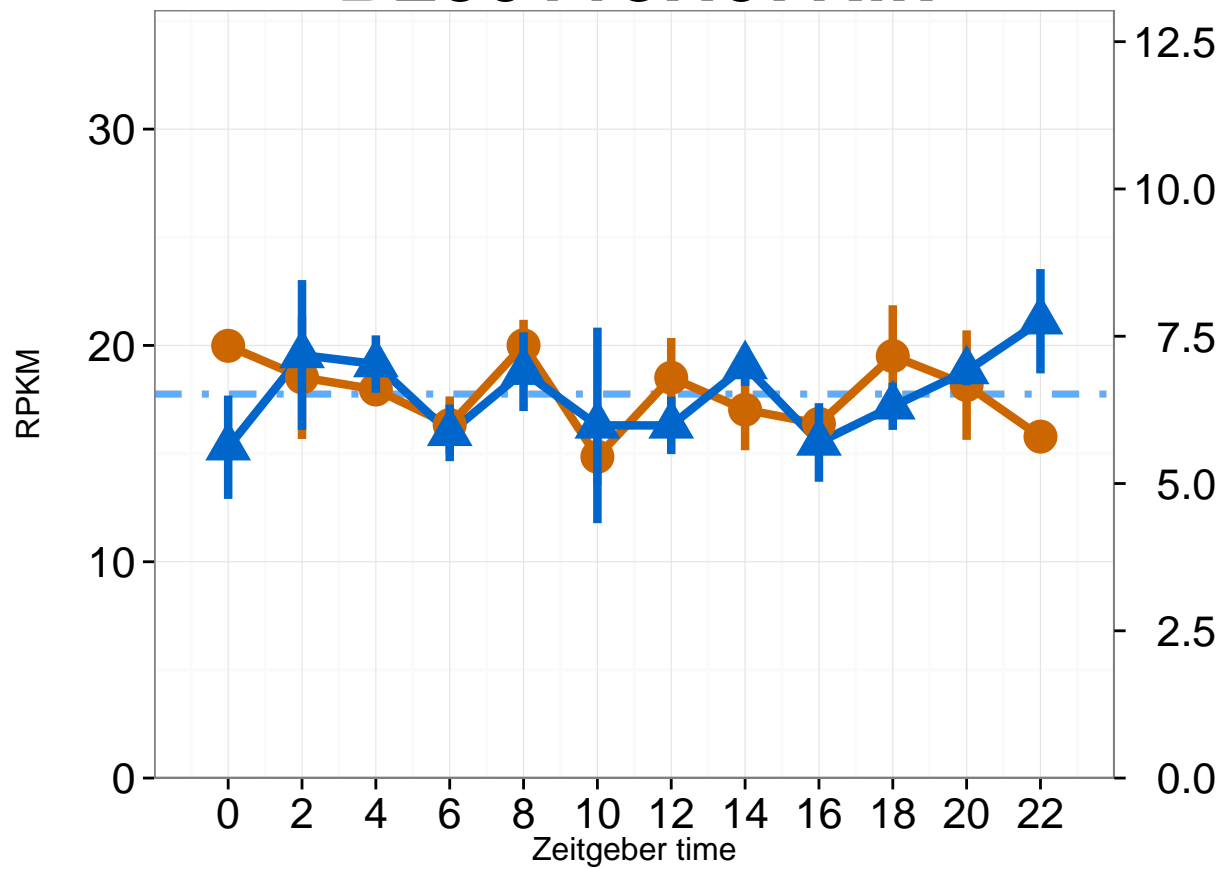

# B230118H07Rik

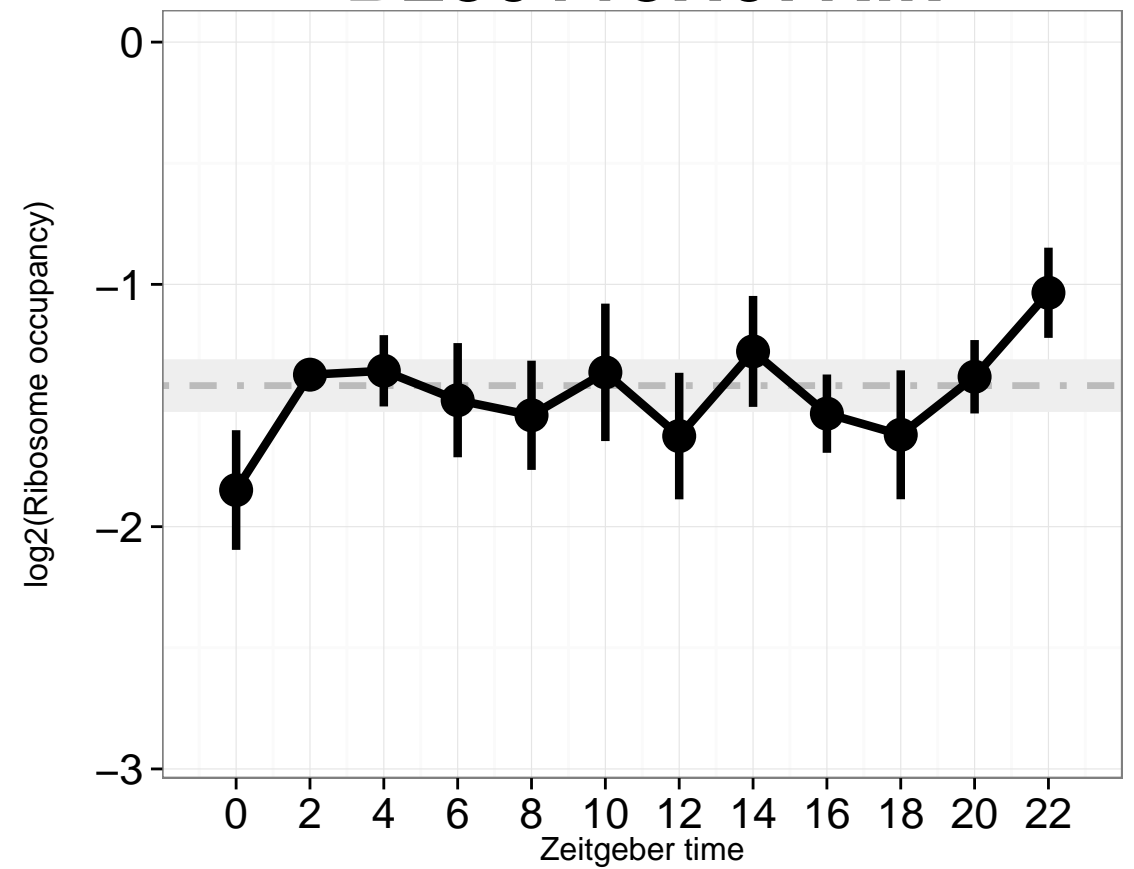

Supplement: SuppDataset_1.zip [file B230118H07Rik_set_A.pdf › Supplemental Dataset 1/A-mRNA_nonrhyth_translation_nonrhyth/B230118H07Rik_set_A.pdf]

# B230219D22Rik

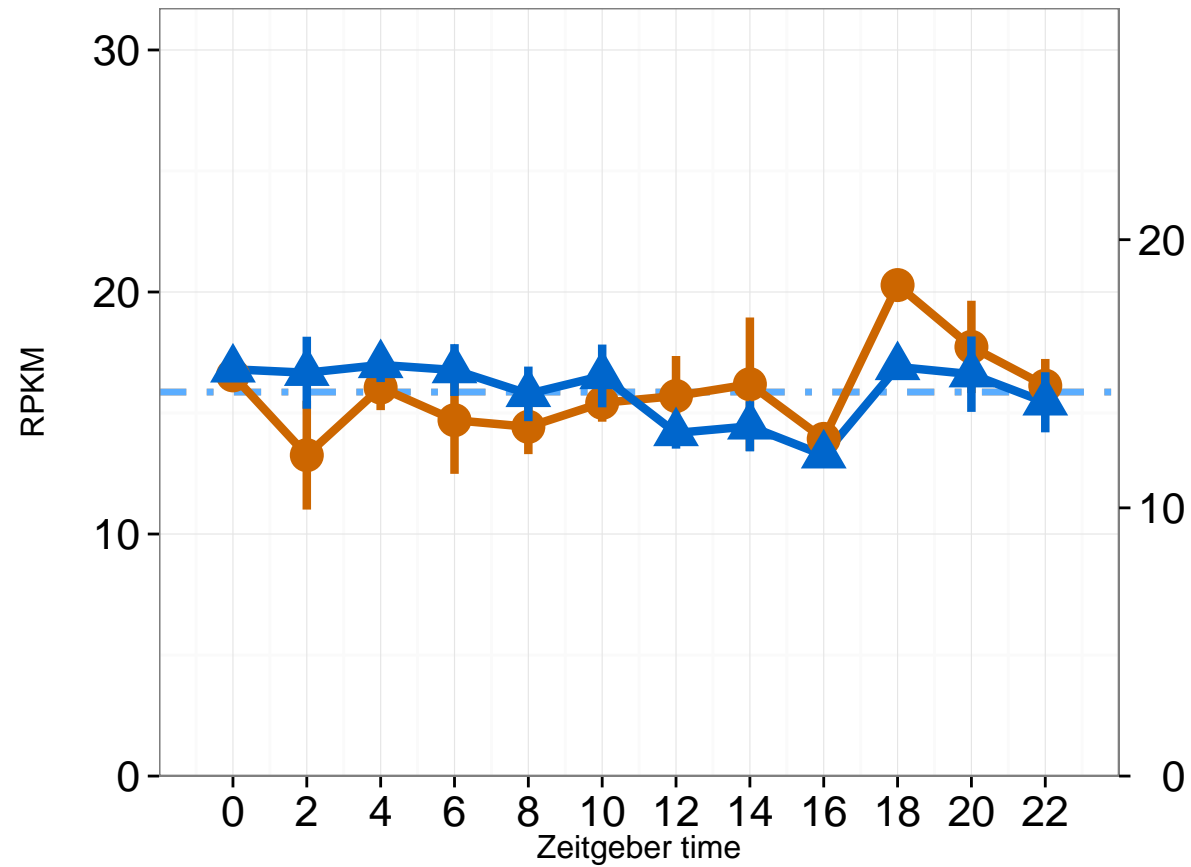

# B230219D22Rik

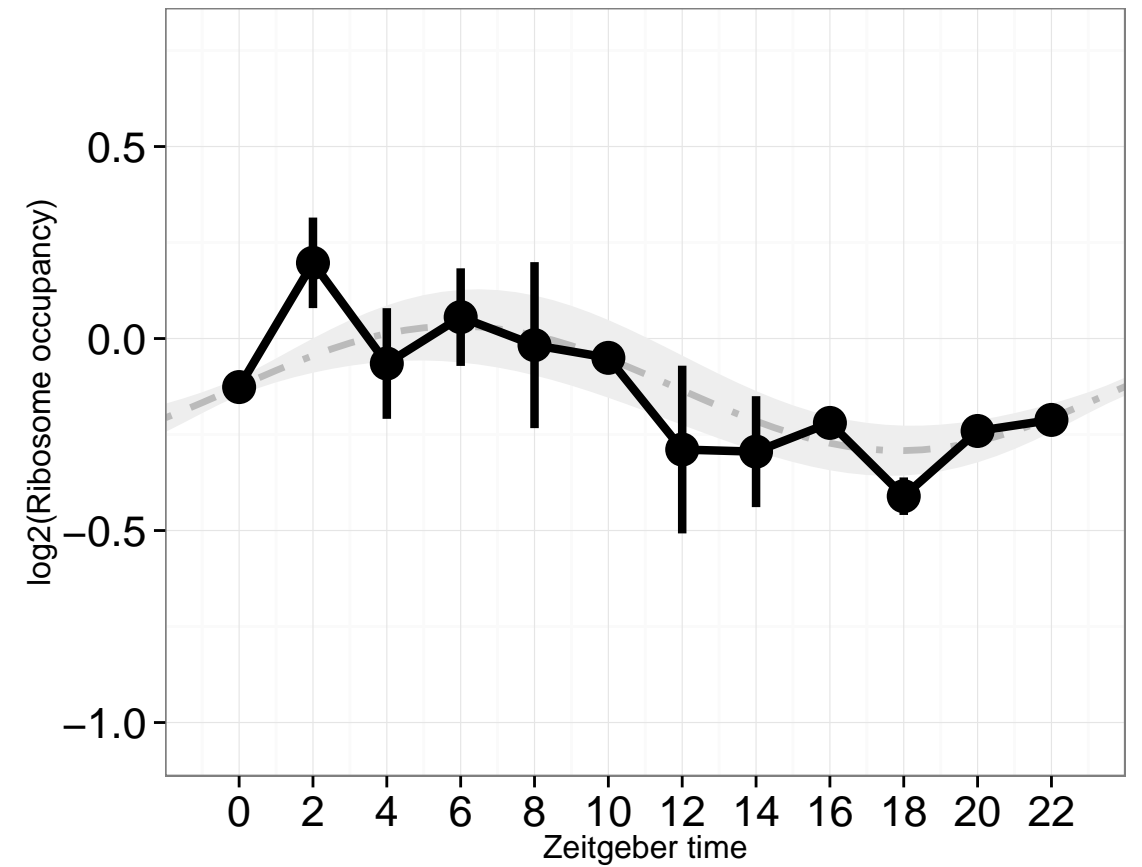

Supplement: SuppDataset_1.zip [file B230219D22Rik_set_A.pdf › Supplemental Dataset 1/A-mRNA_nonrhyth_translation_nonrhyth/B230219D22Rik_set_A.pdf]

# B2m

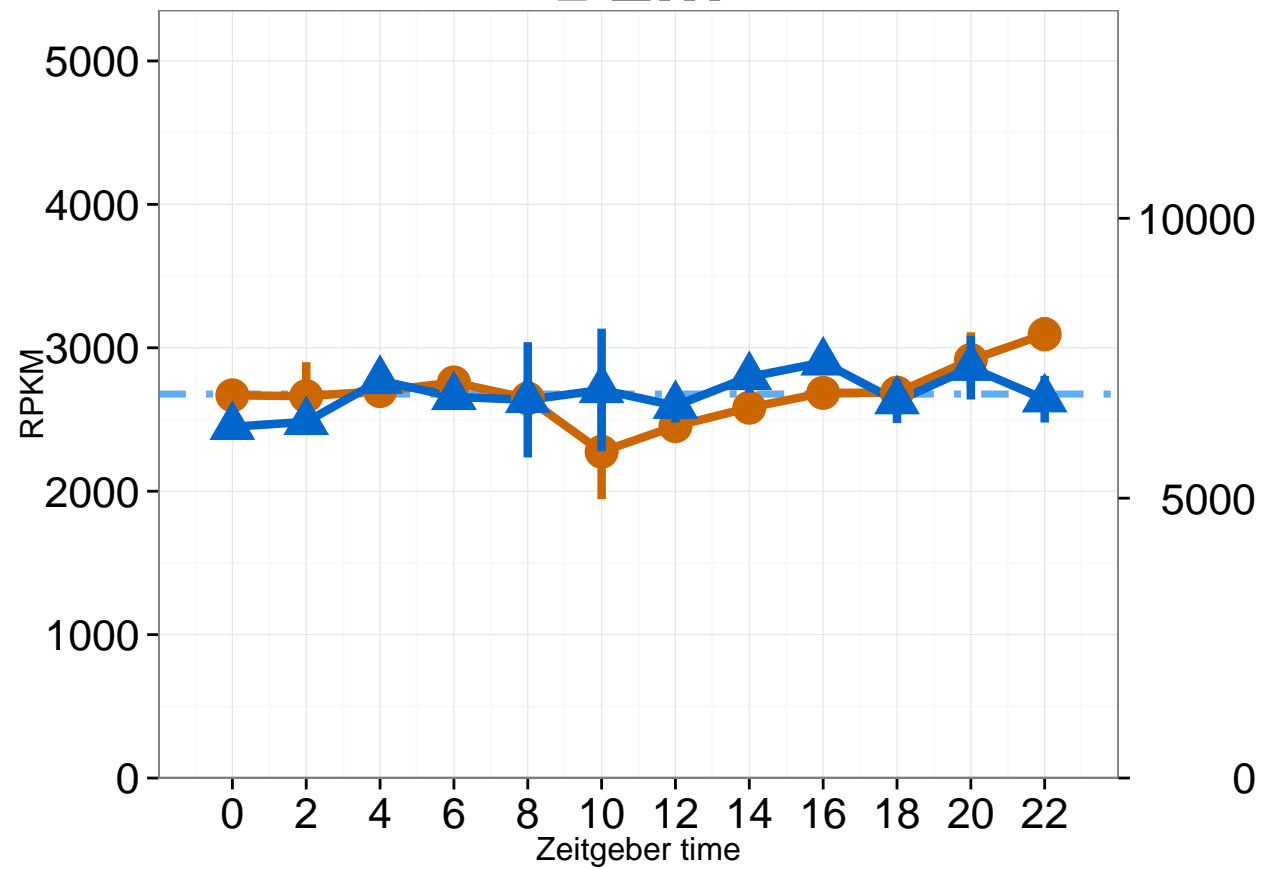

# B2m

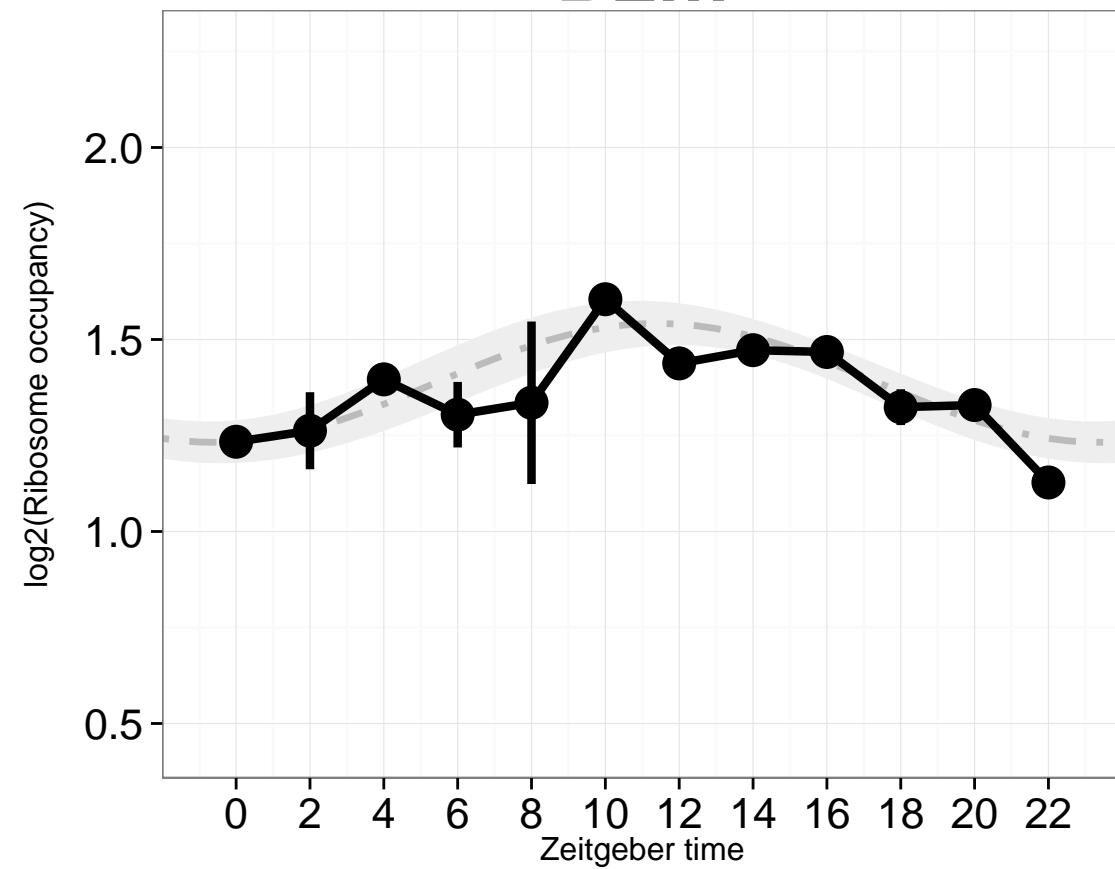

Supplement: SuppDataset_1.zip [file B2m_set_A.pdf › Supplemental Dataset 1/A-mRNA_nonrhyth_translation_nonrhyth/B2m_set_A.pdf]

# B3galnt2

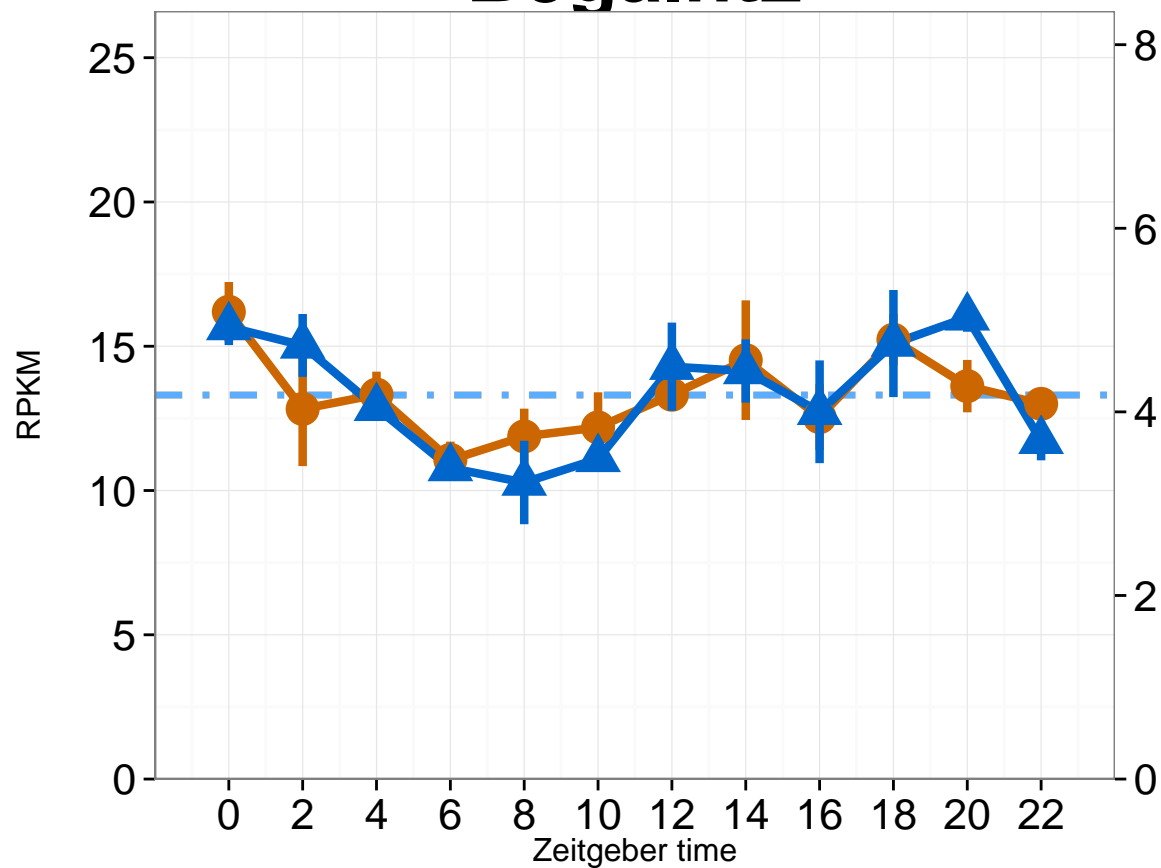

# B3galnt2

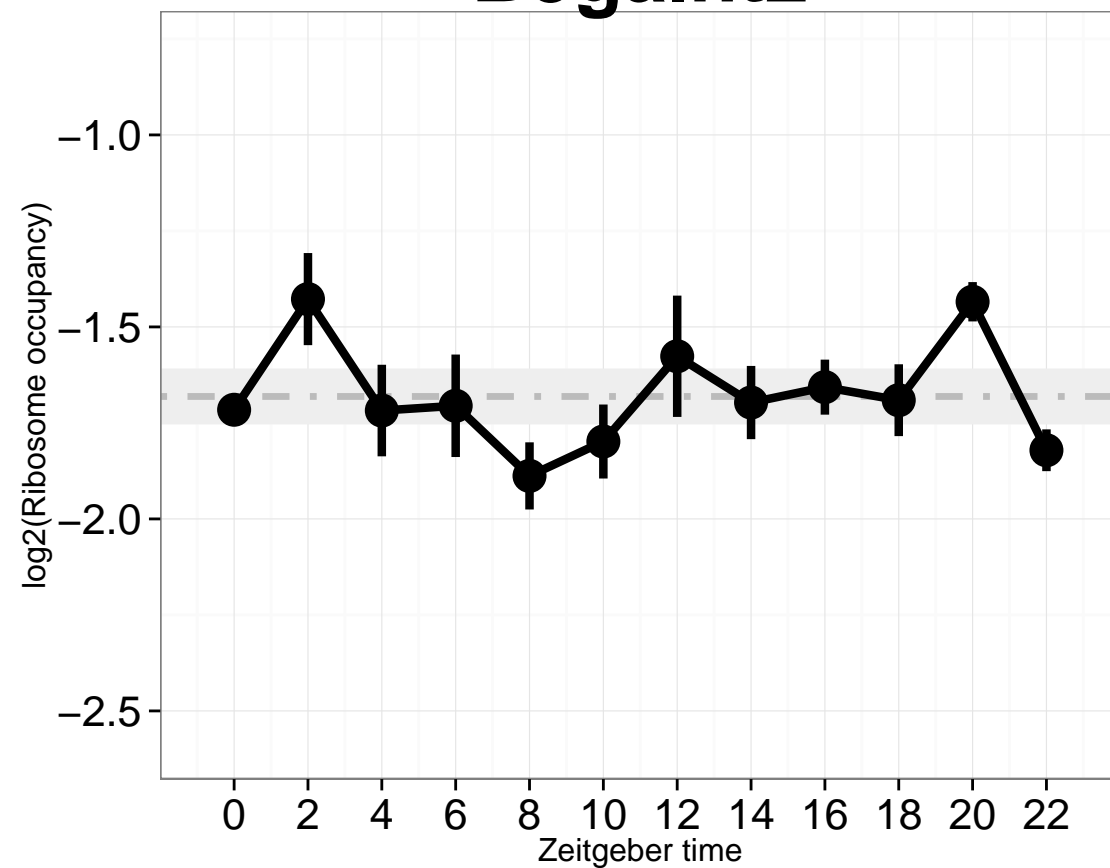

Supplement: SuppDataset_1.zip [file B3galnt2_set_A.pdf › Supplemental Dataset 1/A-mRNA_nonrhyth_translation_nonrhyth/B3galnt2_set_A.pdf]

# B3galt1

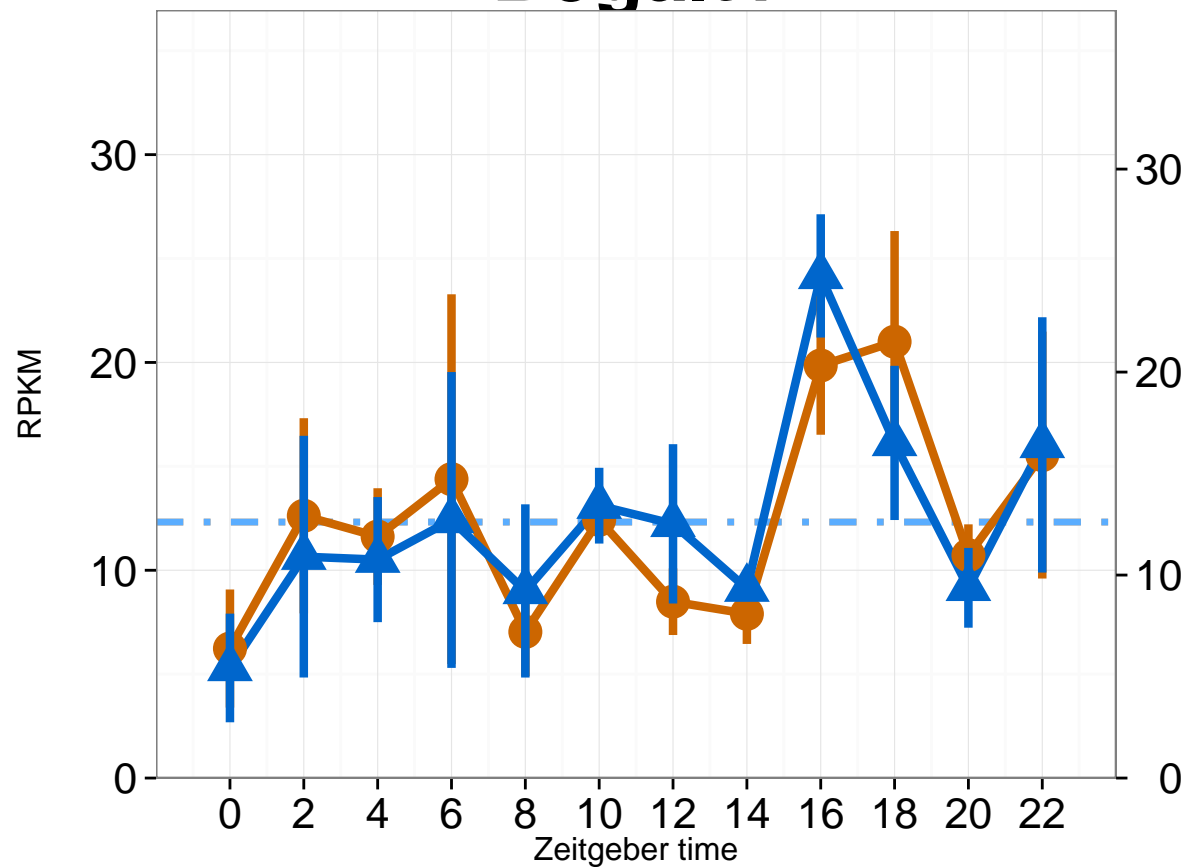

# B3galt1

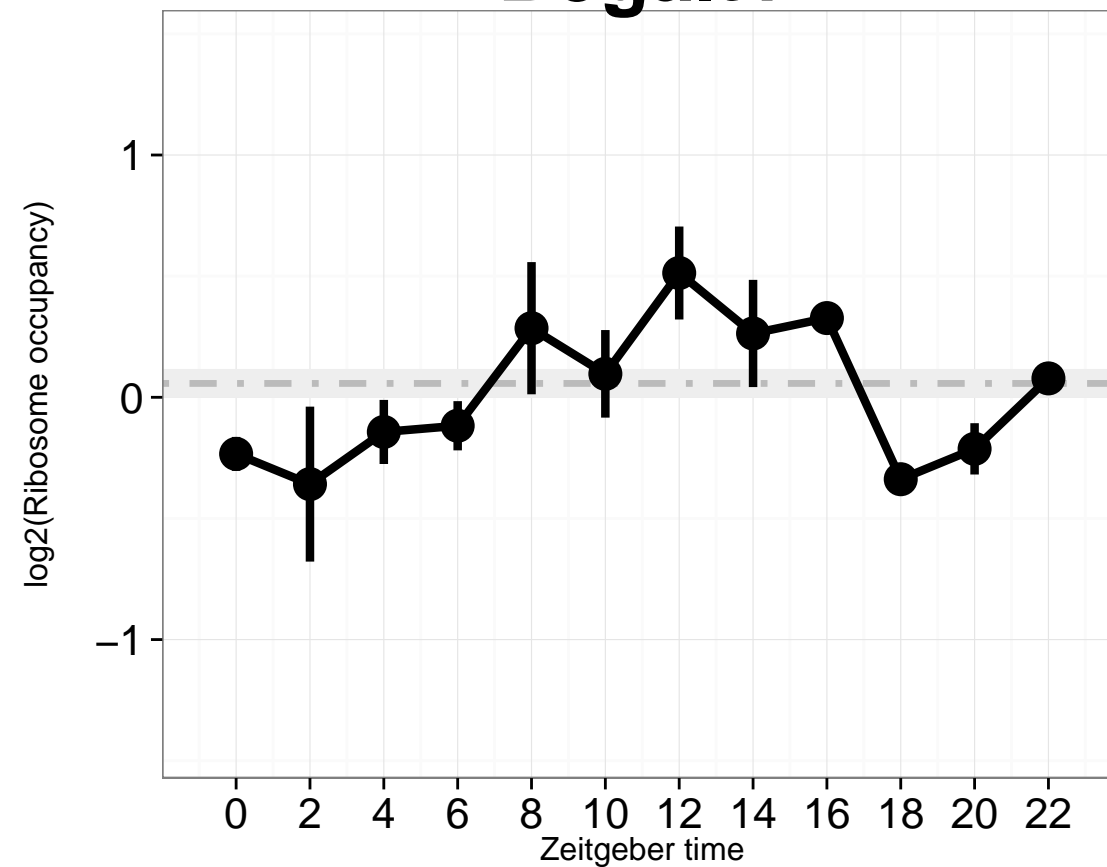

Supplement: SuppDataset_1.zip [file B3galt1_set_A.pdf › Supplemental Dataset 1/A-mRNA_nonrhyth_translation_nonrhyth/B3galt1_set_A.pdf]

## B3galtl

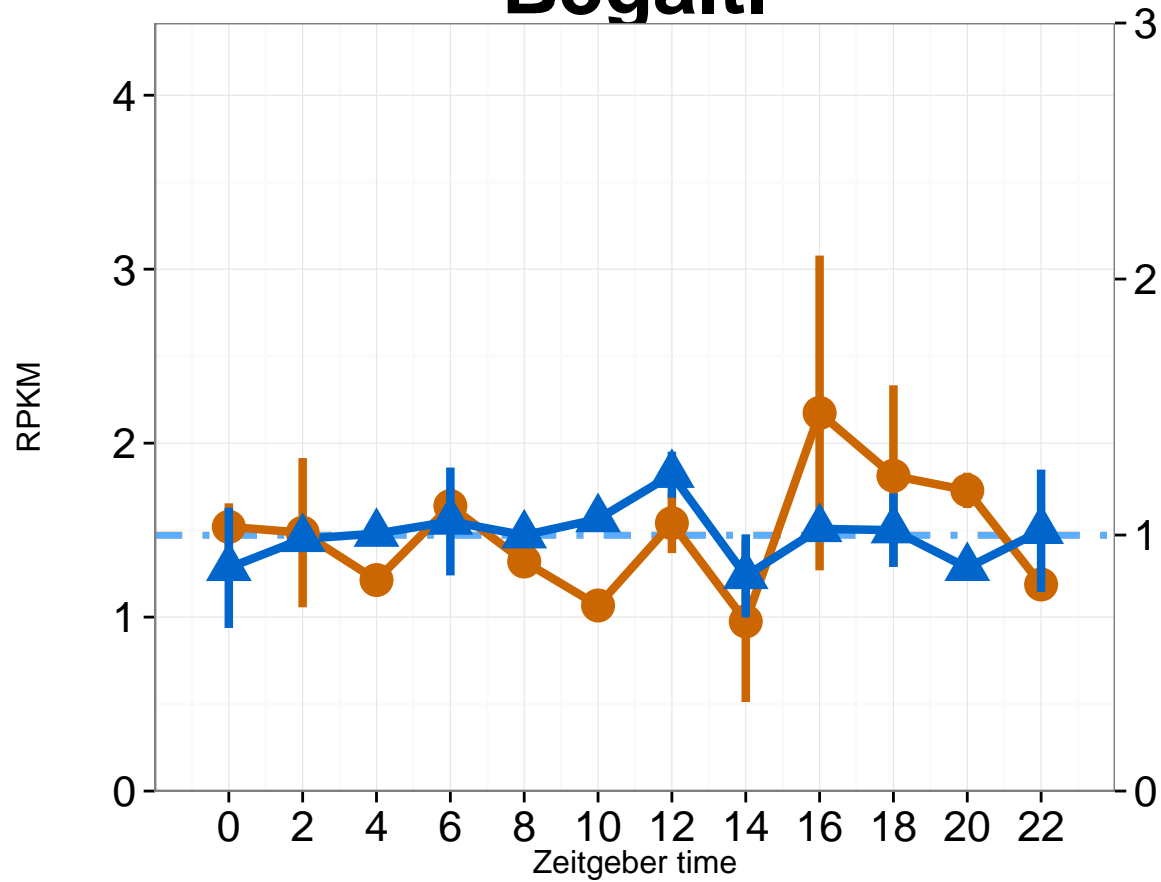

## B3galtl

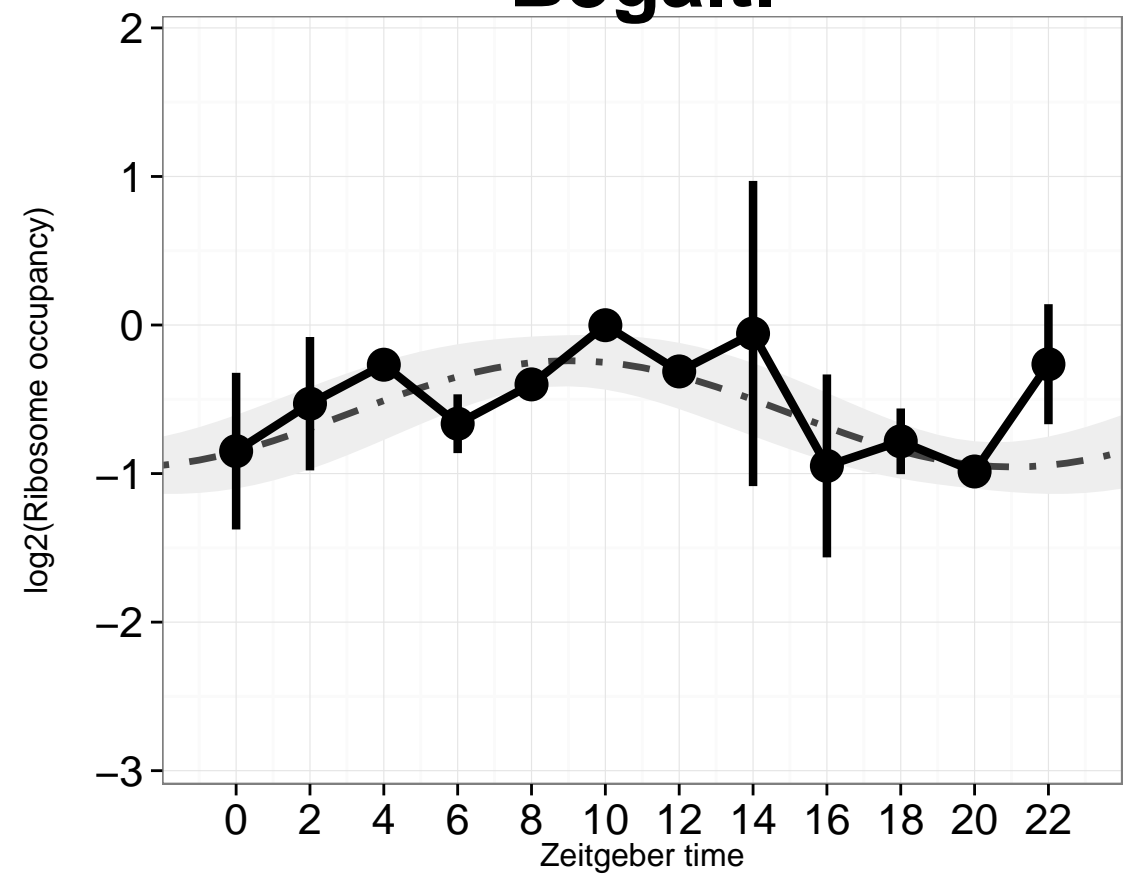

Supplement: SuppDataset_1.zip [file B3galtl_set_A.pdf › Supplemental Dataset 1/A-mRNA_nonrhyth_translation_nonrhyth/B3galtl_set_A.pdf]

# B3gnt1

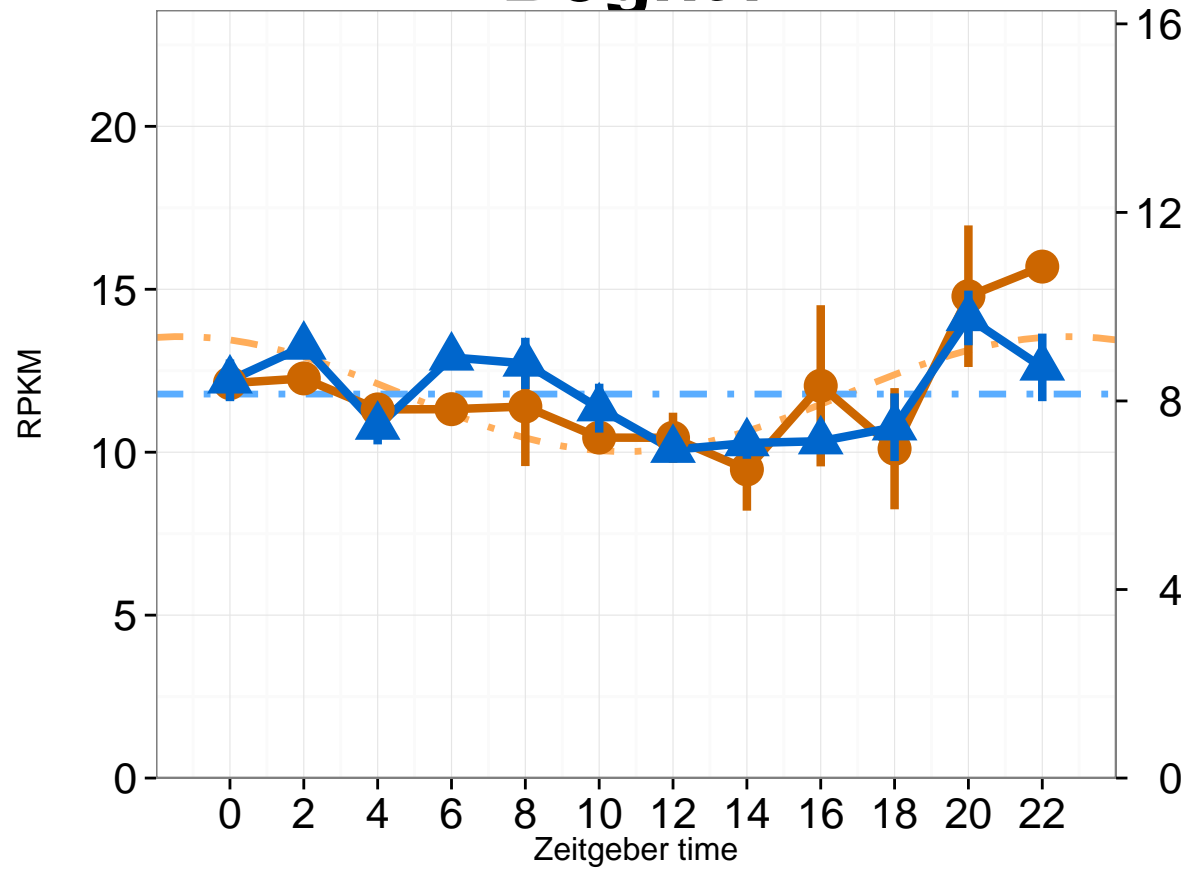

# B3gnt1

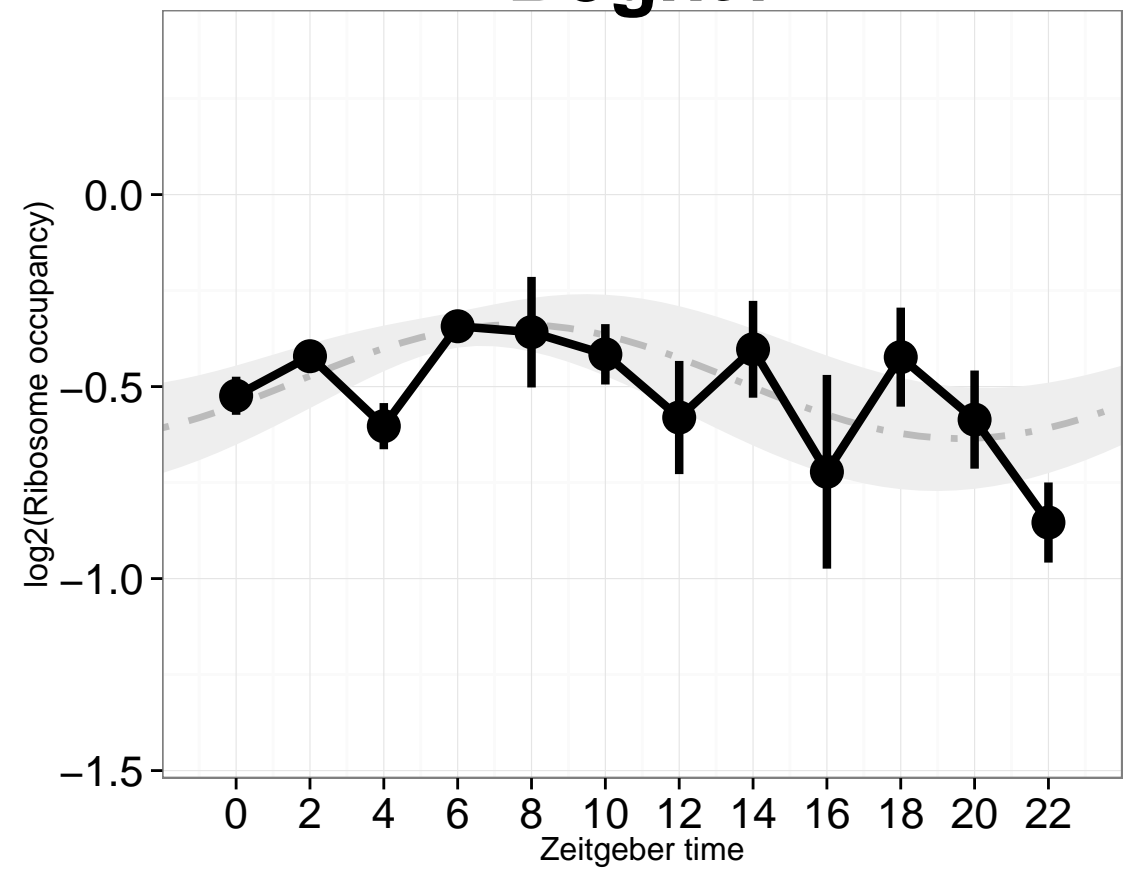

Supplement: SuppDataset_1.zip [file B3gnt1_set_A.pdf › Supplemental Dataset 1/A-mRNA_nonrhyth_translation_nonrhyth/B3gnt1_set_A.pdf]

## B3gnt2

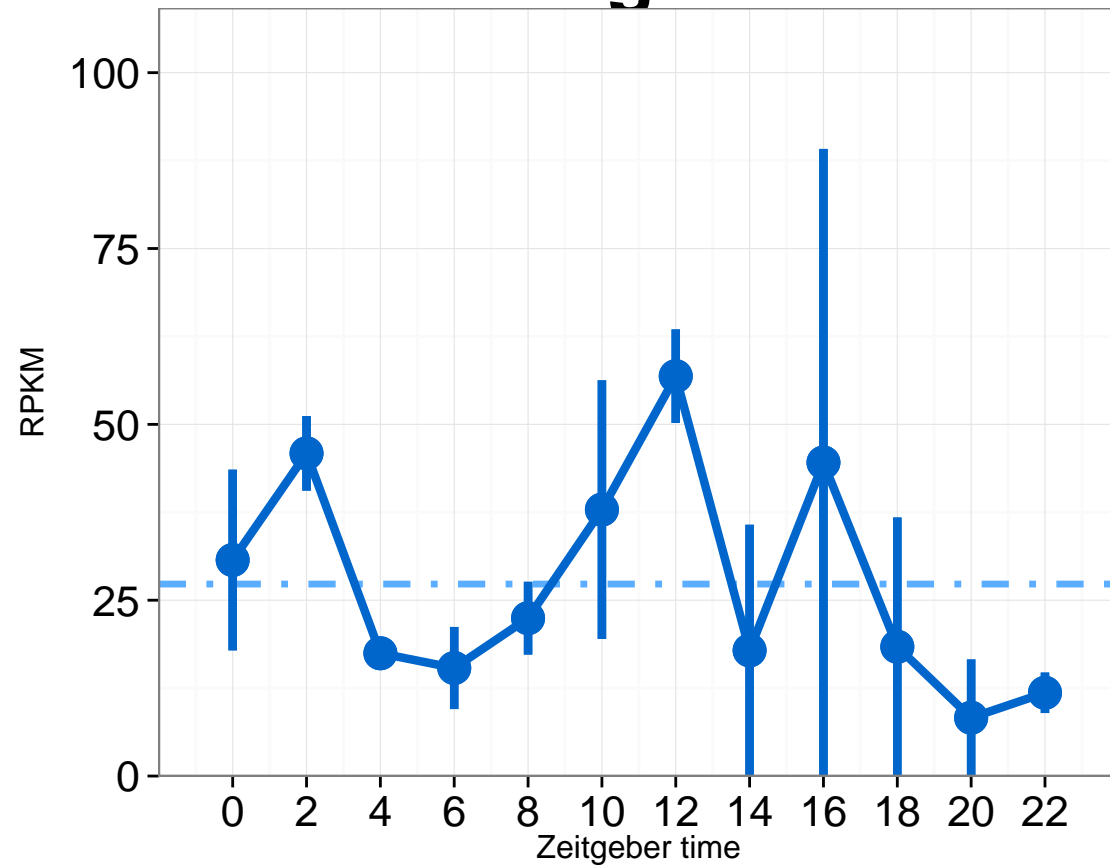

## B3gnt2 log2(Ribosome occupancy)



Supplement: SuppDataset_1.zip [file B3gnt2_set_A.pdf › Supplemental Dataset 1/A-mRNA_nonrhyth_translation_nonrhyth/B3gnt2_set_A.pdf]

# B3gnt3

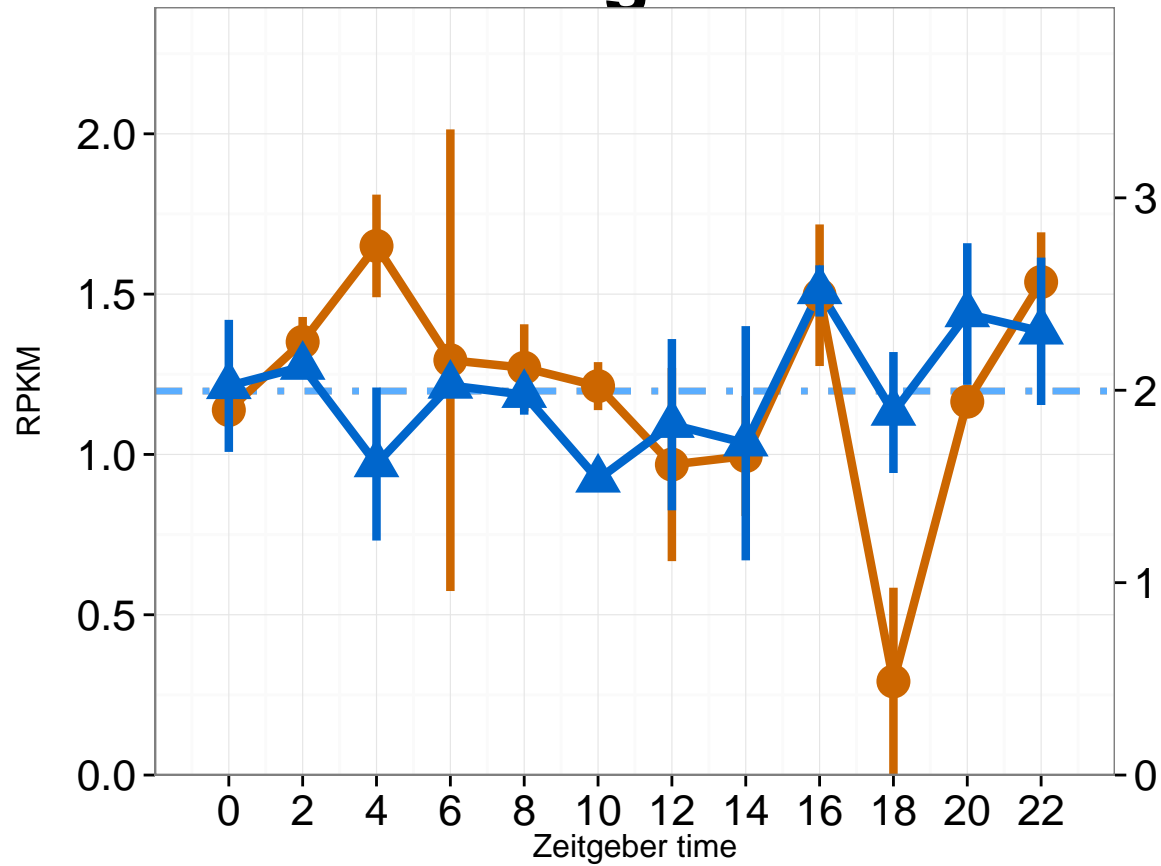

# B3gnt3

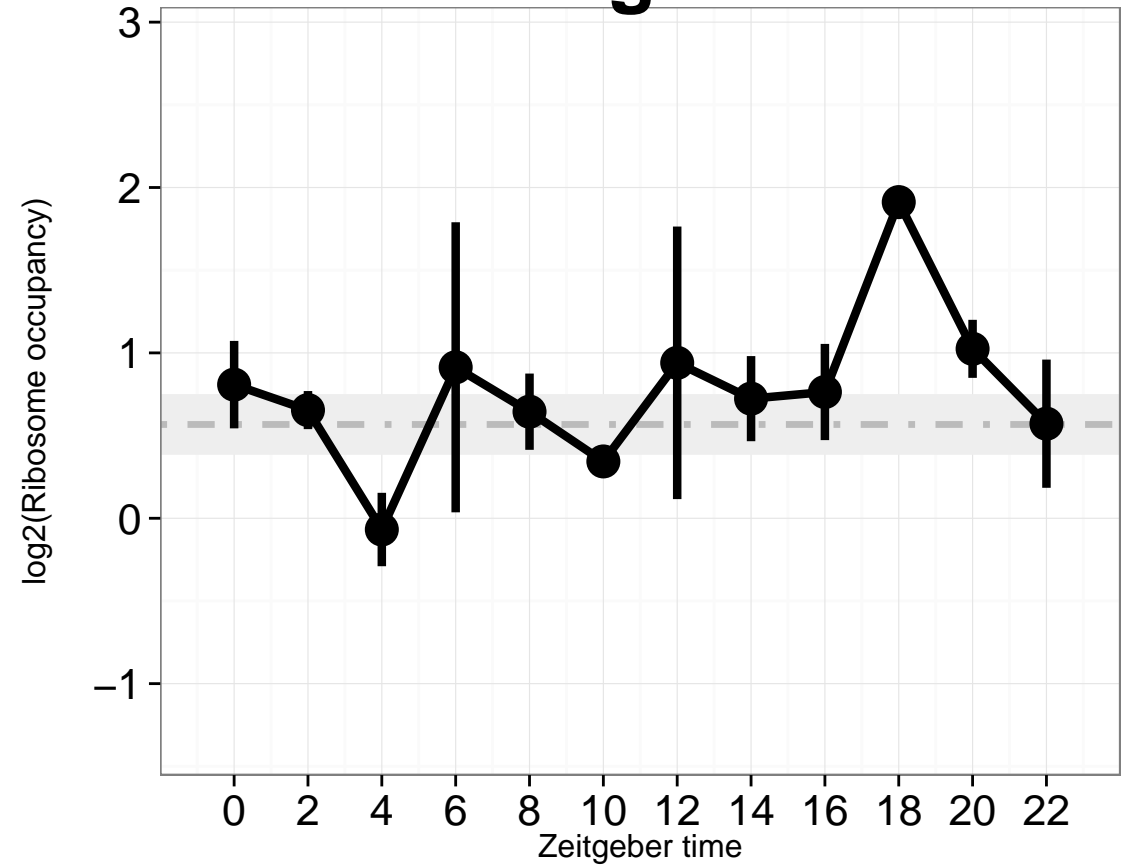

Supplement: SuppDataset_1.zip [file B3gnt3_set_A.pdf › Supplemental Dataset 1/A-mRNA_nonrhyth_translation_nonrhyth/B3gnt3_set_A.pdf]

# B3gntl1

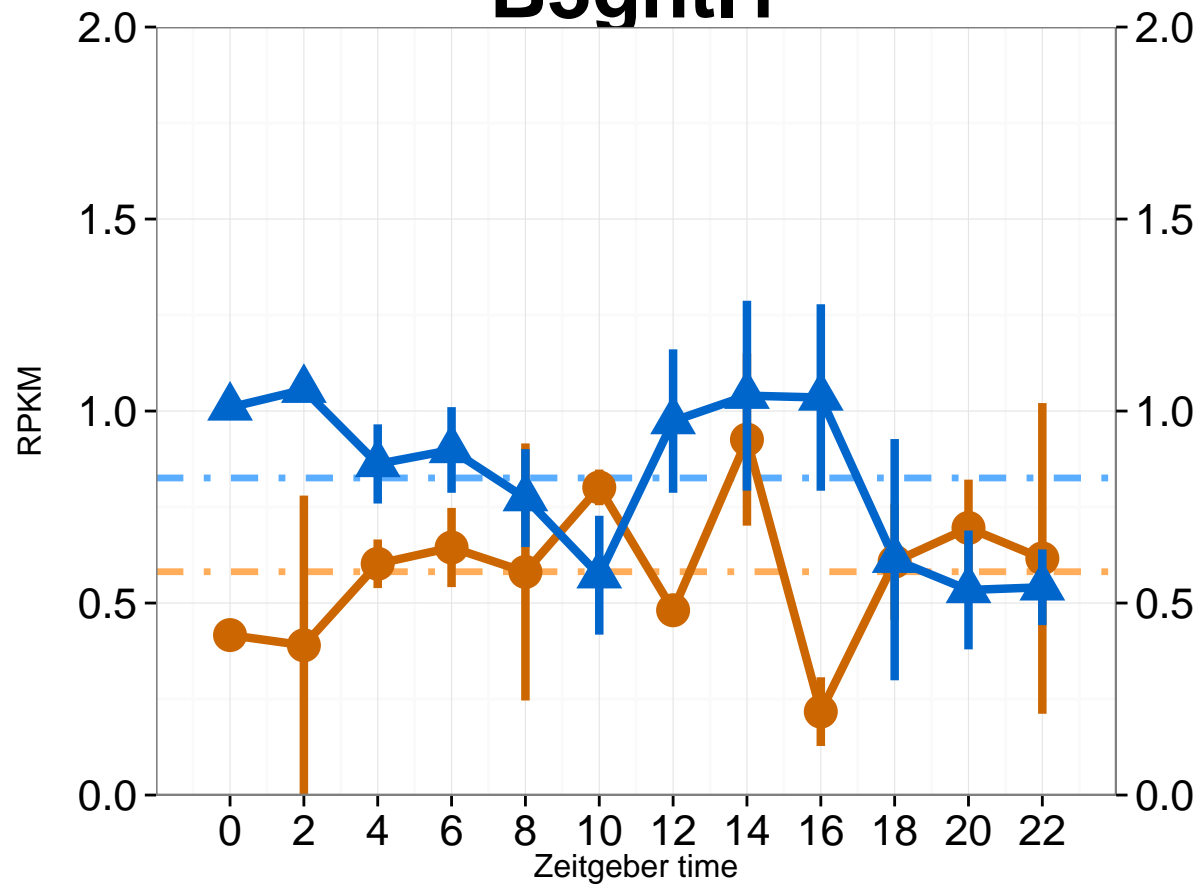

# B3gntl1

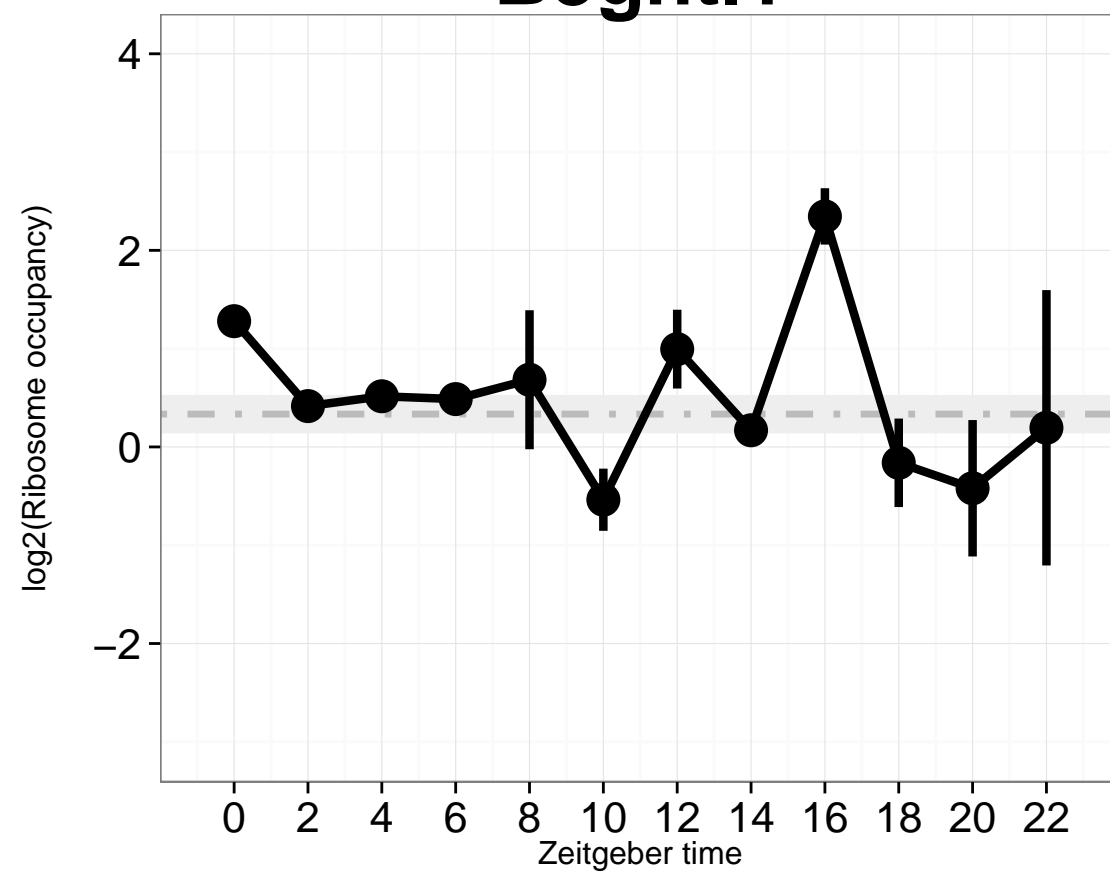

Supplement: SuppDataset_1.zip [file B3gntl1_set_A.pdf › Supplemental Dataset 1/A-mRNA_nonrhyth_translation_nonrhyth/B3gntl1_set_A.pdf]

# B430306N03Rik

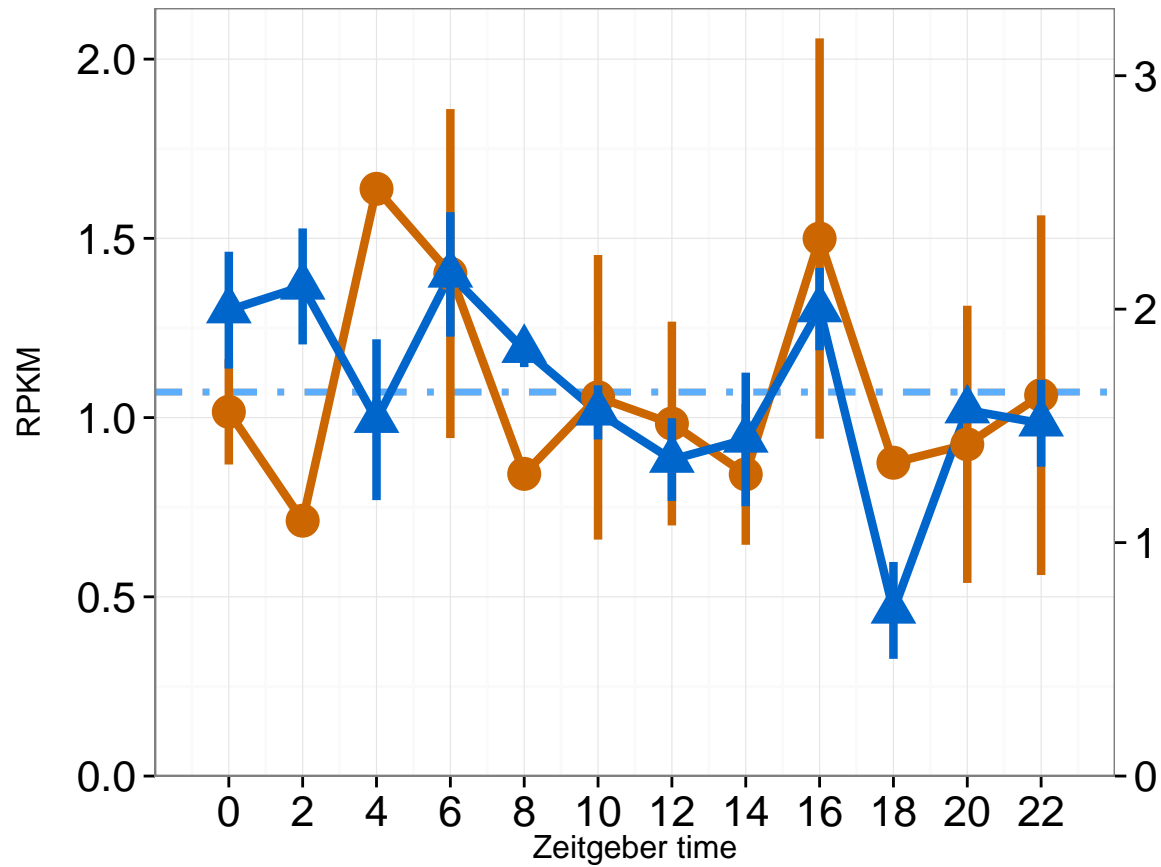

# B430306N03Rik

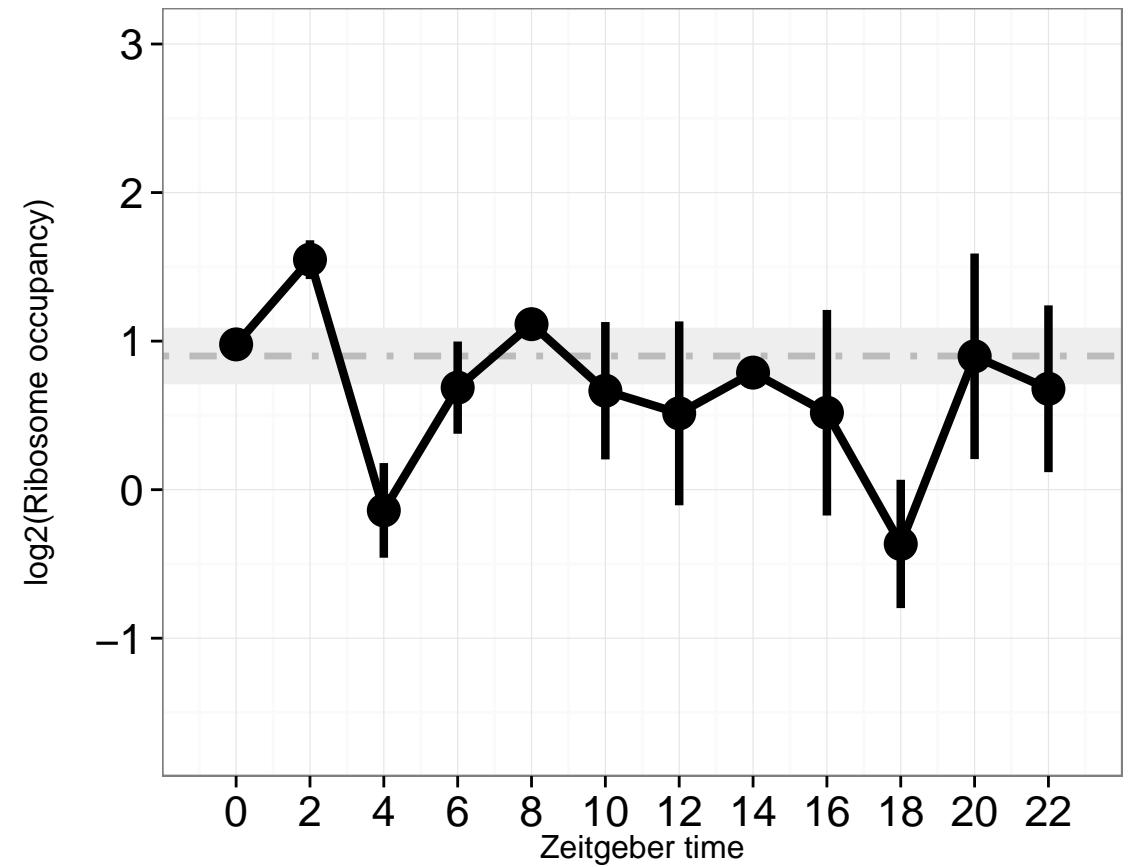

Supplement: SuppDataset_1.zip [file B430306N03Rik_set_A.pdf › Supplemental Dataset 1/A-mRNA_nonrhyth_translation_nonrhyth/B430306N03Rik_set_A.pdf]

# B4galnt1

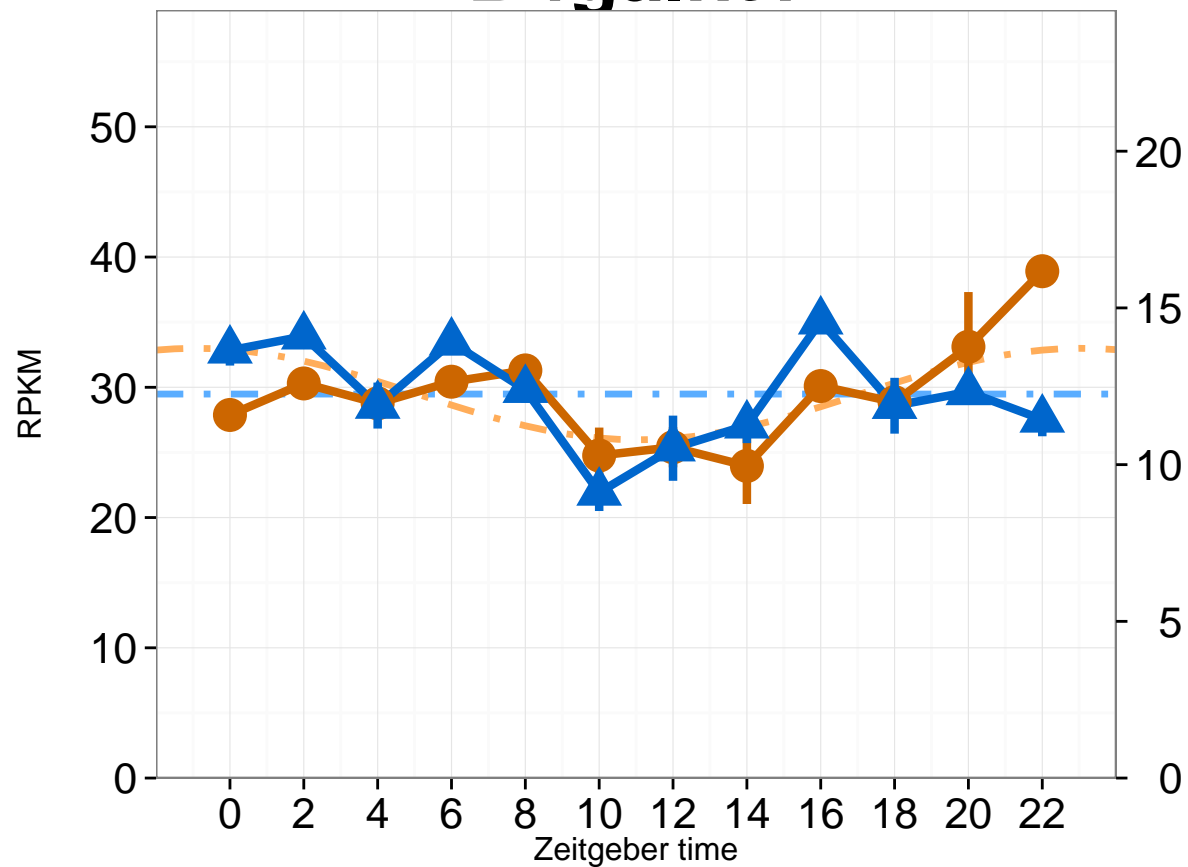

# B4galnt1

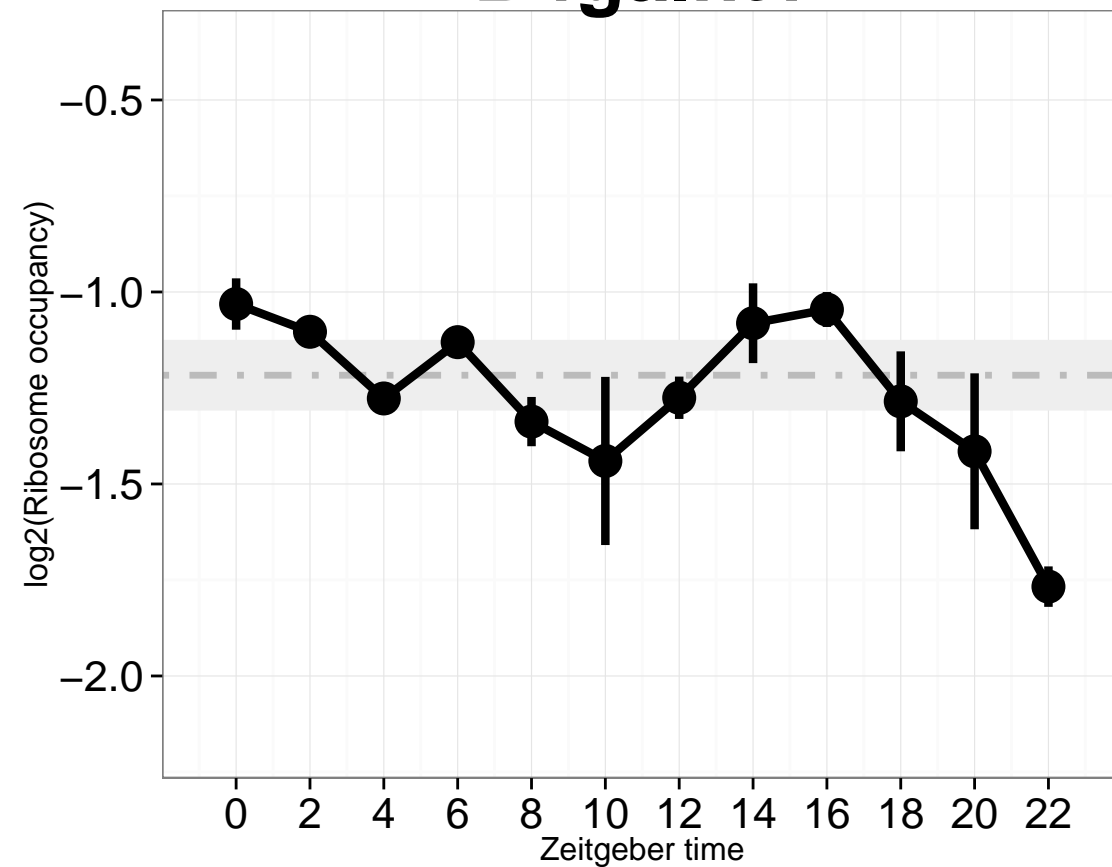

Supplement: SuppDataset_1.zip [file B4galnt1_set_A.pdf › Supplemental Dataset 1/A-mRNA_nonrhyth_translation_nonrhyth/B4galnt1_set_A.pdf]

# B4galt4

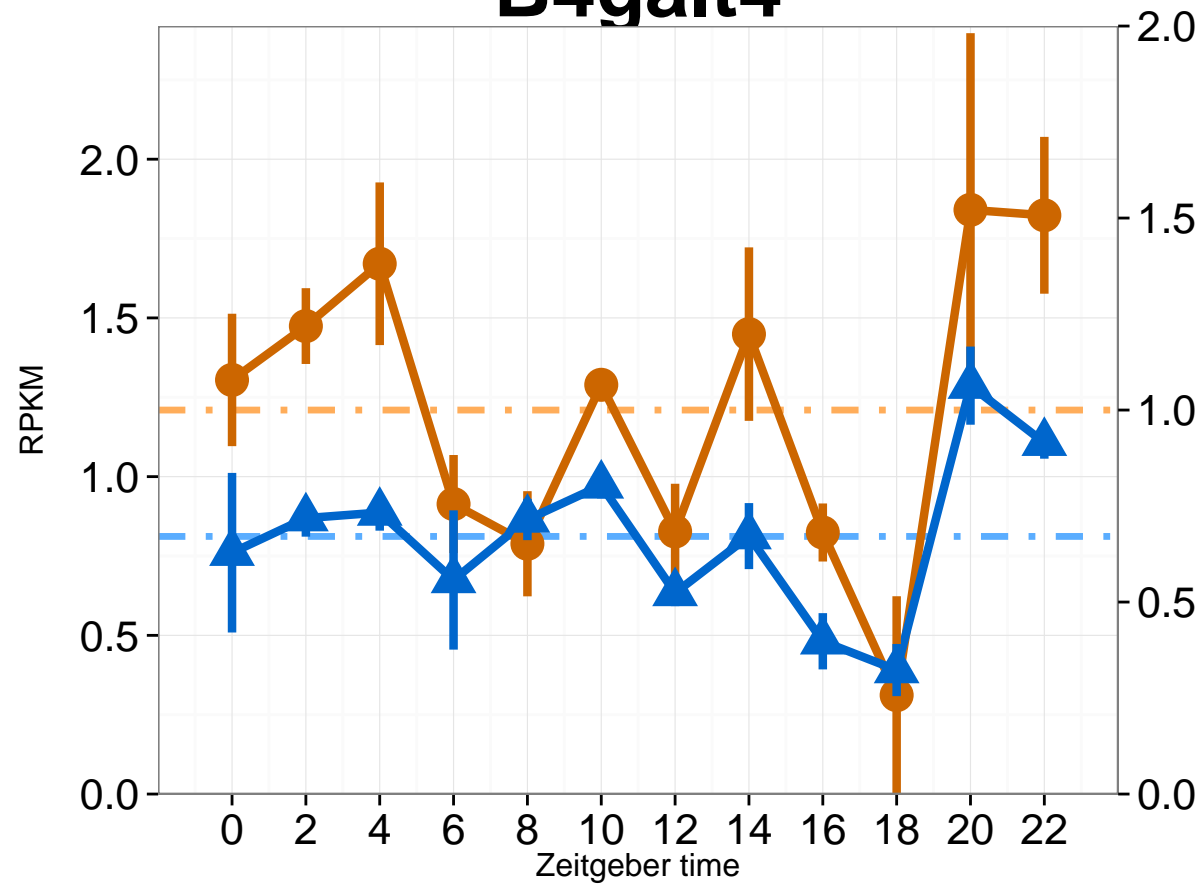

# B4galt4

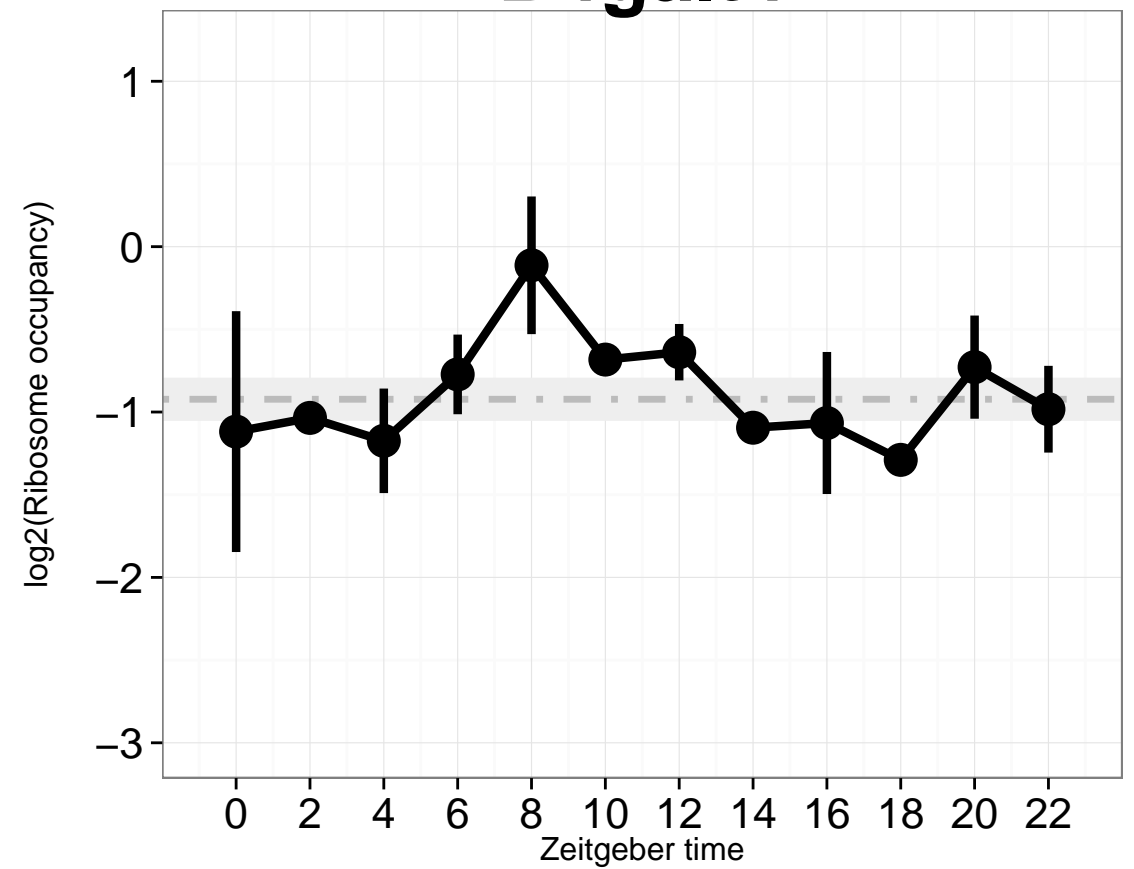

Supplement: SuppDataset_1.zip [file B4galt4_set_A.pdf › Supplemental Dataset 1/A-mRNA_nonrhyth_translation_nonrhyth/B4galt4_set_A.pdf]

## B4galt6

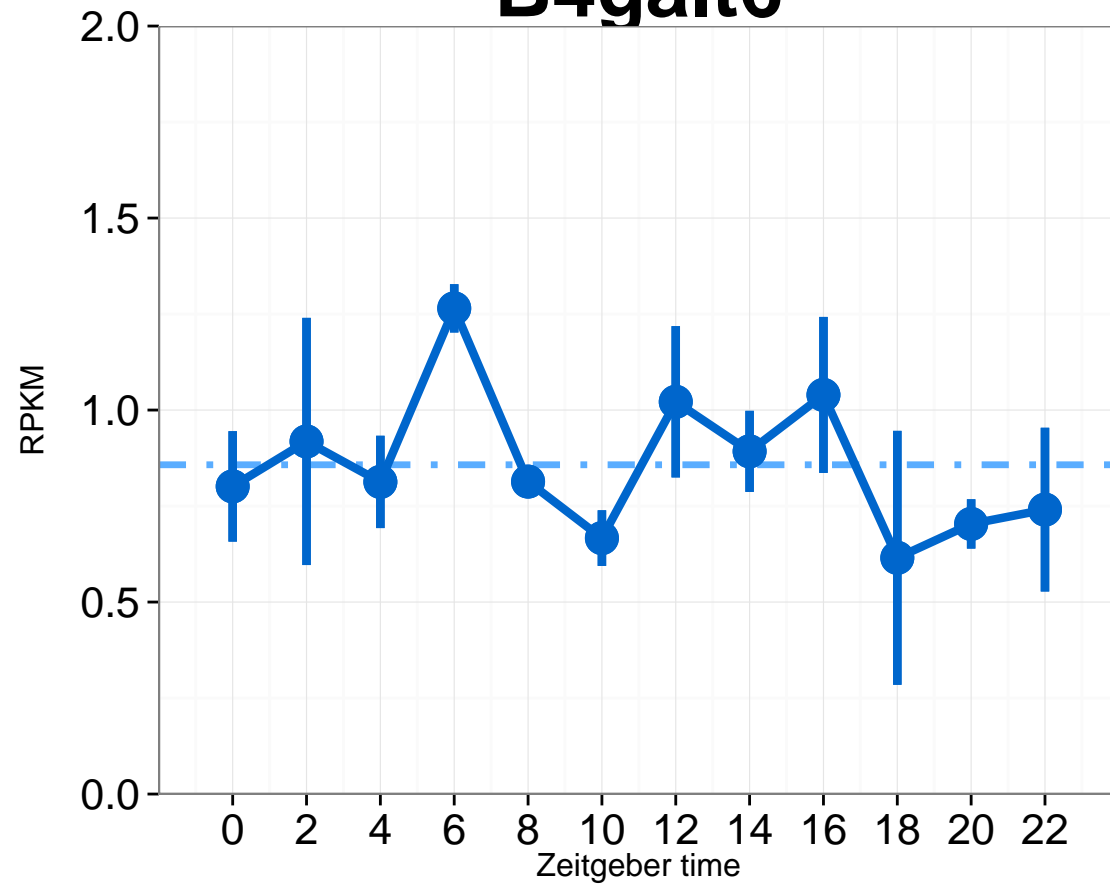

## B4galt6 log2(Ribosome occupancy)

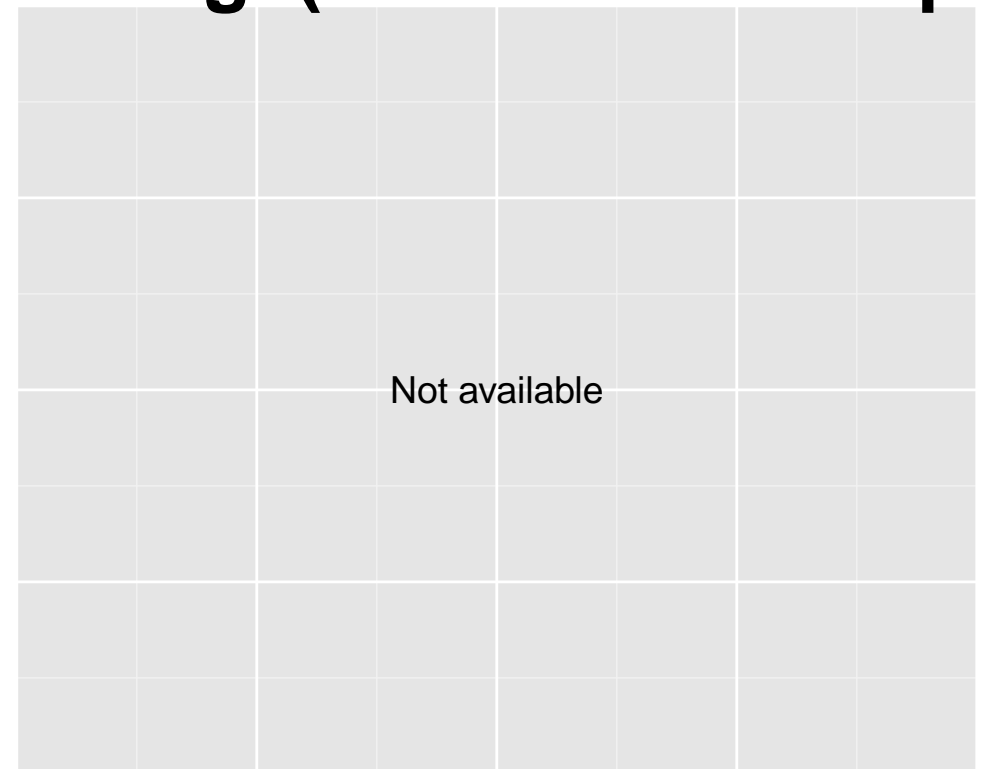

Supplement: SuppDataset_1.zip [file B4galt6_set_A.pdf › Supplemental Dataset 1/A-mRNA_nonrhyth_translation_nonrhyth/B4galt6_set_A.pdf]

# B9d2

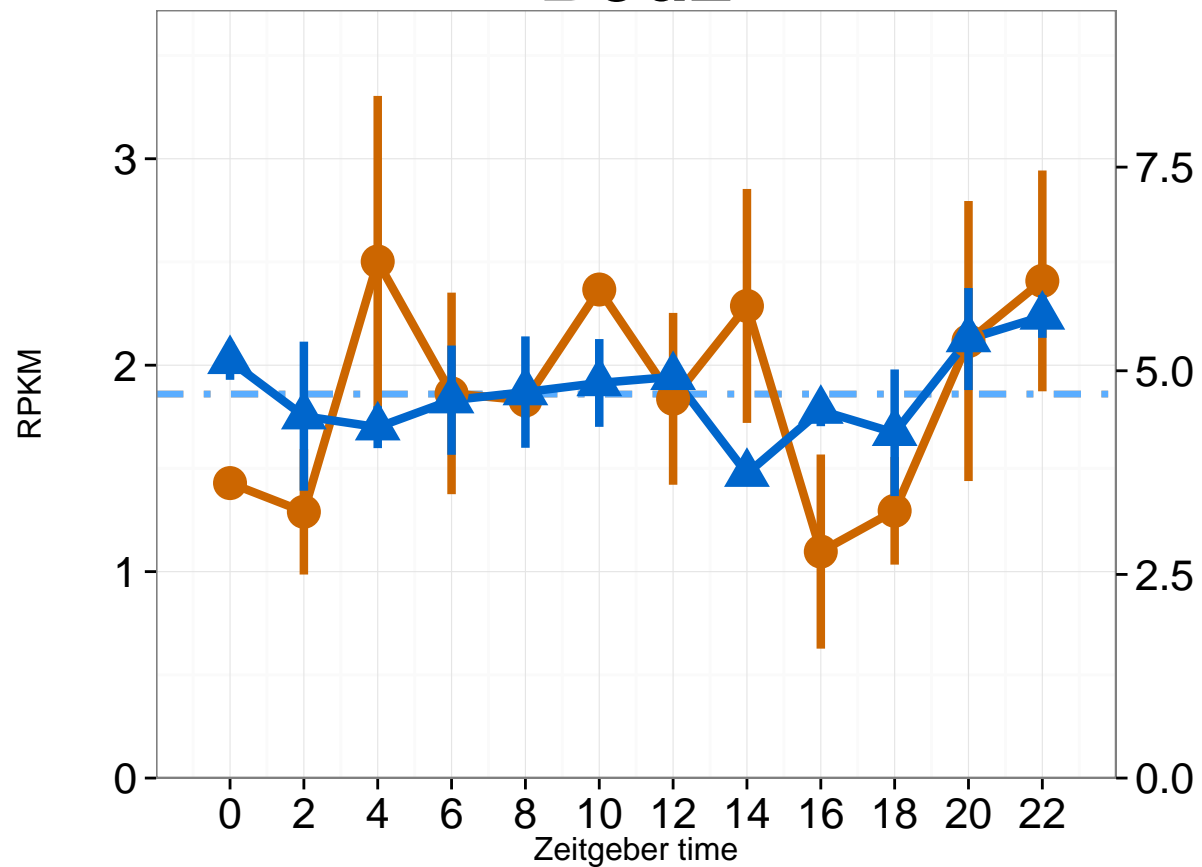

# B9d2

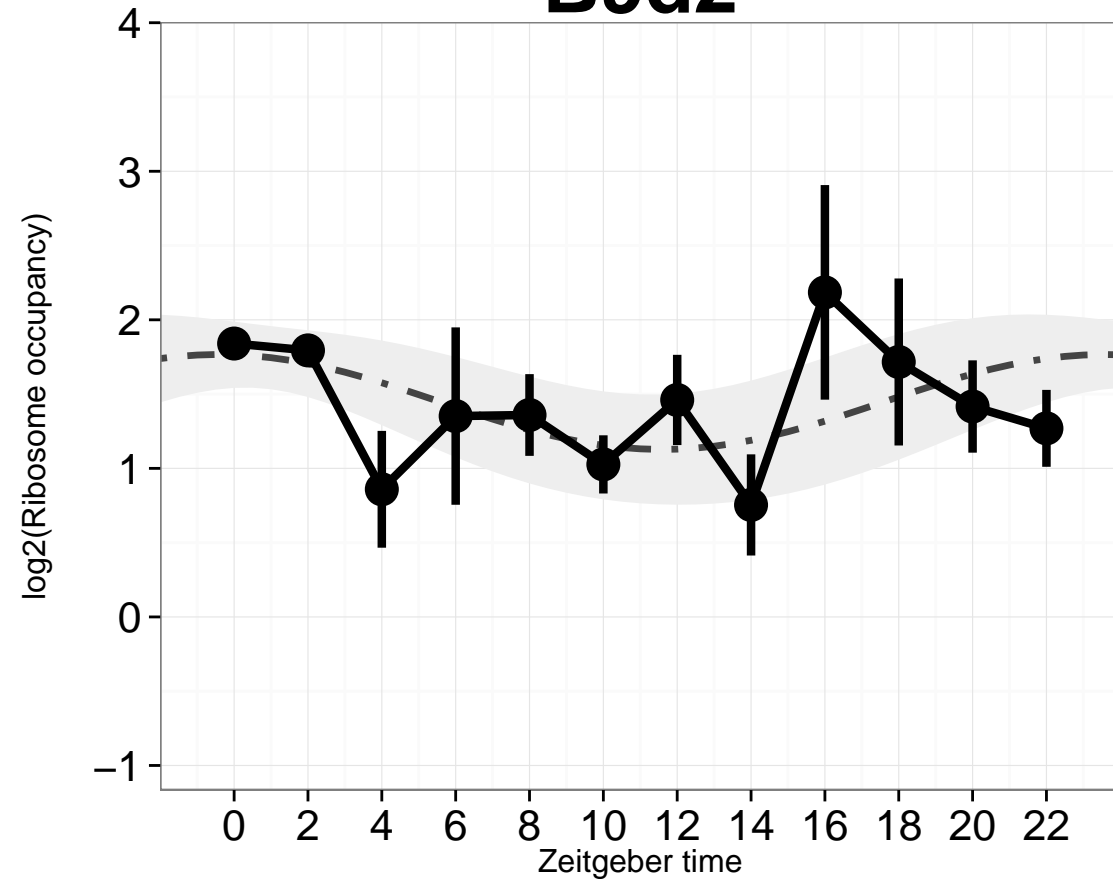

Supplement: SuppDataset_1.zip [file B9d2_set_A.pdf › Supplemental Dataset 1/A-mRNA_nonrhyth_translation_nonrhyth/B9d2_set_A.pdf]

# BC002059

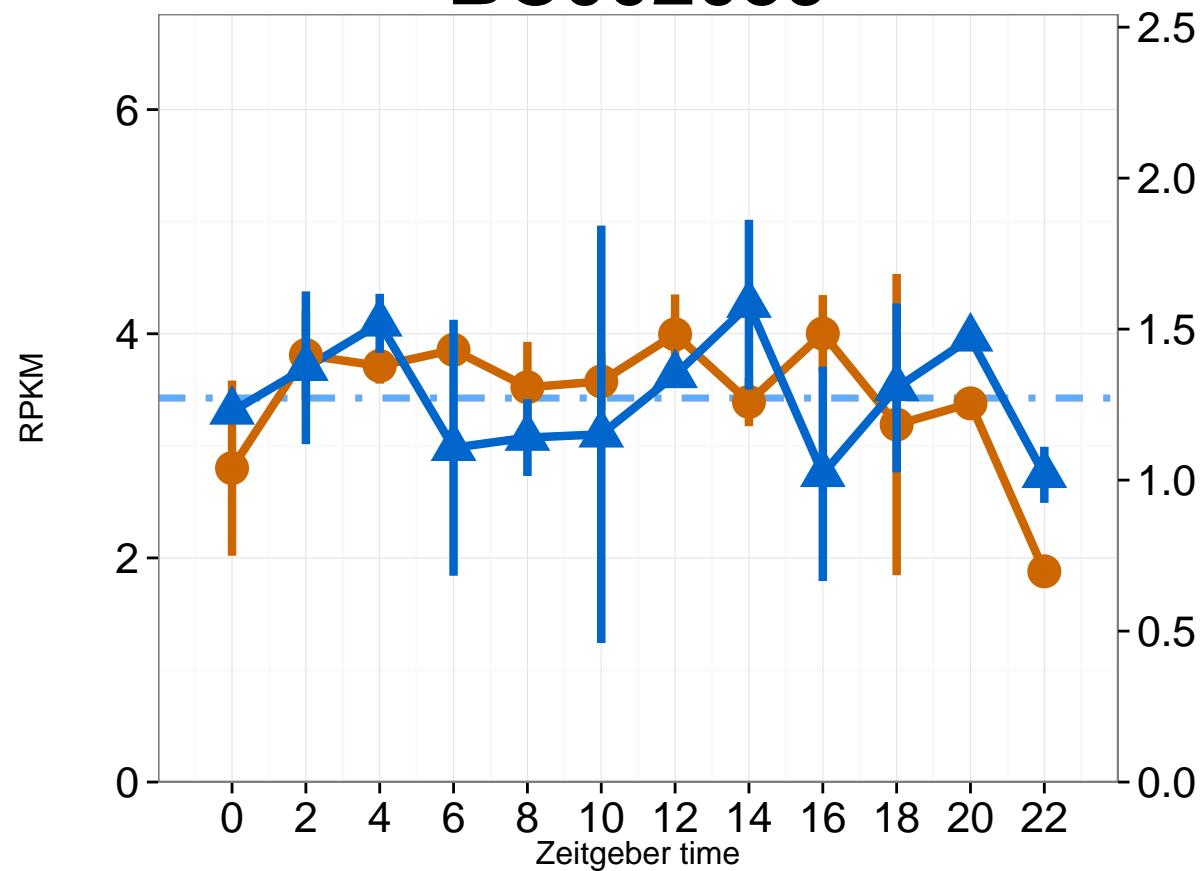

# BC002059

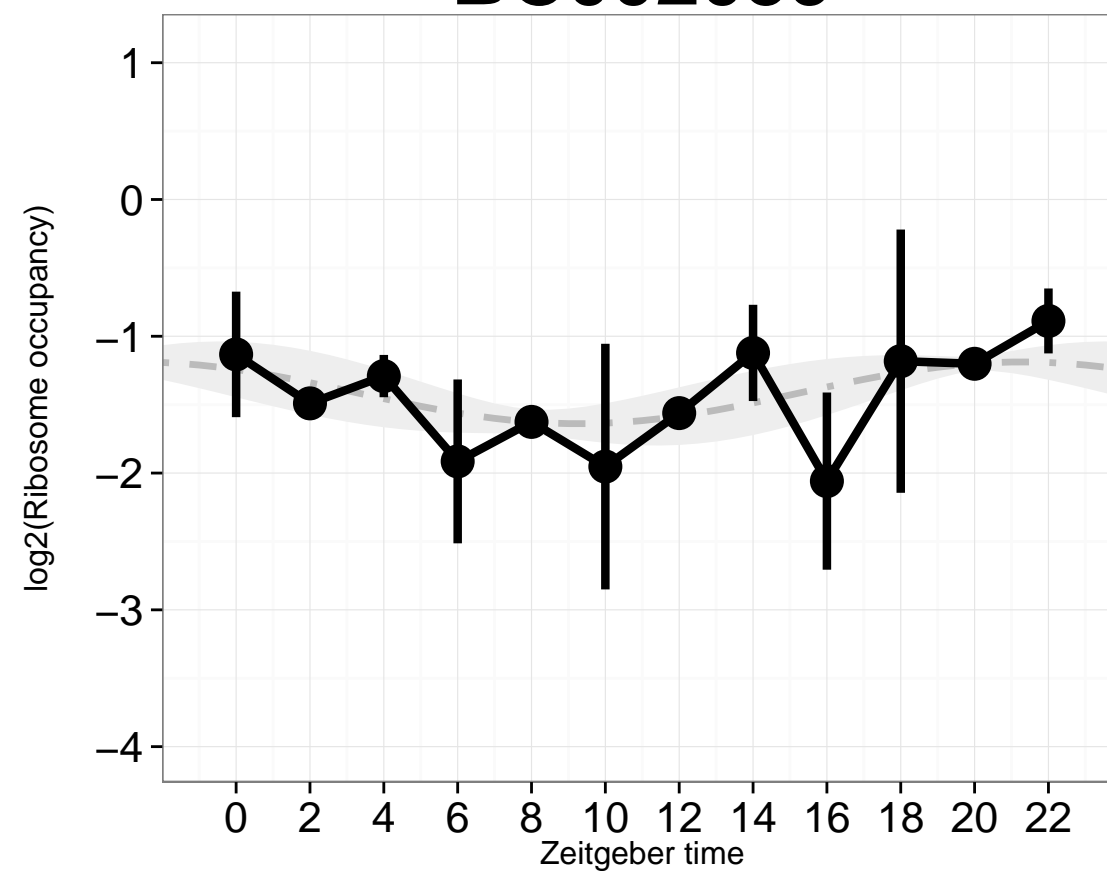

Supplement: SuppDataset_1.zip [file BC002059_set_A.pdf › Supplemental Dataset 1/A-mRNA_nonrhyth_translation_nonrhyth/BC002059_set_A.pdf]

# BC003331

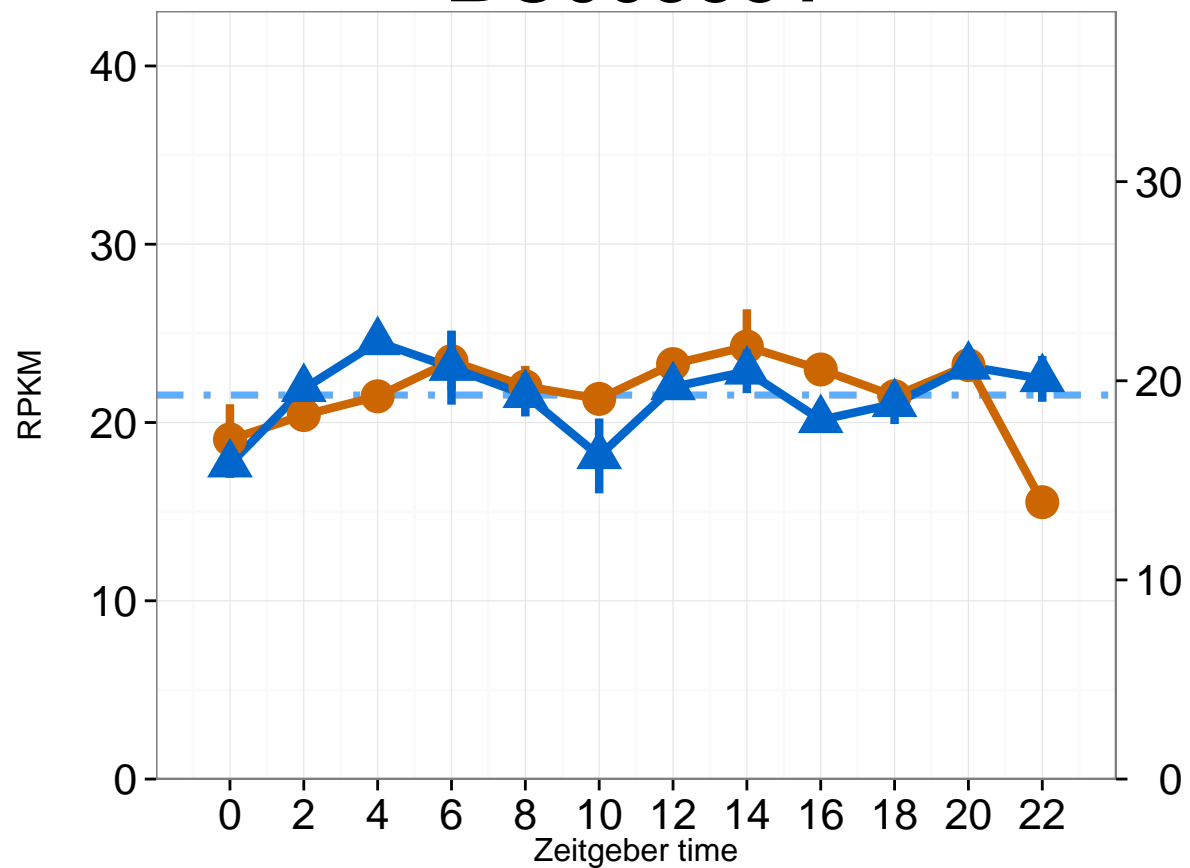

# BC003331

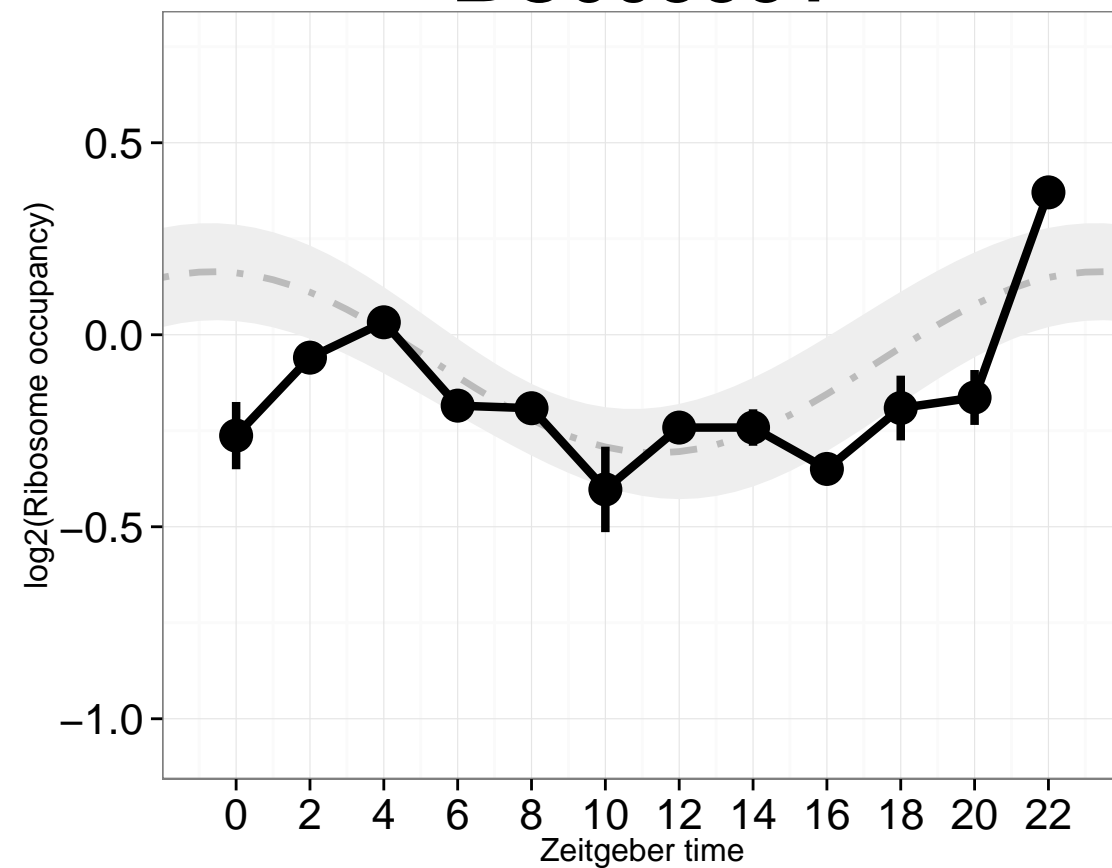

Supplement: SuppDataset_1.zip [file BC003331_set_A.pdf › Supplemental Dataset 1/A-mRNA_nonrhyth_translation_nonrhyth/BC003331_set_A.pdf]

## BC003965

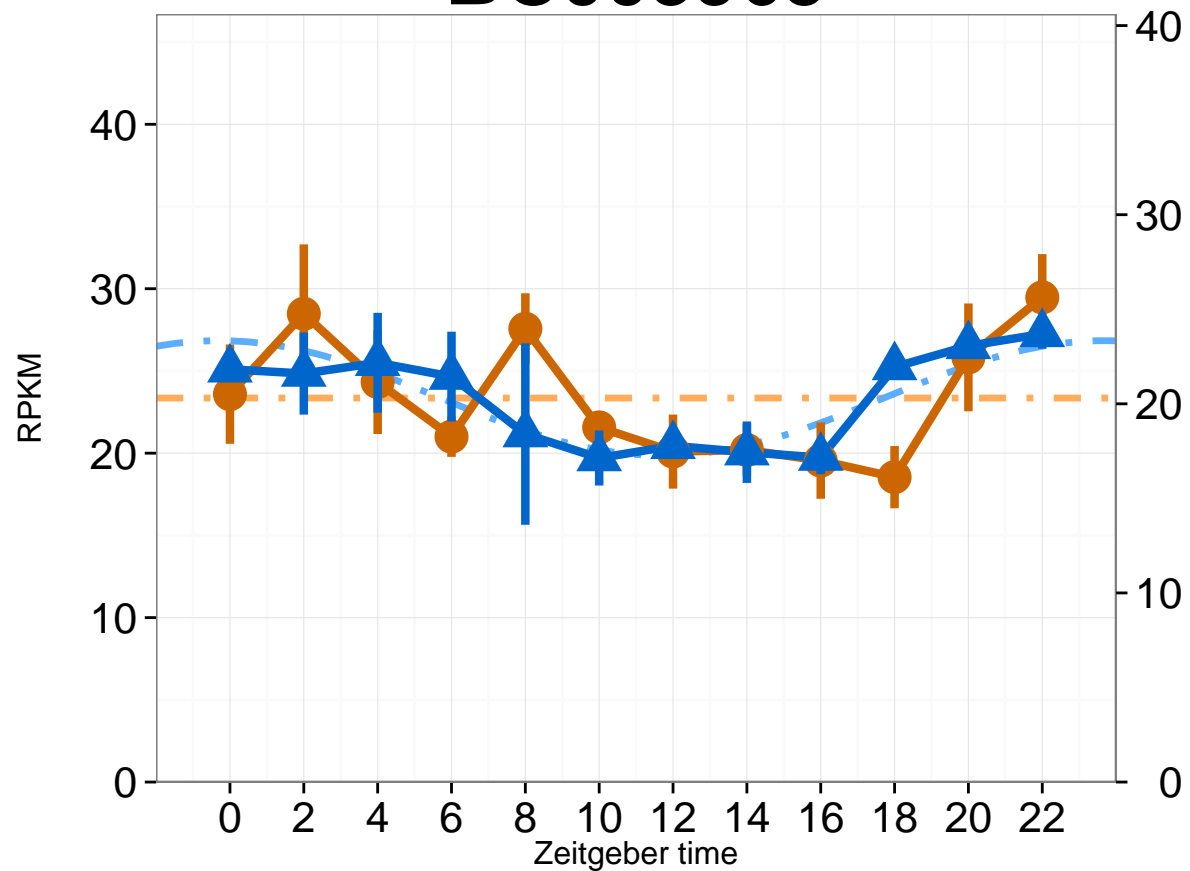

## BC003965

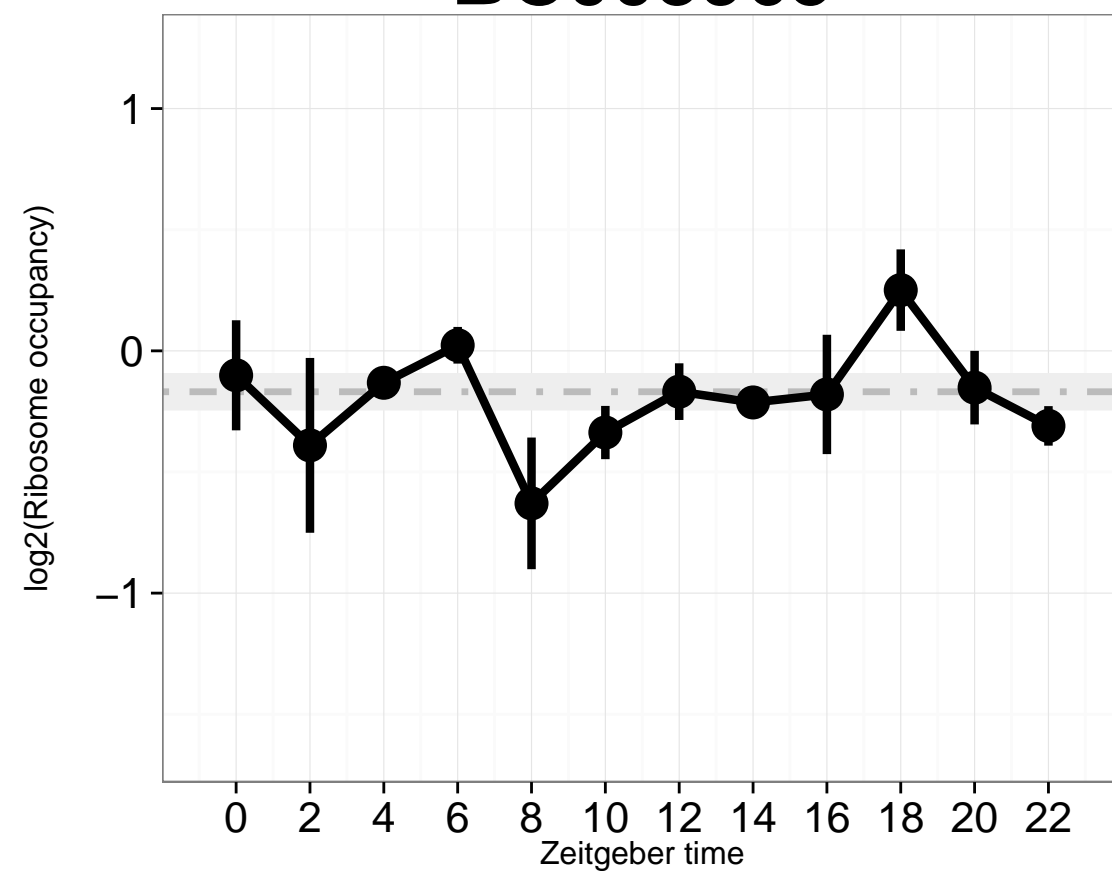

Supplement: SuppDataset_1.zip [file BC003965_set_A.pdf › Supplemental Dataset 1/A-mRNA_nonrhyth_translation_nonrhyth/BC003965_set_A.pdf]

## BC005561

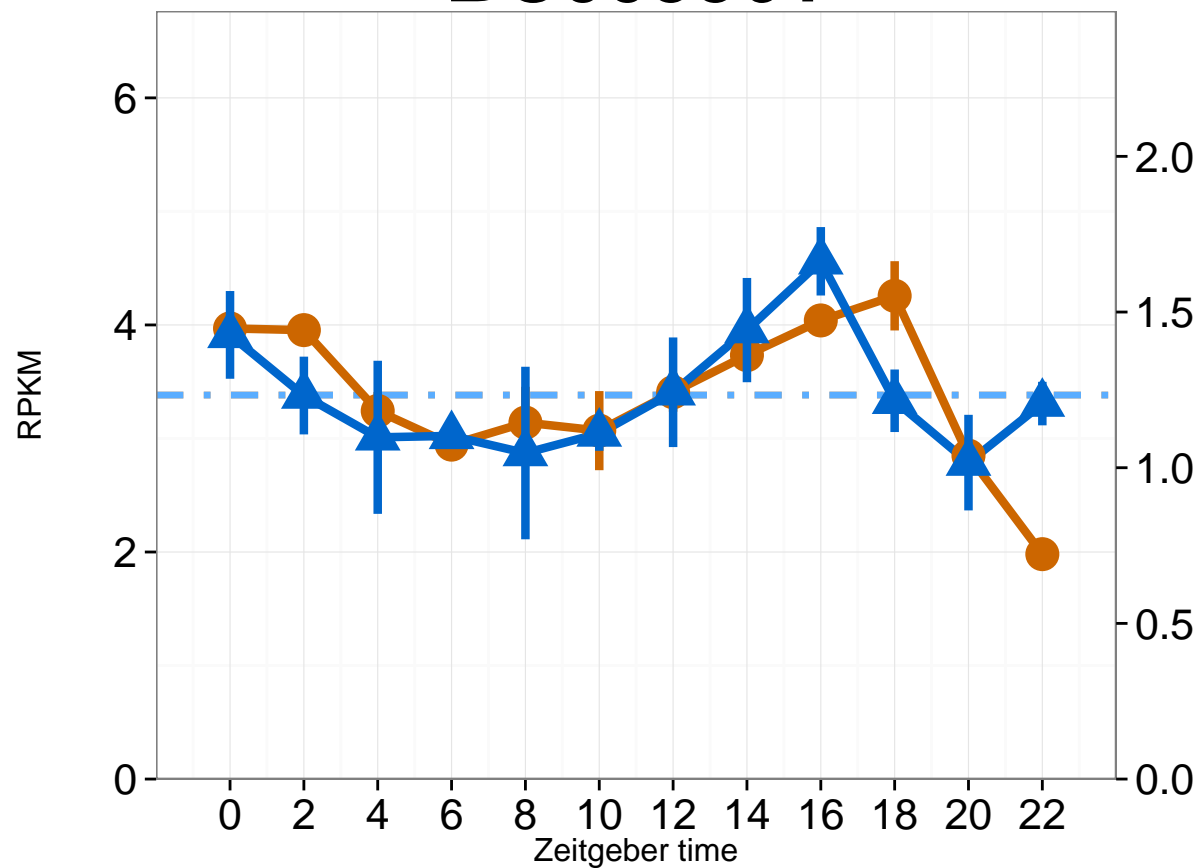

## BC005561

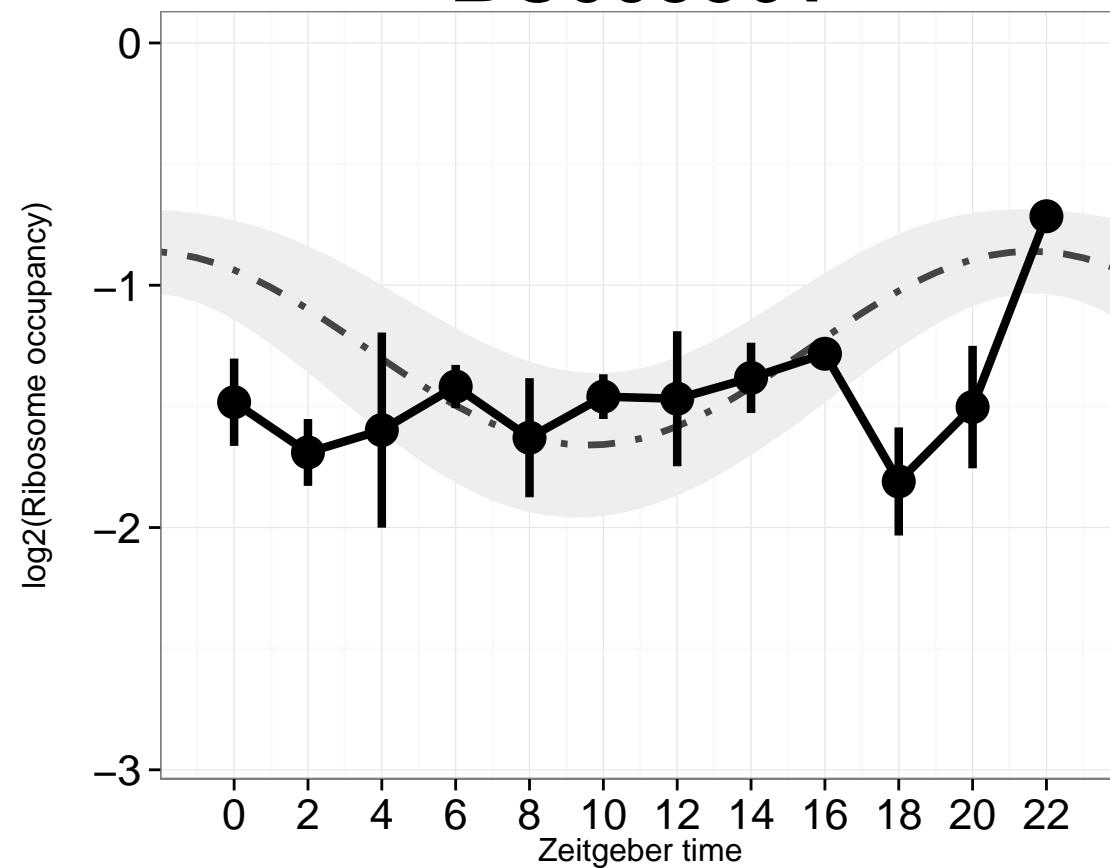

Supplement: SuppDataset_1.zip [file BC005561_set_A.pdf › Supplemental Dataset 1/A-mRNA_nonrhyth_translation_nonrhyth/BC005561_set_A.pdf]

# BC005624

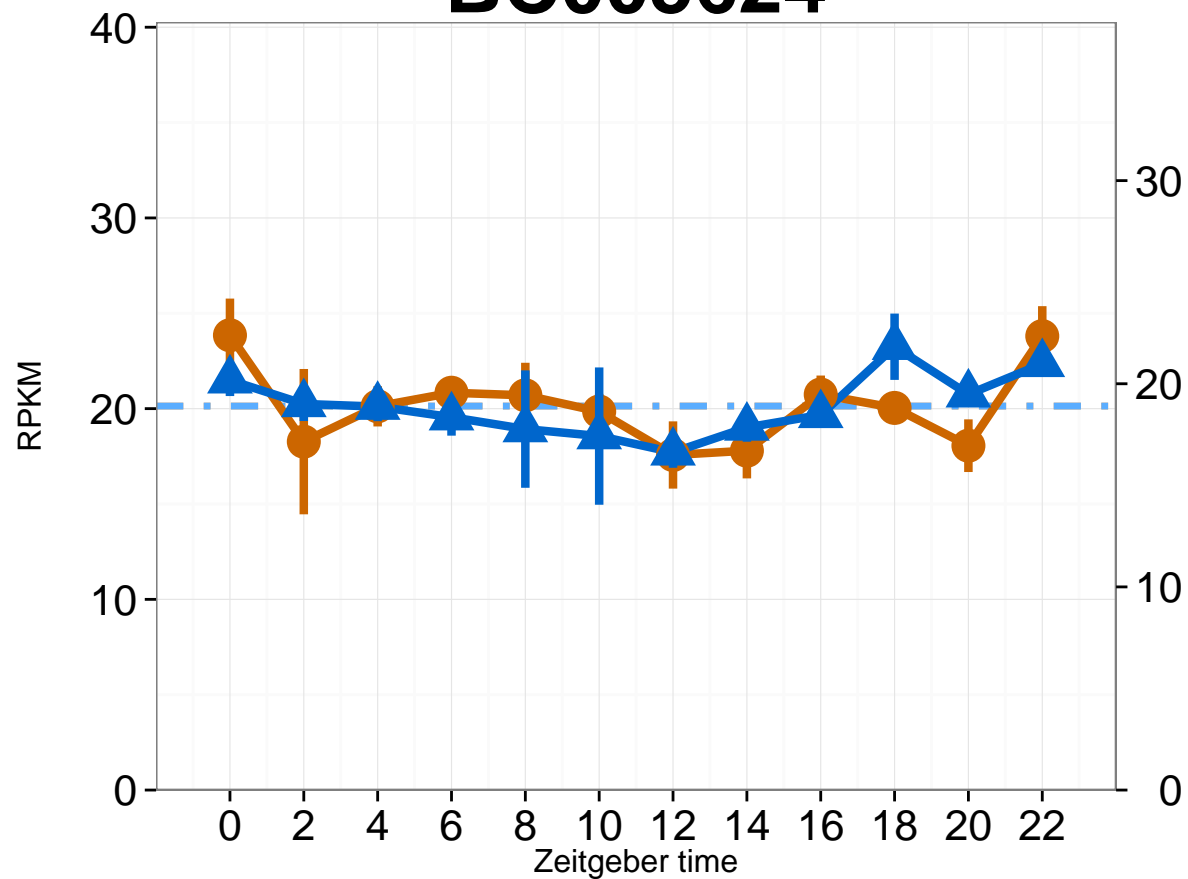

# BC005624

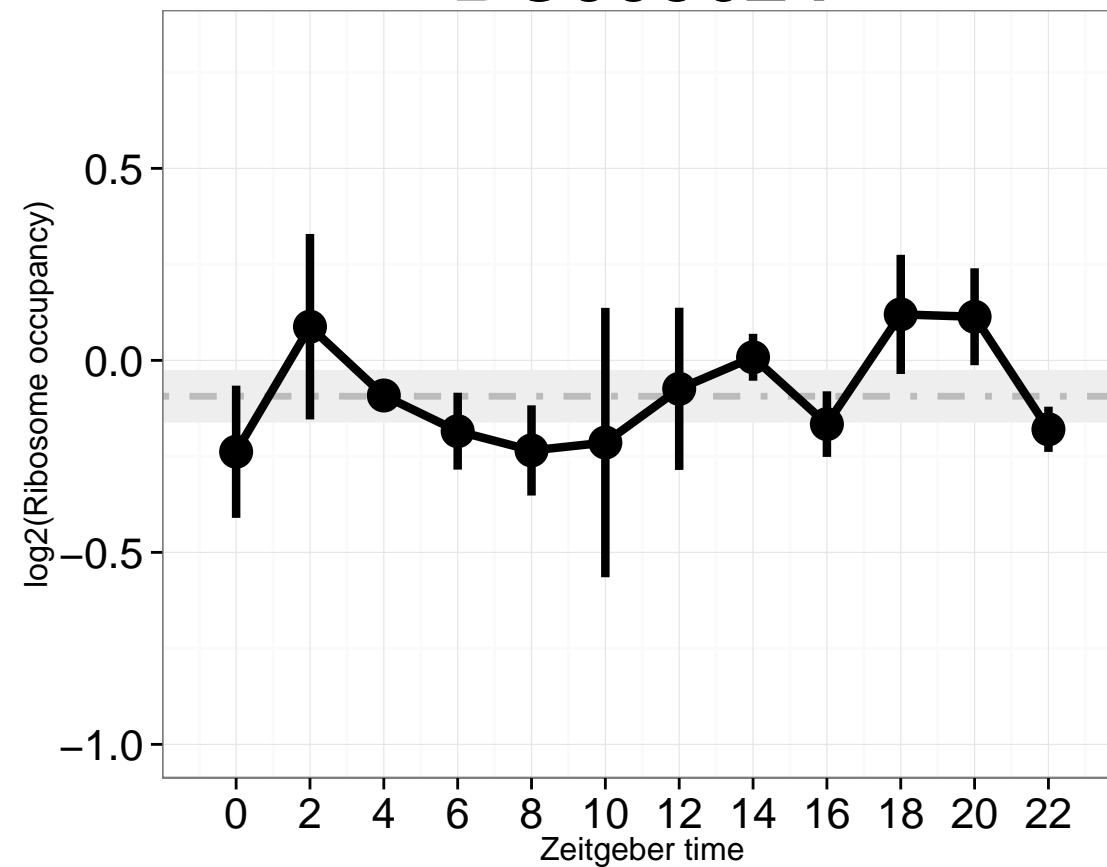

Supplement: SuppDataset_1.zip [file BC005624_set_A.pdf › Supplemental Dataset 1/A-mRNA_nonrhyth_translation_nonrhyth/BC005624_set_A.pdf]

# BC016423

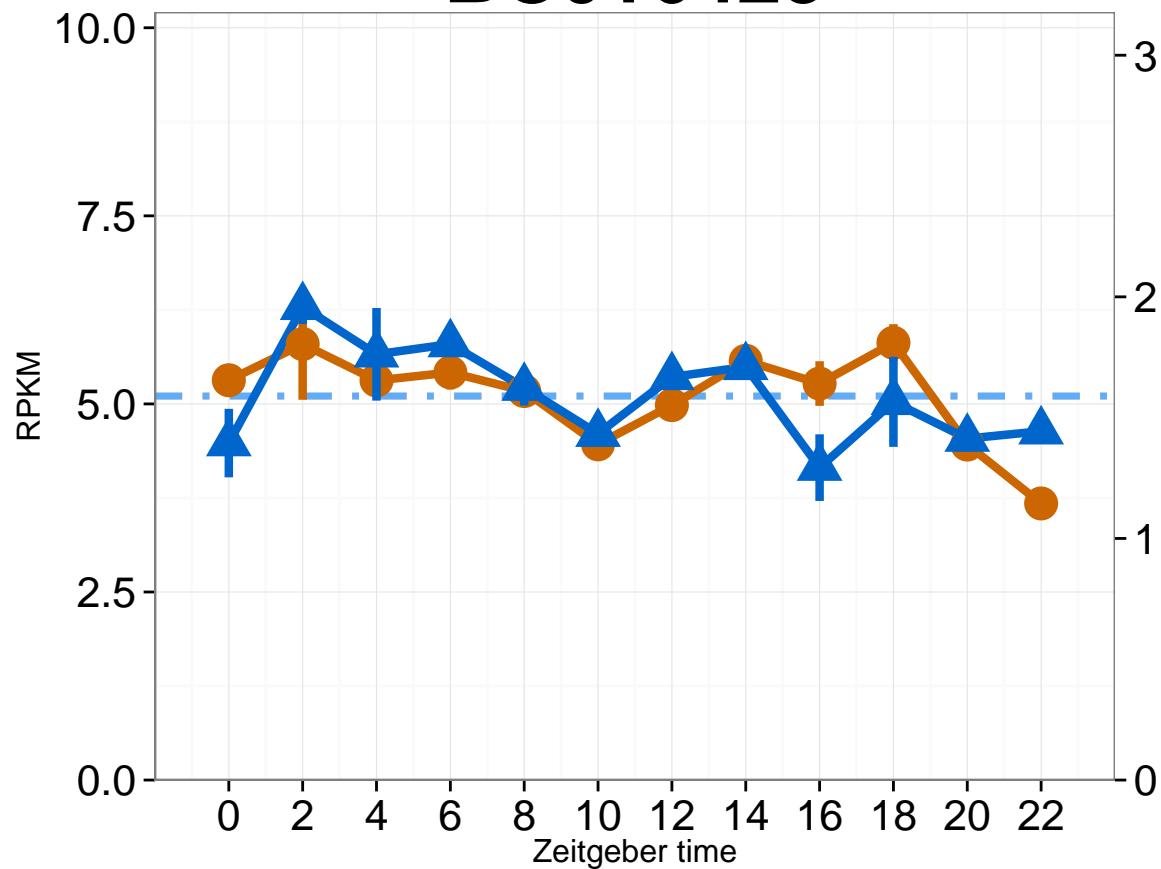

# BC016423

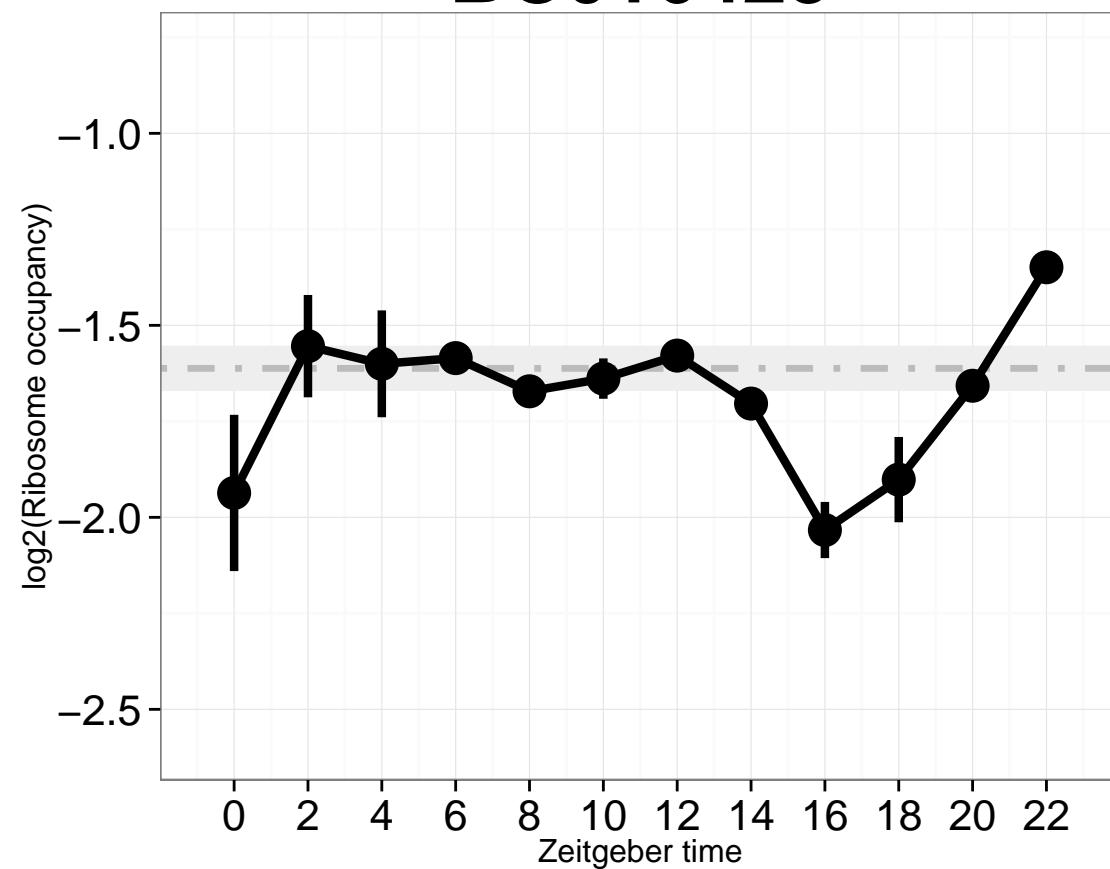

Supplement: SuppDataset_1.zip [file BC016423_set_A.pdf › Supplemental Dataset 1/A-mRNA_nonrhyth_translation_nonrhyth/BC016423_set_A.pdf]

# BC017158

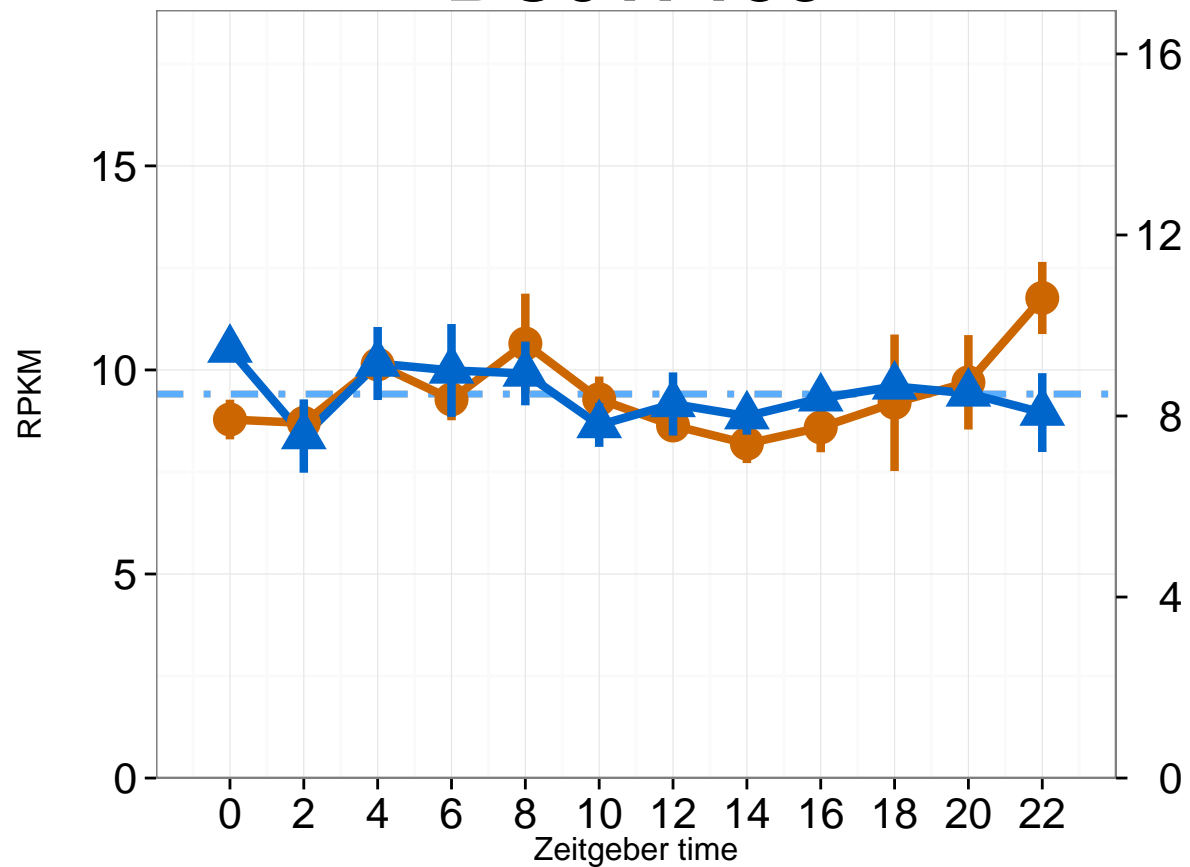

# BC017158

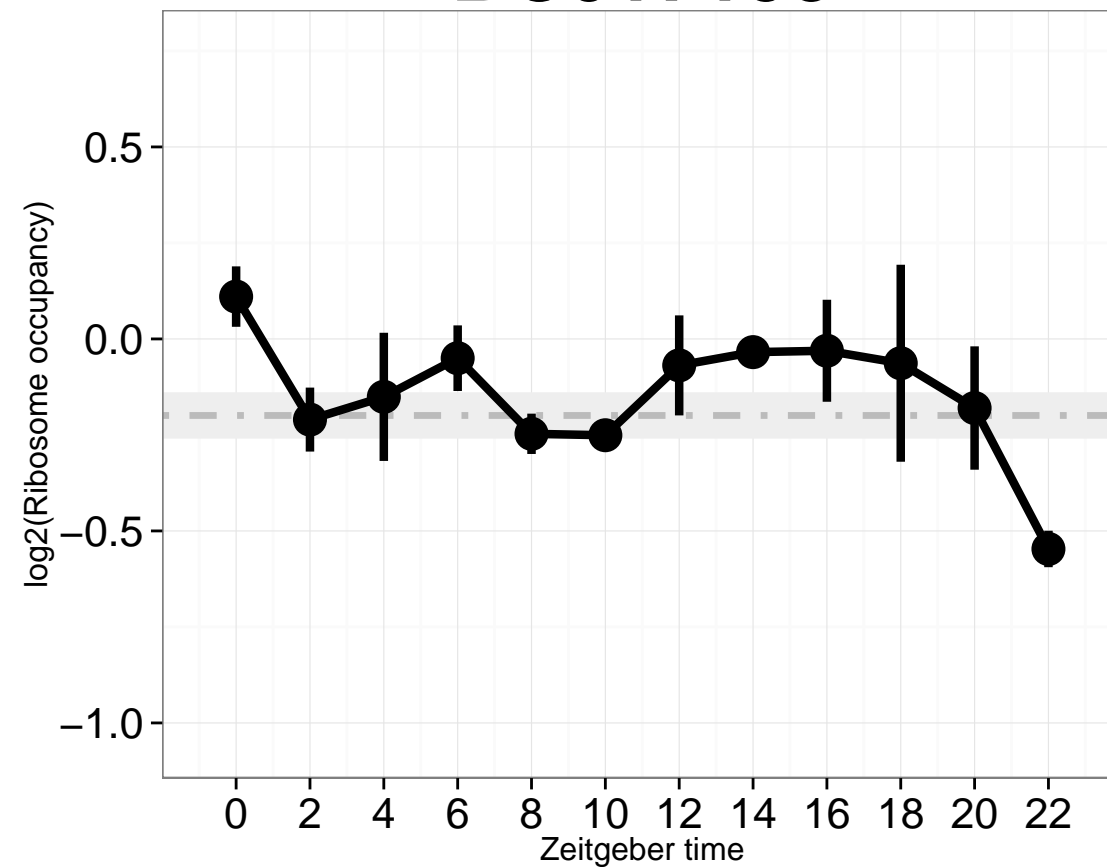

Supplement: SuppDataset_1.zip [file BC017158_set_A.pdf › Supplemental Dataset 1/A-mRNA_nonrhyth_translation_nonrhyth/BC017158_set_A.pdf]

# BC017643

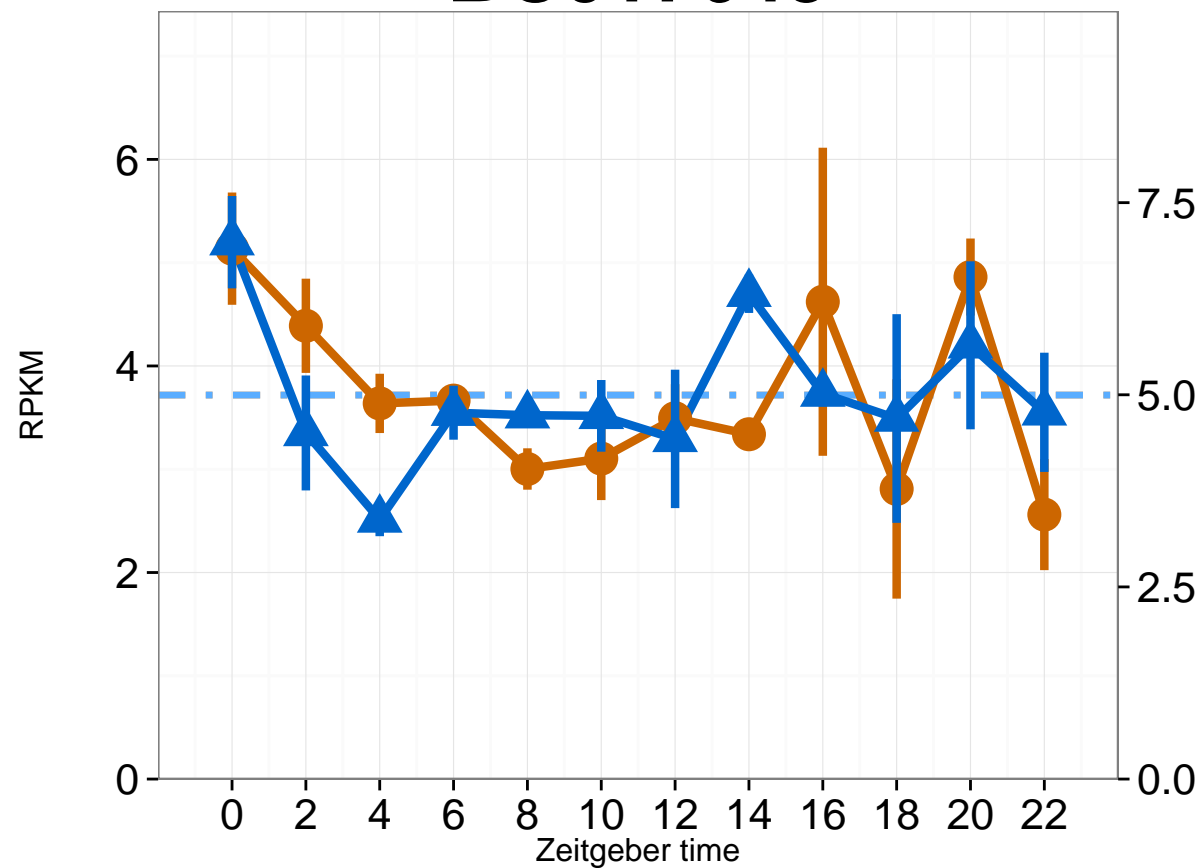

# BC017643

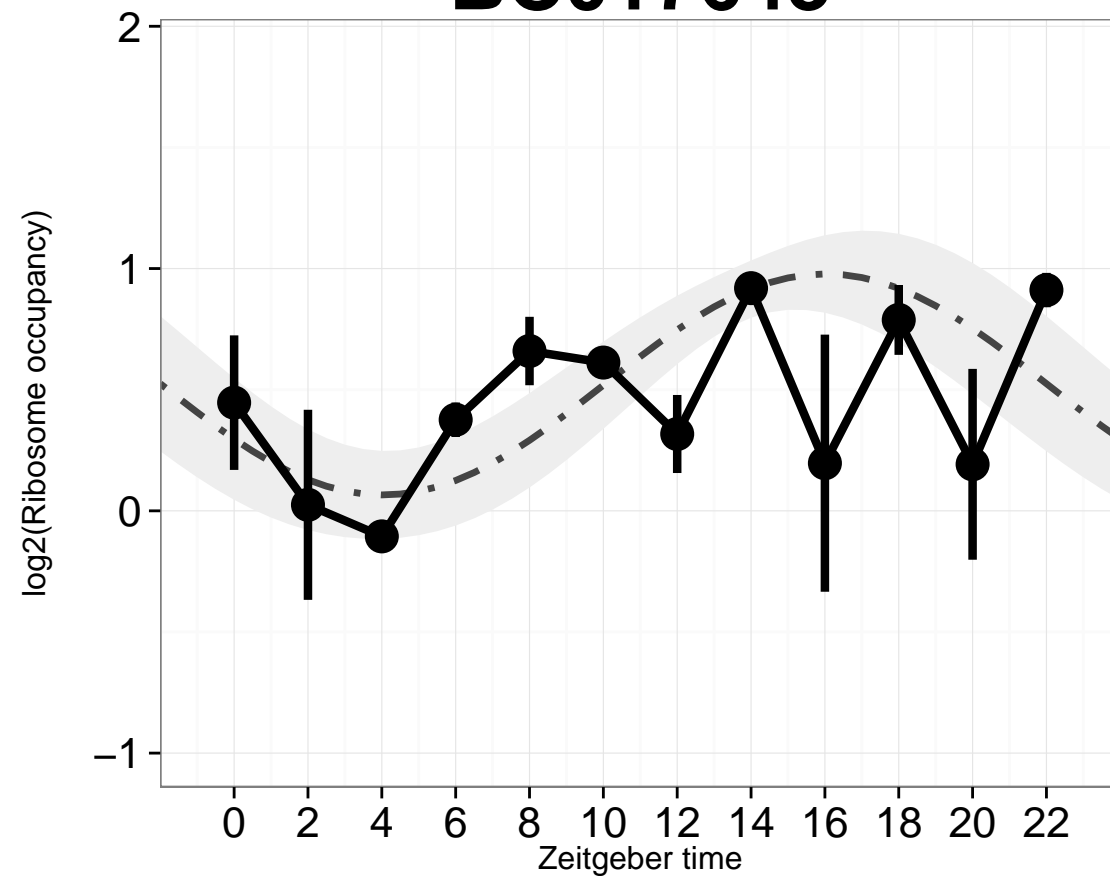

Supplement: SuppDataset_1.zip [file BC017643_set_A.pdf › Supplemental Dataset 1/A-mRNA_nonrhyth_translation_nonrhyth/BC017643_set_A.pdf]

## BC018507

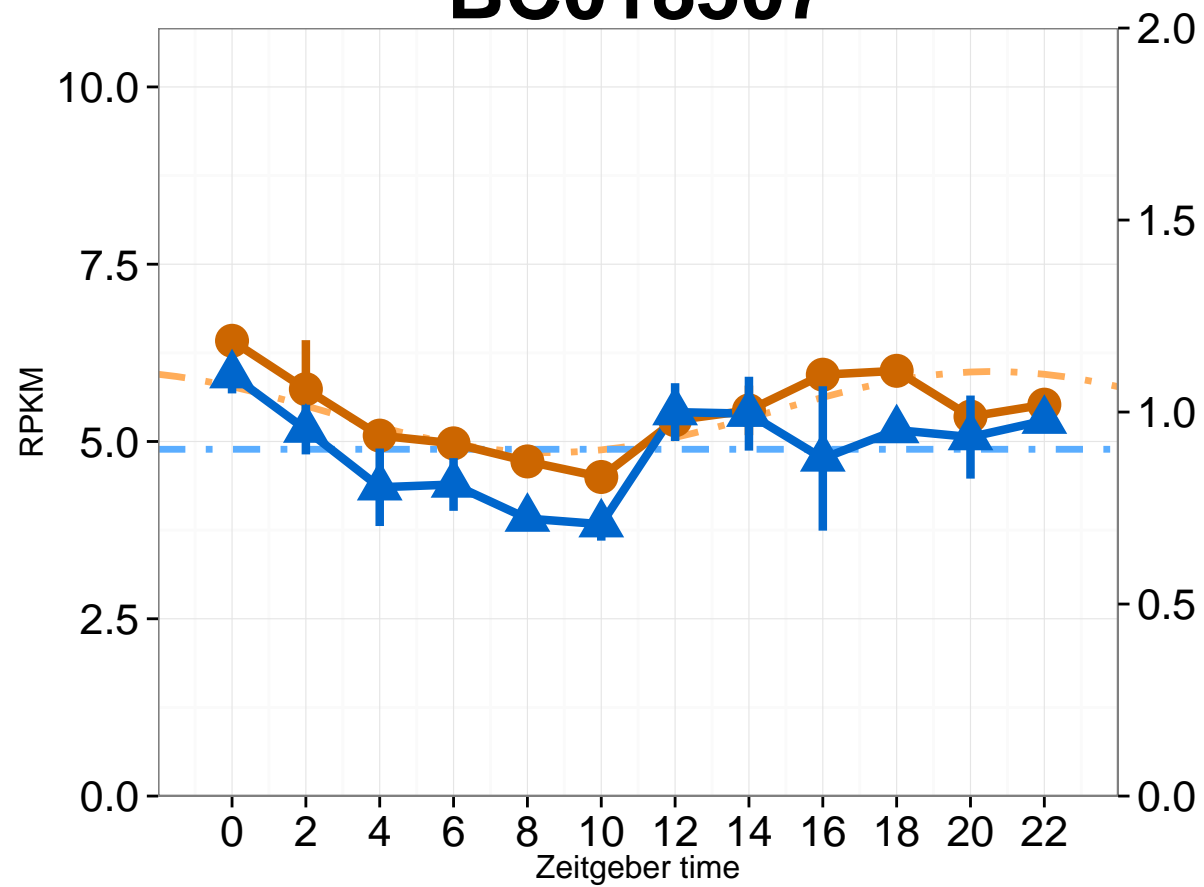

## BC018507

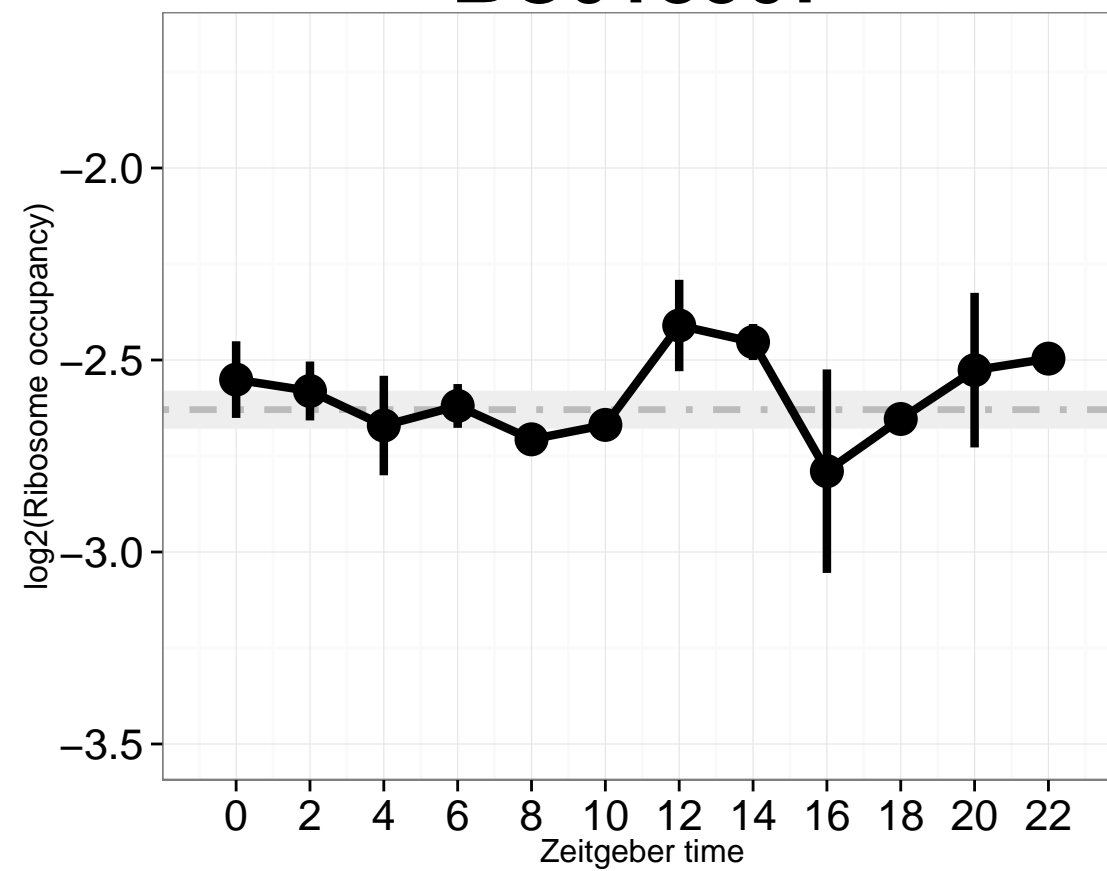

Supplement: SuppDataset_1.zip [file BC018507_set_A.pdf › Supplemental Dataset 1/A-mRNA_nonrhyth_translation_nonrhyth/BC018507_set_A.pdf]

## BC021891

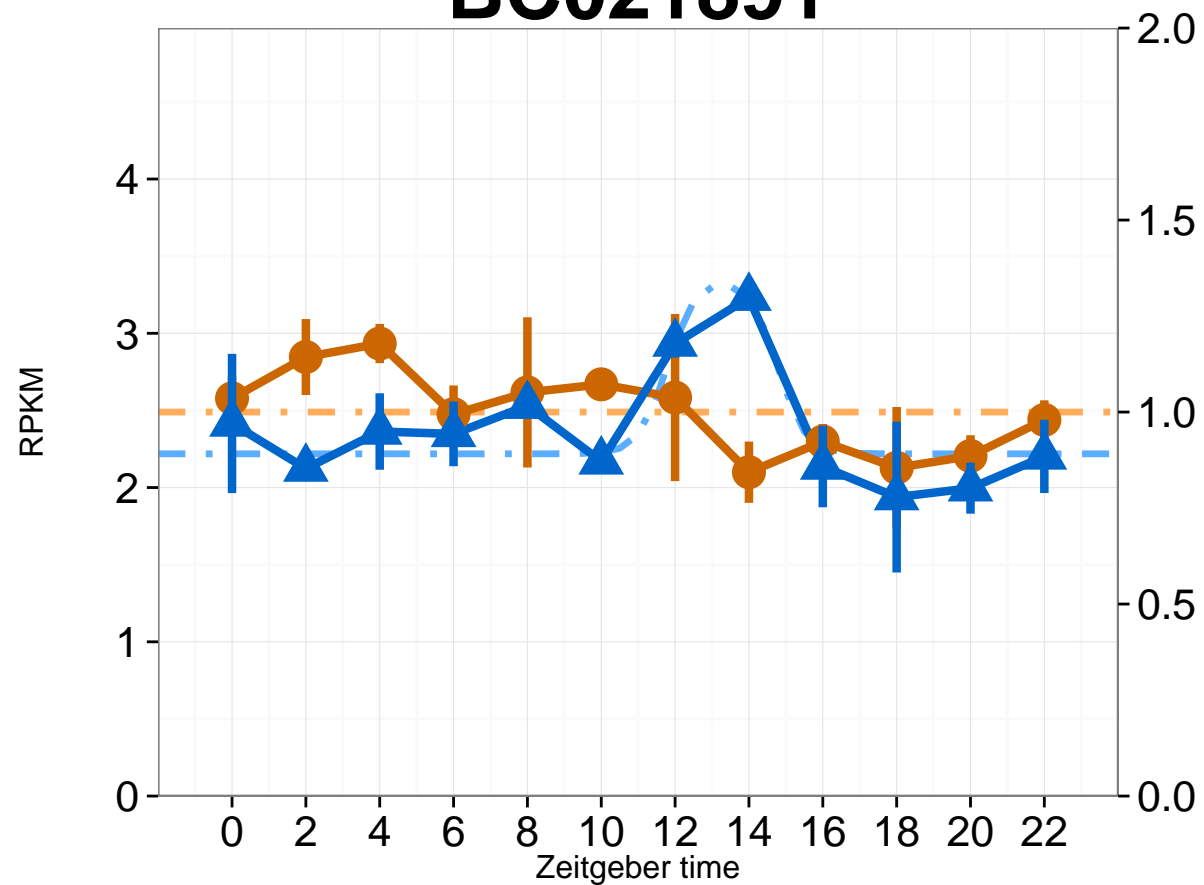

## BC021891

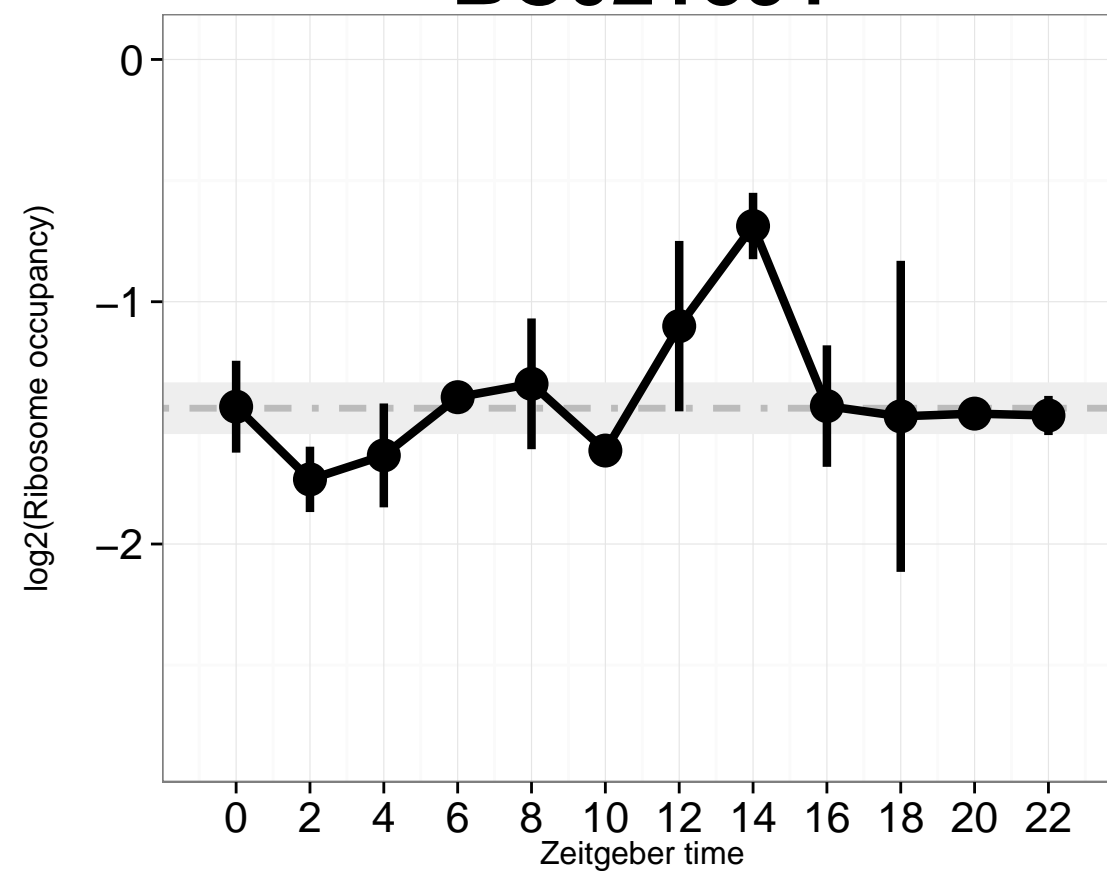

Supplement: SuppDataset_1.zip [file BC021891_set_A.pdf › Supplemental Dataset 1/A-mRNA_nonrhyth_translation_nonrhyth/BC021891_set_A.pdf]

# BC024139

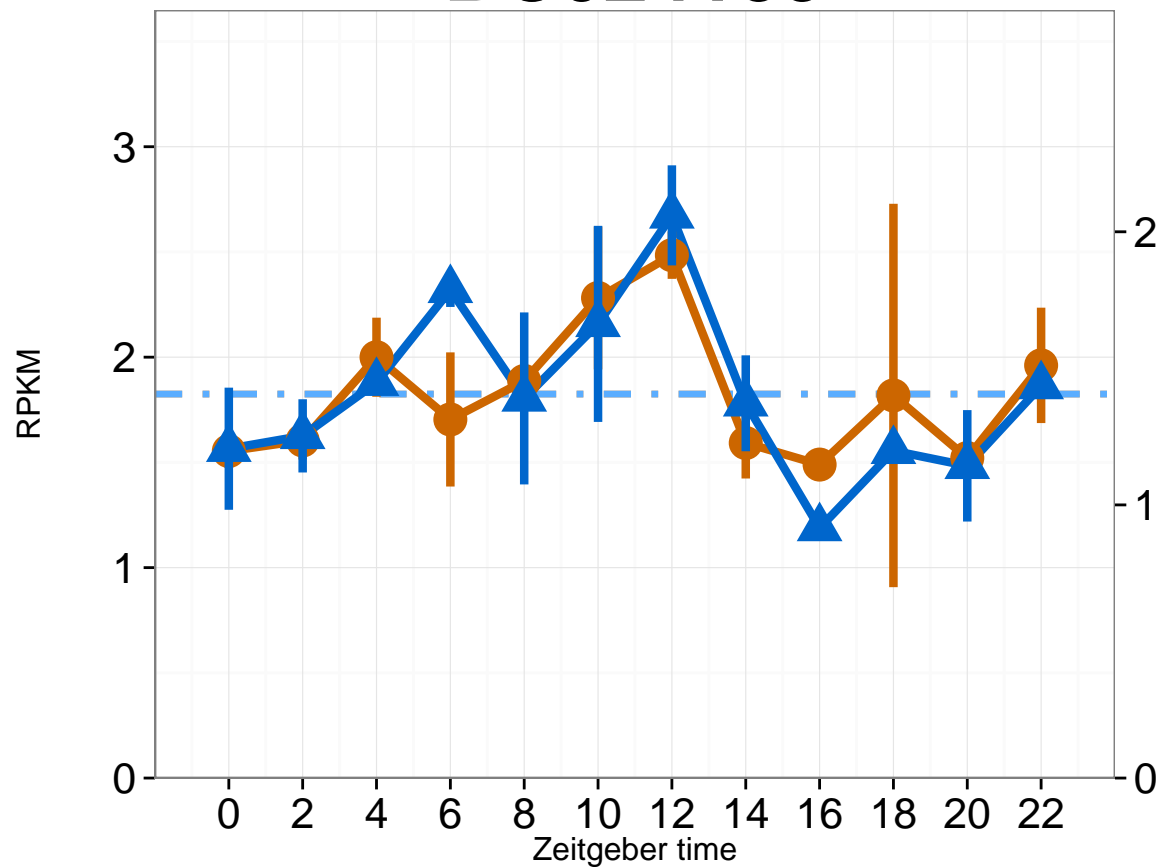

# BC024139

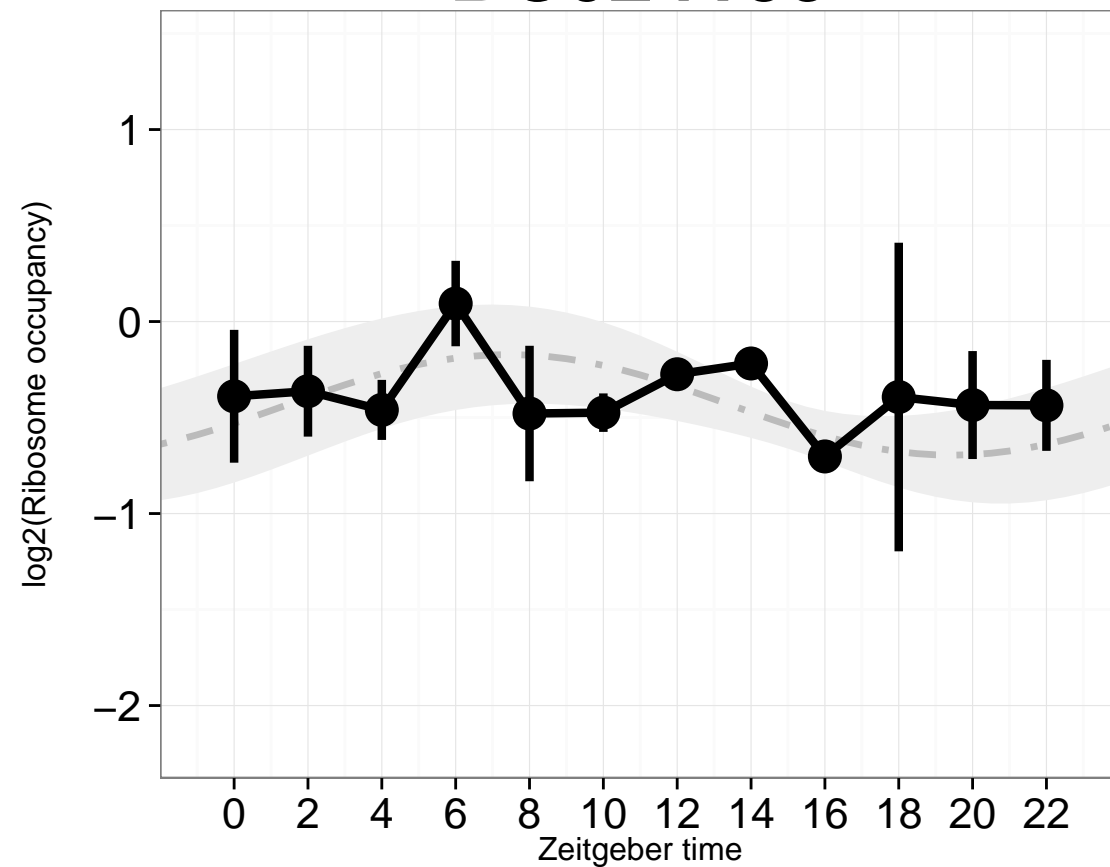

Supplement: SuppDataset_1.zip [file BC024139_set_A.pdf › Supplemental Dataset 1/A-mRNA_nonrhyth_translation_nonrhyth/BC024139_set_A.pdf]

# BC024978

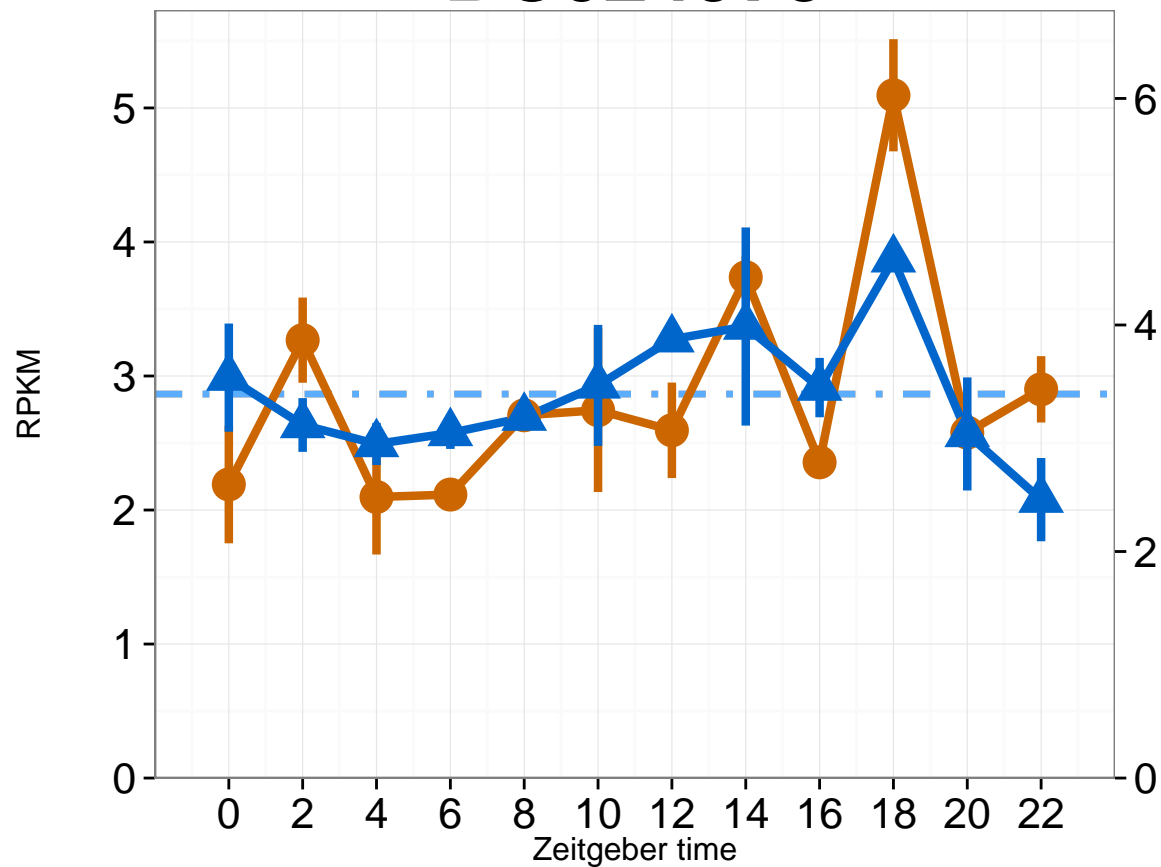

# BC024978

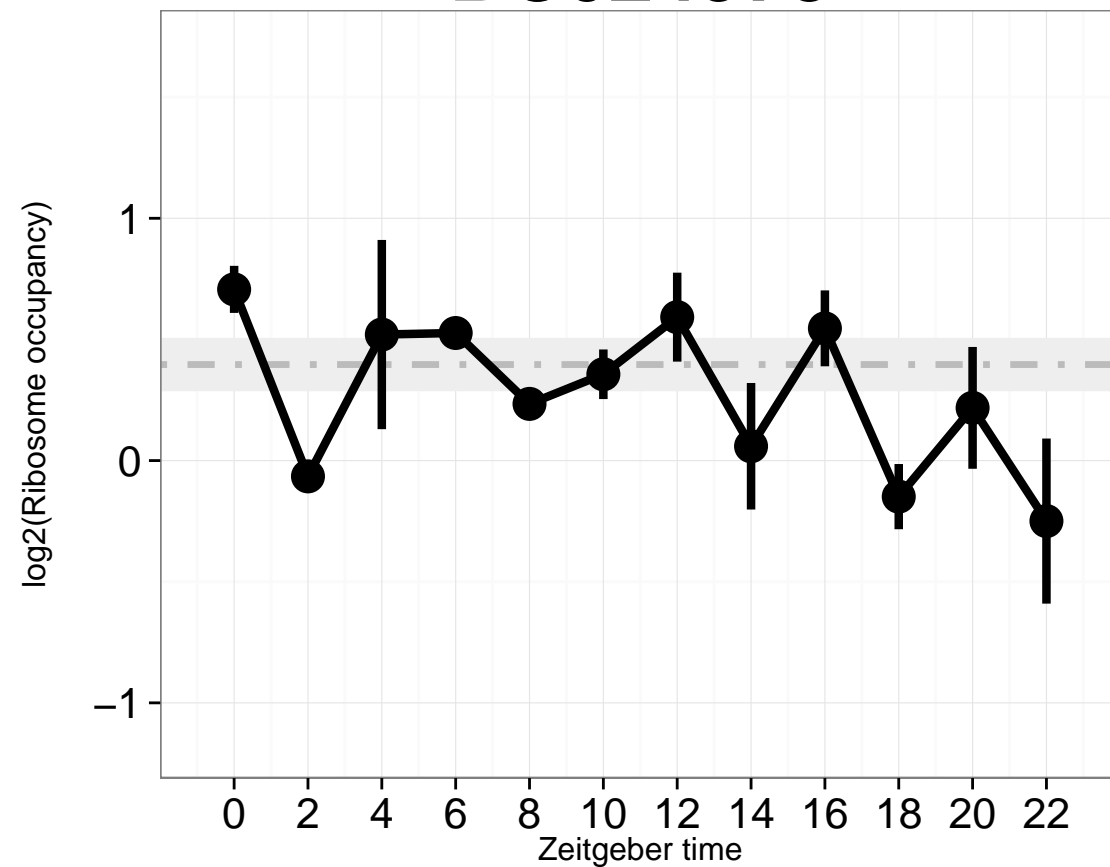

Supplement: SuppDataset_1.zip [file BC024978_set_A.pdf › Supplemental Dataset 1/A-mRNA_nonrhyth_translation_nonrhyth/BC024978_set_A.pdf]
