# Supplementary figures and images for: Ribosome profiling reveals the rhythmic liver translatome and circadian clock regulation by upstream open reading frames (part 88 of 113)
Source: HighWire-hosted journal article supplement (doi:10.1101/gr.195404.115), 2015-10-20

# Atp6v1c1

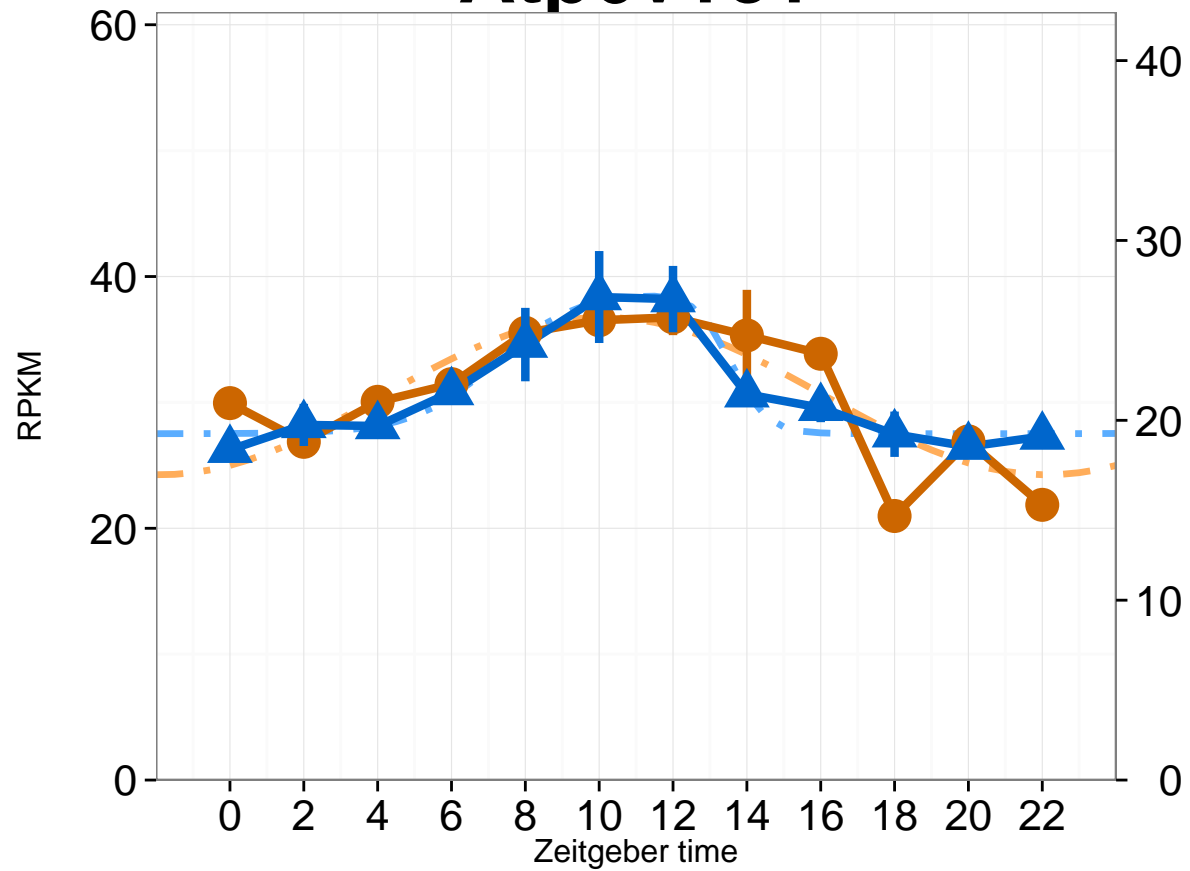

# Atp6v1c1

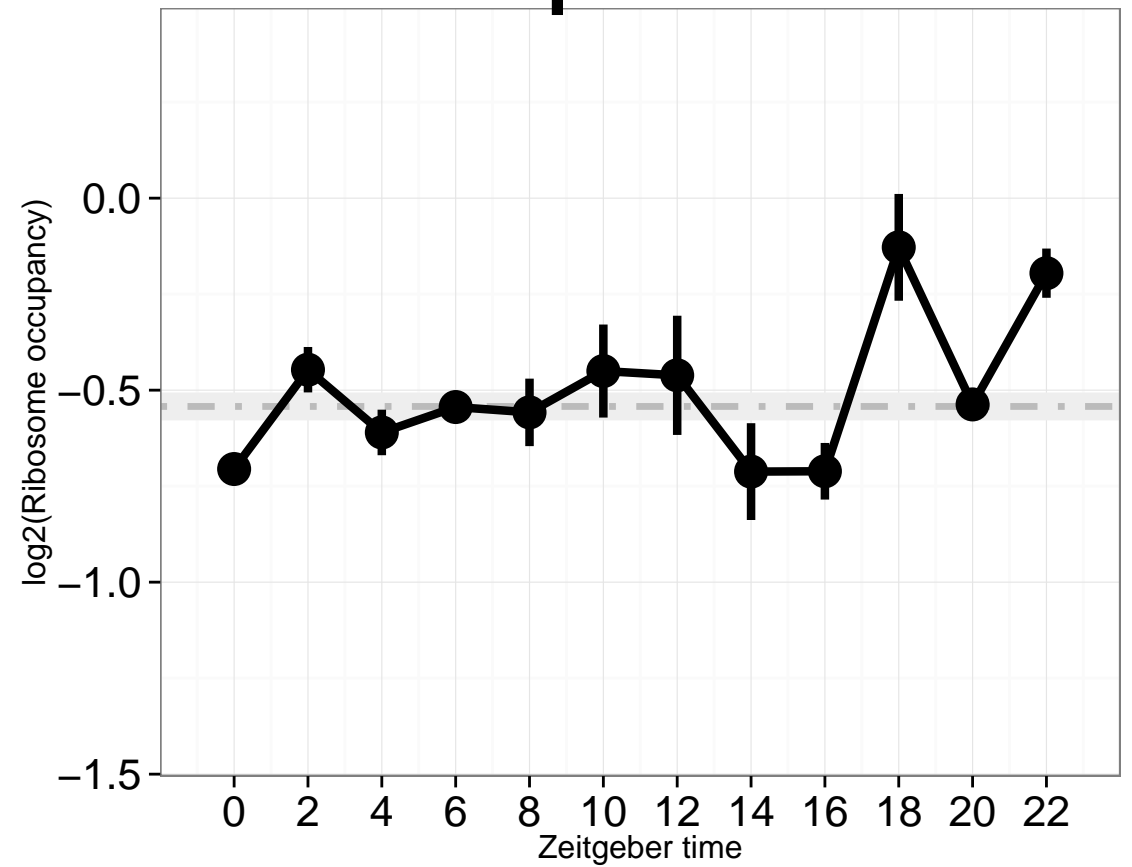

Supplement: SuppDataset_1.zip [file Atp6v1c1_set_B.pdf › Supplemental Dataset 1/B-mRNA_rhythm_translation_nonrhyth/Atp6v1c1_set_B.pdf]

# Atp6v1g1

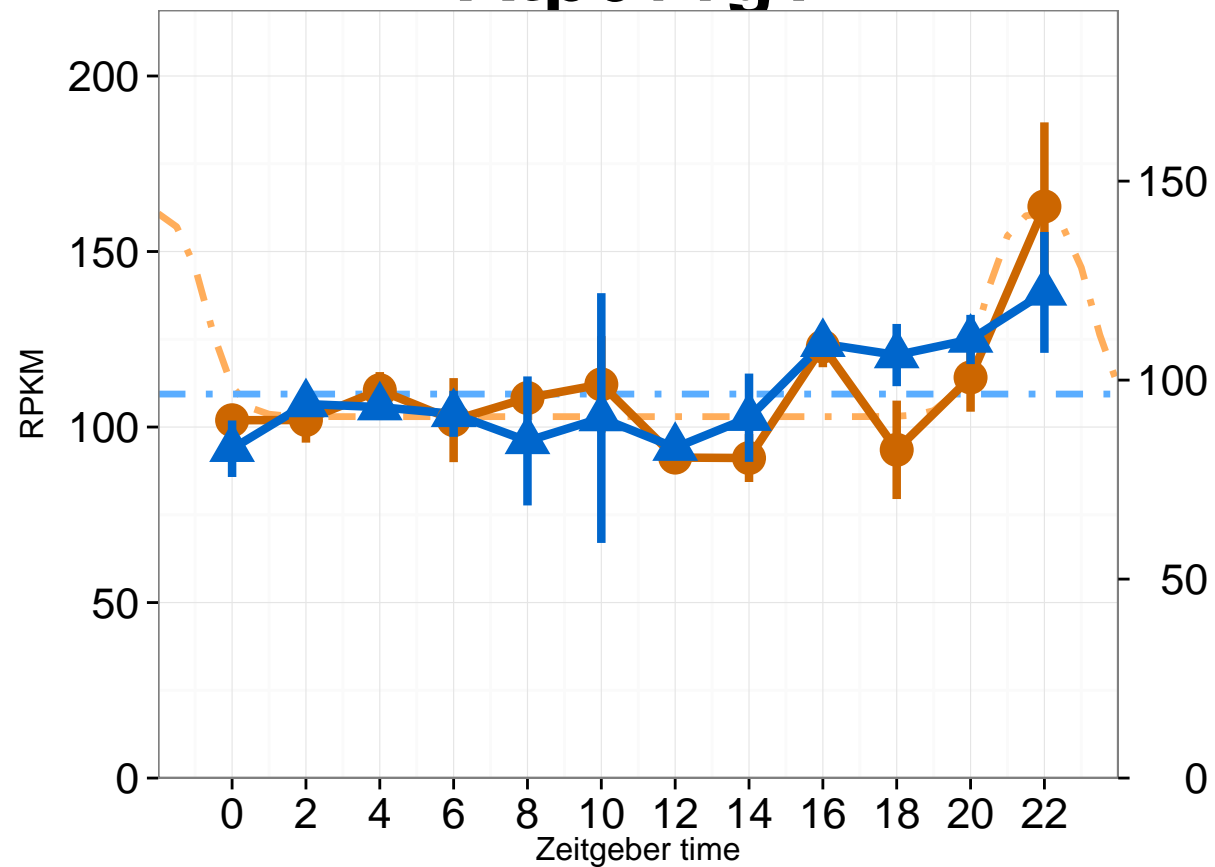

# Atp6v1g1

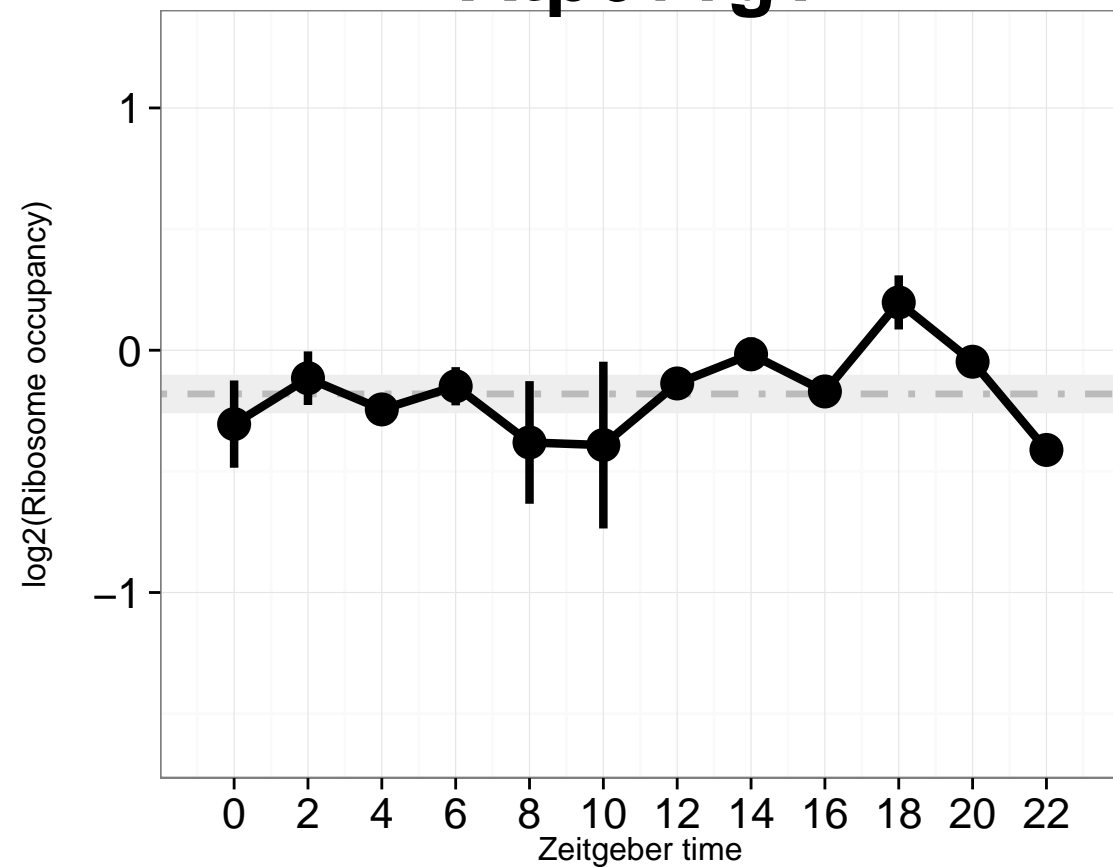

Supplement: SuppDataset_1.zip [file Atp6v1g1_set_B.pdf › Supplemental Dataset 1/B-mRNA_rhythm_translation_nonrhyth/Atp6v1g1_set_B.pdf]

# B4galt7

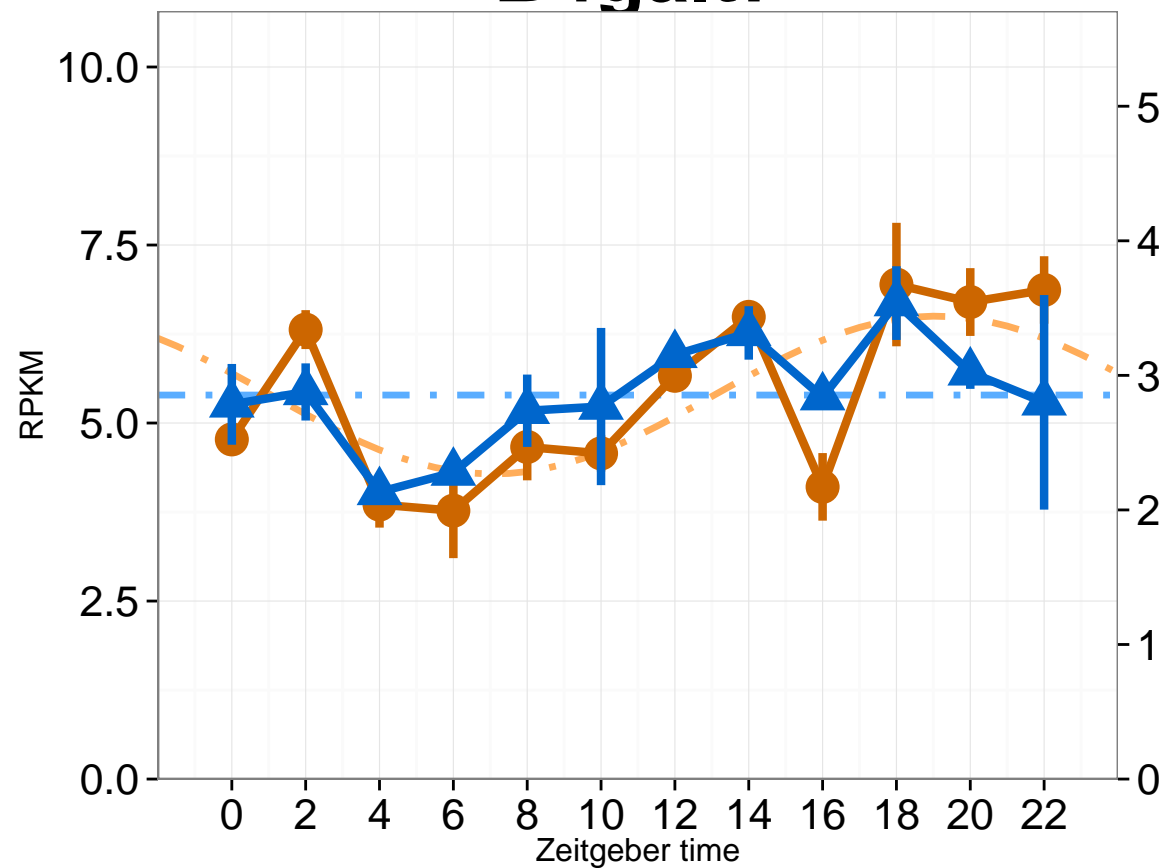

# B4galt7

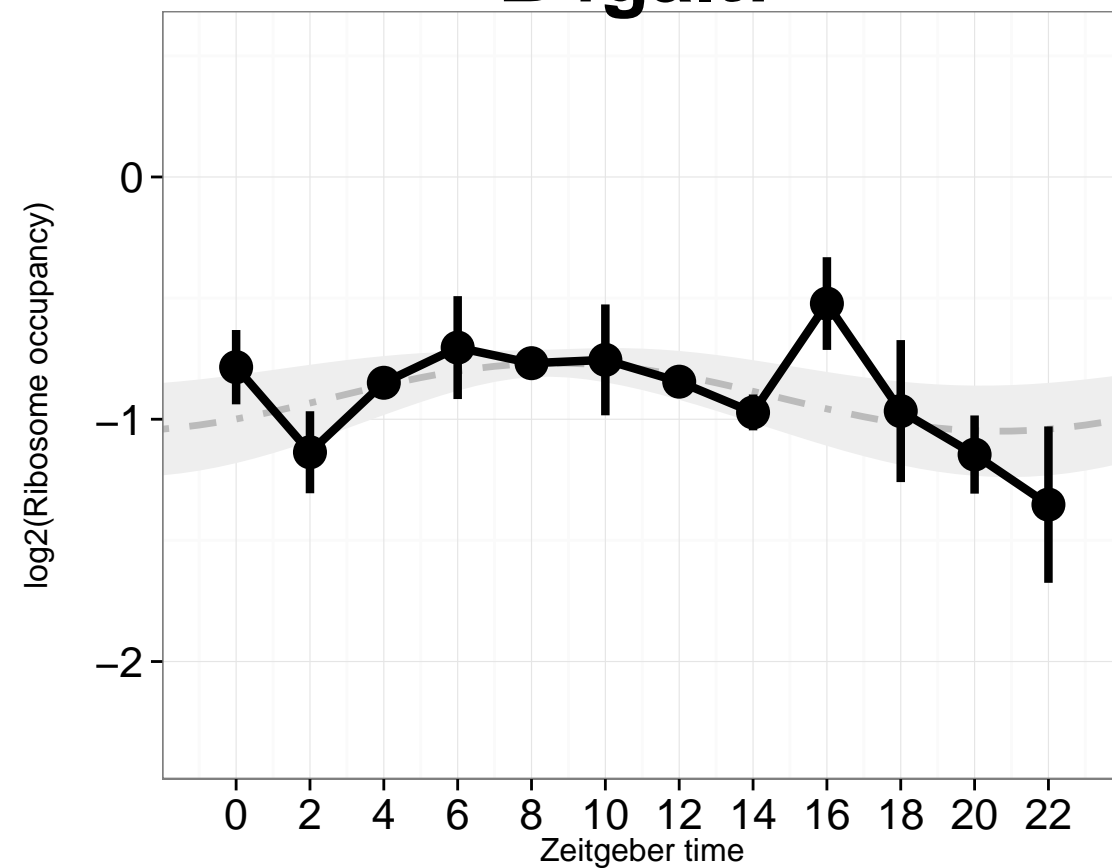

Supplement: SuppDataset_1.zip [file B4galt7_set_B.pdf › Supplemental Dataset 1/B-mRNA_rhythm_translation_nonrhyth/B4galt7_set_B.pdf]

# B630005N14Rik

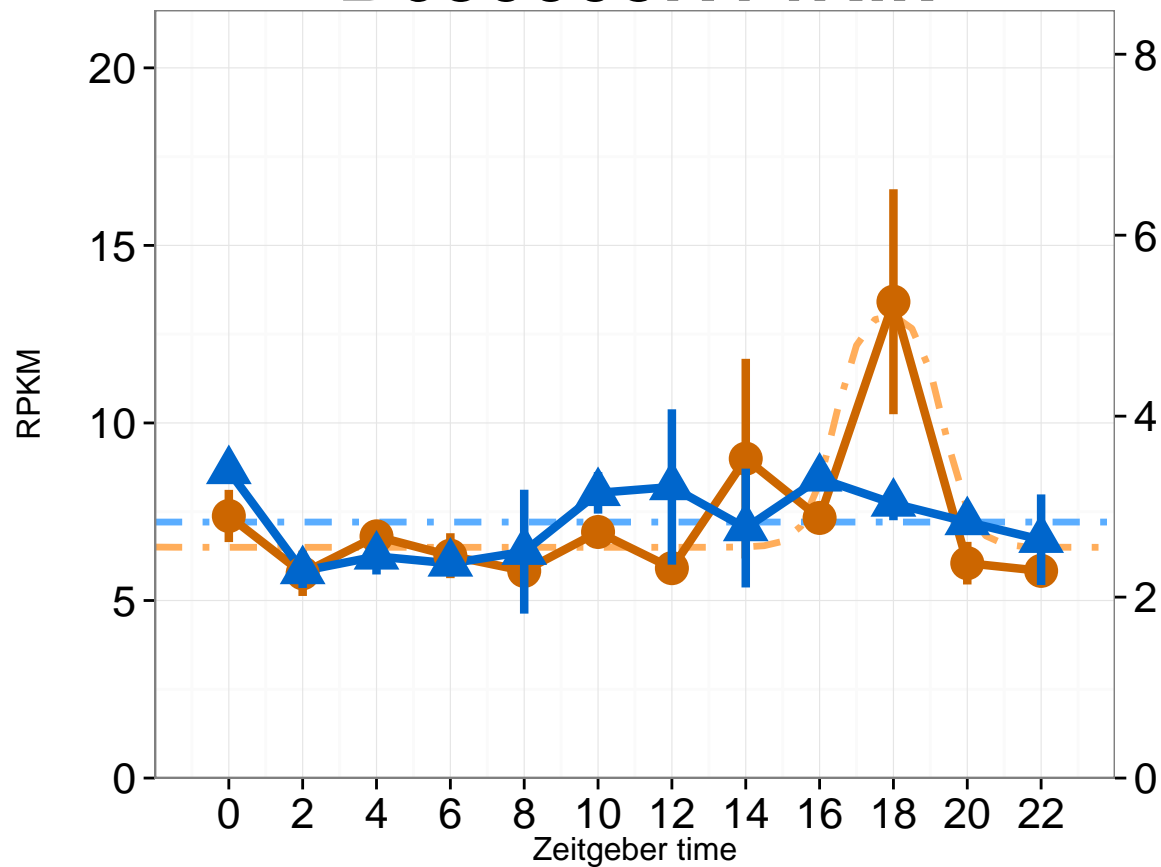

# B630005N14Rik

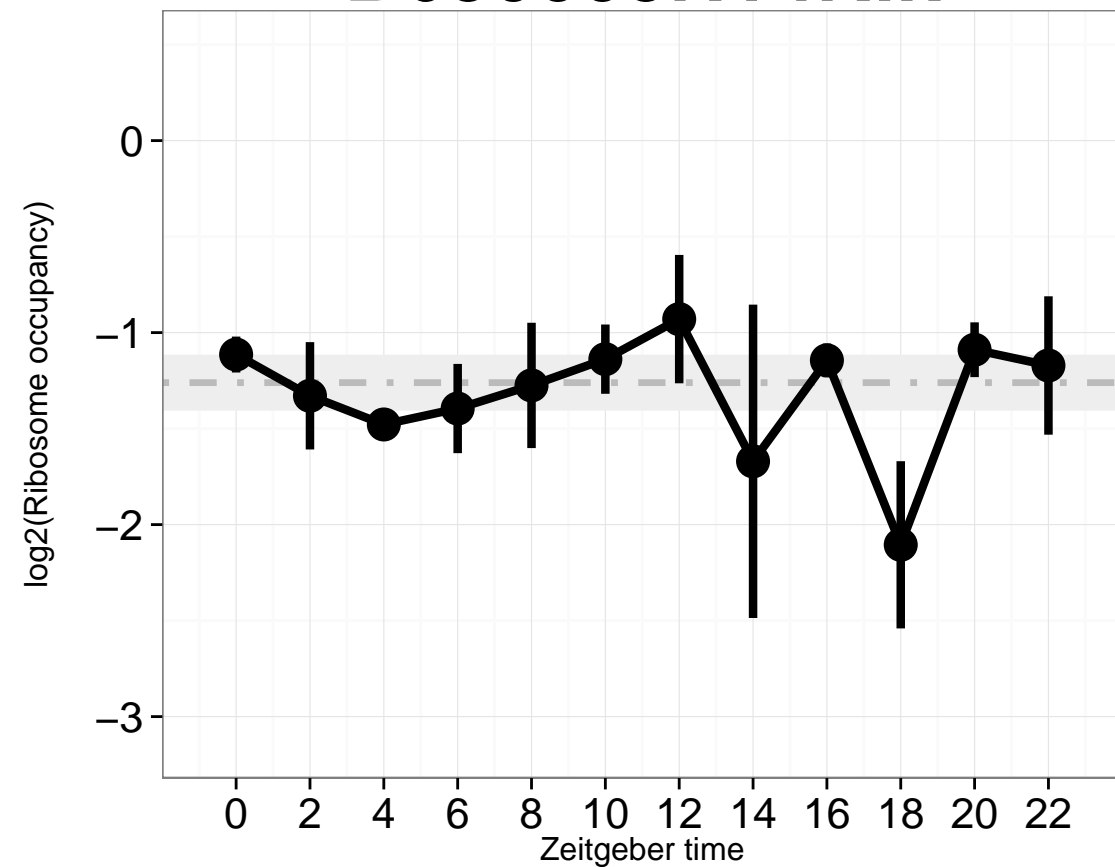

Supplement: SuppDataset_1.zip [file B630005N14Rik_set_B.pdf › Supplemental Dataset 1/B-mRNA_rhythm_translation_nonrhyth/B630005N14Rik_set_B.pdf]

# BC025446

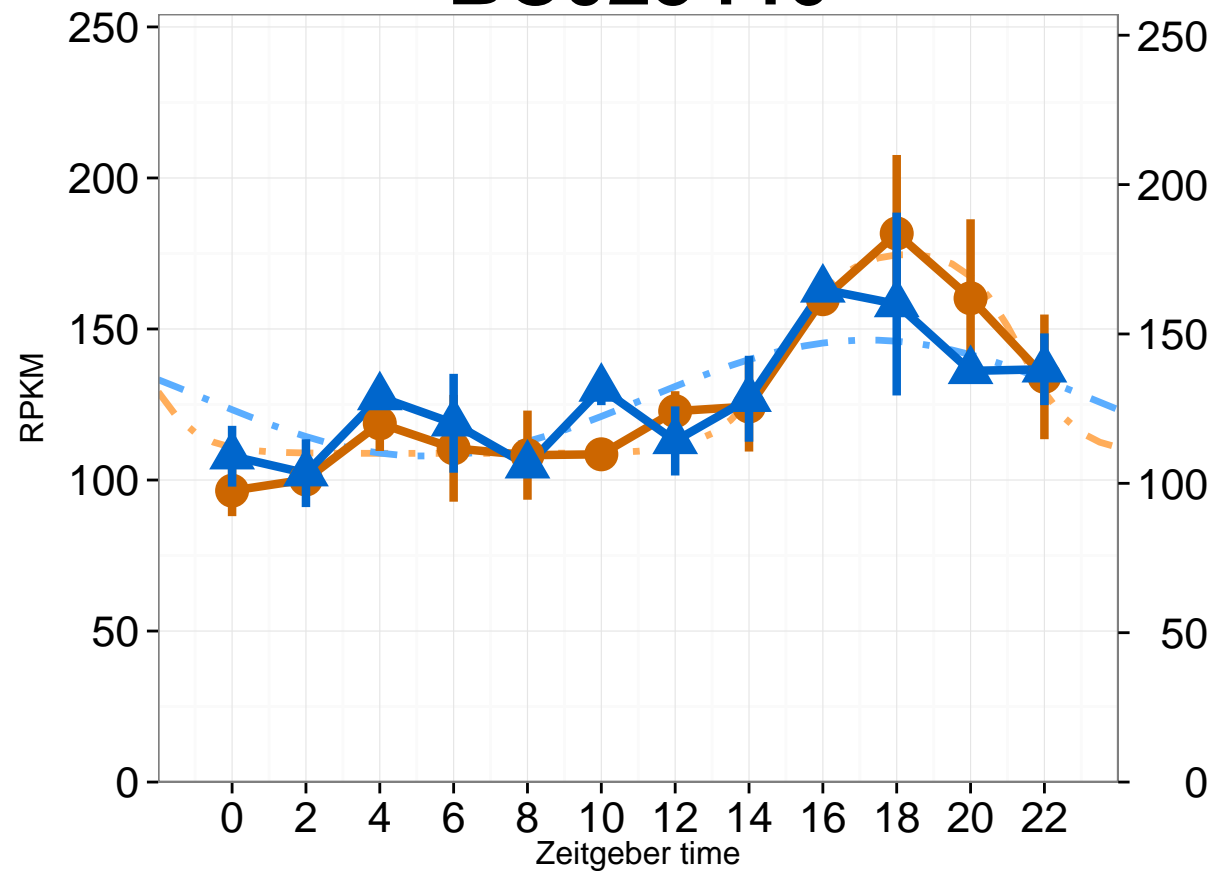

# BC025446

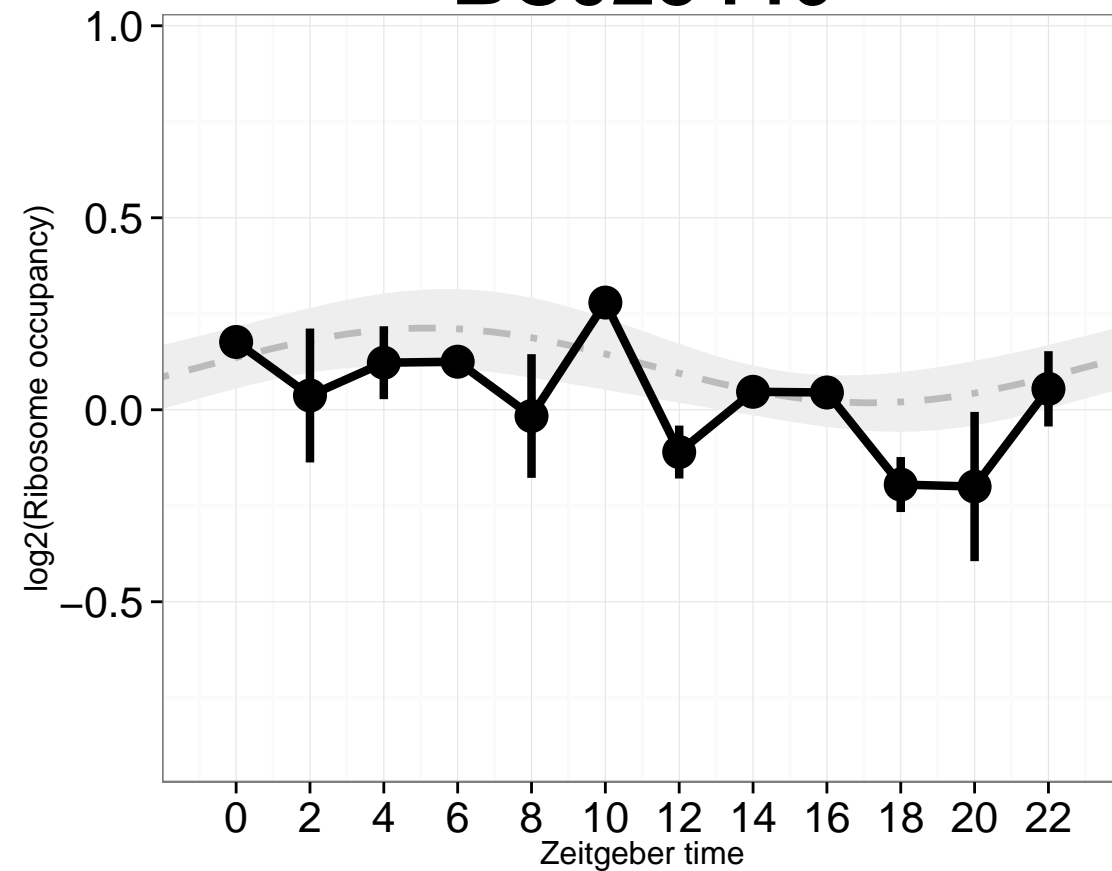

Supplement: SuppDataset_1.zip [file BC025446_set_B.pdf › Supplemental Dataset 1/B-mRNA_rhythm_translation_nonrhyth/BC025446_set_B.pdf]

## Bag3

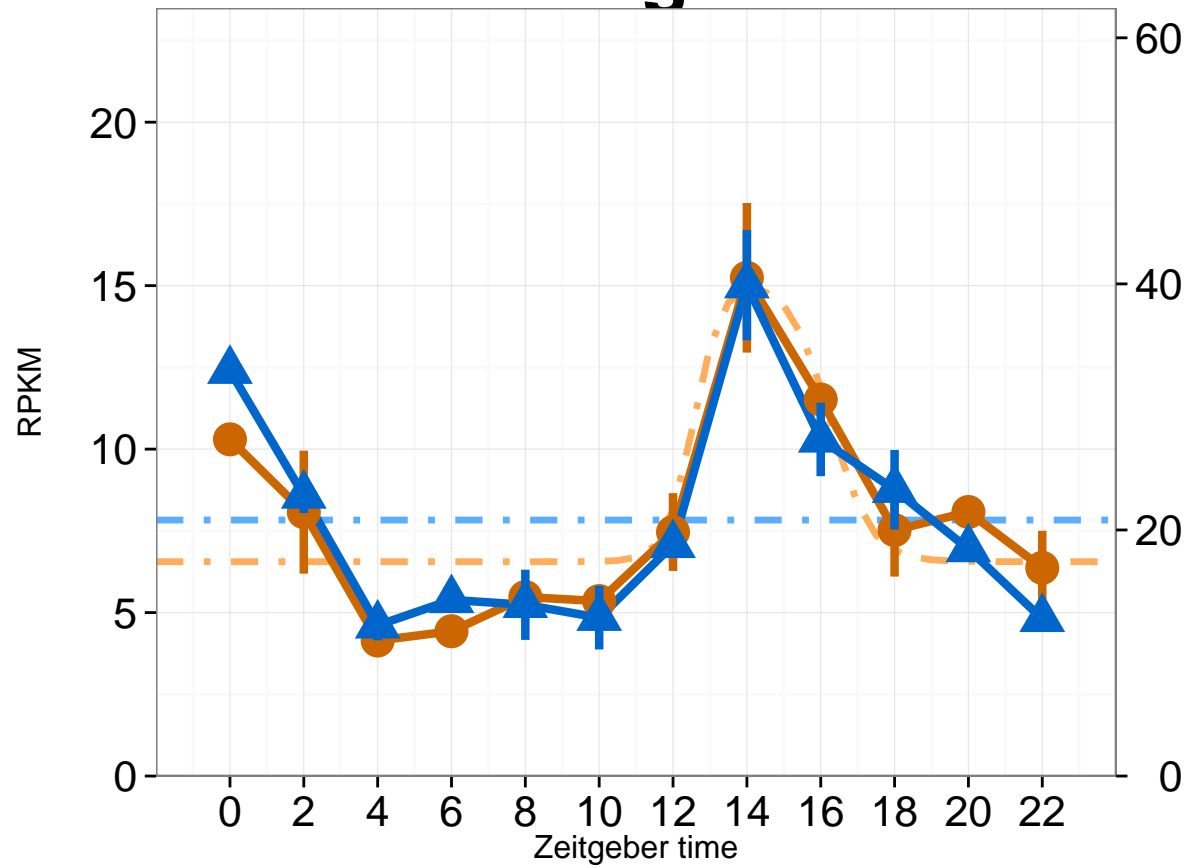

## Bag3

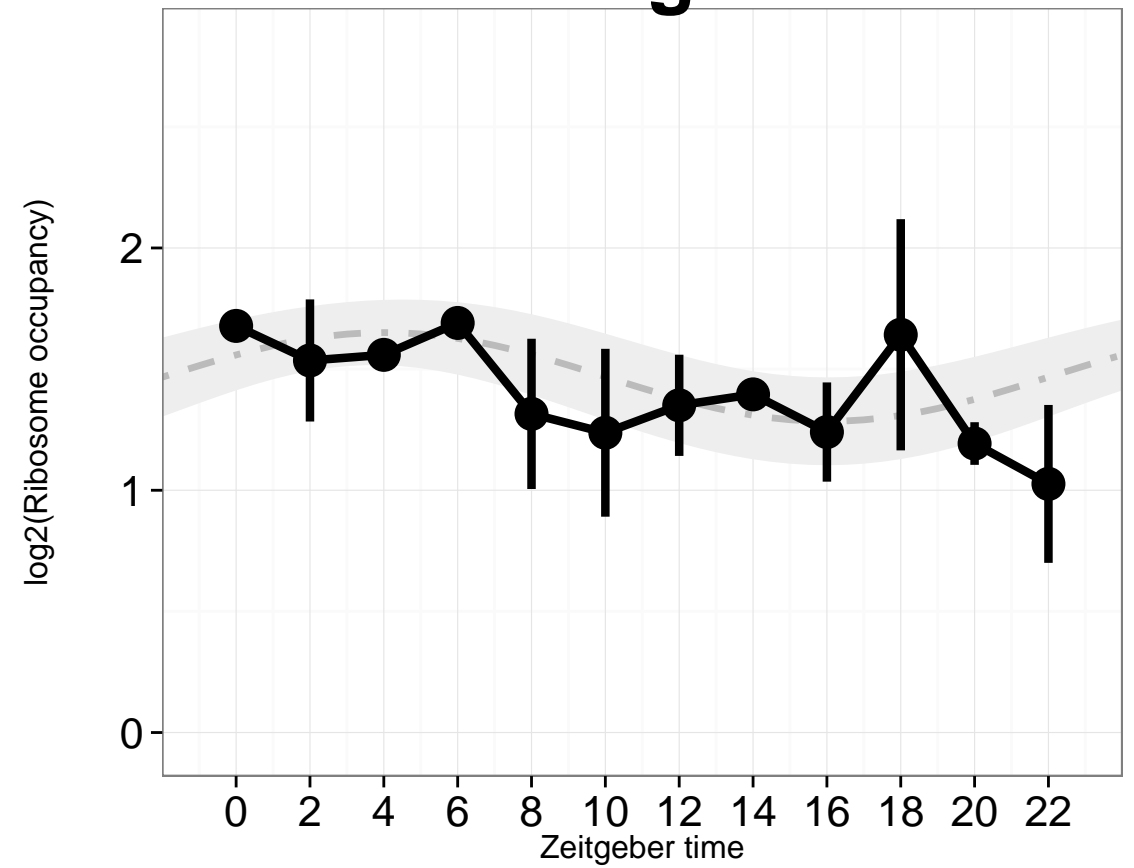

Supplement: SuppDataset_1.zip [file Bag3_set_B.pdf › Supplemental Dataset 1/B-mRNA_rhythm_translation_nonrhyth/Bag3_set_B.pdf]

## Bambi

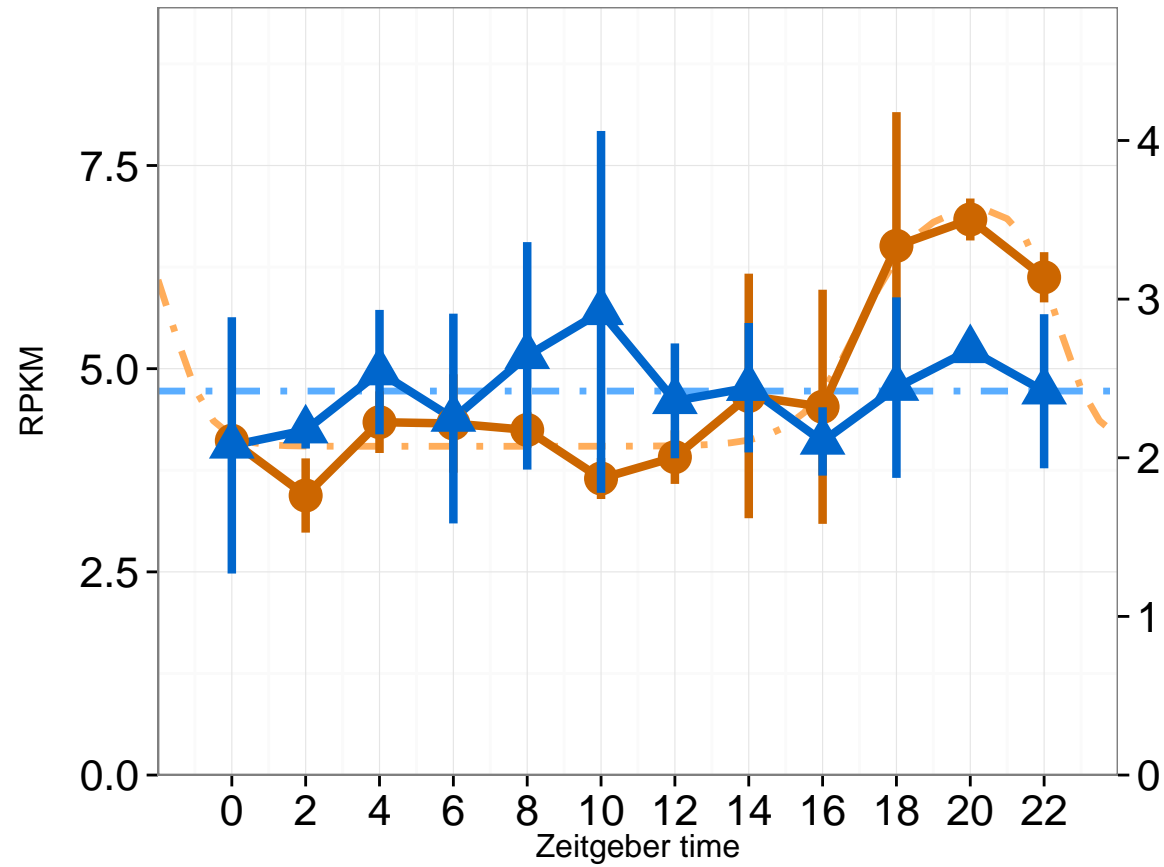

## Bambi

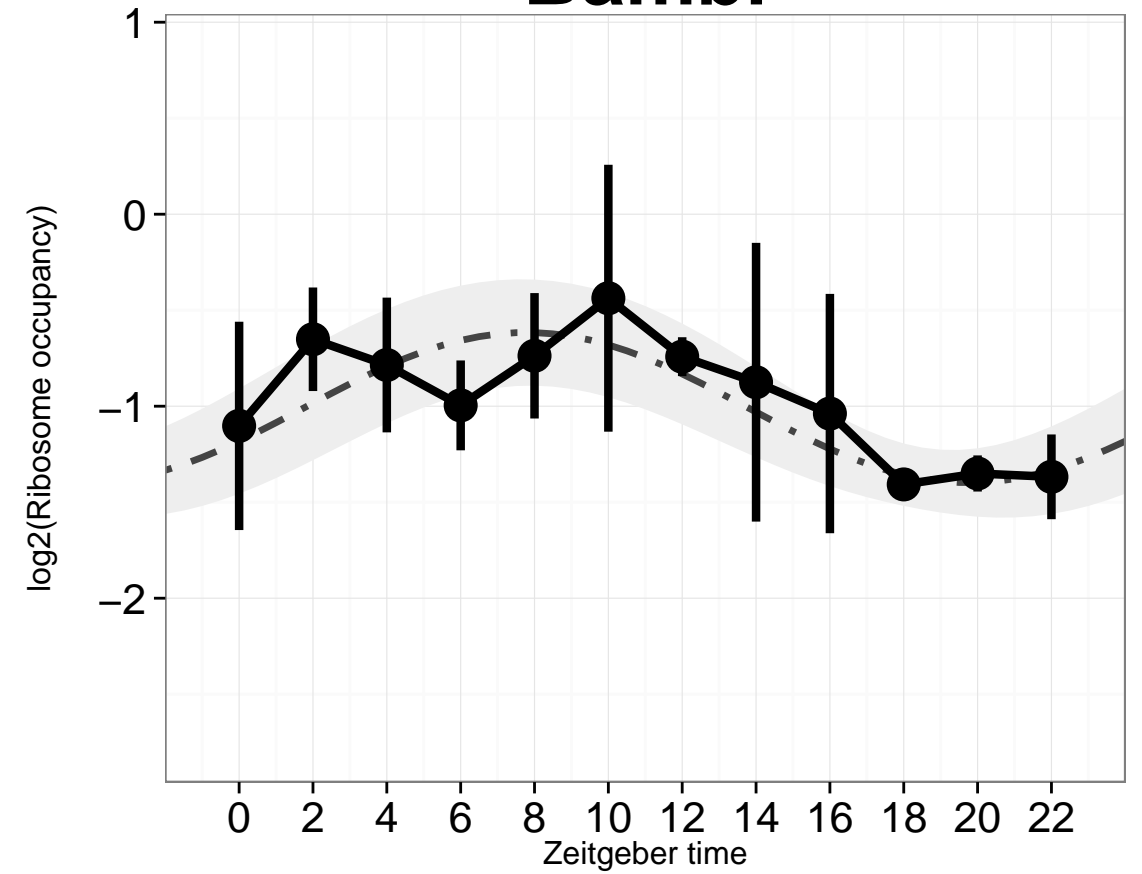

Supplement: SuppDataset_1.zip [file Bambi_set_B.pdf › Supplemental Dataset 1/B-mRNA_rhythm_translation_nonrhyth/Bambi_set_B.pdf]

## Bbs9

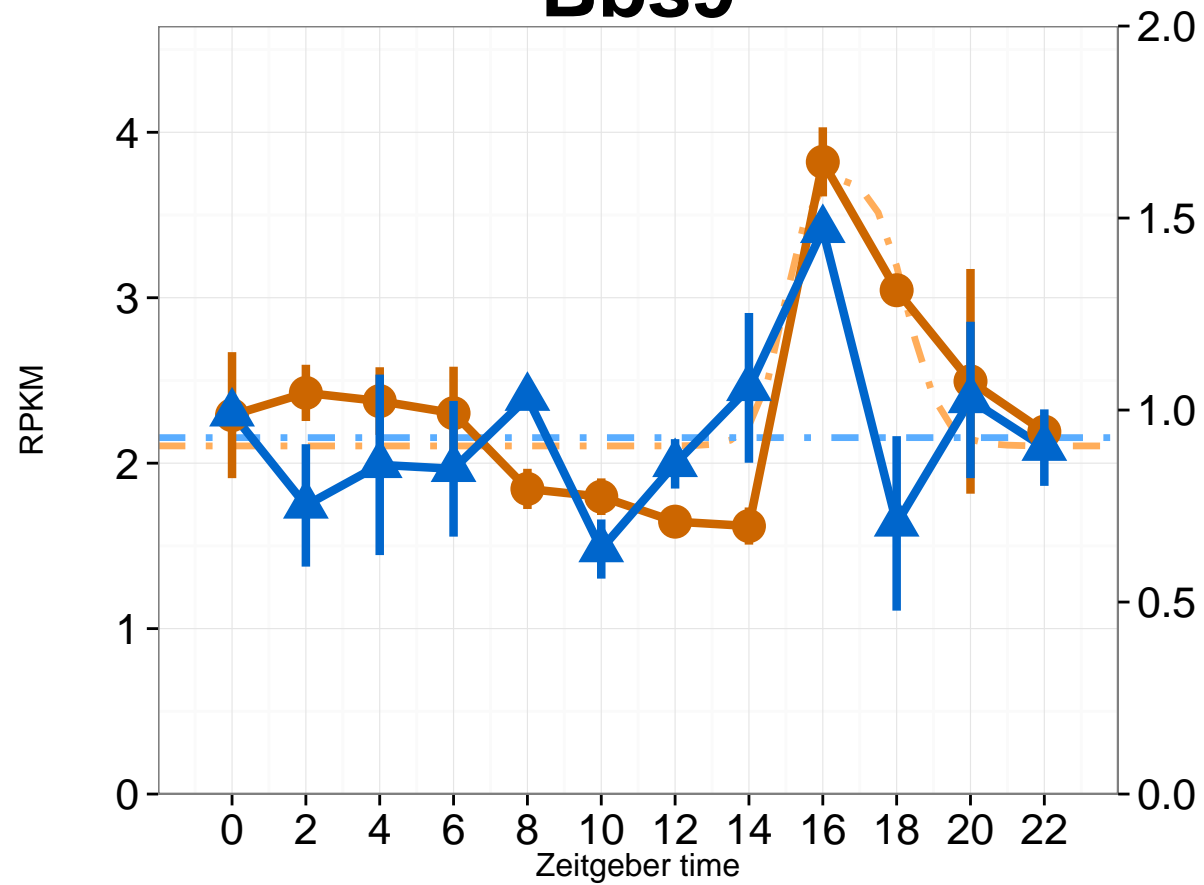

## Bbs9

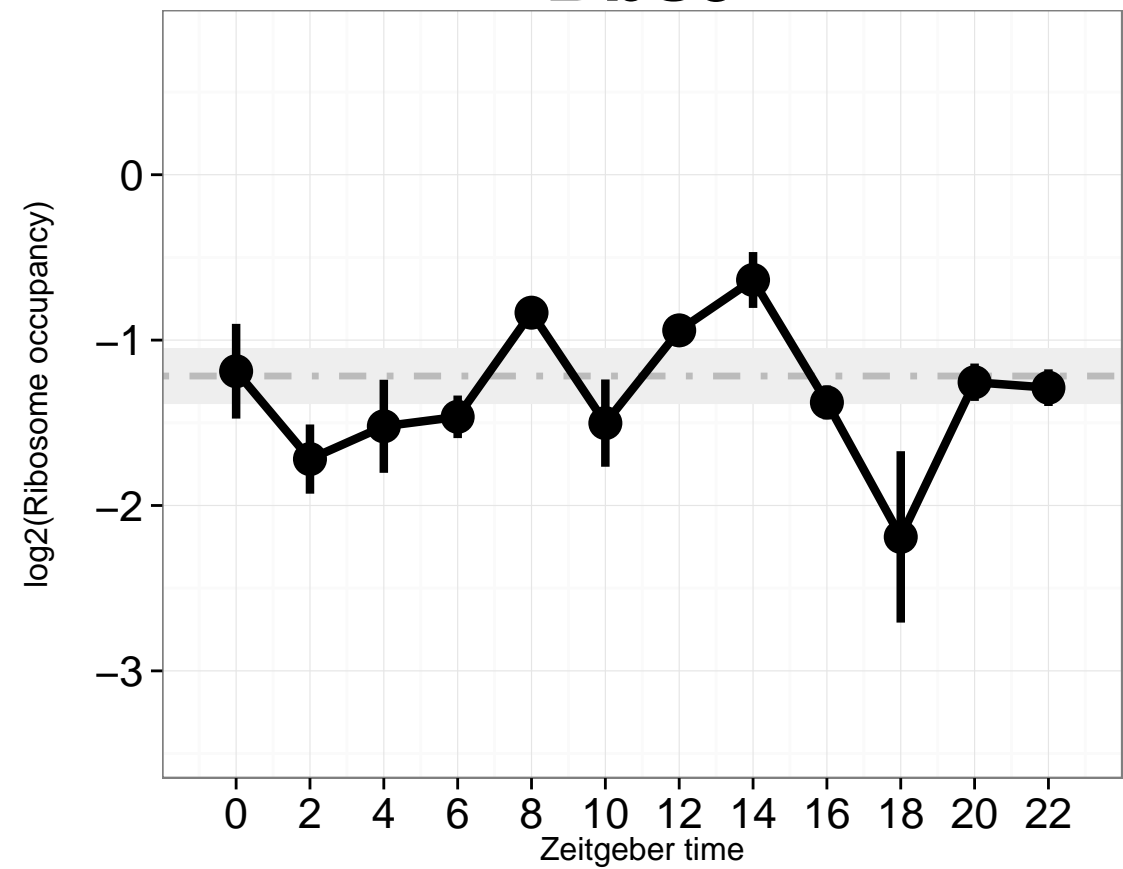

Supplement: SuppDataset_1.zip [file Bbs9_set_B.pdf › Supplemental Dataset 1/B-mRNA_rhythm_translation_nonrhyth/Bbs9_set_B.pdf]

## Bet1l

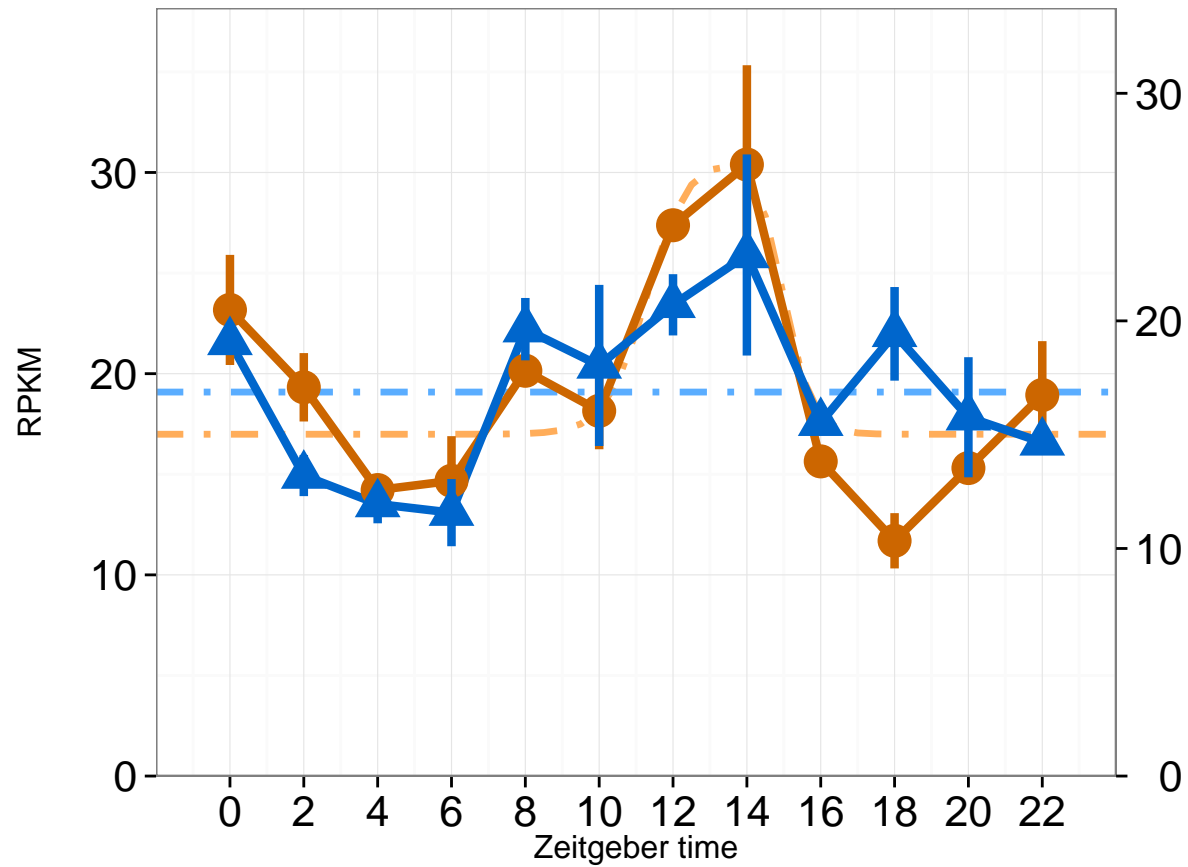

## Bet1l

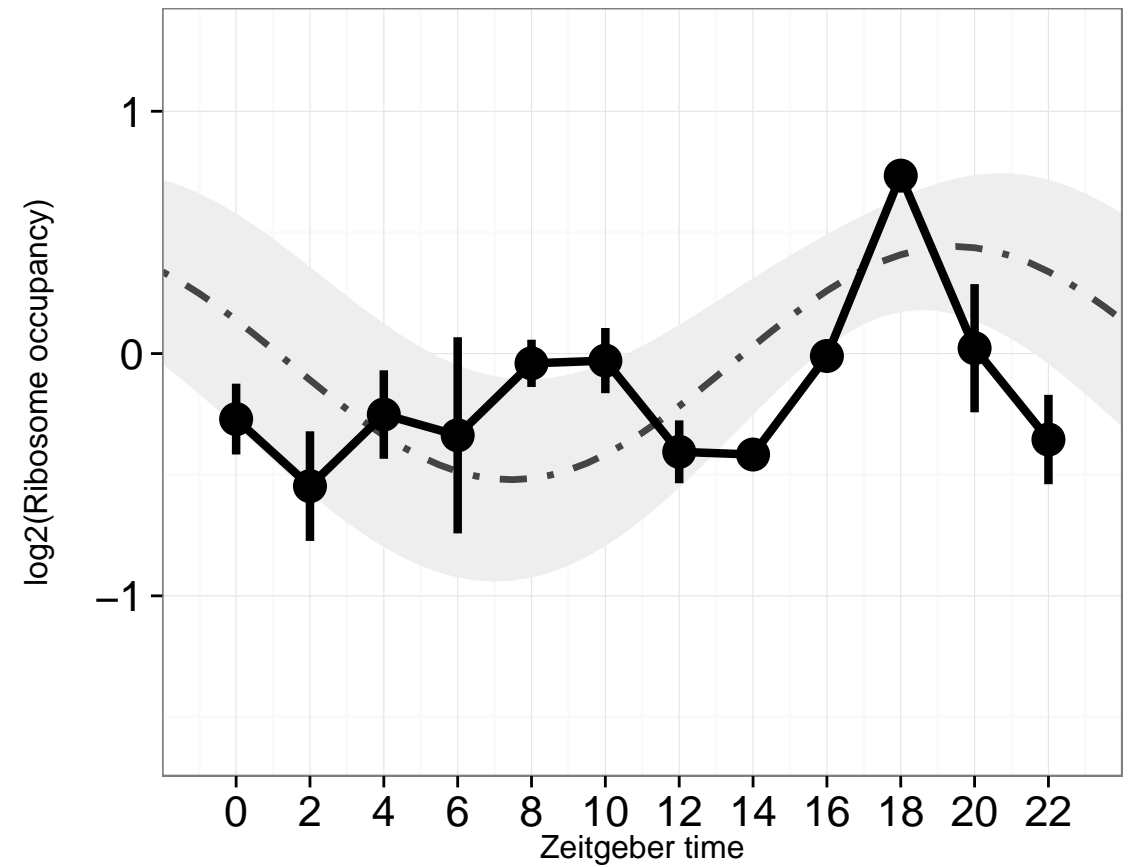

Supplement: SuppDataset_1.zip [file Bet1l_set_B.pdf › Supplemental Dataset 1/B-mRNA_rhythm_translation_nonrhyth/Bet1l_set_B.pdf]

## Bgn

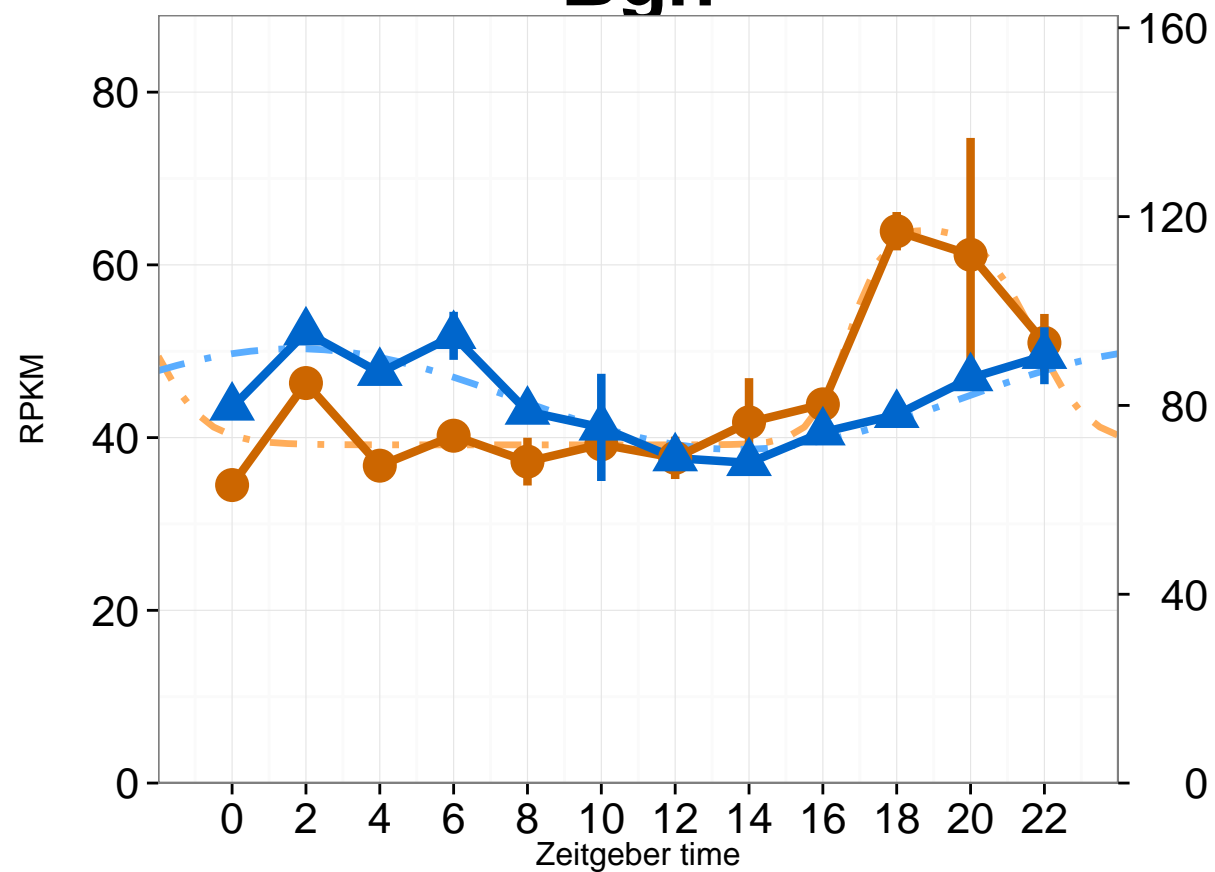

## Bgn

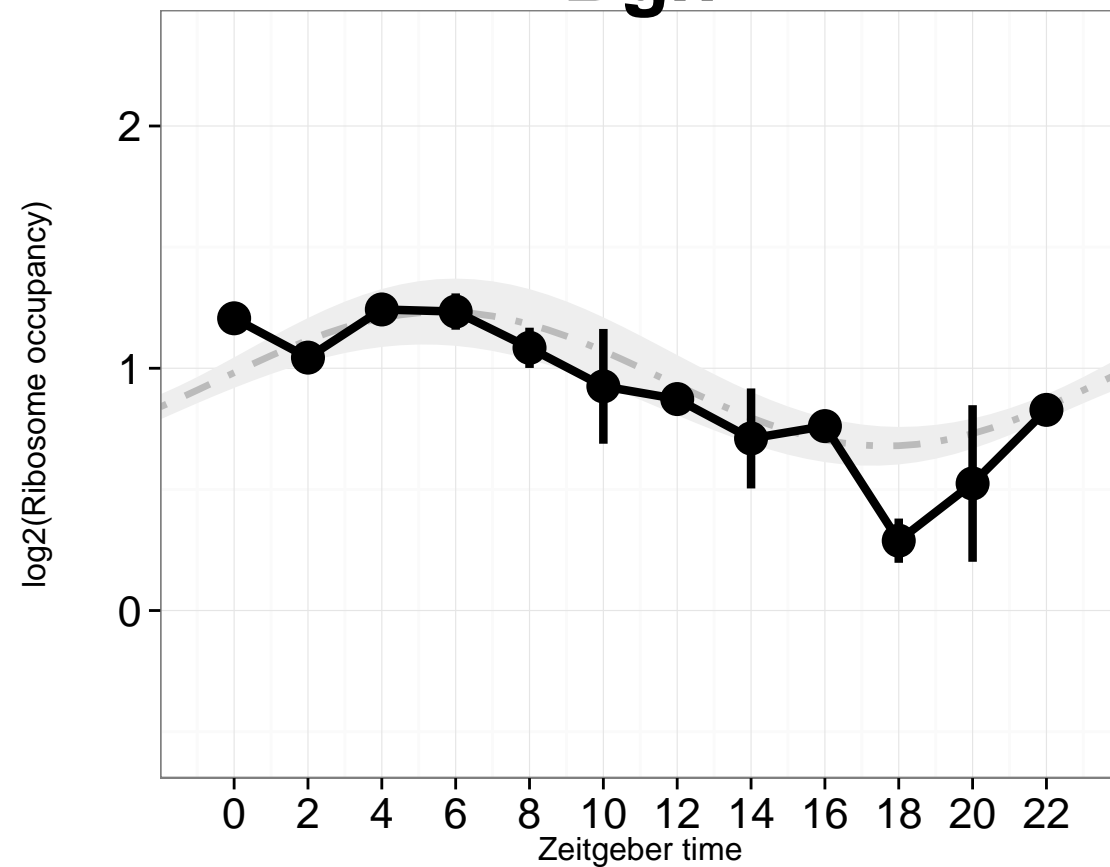

Supplement: SuppDataset_1.zip [file Bgn_set_B.pdf › Supplemental Dataset 1/B-mRNA_rhythm_translation_nonrhyth/Bgn_set_B.pdf]

# Bhlhb9

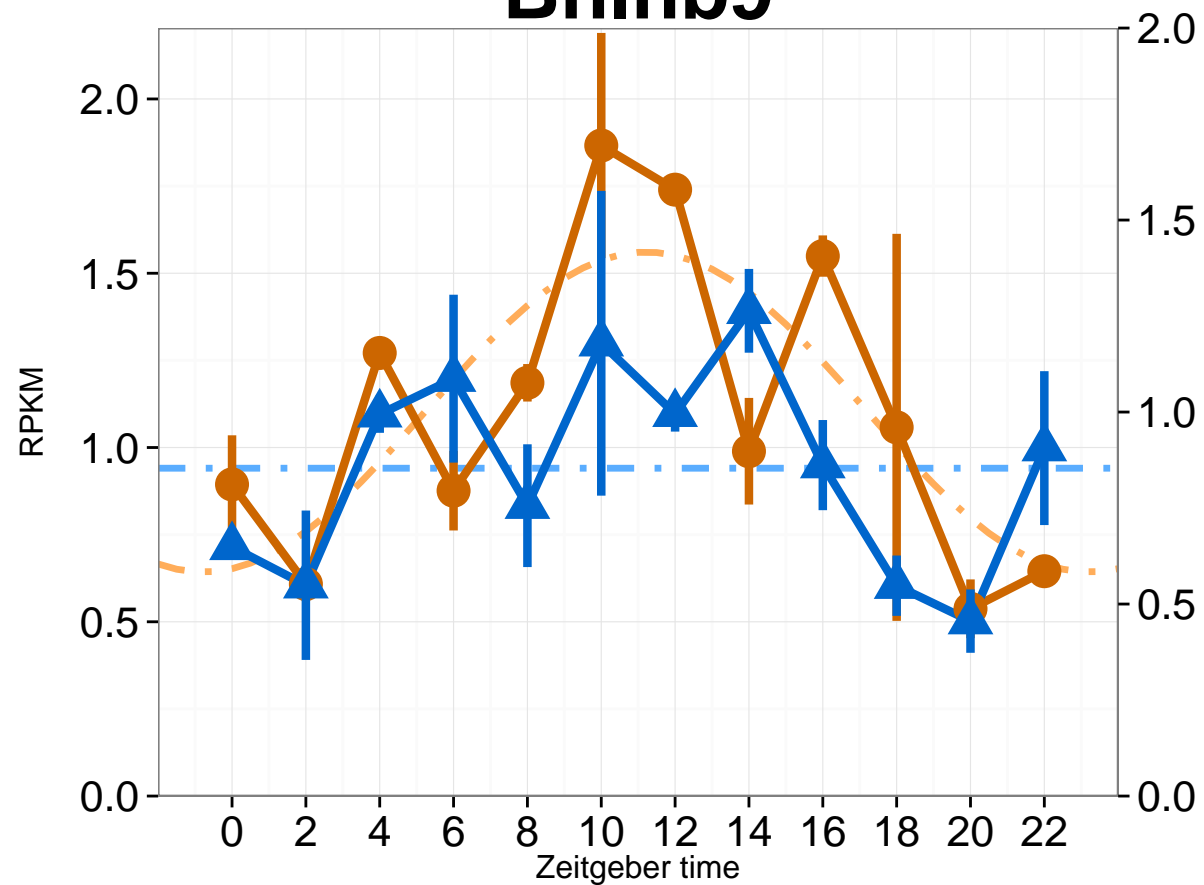

# Bhlhb9

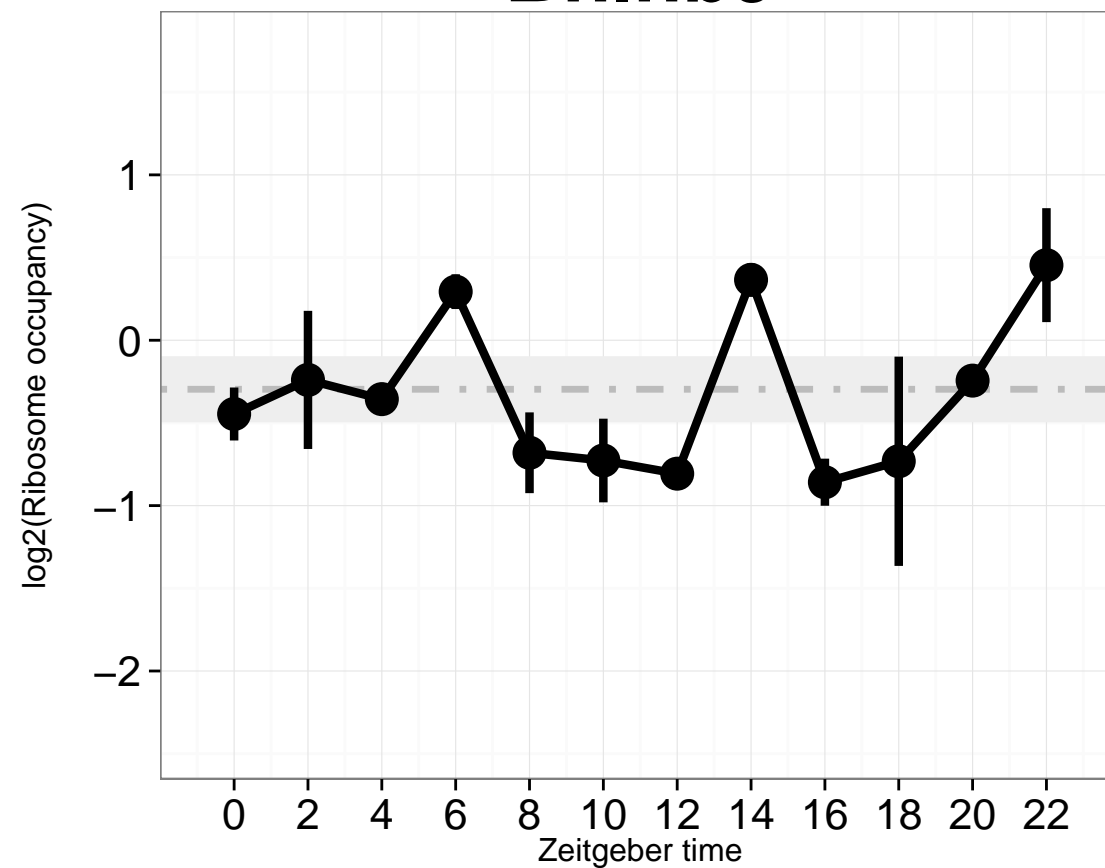

Supplement: SuppDataset_1.zip [file Bhlhb9_set_B.pdf › Supplemental Dataset 1/B-mRNA_rhythm_translation_nonrhyth/Bhlhb9_set_B.pdf]

## BIm

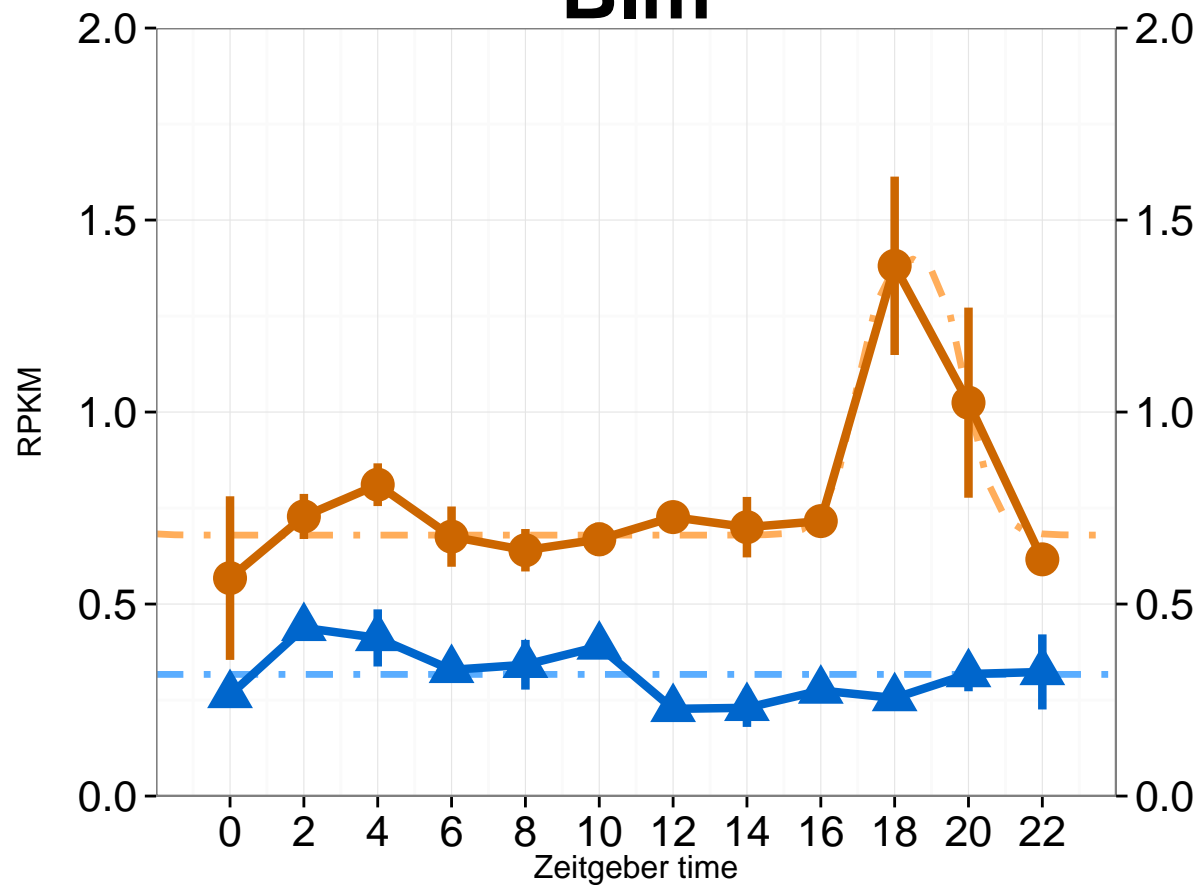

## BIm

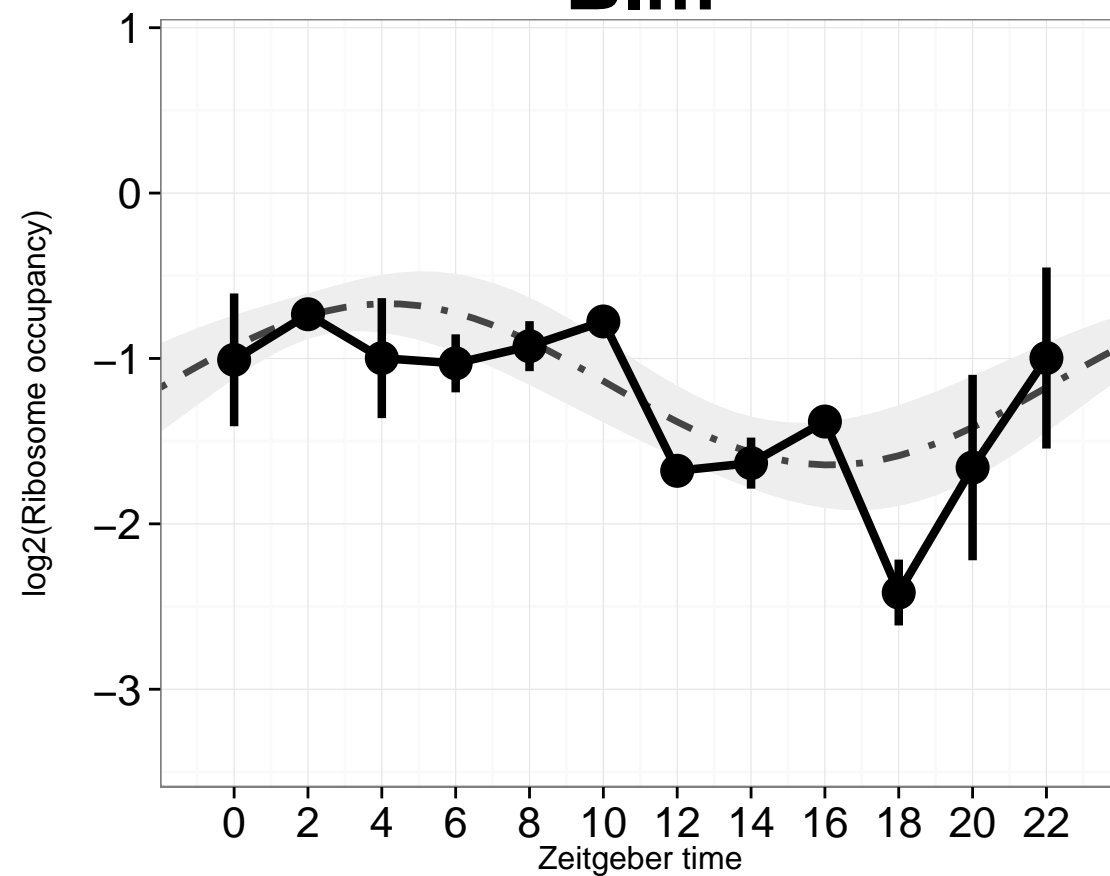

Supplement: SuppDataset_1.zip [file Blm_set_B.pdf › Supplemental Dataset 1/B-mRNA_rhythm_translation_nonrhyth/Blm_set_B.pdf]

# Bmp6

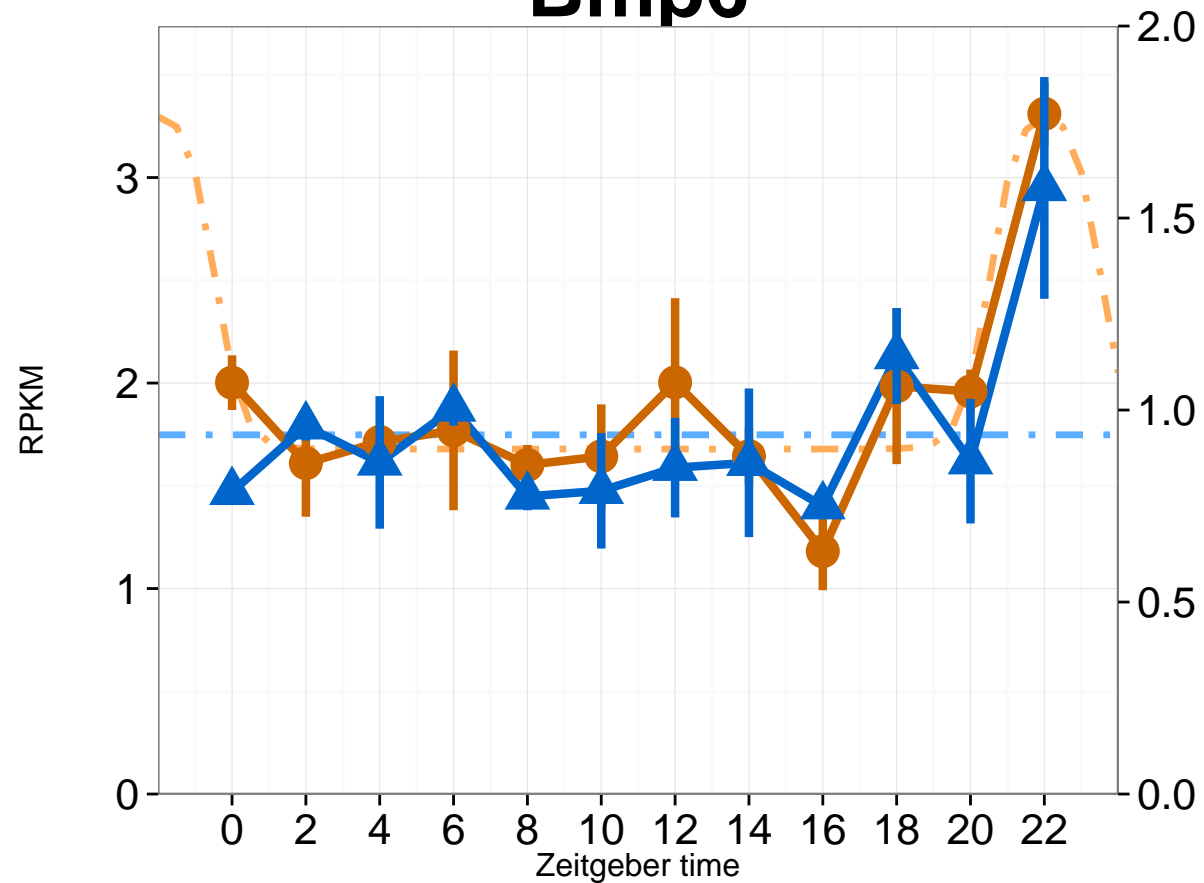

# Bmp6

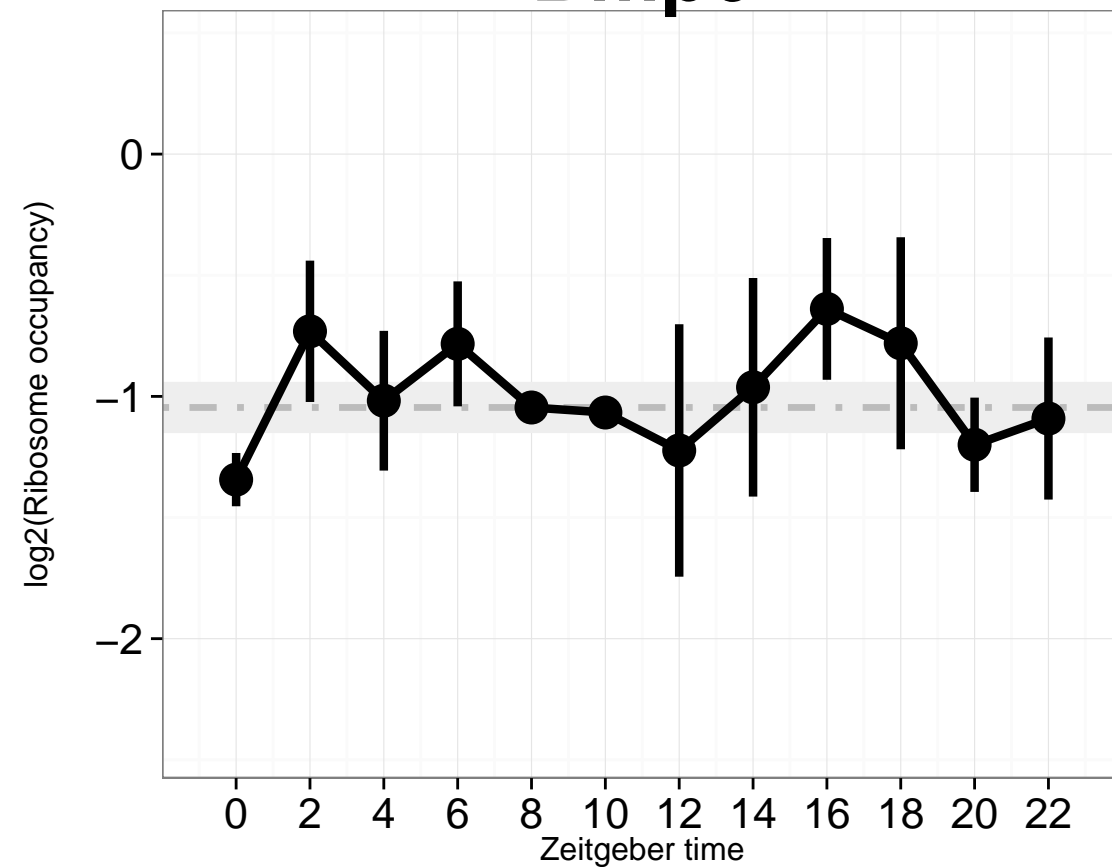

Supplement: SuppDataset_1.zip [file Bmp6_set_B.pdf › Supplemental Dataset 1/B-mRNA_rhythm_translation_nonrhyth/Bmp6_set_B.pdf]

# Bmper

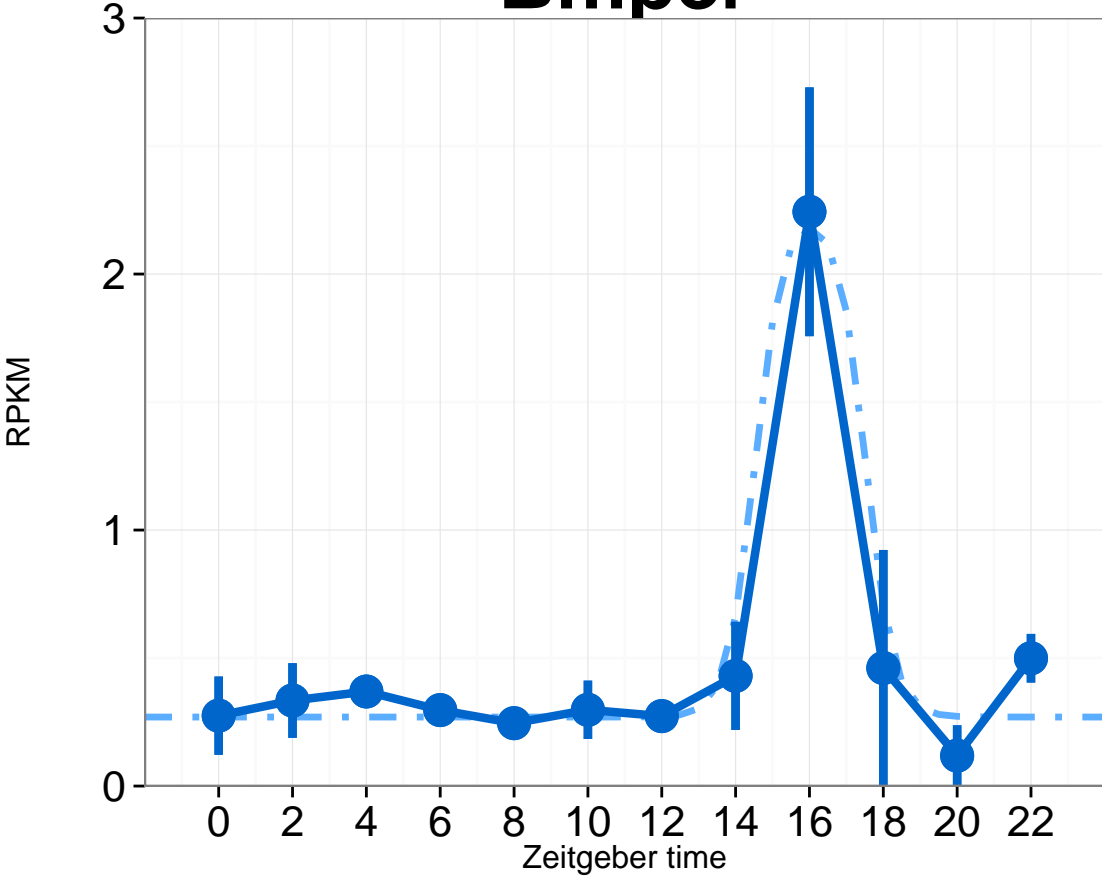

# Bmper log2(Ribosome occupancy

Supplement: SuppDataset_1.zip [file Bmper_set_B.pdf › Supplemental Dataset 1/B-mRNA_rhythm_translation_nonrhyth/Bmper_set_B.pdf]

## Bnip2

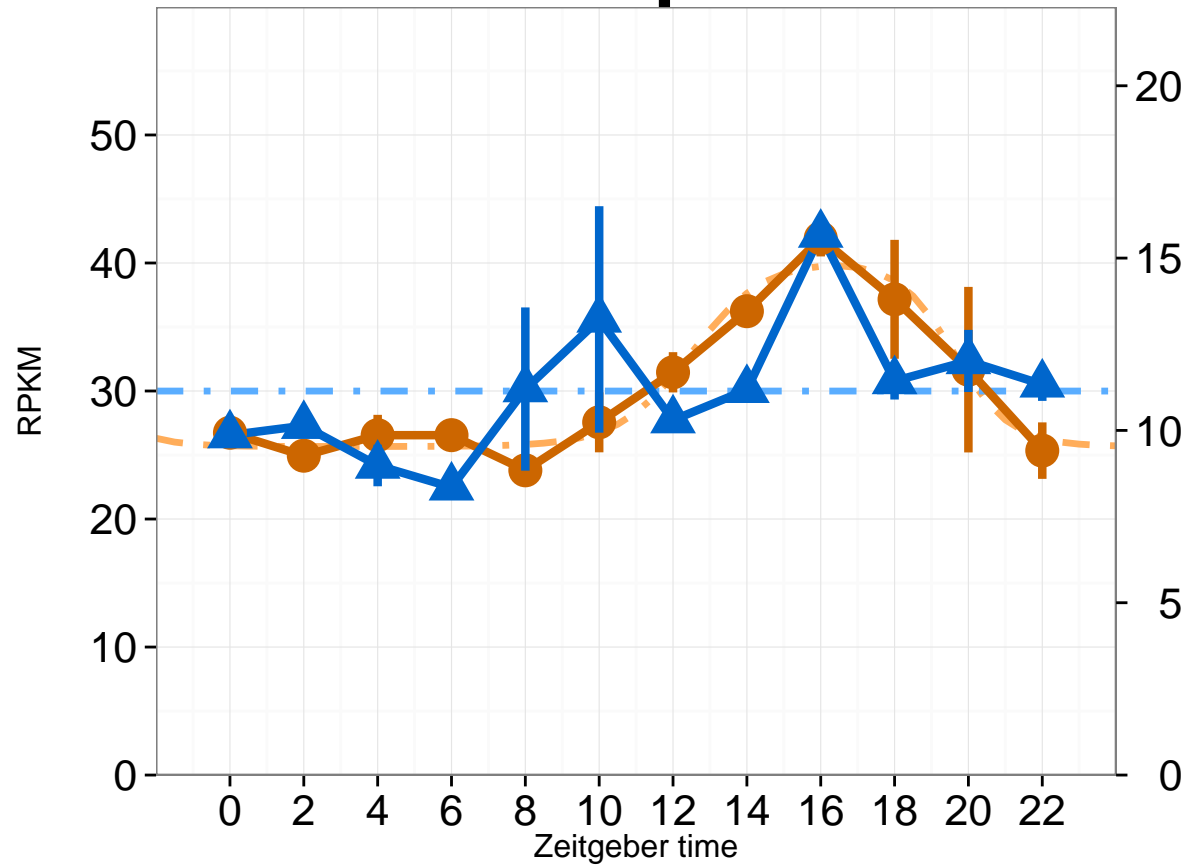

## Bnip2

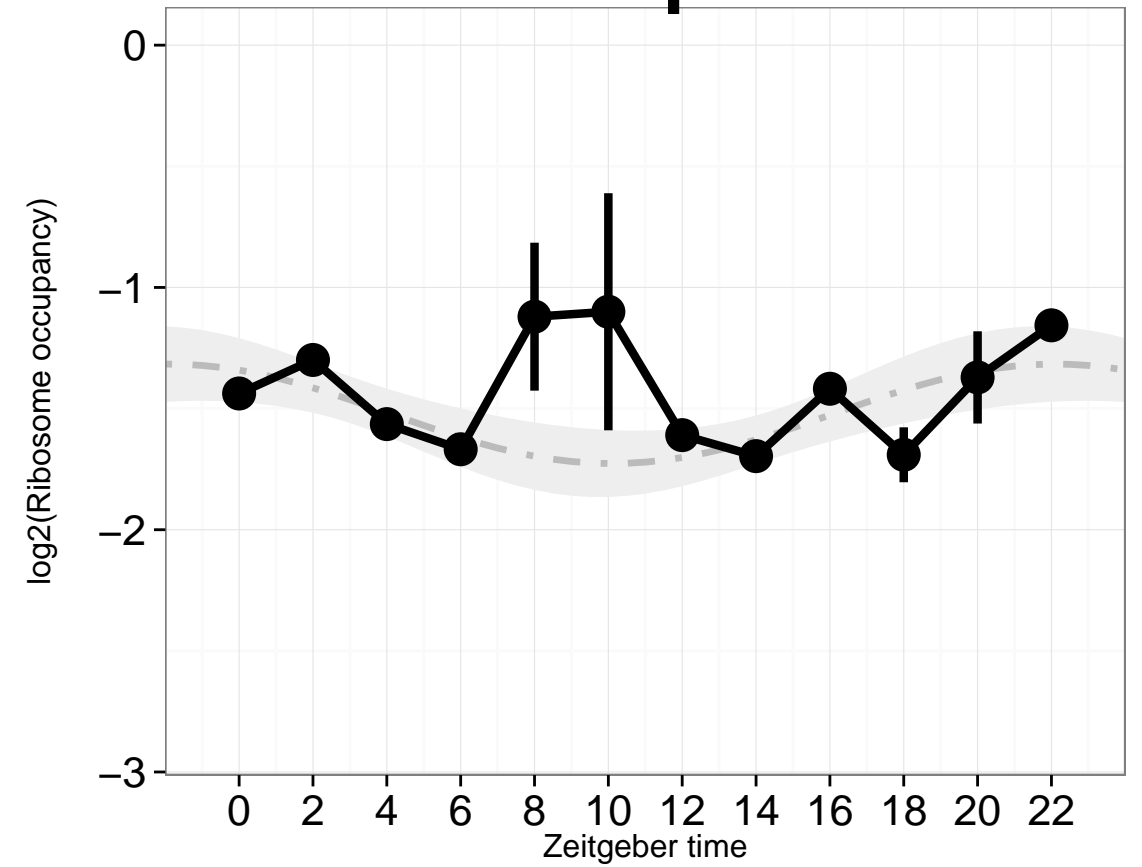

Supplement: SuppDataset_1.zip [file Bnip2_set_B.pdf › Supplemental Dataset 1/B-mRNA_rhythm_translation_nonrhyth/Bnip2_set_B.pdf]

# Brca2

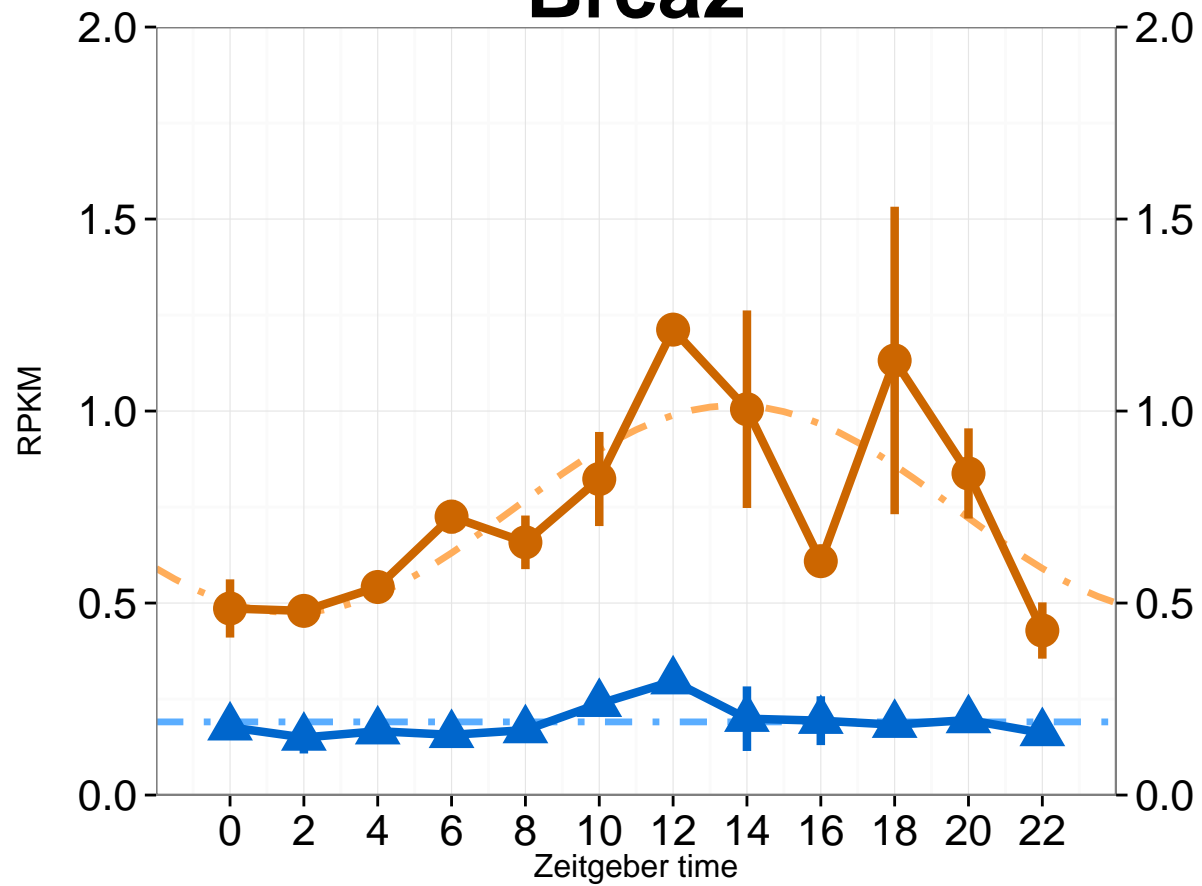

# Brca2

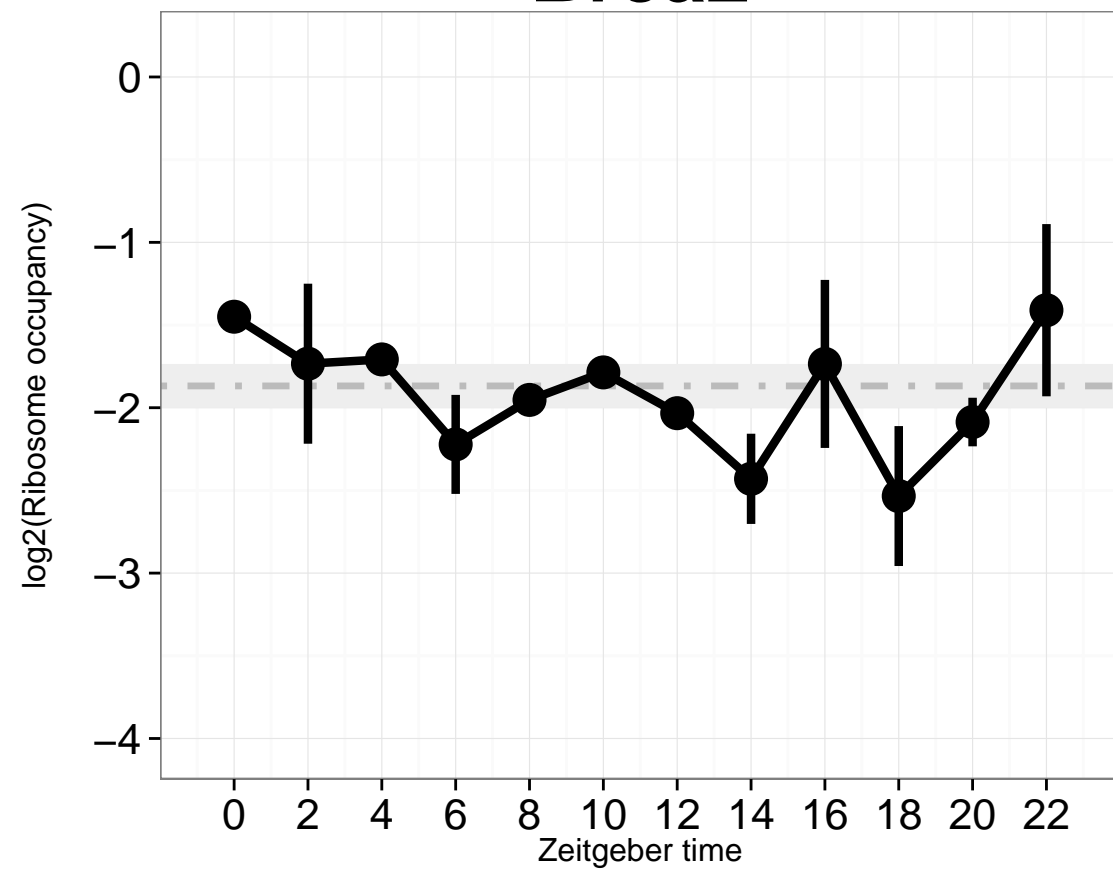

Supplement: SuppDataset_1.zip [file Brca2_set_B.pdf › Supplemental Dataset 1/B-mRNA_rhythm_translation_nonrhyth/Brca2_set_B.pdf]

## Btc

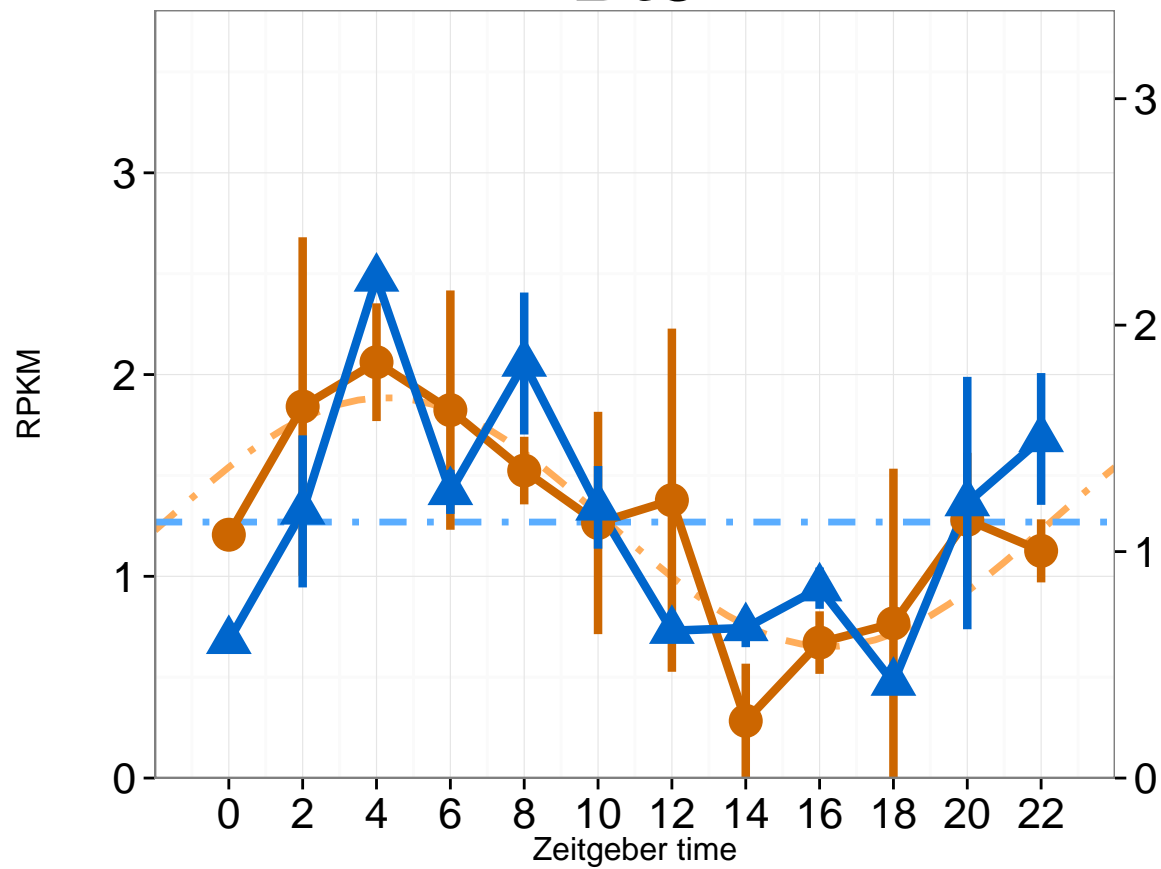

## Btc

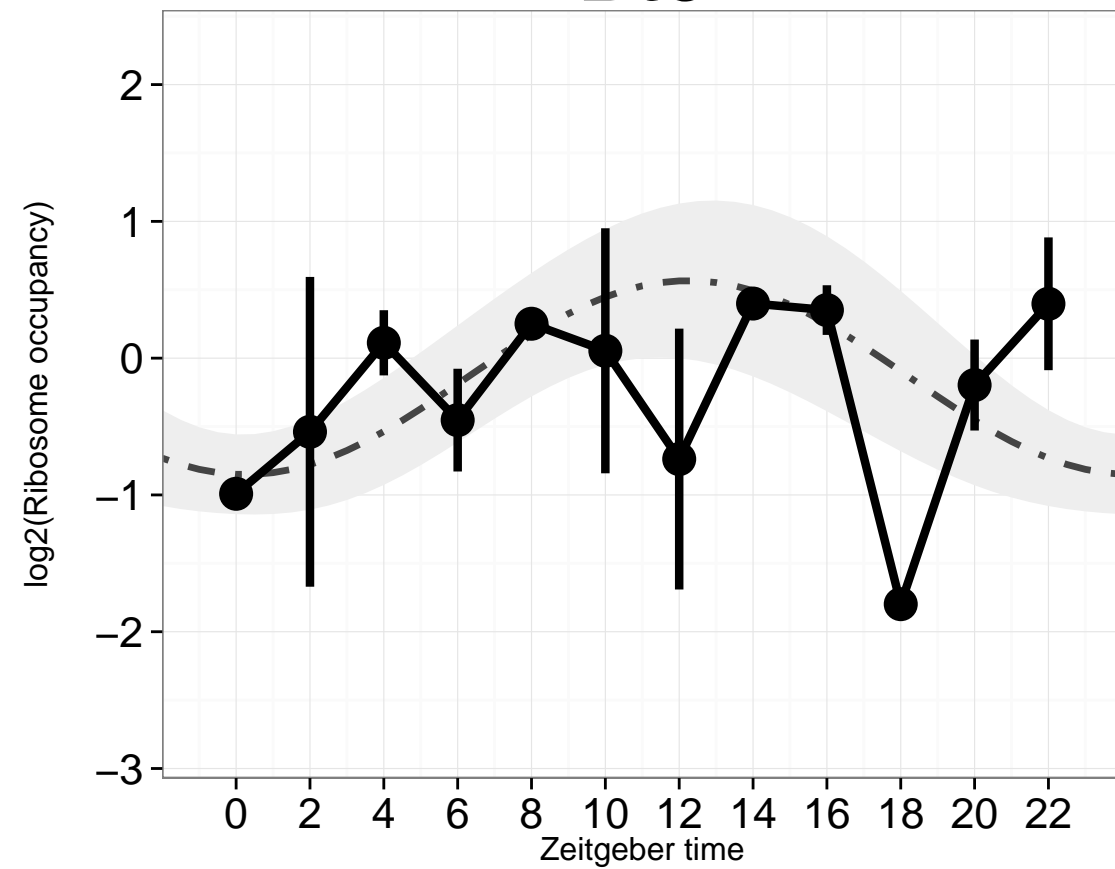

Supplement: SuppDataset_1.zip [file Btc_set_B.pdf › Supplemental Dataset 1/B-mRNA_rhythm_translation_nonrhyth/Btc_set_B.pdf]

## Cad

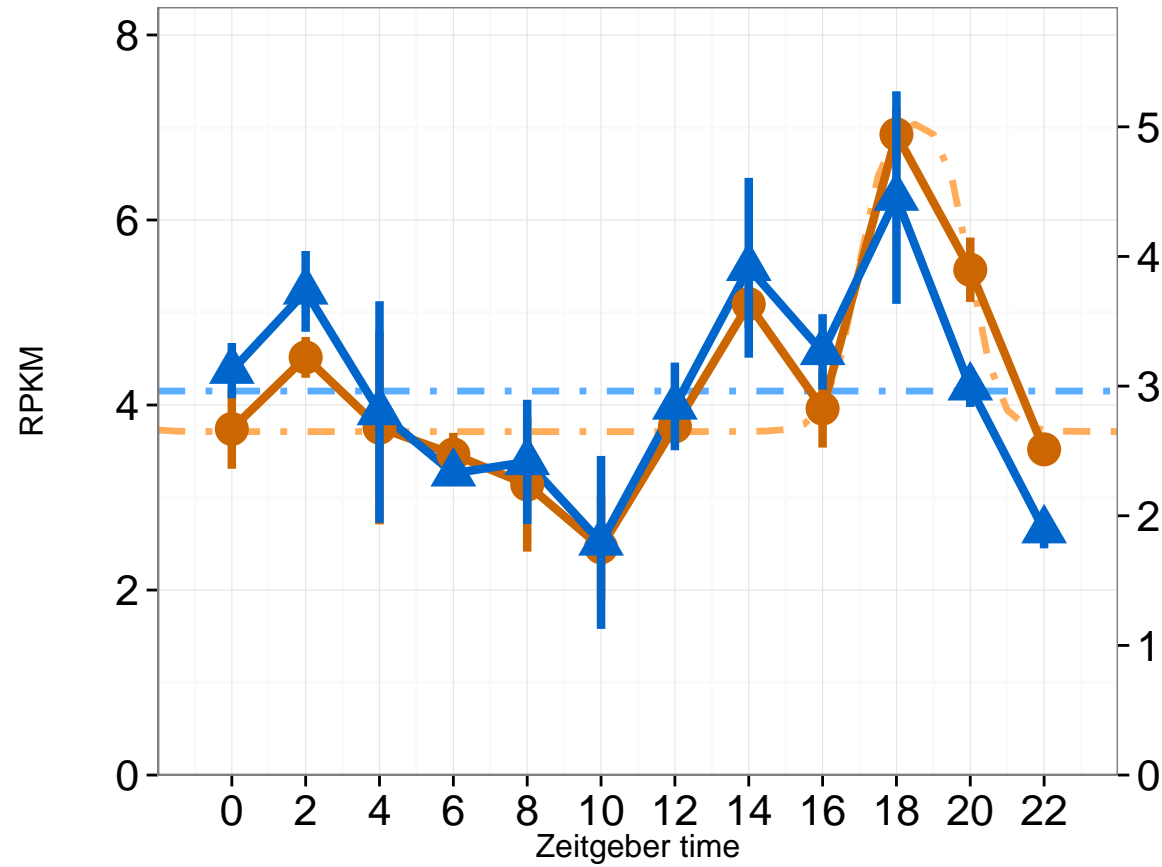

## Cad

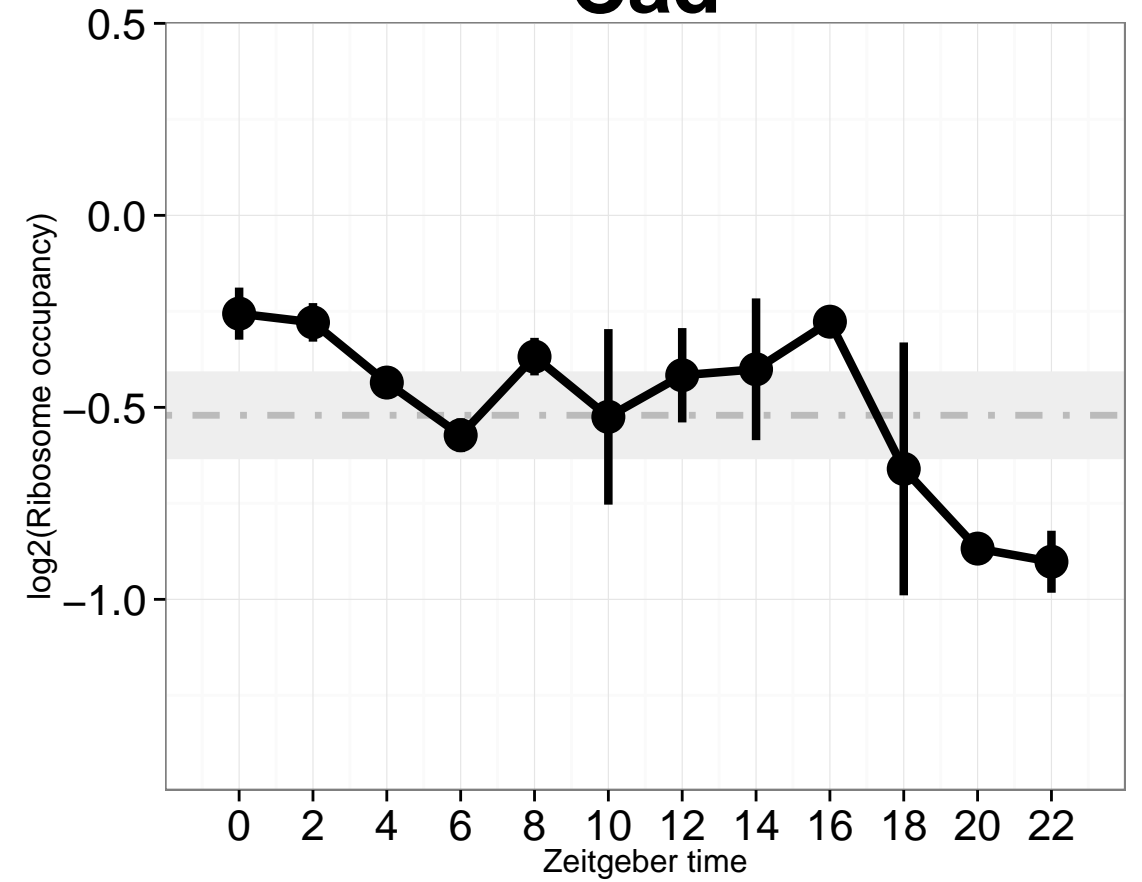

Supplement: SuppDataset_1.zip [file Cad_set_B.pdf › Supplemental Dataset 1/B-mRNA_rhythm_translation_nonrhyth/Cad_set_B.pdf]

## Camkk2

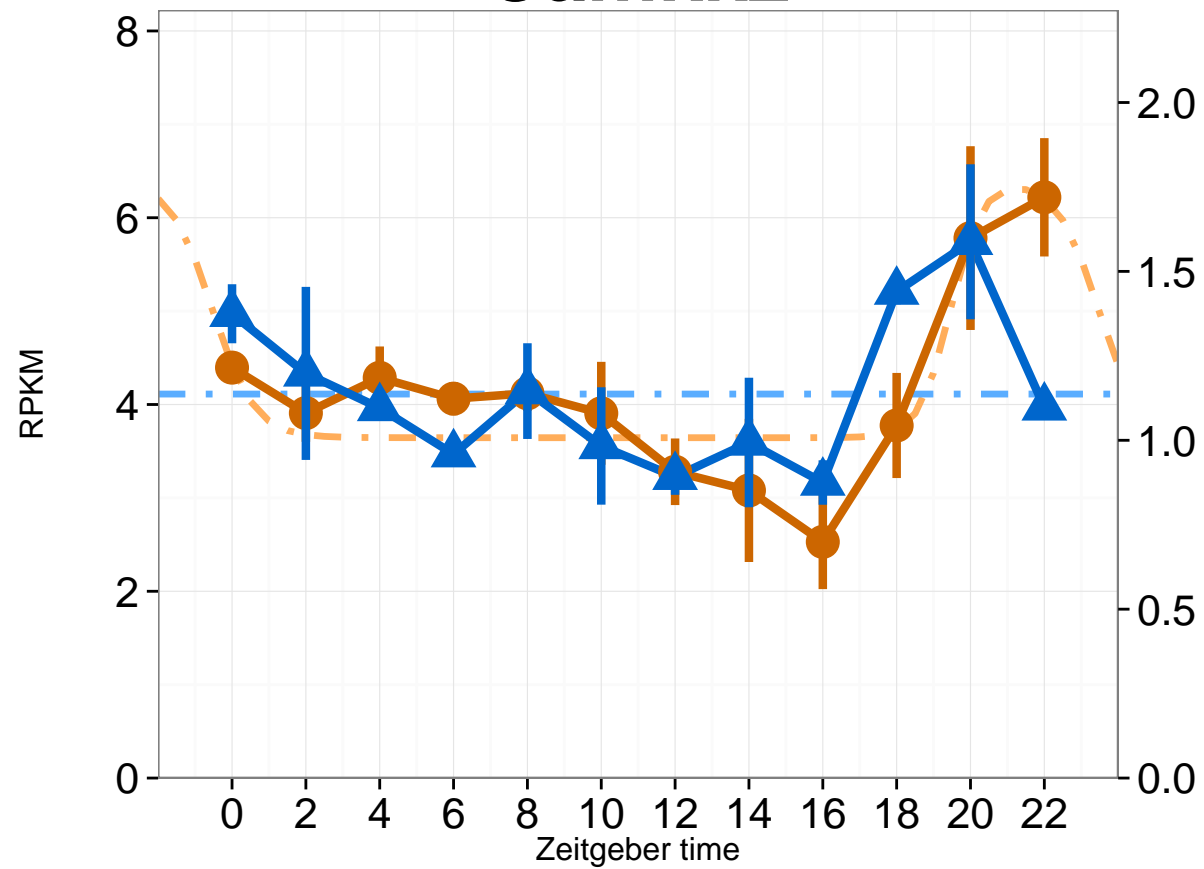

## Camkk2

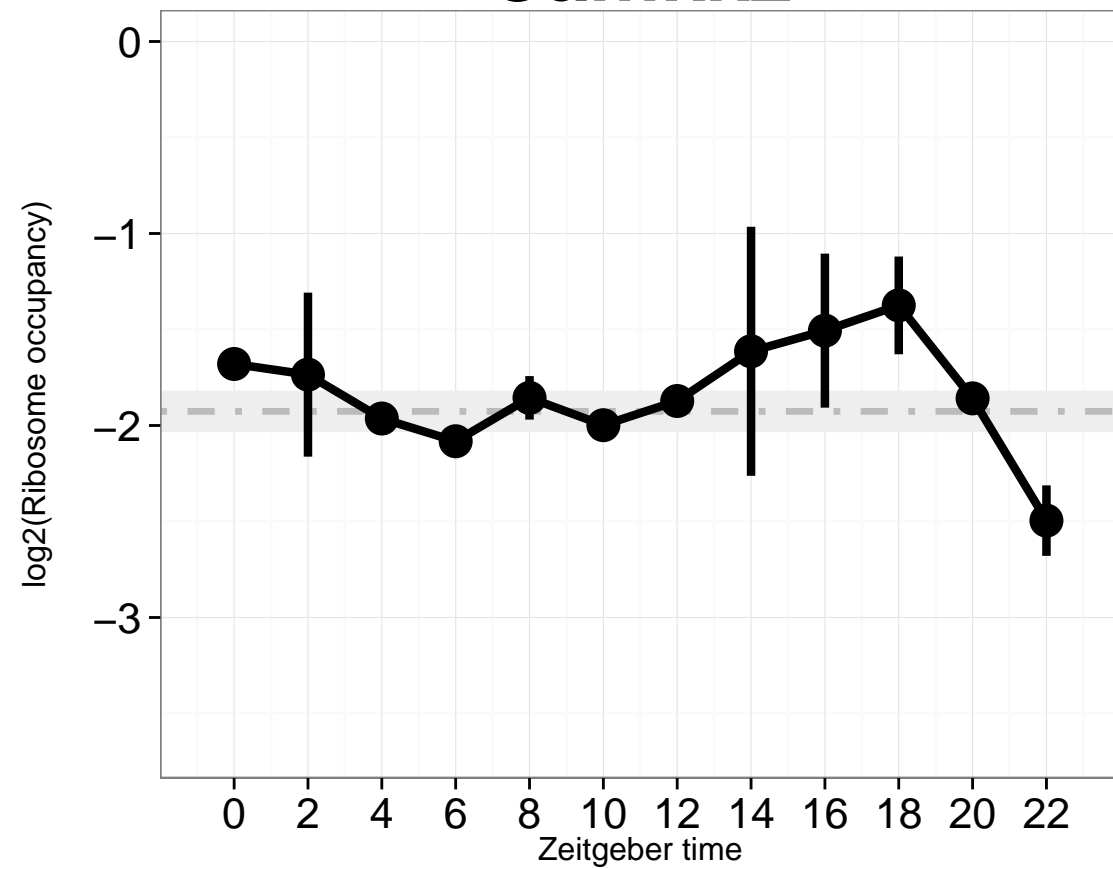

Supplement: SuppDataset_1.zip [file Camkk2_set_B.pdf › Supplemental Dataset 1/B-mRNA_rhythm_translation_nonrhyth/Camkk2_set_B.pdf]

## Camkmt

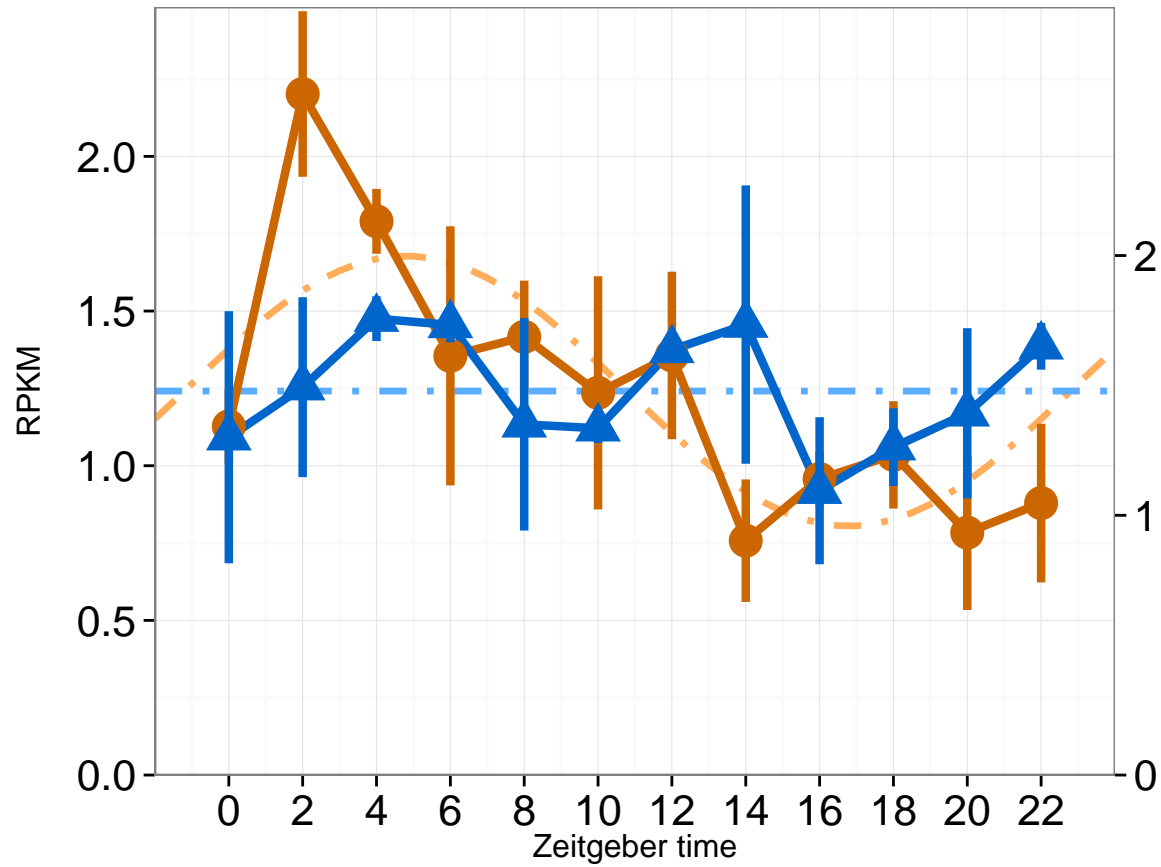

## Camkmt

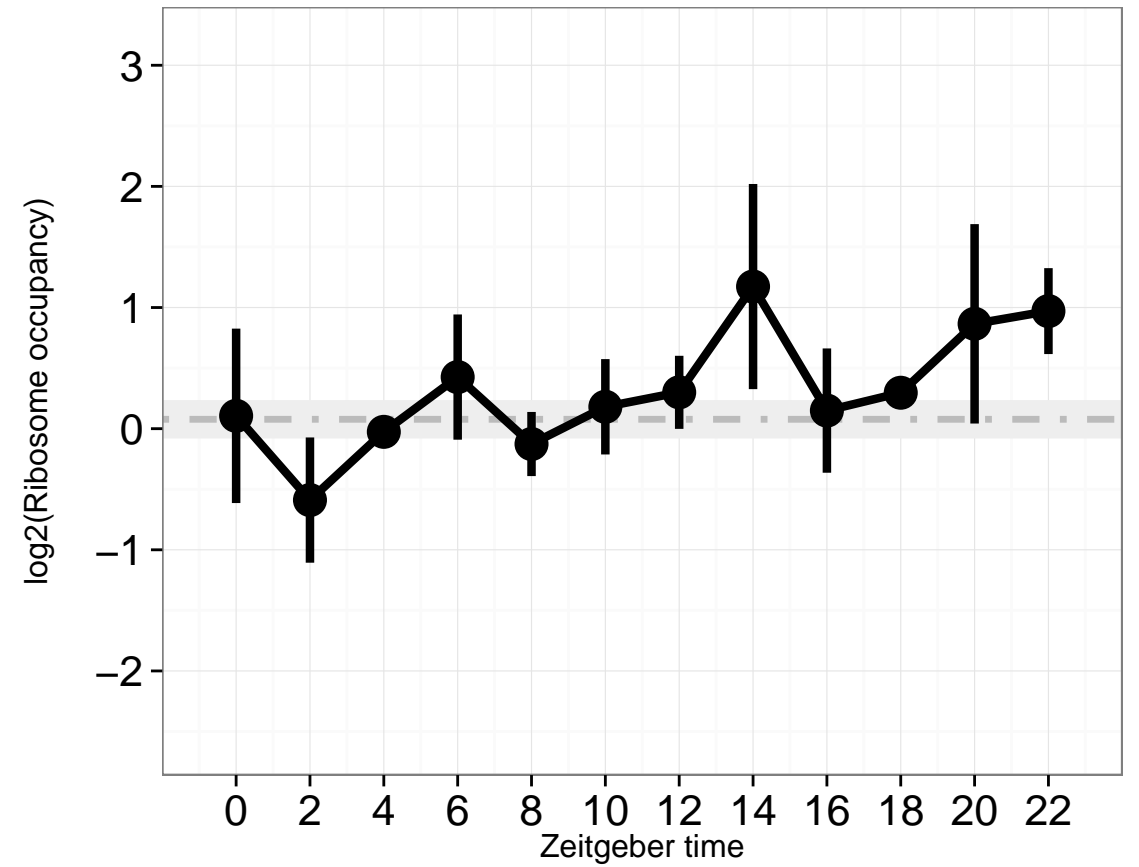

Supplement: SuppDataset_1.zip [file Camkmt_set_B.pdf › Supplemental Dataset 1/B-mRNA_rhythm_translation_nonrhyth/Camkmt_set_B.pdf]

# Camta1

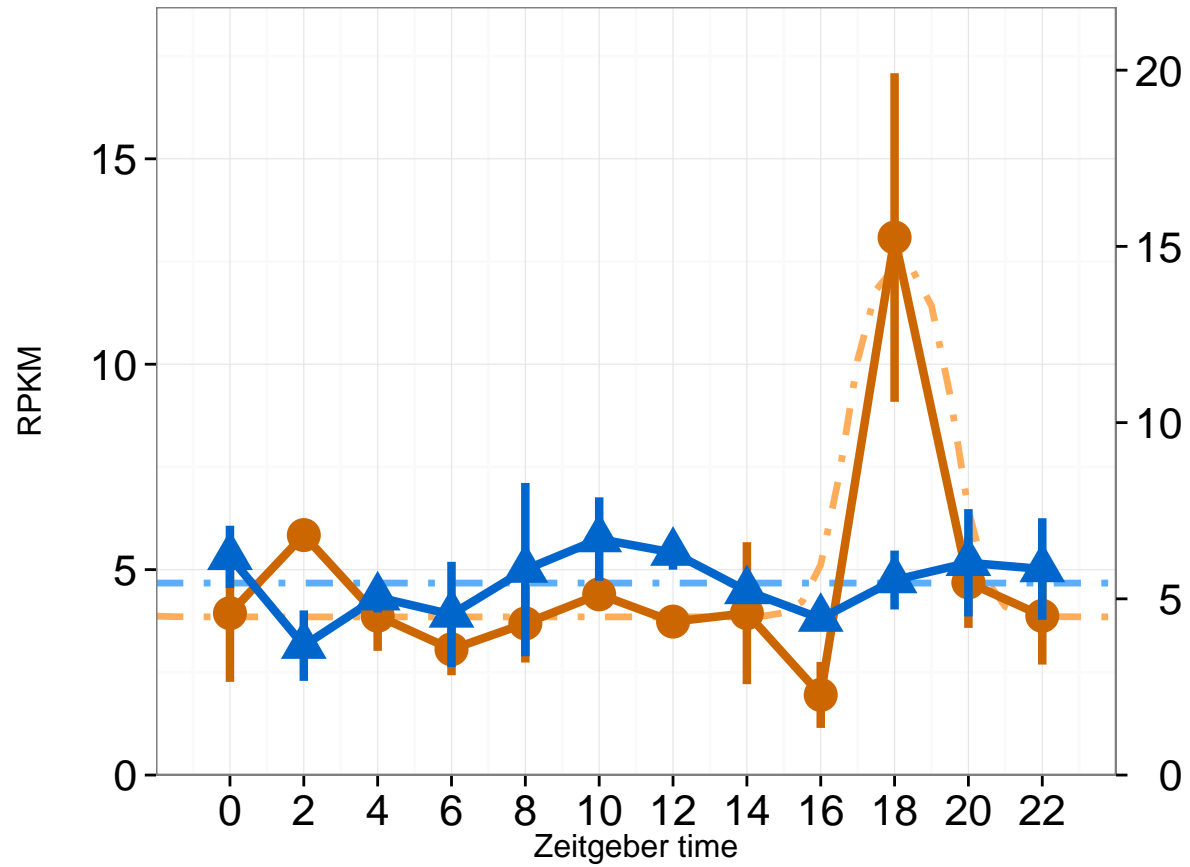

# Camta1

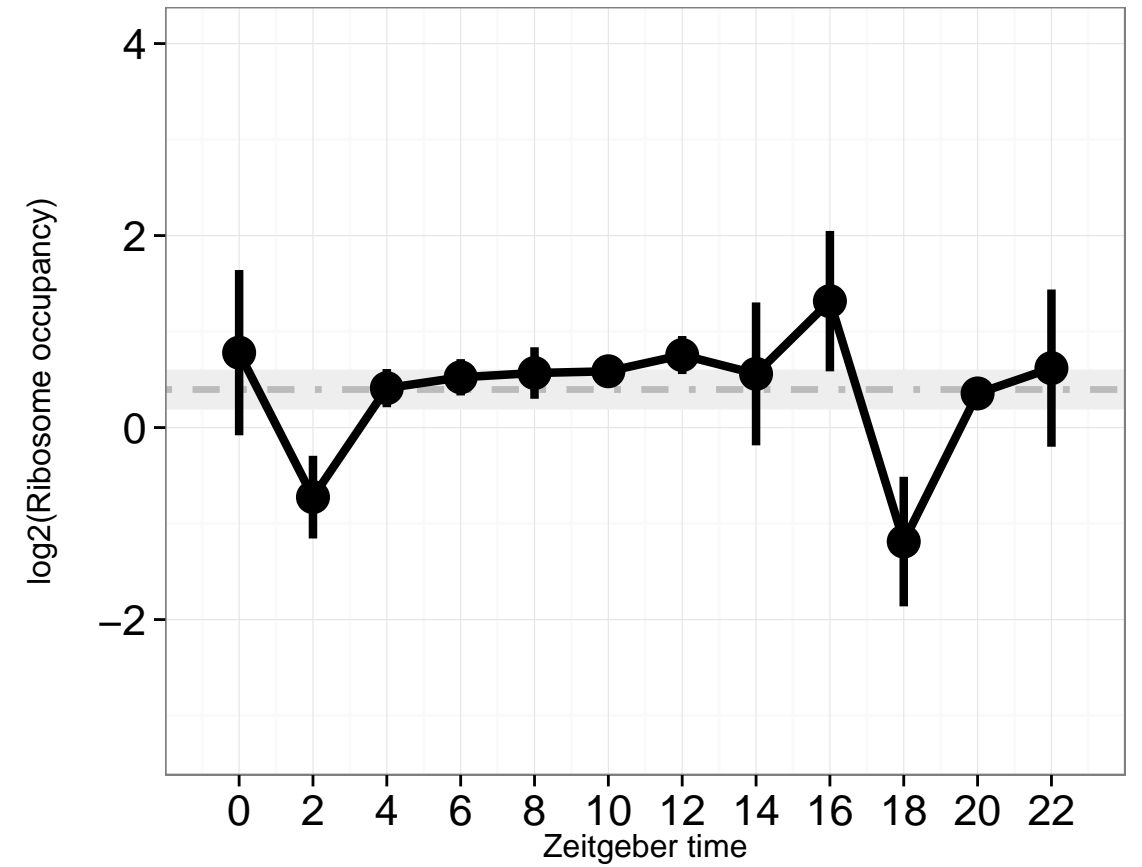

Supplement: SuppDataset_1.zip [file Camta1_set_B.pdf › Supplemental Dataset 1/B-mRNA_rhythm_translation_nonrhyth/Camta1_set_B.pdf]

# Car1

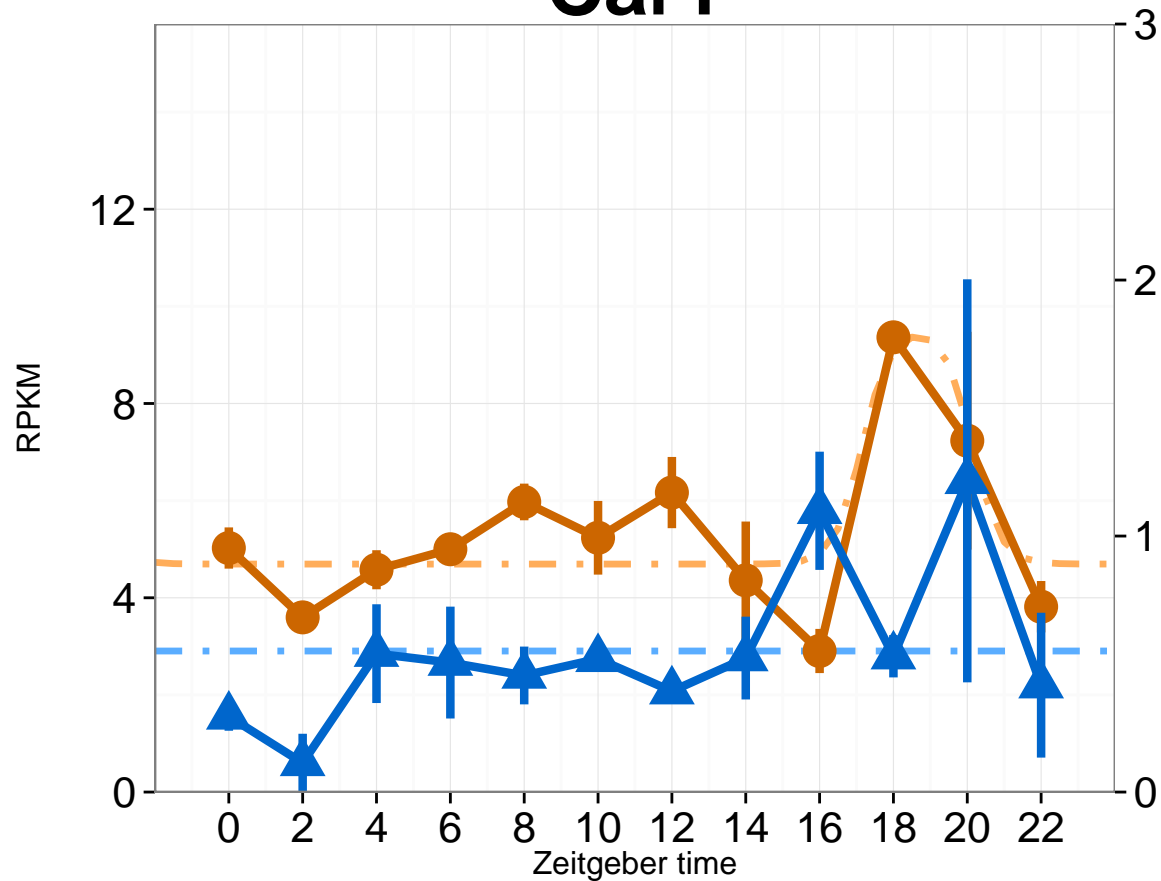

# Car1

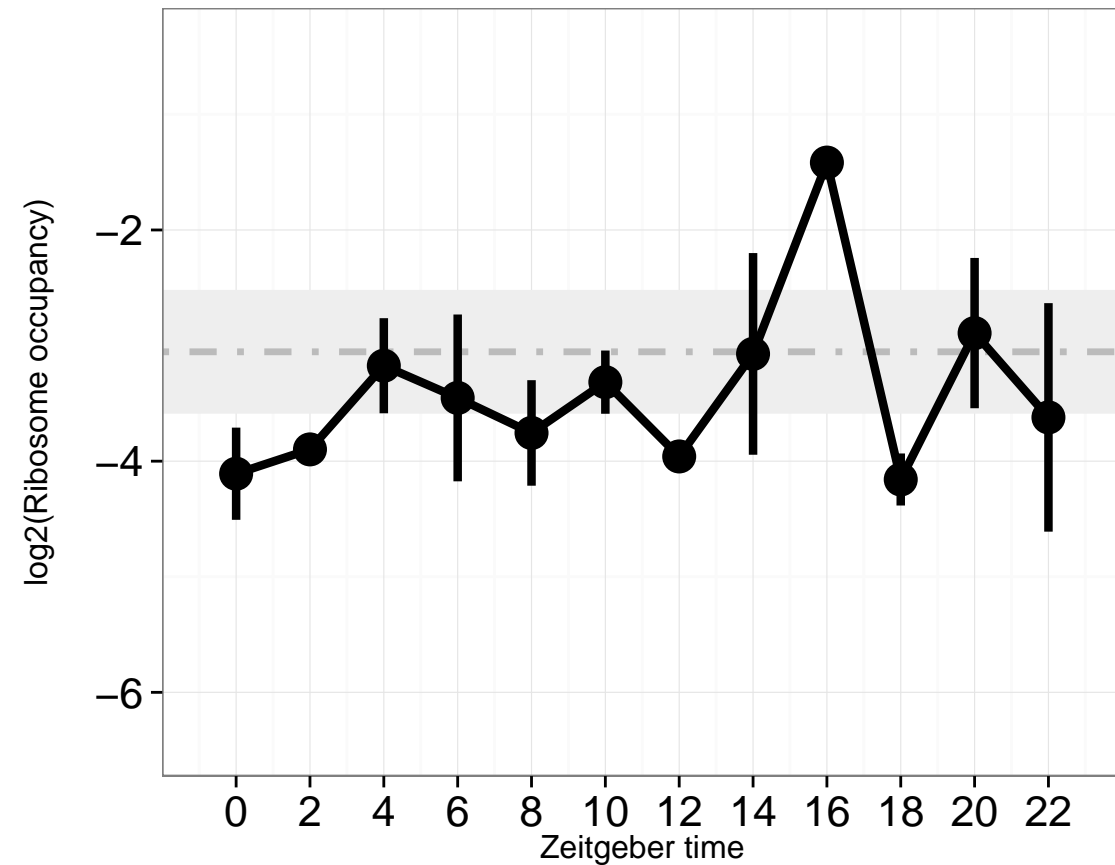

Supplement: SuppDataset_1.zip [file Car1_set_B.pdf › Supplemental Dataset 1/B-mRNA_rhythm_translation_nonrhyth/Car1_set_B.pdf]

# Car5b

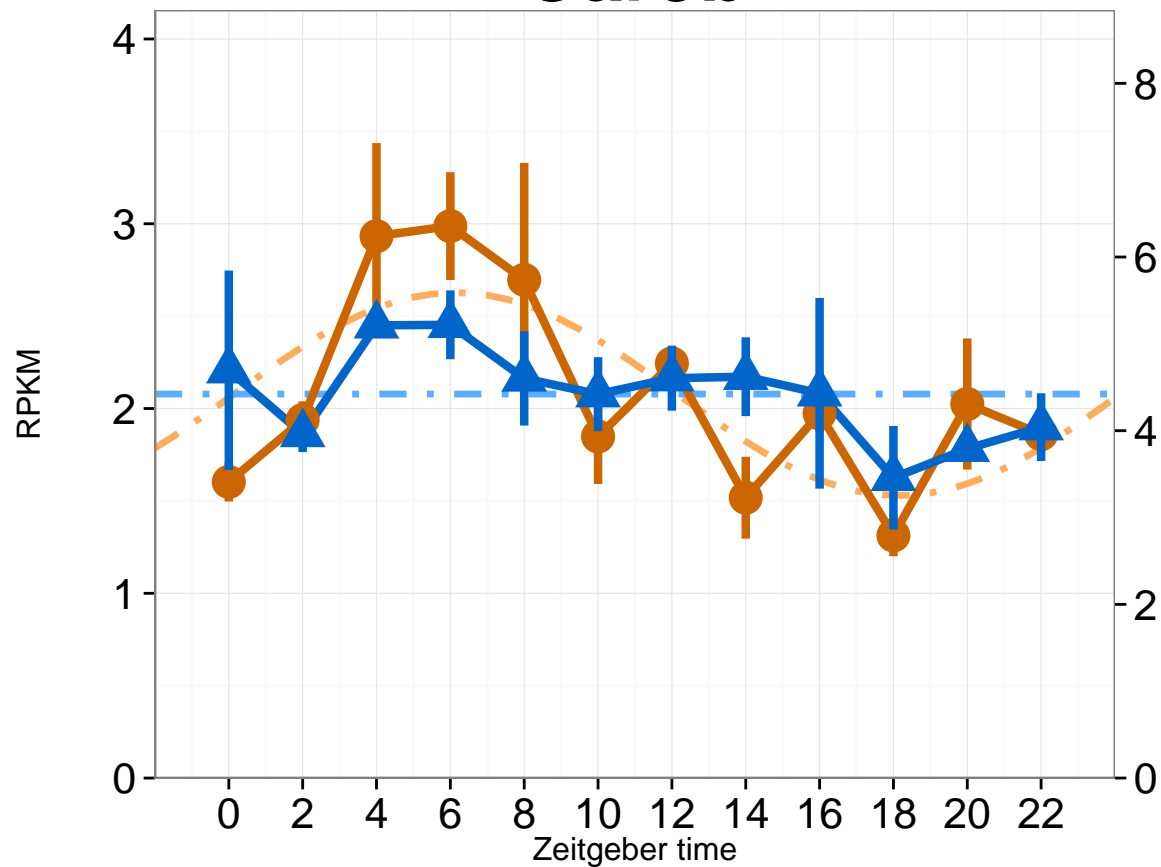

# Car5b

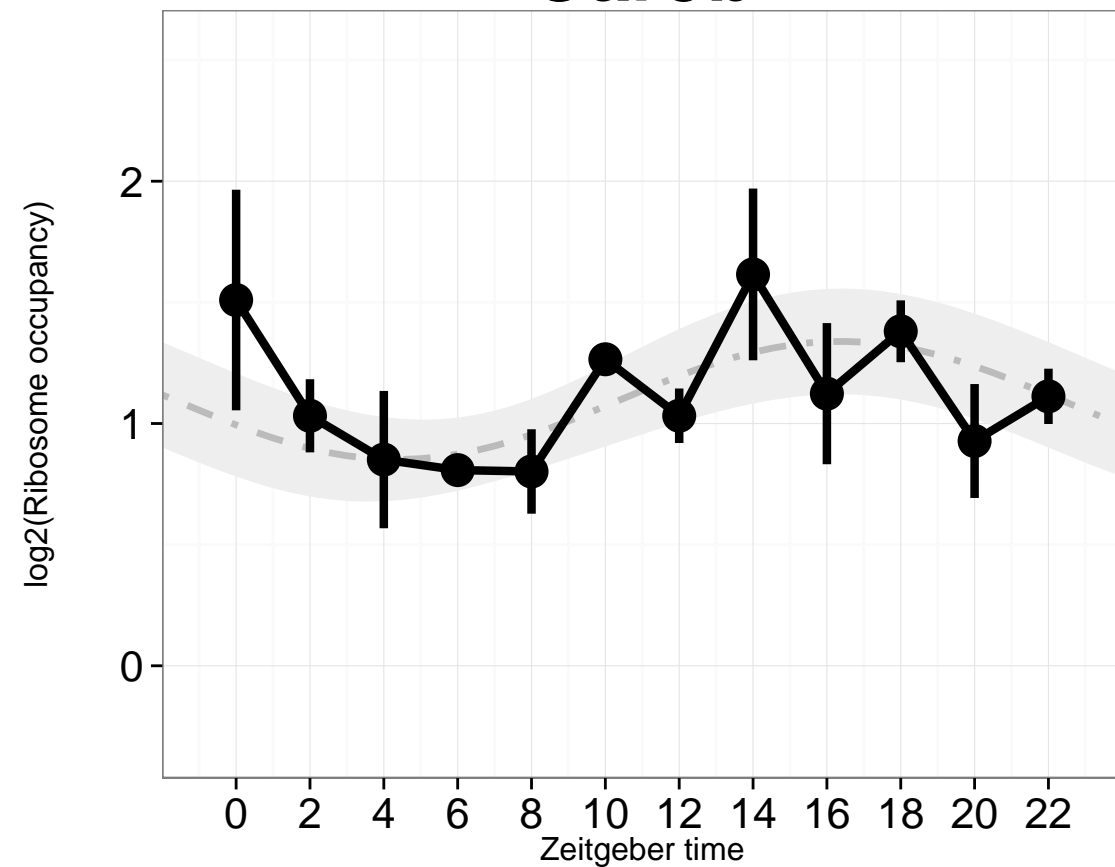

Supplement: SuppDataset_1.zip [file Car5b_set_B.pdf › Supplemental Dataset 1/B-mRNA_rhythm_translation_nonrhyth/Car5b_set_B.pdf]

## Card11

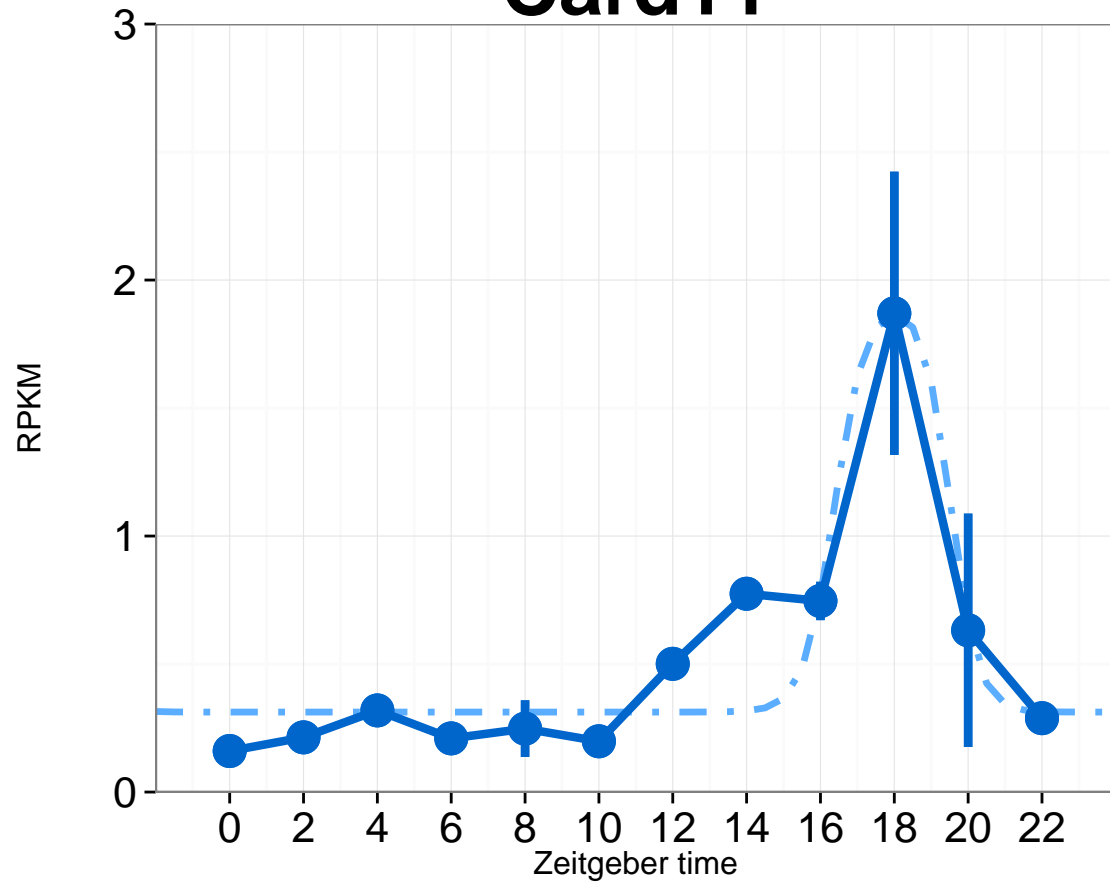

## Card11 log2(Ribosome occupancy

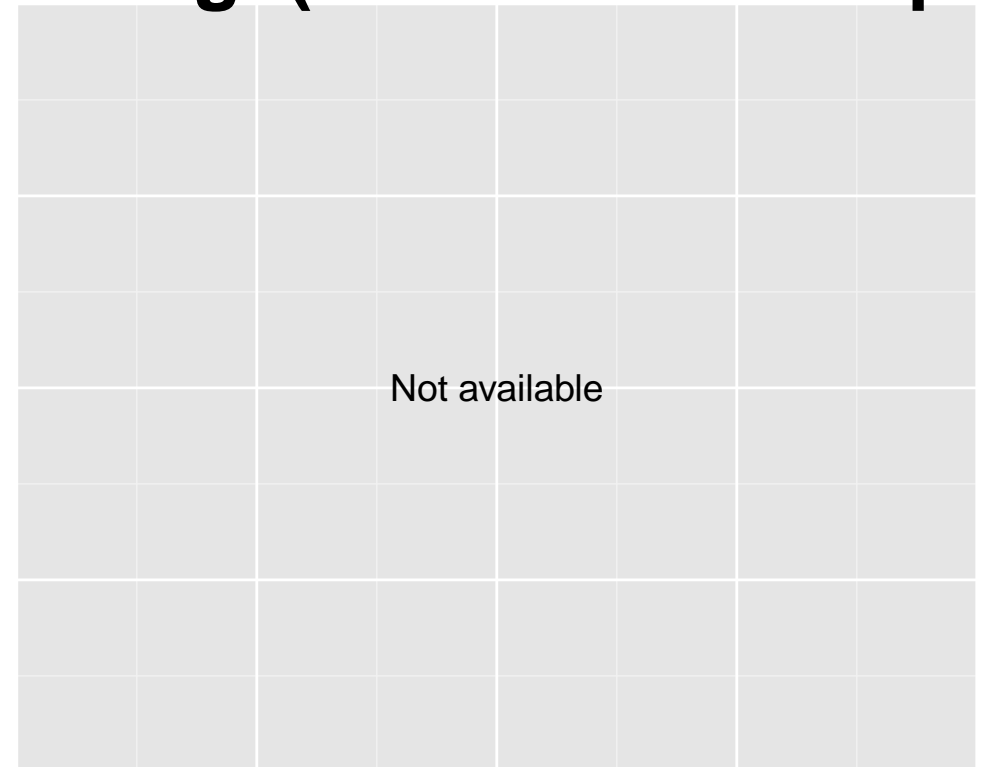

Supplement: SuppDataset_1.zip [file Card11_set_B.pdf › Supplemental Dataset 1/B-mRNA_rhythm_translation_nonrhyth/Card11_set_B.pdf]

# Carm1

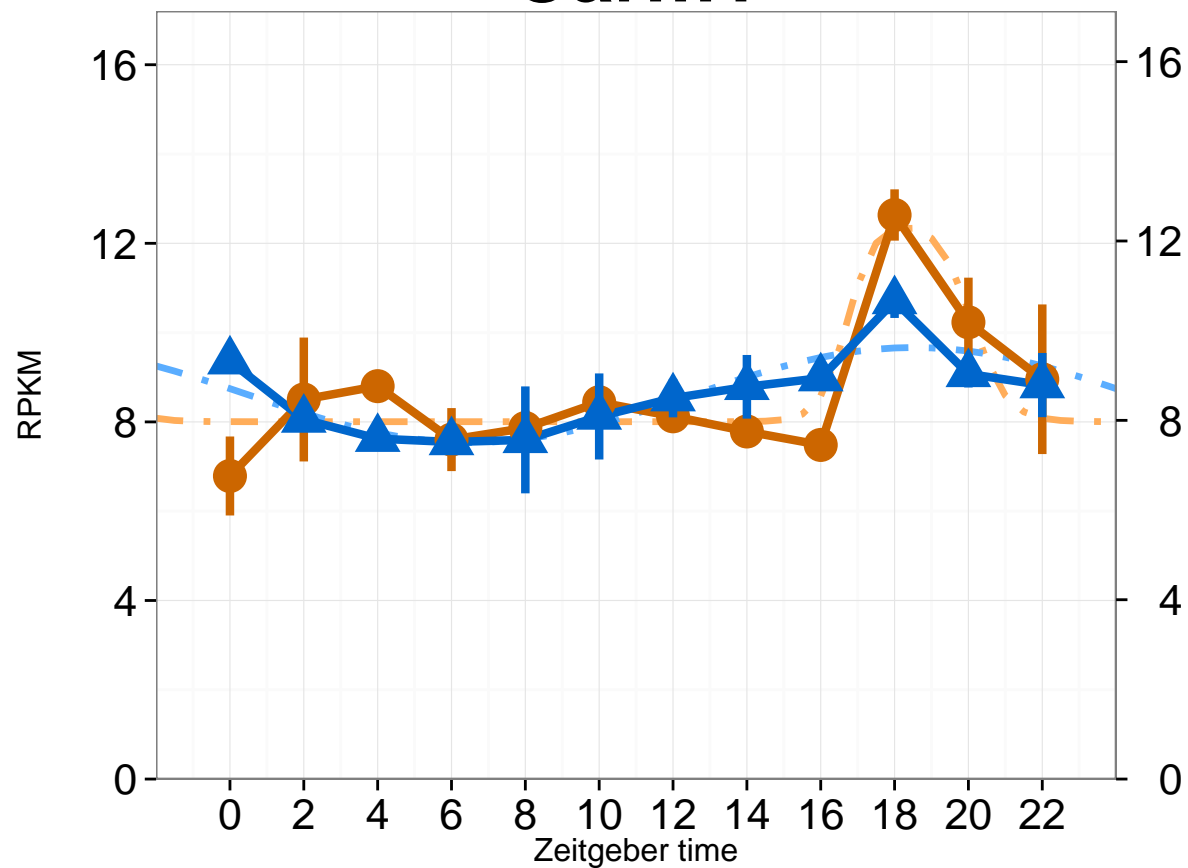

# Carm1

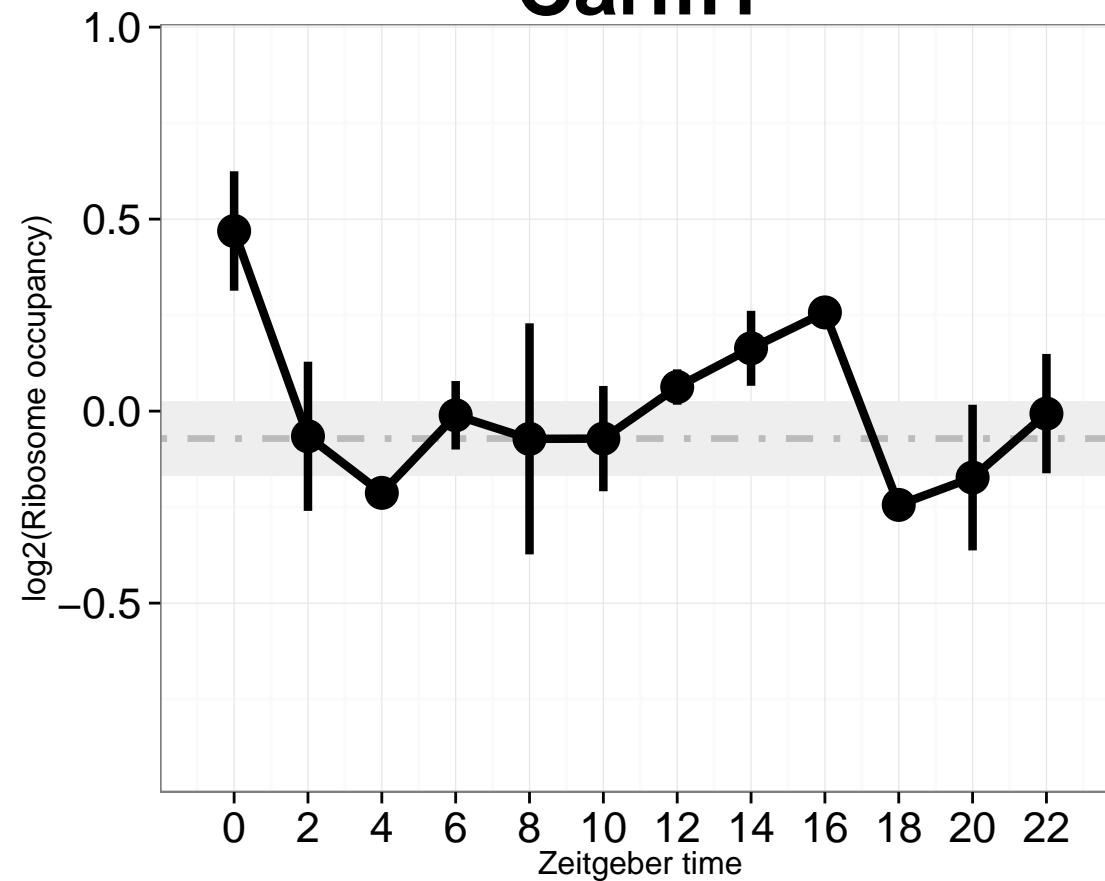

Supplement: SuppDataset_1.zip [file Carm1_set_B.pdf › Supplemental Dataset 1/B-mRNA_rhythm_translation_nonrhyth/Carm1_set_B.pdf]

## Cav1

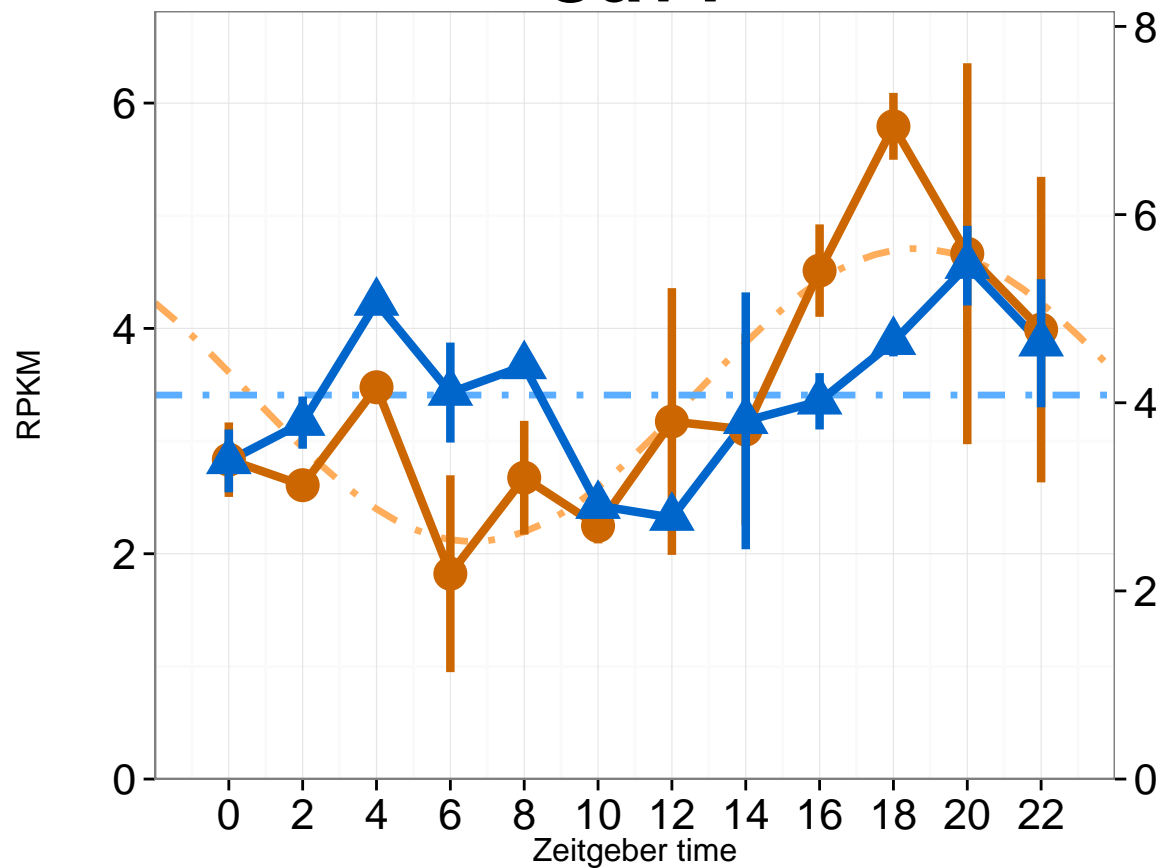

## Cav1

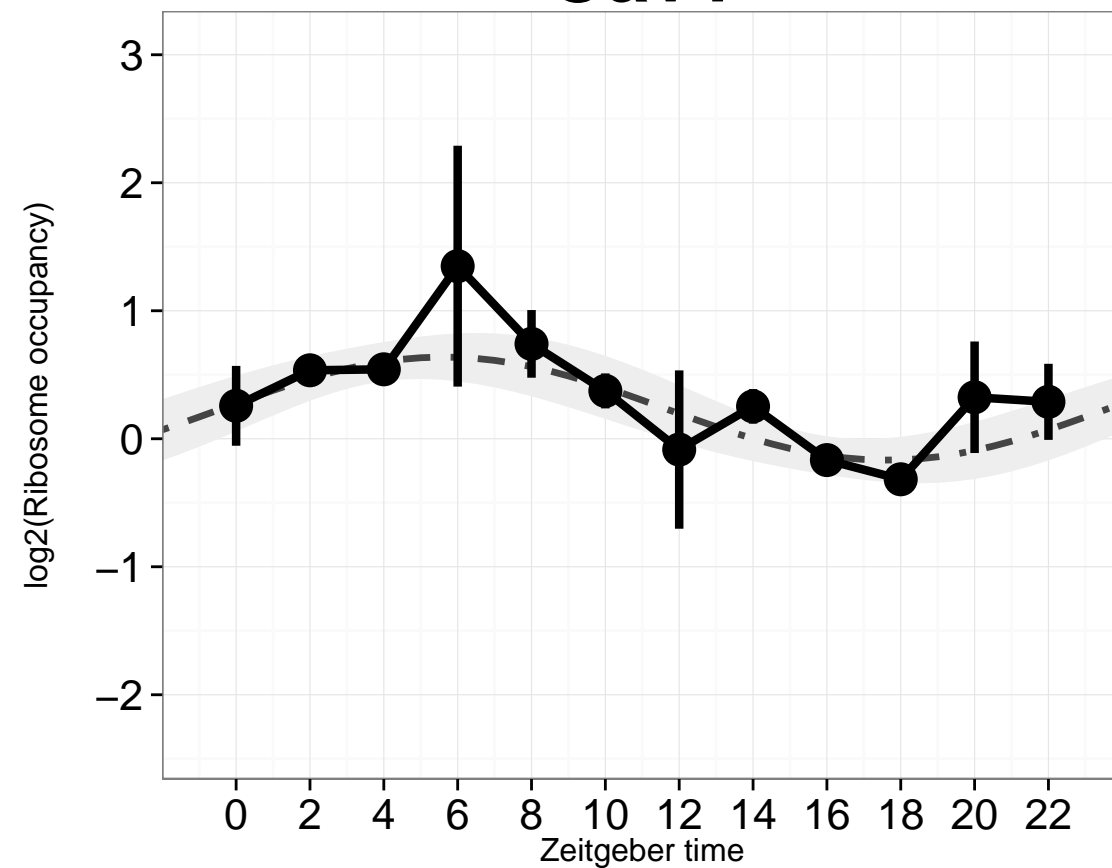

Supplement: SuppDataset_1.zip [file Cav1_set_B.pdf › Supplemental Dataset 1/B-mRNA_rhythm_translation_nonrhyth/Cav1_set_B.pdf]

## Cbr1

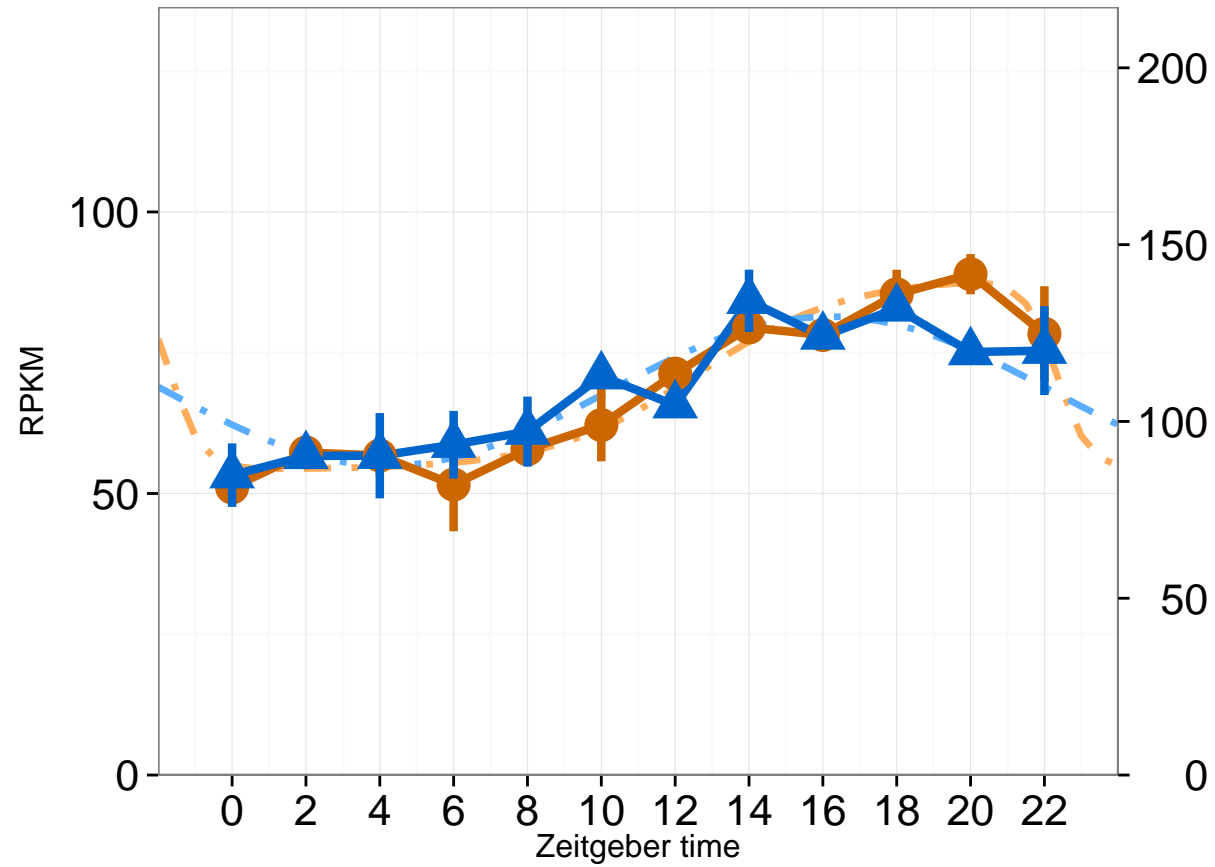

## Cbr1

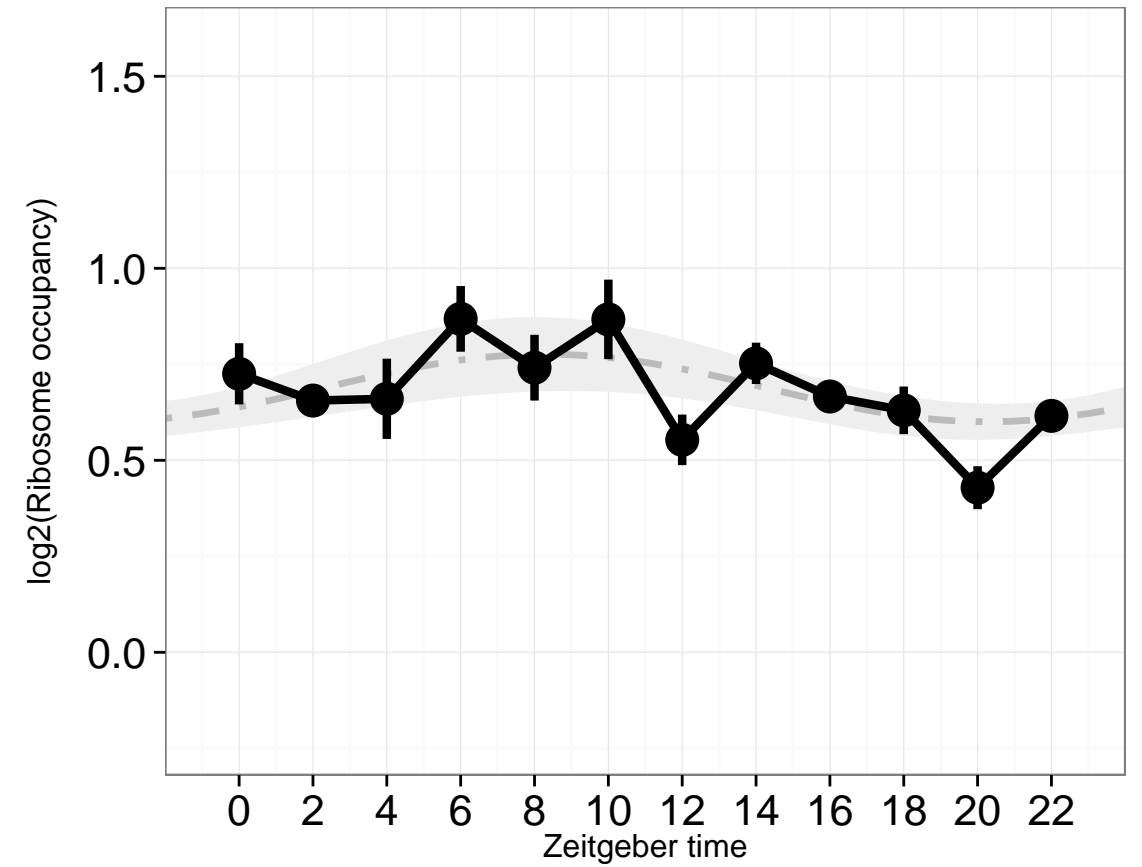

Supplement: SuppDataset_1.zip [file Cbr1_set_B.pdf › Supplemental Dataset 1/B-mRNA_rhythm_translation_nonrhyth/Cbr1_set_B.pdf]

## Cbx6

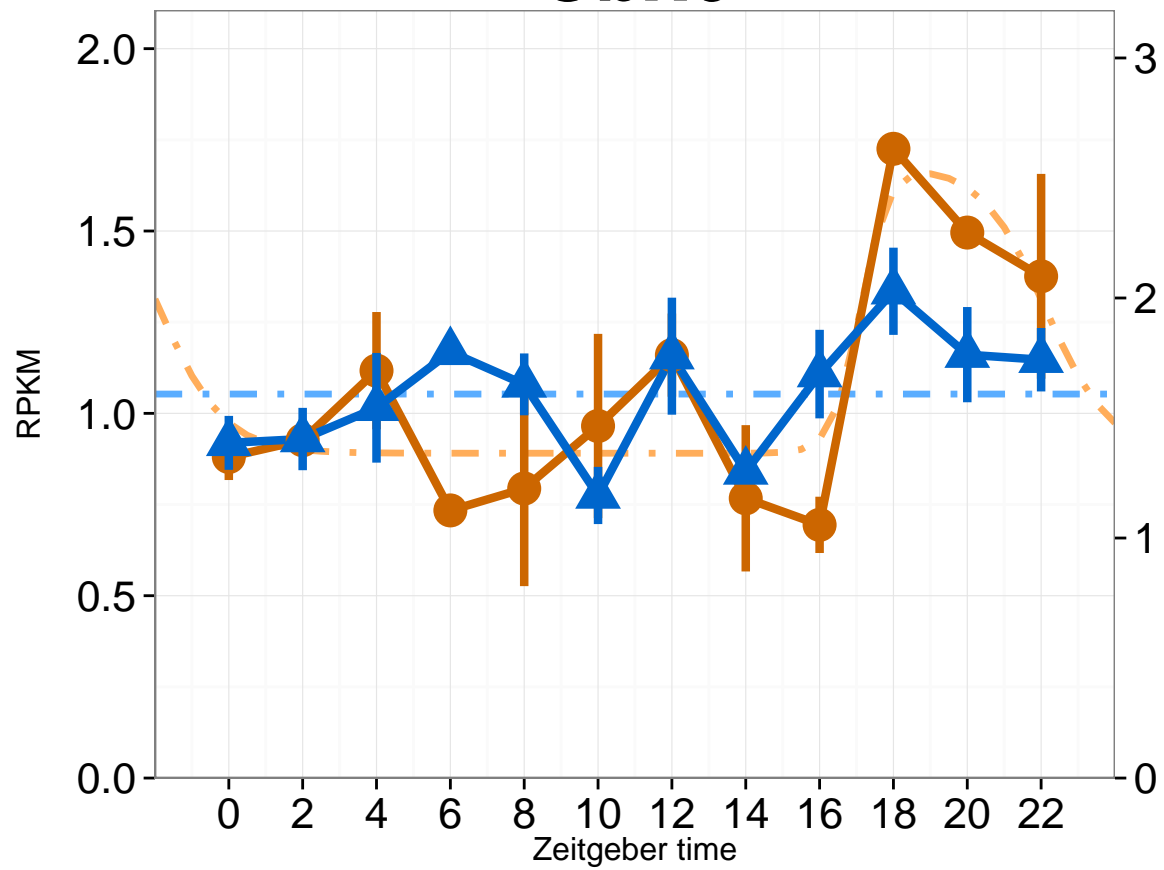

## Cbx6

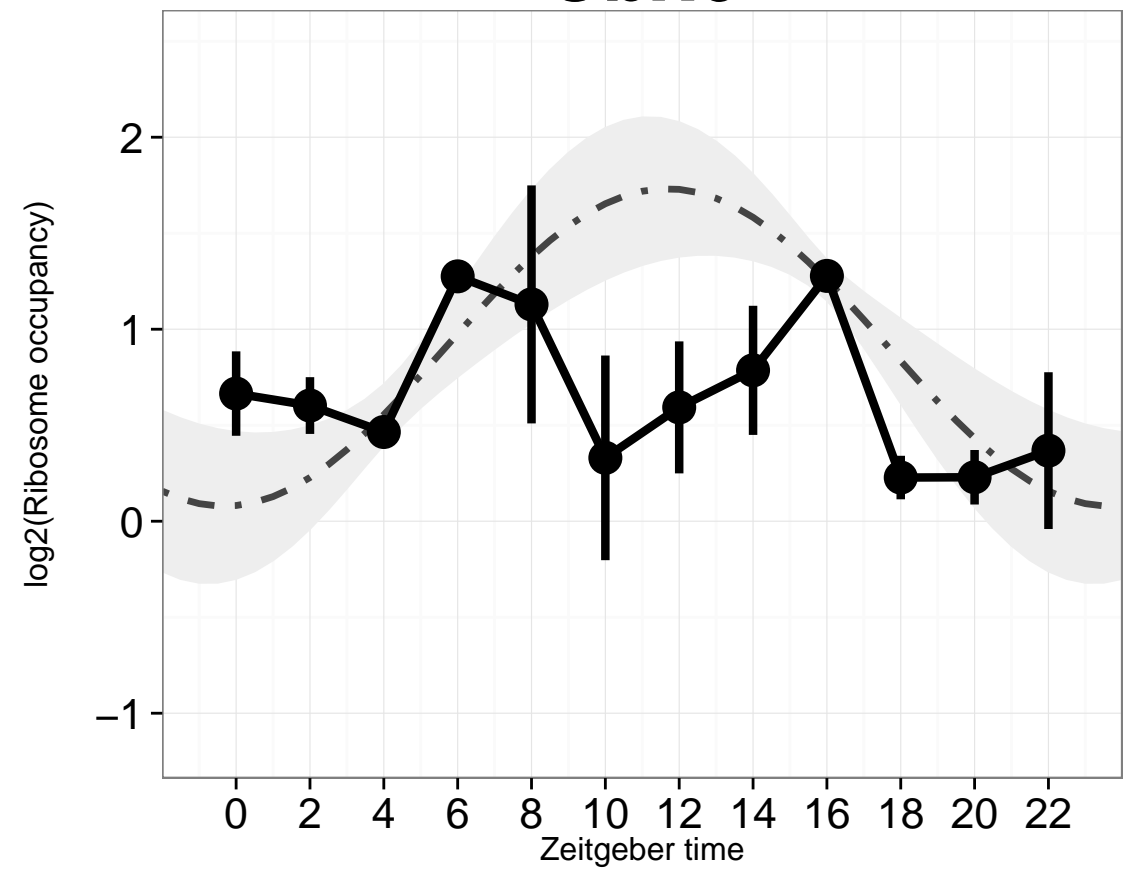

Supplement: SuppDataset_1.zip [file Cbx6_set_B.pdf › Supplemental Dataset 1/B-mRNA_rhythm_translation_nonrhyth/Cbx6_set_B.pdf]

# Ccbe1

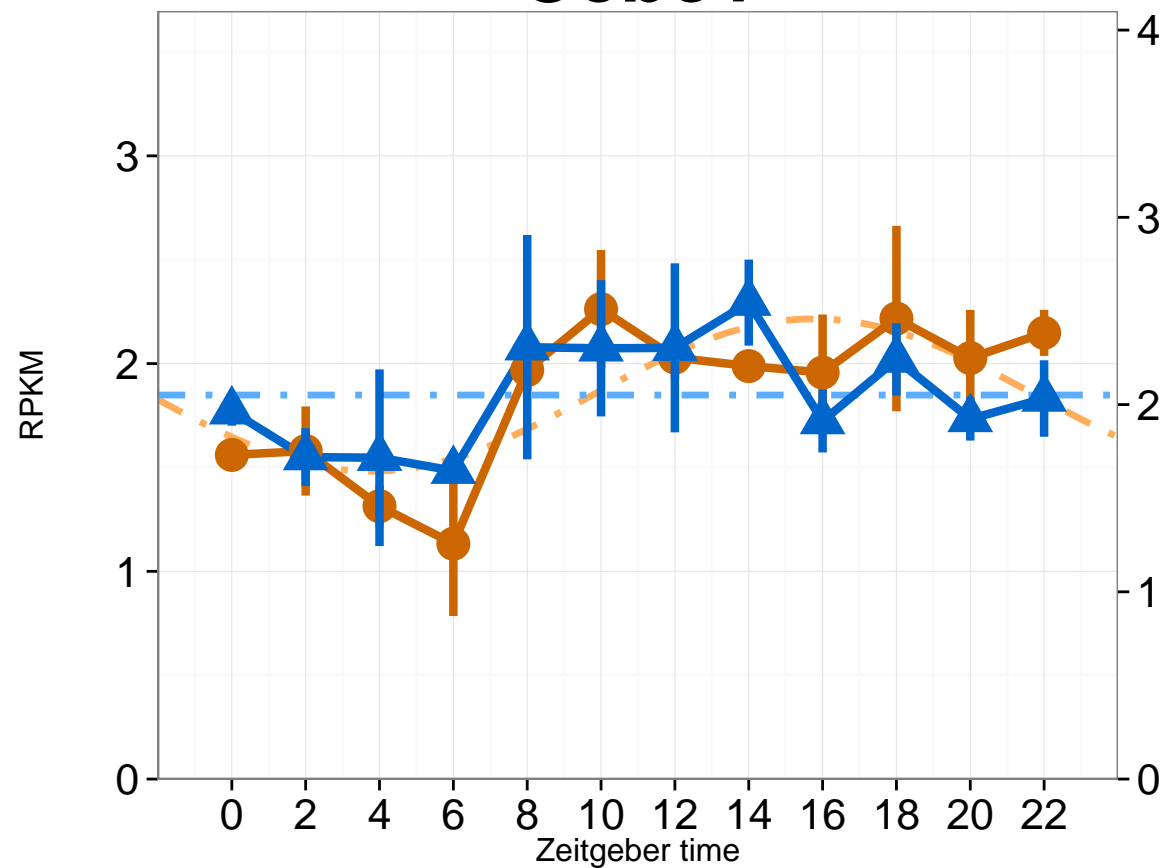

# Ccbe1

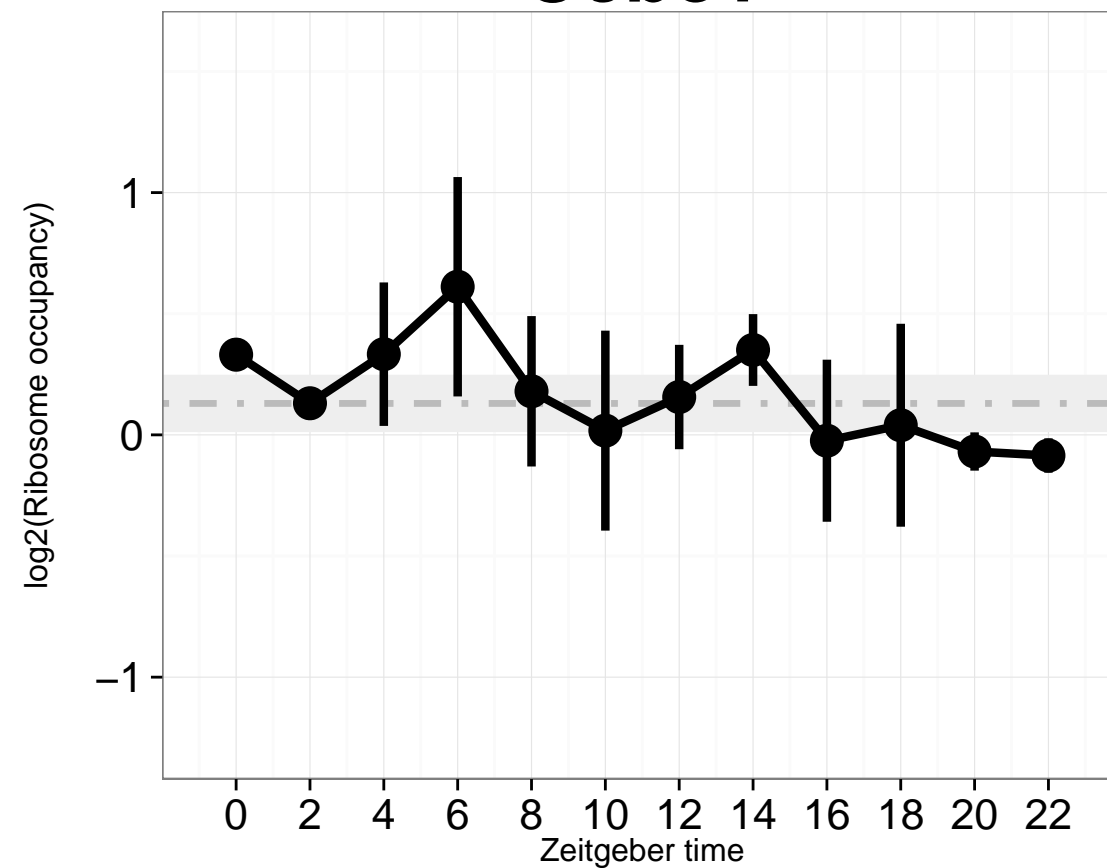

Supplement: SuppDataset_1.zip [file Ccbe1_set_B.pdf › Supplemental Dataset 1/B-mRNA_rhythm_translation_nonrhyth/Ccbe1_set_B.pdf]

## Ccbl1

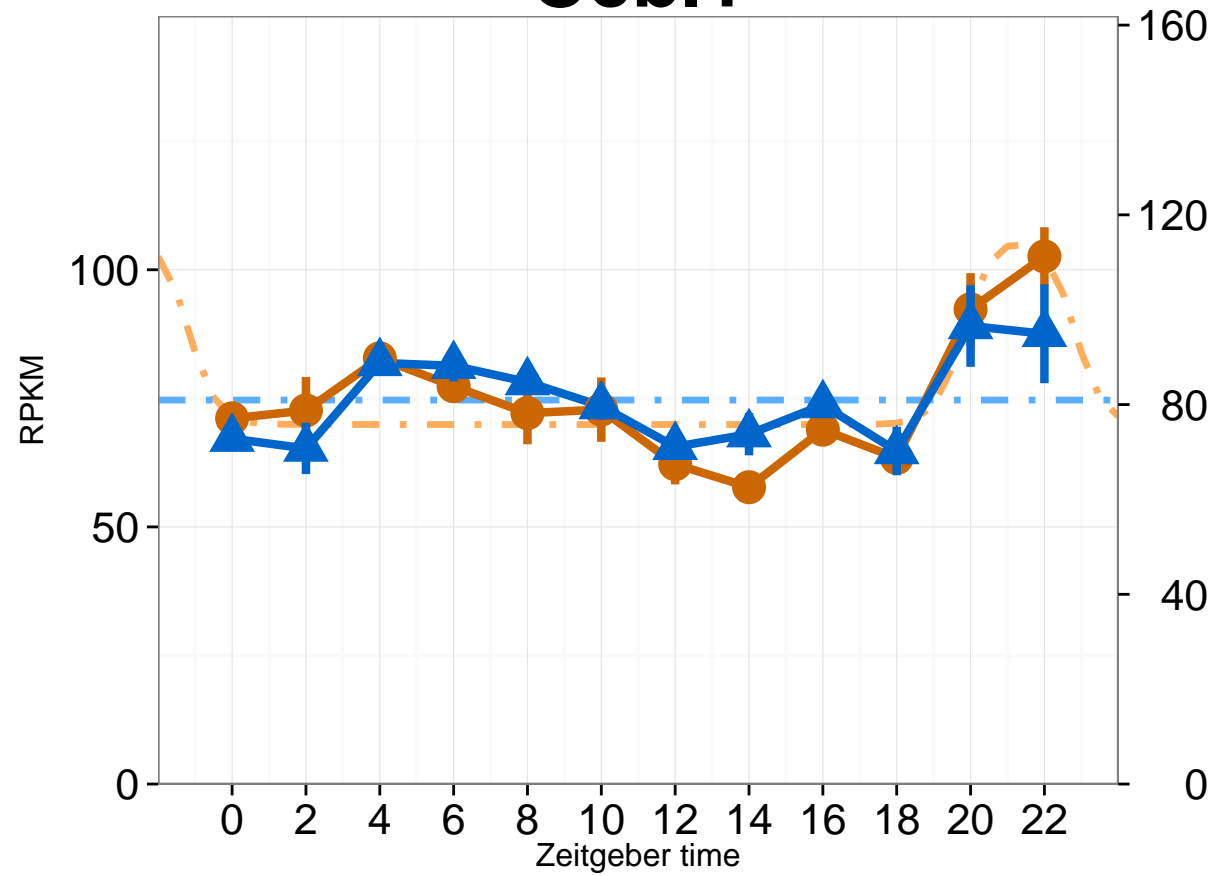

## Ccbl1

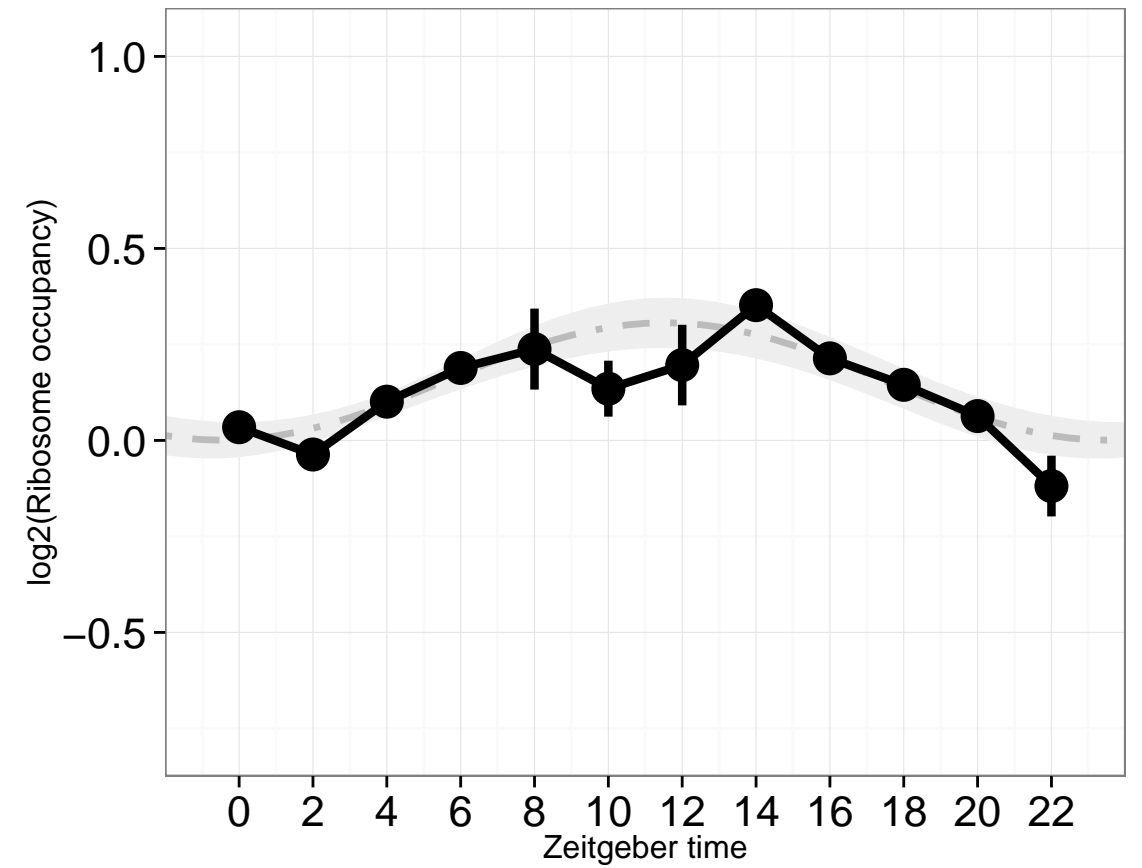

Supplement: SuppDataset_1.zip [file Ccbl1_set_B.pdf › Supplemental Dataset 1/B-mRNA_rhythm_translation_nonrhyth/Ccbl1_set_B.pdf]

# Ccdc122

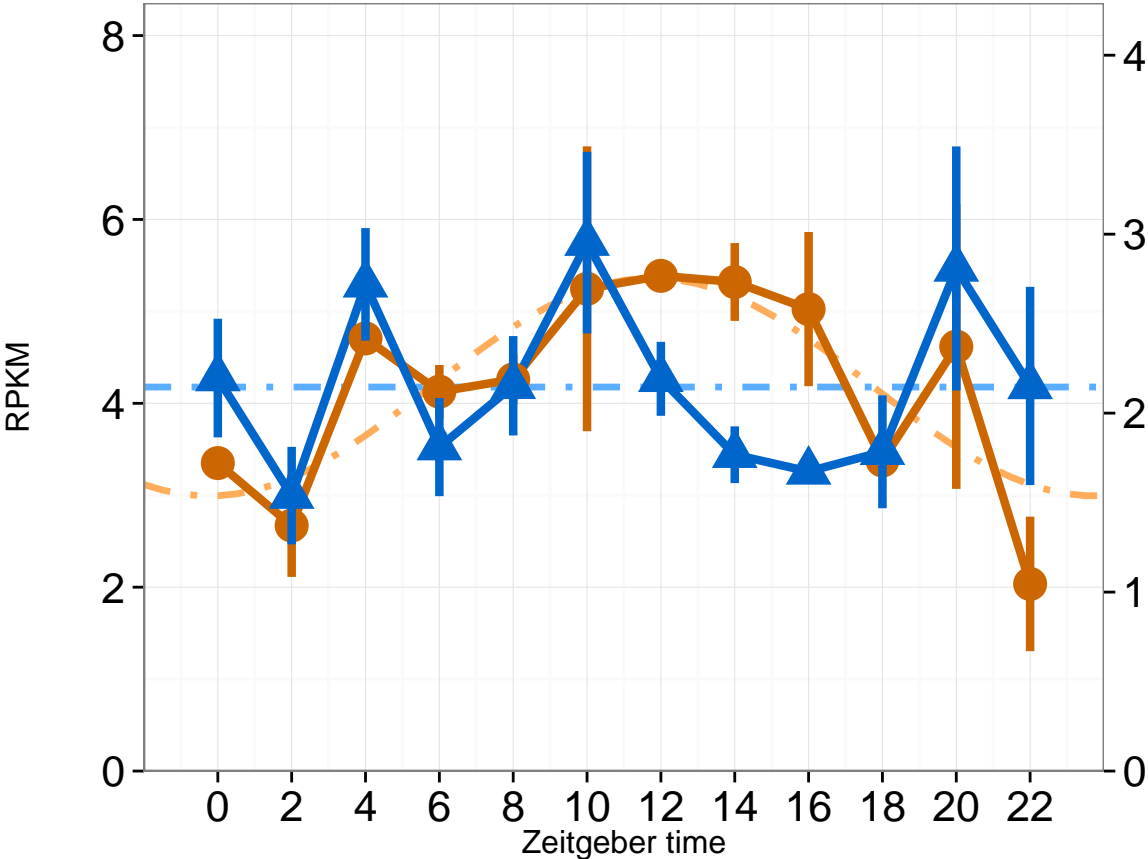

# Ccdc122

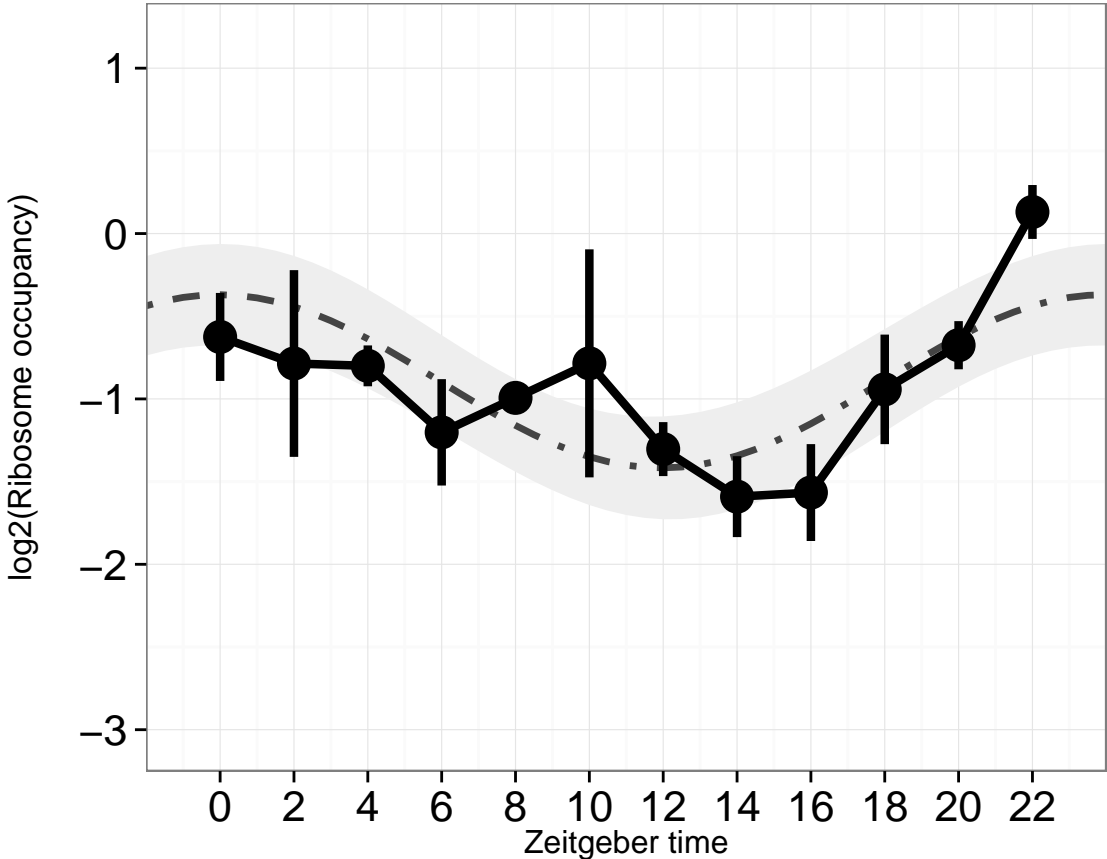

Supplement: SuppDataset_1.zip [file Ccdc122_set_B.pdf › Supplemental Dataset 1/B-mRNA_rhythm_translation_nonrhyth/Ccdc122_set_B.pdf]

## Ccdc171

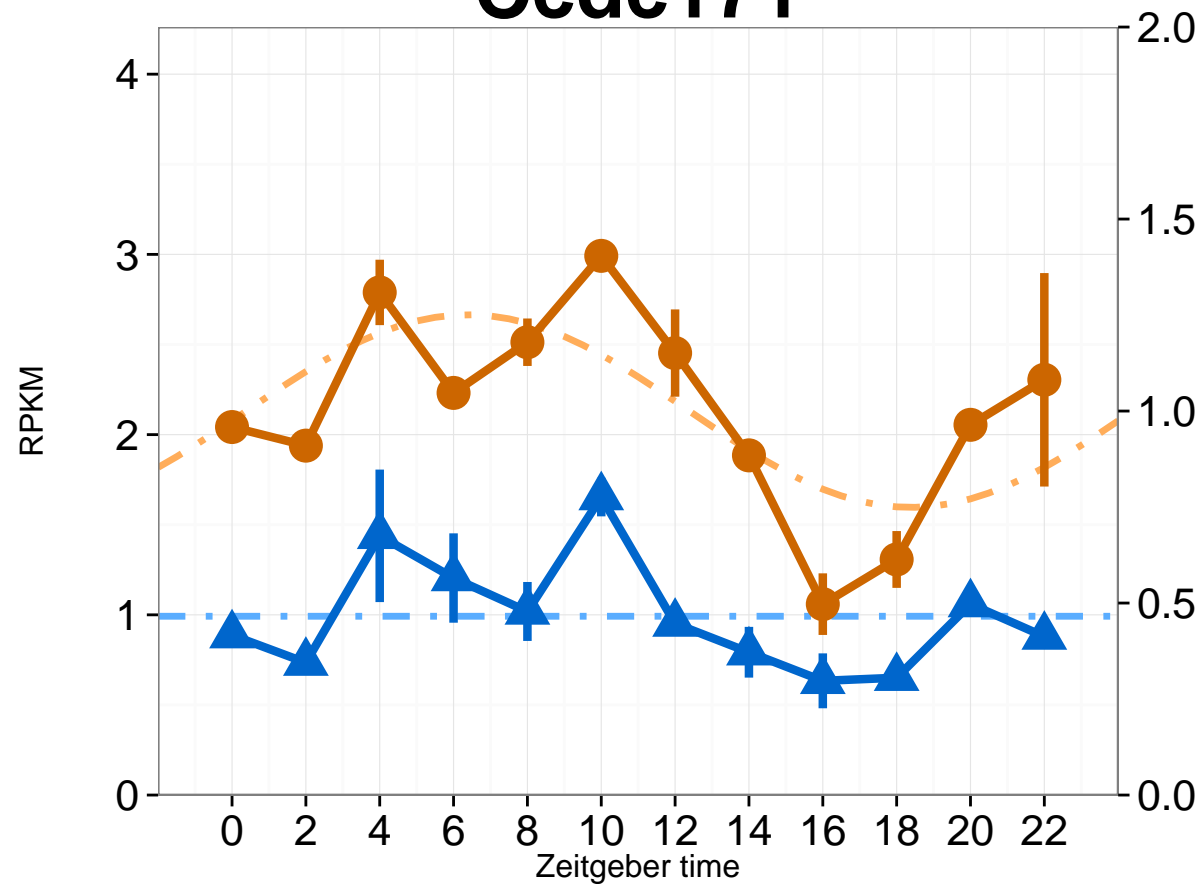

## Ccdc171

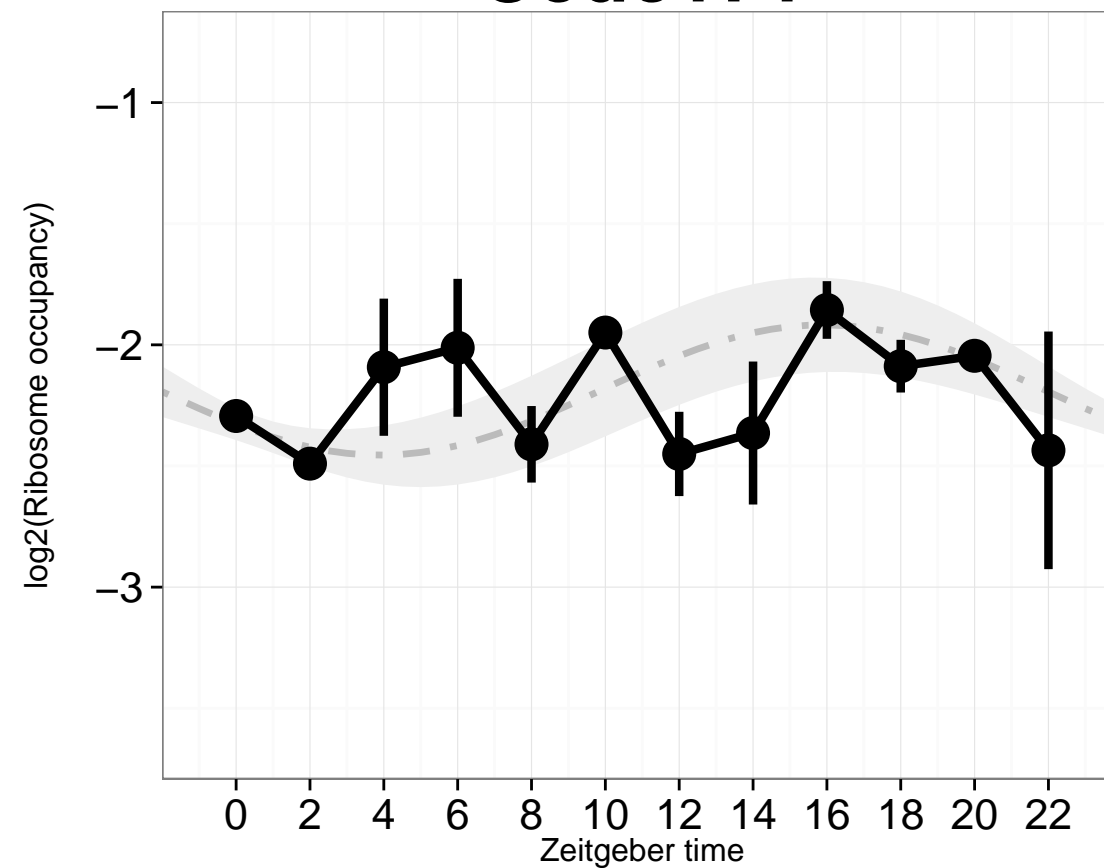

Supplement: SuppDataset_1.zip [file Ccdc171_set_B.pdf › Supplemental Dataset 1/B-mRNA_rhythm_translation_nonrhyth/Ccdc171_set_B.pdf]

# Ccdc71

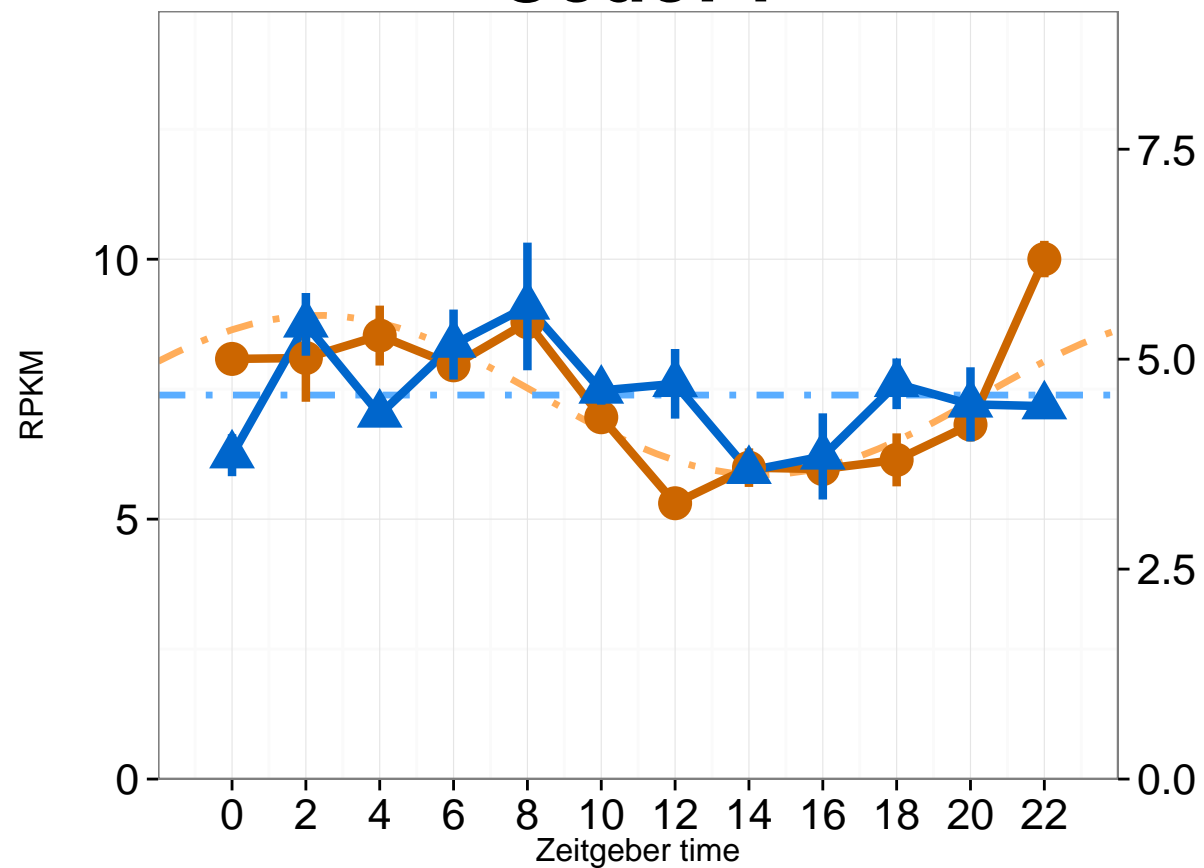

# Ccdc71

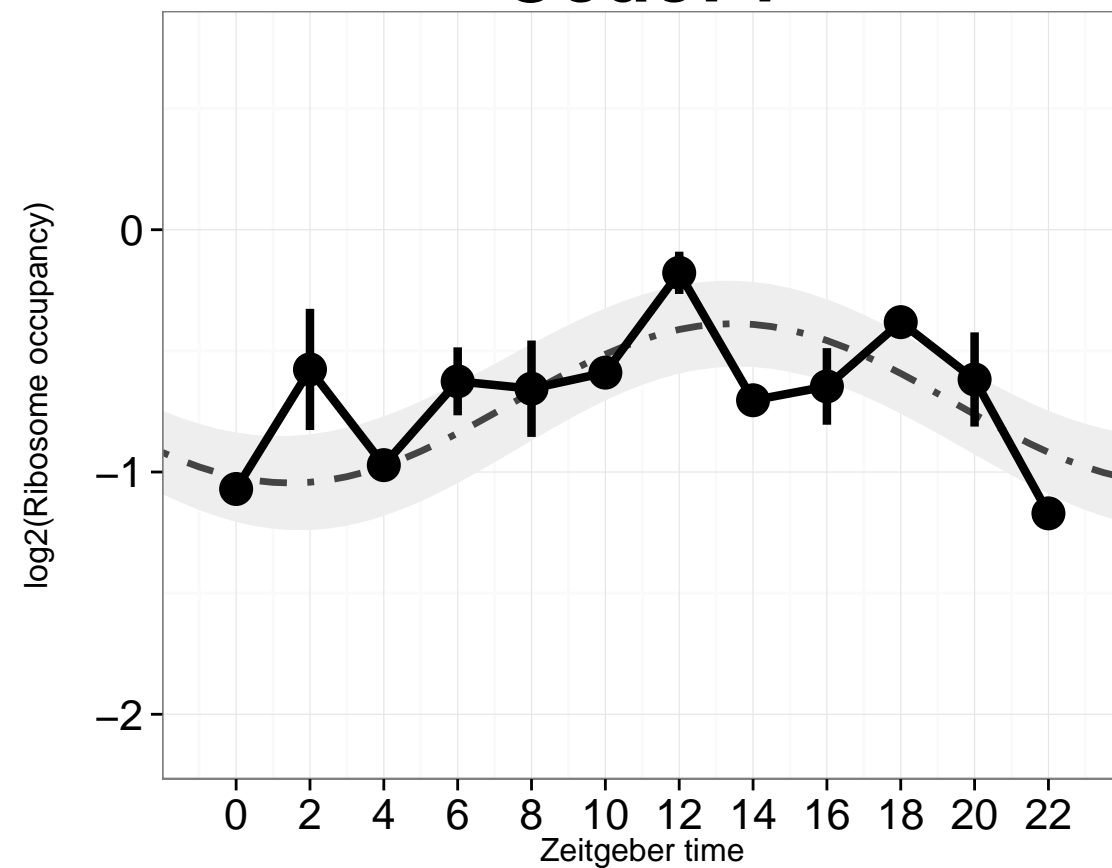

Supplement: SuppDataset_1.zip [file Ccdc71_set_B.pdf › Supplemental Dataset 1/B-mRNA_rhythm_translation_nonrhyth/Ccdc71_set_B.pdf]

## Ccdc8

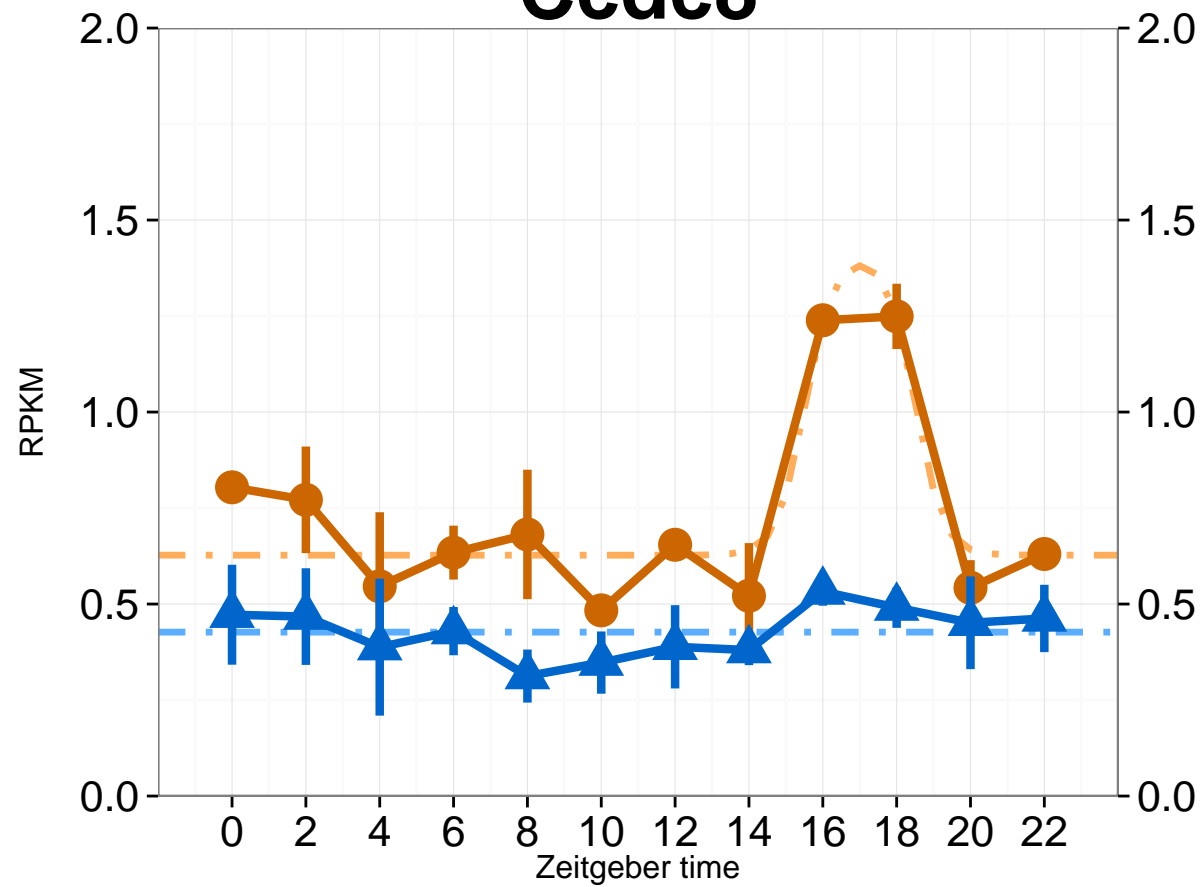

## Ccdc8

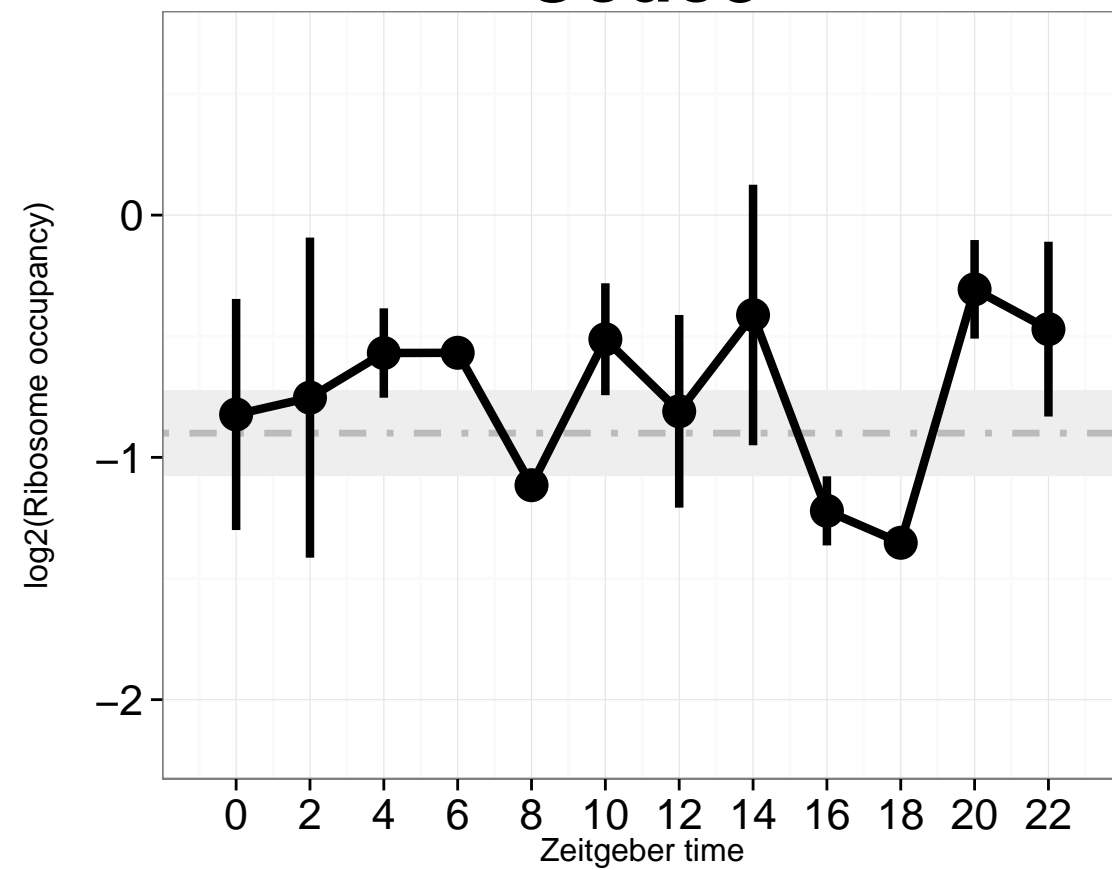

Supplement: SuppDataset_1.zip [file Ccdc8_set_B.pdf › Supplemental Dataset 1/B-mRNA_rhythm_translation_nonrhyth/Ccdc8_set_B.pdf]

## Ccl6

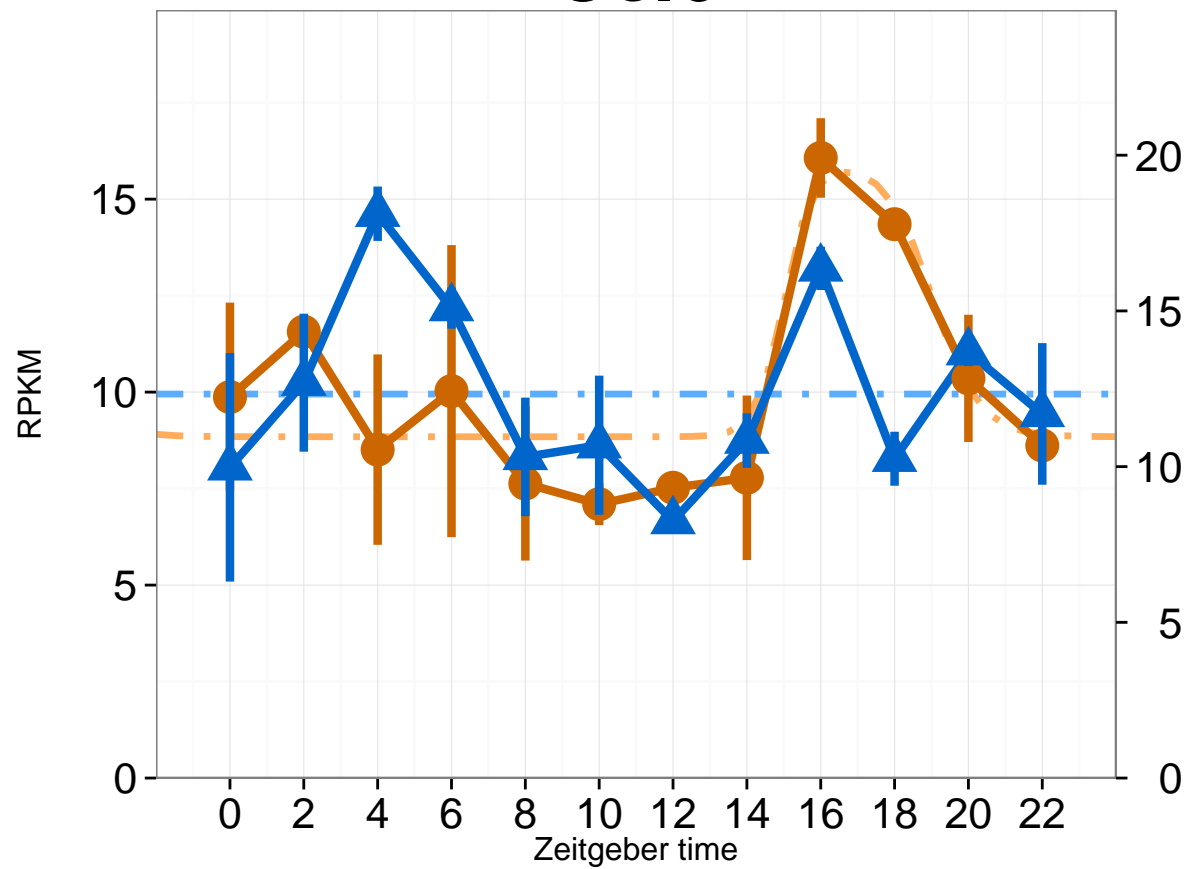

## Ccl6

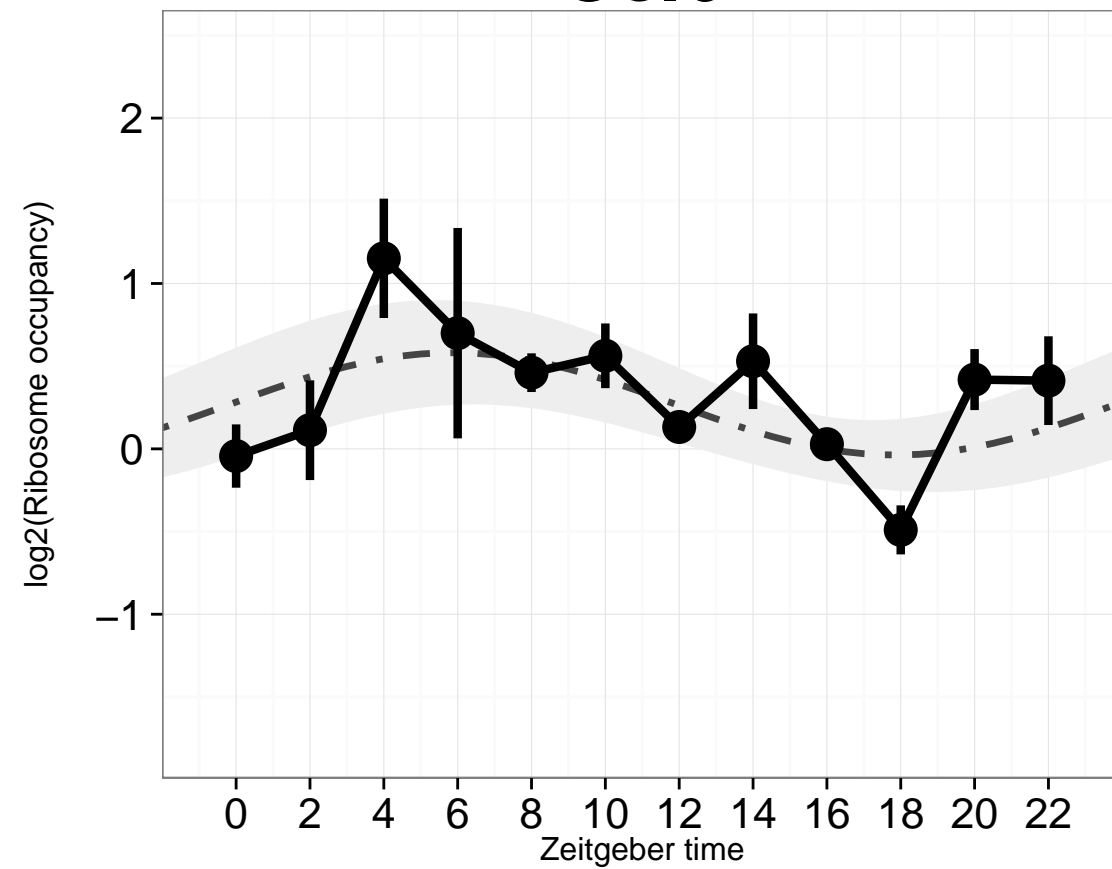

Supplement: SuppDataset_1.zip [file Ccl6_set_B.pdf › Supplemental Dataset 1/B-mRNA_rhythm_translation_nonrhyth/Ccl6_set_B.pdf]

## Cd276

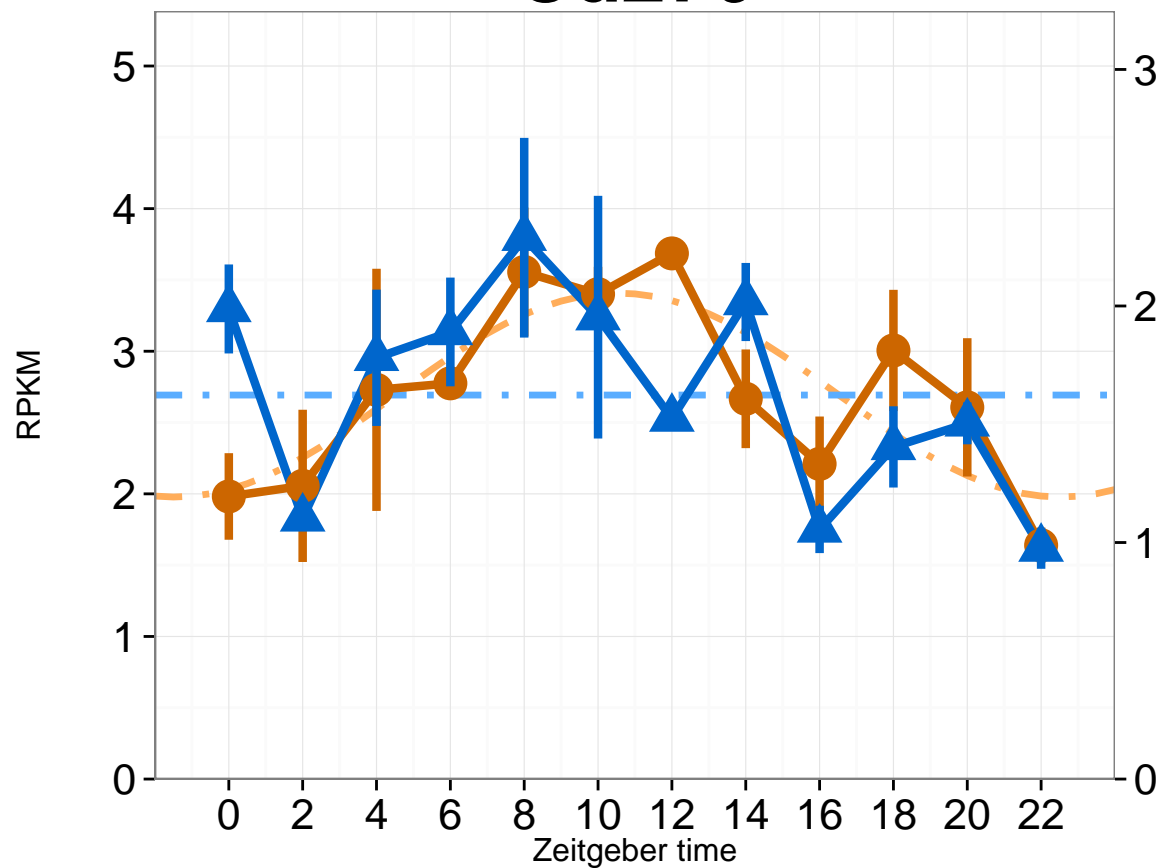

## Cd276

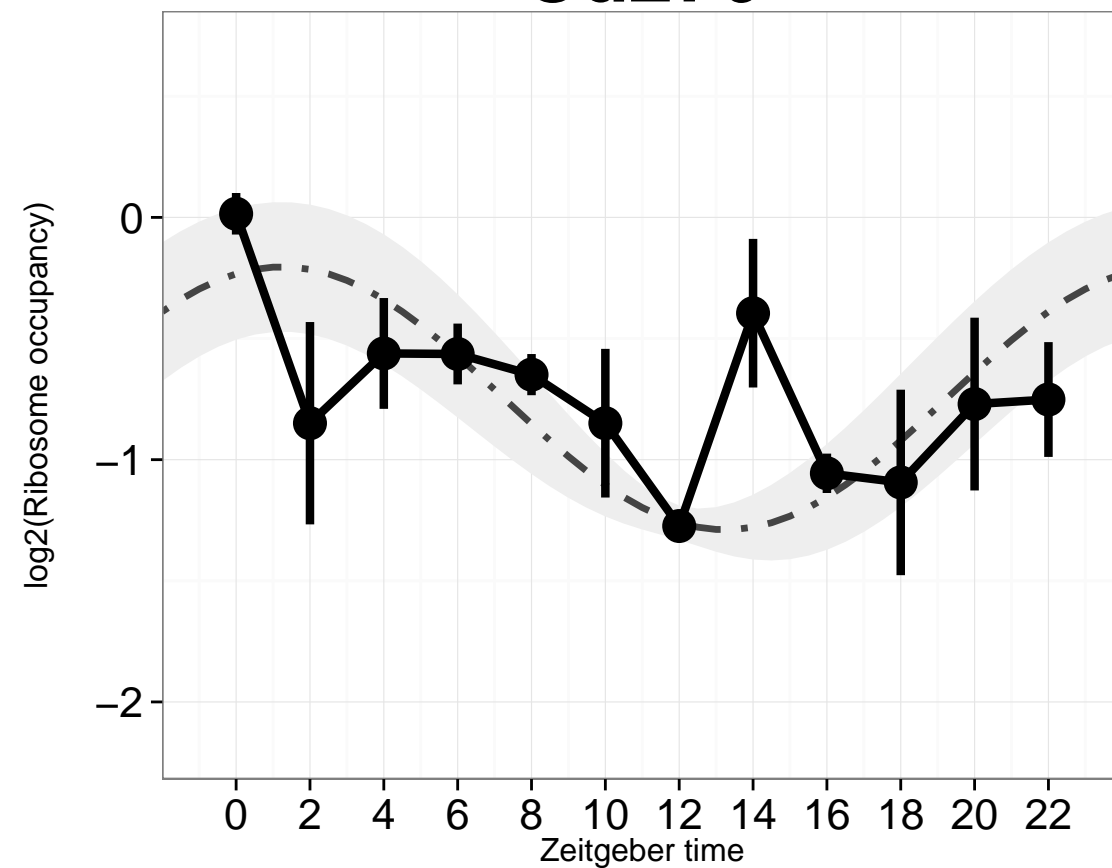

Supplement: SuppDataset_1.zip [file Cd276_set_B.pdf › Supplemental Dataset 1/B-mRNA_rhythm_translation_nonrhyth/Cd276_set_B.pdf]

## Cd300Id

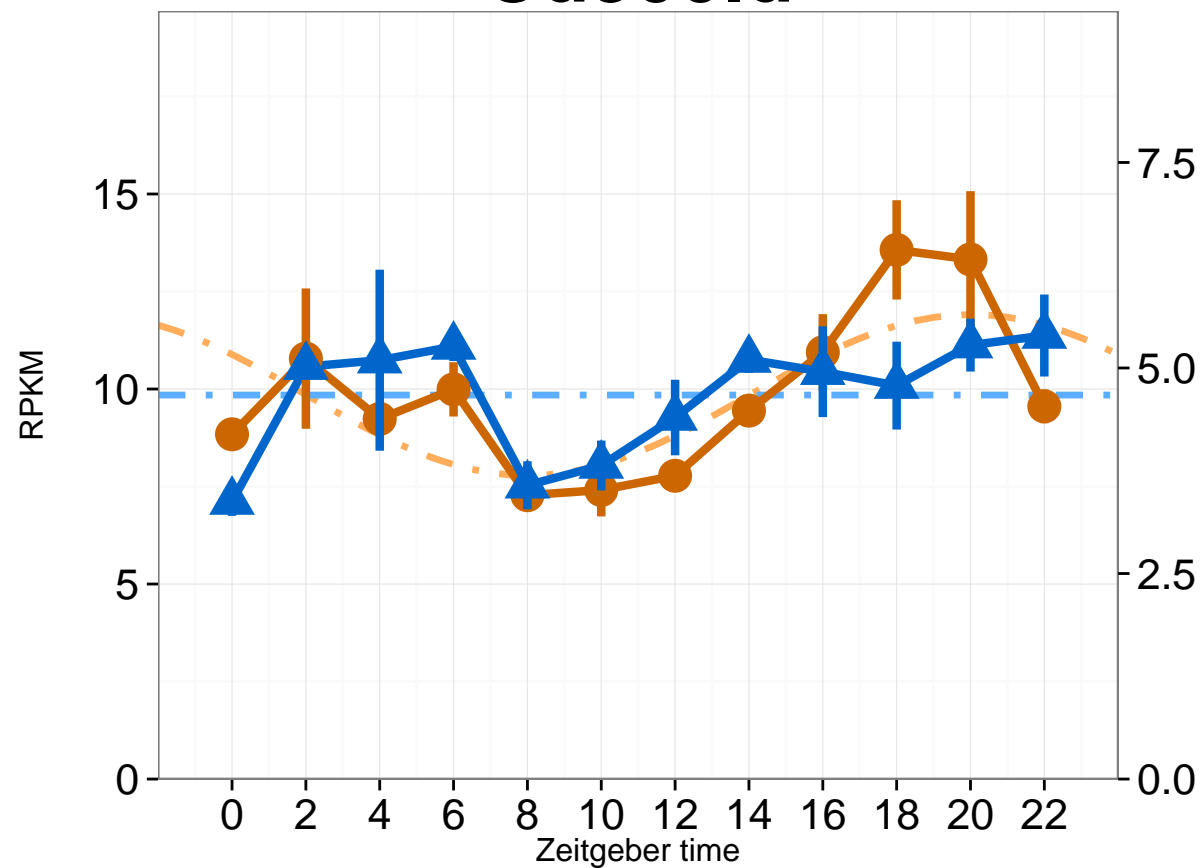

## Cd300Id

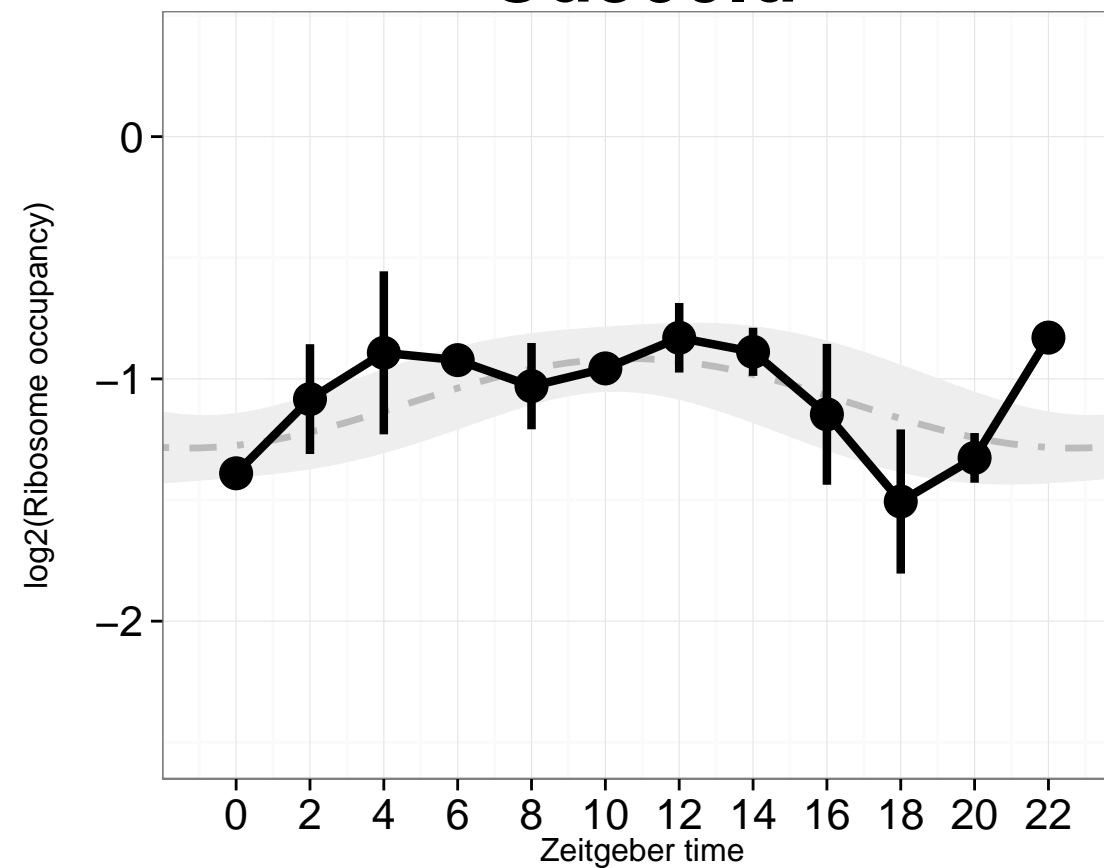

Supplement: SuppDataset_1.zip [file Cd300ld_set_B.pdf › Supplemental Dataset 1/B-mRNA_rhythm_translation_nonrhyth/Cd300ld_set_B.pdf]

# Cd59a

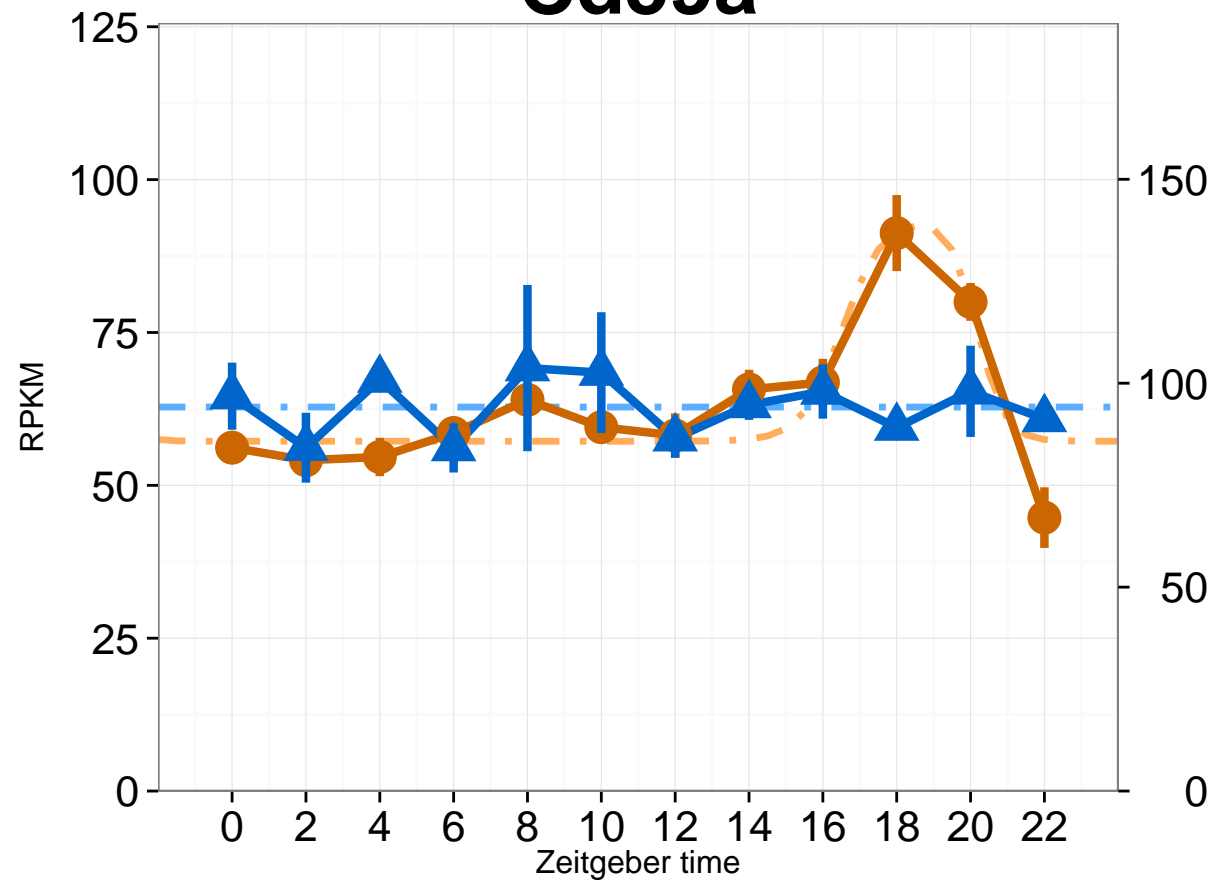

# Cd59a

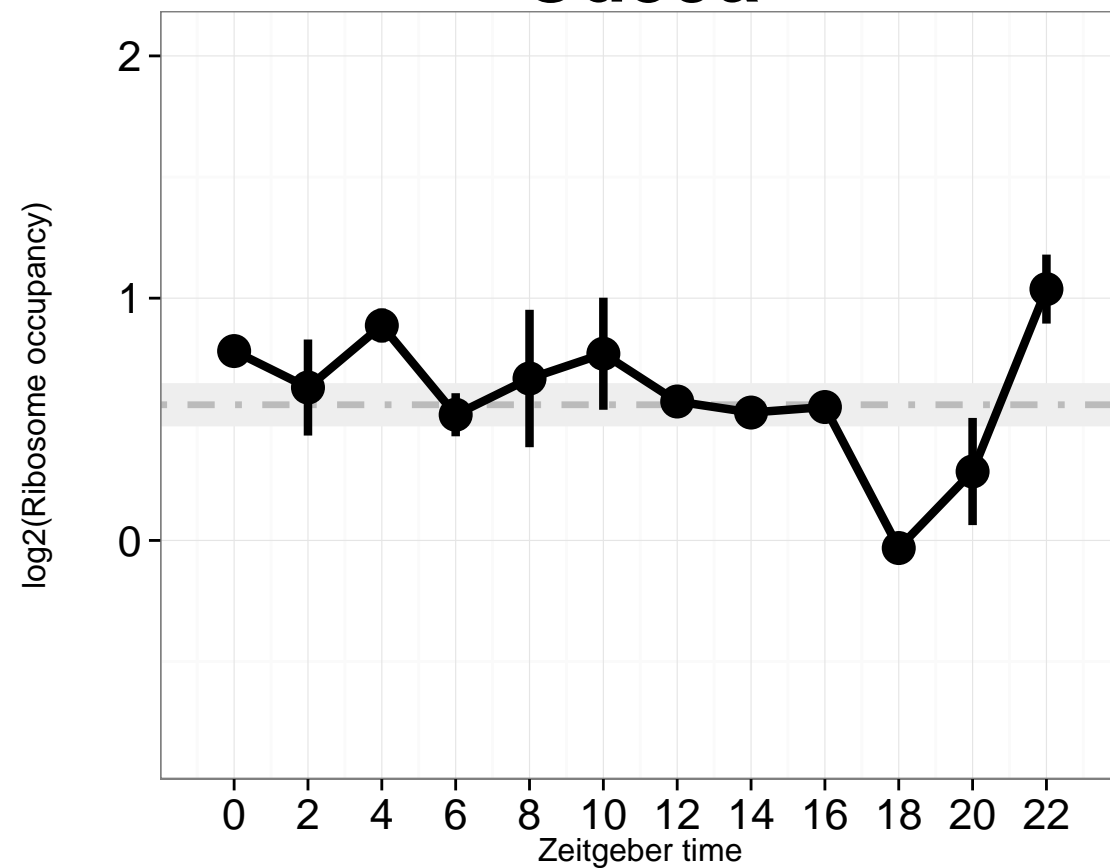

Supplement: SuppDataset_1.zip [file Cd59a_set_B.pdf › Supplemental Dataset 1/B-mRNA_rhythm_translation_nonrhyth/Cd59a_set_B.pdf]

## Cd63

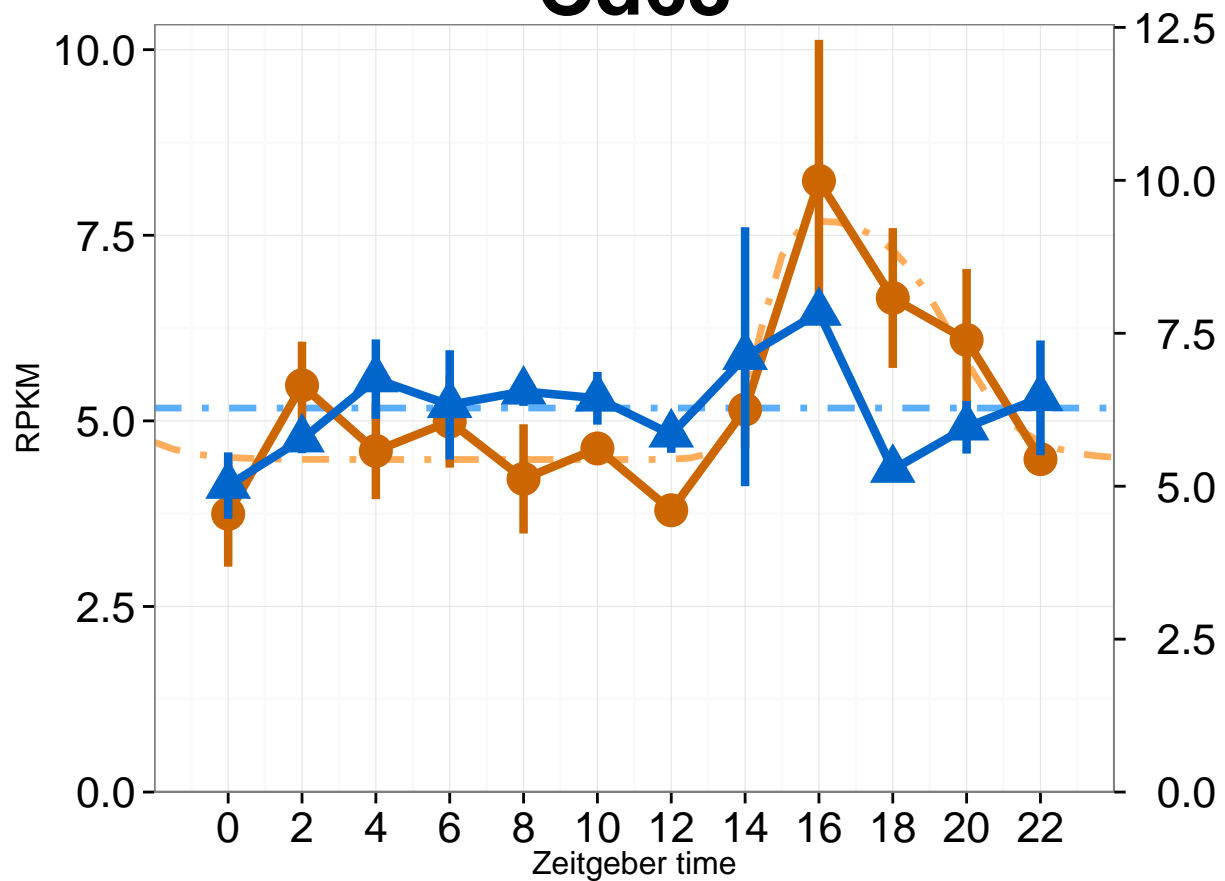

## Cd63

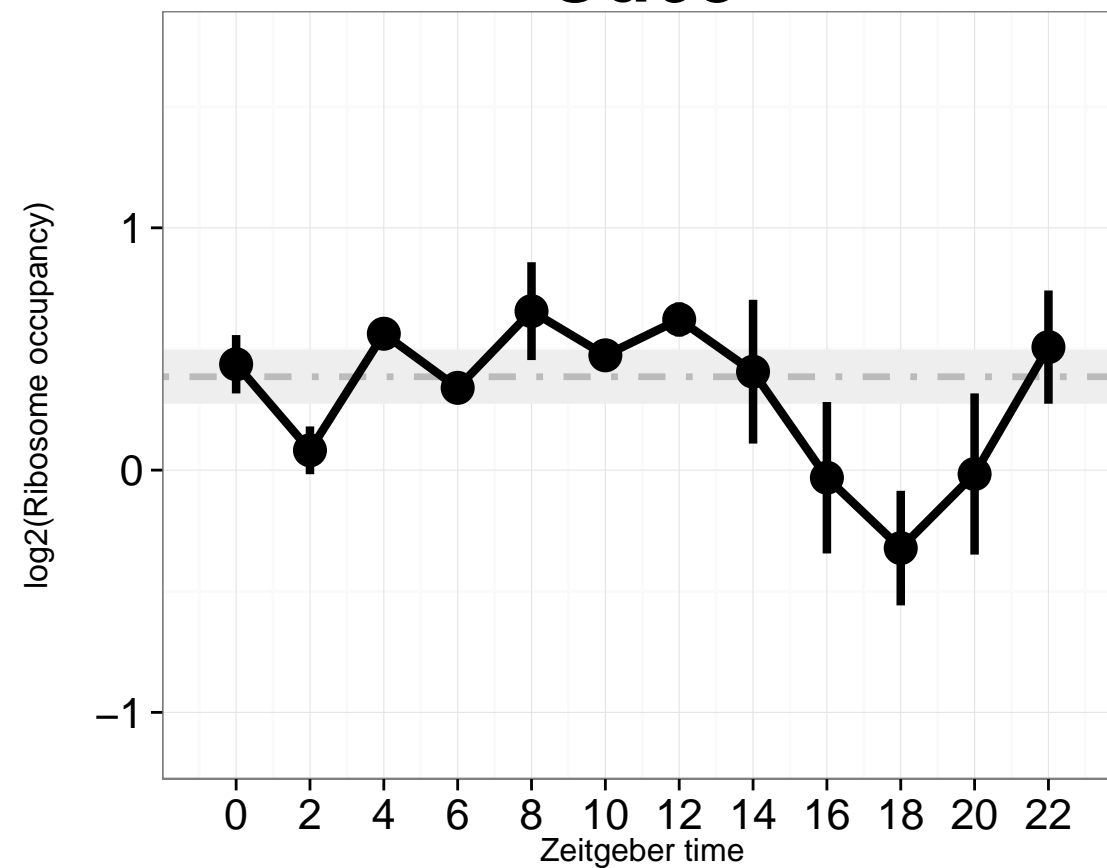

Supplement: SuppDataset_1.zip [file Cd63_set_B.pdf › Supplemental Dataset 1/B-mRNA_rhythm_translation_nonrhyth/Cd63_set_B.pdf]

# Cdc42ep5

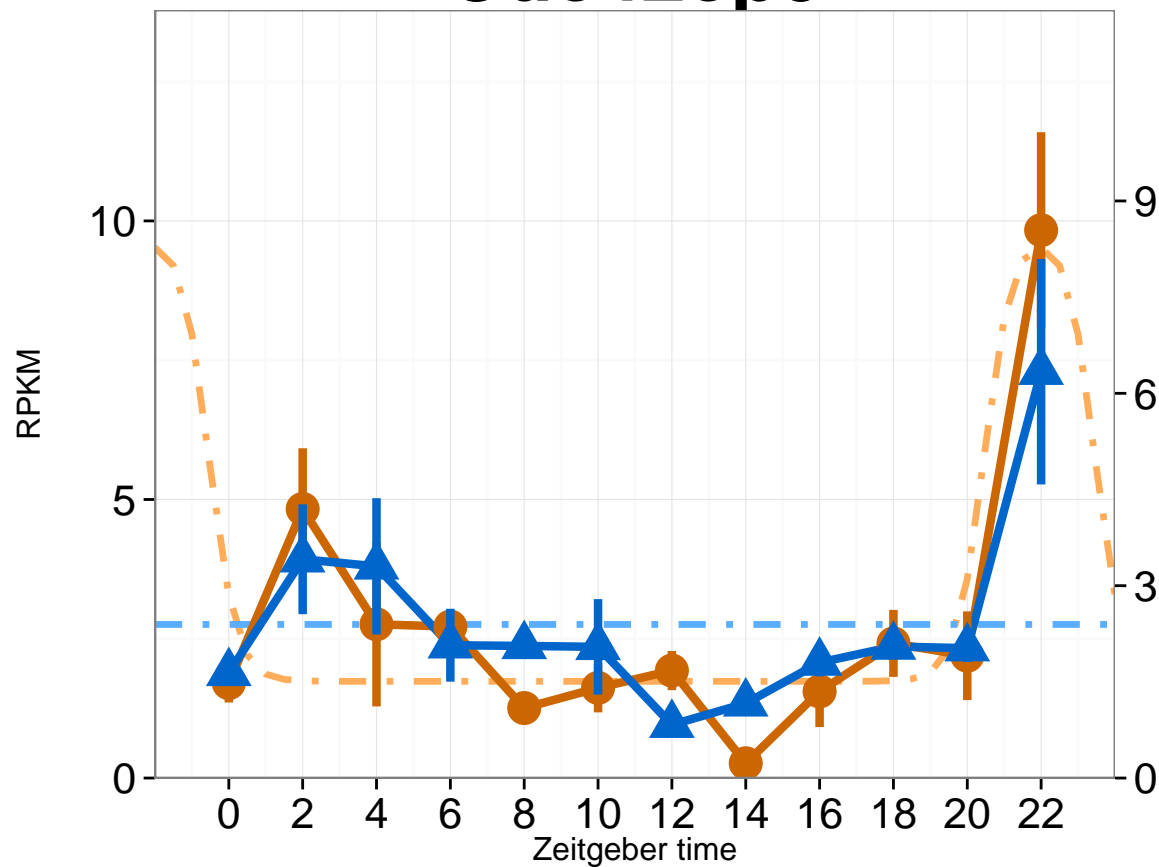

# Cdc42ep5

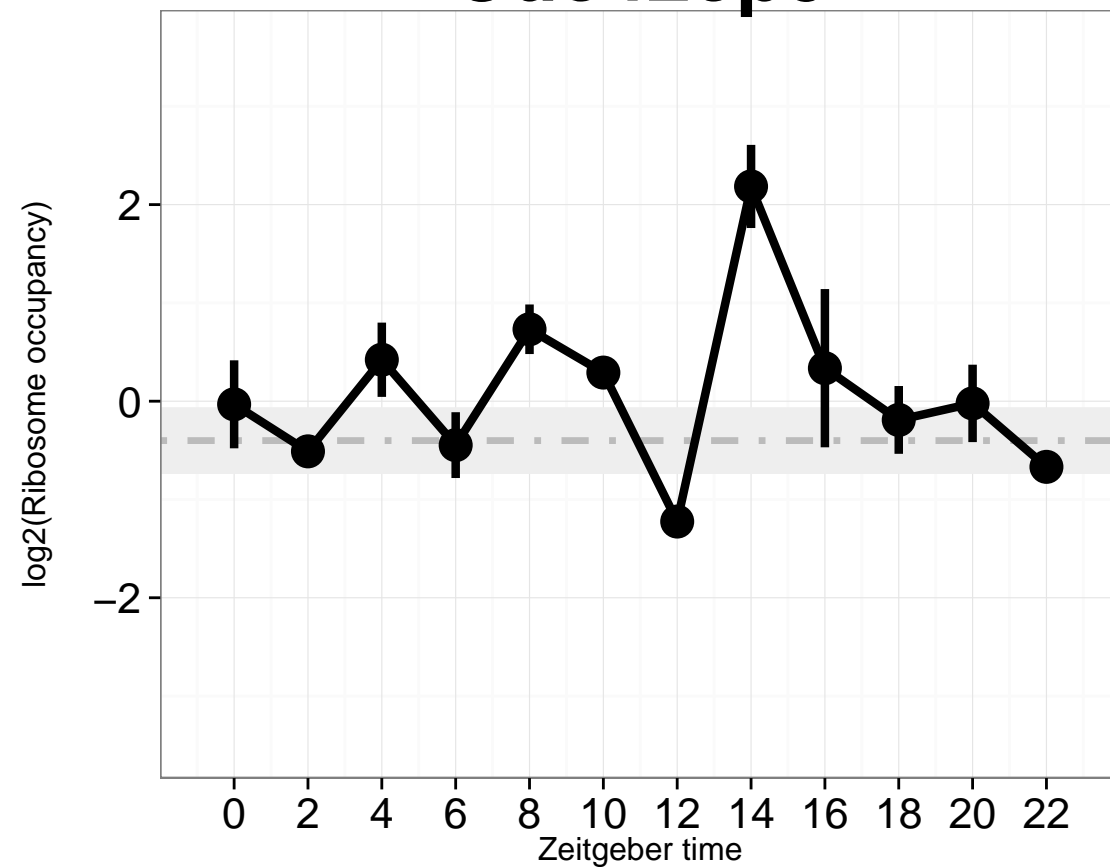

Supplement: SuppDataset_1.zip [file Cdc42ep5_set_B.pdf › Supplemental Dataset 1/B-mRNA_rhythm_translation_nonrhyth/Cdc42ep5_set_B.pdf]

## Cdca7

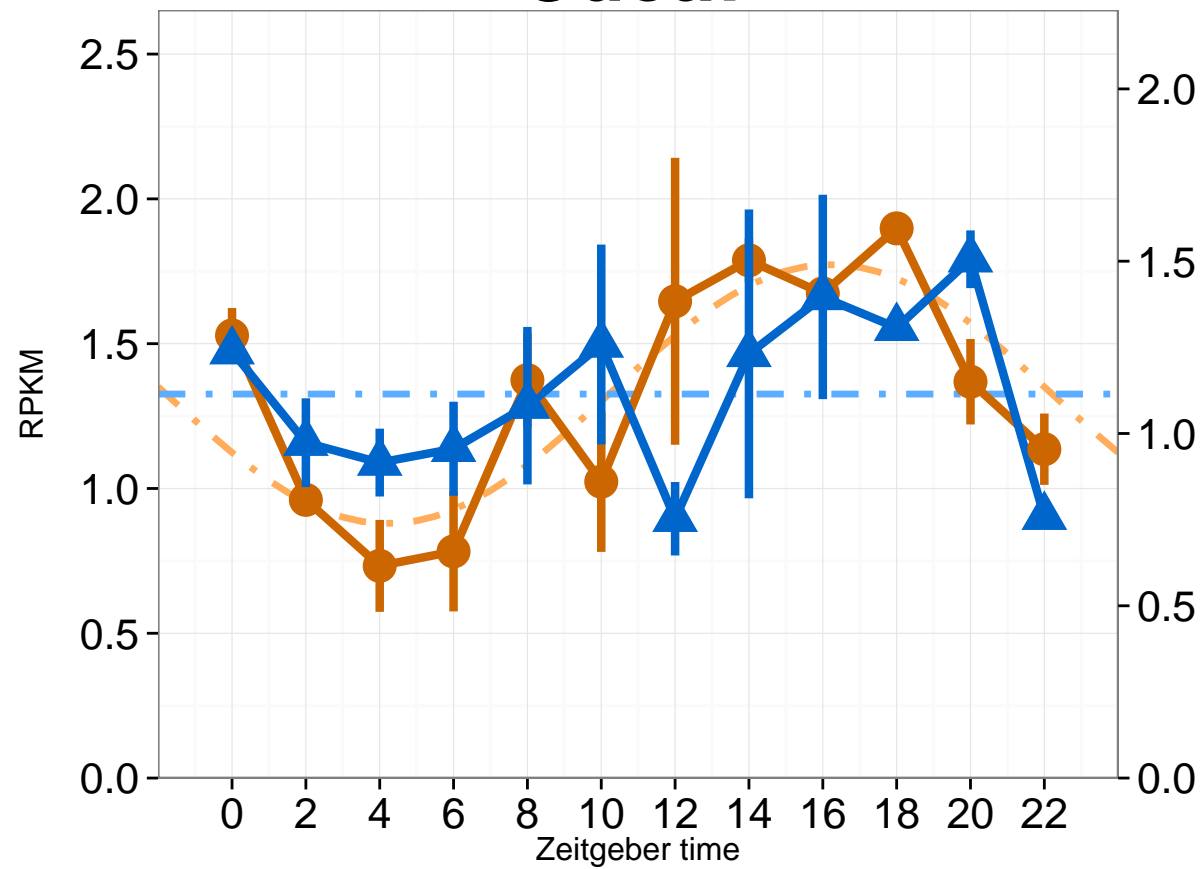

## Cdca7

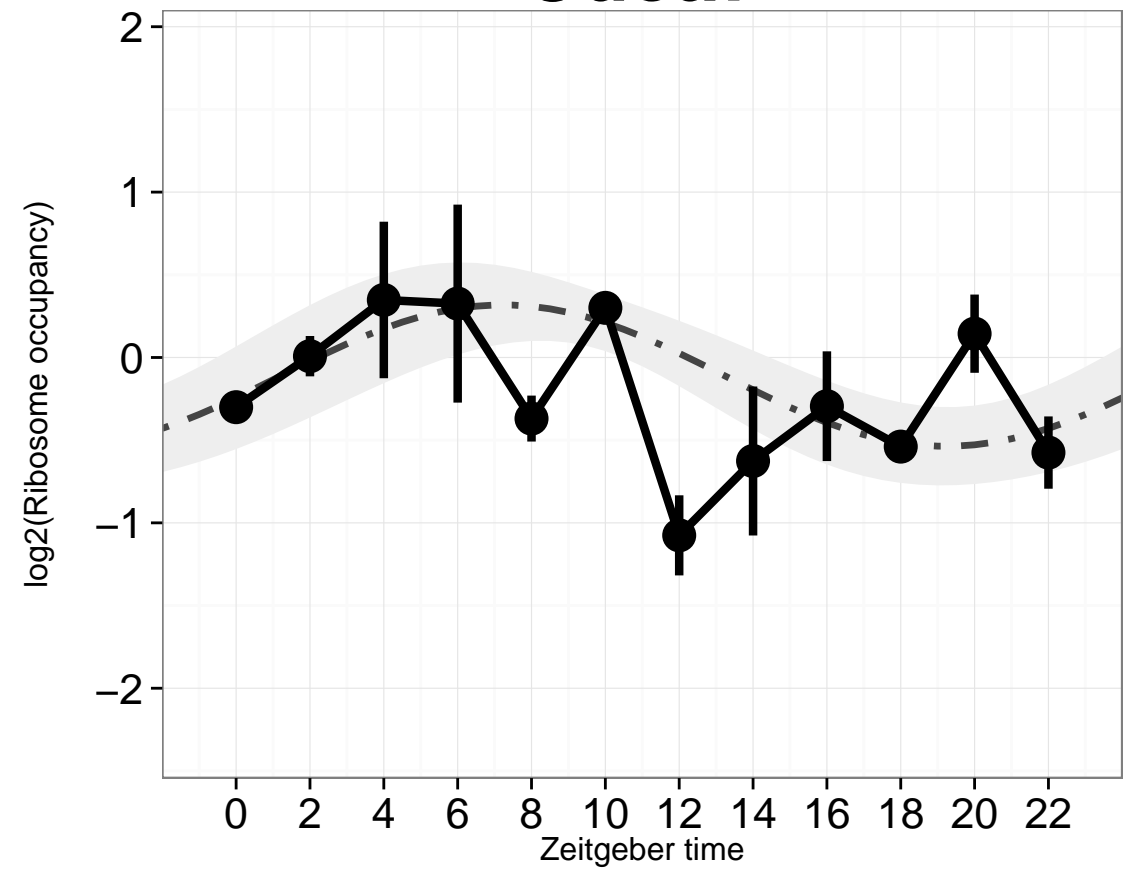

Supplement: SuppDataset_1.zip [file Cdca7_set_B.pdf › Supplemental Dataset 1/B-mRNA_rhythm_translation_nonrhyth/Cdca7_set_B.pdf]

## Cdip1

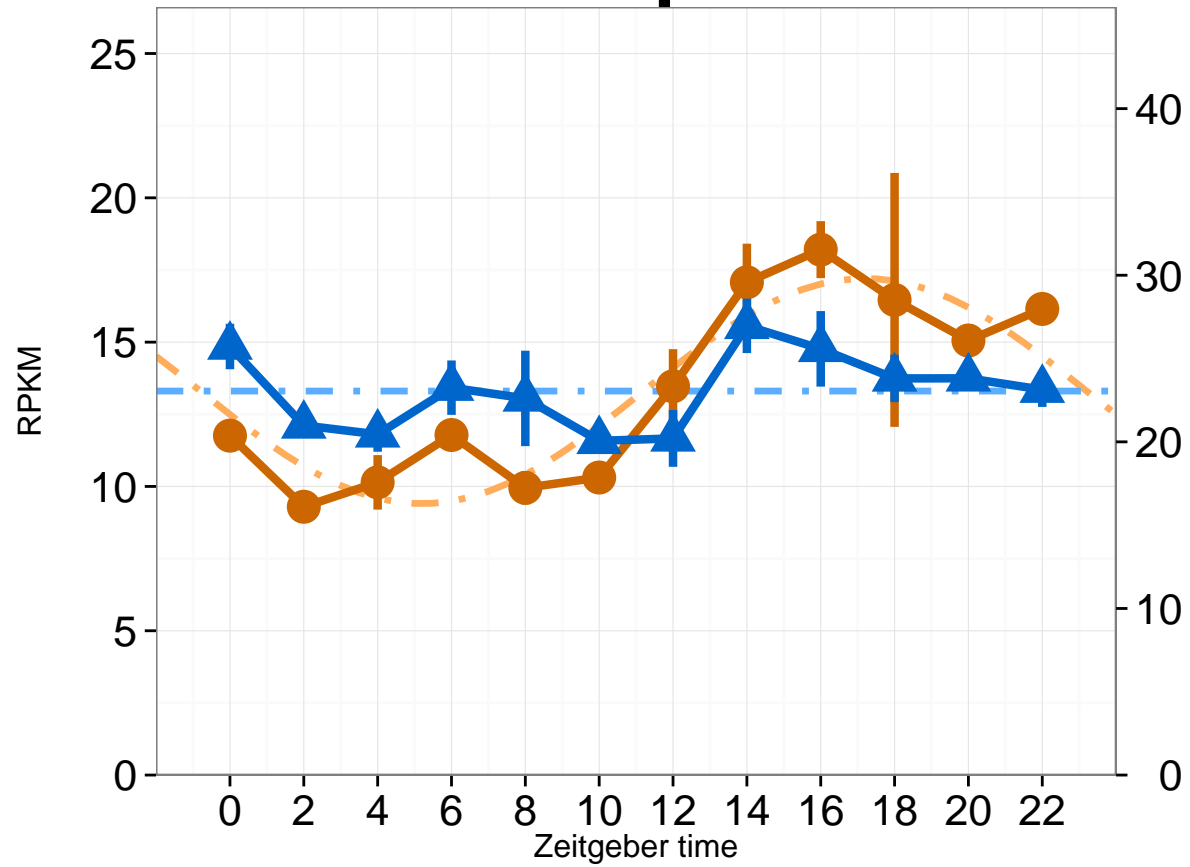

## Cdip1

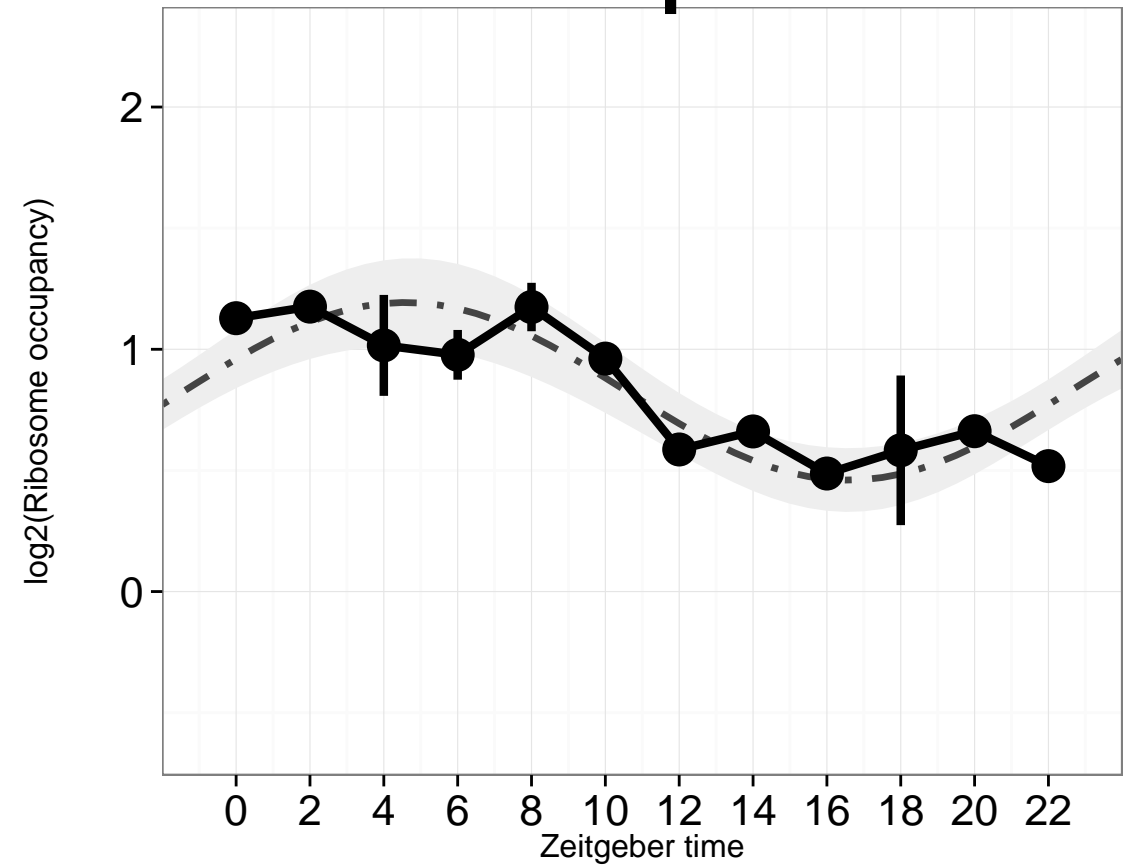

Supplement: SuppDataset_1.zip [file Cdip1_set_B.pdf › Supplemental Dataset 1/B-mRNA_rhythm_translation_nonrhyth/Cdip1_set_B.pdf]

## Cdkl2

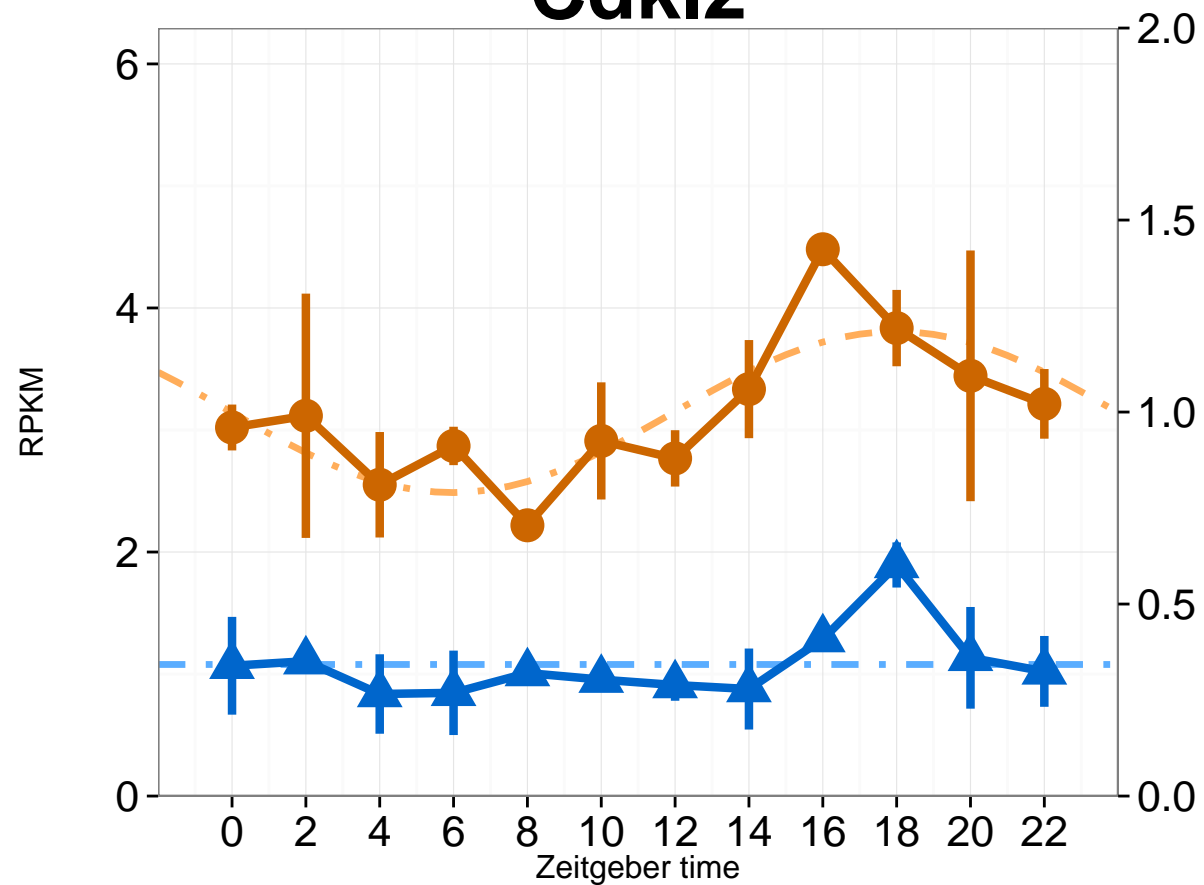

## Cdkl2

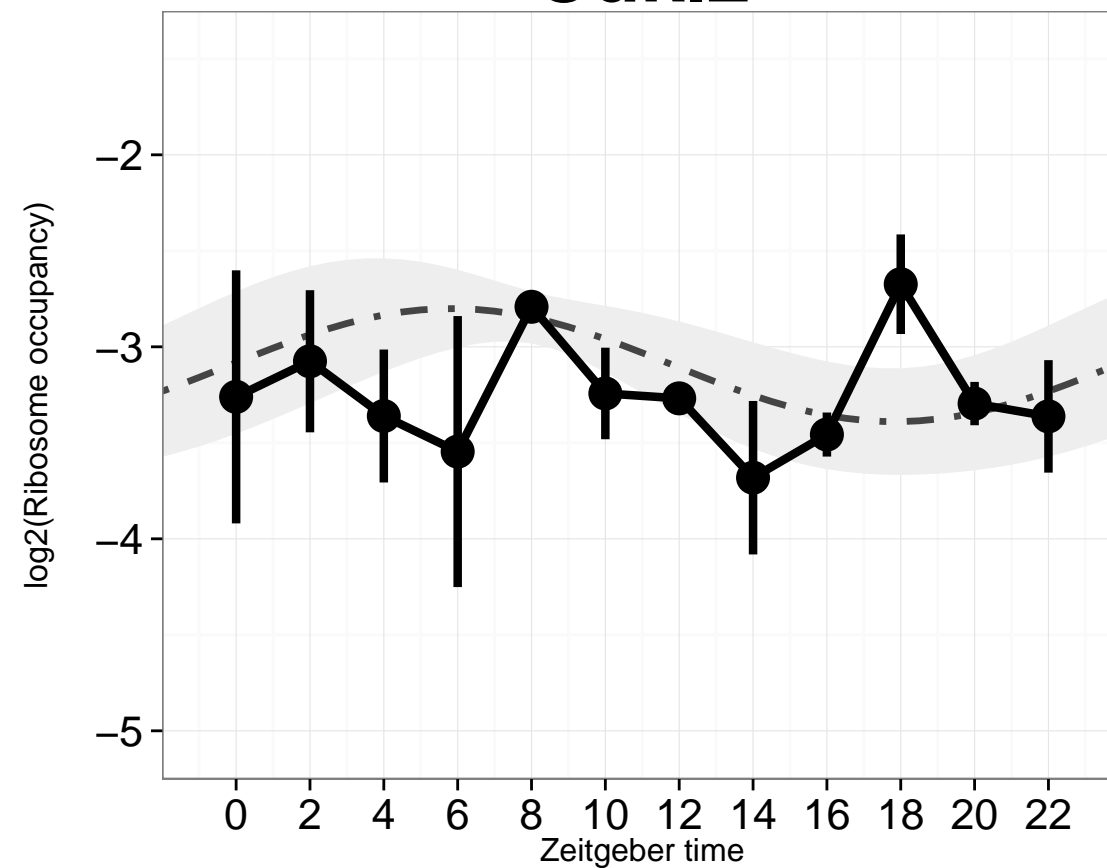

Supplement: SuppDataset_1.zip [file Cdkl2_set_B.pdf › Supplemental Dataset 1/B-mRNA_rhythm_translation_nonrhyth/Cdkl2_set_B.pdf]

## Cdv3

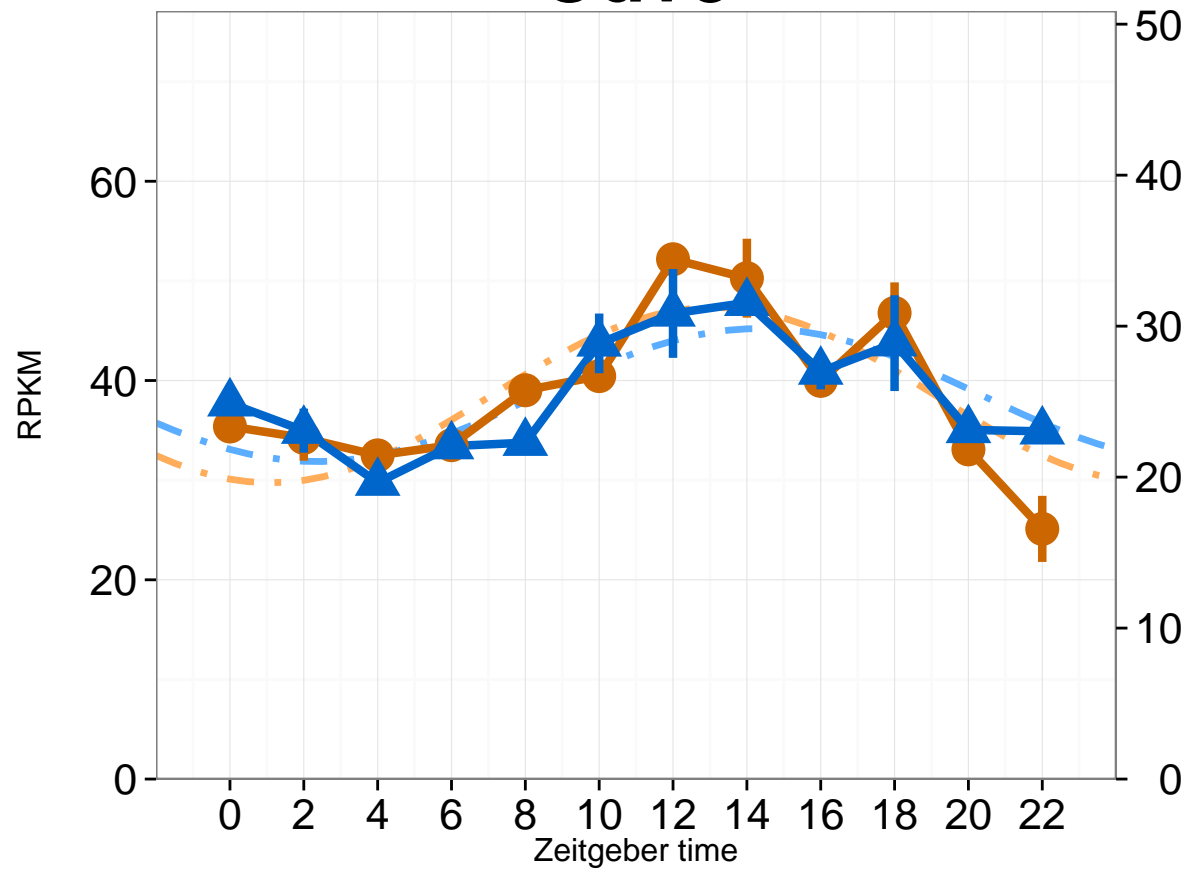

## Cdv3

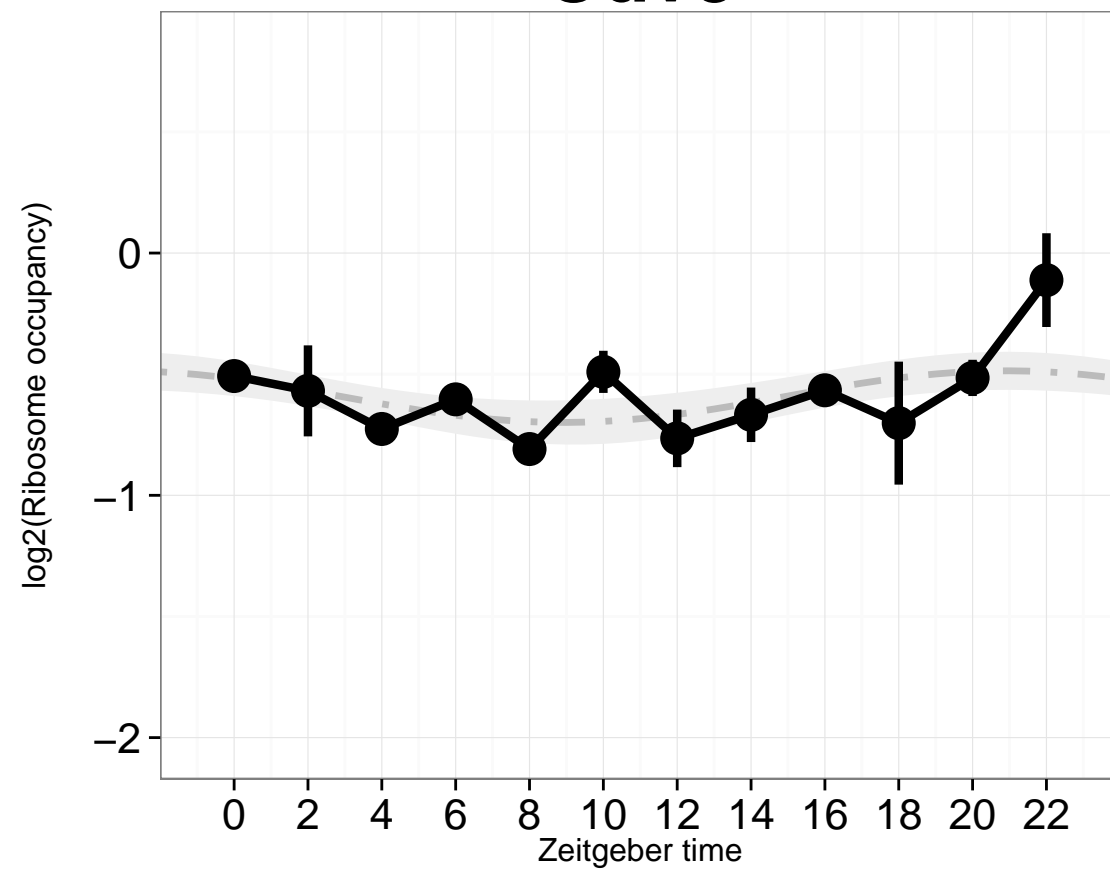

Supplement: SuppDataset_1.zip [file Cdv3_set_B.pdf › Supplemental Dataset 1/B-mRNA_rhythm_translation_nonrhyth/Cdv3_set_B.pdf]

## Cebpb

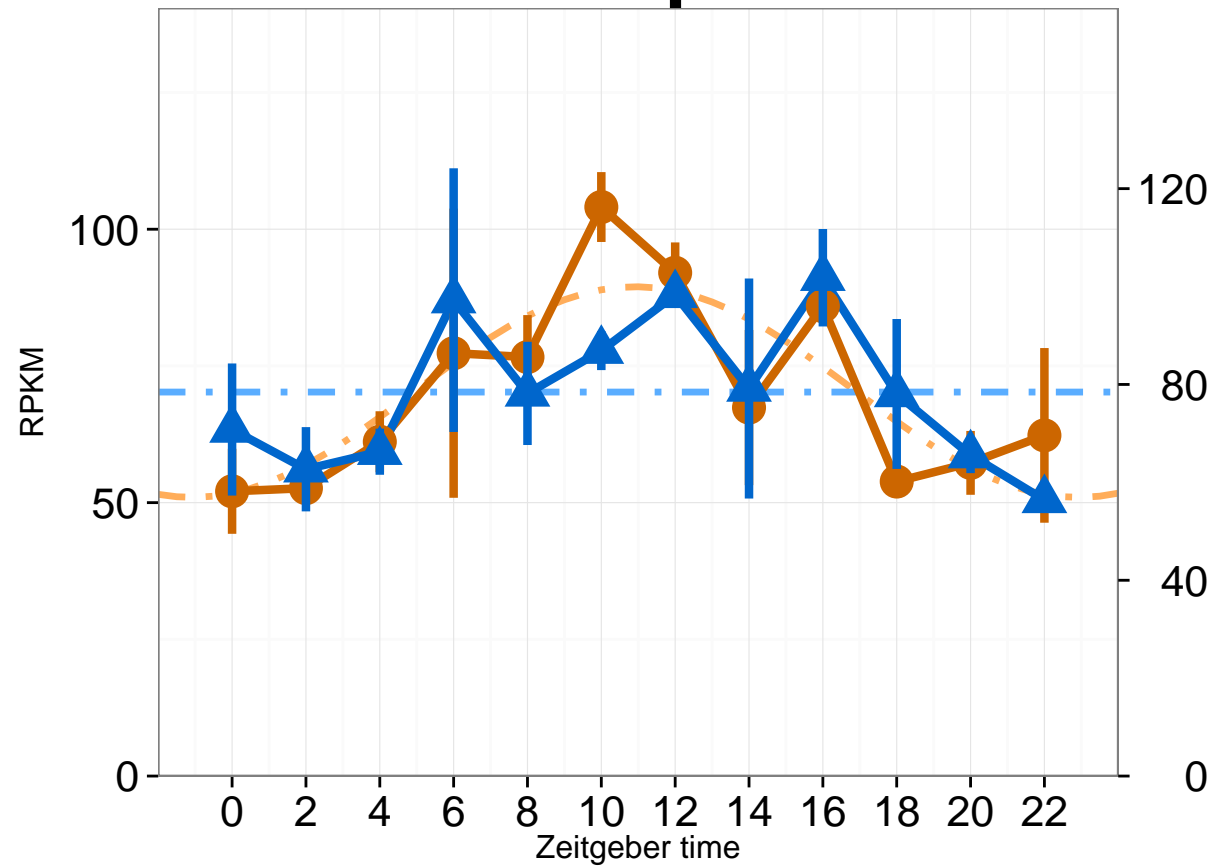

## Cebpb

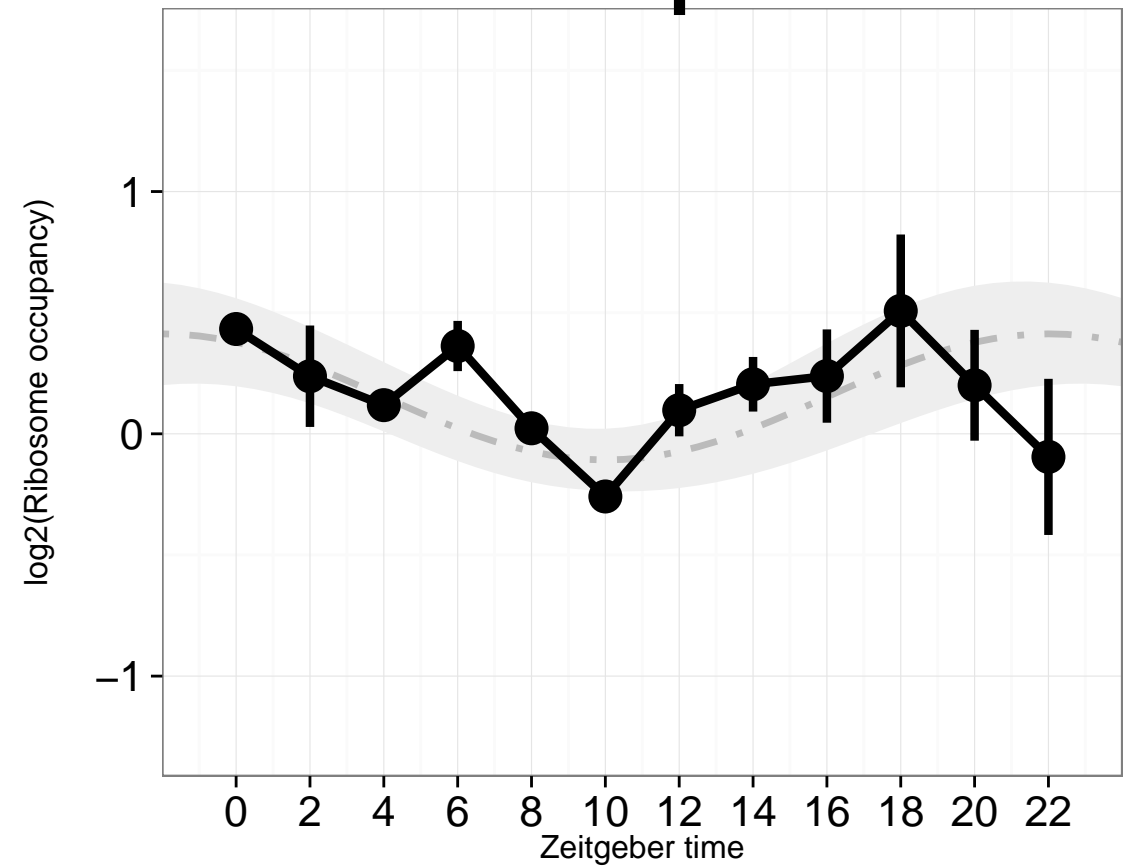

Supplement: SuppDataset_1.zip [file Cebpb_set_B.pdf › Supplemental Dataset 1/B-mRNA_rhythm_translation_nonrhyth/Cebpb_set_B.pdf]

# Cecr5

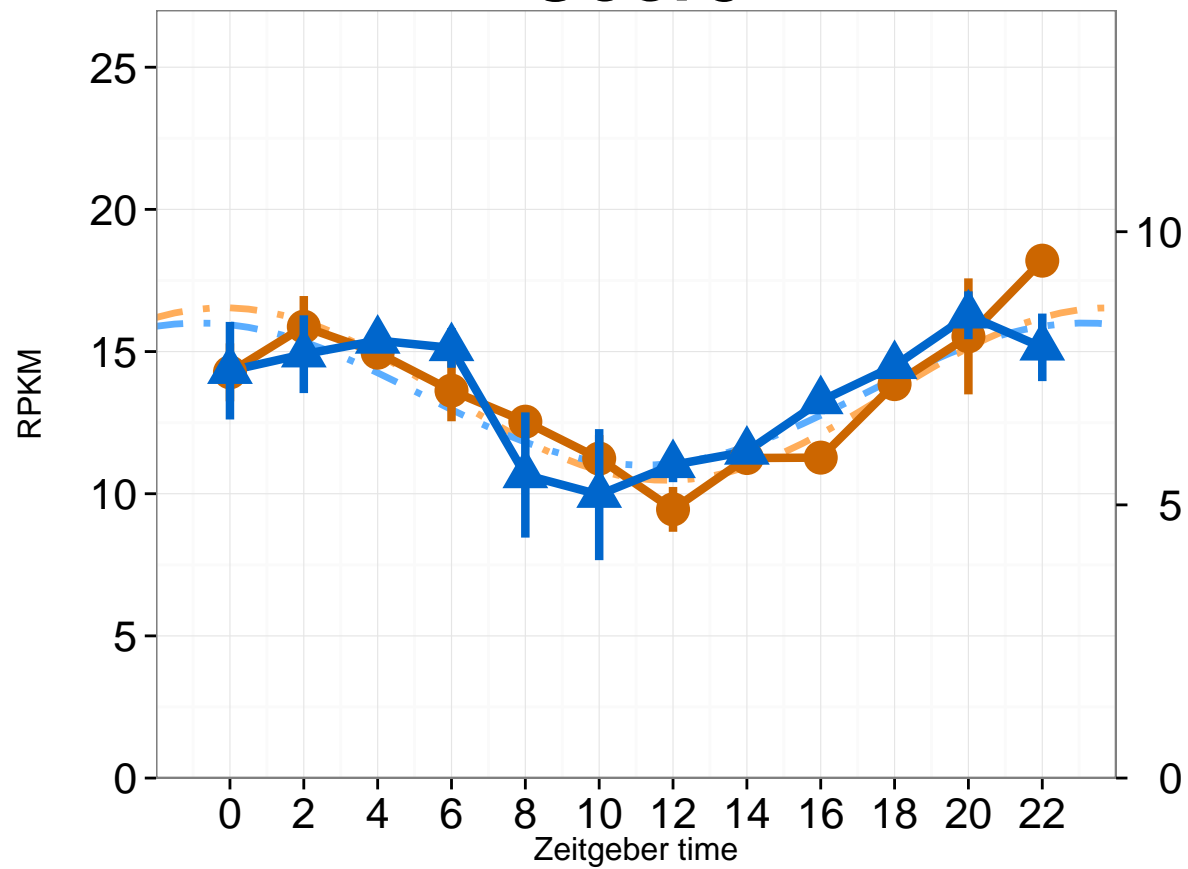

# Cecr5

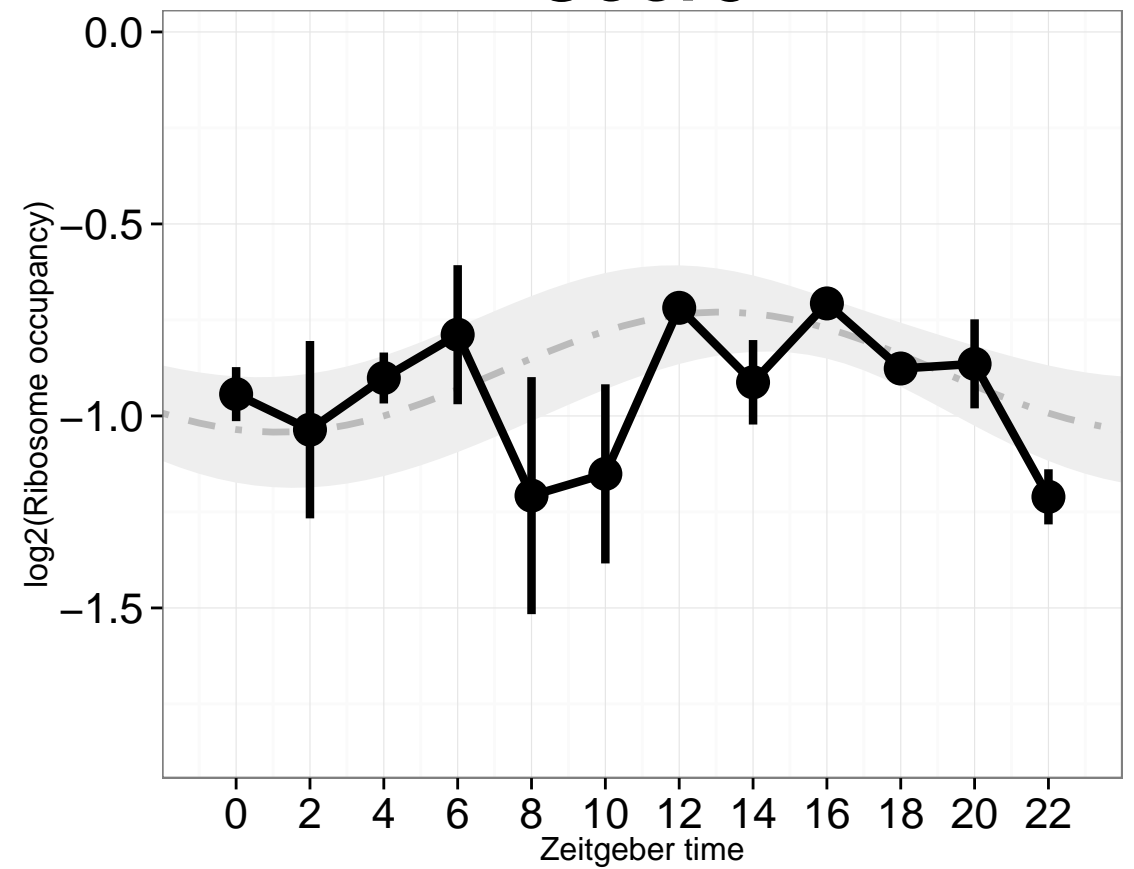

Supplement: SuppDataset_1.zip [file Cecr5_set_B.pdf › Supplemental Dataset 1/B-mRNA_rhythm_translation_nonrhyth/Cecr5_set_B.pdf]

## Cenpl

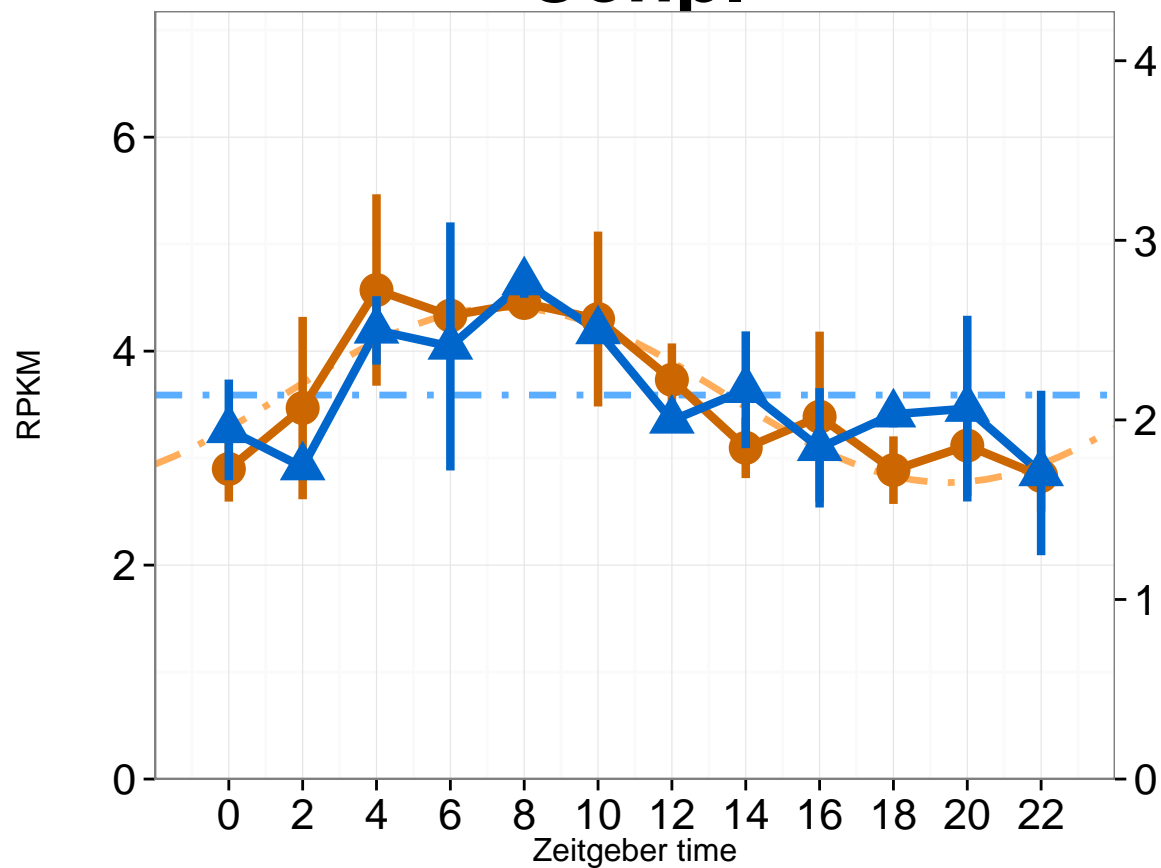

## Cenpl

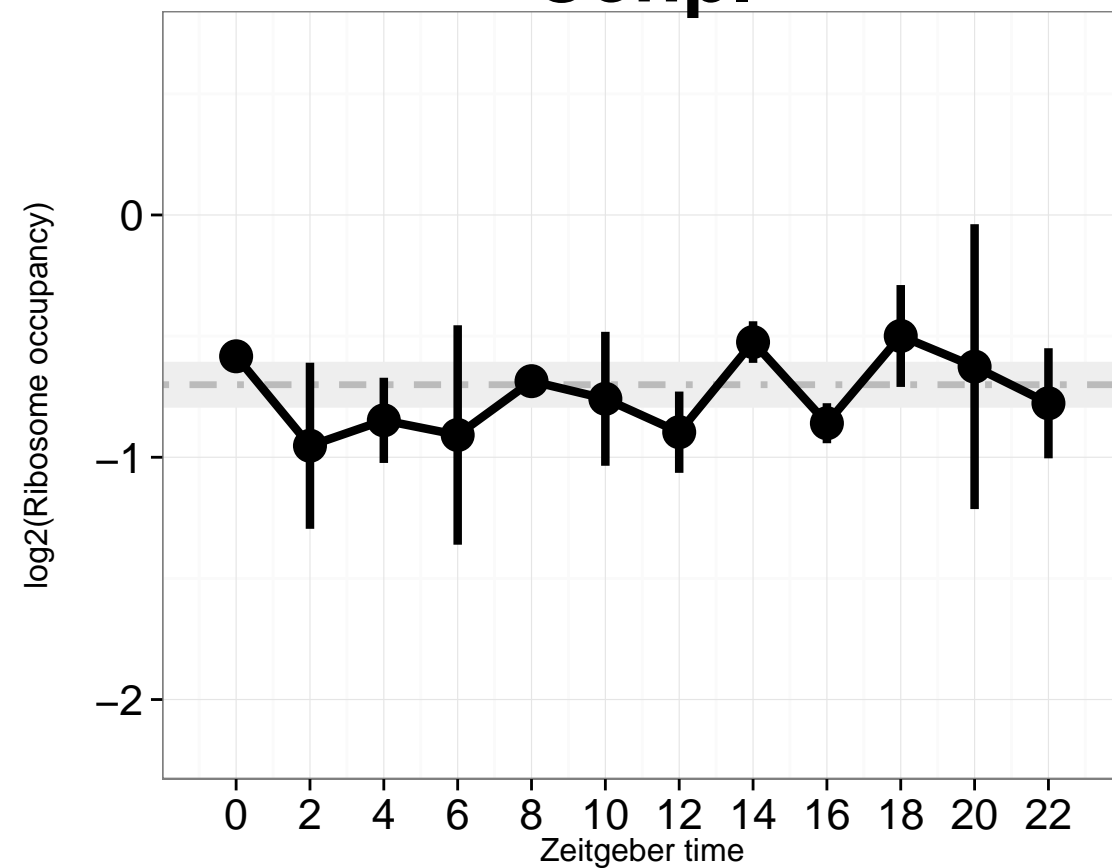

Supplement: SuppDataset_1.zip [file Cenpl_set_B.pdf › Supplemental Dataset 1/B-mRNA_rhythm_translation_nonrhyth/Cenpl_set_B.pdf]

# Cep76

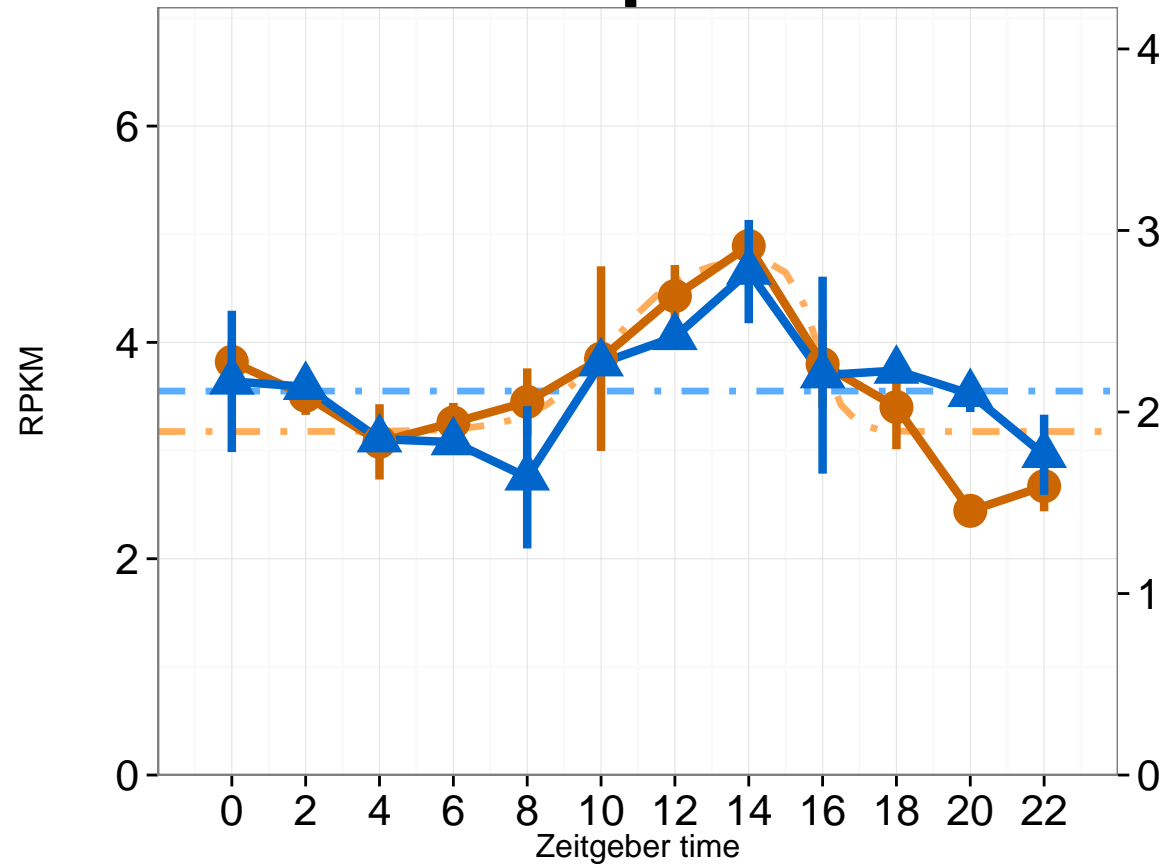

# Cep76

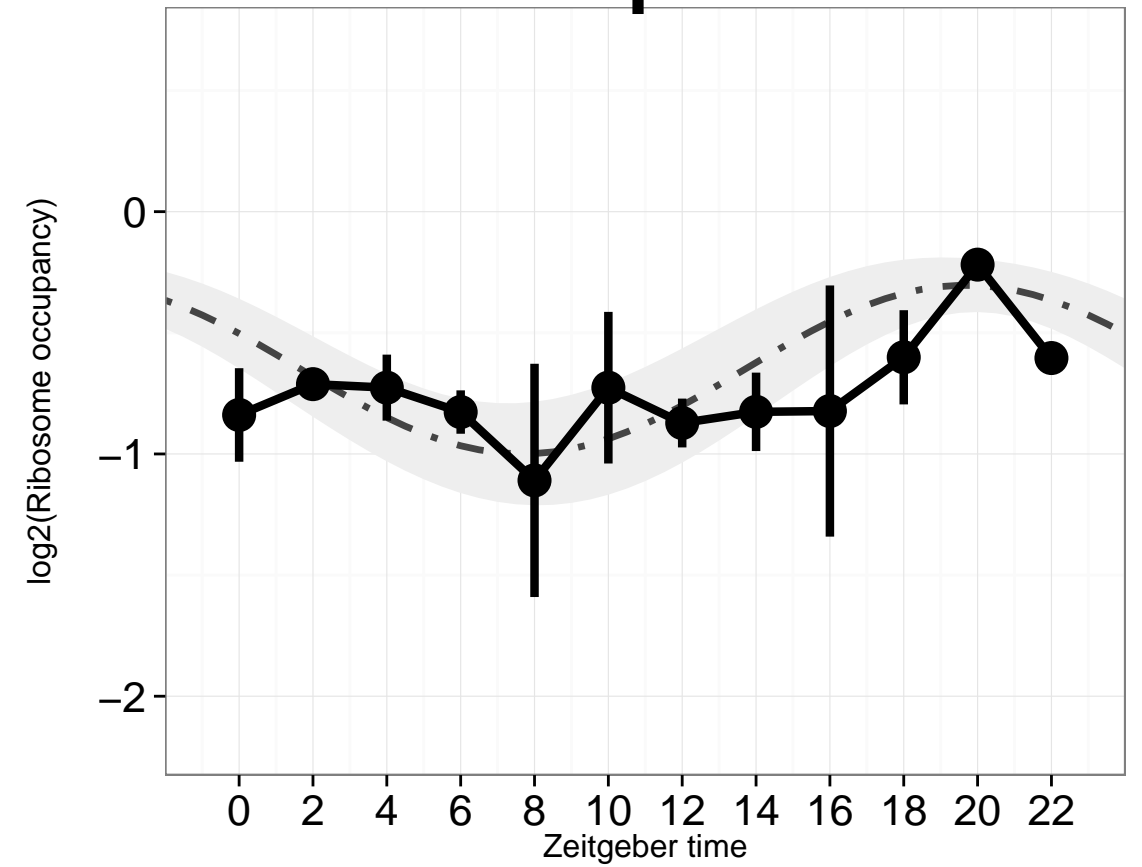

Supplement: SuppDataset_1.zip [file Cep76_set_B.pdf › Supplemental Dataset 1/B-mRNA_rhythm_translation_nonrhyth/Cep76_set_B.pdf]

## Cfb

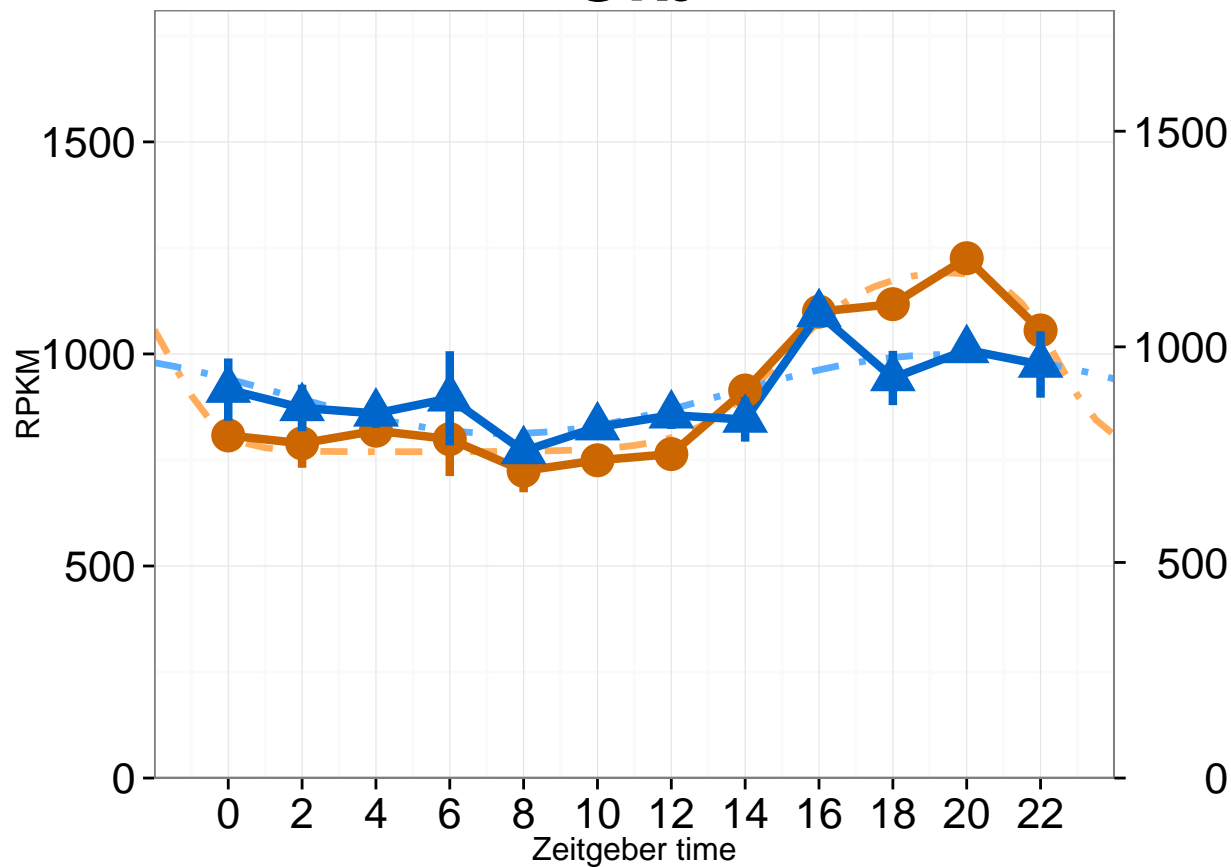

## Cfb

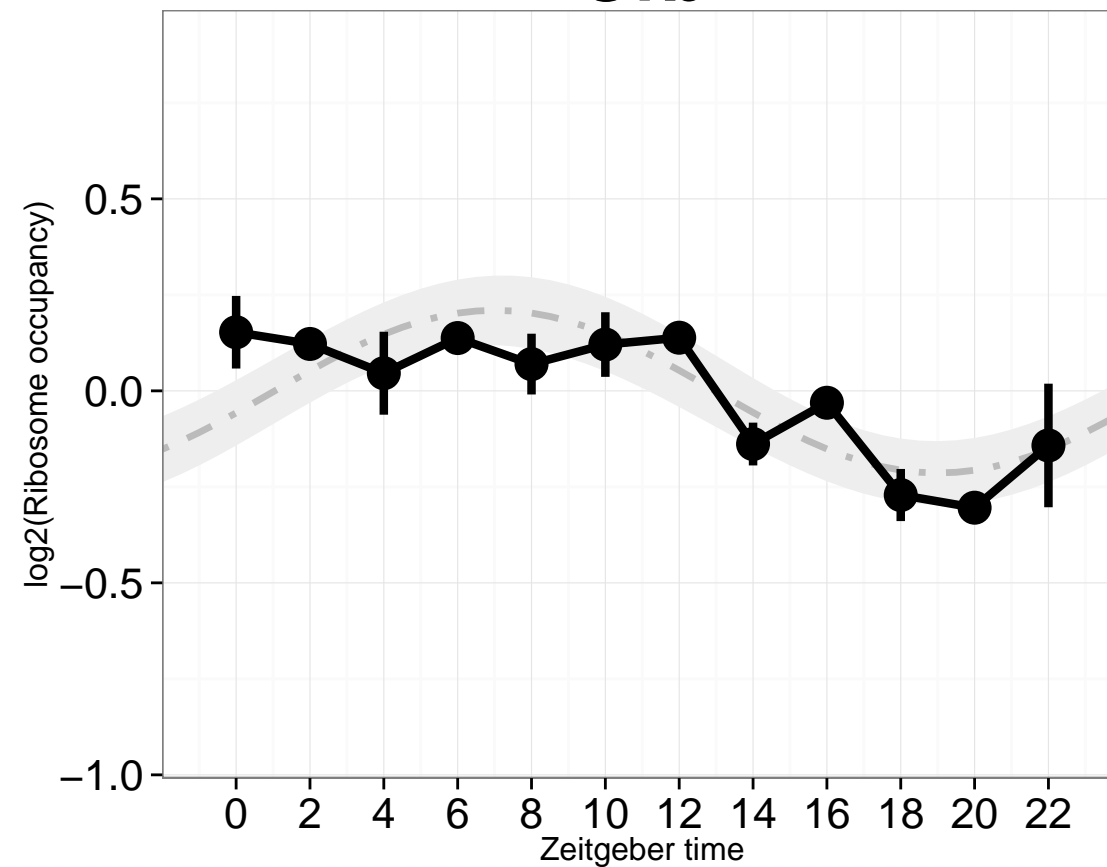

Supplement: SuppDataset_1.zip [file Cfb_set_B.pdf › Supplemental Dataset 1/B-mRNA_rhythm_translation_nonrhyth/Cfb_set_B.pdf]

## Chic2

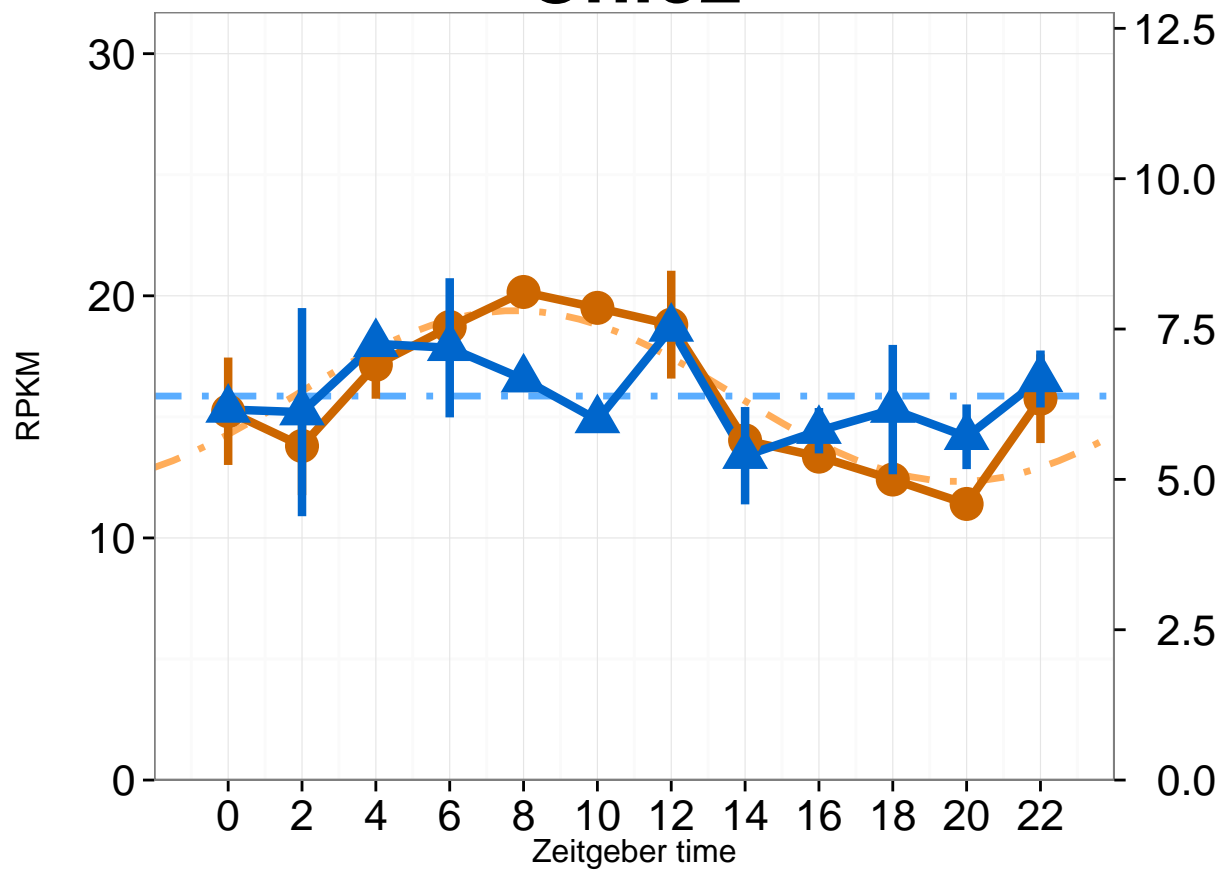

## Chic2

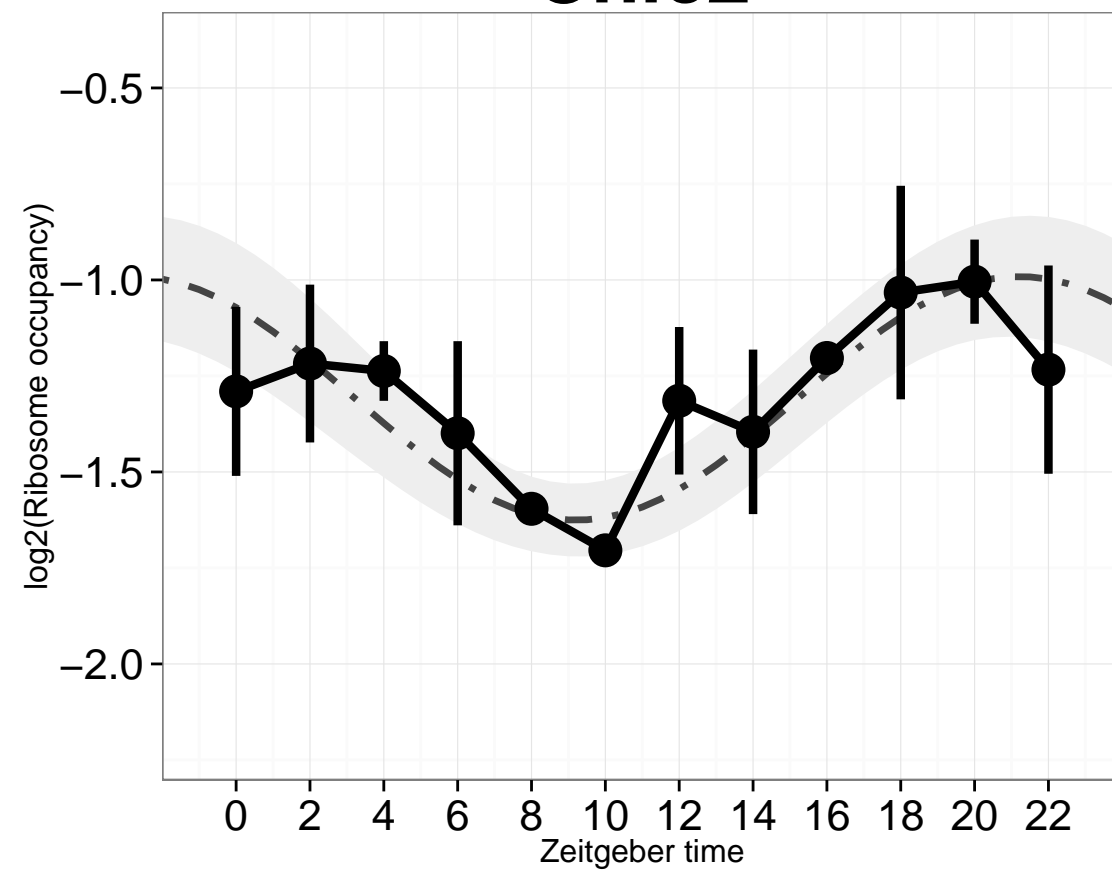

Supplement: SuppDataset_1.zip [file Chic2_set_B.pdf › Supplemental Dataset 1/B-mRNA_rhythm_translation_nonrhyth/Chic2_set_B.pdf]

## Chst2

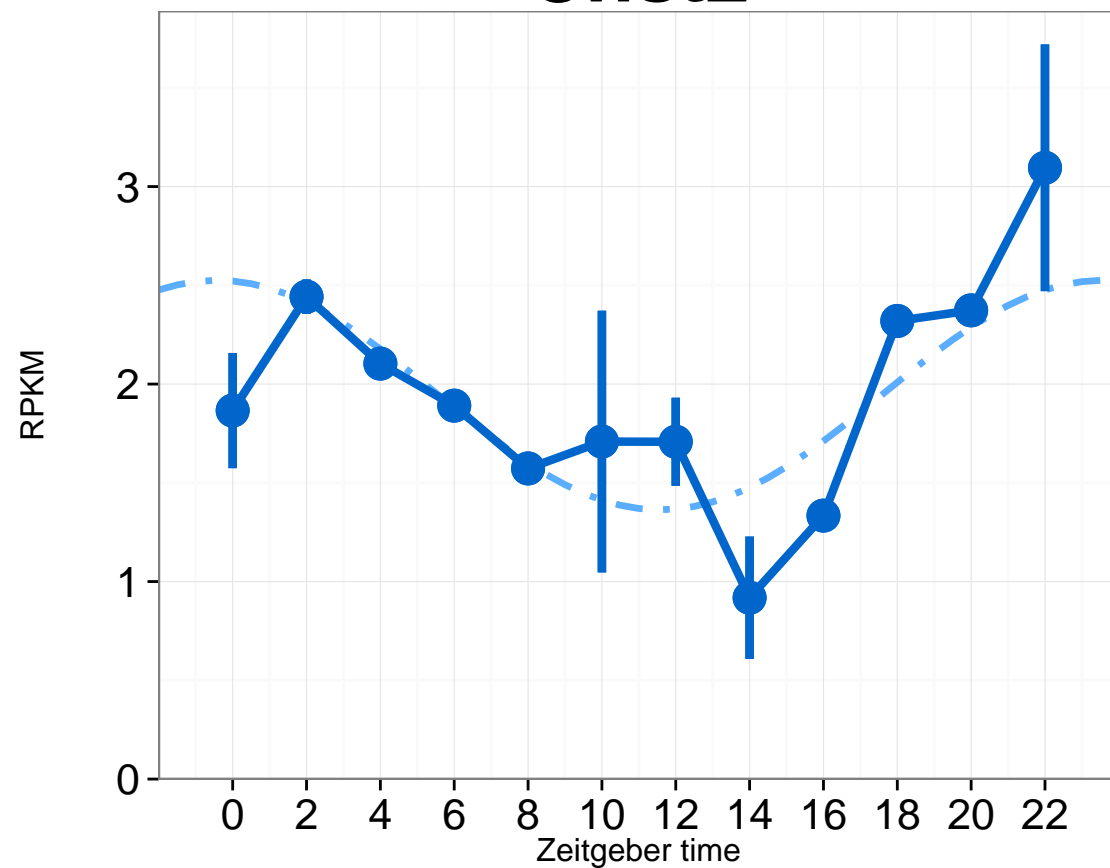

## Chst2 log2(Ribosome occupancy

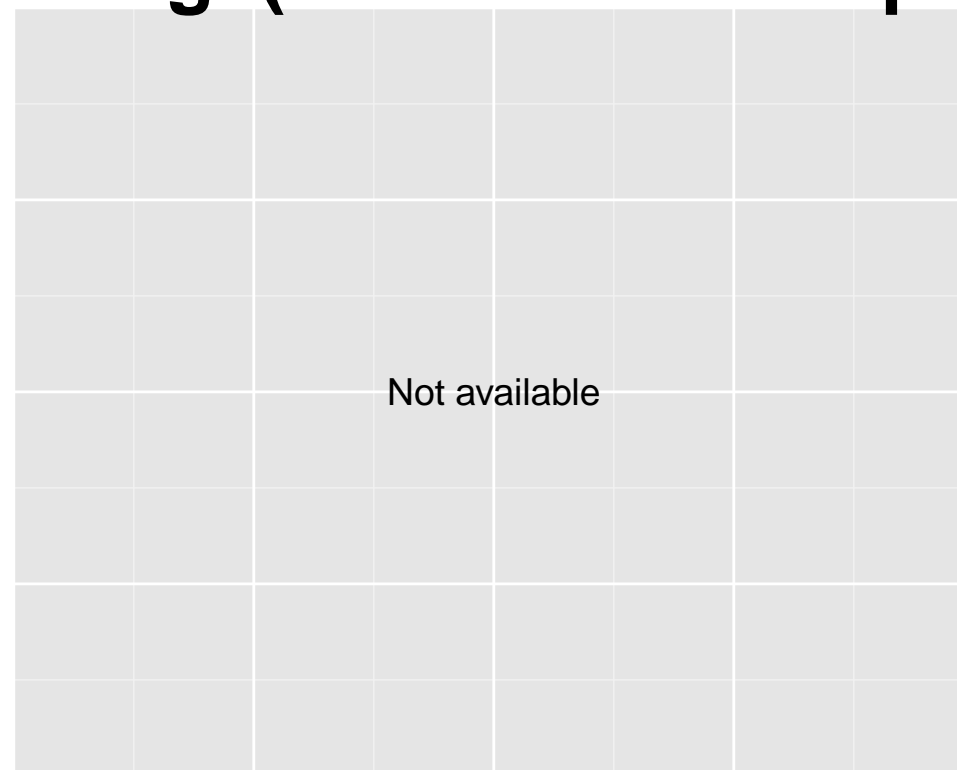

Supplement: SuppDataset_1.zip [file Chst2_set_B.pdf › Supplemental Dataset 1/B-mRNA_rhythm_translation_nonrhyth/Chst2_set_B.pdf]

## Chuk

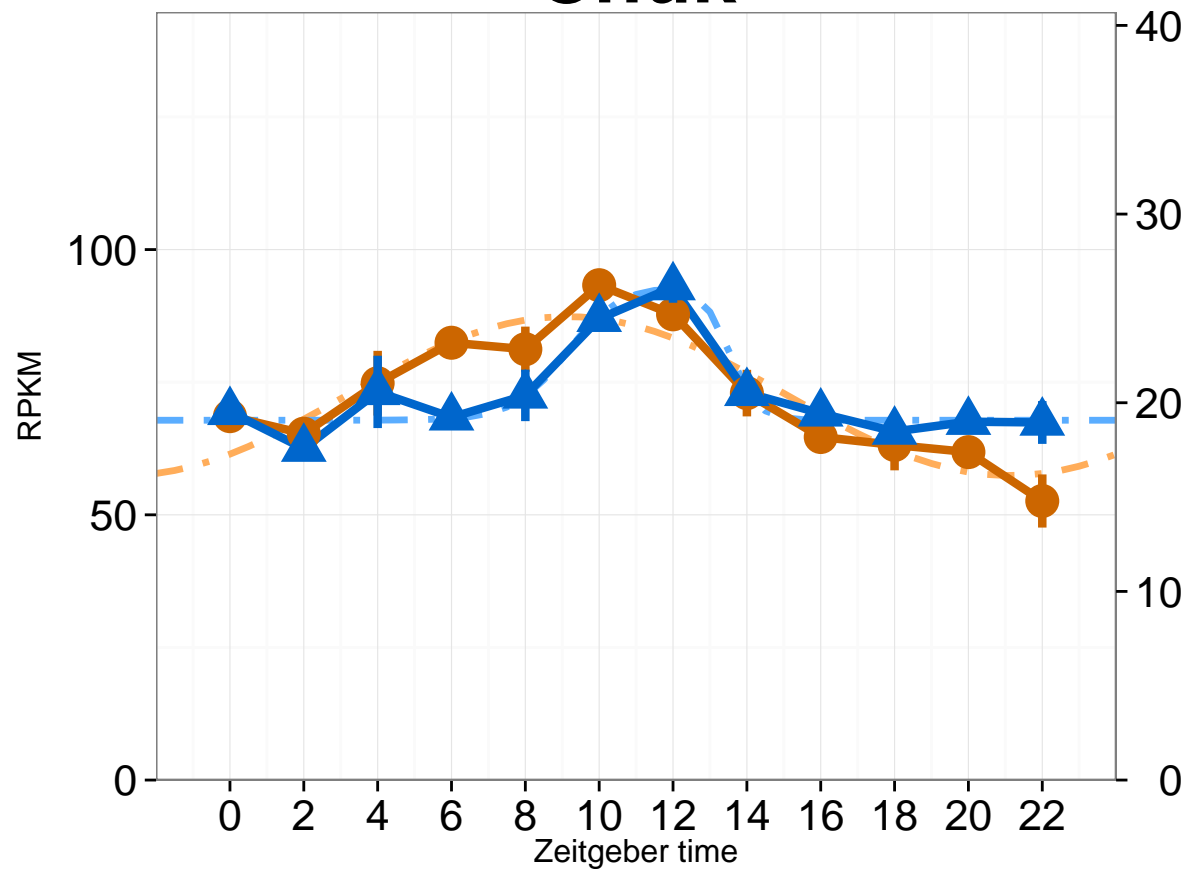

## Chuk

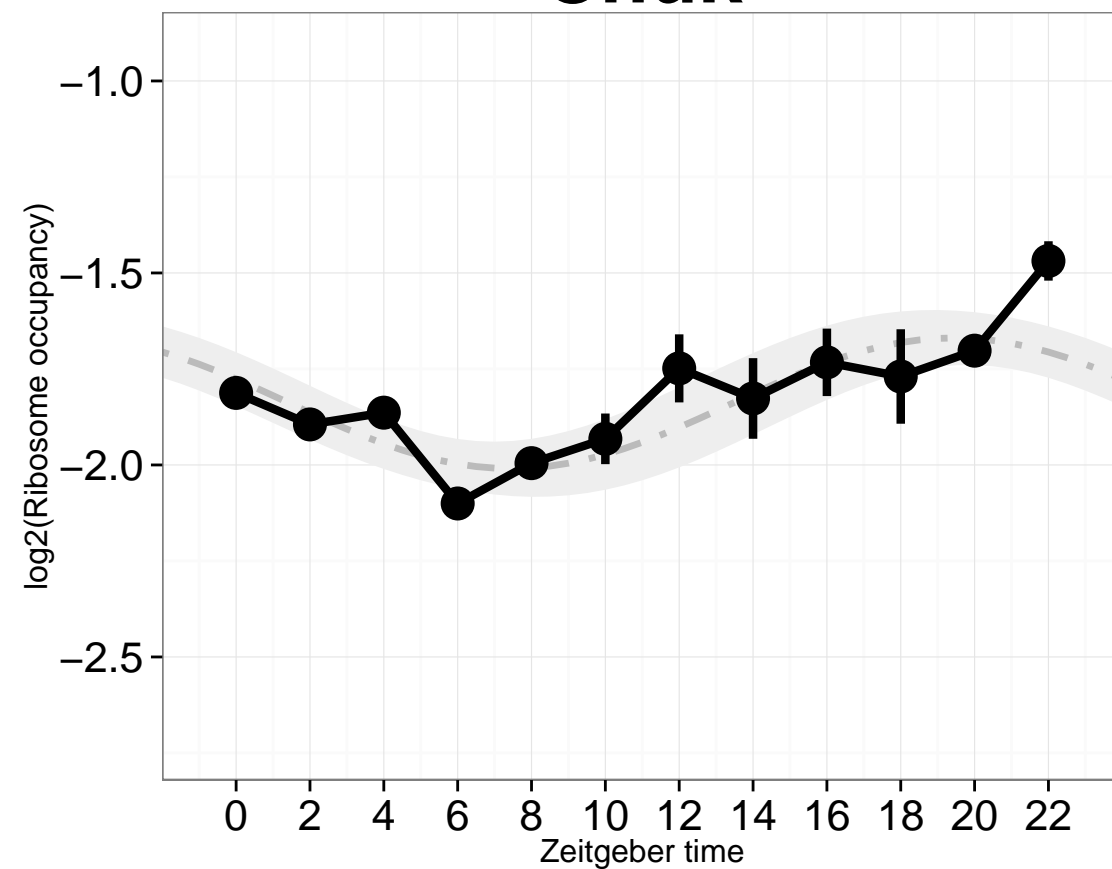

Supplement: SuppDataset_1.zip [file Chuk_set_B.pdf › Supplemental Dataset 1/B-mRNA_rhythm_translation_nonrhyth/Chuk_set_B.pdf]

## Cldn5

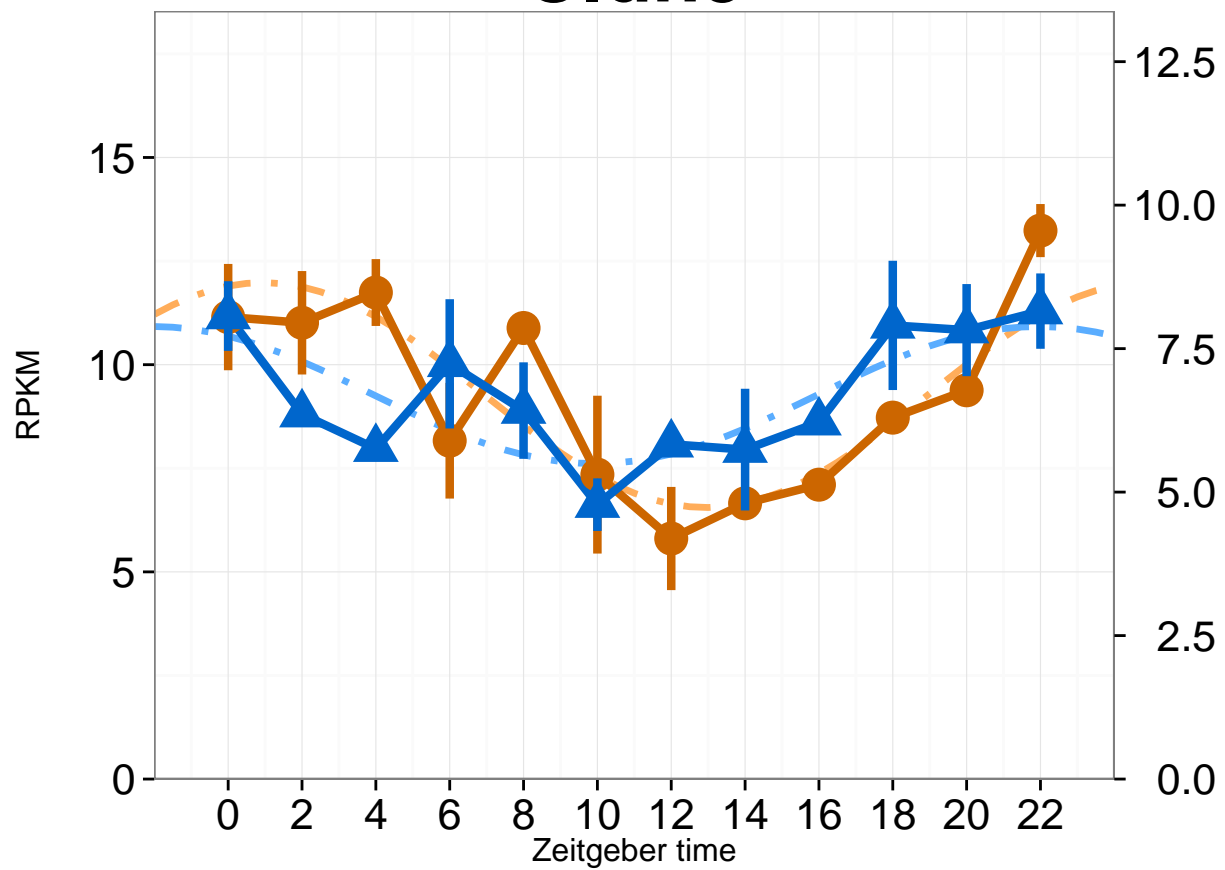

## Cldn5

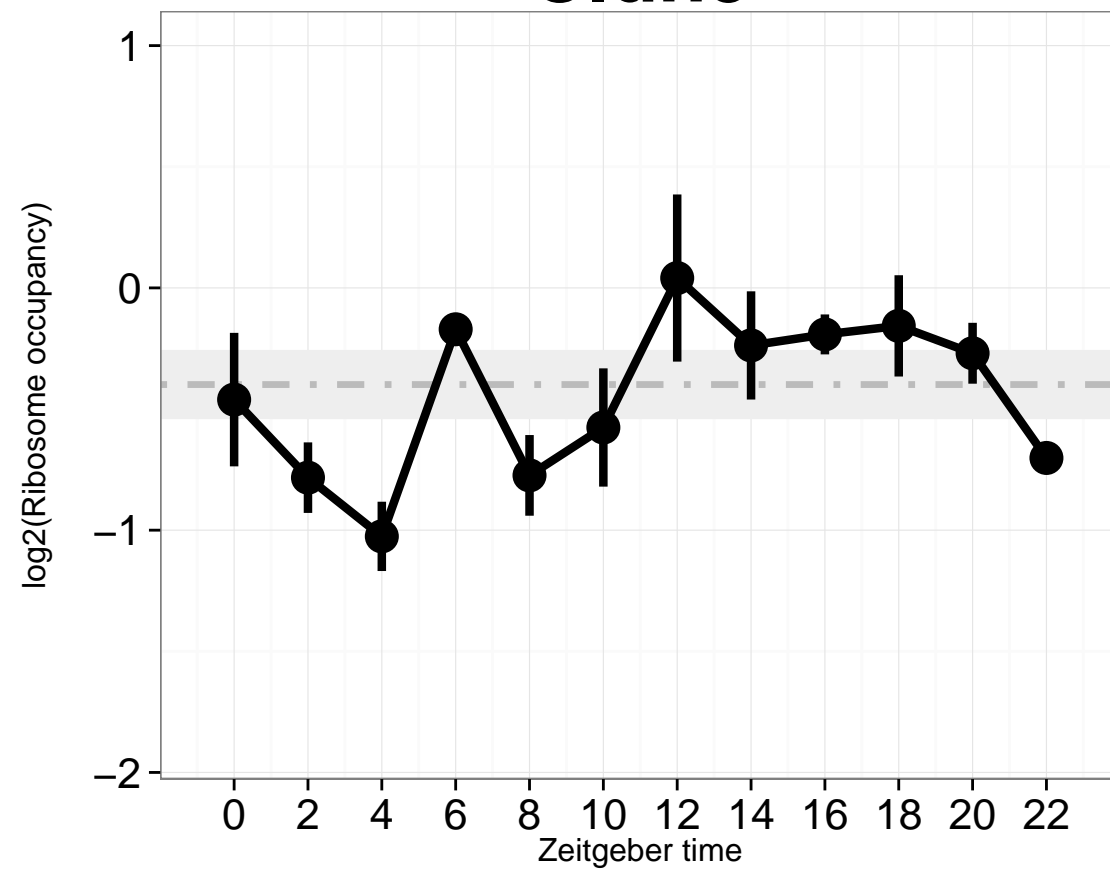

Supplement: SuppDataset_1.zip [file Cldn5_set_B.pdf › Supplemental Dataset 1/B-mRNA_rhythm_translation_nonrhyth/Cldn5_set_B.pdf]

## Clic4

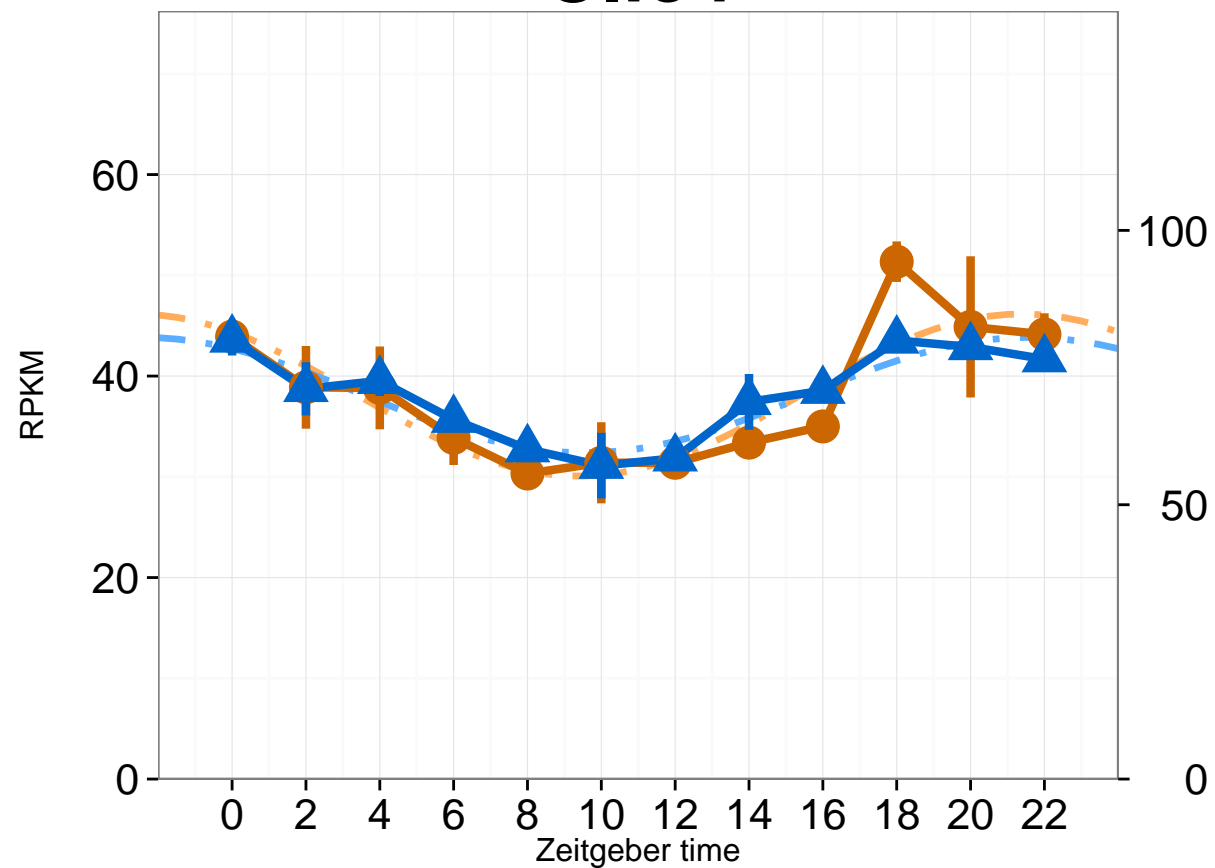

## Clic4

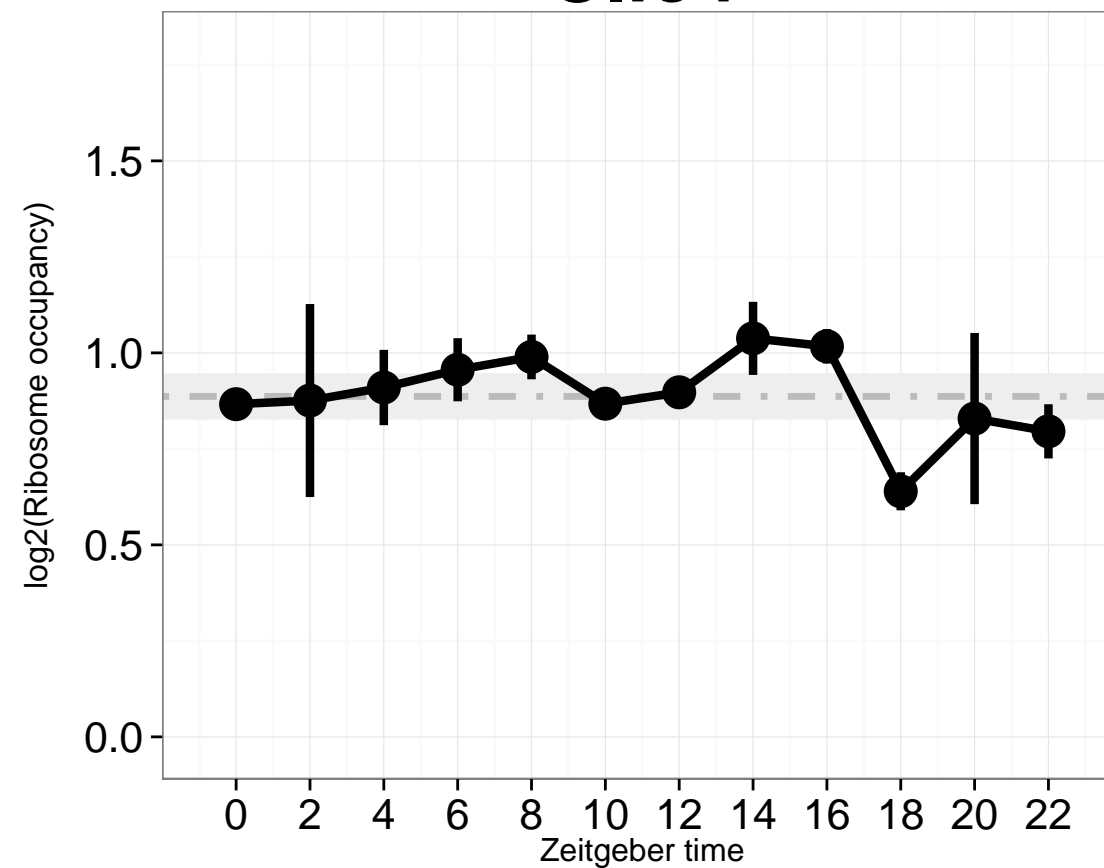

Supplement: SuppDataset_1.zip [file Clic4_set_B.pdf › Supplemental Dataset 1/B-mRNA_rhythm_translation_nonrhyth/Clic4_set_B.pdf]

# Cluap1

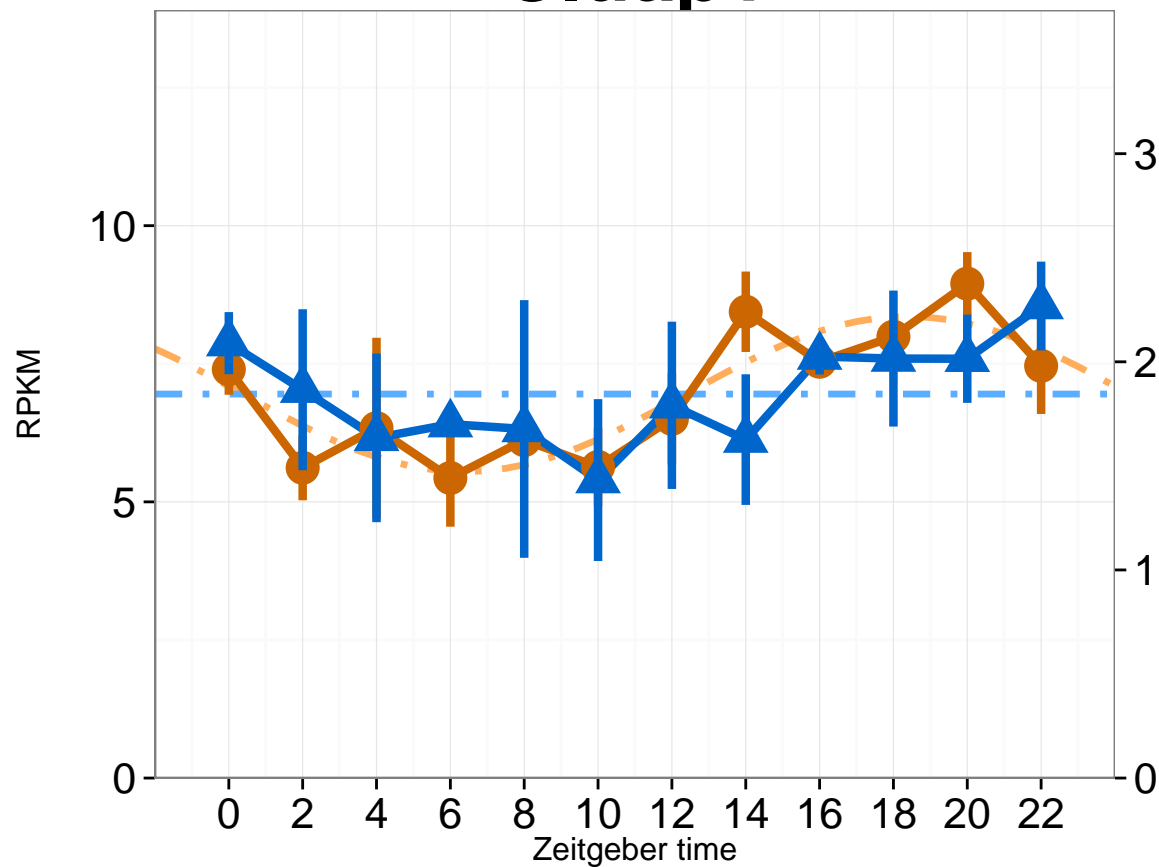

# Cluap1

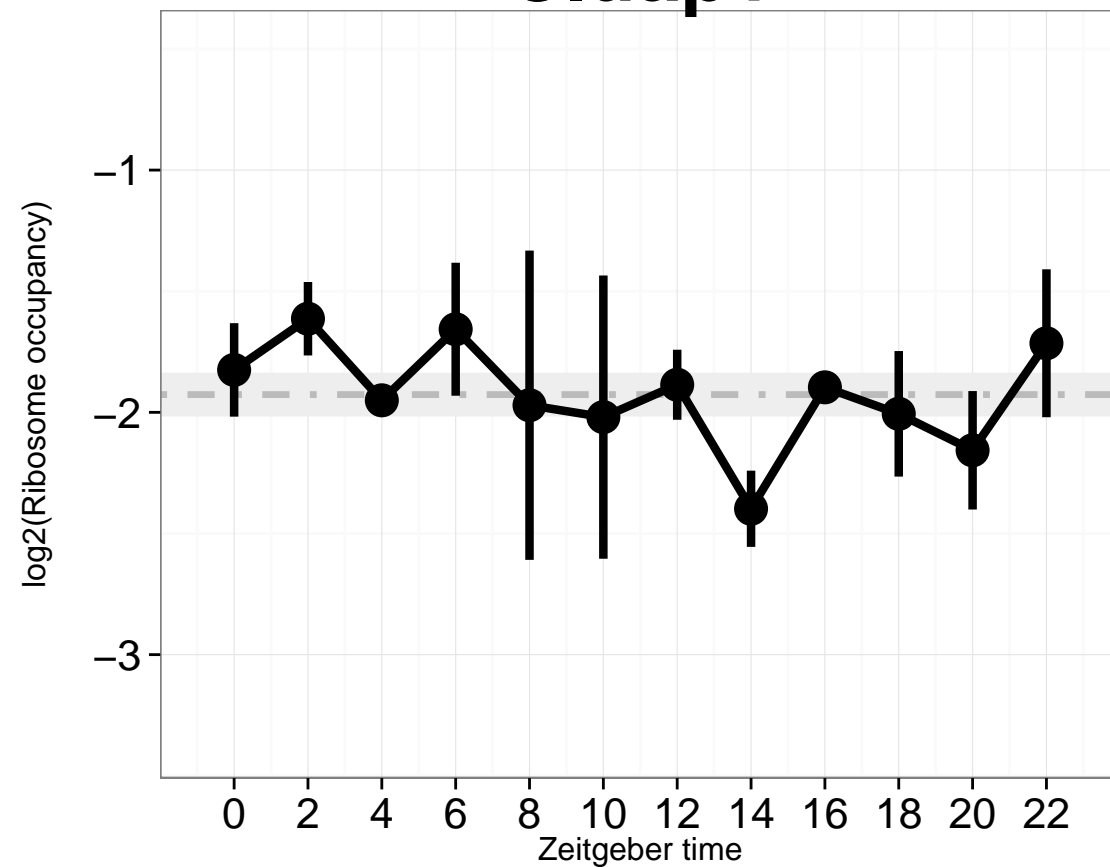

Supplement: SuppDataset_1.zip [file Cluap1_set_B.pdf › Supplemental Dataset 1/B-mRNA_rhythm_translation_nonrhyth/Cluap1_set_B.pdf]

# Cmtm6

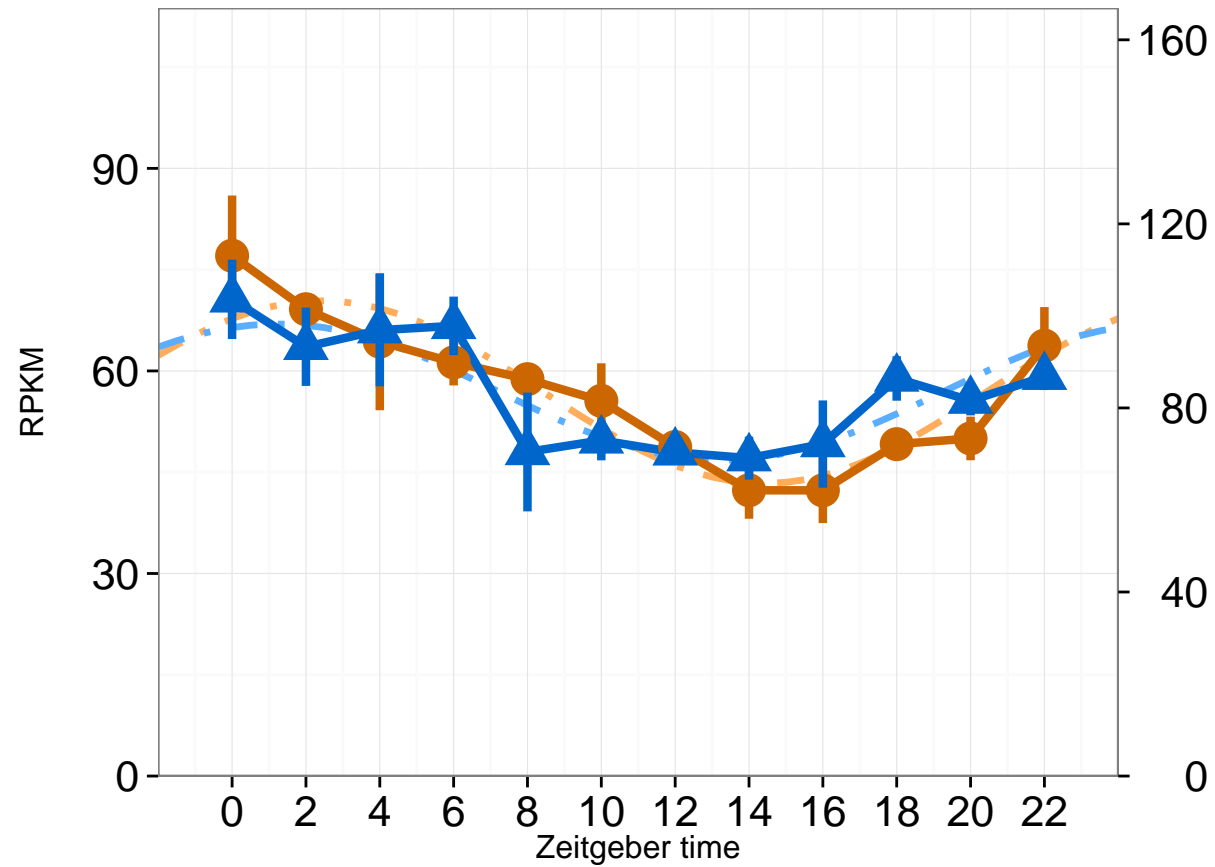

# Cmtm6

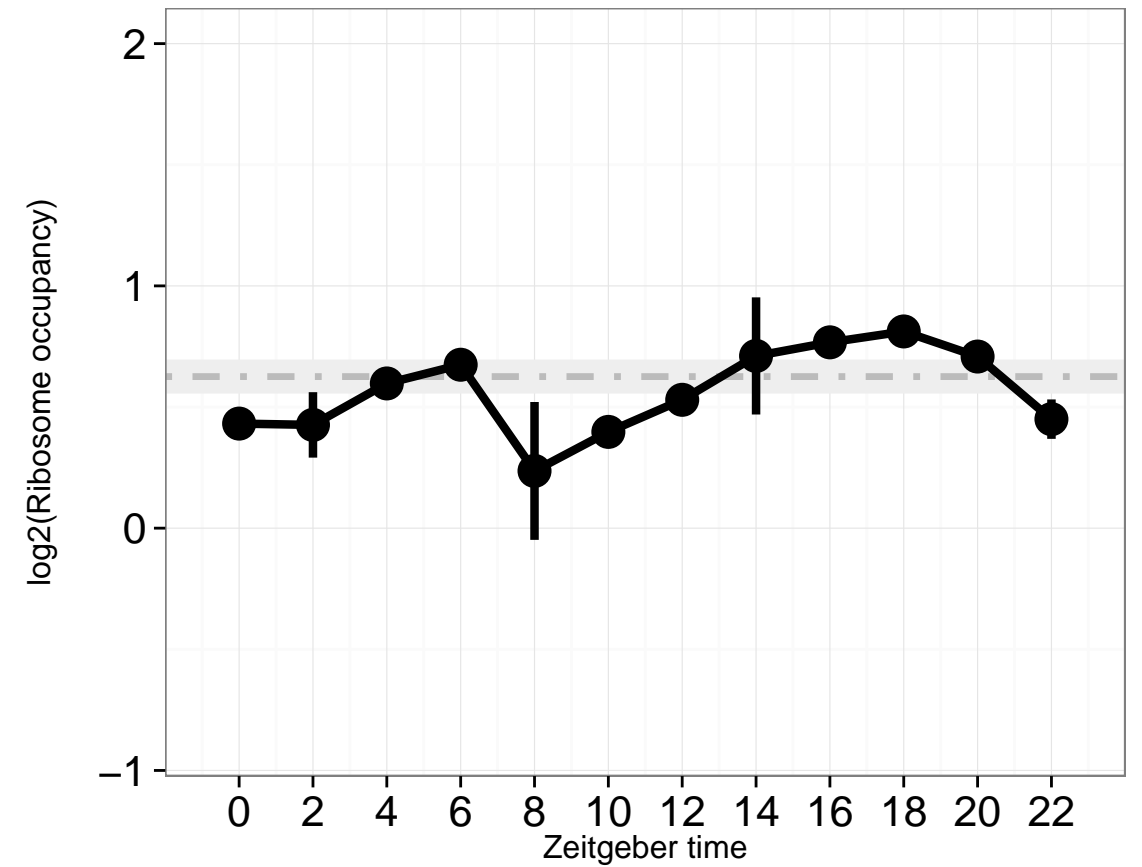

Supplement: SuppDataset_1.zip [file Cmtm6_set_B.pdf › Supplemental Dataset 1/B-mRNA_rhythm_translation_nonrhyth/Cmtm6_set_B.pdf]

# Cmtr1

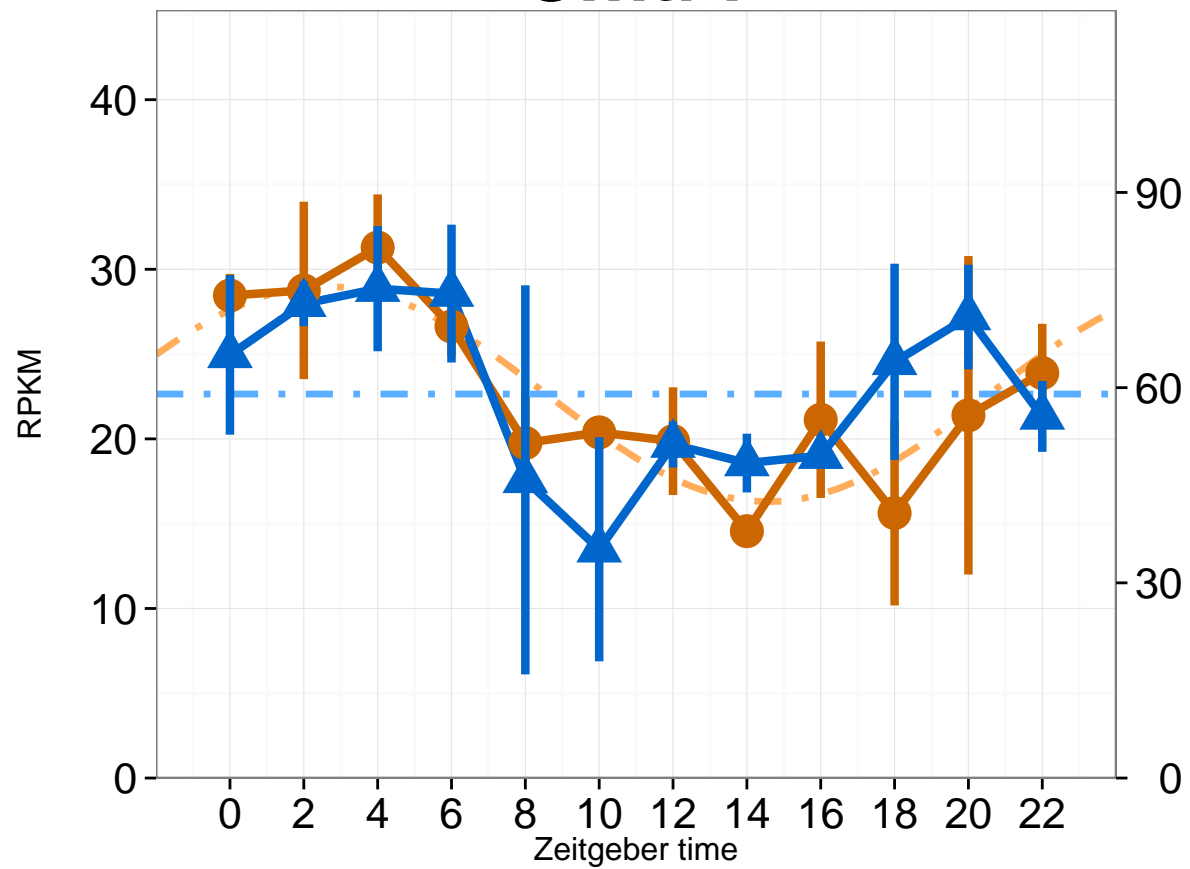

# Cmtr1

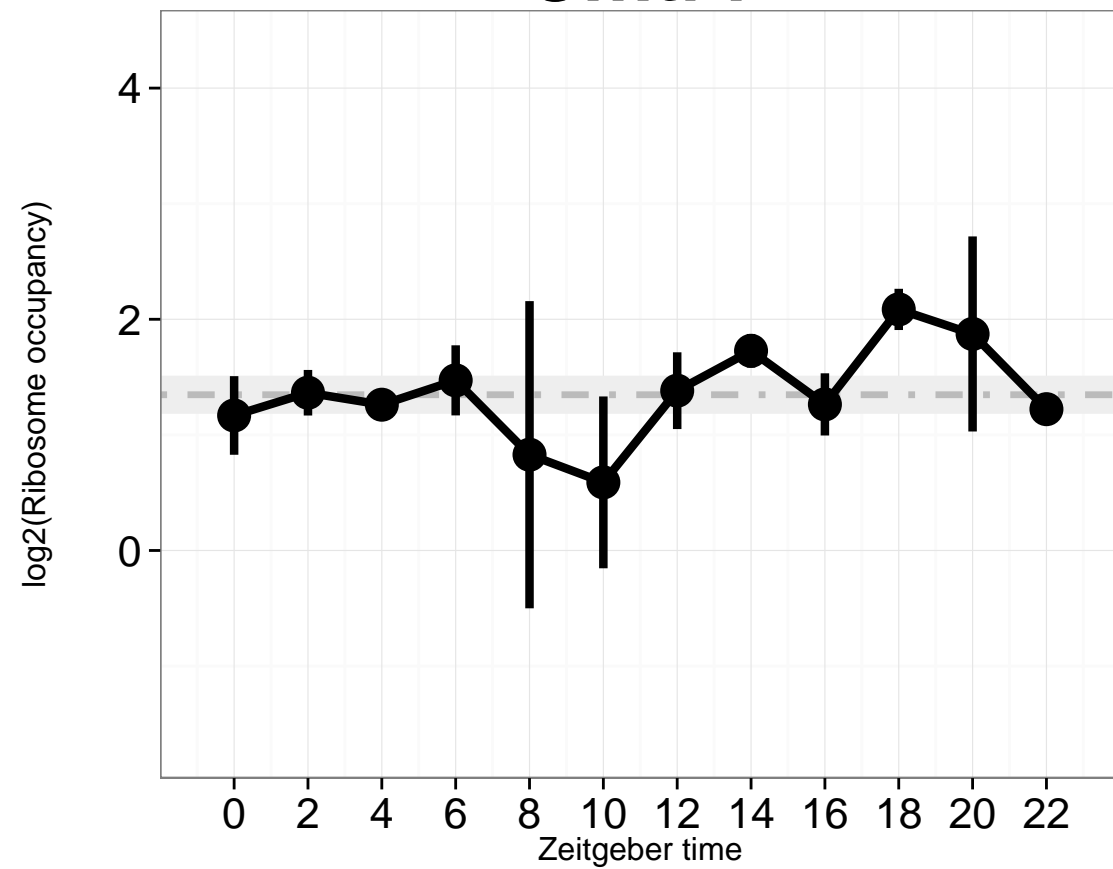

Supplement: SuppDataset_1.zip [file Cmtr1_set_B.pdf › Supplemental Dataset 1/B-mRNA_rhythm_translation_nonrhyth/Cmtr1_set_B.pdf]

# Cnppd1

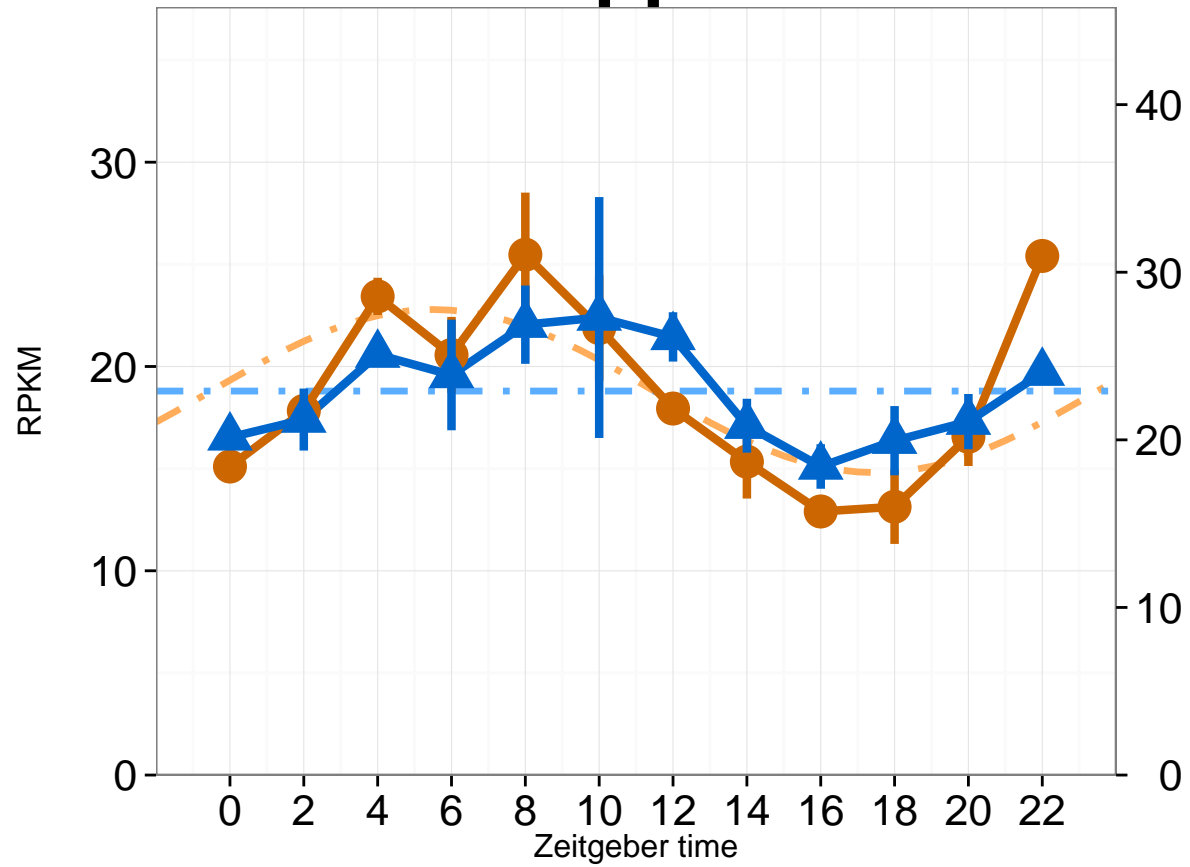

# Cnppd1

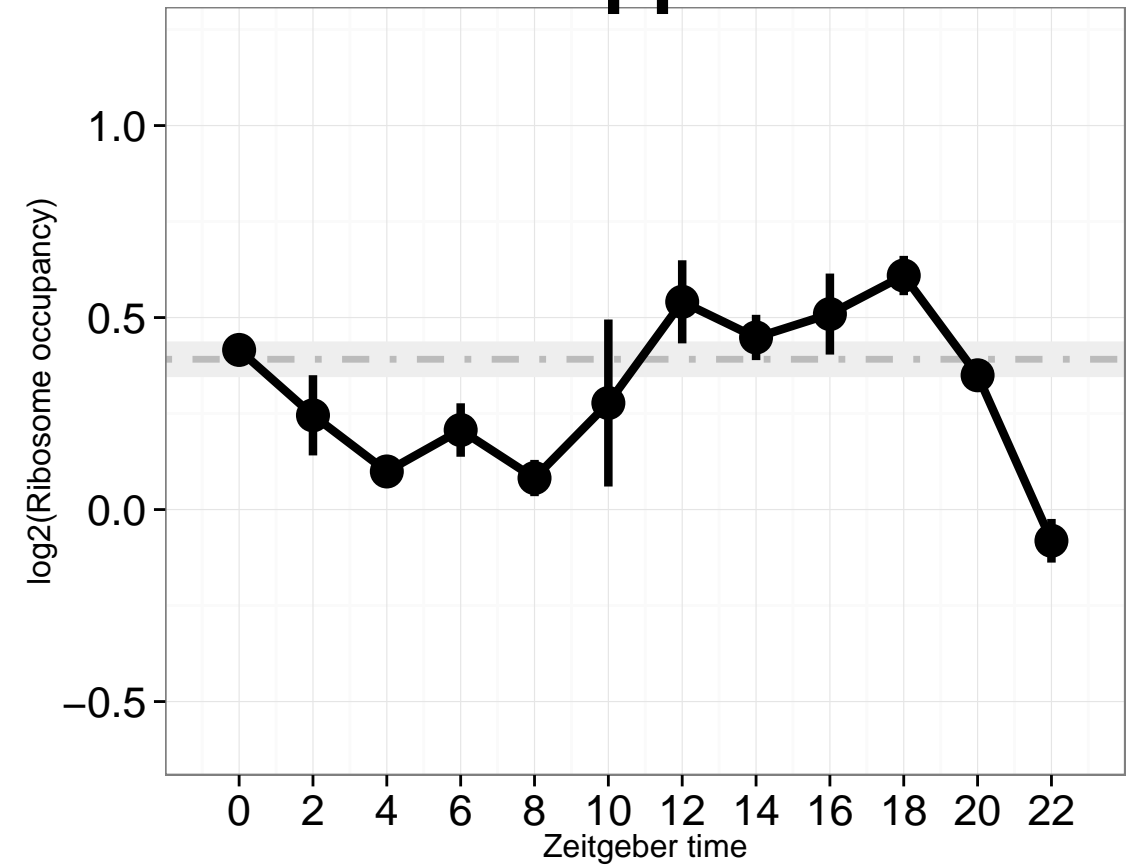

Supplement: SuppDataset_1.zip [file Cnppd1_set_B.pdf › Supplemental Dataset 1/B-mRNA_rhythm_translation_nonrhyth/Cnppd1_set_B.pdf]

## Cntrob

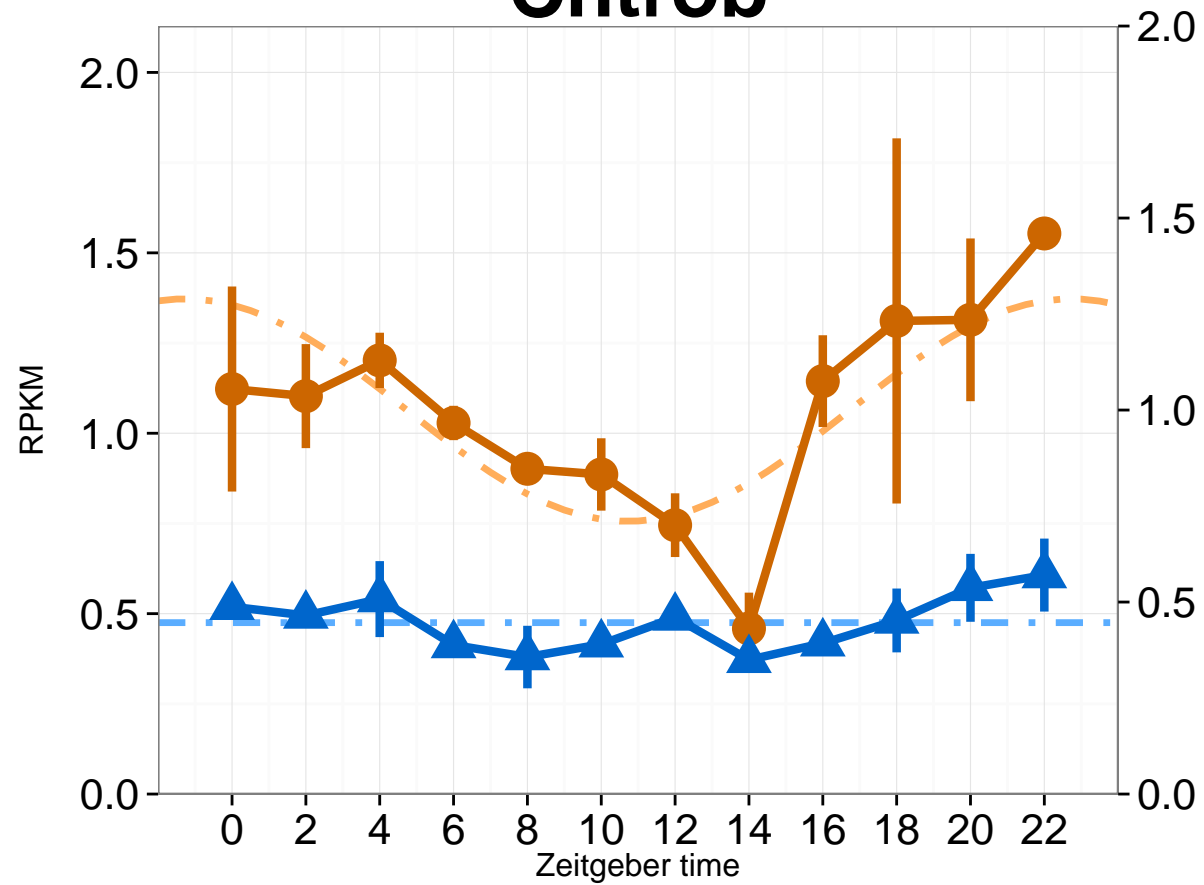

## Cntrob

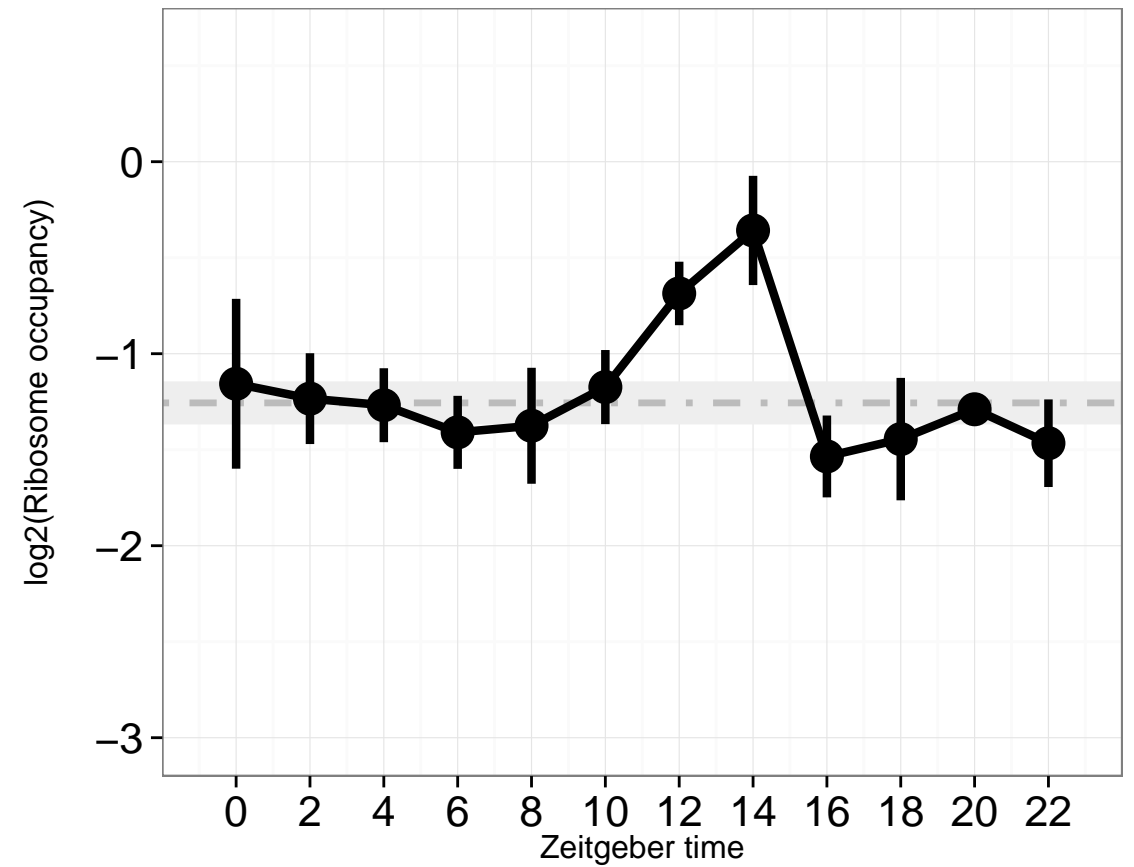

Supplement: SuppDataset_1.zip [file Cntrob_set_B.pdf › Supplemental Dataset 1/B-mRNA_rhythm_translation_nonrhyth/Cntrob_set_B.pdf]

## Cobl

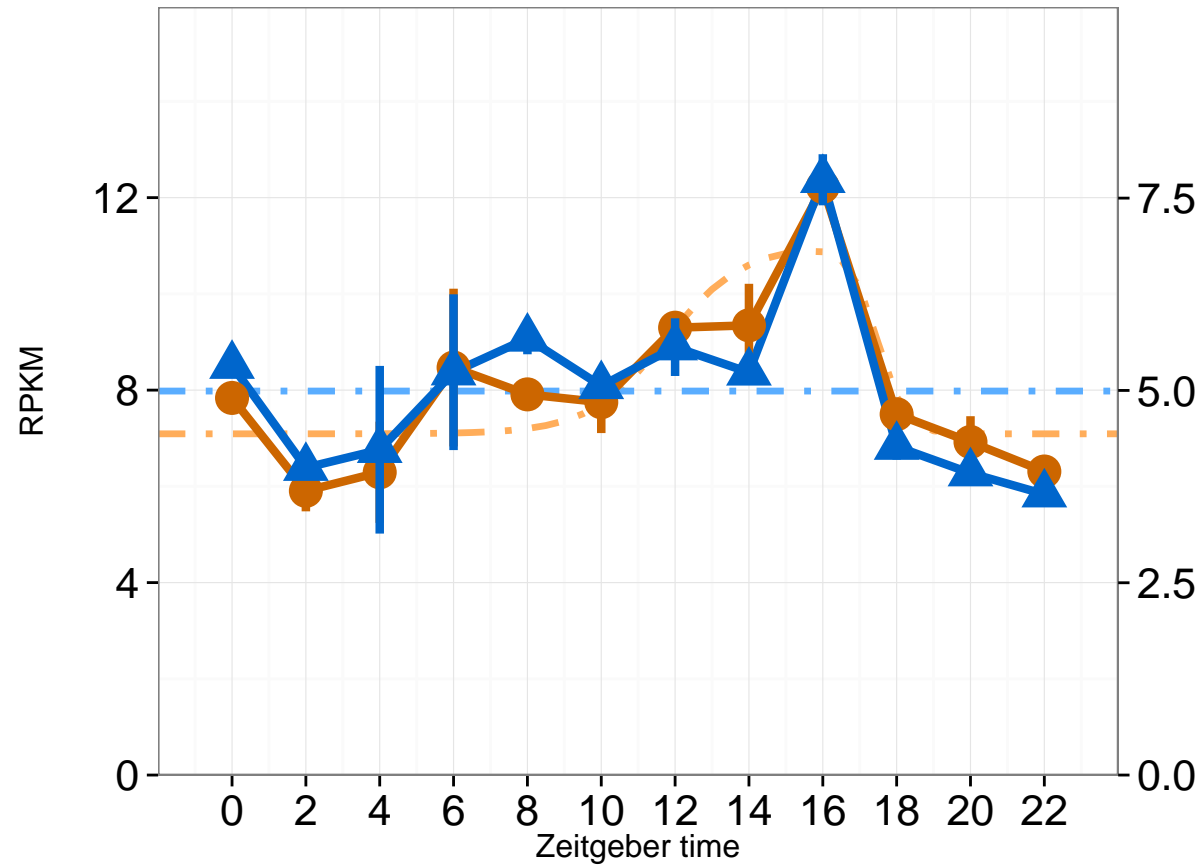

## Cobl

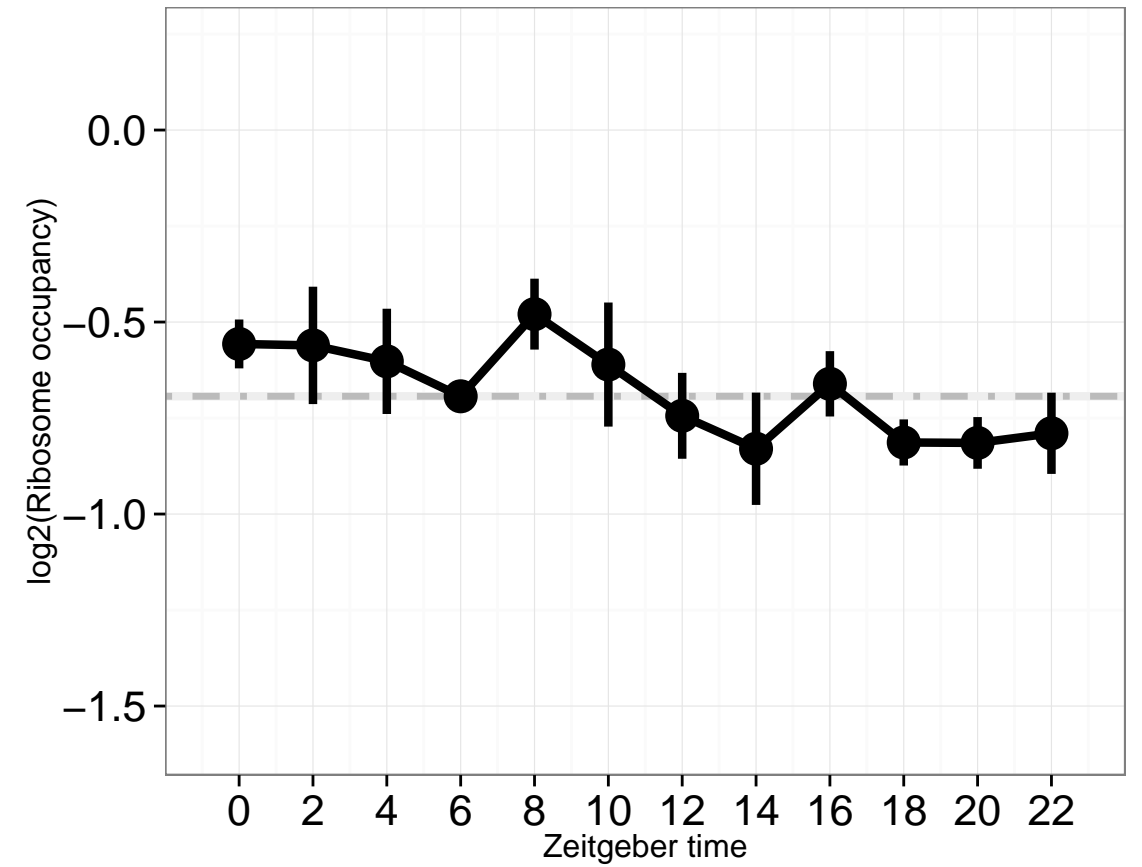

Supplement: SuppDataset_1.zip [file Cobl_set_B.pdf › Supplemental Dataset 1/B-mRNA_rhythm_translation_nonrhyth/Cobl_set_B.pdf]

# Col15a1

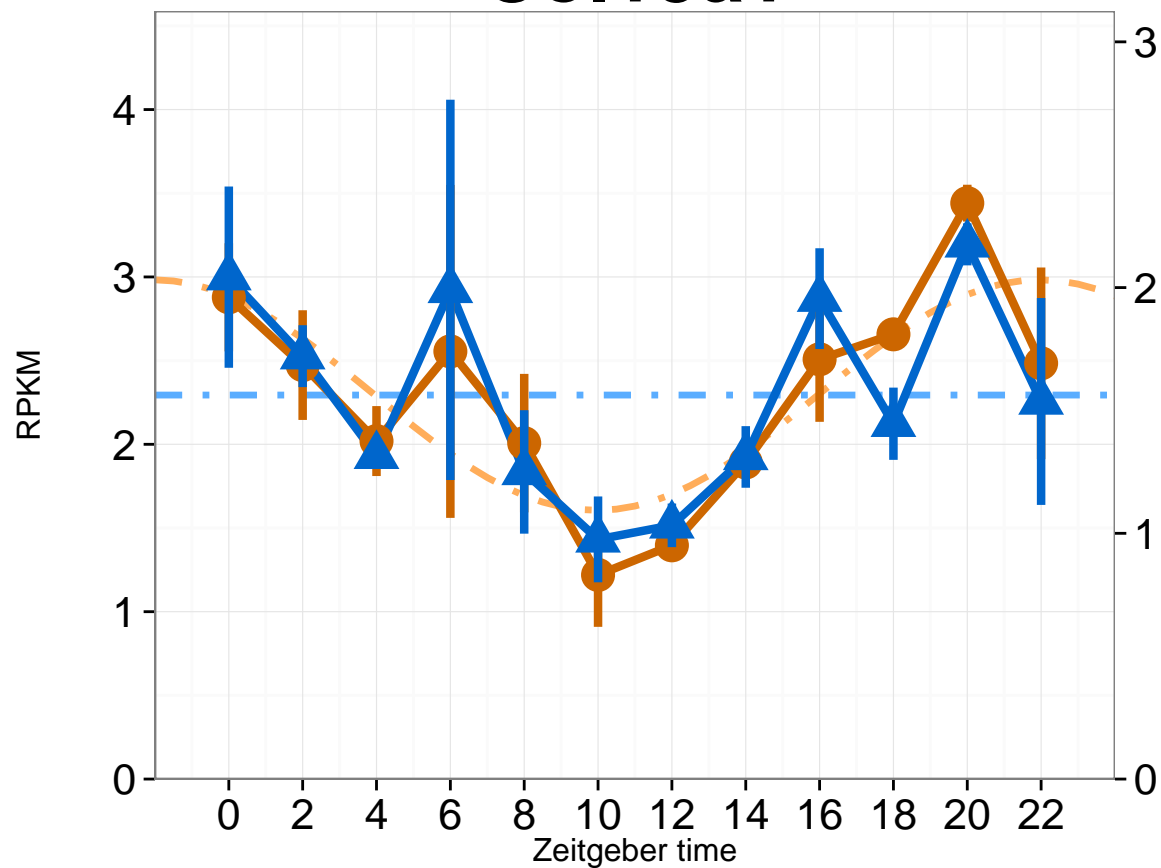

# Col15a1

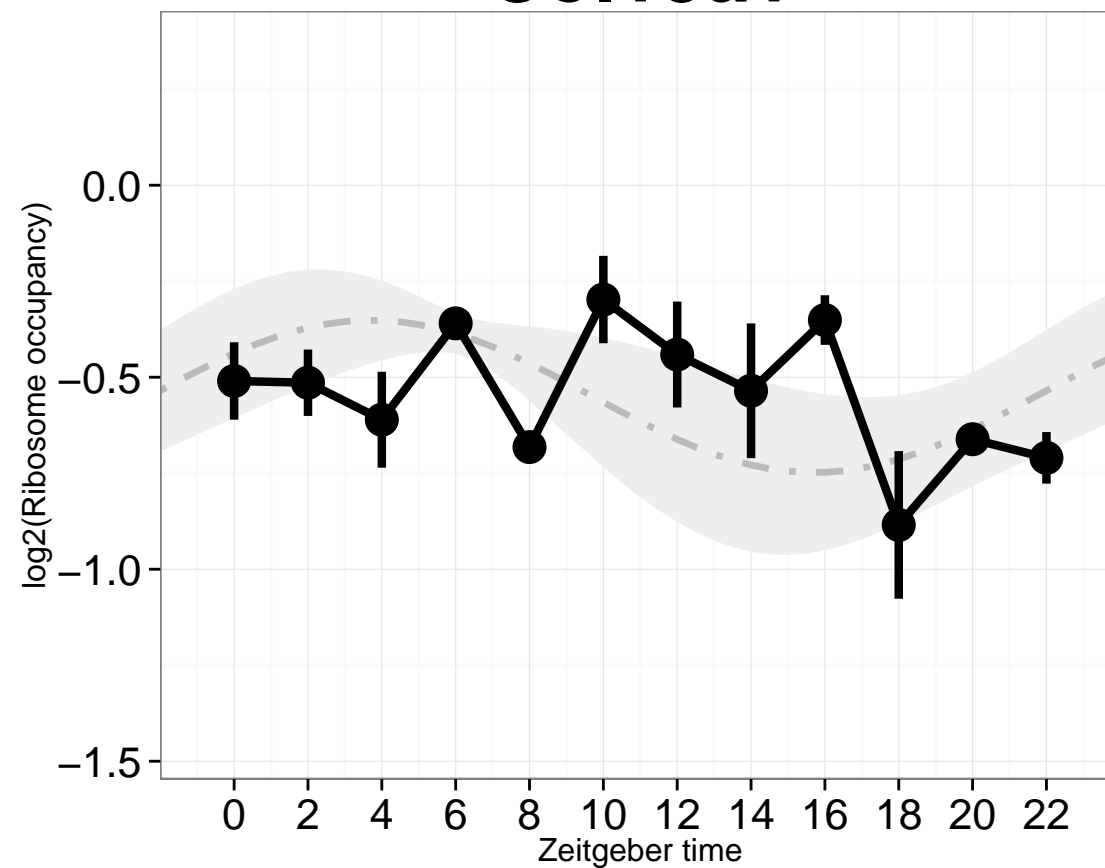

Supplement: SuppDataset_1.zip [file Col15a1_set_B.pdf › Supplemental Dataset 1/B-mRNA_rhythm_translation_nonrhyth/Col15a1_set_B.pdf]

# Colgalt2

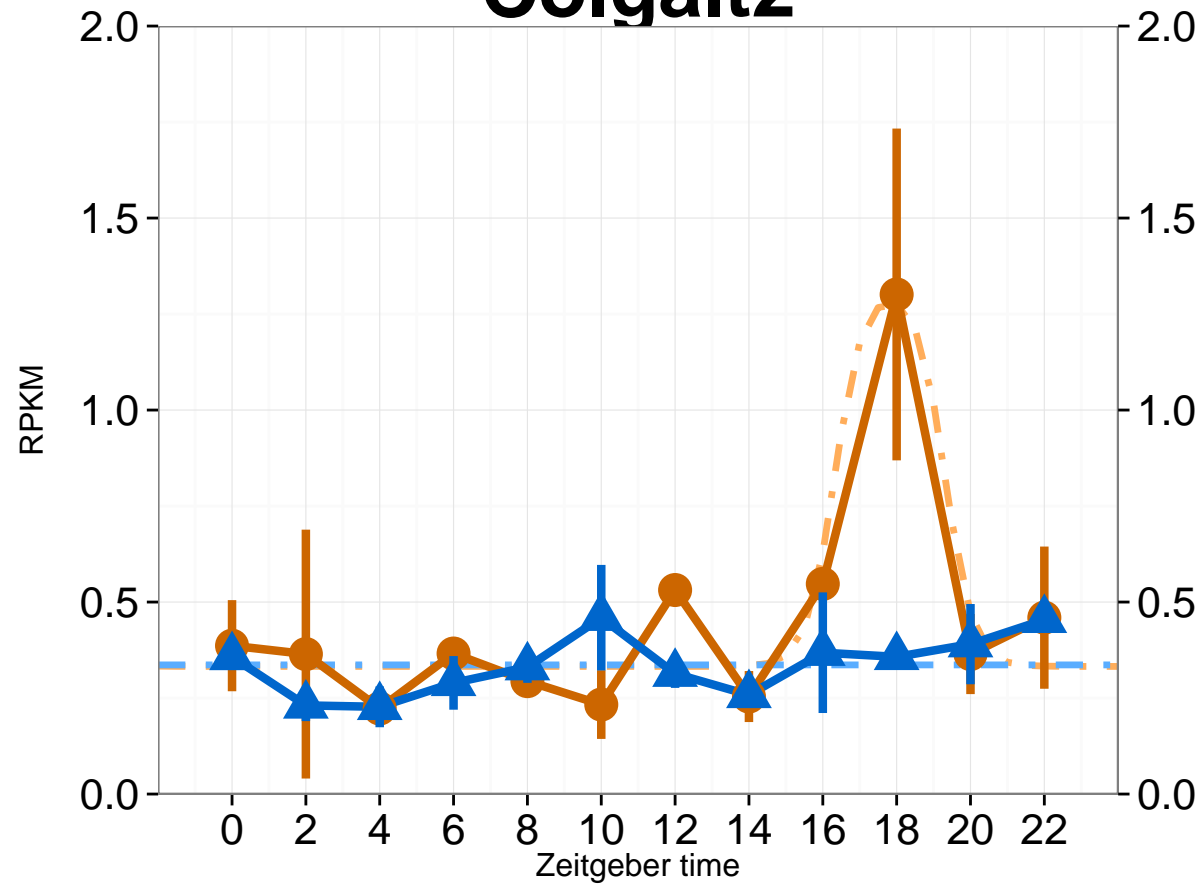

# Colgalt2

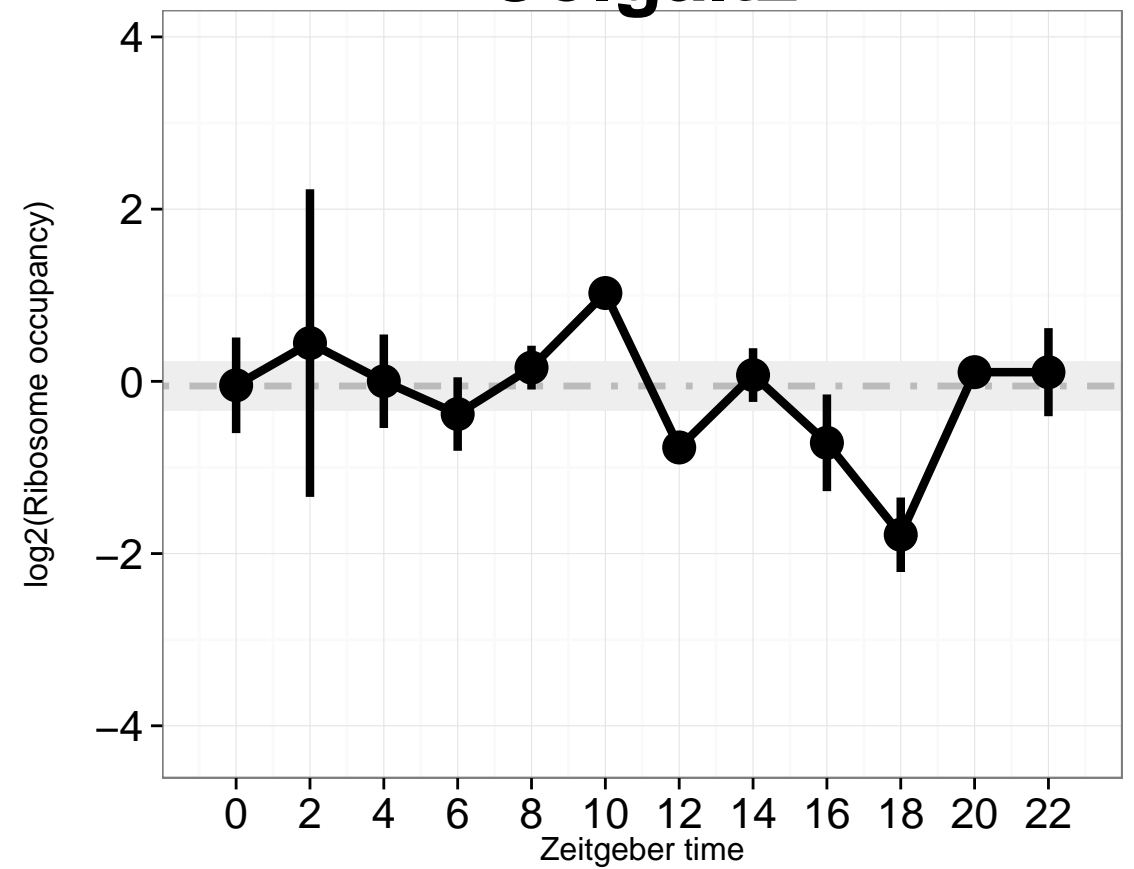

Supplement: SuppDataset_1.zip [file Colgalt2_set_B.pdf › Supplemental Dataset 1/B-mRNA_rhythm_translation_nonrhyth/Colgalt2_set_B.pdf]

## Cot11

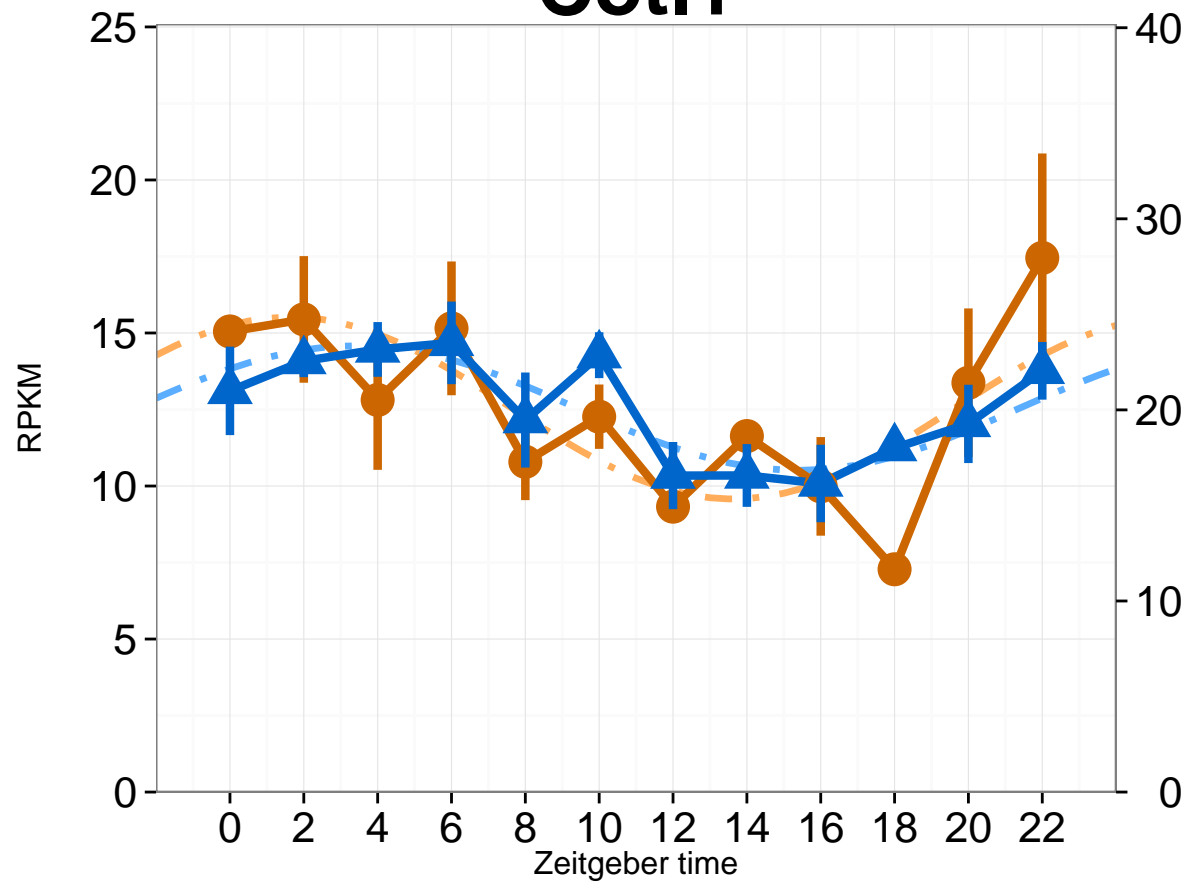

## Cot11

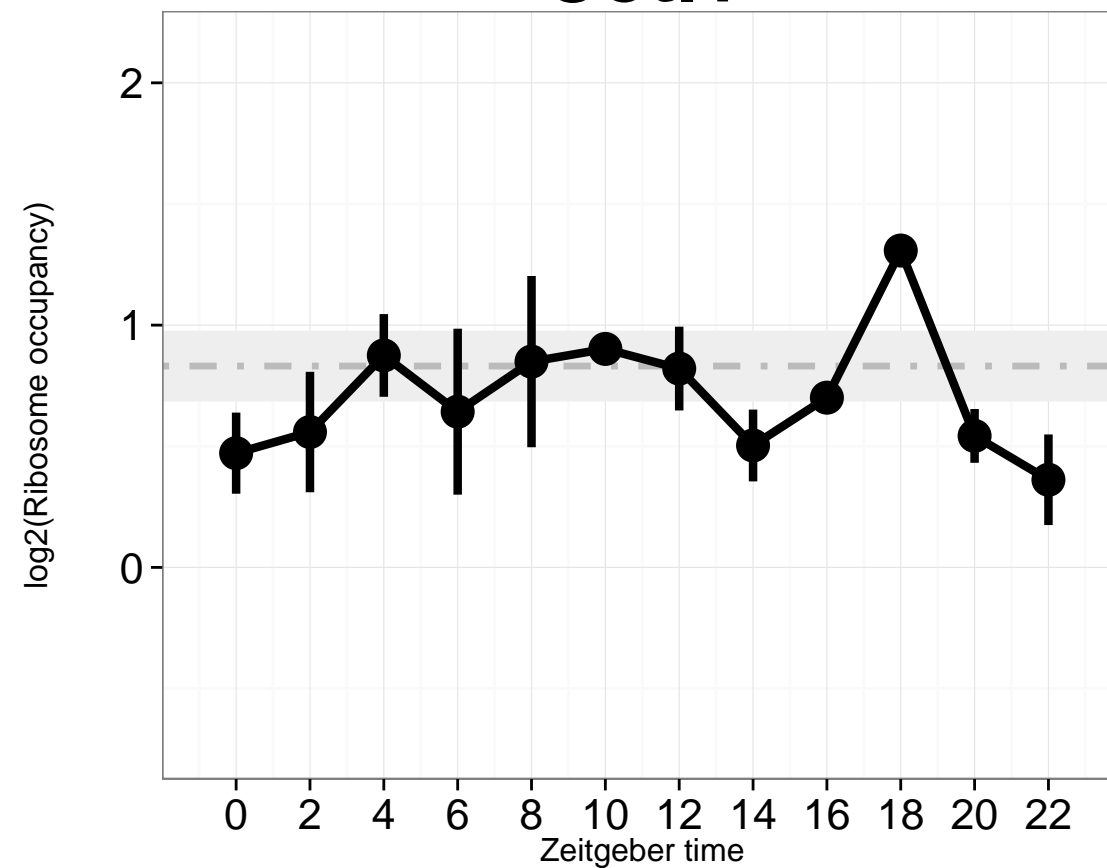

Supplement: SuppDataset_1.zip [file Cotl1_set_B.pdf › Supplemental Dataset 1/B-mRNA_rhythm_translation_nonrhyth/Cotl1_set_B.pdf]

# Cox14

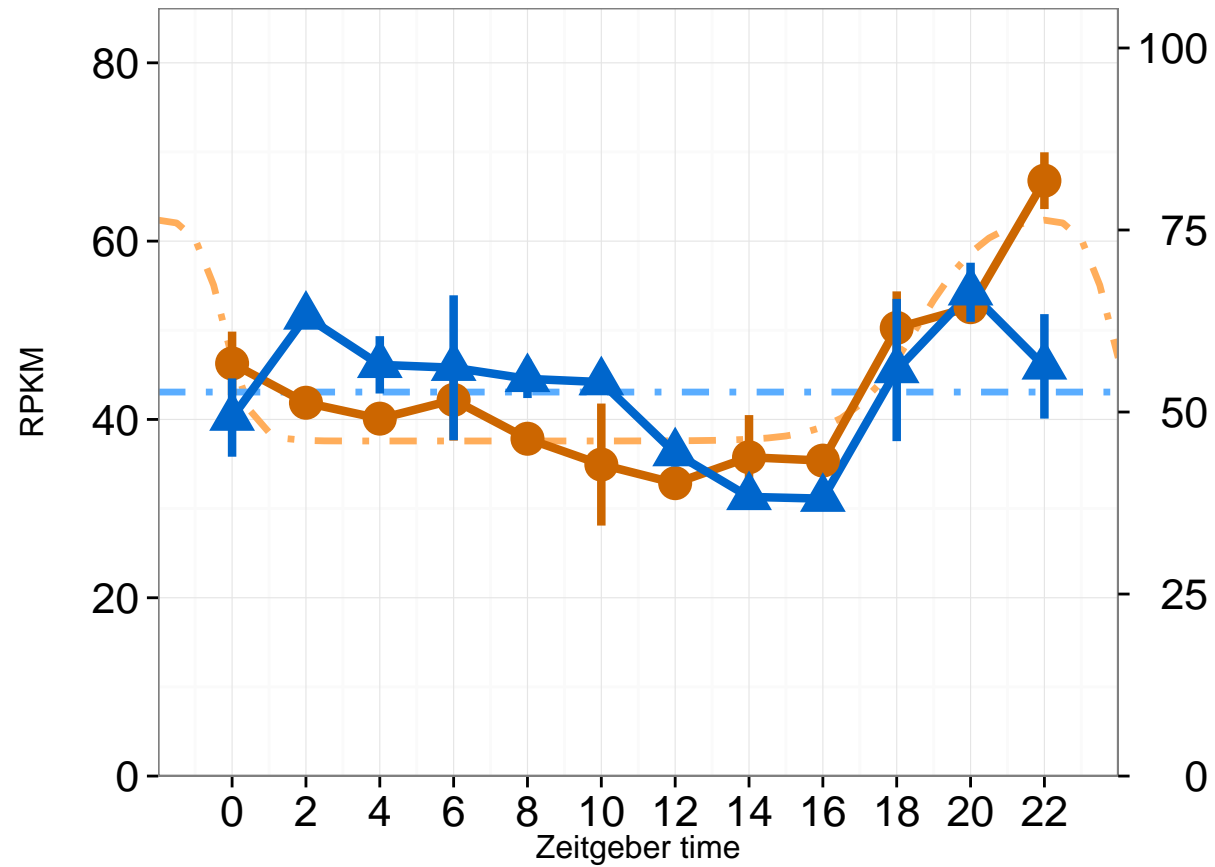

# Cox14

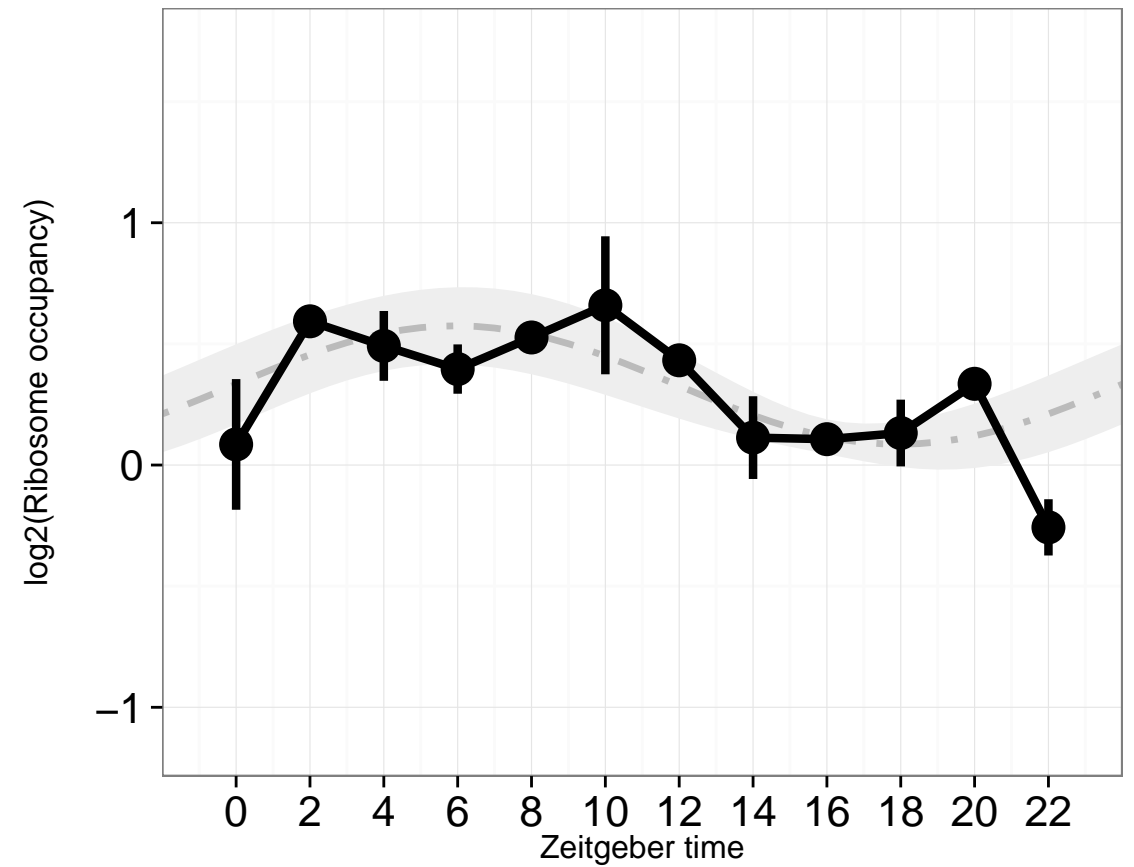

Supplement: SuppDataset_1.zip [file Cox14_set_B.pdf › Supplemental Dataset 1/B-mRNA_rhythm_translation_nonrhyth/Cox14_set_B.pdf]

# Cox6a1

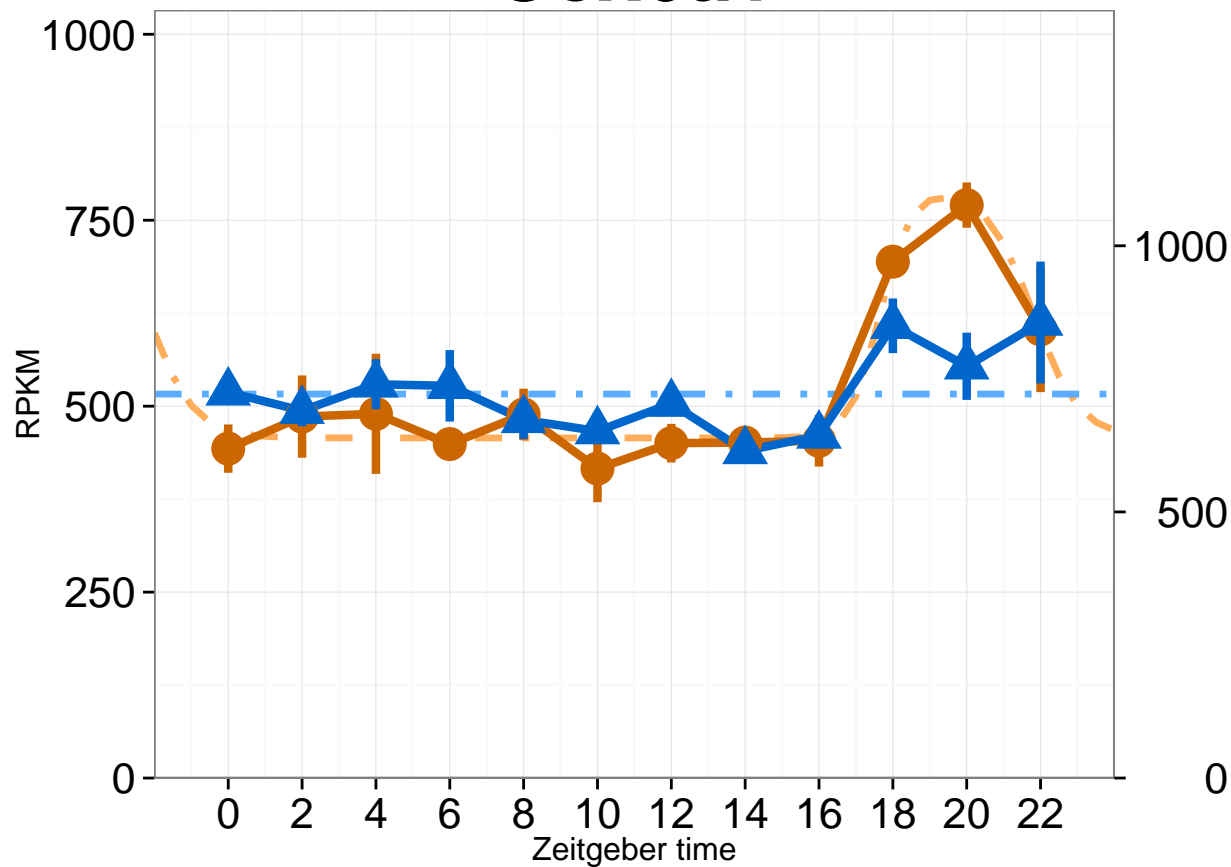

# Cox6a1

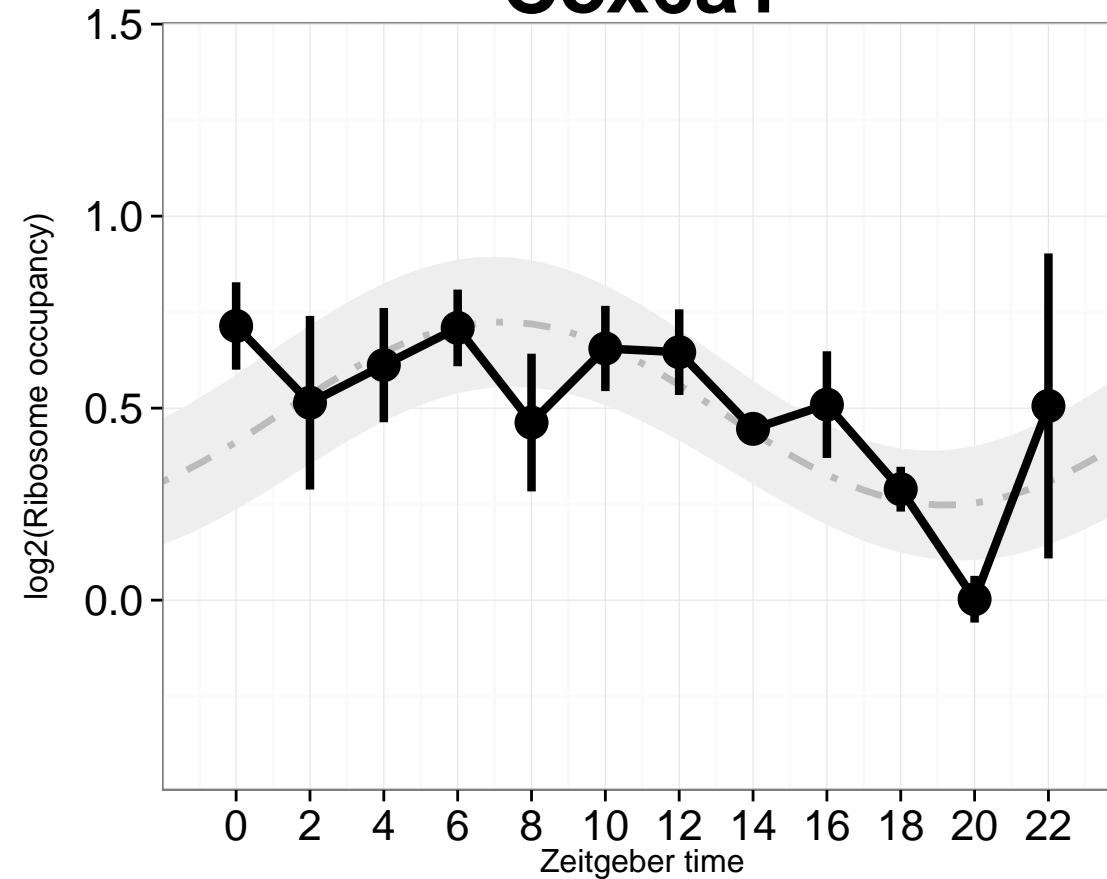

Supplement: SuppDataset_1.zip [file Cox6a1_set_B.pdf › Supplemental Dataset 1/B-mRNA_rhythm_translation_nonrhyth/Cox6a1_set_B.pdf]

# Cpm

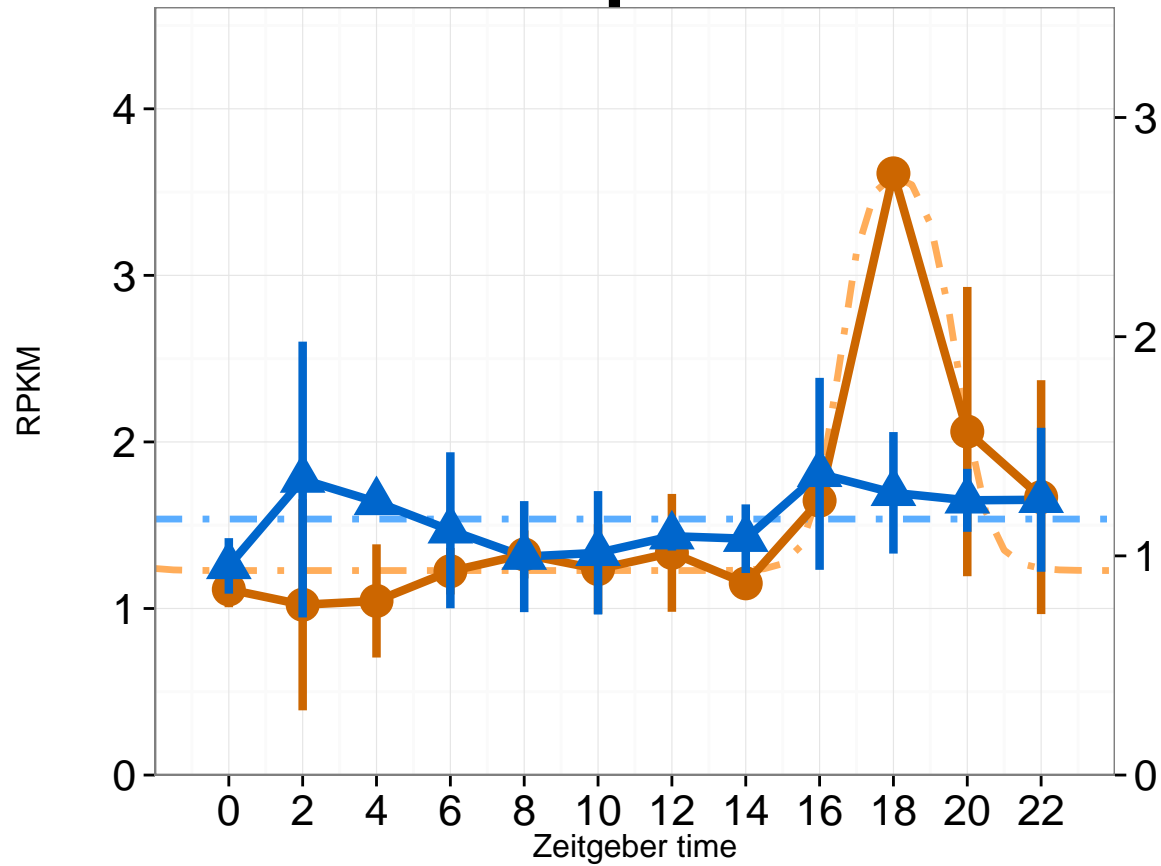

# Cpm

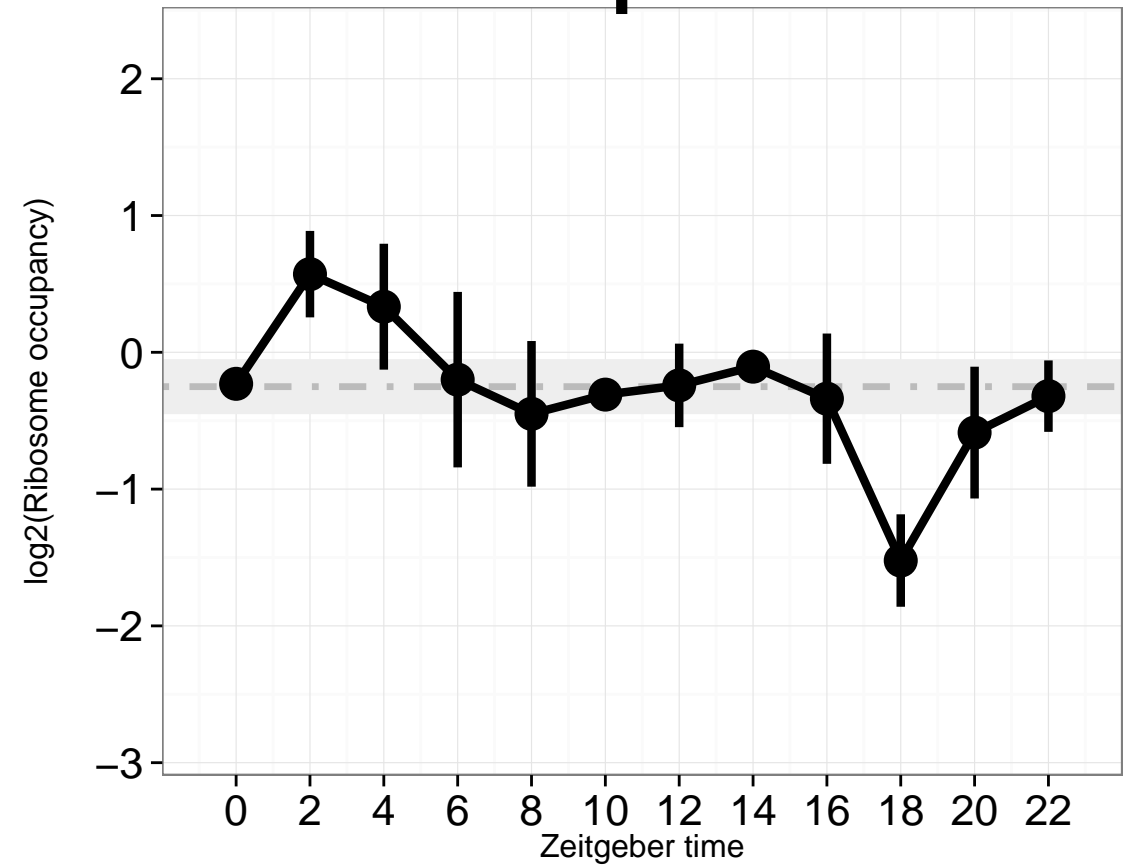

Supplement: SuppDataset_1.zip [file Cpm_set_B.pdf › Supplemental Dataset 1/B-mRNA_rhythm_translation_nonrhyth/Cpm_set_B.pdf]

## Cradd

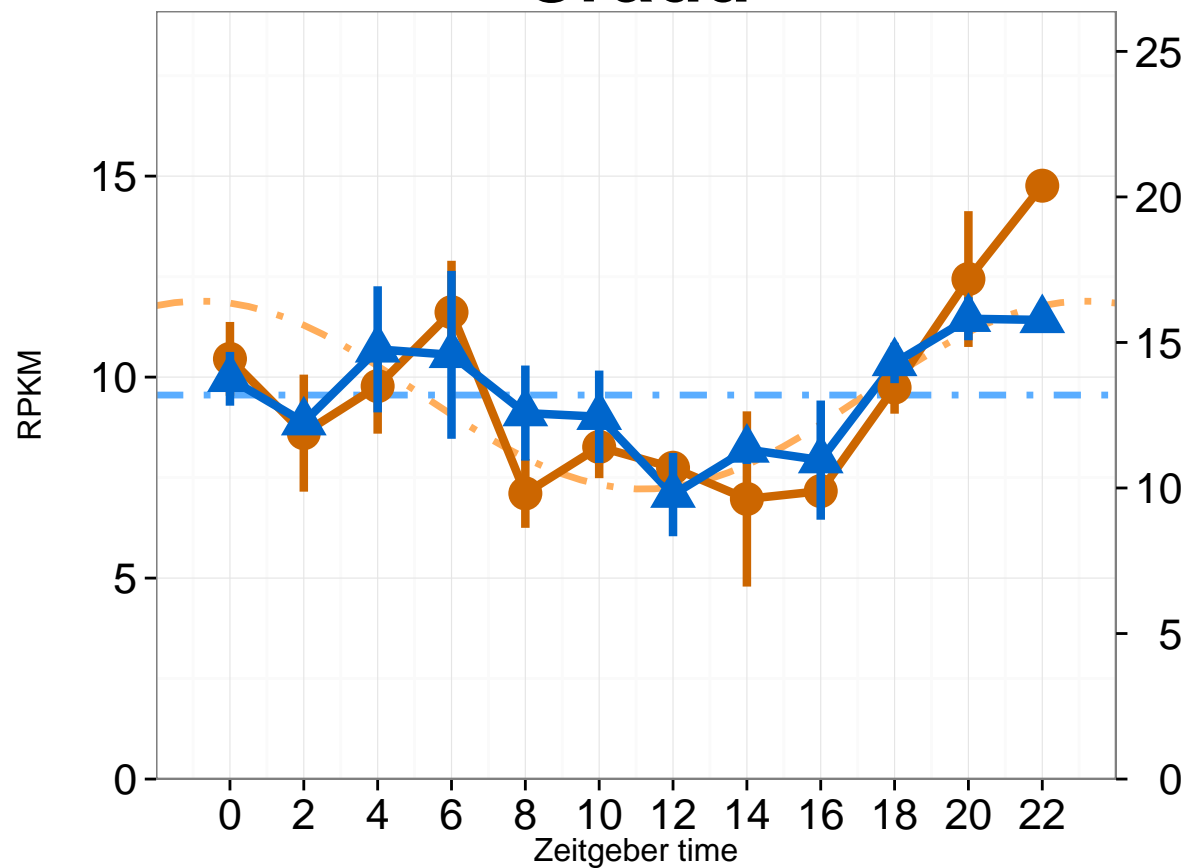

## Cradd

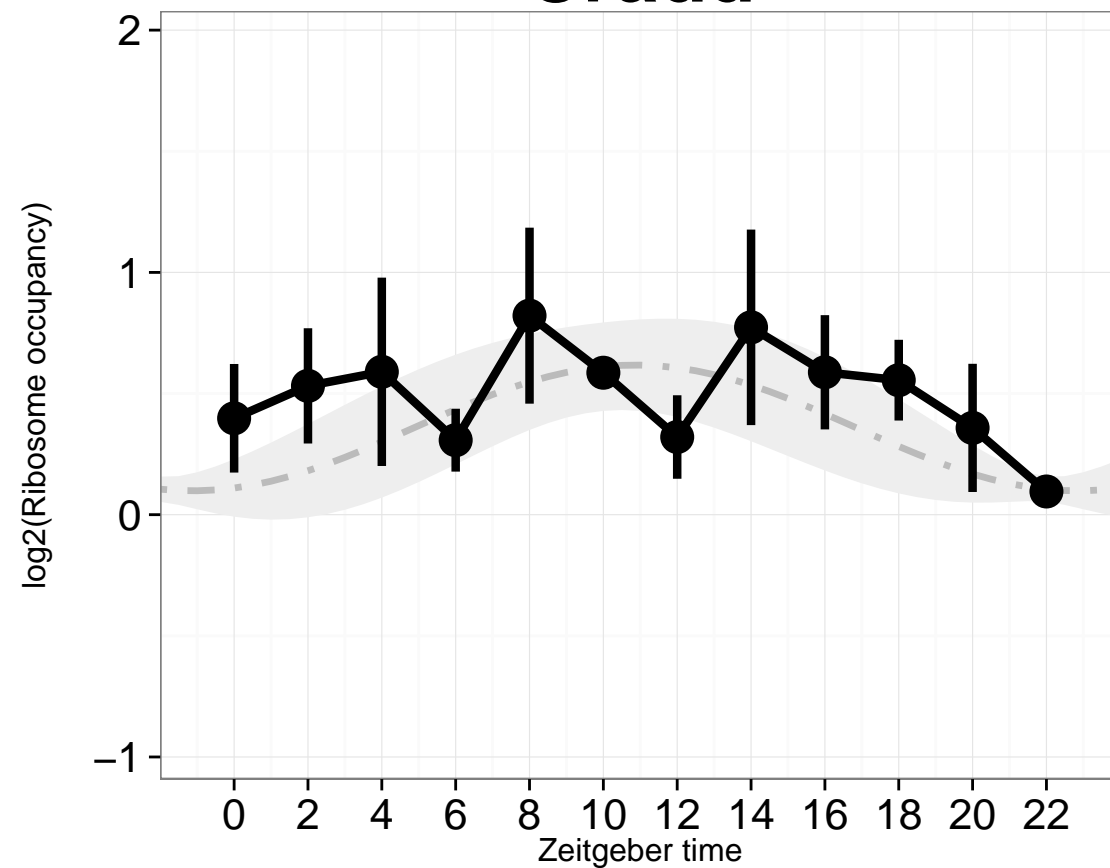

Supplement: SuppDataset_1.zip [file Cradd_set_B.pdf › Supplemental Dataset 1/B-mRNA_rhythm_translation_nonrhyth/Cradd_set_B.pdf]

## Crem

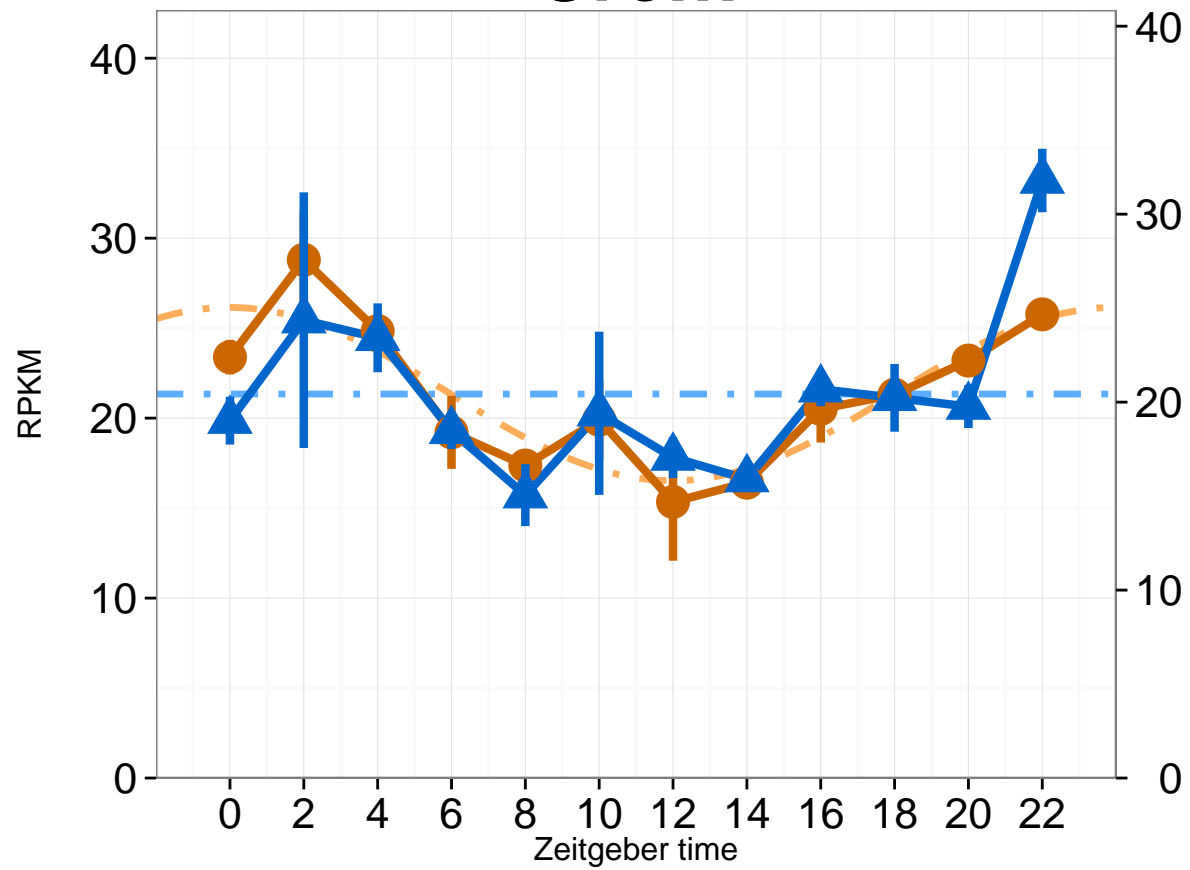

## Crem

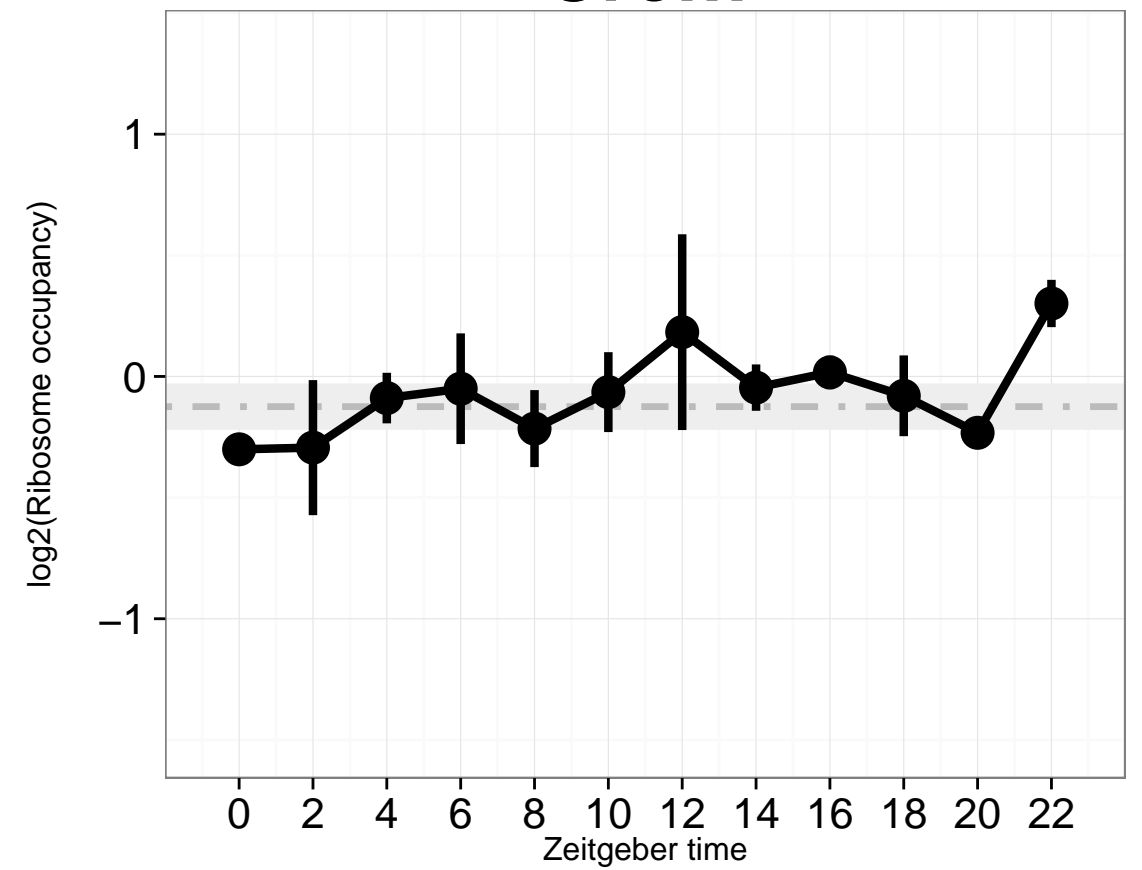

Supplement: SuppDataset_1.zip [file Crem_set_B.pdf › Supplemental Dataset 1/B-mRNA_rhythm_translation_nonrhyth/Crem_set_B.pdf]

## Crkl

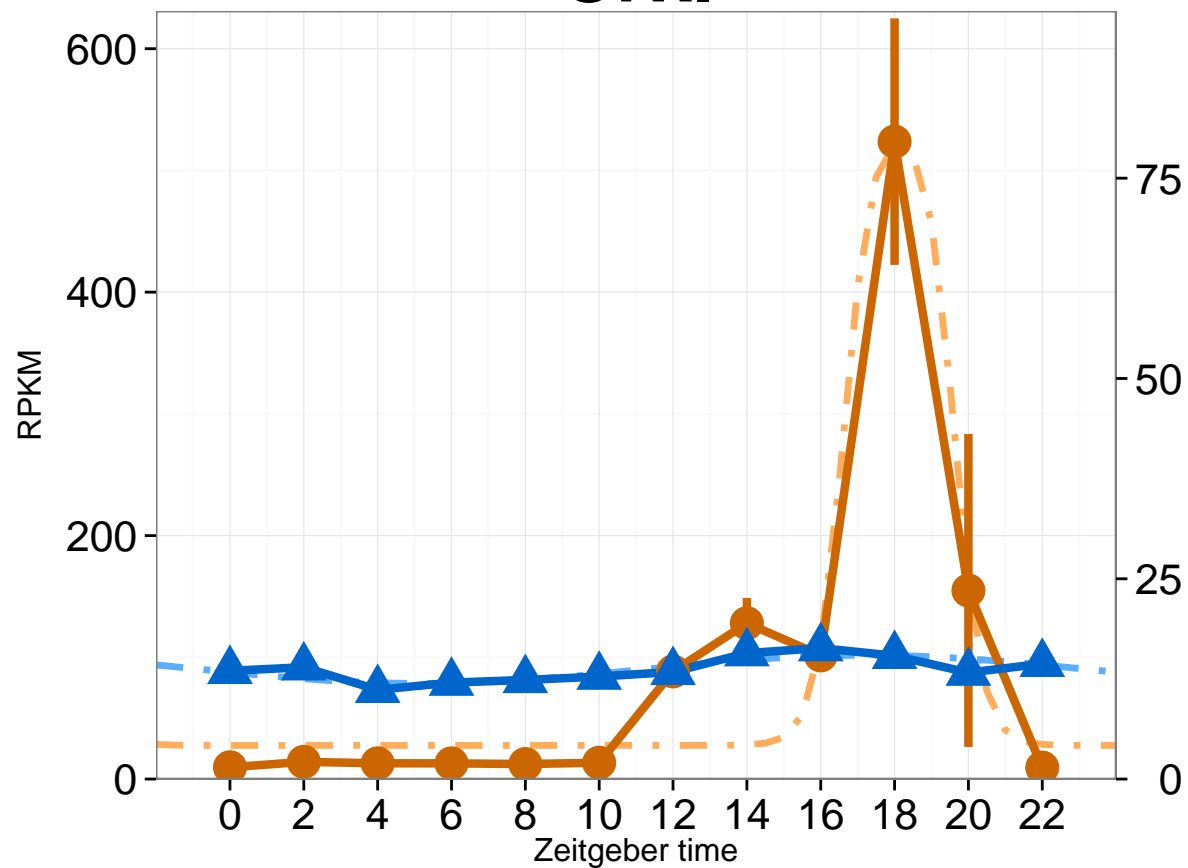

## Crkl

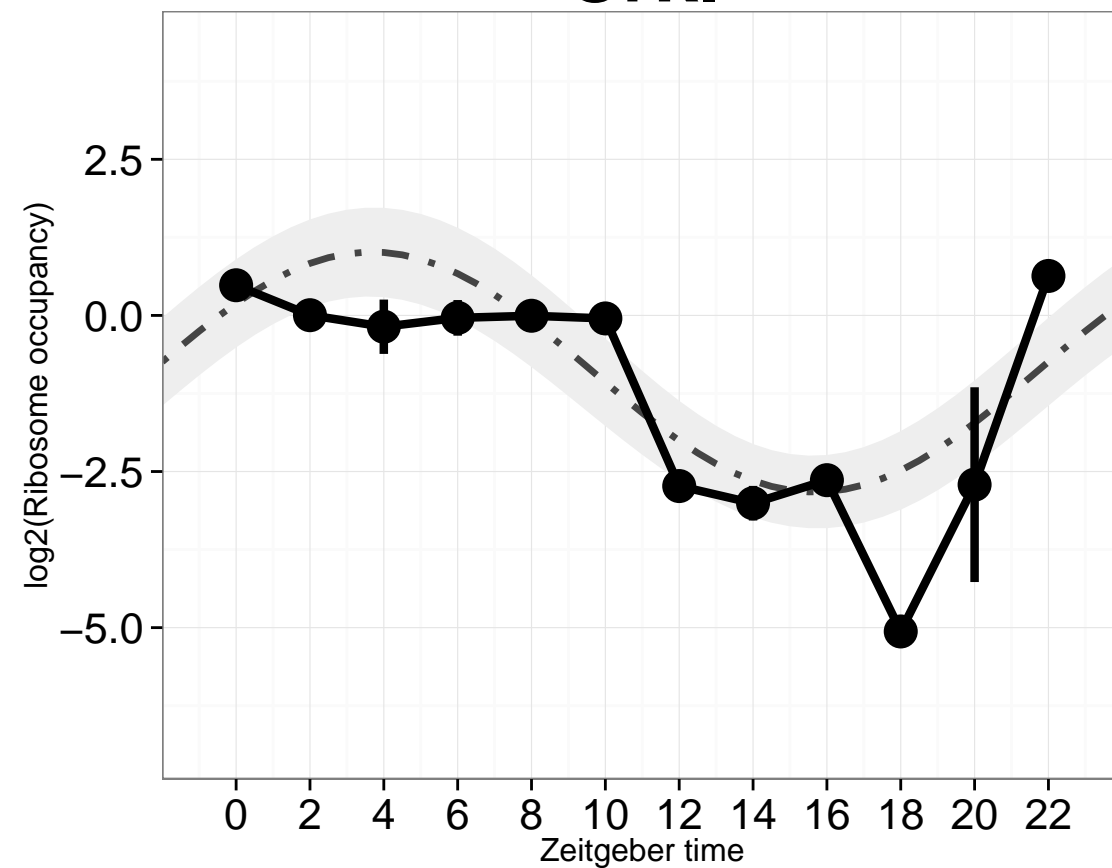

Supplement: SuppDataset_1.zip [file Crkl_set_B.pdf › Supplemental Dataset 1/B-mRNA_rhythm_translation_nonrhyth/Crkl_set_B.pdf]

## Crp

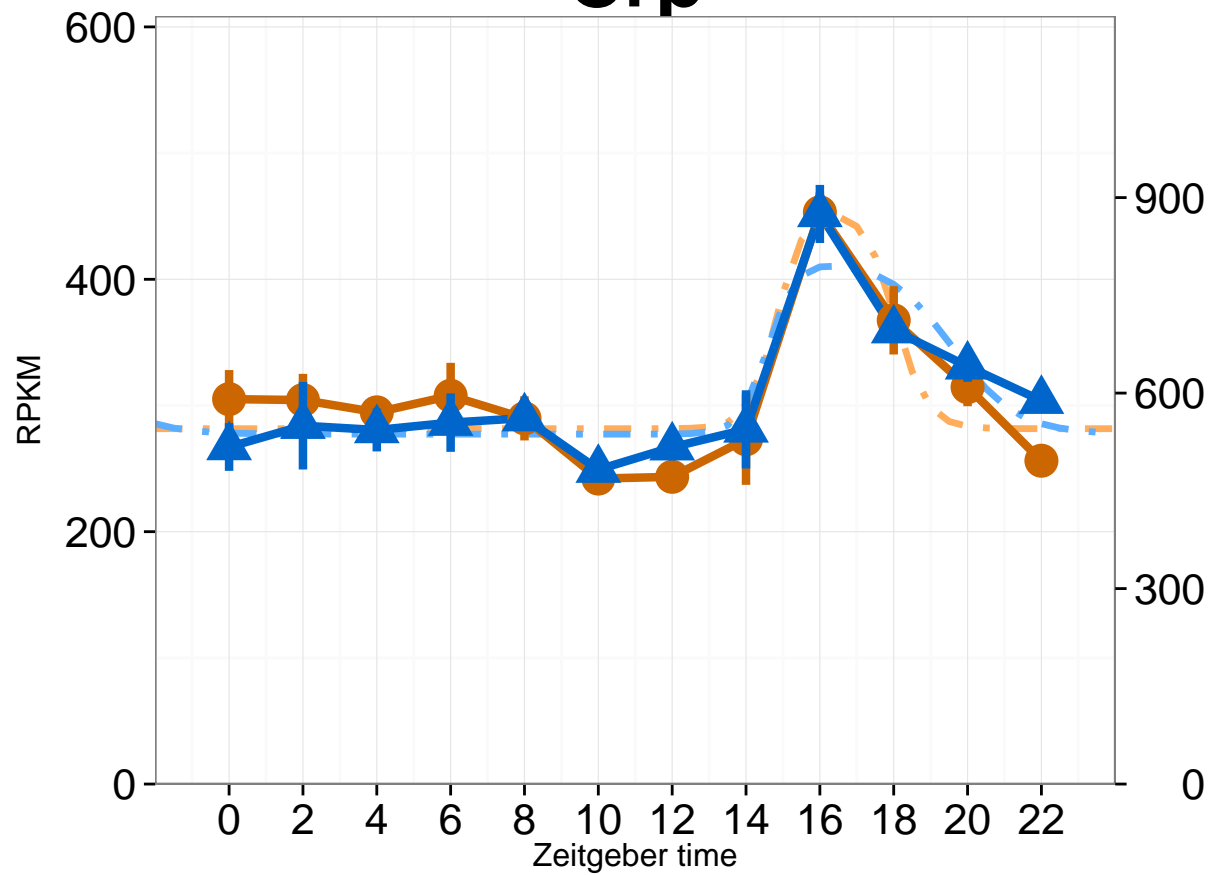

## Crp

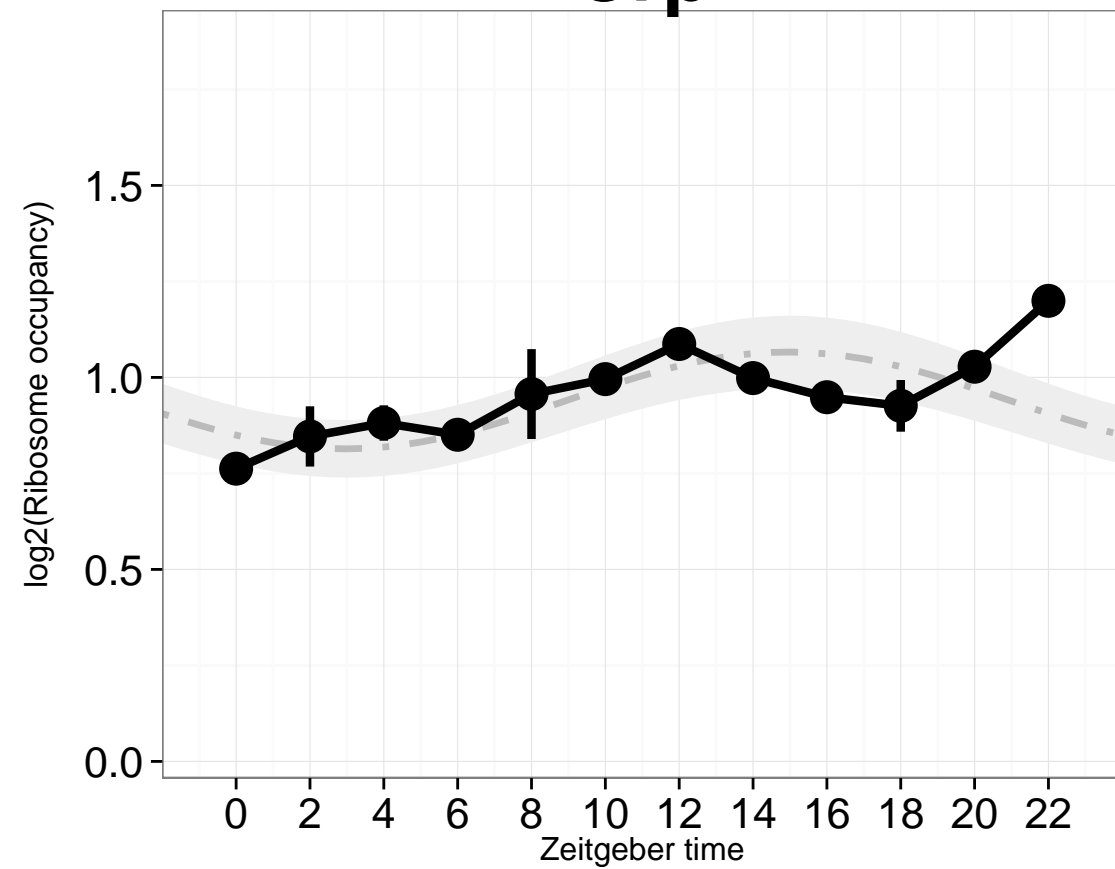

Supplement: SuppDataset_1.zip [file Crp_set_B.pdf › Supplemental Dataset 1/B-mRNA_rhythm_translation_nonrhyth/Crp_set_B.pdf]

## Cstf3

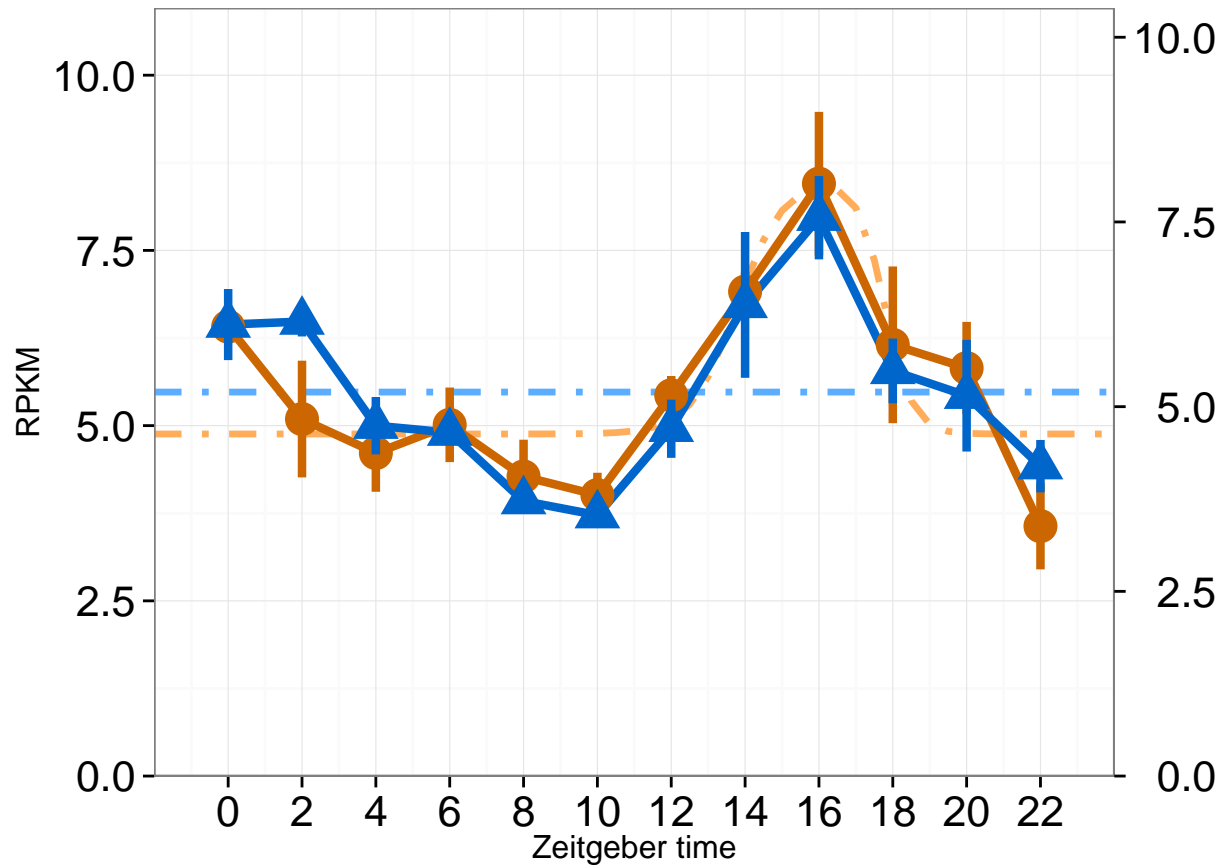

## Cstf3

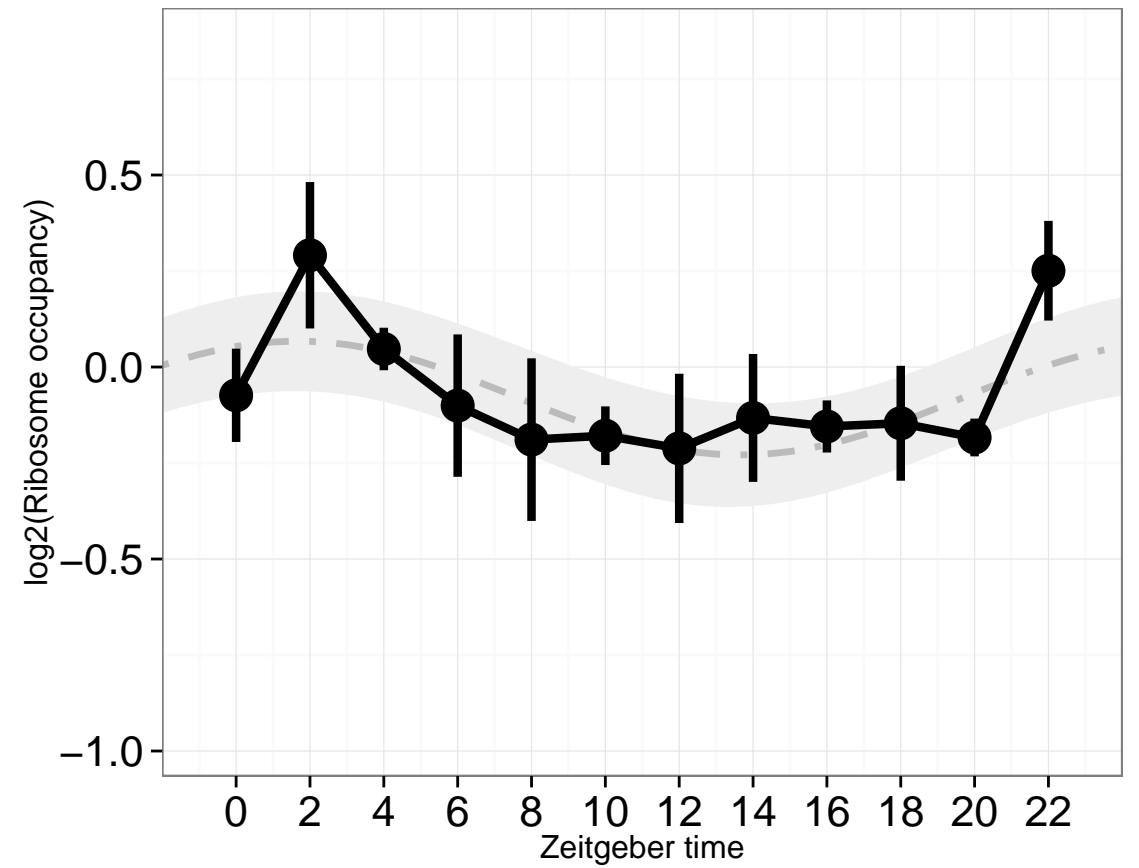

Supplement: SuppDataset_1.zip [file Cstf3_set_B.pdf › Supplemental Dataset 1/B-mRNA_rhythm_translation_nonrhyth/Cstf3_set_B.pdf]

# Ctbp2

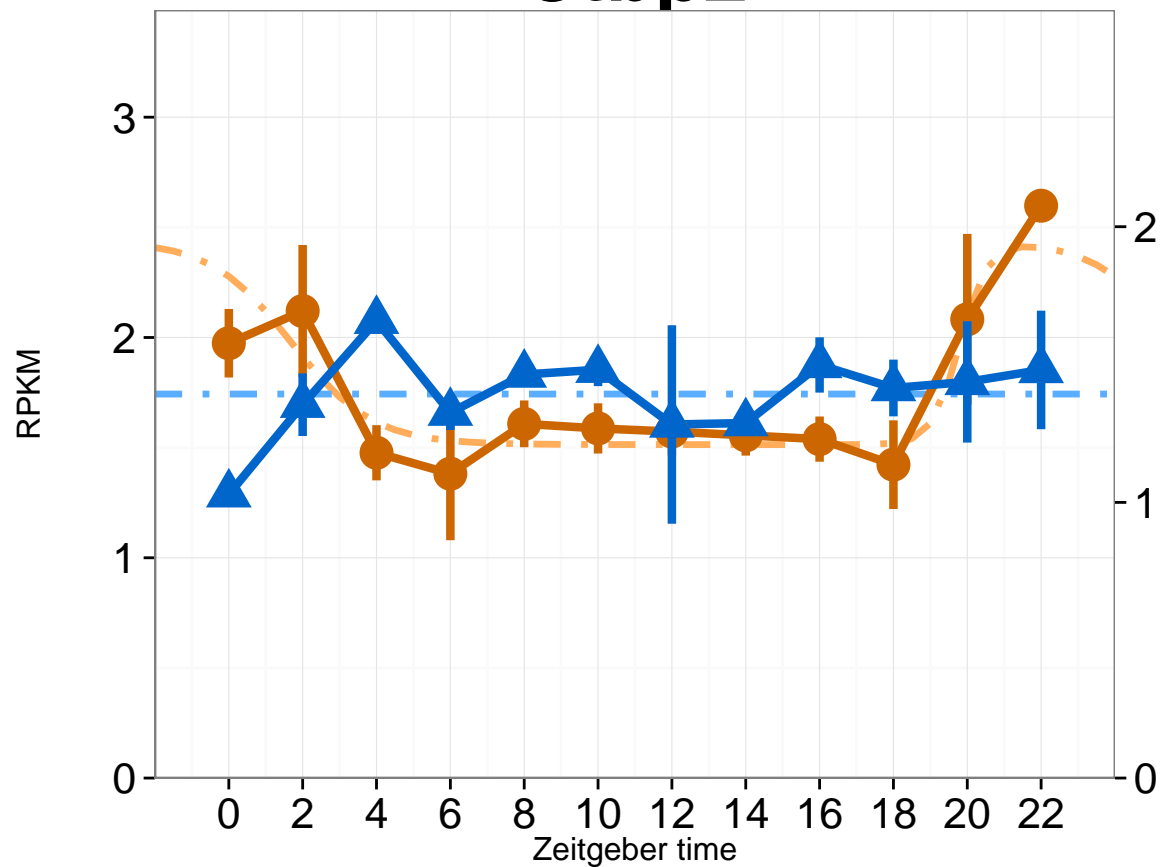

# Ctbp2

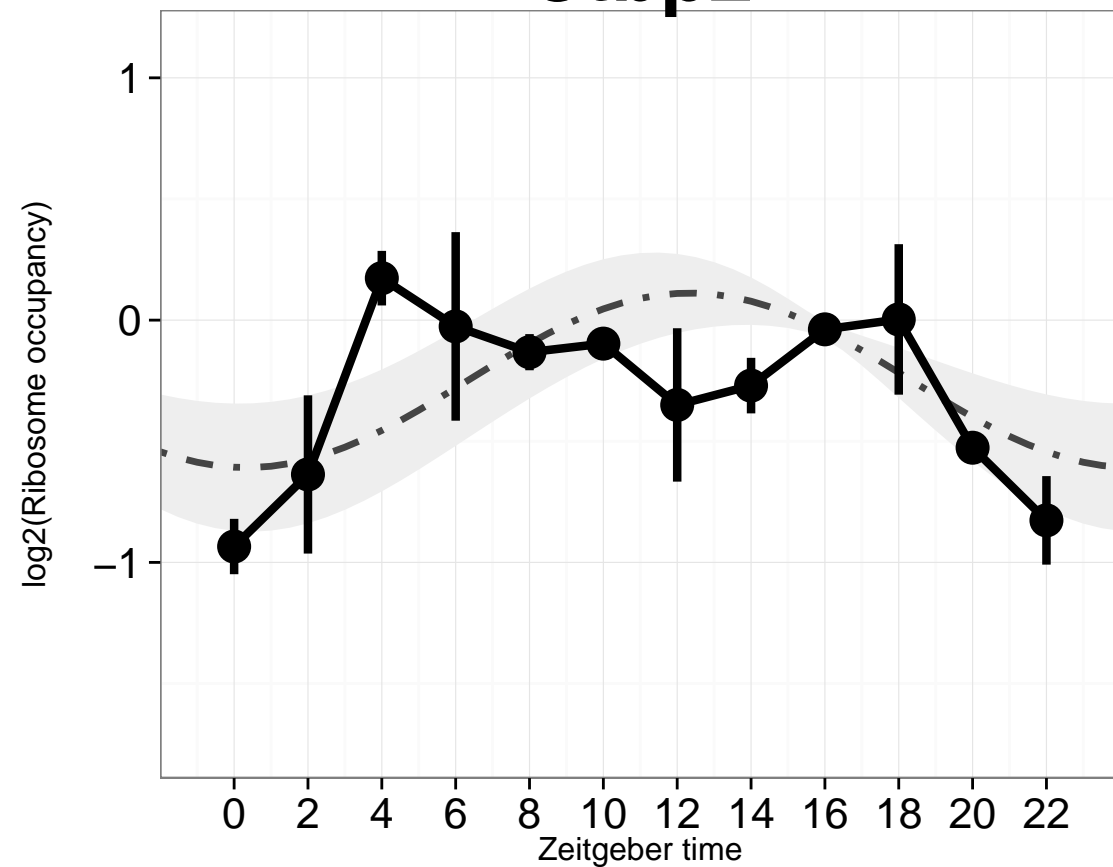

Supplement: SuppDataset_1.zip [file Ctbp2_set_B.pdf › Supplemental Dataset 1/B-mRNA_rhythm_translation_nonrhyth/Ctbp2_set_B.pdf]

## Ctc1

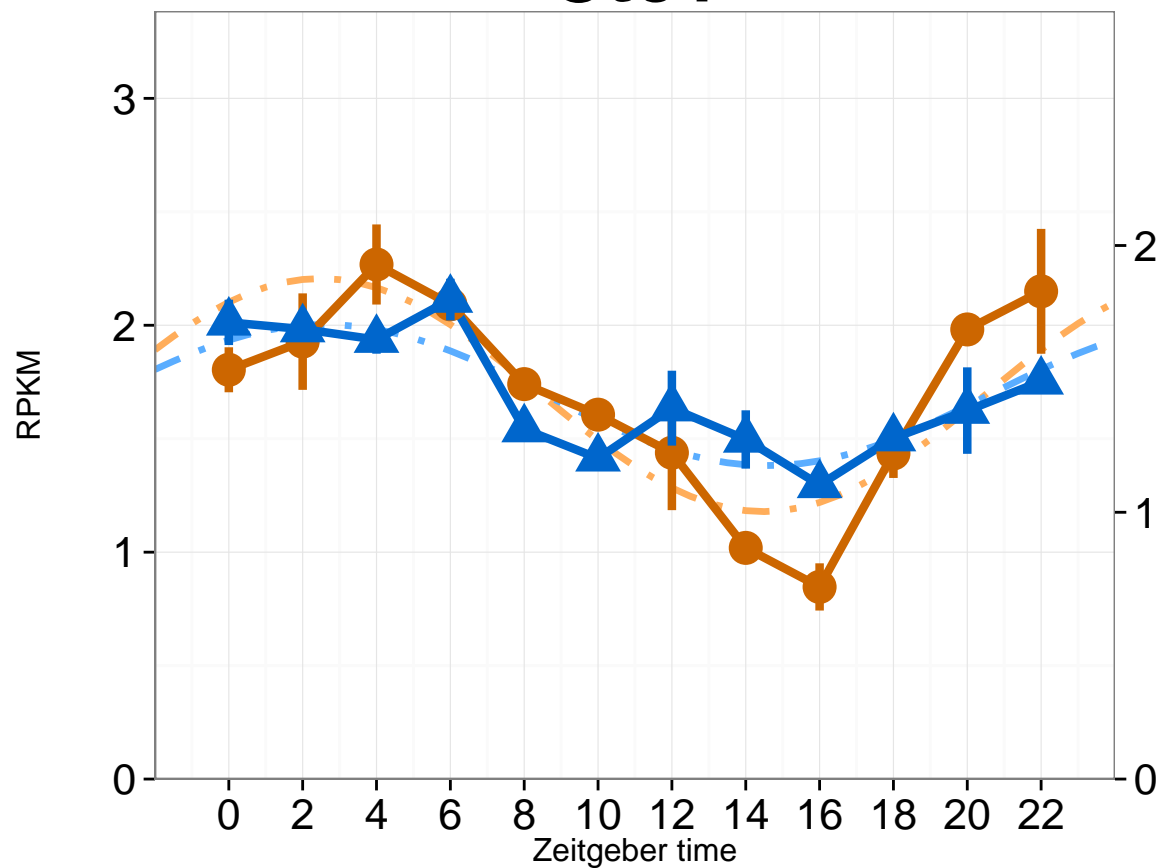

## Ctc1

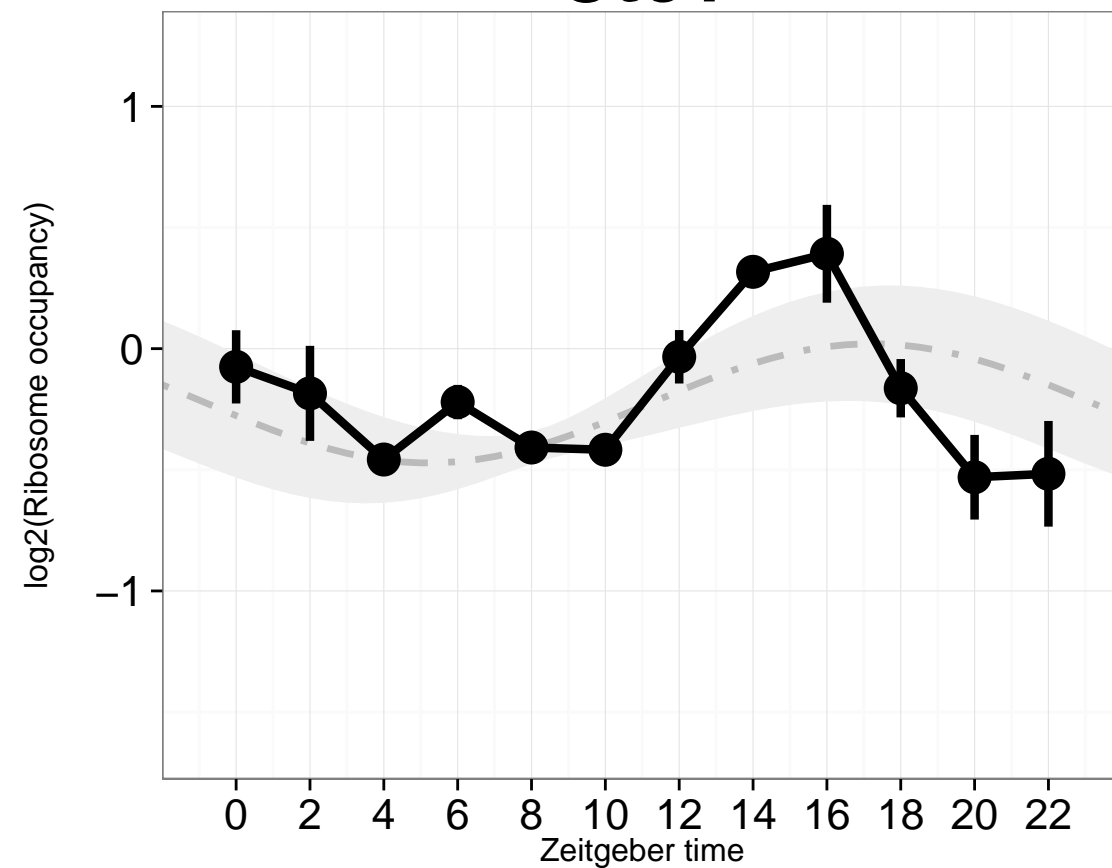

Supplement: SuppDataset_1.zip [file Ctc1_set_B.pdf › Supplemental Dataset 1/B-mRNA_rhythm_translation_nonrhyth/Ctc1_set_B.pdf]

## Ctdsp1

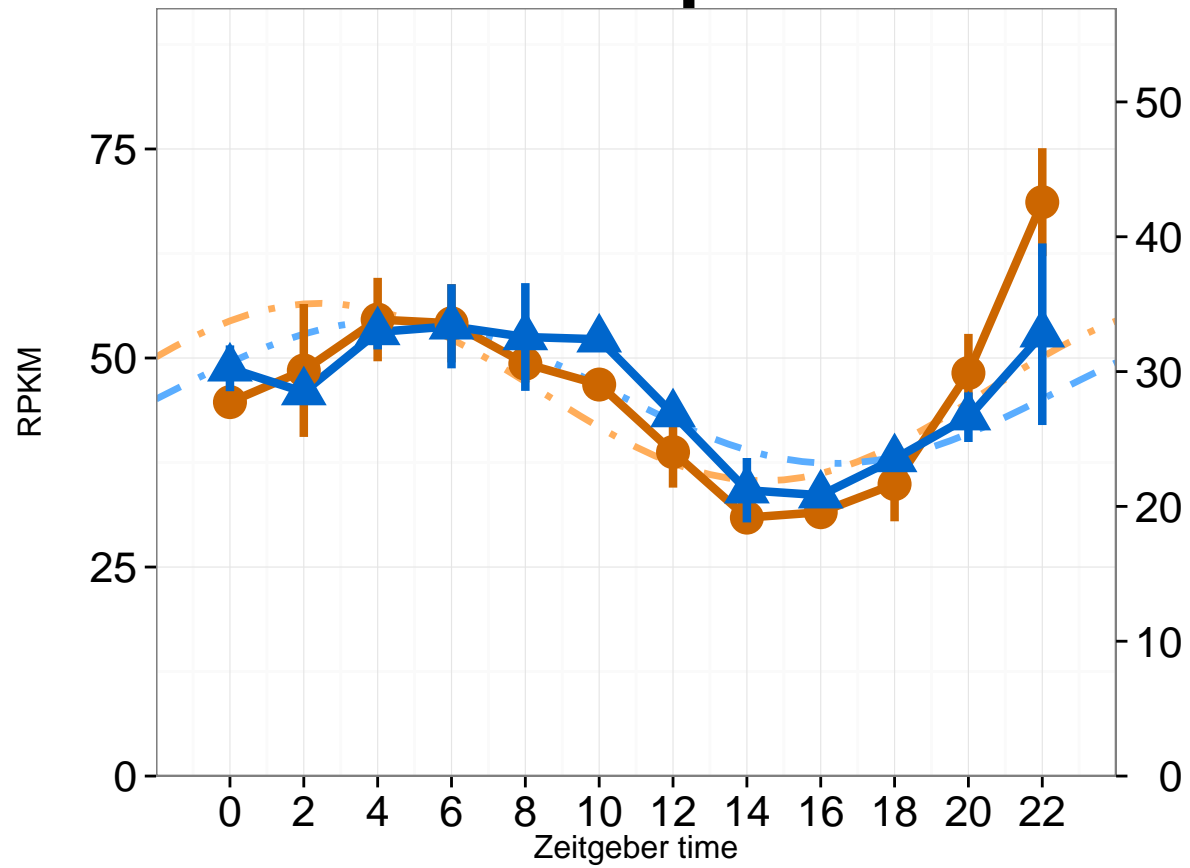

## Ctdsp1

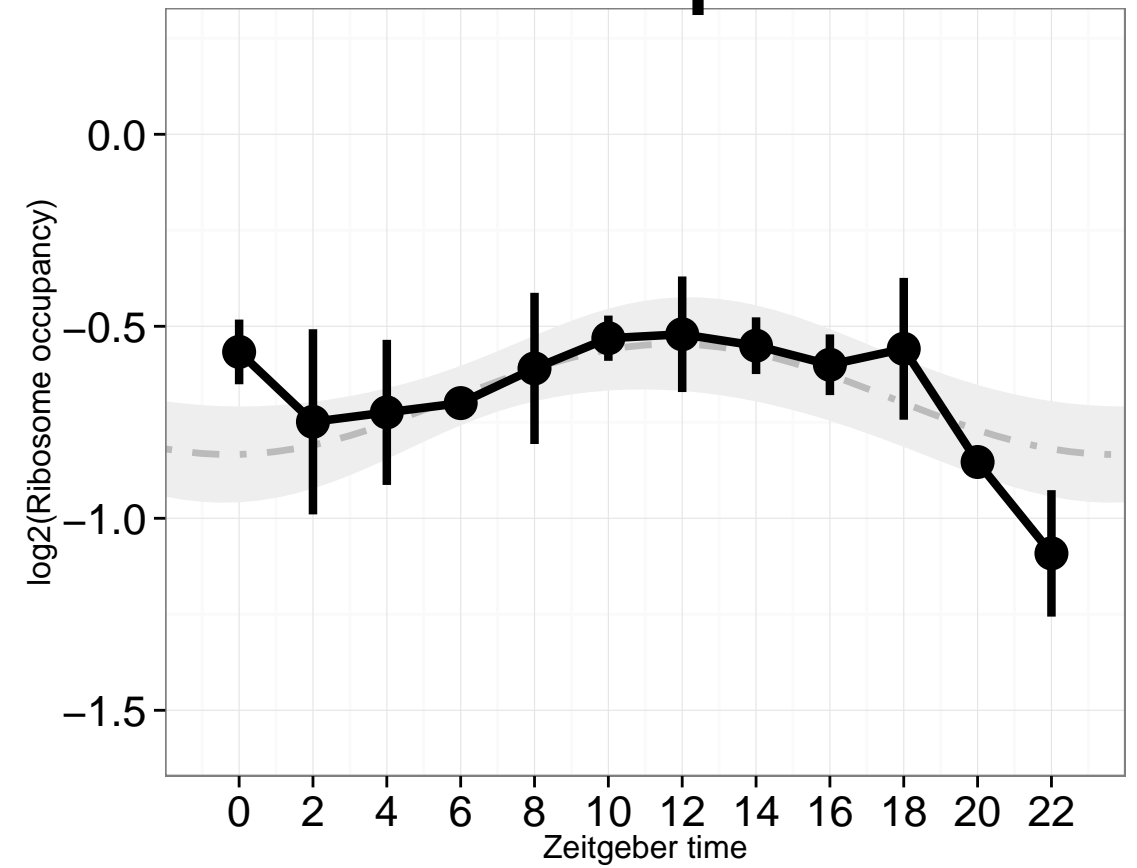

Supplement: SuppDataset_1.zip [file Ctdsp1_set_B.pdf › Supplemental Dataset 1/B-mRNA_rhythm_translation_nonrhyth/Ctdsp1_set_B.pdf]

# Ctdsp2

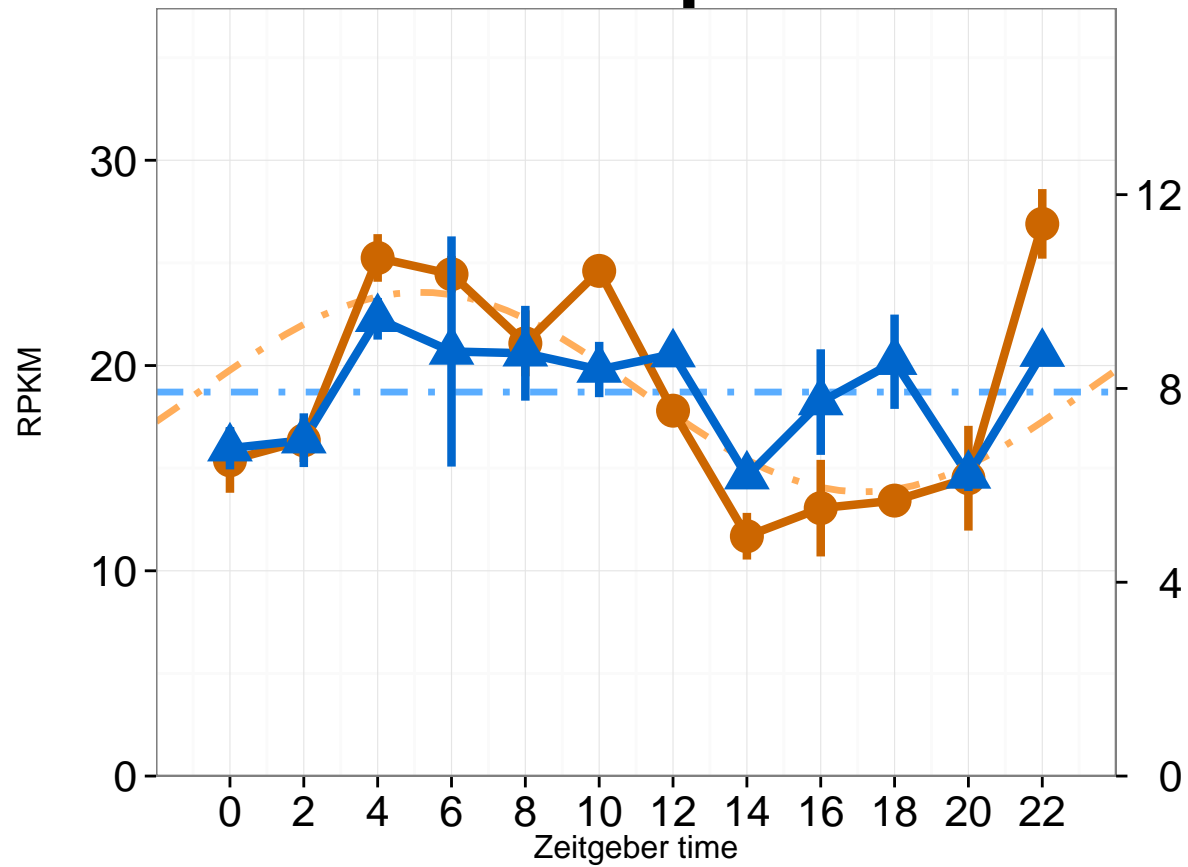

# Ctdsp2

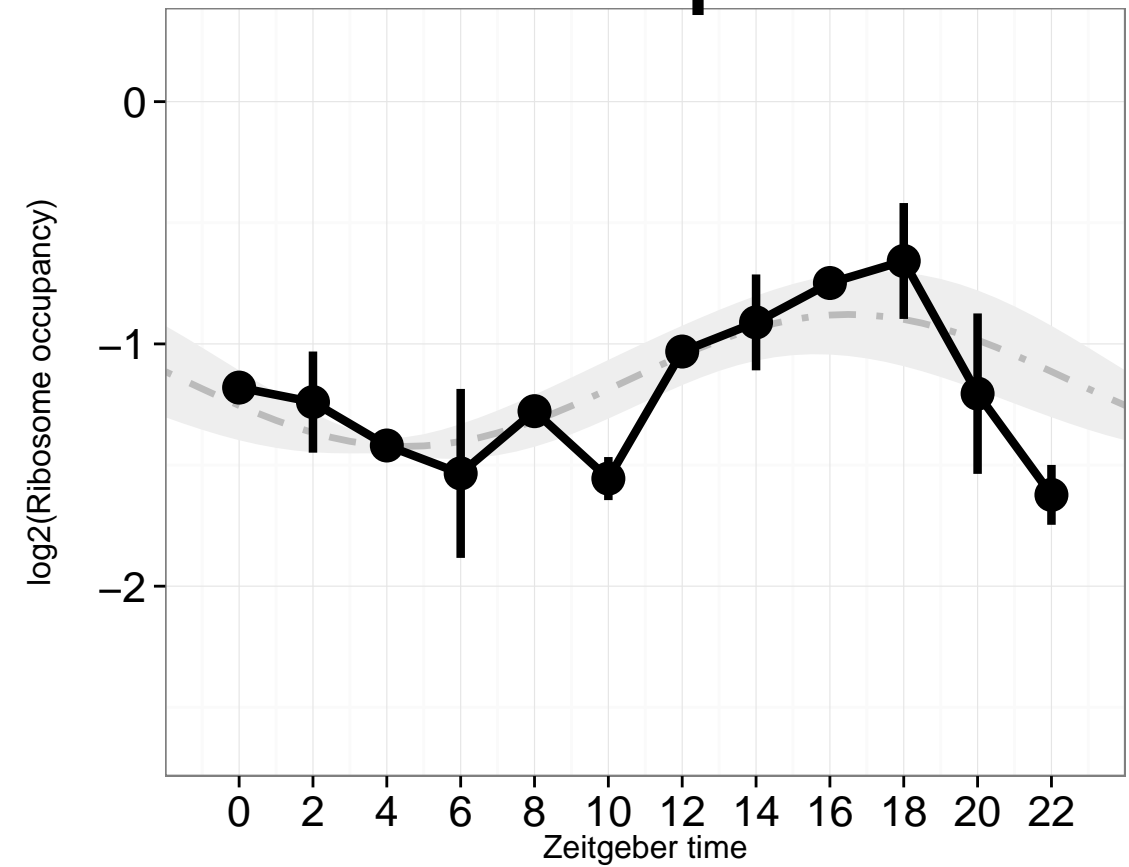

Supplement: SuppDataset_1.zip [file Ctdsp2_set_B.pdf › Supplemental Dataset 1/B-mRNA_rhythm_translation_nonrhyth/Ctdsp2_set_B.pdf]

# Ctps2

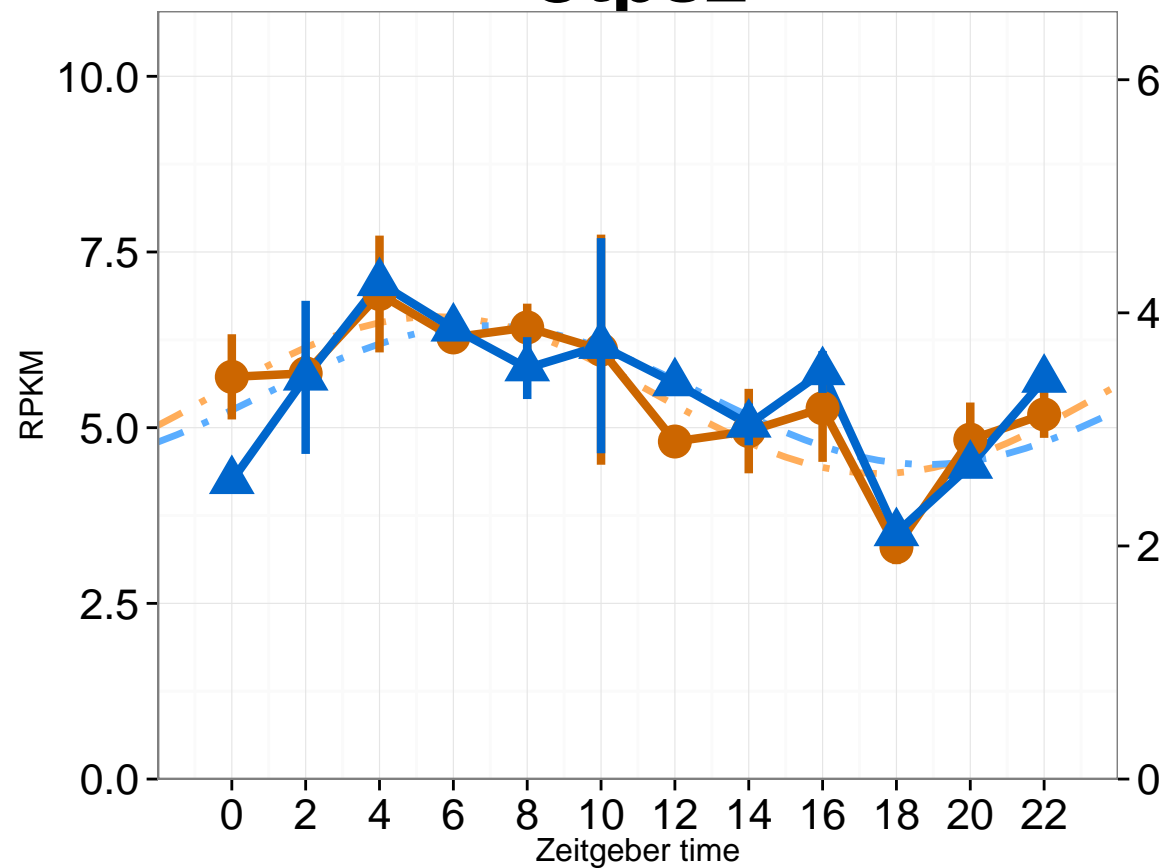

# Ctps2

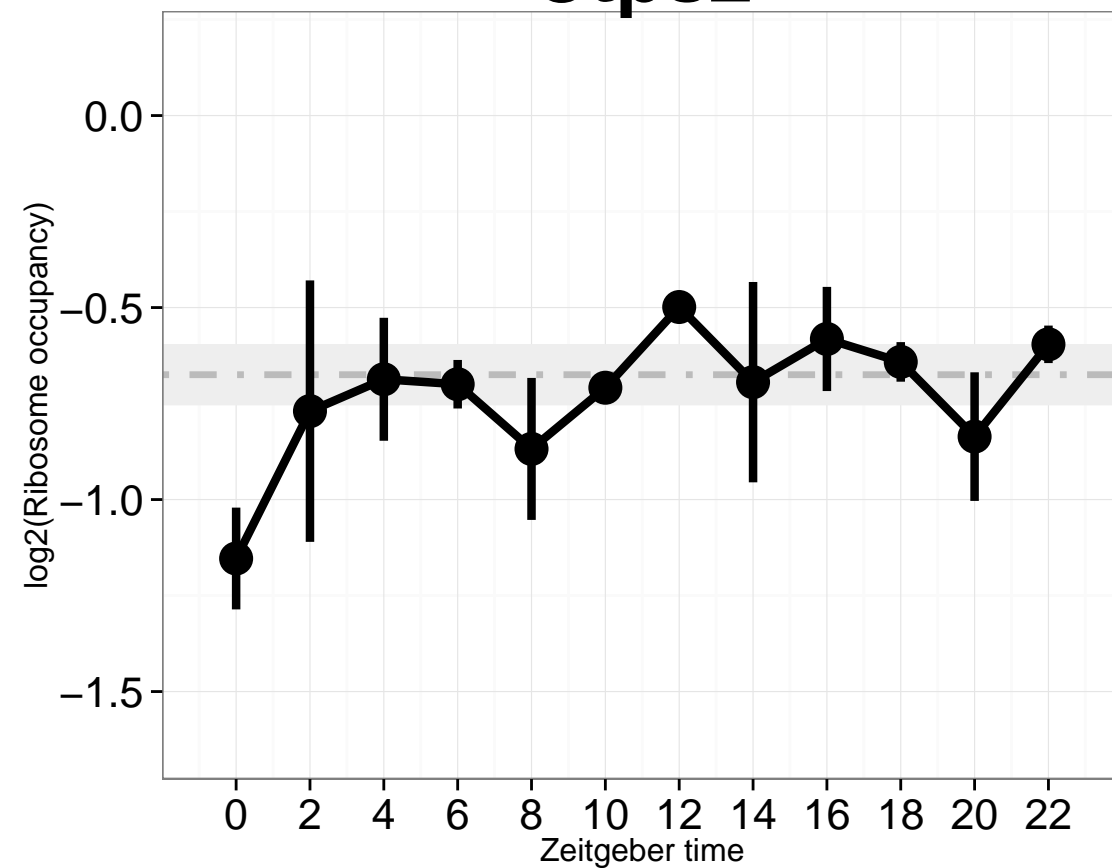

Supplement: SuppDataset_1.zip [file Ctps2_set_B.pdf › Supplemental Dataset 1/B-mRNA_rhythm_translation_nonrhyth/Ctps2_set_B.pdf]

# Cyb561a3

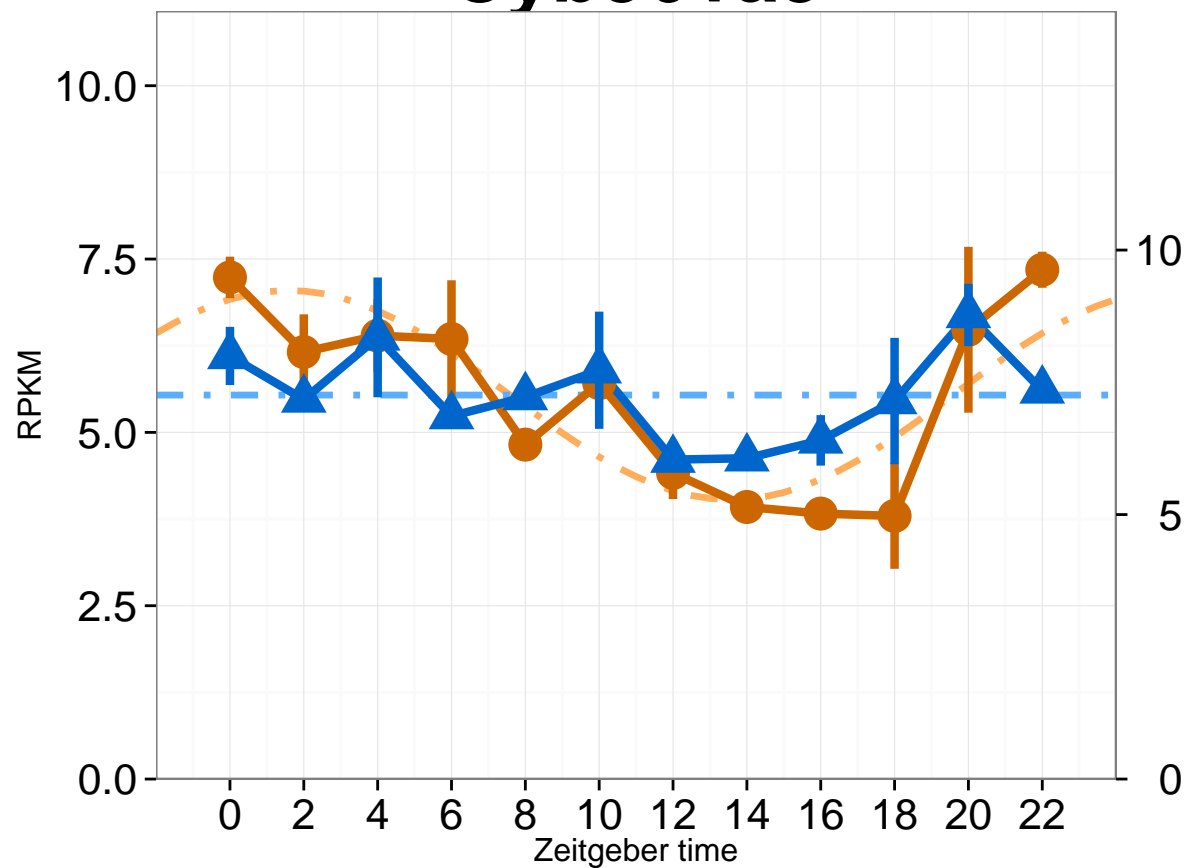

# Cyb561a3

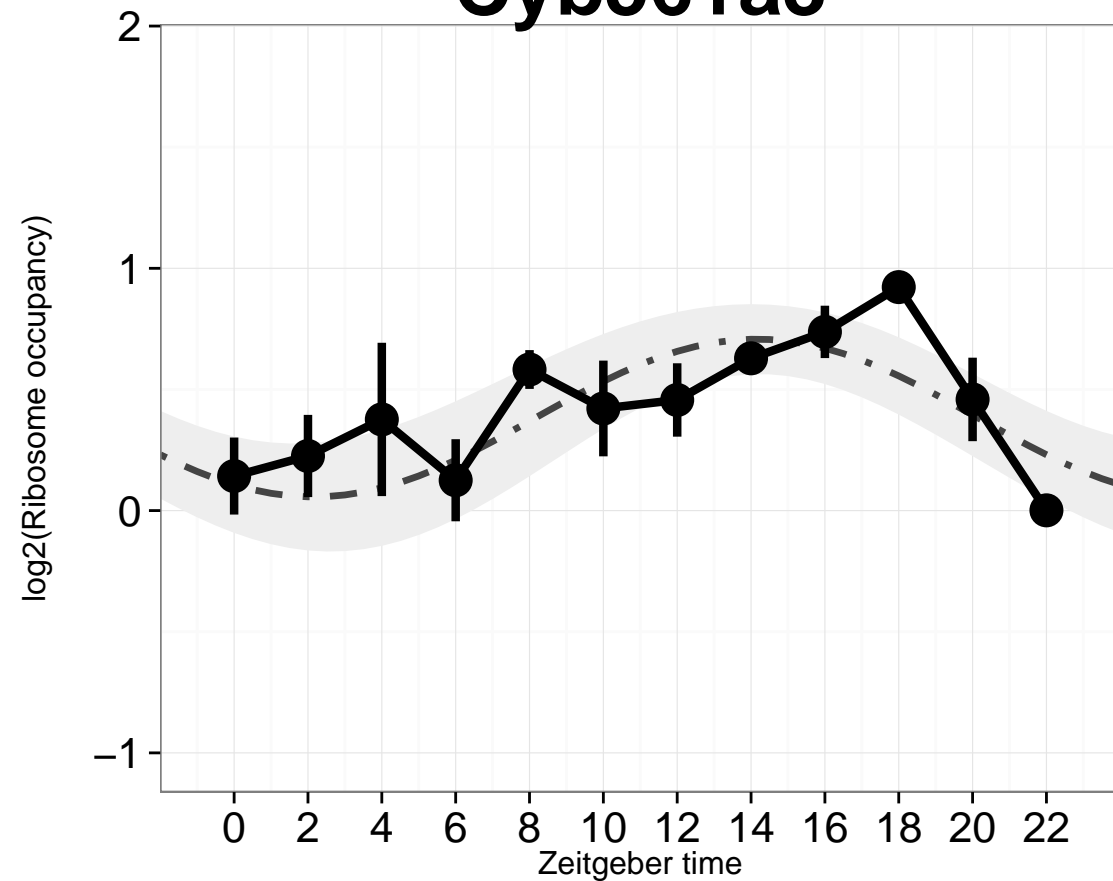

Supplement: SuppDataset_1.zip [file Cyb561a3_set_B.pdf › Supplemental Dataset 1/B-mRNA_rhythm_translation_nonrhyth/Cyb561a3_set_B.pdf]

# Cyb561d1

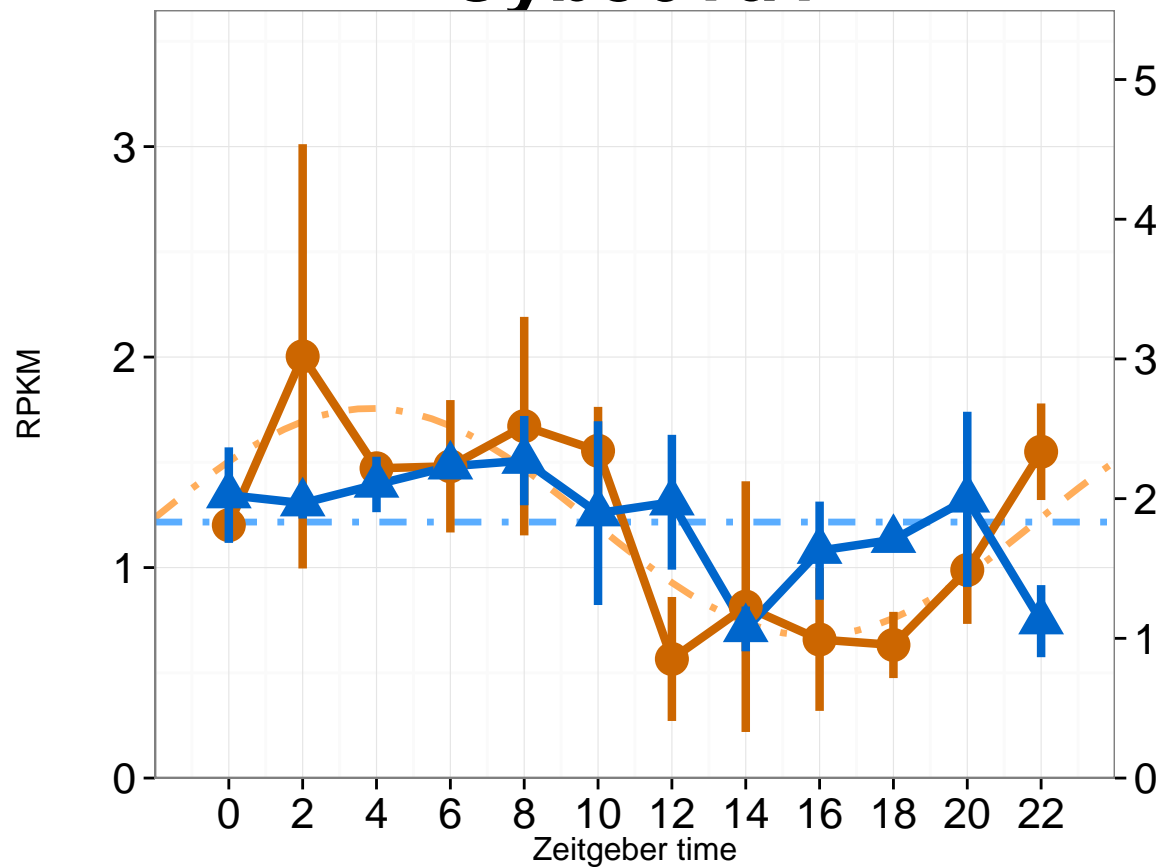

# Cyb561d1

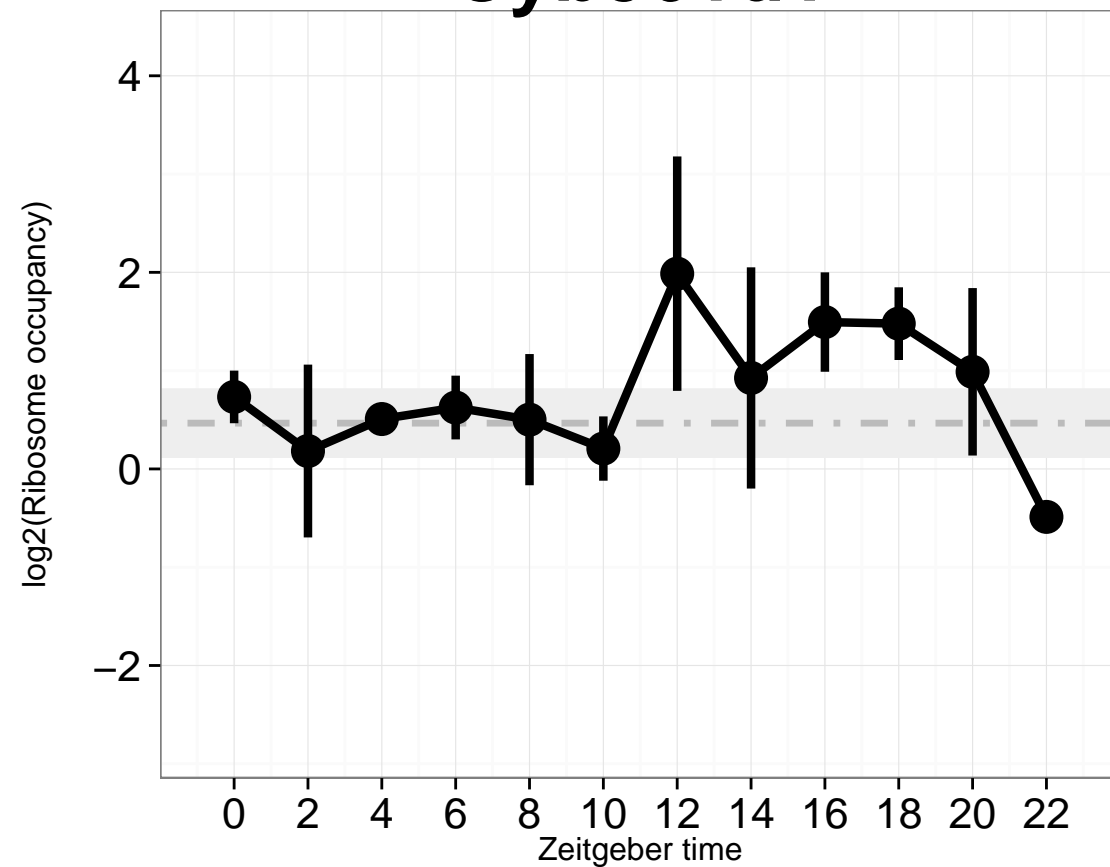

Supplement: SuppDataset_1.zip [file Cyb561d1_set_B.pdf › Supplemental Dataset 1/B-mRNA_rhythm_translation_nonrhyth/Cyb561d1_set_B.pdf]

# Cyb5r1

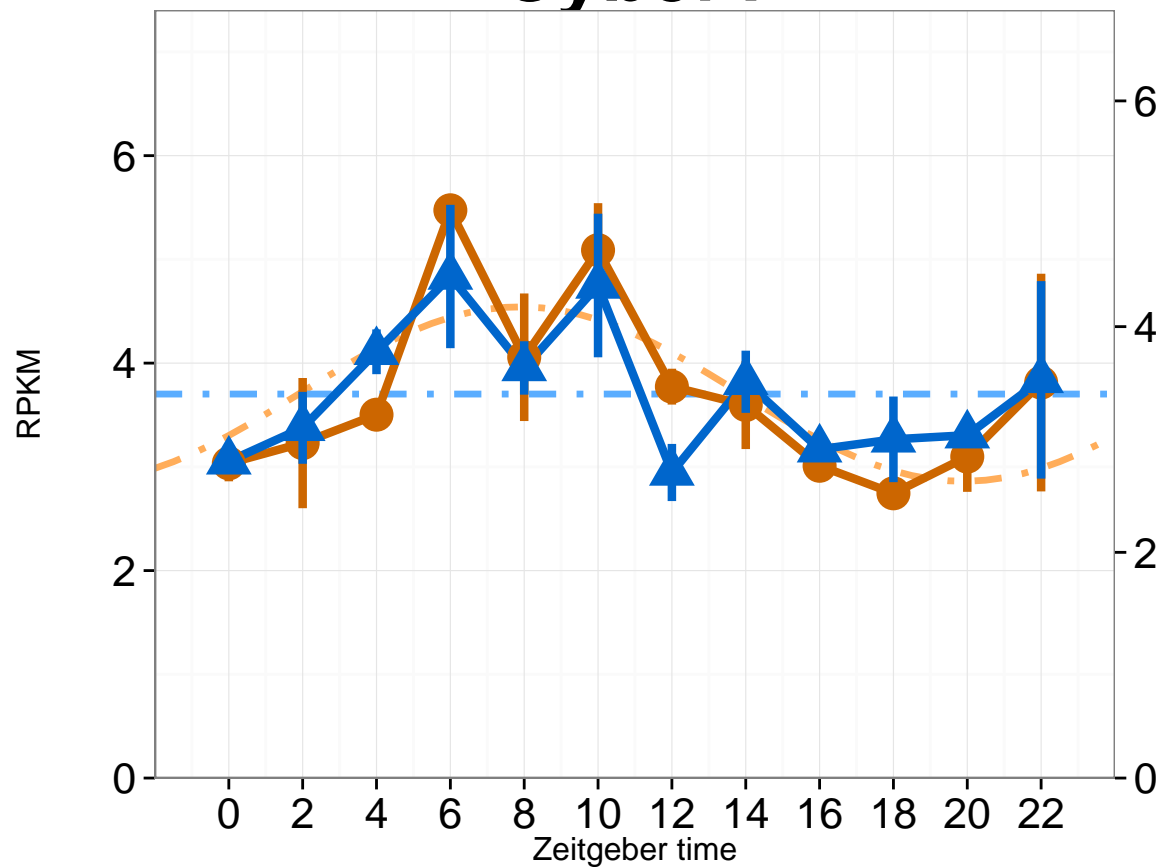

# Cyb5r1

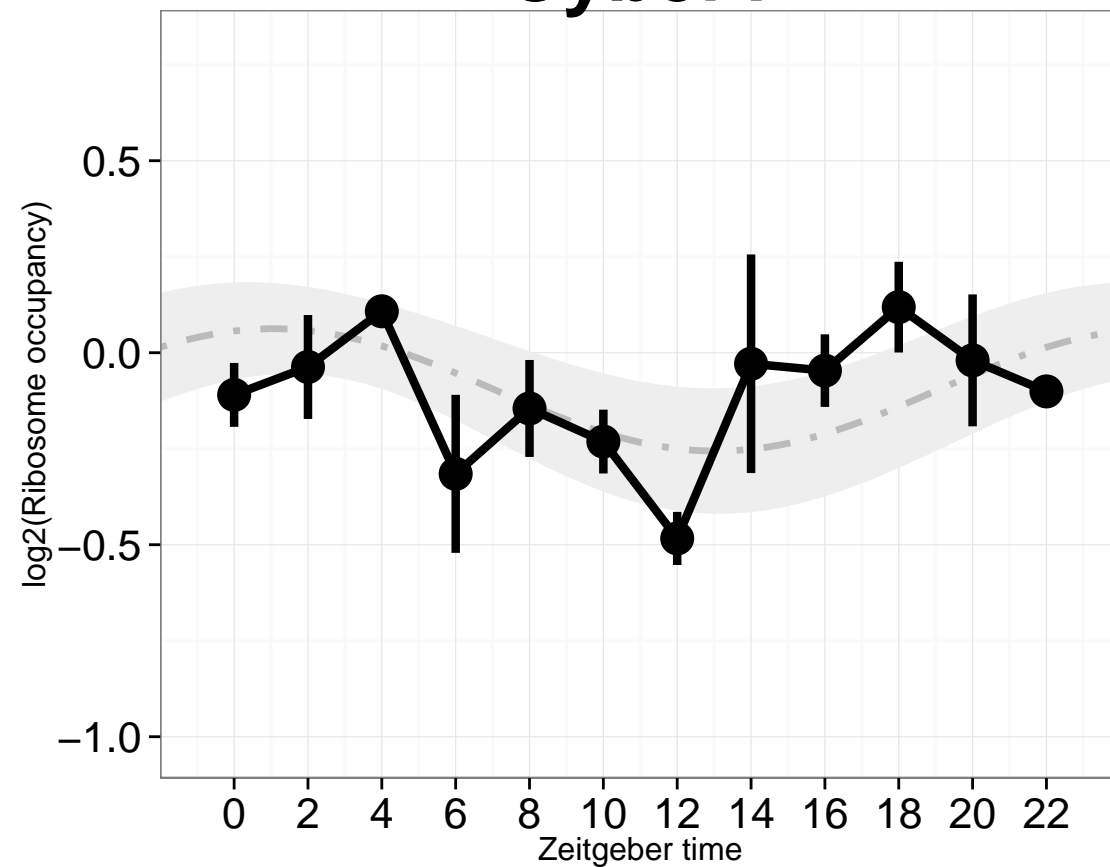

Supplement: SuppDataset_1.zip [file Cyb5r1_set_B.pdf › Supplemental Dataset 1/B-mRNA_rhythm_translation_nonrhyth/Cyb5r1_set_B.pdf]

## Cyp17a1

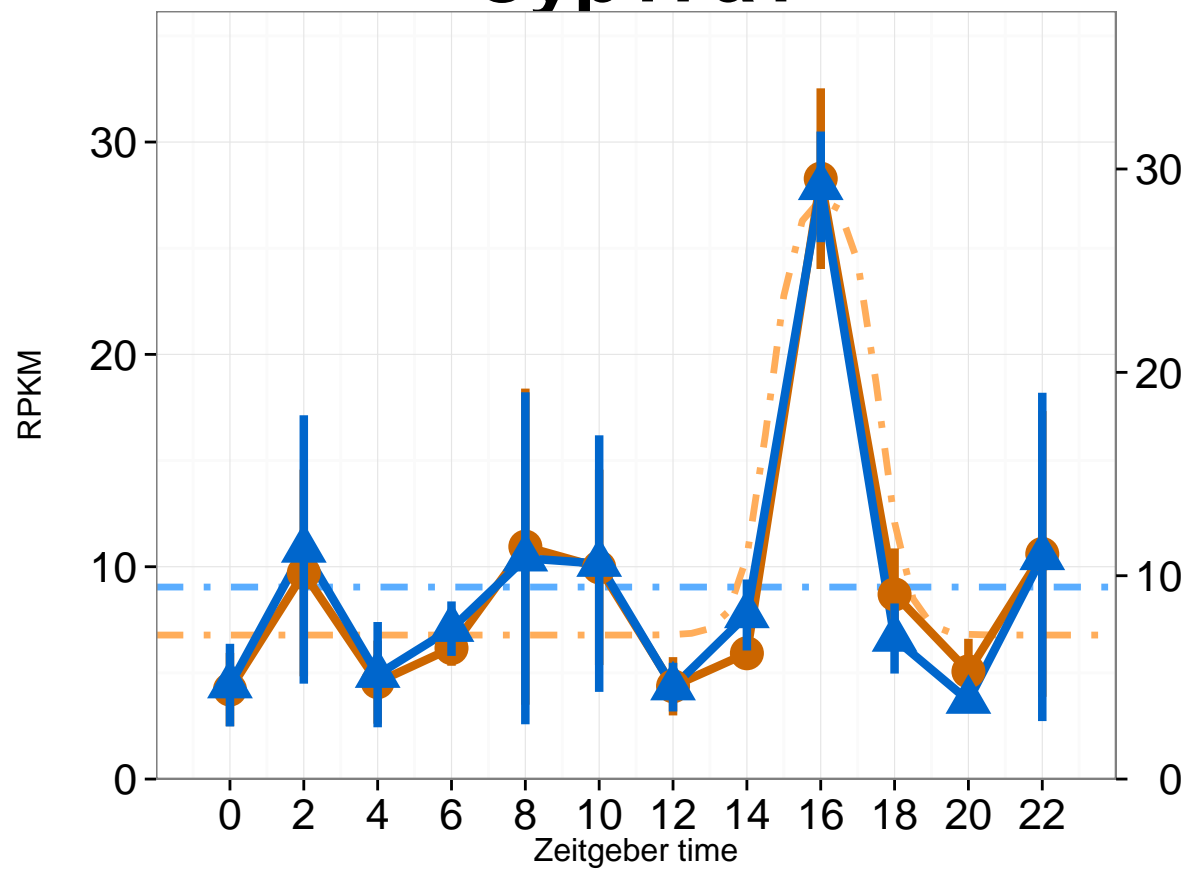

## Cyp17a1

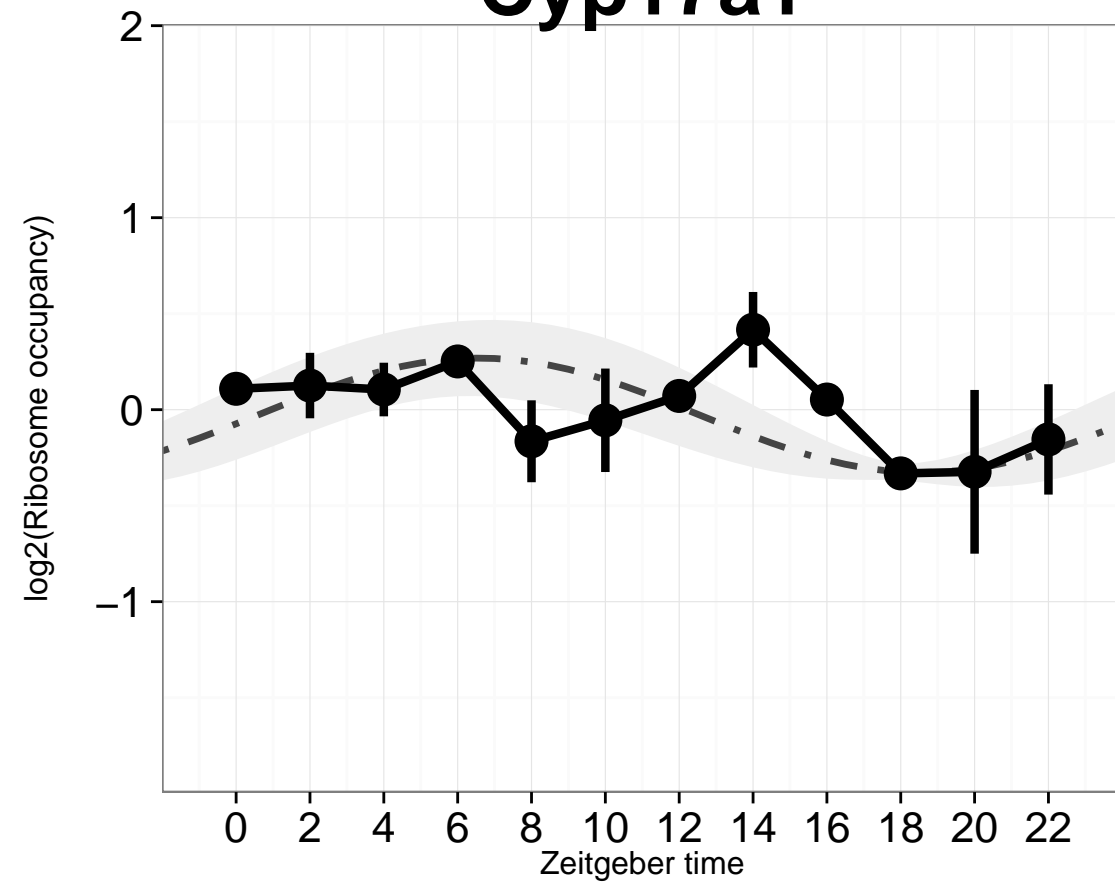

Supplement: SuppDataset_1.zip [file Cyp17a1_set_B.pdf › Supplemental Dataset 1/B-mRNA_rhythm_translation_nonrhyth/Cyp17a1_set_B.pdf]

# Cyp26a1

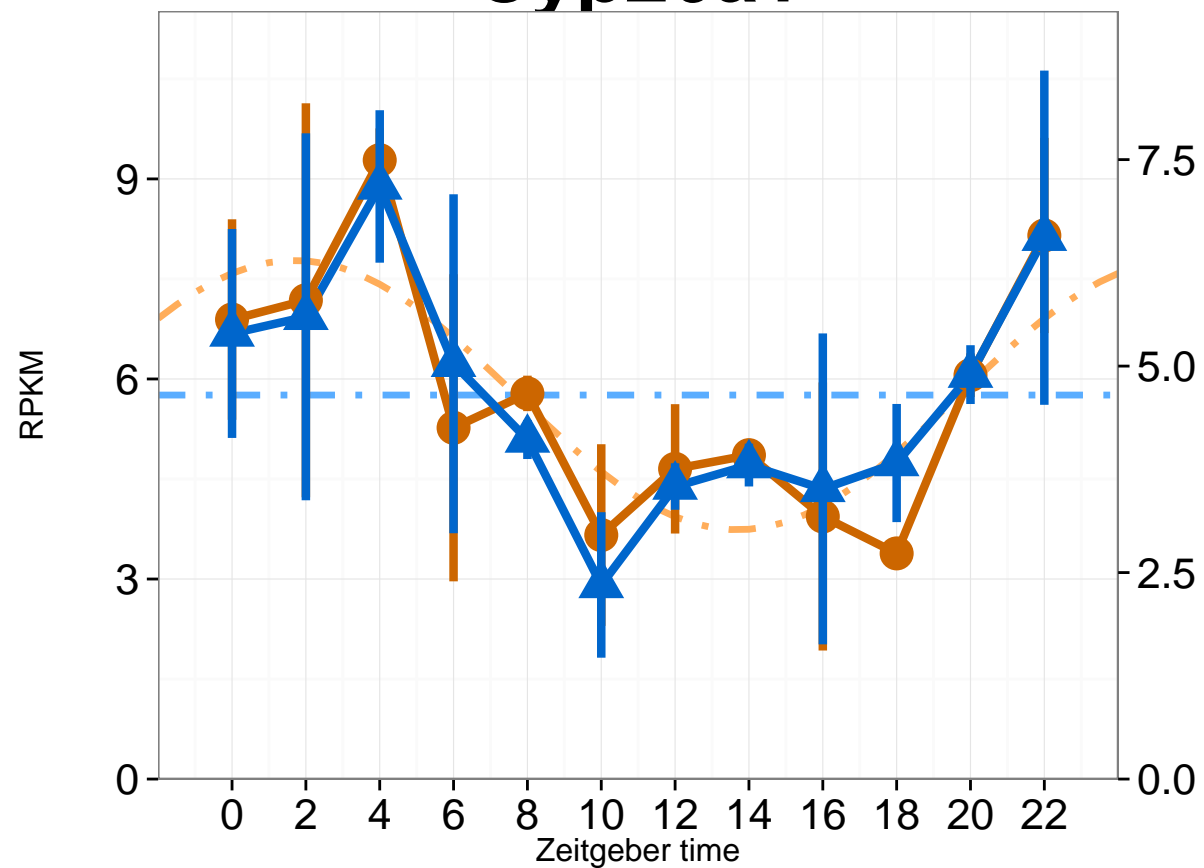

# Cyp26a1

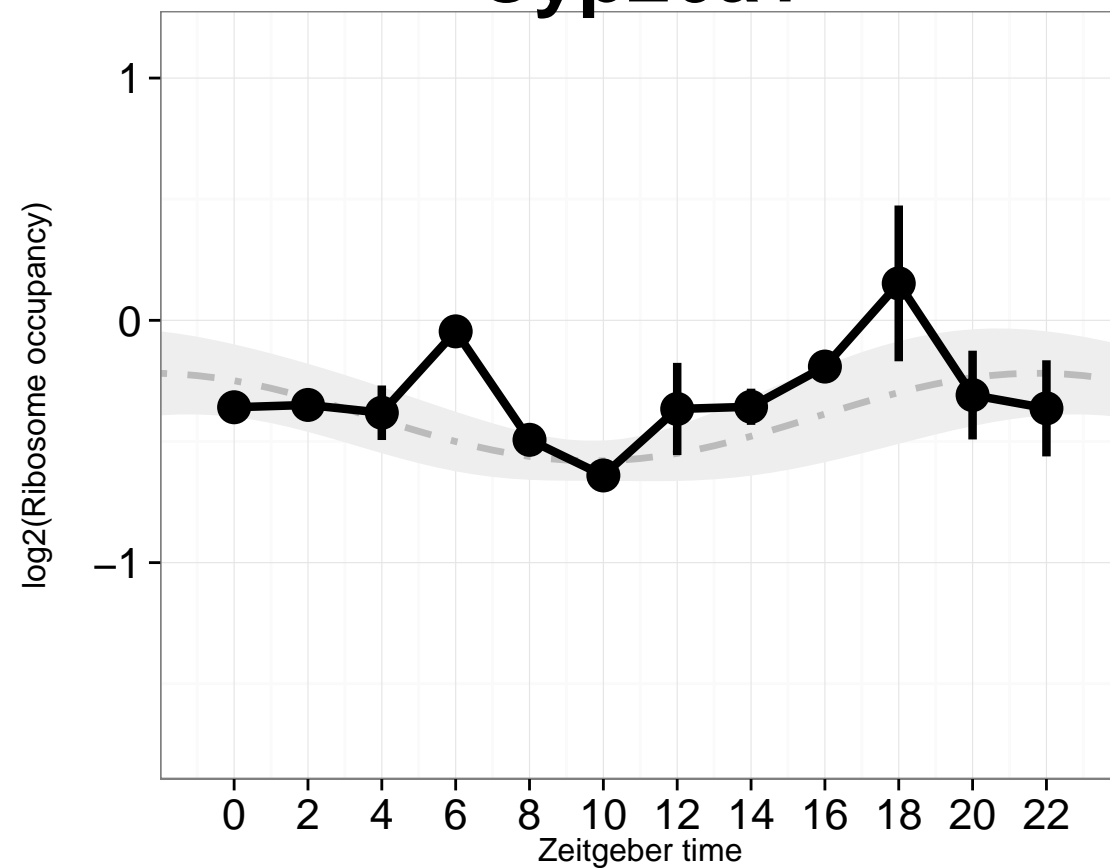

Supplement: SuppDataset_1.zip [file Cyp26a1_set_B.pdf › Supplemental Dataset 1/B-mRNA_rhythm_translation_nonrhyth/Cyp26a1_set_B.pdf]

# Cyp2c39

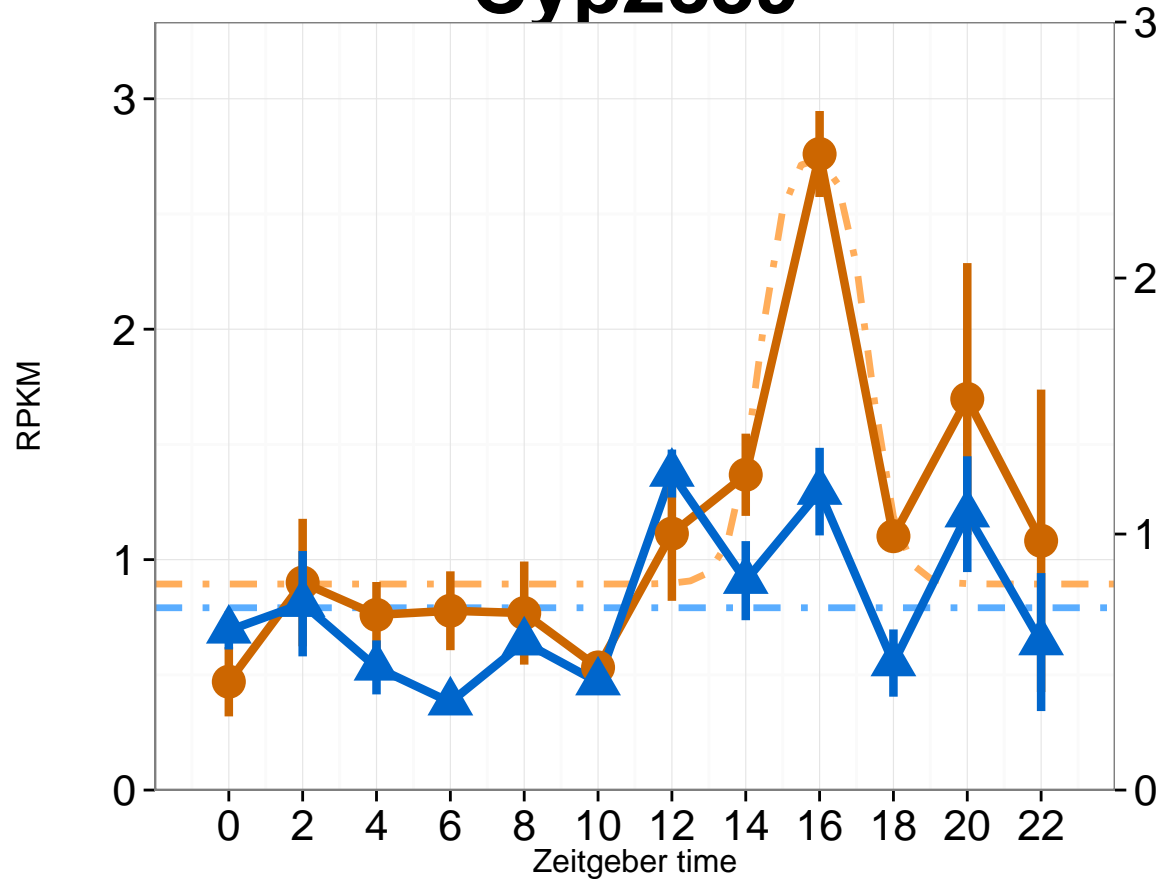

# Cyp2c39

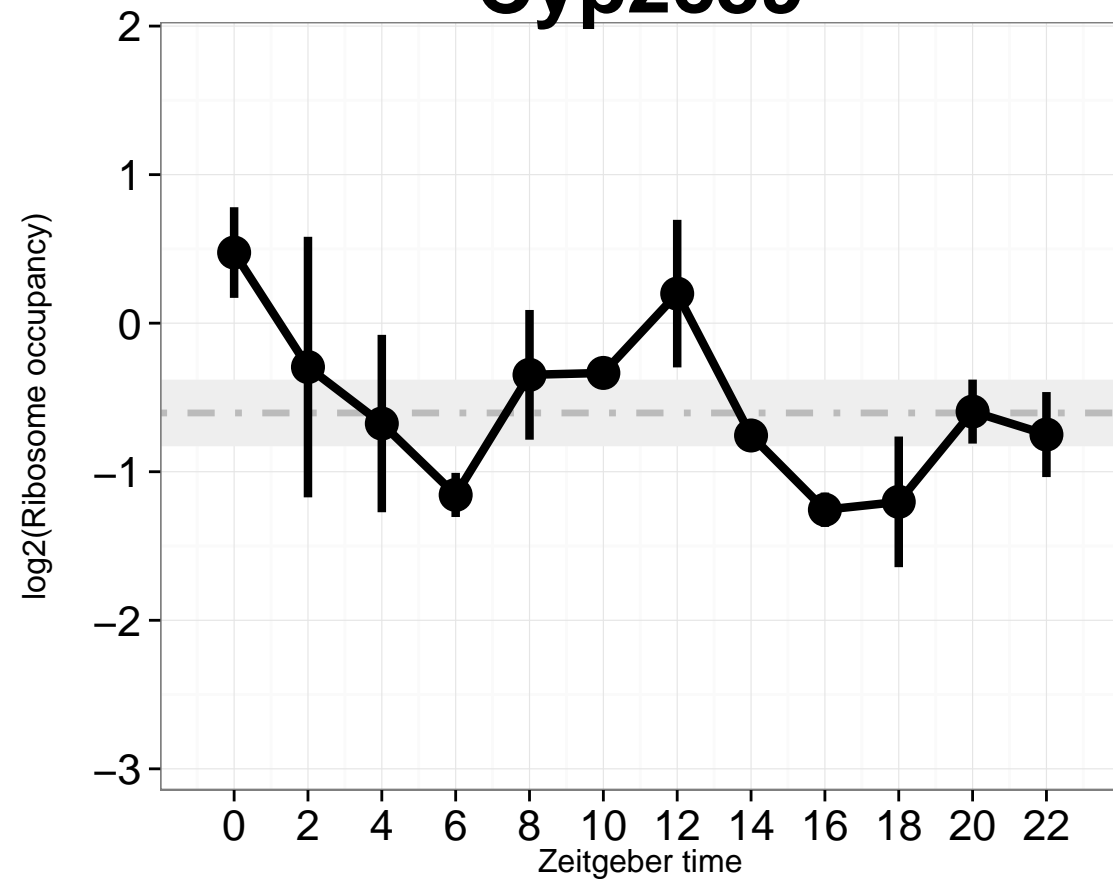

Supplement: SuppDataset_1.zip [file Cyp2c39_set_B.pdf › Supplemental Dataset 1/B-mRNA_rhythm_translation_nonrhyth/Cyp2c39_set_B.pdf]

# Cyp2c54

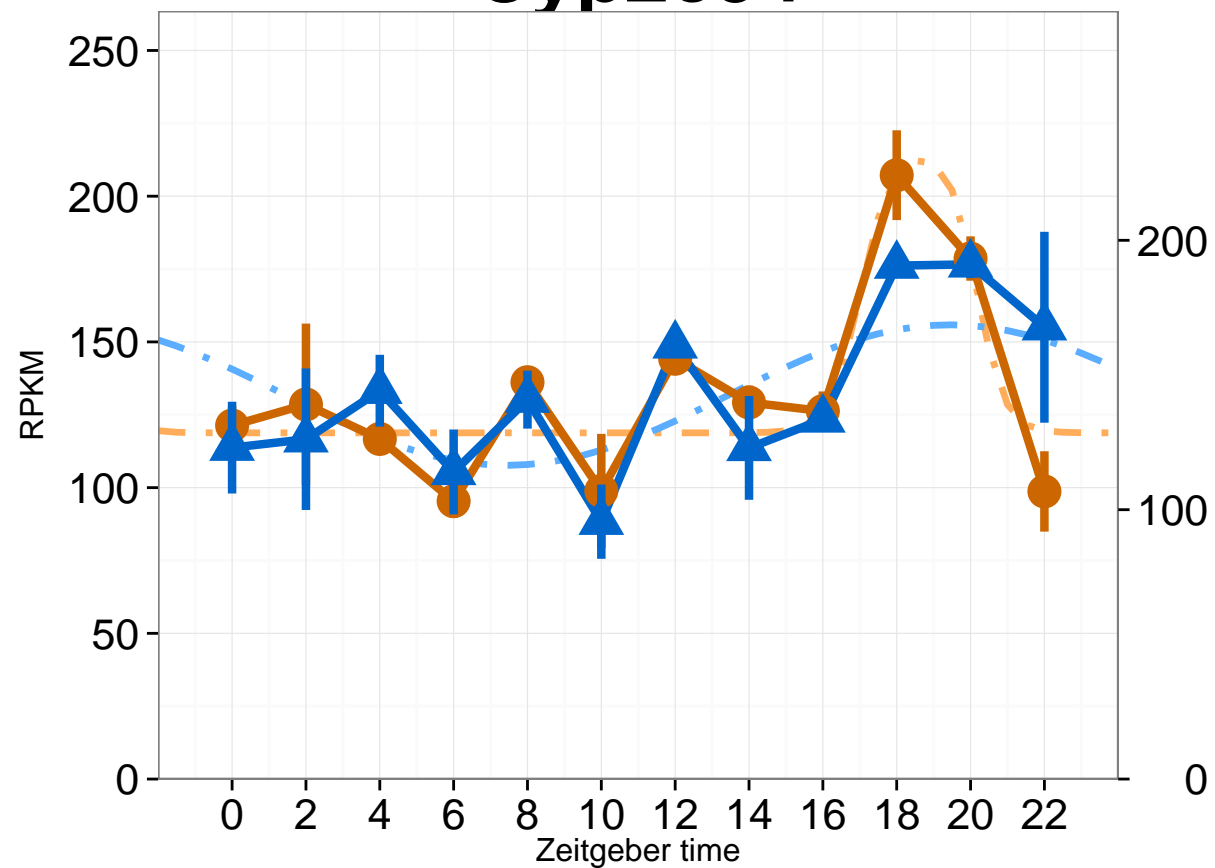

# Cyp2c54

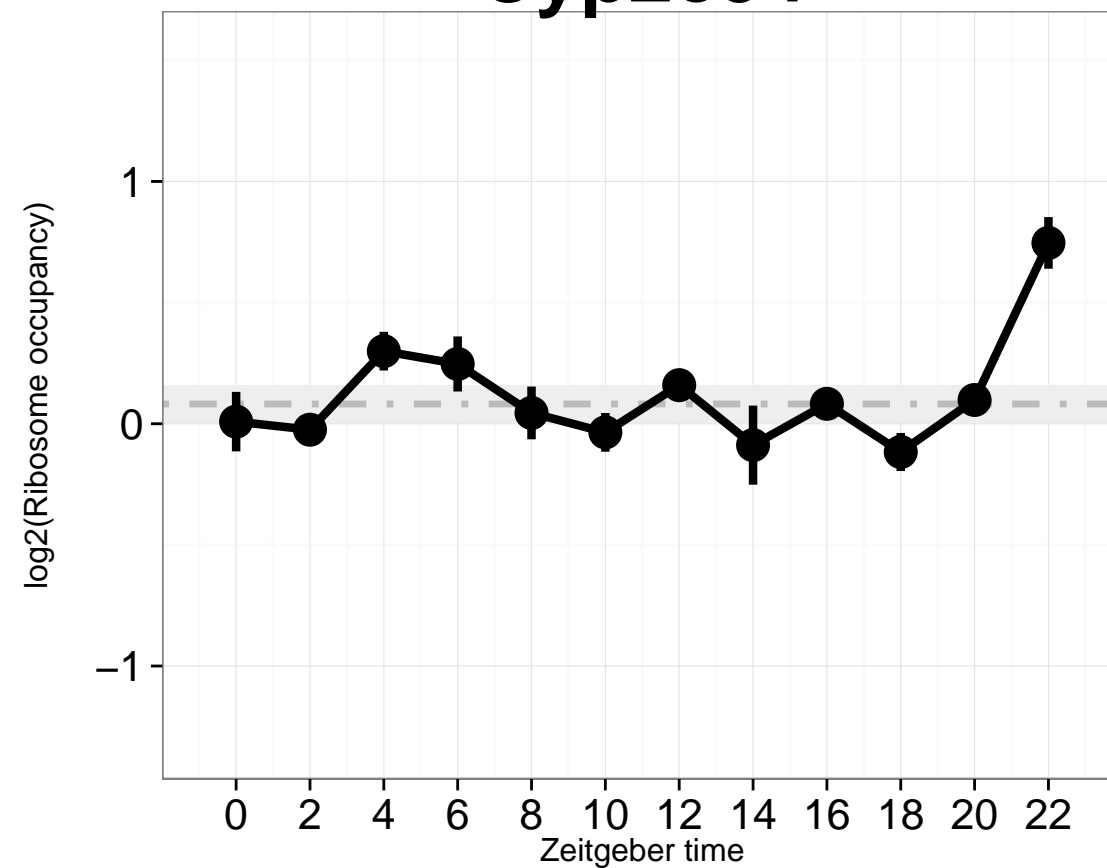

Supplement: SuppDataset_1.zip [file Cyp2c54_set_B.pdf › Supplemental Dataset 1/B-mRNA_rhythm_translation_nonrhyth/Cyp2c54_set_B.pdf]

# Cyp2d11

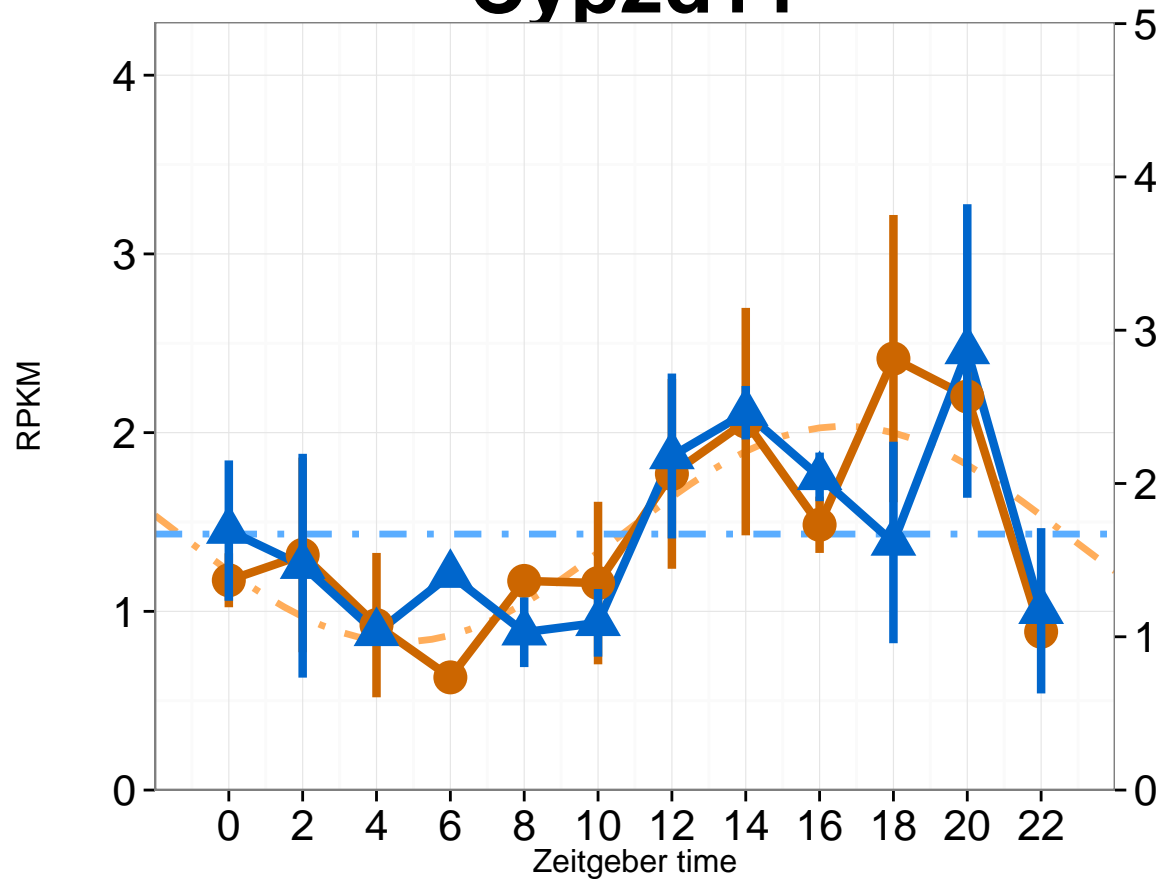

# Cyp2d11

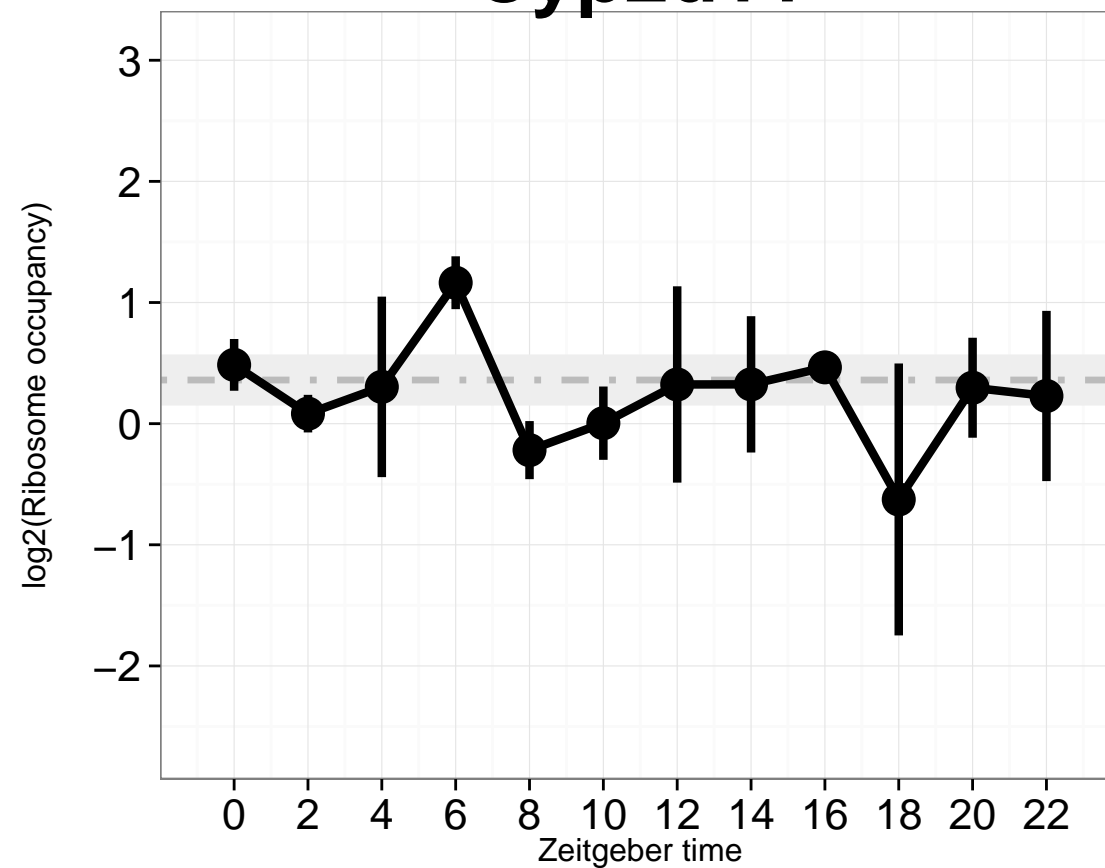

Supplement: SuppDataset_1.zip [file Cyp2d11_set_B.pdf › Supplemental Dataset 1/B-mRNA_rhythm_translation_nonrhyth/Cyp2d11_set_B.pdf]

# D19Ertd737e

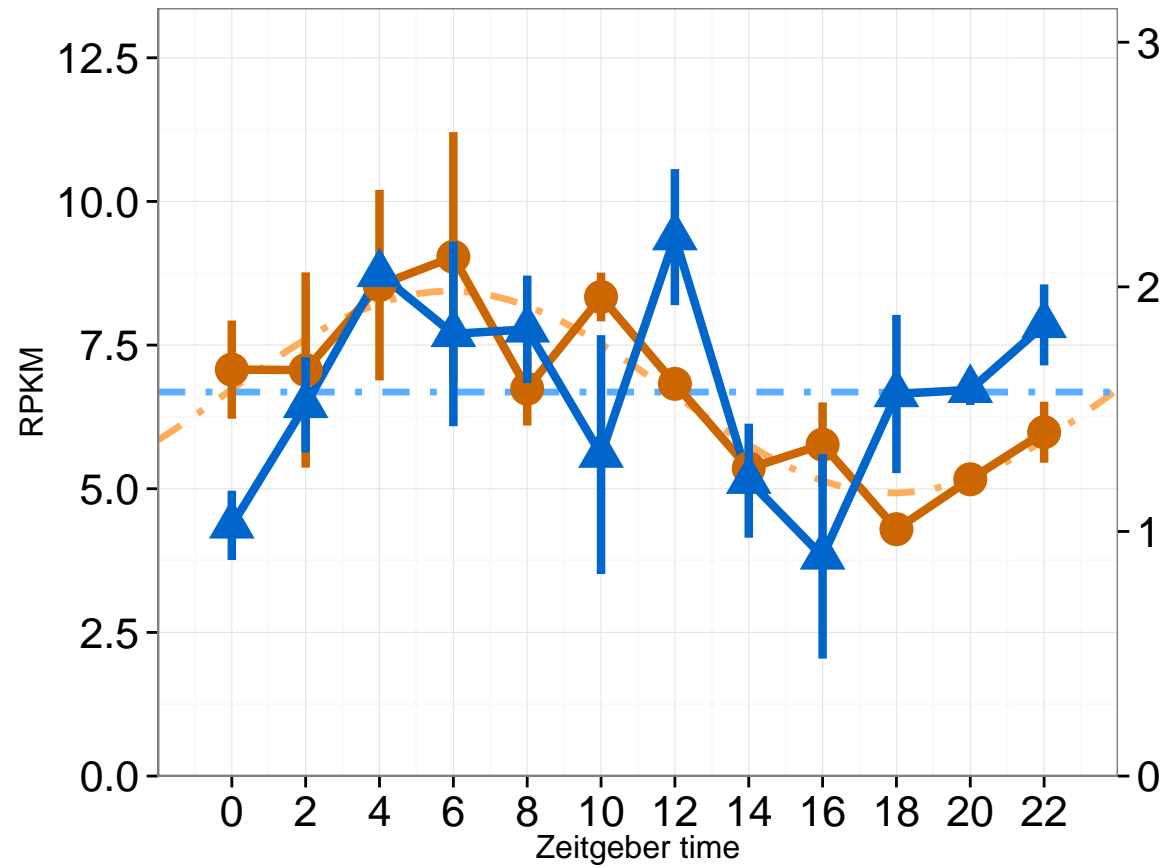

# D19Ertd737e

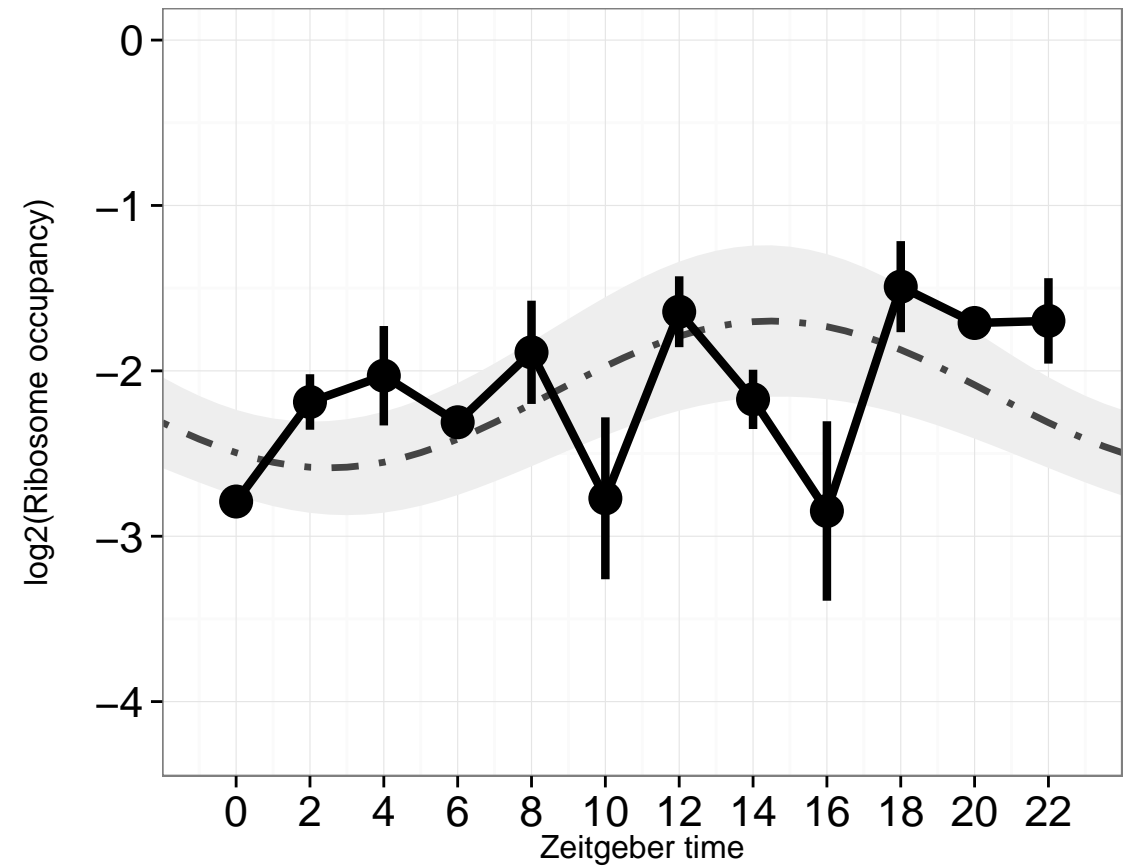

Supplement: SuppDataset_1.zip [file D19Ertd737e_set_B.pdf › Supplemental Dataset 1/B-mRNA_rhythm_translation_nonrhyth/D19Ertd737e_set_B.pdf]

# D5Ertd579e

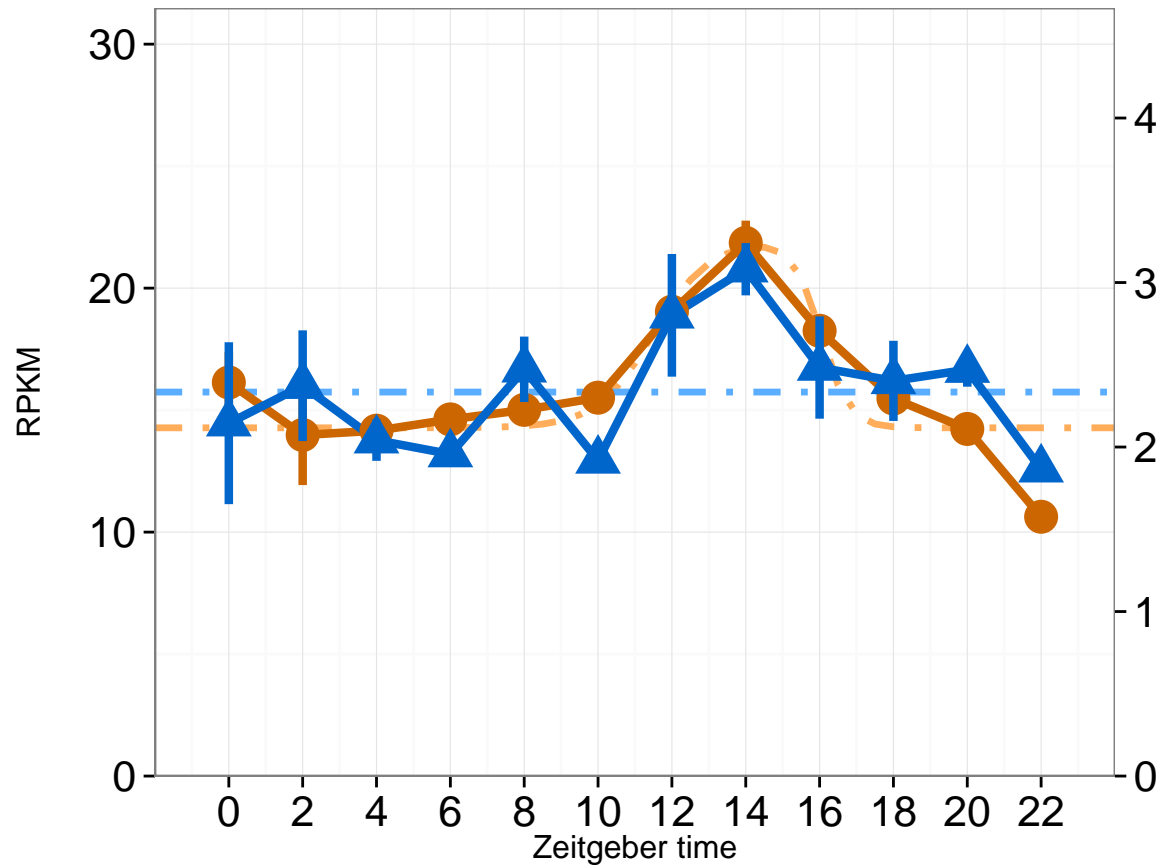

# D5Ertd579e

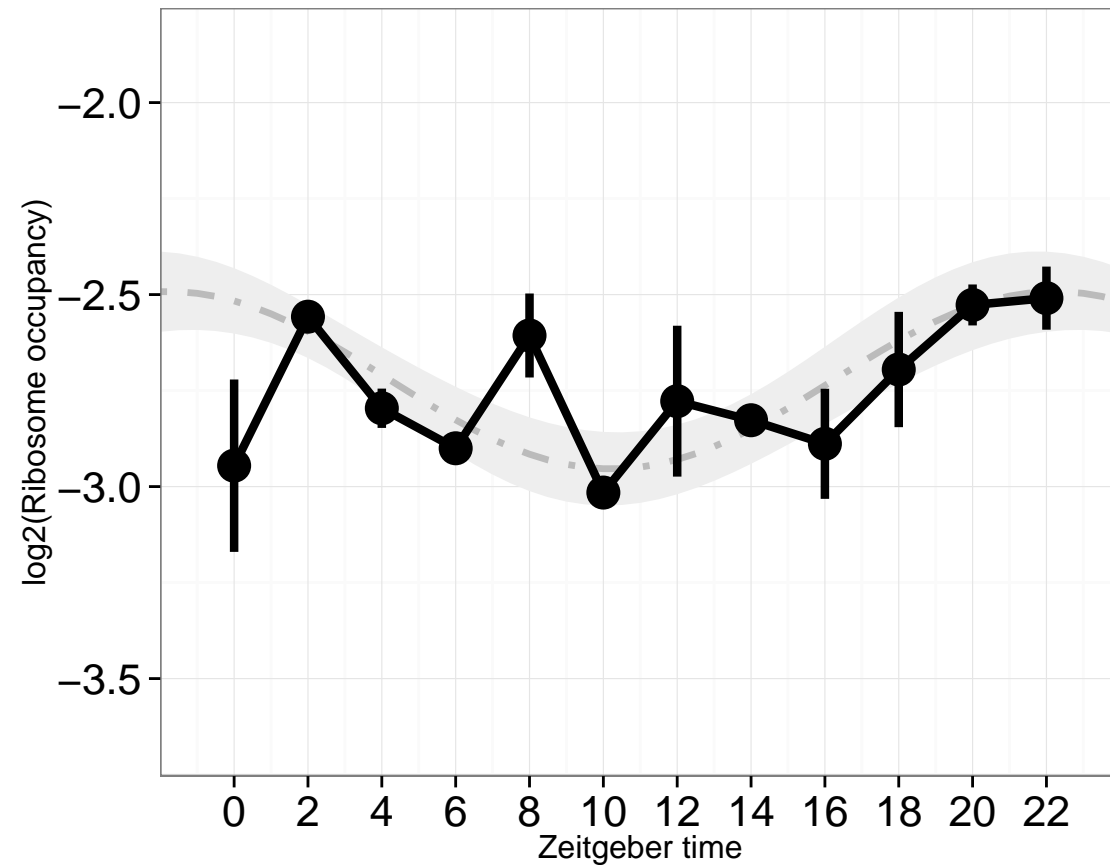

Supplement: SuppDataset_1.zip [file D5Ertd579e_set_B.pdf › Supplemental Dataset 1/B-mRNA_rhythm_translation_nonrhyth/D5Ertd579e_set_B.pdf]

## Dact3

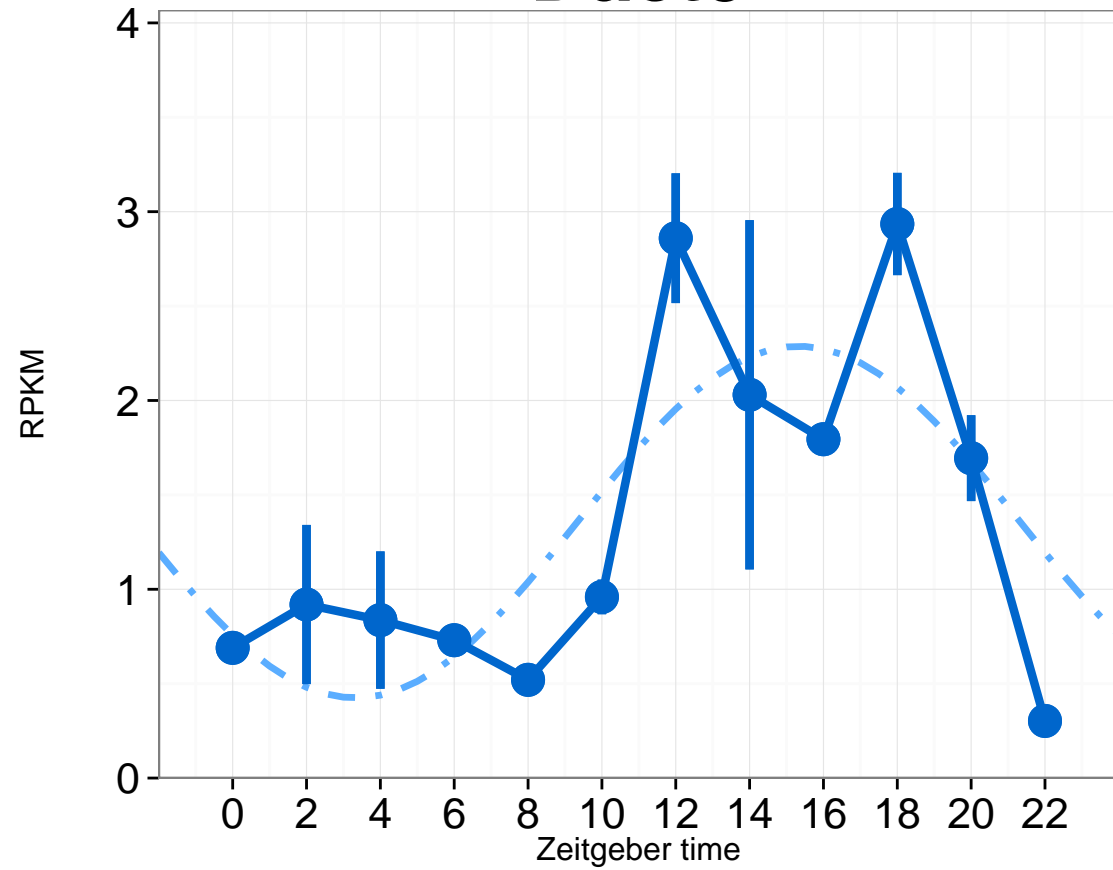

## Dact3 log2(Ribosome occupancy)

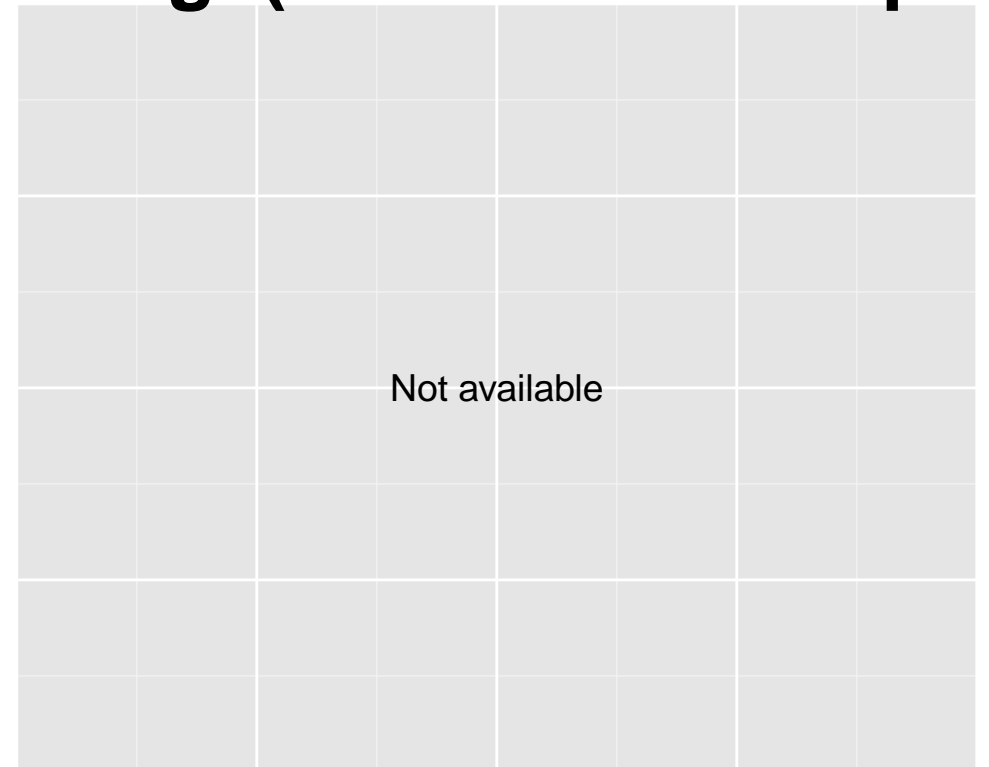

Supplement: SuppDataset_1.zip [file Dact3_set_B.pdf › Supplemental Dataset 1/B-mRNA_rhythm_translation_nonrhyth/Dact3_set_B.pdf]

## Dap

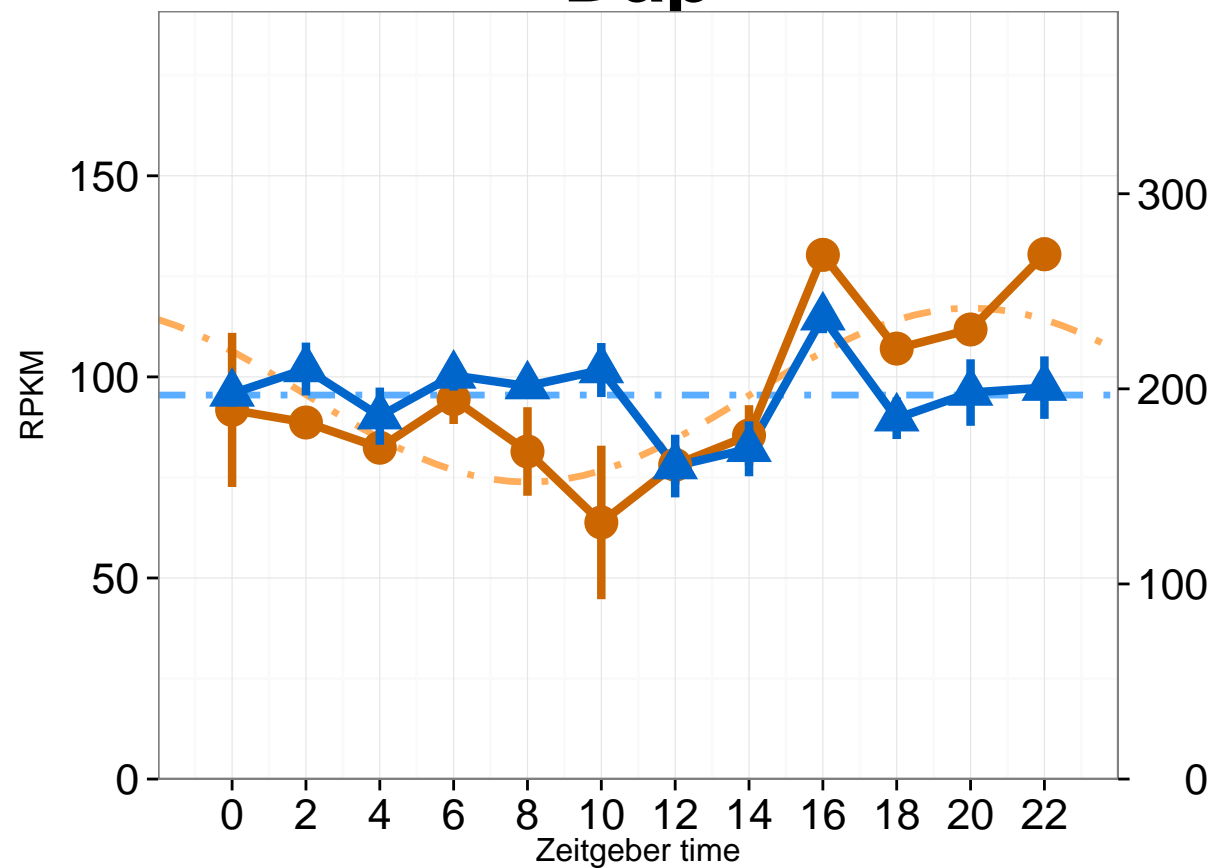

## Dap

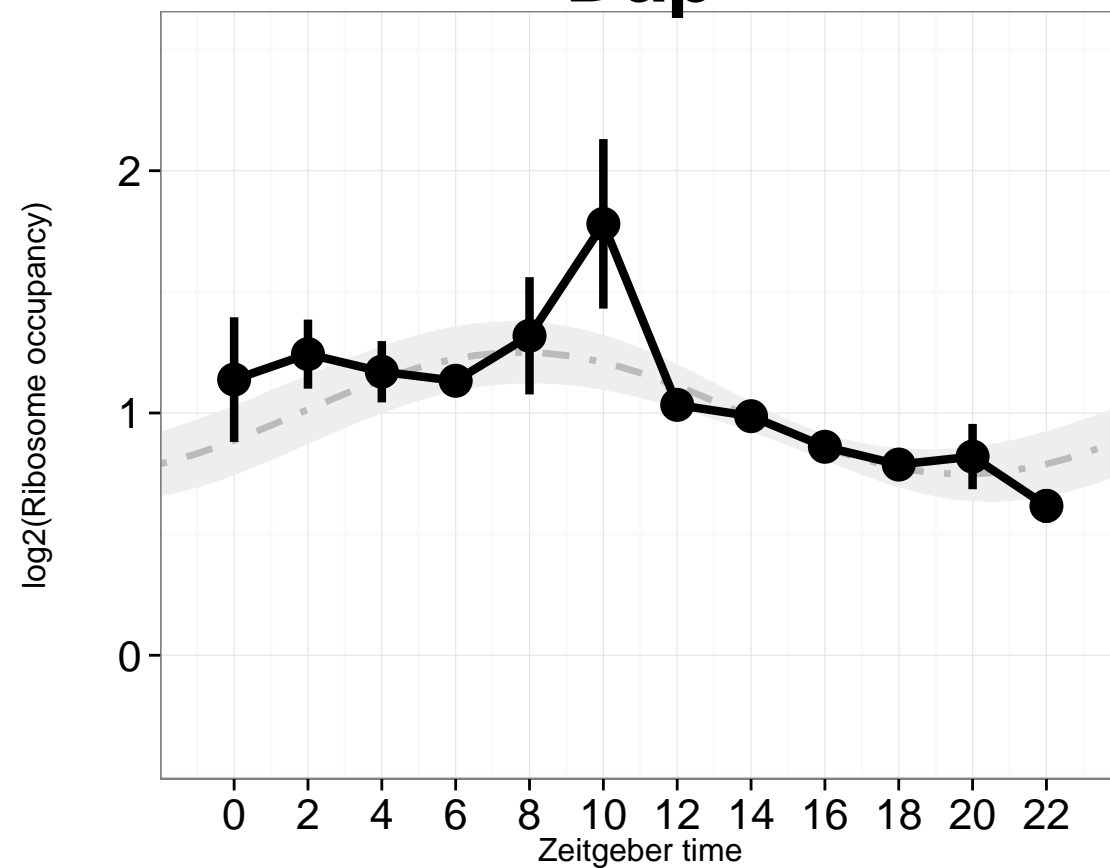

Supplement: SuppDataset_1.zip [file Dap_set_B.pdf › Supplemental Dataset 1/B-mRNA_rhythm_translation_nonrhyth/Dap_set_B.pdf]

## Dcakd

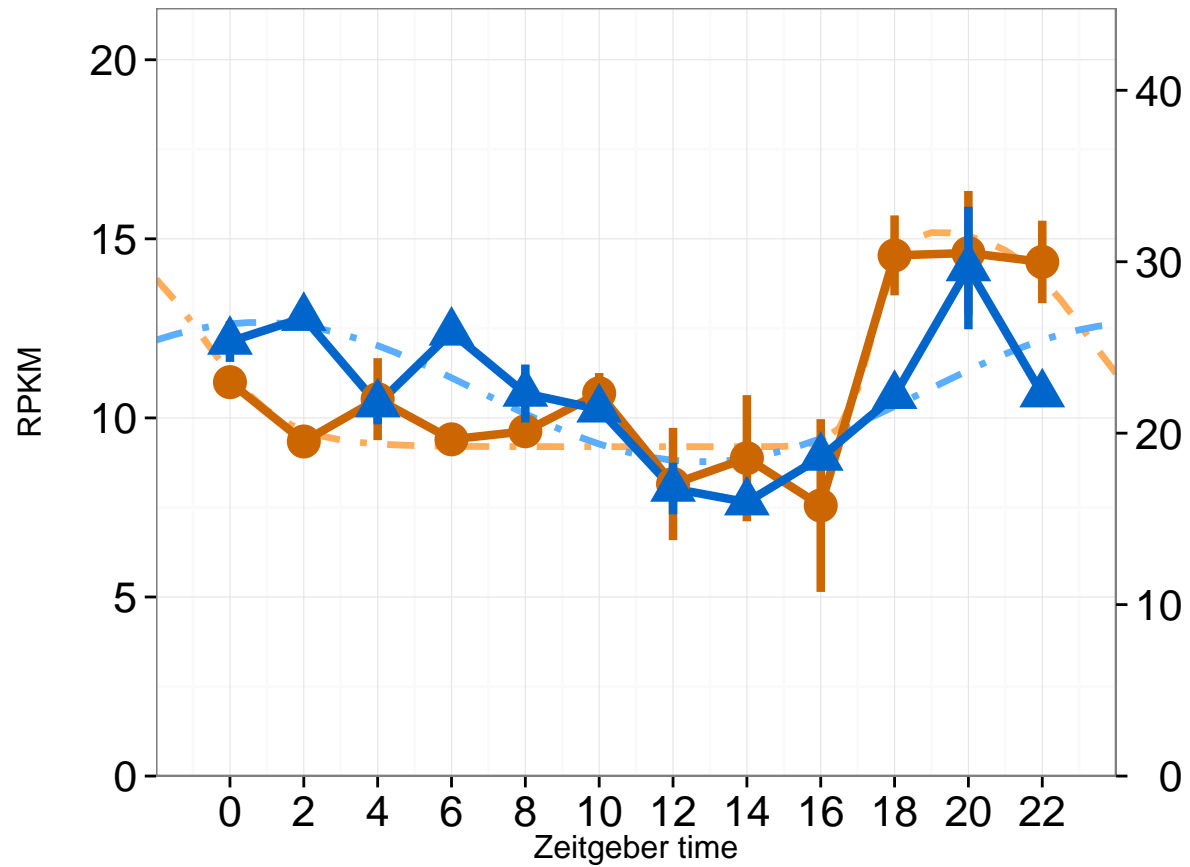

## Dcakd

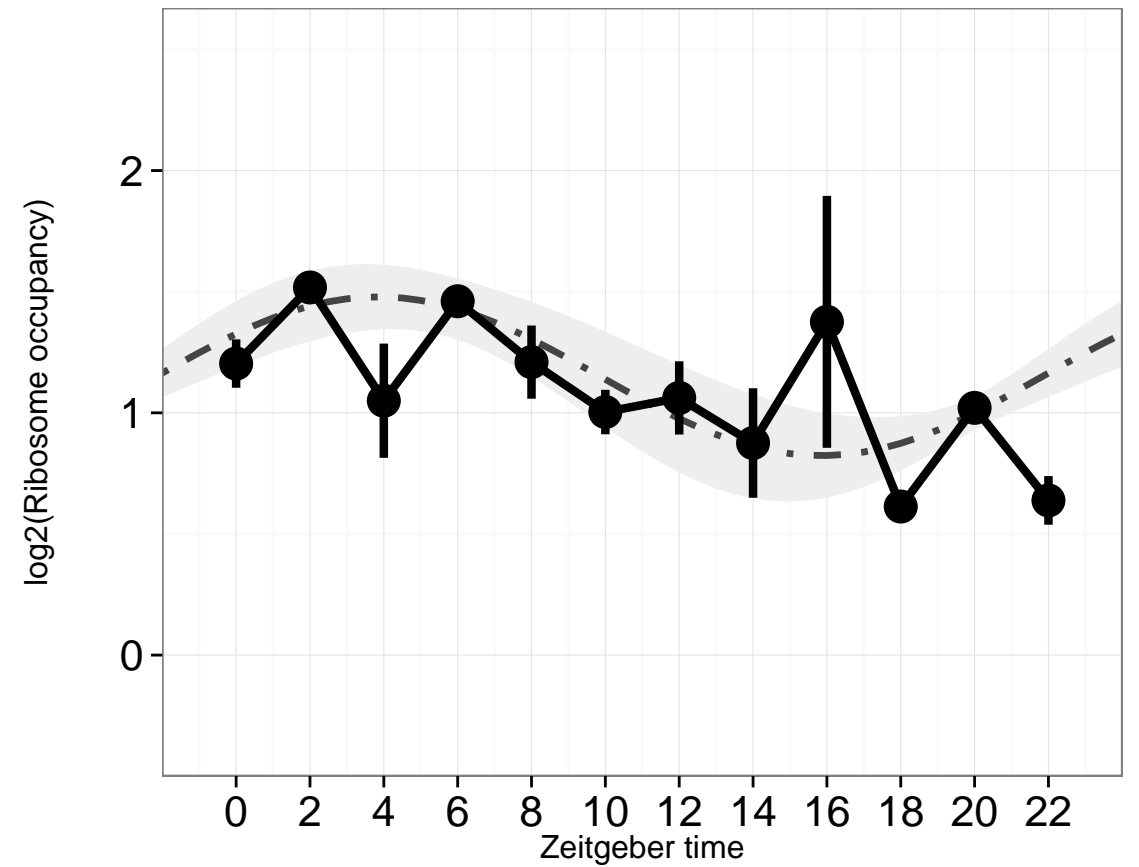

Supplement: SuppDataset_1.zip [file Dcakd_set_B.pdf › Supplemental Dataset 1/B-mRNA_rhythm_translation_nonrhyth/Dcakd_set_B.pdf]

## Dcn

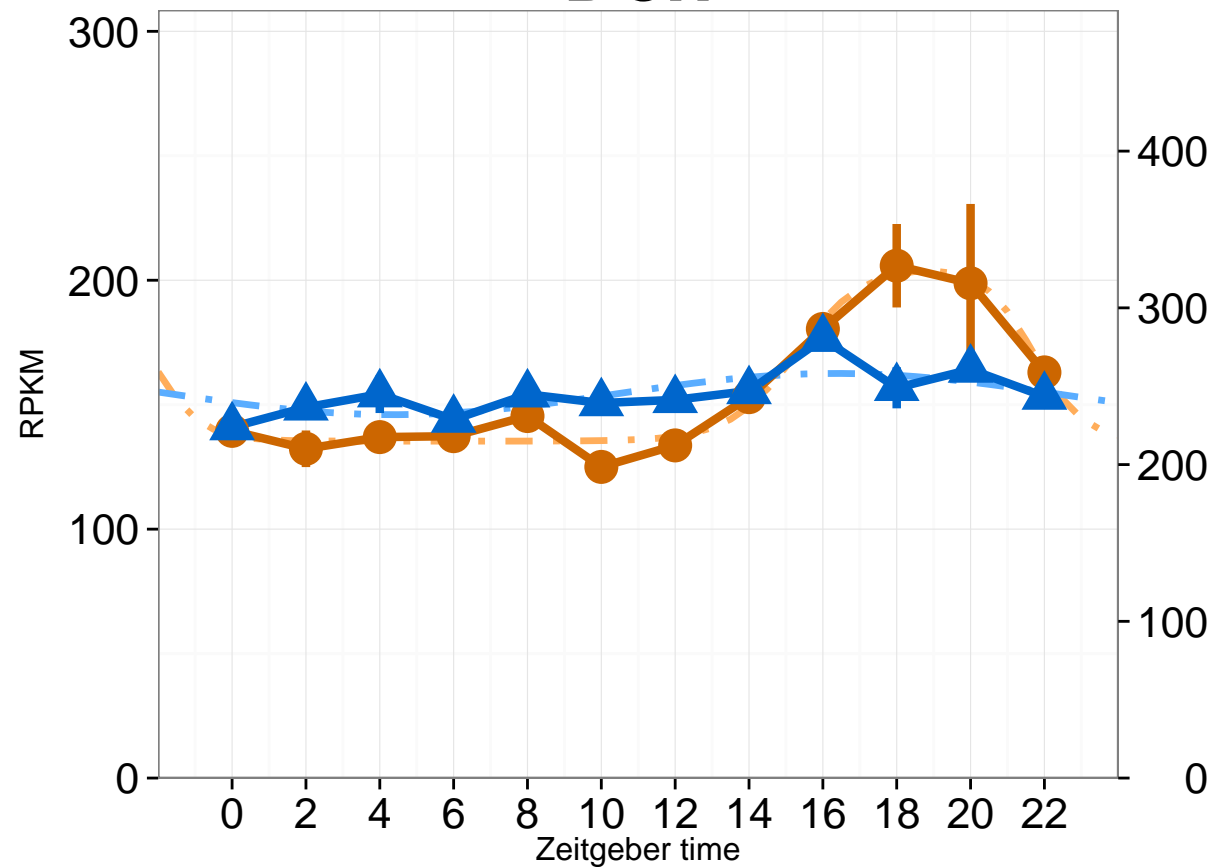

## Dcn

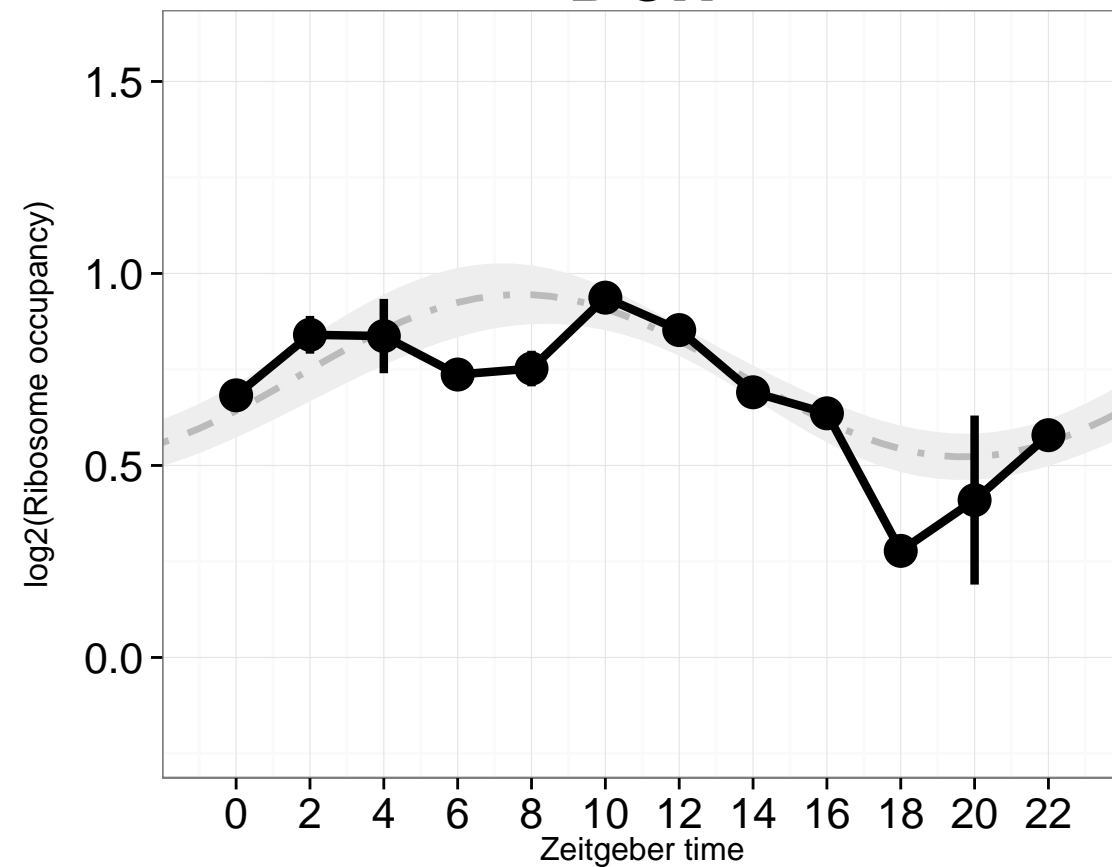

Supplement: SuppDataset_1.zip [file Dcn_set_B.pdf › Supplemental Dataset 1/B-mRNA_rhythm_translation_nonrhyth/Dcn_set_B.pdf]

# Dcun1d3

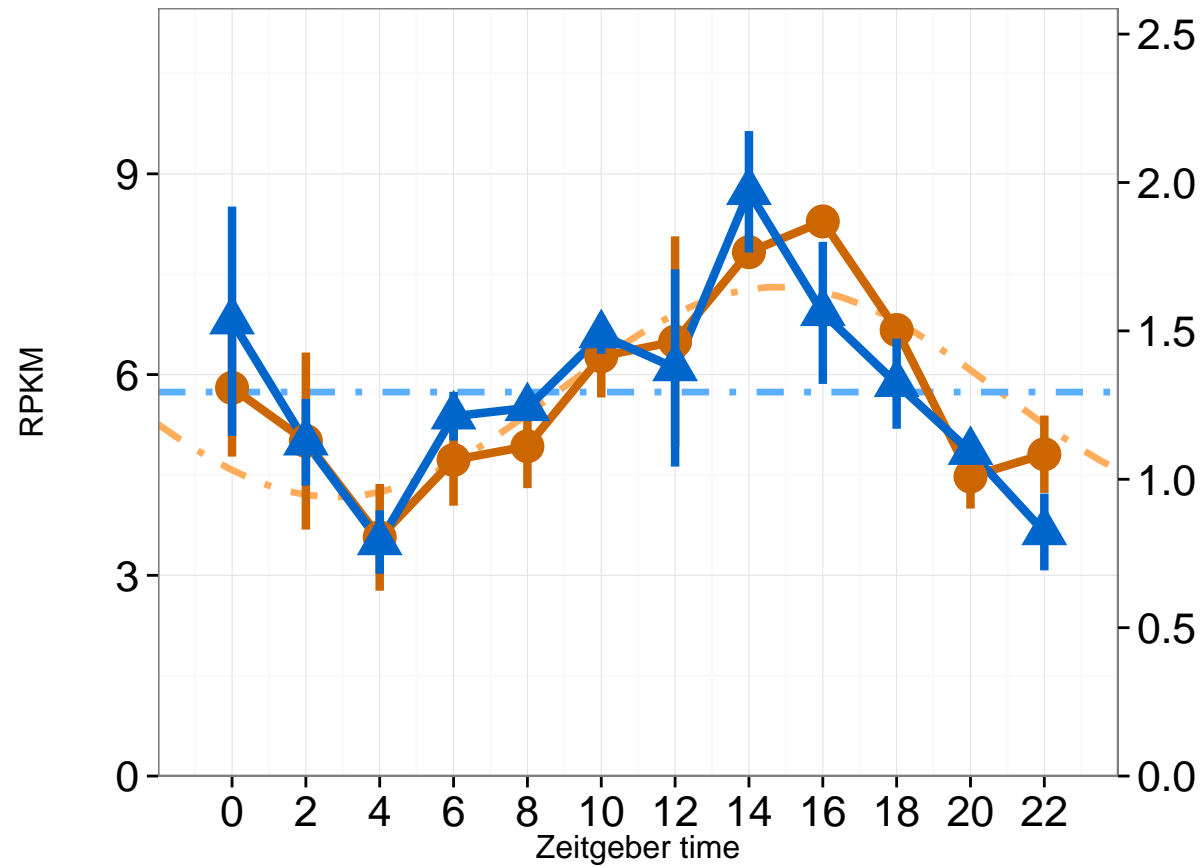

# Dcun1d3

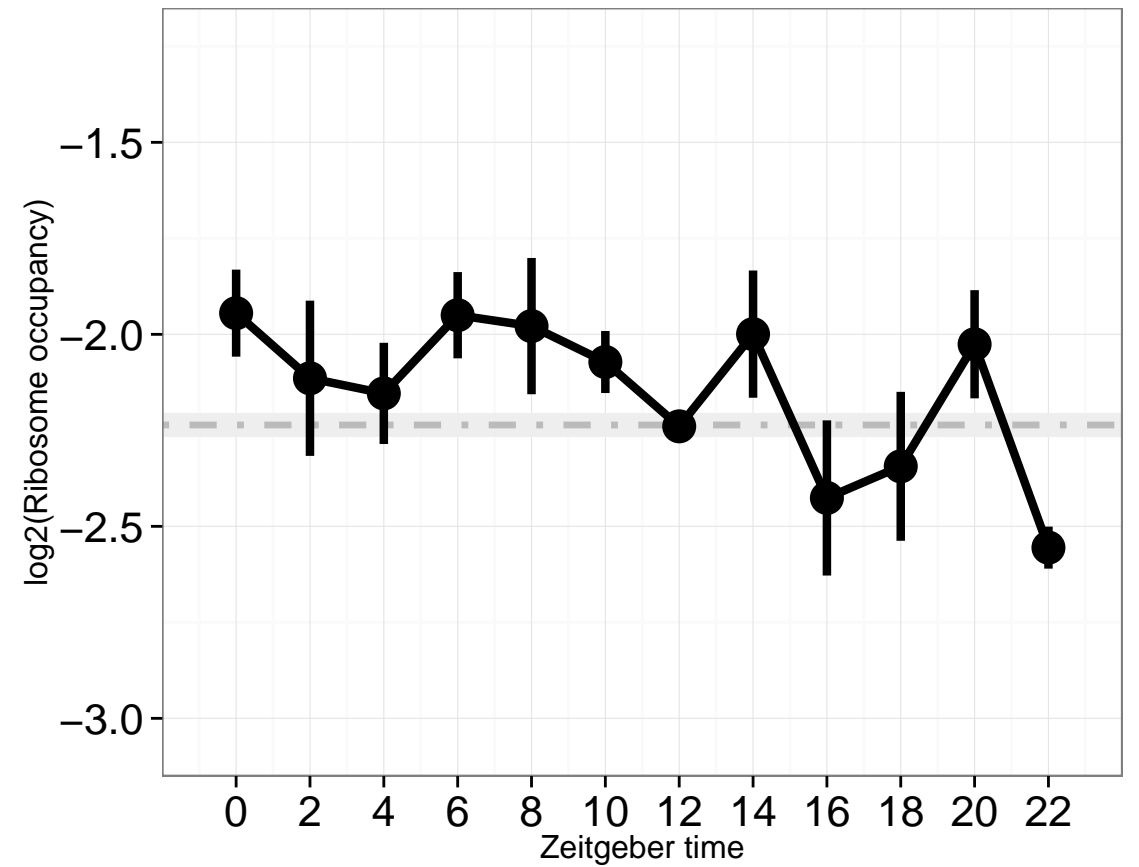

Supplement: SuppDataset_1.zip [file Dcun1d3_set_B.pdf › Supplemental Dataset 1/B-mRNA_rhythm_translation_nonrhyth/Dcun1d3_set_B.pdf]

## Ddr2

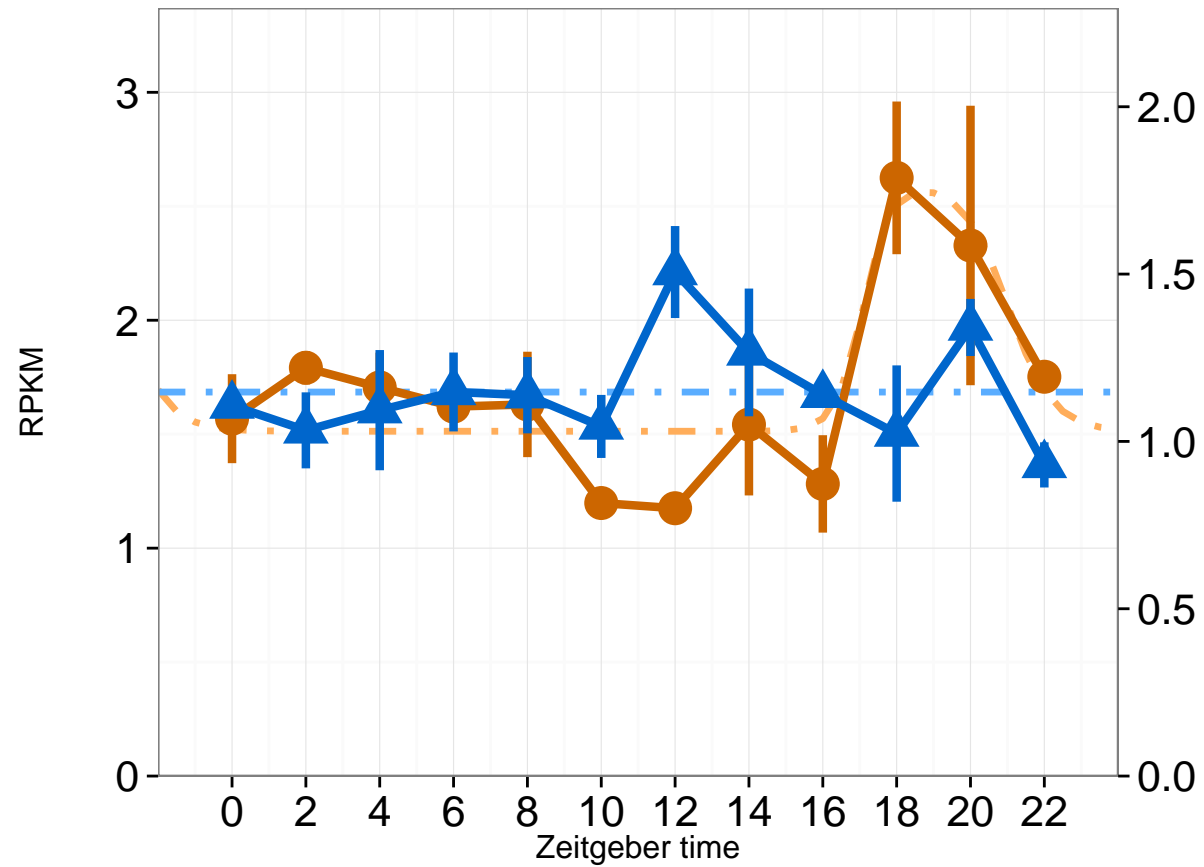

## Ddr2

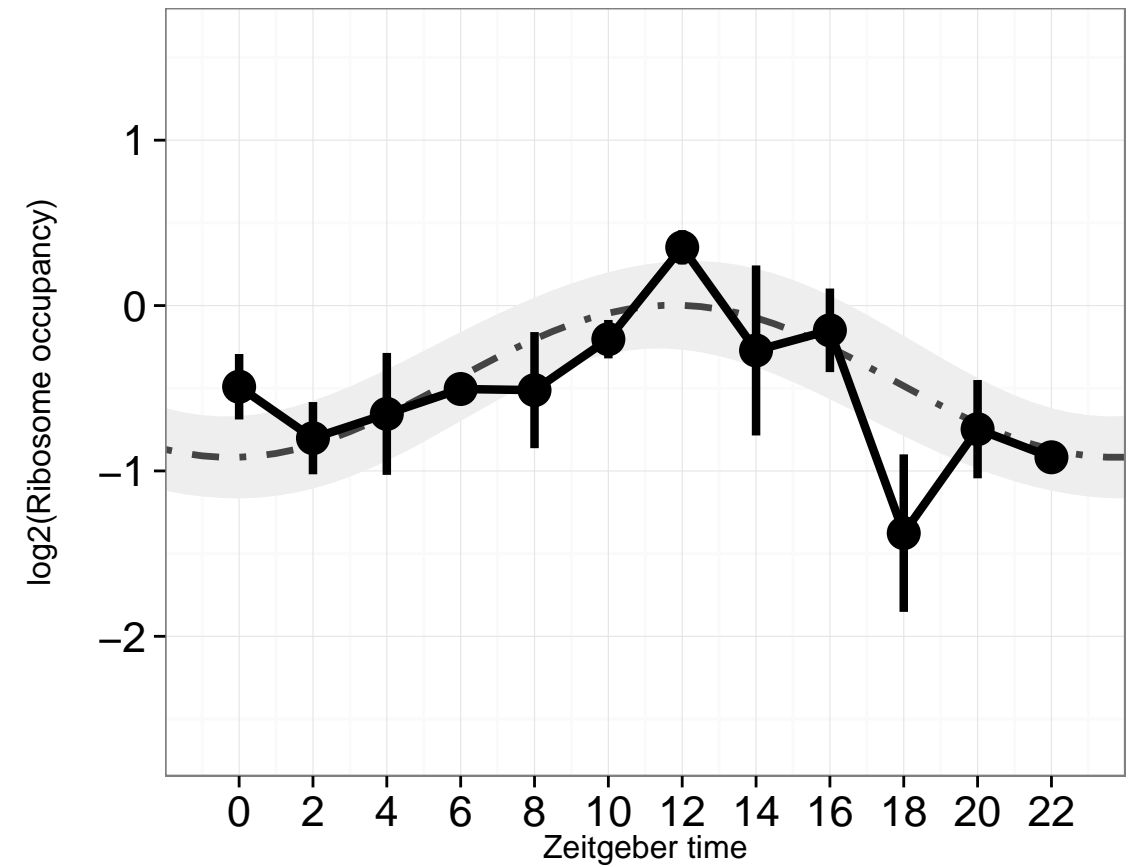

Supplement: SuppDataset_1.zip [file Ddr2_set_B.pdf › Supplemental Dataset 1/B-mRNA_rhythm_translation_nonrhyth/Ddr2_set_B.pdf]

## Ddt

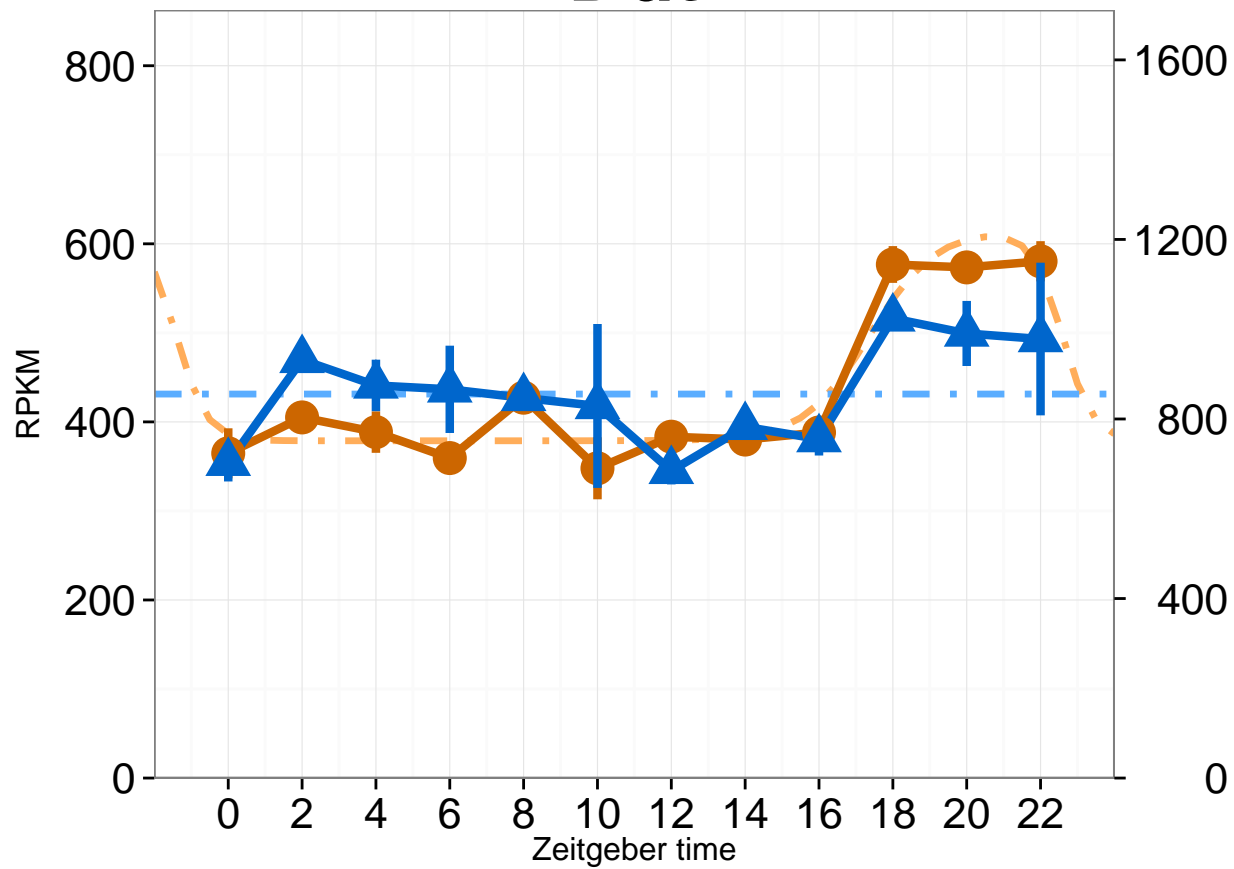

## Ddt

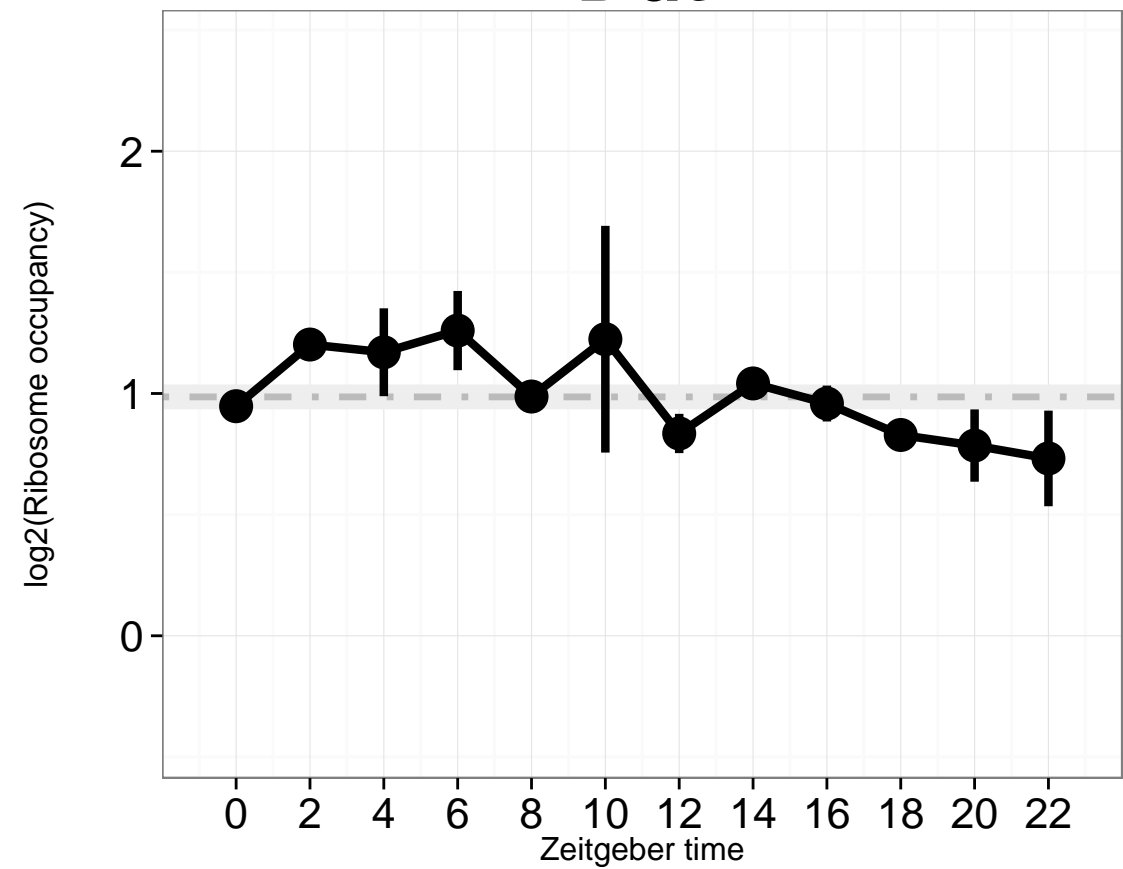

Supplement: SuppDataset_1.zip [file Ddt_set_B.pdf › Supplemental Dataset 1/B-mRNA_rhythm_translation_nonrhyth/Ddt_set_B.pdf]

# Dedd2

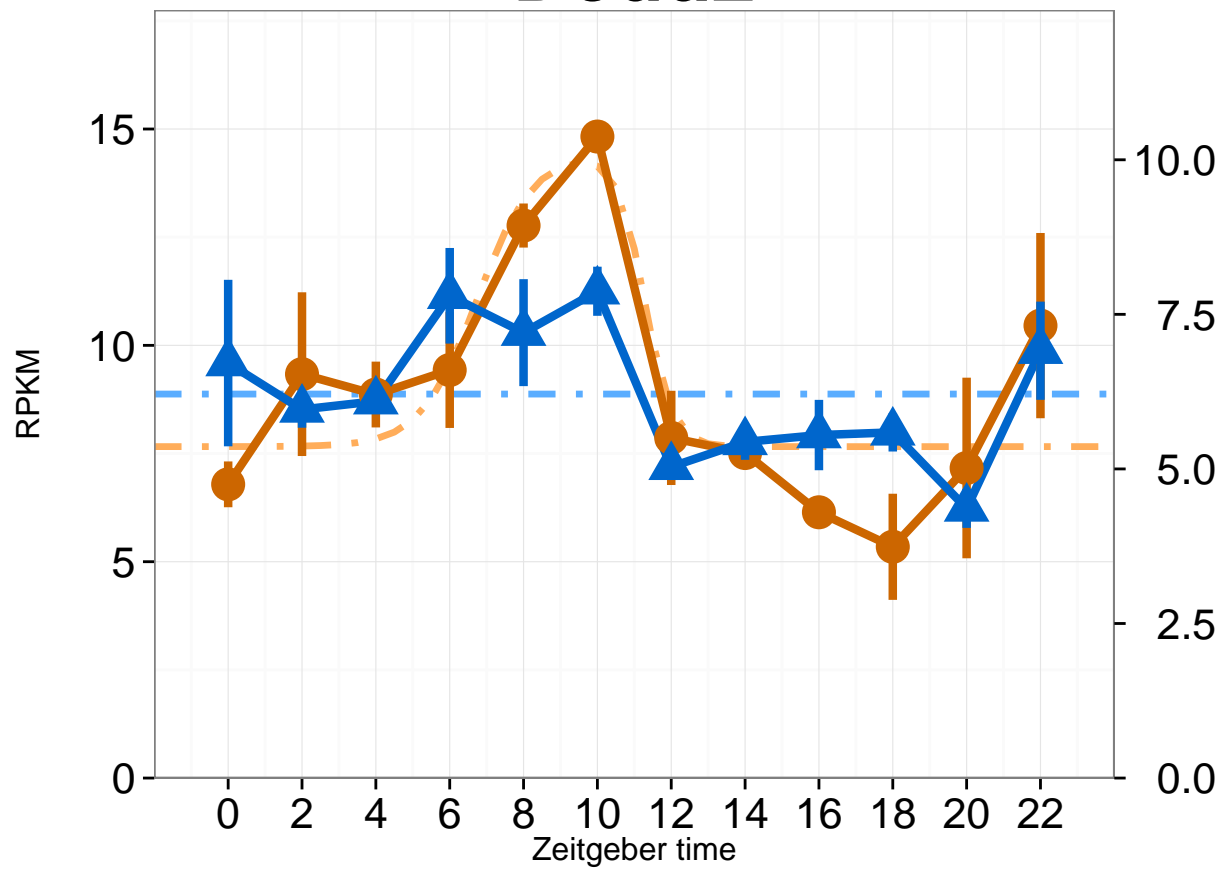

# Dedd2

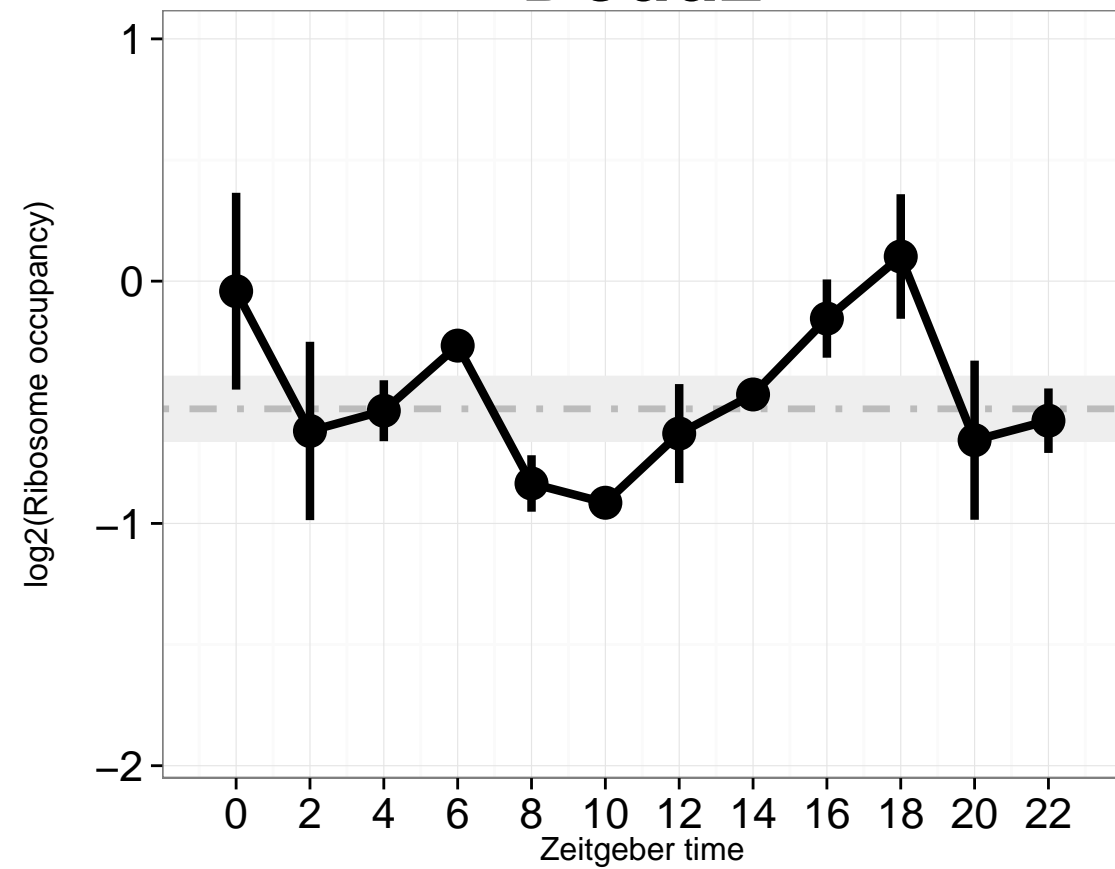

Supplement: SuppDataset_1.zip [file Dedd2_set_B.pdf › Supplemental Dataset 1/B-mRNA_rhythm_translation_nonrhyth/Dedd2_set_B.pdf]

# Dgcr6

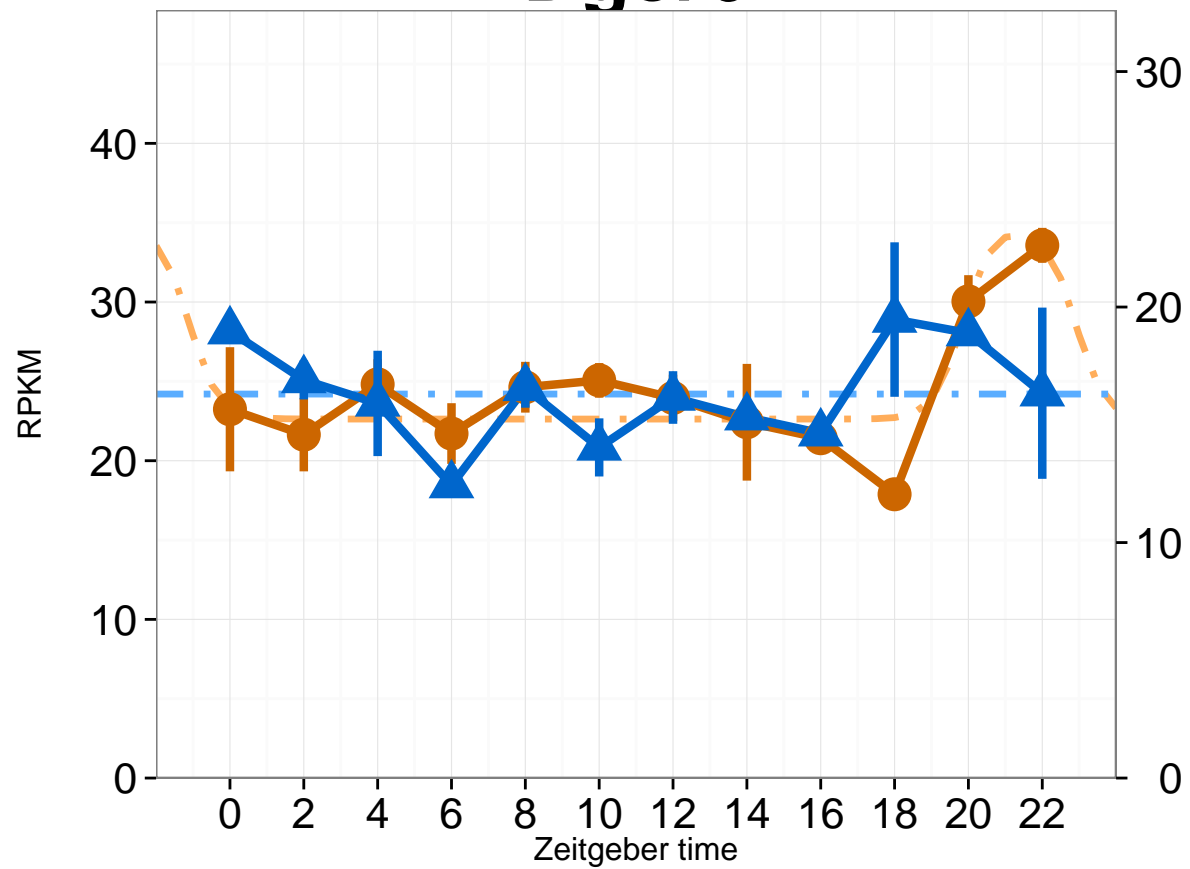

# Dgcr6

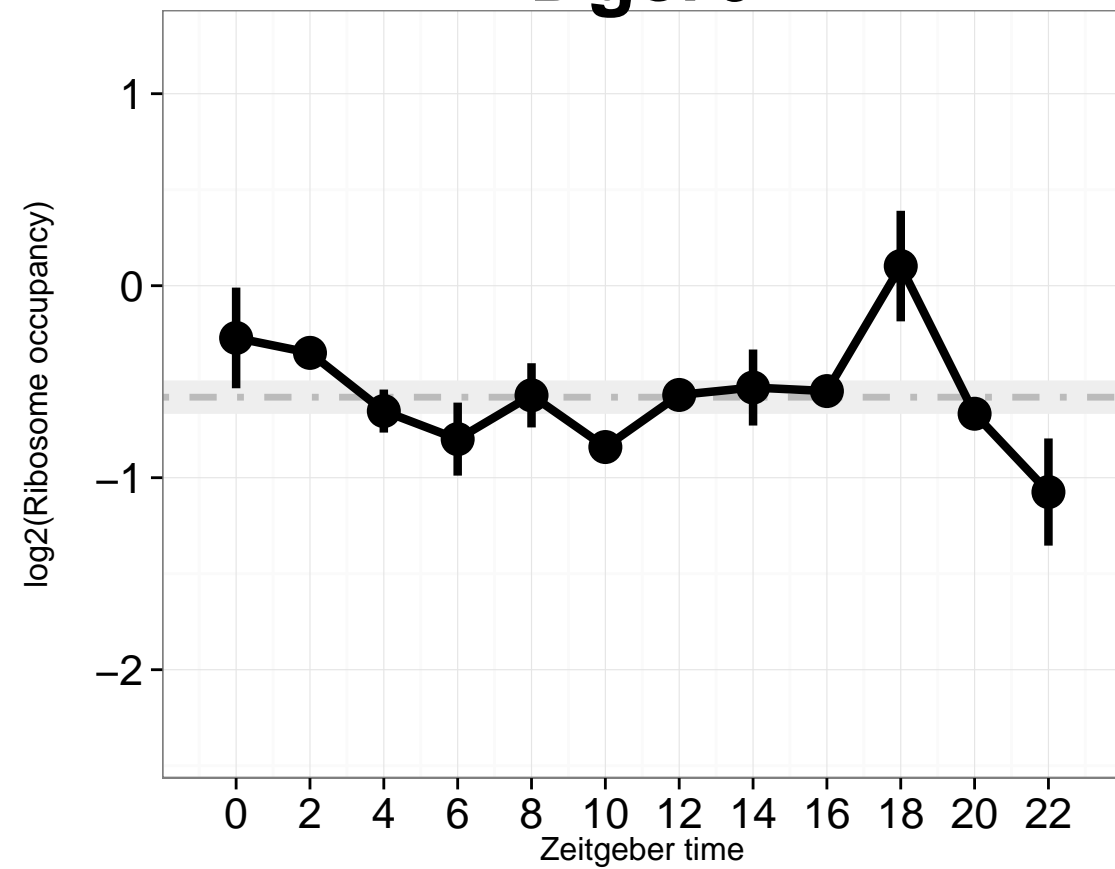

Supplement: SuppDataset_1.zip [file Dgcr6_set_B.pdf › Supplemental Dataset 1/B-mRNA_rhythm_translation_nonrhyth/Dgcr6_set_B.pdf]

## Dhfr

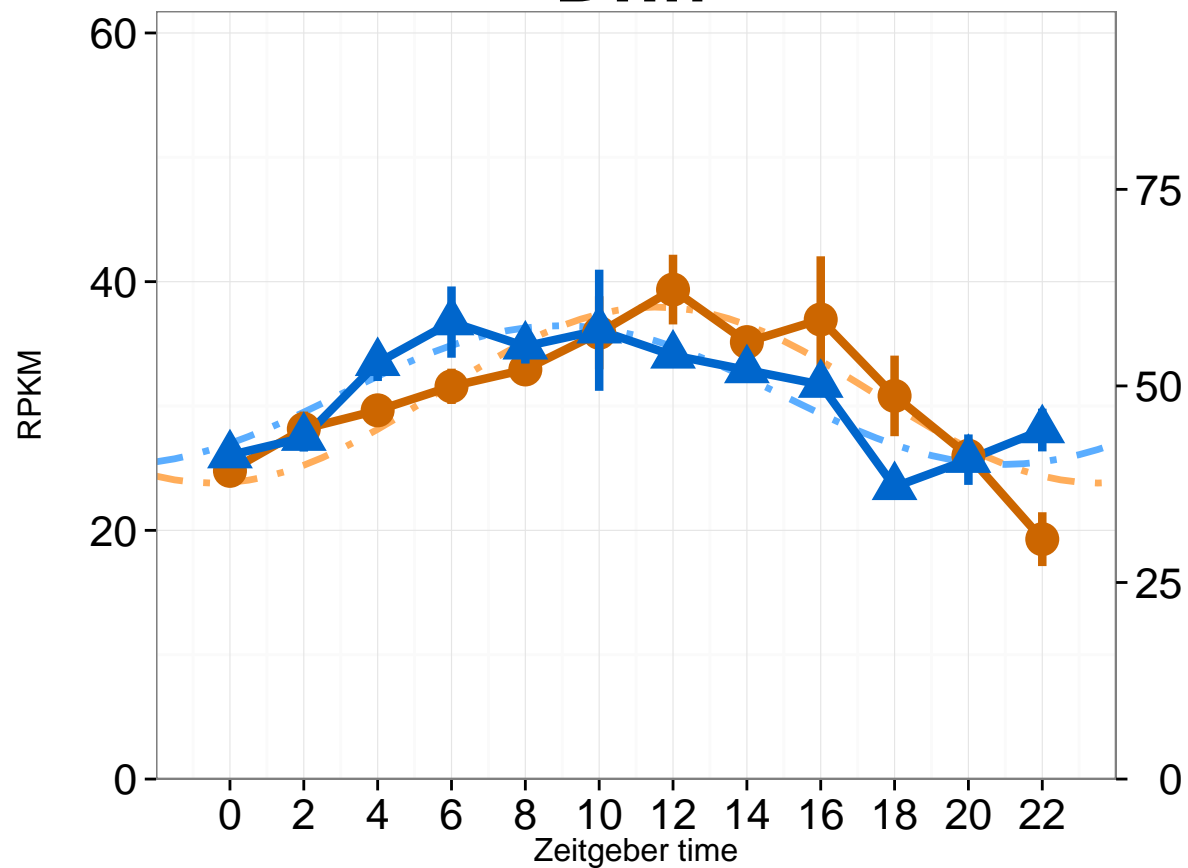

## Dhfr

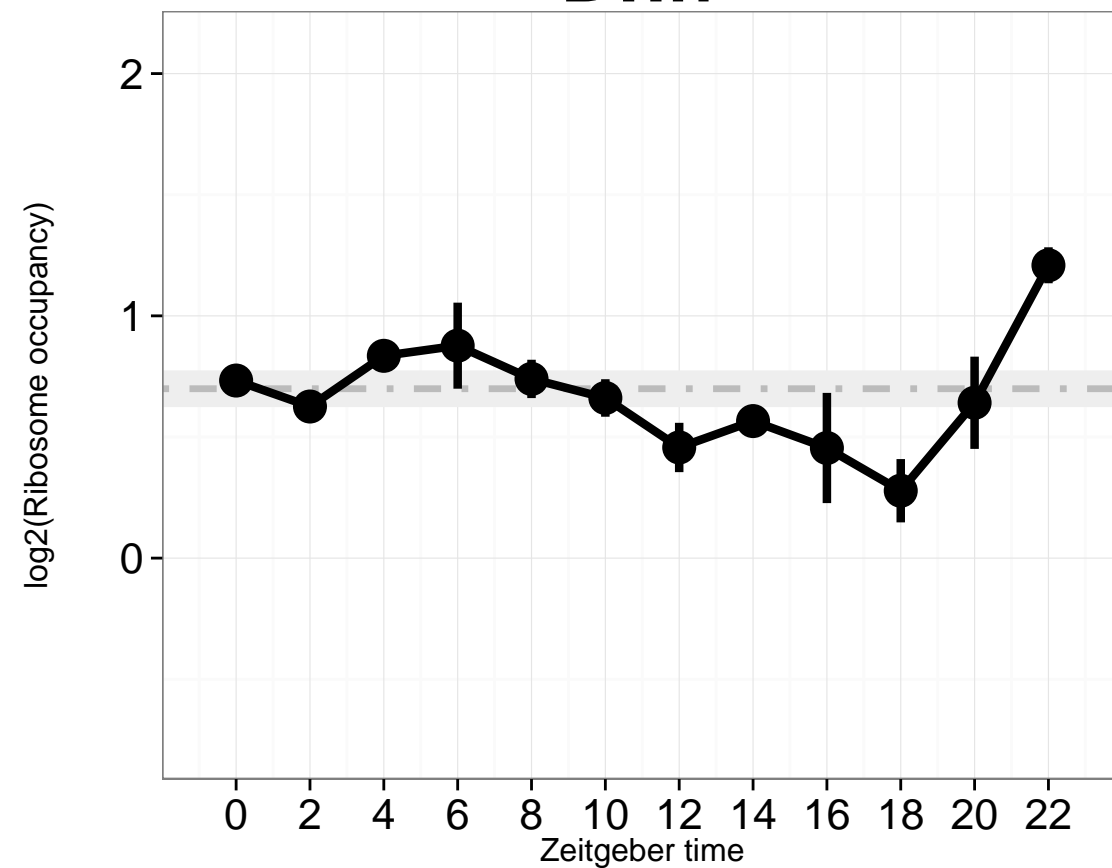

Supplement: SuppDataset_1.zip [file Dhfr_set_B.pdf › Supplemental Dataset 1/B-mRNA_rhythm_translation_nonrhyth/Dhfr_set_B.pdf]

## Dhx9

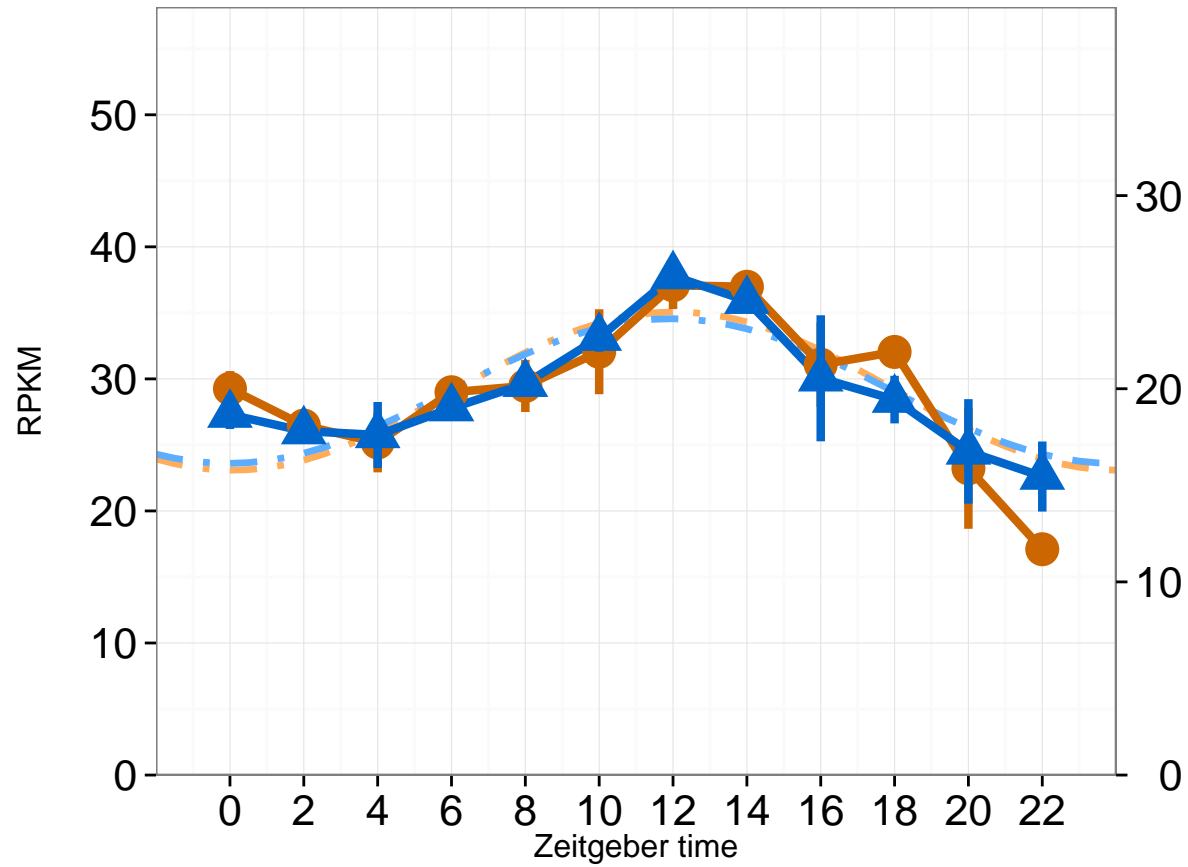

## Dhx9

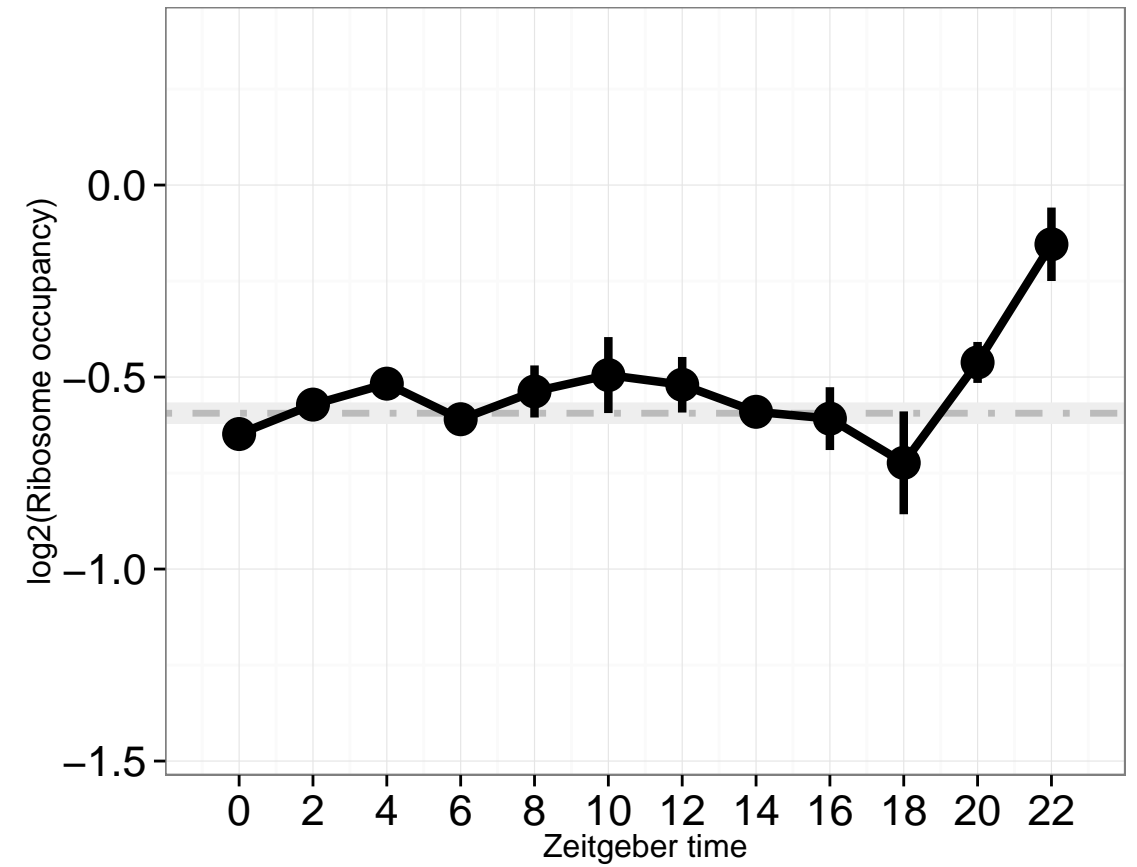

Supplement: SuppDataset_1.zip [file Dhx9_set_B.pdf › Supplemental Dataset 1/B-mRNA_rhythm_translation_nonrhyth/Dhx9_set_B.pdf]

## Dlc1

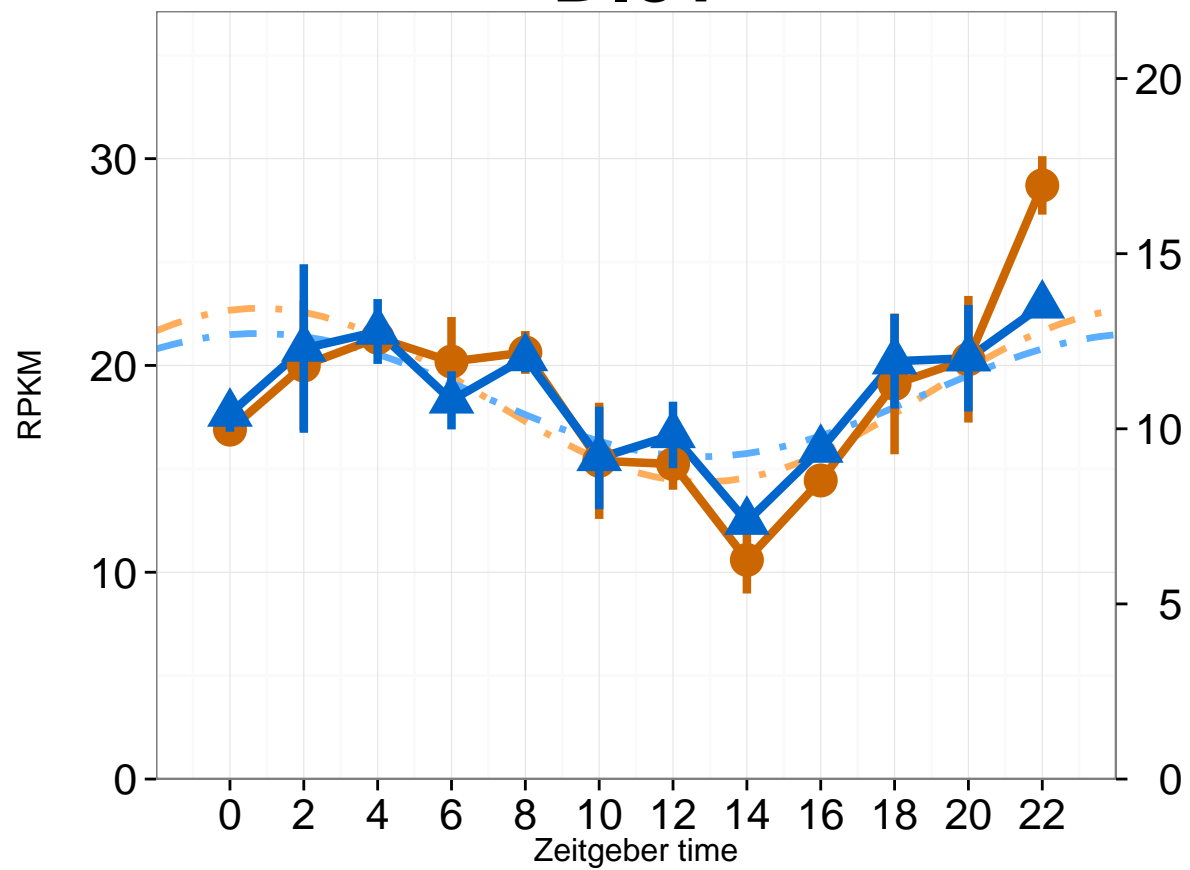

## Dlc1

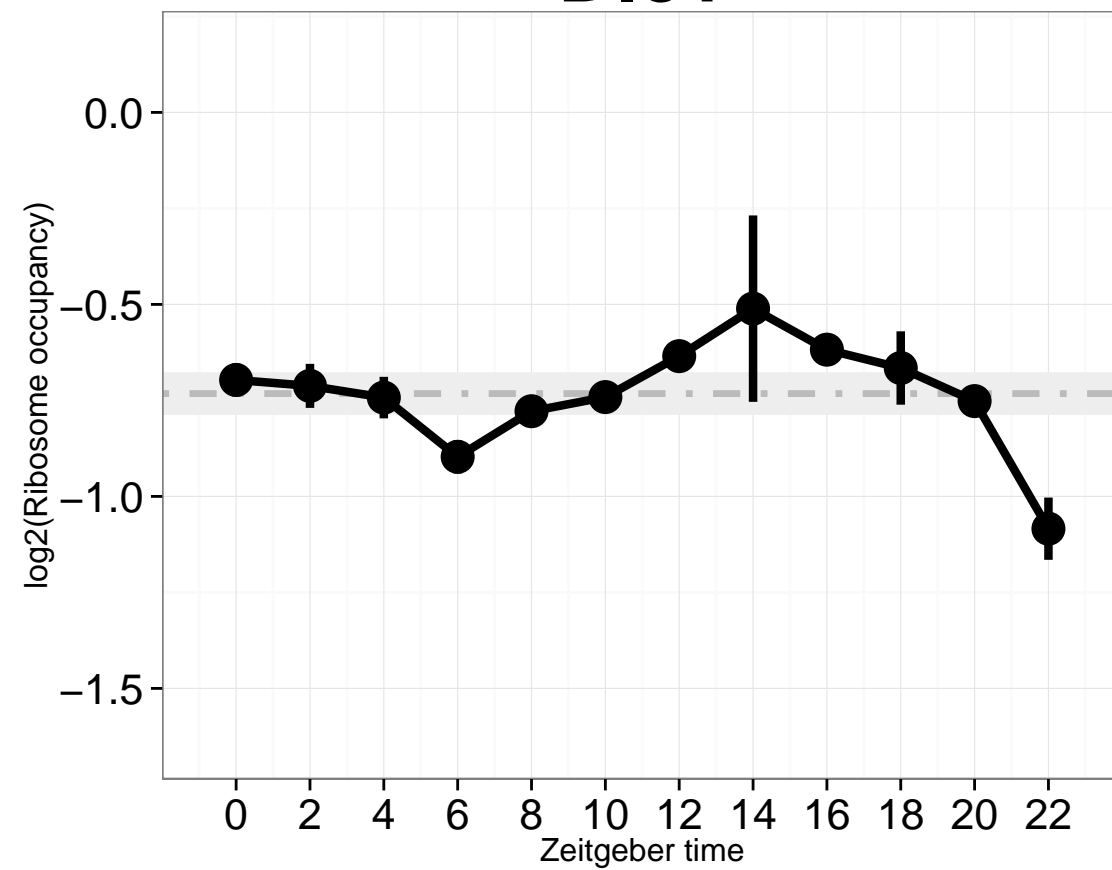

Supplement: SuppDataset_1.zip [file Dlc1_set_B.pdf › Supplemental Dataset 1/B-mRNA_rhythm_translation_nonrhyth/Dlc1_set_B.pdf]

## Dlg1

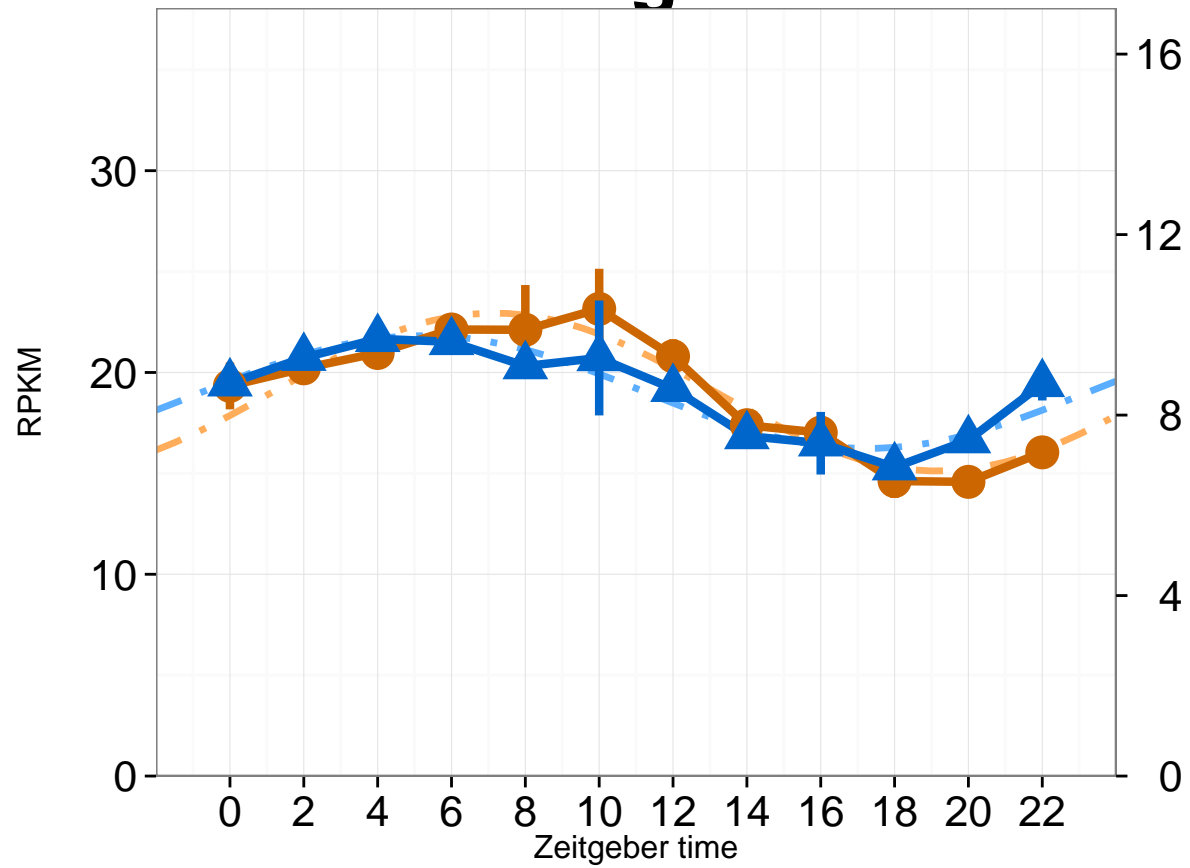

## Dlg1

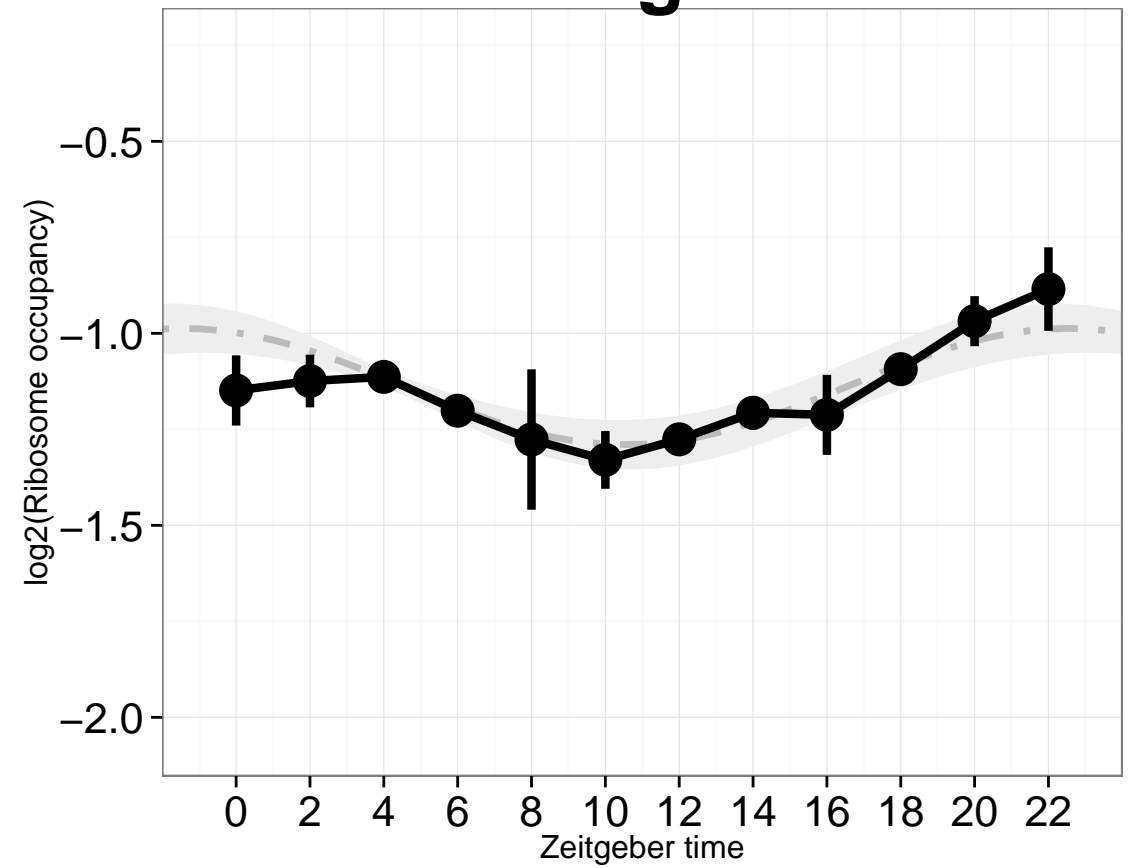

Supplement: SuppDataset_1.zip [file Dlg1_set_B.pdf › Supplemental Dataset 1/B-mRNA_rhythm_translation_nonrhyth/Dlg1_set_B.pdf]

# Dmap1

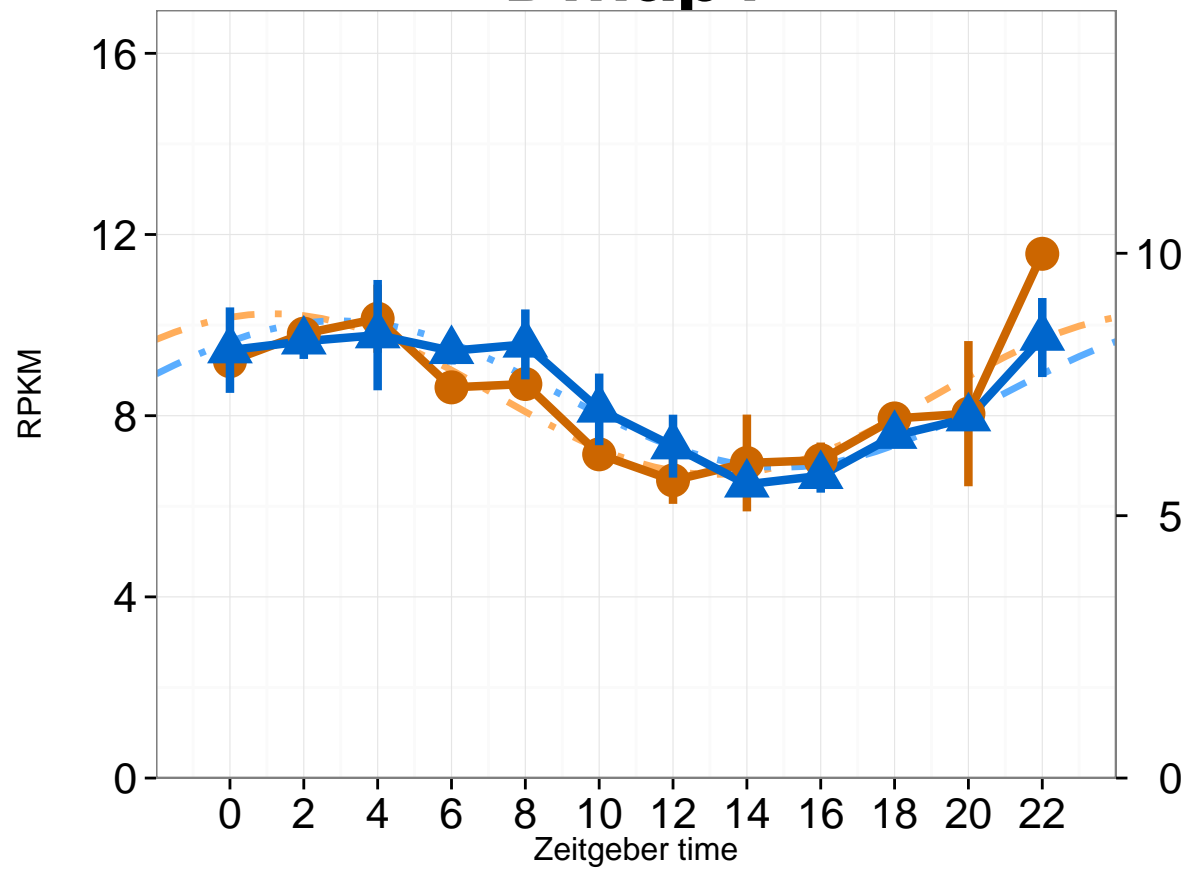

# Dmap1

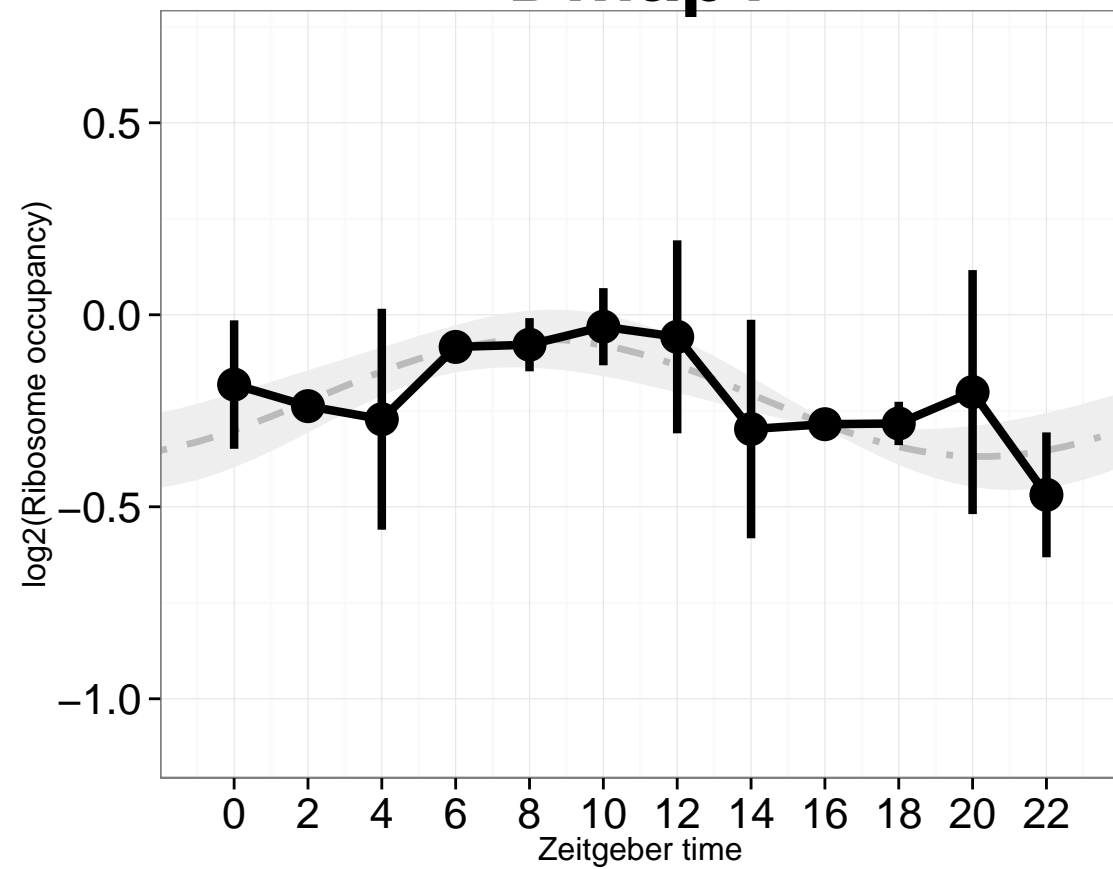

Supplement: SuppDataset_1.zip [file Dmap1_set_B.pdf › Supplemental Dataset 1/B-mRNA_rhythm_translation_nonrhyth/Dmap1_set_B.pdf]
