# Supplementary figures and images for: Ribosome profiling reveals the rhythmic liver translatome and circadian clock regulation by upstream open reading frames (part 103 of 113)
Source: HighWire-hosted journal article supplement (doi:10.1101/gr.195404.115), 2015-10-20

# B4galt5

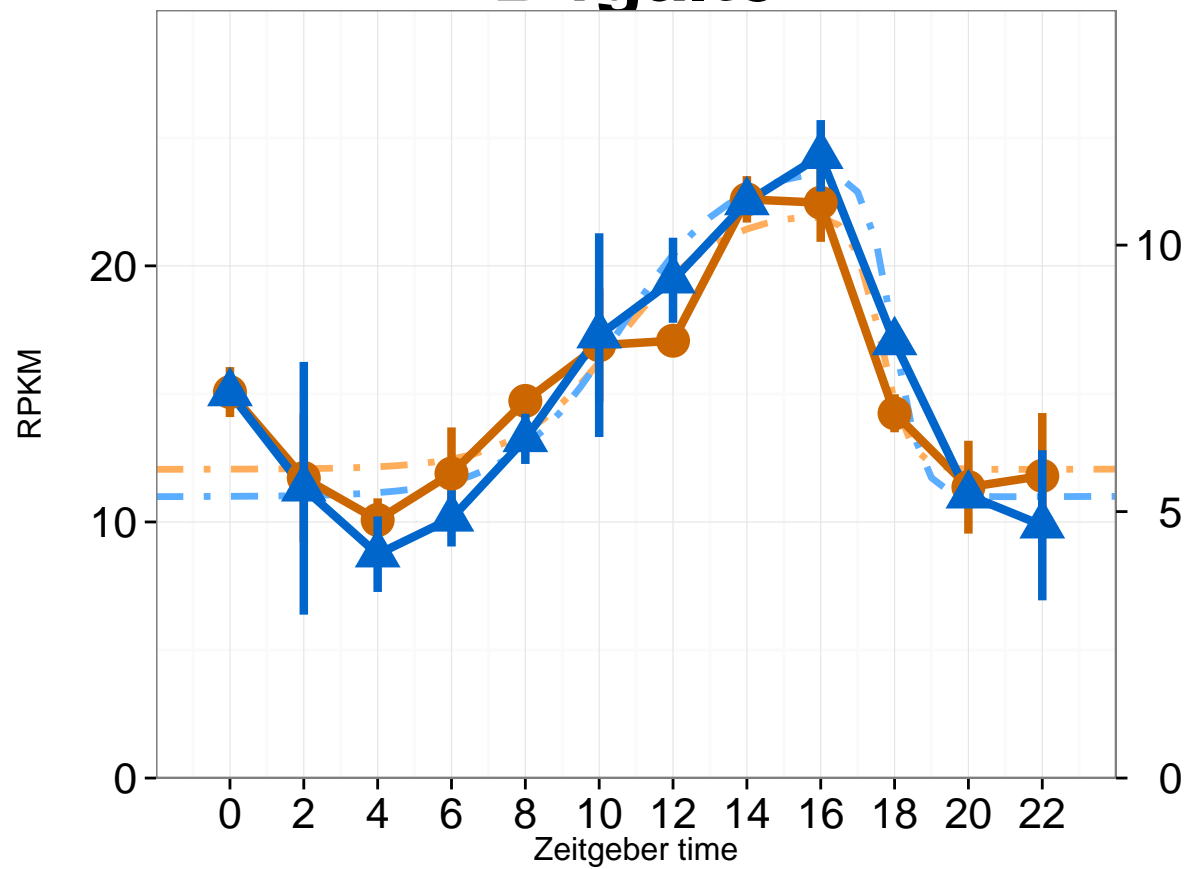

# B4galt5

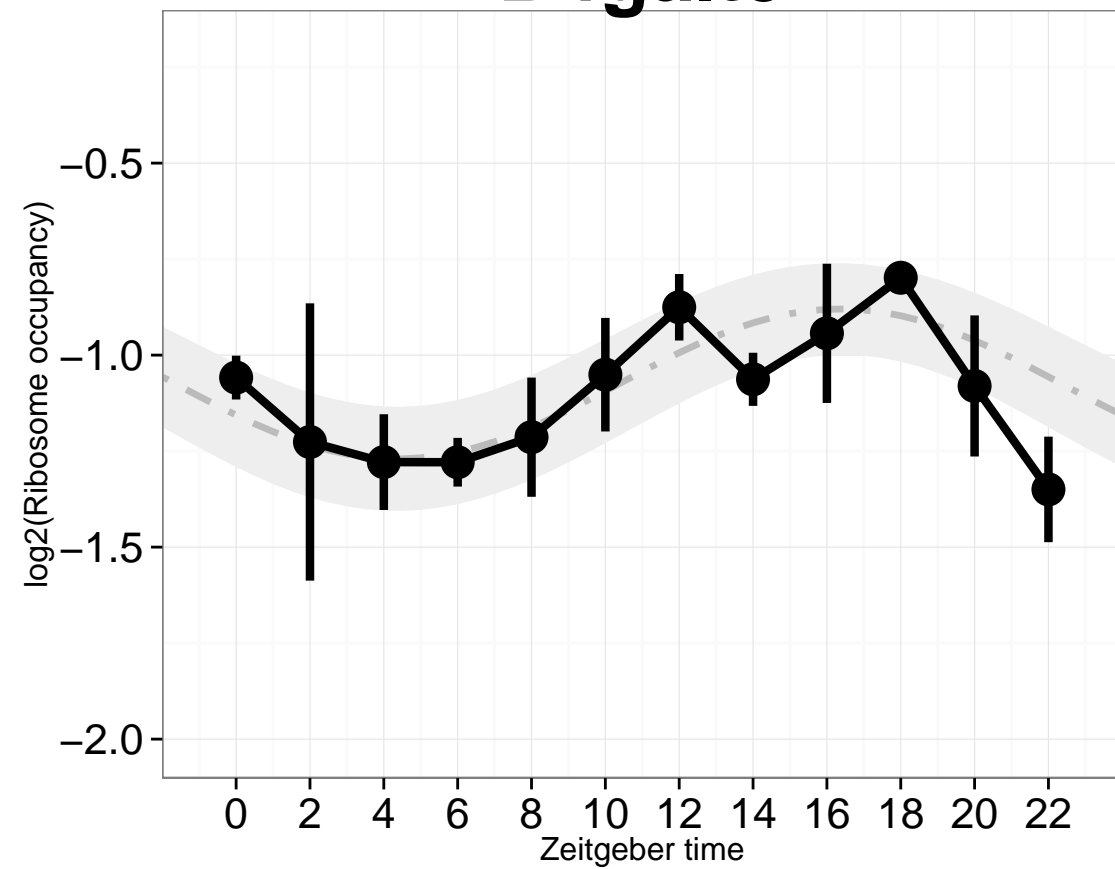

Supplement: SuppDataset_1.zip [file B4galt5_set_D.pdf › Supplemental Dataset 1/D-mRNA_rhythm_translation_rhyth/B4galt5_set_D.pdf]

## BC004004

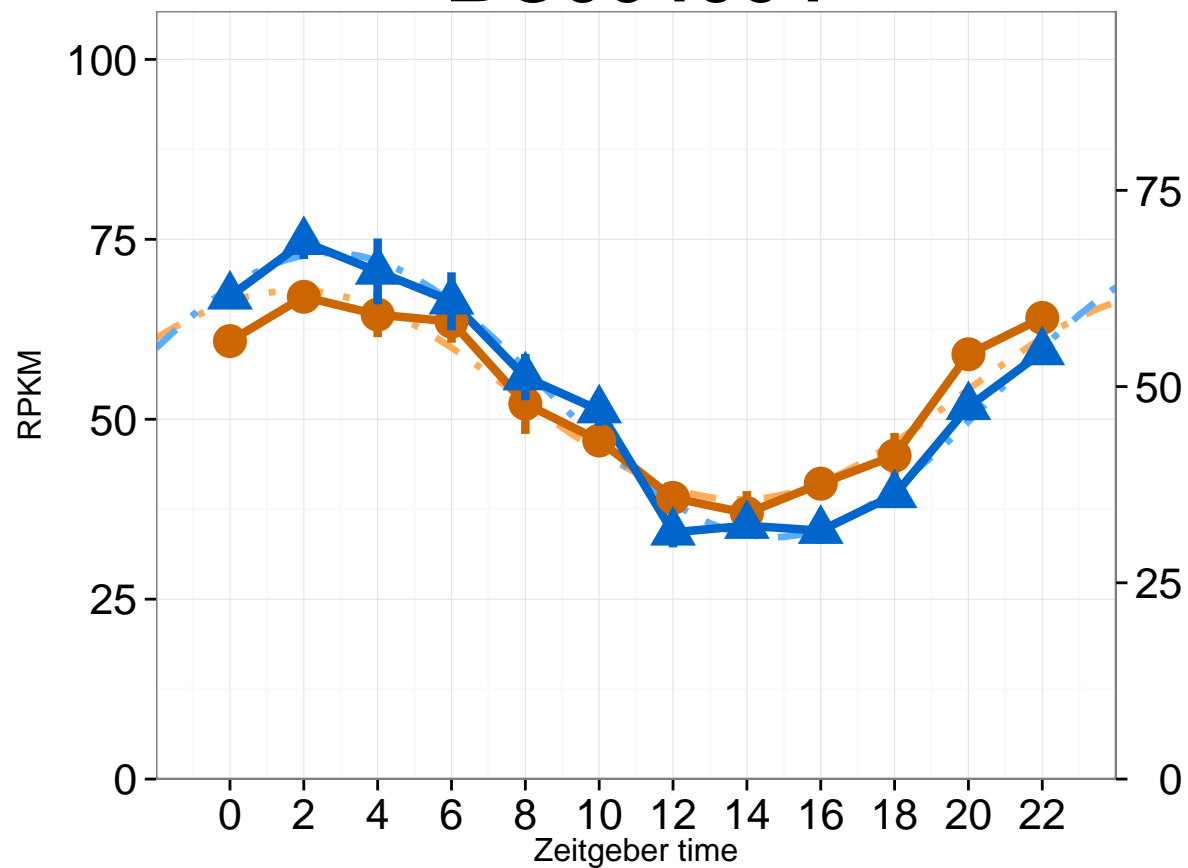

## BC004004

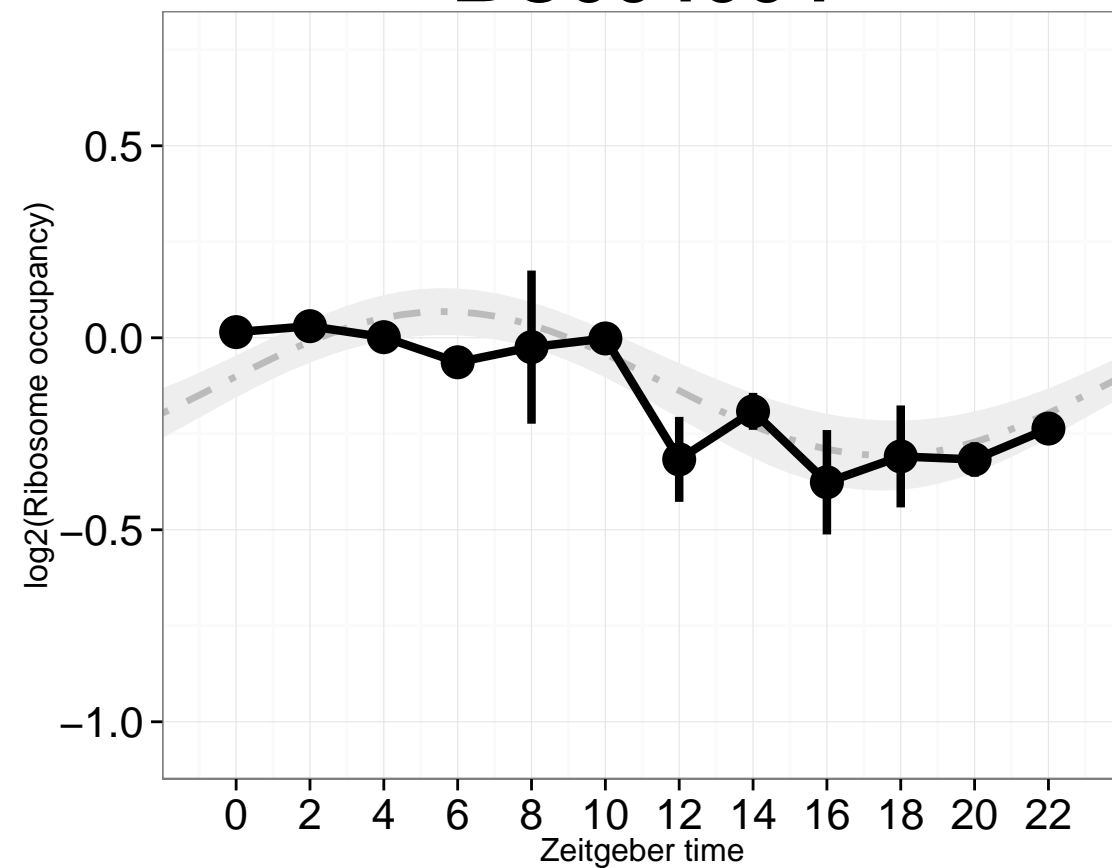

Supplement: SuppDataset_1.zip [file BC004004_set_D.pdf › Supplemental Dataset 1/D-mRNA_rhythm_translation_rhyth/BC004004_set_D.pdf]

# BC027231

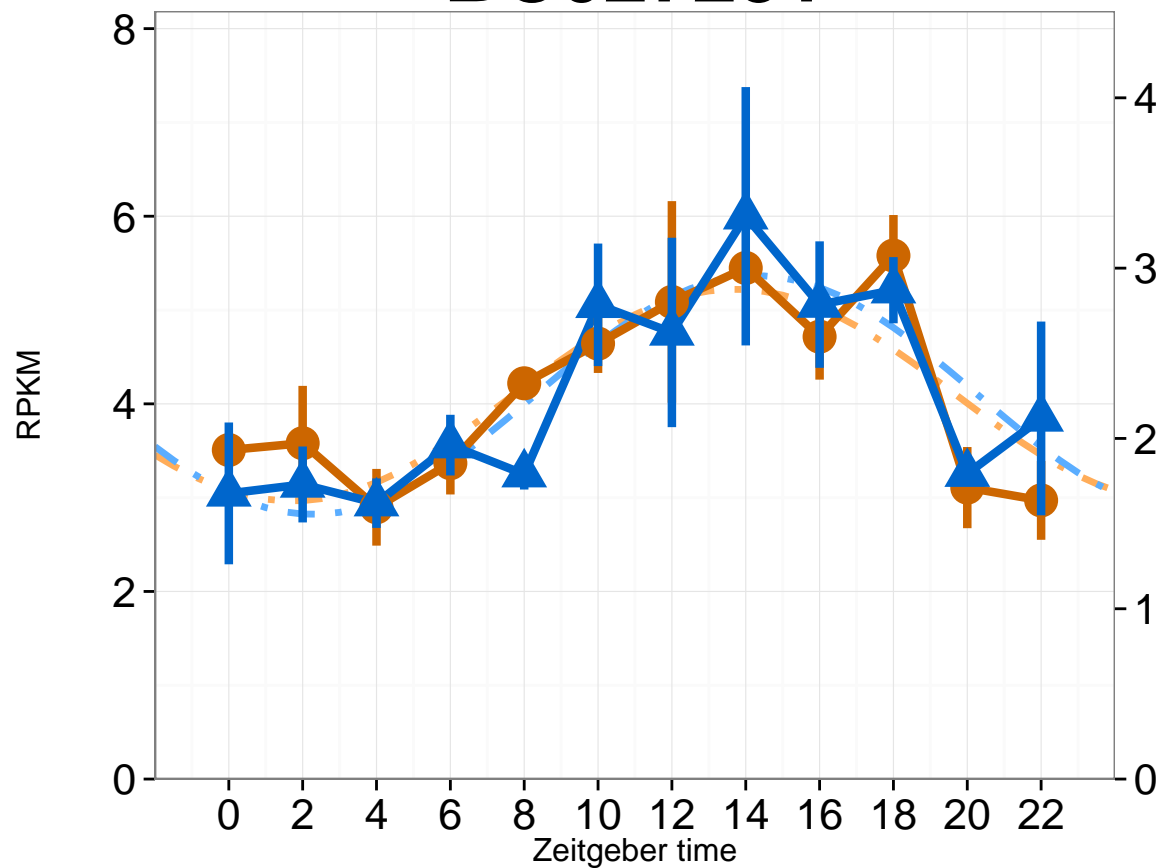

# BC027231

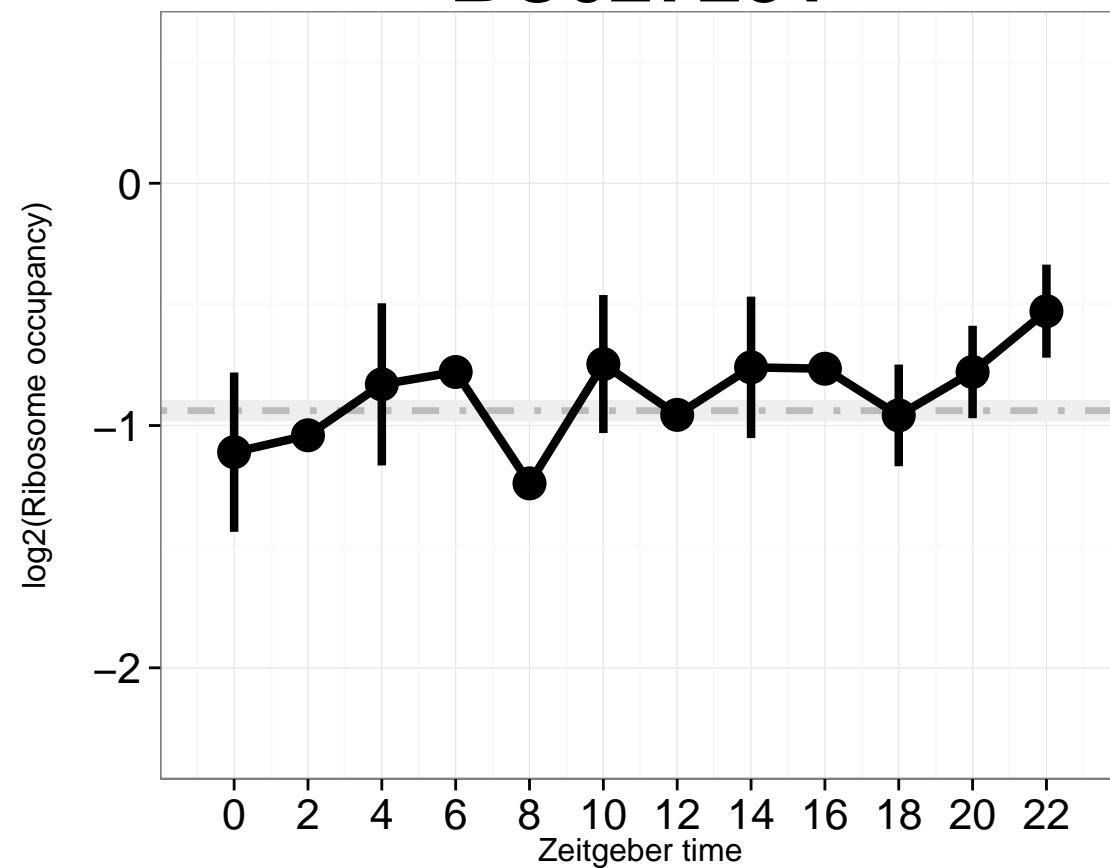

Supplement: SuppDataset_1.zip [file BC027231_set_D.pdf › Supplemental Dataset 1/D-mRNA_rhythm_translation_rhyth/BC027231_set_D.pdf]

# BC029214

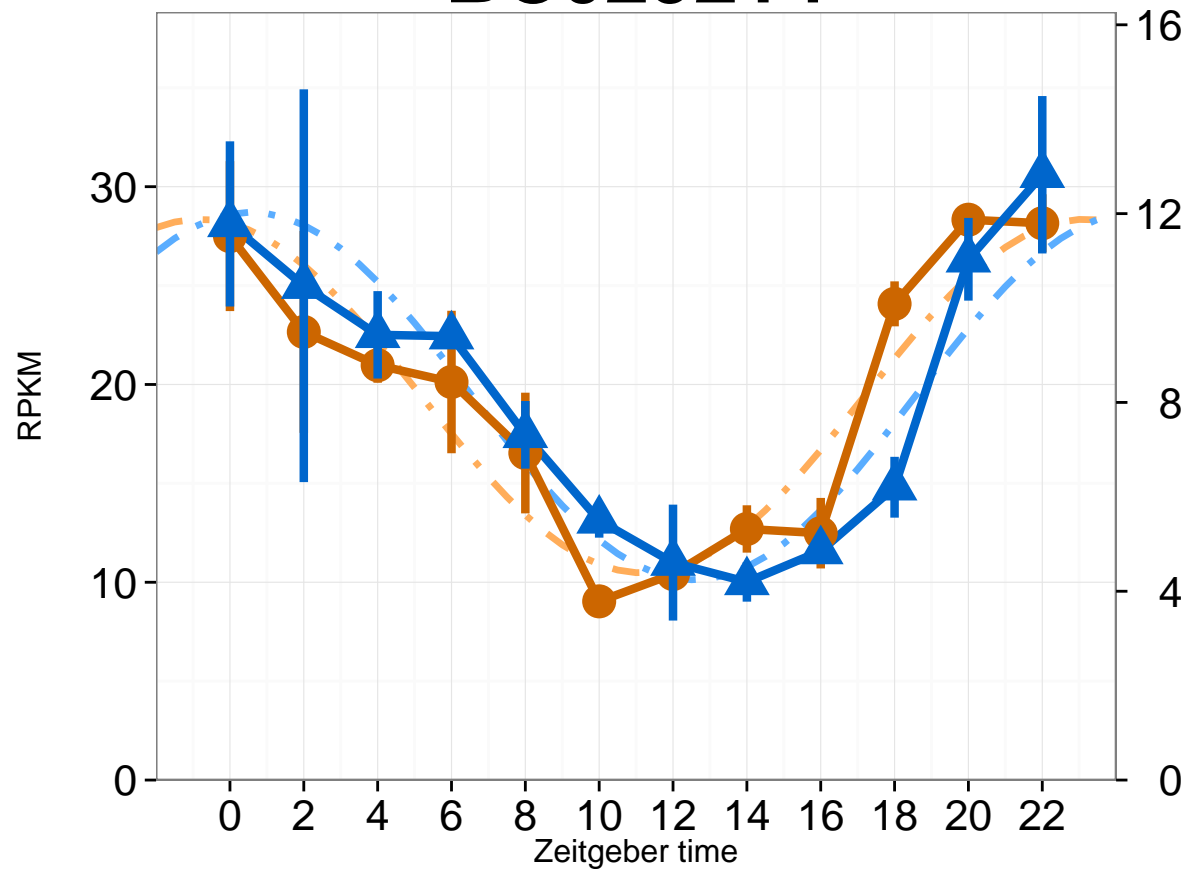

# BC029214

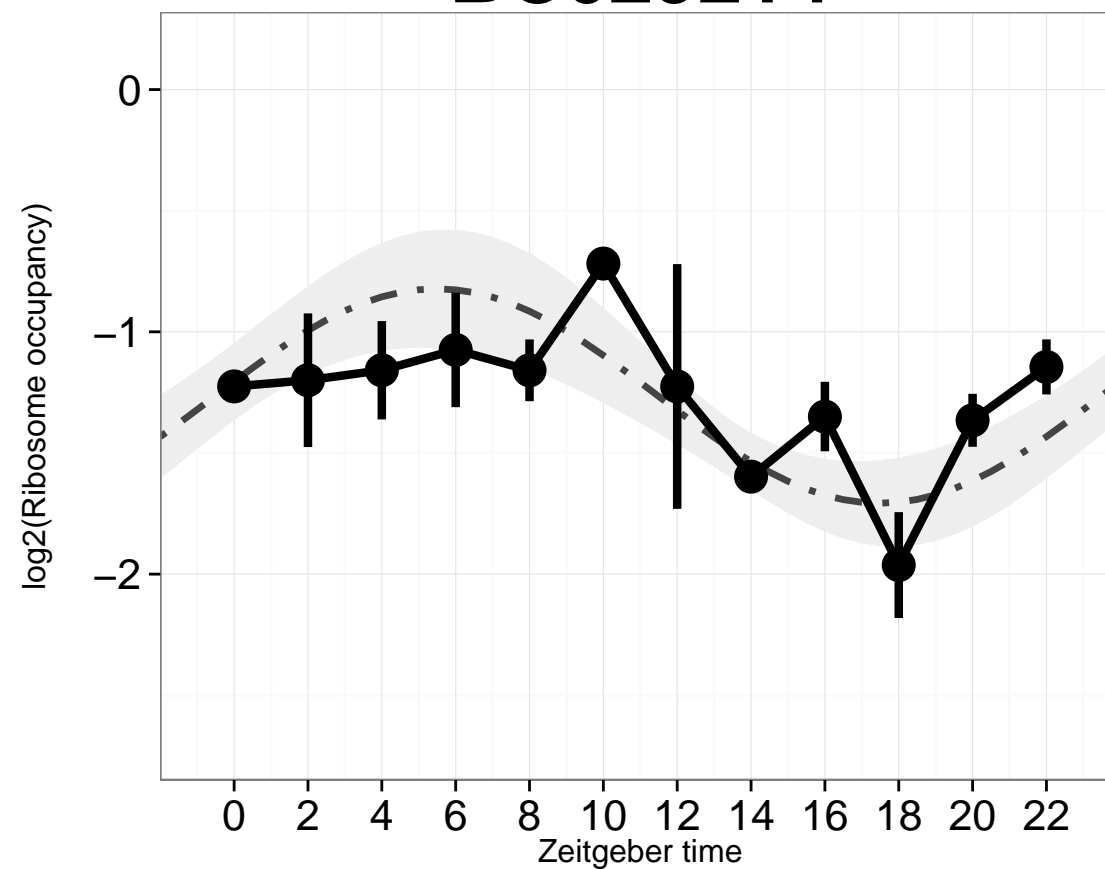

Supplement: SuppDataset_1.zip [file BC029214_set_D.pdf › Supplemental Dataset 1/D-mRNA_rhythm_translation_rhyth/BC029214_set_D.pdf]

# BC048546

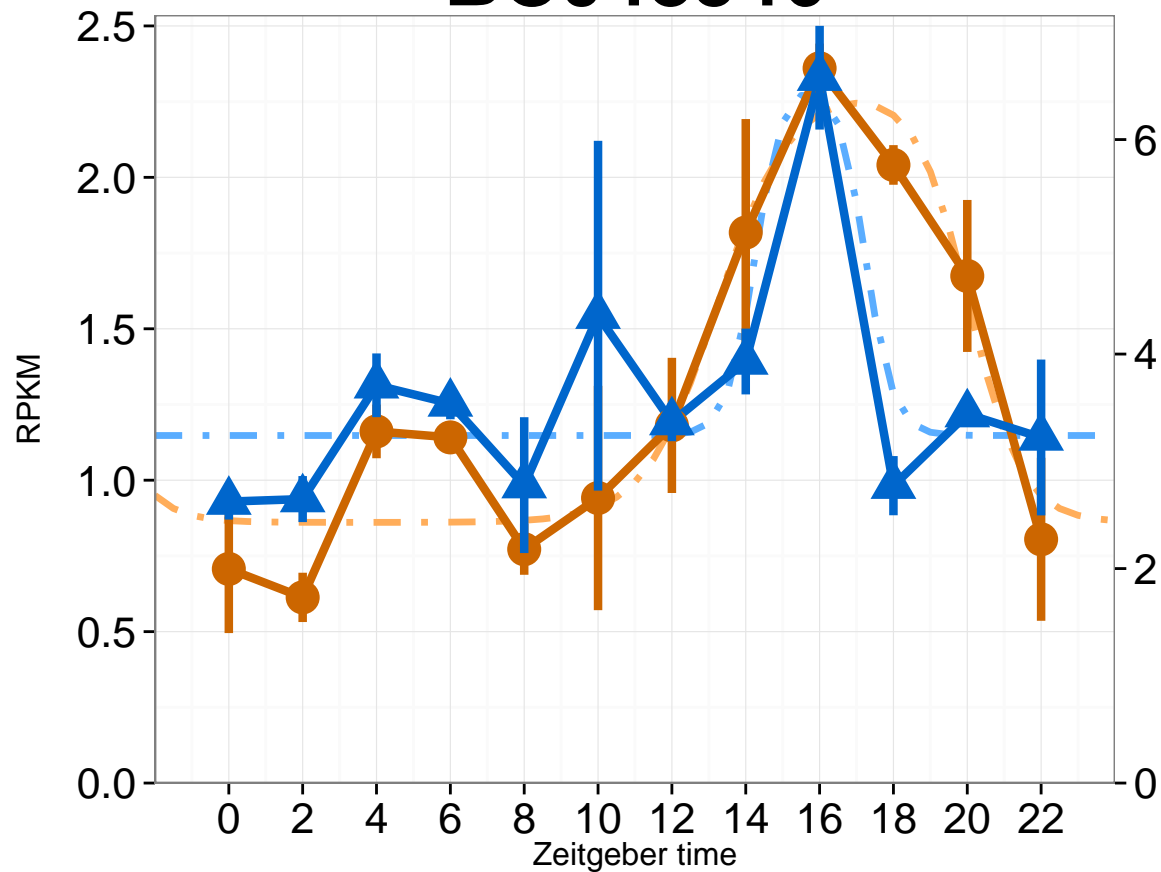

# BC048546

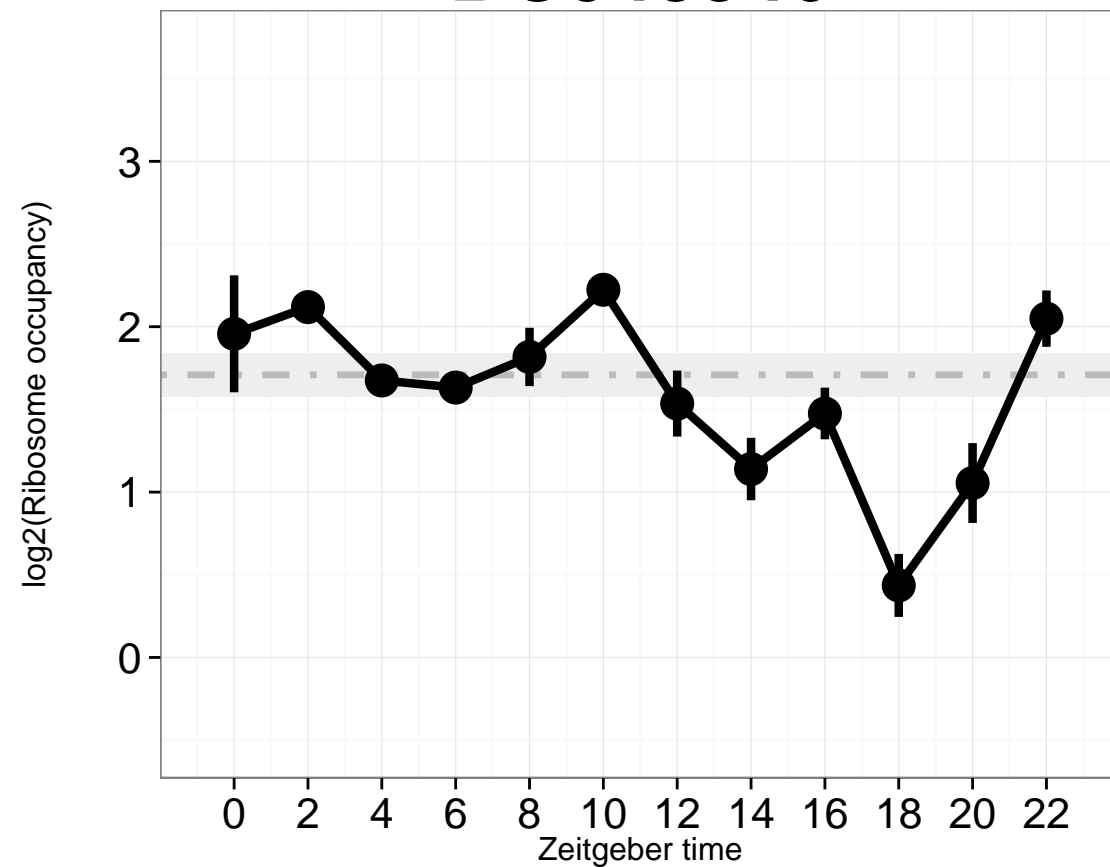

Supplement: SuppDataset_1.zip [file BC048546_set_D.pdf › Supplemental Dataset 1/D-mRNA_rhythm_translation_rhyth/BC048546_set_D.pdf]

# Bach1

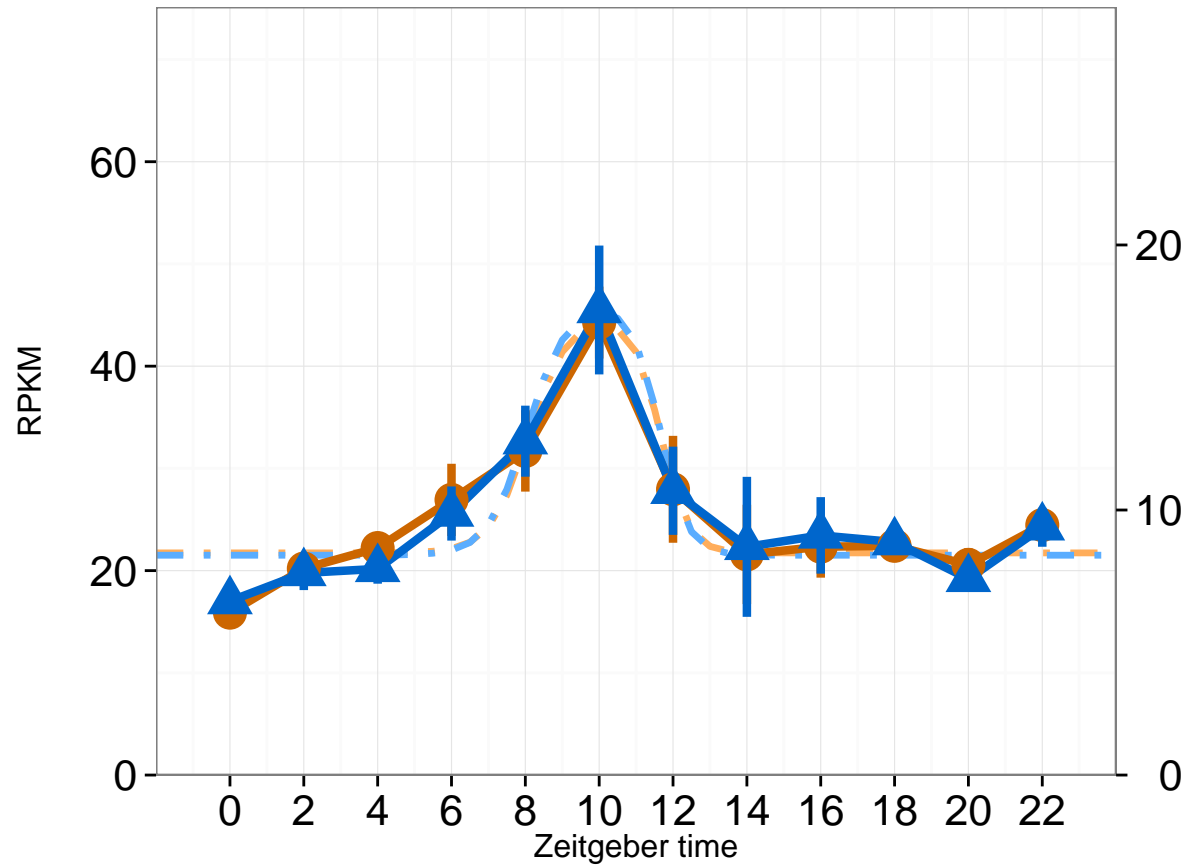

# Bach1

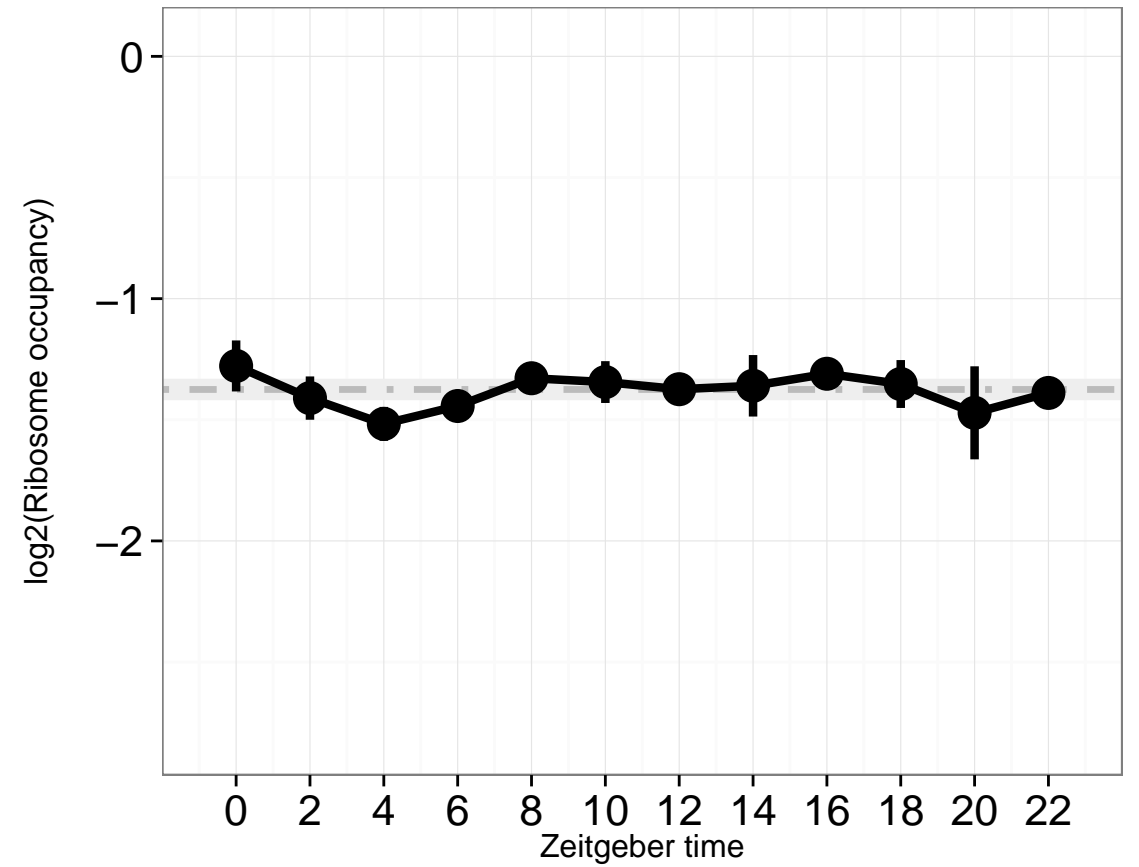

Supplement: SuppDataset_1.zip [file Bach1_set_D.pdf › Supplemental Dataset 1/D-mRNA_rhythm_translation_rhyth/Bach1_set_D.pdf]

## Baiap2

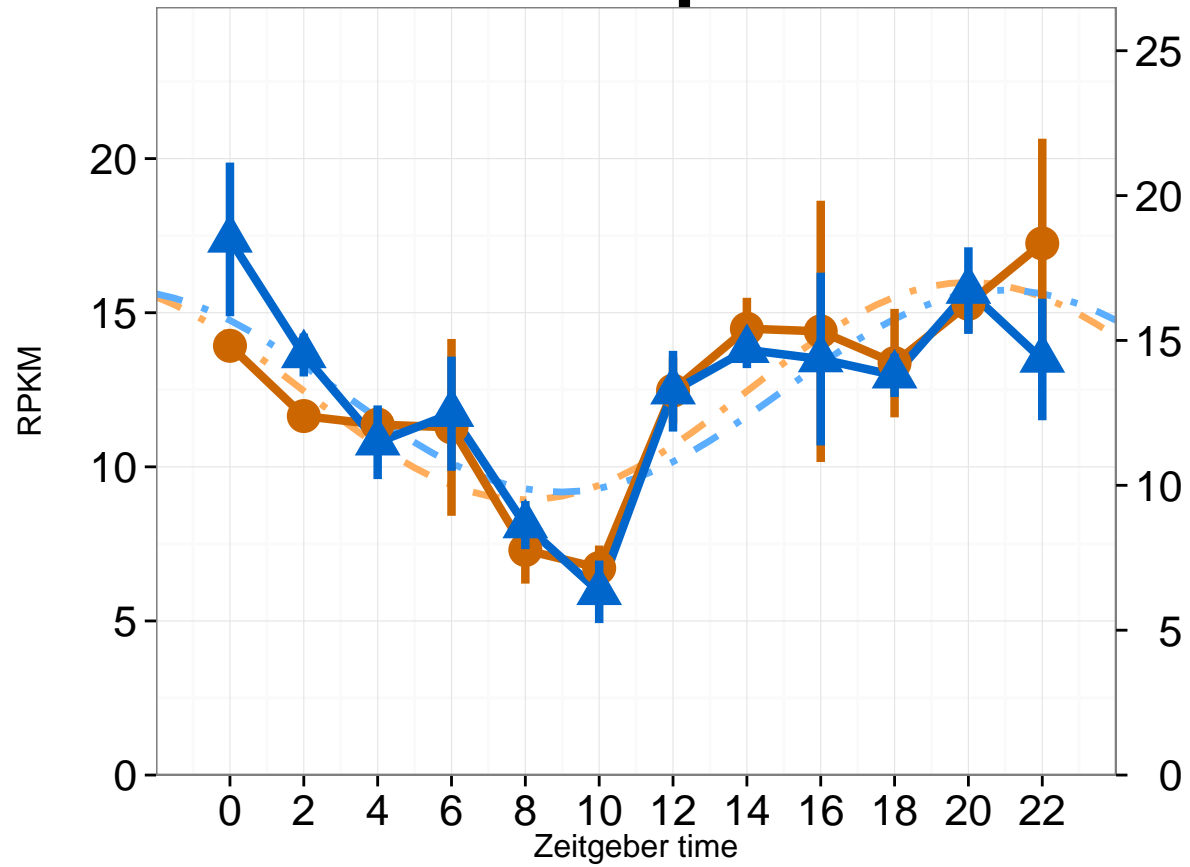

## Baiap2

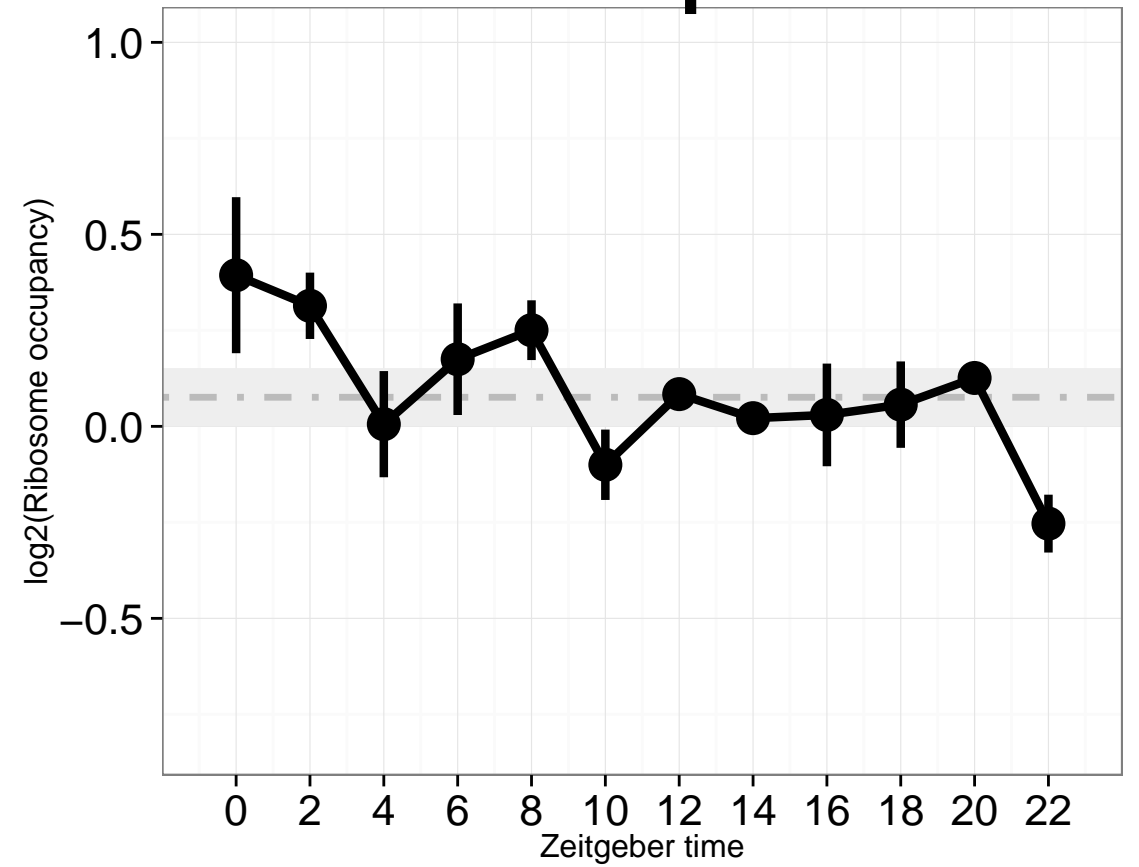

Supplement: SuppDataset_1.zip [file Baiap2_set_D.pdf › Supplemental Dataset 1/D-mRNA_rhythm_translation_rhyth/Baiap2_set_D.pdf]

# Baz1a

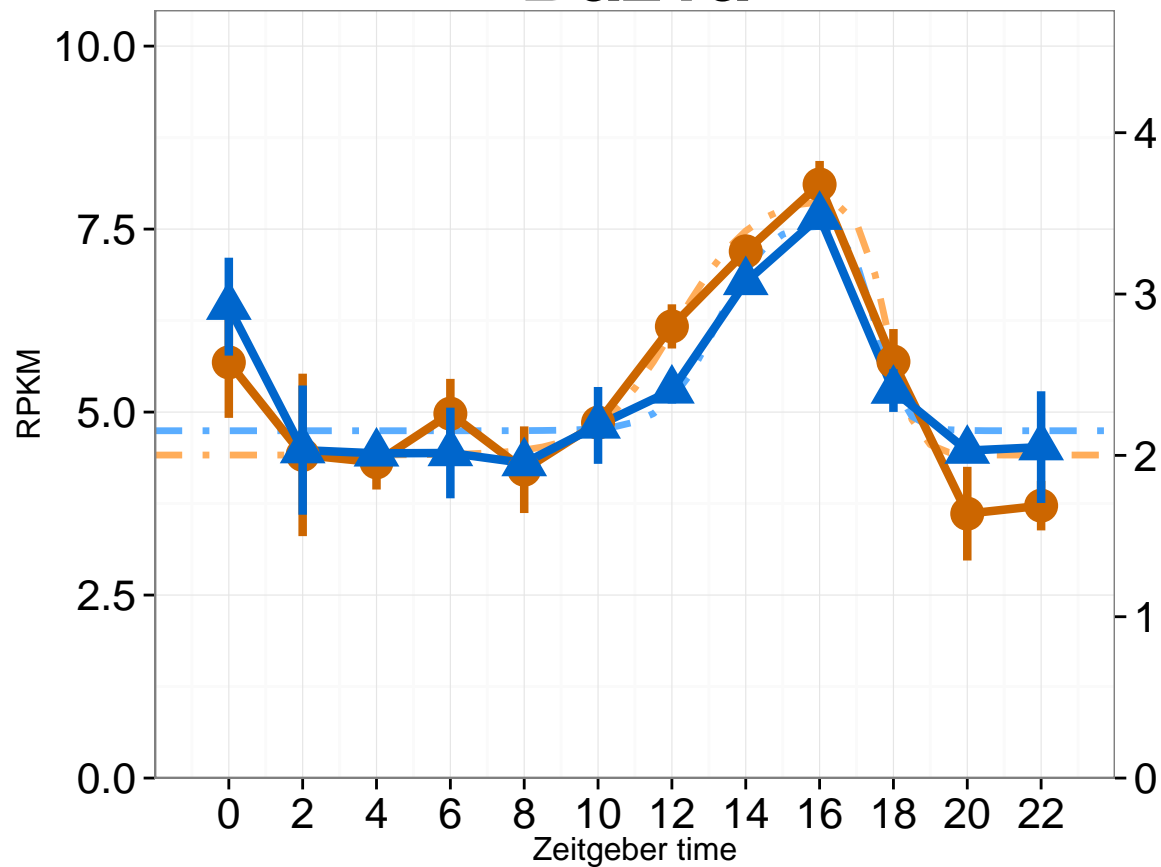

# Baz1a

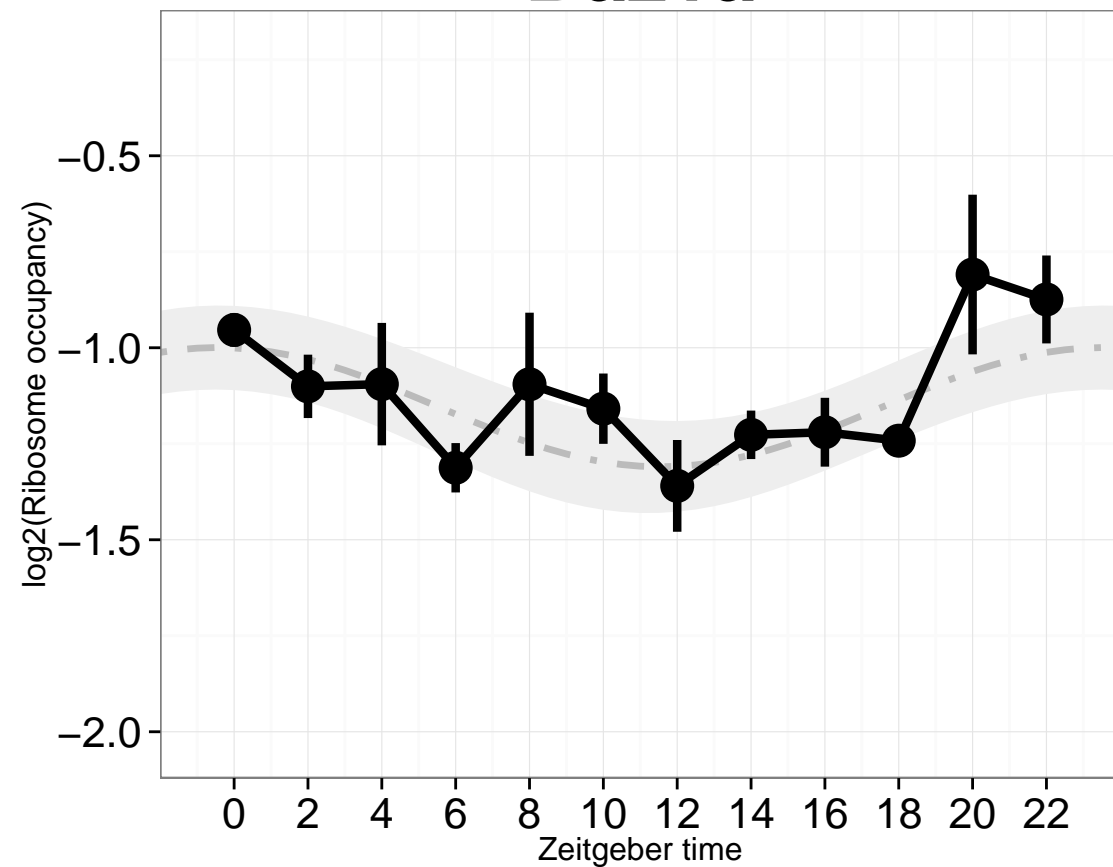

Supplement: SuppDataset_1.zip [file Baz1a_set_D.pdf › Supplemental Dataset 1/D-mRNA_rhythm_translation_rhyth/Baz1a_set_D.pdf]

# Baz1b

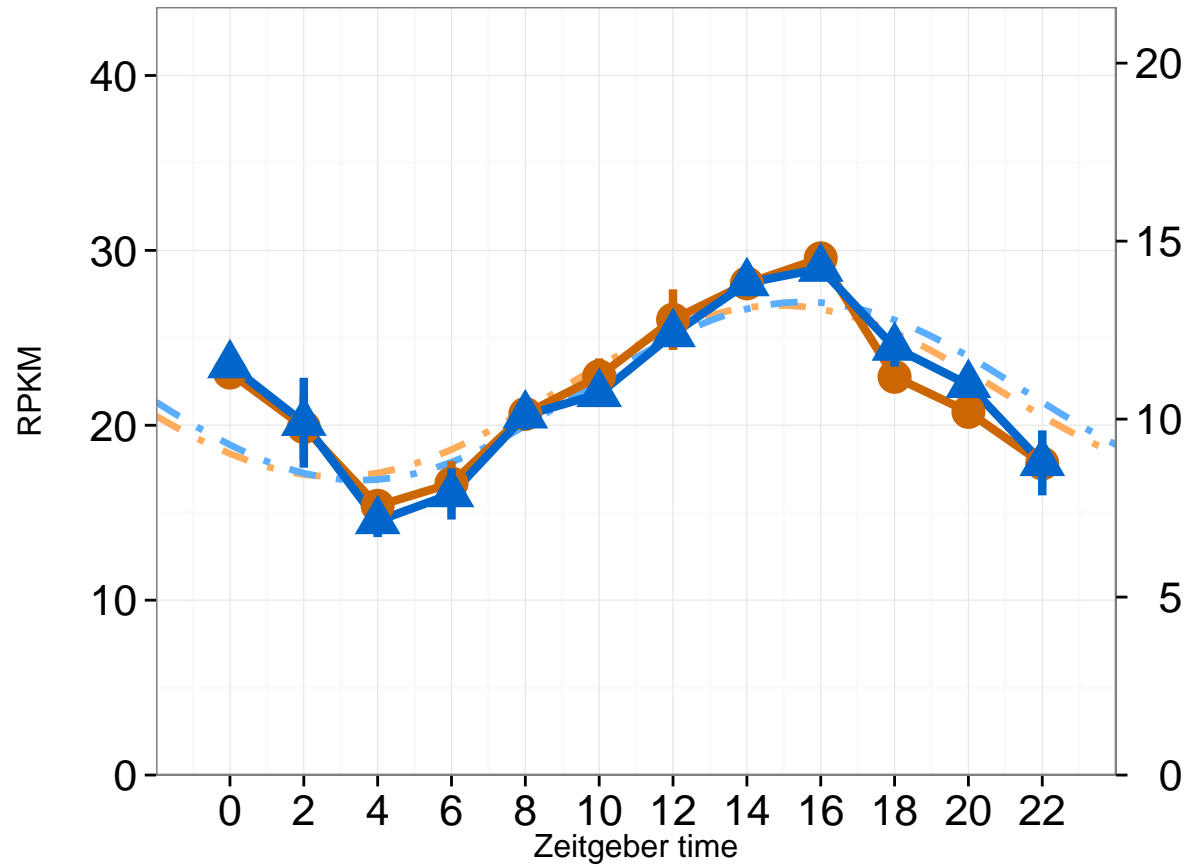

# Baz1b

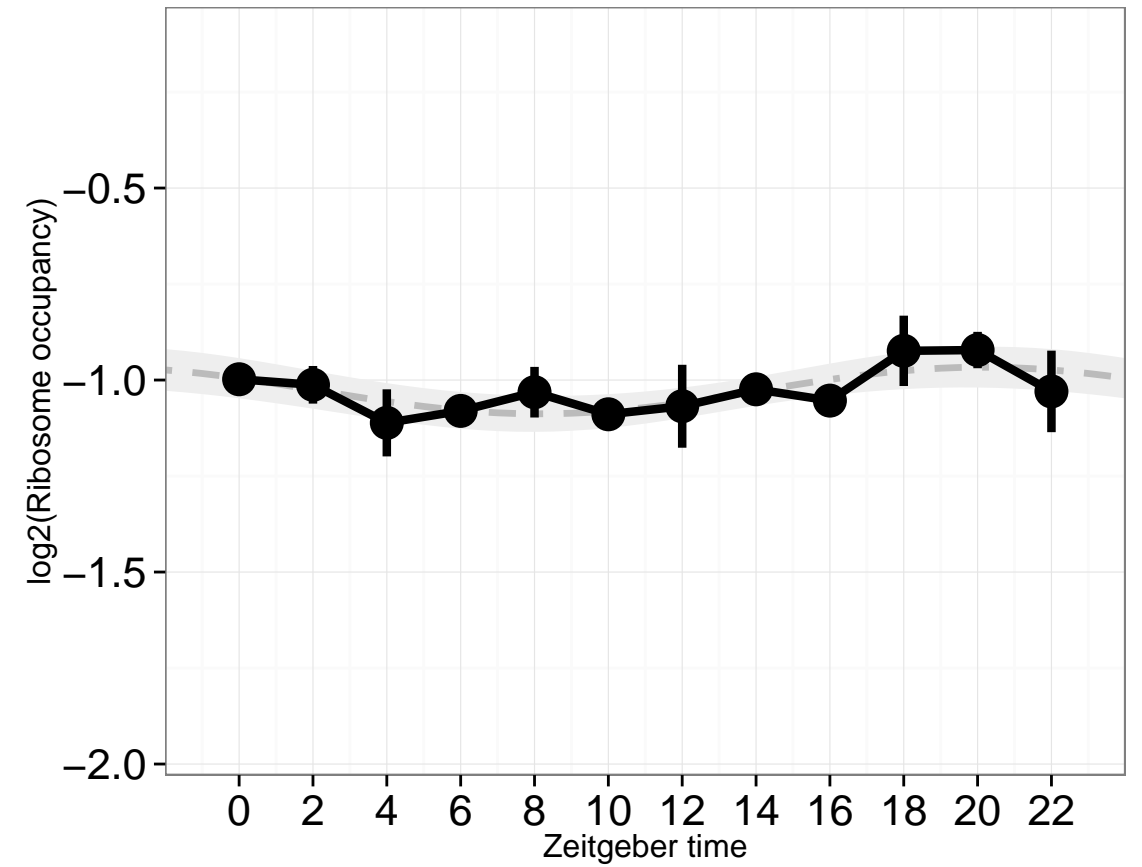

Supplement: SuppDataset_1.zip [file Baz1b_set_D.pdf › Supplemental Dataset 1/D-mRNA_rhythm_translation_rhyth/Baz1b_set_D.pdf]

## Bcl7c

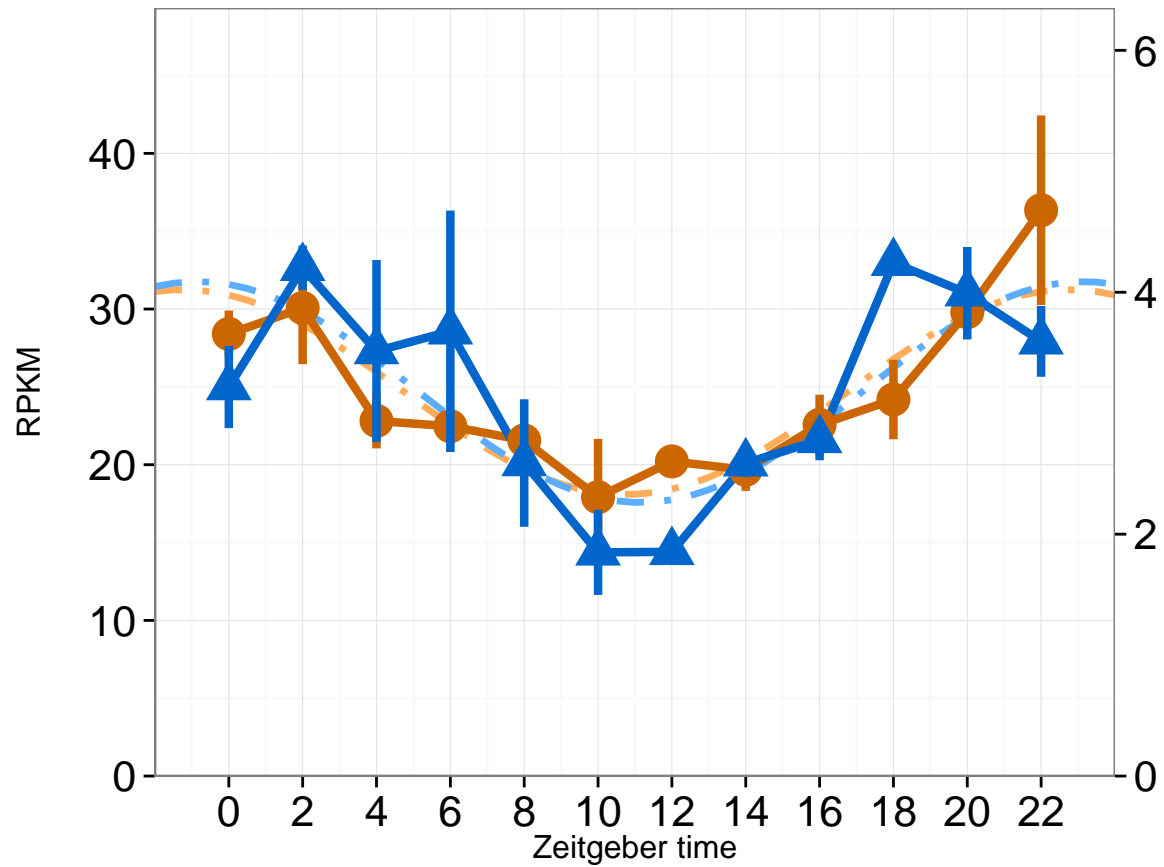

## Bcl7c

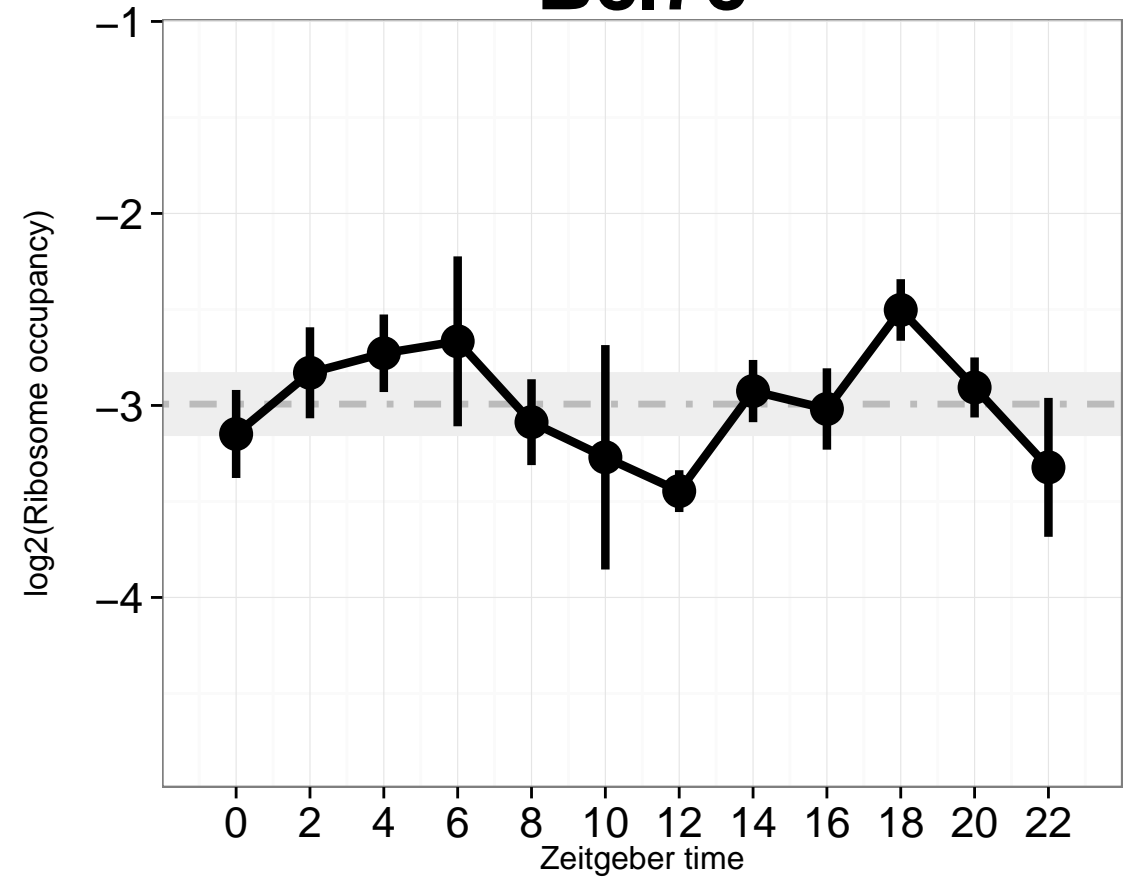

Supplement: SuppDataset_1.zip [file Bcl7c_set_D.pdf › Supplemental Dataset 1/D-mRNA_rhythm_translation_rhyth/Bcl7c_set_D.pdf]

## Bclaf1

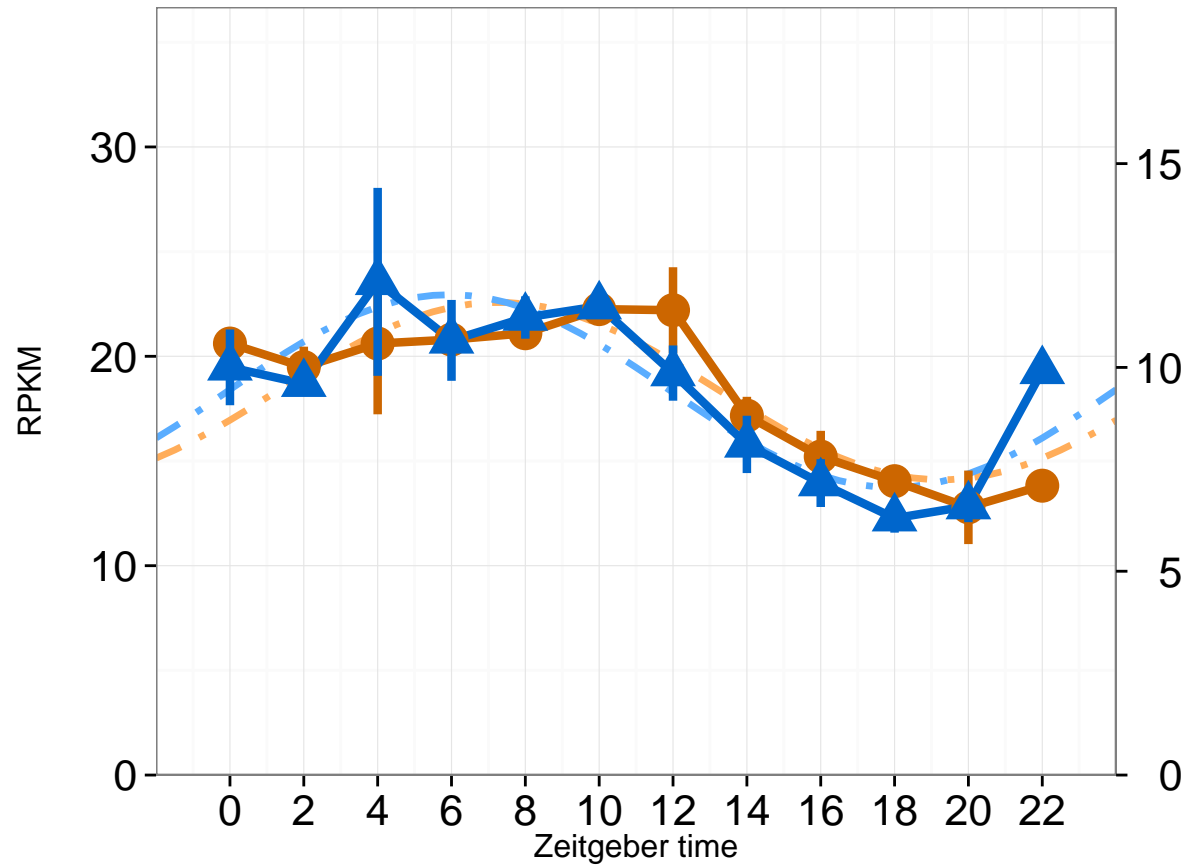

## Bclaf1

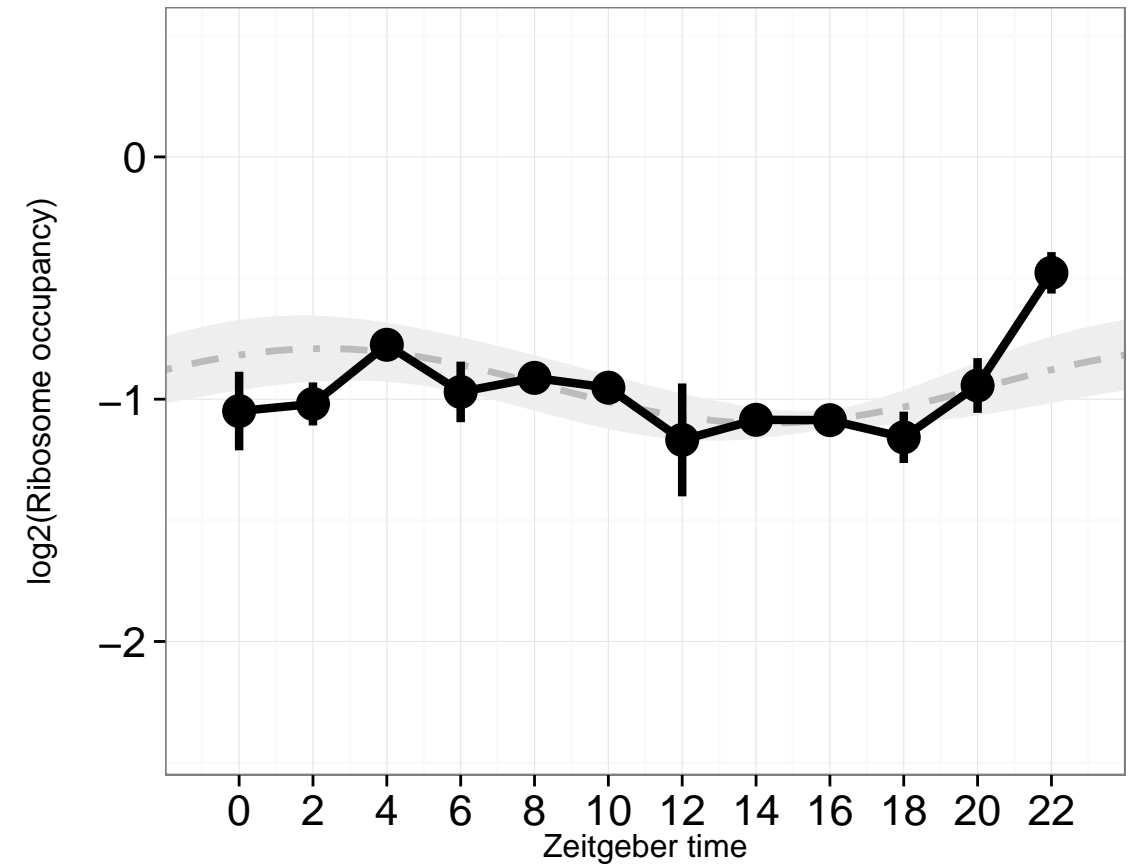

Supplement: SuppDataset_1.zip [file Bclaf1_set_D.pdf › Supplemental Dataset 1/D-mRNA_rhythm_translation_rhyth/Bclaf1_set_D.pdf]

## Bco2

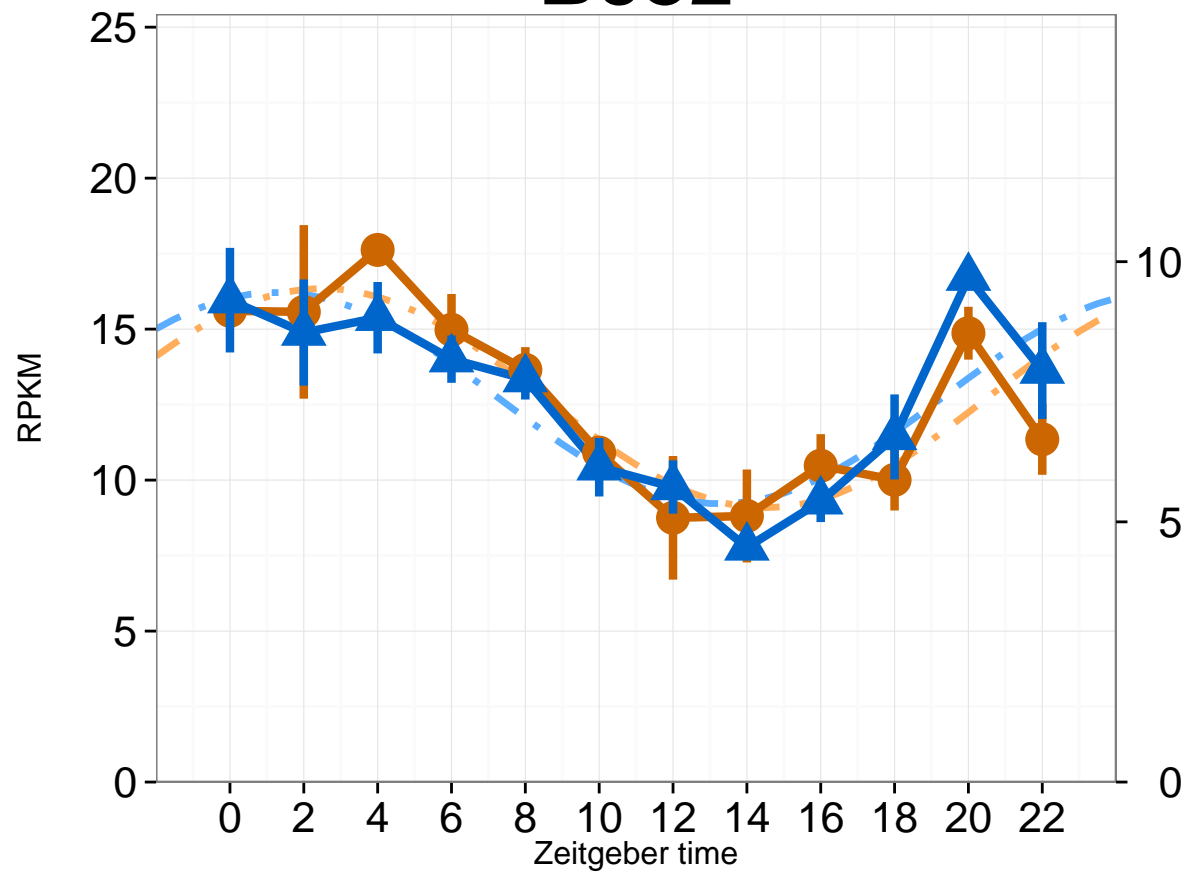

## Bco2

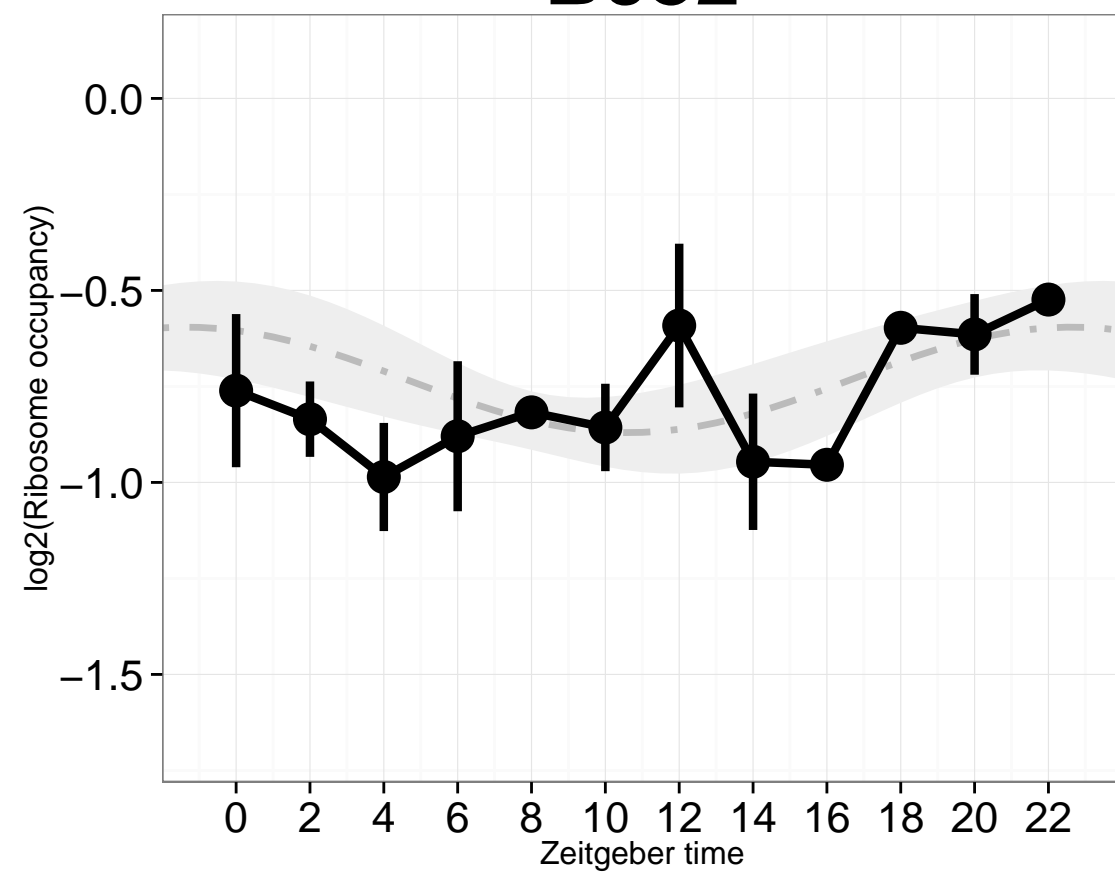

Supplement: SuppDataset_1.zip [file Bco2_set_D.pdf › Supplemental Dataset 1/D-mRNA_rhythm_translation_rhyth/Bco2_set_D.pdf]

## Bet1

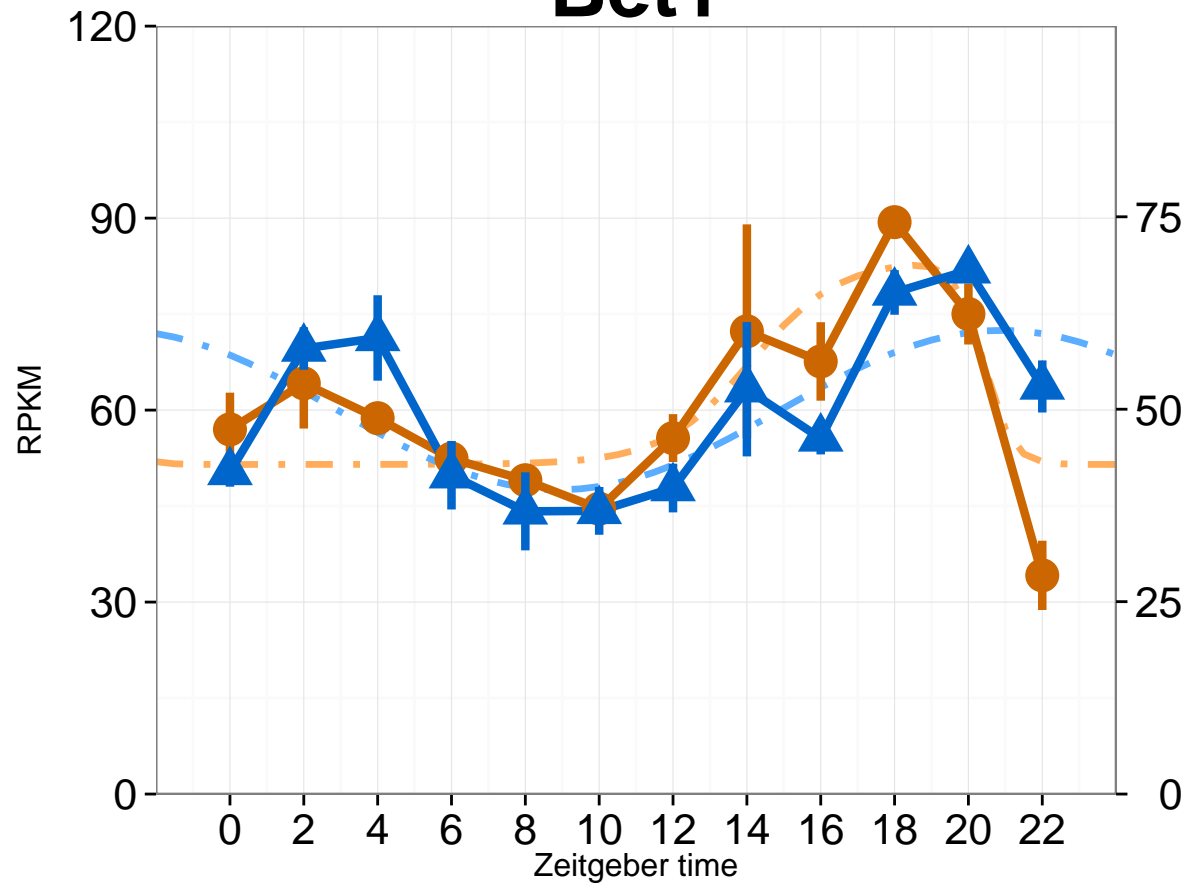

## Bet1

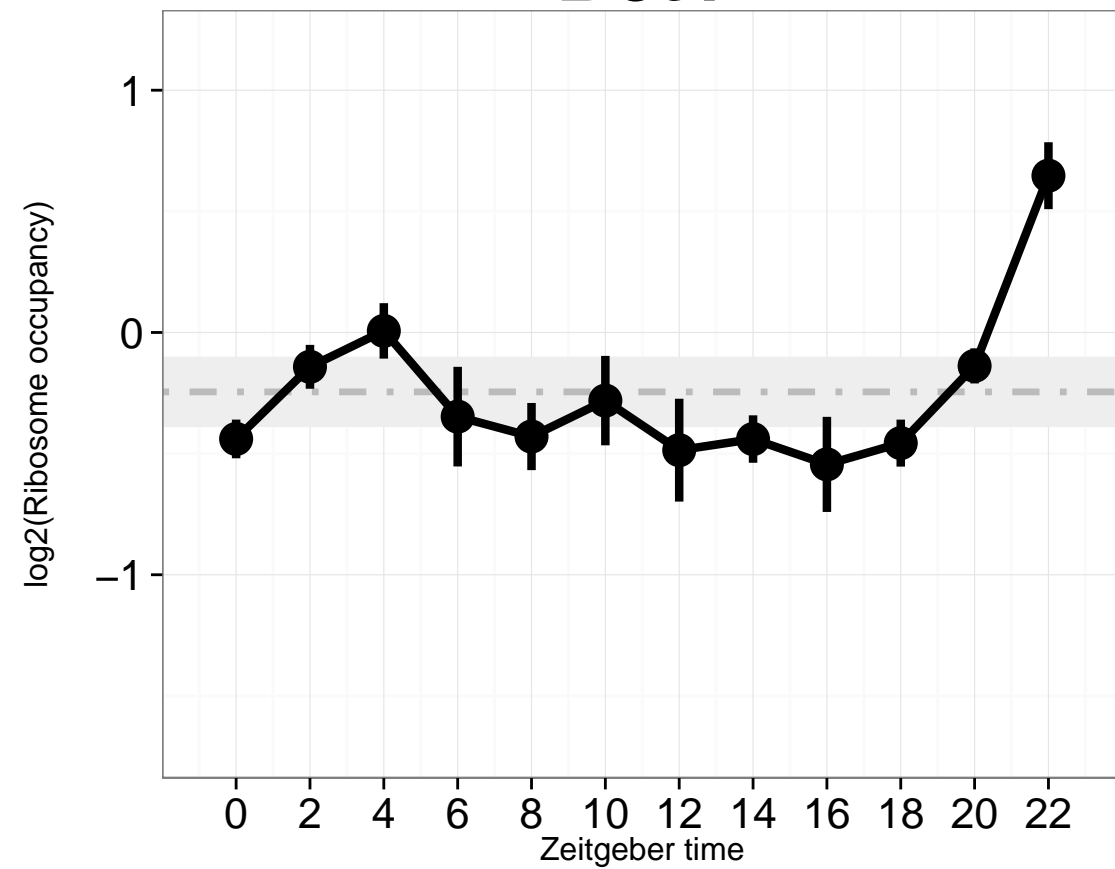

Supplement: SuppDataset_1.zip [file Bet1_set_D.pdf › Supplemental Dataset 1/D-mRNA_rhythm_translation_rhyth/Bet1_set_D.pdf]

## Bhlhe40

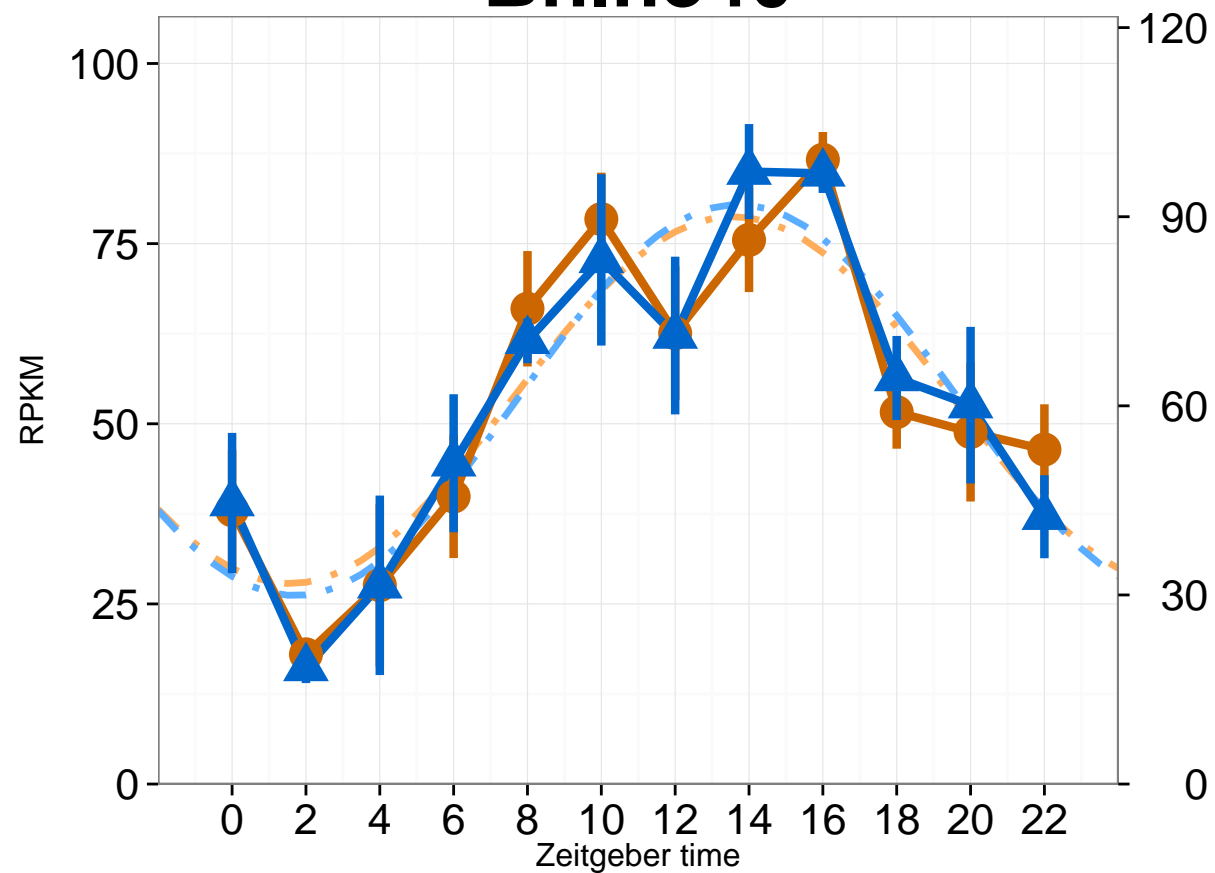

## Bhlhe40

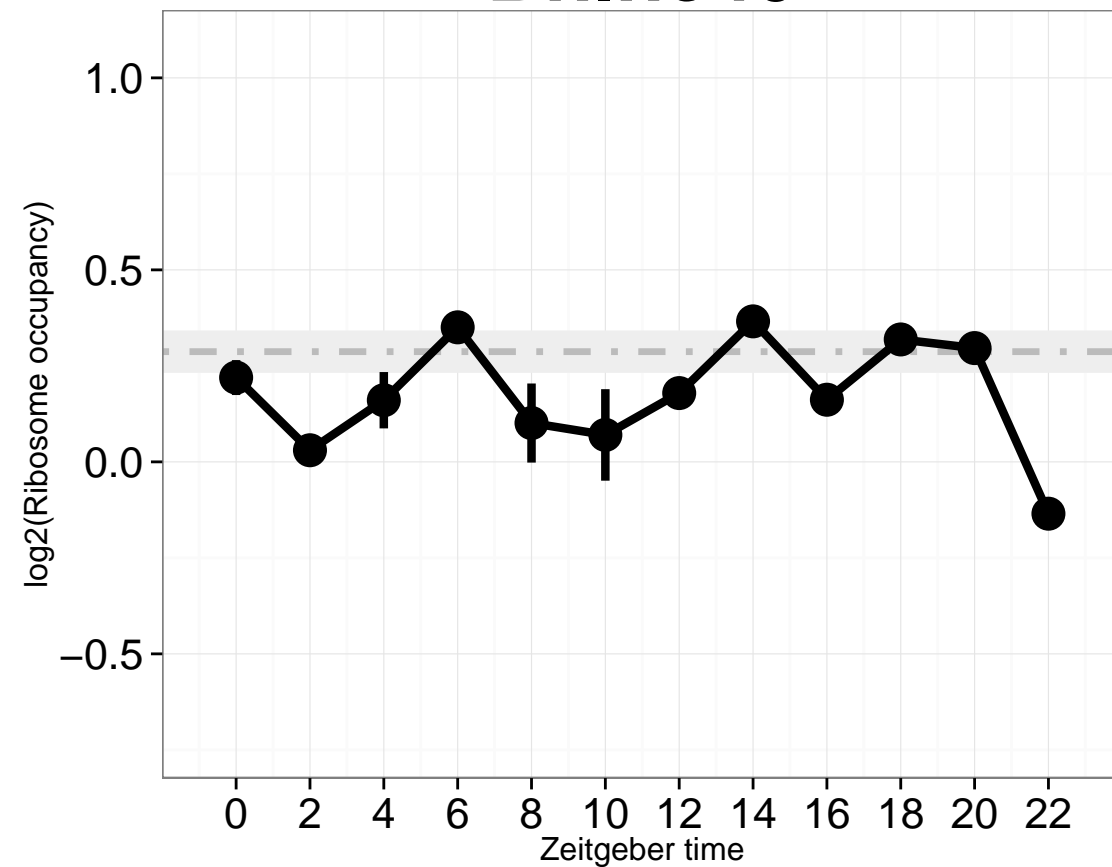

Supplement: SuppDataset_1.zip [file Bhlhe40_set_D.pdf › Supplemental Dataset 1/D-mRNA_rhythm_translation_rhyth/Bhlhe40_set_D.pdf]

# Bhlhe41

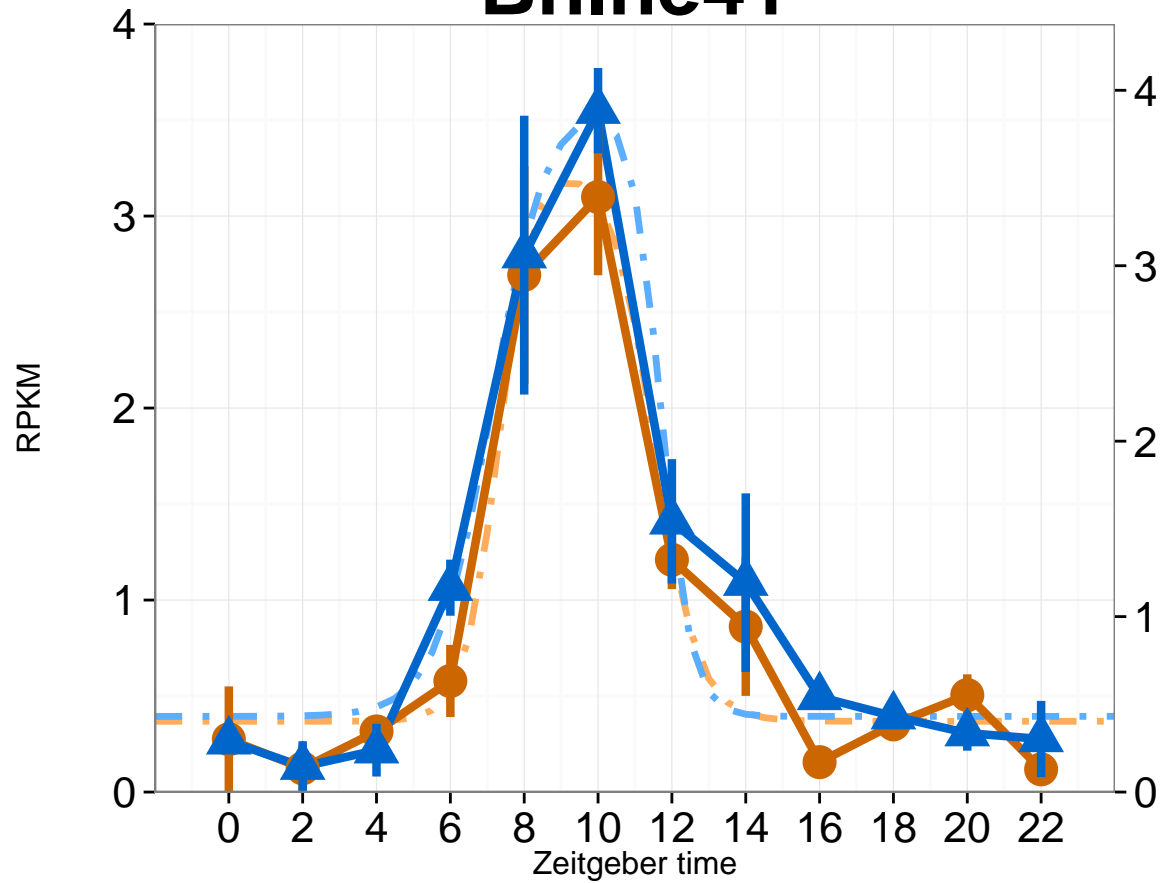

# Bhlhe41

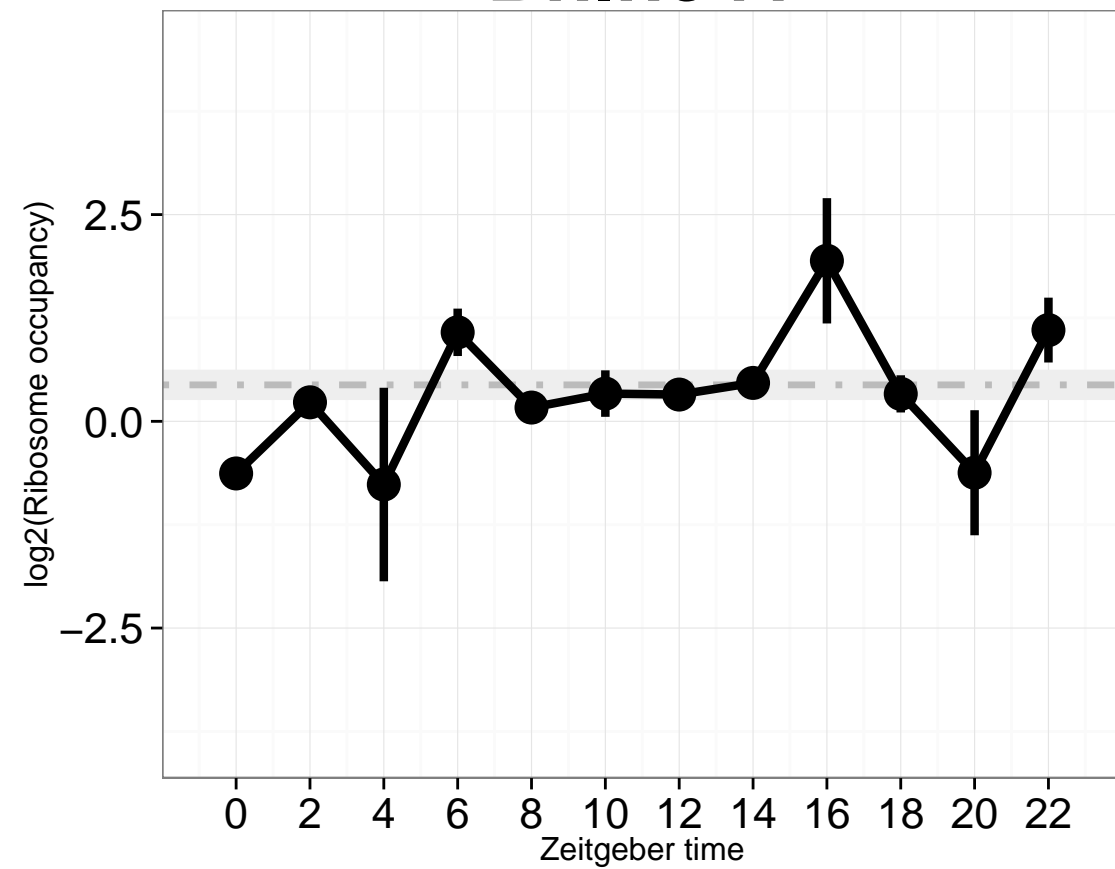

Supplement: SuppDataset_1.zip [file Bhlhe41_set_D.pdf › Supplemental Dataset 1/D-mRNA_rhythm_translation_rhyth/Bhlhe41_set_D.pdf]

## Bhmt

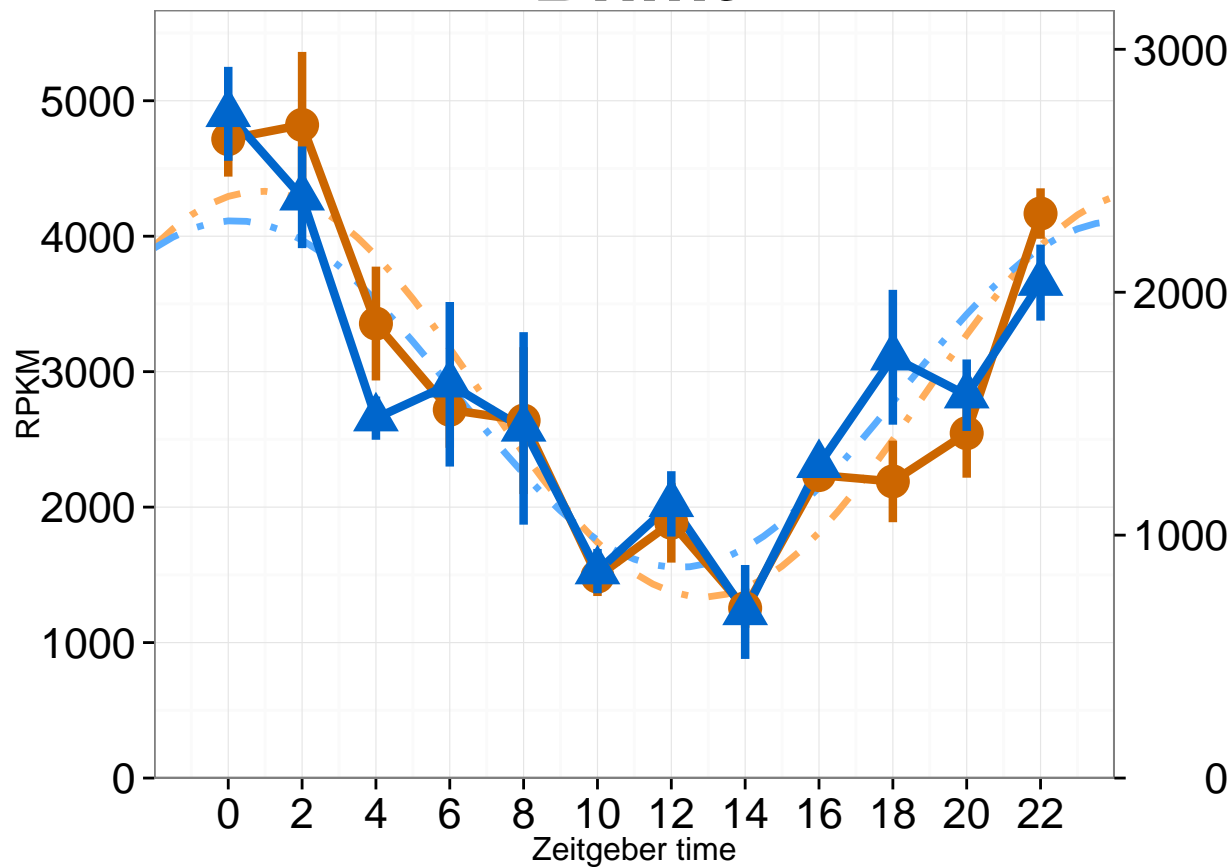

## Bhmt

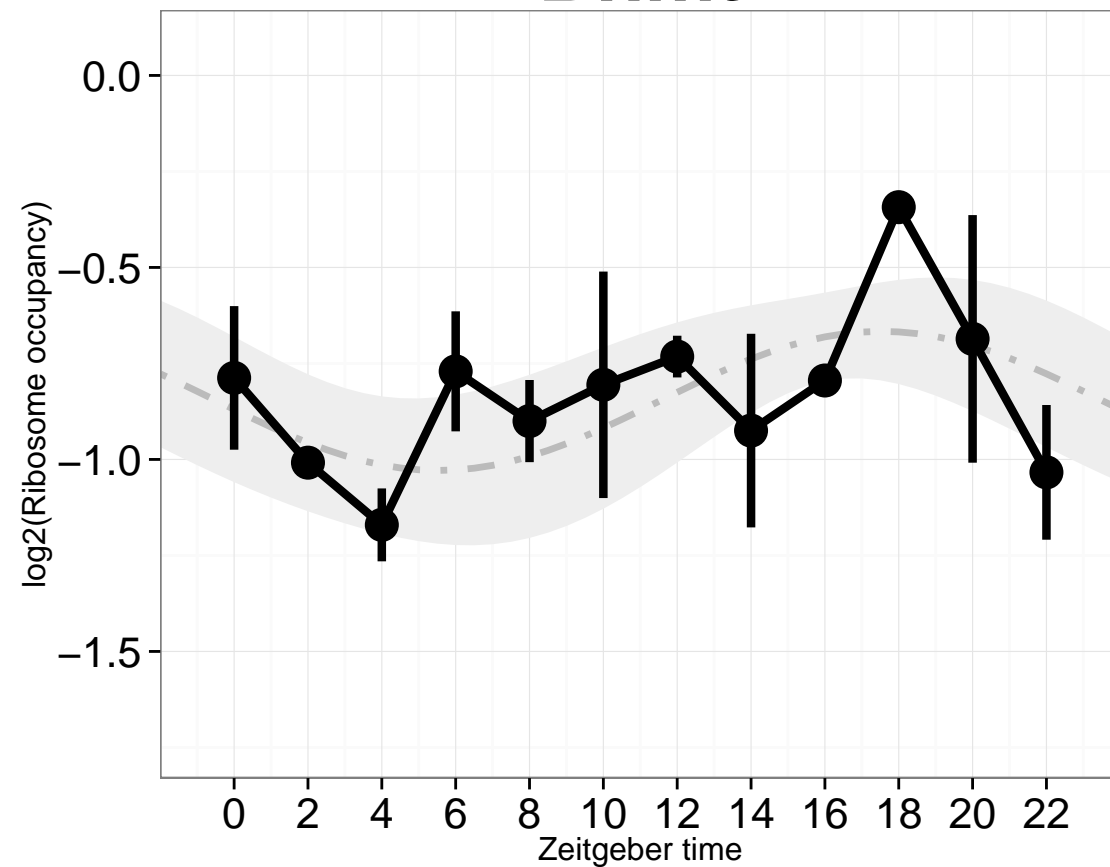

Supplement: SuppDataset_1.zip [file Bhmt_set_D.pdf › Supplemental Dataset 1/D-mRNA_rhythm_translation_rhyth/Bhmt_set_D.pdf]

# Bloc1s1

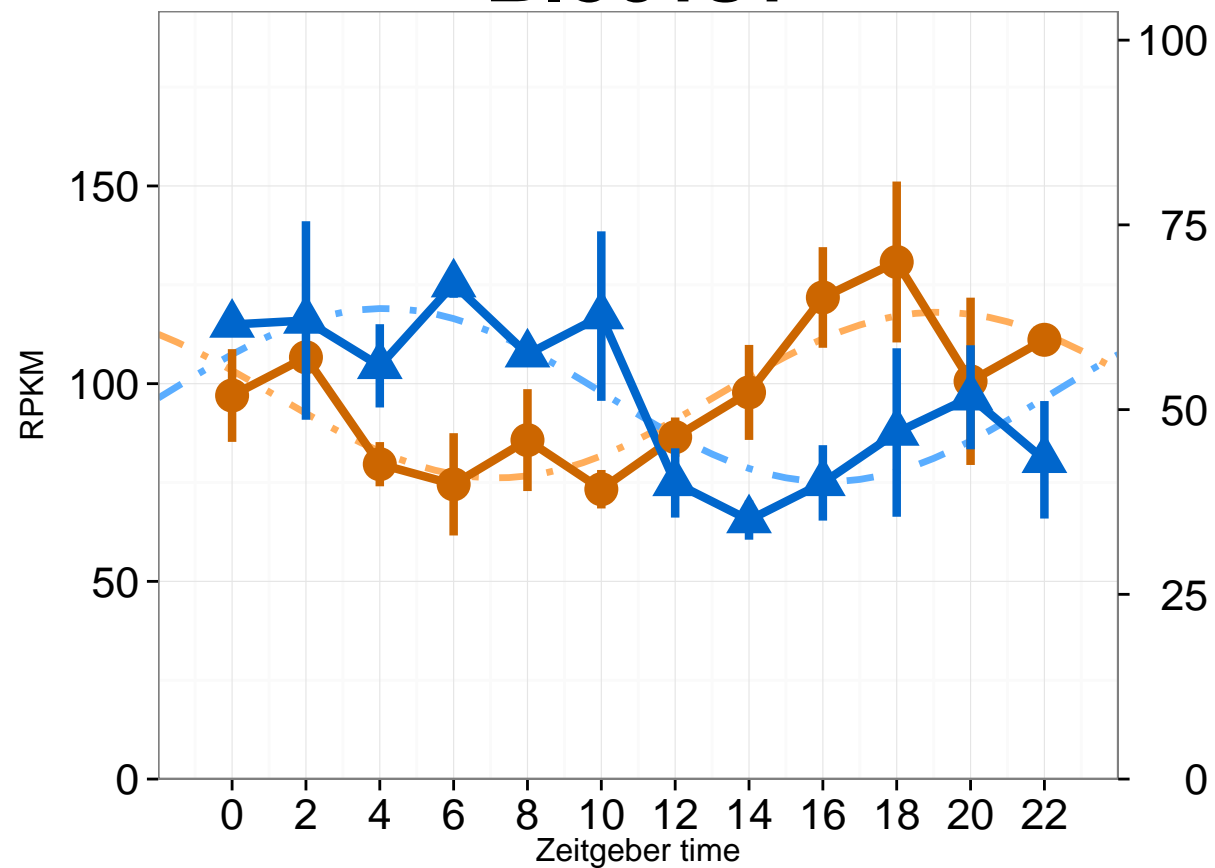

# Bloc1s1

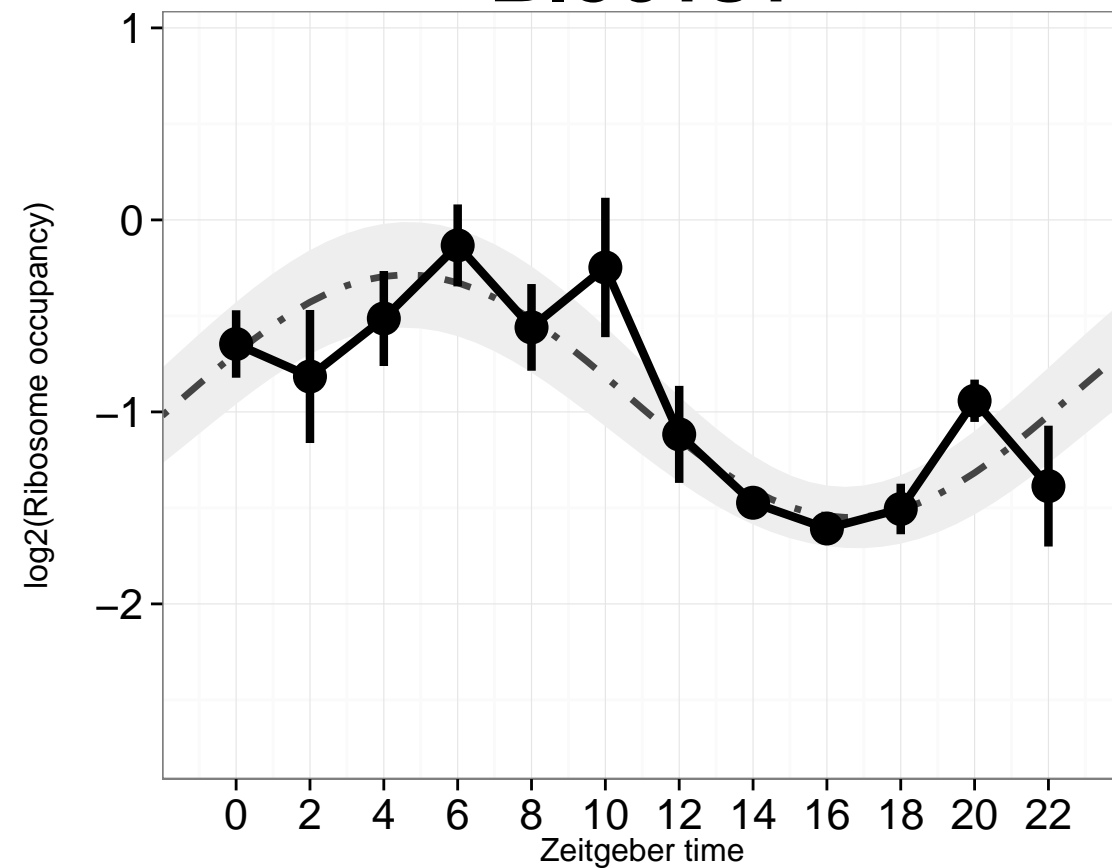

Supplement: SuppDataset_1.zip [file Bloc1s1_set_D.pdf › Supplemental Dataset 1/D-mRNA_rhythm_translation_rhyth/Bloc1s1_set_D.pdf]

## Bloc1s3

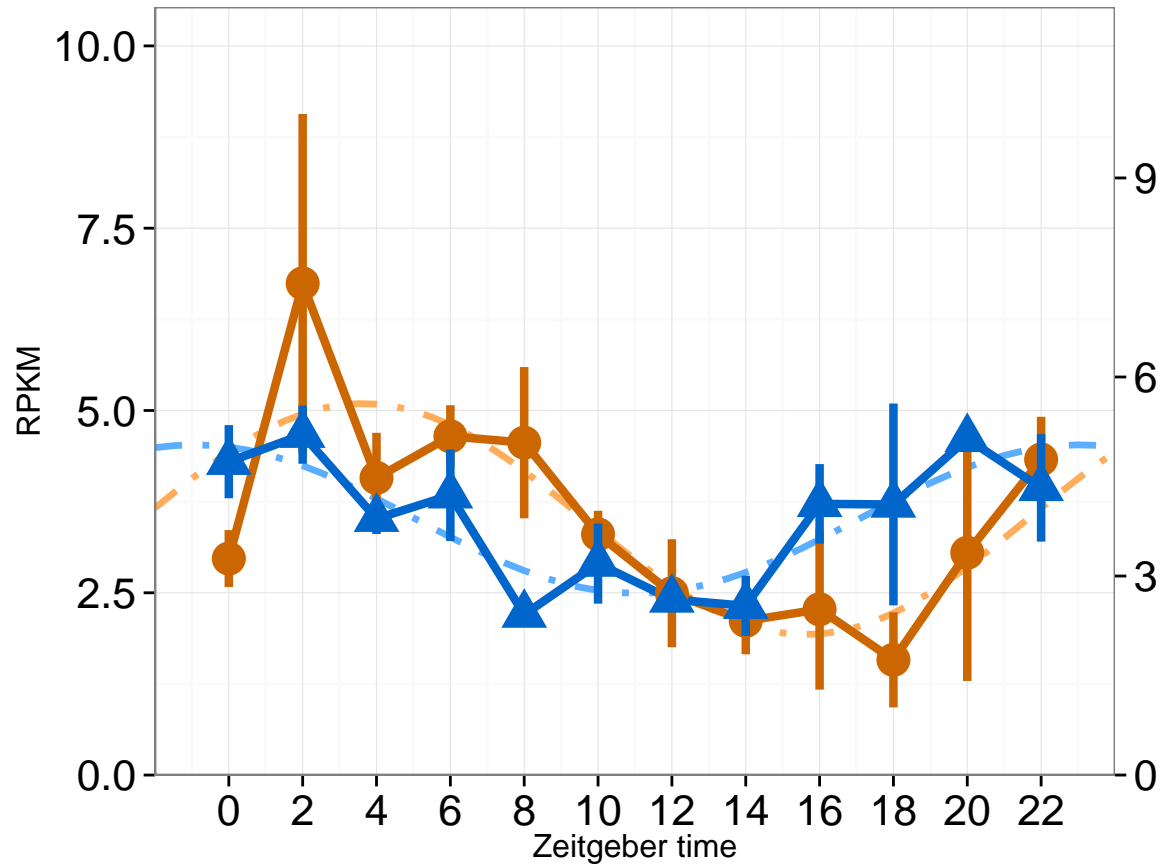

## Bloc1s3

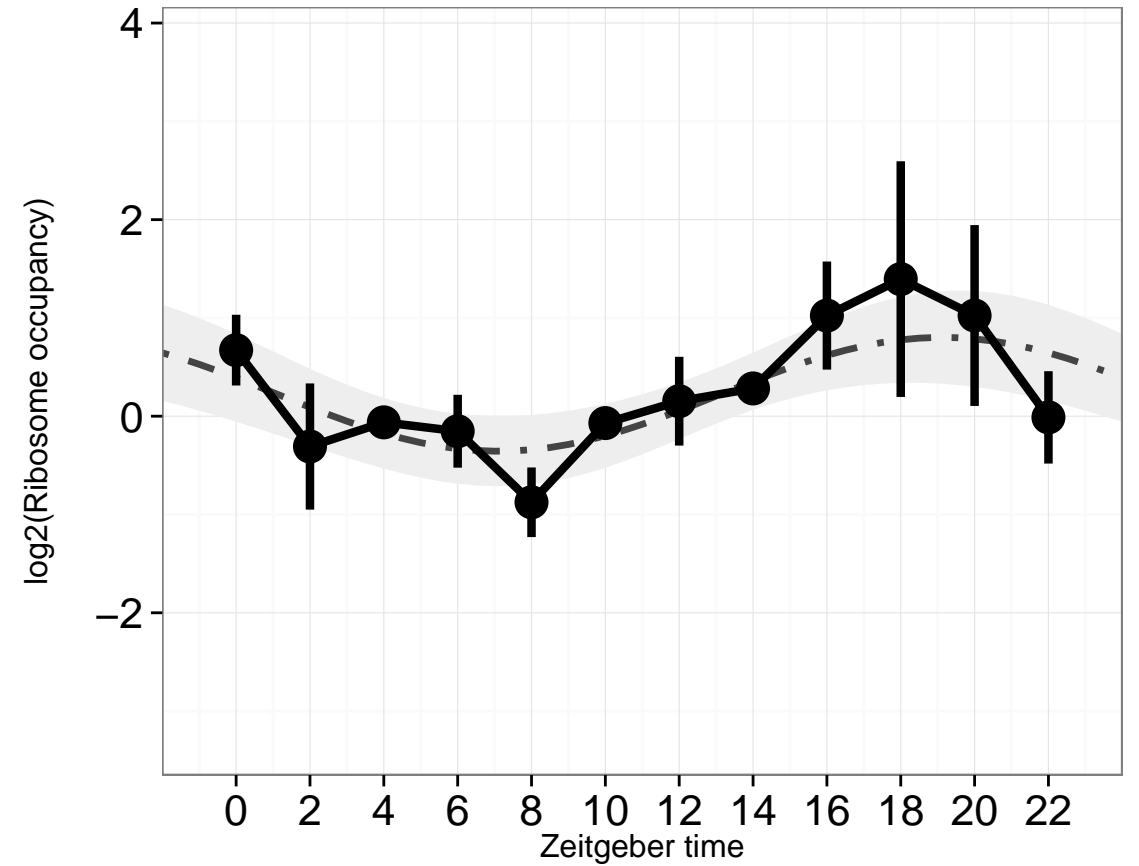

Supplement: SuppDataset_1.zip [file Bloc1s3_set_D.pdf › Supplemental Dataset 1/D-mRNA_rhythm_translation_rhyth/Bloc1s3_set_D.pdf]

# Bmf

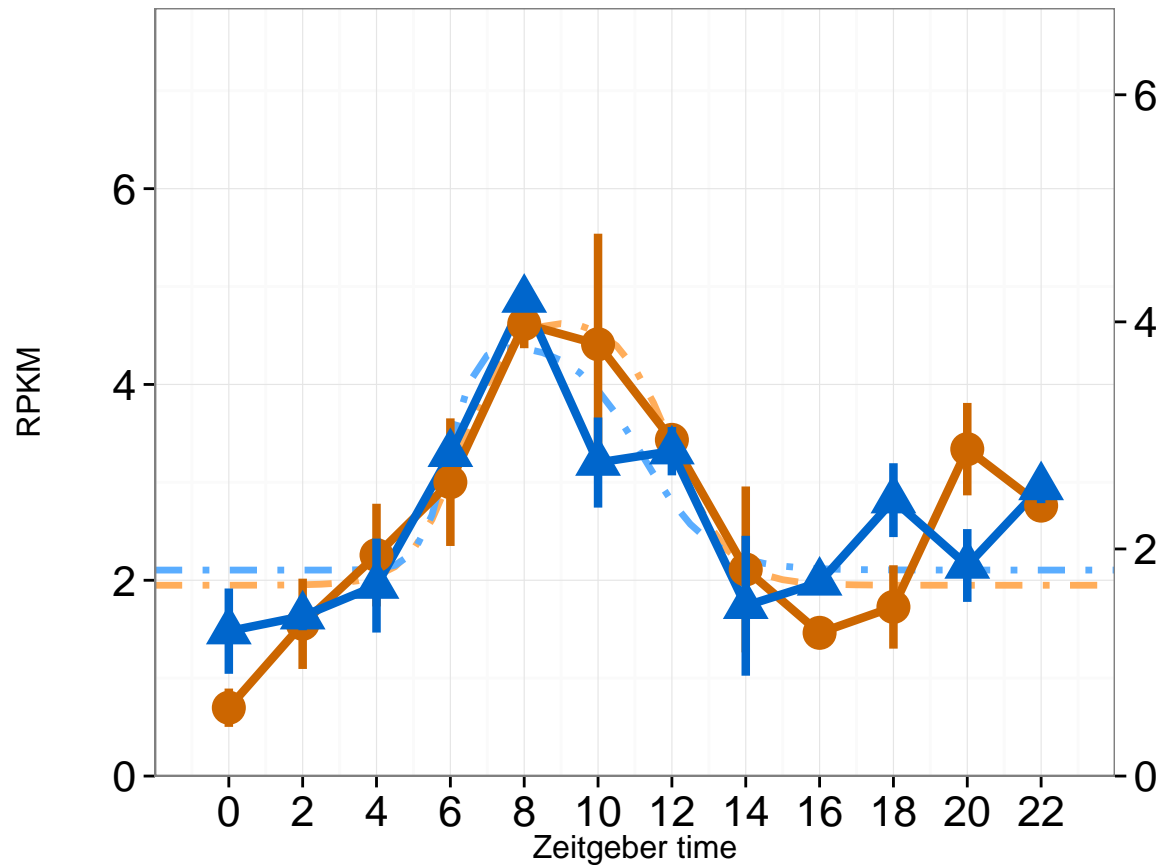

# Bmf

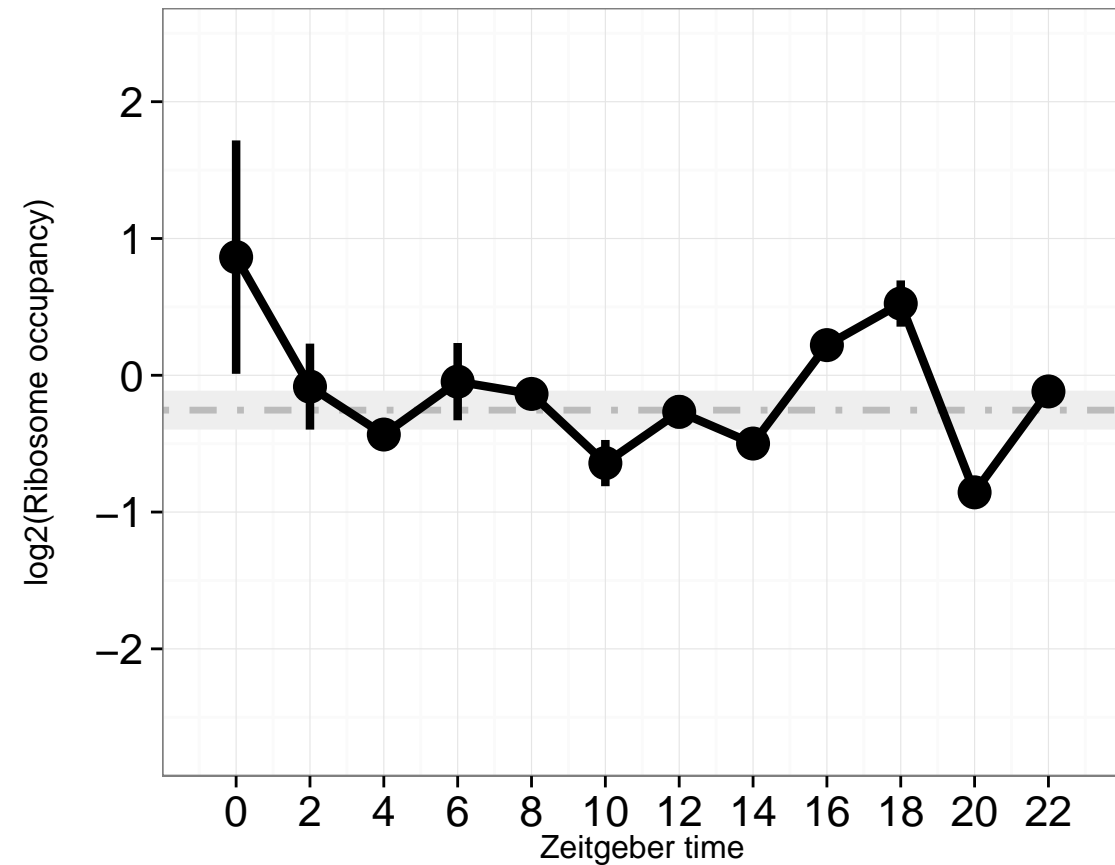

Supplement: SuppDataset_1.zip [file Bmf_set_D.pdf › Supplemental Dataset 1/D-mRNA_rhythm_translation_rhyth/Bmf_set_D.pdf]

## Bnip3

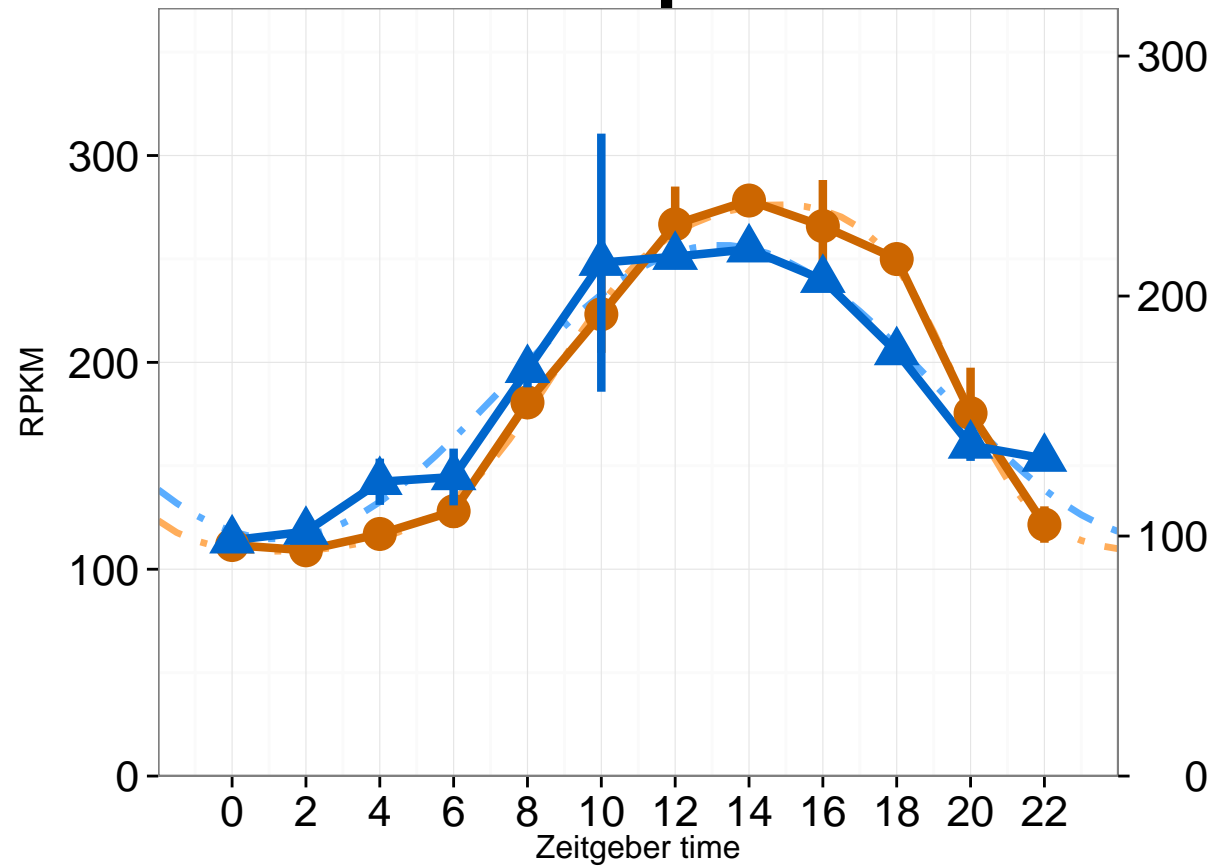

## Bnip3

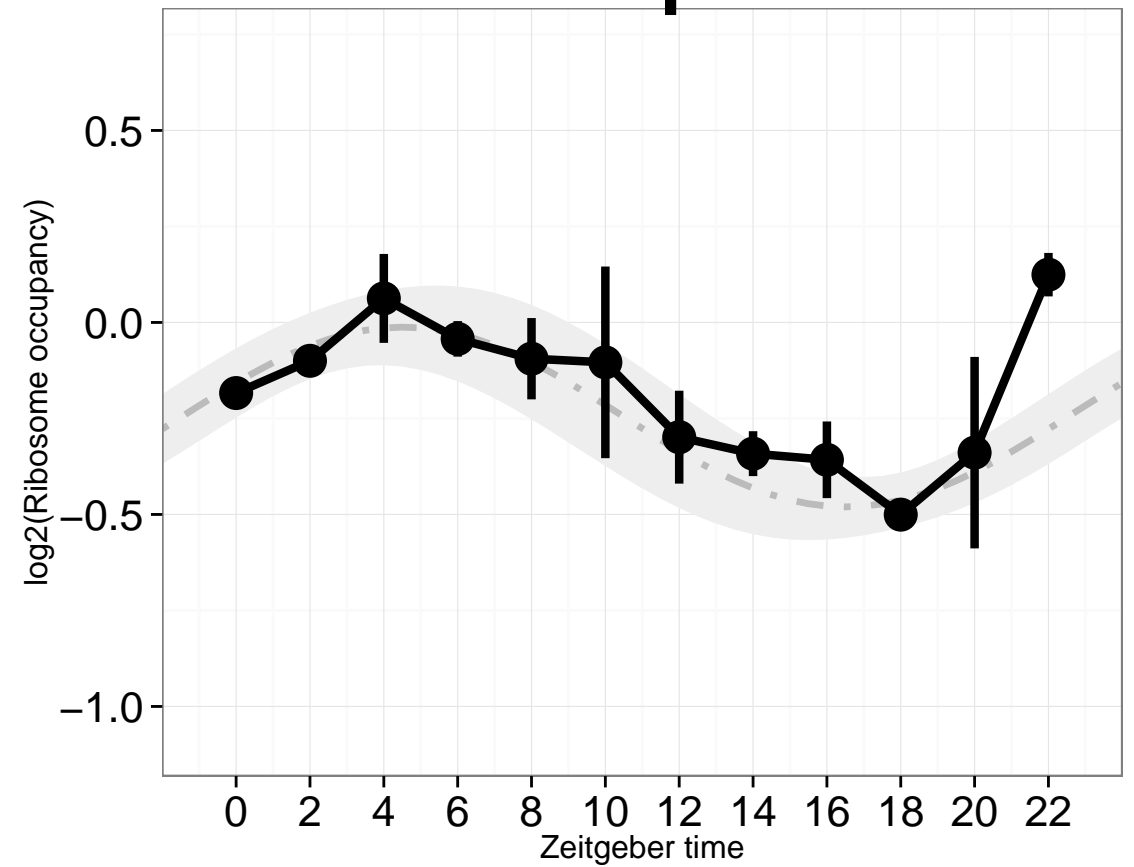

Supplement: SuppDataset_1.zip [file Bnip3_set_D.pdf › Supplemental Dataset 1/D-mRNA_rhythm_translation_rhyth/Bnip3_set_D.pdf]

## Bok

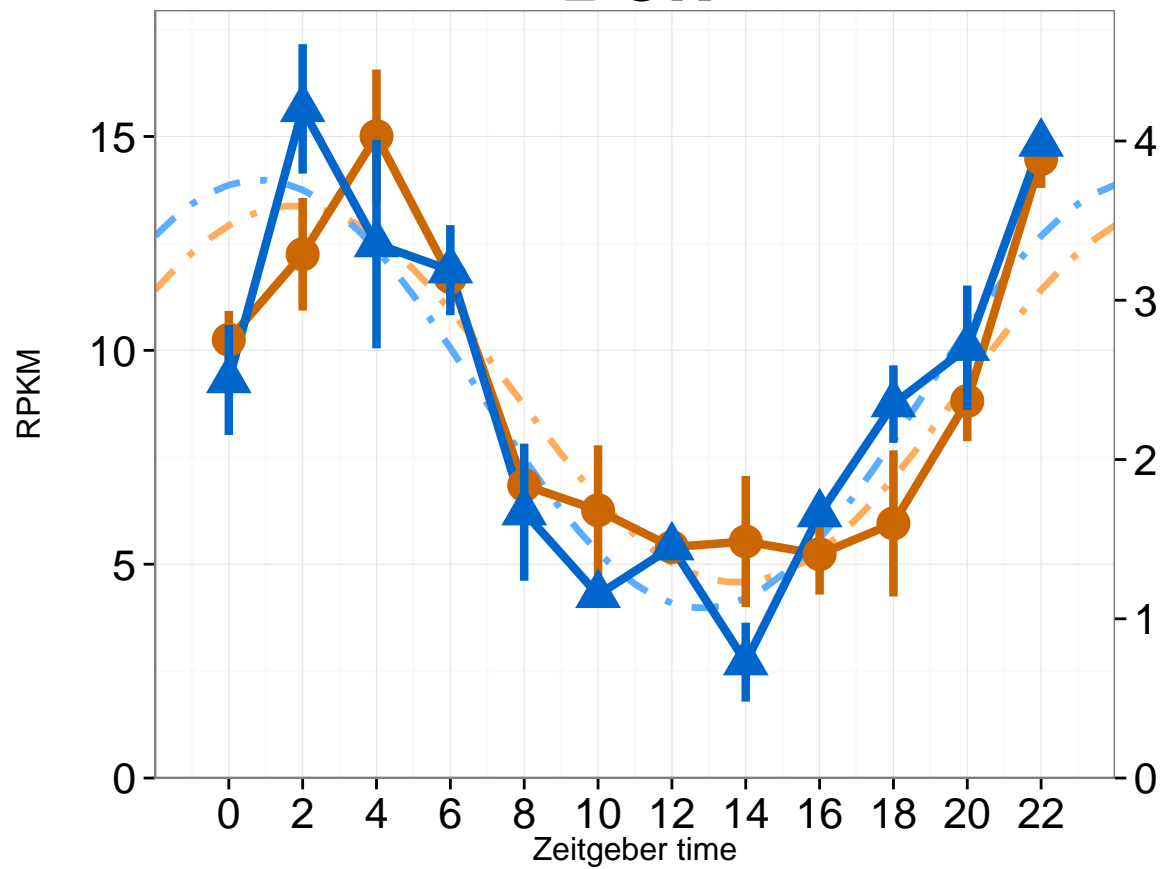

## Bok

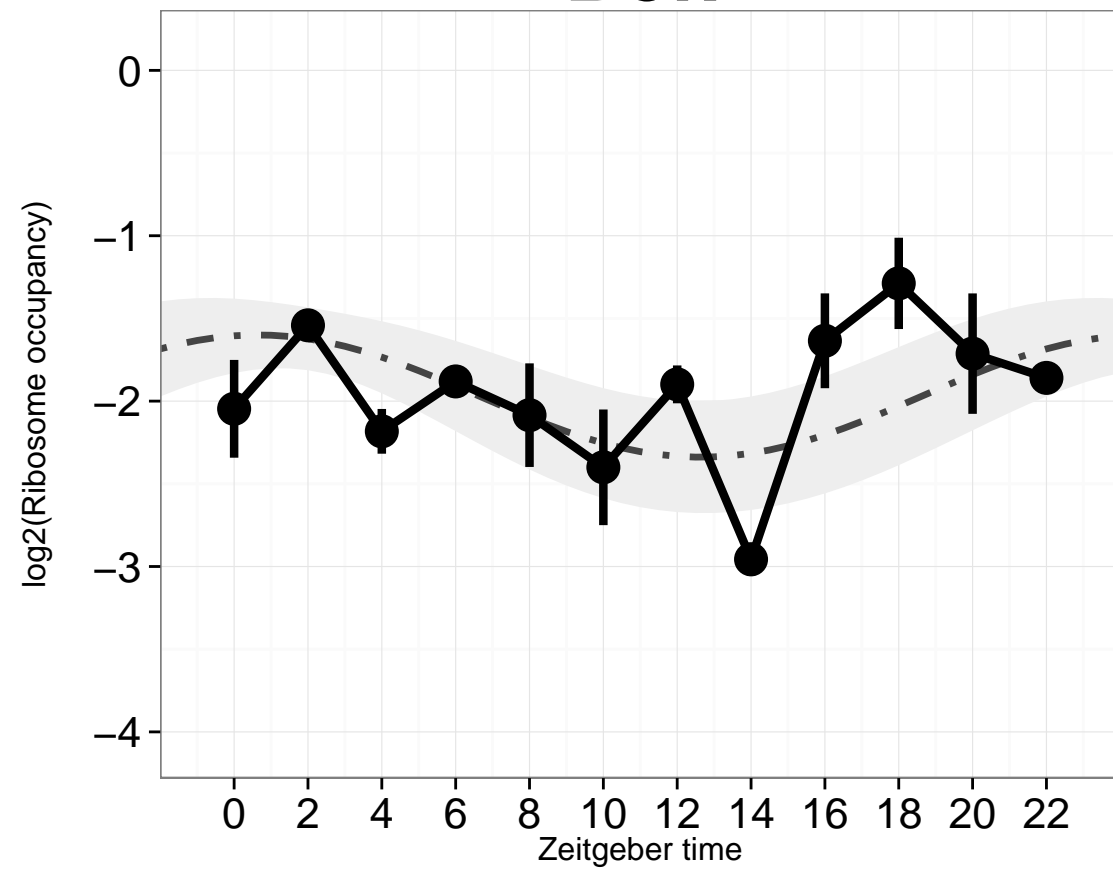

Supplement: SuppDataset_1.zip [file Bok_set_D.pdf › Supplemental Dataset 1/D-mRNA_rhythm_translation_rhyth/Bok_set_D.pdf]

# Brca1

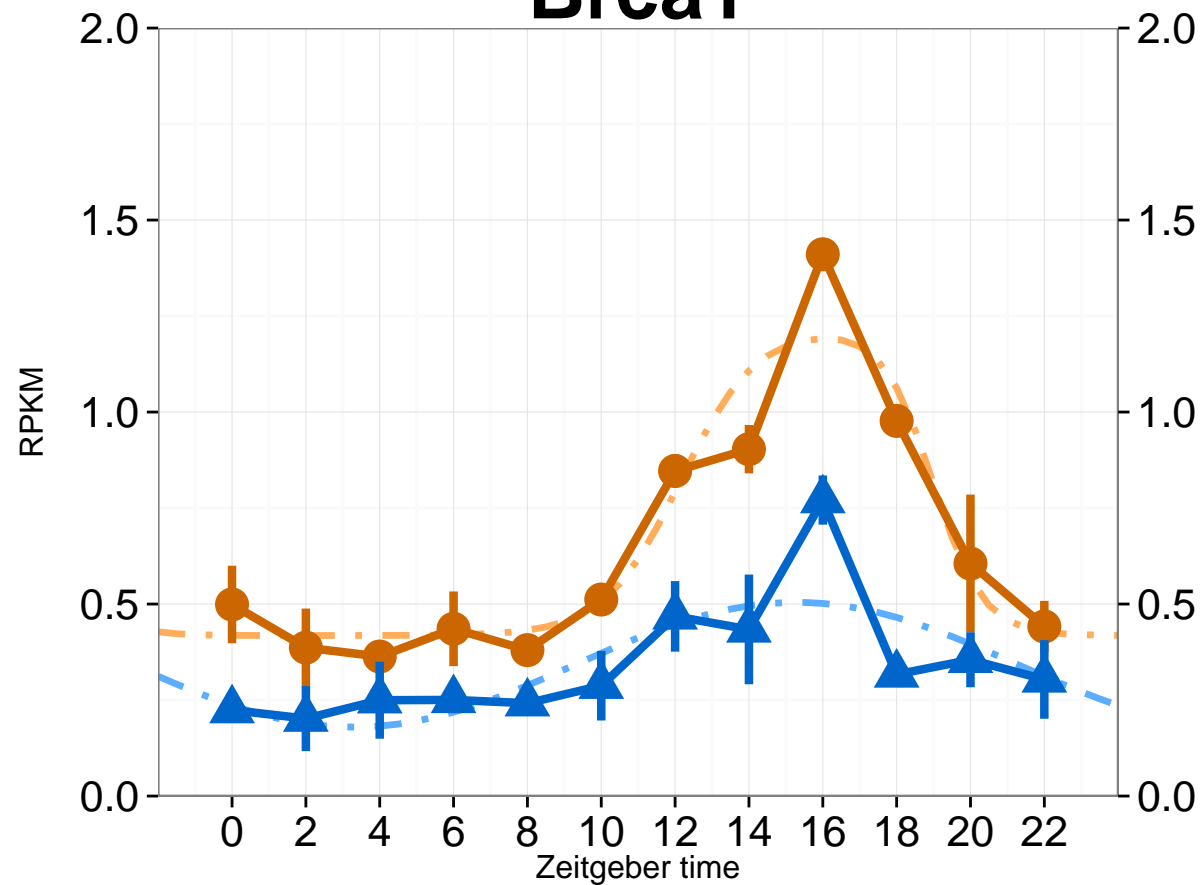

# Brca1

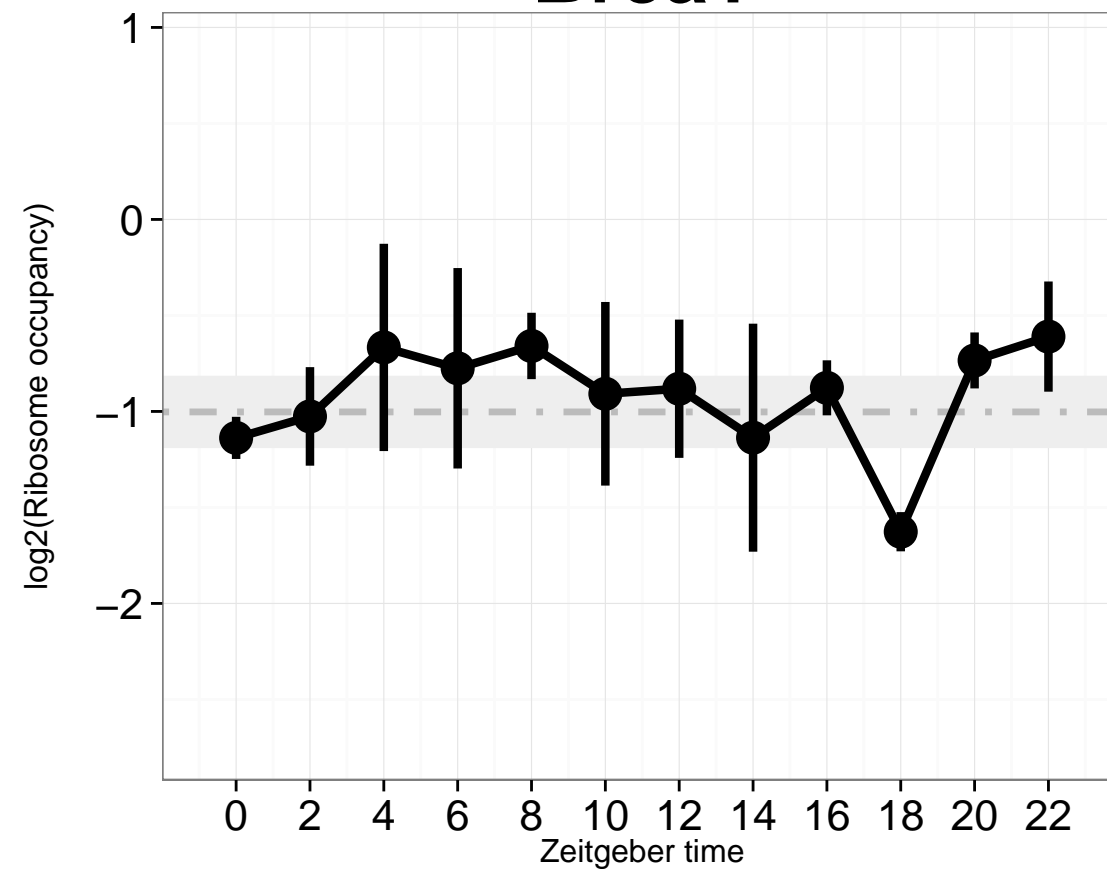

Supplement: SuppDataset_1.zip [file Brca1_set_D.pdf › Supplemental Dataset 1/D-mRNA_rhythm_translation_rhyth/Brca1_set_D.pdf]

# Brip1

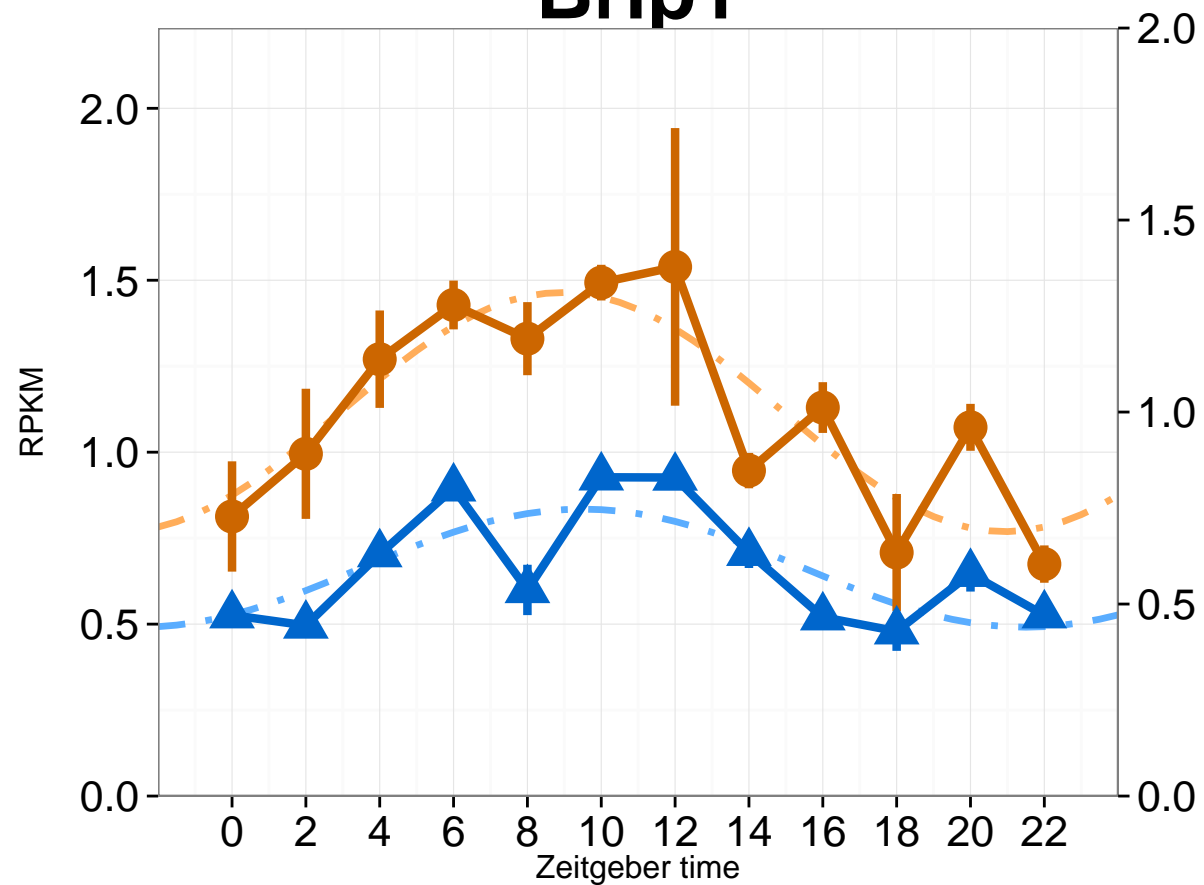

# Brip1

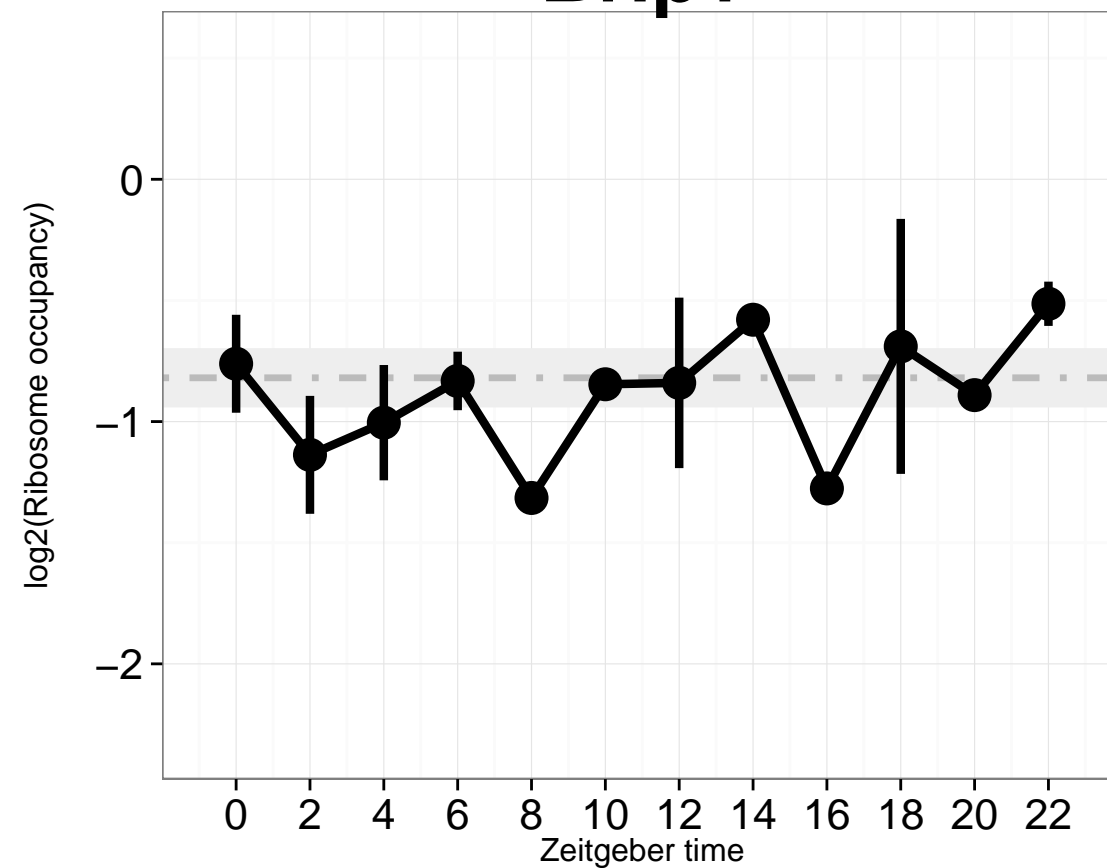

Supplement: SuppDataset_1.zip [file Brip1_set_D.pdf › Supplemental Dataset 1/D-mRNA_rhythm_translation_rhyth/Brip1_set_D.pdf]

## Btg1

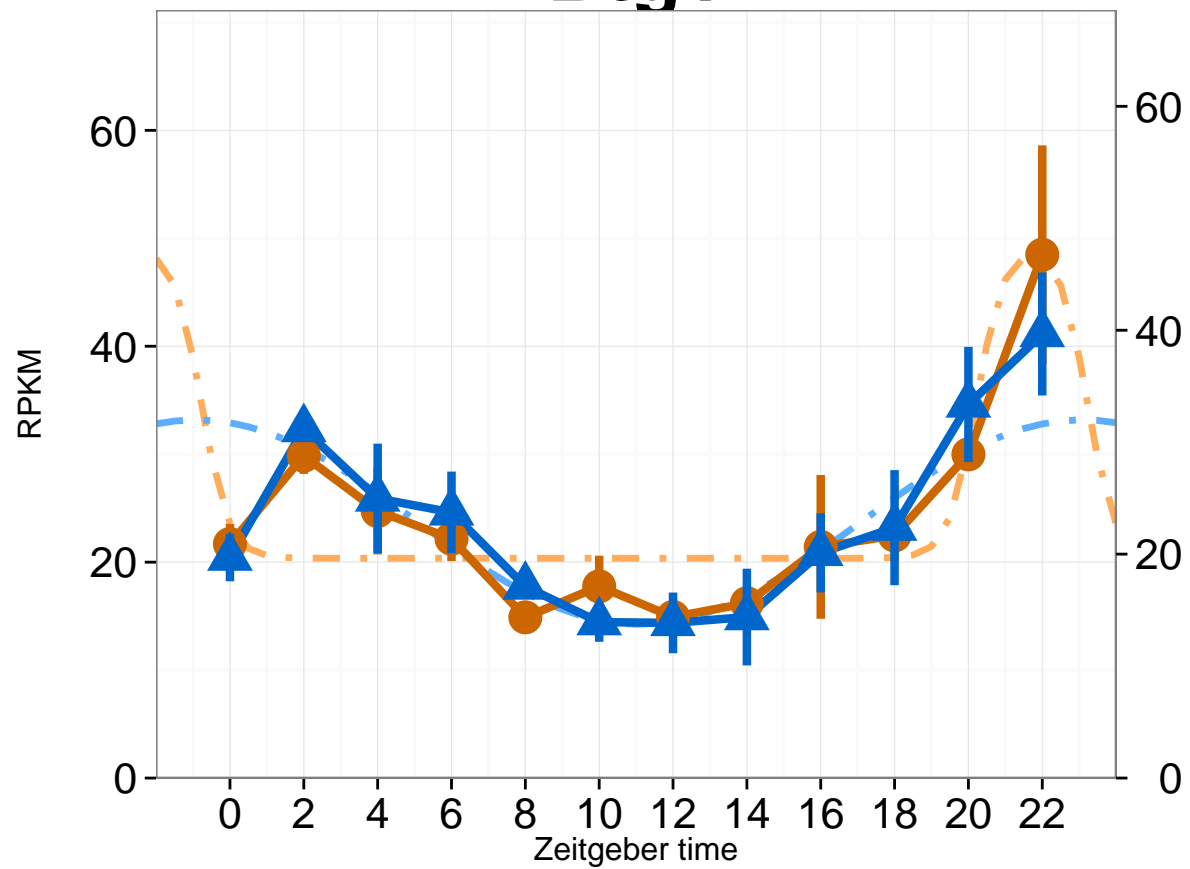

## Btg1

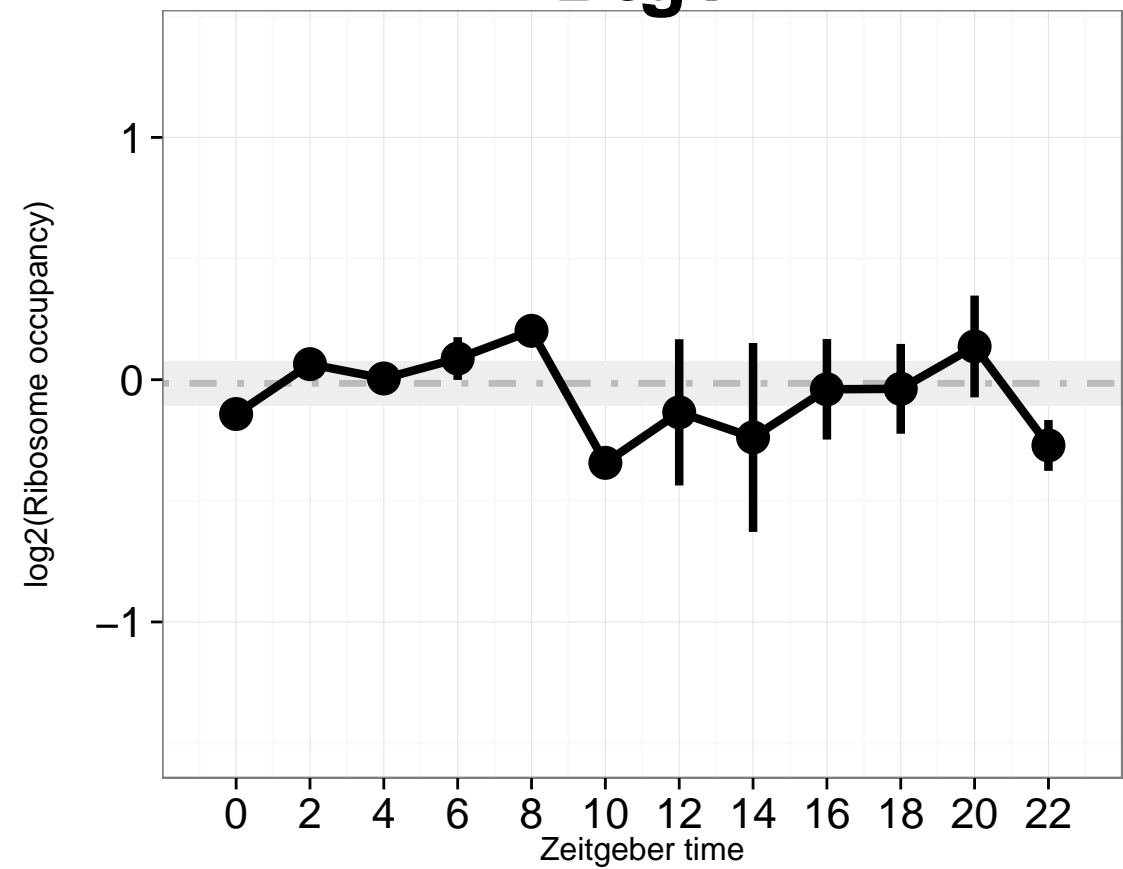

Supplement: SuppDataset_1.zip [file Btg1_set_D.pdf › Supplemental Dataset 1/D-mRNA_rhythm_translation_rhyth/Btg1_set_D.pdf]

# Btg3

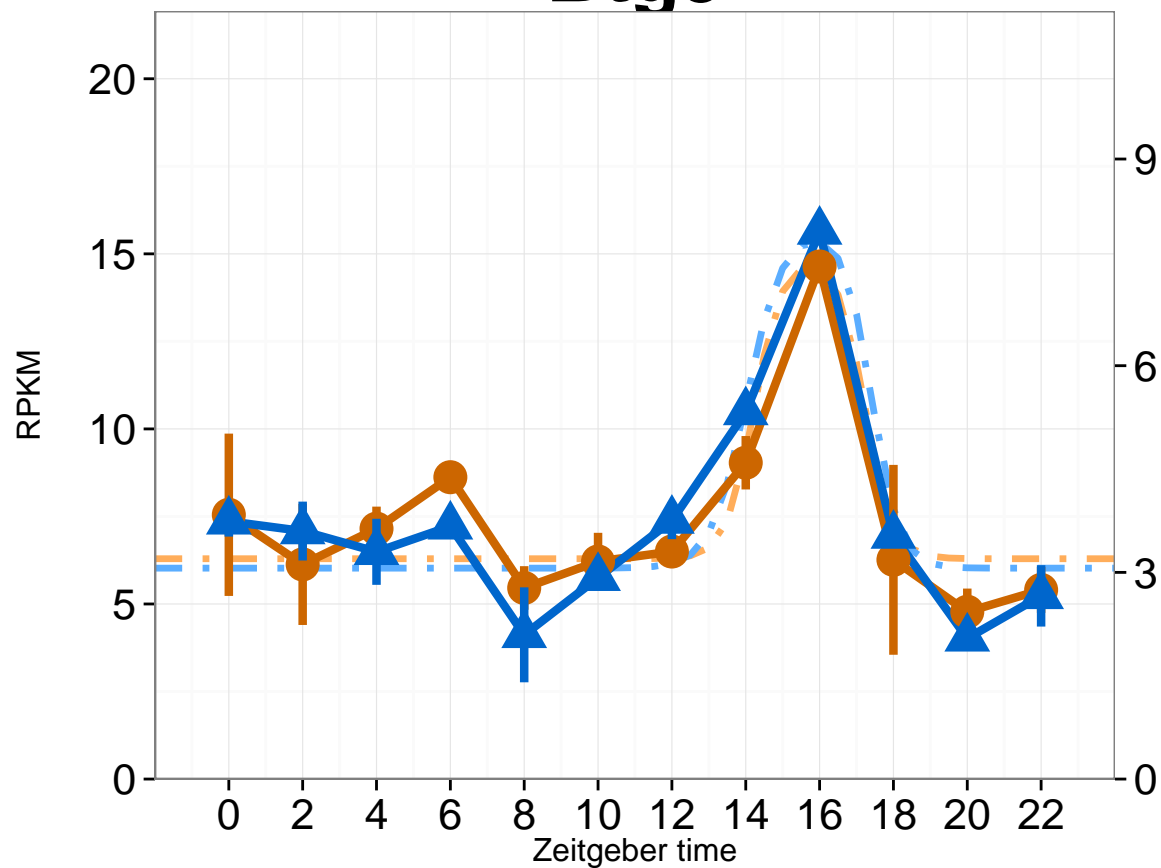

# Btg3

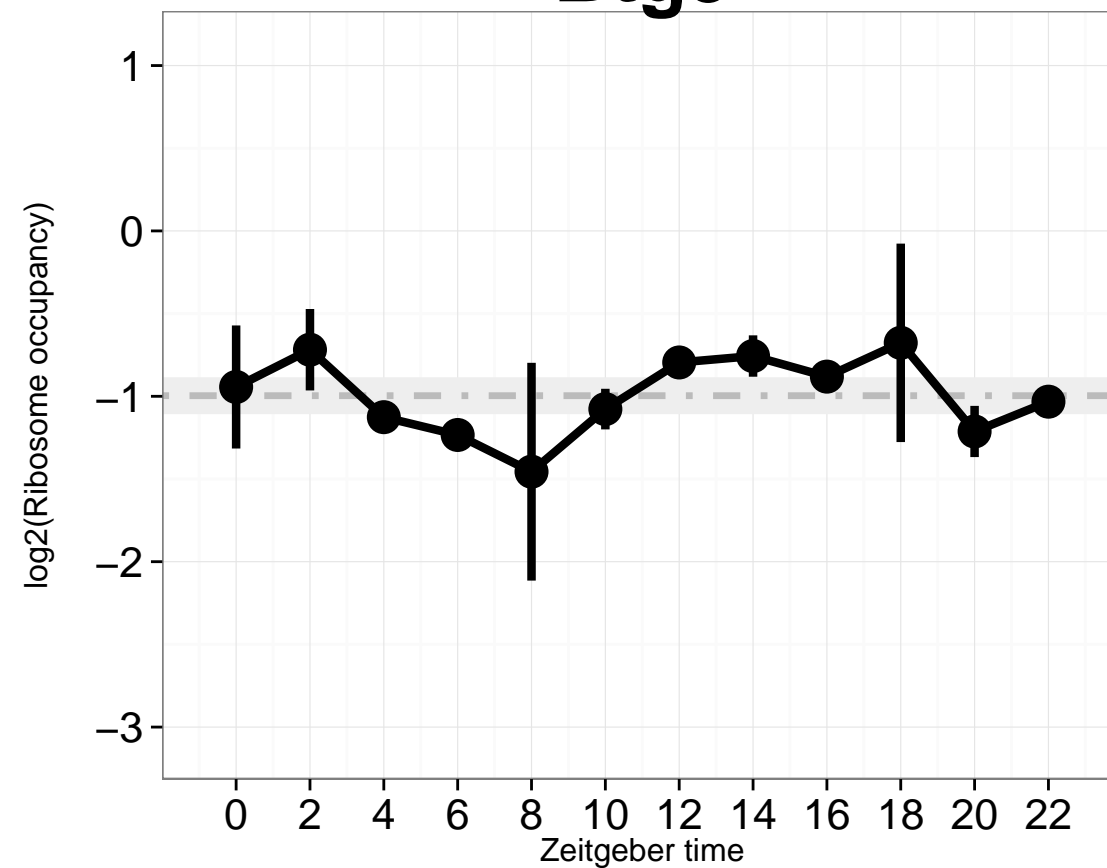

Supplement: SuppDataset_1.zip [file Btg3_set_D.pdf › Supplemental Dataset 1/D-mRNA_rhythm_translation_rhyth/Btg3_set_D.pdf]

# Btnl9

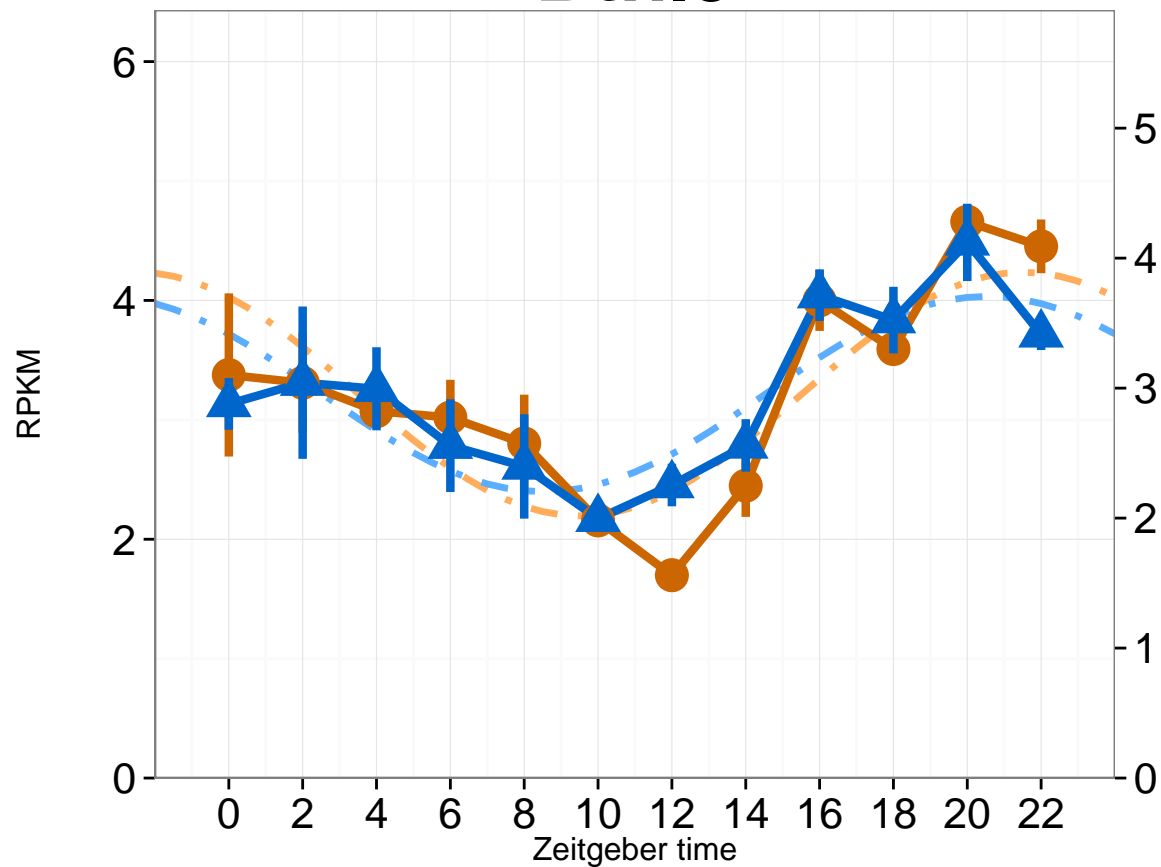

# Btnl9

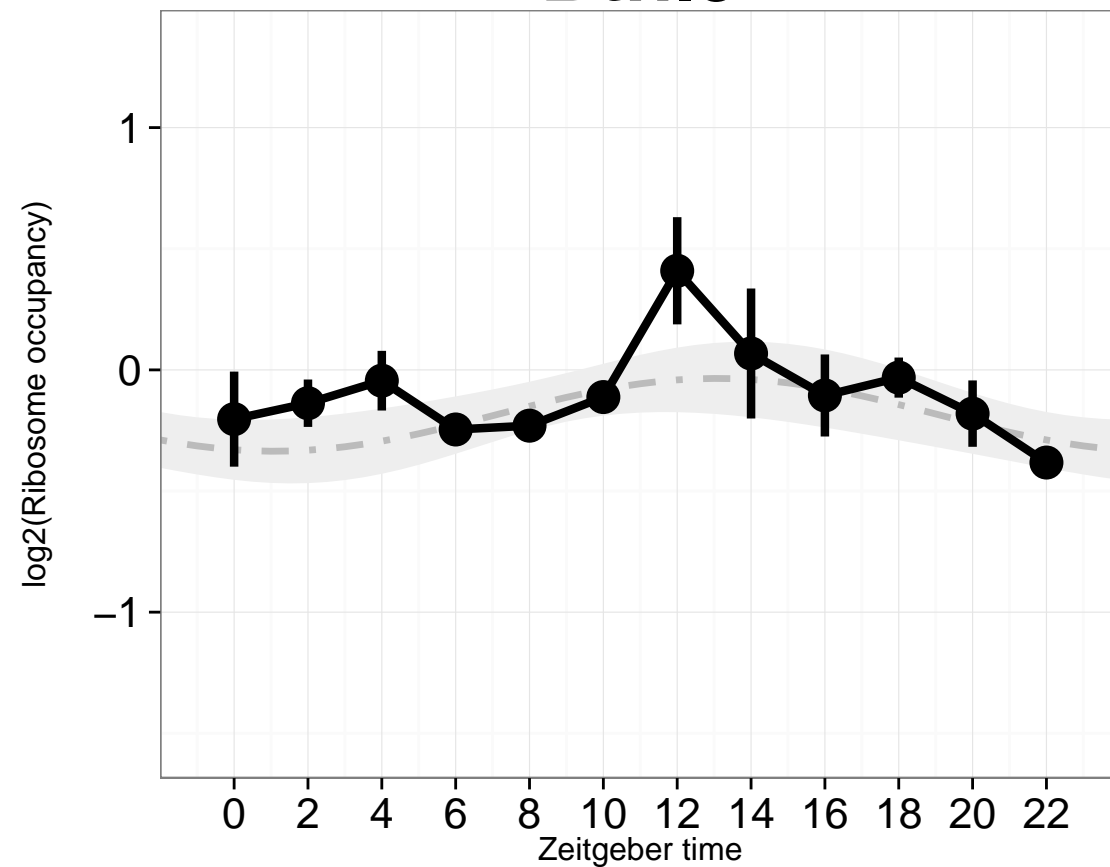

Supplement: SuppDataset_1.zip [file Btnl9_set_D.pdf › Supplemental Dataset 1/D-mRNA_rhythm_translation_rhyth/Btnl9_set_D.pdf]

# C2cd4d

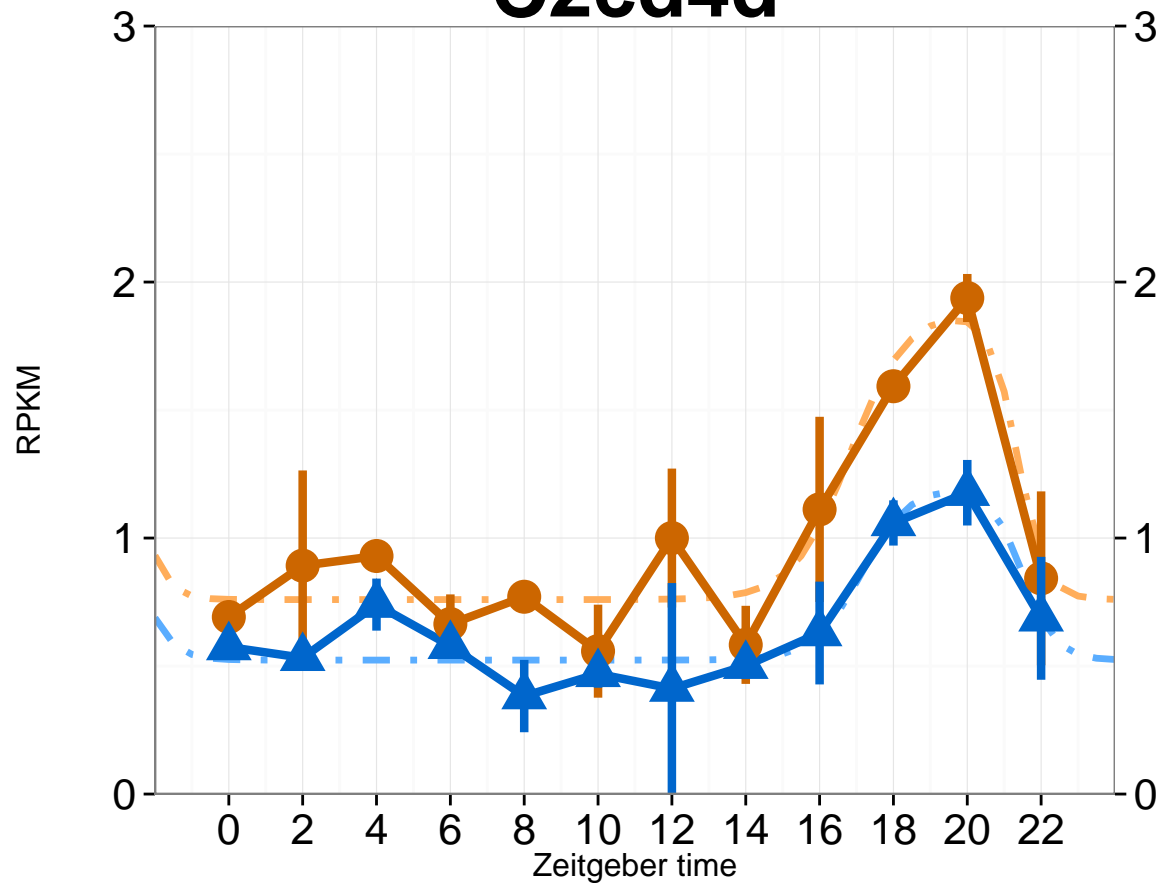

# C2cd4d

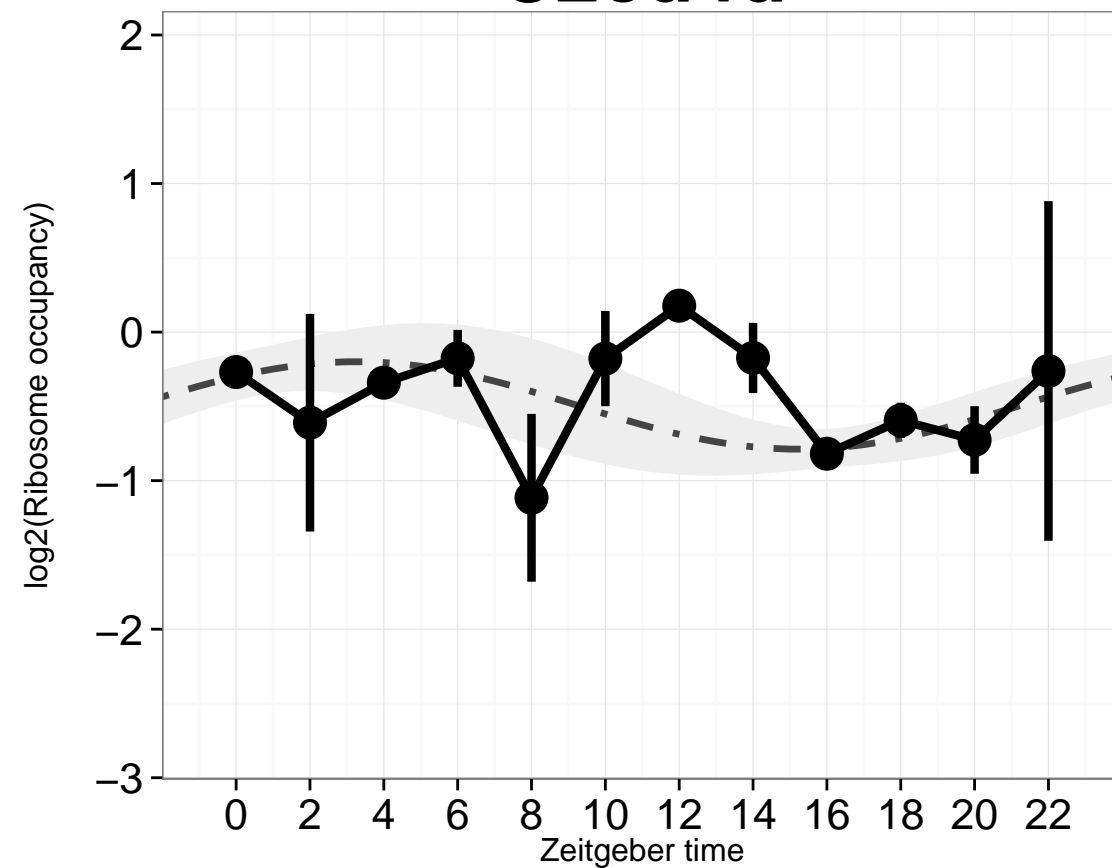

Supplement: SuppDataset_1.zip [file C2cd4d_set_D.pdf › Supplemental Dataset 1/D-mRNA_rhythm_translation_rhyth/C2cd4d_set_D.pdf]

**C3**

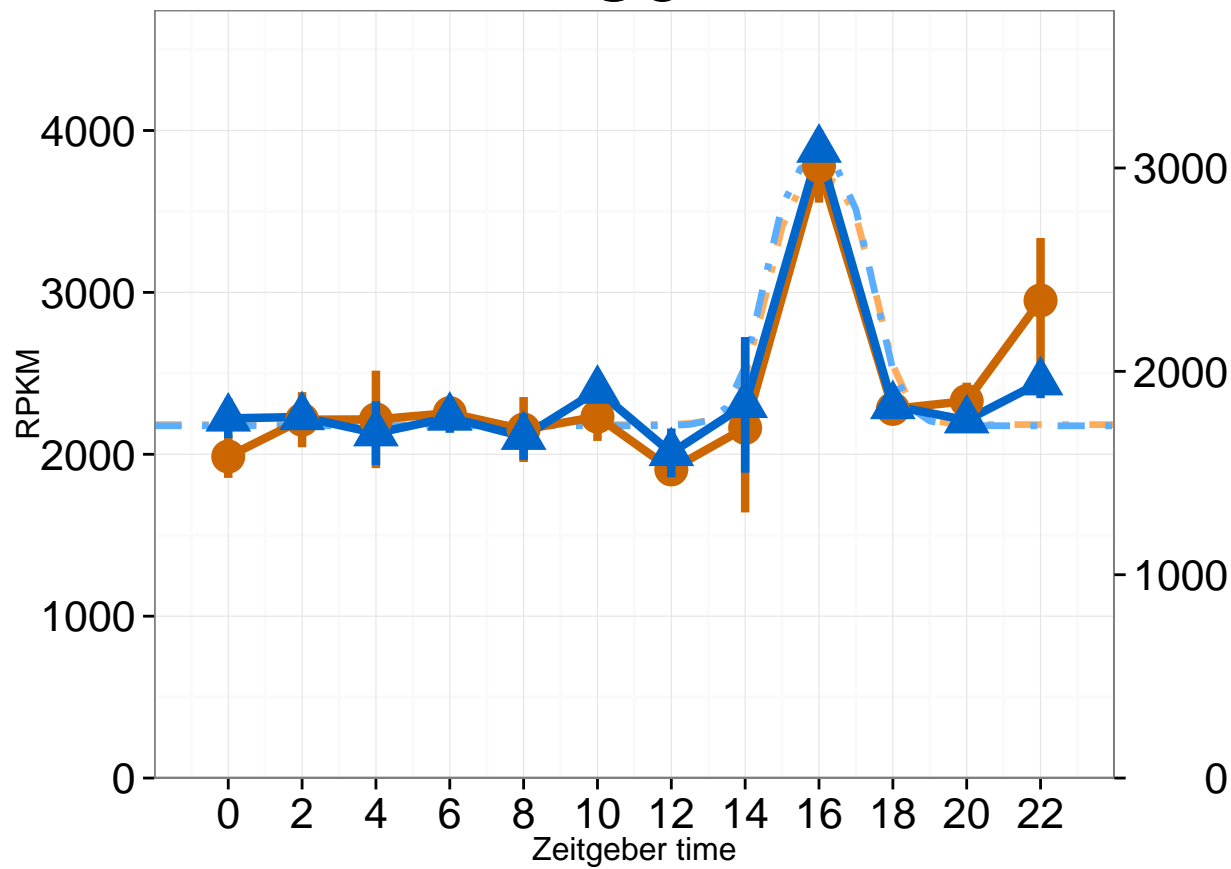

**C3**

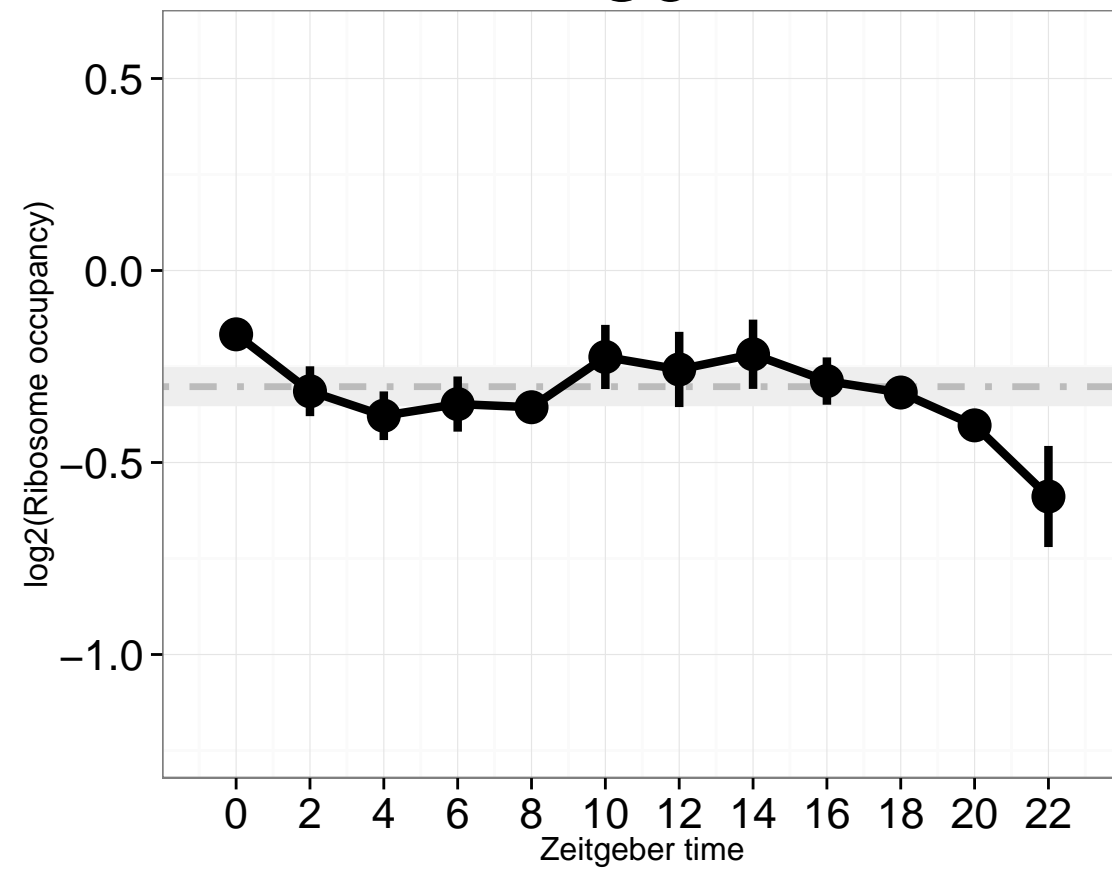

Supplement: SuppDataset_1.zip [file C3_set_D.pdf › Supplemental Dataset 1/D-mRNA_rhythm_translation_rhyth/C3_set_D.pdf]

## C4bp

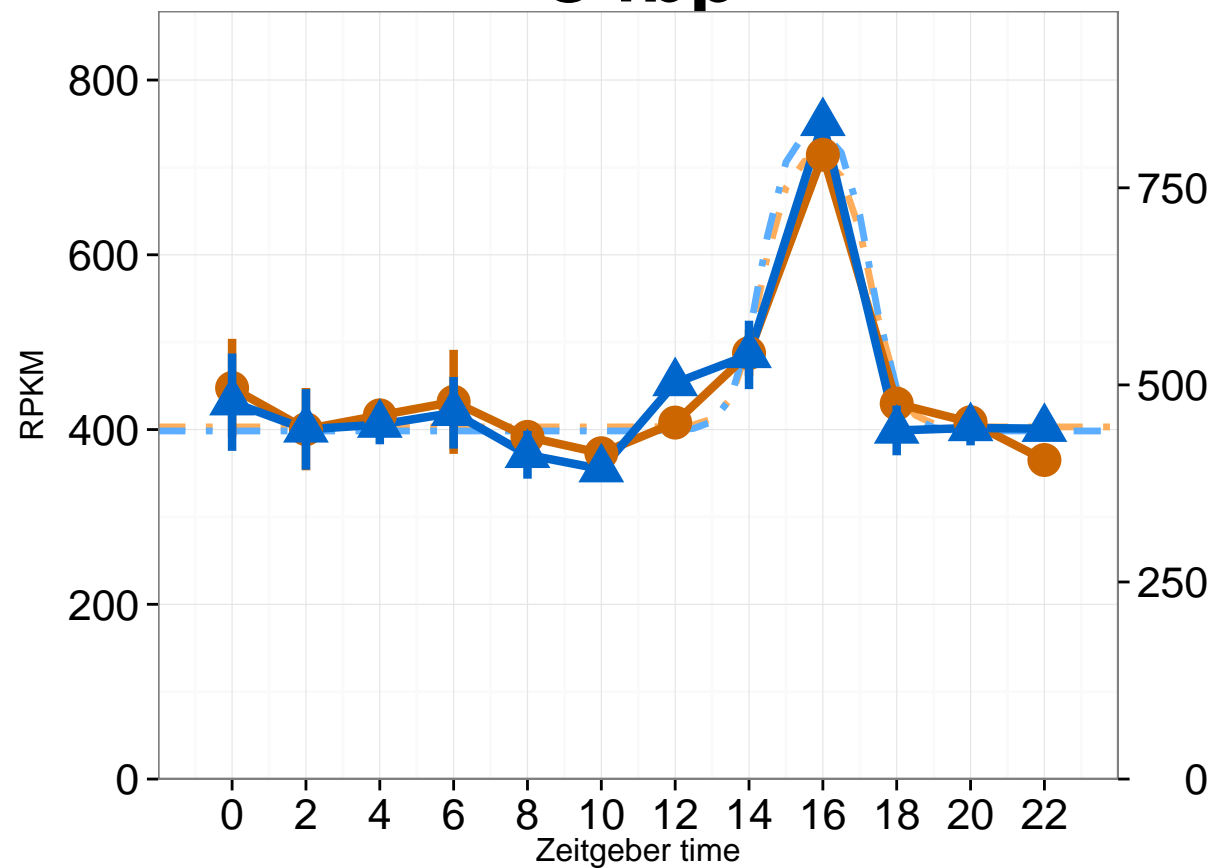

## C4bp

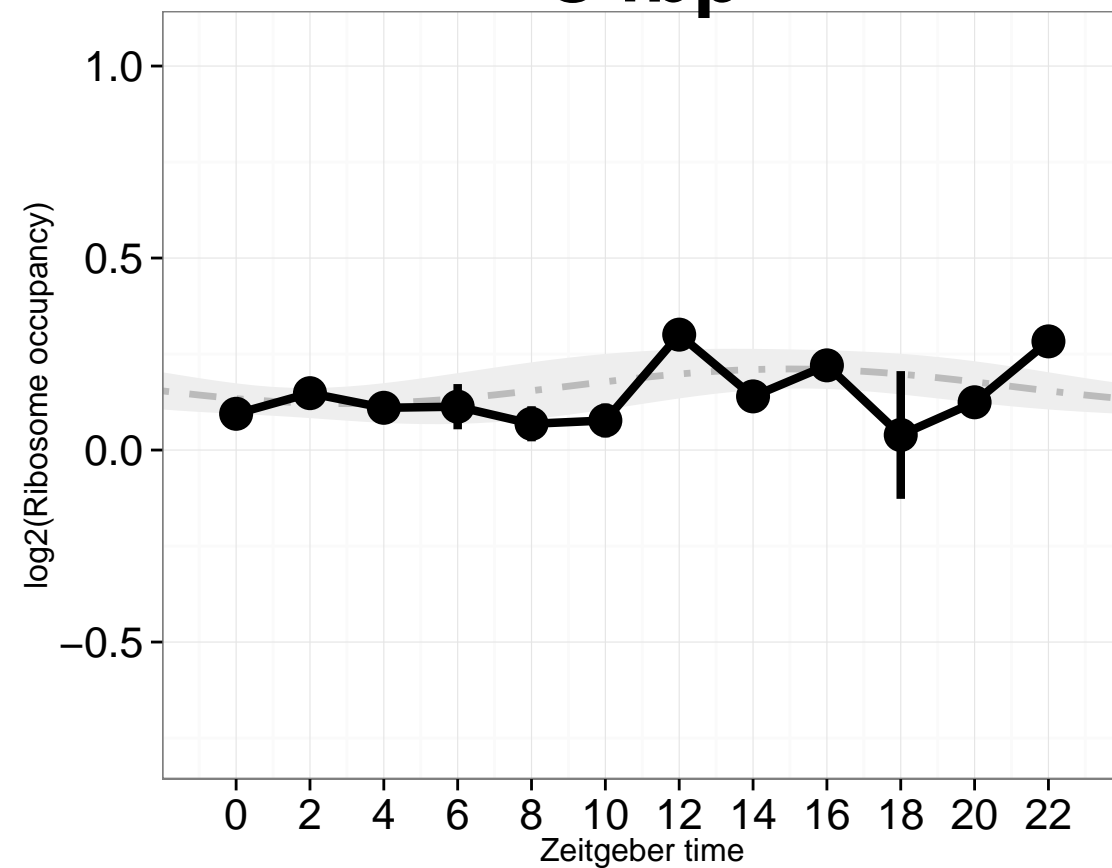

Supplement: SuppDataset_1.zip [file C4bp_set_D.pdf › Supplemental Dataset 1/D-mRNA_rhythm_translation_rhyth/C4bp_set_D.pdf]

## C77080

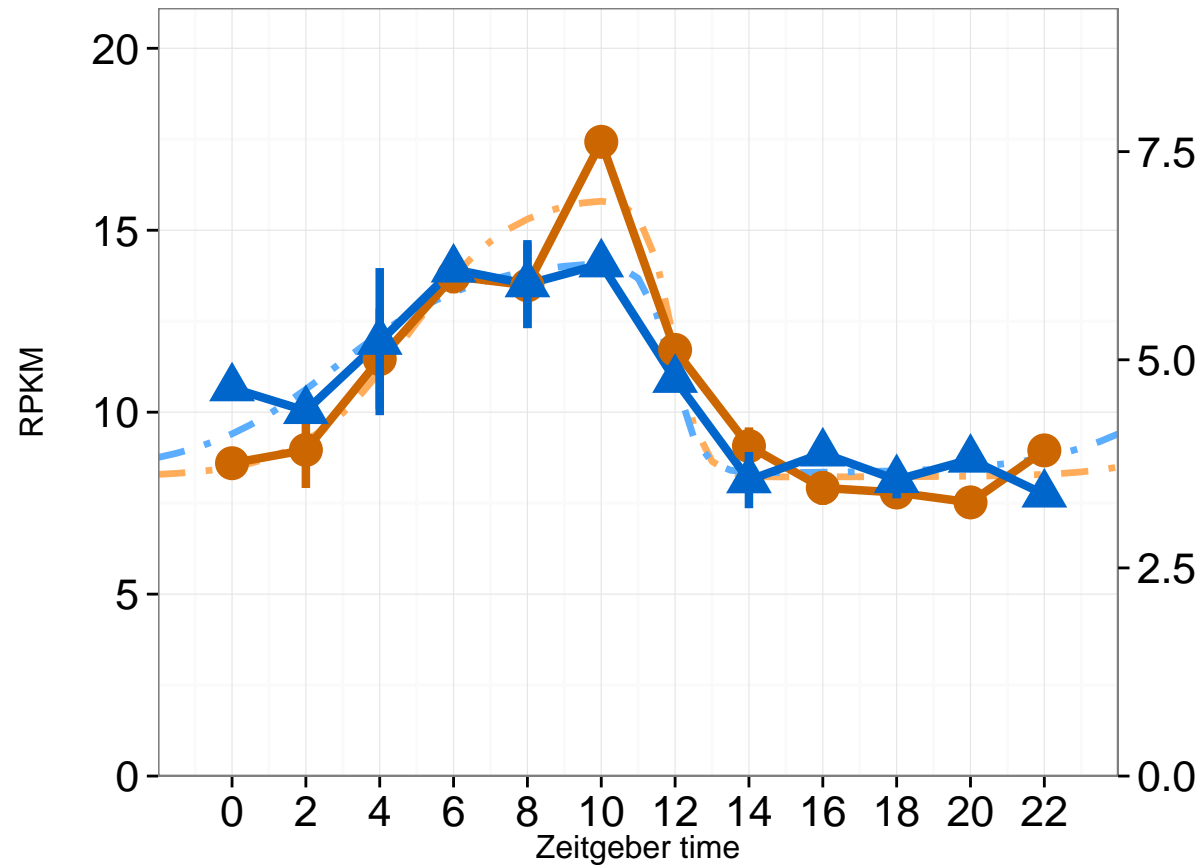

## C77080

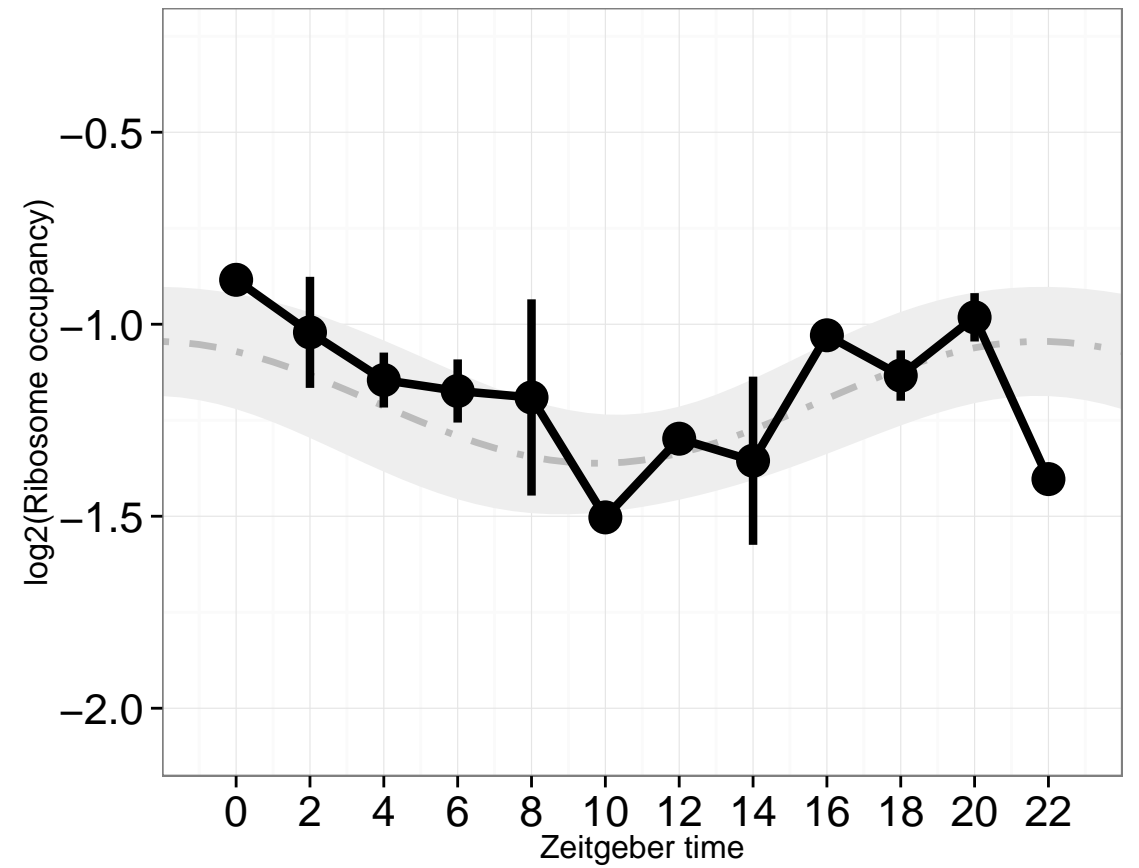

Supplement: SuppDataset_1.zip [file C77080_set_D.pdf › Supplemental Dataset 1/D-mRNA_rhythm_translation_rhyth/C77080_set_D.pdf]

# COMT

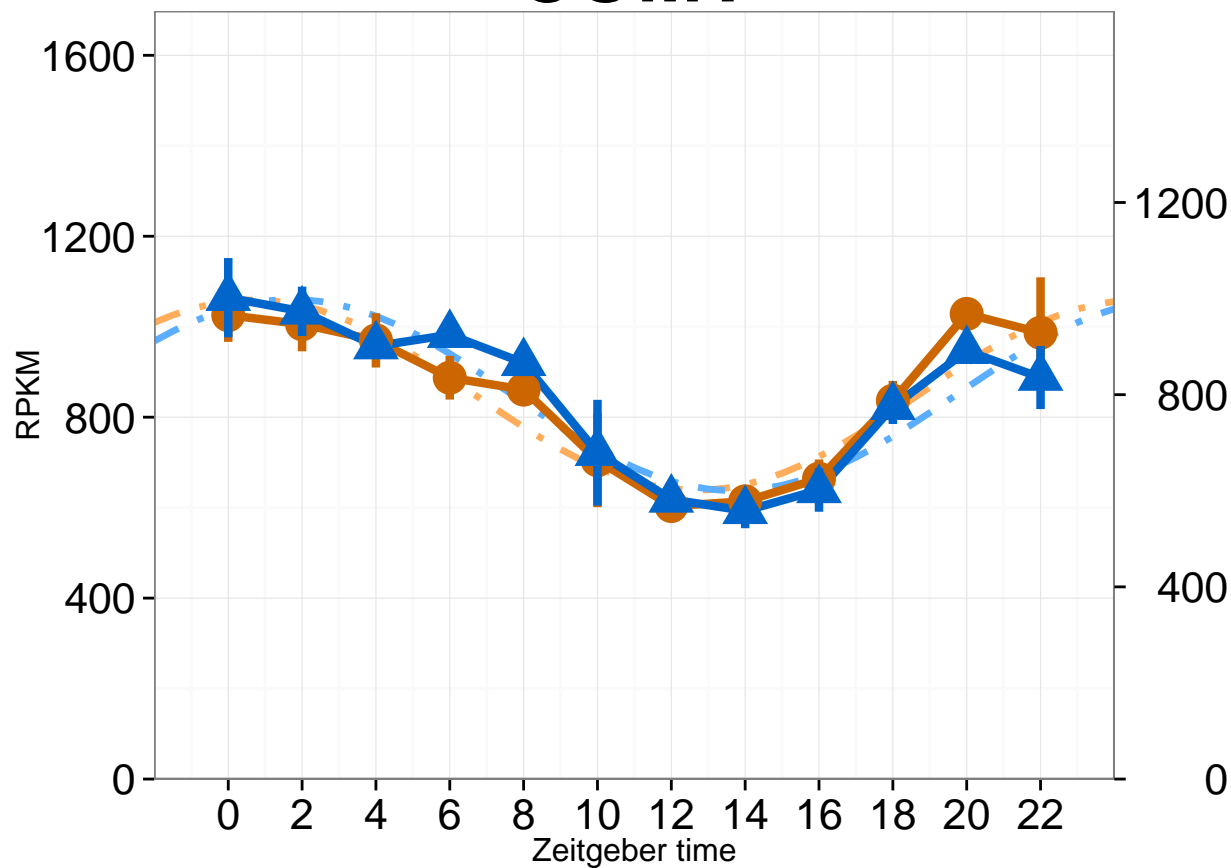

# COMT

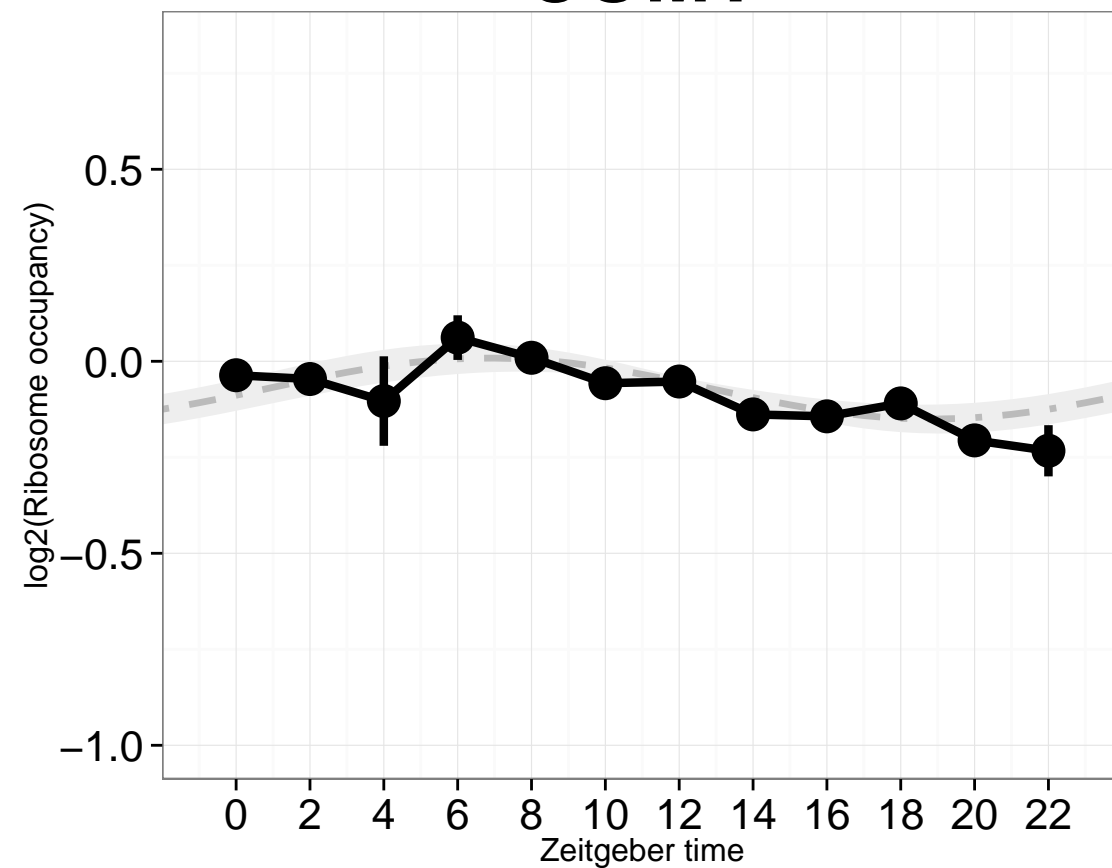

Supplement: SuppDataset_1.zip [file COMT_set_D.pdf › Supplemental Dataset 1/D-mRNA_rhythm_translation_rhyth/COMT_set_D.pdf]

## Cacybp

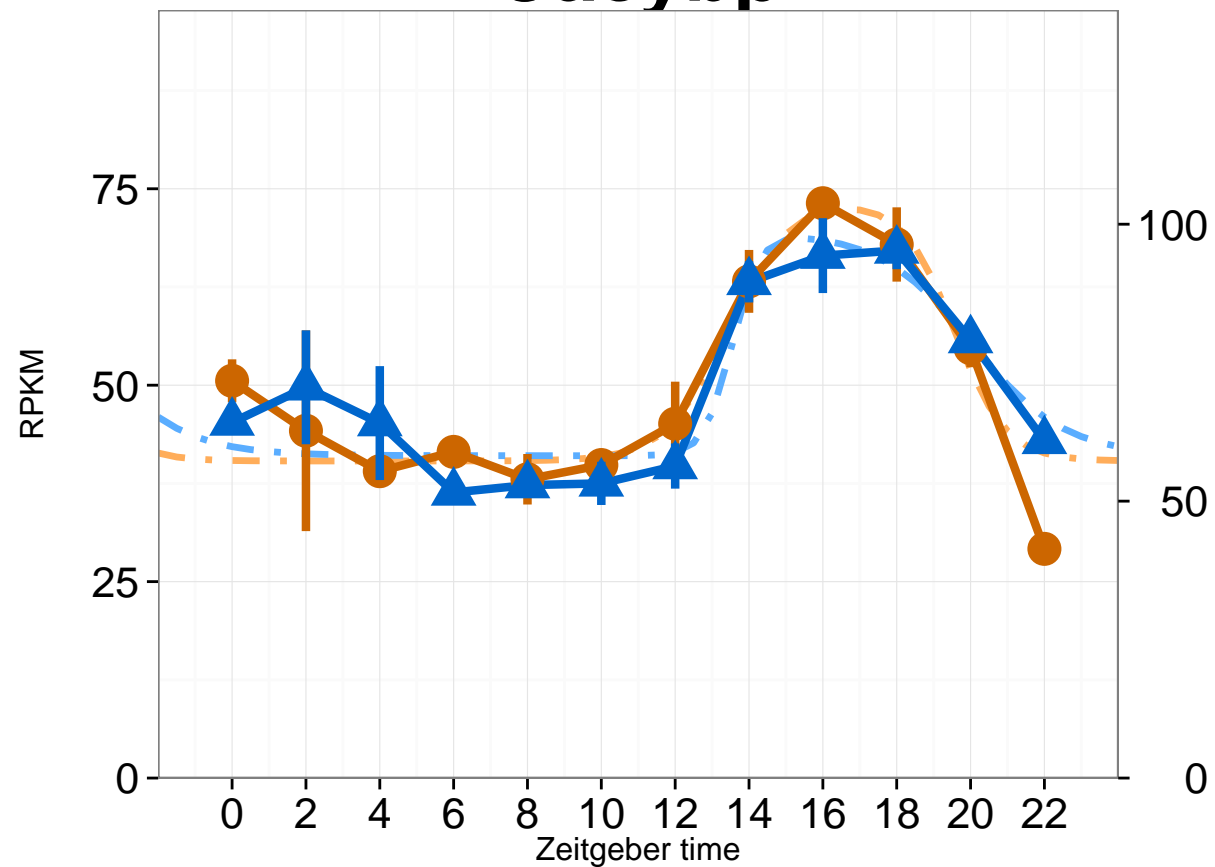

## Cacybp

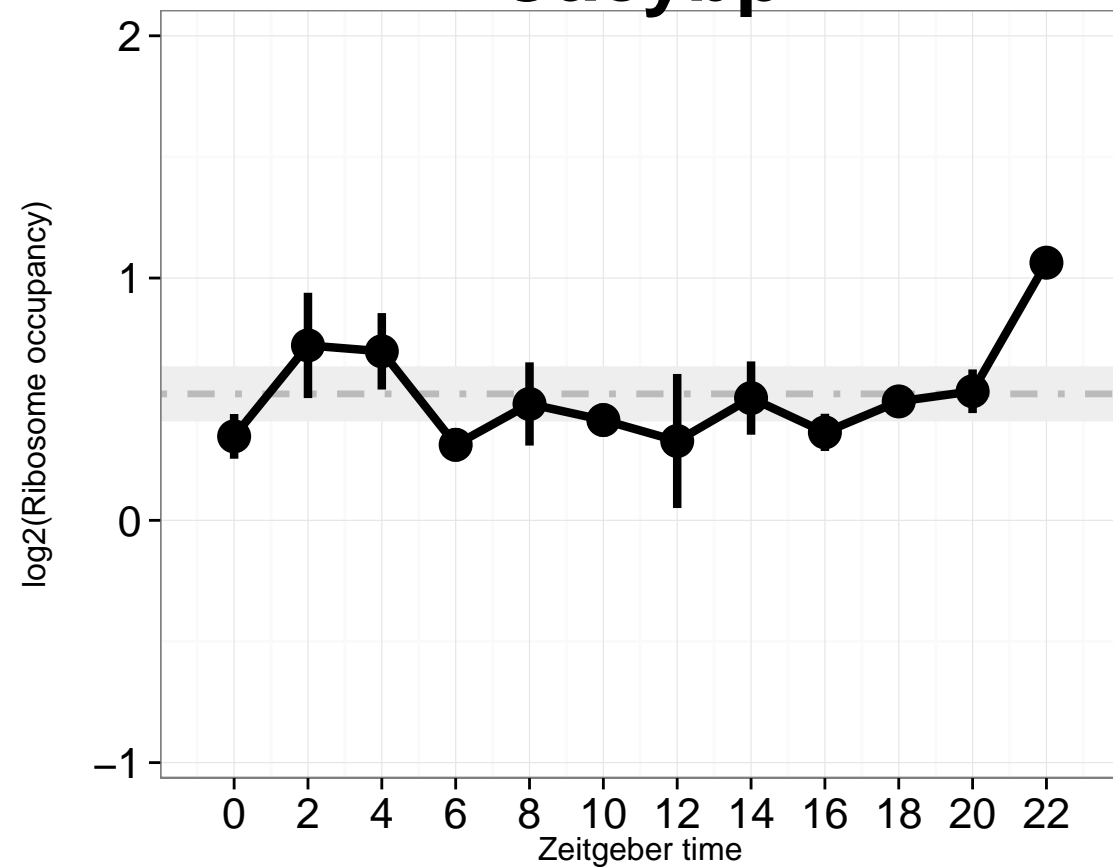

Supplement: SuppDataset_1.zip [file Cacybp_set_D.pdf › Supplemental Dataset 1/D-mRNA_rhythm_translation_rhyth/Cacybp_set_D.pdf]

## Calcoco1

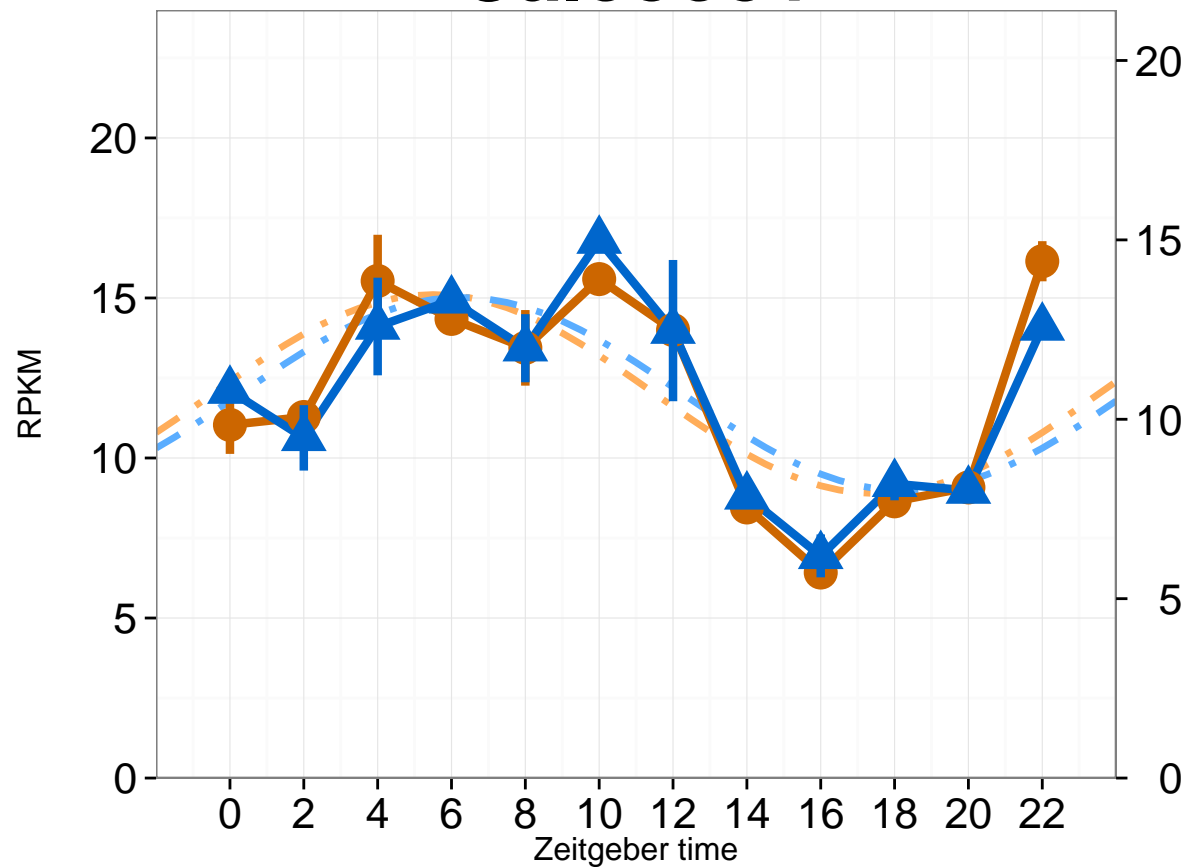

## Calcoco1

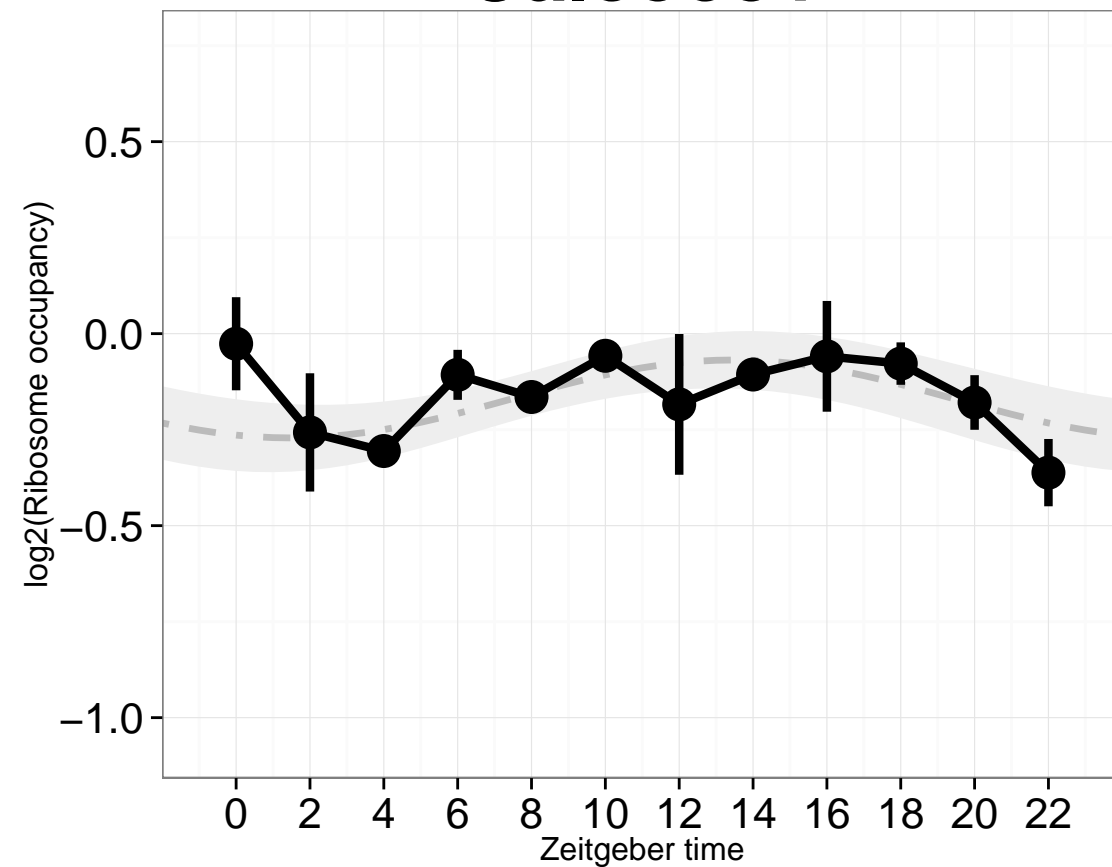

Supplement: SuppDataset_1.zip [file Calcoco1_set_D.pdf › Supplemental Dataset 1/D-mRNA_rhythm_translation_rhyth/Calcoco1_set_D.pdf]

# Caln1

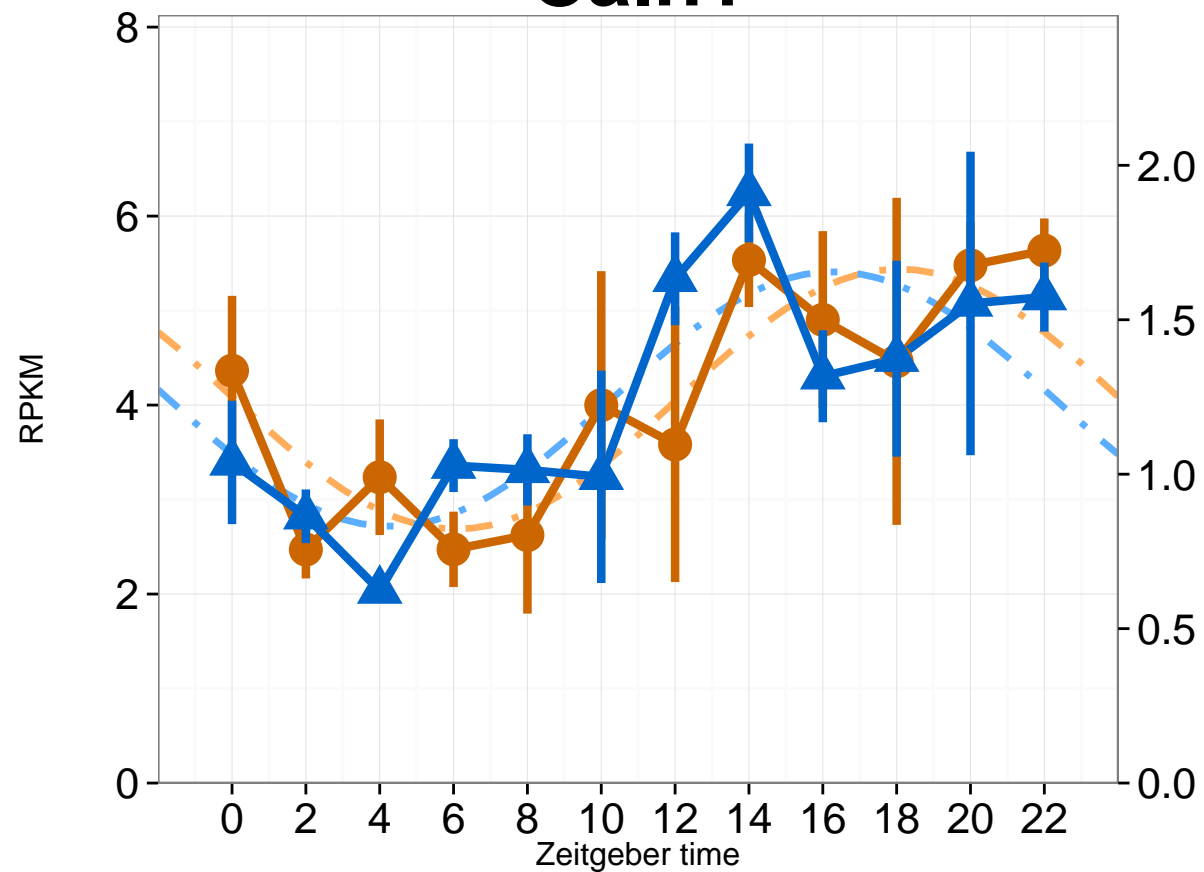

# Caln1

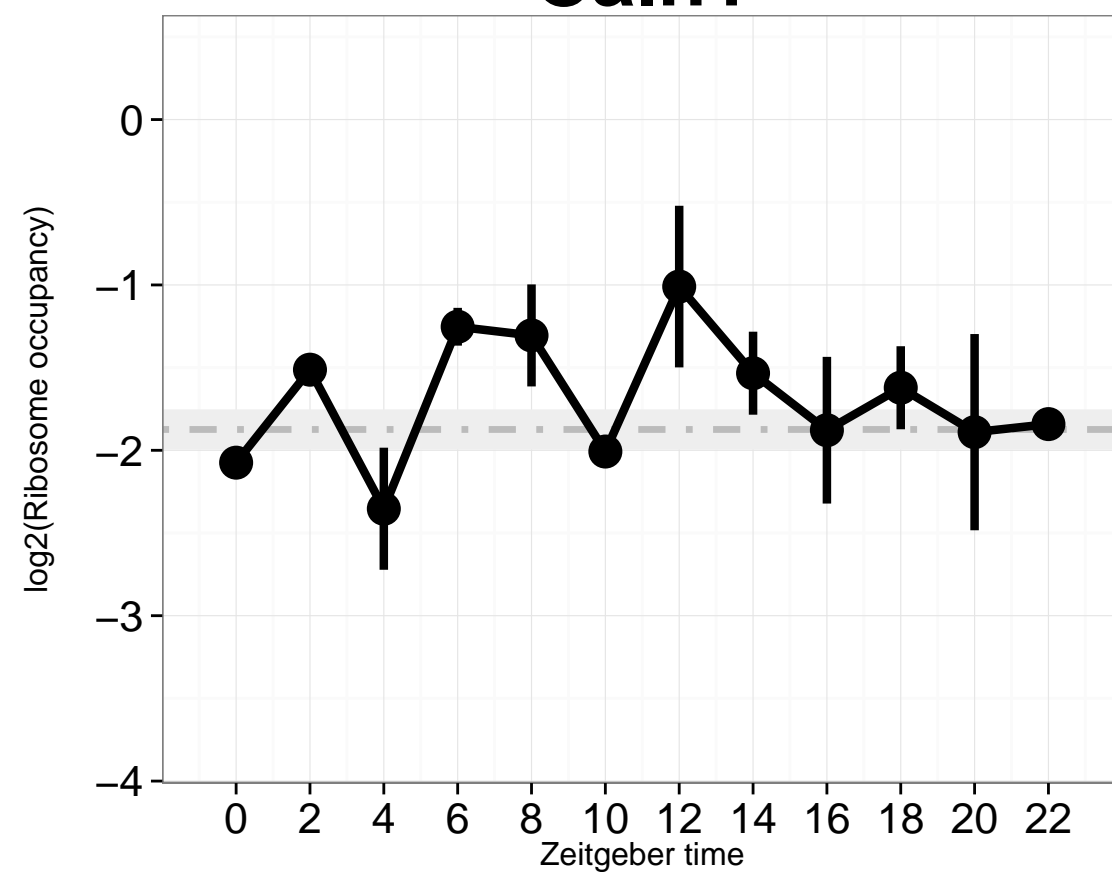

Supplement: SuppDataset_1.zip [file Caln1_set_D.pdf › Supplemental Dataset 1/D-mRNA_rhythm_translation_rhyth/Caln1_set_D.pdf]

# Camk1d

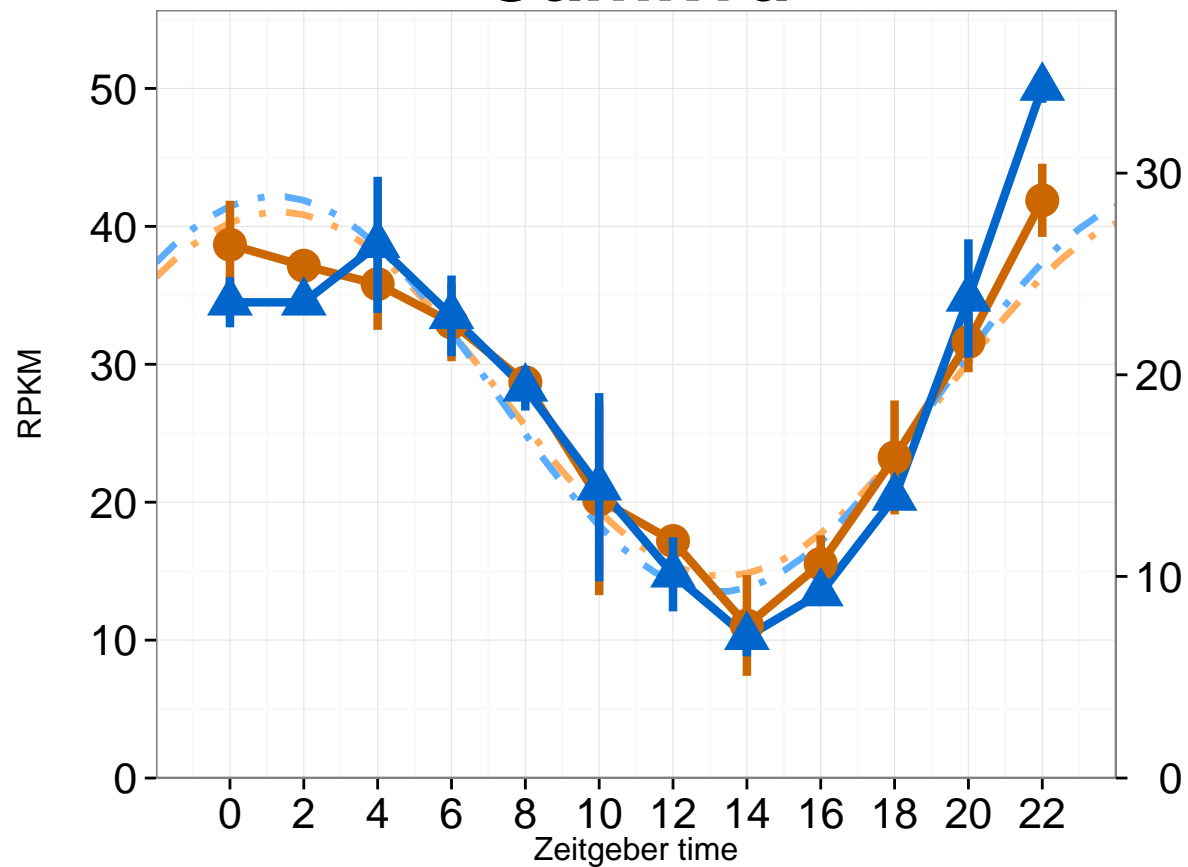

# Camk1d

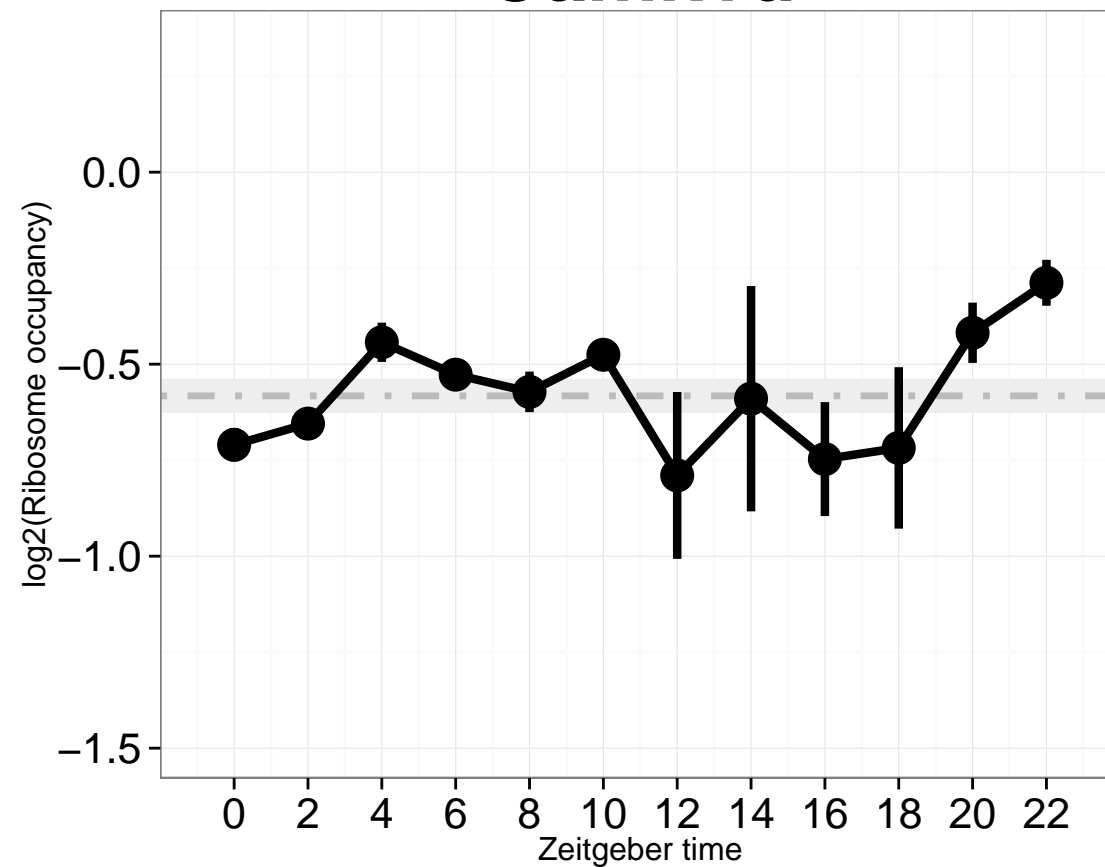

Supplement: SuppDataset_1.zip [file Camk1d_set_D.pdf › Supplemental Dataset 1/D-mRNA_rhythm_translation_rhyth/Camk1d_set_D.pdf]

# Camk2b

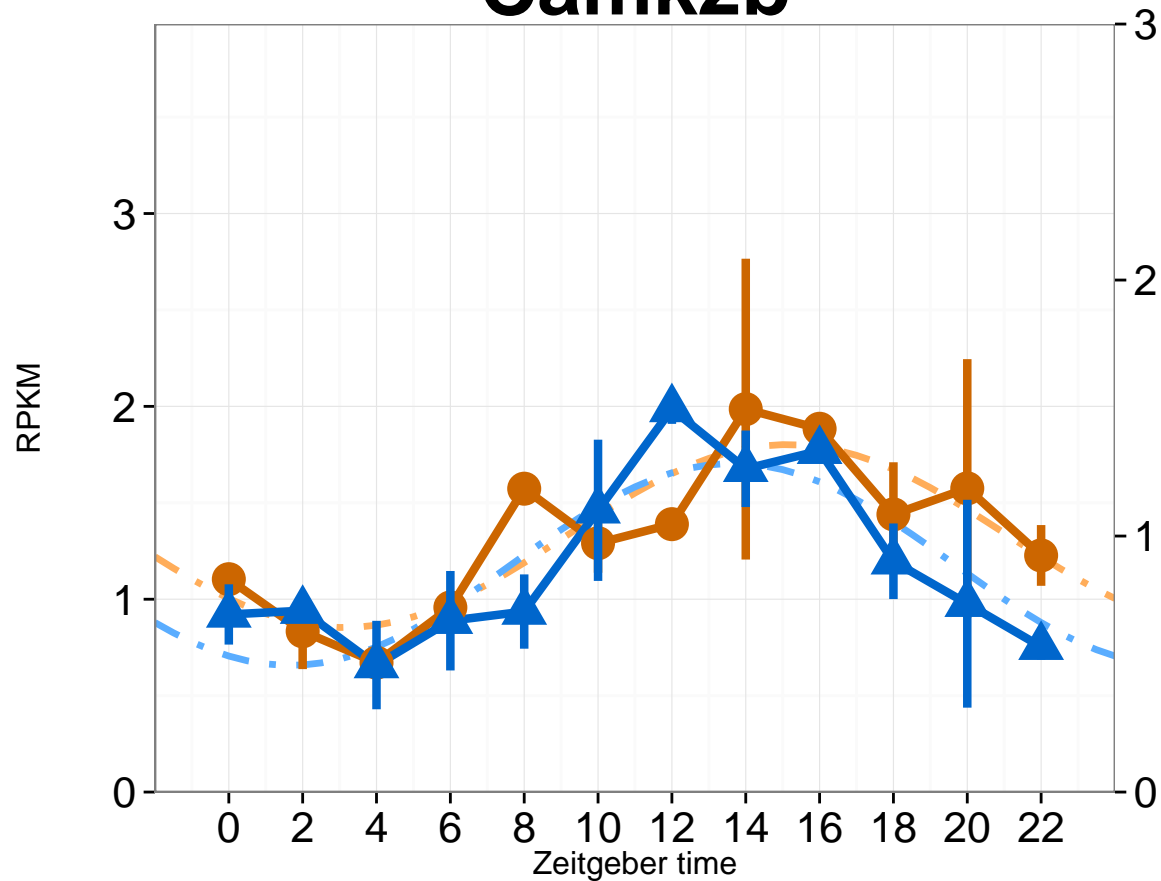

# Camk2b

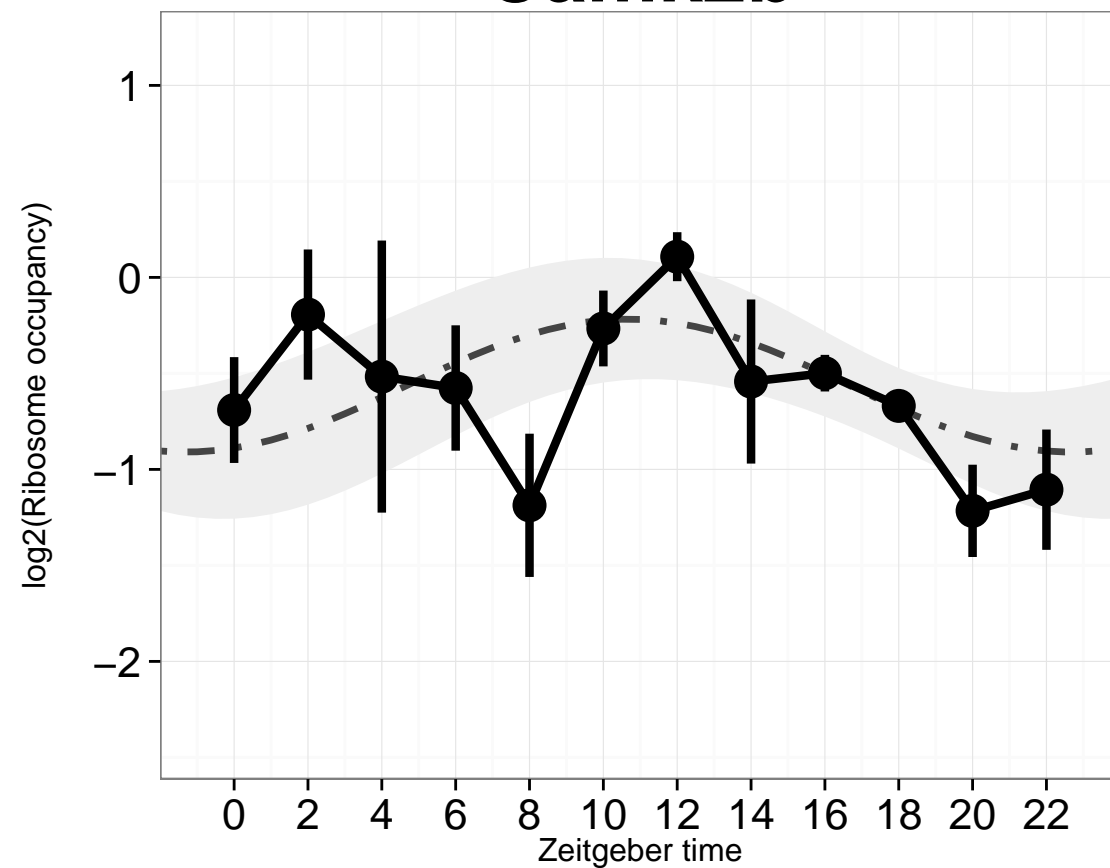

Supplement: SuppDataset_1.zip [file Camk2b_set_D.pdf › Supplemental Dataset 1/D-mRNA_rhythm_translation_rhyth/Camk2b_set_D.pdf]

# Capn2

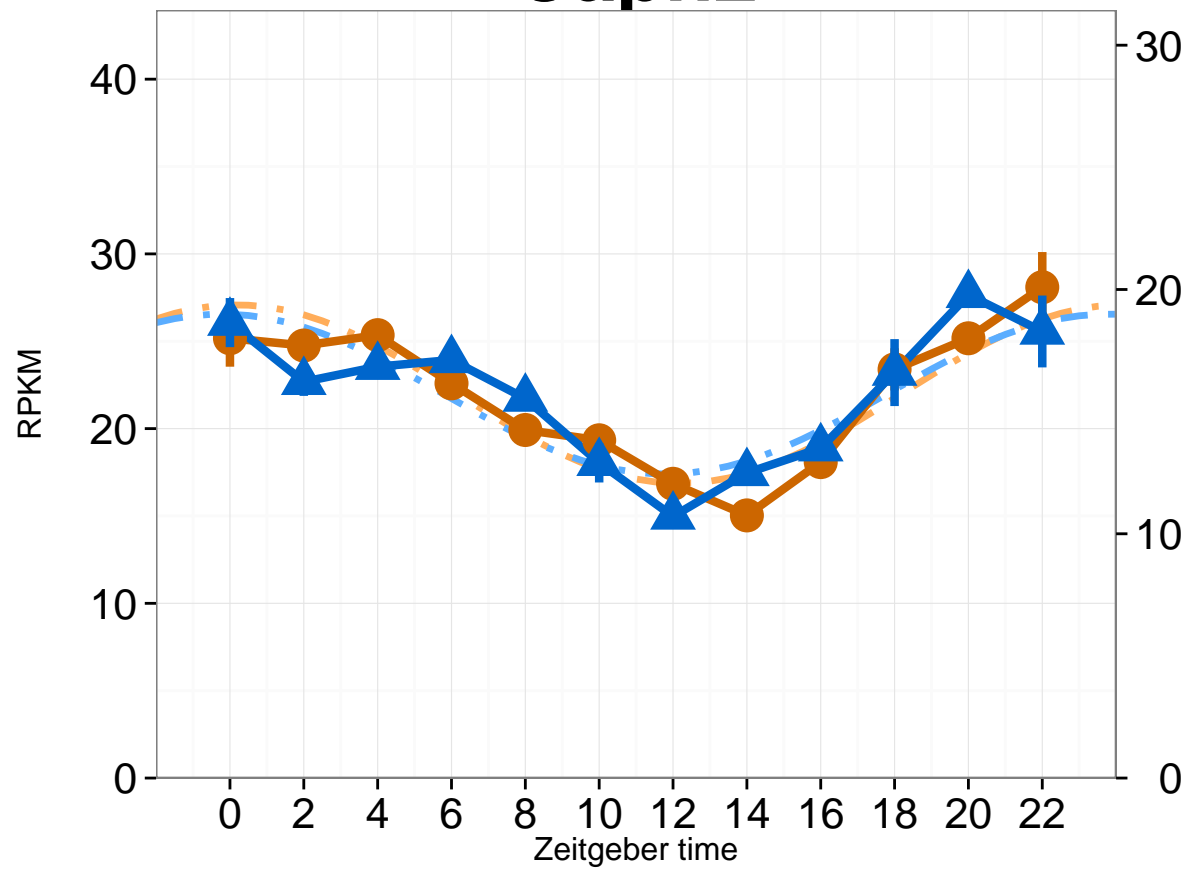

# Capn2

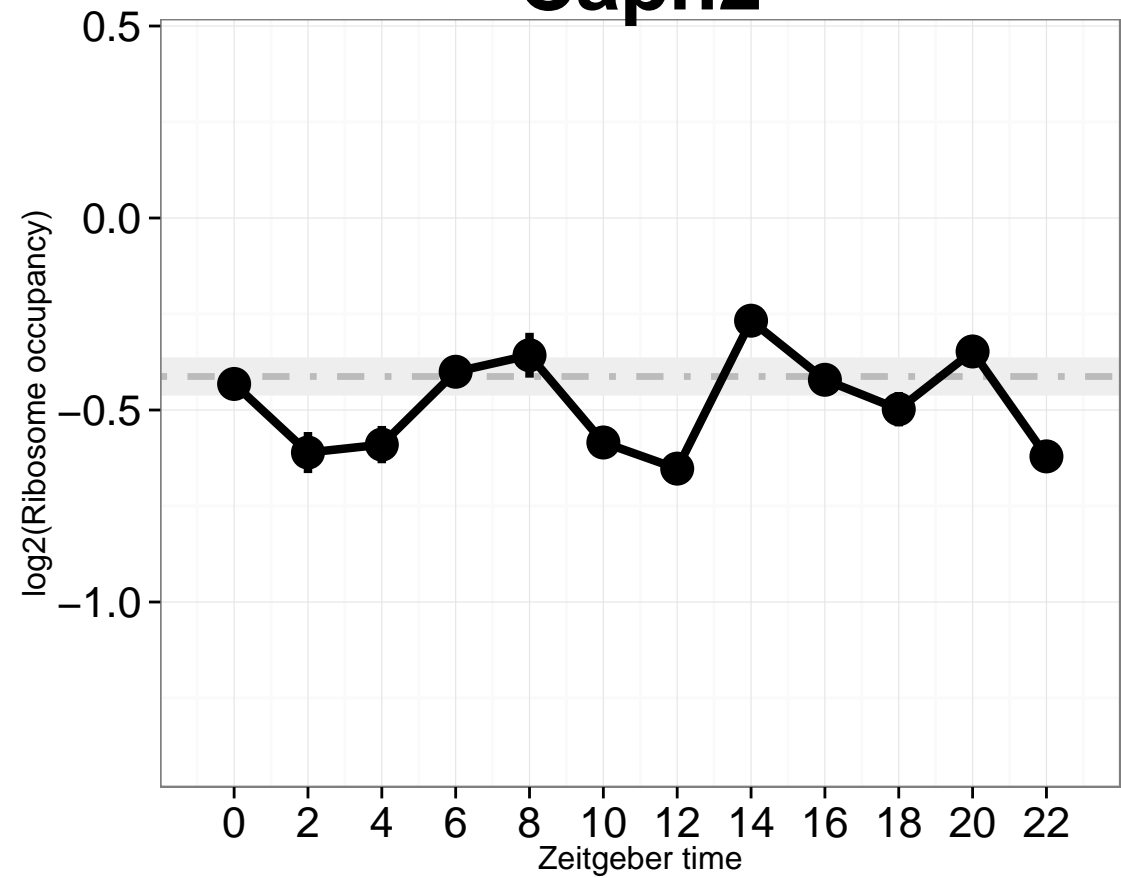

Supplement: SuppDataset_1.zip [file Capn2_set_D.pdf › Supplemental Dataset 1/D-mRNA_rhythm_translation_rhyth/Capn2_set_D.pdf]

# Caprin1

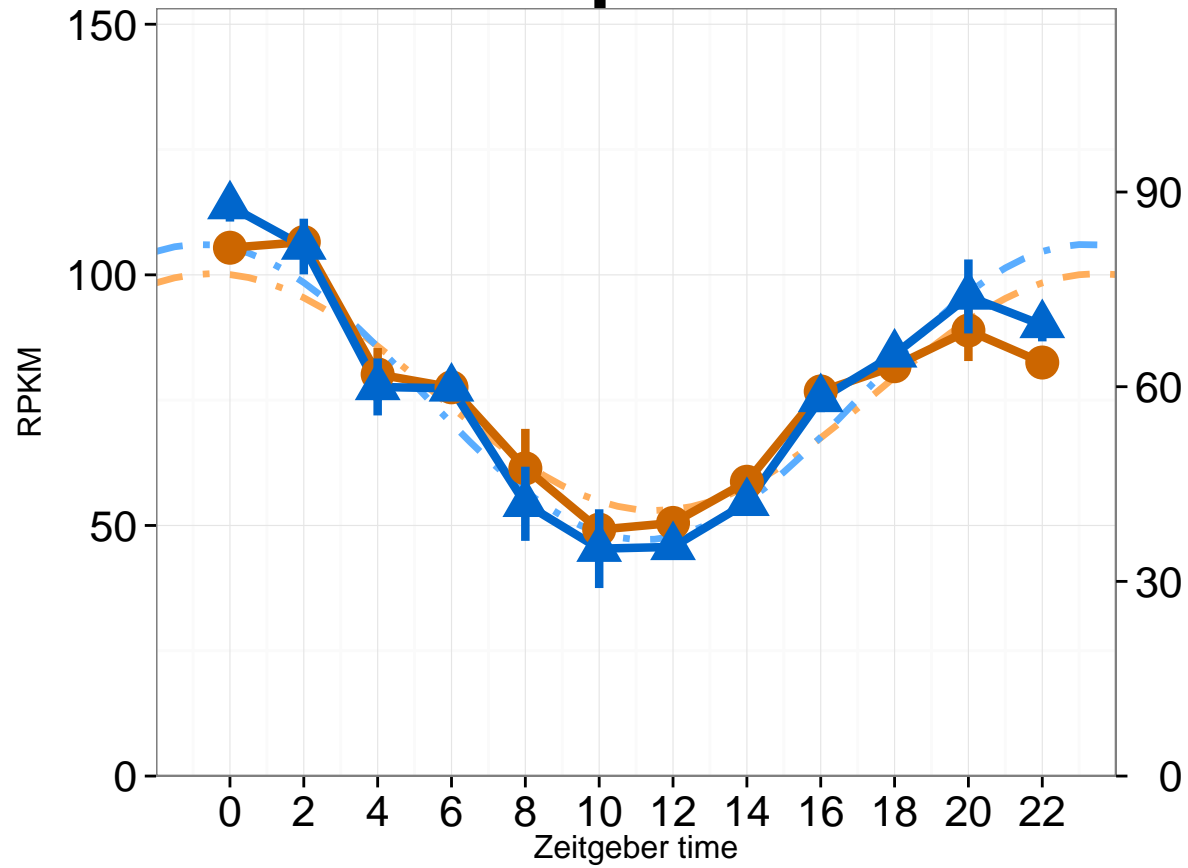

# Caprin1

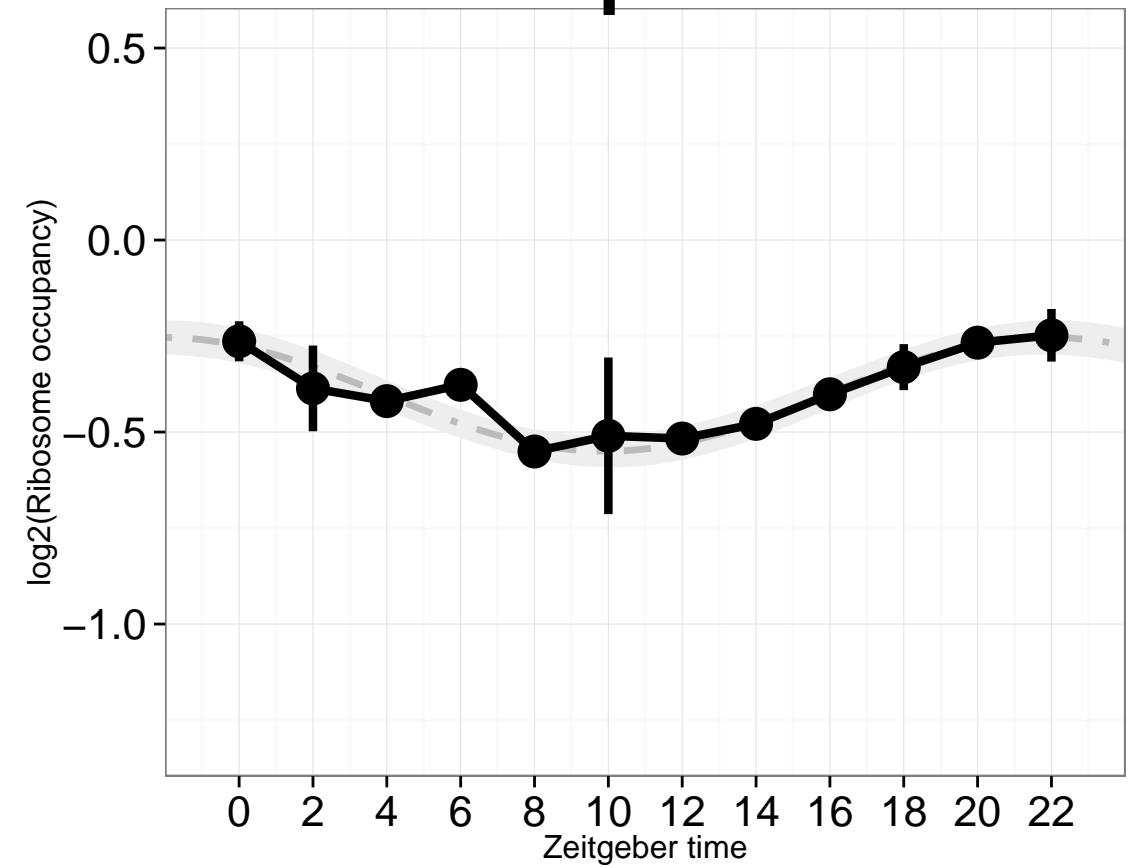

Supplement: SuppDataset_1.zip [file Caprin1_set_D.pdf › Supplemental Dataset 1/D-mRNA_rhythm_translation_rhyth/Caprin1_set_D.pdf]

## Car14

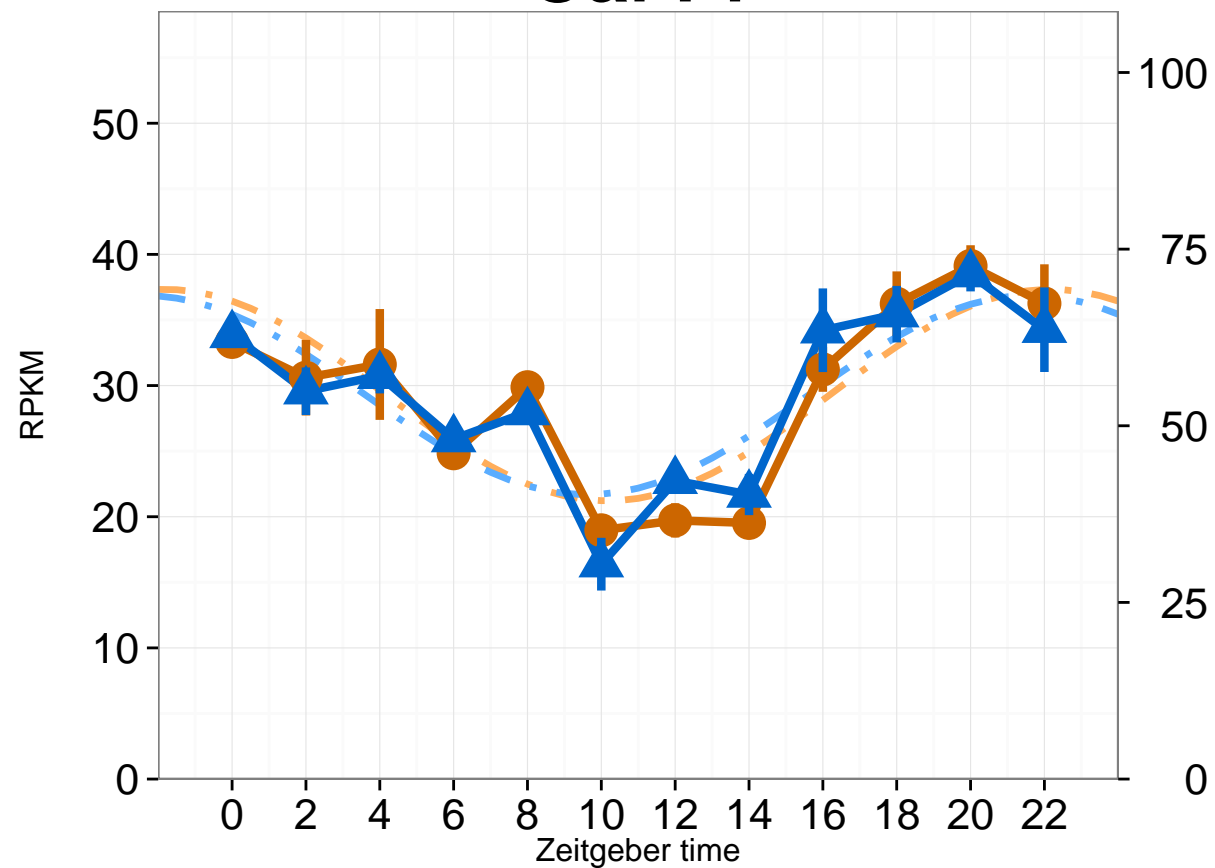

## Car14

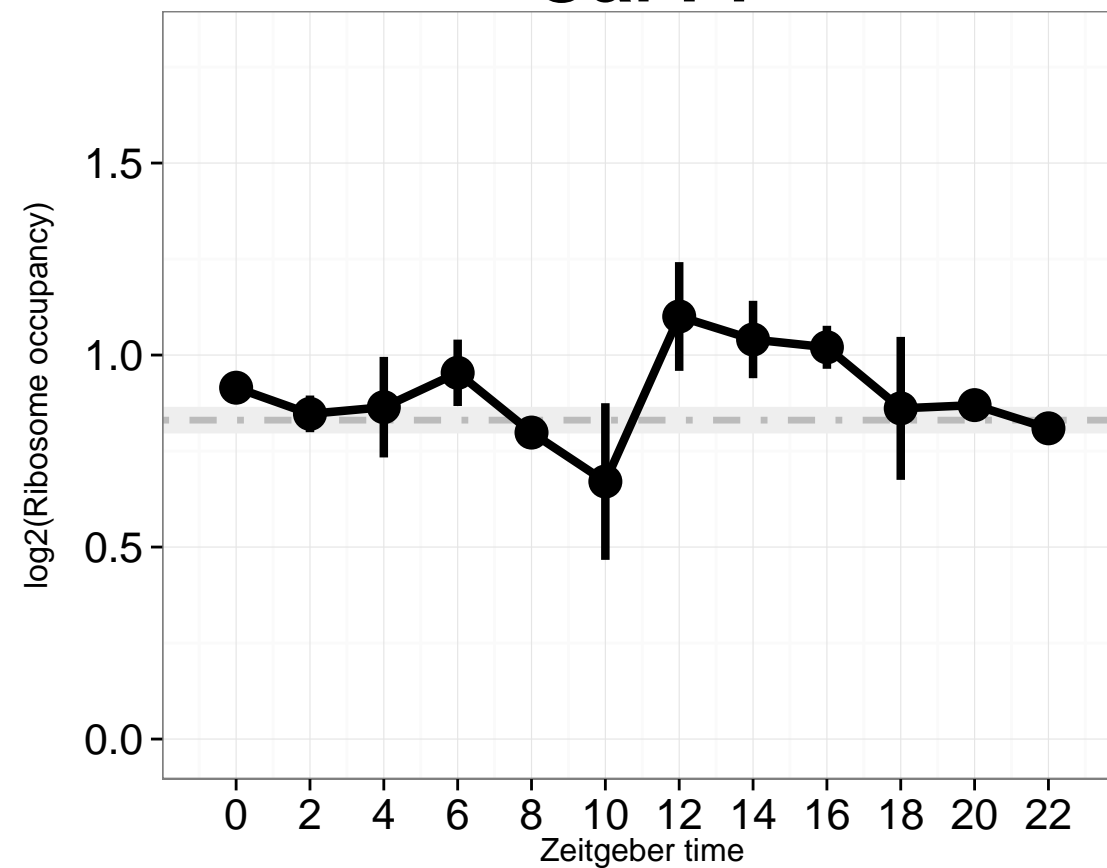

Supplement: SuppDataset_1.zip [file Car14_set_D.pdf › Supplemental Dataset 1/D-mRNA_rhythm_translation_rhyth/Car14_set_D.pdf]

## Cars

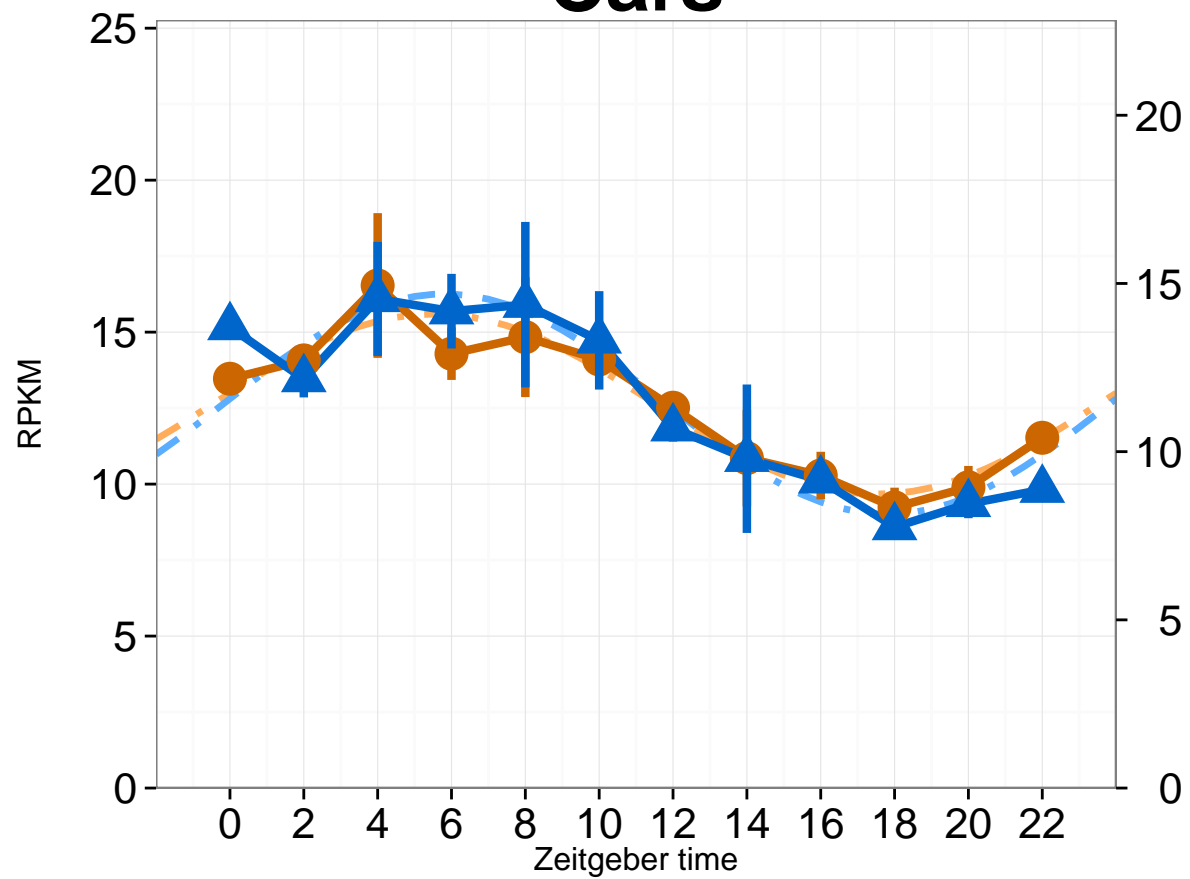

## Cars

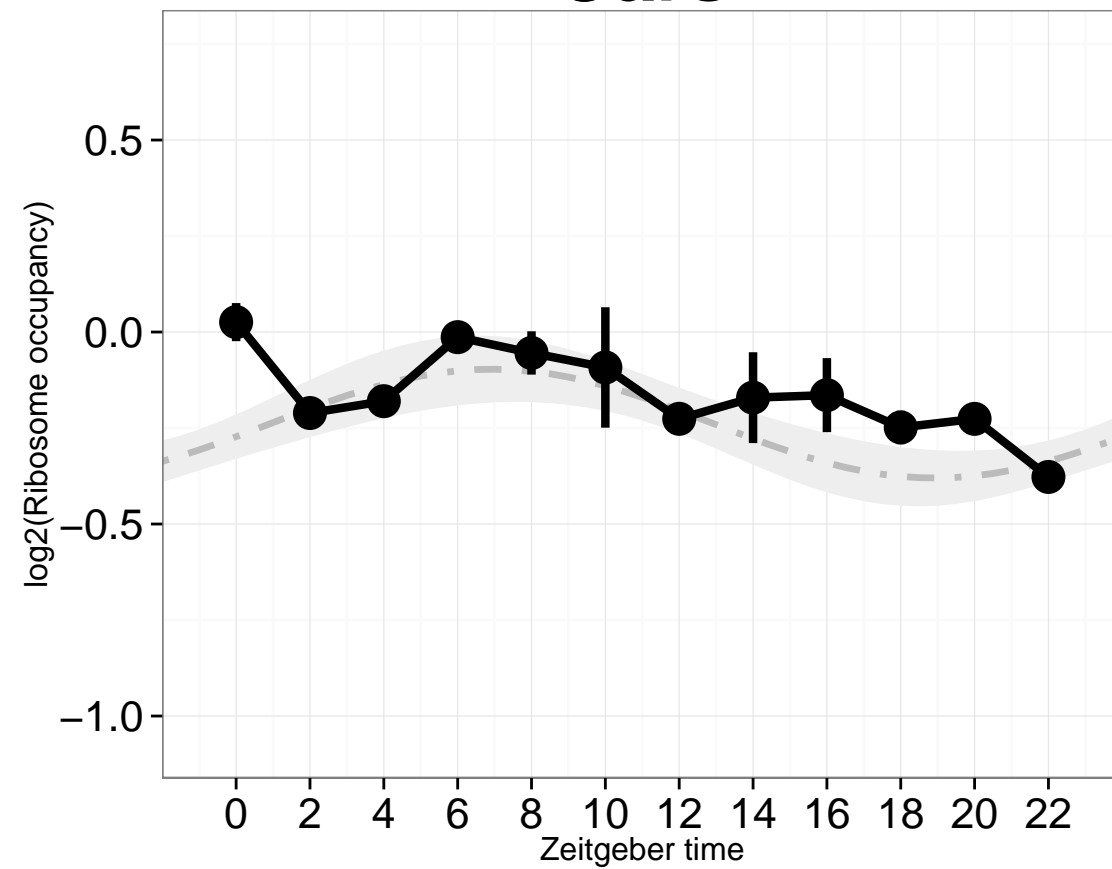

Supplement: SuppDataset_1.zip [file Cars_set_D.pdf › Supplemental Dataset 1/D-mRNA_rhythm_translation_rhyth/Cars_set_D.pdf]

## Casp6

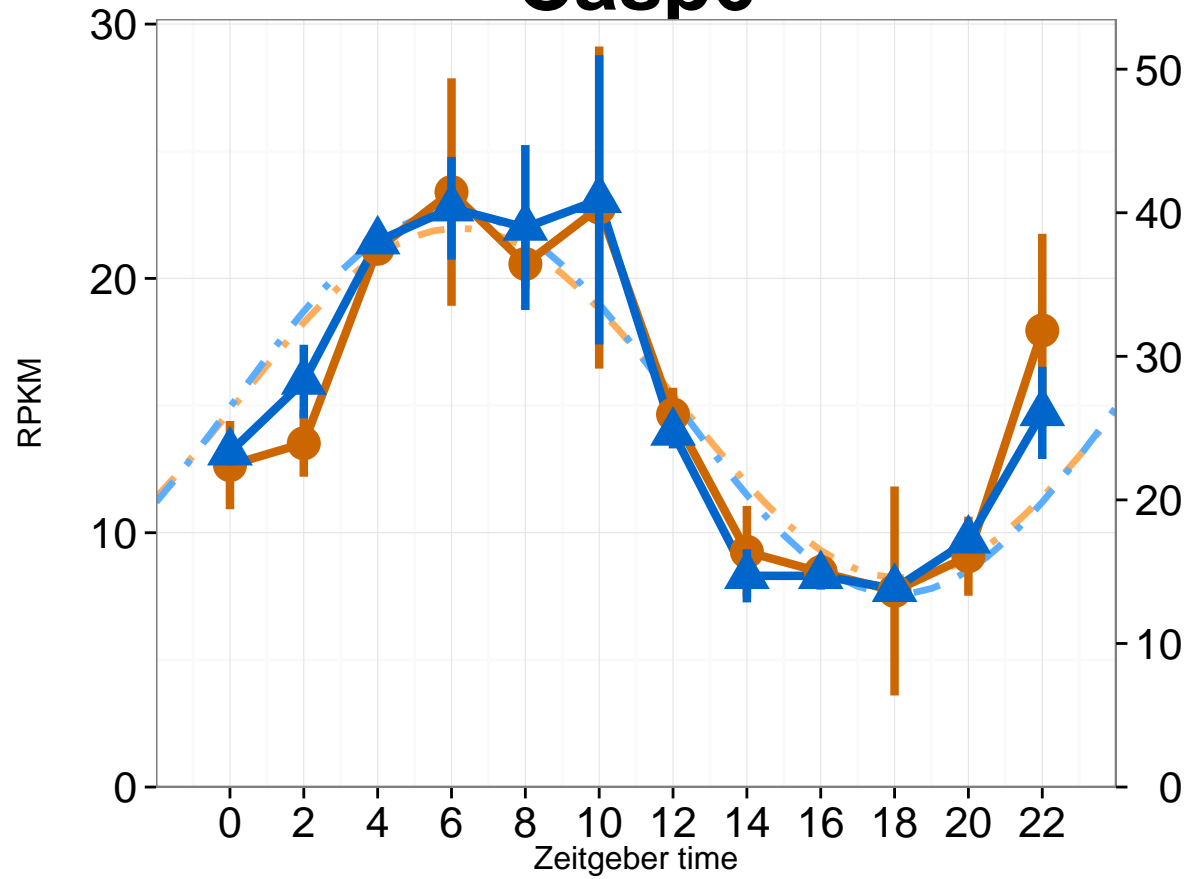

## Casp6

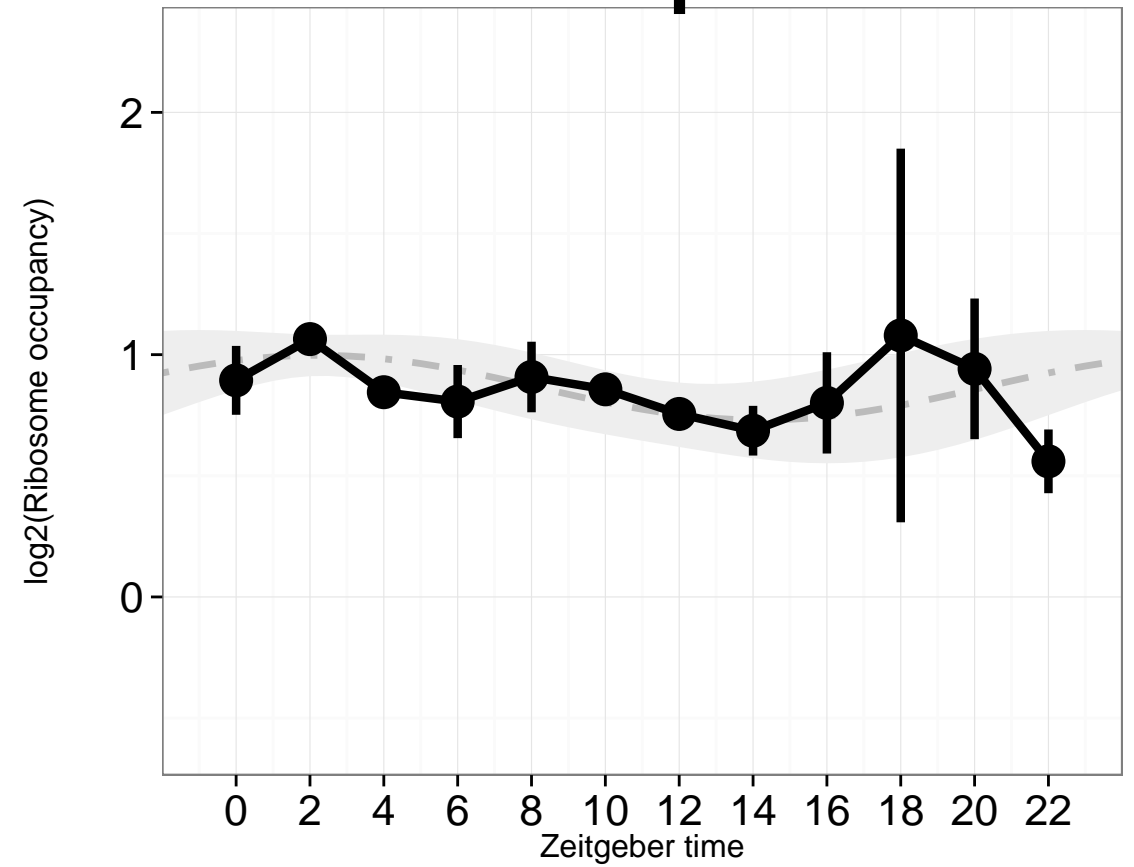

Supplement: SuppDataset_1.zip [file Casp6_set_D.pdf › Supplemental Dataset 1/D-mRNA_rhythm_translation_rhyth/Casp6_set_D.pdf]

## Cbs

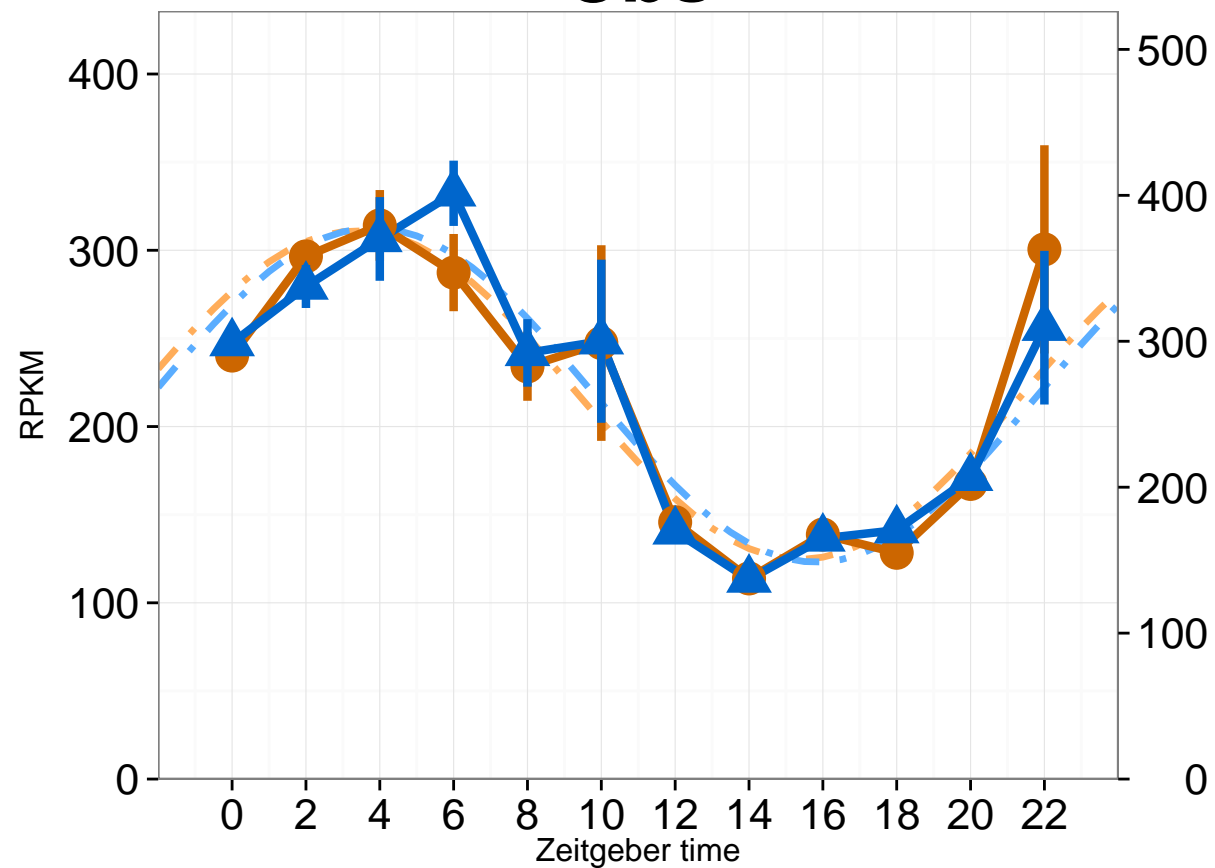

## Cbs

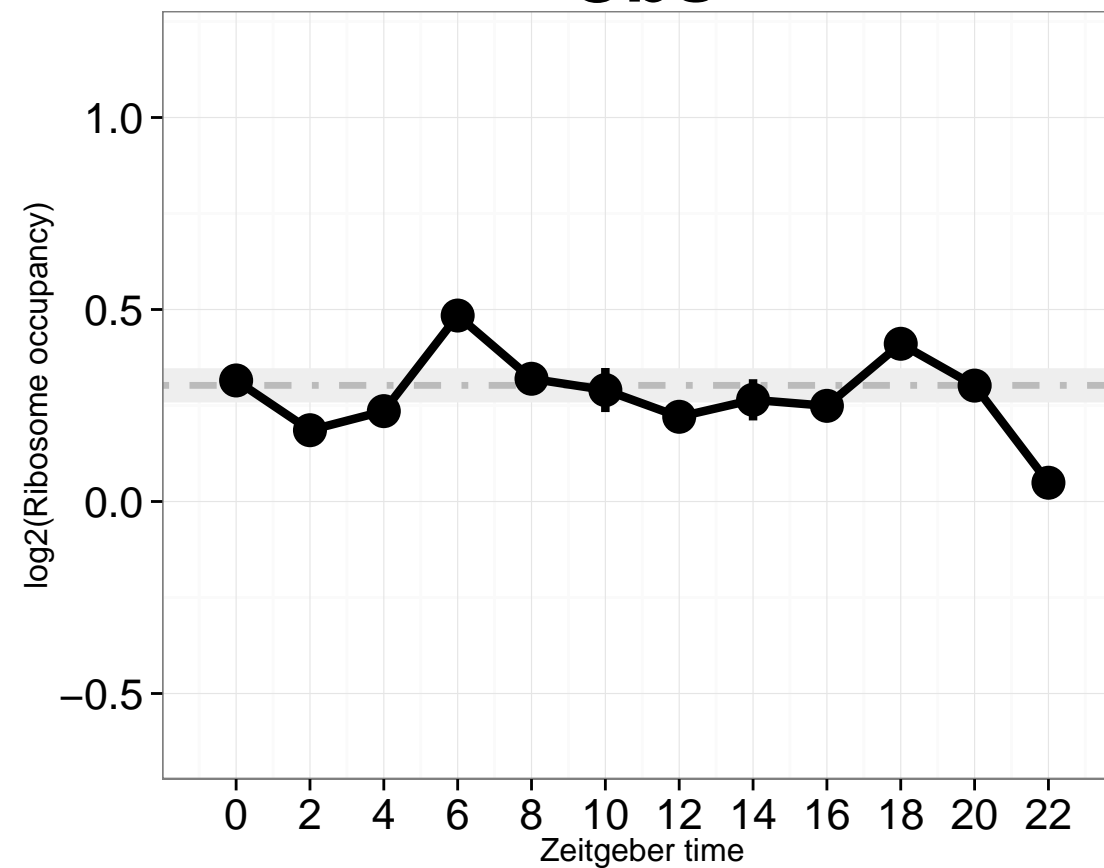

Supplement: SuppDataset_1.zip [file Cbs_set_D.pdf › Supplemental Dataset 1/D-mRNA_rhythm_translation_rhyth/Cbs_set_D.pdf]

# Cc2d1a

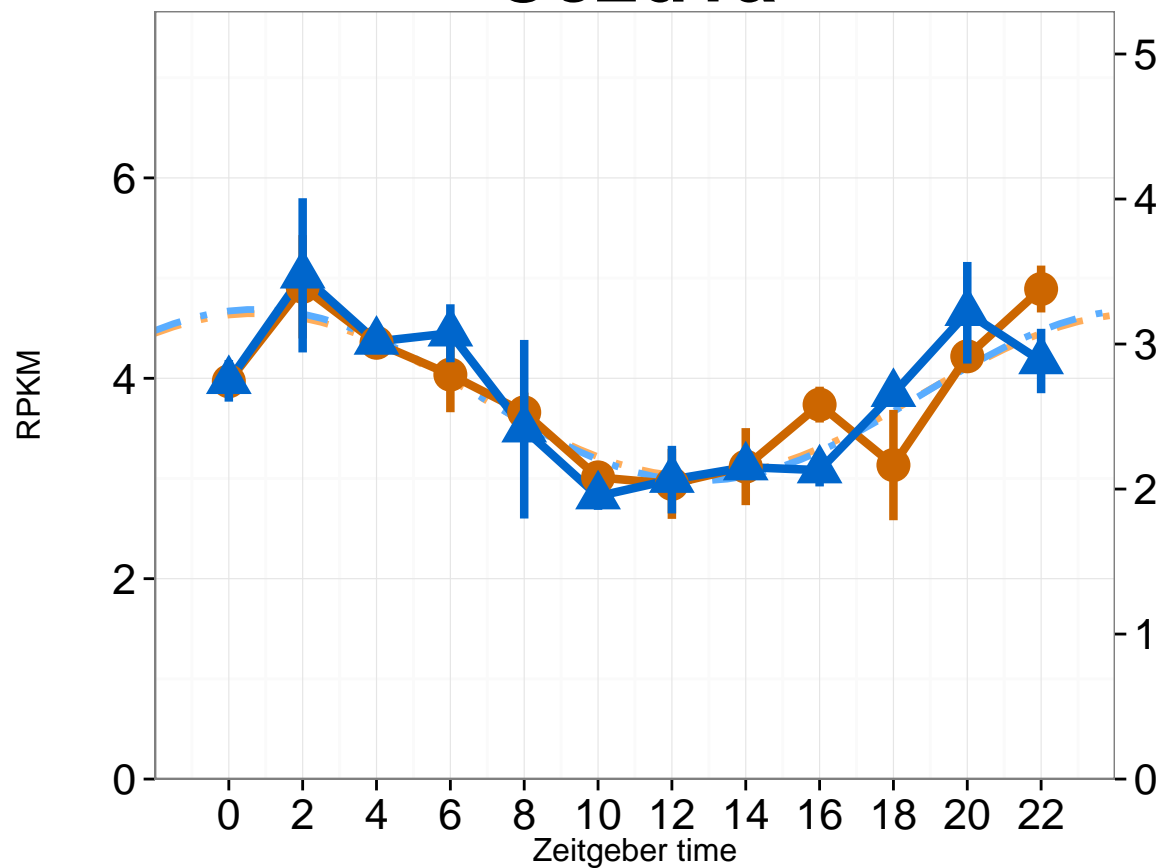

# Cc2d1a

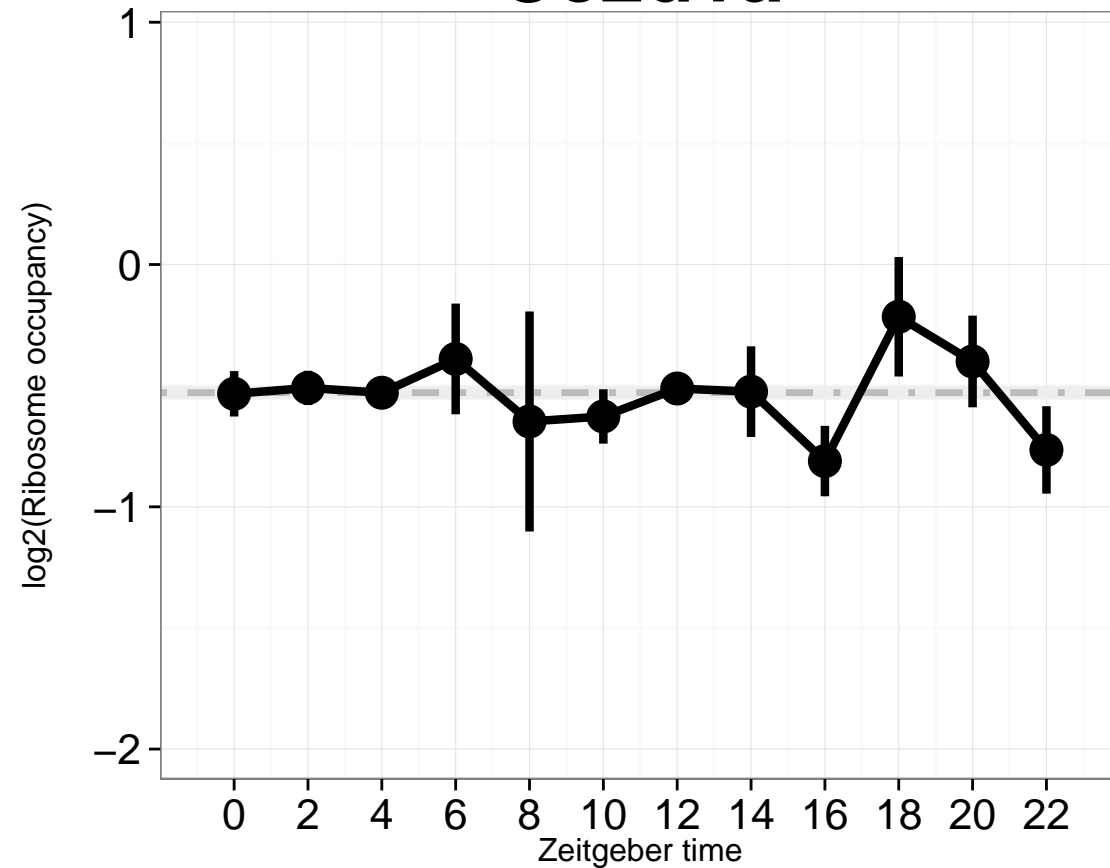

Supplement: SuppDataset_1.zip [file Cc2d1a_set_D.pdf › Supplemental Dataset 1/D-mRNA_rhythm_translation_rhyth/Cc2d1a_set_D.pdf]

## Ccdc12

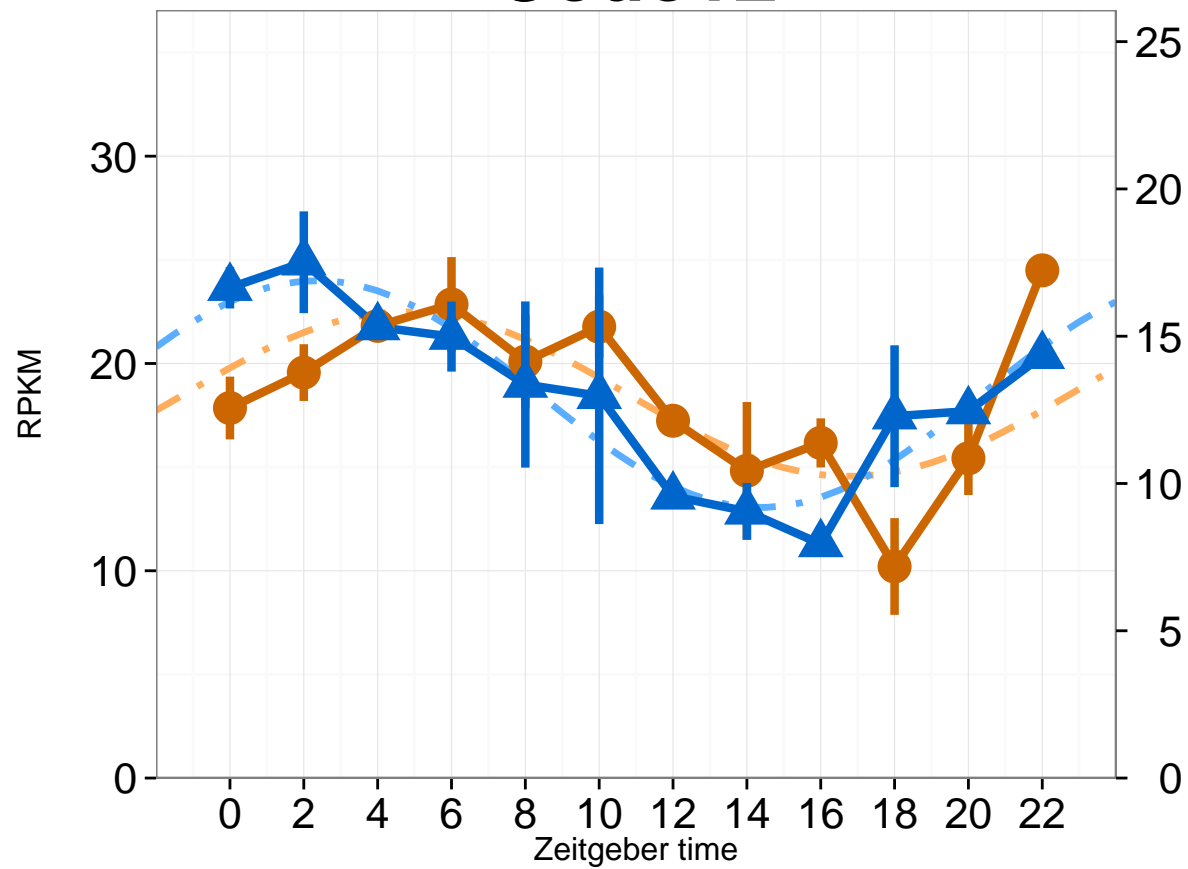

## Ccdc12

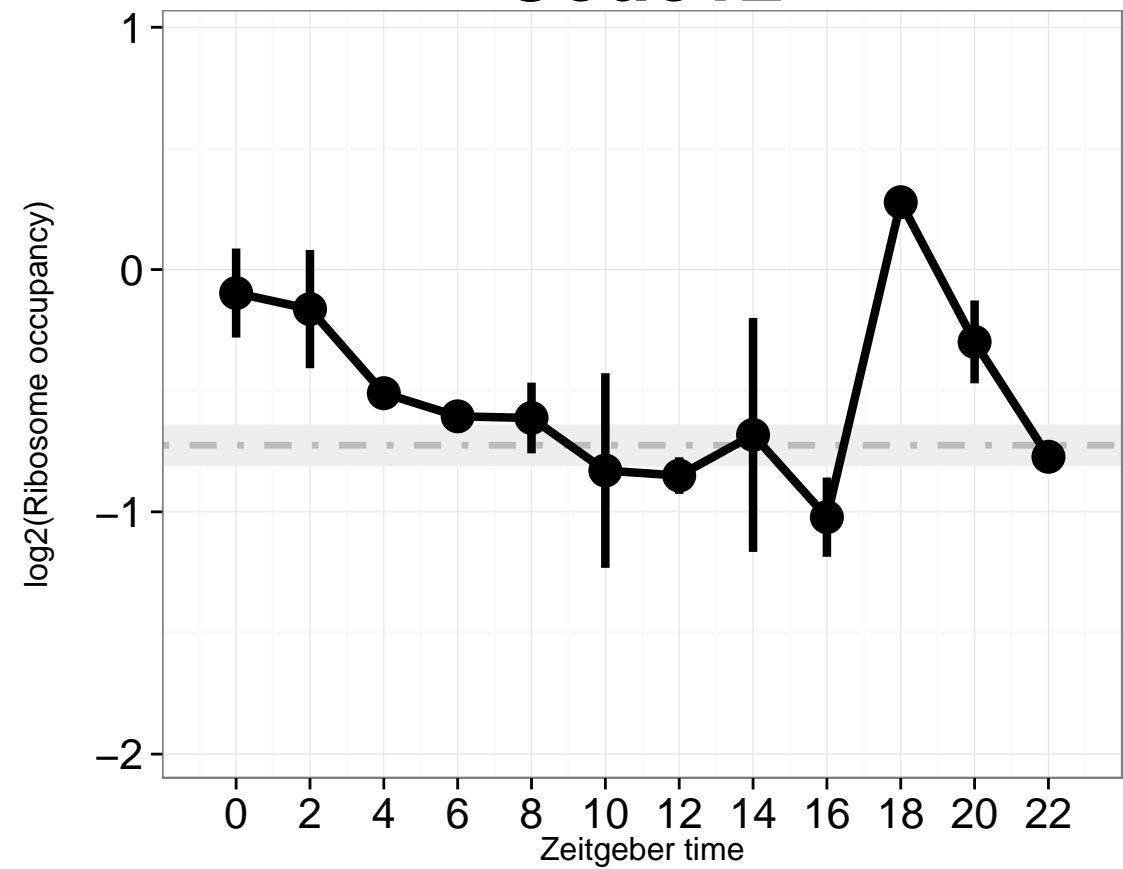

Supplement: SuppDataset_1.zip [file Ccdc12_set_D.pdf › Supplemental Dataset 1/D-mRNA_rhythm_translation_rhyth/Ccdc12_set_D.pdf]

# Ccdc151

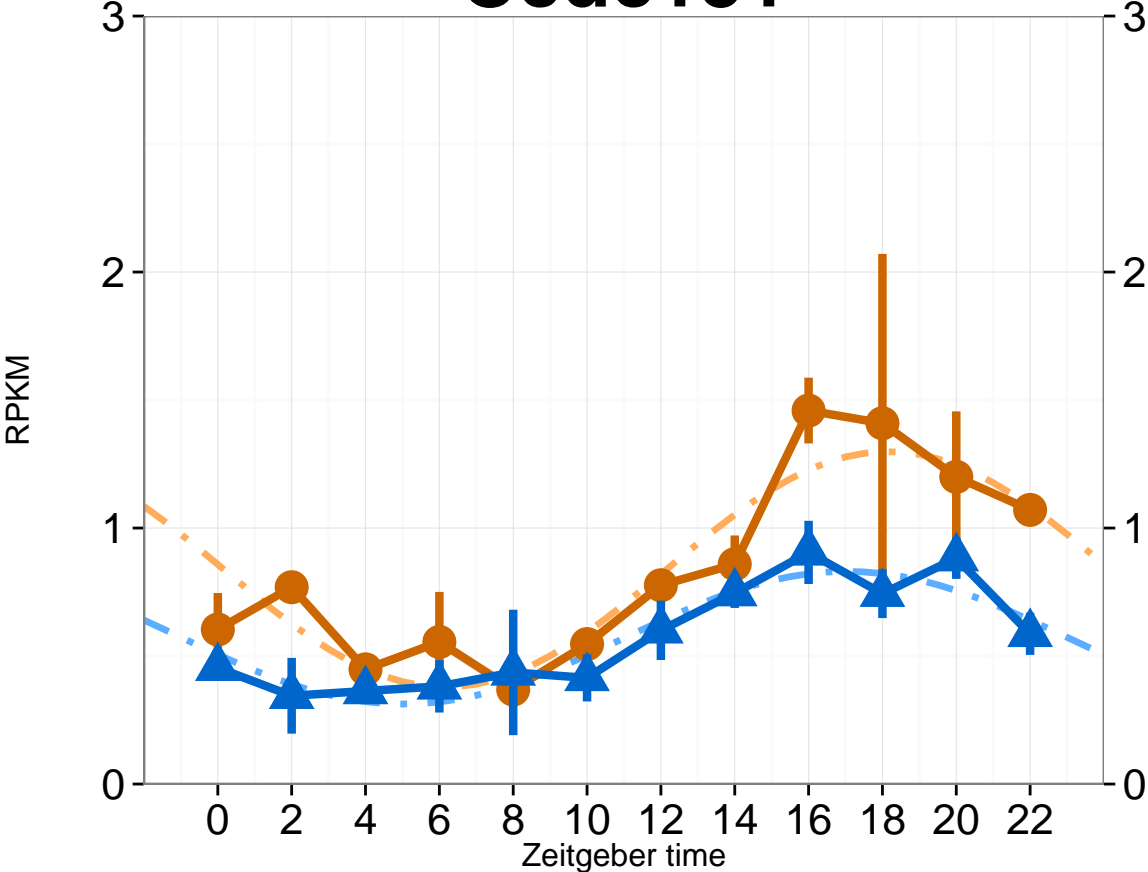

# Ccdc151

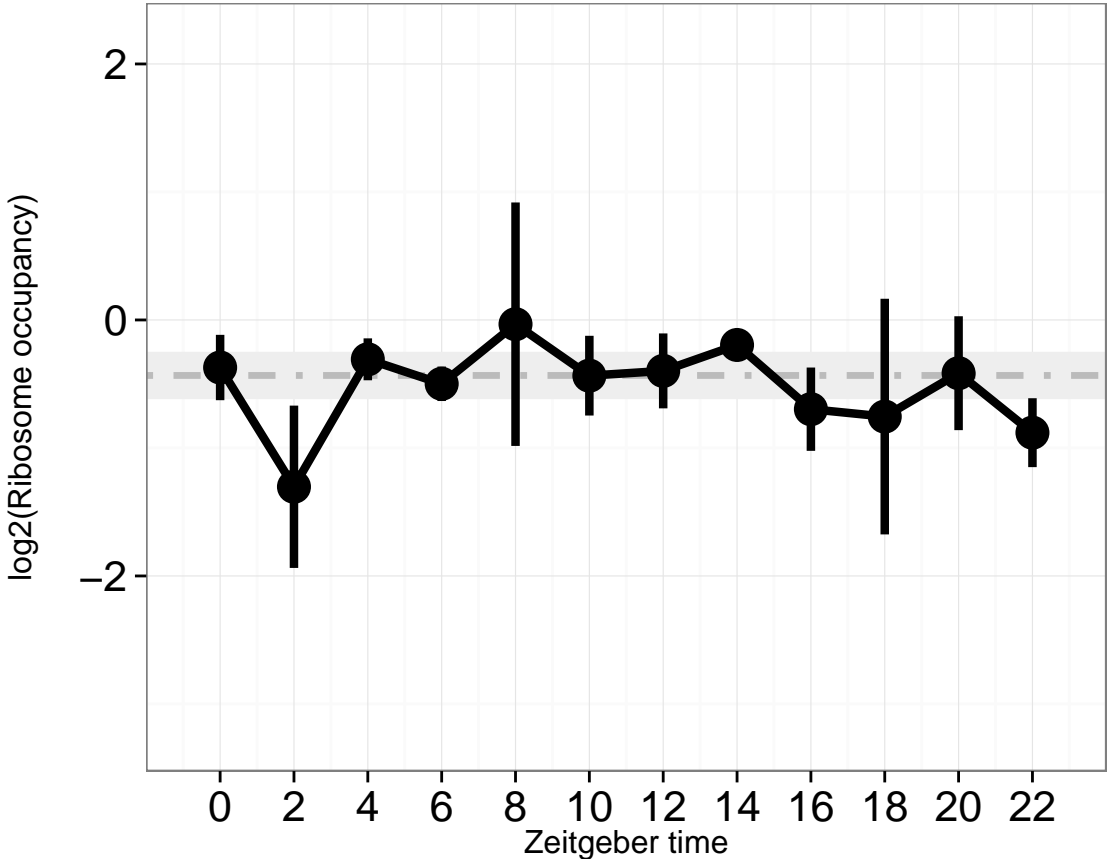

Supplement: SuppDataset_1.zip [file Ccdc151_set_D.pdf › Supplemental Dataset 1/D-mRNA_rhythm_translation_rhyth/Ccdc151_set_D.pdf]

# Ccdc57

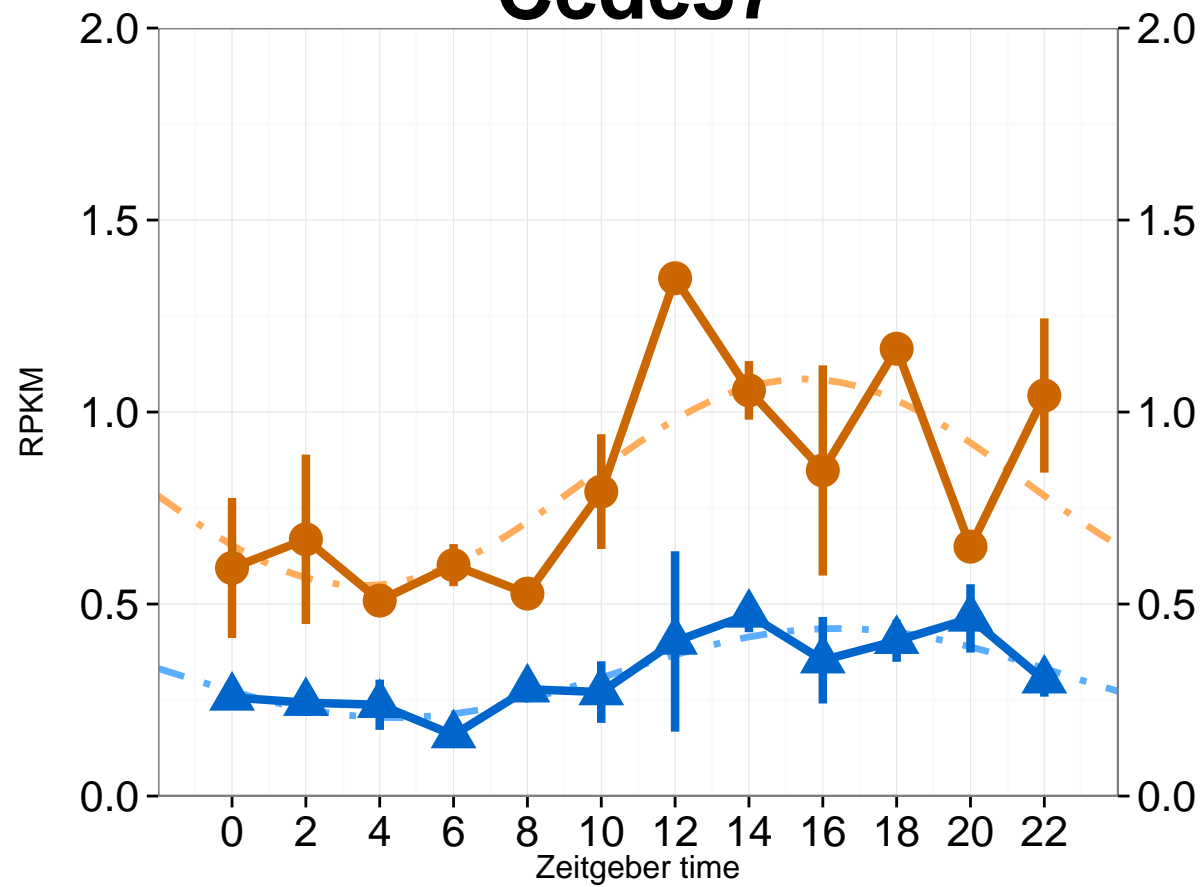

# Ccdc57

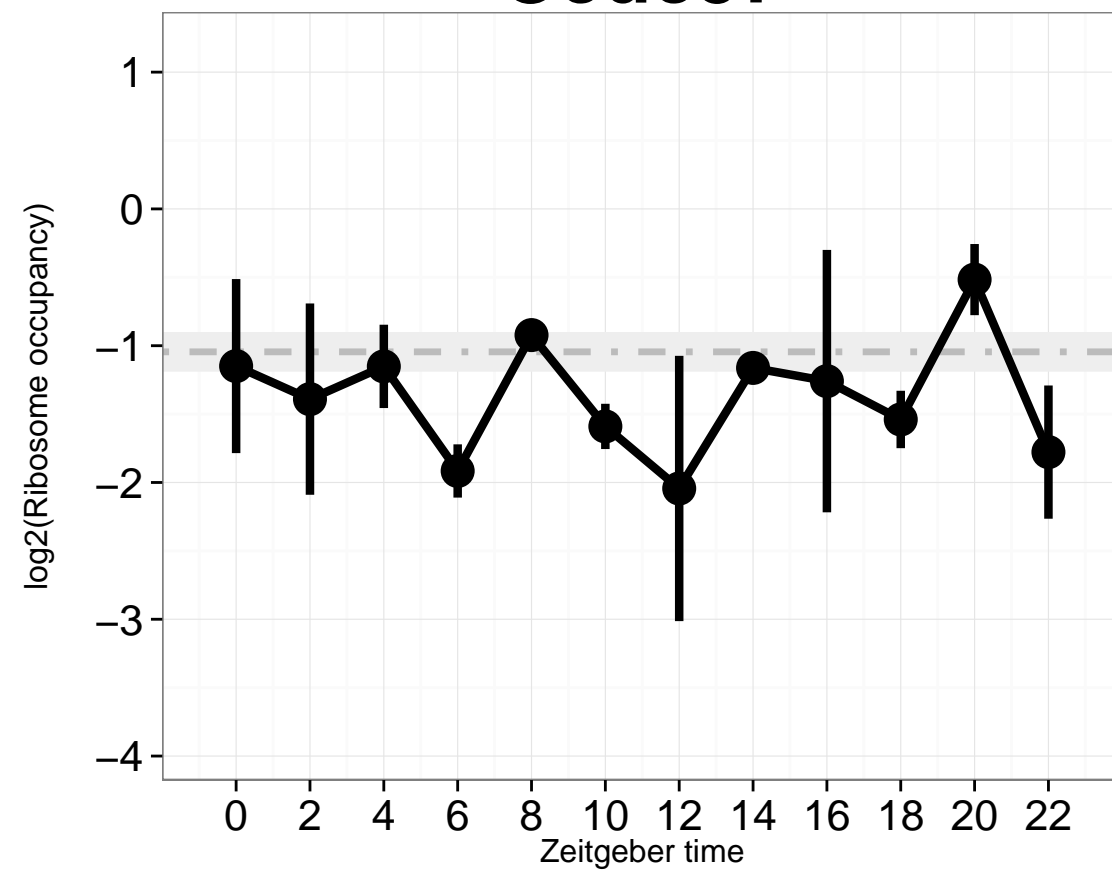

Supplement: SuppDataset_1.zip [file Ccdc57_set_D.pdf › Supplemental Dataset 1/D-mRNA_rhythm_translation_rhyth/Ccdc57_set_D.pdf]

**Ccdc85c**

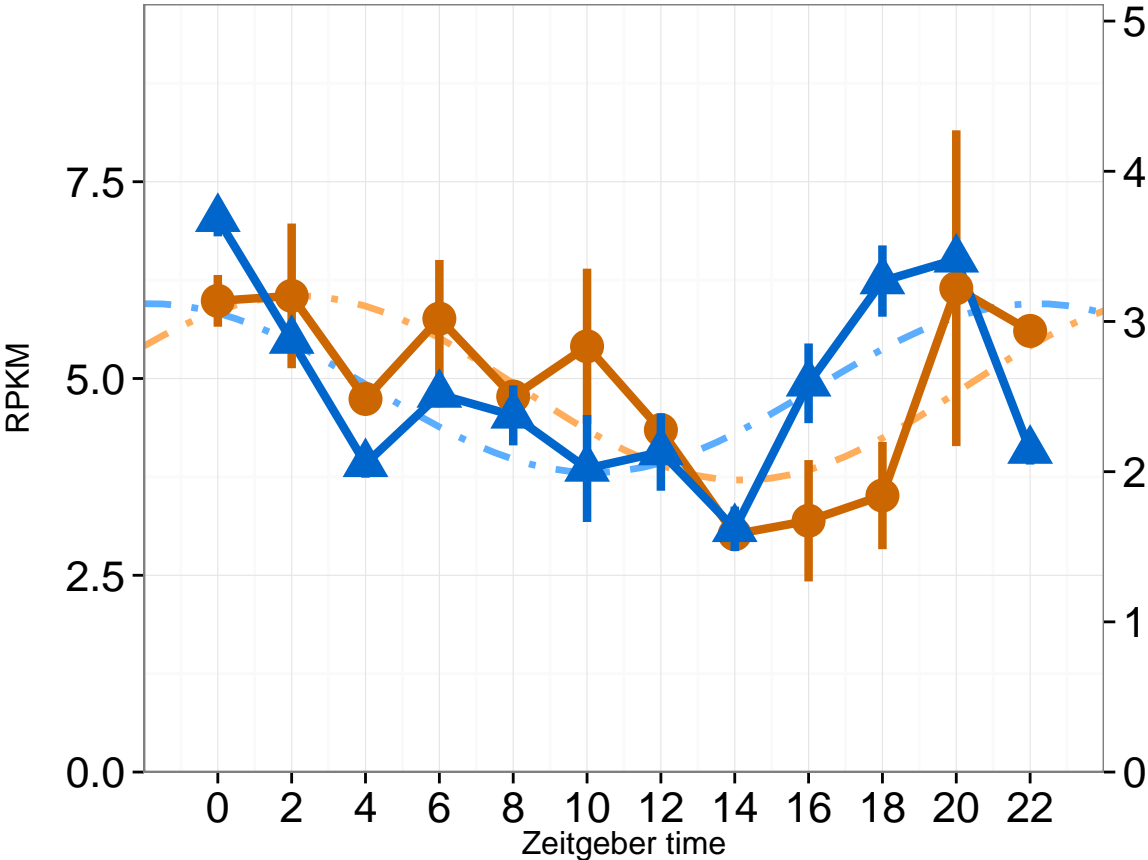

**Ccdc85c**

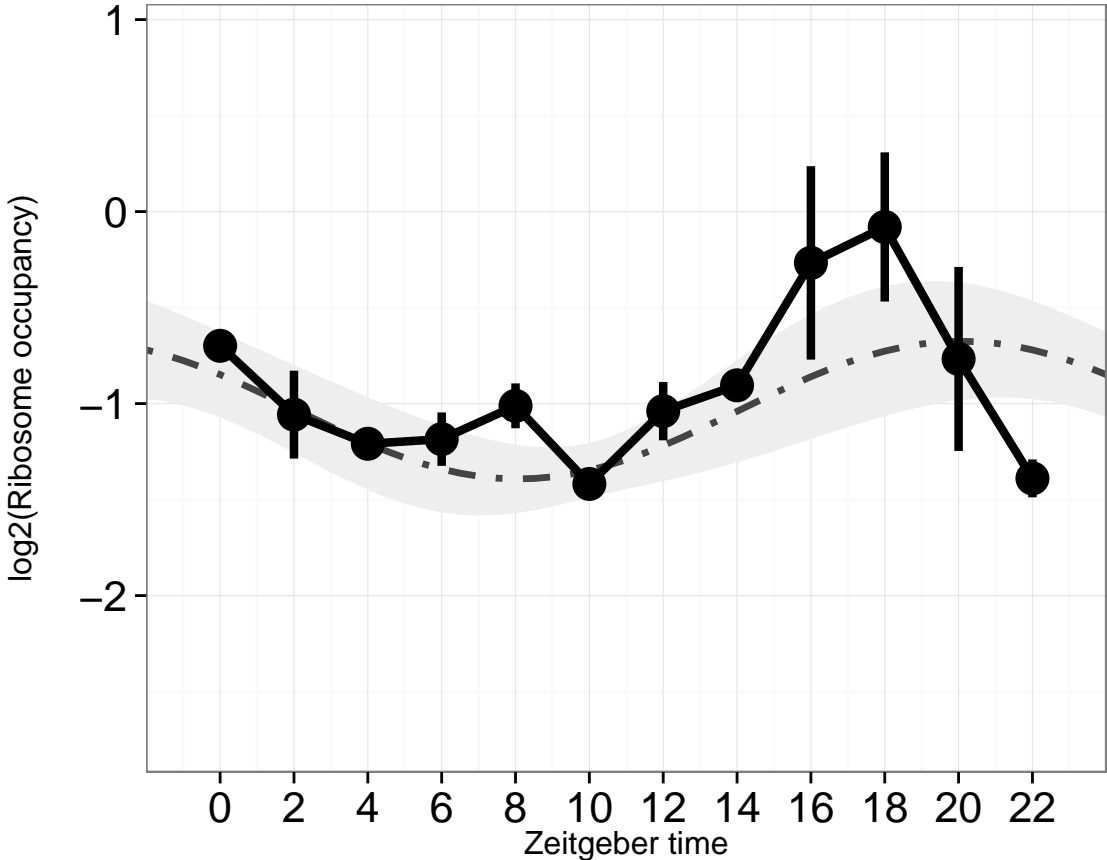

Supplement: SuppDataset_1.zip [file Ccdc85c_set_D.pdf › Supplemental Dataset 1/D-mRNA_rhythm_translation_rhyth/Ccdc85c_set_D.pdf]

# Ccne1

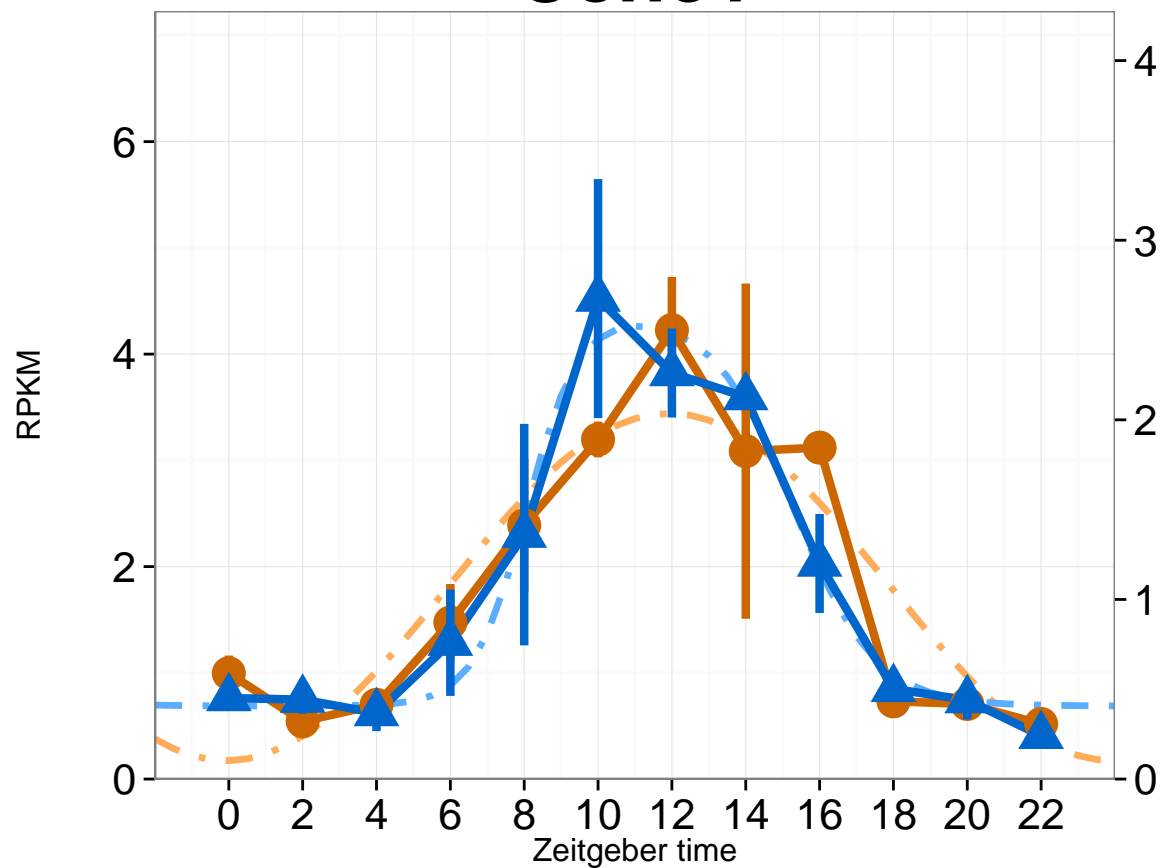

# Ccne1

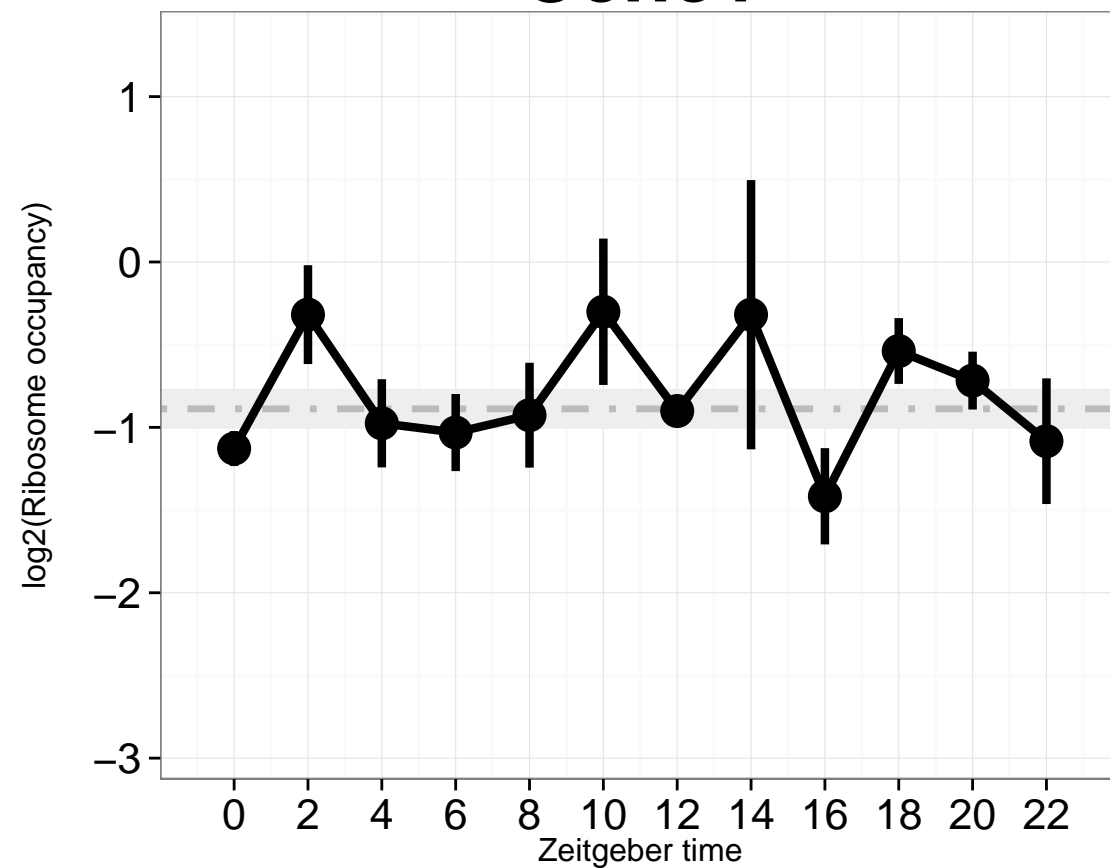

Supplement: SuppDataset_1.zip [file Ccne1_set_D.pdf › Supplemental Dataset 1/D-mRNA_rhythm_translation_rhyth/Ccne1_set_D.pdf]

# Ccne2

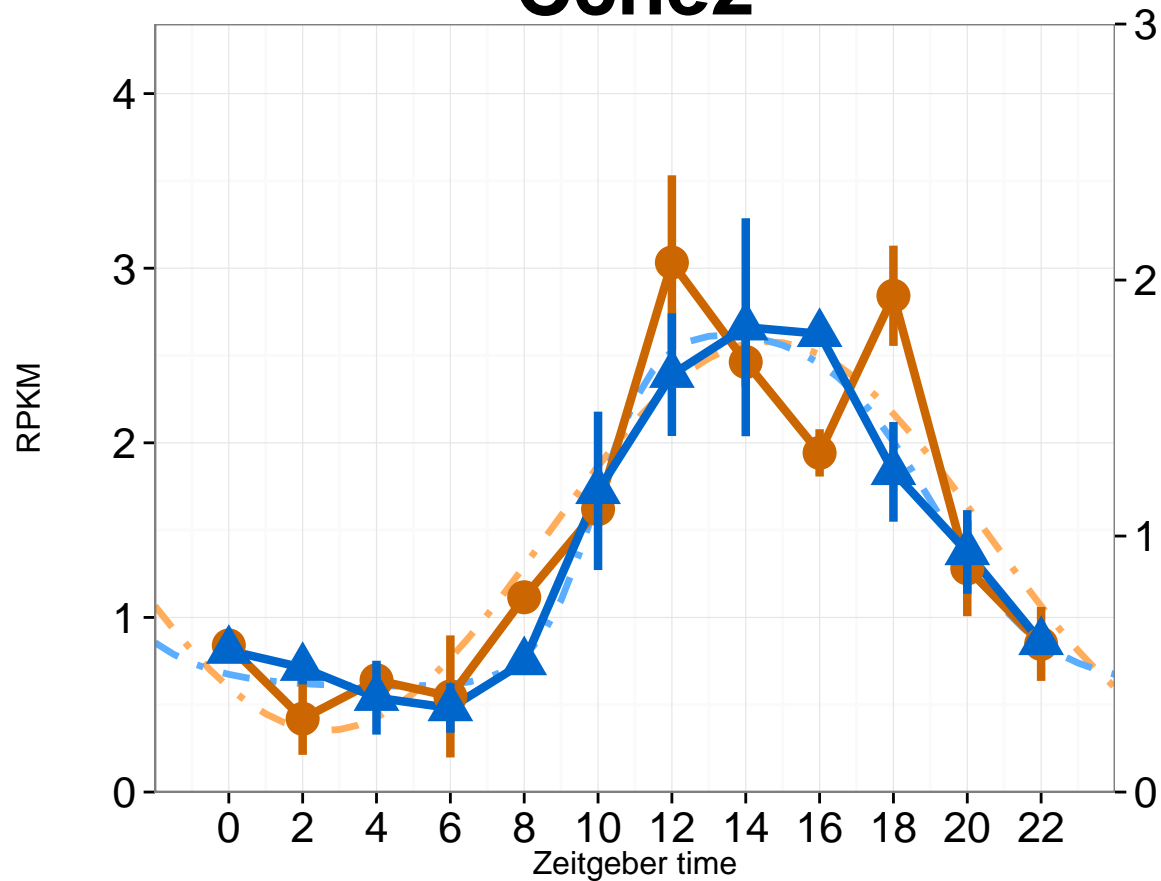

# Ccne2

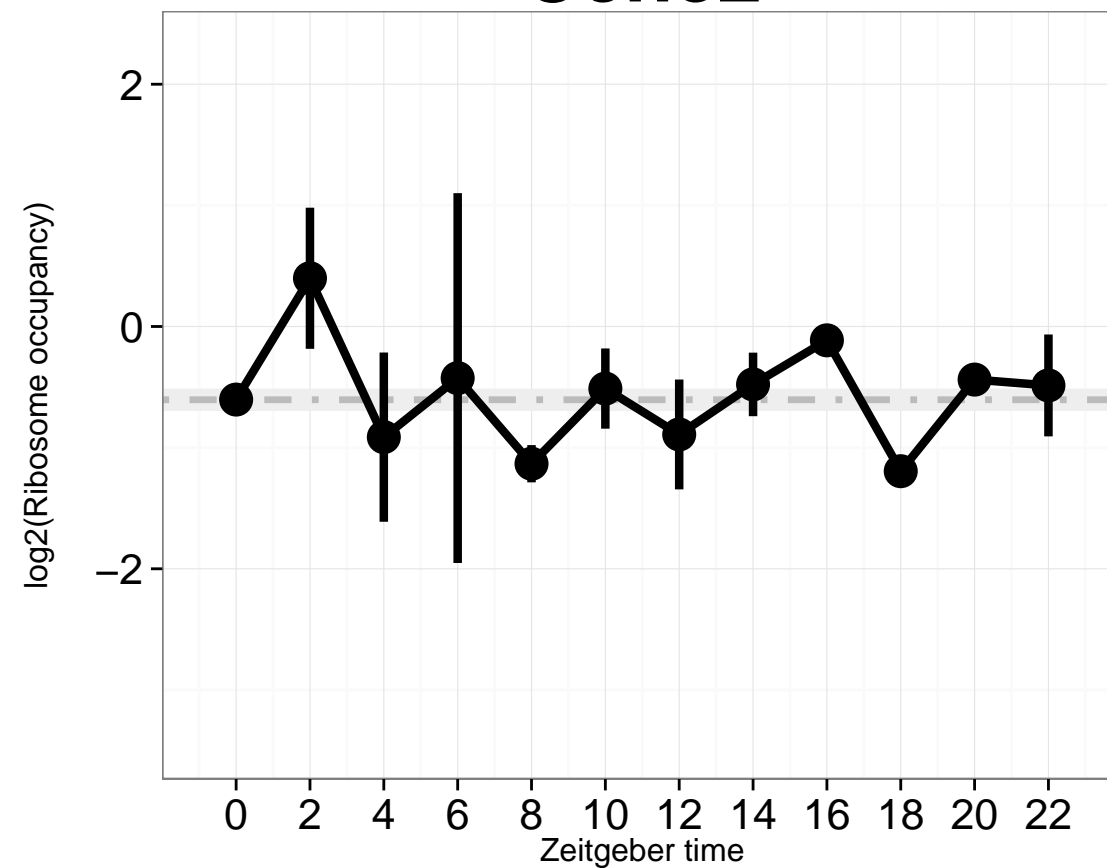

Supplement: SuppDataset_1.zip [file Ccne2_set_D.pdf › Supplemental Dataset 1/D-mRNA_rhythm_translation_rhyth/Ccne2_set_D.pdf]

## Ccnf

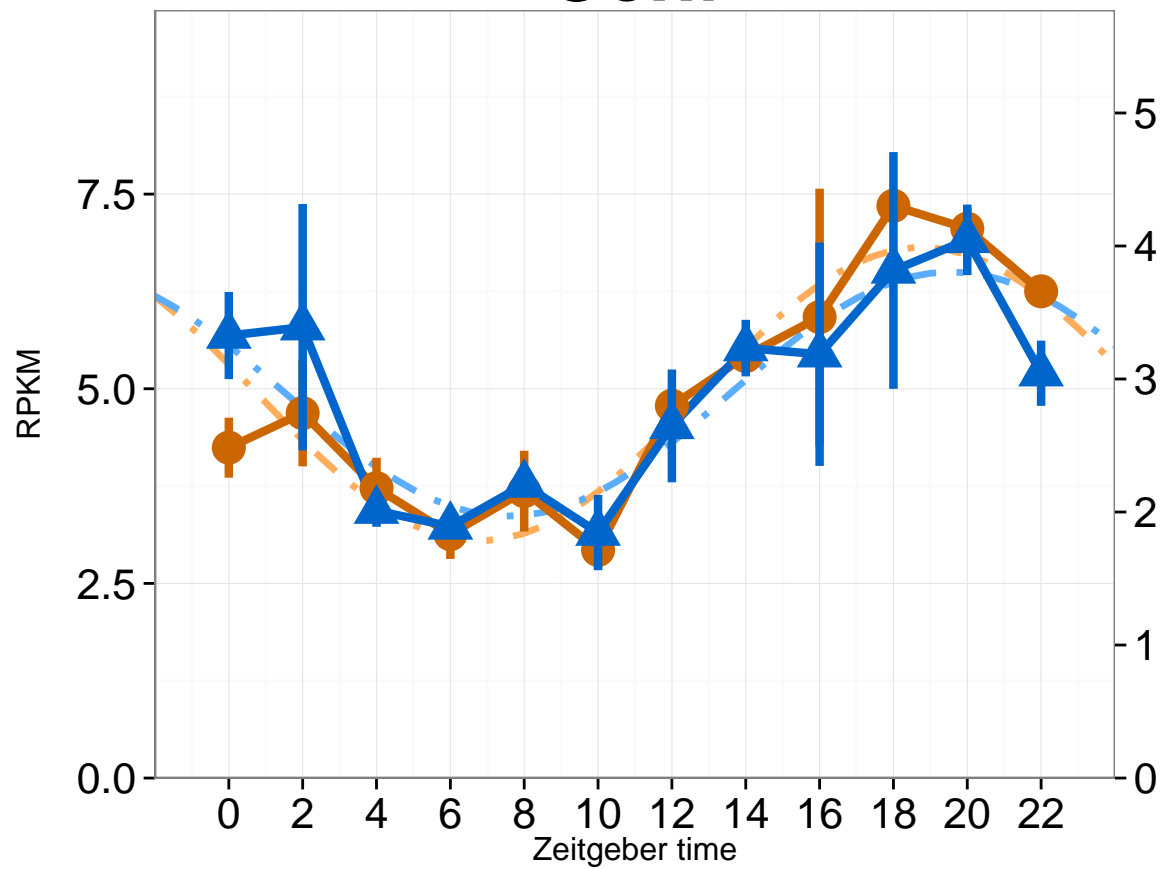

## Ccnf

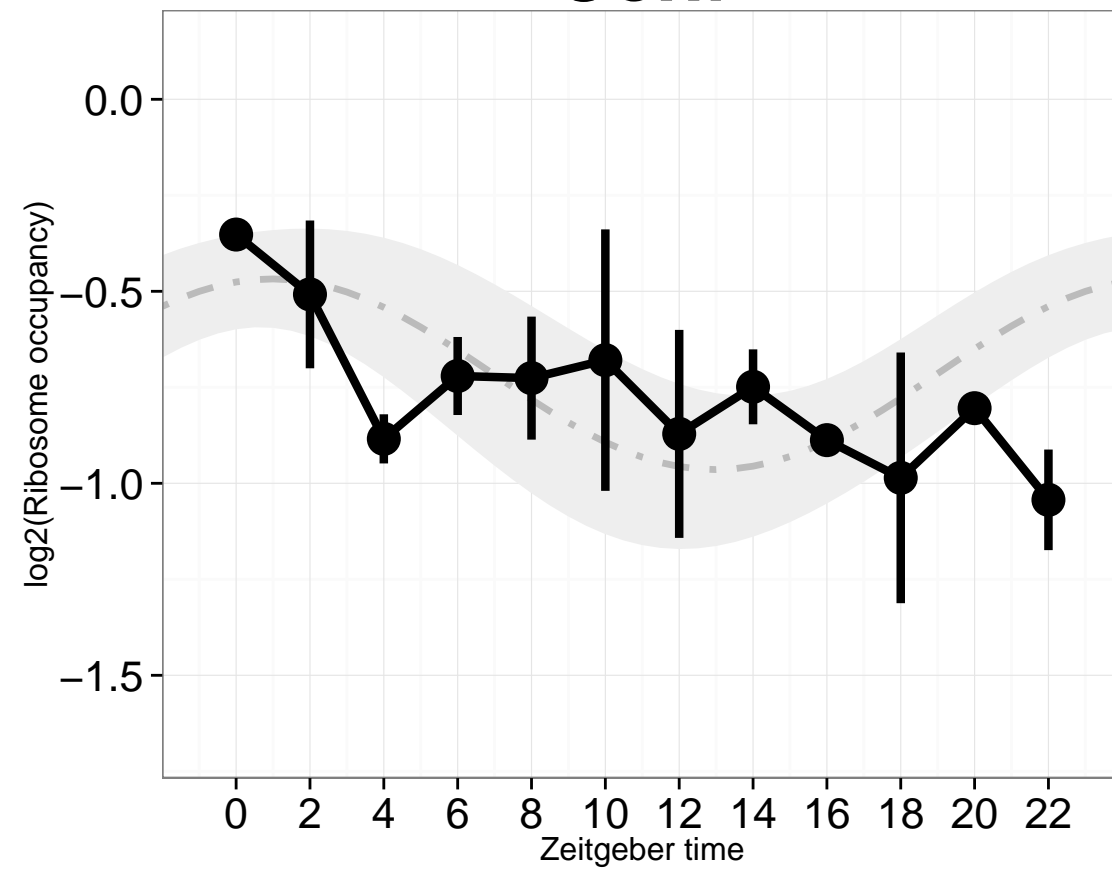

Supplement: SuppDataset_1.zip [file Ccnf_set_D.pdf › Supplemental Dataset 1/D-mRNA_rhythm_translation_rhyth/Ccnf_set_D.pdf]

## Ccng2

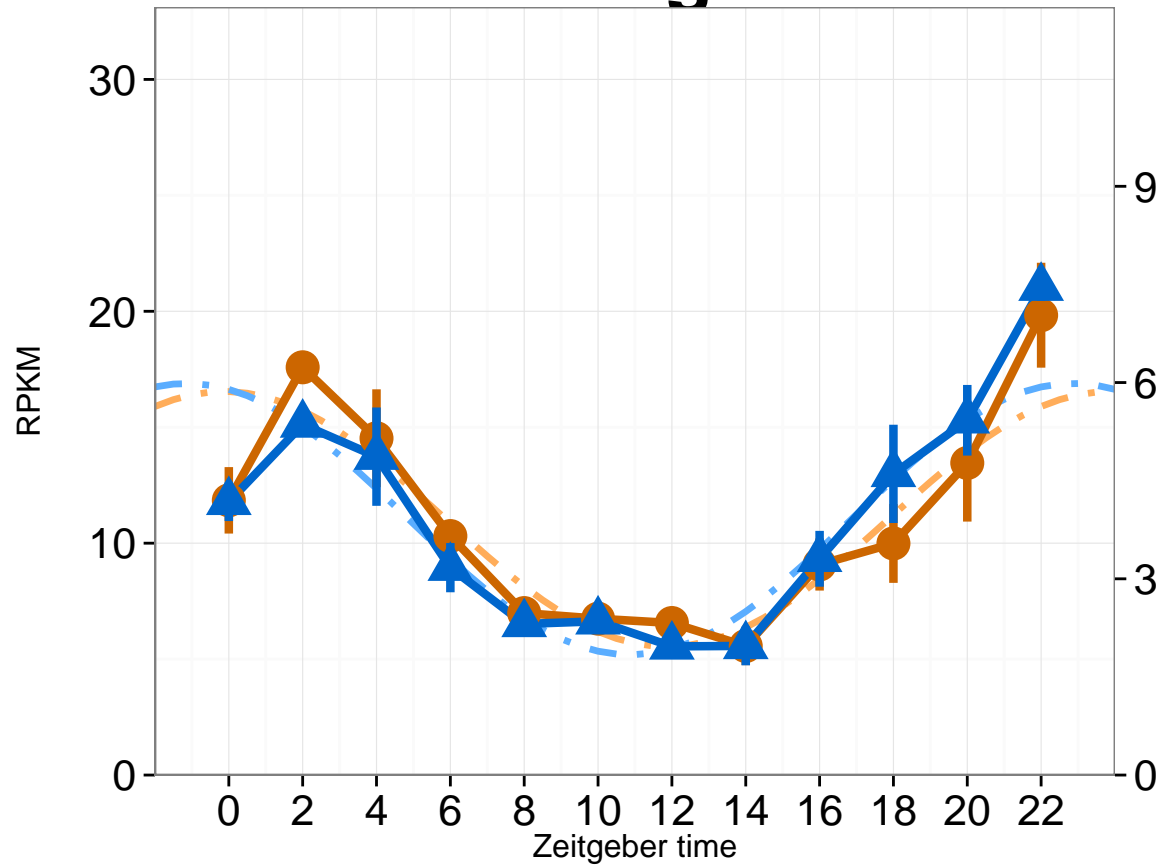

## Ccng2

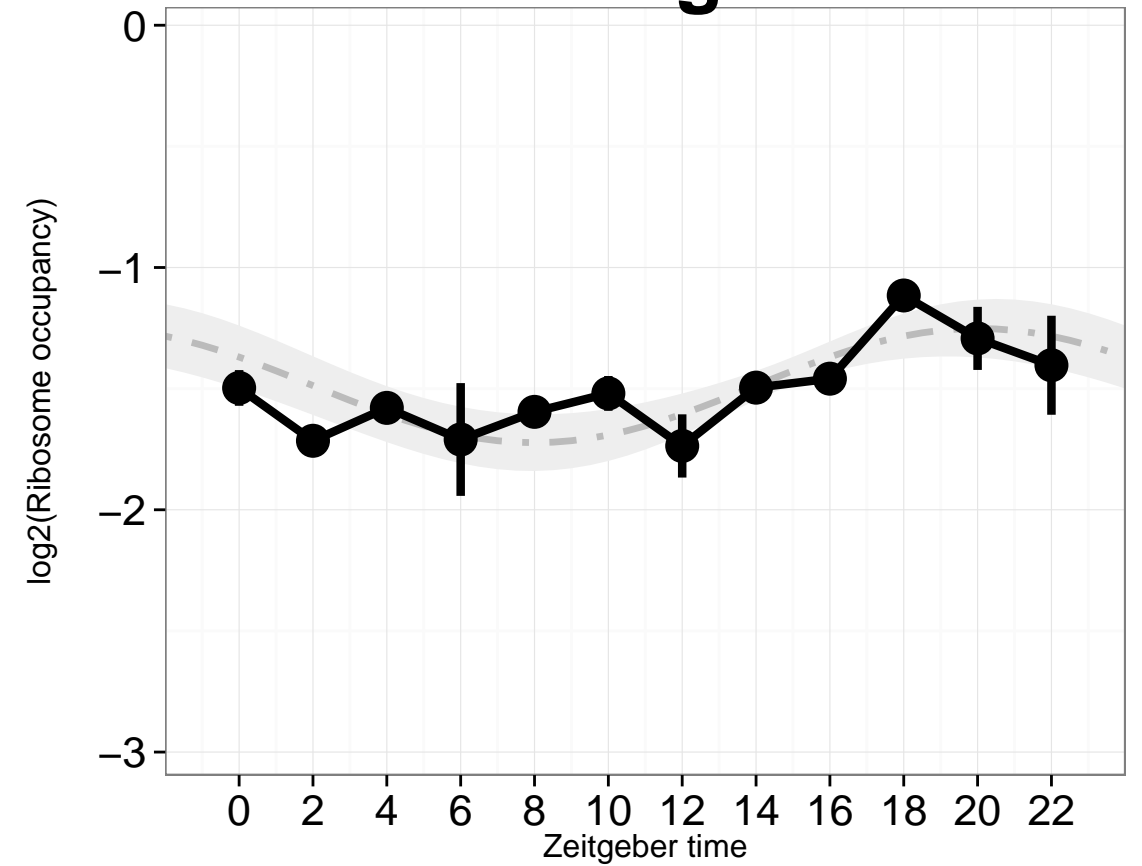

Supplement: SuppDataset_1.zip [file Ccng2_set_D.pdf › Supplemental Dataset 1/D-mRNA_rhythm_translation_rhyth/Ccng2_set_D.pdf]

# Ccp110

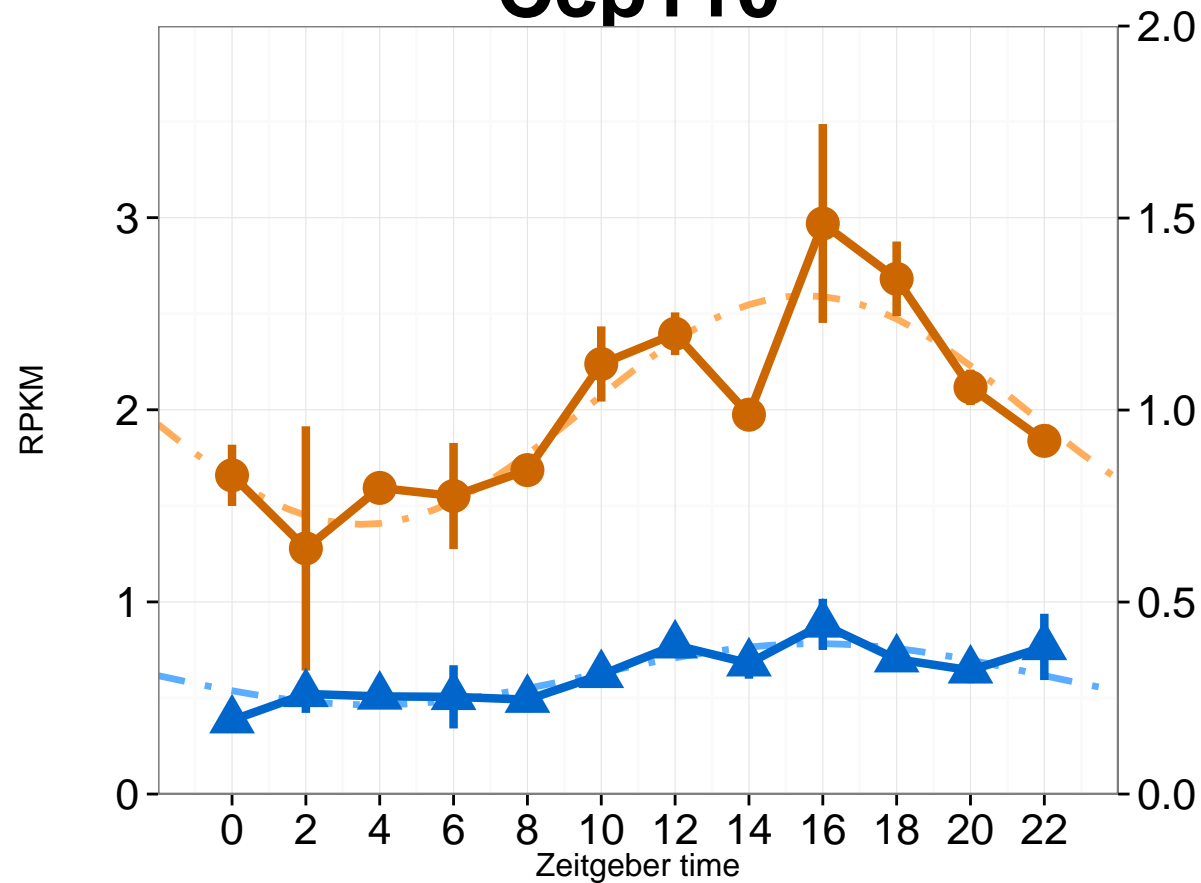

# Ccp110

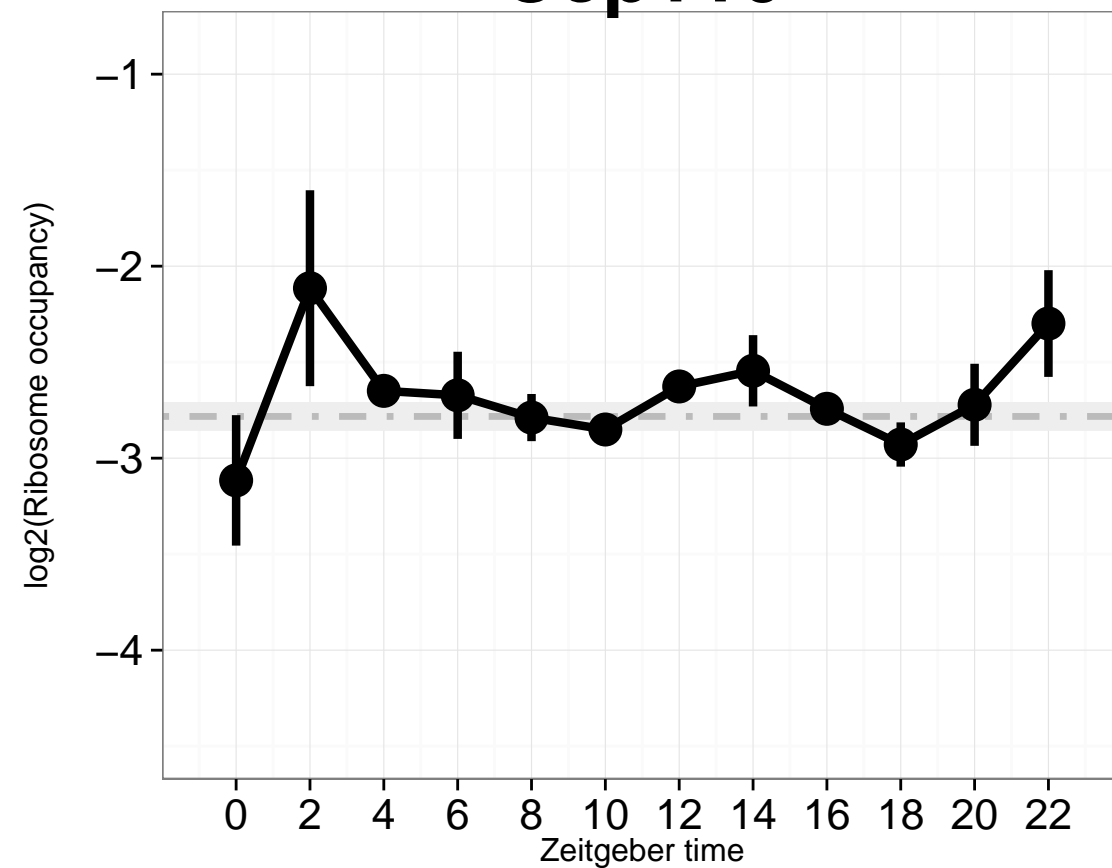

Supplement: SuppDataset_1.zip [file Ccp110_set_D.pdf › Supplemental Dataset 1/D-mRNA_rhythm_translation_rhyth/Ccp110_set_D.pdf]

# Ccrn4l

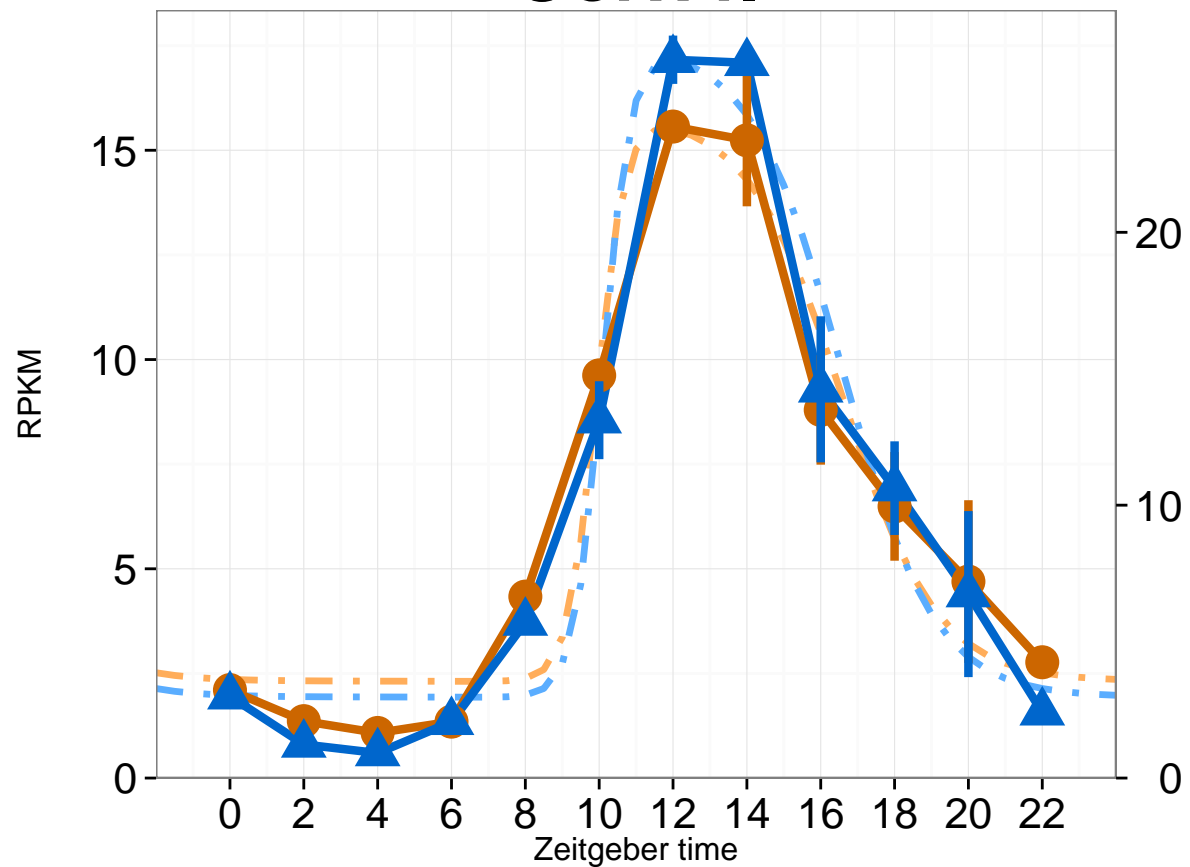

# Ccrn4l

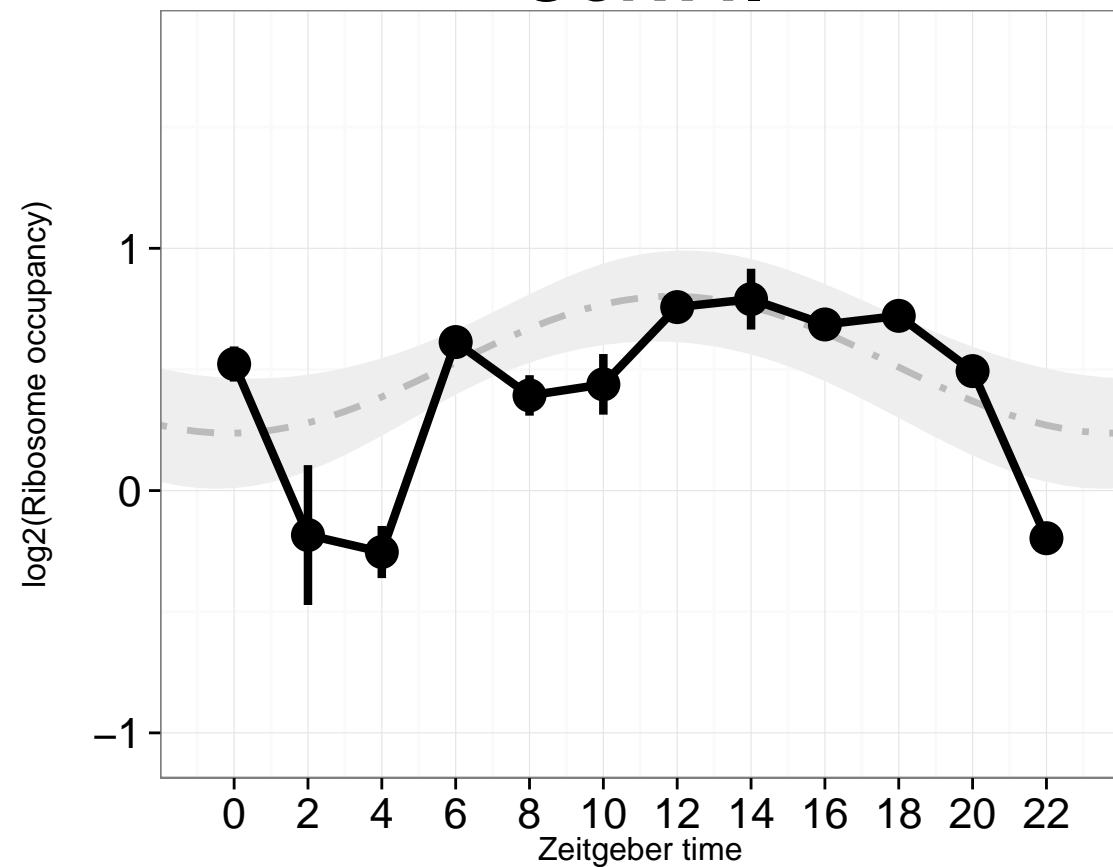

Supplement: SuppDataset_1.zip [file Ccrn4l_set_D.pdf › Supplemental Dataset 1/D-mRNA_rhythm_translation_rhyth/Ccrn4l_set_D.pdf]

## Cd163

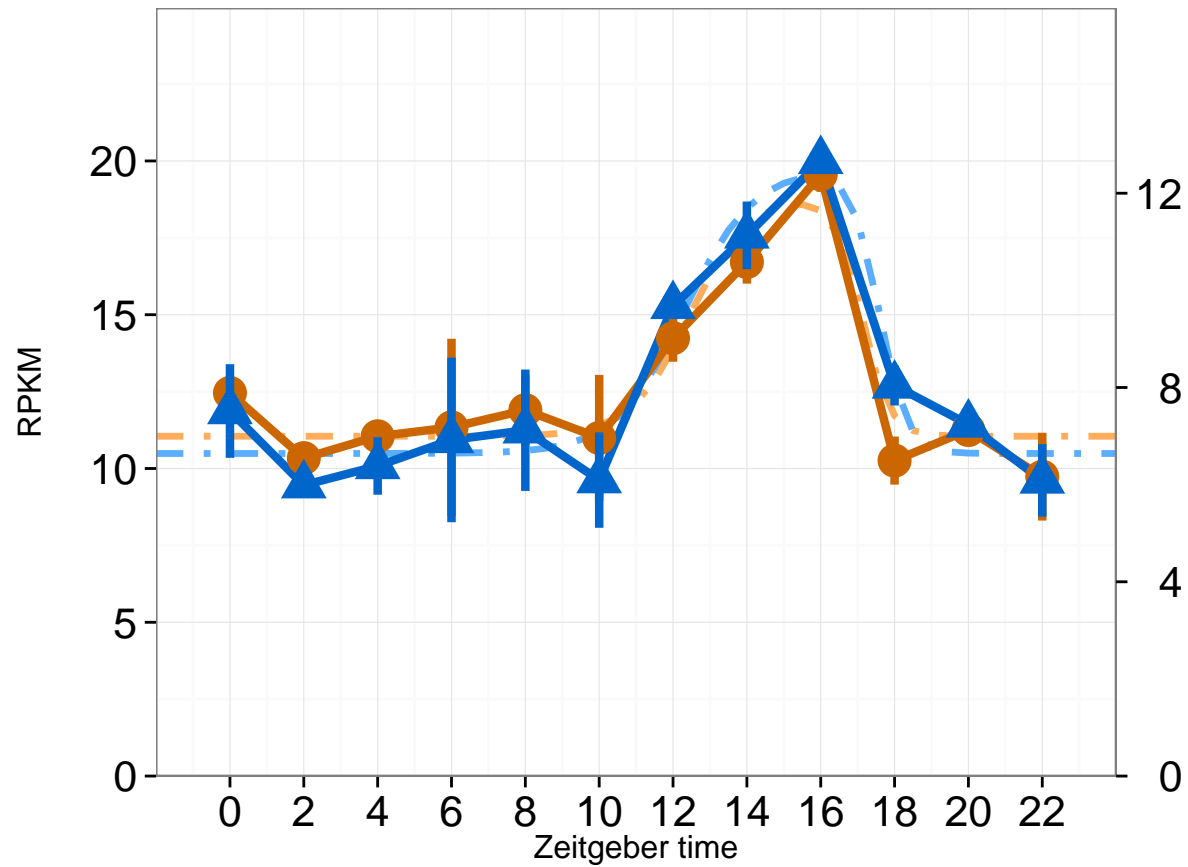

## Cd163

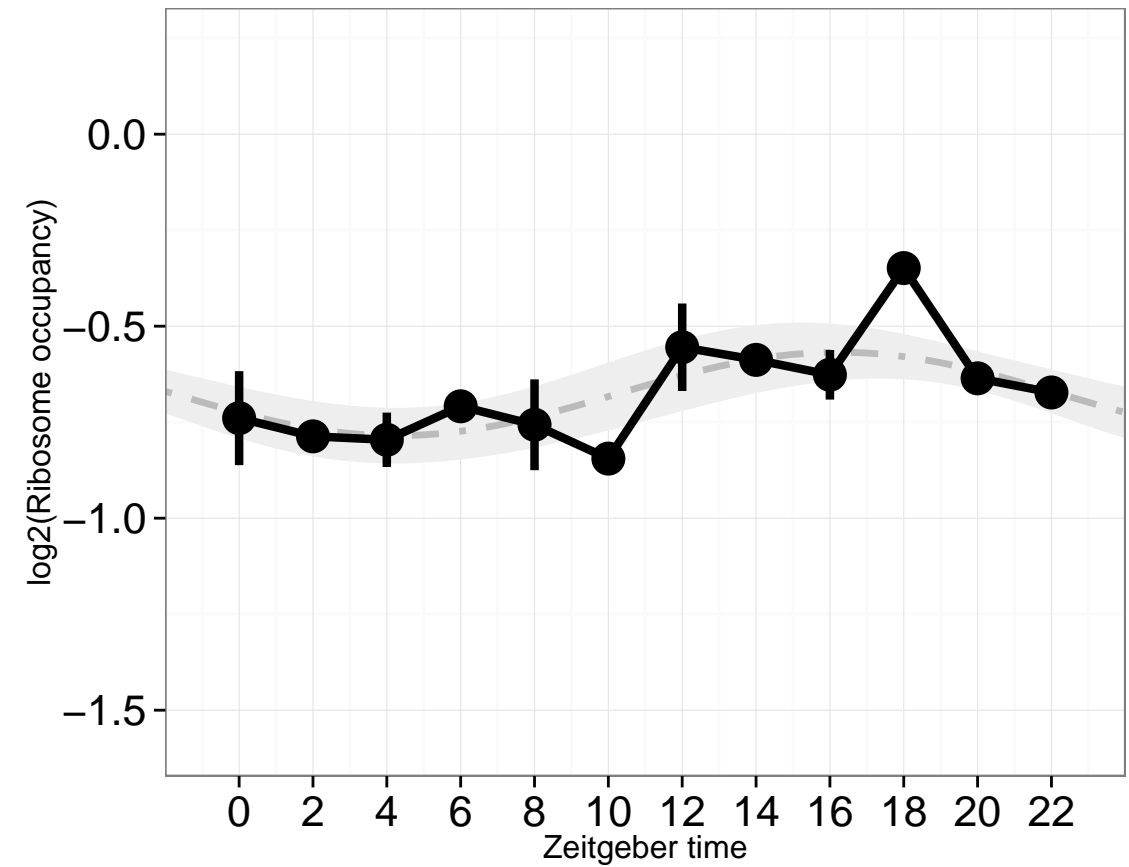

Supplement: SuppDataset_1.zip [file Cd163_set_D.pdf › Supplemental Dataset 1/D-mRNA_rhythm_translation_rhyth/Cd163_set_D.pdf]

## Cd207

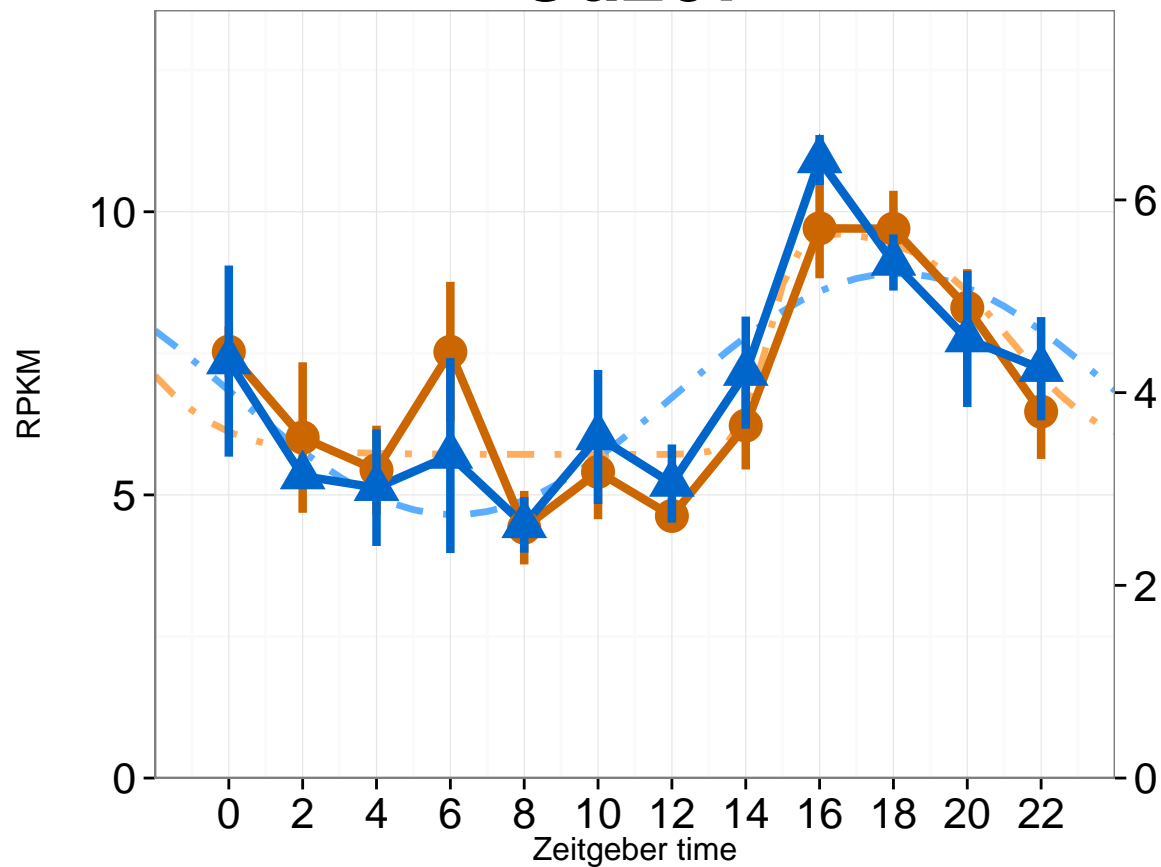

## Cd207

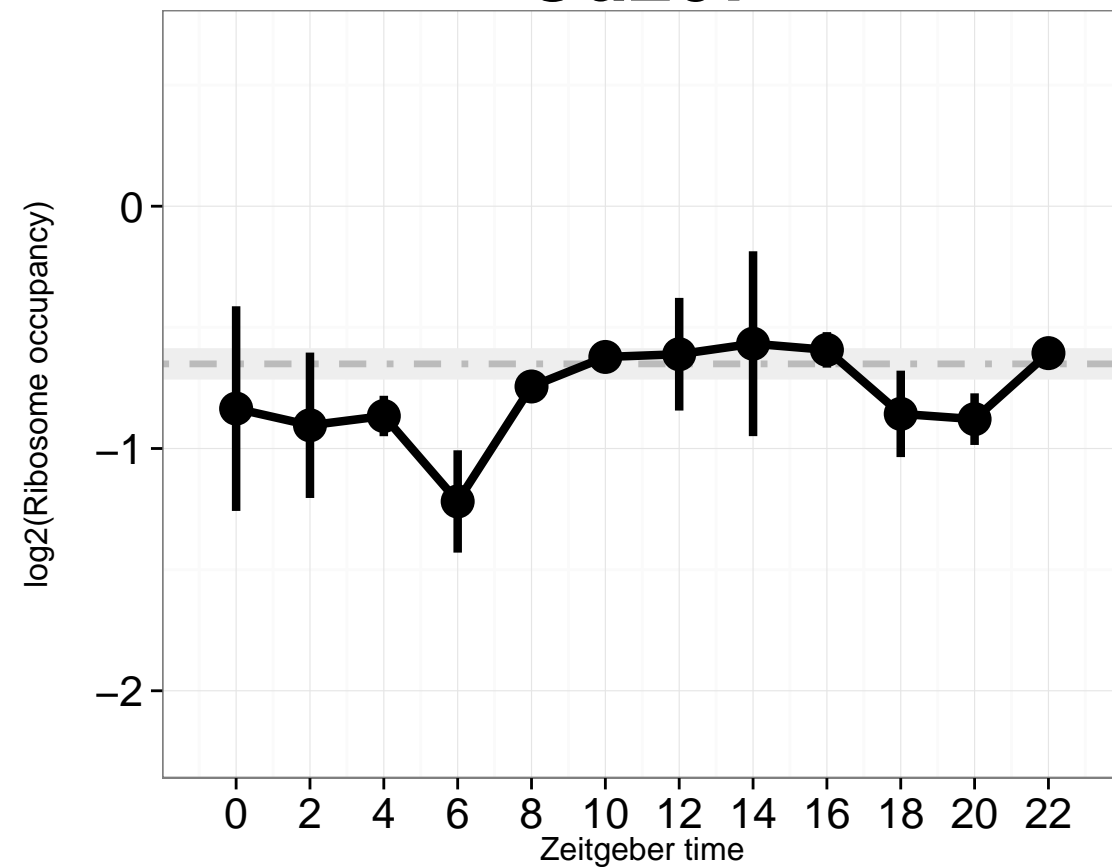

Supplement: SuppDataset_1.zip [file Cd207_set_D.pdf › Supplemental Dataset 1/D-mRNA_rhythm_translation_rhyth/Cd207_set_D.pdf]

## Cd302

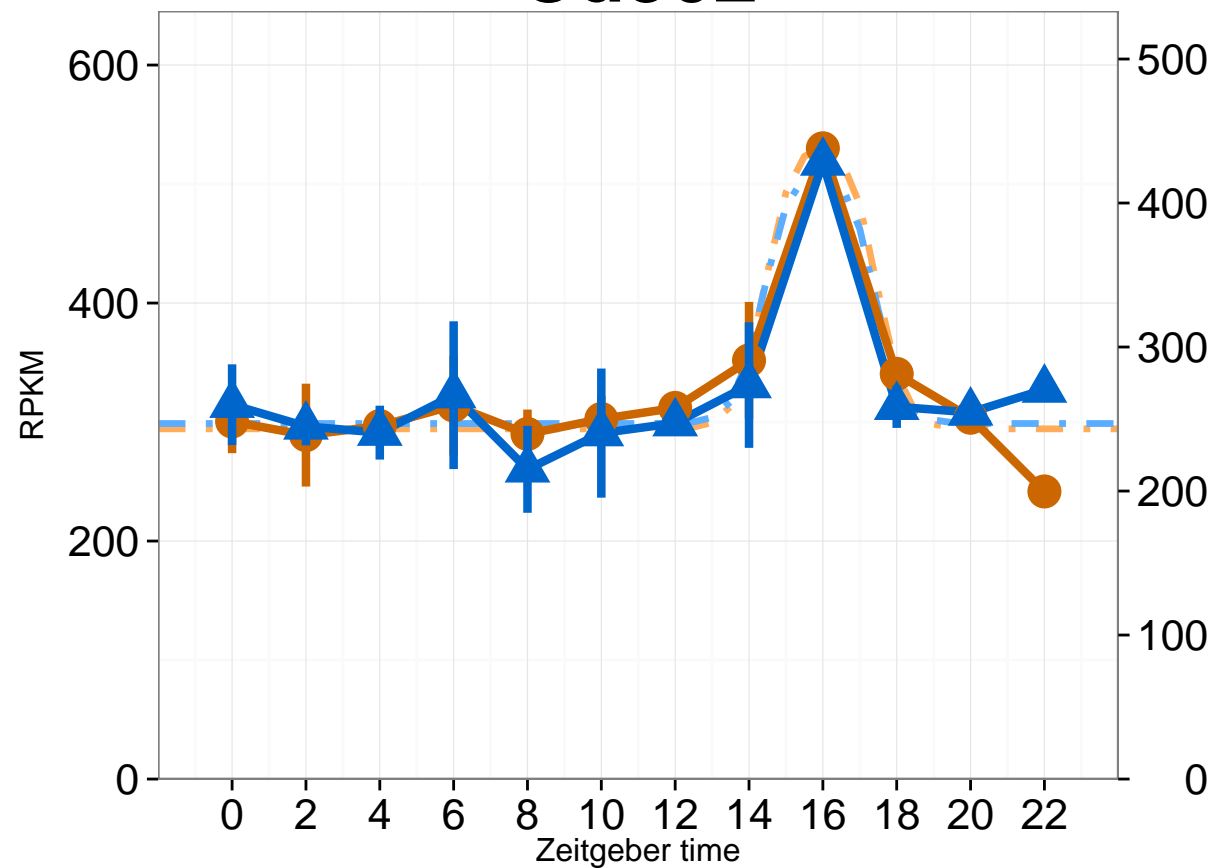

## Cd302

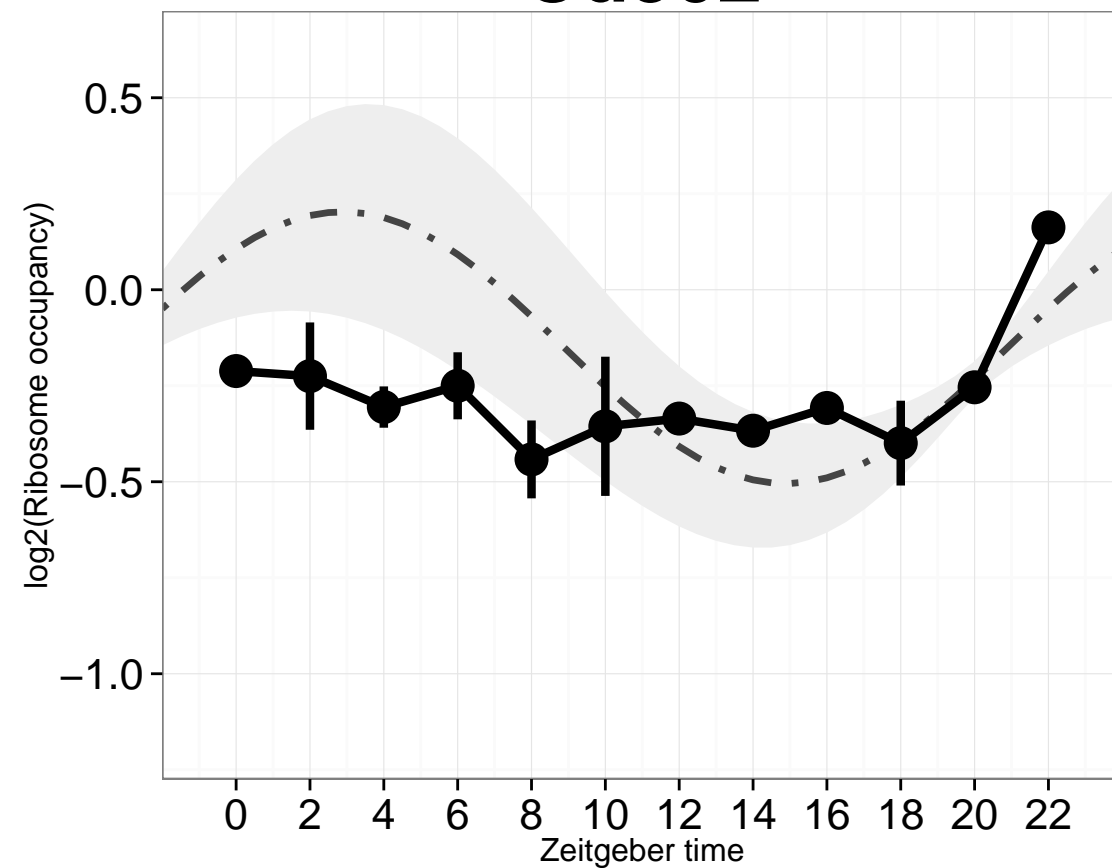

Supplement: SuppDataset_1.zip [file Cd302_set_D.pdf › Supplemental Dataset 1/D-mRNA_rhythm_translation_rhyth/Cd302_set_D.pdf]

## Cd4

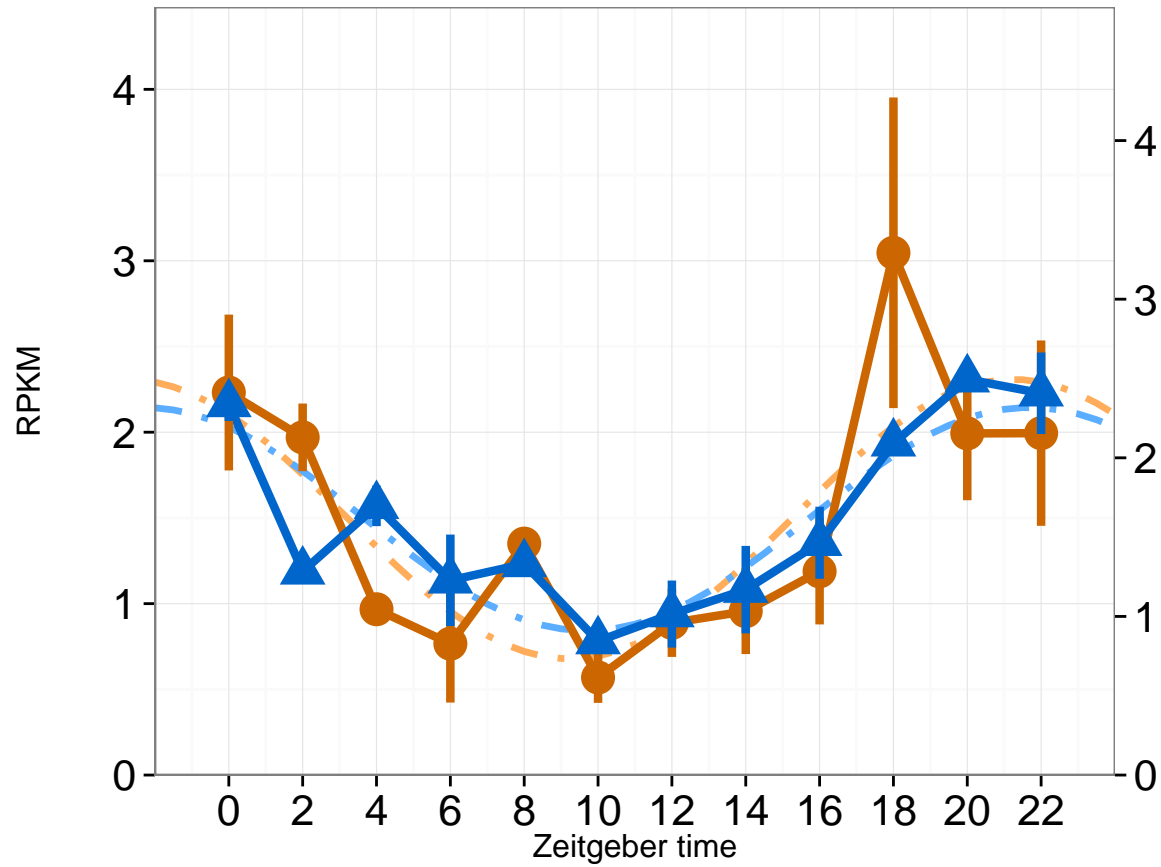

## Cd4

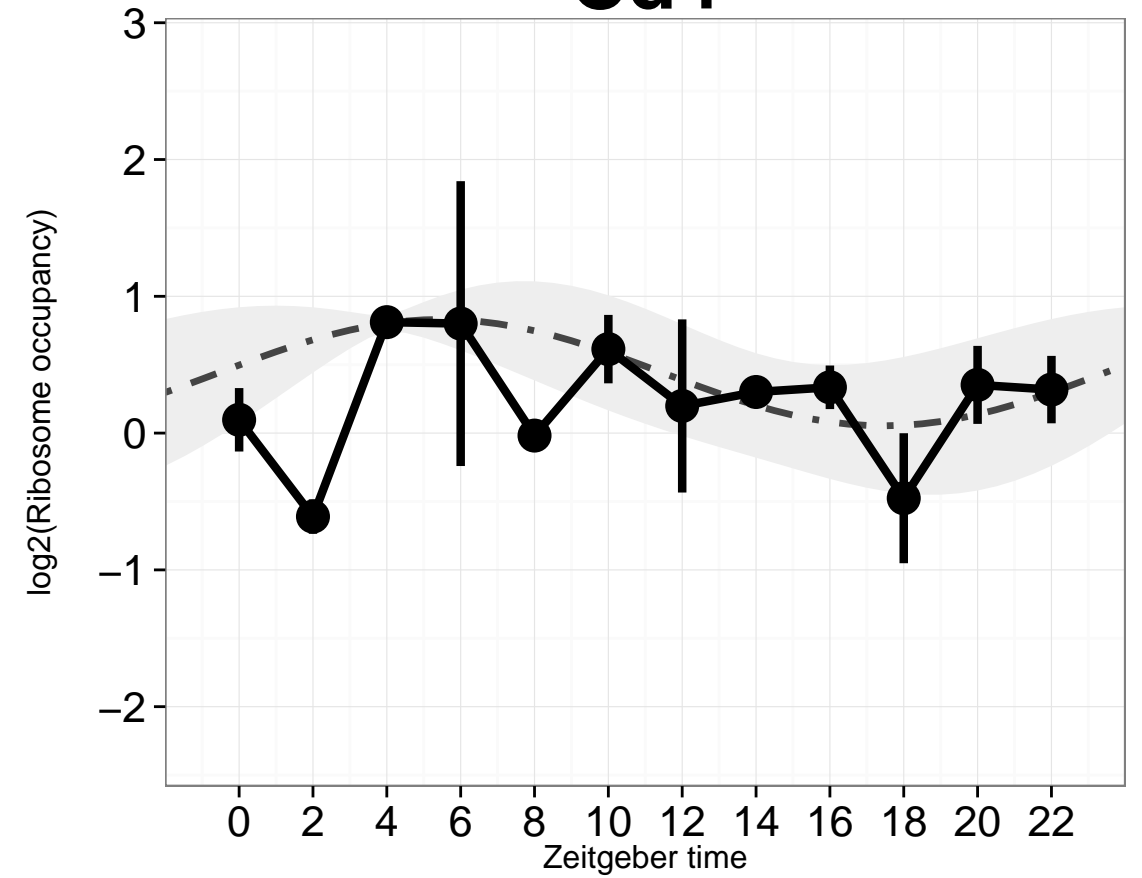

Supplement: SuppDataset_1.zip [file Cd4_set_D.pdf › Supplemental Dataset 1/D-mRNA_rhythm_translation_rhyth/Cd4_set_D.pdf]

## Cd9

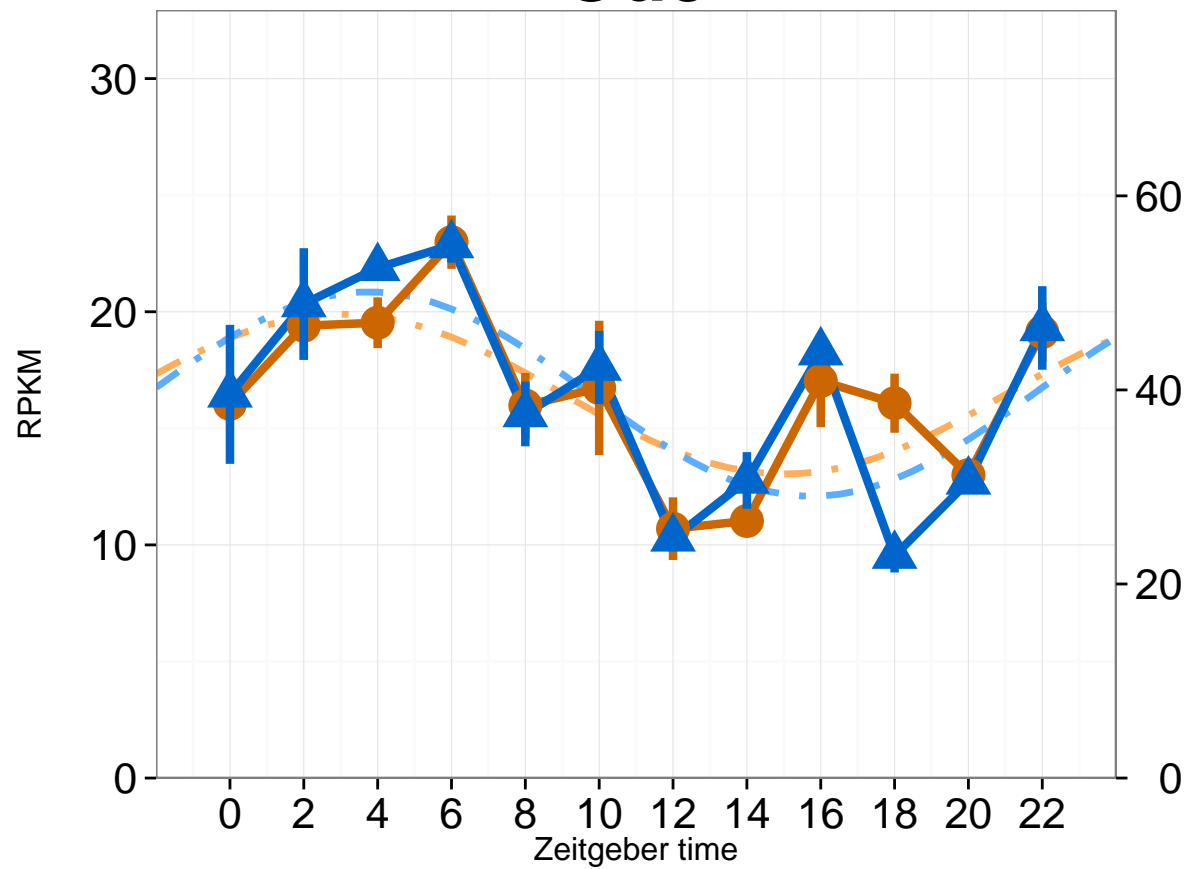

## Cd9

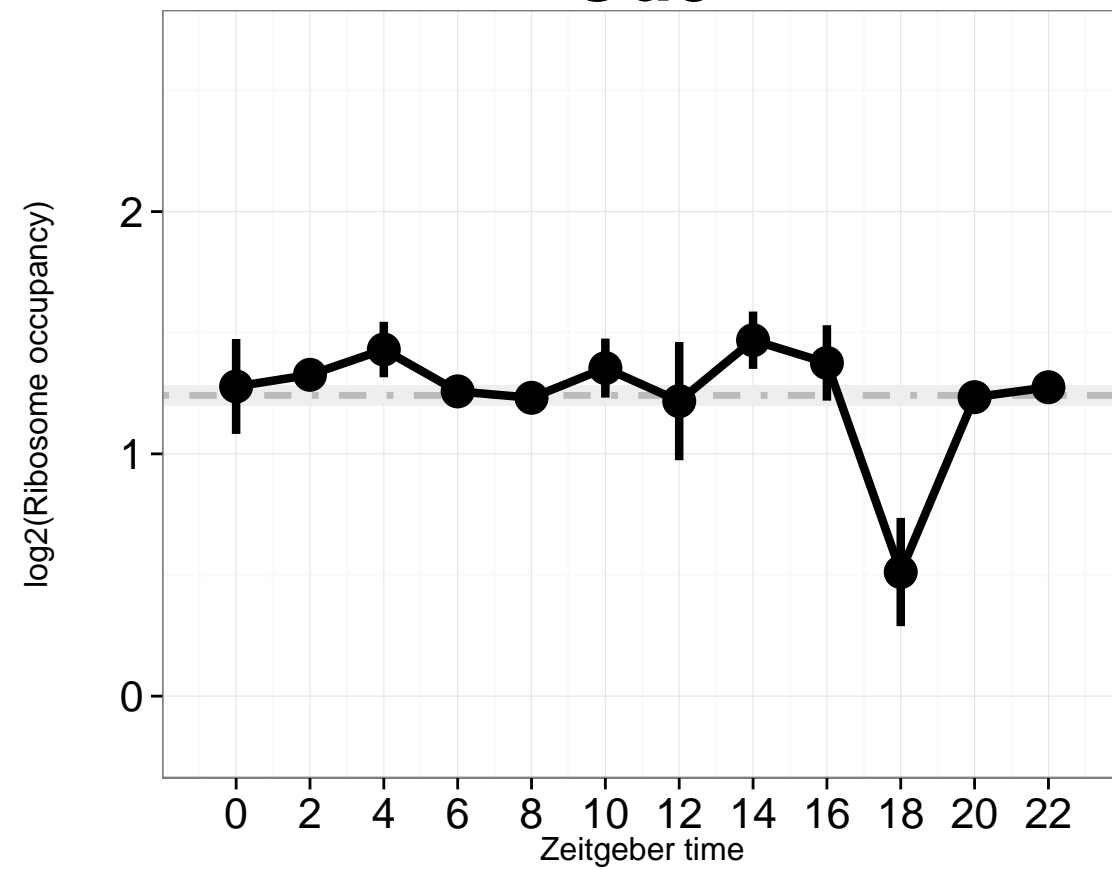

Supplement: SuppDataset_1.zip [file Cd9_set_D.pdf › Supplemental Dataset 1/D-mRNA_rhythm_translation_rhyth/Cd9_set_D.pdf]

## Cdcp1

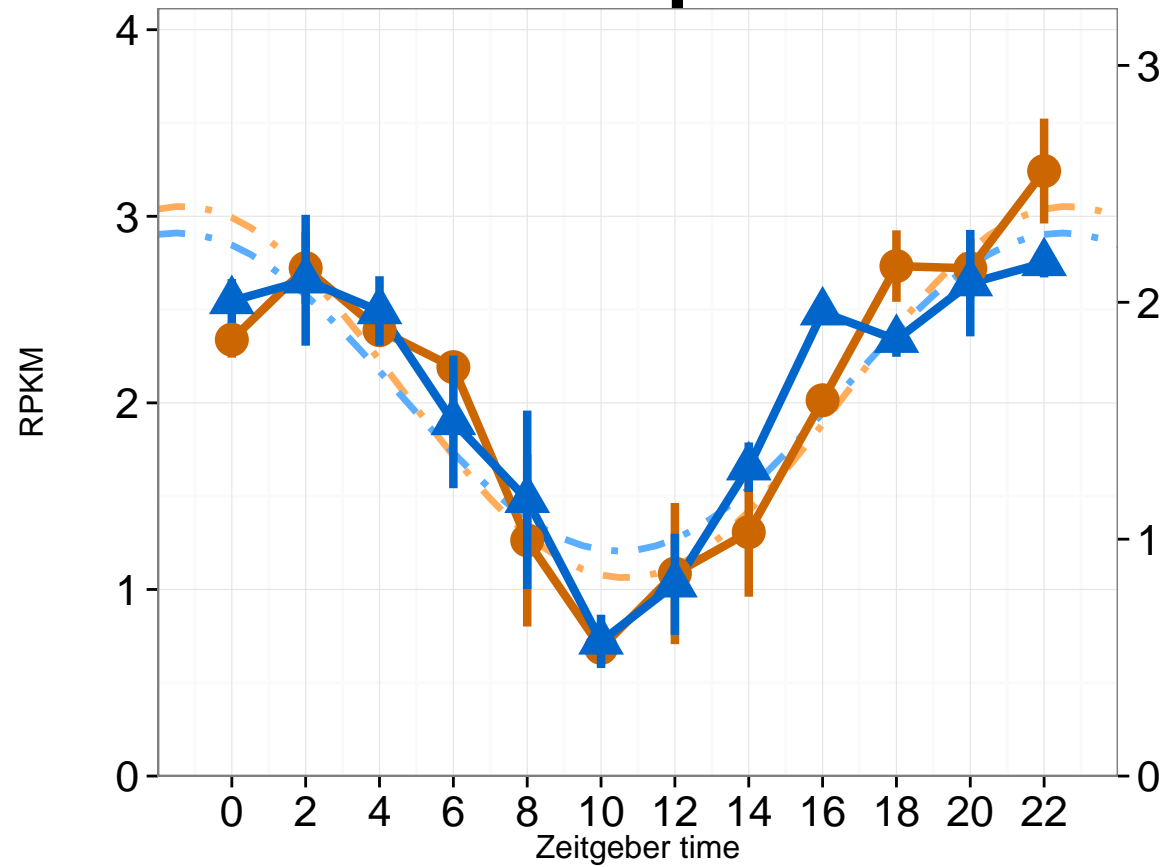

## Cdcp1

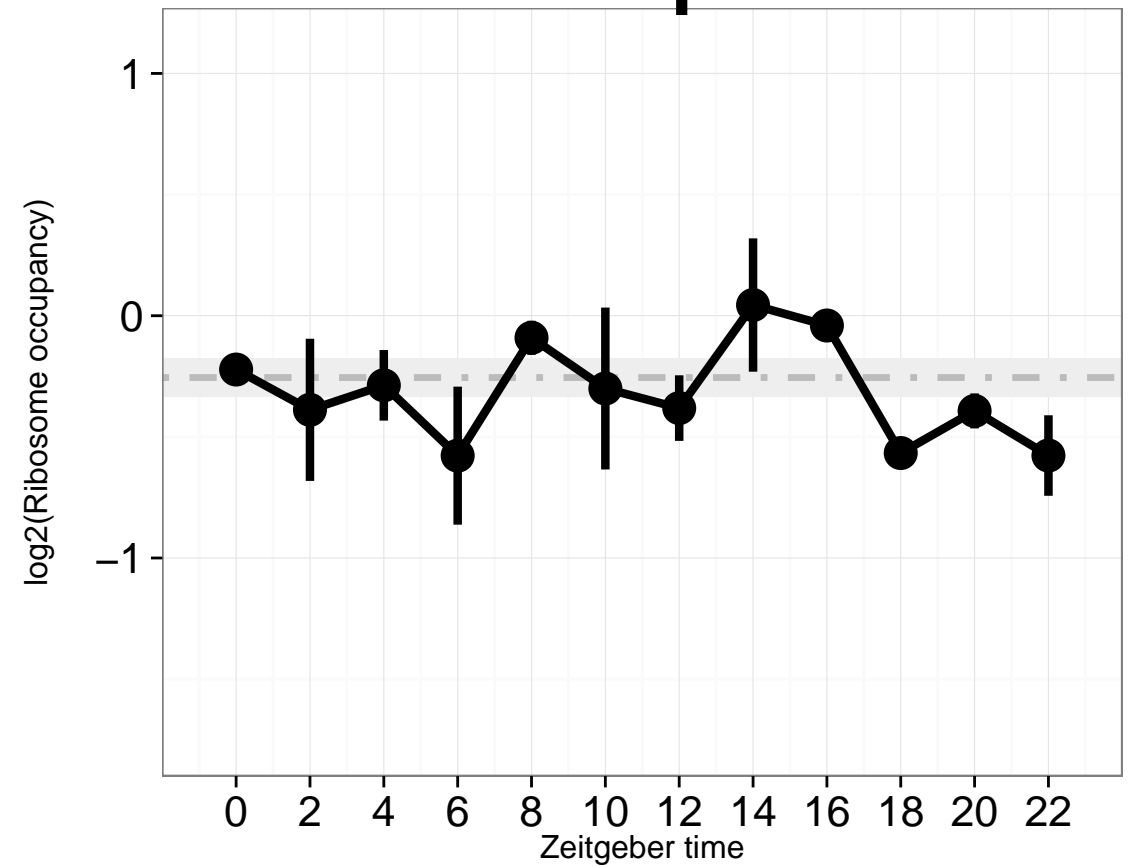

Supplement: SuppDataset_1.zip [file Cdcp1_set_D.pdf › Supplemental Dataset 1/D-mRNA_rhythm_translation_rhyth/Cdcp1_set_D.pdf]

## Cdh1

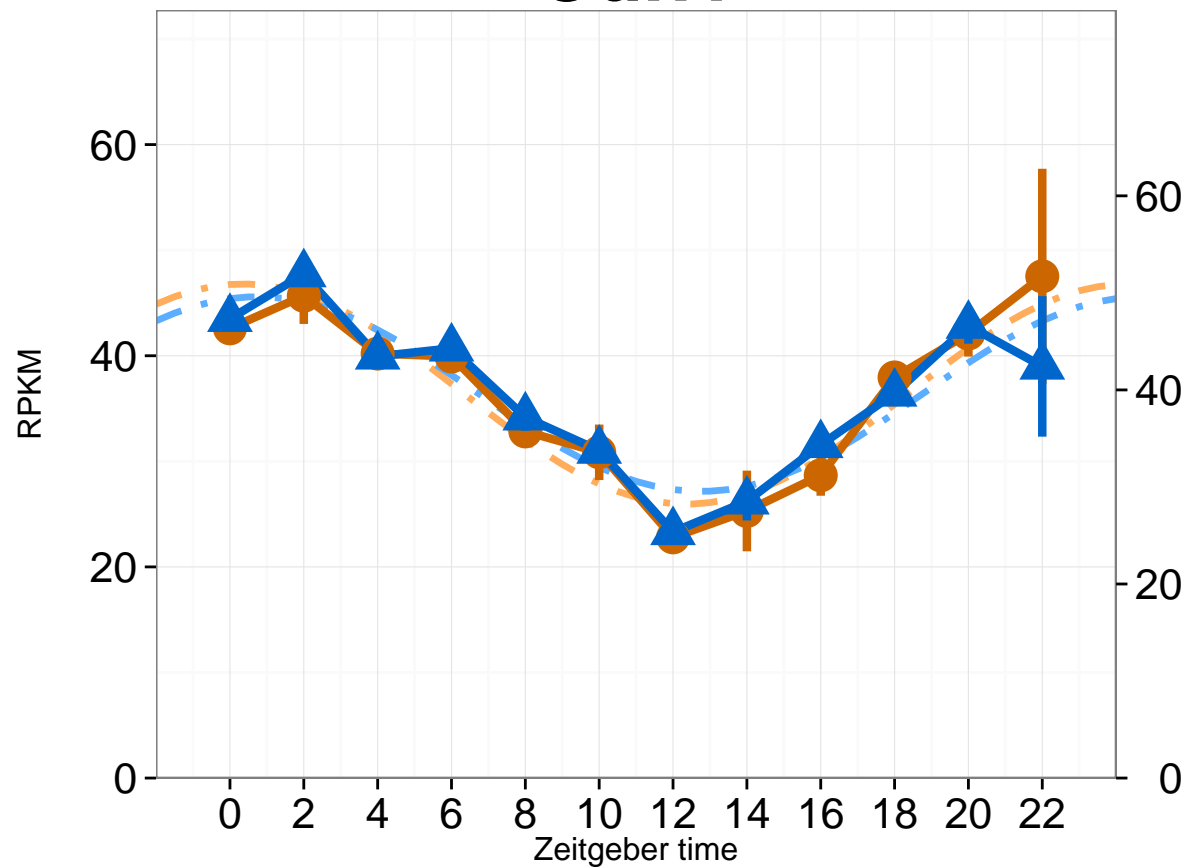

## Cdh1

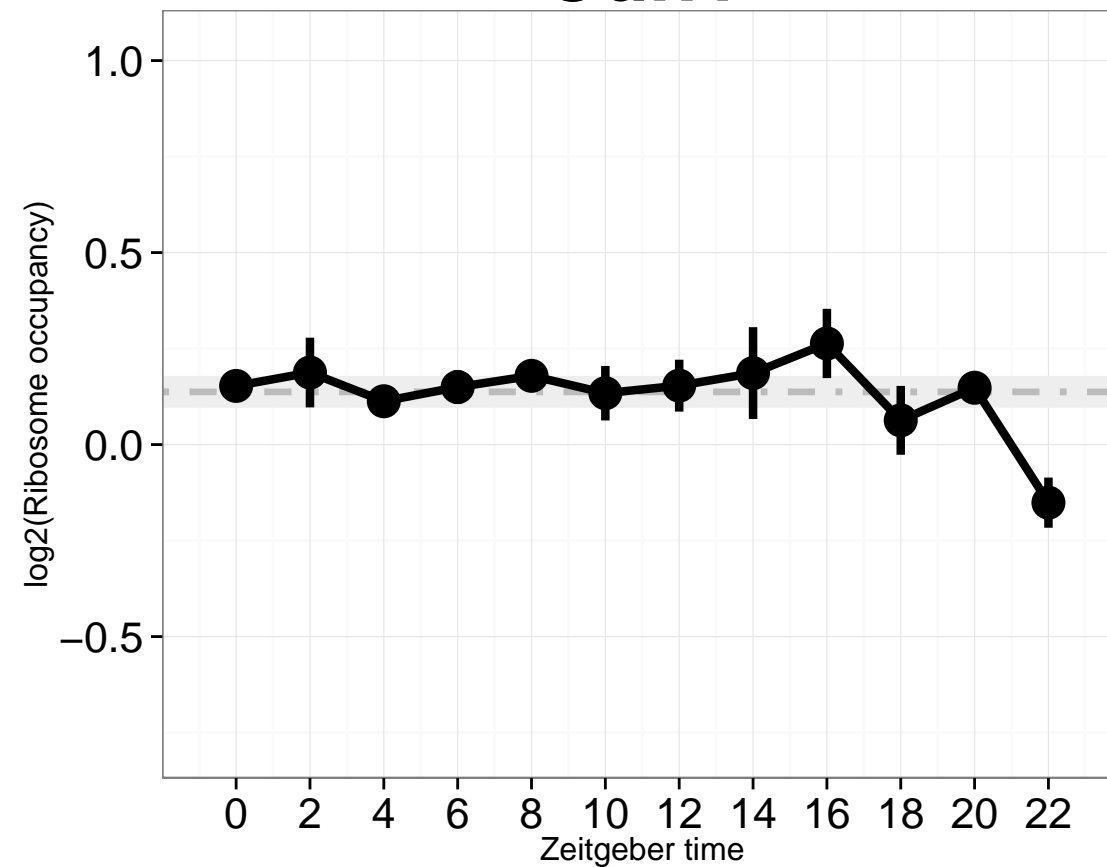

Supplement: SuppDataset_1.zip [file Cdh1_set_D.pdf › Supplemental Dataset 1/D-mRNA_rhythm_translation_rhyth/Cdh1_set_D.pdf]

# Cdk18

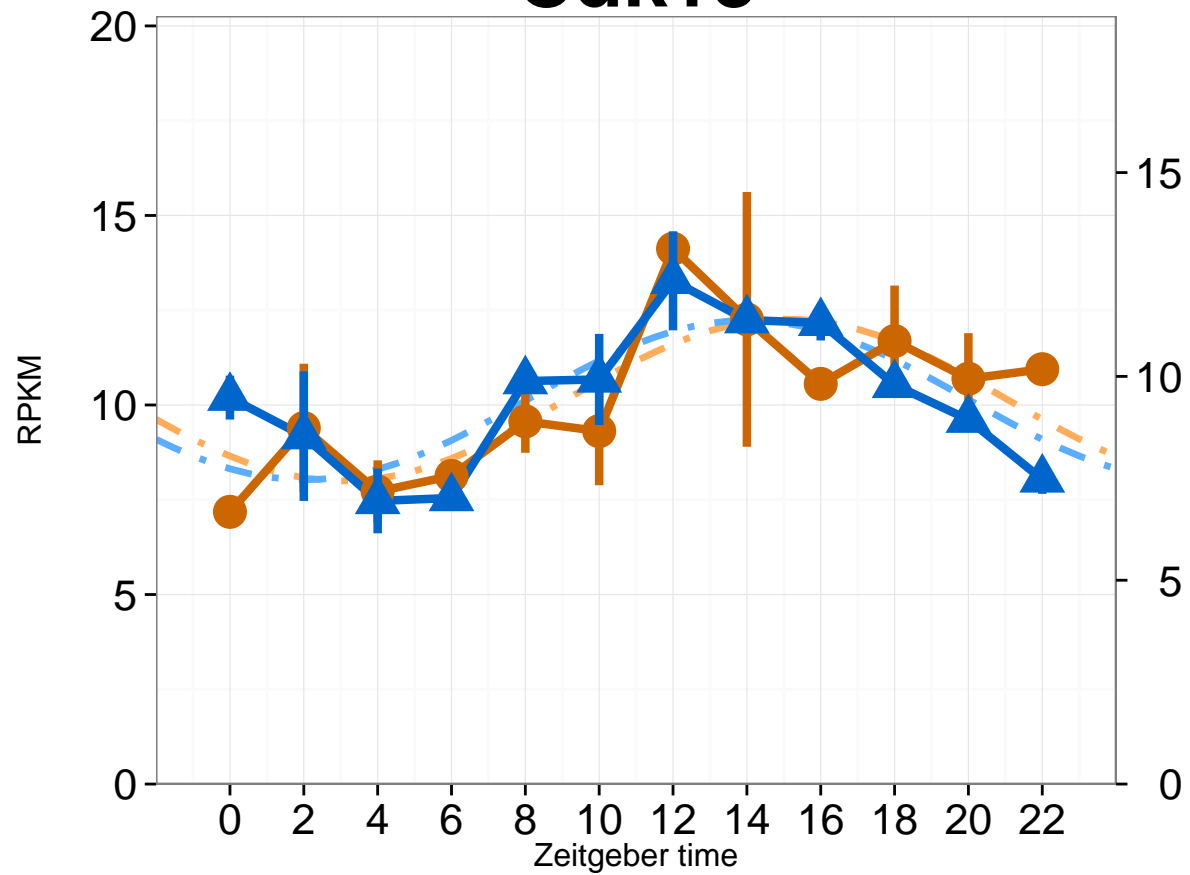

# Cdk18

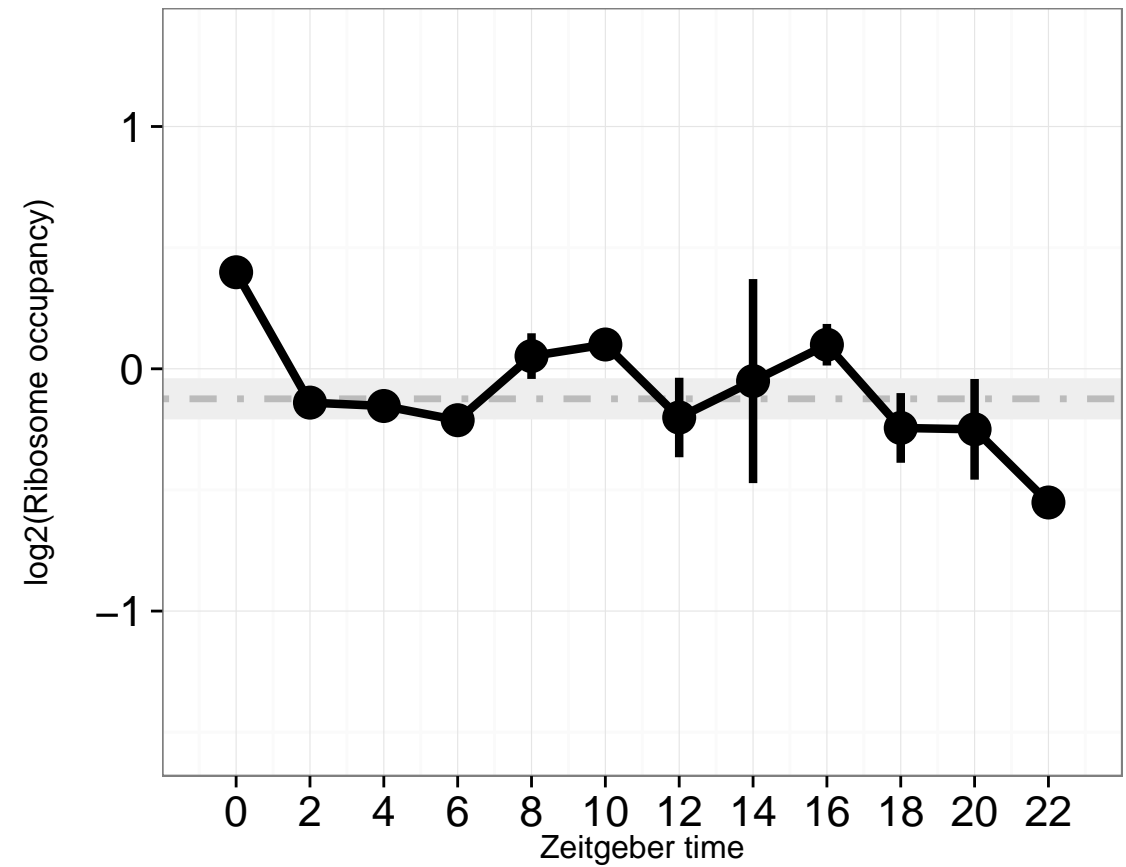

Supplement: SuppDataset_1.zip [file Cdk18_set_D.pdf › Supplemental Dataset 1/D-mRNA_rhythm_translation_rhyth/Cdk18_set_D.pdf]

## Cdk20

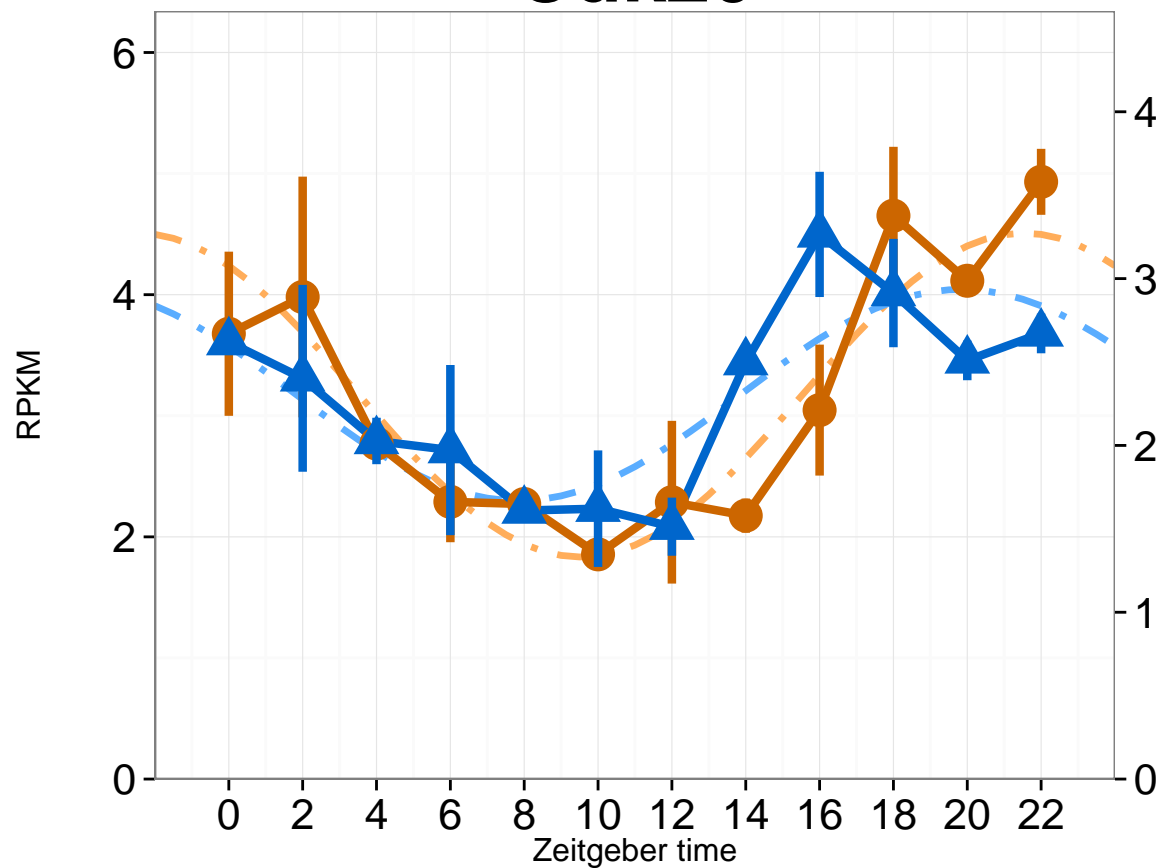

## Cdk20

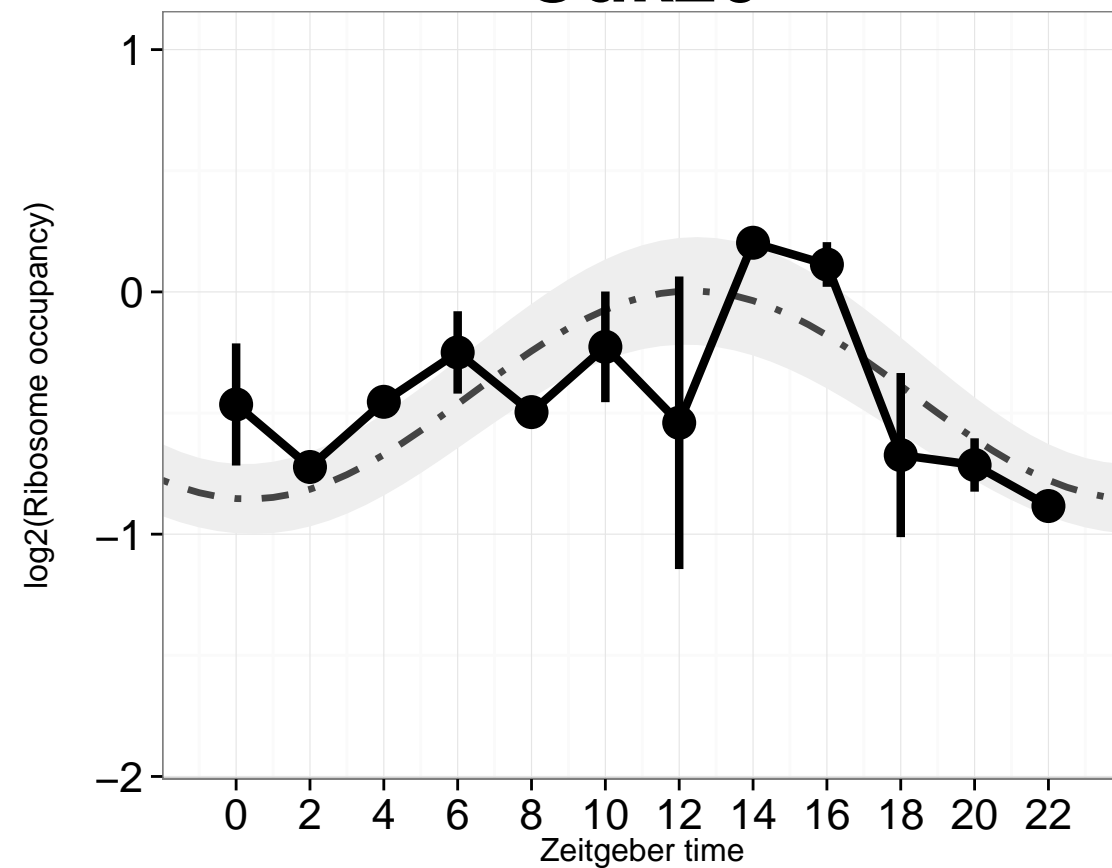

Supplement: SuppDataset_1.zip [file Cdk20_set_D.pdf › Supplemental Dataset 1/D-mRNA_rhythm_translation_rhyth/Cdk20_set_D.pdf]

# Cdkn1a

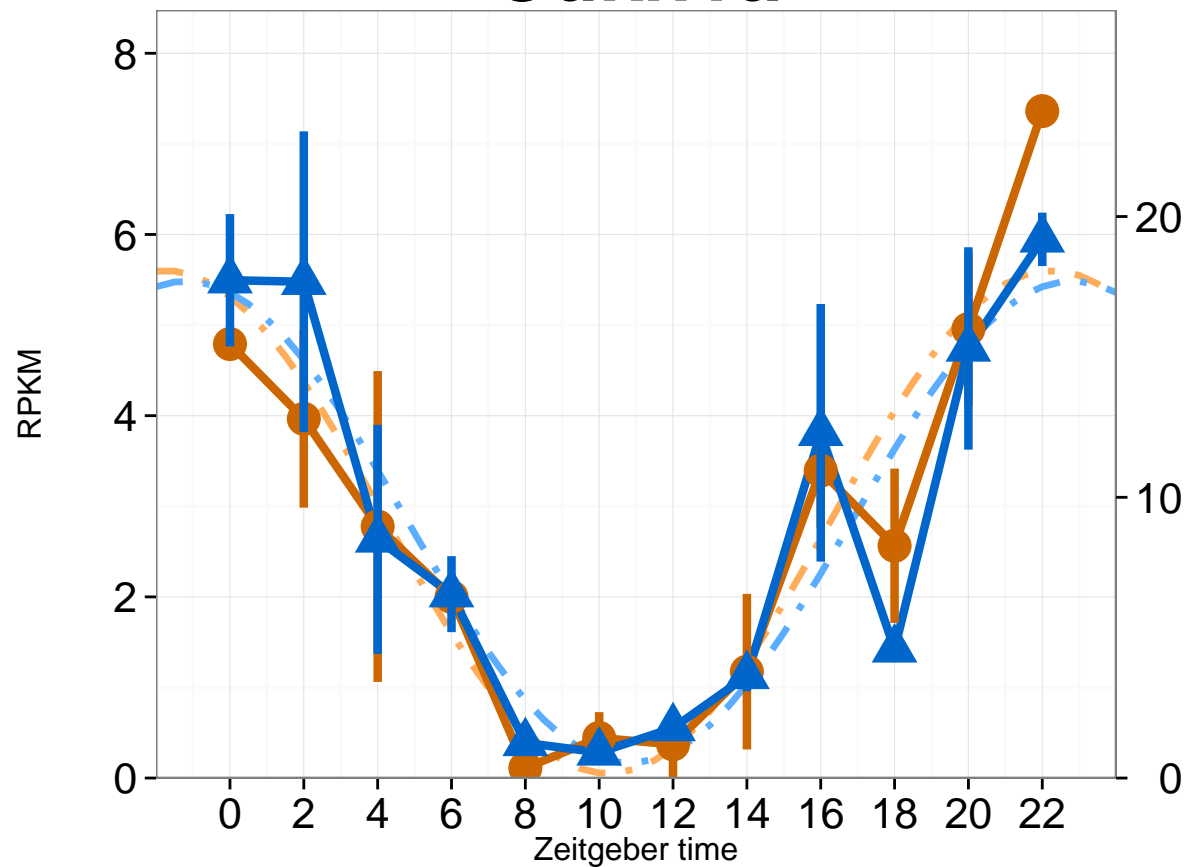

# Cdkn1a

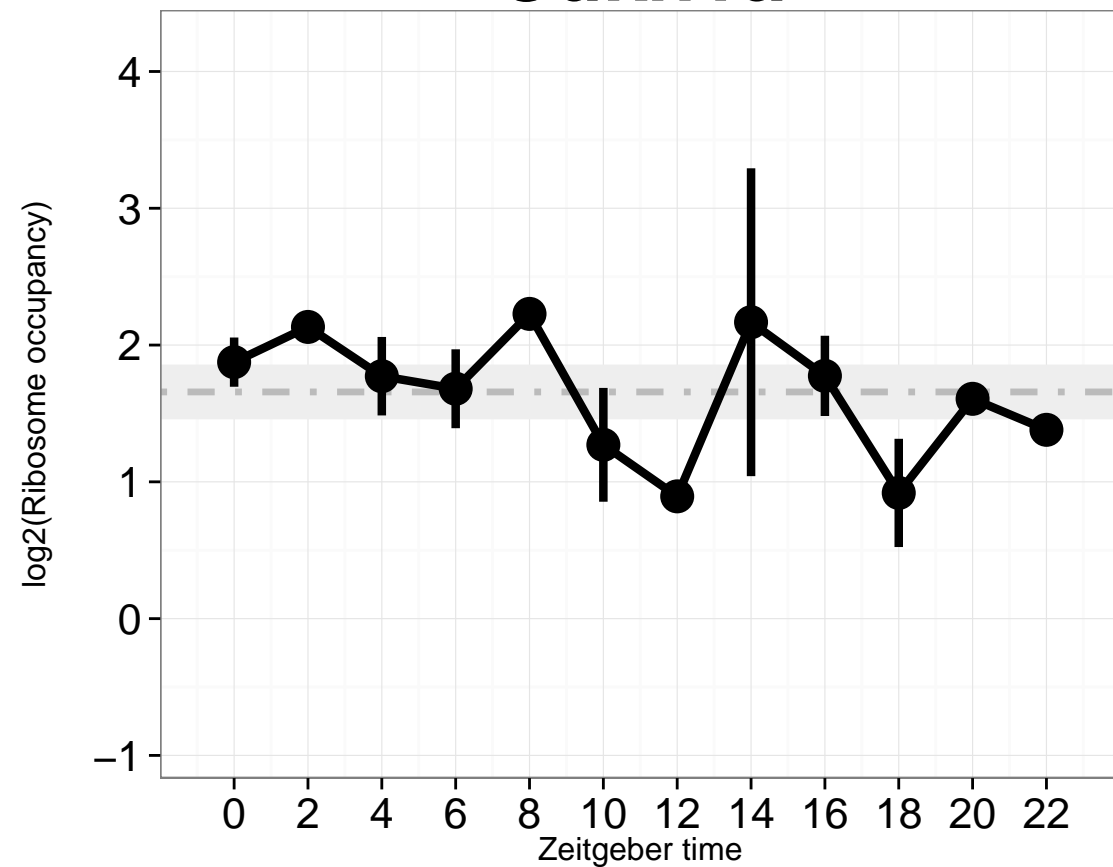

Supplement: SuppDataset_1.zip [file Cdkn1a_set_D.pdf › Supplemental Dataset 1/D-mRNA_rhythm_translation_rhyth/Cdkn1a_set_D.pdf]

# Cdpf1

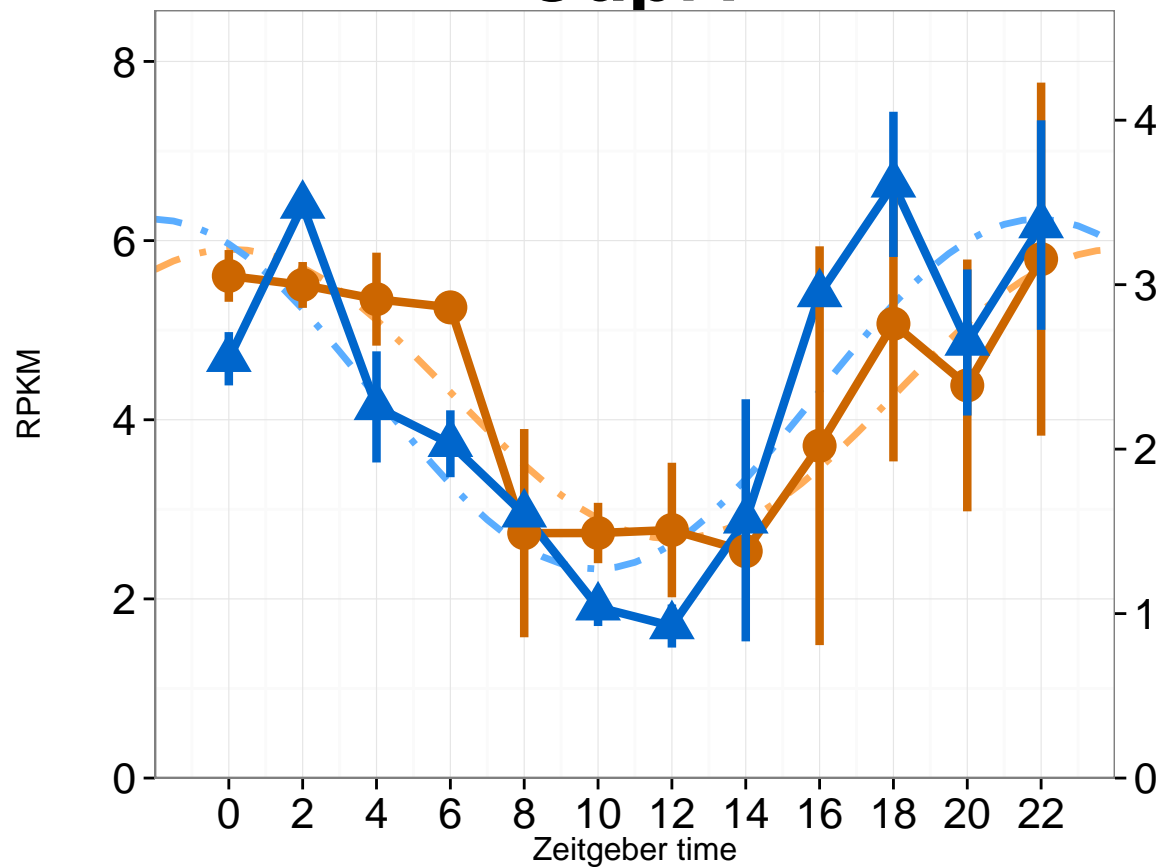

# Cdpf1

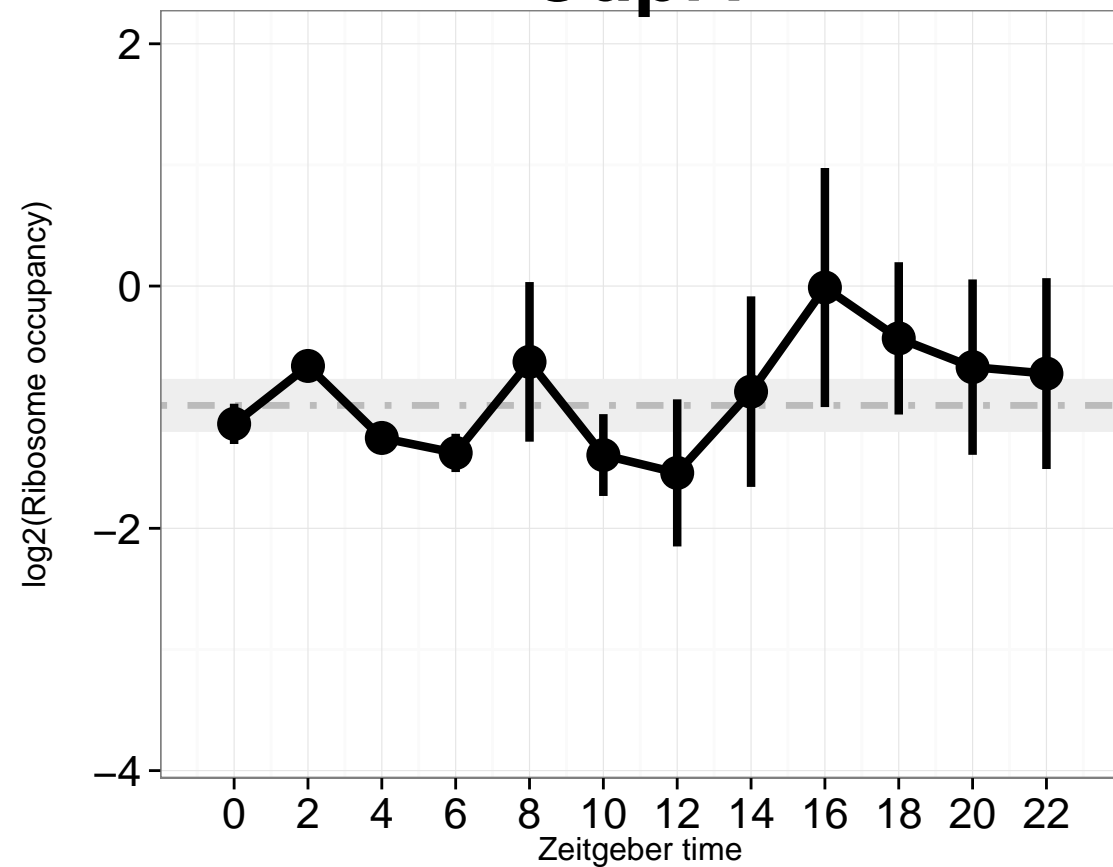

Supplement: SuppDataset_1.zip [file Cdpf1_set_D.pdf › Supplemental Dataset 1/D-mRNA_rhythm_translation_rhyth/Cdpf1_set_D.pdf]

## Celsr1

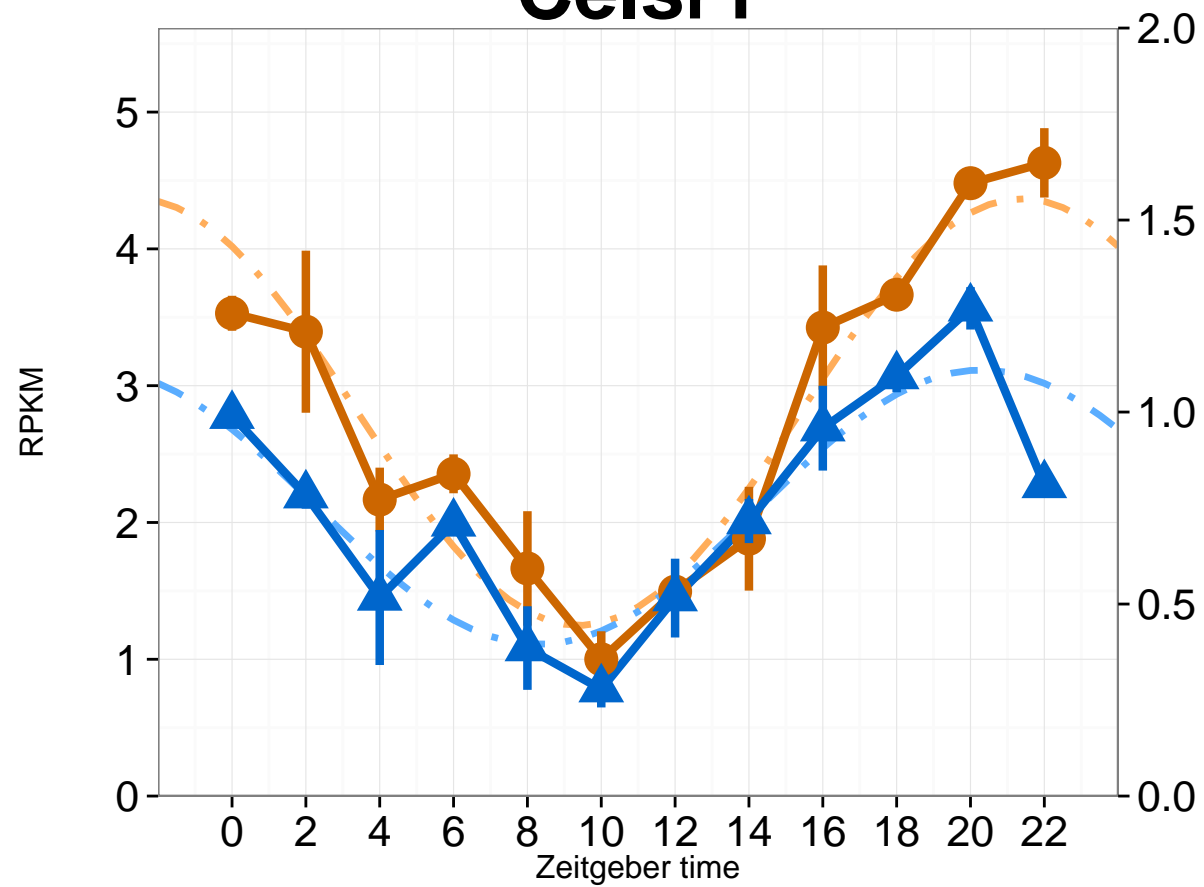

## Celsr1

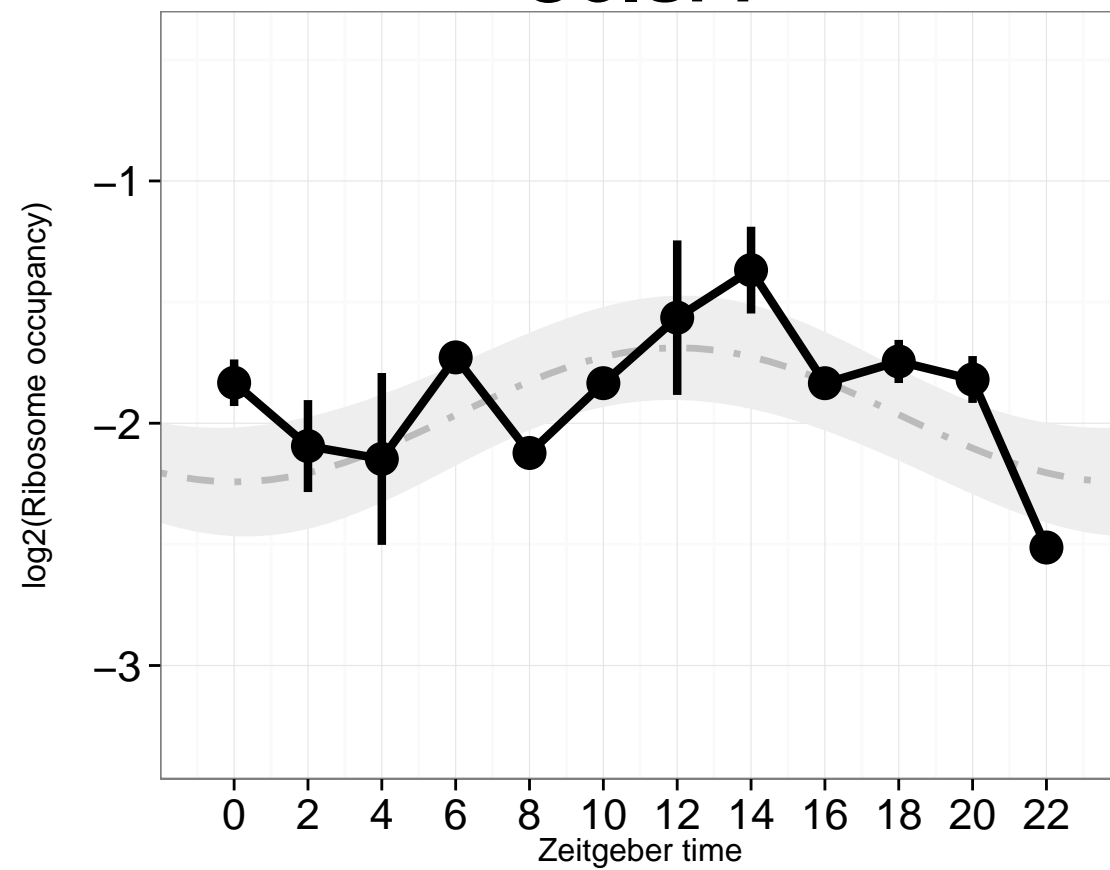

Supplement: SuppDataset_1.zip [file Celsr1_set_D.pdf › Supplemental Dataset 1/D-mRNA_rhythm_translation_rhyth/Celsr1_set_D.pdf]

# Cep152

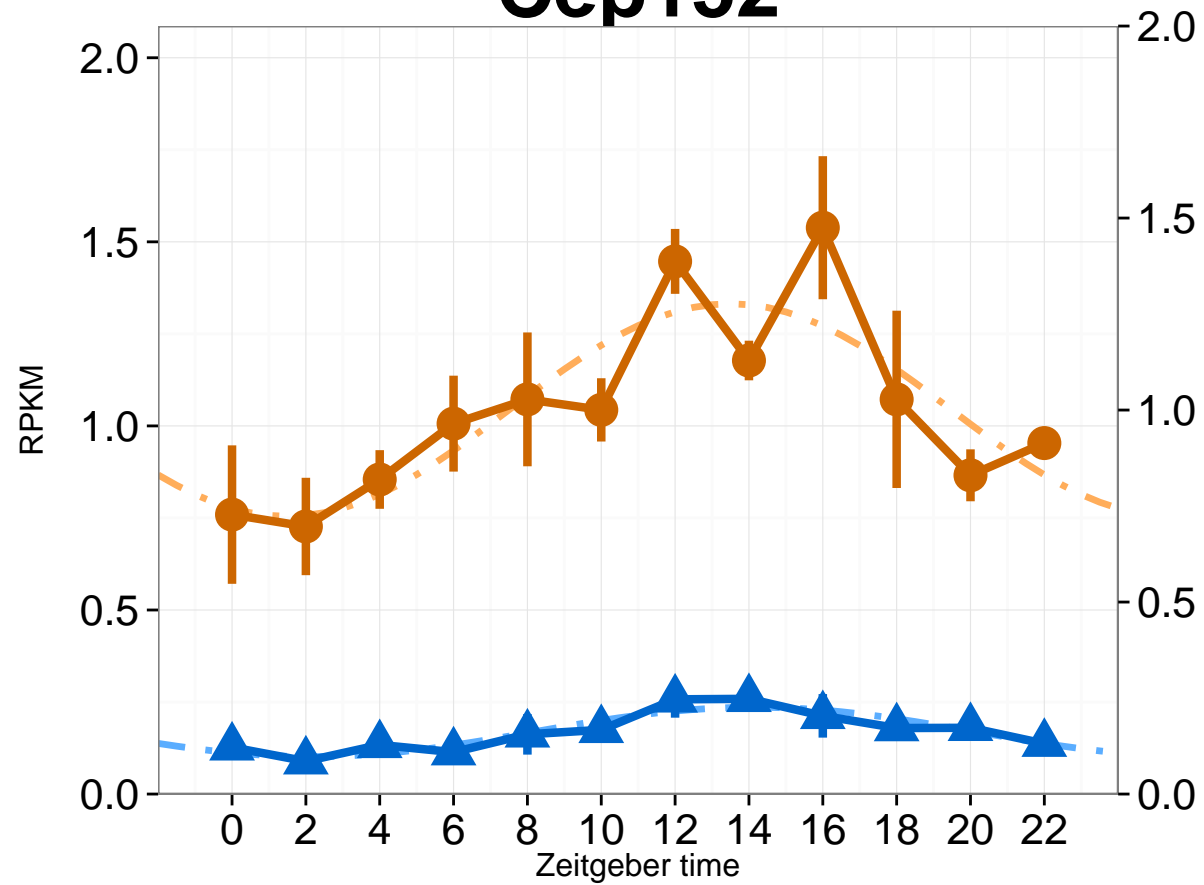

# Cep152

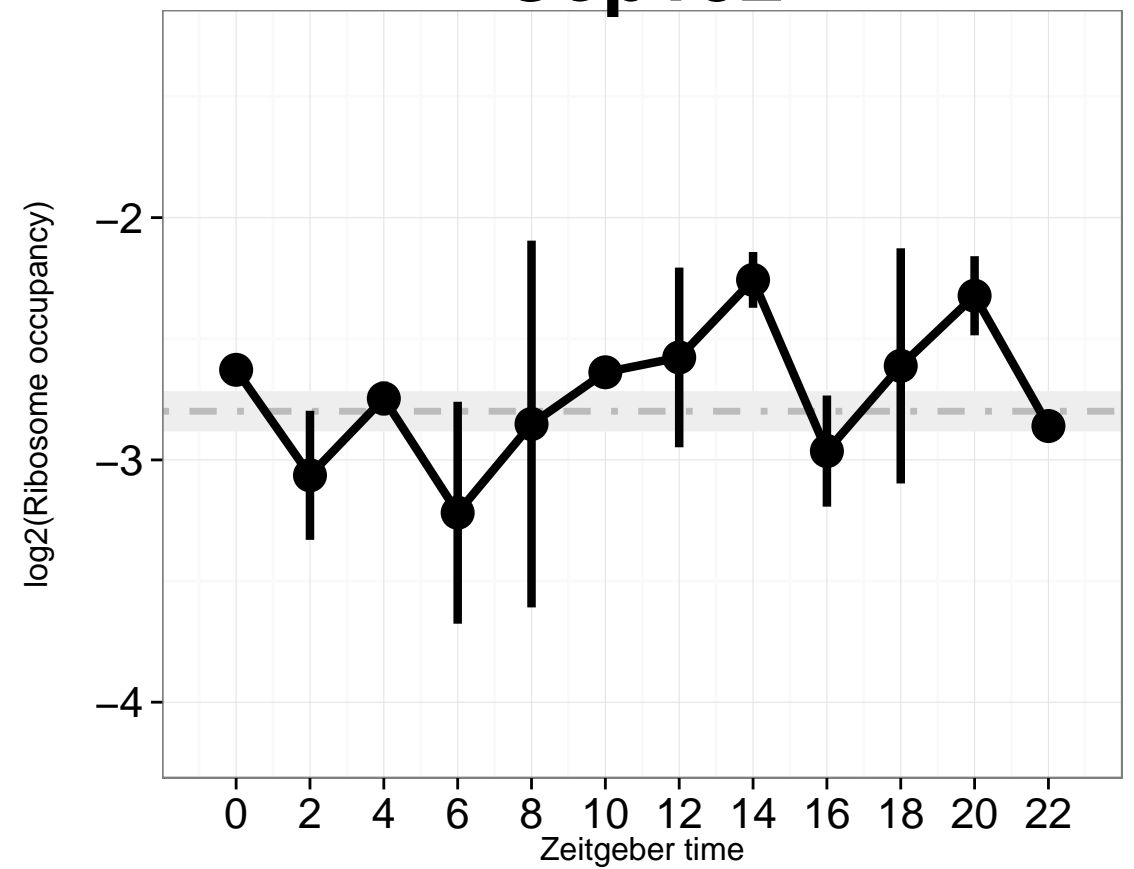

Supplement: SuppDataset_1.zip [file Cep152_set_D.pdf › Supplemental Dataset 1/D-mRNA_rhythm_translation_rhyth/Cep152_set_D.pdf]

## Cerk

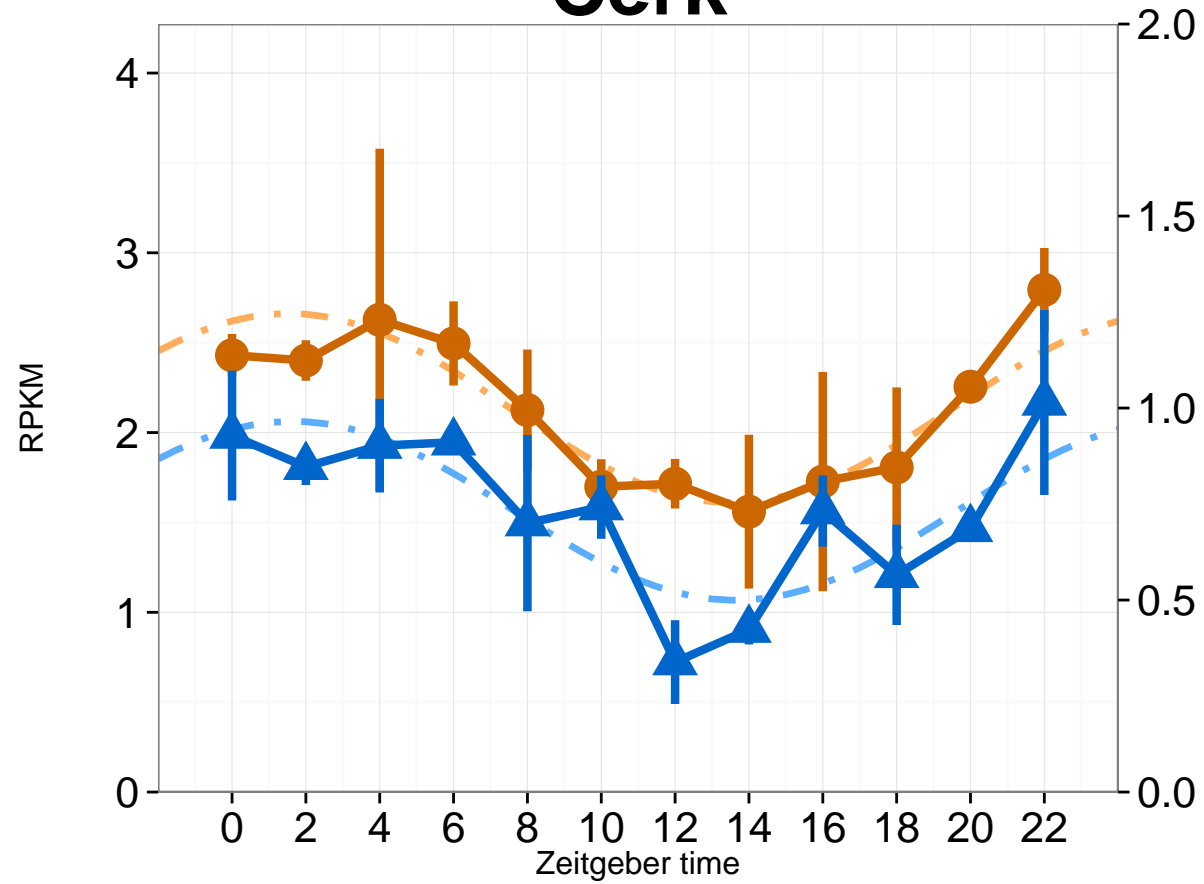

## Cerk

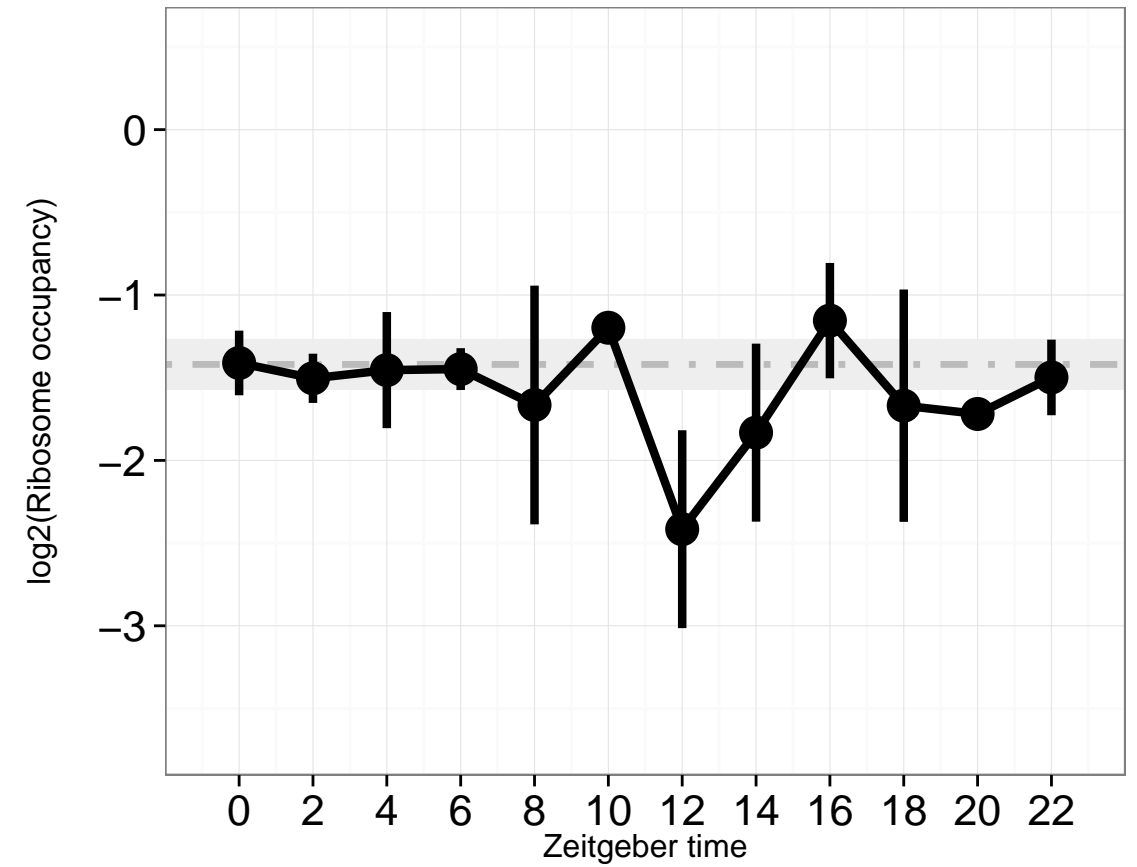

Supplement: SuppDataset_1.zip [file Cerk_set_D.pdf › Supplemental Dataset 1/D-mRNA_rhythm_translation_rhyth/Cerk_set_D.pdf]

## Cers6

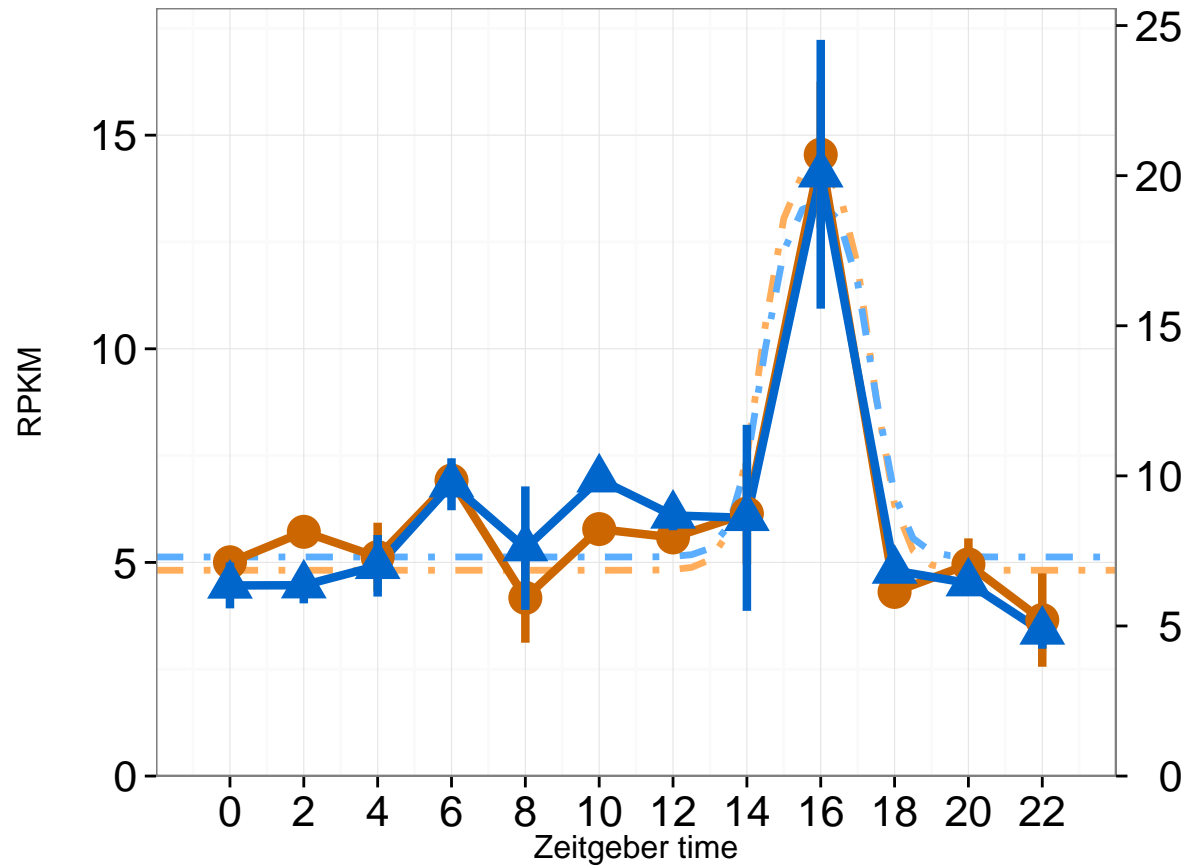

## Cers6

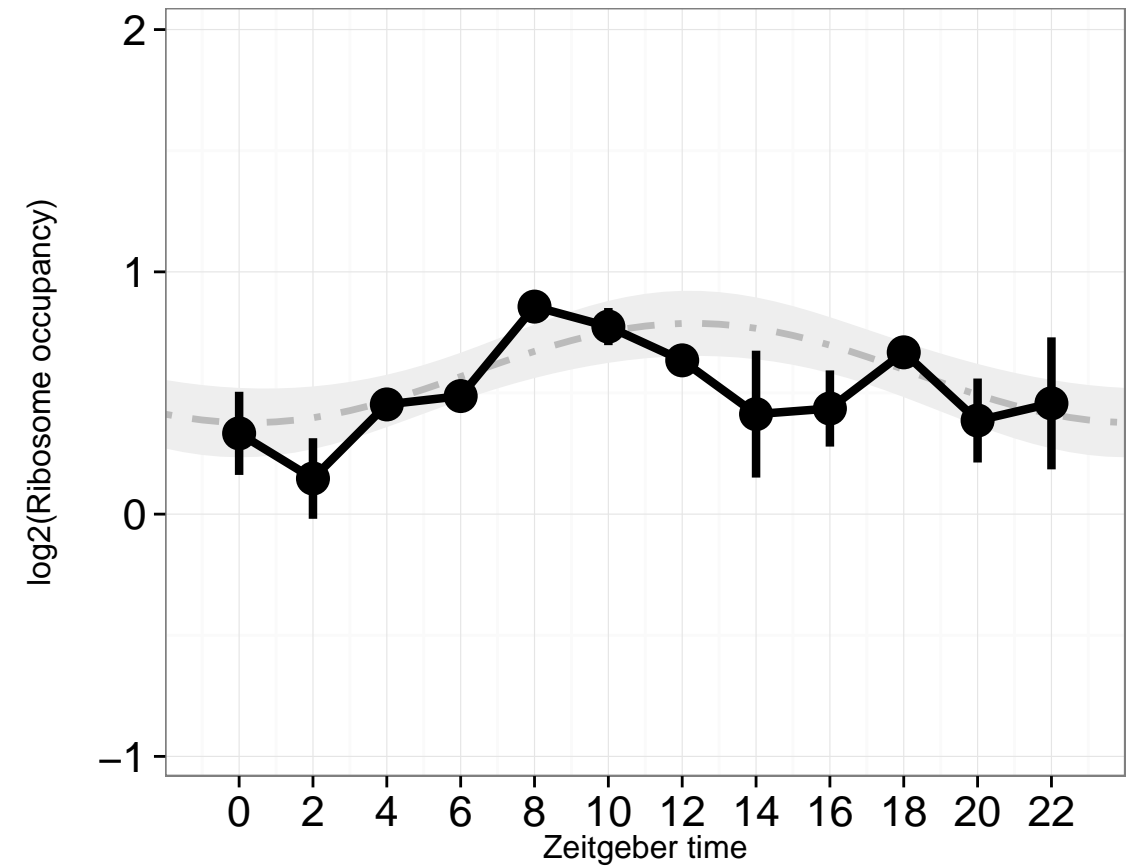

Supplement: SuppDataset_1.zip [file Cers6_set_D.pdf › Supplemental Dataset 1/D-mRNA_rhythm_translation_rhyth/Cers6_set_D.pdf]

## Ces1d

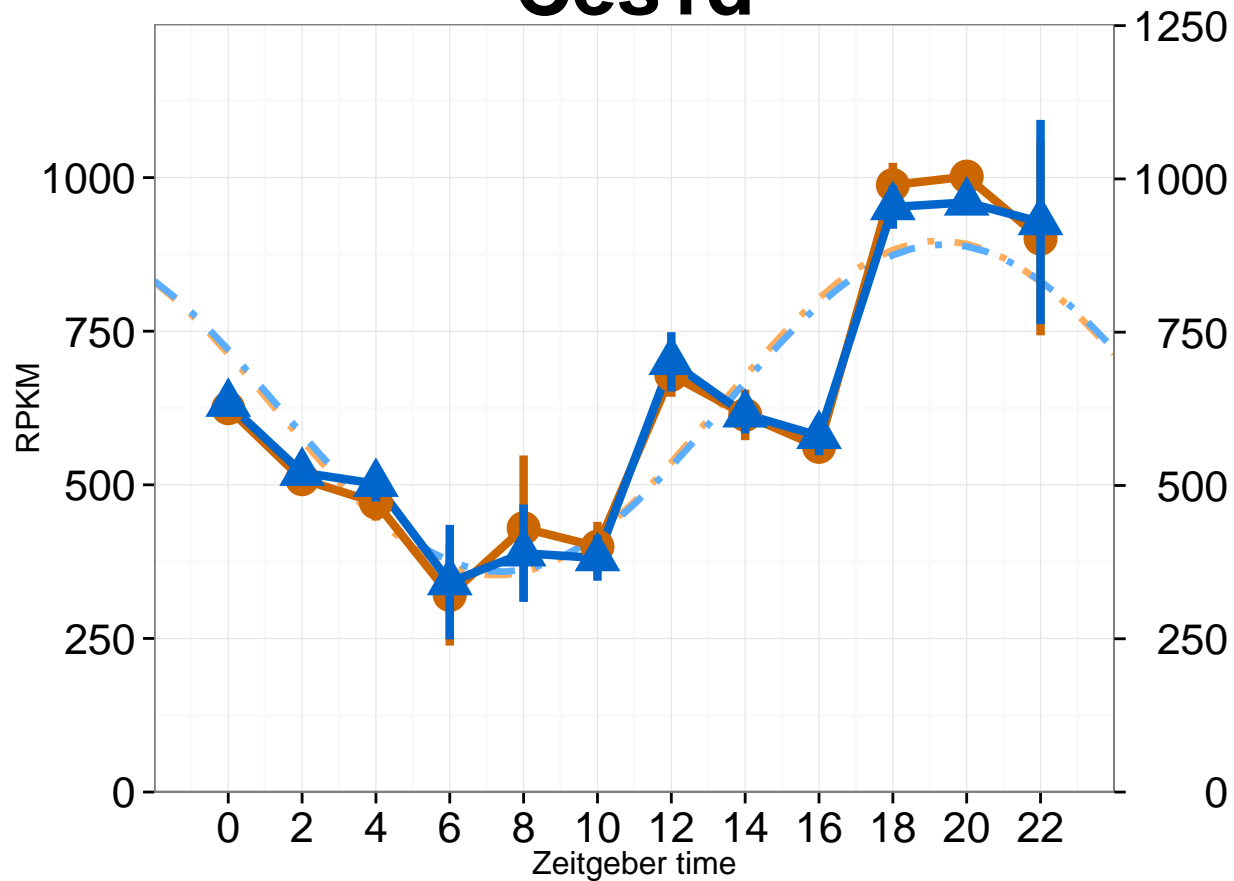

## Ces1d

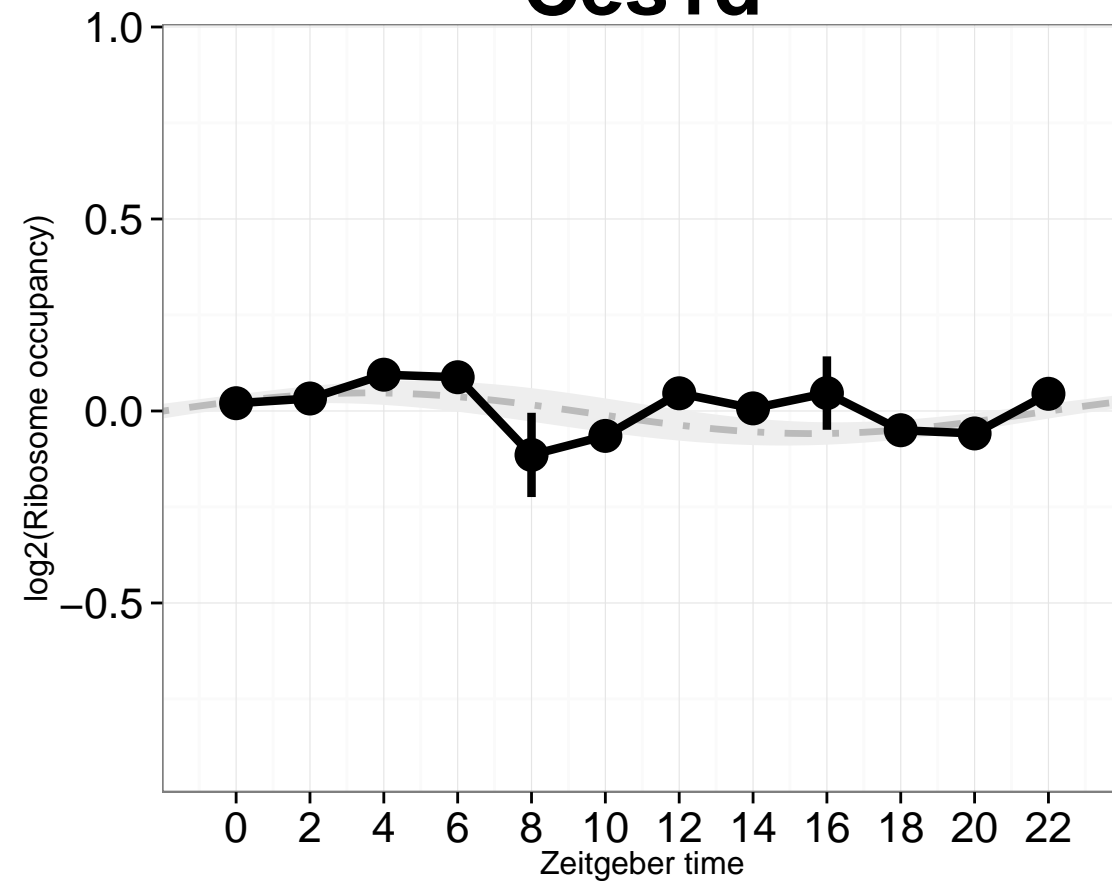

Supplement: SuppDataset_1.zip [file Ces1d_set_D.pdf › Supplemental Dataset 1/D-mRNA_rhythm_translation_rhyth/Ces1d_set_D.pdf]

## Cfh

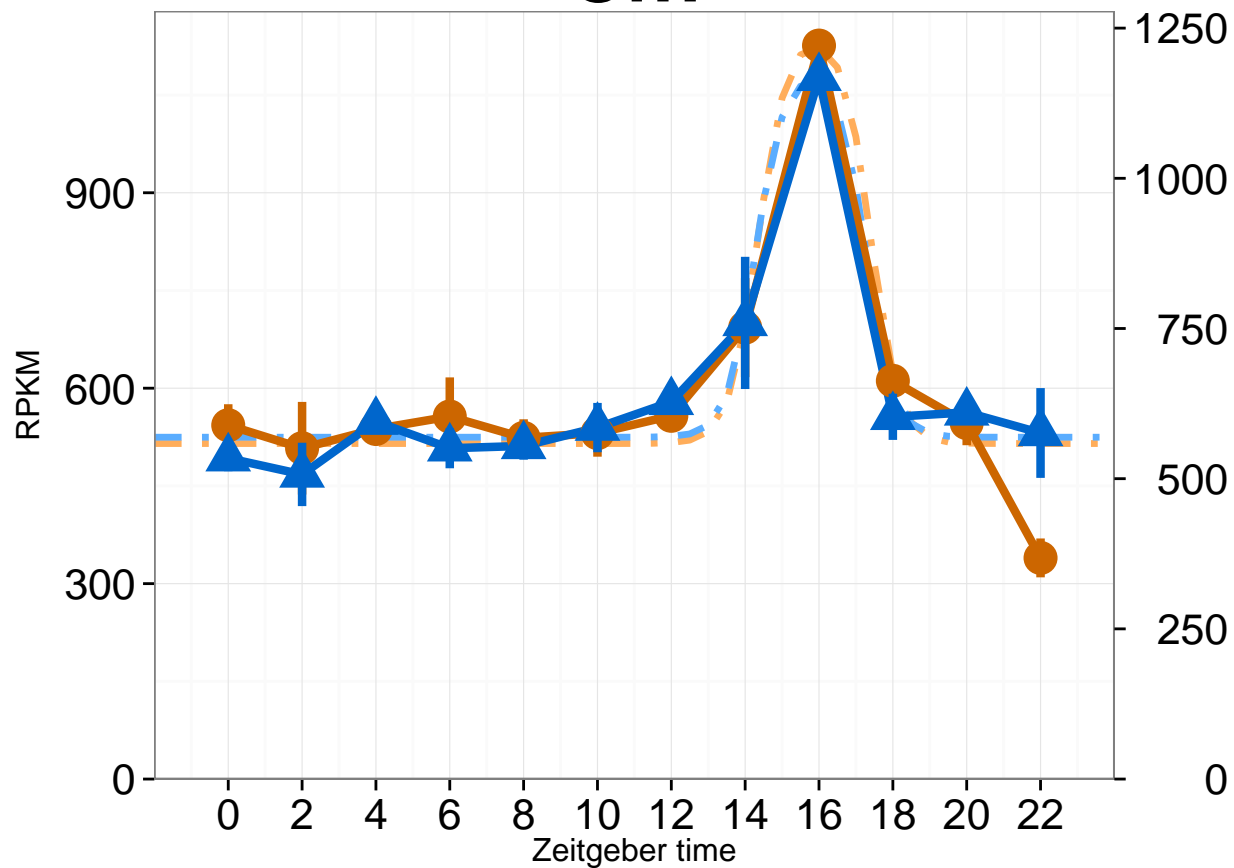

## Cfh

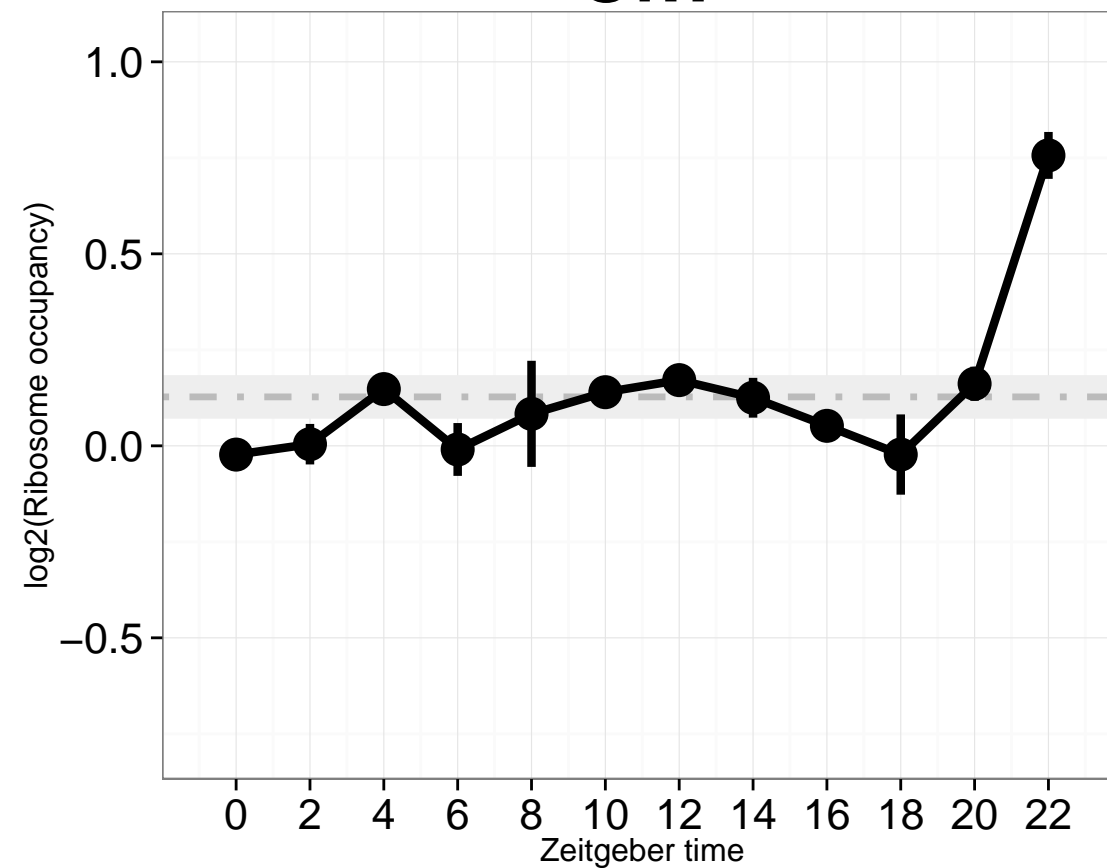

Supplement: SuppDataset_1.zip [file Cfh_set_D.pdf › Supplemental Dataset 1/D-mRNA_rhythm_translation_rhyth/Cfh_set_D.pdf]

## Cgn

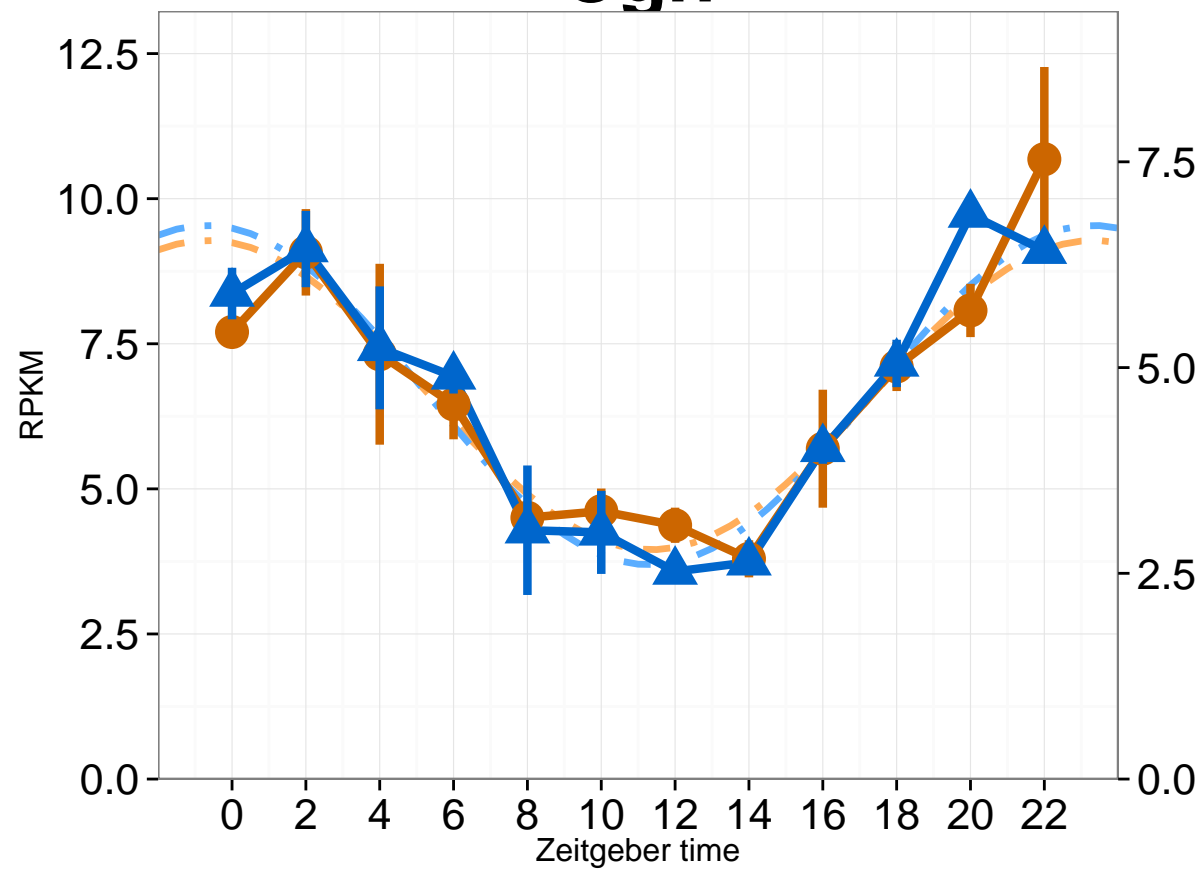

## Cgn

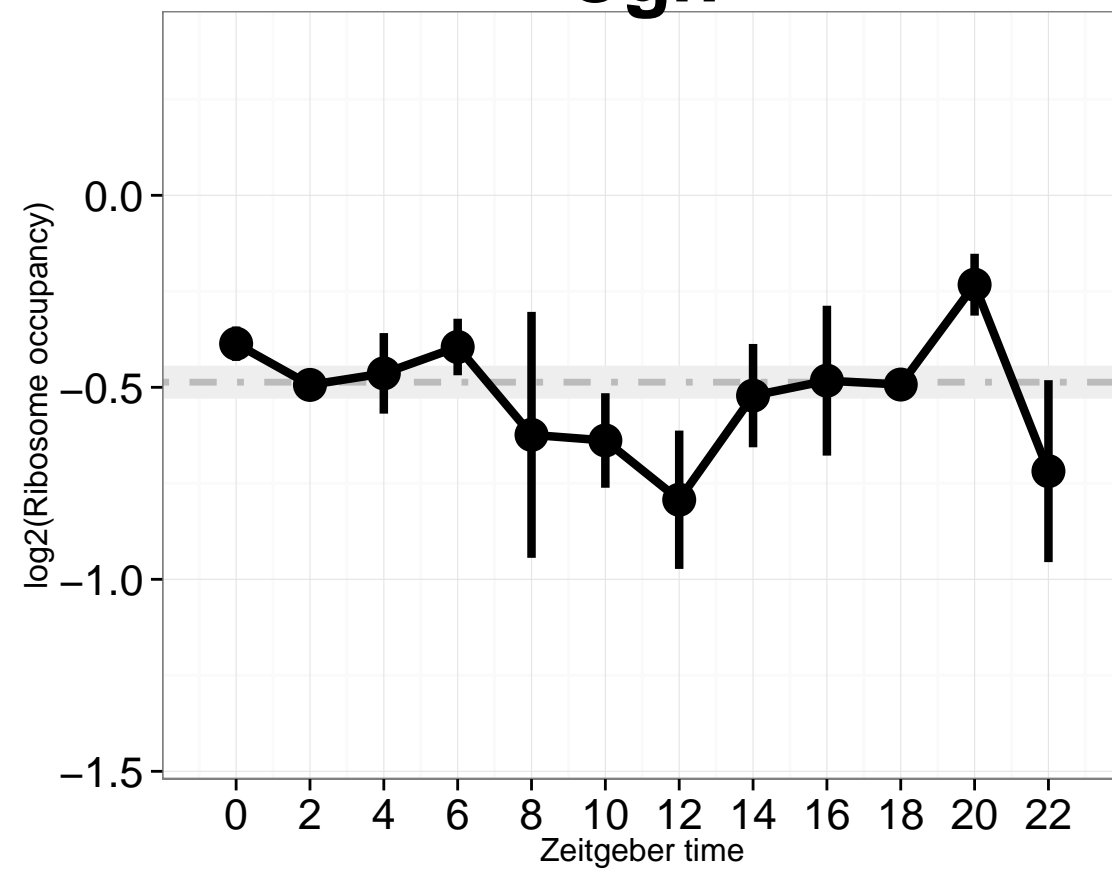

Supplement: SuppDataset_1.zip [file Cgn_set_D.pdf › Supplemental Dataset 1/D-mRNA_rhythm_translation_rhyth/Cgn_set_D.pdf]

## Chchd4

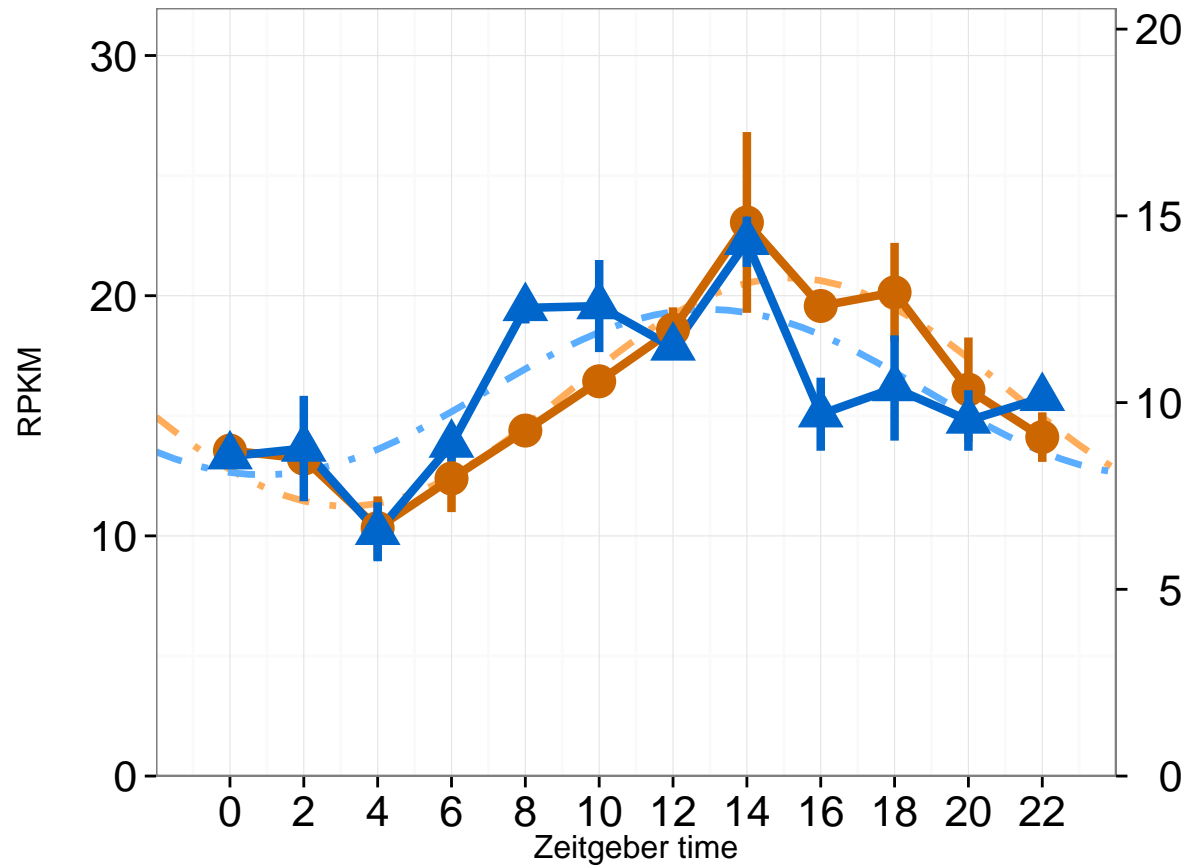

## Chchd4

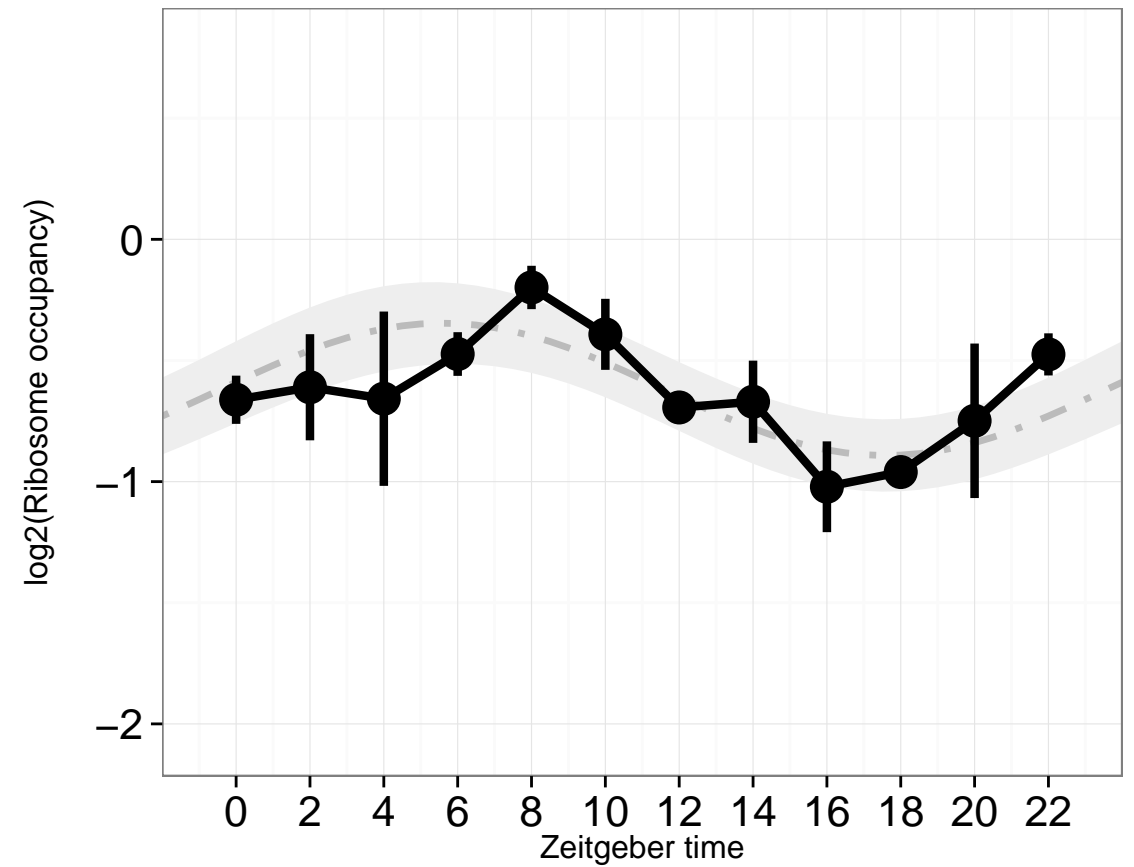

Supplement: SuppDataset_1.zip [file Chchd4_set_D.pdf › Supplemental Dataset 1/D-mRNA_rhythm_translation_rhyth/Chchd4_set_D.pdf]

# Chic1

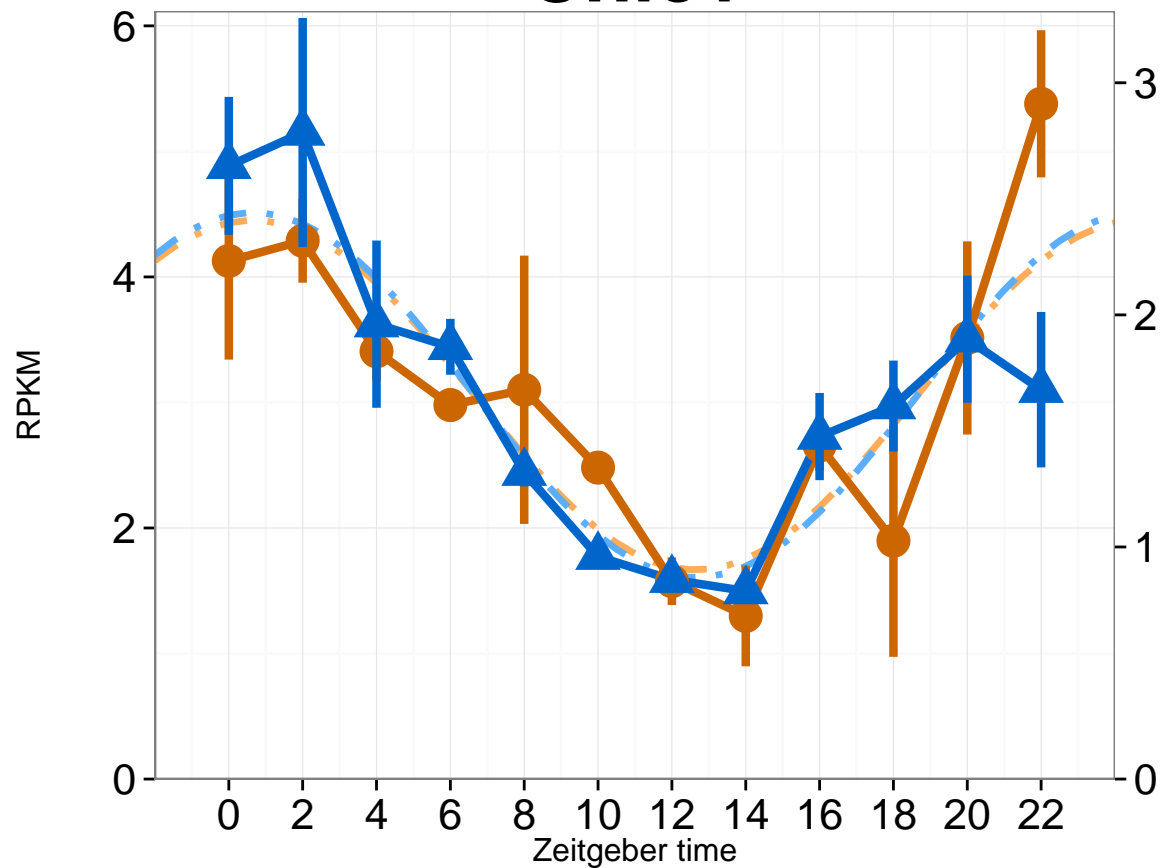

# Chic1

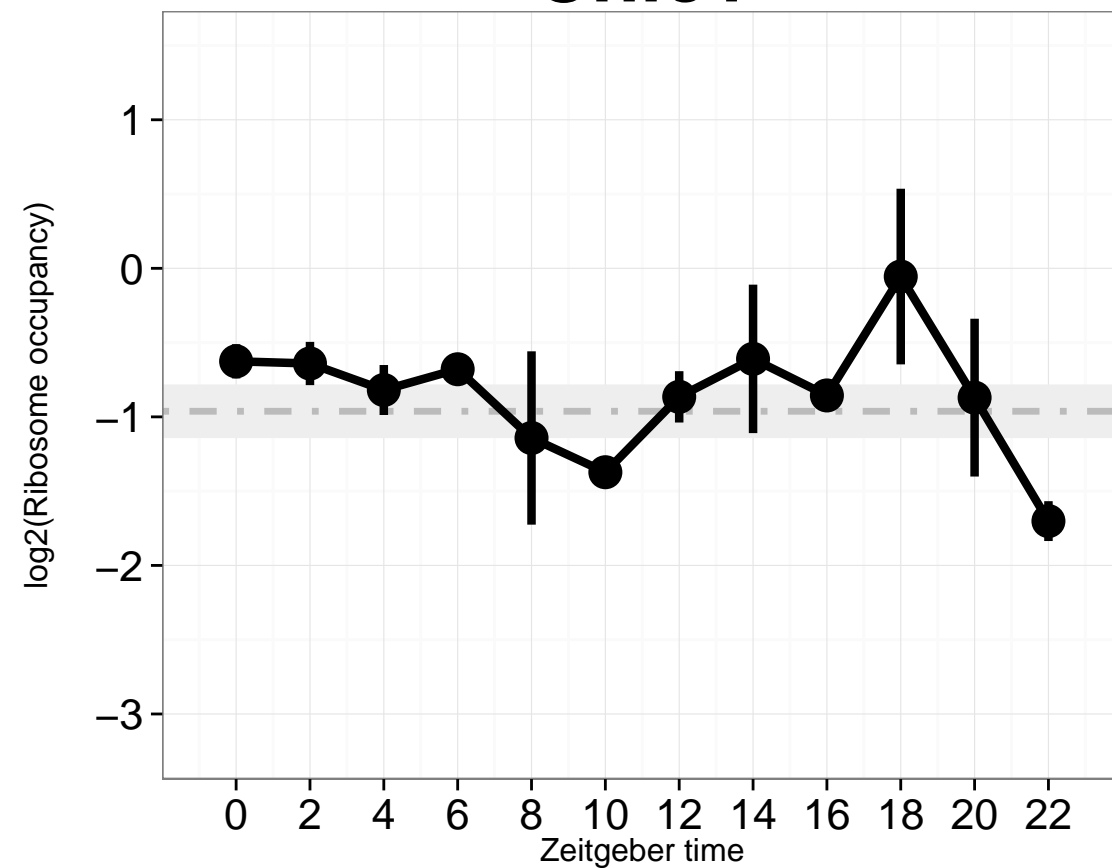

Supplement: SuppDataset_1.zip [file Chic1_set_D.pdf › Supplemental Dataset 1/D-mRNA_rhythm_translation_rhyth/Chic1_set_D.pdf]

## Chka

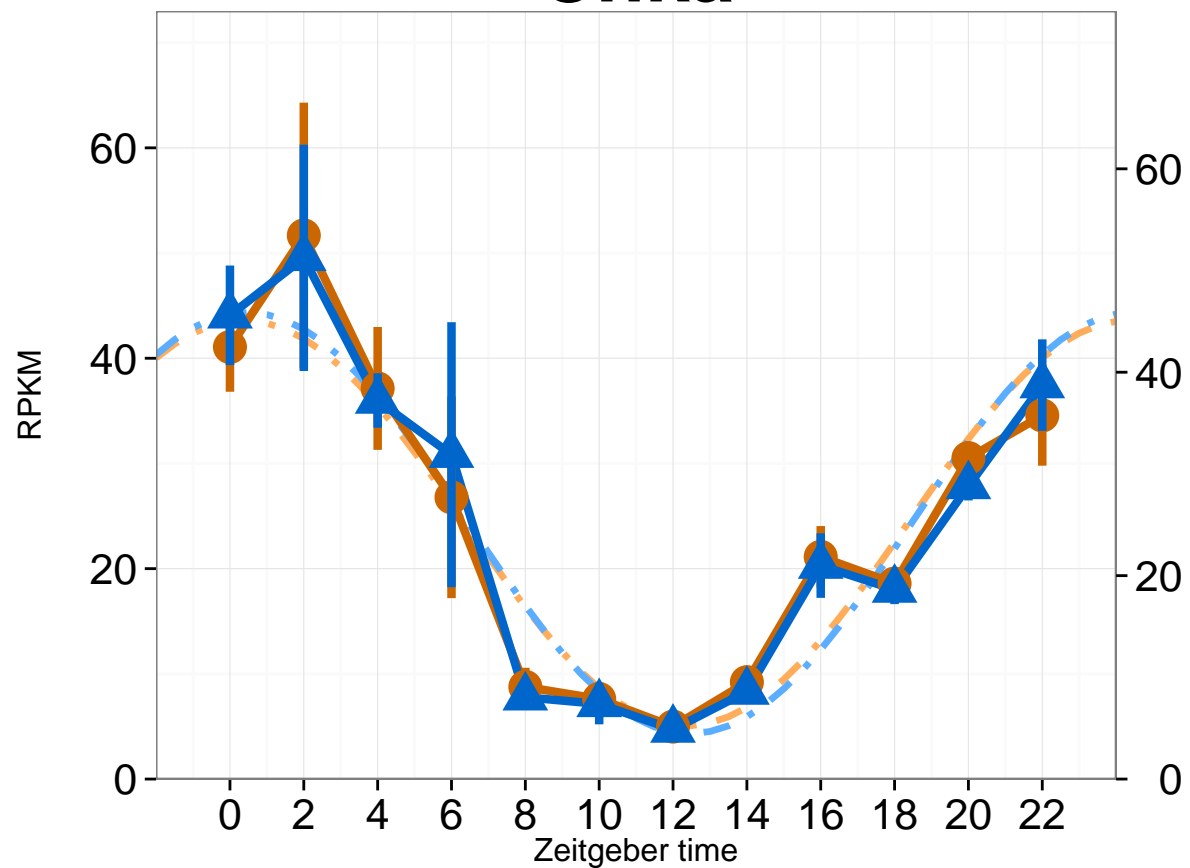

## Chka

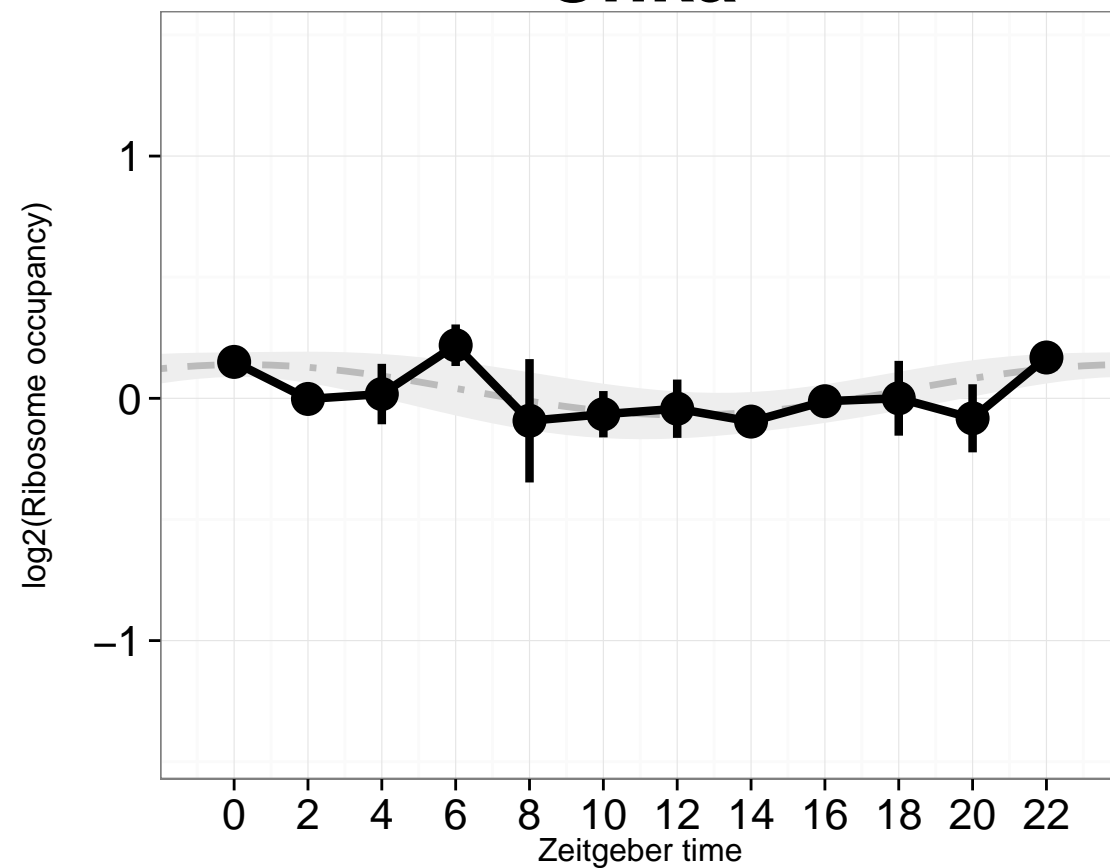

Supplement: SuppDataset_1.zip [file Chka_set_D.pdf › Supplemental Dataset 1/D-mRNA_rhythm_translation_rhyth/Chka_set_D.pdf]

## Chkb

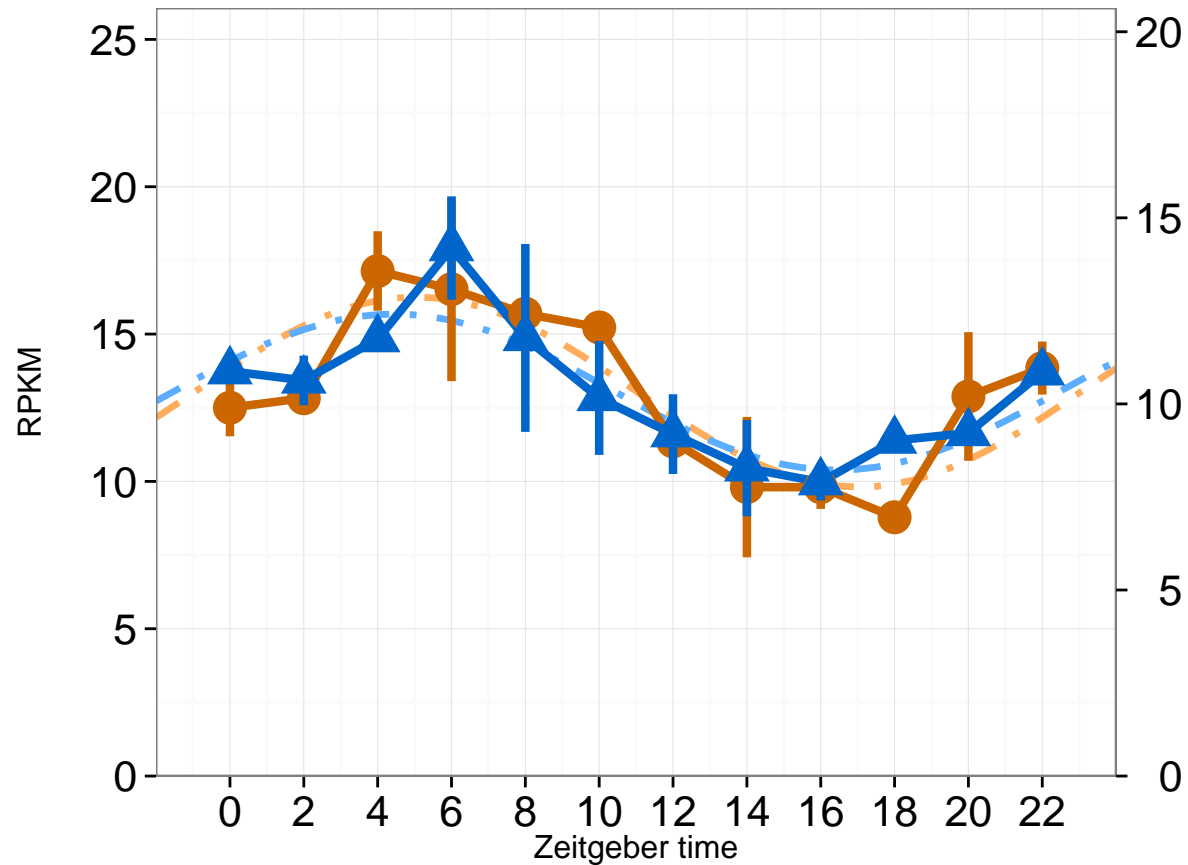

## Chkb

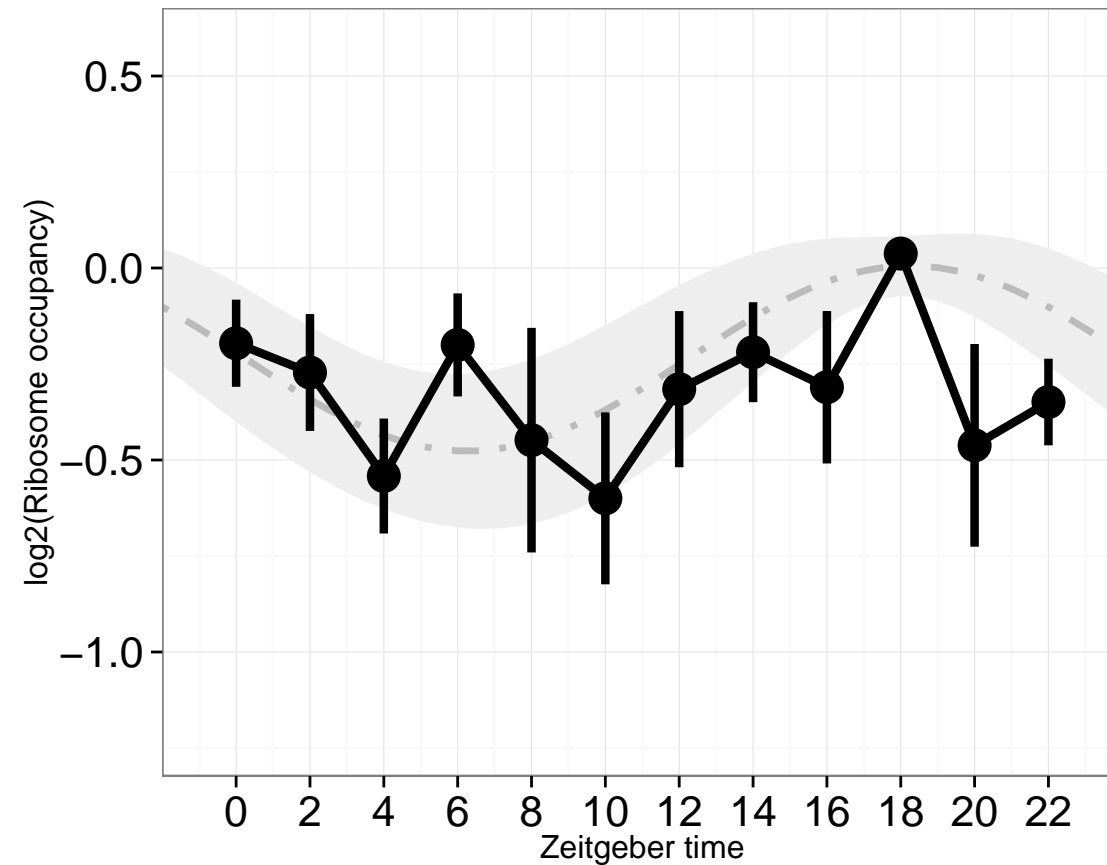

Supplement: SuppDataset_1.zip [file Chkb_set_D.pdf › Supplemental Dataset 1/D-mRNA_rhythm_translation_rhyth/Chkb_set_D.pdf]

# Chordc1

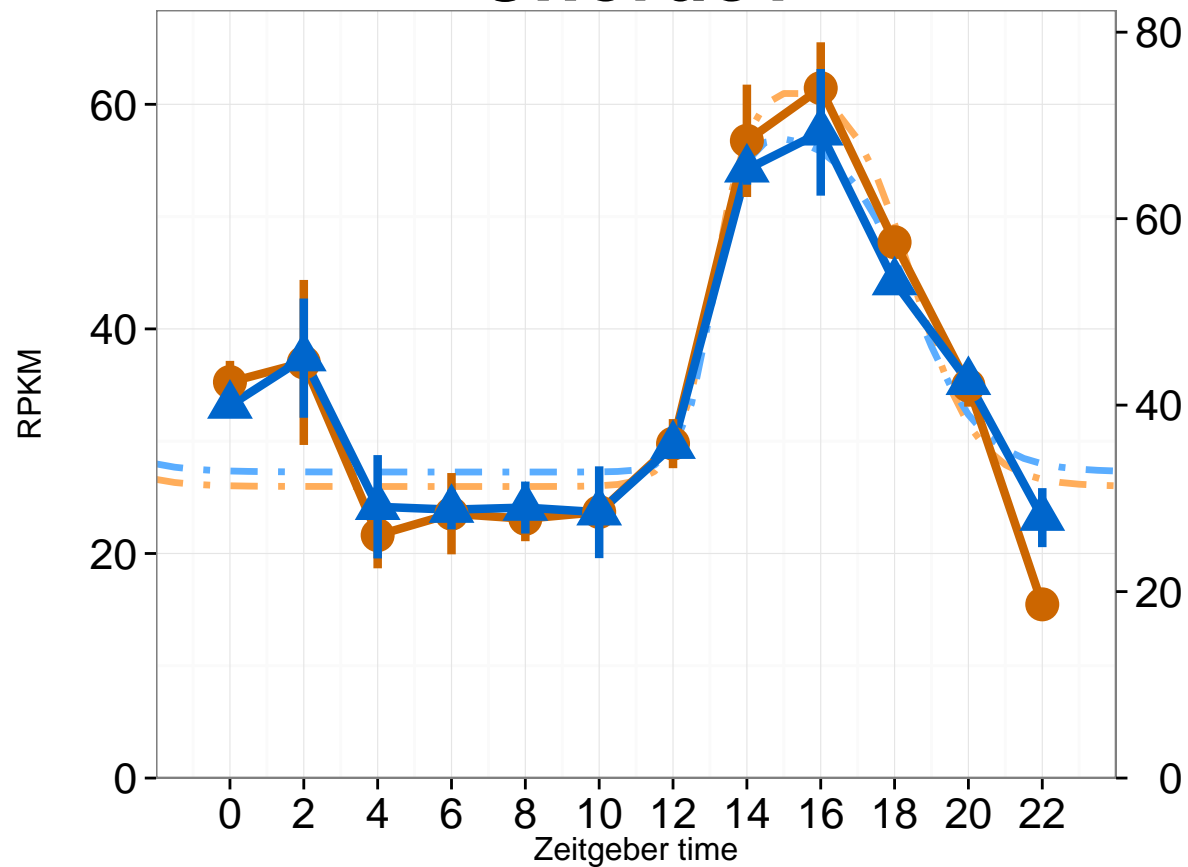

# Chordc1

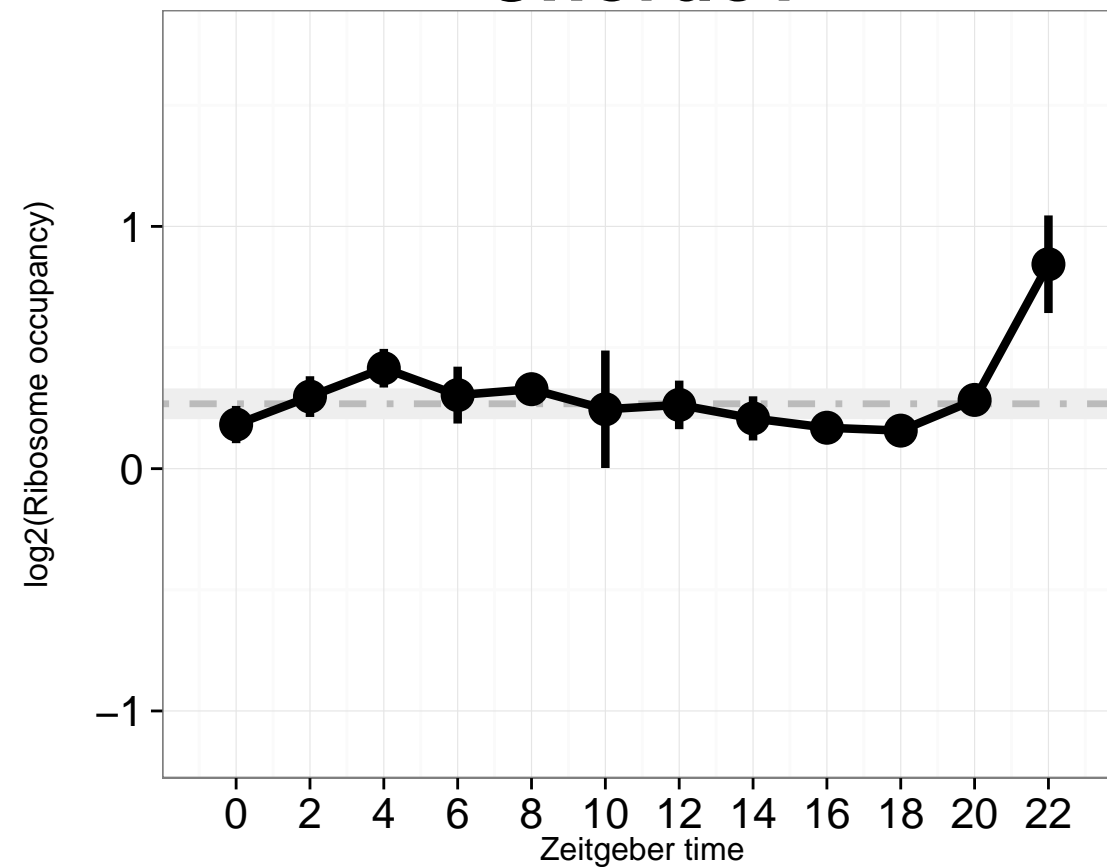

Supplement: SuppDataset_1.zip [file Chordc1_set_D.pdf › Supplemental Dataset 1/D-mRNA_rhythm_translation_rhyth/Chordc1_set_D.pdf]

# Chrna4

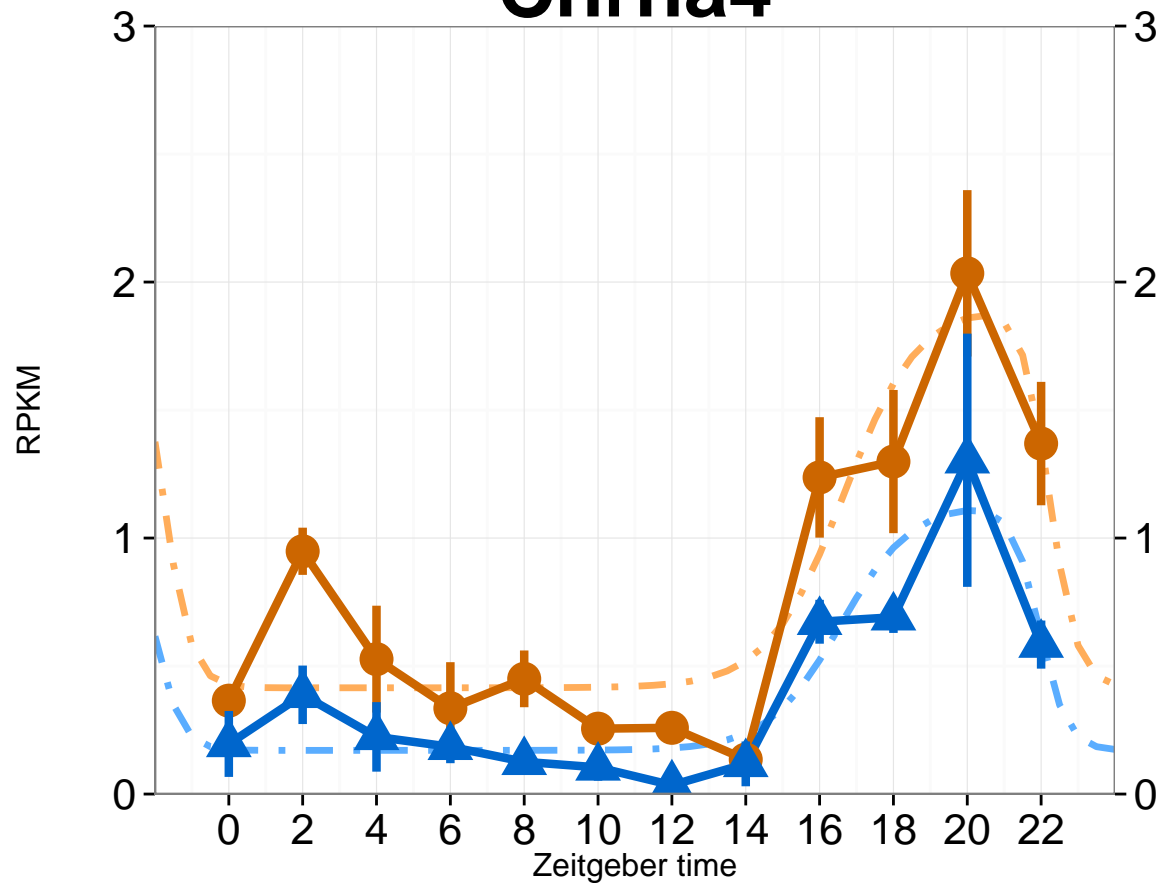

# Chrna4

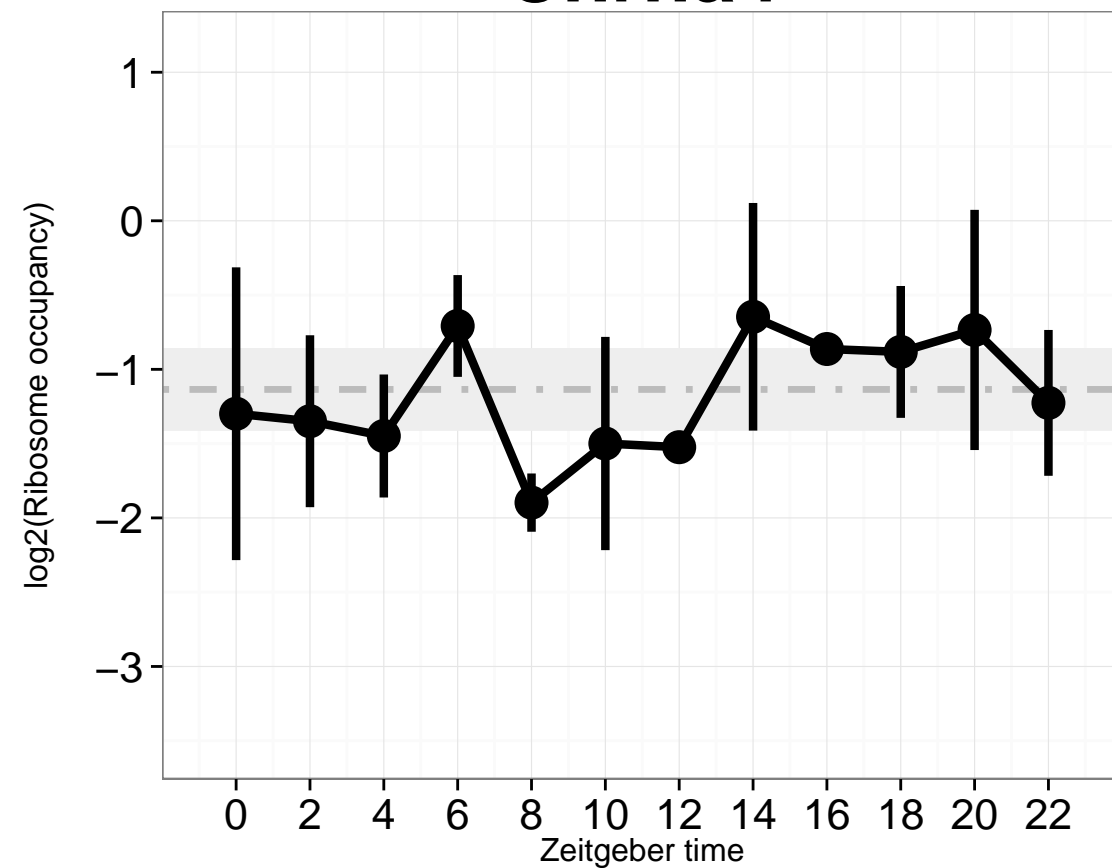

Supplement: SuppDataset_1.zip [file Chrna4_set_D.pdf › Supplemental Dataset 1/D-mRNA_rhythm_translation_rhyth/Chrna4_set_D.pdf]

# Chst13

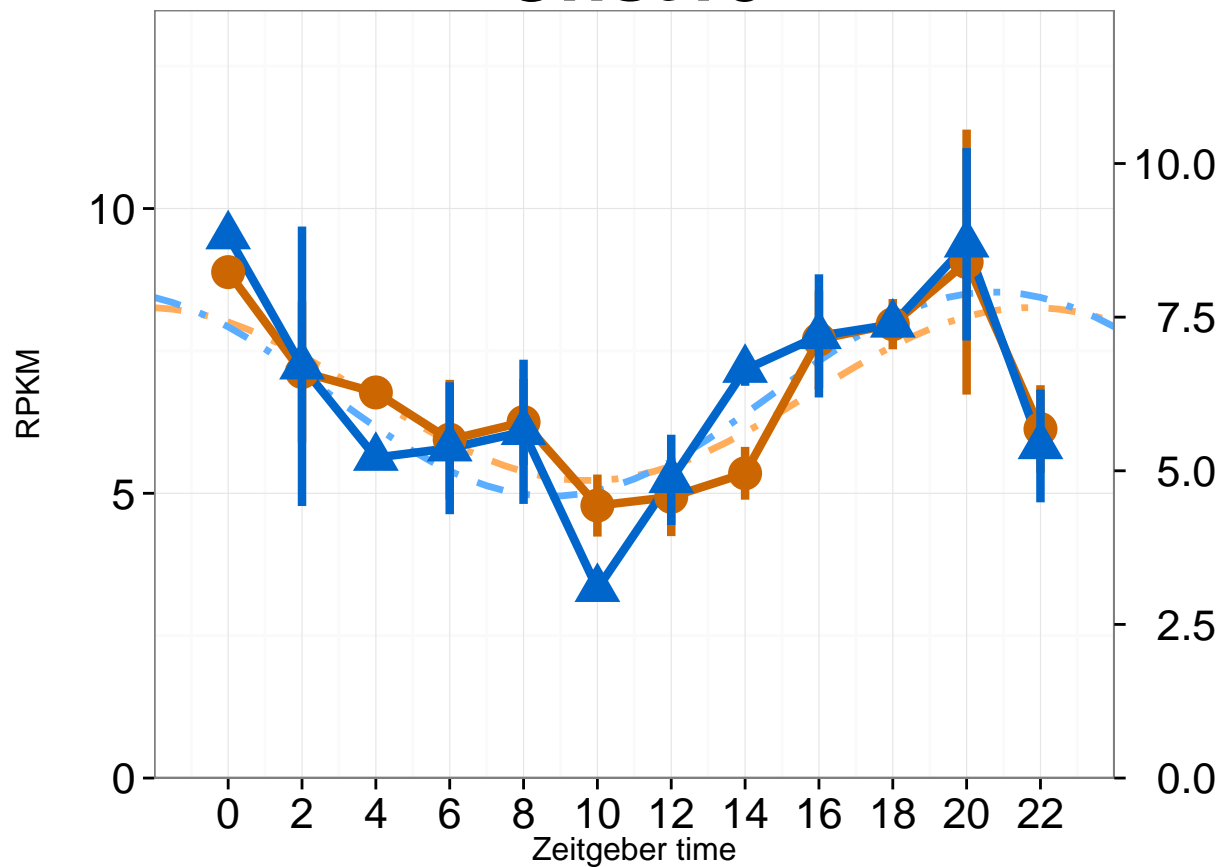

# Chst13

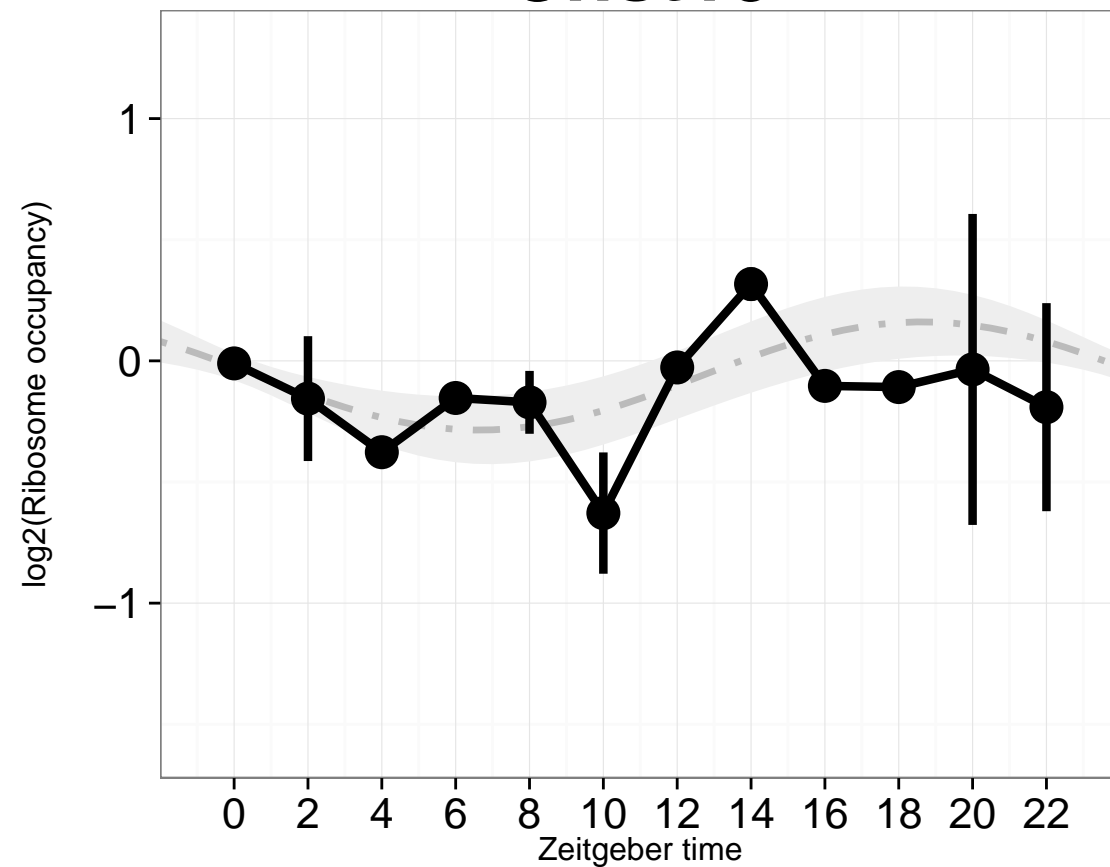

Supplement: SuppDataset_1.zip [file Chst13_set_D.pdf › Supplemental Dataset 1/D-mRNA_rhythm_translation_rhyth/Chst13_set_D.pdf]

## Cirbp

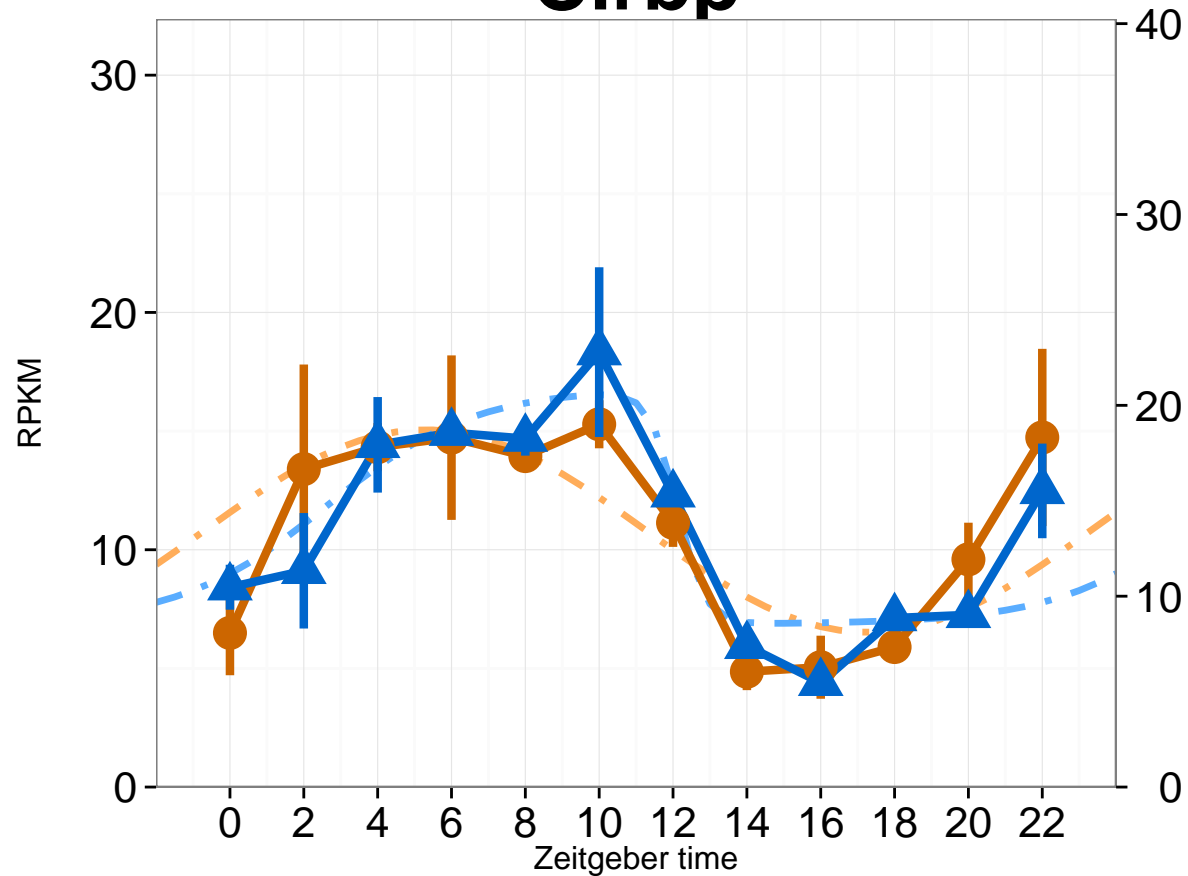

## Cirbp

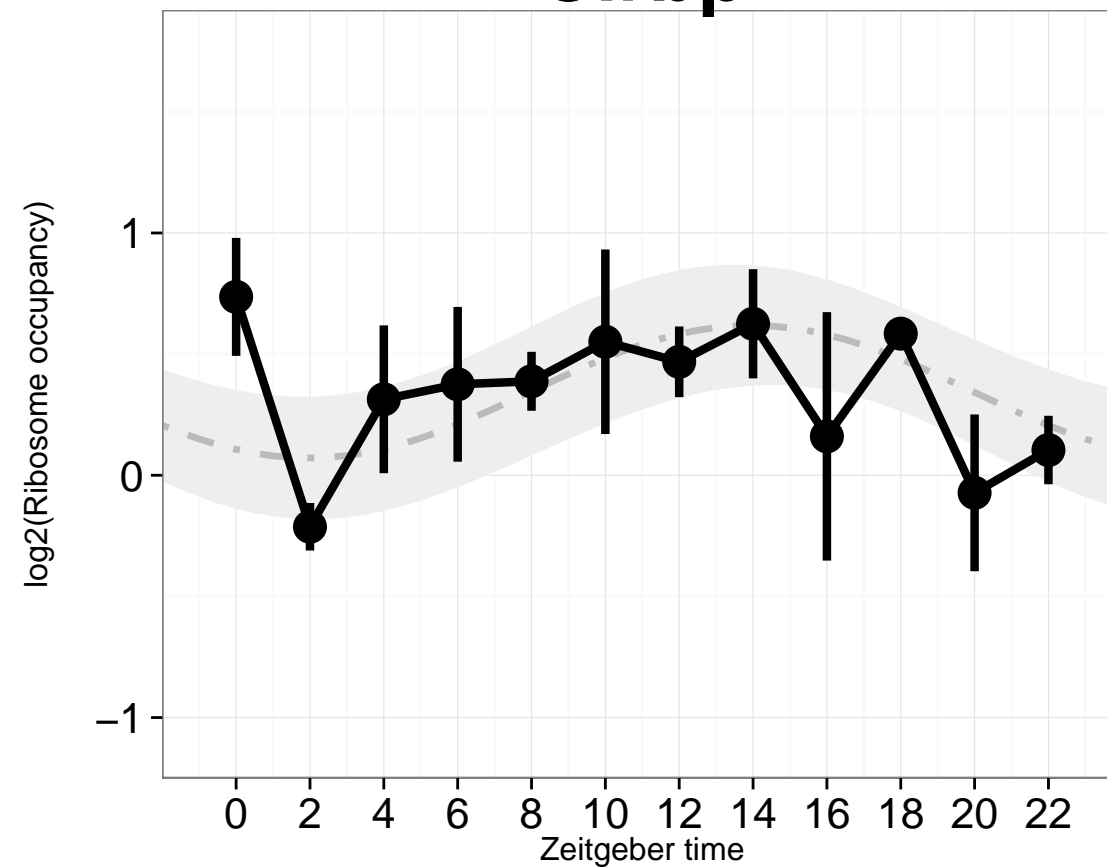

Supplement: SuppDataset_1.zip [file Cirbp_set_D.pdf › Supplemental Dataset 1/D-mRNA_rhythm_translation_rhyth/Cirbp_set_D.pdf]

## Ckb

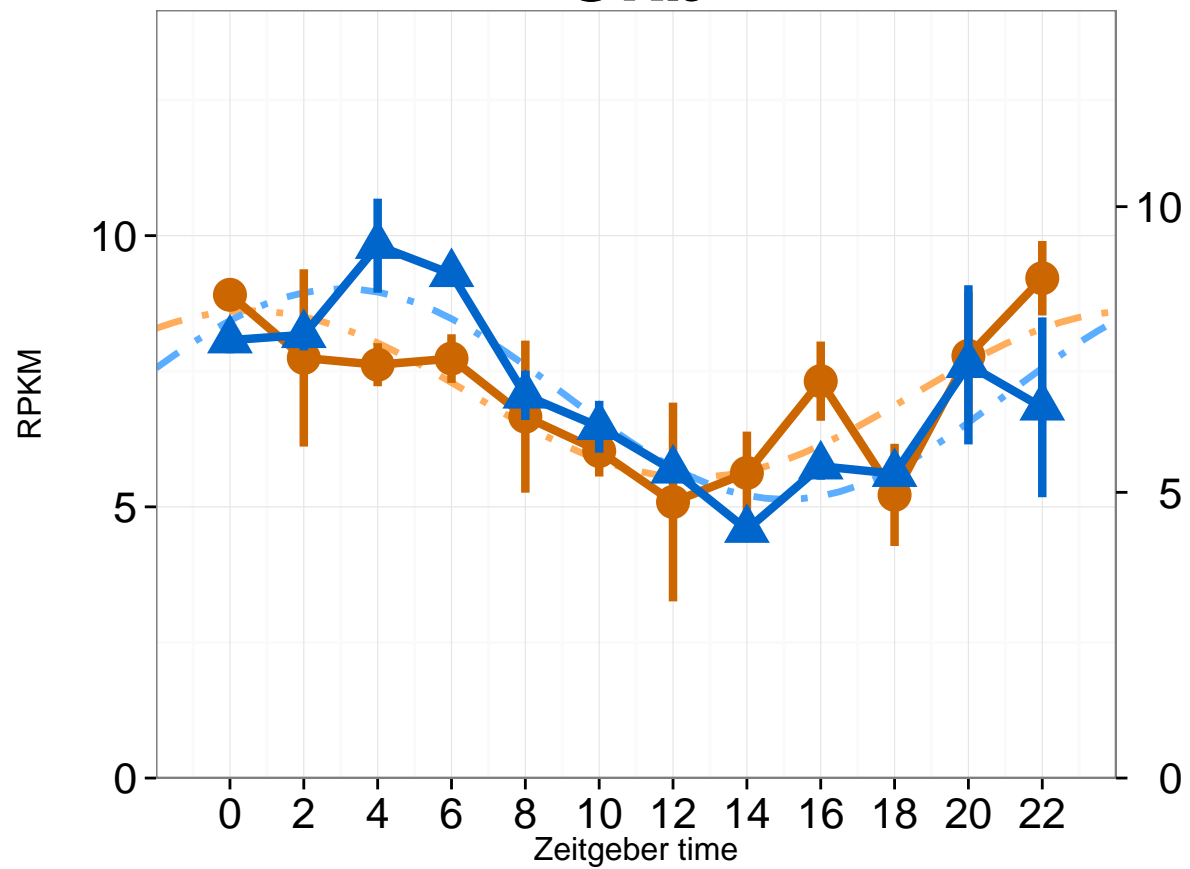

## Ckb

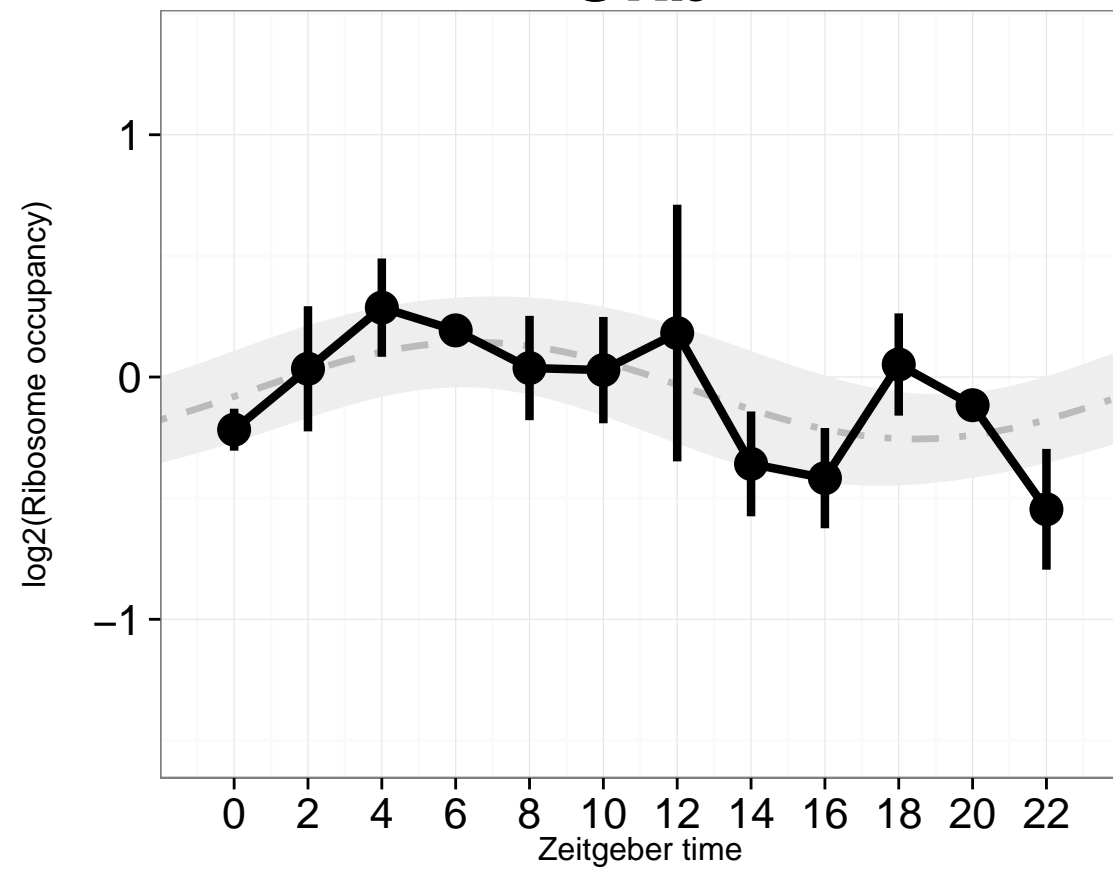

Supplement: SuppDataset_1.zip [file Ckb_set_D.pdf › Supplemental Dataset 1/D-mRNA_rhythm_translation_rhyth/Ckb_set_D.pdf]

## Cks2

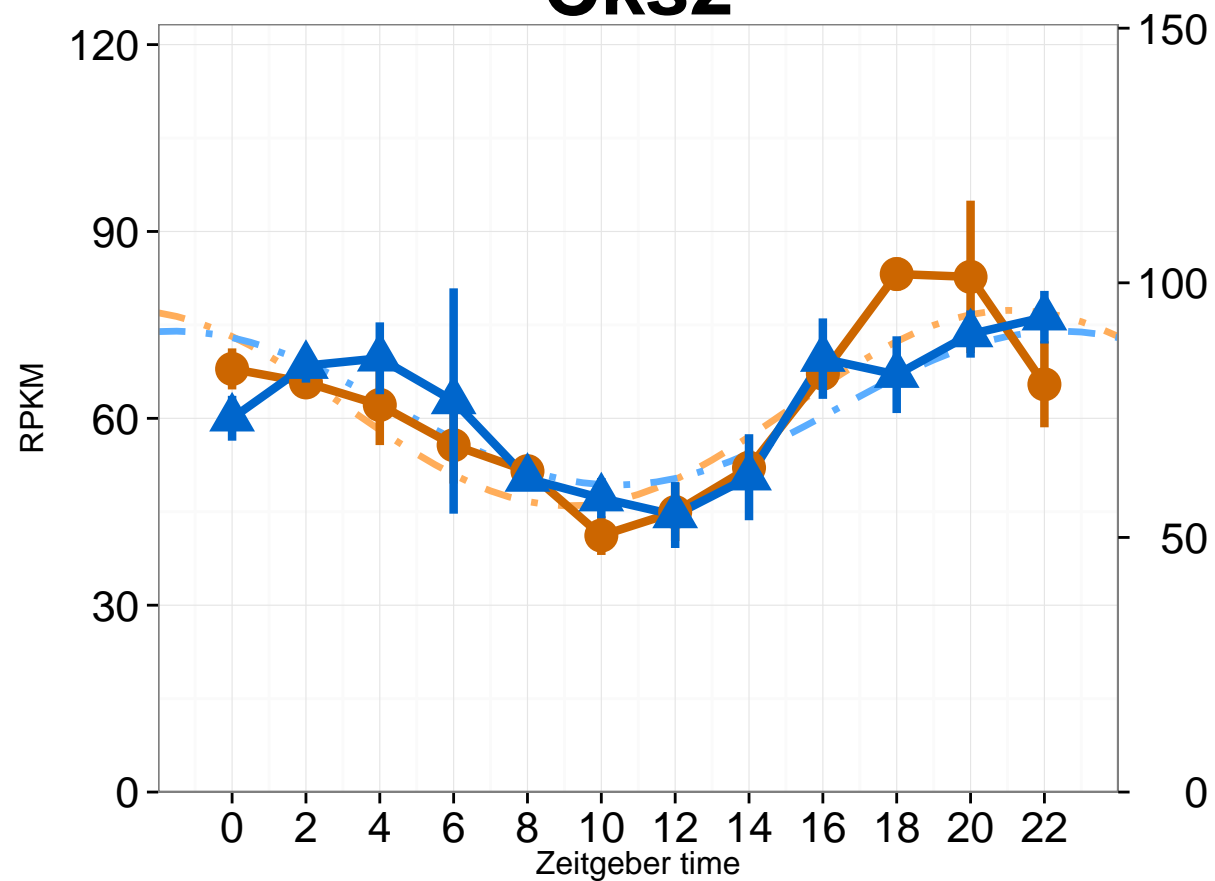

## Cks2

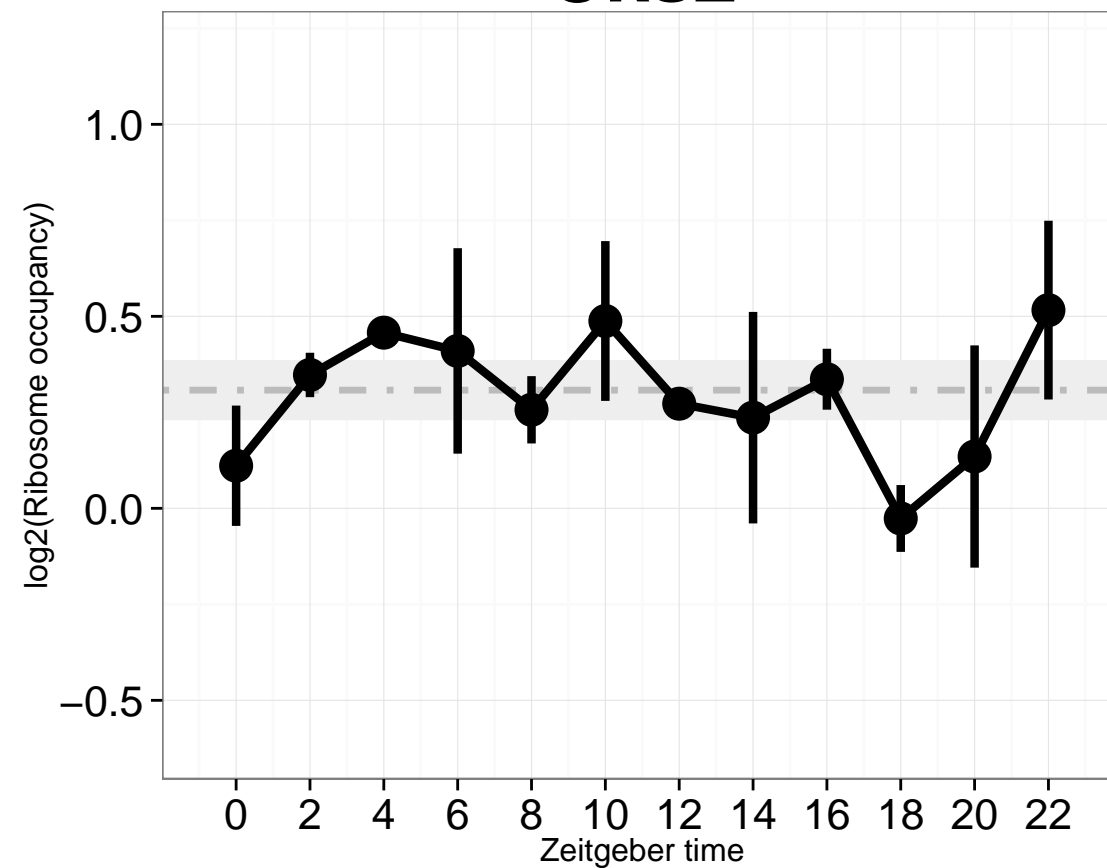

Supplement: SuppDataset_1.zip [file Cks2_set_D.pdf › Supplemental Dataset 1/D-mRNA_rhythm_translation_rhyth/Cks2_set_D.pdf]

# Clasrp

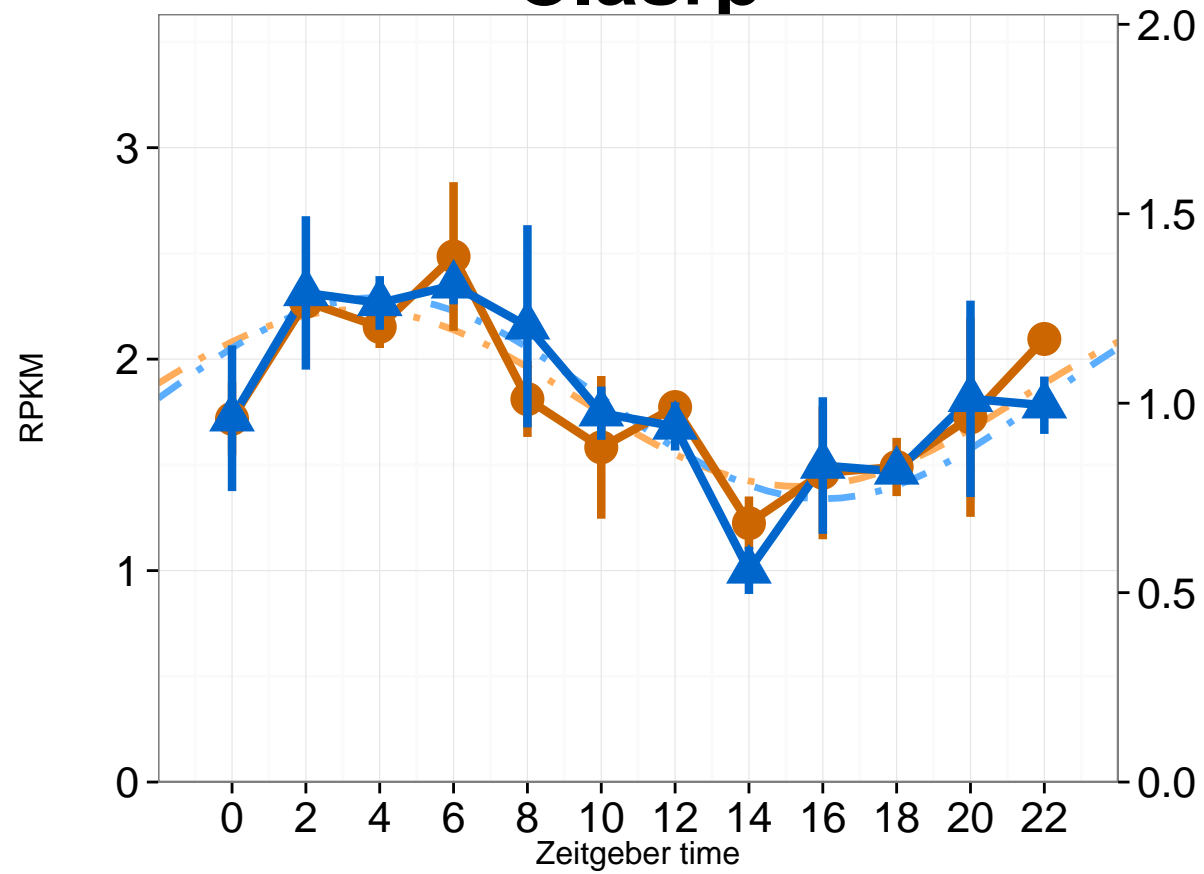

# Clasrp

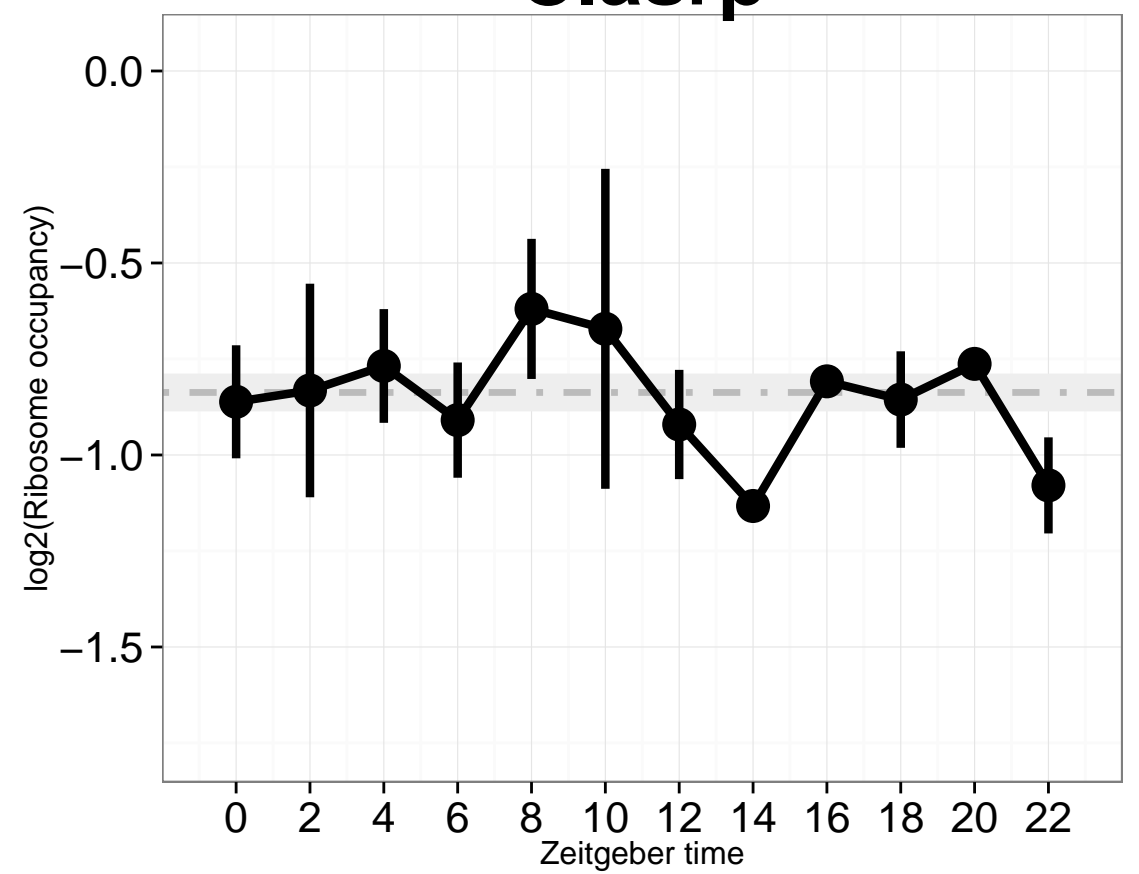

Supplement: SuppDataset_1.zip [file Clasrp_set_D.pdf › Supplemental Dataset 1/D-mRNA_rhythm_translation_rhyth/Clasrp_set_D.pdf]

# Clca1

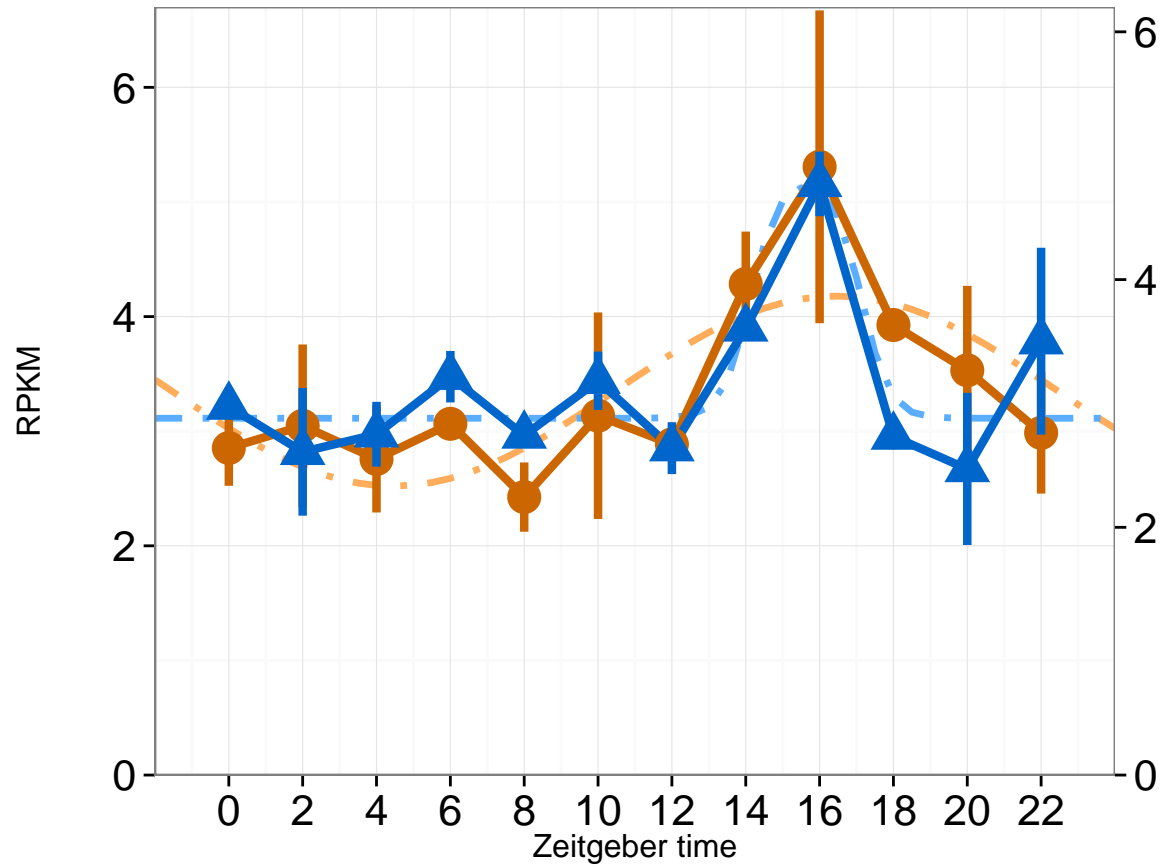

# Clca1

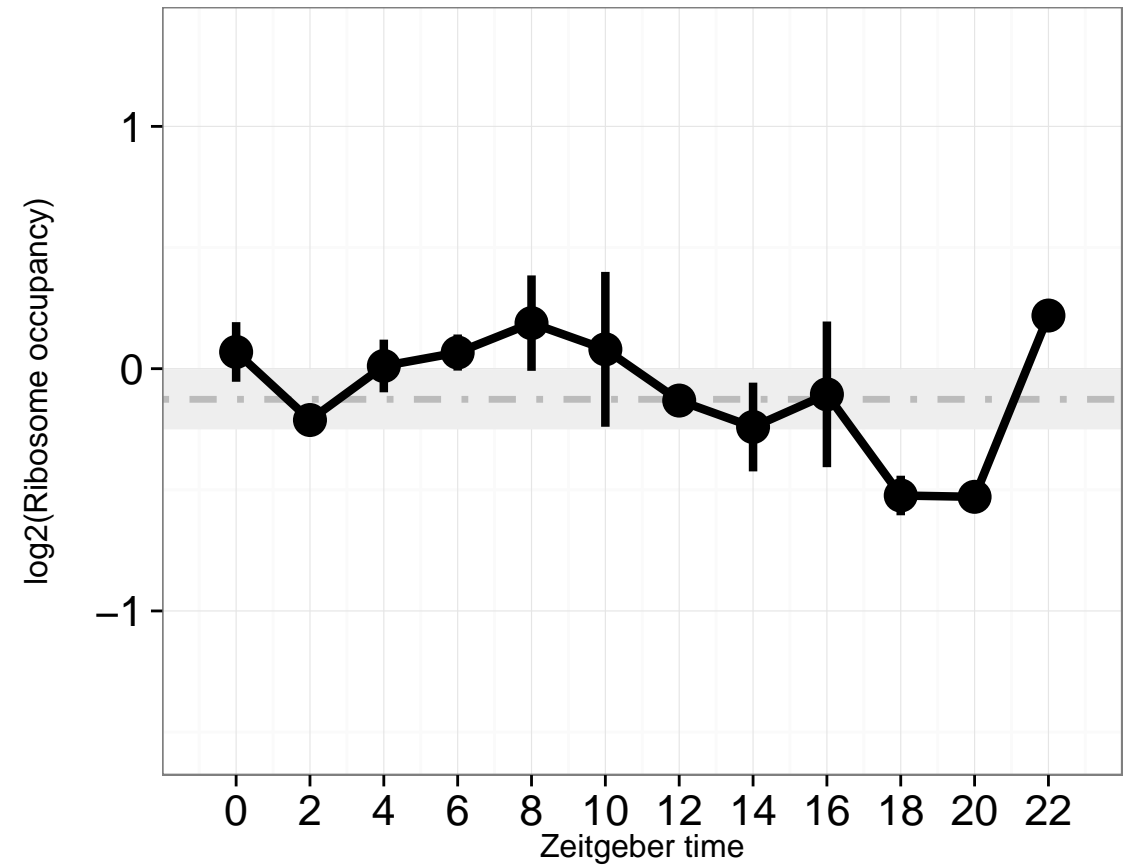

Supplement: SuppDataset_1.zip [file Clca1_set_D.pdf › Supplemental Dataset 1/D-mRNA_rhythm_translation_rhyth/Clca1_set_D.pdf]

## Clcn6

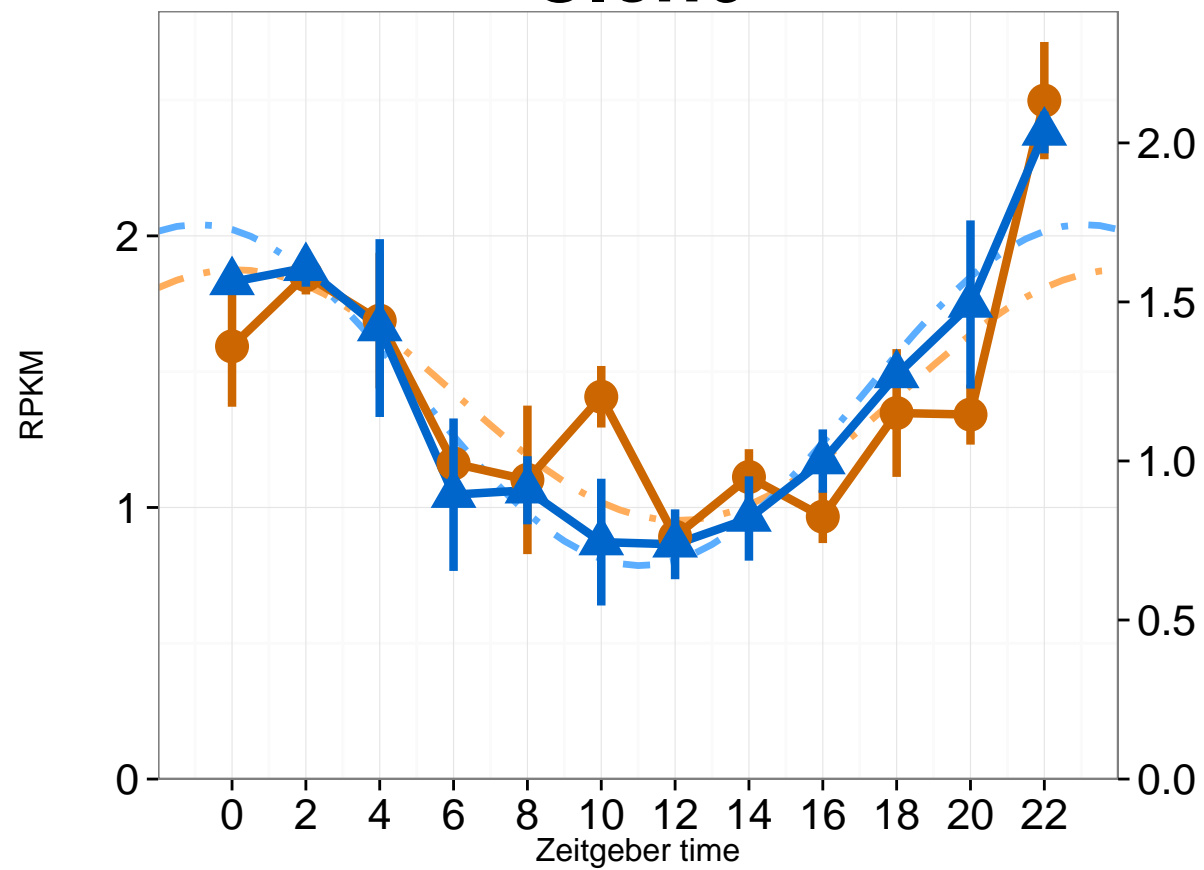

## Clcn6

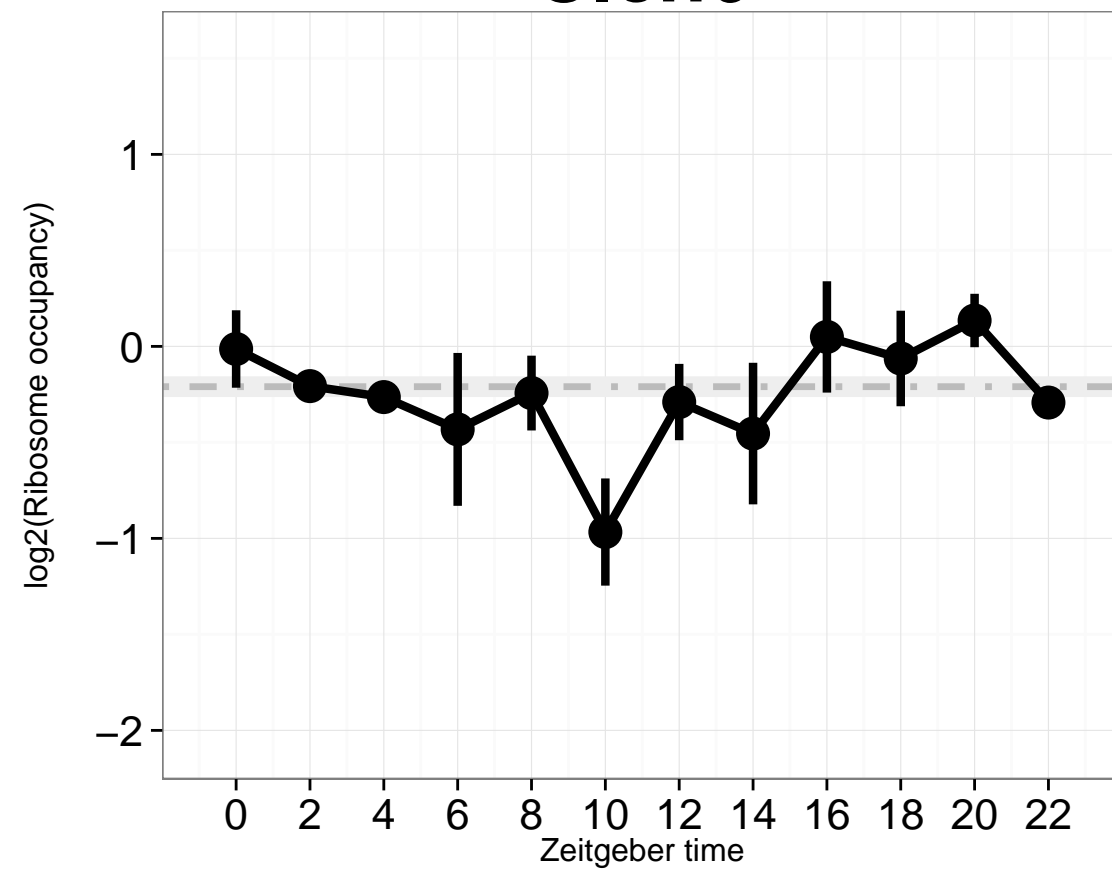

Supplement: SuppDataset_1.zip [file Clcn6_set_D.pdf › Supplemental Dataset 1/D-mRNA_rhythm_translation_rhyth/Clcn6_set_D.pdf]

## Cldn1

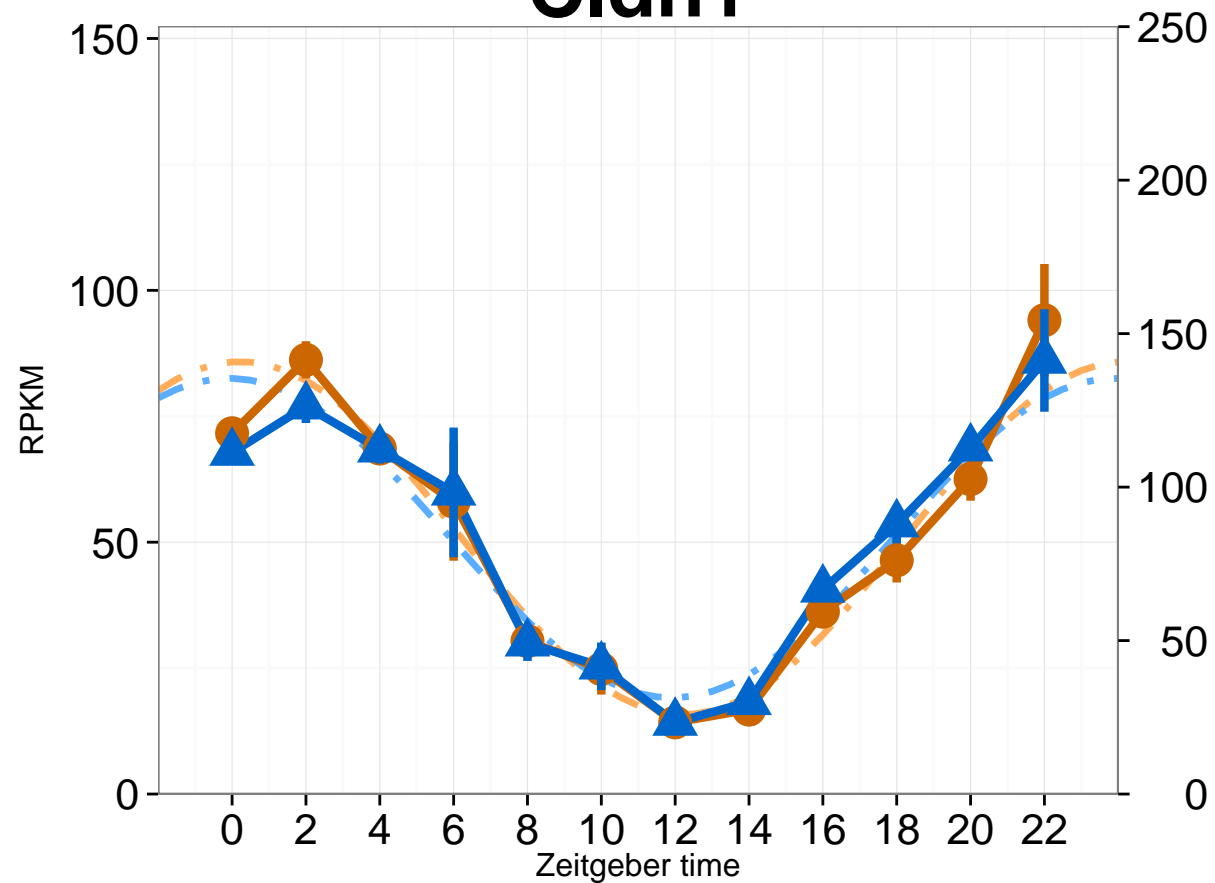

## Cldn1

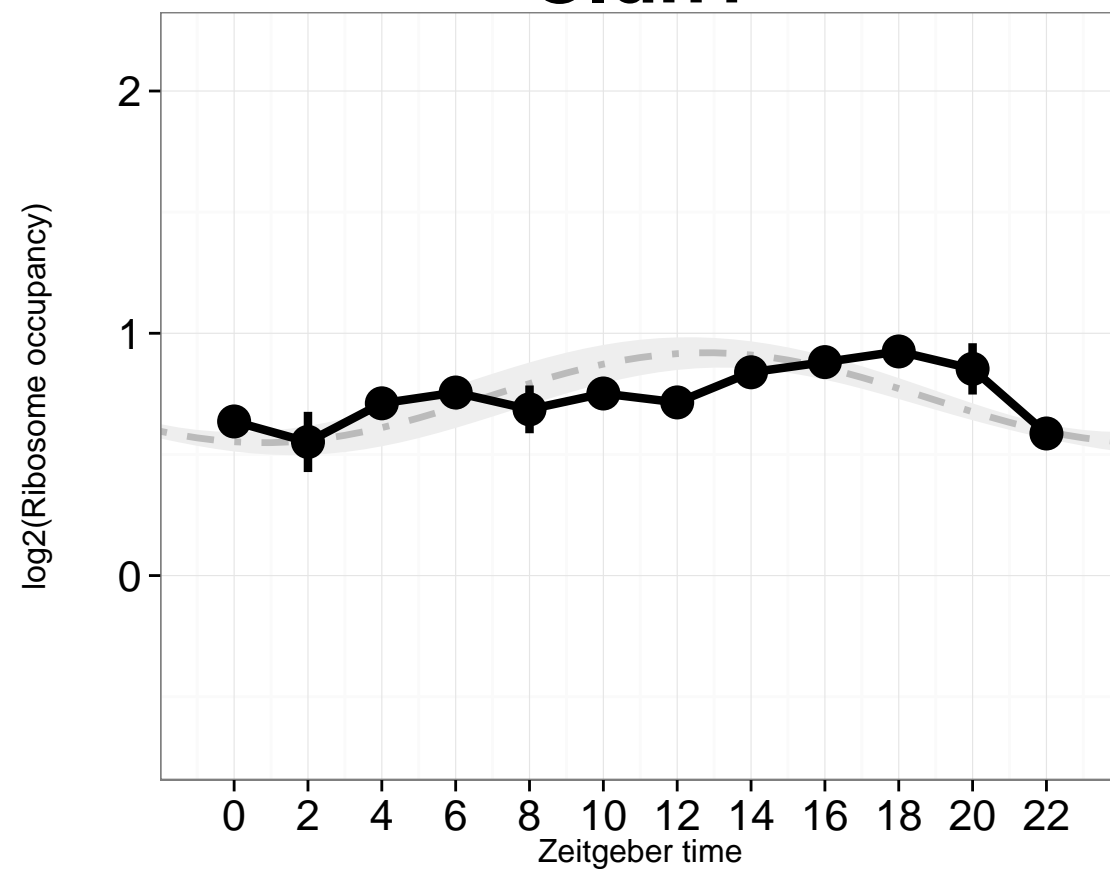

Supplement: SuppDataset_1.zip [file Cldn1_set_D.pdf › Supplemental Dataset 1/D-mRNA_rhythm_translation_rhyth/Cldn1_set_D.pdf]

## Cldn2

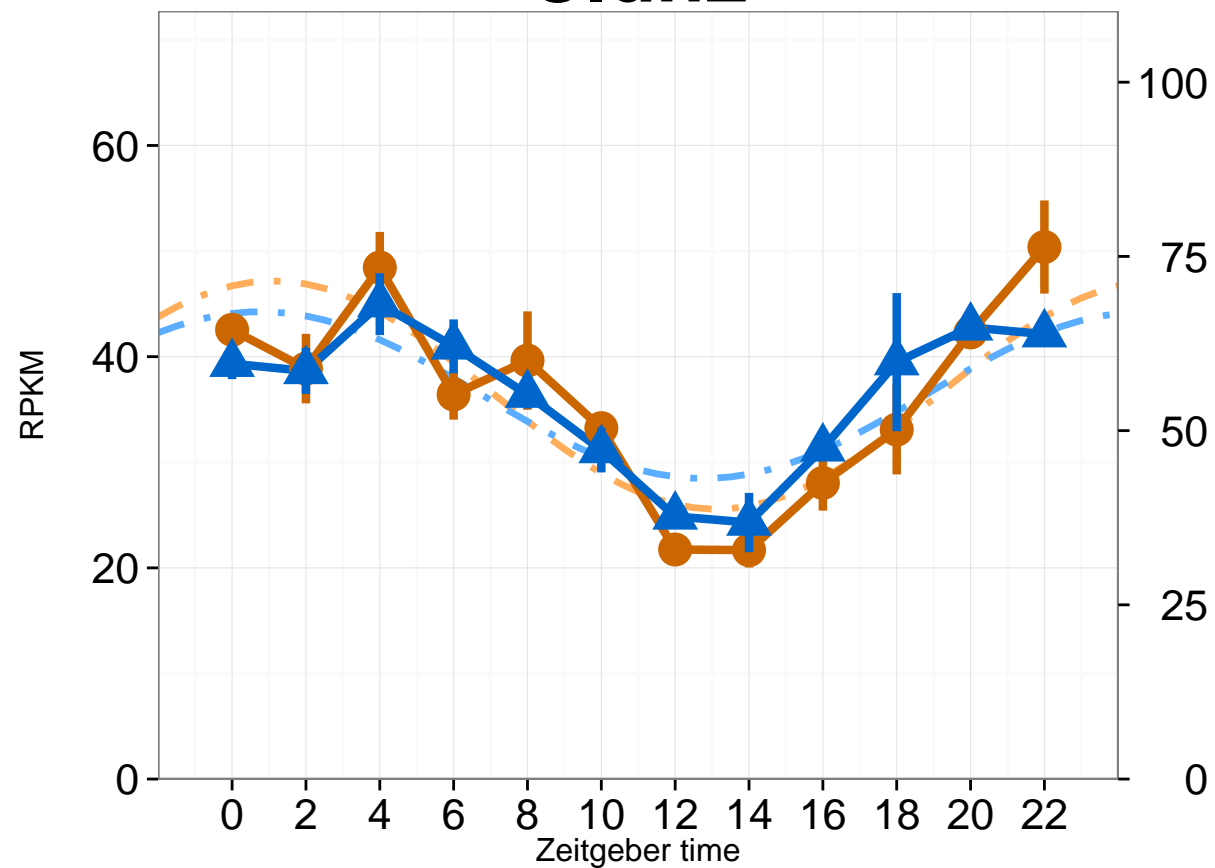

## Cldn2

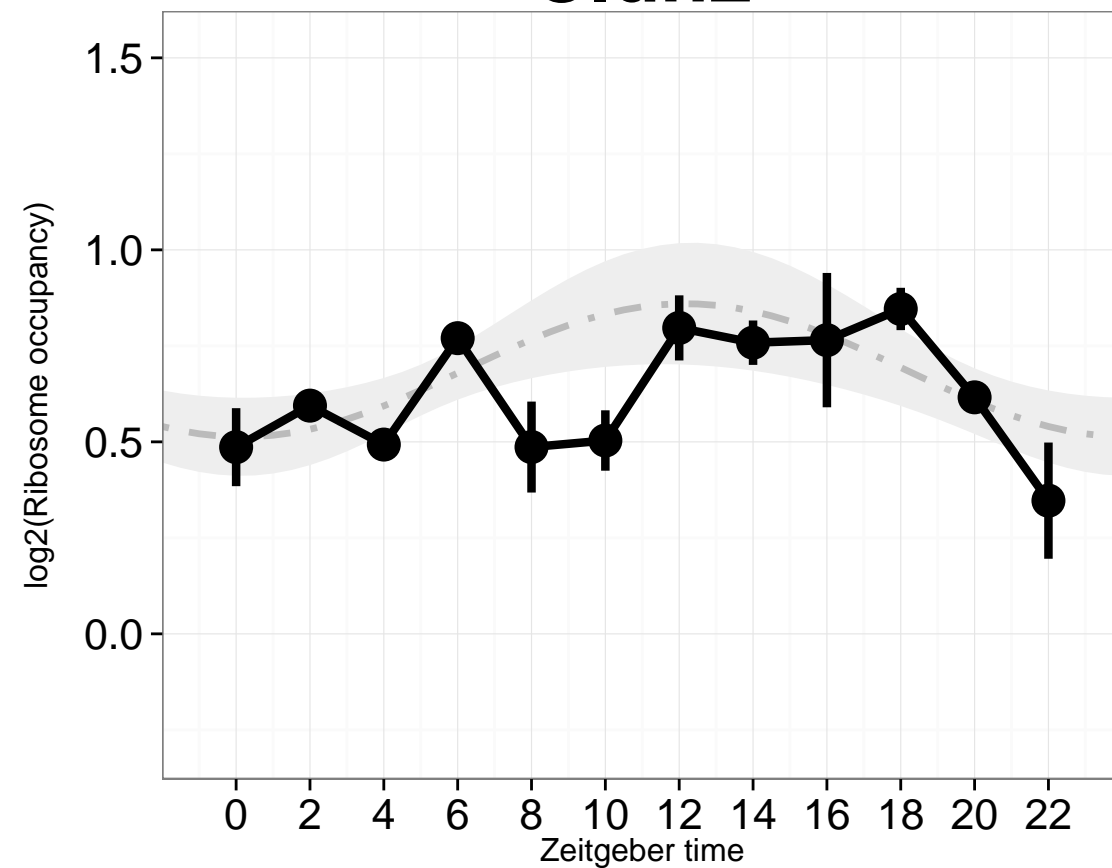

Supplement: SuppDataset_1.zip [file Cldn2_set_D.pdf › Supplemental Dataset 1/D-mRNA_rhythm_translation_rhyth/Cldn2_set_D.pdf]

## Cldn3

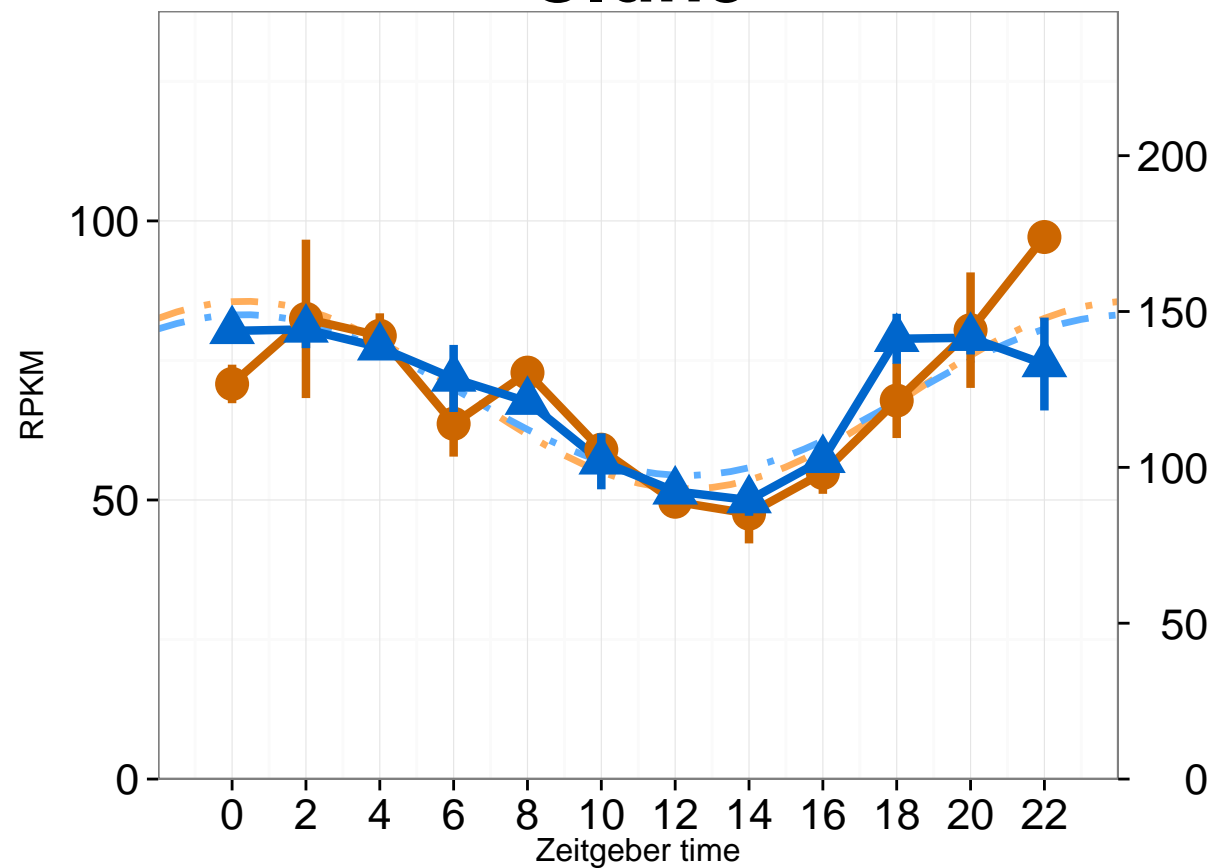

## Cldn3

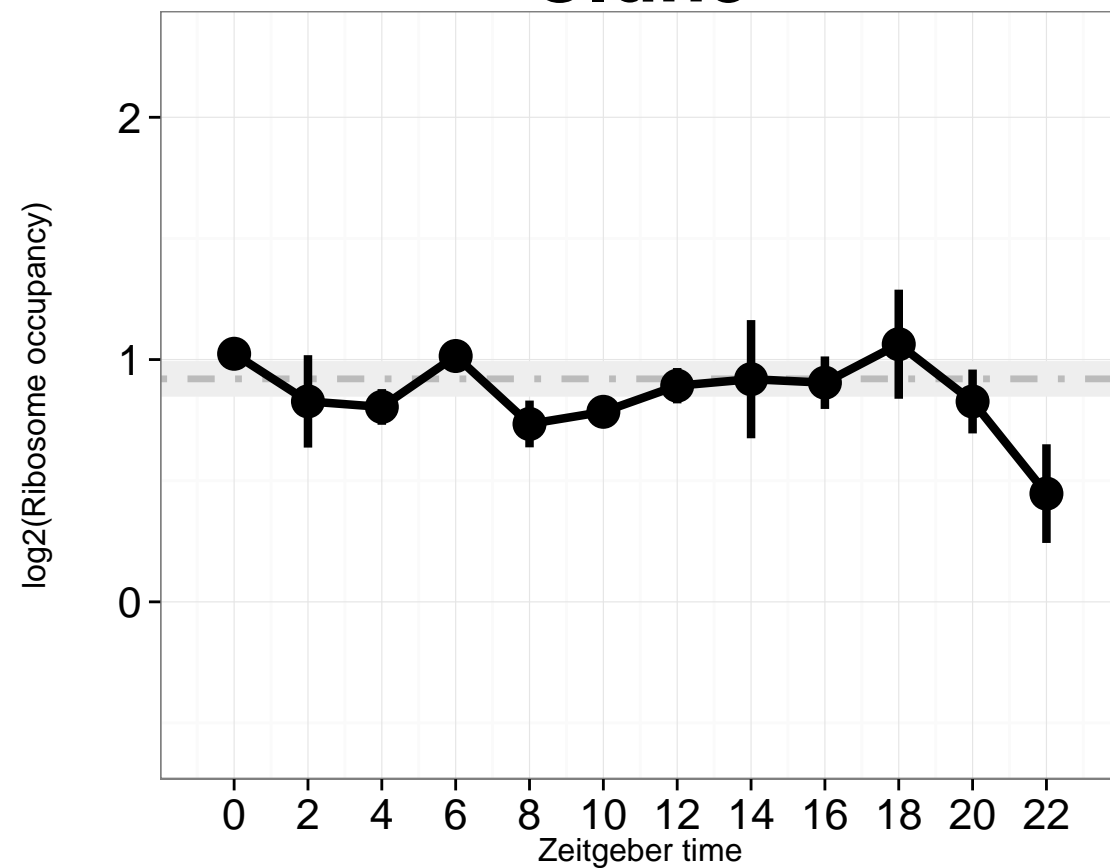

Supplement: SuppDataset_1.zip [file Cldn3_set_D.pdf › Supplemental Dataset 1/D-mRNA_rhythm_translation_rhyth/Cldn3_set_D.pdf]

# Clec2h

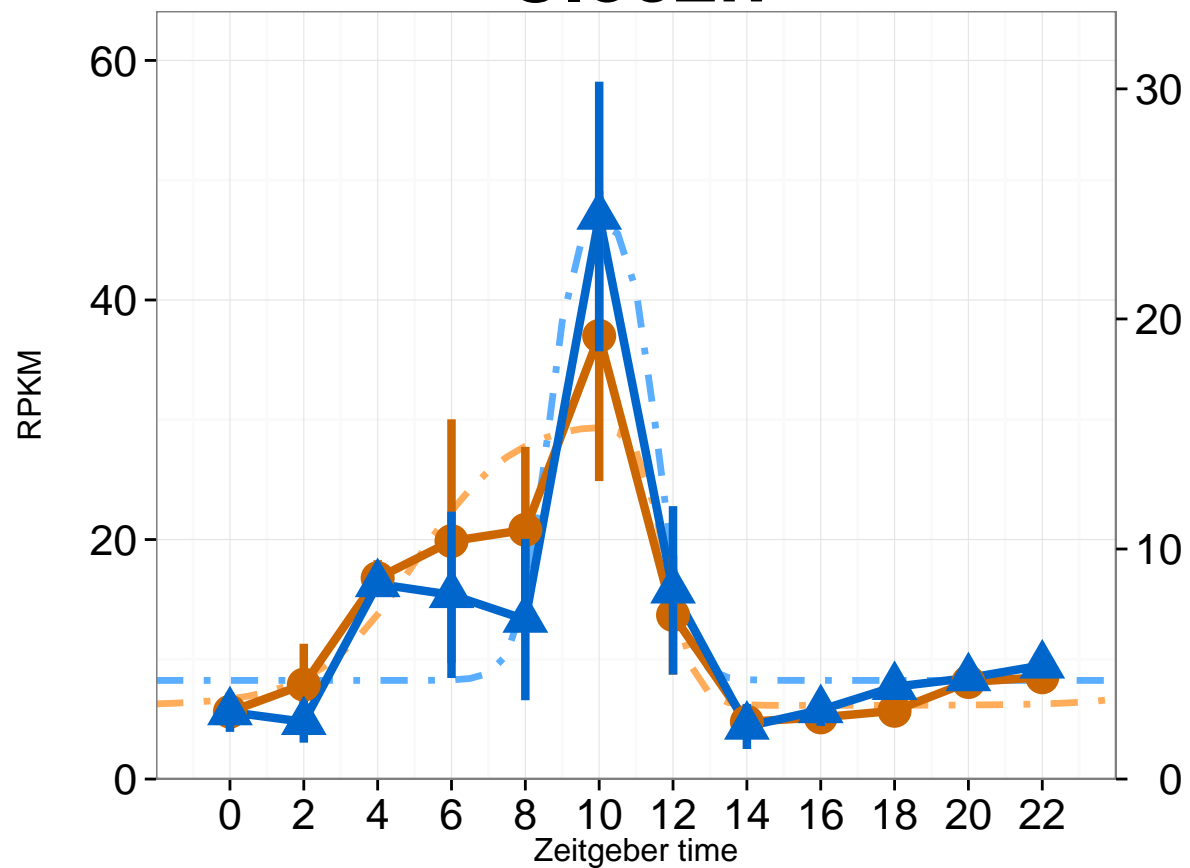

# Clec2h

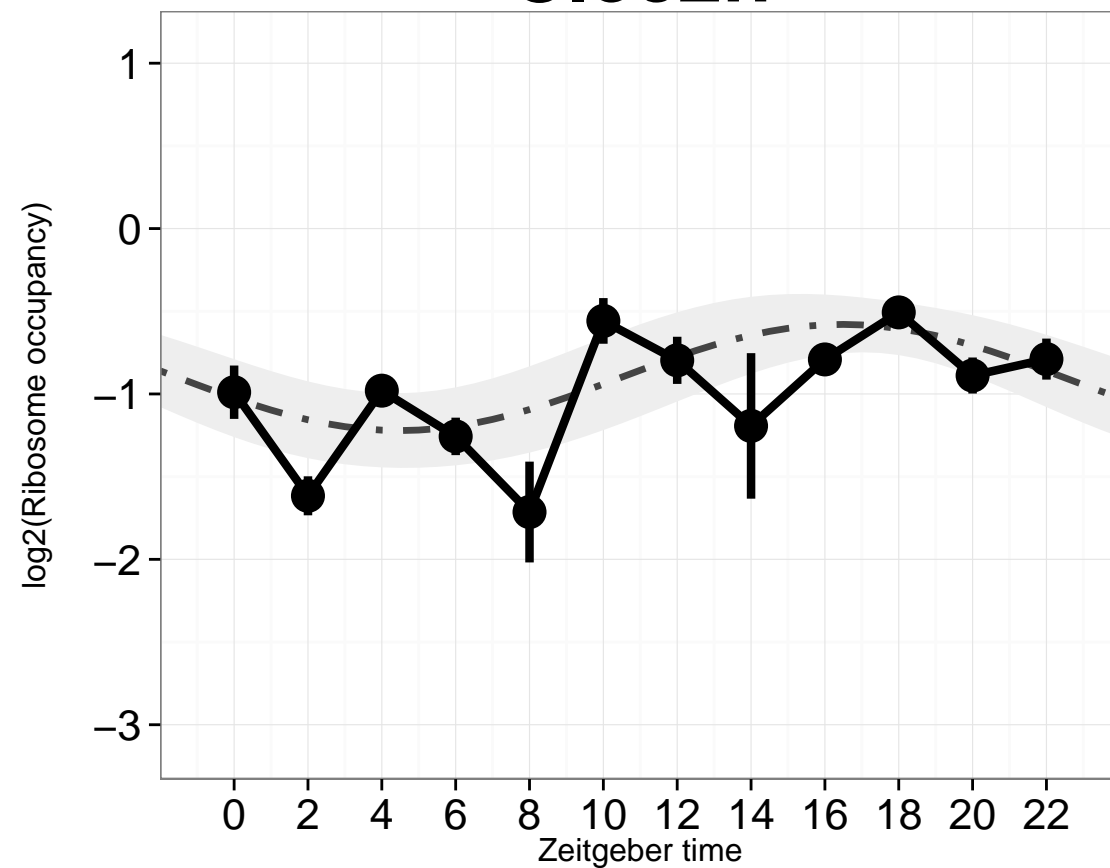

Supplement: SuppDataset_1.zip [file Clec2h_set_D.pdf › Supplemental Dataset 1/D-mRNA_rhythm_translation_rhyth/Clec2h_set_D.pdf]

# Clip2

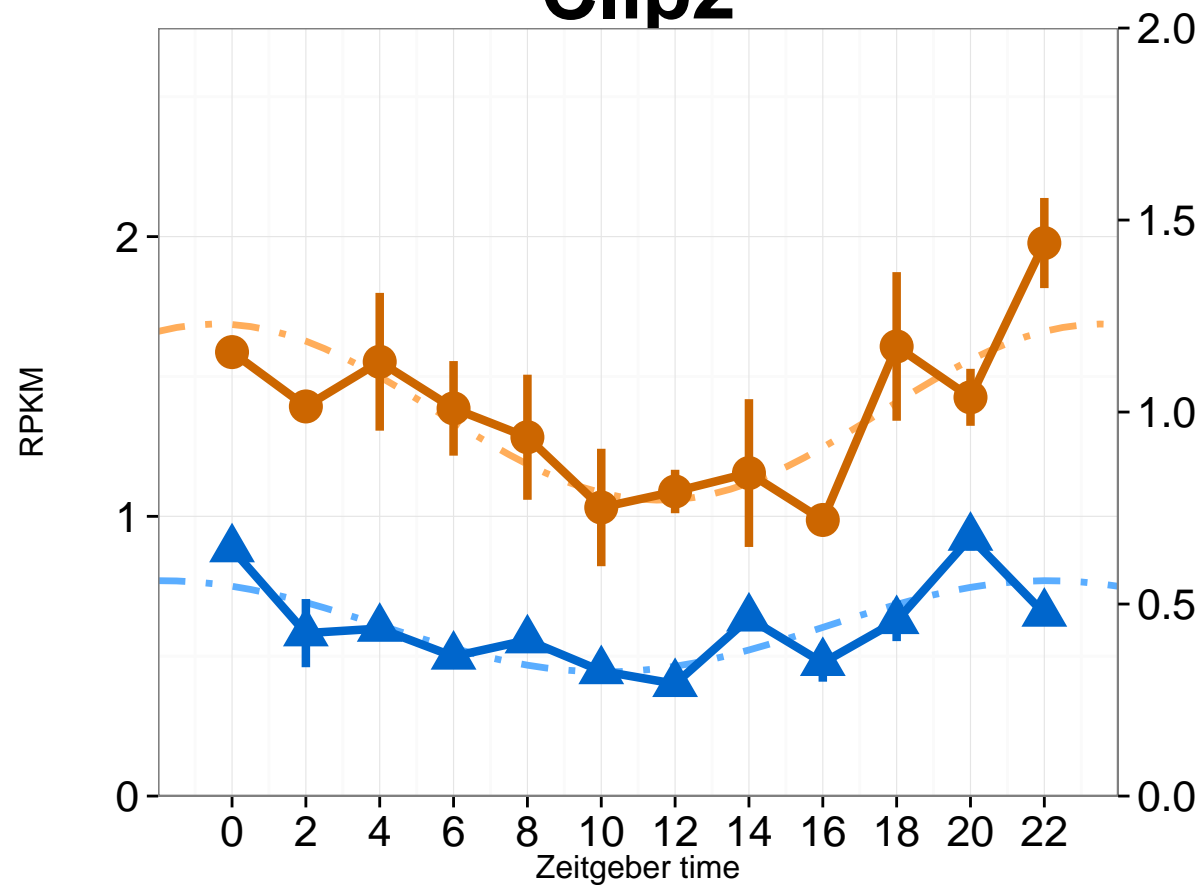

# Clip2

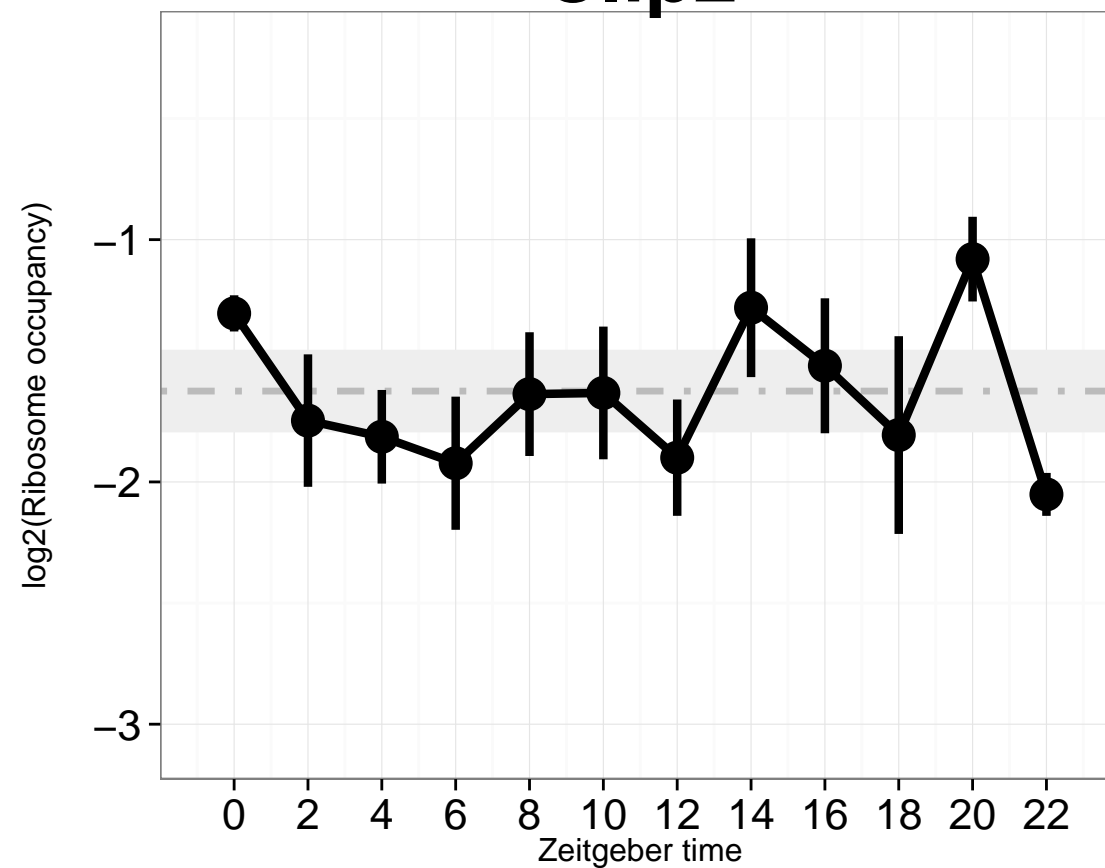

Supplement: SuppDataset_1.zip [file Clip2_set_D.pdf › Supplemental Dataset 1/D-mRNA_rhythm_translation_rhyth/Clip2_set_D.pdf]

# Clnn

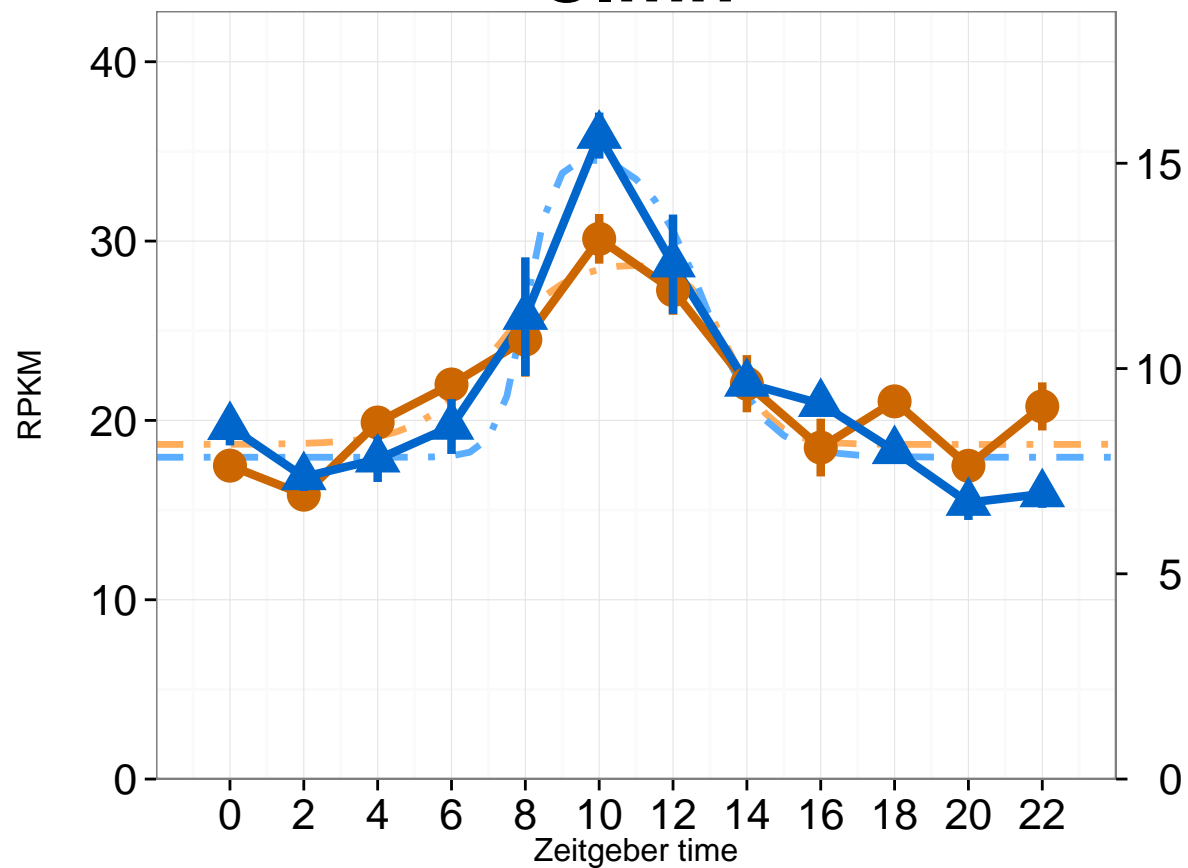

# Clnn

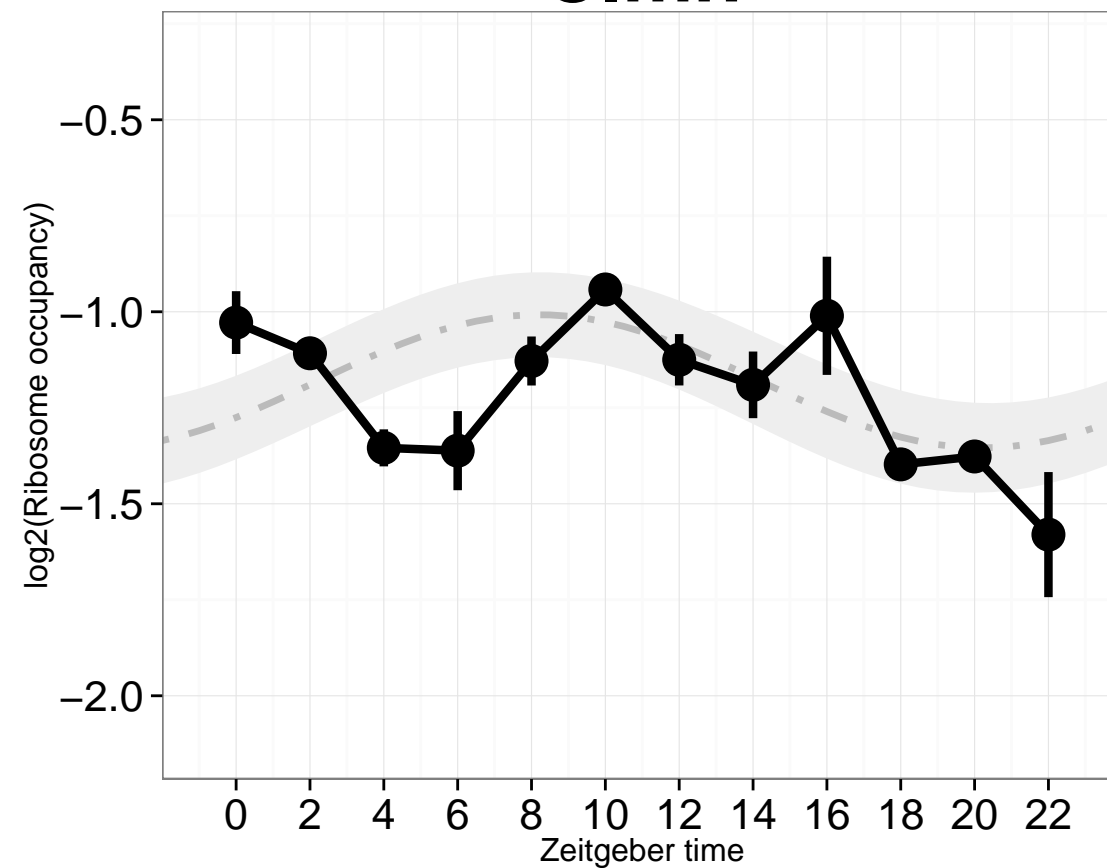

Supplement: SuppDataset_1.zip [file Clmn_set_D.pdf › Supplemental Dataset 1/D-mRNA_rhythm_translation_rhyth/Clmn_set_D.pdf]

## Clock

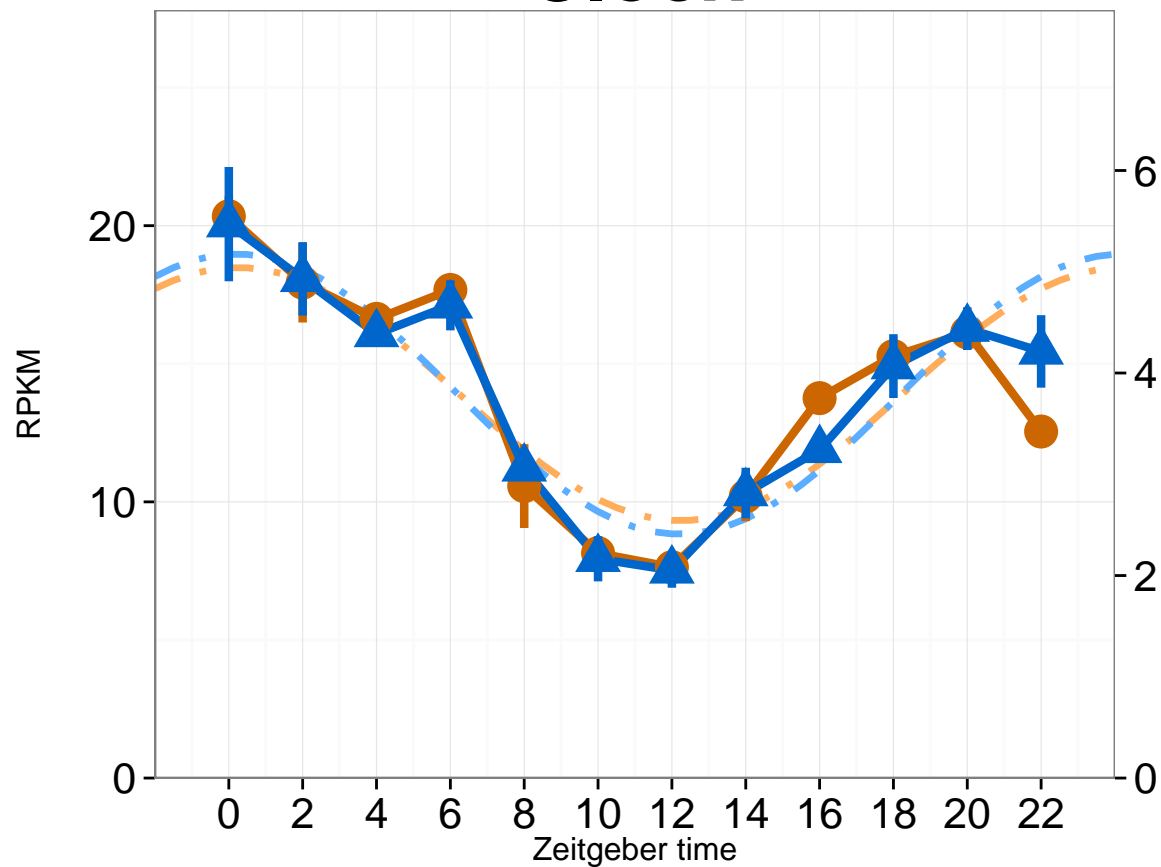

## Clock

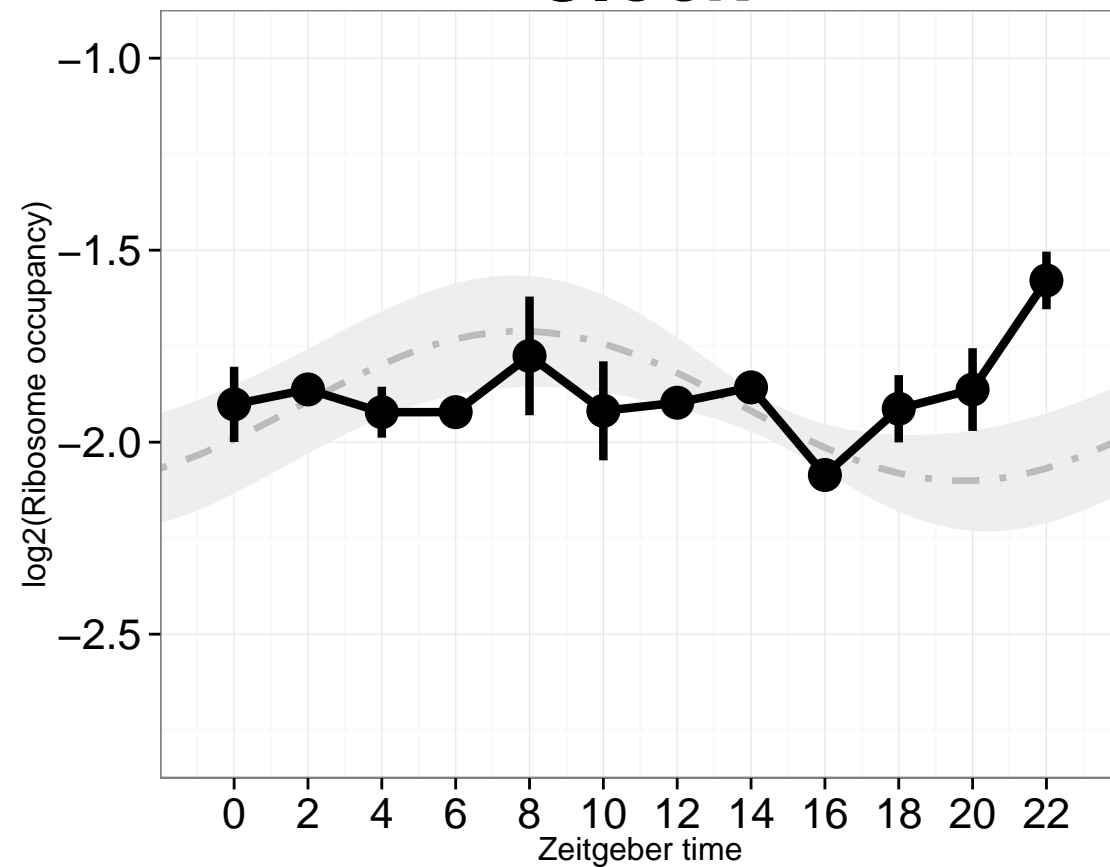

Supplement: SuppDataset_1.zip [file Clock_set_D.pdf › Supplemental Dataset 1/D-mRNA_rhythm_translation_rhyth/Clock_set_D.pdf]

## Clpx

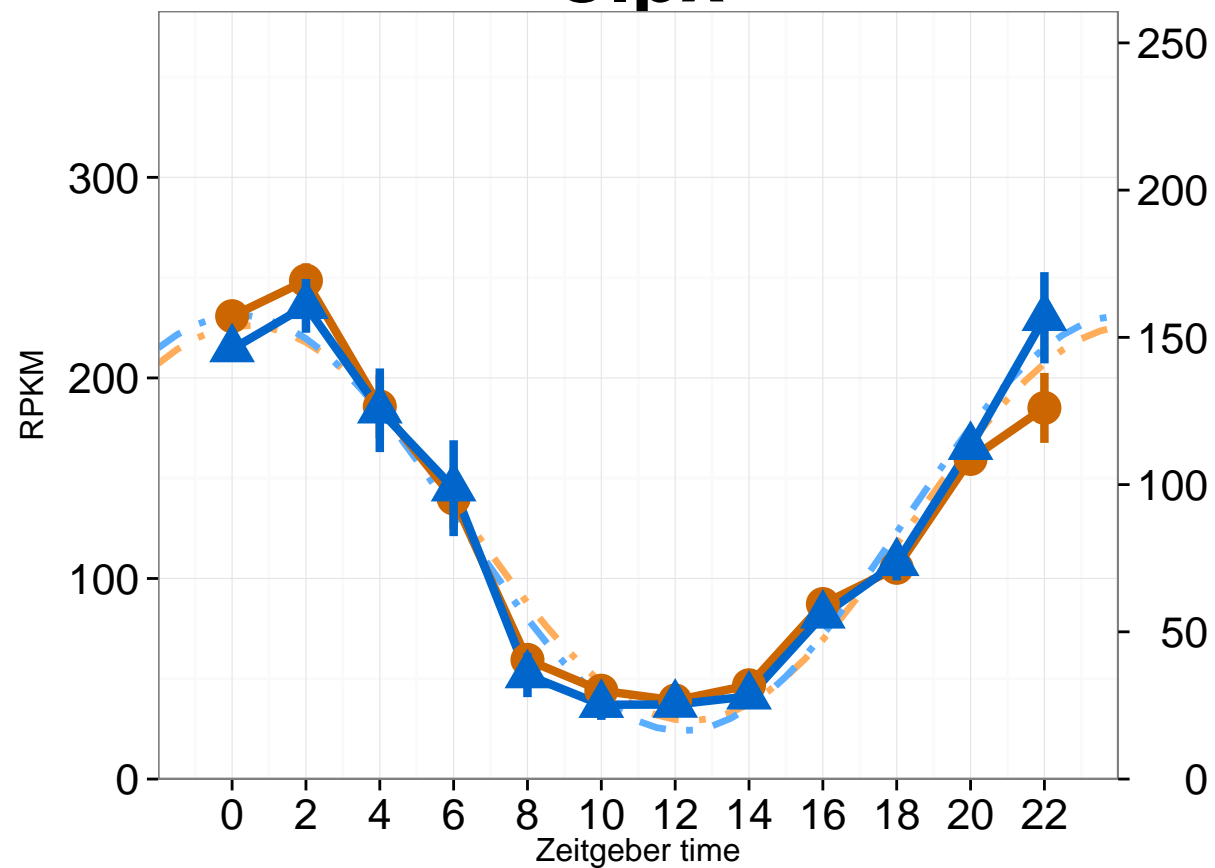

## Clpx

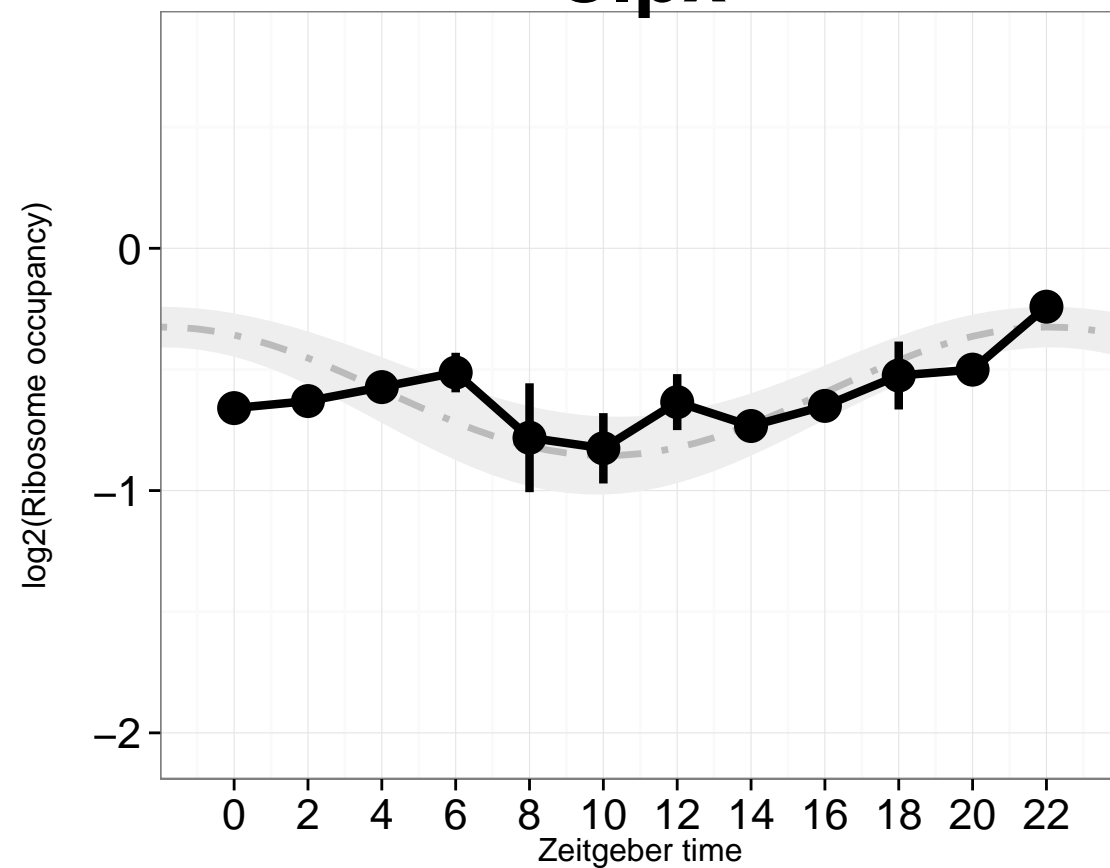

Supplement: SuppDataset_1.zip [file Clpx_set_D.pdf › Supplemental Dataset 1/D-mRNA_rhythm_translation_rhyth/Clpx_set_D.pdf]

# Clstn3

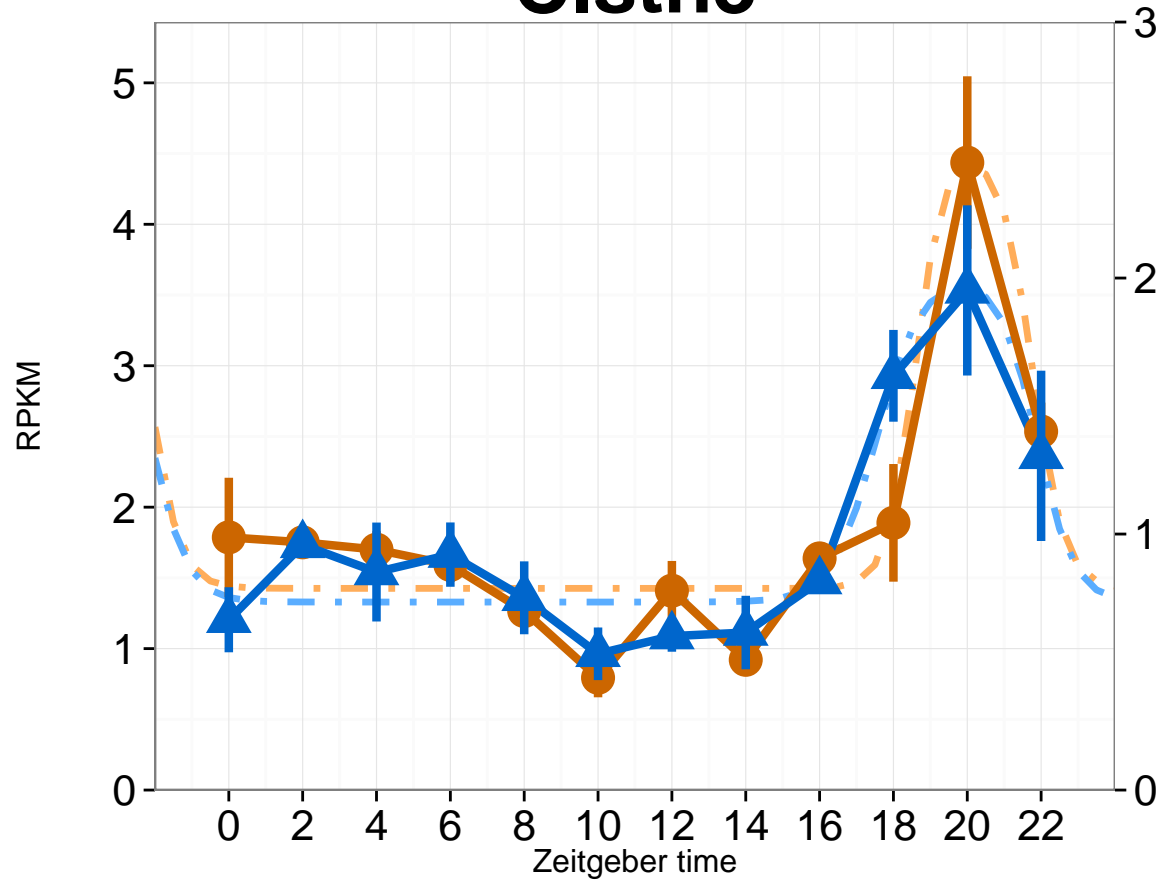

# Clstn3

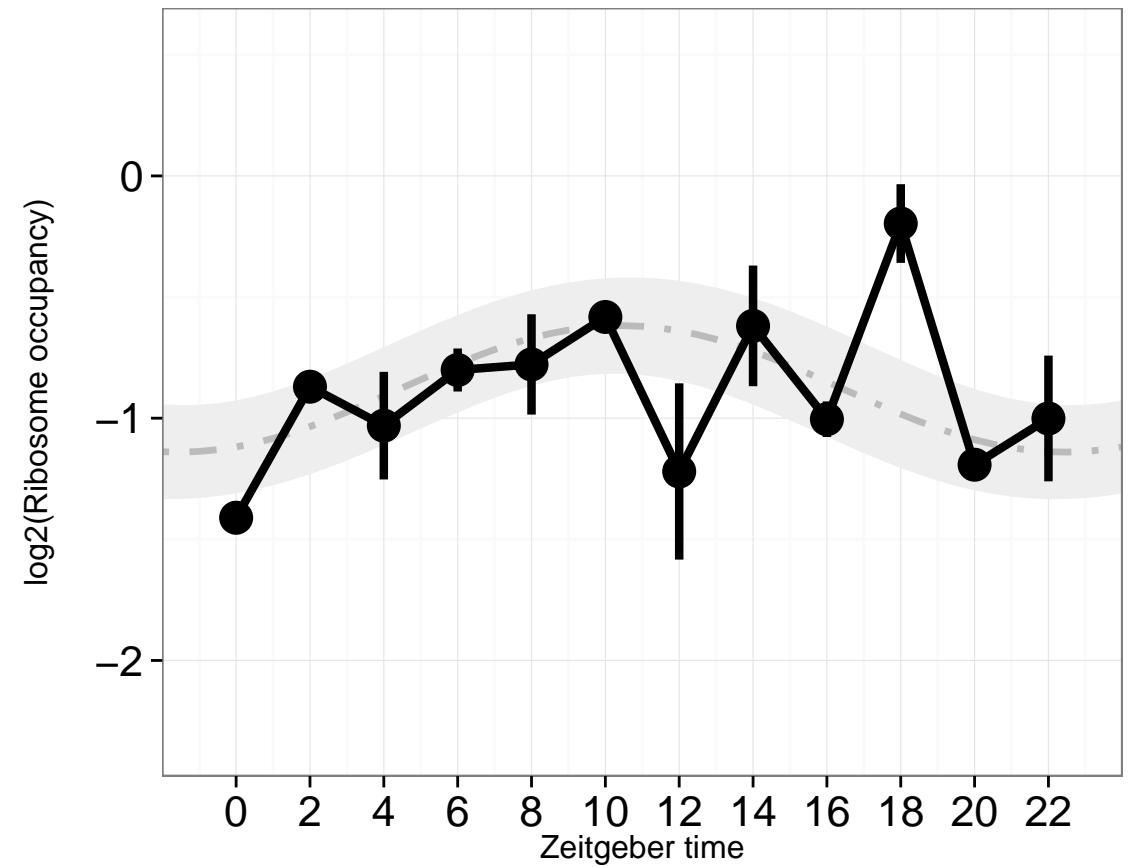

Supplement: SuppDataset_1.zip [file Clstn3_set_D.pdf › Supplemental Dataset 1/D-mRNA_rhythm_translation_rhyth/Clstn3_set_D.pdf]

## Cluh

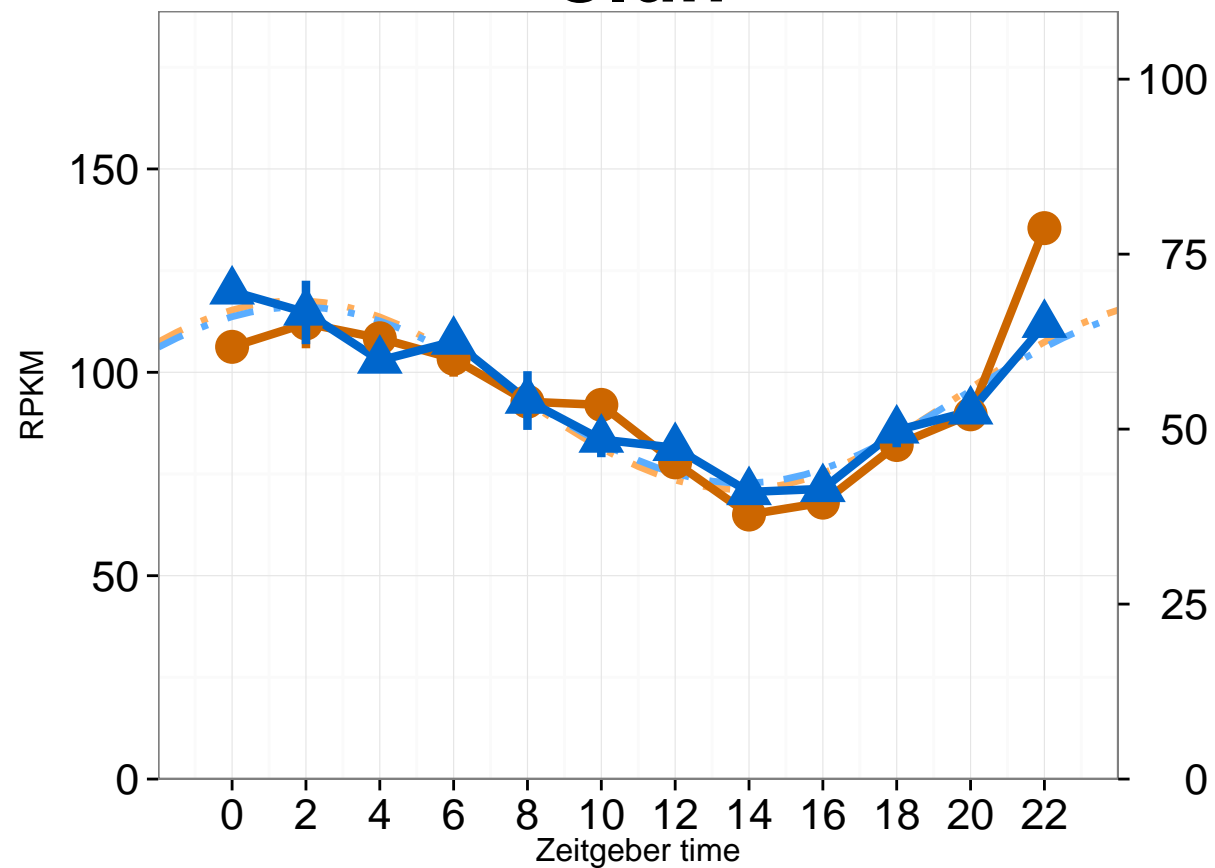

## Cluh

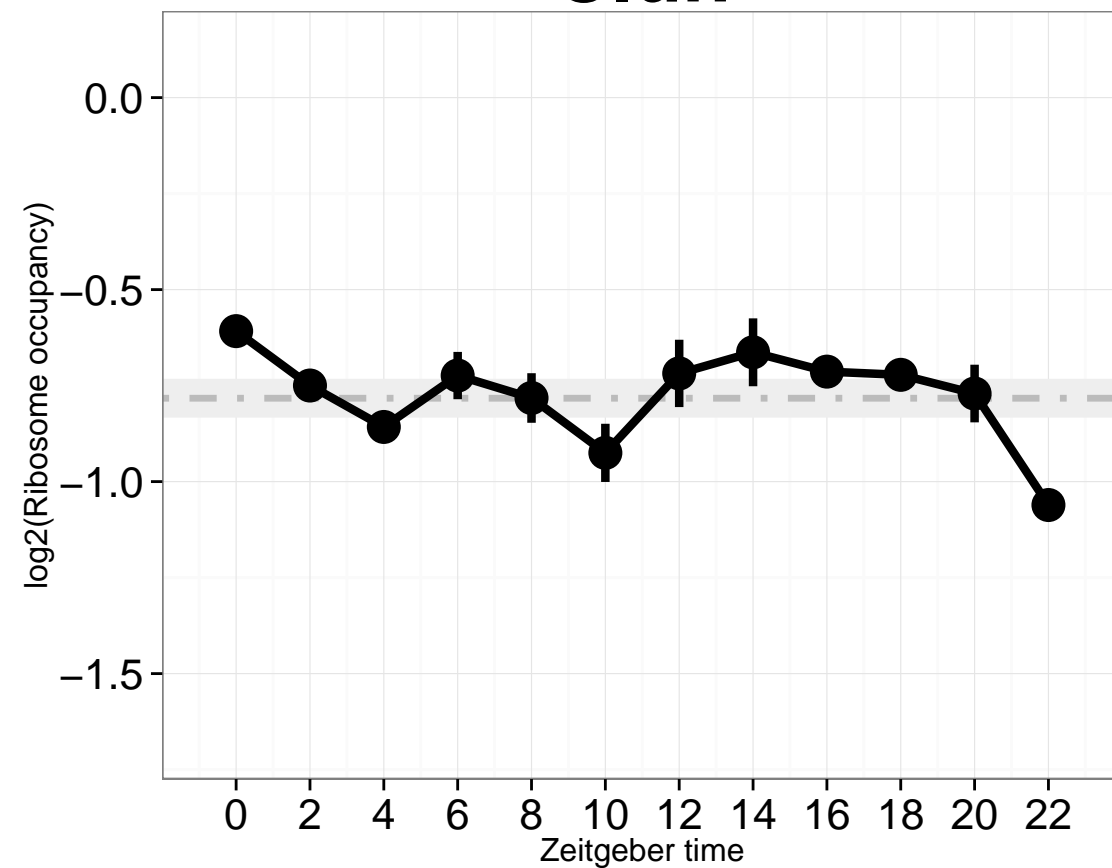

Supplement: SuppDataset_1.zip [file Cluh_set_D.pdf › Supplemental Dataset 1/D-mRNA_rhythm_translation_rhyth/Cluh_set_D.pdf]

## Cml5

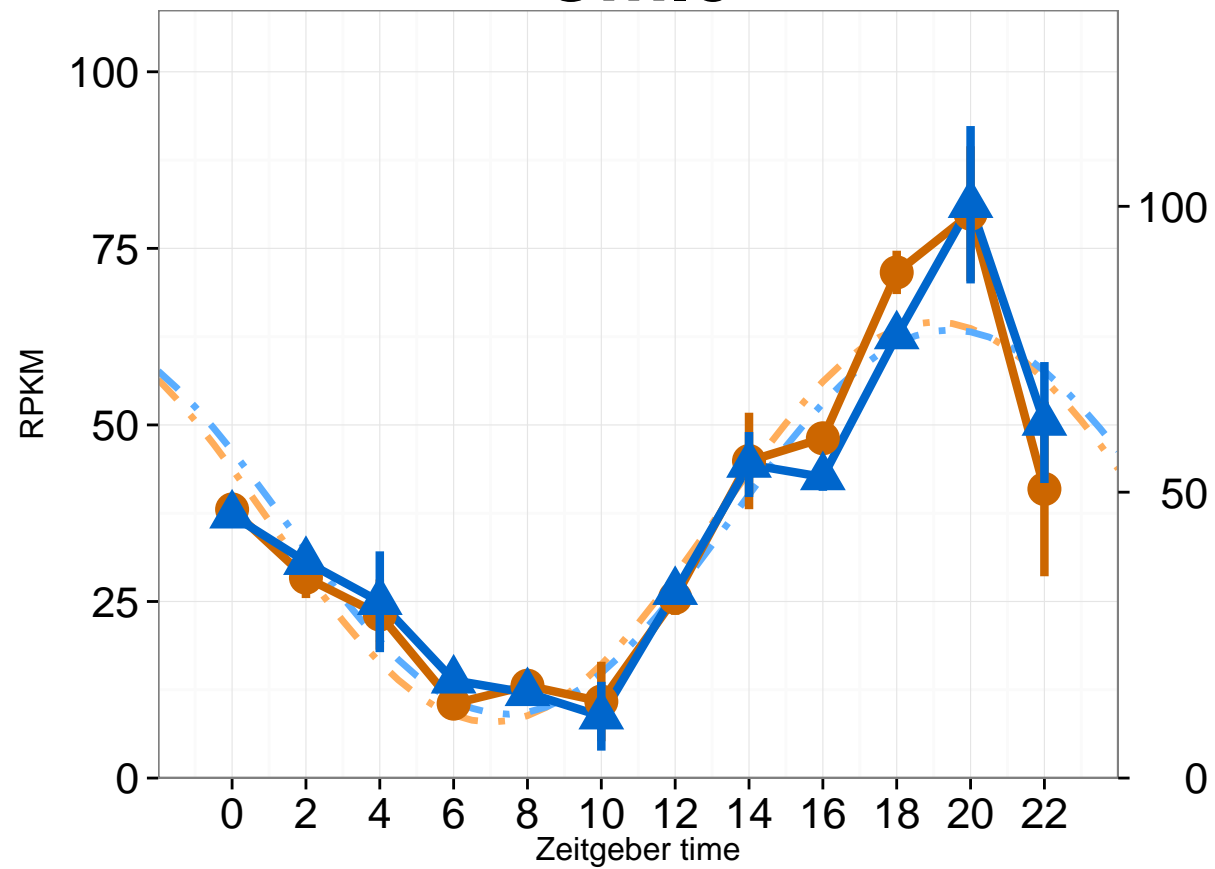

## Cml5

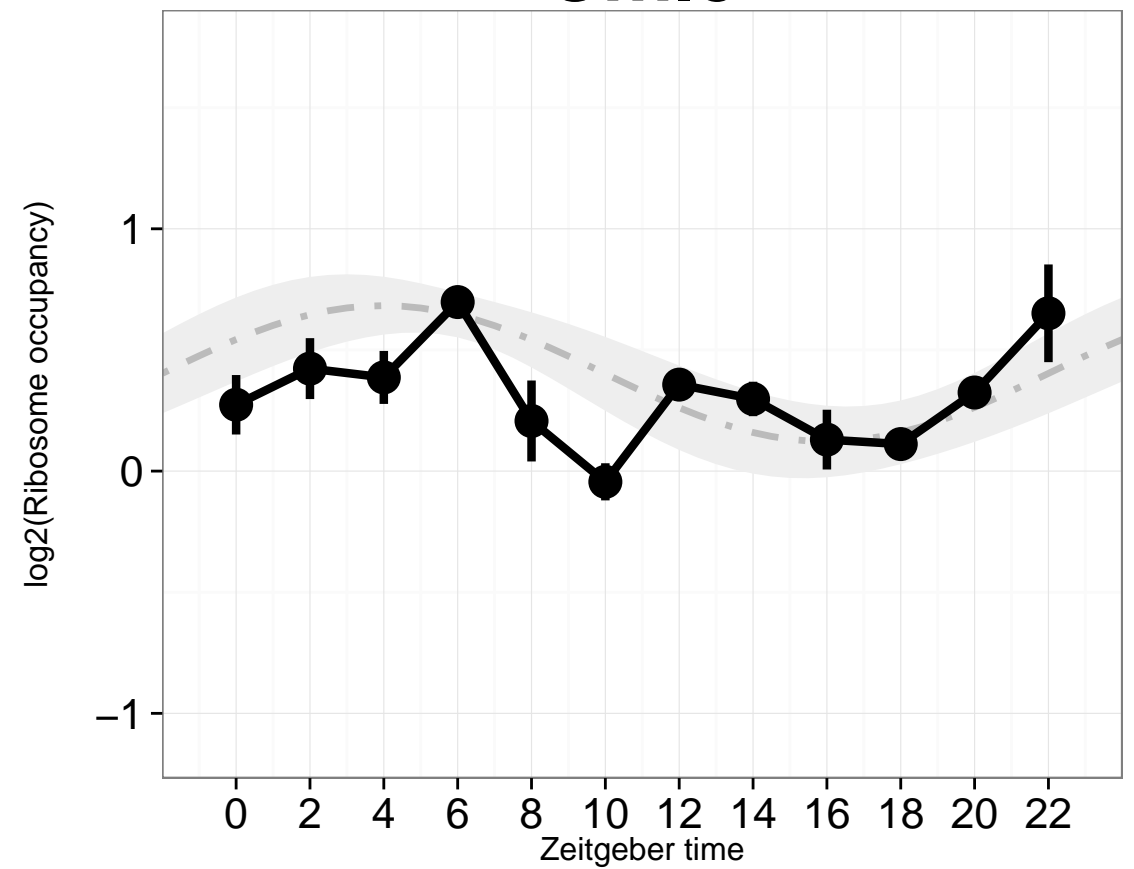

Supplement: SuppDataset_1.zip [file Cml5_set_D.pdf › Supplemental Dataset 1/D-mRNA_rhythm_translation_rhyth/Cml5_set_D.pdf]

## Cmpk2

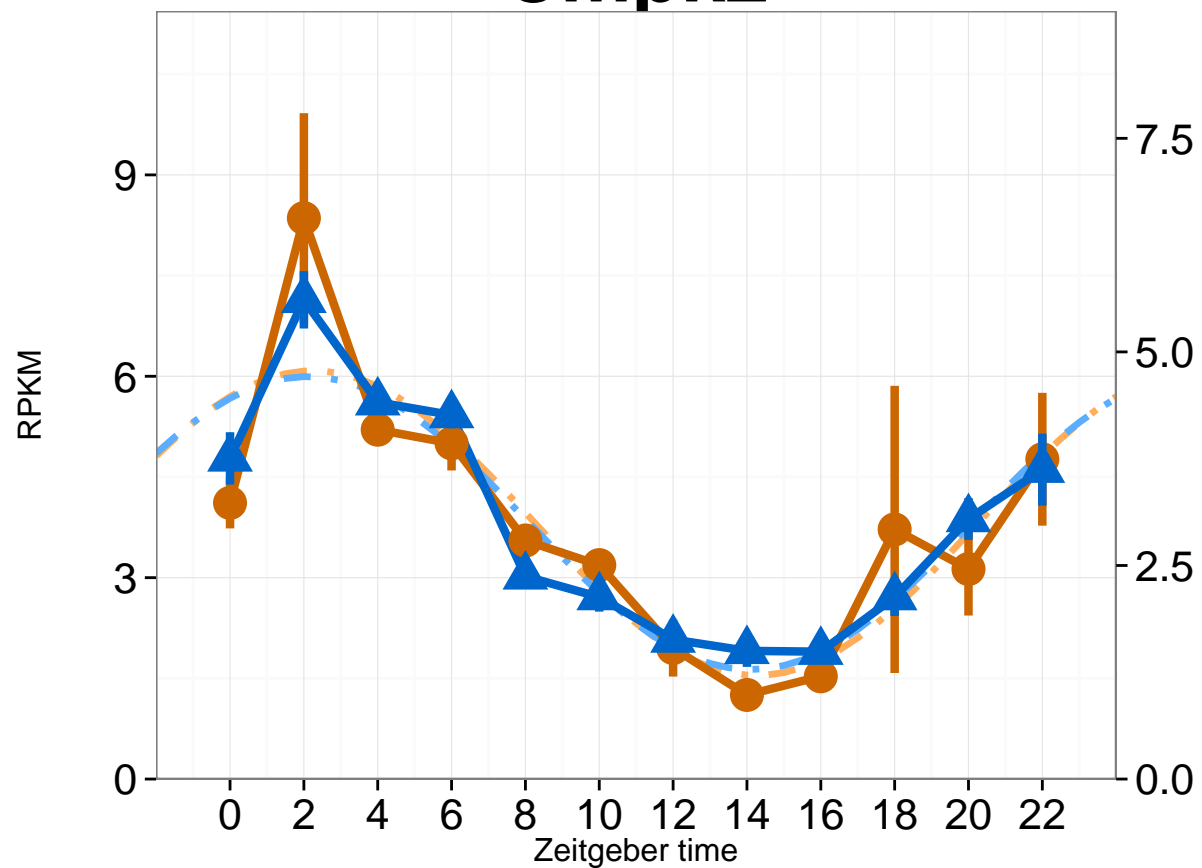

## Cmpk2

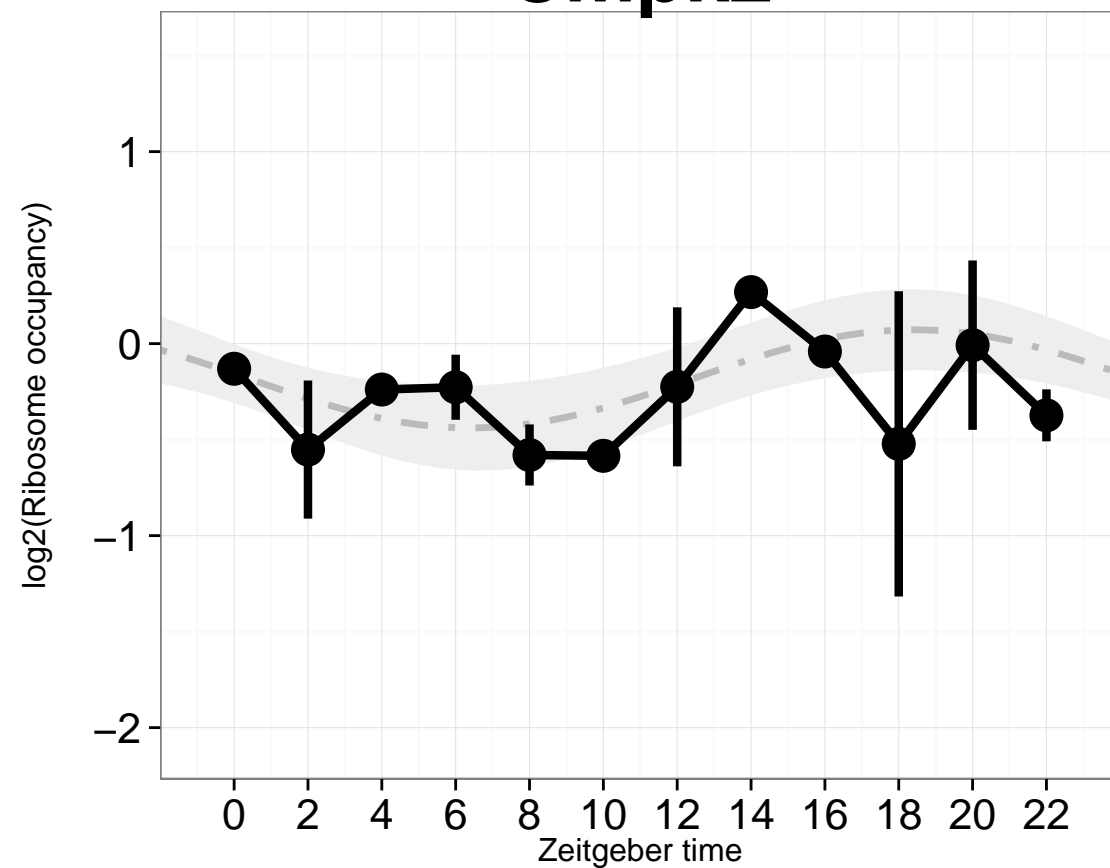

Supplement: SuppDataset_1.zip [file Cmpk2_set_D.pdf › Supplemental Dataset 1/D-mRNA_rhythm_translation_rhyth/Cmpk2_set_D.pdf]

## Cnksr3

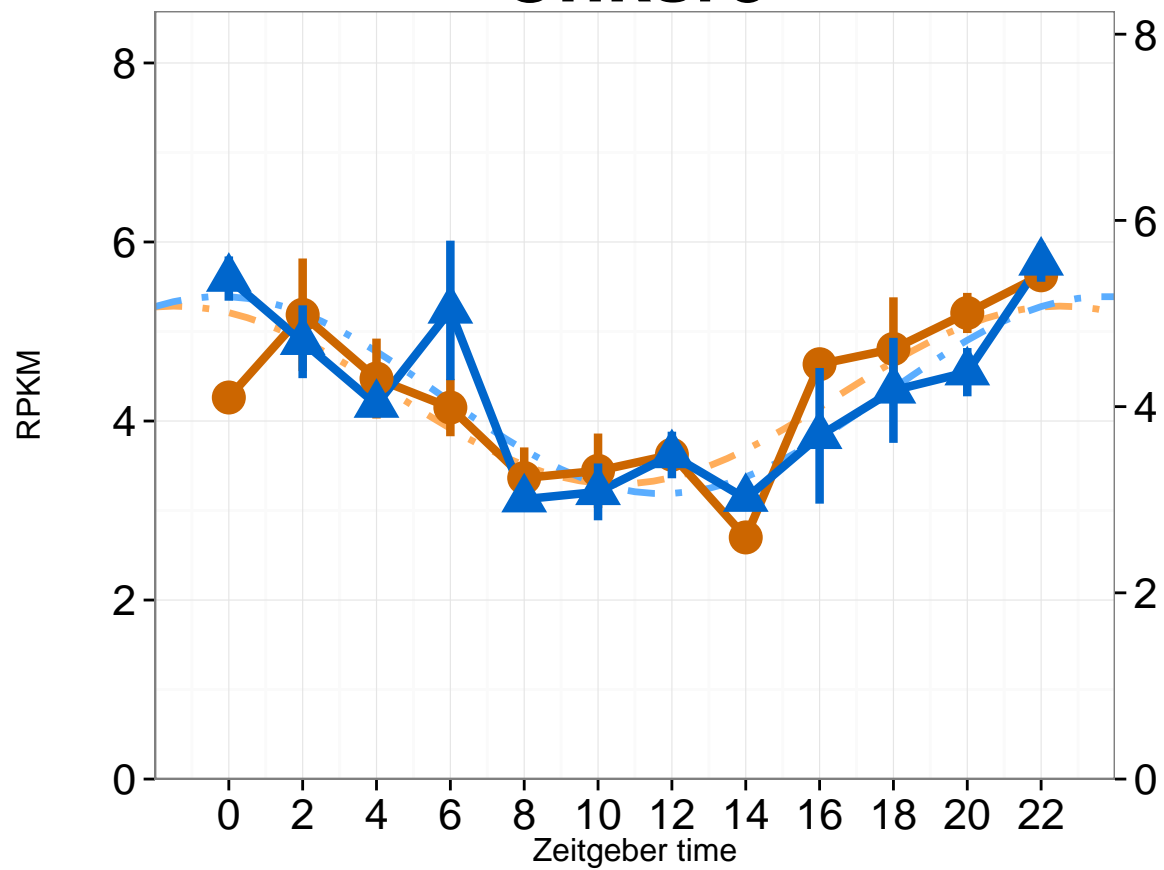

## Cnksr3

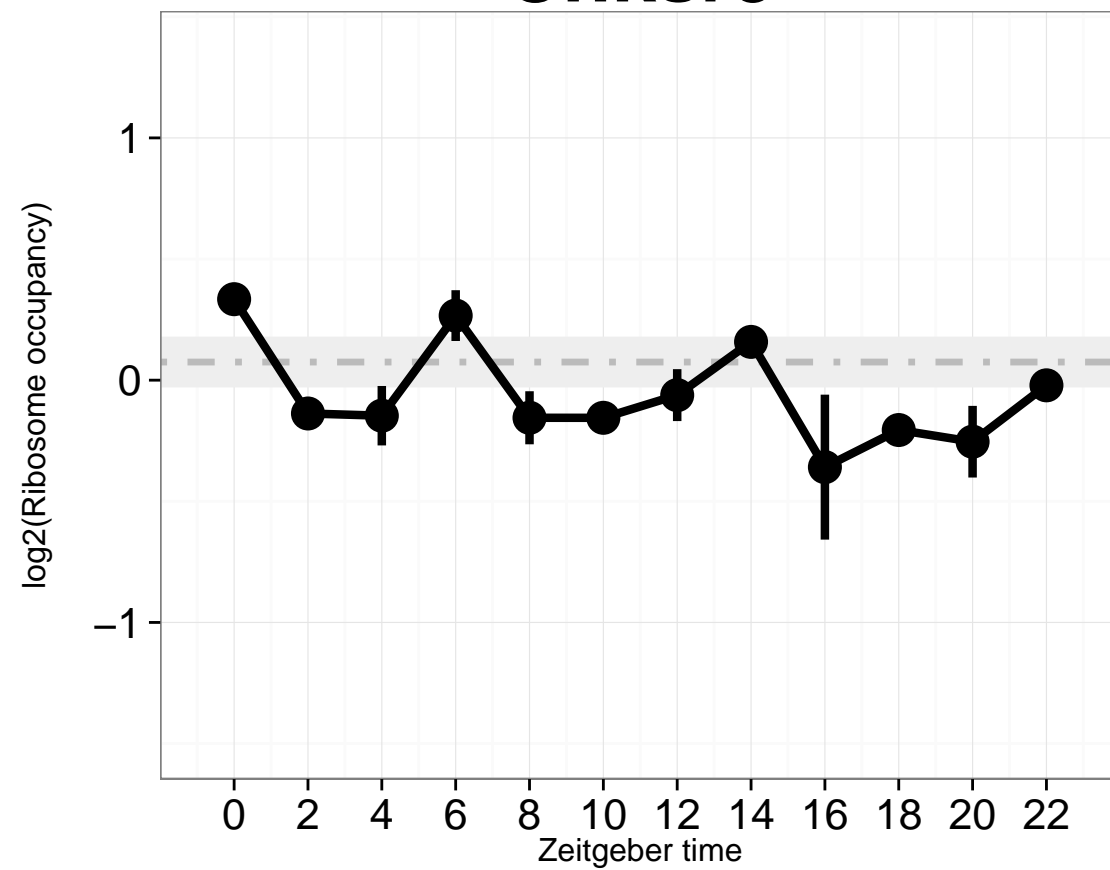

Supplement: SuppDataset_1.zip [file Cnksr3_set_D.pdf › Supplemental Dataset 1/D-mRNA_rhythm_translation_rhyth/Cnksr3_set_D.pdf]

## Cnnm3

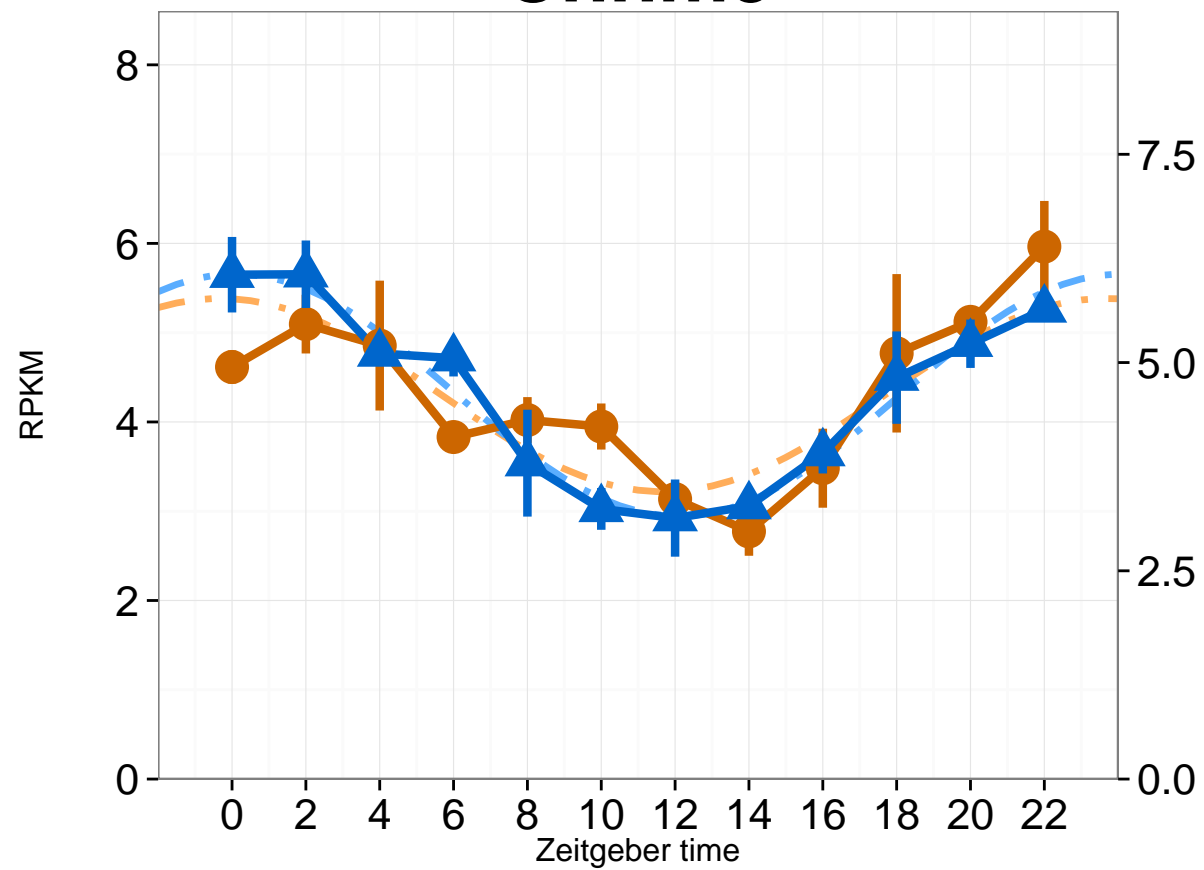

## Cnnm3

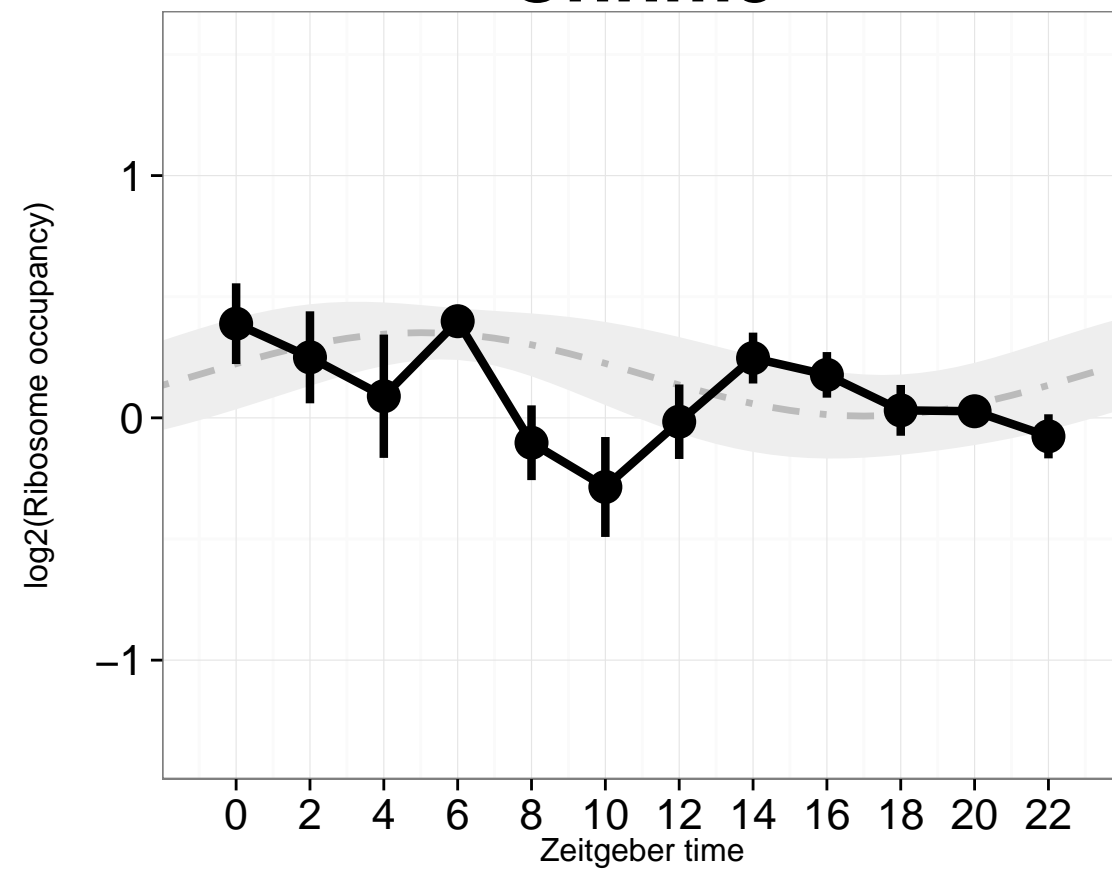

Supplement: SuppDataset_1.zip [file Cnnm3_set_D.pdf › Supplemental Dataset 1/D-mRNA_rhythm_translation_rhyth/Cnnm3_set_D.pdf]

## Cnnm4

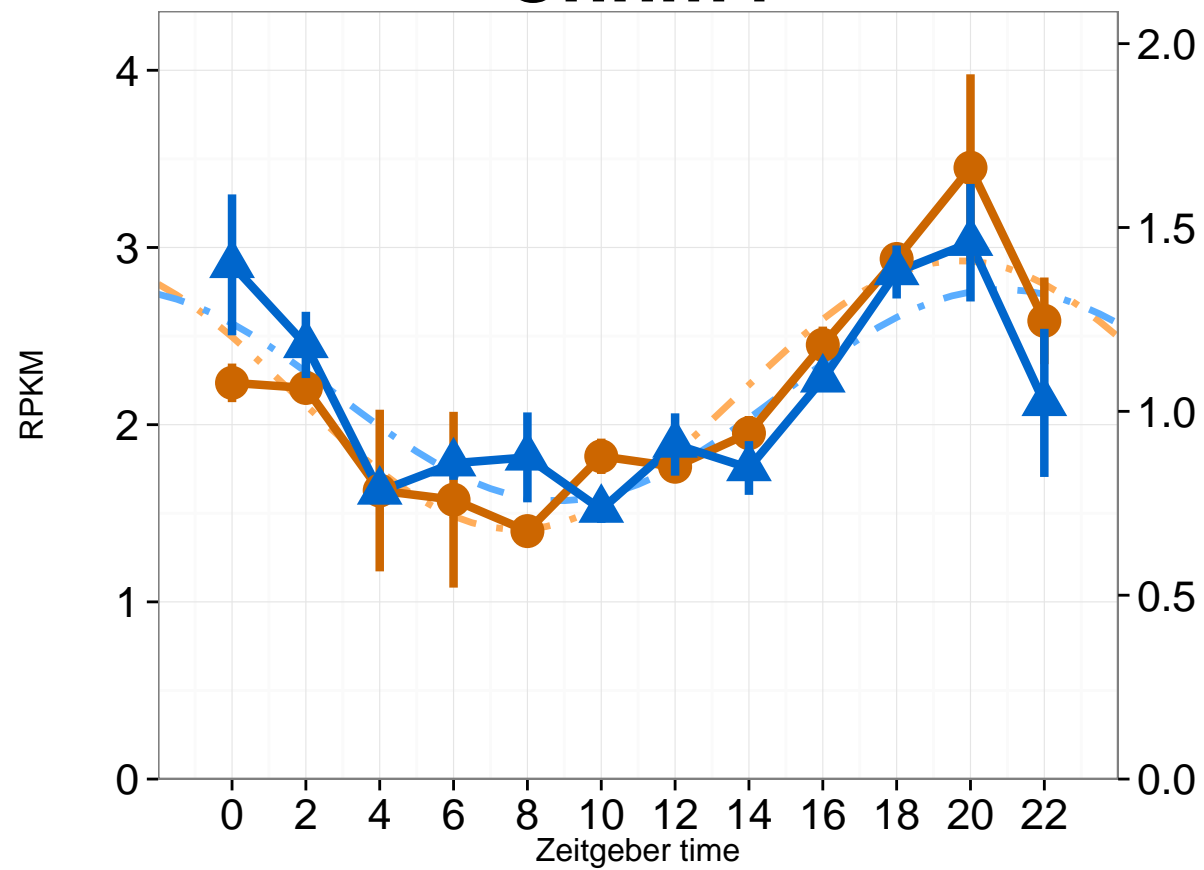

## Cnnm4

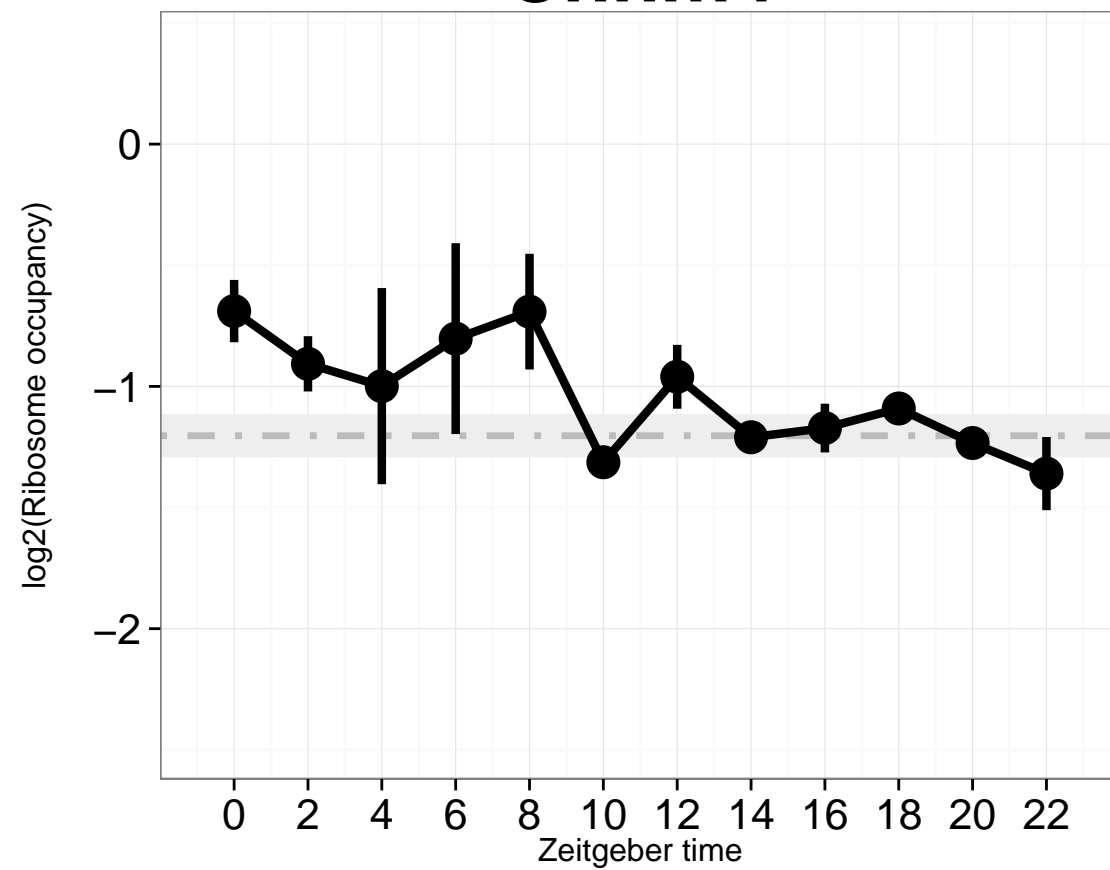

Supplement: SuppDataset_1.zip [file Cnnm4_set_D.pdf › Supplemental Dataset 1/D-mRNA_rhythm_translation_rhyth/Cnnm4_set_D.pdf]

# Cnot7

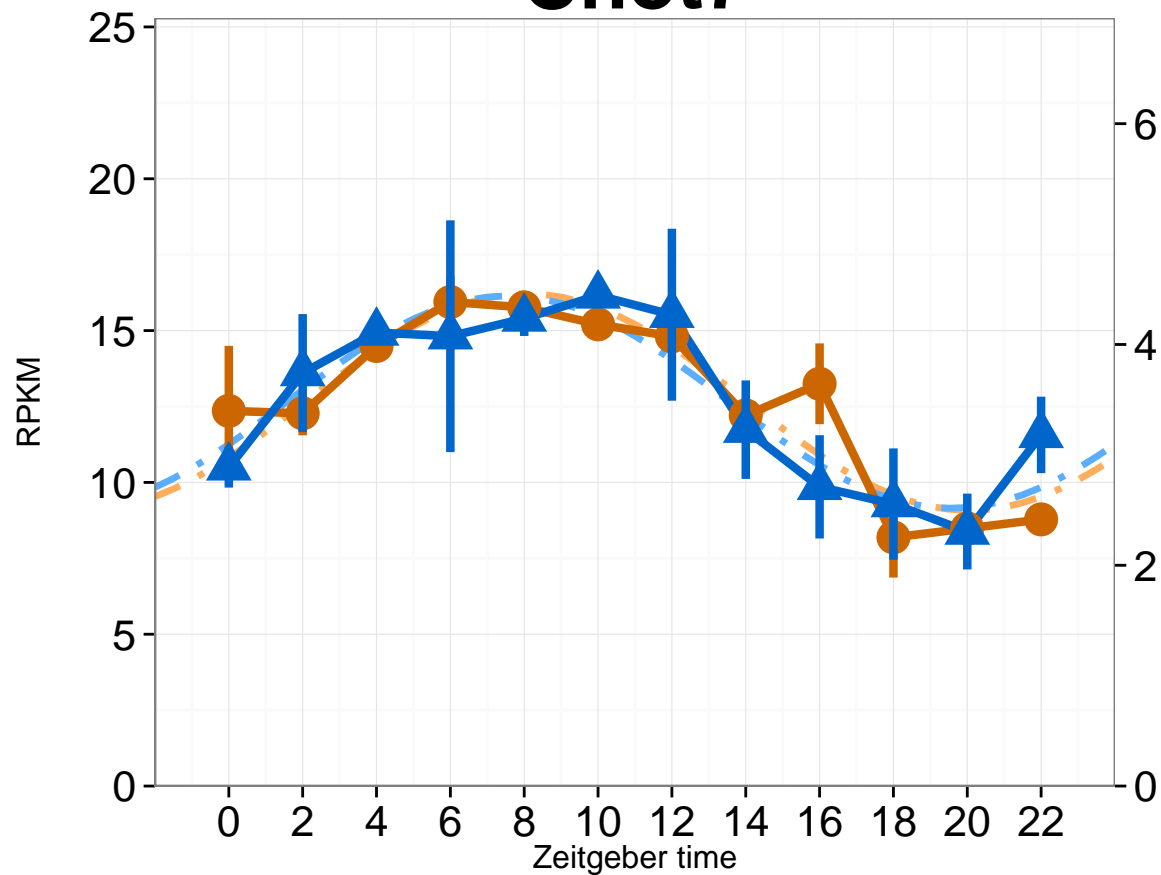

# Cnot7

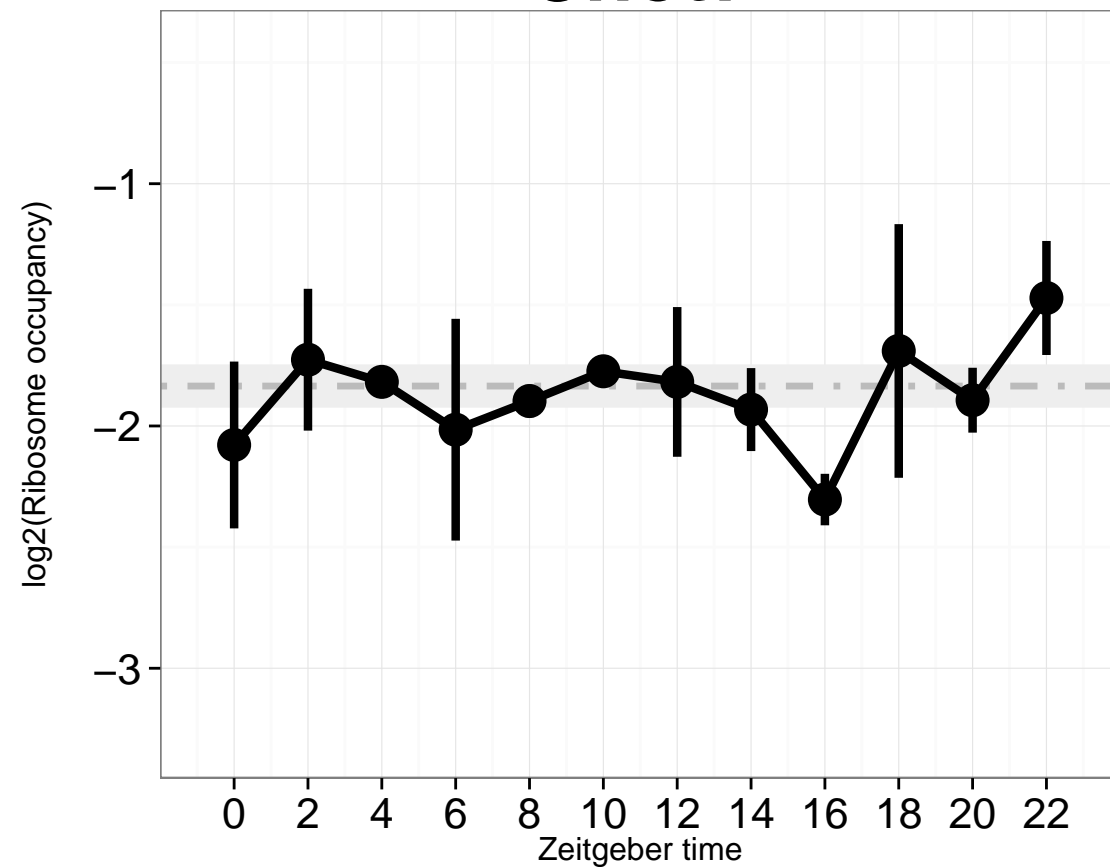

Supplement: SuppDataset_1.zip [file Cnot7_set_D.pdf › Supplemental Dataset 1/D-mRNA_rhythm_translation_rhyth/Cnot7_set_D.pdf]
