# Supplementary figures and images for: Ribosome profiling reveals the rhythmic liver translatome and circadian clock regulation by upstream open reading frames (part 10 of 113)
Source: HighWire-hosted journal article supplement (doi:10.1101/gr.195404.115), 2015-10-20

## BC026585

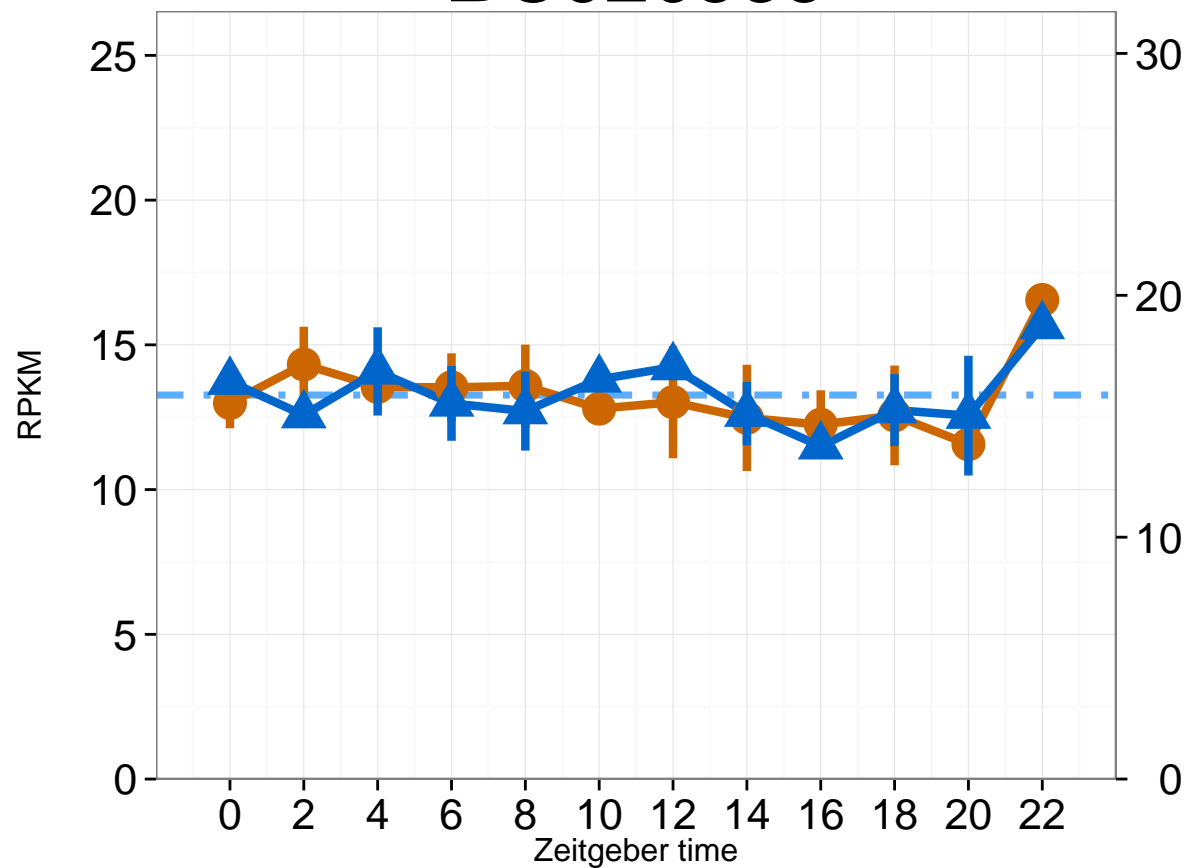

## BC026585

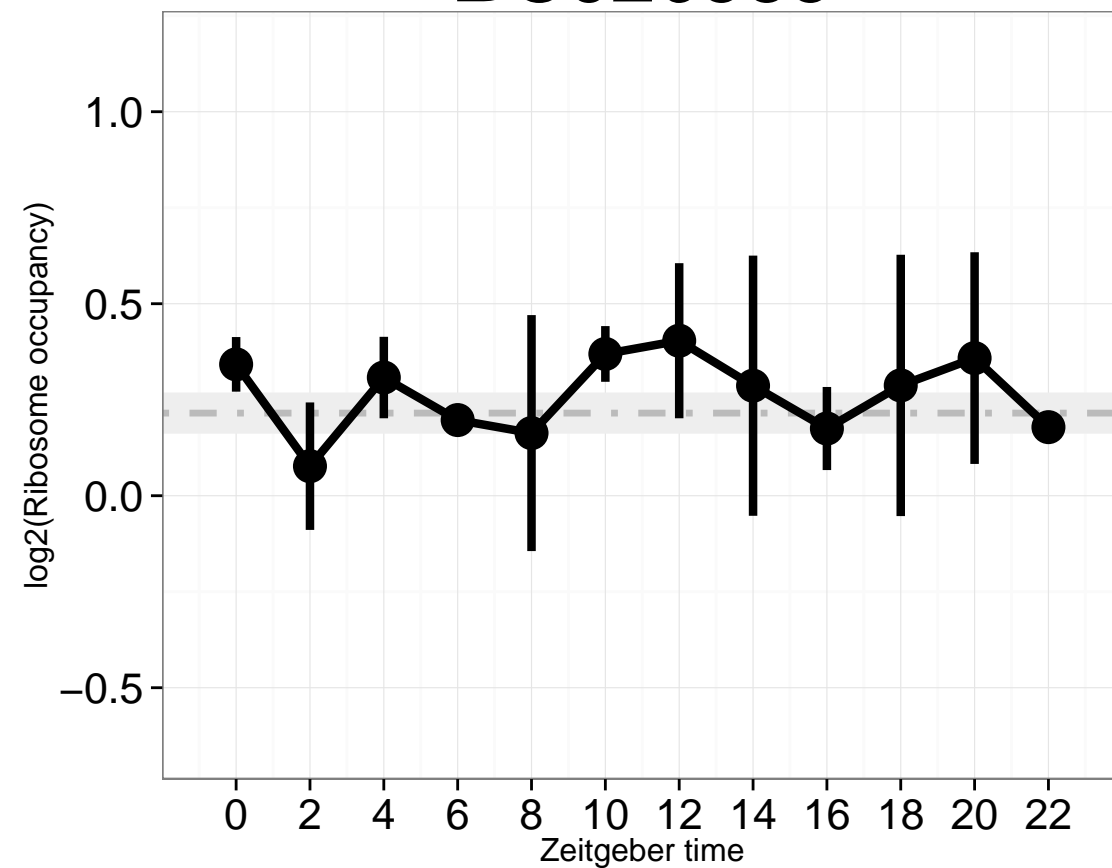

Supplement: SuppDataset_1.zip [file BC026585_set_A.pdf › Supplemental Dataset 1/A-mRNA_nonrhyth_translation_nonrhyth/BC026585_set_A.pdf]

**BC028528 TR**

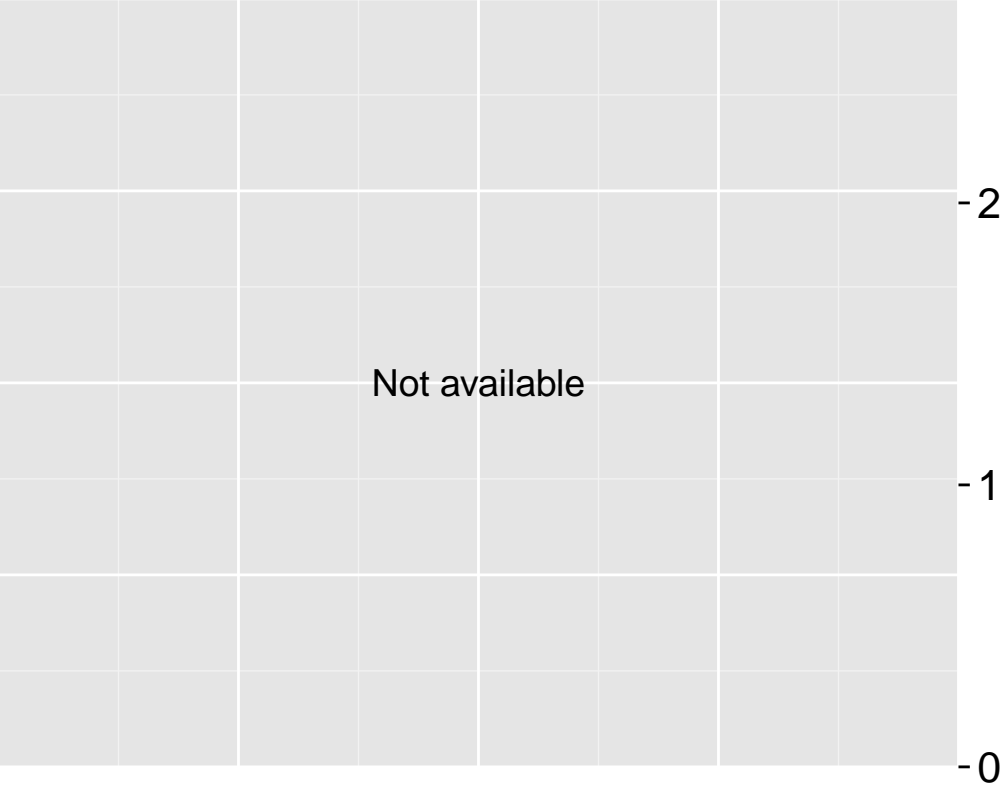

**BC028528 log2(Ribosome occupancy)**

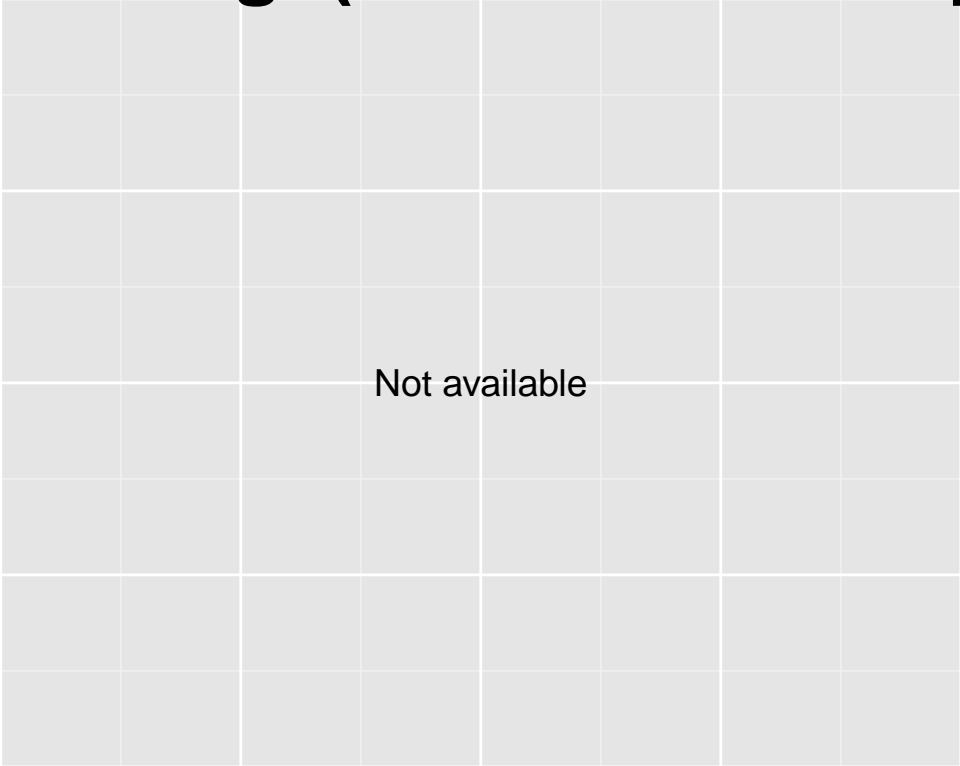

Supplement: SuppDataset_1.zip [file BC028528_set_A.pdf › Supplemental Dataset 1/A-mRNA_nonrhyth_translation_nonrhyth/BC028528_set_A.pdf]

## BC030307

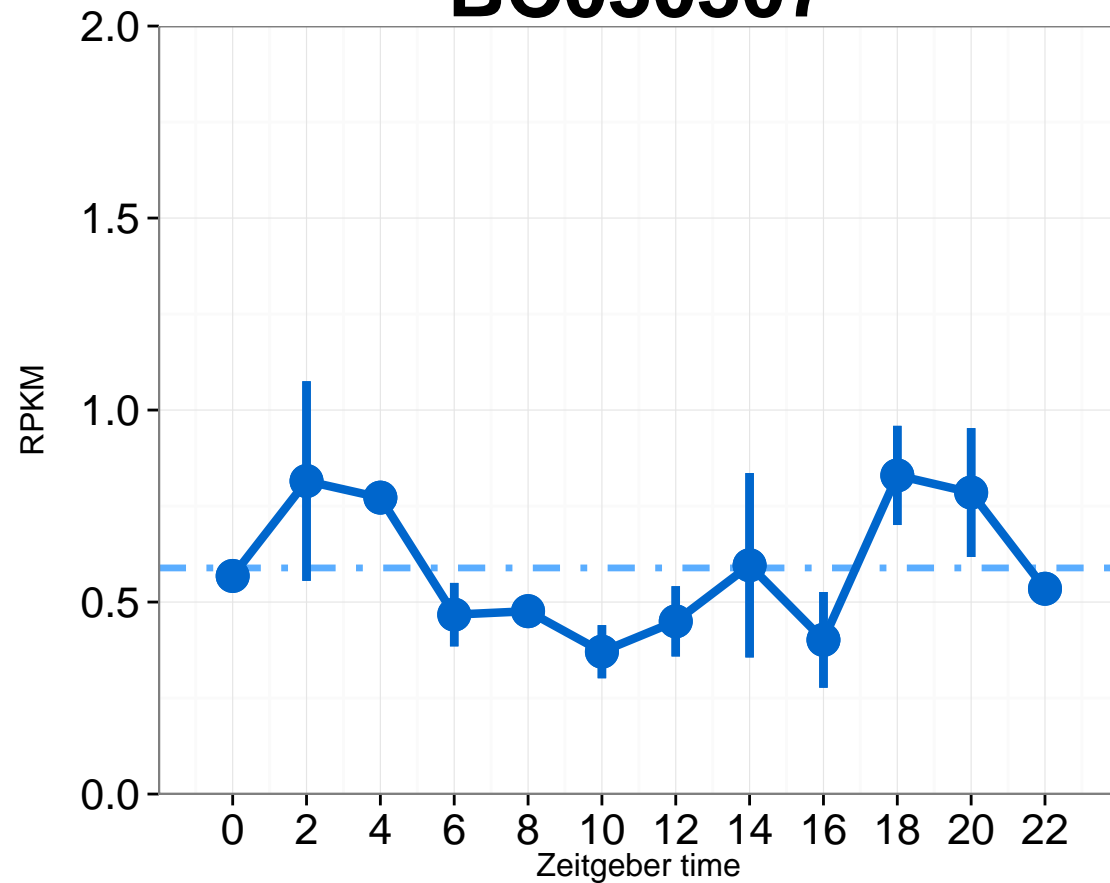

## BC030307 log<sub>2</sub>(Ribosome occupancy)

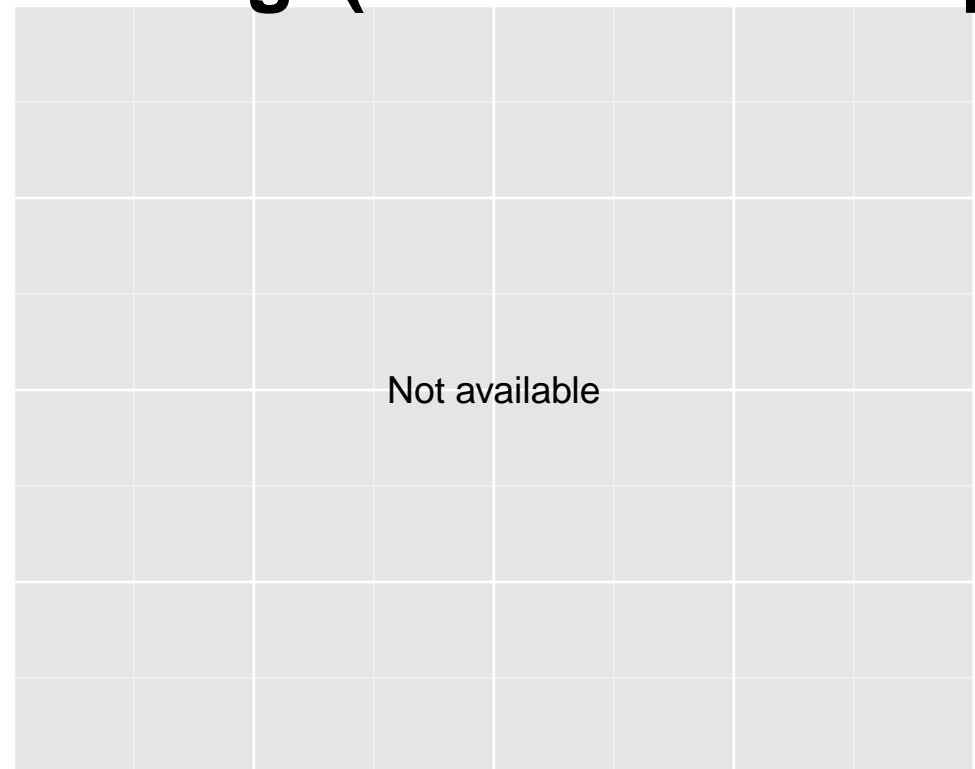

Supplement: SuppDataset_1.zip [file BC030307_set_A.pdf › Supplemental Dataset 1/A-mRNA_nonrhyth_translation_nonrhyth/BC030307_set_A.pdf]

# BC030336

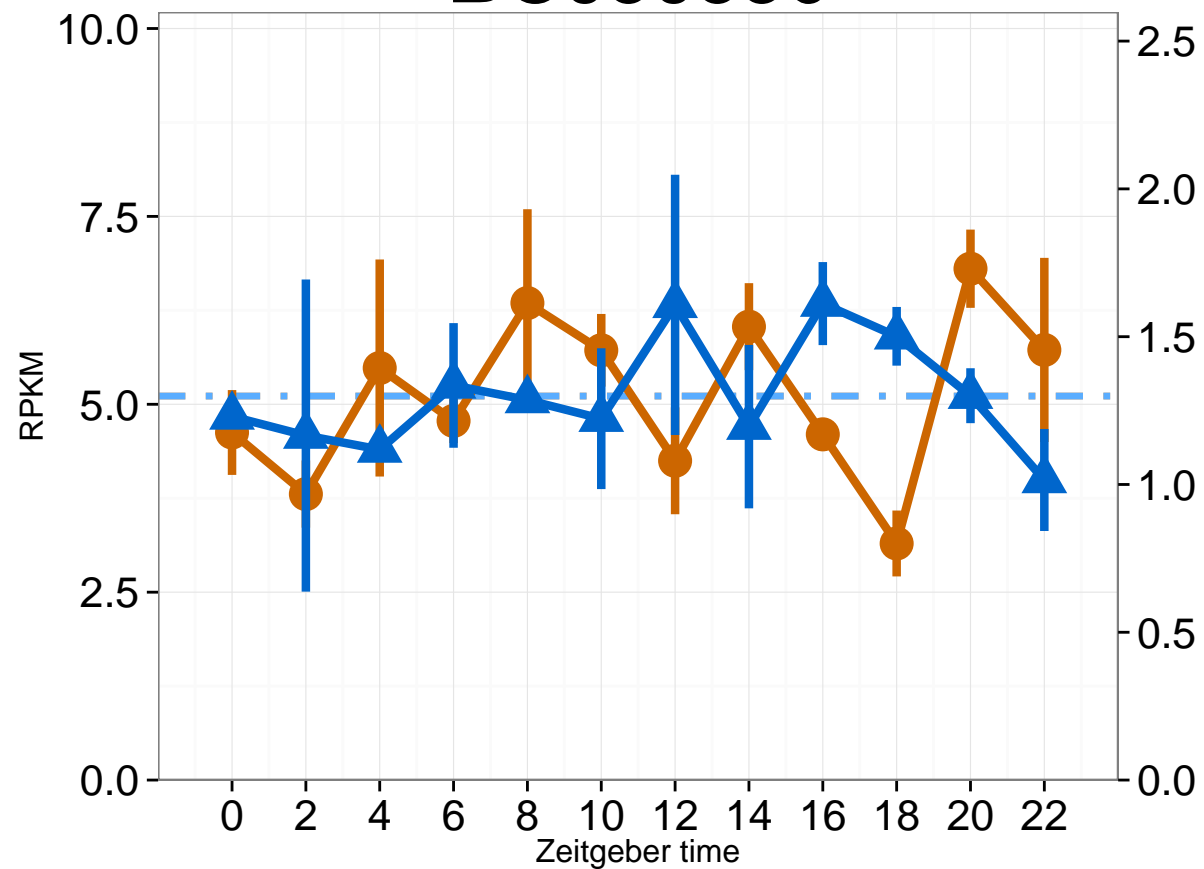

# BC030336

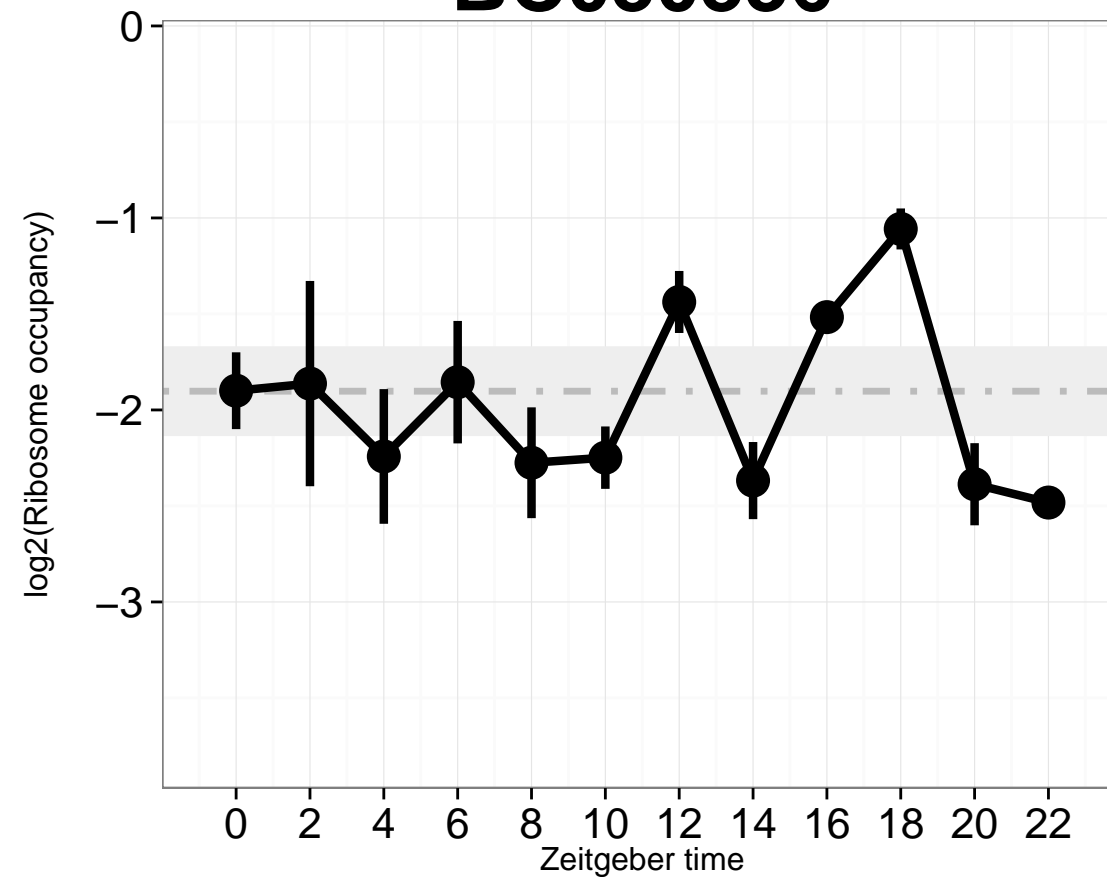

Supplement: SuppDataset_1.zip [file BC030336_set_A.pdf › Supplemental Dataset 1/A-mRNA_nonrhyth_translation_nonrhyth/BC030336_set_A.pdf]

# BC031181

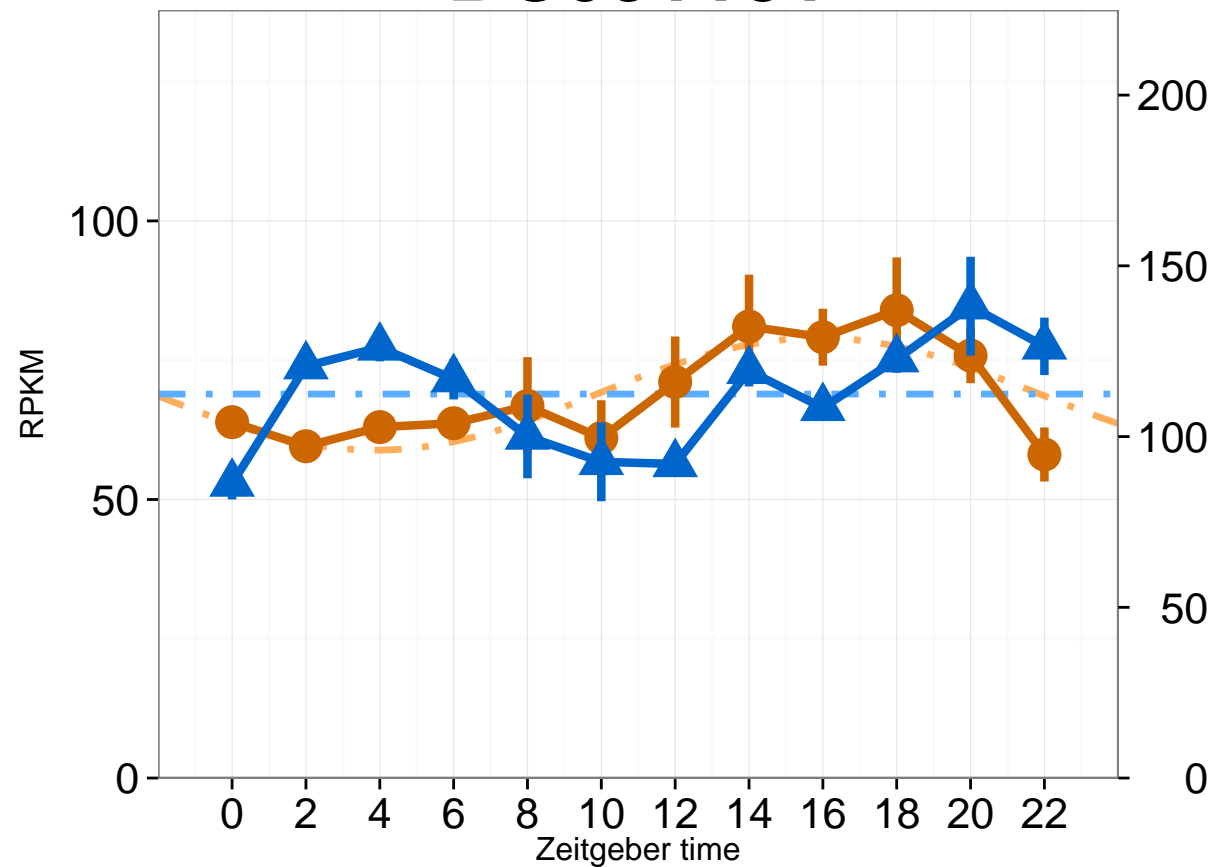

# BC031181

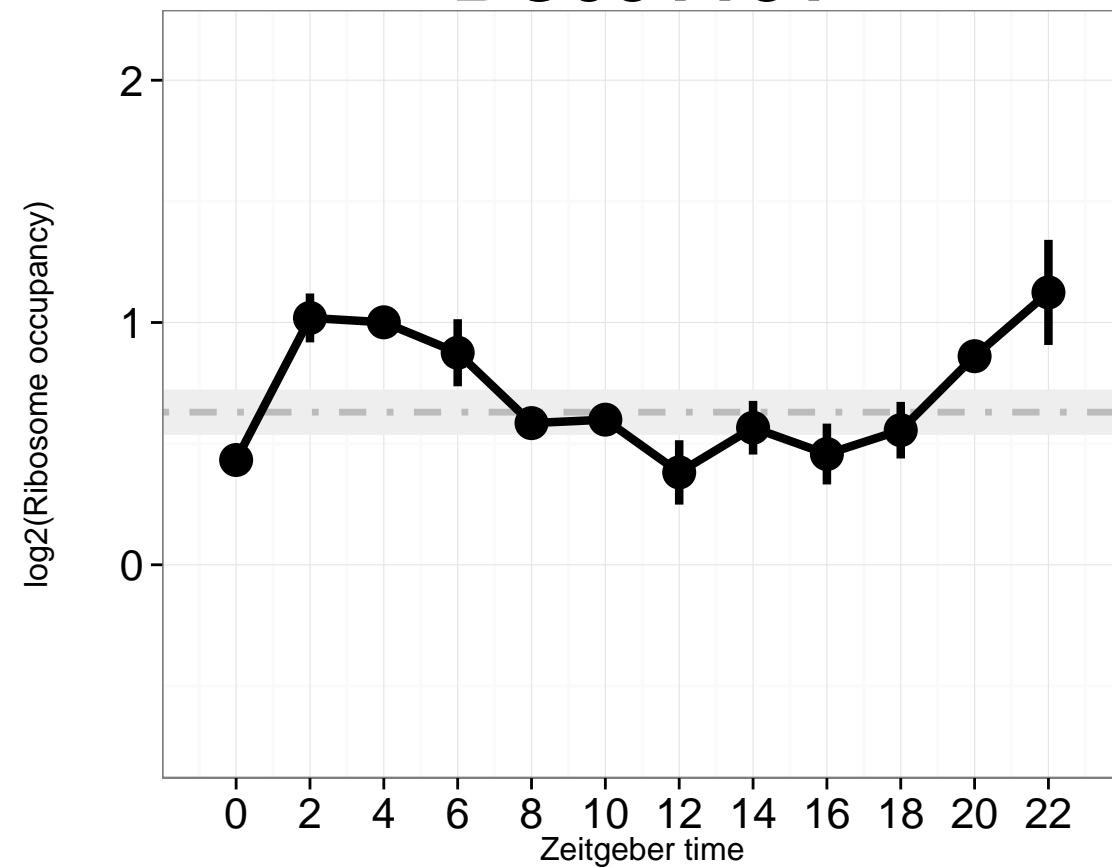

Supplement: SuppDataset_1.zip [file BC031181_set_A.pdf › Supplemental Dataset 1/A-mRNA_nonrhyth_translation_nonrhyth/BC031181_set_A.pdf]

# BC048403

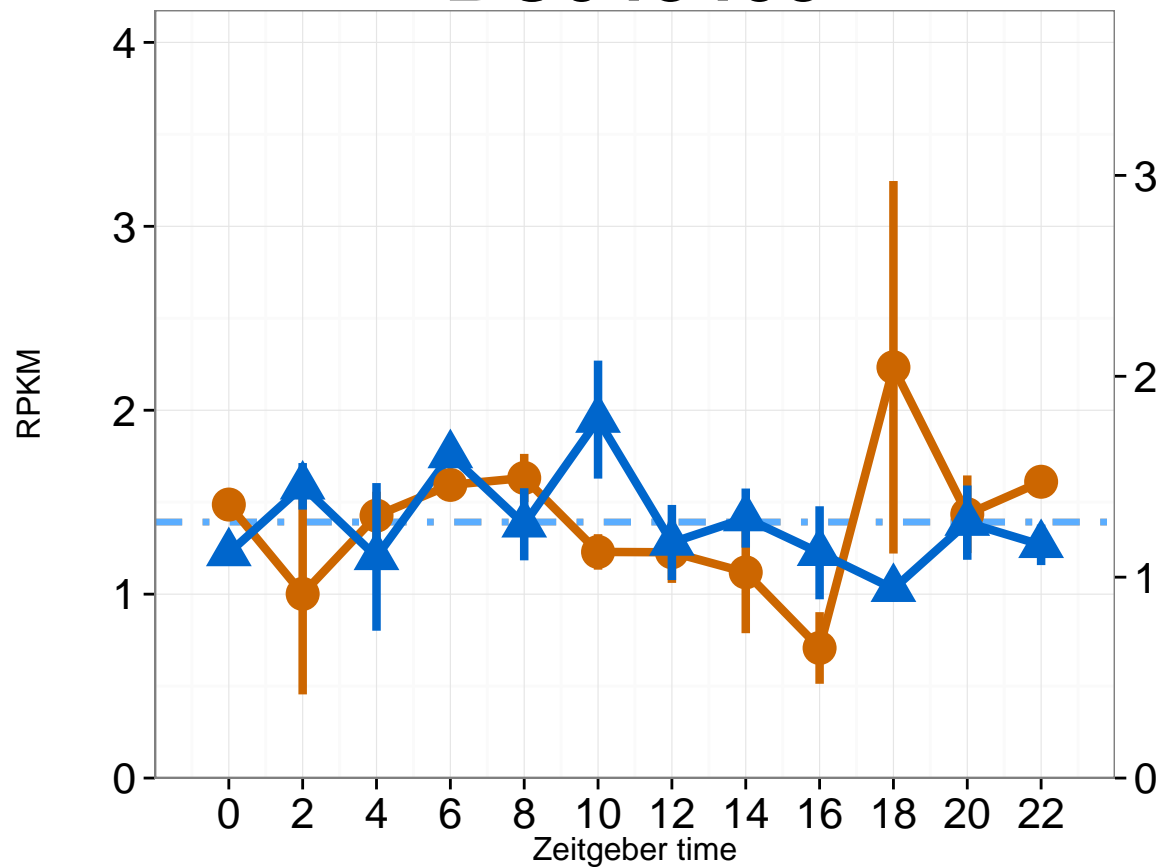

# BC048403

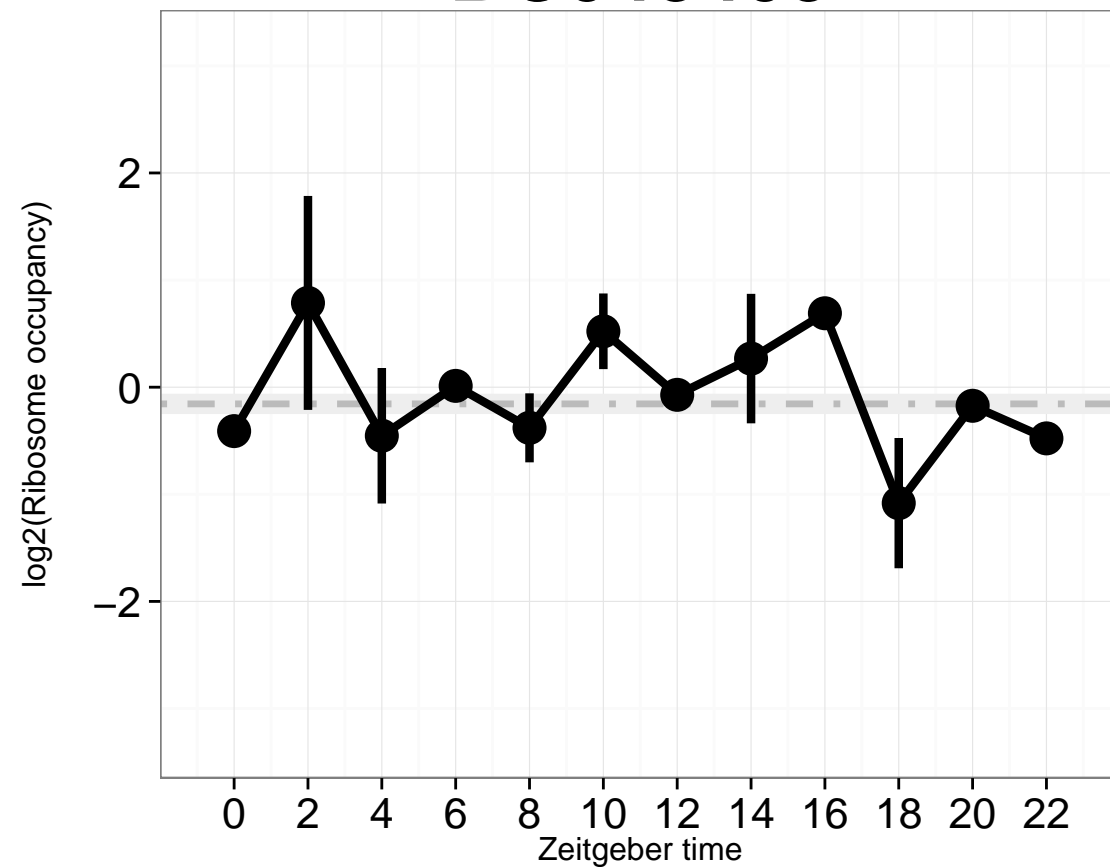

Supplement: SuppDataset_1.zip [file BC048403_set_A.pdf › Supplemental Dataset 1/A-mRNA_nonrhyth_translation_nonrhyth/BC048403_set_A.pdf]

# BC053749

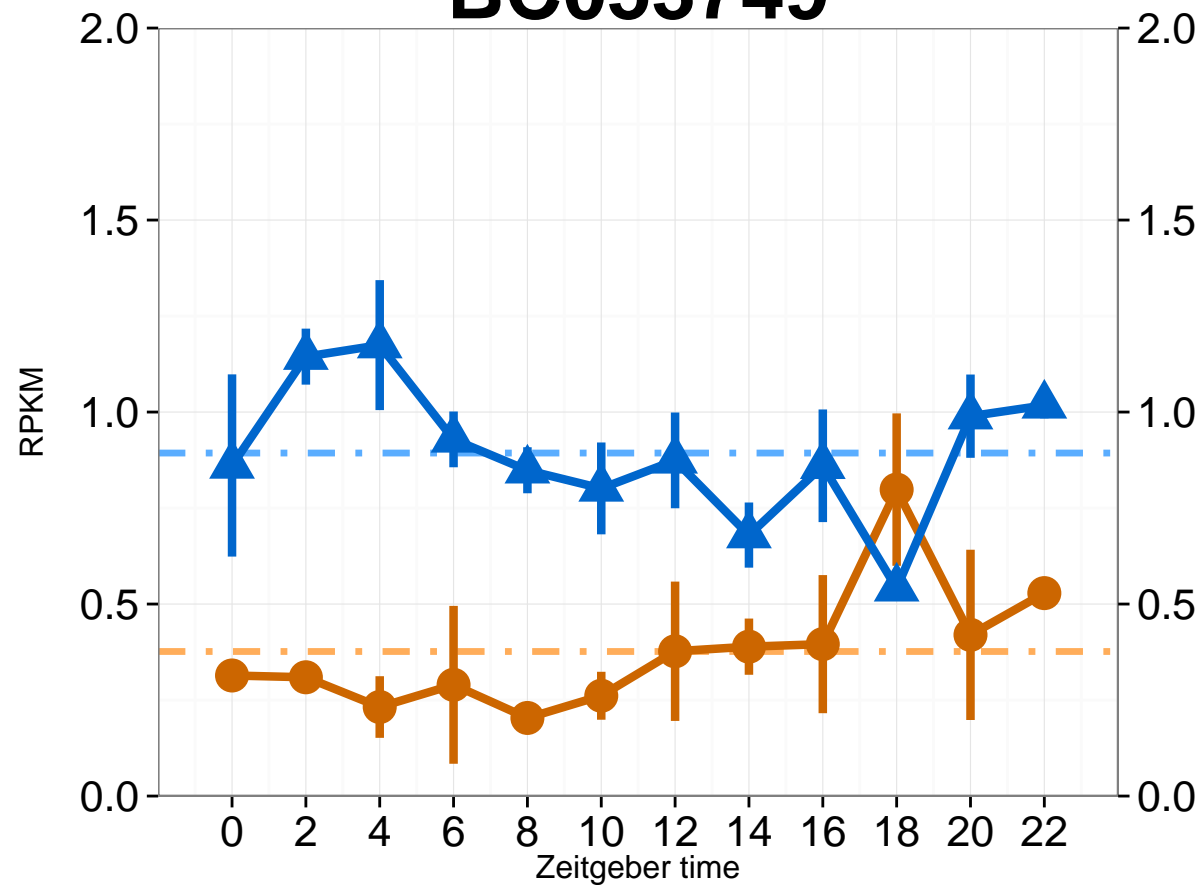

# BC053749

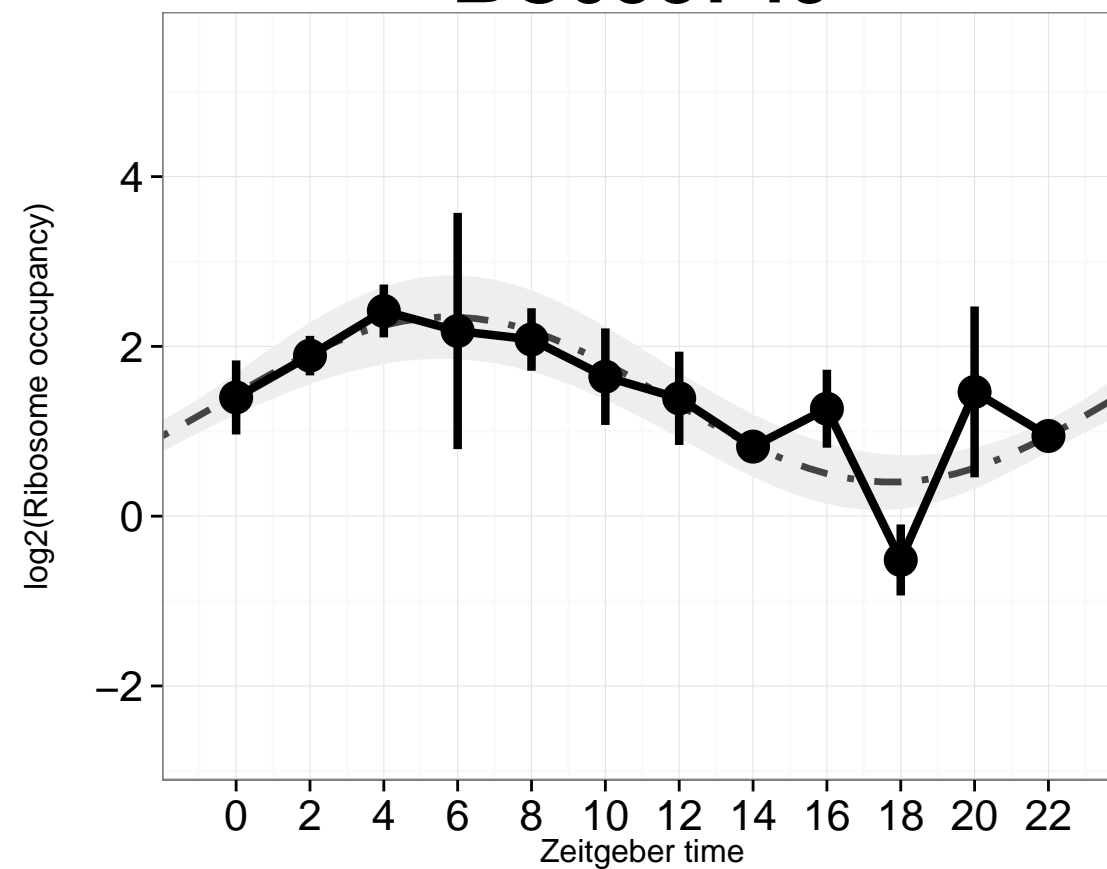

Supplement: SuppDataset_1.zip [file BC053749_set_A.pdf › Supplemental Dataset 1/A-mRNA_nonrhyth_translation_nonrhyth/BC053749_set_A.pdf]

**BC055324 TR**

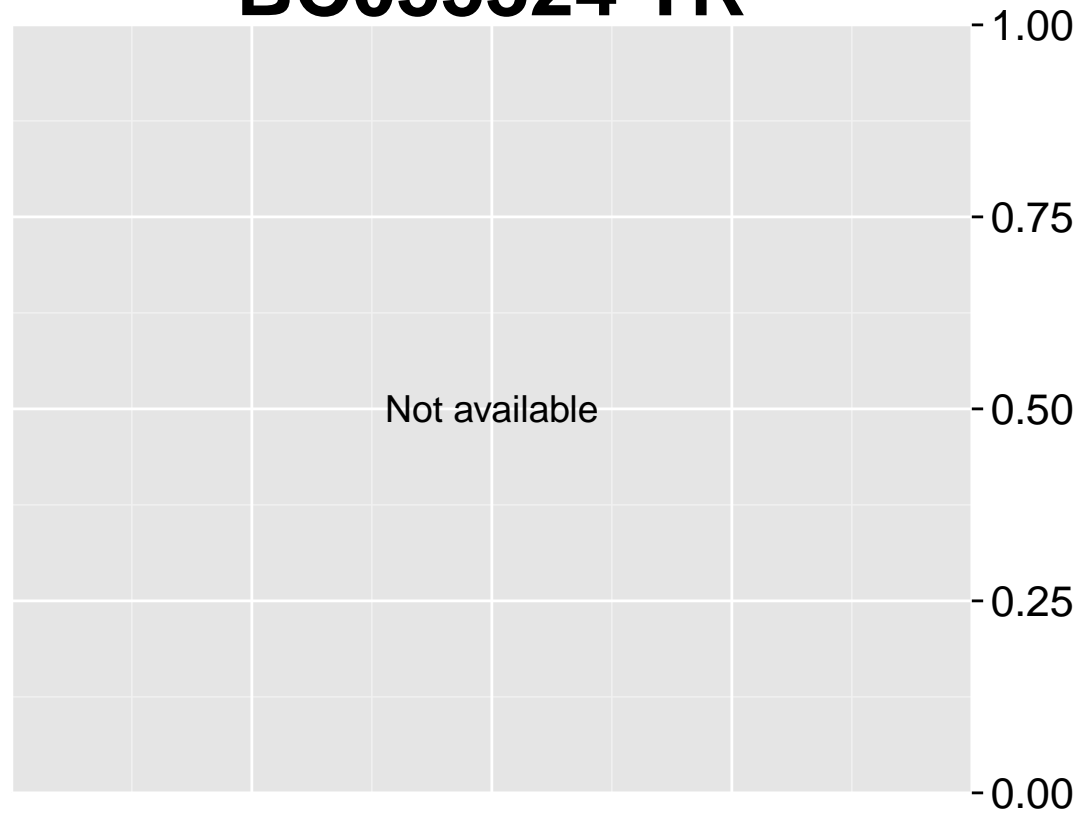

**BC055324 log<sub>2</sub>(Ribosome occupancy)**

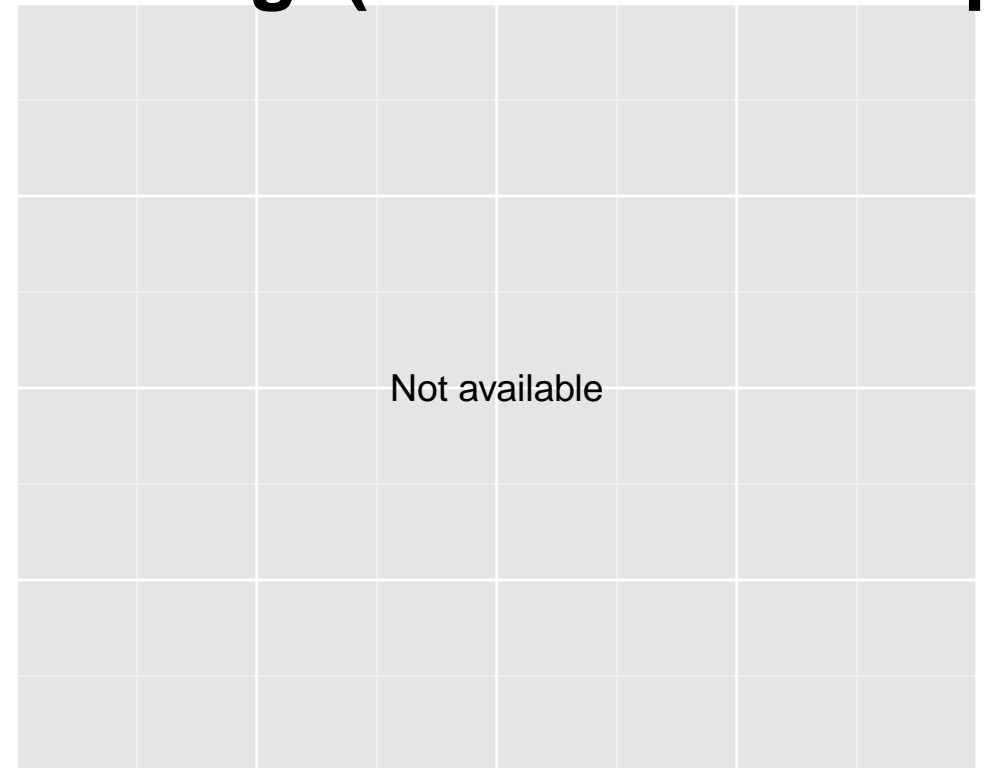

Supplement: SuppDataset_1.zip [file BC055324_set_A.pdf › Supplemental Dataset 1/A-mRNA_nonrhyth_translation_nonrhyth/BC055324_set_A.pdf]

# BC056474

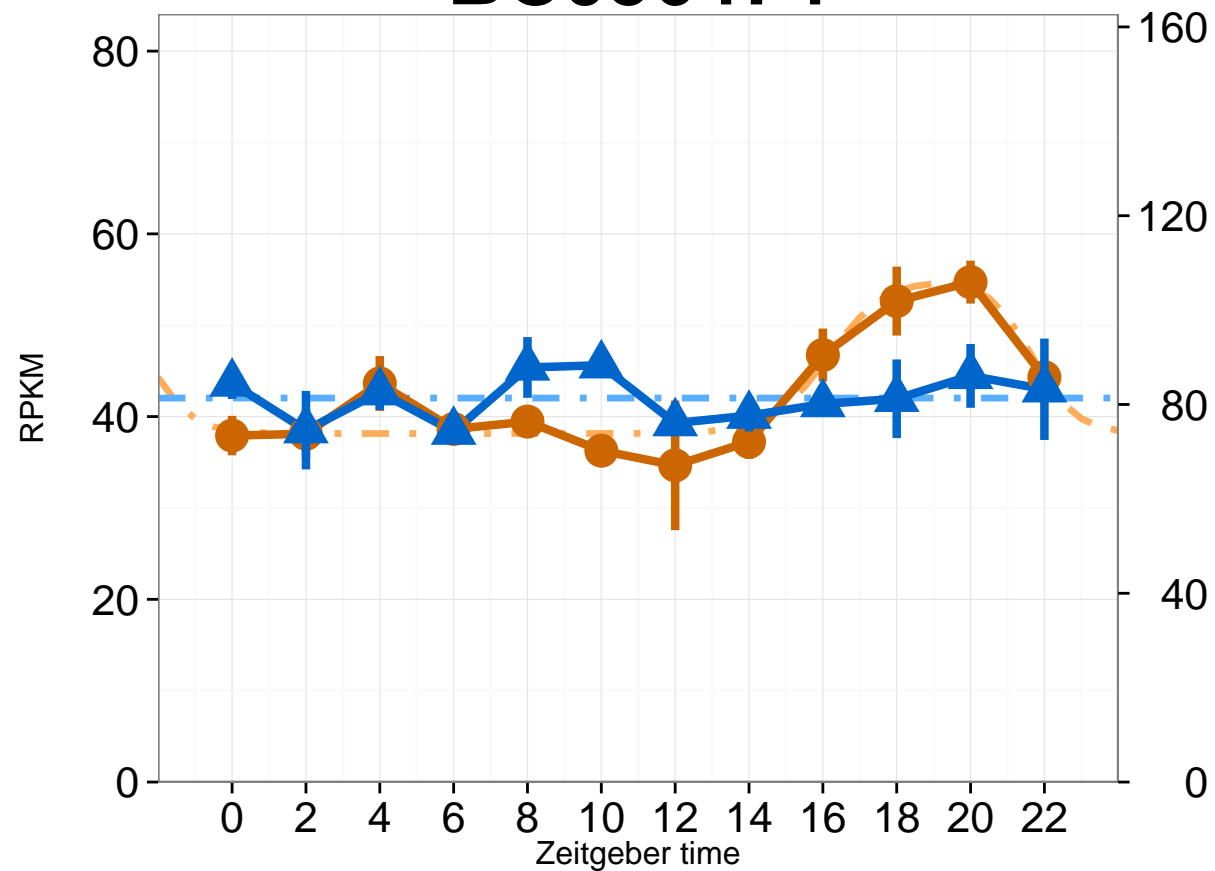

# BC056474

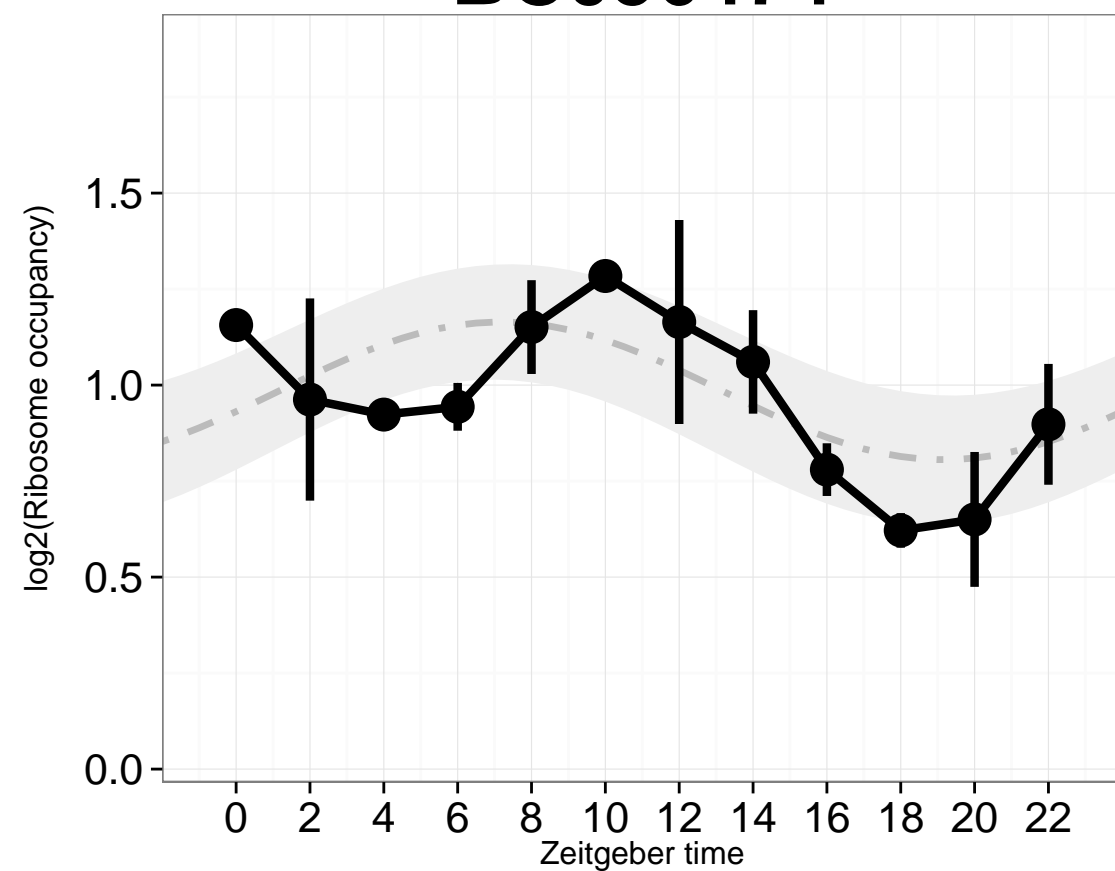

Supplement: SuppDataset_1.zip [file BC056474_set_A.pdf › Supplemental Dataset 1/A-mRNA_nonrhyth_translation_nonrhyth/BC056474_set_A.pdf]

# BC068281

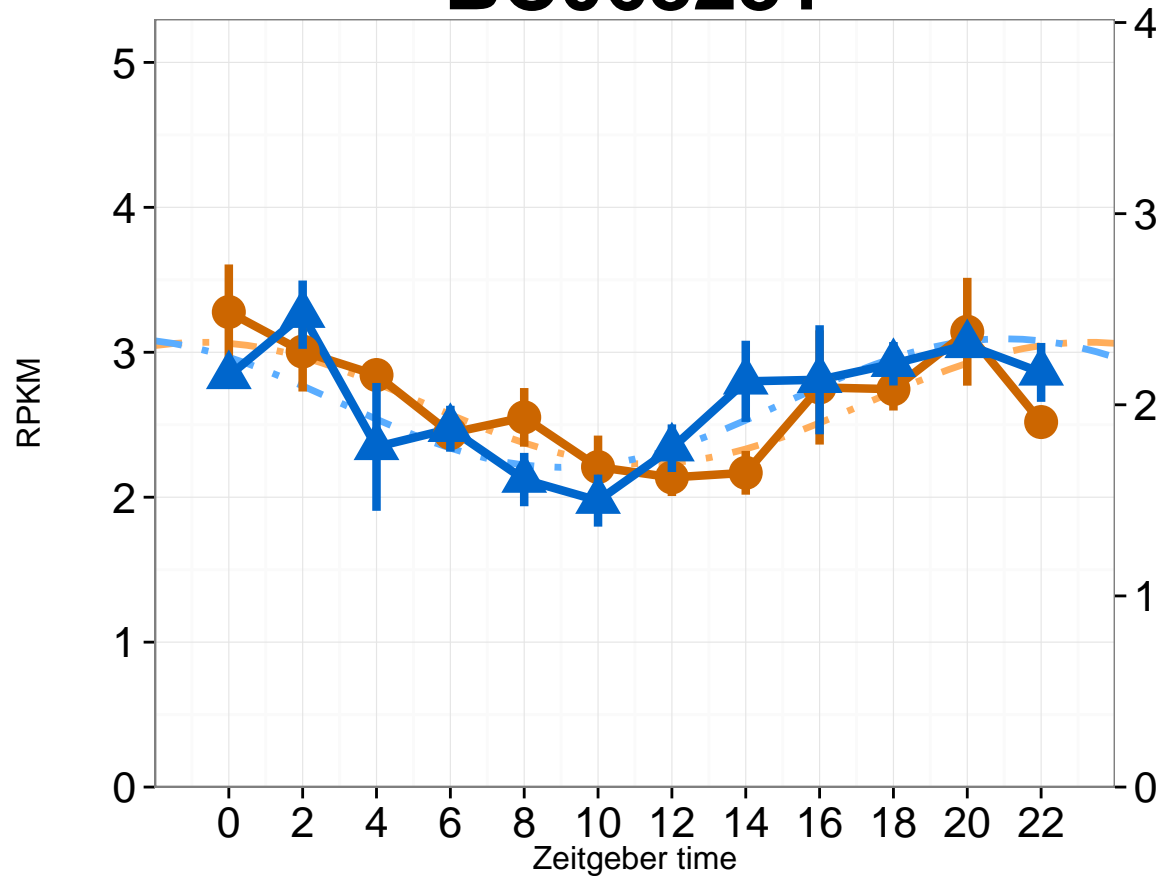

# BC068281

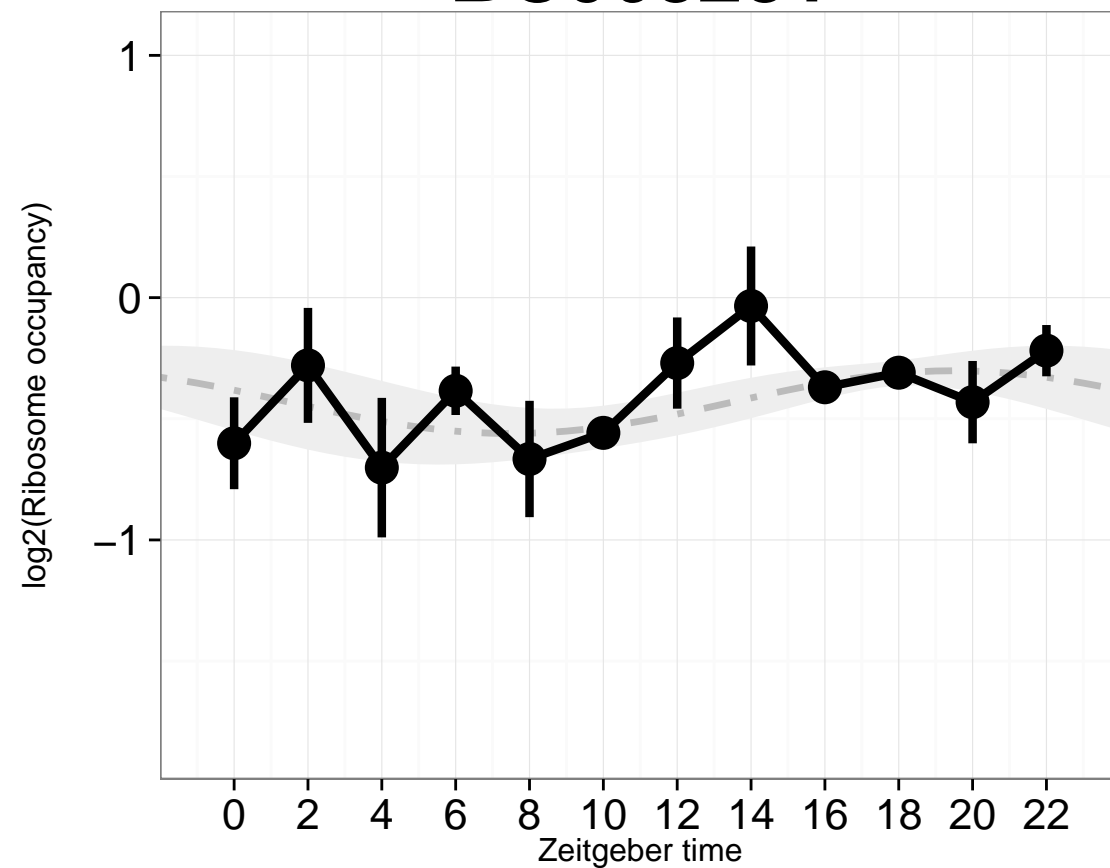

Supplement: SuppDataset_1.zip [file BC068281_set_A.pdf › Supplemental Dataset 1/A-mRNA_nonrhyth_translation_nonrhyth/BC068281_set_A.pdf]

# BC089597

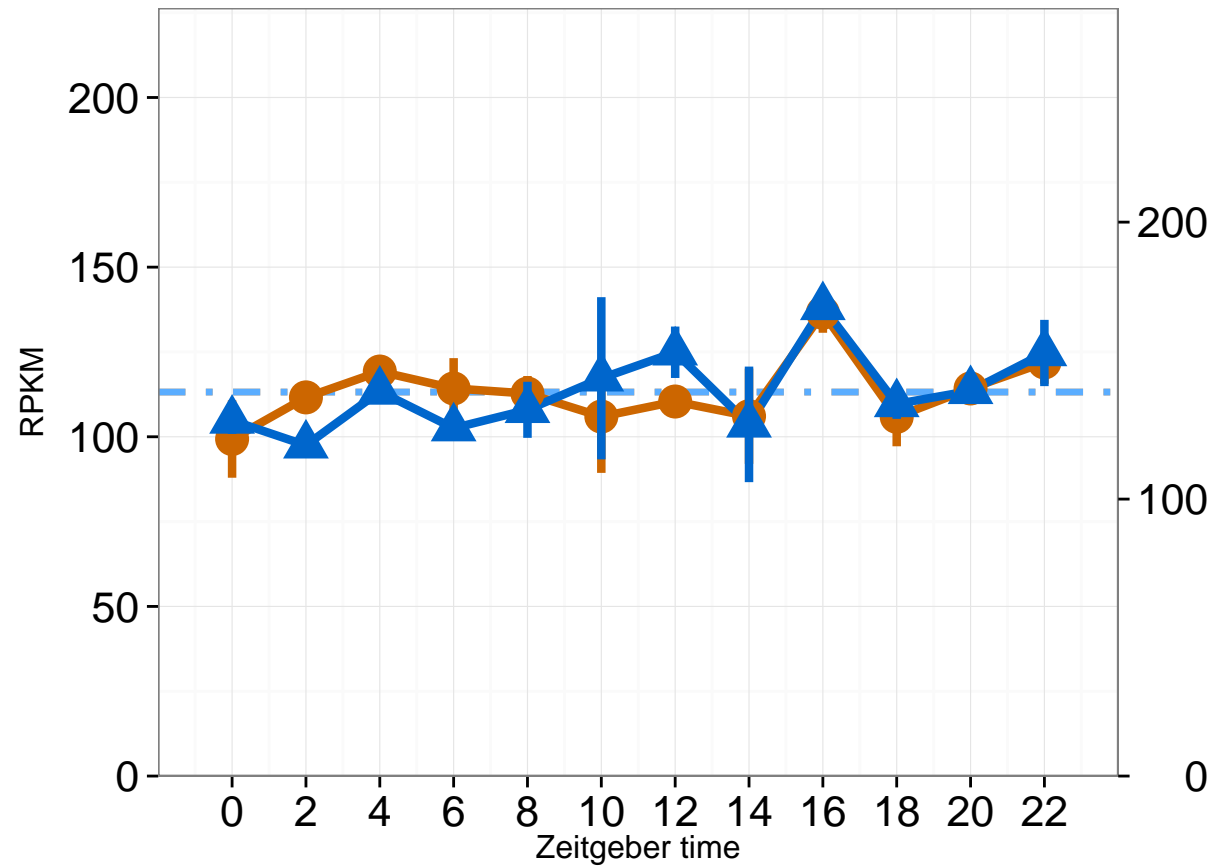

# BC089597

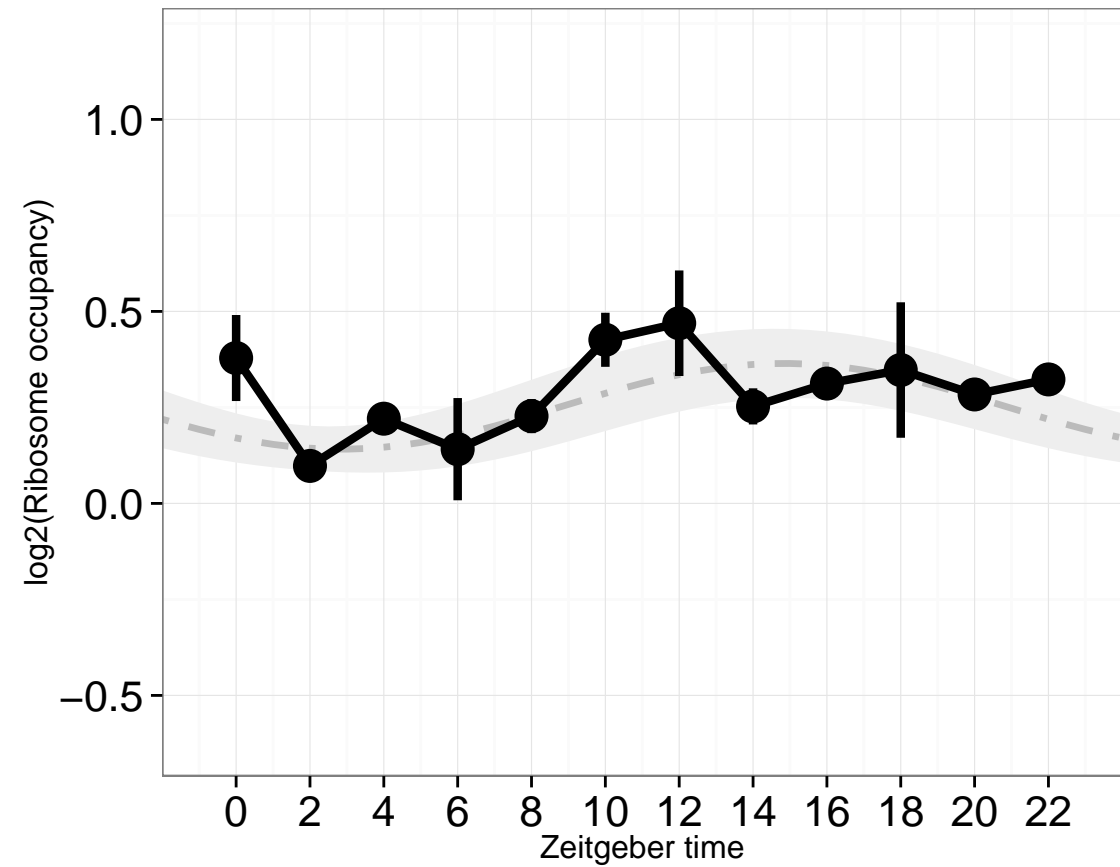

Supplement: SuppDataset_1.zip [file BC089597_set_A.pdf › Supplemental Dataset 1/A-mRNA_nonrhyth_translation_nonrhyth/BC089597_set_A.pdf]

## Baat

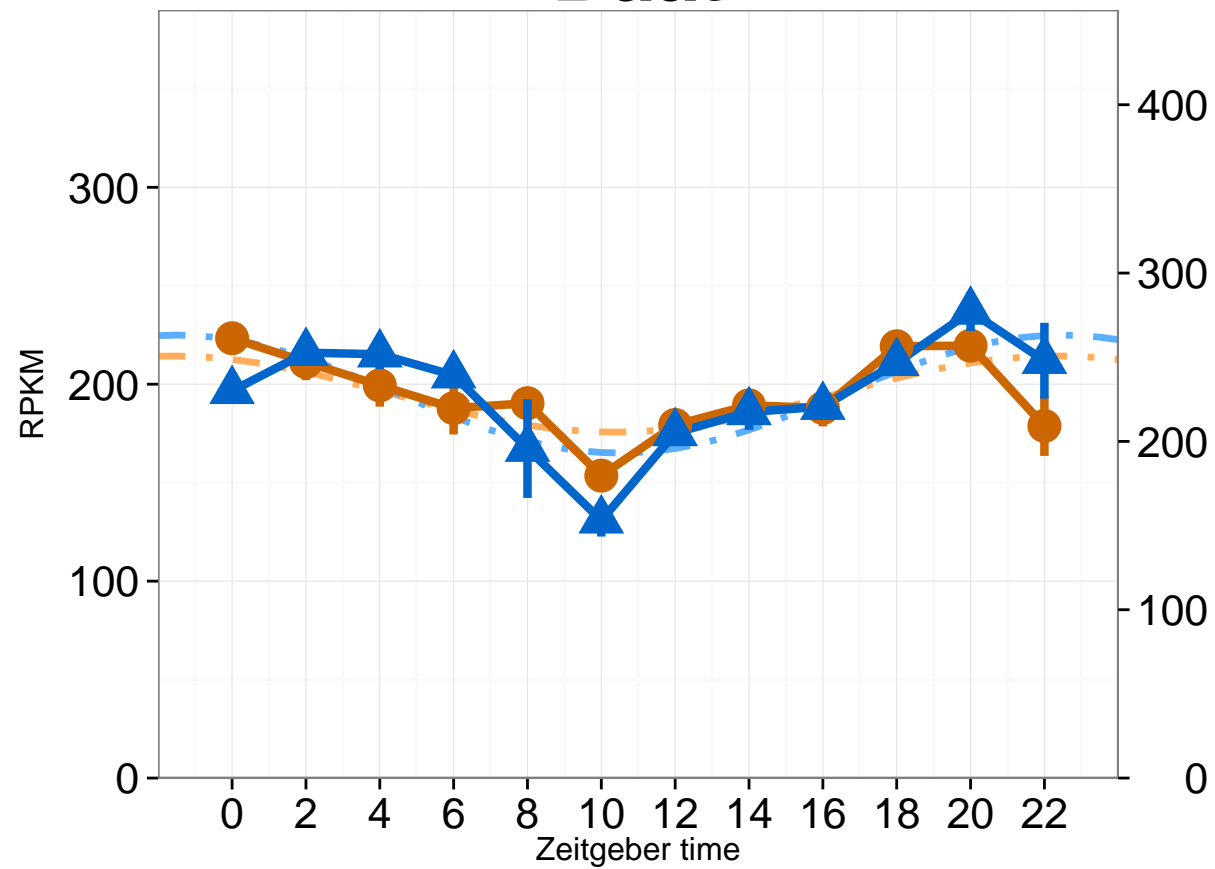

## Baat

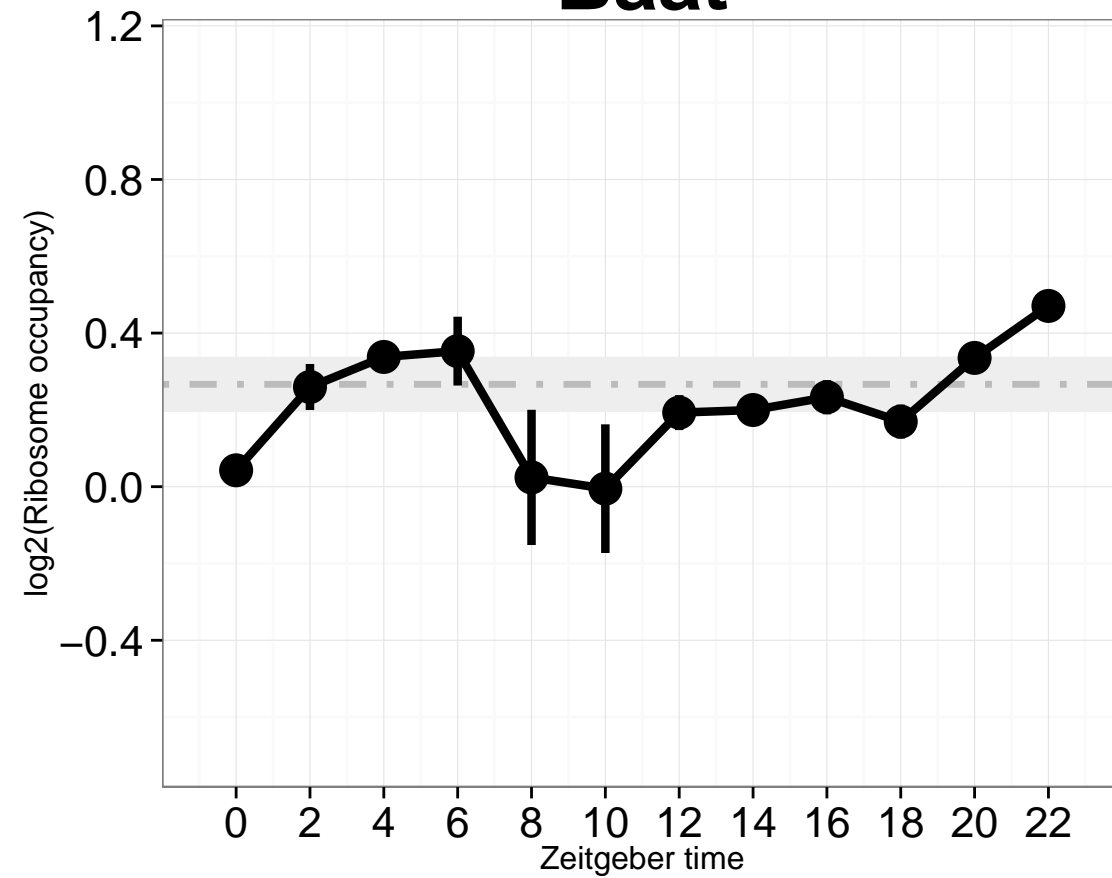

Supplement: SuppDataset_1.zip [file Baat_set_A.pdf › Supplemental Dataset 1/A-mRNA_nonrhyth_translation_nonrhyth/Baat_set_A.pdf]

# Babam1

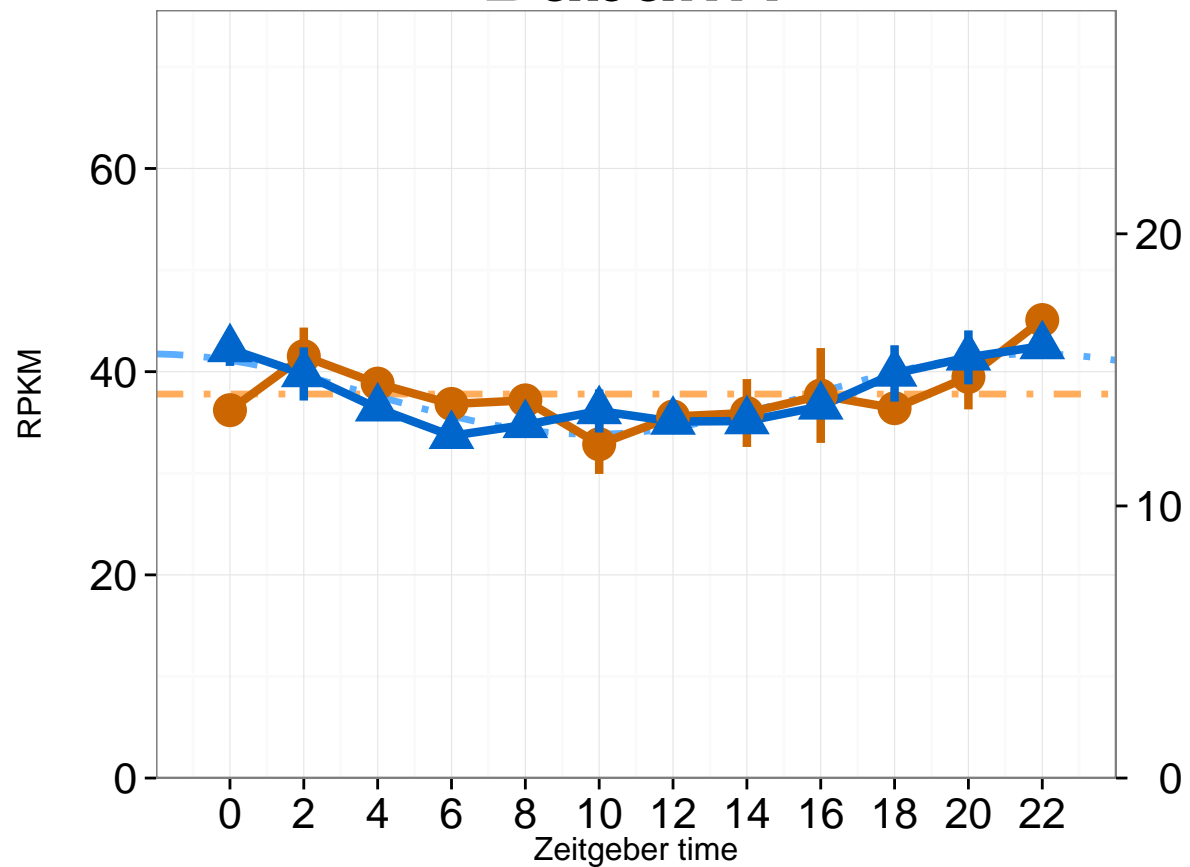

# Babam1

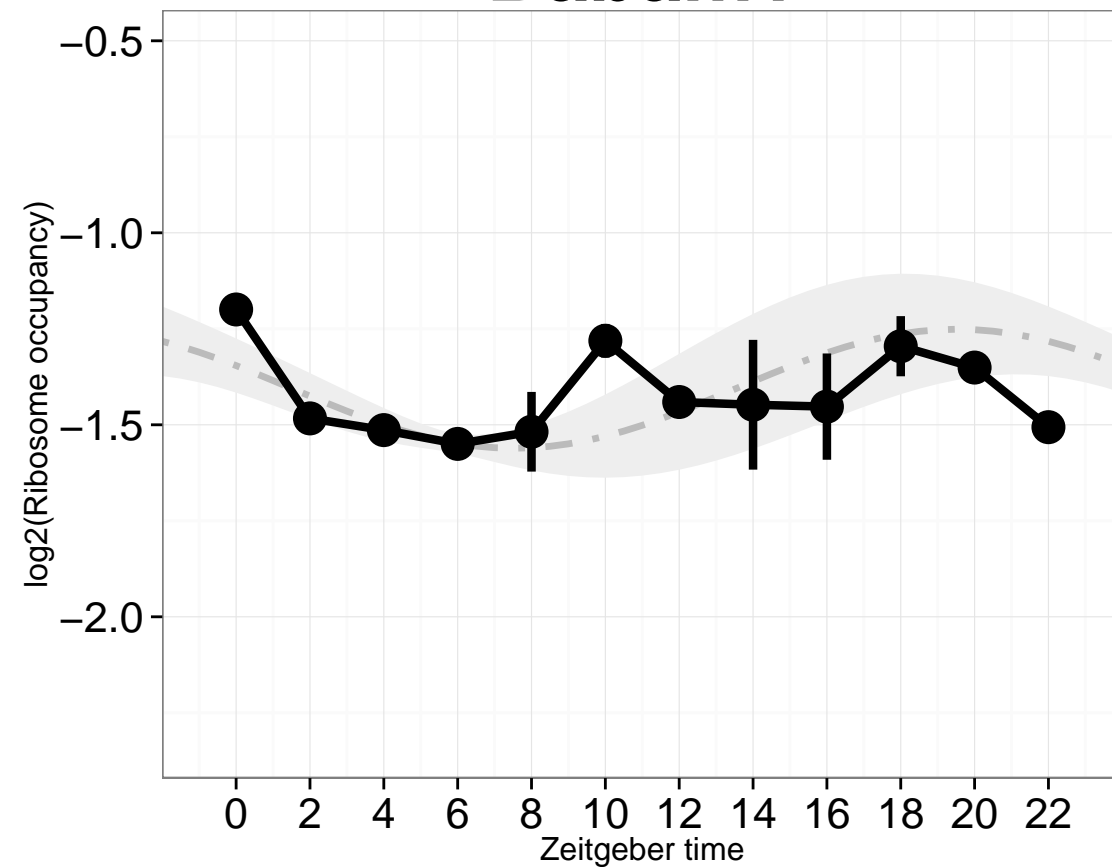

Supplement: SuppDataset_1.zip [file Babam1_set_A.pdf › Supplemental Dataset 1/A-mRNA_nonrhyth_translation_nonrhyth/Babam1_set_A.pdf]

# Bace1

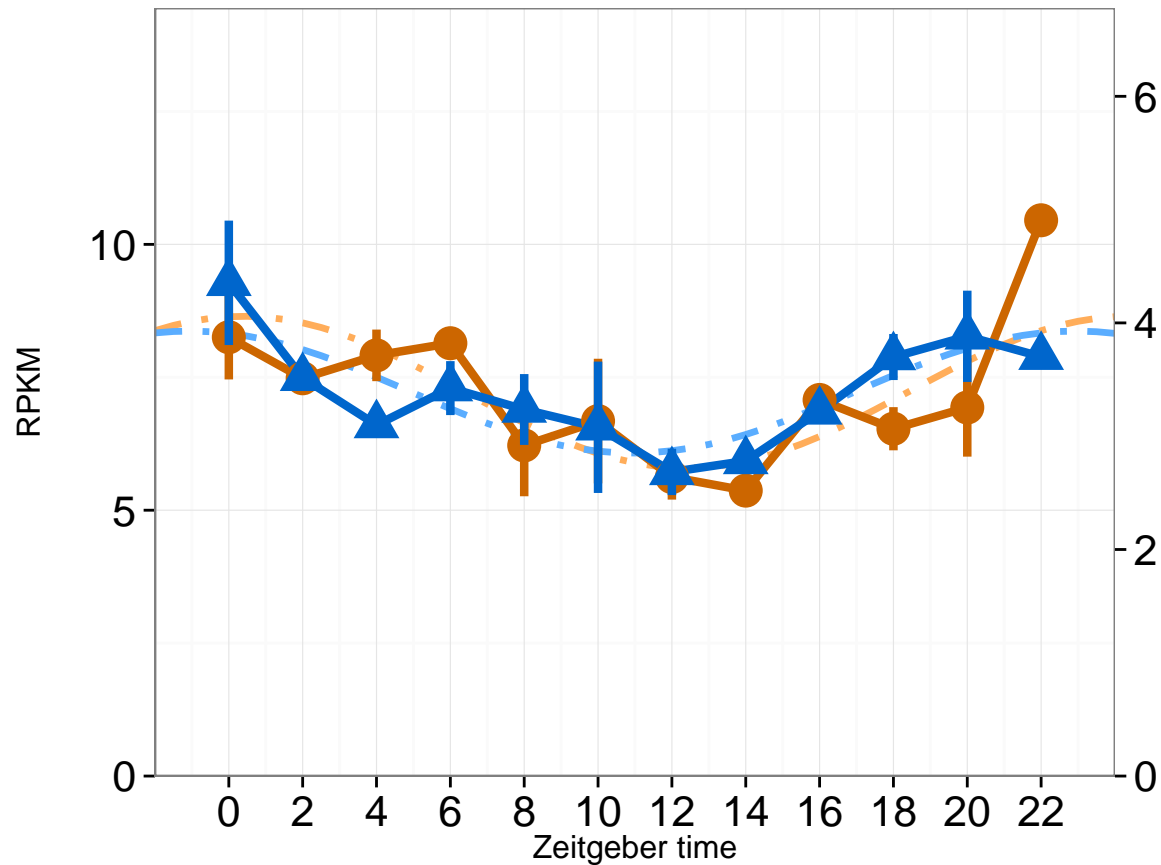

# Bace1

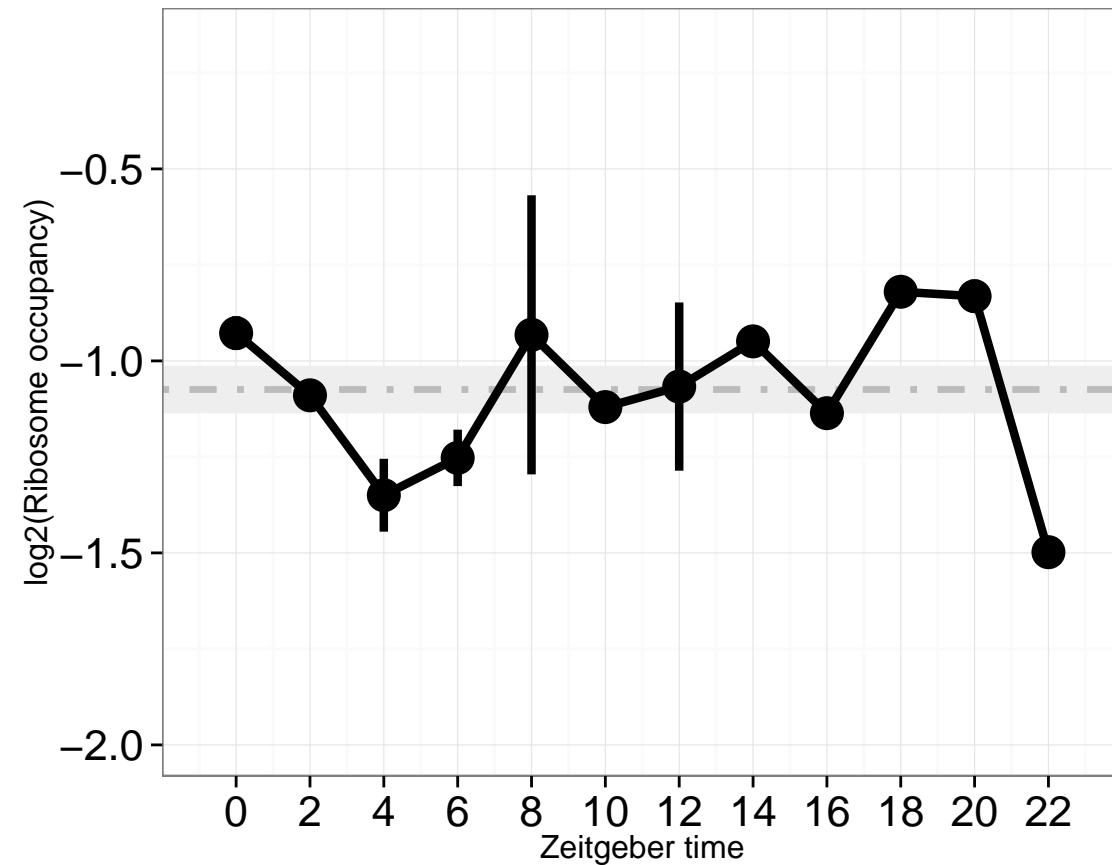

Supplement: SuppDataset_1.zip [file Bace1_set_A.pdf › Supplemental Dataset 1/A-mRNA_nonrhyth_translation_nonrhyth/Bace1_set_A.pdf]

# Bace2

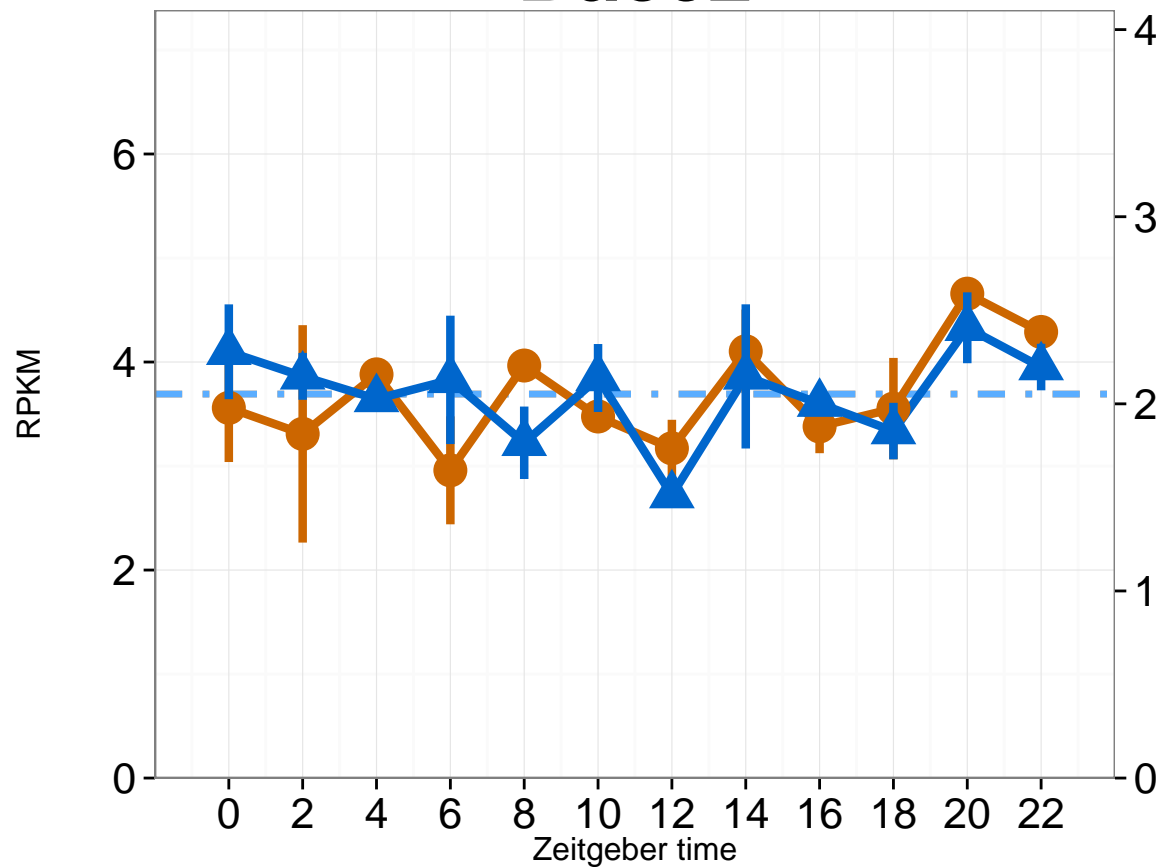

# Bace2

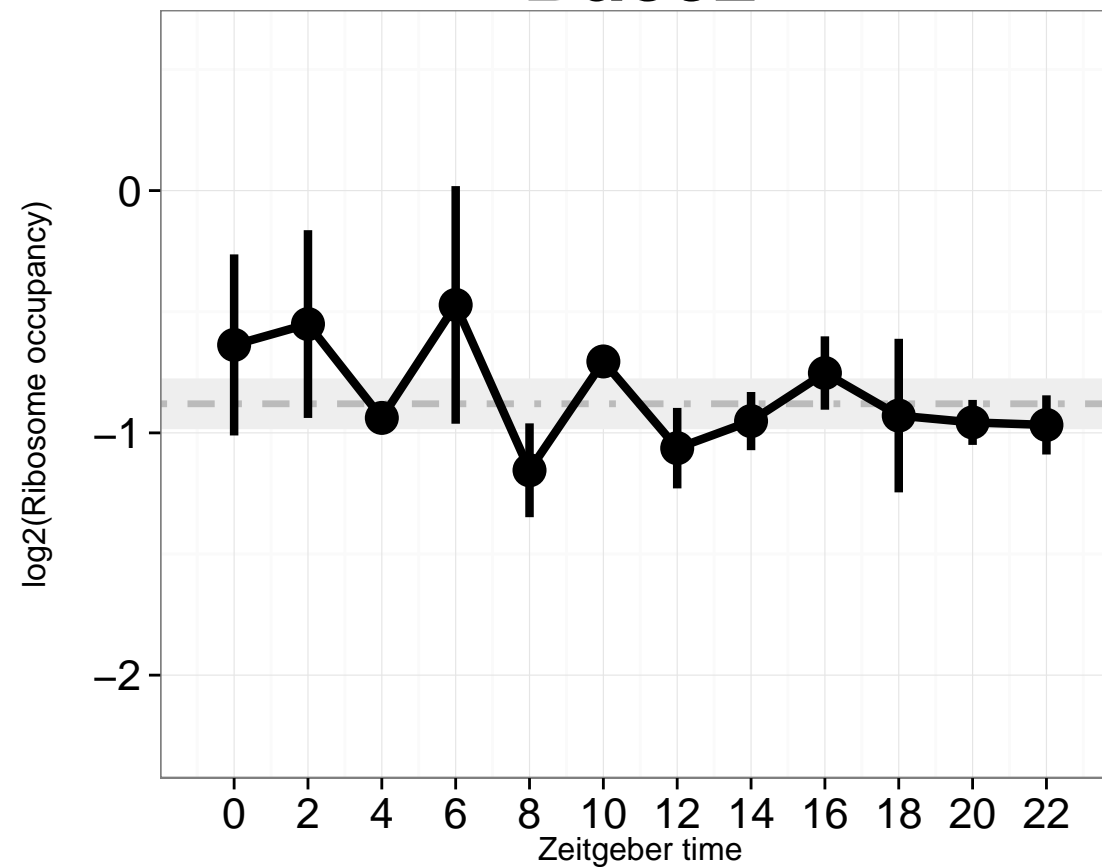

Supplement: SuppDataset_1.zip [file Bace2_set_A.pdf › Supplemental Dataset 1/A-mRNA_nonrhyth_translation_nonrhyth/Bace2_set_A.pdf]

## Bach2

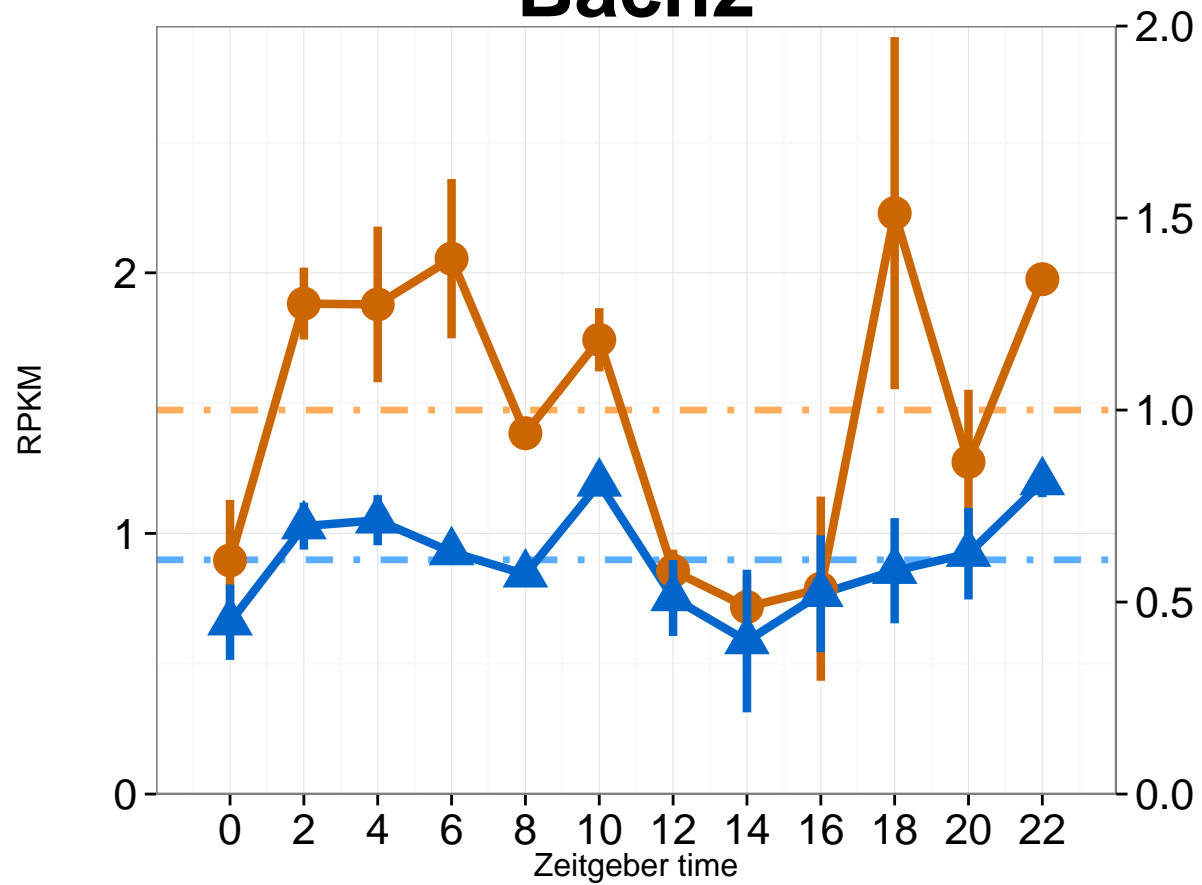

## Bach2

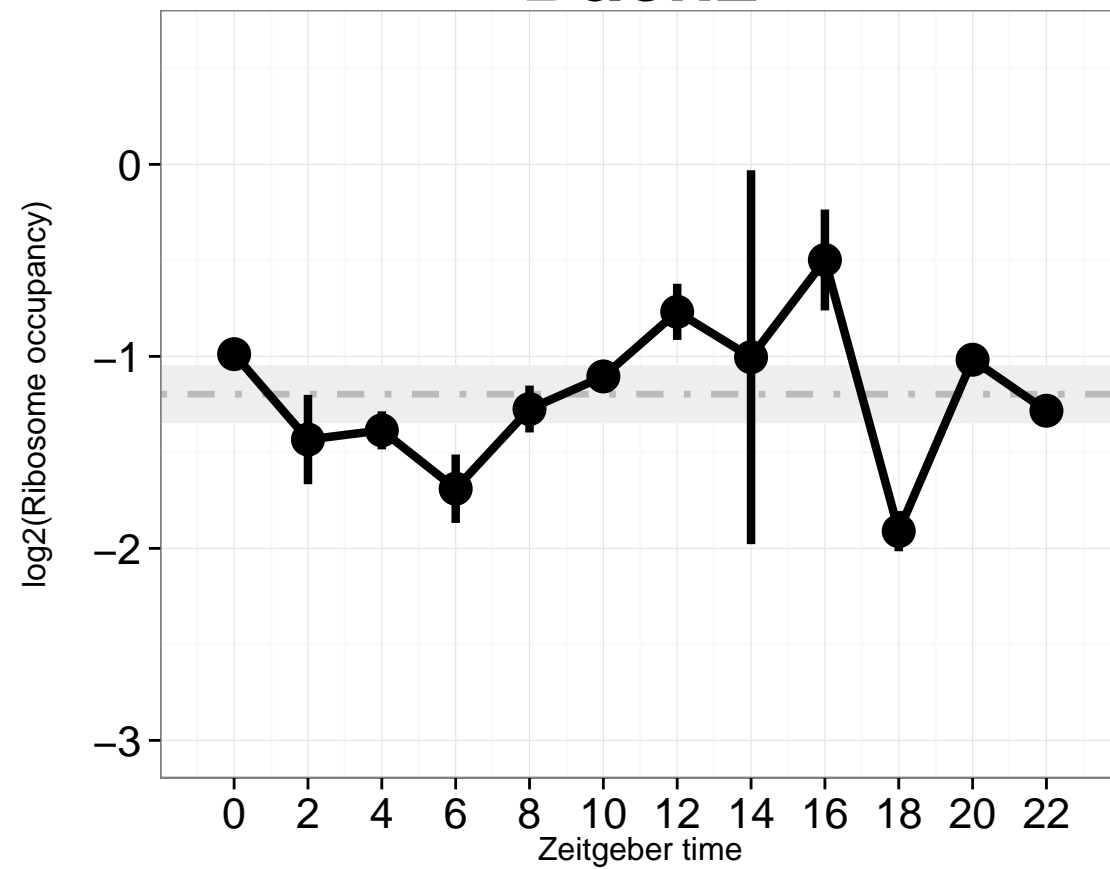

Supplement: SuppDataset_1.zip [file Bach2_set_A.pdf › Supplemental Dataset 1/A-mRNA_nonrhyth_translation_nonrhyth/Bach2_set_A.pdf]

**Bad**

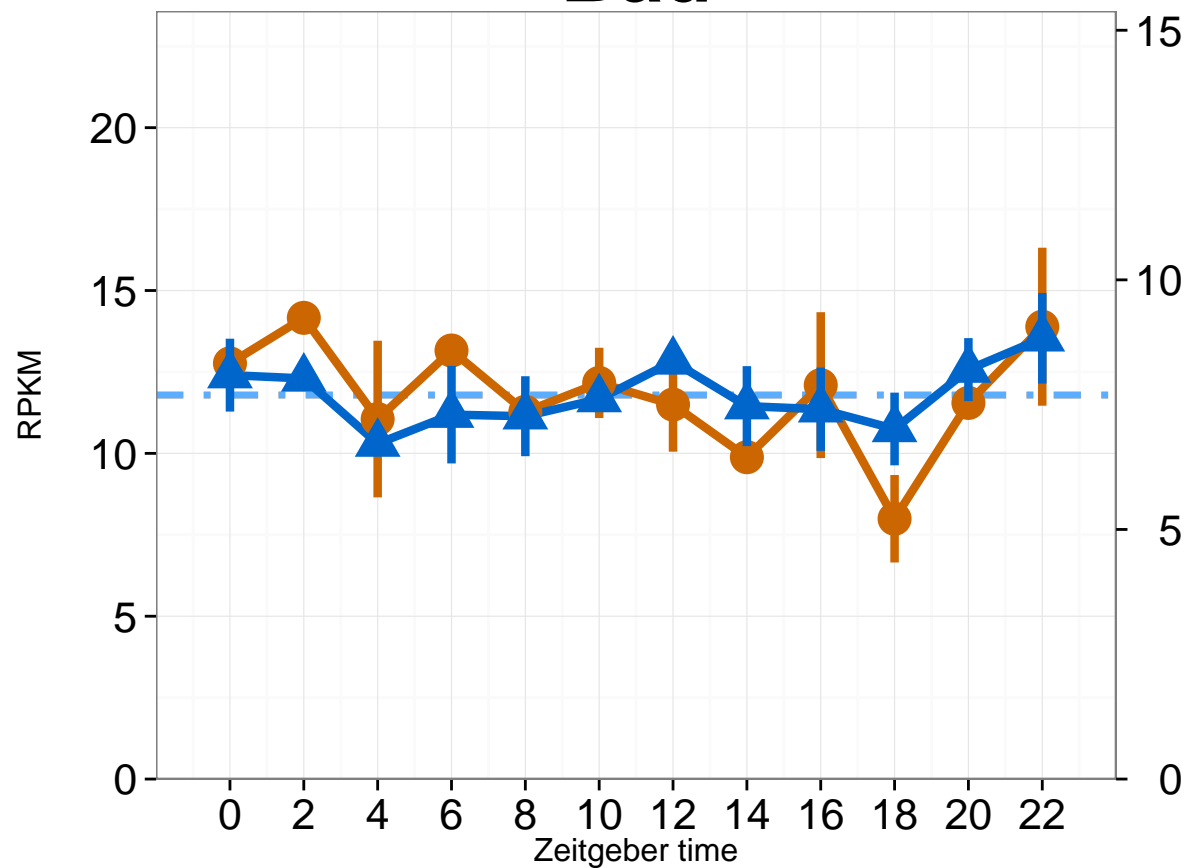

**Bad**

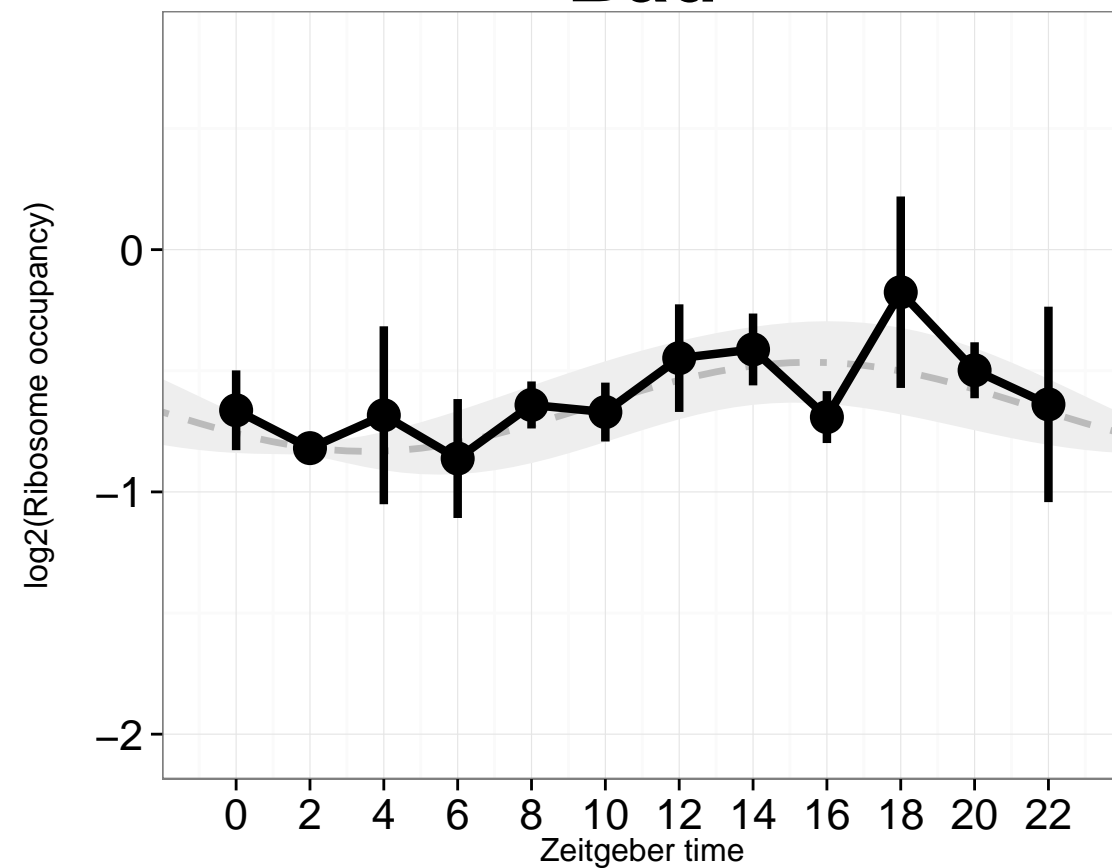

Supplement: SuppDataset_1.zip [file Bad_set_A.pdf › Supplemental Dataset 1/A-mRNA_nonrhyth_translation_nonrhyth/Bad_set_A.pdf]

# Bag1

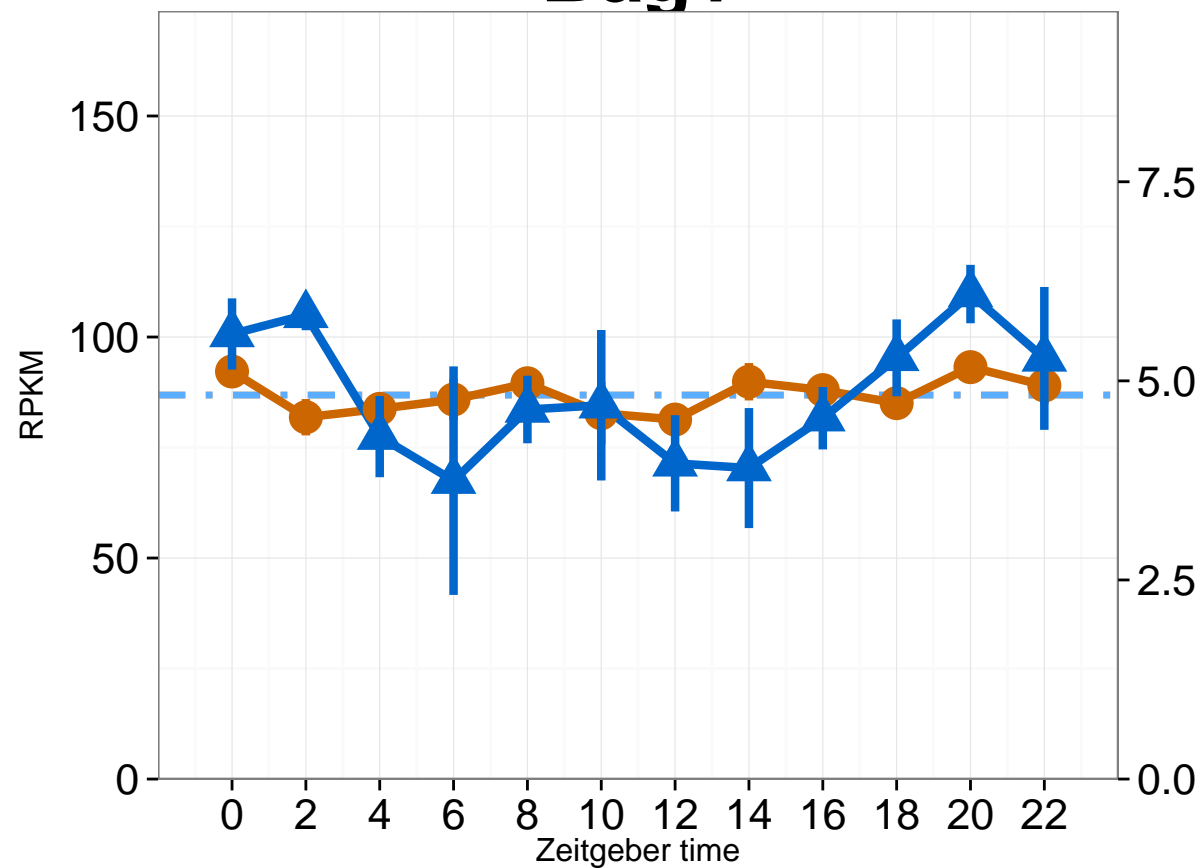

# Bag1

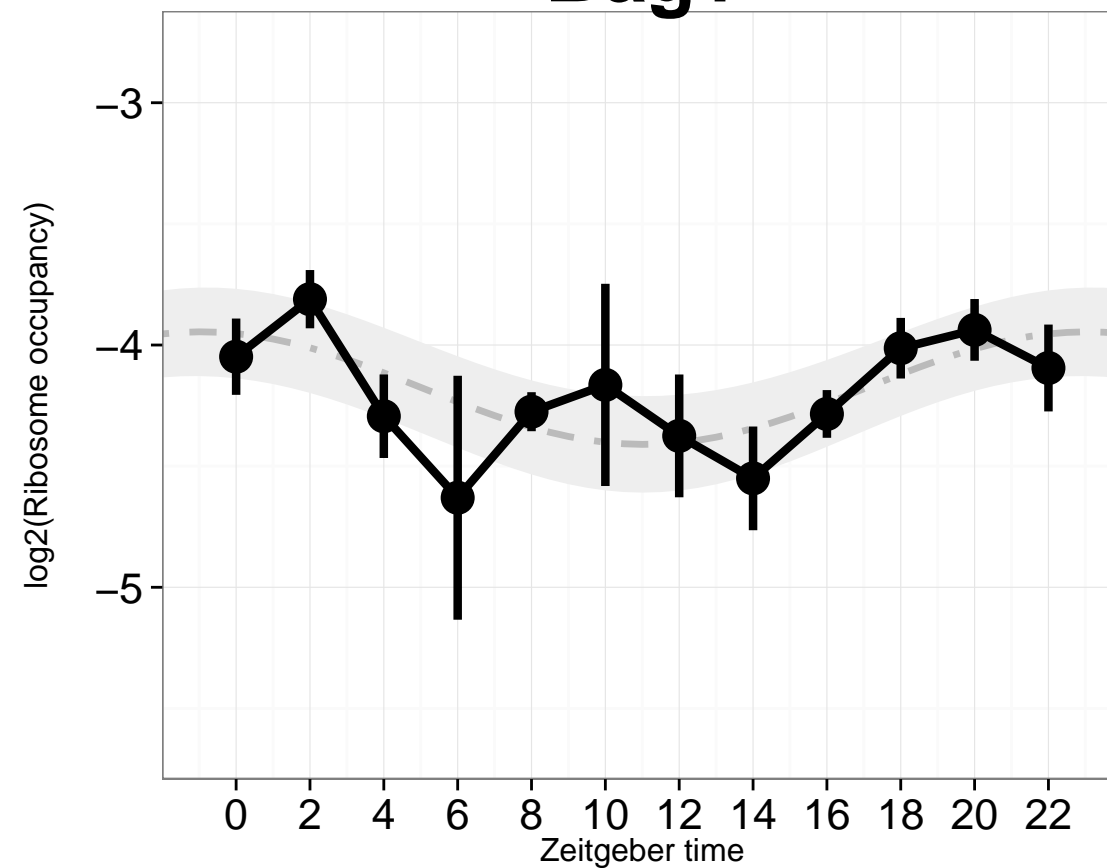

Supplement: SuppDataset_1.zip [file Bag1_set_A.pdf › Supplemental Dataset 1/A-mRNA_nonrhyth_translation_nonrhyth/Bag1_set_A.pdf]

## Bag2

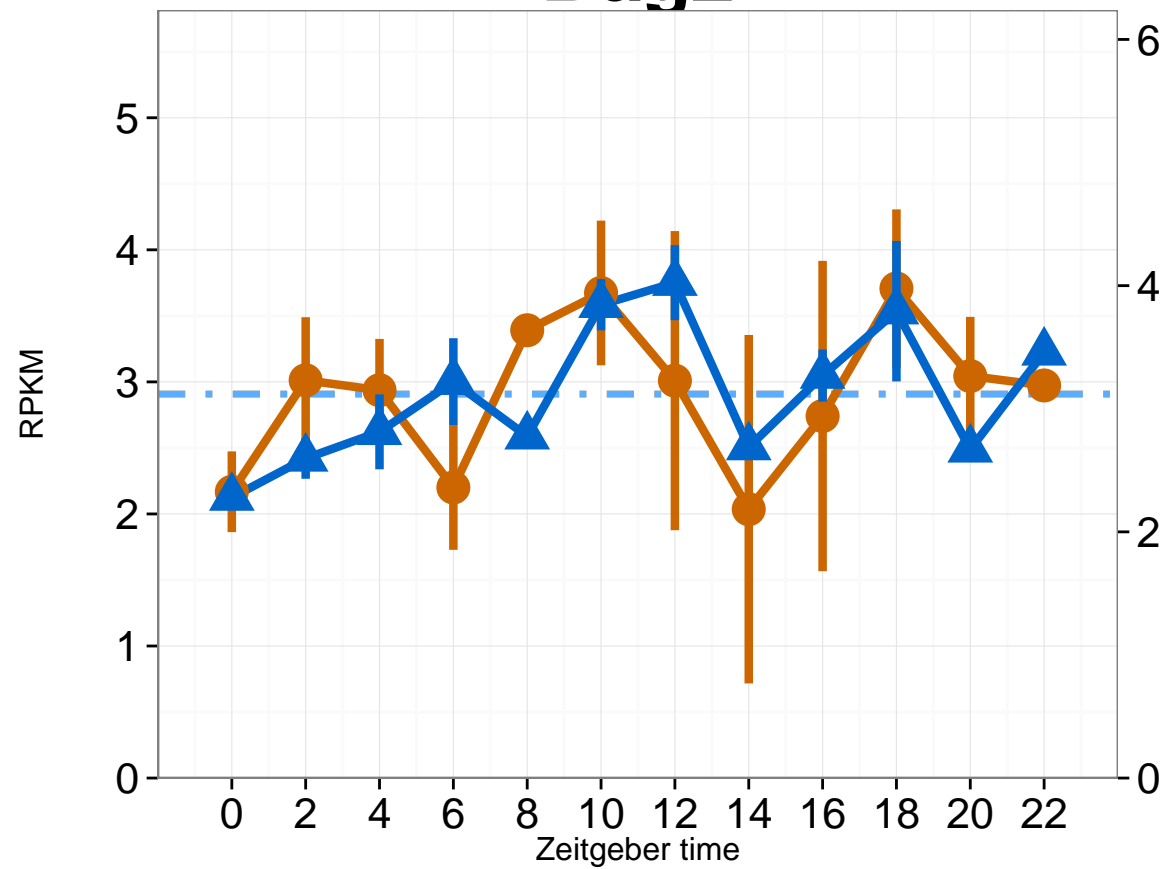

## Bag2

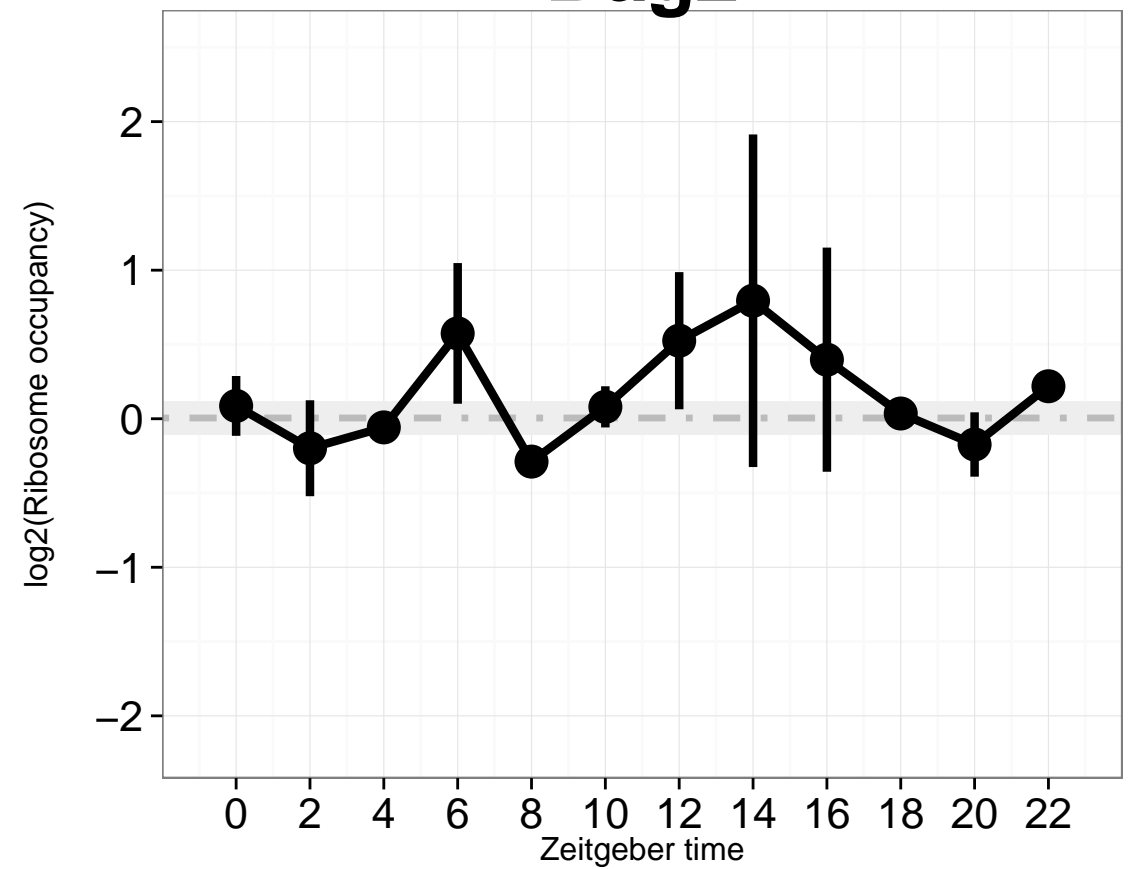

Supplement: SuppDataset_1.zip [file Bag2_set_A.pdf › Supplemental Dataset 1/A-mRNA_nonrhyth_translation_nonrhyth/Bag2_set_A.pdf]

# Bag4

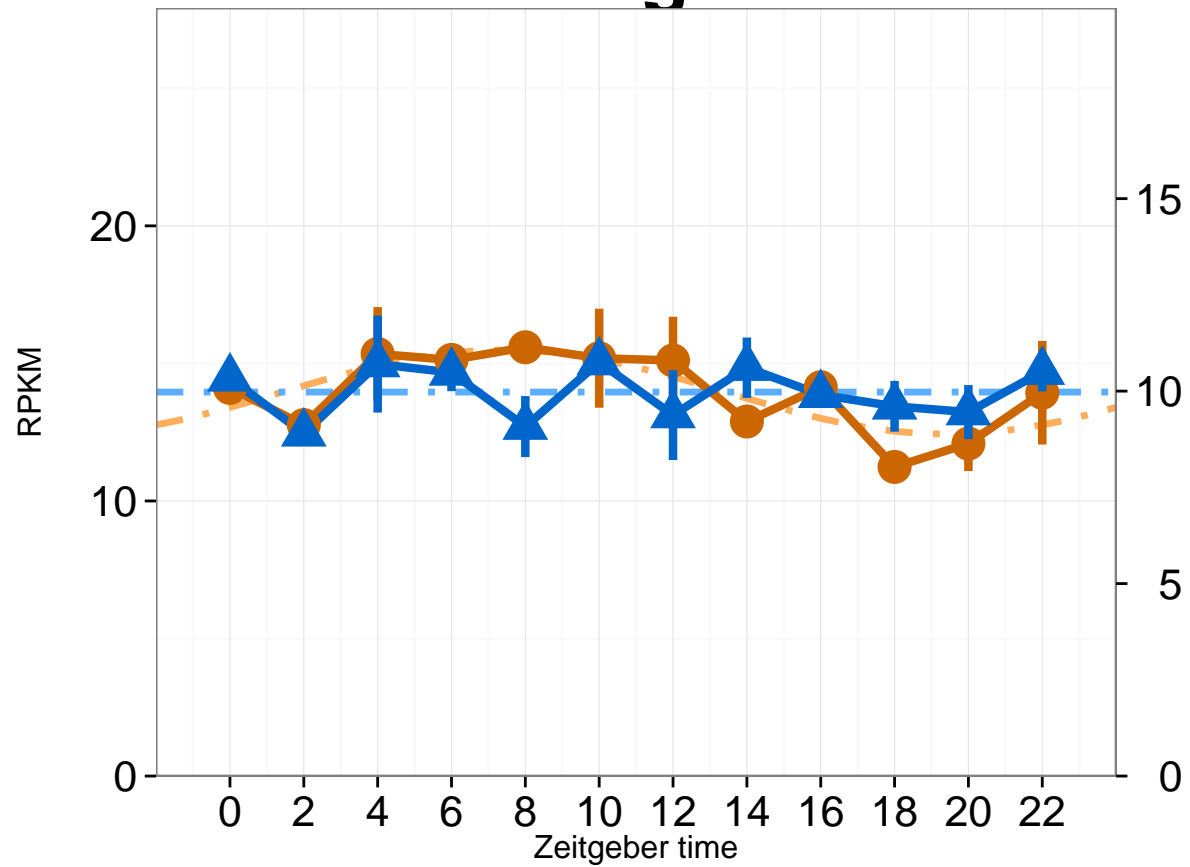

# Bag4

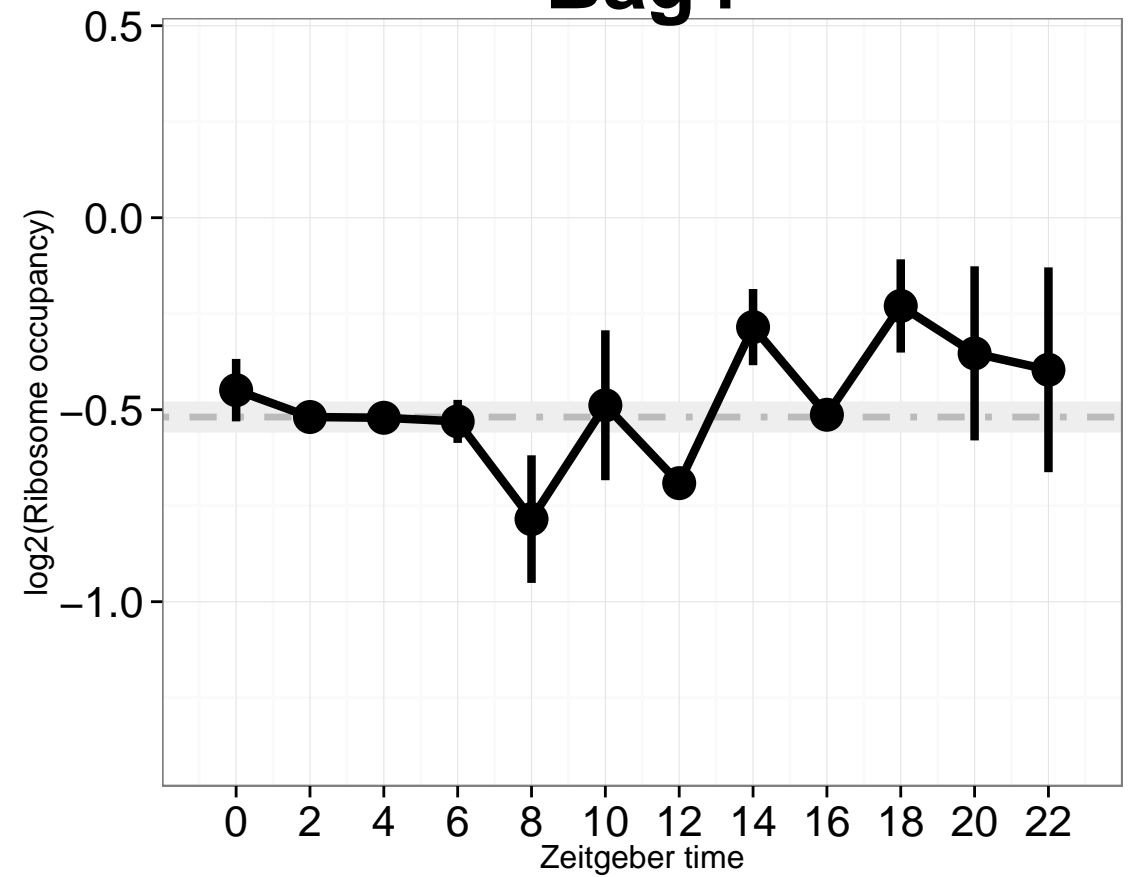

Supplement: SuppDataset_1.zip [file Bag4_set_A.pdf › Supplemental Dataset 1/A-mRNA_nonrhyth_translation_nonrhyth/Bag4_set_A.pdf]

## Bag5

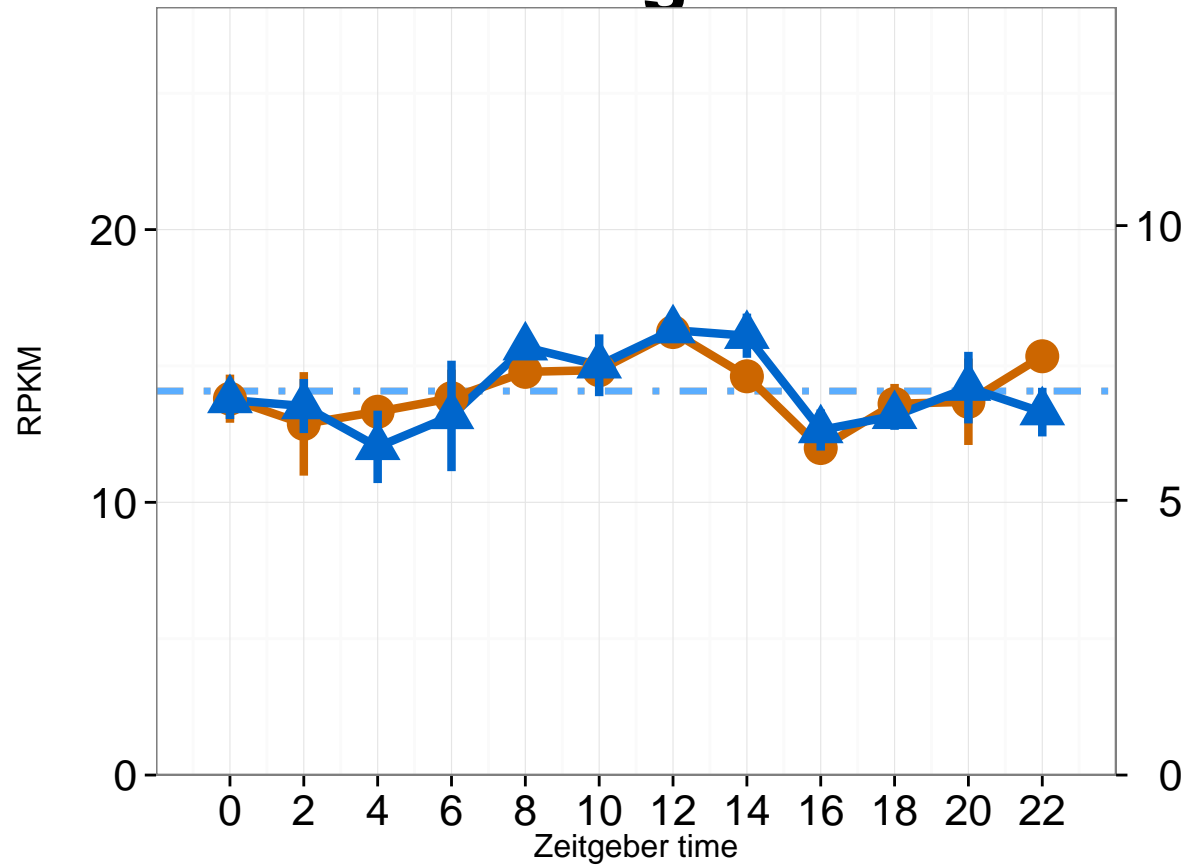

## Bag5

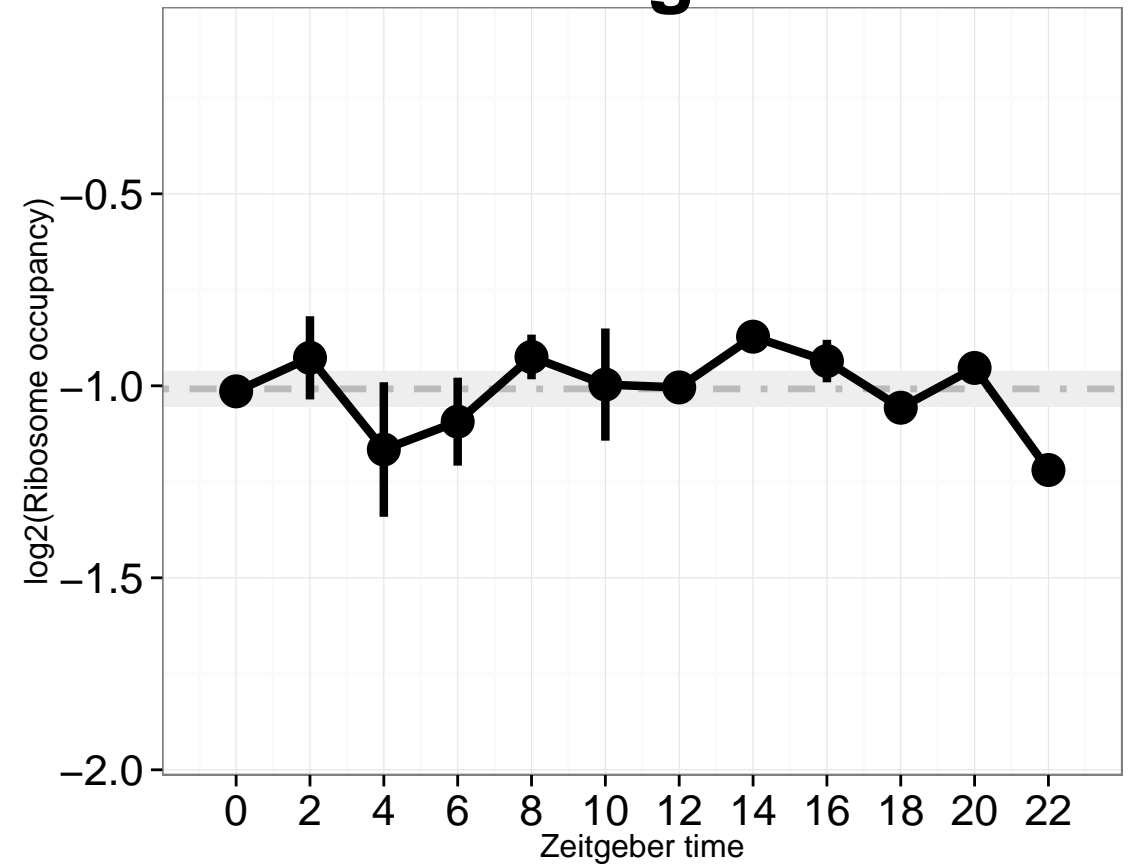

Supplement: SuppDataset_1.zip [file Bag5_set_A.pdf › Supplemental Dataset 1/A-mRNA_nonrhyth_translation_nonrhyth/Bag5_set_A.pdf]

# Bag6

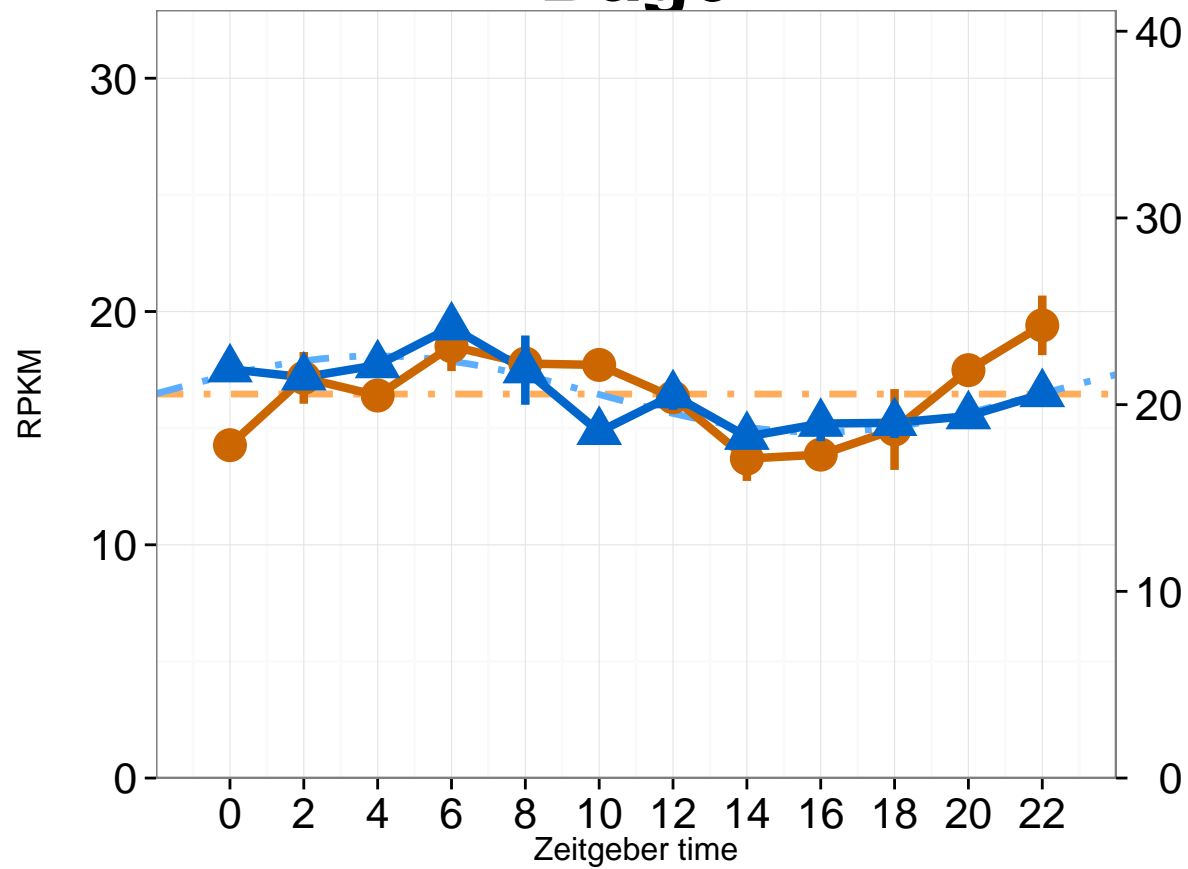

# Bag6

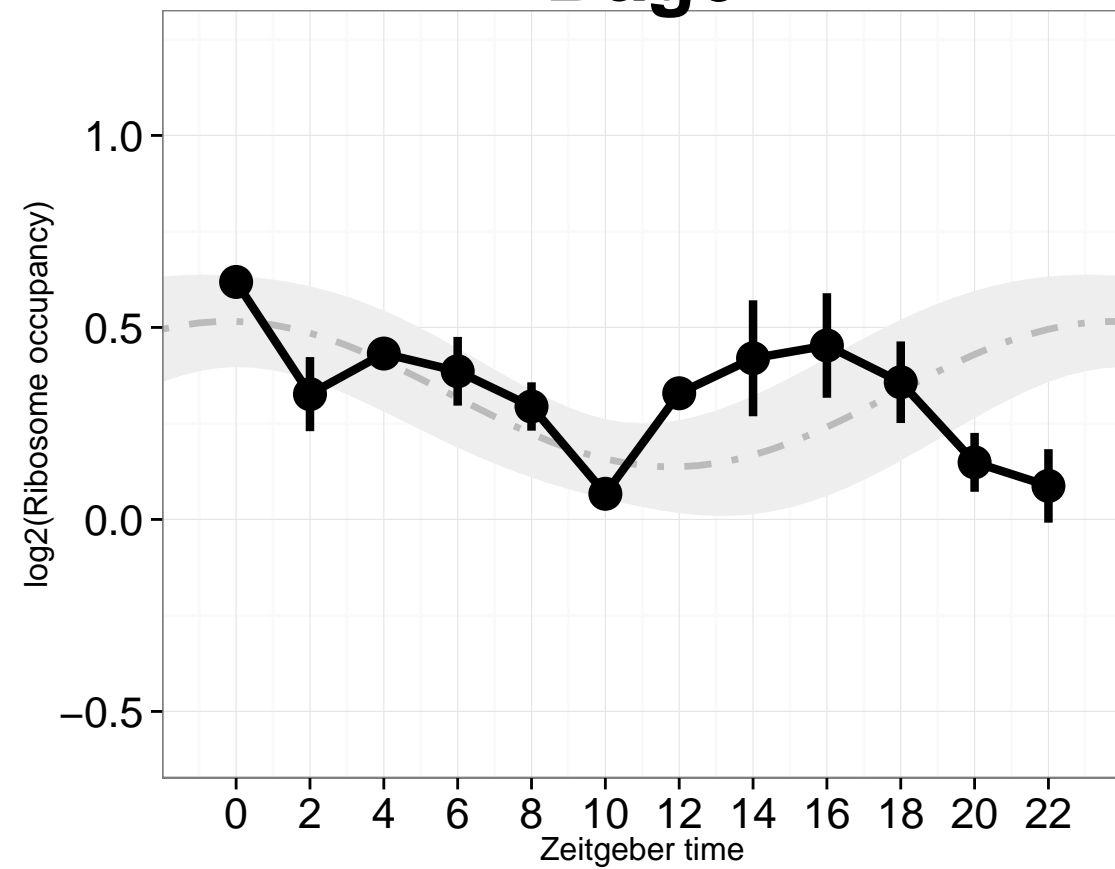

Supplement: SuppDataset_1.zip [file Bag6_set_A.pdf › Supplemental Dataset 1/A-mRNA_nonrhyth_translation_nonrhyth/Bag6_set_A.pdf]

# Bahd1

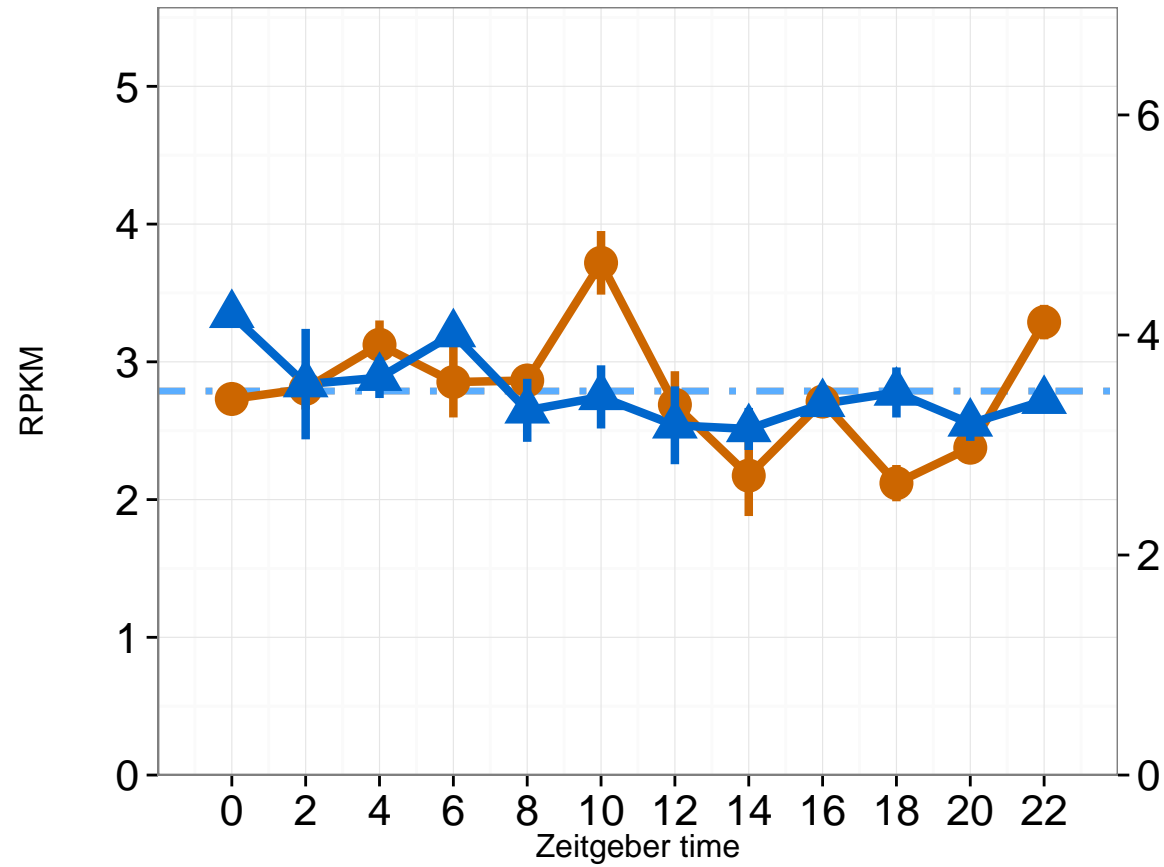

# Bahd1

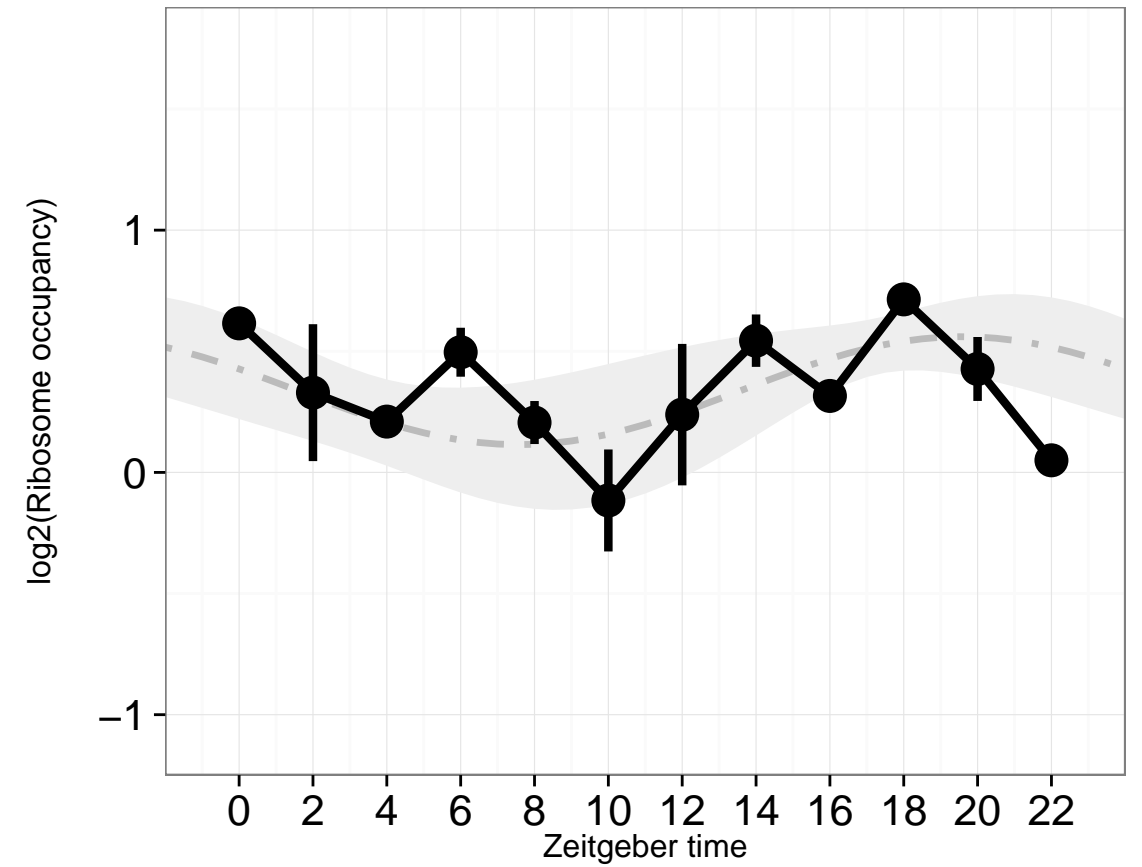

Supplement: SuppDataset_1.zip [file Bahd1_set_A.pdf › Supplemental Dataset 1/A-mRNA_nonrhyth_translation_nonrhyth/Bahd1_set_A.pdf]

## Baiap2l1

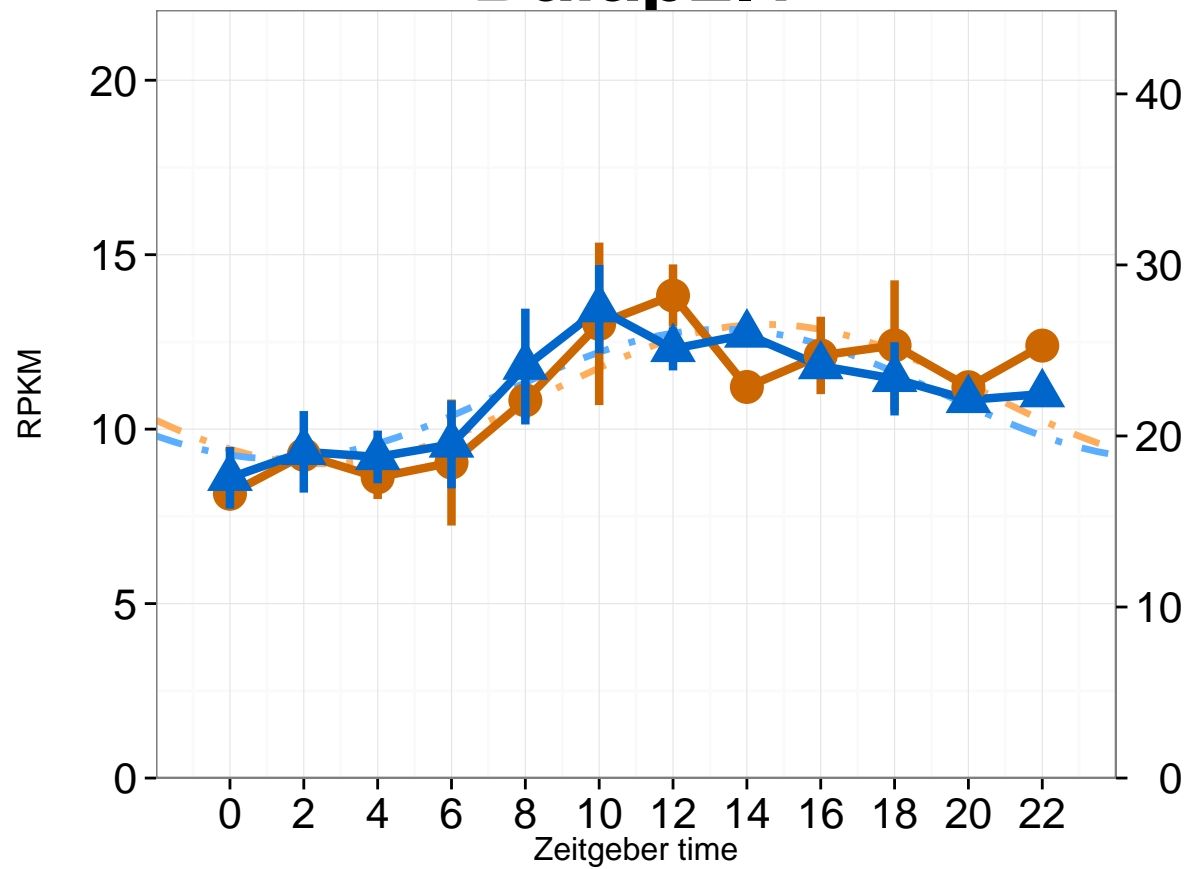

## Baiap2l1

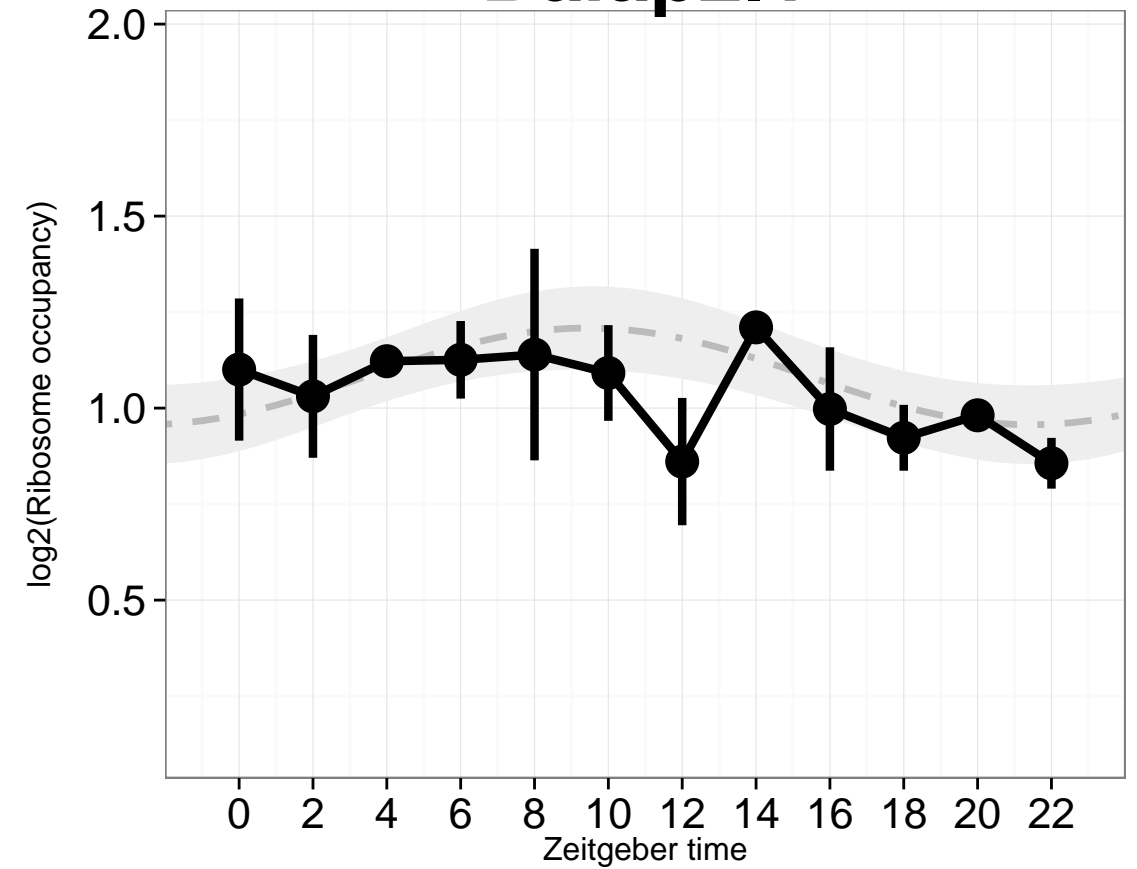

Supplement: SuppDataset_1.zip [file Baiap2l1_set_A.pdf › Supplemental Dataset 1/A-mRNA_nonrhyth_translation_nonrhyth/Baiap2l1_set_A.pdf]

## Bak1

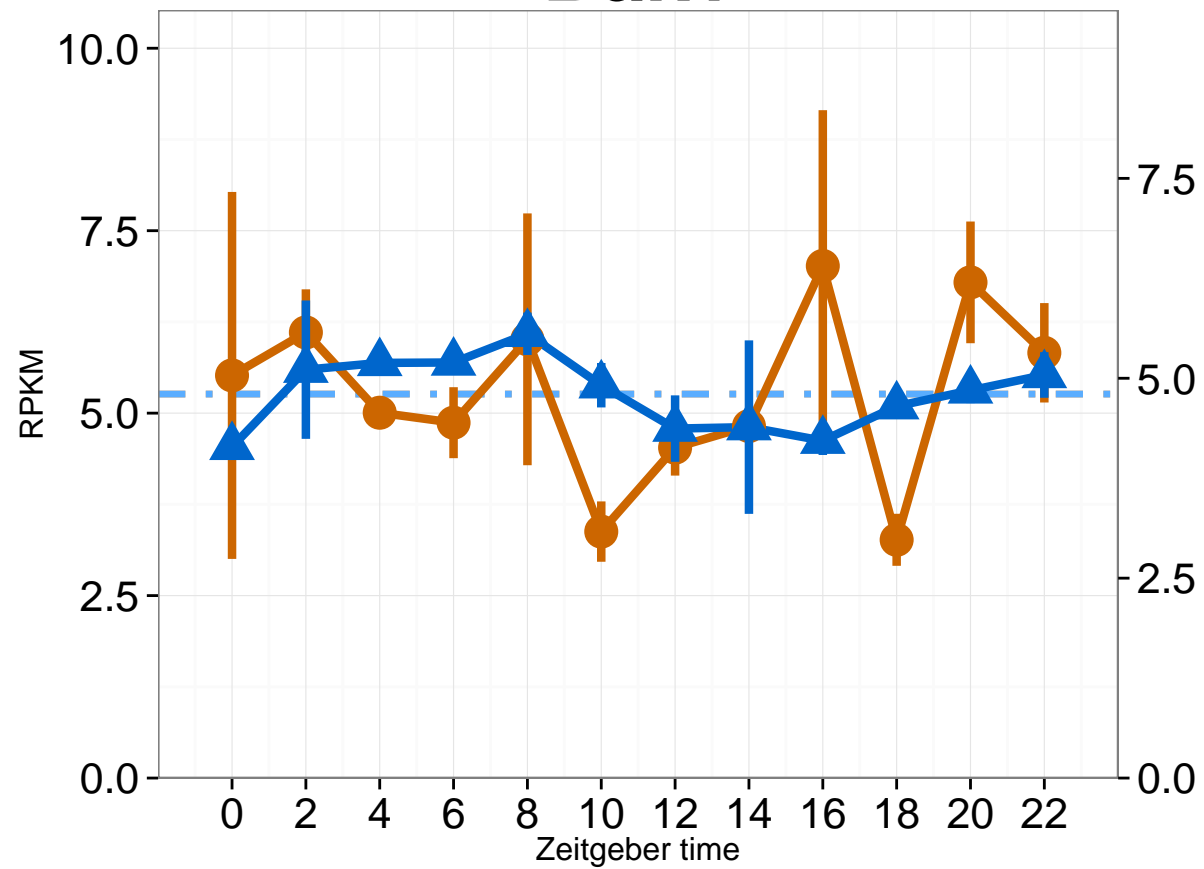

## Bak1

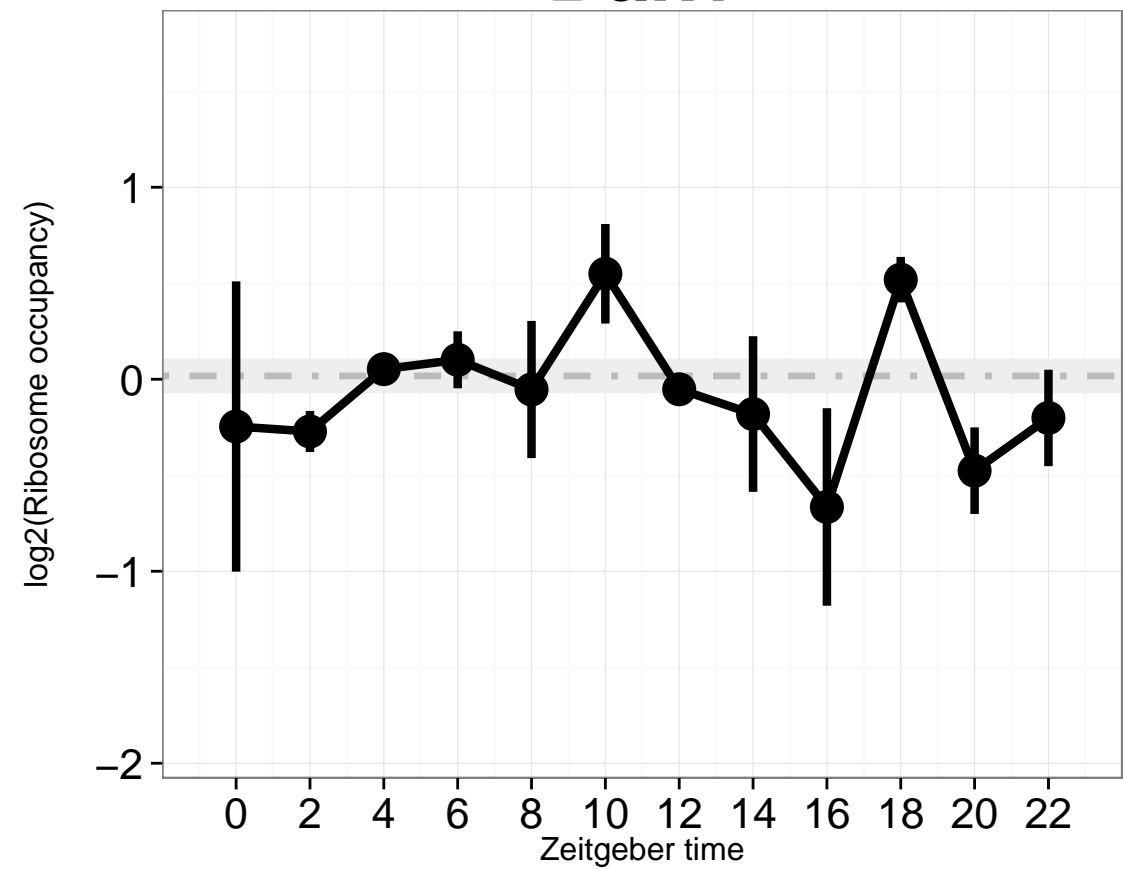

Supplement: SuppDataset_1.zip [file Bak1_set_A.pdf › Supplemental Dataset 1/A-mRNA_nonrhyth_translation_nonrhyth/Bak1_set_A.pdf]

## Banf1

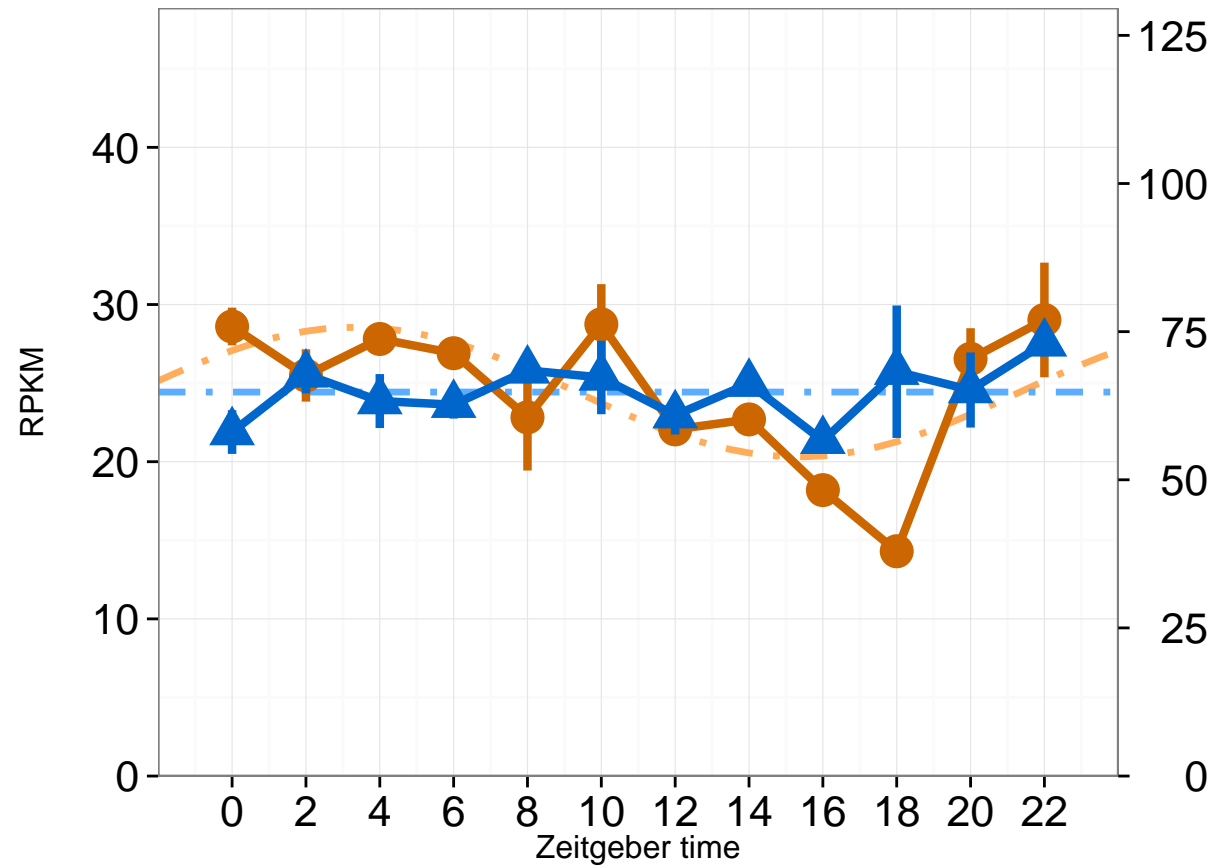

## Banf1

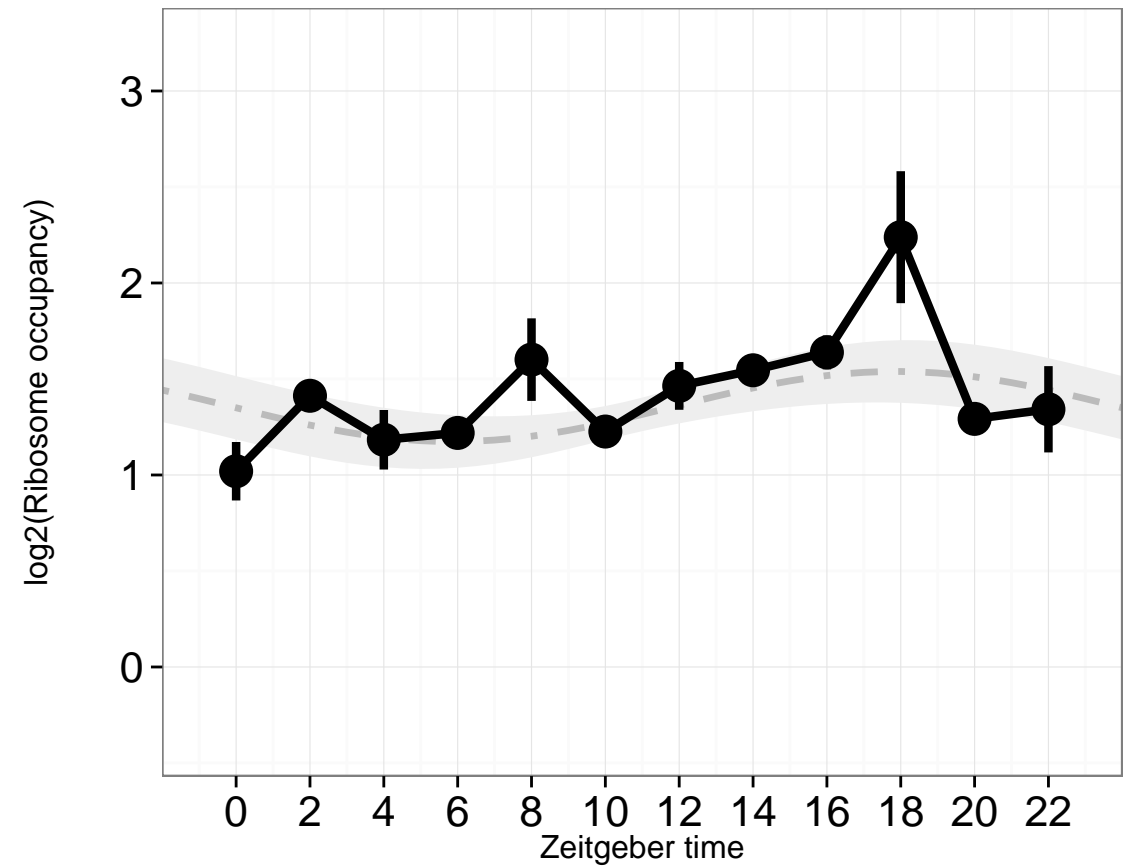

Supplement: SuppDataset_1.zip [file Banf1_set_A.pdf › Supplemental Dataset 1/A-mRNA_nonrhyth_translation_nonrhyth/Banf1_set_A.pdf]

# Bank1

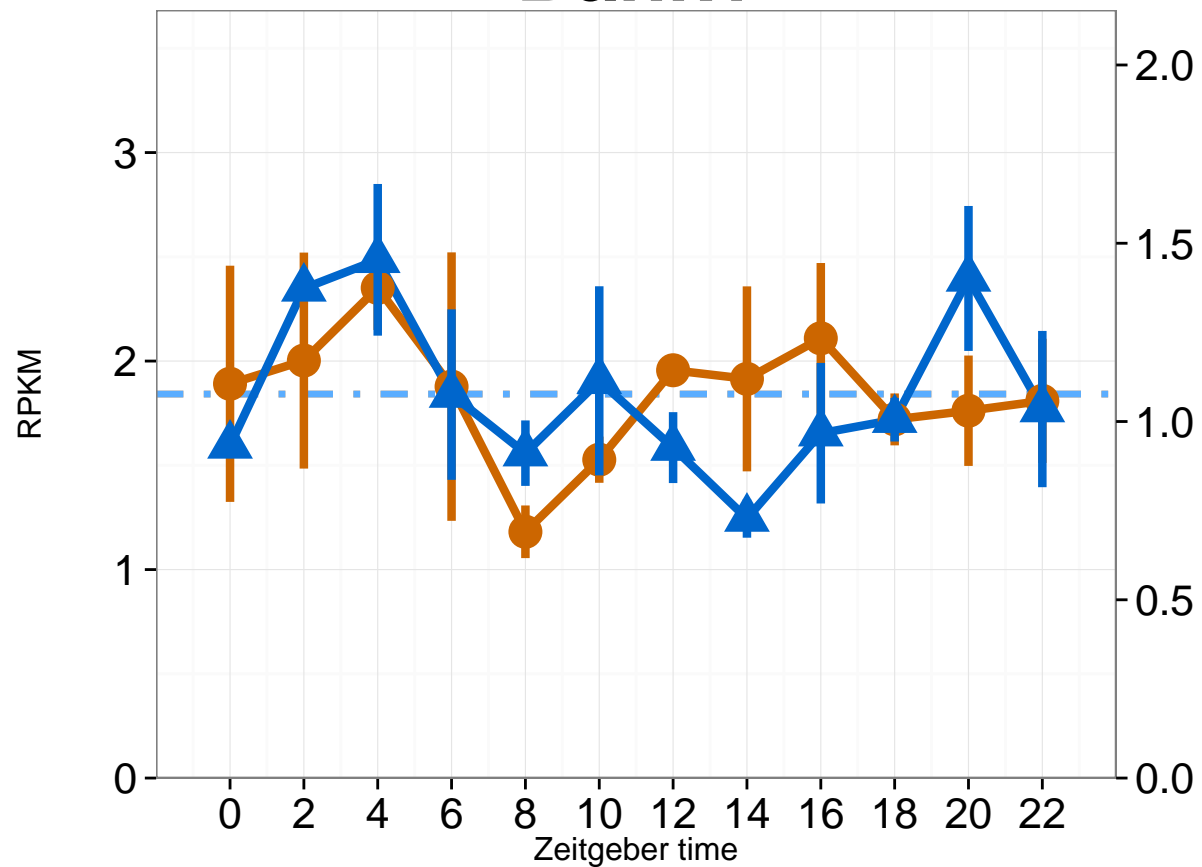

# Bank1

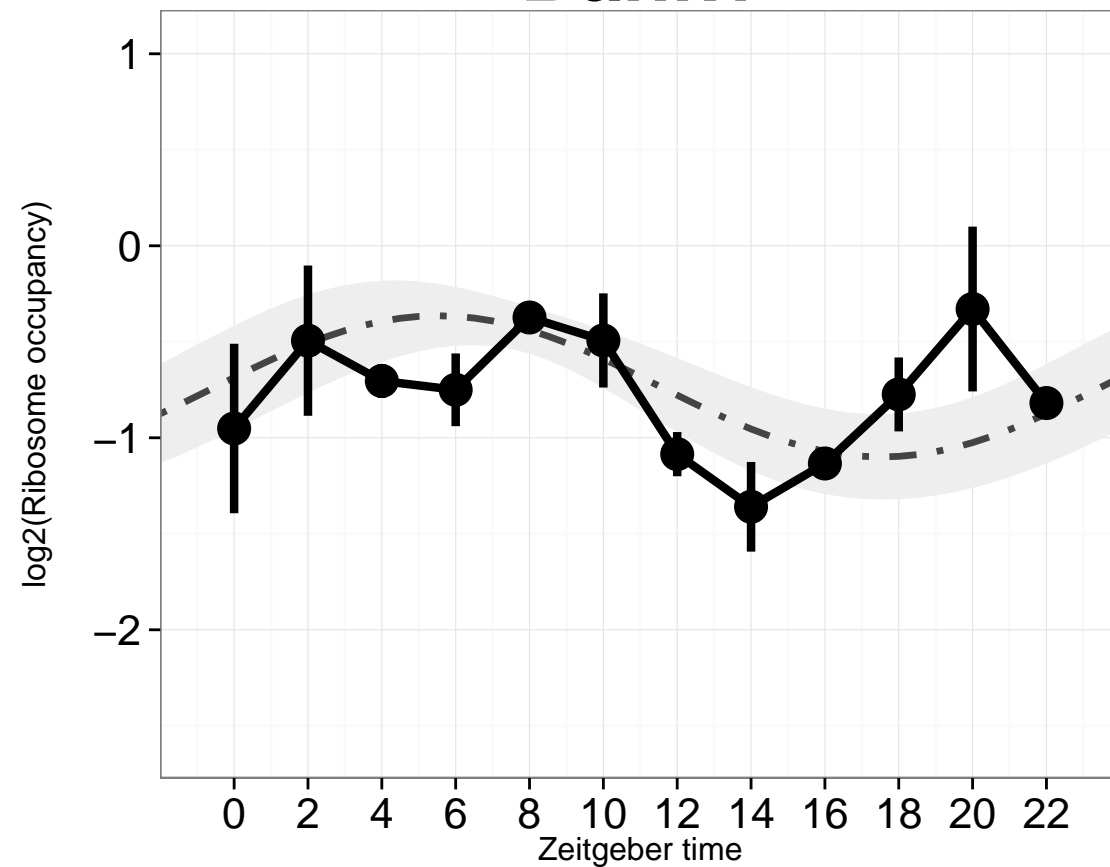

Supplement: SuppDataset_1.zip [file Bank1_set_A.pdf › Supplemental Dataset 1/A-mRNA_nonrhyth_translation_nonrhyth/Bank1_set_A.pdf]

# Bap1

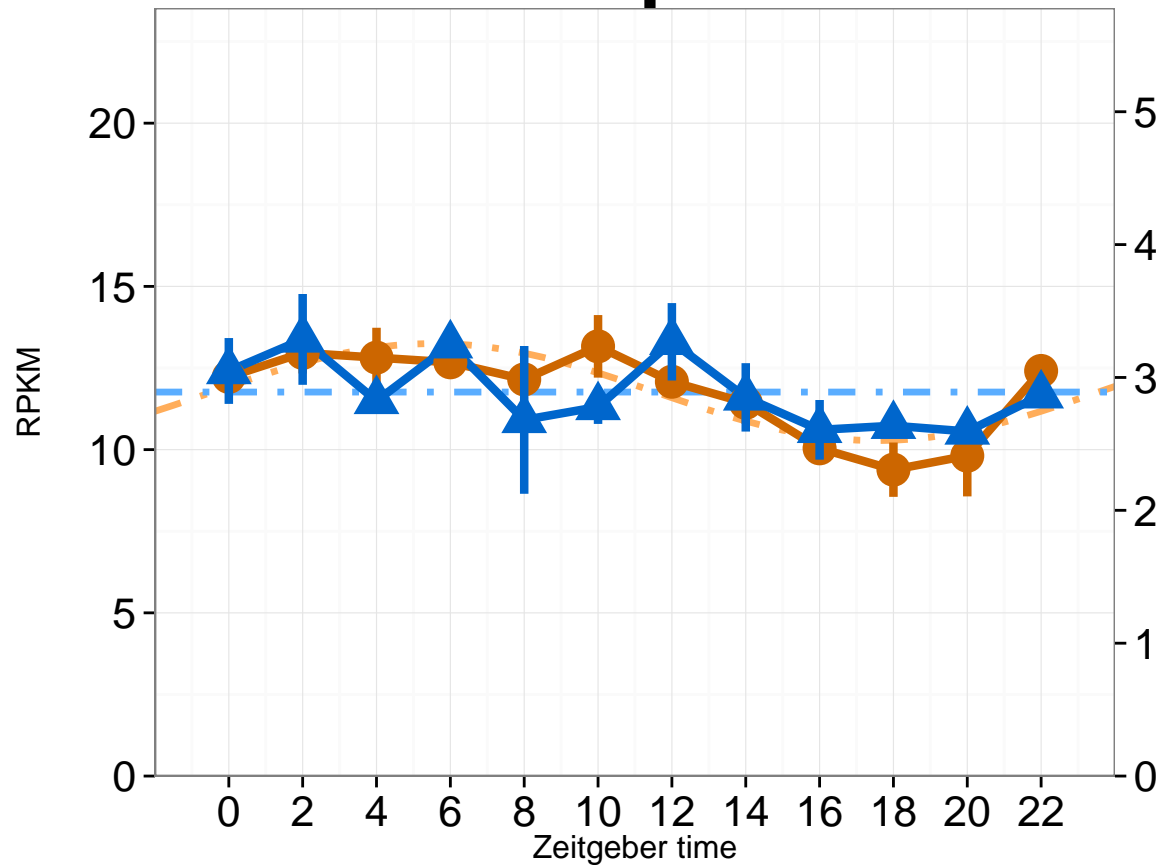

# Bap1

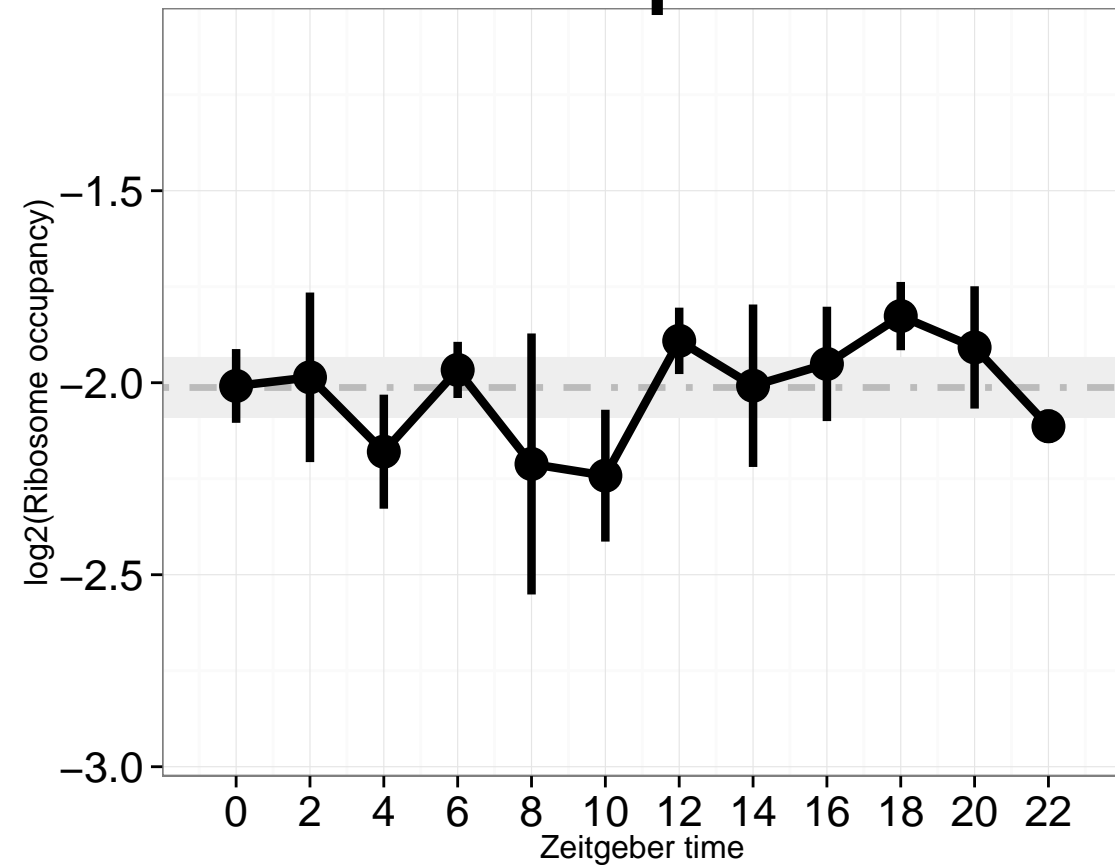

Supplement: SuppDataset_1.zip [file Bap1_set_A.pdf › Supplemental Dataset 1/A-mRNA_nonrhyth_translation_nonrhyth/Bap1_set_A.pdf]

## Bard1

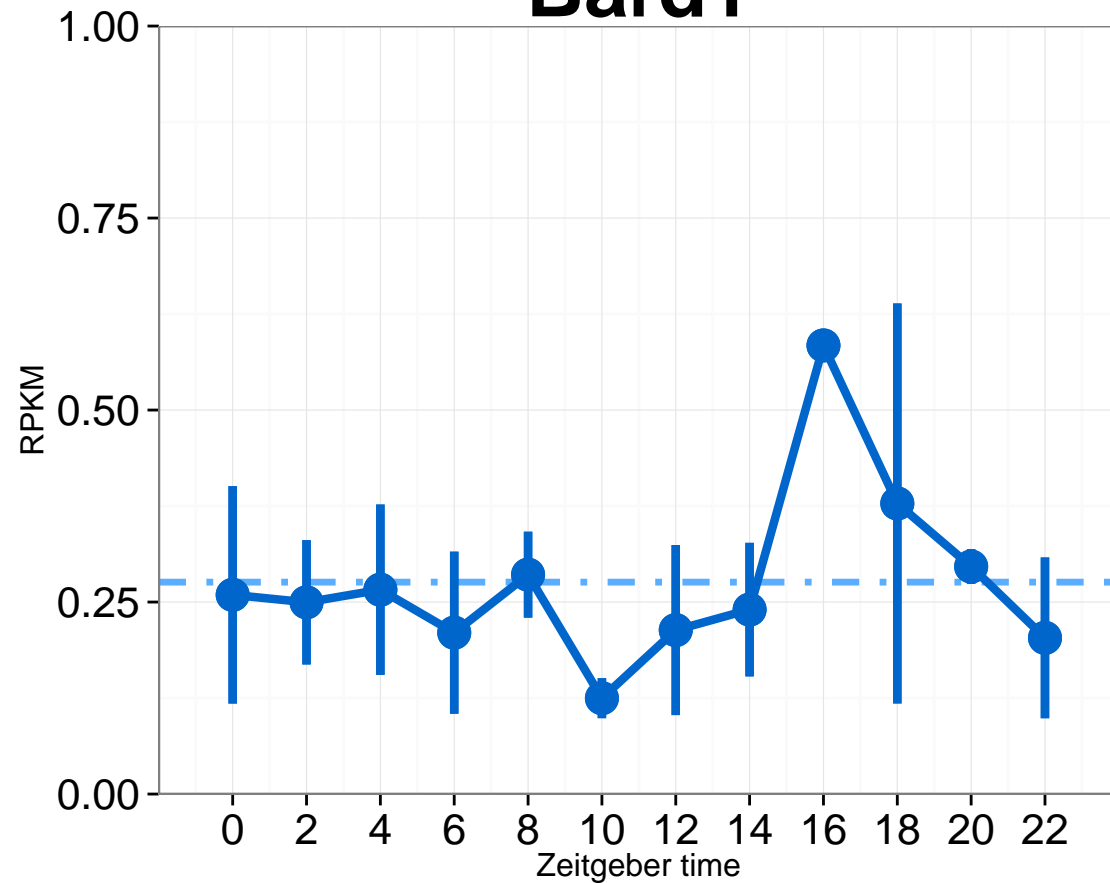

## Bard1 log2(Ribosome occupancy

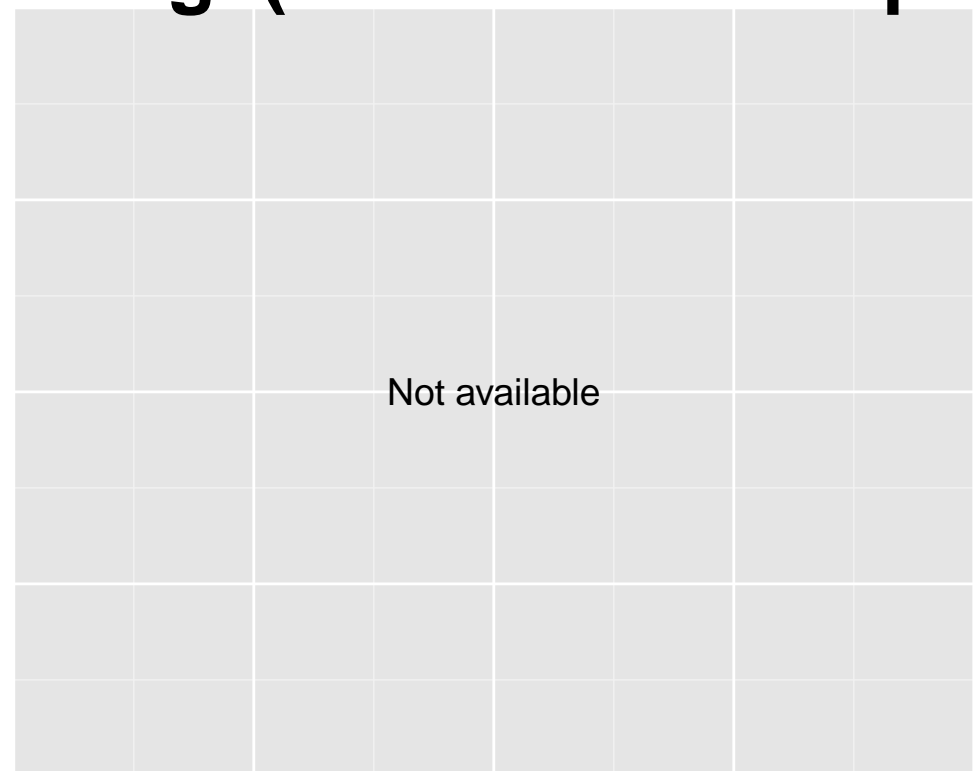

Supplement: SuppDataset_1.zip [file Bard1_set_A.pdf › Supplemental Dataset 1/A-mRNA_nonrhyth_translation_nonrhyth/Bard1_set_A.pdf]

## Bax

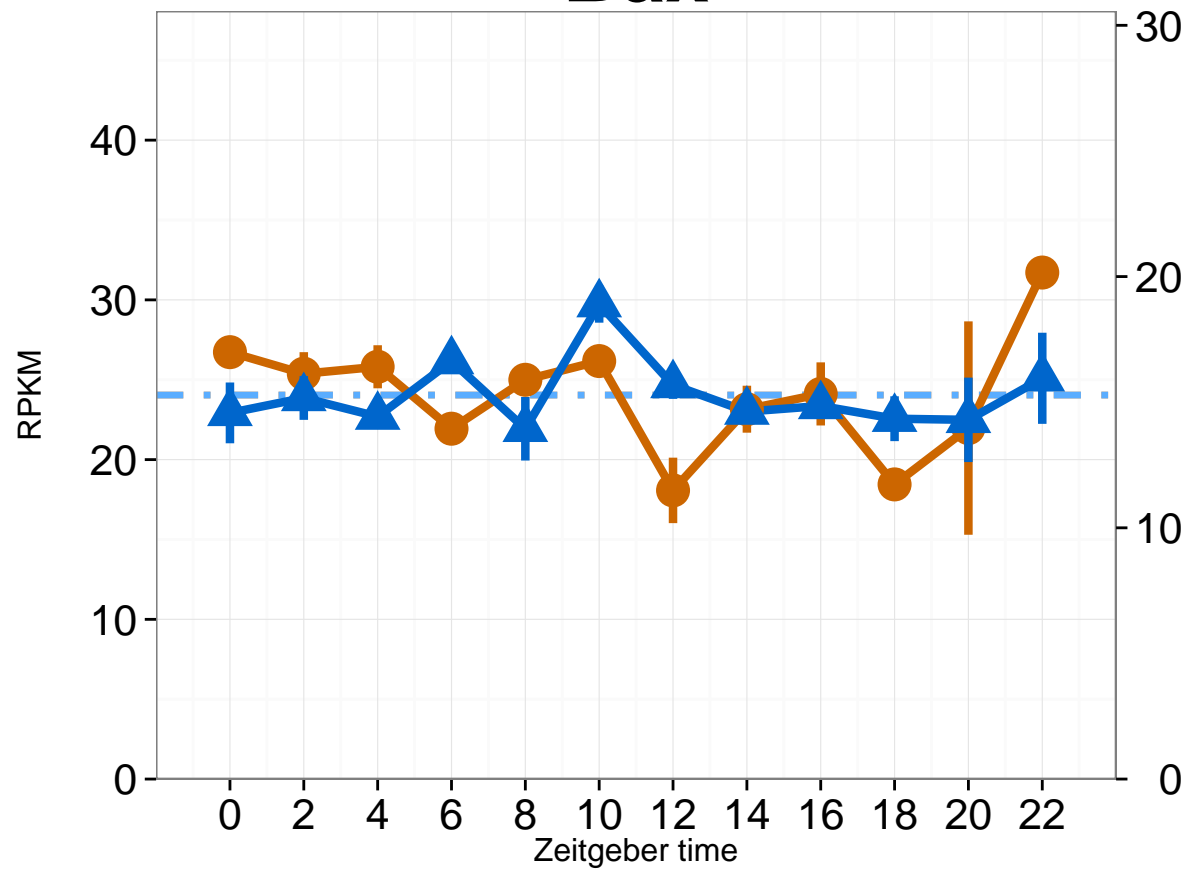

## Bax

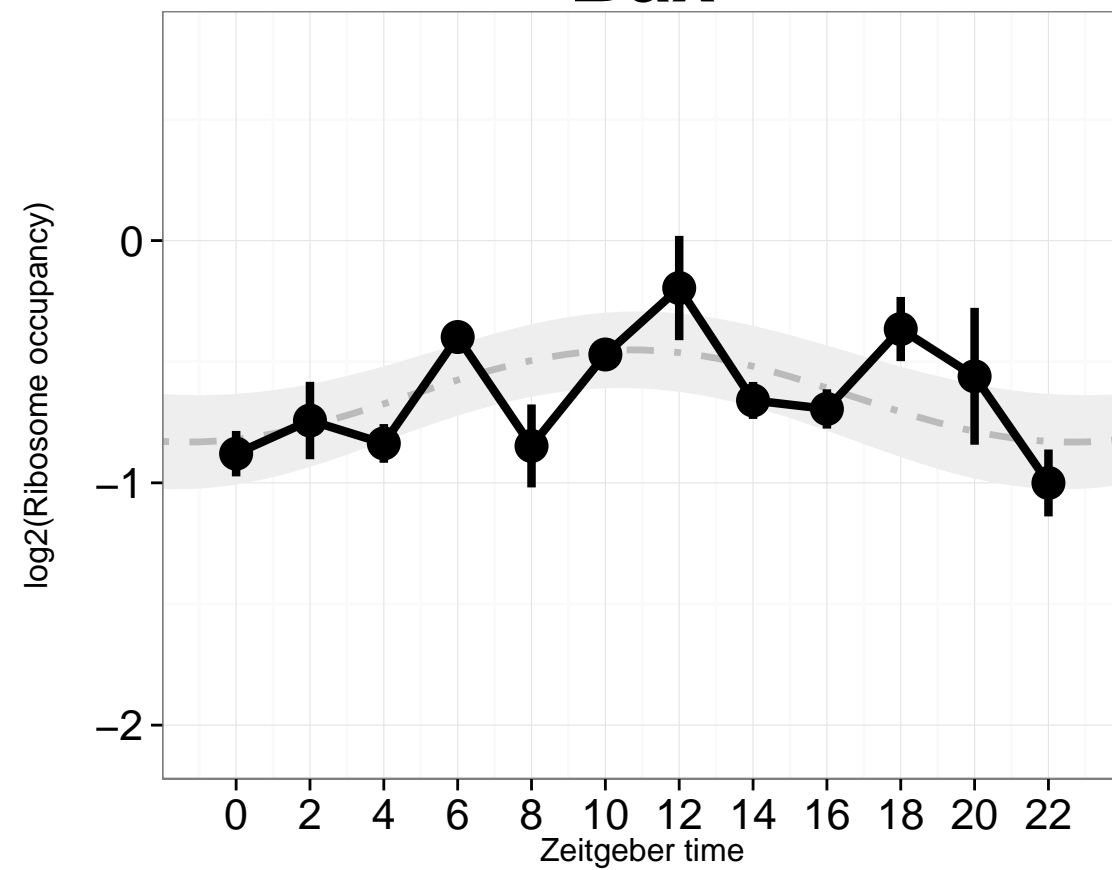

Supplement: SuppDataset_1.zip [file Bax_set_A.pdf › Supplemental Dataset 1/A-mRNA_nonrhyth_translation_nonrhyth/Bax_set_A.pdf]

## Baz2a

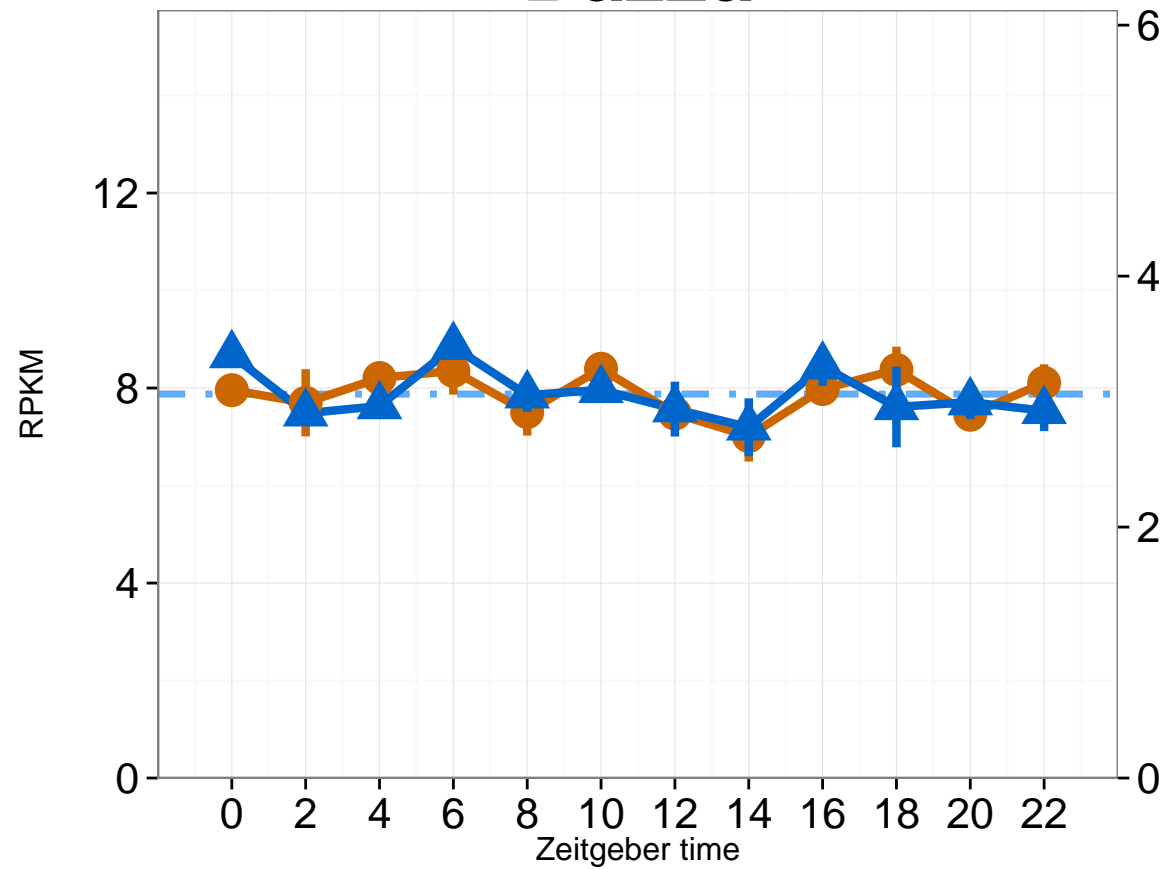

## Baz2a

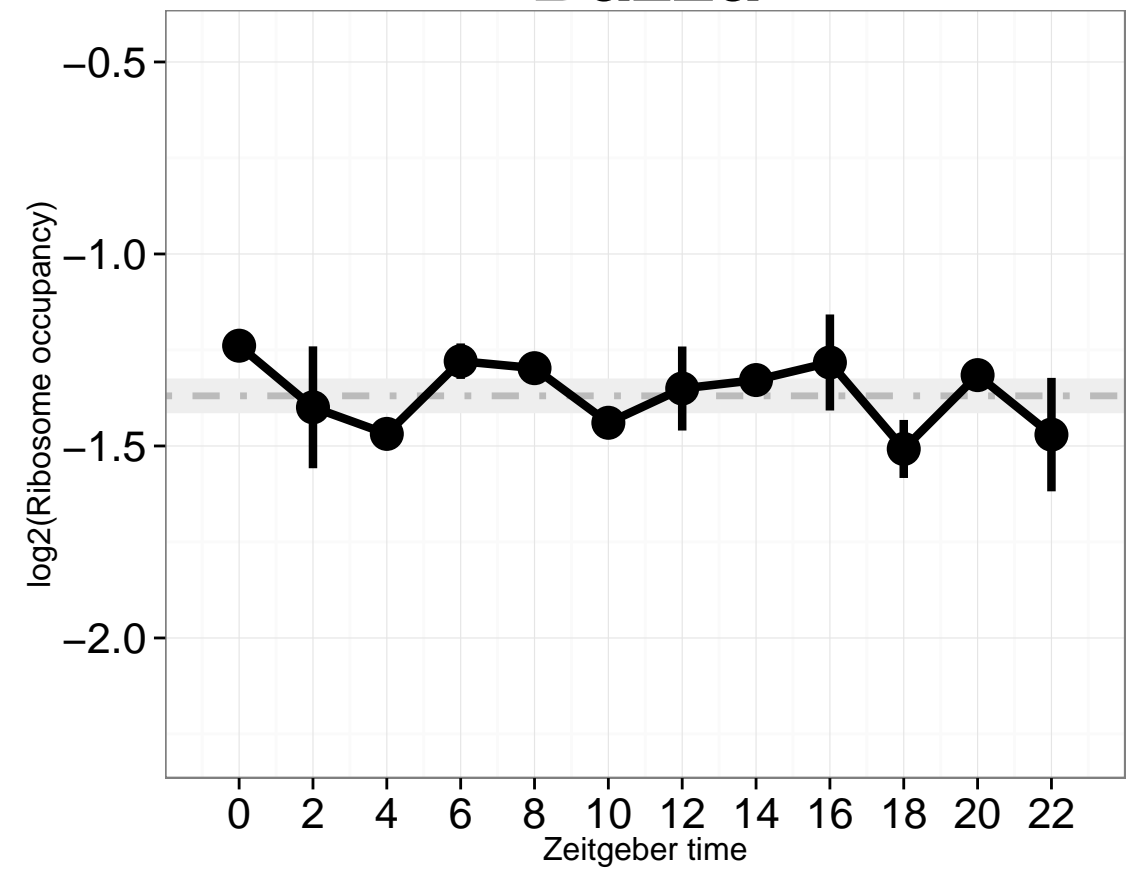

Supplement: SuppDataset_1.zip [file Baz2a_set_A.pdf › Supplemental Dataset 1/A-mRNA_nonrhyth_translation_nonrhyth/Baz2a_set_A.pdf]

# Baz2b

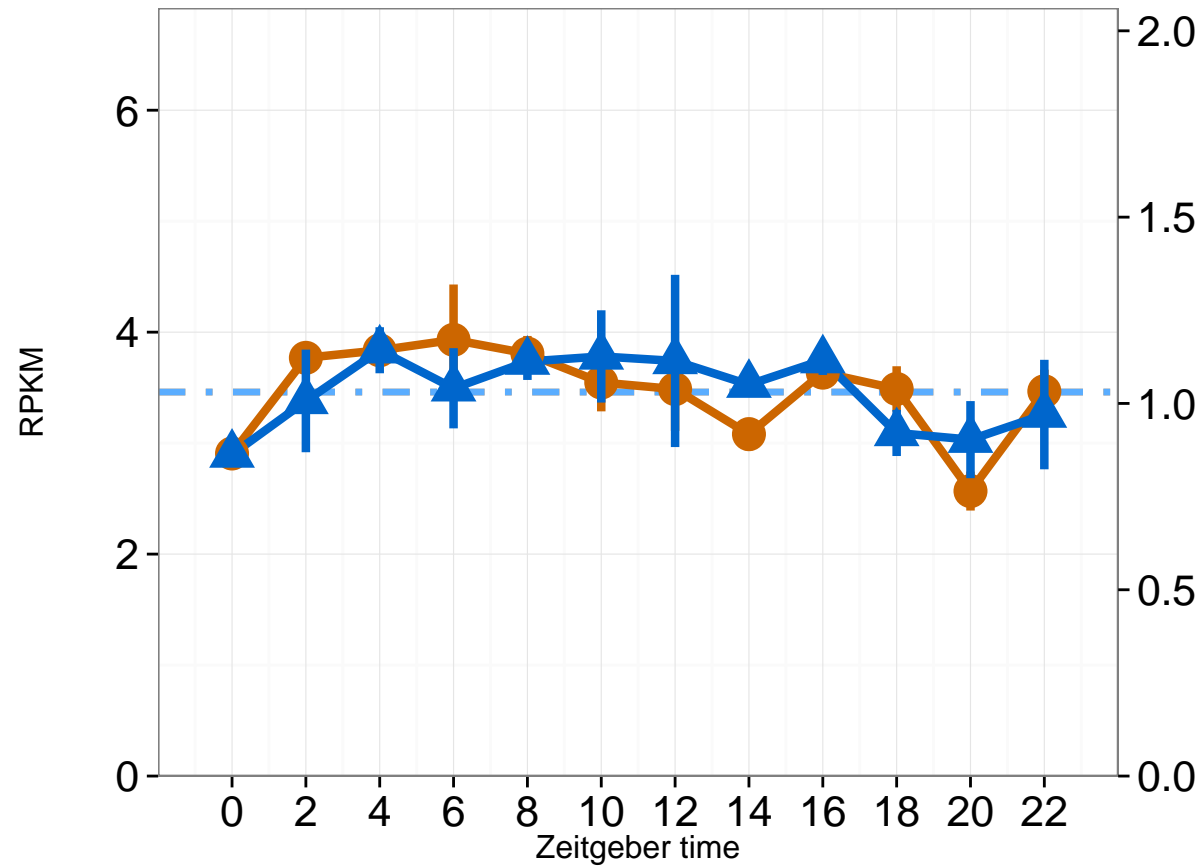

# Baz2b

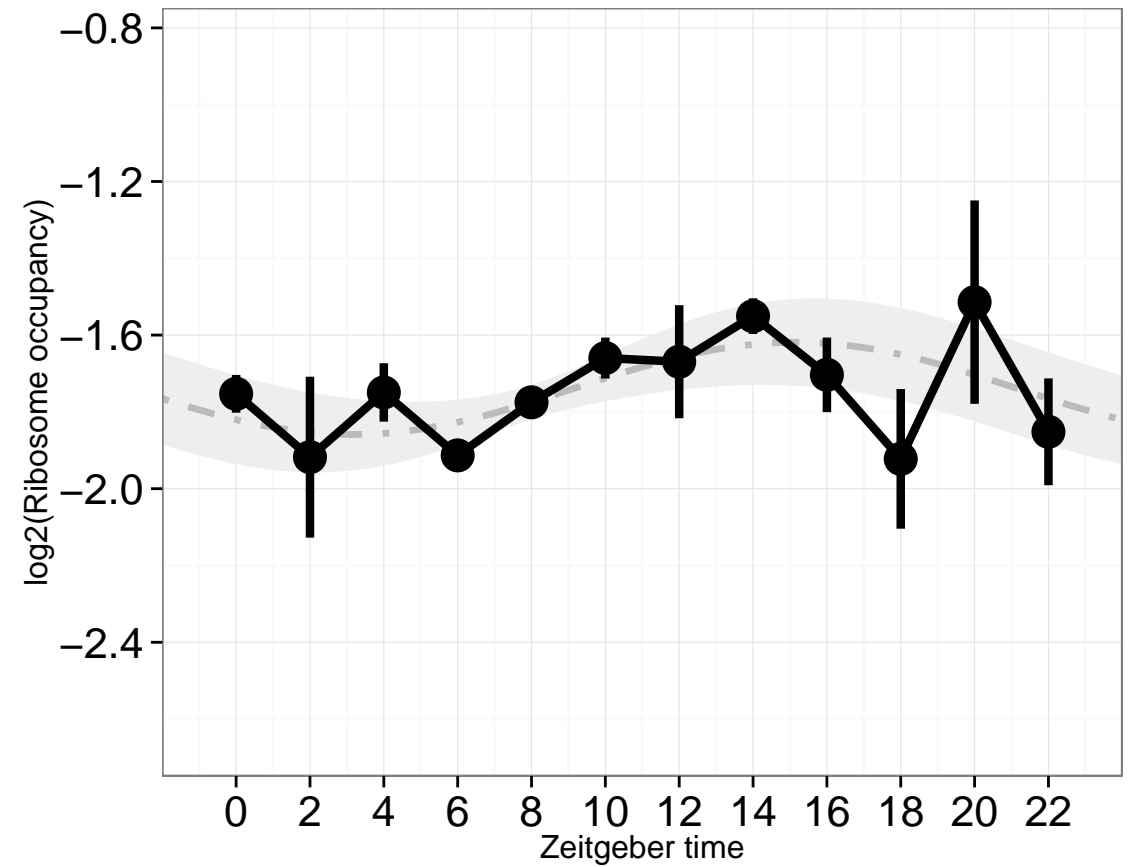

Supplement: SuppDataset_1.zip [file Baz2b_set_A.pdf › Supplemental Dataset 1/A-mRNA_nonrhyth_translation_nonrhyth/Baz2b_set_A.pdf]

# Bbc3

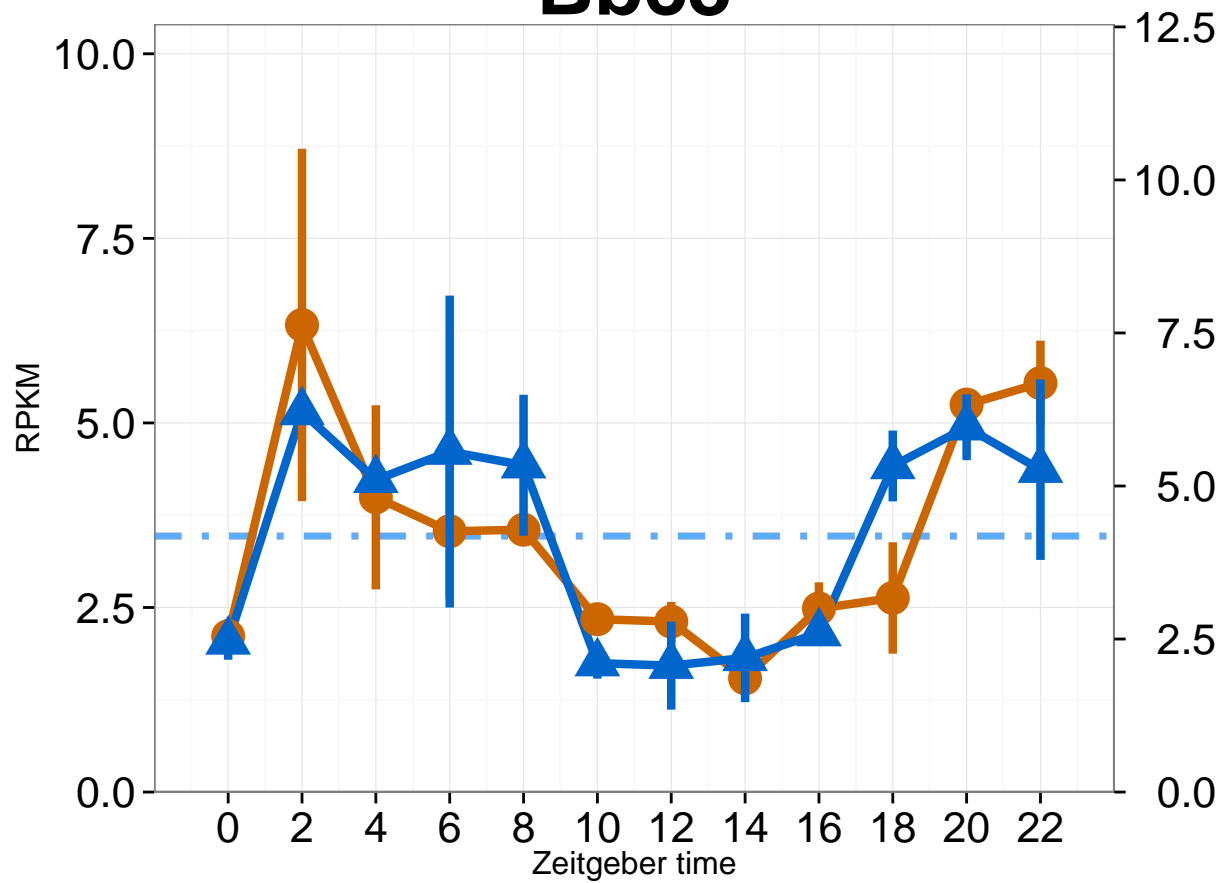

# Bbc3

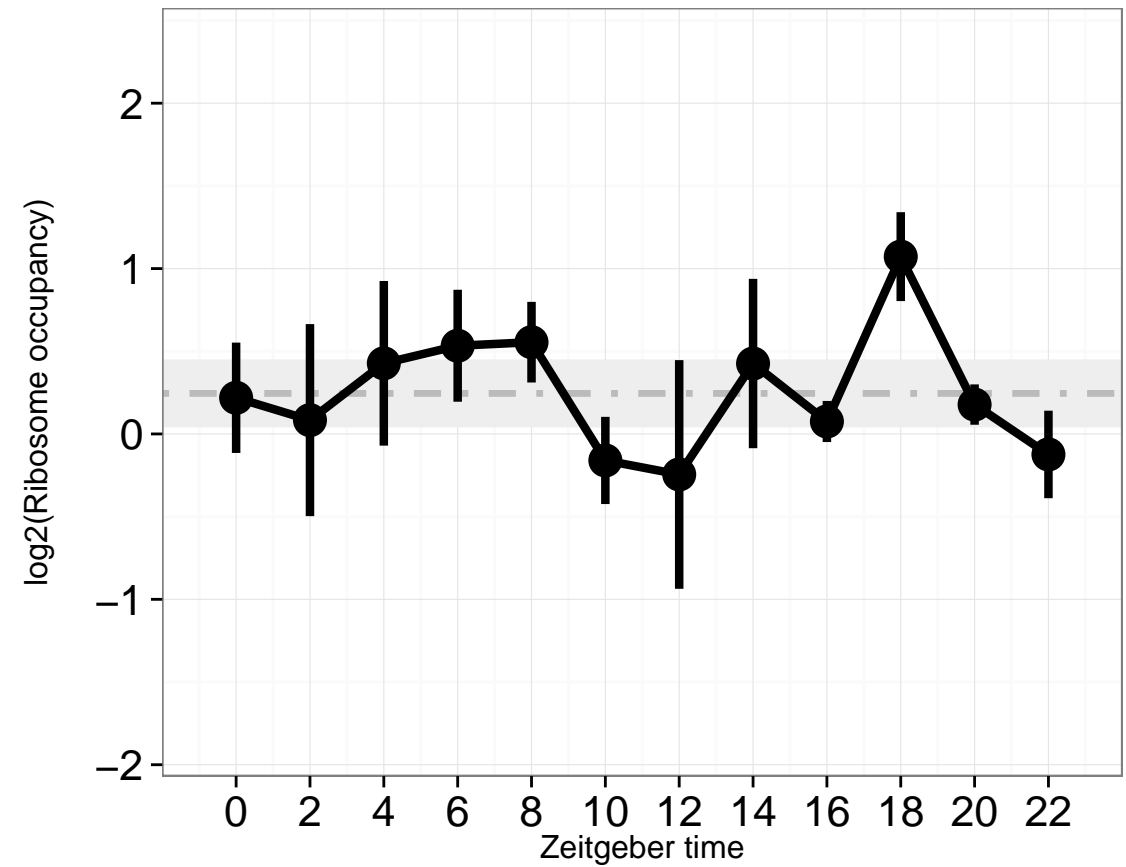

Supplement: SuppDataset_1.zip [file Bbc3_set_A.pdf › Supplemental Dataset 1/A-mRNA_nonrhyth_translation_nonrhyth/Bbc3_set_A.pdf]

# Bbip1

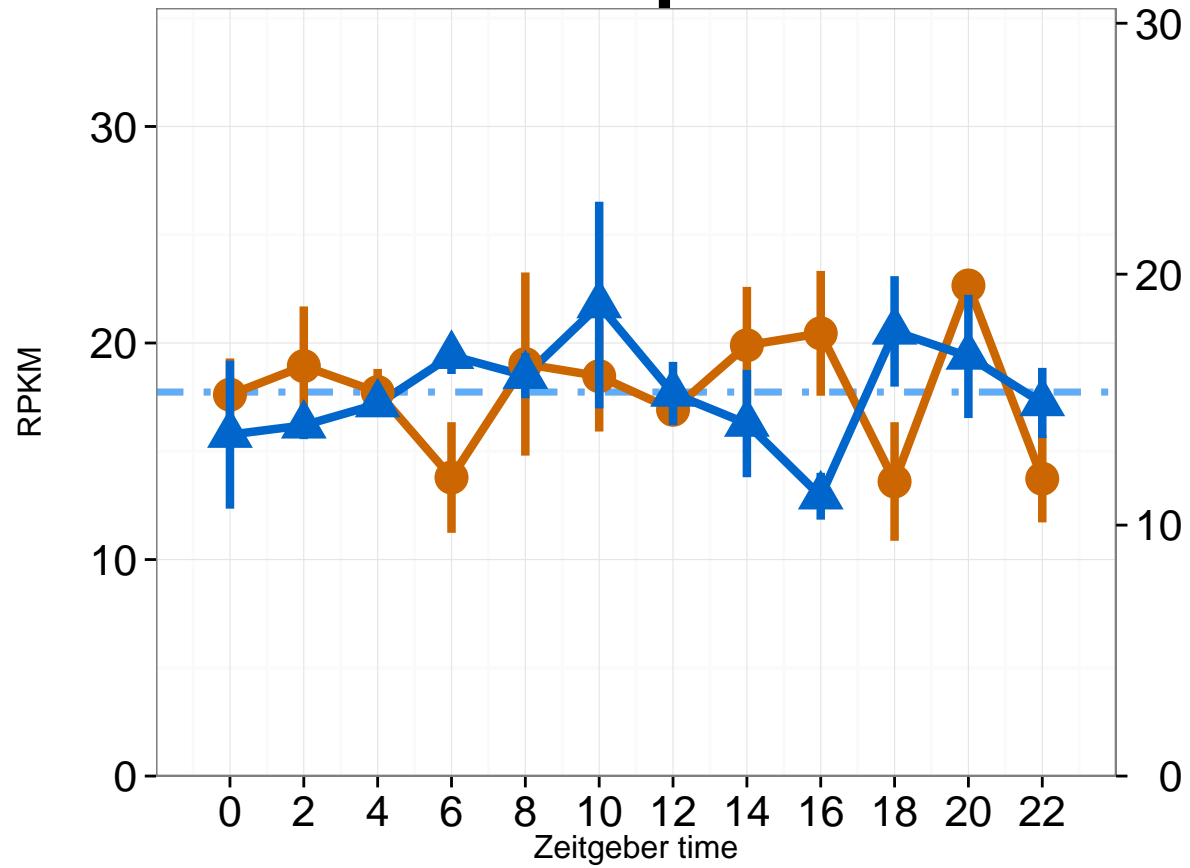

# Bbip1

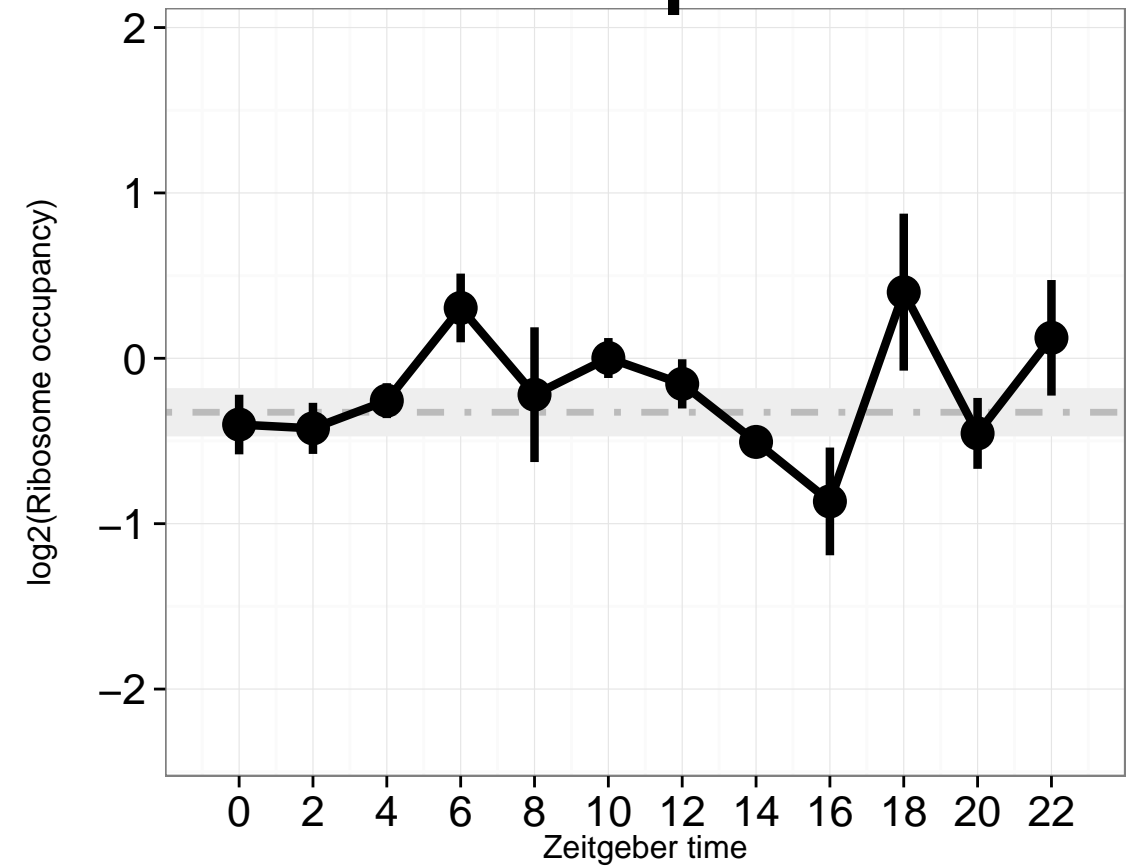

Supplement: SuppDataset_1.zip [file Bbip1_set_A.pdf › Supplemental Dataset 1/A-mRNA_nonrhyth_translation_nonrhyth/Bbip1_set_A.pdf]

# Bbox1

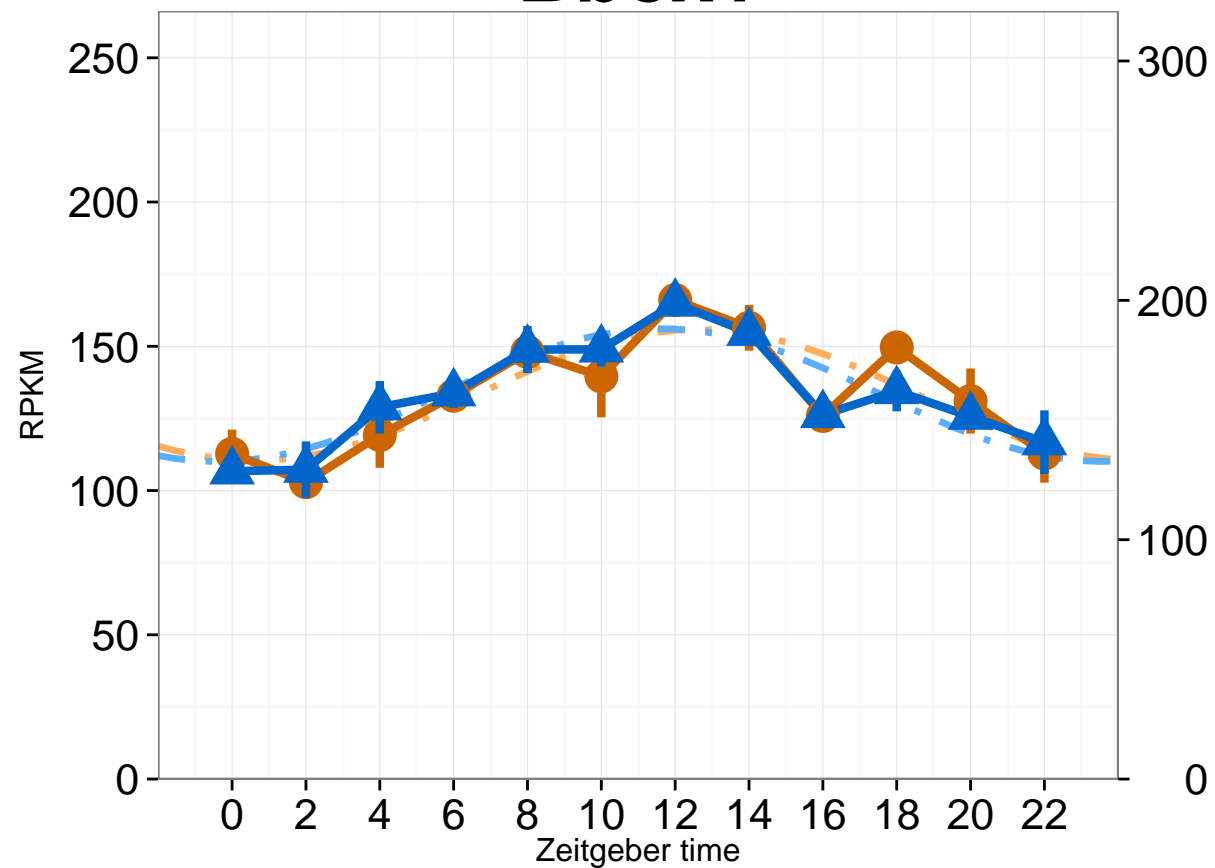

# Bbox1

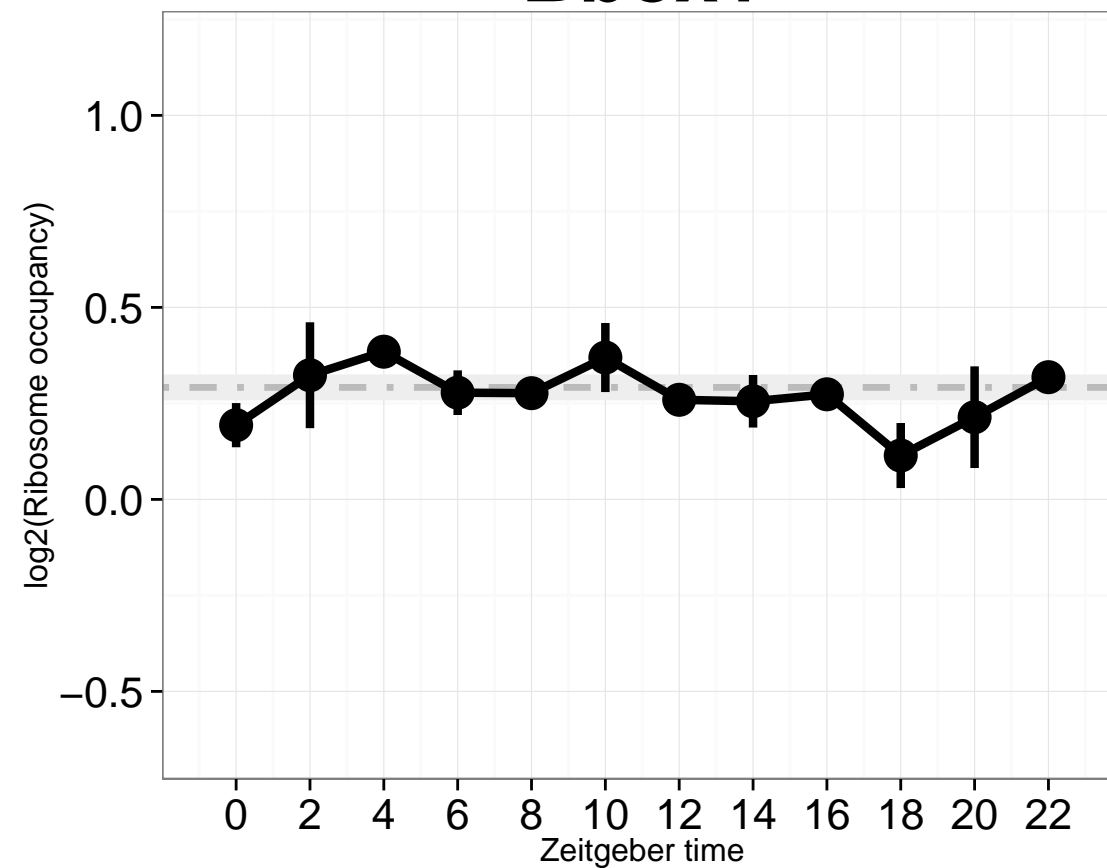

Supplement: SuppDataset_1.zip [file Bbox1_set_A.pdf › Supplemental Dataset 1/A-mRNA_nonrhyth_translation_nonrhyth/Bbox1_set_A.pdf]

# Bbs10

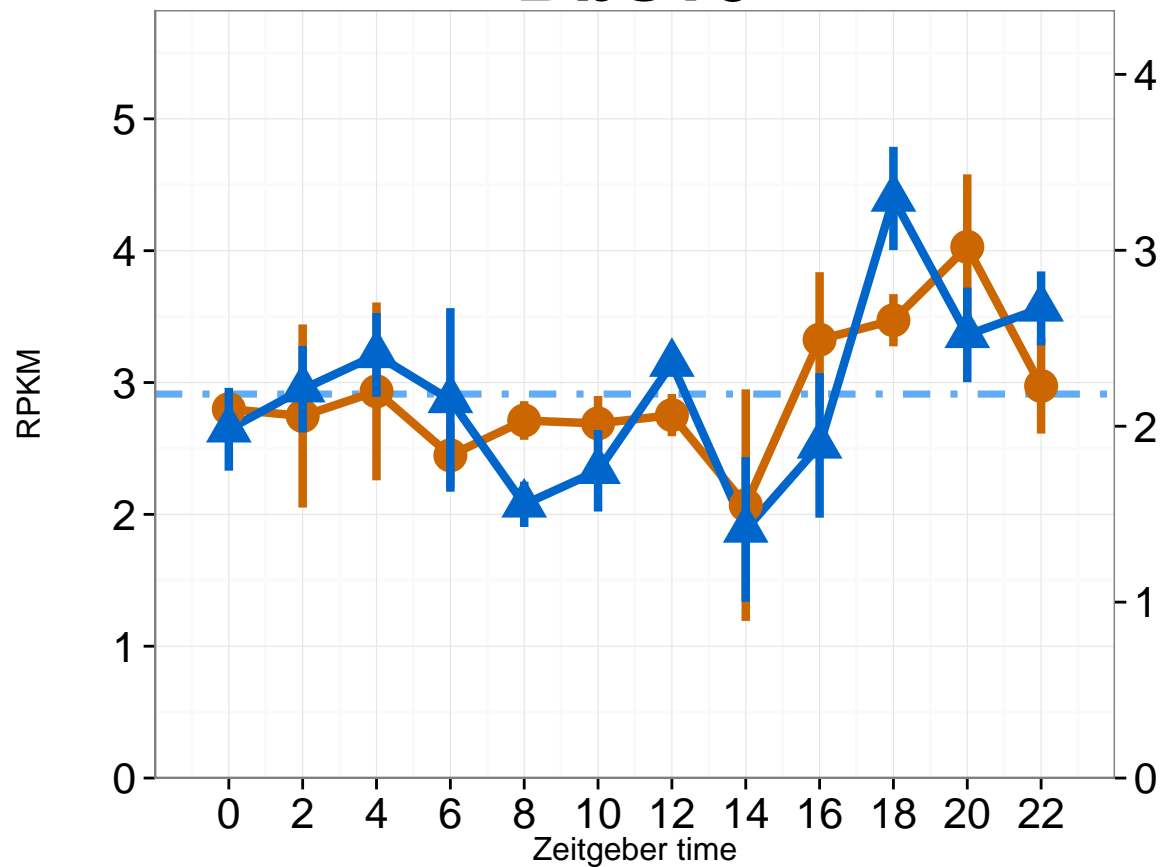

# Bbs10

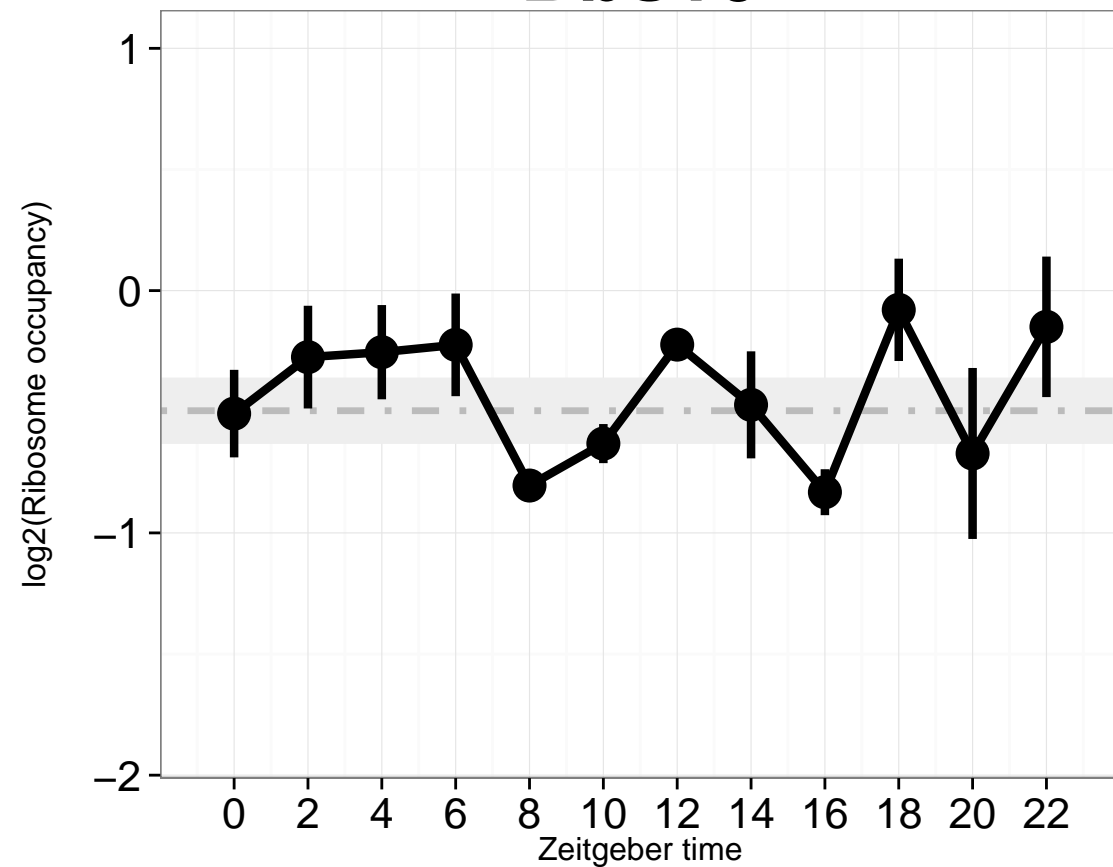

Supplement: SuppDataset_1.zip [file Bbs10_set_A.pdf › Supplemental Dataset 1/A-mRNA_nonrhyth_translation_nonrhyth/Bbs10_set_A.pdf]

# Bbs1

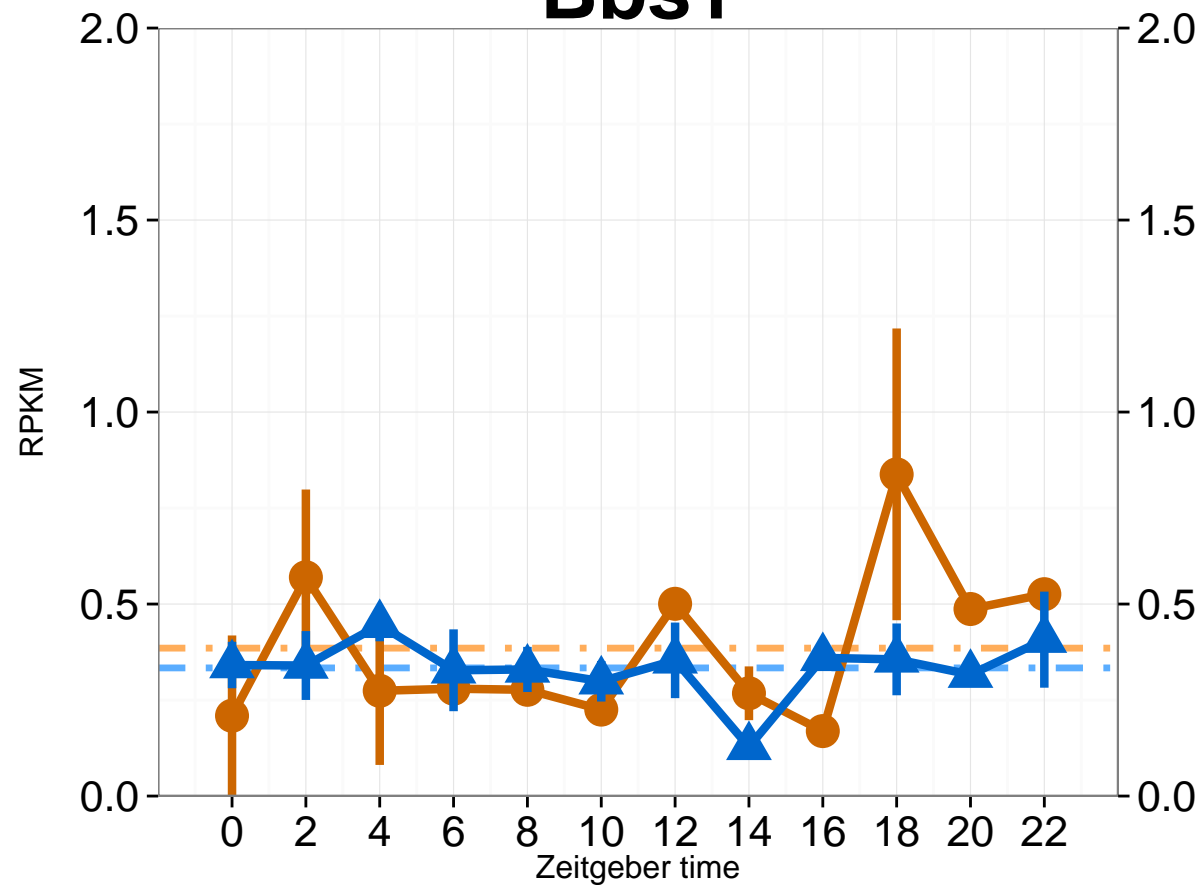

# Bbs1

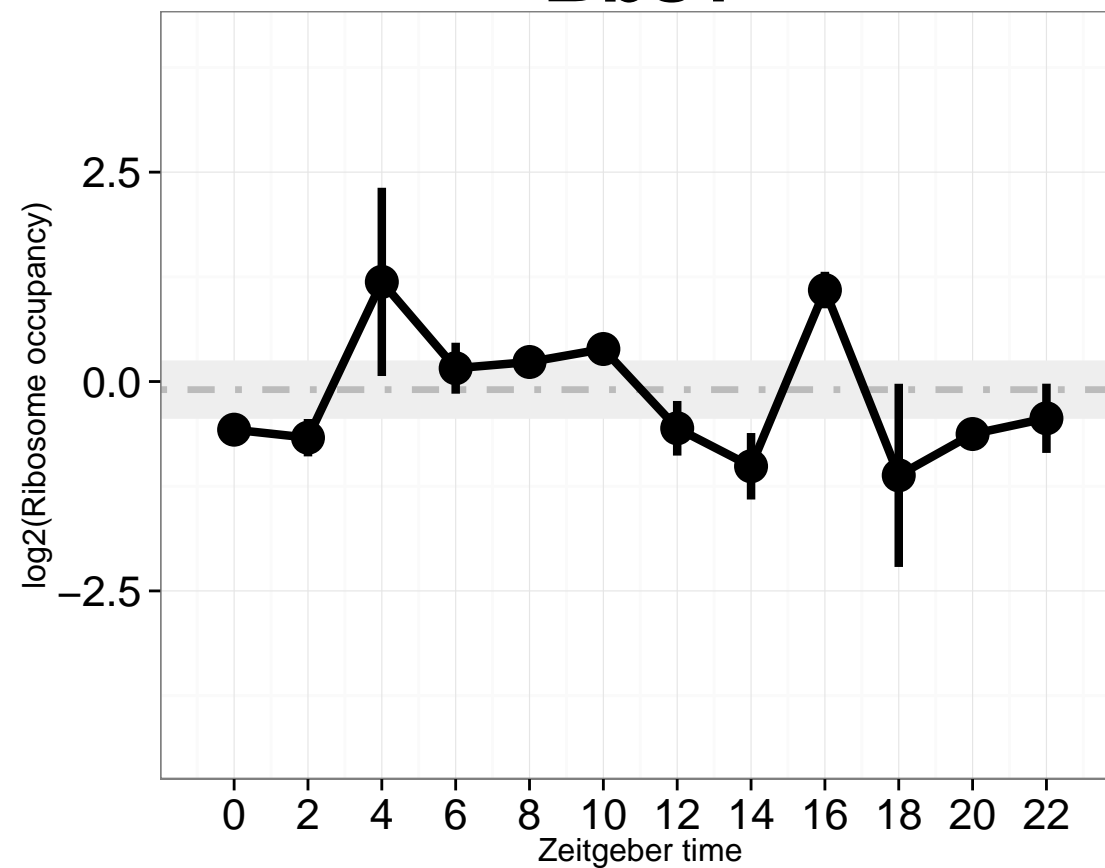

Supplement: SuppDataset_1.zip [file Bbs1_set_A.pdf › Supplemental Dataset 1/A-mRNA_nonrhyth_translation_nonrhyth/Bbs1_set_A.pdf]

## Bbs2

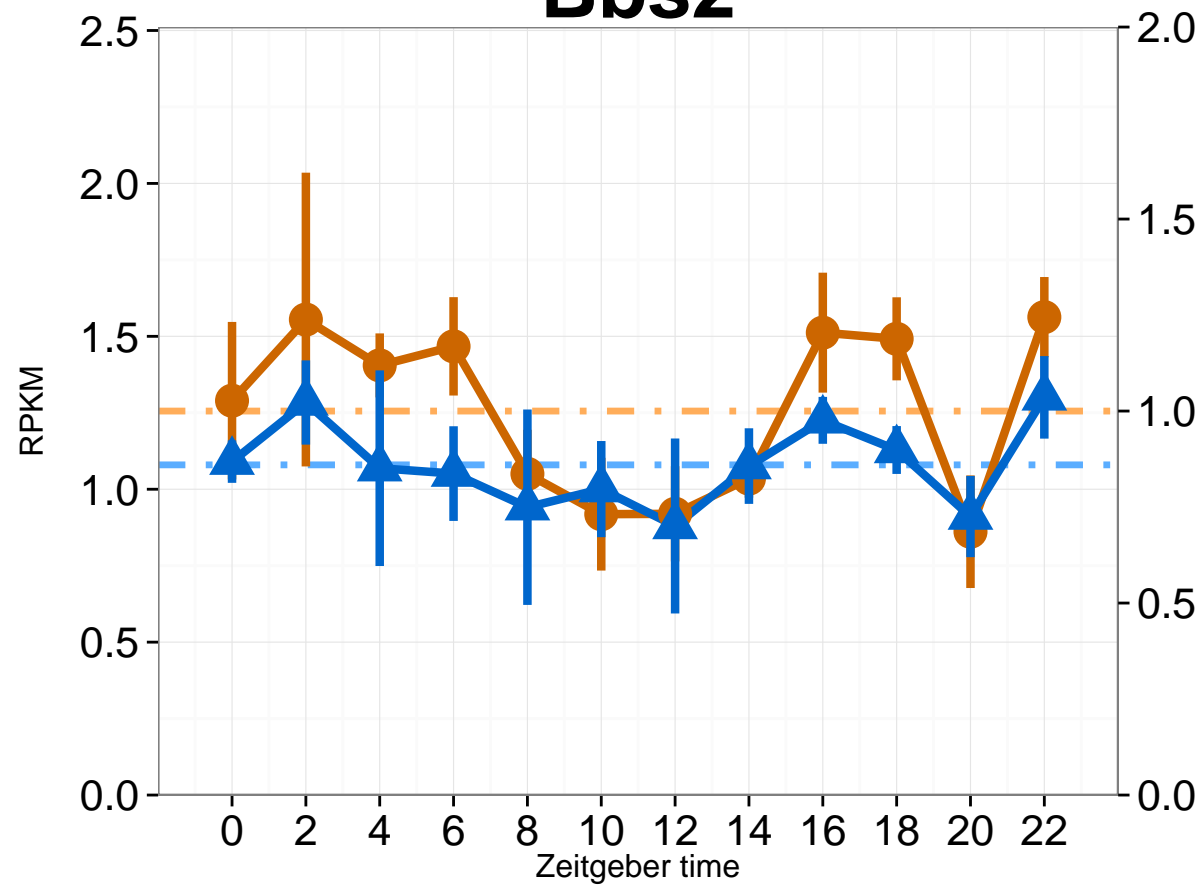

## Bbs2

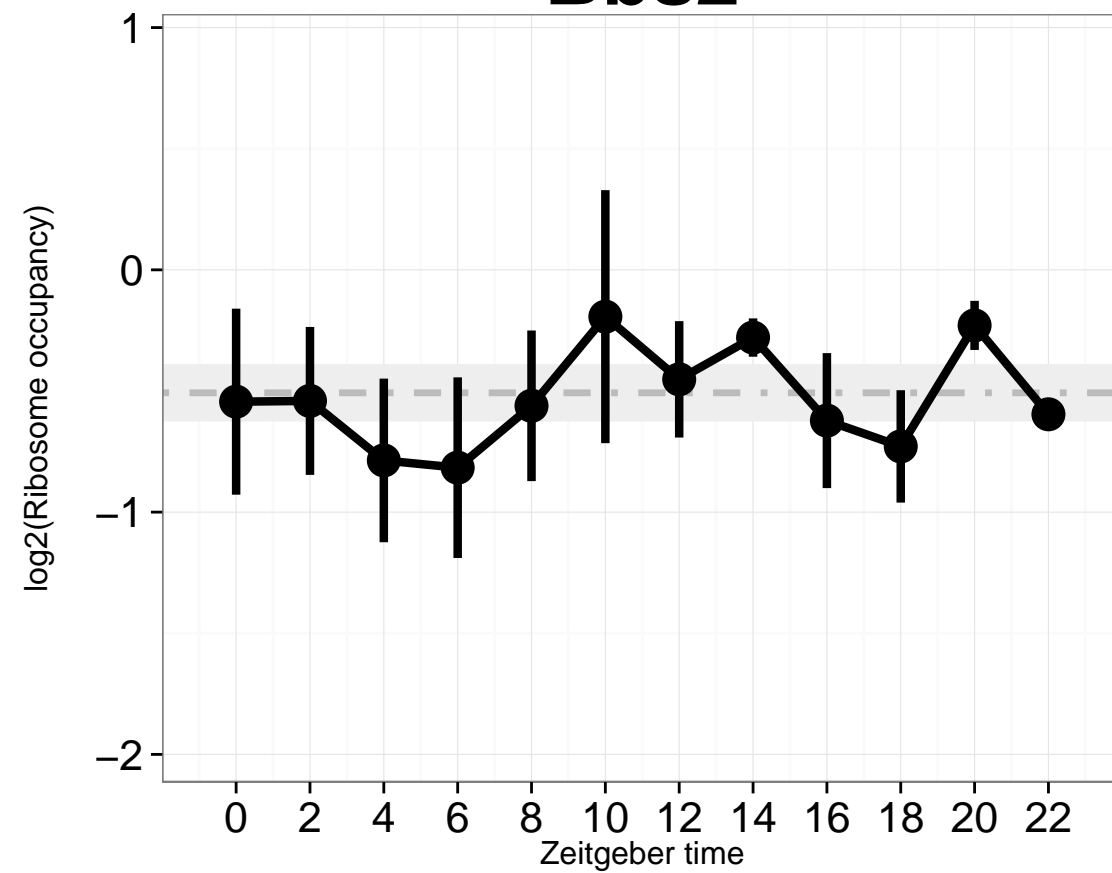

Supplement: SuppDataset_1.zip [file Bbs2_set_A.pdf › Supplemental Dataset 1/A-mRNA_nonrhyth_translation_nonrhyth/Bbs2_set_A.pdf]

## Bbs4

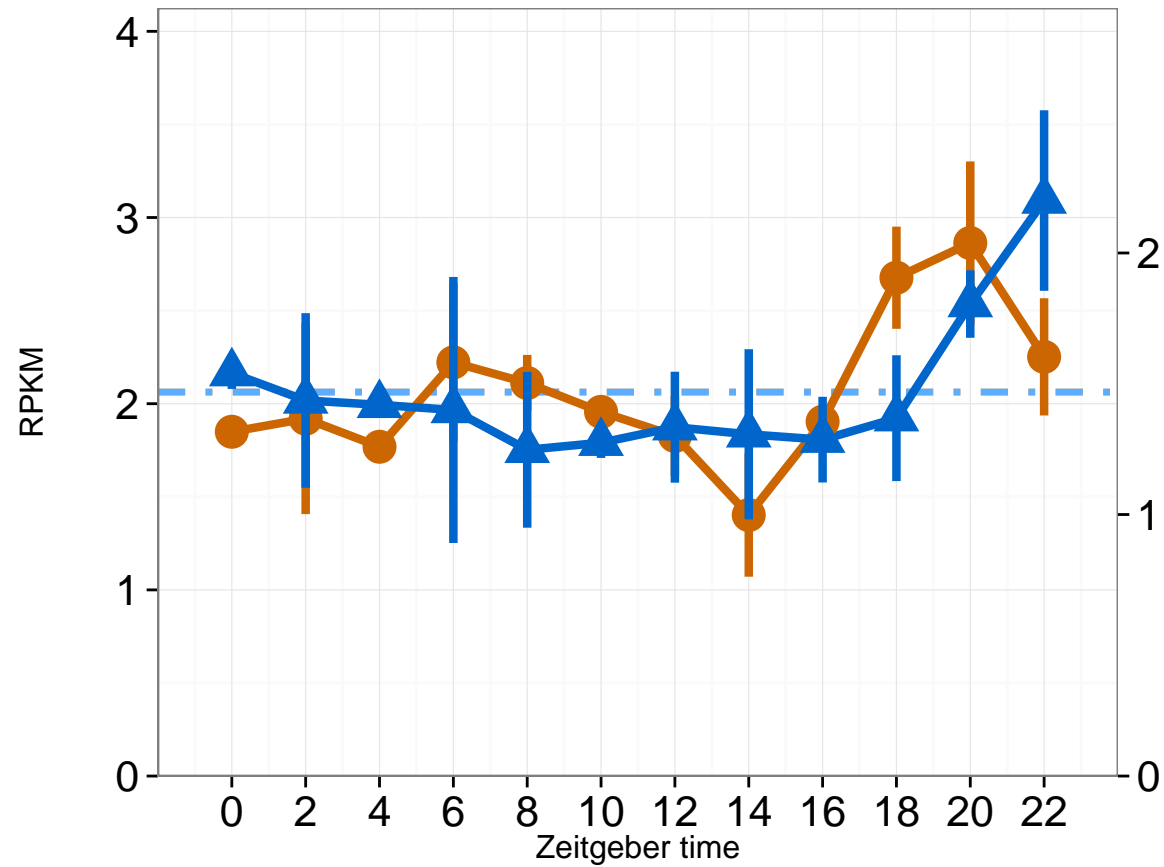

## Bbs4

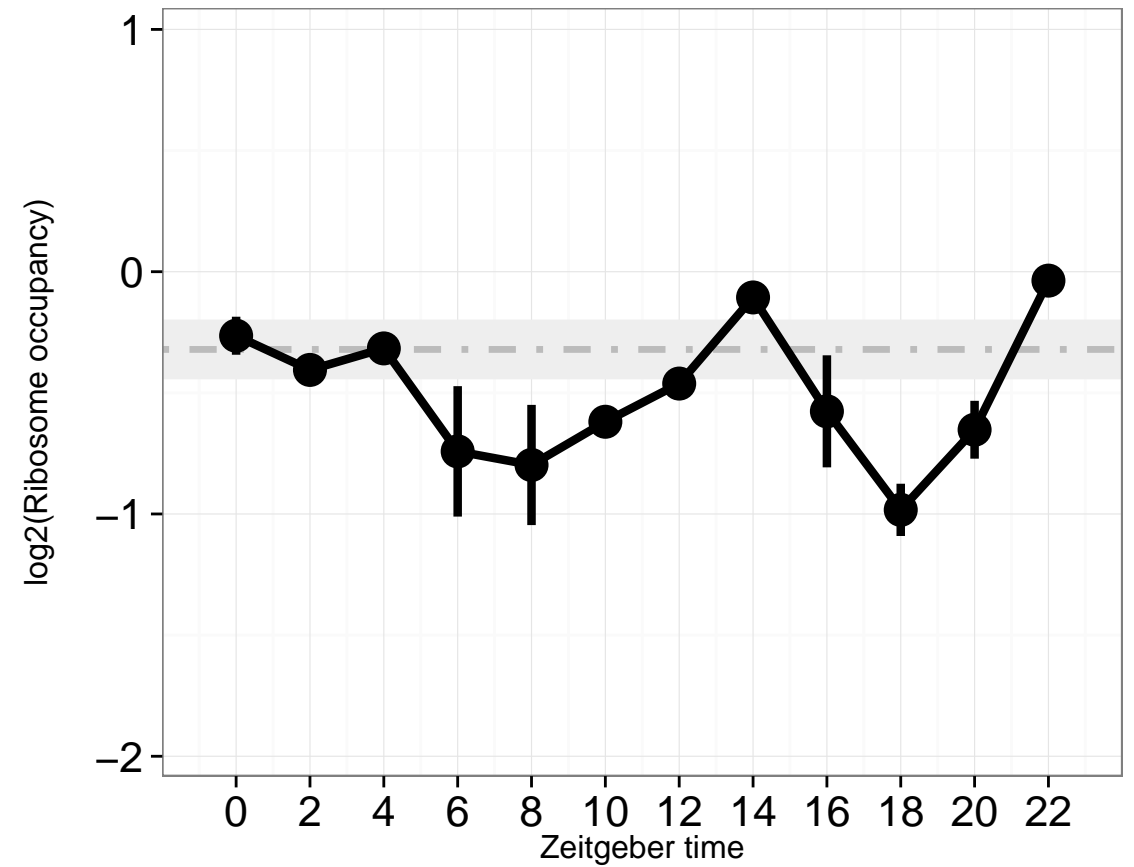

Supplement: SuppDataset_1.zip [file Bbs4_set_A.pdf › Supplemental Dataset 1/A-mRNA_nonrhyth_translation_nonrhyth/Bbs4_set_A.pdf]

# Bbs5

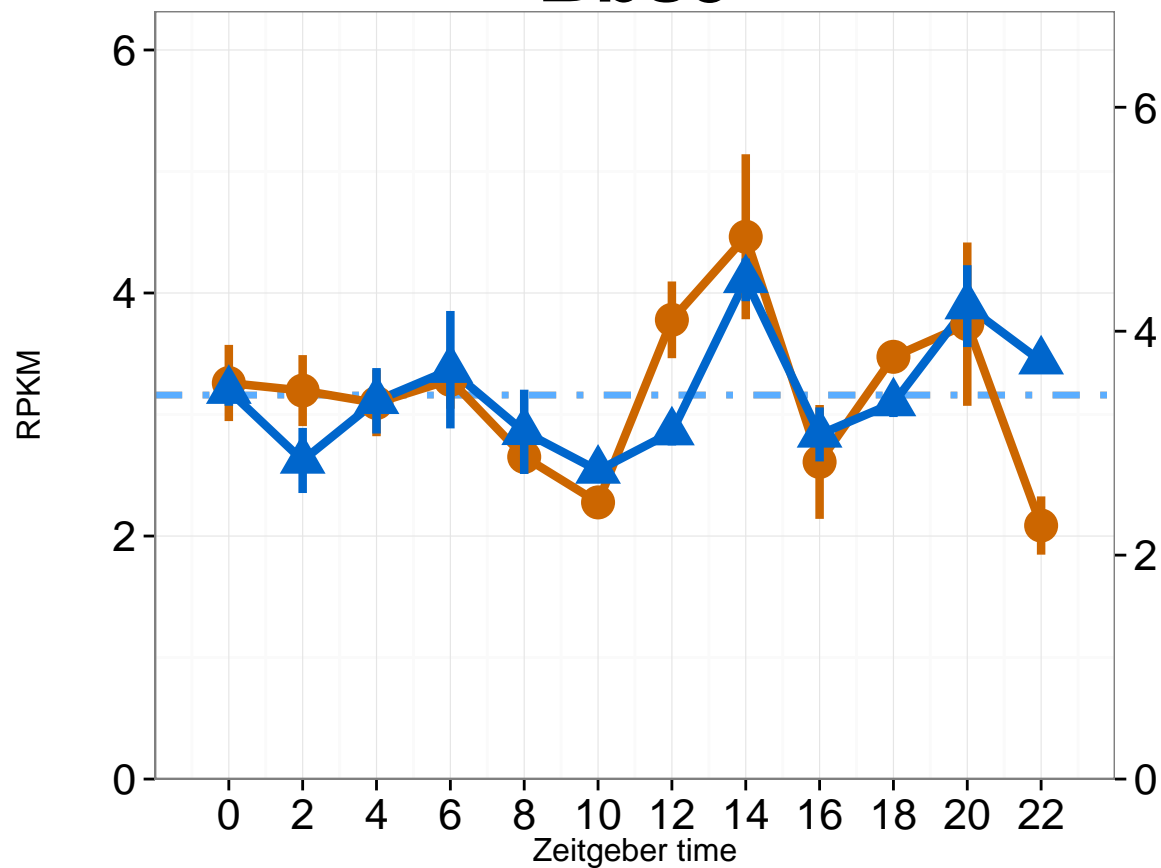

# Bbs5

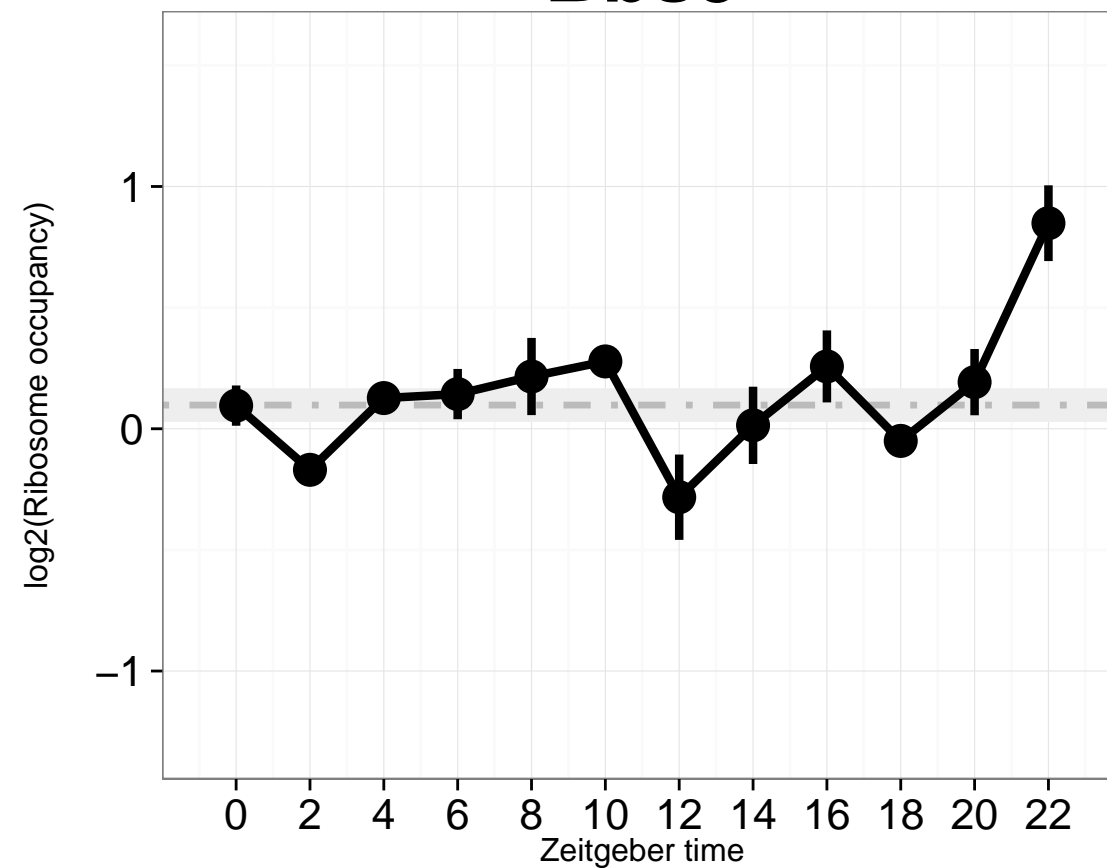

Supplement: SuppDataset_1.zip [file Bbs5_set_A.pdf › Supplemental Dataset 1/A-mRNA_nonrhyth_translation_nonrhyth/Bbs5_set_A.pdf]

# Bbs7

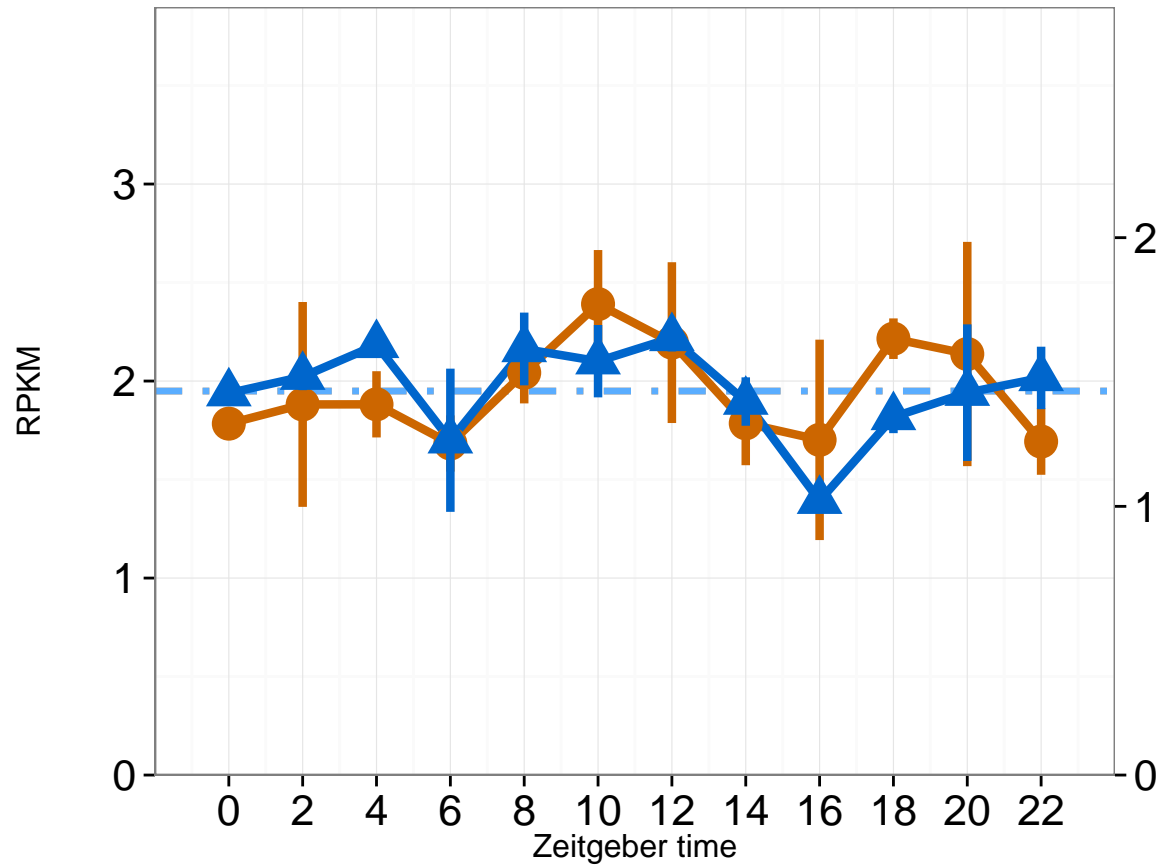

# Bbs7

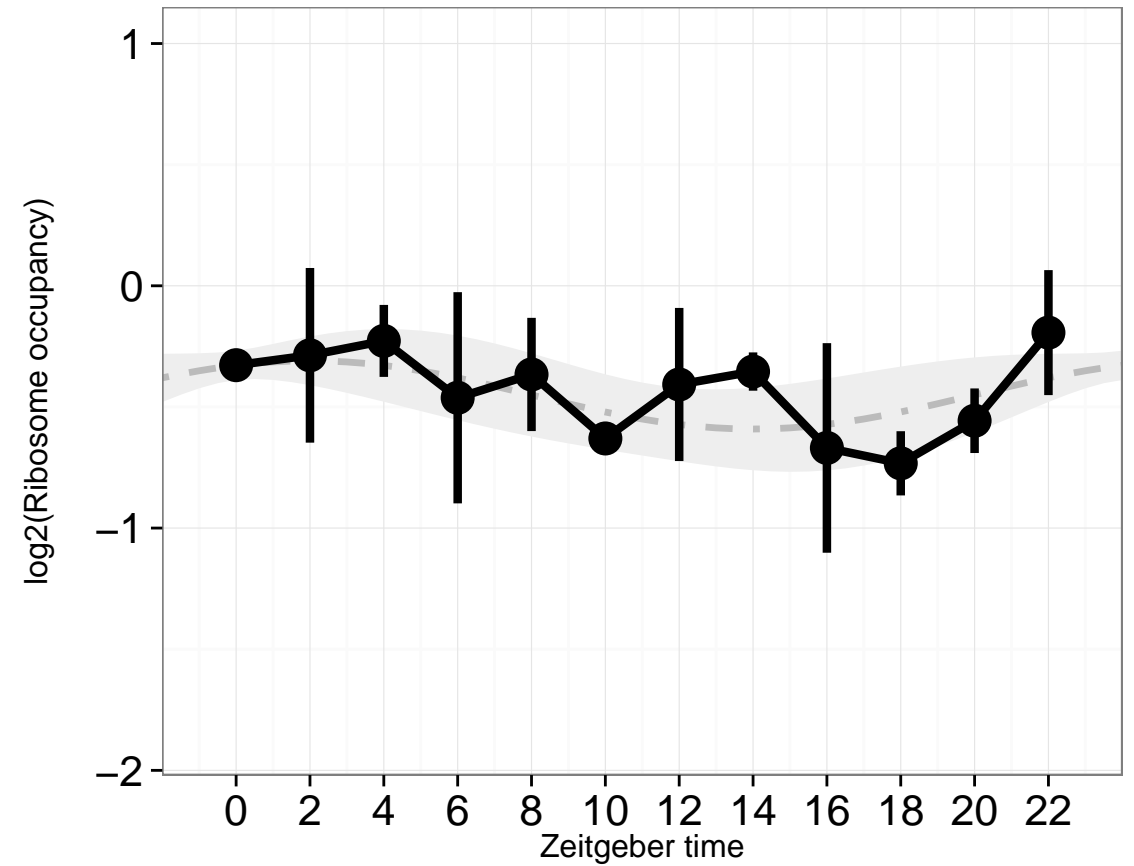

Supplement: SuppDataset_1.zip [file Bbs7_set_A.pdf › Supplemental Dataset 1/A-mRNA_nonrhyth_translation_nonrhyth/Bbs7_set_A.pdf]

## Bbx

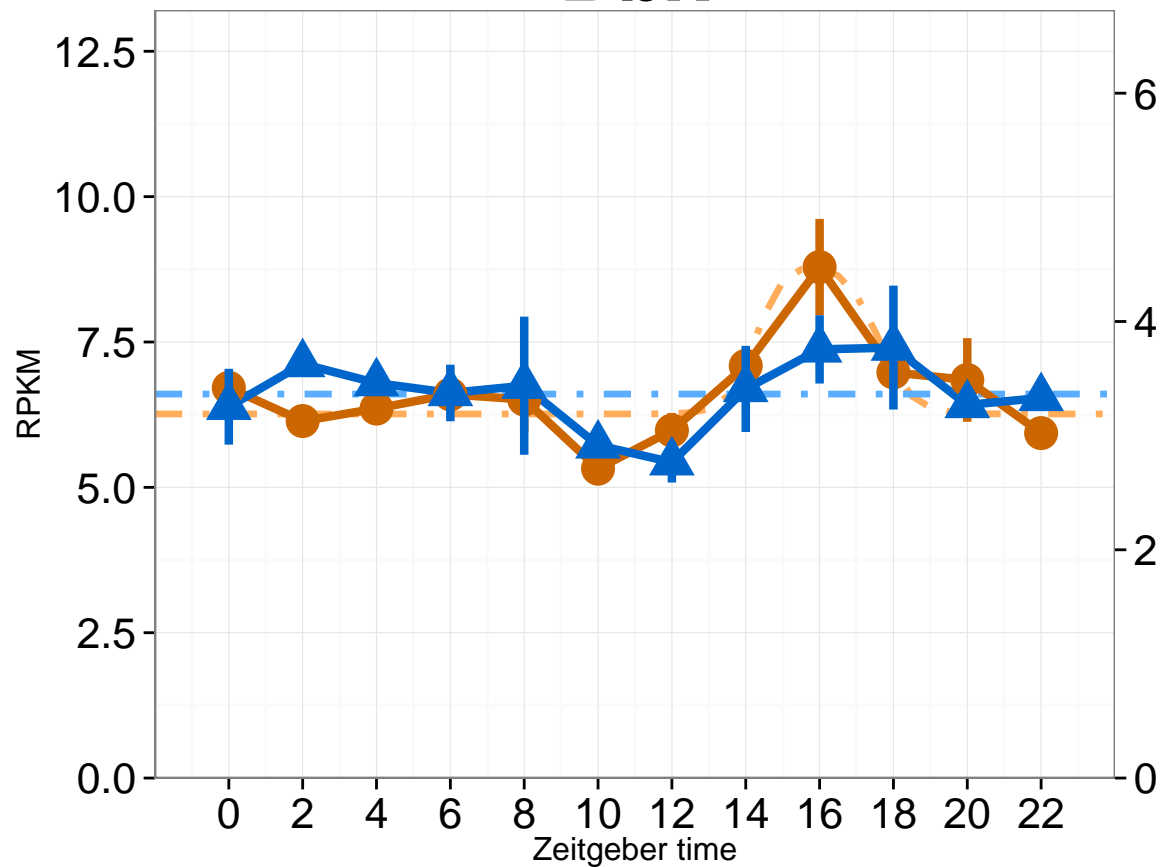

## Bbx

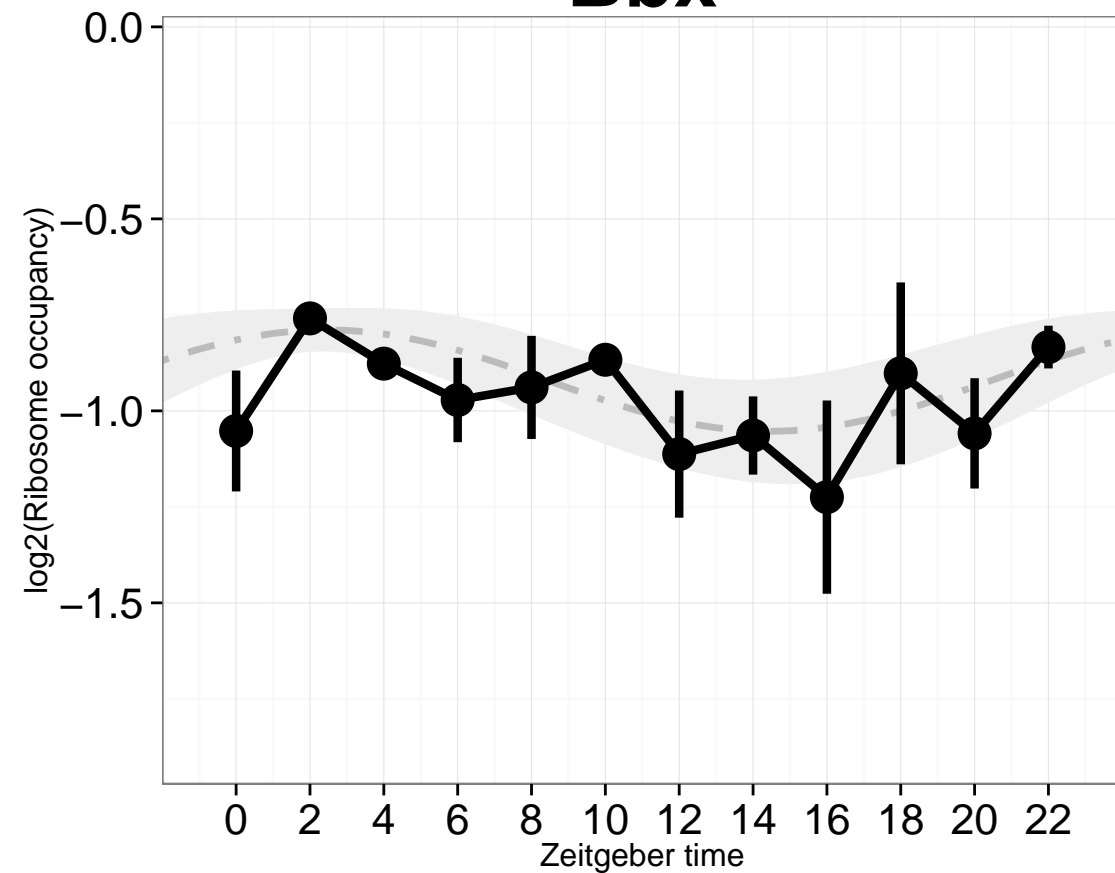

Supplement: SuppDataset_1.zip [file Bbx_set_A.pdf › Supplemental Dataset 1/A-mRNA_nonrhyth_translation_nonrhyth/Bbx_set_A.pdf]

# Bcam

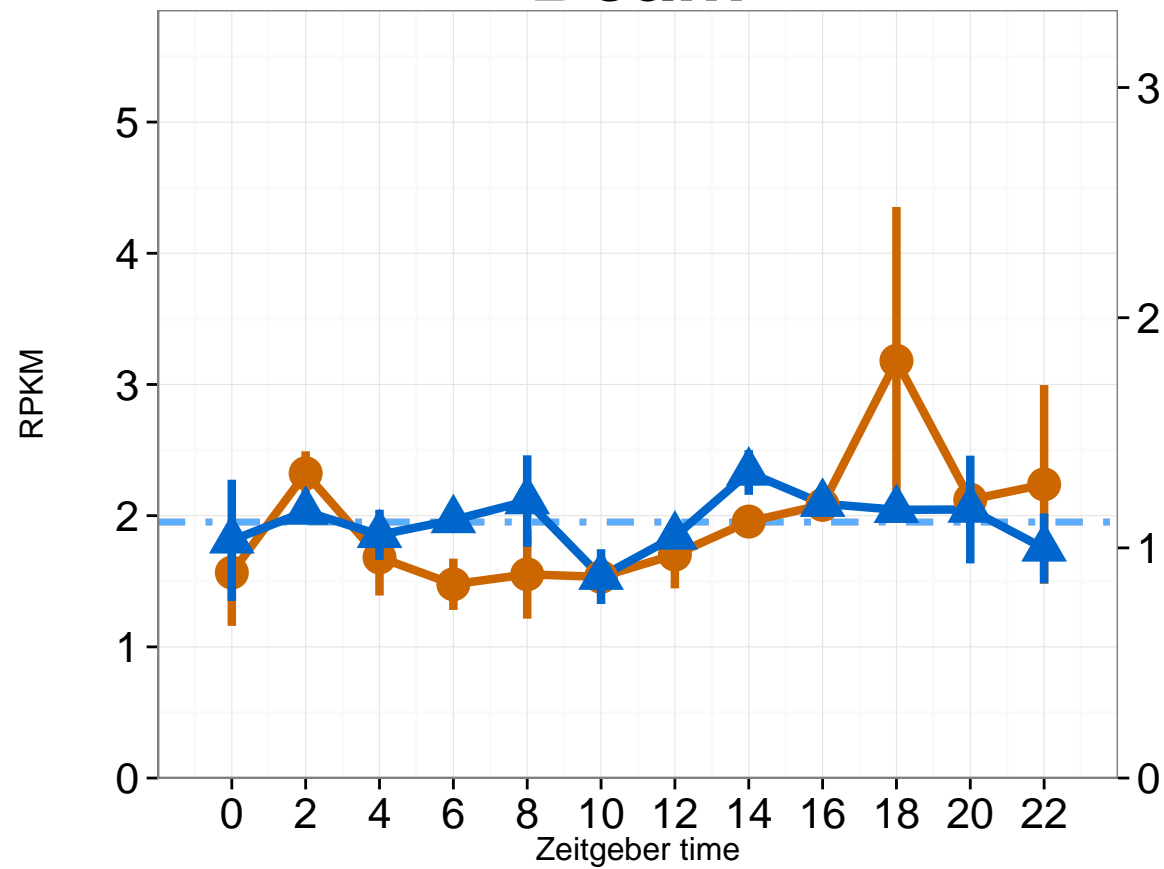

# Bcam

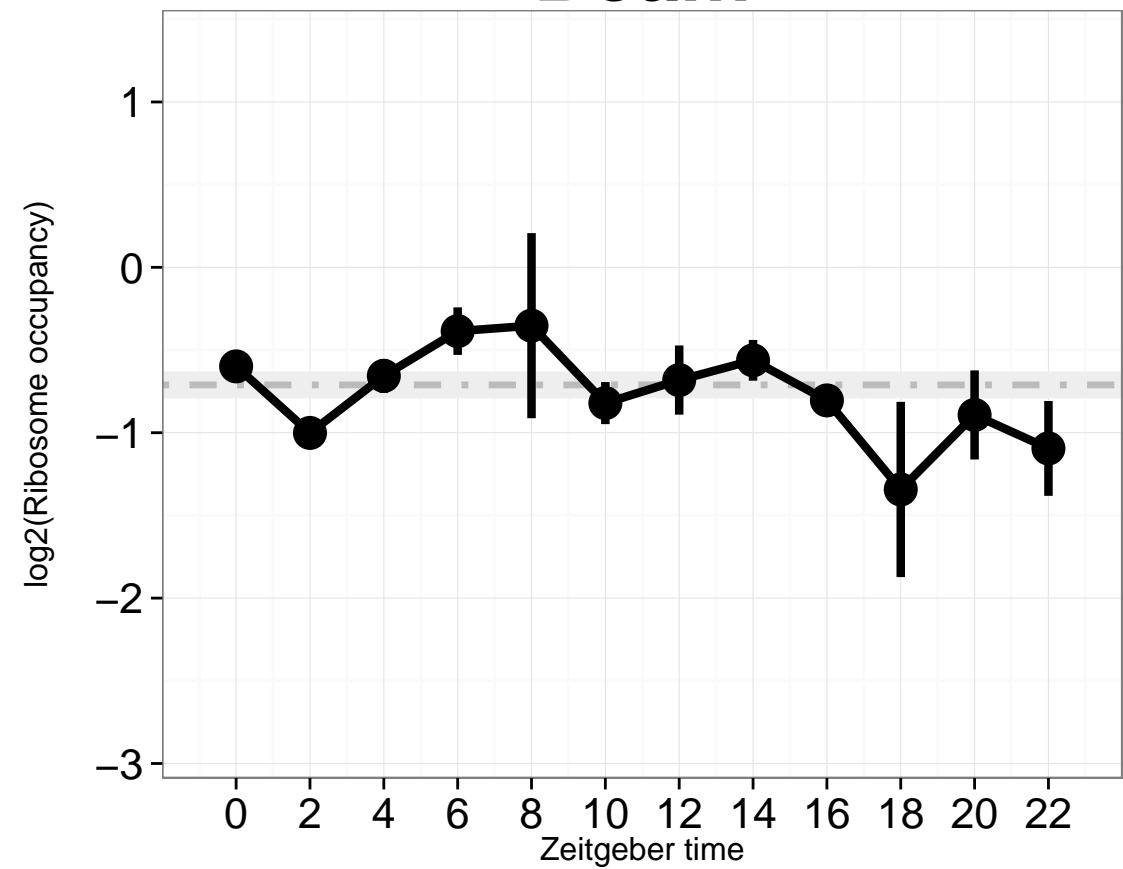

Supplement: SuppDataset_1.zip [file Bcam_set_A.pdf › Supplemental Dataset 1/A-mRNA_nonrhyth_translation_nonrhyth/Bcam_set_A.pdf]

## Bcap29

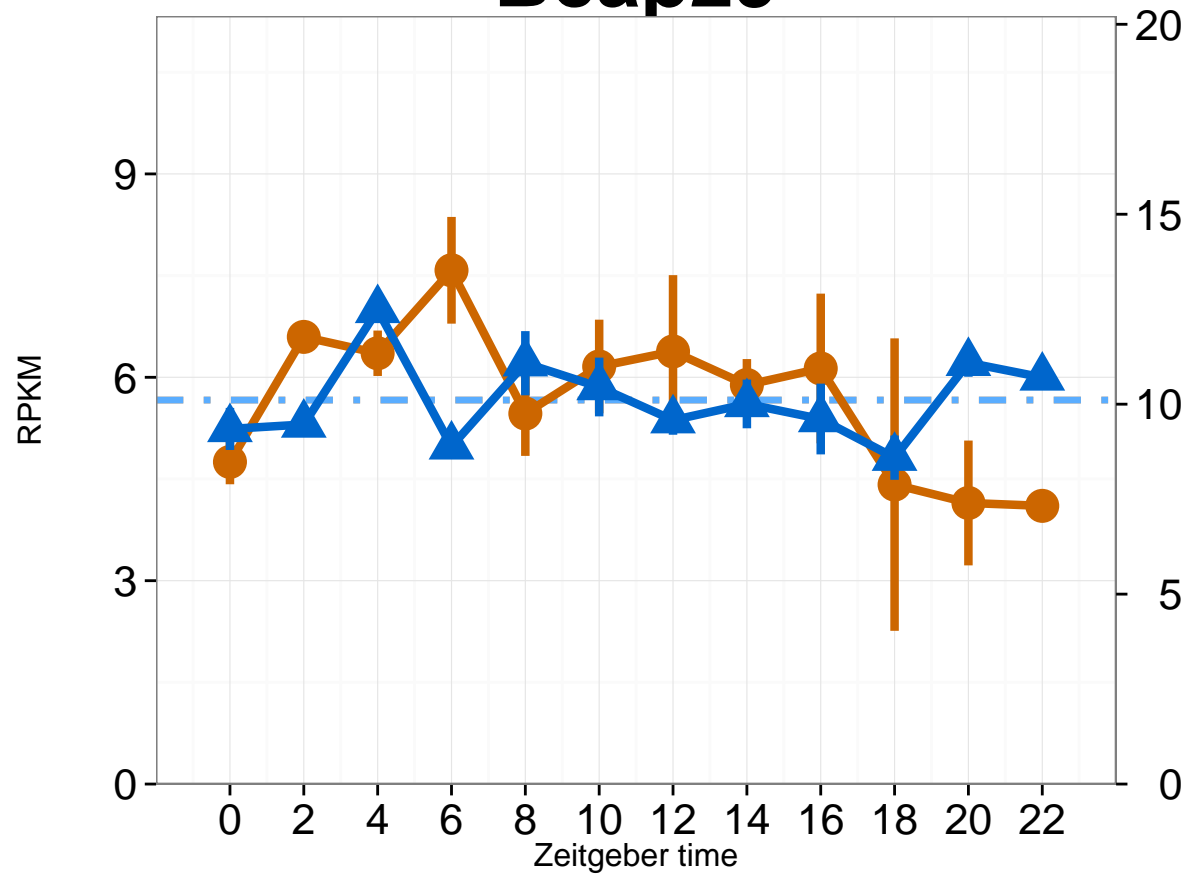

## Bcap29

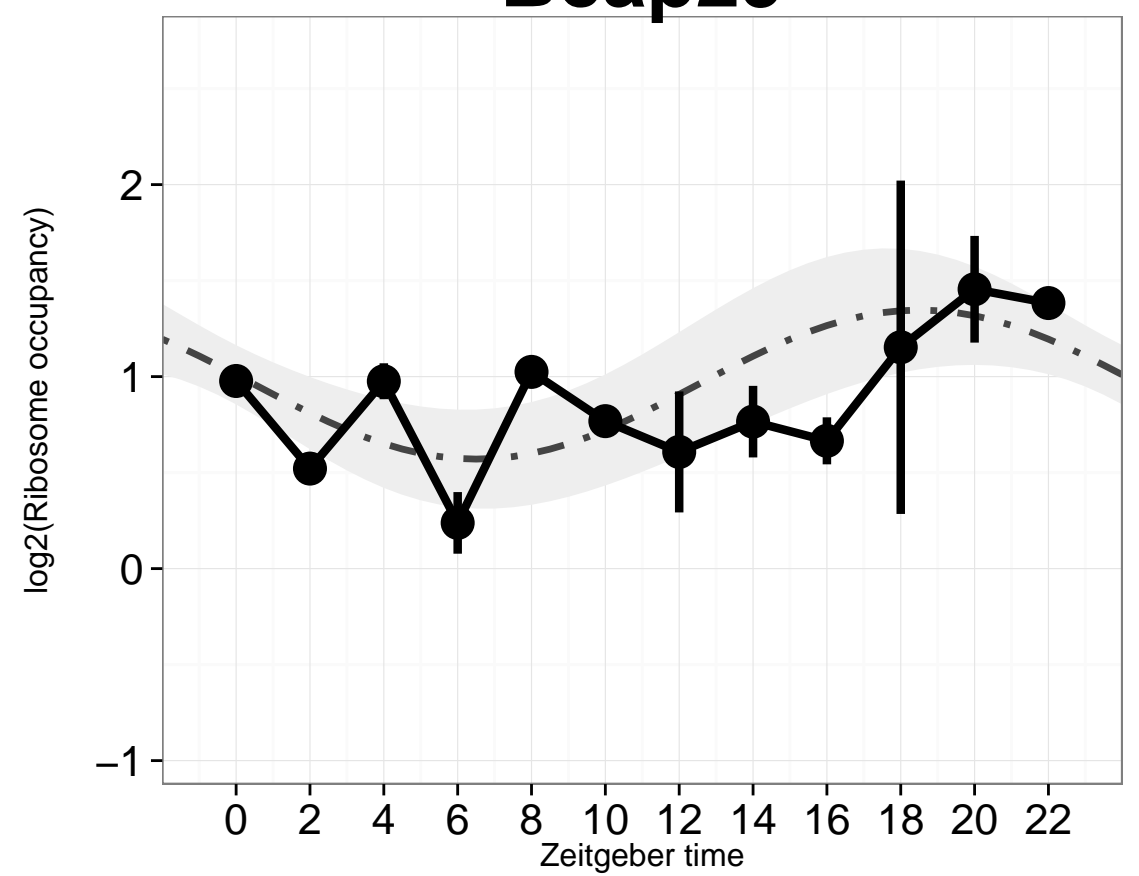

Supplement: SuppDataset_1.zip [file Bcap29_set_A.pdf › Supplemental Dataset 1/A-mRNA_nonrhyth_translation_nonrhyth/Bcap29_set_A.pdf]

# Bcap31

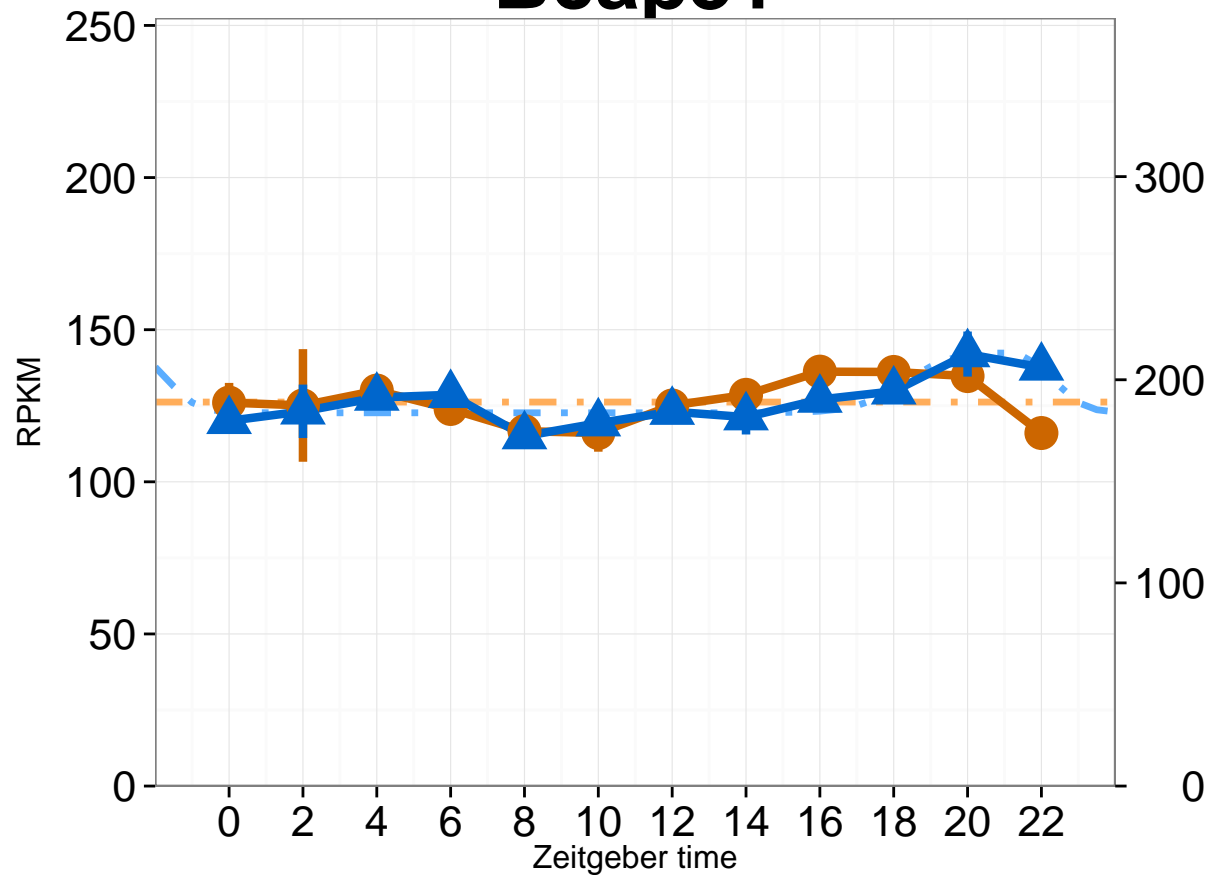

# Bcap31

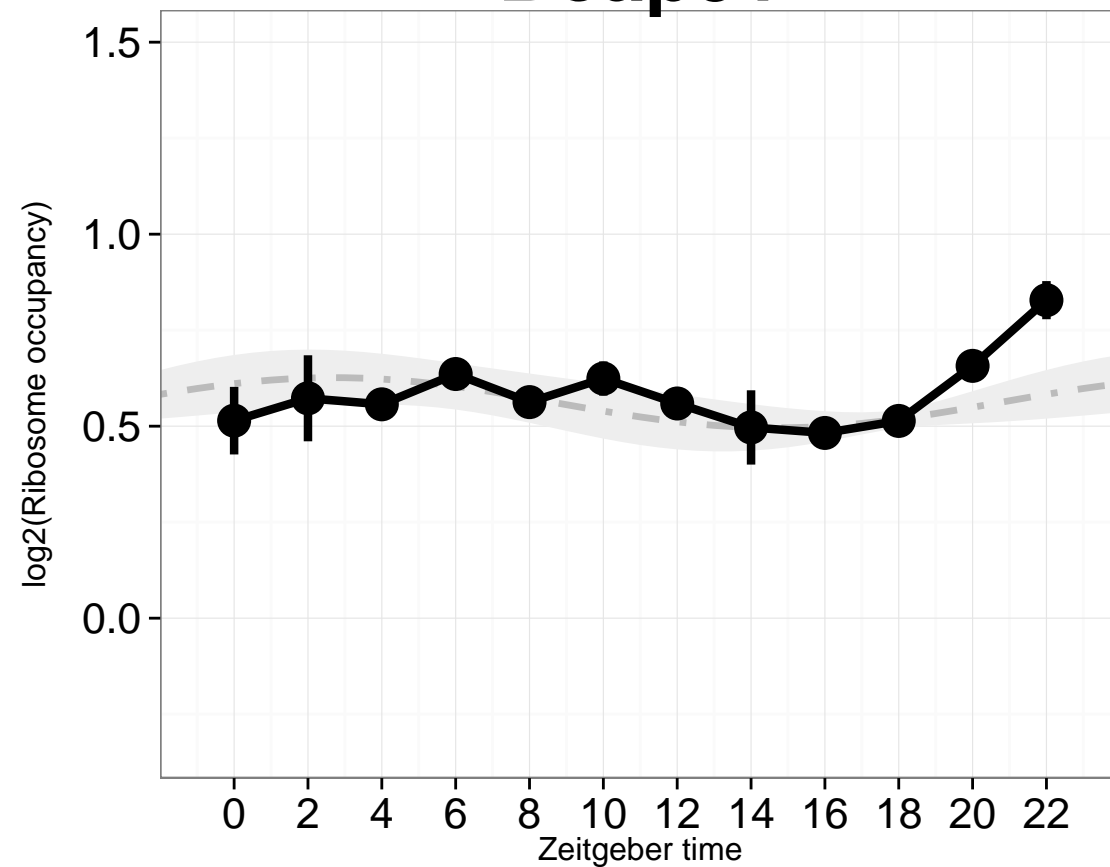

Supplement: SuppDataset_1.zip [file Bcap31_set_A.pdf › Supplemental Dataset 1/A-mRNA_nonrhyth_translation_nonrhyth/Bcap31_set_A.pdf]

## Bcar1

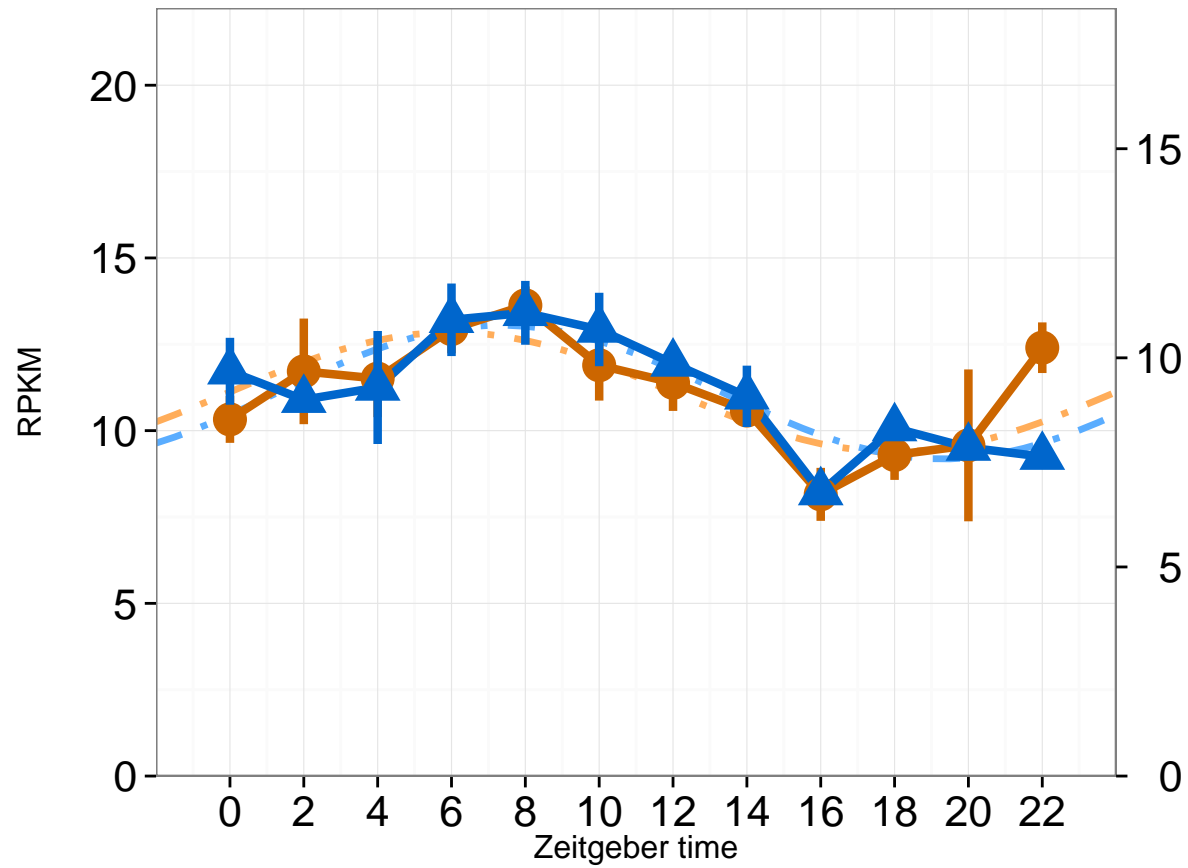

## Bcar1

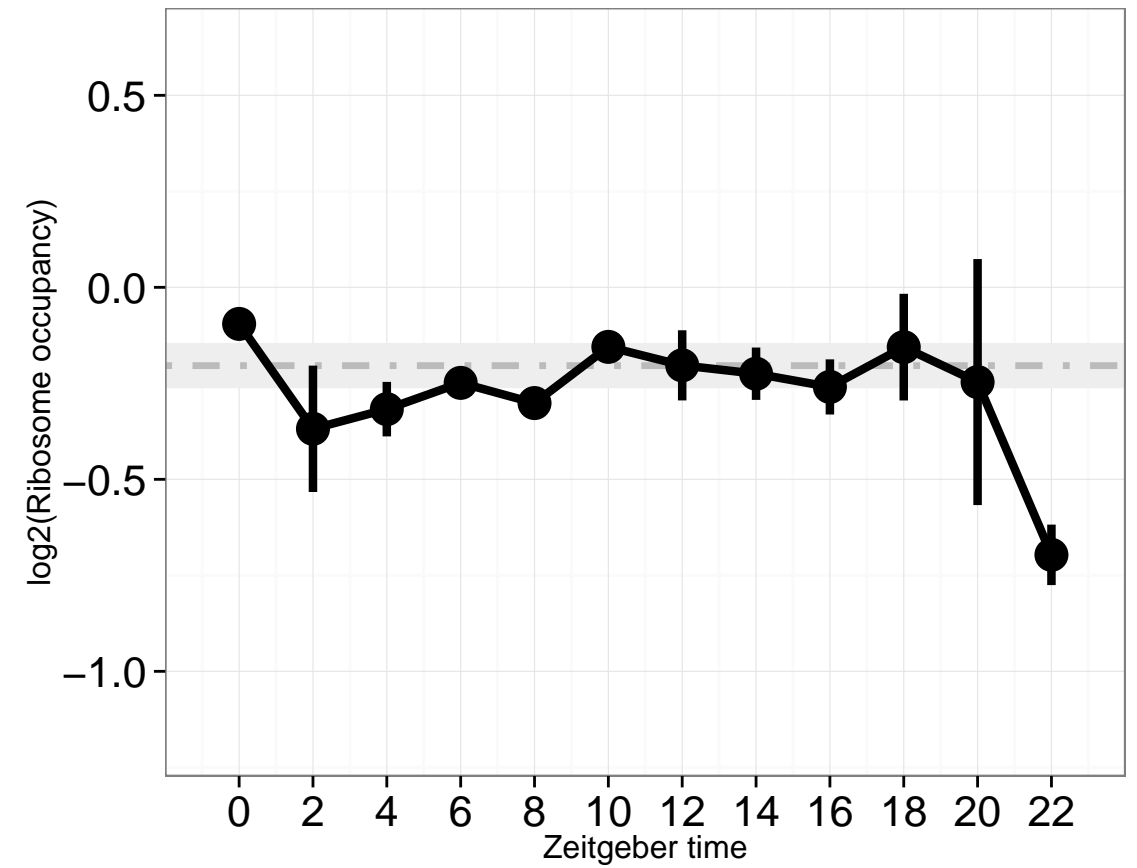

Supplement: SuppDataset_1.zip [file Bcar1_set_A.pdf › Supplemental Dataset 1/A-mRNA_nonrhyth_translation_nonrhyth/Bcar1_set_A.pdf]

## Bcar3

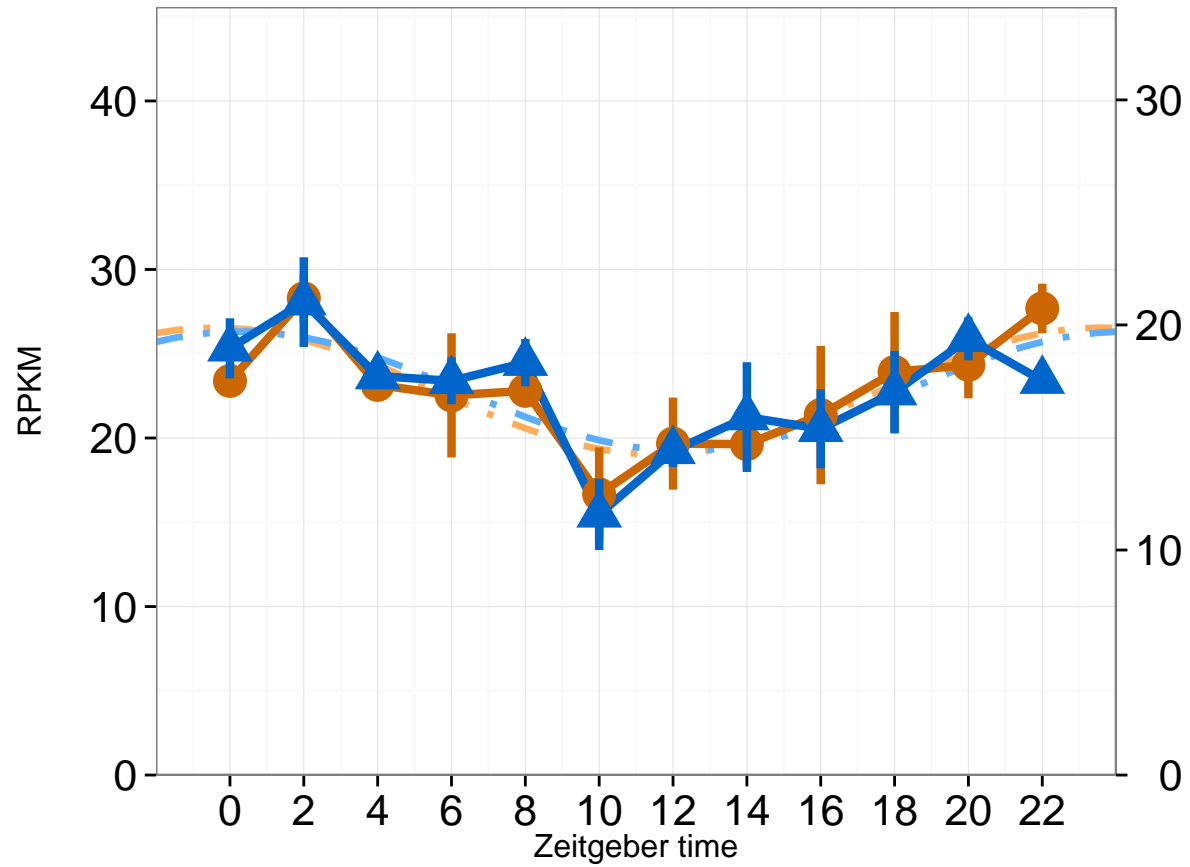

## Bcar3

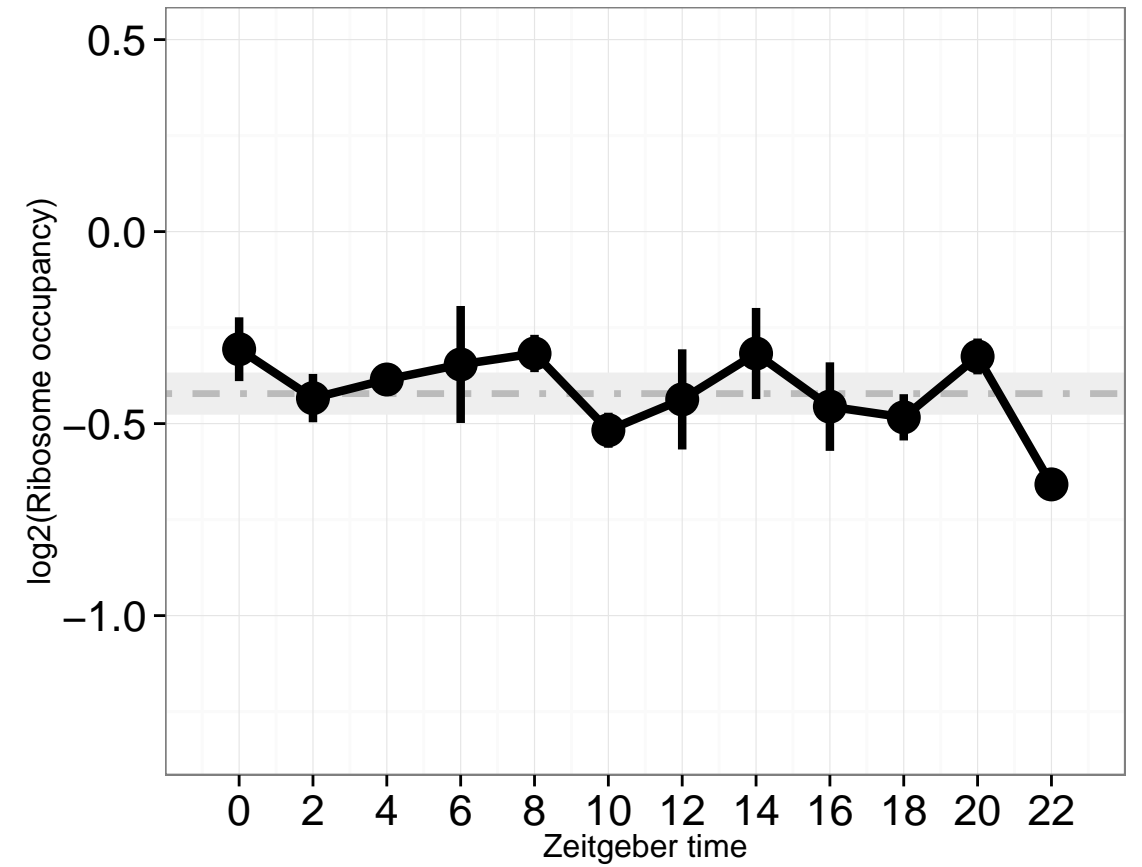

Supplement: SuppDataset_1.zip [file Bcar3_set_A.pdf › Supplemental Dataset 1/A-mRNA_nonrhyth_translation_nonrhyth/Bcar3_set_A.pdf]

## Bcas2

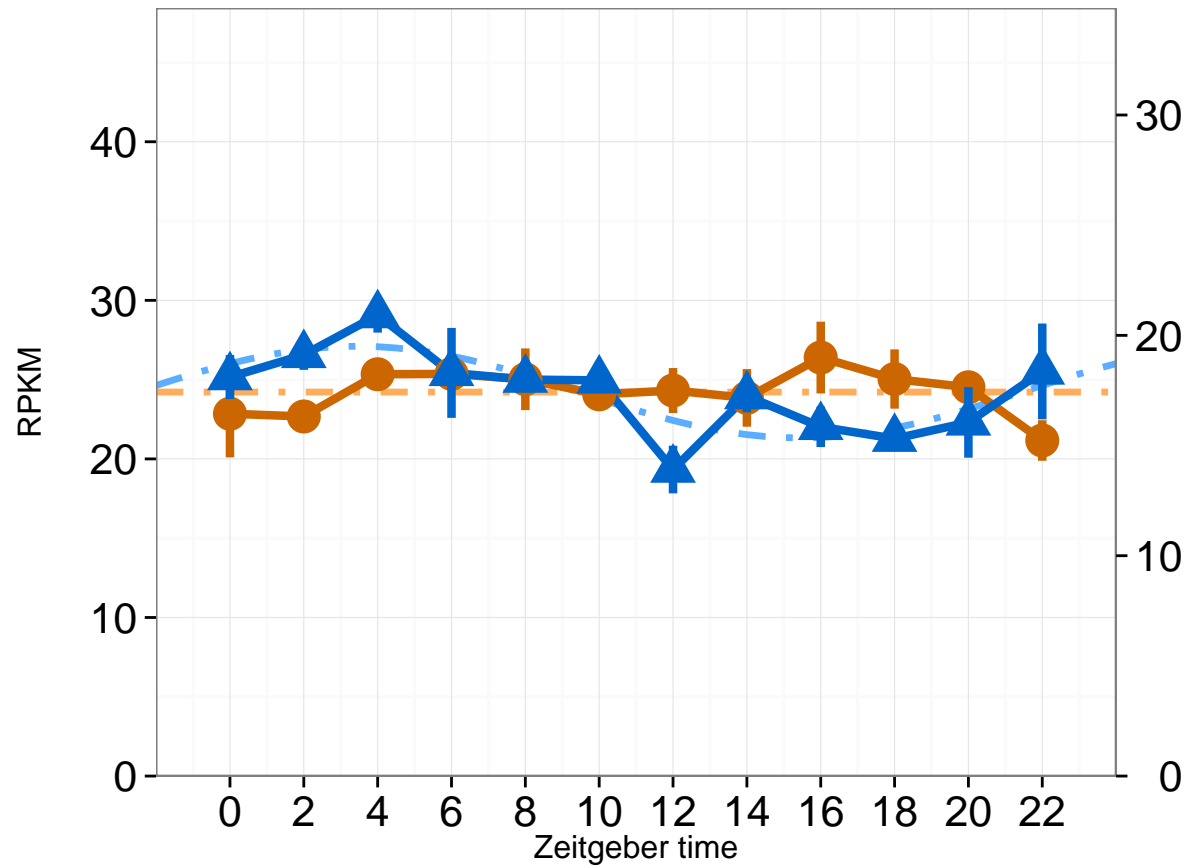

## Bcas2

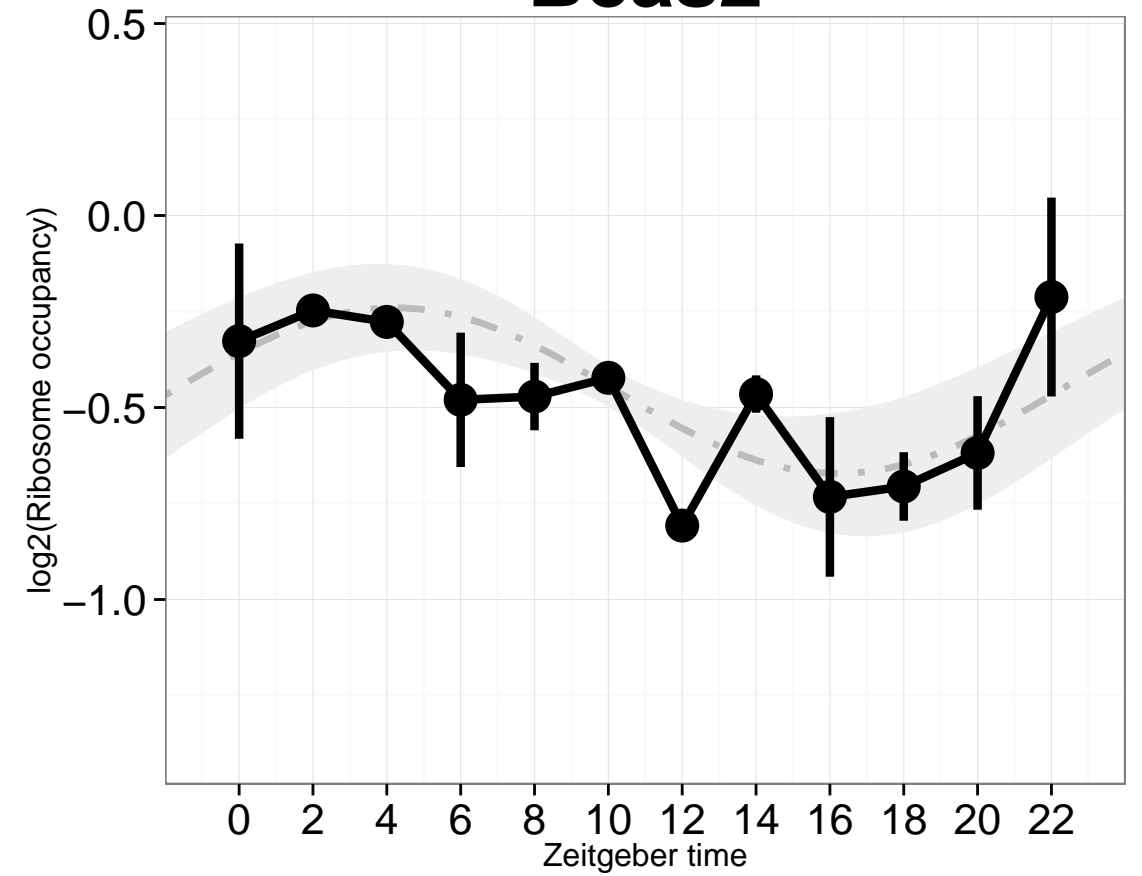

Supplement: SuppDataset_1.zip [file Bcas2_set_A.pdf › Supplemental Dataset 1/A-mRNA_nonrhyth_translation_nonrhyth/Bcas2_set_A.pdf]

## Bcat2

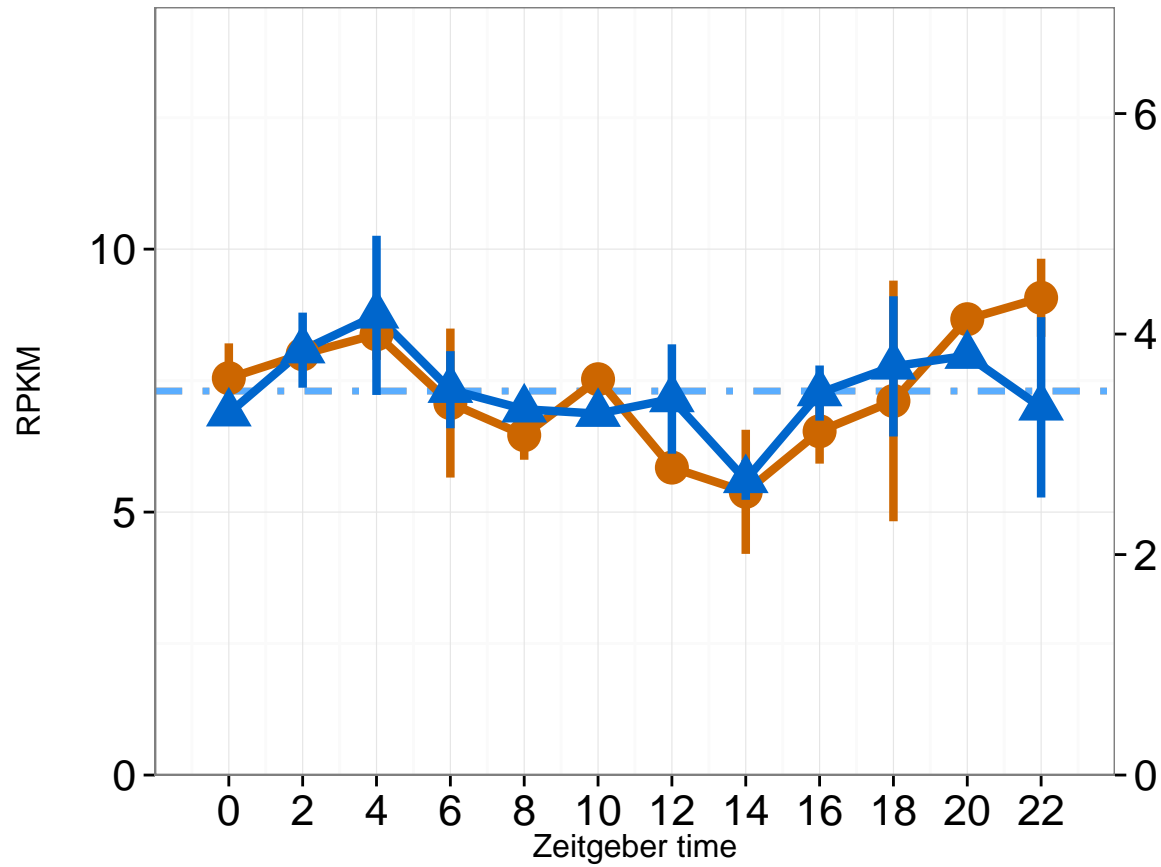

## Bcat2

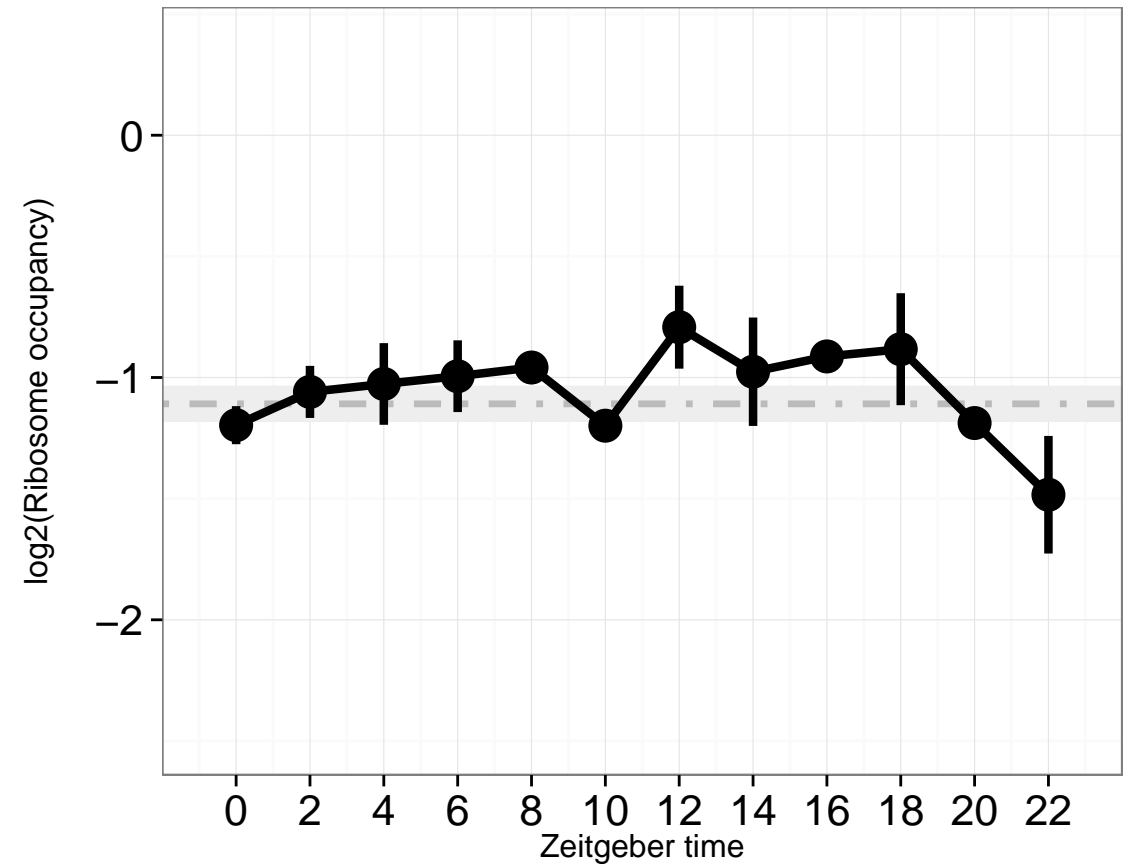

Supplement: SuppDataset_1.zip [file Bcat2_set_A.pdf › Supplemental Dataset 1/A-mRNA_nonrhyth_translation_nonrhyth/Bcat2_set_A.pdf]

## Bccip

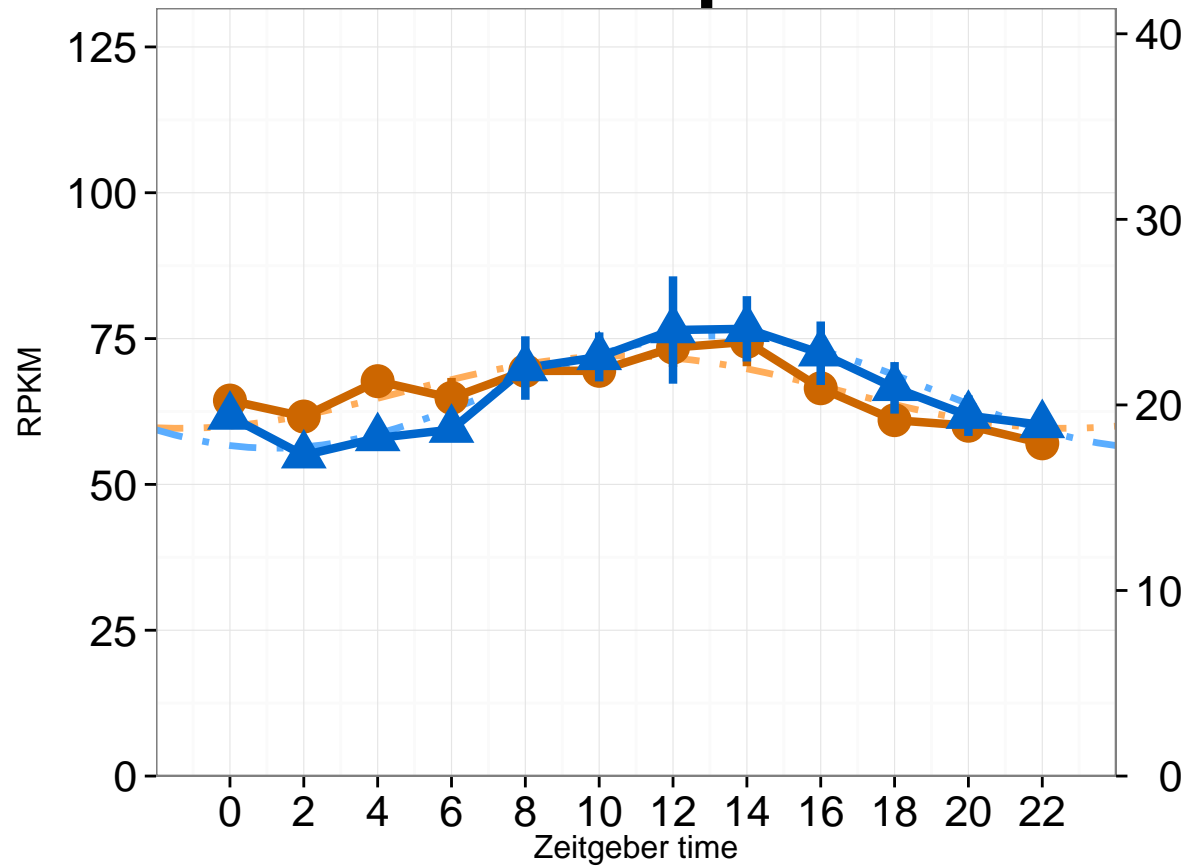

## Bccip

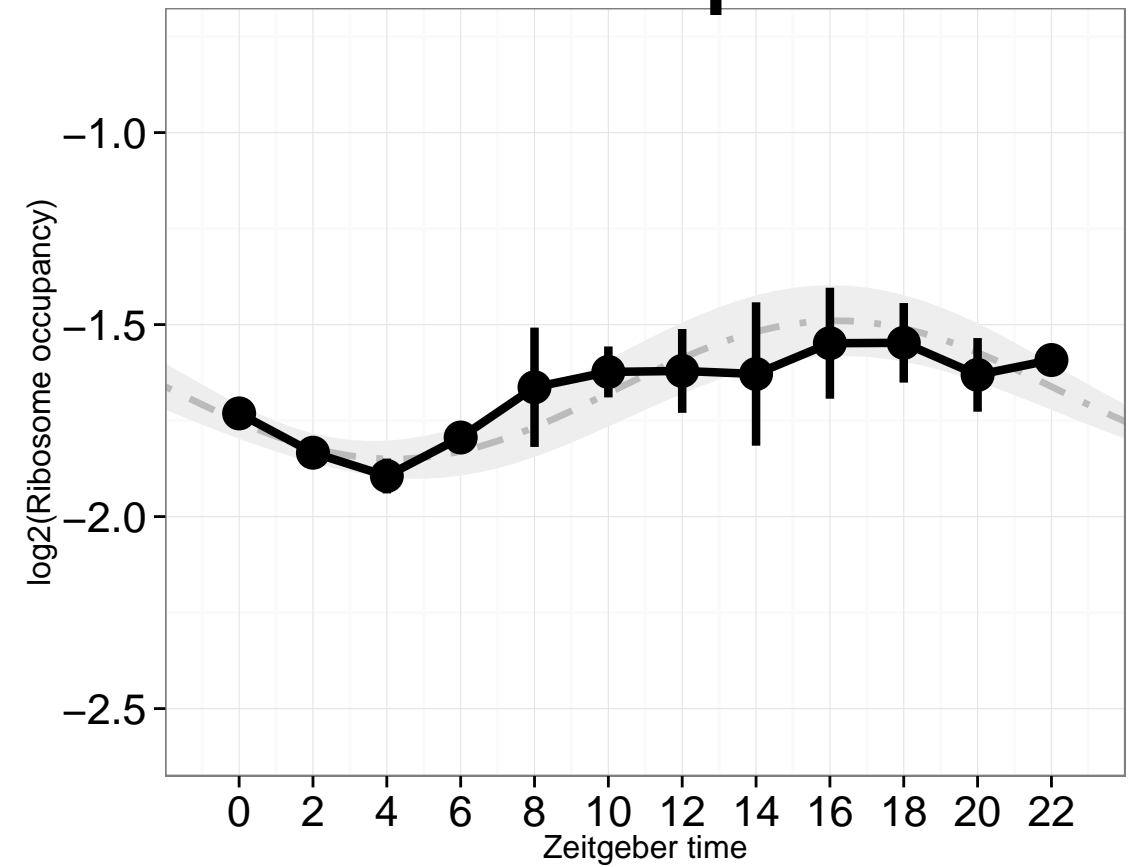

Supplement: SuppDataset_1.zip [file Bccip_set_A.pdf › Supplemental Dataset 1/A-mRNA_nonrhyth_translation_nonrhyth/Bccip_set_A.pdf]

# Bcdin3d

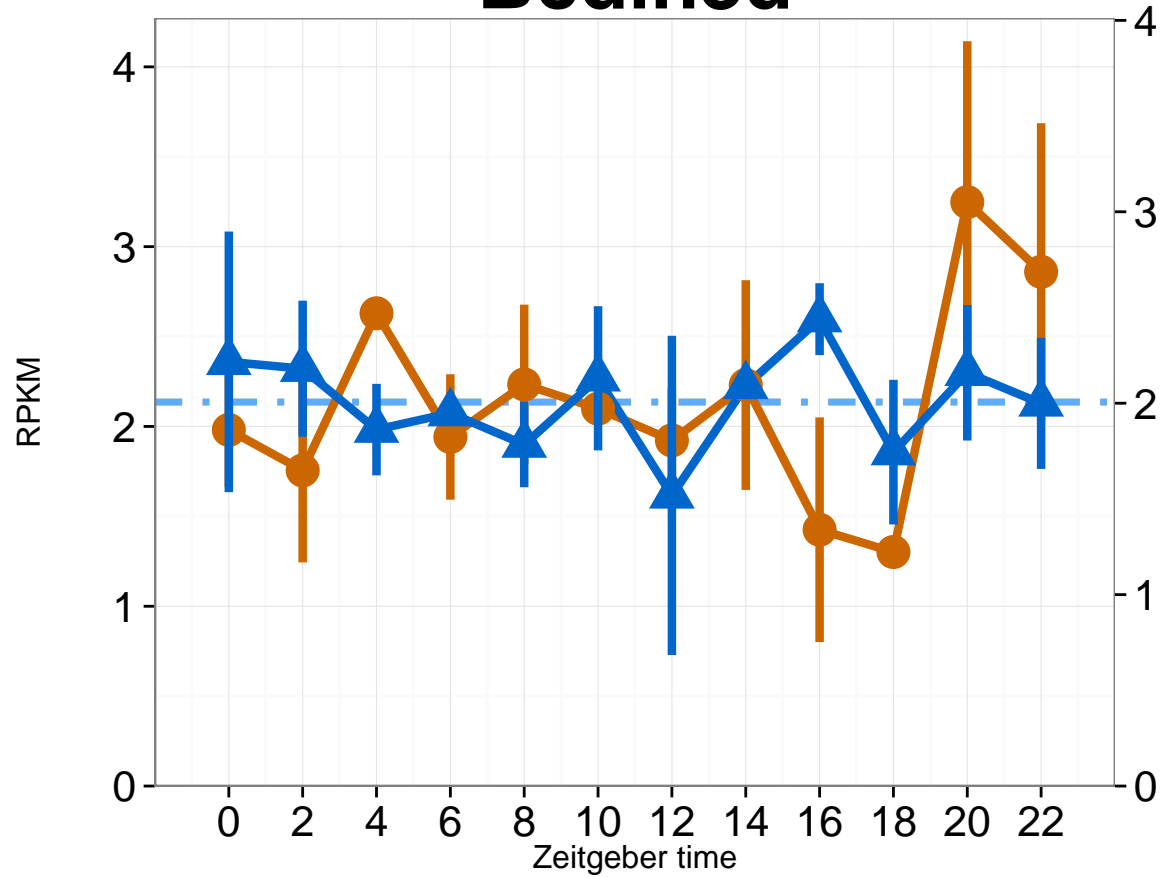

# Bcdin3d

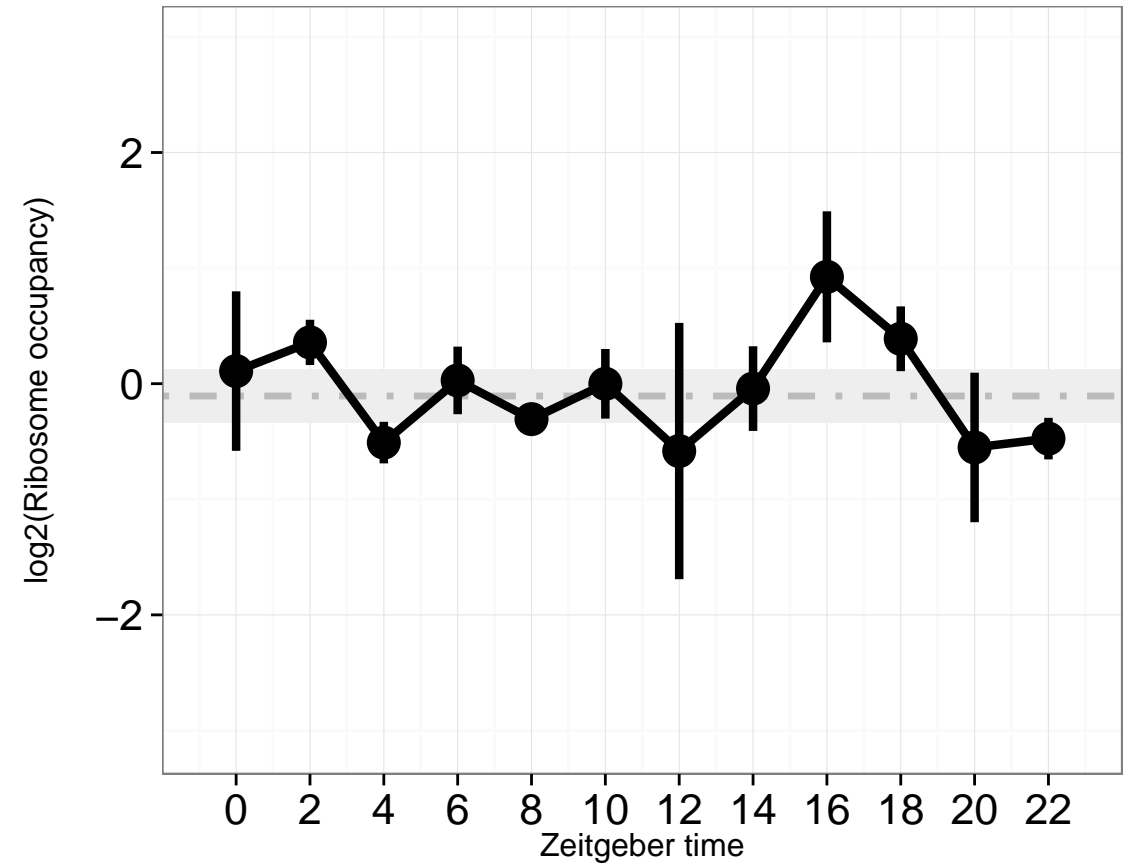

Supplement: SuppDataset_1.zip [file Bcdin3d_set_A.pdf › Supplemental Dataset 1/A-mRNA_nonrhyth_translation_nonrhyth/Bcdin3d_set_A.pdf]

## Bche

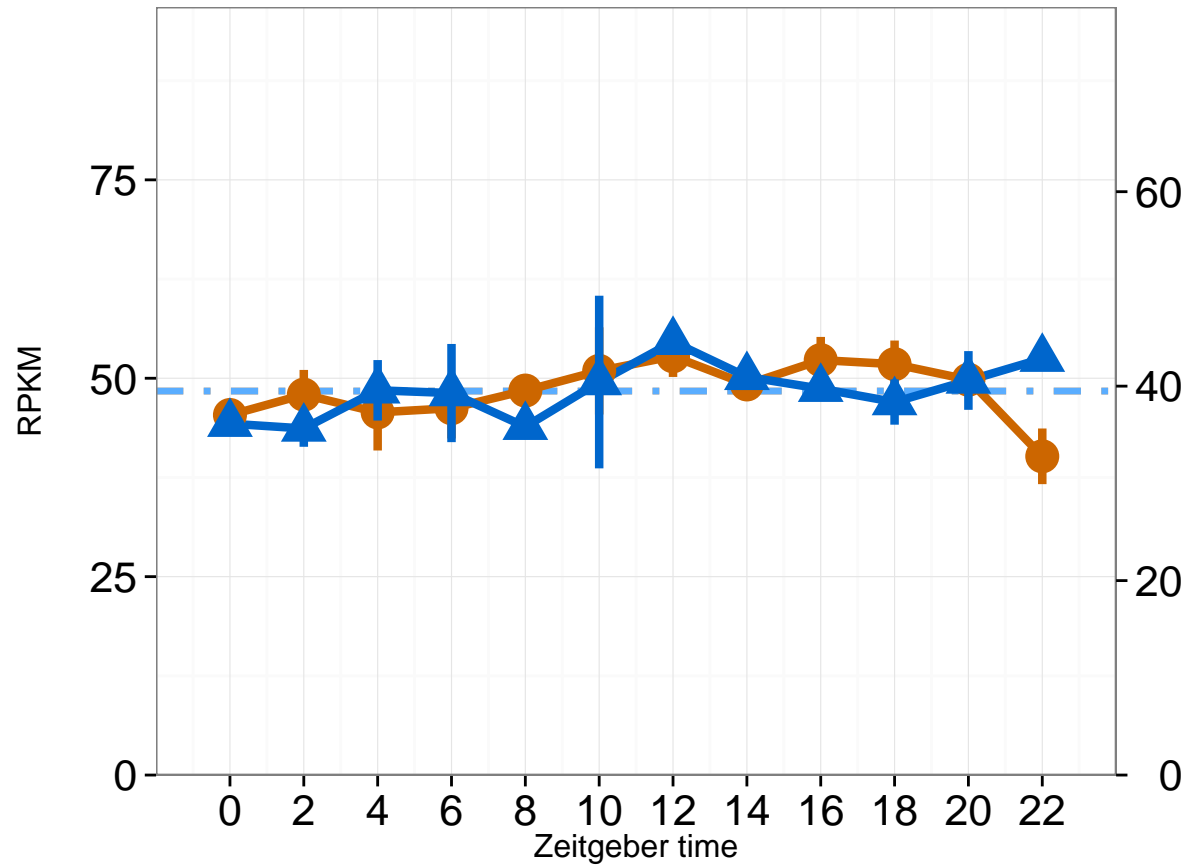

## Bche

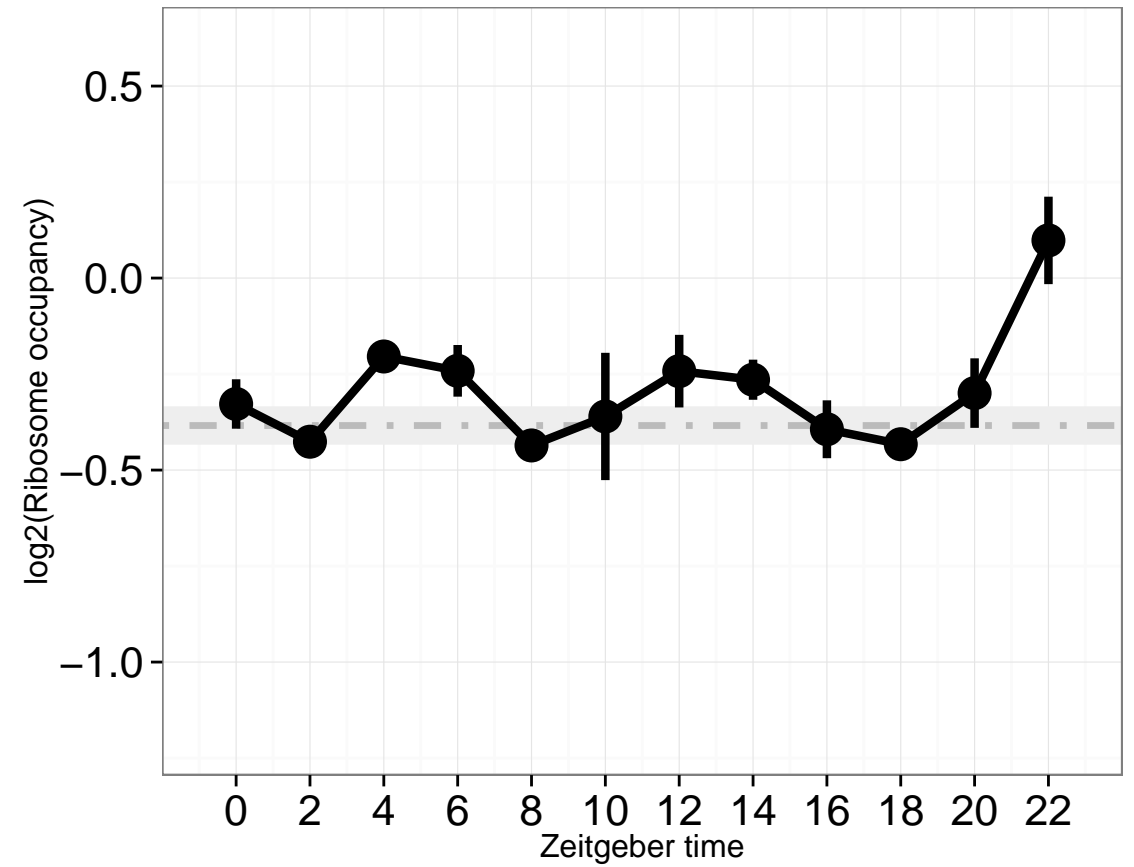

Supplement: SuppDataset_1.zip [file Bche_set_A.pdf › Supplemental Dataset 1/A-mRNA_nonrhyth_translation_nonrhyth/Bche_set_A.pdf]

## Bckdha

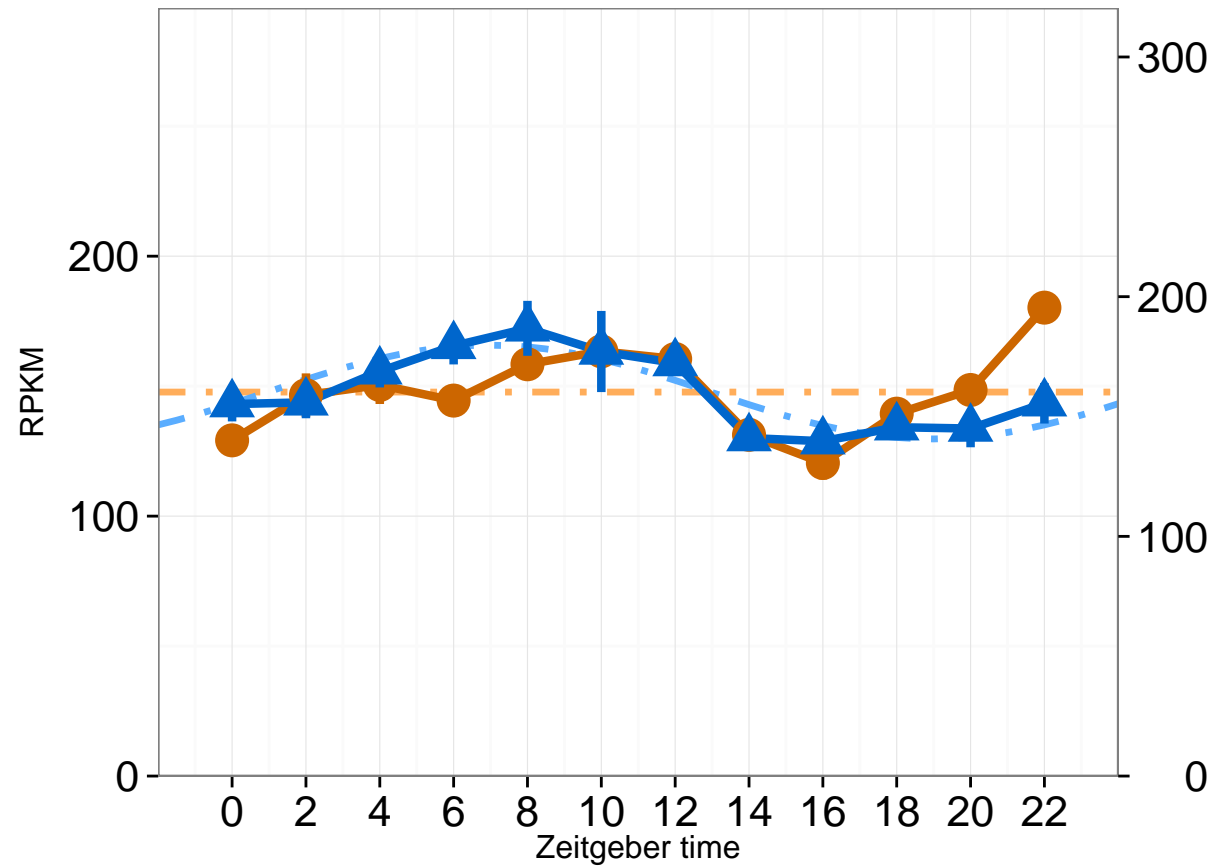

## Bckdha

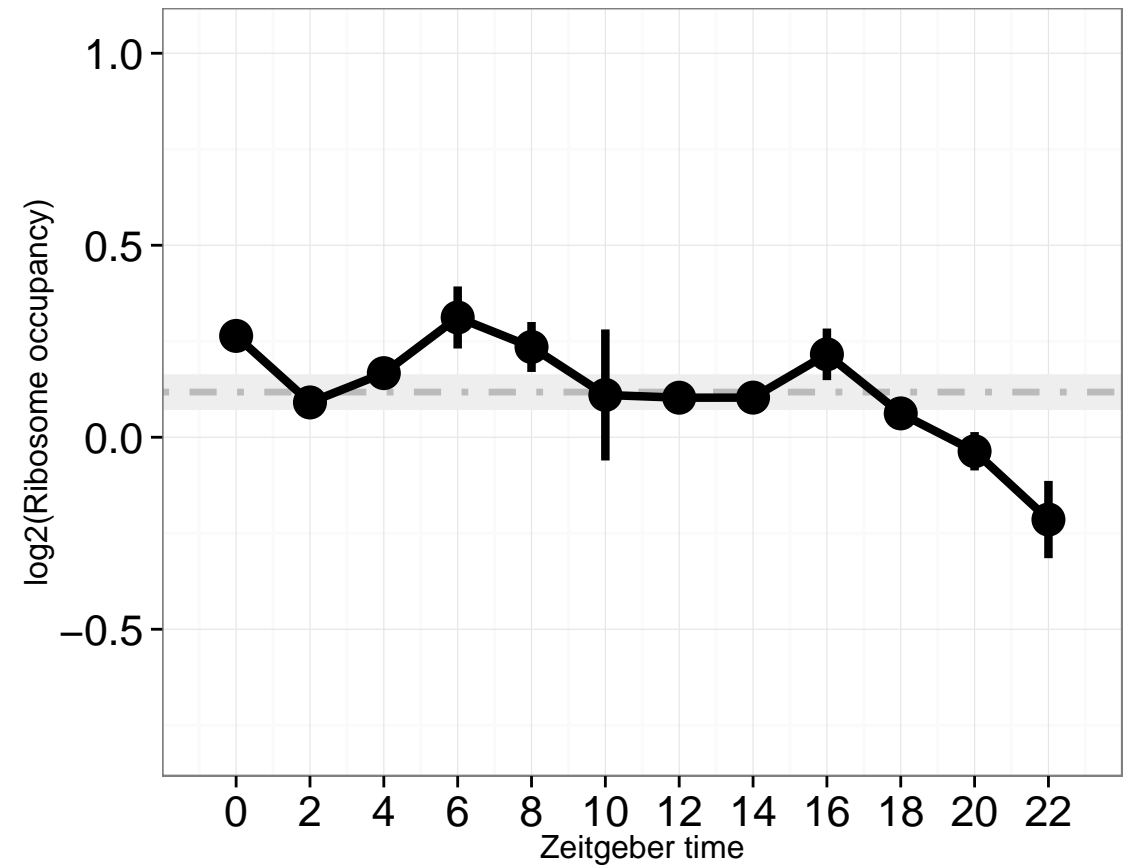

Supplement: SuppDataset_1.zip [file Bckdha_set_A.pdf › Supplemental Dataset 1/A-mRNA_nonrhyth_translation_nonrhyth/Bckdha_set_A.pdf]

## Bckdhb

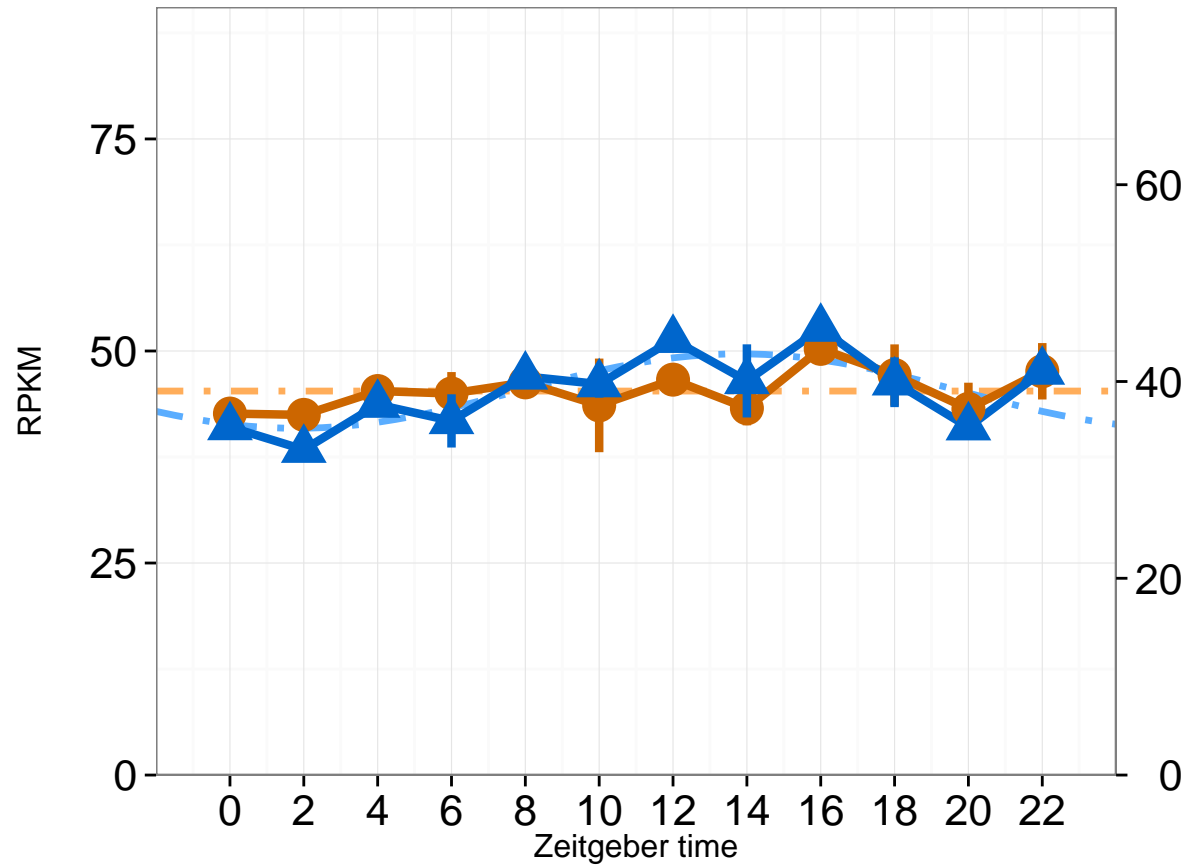

## Bckdhb

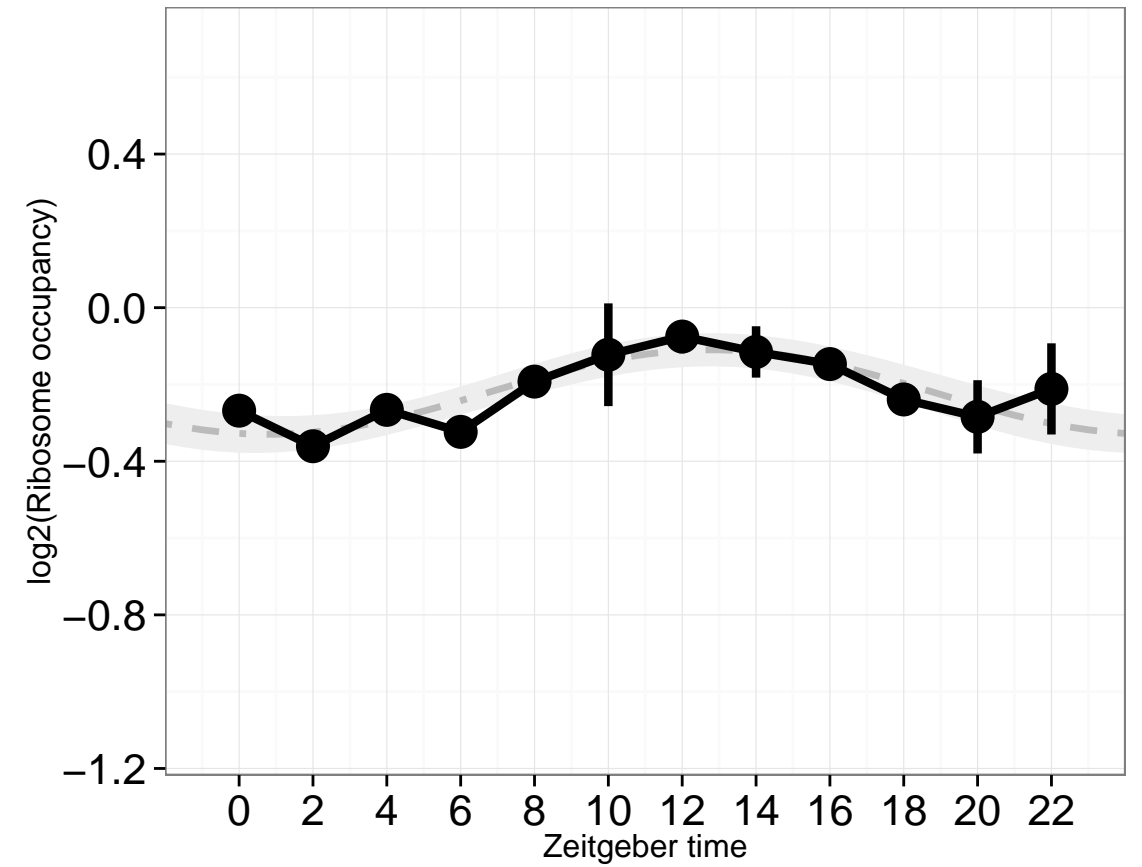

Supplement: SuppDataset_1.zip [file Bckdhb_set_A.pdf › Supplemental Dataset 1/A-mRNA_nonrhyth_translation_nonrhyth/Bckdhb_set_A.pdf]

# Bckdk

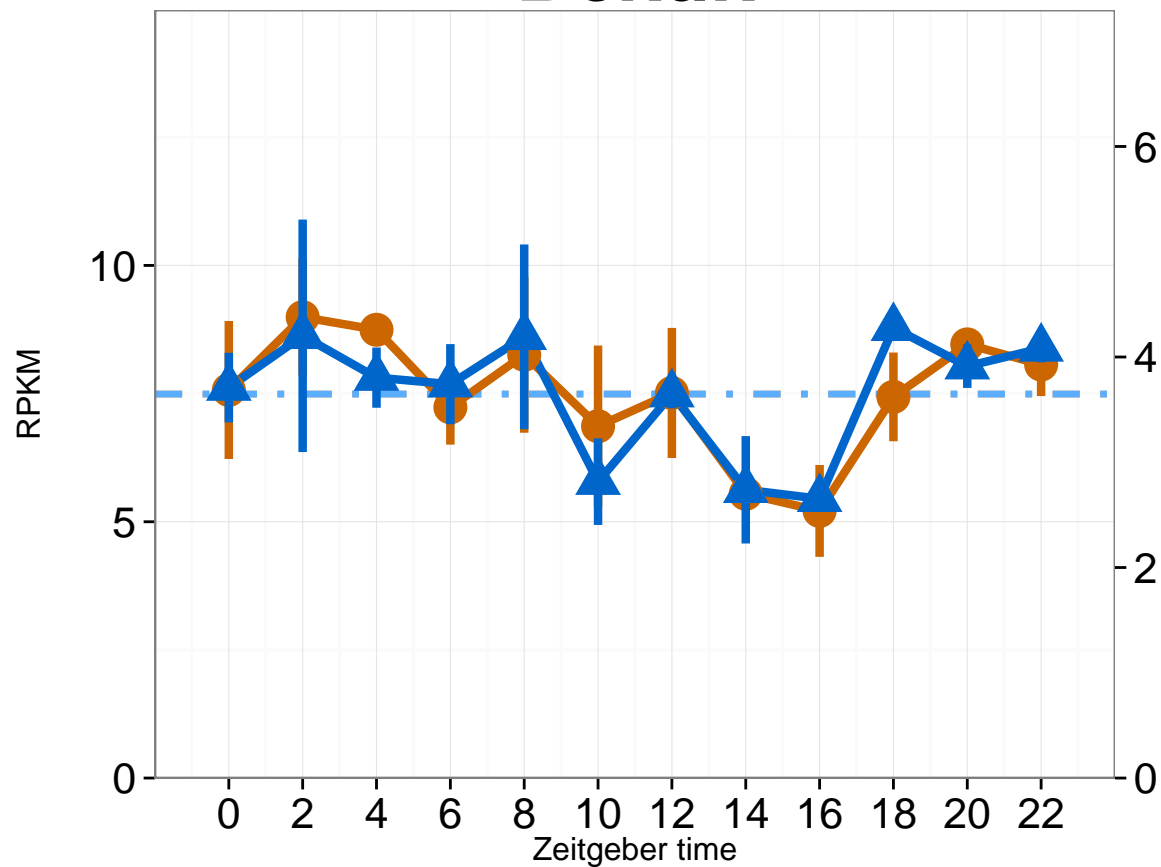

# Bckdk

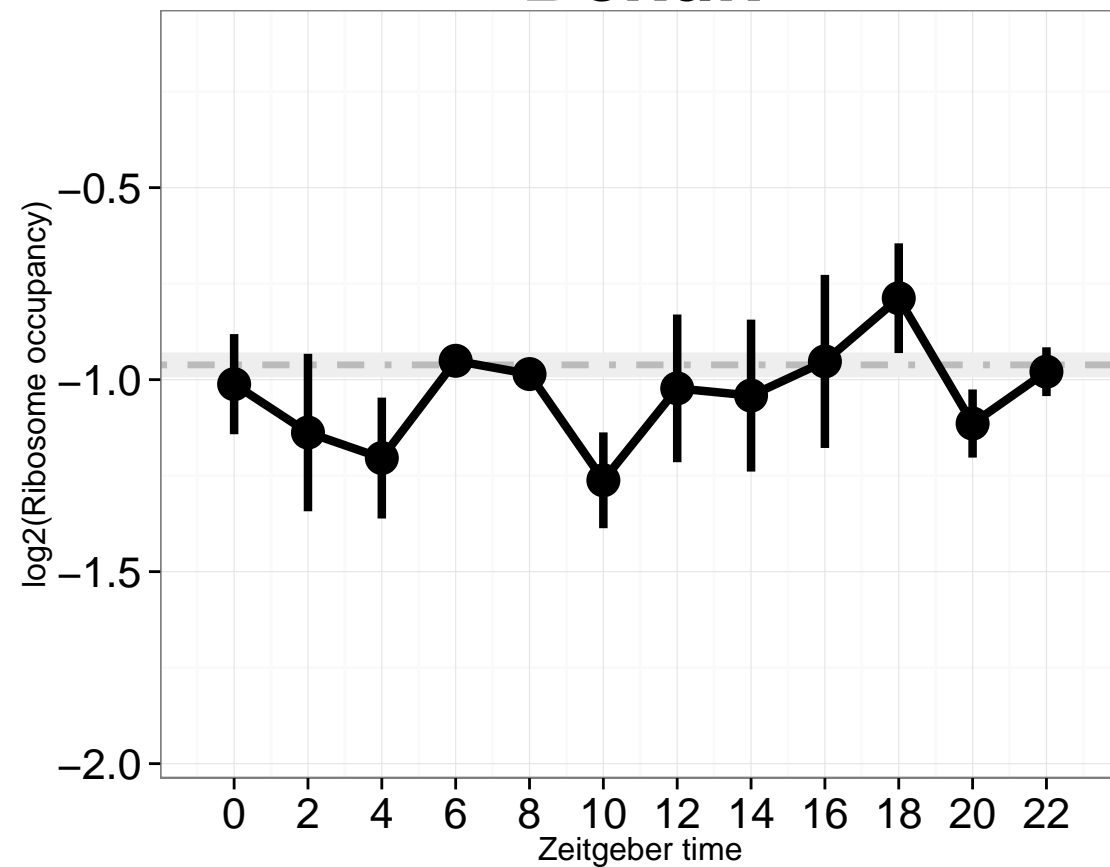

Supplement: SuppDataset_1.zip [file Bckdk_set_A.pdf › Supplemental Dataset 1/A-mRNA_nonrhyth_translation_nonrhyth/Bckdk_set_A.pdf]

## Bcl10

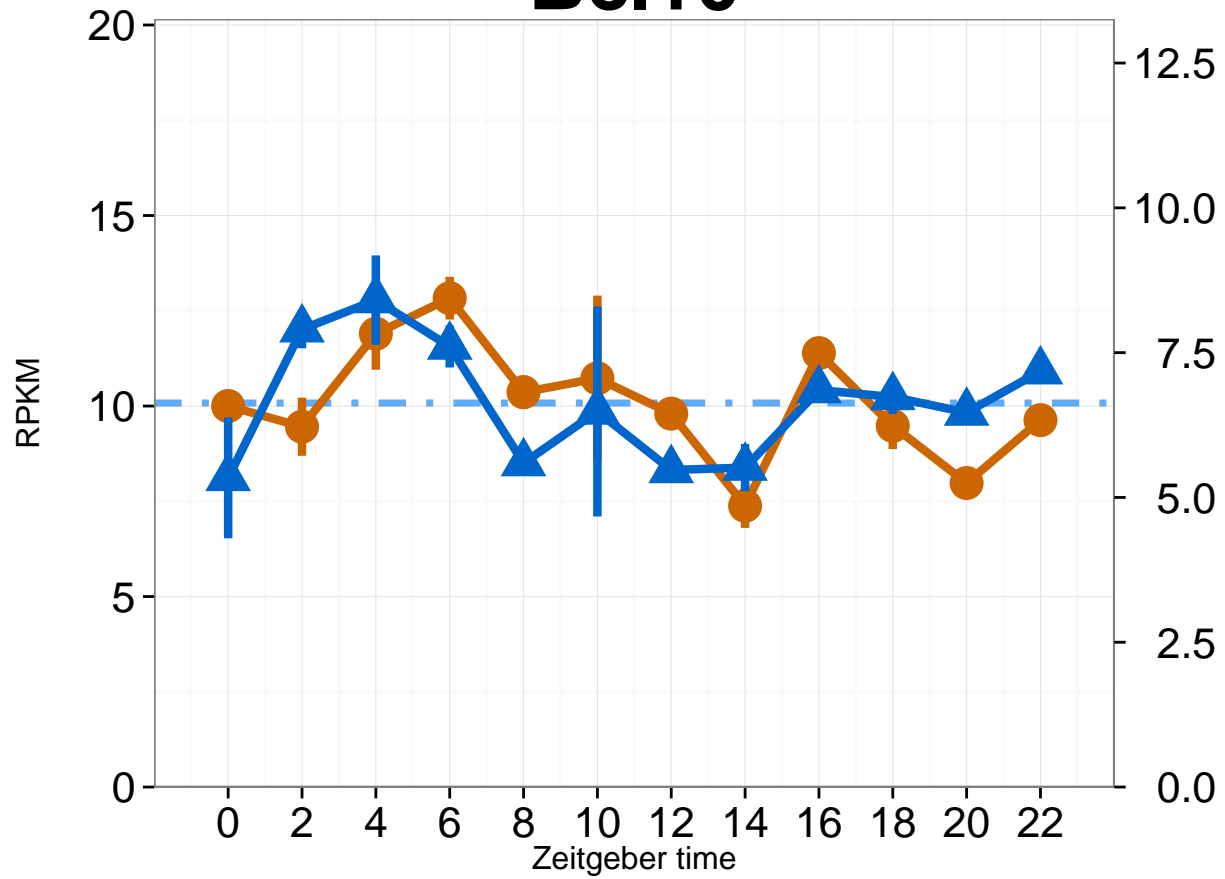

## Bcl10

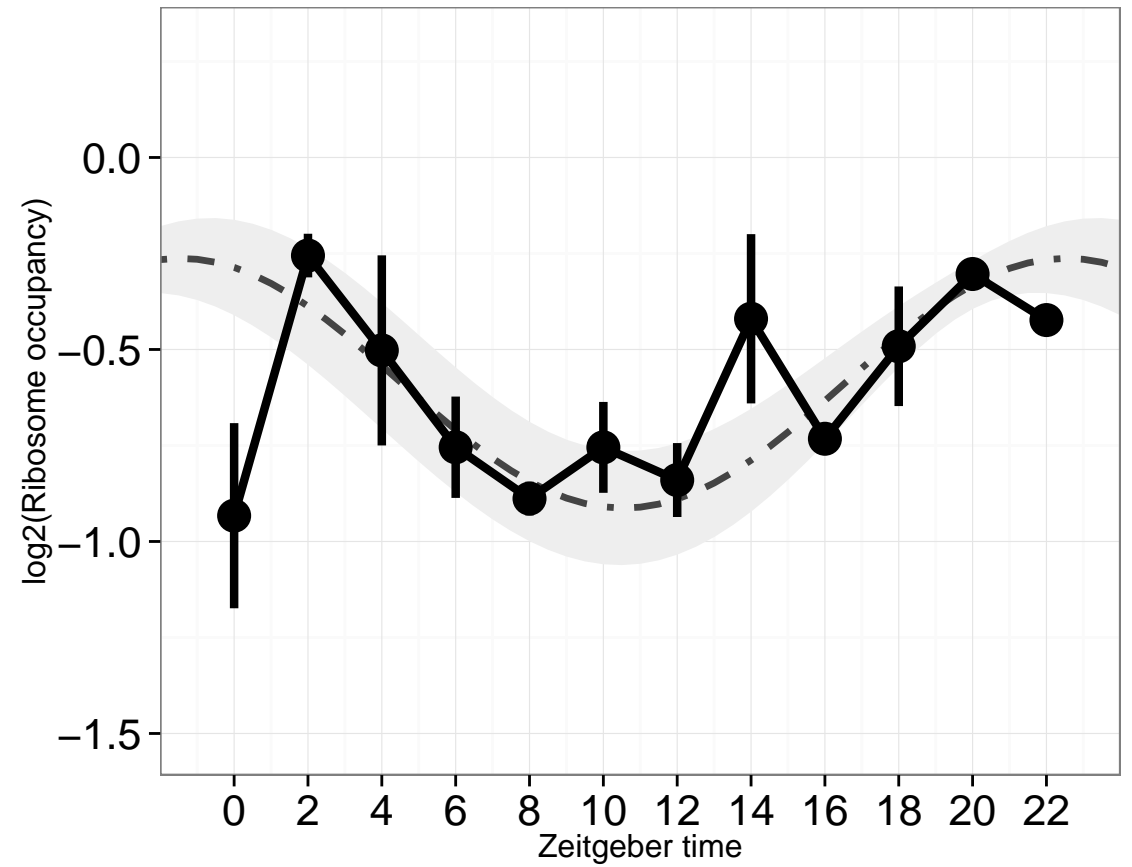

Supplement: SuppDataset_1.zip [file Bcl10_set_A.pdf › Supplemental Dataset 1/A-mRNA_nonrhyth_translation_nonrhyth/Bcl10_set_A.pdf]

## Bcl2l11

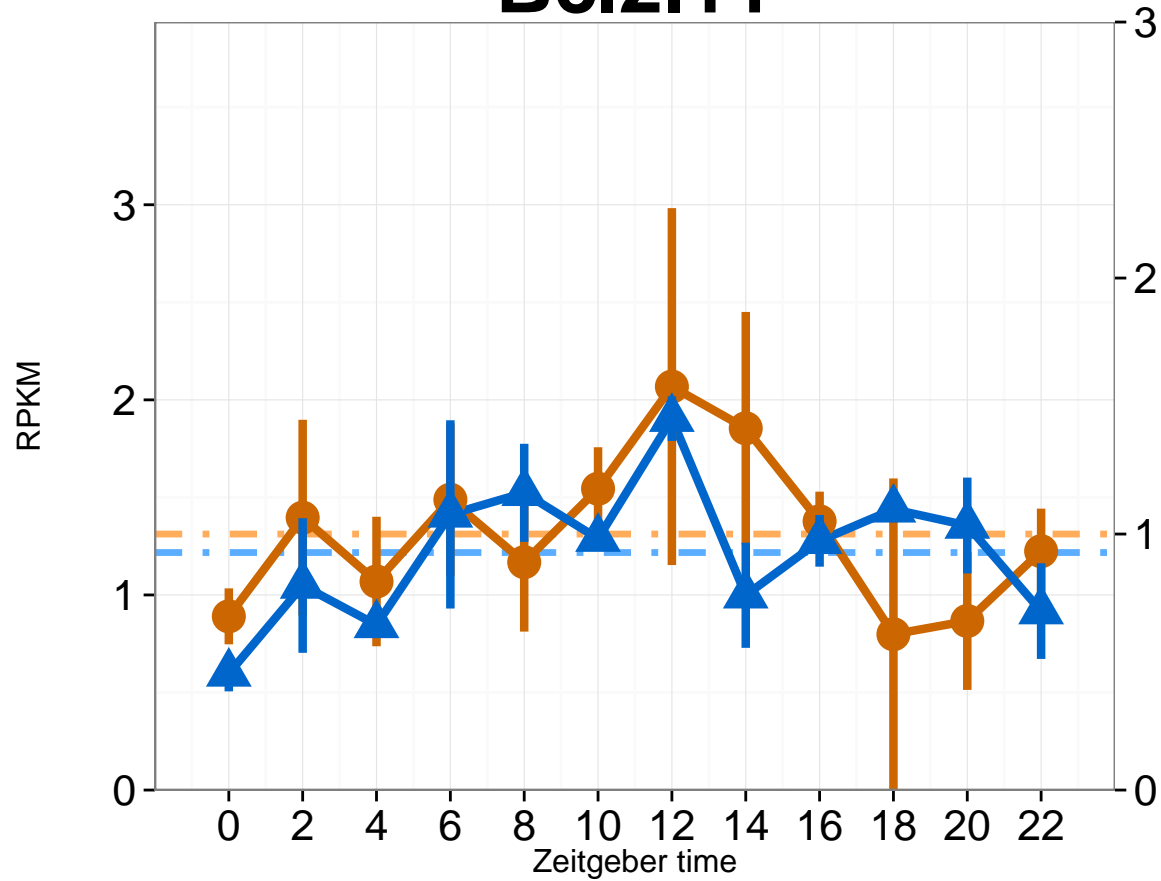

## Bcl2l11

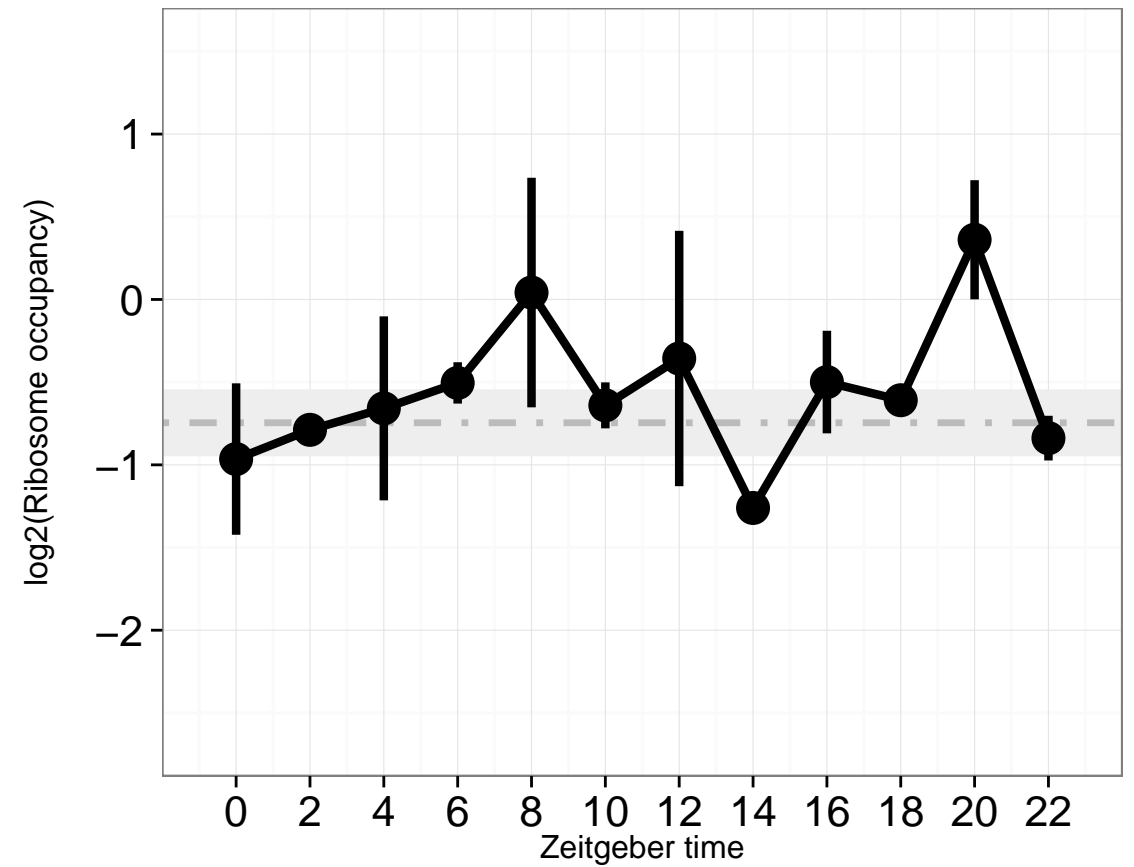

Supplement: SuppDataset_1.zip [file Bcl2l11_set_A.pdf › Supplemental Dataset 1/A-mRNA_nonrhyth_translation_nonrhyth/Bcl2l11_set_A.pdf]

## Bcl2l13

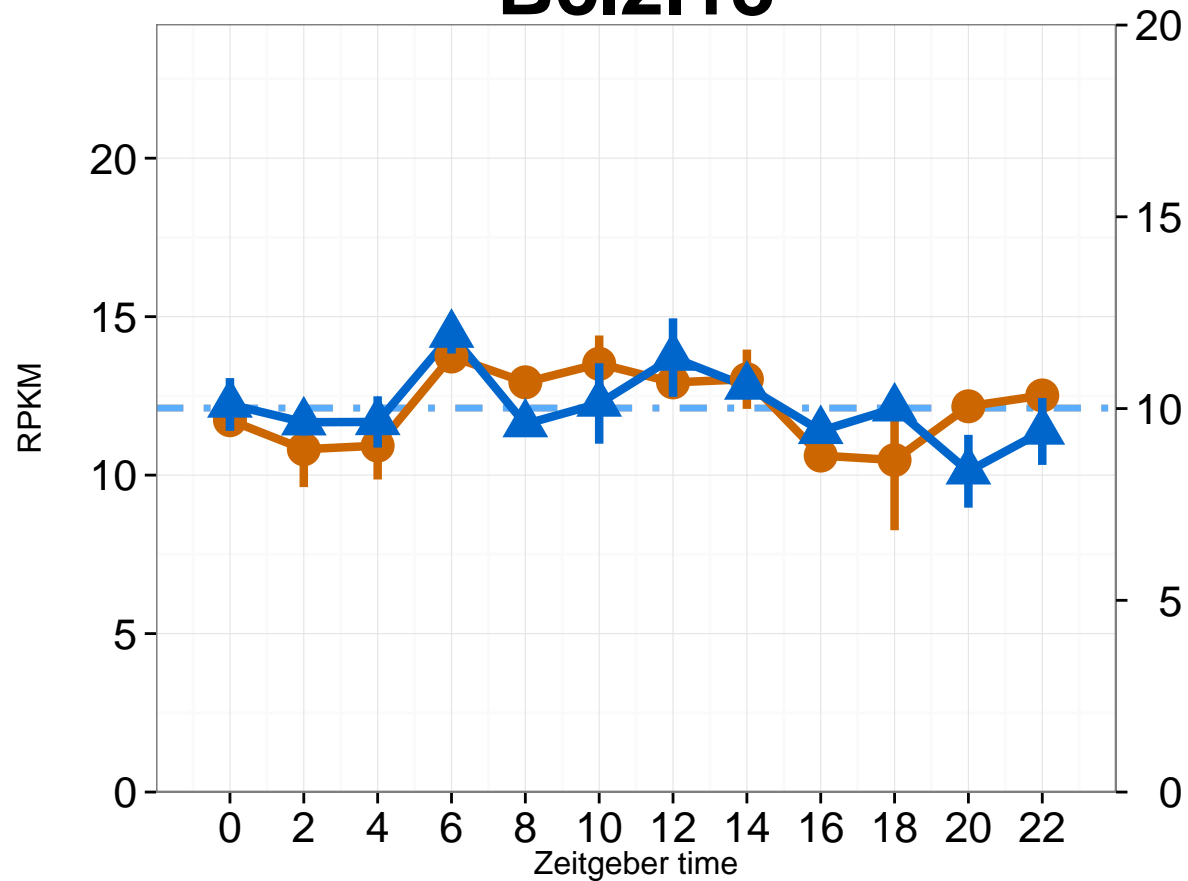

## Bcl2l13

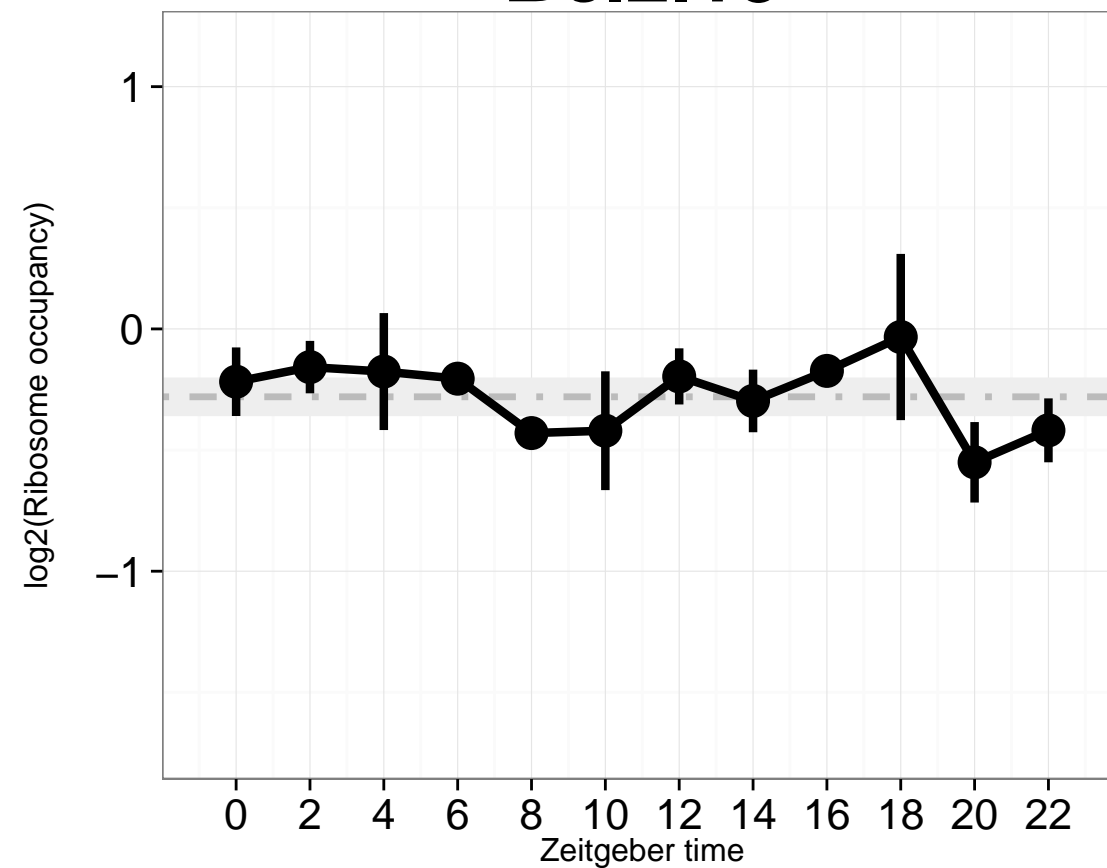

Supplement: SuppDataset_1.zip [file Bcl2l13_set_A.pdf › Supplemental Dataset 1/A-mRNA_nonrhyth_translation_nonrhyth/Bcl2l13_set_A.pdf]

## Bcl2l1

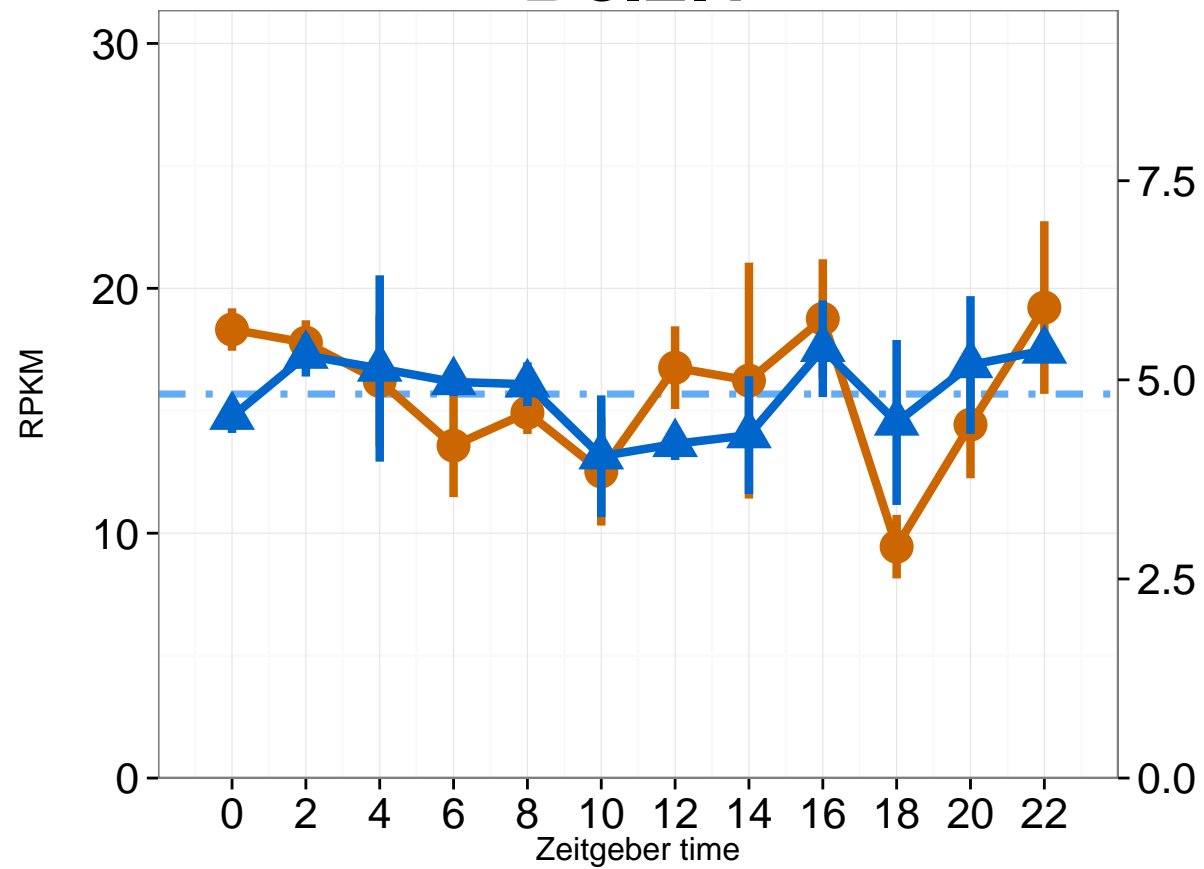

## Bcl2l1

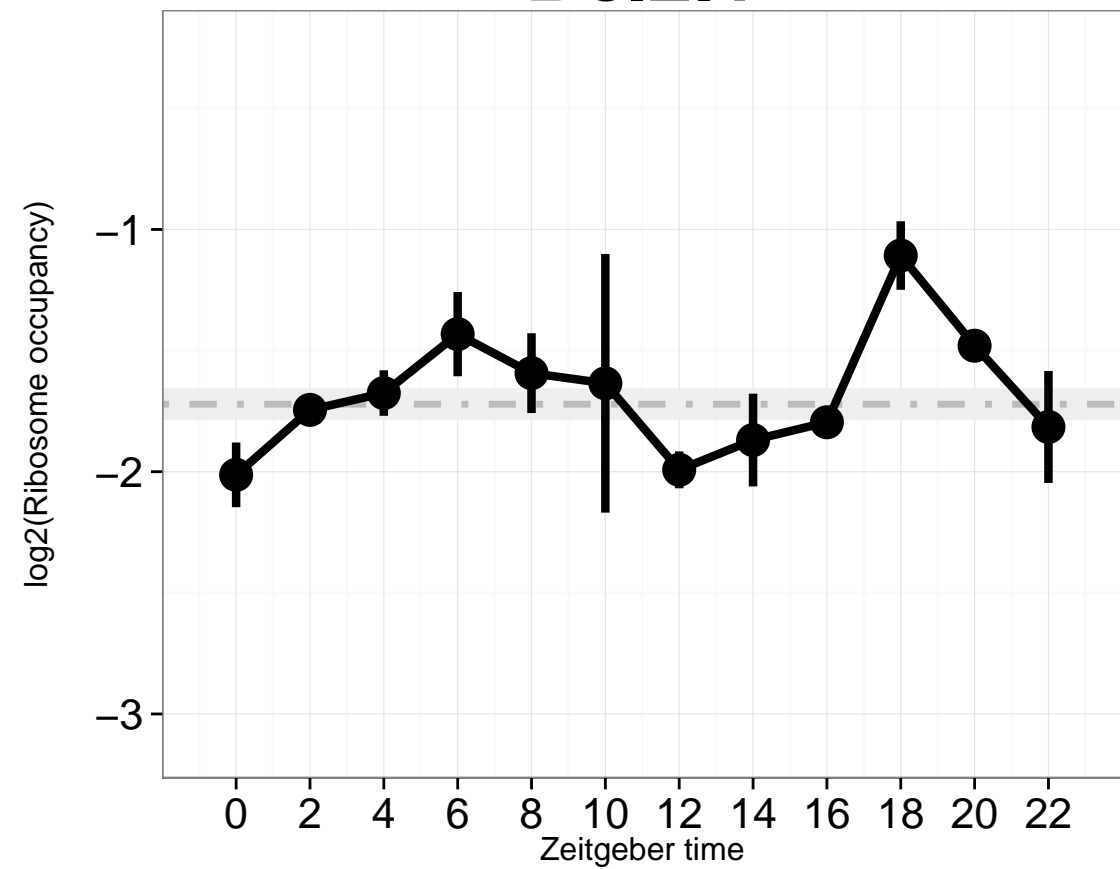

Supplement: SuppDataset_1.zip [file Bcl2l1_set_A.pdf › Supplemental Dataset 1/A-mRNA_nonrhyth_translation_nonrhyth/Bcl2l1_set_A.pdf]

## Bcl2l2

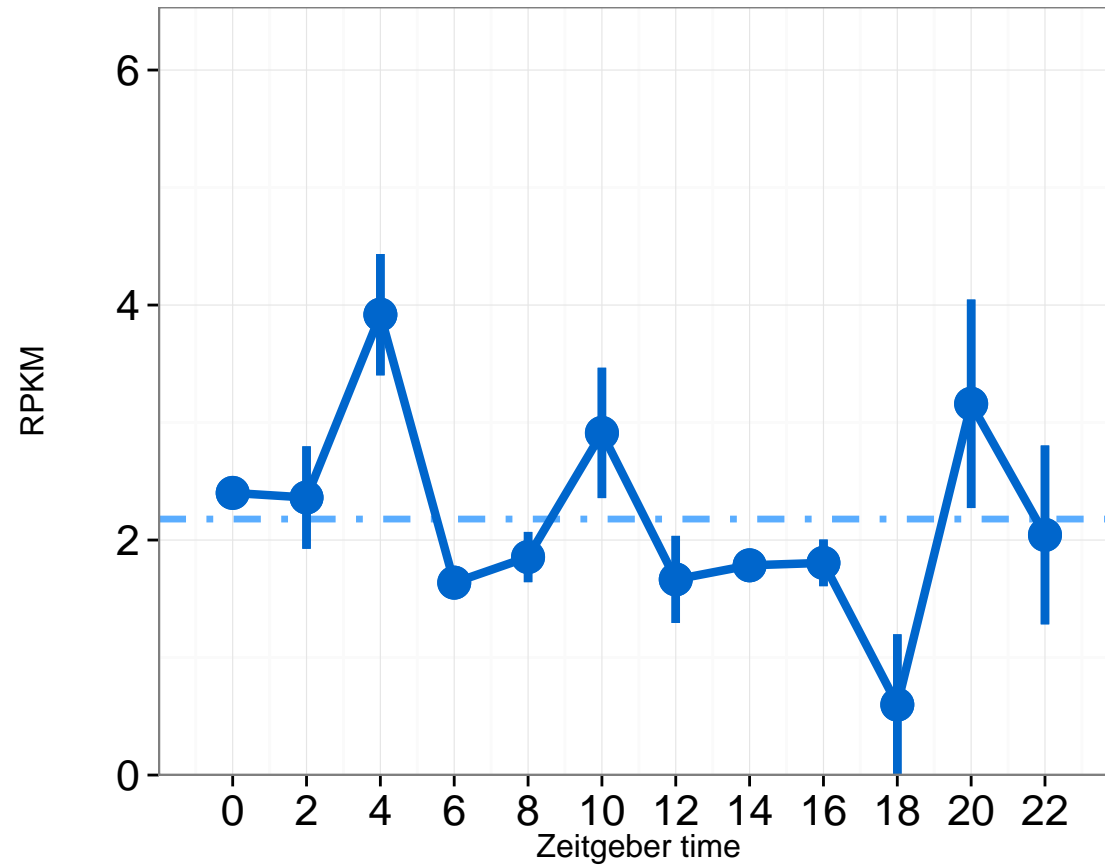

## Bcl2l2 log2(Ribosome occupancy

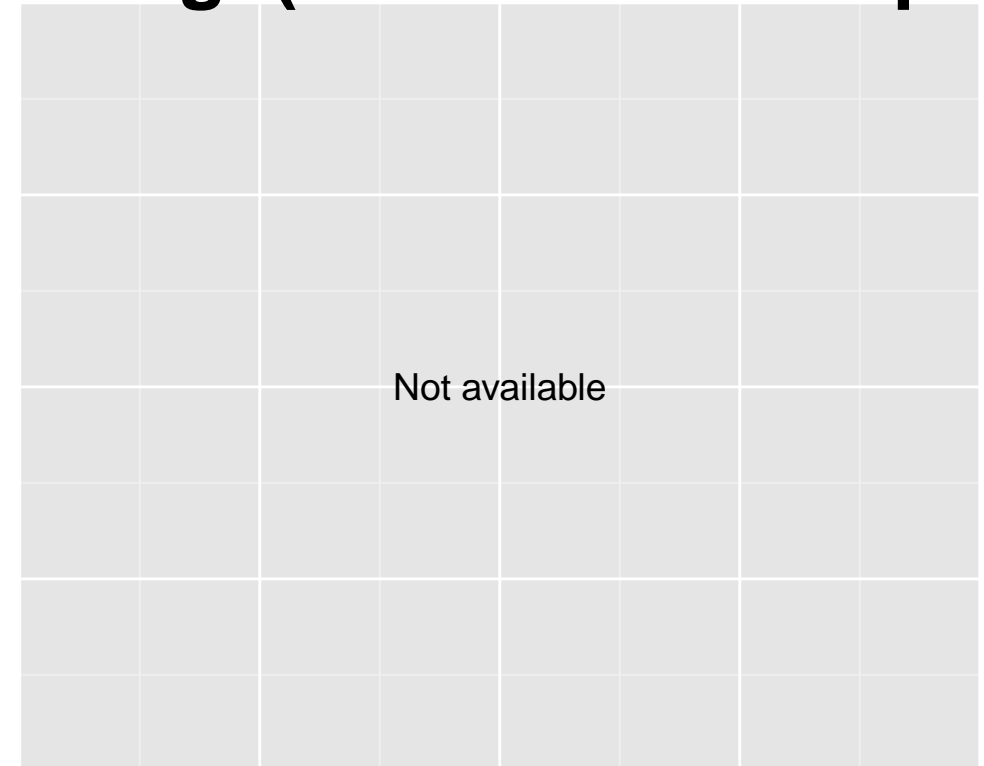

Supplement: SuppDataset_1.zip [file Bcl2l2_set_A.pdf › Supplemental Dataset 1/A-mRNA_nonrhyth_translation_nonrhyth/Bcl2l2_set_A.pdf]

## Bcl6

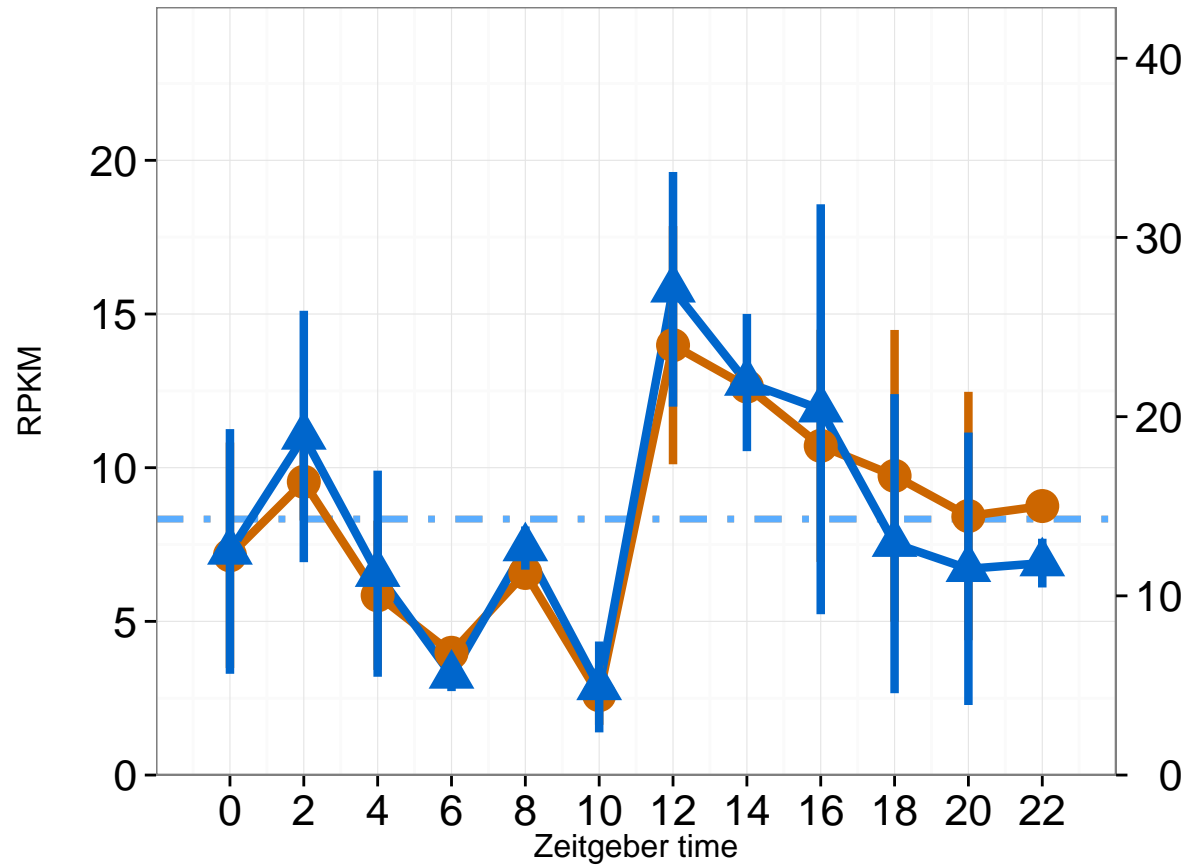

## Bcl6

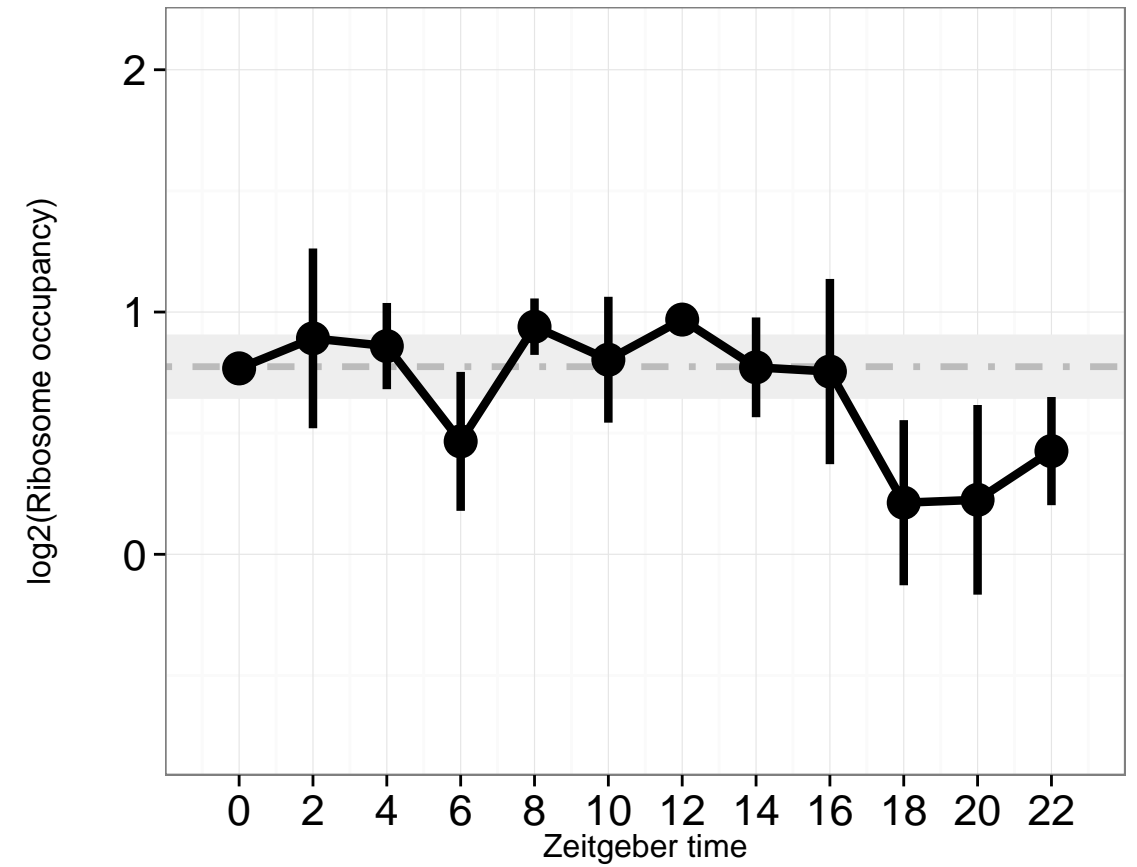

Supplement: SuppDataset_1.zip [file Bcl6_set_A.pdf › Supplemental Dataset 1/A-mRNA_nonrhyth_translation_nonrhyth/Bcl6_set_A.pdf]

# Bcl6b

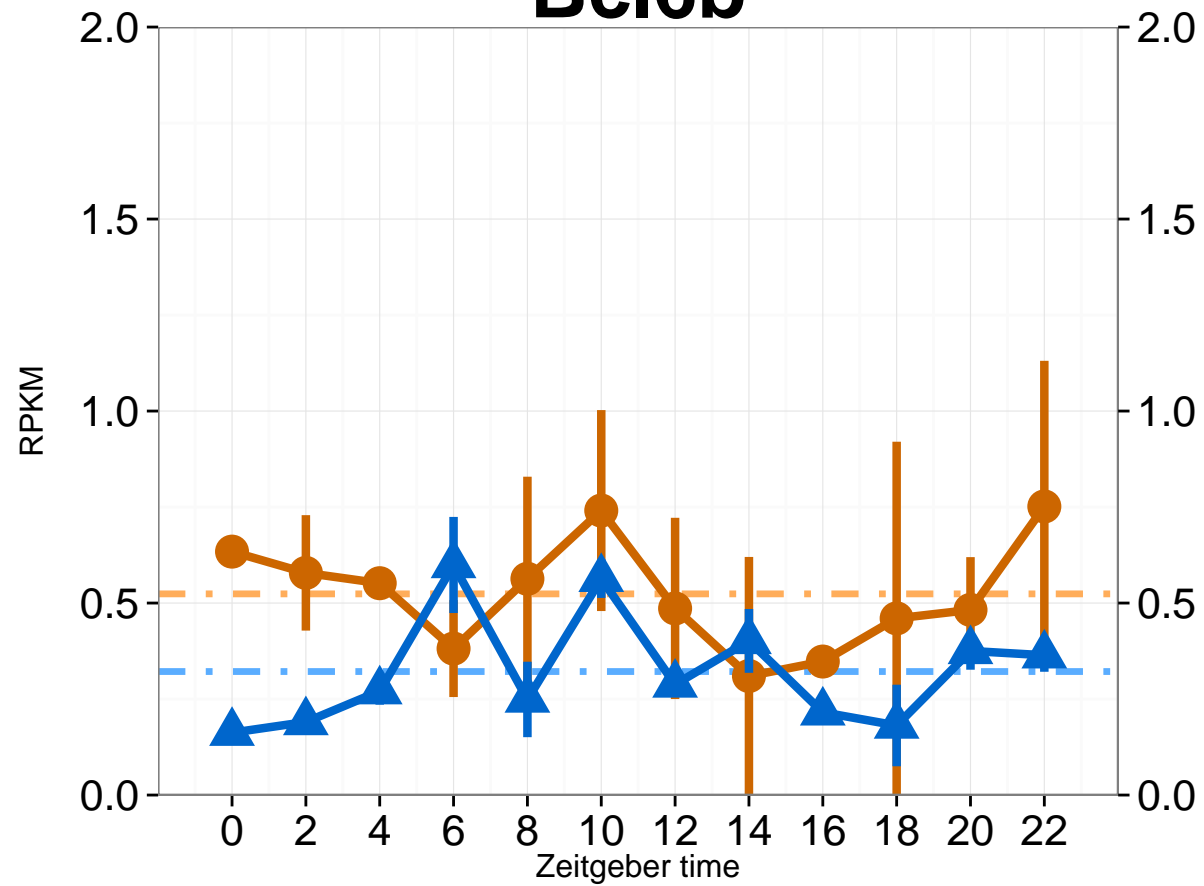

# Bcl6b

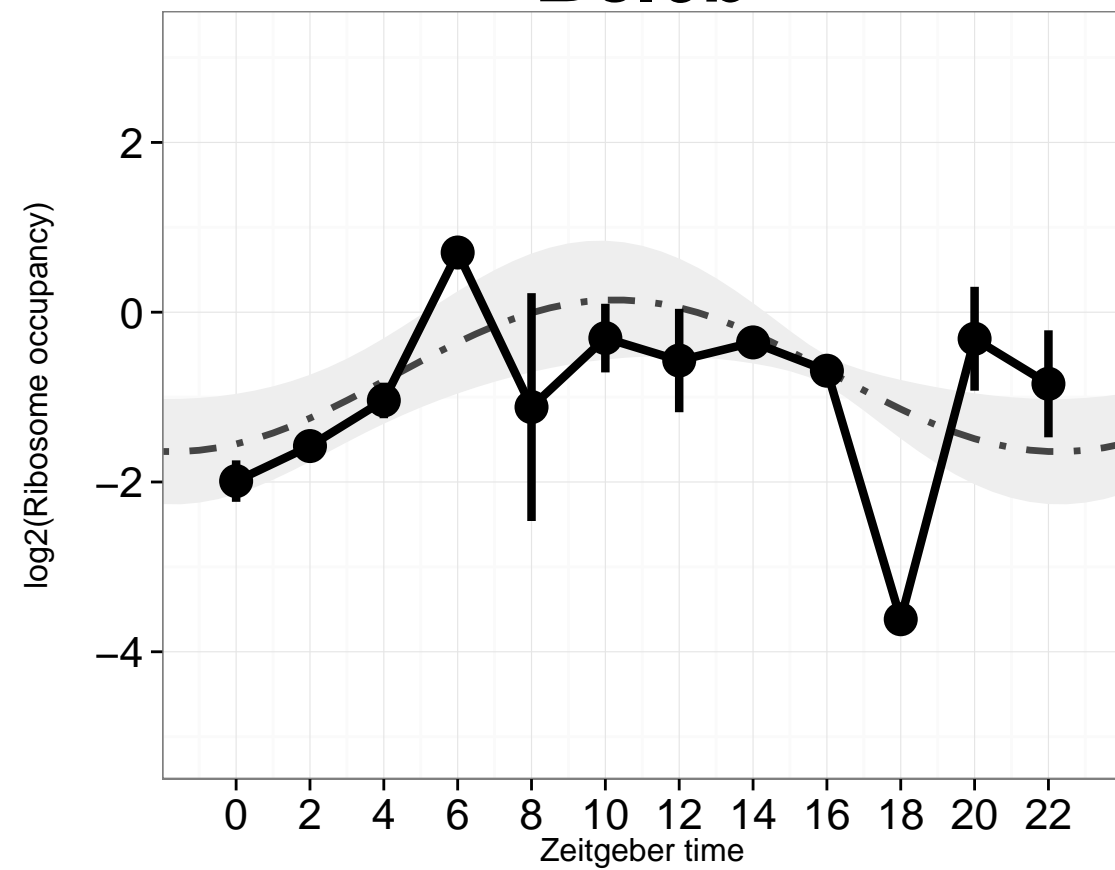

Supplement: SuppDataset_1.zip [file Bcl6b_set_A.pdf › Supplemental Dataset 1/A-mRNA_nonrhyth_translation_nonrhyth/Bcl6b_set_A.pdf]

# Bcl7a

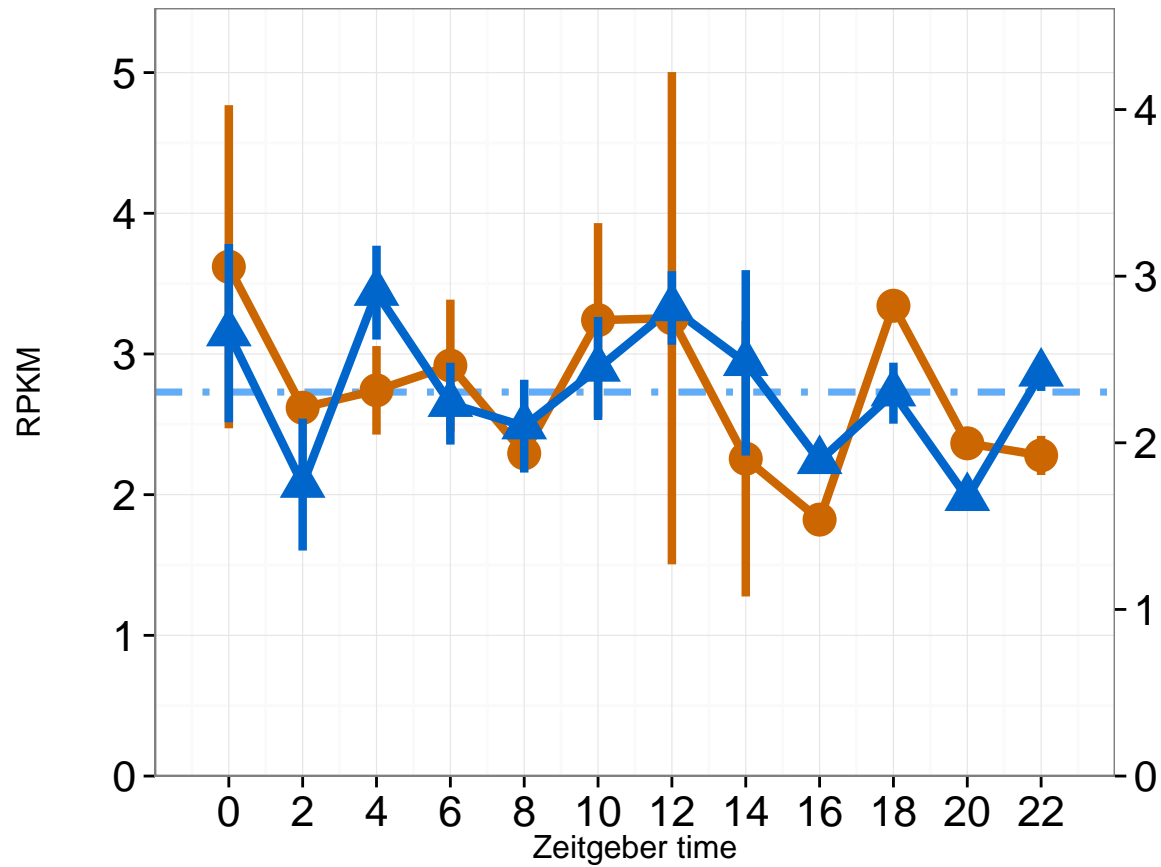

# Bcl7a

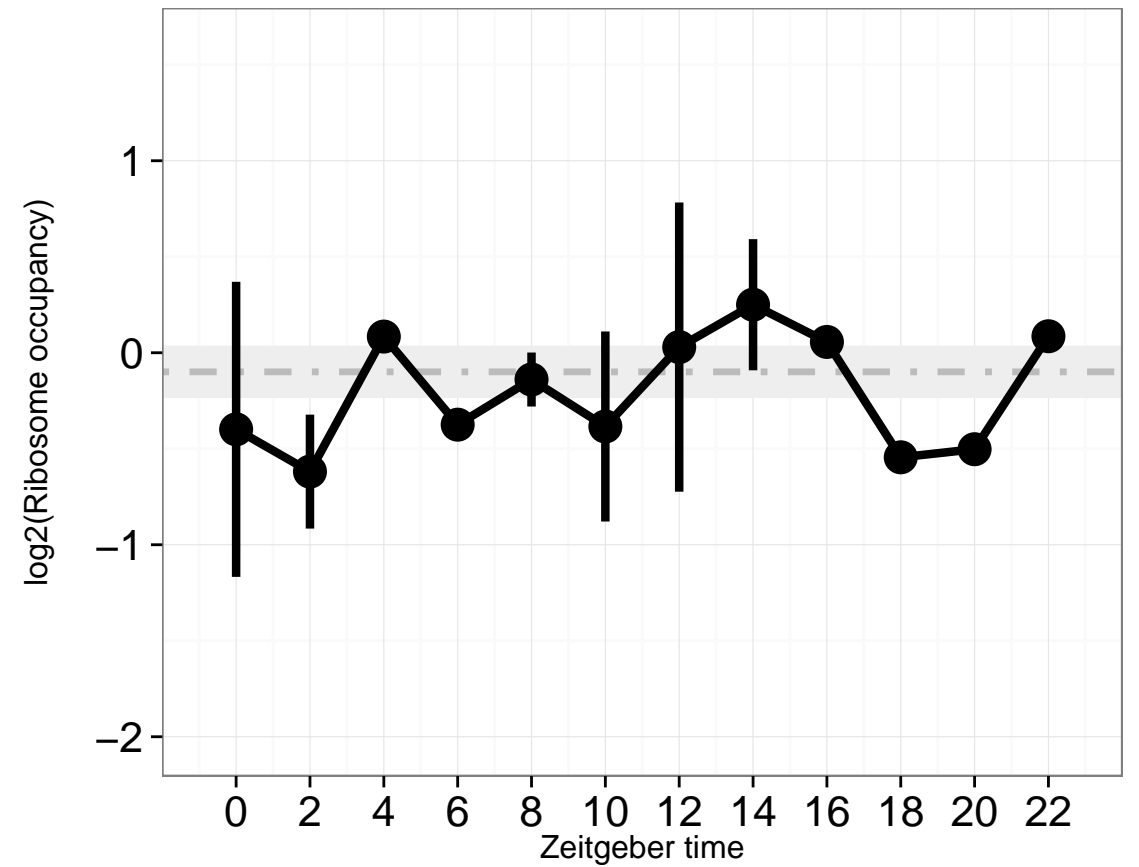

Supplement: SuppDataset_1.zip [file Bcl7a_set_A.pdf › Supplemental Dataset 1/A-mRNA_nonrhyth_translation_nonrhyth/Bcl7a_set_A.pdf]

## Bcl7b

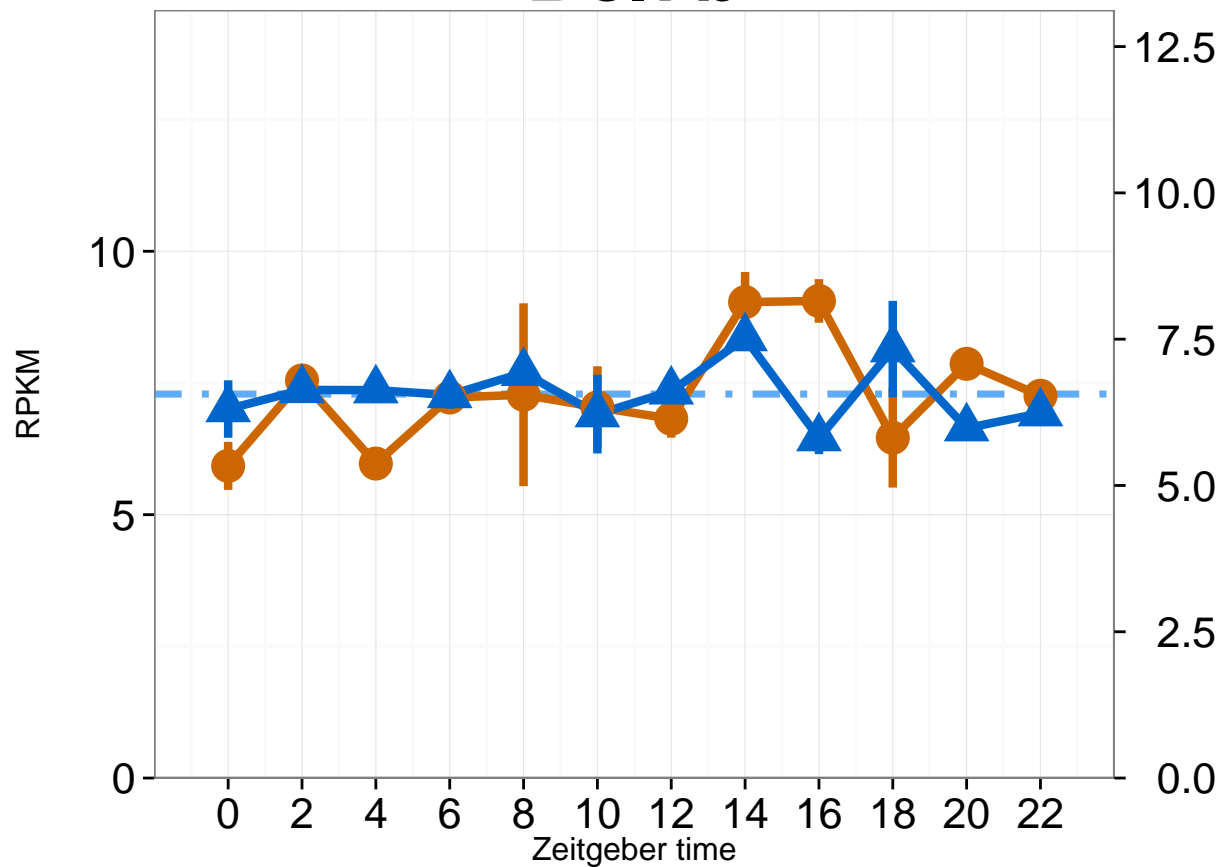

## Bcl7b

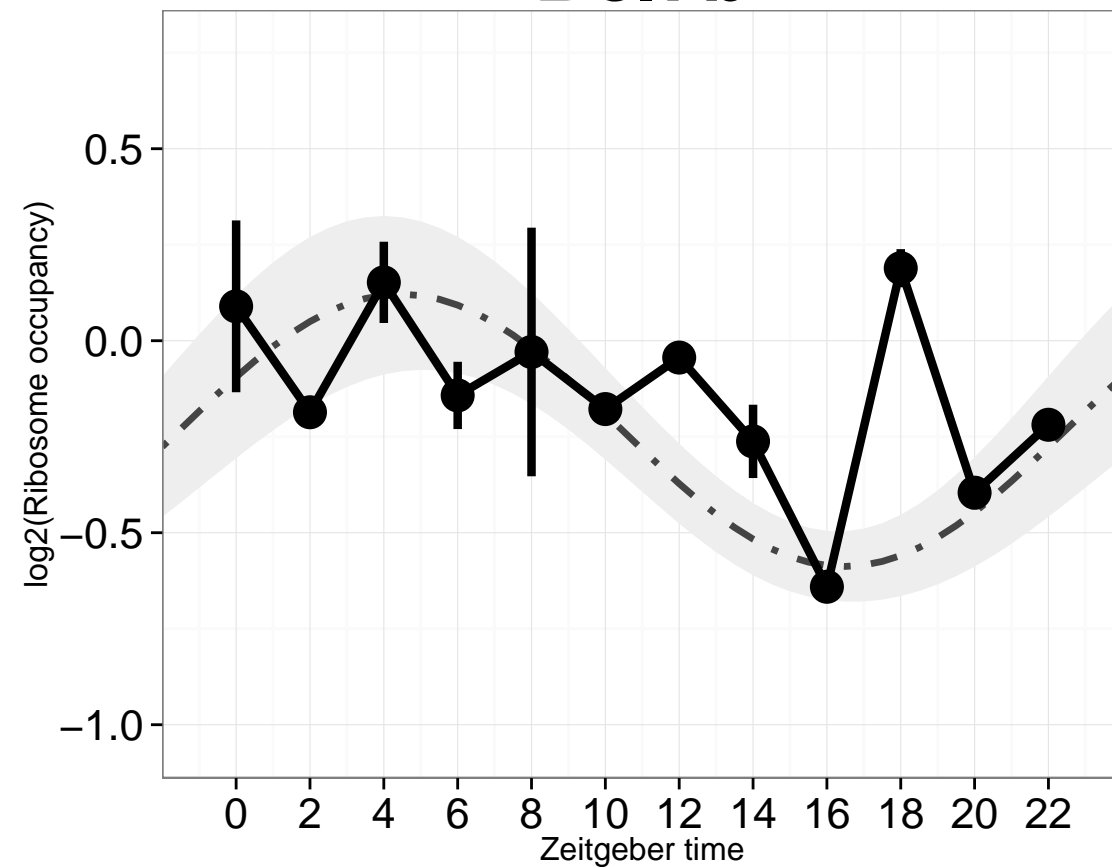

Supplement: SuppDataset_1.zip [file Bcl7b_set_A.pdf › Supplemental Dataset 1/A-mRNA_nonrhyth_translation_nonrhyth/Bcl7b_set_A.pdf]

## Bcl9

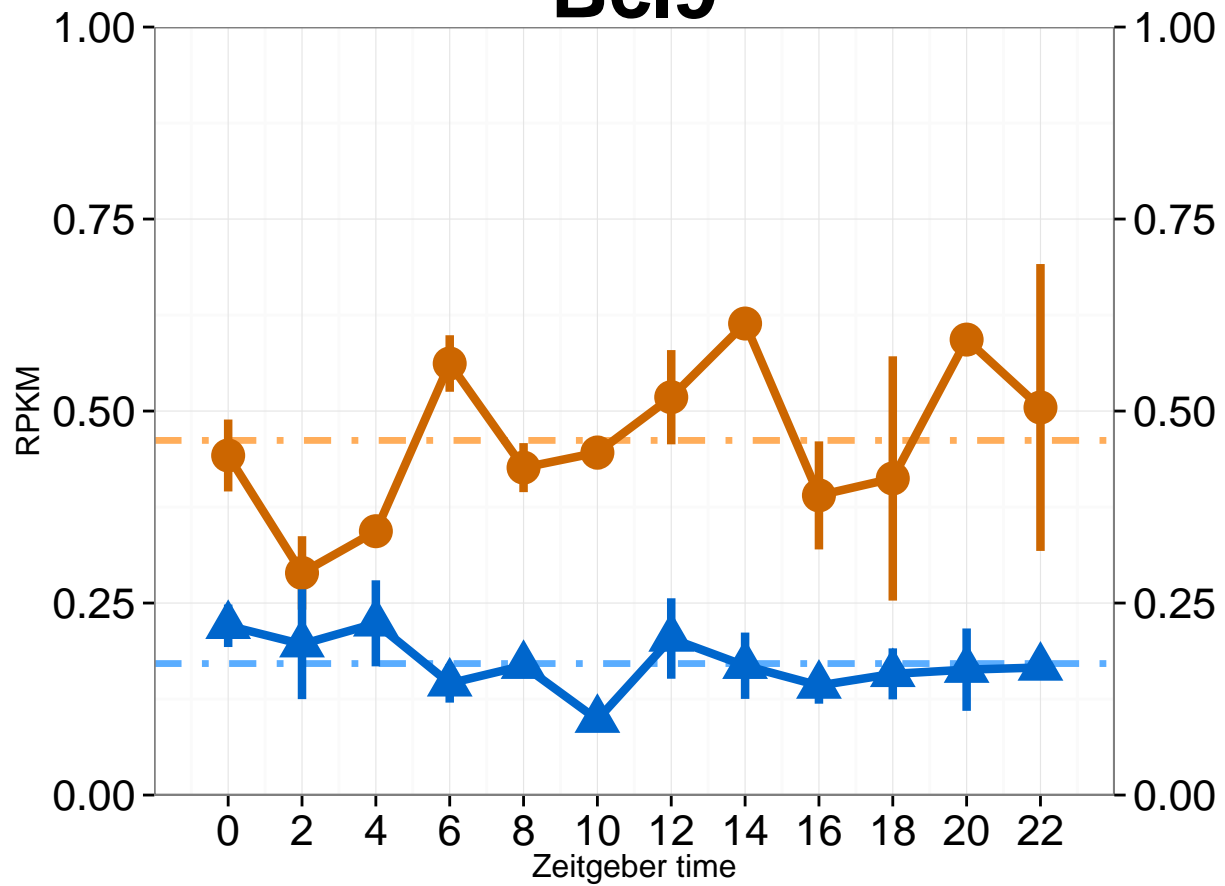

## Bcl9

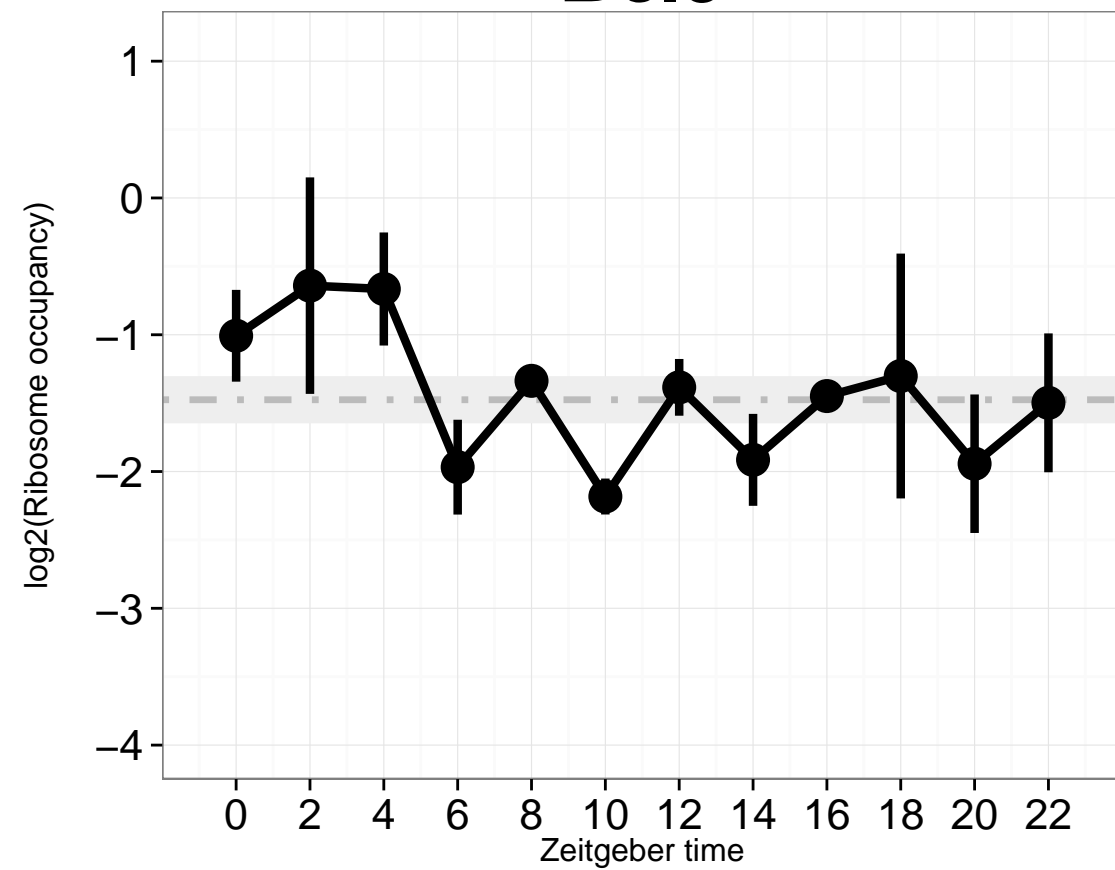

Supplement: SuppDataset_1.zip [file Bcl9_set_A.pdf › Supplemental Dataset 1/A-mRNA_nonrhyth_translation_nonrhyth/Bcl9_set_A.pdf]

## Bcl9l

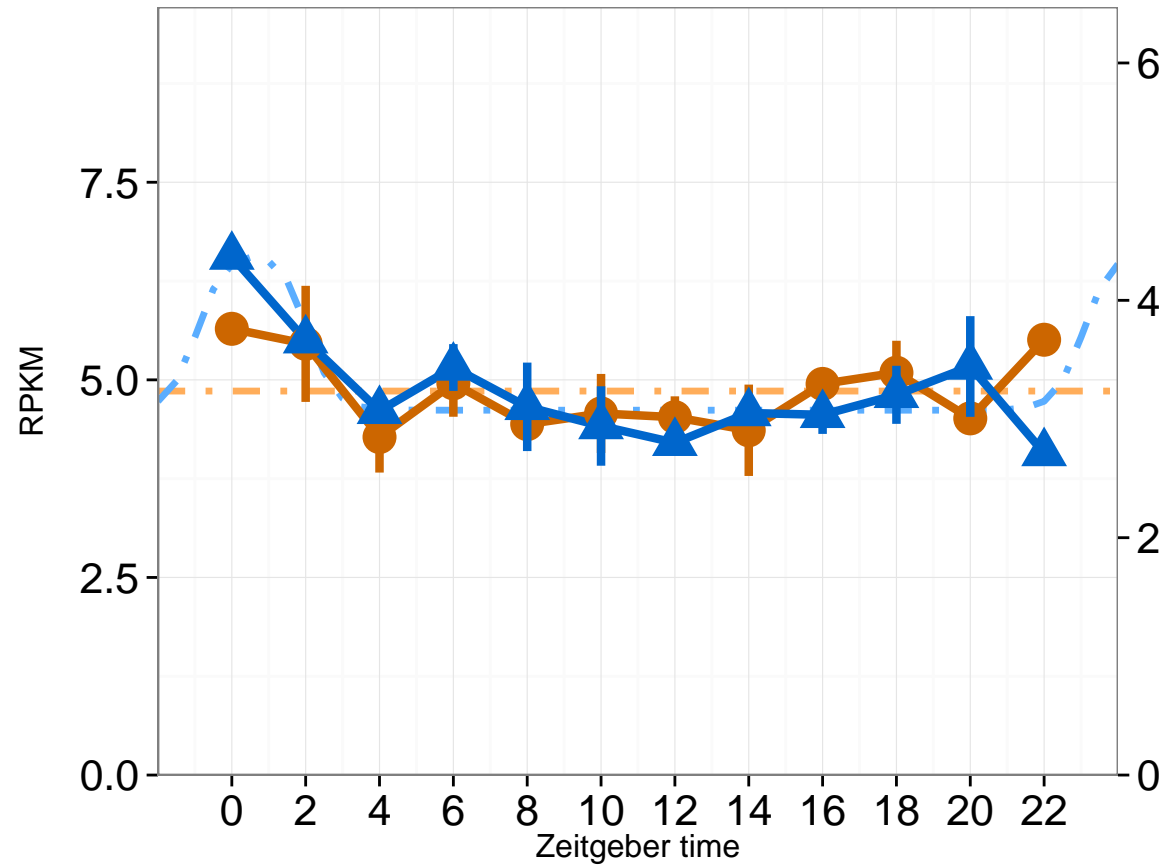

## Bcl9l

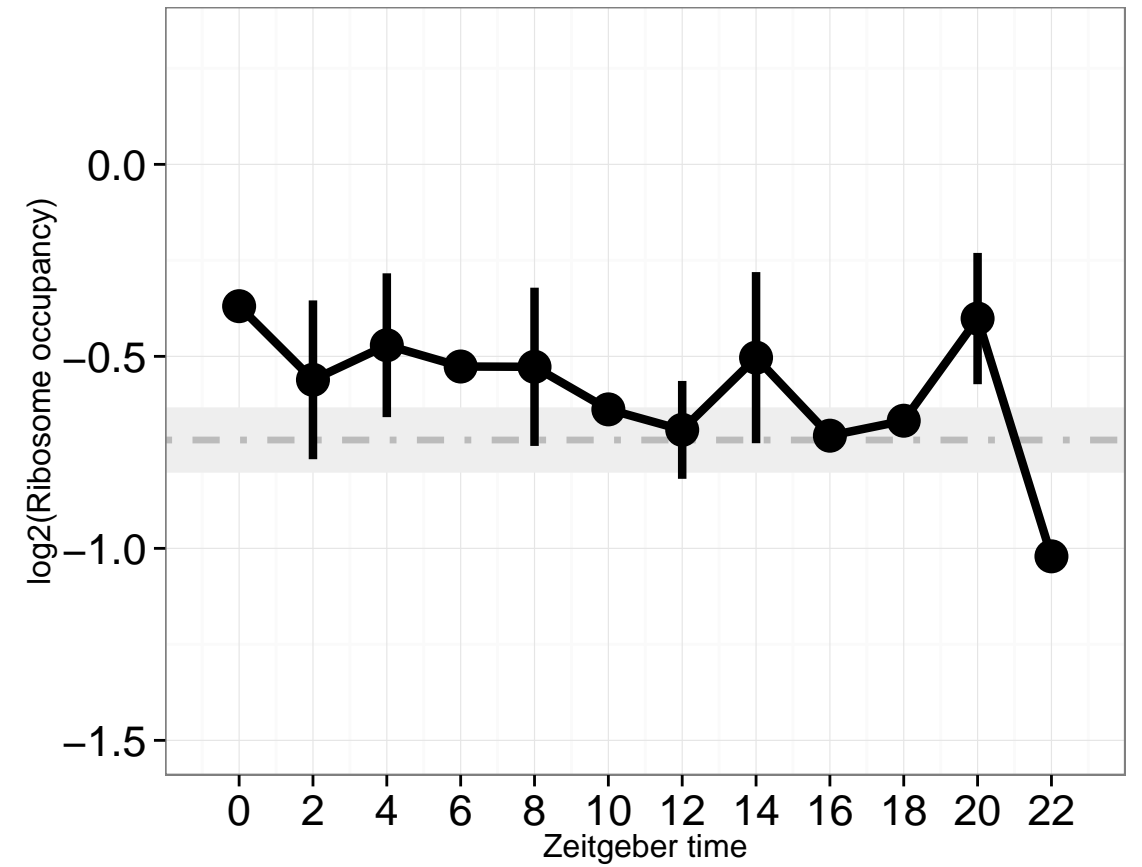

Supplement: SuppDataset_1.zip [file Bcl9l_set_A.pdf › Supplemental Dataset 1/A-mRNA_nonrhyth_translation_nonrhyth/Bcl9l_set_A.pdf]

## Bcor

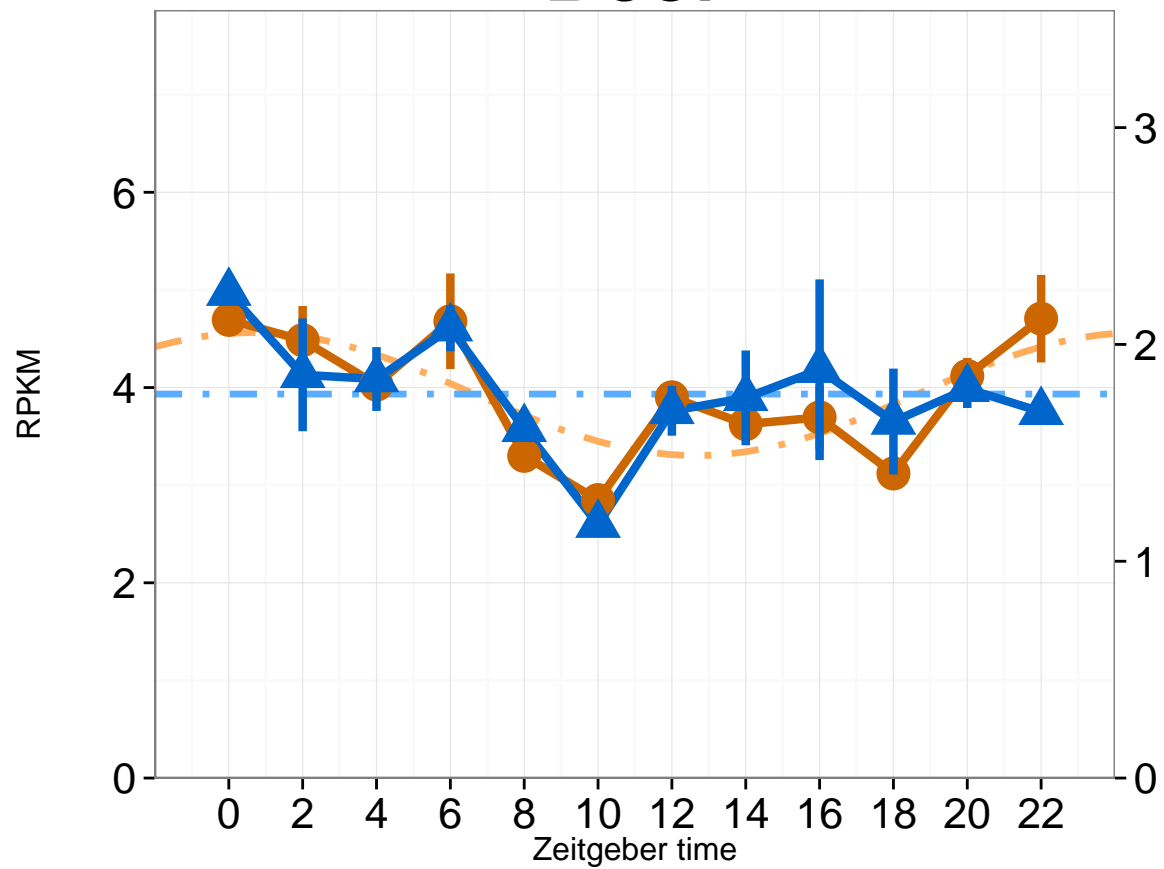

## Bcor

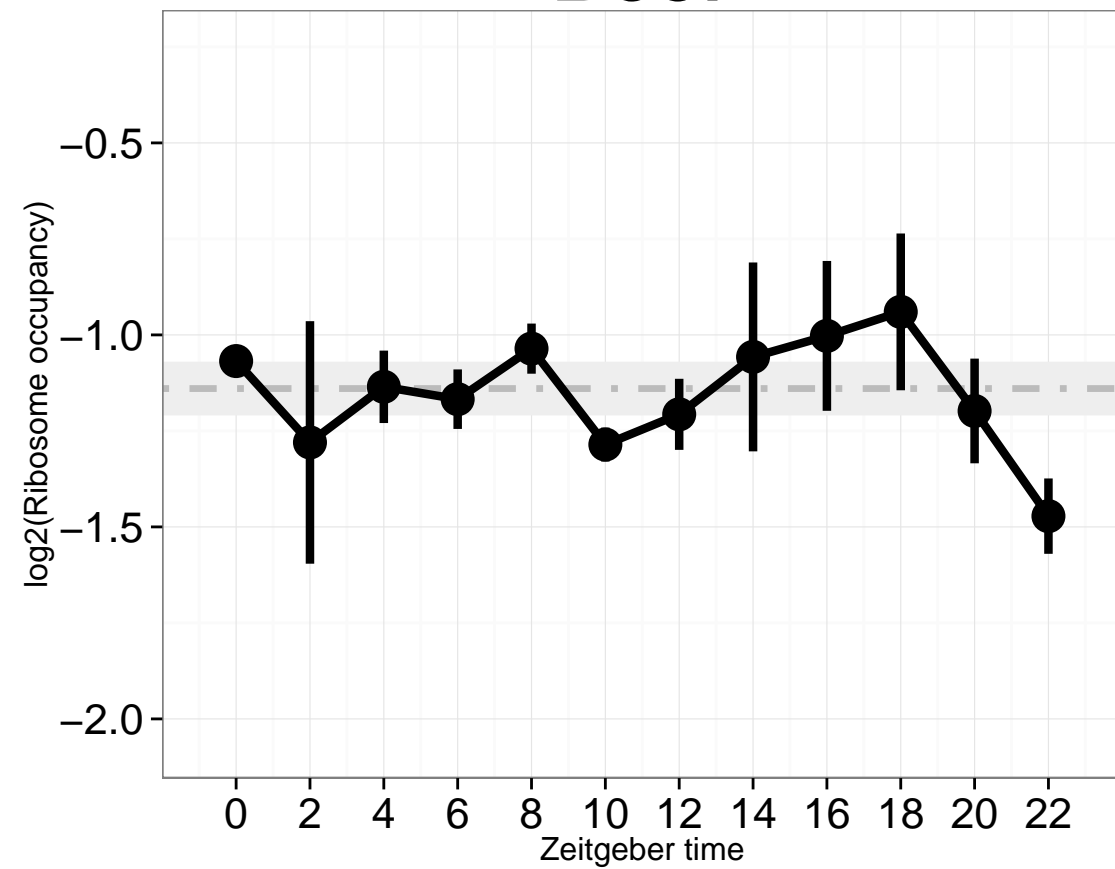

Supplement: SuppDataset_1.zip [file Bcor_set_A.pdf › Supplemental Dataset 1/A-mRNA_nonrhyth_translation_nonrhyth/Bcor_set_A.pdf]

# Bcorl1

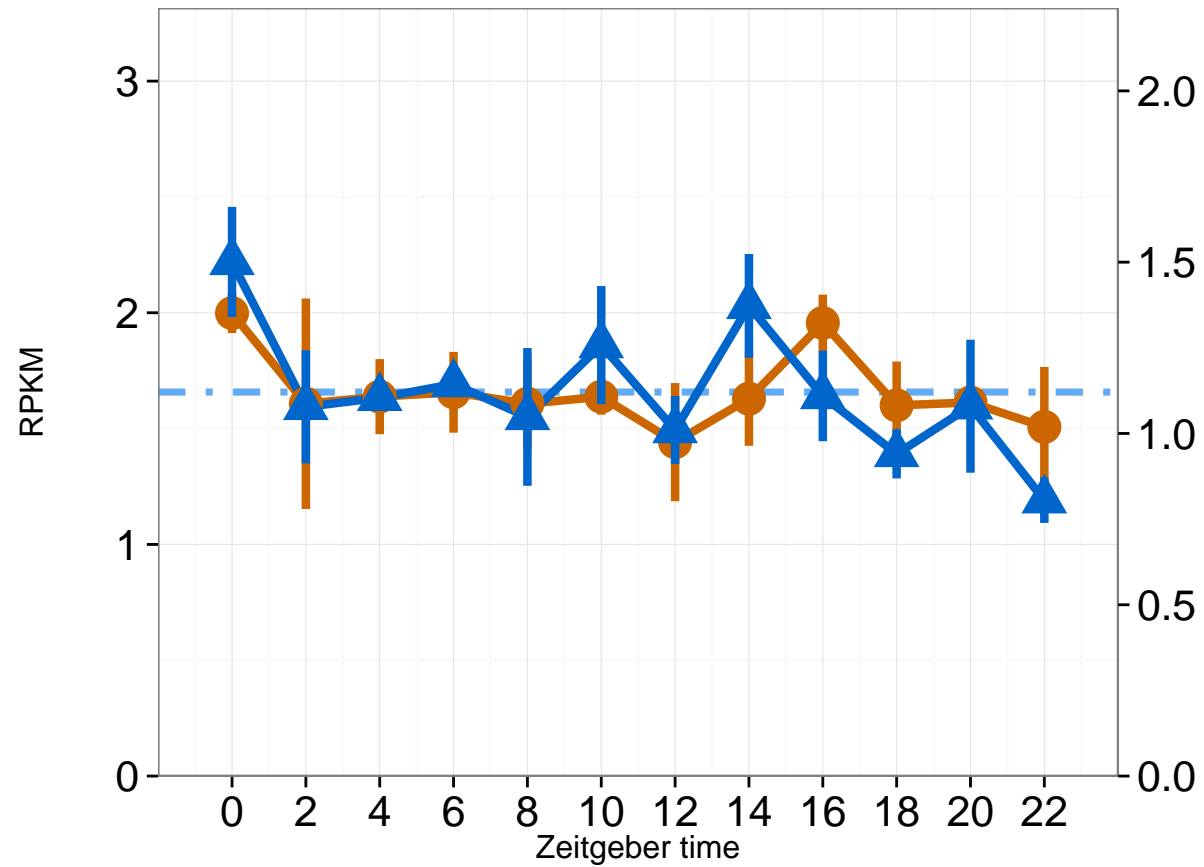

# Bcorl1

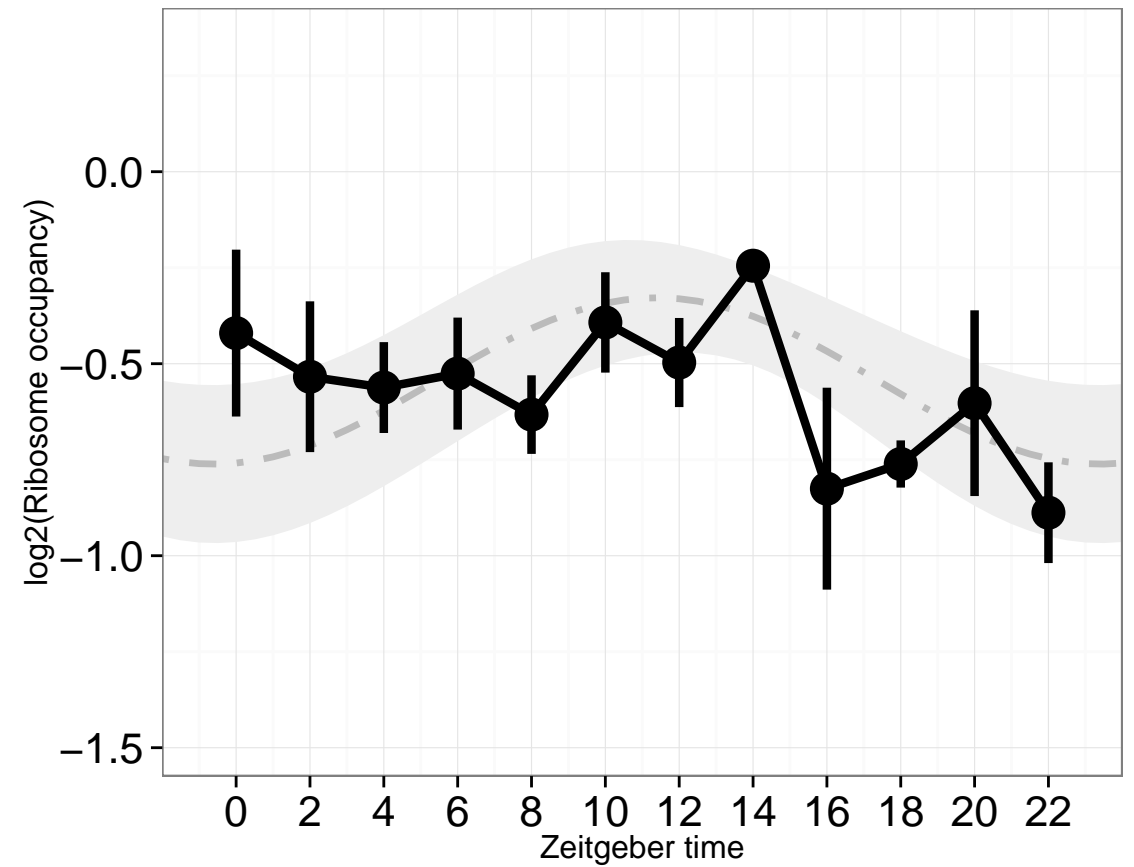

Supplement: SuppDataset_1.zip [file Bcorl1_set_A.pdf › Supplemental Dataset 1/A-mRNA_nonrhyth_translation_nonrhyth/Bcorl1_set_A.pdf]

## Bcr

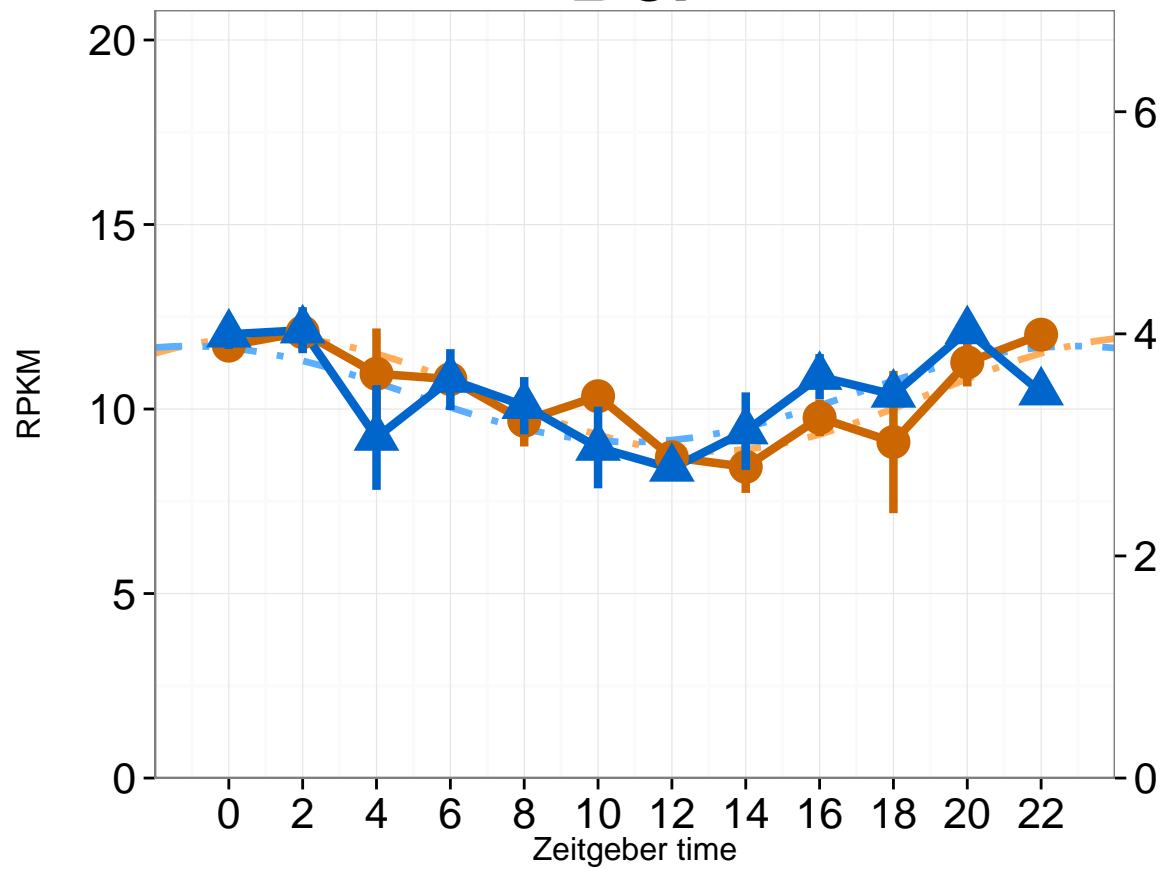

## Bcr

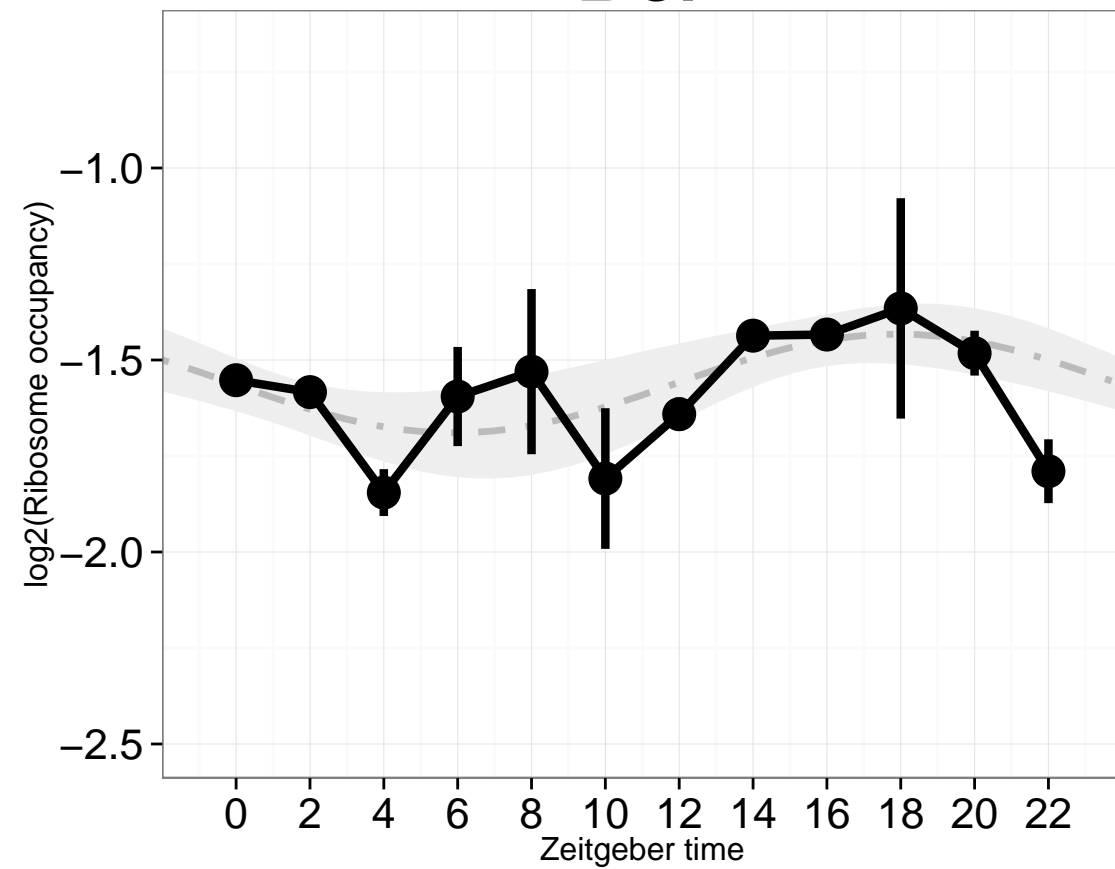

Supplement: SuppDataset_1.zip [file Bcr_set_A.pdf › Supplemental Dataset 1/A-mRNA_nonrhyth_translation_nonrhyth/Bcr_set_A.pdf]

## Bcs1l

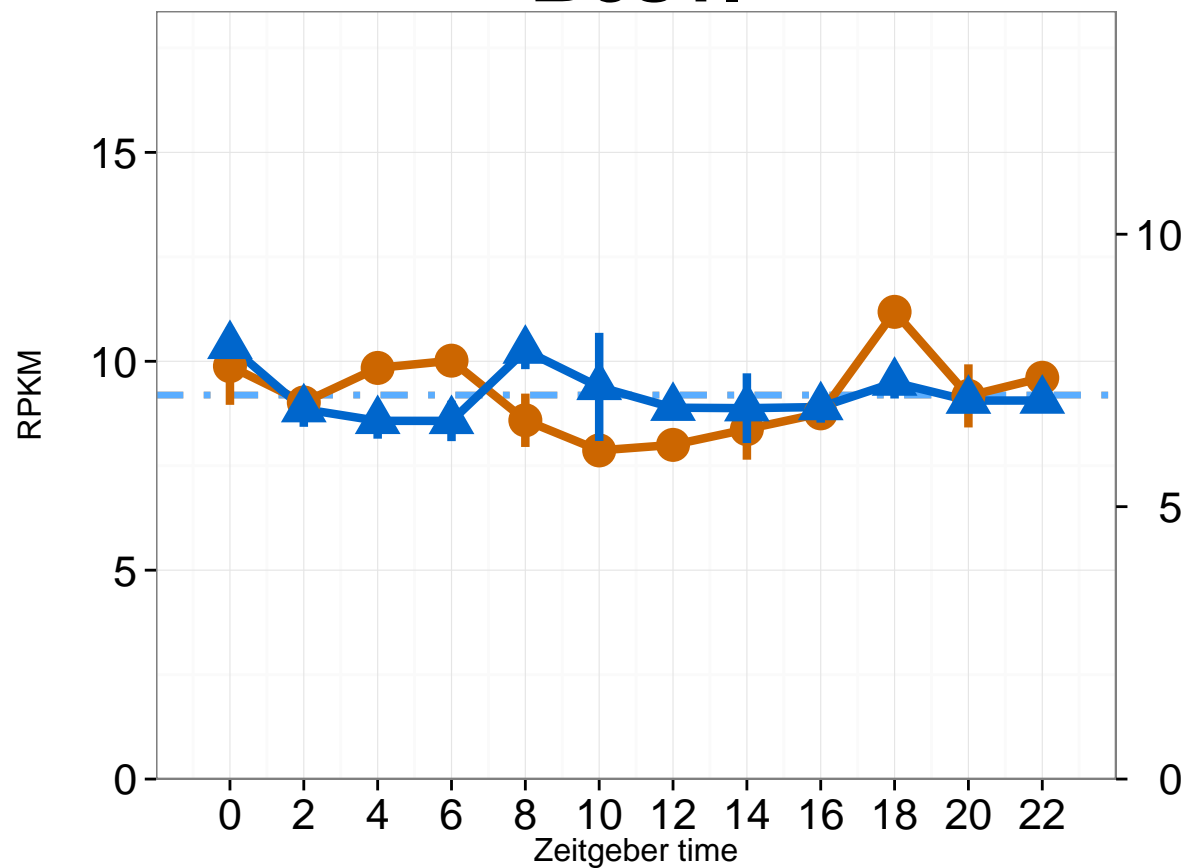

## Bcs1l

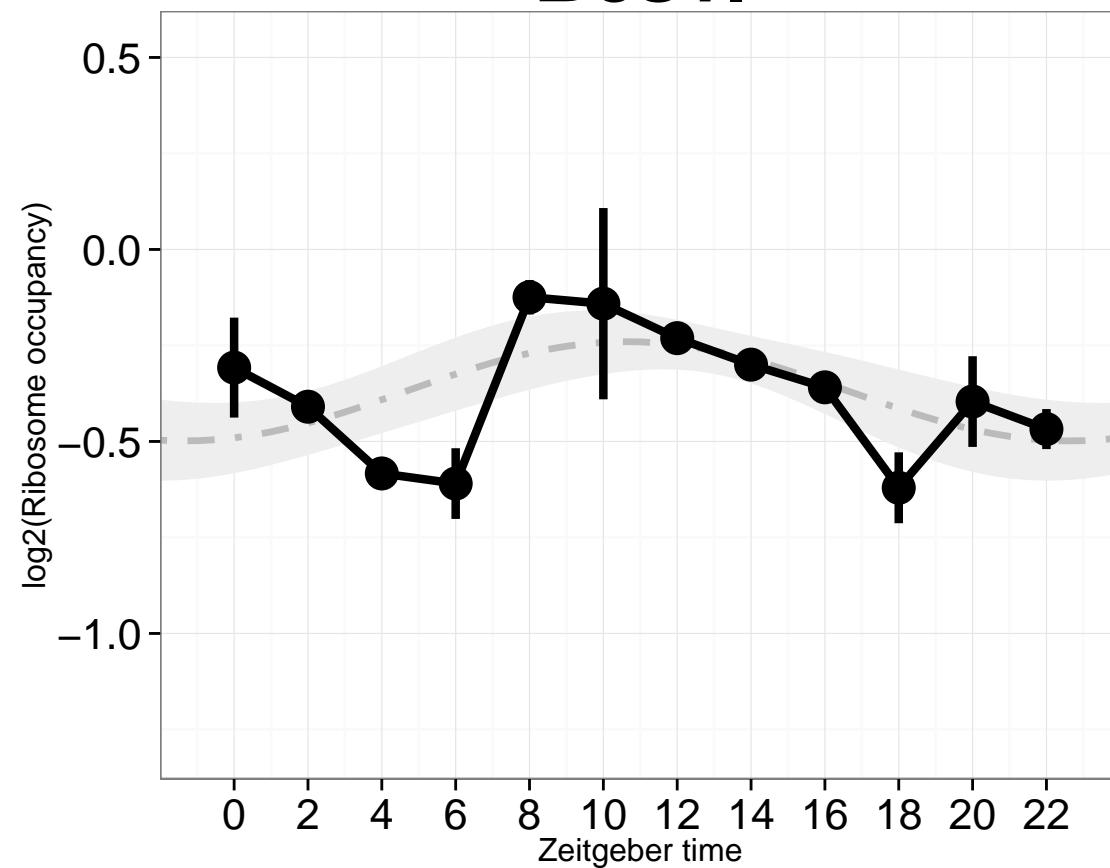

Supplement: SuppDataset_1.zip [file Bcs1l_set_A.pdf › Supplemental Dataset 1/A-mRNA_nonrhyth_translation_nonrhyth/Bcs1l_set_A.pdf]

## Bdh2

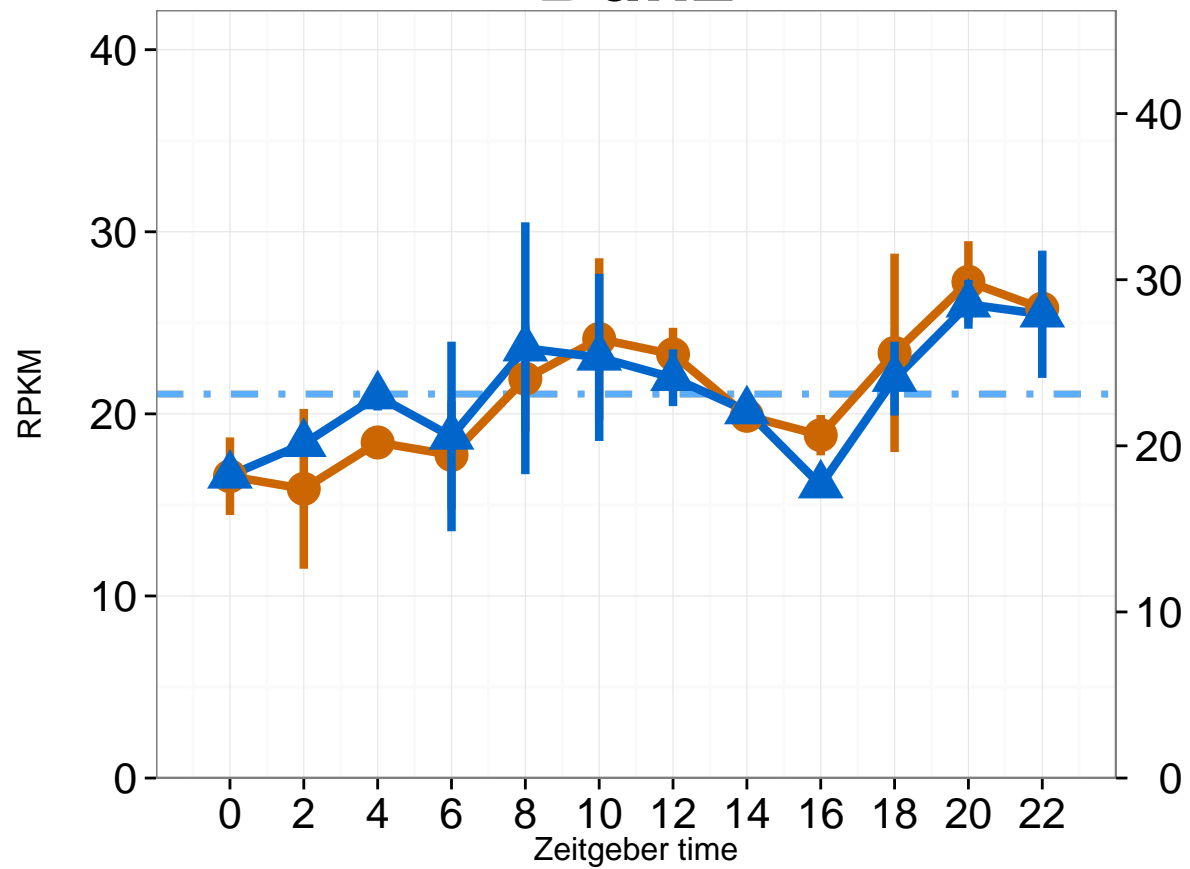

## Bdh2

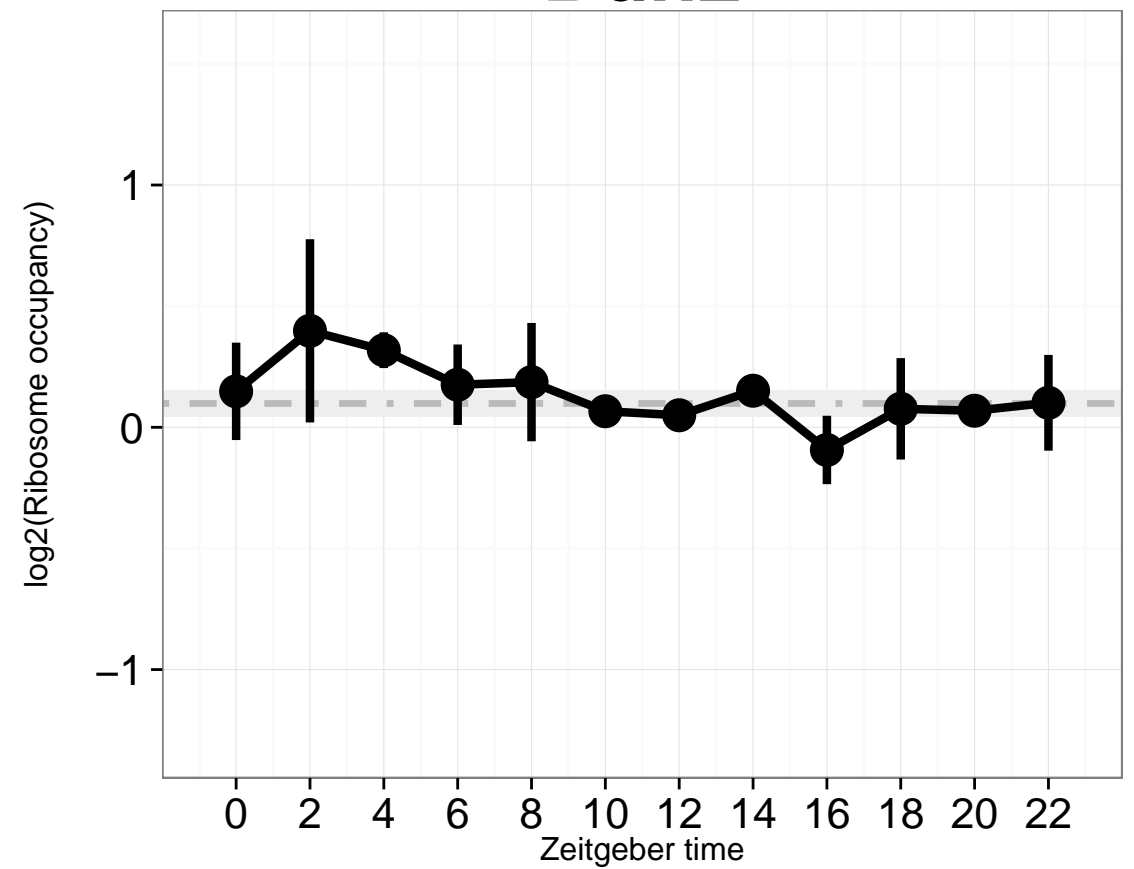

Supplement: SuppDataset_1.zip [file Bdh2_set_A.pdf › Supplemental Dataset 1/A-mRNA_nonrhyth_translation_nonrhyth/Bdh2_set_A.pdf]

# Bdp1

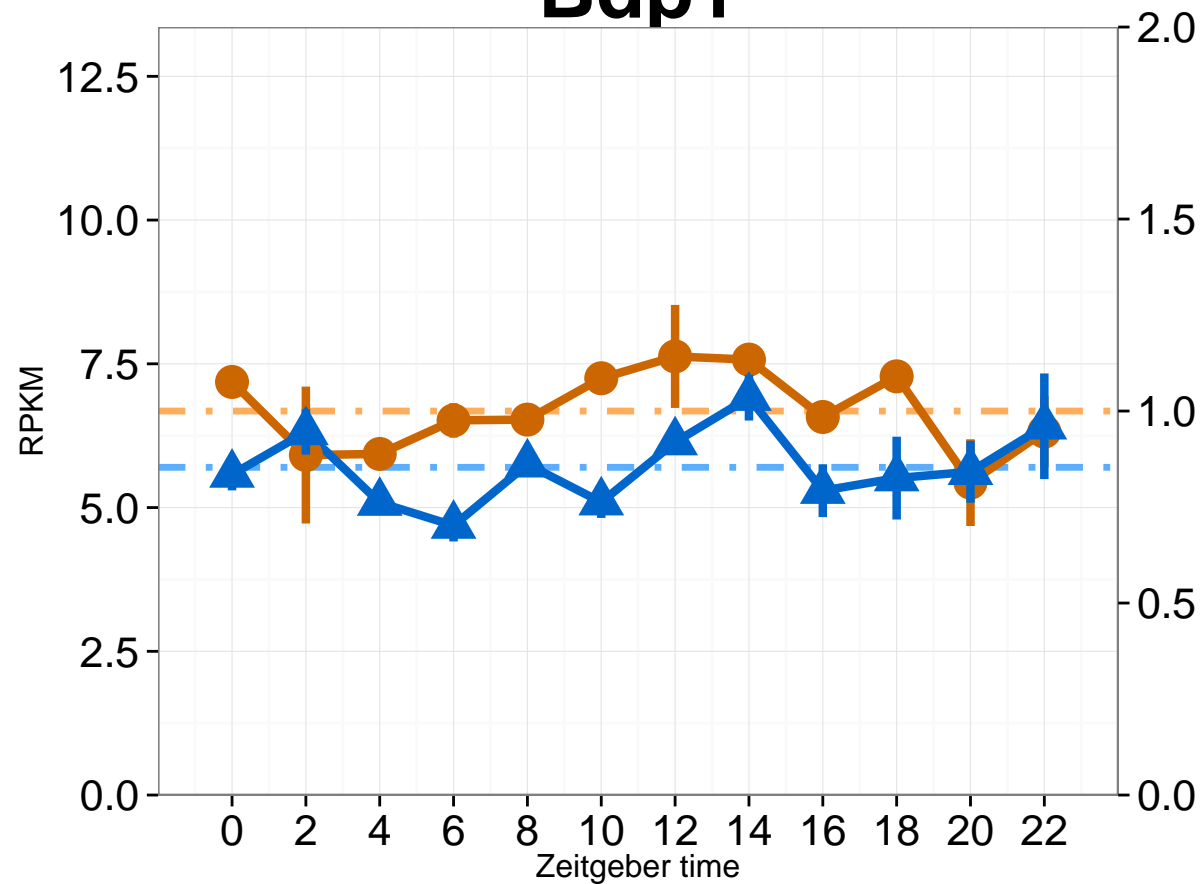

# Bdp1

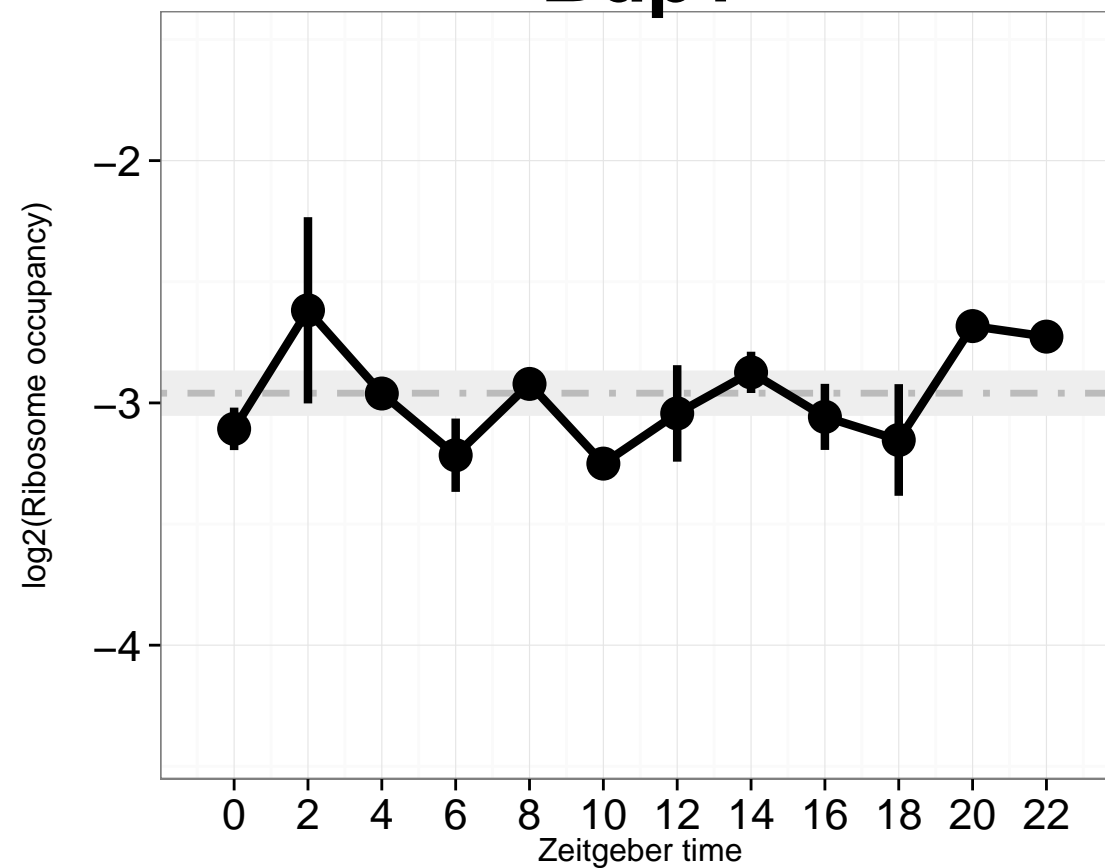

Supplement: SuppDataset_1.zip [file Bdp1_set_A.pdf › Supplemental Dataset 1/A-mRNA_nonrhyth_translation_nonrhyth/Bdp1_set_A.pdf]

# Becn1

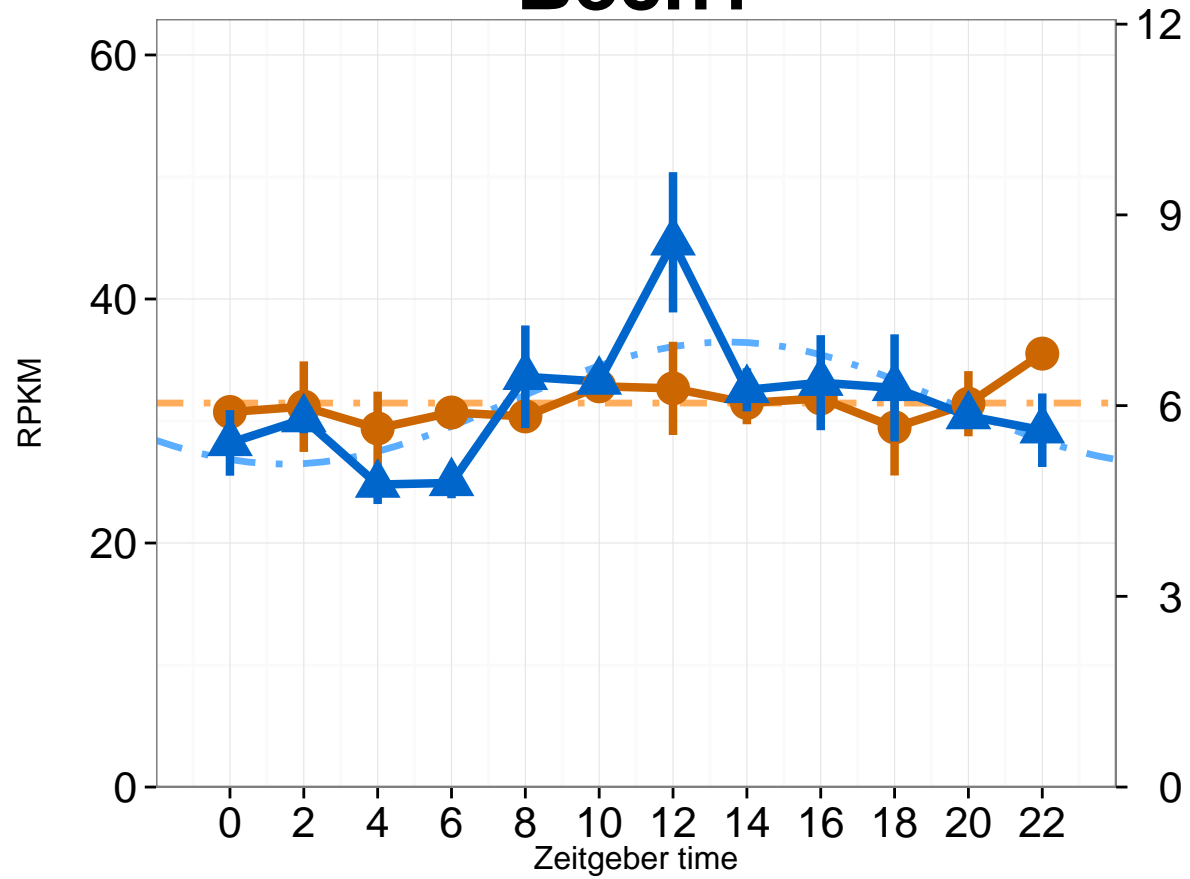

# Becn1

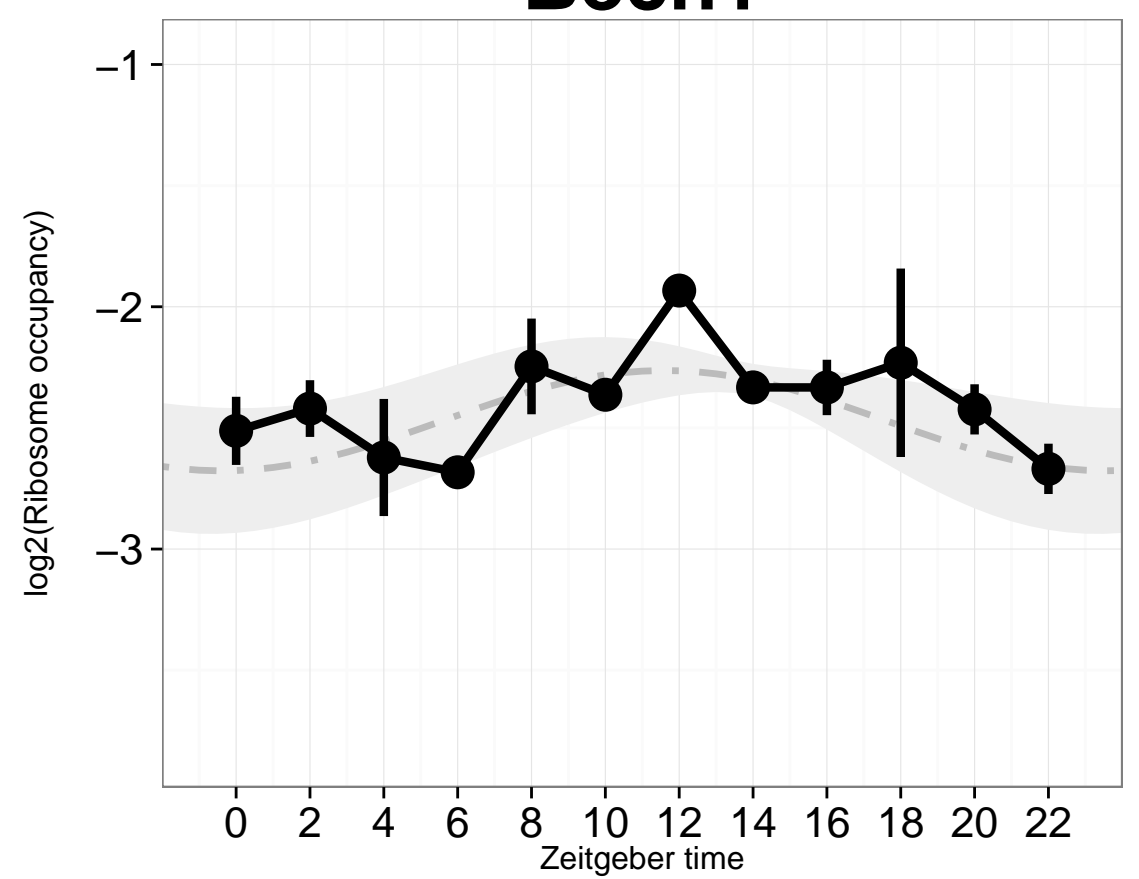

Supplement: SuppDataset_1.zip [file Becn1_set_A.pdf › Supplemental Dataset 1/A-mRNA_nonrhyth_translation_nonrhyth/Becn1_set_A.pdf]

# Bend3

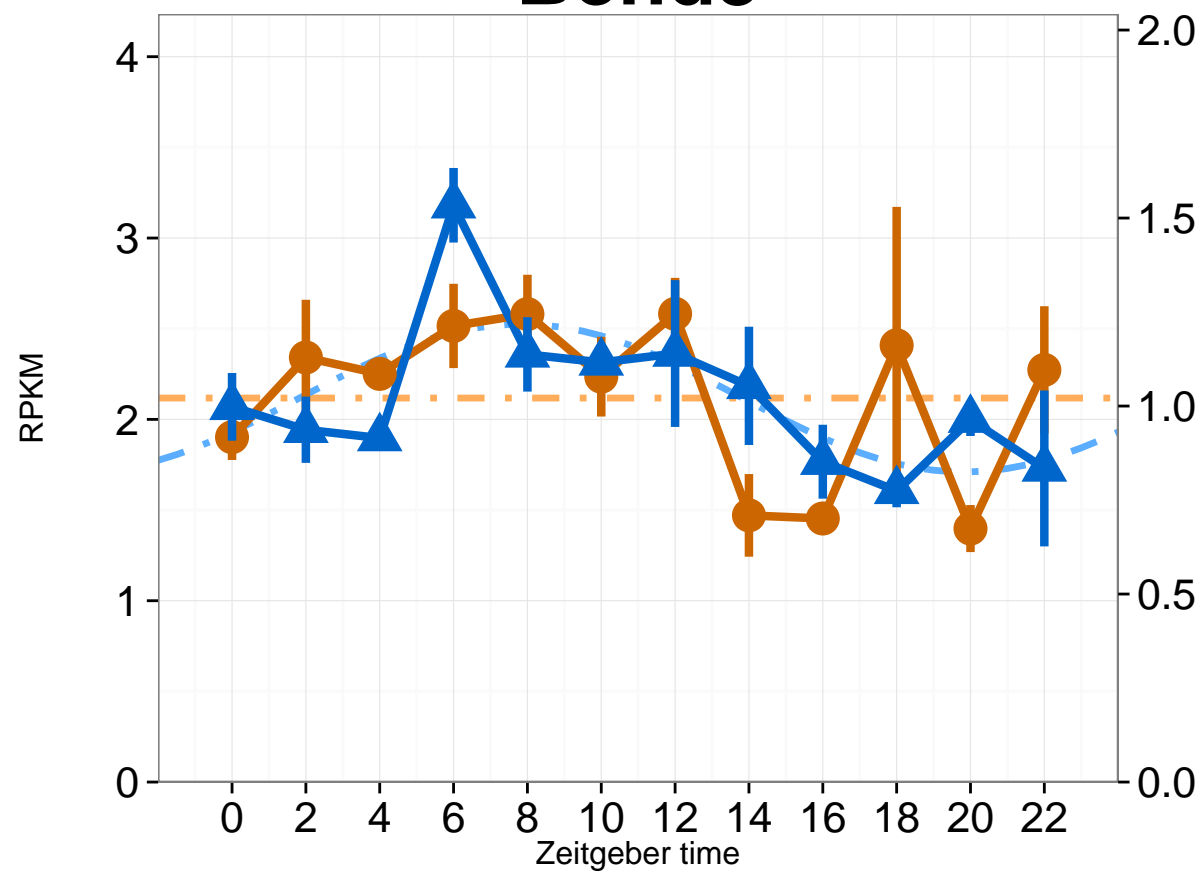

# Bend3

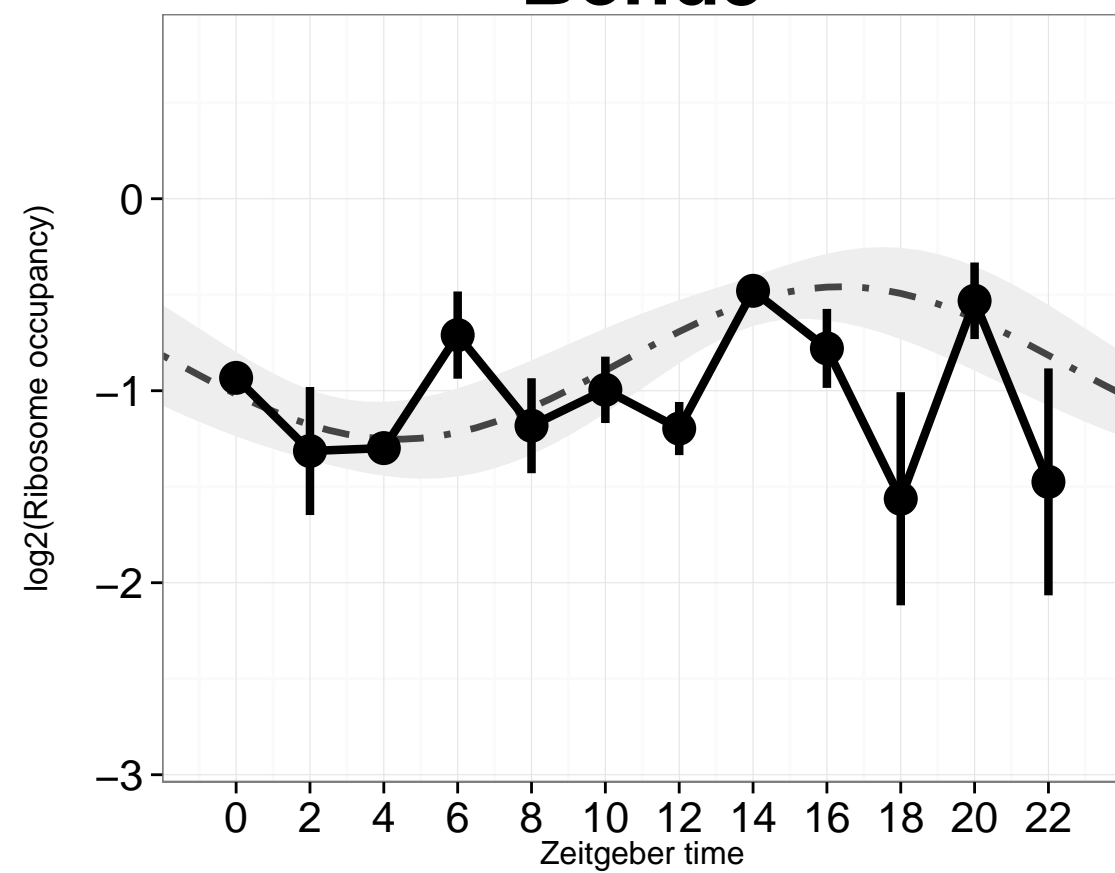

Supplement: SuppDataset_1.zip [file Bend3_set_A.pdf › Supplemental Dataset 1/A-mRNA_nonrhyth_translation_nonrhyth/Bend3_set_A.pdf]

## Bend4

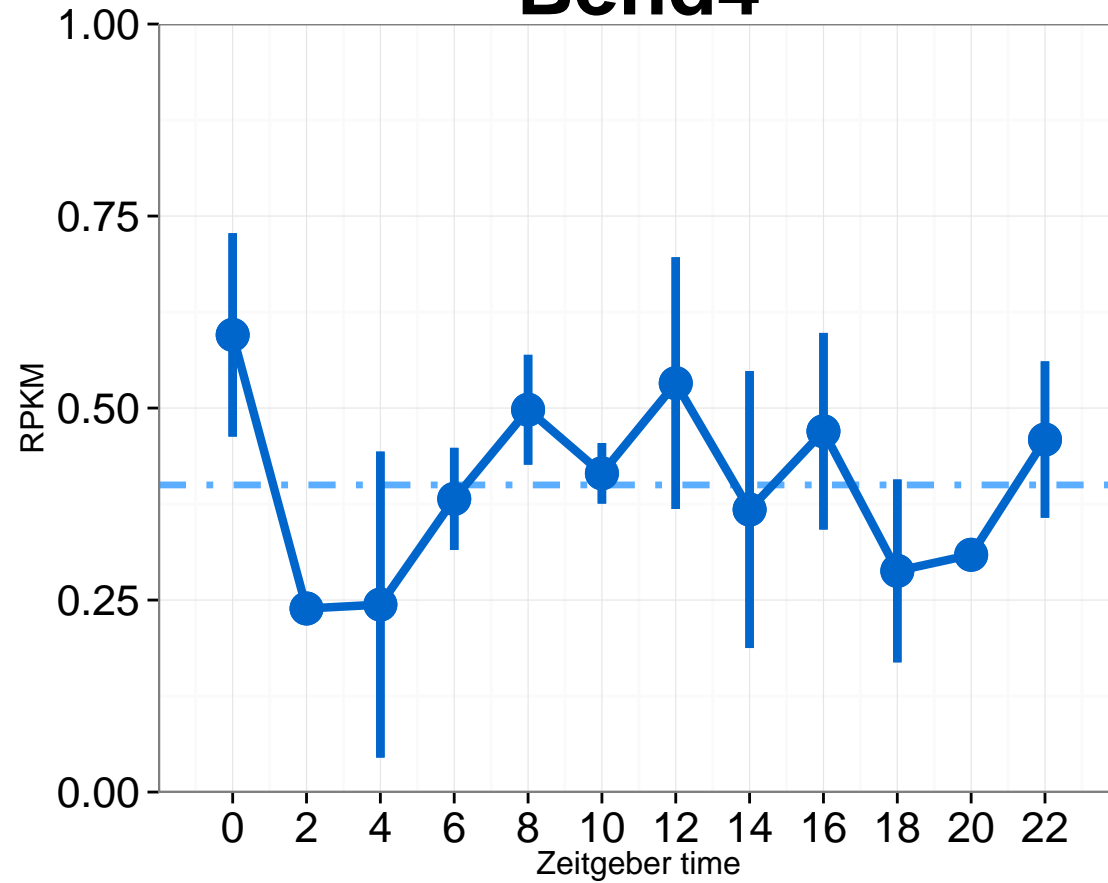

## Bend4 log2(Ribosome occupancy

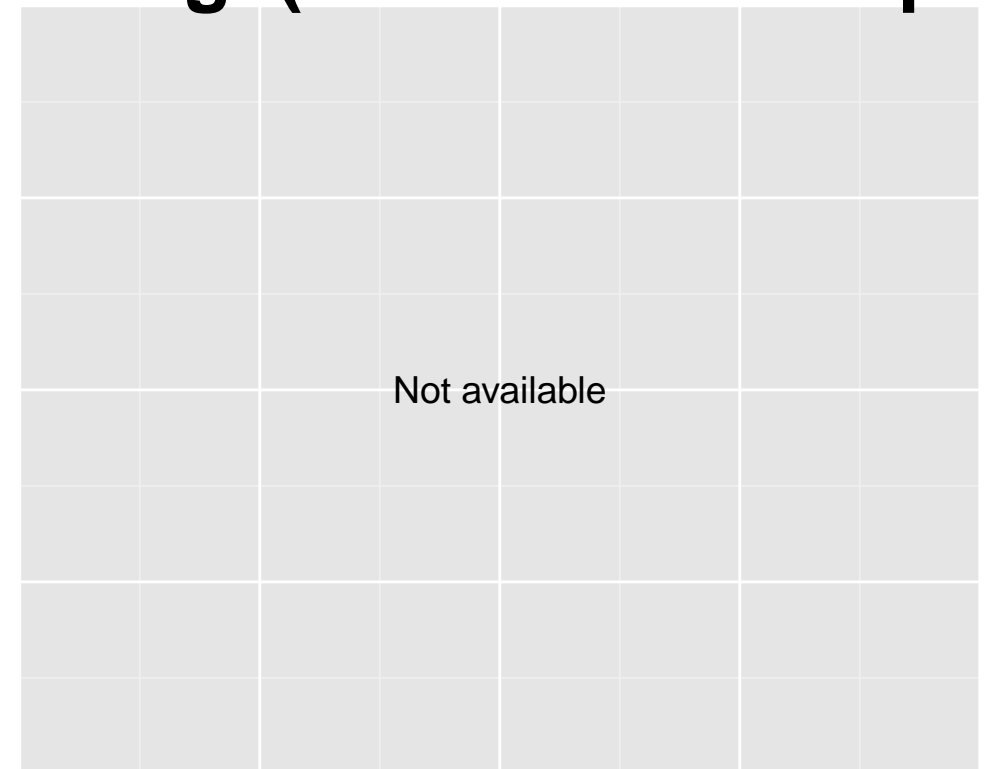

Supplement: SuppDataset_1.zip [file Bend4_set_A.pdf › Supplemental Dataset 1/A-mRNA_nonrhyth_translation_nonrhyth/Bend4_set_A.pdf]

# Bend7

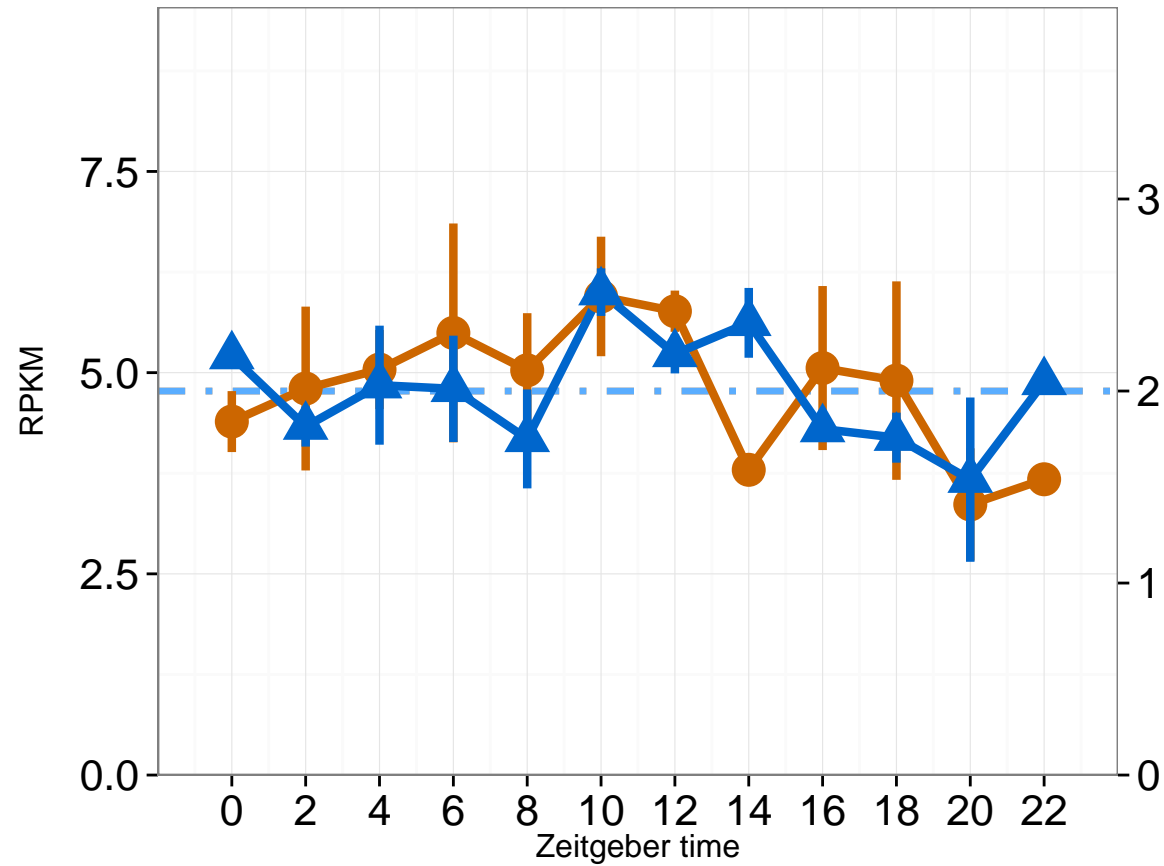

# Bend7

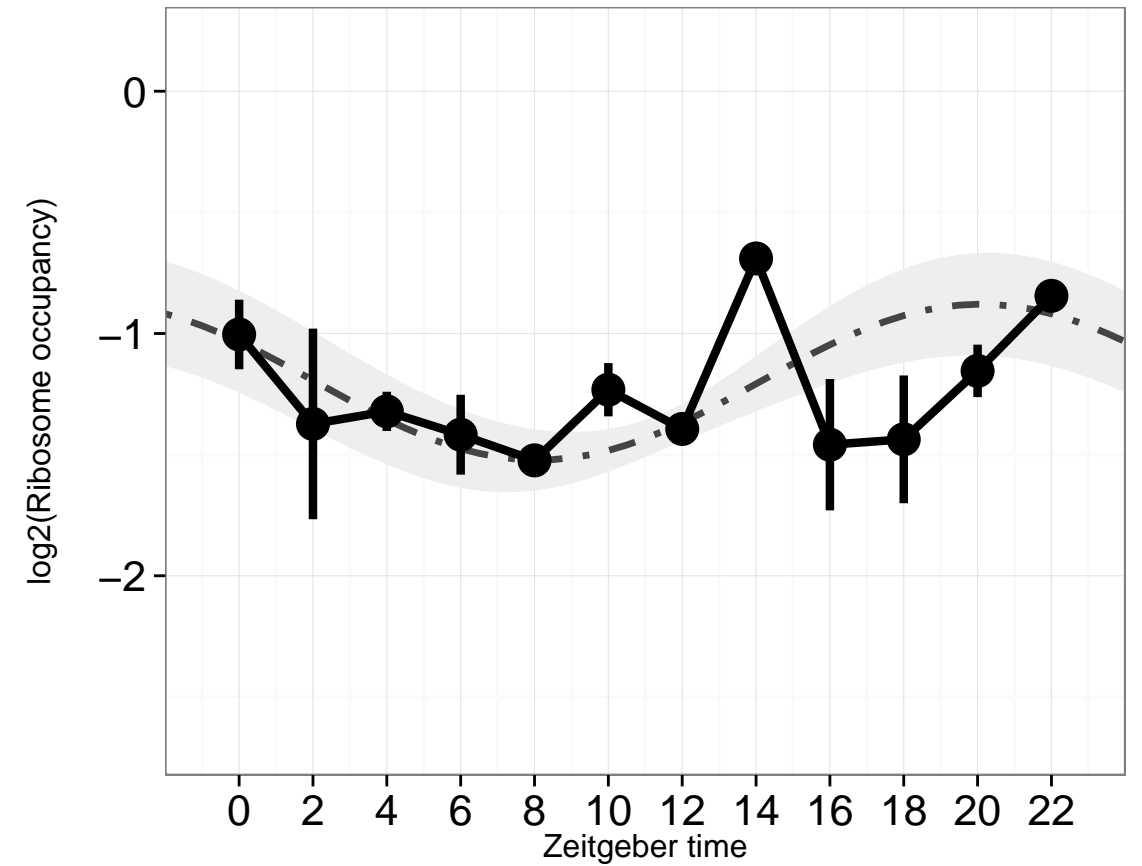

Supplement: SuppDataset_1.zip [file Bend7_set_A.pdf › Supplemental Dataset 1/A-mRNA_nonrhyth_translation_nonrhyth/Bend7_set_A.pdf]

## Bfar

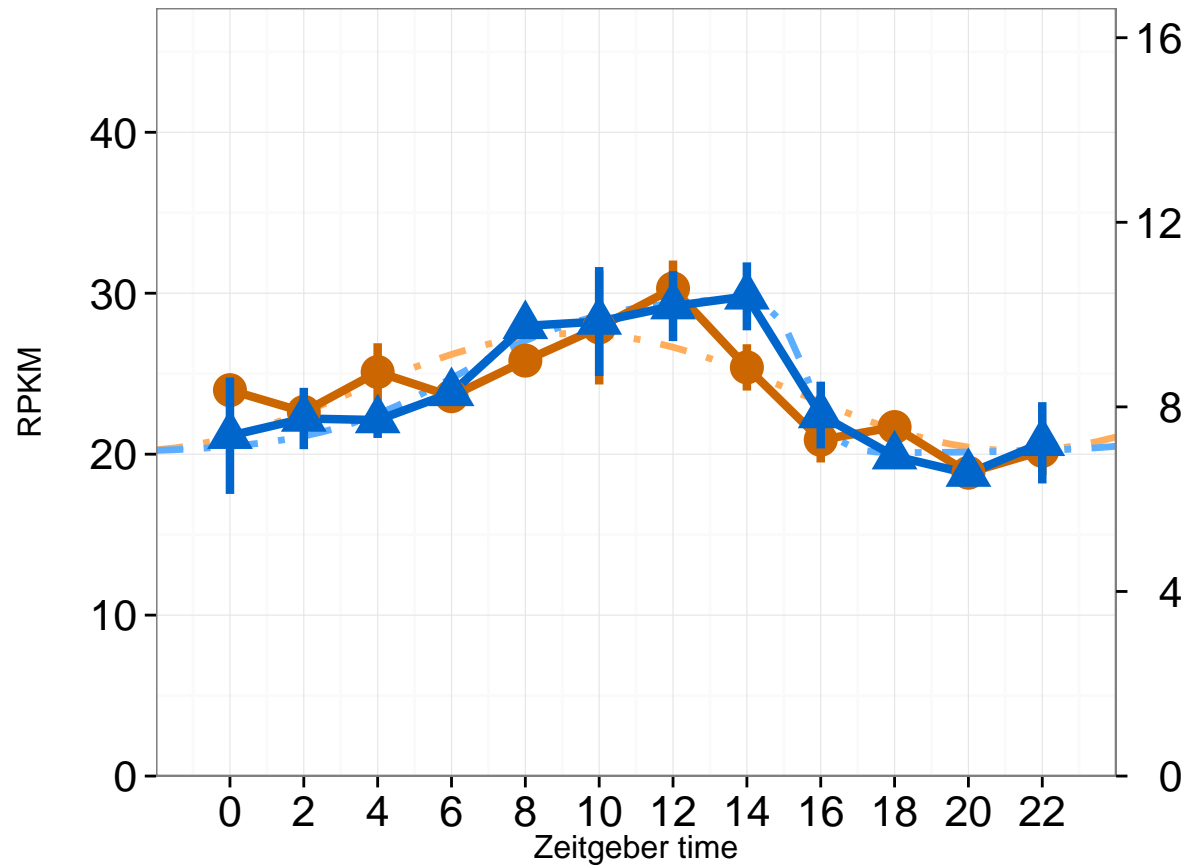

## Bfar

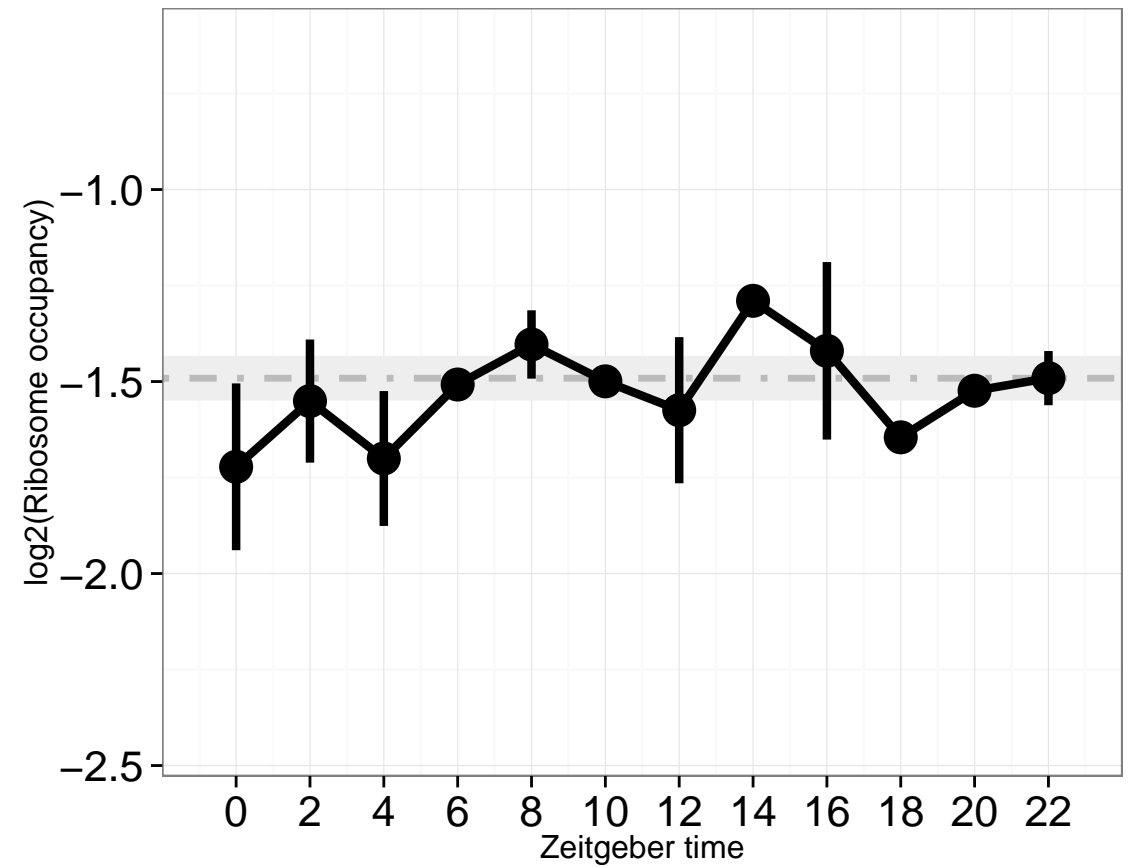

Supplement: SuppDataset_1.zip [file Bfar_set_A.pdf › Supplemental Dataset 1/A-mRNA_nonrhyth_translation_nonrhyth/Bfar_set_A.pdf]

## Bhmt2

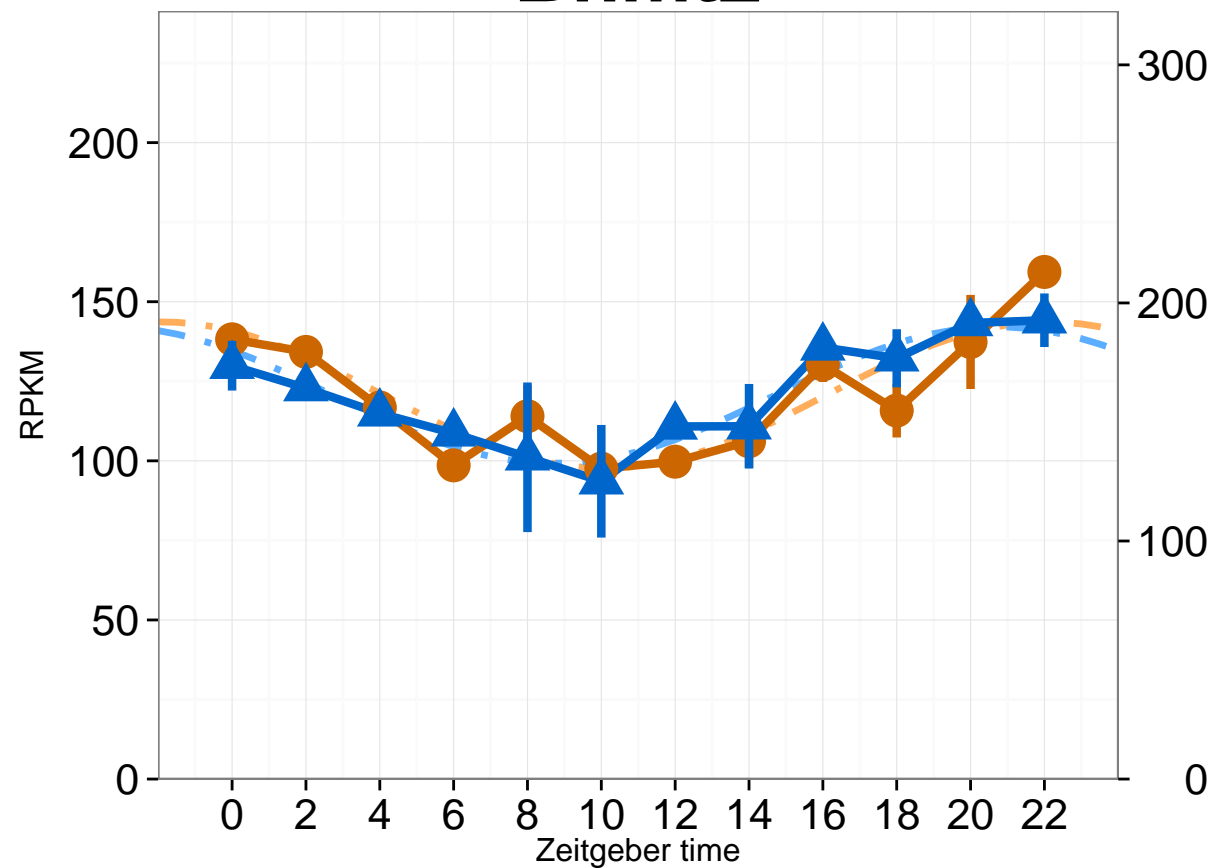

## Bhmt2

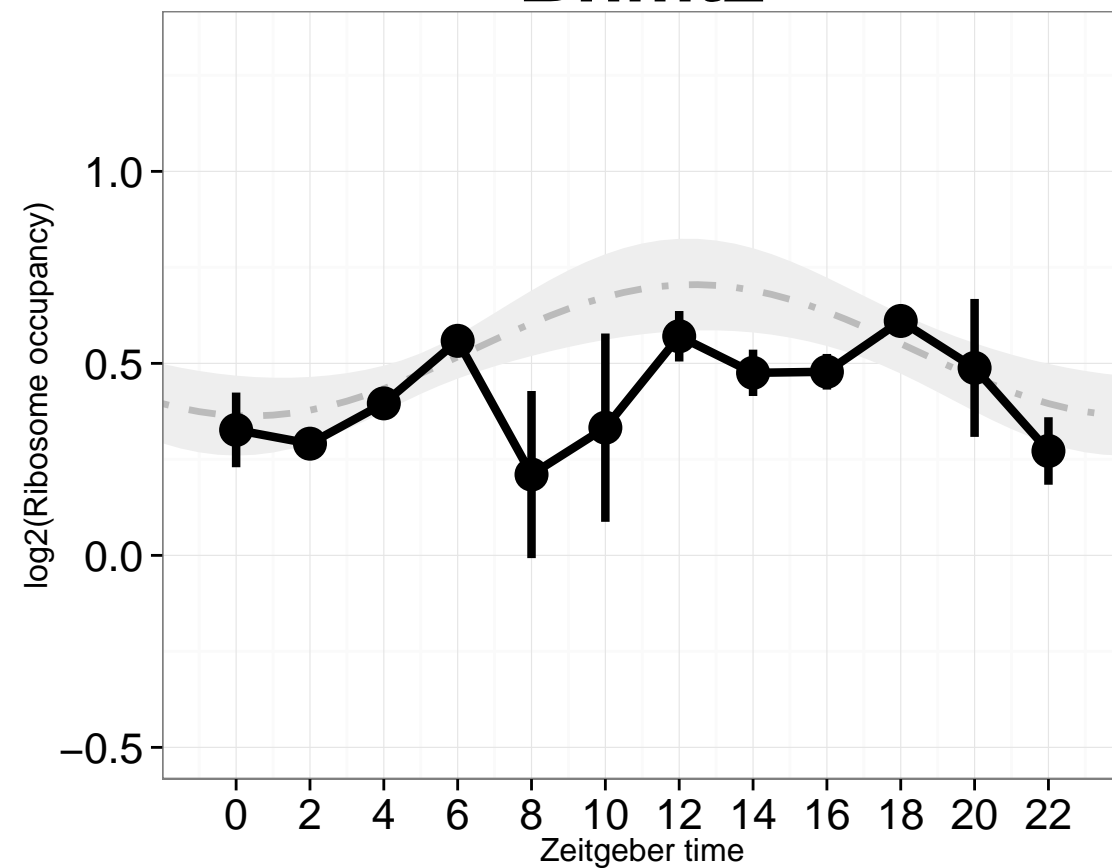

Supplement: SuppDataset_1.zip [file Bhmt2_set_A.pdf › Supplemental Dataset 1/A-mRNA_nonrhyth_translation_nonrhyth/Bhmt2_set_A.pdf]

## Bicc1

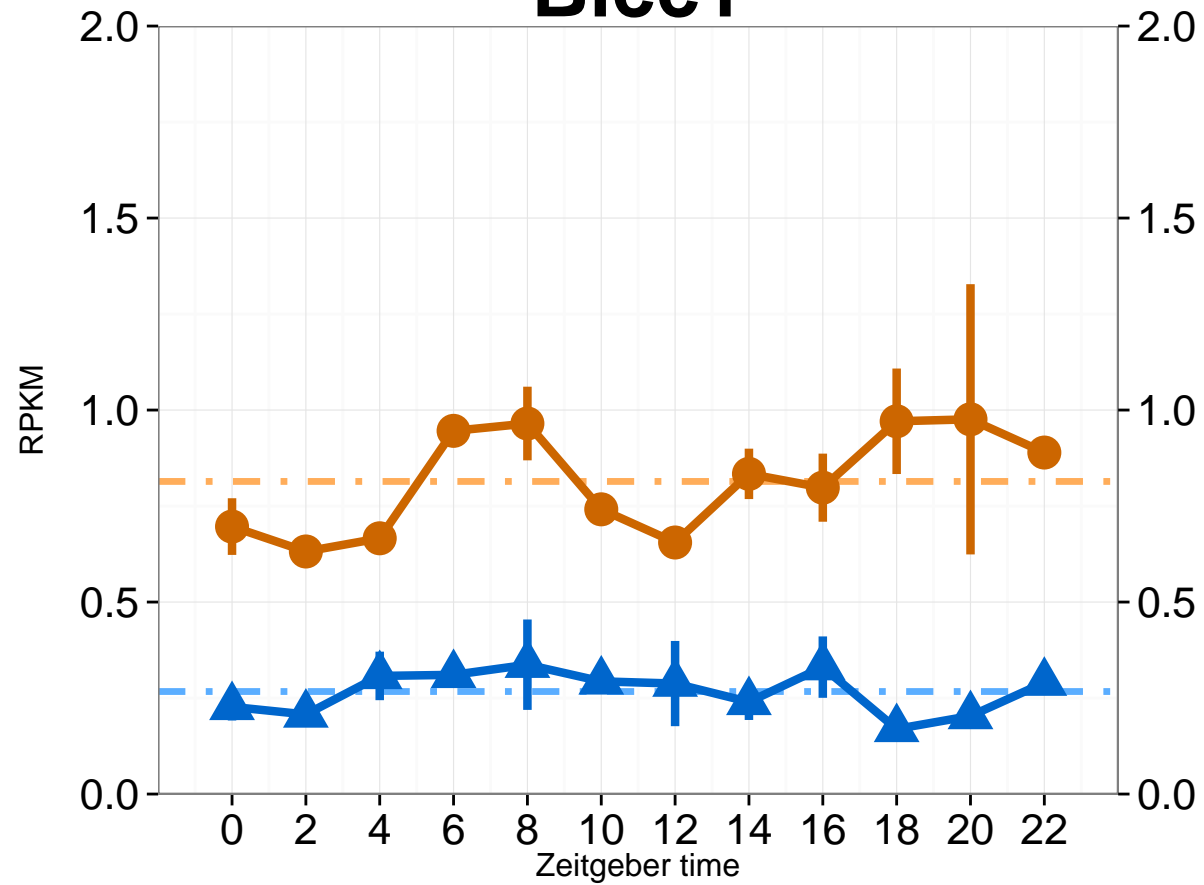

## Bicc1

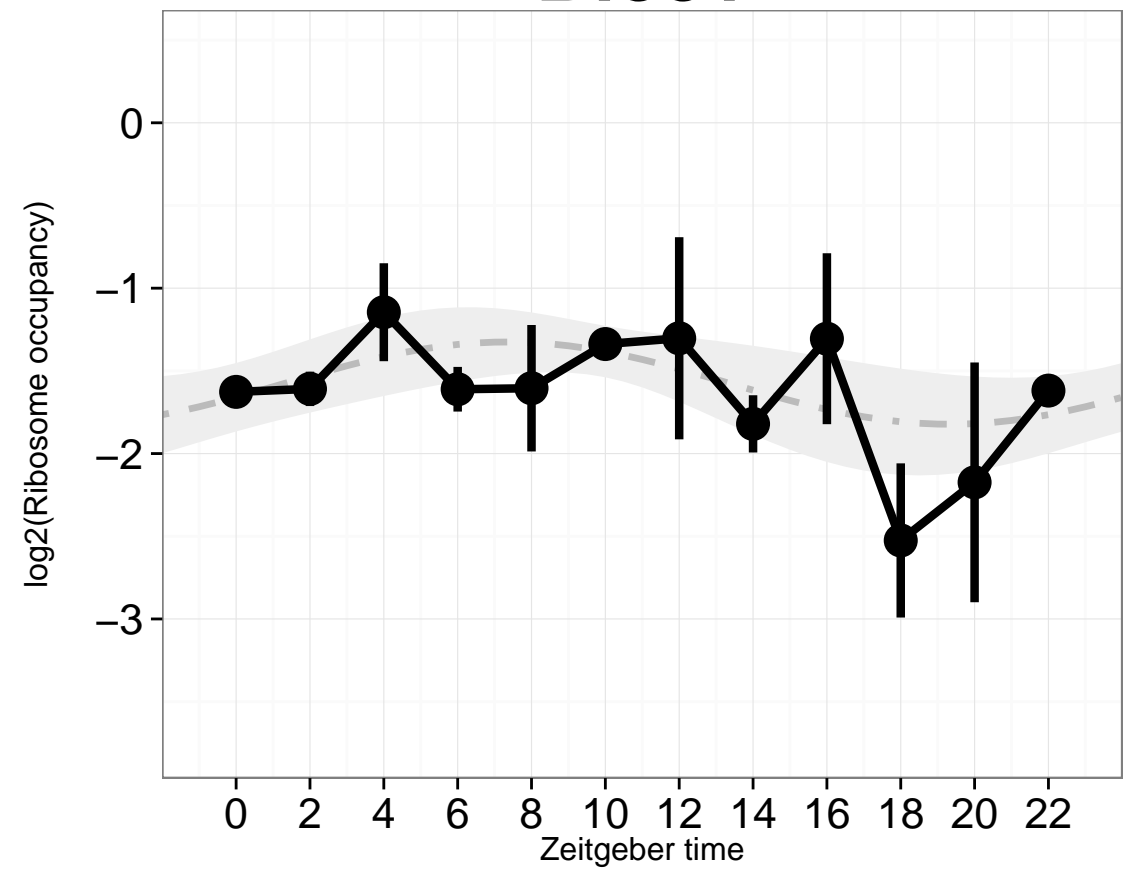

Supplement: SuppDataset_1.zip [file Bicc1_set_A.pdf › Supplemental Dataset 1/A-mRNA_nonrhyth_translation_nonrhyth/Bicc1_set_A.pdf]

## Bicd2

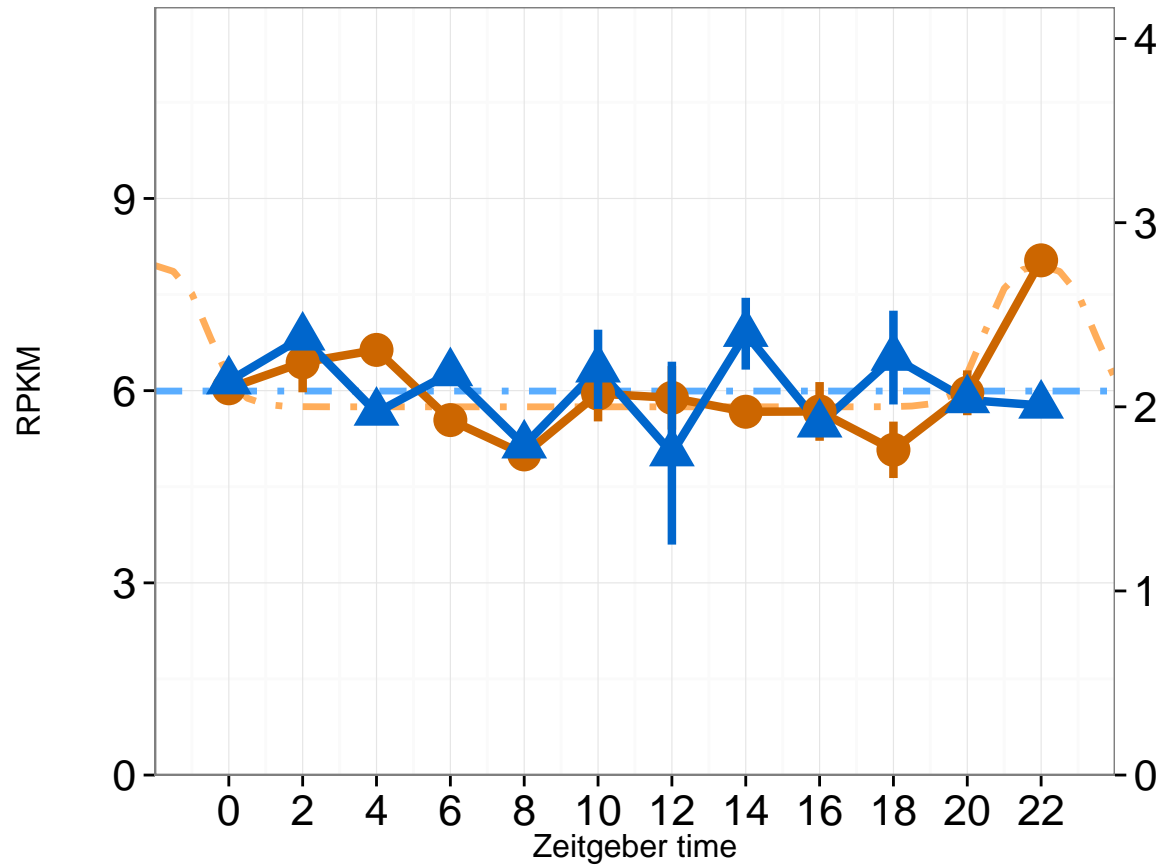

## Bicd2

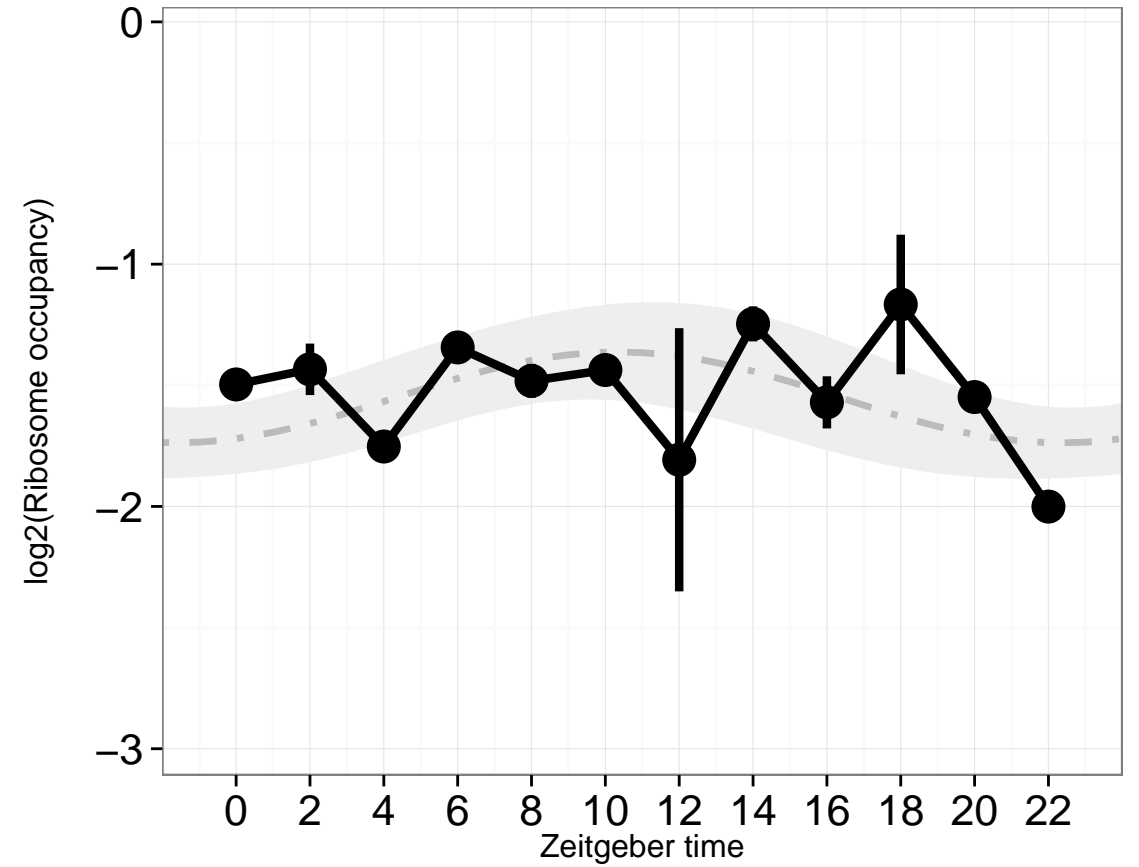

Supplement: SuppDataset_1.zip [file Bicd2_set_A.pdf › Supplemental Dataset 1/A-mRNA_nonrhyth_translation_nonrhyth/Bicd2_set_A.pdf]

## Bid

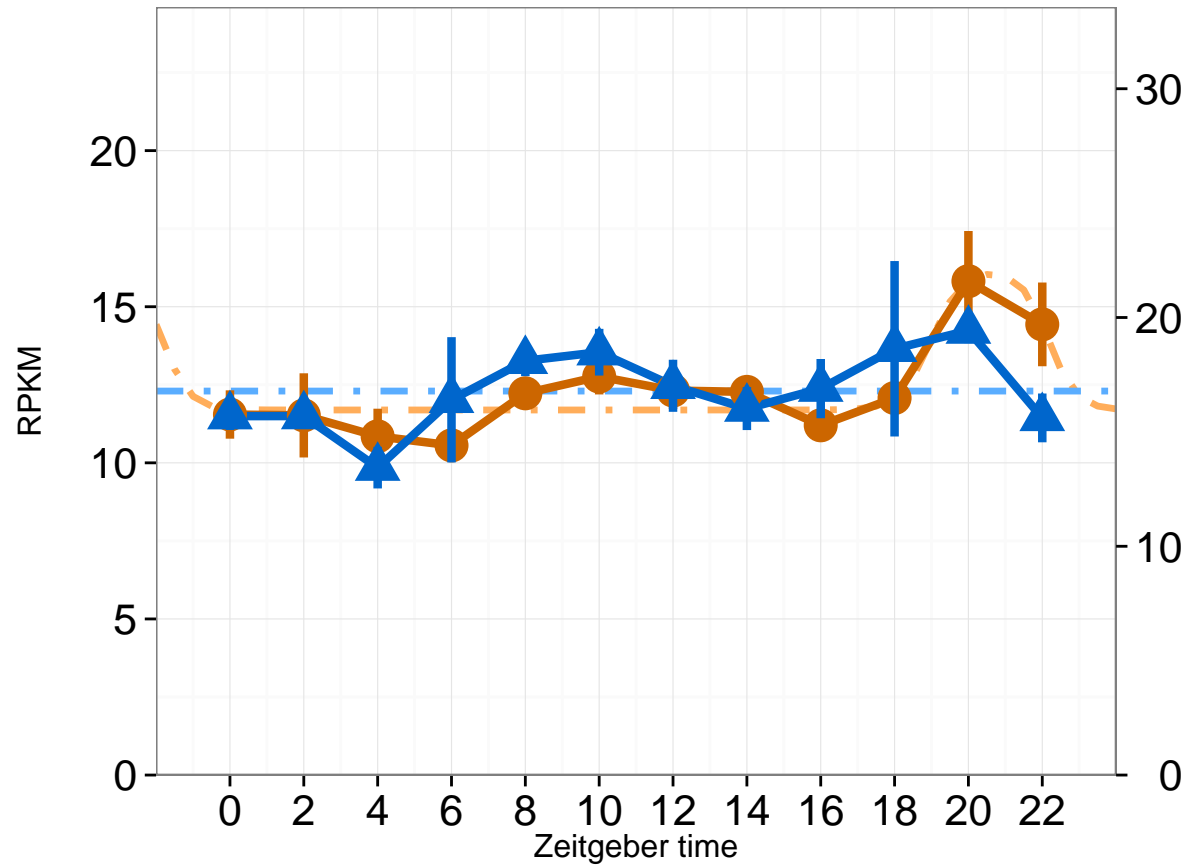

## Bid

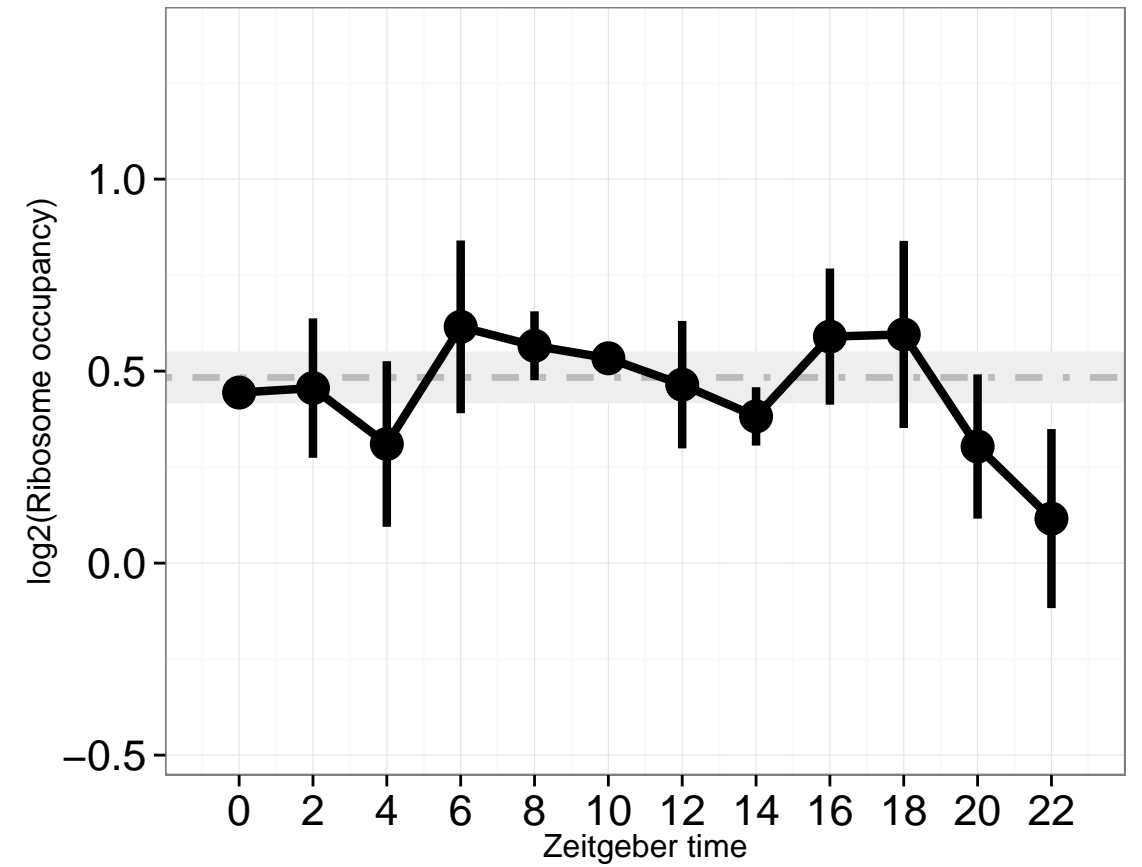

Supplement: SuppDataset_1.zip [file Bid_set_A.pdf › Supplemental Dataset 1/A-mRNA_nonrhyth_translation_nonrhyth/Bid_set_A.pdf]

## Bik

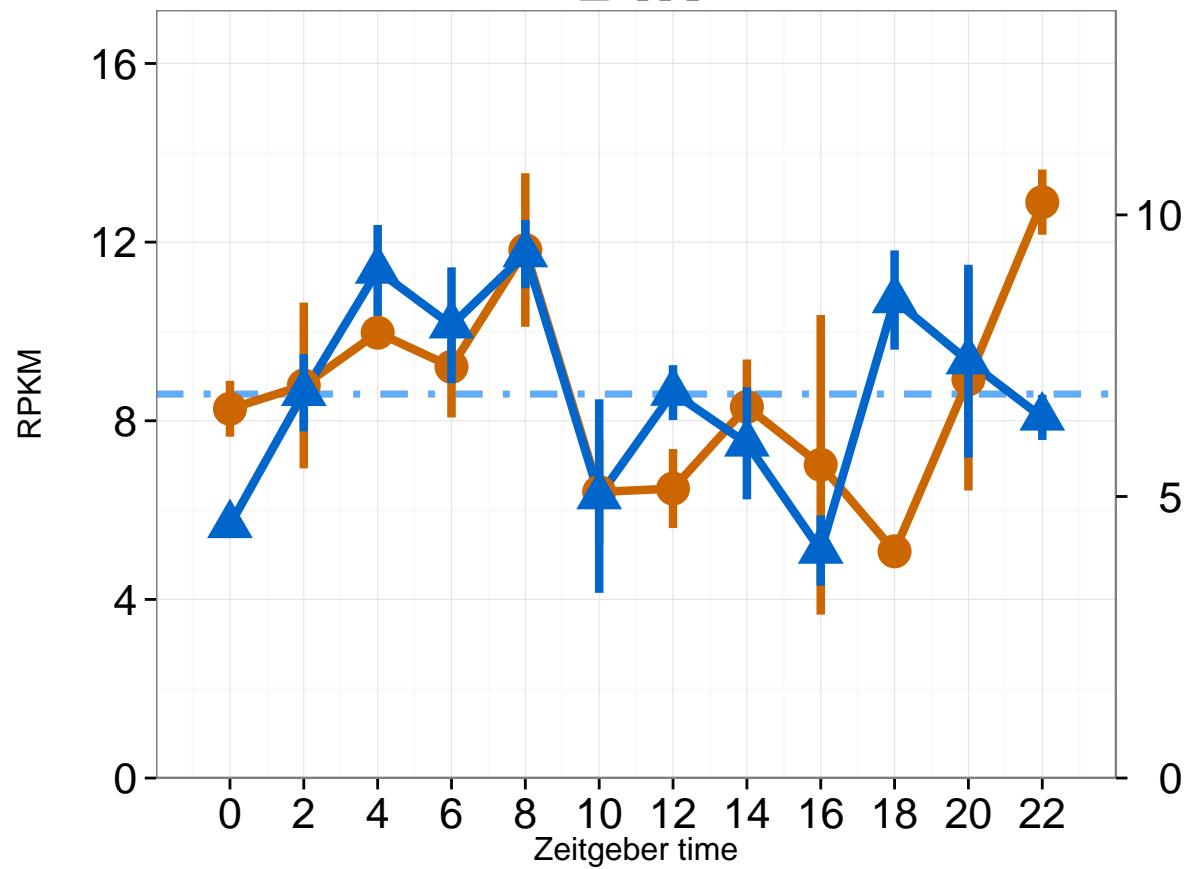

## Bik

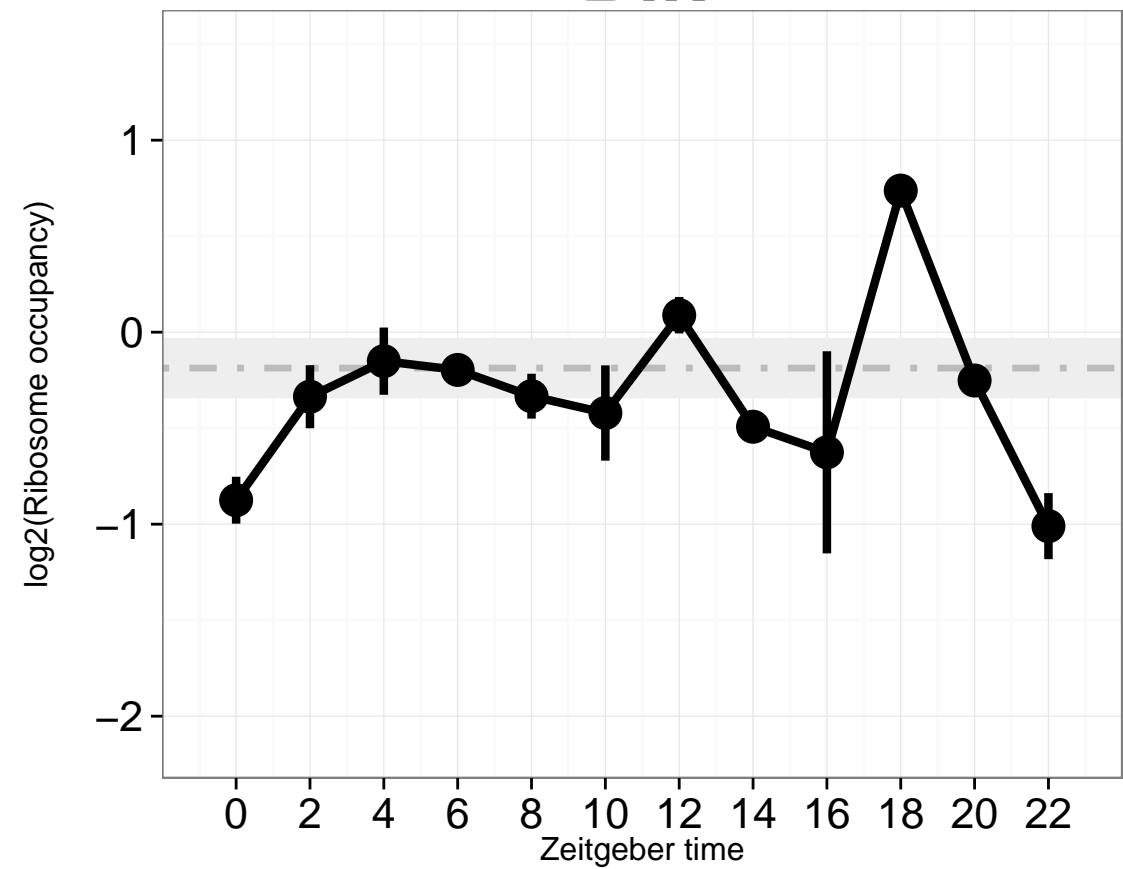

Supplement: SuppDataset_1.zip [file Bik_set_A.pdf › Supplemental Dataset 1/A-mRNA_nonrhyth_translation_nonrhyth/Bik_set_A.pdf]

# Bin1

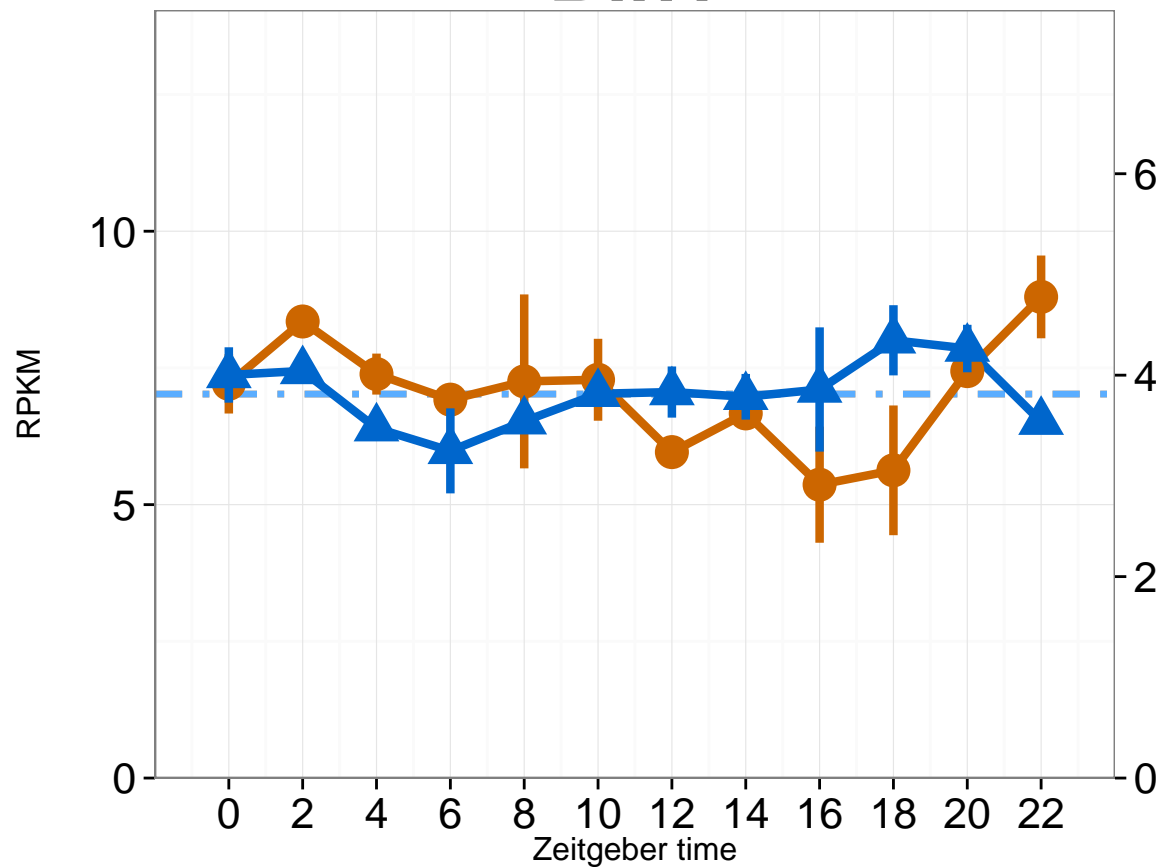

# Bin1

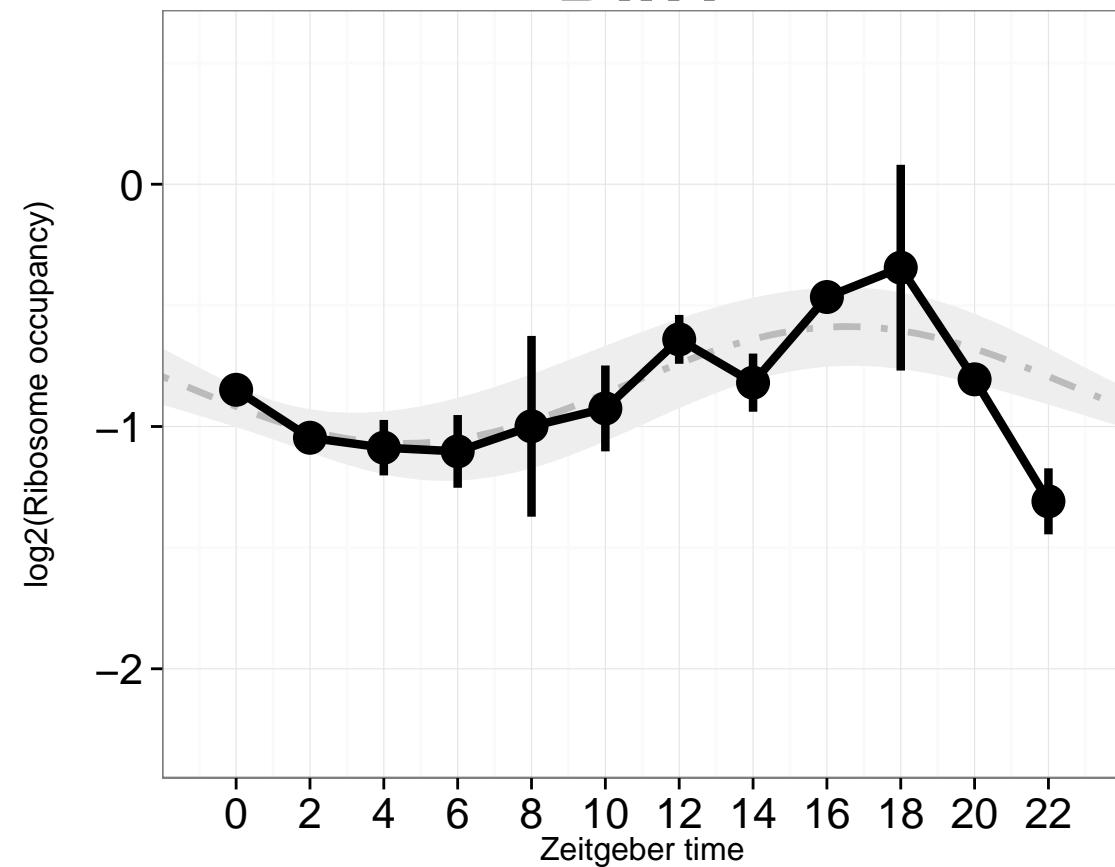

Supplement: SuppDataset_1.zip [file Bin1_set_A.pdf › Supplemental Dataset 1/A-mRNA_nonrhyth_translation_nonrhyth/Bin1_set_A.pdf]

# Bin3

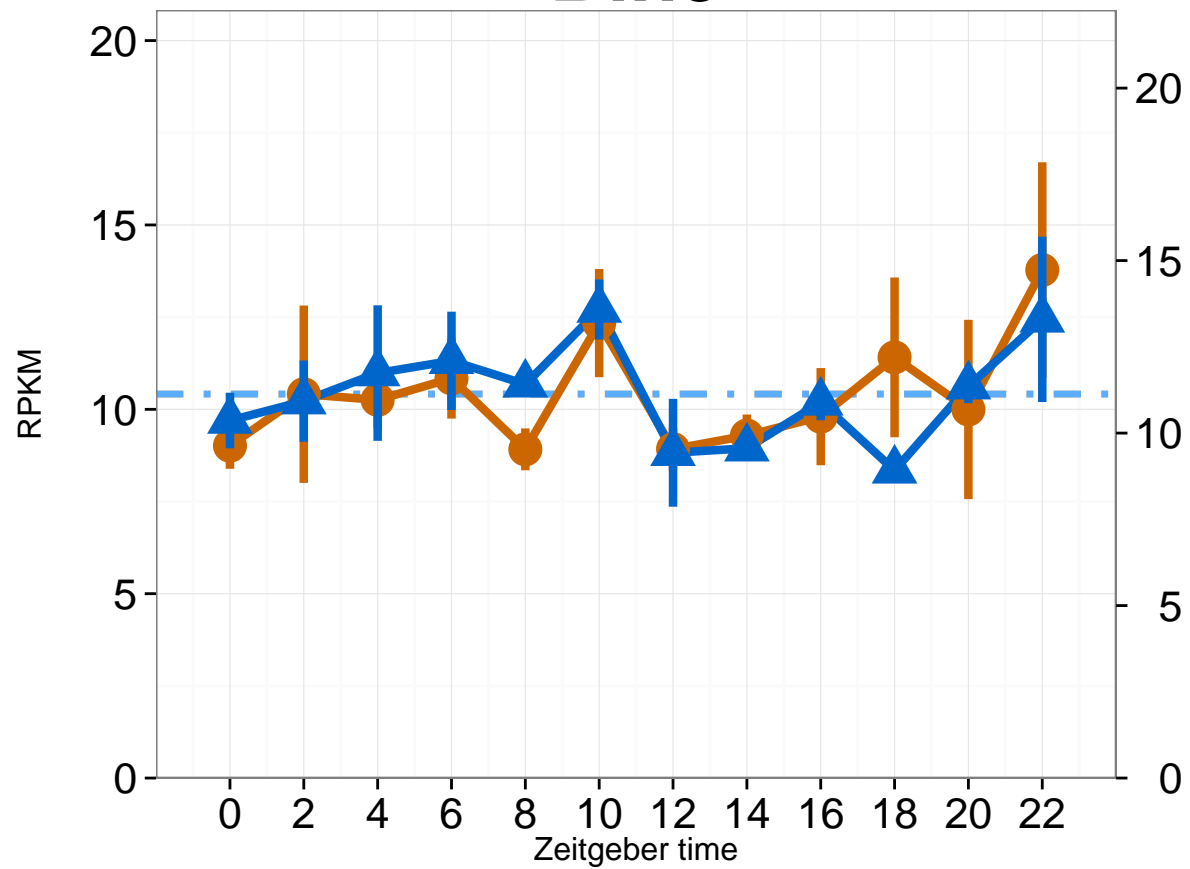

# Bin3

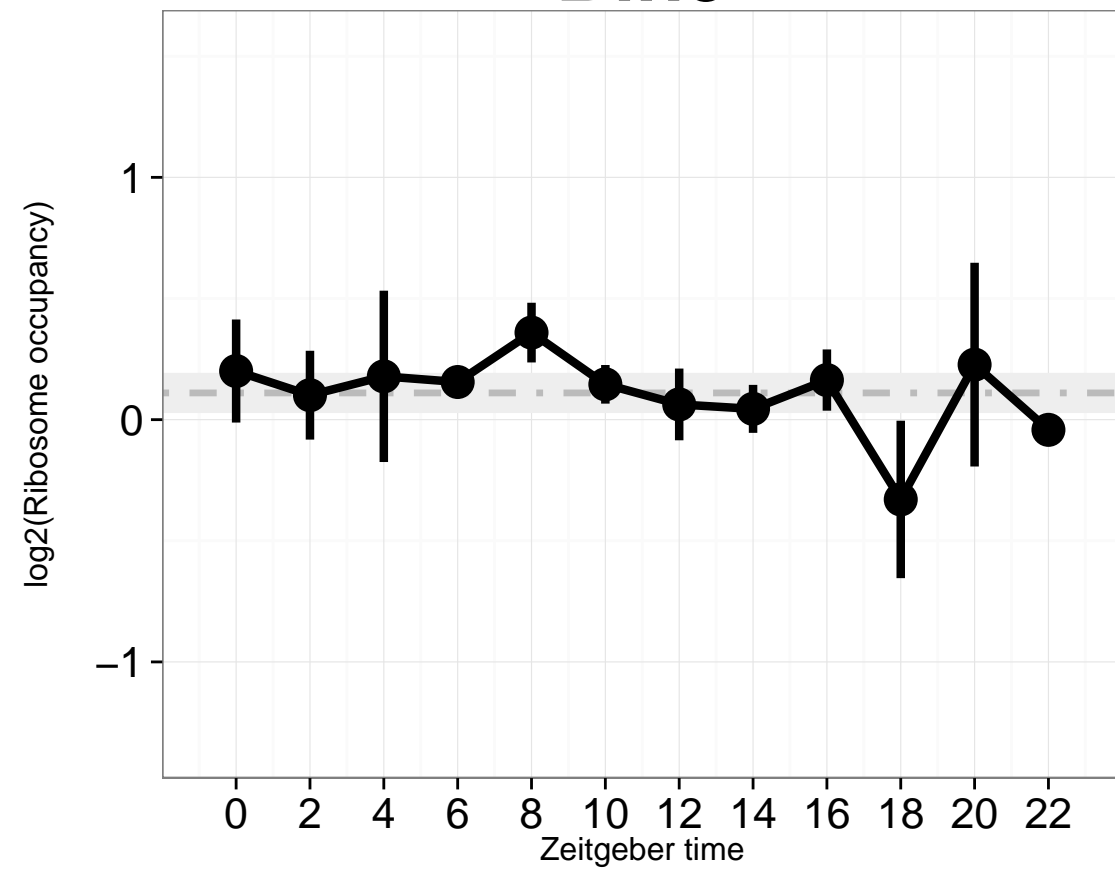

Supplement: SuppDataset_1.zip [file Bin3_set_A.pdf › Supplemental Dataset 1/A-mRNA_nonrhyth_translation_nonrhyth/Bin3_set_A.pdf]

## Birc2

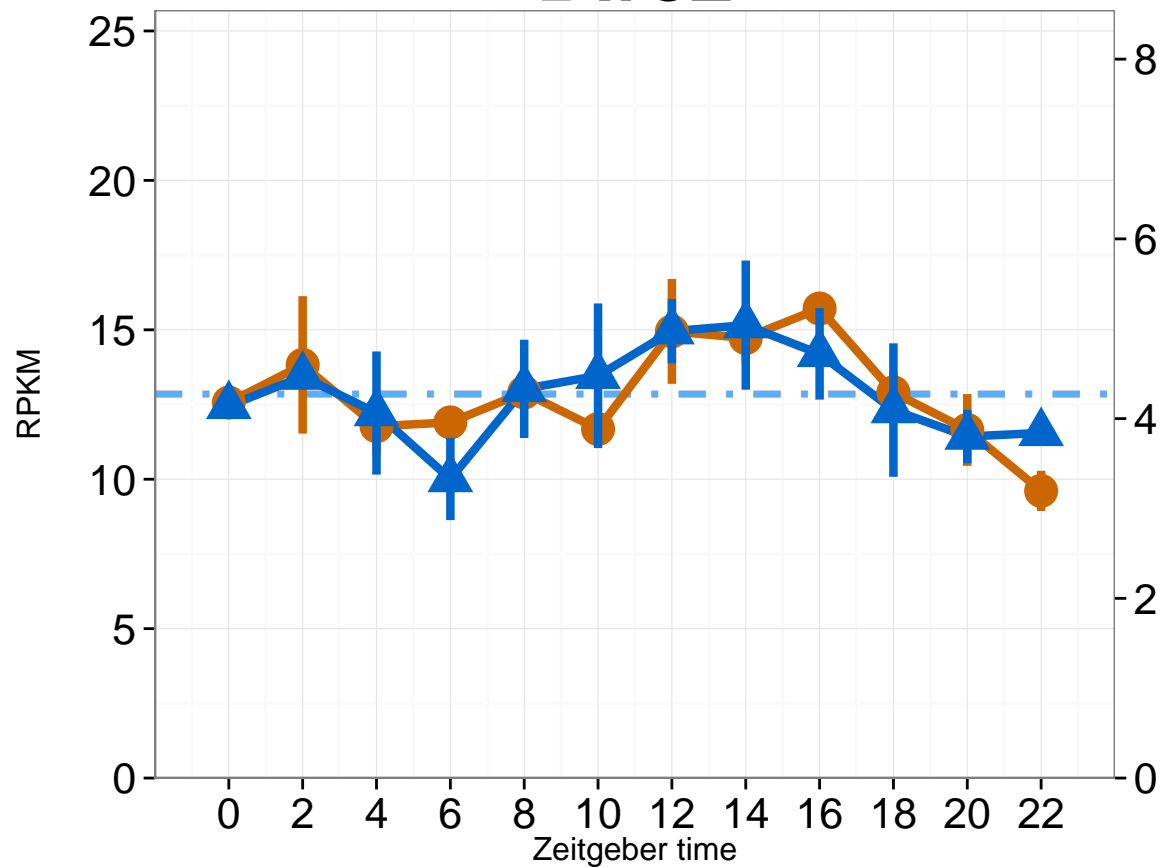

## Birc2

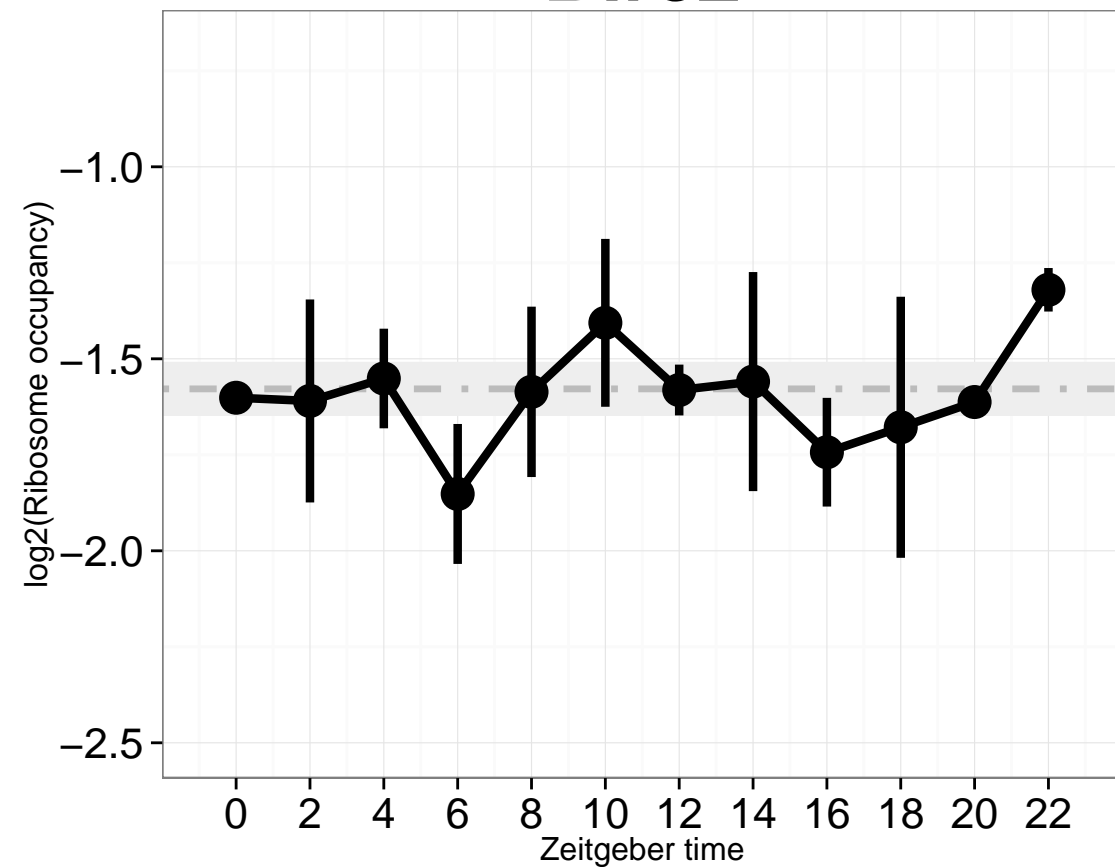

Supplement: SuppDataset_1.zip [file Birc2_set_A.pdf › Supplemental Dataset 1/A-mRNA_nonrhyth_translation_nonrhyth/Birc2_set_A.pdf]

## Birc3

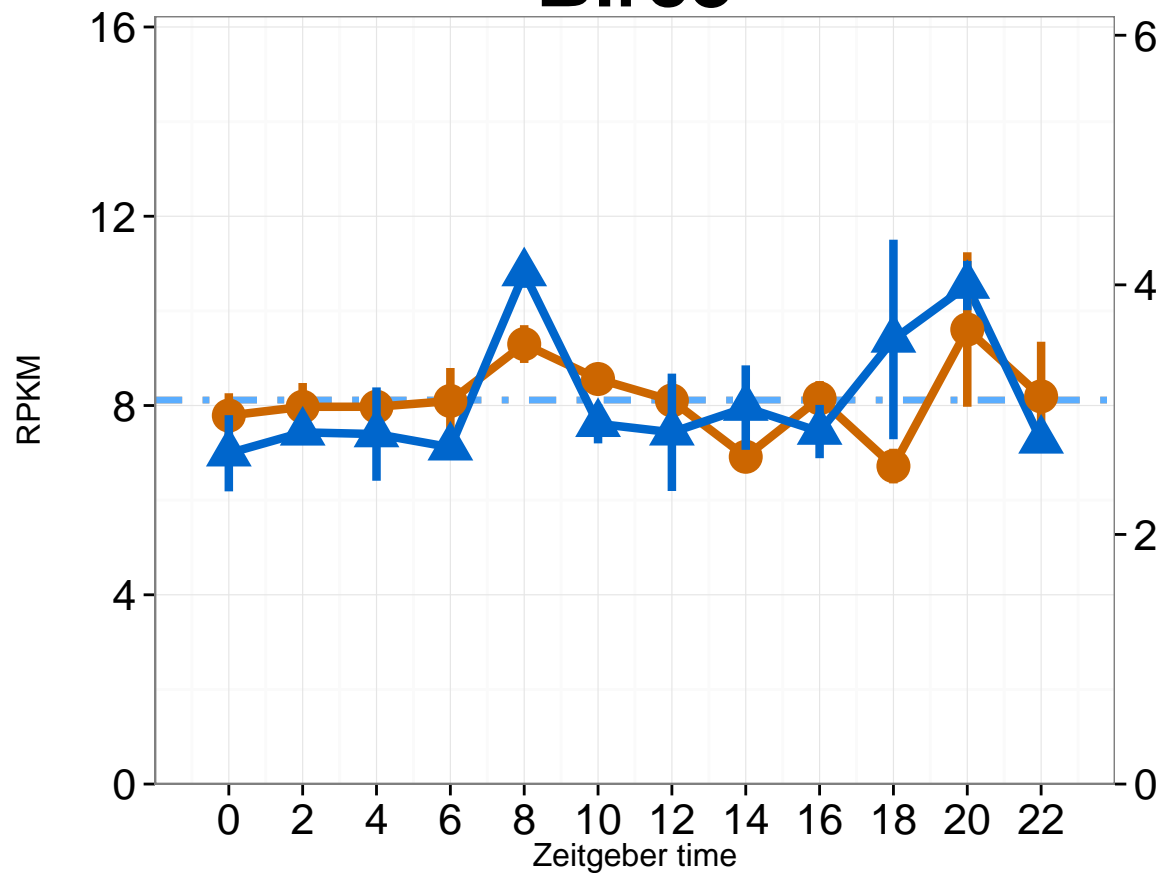

## Birc3

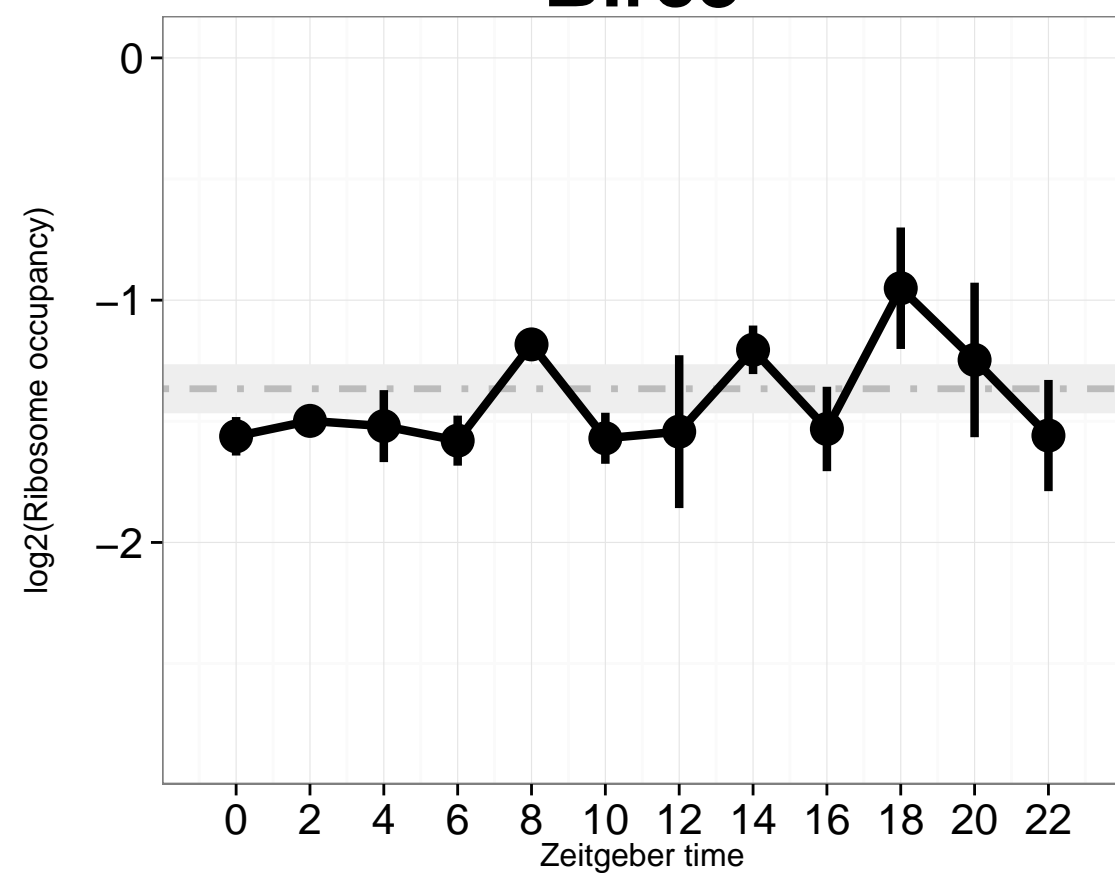

Supplement: SuppDataset_1.zip [file Birc3_set_A.pdf › Supplemental Dataset 1/A-mRNA_nonrhyth_translation_nonrhyth/Birc3_set_A.pdf]

# Birc5

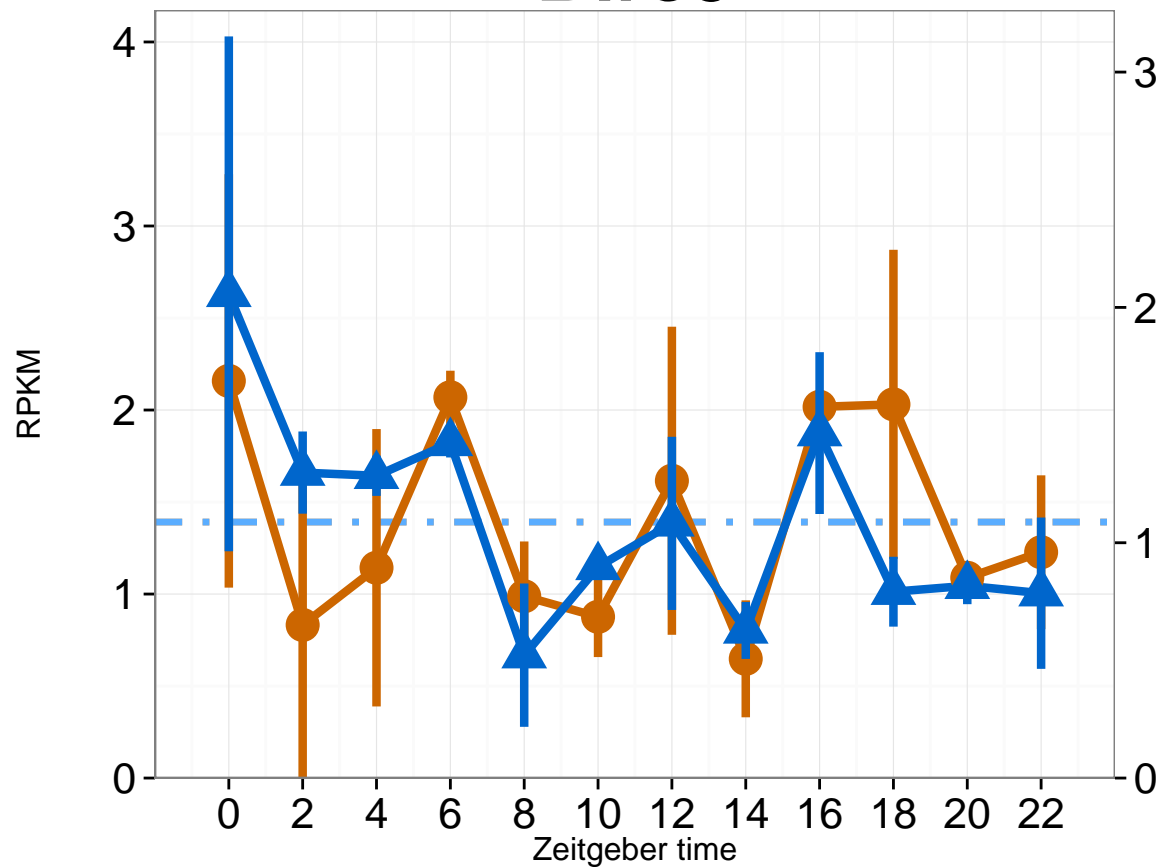

# Birc5

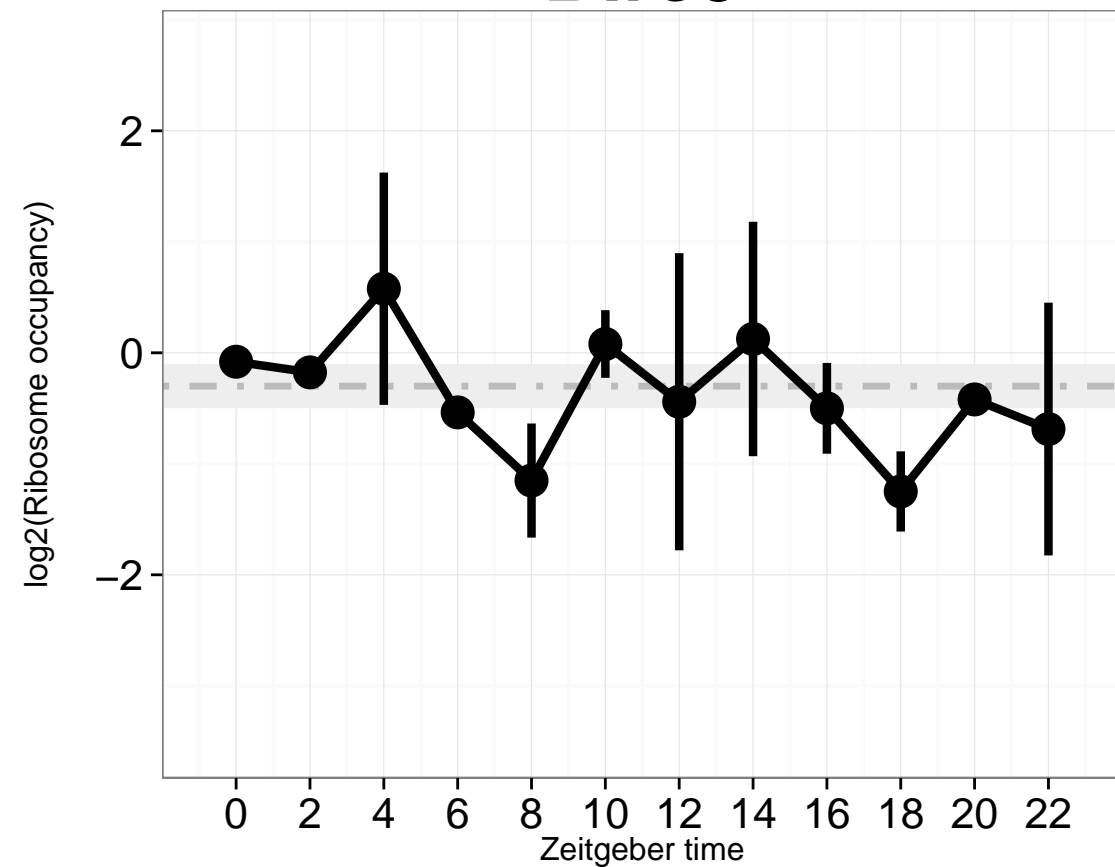

Supplement: SuppDataset_1.zip [file Birc5_set_A.pdf › Supplemental Dataset 1/A-mRNA_nonrhyth_translation_nonrhyth/Birc5_set_A.pdf]

# Birc6

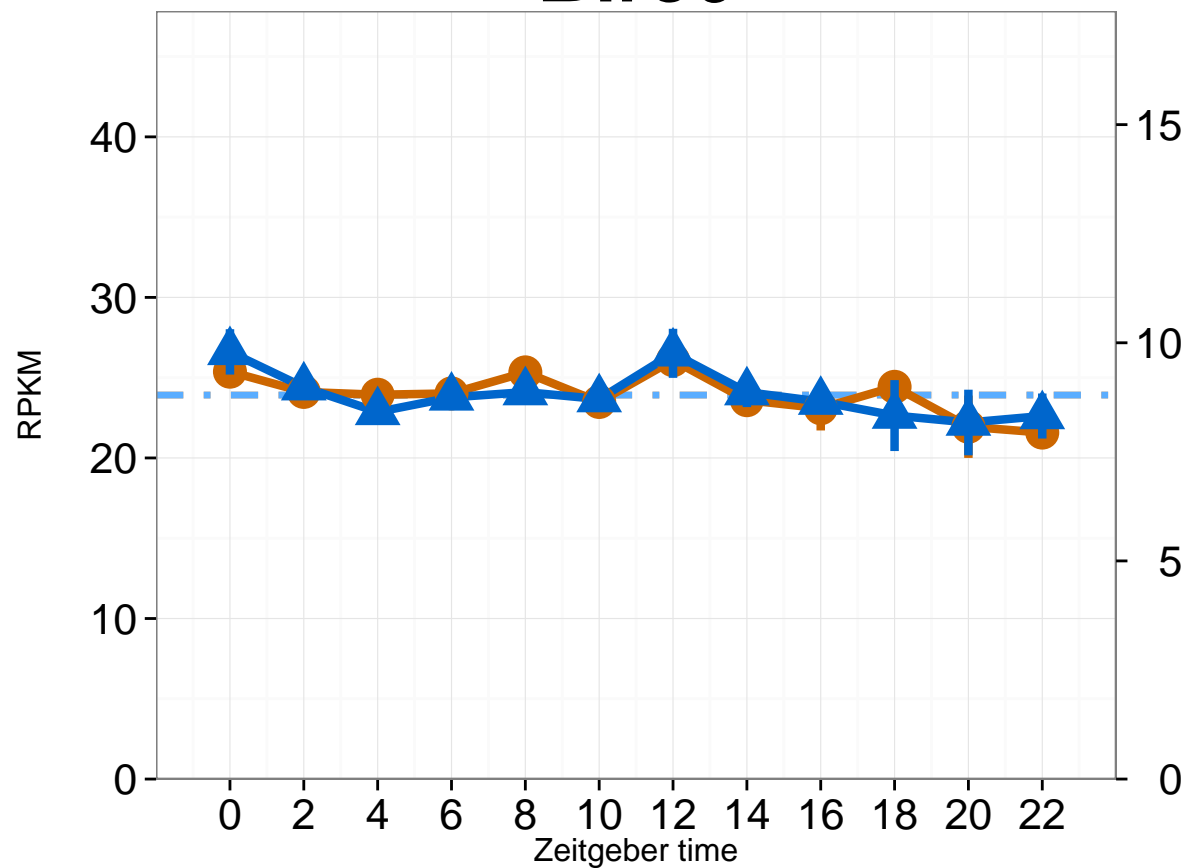

# Birc6

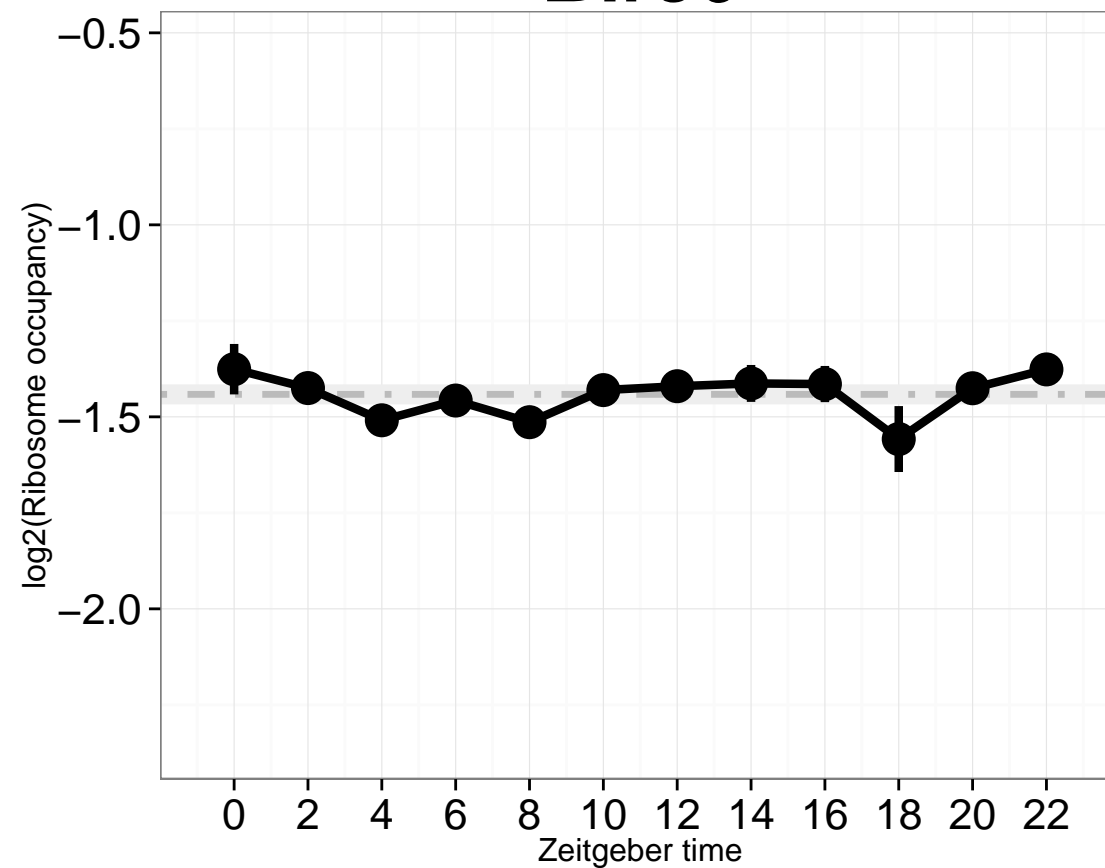

Supplement: SuppDataset_1.zip [file Birc6_set_A.pdf › Supplemental Dataset 1/A-mRNA_nonrhyth_translation_nonrhyth/Birc6_set_A.pdf]

## Bivm

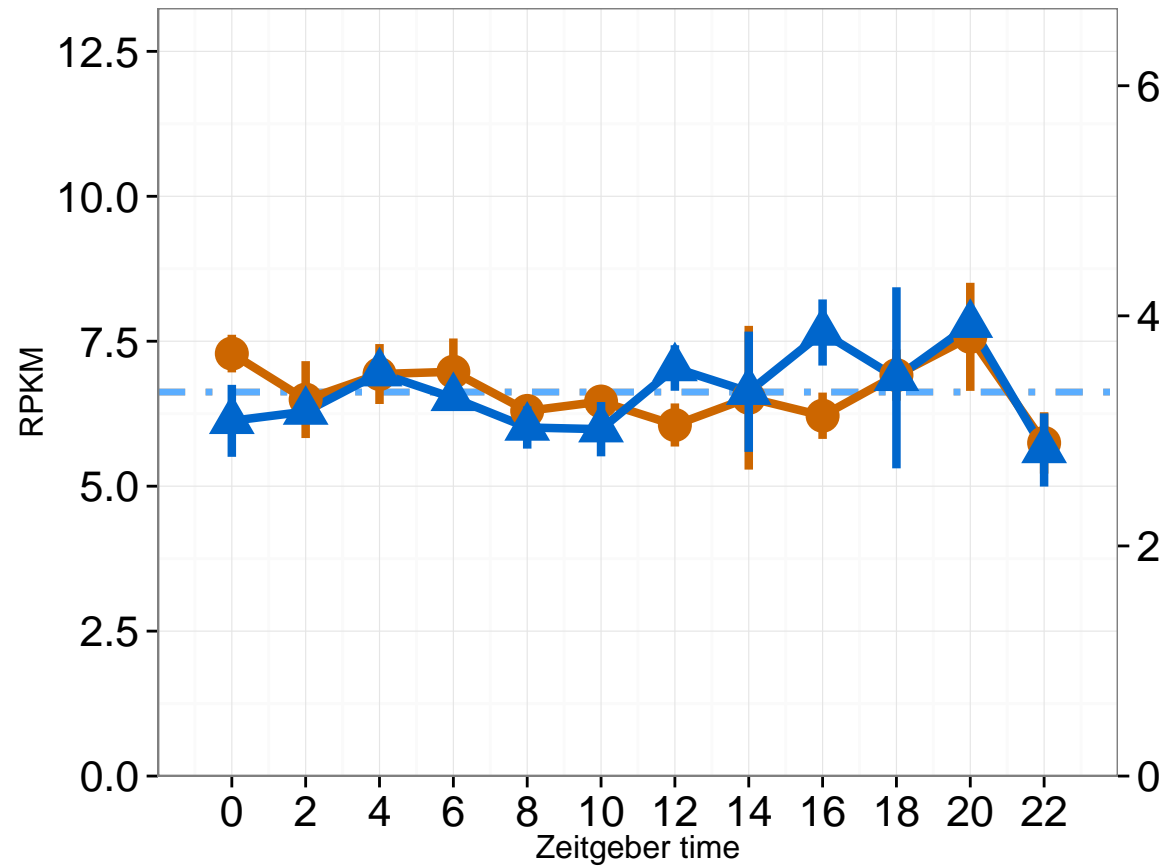

## Bivm

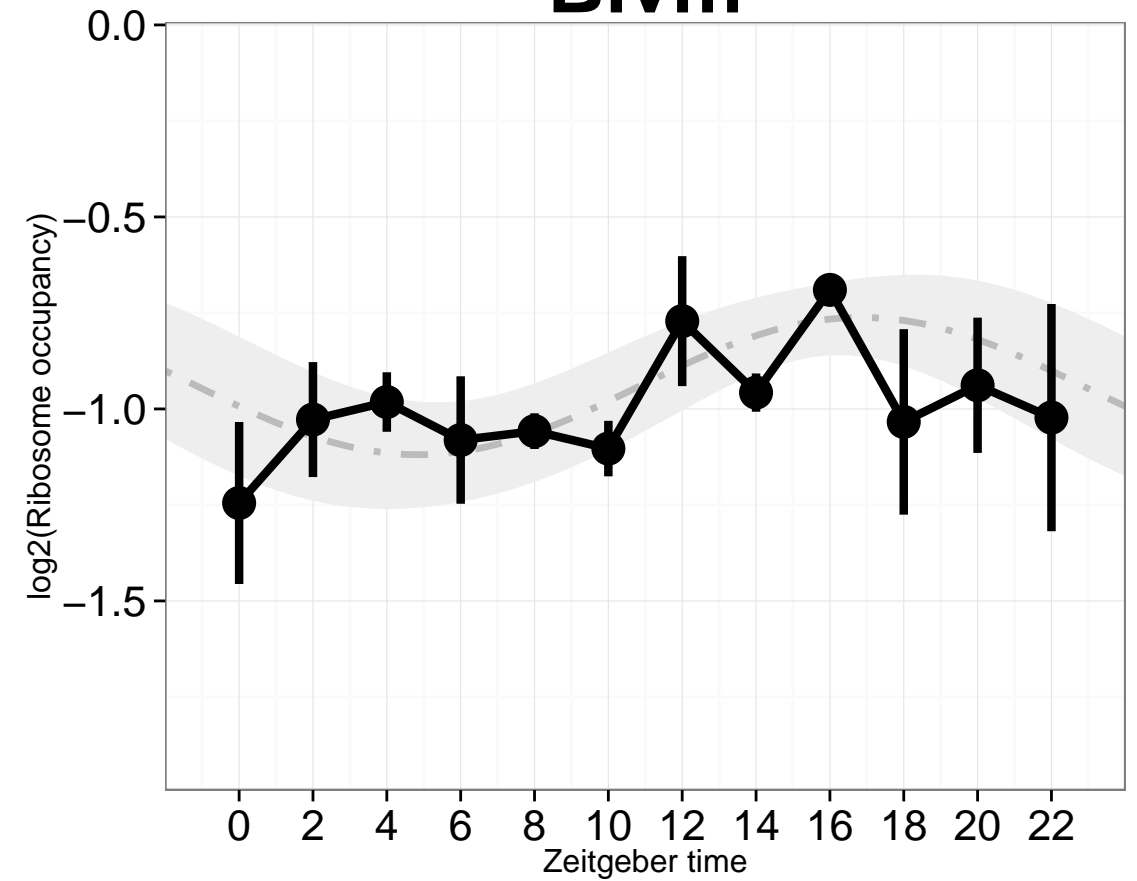

Supplement: SuppDataset_1.zip [file Bivm_set_A.pdf › Supplemental Dataset 1/A-mRNA_nonrhyth_translation_nonrhyth/Bivm_set_A.pdf]

## Blmh

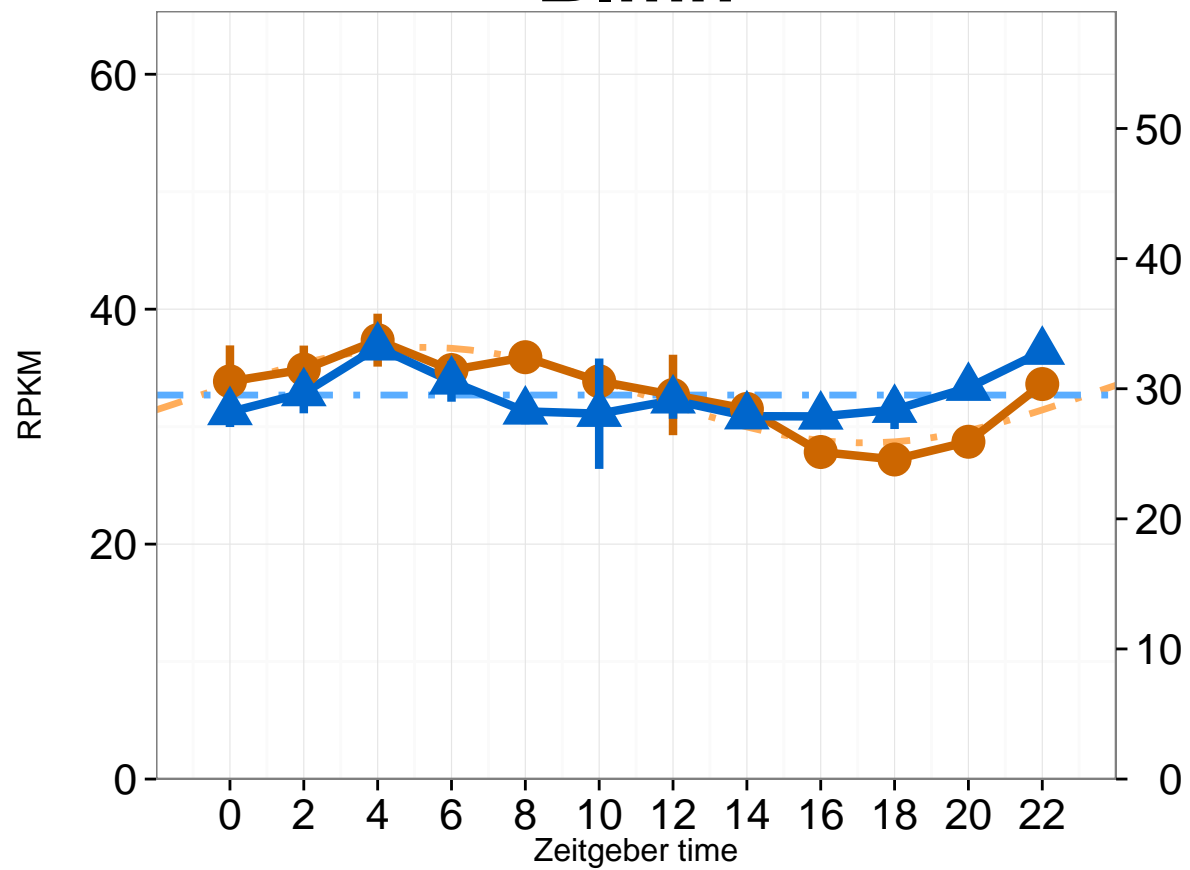

## Blmh

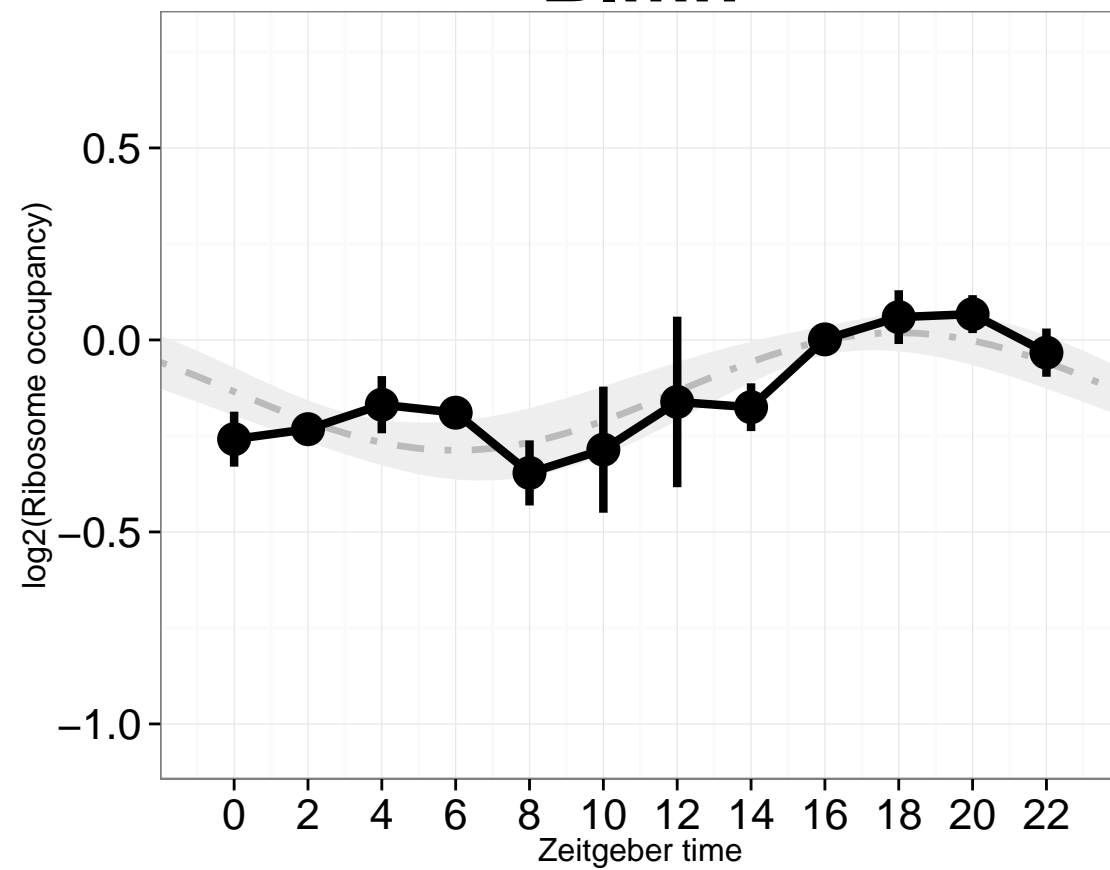

Supplement: SuppDataset_1.zip [file Blmh_set_A.pdf › Supplemental Dataset 1/A-mRNA_nonrhyth_translation_nonrhyth/Blmh_set_A.pdf]

## Blink

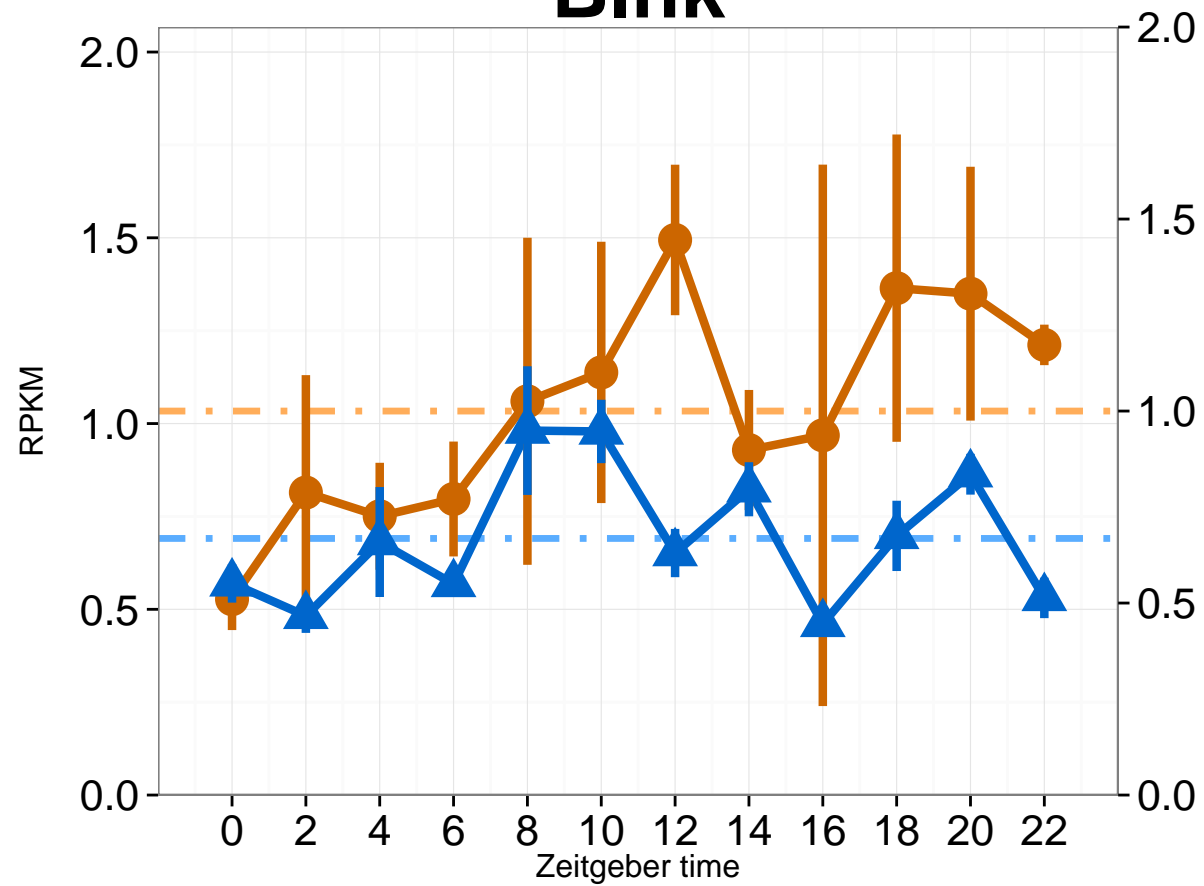

## Blink

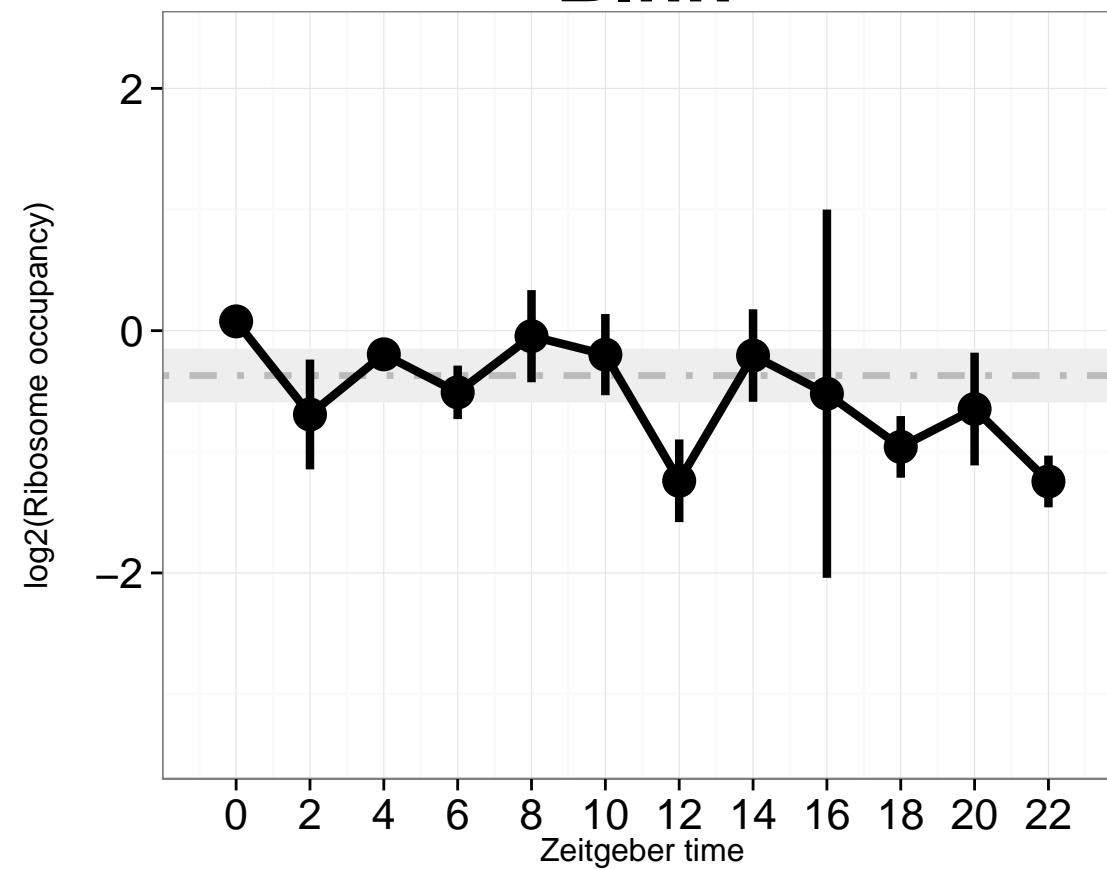

Supplement: SuppDataset_1.zip [file Blnk_set_A.pdf › Supplemental Dataset 1/A-mRNA_nonrhyth_translation_nonrhyth/Blnk_set_A.pdf]

# Bloc1s2

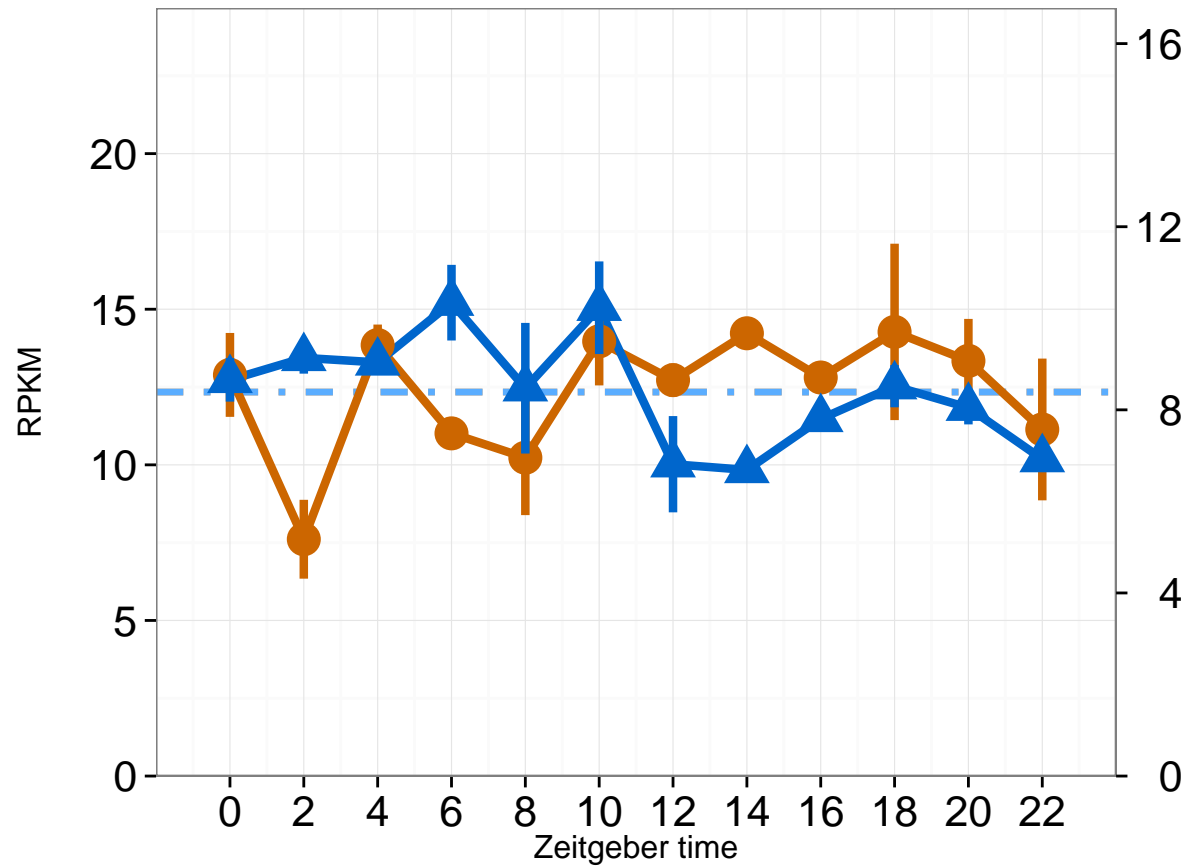

# Bloc1s2

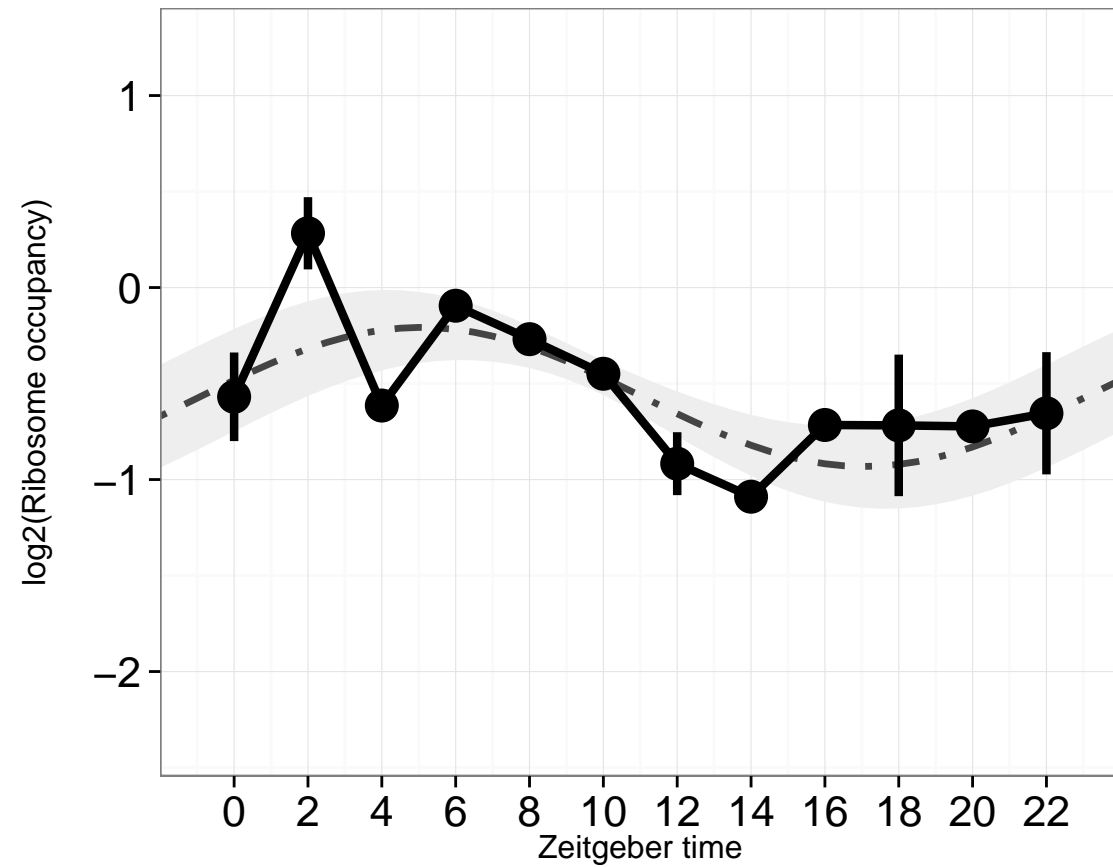

Supplement: SuppDataset_1.zip [file Bloc1s2_set_A.pdf › Supplemental Dataset 1/A-mRNA_nonrhyth_translation_nonrhyth/Bloc1s2_set_A.pdf]

# Bloc1s4

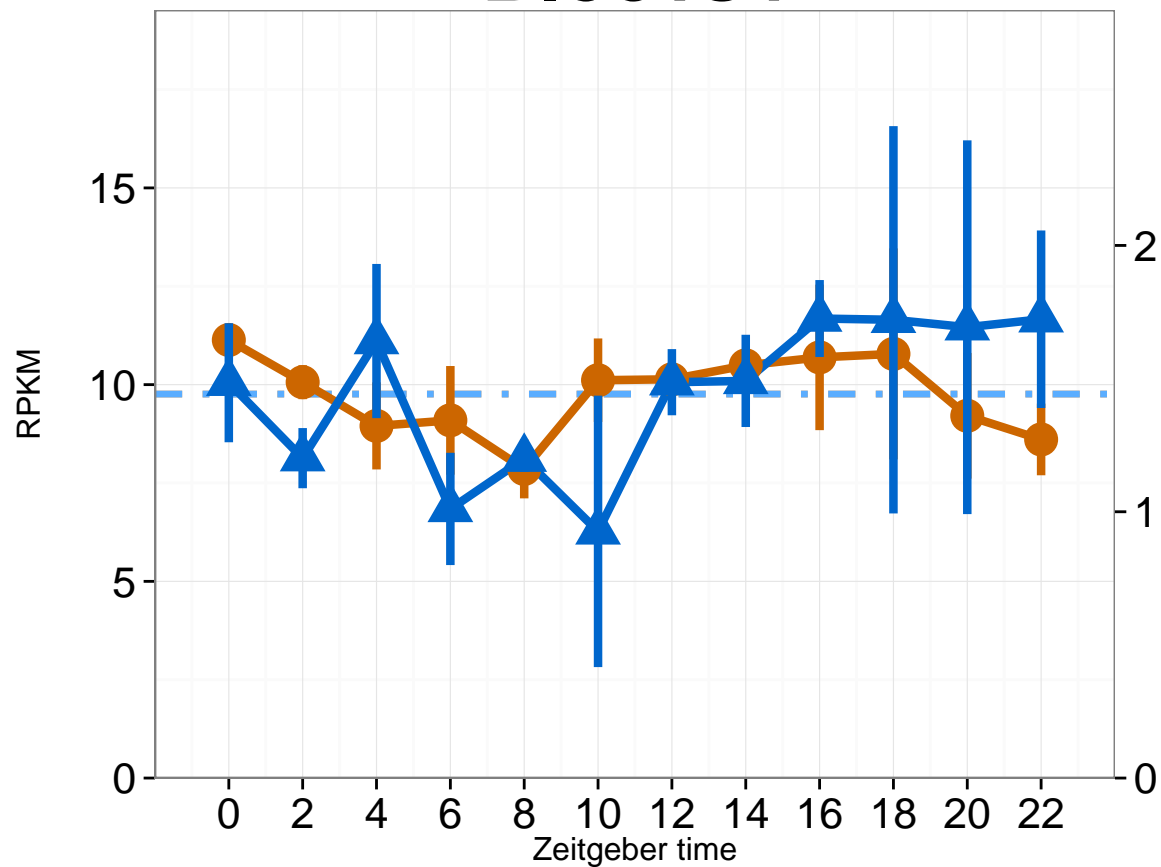

# Bloc1s4

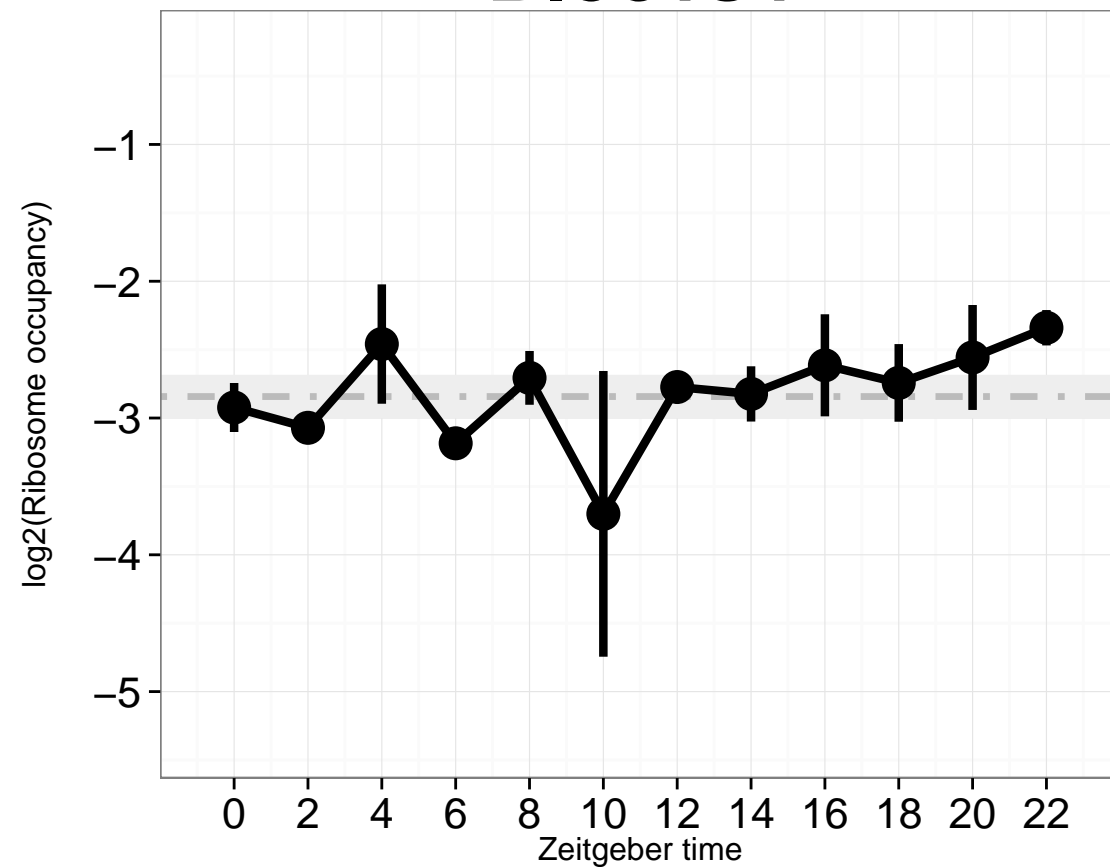

Supplement: SuppDataset_1.zip [file Bloc1s4_set_A.pdf › Supplemental Dataset 1/A-mRNA_nonrhyth_translation_nonrhyth/Bloc1s4_set_A.pdf]

# Bloc1s5

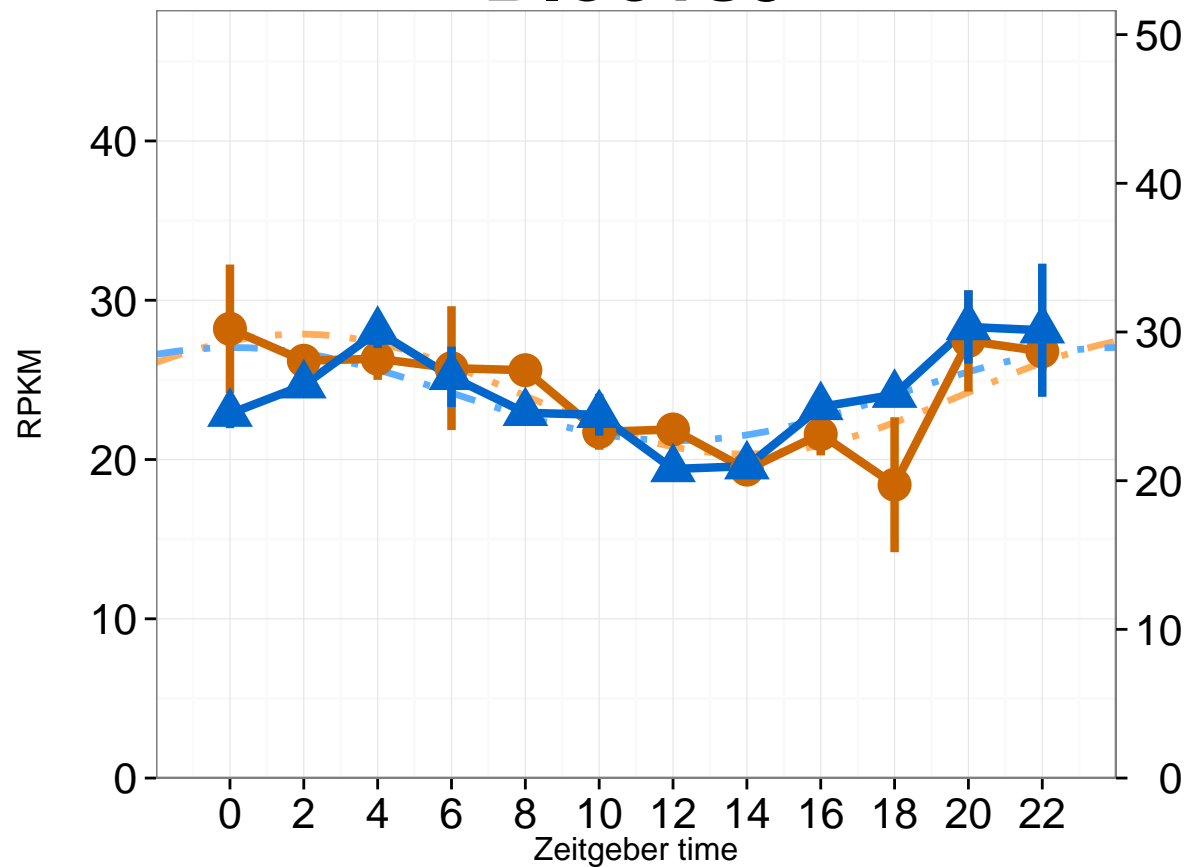

# Bloc1s5

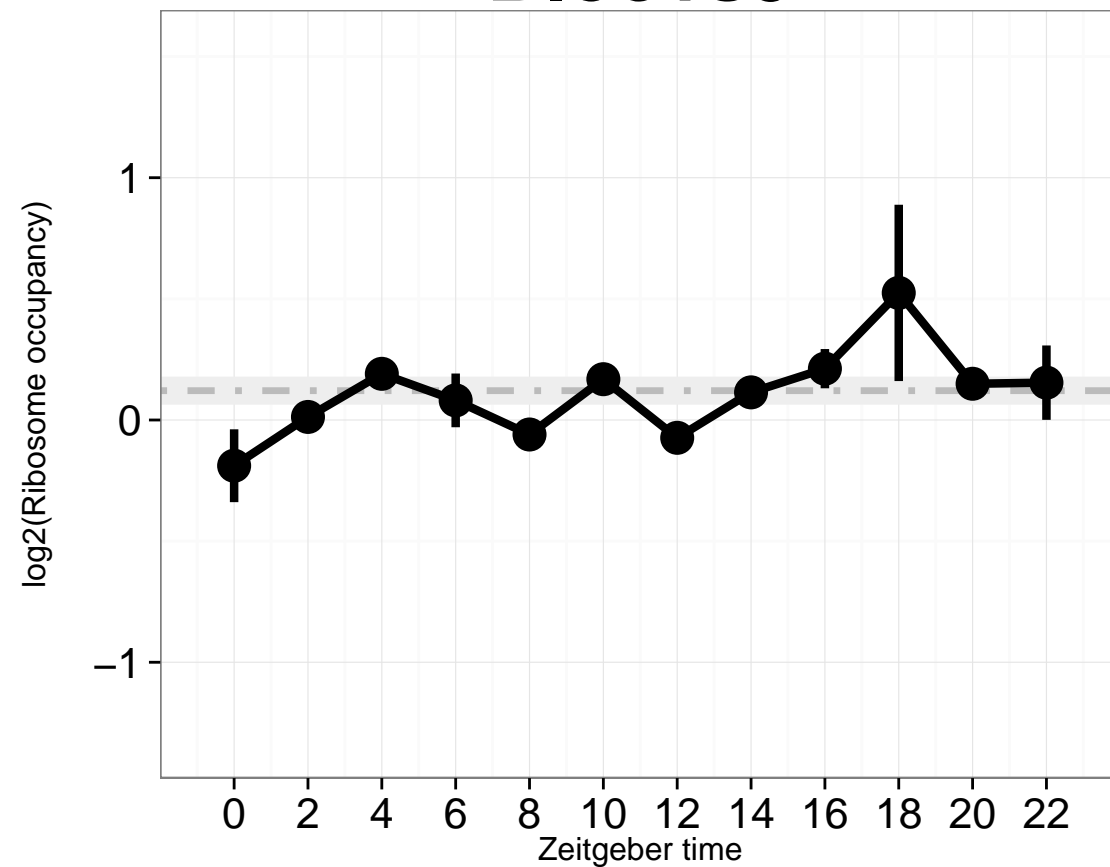

Supplement: SuppDataset_1.zip [file Bloc1s5_set_A.pdf › Supplemental Dataset 1/A-mRNA_nonrhyth_translation_nonrhyth/Bloc1s5_set_A.pdf]

# Bloc1s6

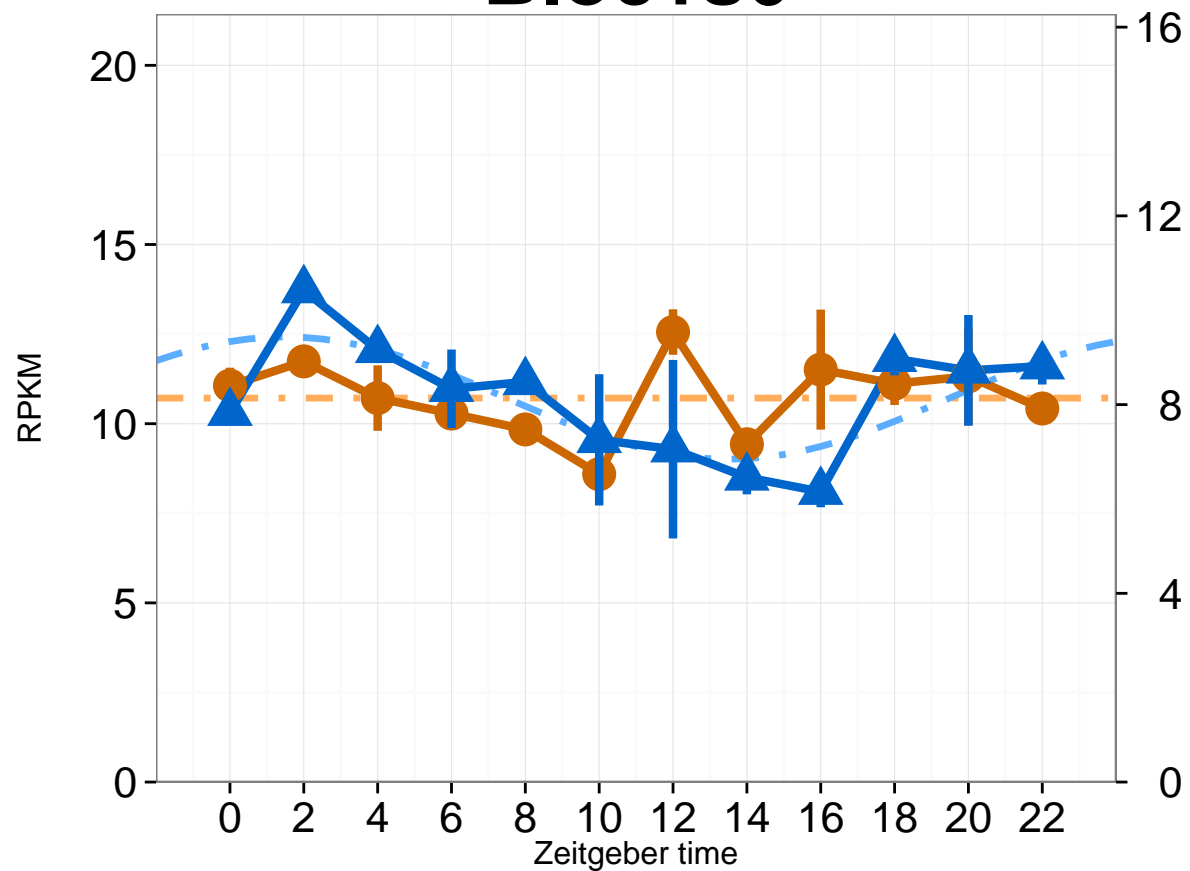

# Bloc1s6

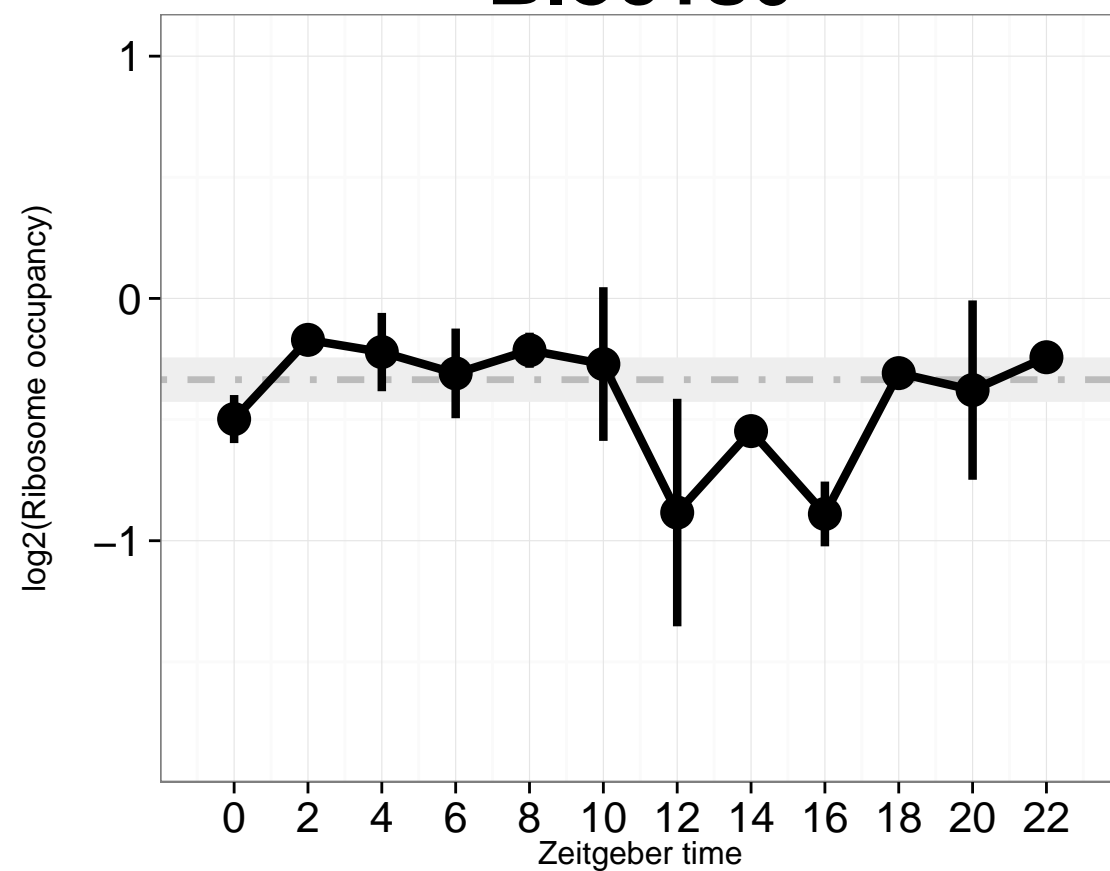

Supplement: SuppDataset_1.zip [file Bloc1s6_set_A.pdf › Supplemental Dataset 1/A-mRNA_nonrhyth_translation_nonrhyth/Bloc1s6_set_A.pdf]

## Blvra

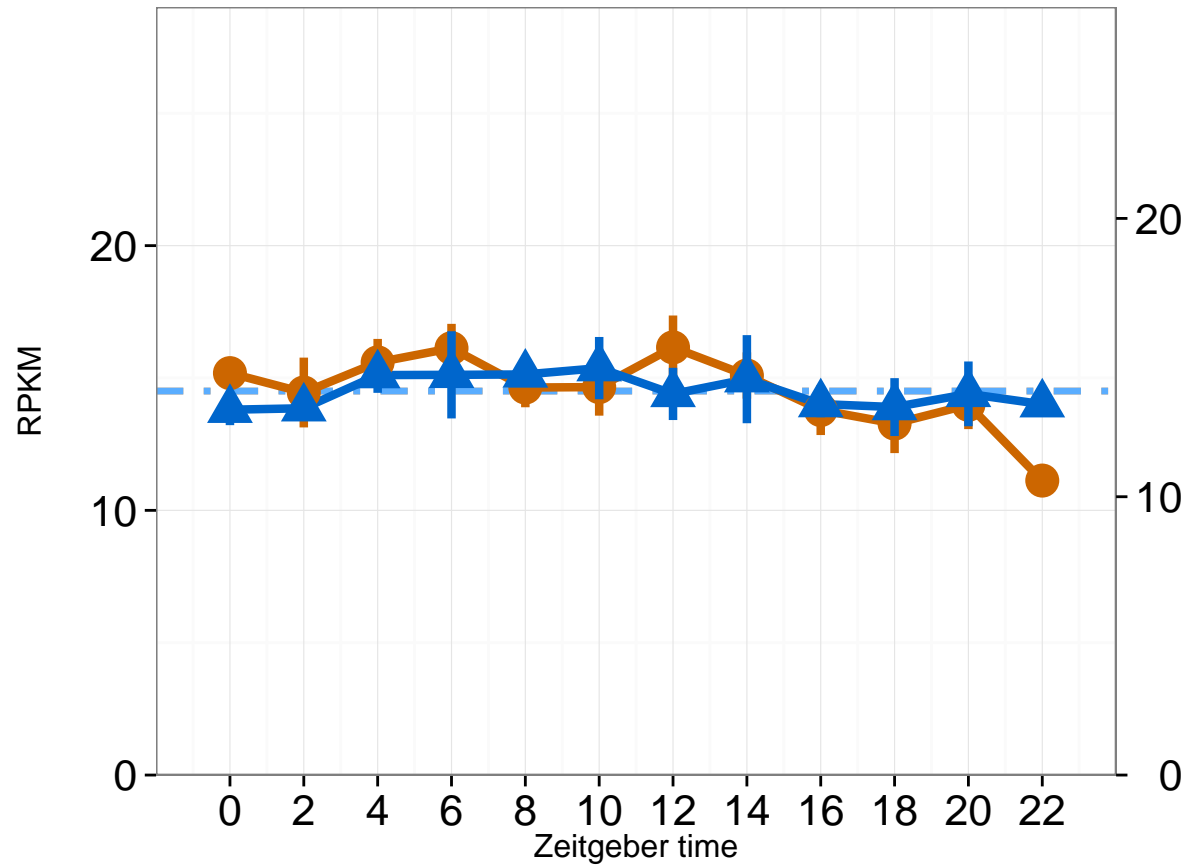

## Blvra

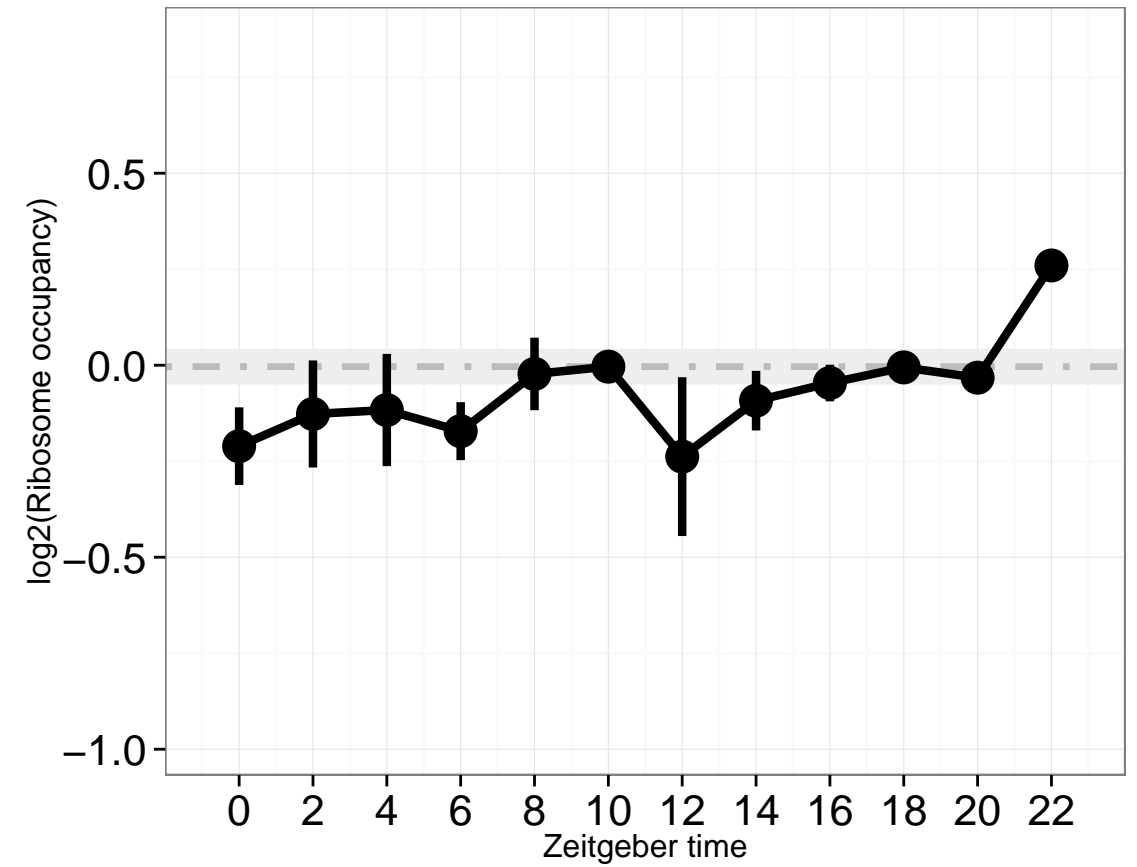

Supplement: SuppDataset_1.zip [file Blvra_set_A.pdf › Supplemental Dataset 1/A-mRNA_nonrhyth_translation_nonrhyth/Blvra_set_A.pdf]

## Blvrb

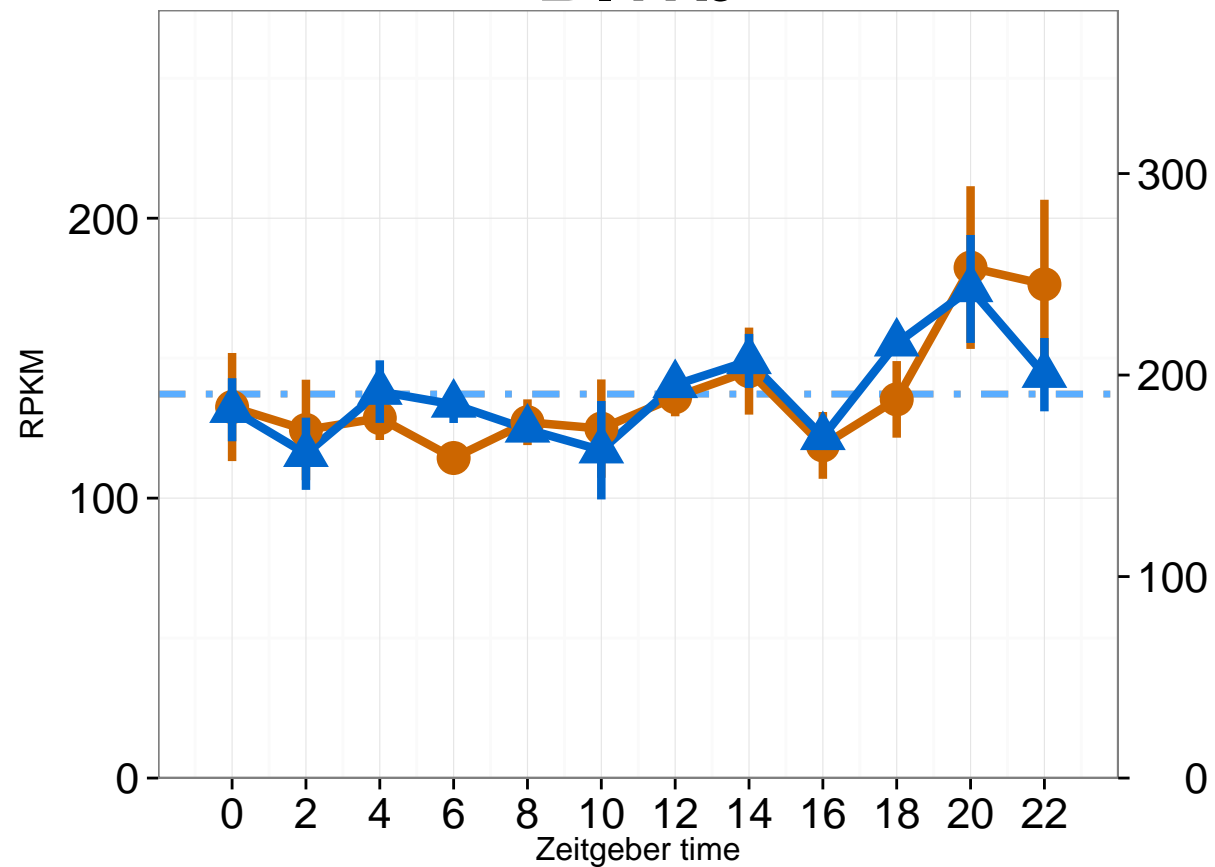

## Blvrb

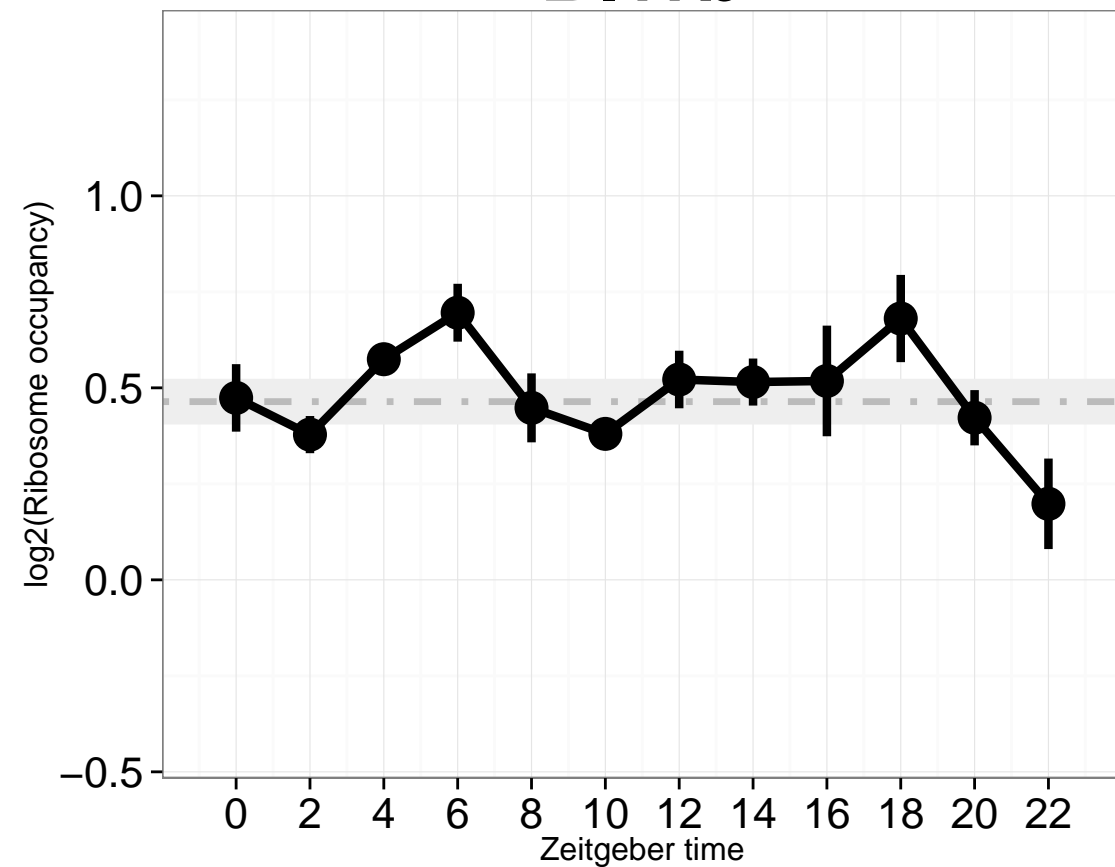

Supplement: SuppDataset_1.zip [file Blvrb_set_A.pdf › Supplemental Dataset 1/A-mRNA_nonrhyth_translation_nonrhyth/Blvrb_set_A.pdf]

## Blzf1

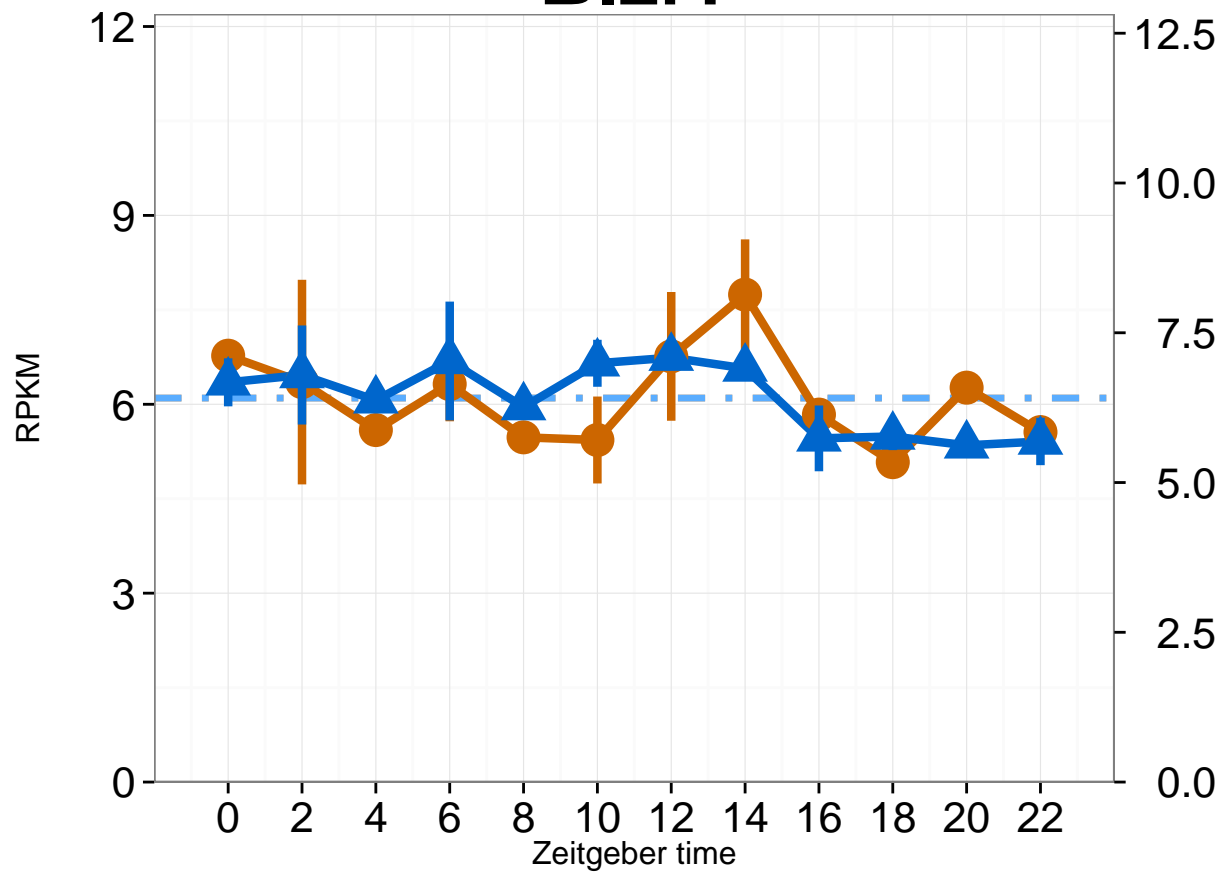

## Blzf1

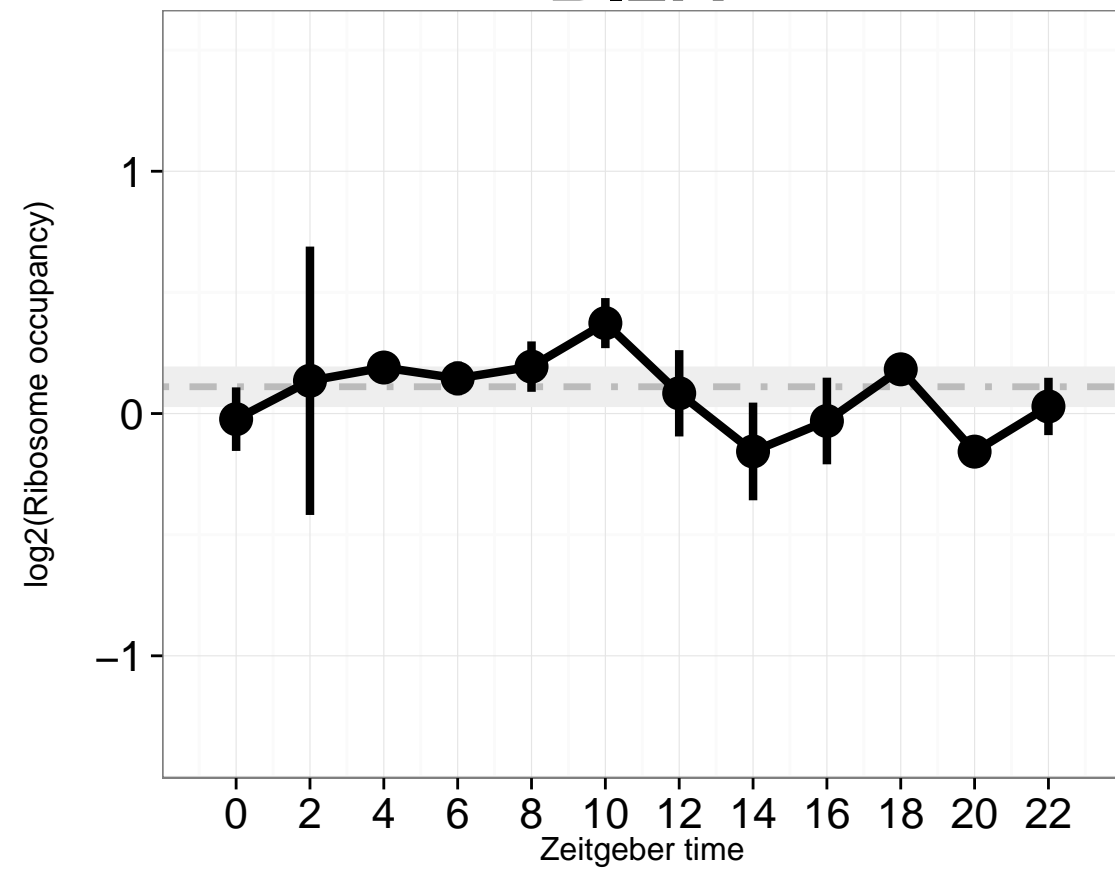

Supplement: SuppDataset_1.zip [file Blzf1_set_A.pdf › Supplemental Dataset 1/A-mRNA_nonrhyth_translation_nonrhyth/Blzf1_set_A.pdf]

## Bmi1

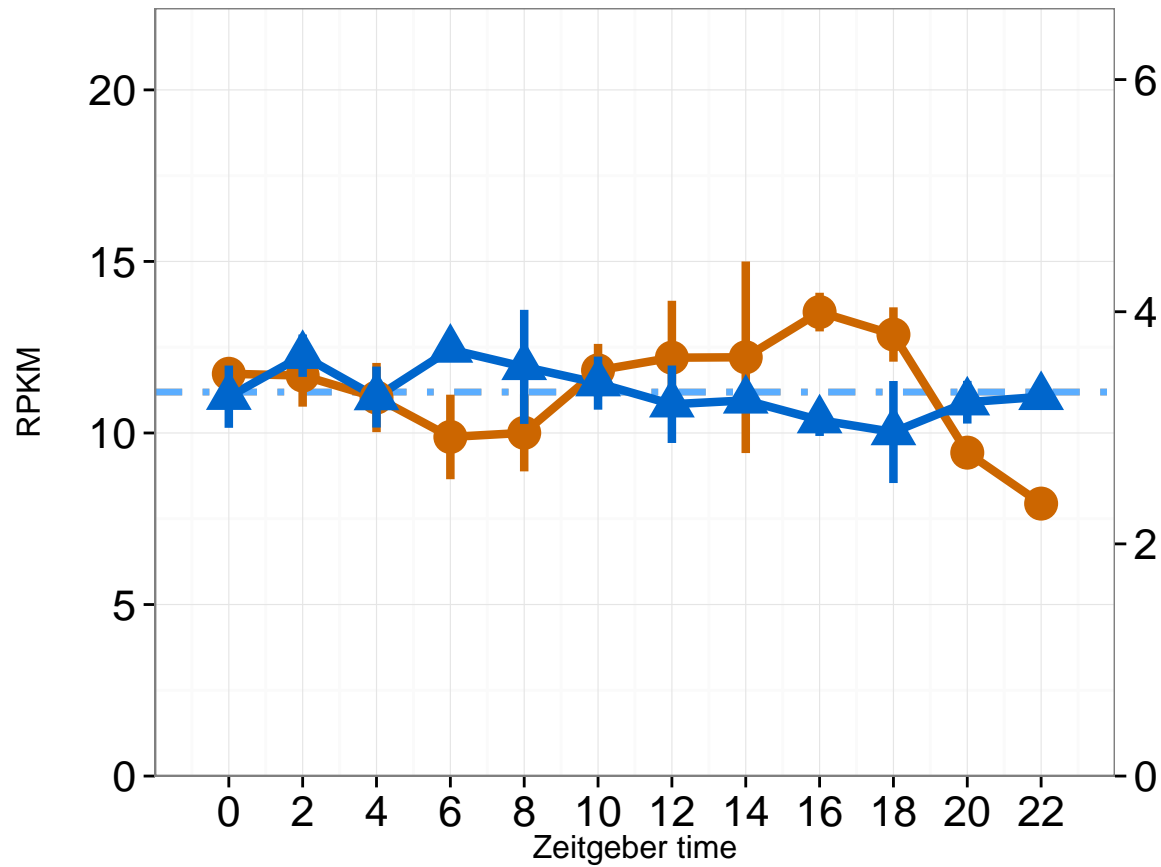

## Bmi1

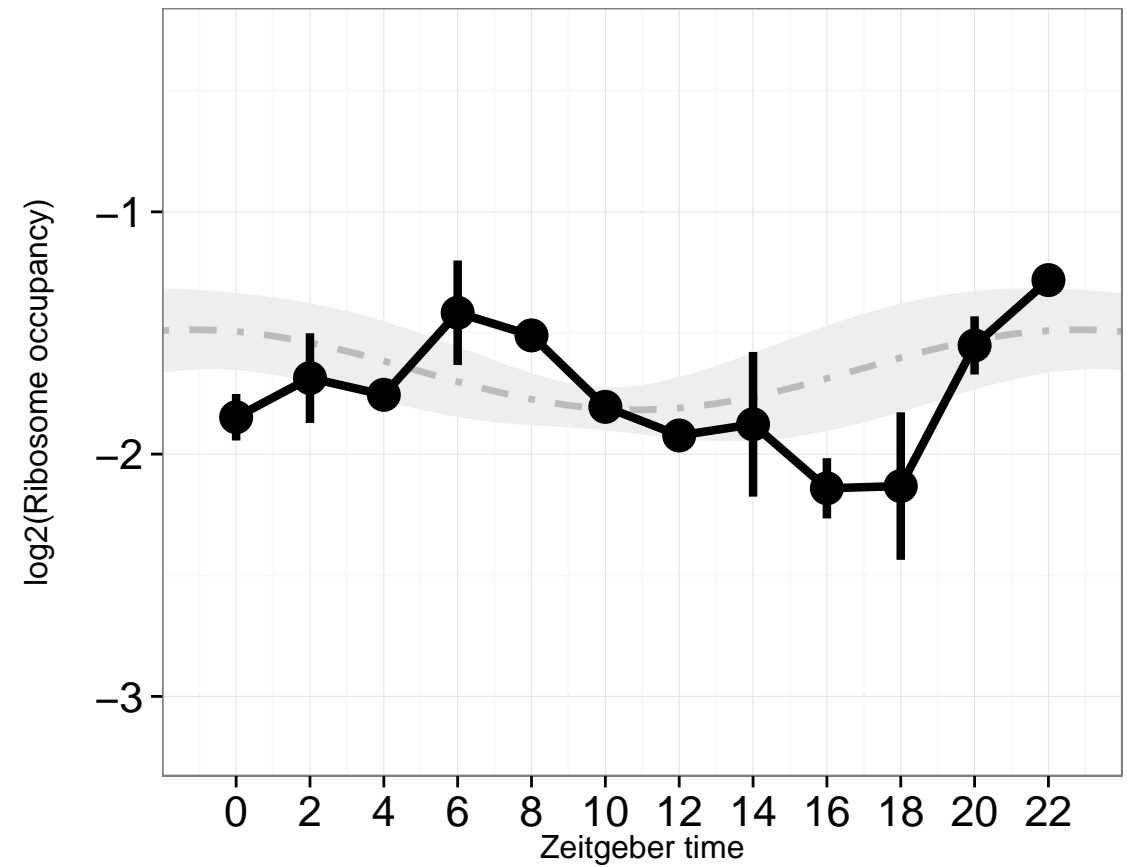

Supplement: SuppDataset_1.zip [file Bmi1_set_A.pdf › Supplemental Dataset 1/A-mRNA_nonrhyth_translation_nonrhyth/Bmi1_set_A.pdf]

## Bmp1

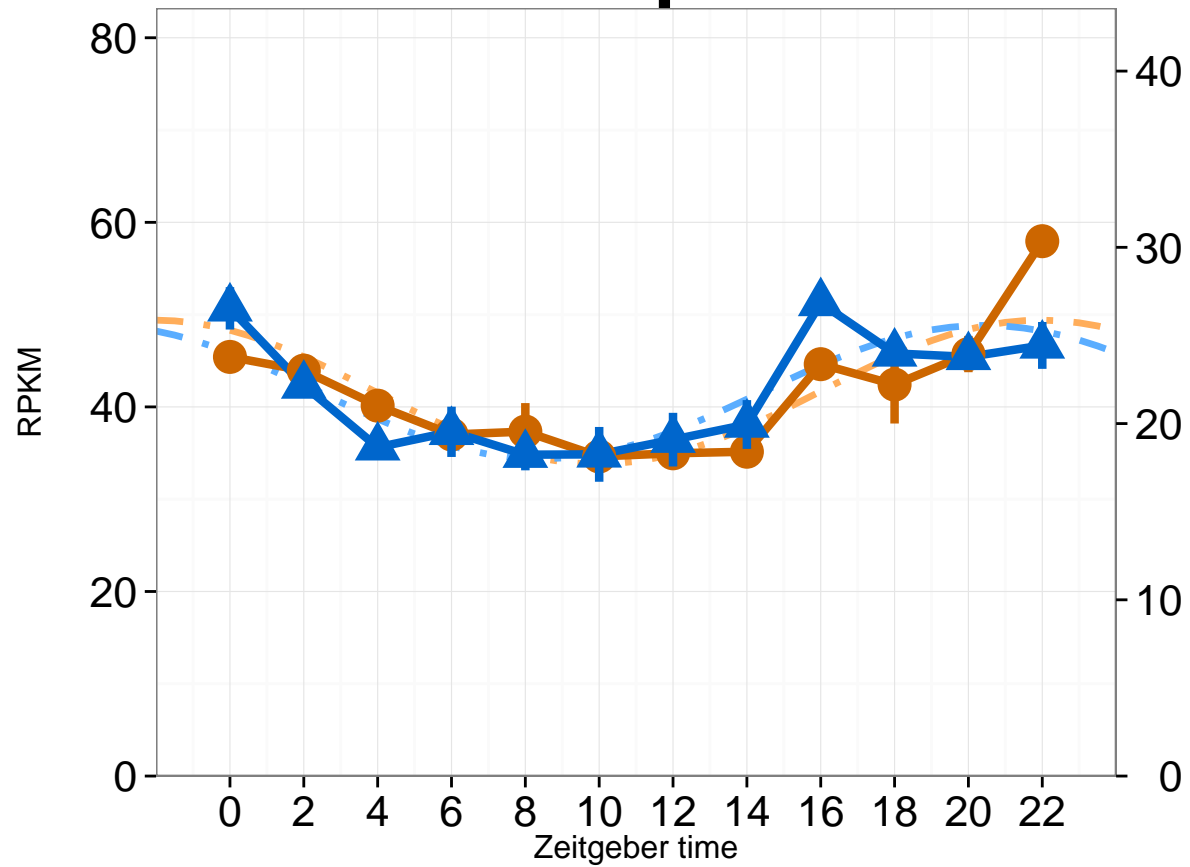

## Bmp1

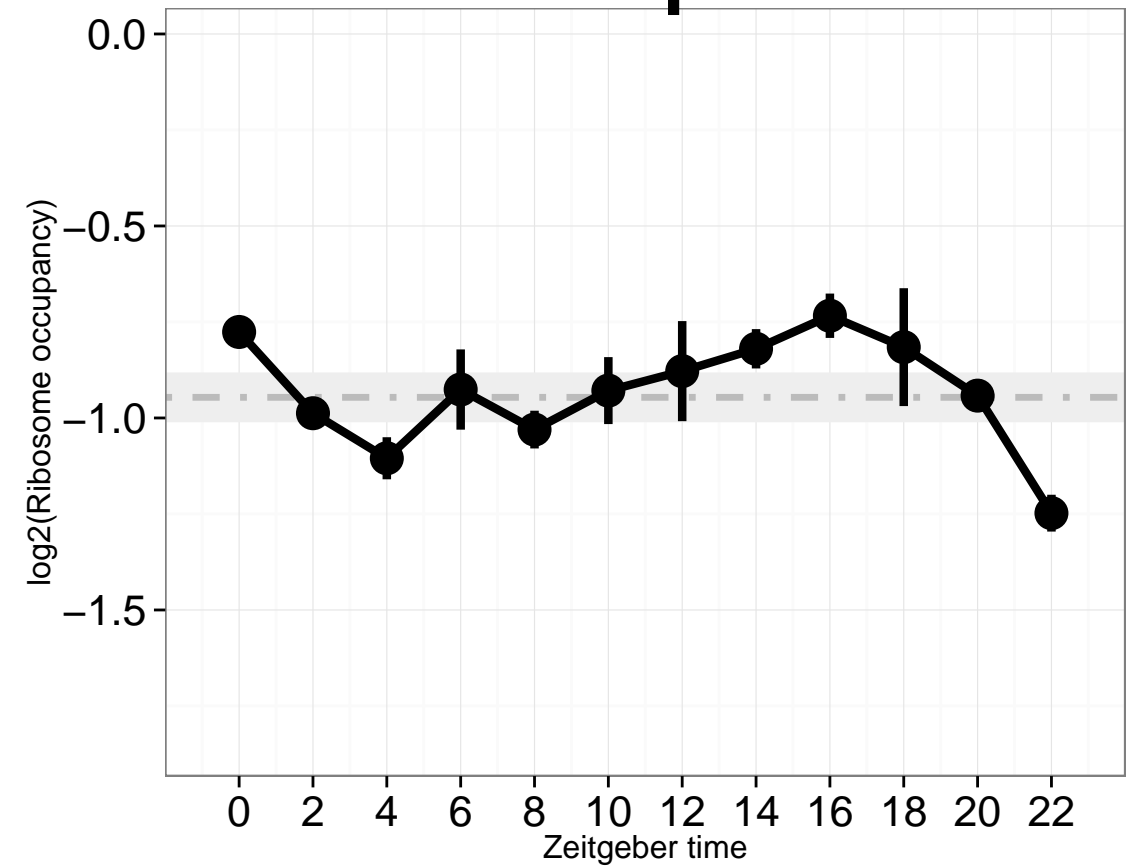

Supplement: SuppDataset_1.zip [file Bmp1_set_A.pdf › Supplemental Dataset 1/A-mRNA_nonrhyth_translation_nonrhyth/Bmp1_set_A.pdf]
