# Supplementary figures and images for: Ribosome profiling reveals the rhythmic liver translatome and circadian clock regulation by upstream open reading frames (part 11 of 113)
Source: HighWire-hosted journal article supplement (doi:10.1101/gr.195404.115), 2015-10-20

# Bmp2

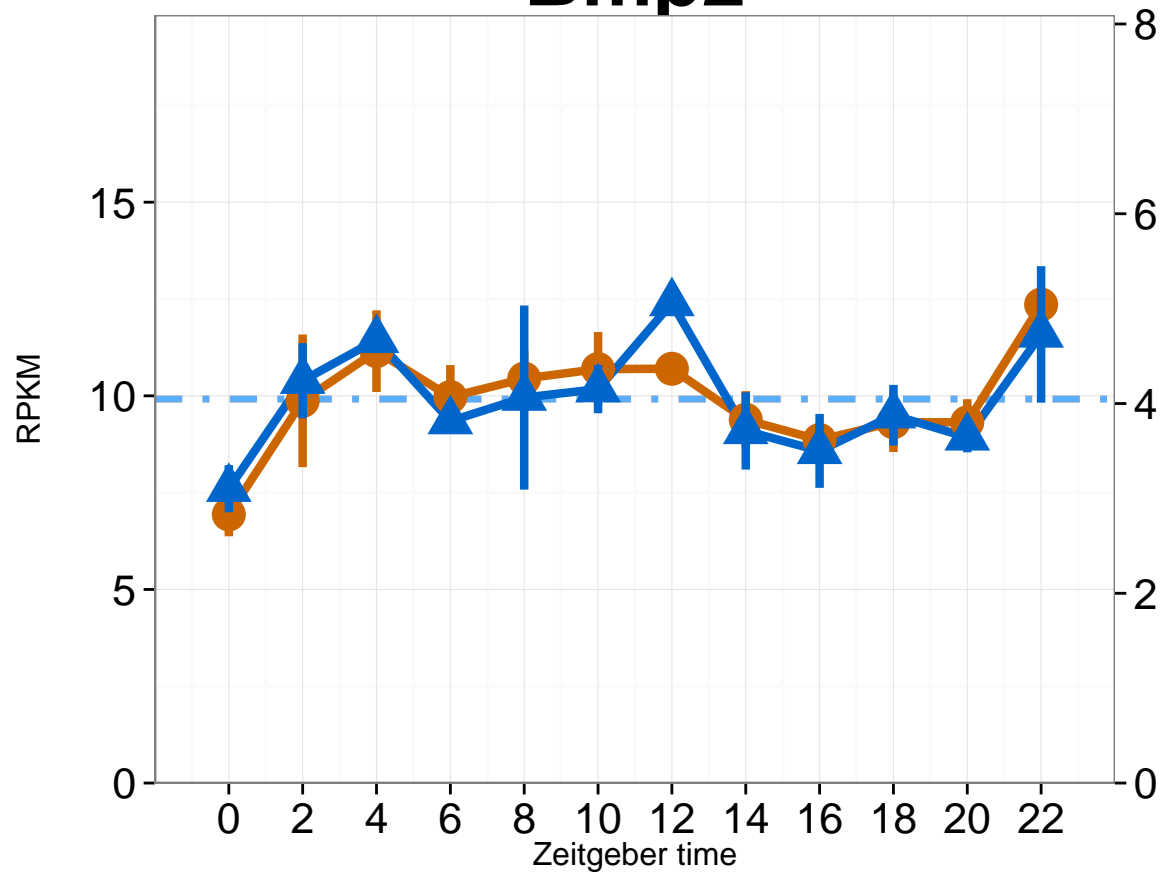

# Bmp2

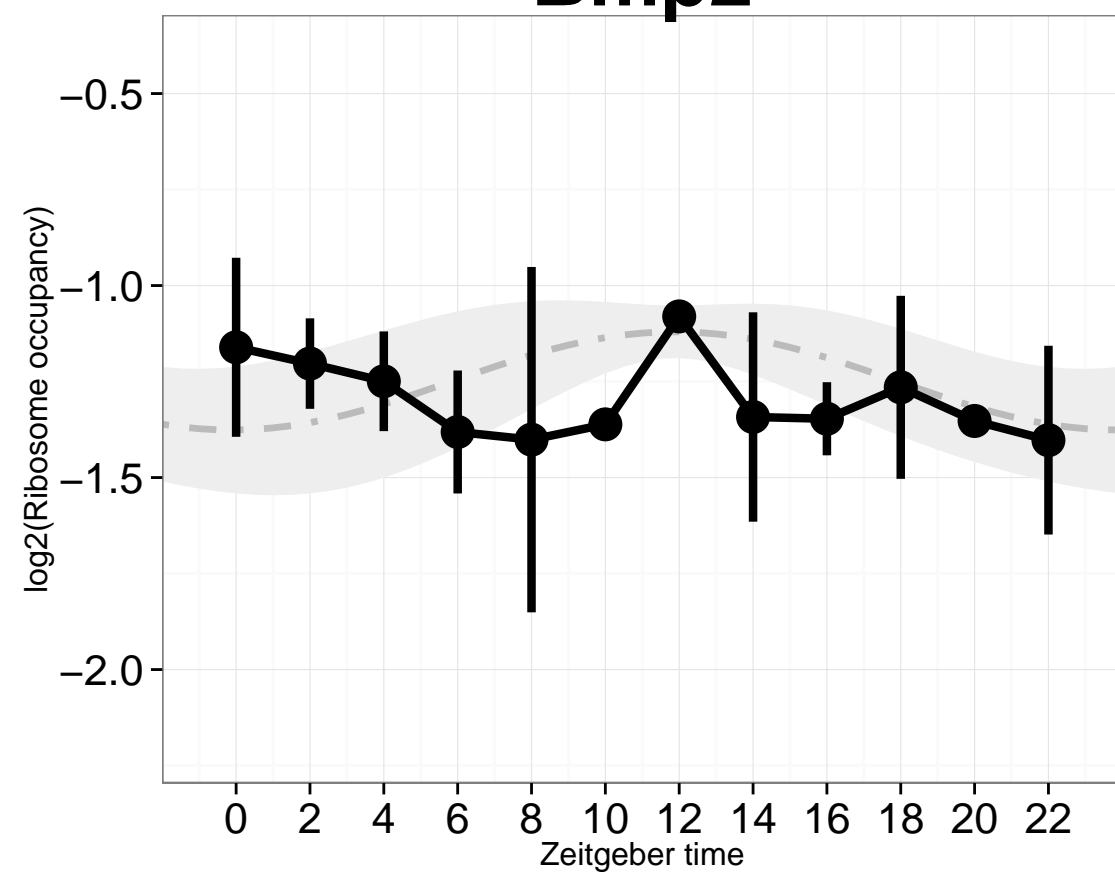

Supplement: SuppDataset_1.zip [file Bmp2_set_A.pdf › Supplemental Dataset 1/A-mRNA_nonrhyth_translation_nonrhyth/Bmp2_set_A.pdf]

# Bmp2k

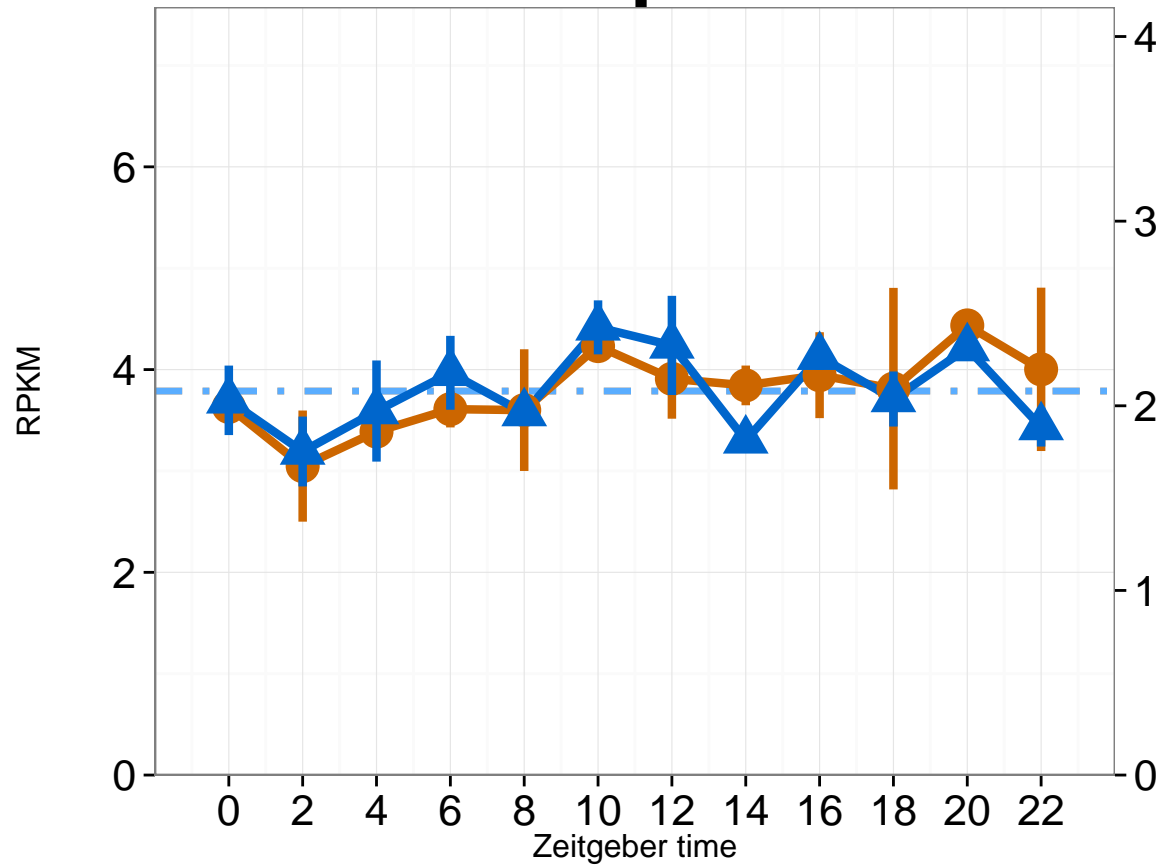

# Bmp2k

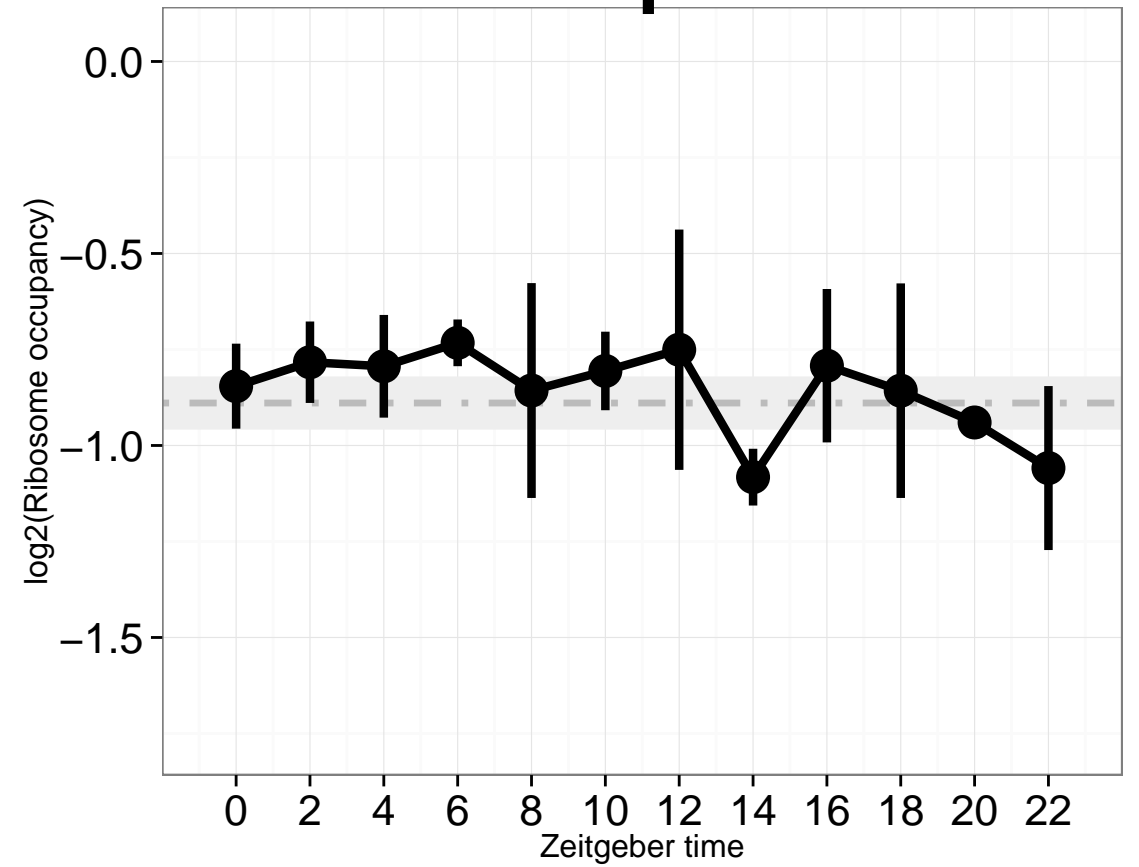

Supplement: SuppDataset_1.zip [file Bmp2k_set_A.pdf › Supplemental Dataset 1/A-mRNA_nonrhyth_translation_nonrhyth/Bmp2k_set_A.pdf]

# Bmp4

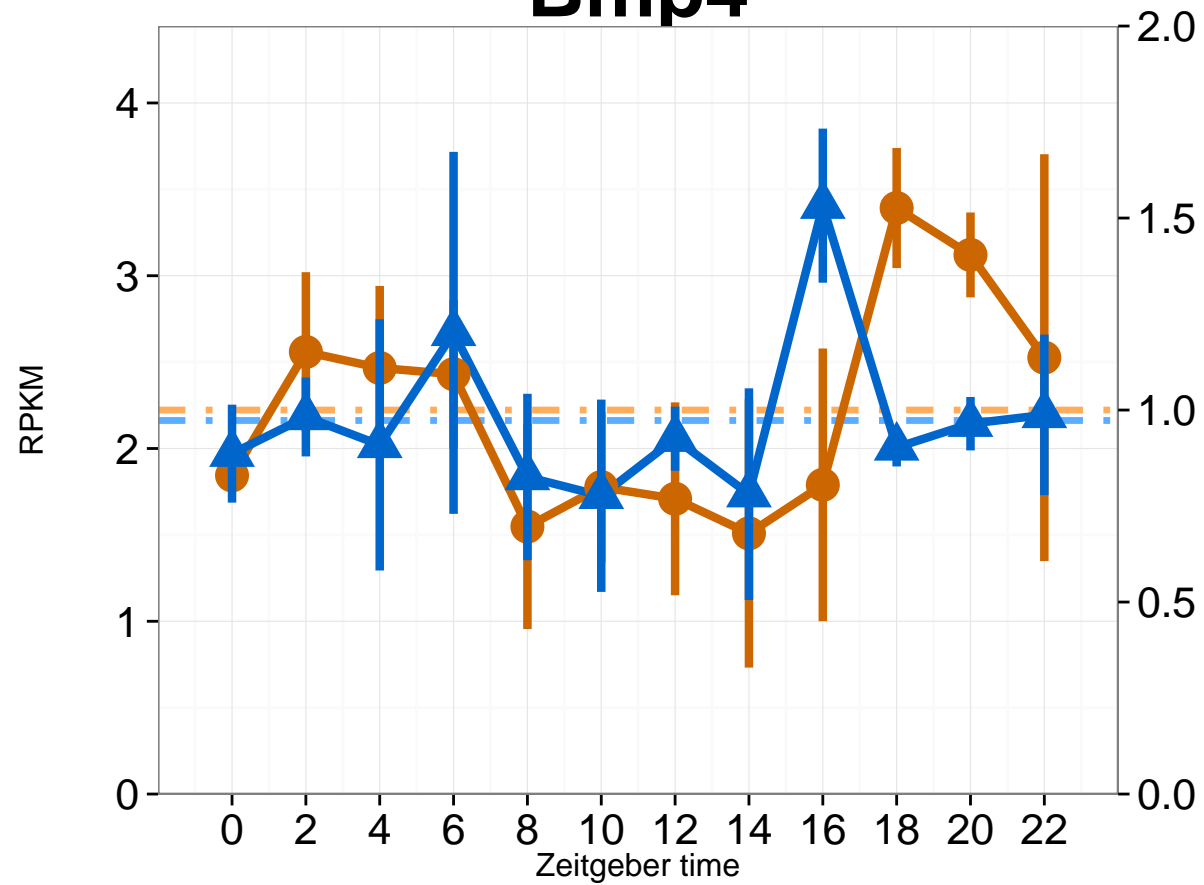

# Bmp4

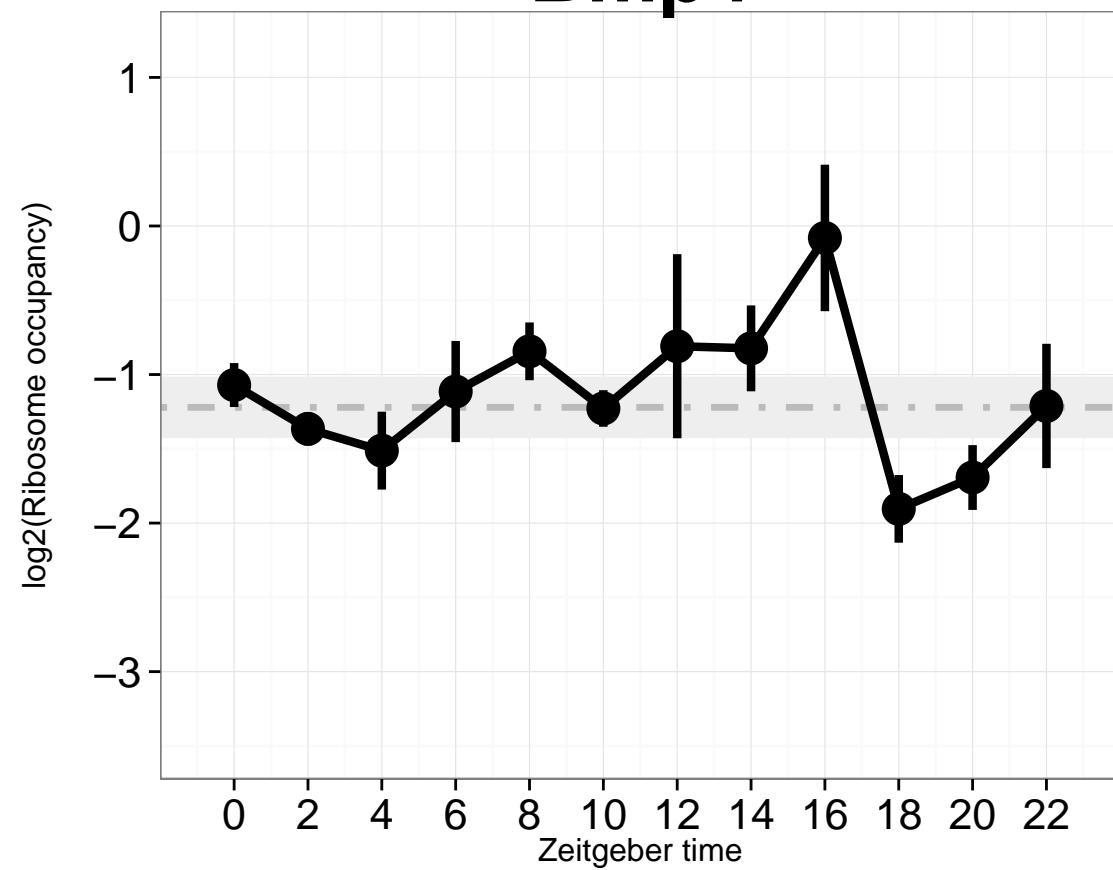

Supplement: SuppDataset_1.zip [file Bmp4_set_A.pdf › Supplemental Dataset 1/A-mRNA_nonrhyth_translation_nonrhyth/Bmp4_set_A.pdf]

# Bmp5

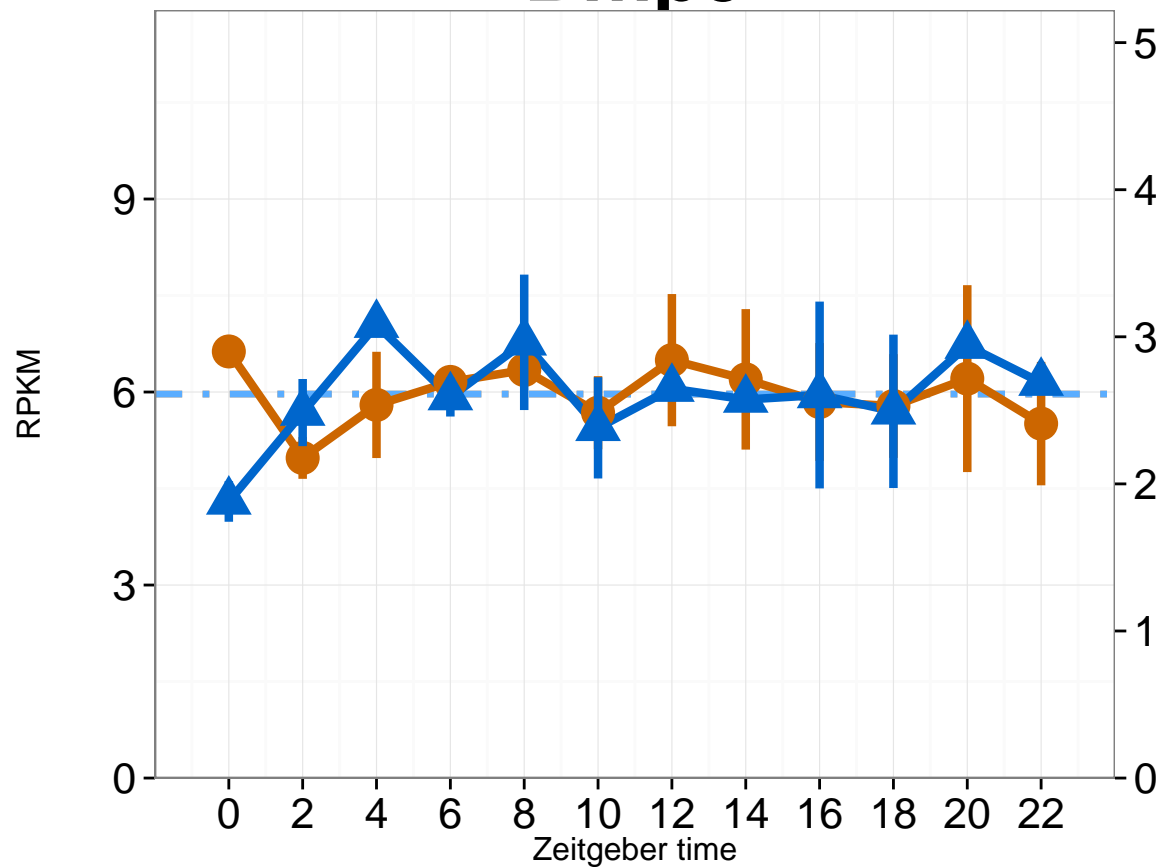

# Bmp5

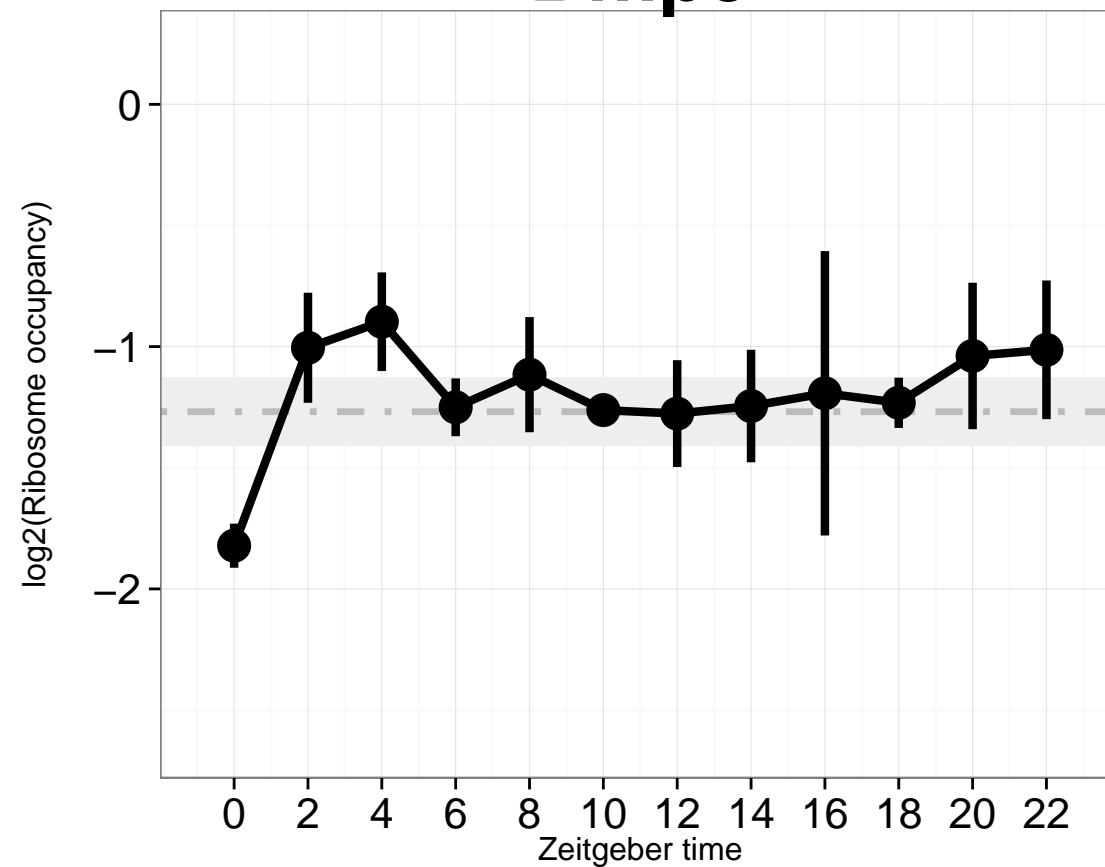

Supplement: SuppDataset_1.zip [file Bmp5_set_A.pdf › Supplemental Dataset 1/A-mRNA_nonrhyth_translation_nonrhyth/Bmp5_set_A.pdf]

# Bmp7

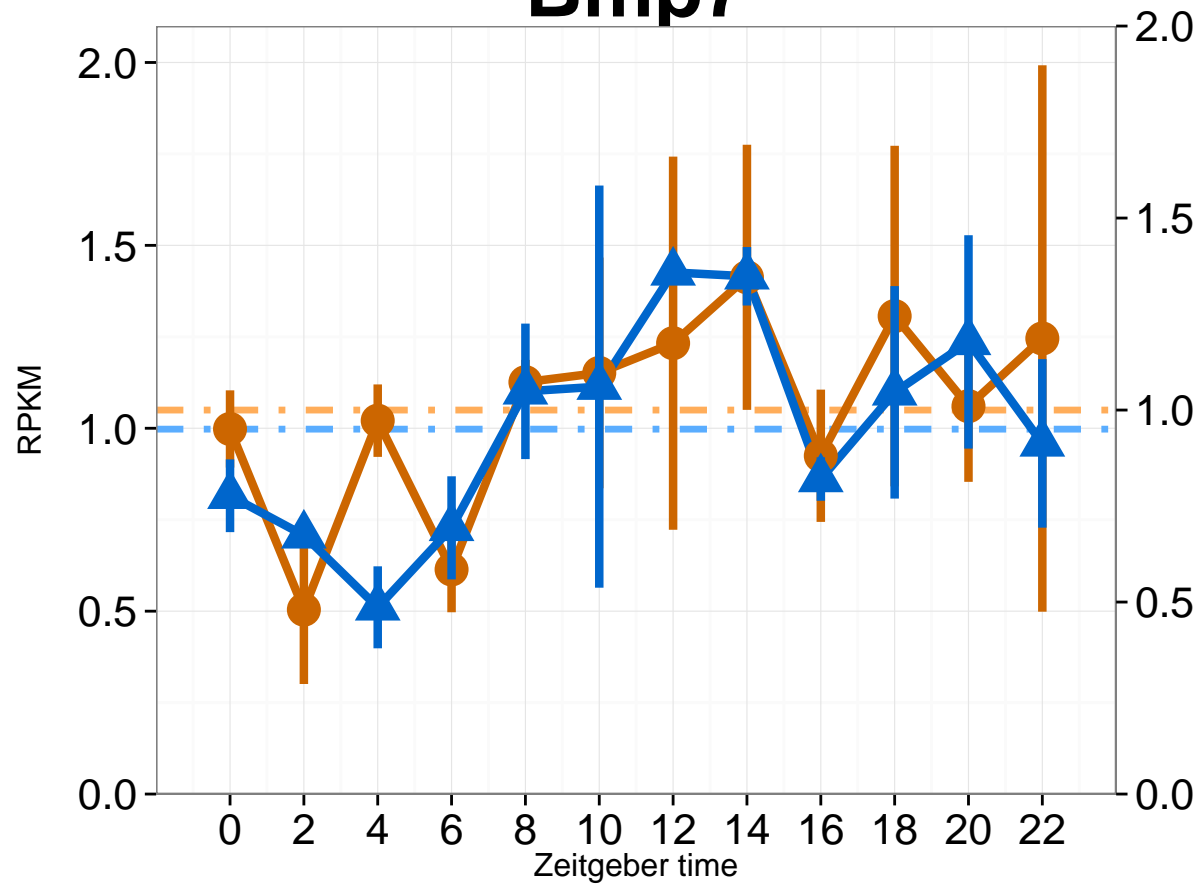

# Bmp7

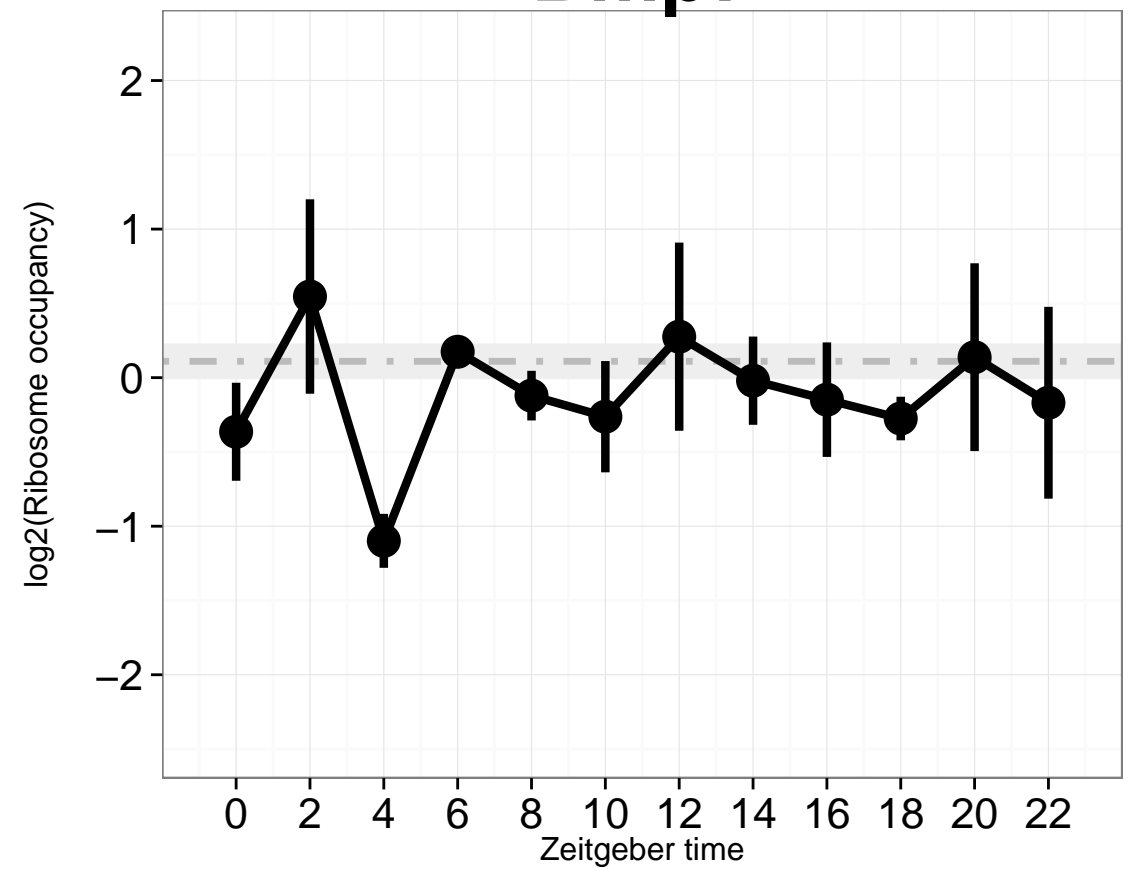

Supplement: SuppDataset_1.zip [file Bmp7_set_A.pdf › Supplemental Dataset 1/A-mRNA_nonrhyth_translation_nonrhyth/Bmp7_set_A.pdf]

# Bmpr1a

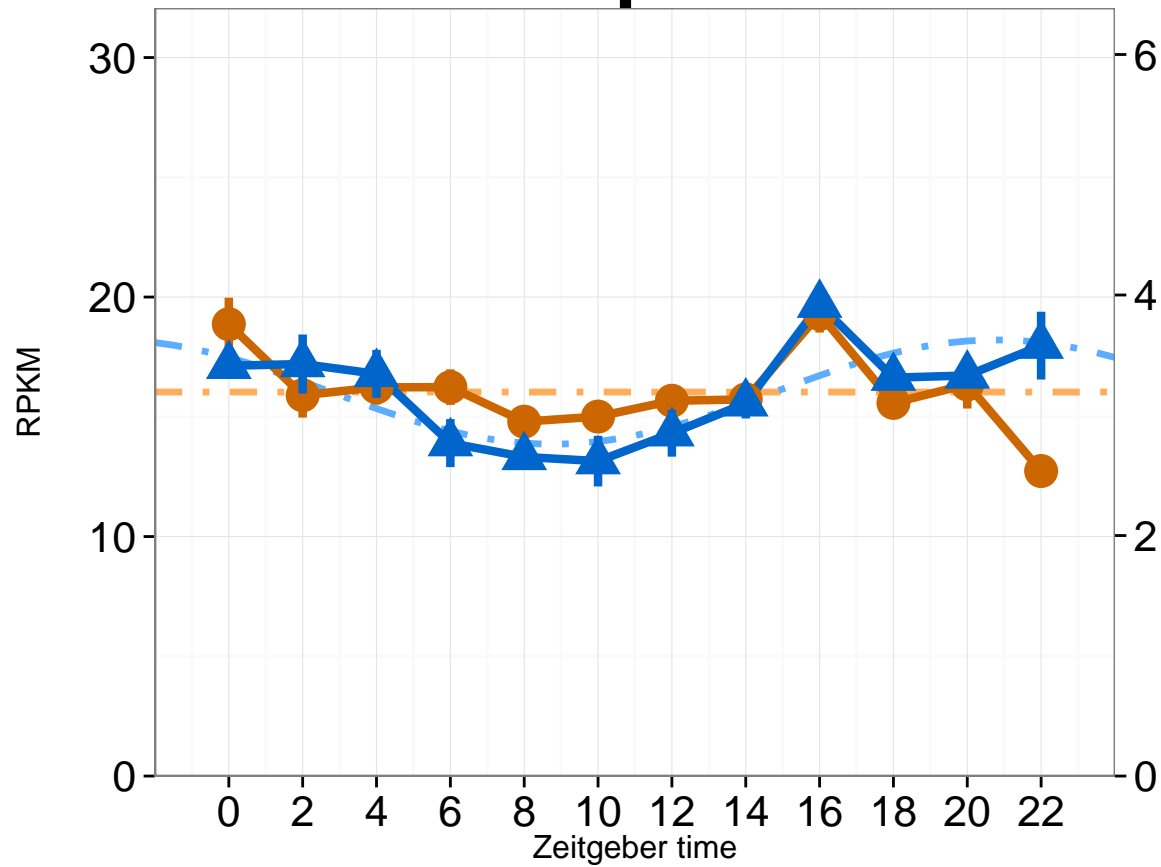

# Bmpr1a

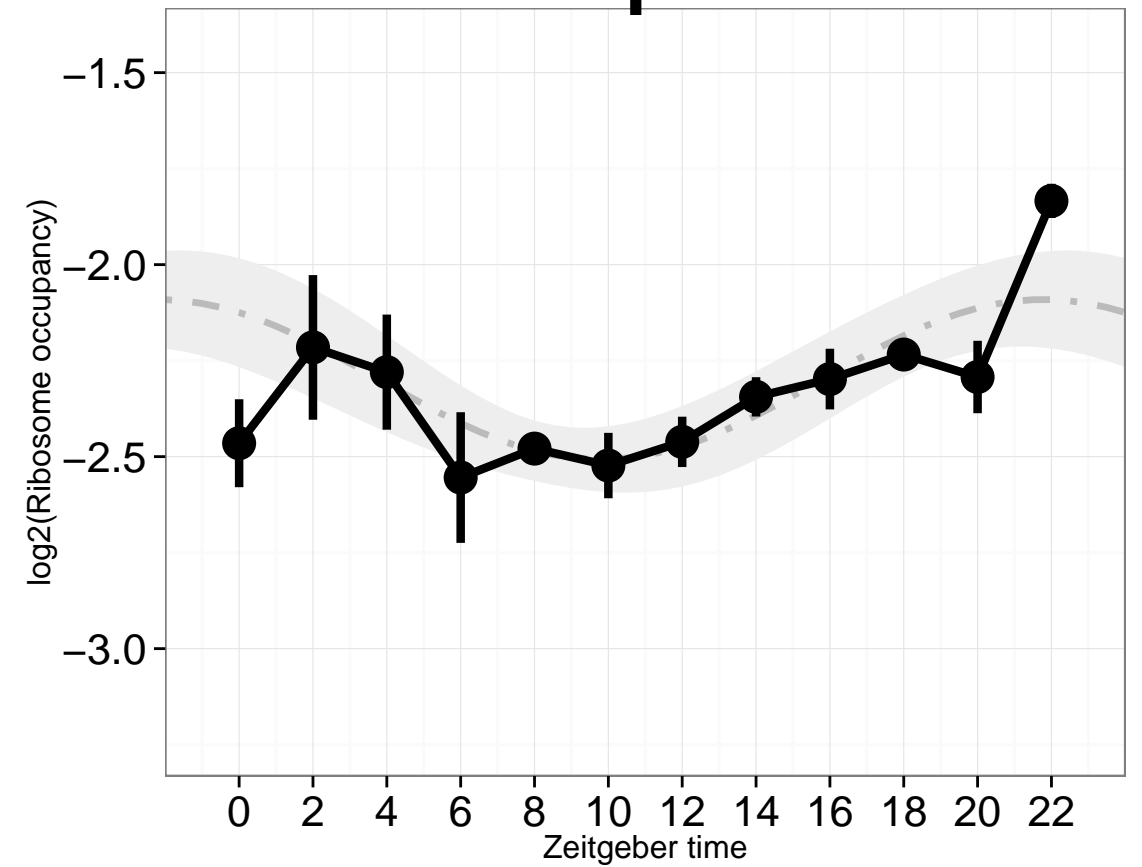

Supplement: SuppDataset_1.zip [file Bmpr1a_set_A.pdf › Supplemental Dataset 1/A-mRNA_nonrhyth_translation_nonrhyth/Bmpr1a_set_A.pdf]

# Bmpr2

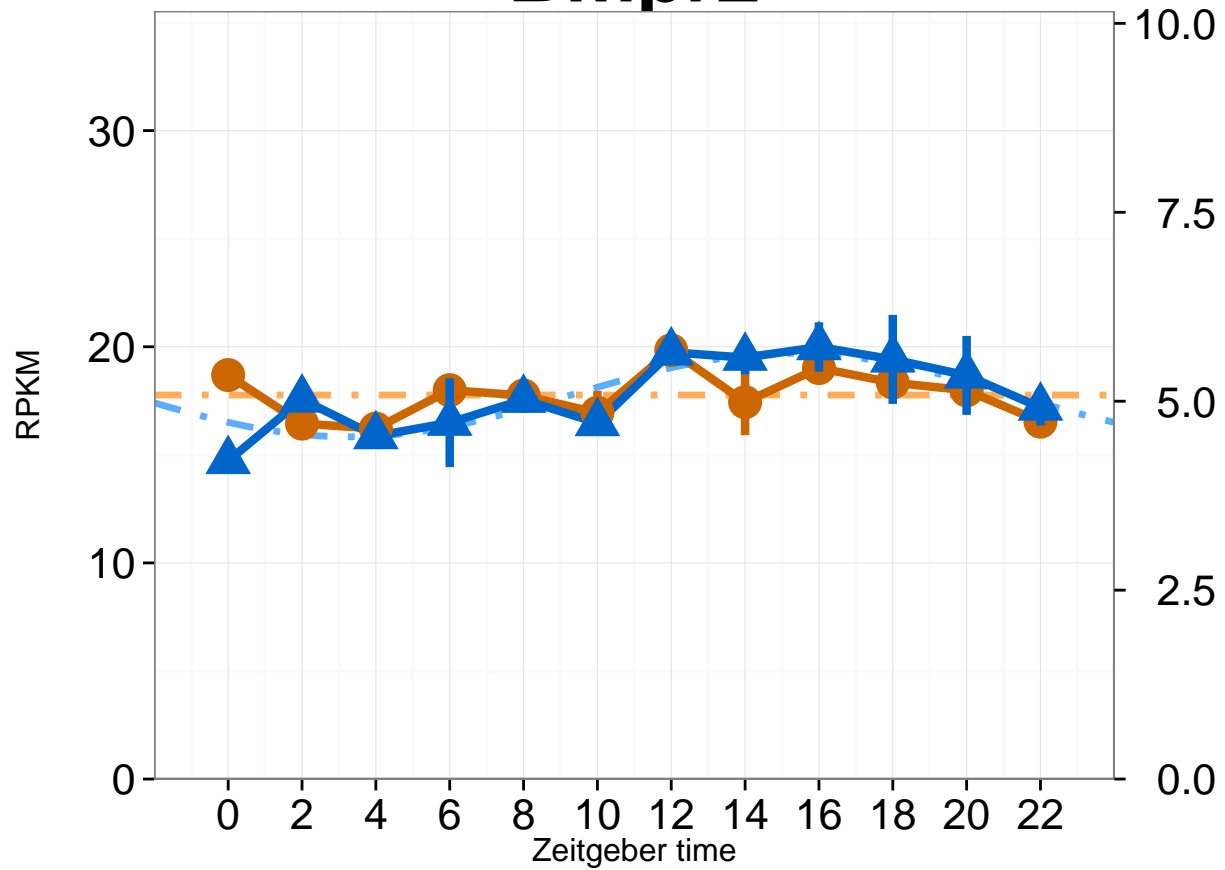

# Bmpr2

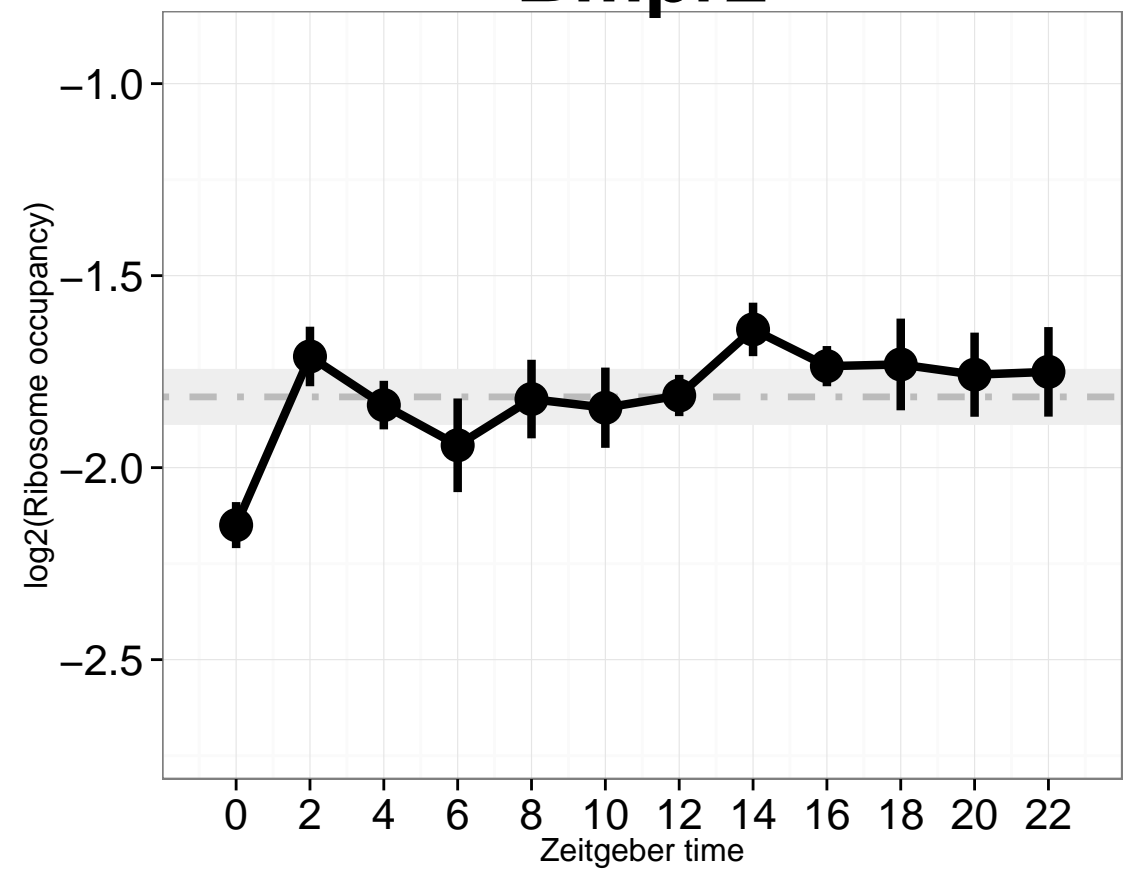

Supplement: SuppDataset_1.zip [file Bmpr2_set_A.pdf › Supplemental Dataset 1/A-mRNA_nonrhyth_translation_nonrhyth/Bmpr2_set_A.pdf]

## Bms1

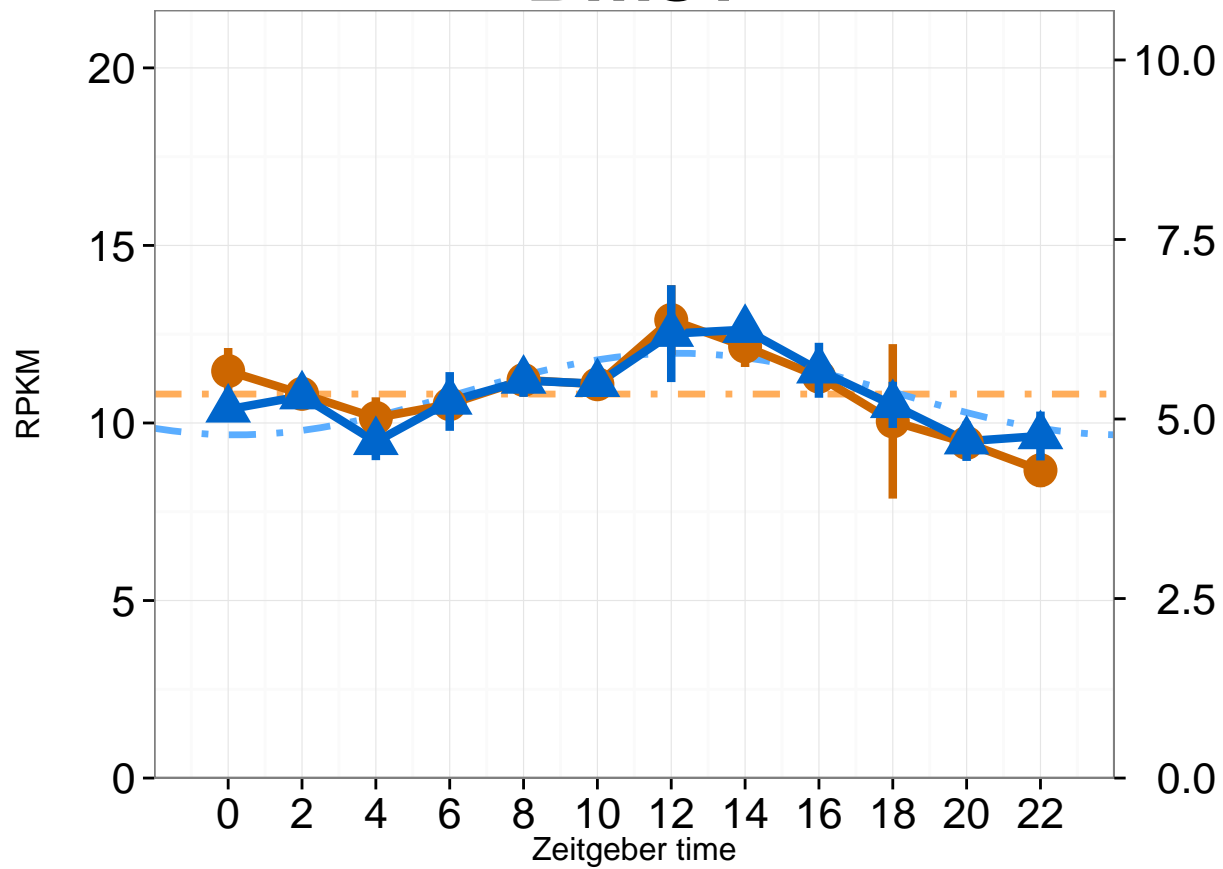

## Bms1

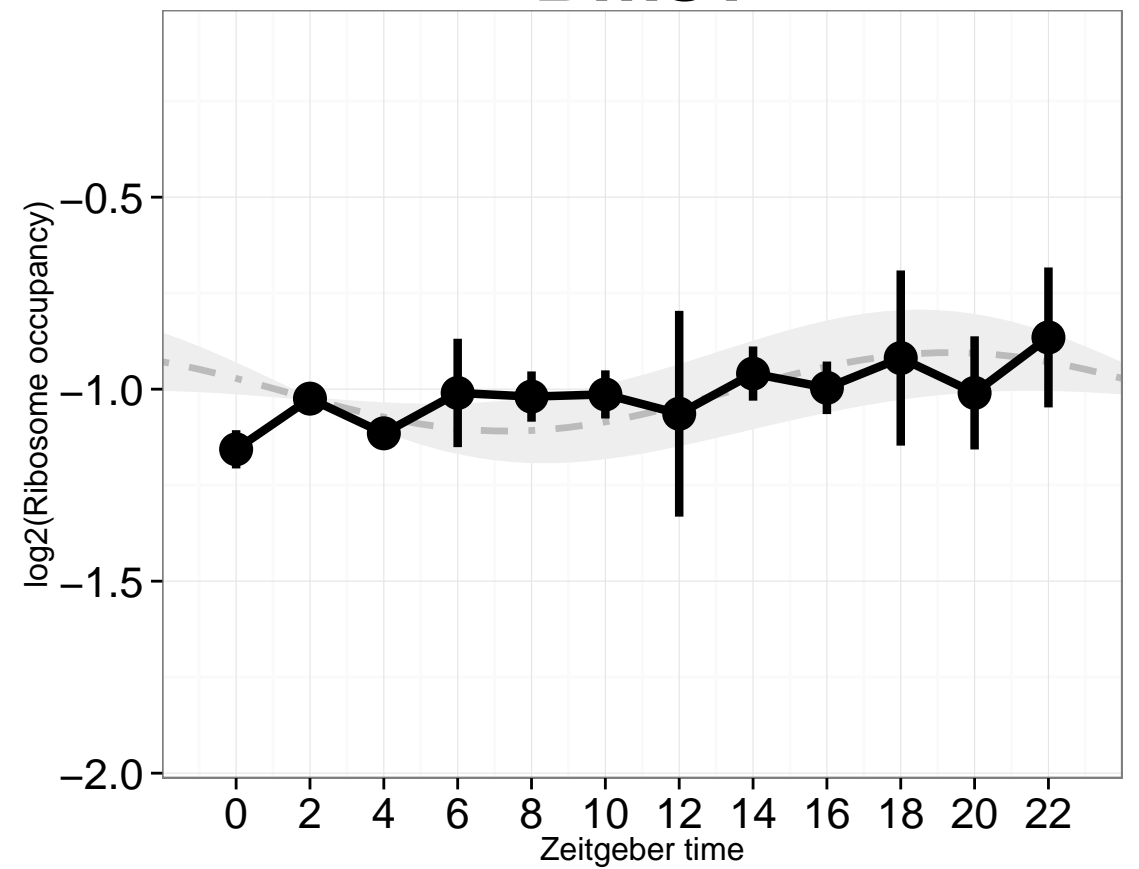

Supplement: SuppDataset_1.zip [file Bms1_set_A.pdf › Supplemental Dataset 1/A-mRNA_nonrhyth_translation_nonrhyth/Bms1_set_A.pdf]

## Bmyc

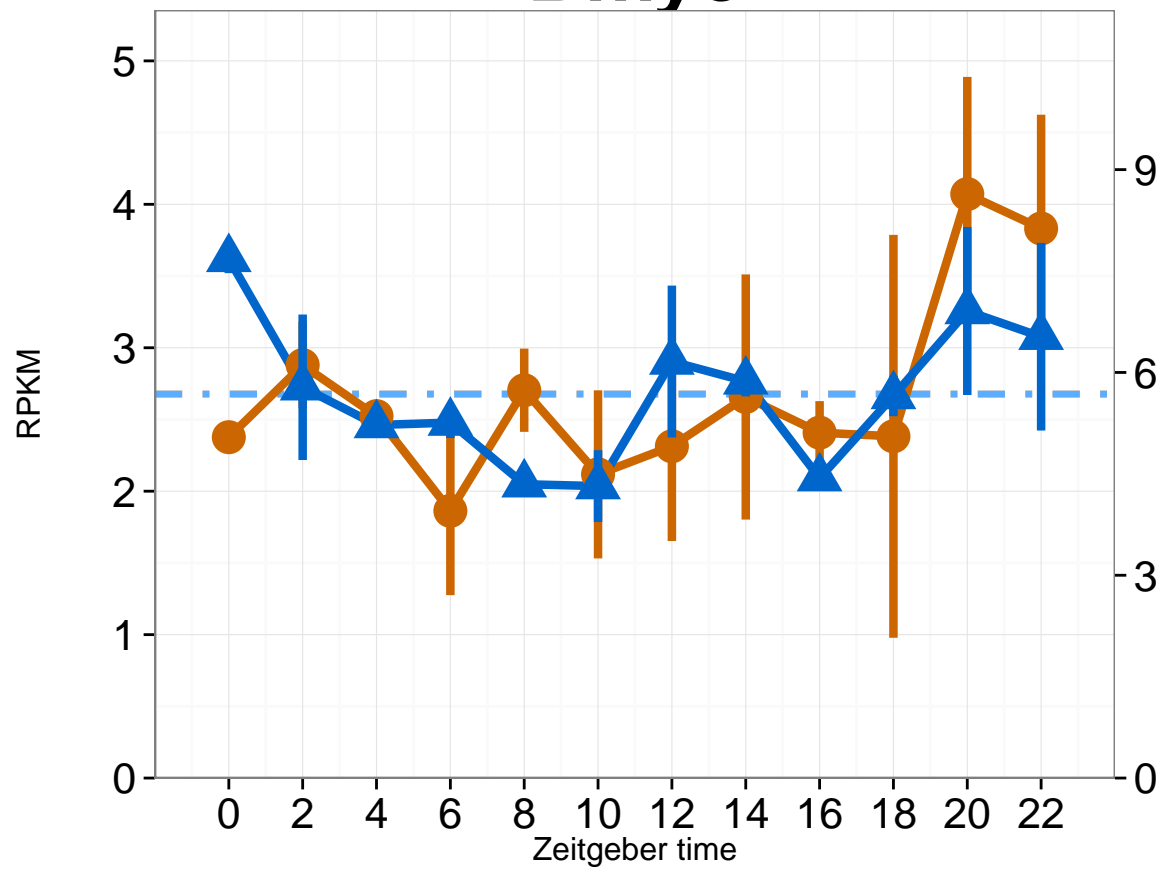

## Bmyc

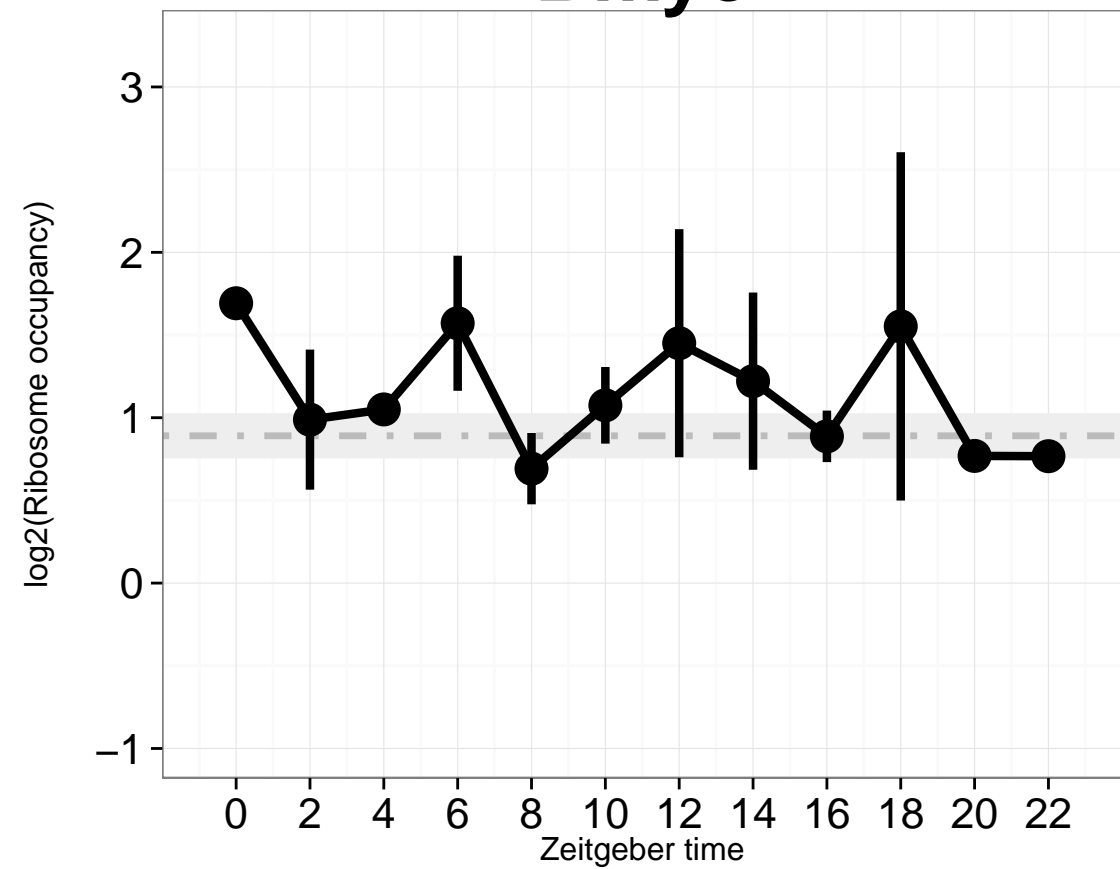

Supplement: SuppDataset_1.zip [file Bmyc_set_A.pdf › Supplemental Dataset 1/A-mRNA_nonrhyth_translation_nonrhyth/Bmyc_set_A.pdf]

## Bnip1

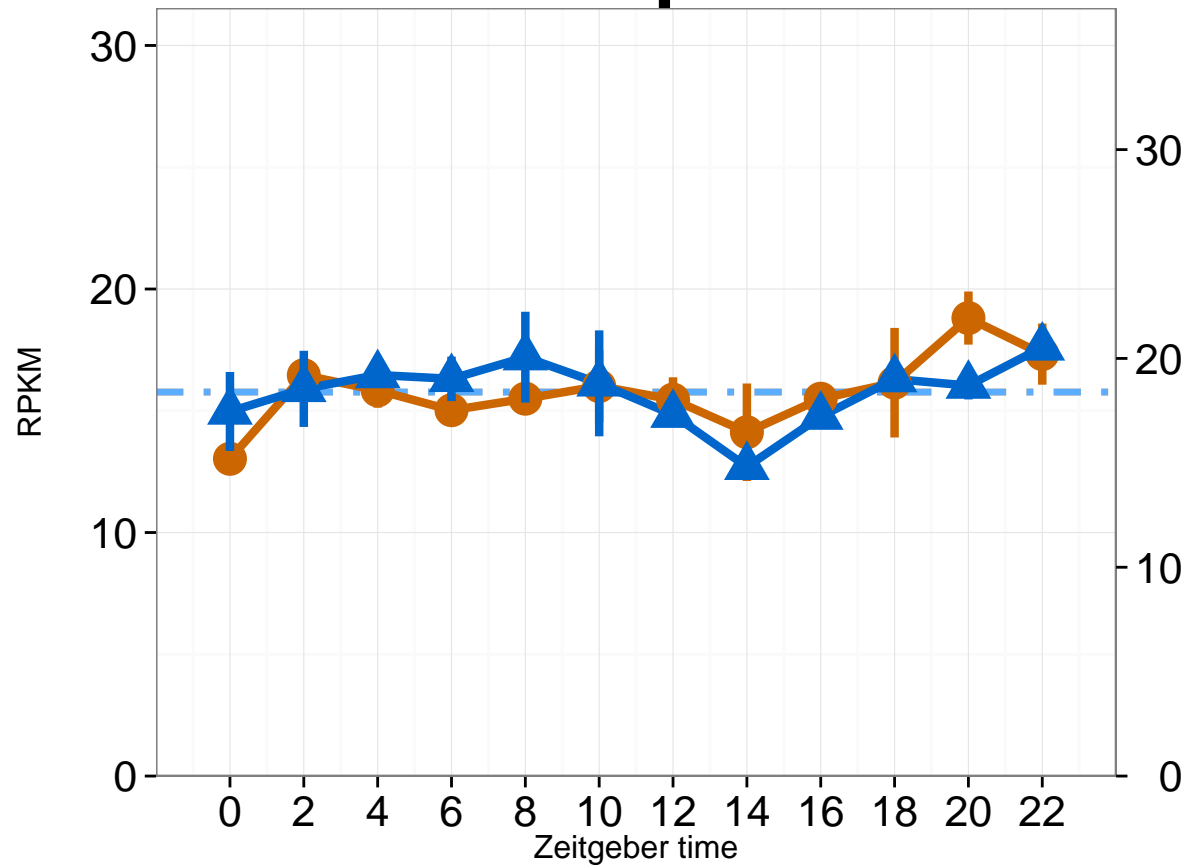

## Bnip1

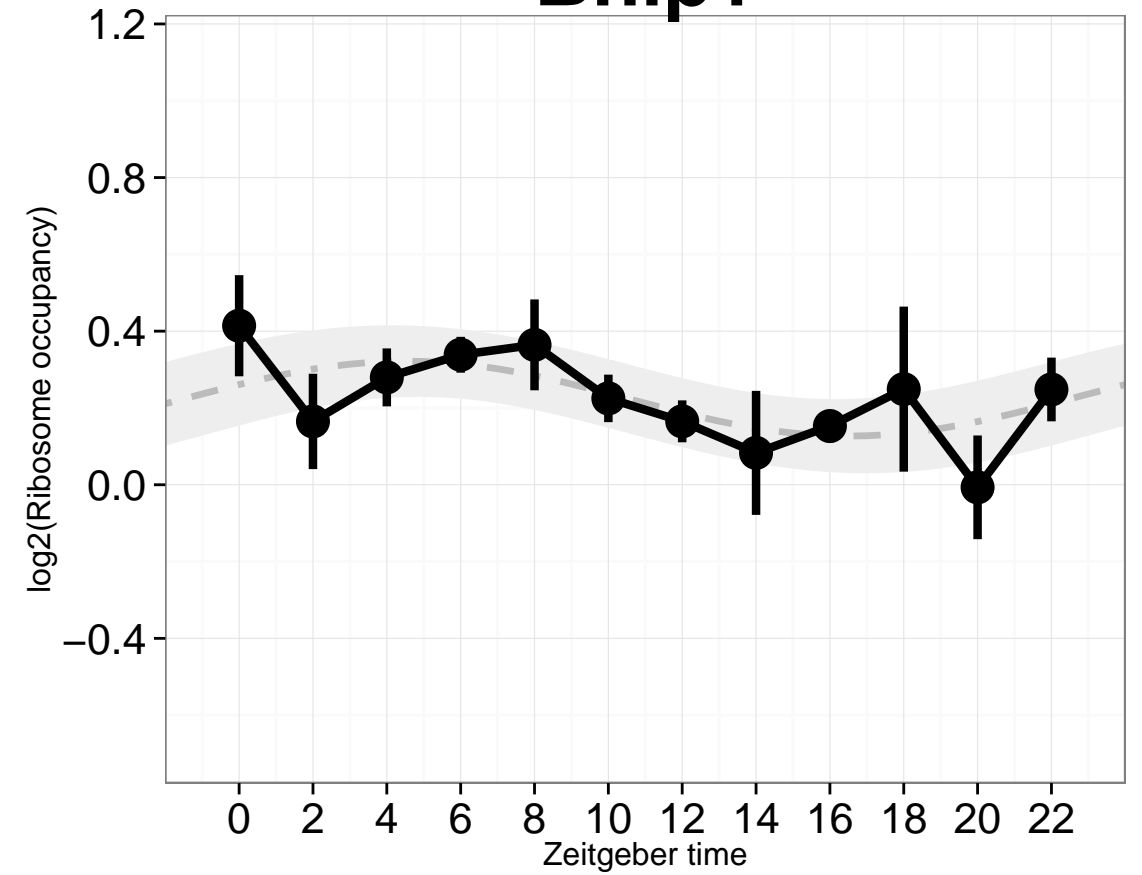

Supplement: SuppDataset_1.zip [file Bnip1_set_A.pdf › Supplemental Dataset 1/A-mRNA_nonrhyth_translation_nonrhyth/Bnip1_set_A.pdf]

## Bnip3l

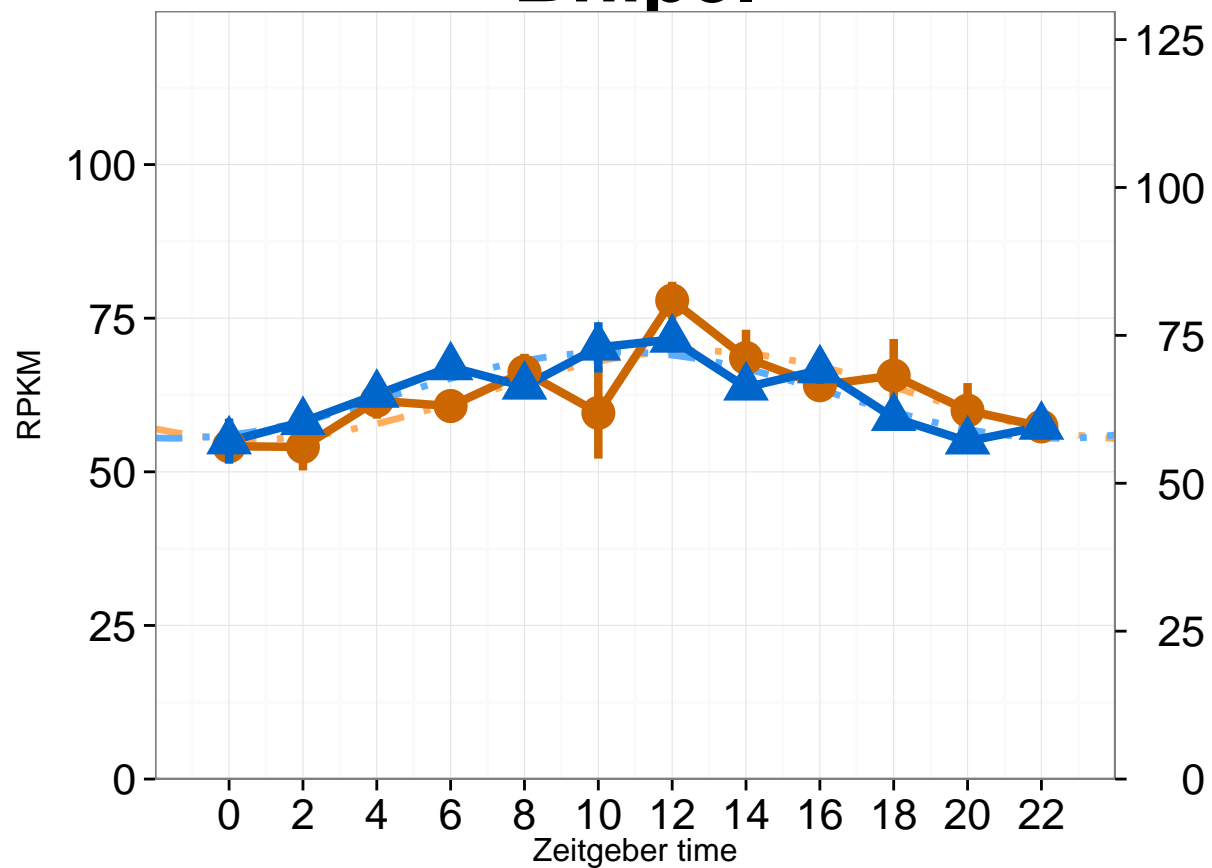

## Bnip3l

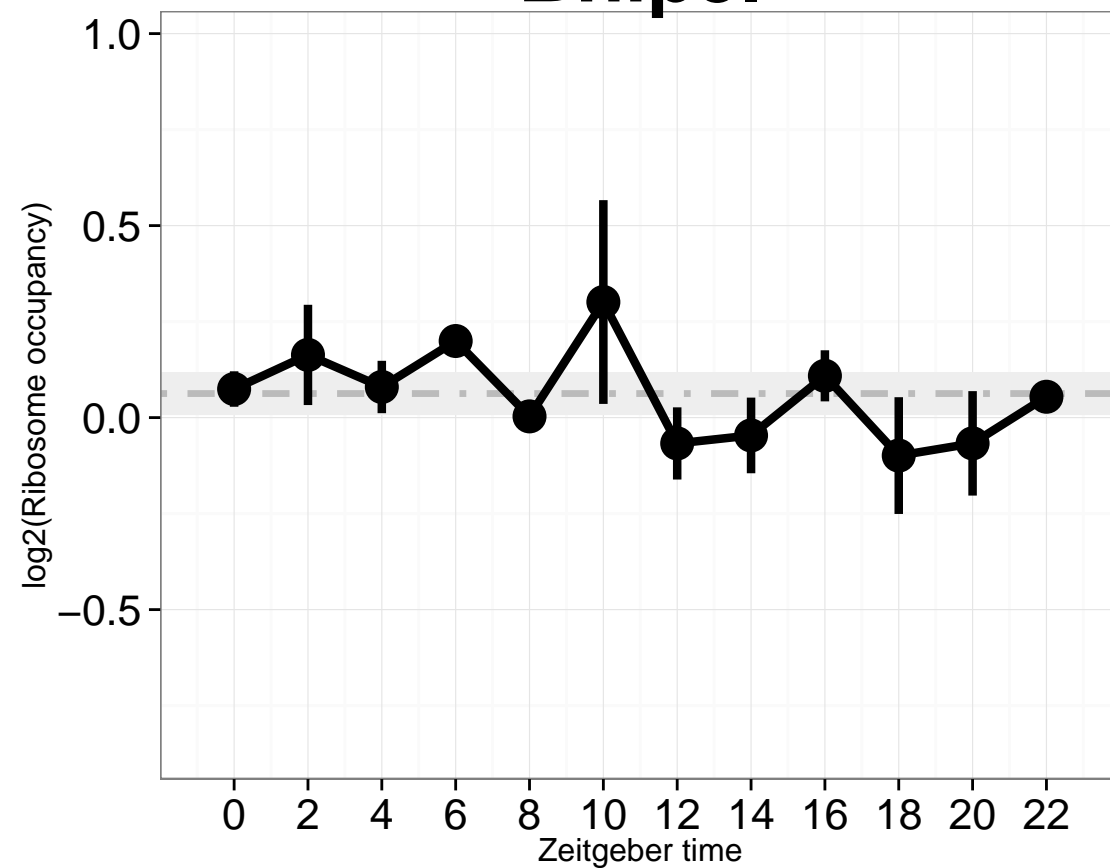

Supplement: SuppDataset_1.zip [file Bnip3l_set_A.pdf › Supplemental Dataset 1/A-mRNA_nonrhyth_translation_nonrhyth/Bnip3l_set_A.pdf]

# Bod1

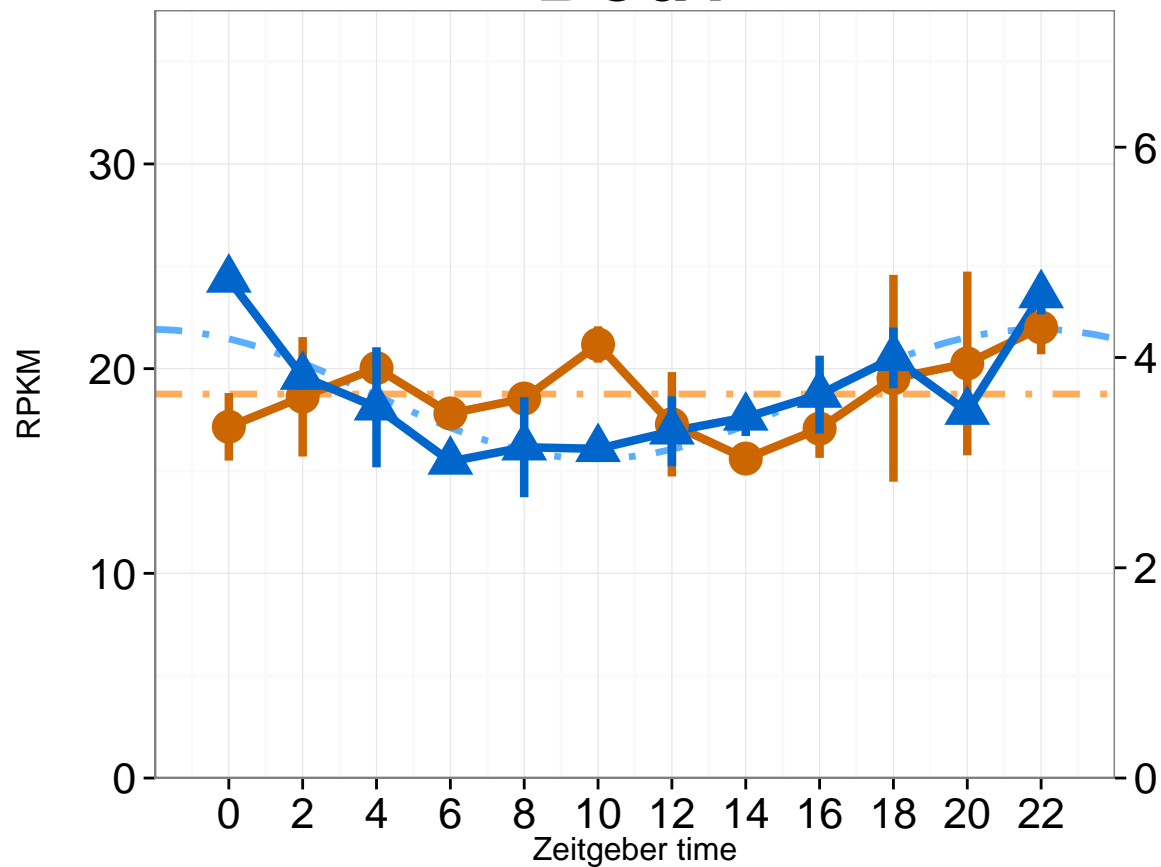

# Bod1

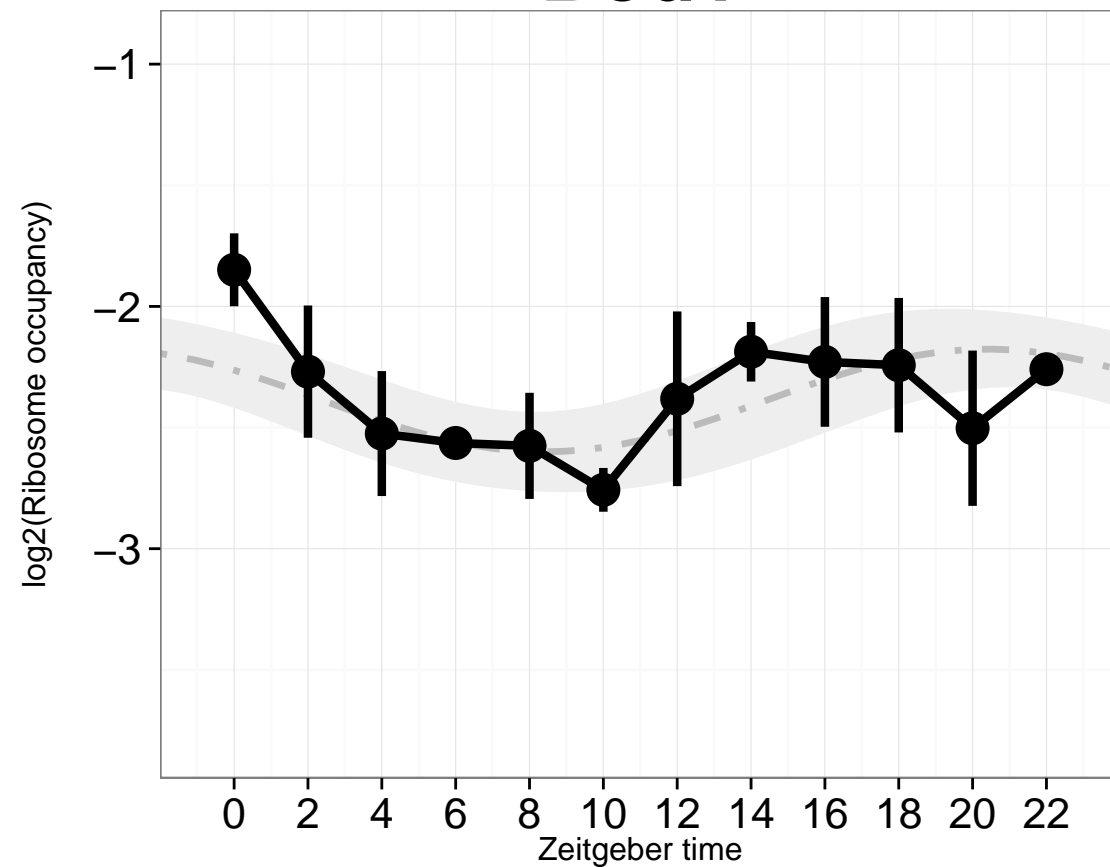

Supplement: SuppDataset_1.zip [file Bod1_set_A.pdf › Supplemental Dataset 1/A-mRNA_nonrhyth_translation_nonrhyth/Bod1_set_A.pdf]

## Bod1l

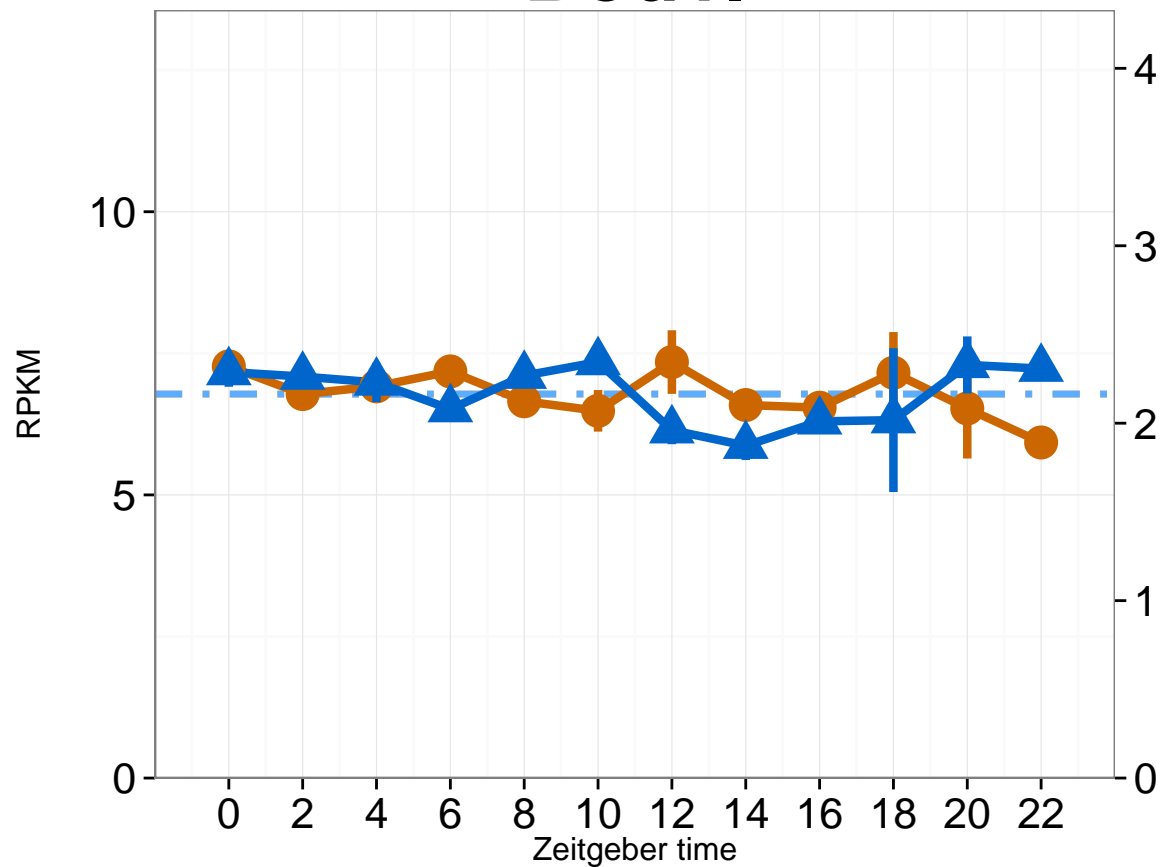

## Bod1l

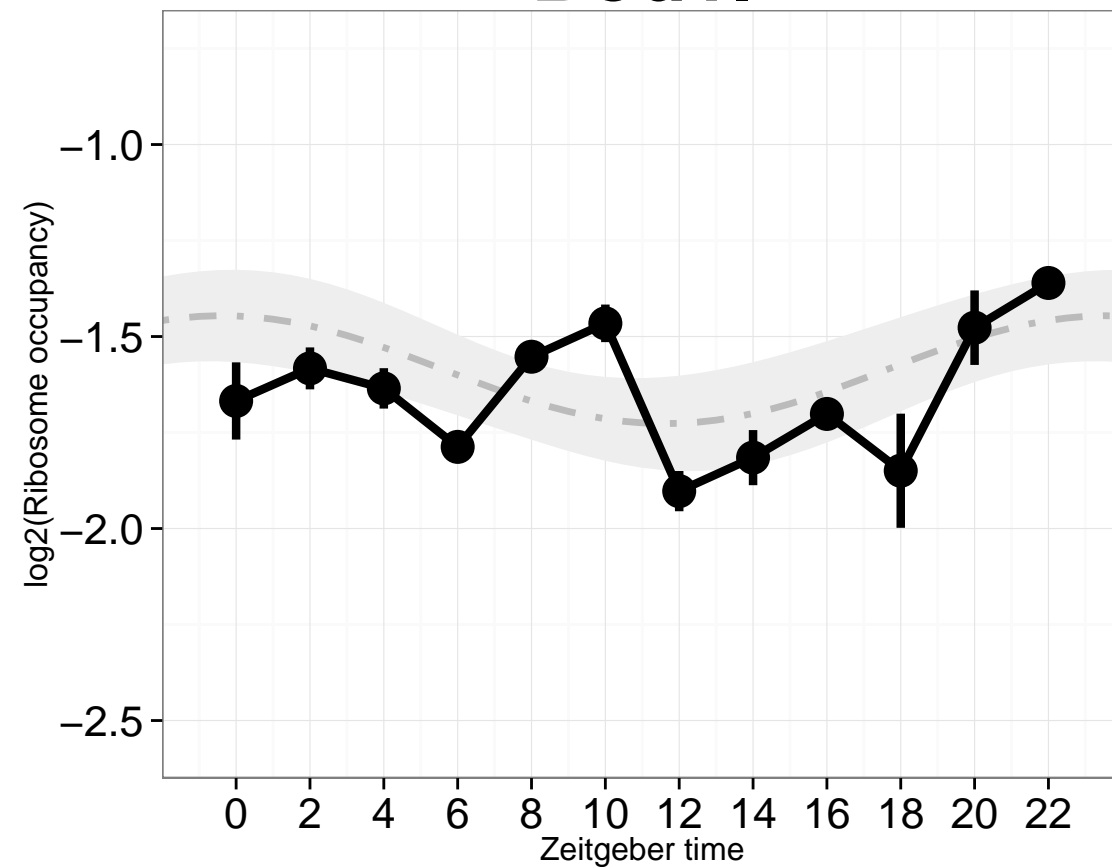

Supplement: SuppDataset_1.zip [file Bod1l_set_A.pdf › Supplemental Dataset 1/A-mRNA_nonrhyth_translation_nonrhyth/Bod1l_set_A.pdf]

## Bola1

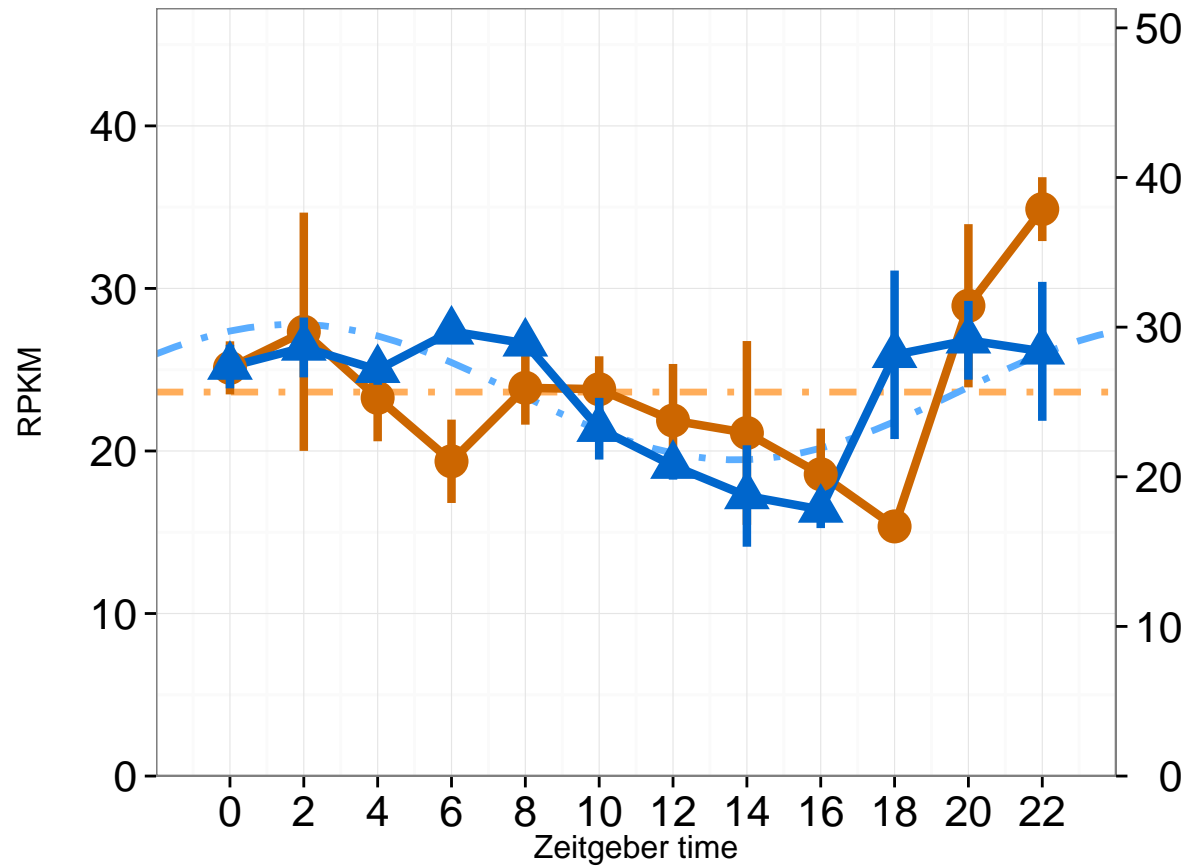

## Bola1

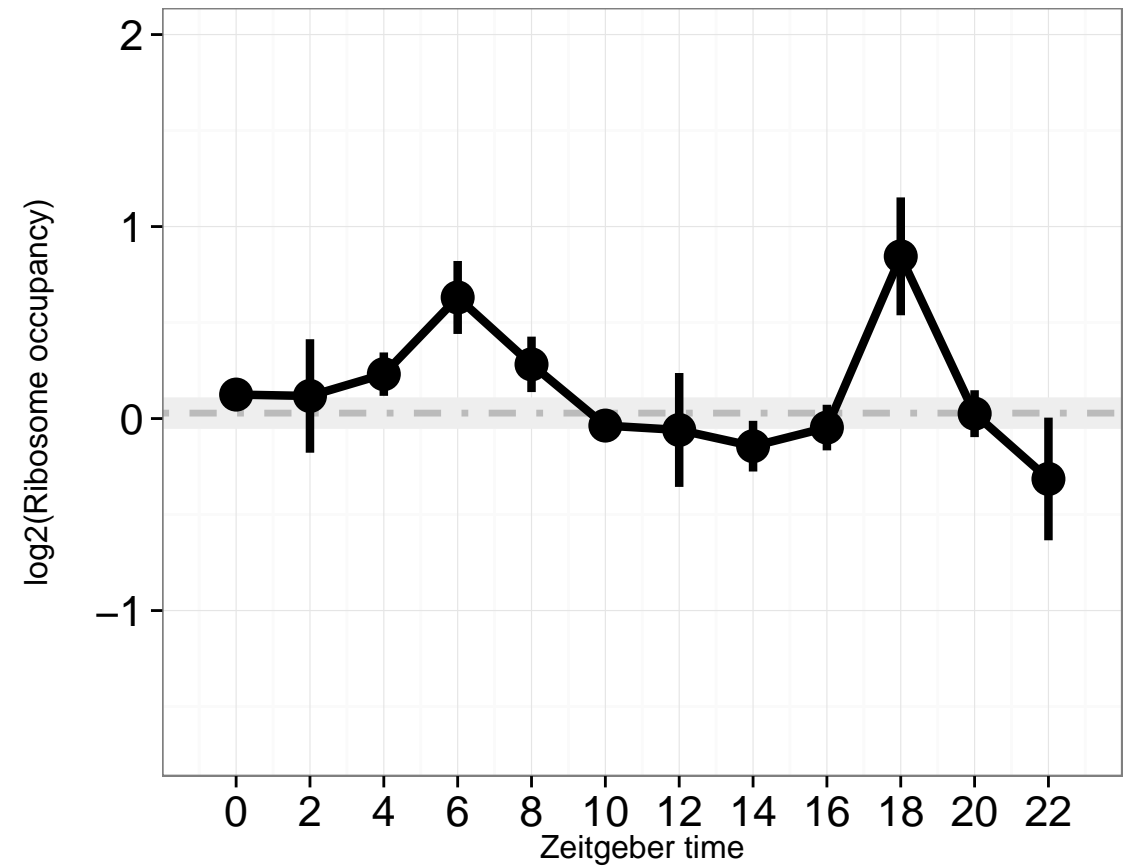

Supplement: SuppDataset_1.zip [file Bola1_set_A.pdf › Supplemental Dataset 1/A-mRNA_nonrhyth_translation_nonrhyth/Bola1_set_A.pdf]

## Bola2

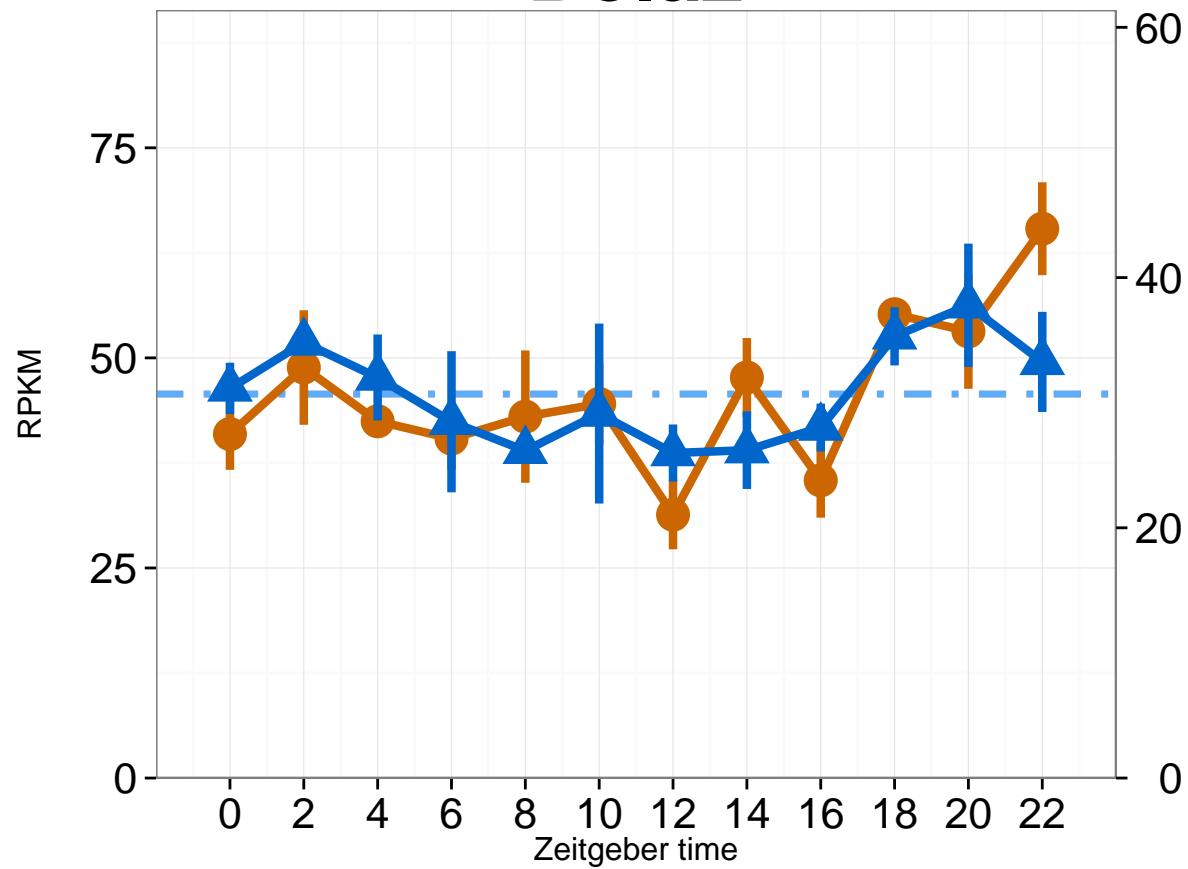

## Bola2

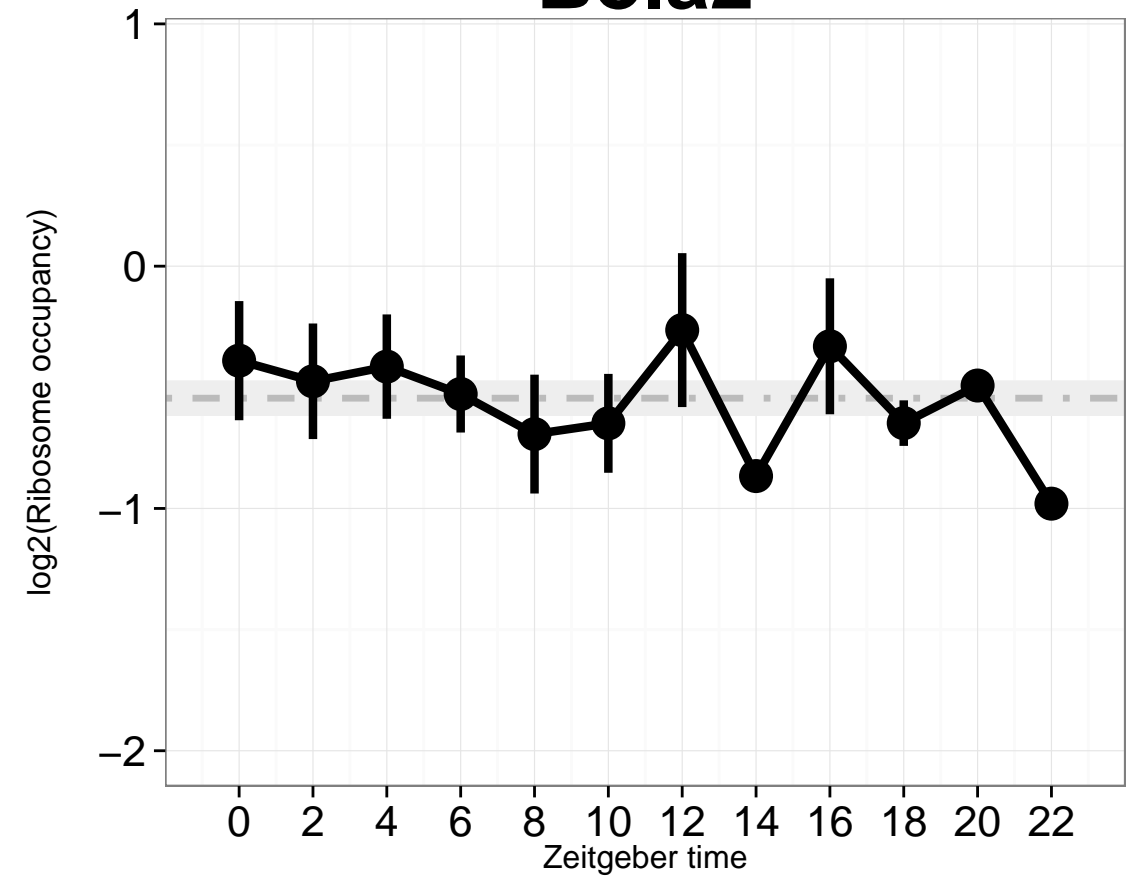

Supplement: SuppDataset_1.zip [file Bola2_set_A.pdf › Supplemental Dataset 1/A-mRNA_nonrhyth_translation_nonrhyth/Bola2_set_A.pdf]

## Bop1

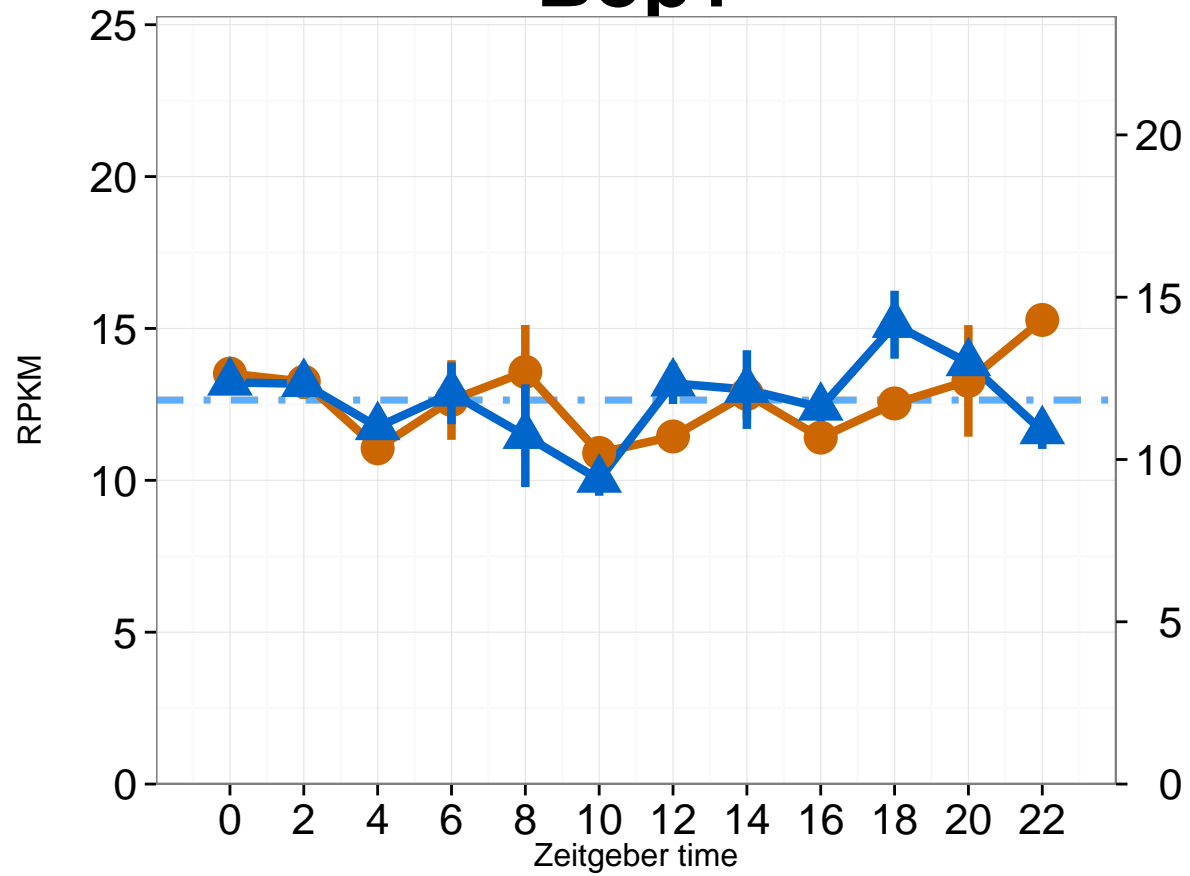

## Bop1

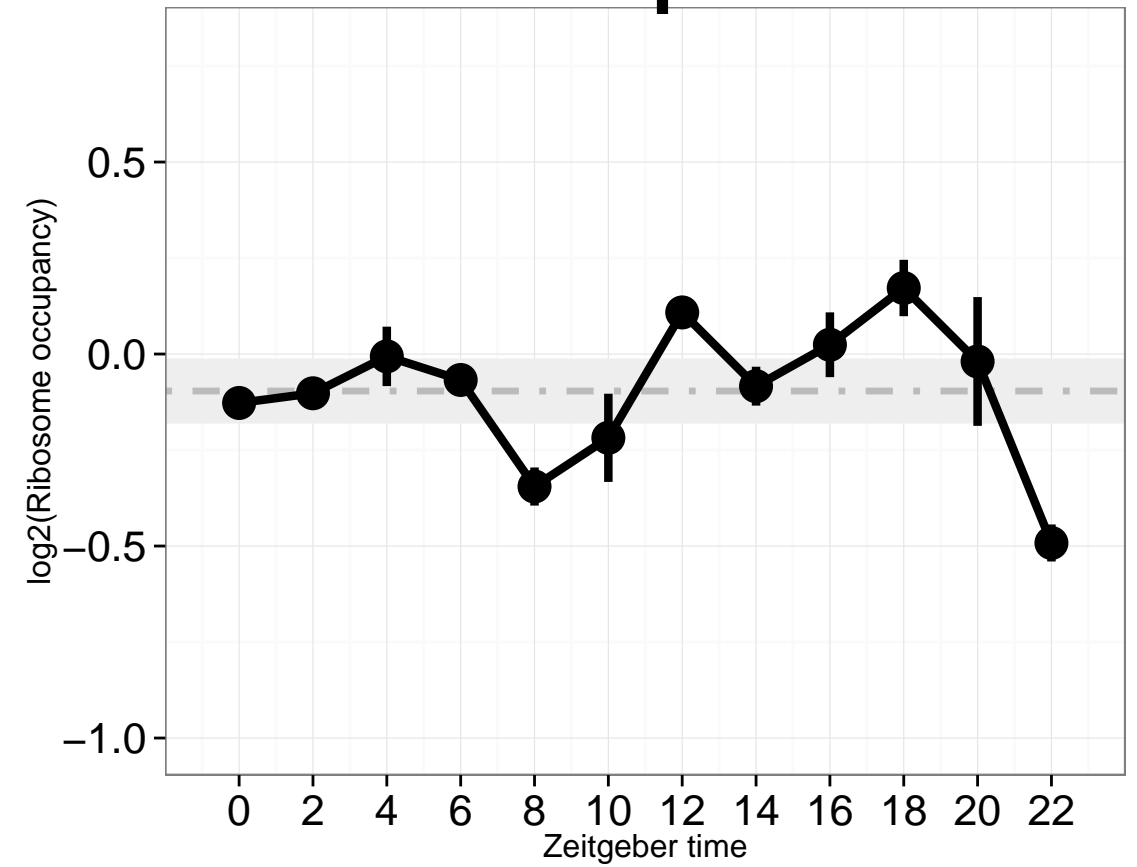

Supplement: SuppDataset_1.zip [file Bop1_set_A.pdf › Supplemental Dataset 1/A-mRNA_nonrhyth_translation_nonrhyth/Bop1_set_A.pdf]

# Bora

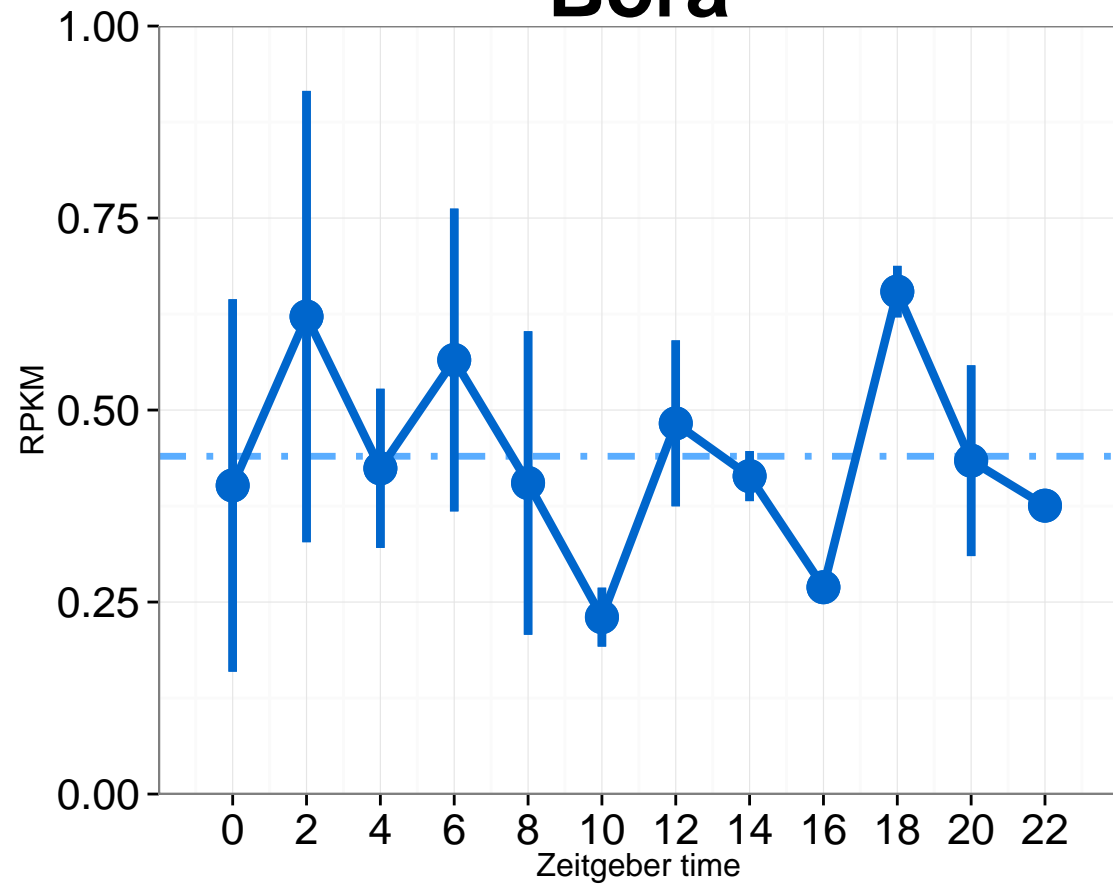

# Bora $\log_2(\text{Ribosome occupancy})$

Supplement: SuppDataset_1.zip [file Bora_set_A.pdf › Supplemental Dataset 1/A-mRNA_nonrhyth_translation_nonrhyth/Bora_set_A.pdf]

# Bpgm

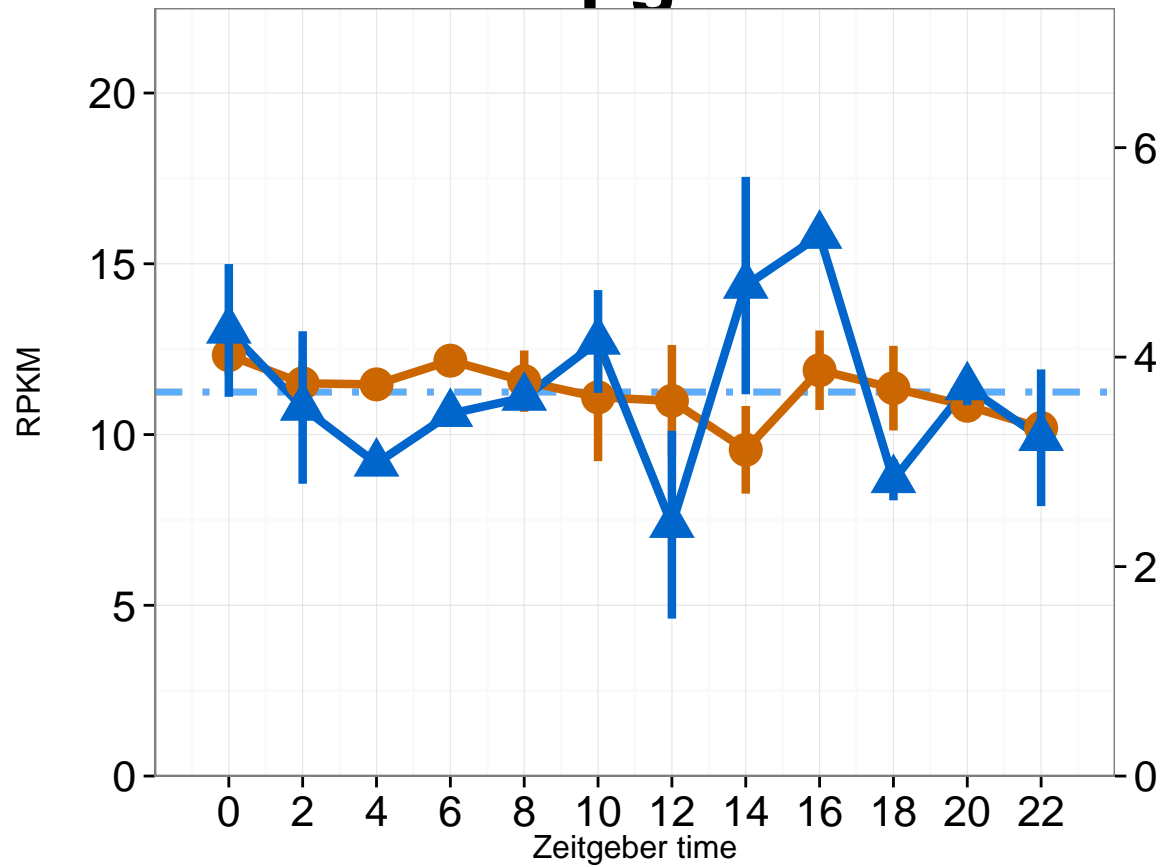

# Bpgm

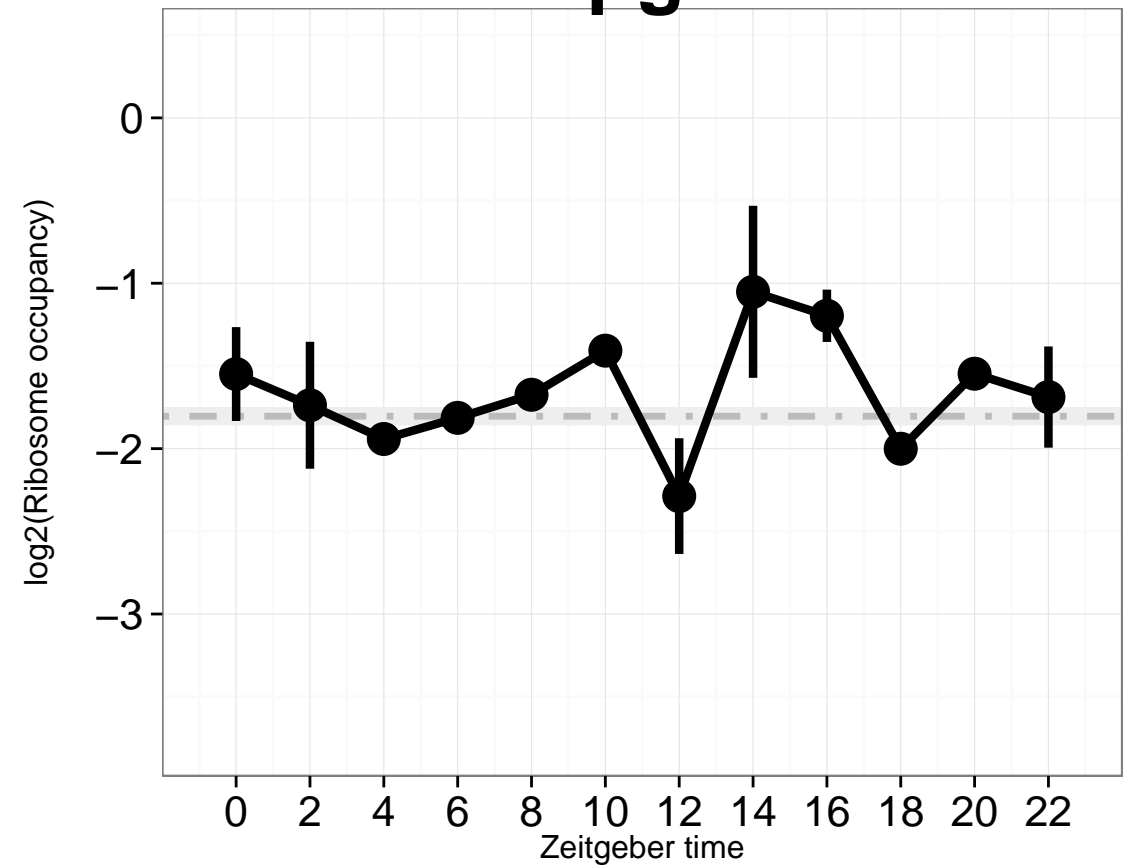

Supplement: SuppDataset_1.zip [file Bpgm_set_A.pdf › Supplemental Dataset 1/A-mRNA_nonrhyth_translation_nonrhyth/Bpgm_set_A.pdf]

## Bphl

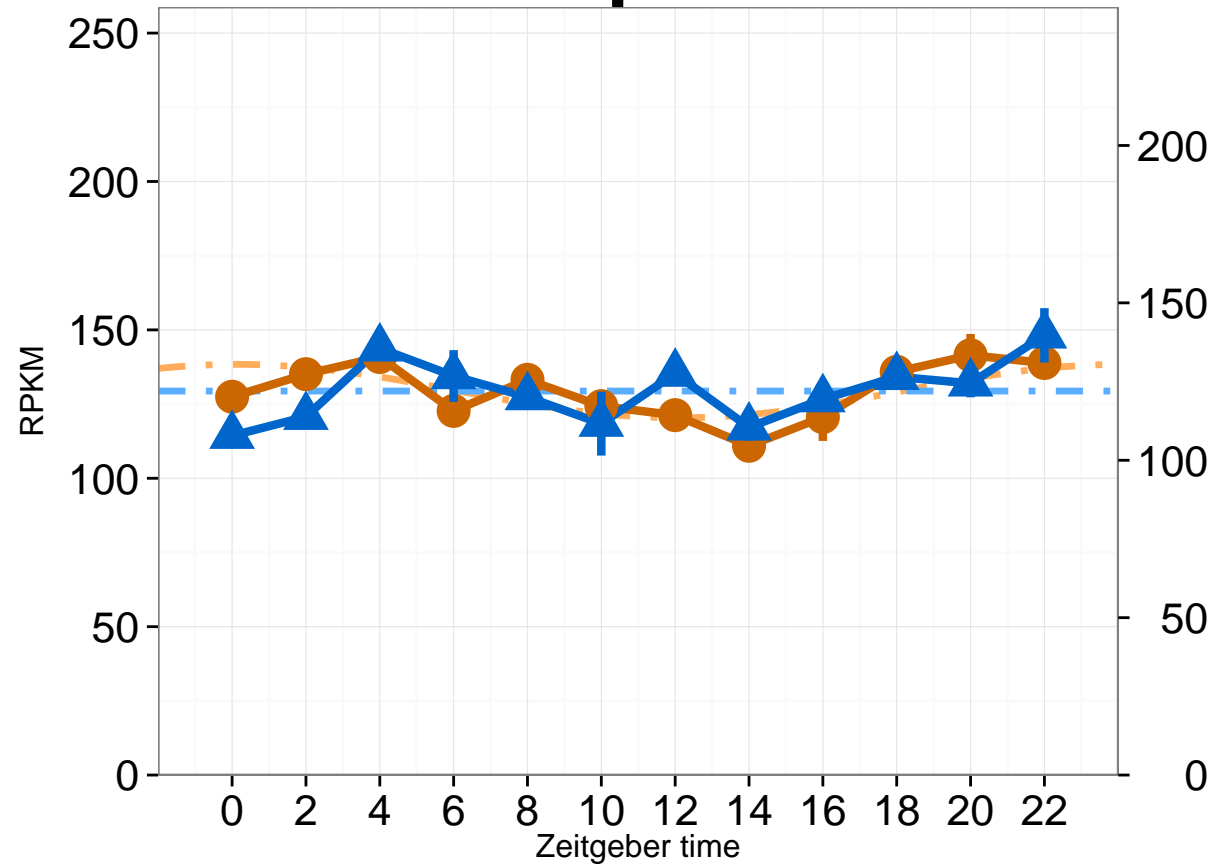

## Bphl

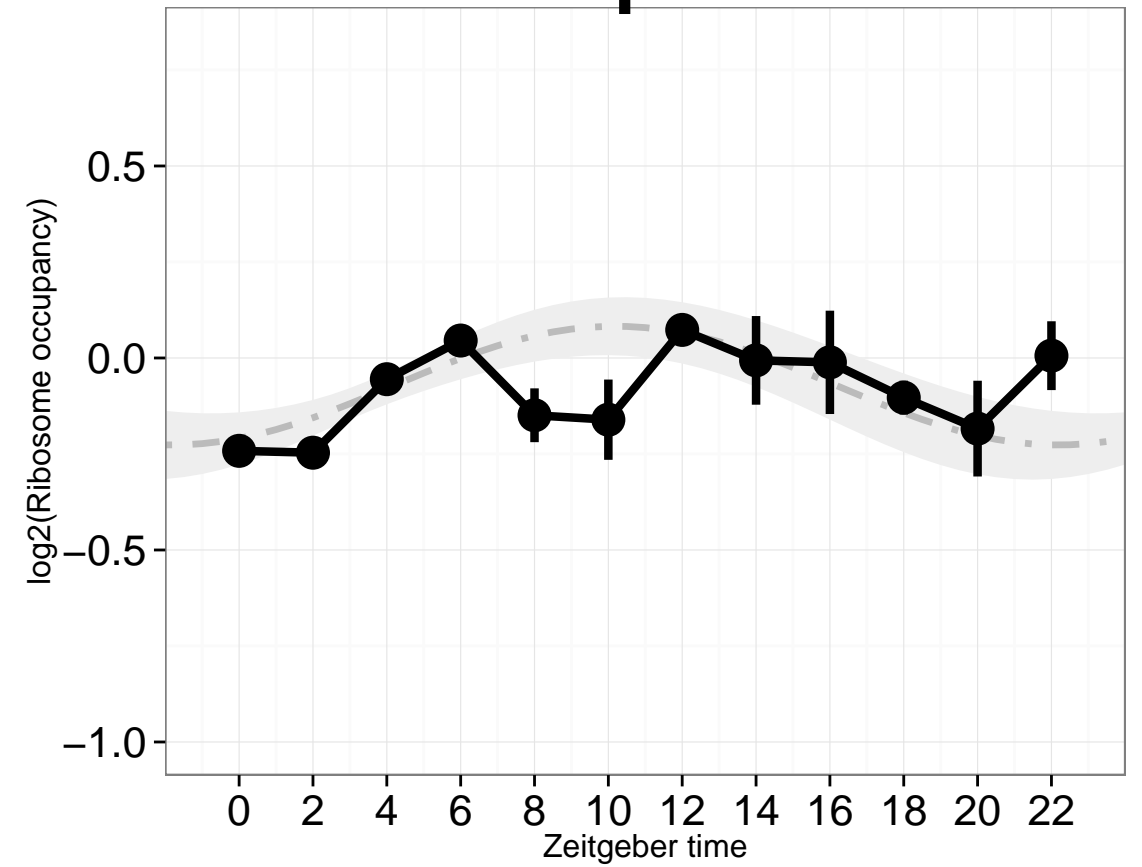

Supplement: SuppDataset_1.zip [file Bphl_set_A.pdf › Supplemental Dataset 1/A-mRNA_nonrhyth_translation_nonrhyth/Bphl_set_A.pdf]

# Bpnt1

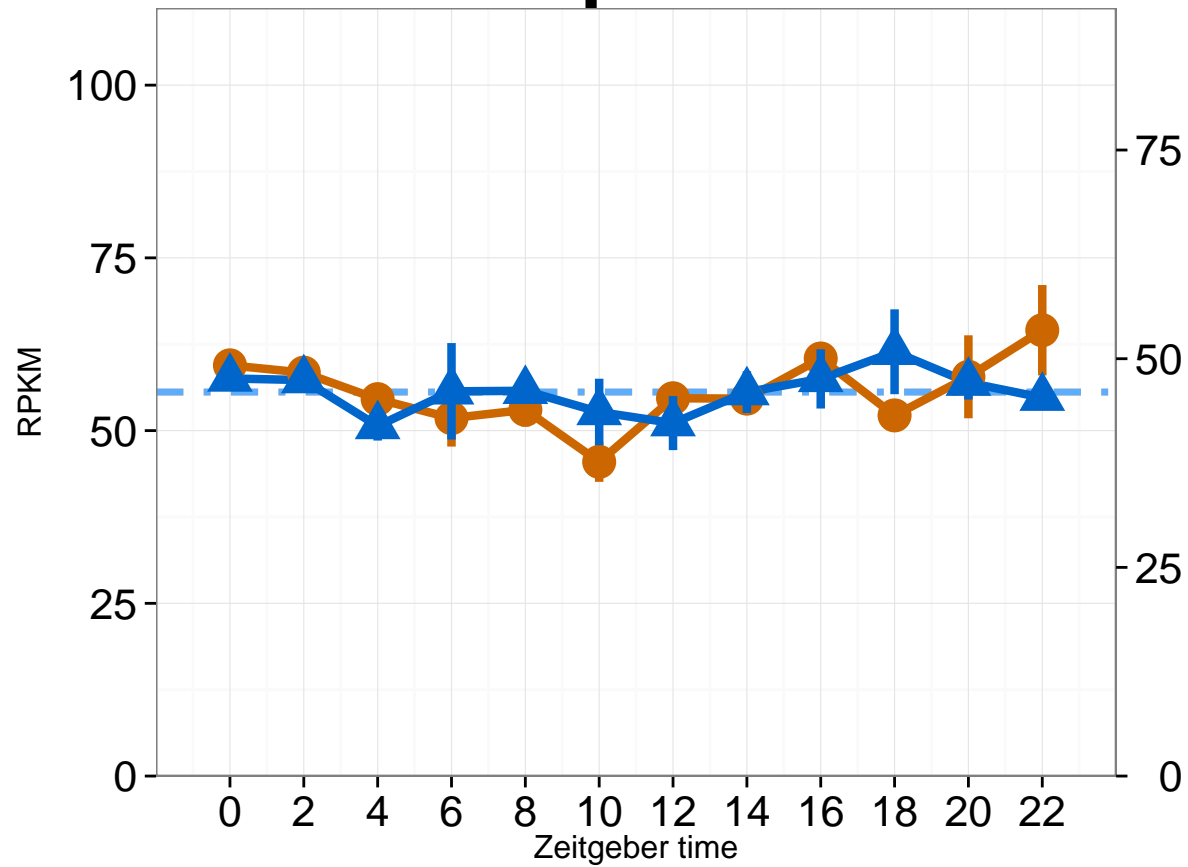

# Bpnt1

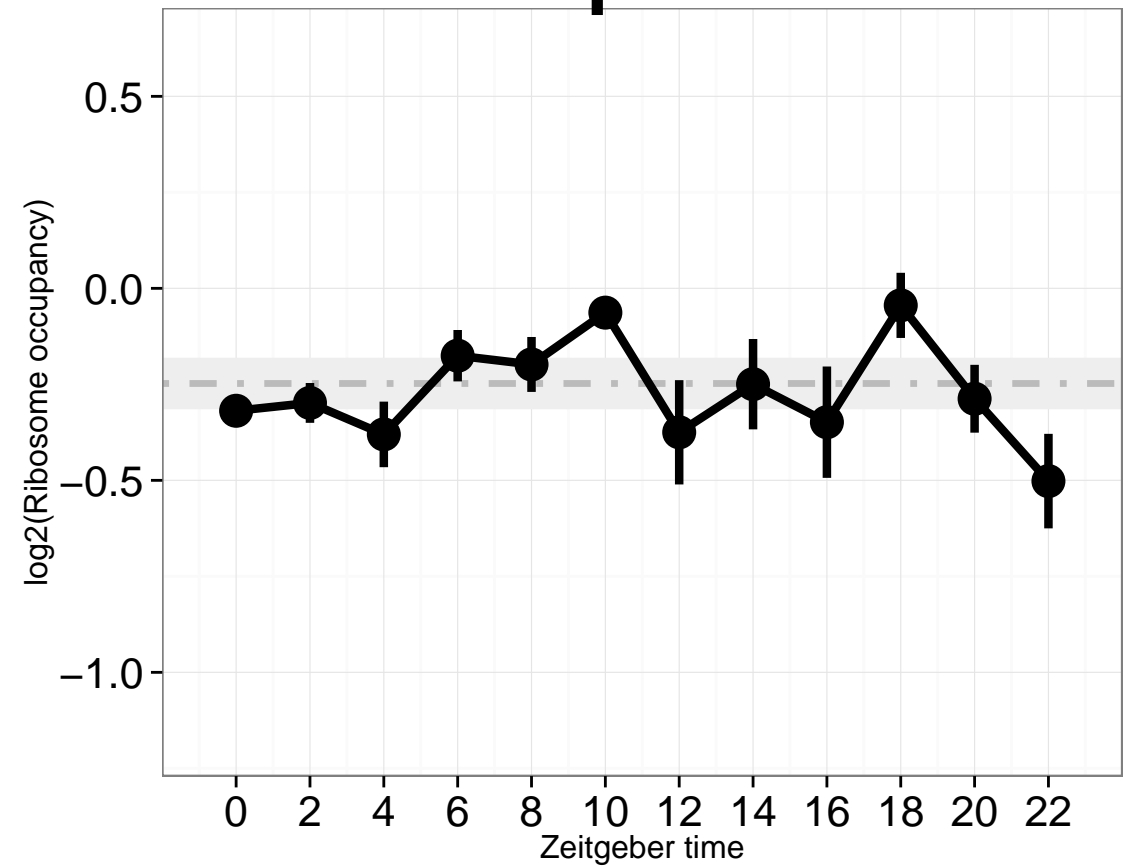

Supplement: SuppDataset_1.zip [file Bpnt1_set_A.pdf › Supplemental Dataset 1/A-mRNA_nonrhyth_translation_nonrhyth/Bpnt1_set_A.pdf]

## Bptf

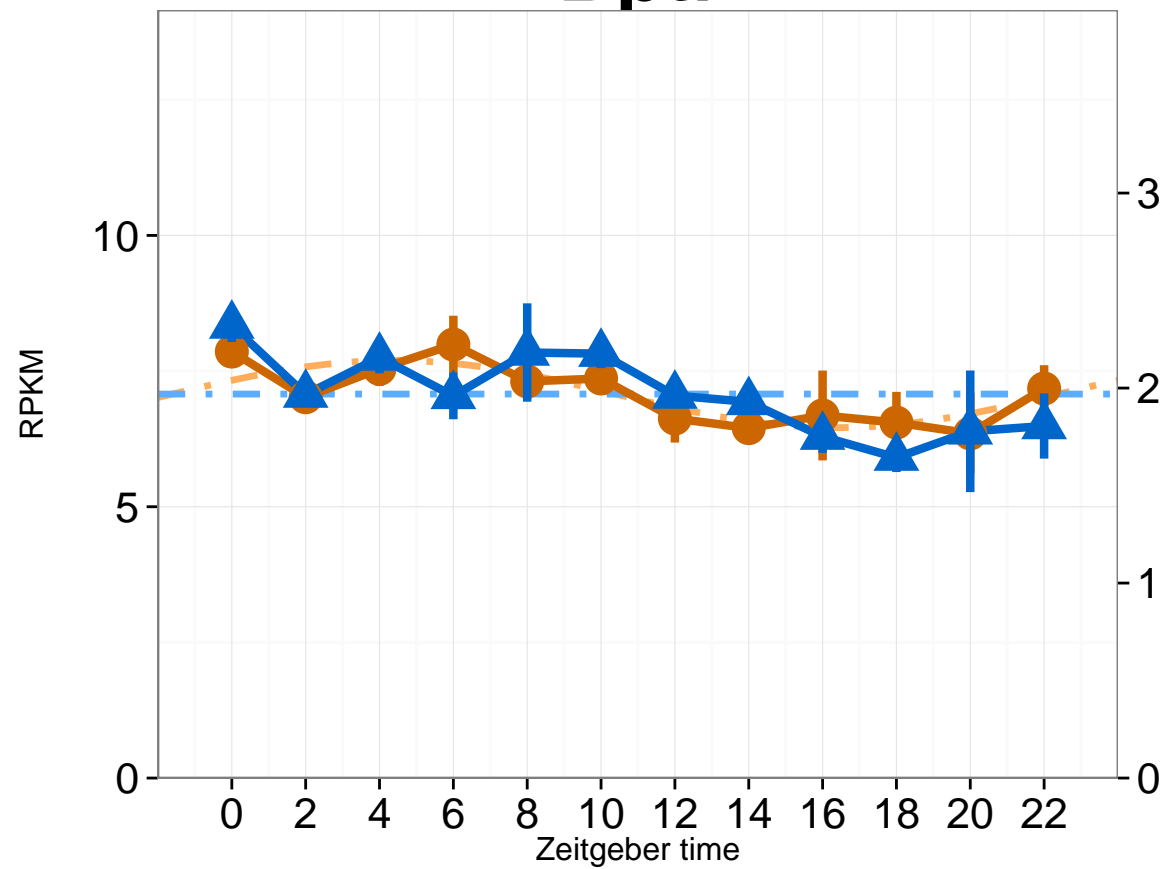

## Bptf

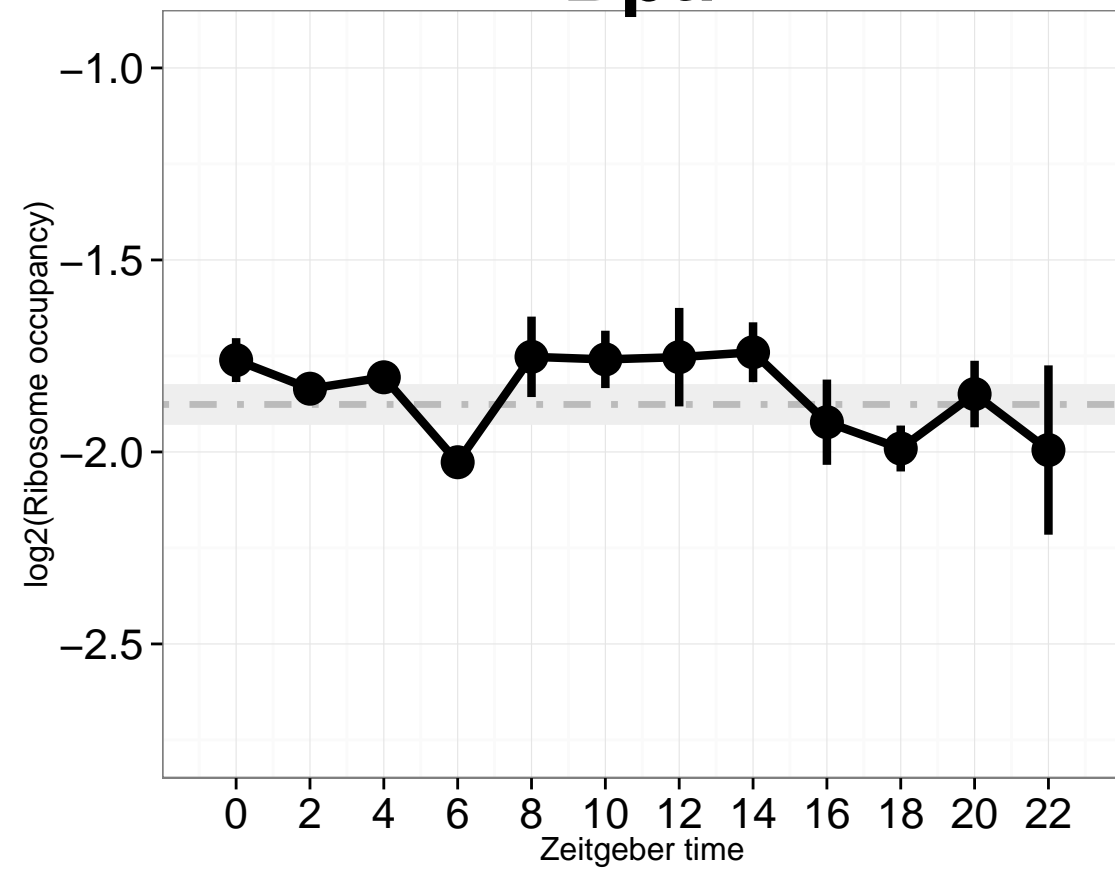

Supplement: SuppDataset_1.zip [file Bptf_set_A.pdf › Supplemental Dataset 1/A-mRNA_nonrhyth_translation_nonrhyth/Bptf_set_A.pdf]

## Braf

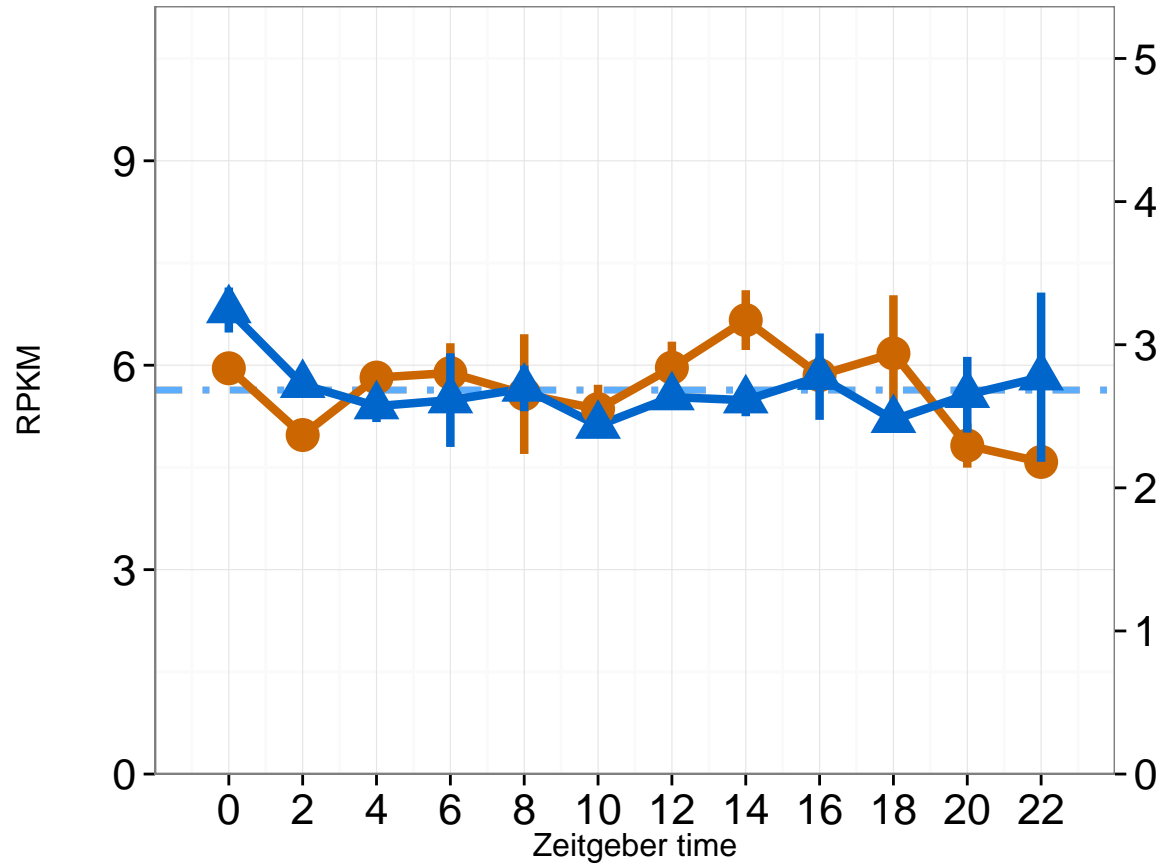

## Braf

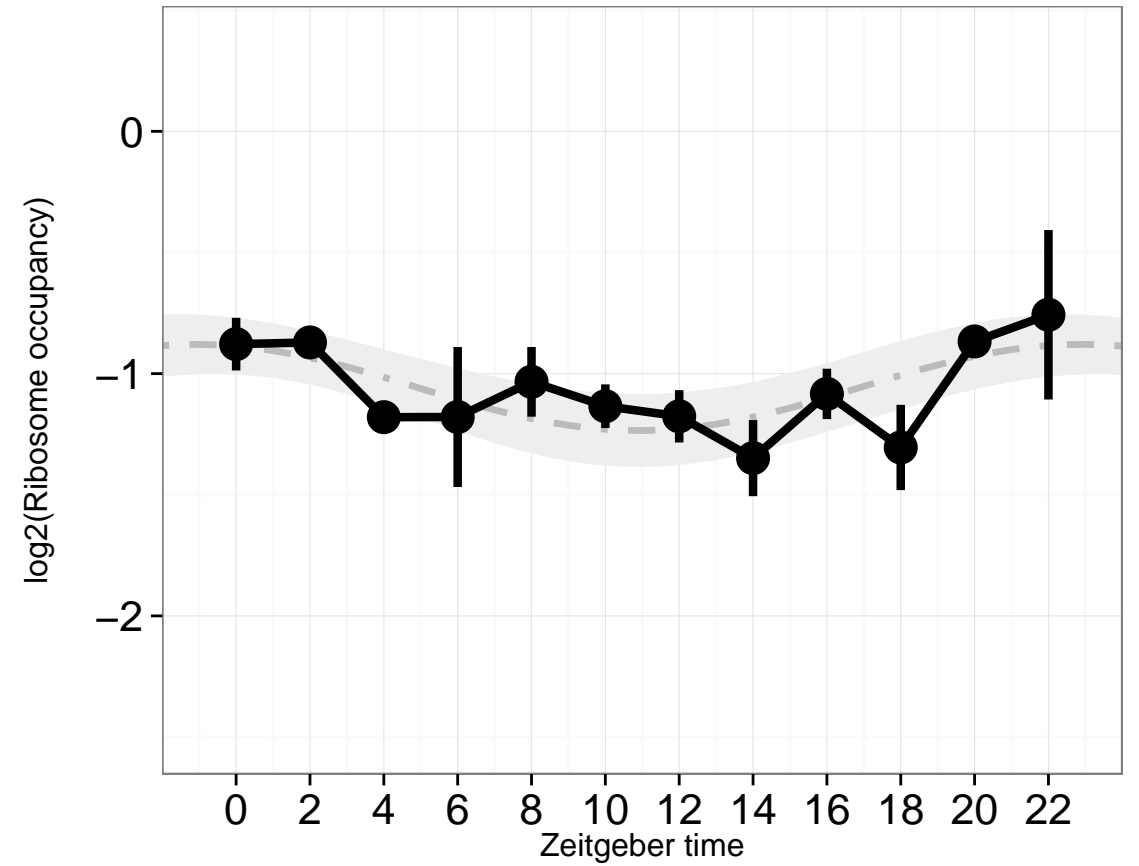

Supplement: SuppDataset_1.zip [file Braf_set_A.pdf › Supplemental Dataset 1/A-mRNA_nonrhyth_translation_nonrhyth/Braf_set_A.pdf]

## Brp

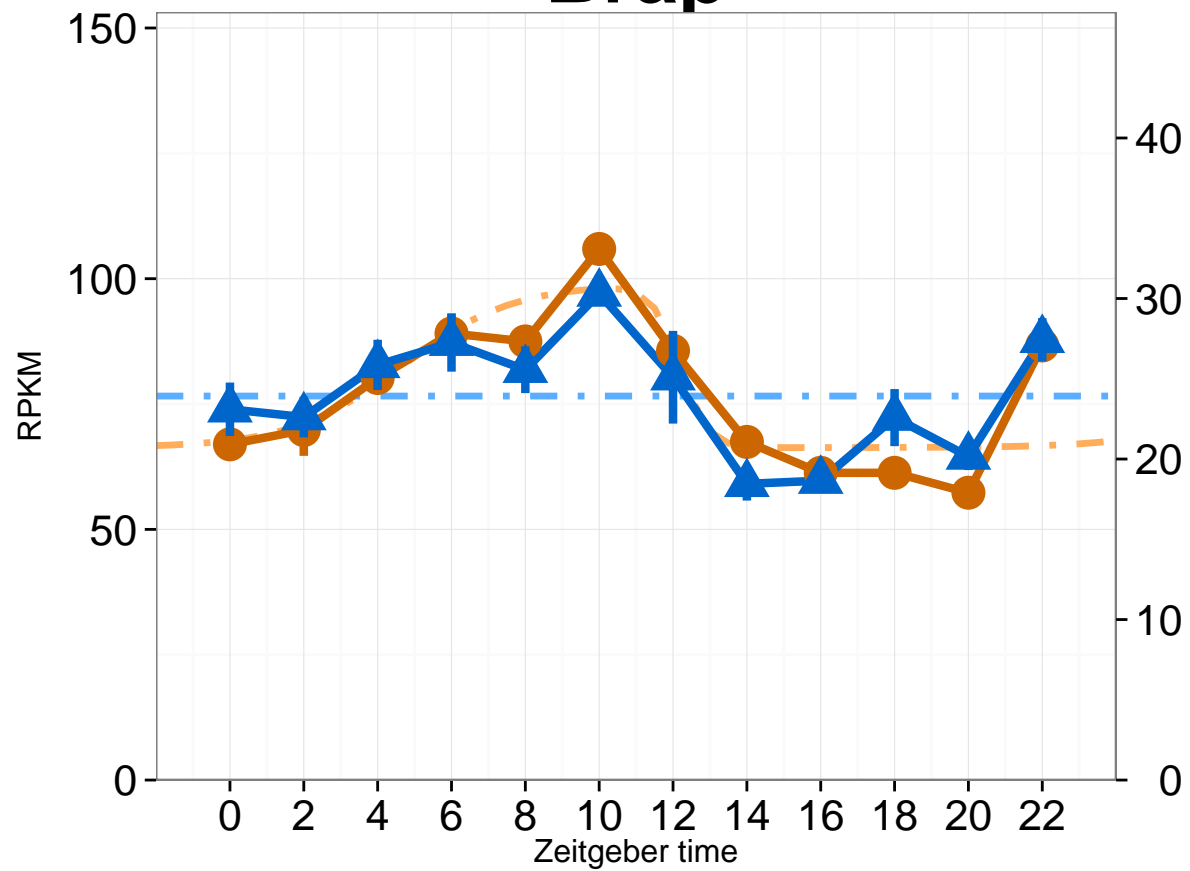

## Brp

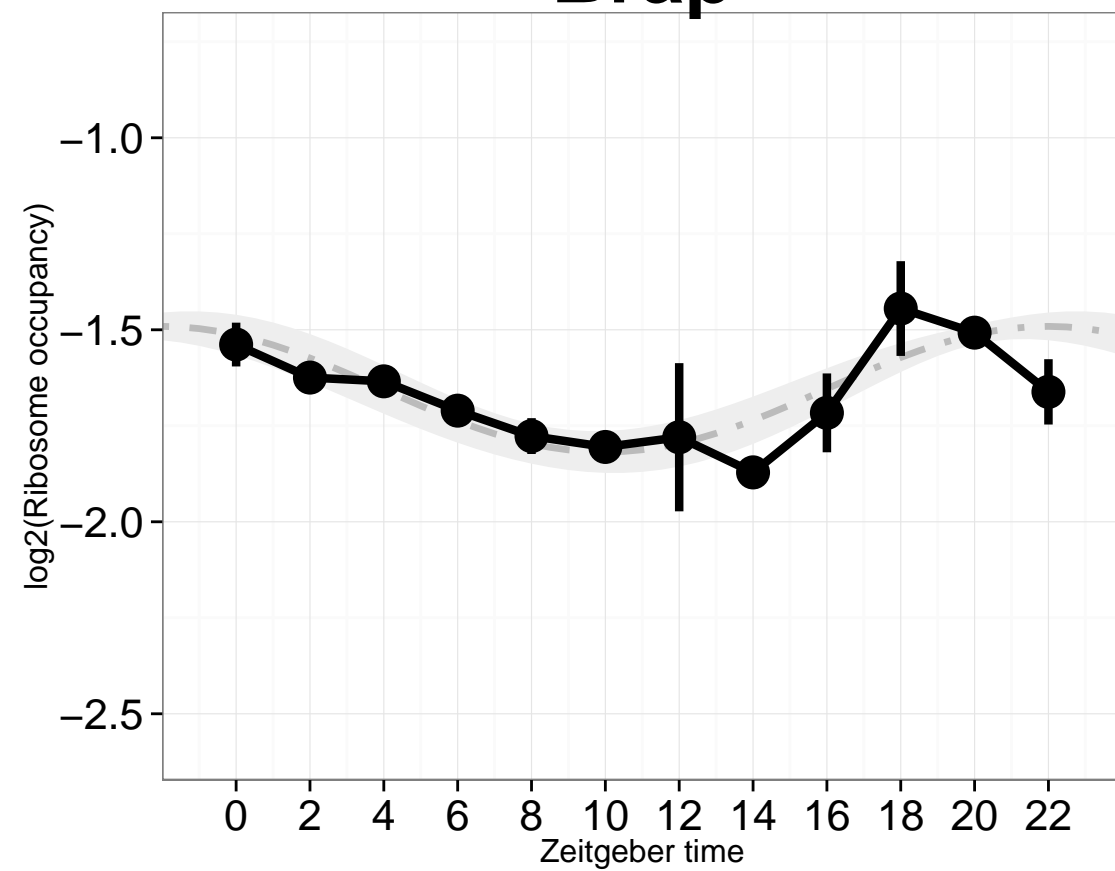

Supplement: SuppDataset_1.zip [file Brap_set_A.pdf › Supplemental Dataset 1/A-mRNA_nonrhyth_translation_nonrhyth/Brap_set_A.pdf]

# Brat1

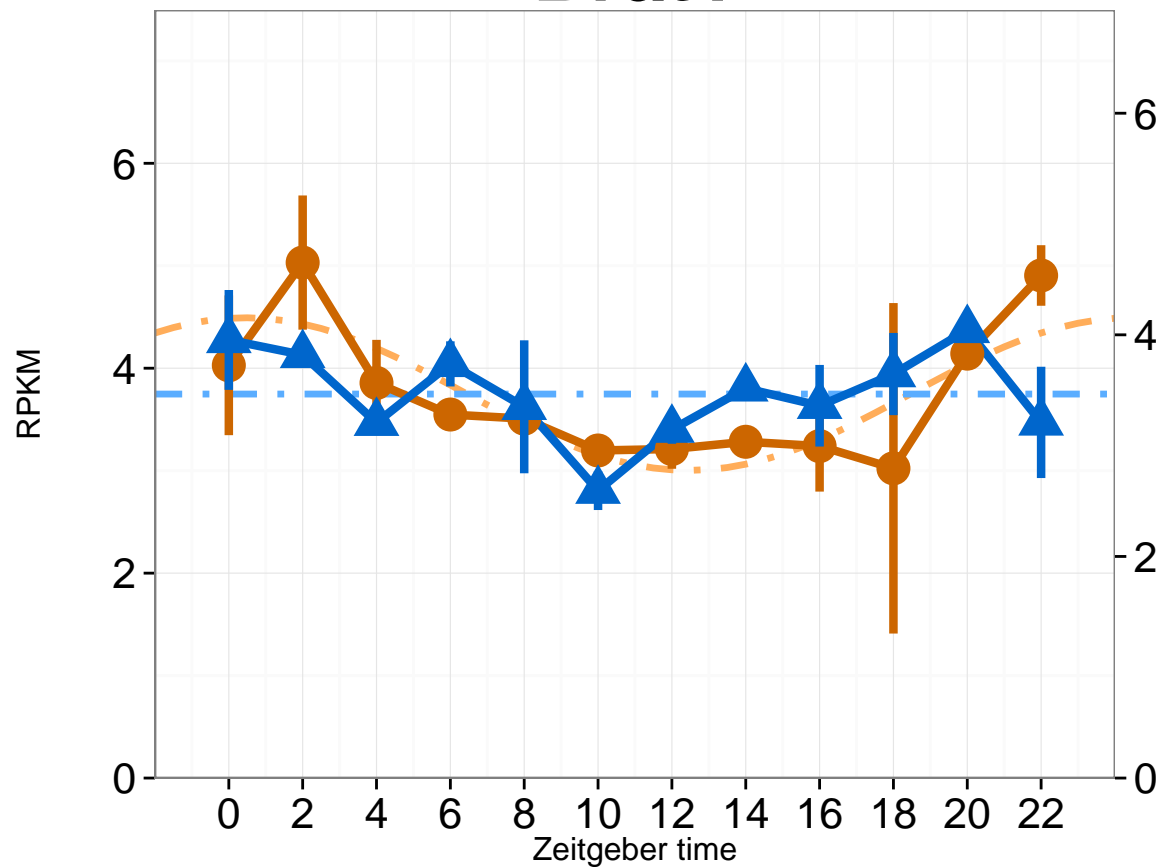

# Brat1

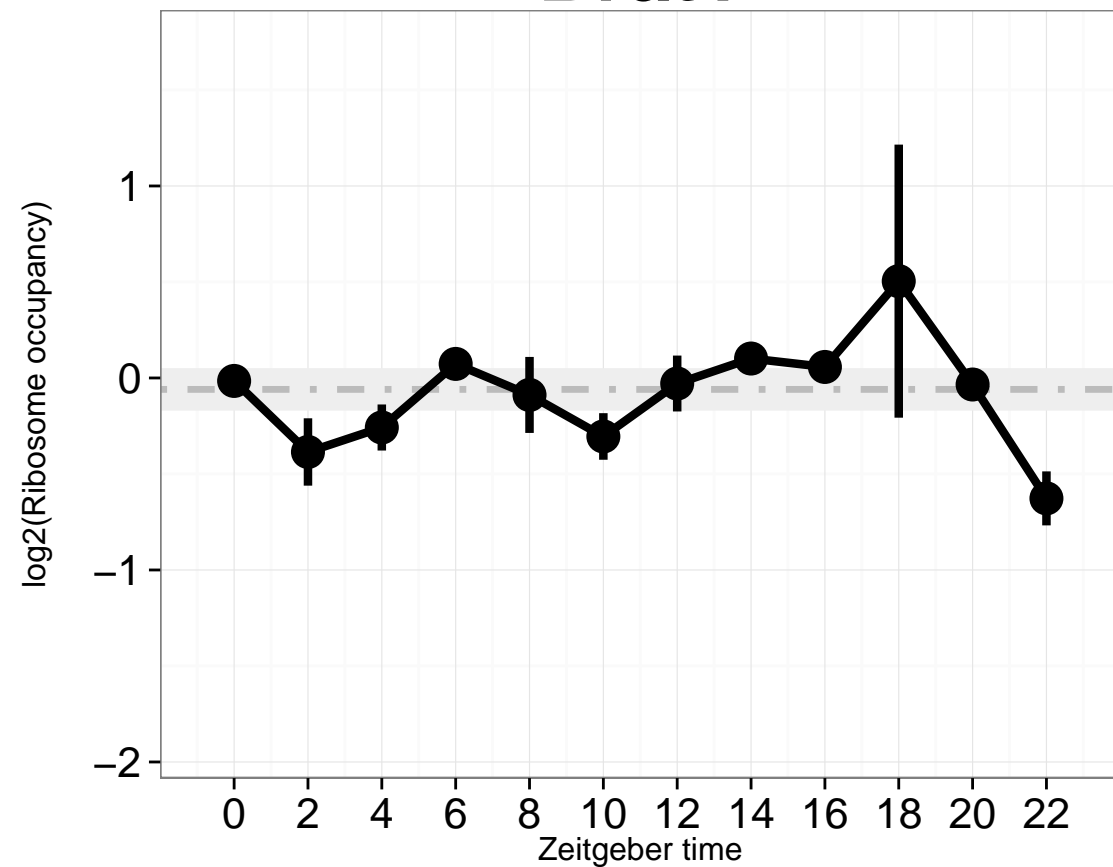

Supplement: SuppDataset_1.zip [file Brat1_set_A.pdf › Supplemental Dataset 1/A-mRNA_nonrhyth_translation_nonrhyth/Brat1_set_A.pdf]

## Brcc3

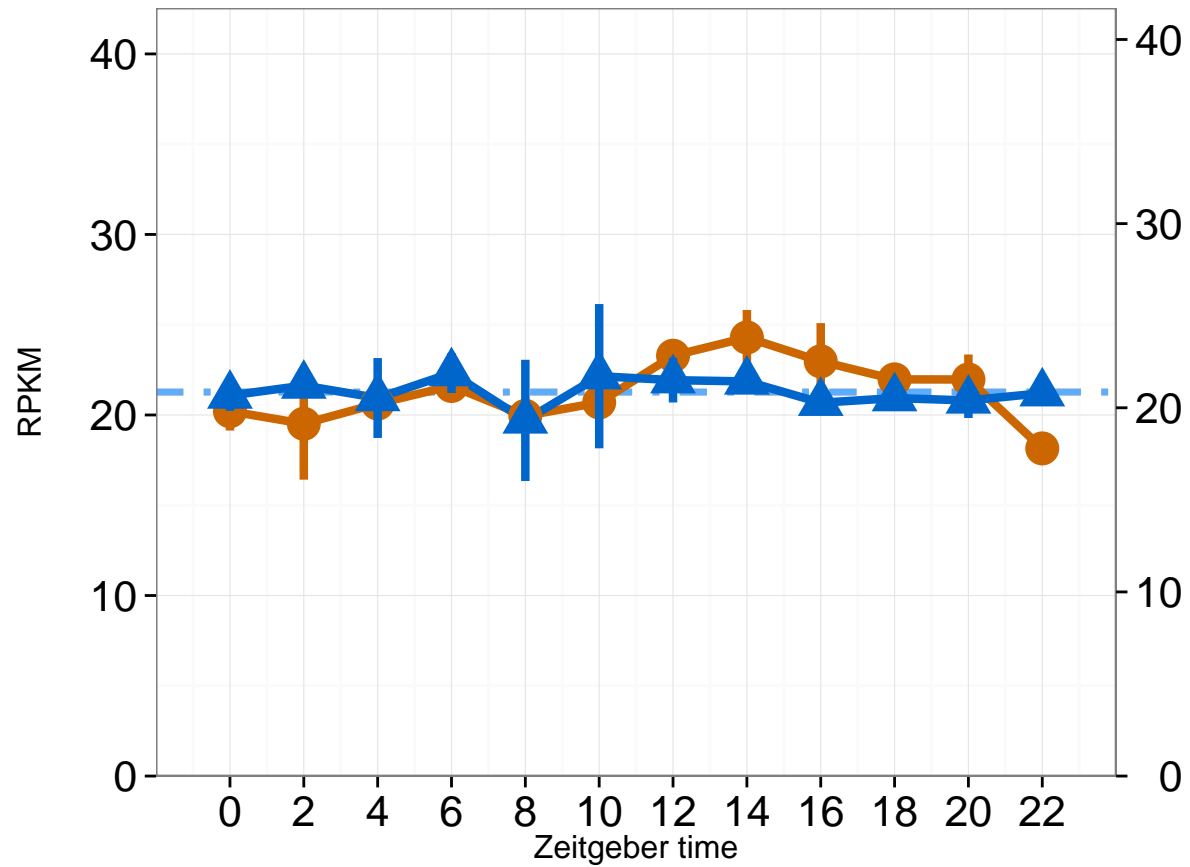

## Brcc3

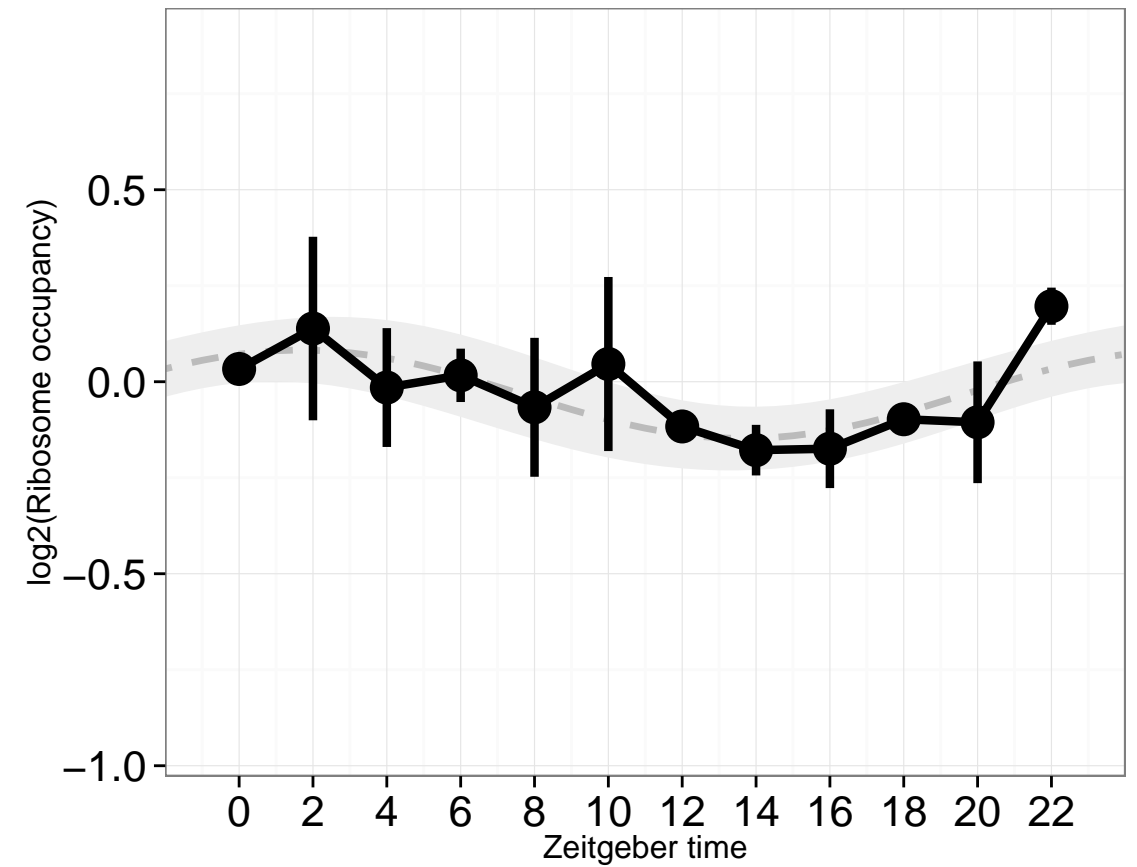

Supplement: SuppDataset_1.zip [file Brcc3_set_A.pdf › Supplemental Dataset 1/A-mRNA_nonrhyth_translation_nonrhyth/Brcc3_set_A.pdf]

# Brd1

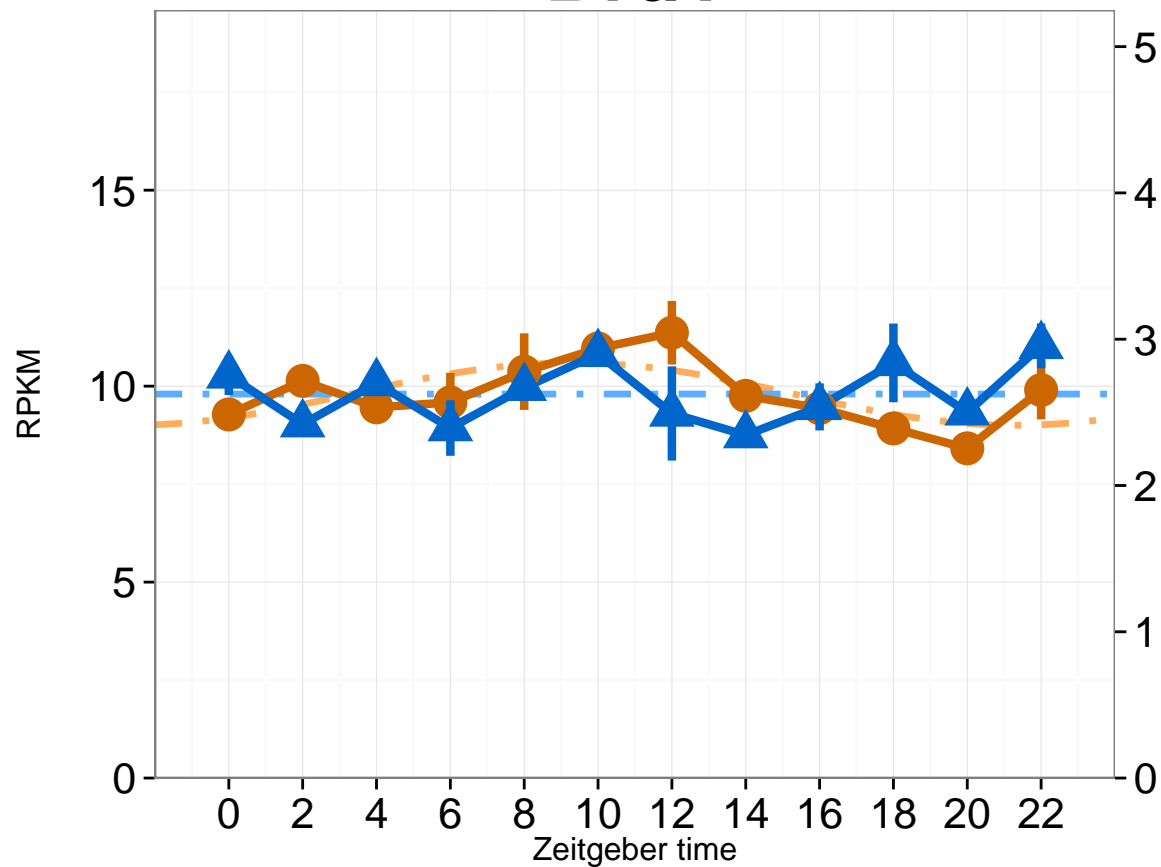

# Brd1

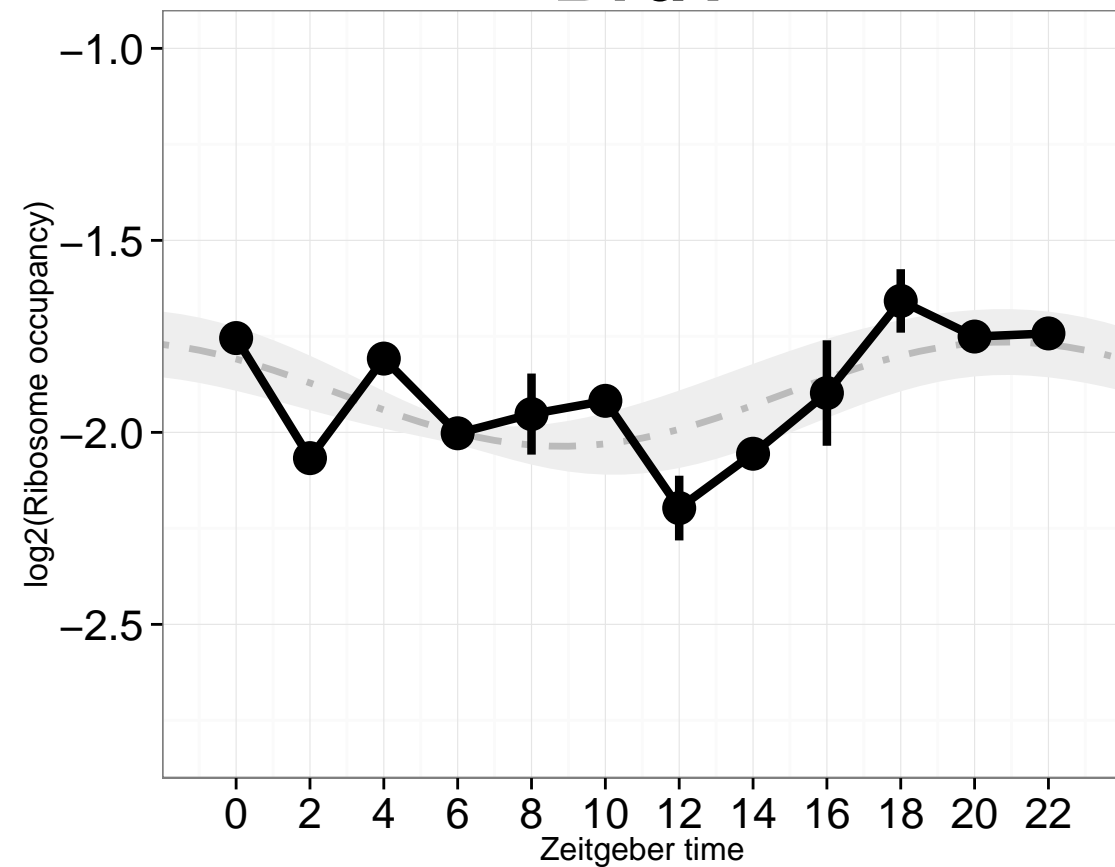

Supplement: SuppDataset_1.zip [file Brd1_set_A.pdf › Supplemental Dataset 1/A-mRNA_nonrhyth_translation_nonrhyth/Brd1_set_A.pdf]

## Brd2

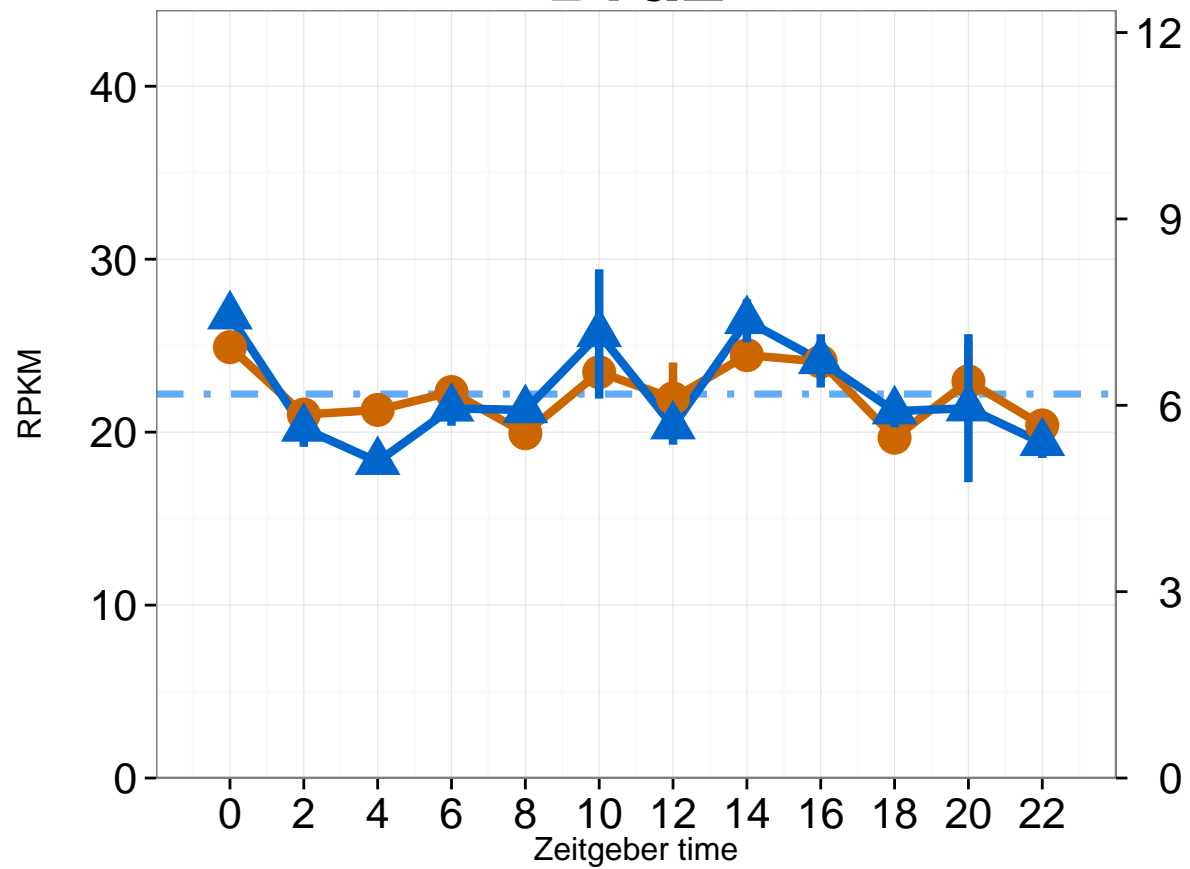

## Brd2

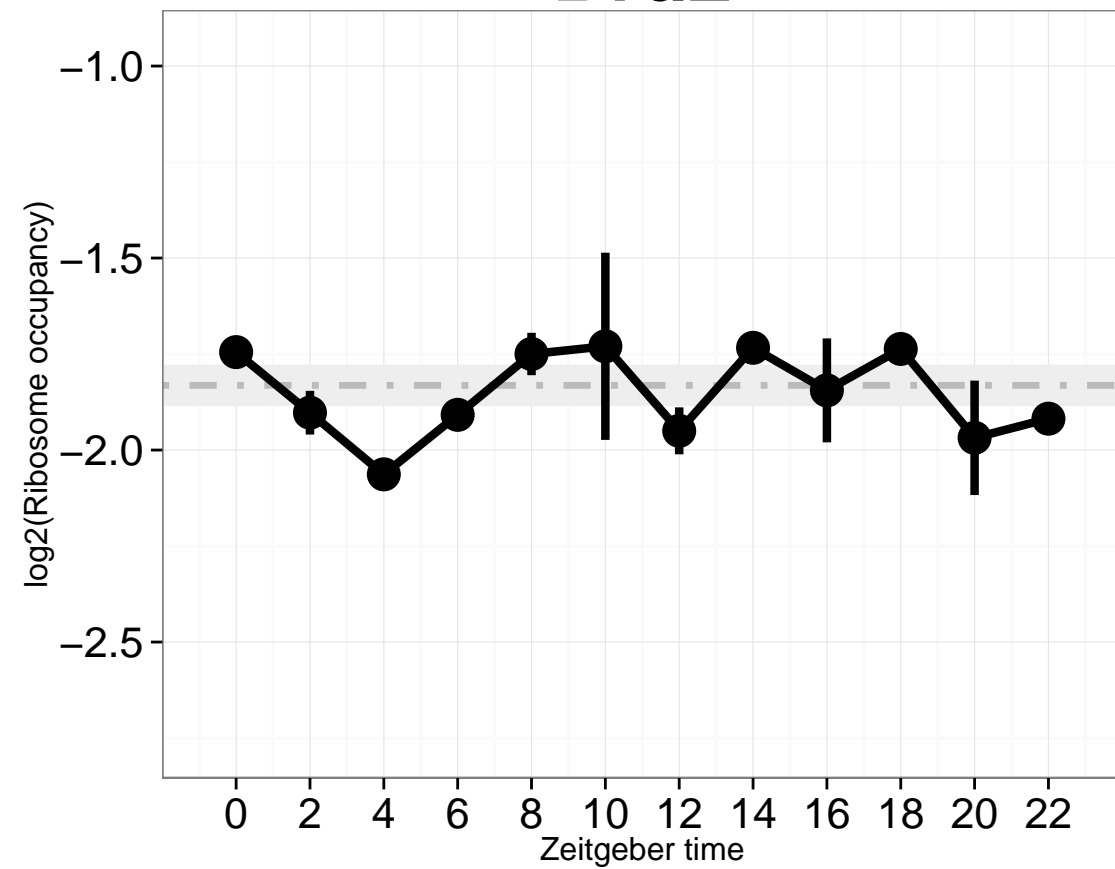

Supplement: SuppDataset_1.zip [file Brd2_set_A.pdf › Supplemental Dataset 1/A-mRNA_nonrhyth_translation_nonrhyth/Brd2_set_A.pdf]

## Brd3

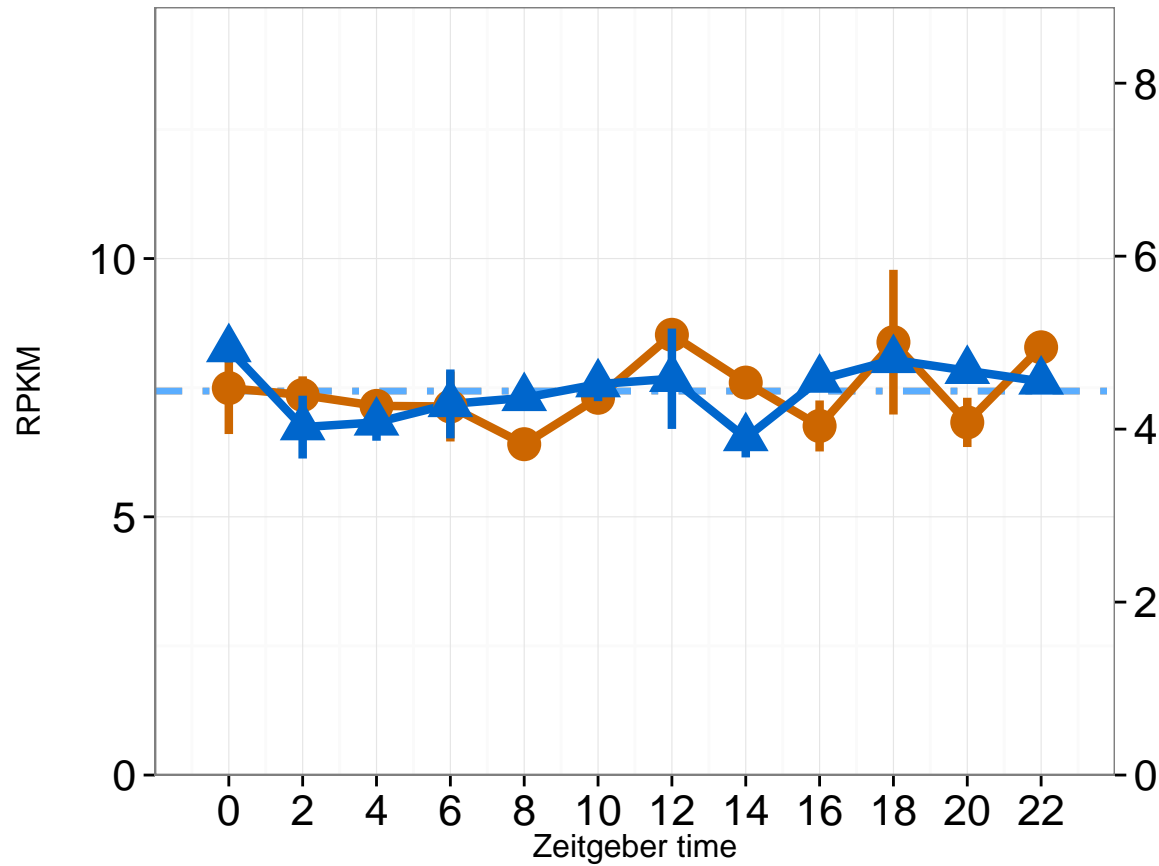

## Brd3

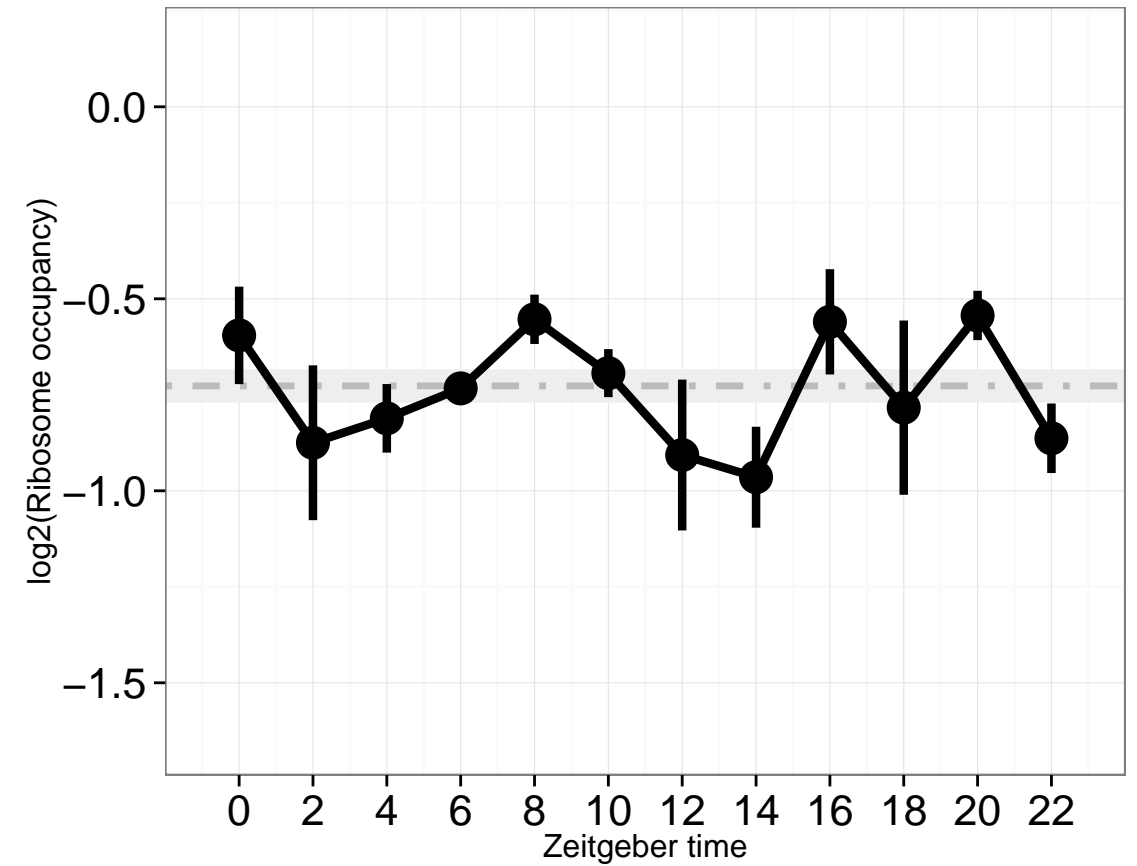

Supplement: SuppDataset_1.zip [file Brd3_set_A.pdf › Supplemental Dataset 1/A-mRNA_nonrhyth_translation_nonrhyth/Brd3_set_A.pdf]

## Brd4

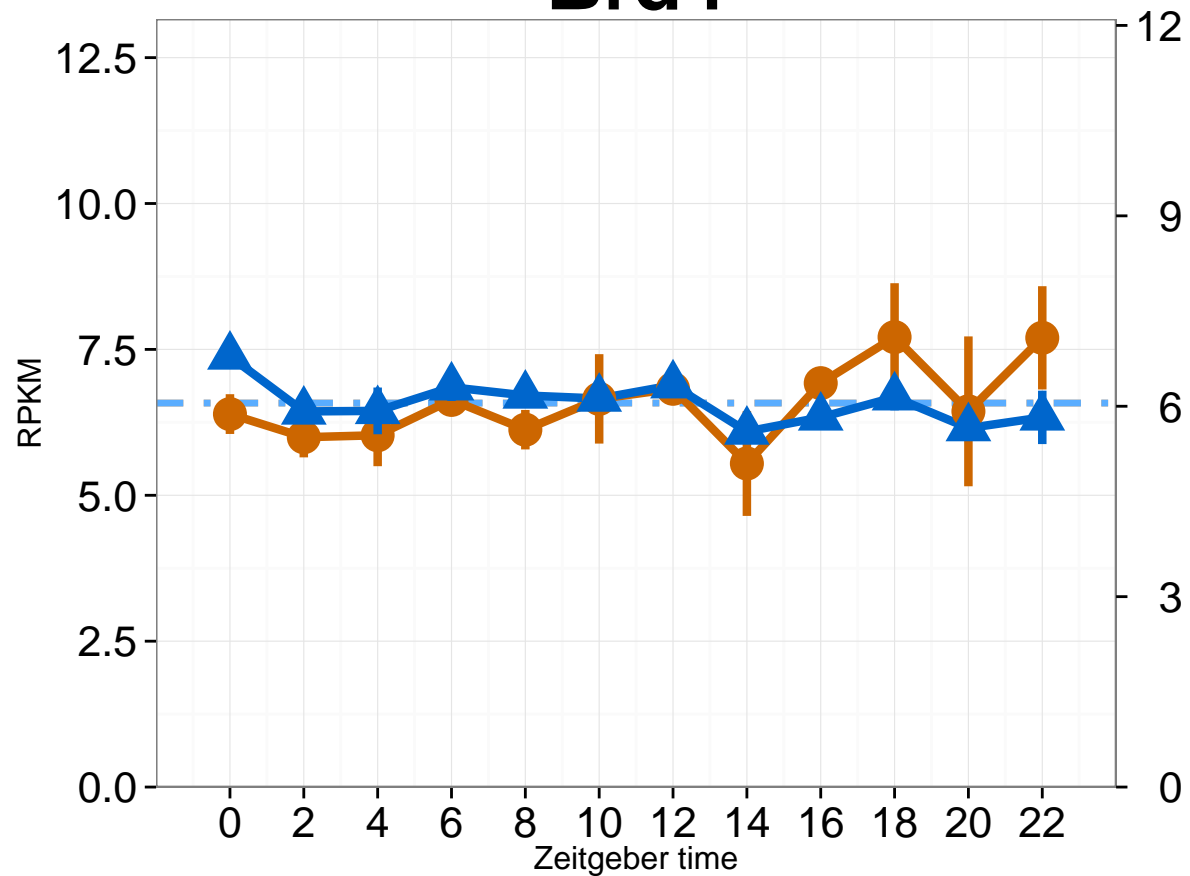

## Brd4

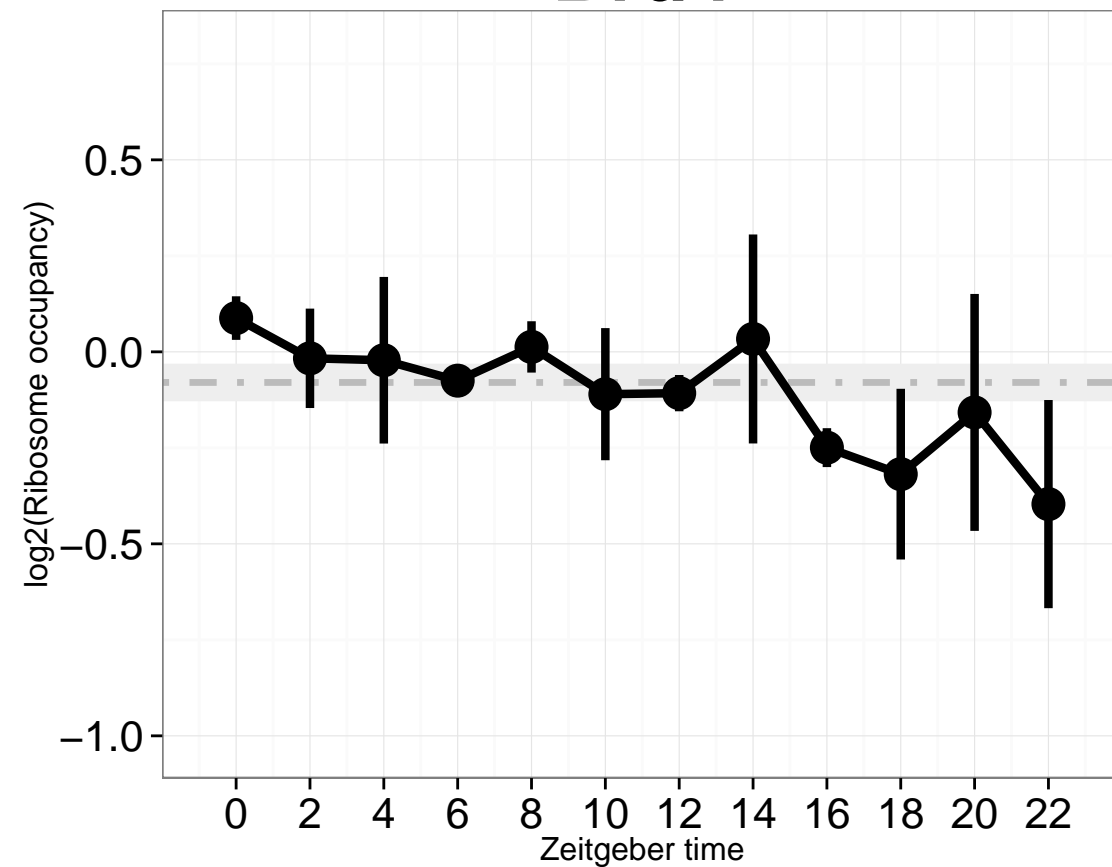

Supplement: SuppDataset_1.zip [file Brd4_set_A.pdf › Supplemental Dataset 1/A-mRNA_nonrhyth_translation_nonrhyth/Brd4_set_A.pdf]

# Brd7

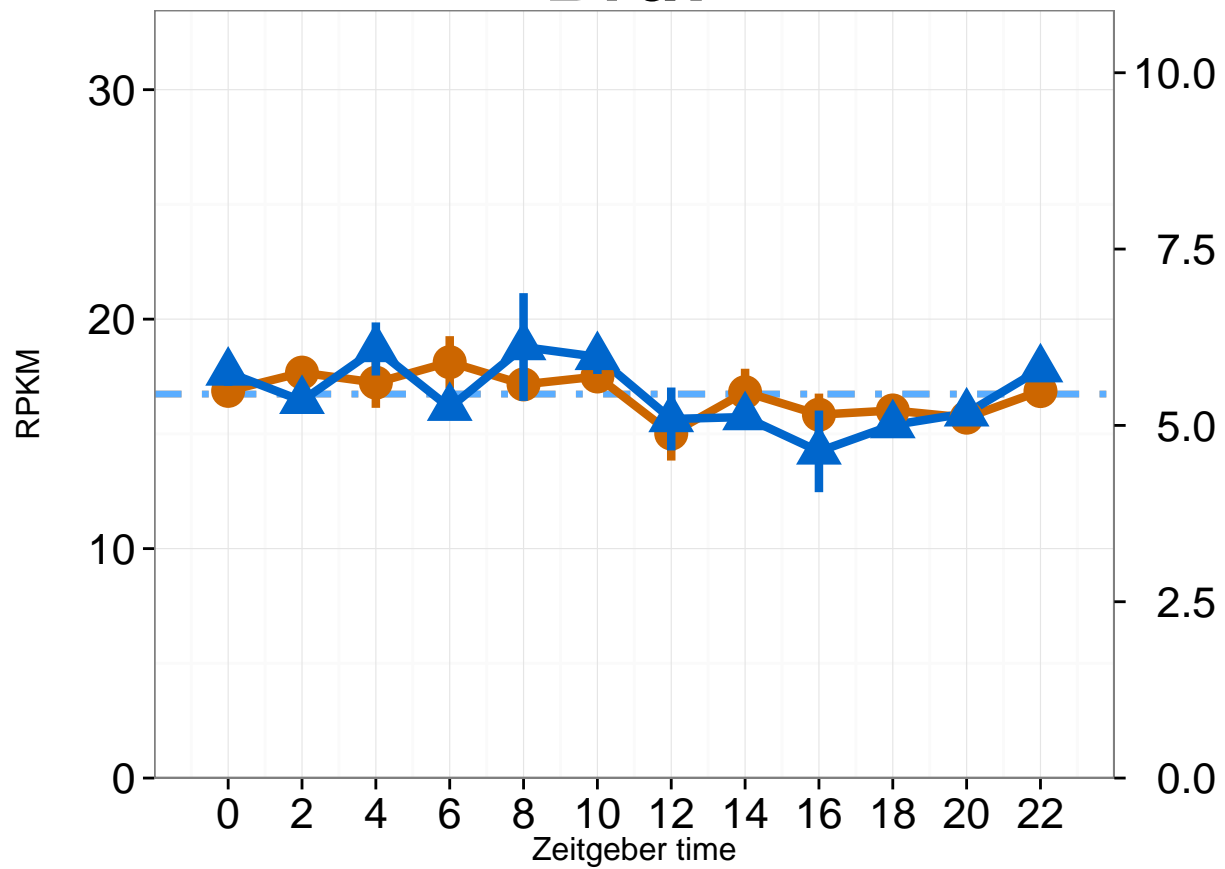

# Brd7

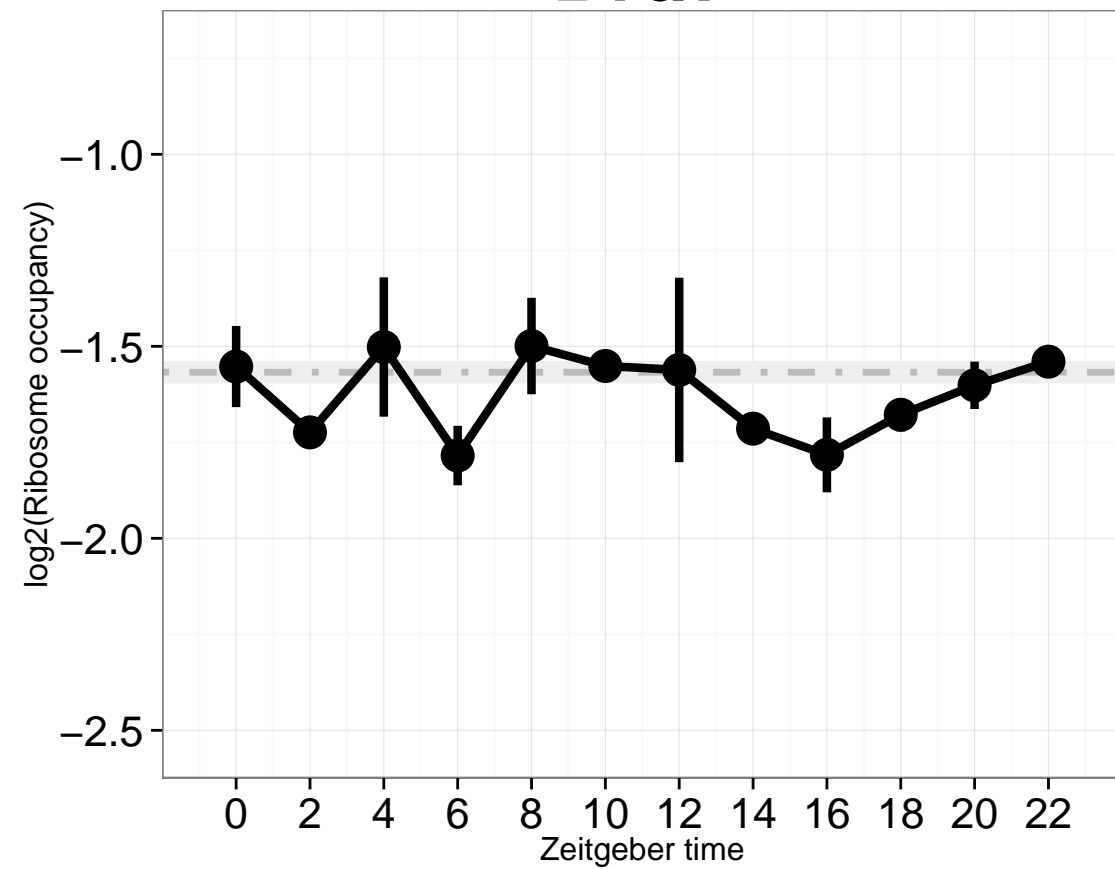

Supplement: SuppDataset_1.zip [file Brd7_set_A.pdf › Supplemental Dataset 1/A-mRNA_nonrhyth_translation_nonrhyth/Brd7_set_A.pdf]

## Brd8

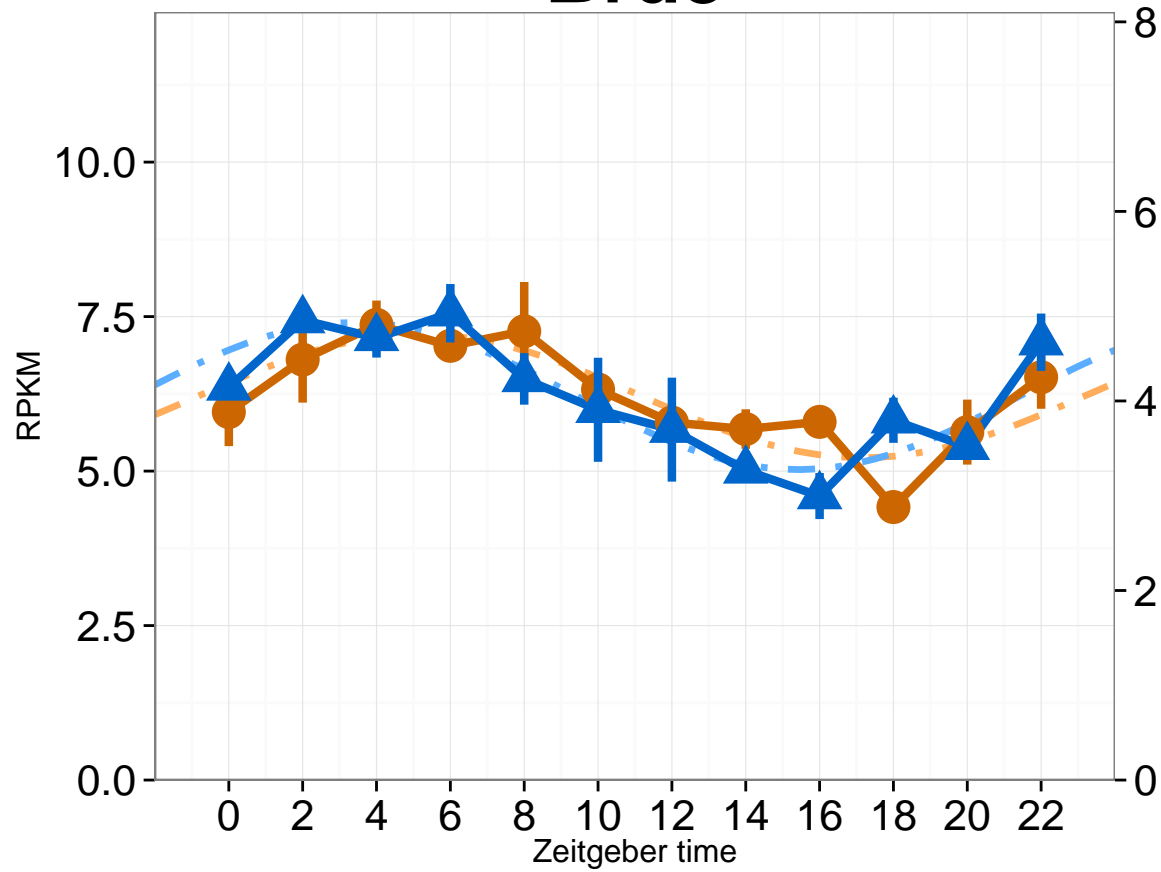

## Brd8

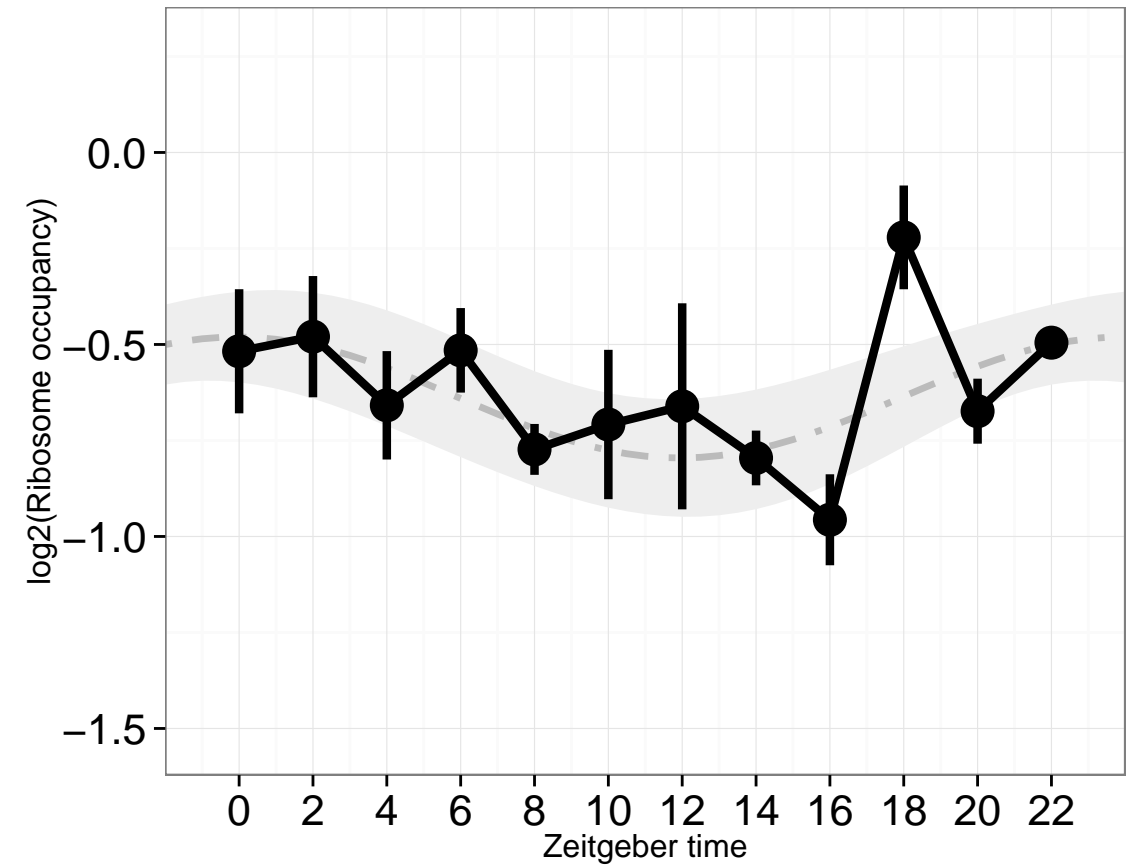

Supplement: SuppDataset_1.zip [file Brd8_set_A.pdf › Supplemental Dataset 1/A-mRNA_nonrhyth_translation_nonrhyth/Brd8_set_A.pdf]

## Bre

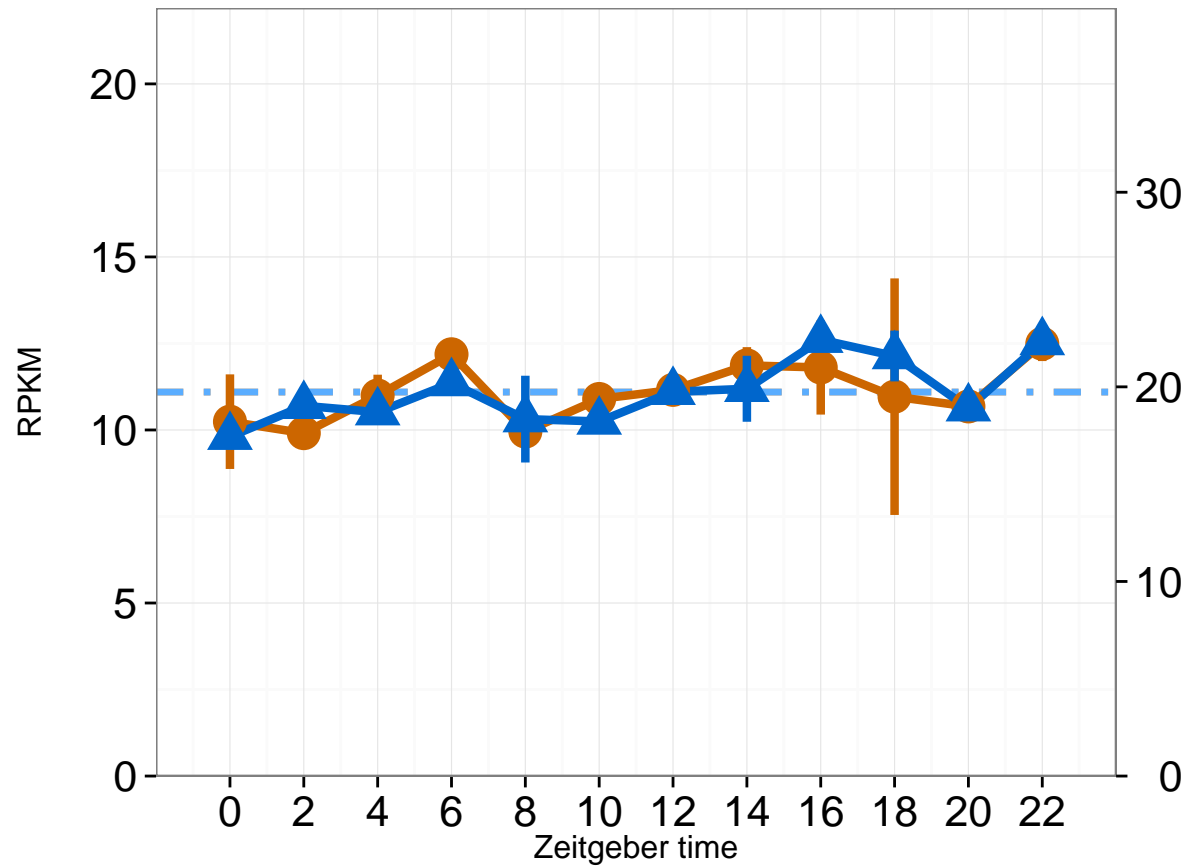

## Bre

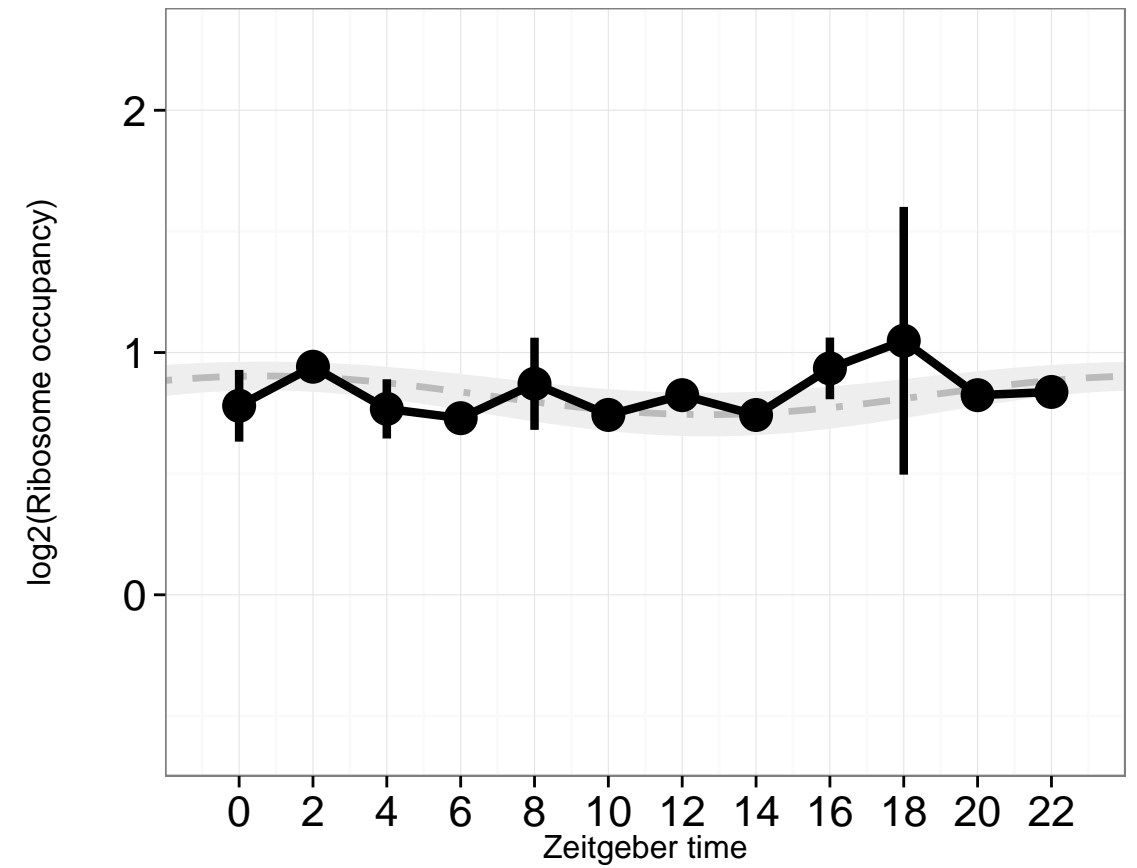

Supplement: SuppDataset_1.zip [file Bre_set_A.pdf › Supplemental Dataset 1/A-mRNA_nonrhyth_translation_nonrhyth/Bre_set_A.pdf]

## Brf1

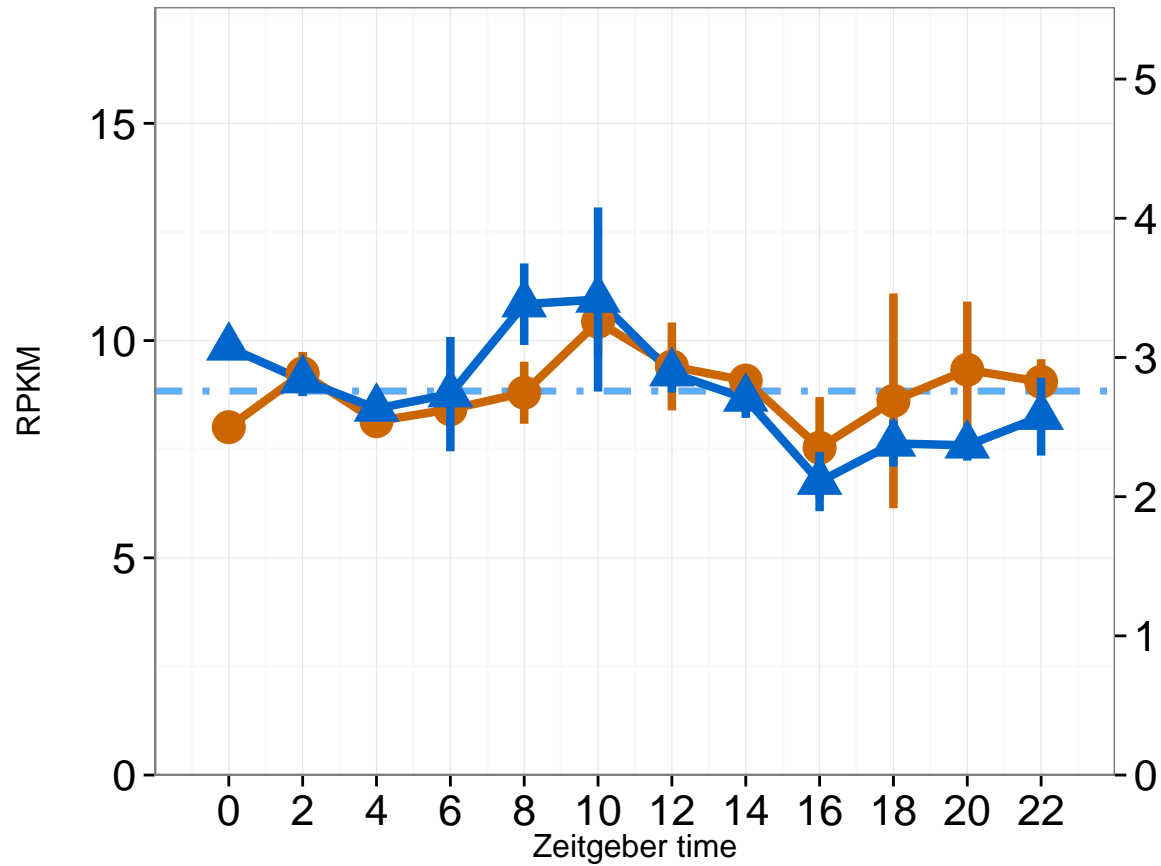

## Brf1

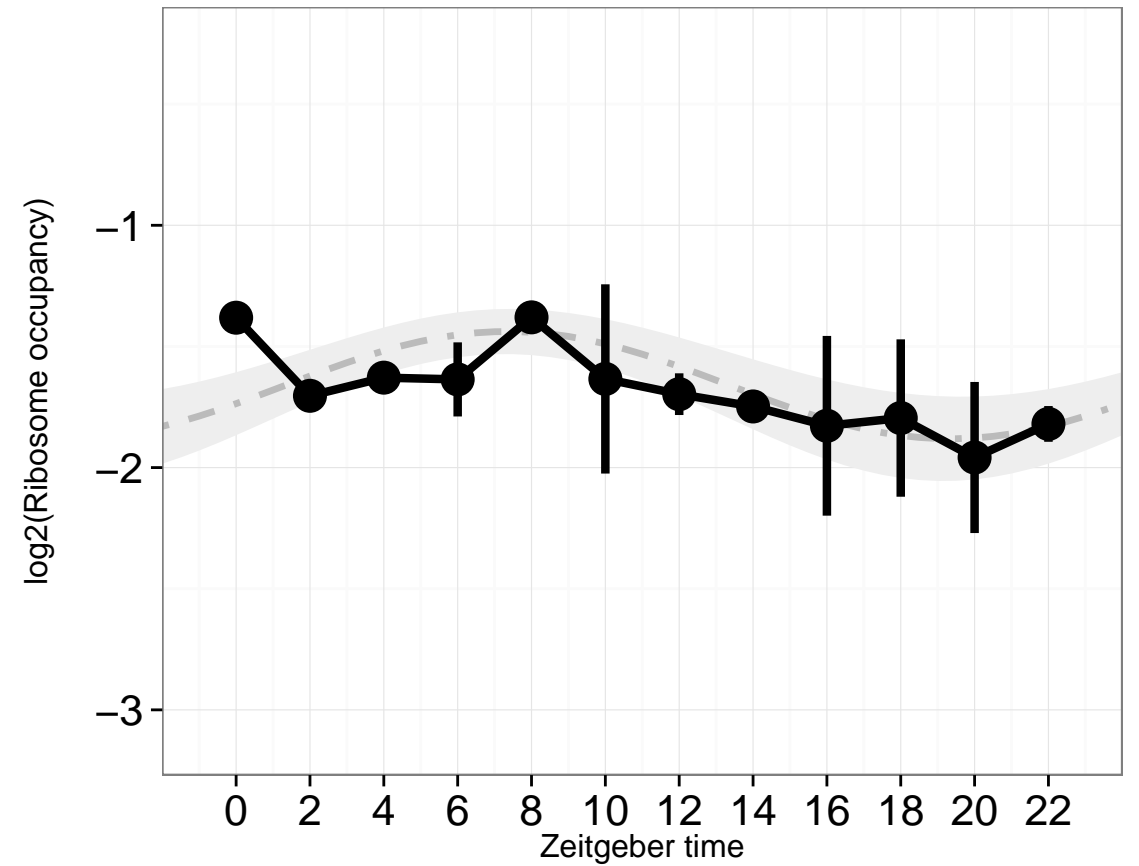

Supplement: SuppDataset_1.zip [file Brf1_set_A.pdf › Supplemental Dataset 1/A-mRNA_nonrhyth_translation_nonrhyth/Brf1_set_A.pdf]

## Brf2

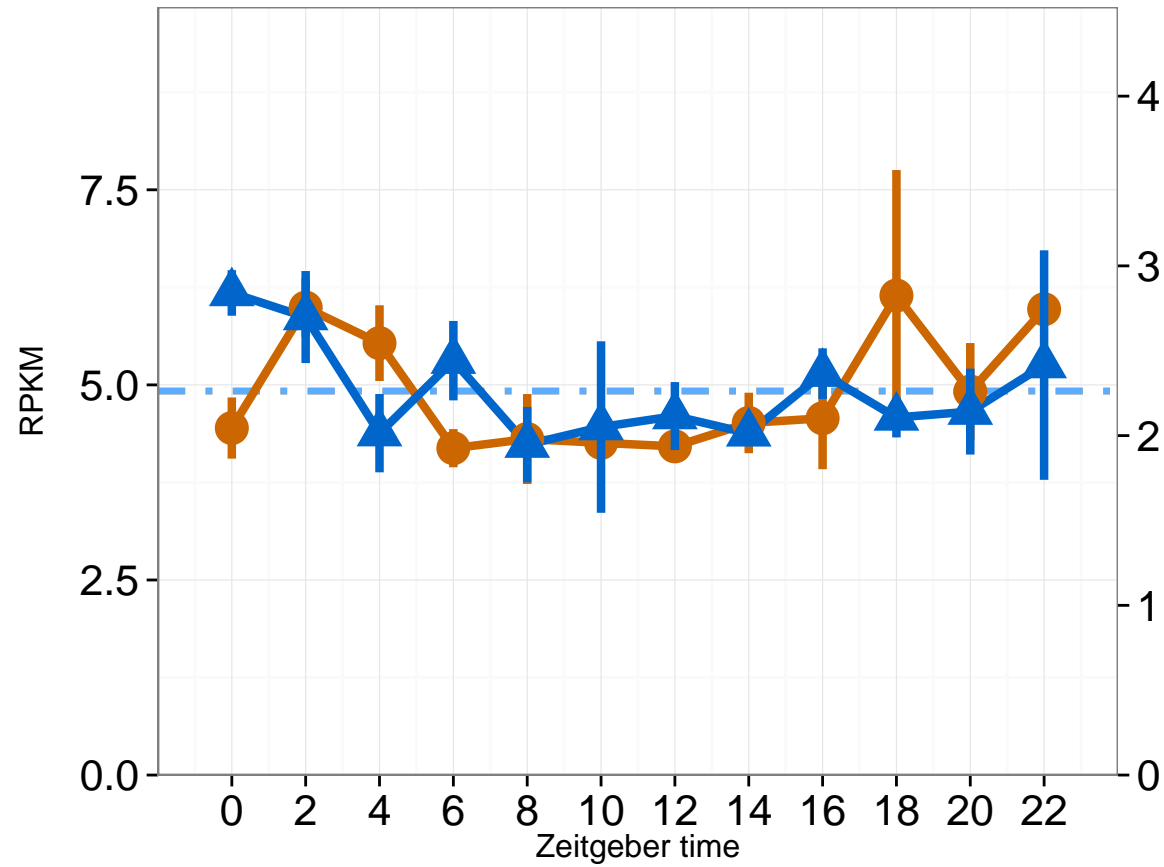

## Brf2

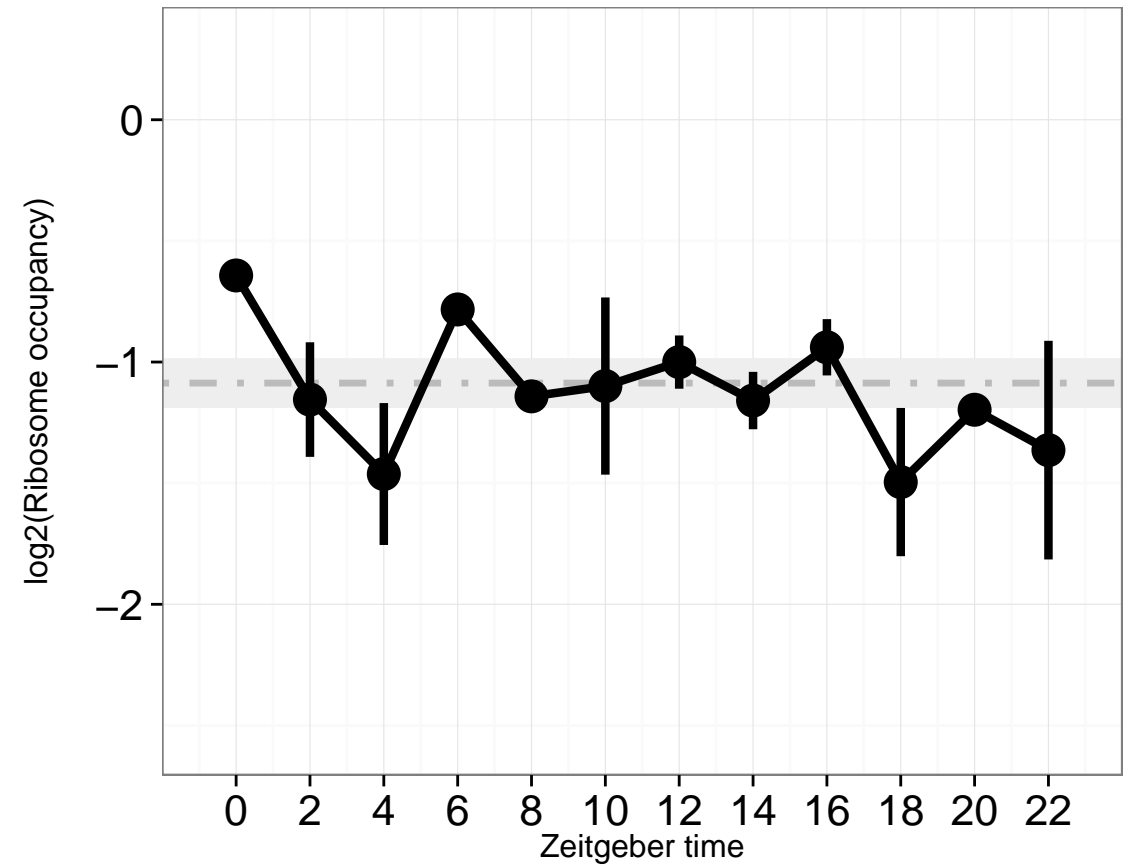

Supplement: SuppDataset_1.zip [file Brf2_set_A.pdf › Supplemental Dataset 1/A-mRNA_nonrhyth_translation_nonrhyth/Brf2_set_A.pdf]

## Bri3bp

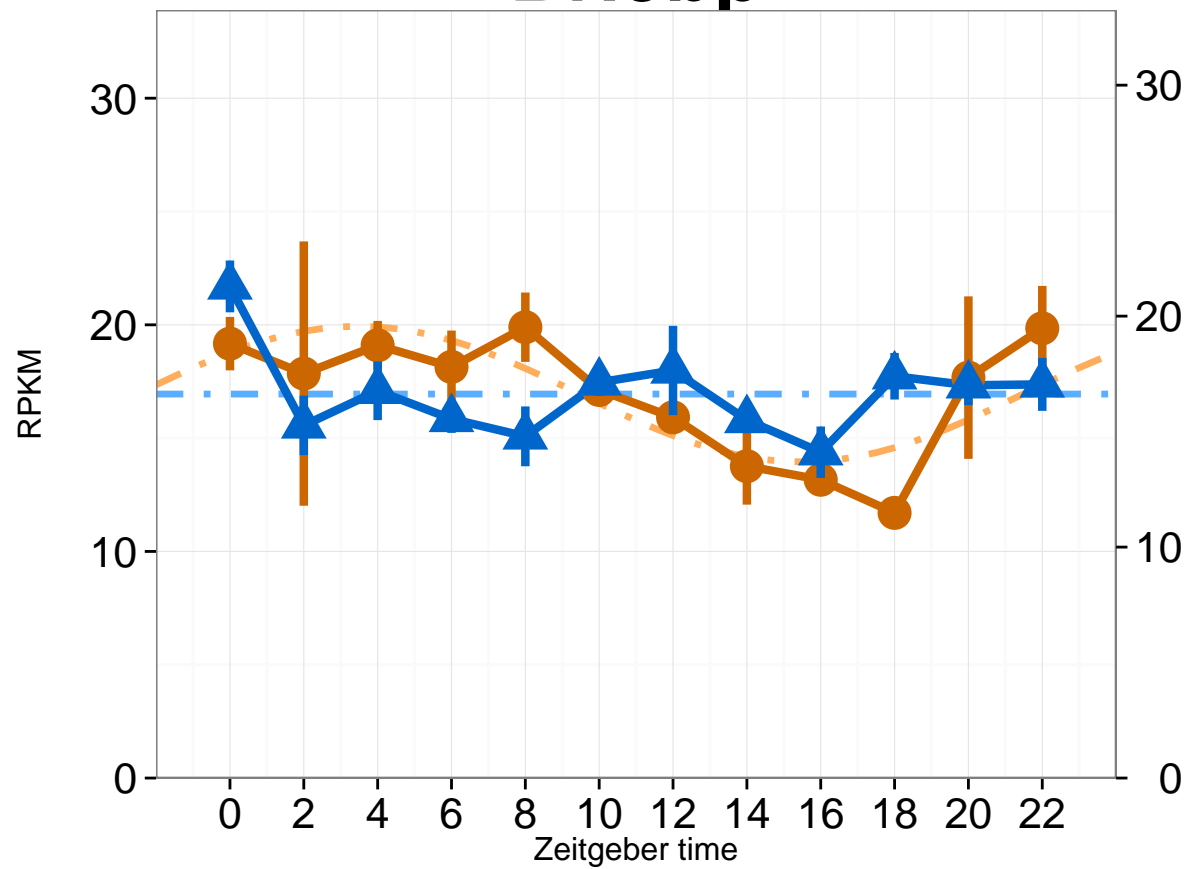

## Bri3bp

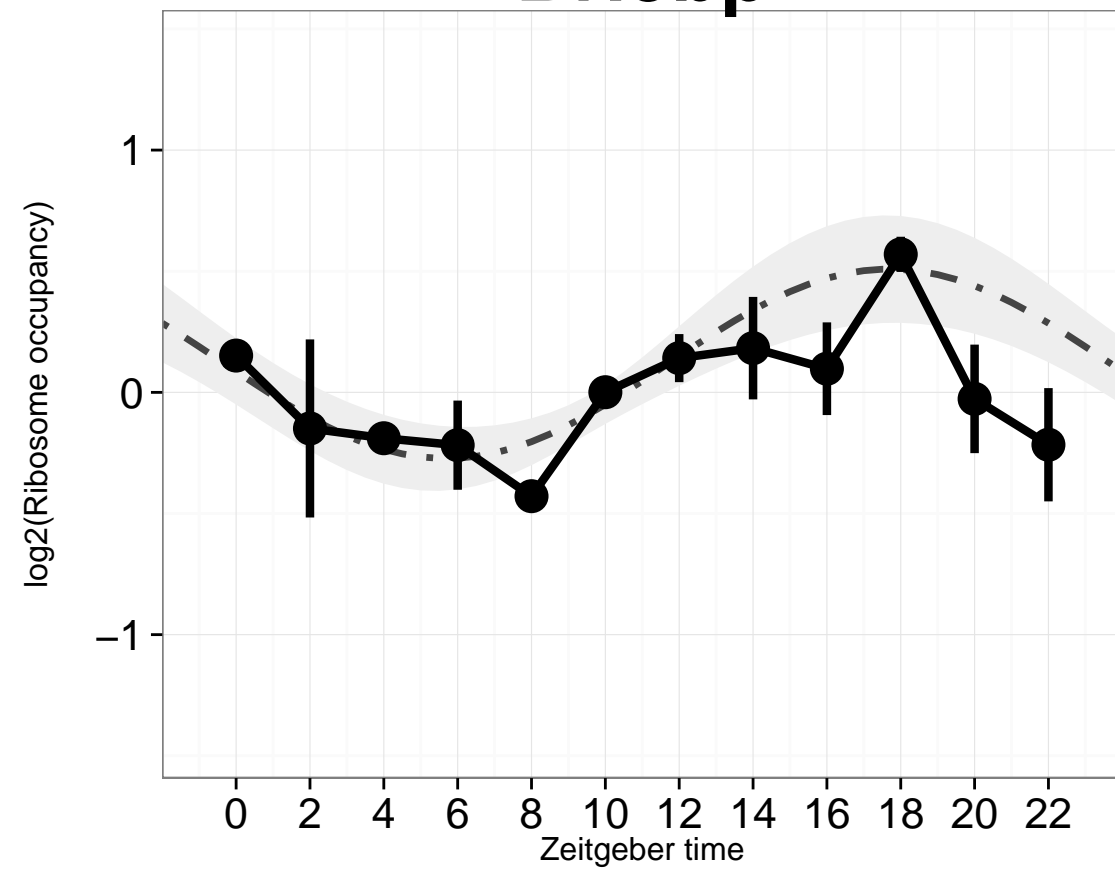

Supplement: SuppDataset_1.zip [file Bri3bp_set_A.pdf › Supplemental Dataset 1/A-mRNA_nonrhyth_translation_nonrhyth/Bri3bp_set_A.pdf]

# Brix1

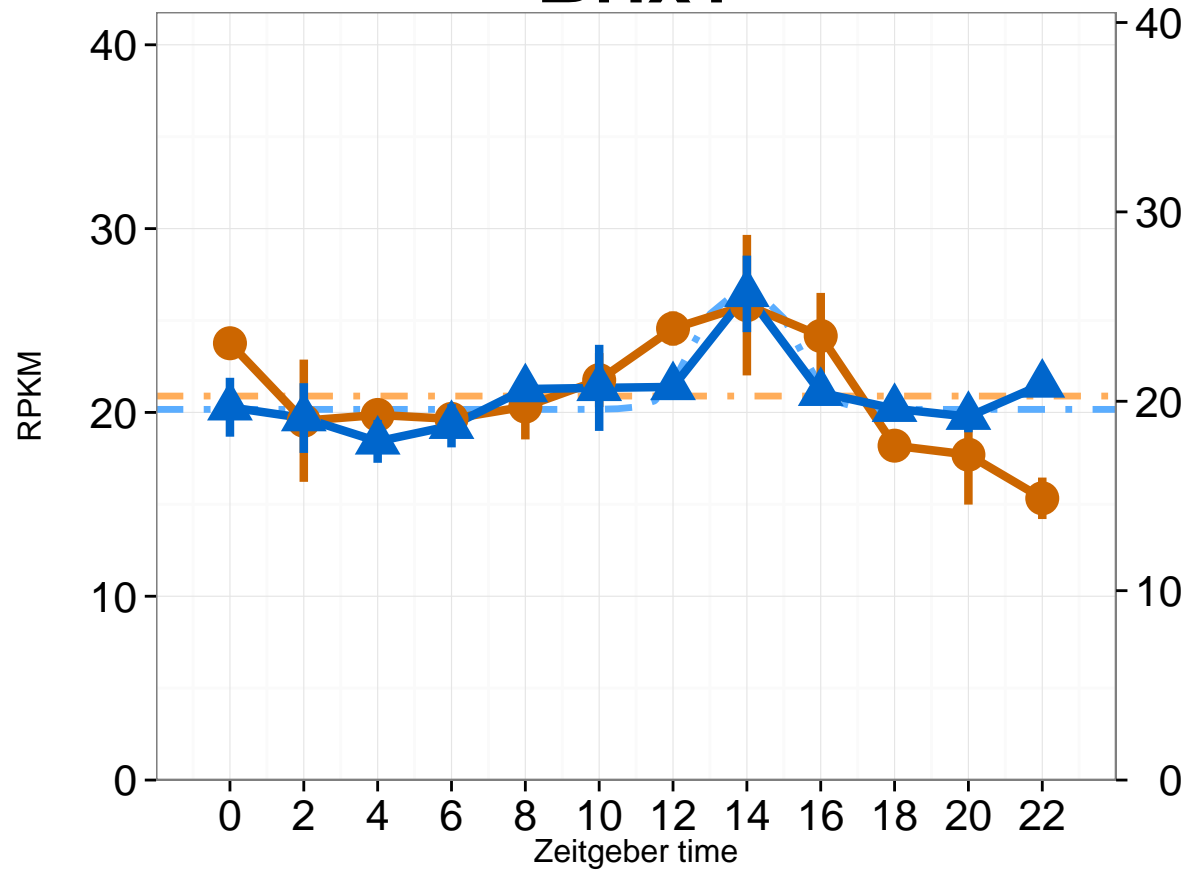

# Brix1

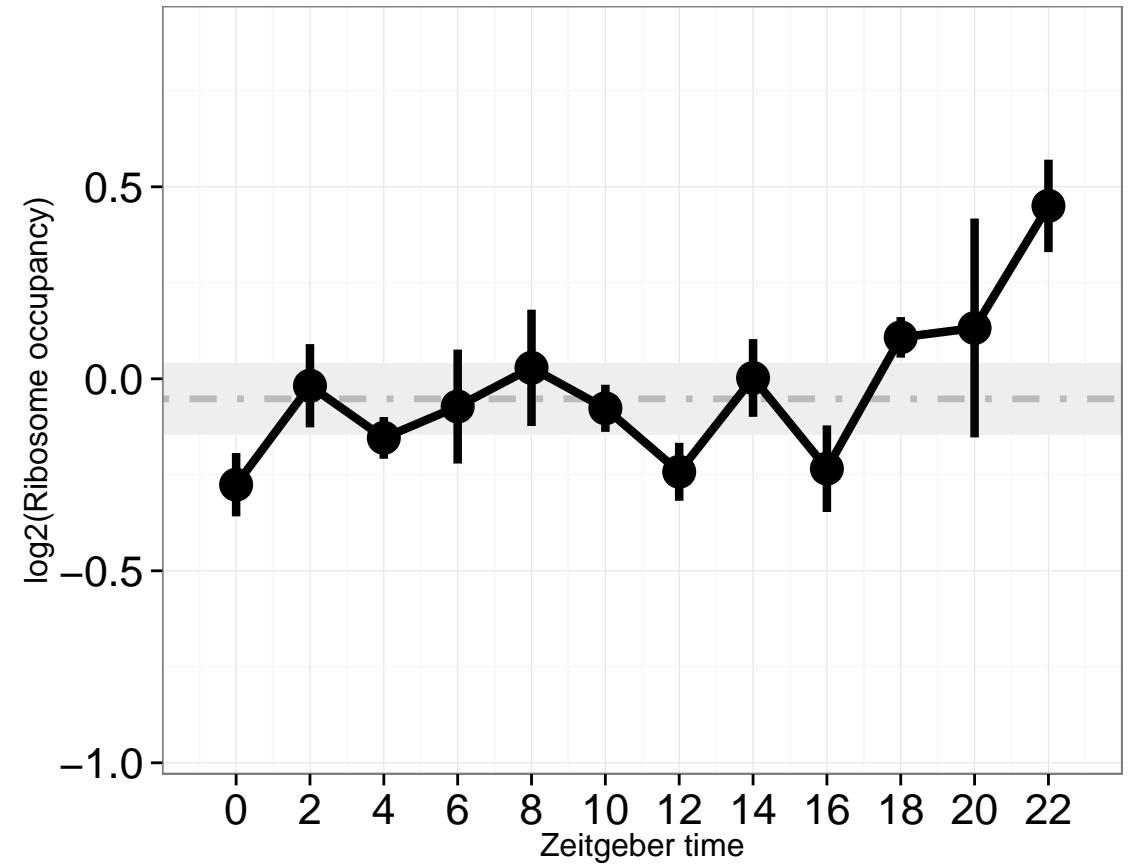

Supplement: SuppDataset_1.zip [file Brix1_set_A.pdf › Supplemental Dataset 1/A-mRNA_nonrhyth_translation_nonrhyth/Brix1_set_A.pdf]

## Brk1

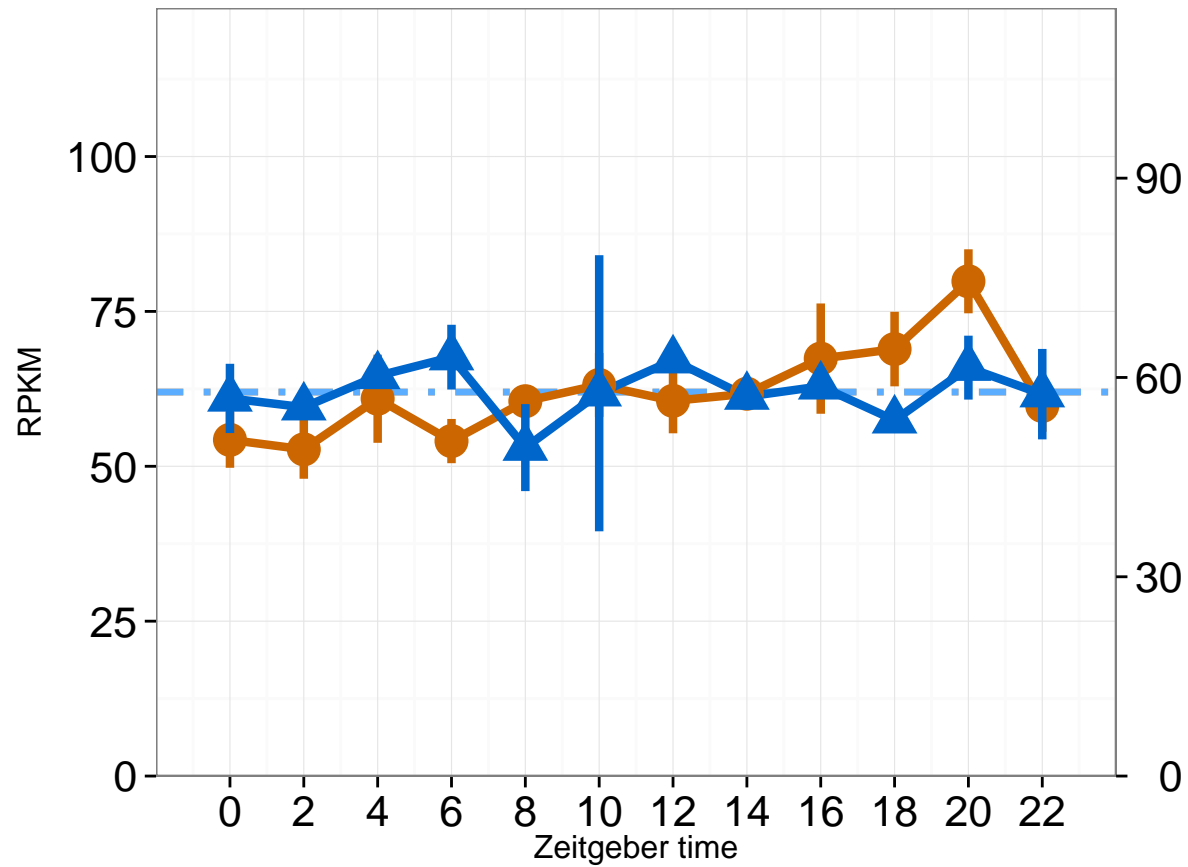

## Brk1

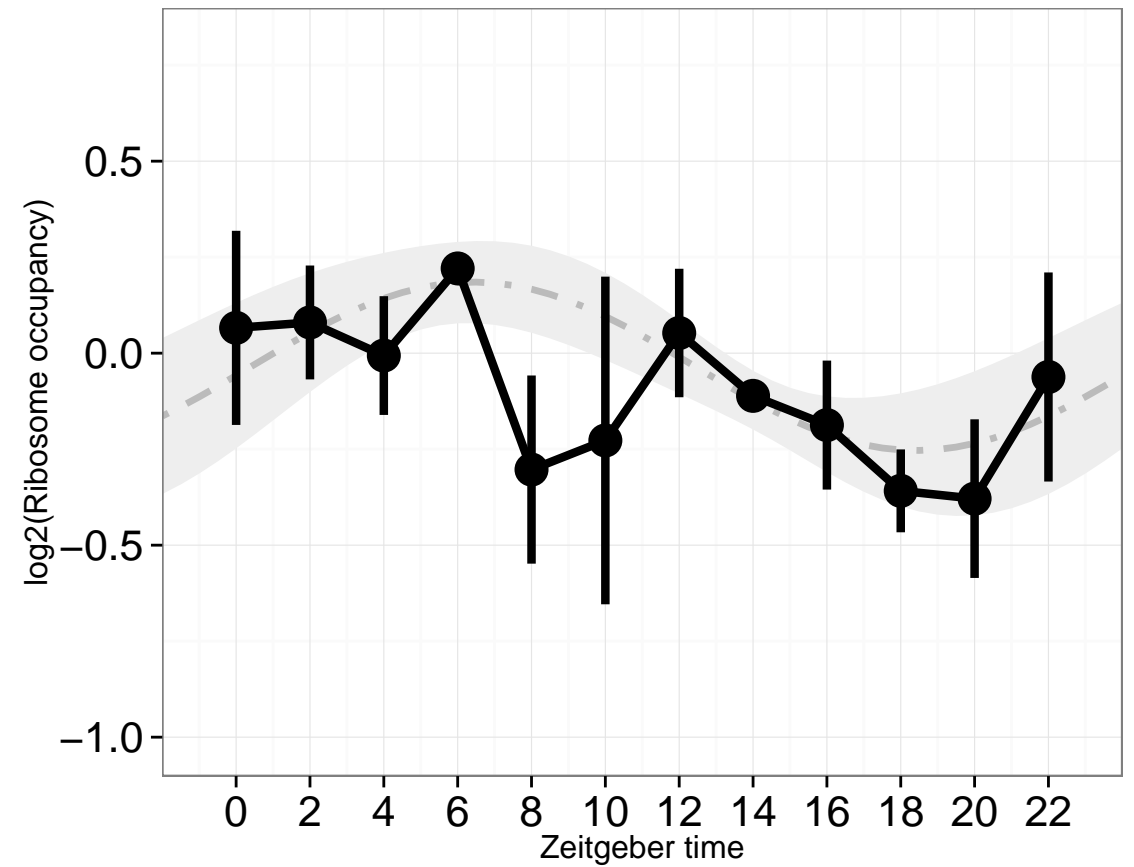

Supplement: SuppDataset_1.zip [file Brk1_set_A.pdf › Supplemental Dataset 1/A-mRNA_nonrhyth_translation_nonrhyth/Brk1_set_A.pdf]

## Brms1

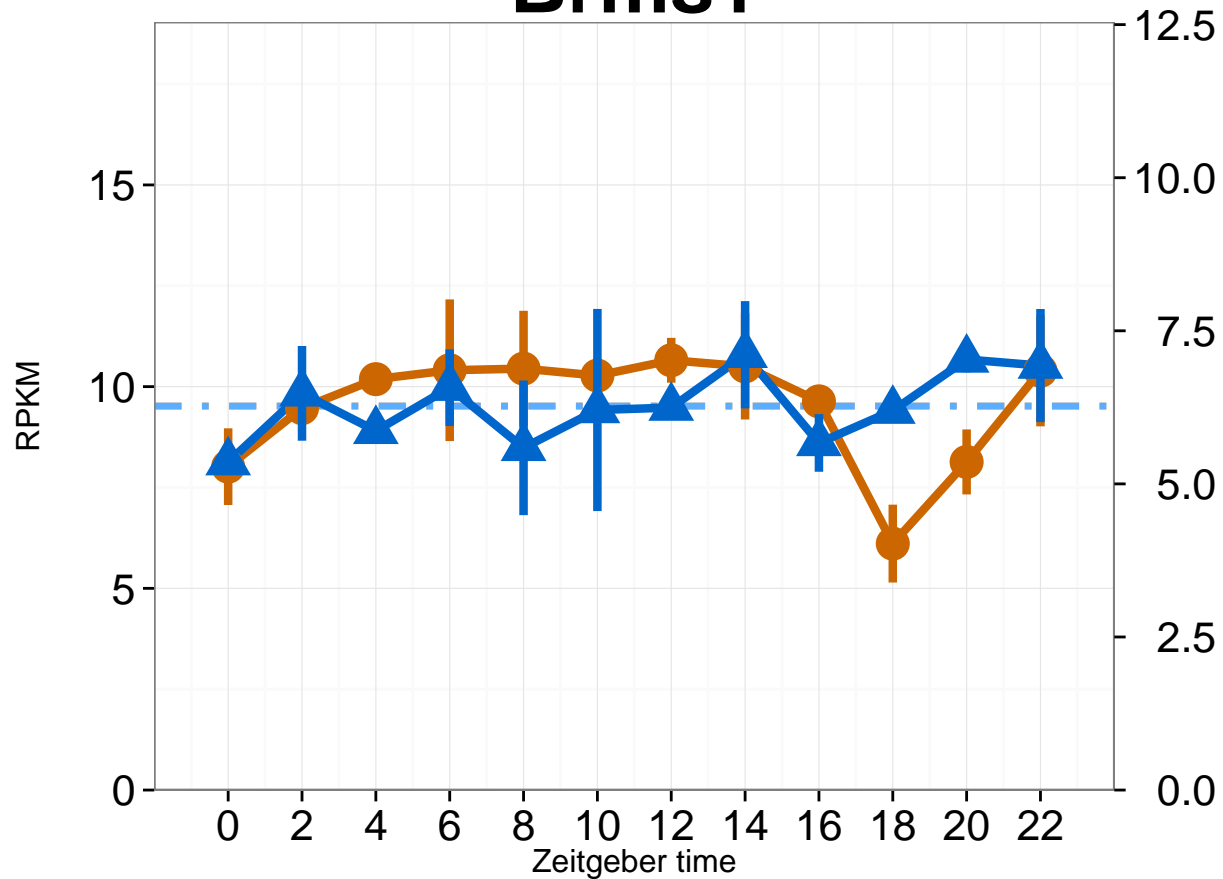

## Brms1

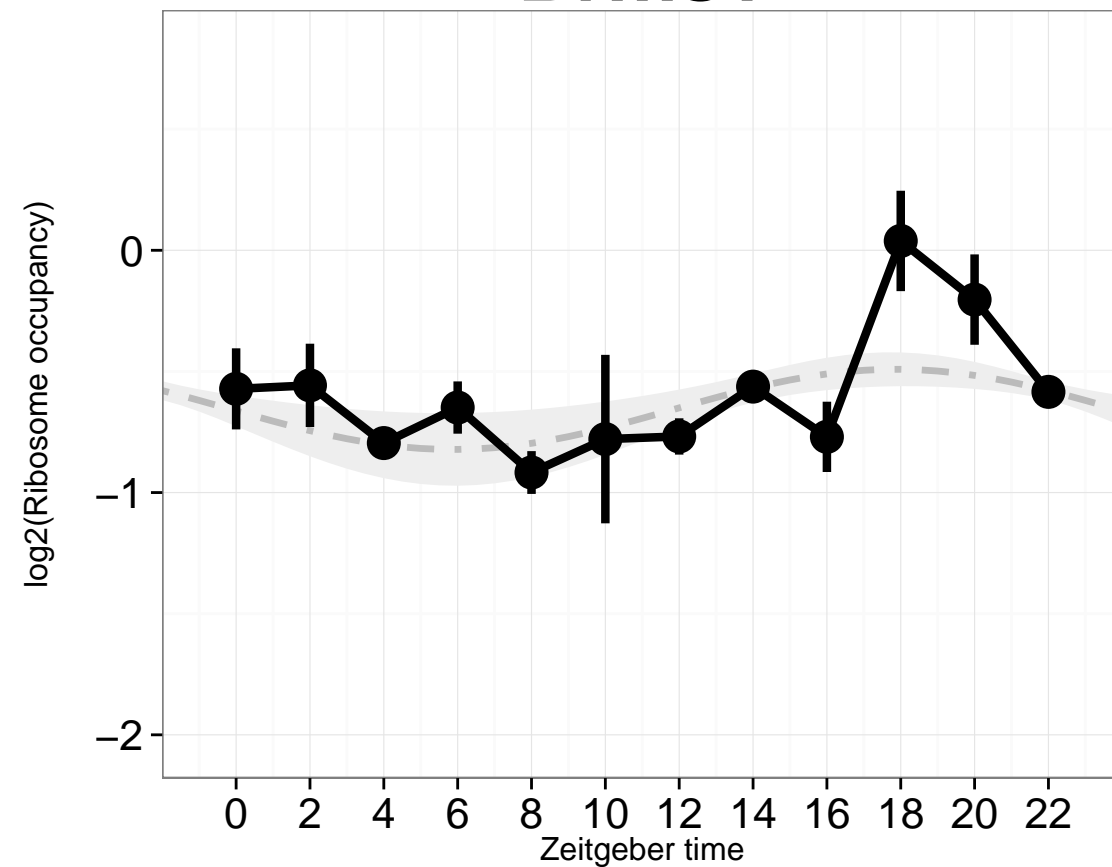

Supplement: SuppDataset_1.zip [file Brms1_set_A.pdf › Supplemental Dataset 1/A-mRNA_nonrhyth_translation_nonrhyth/Brms1_set_A.pdf]

## Brms1l

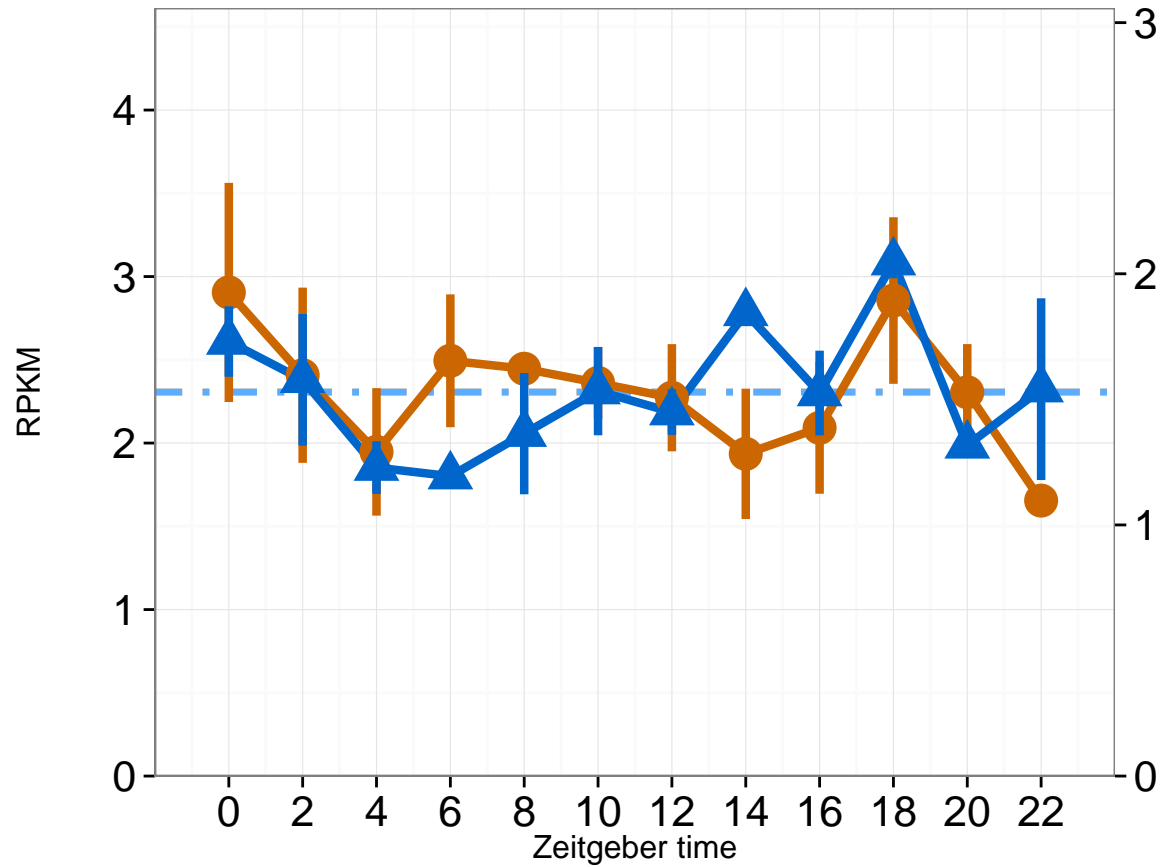

## Brms1l

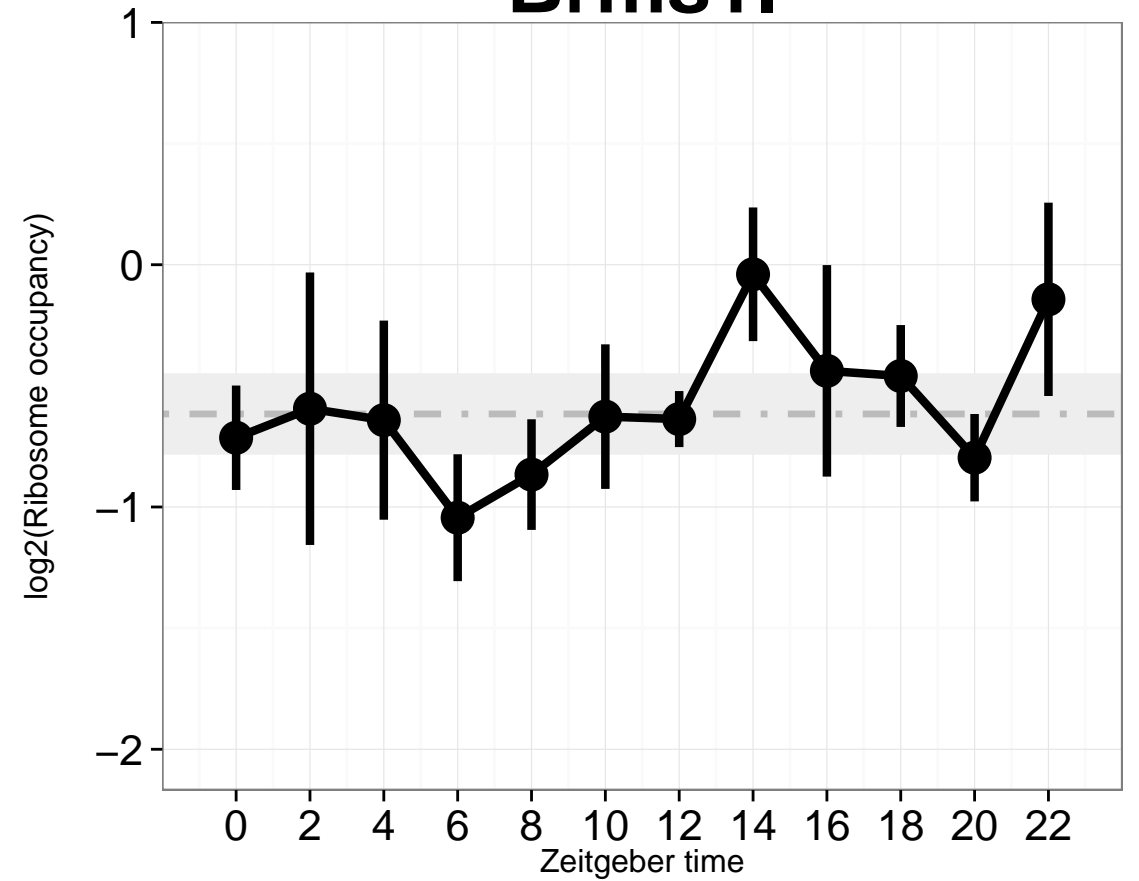

Supplement: SuppDataset_1.zip [file Brms1l_set_A.pdf › Supplemental Dataset 1/A-mRNA_nonrhyth_translation_nonrhyth/Brms1l_set_A.pdf]

## Brox

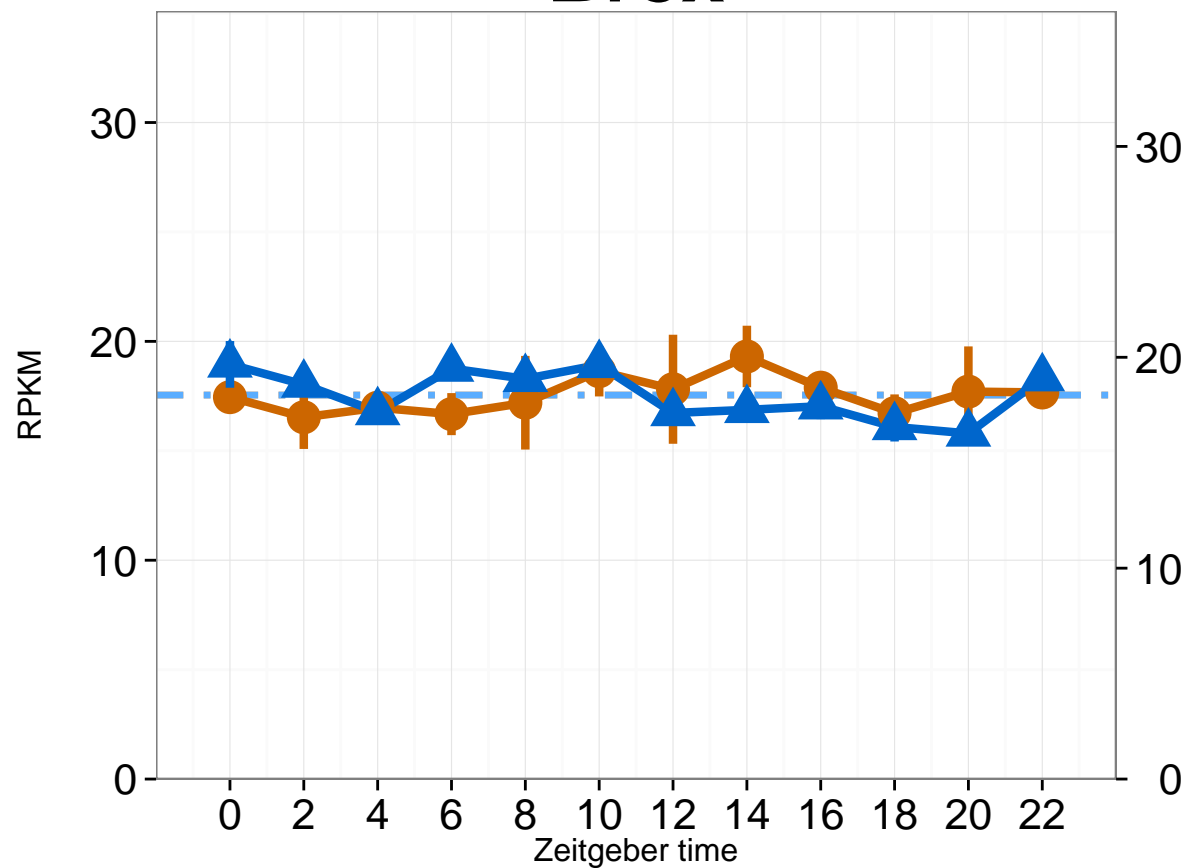

## Brox

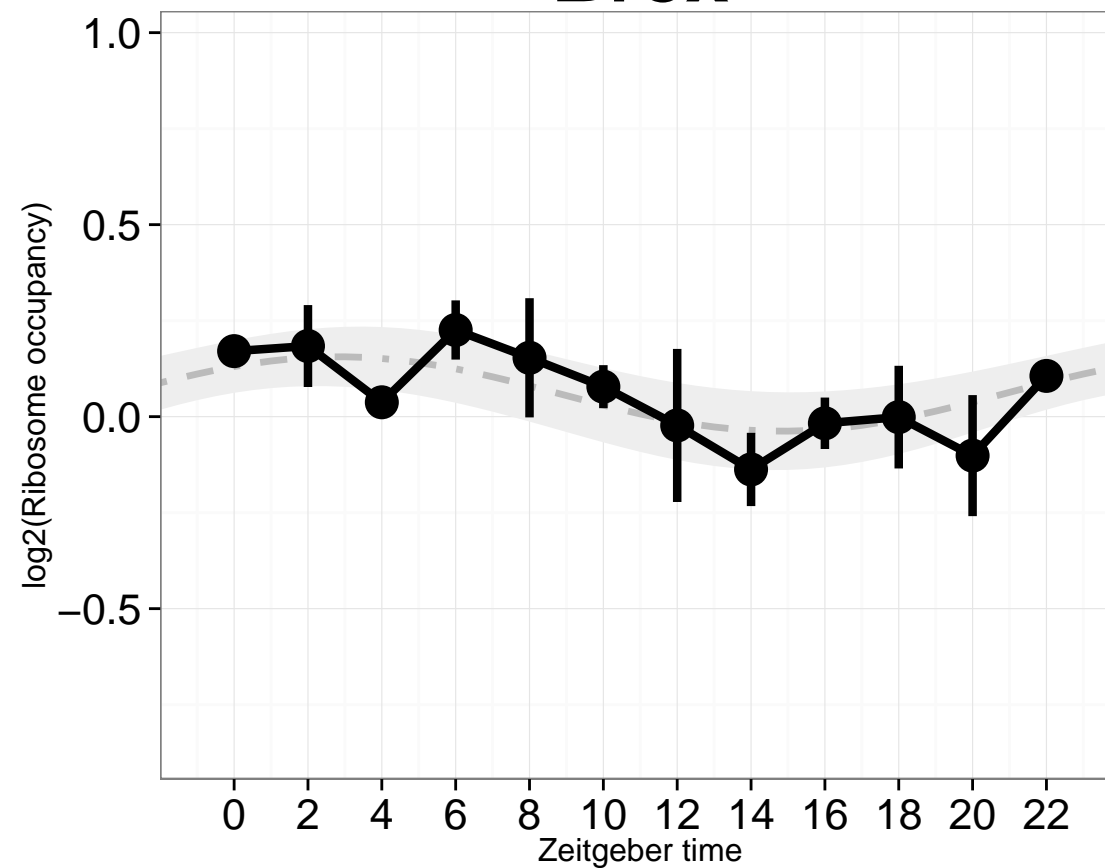

Supplement: SuppDataset_1.zip [file Brox_set_A.pdf › Supplemental Dataset 1/A-mRNA_nonrhyth_translation_nonrhyth/Brox_set_A.pdf]

# Brpf1

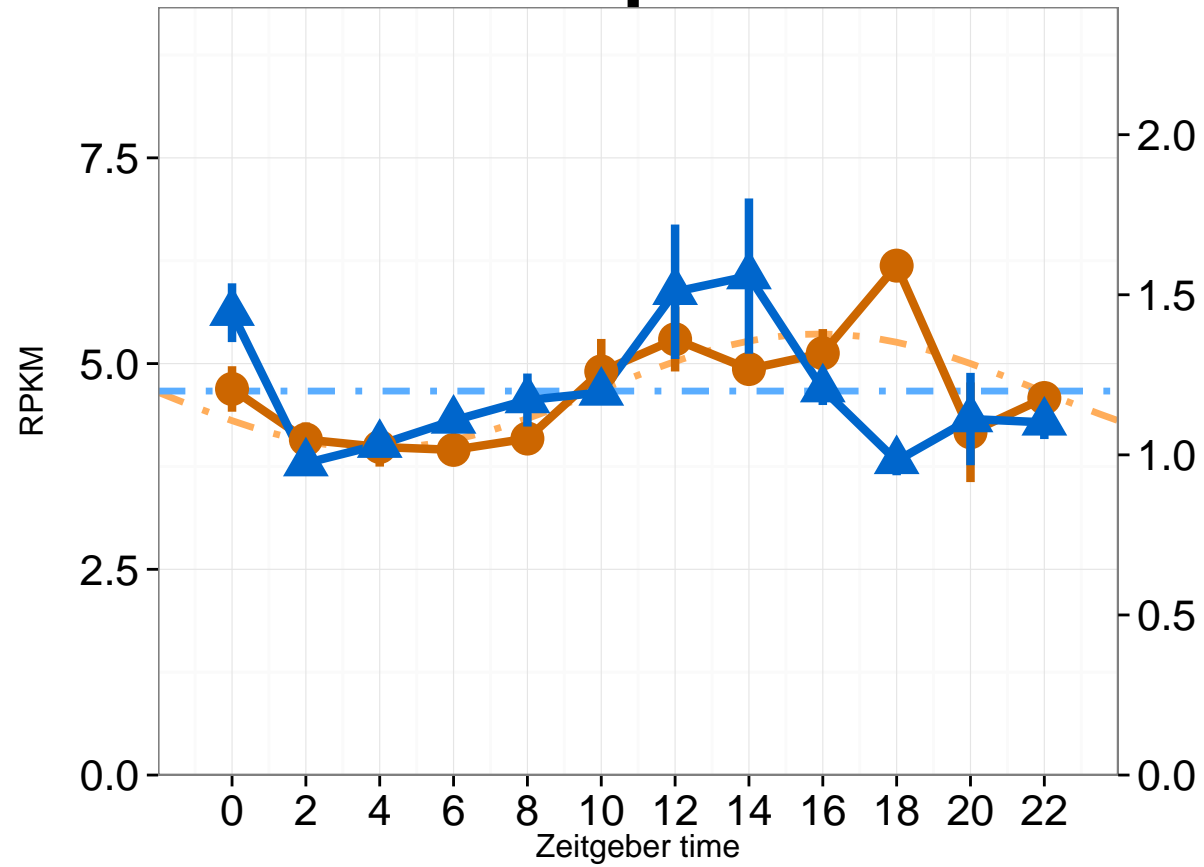

# Brpf1

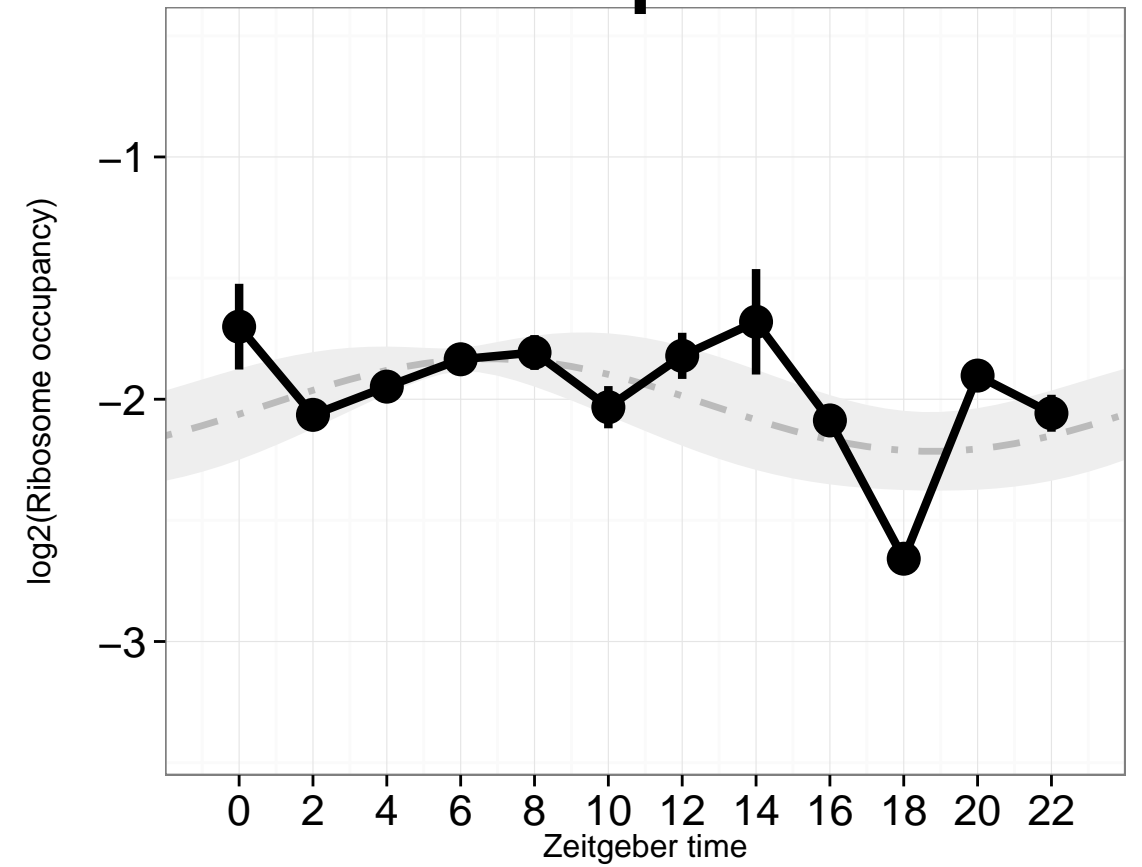

Supplement: SuppDataset_1.zip [file Brpf1_set_A.pdf › Supplemental Dataset 1/A-mRNA_nonrhyth_translation_nonrhyth/Brpf1_set_A.pdf]

# Brpf3

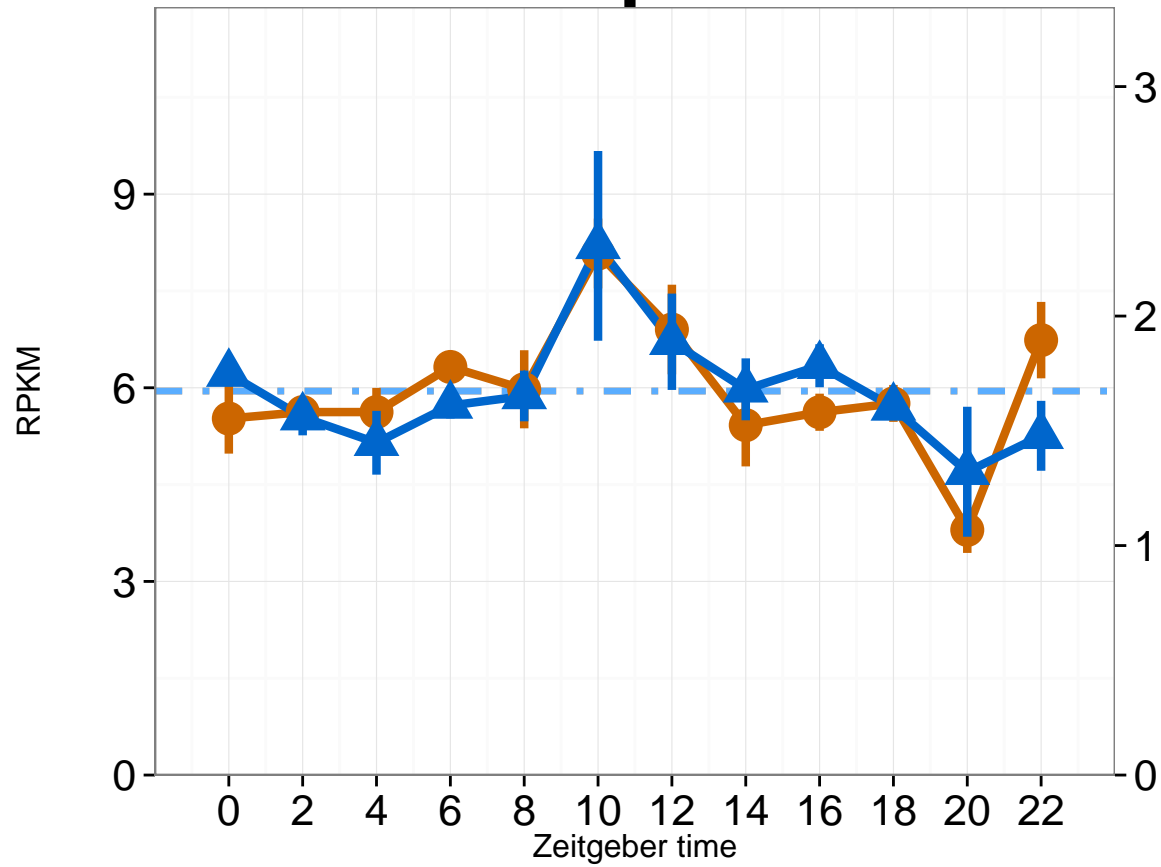

# Brpf3

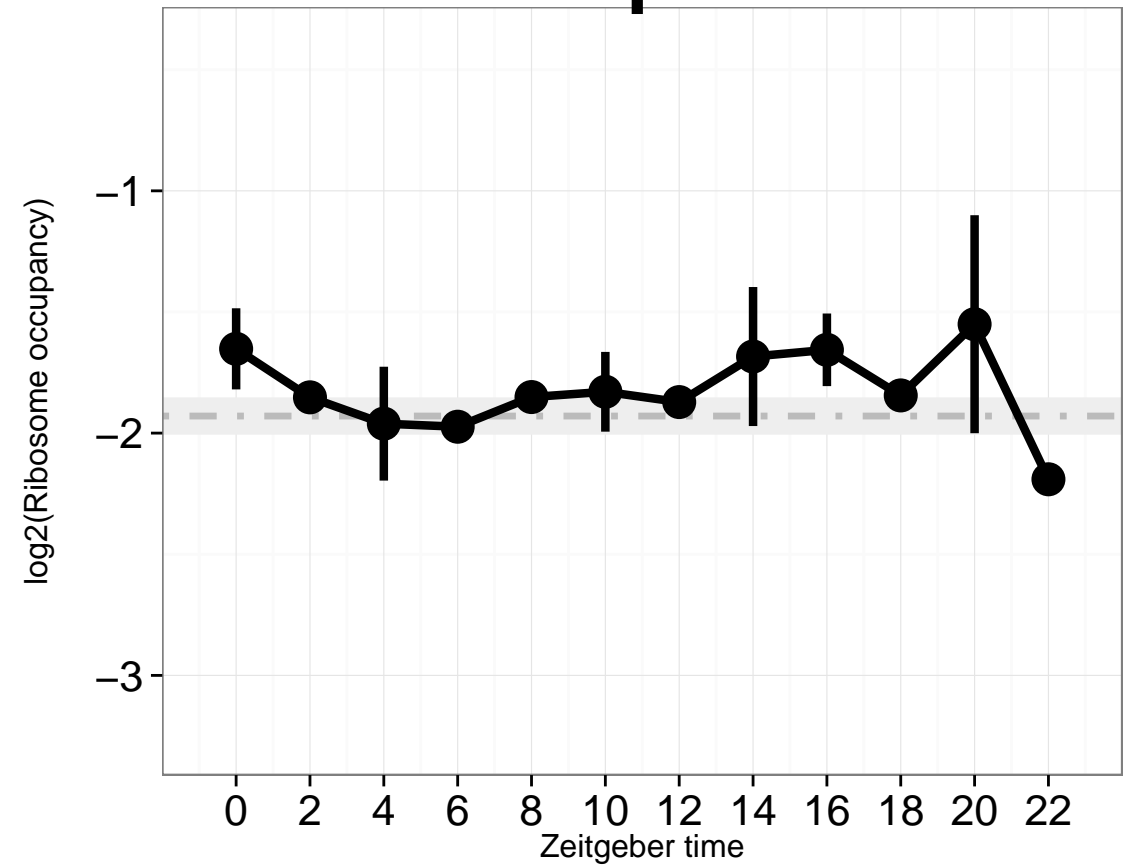

Supplement: SuppDataset_1.zip [file Brpf3_set_A.pdf › Supplemental Dataset 1/A-mRNA_nonrhyth_translation_nonrhyth/Brpf3_set_A.pdf]

# Brwd1

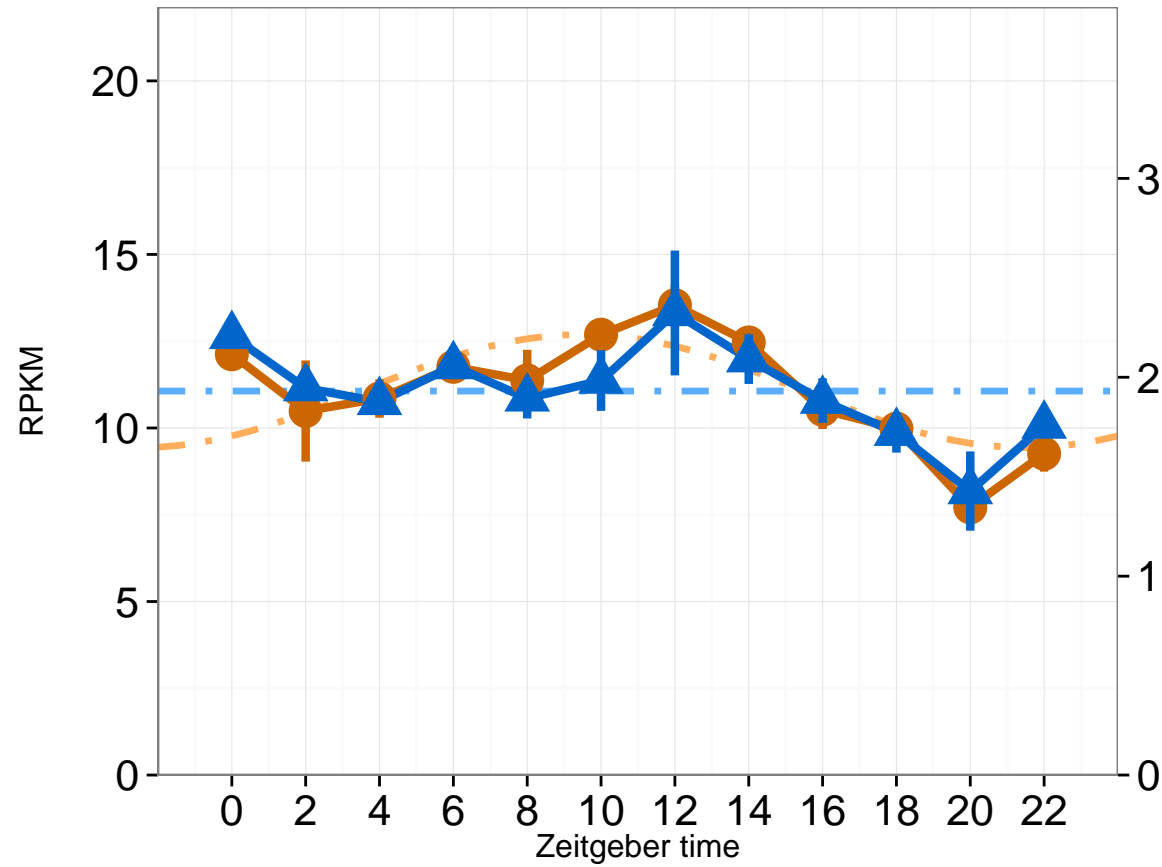

# Brwd1

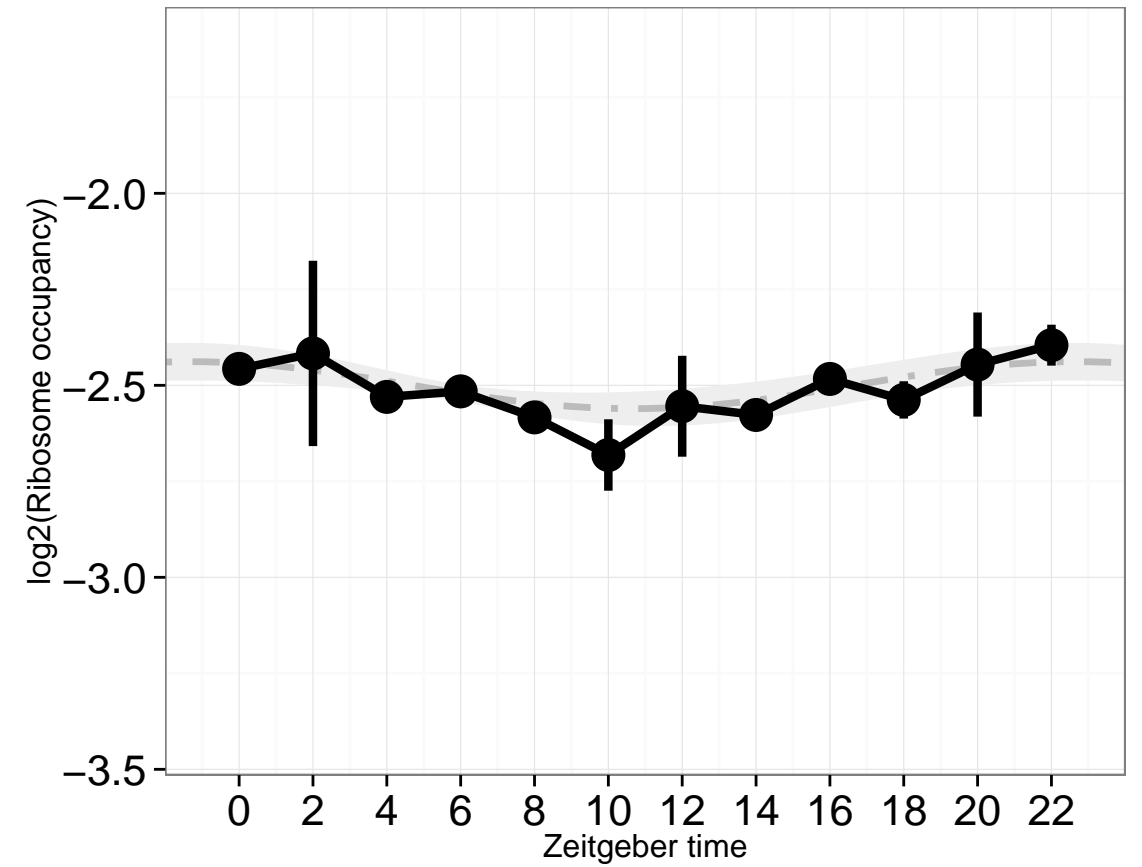

Supplement: SuppDataset_1.zip [file Brwd1_set_A.pdf › Supplemental Dataset 1/A-mRNA_nonrhyth_translation_nonrhyth/Brwd1_set_A.pdf]

## Bscl2

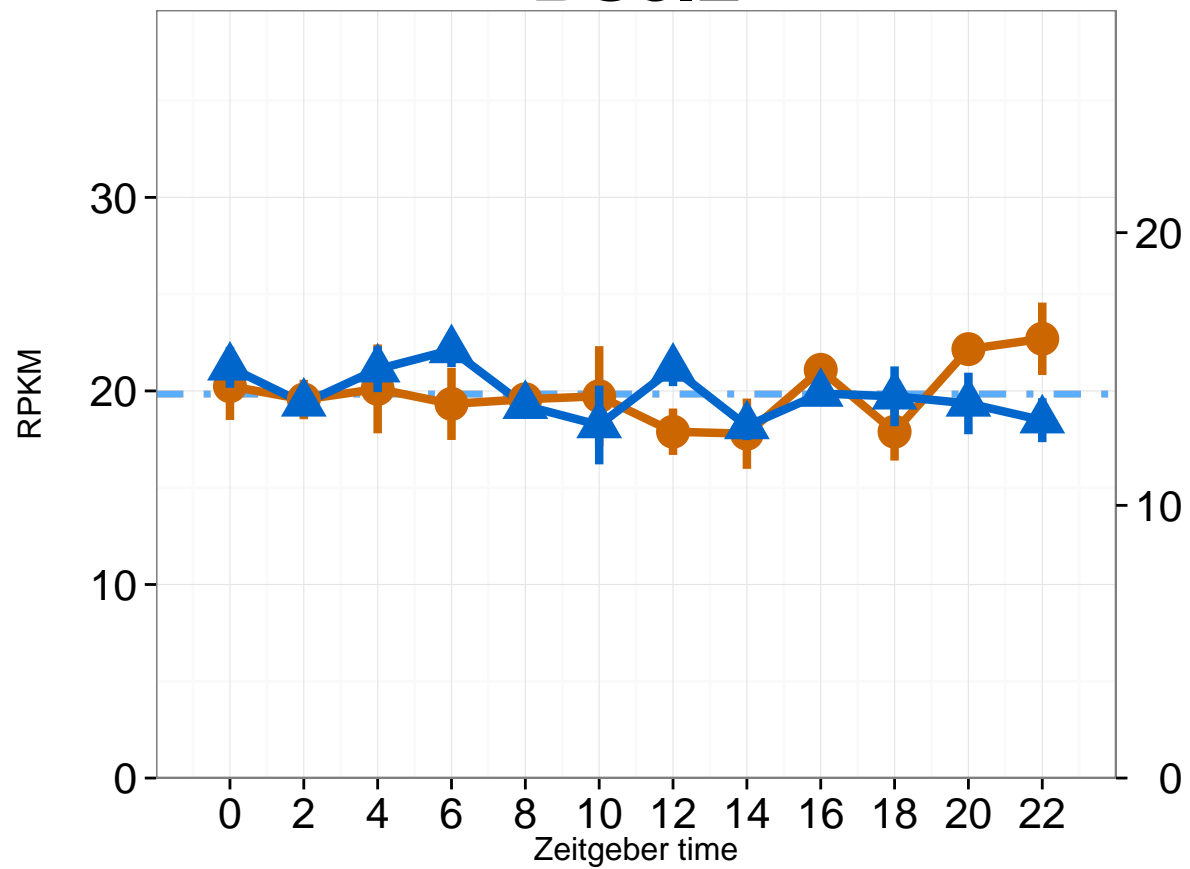

## Bscl2

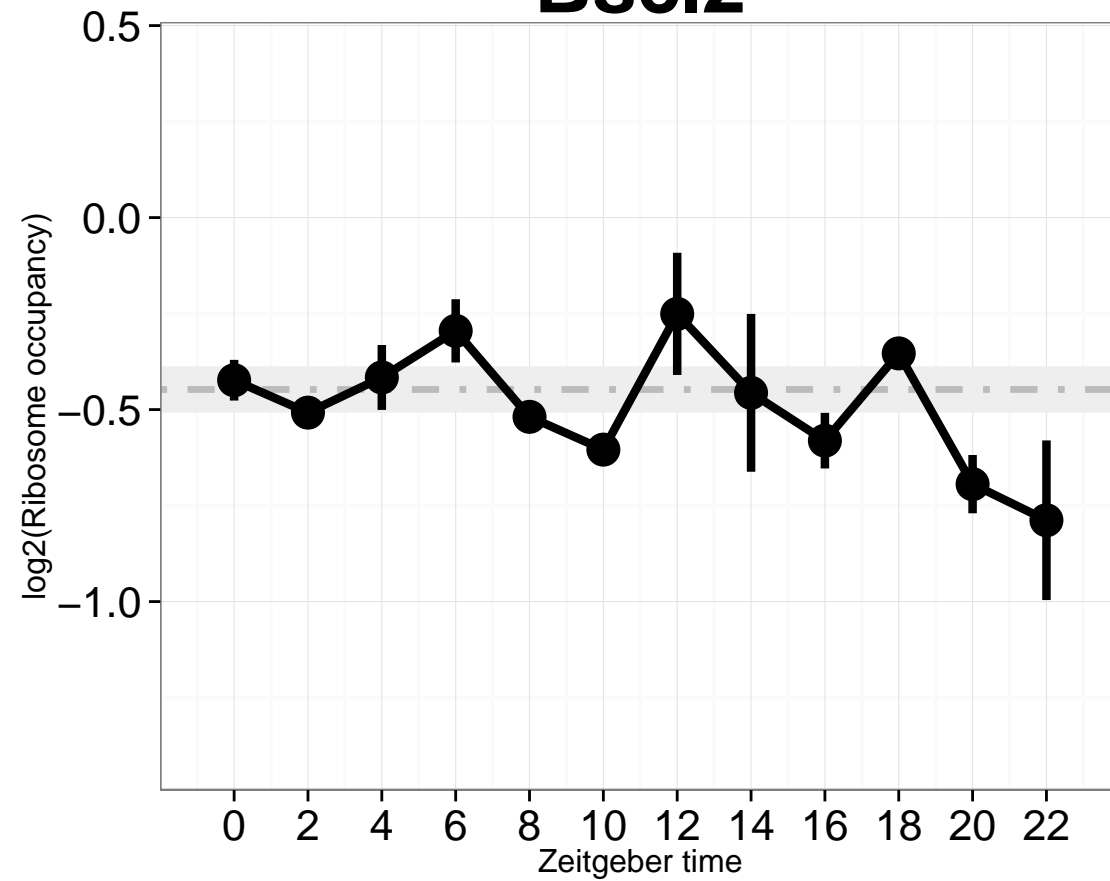

Supplement: SuppDataset_1.zip [file Bscl2_set_A.pdf › Supplemental Dataset 1/A-mRNA_nonrhyth_translation_nonrhyth/Bscl2_set_A.pdf]

## Bsdc1

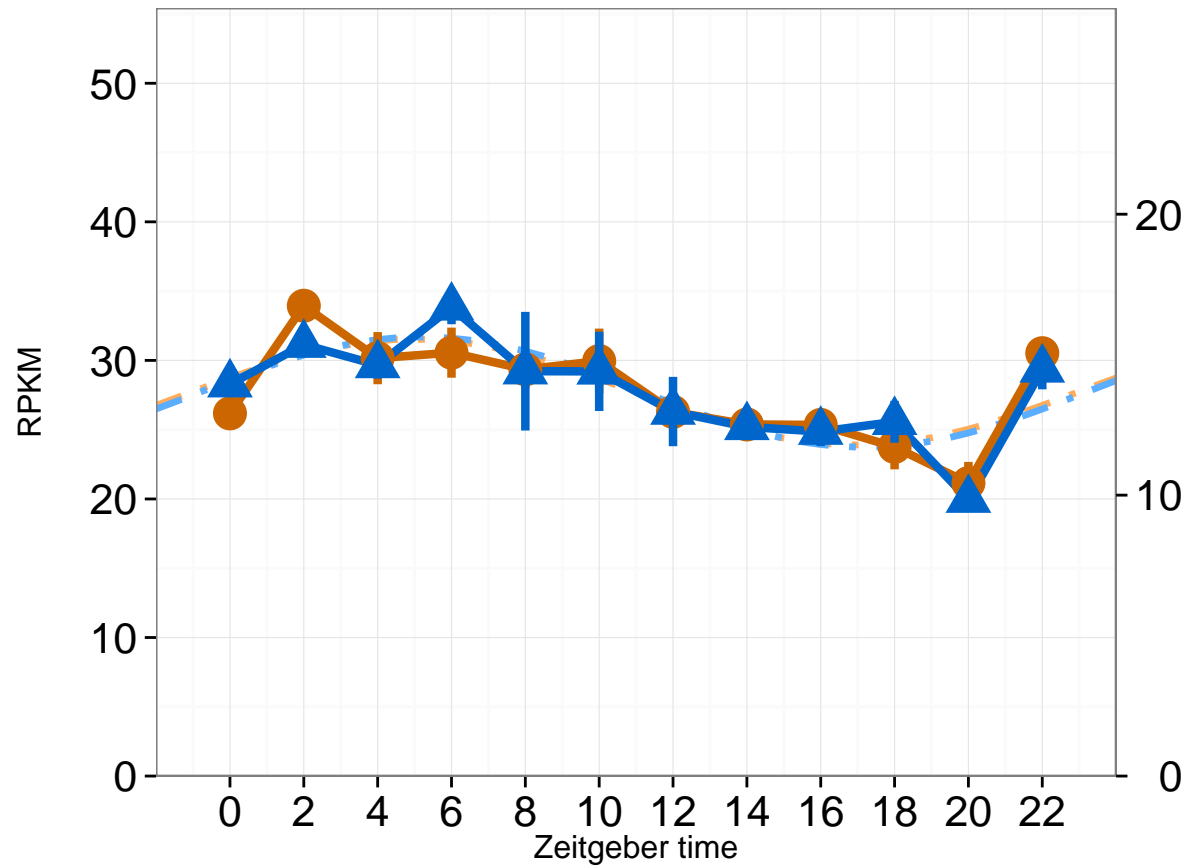

## Bsdc1

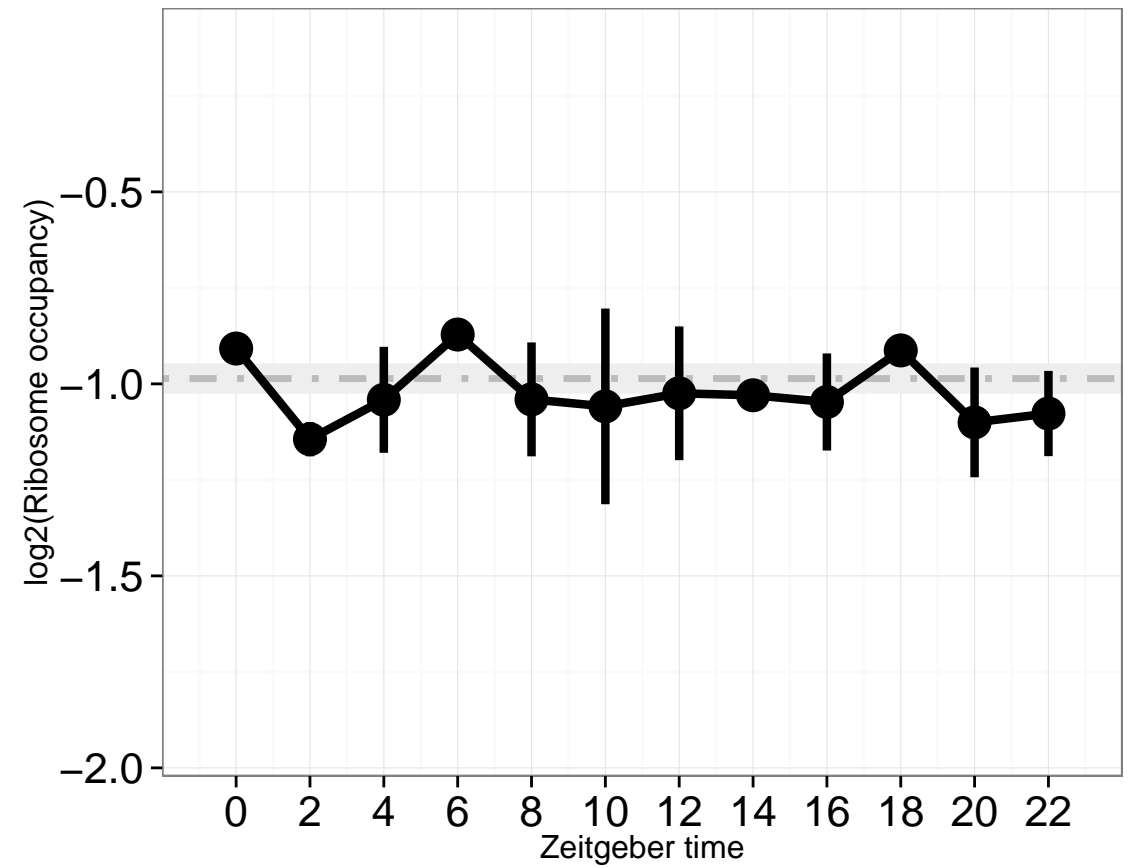

Supplement: SuppDataset_1.zip [file Bsdc1_set_A.pdf › Supplemental Dataset 1/A-mRNA_nonrhyth_translation_nonrhyth/Bsdc1_set_A.pdf]

## Bsg

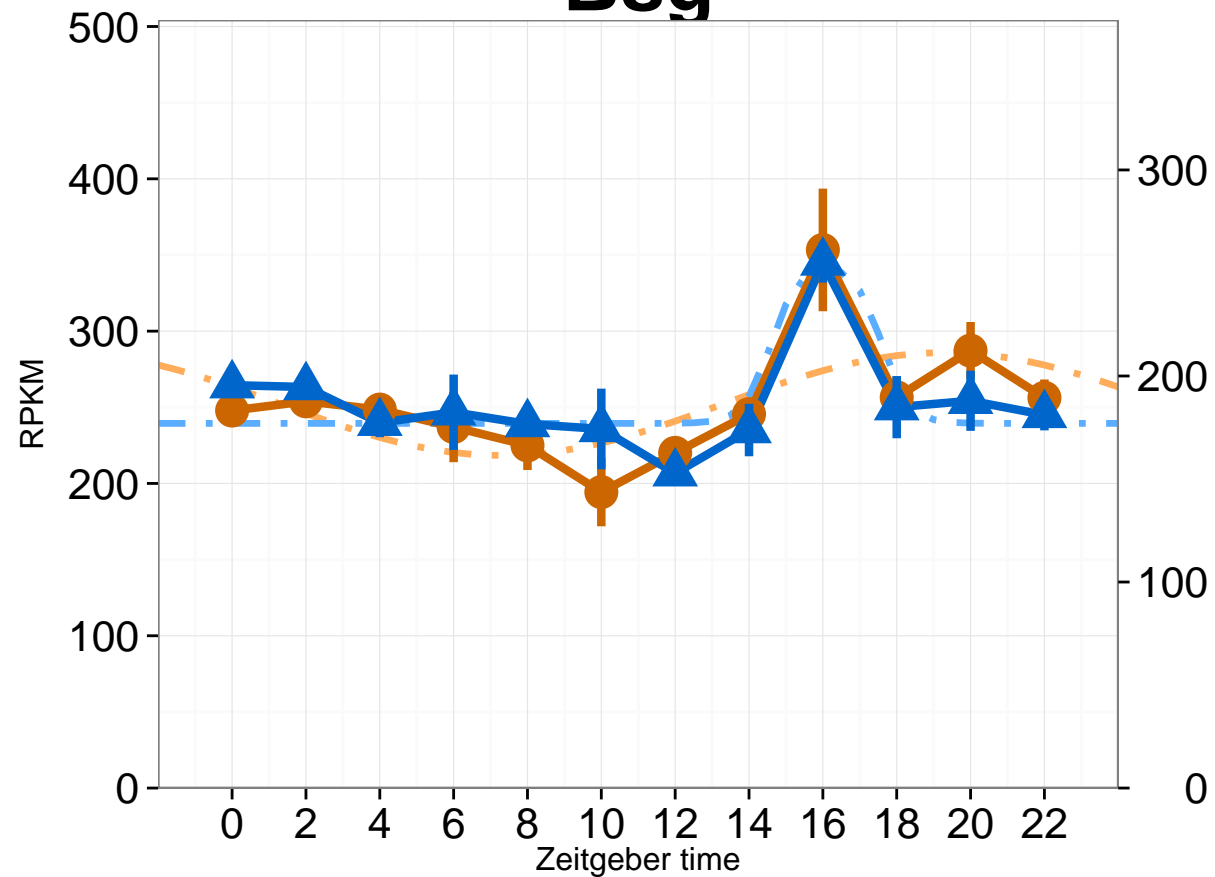

## Bsg

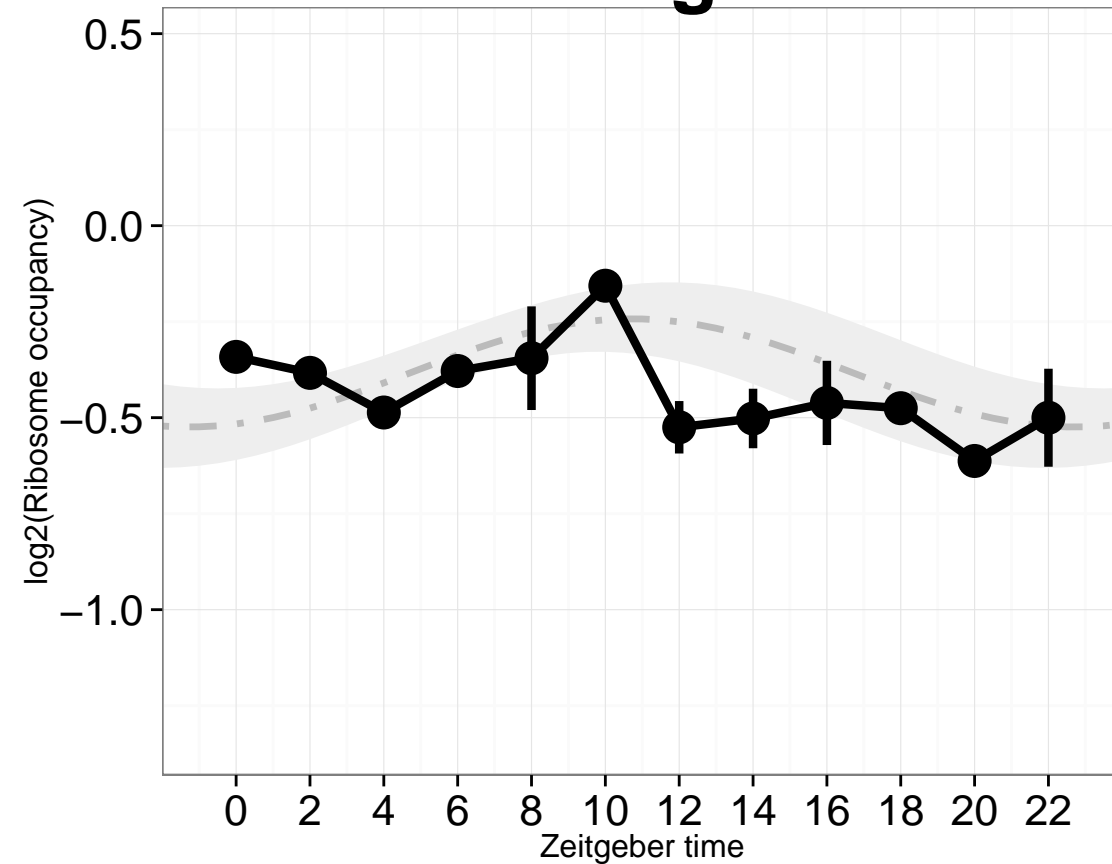

Supplement: SuppDataset_1.zip [file Bsg_set_A.pdf › Supplemental Dataset 1/A-mRNA_nonrhyth_translation_nonrhyth/Bsg_set_A.pdf]

## Bst2

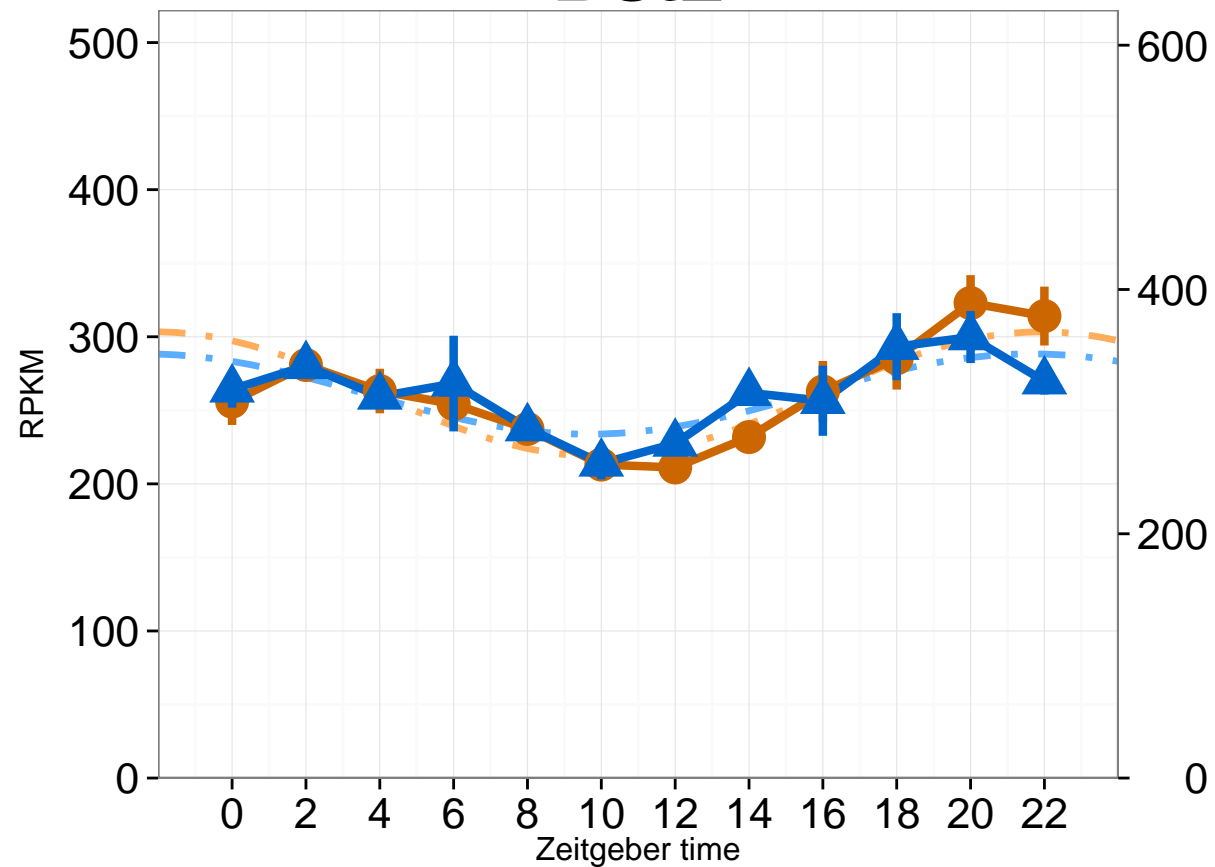

## Bst2

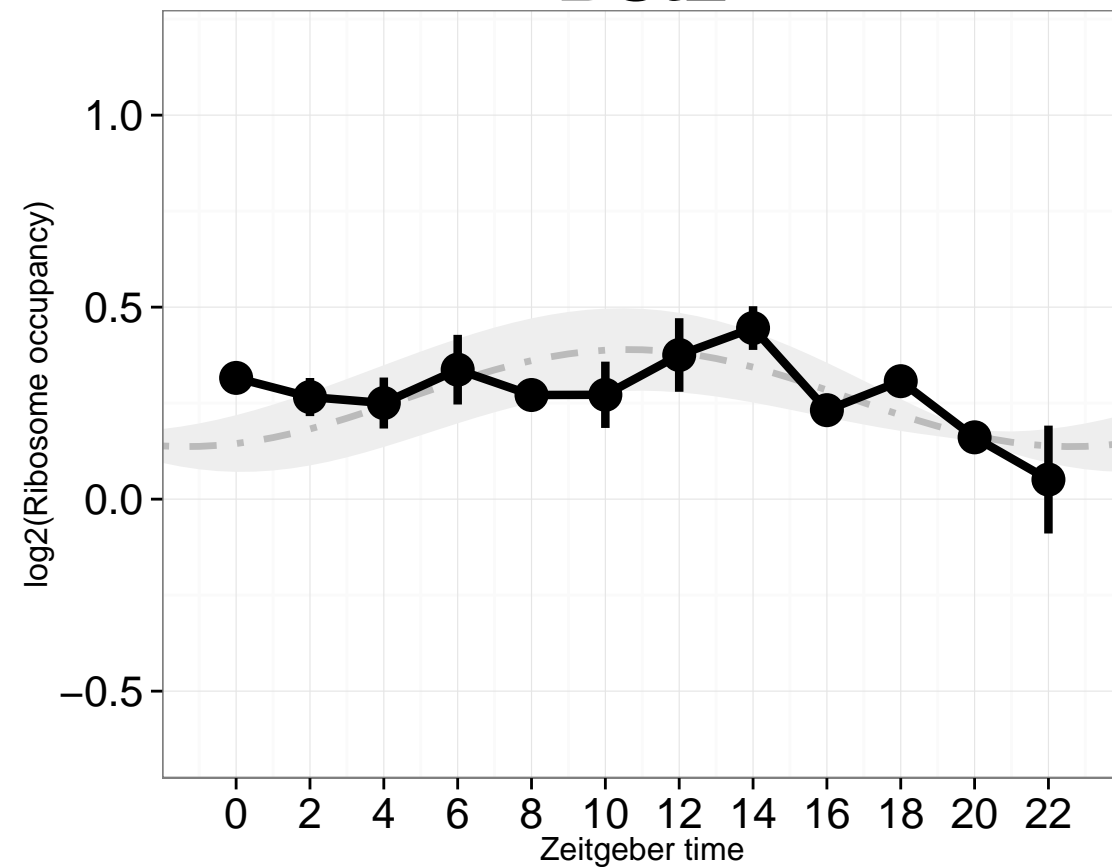

Supplement: SuppDataset_1.zip [file Bst2_set_A.pdf › Supplemental Dataset 1/A-mRNA_nonrhyth_translation_nonrhyth/Bst2_set_A.pdf]

# Btaf1

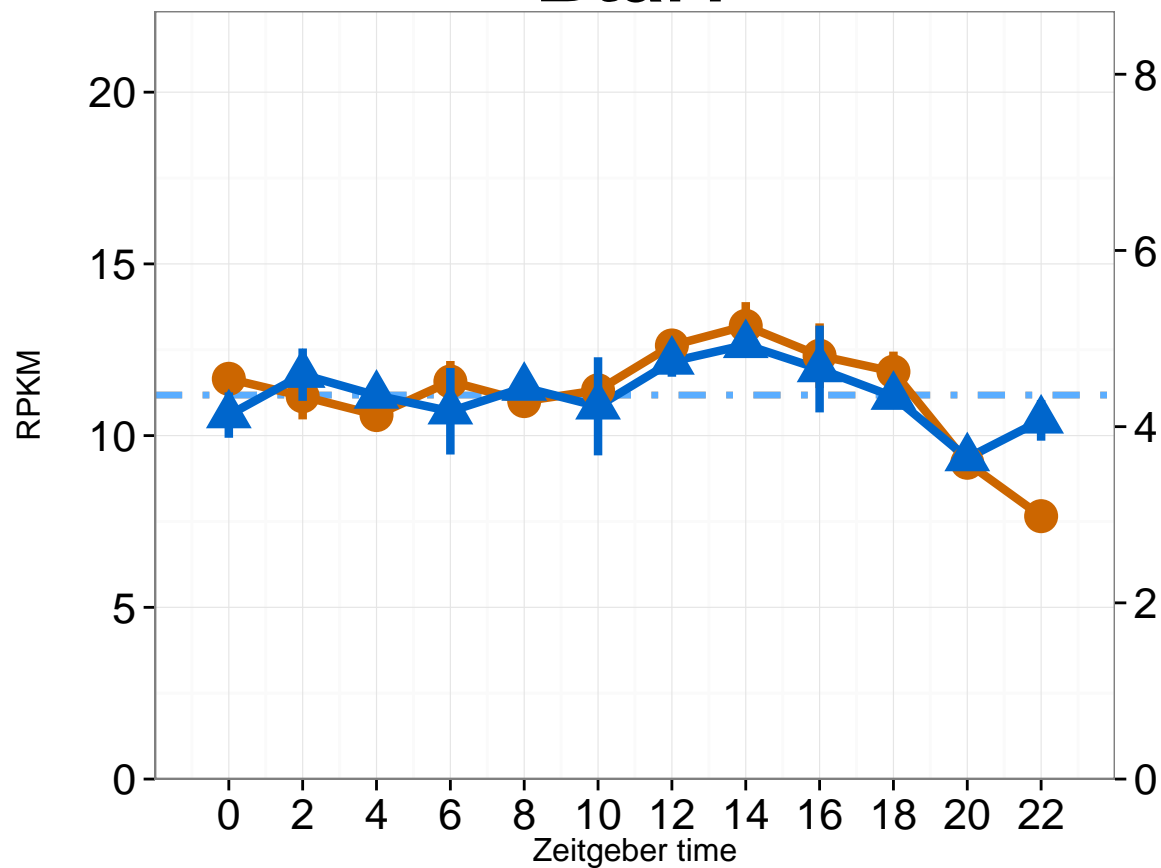

# Btaf1

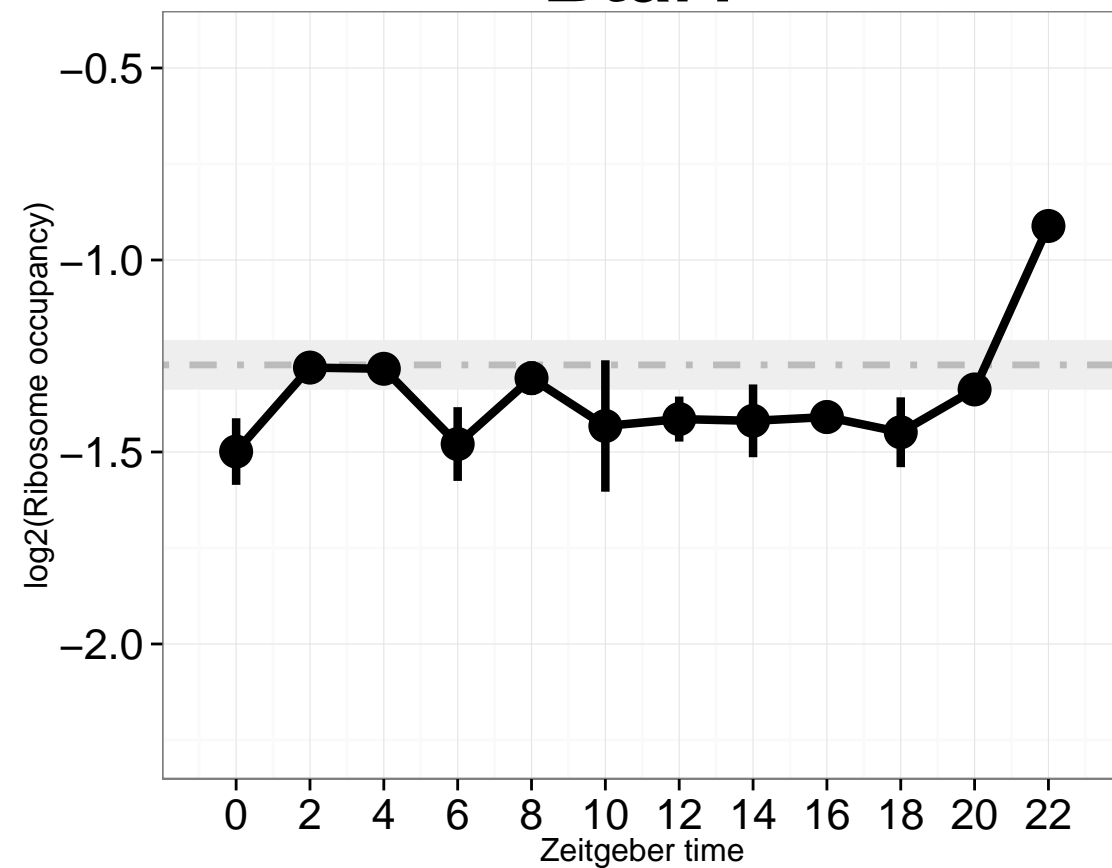

Supplement: SuppDataset_1.zip [file Btaf1_set_A.pdf › Supplemental Dataset 1/A-mRNA_nonrhyth_translation_nonrhyth/Btaf1_set_A.pdf]

# Btbd10

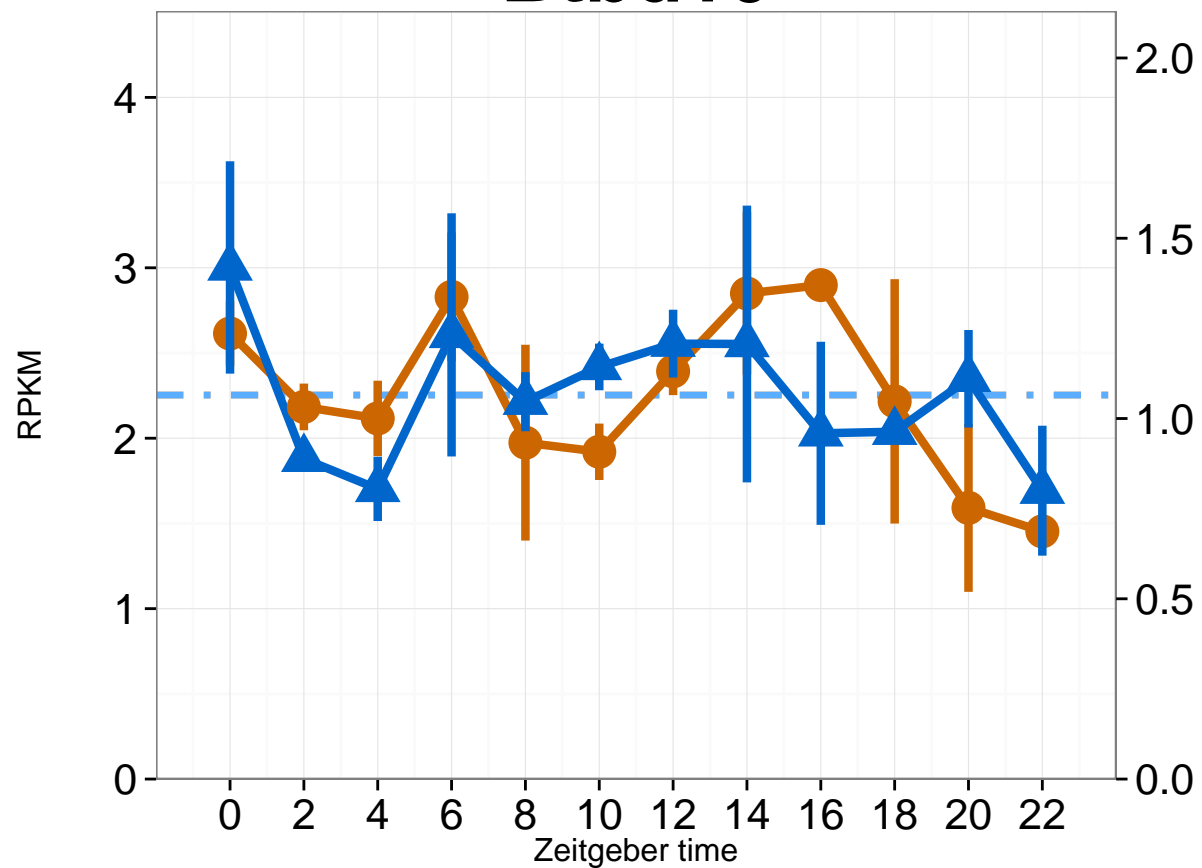

# Btbd10

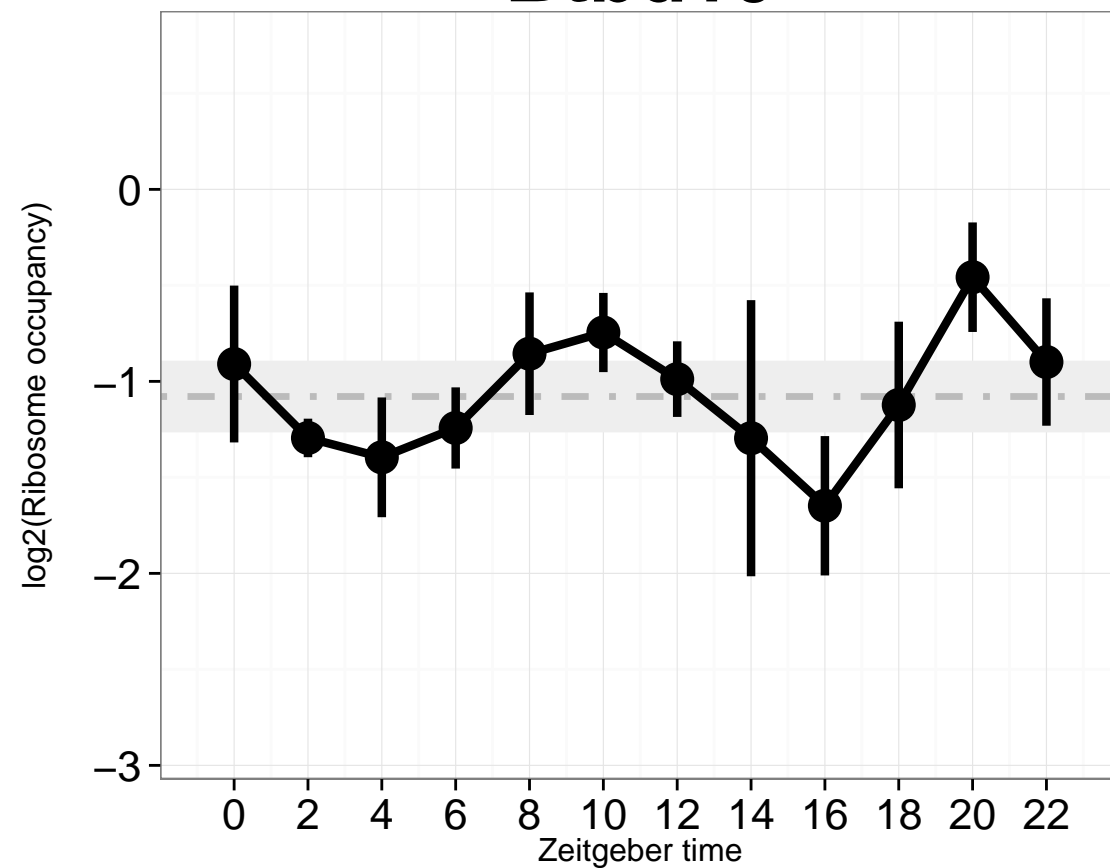

Supplement: SuppDataset_1.zip [file Btbd10_set_A.pdf › Supplemental Dataset 1/A-mRNA_nonrhyth_translation_nonrhyth/Btbd10_set_A.pdf]

# Btbd11

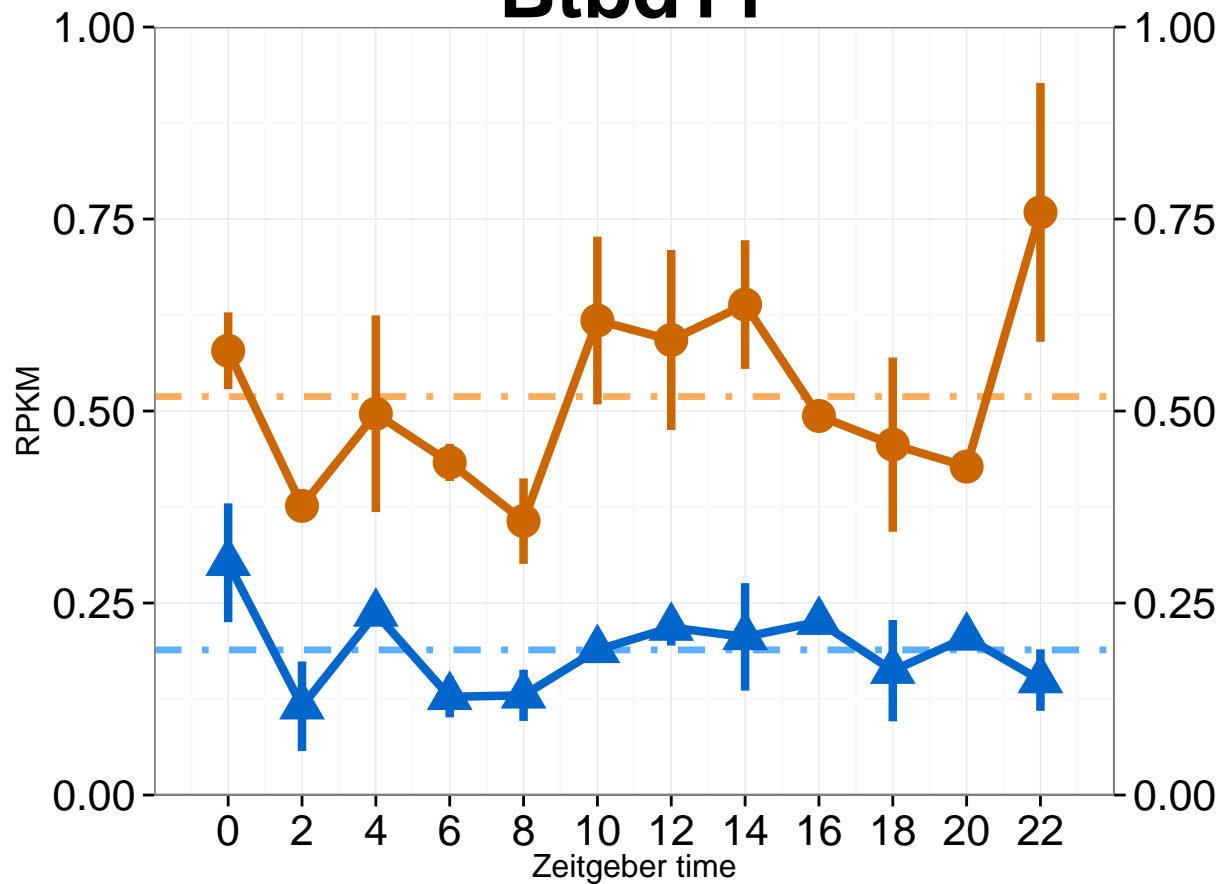

# Btbd11

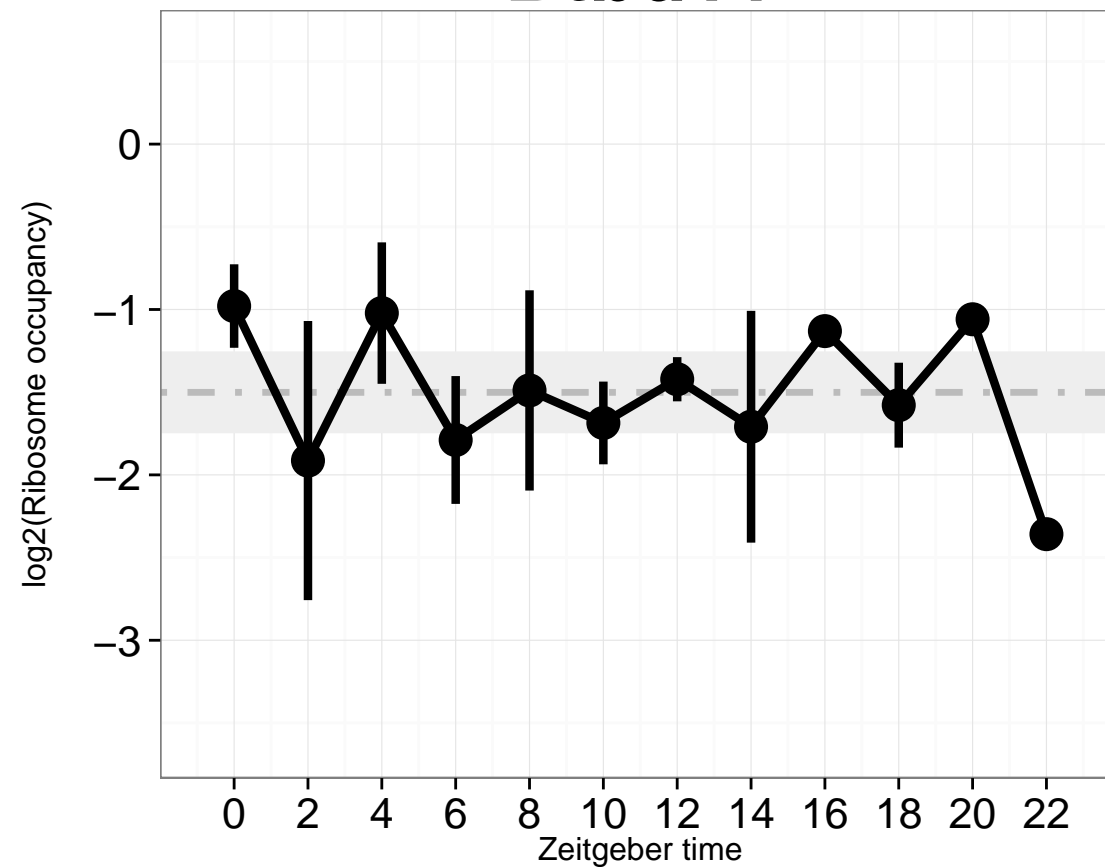

Supplement: SuppDataset_1.zip [file Btbd11_set_A.pdf › Supplemental Dataset 1/A-mRNA_nonrhyth_translation_nonrhyth/Btbd11_set_A.pdf]

# Btbd1

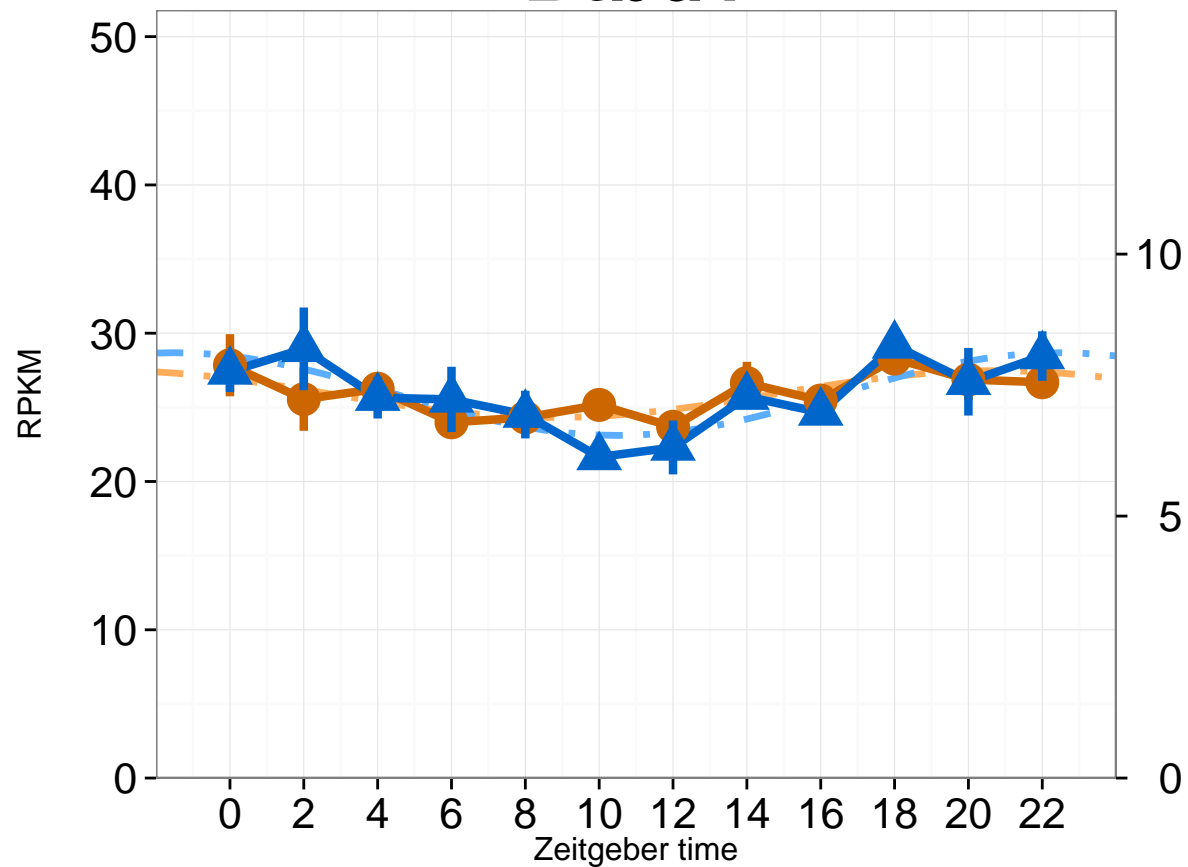

# Btbd1

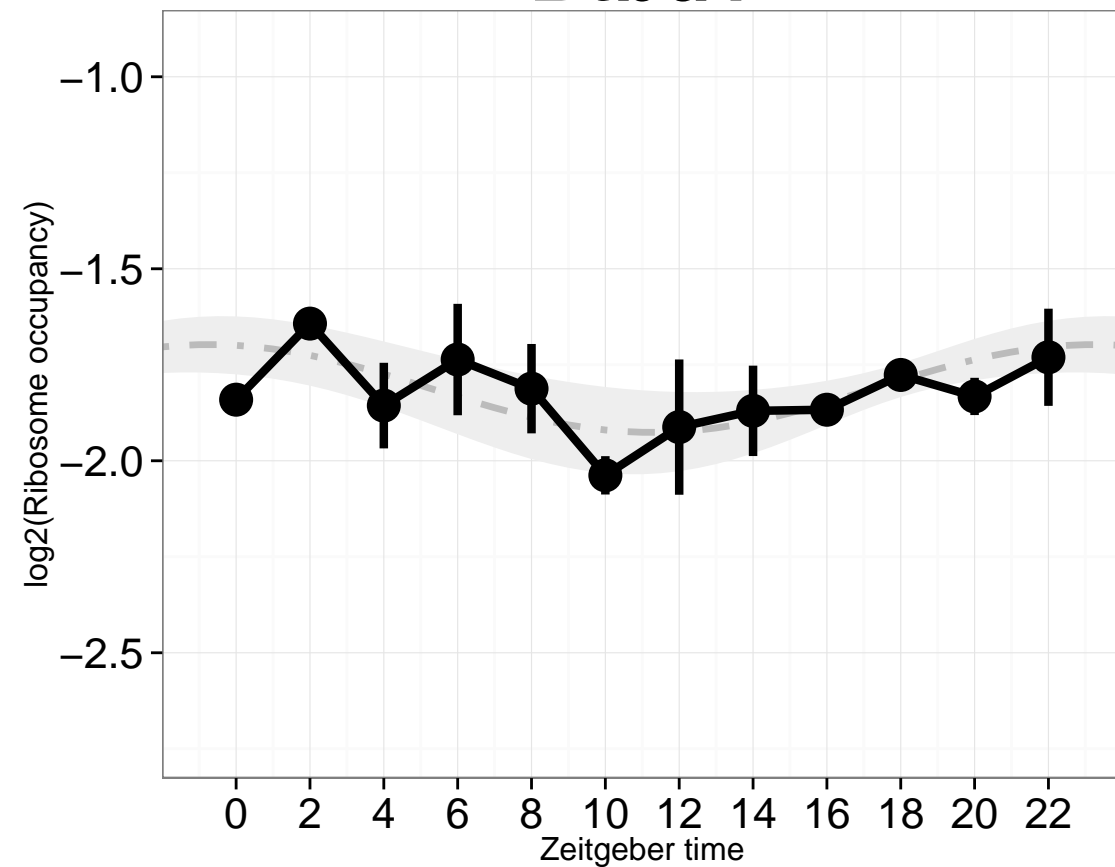

Supplement: SuppDataset_1.zip [file Btbd1_set_A.pdf › Supplemental Dataset 1/A-mRNA_nonrhyth_translation_nonrhyth/Btbd1_set_A.pdf]

# Btbd3

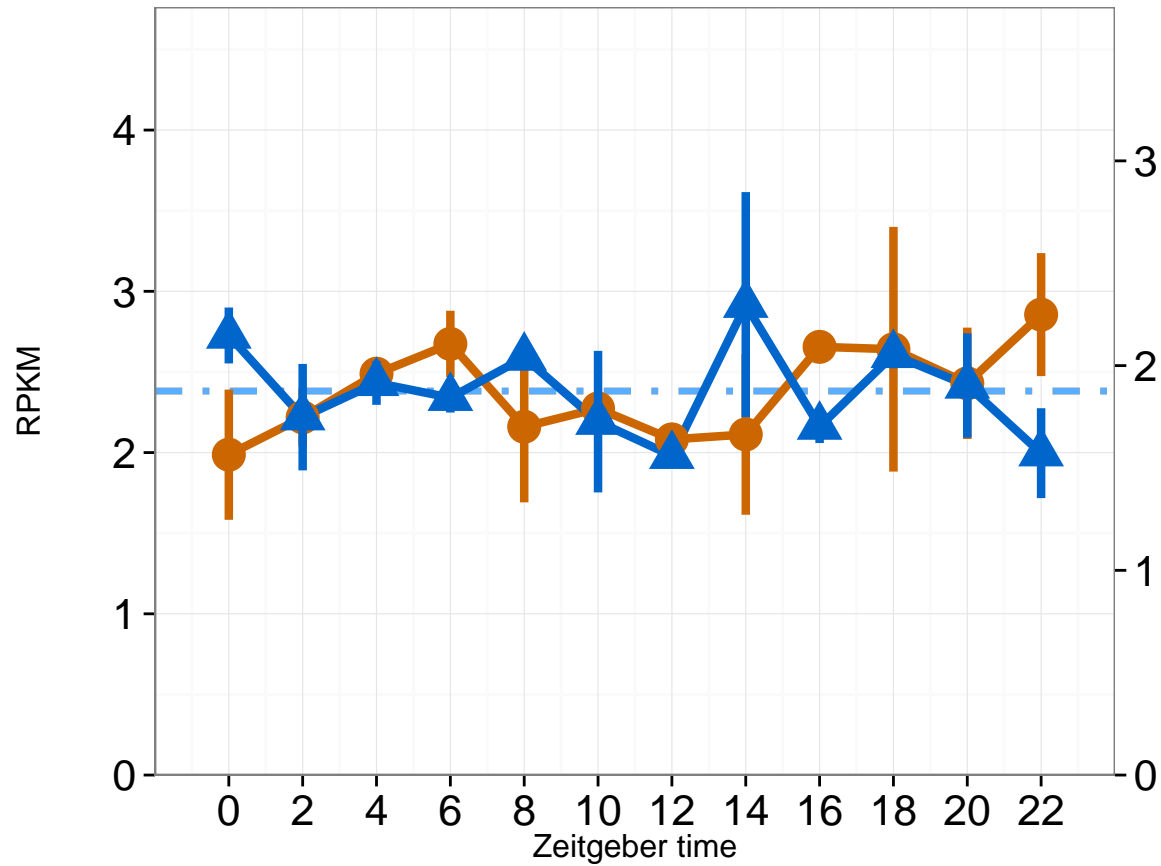

# Btbd3

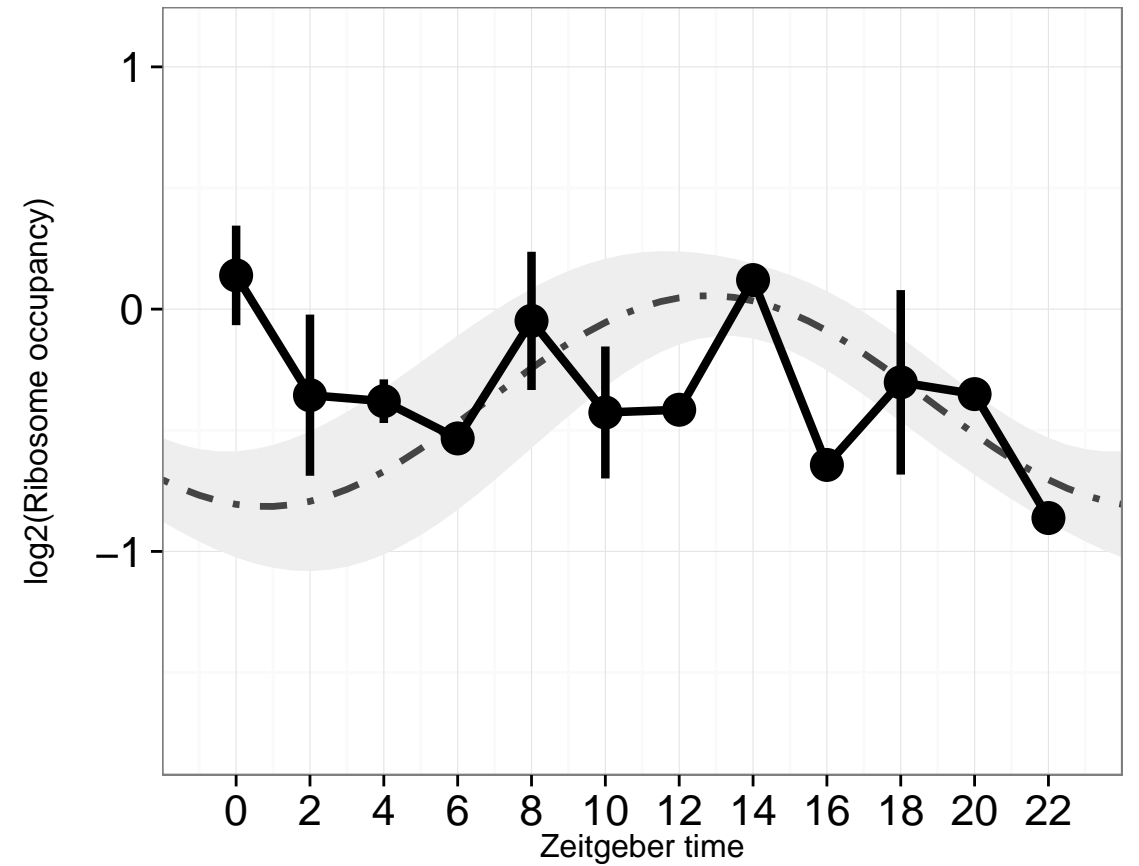

Supplement: SuppDataset_1.zip [file Btbd3_set_A.pdf › Supplemental Dataset 1/A-mRNA_nonrhyth_translation_nonrhyth/Btbd3_set_A.pdf]

# Btbd6

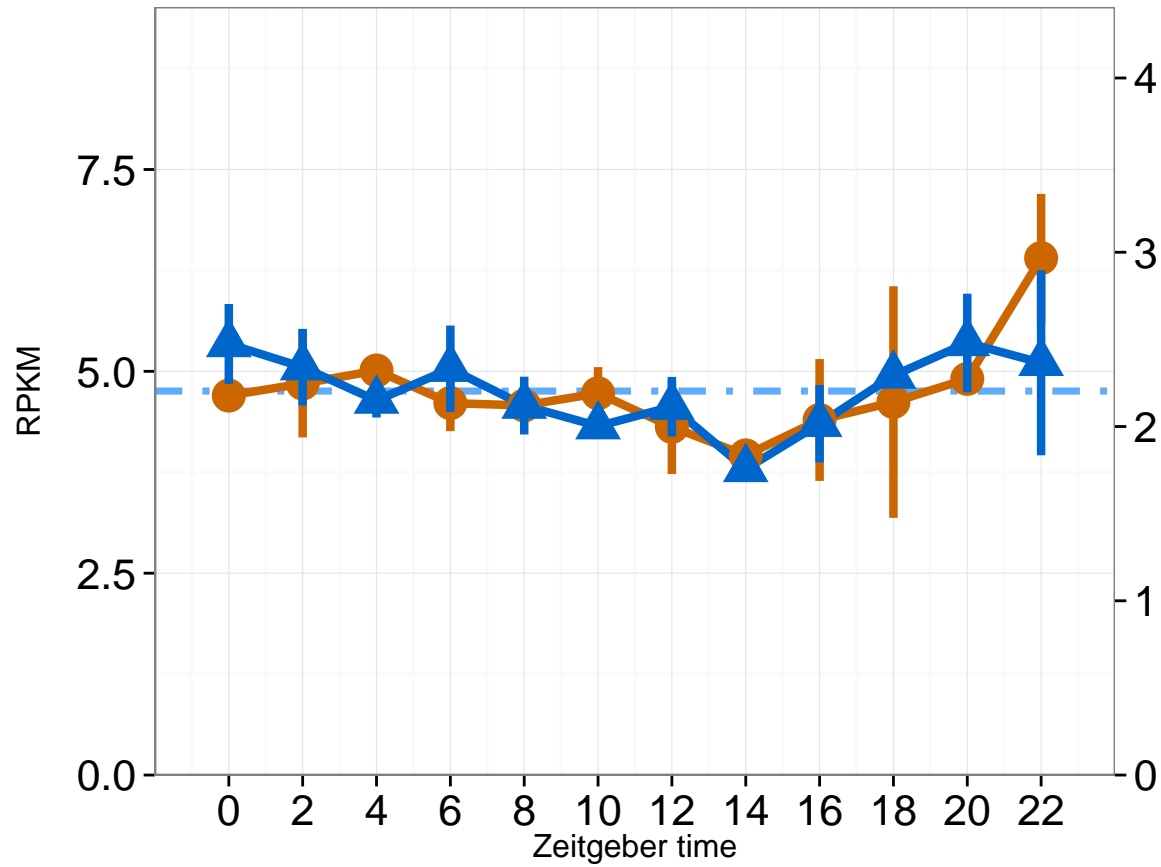

# Btbd6

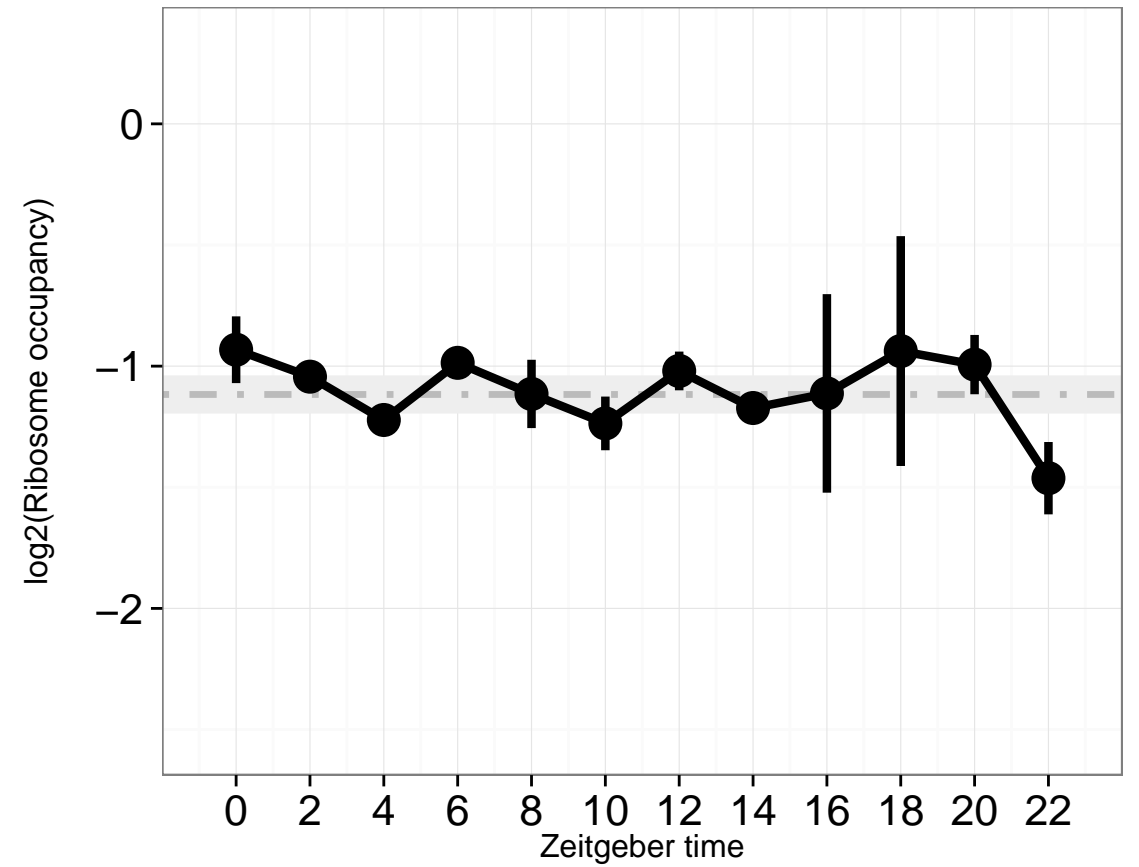

Supplement: SuppDataset_1.zip [file Btbd6_set_A.pdf › Supplemental Dataset 1/A-mRNA_nonrhyth_translation_nonrhyth/Btbd6_set_A.pdf]

# Btbd7

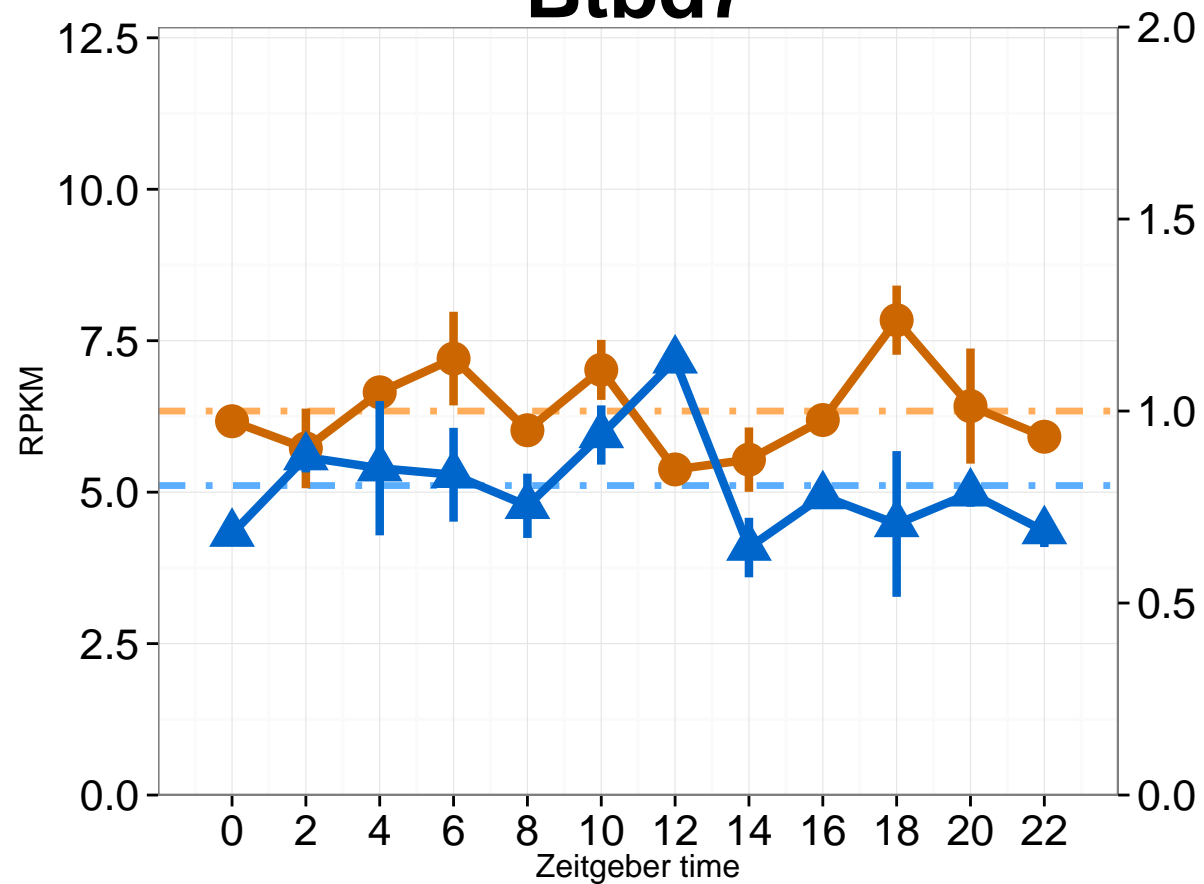

# Btbd7

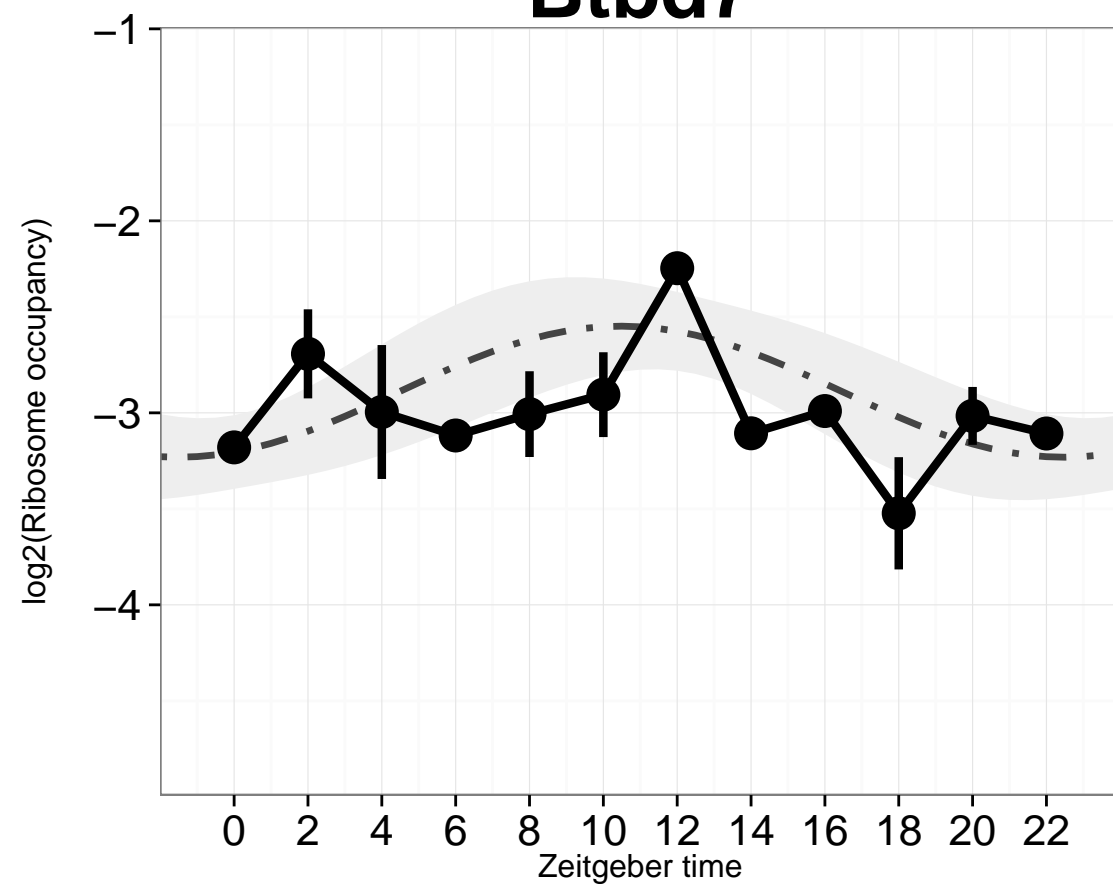

Supplement: SuppDataset_1.zip [file Btbd7_set_A.pdf › Supplemental Dataset 1/A-mRNA_nonrhyth_translation_nonrhyth/Btbd7_set_A.pdf]

## Btbd9

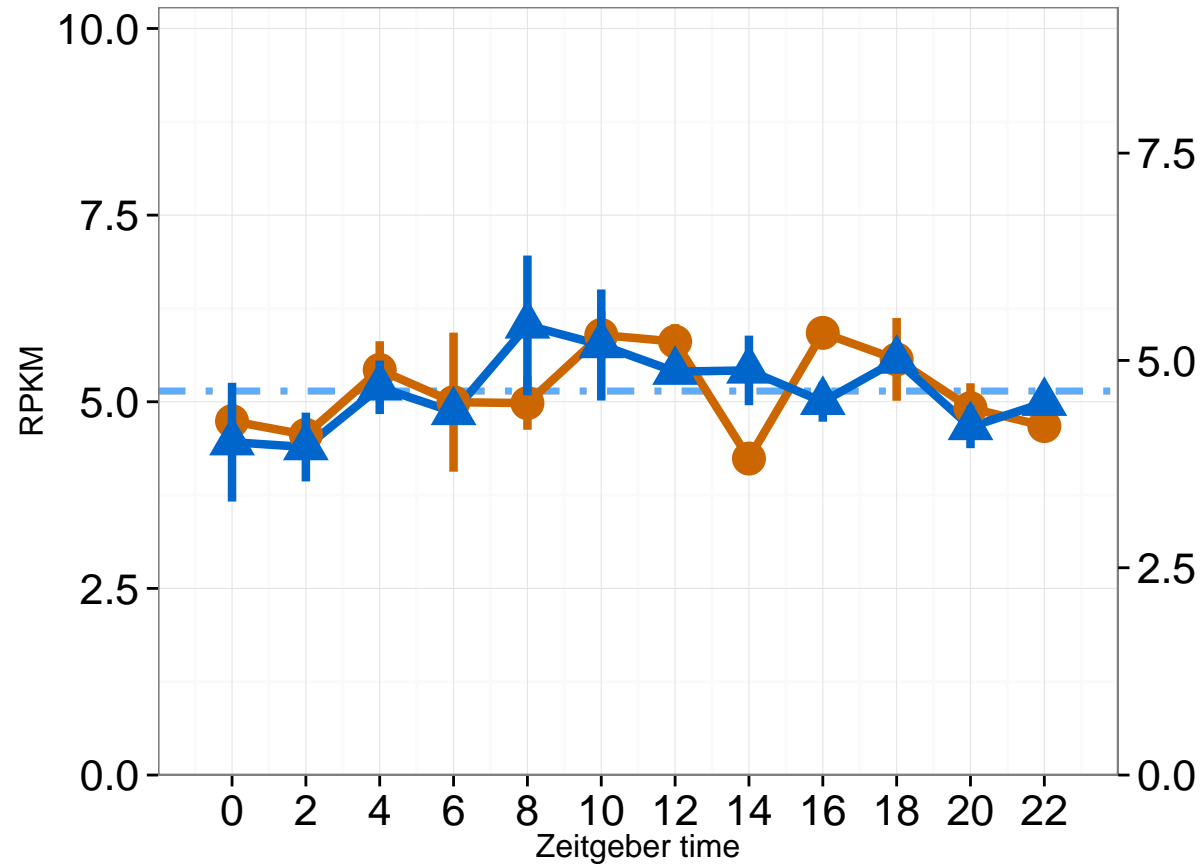

## Btbd9

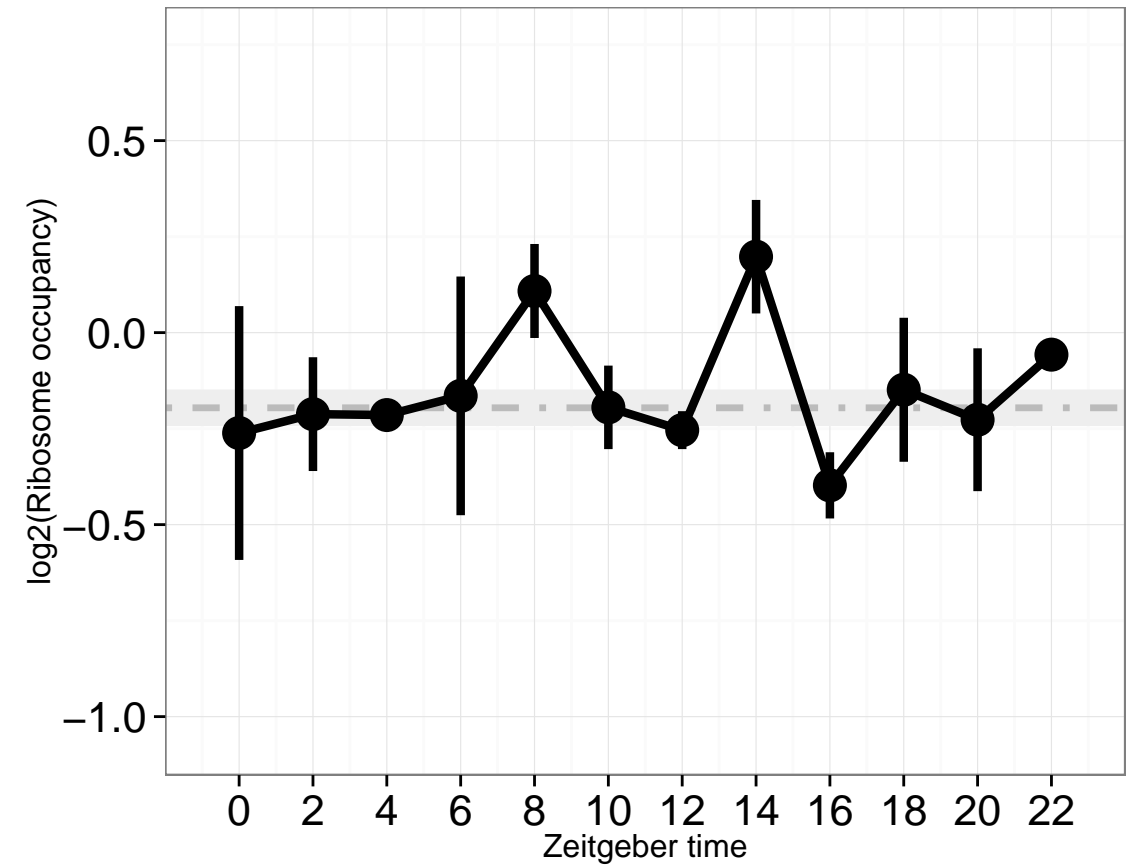

Supplement: SuppDataset_1.zip [file Btbd9_set_A.pdf › Supplemental Dataset 1/A-mRNA_nonrhyth_translation_nonrhyth/Btbd9_set_A.pdf]

## Btd

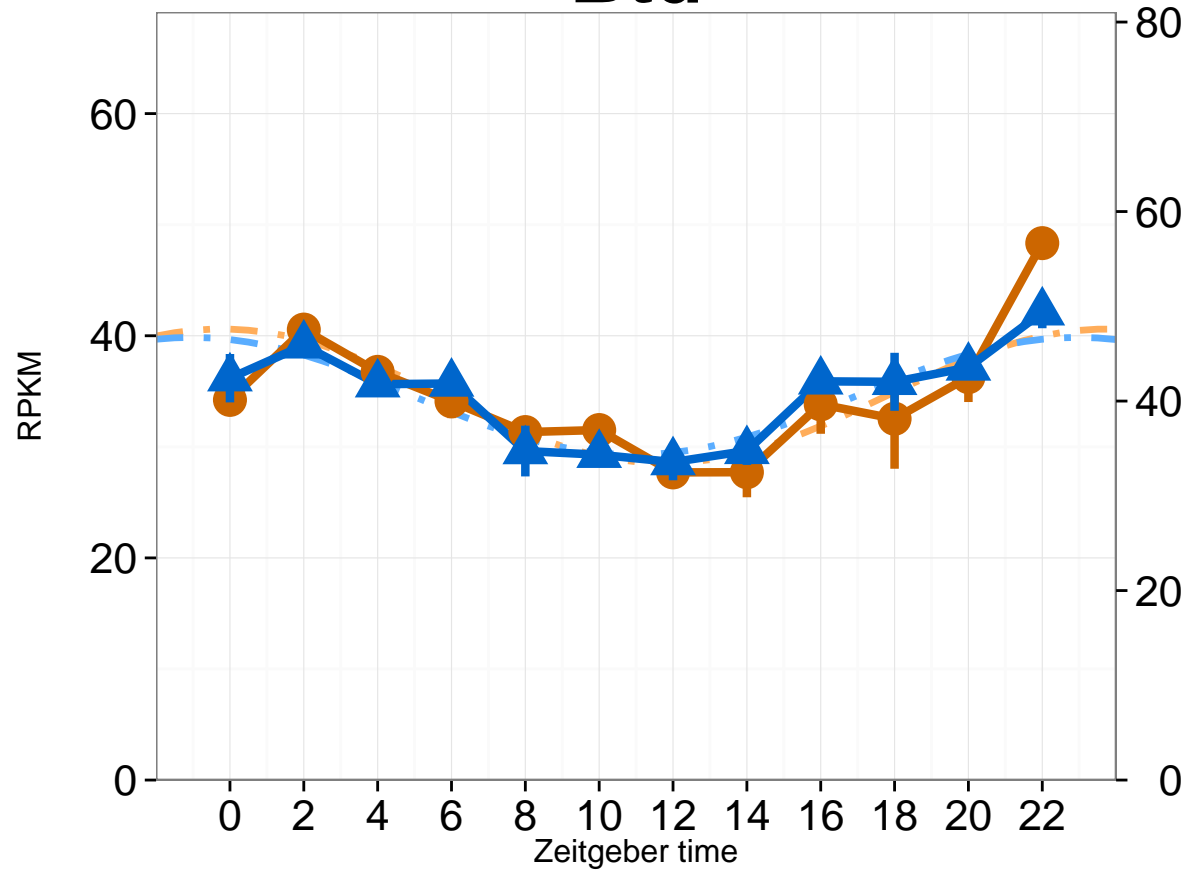

## Btd

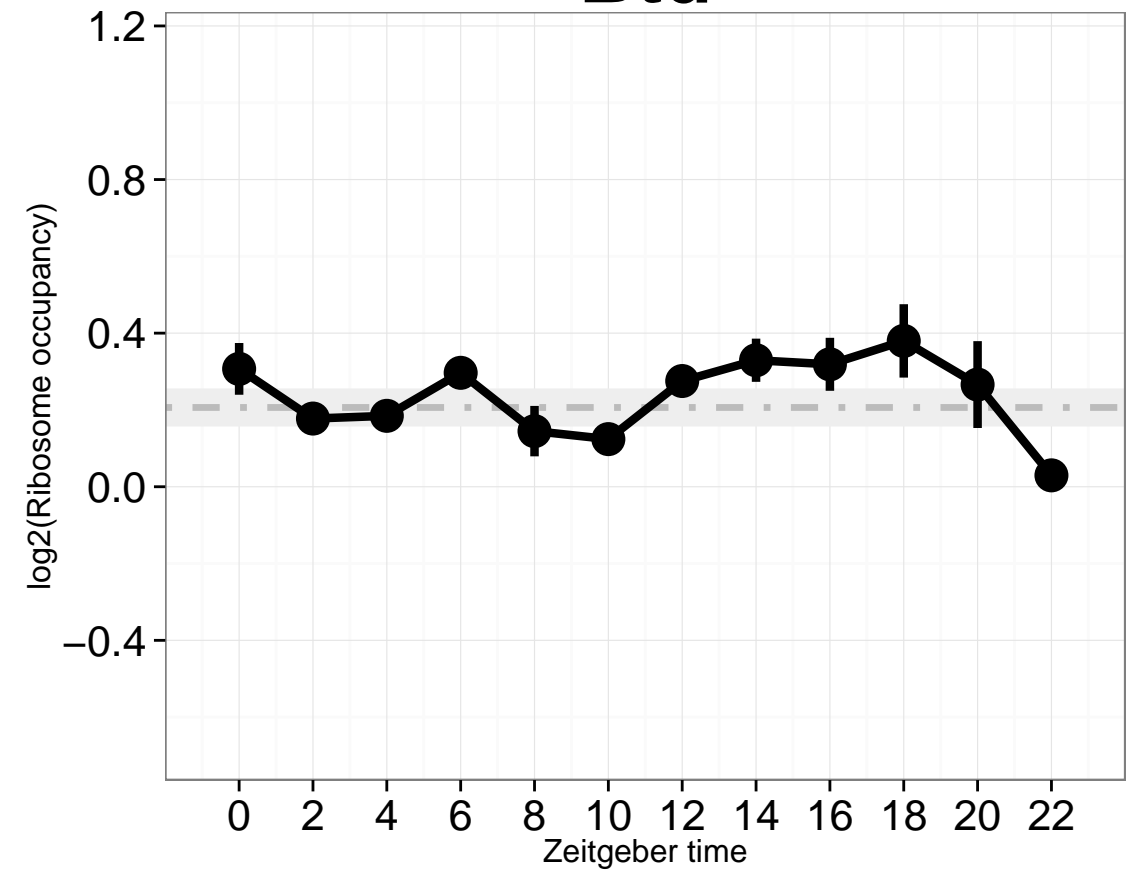

Supplement: SuppDataset_1.zip [file Btd_set_A.pdf › Supplemental Dataset 1/A-mRNA_nonrhyth_translation_nonrhyth/Btd_set_A.pdf]

## Btf3

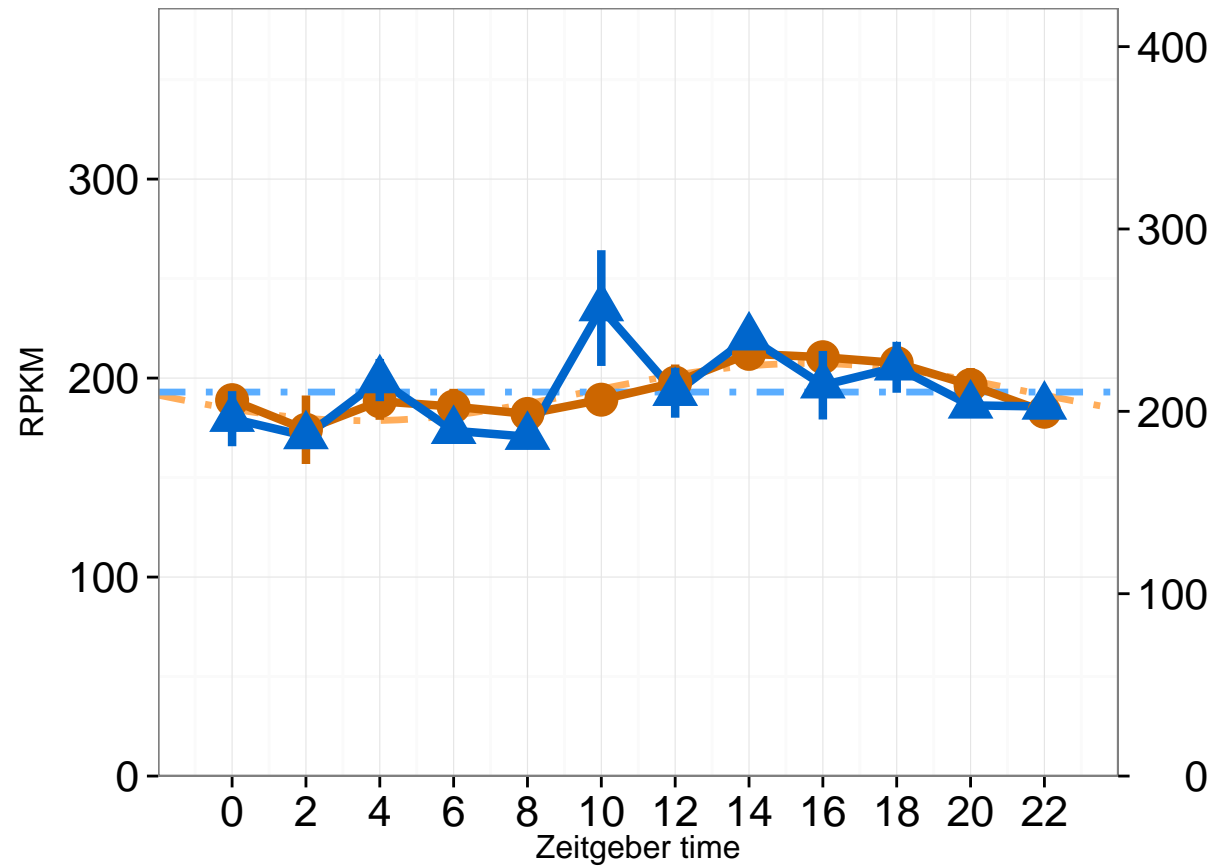

## Btf3

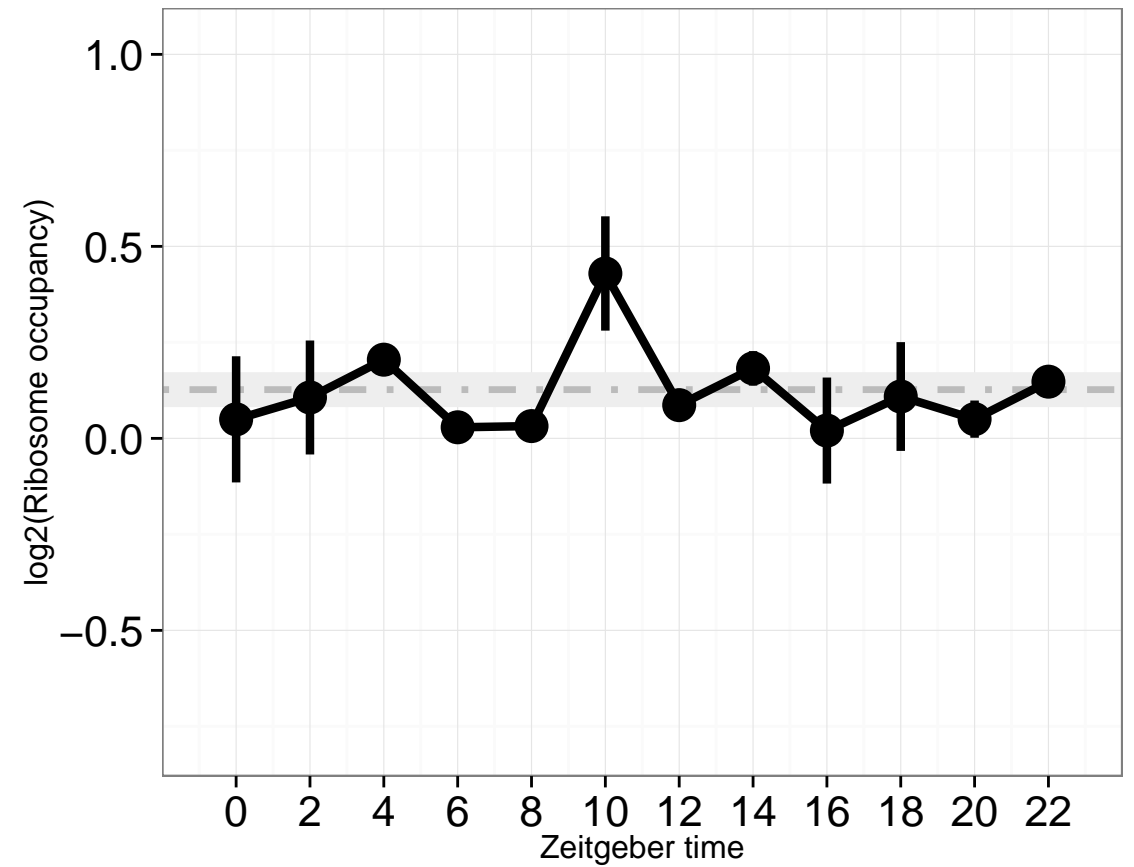

Supplement: SuppDataset_1.zip [file Btf3_set_A.pdf › Supplemental Dataset 1/A-mRNA_nonrhyth_translation_nonrhyth/Btf3_set_A.pdf]

## Btf3l4

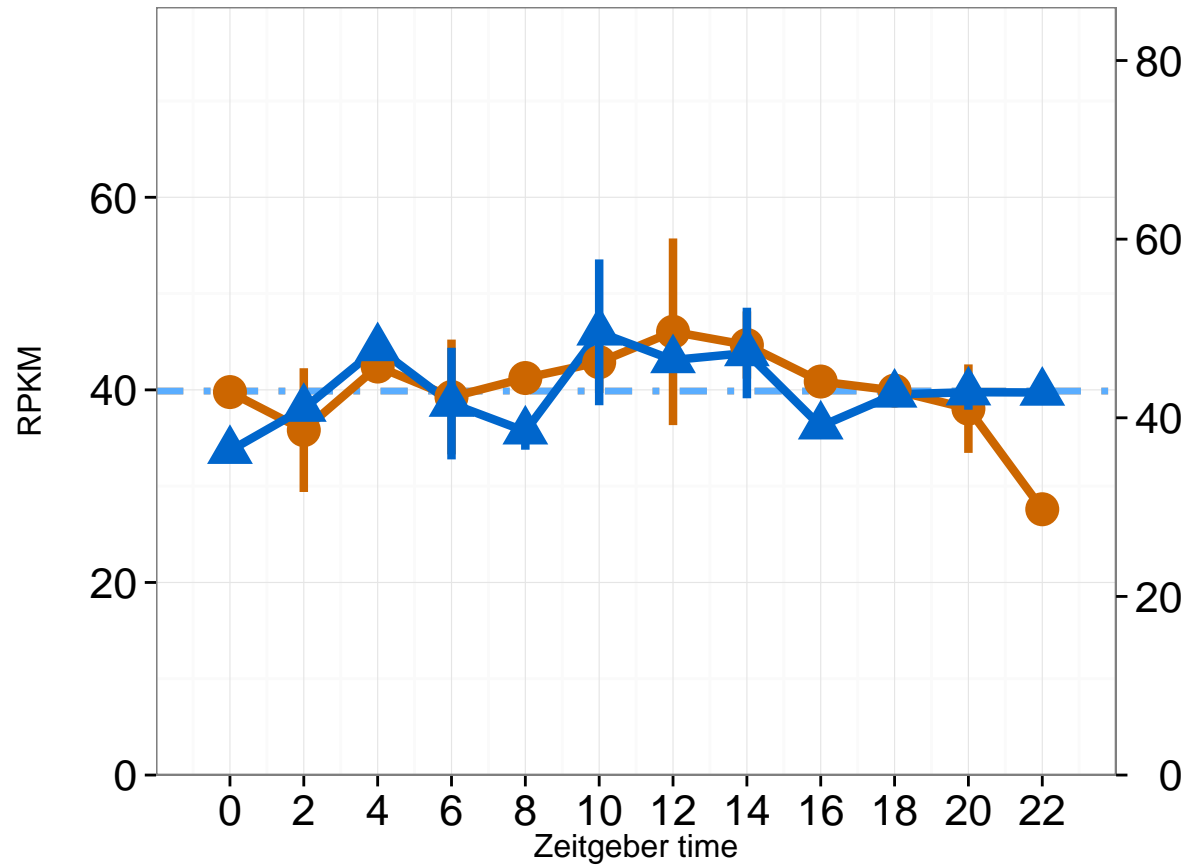

## Btf3l4

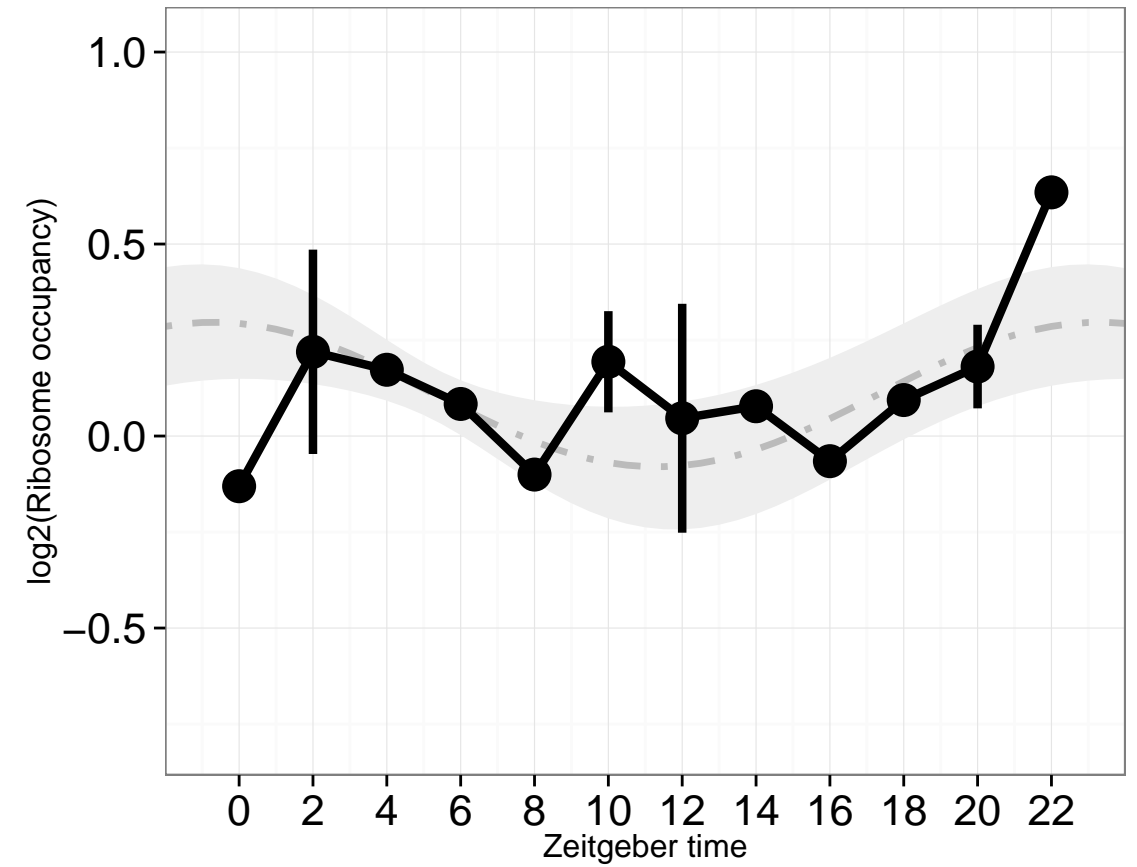

Supplement: SuppDataset_1.zip [file Btf3l4_set_A.pdf › Supplemental Dataset 1/A-mRNA_nonrhyth_translation_nonrhyth/Btf3l4_set_A.pdf]

## Btg2

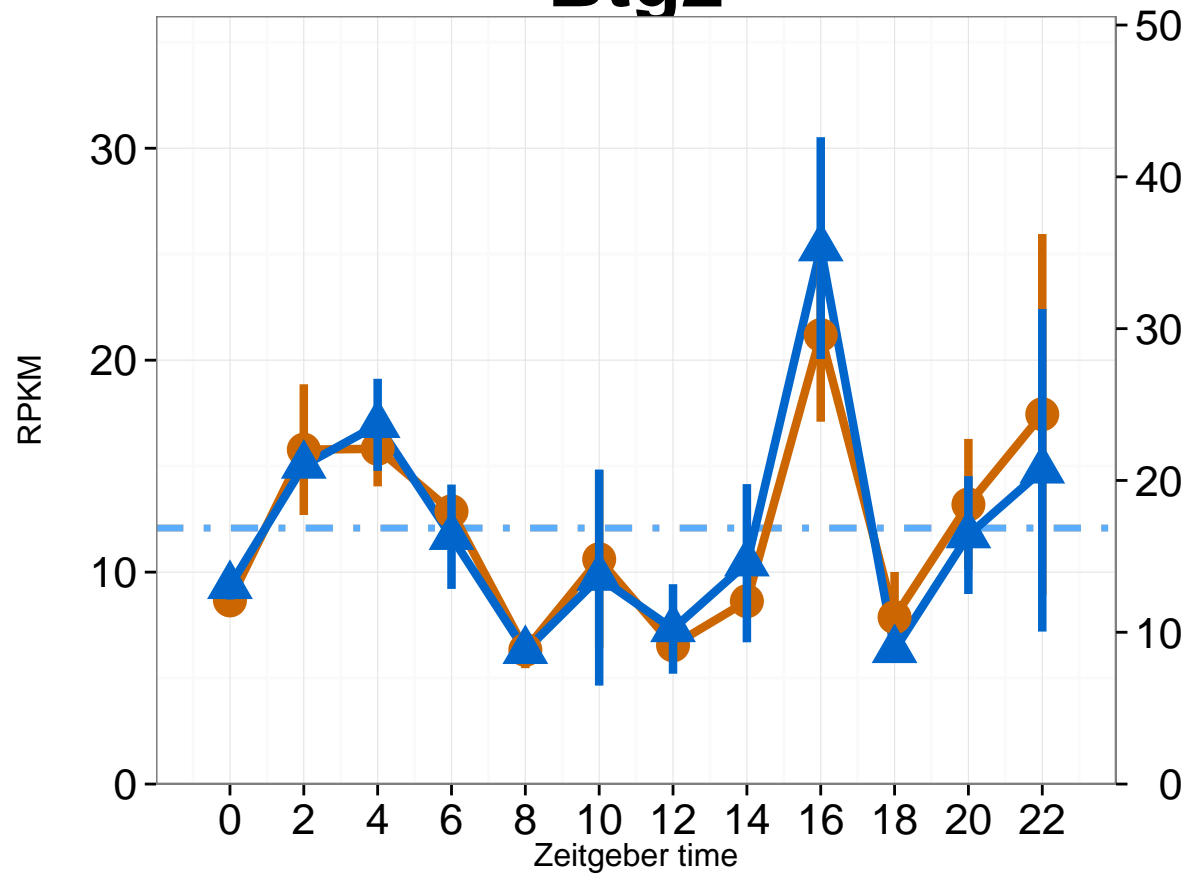

## Btg2

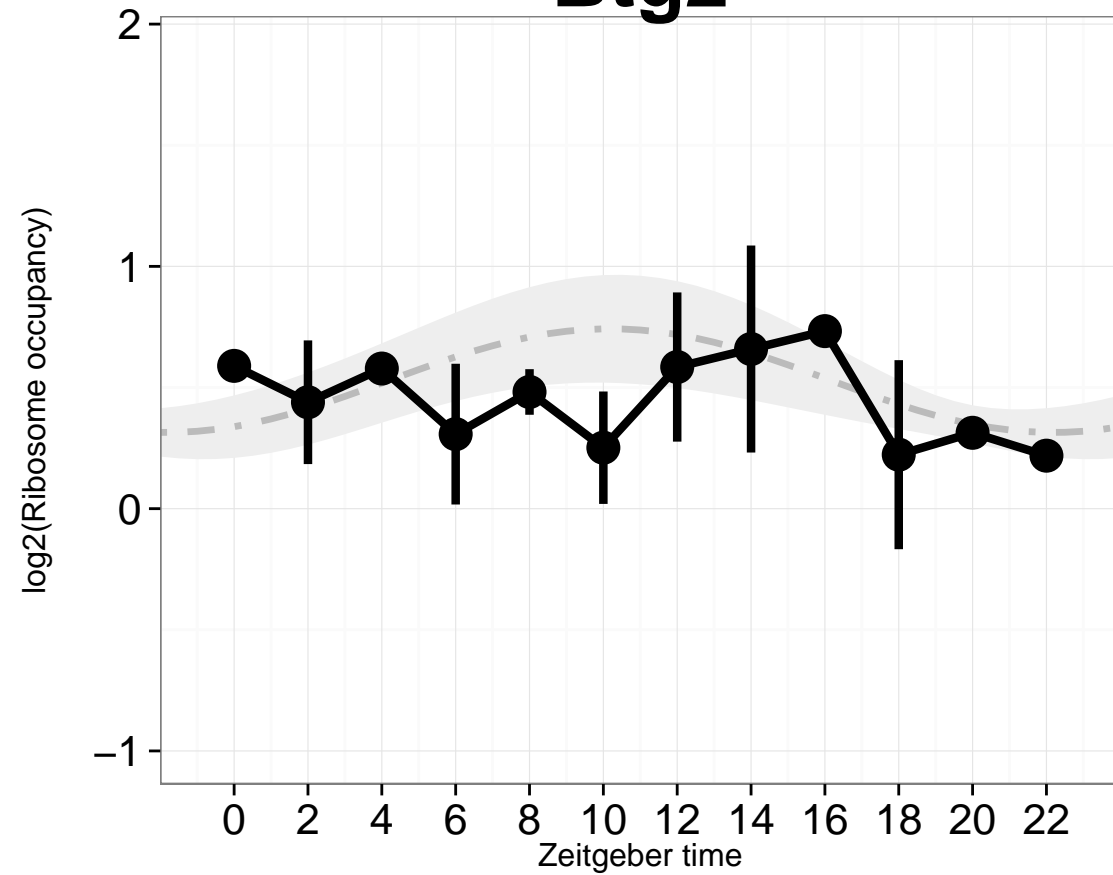

Supplement: SuppDataset_1.zip [file Btg2_set_A.pdf › Supplemental Dataset 1/A-mRNA_nonrhyth_translation_nonrhyth/Btg2_set_A.pdf]

## Btk

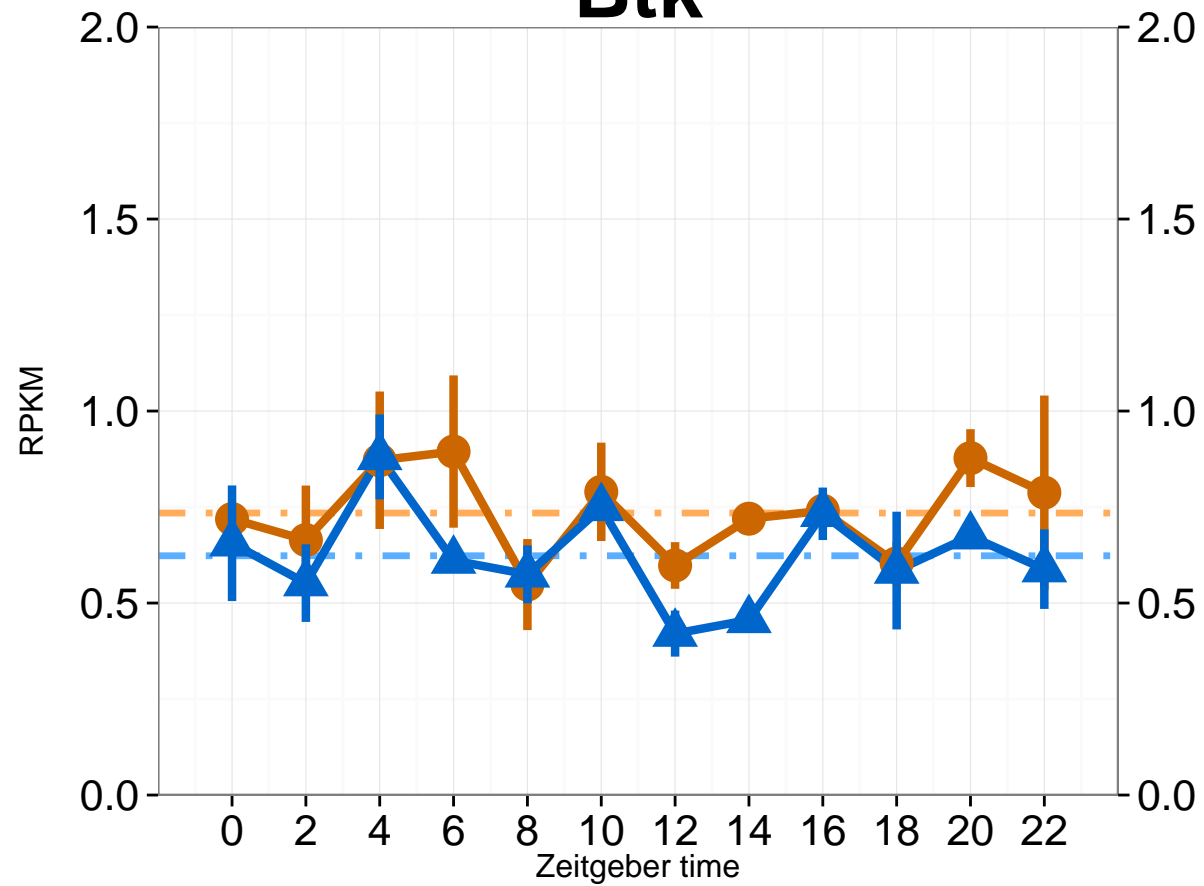

## Btk

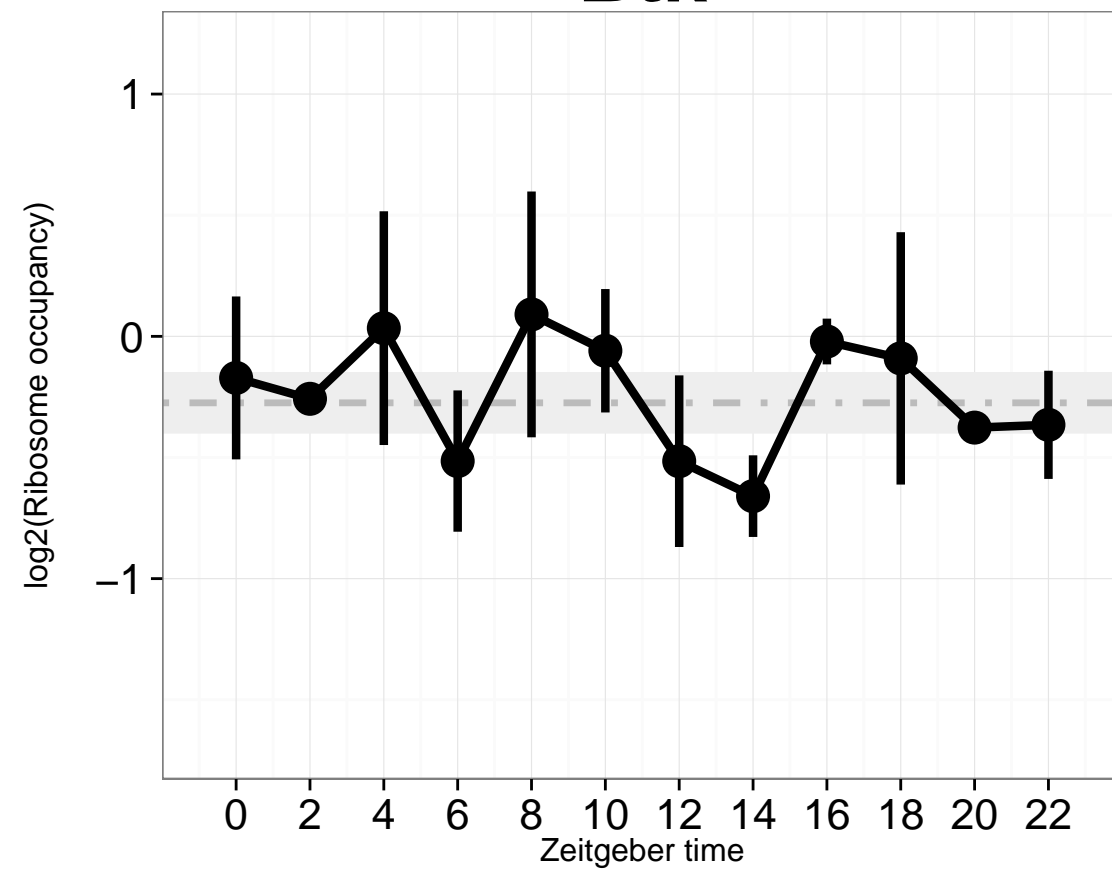

Supplement: SuppDataset_1.zip [file Btk_set_A.pdf › Supplemental Dataset 1/A-mRNA_nonrhyth_translation_nonrhyth/Btk_set_A.pdf]

## Btrc

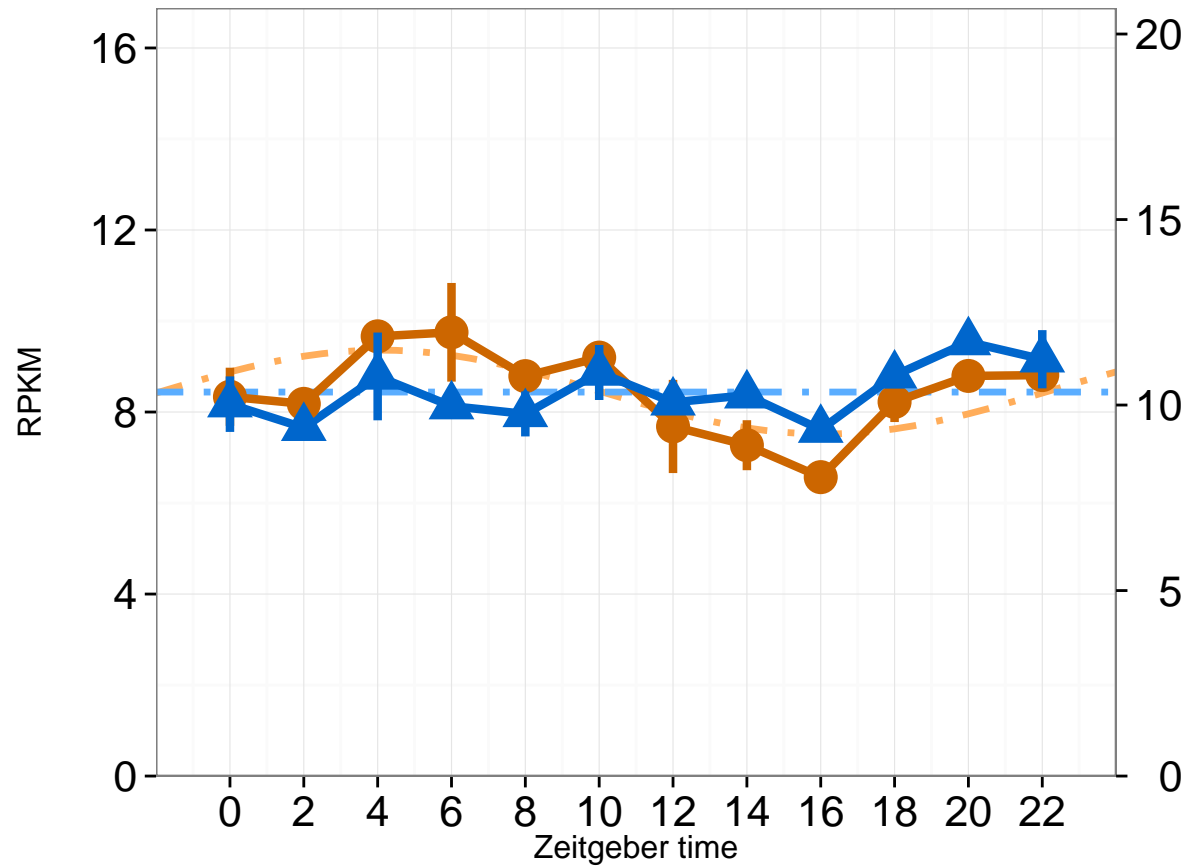

## Btrc

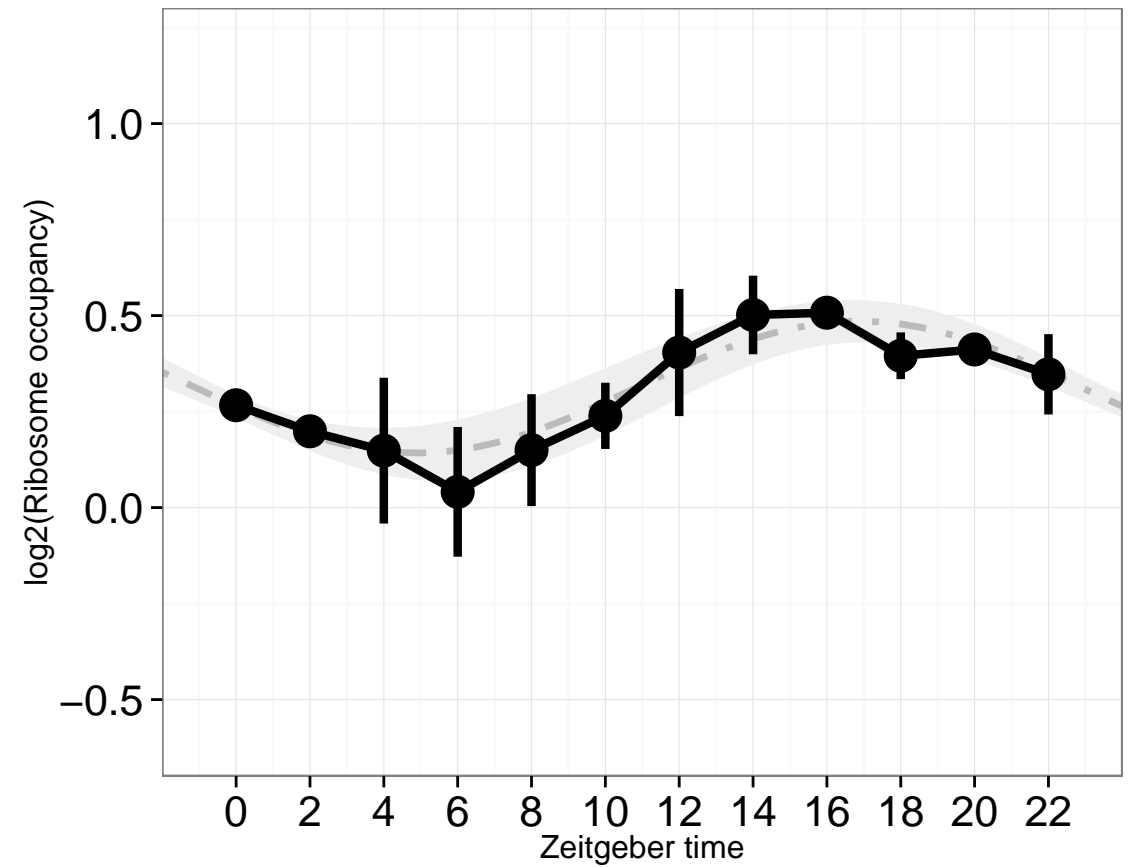

Supplement: SuppDataset_1.zip [file Btrc_set_A.pdf › Supplemental Dataset 1/A-mRNA_nonrhyth_translation_nonrhyth/Btrc_set_A.pdf]

# Bub1b

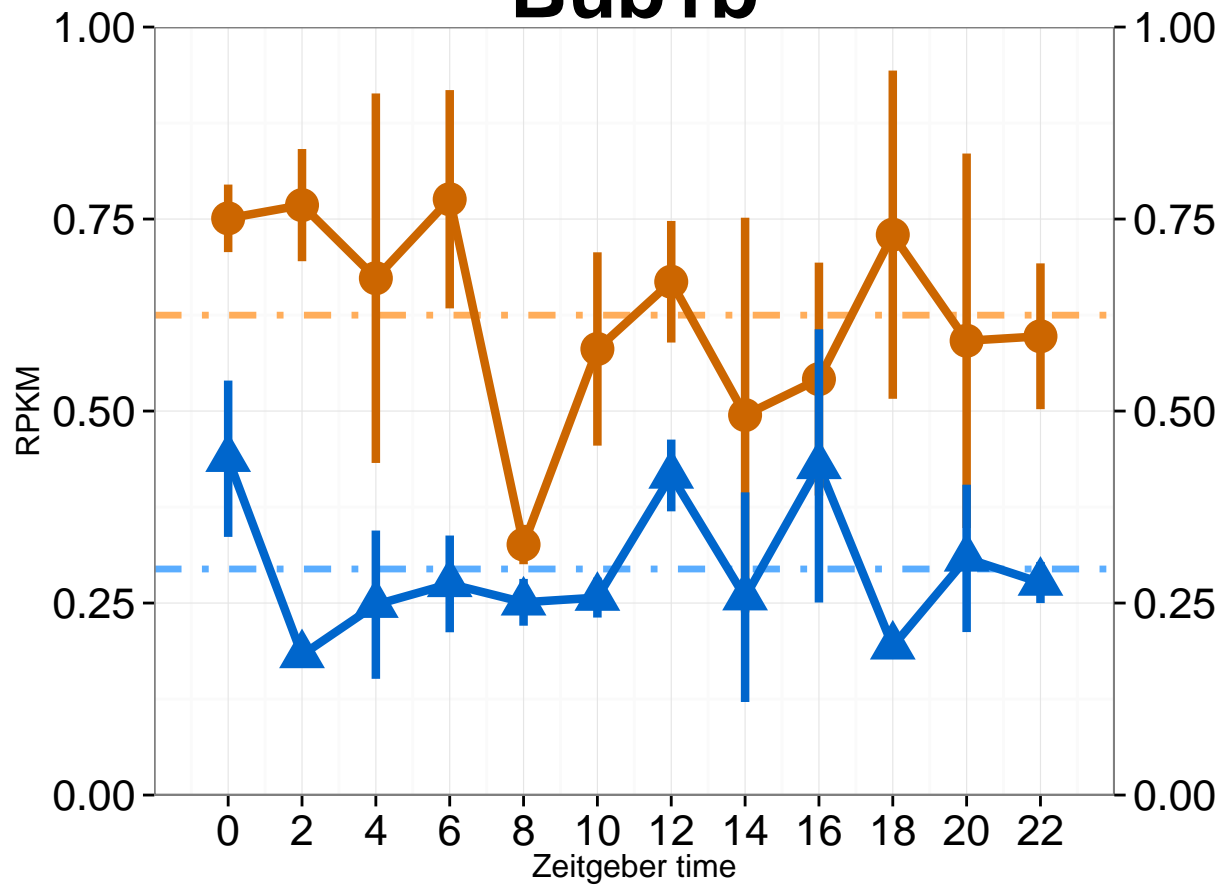

# Bub1b

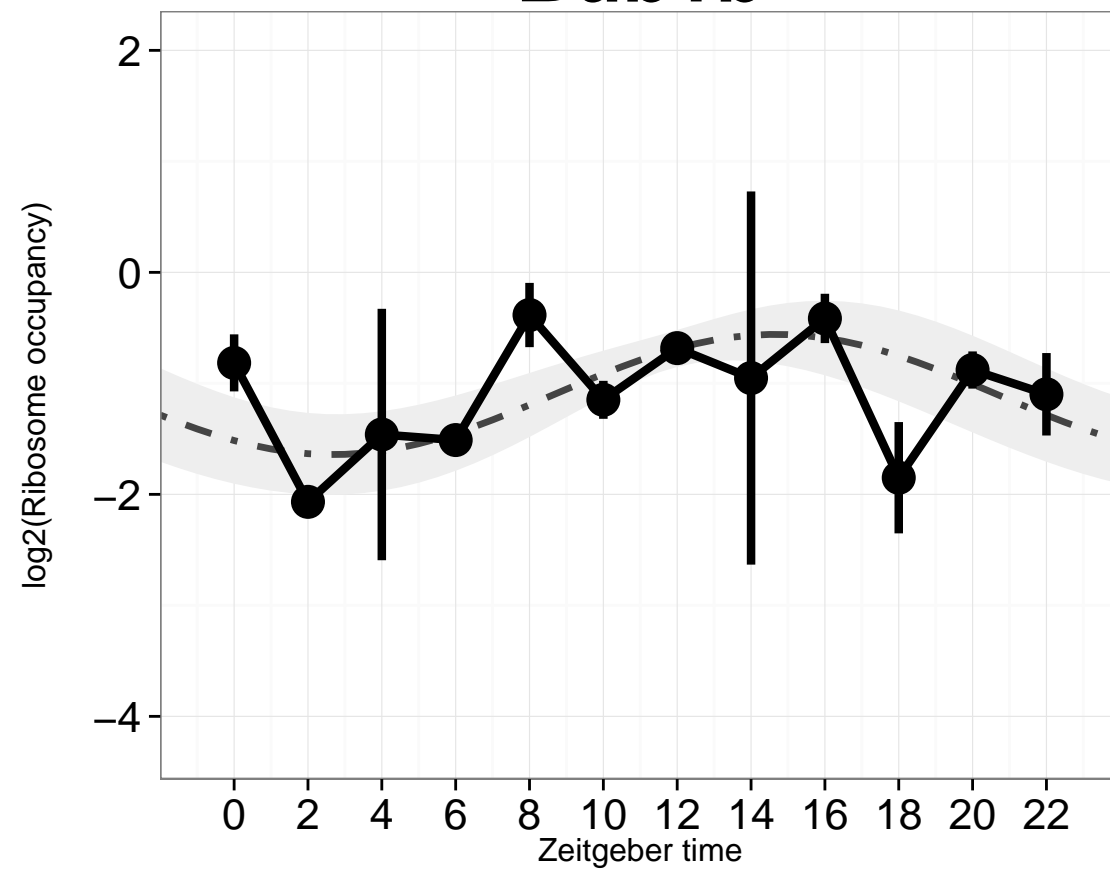

Supplement: SuppDataset_1.zip [file Bub1b_set_A.pdf › Supplemental Dataset 1/A-mRNA_nonrhyth_translation_nonrhyth/Bub1b_set_A.pdf]

## Bub3

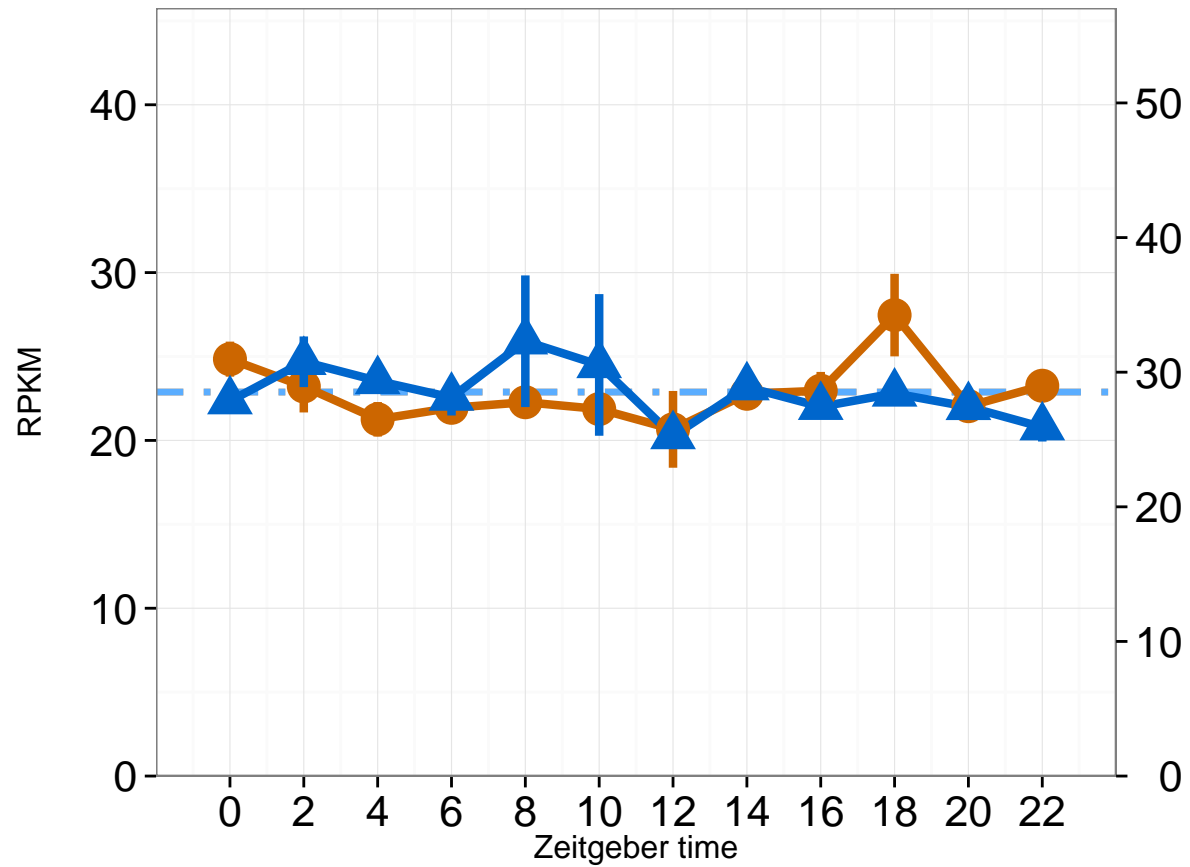

## Bub3

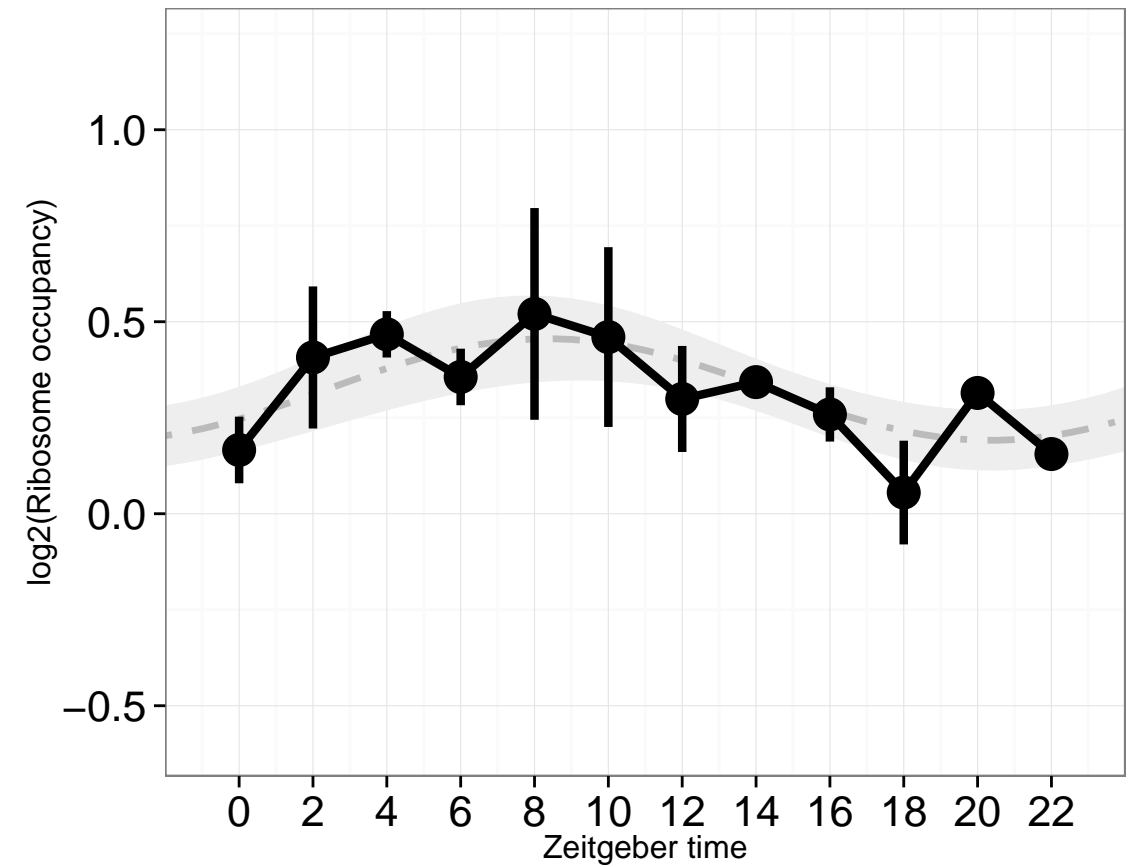

Supplement: SuppDataset_1.zip [file Bub3_set_A.pdf › Supplemental Dataset 1/A-mRNA_nonrhyth_translation_nonrhyth/Bub3_set_A.pdf]

# Bud13

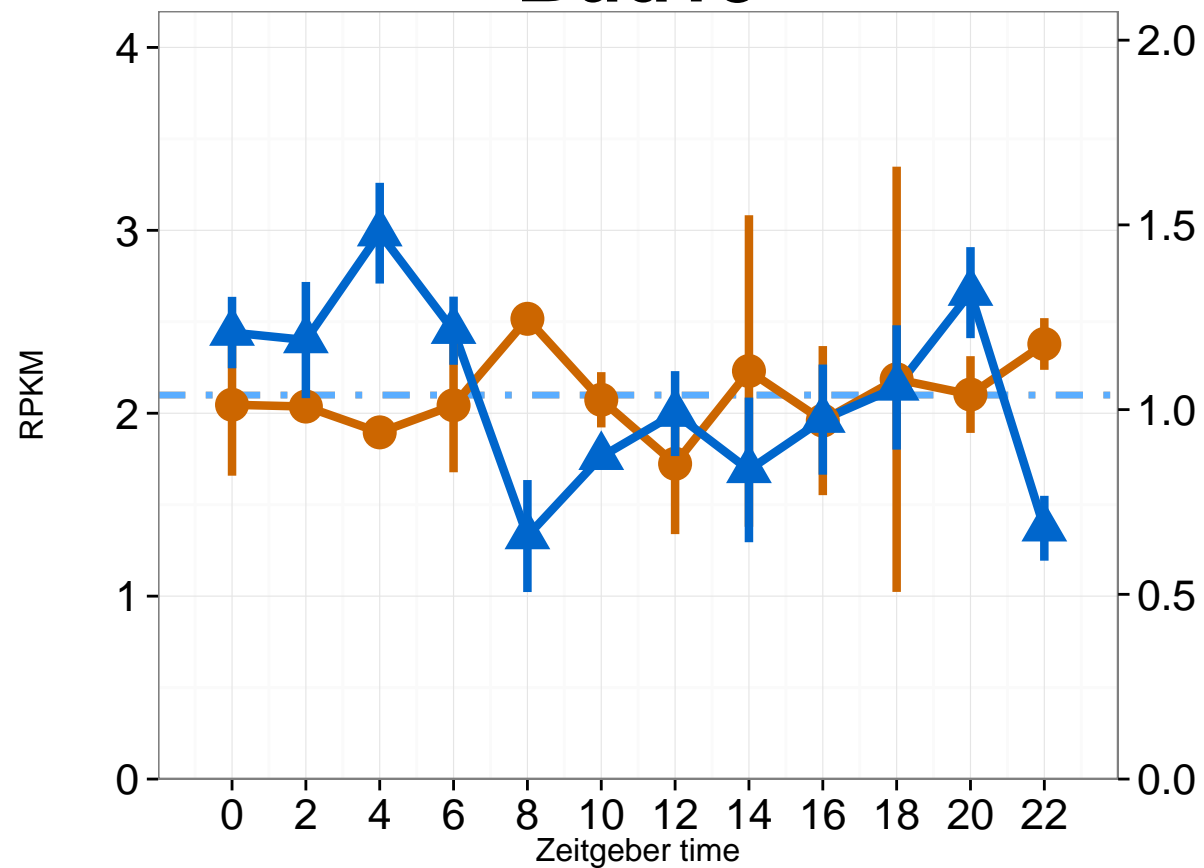

# Bud13

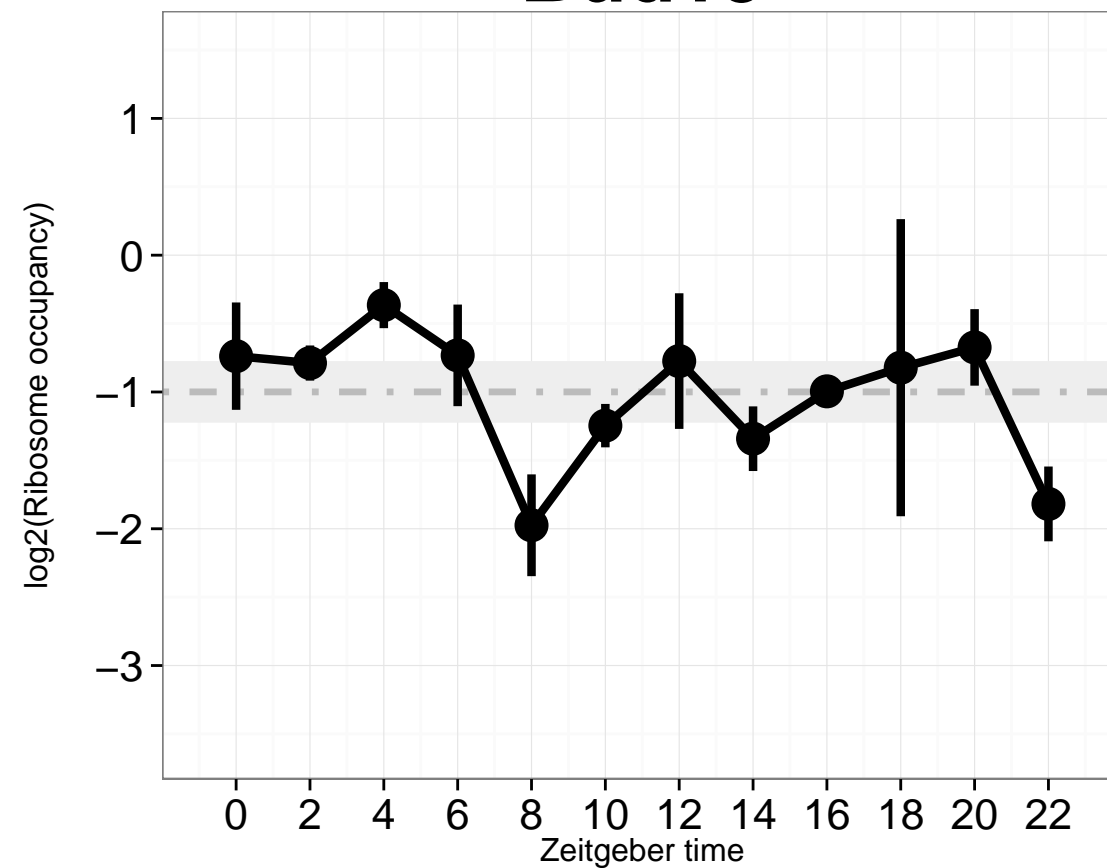

Supplement: SuppDataset_1.zip [file Bud13_set_A.pdf › Supplemental Dataset 1/A-mRNA_nonrhyth_translation_nonrhyth/Bud13_set_A.pdf]

## Bud31

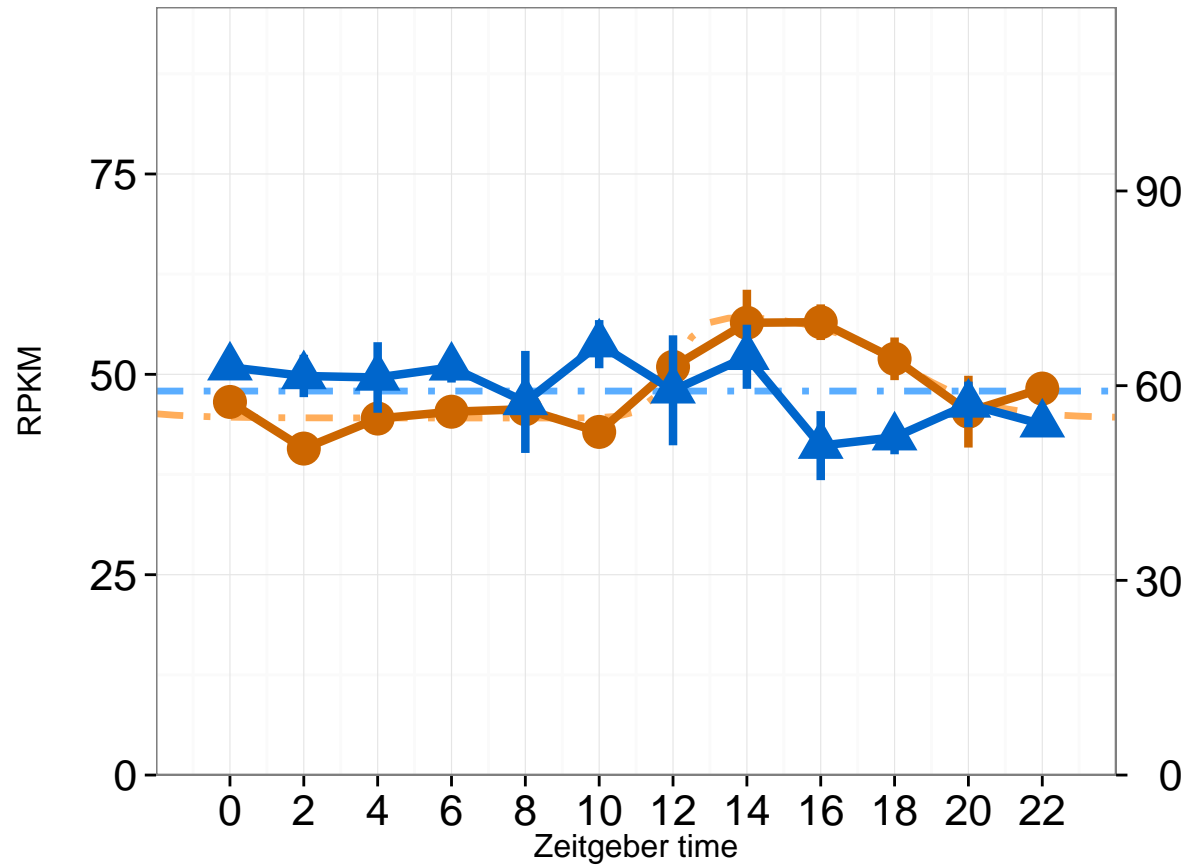

## Bud31

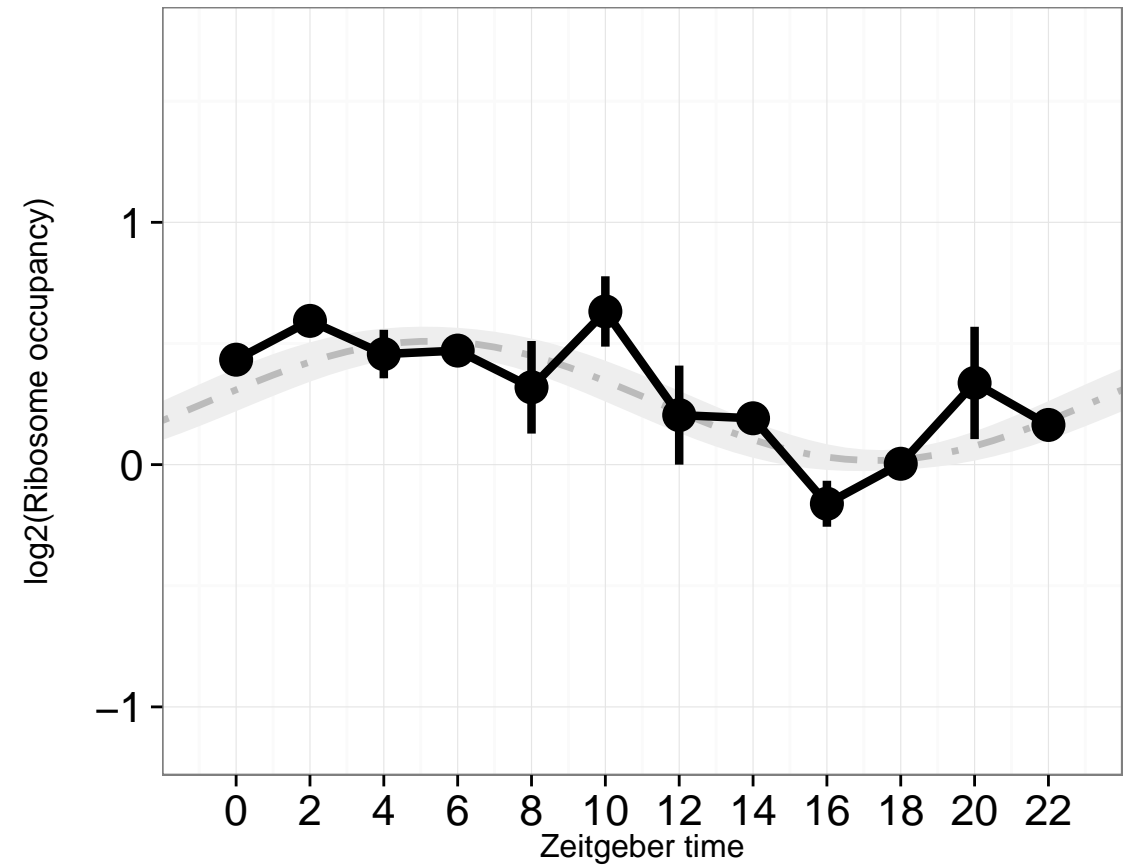

Supplement: SuppDataset_1.zip [file Bud31_set_A.pdf › Supplemental Dataset 1/A-mRNA_nonrhyth_translation_nonrhyth/Bud31_set_A.pdf]

# Bysl

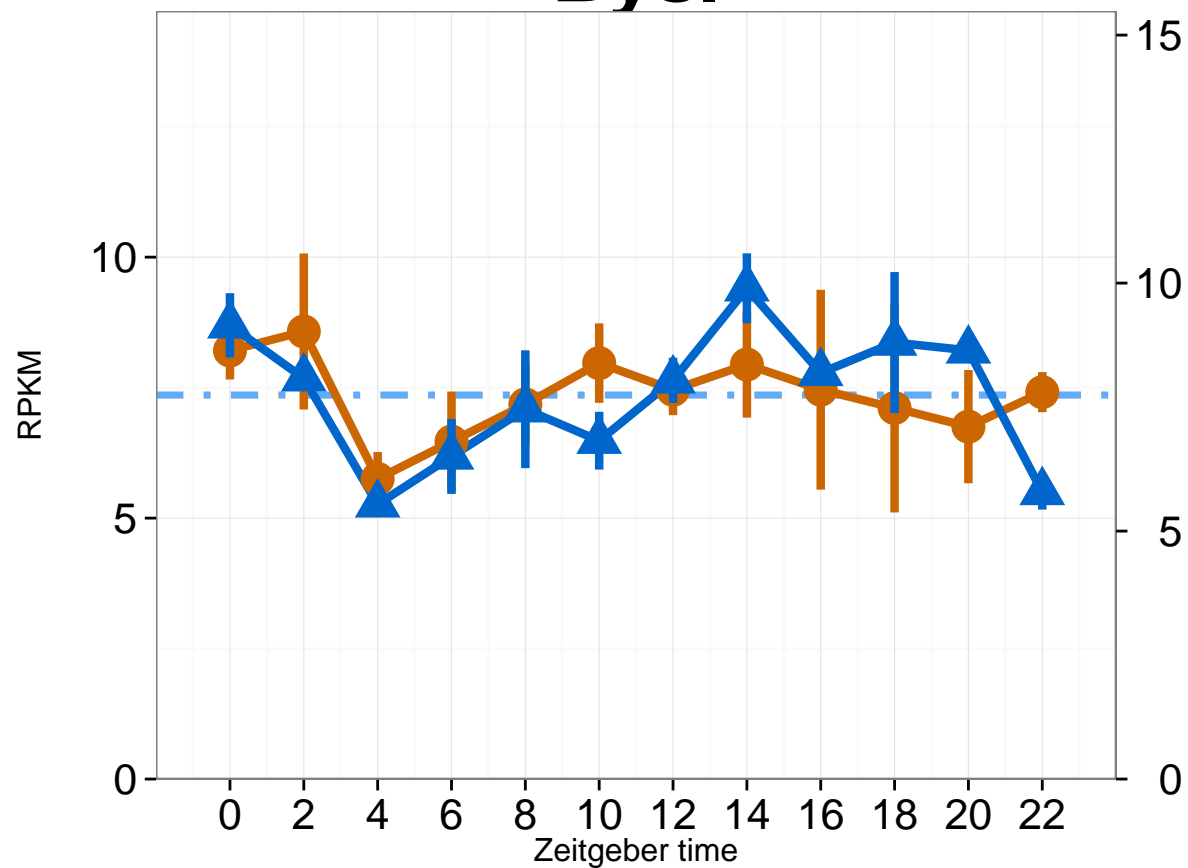

# Bysl

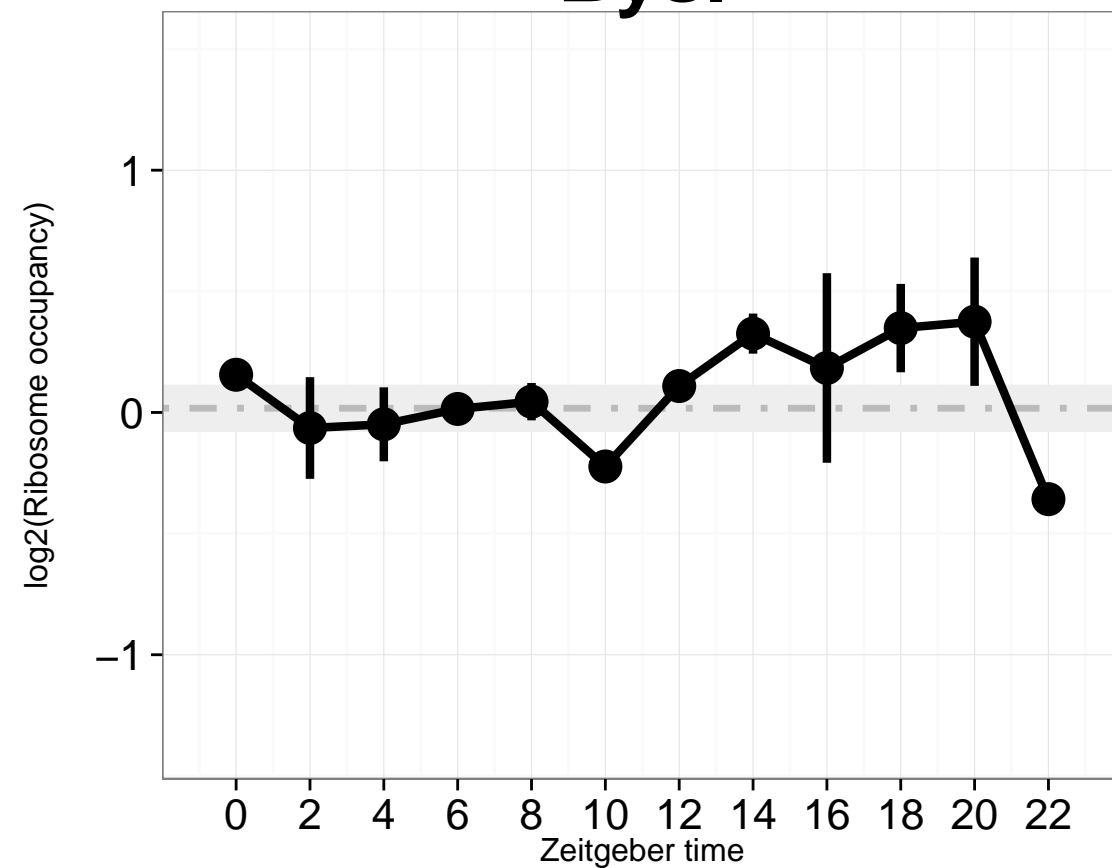

Supplement: SuppDataset_1.zip [file Bysl_set_A.pdf › Supplemental Dataset 1/A-mRNA_nonrhyth_translation_nonrhyth/Bysl_set_A.pdf]

# Bzw1

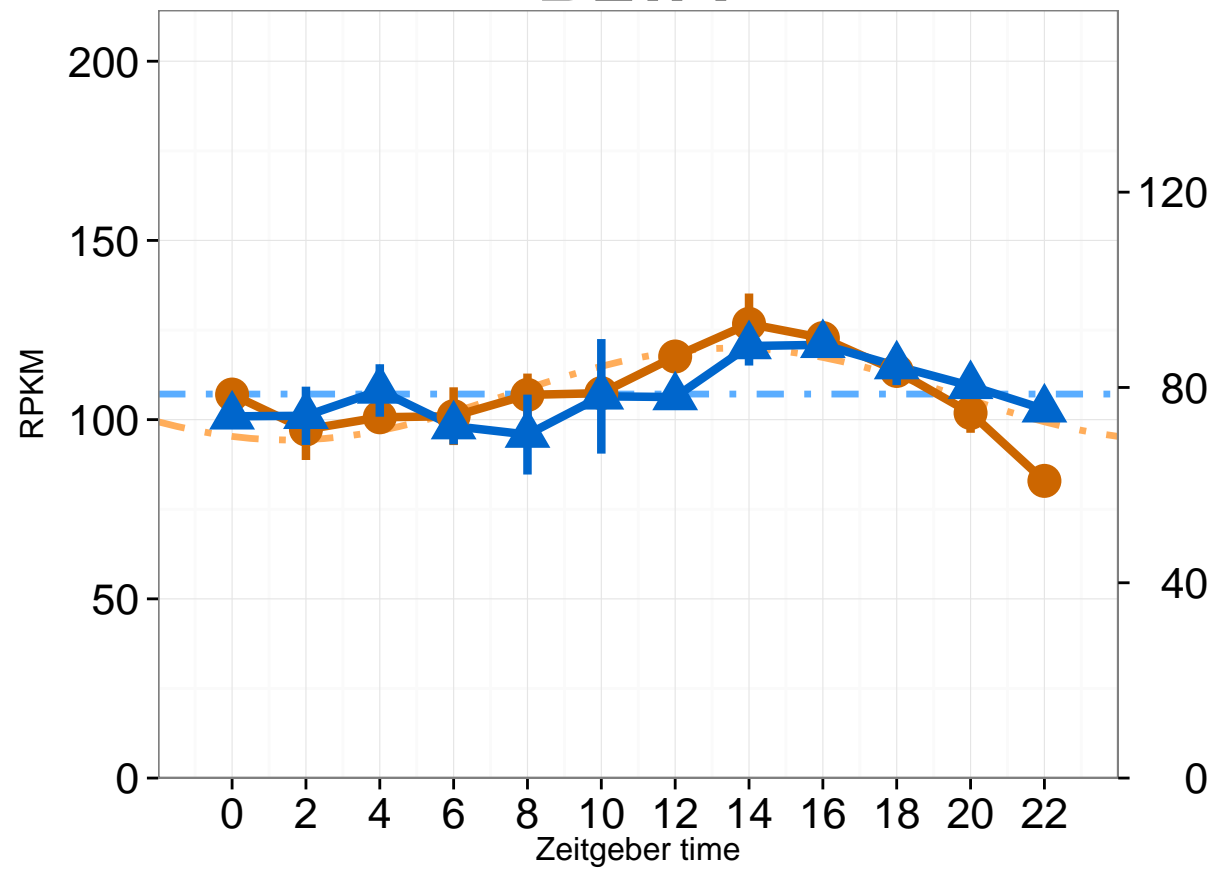

# Bzw1

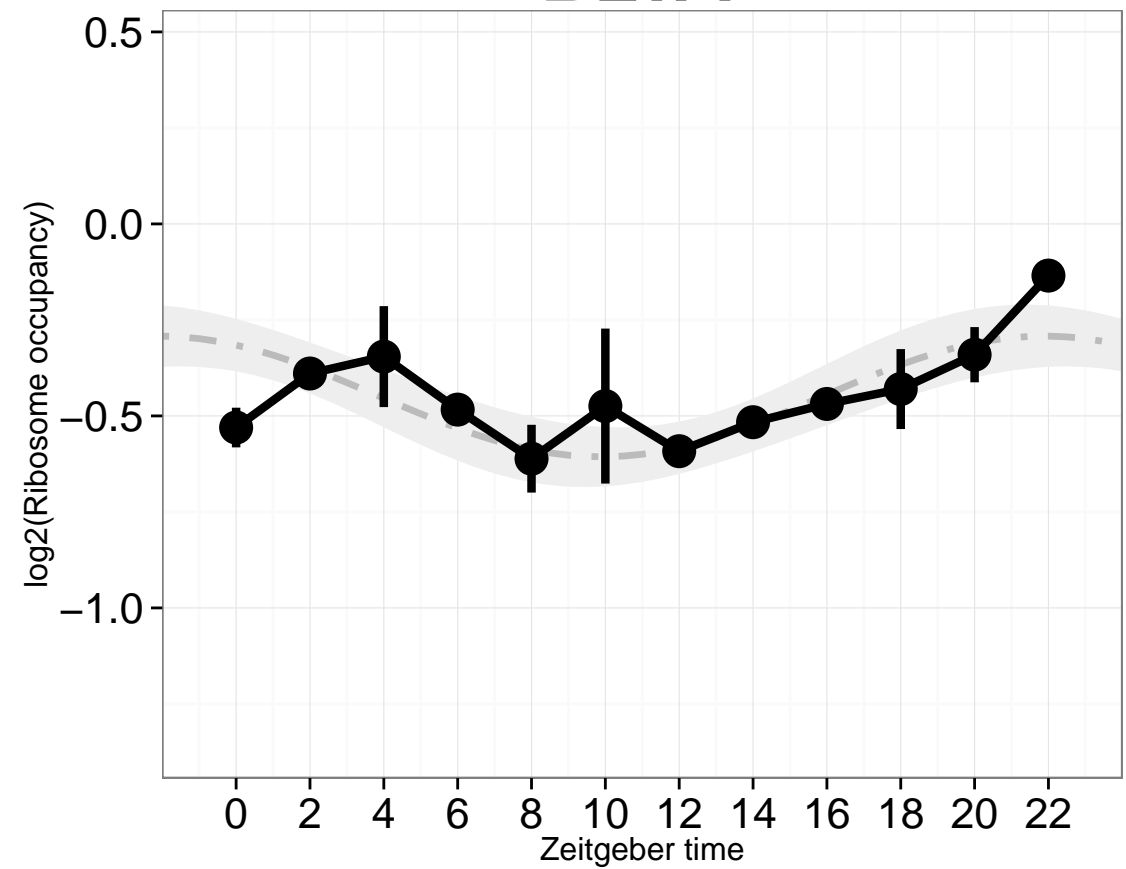

Supplement: SuppDataset_1.zip [file Bzw1_set_A.pdf › Supplemental Dataset 1/A-mRNA_nonrhyth_translation_nonrhyth/Bzw1_set_A.pdf]

# C030006K11Rik

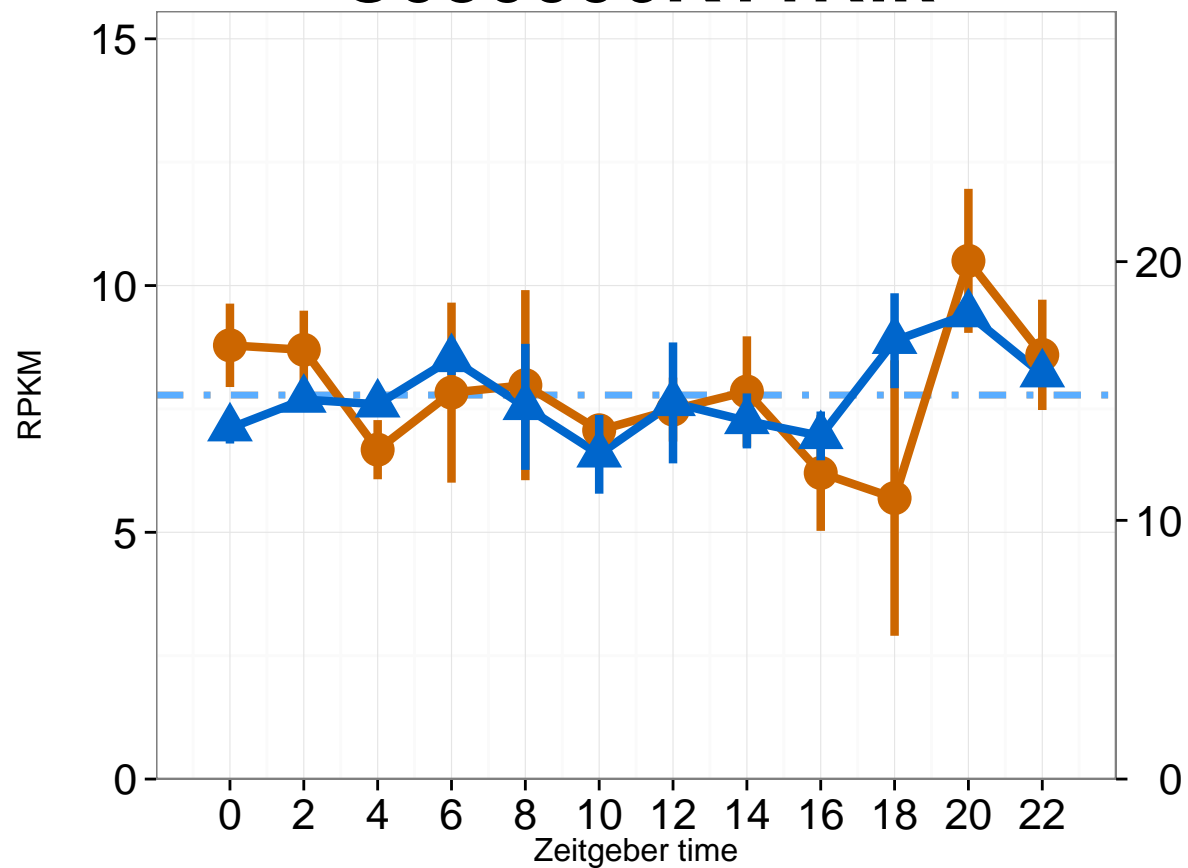

# C030006K11Rik

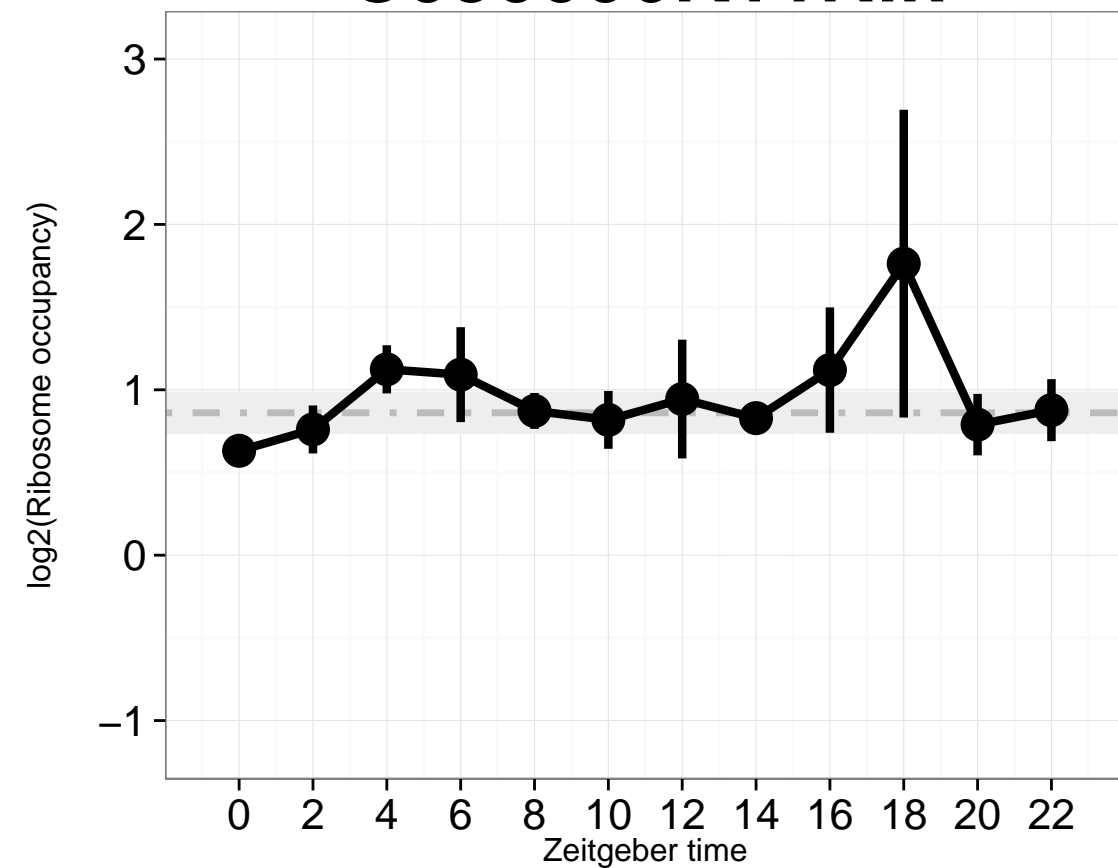

Supplement: SuppDataset_1.zip [file C030006K11Rik_set_A.pdf › Supplemental Dataset 1/A-mRNA_nonrhyth_translation_nonrhyth/C030006K11Rik_set_A.pdf]

# C030046E11Rik

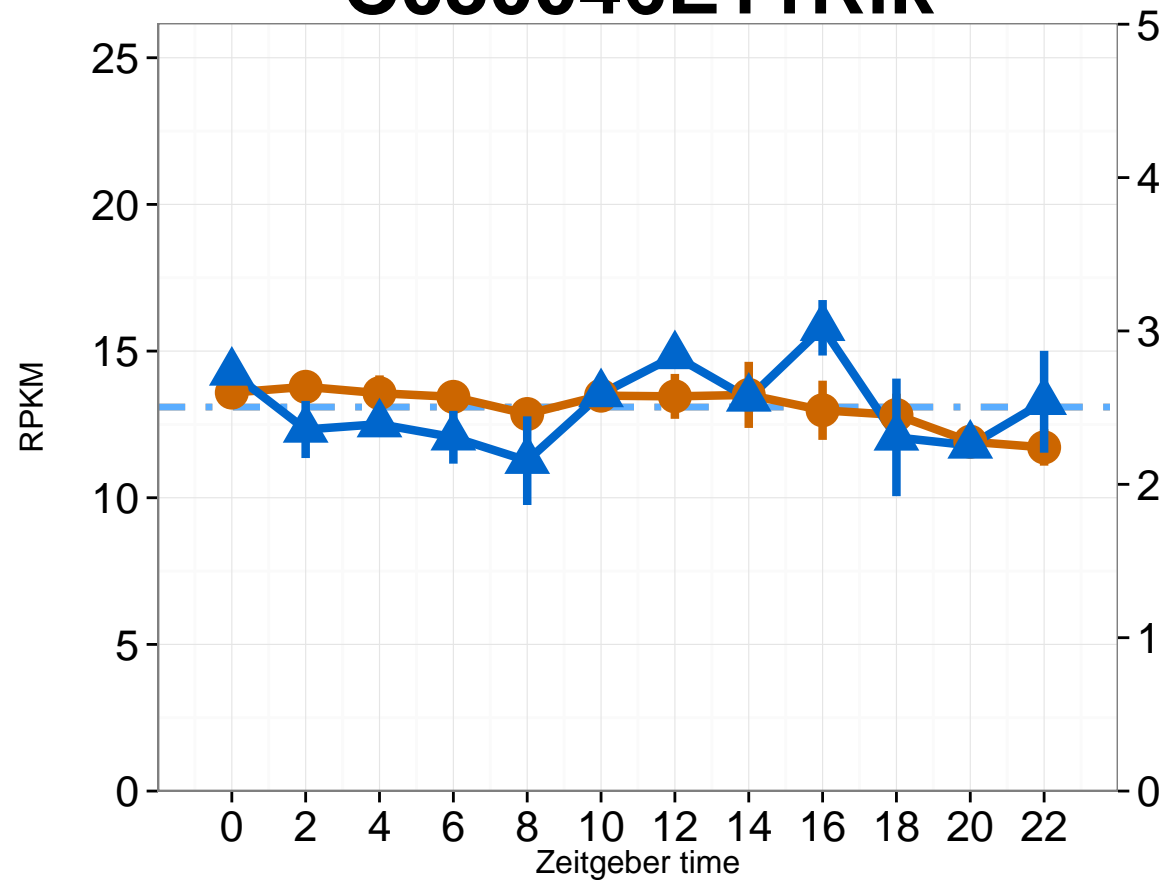

# C030046E11Rik

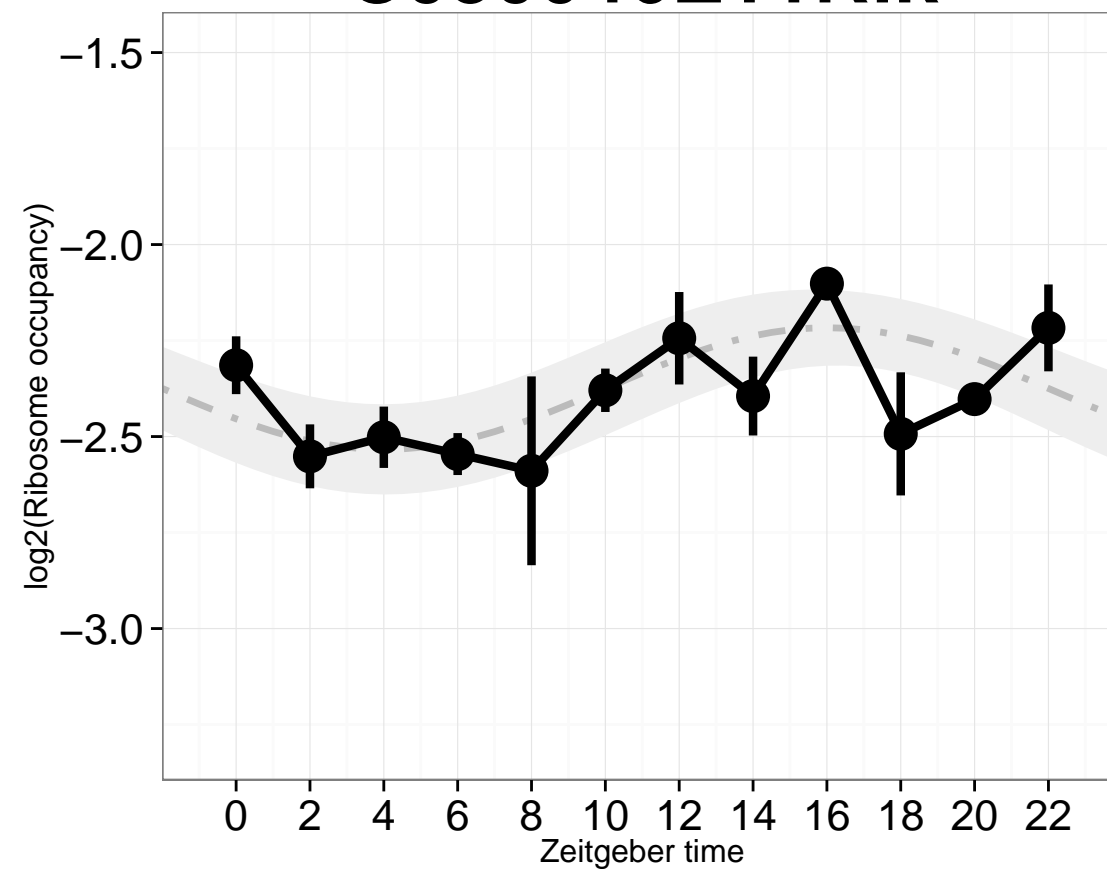

Supplement: SuppDataset_1.zip [file C030046E11Rik_set_A.pdf › Supplemental Dataset 1/A-mRNA_nonrhyth_translation_nonrhyth/C030046E11Rik_set_A.pdf]

# C130074G19Rik

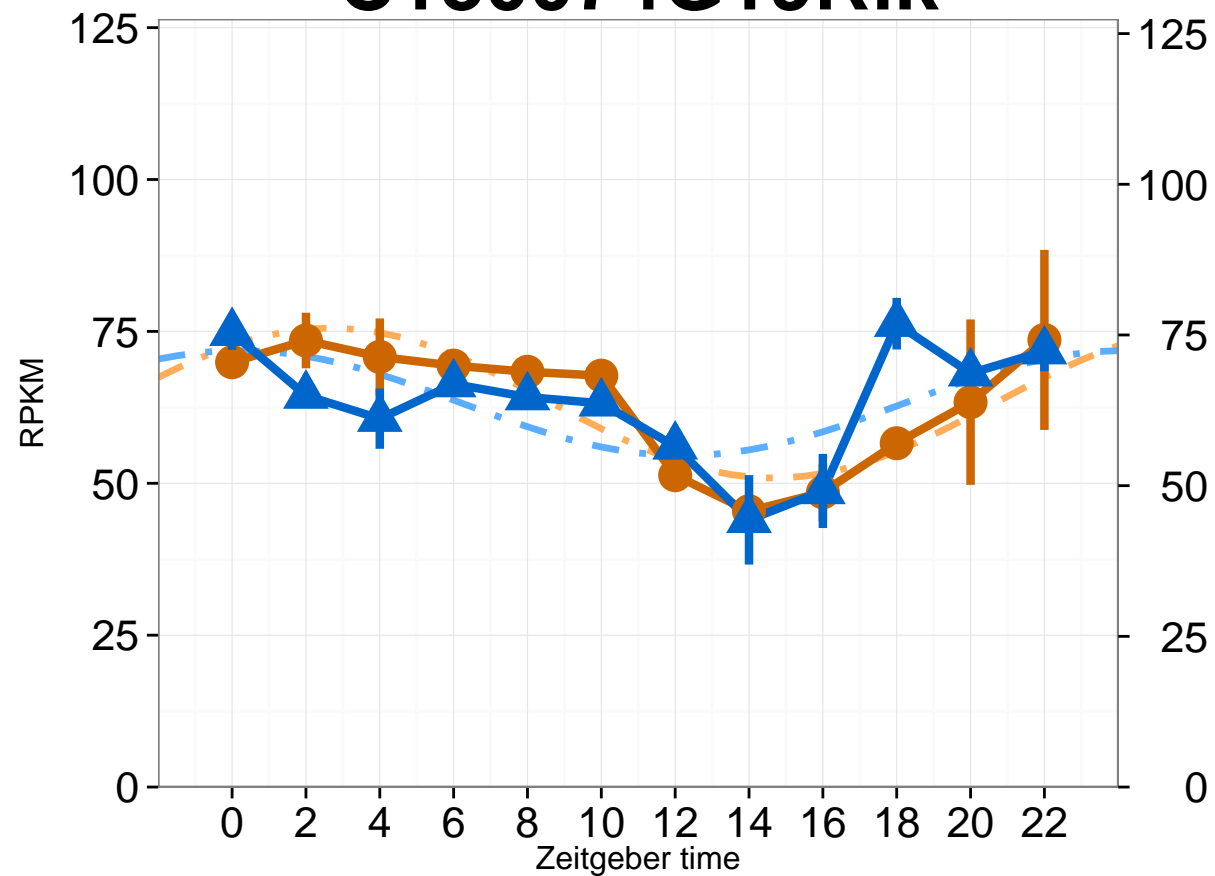

# C130074G19Rik

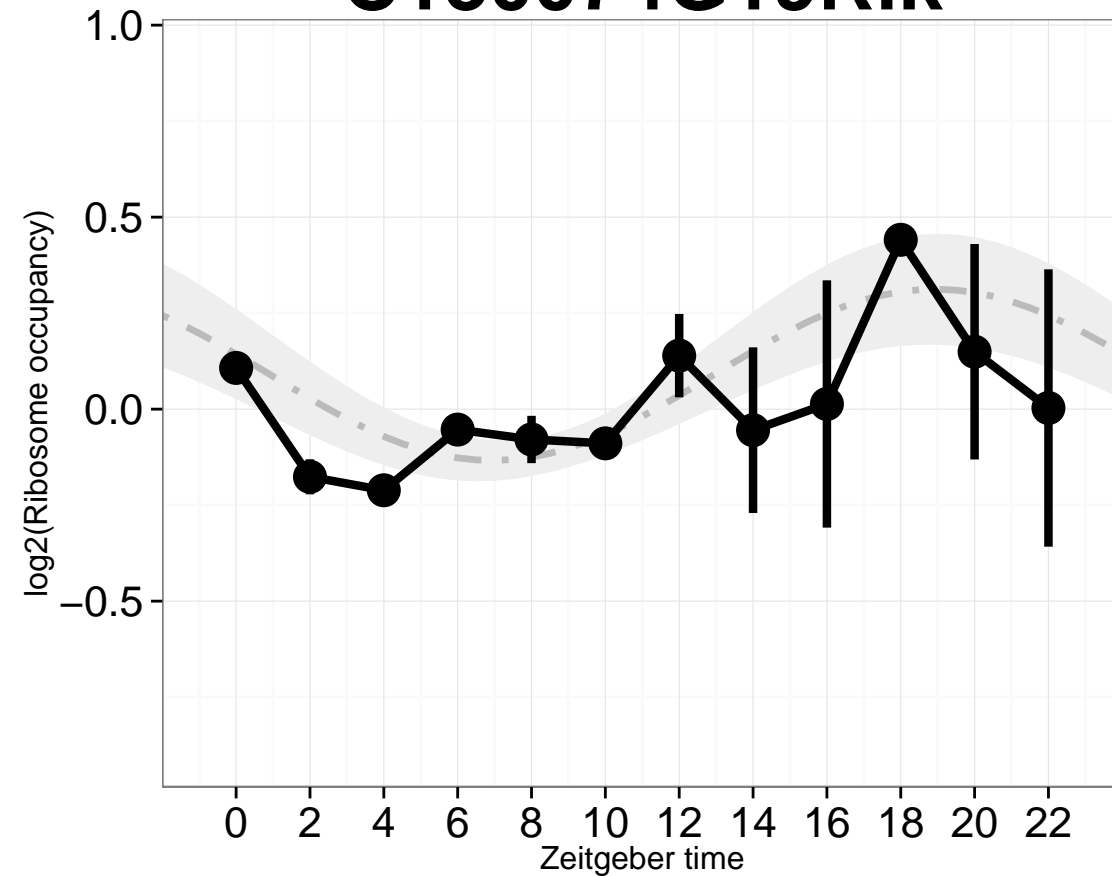

Supplement: SuppDataset_1.zip [file C130074G19Rik_set_A.pdf › Supplemental Dataset 1/A-mRNA_nonrhyth_translation_nonrhyth/C130074G19Rik_set_A.pdf]

# C1d

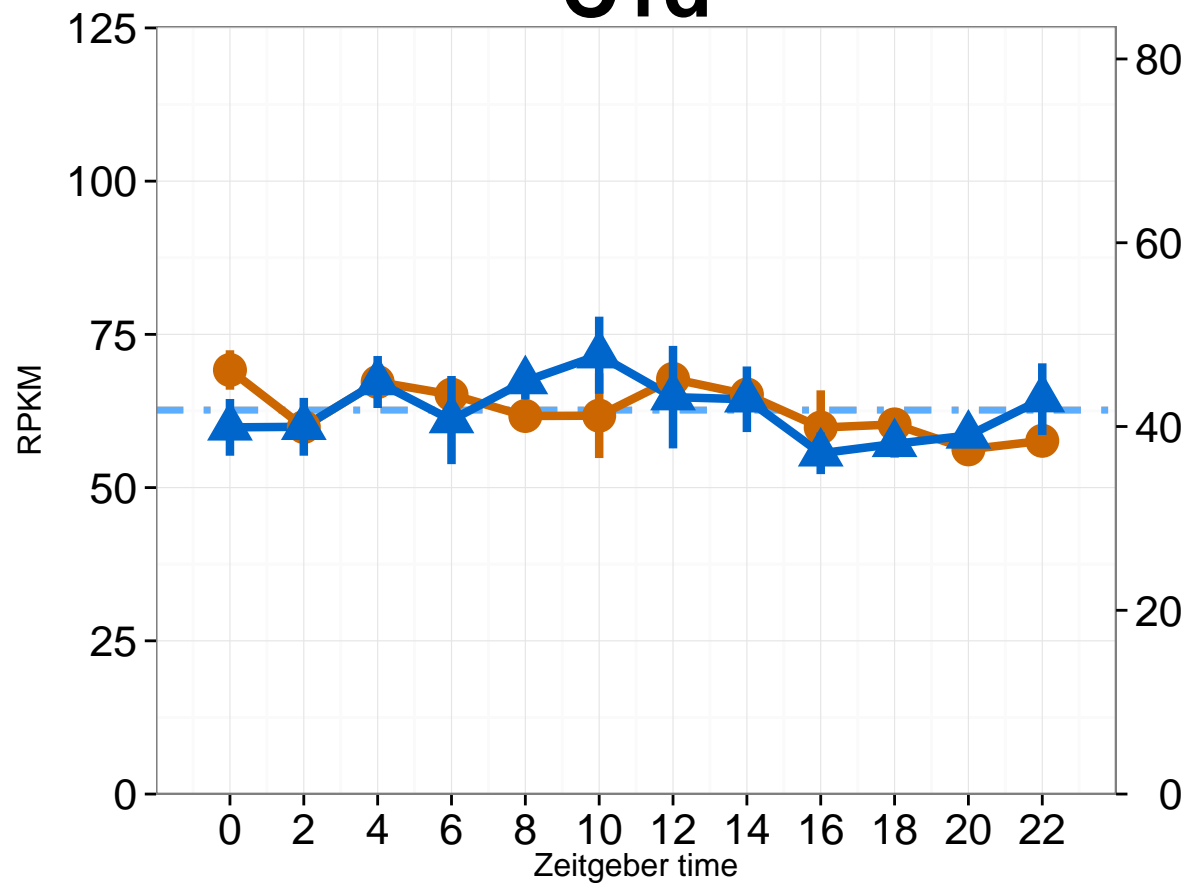

# C1d

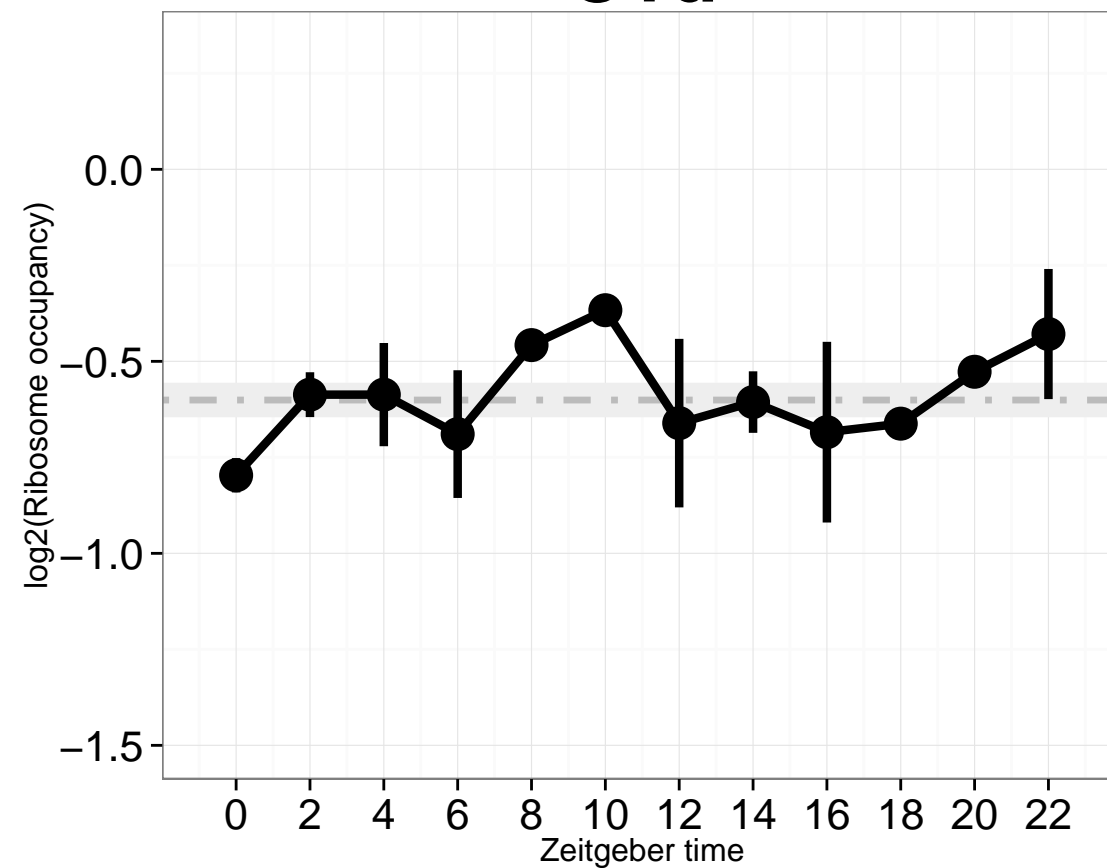

Supplement: SuppDataset_1.zip [file C1d_set_A.pdf › Supplemental Dataset 1/A-mRNA_nonrhyth_translation_nonrhyth/C1d_set_A.pdf]

# C1galt1

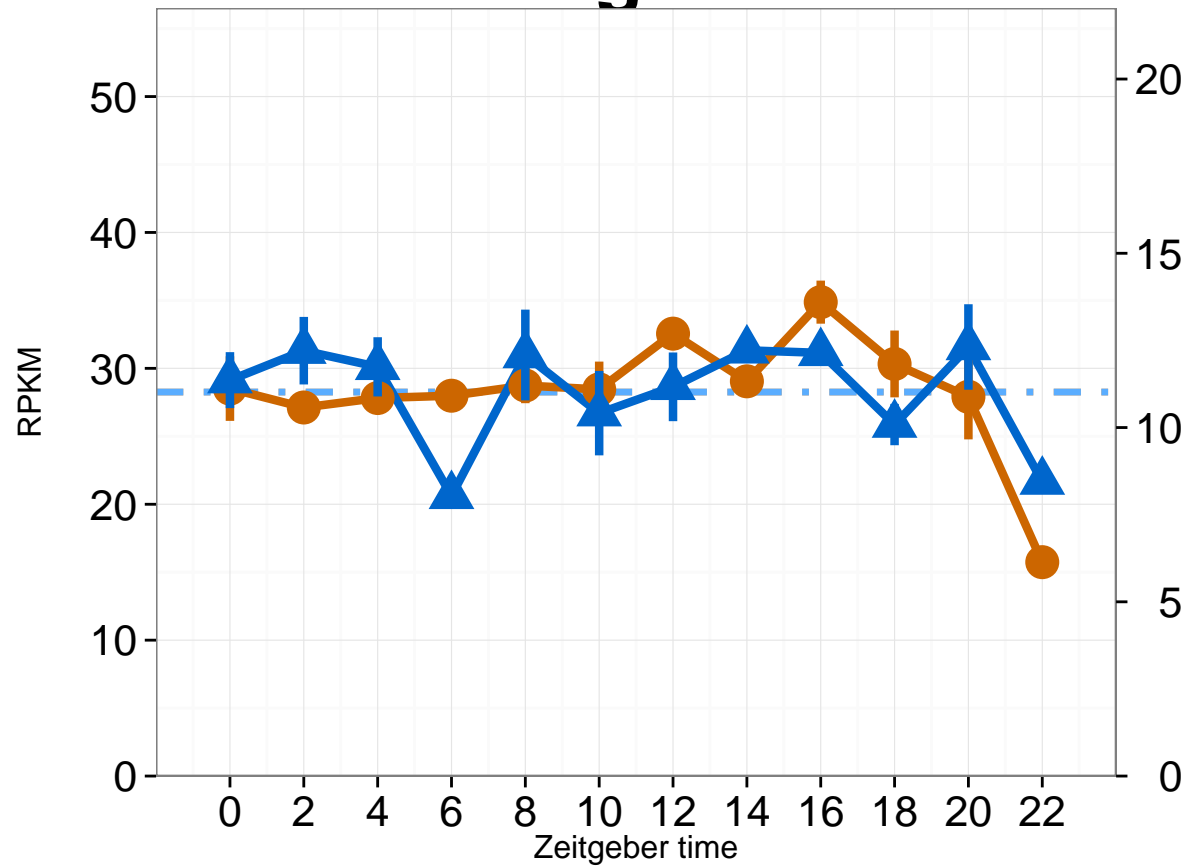

# C1galt1

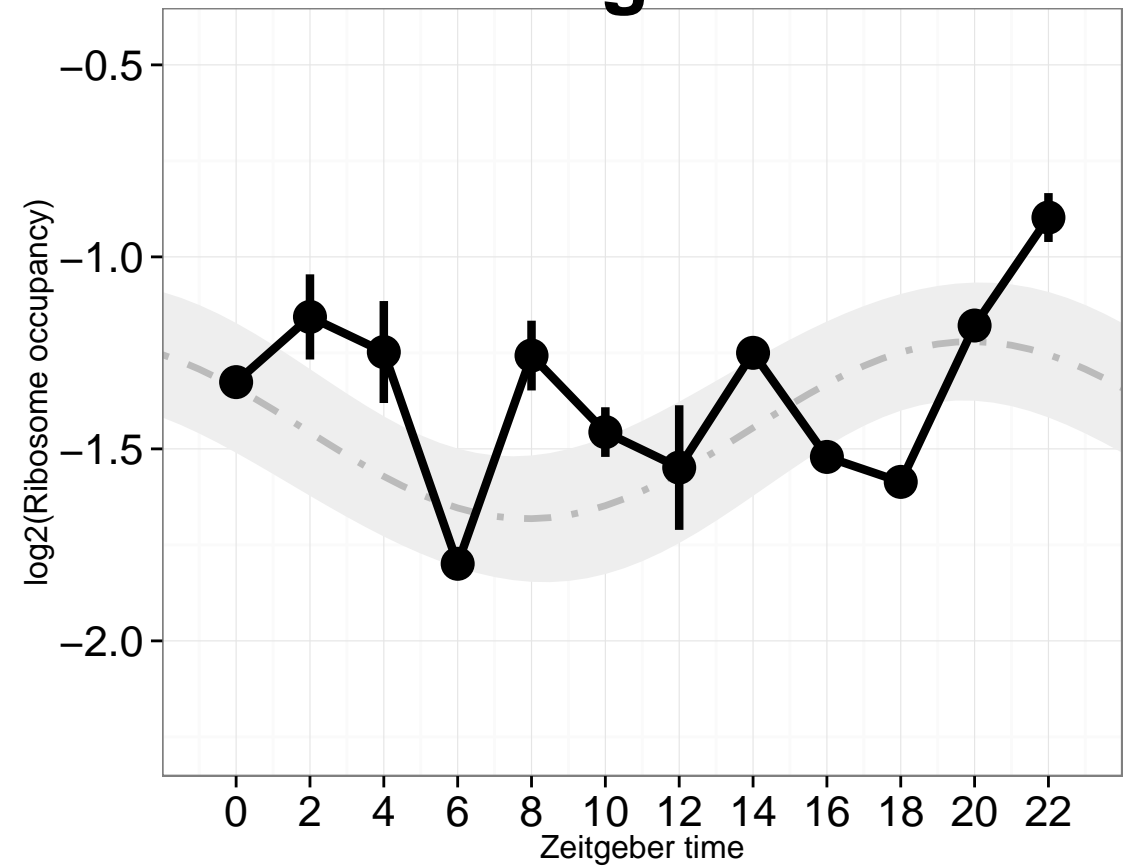

Supplement: SuppDataset_1.zip [file C1galt1_set_A.pdf › Supplemental Dataset 1/A-mRNA_nonrhyth_translation_nonrhyth/C1galt1_set_A.pdf]

# C1galt1c1

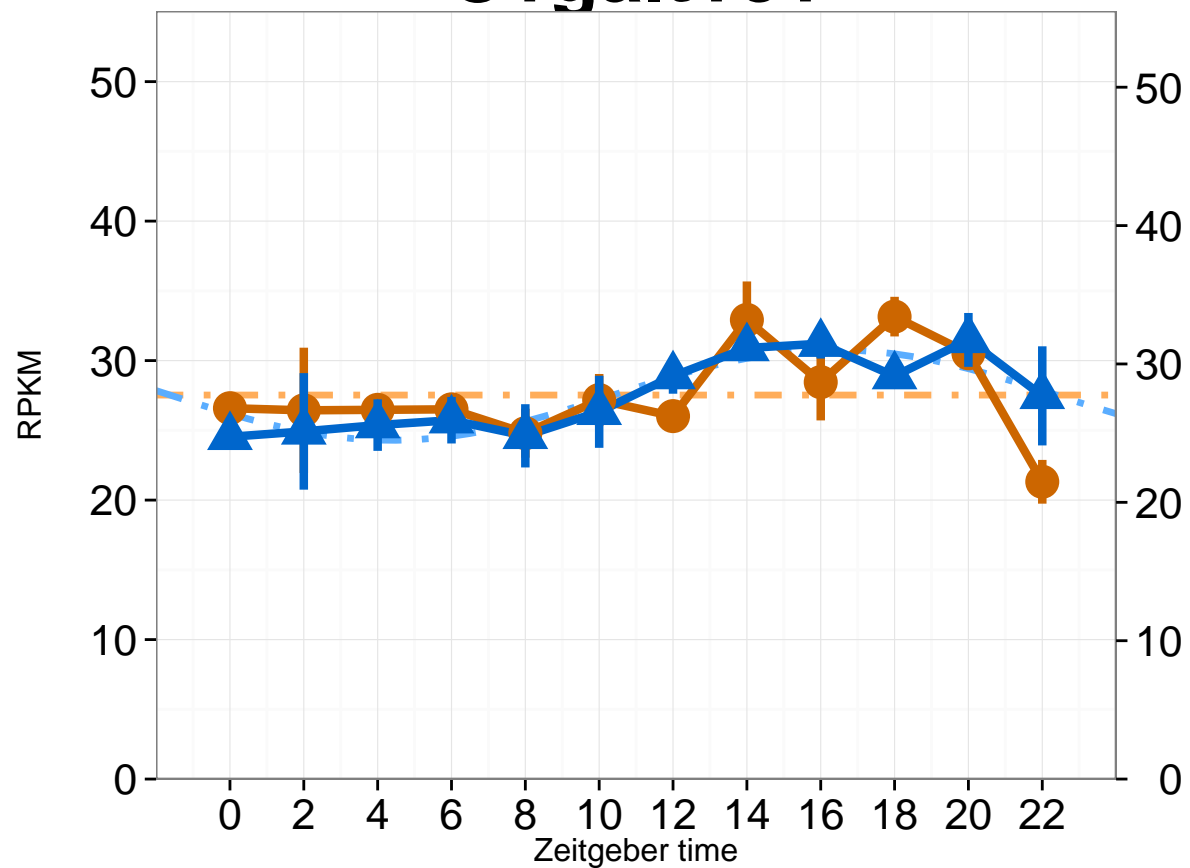

# C1galt1c1

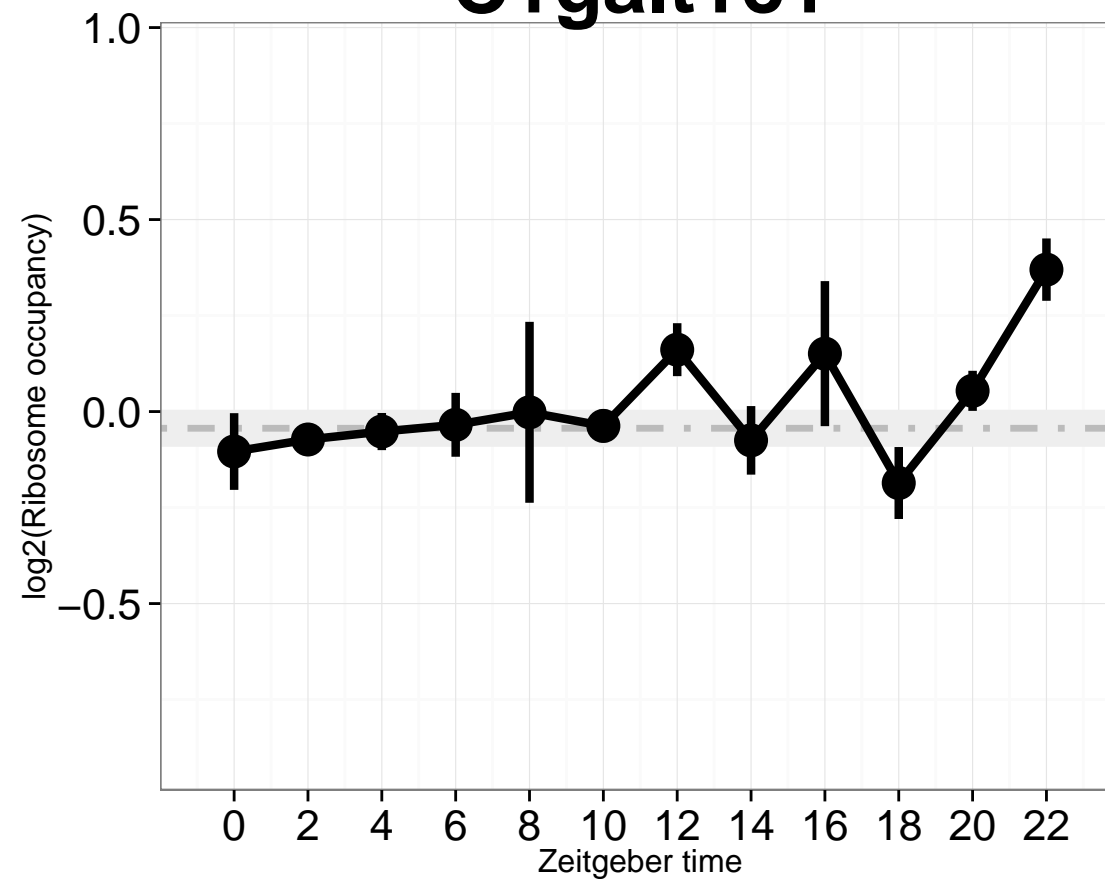

Supplement: SuppDataset_1.zip [file C1galt1c1_set_A.pdf › Supplemental Dataset 1/A-mRNA_nonrhyth_translation_nonrhyth/C1galt1c1_set_A.pdf]

# C1qa

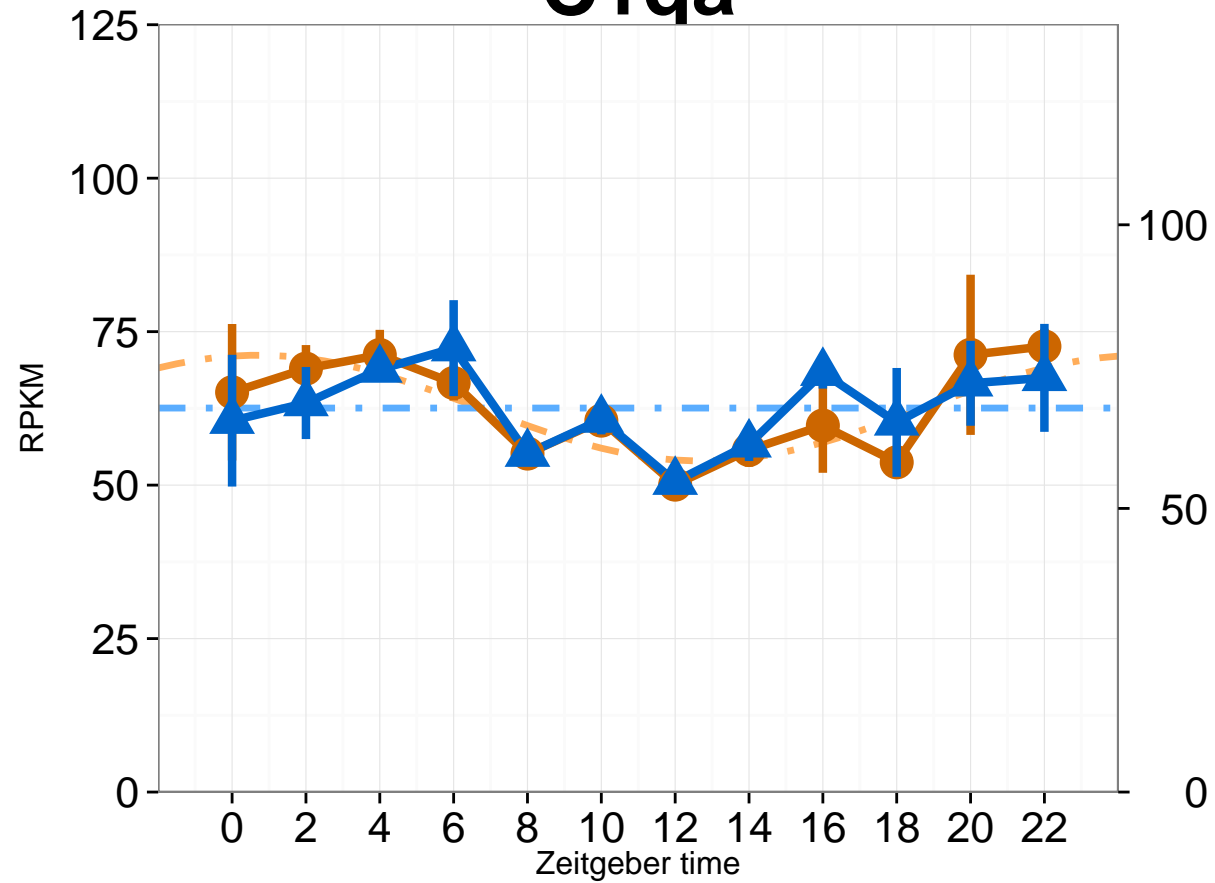

# C1qa

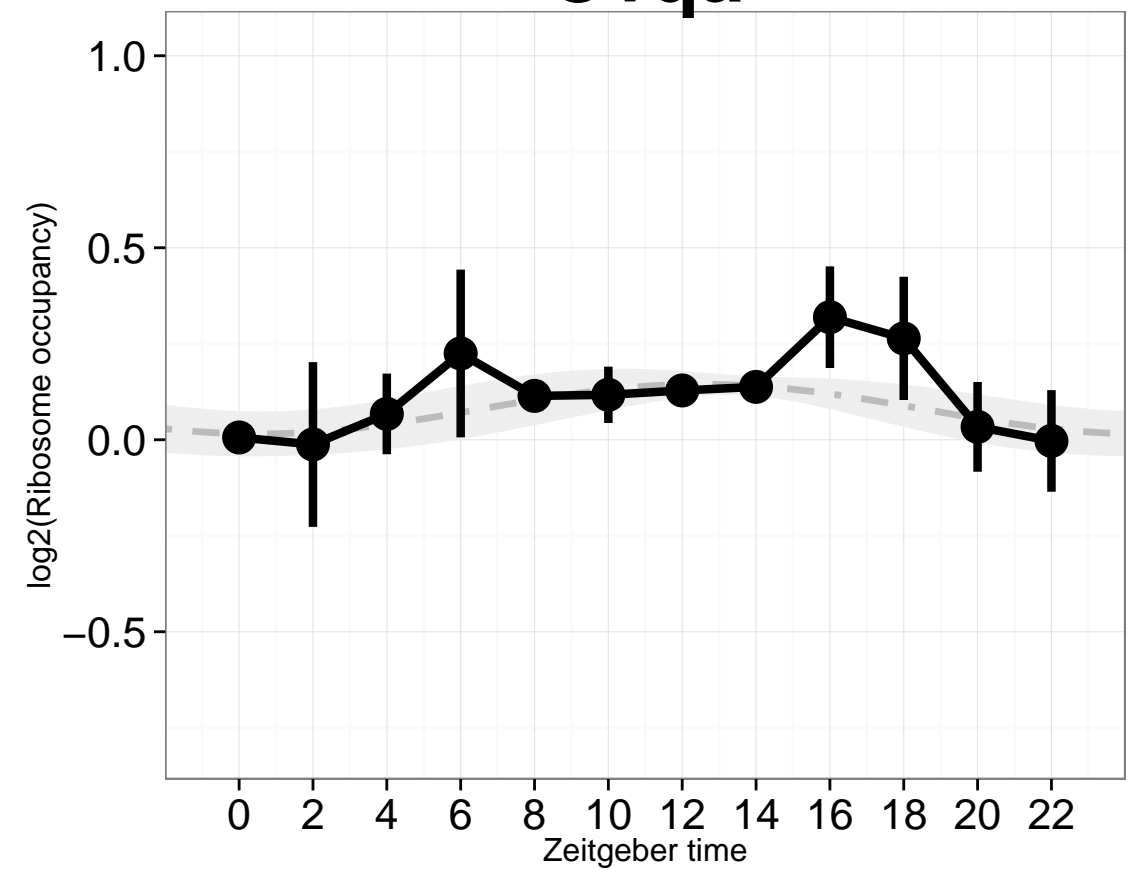

Supplement: SuppDataset_1.zip [file C1qa_set_A.pdf › Supplemental Dataset 1/A-mRNA_nonrhyth_translation_nonrhyth/C1qa_set_A.pdf]

## C1qb

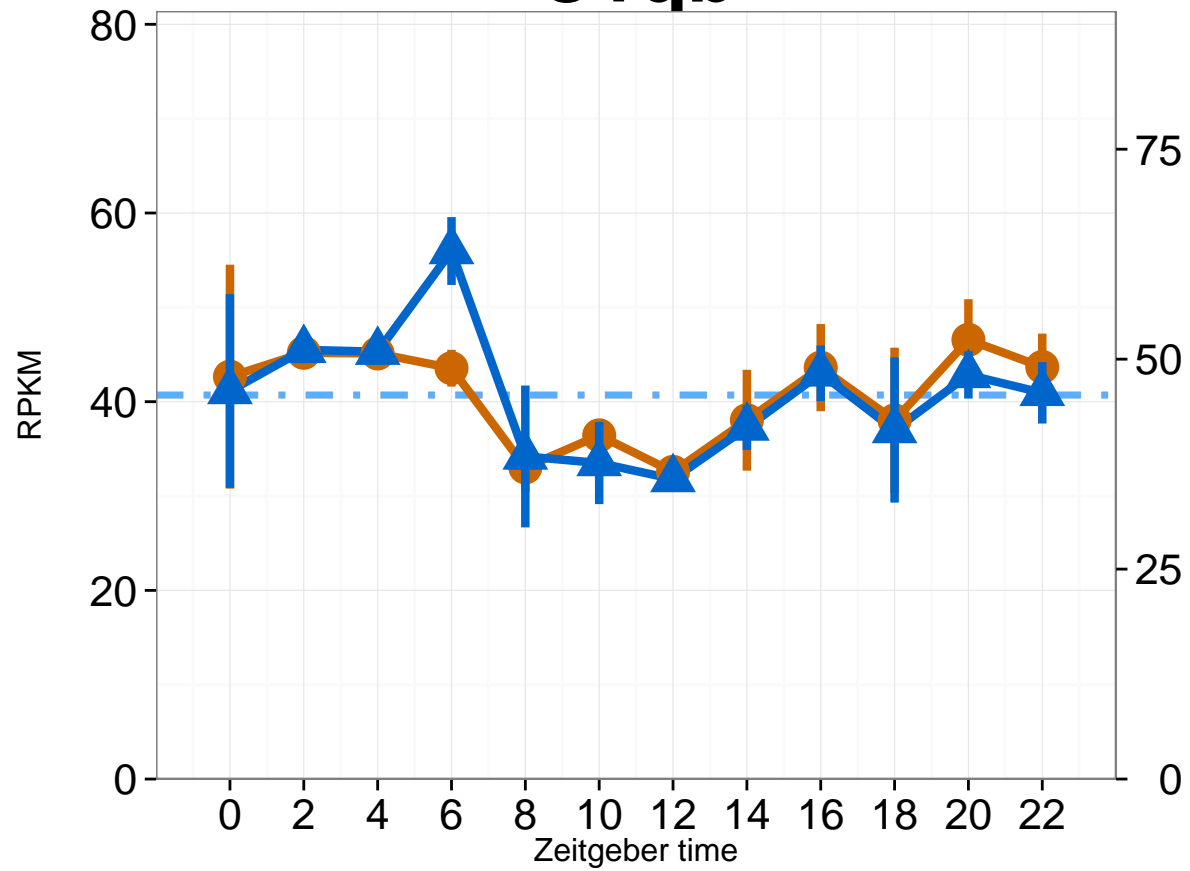

## C1qb

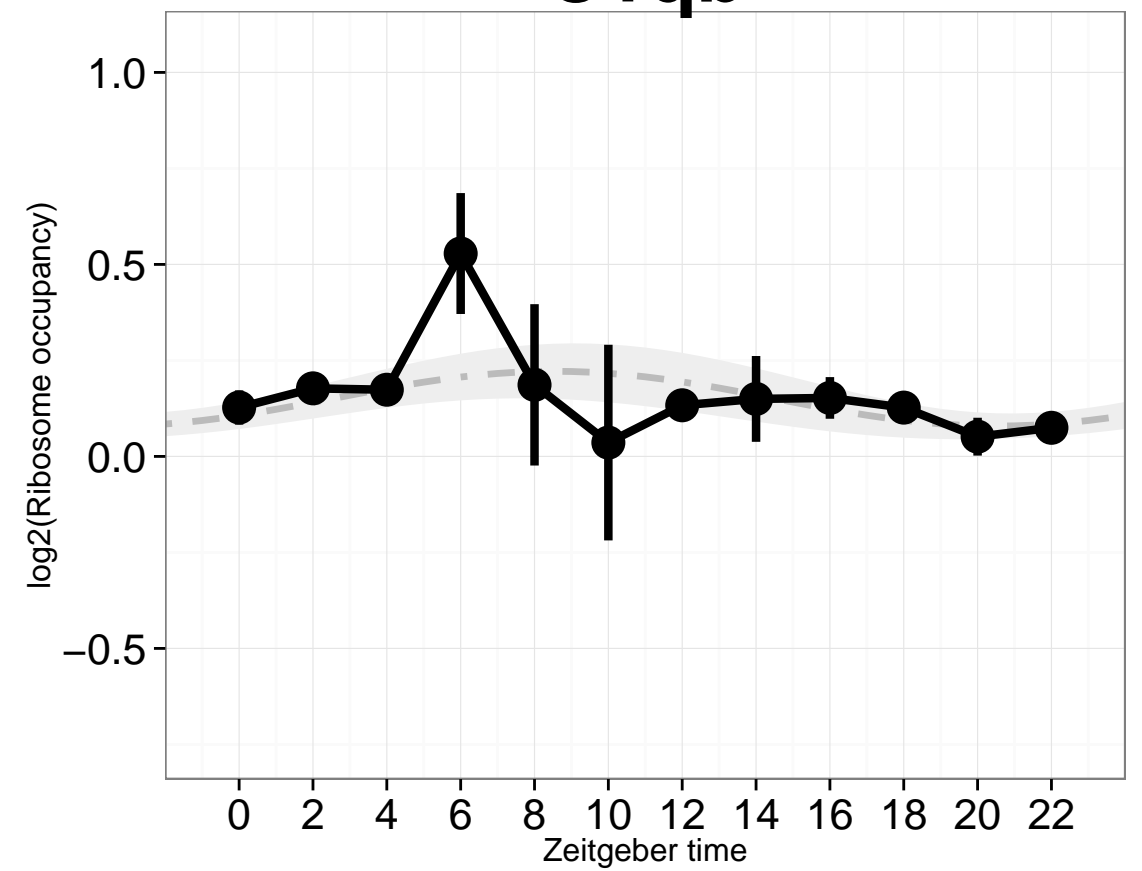

Supplement: SuppDataset_1.zip [file C1qb_set_A.pdf › Supplemental Dataset 1/A-mRNA_nonrhyth_translation_nonrhyth/C1qb_set_A.pdf]

# C1qc

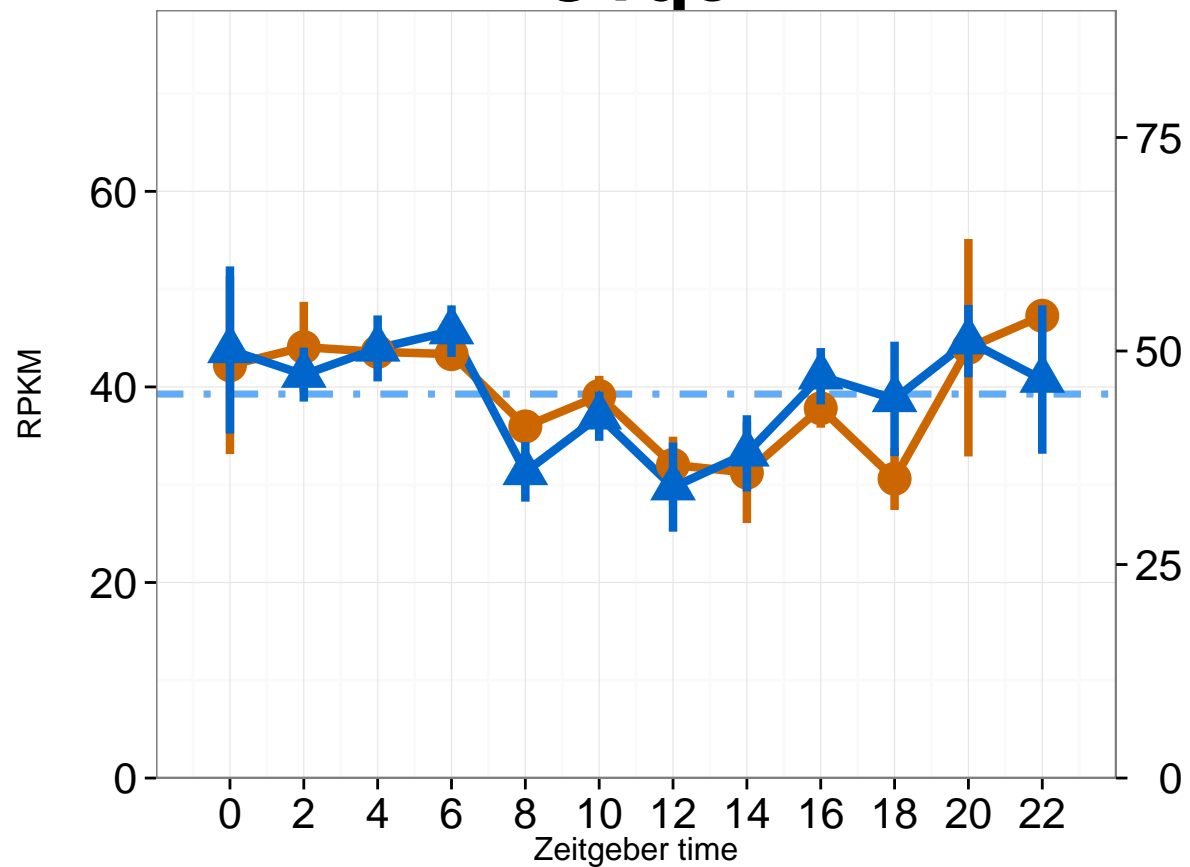

# C1qc

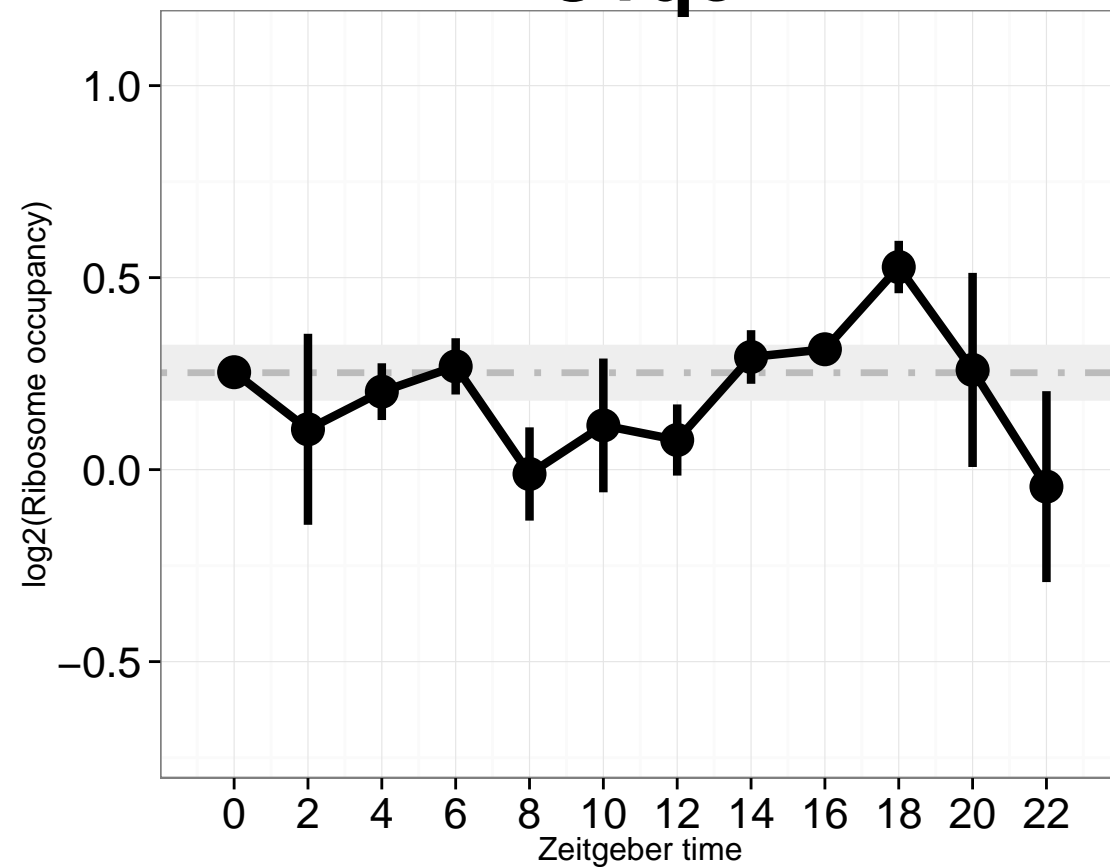

Supplement: SuppDataset_1.zip [file C1qc_set_A.pdf › Supplemental Dataset 1/A-mRNA_nonrhyth_translation_nonrhyth/C1qc_set_A.pdf]

# C1qtnf1

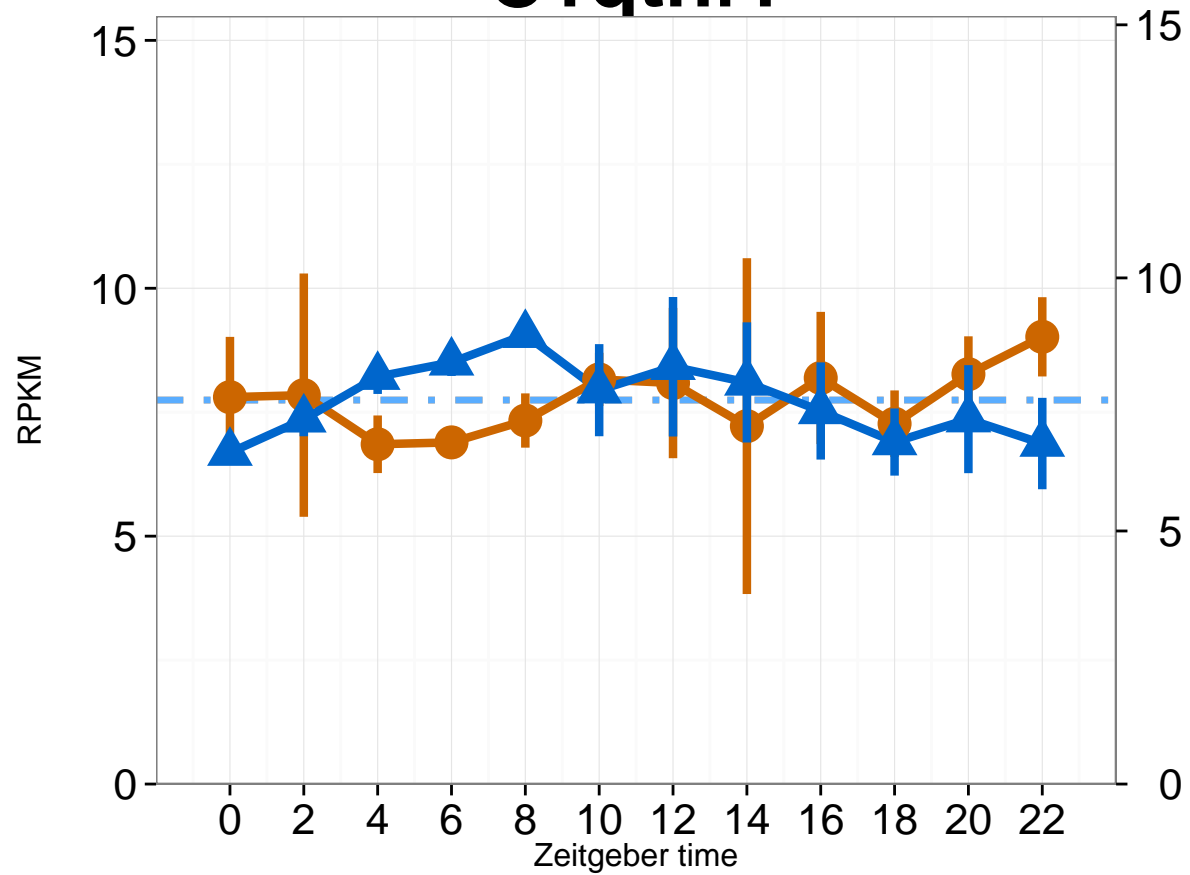

# C1qtnf1

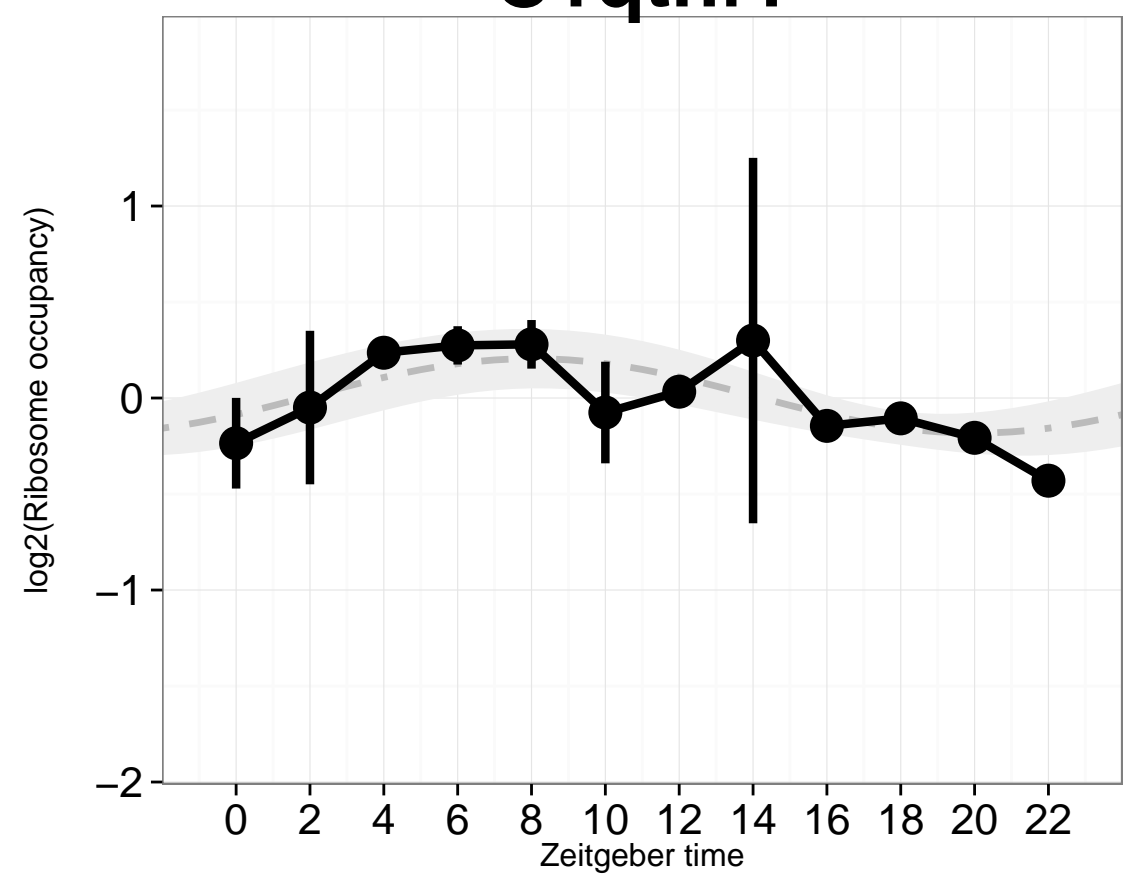

Supplement: SuppDataset_1.zip [file C1qtnf1_set_A.pdf › Supplemental Dataset 1/A-mRNA_nonrhyth_translation_nonrhyth/C1qtnf1_set_A.pdf]

C1qtnf2

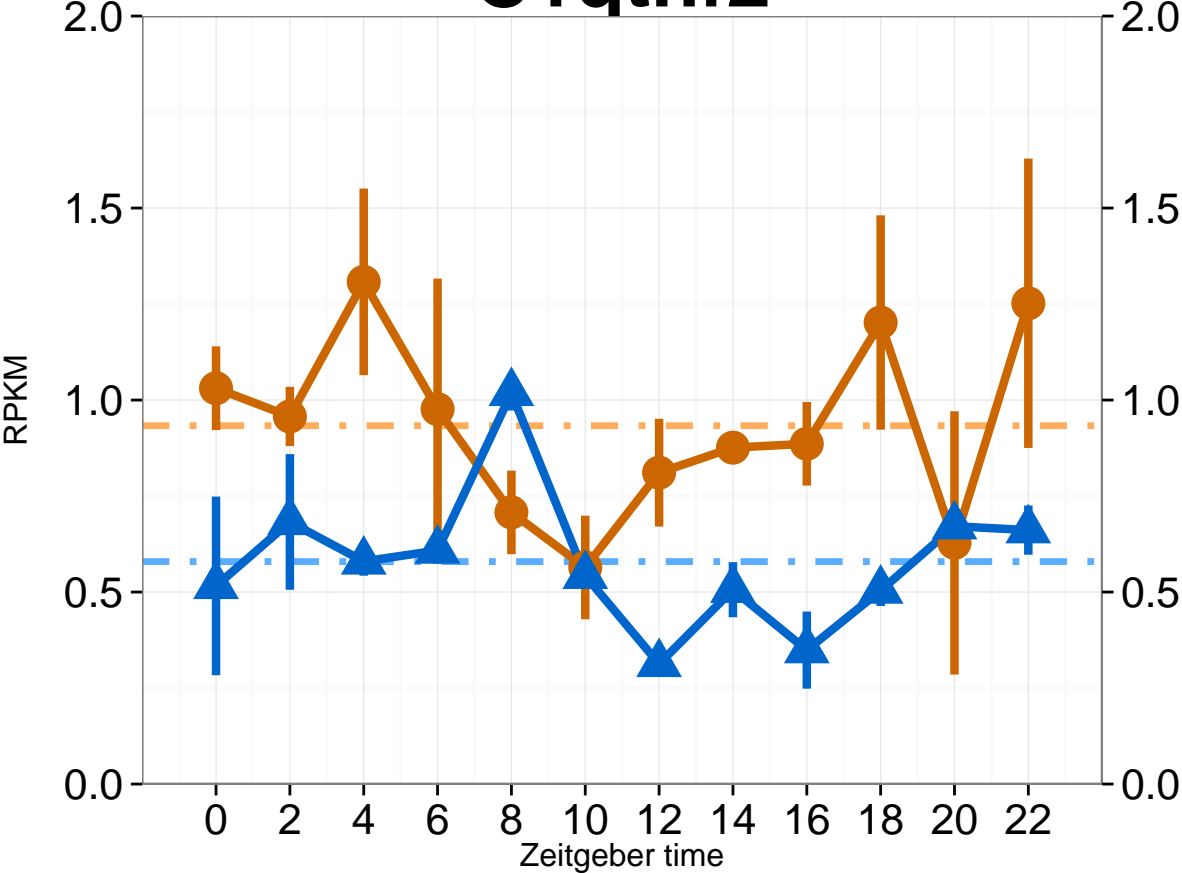

C1qtnf2

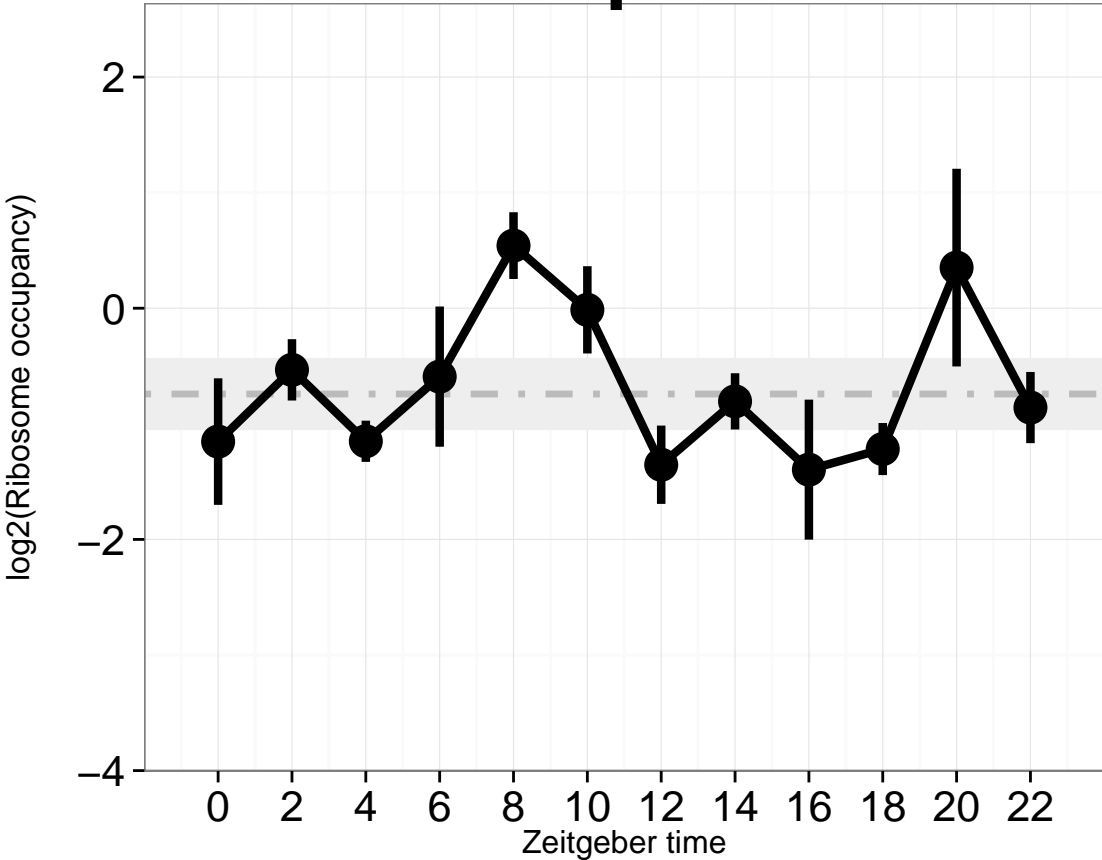

Supplement: SuppDataset_1.zip [file C1qtnf2_set_A.pdf › Supplemental Dataset 1/A-mRNA_nonrhyth_translation_nonrhyth/C1qtnf2_set_A.pdf]

# C1qtnf5

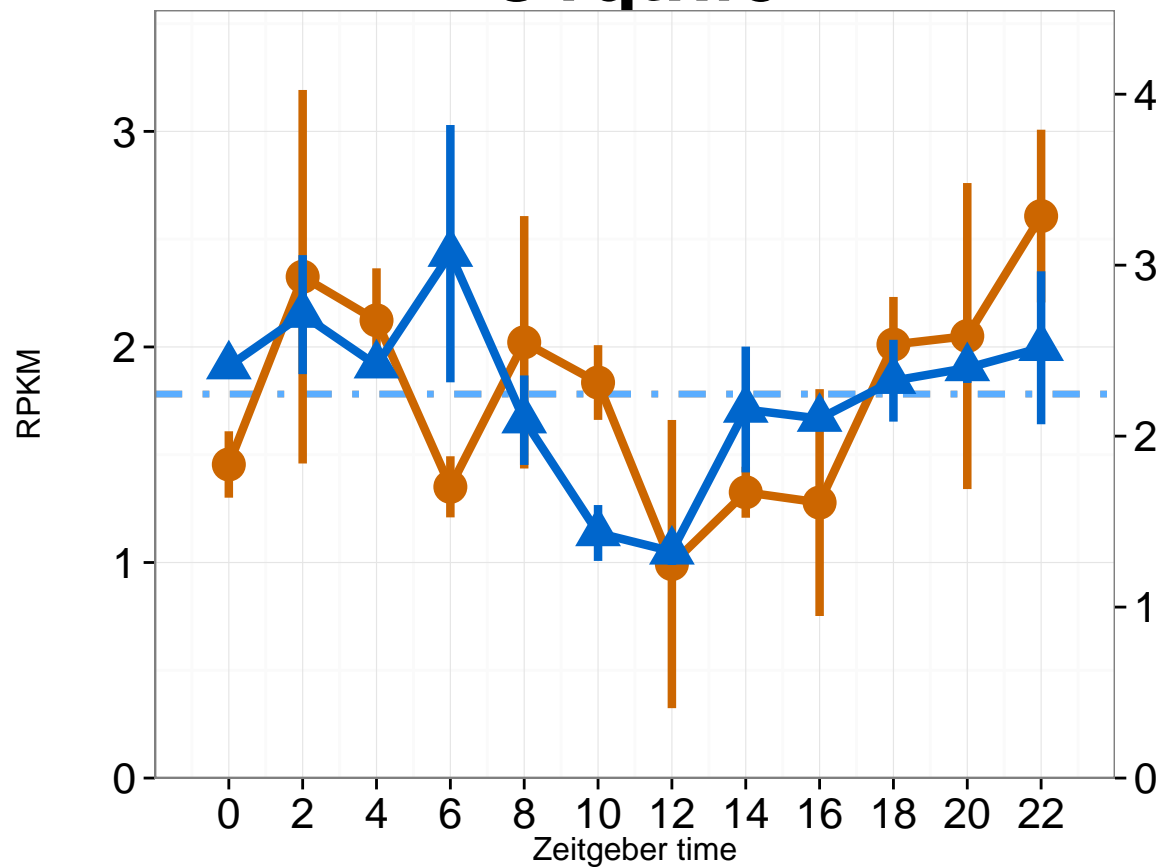

# C1qtnf5

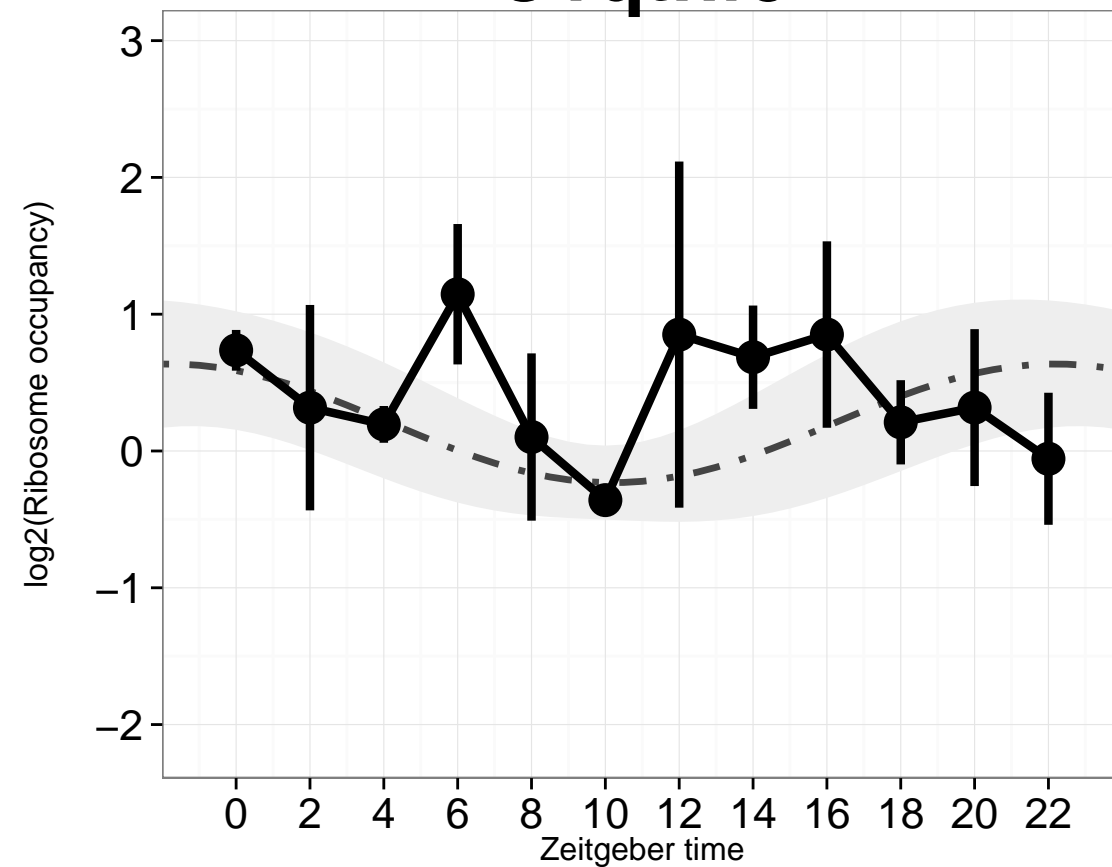

Supplement: SuppDataset_1.zip [file C1qtnf5_set_A.pdf › Supplemental Dataset 1/A-mRNA_nonrhyth_translation_nonrhyth/C1qtnf5_set_A.pdf]

# C1ra

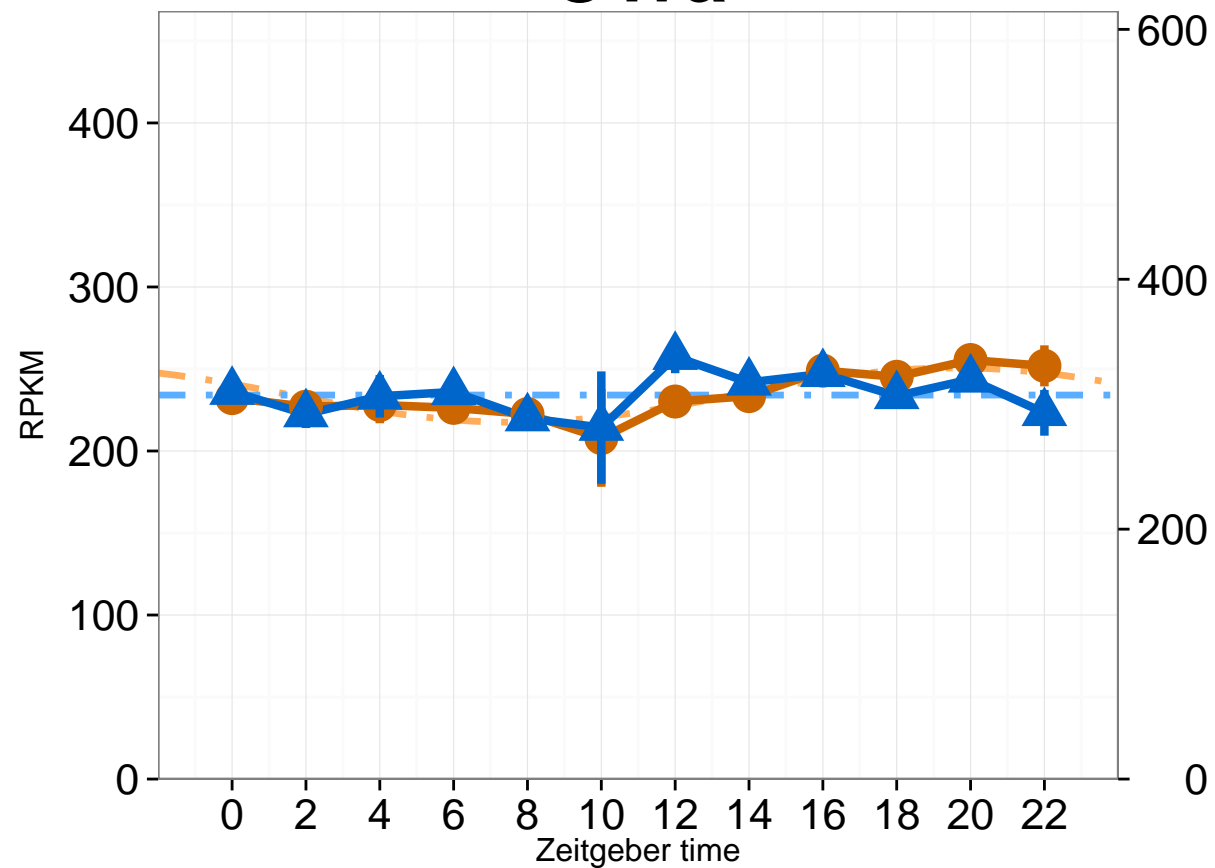

# C1ra

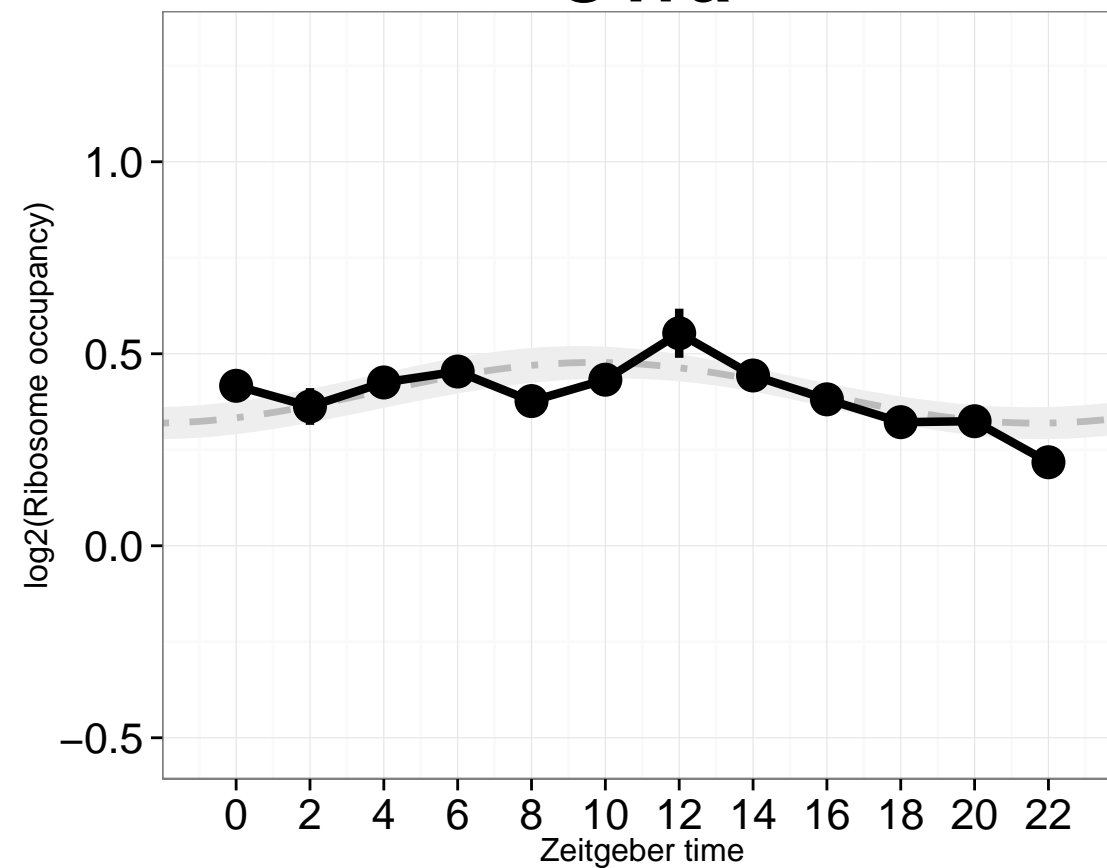

Supplement: SuppDataset_1.zip [file C1ra_set_A.pdf › Supplemental Dataset 1/A-mRNA_nonrhyth_translation_nonrhyth/C1ra_set_A.pdf]

# C1rl

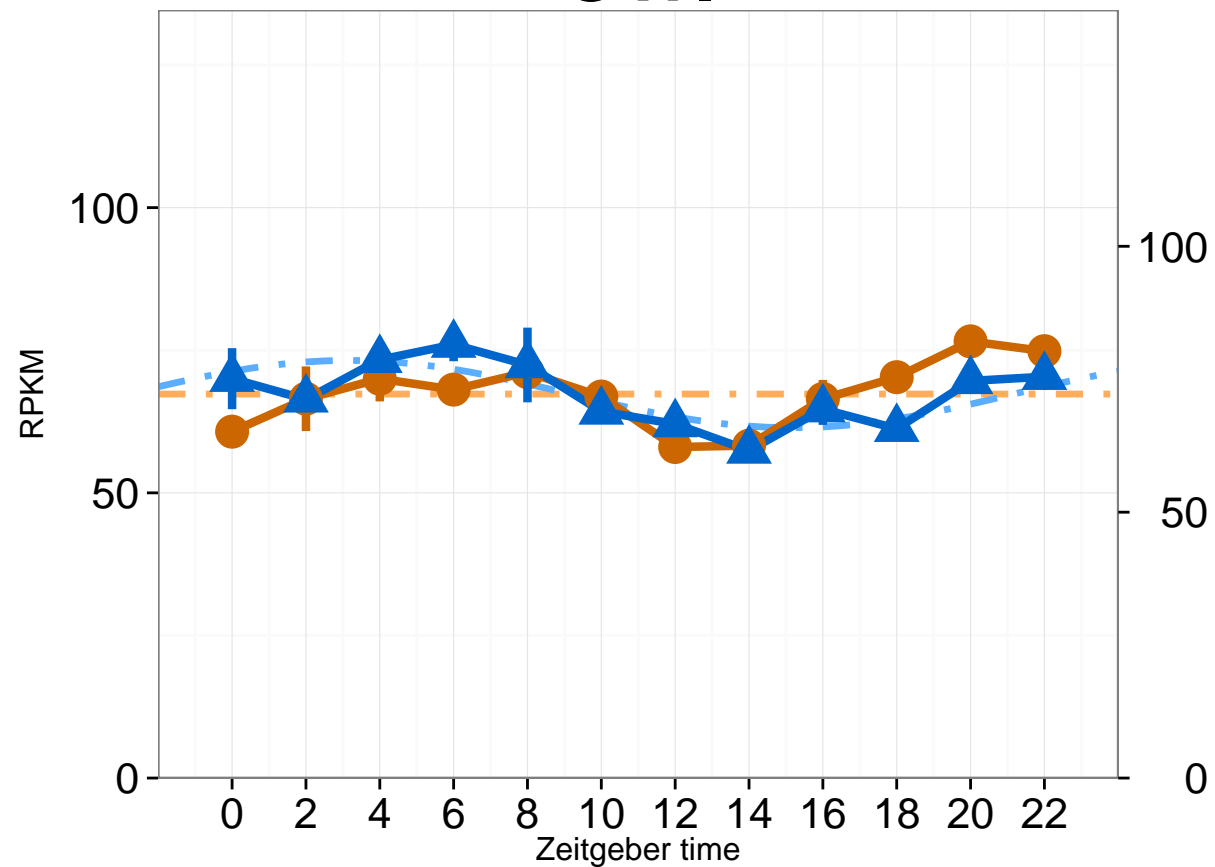

# C1rl

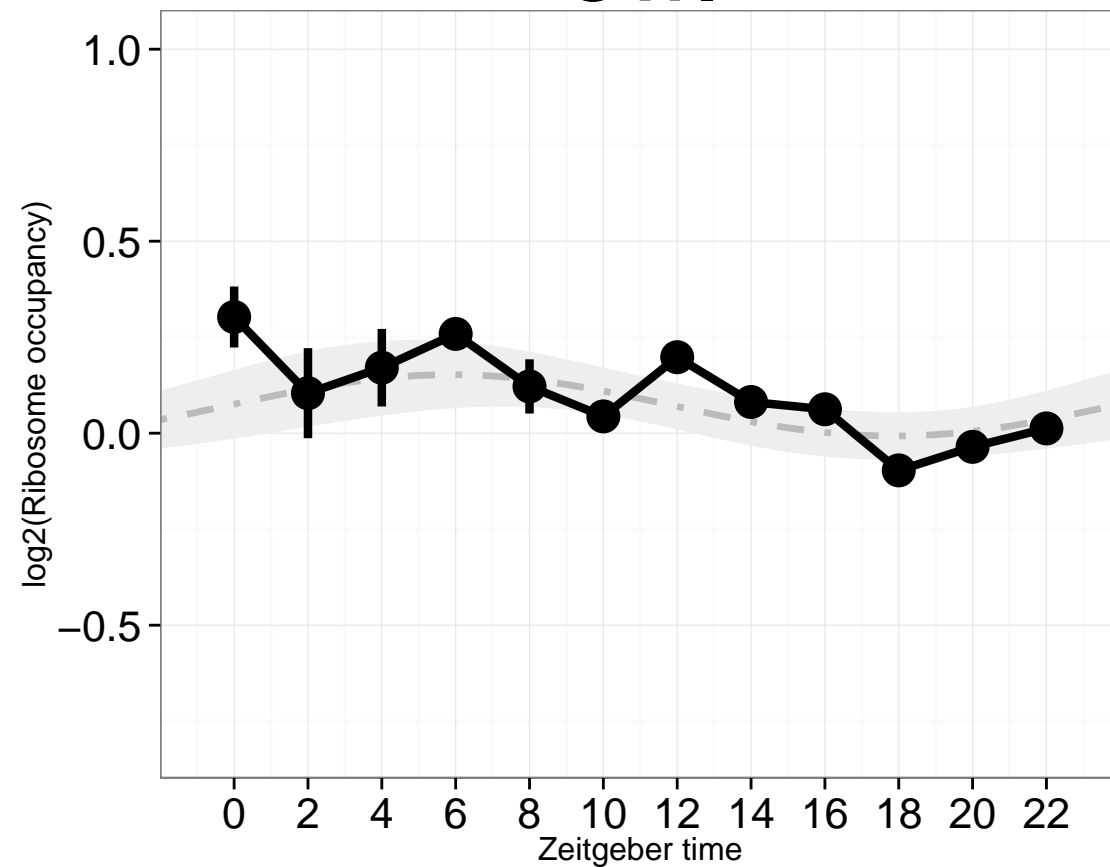

Supplement: SuppDataset_1.zip [file C1rl_set_A.pdf › Supplemental Dataset 1/A-mRNA_nonrhyth_translation_nonrhyth/C1rl_set_A.pdf]

# C1s

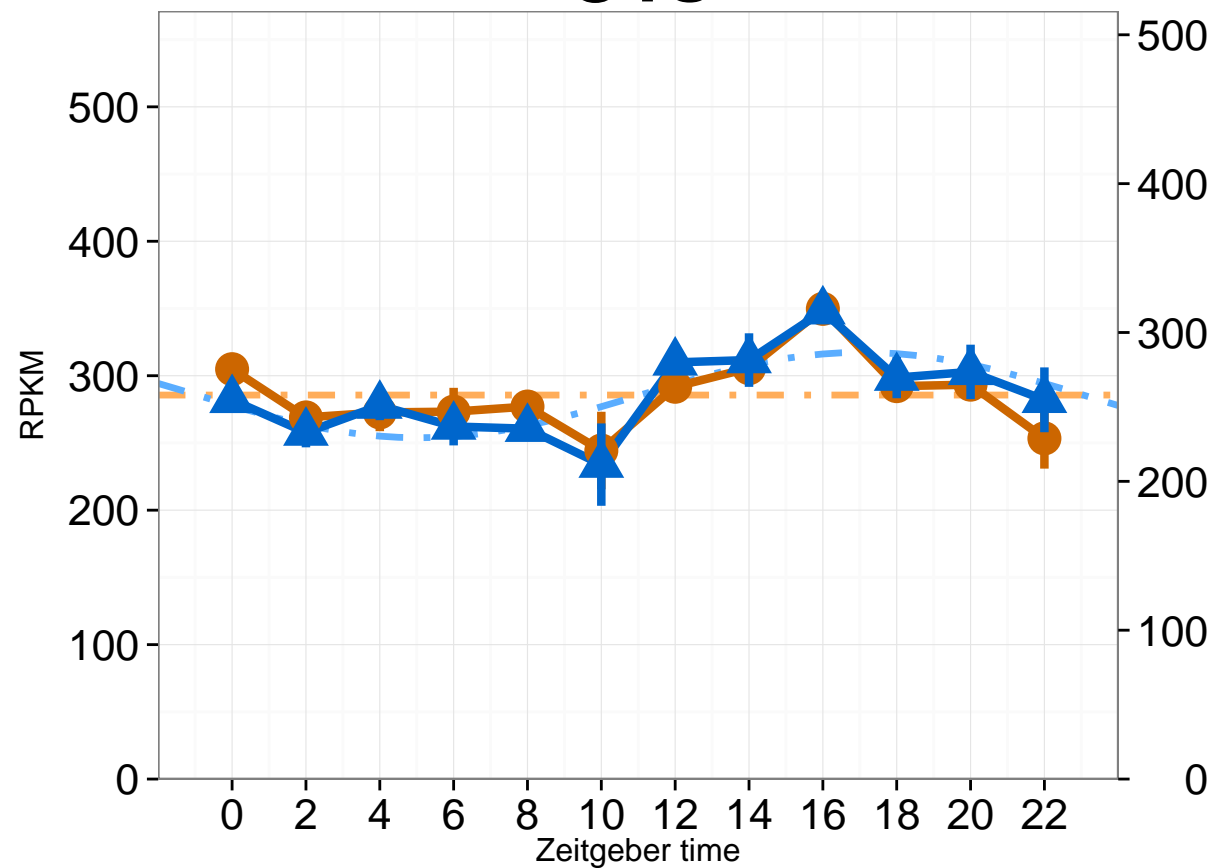

# C1s

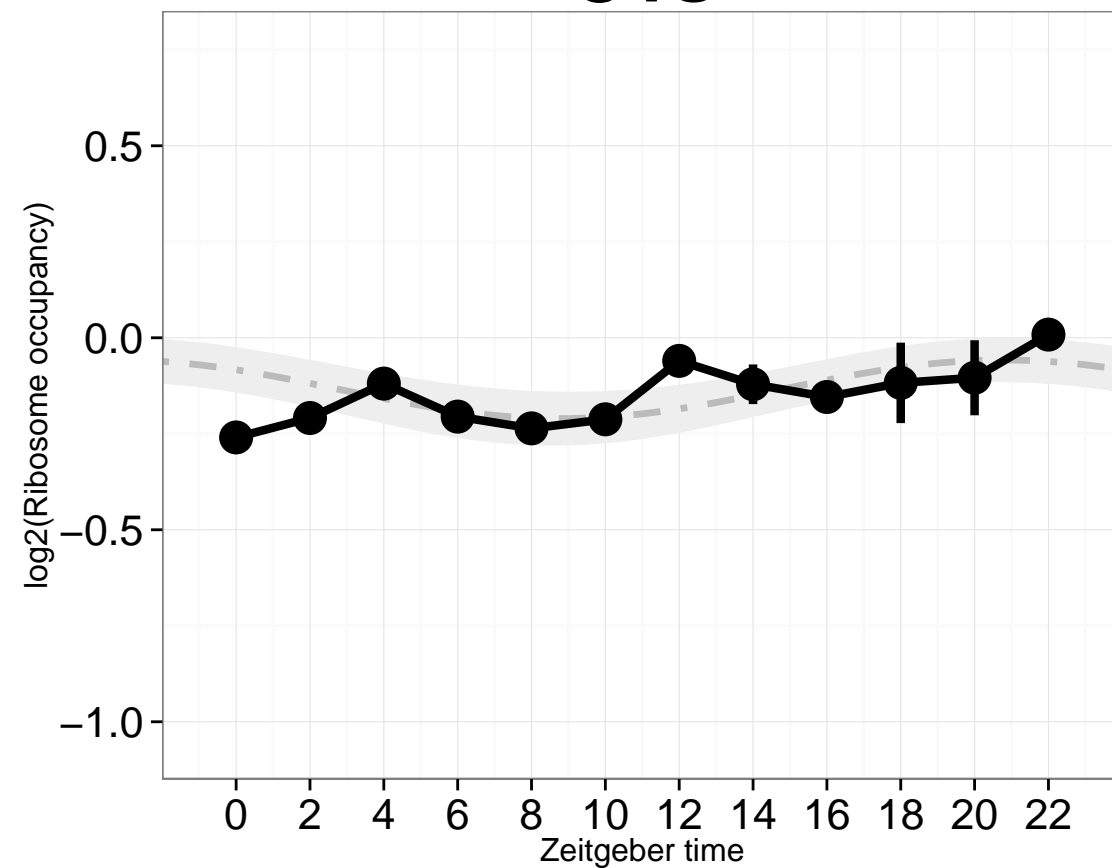

Supplement: SuppDataset_1.zip [file C1s_set_A.pdf › Supplemental Dataset 1/A-mRNA_nonrhyth_translation_nonrhyth/C1s_set_A.pdf]

# C230052I12Rik

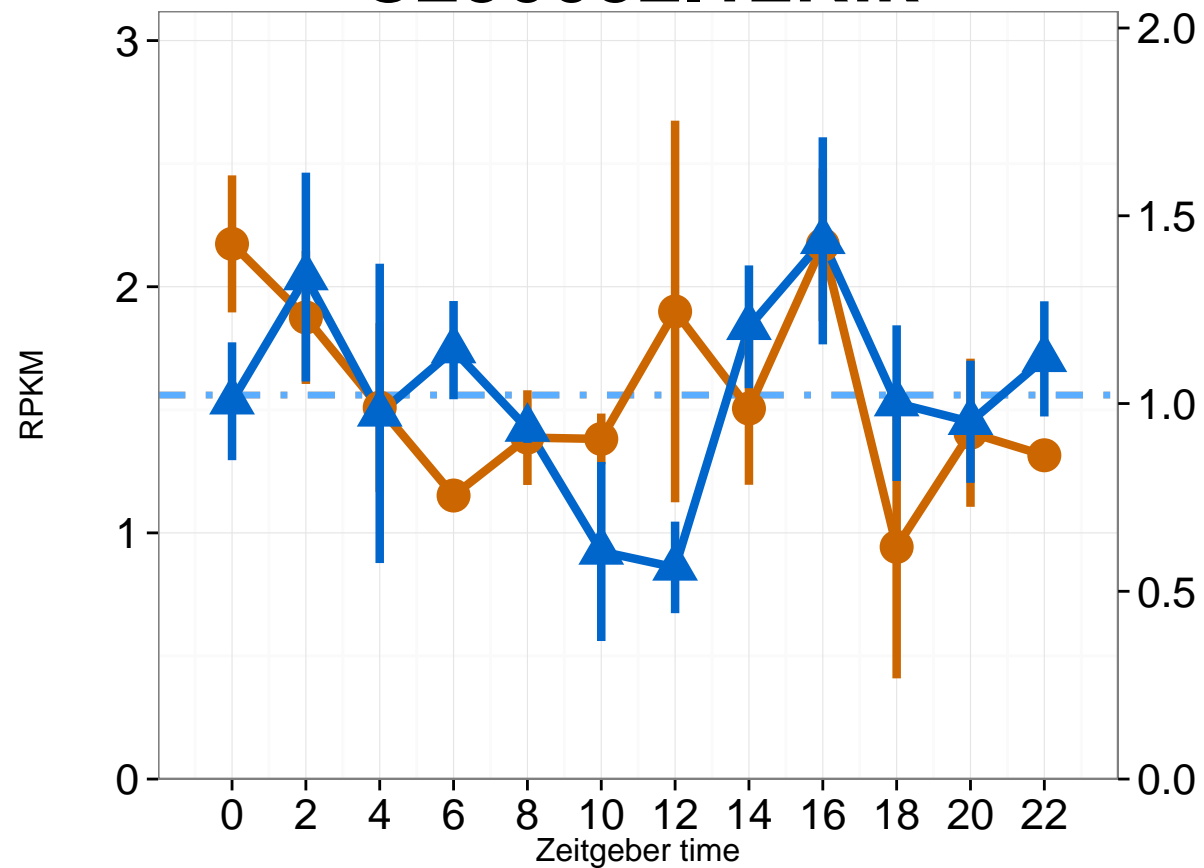

# C230052I12Rik

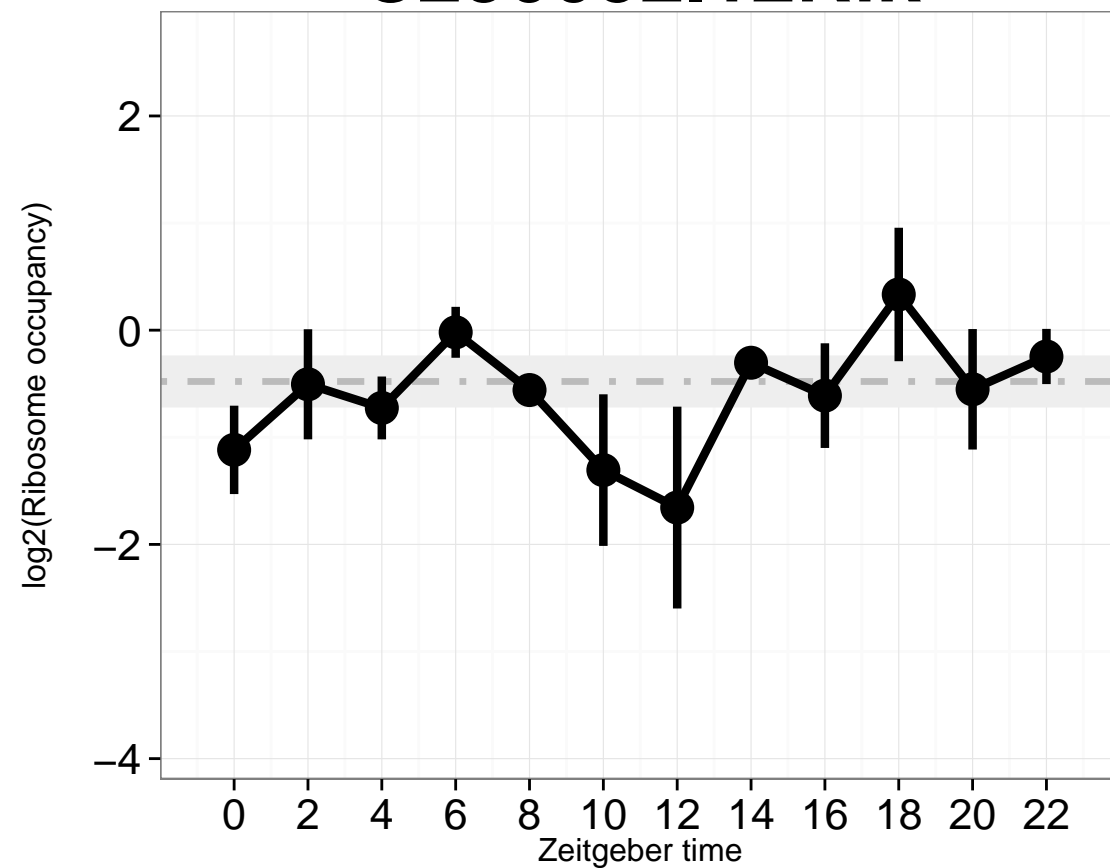

Supplement: SuppDataset_1.zip [file C230052I12Rik_set_A.pdf › Supplemental Dataset 1/A-mRNA_nonrhyth_translation_nonrhyth/C230052I12Rik_set_A.pdf]

# C230081A13Rik

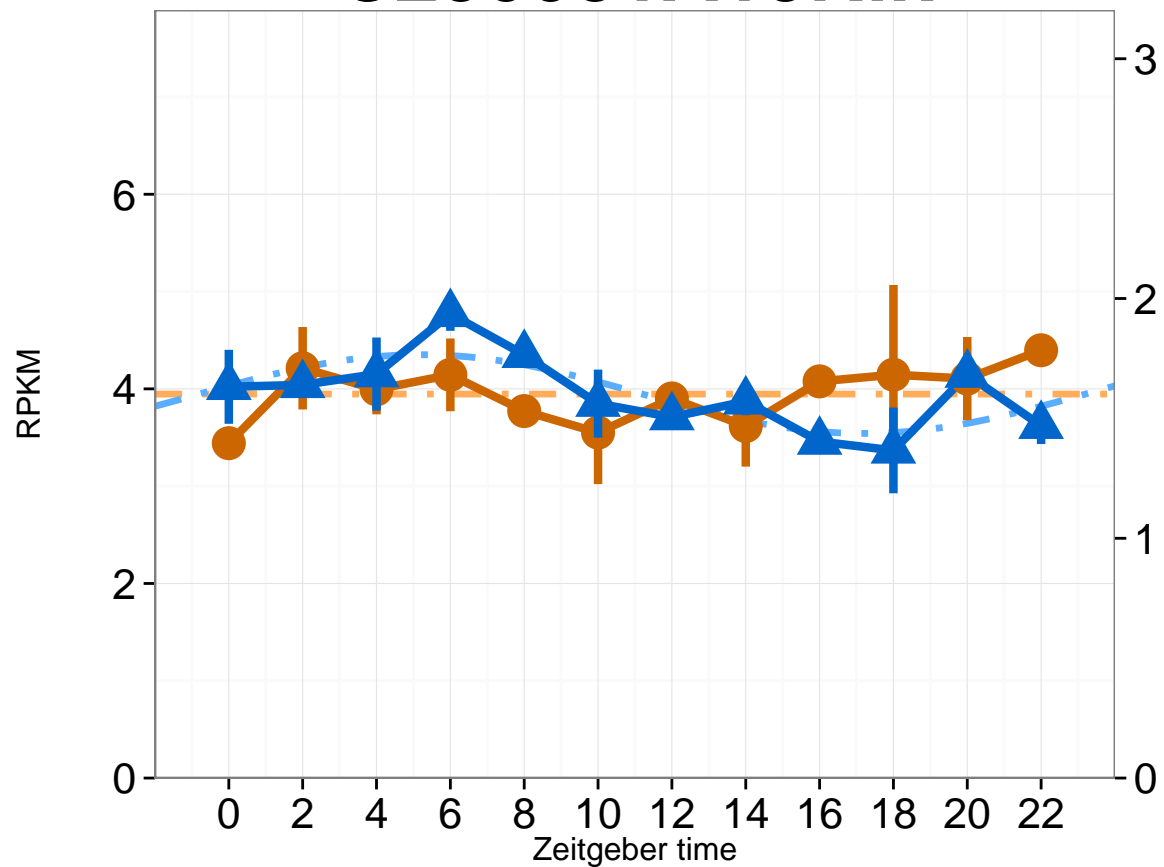

# C230081A13Rik

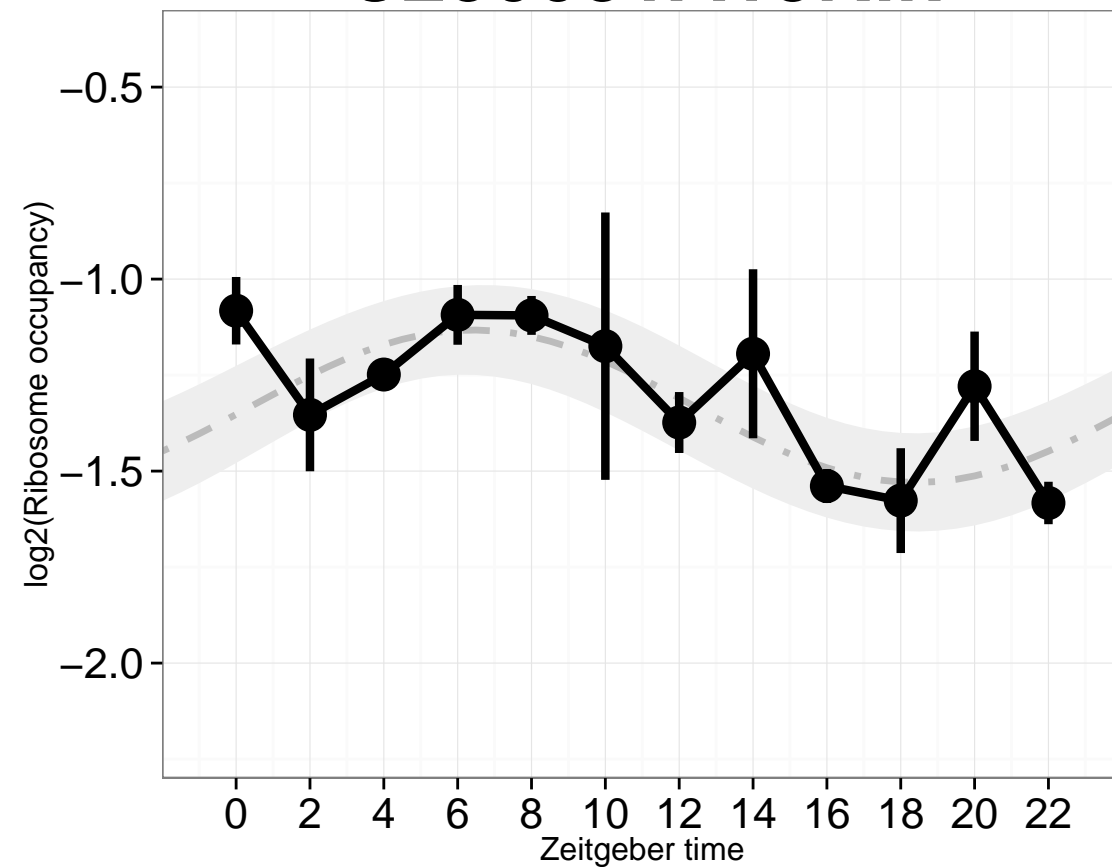

Supplement: SuppDataset_1.zip [file C230081A13Rik_set_A.pdf › Supplemental Dataset 1/A-mRNA_nonrhyth_translation_nonrhyth/C230081A13Rik_set_A.pdf]

**C2**

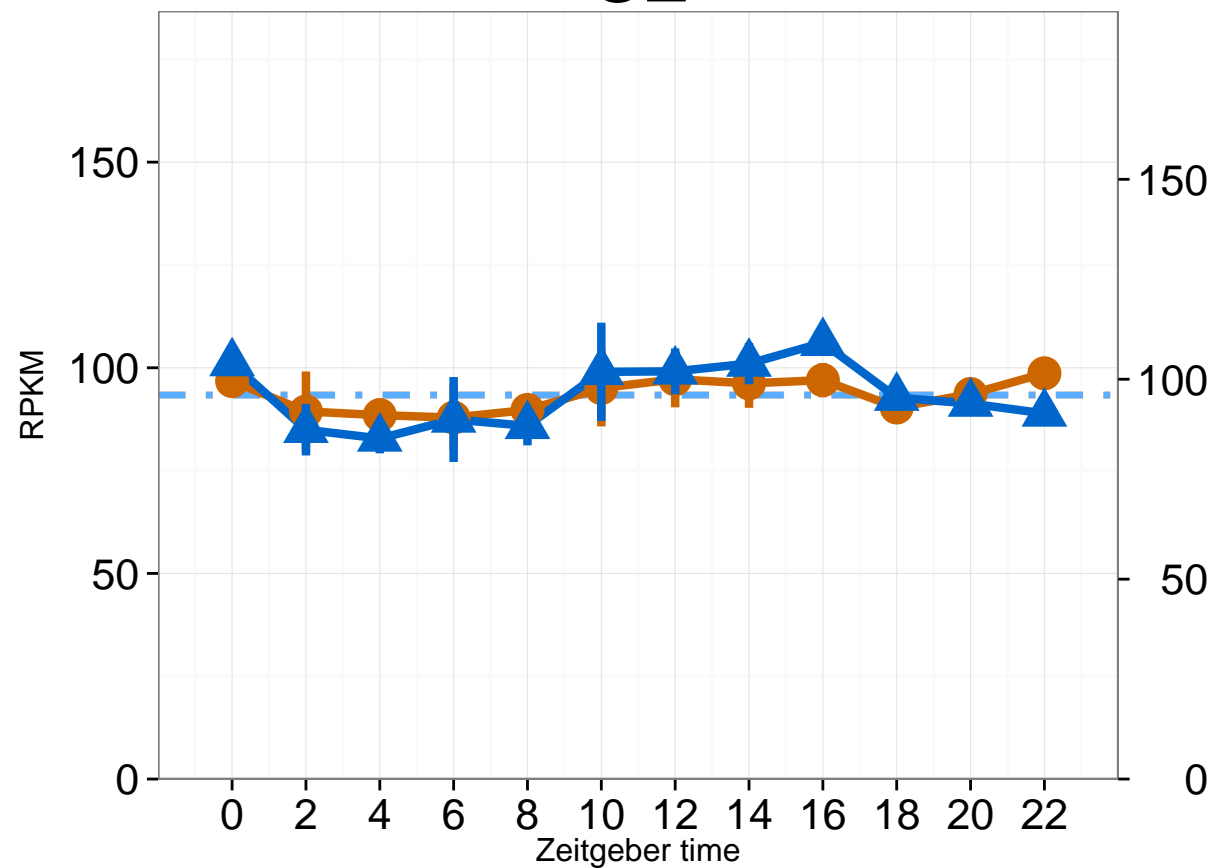

**C2**

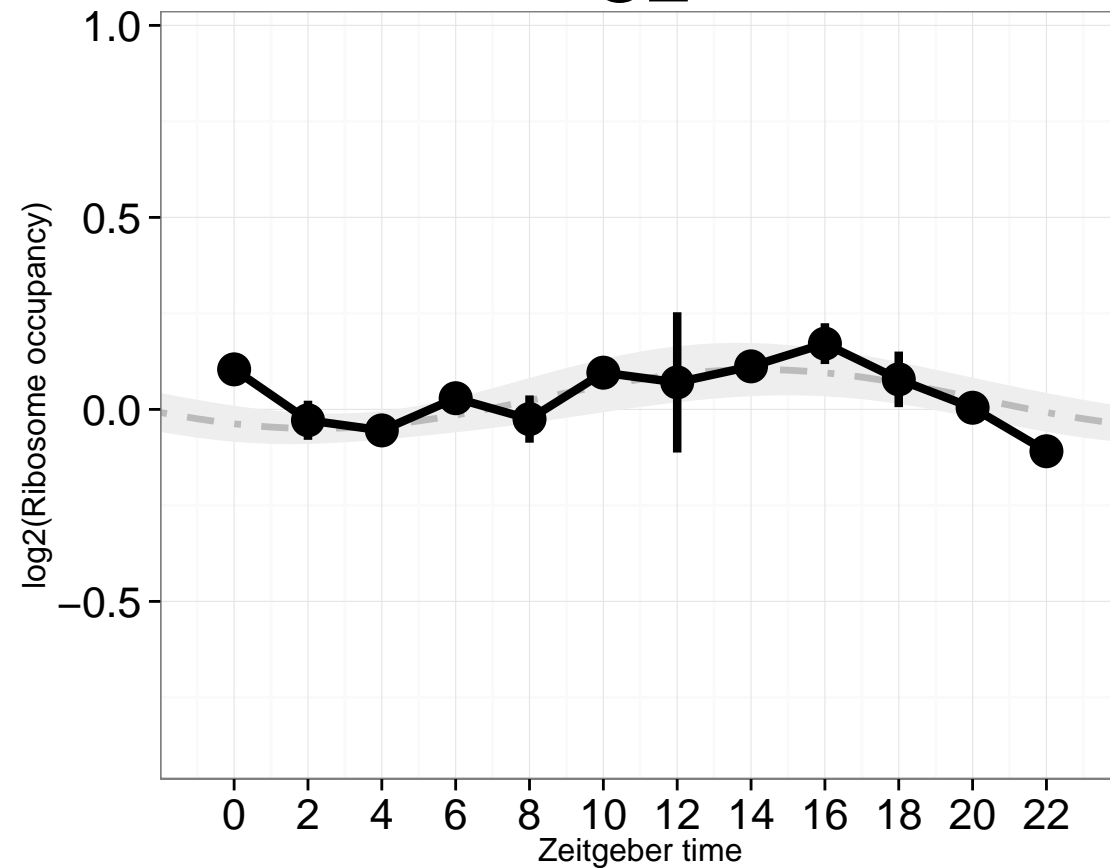

Supplement: SuppDataset_1.zip [file C2_set_A.pdf › Supplemental Dataset 1/A-mRNA_nonrhyth_translation_nonrhyth/C2_set_A.pdf]

# C2cd2

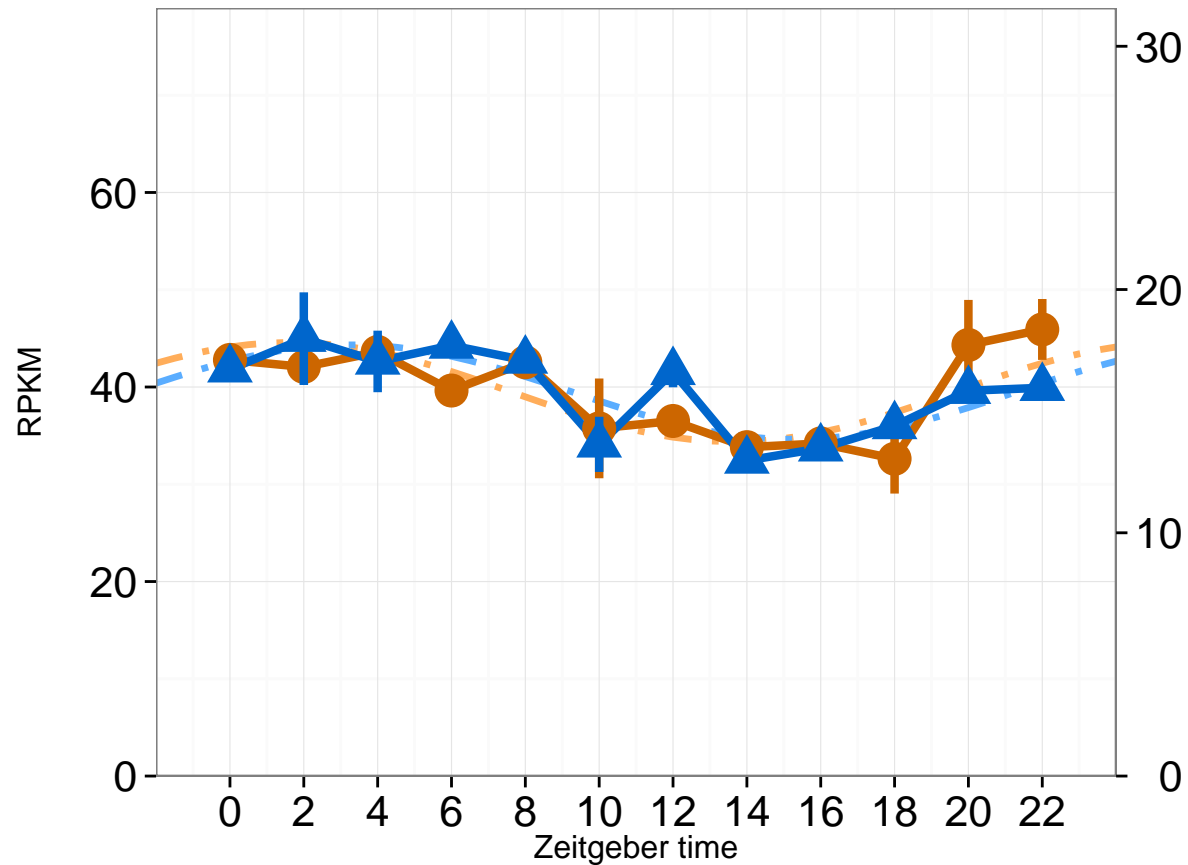

# C2cd2

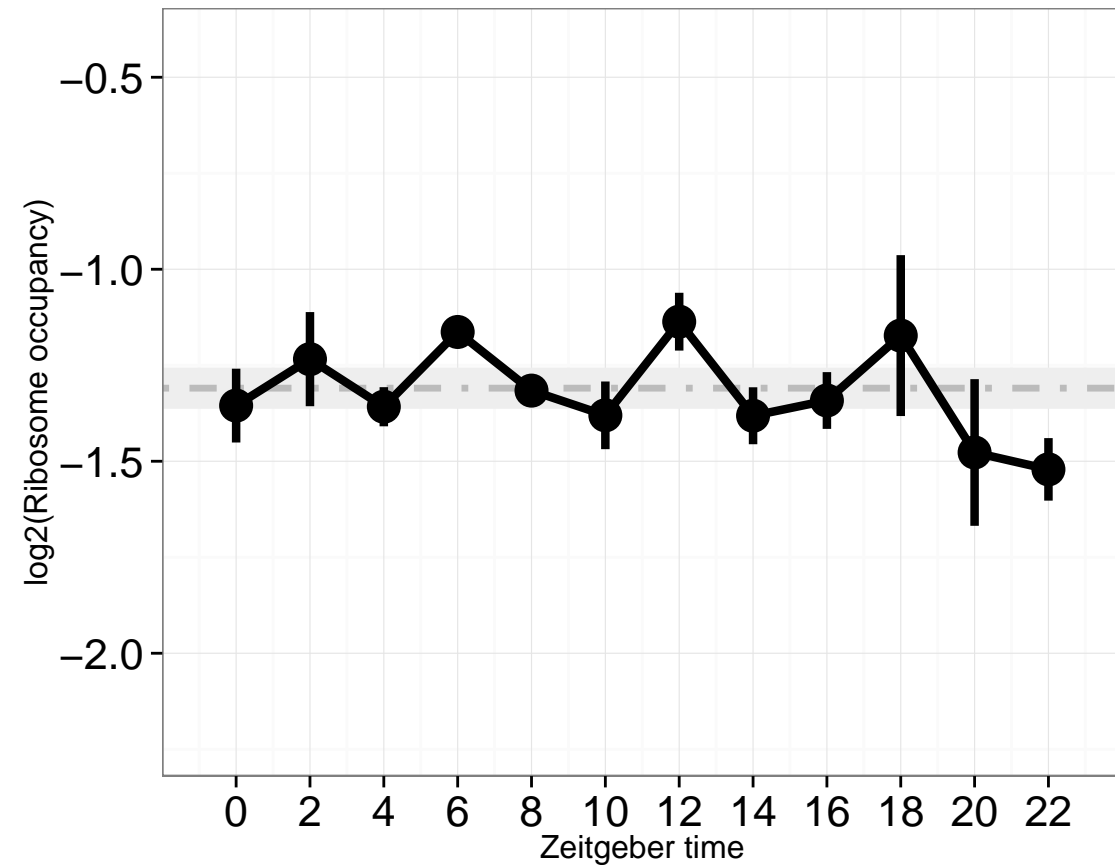

Supplement: SuppDataset_1.zip [file C2cd2_set_A.pdf › Supplemental Dataset 1/A-mRNA_nonrhyth_translation_nonrhyth/C2cd2_set_A.pdf]

## C2cd3

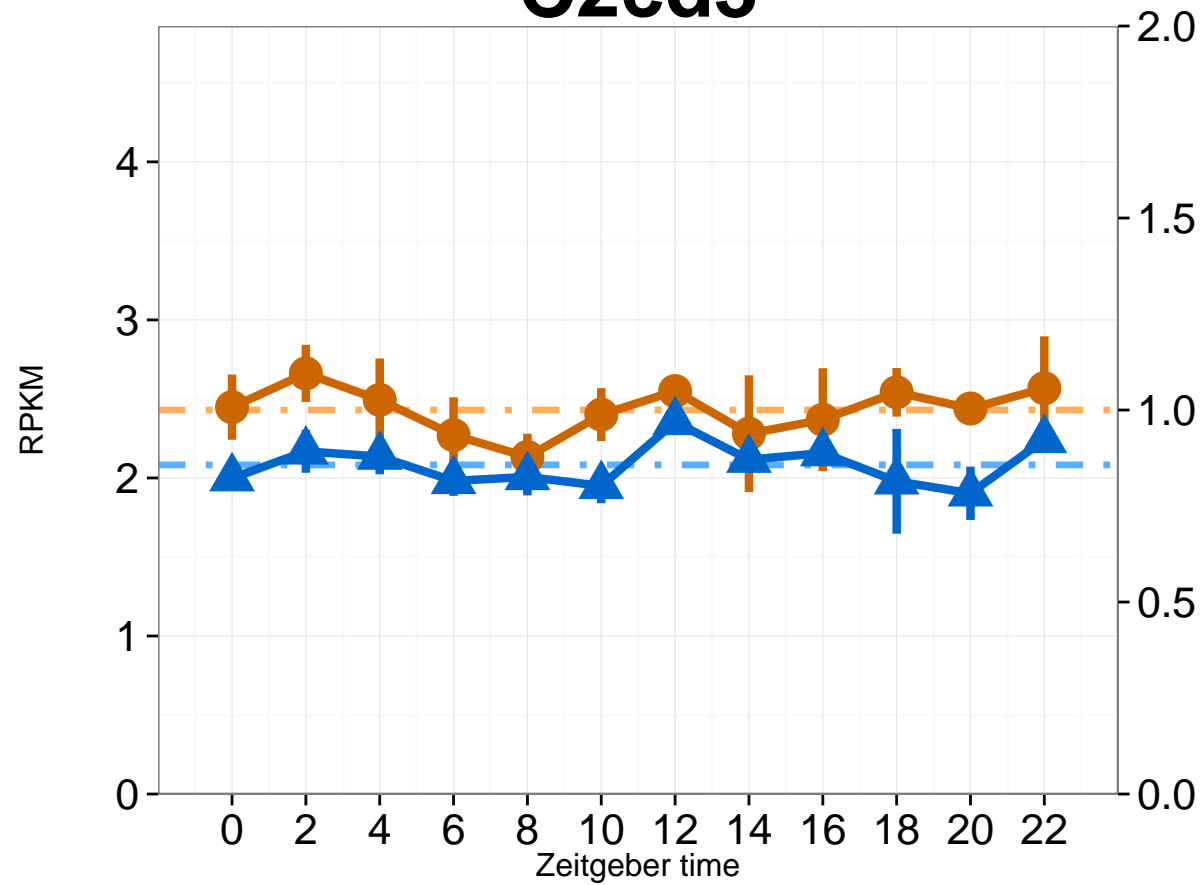

## C2cd3

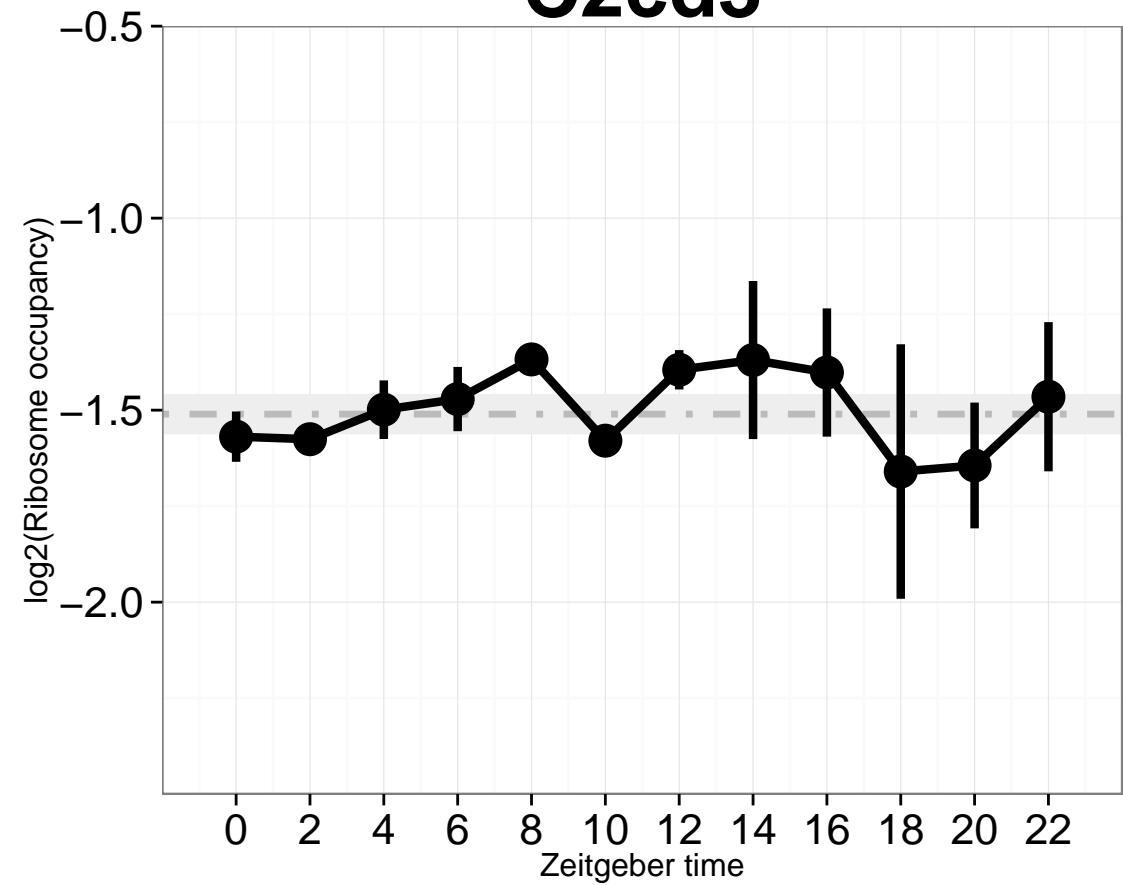

Supplement: SuppDataset_1.zip [file C2cd3_set_A.pdf › Supplemental Dataset 1/A-mRNA_nonrhyth_translation_nonrhyth/C2cd3_set_A.pdf]

## C2cd5

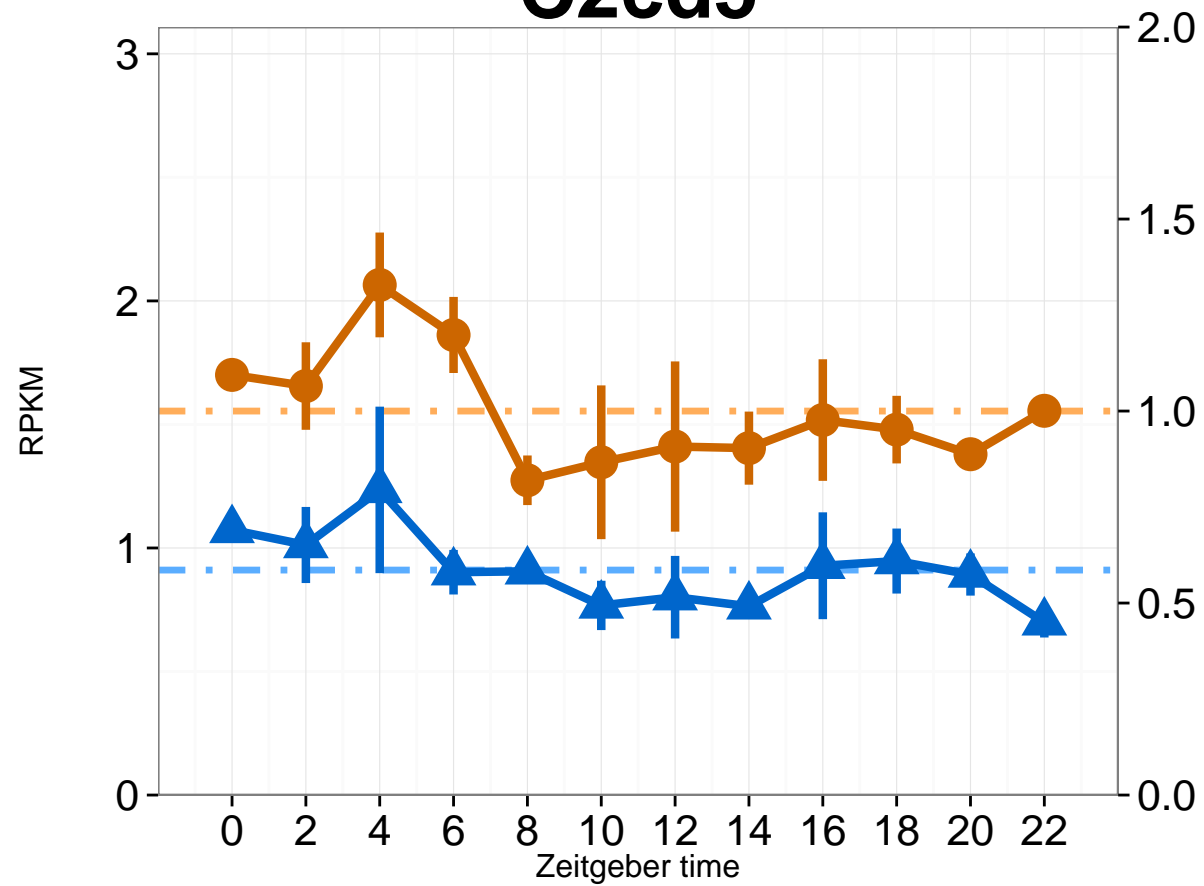

## C2cd5

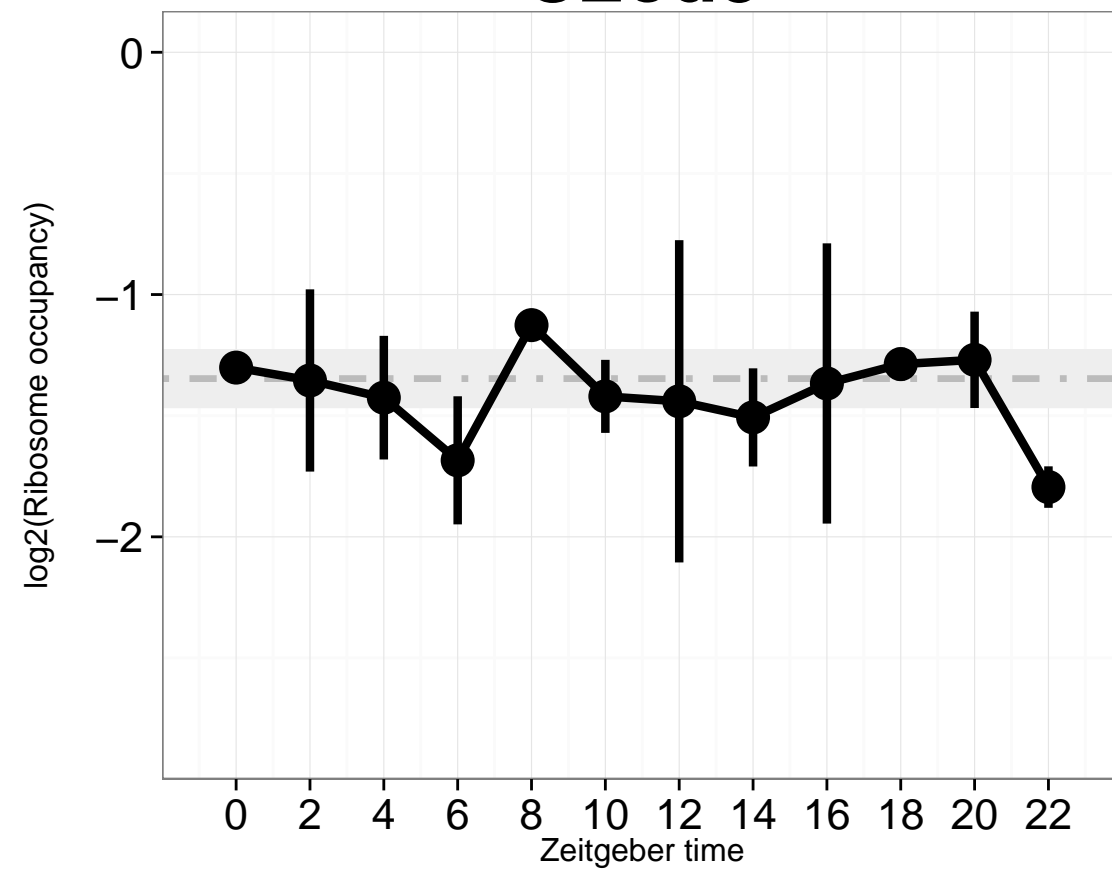

Supplement: SuppDataset_1.zip [file C2cd5_set_A.pdf › Supplemental Dataset 1/A-mRNA_nonrhyth_translation_nonrhyth/C2cd5_set_A.pdf]

## C330006D17Rik

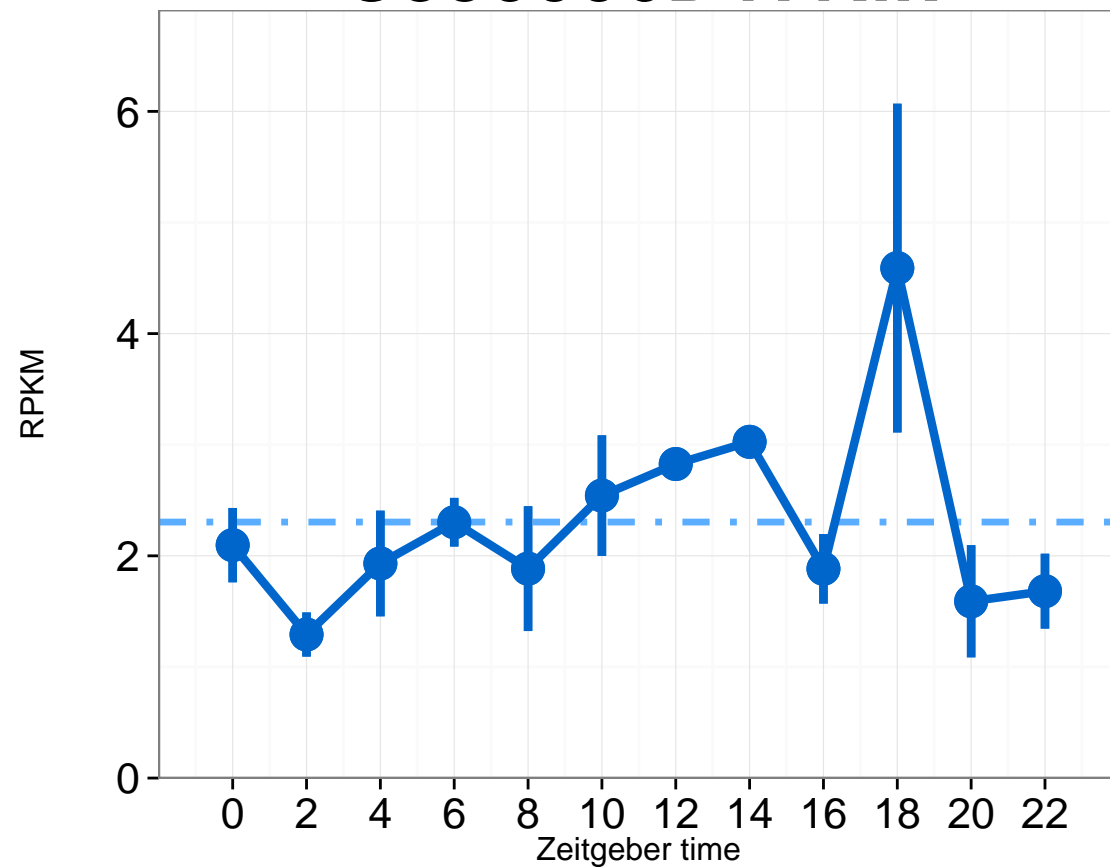

## C330006D17Rik log2(Ribosome occup

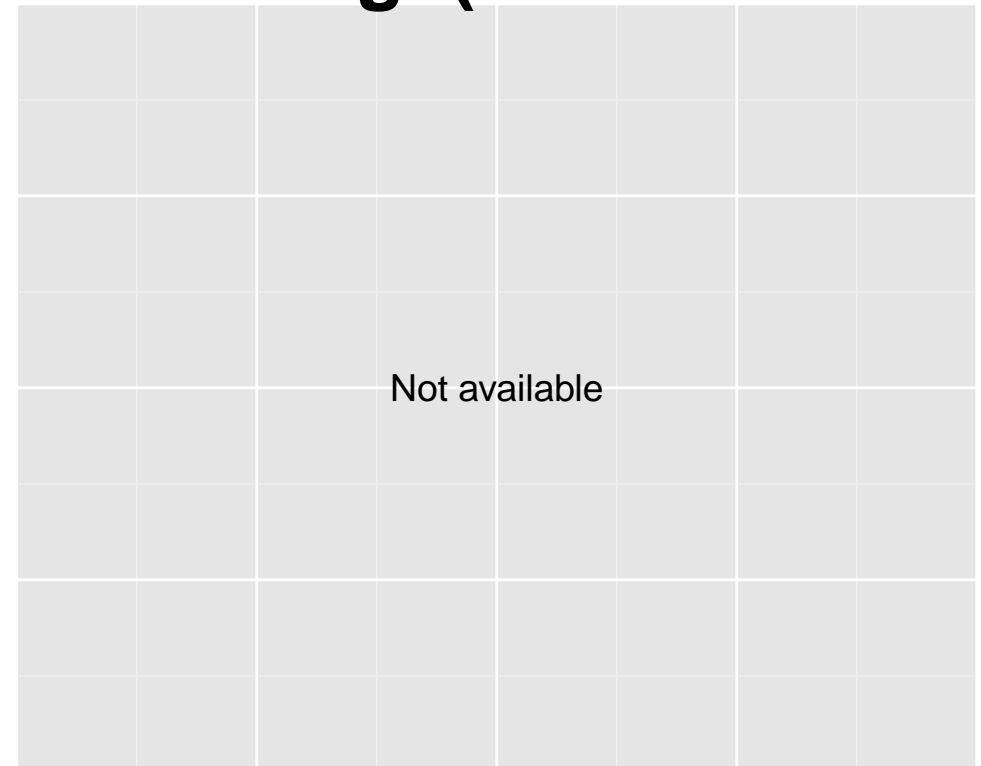

Supplement: SuppDataset_1.zip [file C330006D17Rik_set_A.pdf › Supplemental Dataset 1/A-mRNA_nonrhyth_translation_nonrhyth/C330006D17Rik_set_A.pdf]

## C330018D20Rik

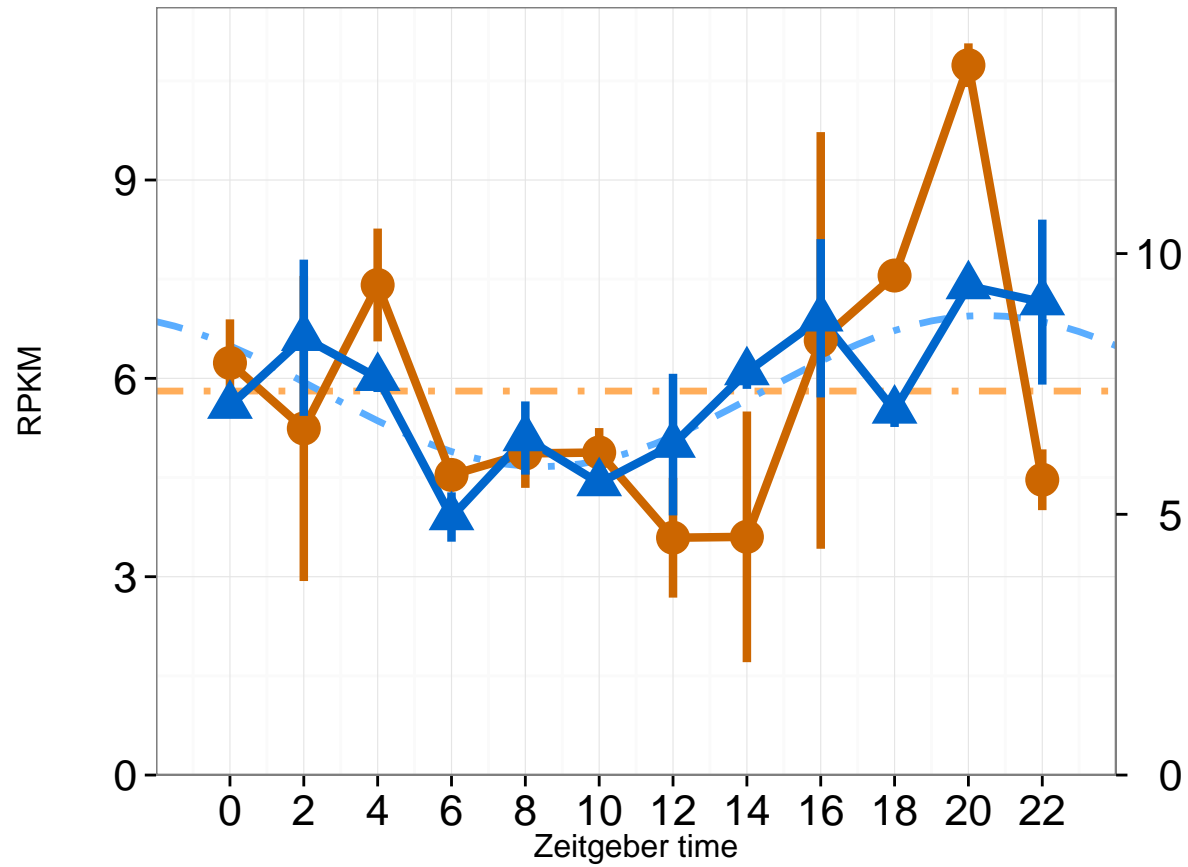

## C330018D20Rik

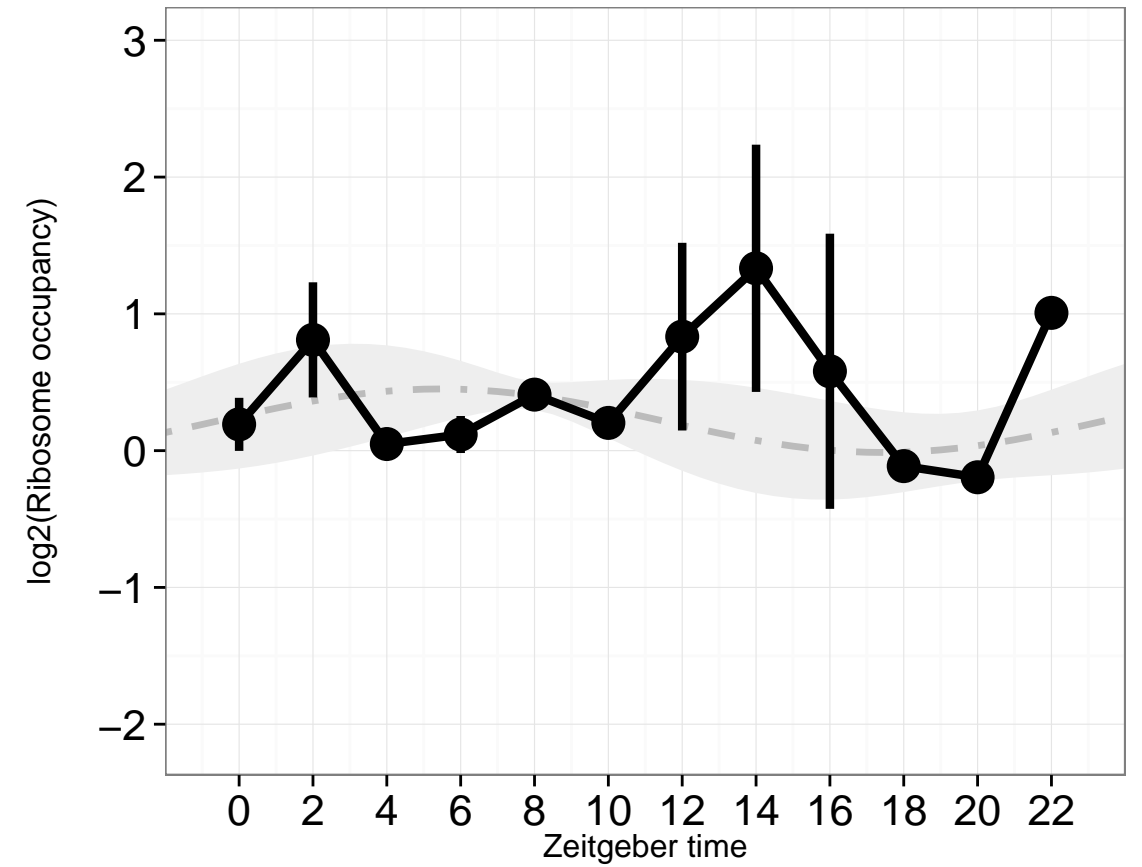

Supplement: SuppDataset_1.zip [file C330018D20Rik_set_A.pdf › Supplemental Dataset 1/A-mRNA_nonrhyth_translation_nonrhyth/C330018D20Rik_set_A.pdf]

## C330021F23Rik

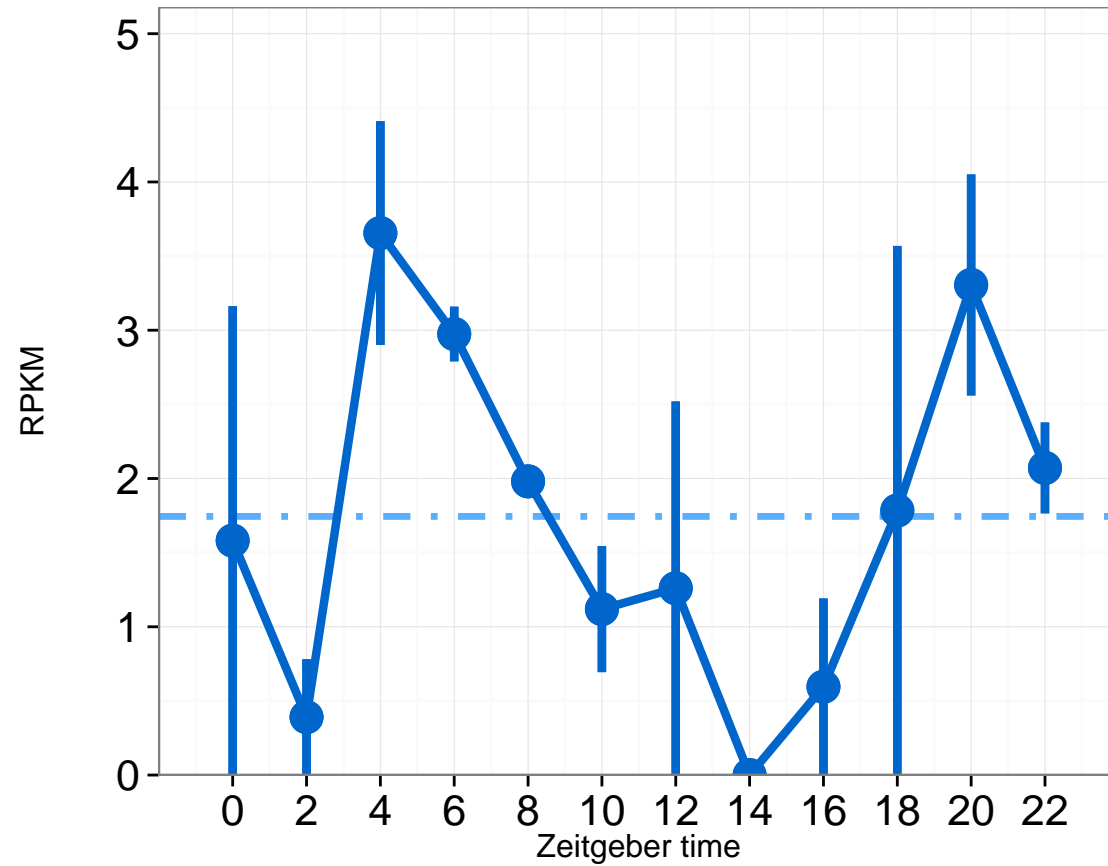

## C330021F23Rik log2(Ribosome occup

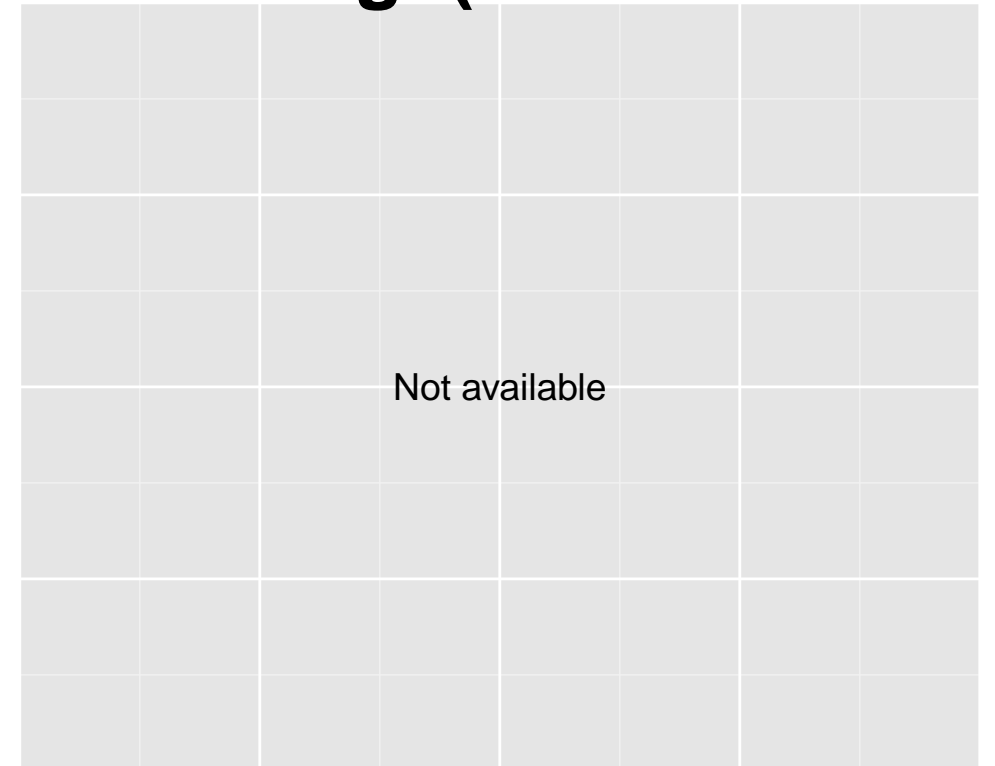

Supplement: SuppDataset_1.zip [file C330021F23Rik_set_A.pdf › Supplemental Dataset 1/A-mRNA_nonrhyth_translation_nonrhyth/C330021F23Rik_set_A.pdf]

# C330027C09Rik

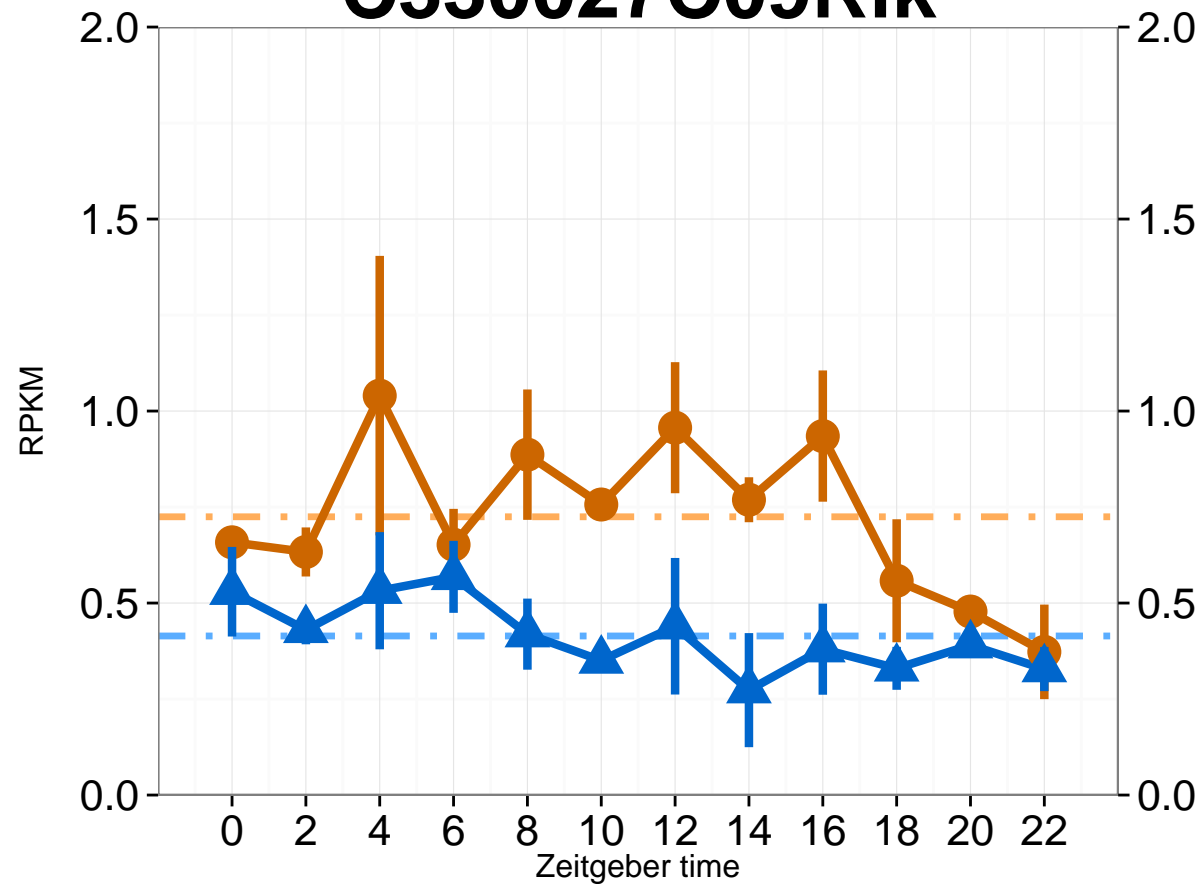

# C330027C09Rik

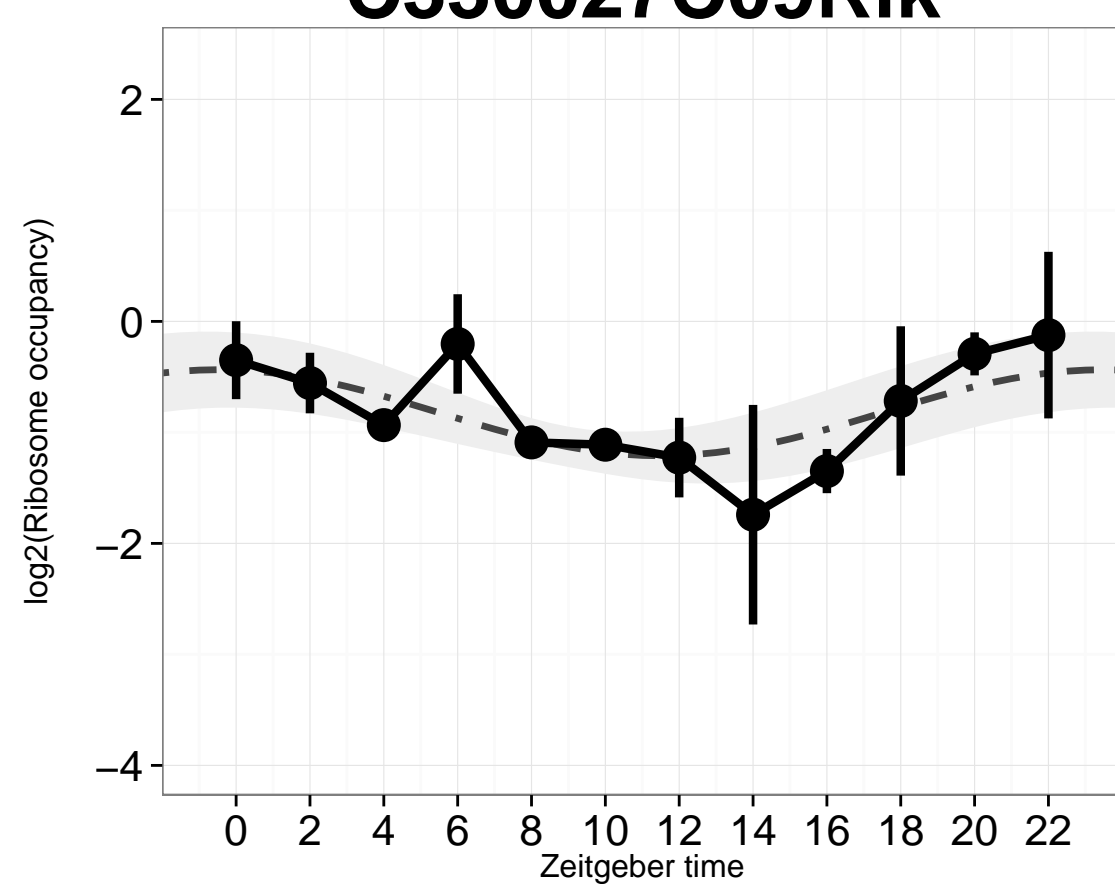

Supplement: SuppDataset_1.zip [file C330027C09Rik_set_A.pdf › Supplemental Dataset 1/A-mRNA_nonrhyth_translation_nonrhyth/C330027C09Rik_set_A.pdf]

# C3ar1

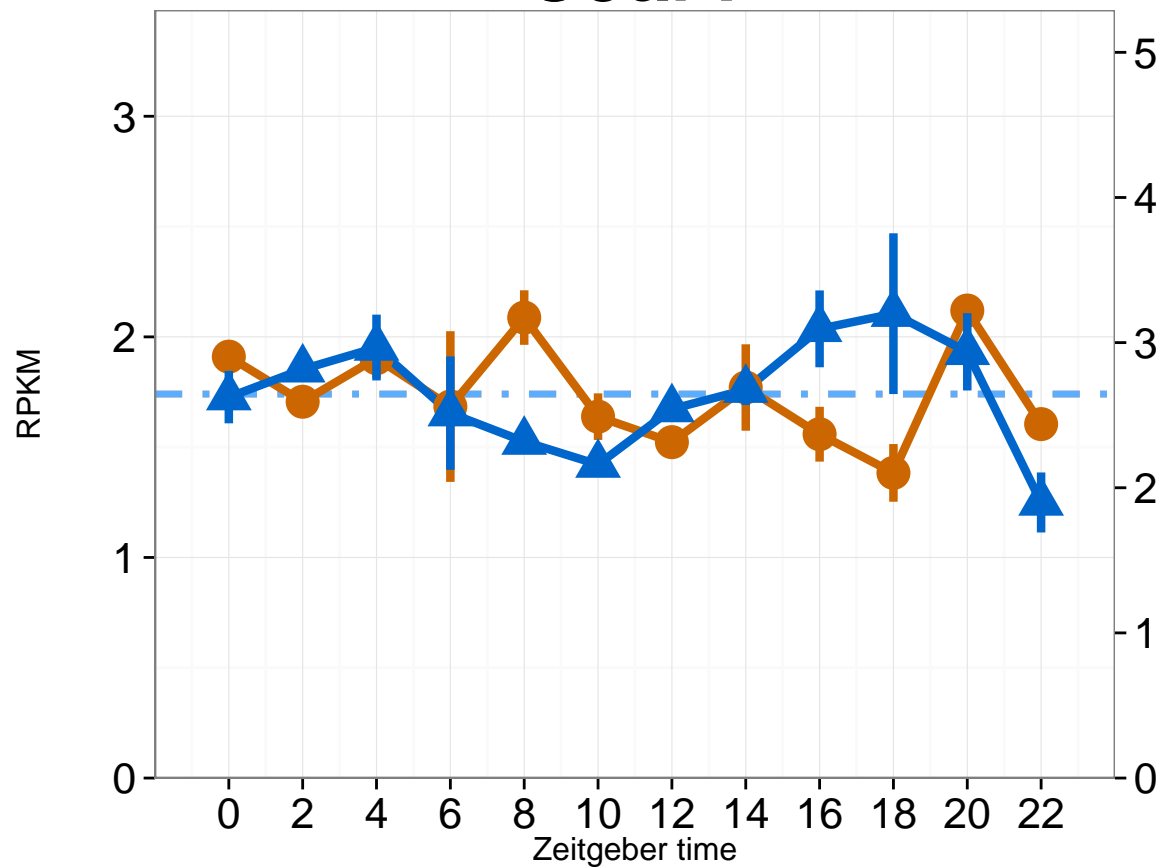

# C3ar1

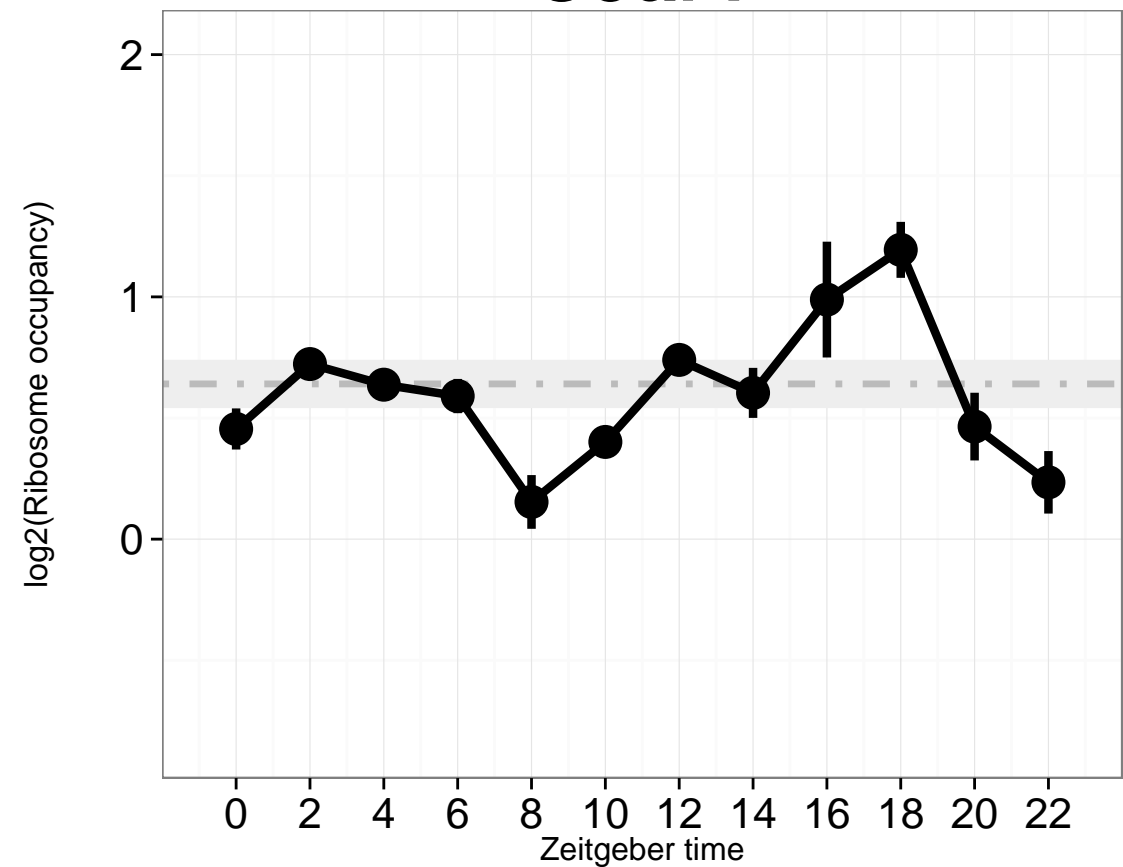

Supplement: SuppDataset_1.zip [file C3ar1_set_A.pdf › Supplemental Dataset 1/A-mRNA_nonrhyth_translation_nonrhyth/C3ar1_set_A.pdf]

### C4b

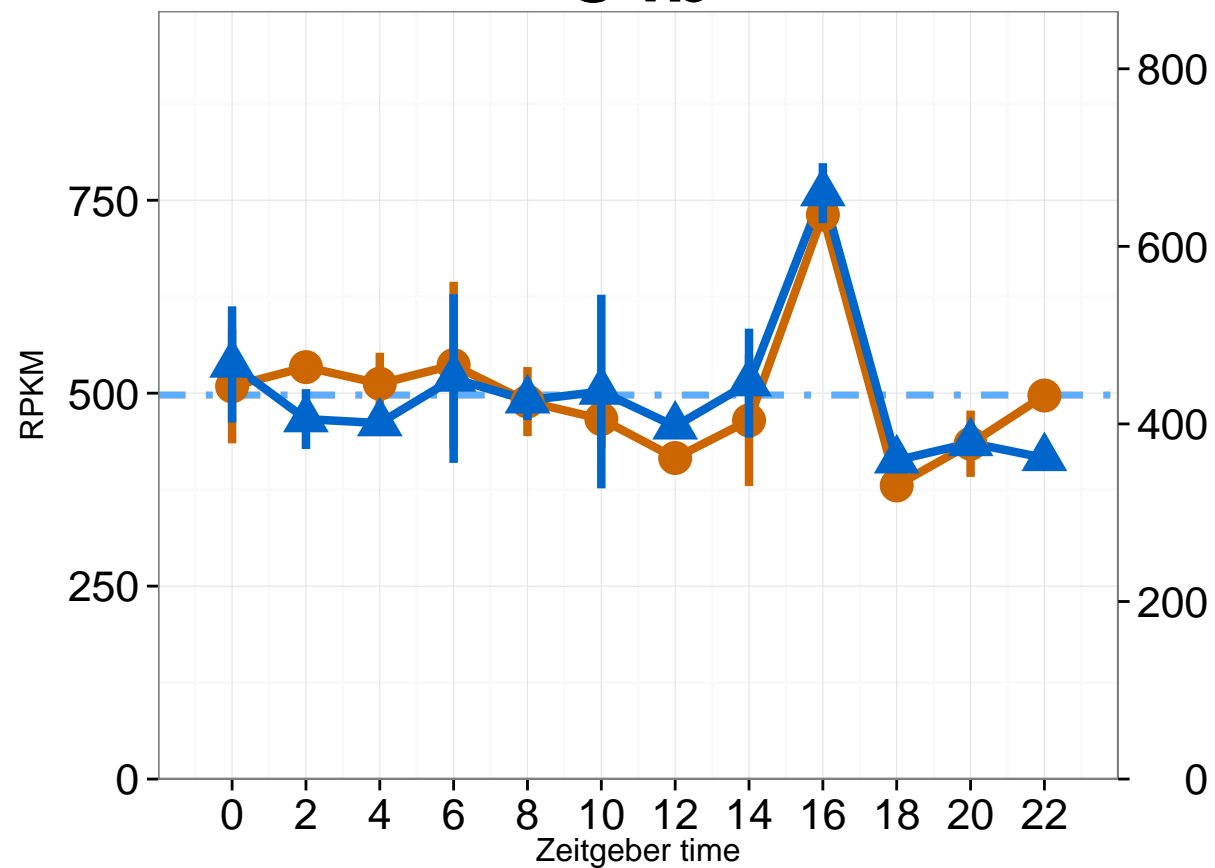

### C4b

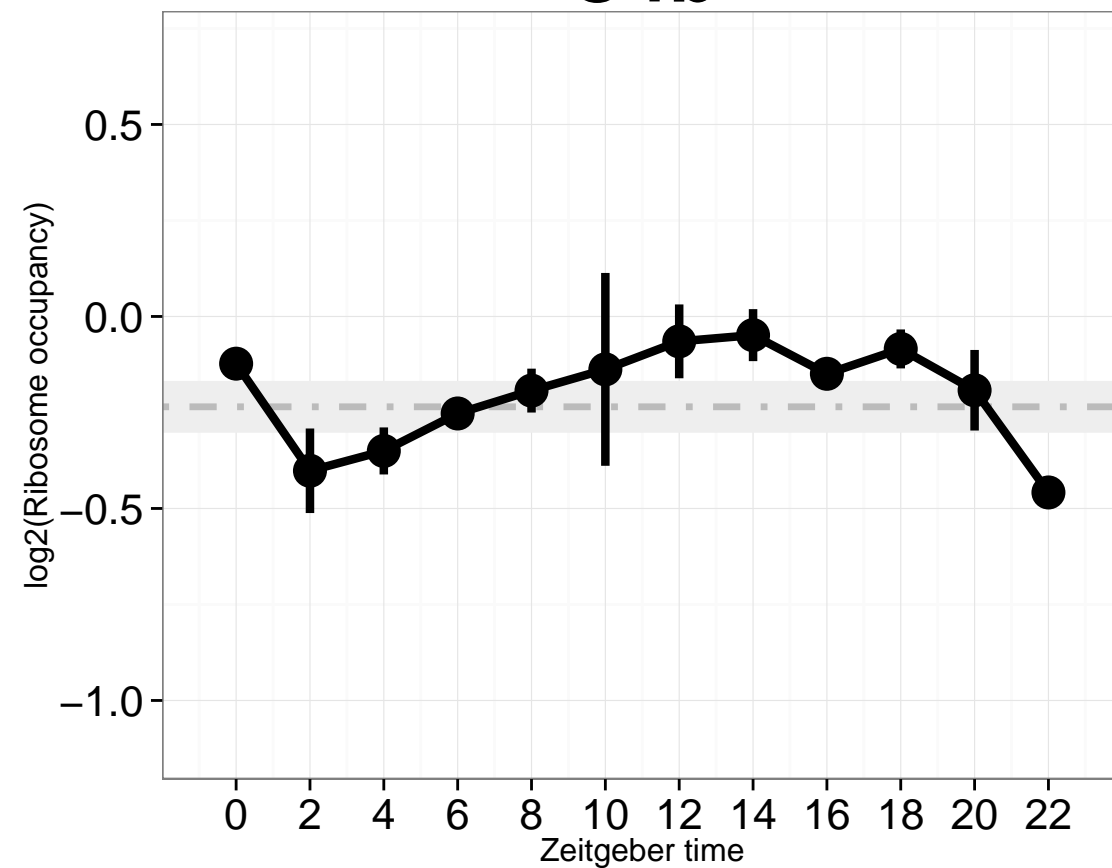

Supplement: SuppDataset_1.zip [file C4b_set_A.pdf › Supplemental Dataset 1/A-mRNA_nonrhyth_translation_nonrhyth/C4b_set_A.pdf]

# C5ar2

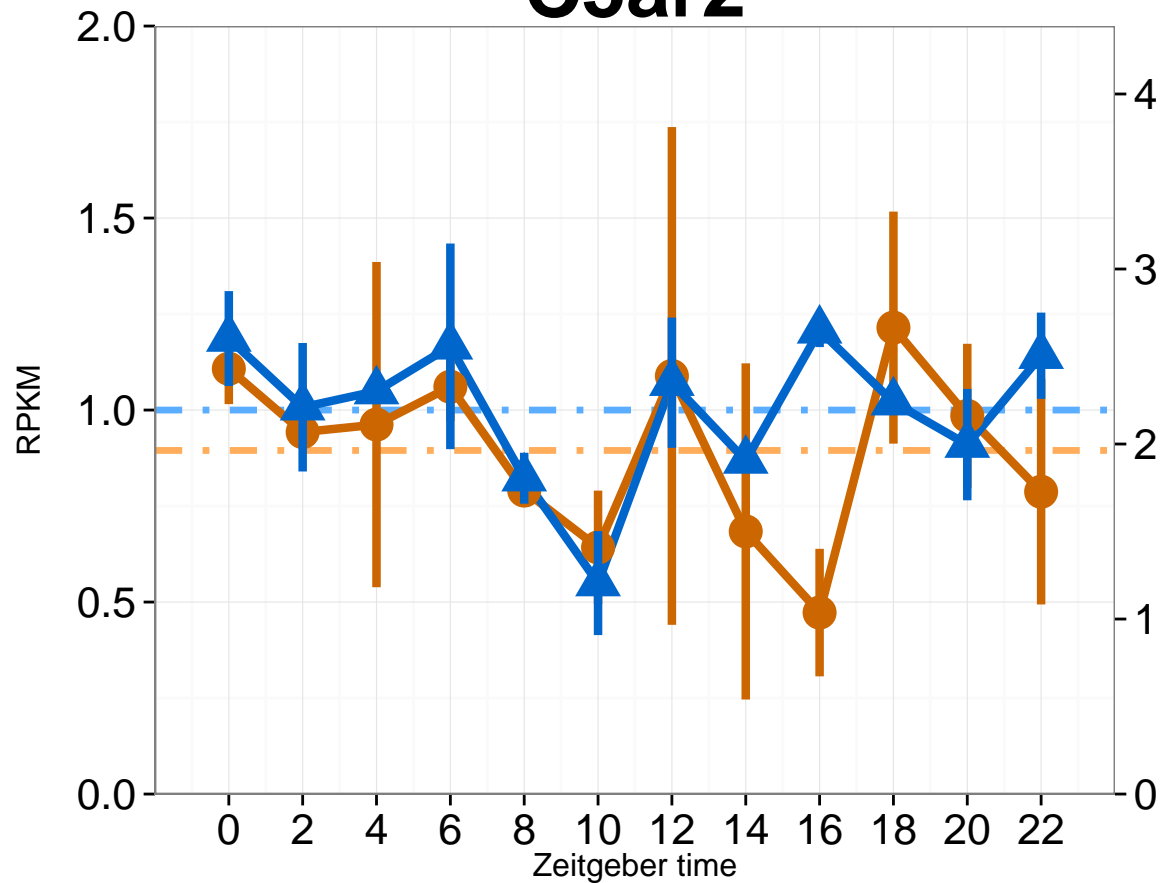

# C5ar2

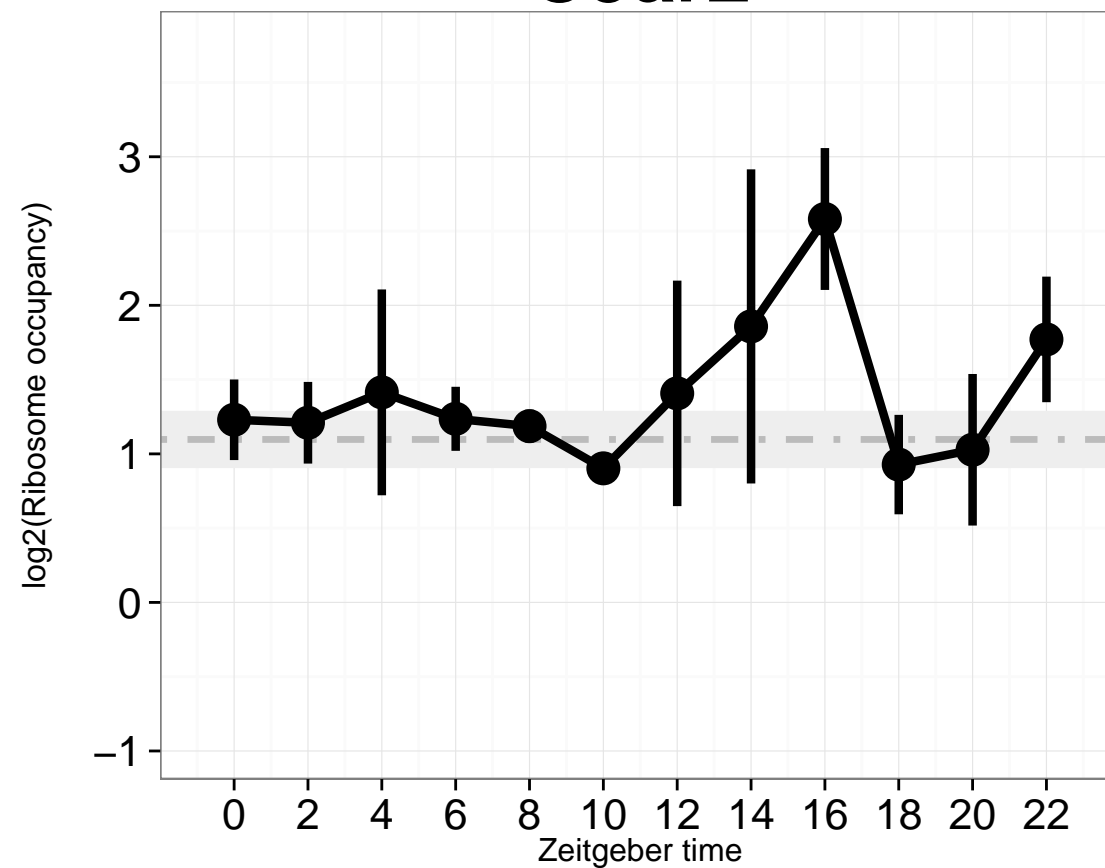

Supplement: SuppDataset_1.zip [file C5ar2_set_A.pdf › Supplemental Dataset 1/A-mRNA_nonrhyth_translation_nonrhyth/C5ar2_set_A.pdf]

**C6**

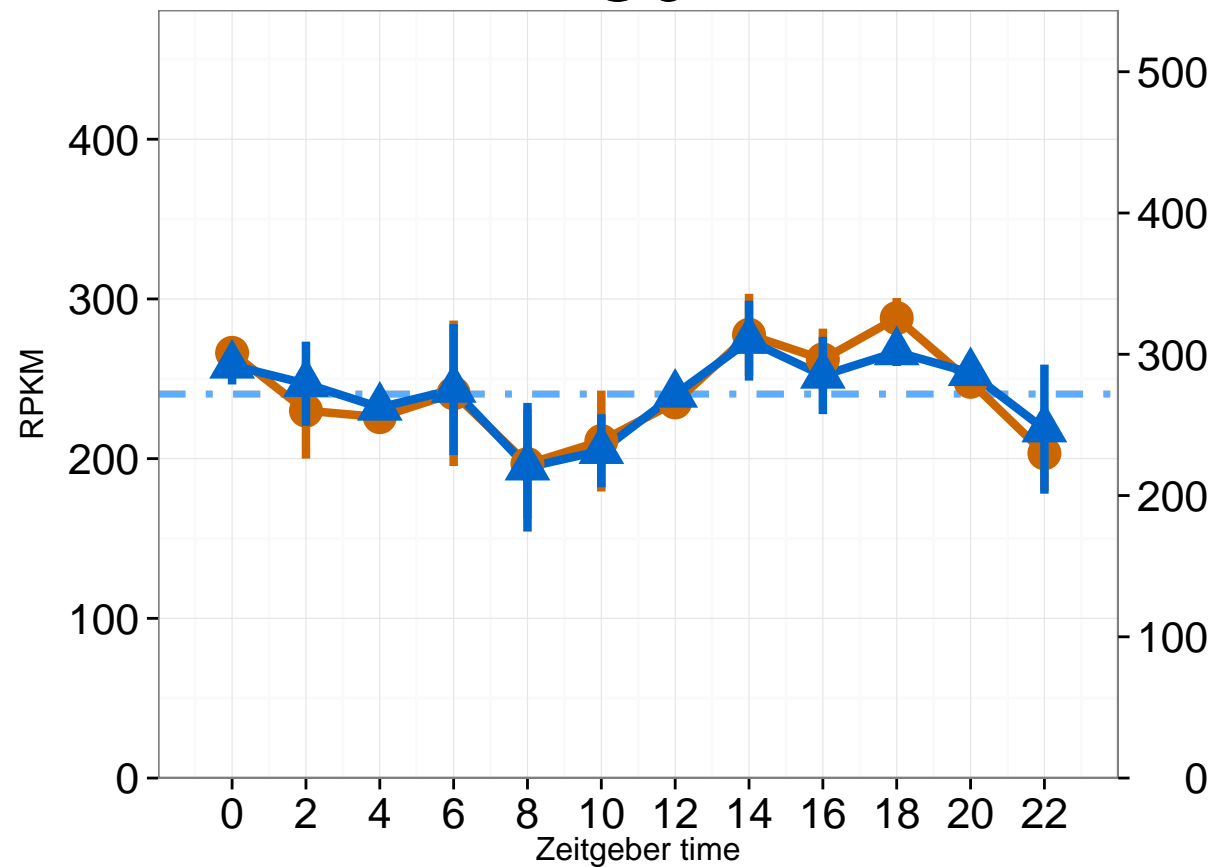

**C6**

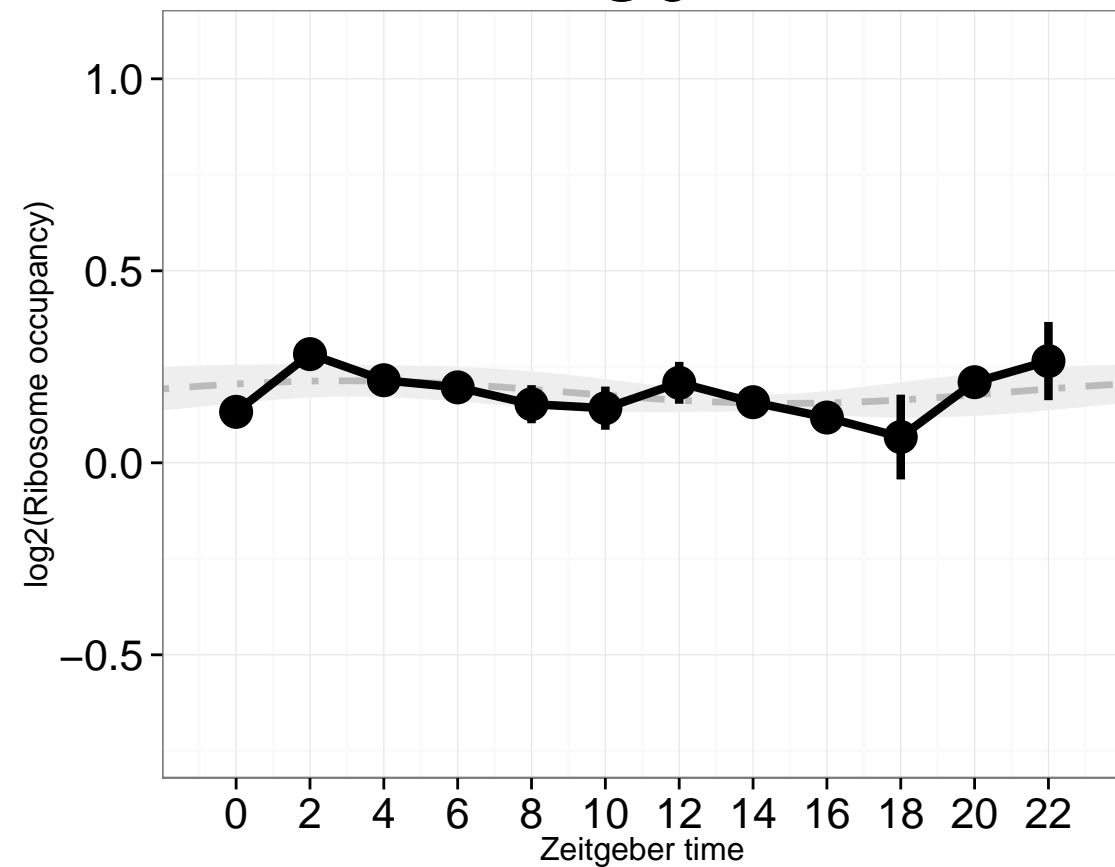

Supplement: SuppDataset_1.zip [file C6_set_A.pdf › Supplemental Dataset 1/A-mRNA_nonrhyth_translation_nonrhyth/C6_set_A.pdf]

# C78339

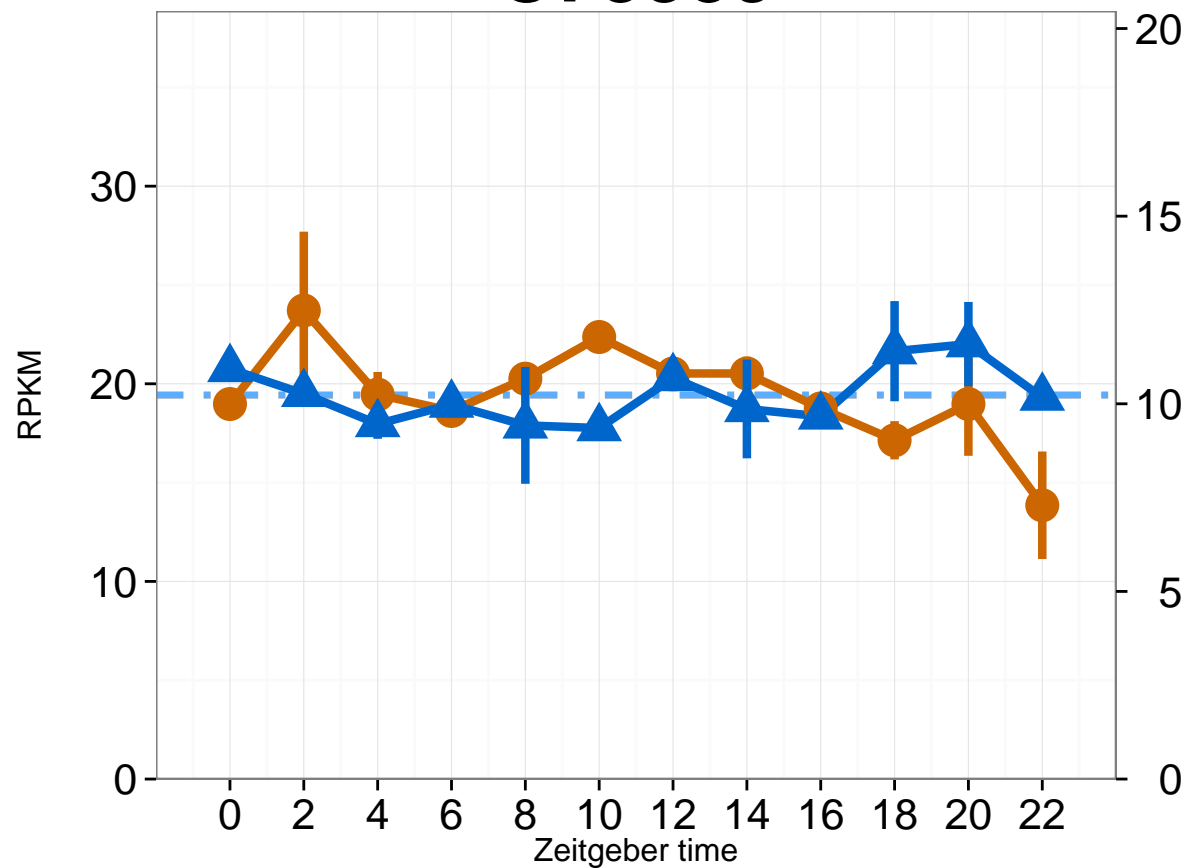

# C78339

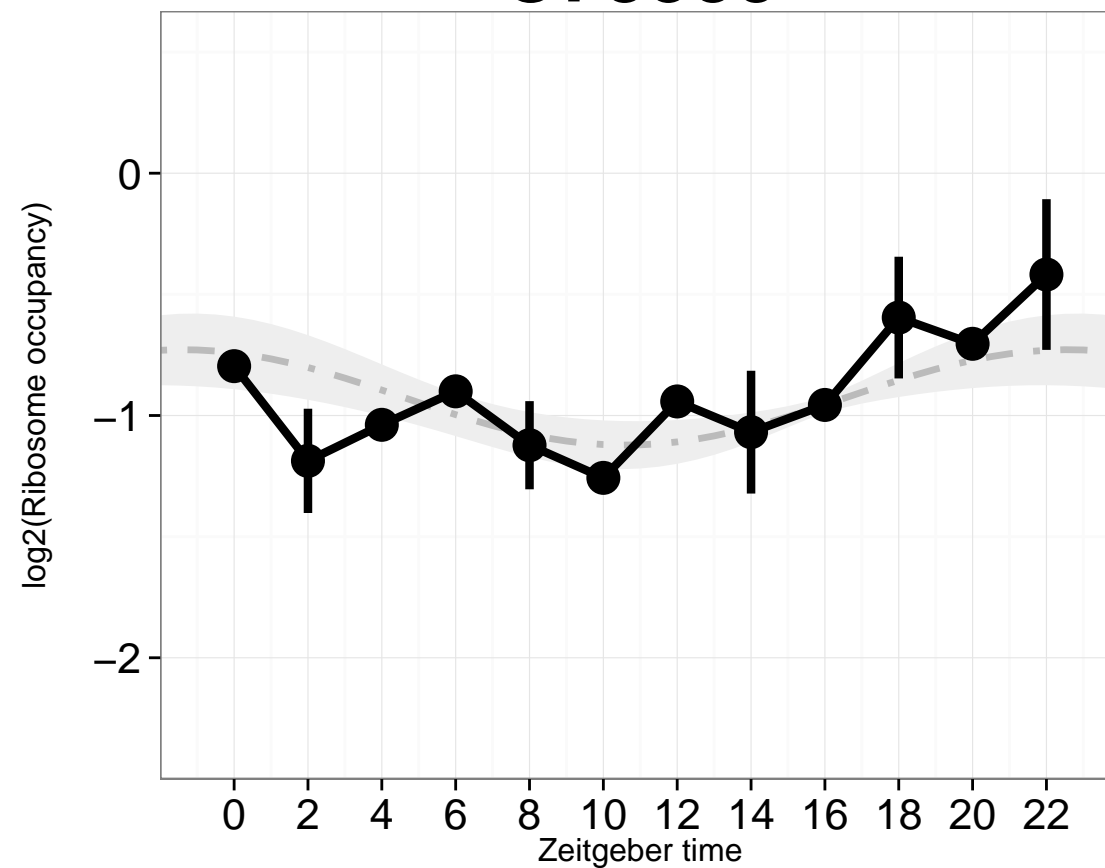

Supplement: SuppDataset_1.zip [file C78339_set_A.pdf › Supplemental Dataset 1/A-mRNA_nonrhyth_translation_nonrhyth/C78339_set_A.pdf]

**C7**

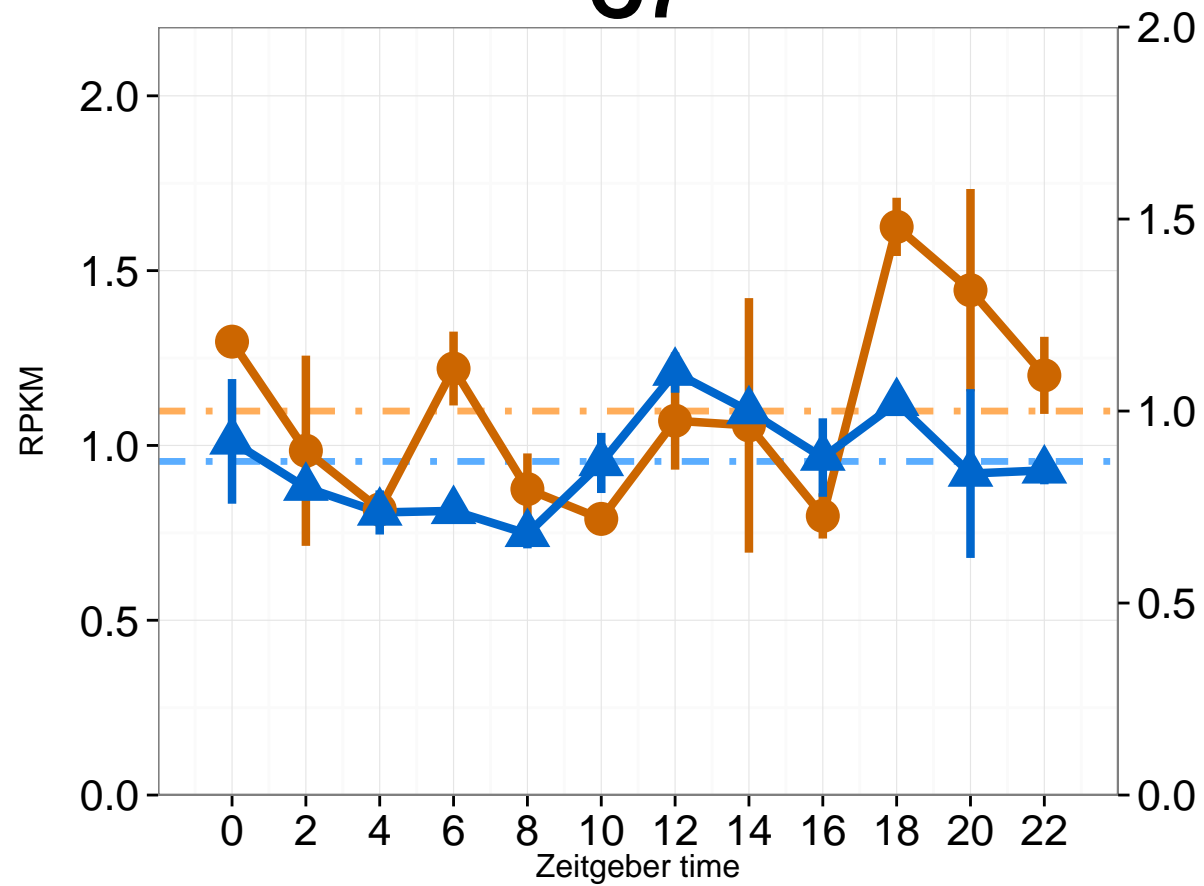

**C7**

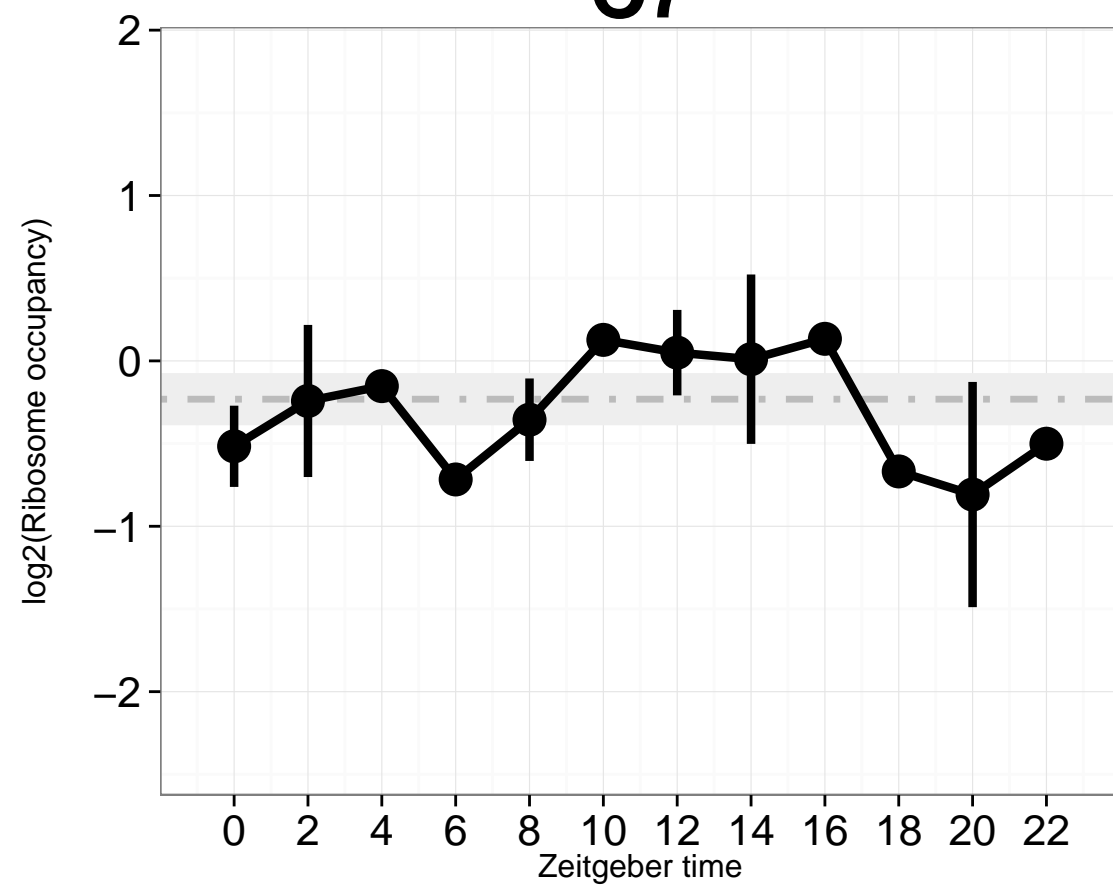

Supplement: SuppDataset_1.zip [file C7_set_A.pdf › Supplemental Dataset 1/A-mRNA_nonrhyth_translation_nonrhyth/C7_set_A.pdf]

# C87436

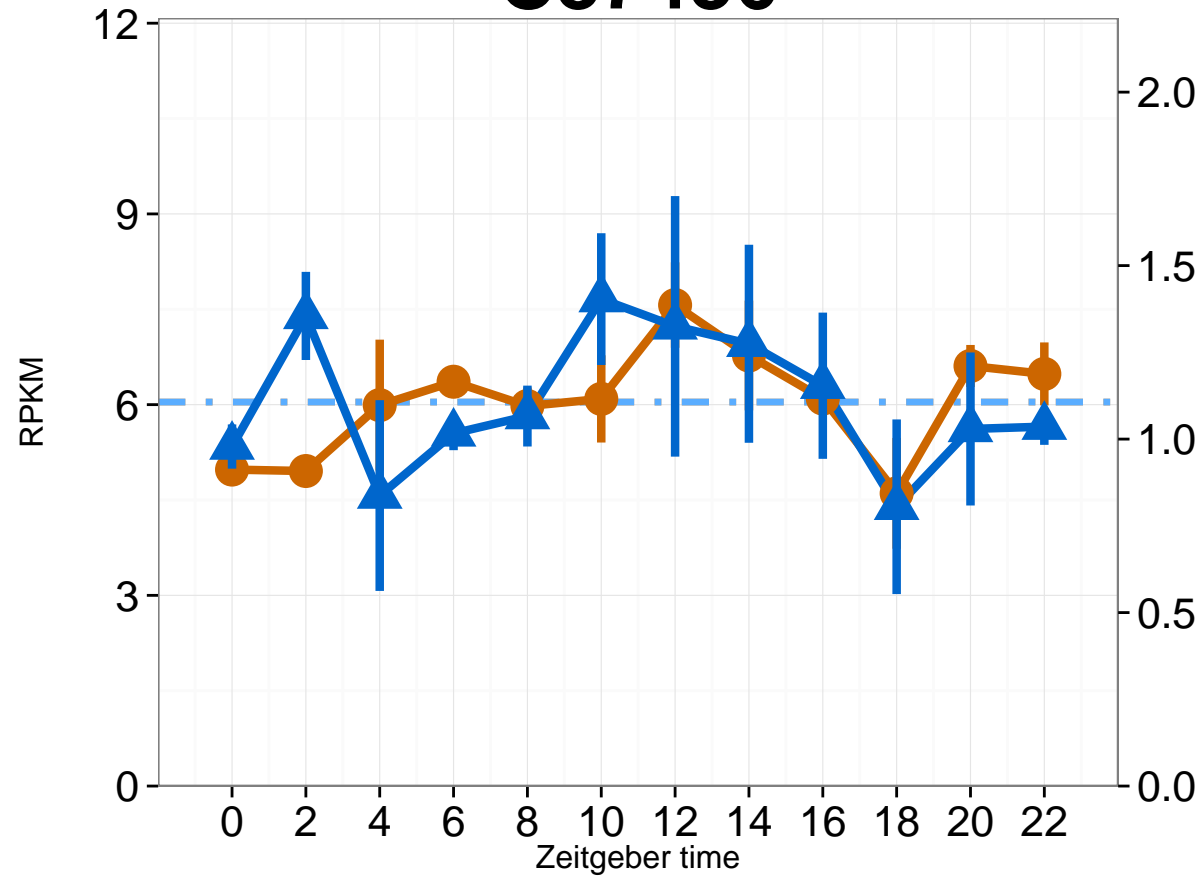

# C87436

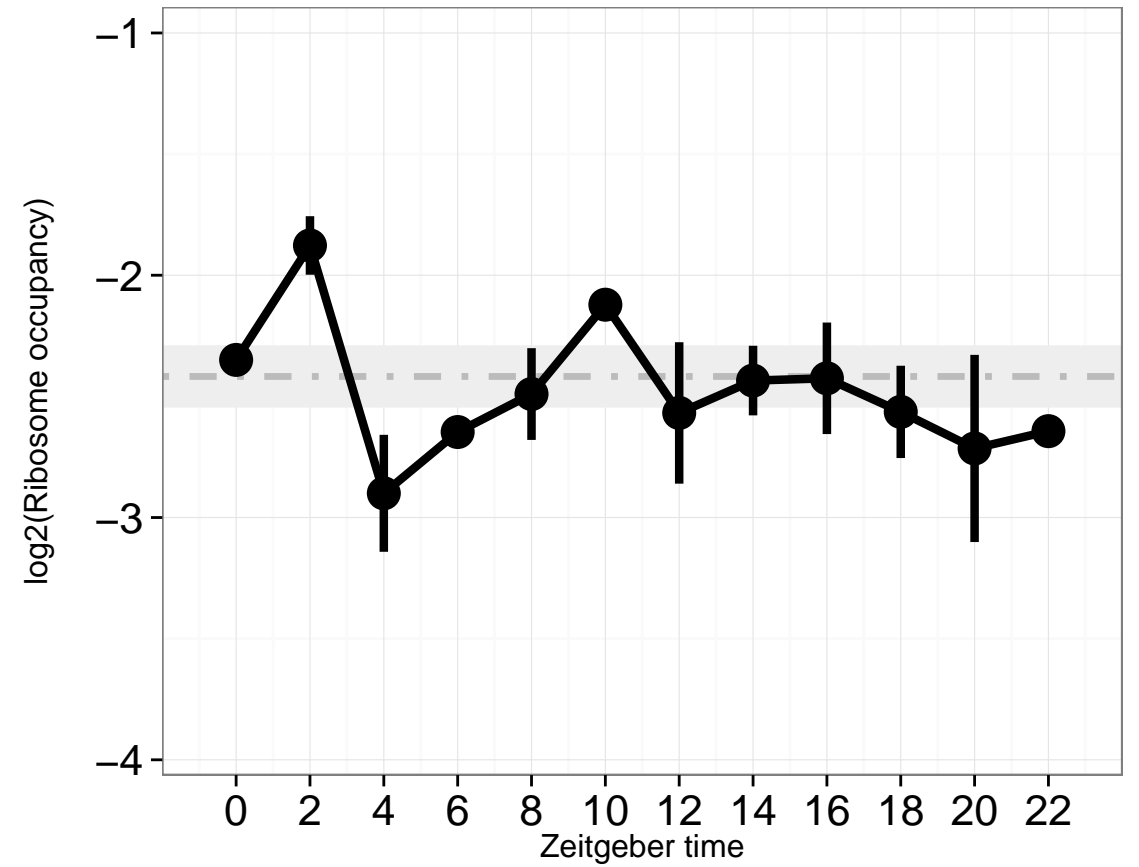

Supplement: SuppDataset_1.zip [file C87436_set_A.pdf › Supplemental Dataset 1/A-mRNA_nonrhyth_translation_nonrhyth/C87436_set_A.pdf]

# C8a

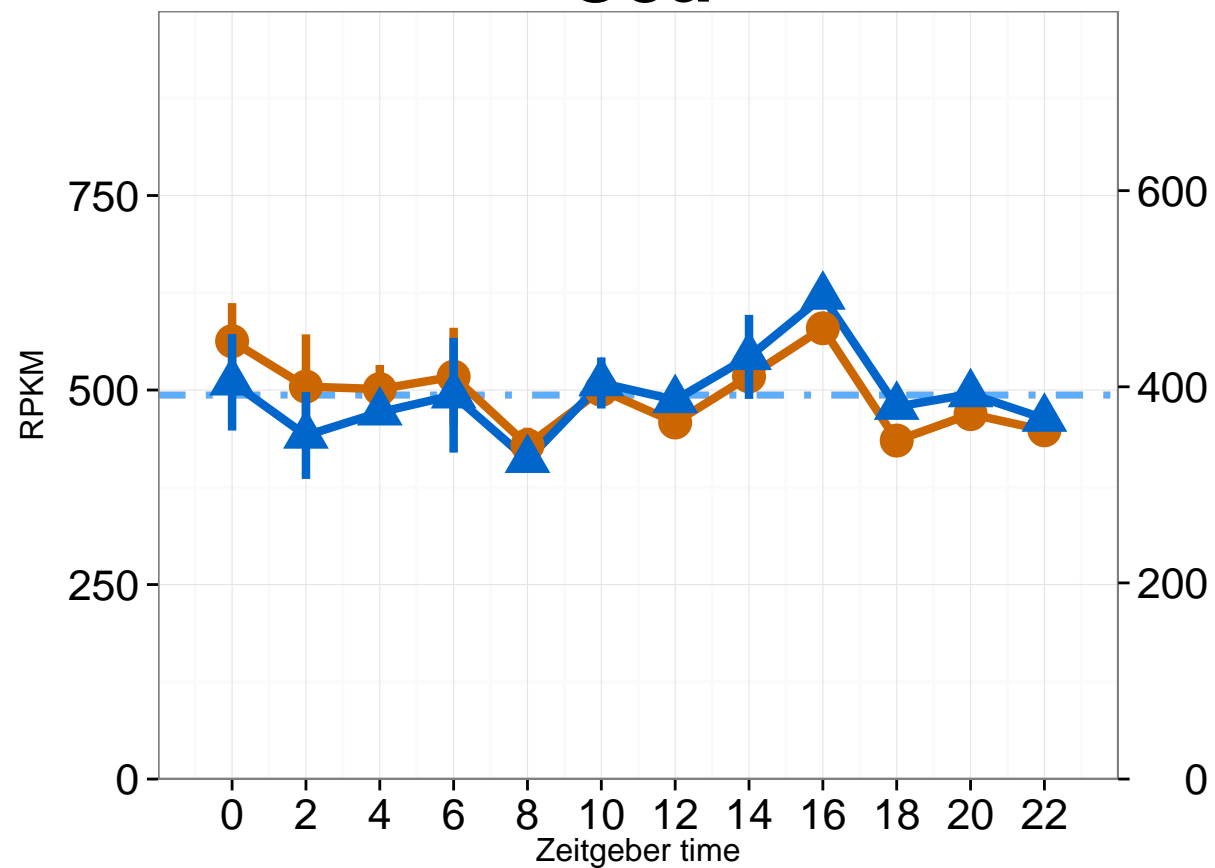

# C8a

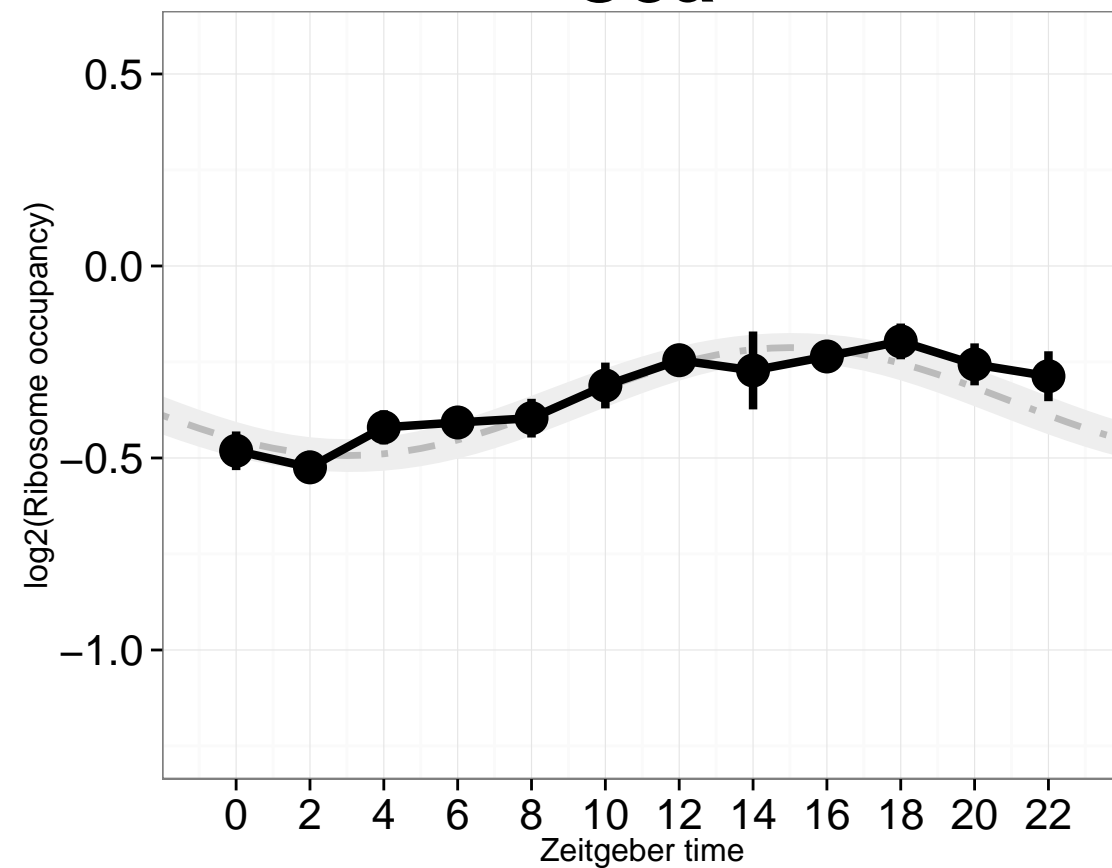

Supplement: SuppDataset_1.zip [file C8a_set_A.pdf › Supplemental Dataset 1/A-mRNA_nonrhyth_translation_nonrhyth/C8a_set_A.pdf]
