# Supplementary figures and images for: Ribosome profiling reveals the rhythmic liver translatome and circadian clock regulation by upstream open reading frames (part 12 of 113)
Source: HighWire-hosted journal article supplement (doi:10.1101/gr.195404.115), 2015-10-20

# C8b

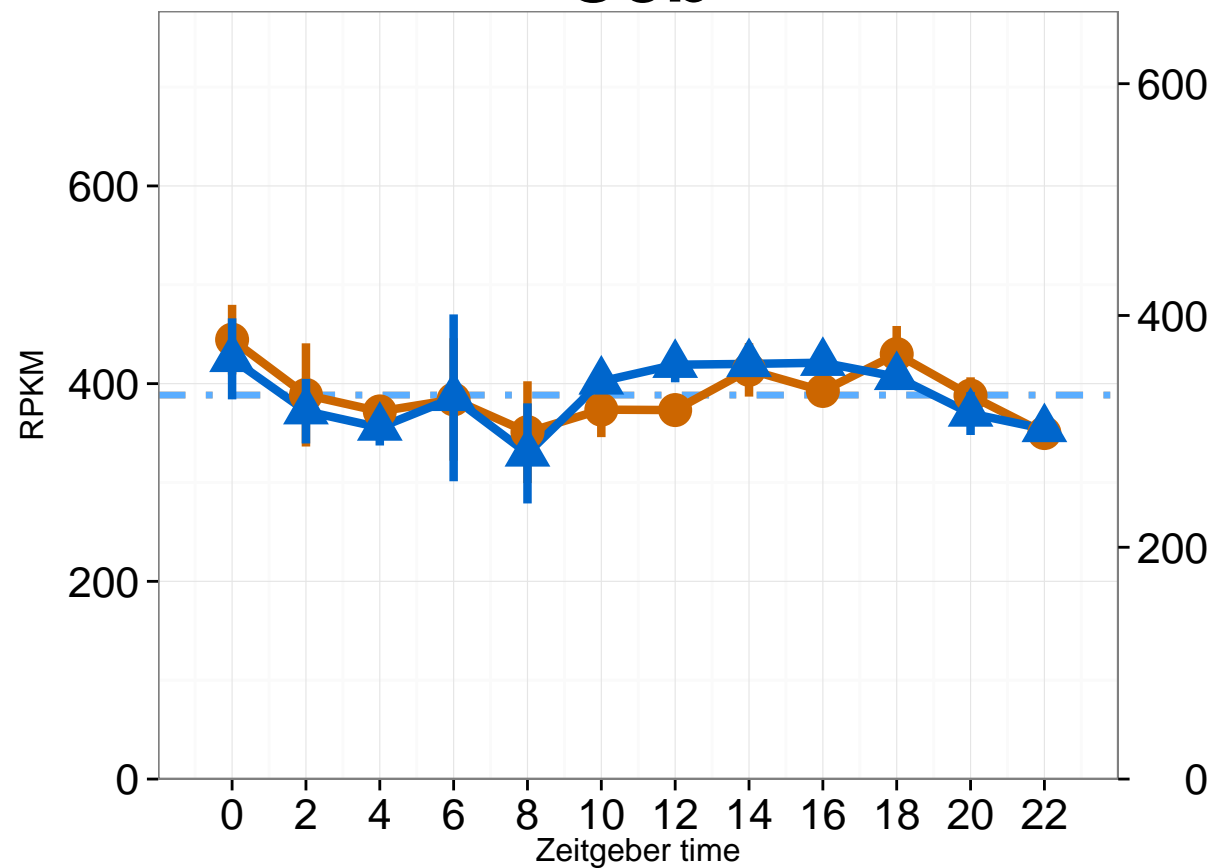

# C8b

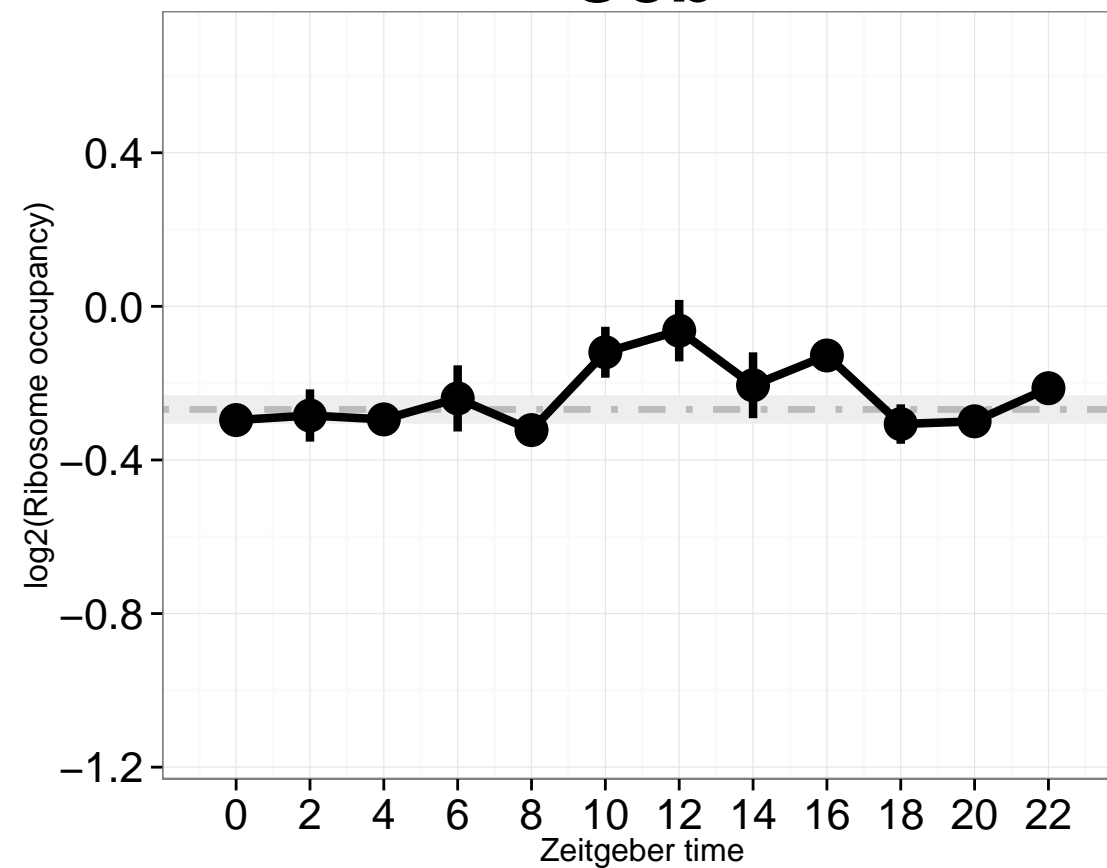

Supplement: SuppDataset_1.zip [file C8b_set_A.pdf › Supplemental Dataset 1/A-mRNA_nonrhyth_translation_nonrhyth/C8b_set_A.pdf]

# C8g

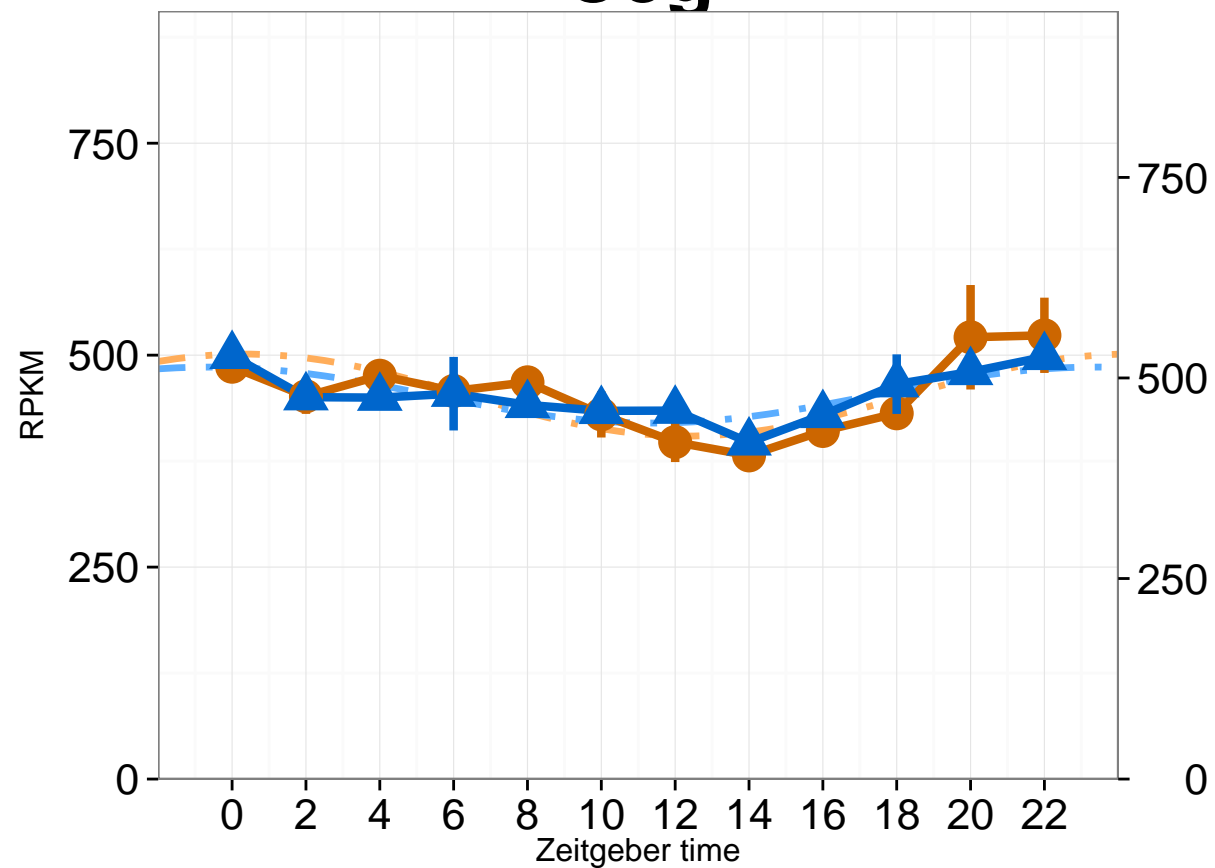

# C8g

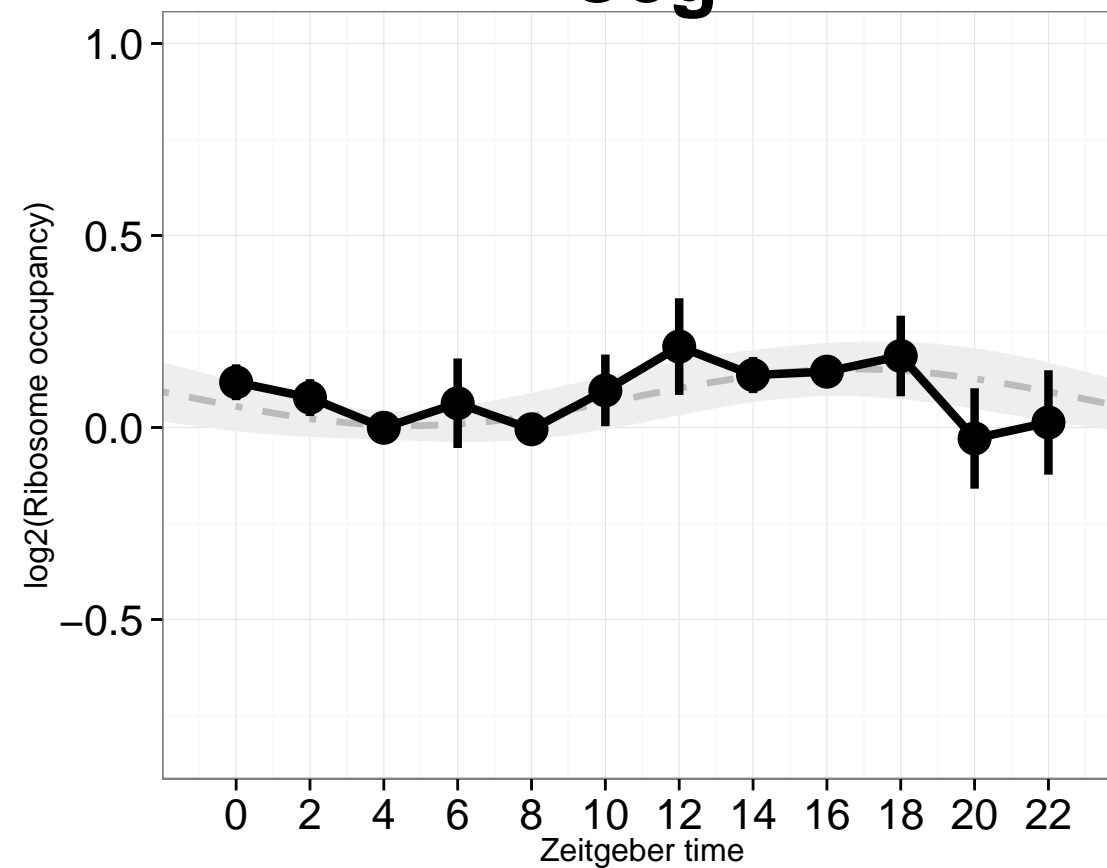

Supplement: SuppDataset_1.zip [file C8g_set_A.pdf › Supplemental Dataset 1/A-mRNA_nonrhyth_translation_nonrhyth/C8g_set_A.pdf]

**C9**

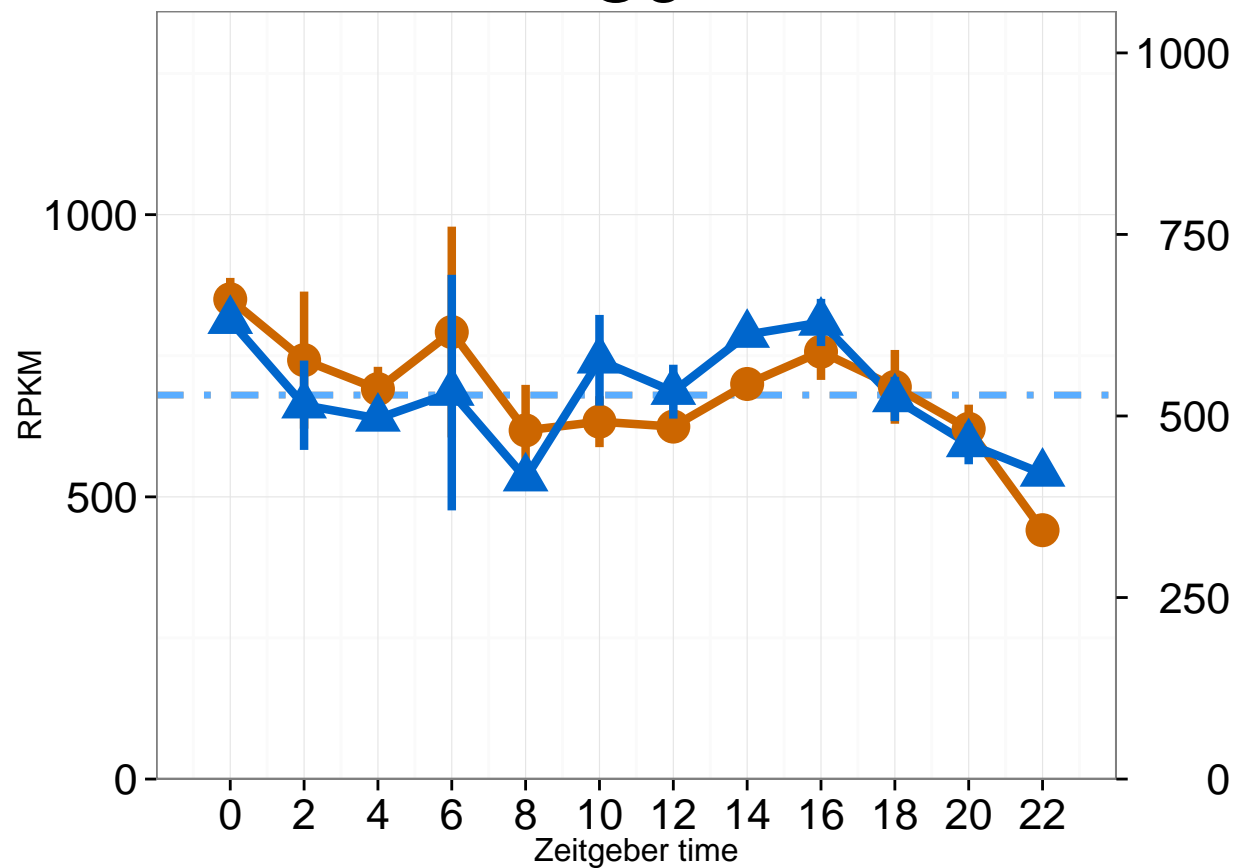

**C9**

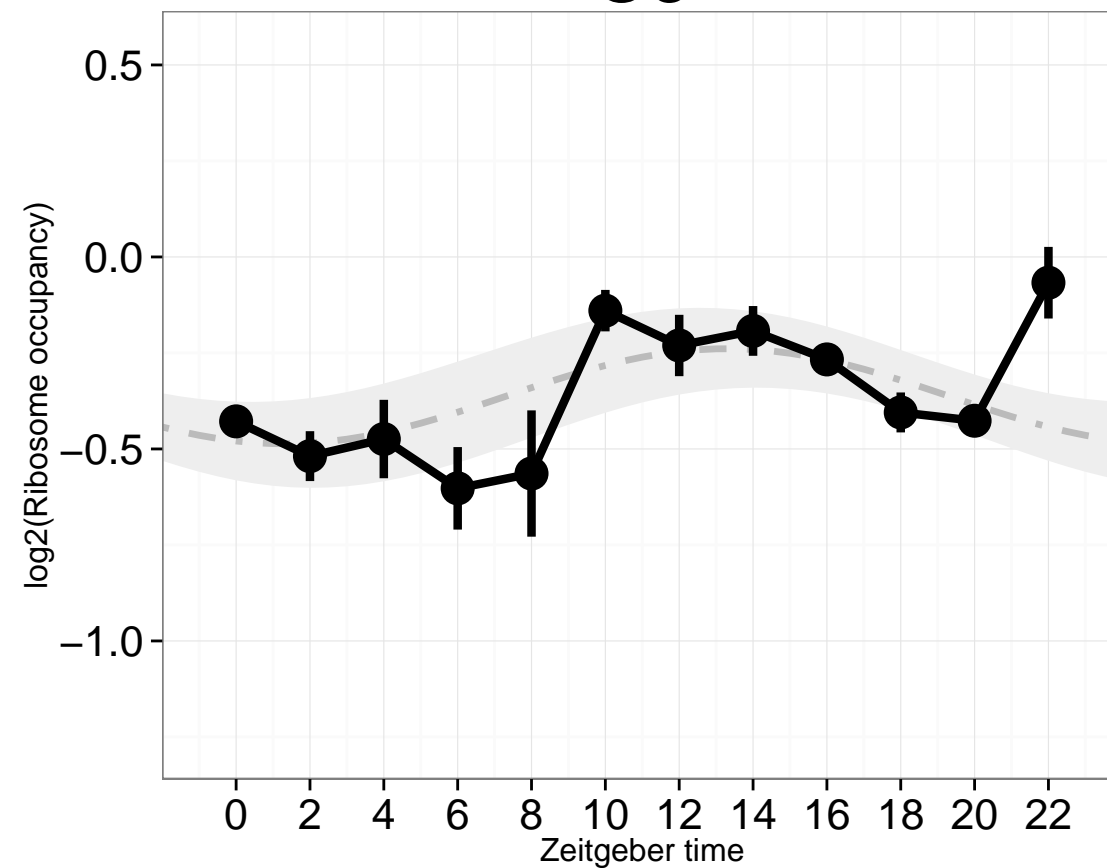

Supplement: SuppDataset_1.zip [file C9_set_A.pdf › Supplemental Dataset 1/A-mRNA_nonrhyth_translation_nonrhyth/C9_set_A.pdf]

# Caap1

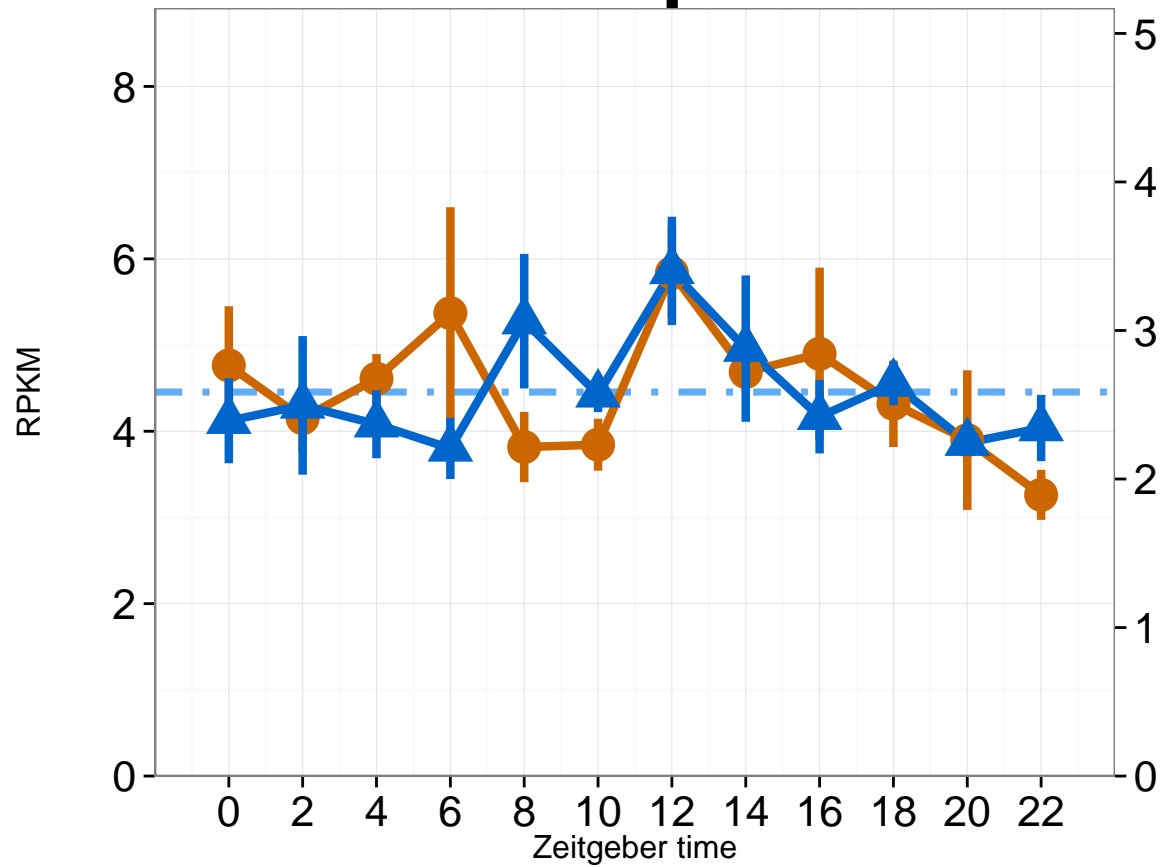

# Caap1

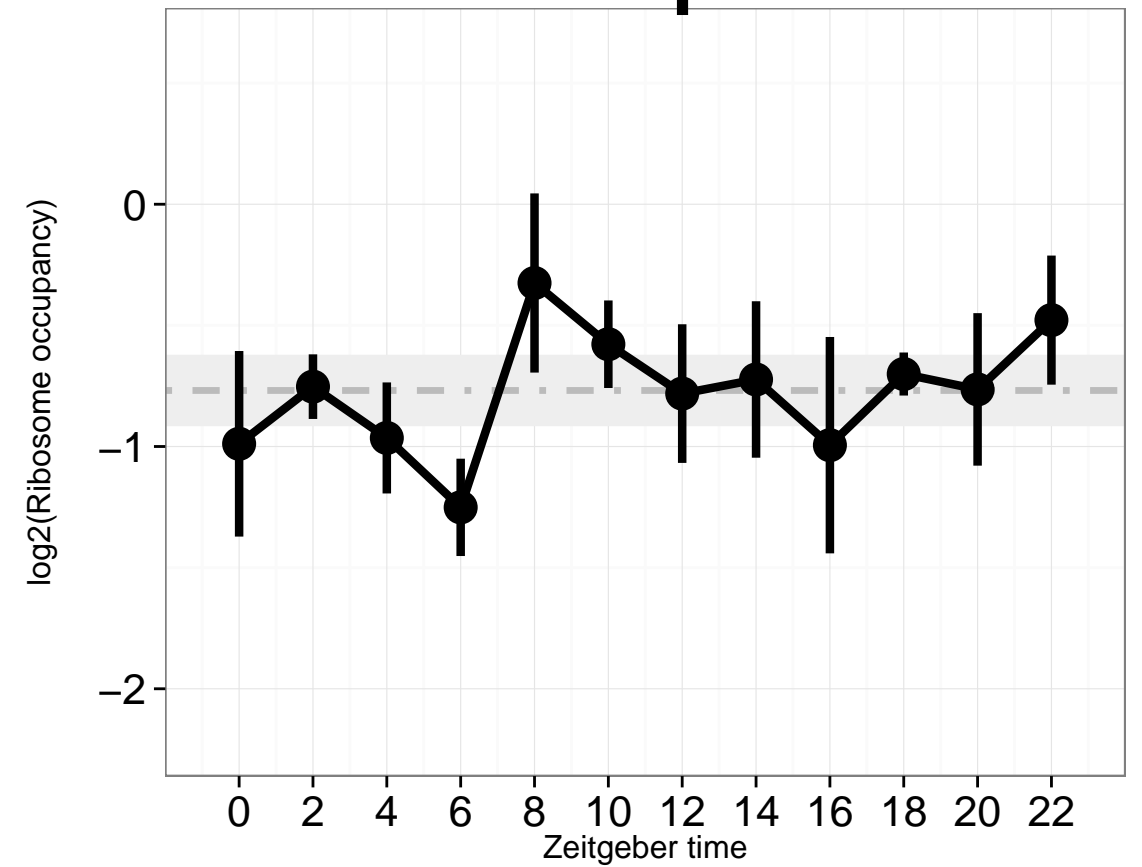

Supplement: SuppDataset_1.zip [file Caap1_set_A.pdf › Supplemental Dataset 1/A-mRNA_nonrhyth_translation_nonrhyth/Caap1_set_A.pdf]

## Cab39

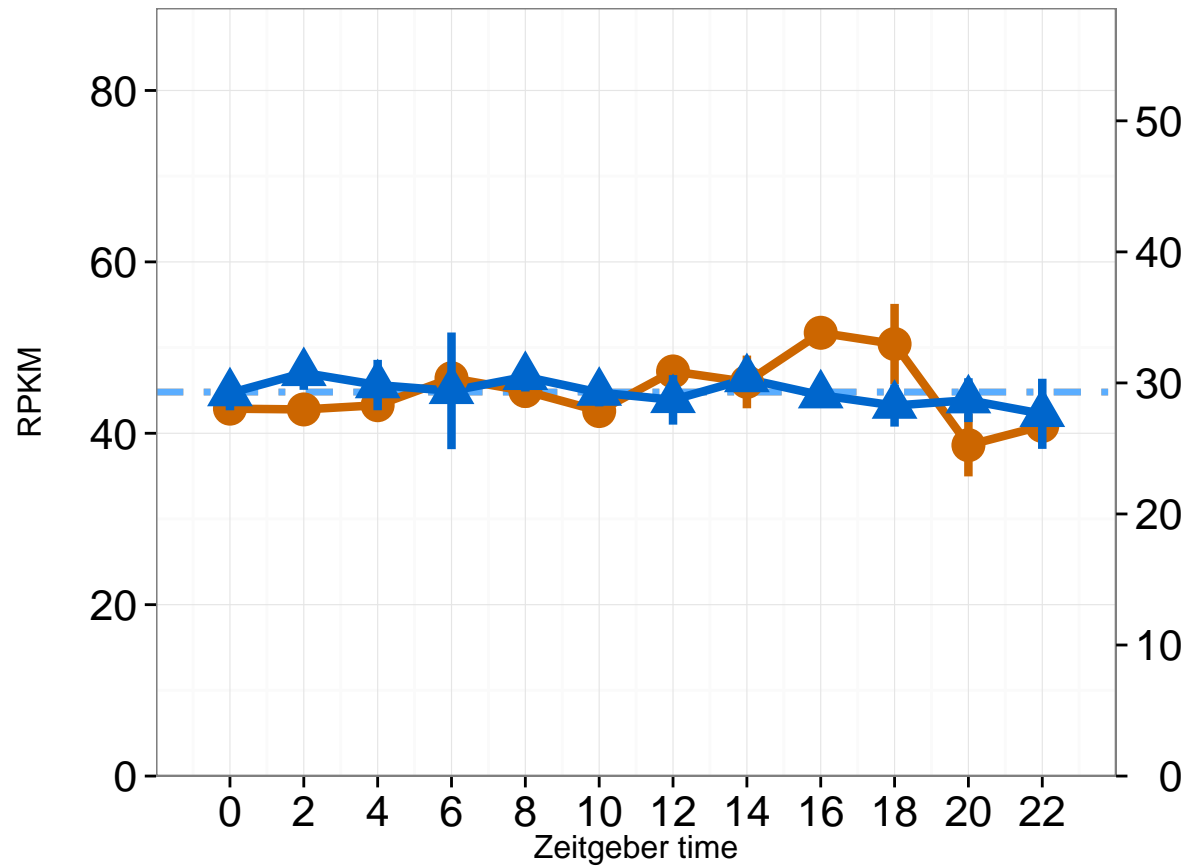

## Cab39

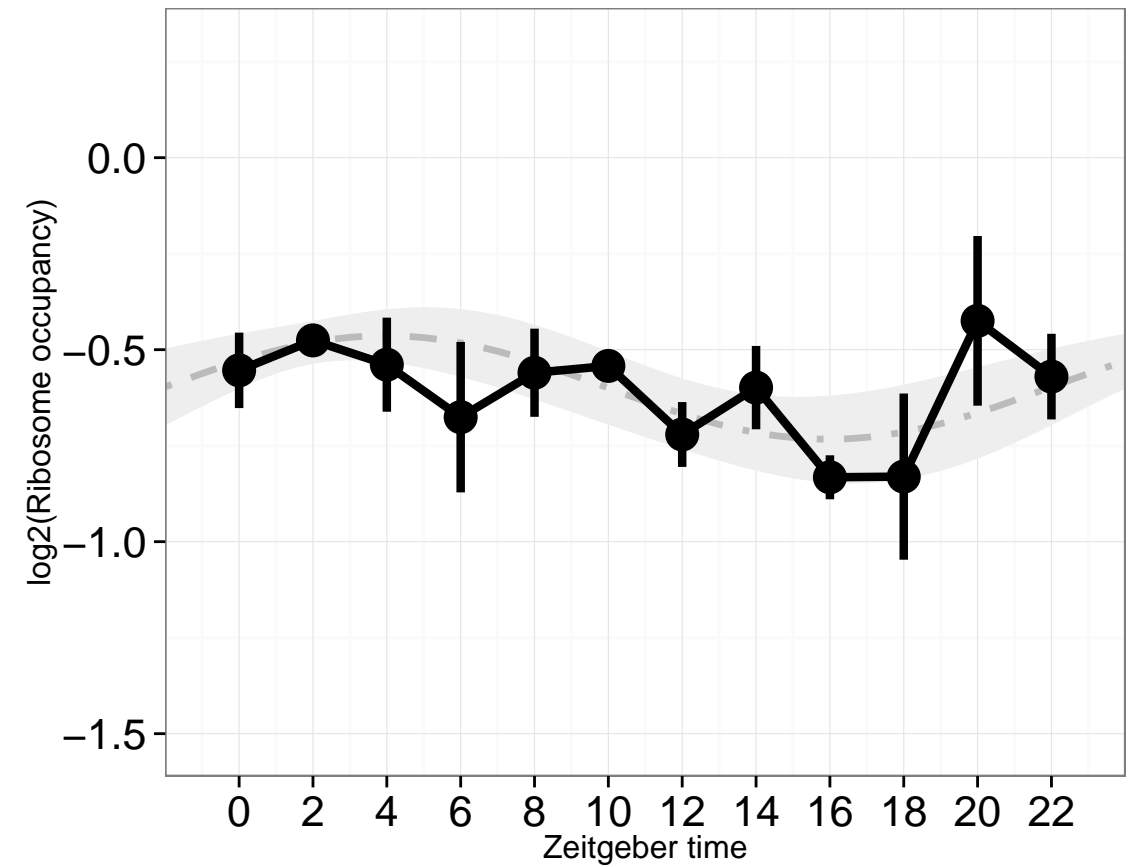

Supplement: SuppDataset_1.zip [file Cab39_set_A.pdf › Supplemental Dataset 1/A-mRNA_nonrhyth_translation_nonrhyth/Cab39_set_A.pdf]

# Cables1

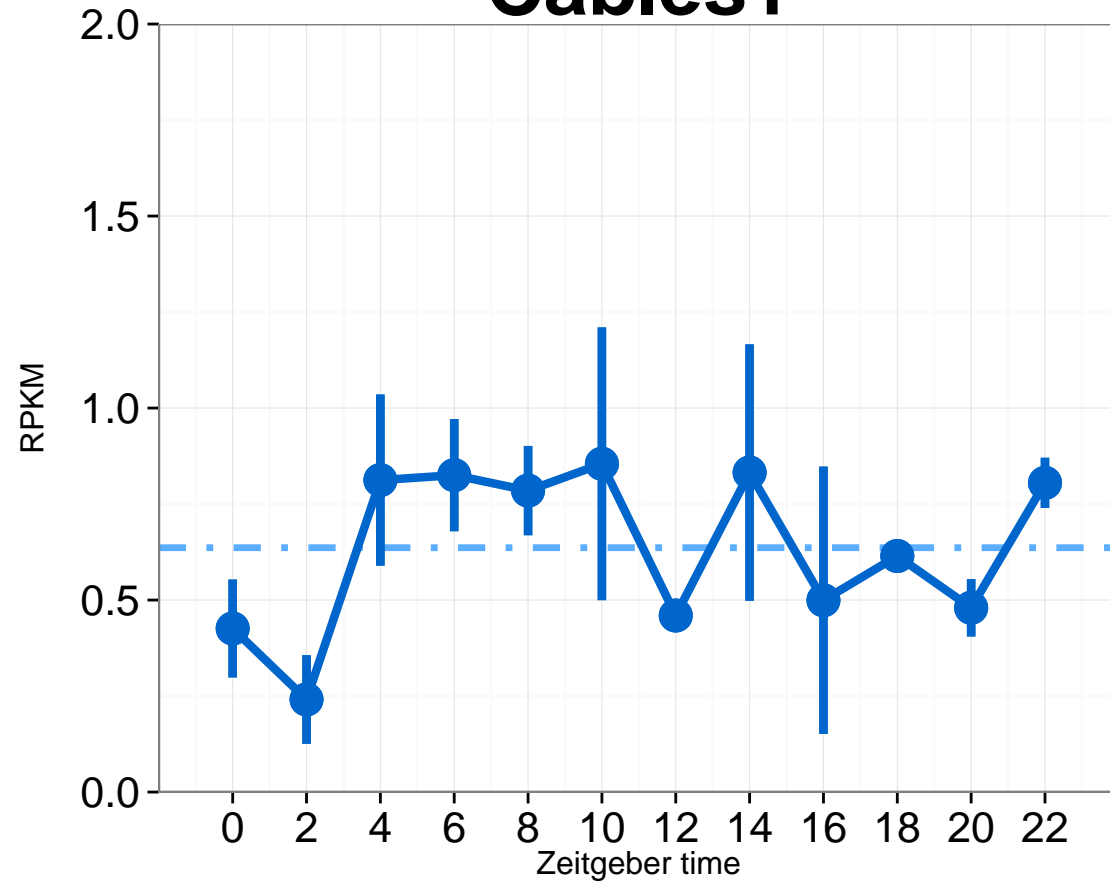

# Cables1 log2(Ribosome occupancy)

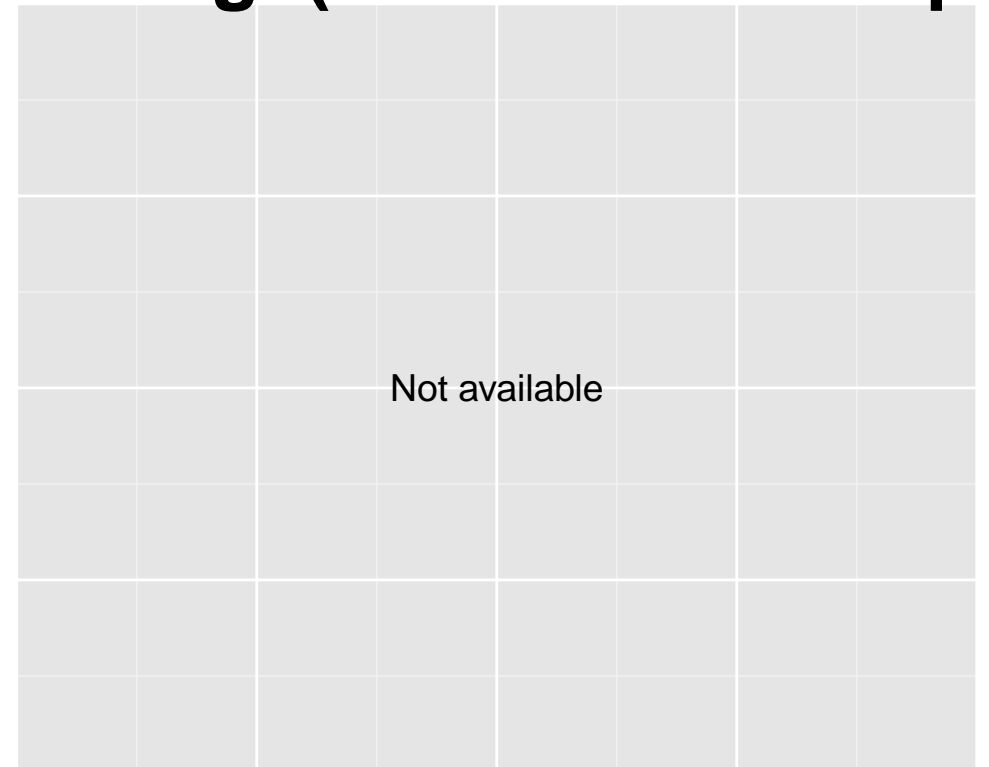

Supplement: SuppDataset_1.zip [file Cables1_set_A.pdf › Supplemental Dataset 1/A-mRNA_nonrhyth_translation_nonrhyth/Cables1_set_A.pdf]

## Cables2

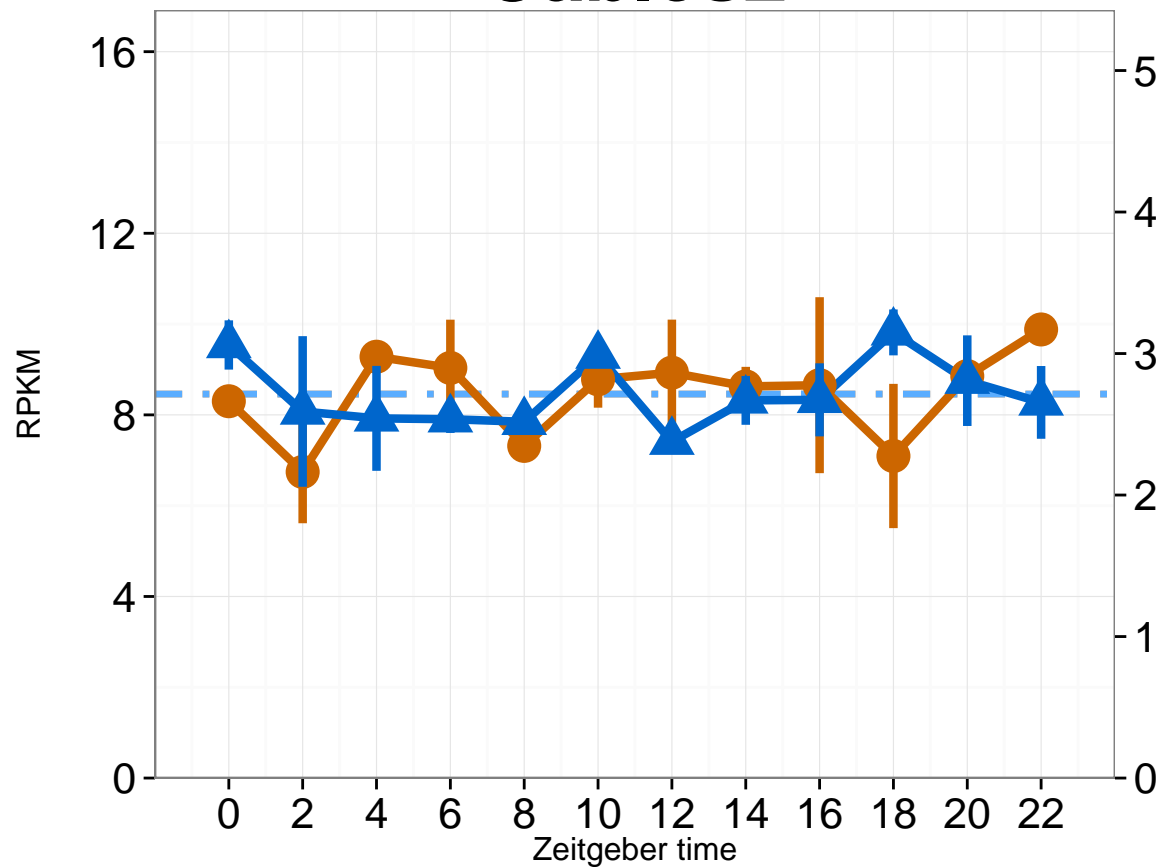

## Cables2

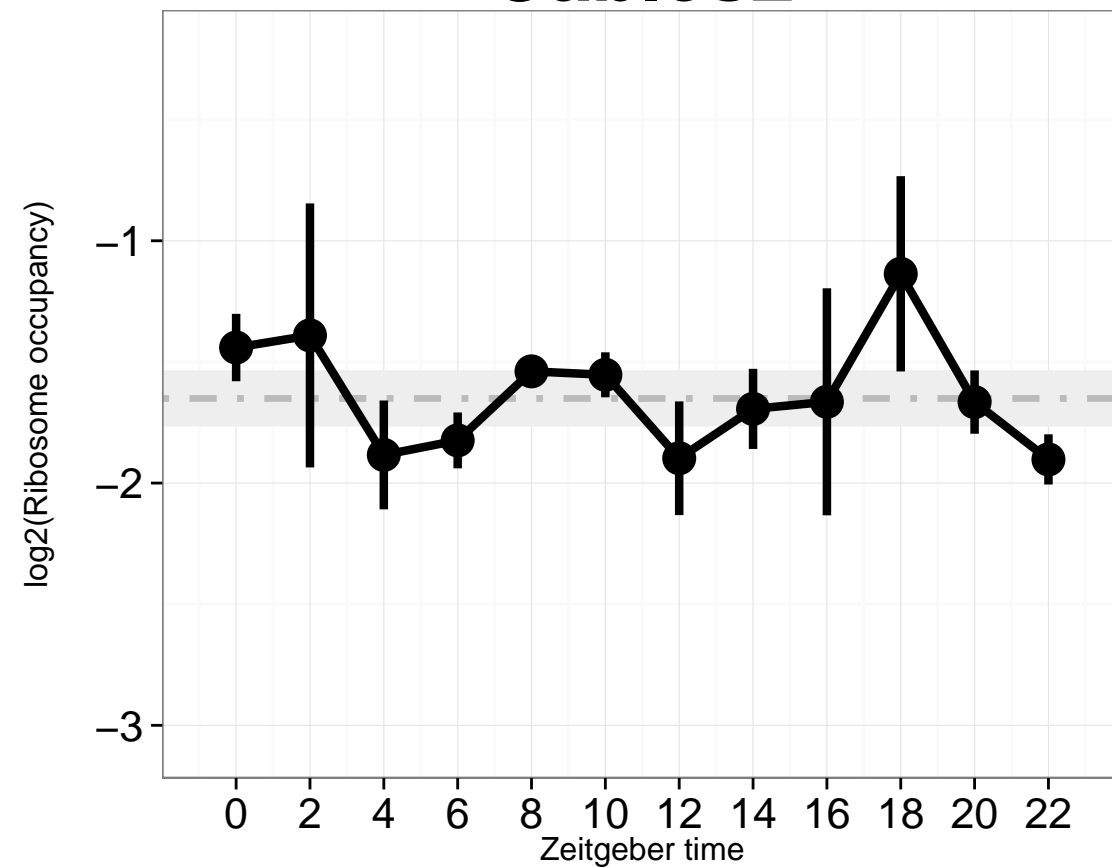

Supplement: SuppDataset_1.zip [file Cables2_set_A.pdf › Supplemental Dataset 1/A-mRNA_nonrhyth_translation_nonrhyth/Cables2_set_A.pdf]

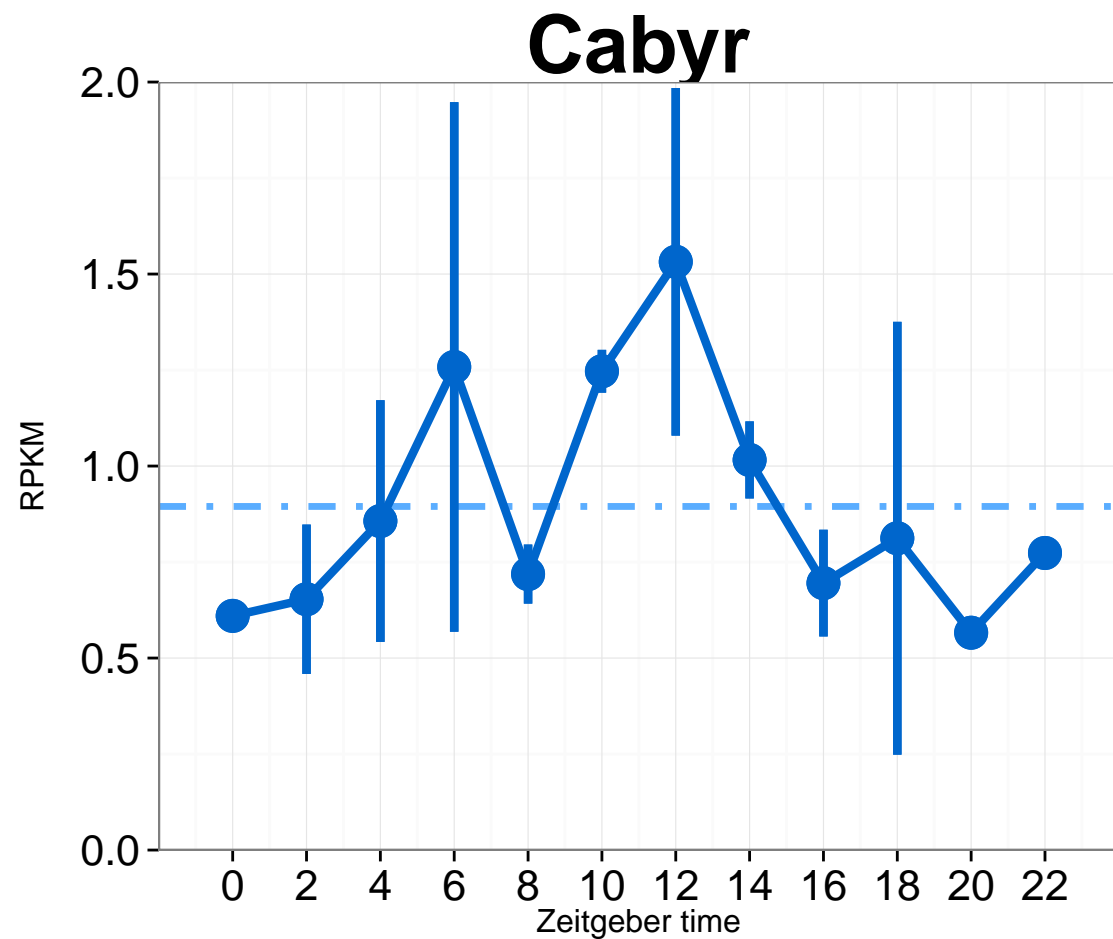

### Cabyr log2(Ribosome occupancy

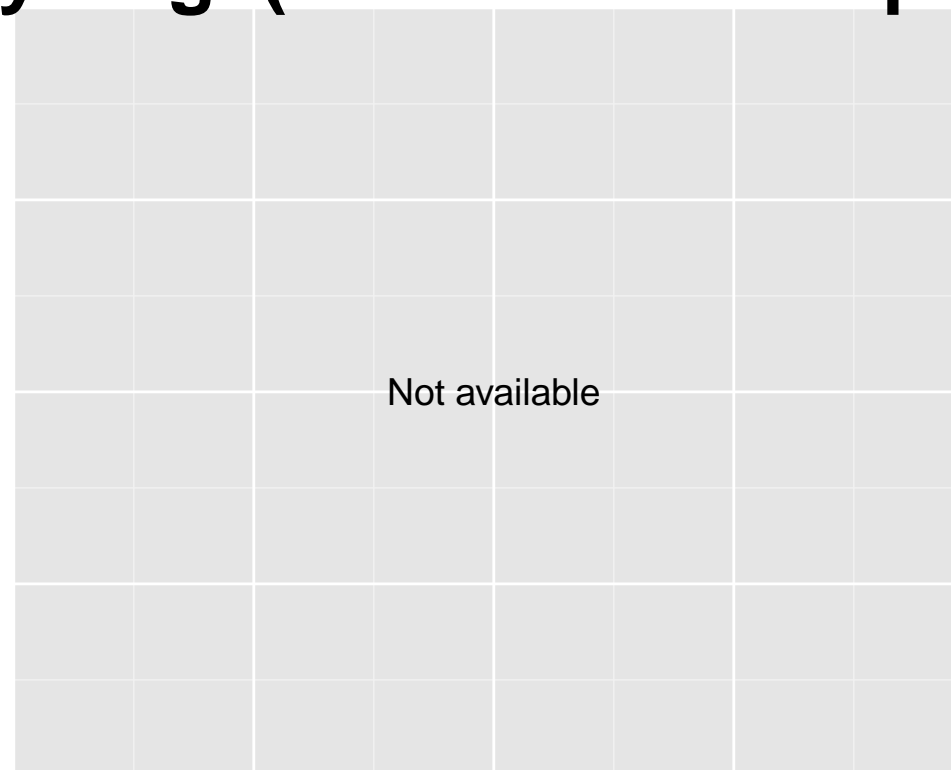

Supplement: SuppDataset_1.zip [file Cabyr_set_A.pdf › Supplemental Dataset 1/A-mRNA_nonrhyth_translation_nonrhyth/Cabyr_set_A.pdf]

# Cacfd1

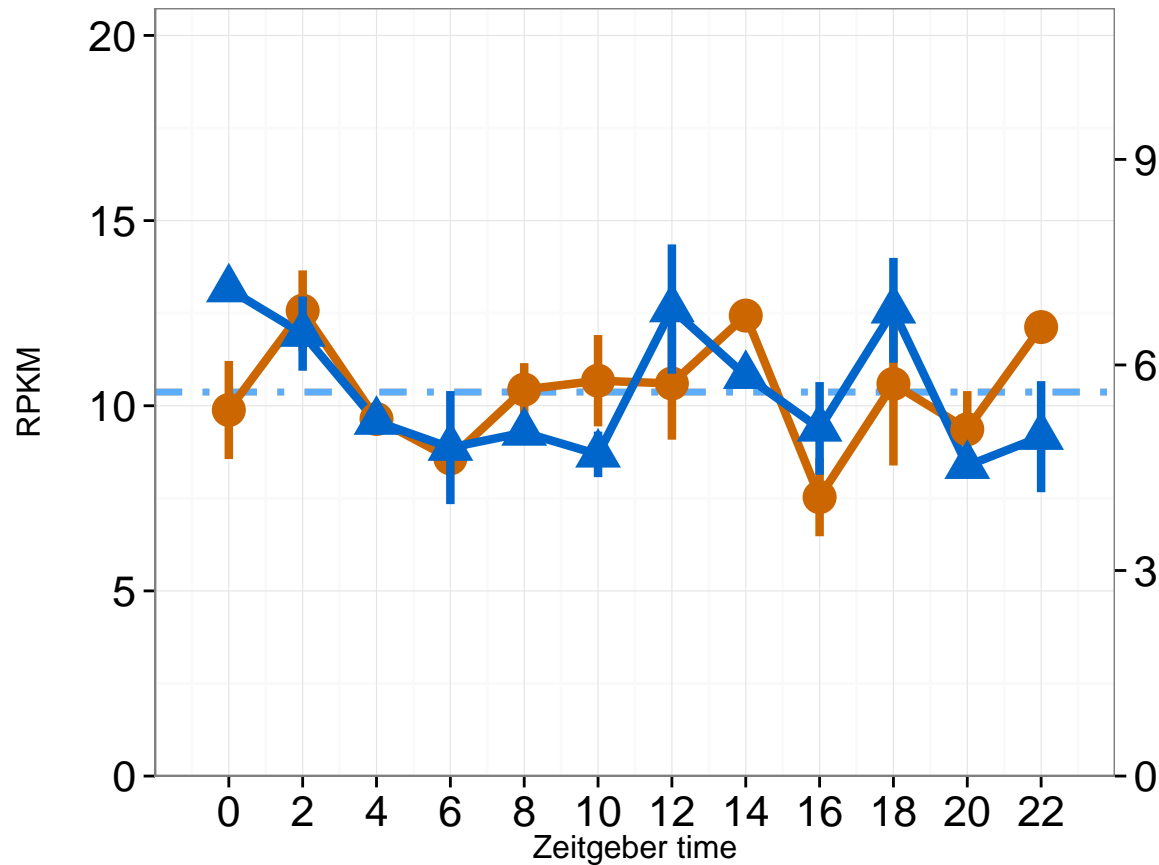

# Cacfd1

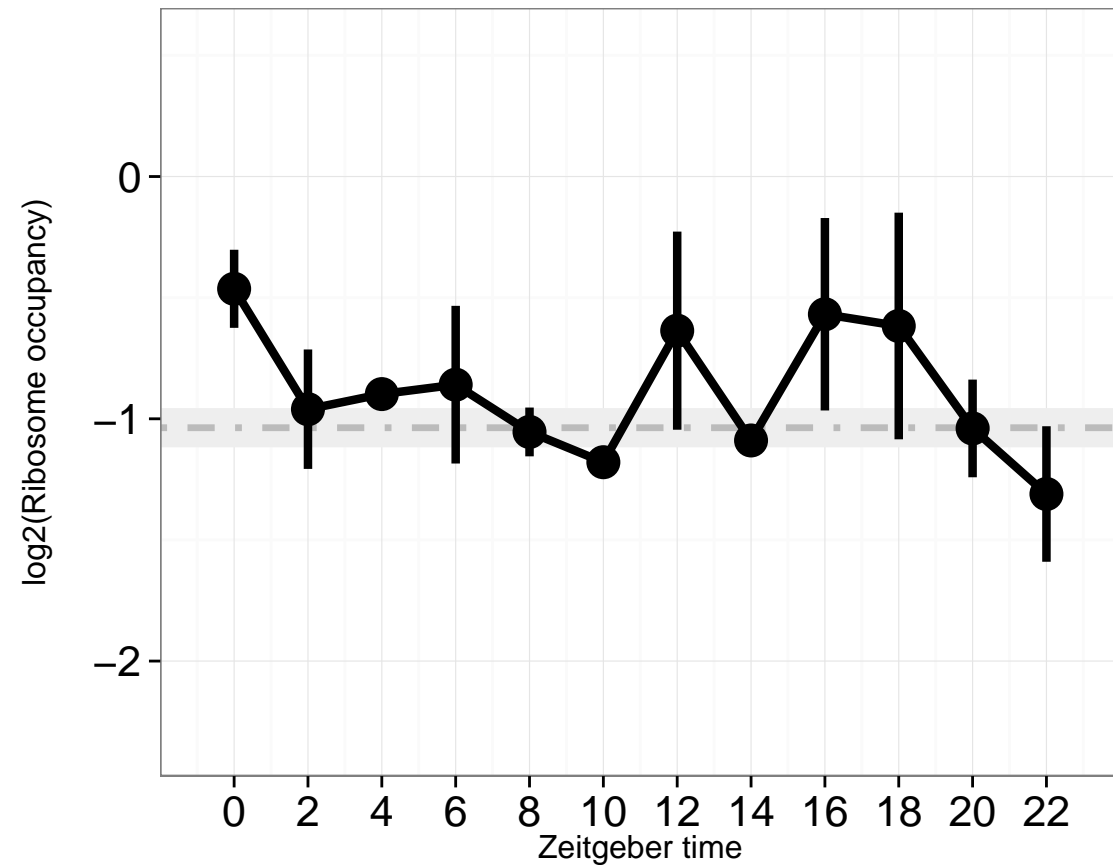

Supplement: SuppDataset_1.zip [file Cacfd1_set_A.pdf › Supplemental Dataset 1/A-mRNA_nonrhyth_translation_nonrhyth/Cacfd1_set_A.pdf]

# Cachd1

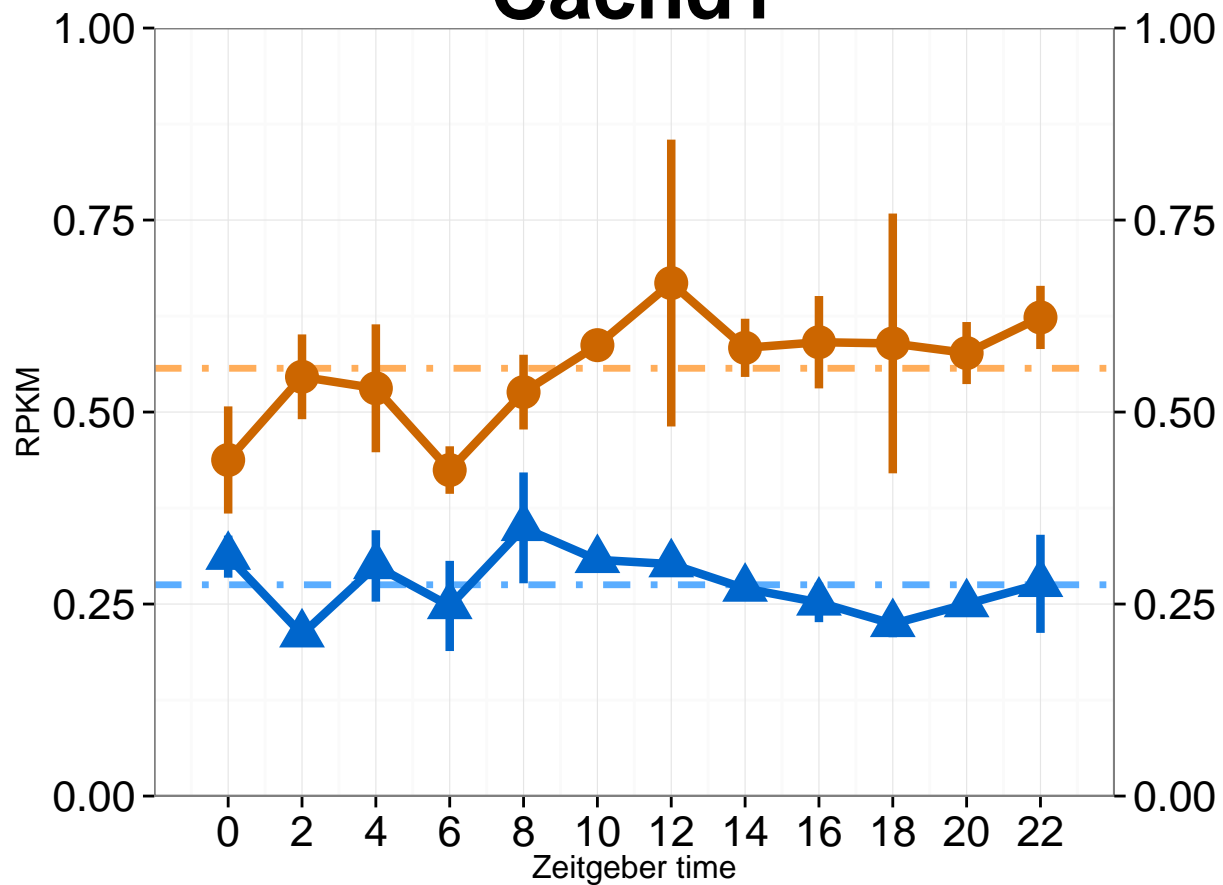

# Cachd1

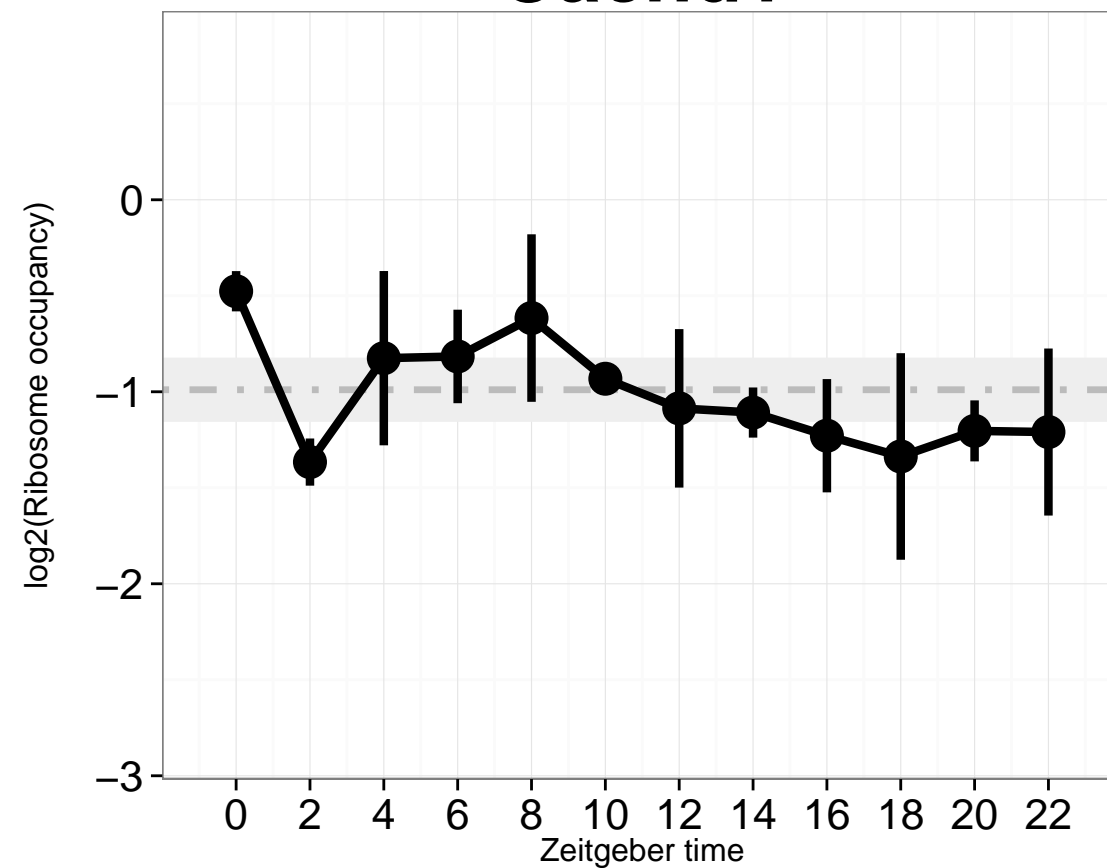

Supplement: SuppDataset_1.zip [file Cachd1_set_A.pdf › Supplemental Dataset 1/A-mRNA_nonrhyth_translation_nonrhyth/Cachd1_set_A.pdf]

# Cacna1d

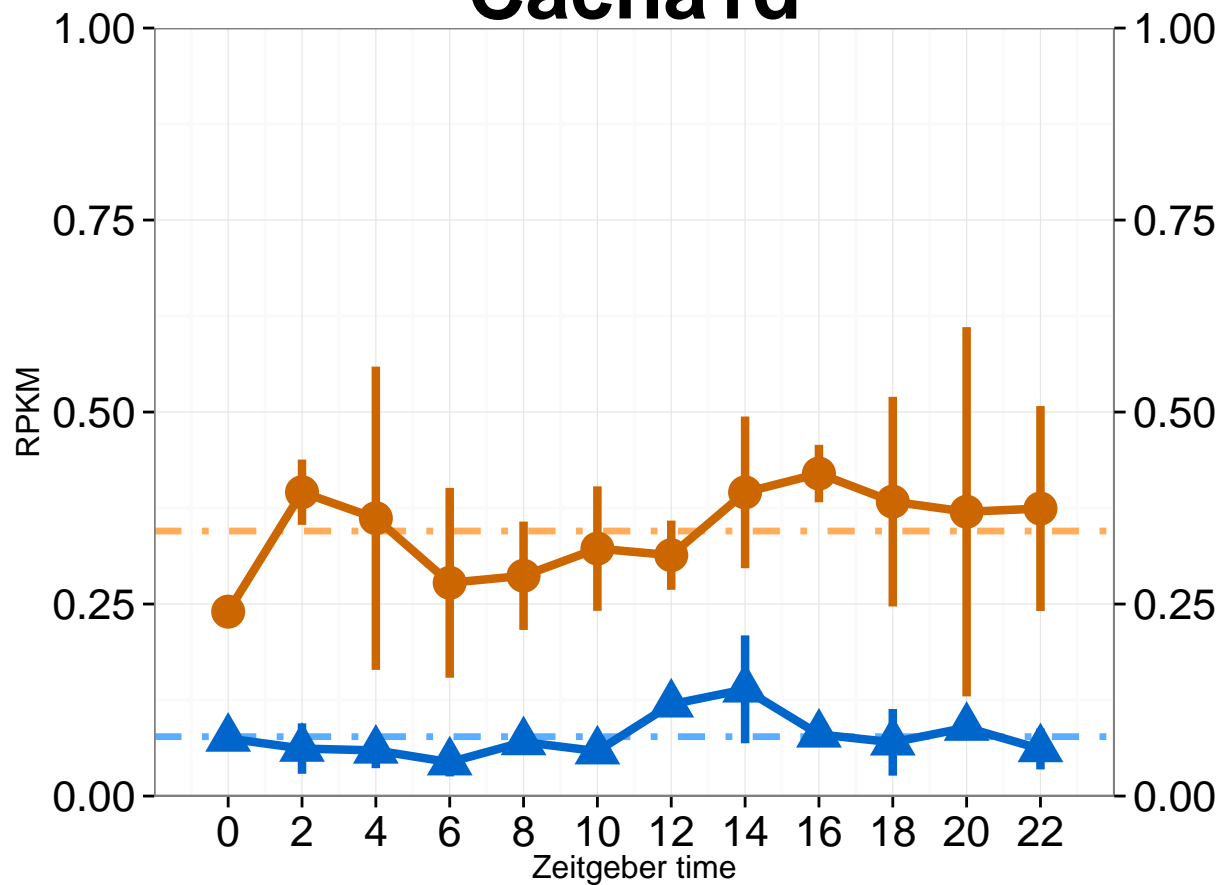

# Cacna1d

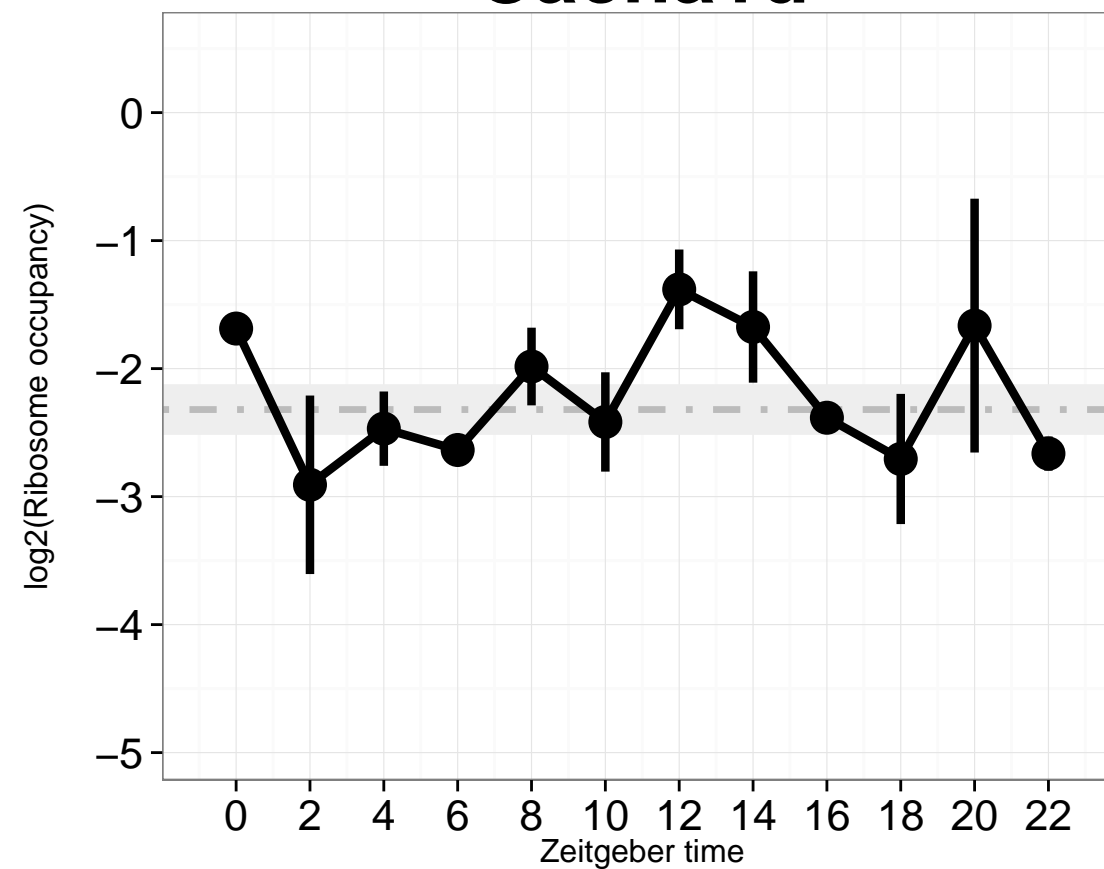

Supplement: SuppDataset_1.zip [file Cacna1d_set_A.pdf › Supplemental Dataset 1/A-mRNA_nonrhyth_translation_nonrhyth/Cacna1d_set_A.pdf]

# Cacna2d1

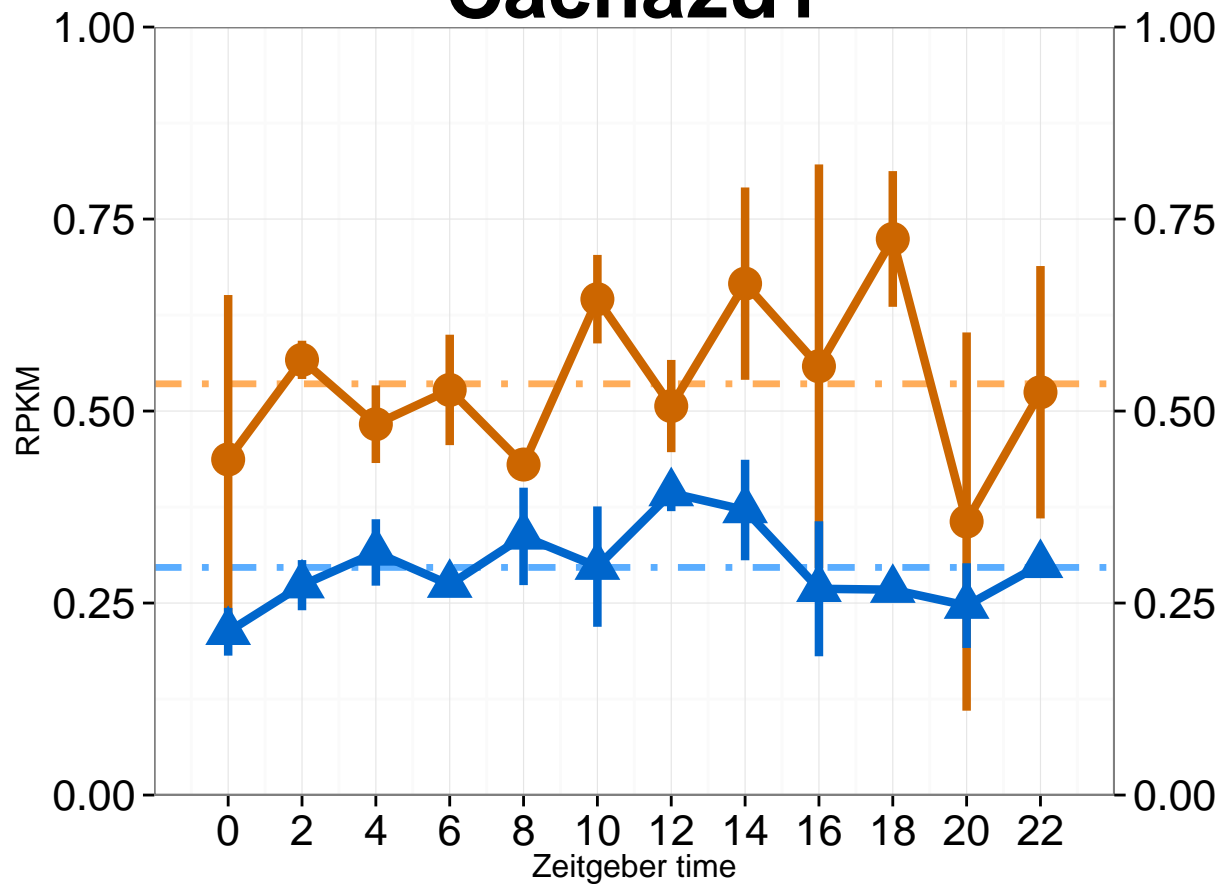

# Cacna2d1

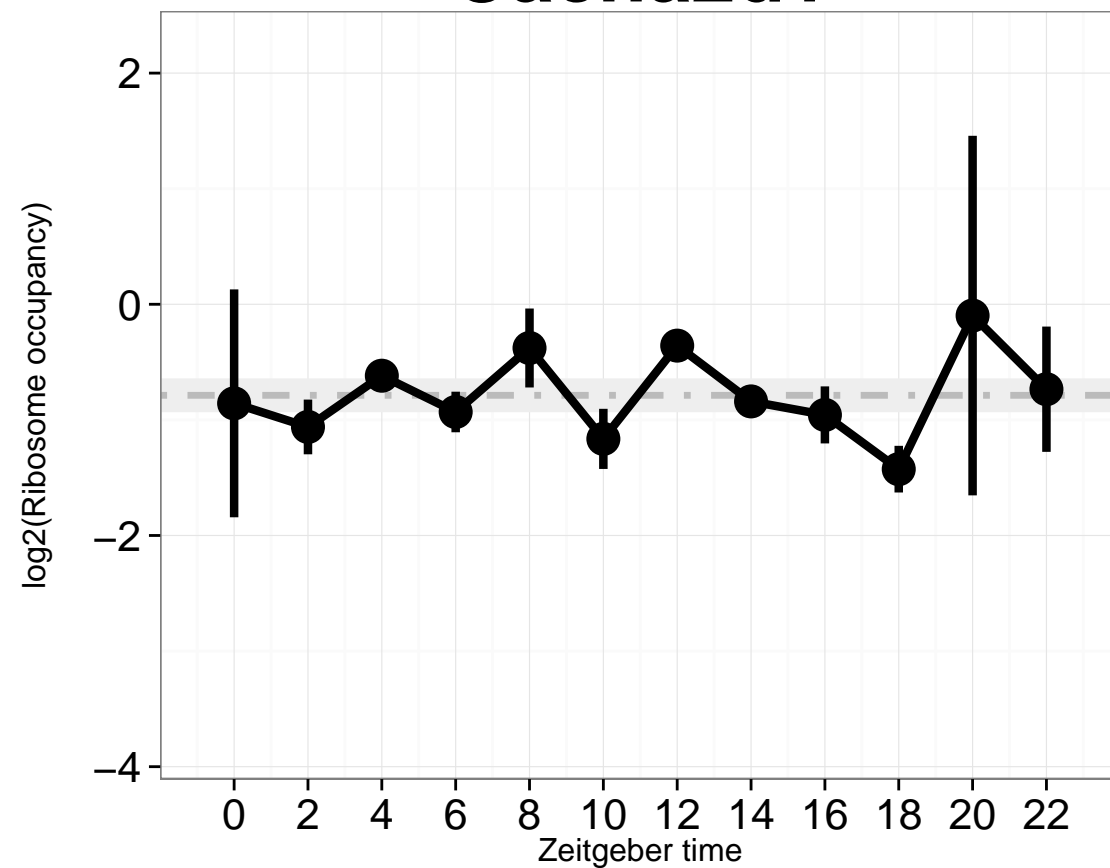

Supplement: SuppDataset_1.zip [file Cacna2d1_set_A.pdf › Supplemental Dataset 1/A-mRNA_nonrhyth_translation_nonrhyth/Cacna2d1_set_A.pdf]

## Cactin

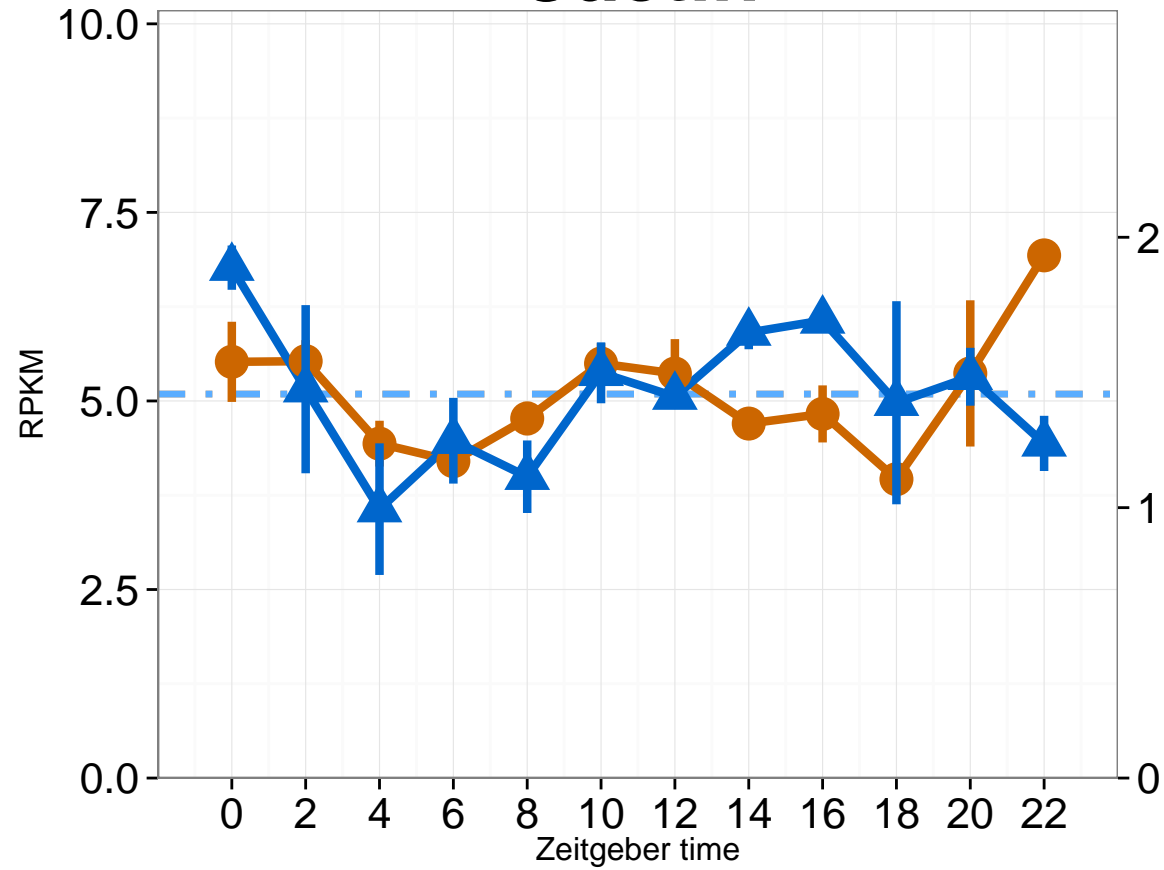

## Cactin

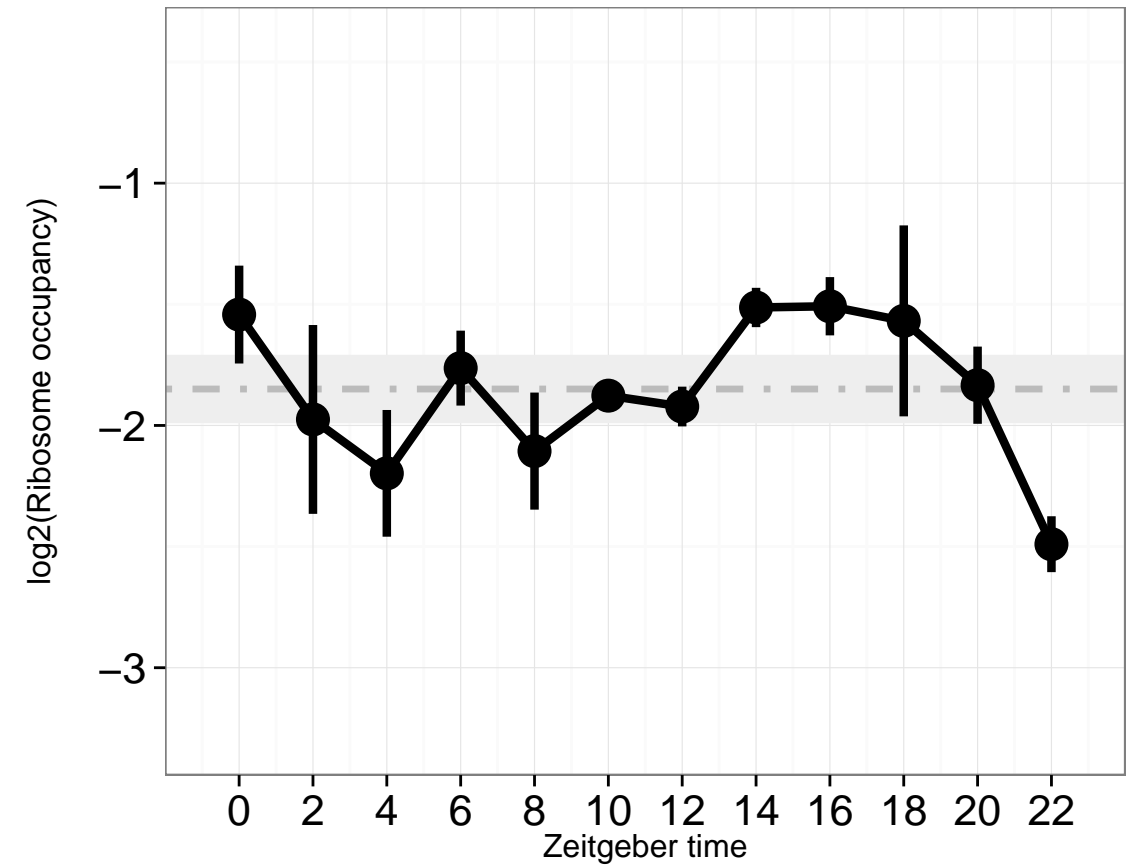

Supplement: SuppDataset_1.zip [file Cactin_set_A.pdf › Supplemental Dataset 1/A-mRNA_nonrhyth_translation_nonrhyth/Cactin_set_A.pdf]

## Cacul1

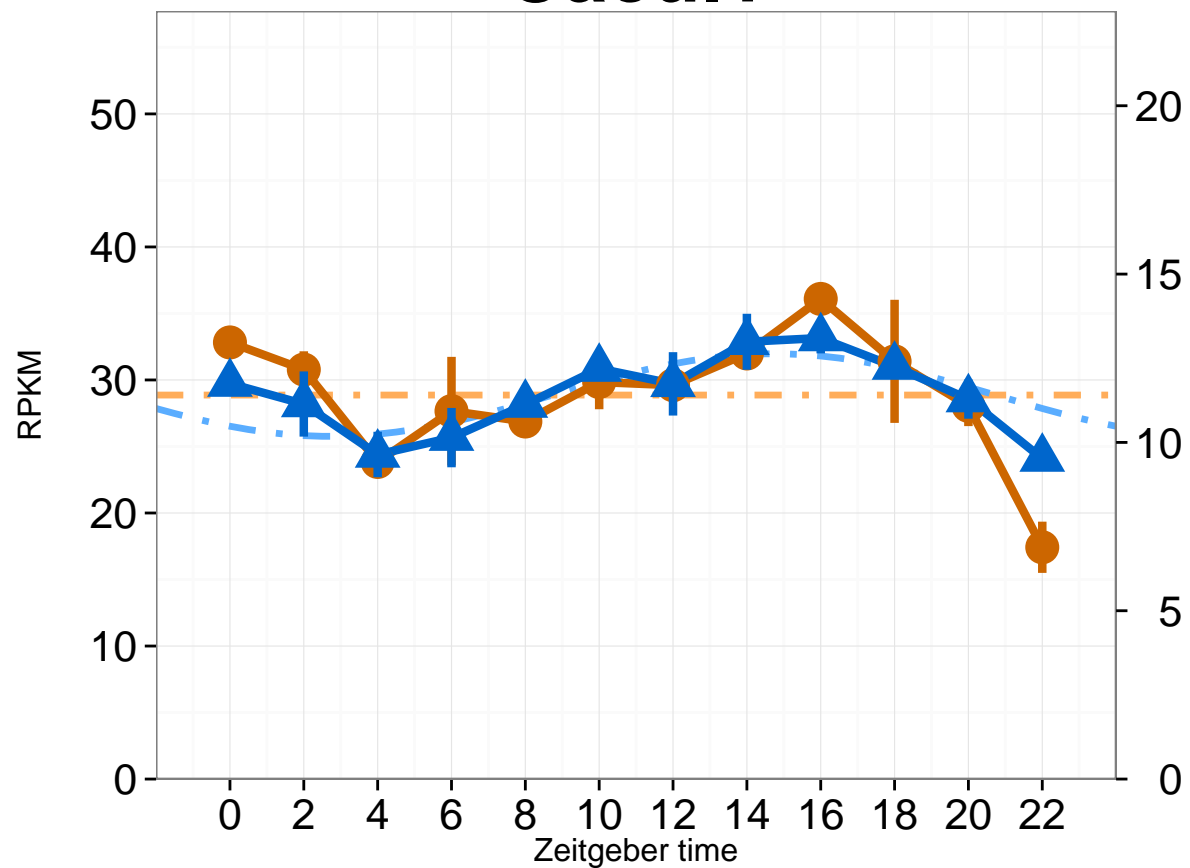

## Cacul1

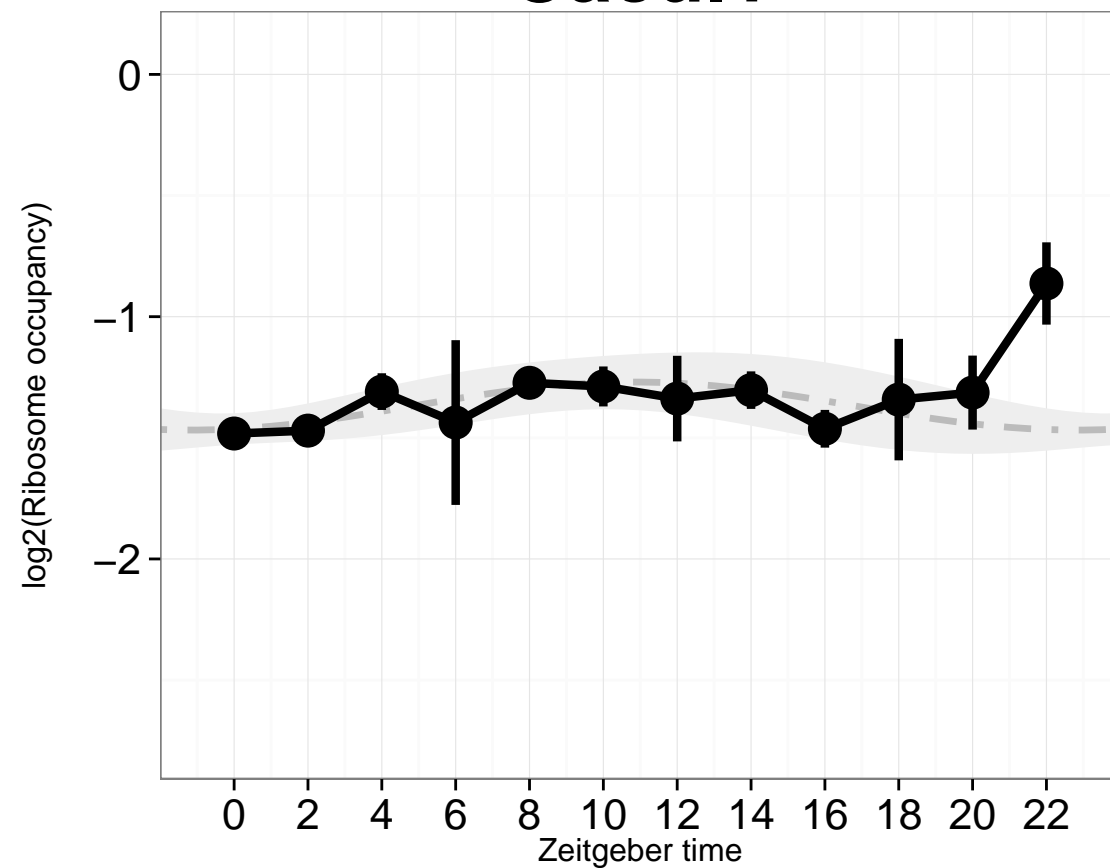

Supplement: SuppDataset_1.zip [file Cacul1_set_A.pdf › Supplemental Dataset 1/A-mRNA_nonrhyth_translation_nonrhyth/Cacul1_set_A.pdf]

## Cadm1

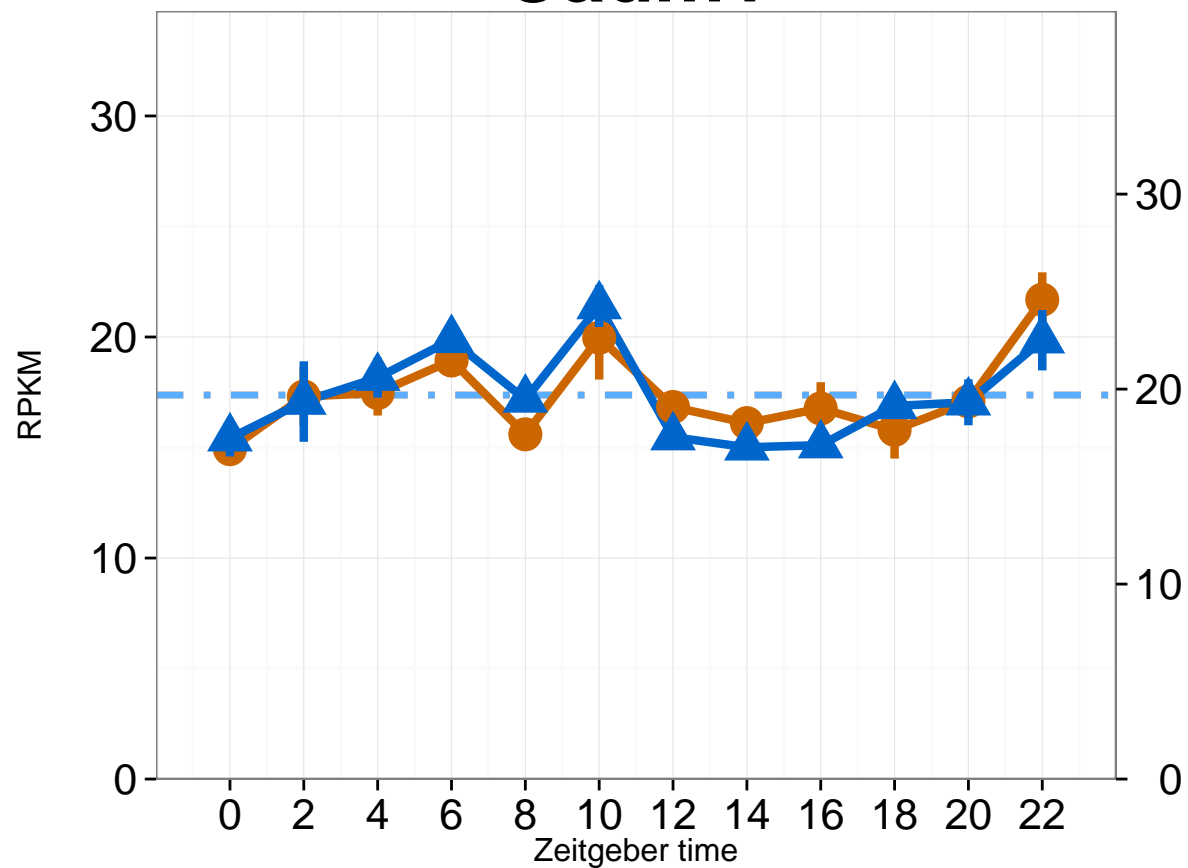

## Cadm1

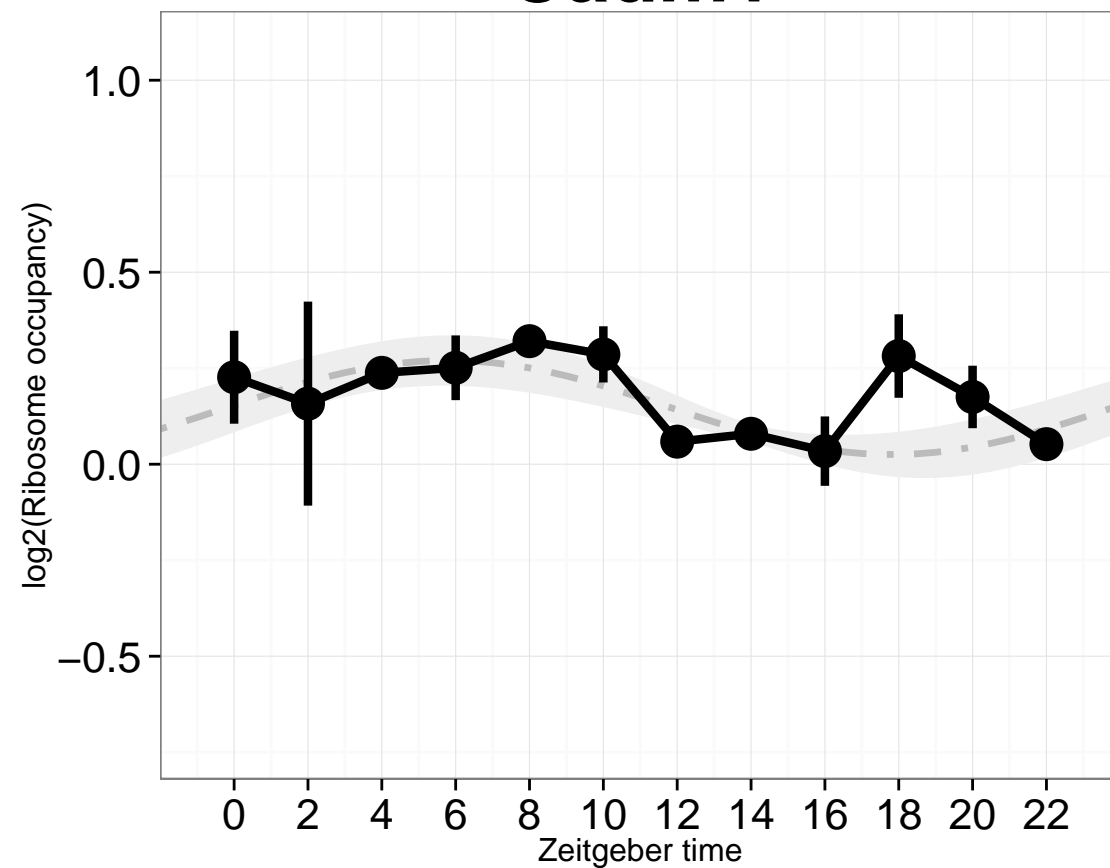

Supplement: SuppDataset_1.zip [file Cadm1_set_A.pdf › Supplemental Dataset 1/A-mRNA_nonrhyth_translation_nonrhyth/Cadm1_set_A.pdf]

## Cadm3

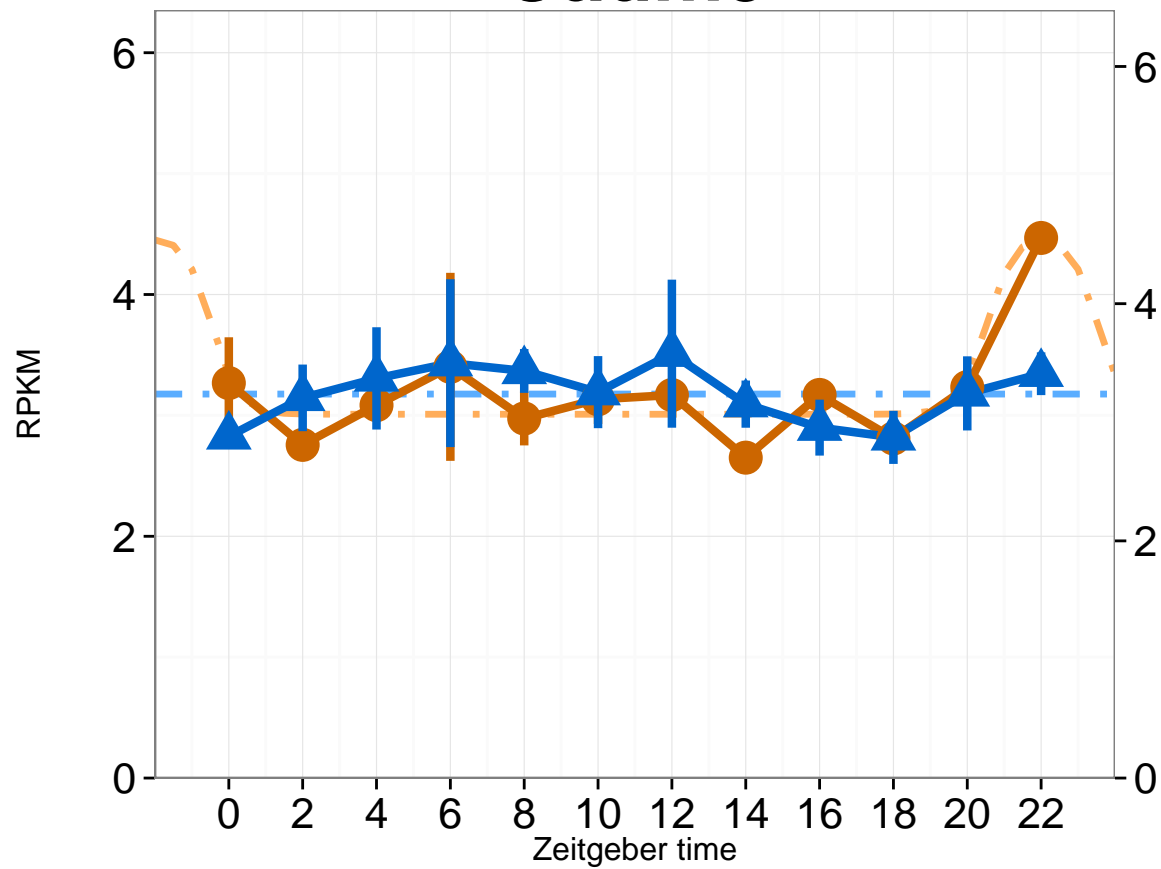

## Cadm3

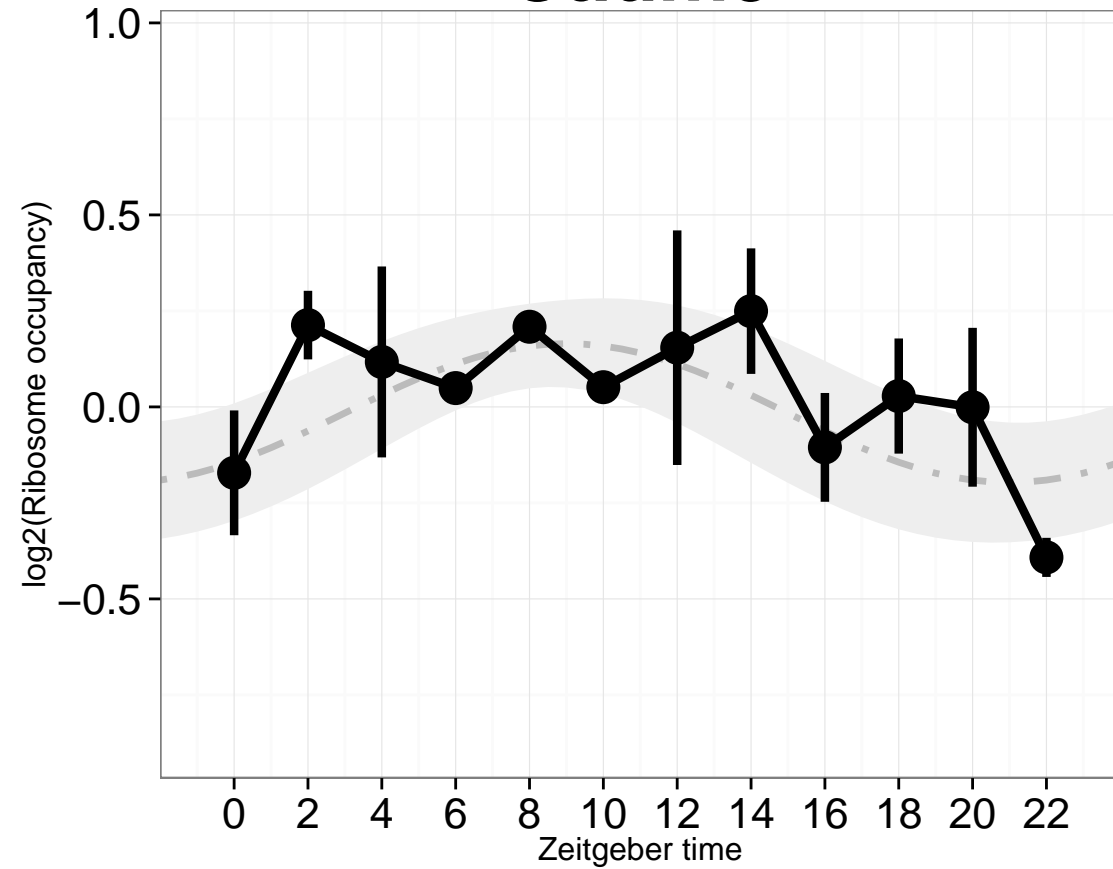

Supplement: SuppDataset_1.zip [file Cadm3_set_A.pdf › Supplemental Dataset 1/A-mRNA_nonrhyth_translation_nonrhyth/Cadm3_set_A.pdf]

## Cadps2

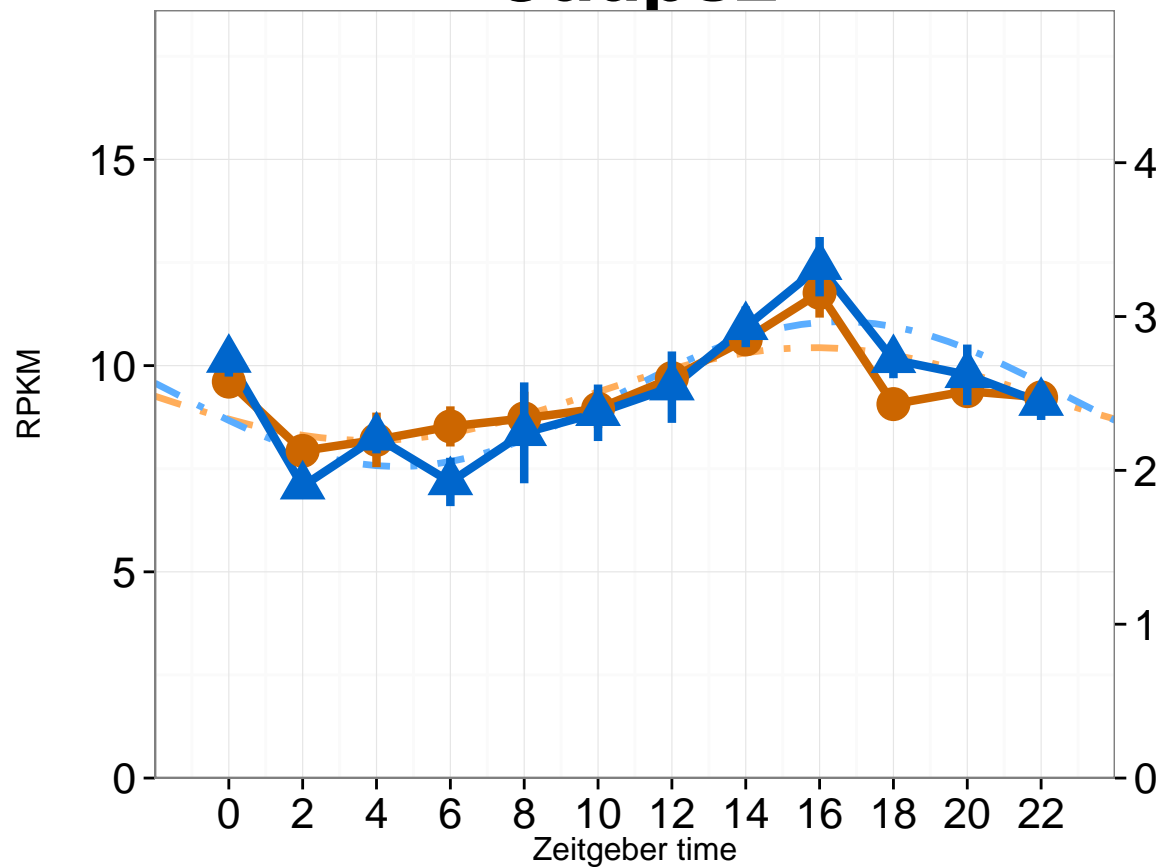

## Cadps2

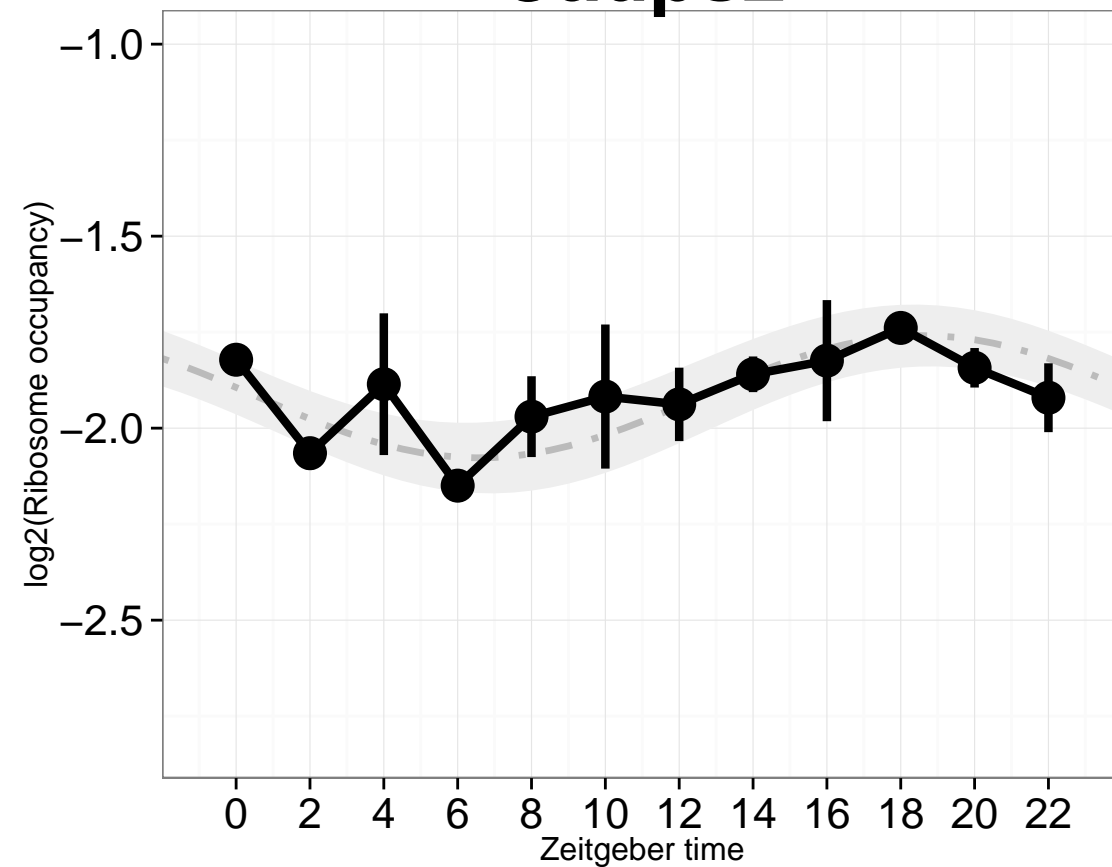

Supplement: SuppDataset_1.zip [file Cadps2_set_A.pdf › Supplemental Dataset 1/A-mRNA_nonrhyth_translation_nonrhyth/Cadps2_set_A.pdf]

# Calcr1

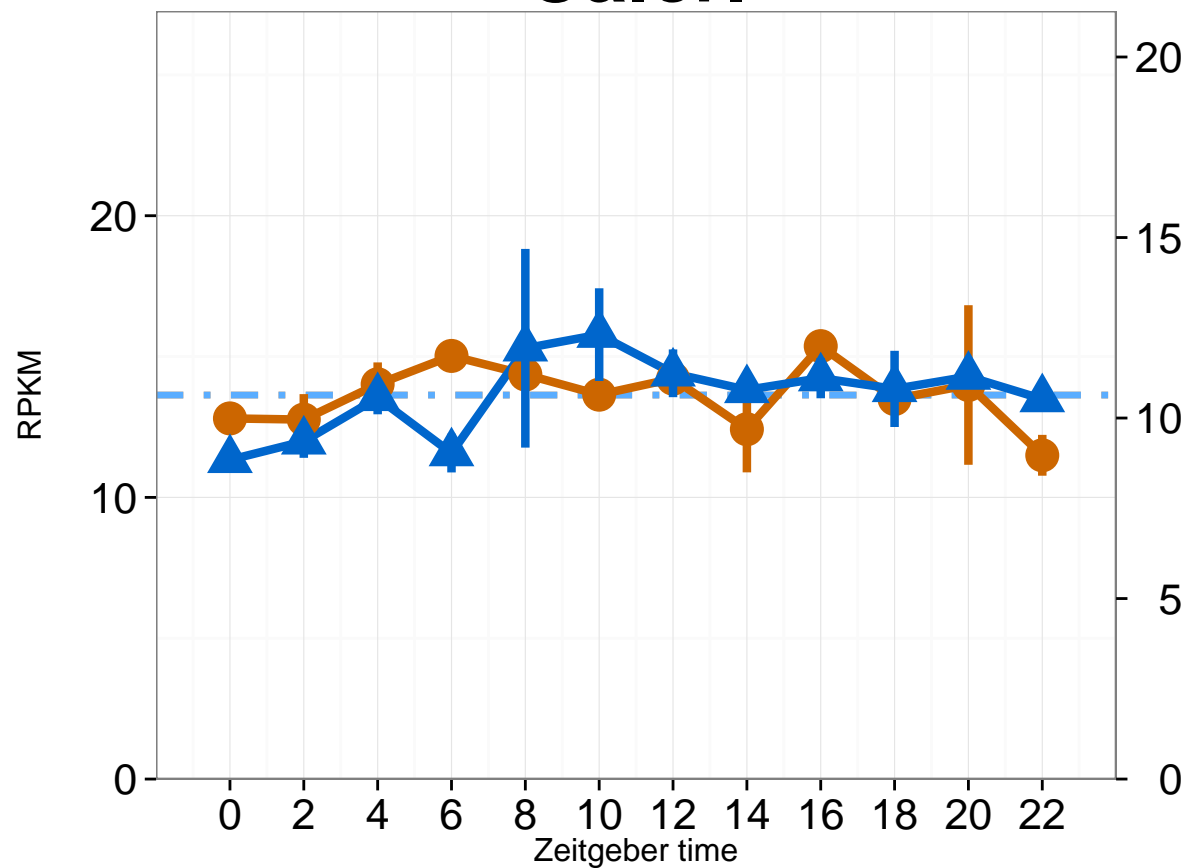

# Calcr1

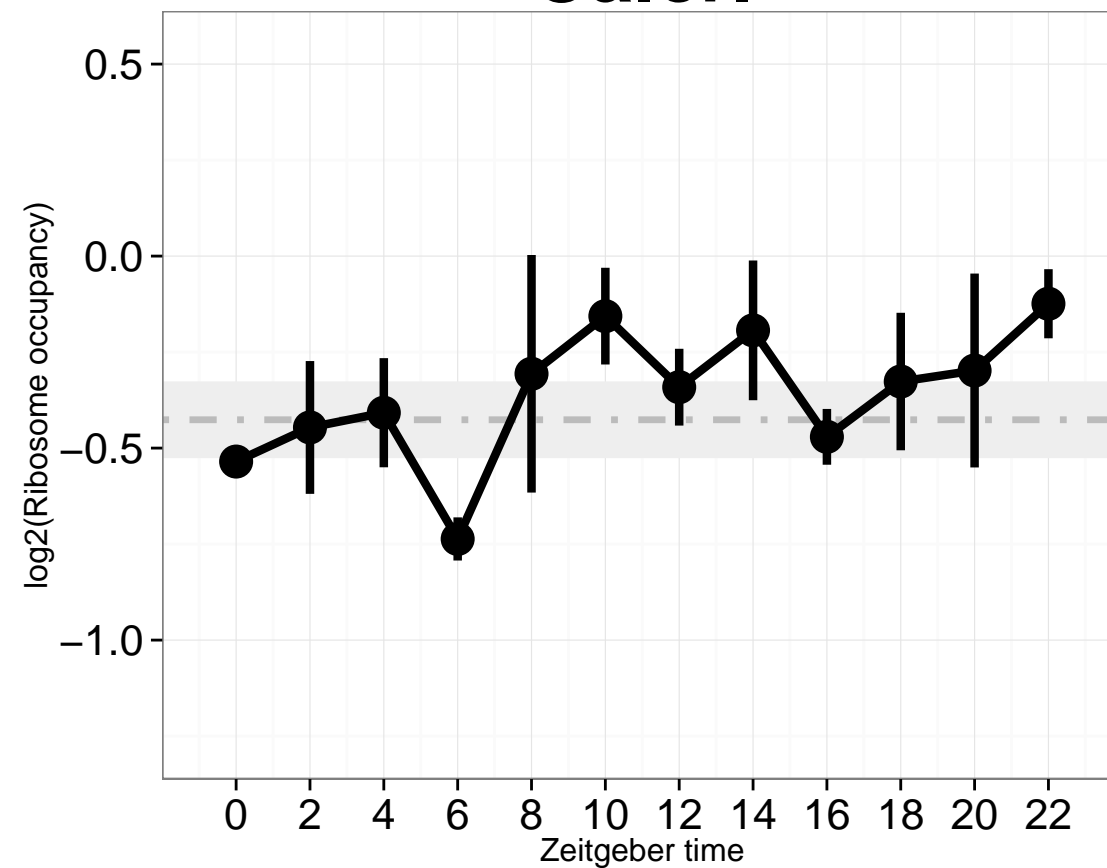

Supplement: SuppDataset_1.zip [file Calcrl_set_A.pdf › Supplemental Dataset 1/A-mRNA_nonrhyth_translation_nonrhyth/Calcrl_set_A.pdf]

# Cald1

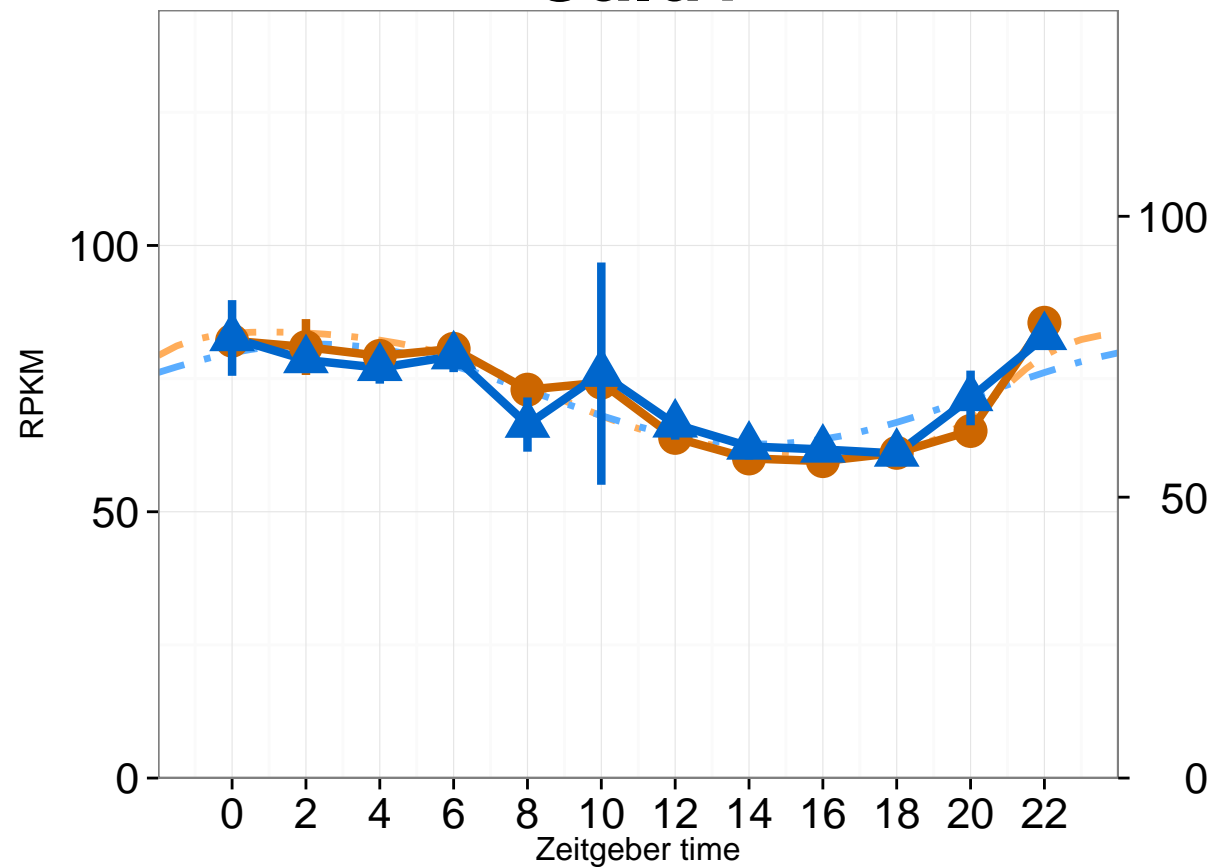

# Cald1

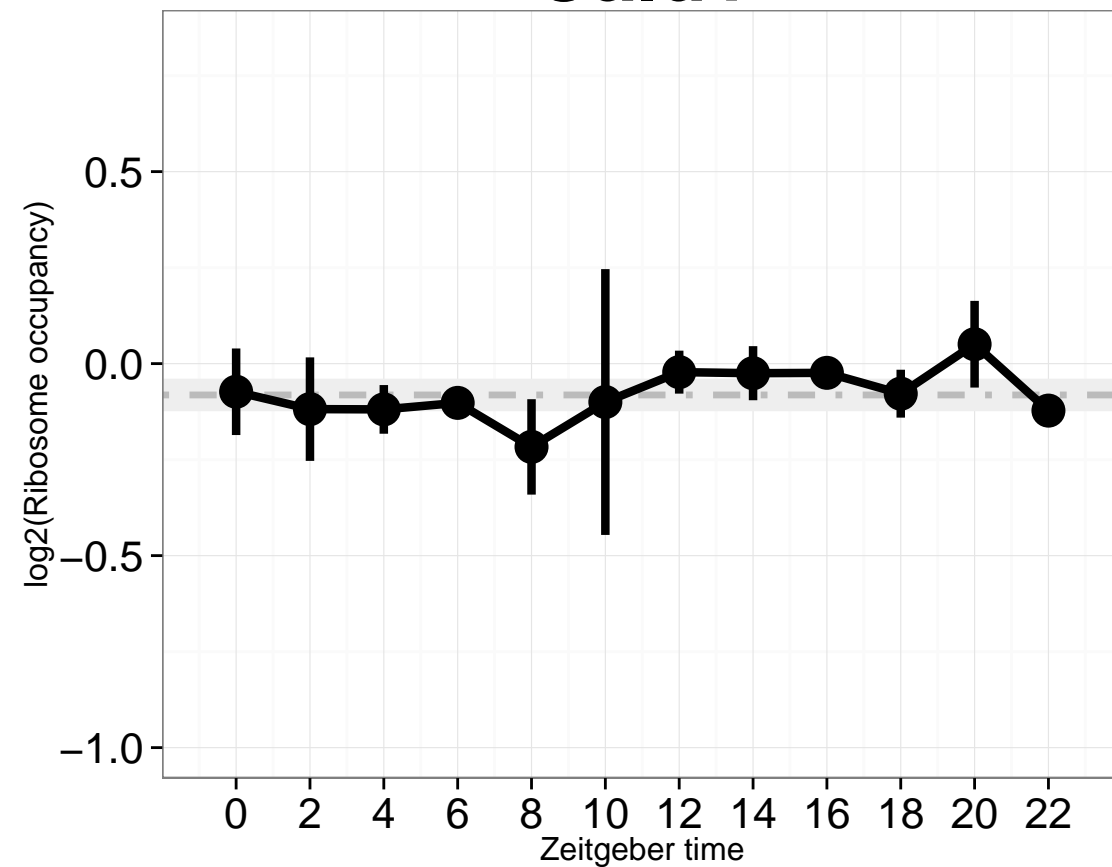

Supplement: SuppDataset_1.zip [file Cald1_set_A.pdf › Supplemental Dataset 1/A-mRNA_nonrhyth_translation_nonrhyth/Cald1_set_A.pdf]

## Calhm2

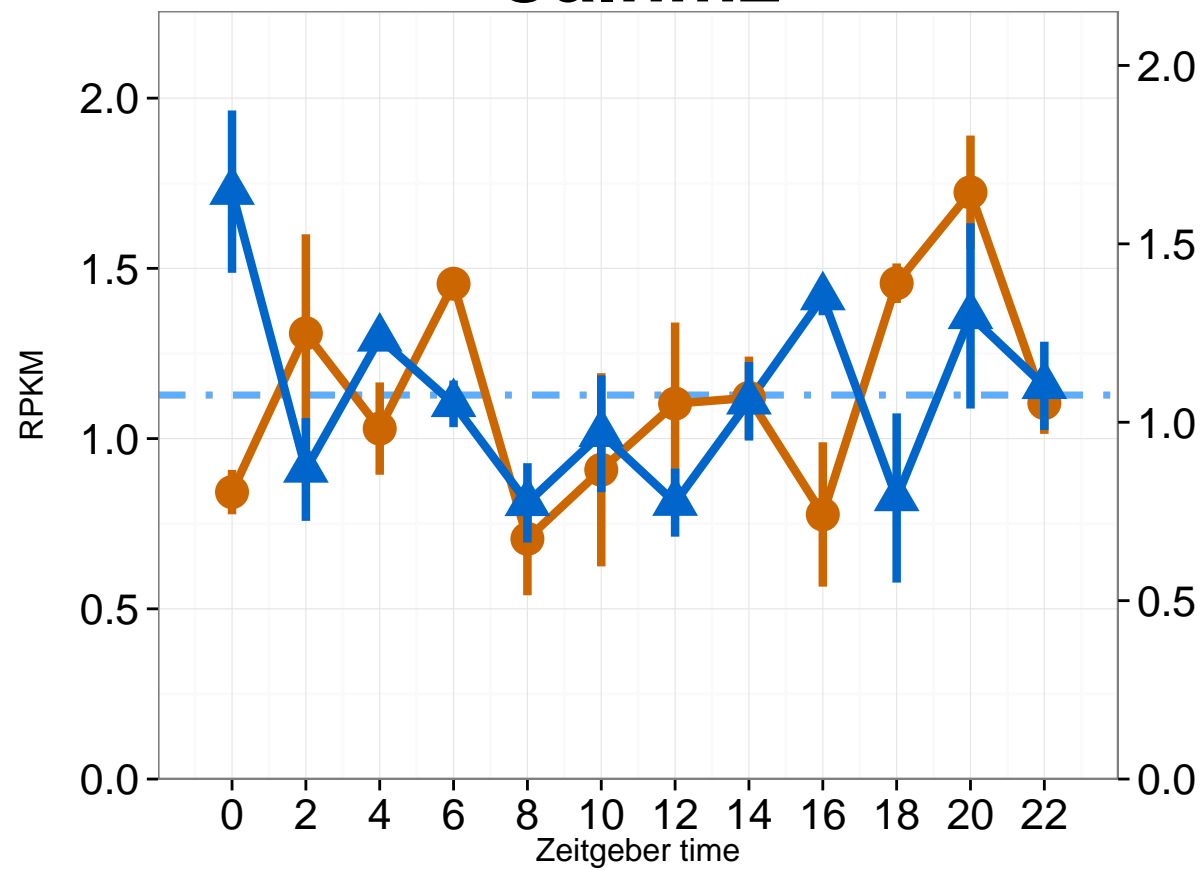

## Calhm2

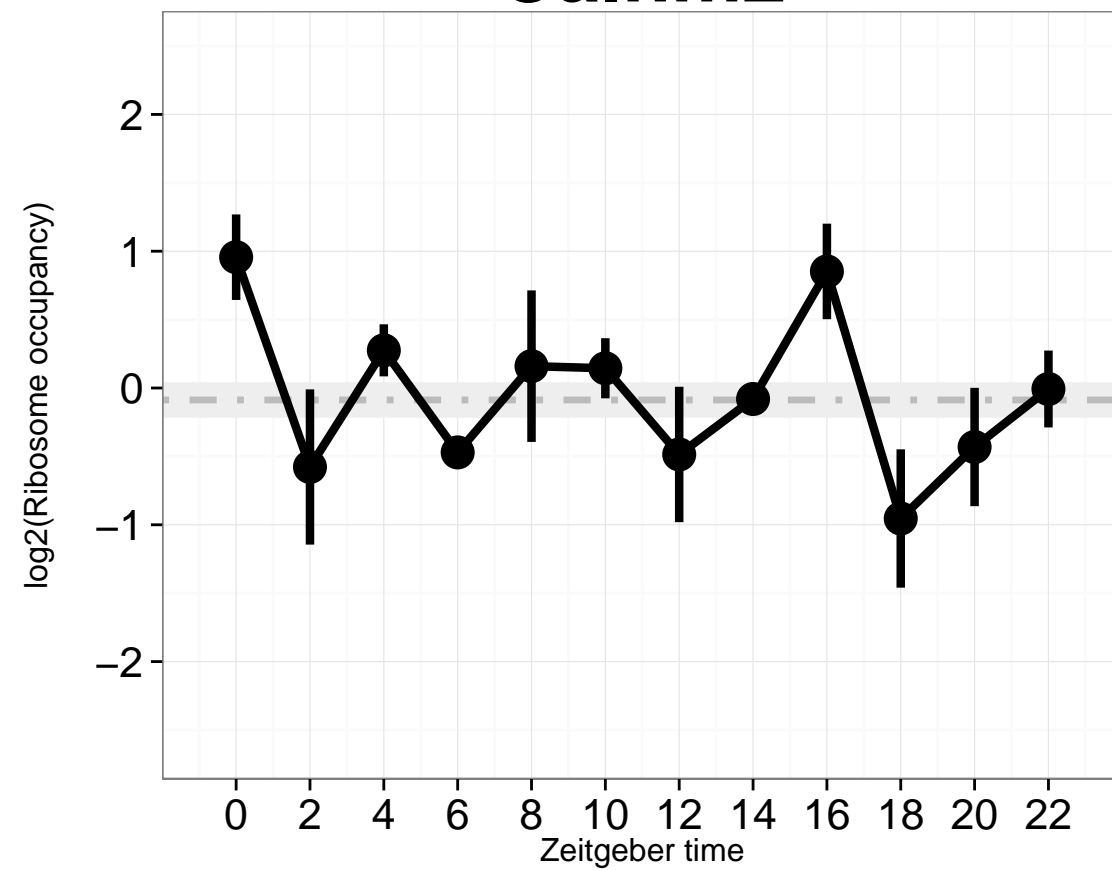

Supplement: SuppDataset_1.zip [file Calhm2_set_A.pdf › Supplemental Dataset 1/A-mRNA_nonrhyth_translation_nonrhyth/Calhm2_set_A.pdf]

## Calm1

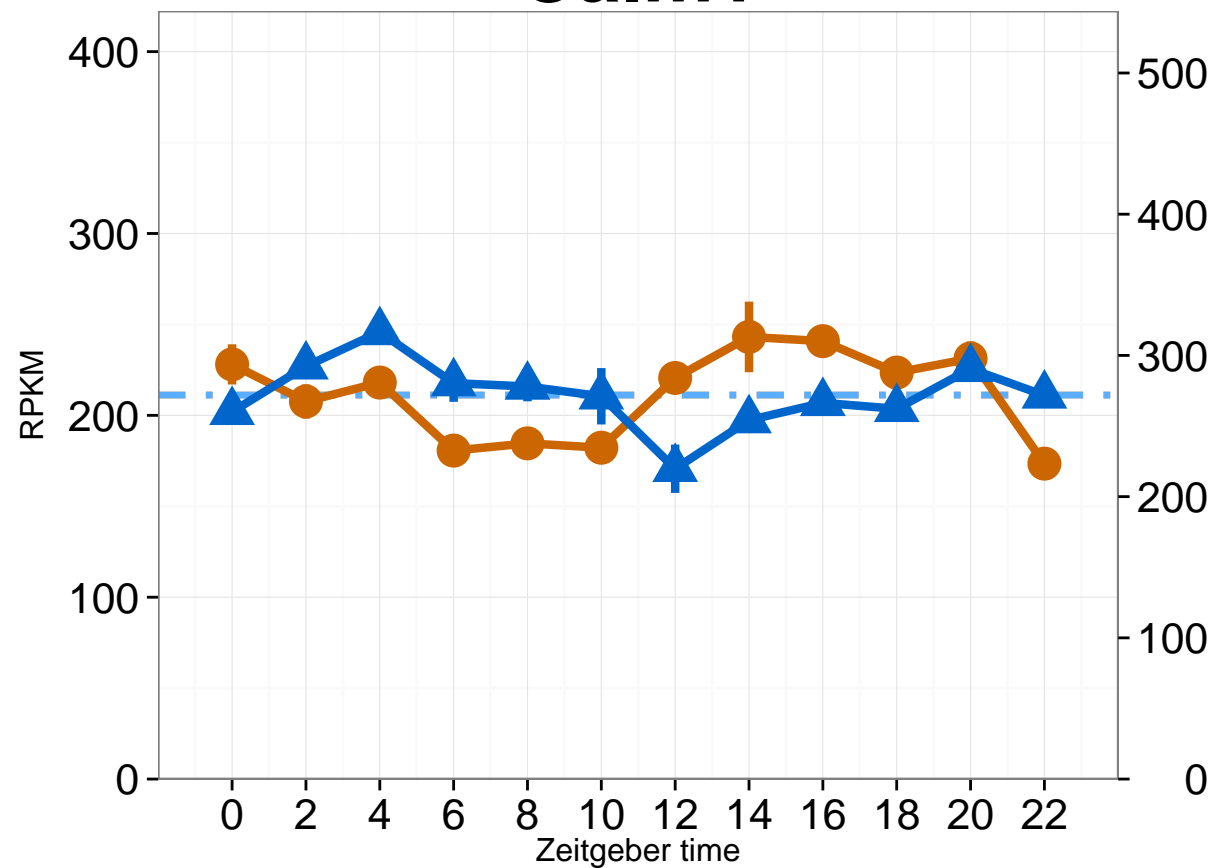

## Calm1

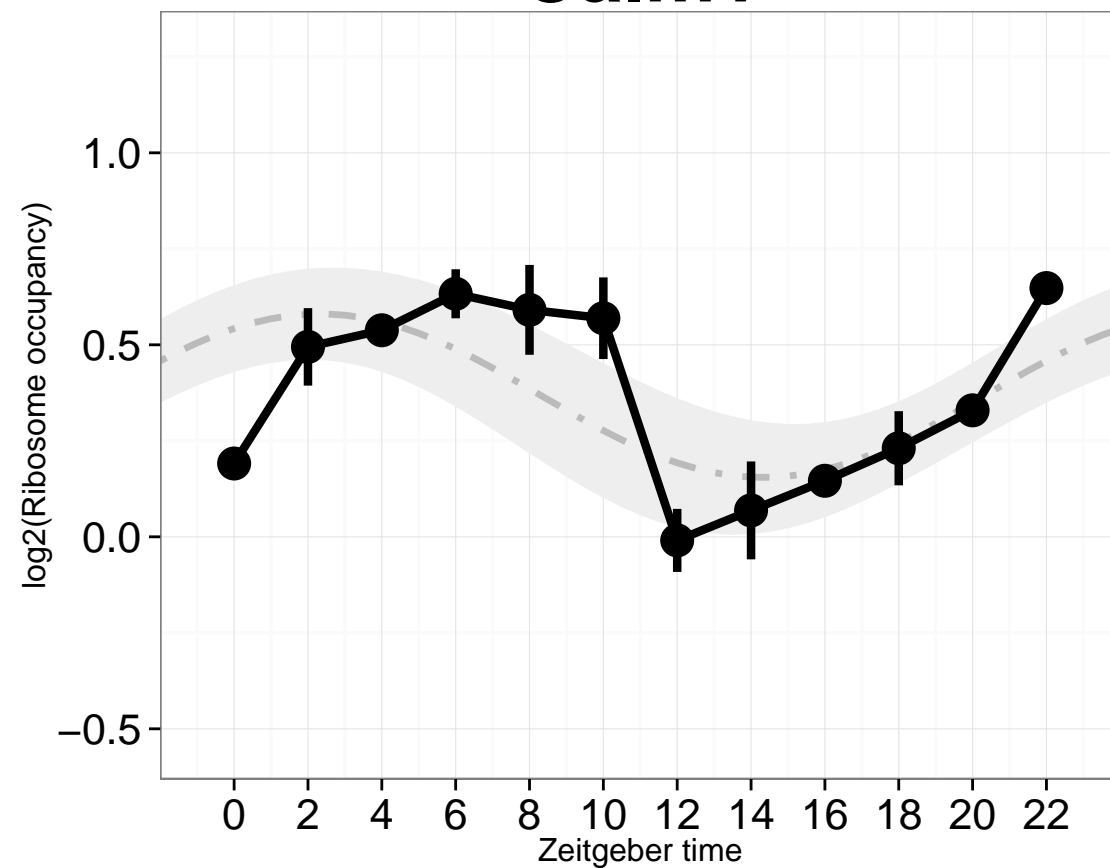

Supplement: SuppDataset_1.zip [file Calm1_set_A.pdf › Supplemental Dataset 1/A-mRNA_nonrhyth_translation_nonrhyth/Calm1_set_A.pdf]

## Calm2

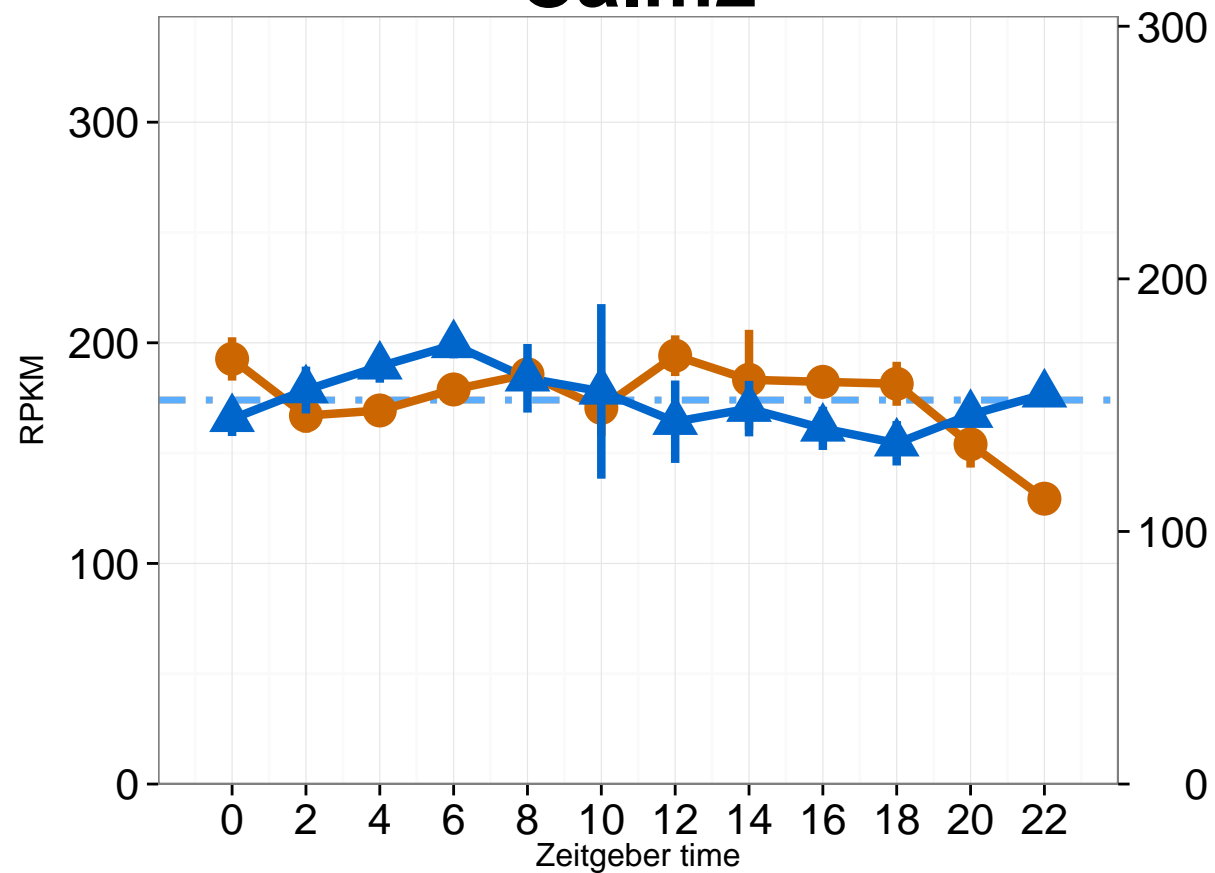

## Calm2

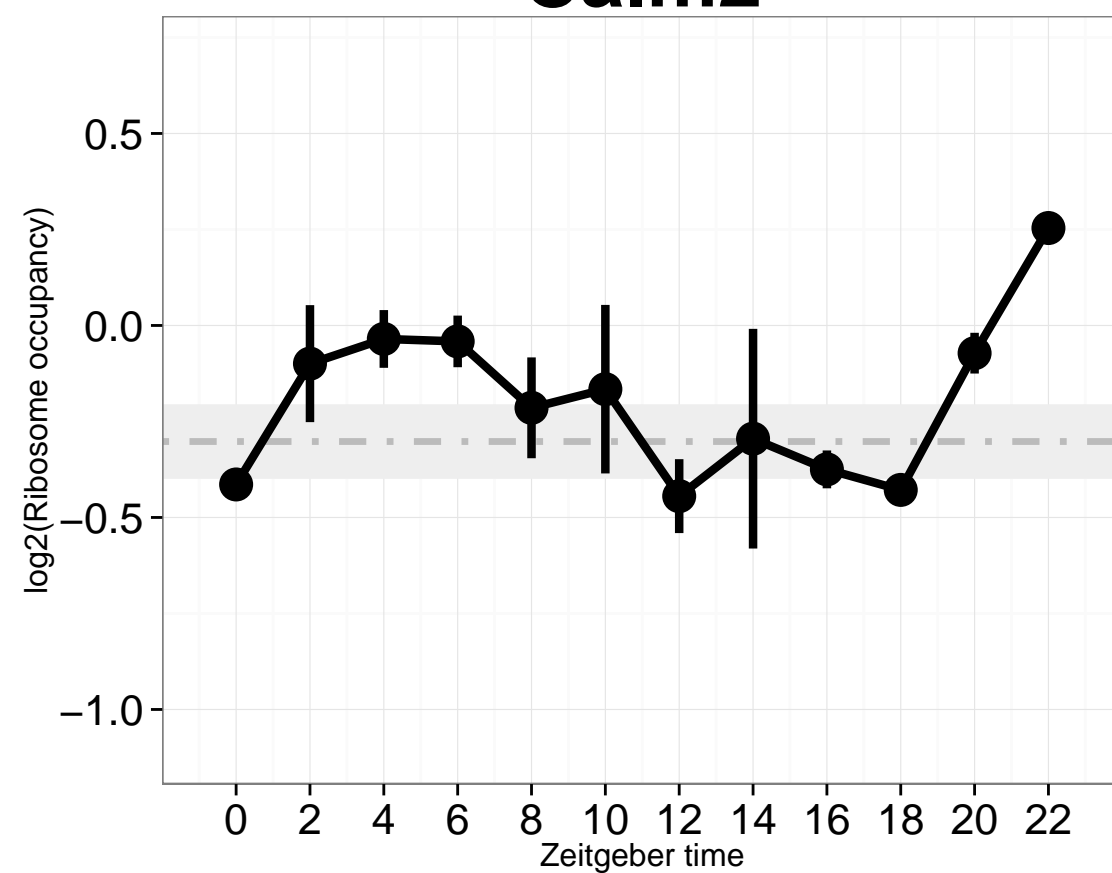

Supplement: SuppDataset_1.zip [file Calm2_set_A.pdf › Supplemental Dataset 1/A-mRNA_nonrhyth_translation_nonrhyth/Calm2_set_A.pdf]

## Calm3

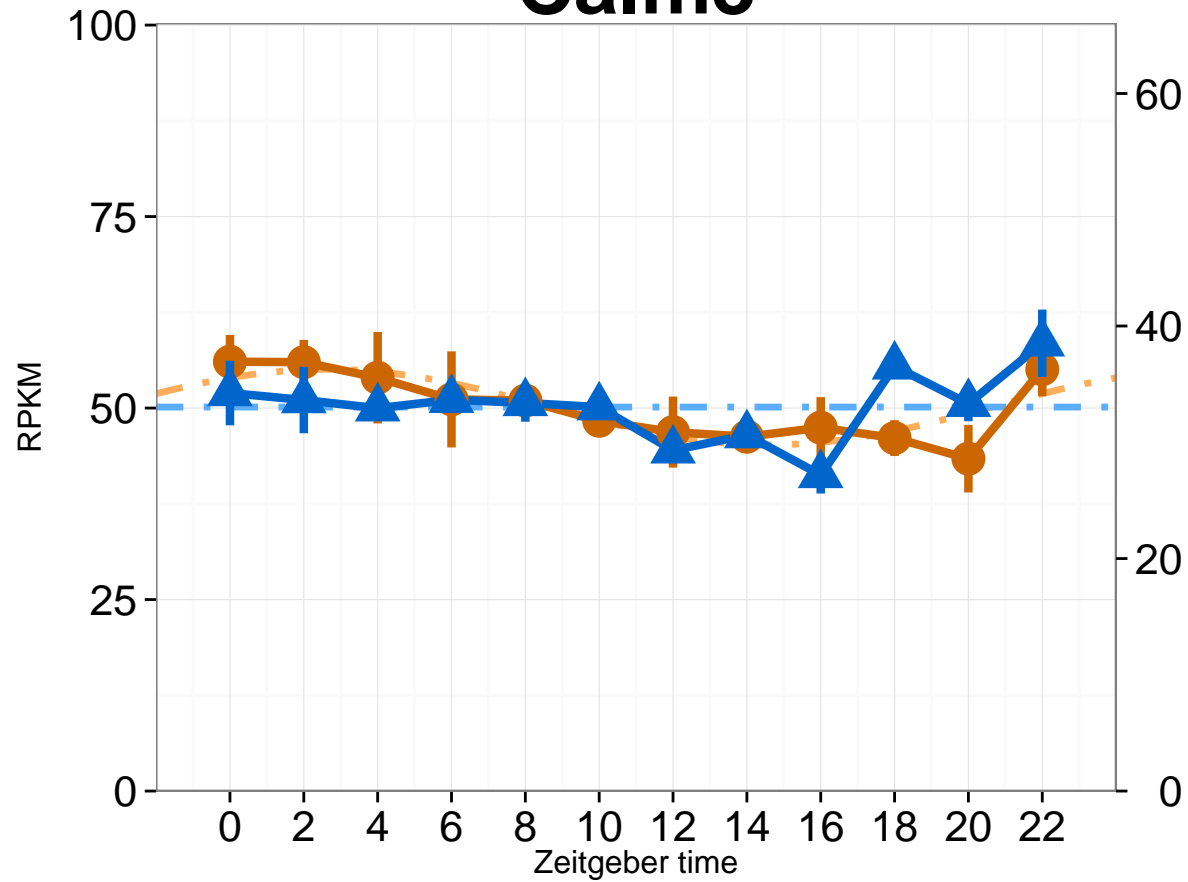

## Calm3

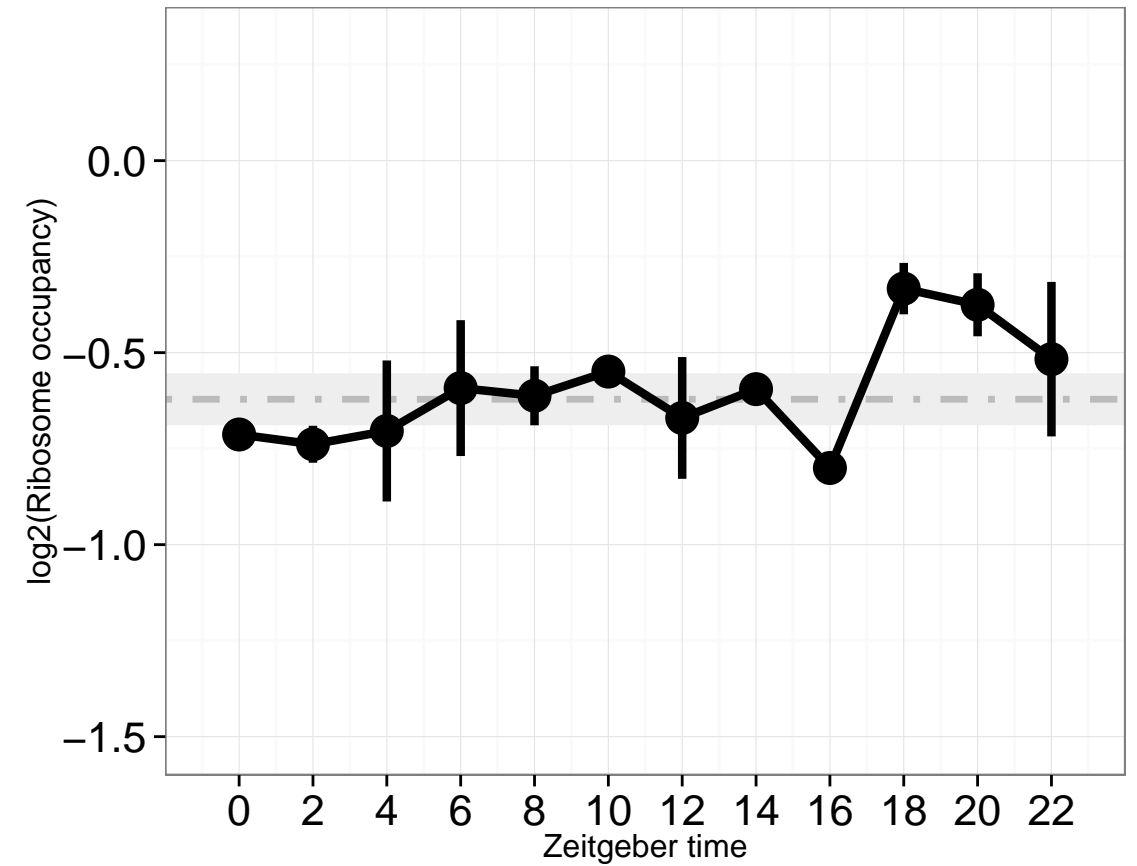

Supplement: SuppDataset_1.zip [file Calm3_set_A.pdf › Supplemental Dataset 1/A-mRNA_nonrhyth_translation_nonrhyth/Calm3_set_A.pdf]

## Calr

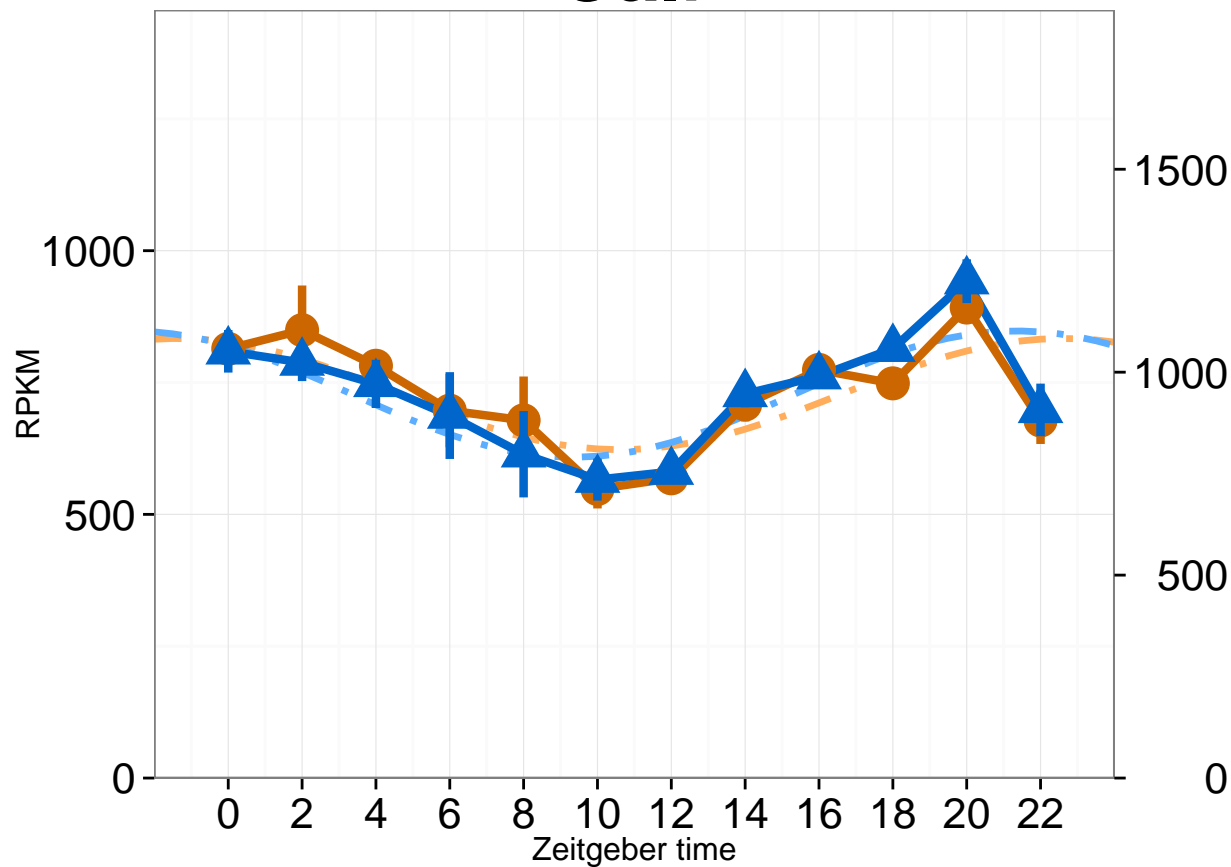

## Calr

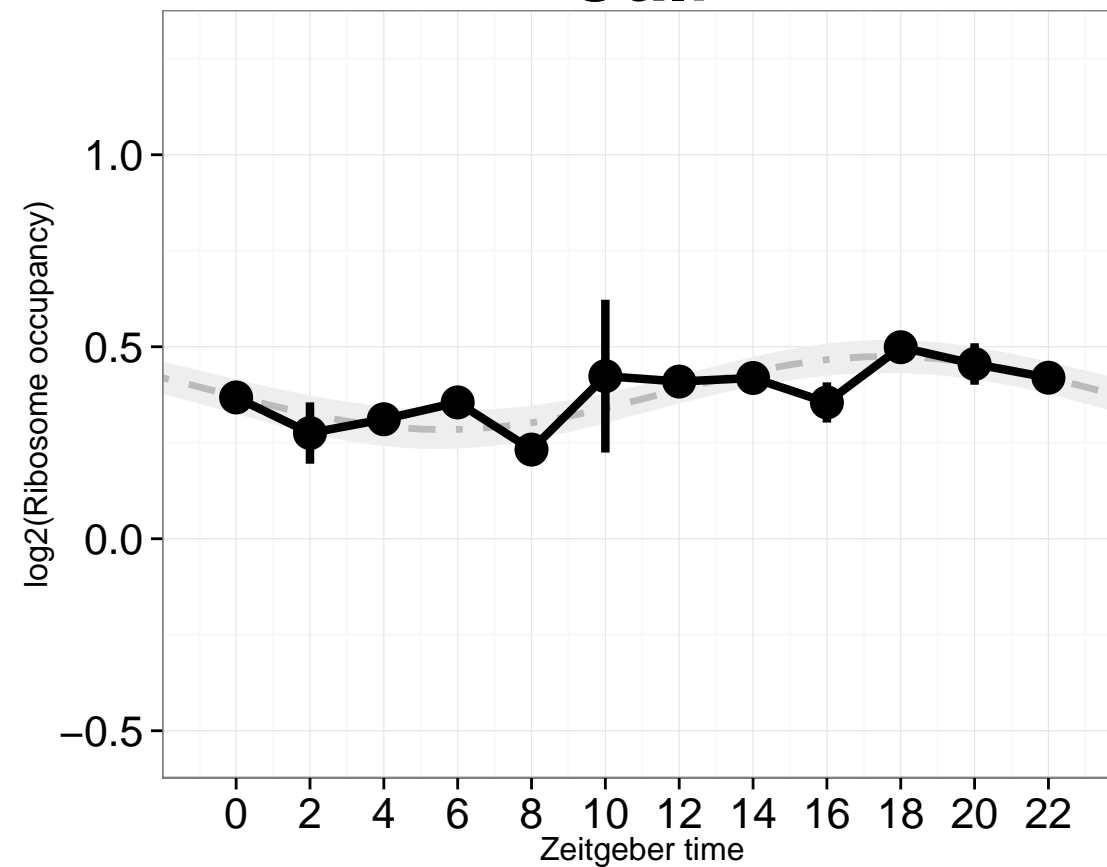

Supplement: SuppDataset_1.zip [file Calr_set_A.pdf › Supplemental Dataset 1/A-mRNA_nonrhyth_translation_nonrhyth/Calr_set_A.pdf]

## Calu

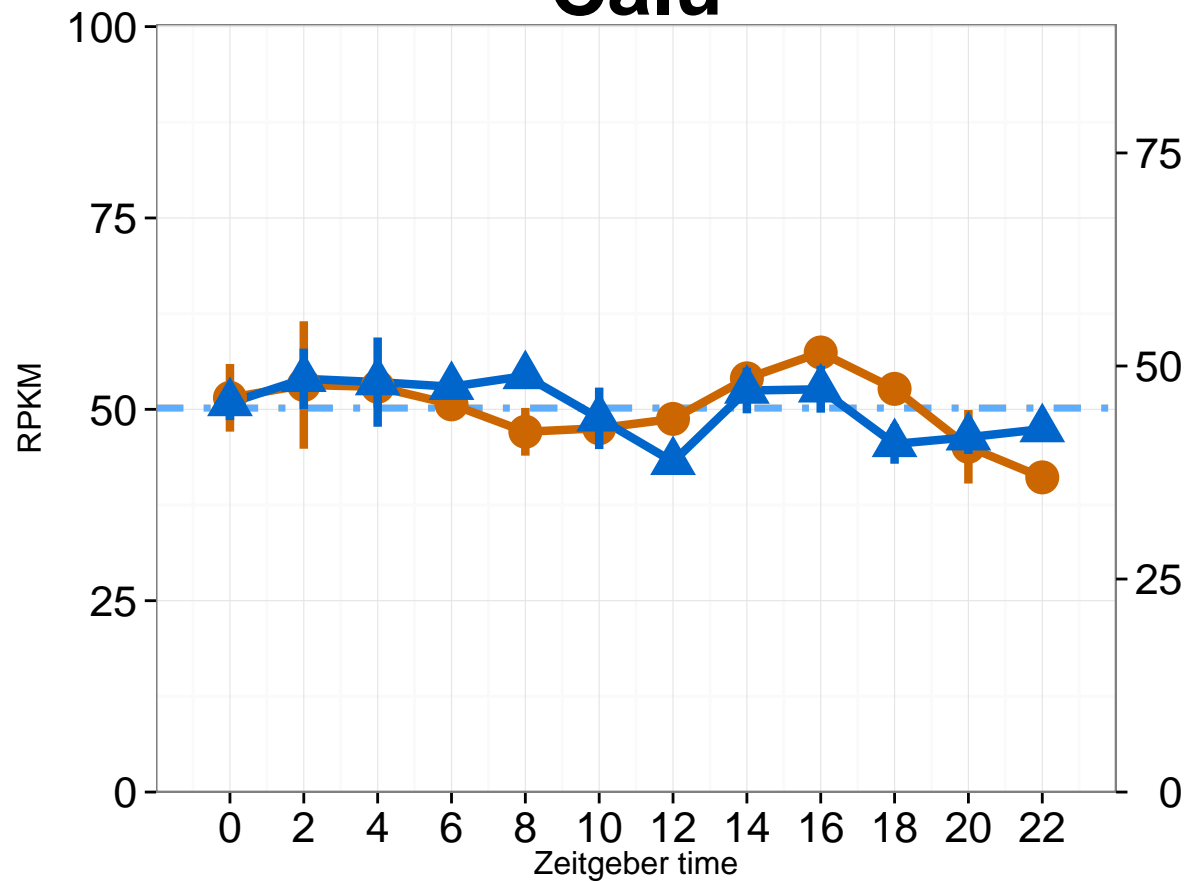

## Calu

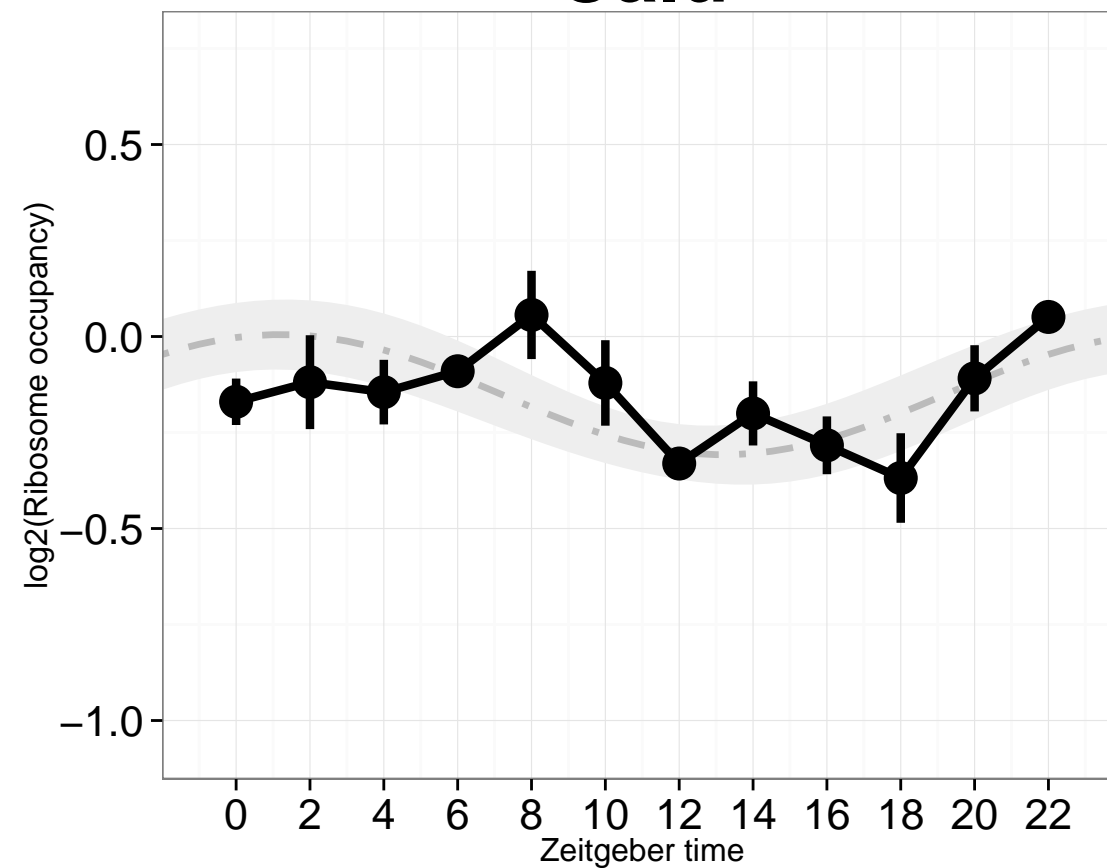

Supplement: SuppDataset_1.zip [file Calu_set_A.pdf › Supplemental Dataset 1/A-mRNA_nonrhyth_translation_nonrhyth/Calu_set_A.pdf]

## Camk1

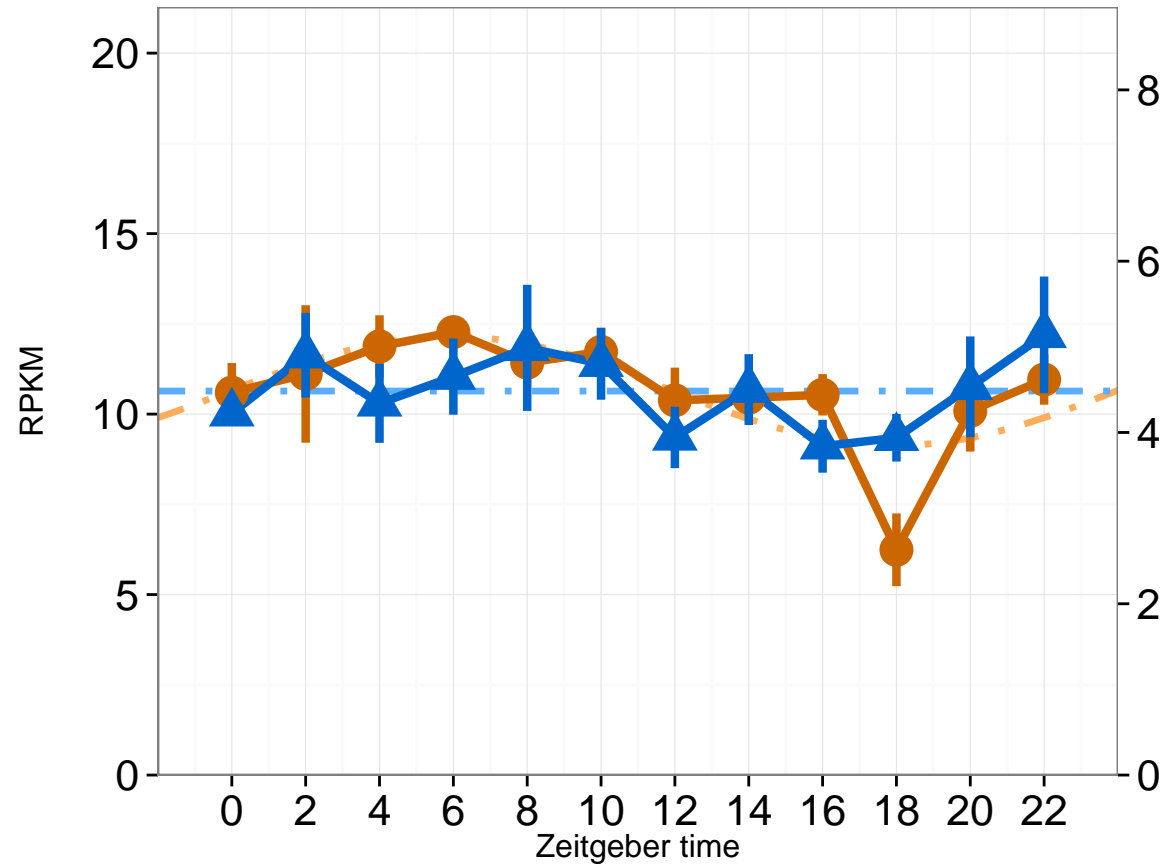

## Camk1

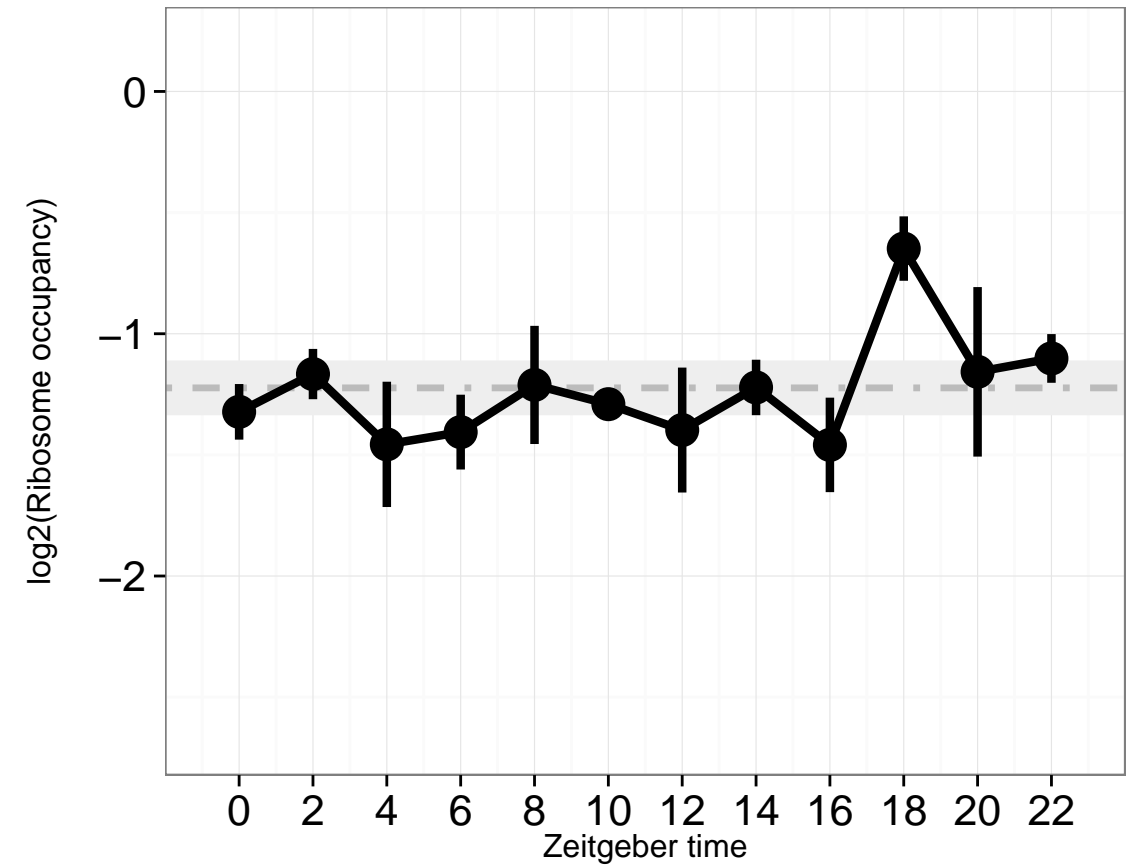

Supplement: SuppDataset_1.zip [file Camk1_set_A.pdf › Supplemental Dataset 1/A-mRNA_nonrhyth_translation_nonrhyth/Camk1_set_A.pdf]

## Camk2d

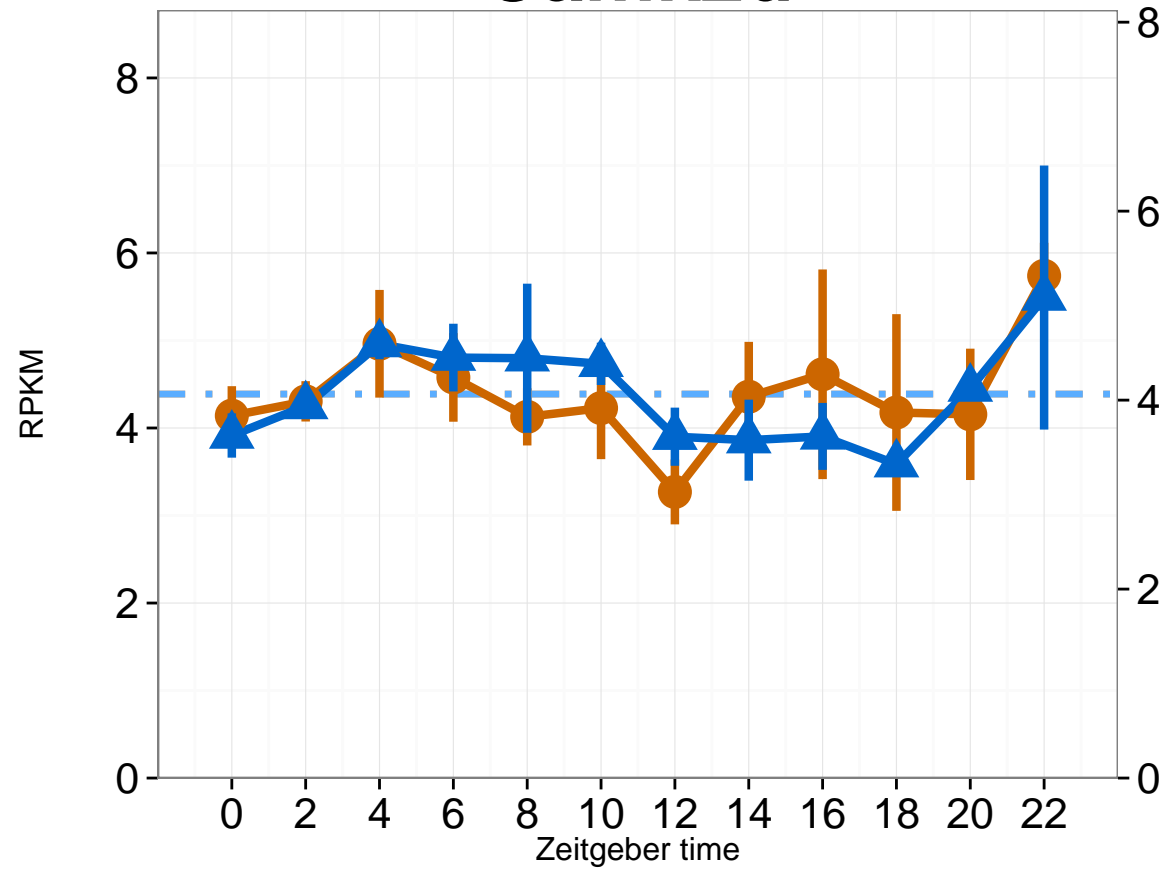

## Camk2d

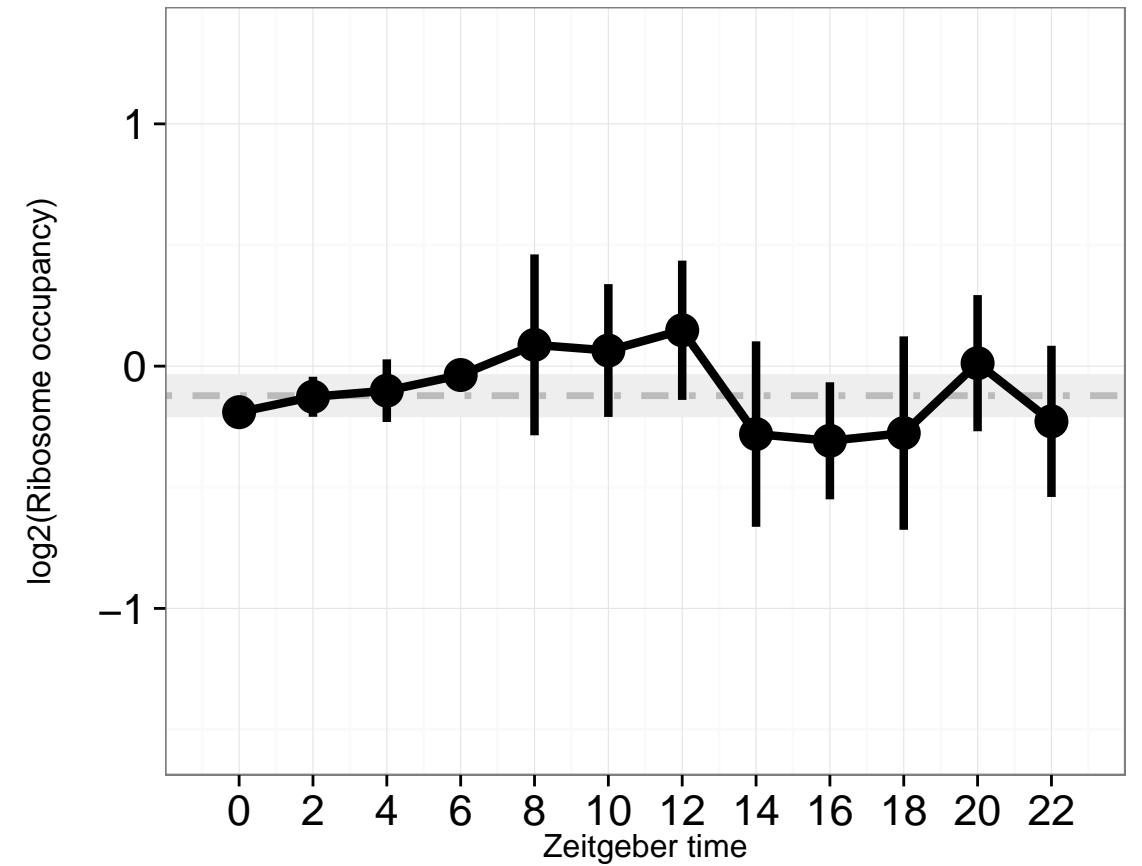

Supplement: SuppDataset_1.zip [file Camk2d_set_A.pdf › Supplemental Dataset 1/A-mRNA_nonrhyth_translation_nonrhyth/Camk2d_set_A.pdf]

# Camk2g

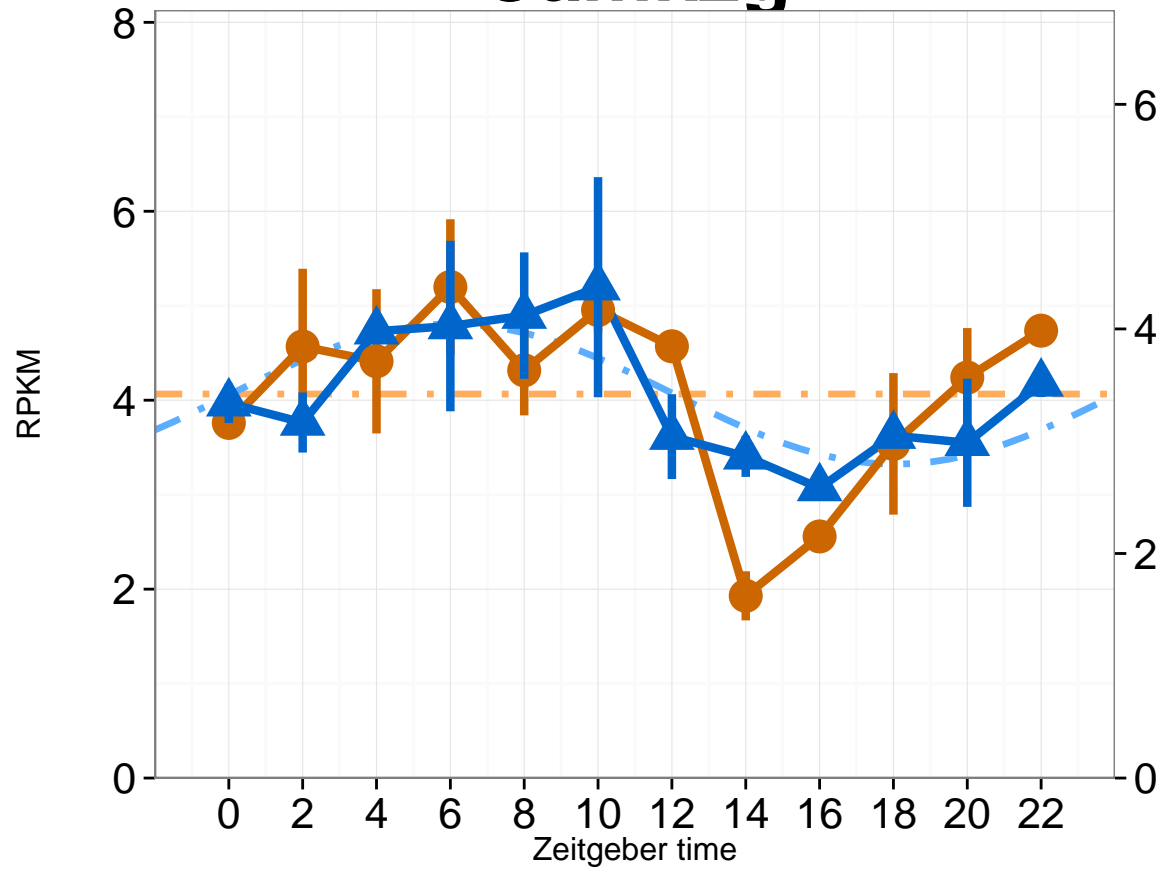

# Camk2g

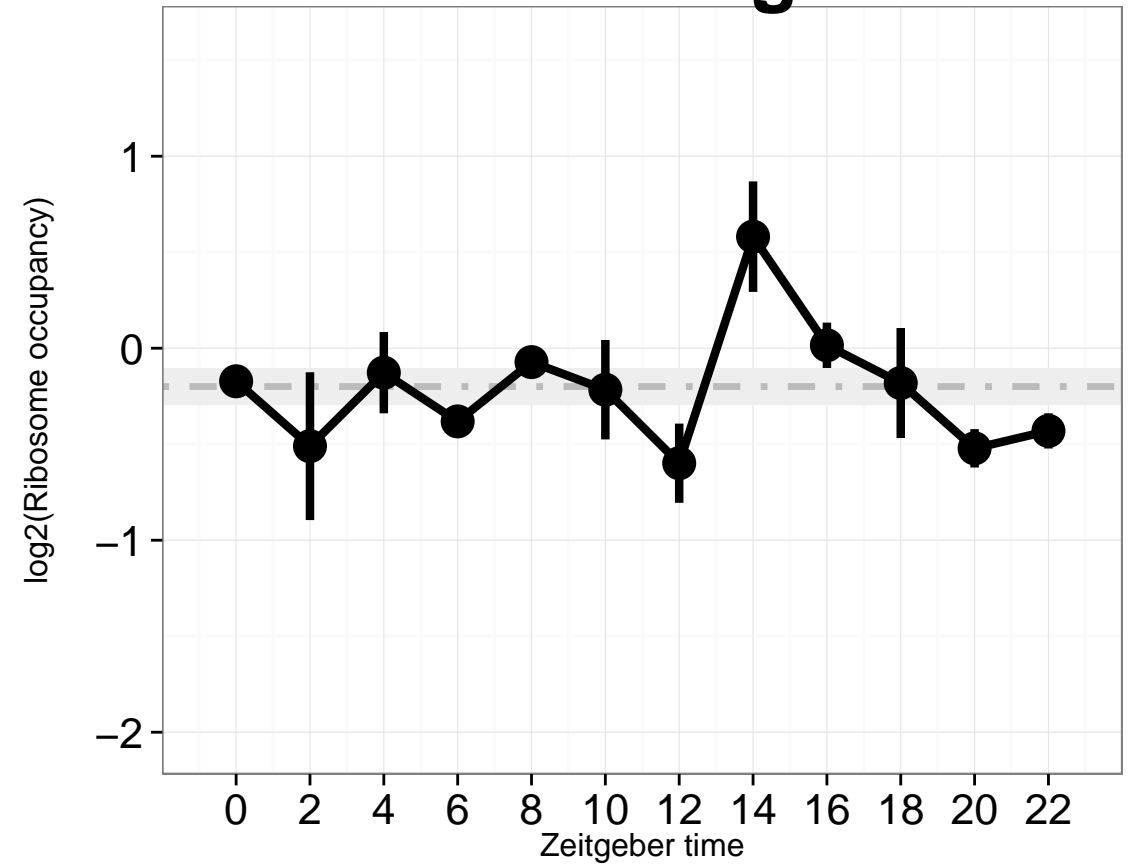

Supplement: SuppDataset_1.zip [file Camk2g_set_A.pdf › Supplemental Dataset 1/A-mRNA_nonrhyth_translation_nonrhyth/Camk2g_set_A.pdf]

# Camk2n1

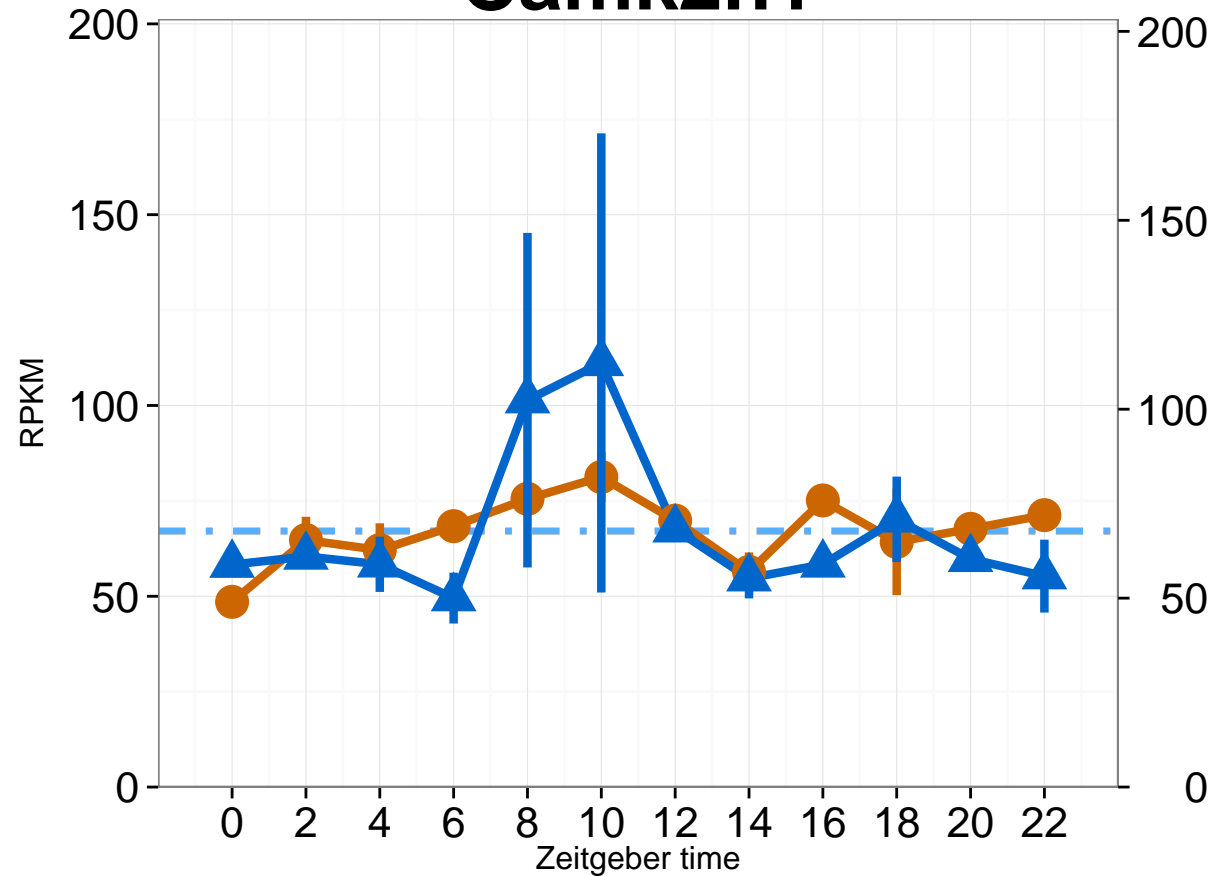

# Camk2n1

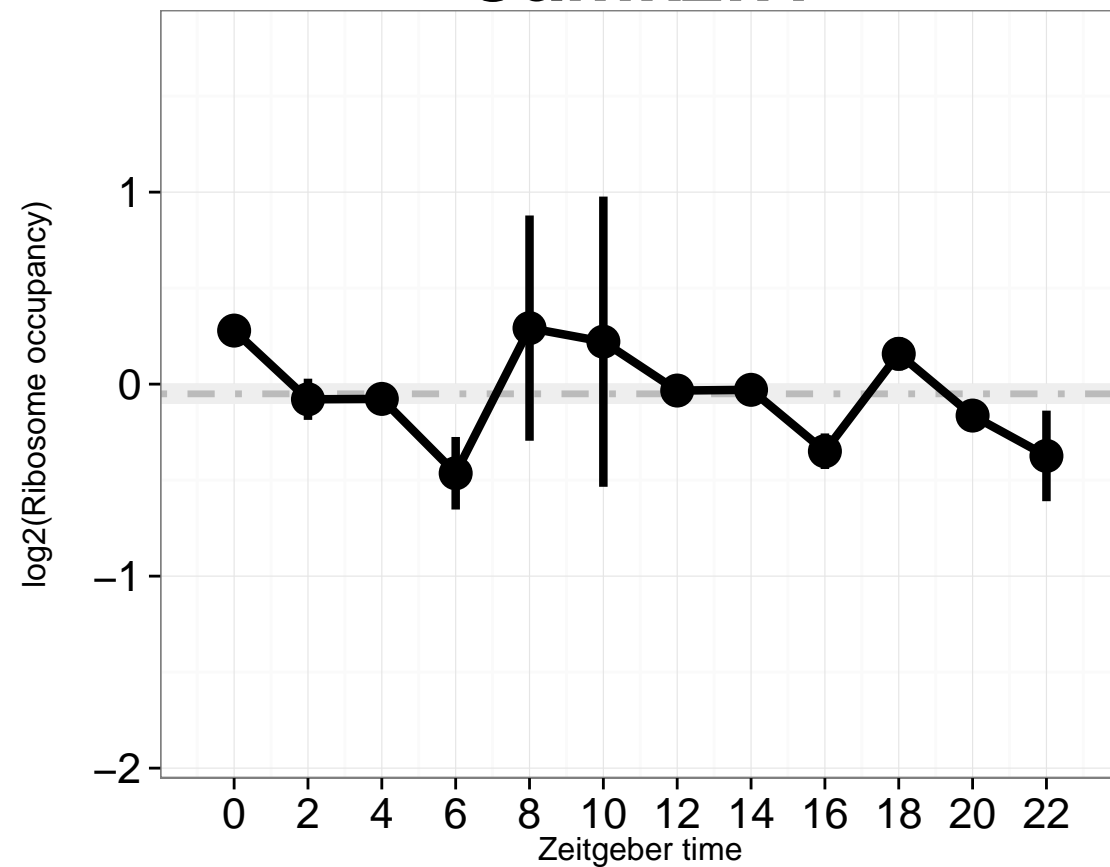

Supplement: SuppDataset_1.zip [file Camk2n1_set_A.pdf › Supplemental Dataset 1/A-mRNA_nonrhyth_translation_nonrhyth/Camk2n1_set_A.pdf]

## CamI

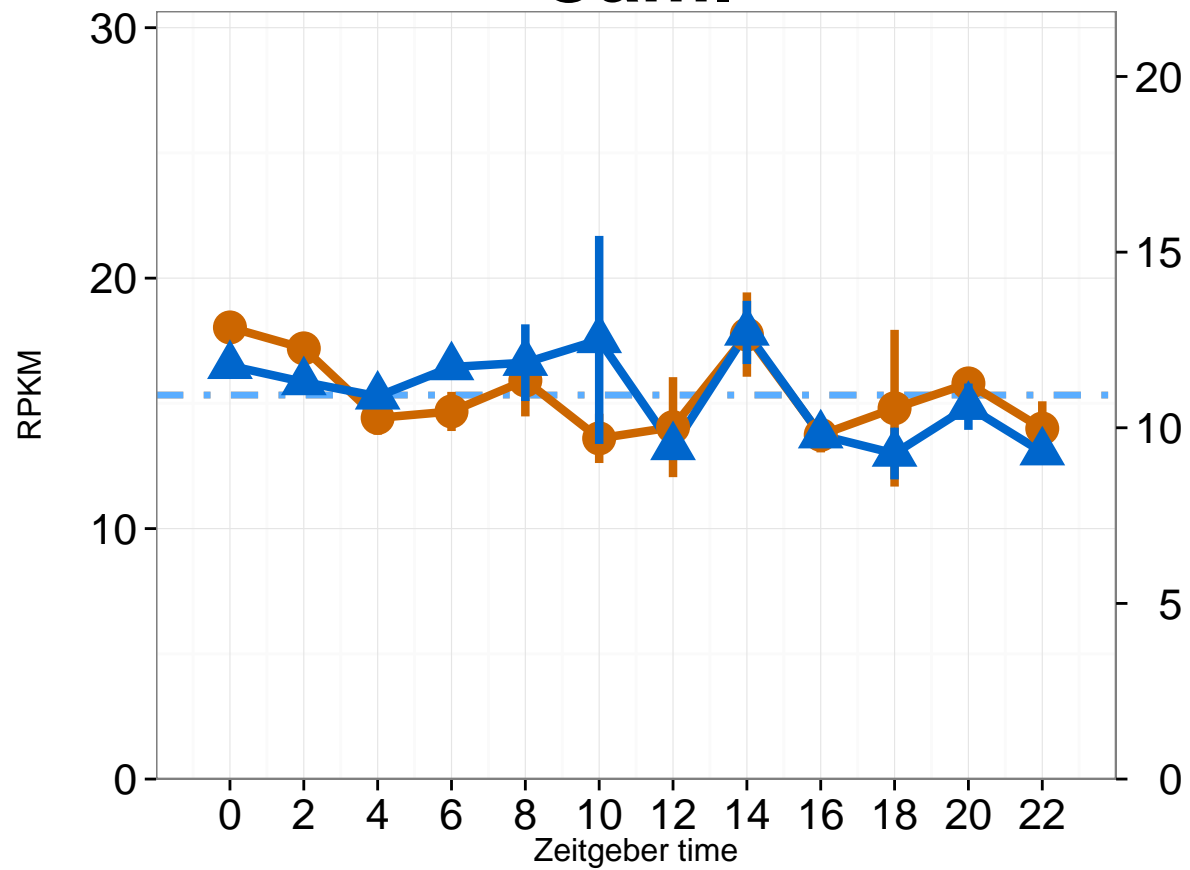

## CamI

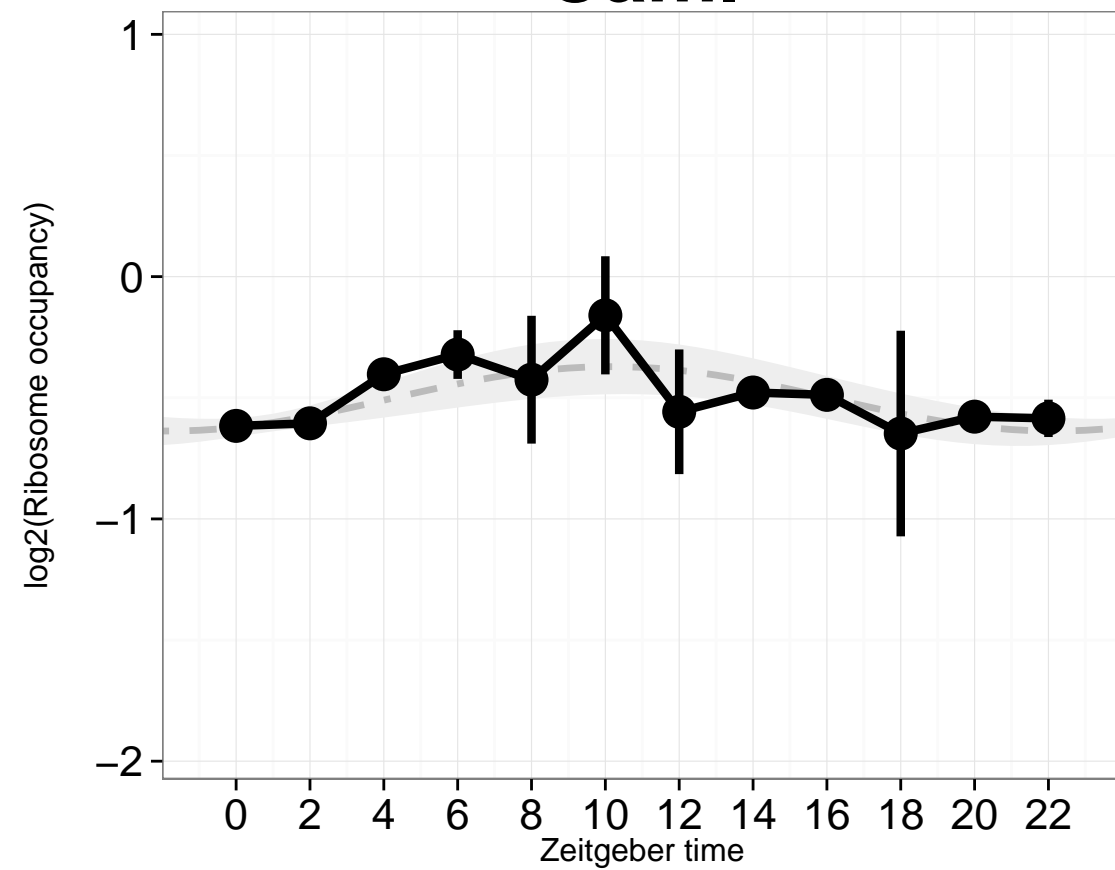

Supplement: SuppDataset_1.zip [file Caml_set_A.pdf › Supplemental Dataset 1/A-mRNA_nonrhyth_translation_nonrhyth/Caml_set_A.pdf]

# Camsap1

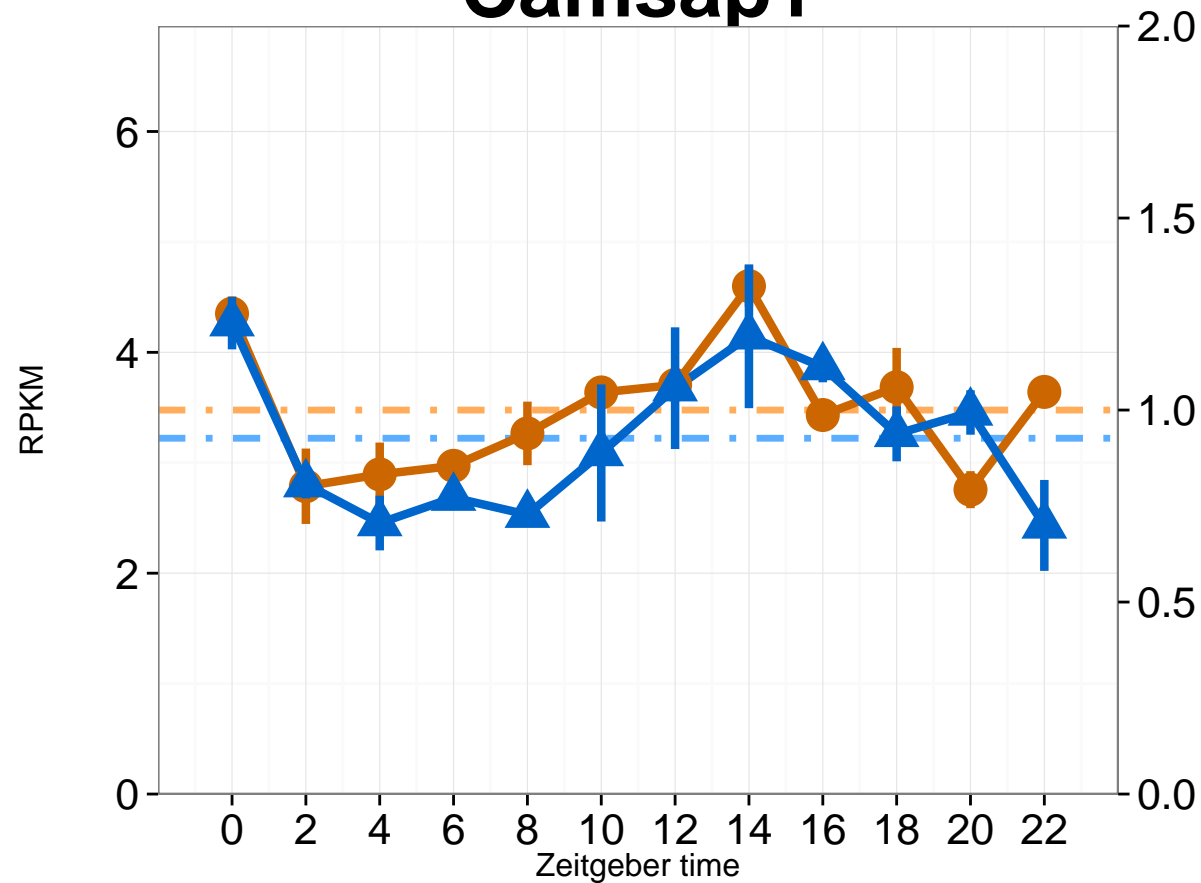

# Camsap1

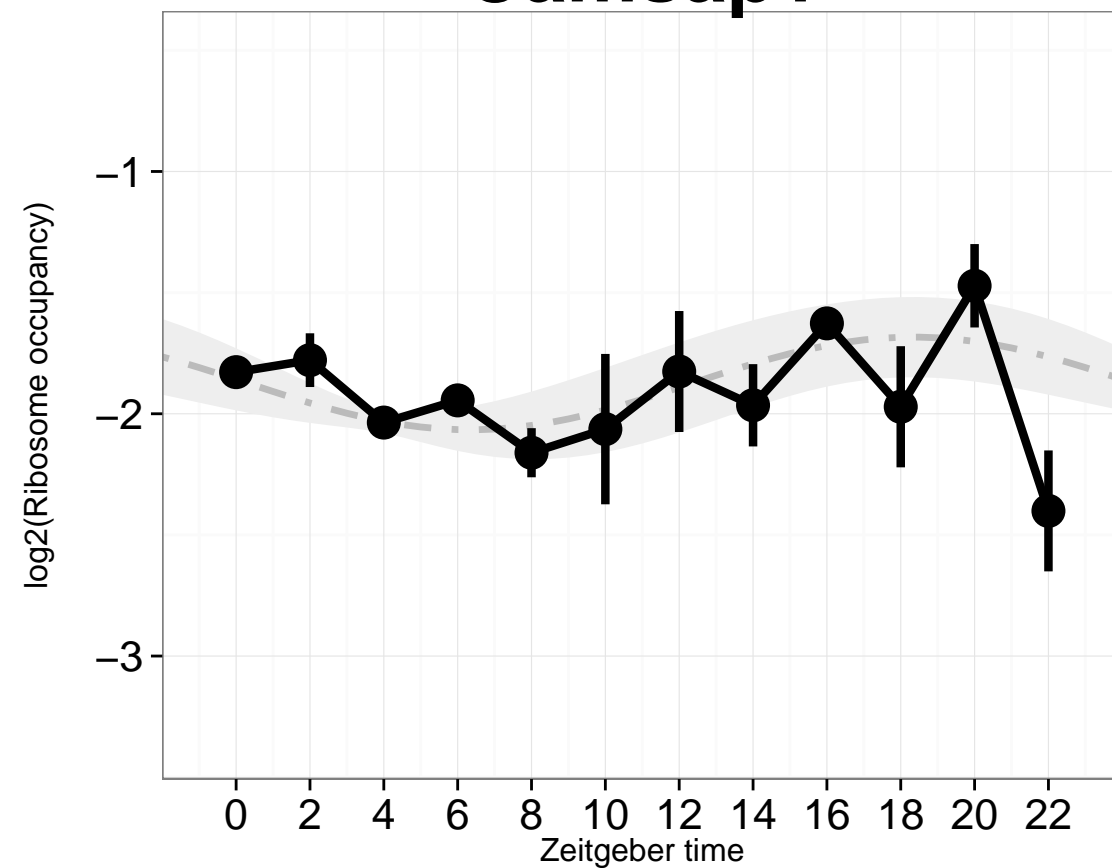

Supplement: SuppDataset_1.zip [file Camsap1_set_A.pdf › Supplemental Dataset 1/A-mRNA_nonrhyth_translation_nonrhyth/Camsap1_set_A.pdf]

# Camsap2

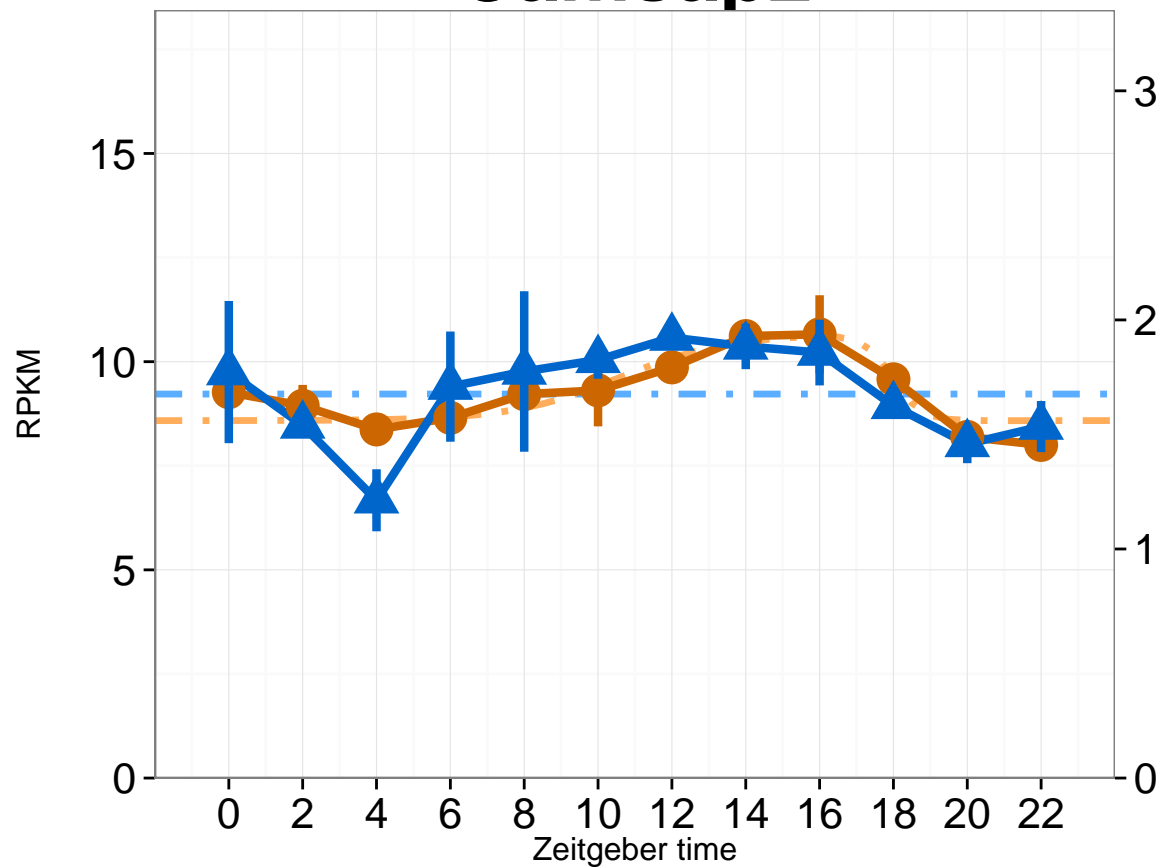

# Camsap2

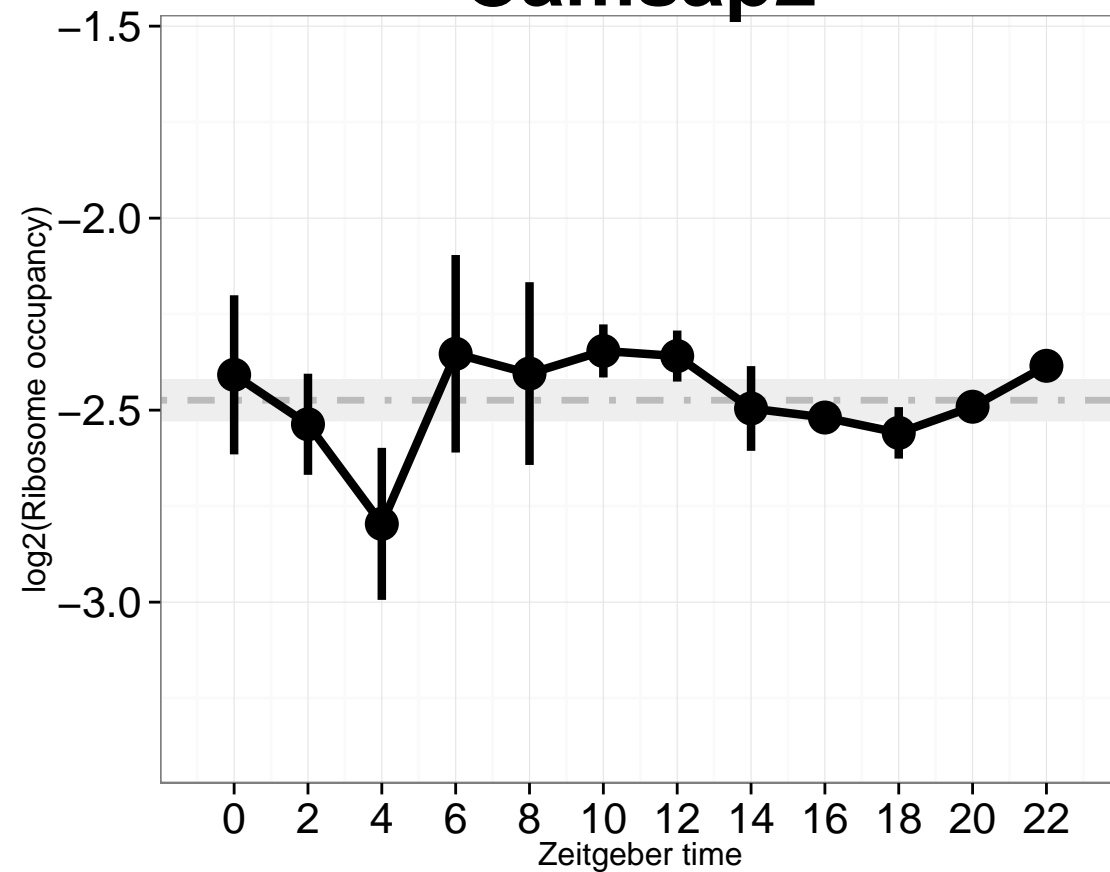

Supplement: SuppDataset_1.zip [file Camsap2_set_A.pdf › Supplemental Dataset 1/A-mRNA_nonrhyth_translation_nonrhyth/Camsap2_set_A.pdf]

# Camsap3

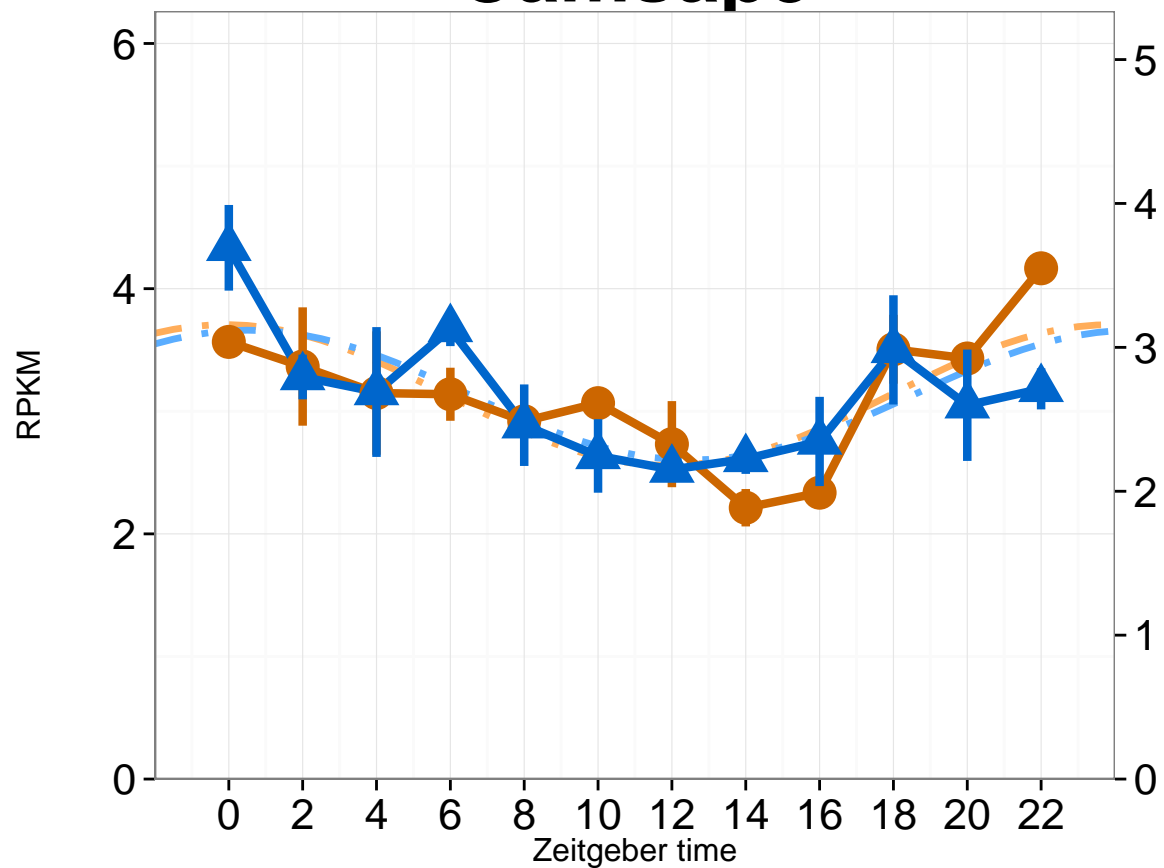

# Camsap3

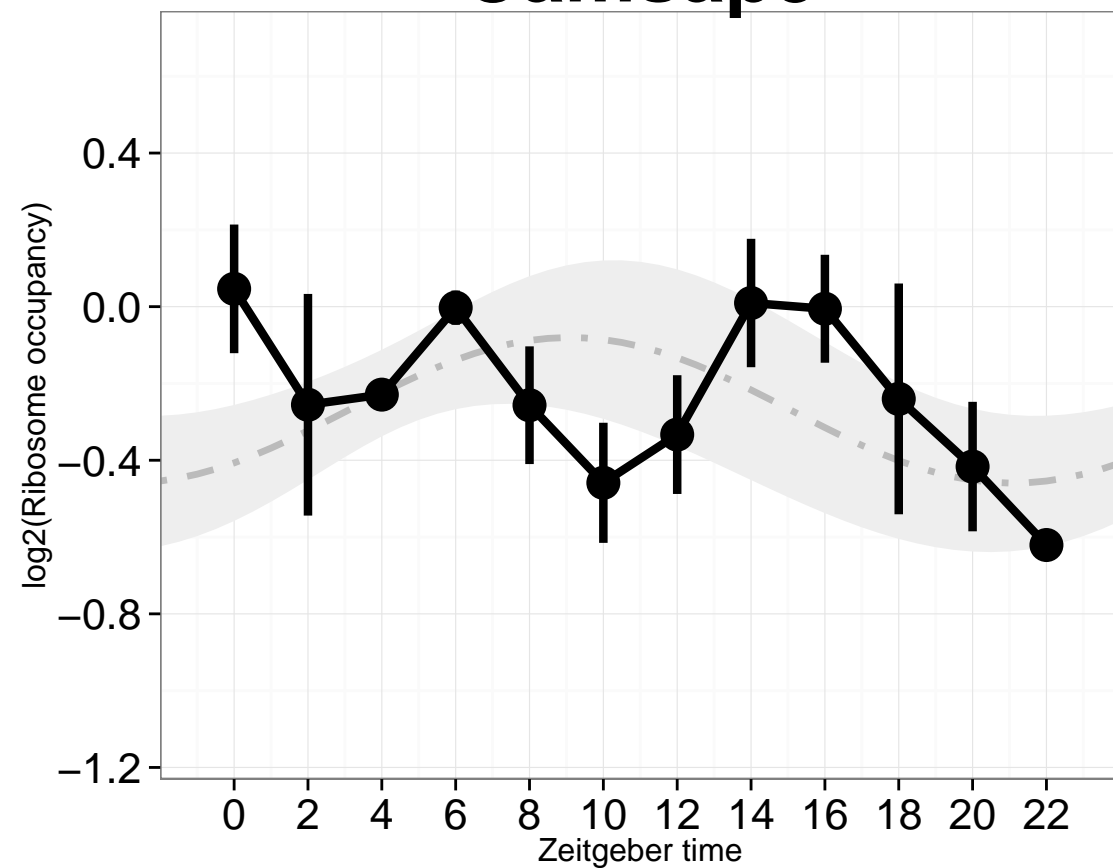

Supplement: SuppDataset_1.zip [file Camsap3_set_A.pdf › Supplemental Dataset 1/A-mRNA_nonrhyth_translation_nonrhyth/Camsap3_set_A.pdf]

# Camta2

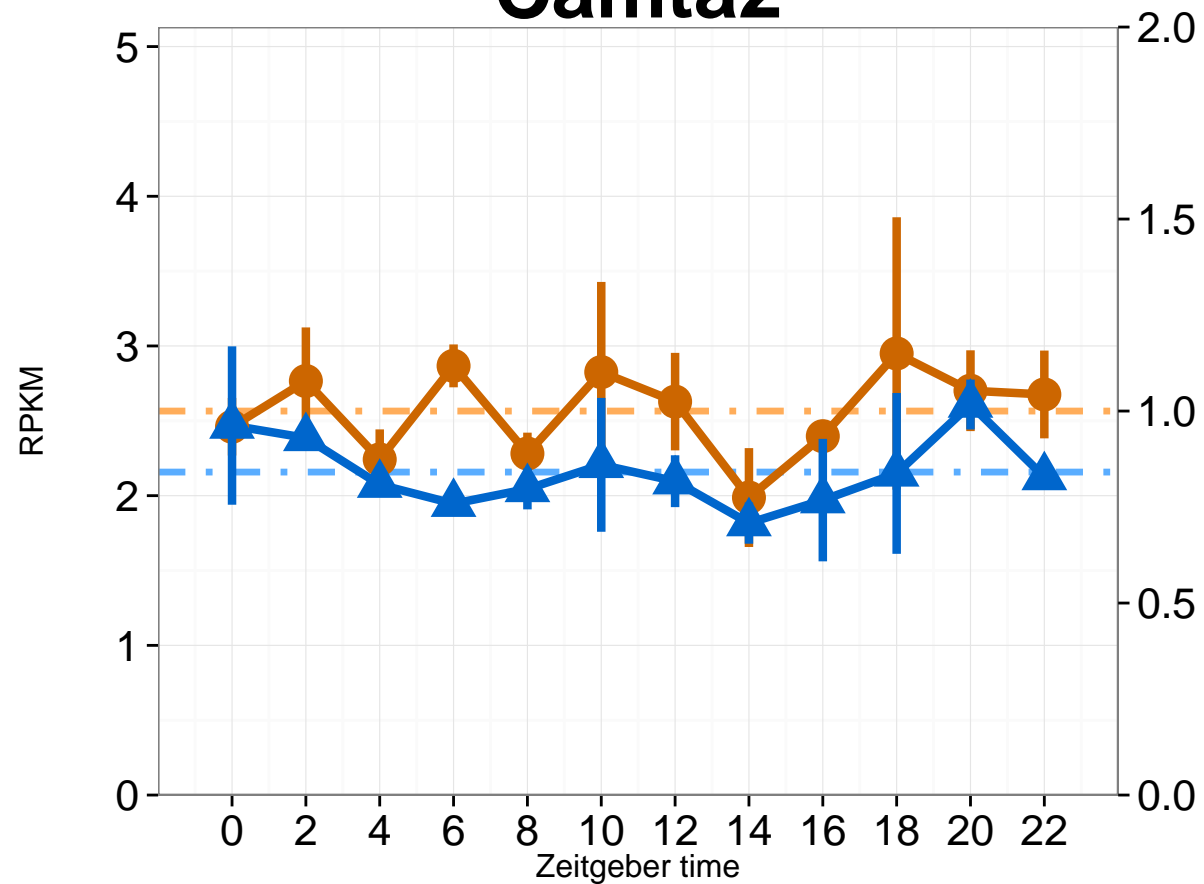

# Camta2

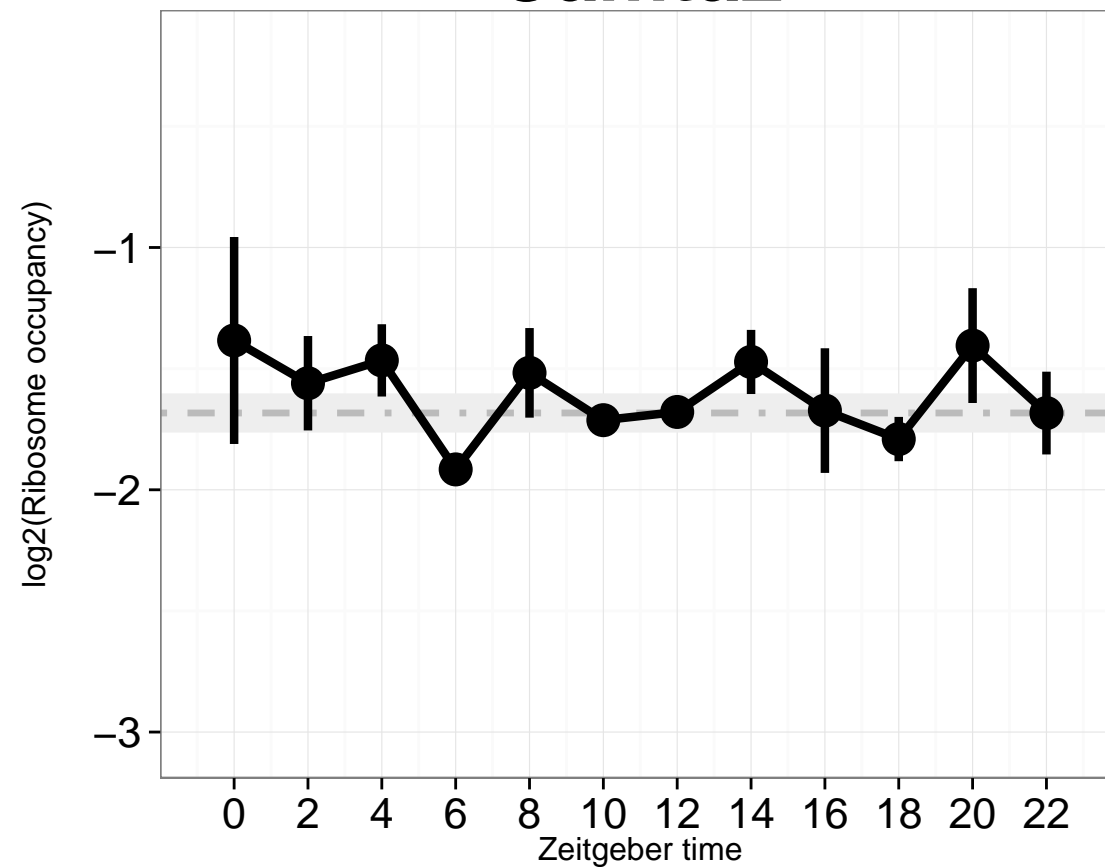

Supplement: SuppDataset_1.zip [file Camta2_set_A.pdf › Supplemental Dataset 1/A-mRNA_nonrhyth_translation_nonrhyth/Camta2_set_A.pdf]

# Cand1

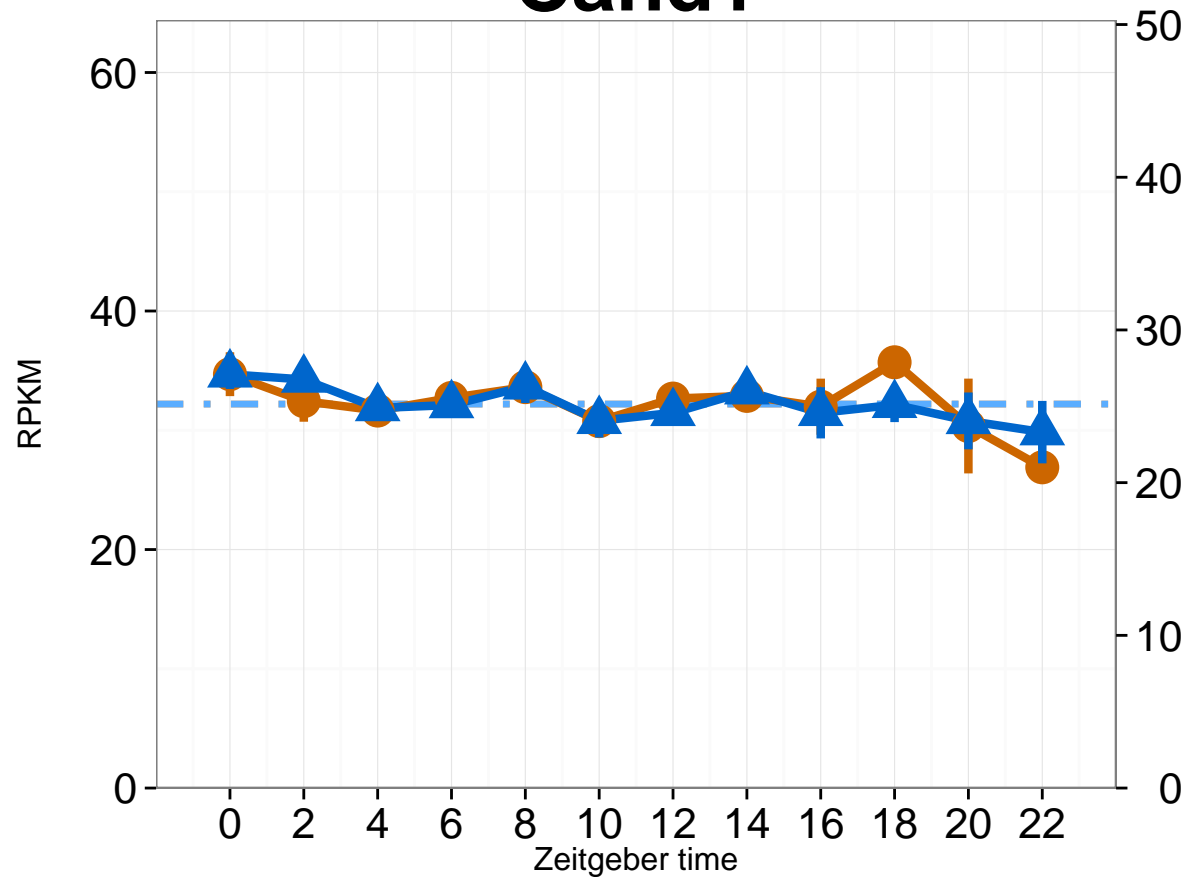

# Cand1

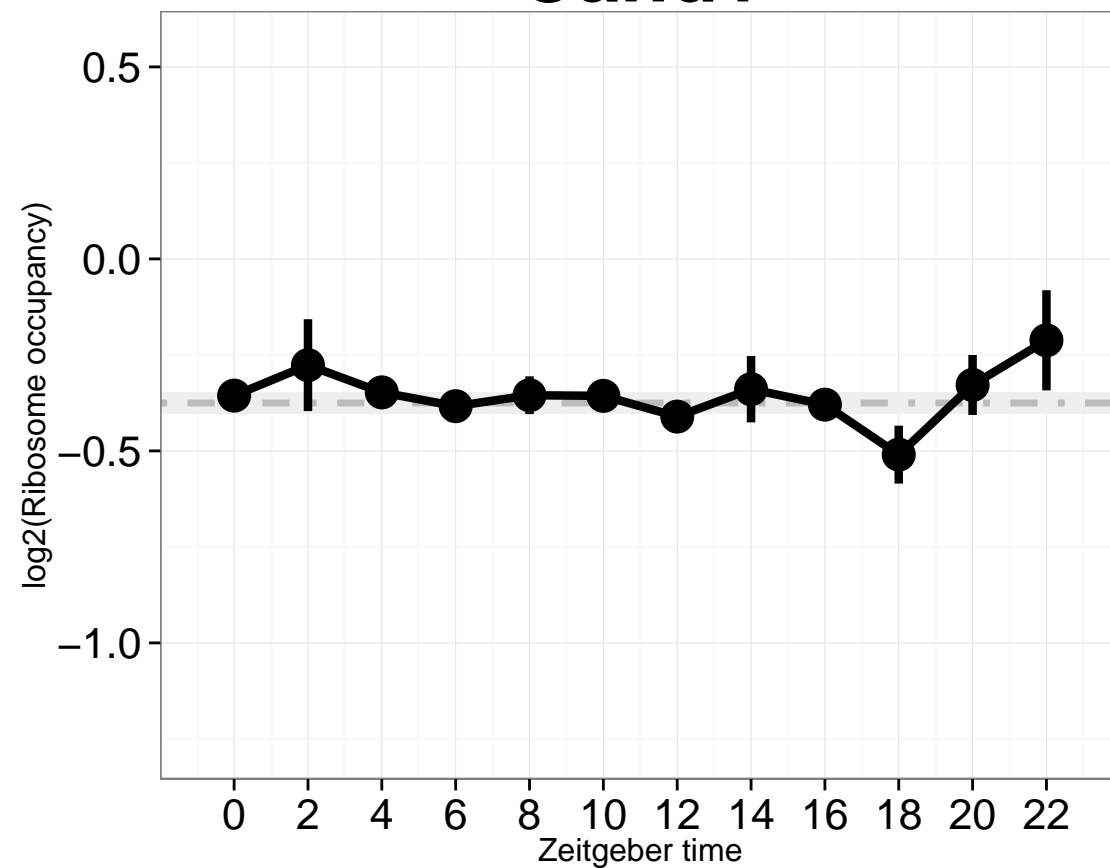

Supplement: SuppDataset_1.zip [file Cand1_set_A.pdf › Supplemental Dataset 1/A-mRNA_nonrhyth_translation_nonrhyth/Cand1_set_A.pdf]

# Cant1

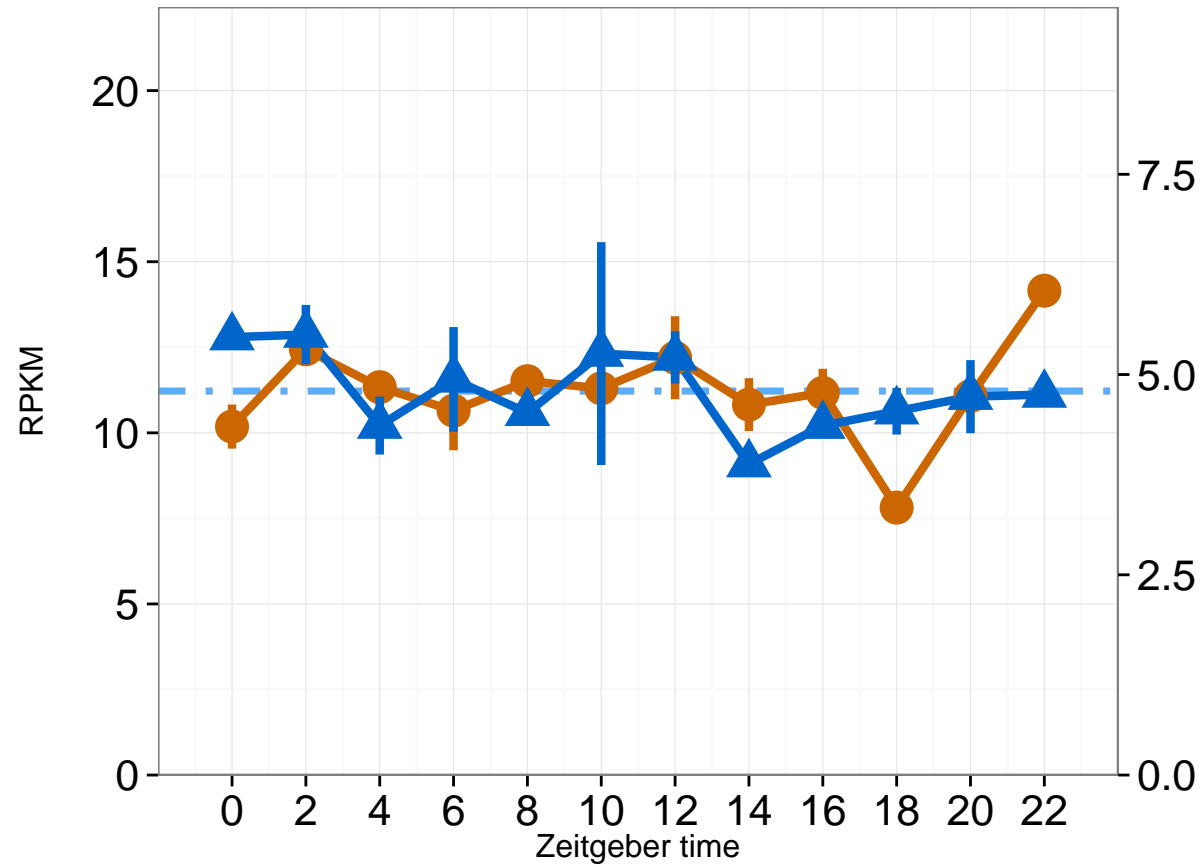

# Cant1

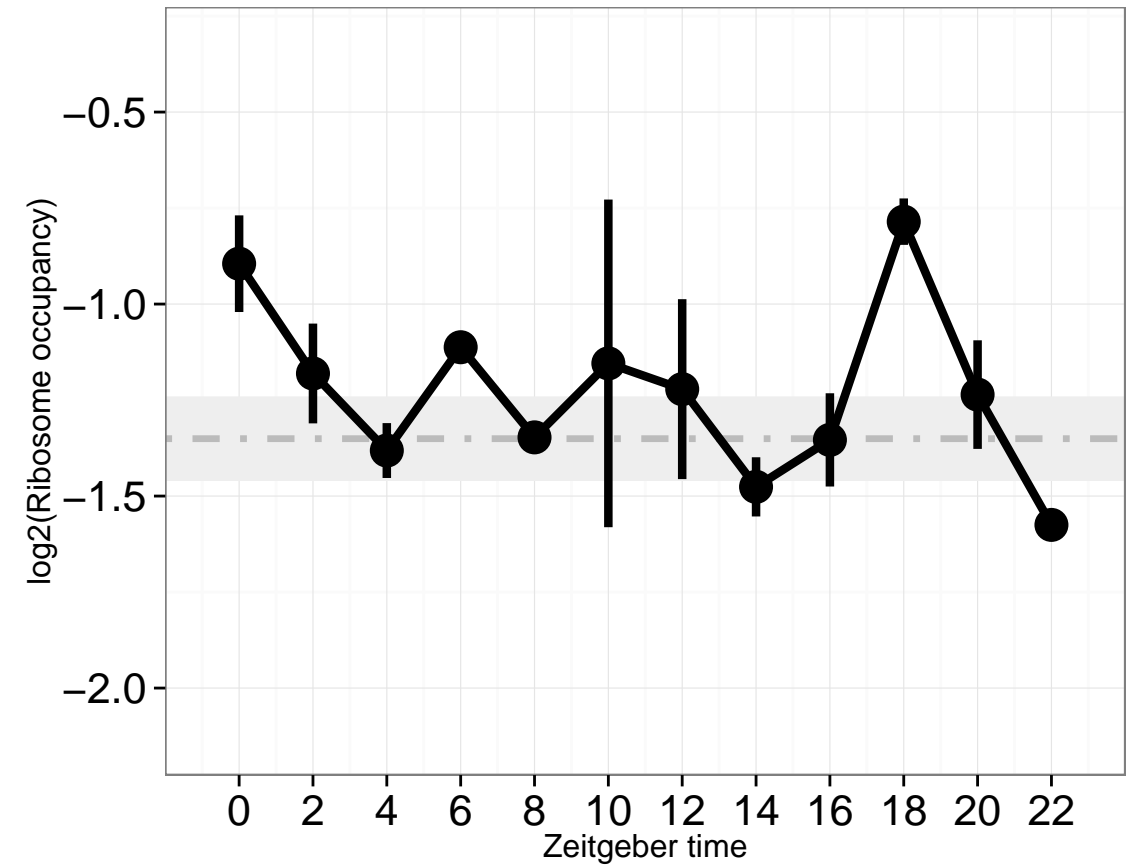

Supplement: SuppDataset_1.zip [file Cant1_set_A.pdf › Supplemental Dataset 1/A-mRNA_nonrhyth_translation_nonrhyth/Cant1_set_A.pdf]

## Canx

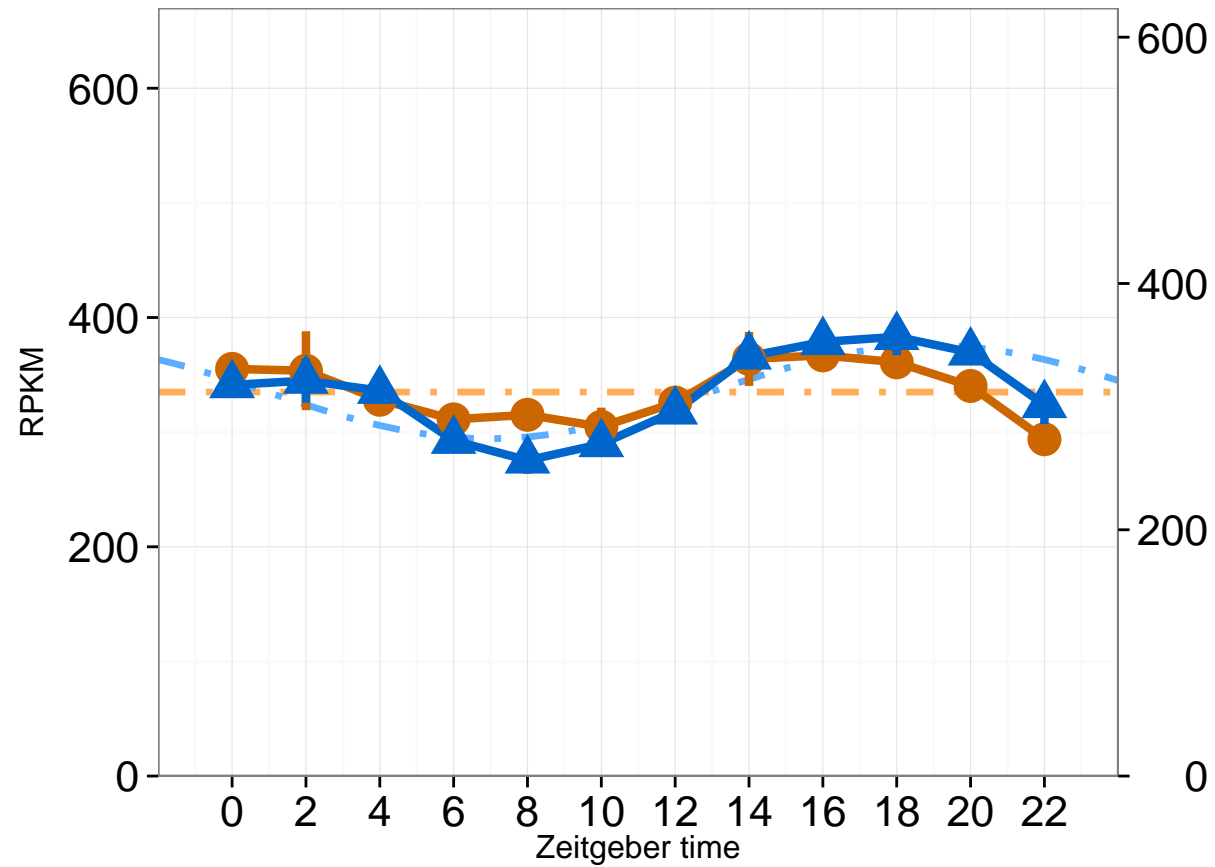

## Canx

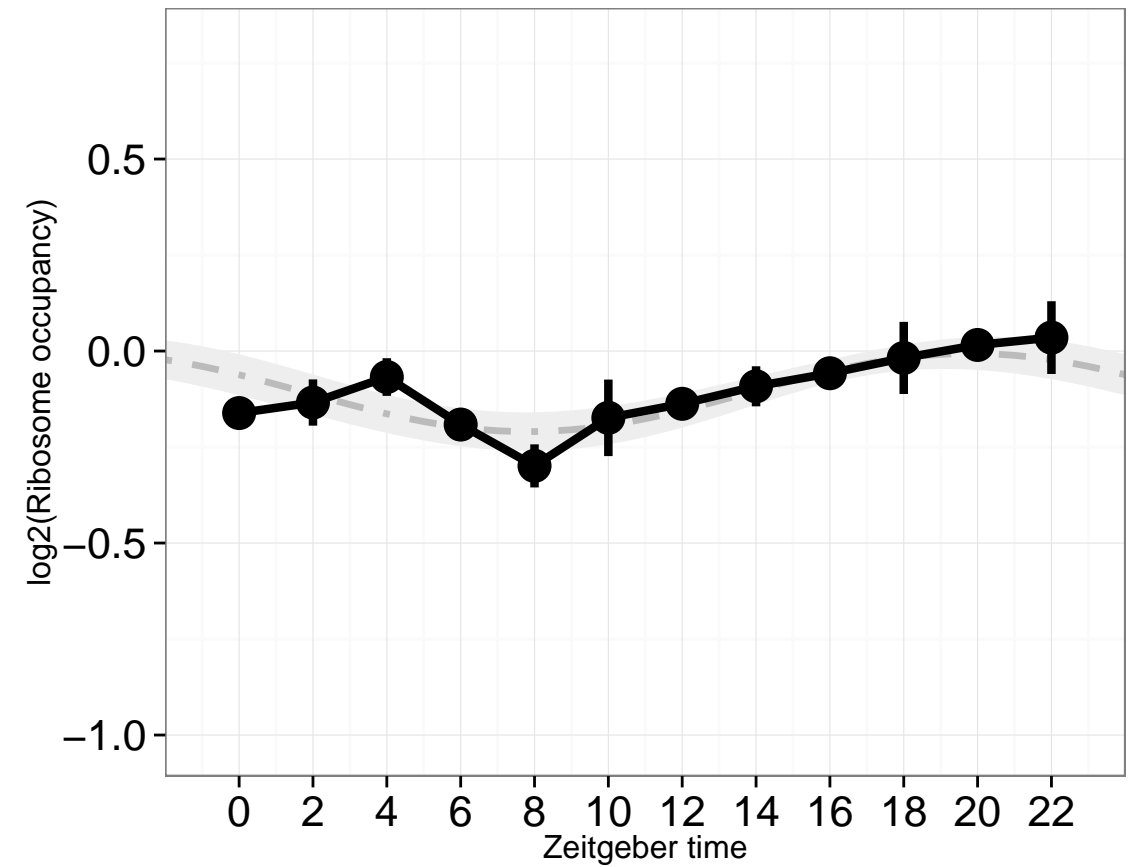

Supplement: SuppDataset_1.zip [file Canx_set_A.pdf › Supplemental Dataset 1/A-mRNA_nonrhyth_translation_nonrhyth/Canx_set_A.pdf]

# Cap1

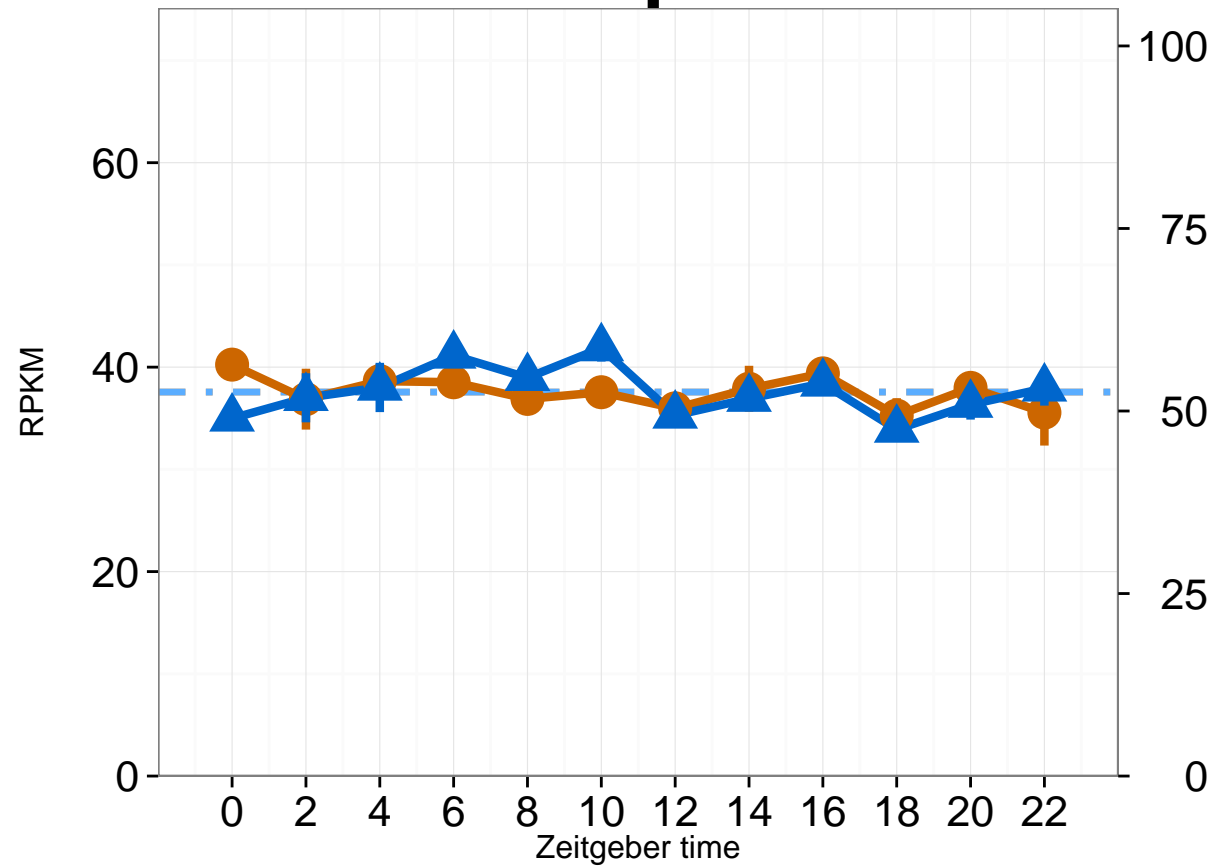

# Cap1

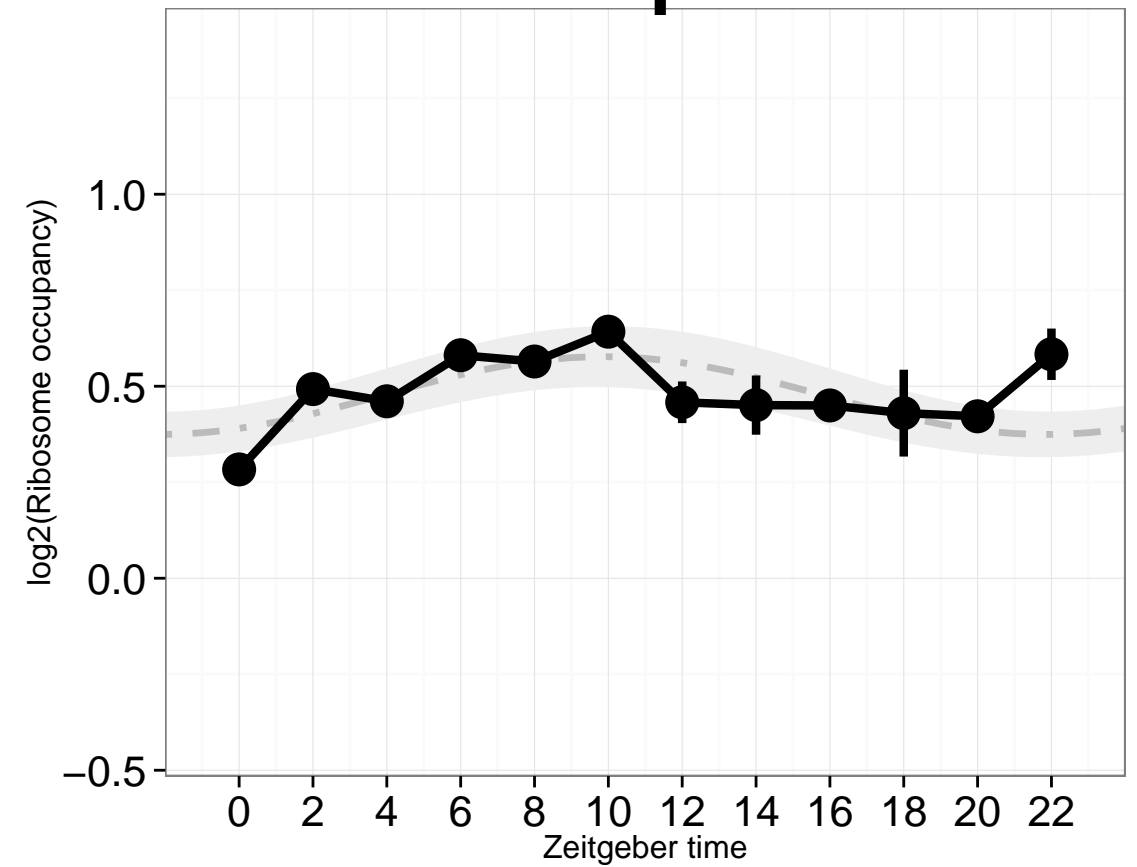

Supplement: SuppDataset_1.zip [file Cap1_set_A.pdf › Supplemental Dataset 1/A-mRNA_nonrhyth_translation_nonrhyth/Cap1_set_A.pdf]

# Capg

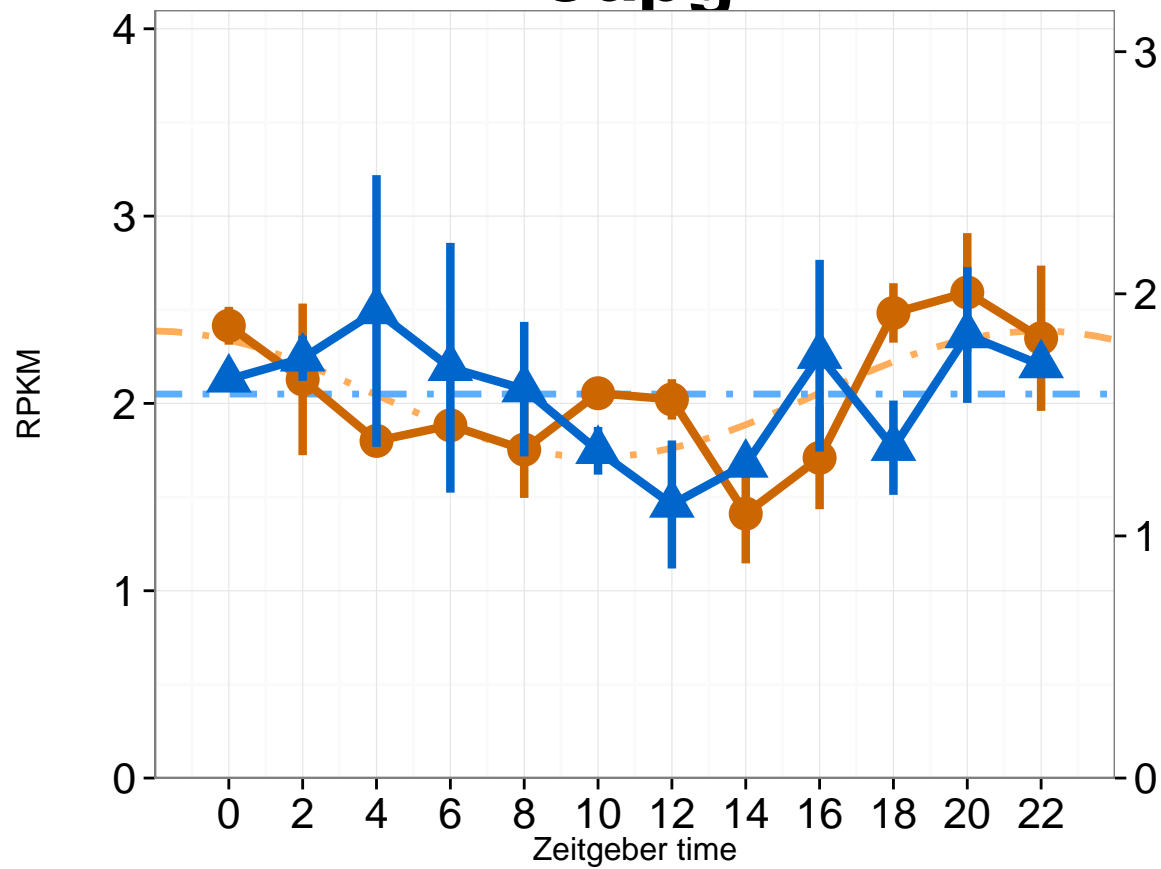

# Capg

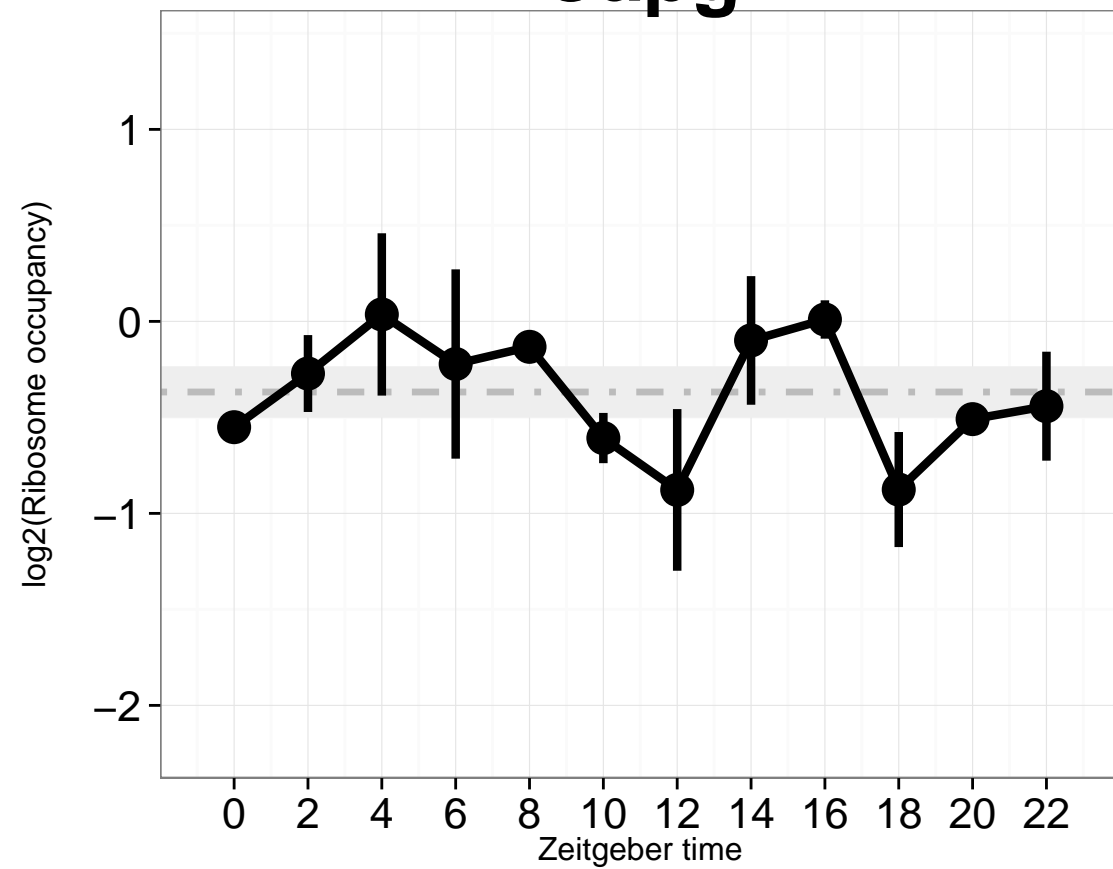

Supplement: SuppDataset_1.zip [file Capg_set_A.pdf › Supplemental Dataset 1/A-mRNA_nonrhyth_translation_nonrhyth/Capg_set_A.pdf]

# Capn10

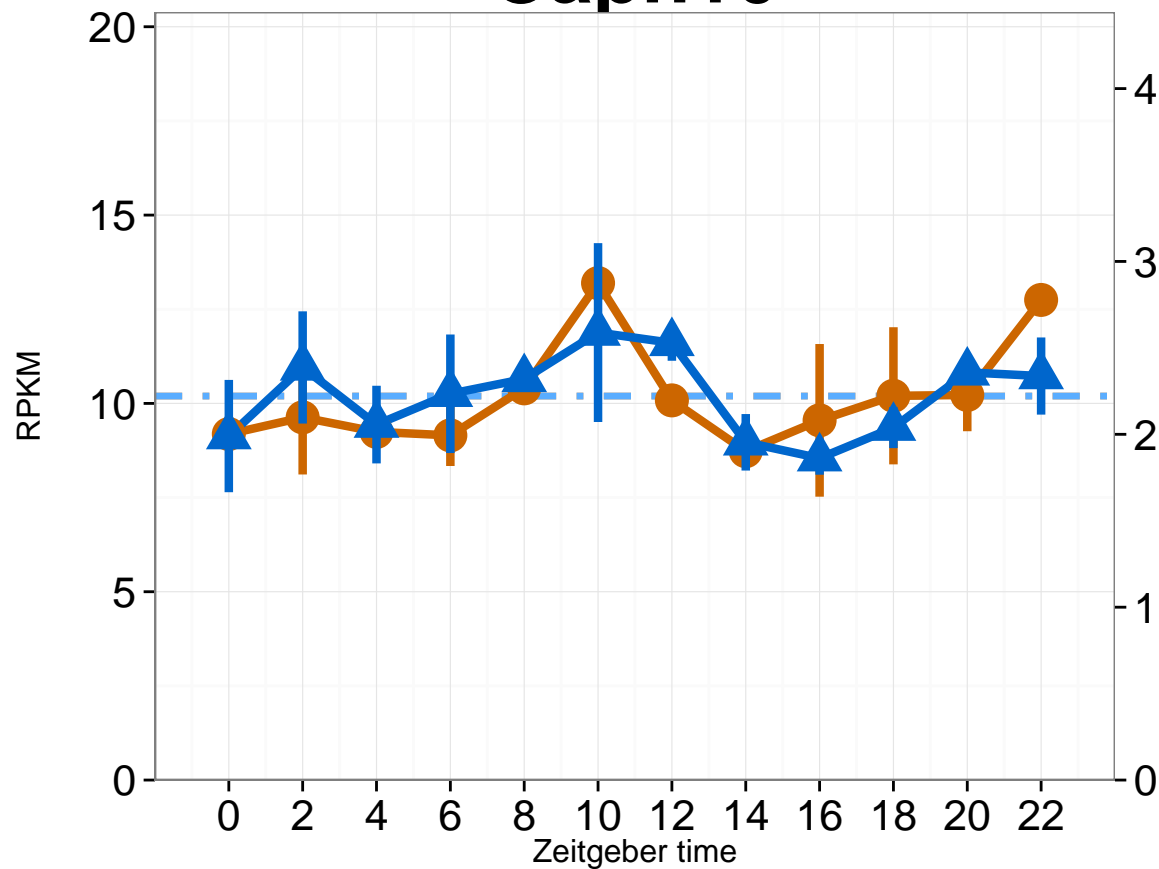

# Capn10

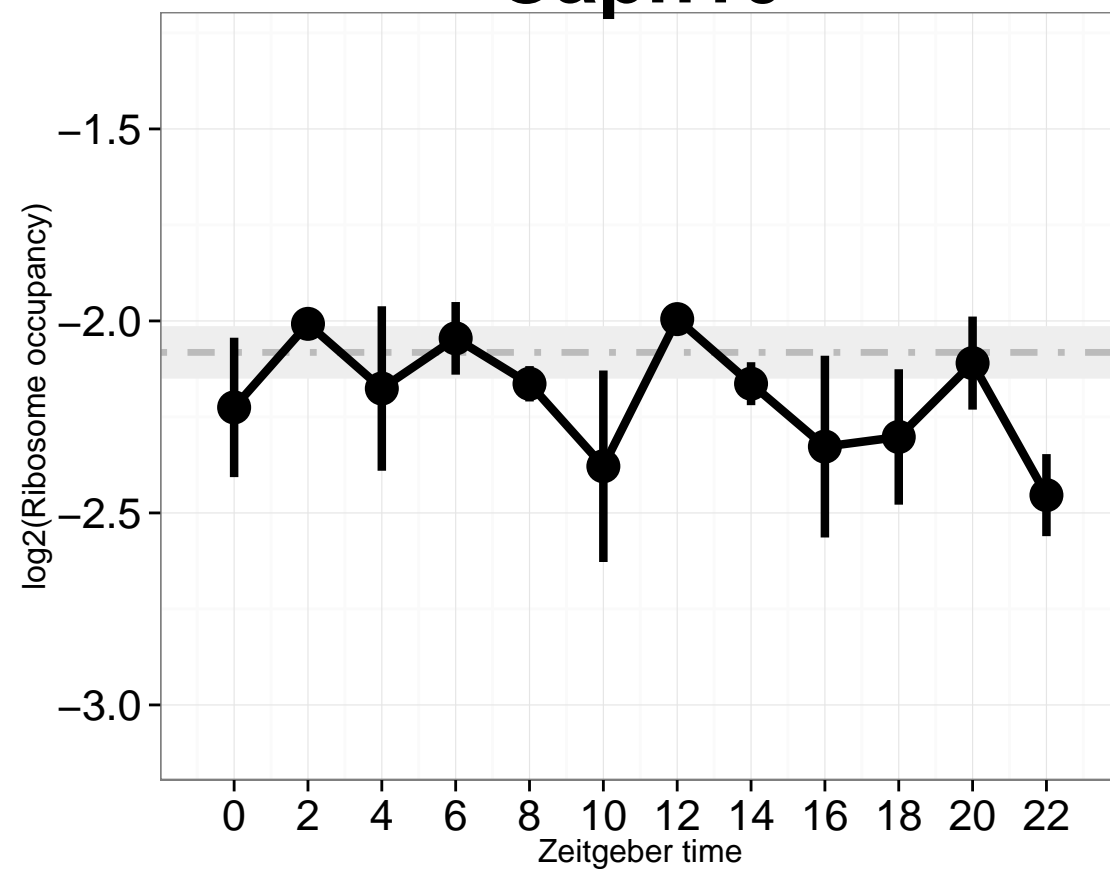

Supplement: SuppDataset_1.zip [file Capn10_set_A.pdf › Supplemental Dataset 1/A-mRNA_nonrhyth_translation_nonrhyth/Capn10_set_A.pdf]

# Capn11

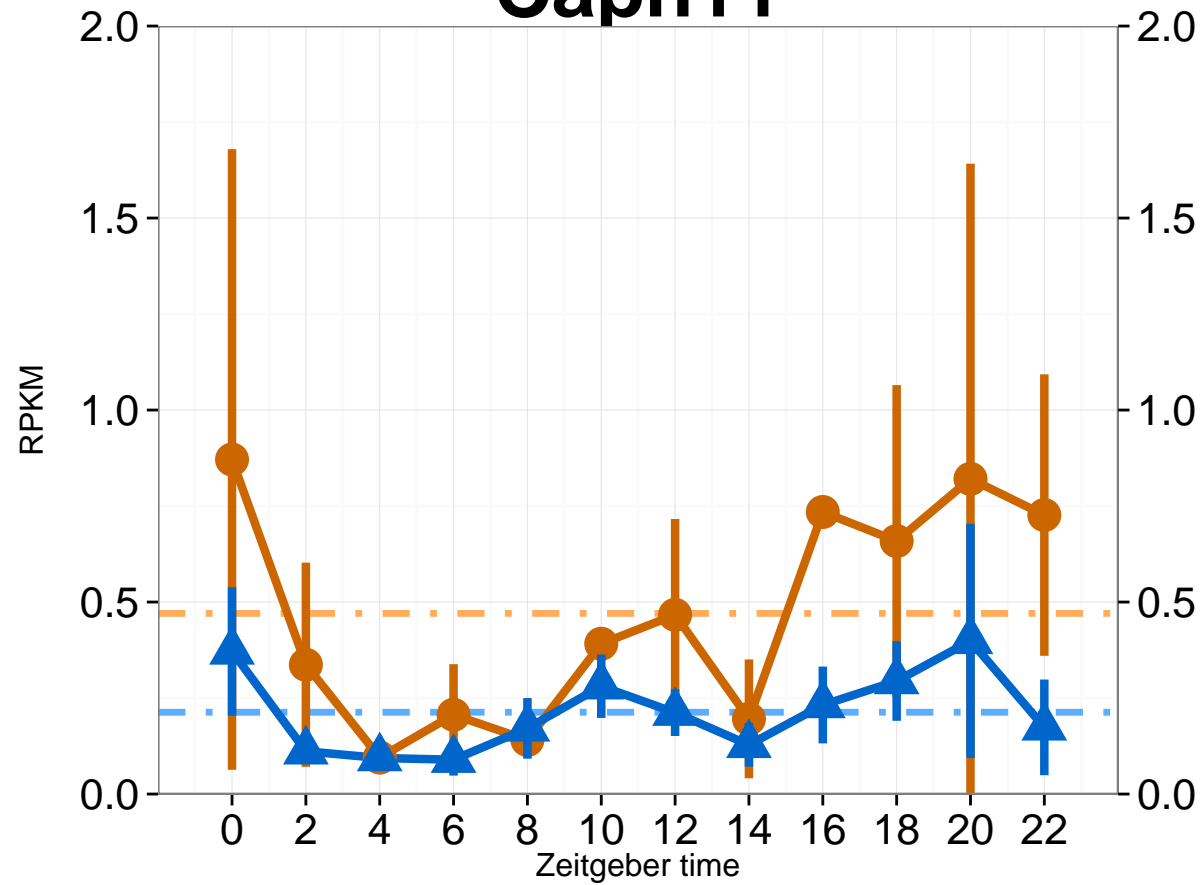

# Capn11

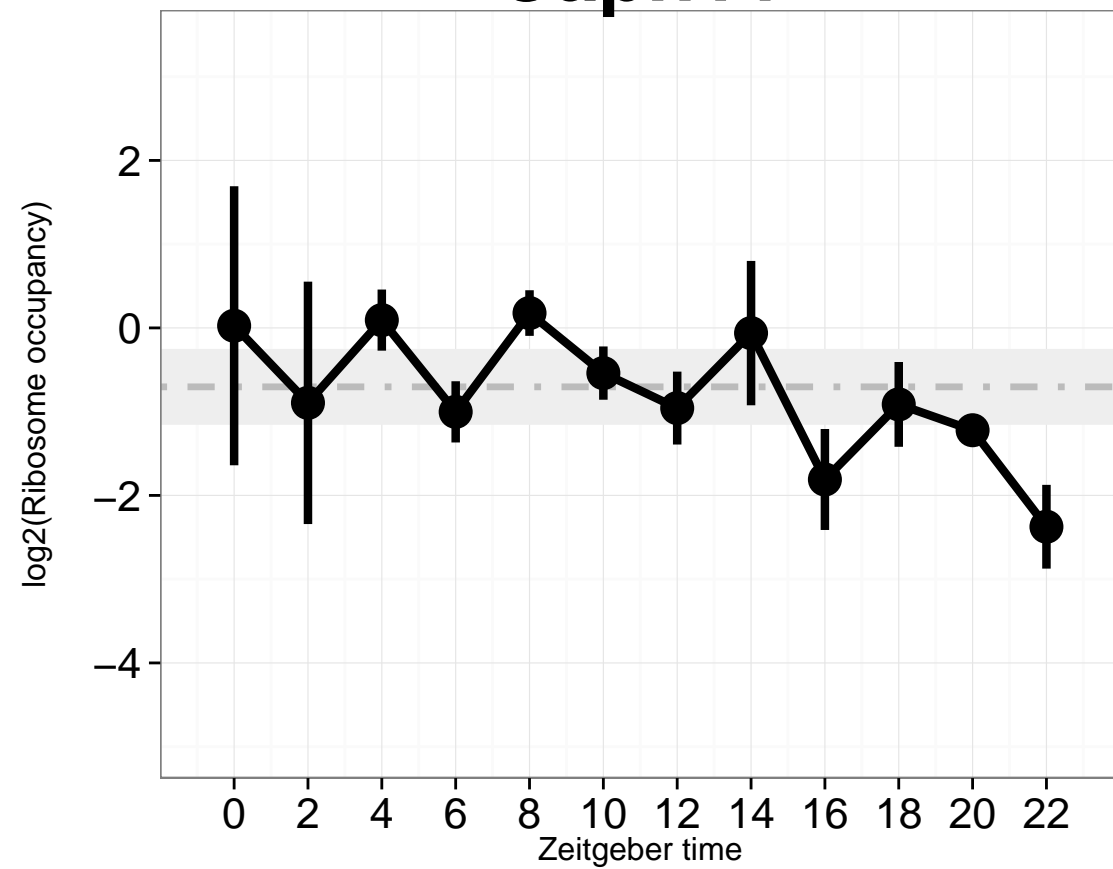

Supplement: SuppDataset_1.zip [file Capn11_set_A.pdf › Supplemental Dataset 1/A-mRNA_nonrhyth_translation_nonrhyth/Capn11_set_A.pdf]

## Capn15

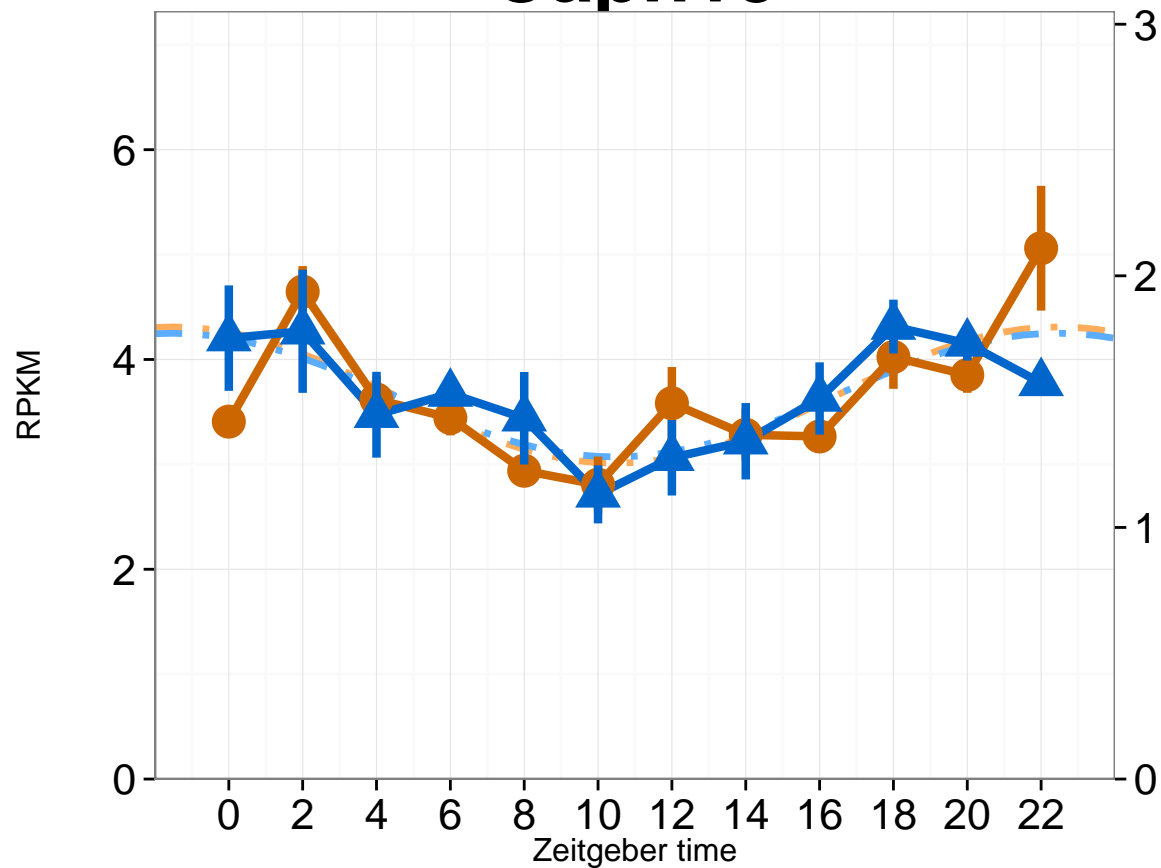

## Capn15

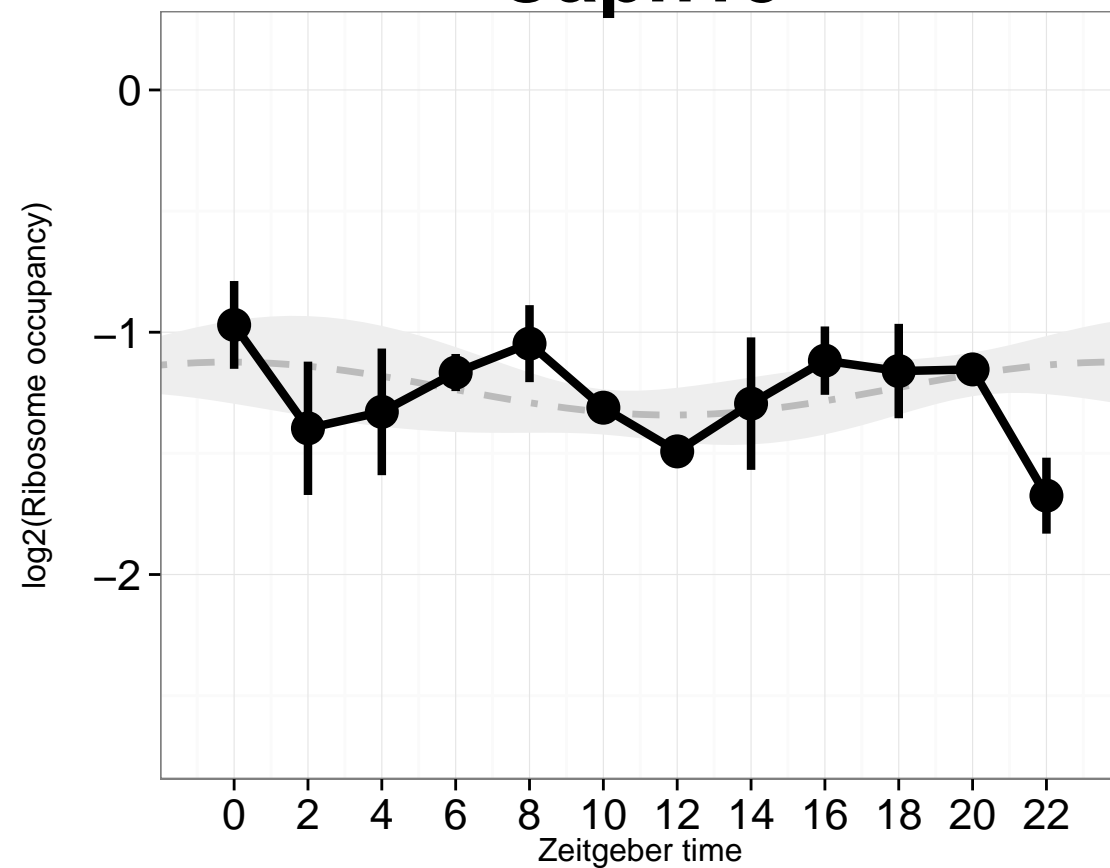

Supplement: SuppDataset_1.zip [file Capn15_set_A.pdf › Supplemental Dataset 1/A-mRNA_nonrhyth_translation_nonrhyth/Capn15_set_A.pdf]

# Capn1

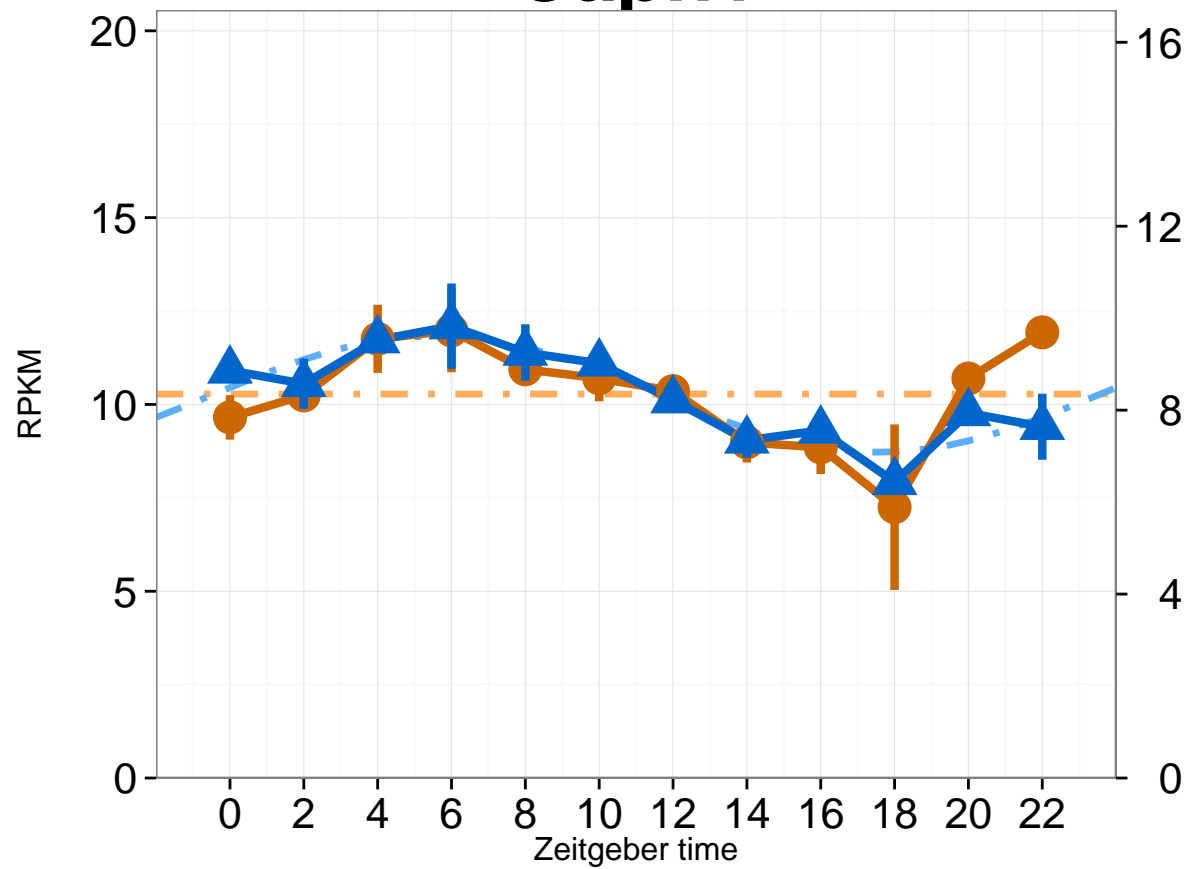

# Capn1

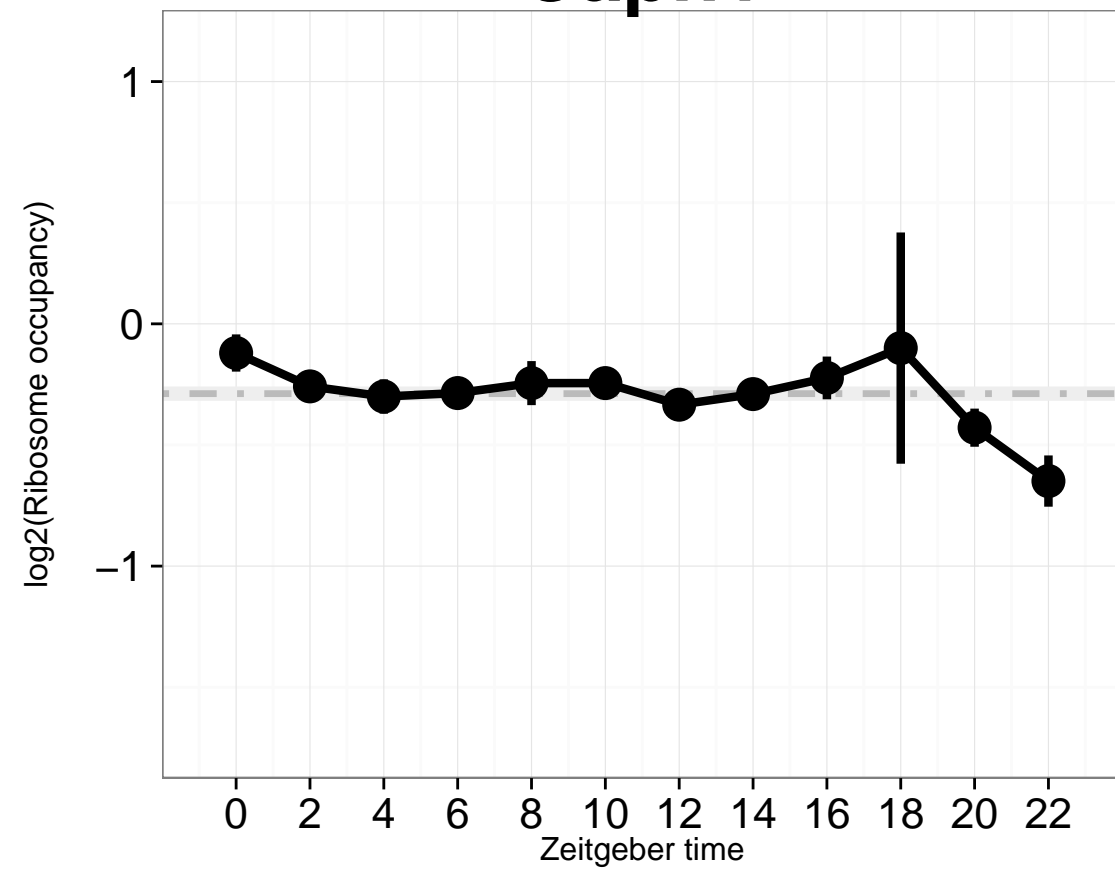

Supplement: SuppDataset_1.zip [file Capn1_set_A.pdf › Supplemental Dataset 1/A-mRNA_nonrhyth_translation_nonrhyth/Capn1_set_A.pdf]

# Capn5

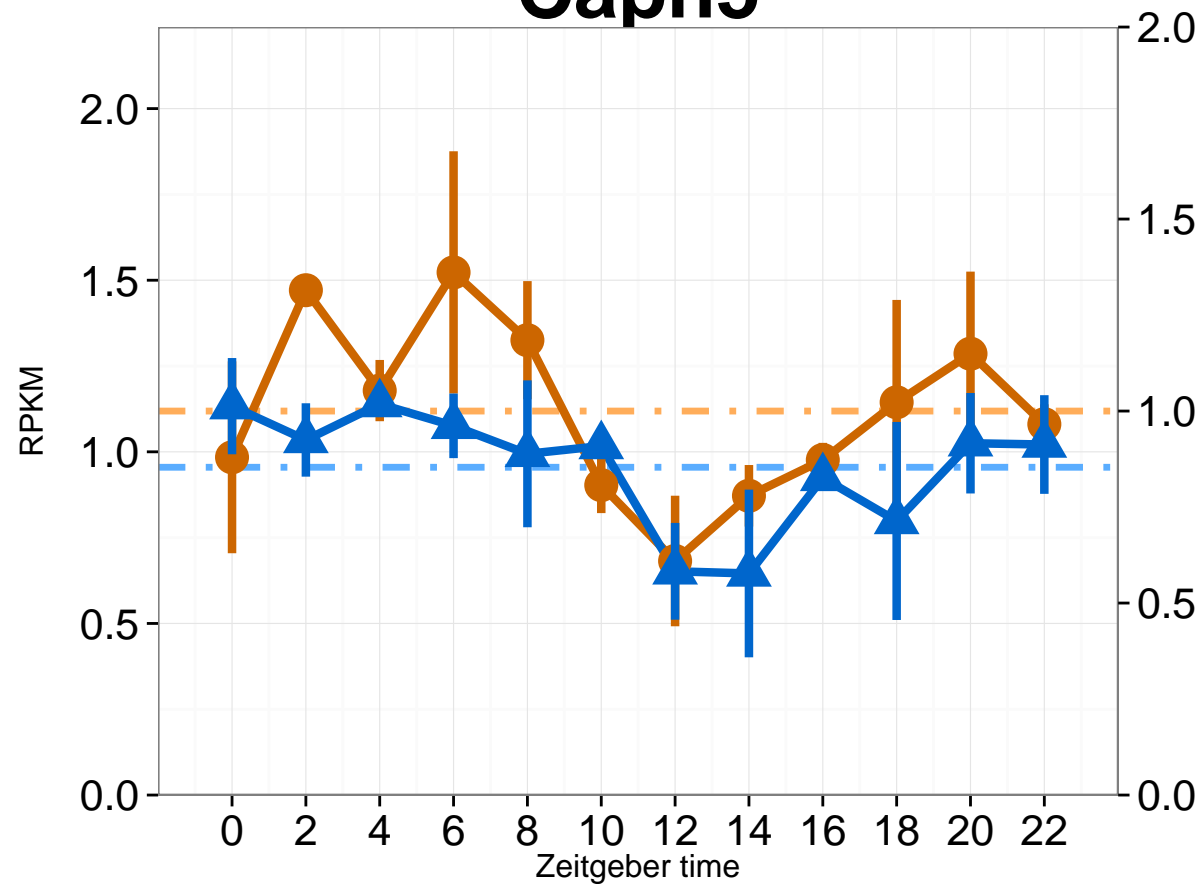

# Capn5

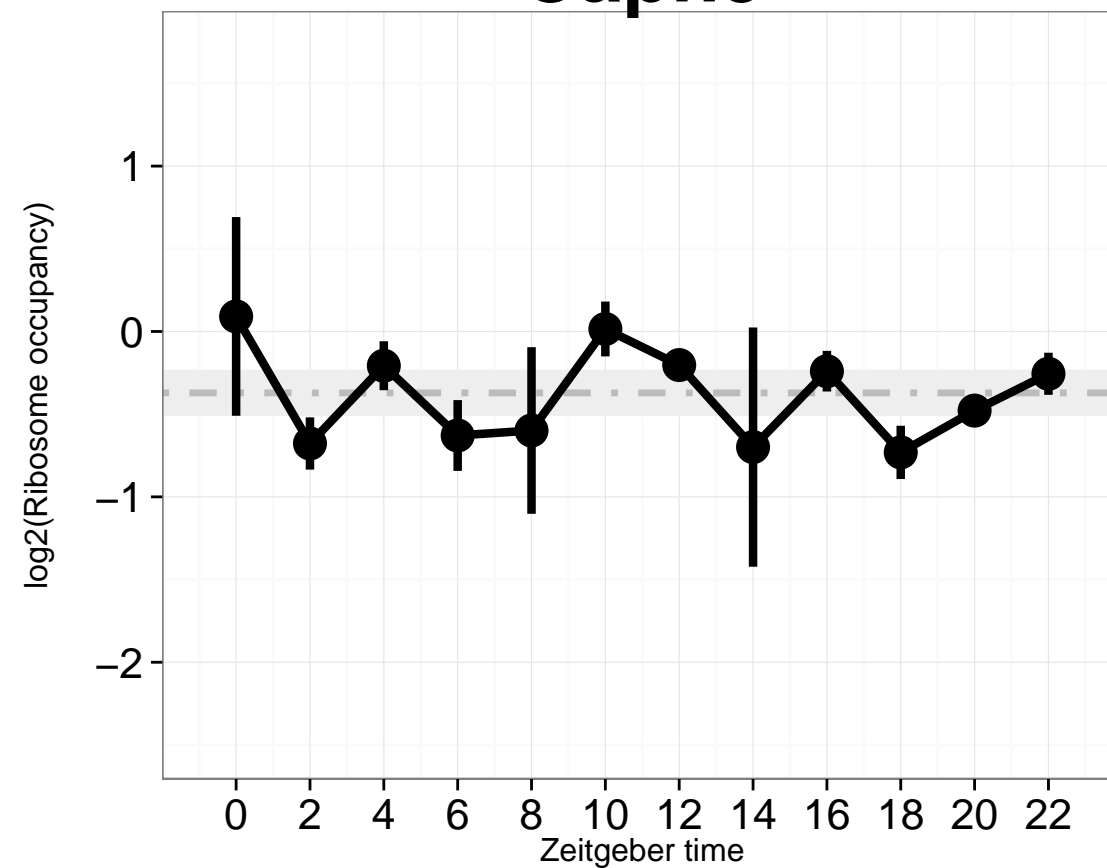

Supplement: SuppDataset_1.zip [file Capn5_set_A.pdf › Supplemental Dataset 1/A-mRNA_nonrhyth_translation_nonrhyth/Capn5_set_A.pdf]

# Capn6

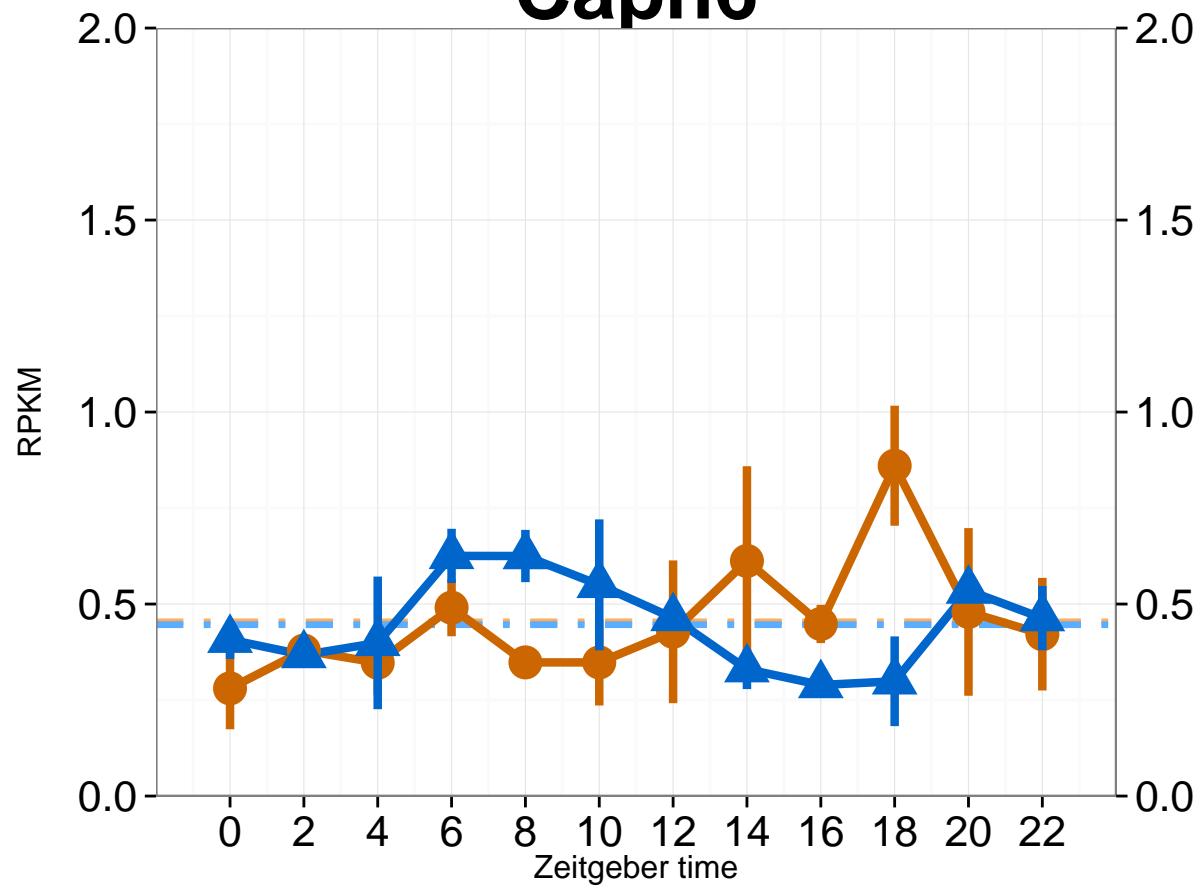

# Capn6

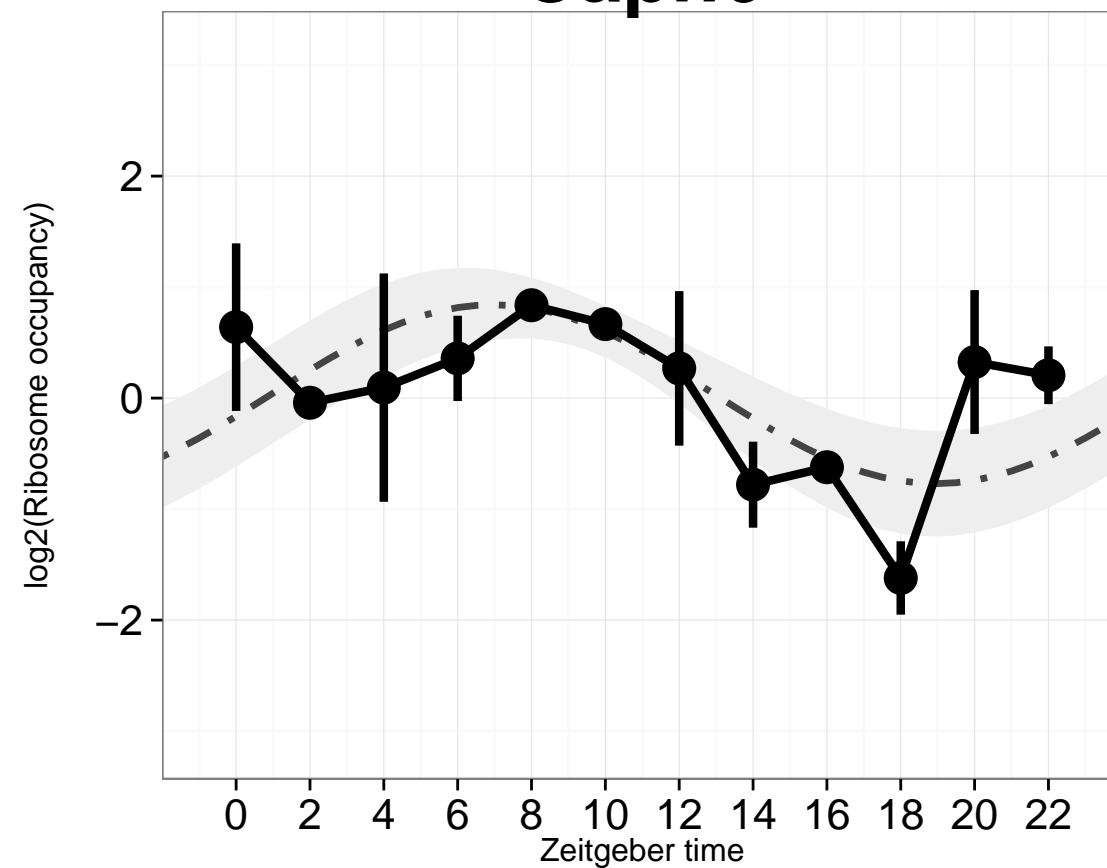

Supplement: SuppDataset_1.zip [file Capn6_set_A.pdf › Supplemental Dataset 1/A-mRNA_nonrhyth_translation_nonrhyth/Capn6_set_A.pdf]

# Capn7

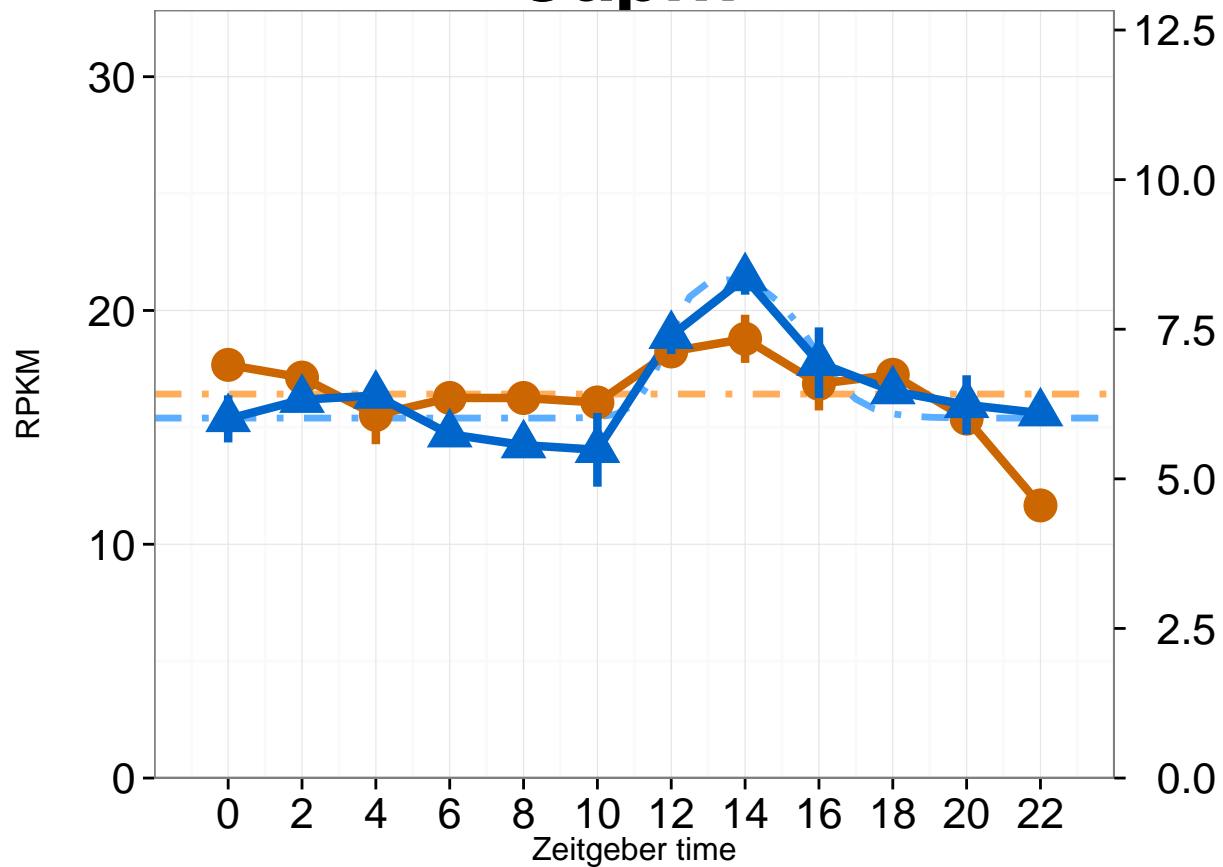

# Capn7

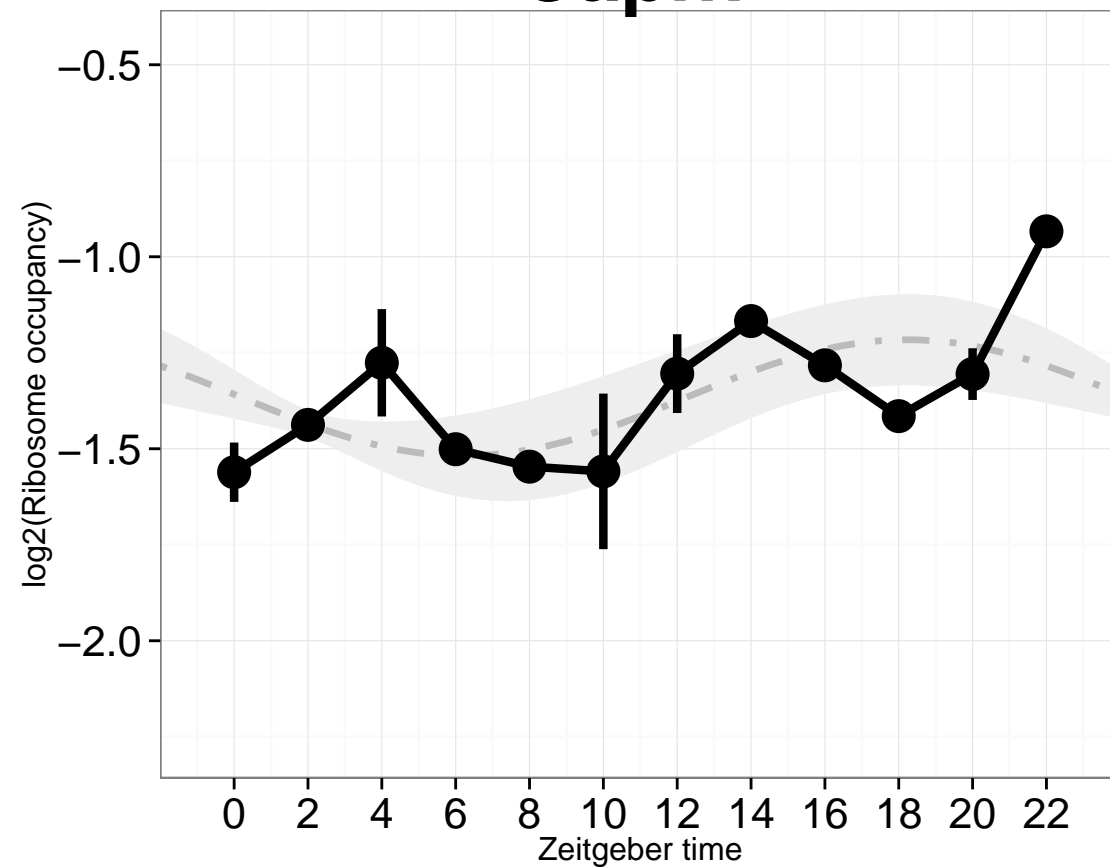

Supplement: SuppDataset_1.zip [file Capn7_set_A.pdf › Supplemental Dataset 1/A-mRNA_nonrhyth_translation_nonrhyth/Capn7_set_A.pdf]

# Capn8

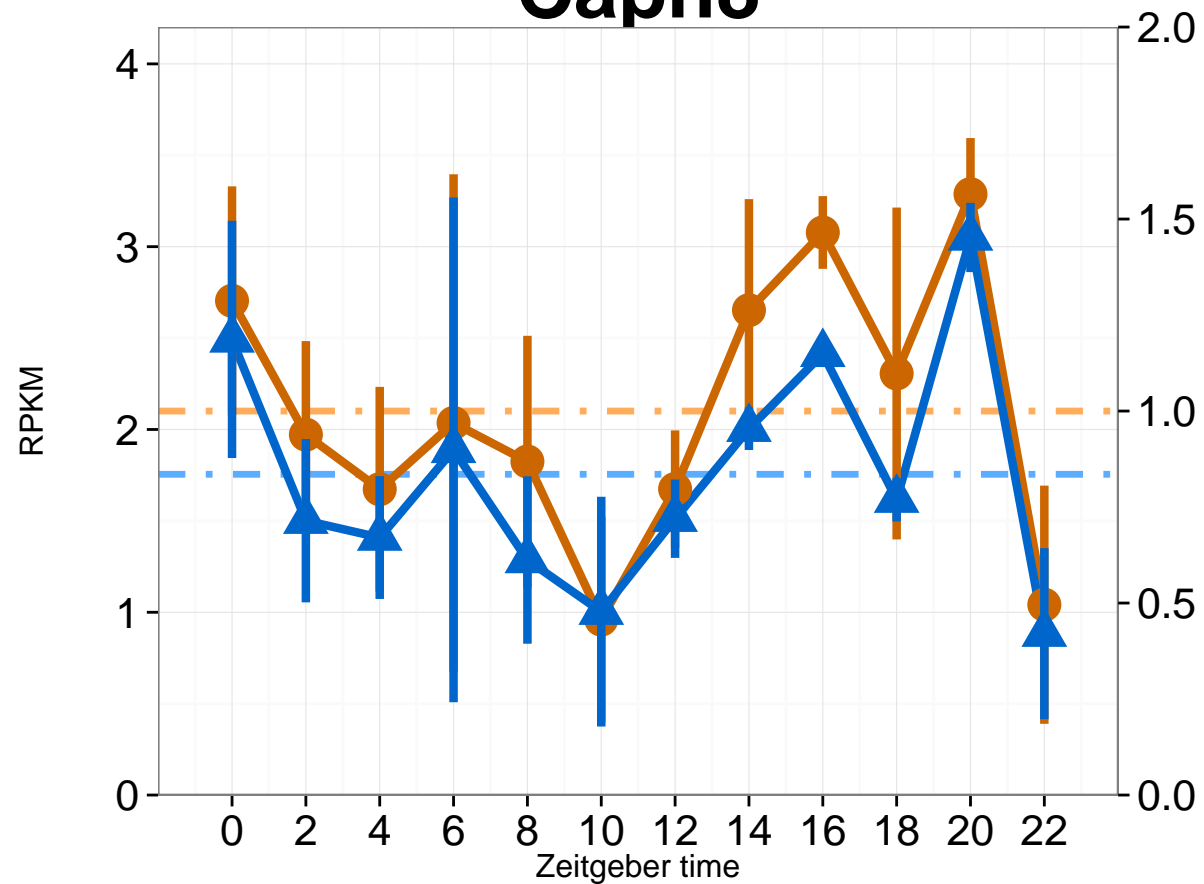

# Capn8

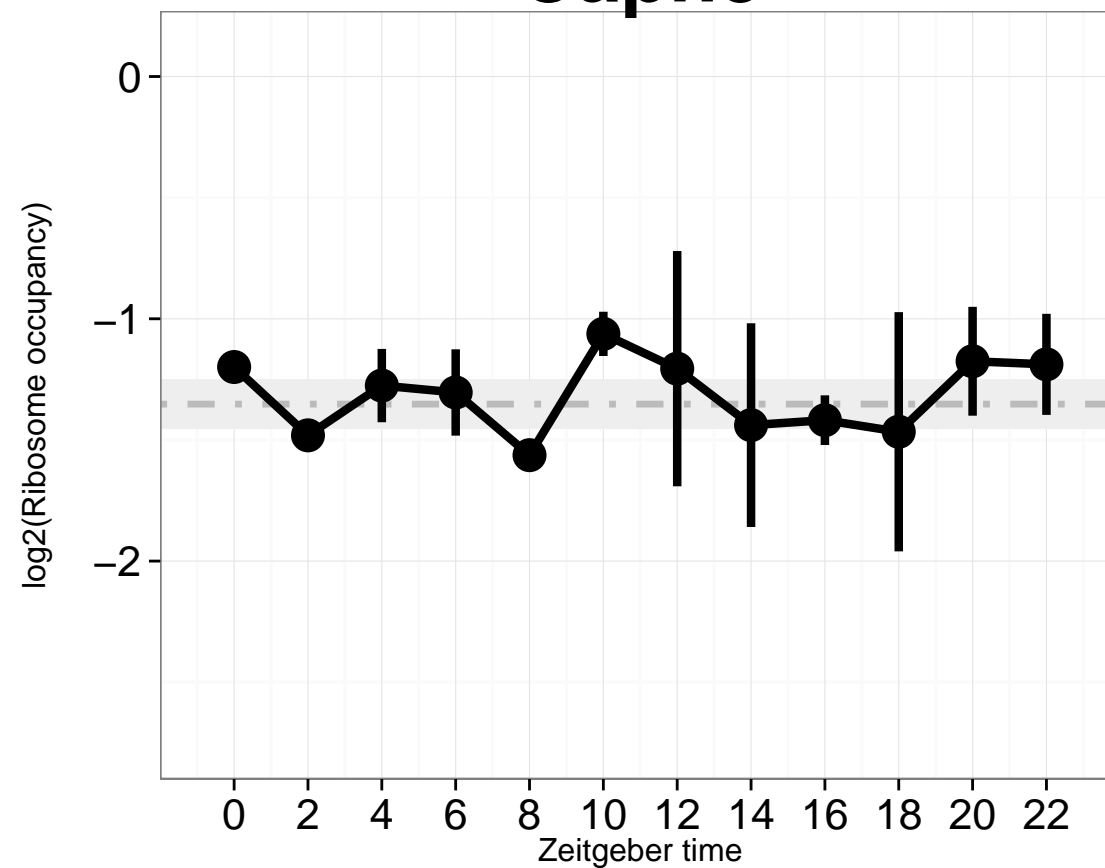

Supplement: SuppDataset_1.zip [file Capn8_set_A.pdf › Supplemental Dataset 1/A-mRNA_nonrhyth_translation_nonrhyth/Capn8_set_A.pdf]

# Capns1

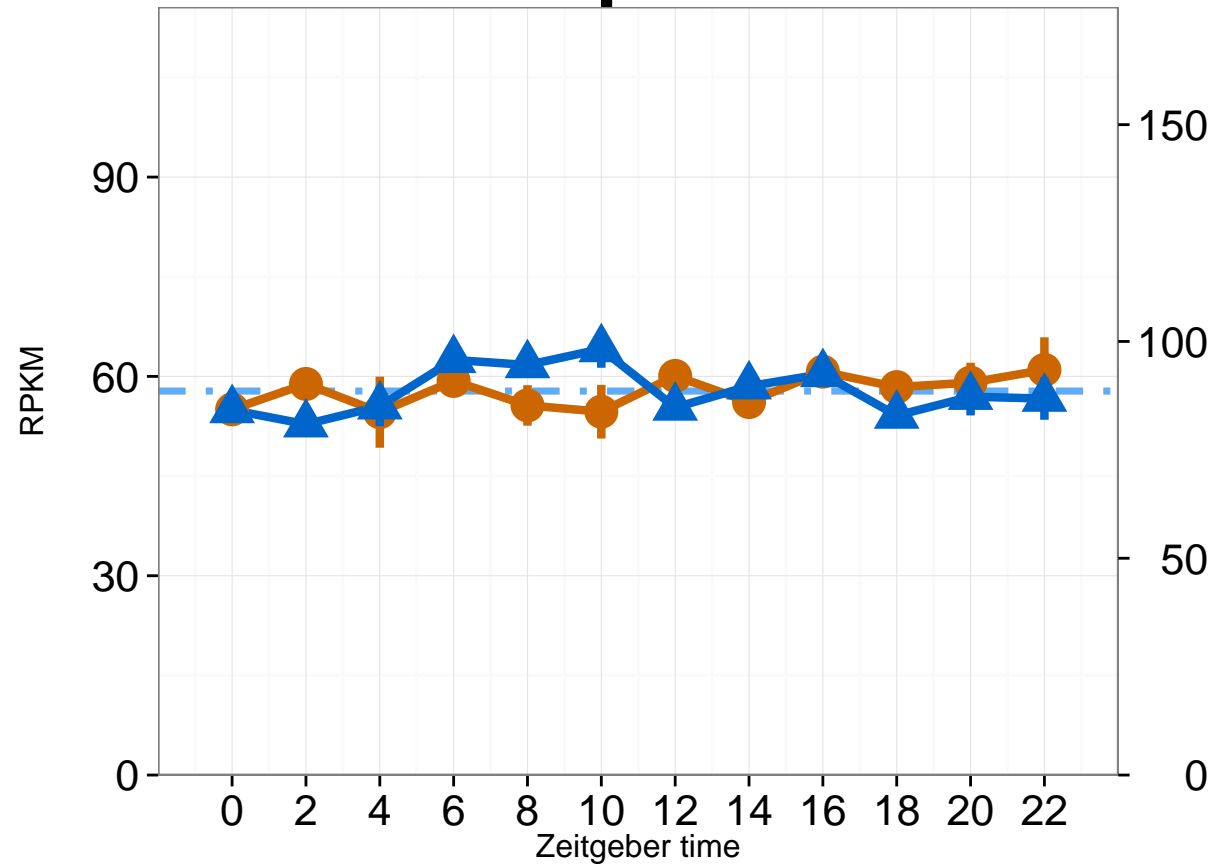

# Capns1

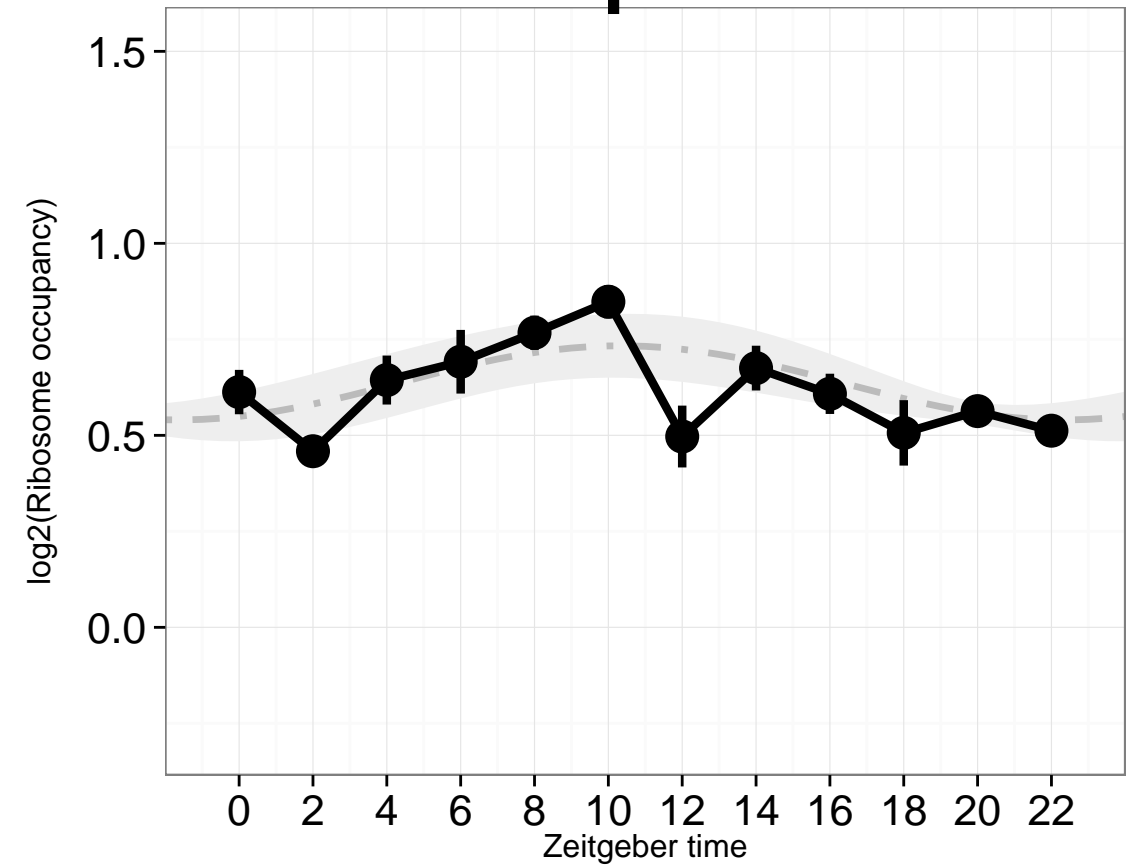

Supplement: SuppDataset_1.zip [file Capns1_set_A.pdf › Supplemental Dataset 1/A-mRNA_nonrhyth_translation_nonrhyth/Capns1_set_A.pdf]

## Caps2

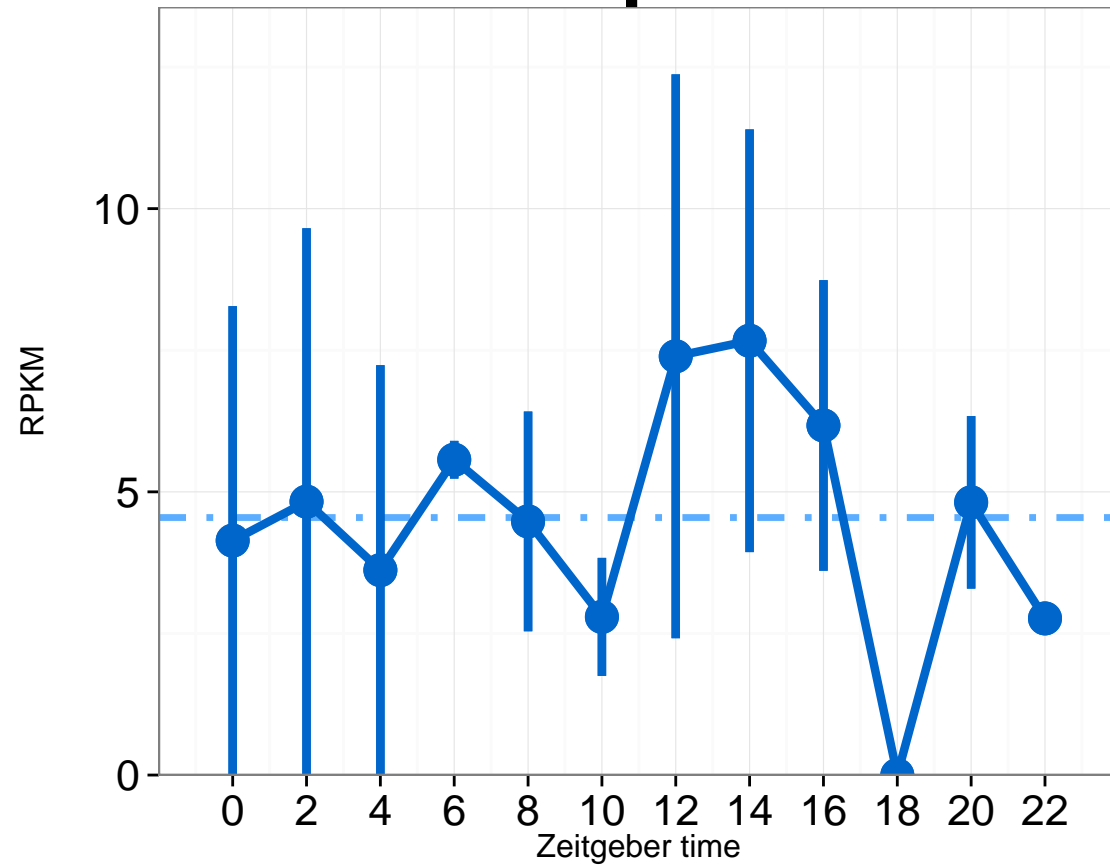

## Caps2 log2(Ribosome occupancy

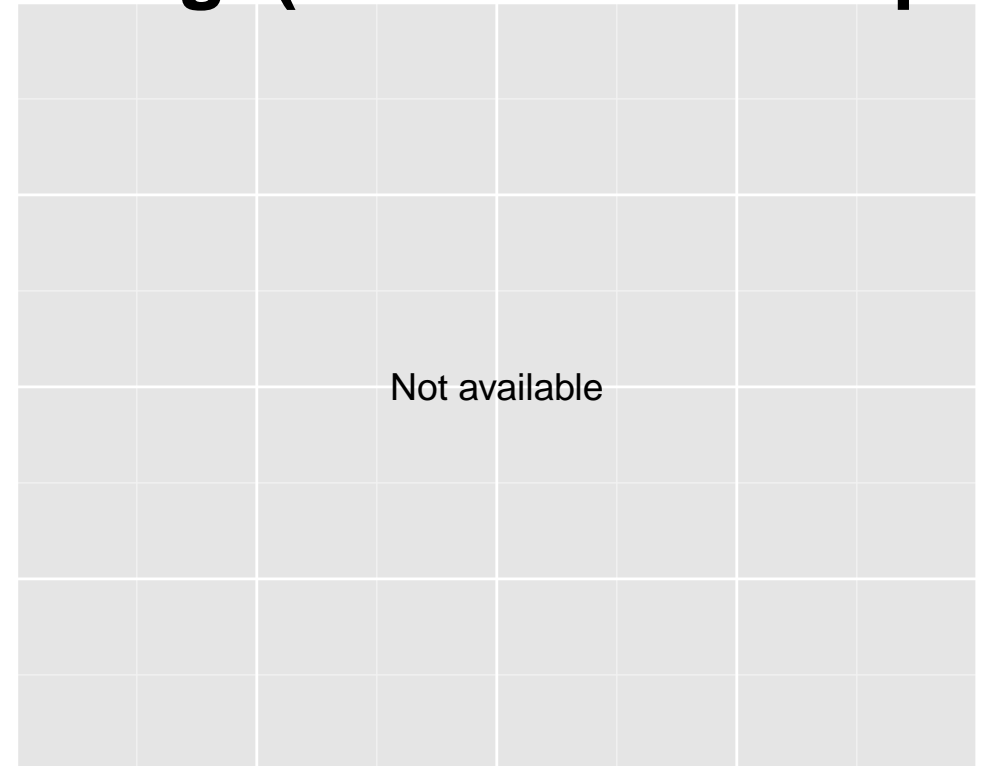

Supplement: SuppDataset_1.zip [file Caps2_set_A.pdf › Supplemental Dataset 1/A-mRNA_nonrhyth_translation_nonrhyth/Caps2_set_A.pdf]

# Capza1

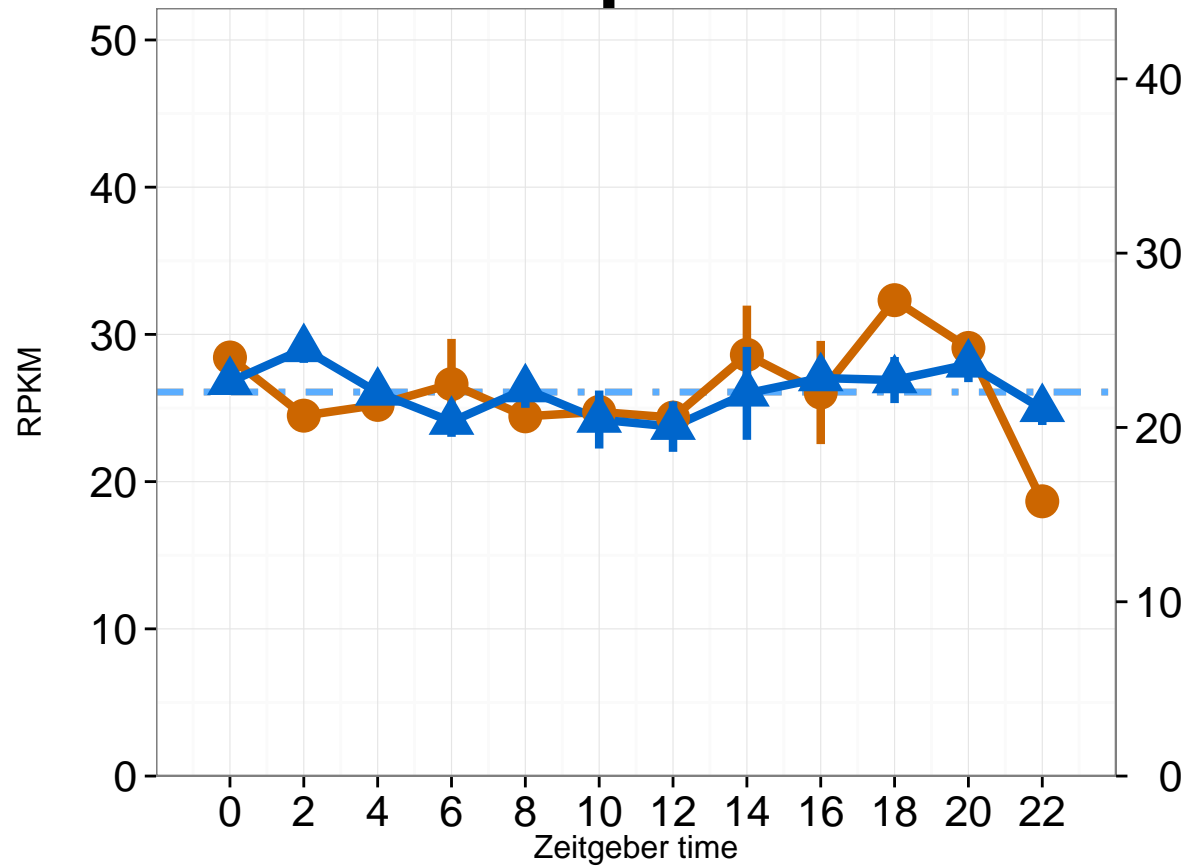

# Capza1

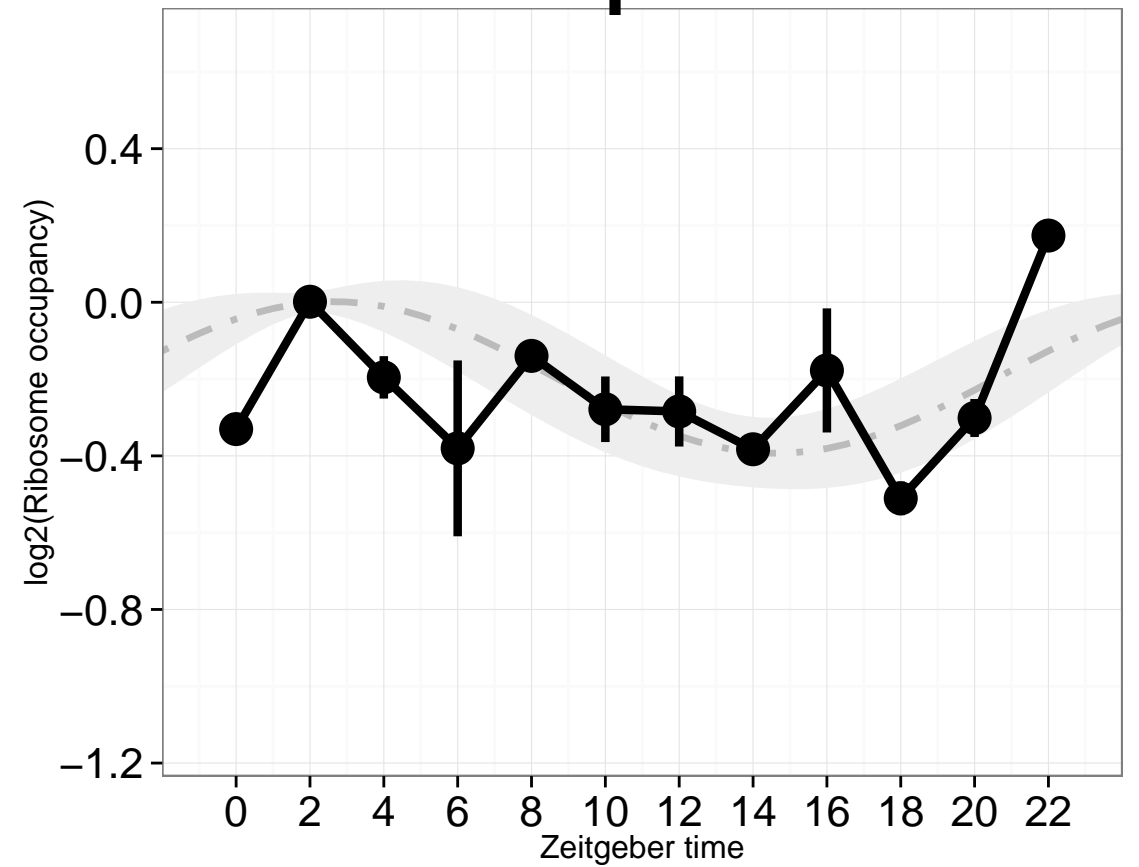

Supplement: SuppDataset_1.zip [file Capza1_set_A.pdf › Supplemental Dataset 1/A-mRNA_nonrhyth_translation_nonrhyth/Capza1_set_A.pdf]

# Capza2

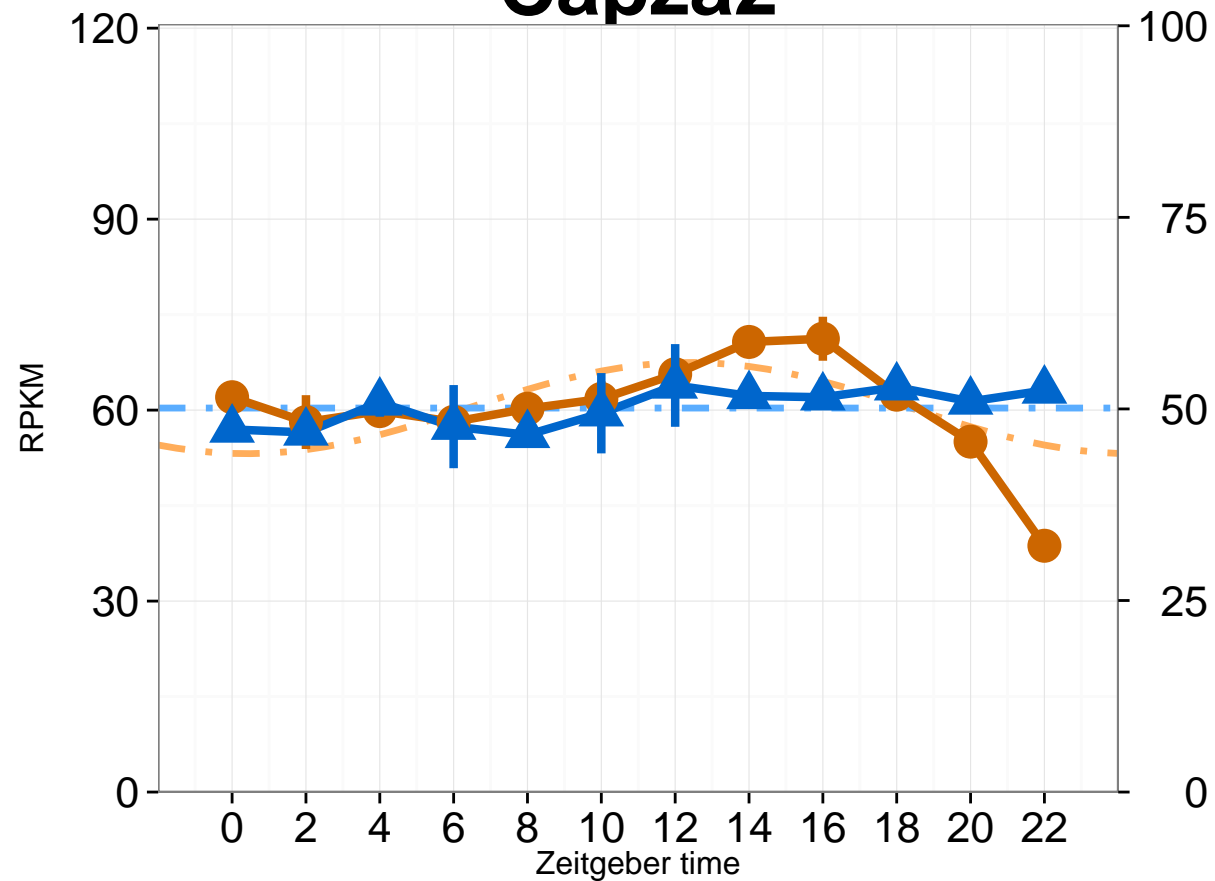

# Capza2

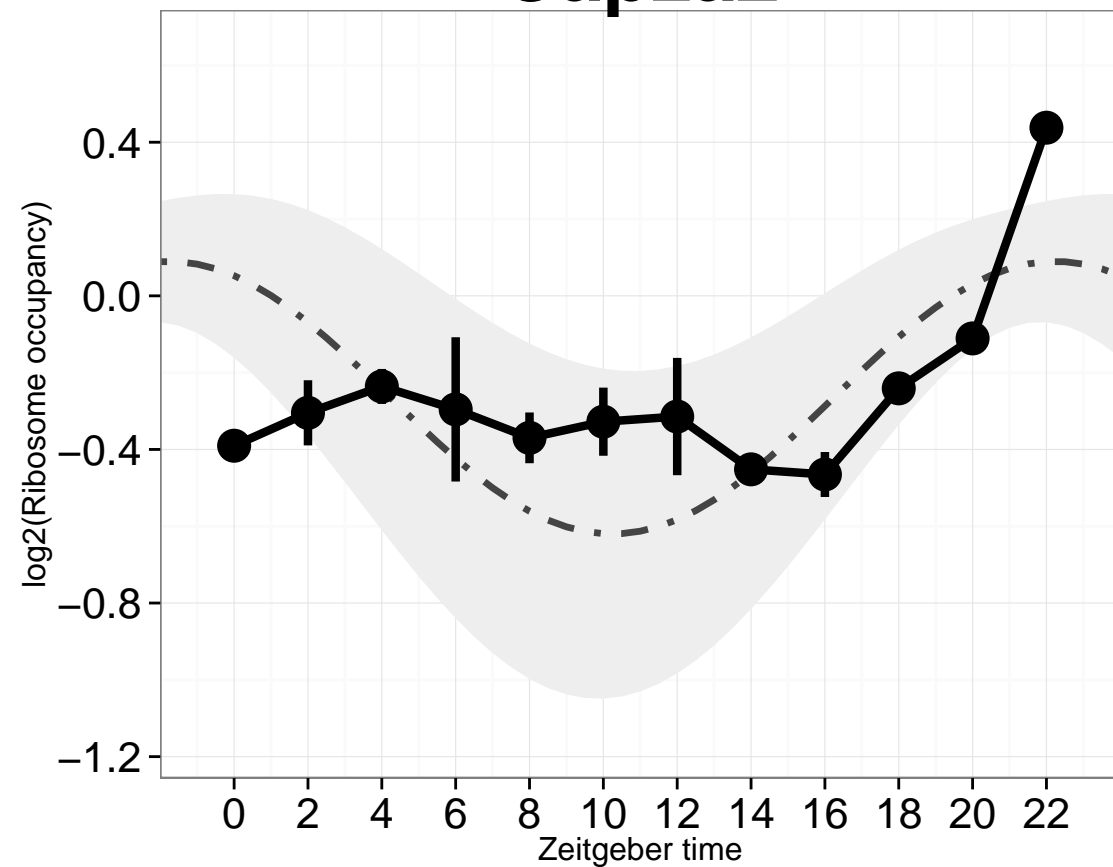

Supplement: SuppDataset_1.zip [file Capza2_set_A.pdf › Supplemental Dataset 1/A-mRNA_nonrhyth_translation_nonrhyth/Capza2_set_A.pdf]

## Capzb

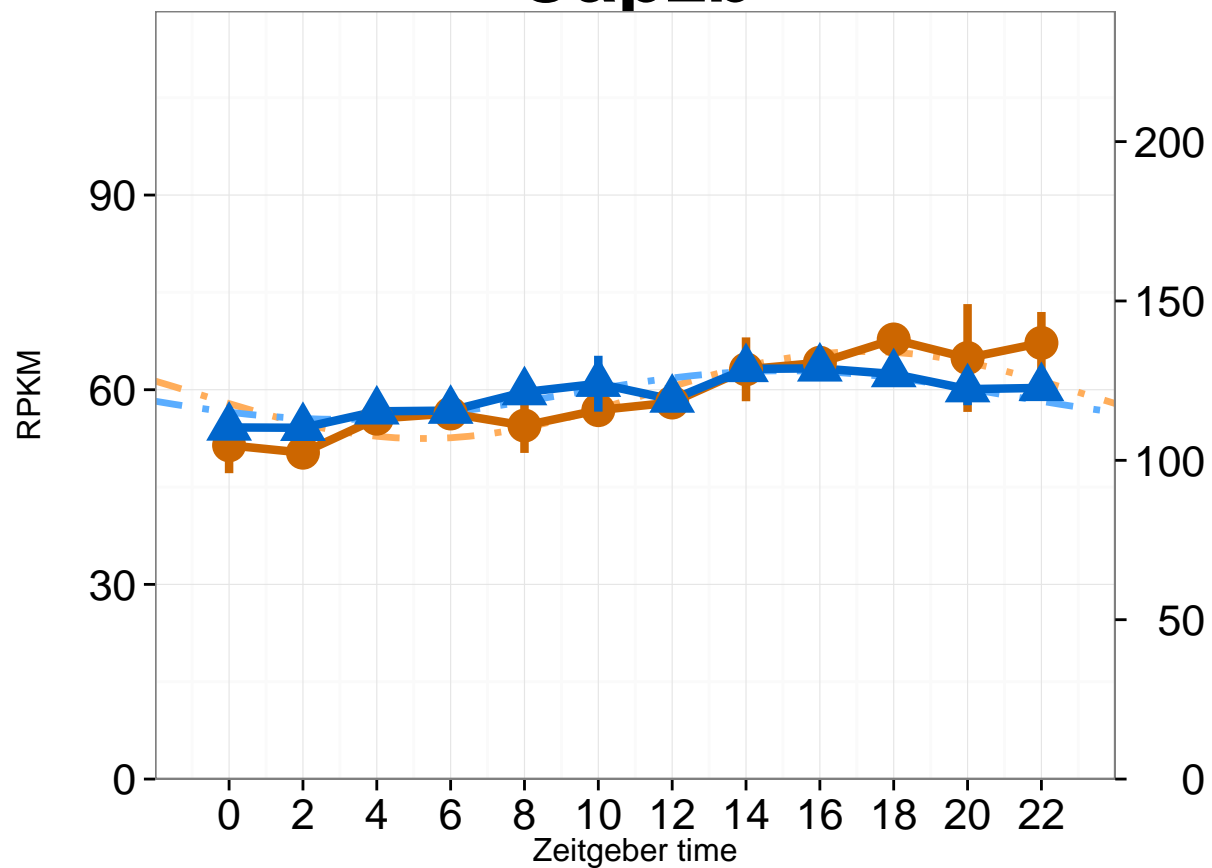

## Capzb

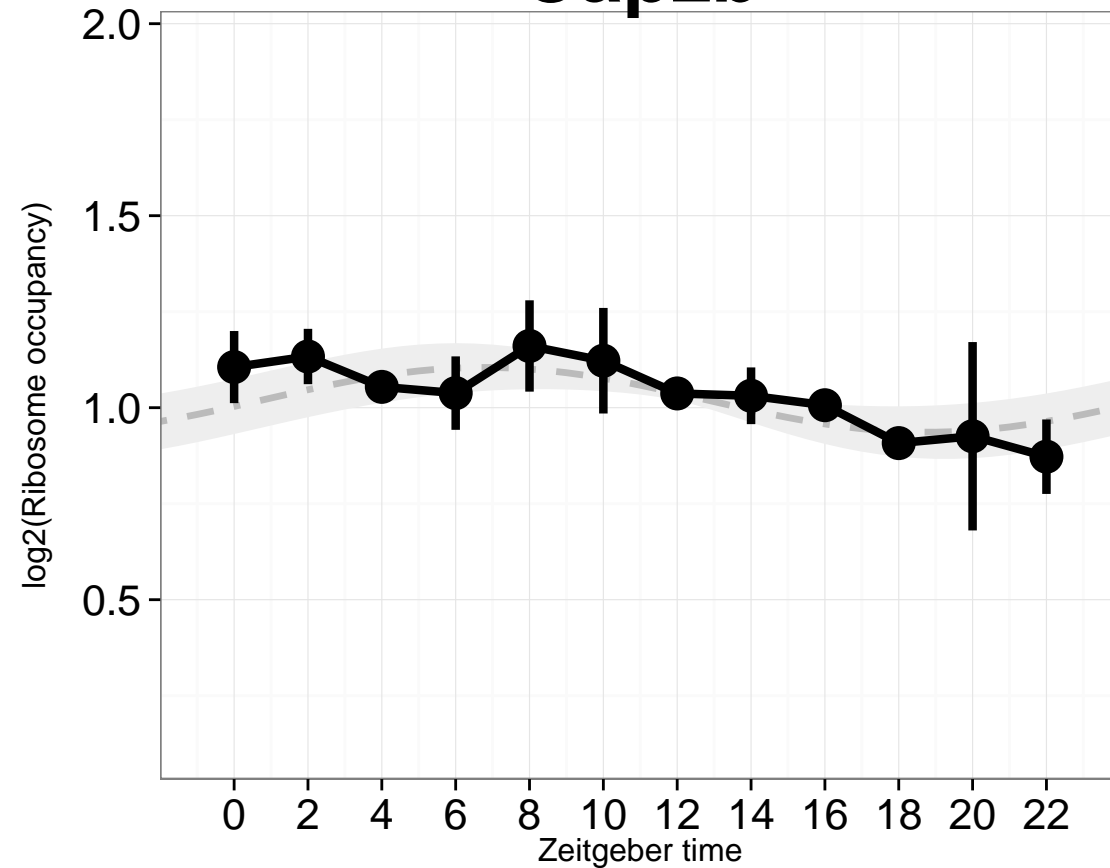

Supplement: SuppDataset_1.zip [file Capzb_set_A.pdf › Supplemental Dataset 1/A-mRNA_nonrhyth_translation_nonrhyth/Capzb_set_A.pdf]

# Car8

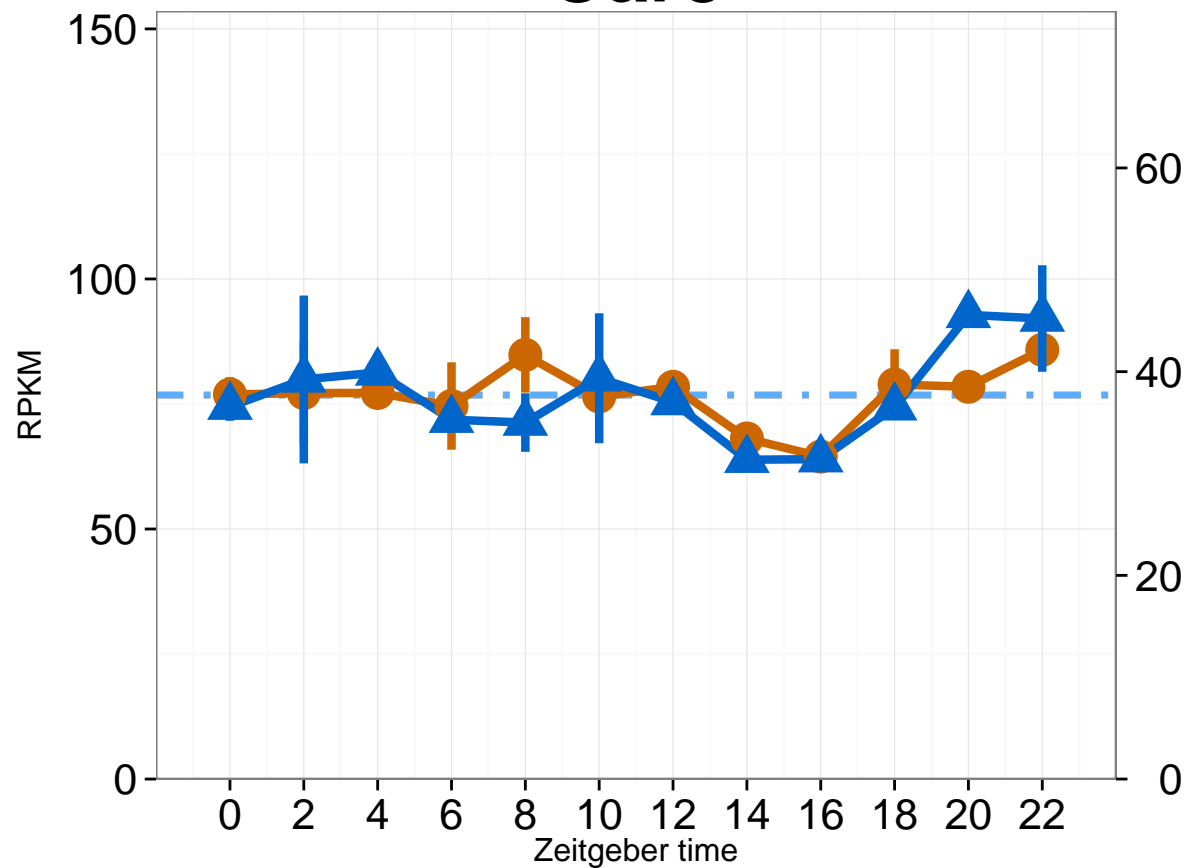

# Car8

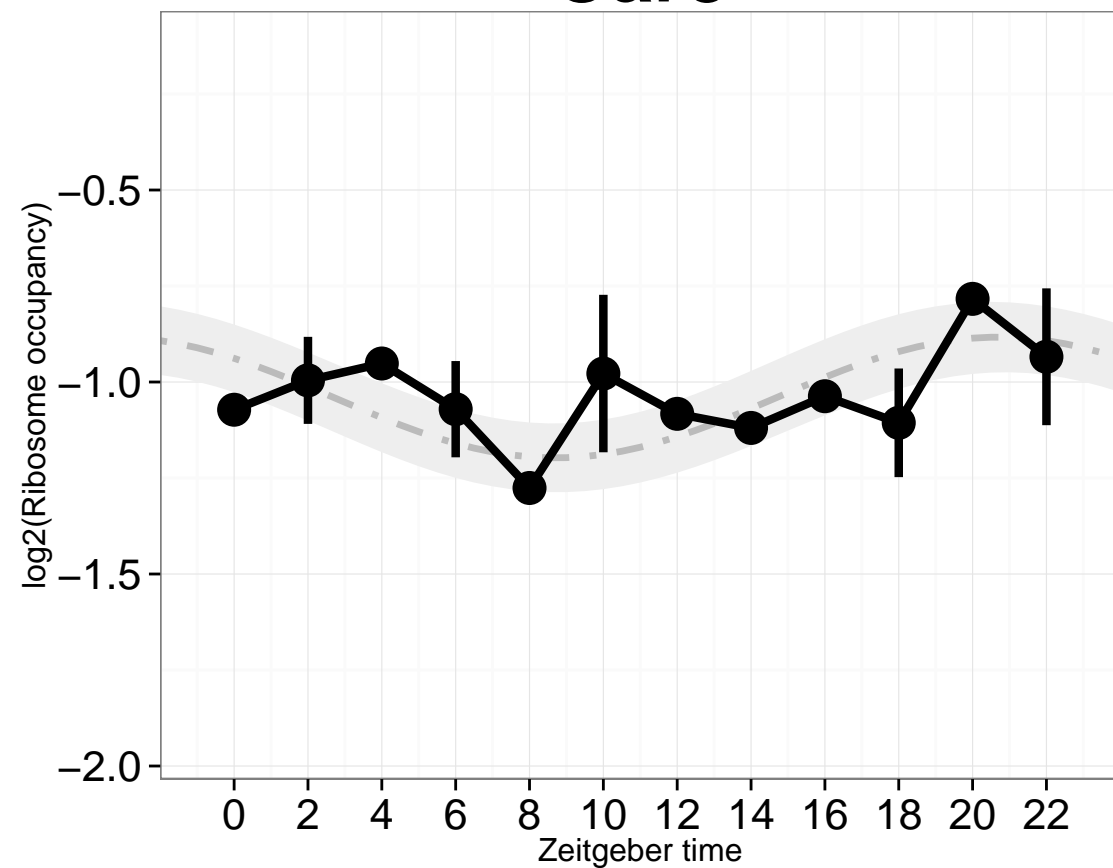

Supplement: SuppDataset_1.zip [file Car8_set_A.pdf › Supplemental Dataset 1/A-mRNA_nonrhyth_translation_nonrhyth/Car8_set_A.pdf]

# Card10

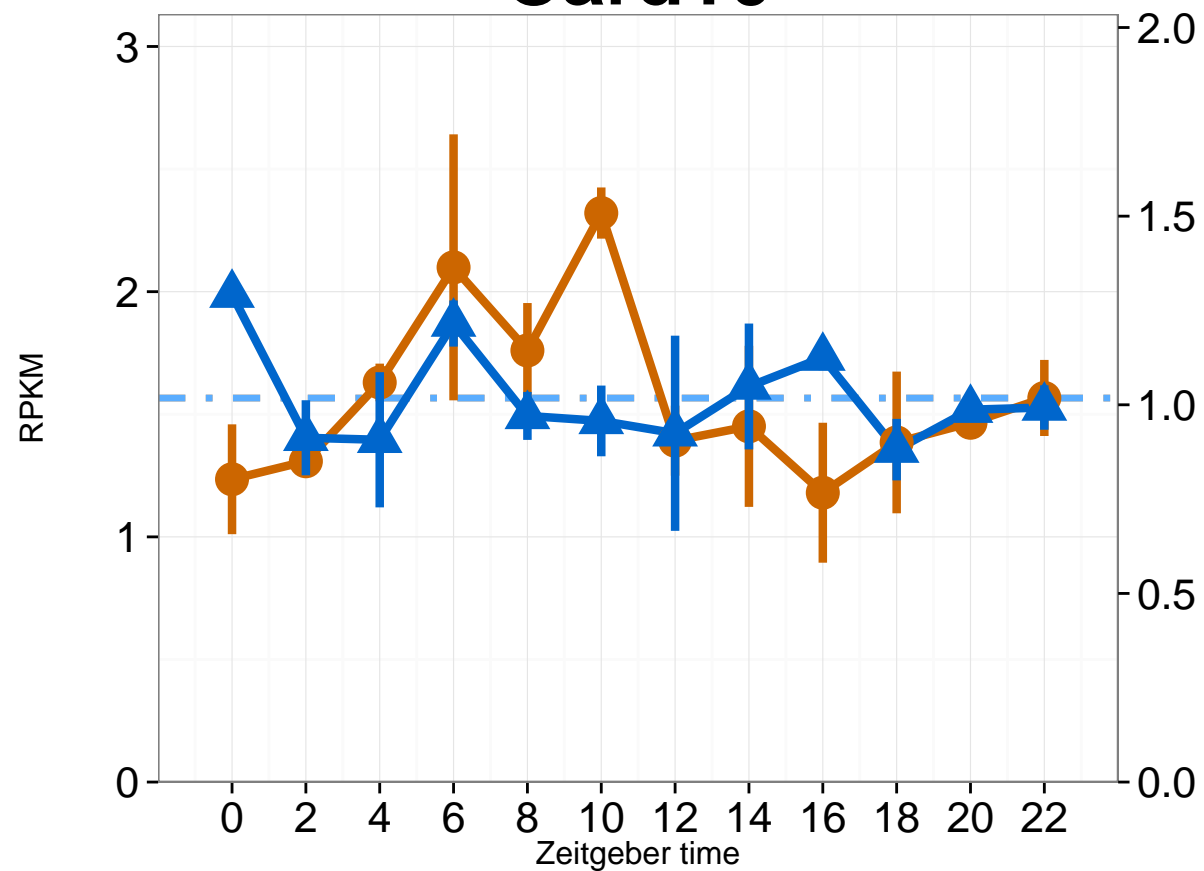

# Card10

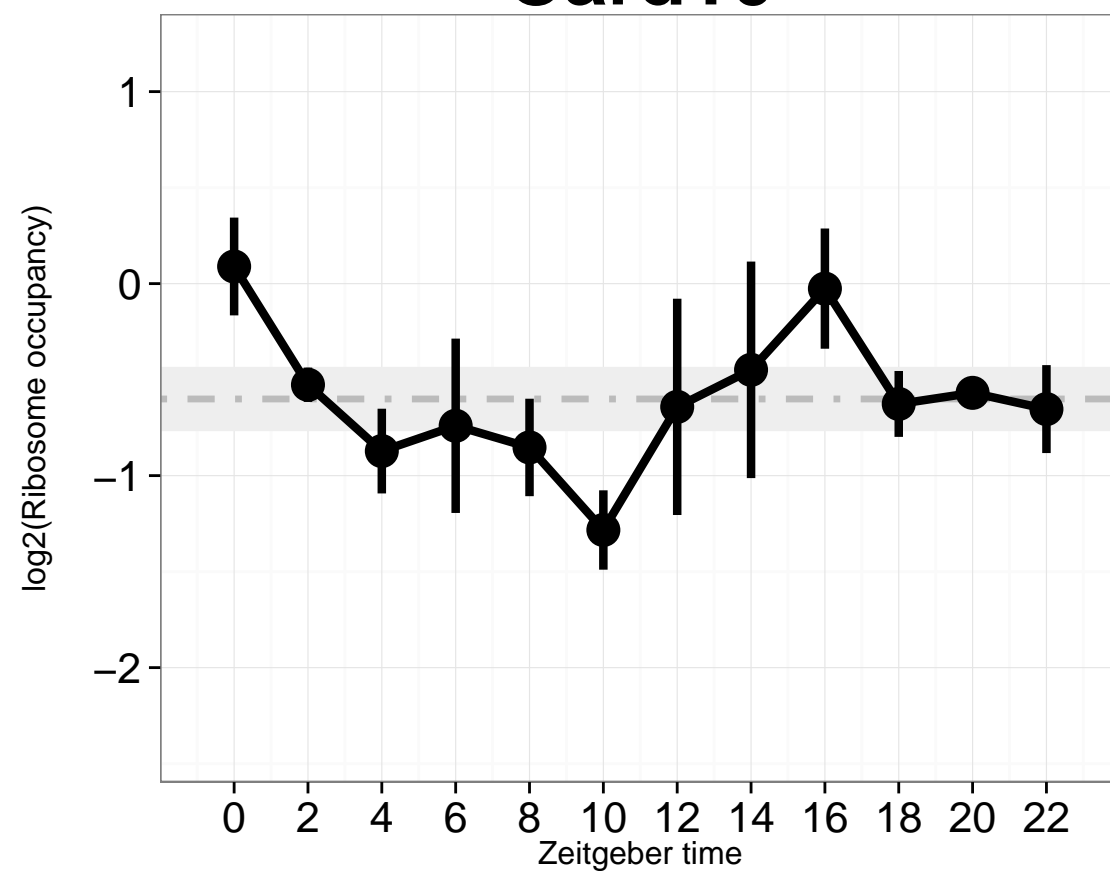

Supplement: SuppDataset_1.zip [file Card10_set_A.pdf › Supplemental Dataset 1/A-mRNA_nonrhyth_translation_nonrhyth/Card10_set_A.pdf]

# Card6

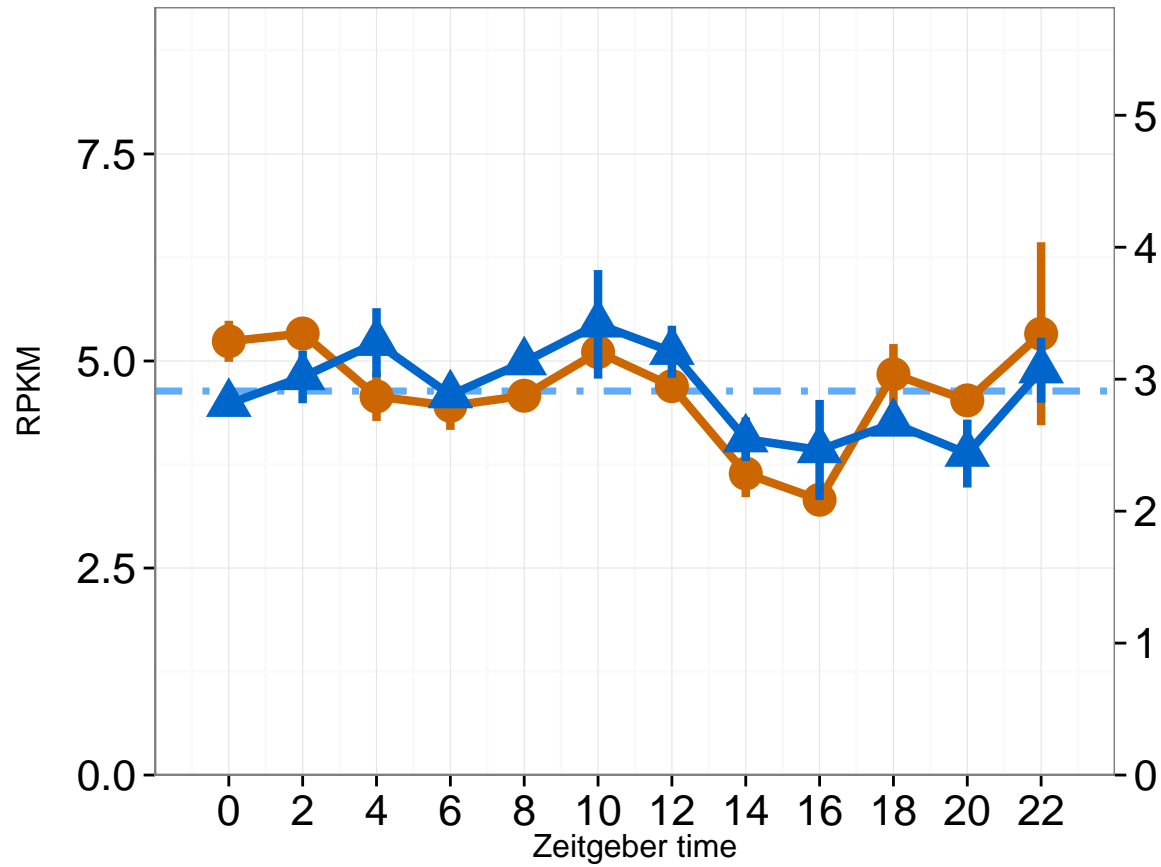

# Card6

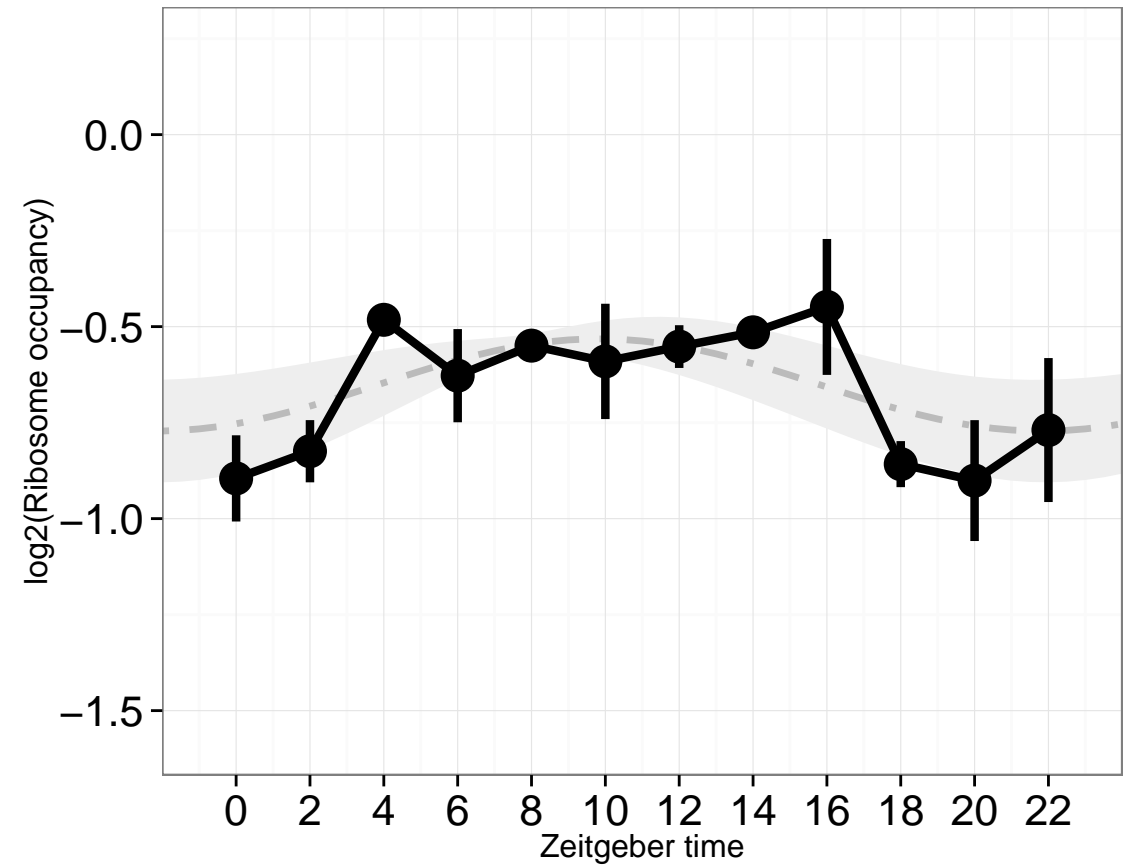

Supplement: SuppDataset_1.zip [file Card6_set_A.pdf › Supplemental Dataset 1/A-mRNA_nonrhyth_translation_nonrhyth/Card6_set_A.pdf]

## Carf

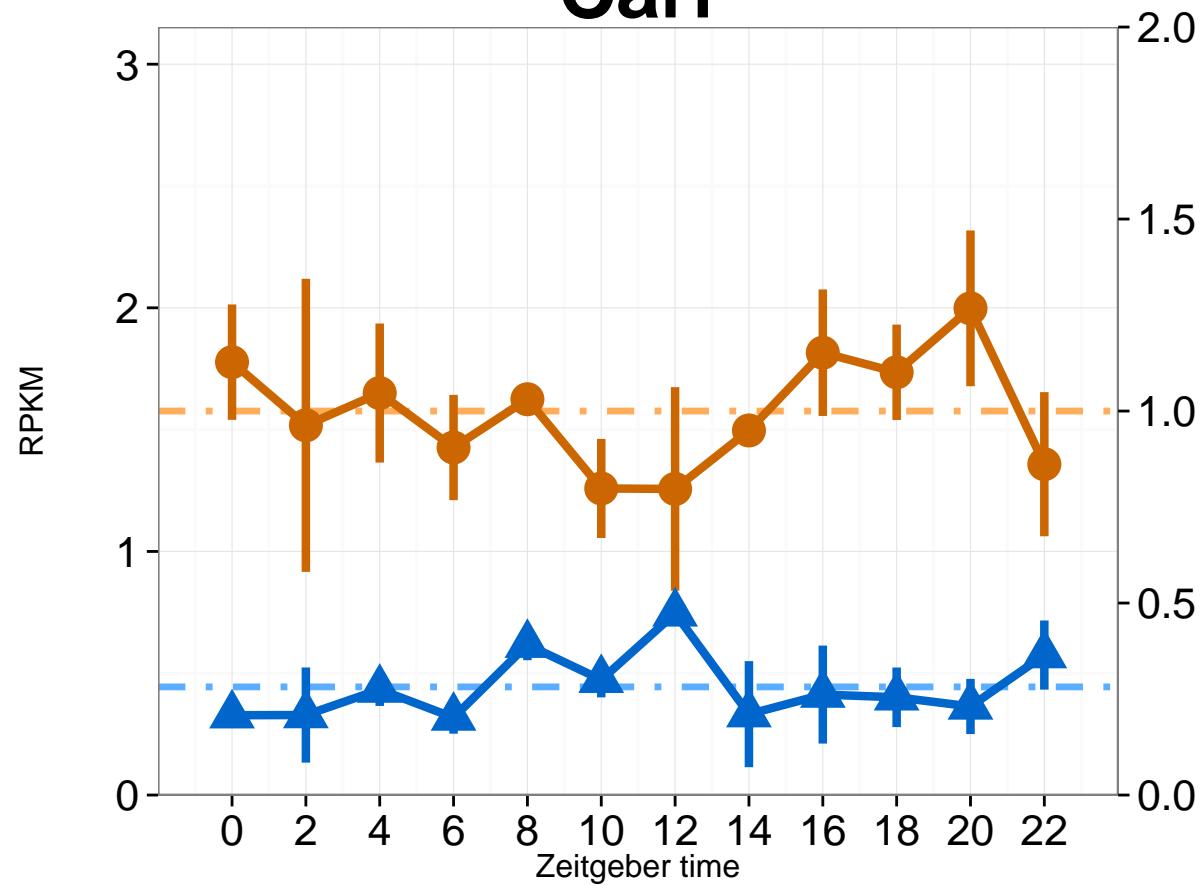

## Carf

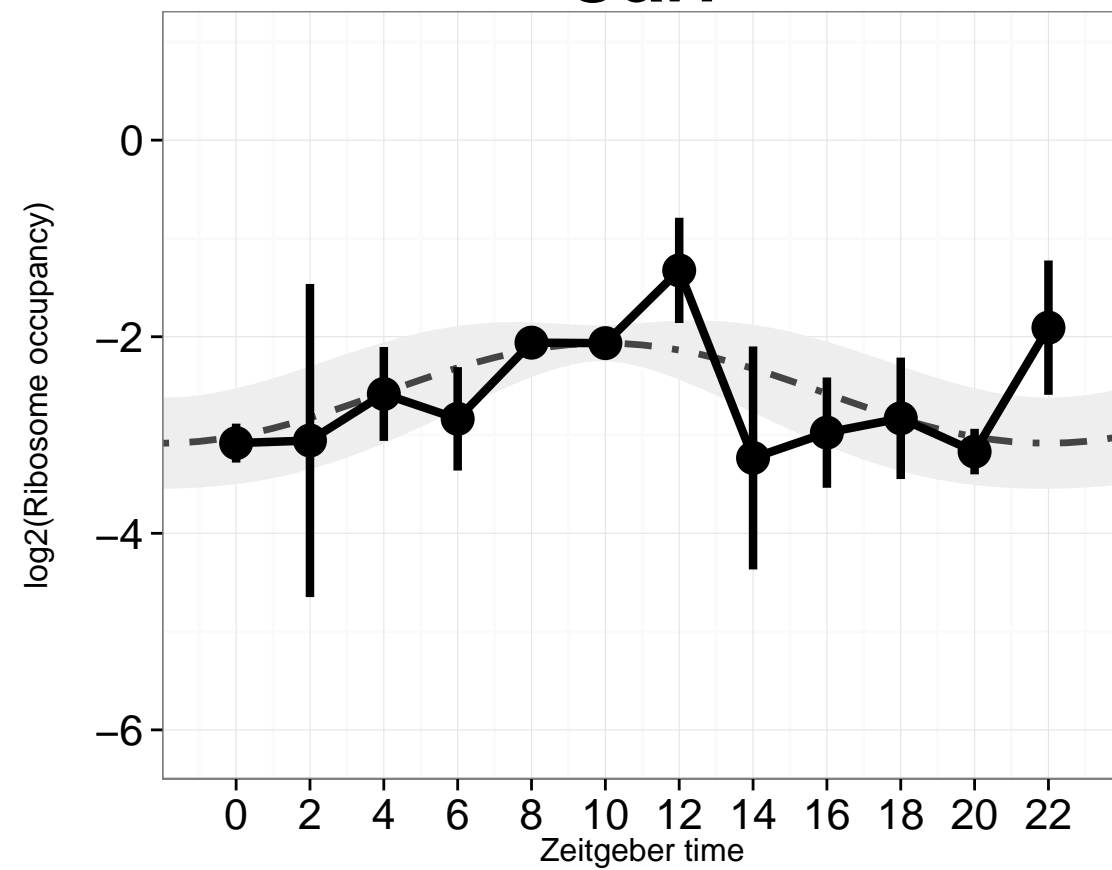

Supplement: SuppDataset_1.zip [file Carf_set_A.pdf › Supplemental Dataset 1/A-mRNA_nonrhyth_translation_nonrhyth/Carf_set_A.pdf]

## Carhsp1

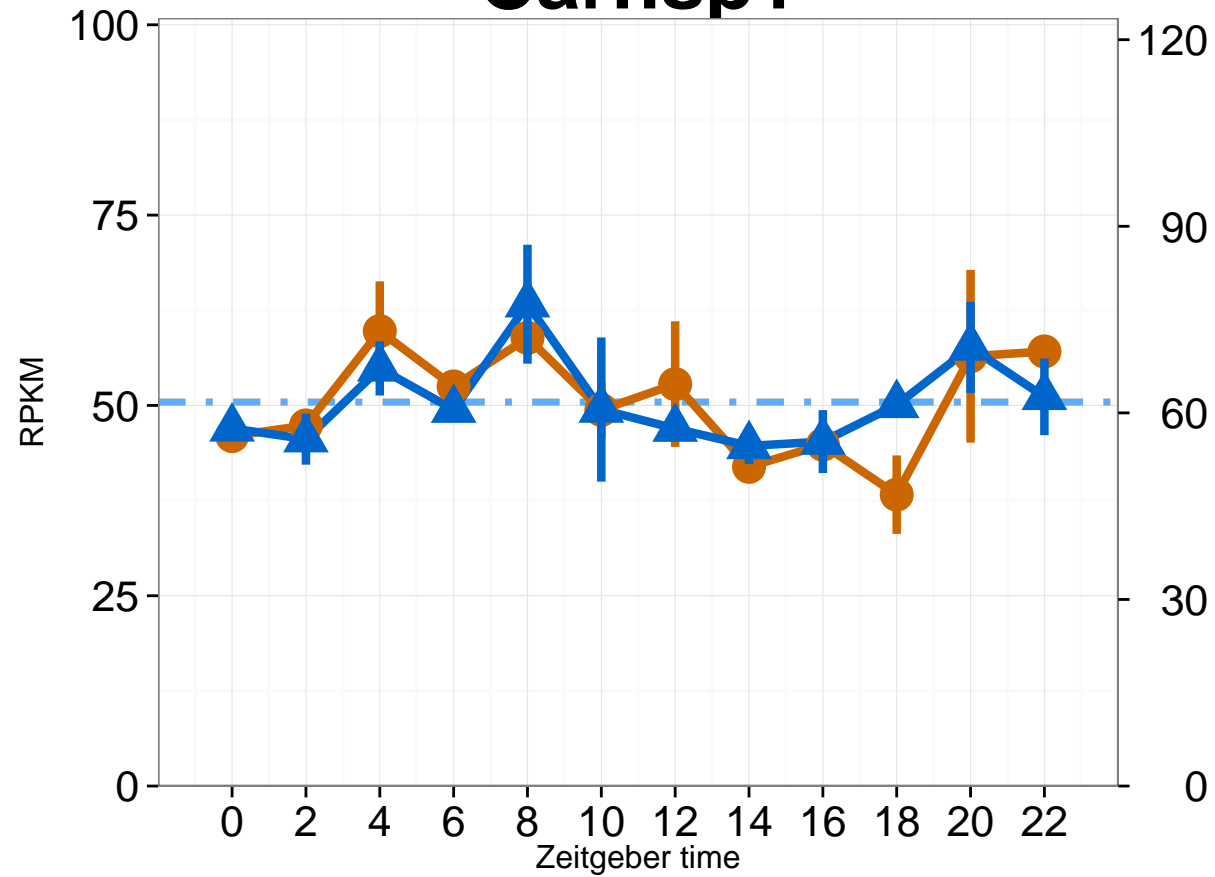

## Carhsp1

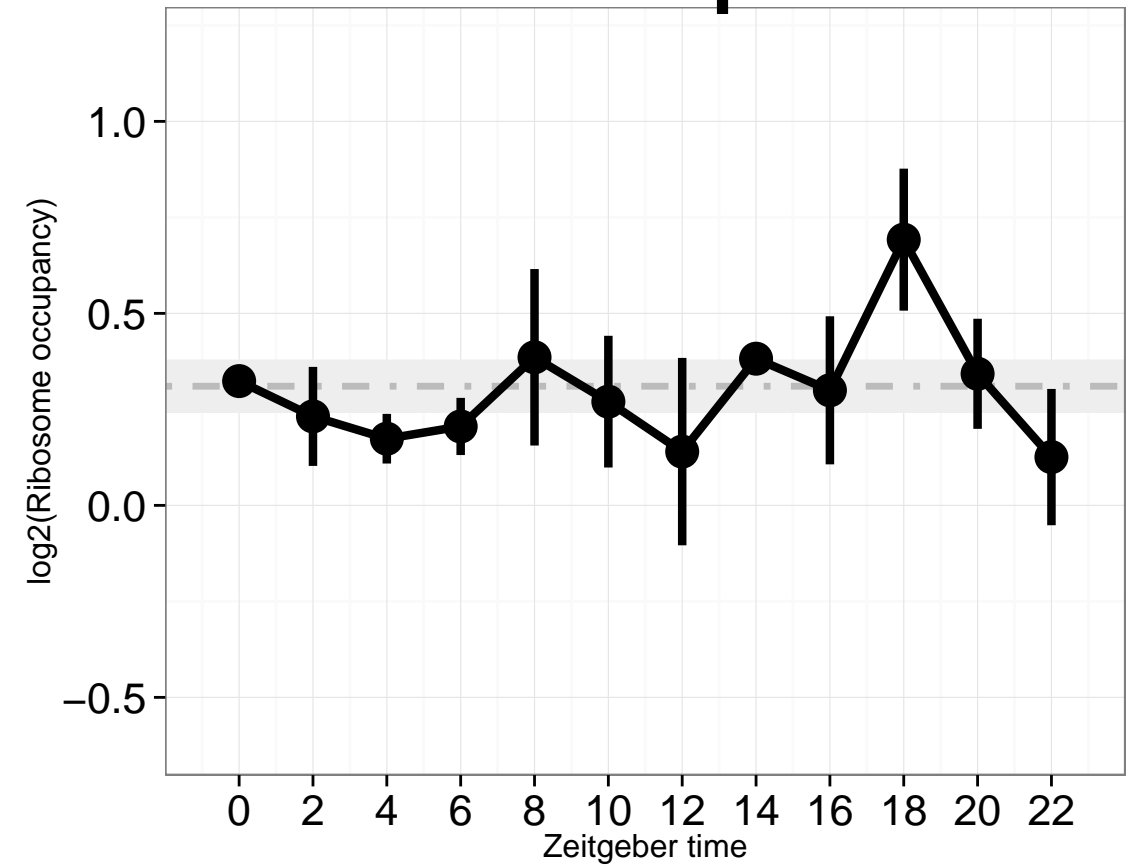

Supplement: SuppDataset_1.zip [file Carhsp1_set_A.pdf › Supplemental Dataset 1/A-mRNA_nonrhyth_translation_nonrhyth/Carhsp1_set_A.pdf]

## Carkd

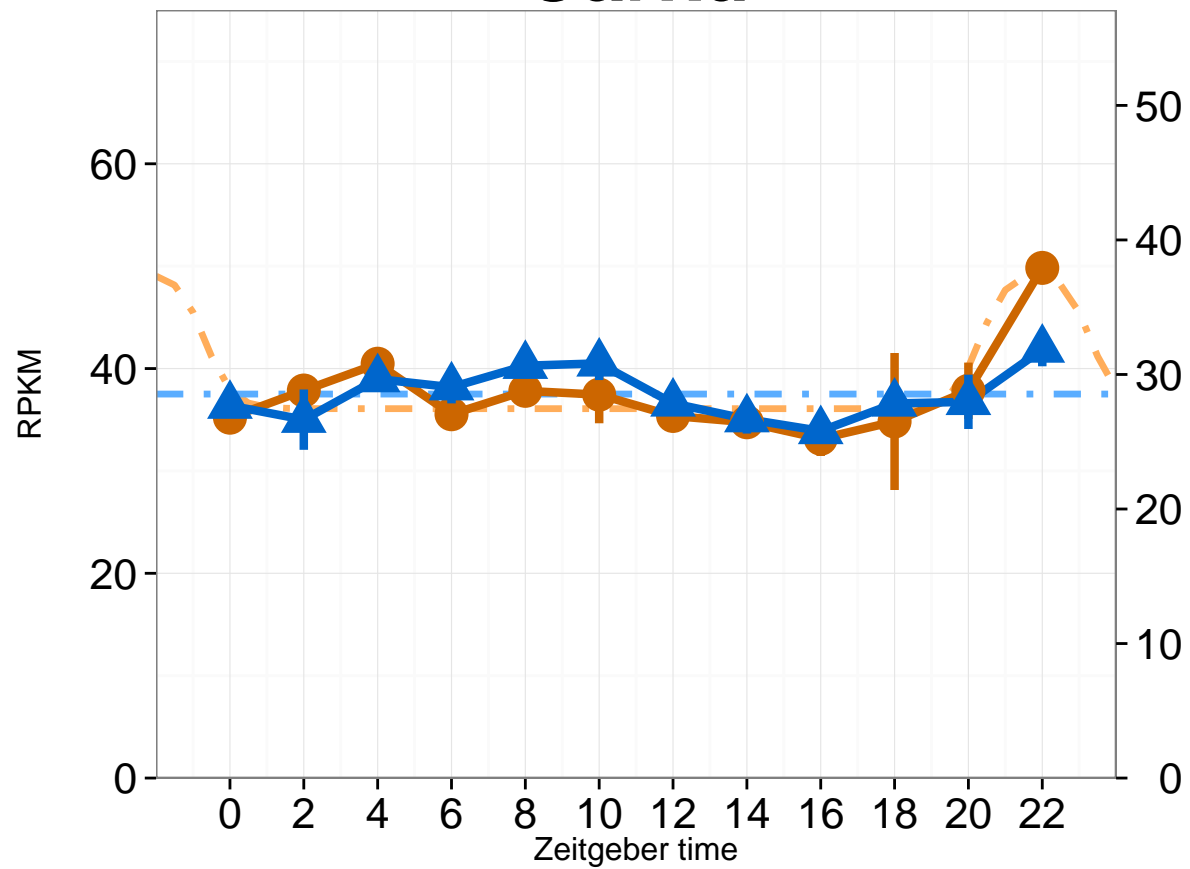

## Carkd

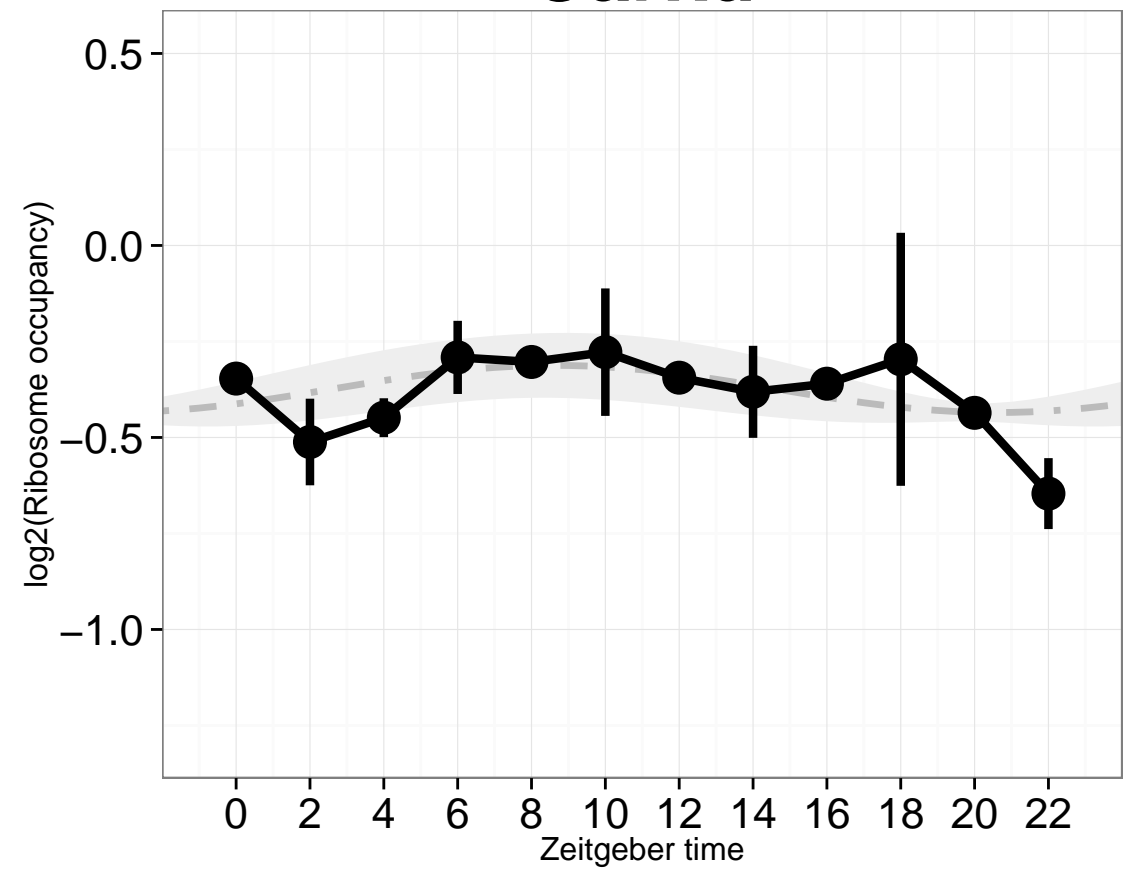

Supplement: SuppDataset_1.zip [file Carkd_set_A.pdf › Supplemental Dataset 1/A-mRNA_nonrhyth_translation_nonrhyth/Carkd_set_A.pdf]

# Cars2

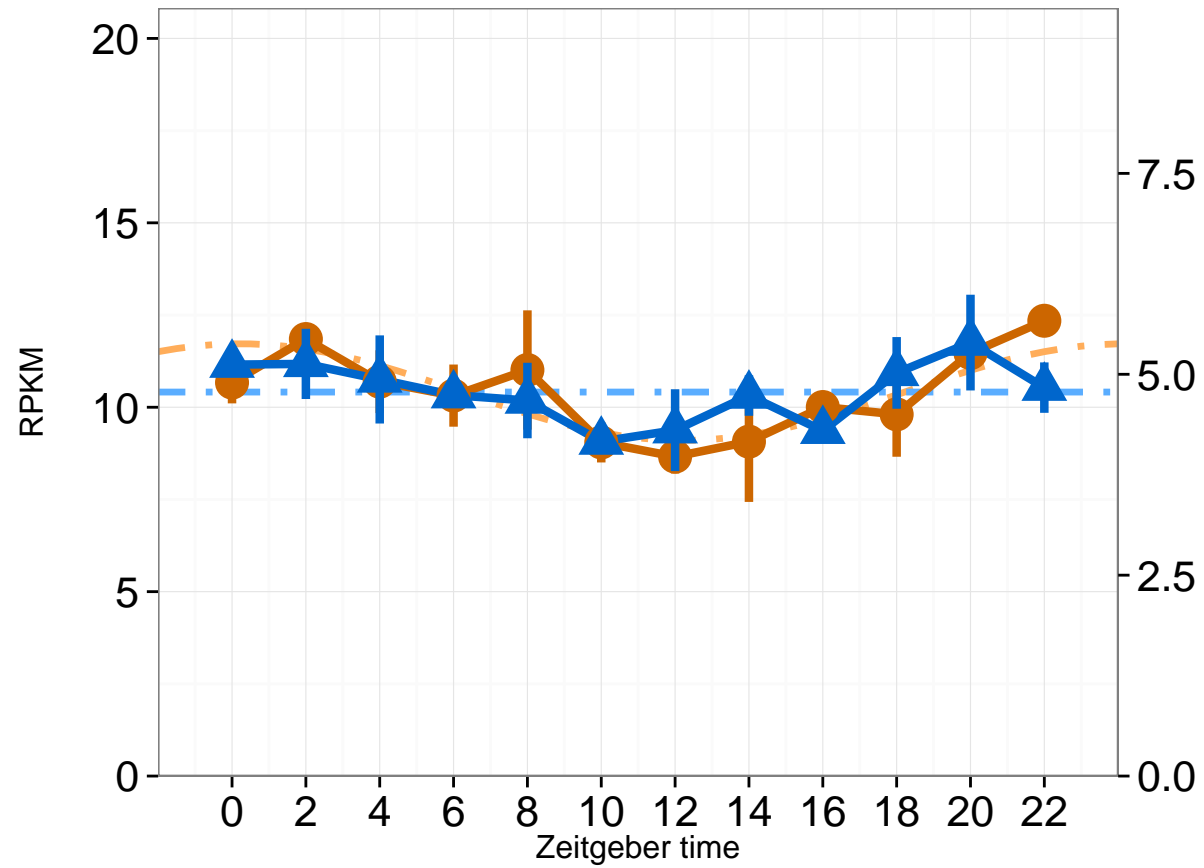

# Cars2

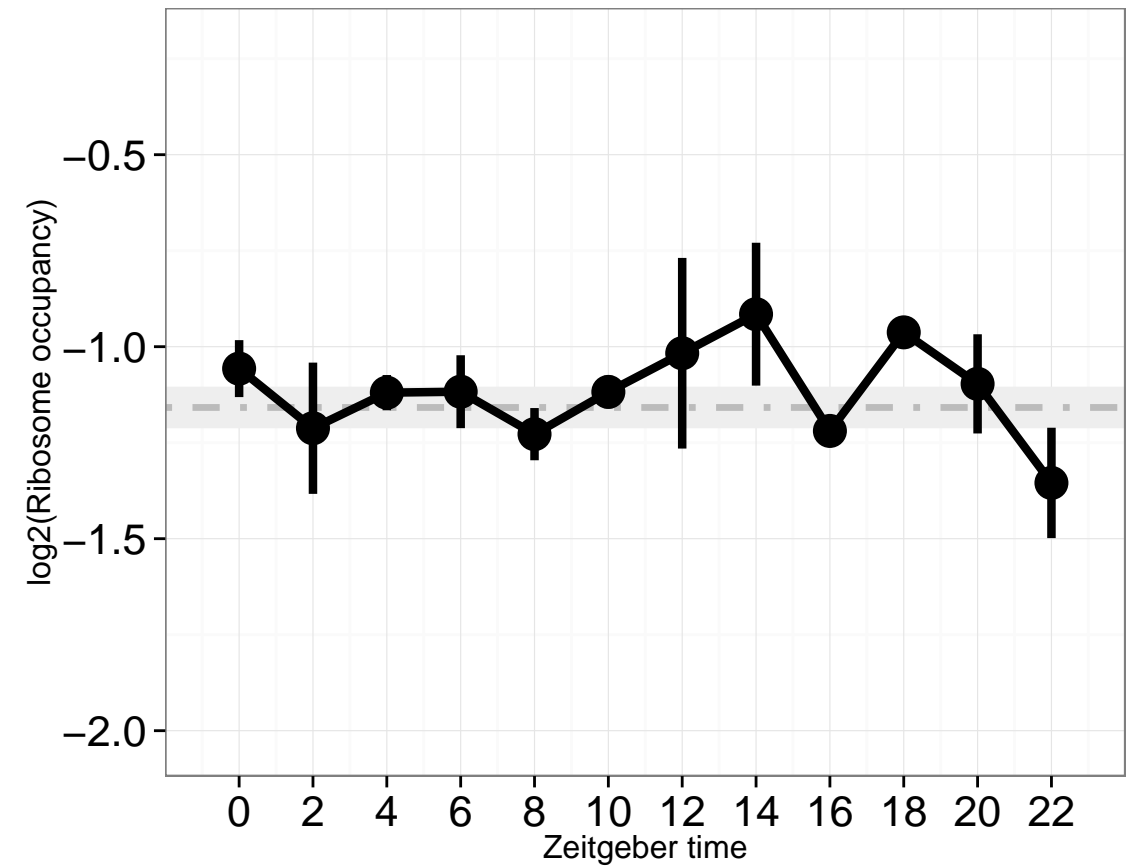

Supplement: SuppDataset_1.zip [file Cars2_set_A.pdf › Supplemental Dataset 1/A-mRNA_nonrhyth_translation_nonrhyth/Cars2_set_A.pdf]

# Casc3

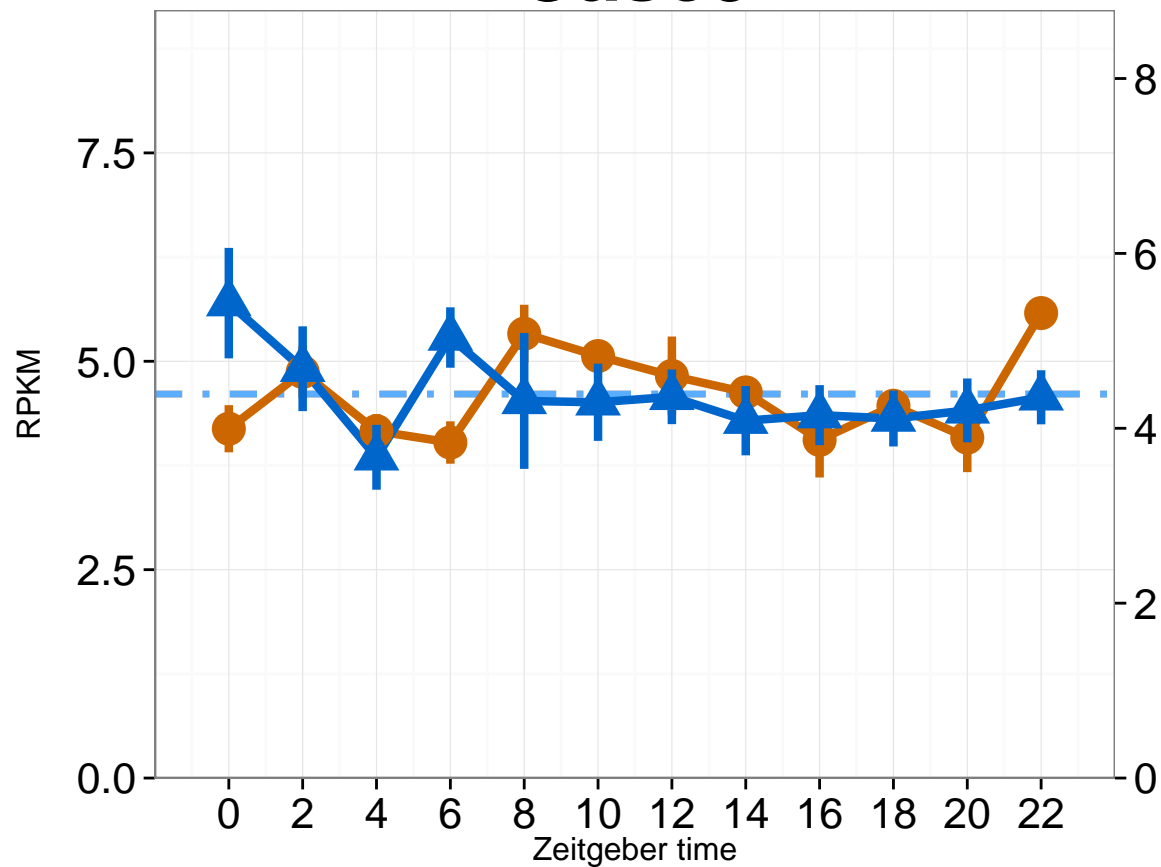

# Casc3

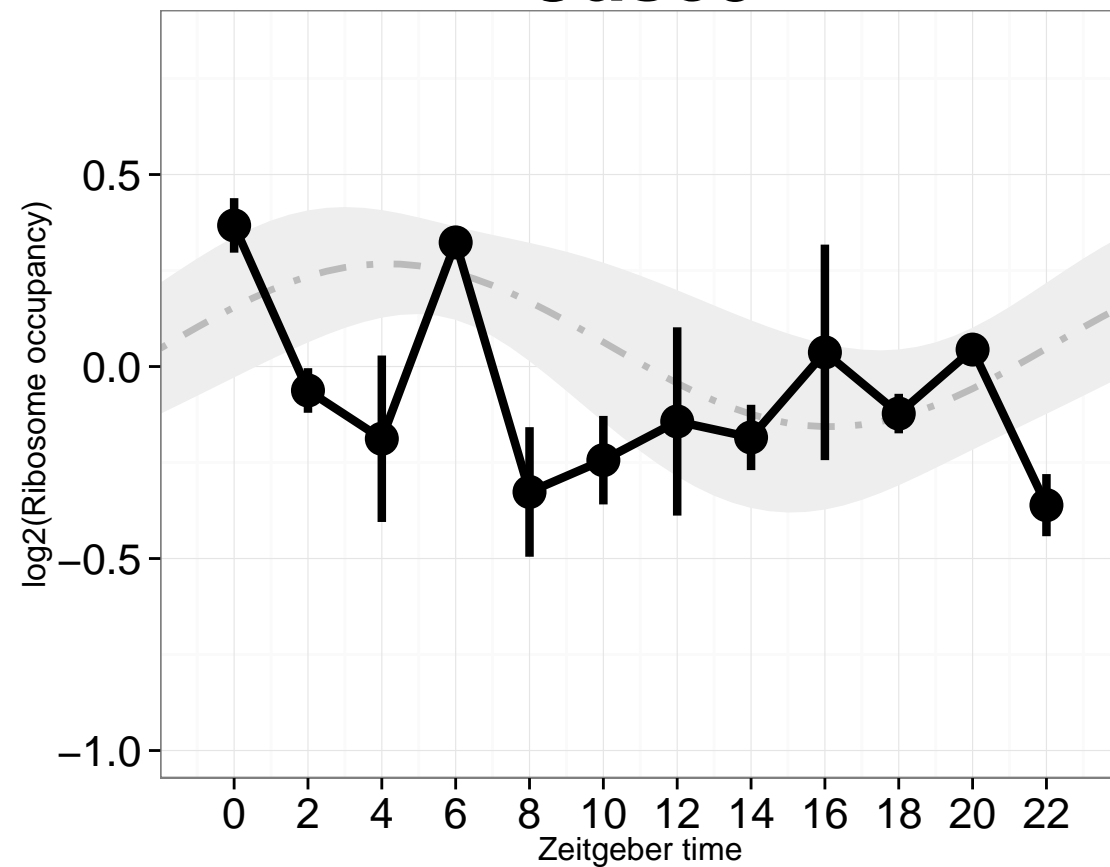

Supplement: SuppDataset_1.zip [file Casc3_set_A.pdf › Supplemental Dataset 1/A-mRNA_nonrhyth_translation_nonrhyth/Casc3_set_A.pdf]

## Casc4

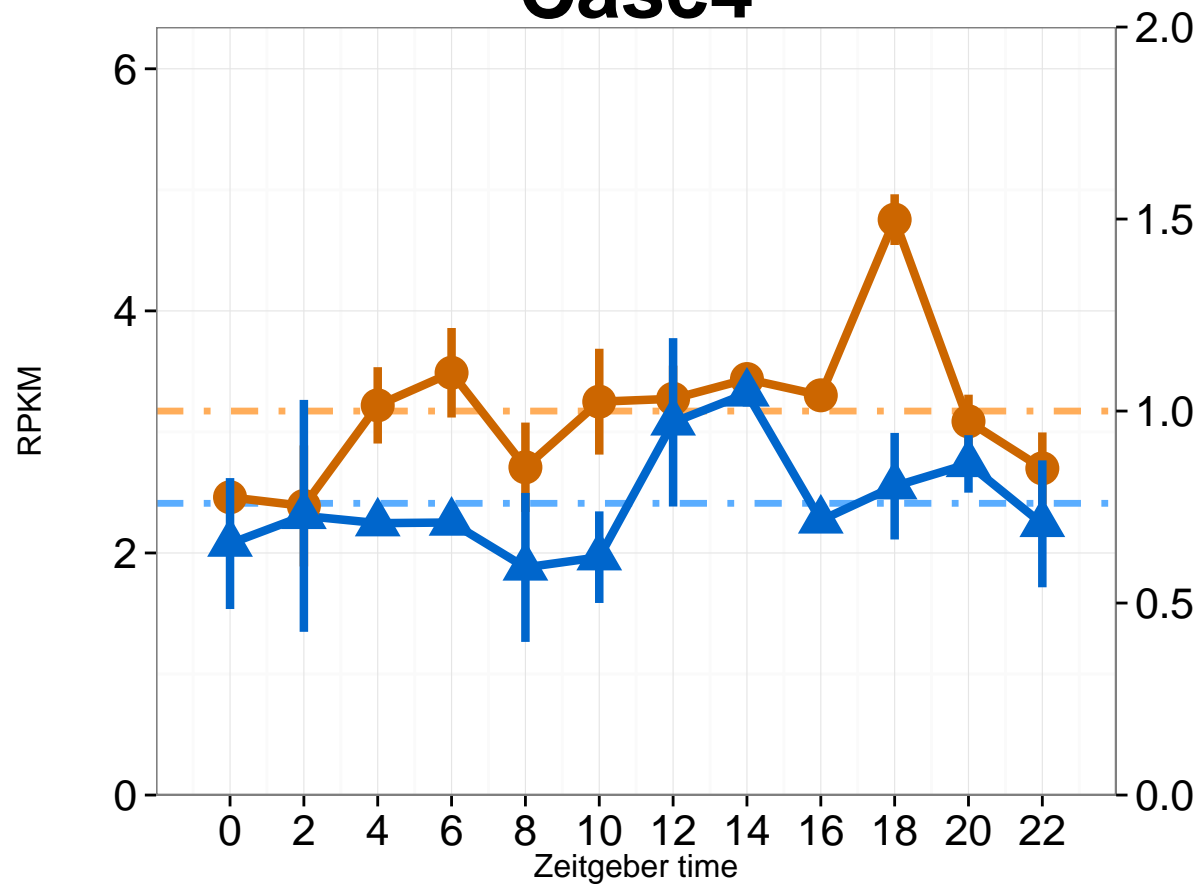

## Casc4

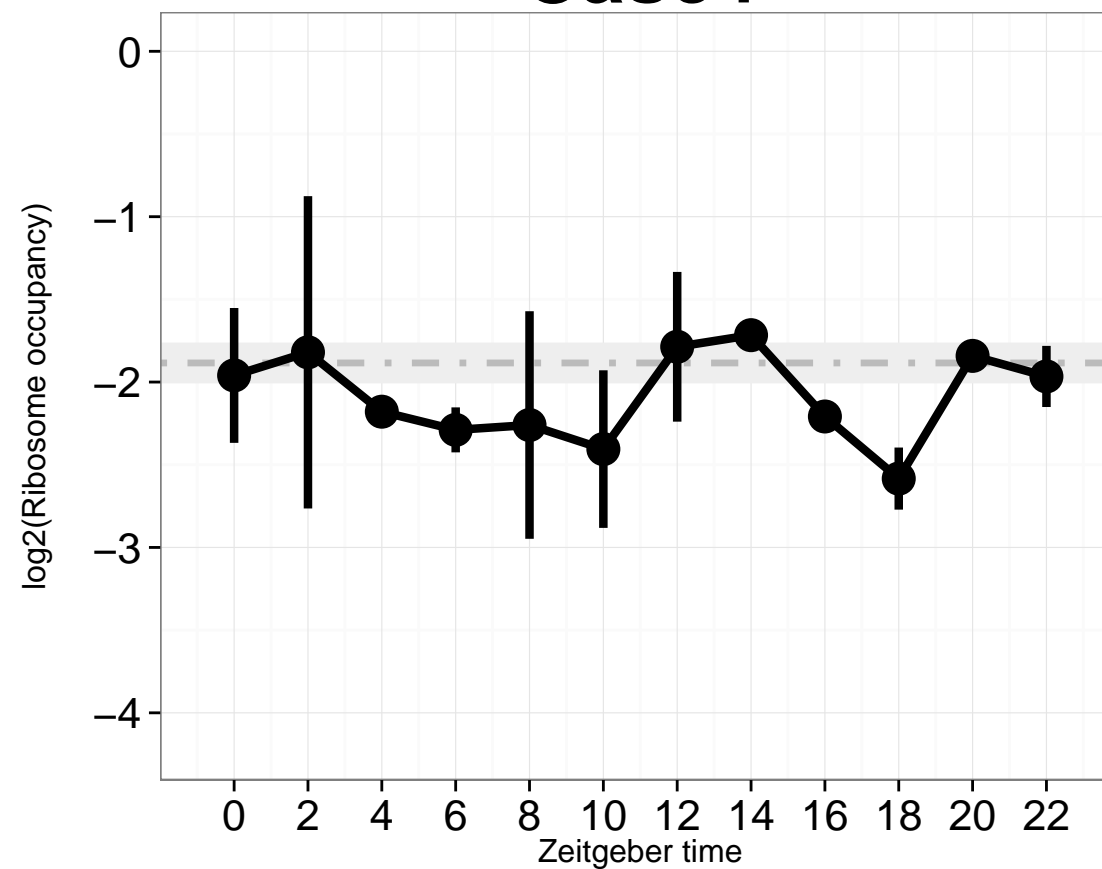

Supplement: SuppDataset_1.zip [file Casc4_set_A.pdf › Supplemental Dataset 1/A-mRNA_nonrhyth_translation_nonrhyth/Casc4_set_A.pdf]

# Casd1

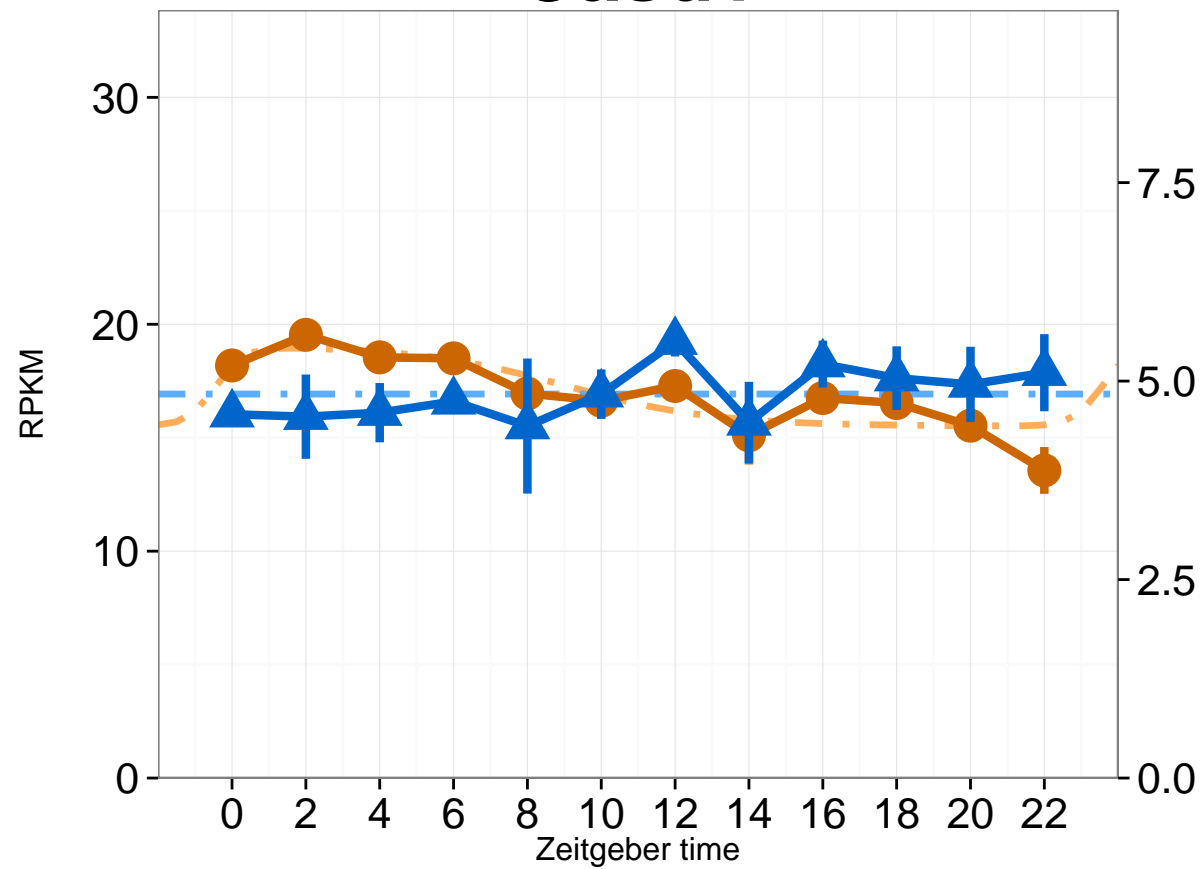

# Casd1

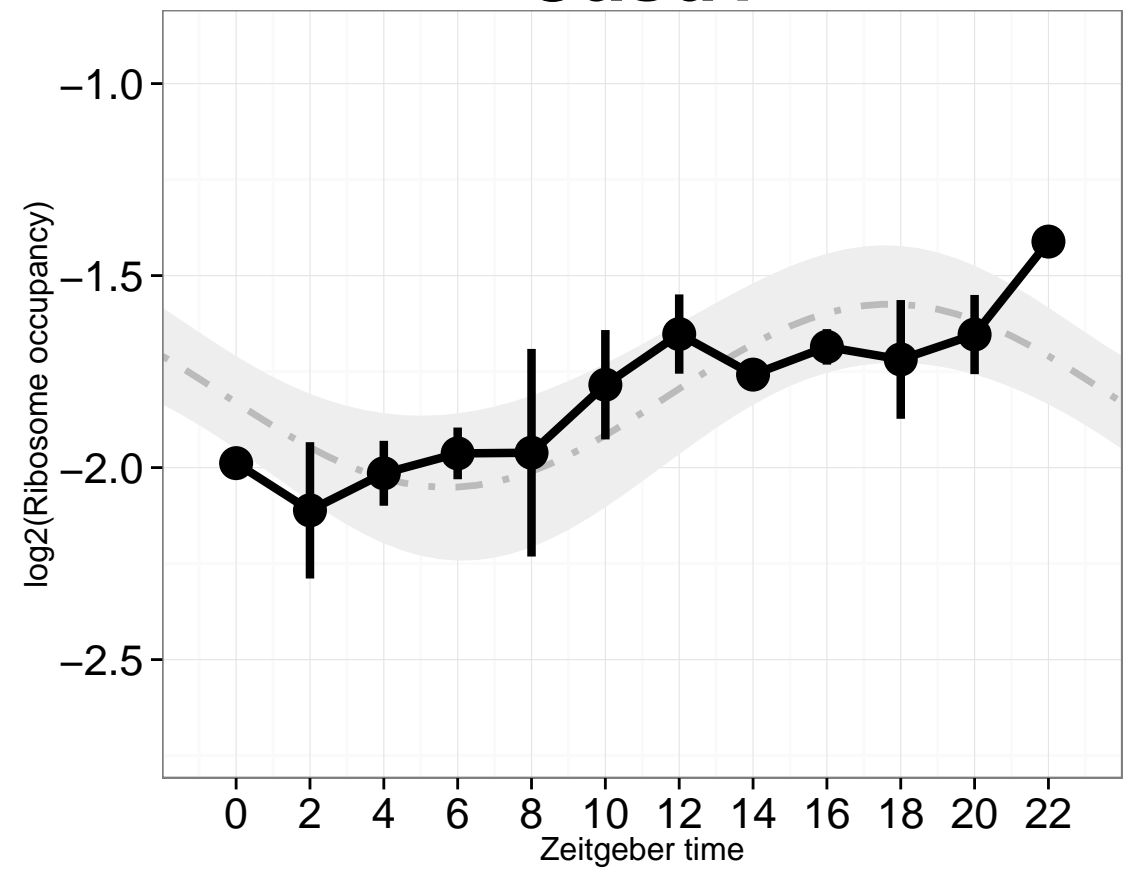

Supplement: SuppDataset_1.zip [file Casd1_set_A.pdf › Supplemental Dataset 1/A-mRNA_nonrhyth_translation_nonrhyth/Casd1_set_A.pdf]

## Cask

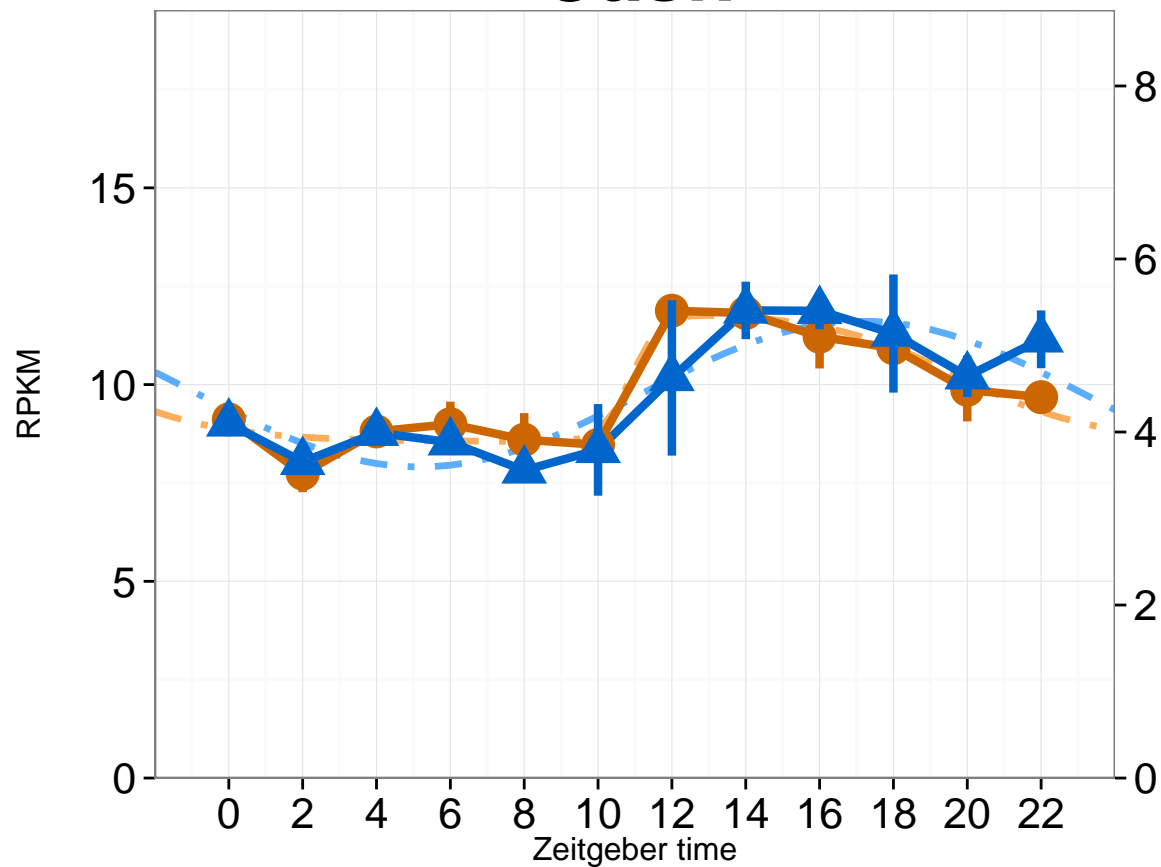

## Cask

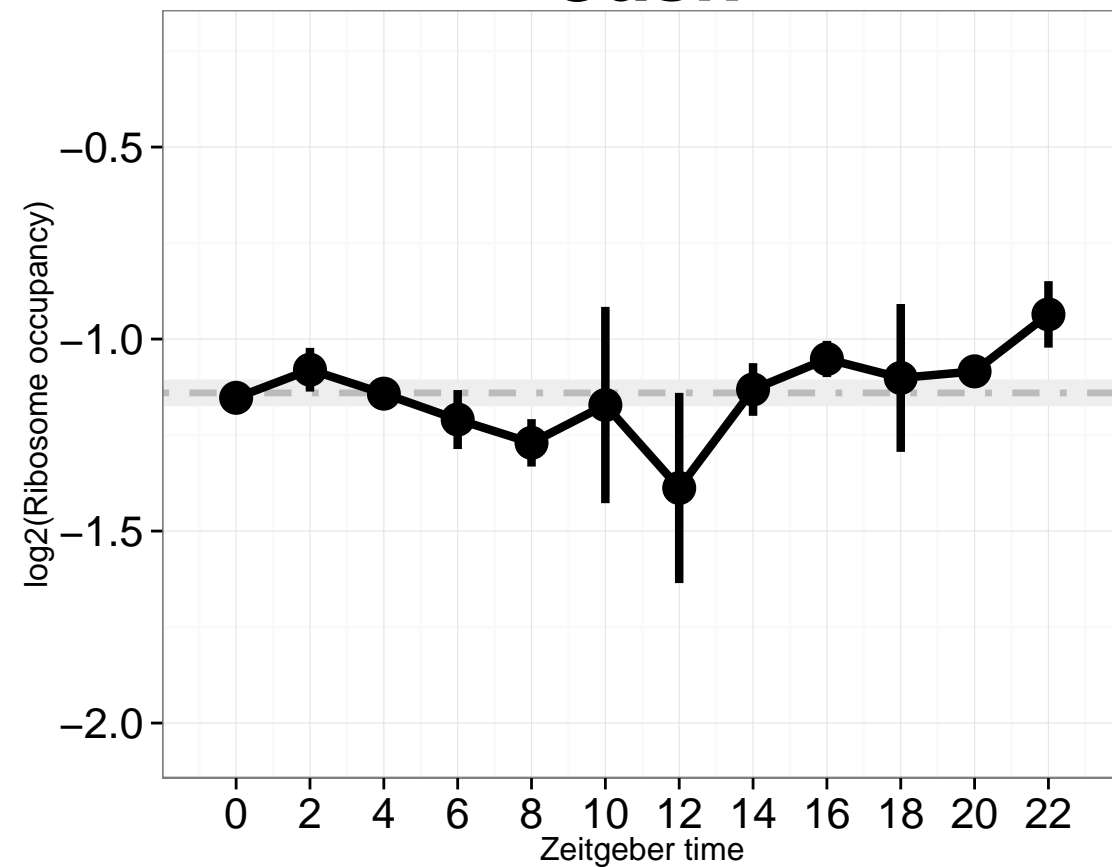

Supplement: SuppDataset_1.zip [file Cask_set_A.pdf › Supplemental Dataset 1/A-mRNA_nonrhyth_translation_nonrhyth/Cask_set_A.pdf]

# Casp12

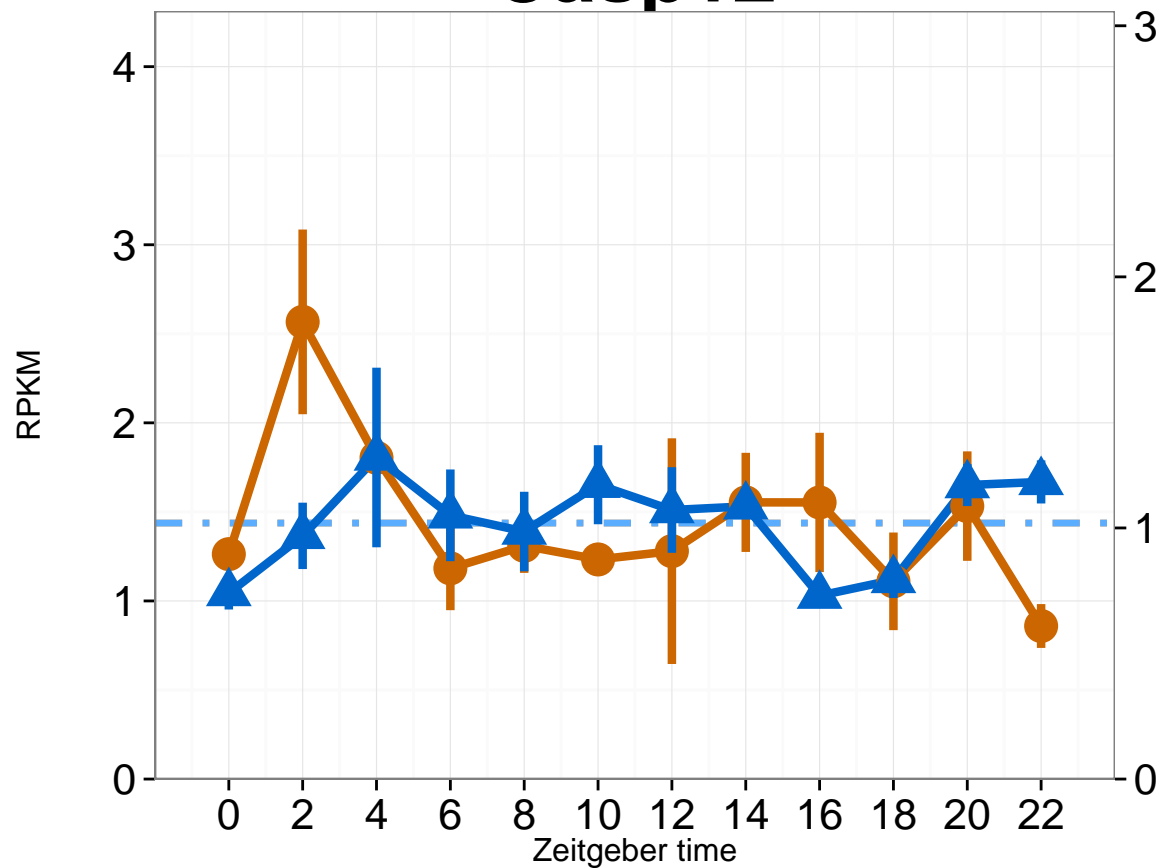

# Casp12

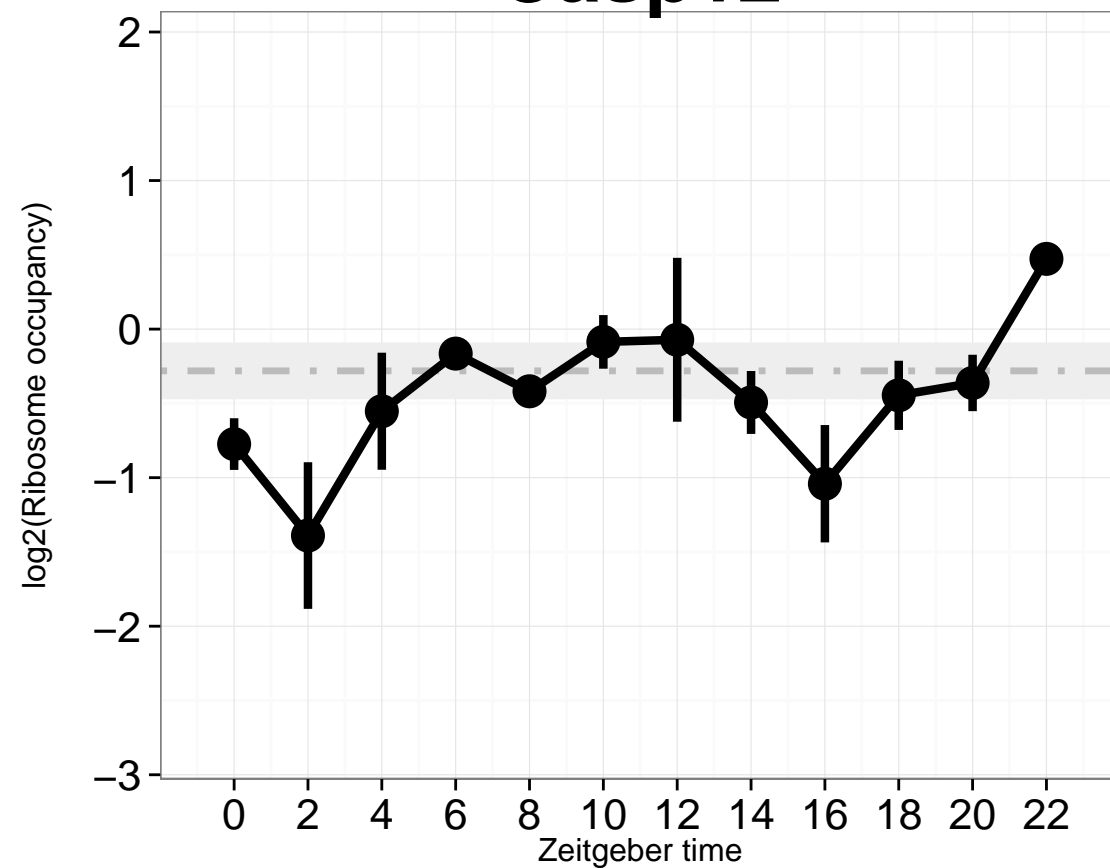

Supplement: SuppDataset_1.zip [file Casp12_set_A.pdf › Supplemental Dataset 1/A-mRNA_nonrhyth_translation_nonrhyth/Casp12_set_A.pdf]

## Casp1

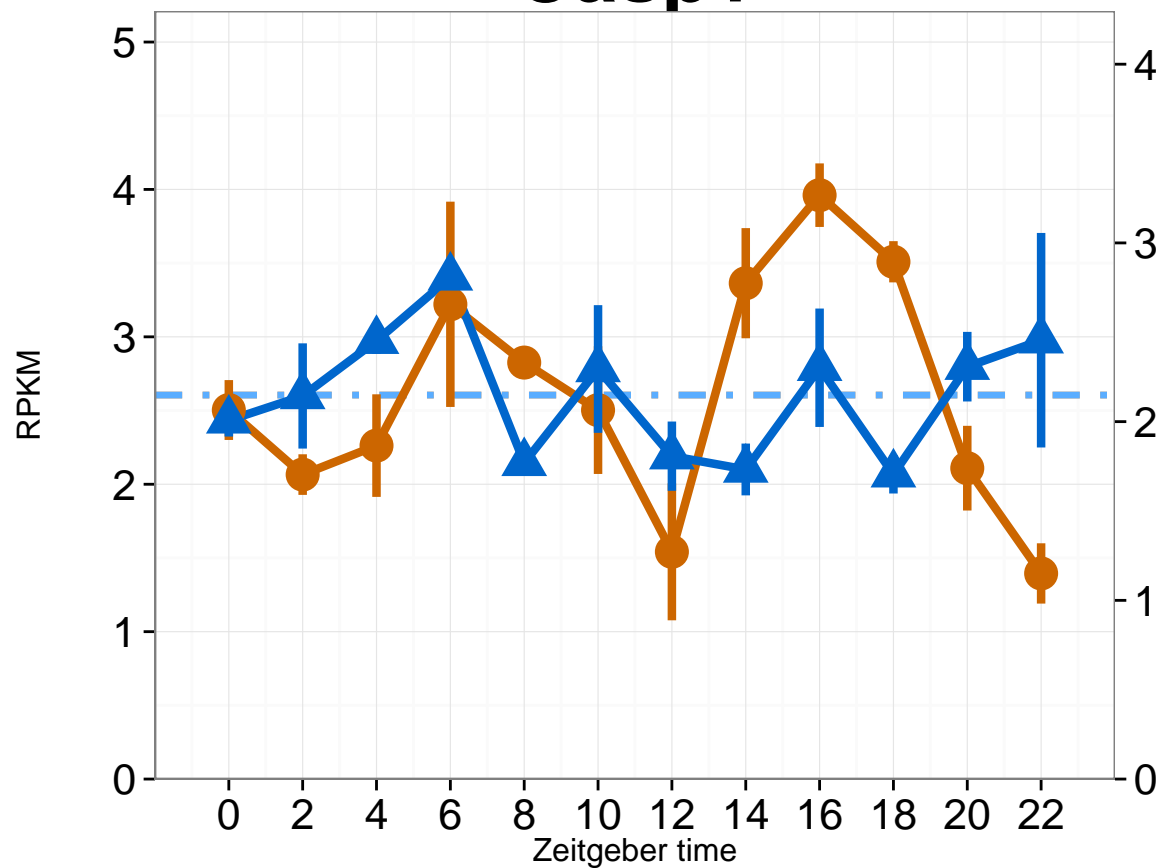

## Casp1

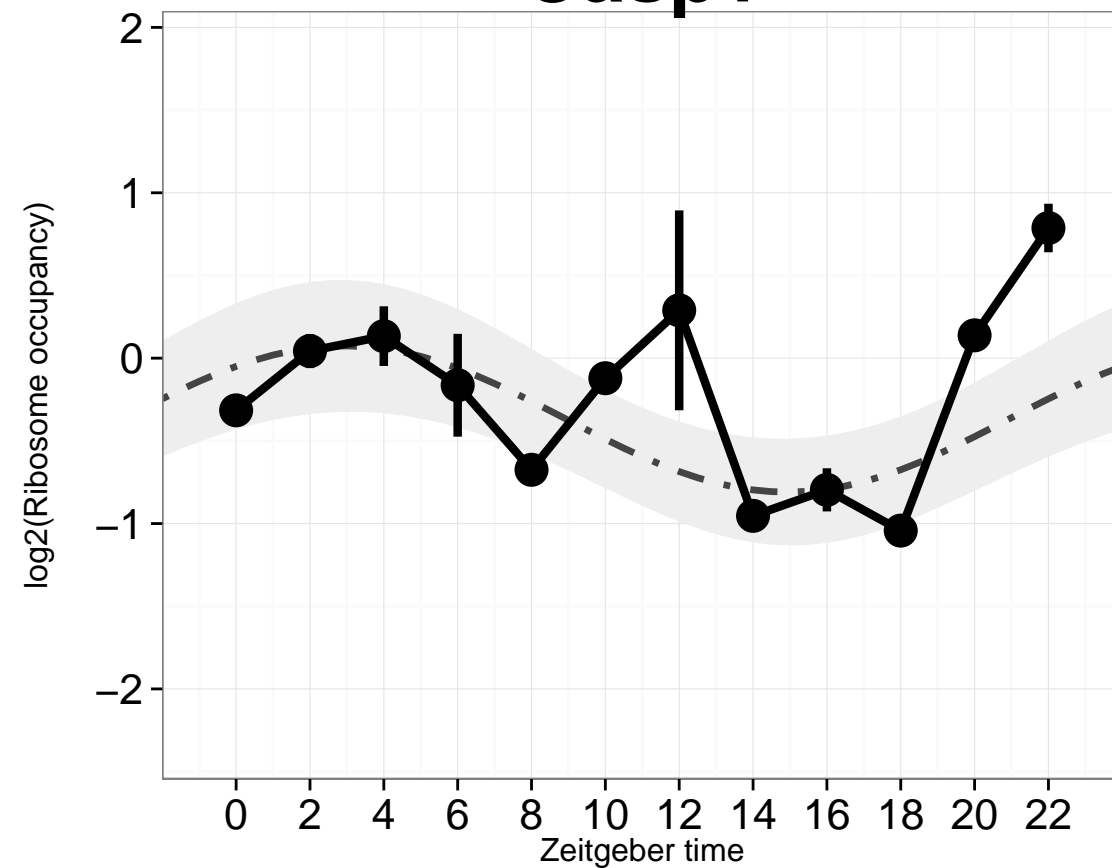

Supplement: SuppDataset_1.zip [file Casp1_set_A.pdf › Supplemental Dataset 1/A-mRNA_nonrhyth_translation_nonrhyth/Casp1_set_A.pdf]

## Casp2

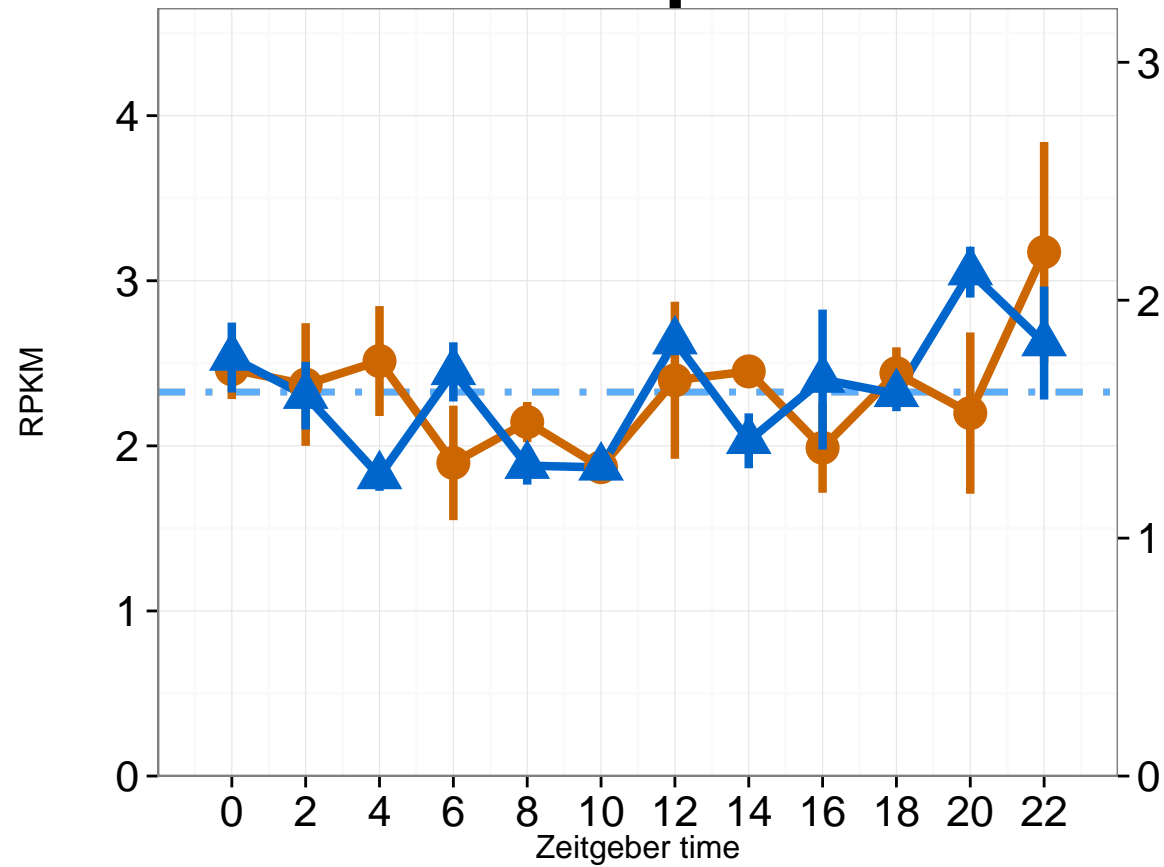

## Casp2

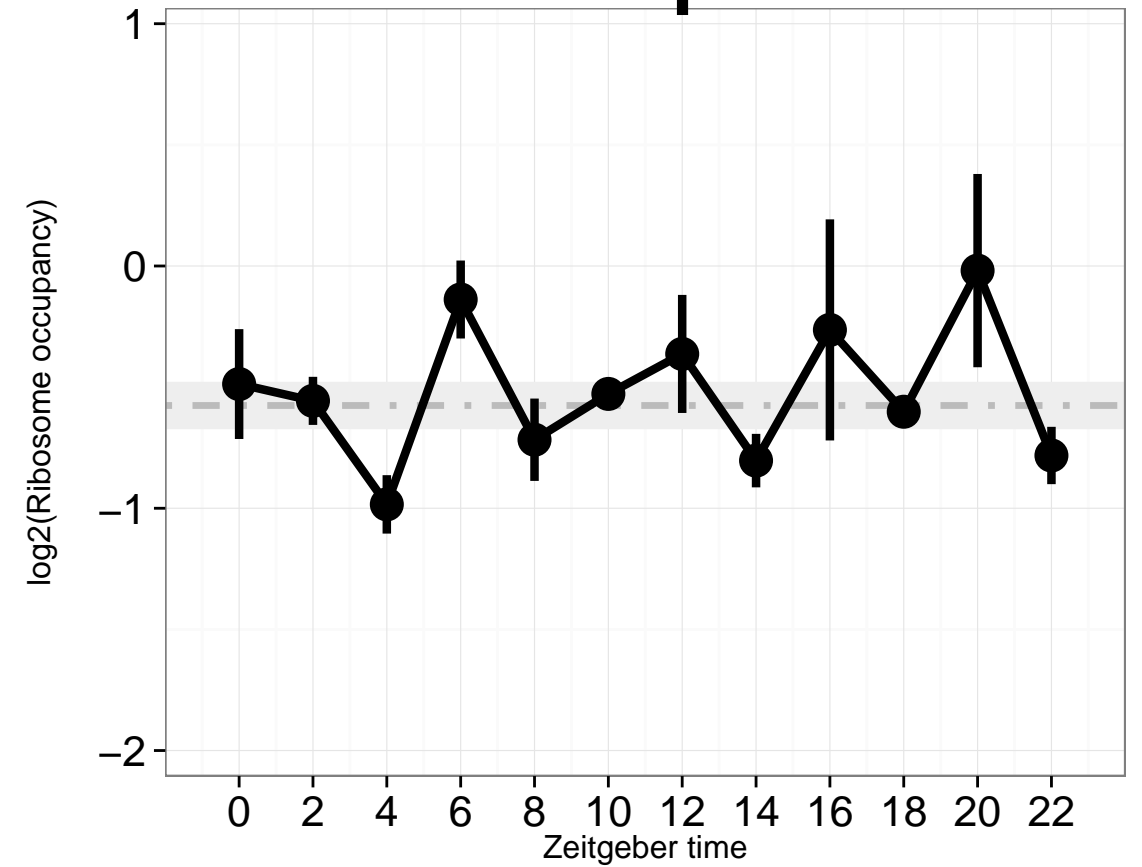

Supplement: SuppDataset_1.zip [file Casp2_set_A.pdf › Supplemental Dataset 1/A-mRNA_nonrhyth_translation_nonrhyth/Casp2_set_A.pdf]

## Casp3

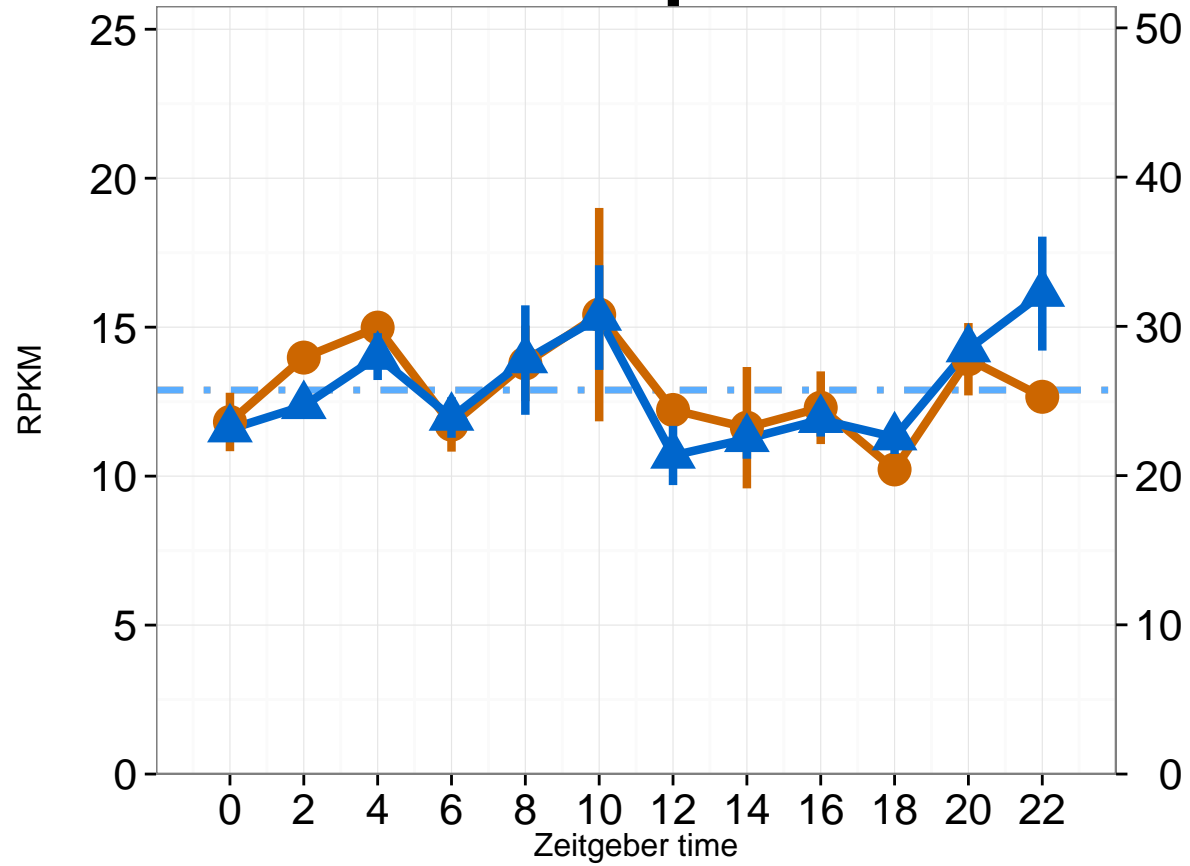

## Casp3

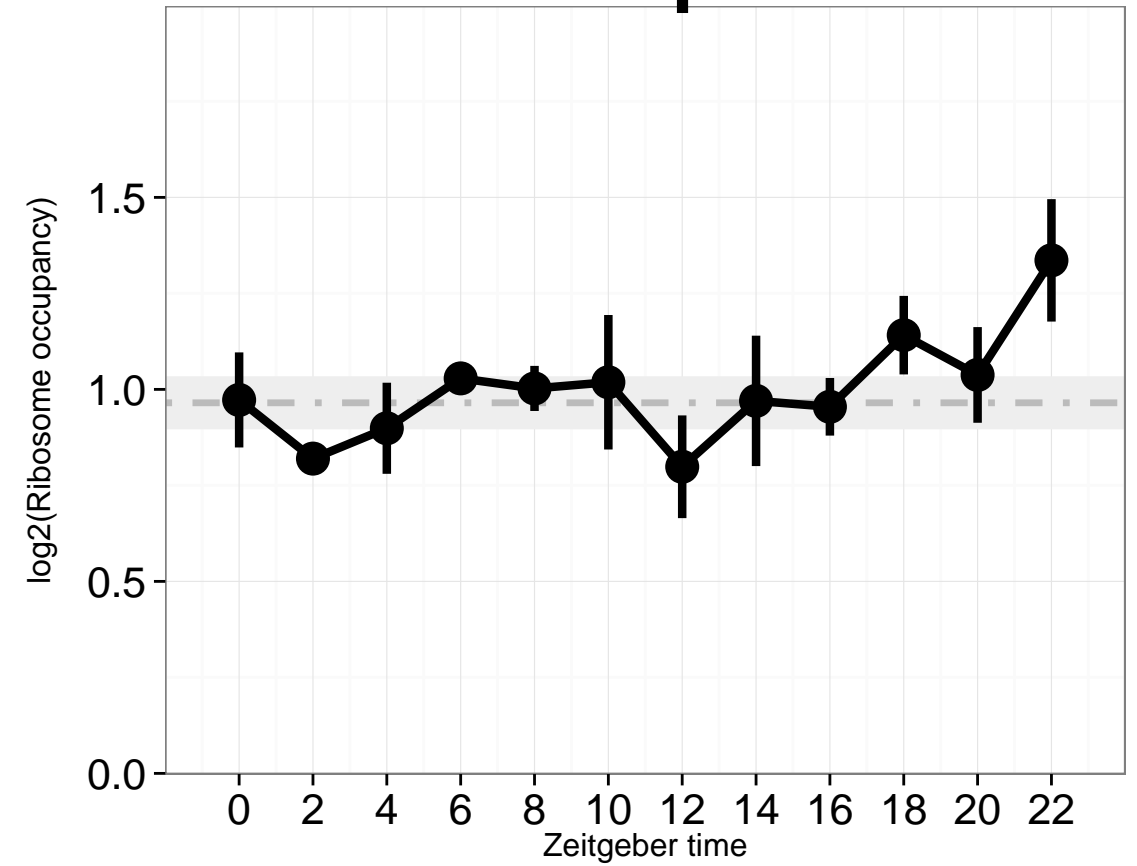

Supplement: SuppDataset_1.zip [file Casp3_set_A.pdf › Supplemental Dataset 1/A-mRNA_nonrhyth_translation_nonrhyth/Casp3_set_A.pdf]

# Casp4

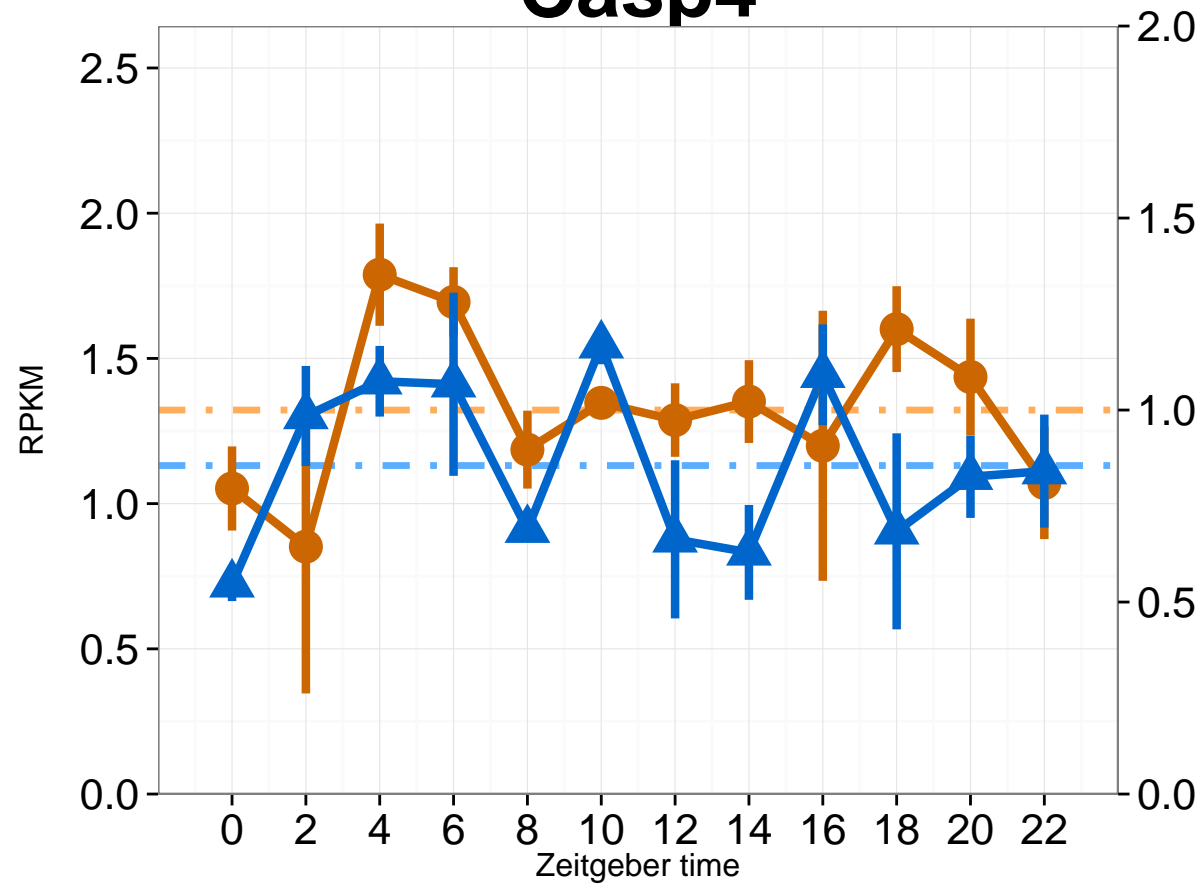

# Casp4

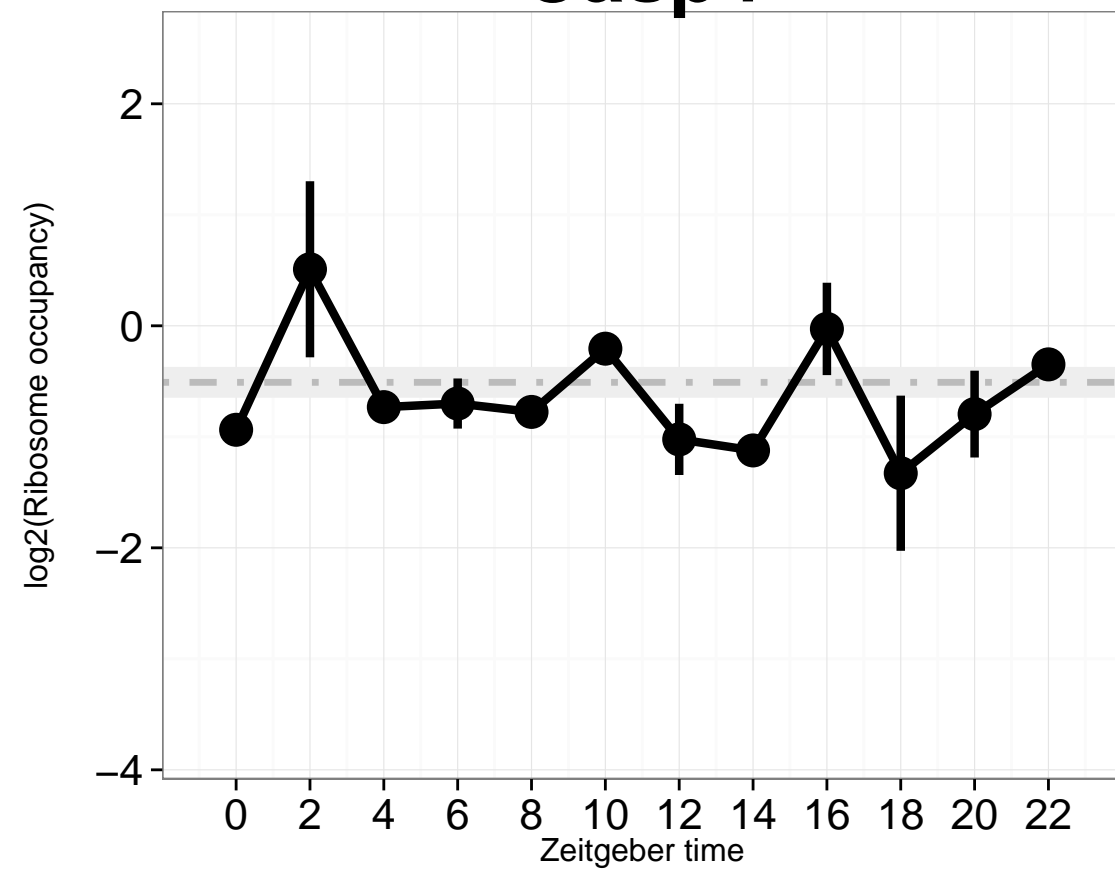

Supplement: SuppDataset_1.zip [file Casp4_set_A.pdf › Supplemental Dataset 1/A-mRNA_nonrhyth_translation_nonrhyth/Casp4_set_A.pdf]

# Casp7

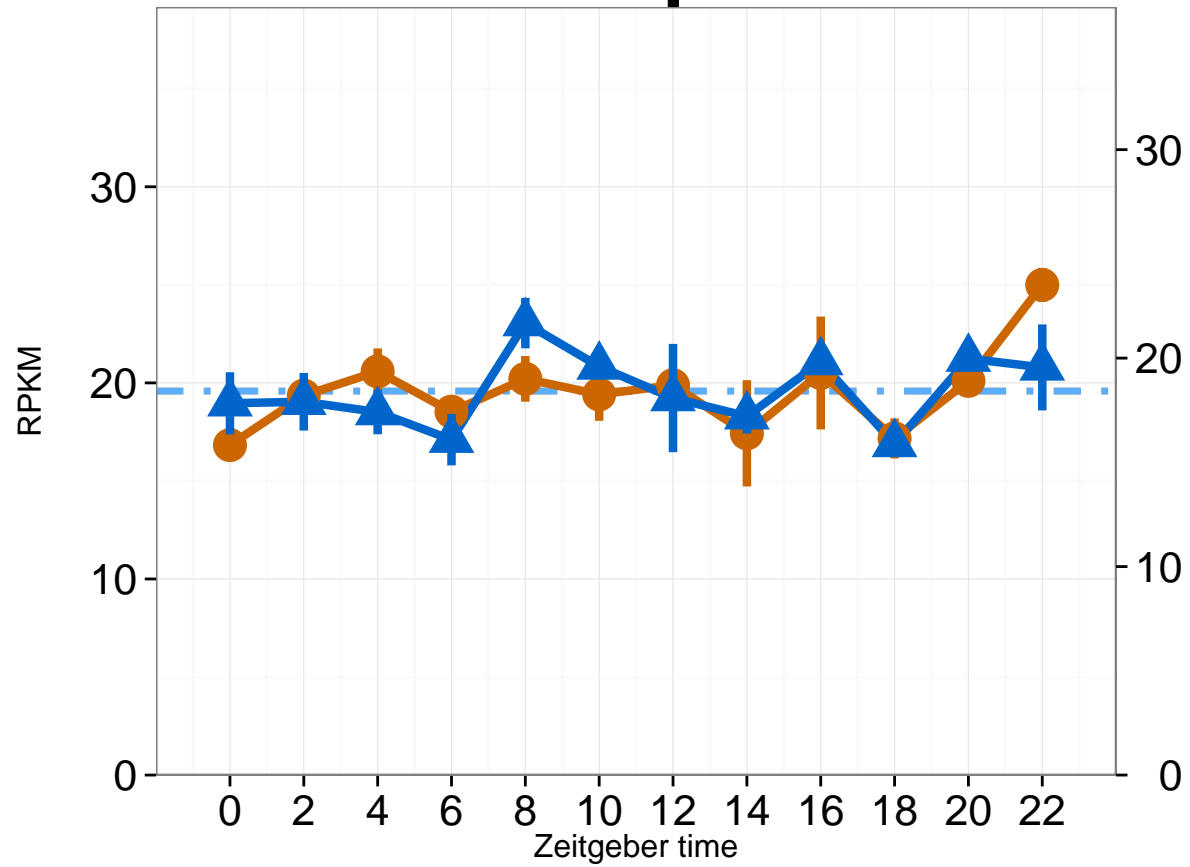

# Casp7

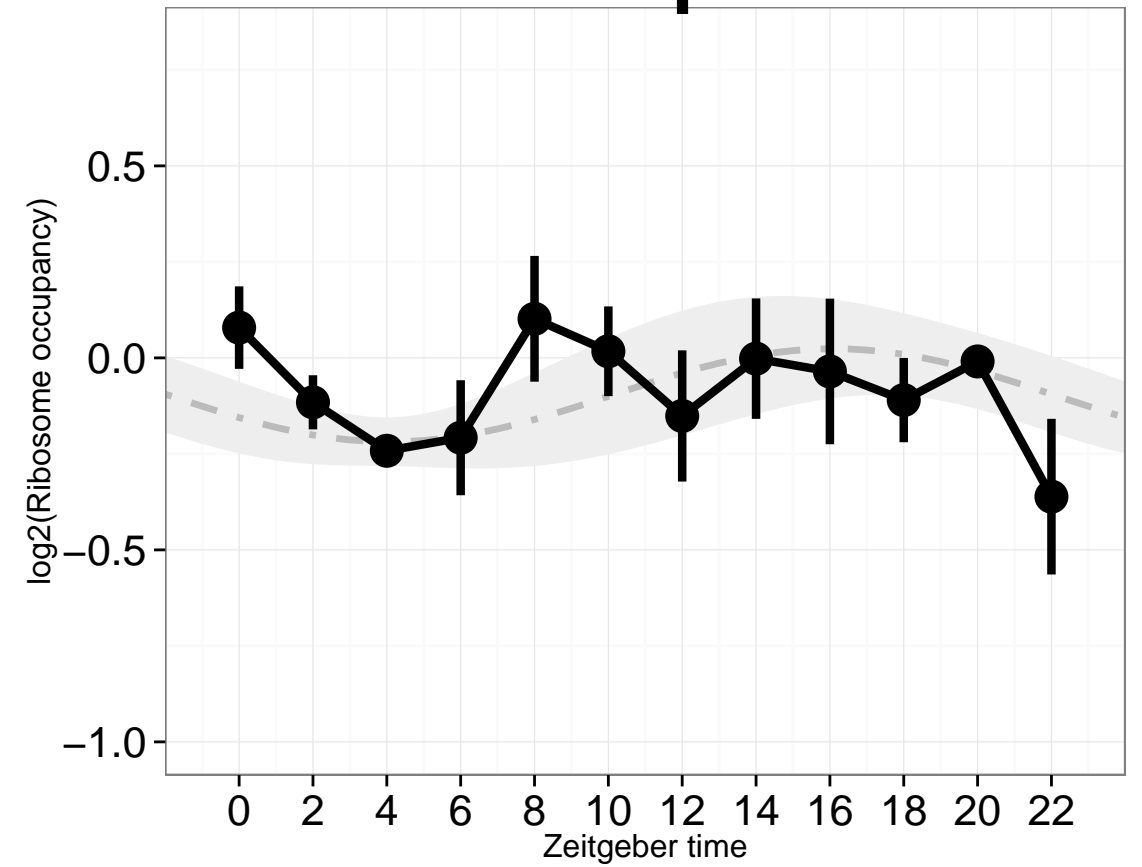

Supplement: SuppDataset_1.zip [file Casp7_set_A.pdf › Supplemental Dataset 1/A-mRNA_nonrhyth_translation_nonrhyth/Casp7_set_A.pdf]

## Casp8

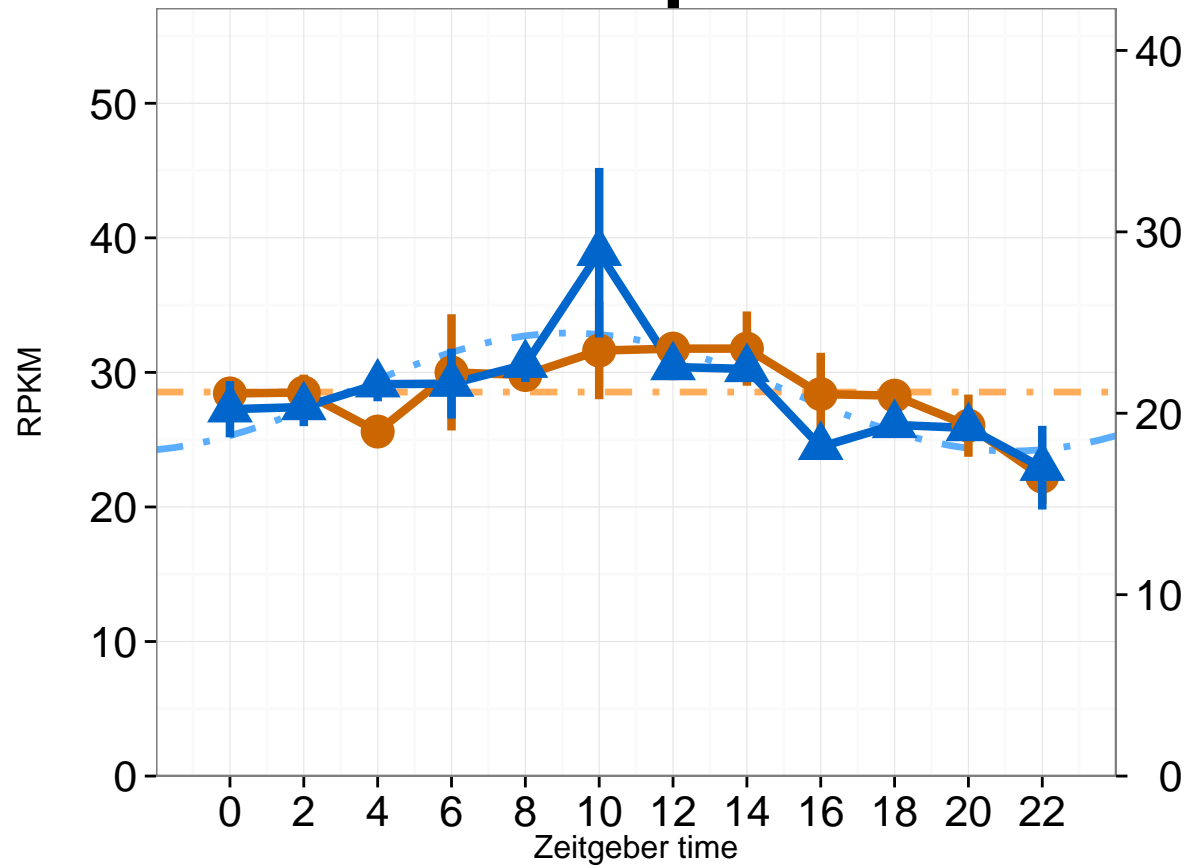

## Casp8

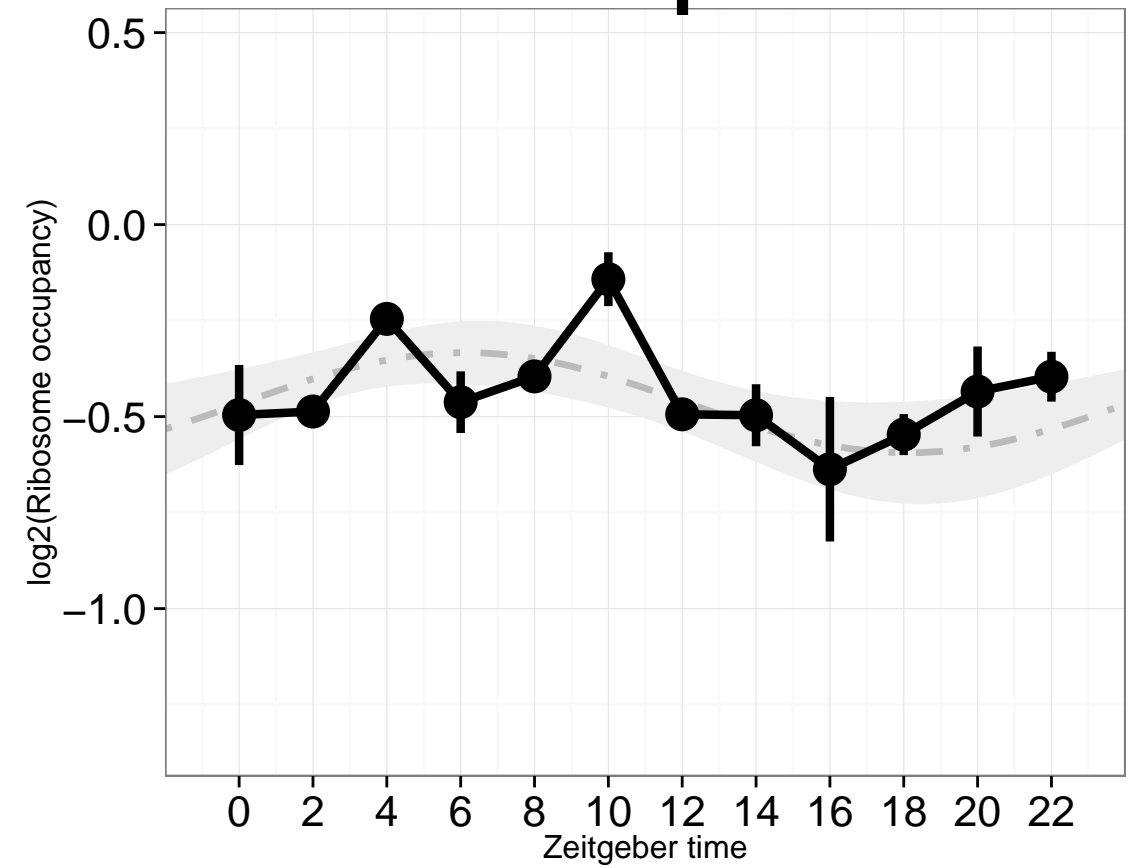

Supplement: SuppDataset_1.zip [file Casp8_set_A.pdf › Supplemental Dataset 1/A-mRNA_nonrhyth_translation_nonrhyth/Casp8_set_A.pdf]

## Casp8ap2

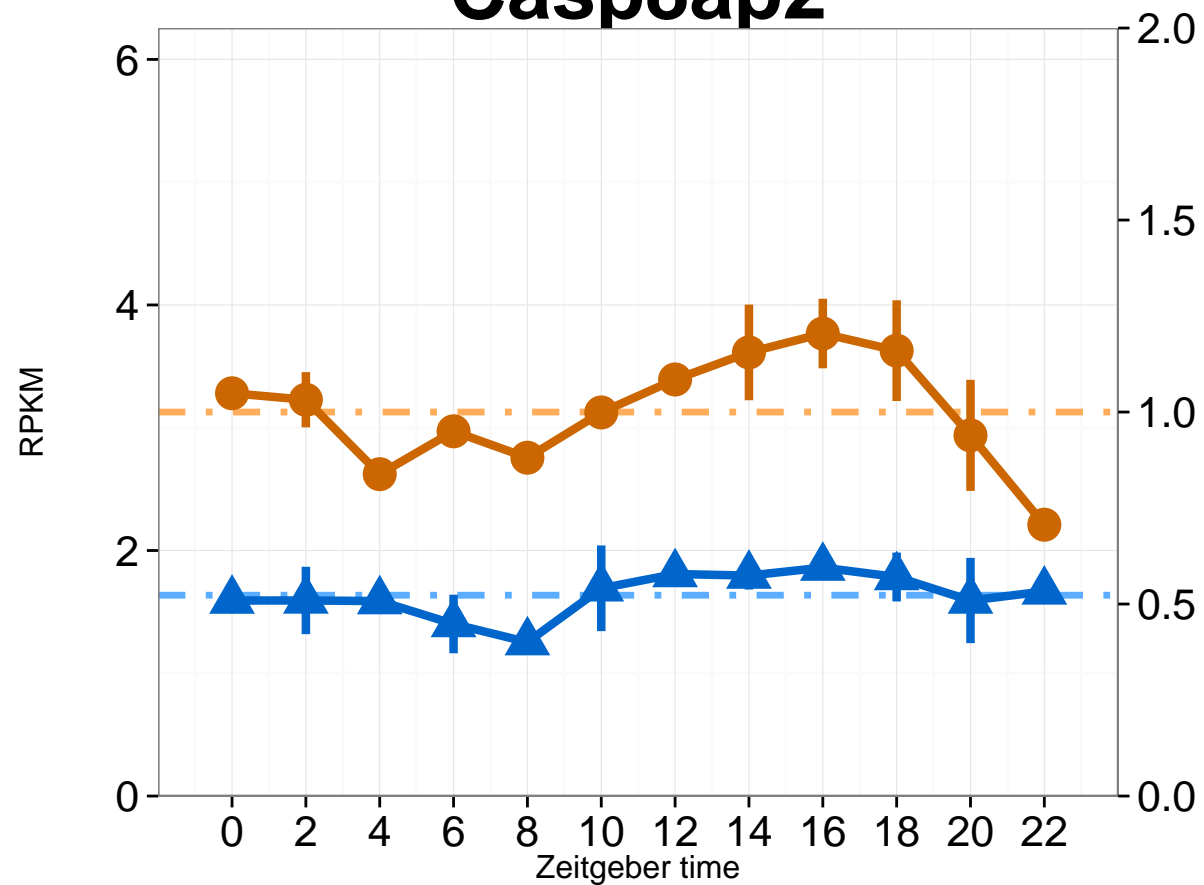

## Casp8ap2

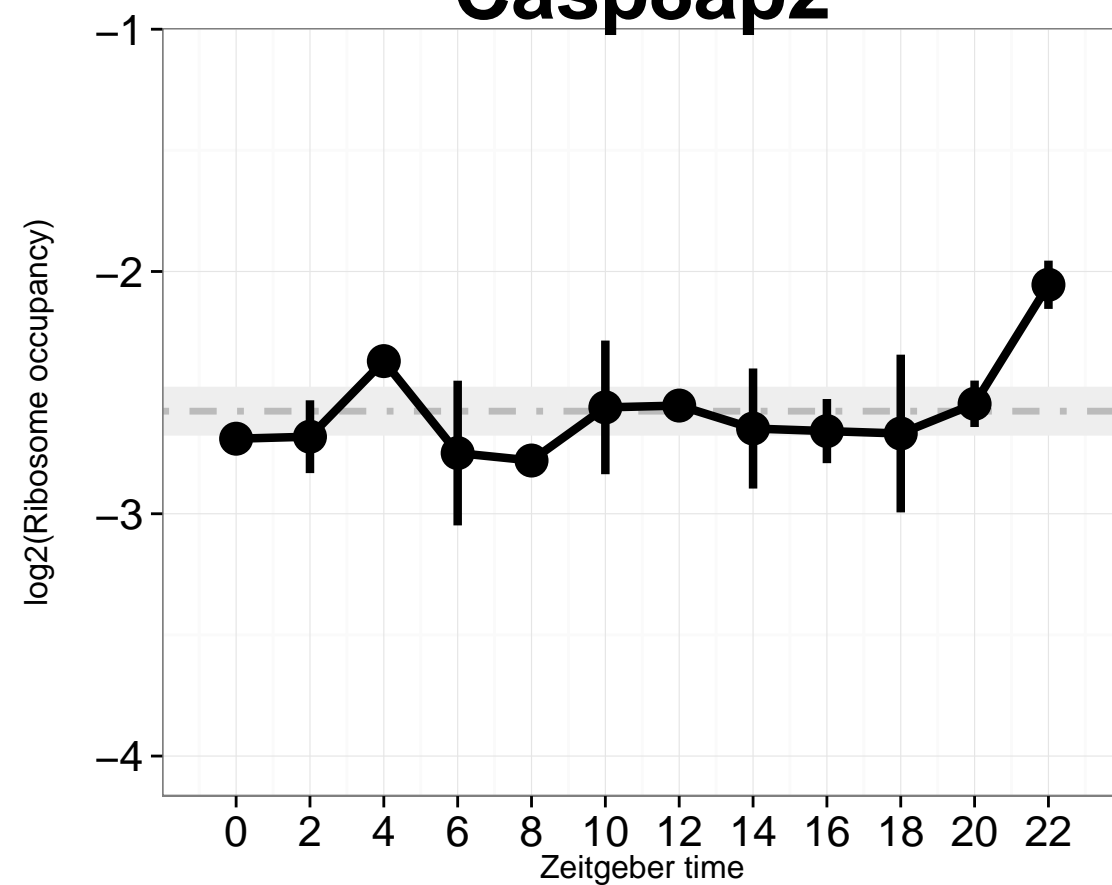

Supplement: SuppDataset_1.zip [file Casp8ap2_set_A.pdf › Supplemental Dataset 1/A-mRNA_nonrhyth_translation_nonrhyth/Casp8ap2_set_A.pdf]

## Casp9

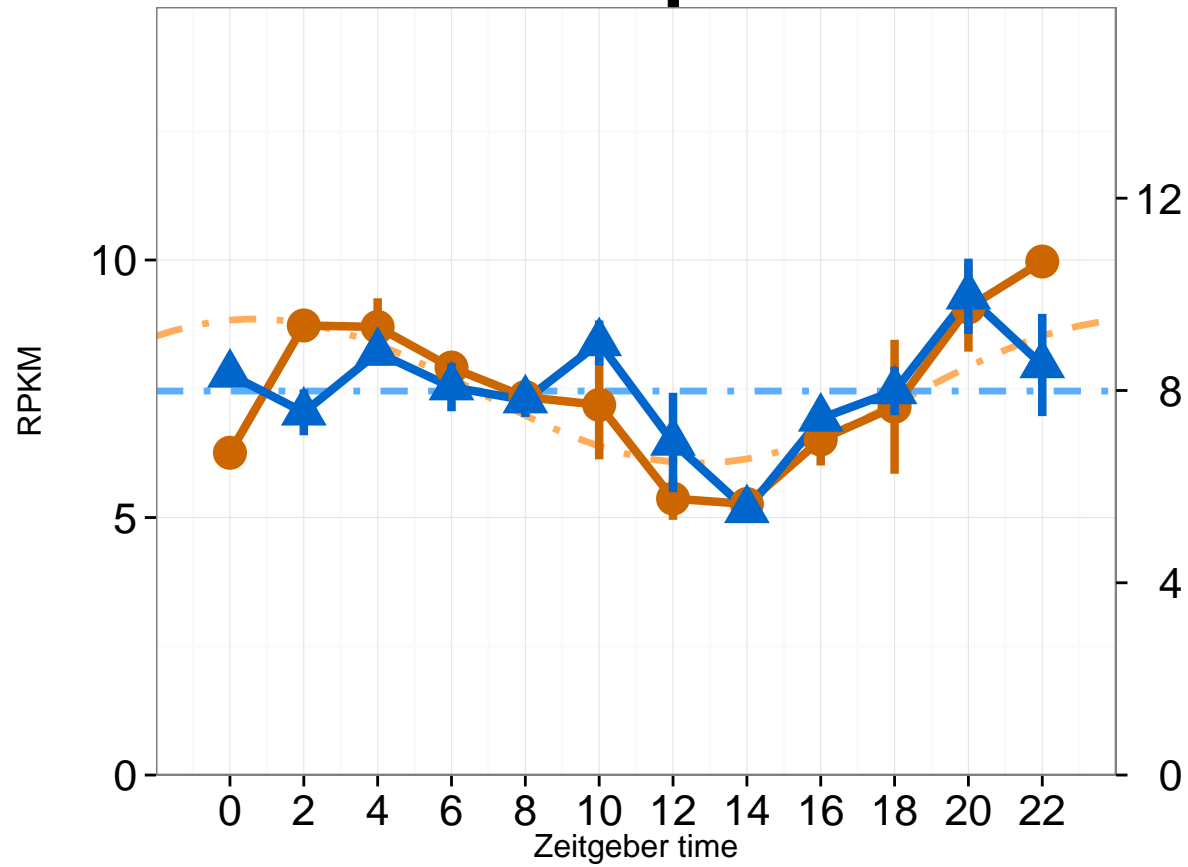

## Casp9

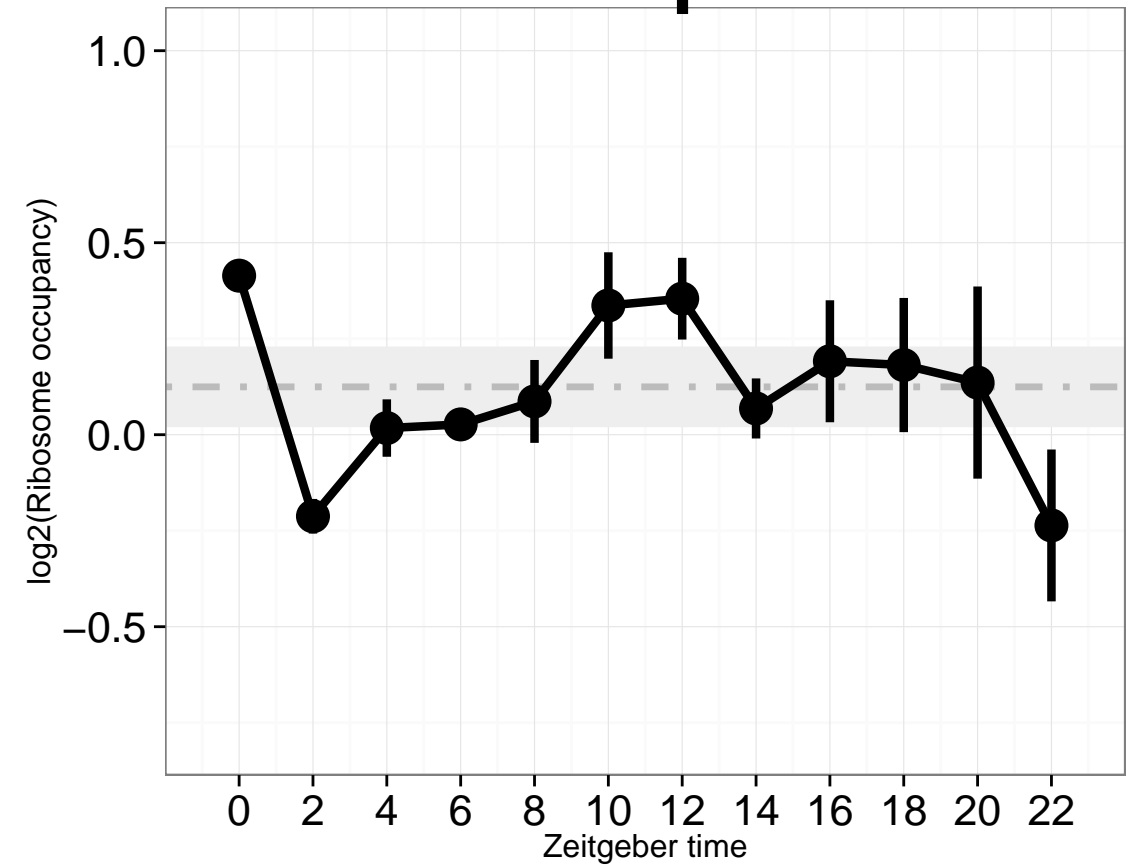

Supplement: SuppDataset_1.zip [file Casp9_set_A.pdf › Supplemental Dataset 1/A-mRNA_nonrhyth_translation_nonrhyth/Casp9_set_A.pdf]

## Cast

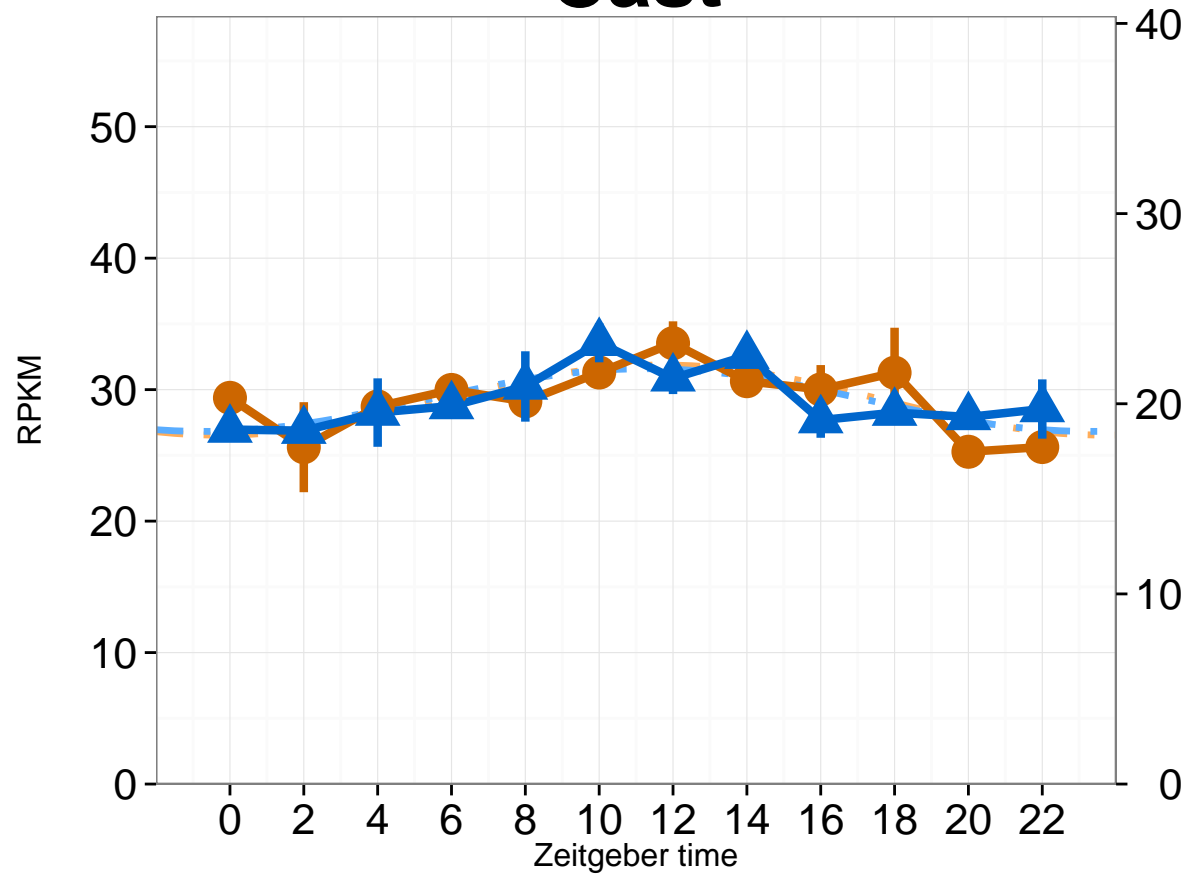

## Cast

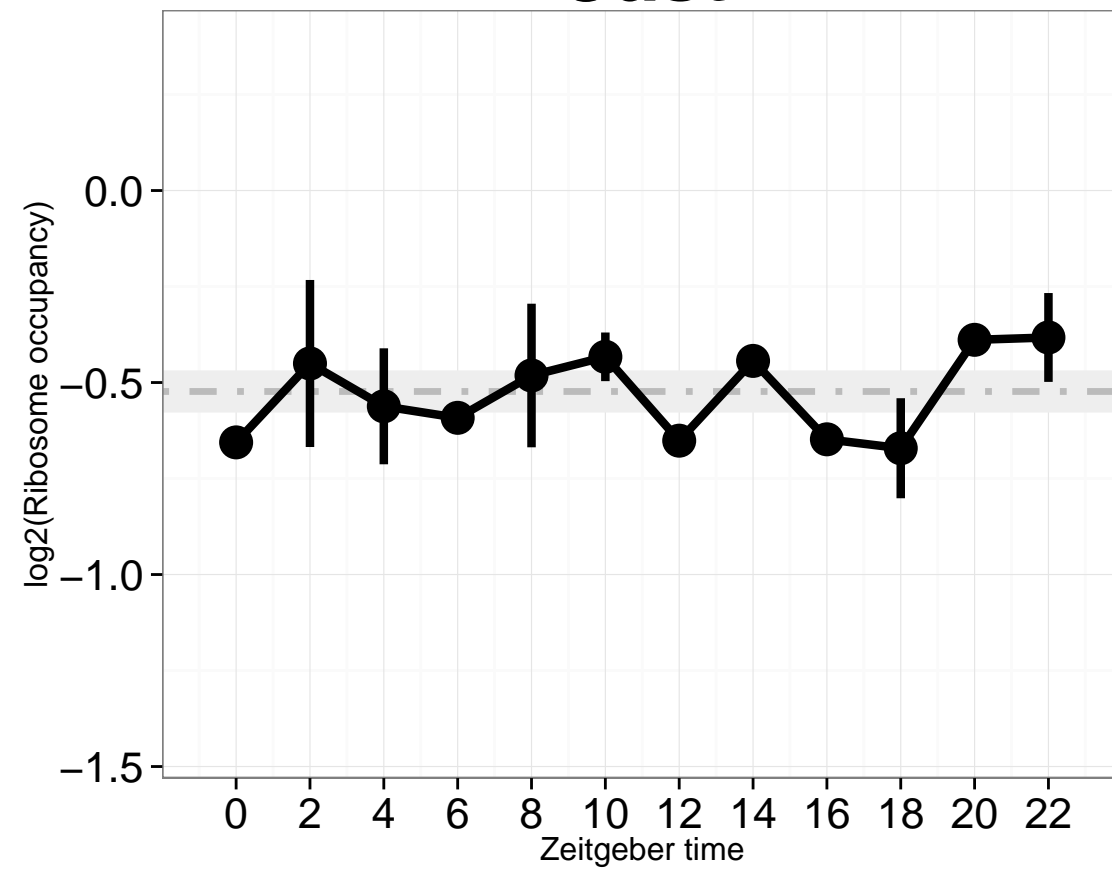

Supplement: SuppDataset_1.zip [file Cast_set_A.pdf › Supplemental Dataset 1/A-mRNA_nonrhyth_translation_nonrhyth/Cast_set_A.pdf]

## Cat

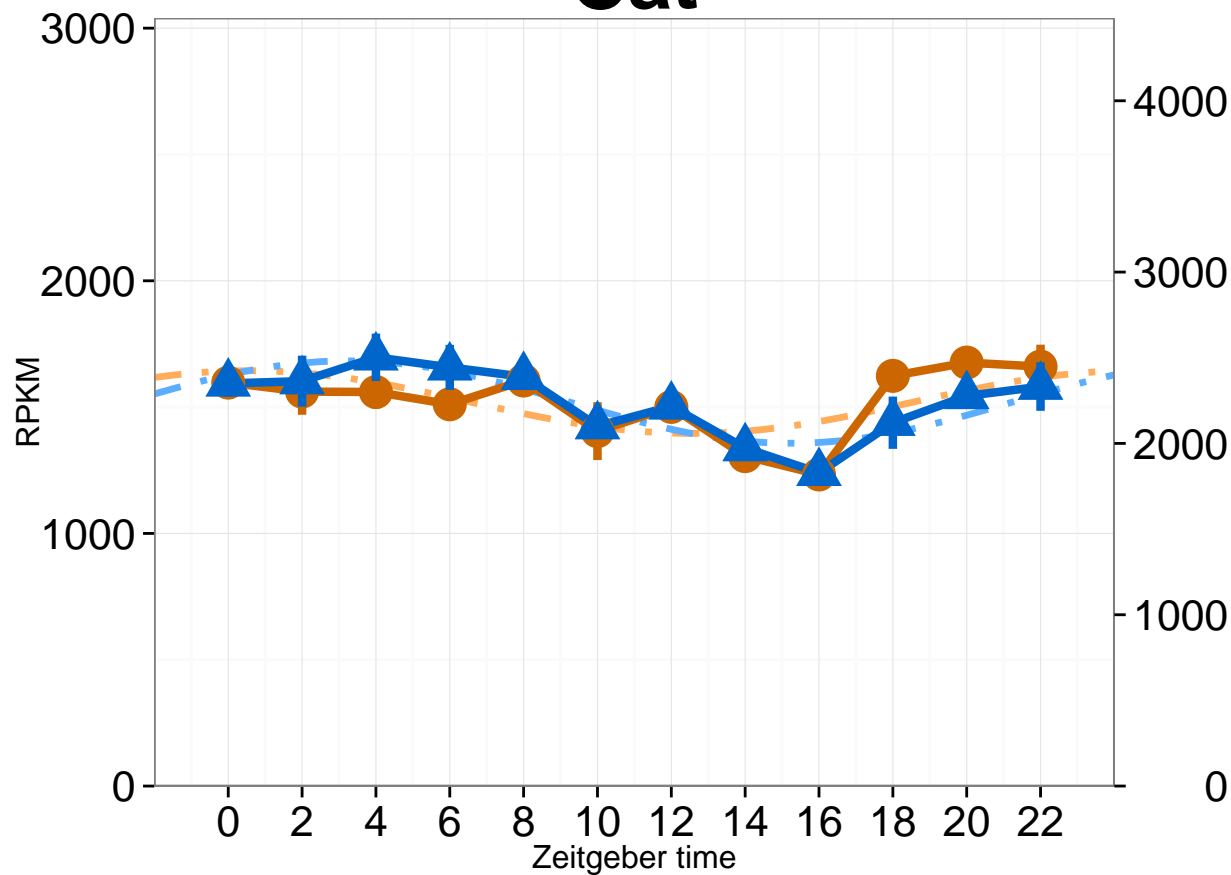

## Cat

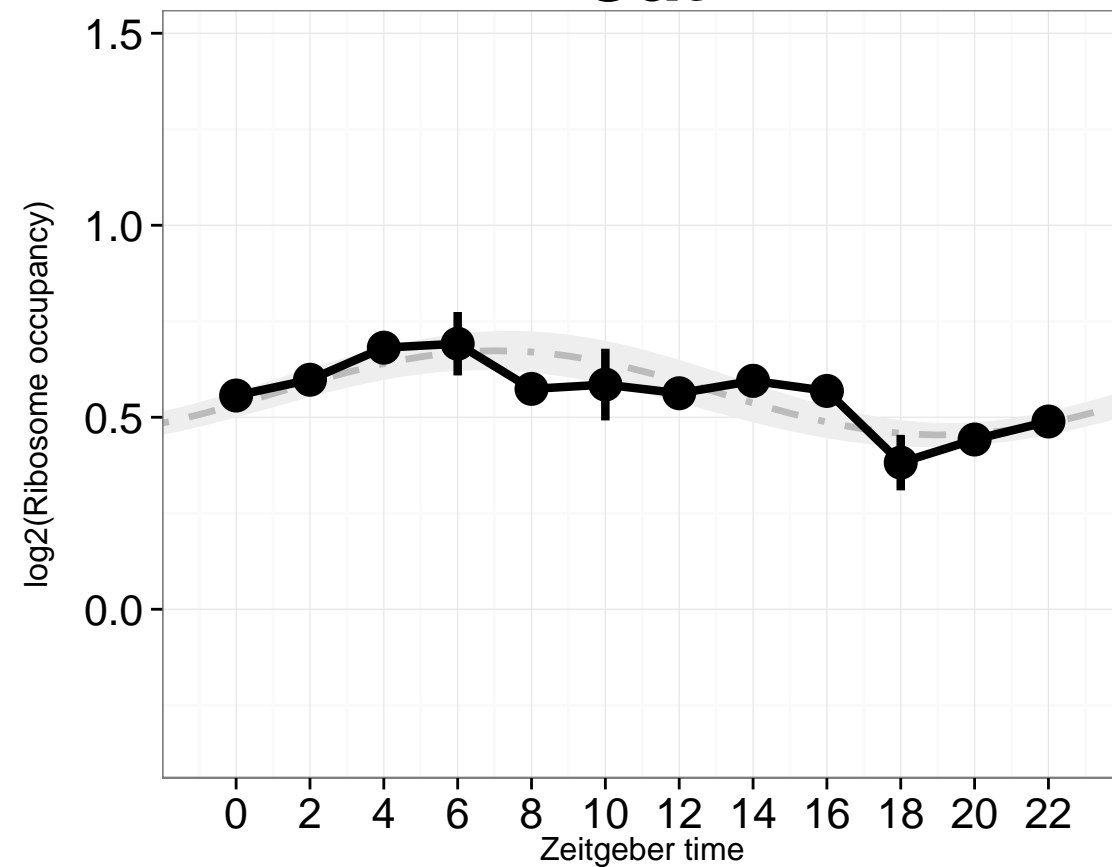

Supplement: SuppDataset_1.zip [file Cat_set_A.pdf › Supplemental Dataset 1/A-mRNA_nonrhyth_translation_nonrhyth/Cat_set_A.pdf]

## Catsper2

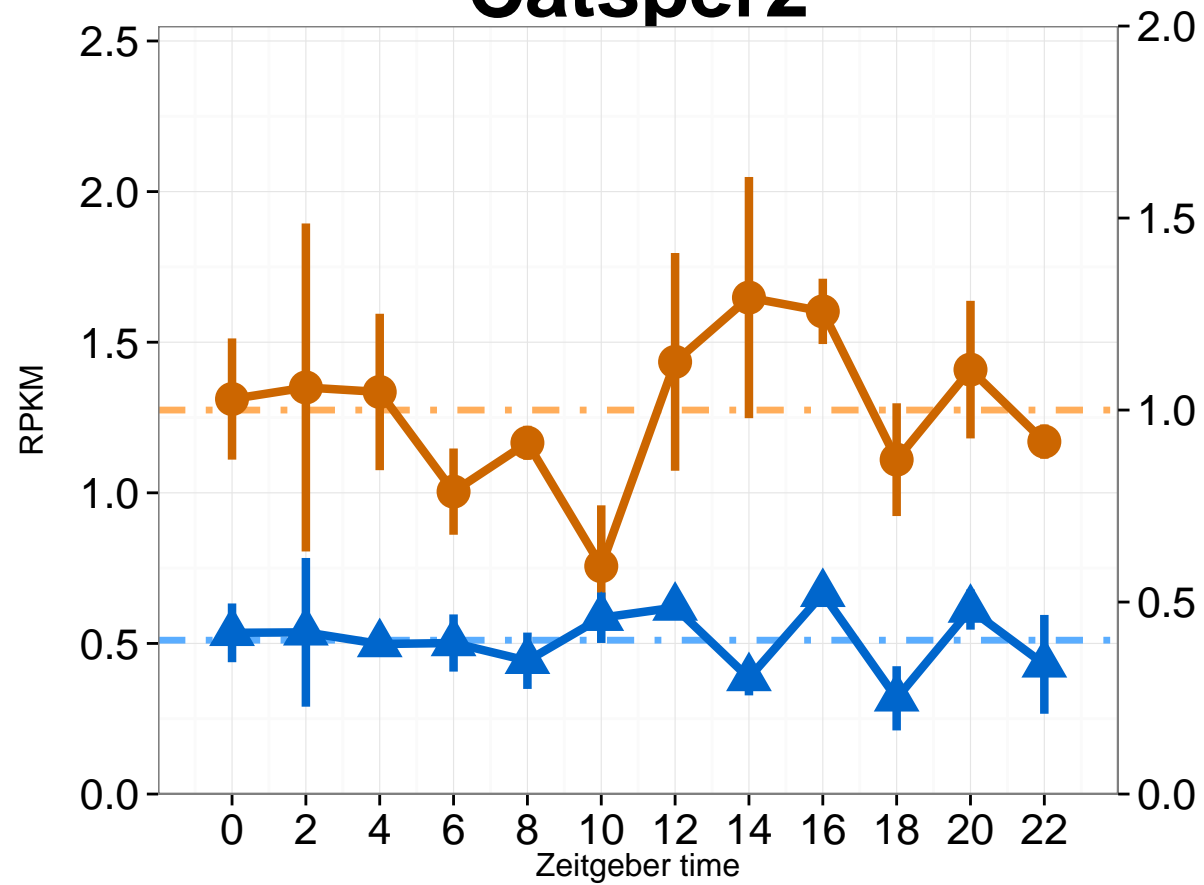

## Catsper2

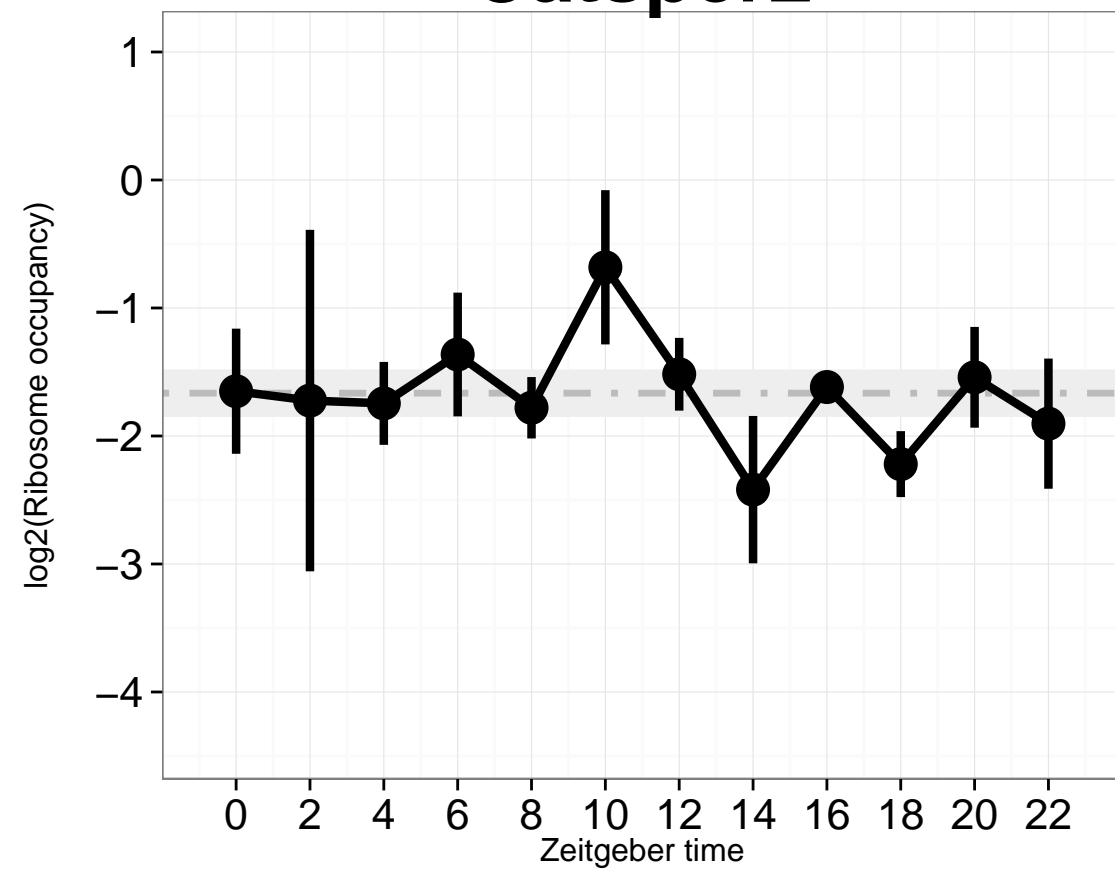

Supplement: SuppDataset_1.zip [file Catsper2_set_A.pdf › Supplemental Dataset 1/A-mRNA_nonrhyth_translation_nonrhyth/Catsper2_set_A.pdf]

## Catsperd

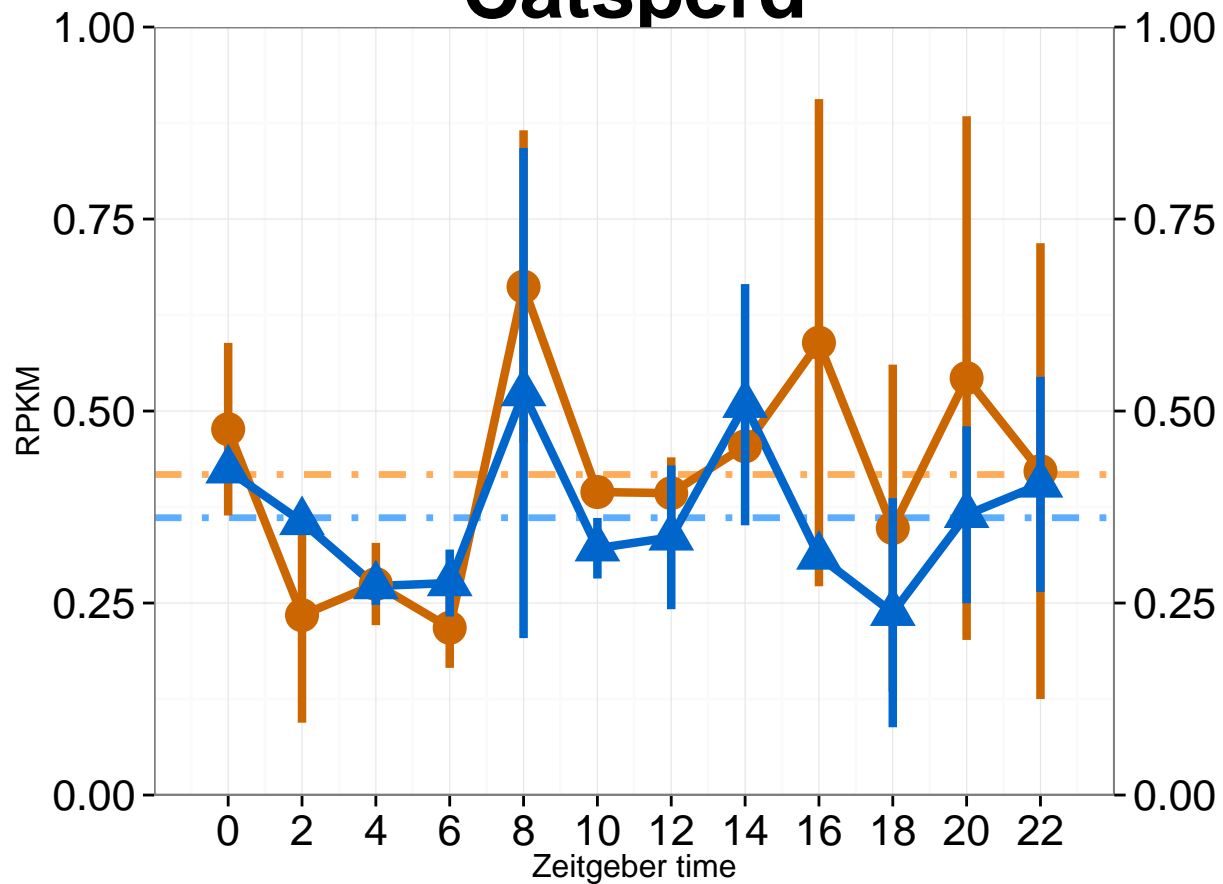

## Catsperd

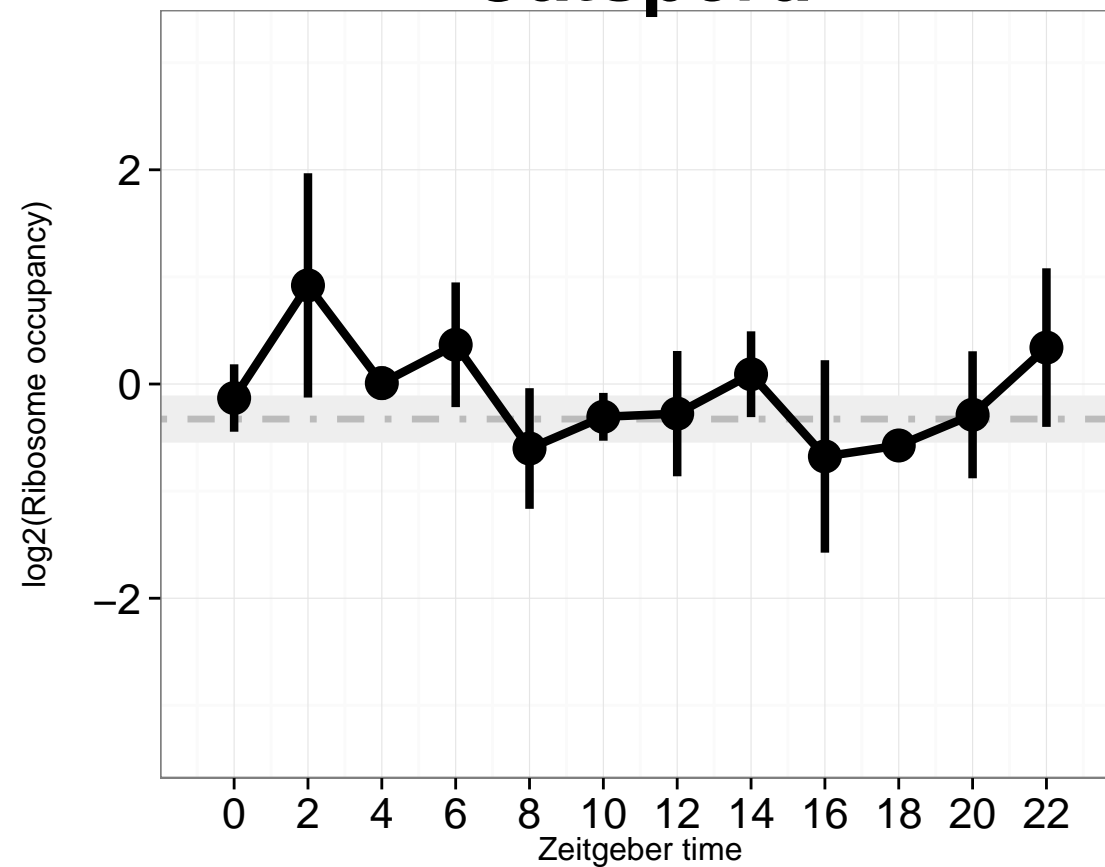

Supplement: SuppDataset_1.zip [file Catsperd_set_A.pdf › Supplemental Dataset 1/A-mRNA_nonrhyth_translation_nonrhyth/Catsperd_set_A.pdf]

## Cav2

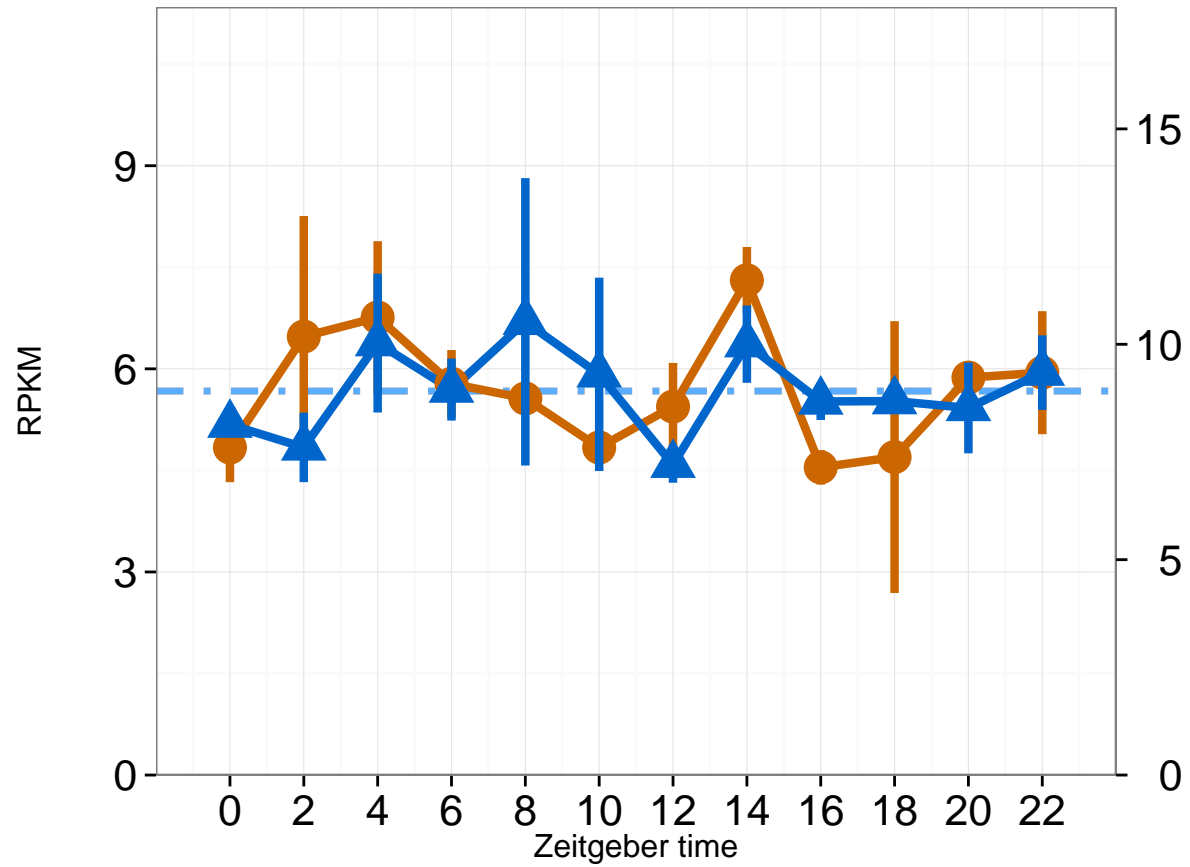

## Cav2

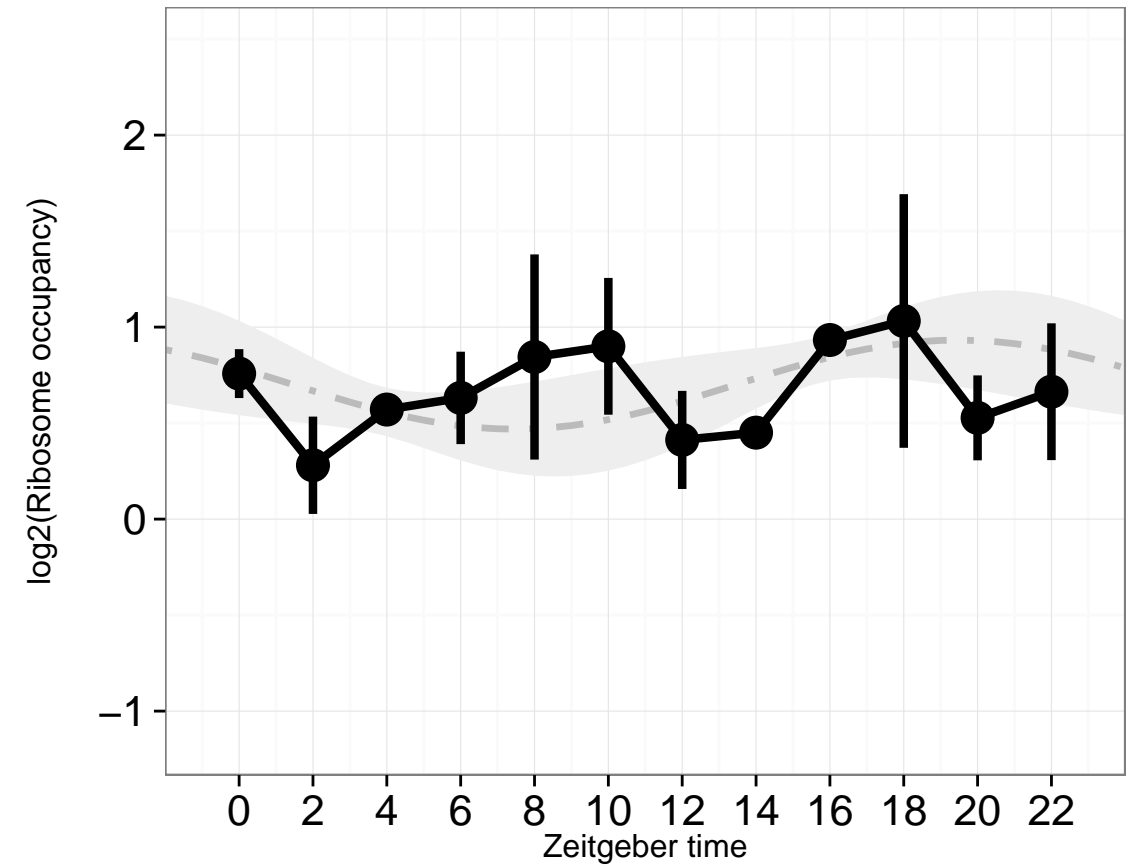

Supplement: SuppDataset_1.zip [file Cav2_set_A.pdf › Supplemental Dataset 1/A-mRNA_nonrhyth_translation_nonrhyth/Cav2_set_A.pdf]

# Cbfa2t2

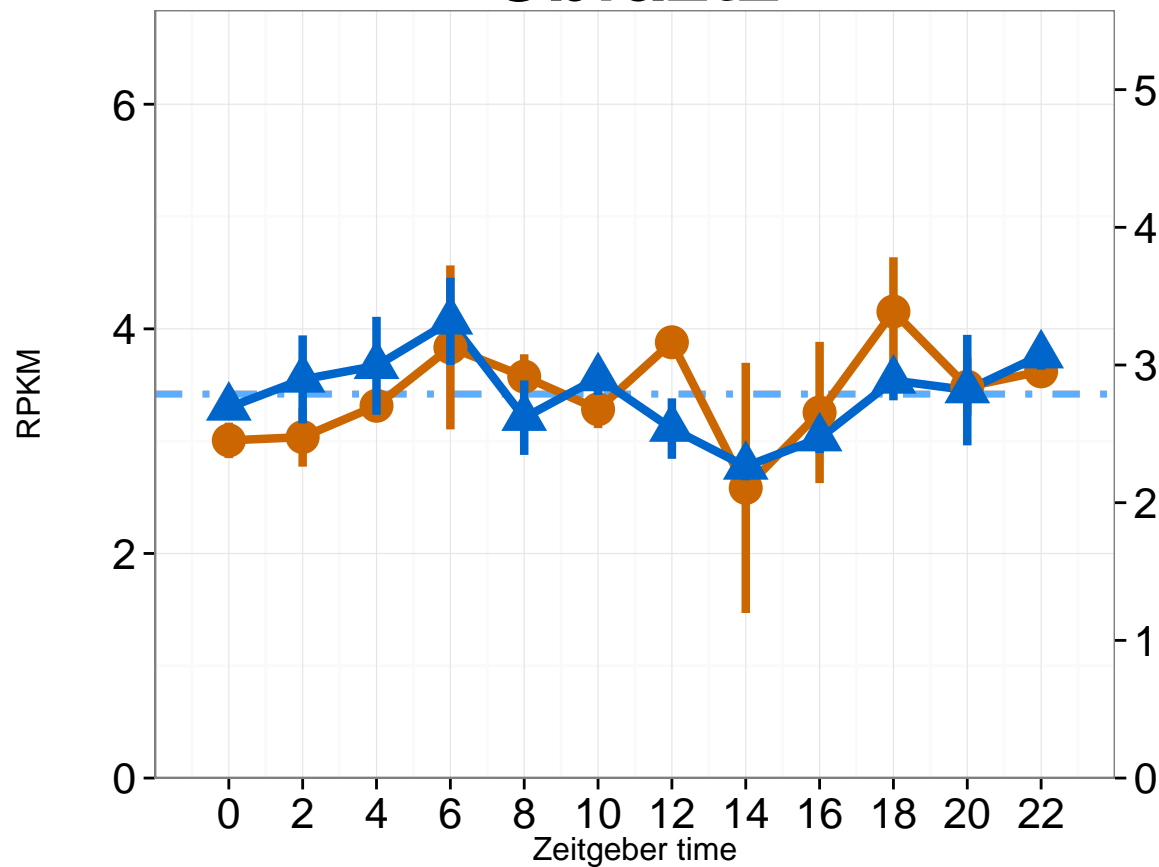

# Cbfa2t2

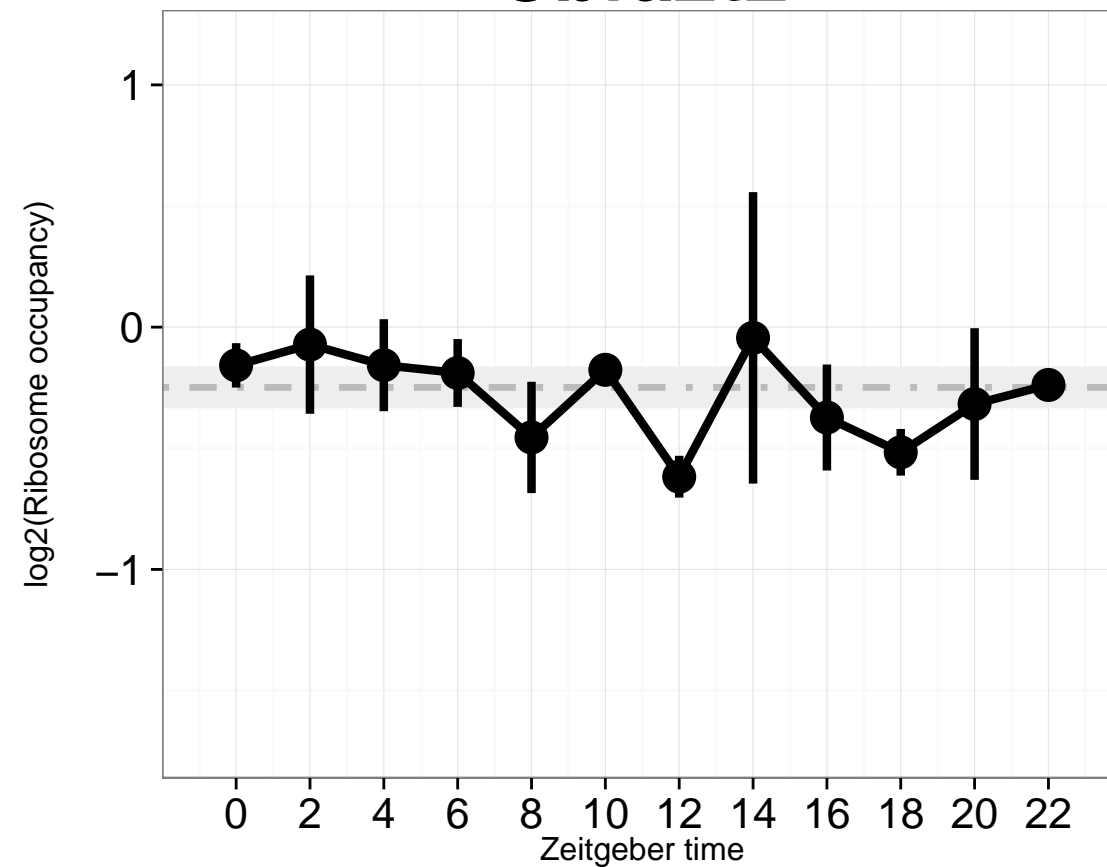

Supplement: SuppDataset_1.zip [file Cbfa2t2_set_A.pdf › Supplemental Dataset 1/A-mRNA_nonrhyth_translation_nonrhyth/Cbfa2t2_set_A.pdf]

## Cbfb

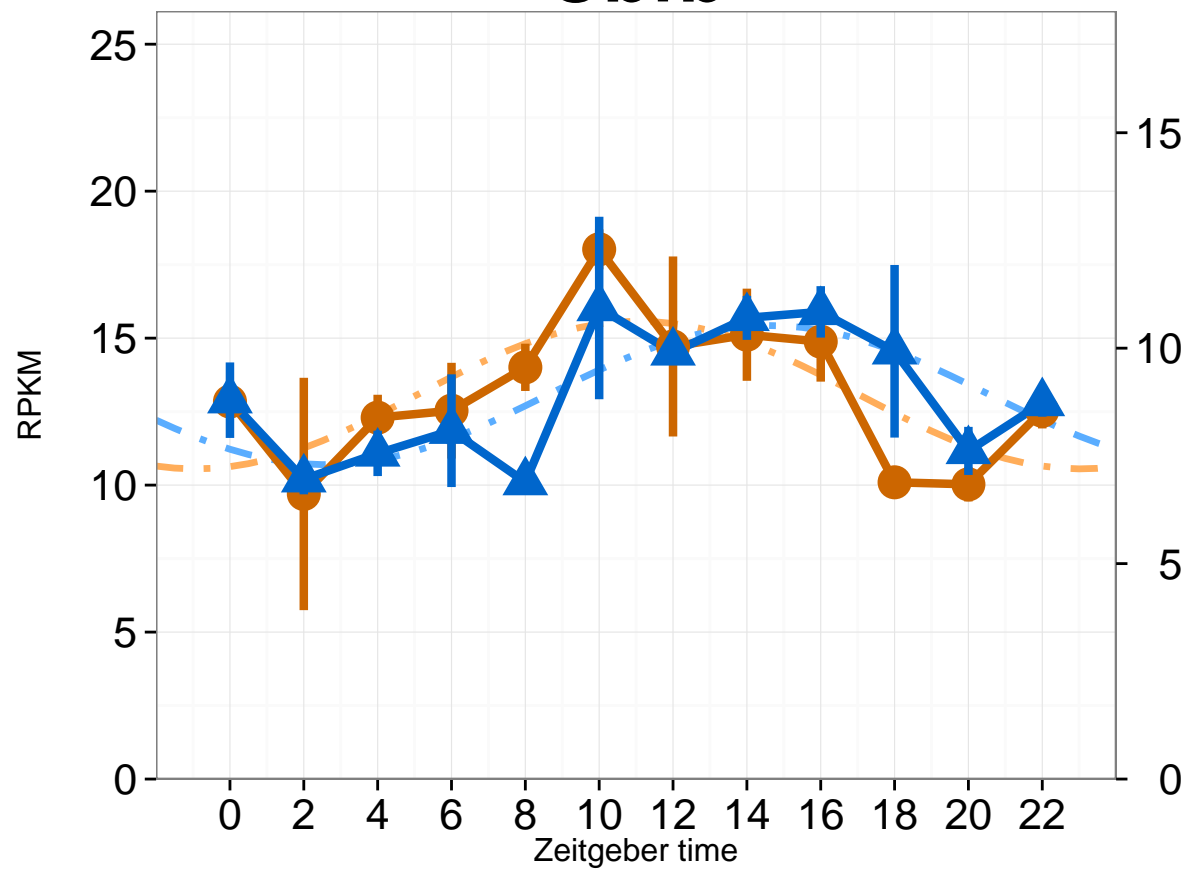

## Cbfb

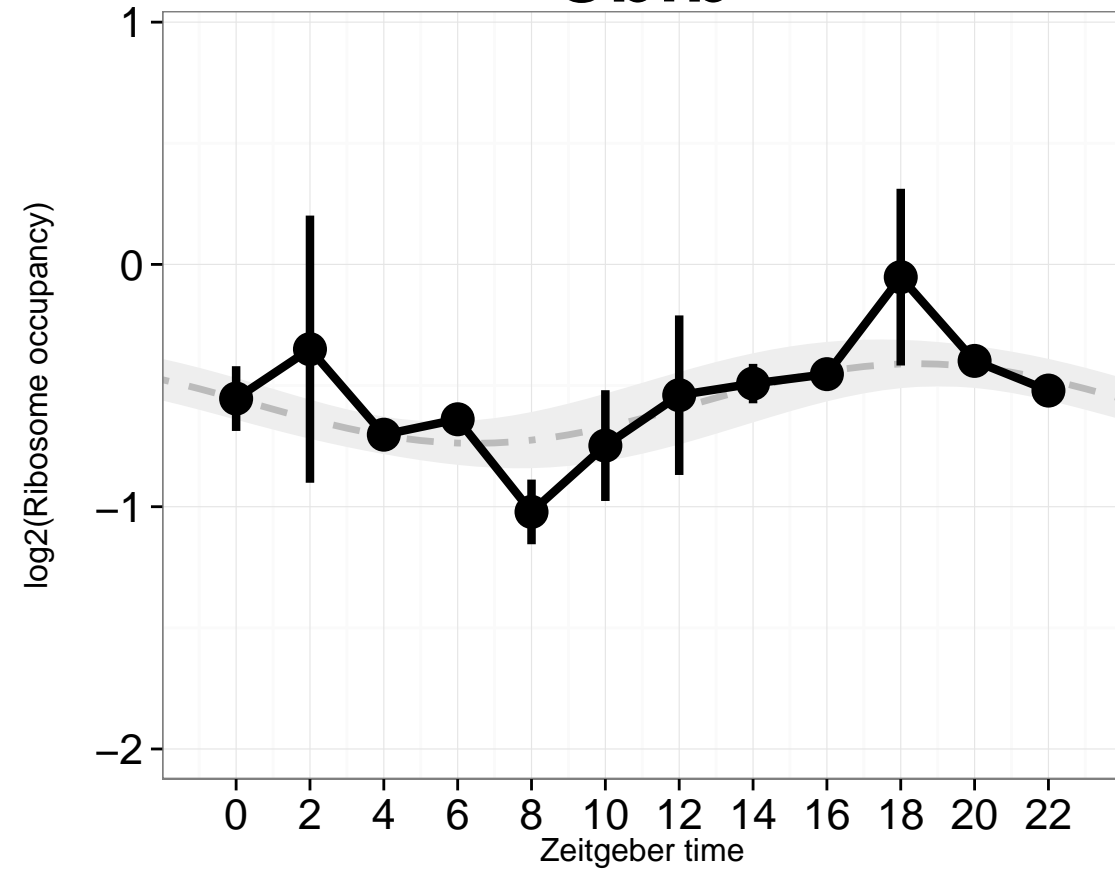

Supplement: SuppDataset_1.zip [file Cbfb_set_A.pdf › Supplemental Dataset 1/A-mRNA_nonrhyth_translation_nonrhyth/Cbfb_set_A.pdf]

## Cbl

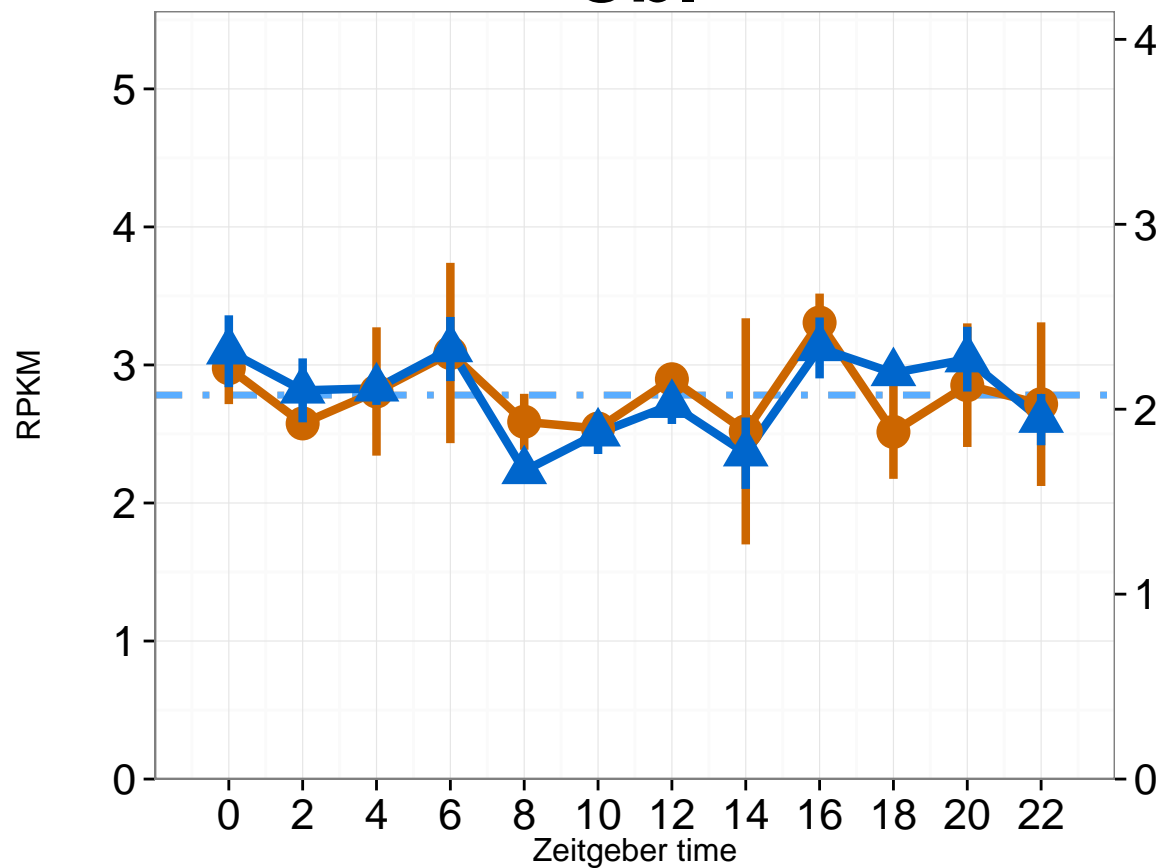

## Cbl

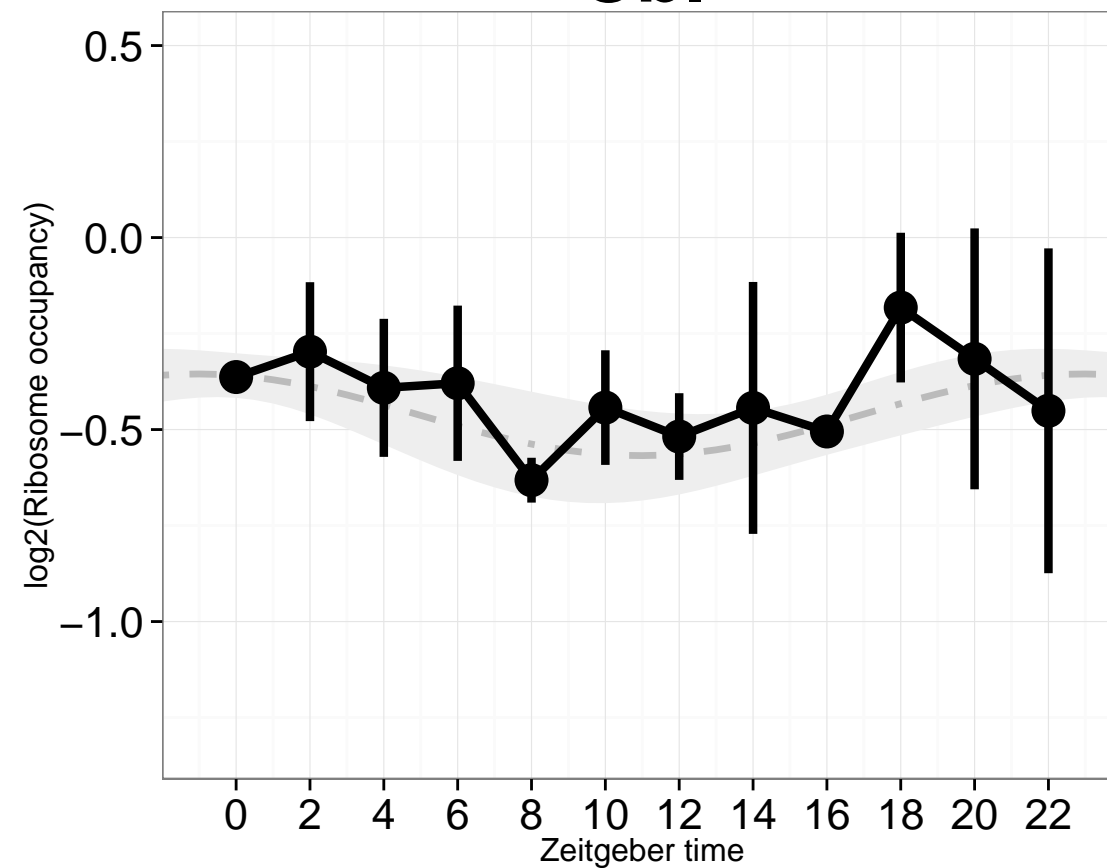

Supplement: SuppDataset_1.zip [file Cbl_set_A.pdf › Supplemental Dataset 1/A-mRNA_nonrhyth_translation_nonrhyth/Cbl_set_A.pdf]

## Cblb

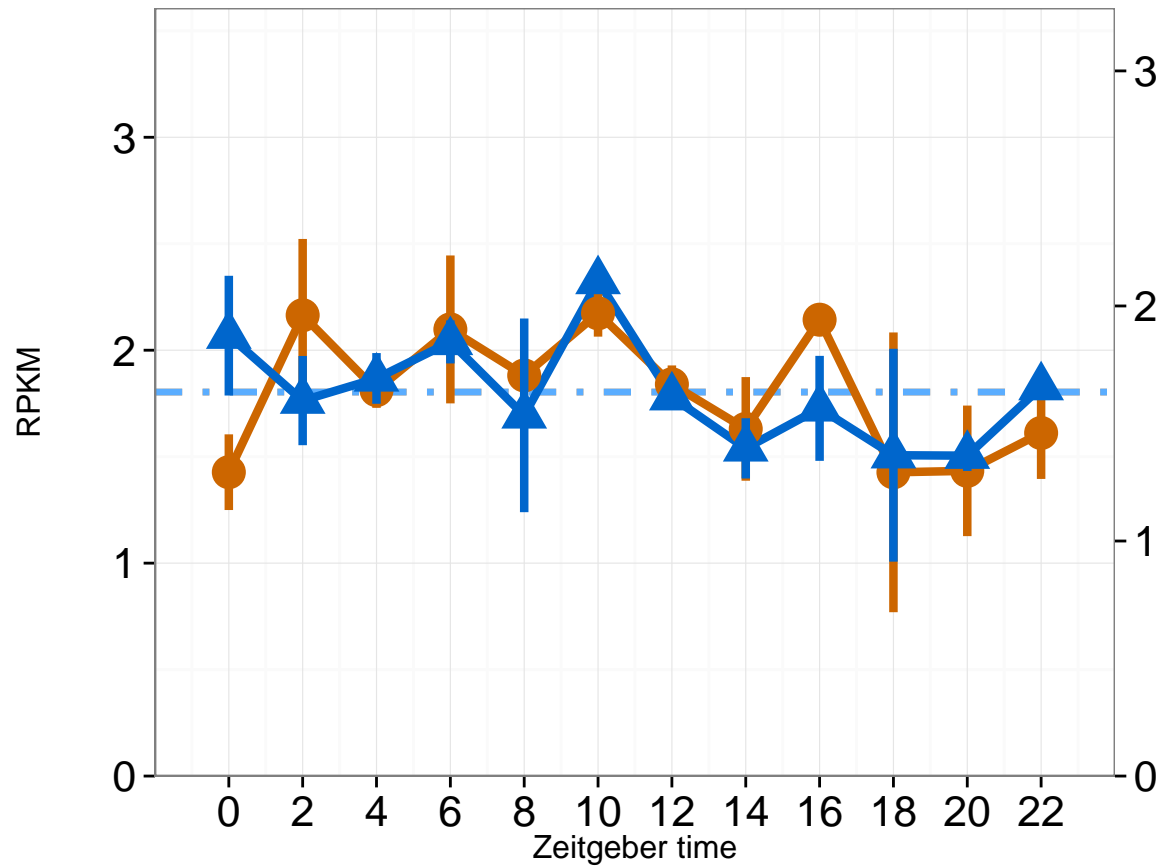

## Cblb

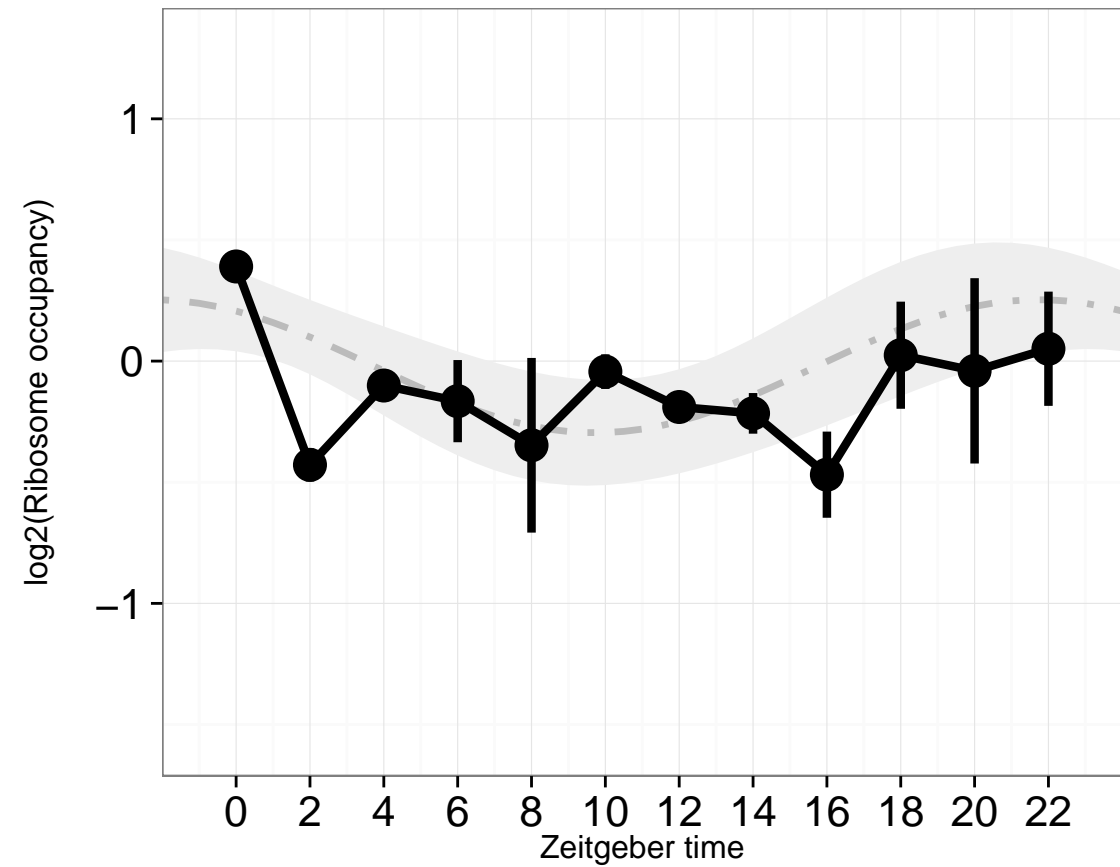

Supplement: SuppDataset_1.zip [file Cblb_set_A.pdf › Supplemental Dataset 1/A-mRNA_nonrhyth_translation_nonrhyth/Cblb_set_A.pdf]

## Cb1c

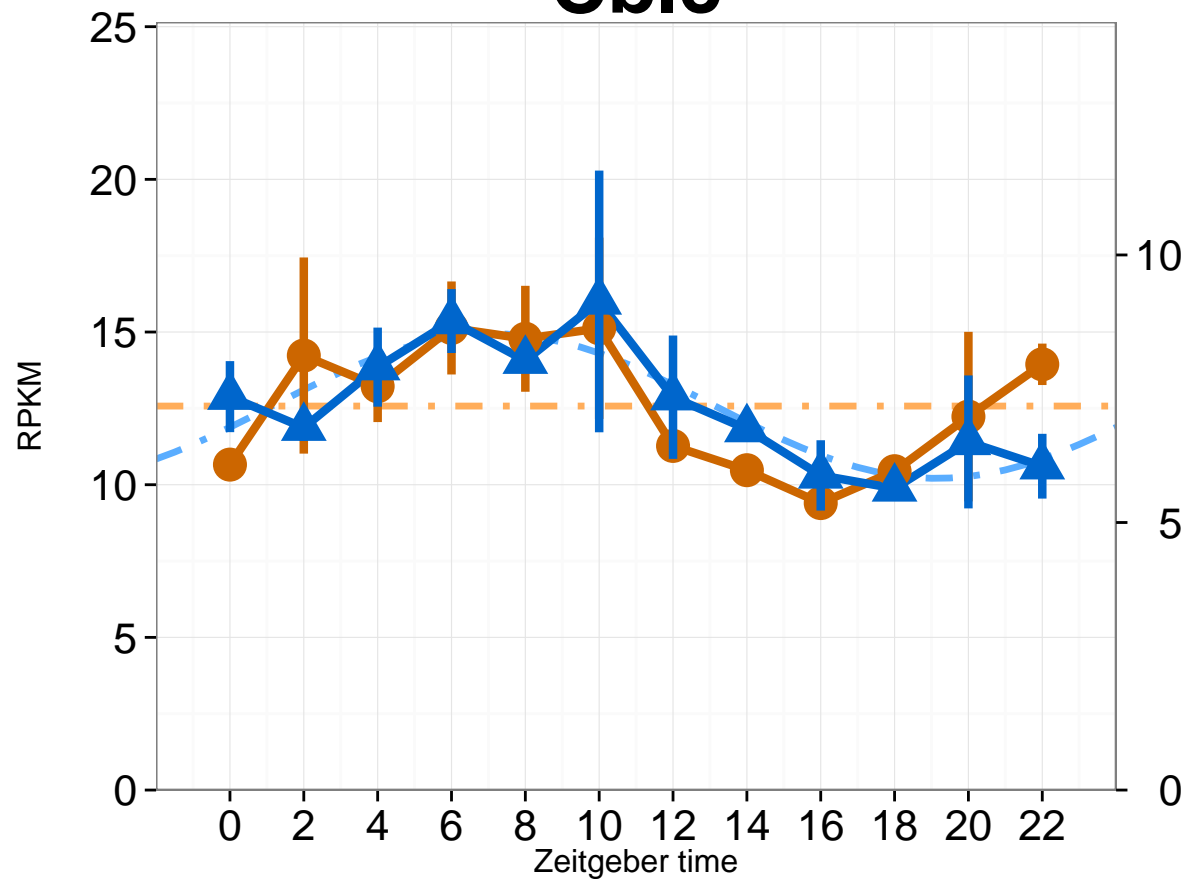

## Cb1c

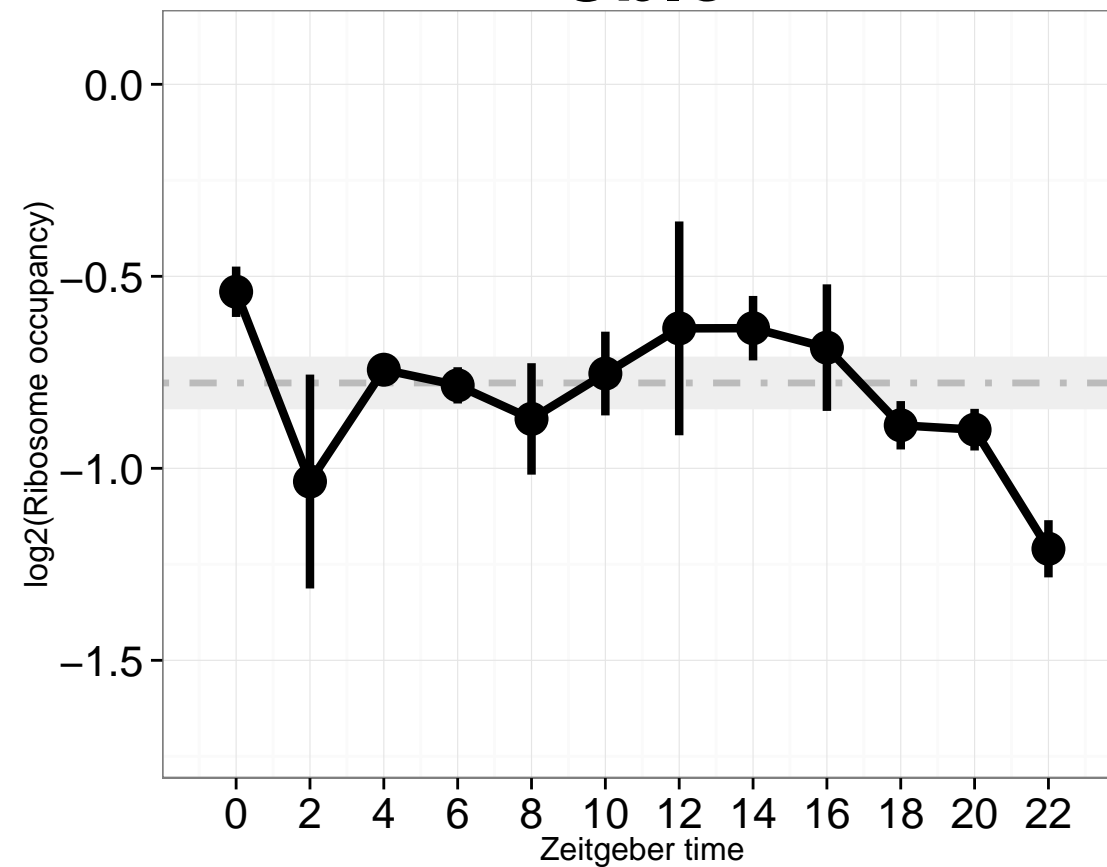

Supplement: SuppDataset_1.zip [file Cblc_set_A.pdf › Supplemental Dataset 1/A-mRNA_nonrhyth_translation_nonrhyth/Cblc_set_A.pdf]

## CbII1

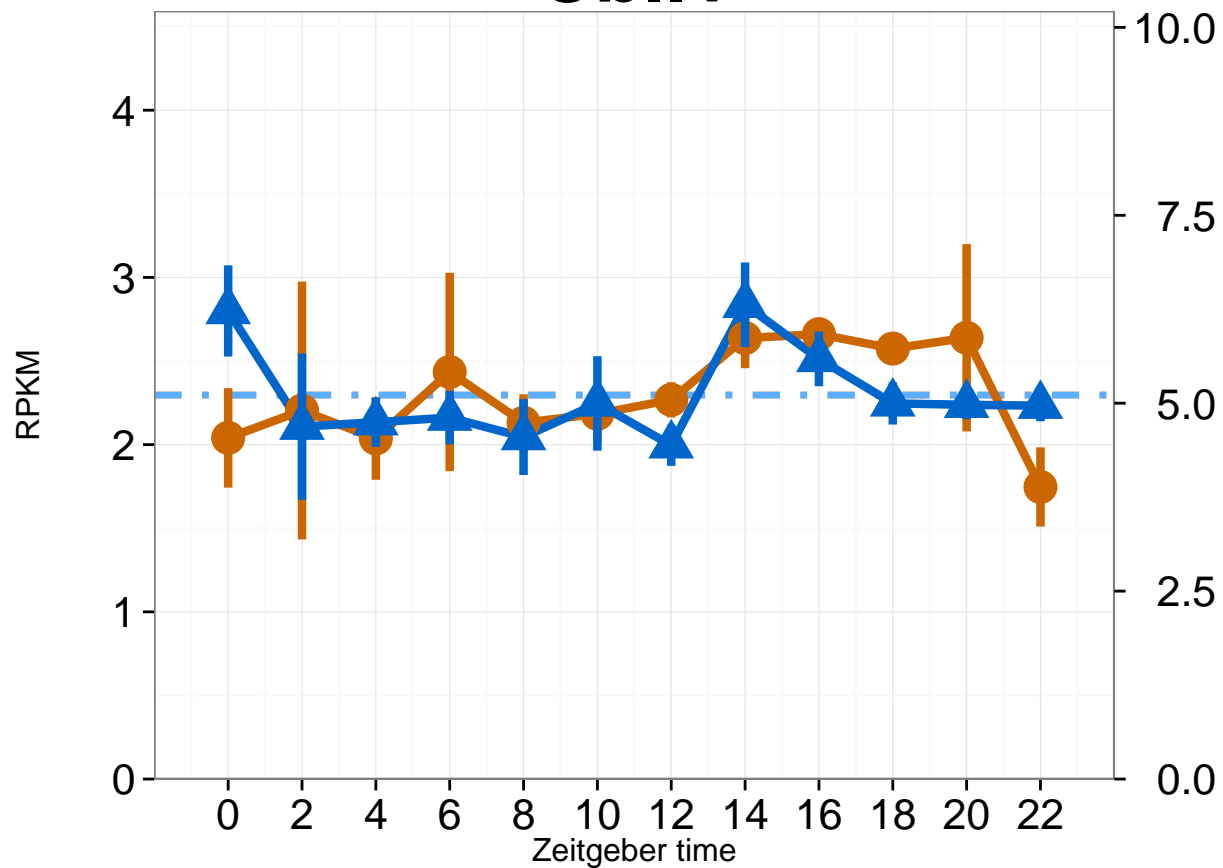

## CbII1

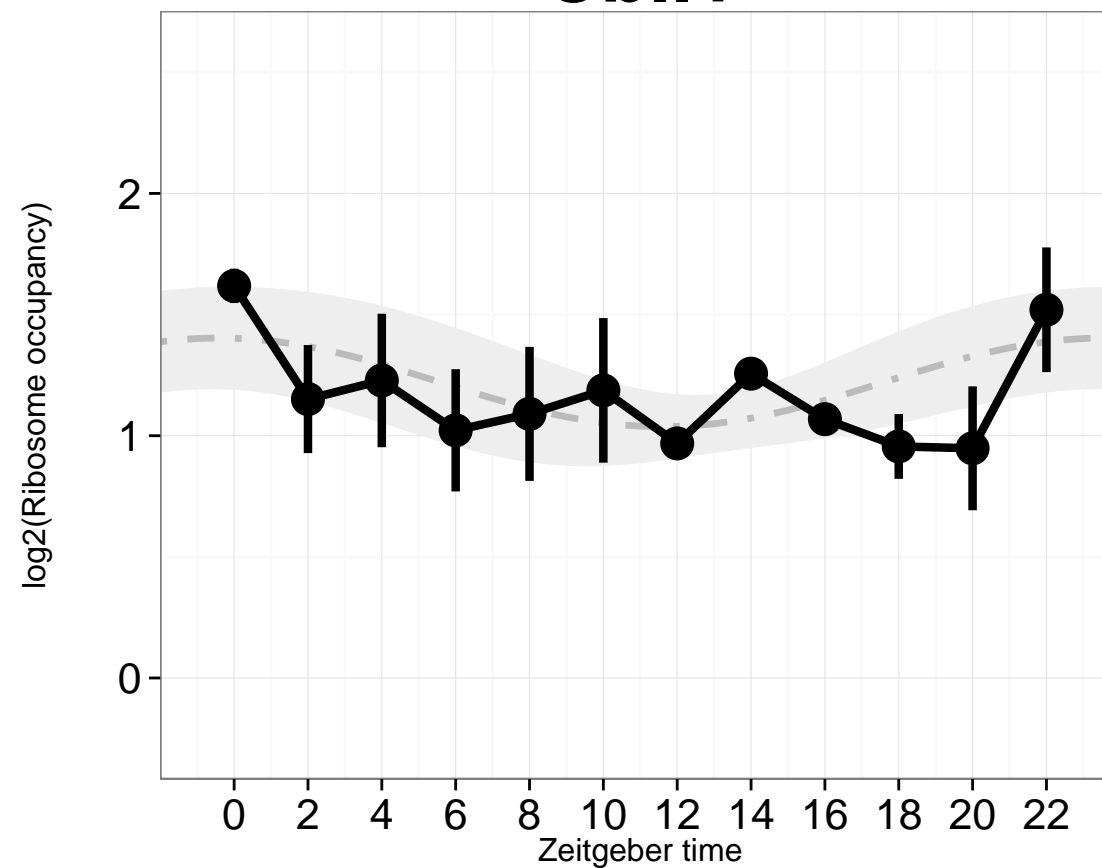

Supplement: SuppDataset_1.zip [file Cbll1_set_A.pdf › Supplemental Dataset 1/A-mRNA_nonrhyth_translation_nonrhyth/Cbll1_set_A.pdf]

**Cbr3 TR**

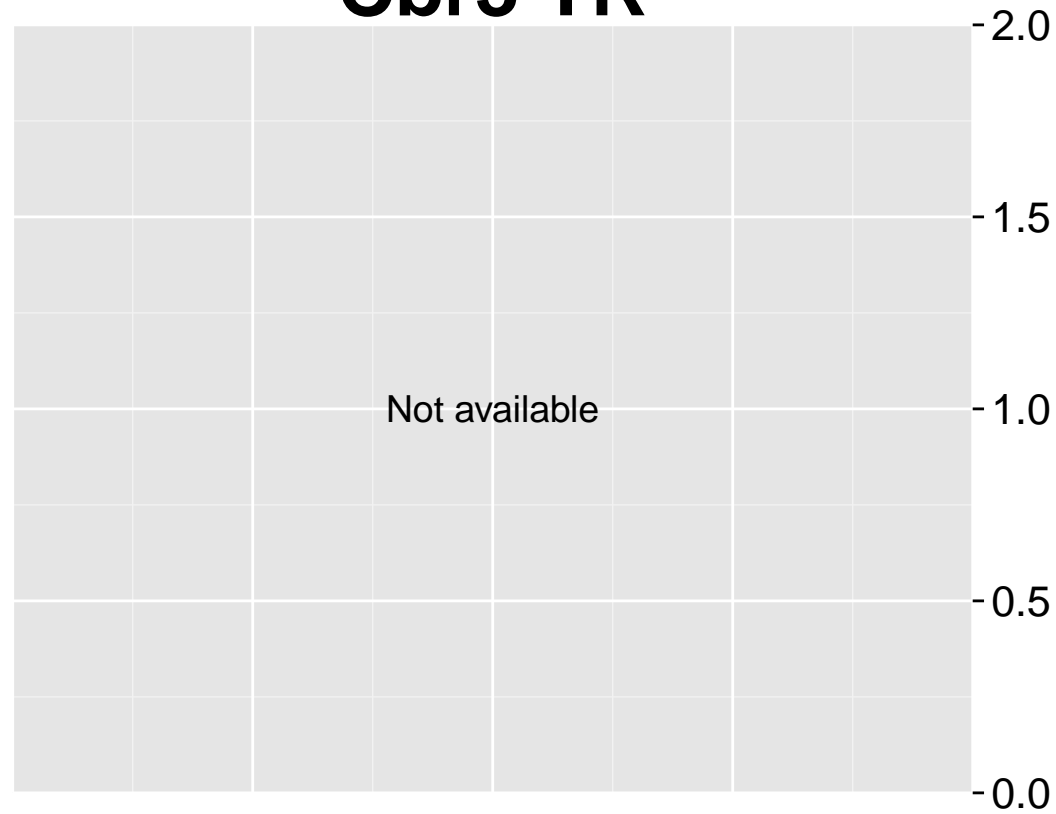

**Cbr3 log2(Ribosome occupancy)**

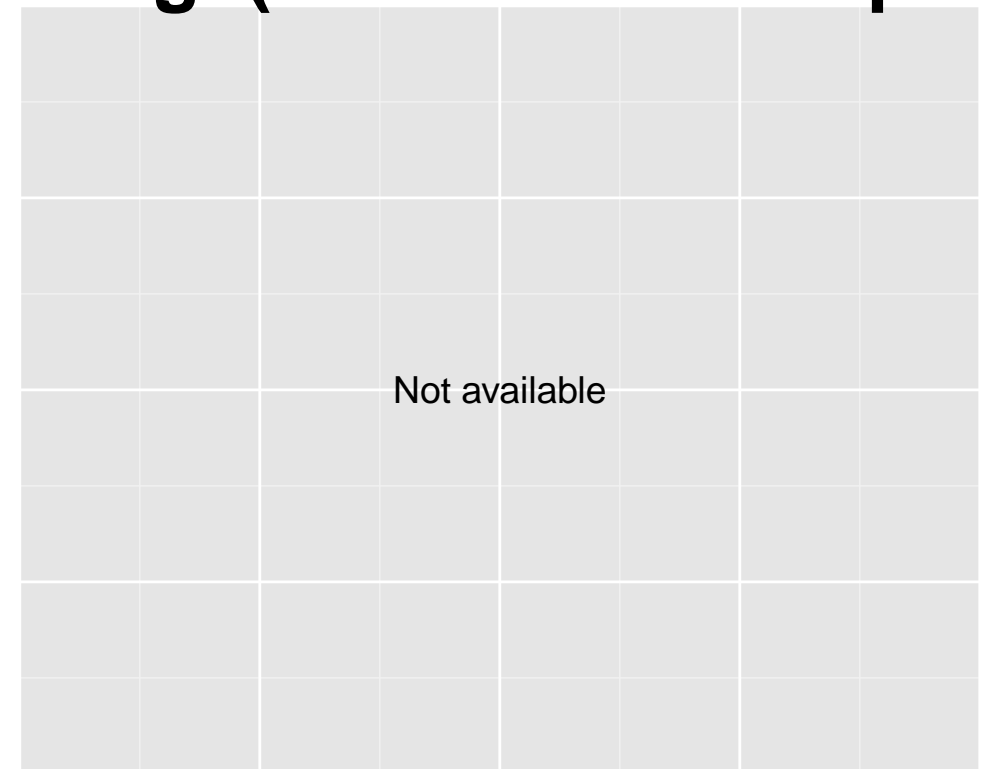

Supplement: SuppDataset_1.zip [file Cbr3_set_A.pdf › Supplemental Dataset 1/A-mRNA_nonrhyth_translation_nonrhyth/Cbr3_set_A.pdf]

## Cbr4

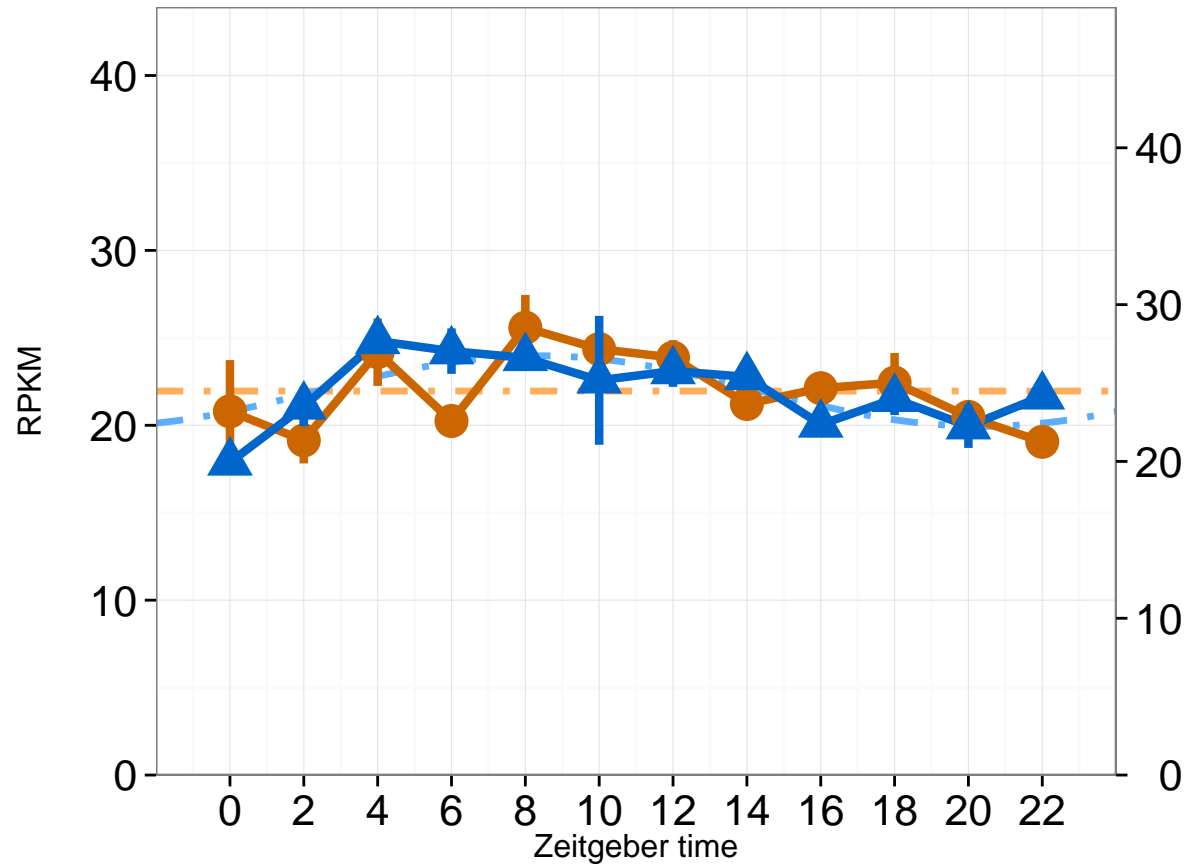

## Cbr4

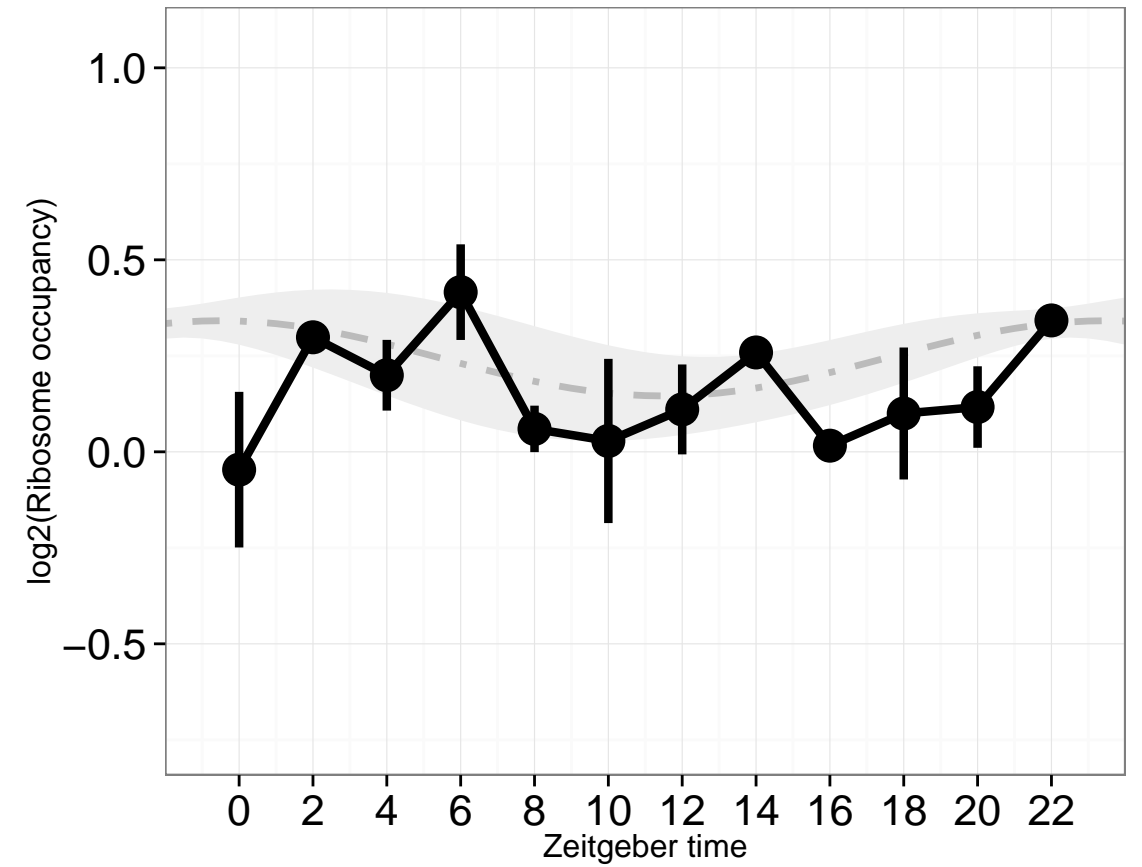

Supplement: SuppDataset_1.zip [file Cbr4_set_A.pdf › Supplemental Dataset 1/A-mRNA_nonrhyth_translation_nonrhyth/Cbr4_set_A.pdf]

# Cbwd1

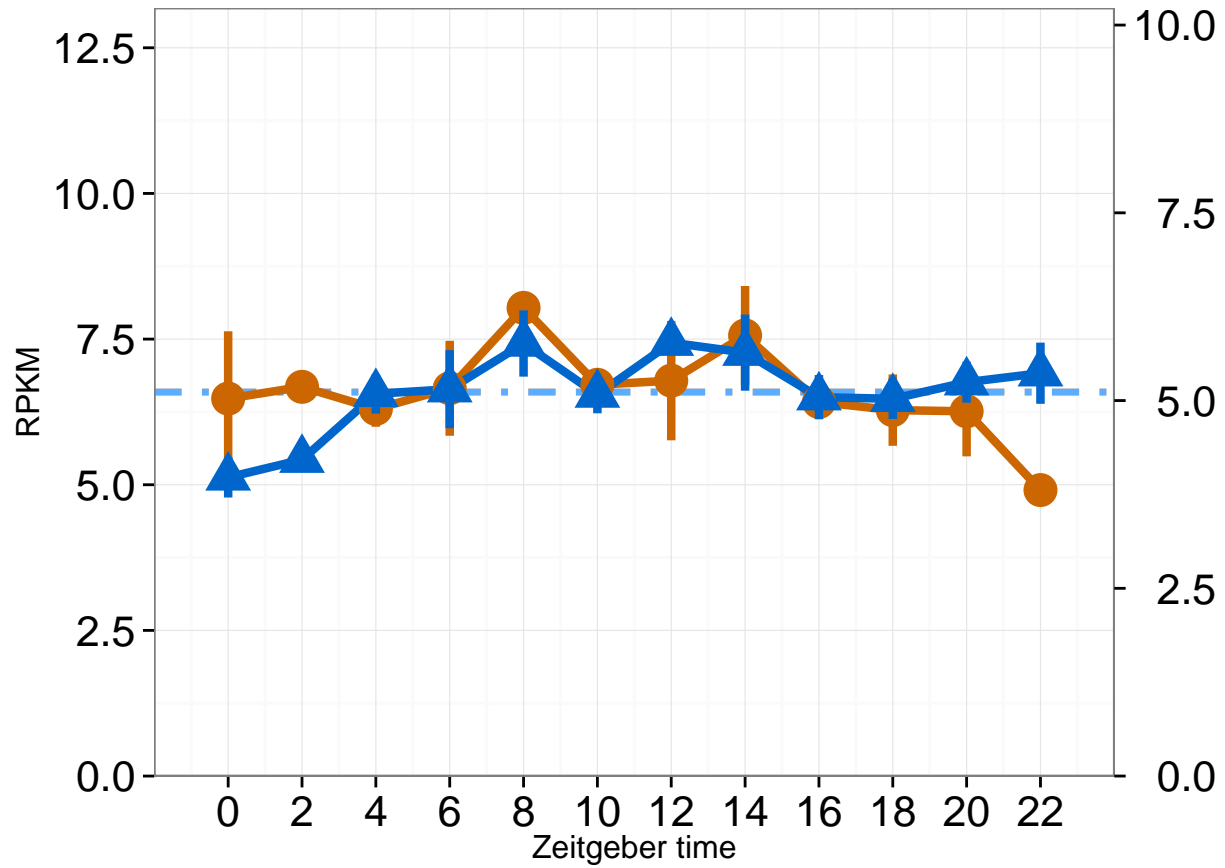

# Cbwd1

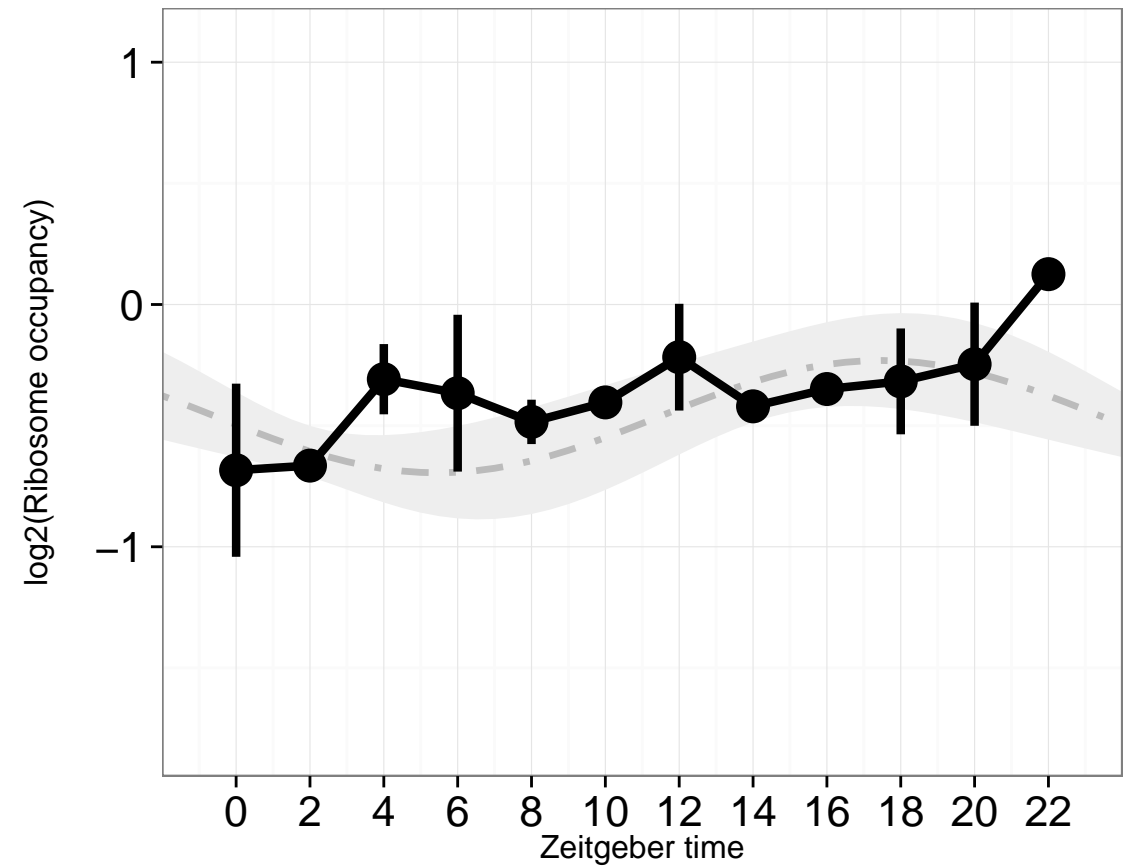

Supplement: SuppDataset_1.zip [file Cbwd1_set_A.pdf › Supplemental Dataset 1/A-mRNA_nonrhyth_translation_nonrhyth/Cbwd1_set_A.pdf]

## Cbx1

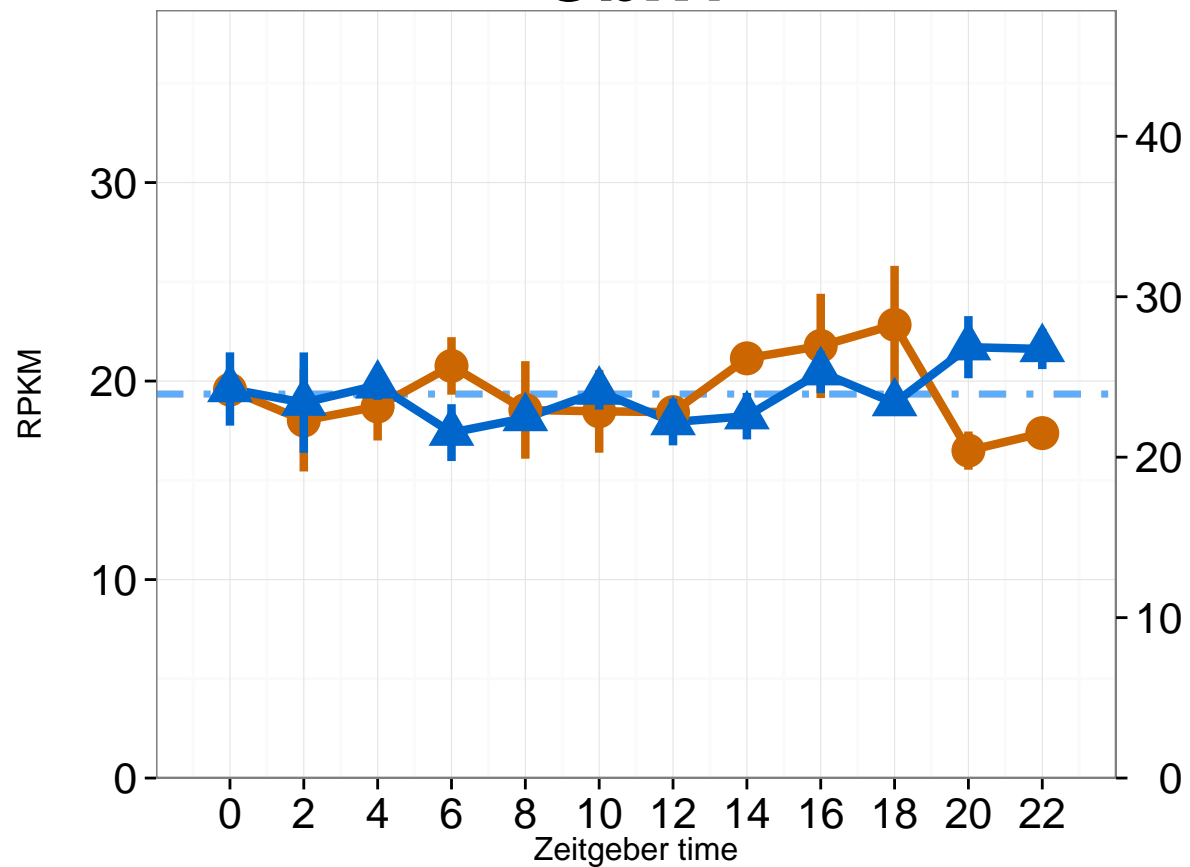

## Cbx1

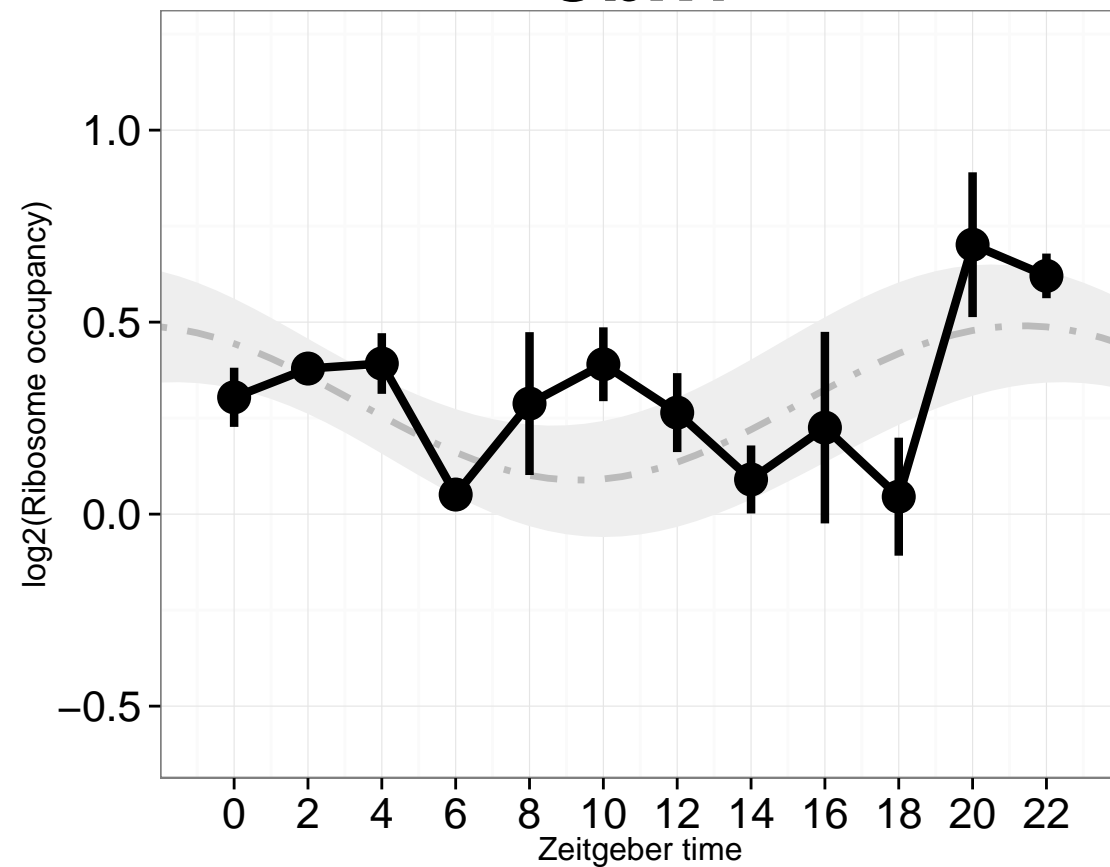

Supplement: SuppDataset_1.zip [file Cbx1_set_A.pdf › Supplemental Dataset 1/A-mRNA_nonrhyth_translation_nonrhyth/Cbx1_set_A.pdf]

# Cbx2

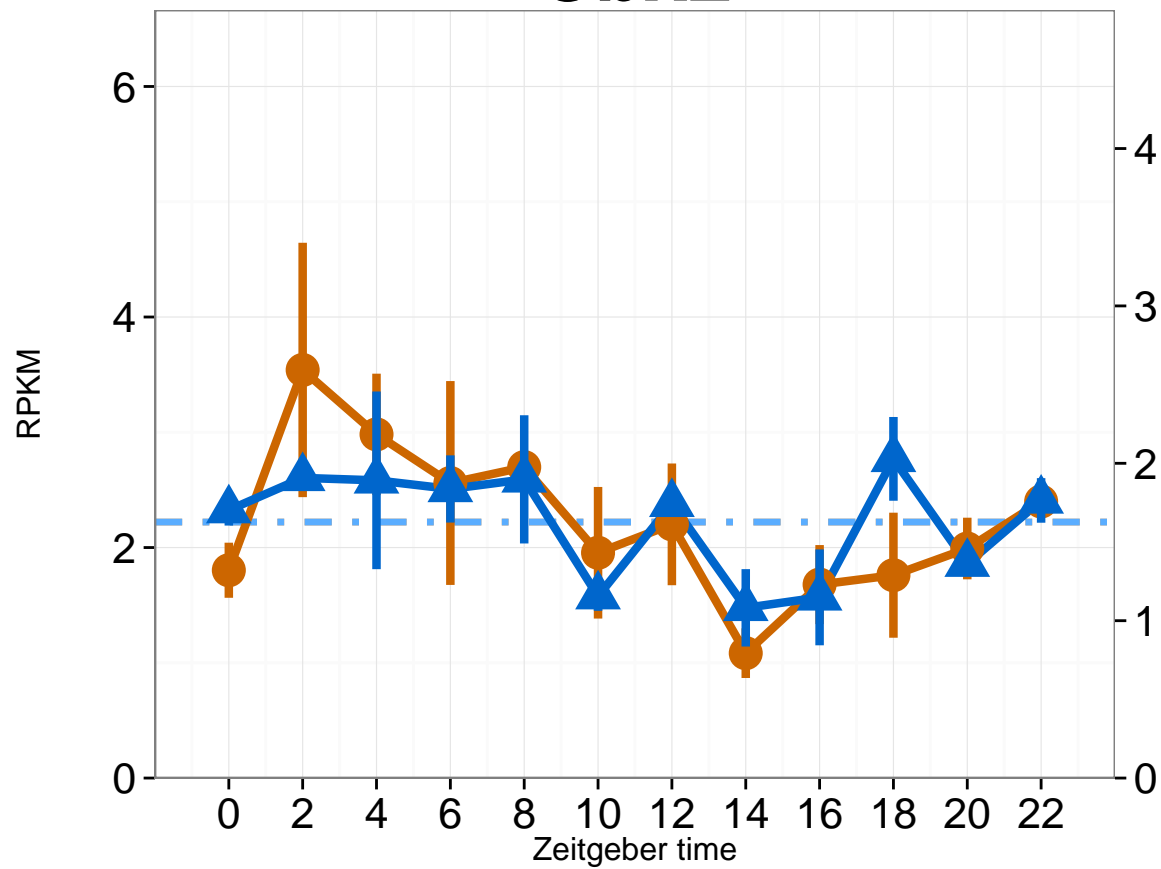

# Cbx2

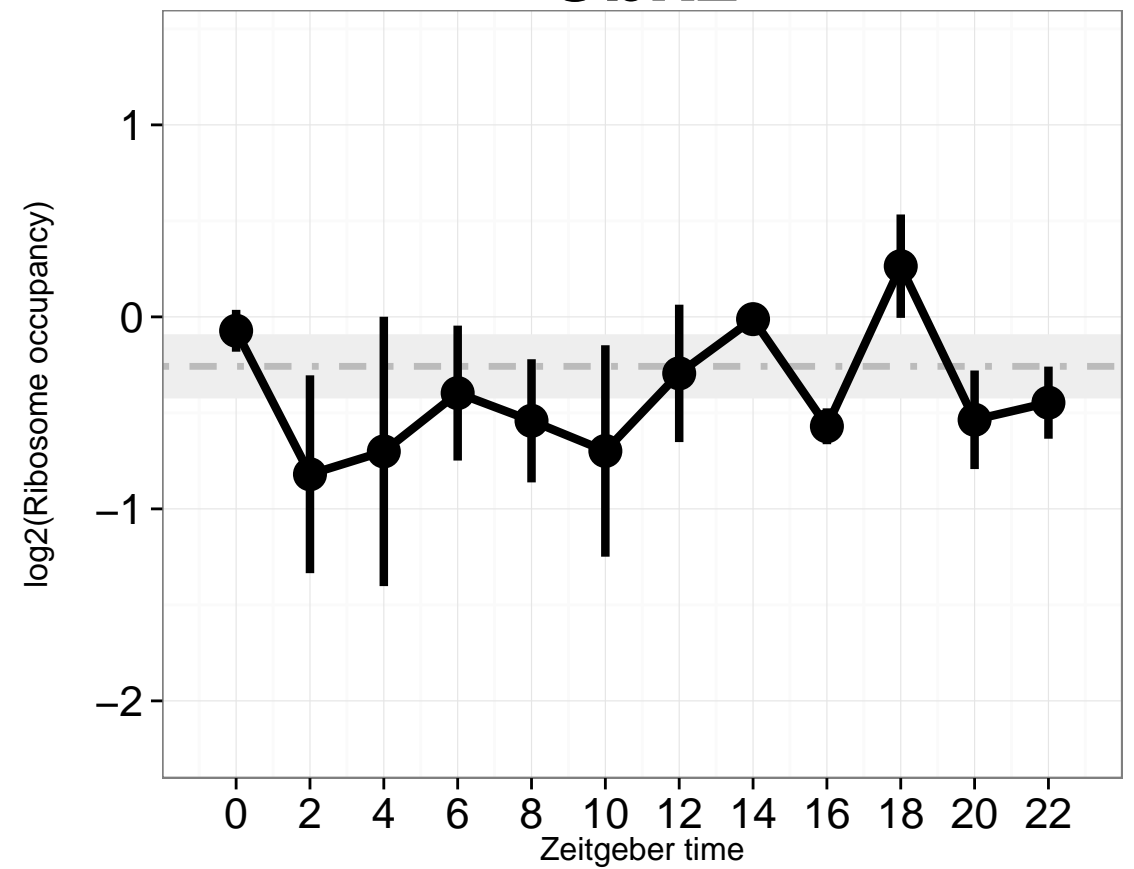

Supplement: SuppDataset_1.zip [file Cbx2_set_A.pdf › Supplemental Dataset 1/A-mRNA_nonrhyth_translation_nonrhyth/Cbx2_set_A.pdf]

## Cbx3

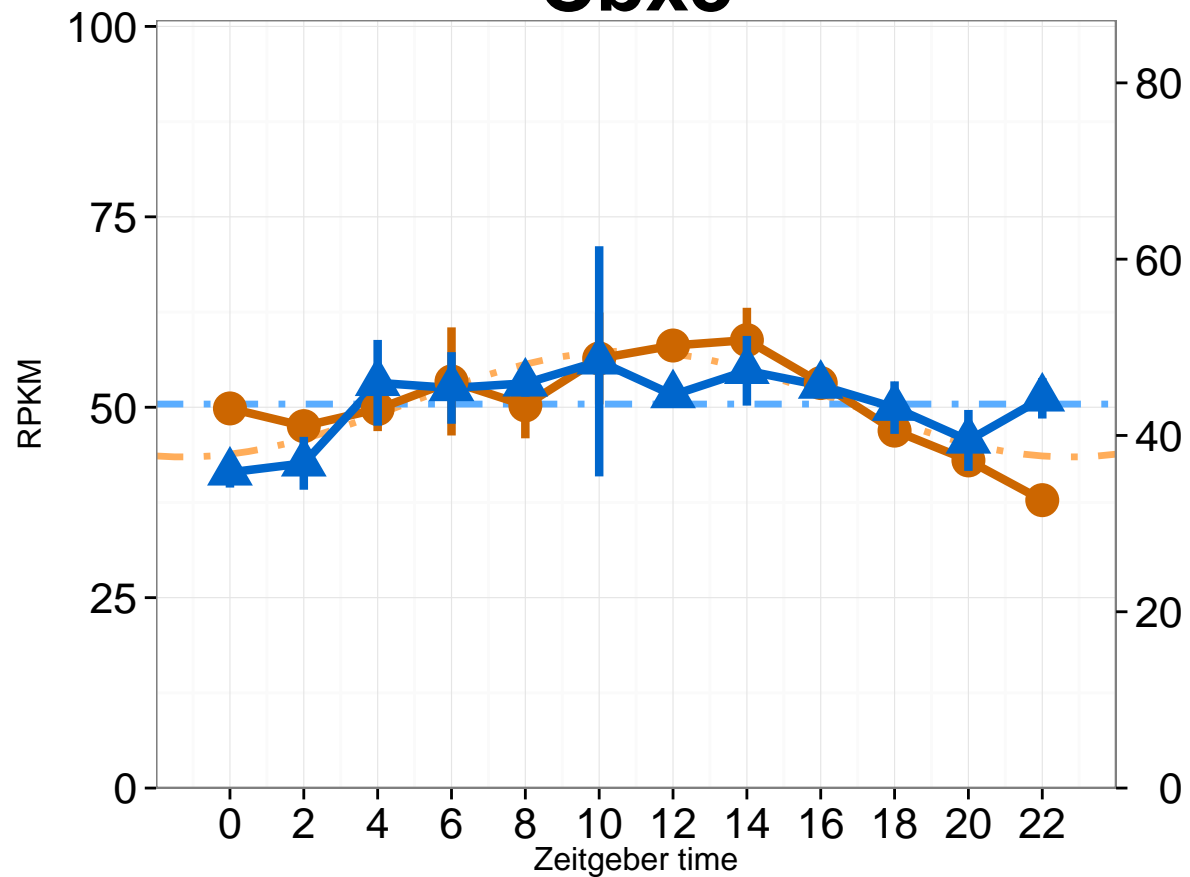

## Cbx3

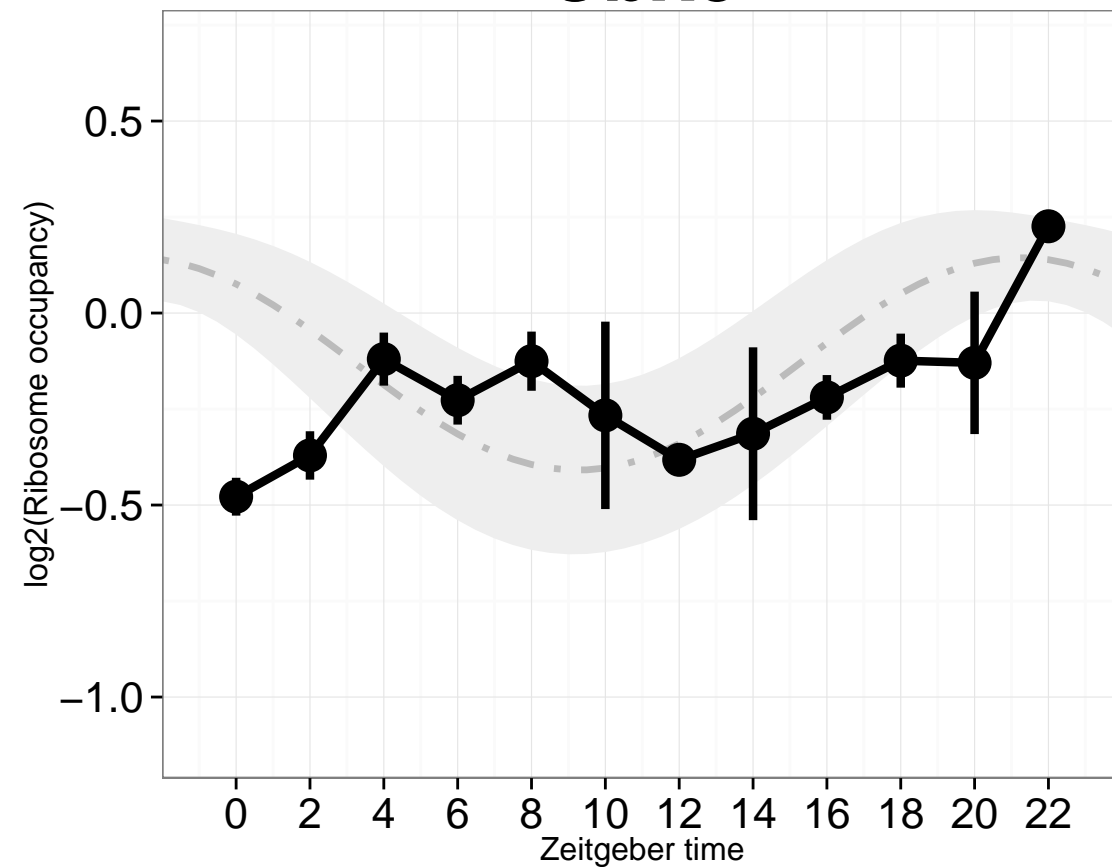

Supplement: SuppDataset_1.zip [file Cbx3_set_A.pdf › Supplemental Dataset 1/A-mRNA_nonrhyth_translation_nonrhyth/Cbx3_set_A.pdf]

## Cbx5

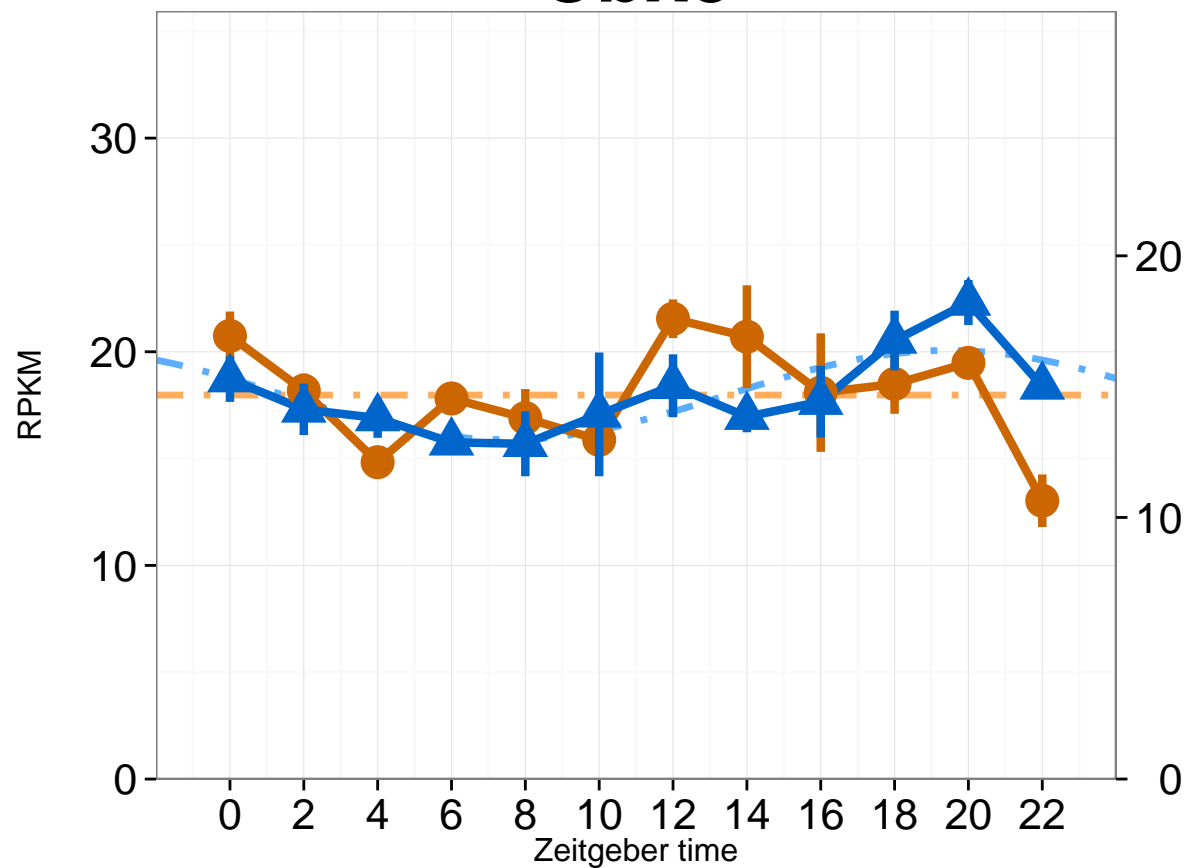

## Cbx5

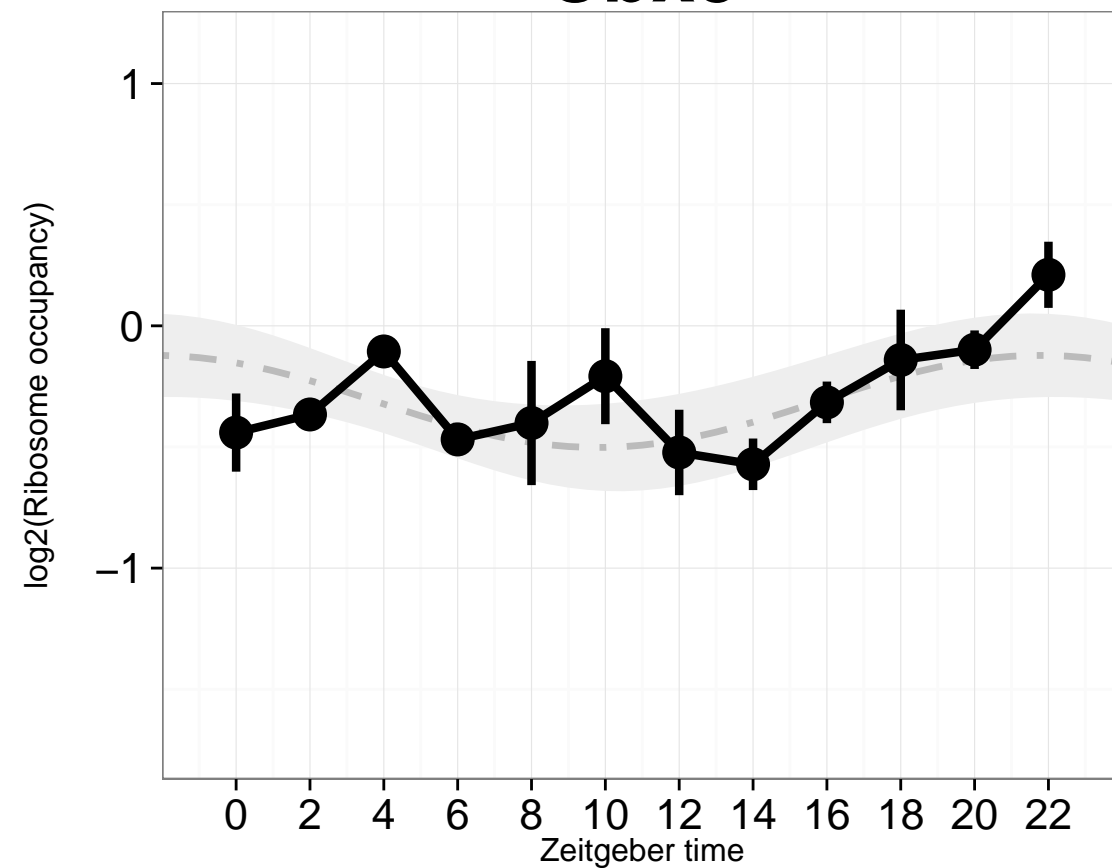

Supplement: SuppDataset_1.zip [file Cbx5_set_A.pdf › Supplemental Dataset 1/A-mRNA_nonrhyth_translation_nonrhyth/Cbx5_set_A.pdf]

## Cbx7

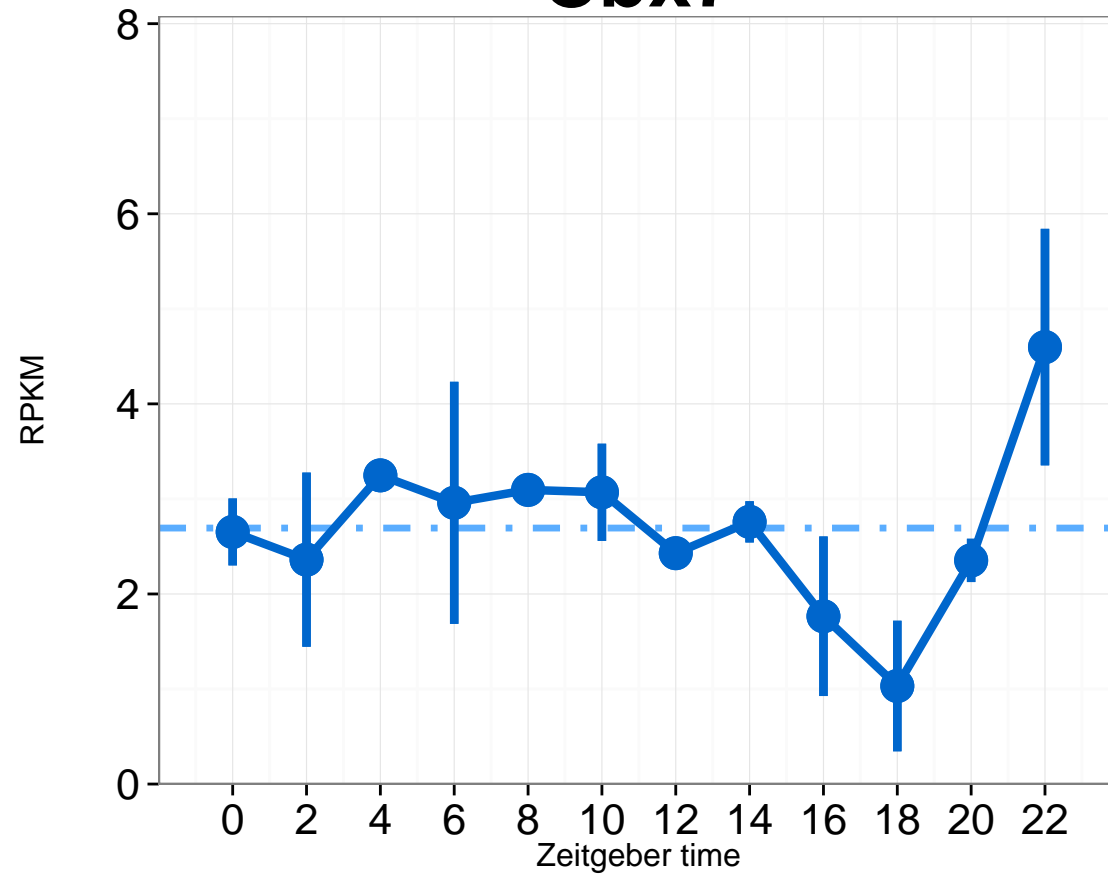

## Cbx7 log2(Ribosome occupancy)

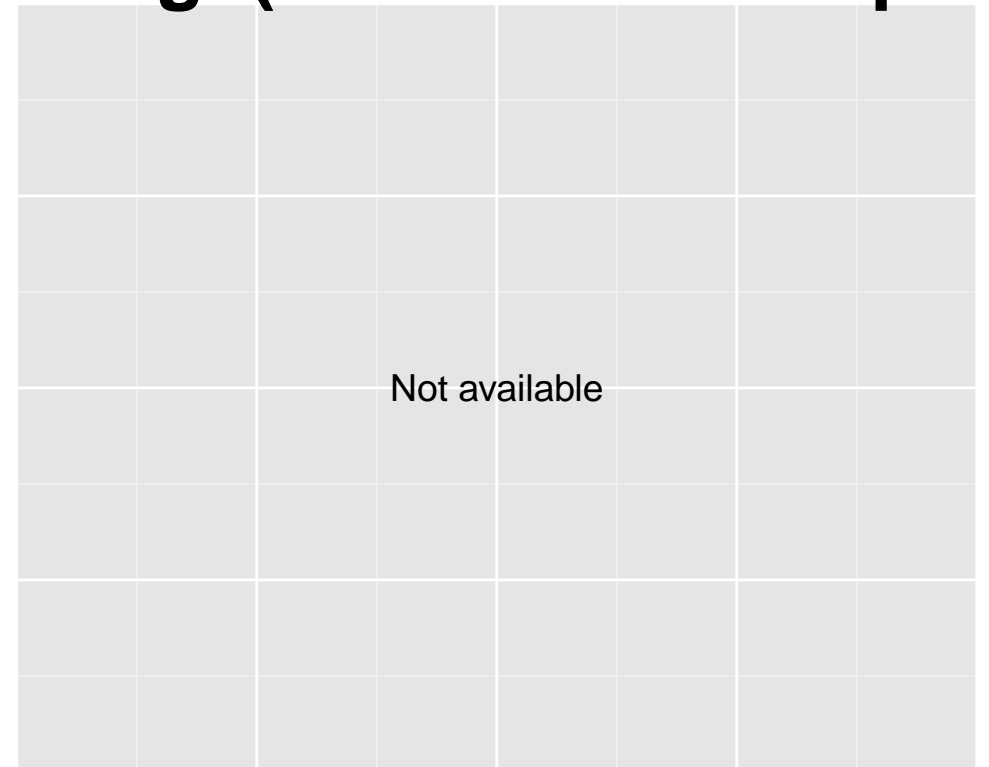

Supplement: SuppDataset_1.zip [file Cbx7_set_A.pdf › Supplemental Dataset 1/A-mRNA_nonrhyth_translation_nonrhyth/Cbx7_set_A.pdf]

## Cbx8

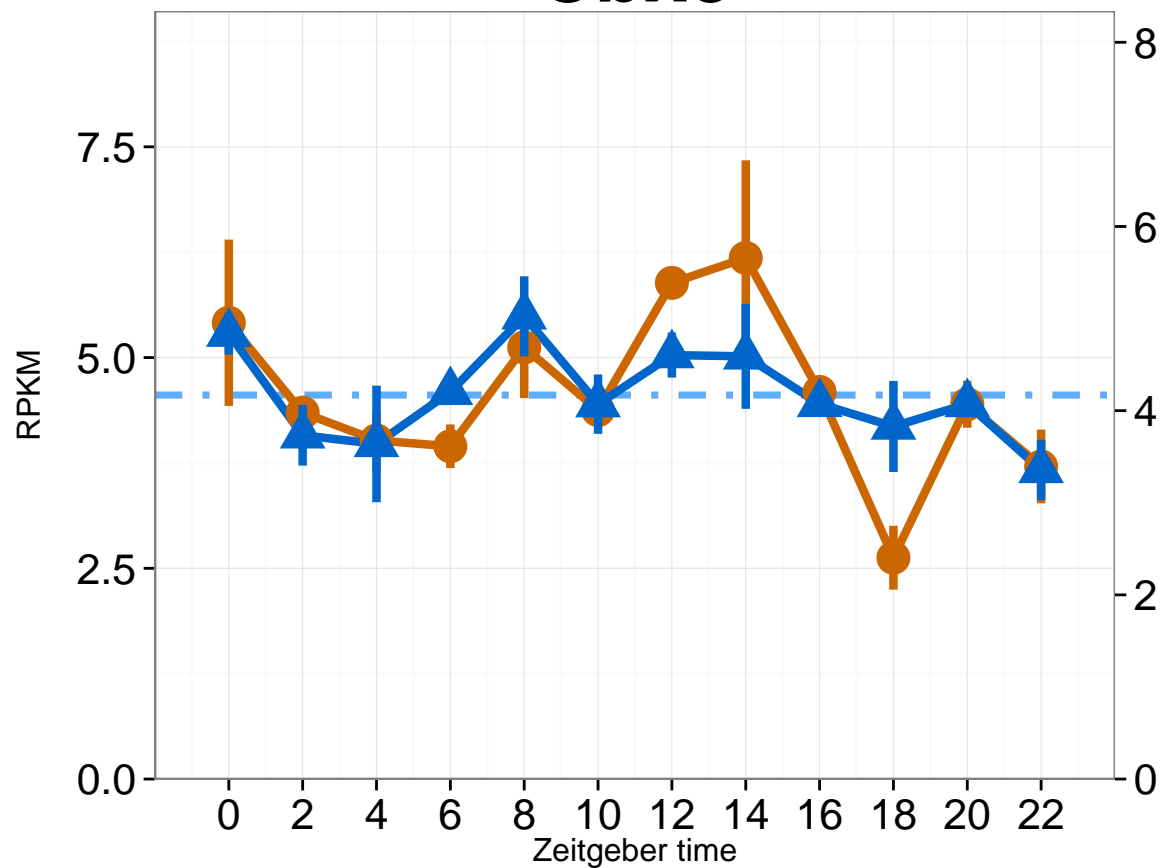

## Cbx8

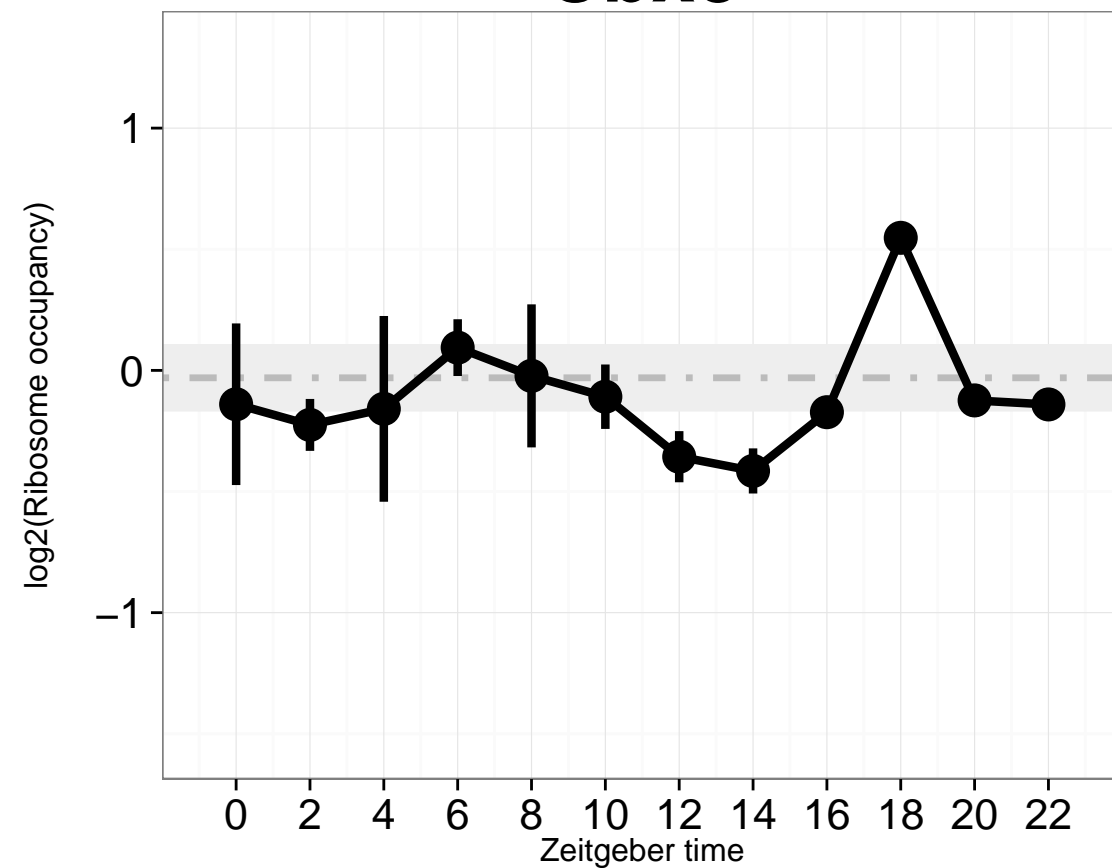

Supplement: SuppDataset_1.zip [file Cbx8_set_A.pdf › Supplemental Dataset 1/A-mRNA_nonrhyth_translation_nonrhyth/Cbx8_set_A.pdf]

# Cby1

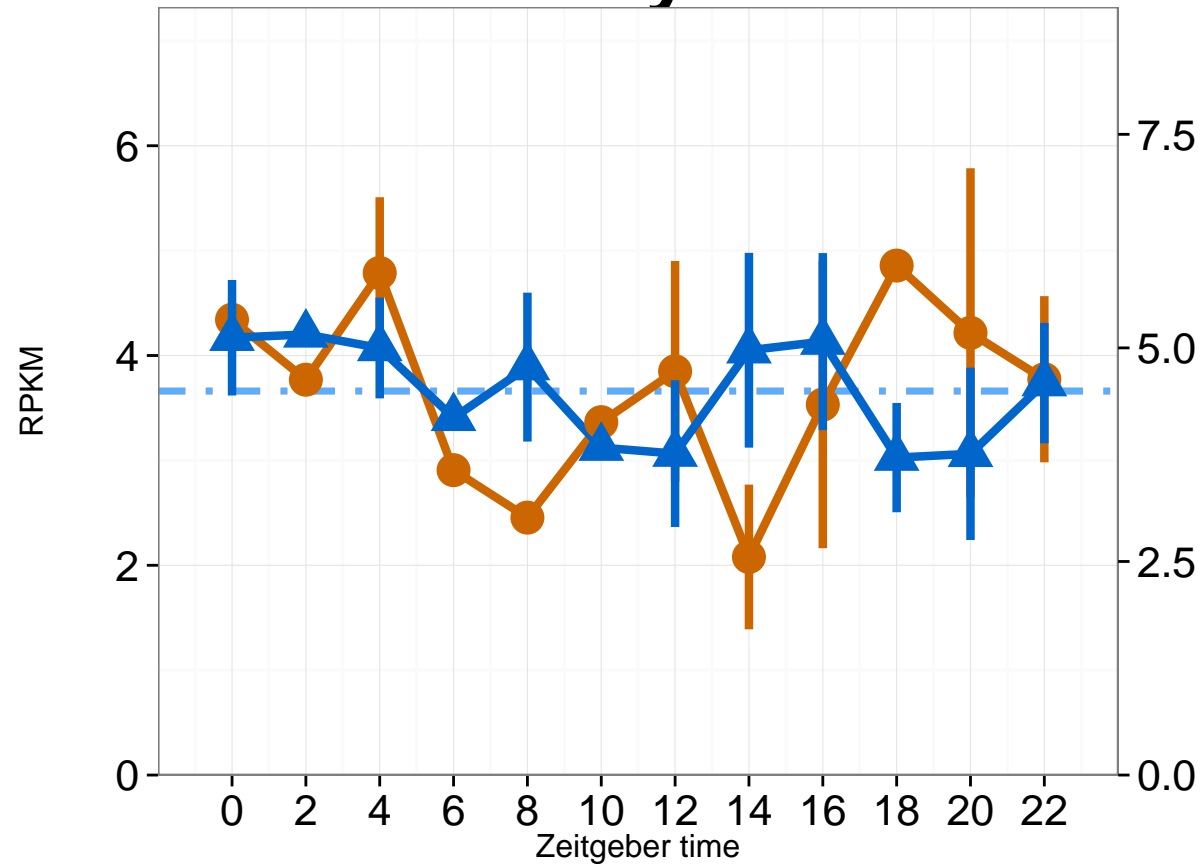

# Cby1

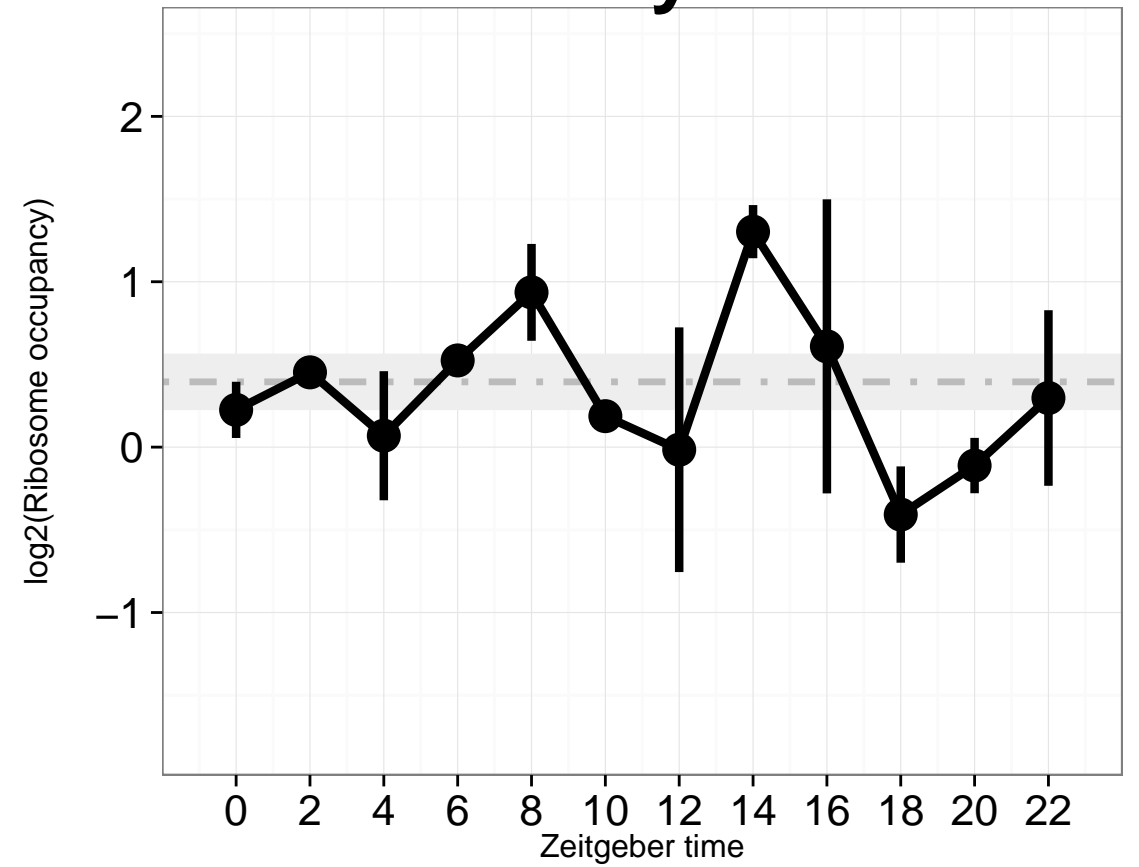

Supplement: SuppDataset_1.zip [file Cby1_set_A.pdf › Supplemental Dataset 1/A-mRNA_nonrhyth_translation_nonrhyth/Cby1_set_A.pdf]

# Cc2d1b

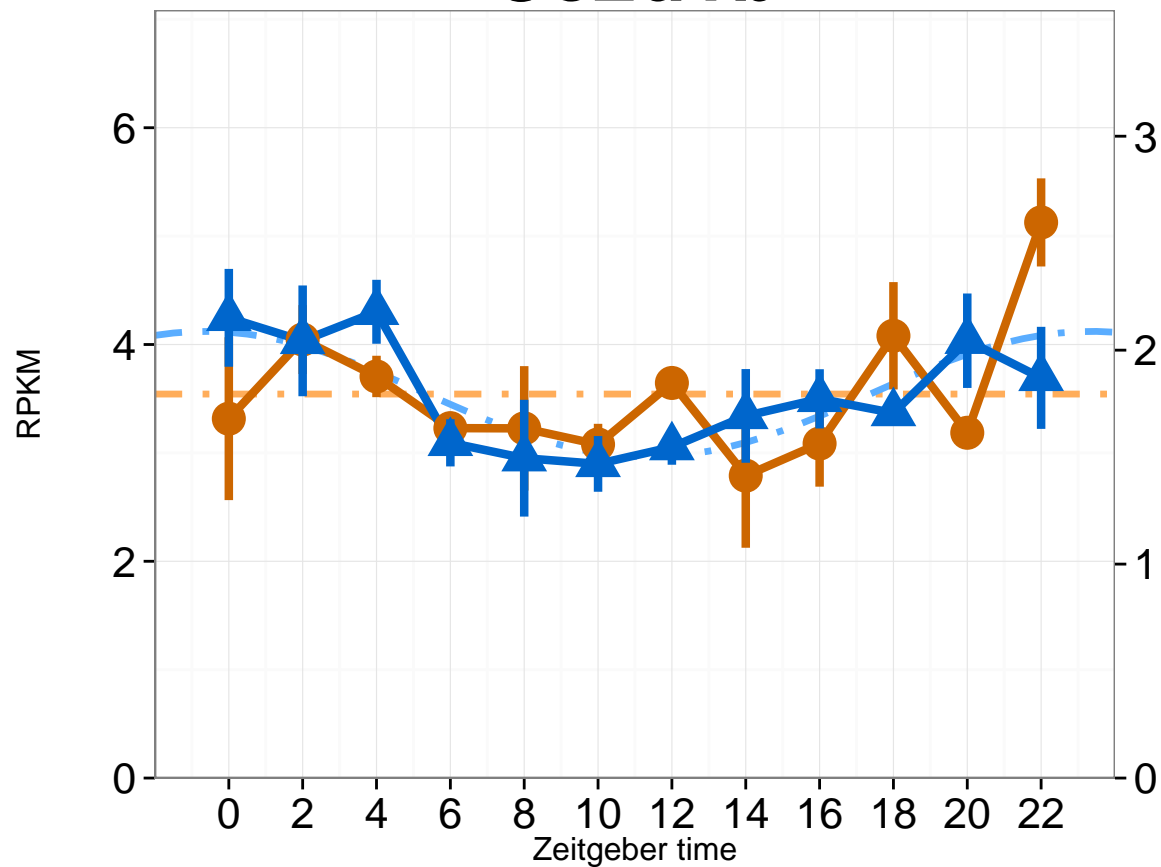

# Cc2d1b

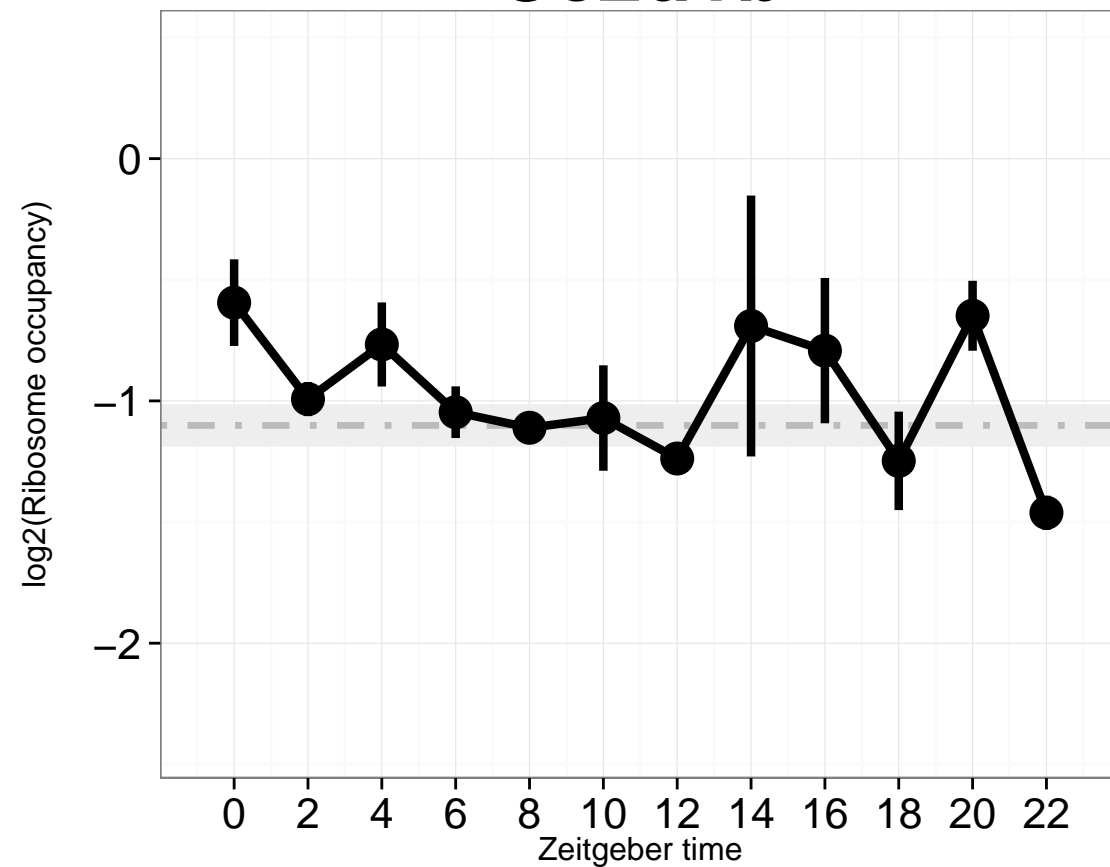

Supplement: SuppDataset_1.zip [file Cc2d1b_set_A.pdf › Supplemental Dataset 1/A-mRNA_nonrhyth_translation_nonrhyth/Cc2d1b_set_A.pdf]

# Cc2d2a

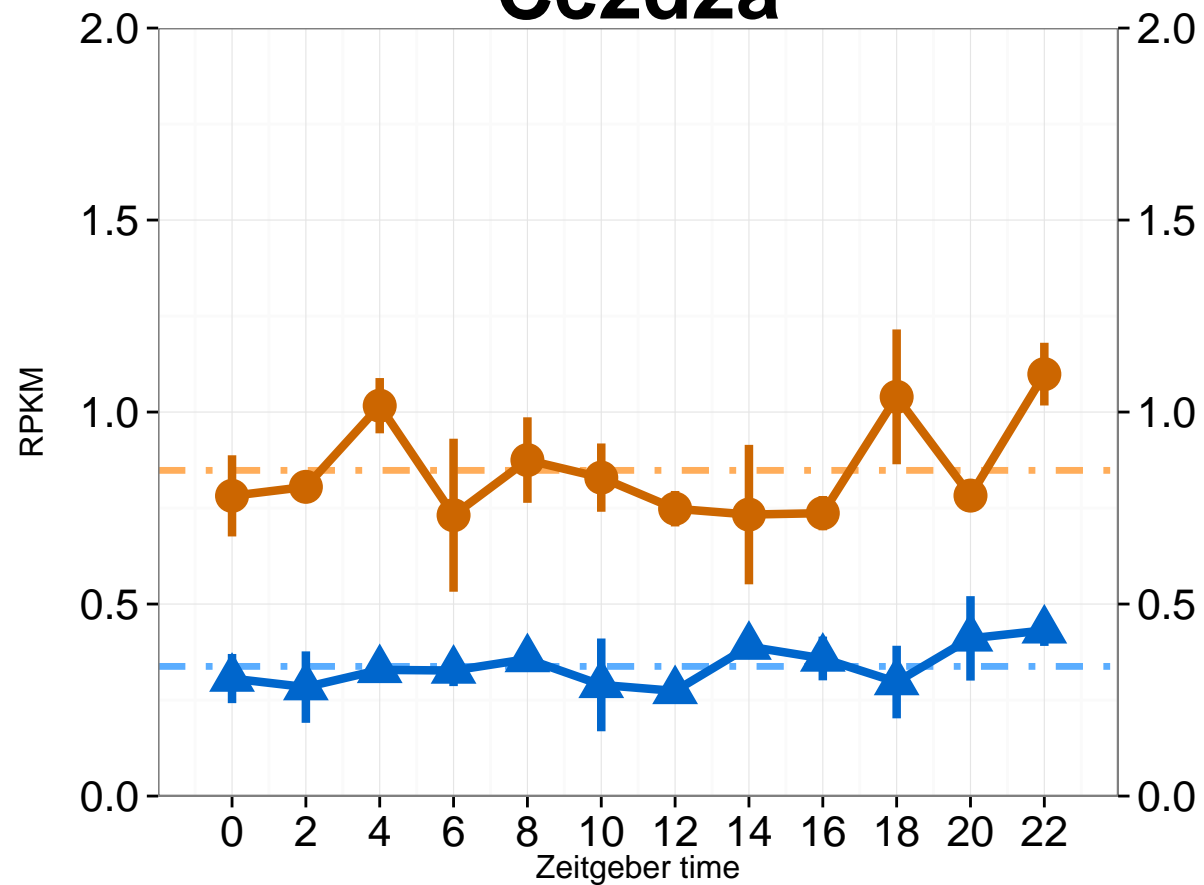

# Cc2d2a

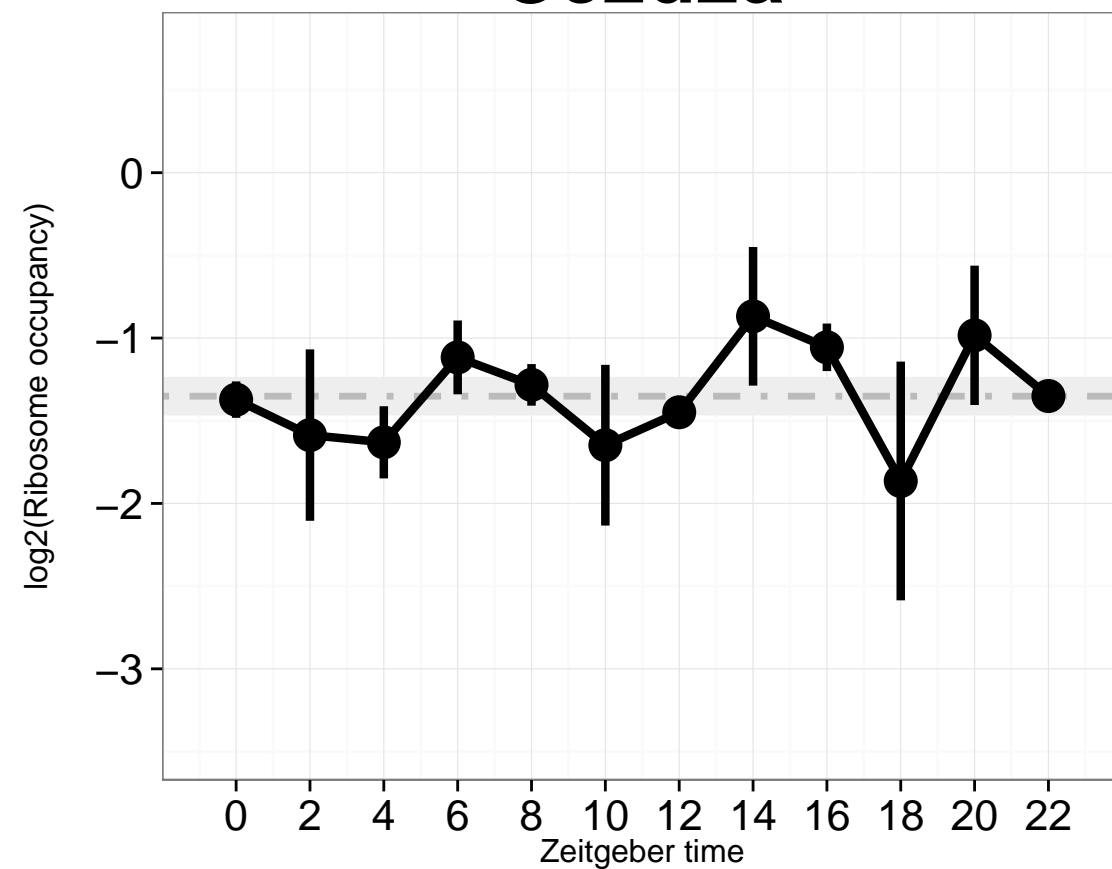

Supplement: SuppDataset_1.zip [file Cc2d2a_set_A.pdf › Supplemental Dataset 1/A-mRNA_nonrhyth_translation_nonrhyth/Cc2d2a_set_A.pdf]

## Ccar2

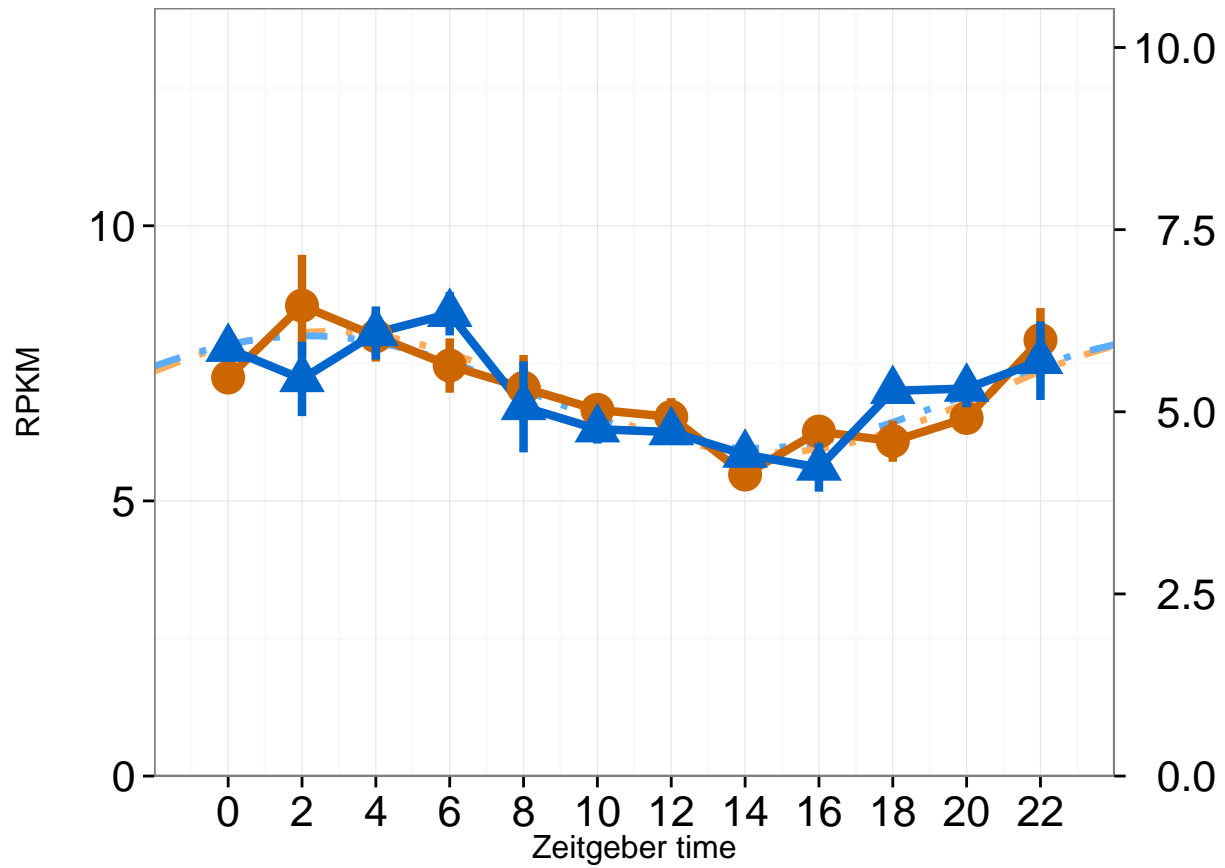

## Ccar2

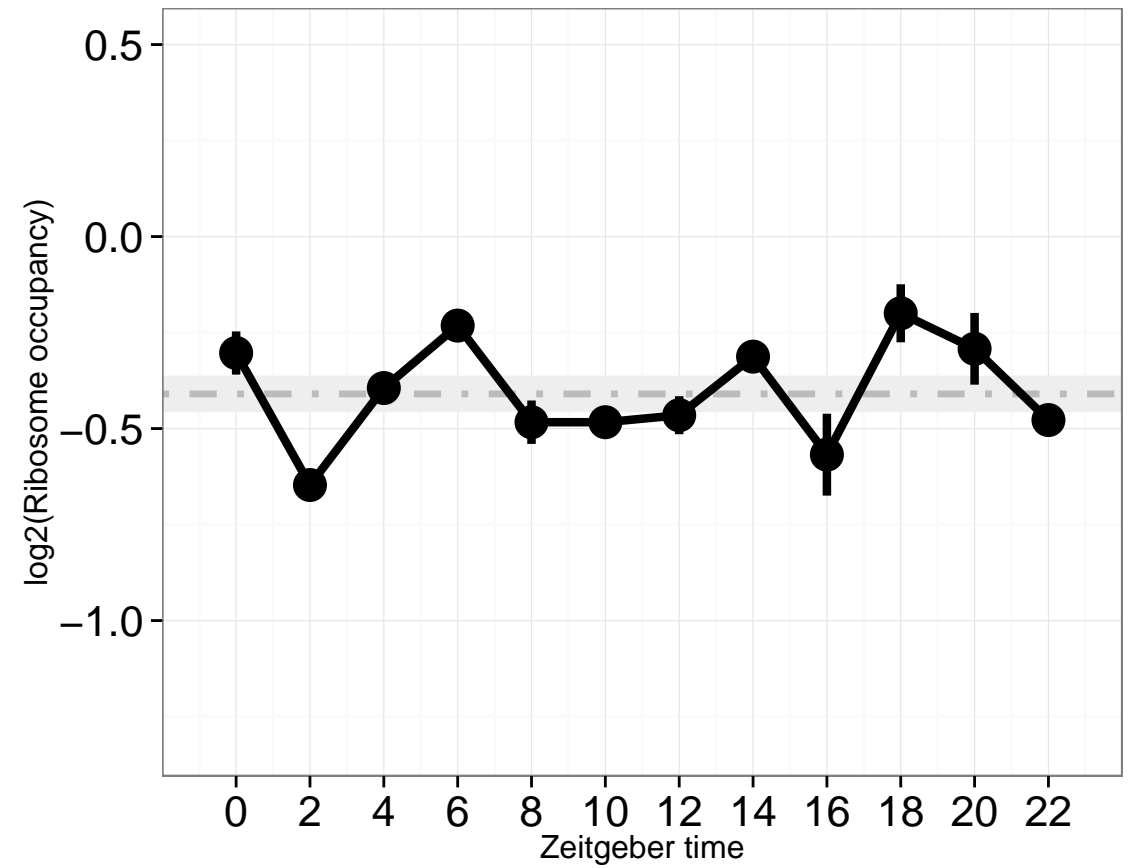

Supplement: SuppDataset_1.zip [file Ccar2_set_A.pdf › Supplemental Dataset 1/A-mRNA_nonrhyth_translation_nonrhyth/Ccar2_set_A.pdf]

# Ccbl2

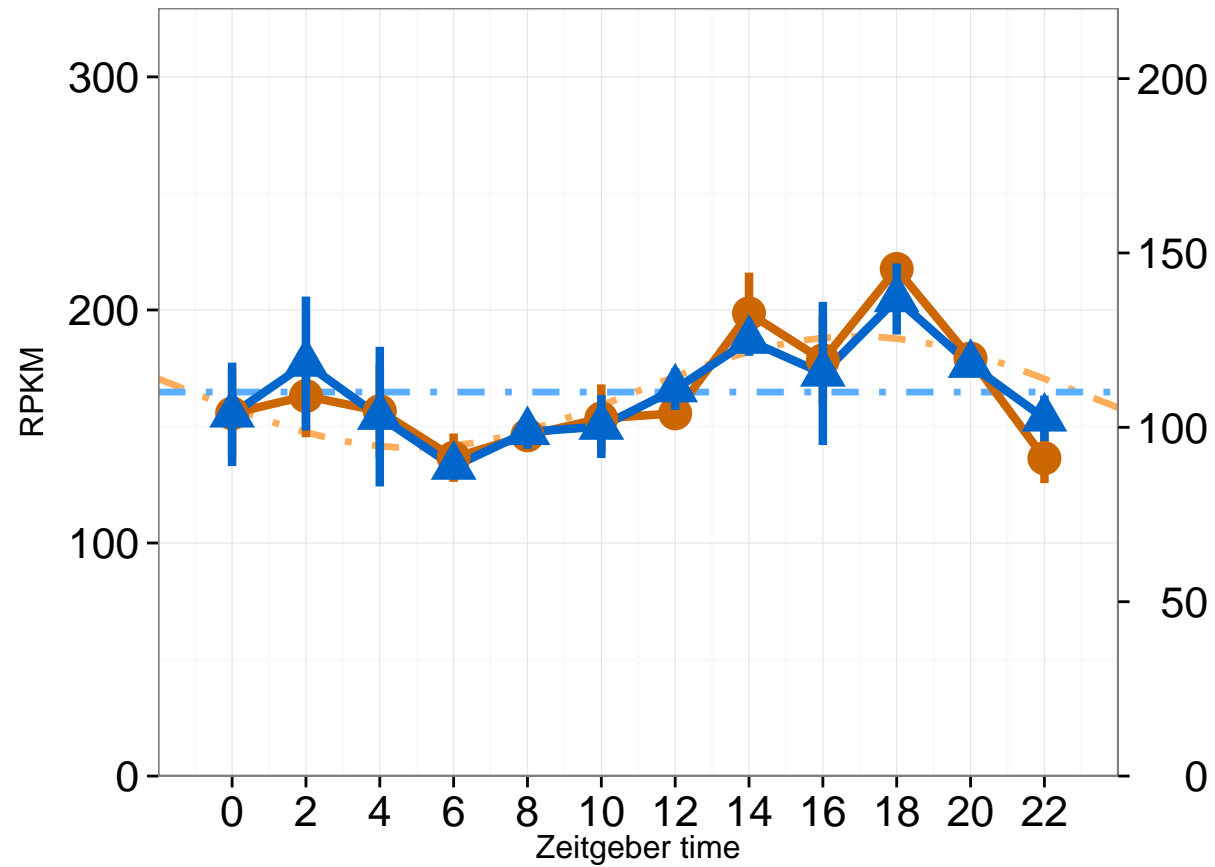

# Ccbl2

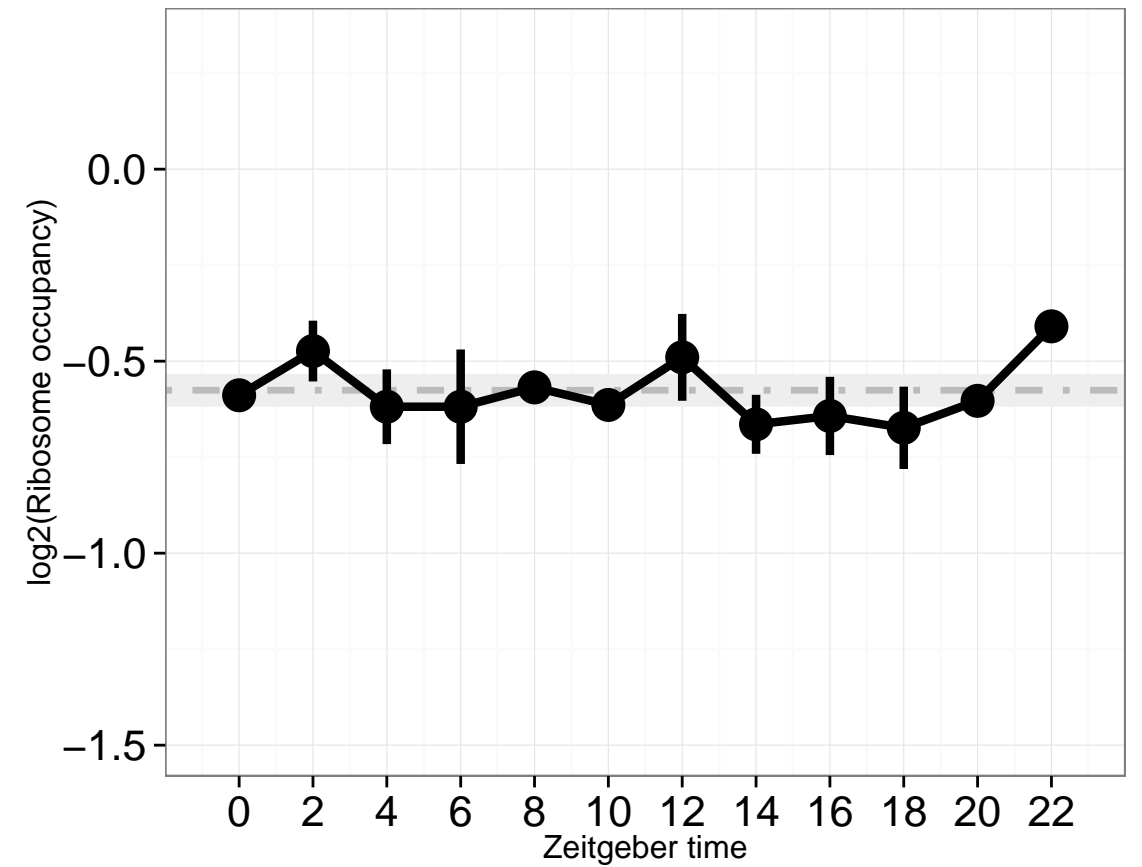

Supplement: SuppDataset_1.zip [file Ccbl2_set_A.pdf › Supplemental Dataset 1/A-mRNA_nonrhyth_translation_nonrhyth/Ccbl2_set_A.pdf]

## Ccdc101

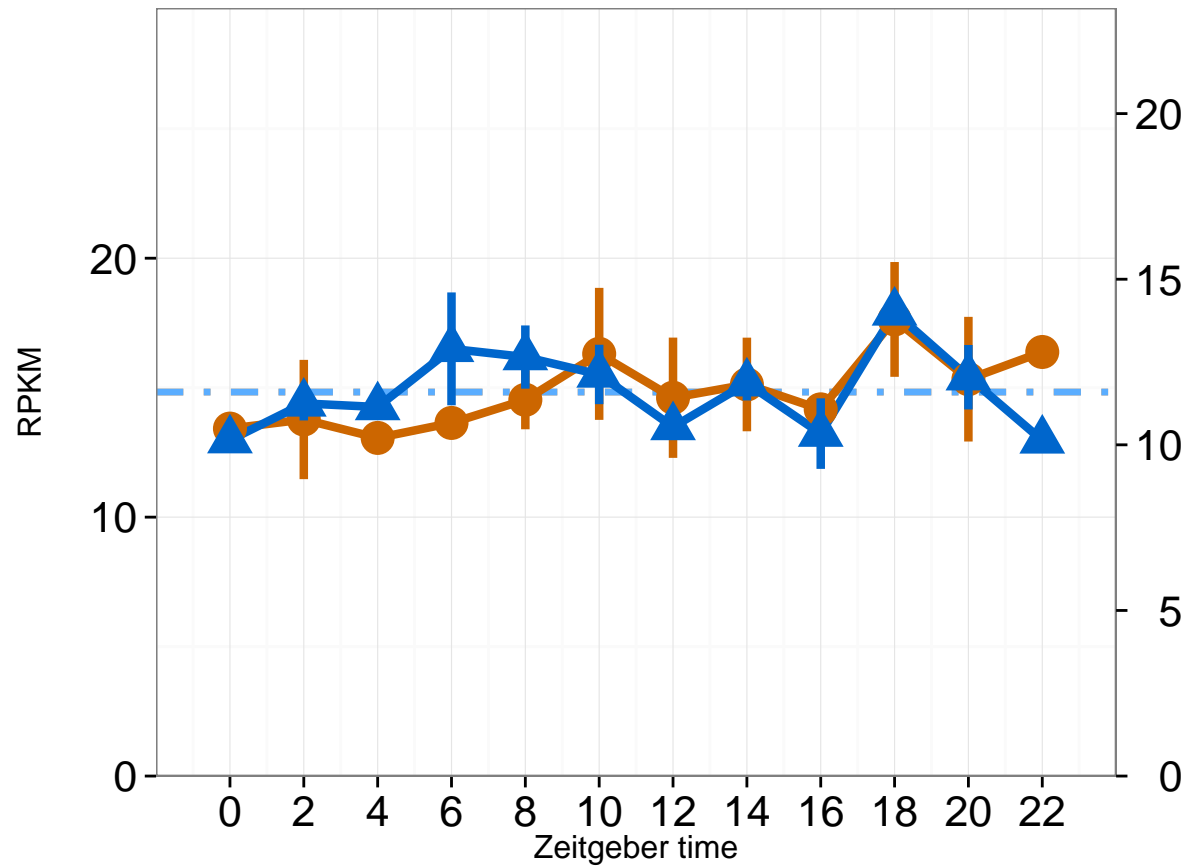

## Ccdc101

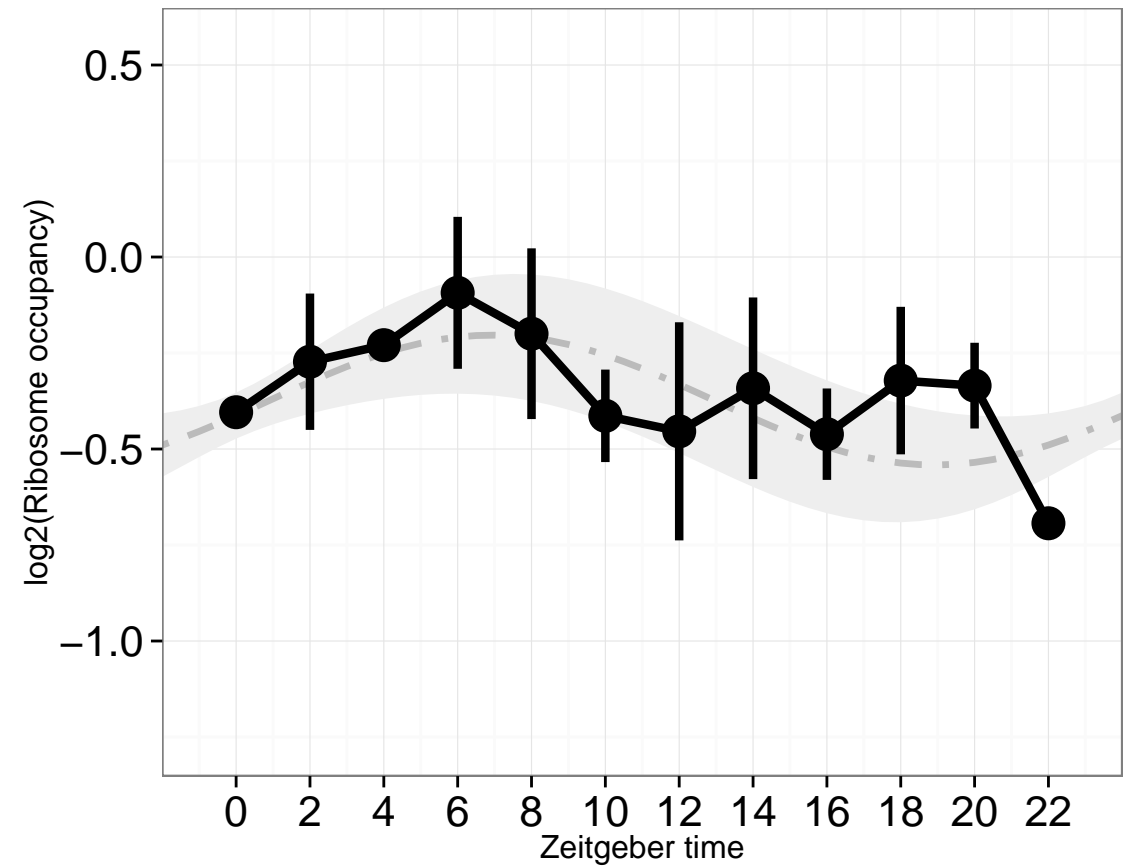

Supplement: SuppDataset_1.zip [file Ccdc101_set_A.pdf › Supplemental Dataset 1/A-mRNA_nonrhyth_translation_nonrhyth/Ccdc101_set_A.pdf]

# Ccdc102a

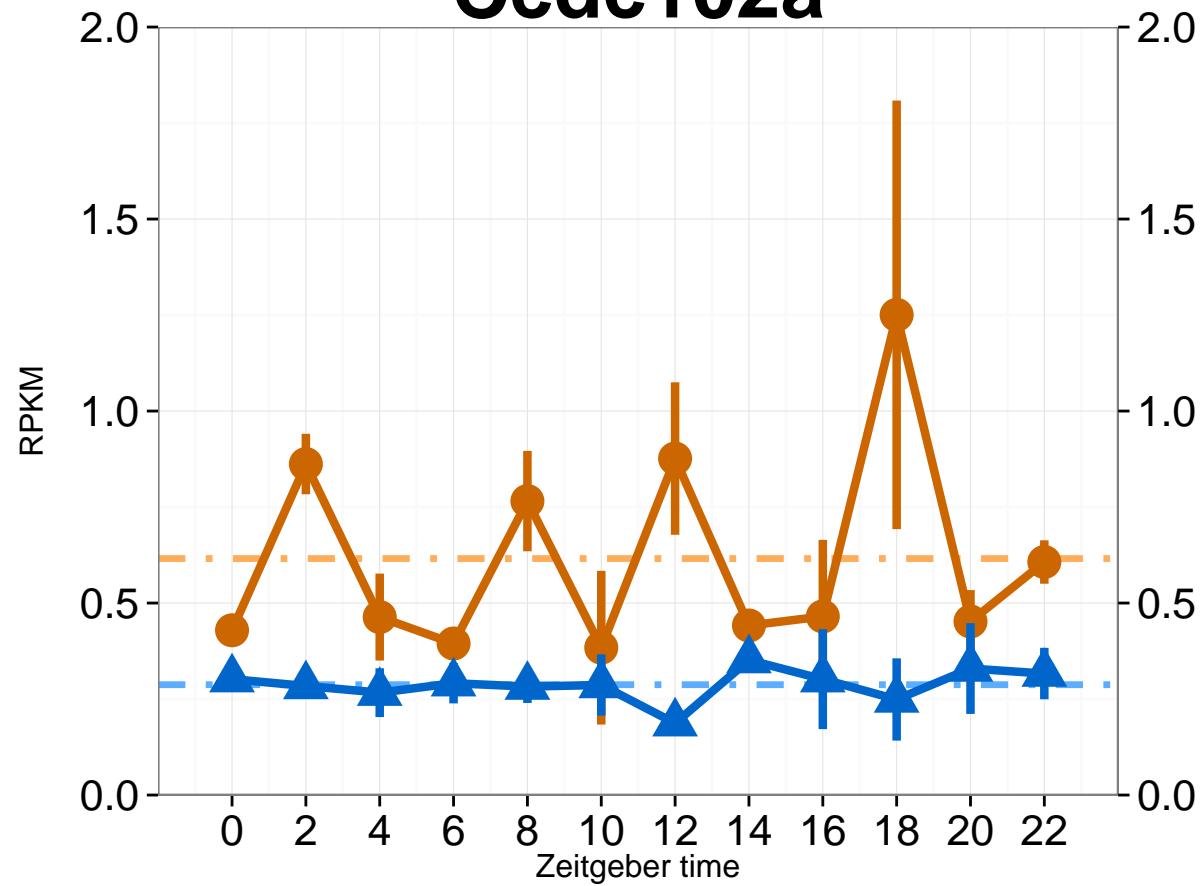

# Ccdc102a

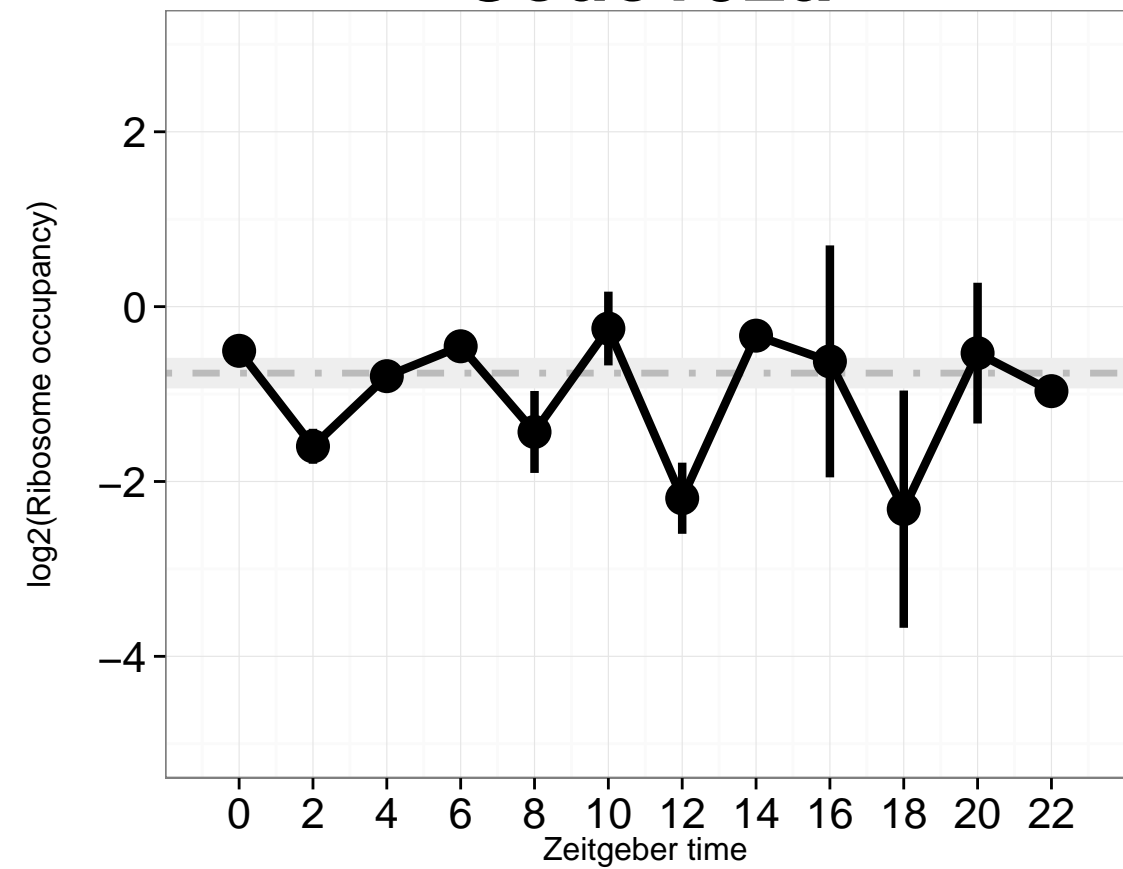

Supplement: SuppDataset_1.zip [file Ccdc102a_set_A.pdf › Supplemental Dataset 1/A-mRNA_nonrhyth_translation_nonrhyth/Ccdc102a_set_A.pdf]

Ccdc104

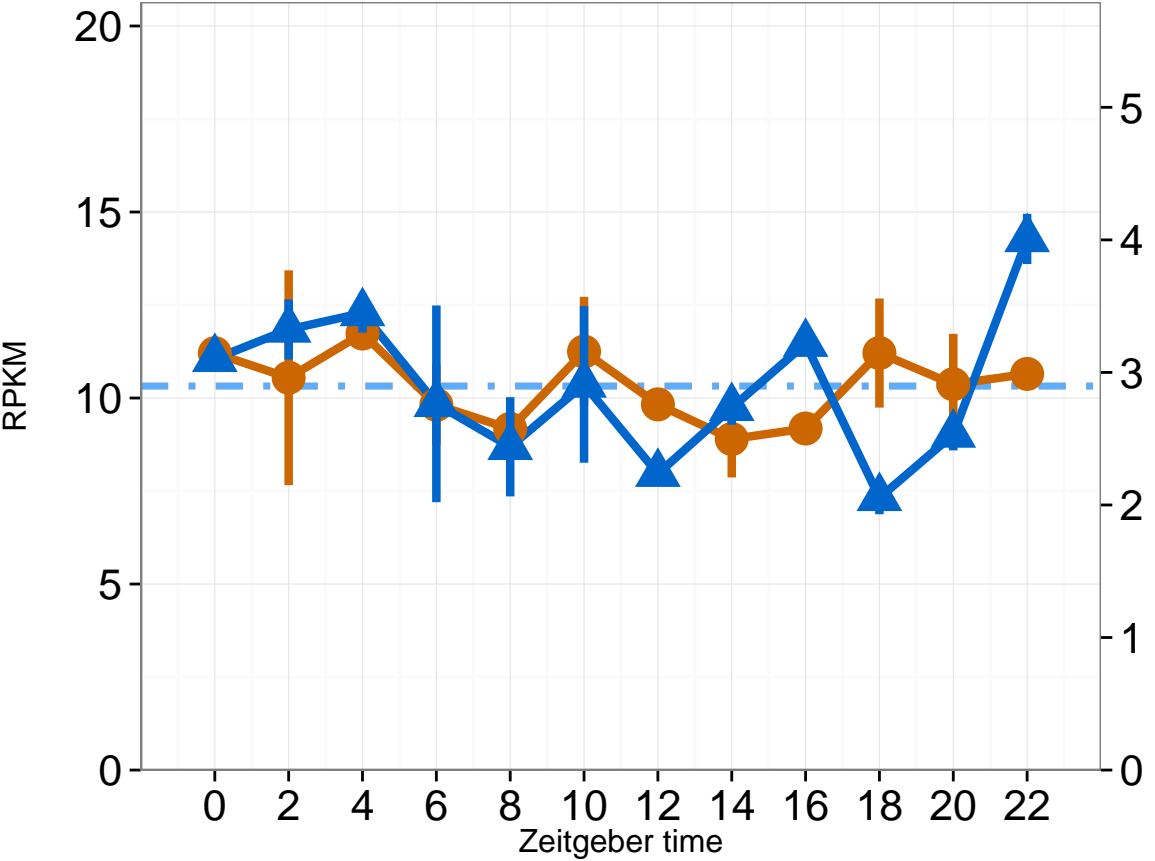

Ccdc104

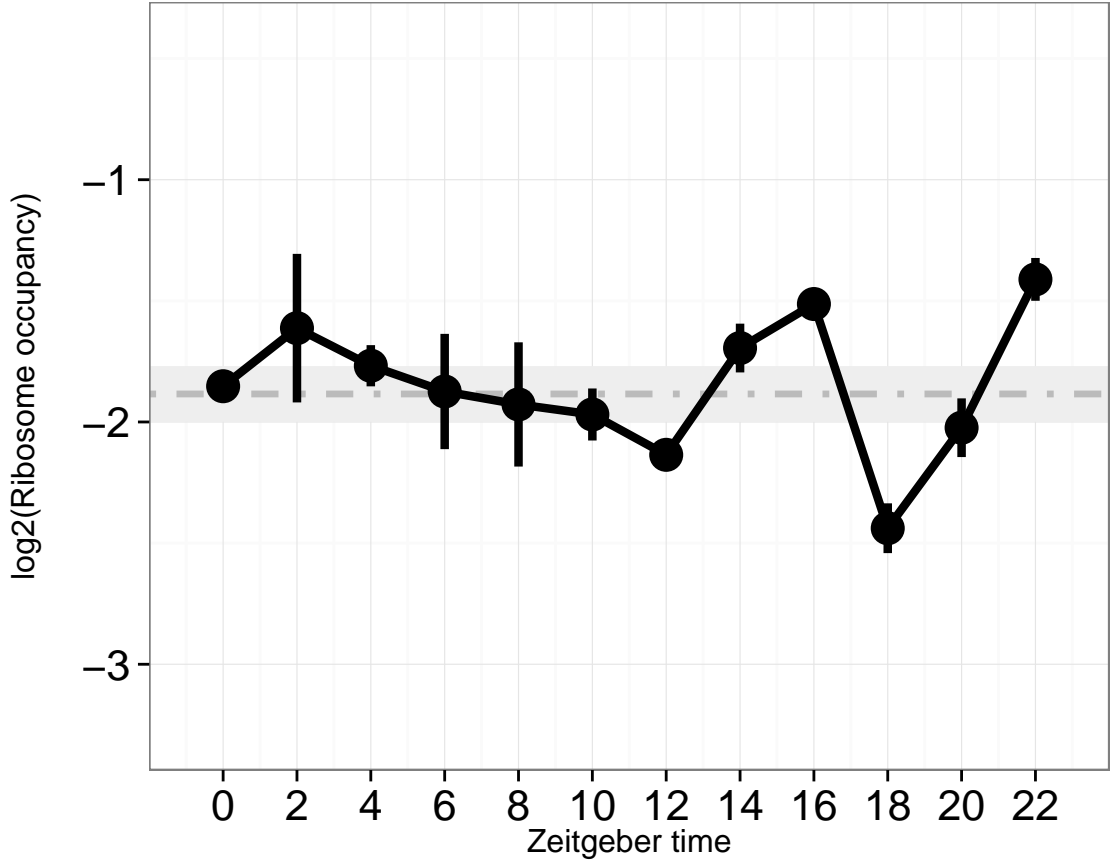

Supplement: SuppDataset_1.zip [file Ccdc104_set_A.pdf › Supplemental Dataset 1/A-mRNA_nonrhyth_translation_nonrhyth/Ccdc104_set_A.pdf]
