# Supplementary figures and images for: Ribosome profiling reveals the rhythmic liver translatome and circadian clock regulation by upstream open reading frames (part 13 of 113)
Source: HighWire-hosted journal article supplement (doi:10.1101/gr.195404.115), 2015-10-20

## Ccdc107

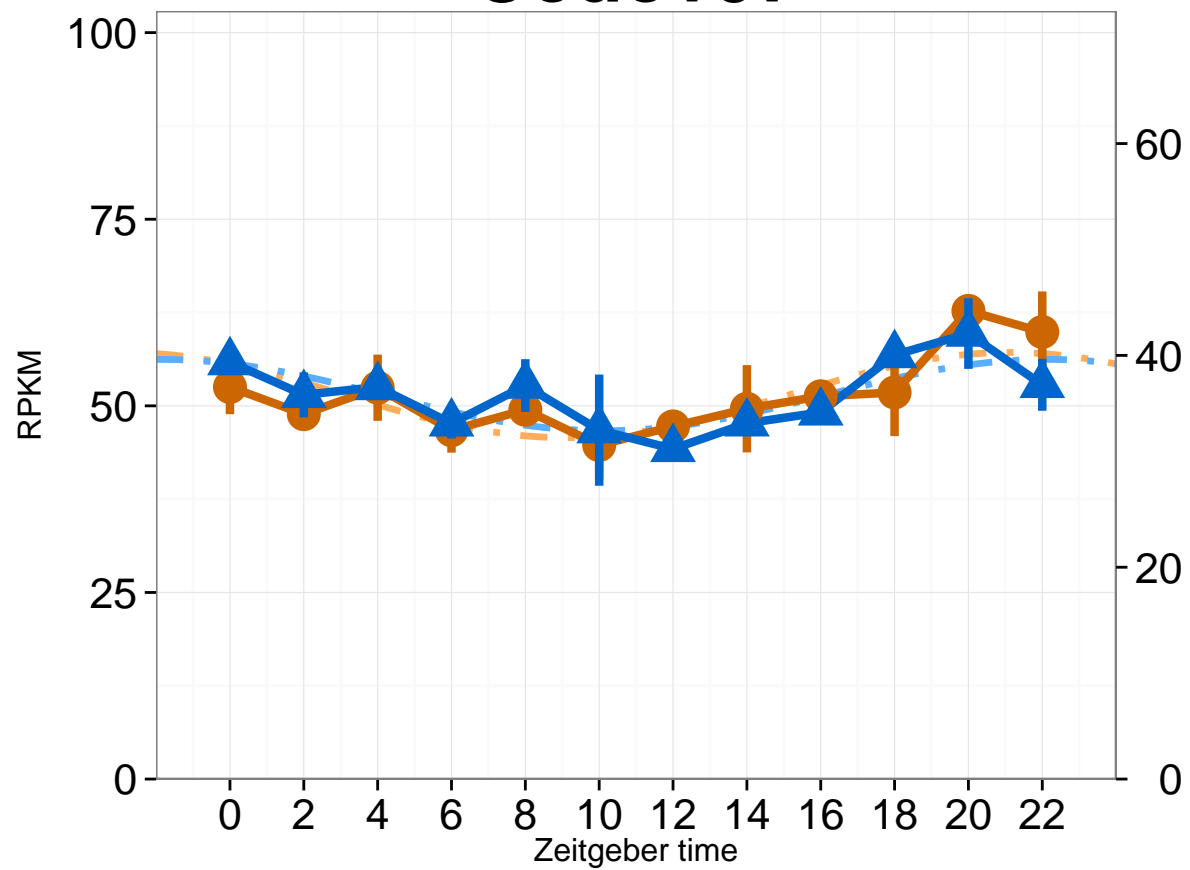

## Ccdc107

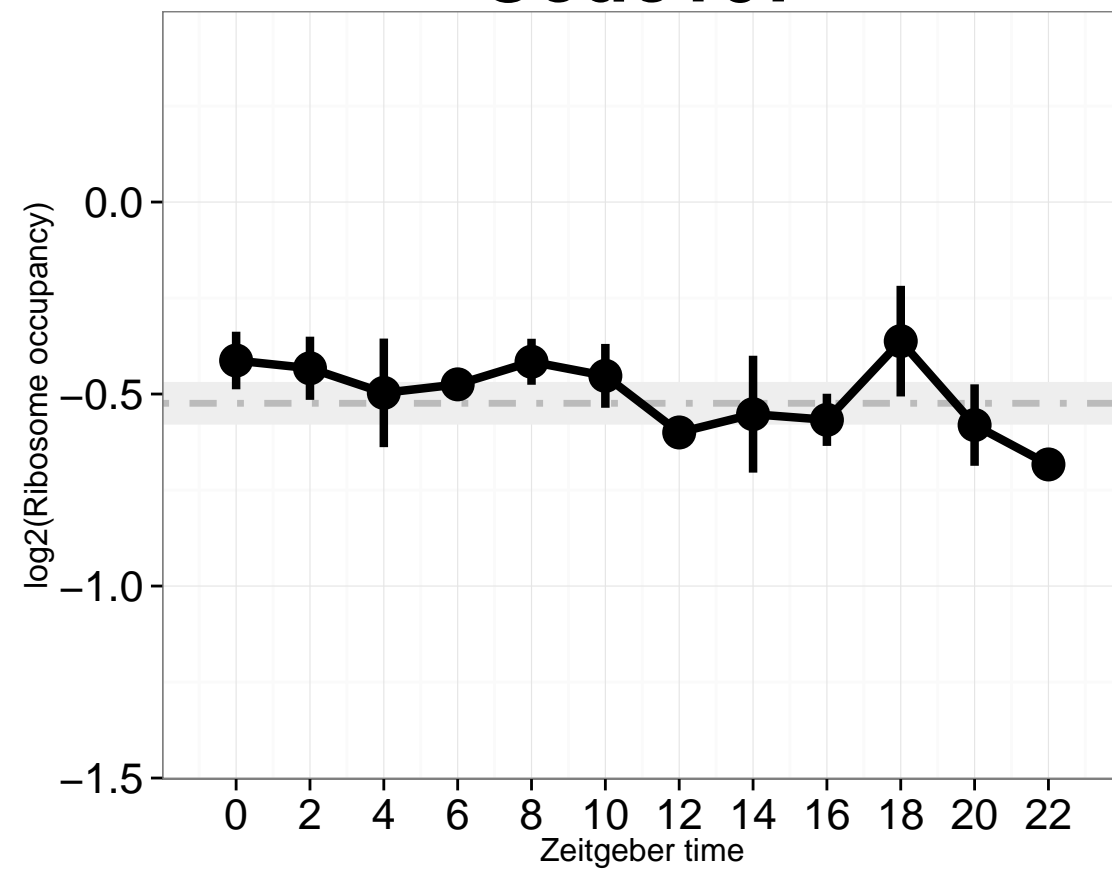

Supplement: SuppDataset_1.zip [file Ccdc107_set_A.pdf › Supplemental Dataset 1/A-mRNA_nonrhyth_translation_nonrhyth/Ccdc107_set_A.pdf]

## Ccdc111

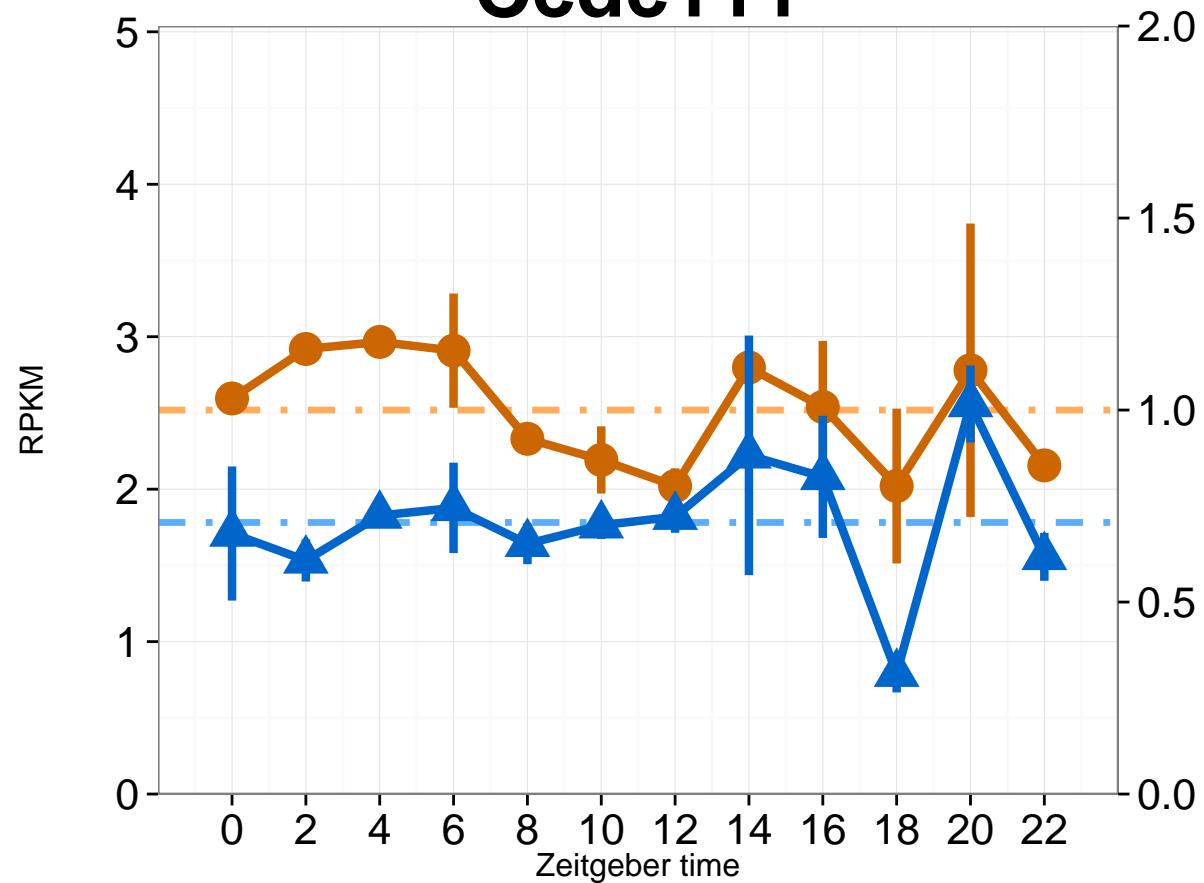

## Ccdc111

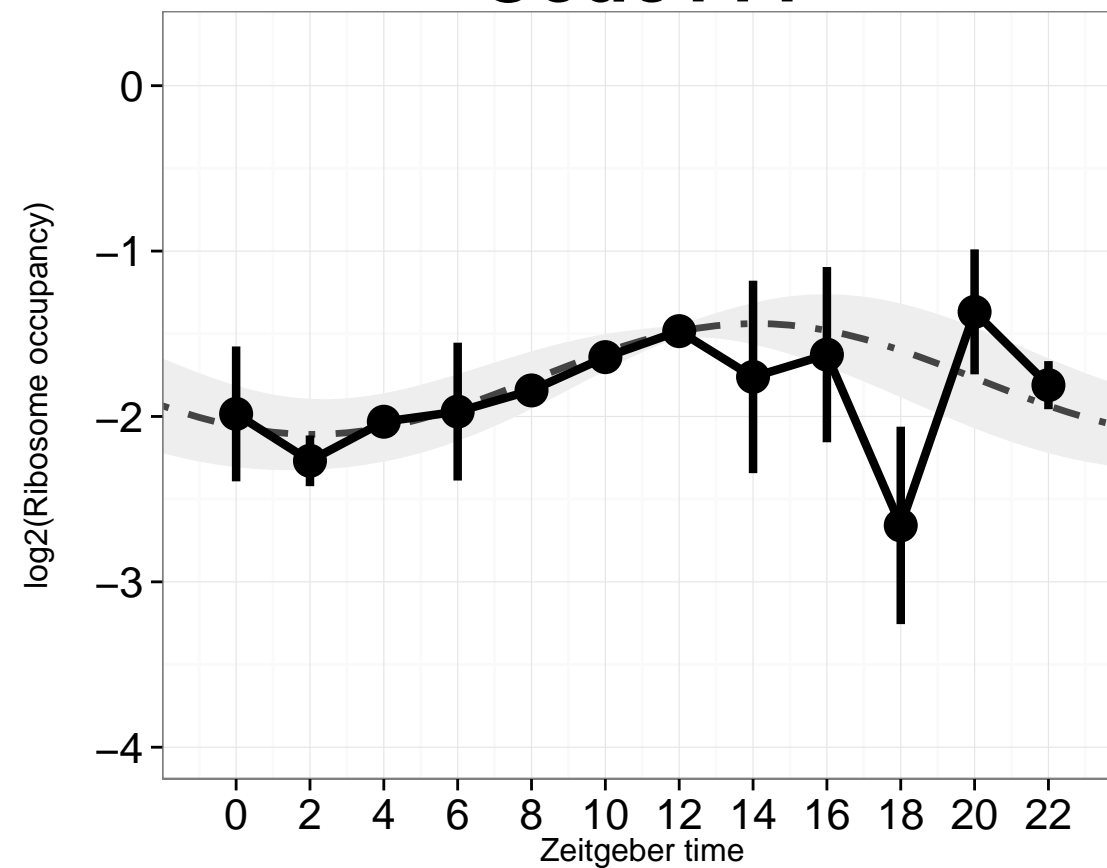

Supplement: SuppDataset_1.zip [file Ccdc111_set_A.pdf › Supplemental Dataset 1/A-mRNA_nonrhyth_translation_nonrhyth/Ccdc111_set_A.pdf]

## Ccdc115

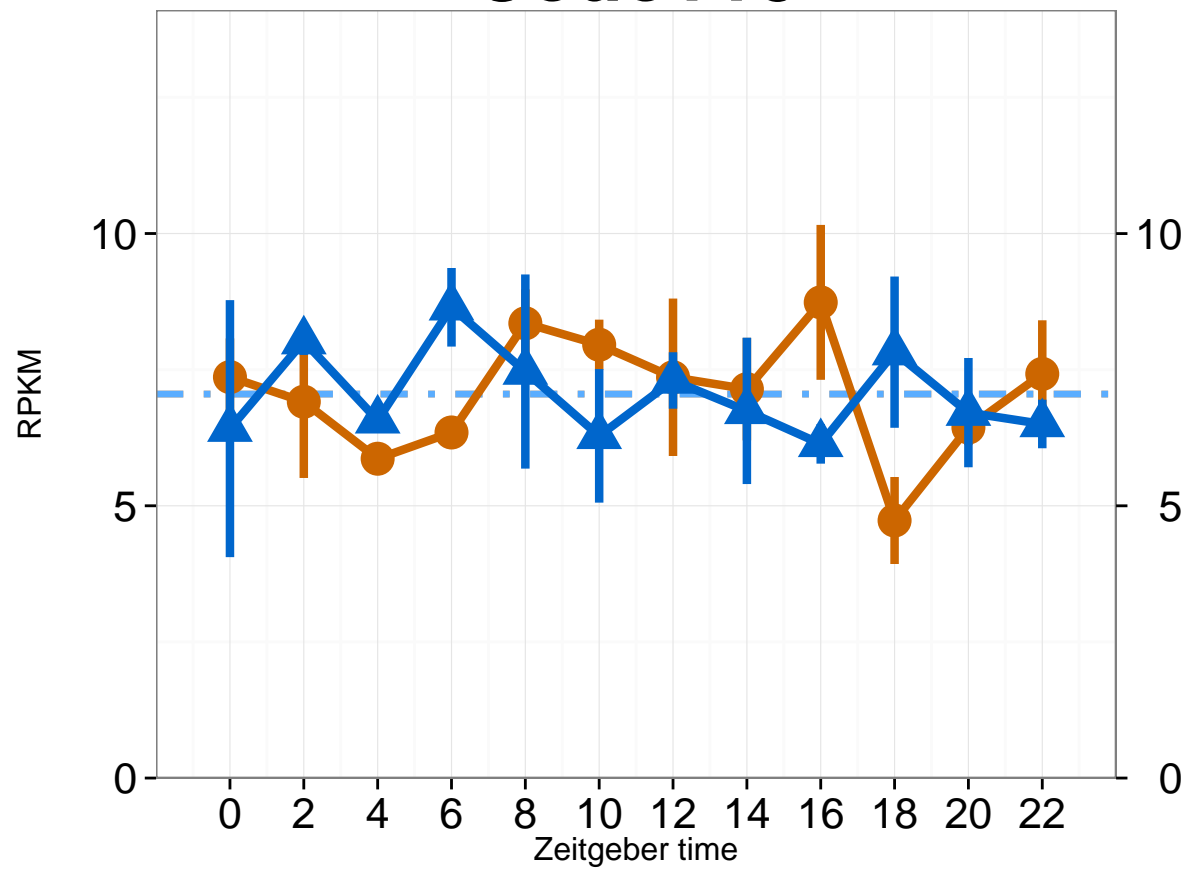

## Ccdc115

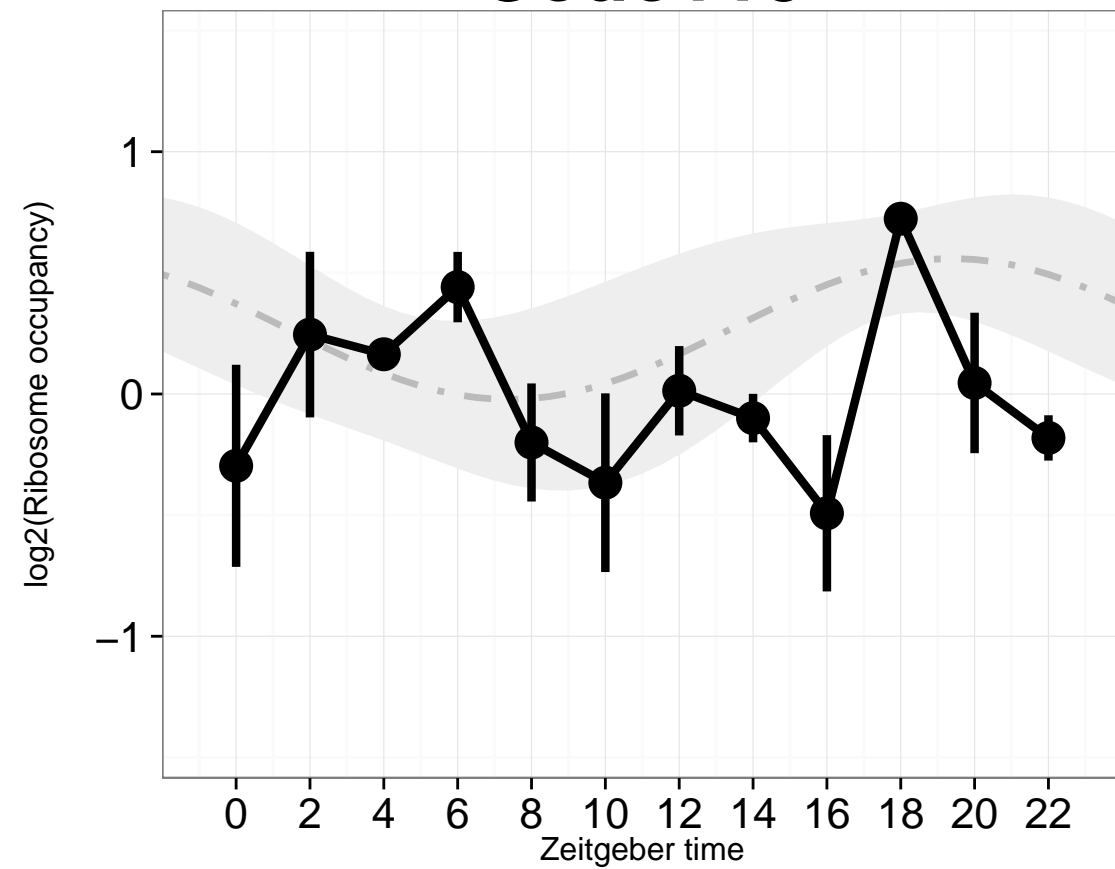

Supplement: SuppDataset_1.zip [file Ccdc115_set_A.pdf › Supplemental Dataset 1/A-mRNA_nonrhyth_translation_nonrhyth/Ccdc115_set_A.pdf]

## Ccdc117

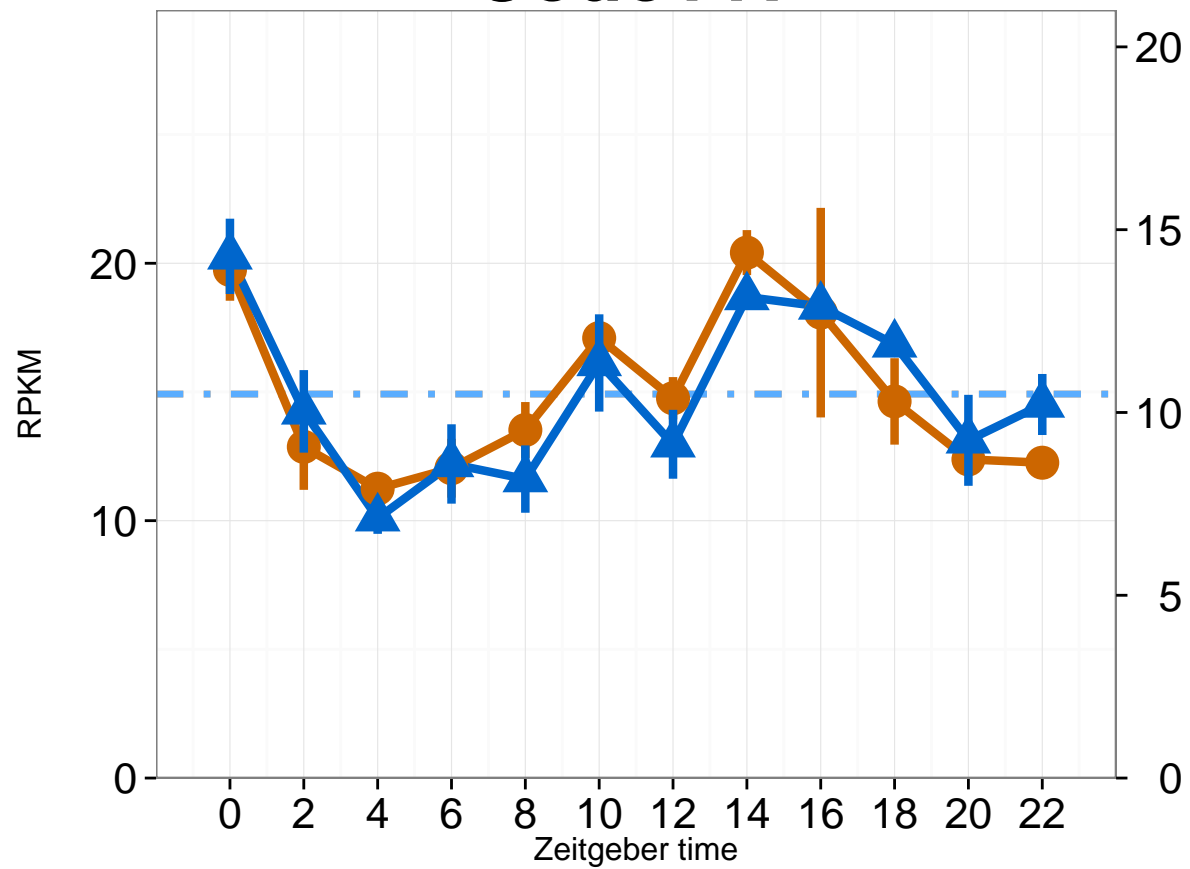

## Ccdc117

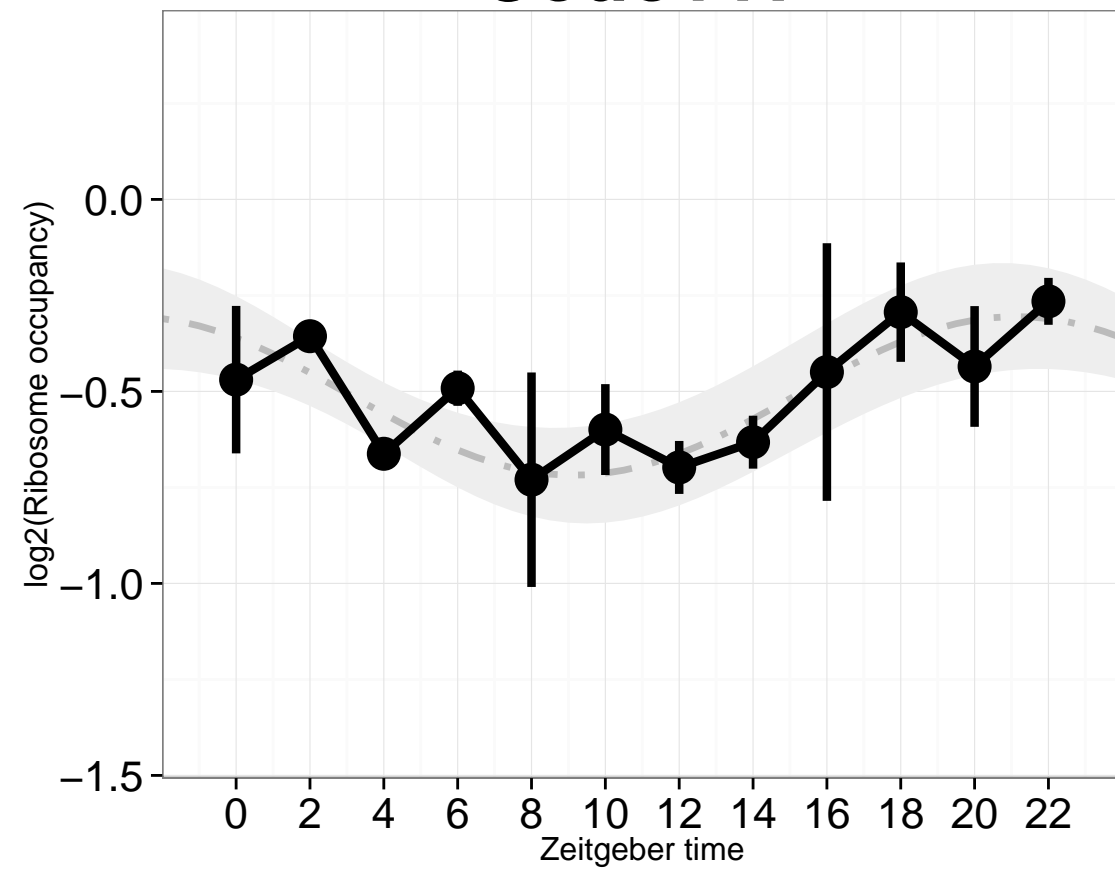

Supplement: SuppDataset_1.zip [file Ccdc117_set_A.pdf › Supplemental Dataset 1/A-mRNA_nonrhyth_translation_nonrhyth/Ccdc117_set_A.pdf]

## Ccdc124

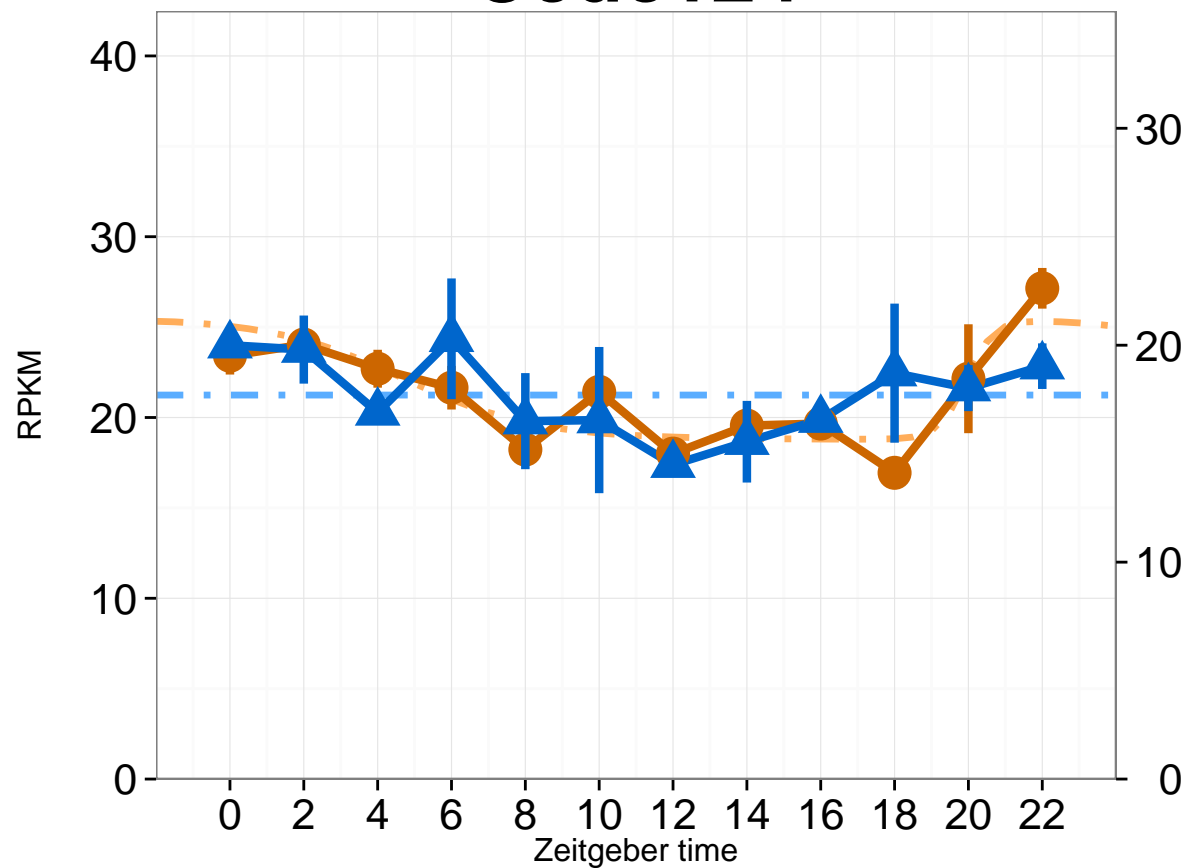

## Ccdc124

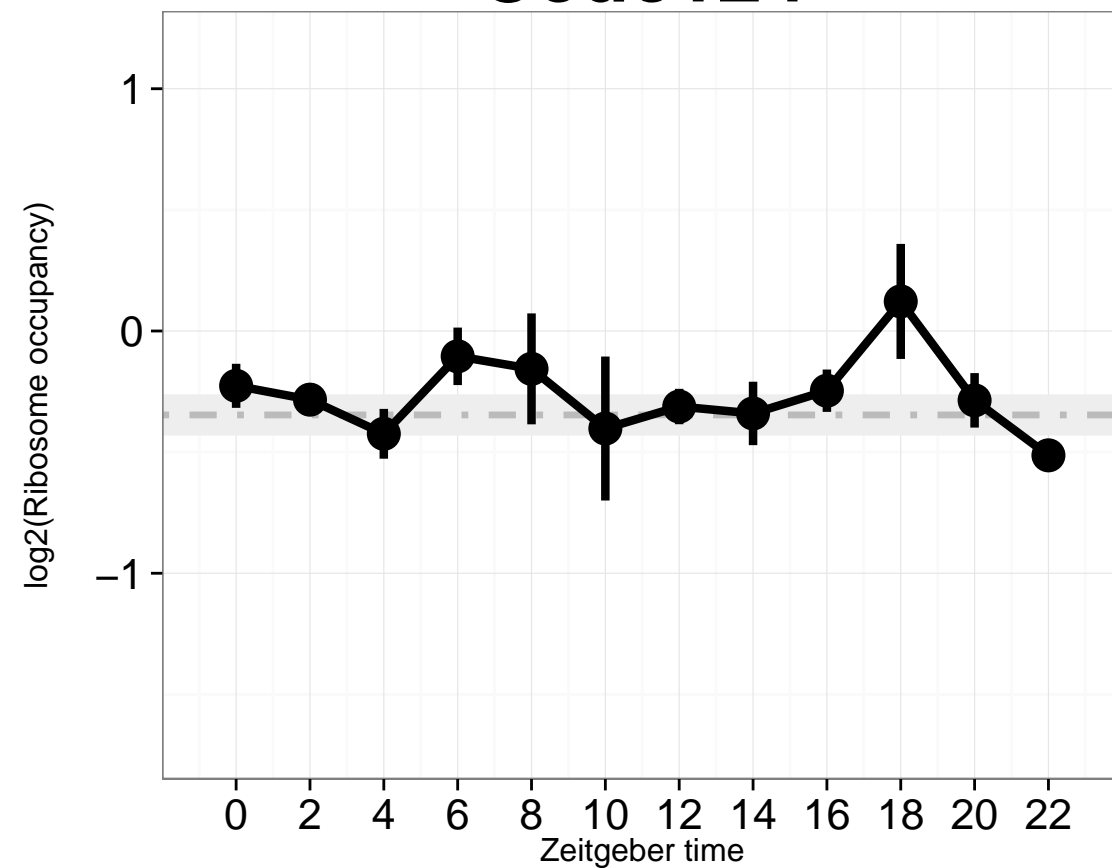

Supplement: SuppDataset_1.zip [file Ccdc124_set_A.pdf › Supplemental Dataset 1/A-mRNA_nonrhyth_translation_nonrhyth/Ccdc124_set_A.pdf]

Ccdc125

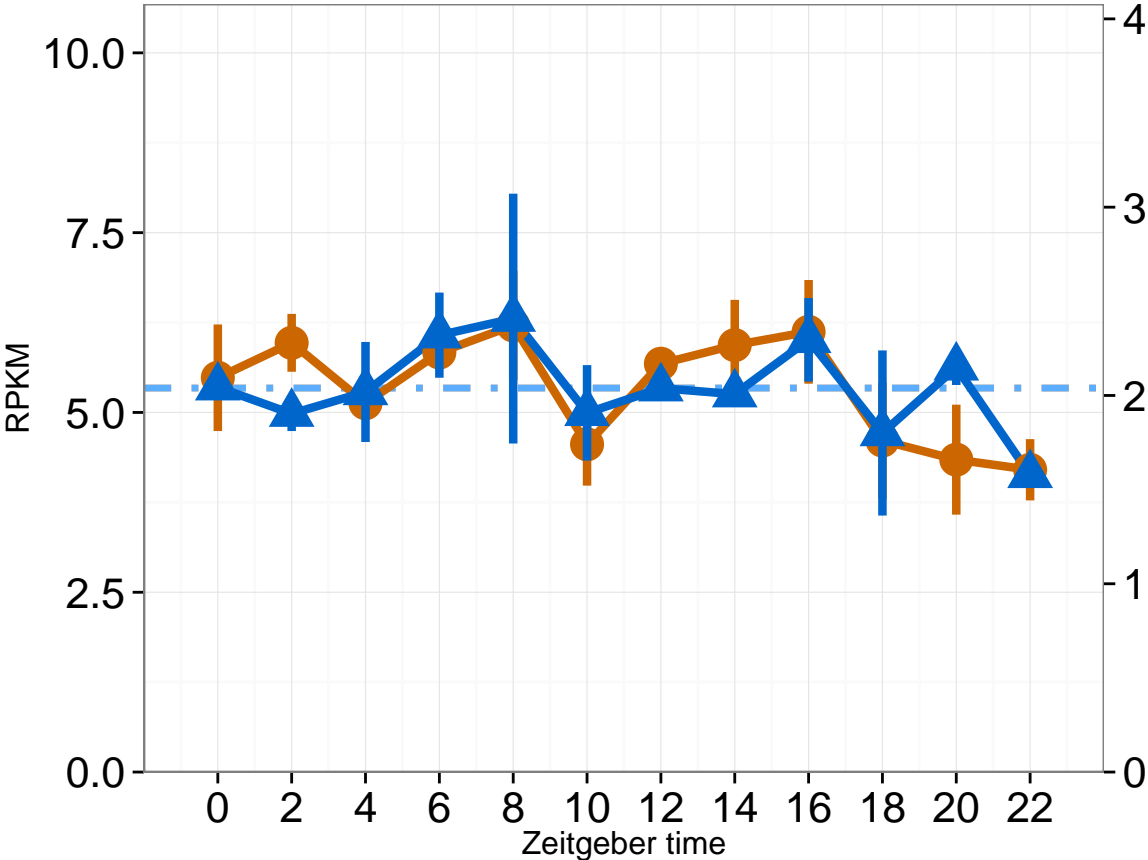

Ccdc125

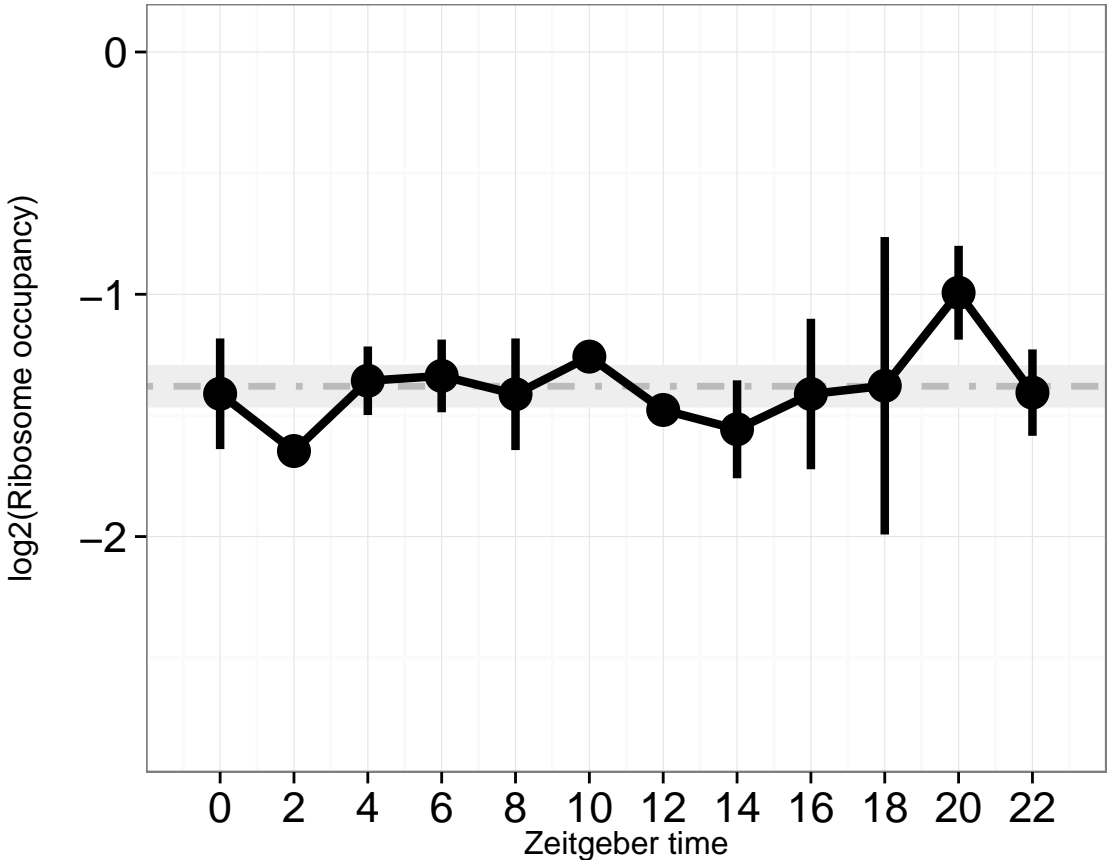

Supplement: SuppDataset_1.zip [file Ccdc125_set_A.pdf › Supplemental Dataset 1/A-mRNA_nonrhyth_translation_nonrhyth/Ccdc125_set_A.pdf]

## Ccdc127

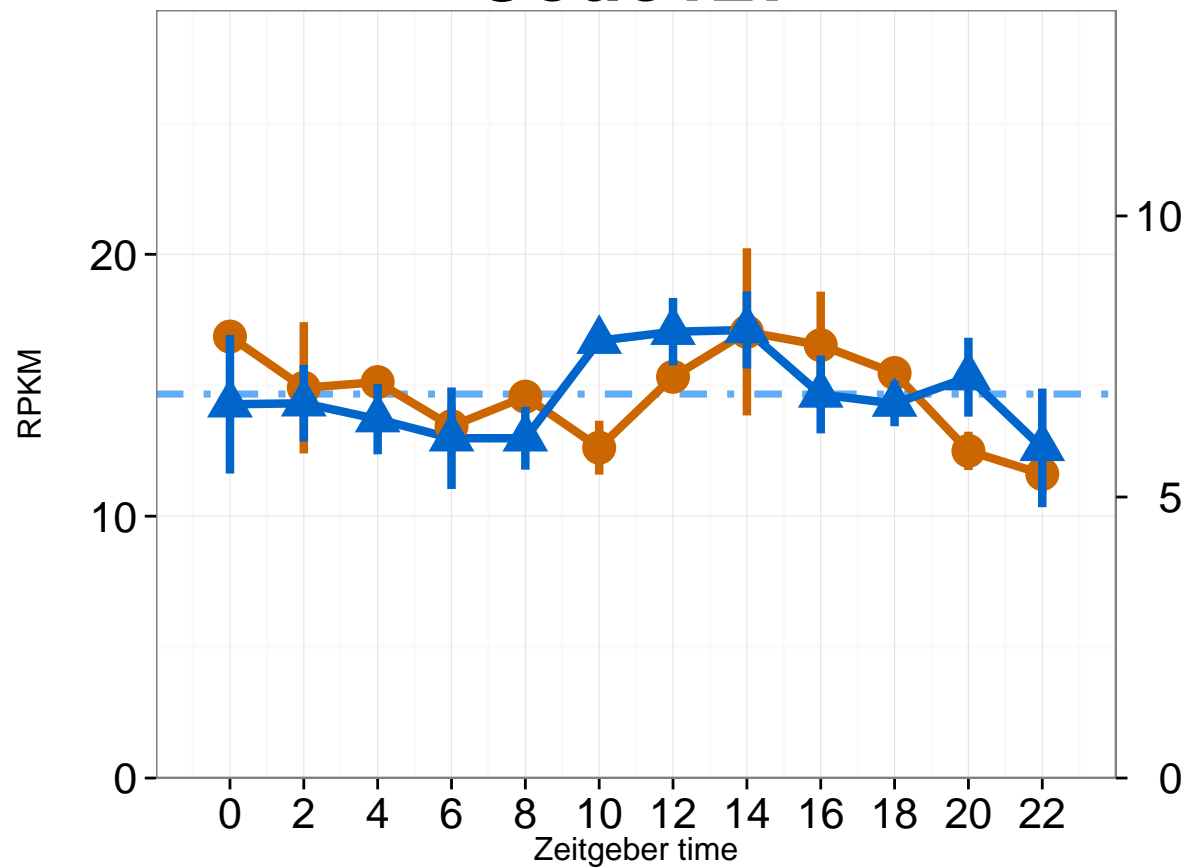

## Ccdc127

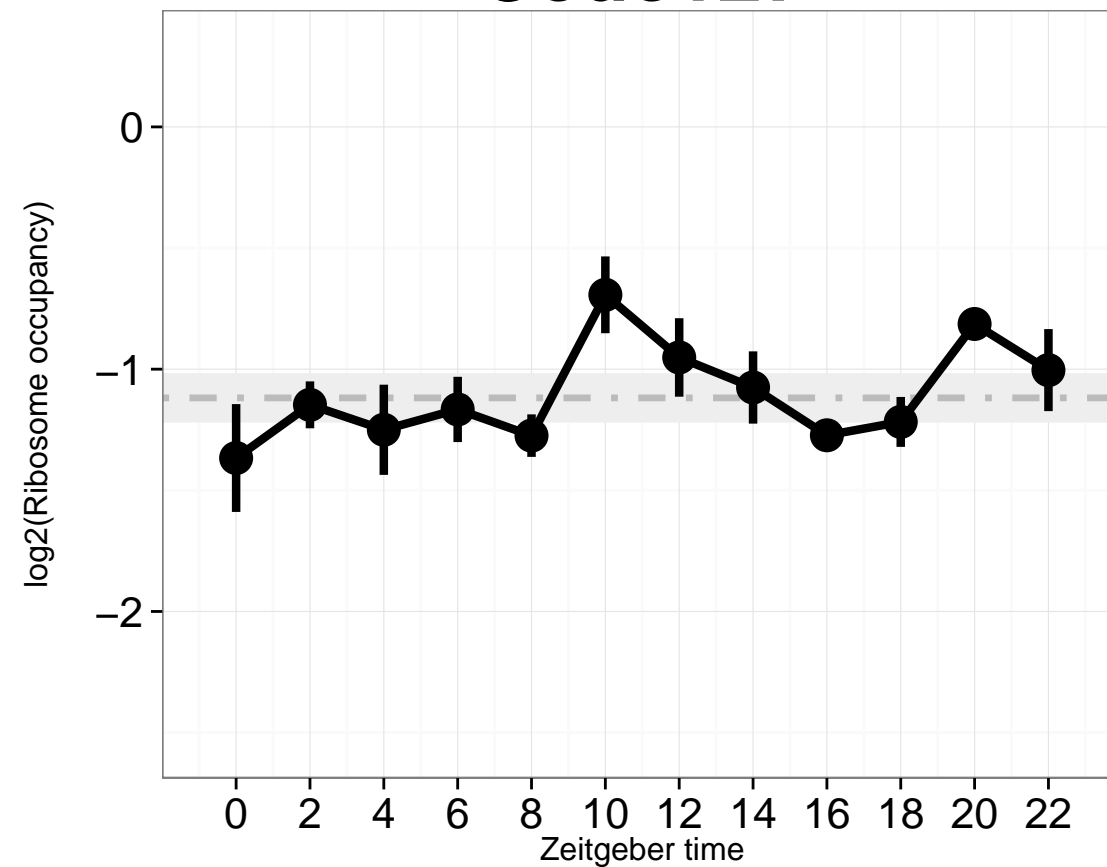

Supplement: SuppDataset_1.zip [file Ccdc127_set_A.pdf › Supplemental Dataset 1/A-mRNA_nonrhyth_translation_nonrhyth/Ccdc127_set_A.pdf]

# Ccdc130

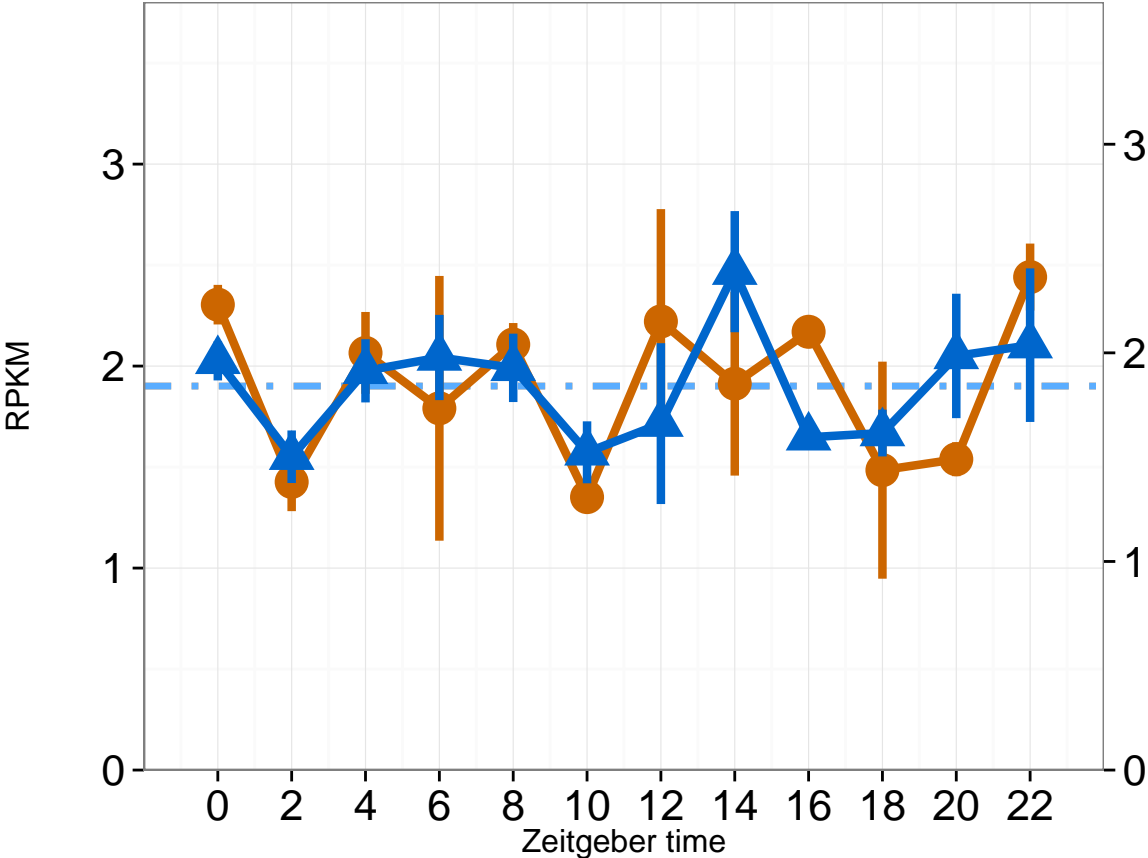

# Ccdc130

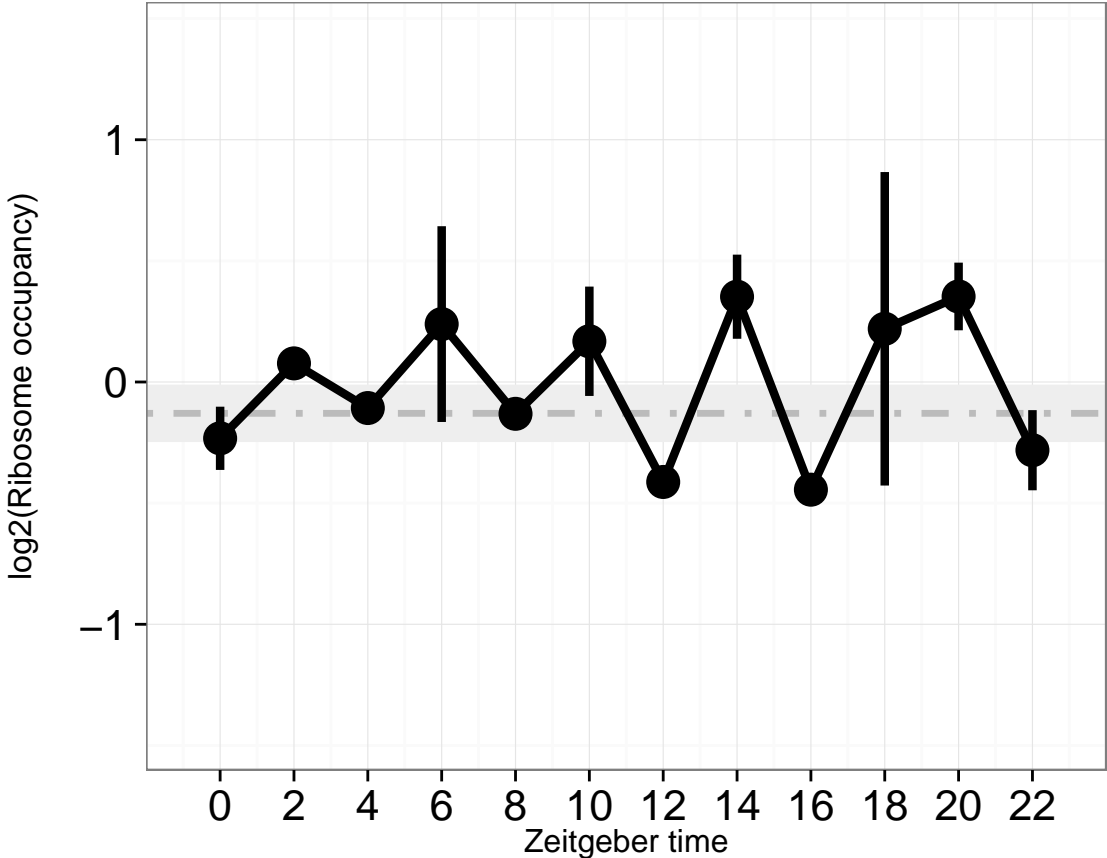

Supplement: SuppDataset_1.zip [file Ccdc130_set_A.pdf › Supplemental Dataset 1/A-mRNA_nonrhyth_translation_nonrhyth/Ccdc130_set_A.pdf]

# Ccdc132

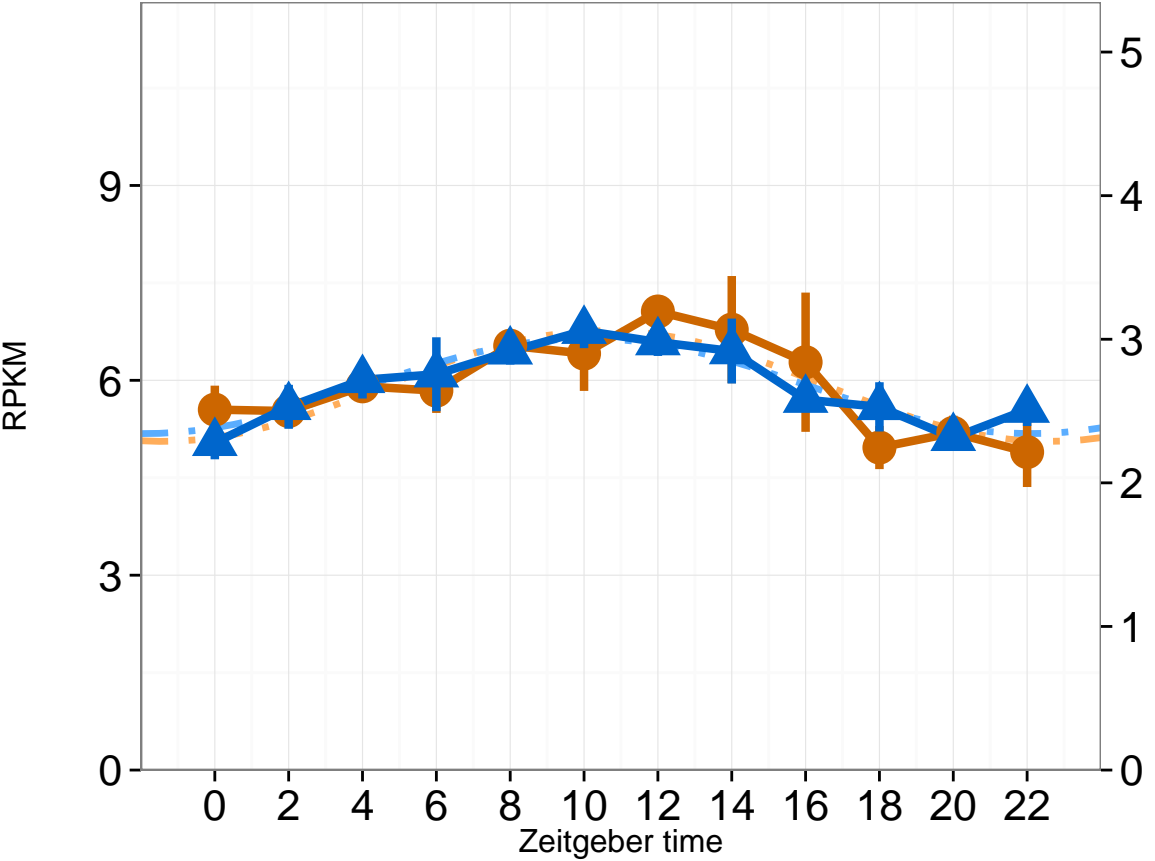

# Ccdc132

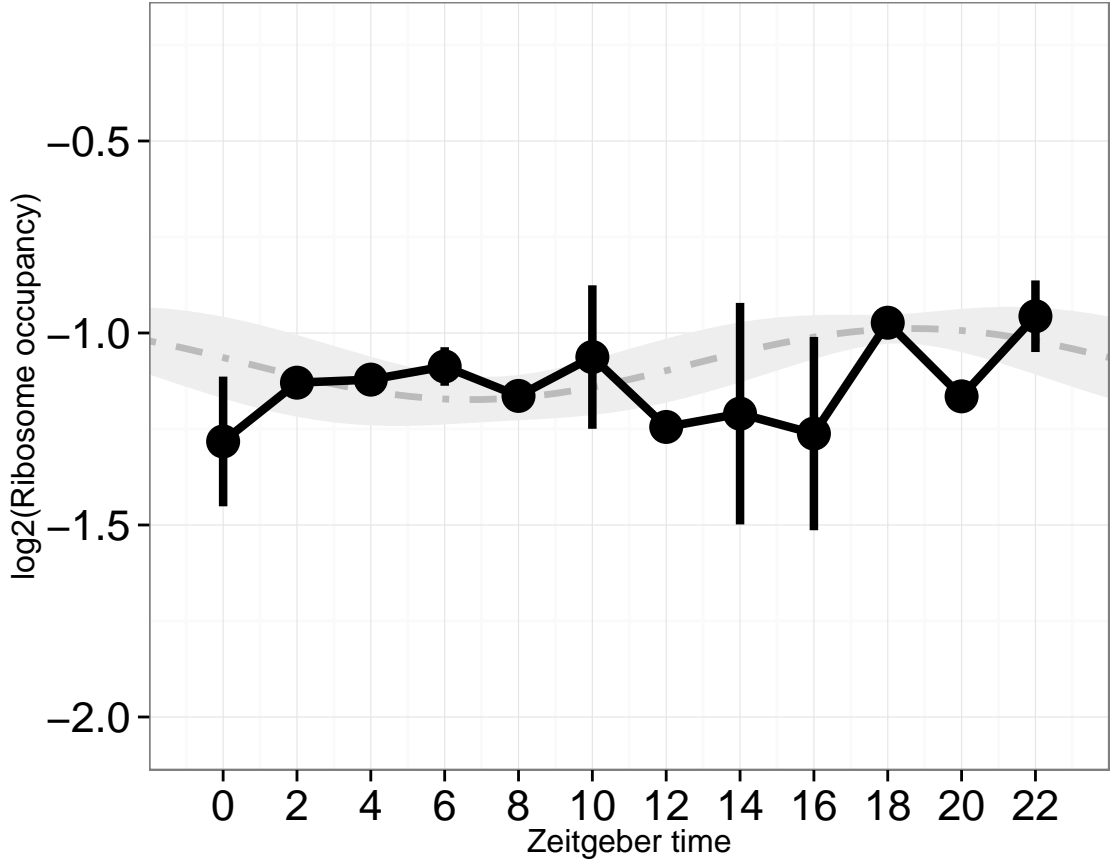

Supplement: SuppDataset_1.zip [file Ccdc132_set_A.pdf › Supplemental Dataset 1/A-mRNA_nonrhyth_translation_nonrhyth/Ccdc132_set_A.pdf]

**Ccdc134**

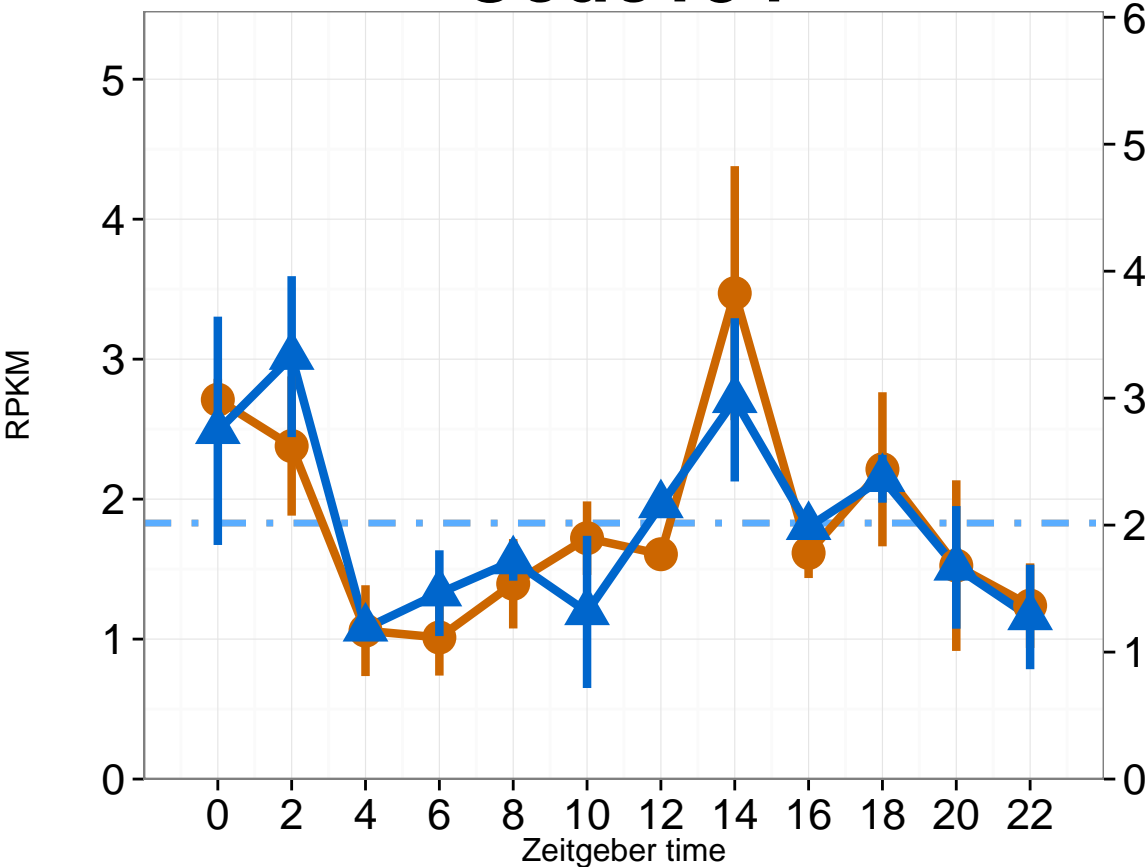

**Ccdc134**

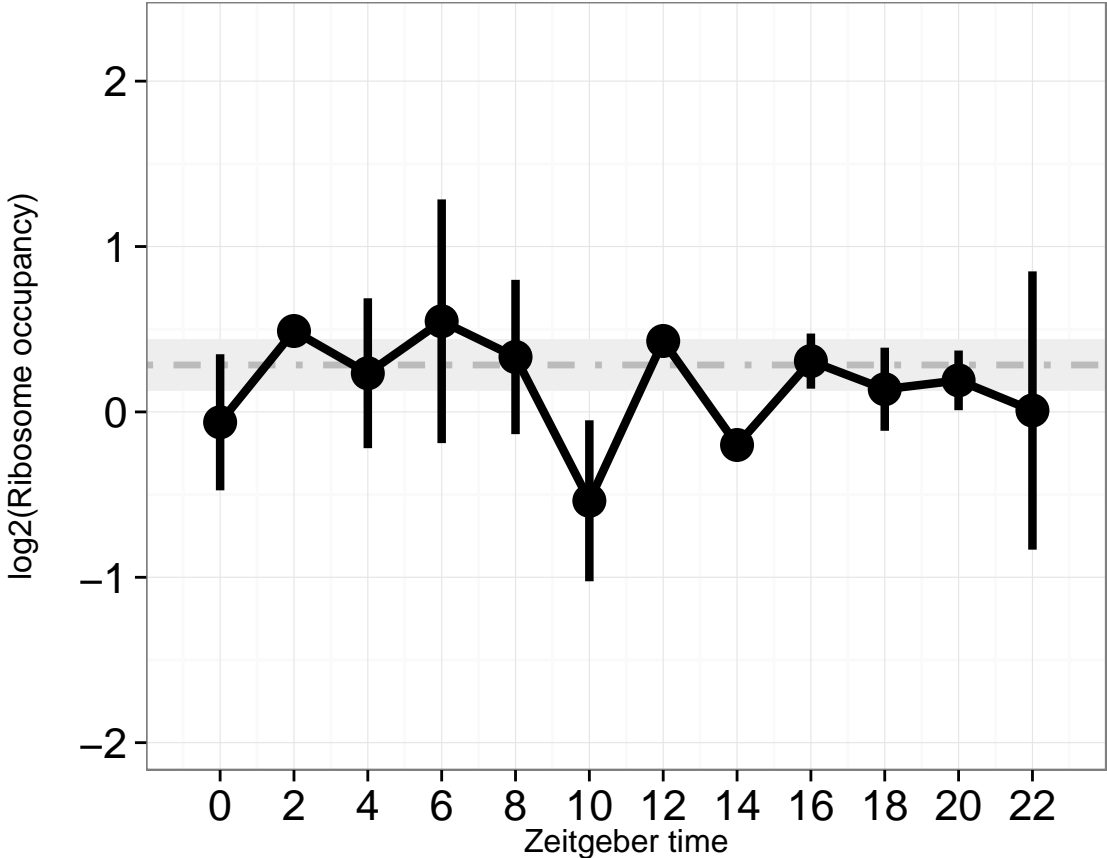

Supplement: SuppDataset_1.zip [file Ccdc134_set_A.pdf › Supplemental Dataset 1/A-mRNA_nonrhyth_translation_nonrhyth/Ccdc134_set_A.pdf]

Ccdc137

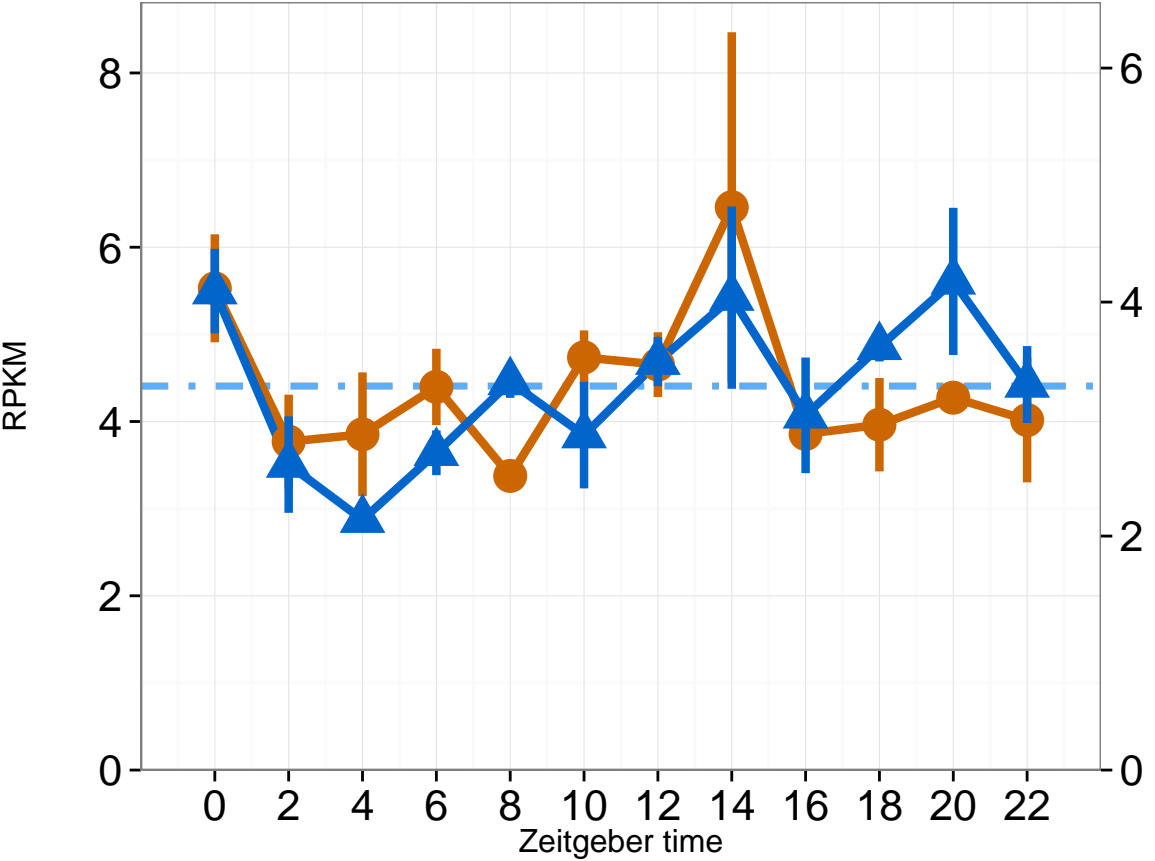

Ccdc137

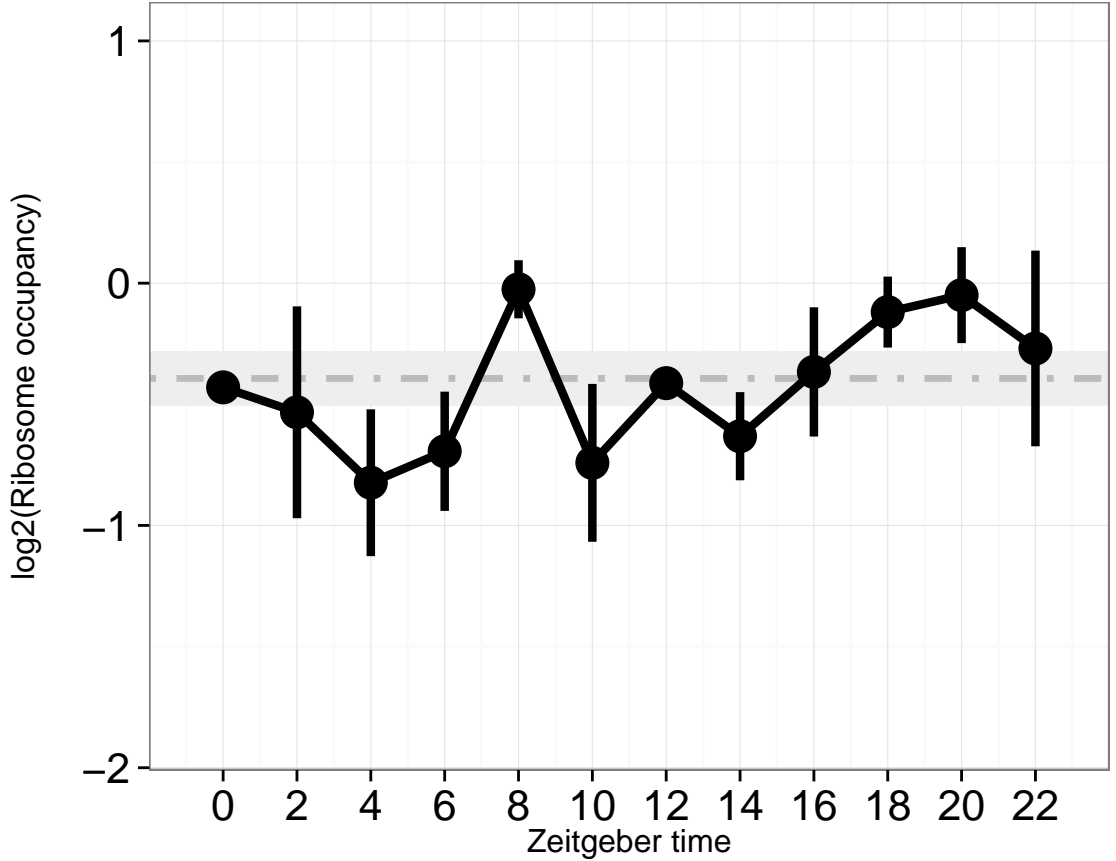

Supplement: SuppDataset_1.zip [file Ccdc137_set_A.pdf › Supplemental Dataset 1/A-mRNA_nonrhyth_translation_nonrhyth/Ccdc137_set_A.pdf]

# Ccdc138

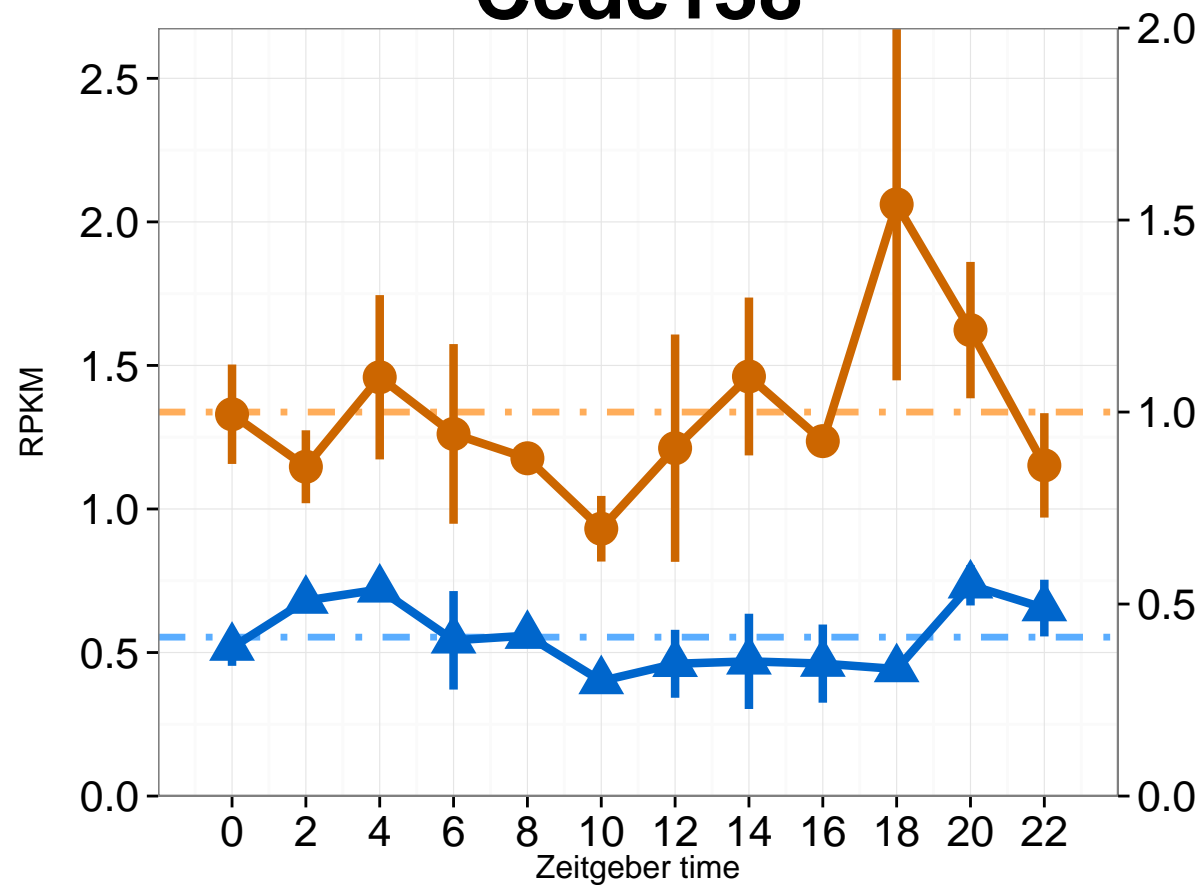

# Ccdc138

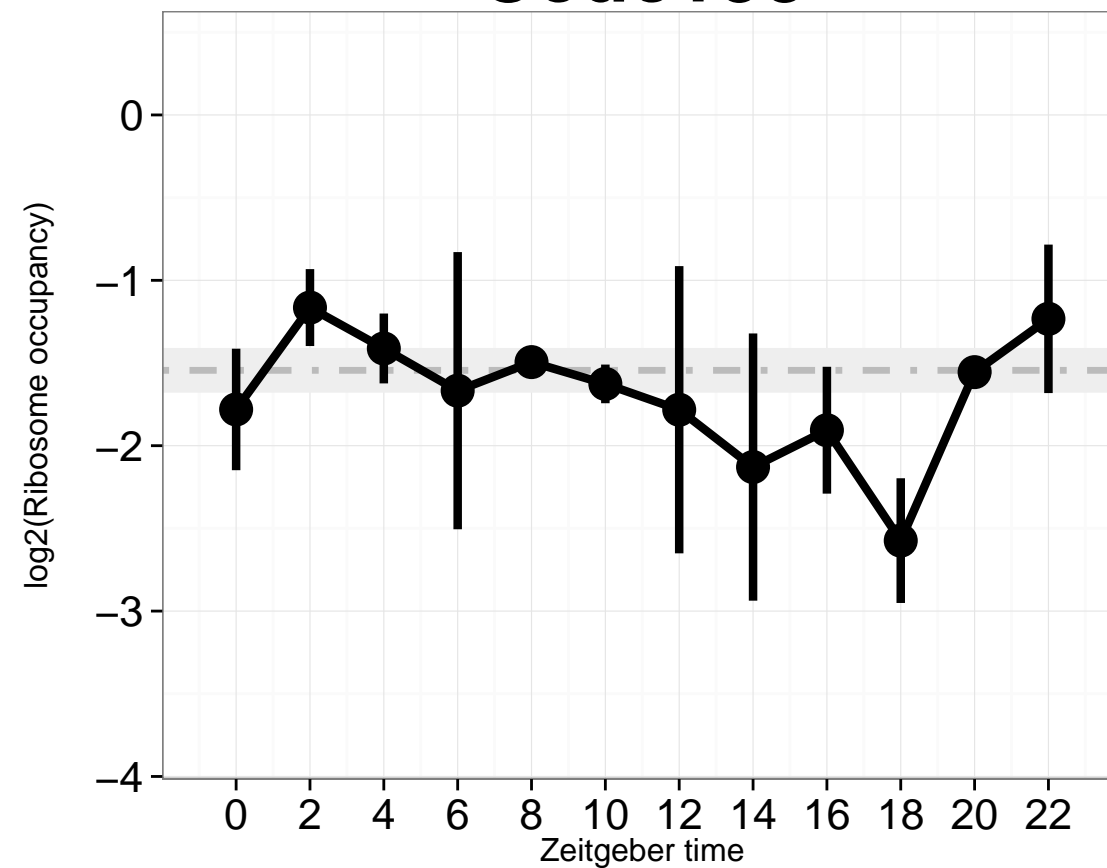

Supplement: SuppDataset_1.zip [file Ccdc138_set_A.pdf › Supplemental Dataset 1/A-mRNA_nonrhyth_translation_nonrhyth/Ccdc138_set_A.pdf]

## Ccdc141

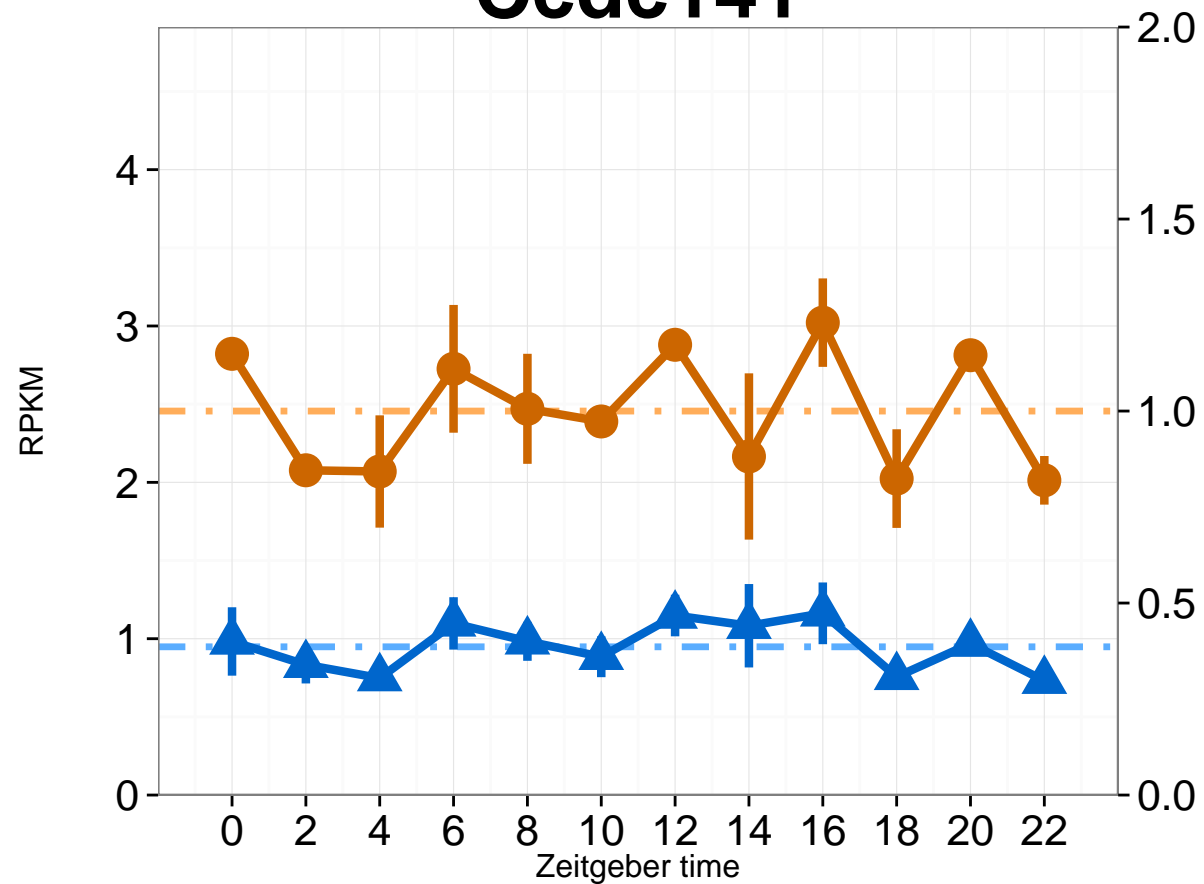

## Ccdc141

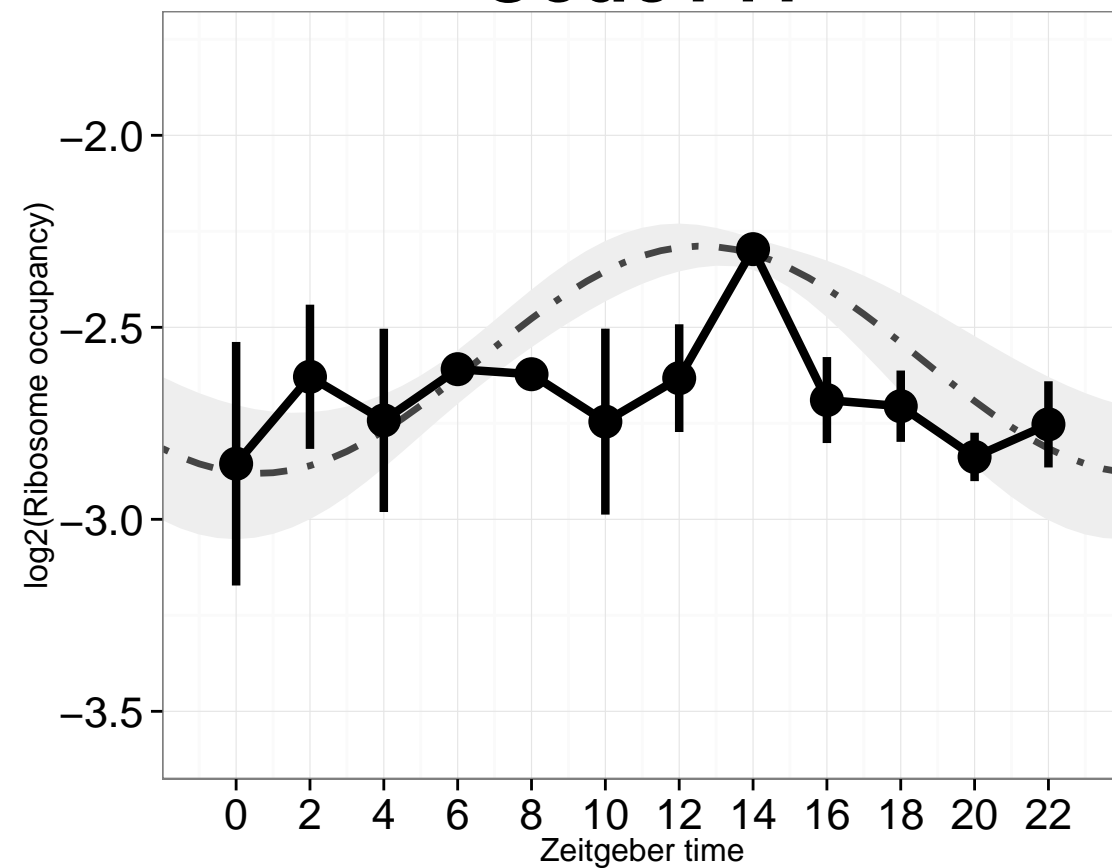

Supplement: SuppDataset_1.zip [file Ccdc141_set_A.pdf › Supplemental Dataset 1/A-mRNA_nonrhyth_translation_nonrhyth/Ccdc141_set_A.pdf]

# Ccdc142

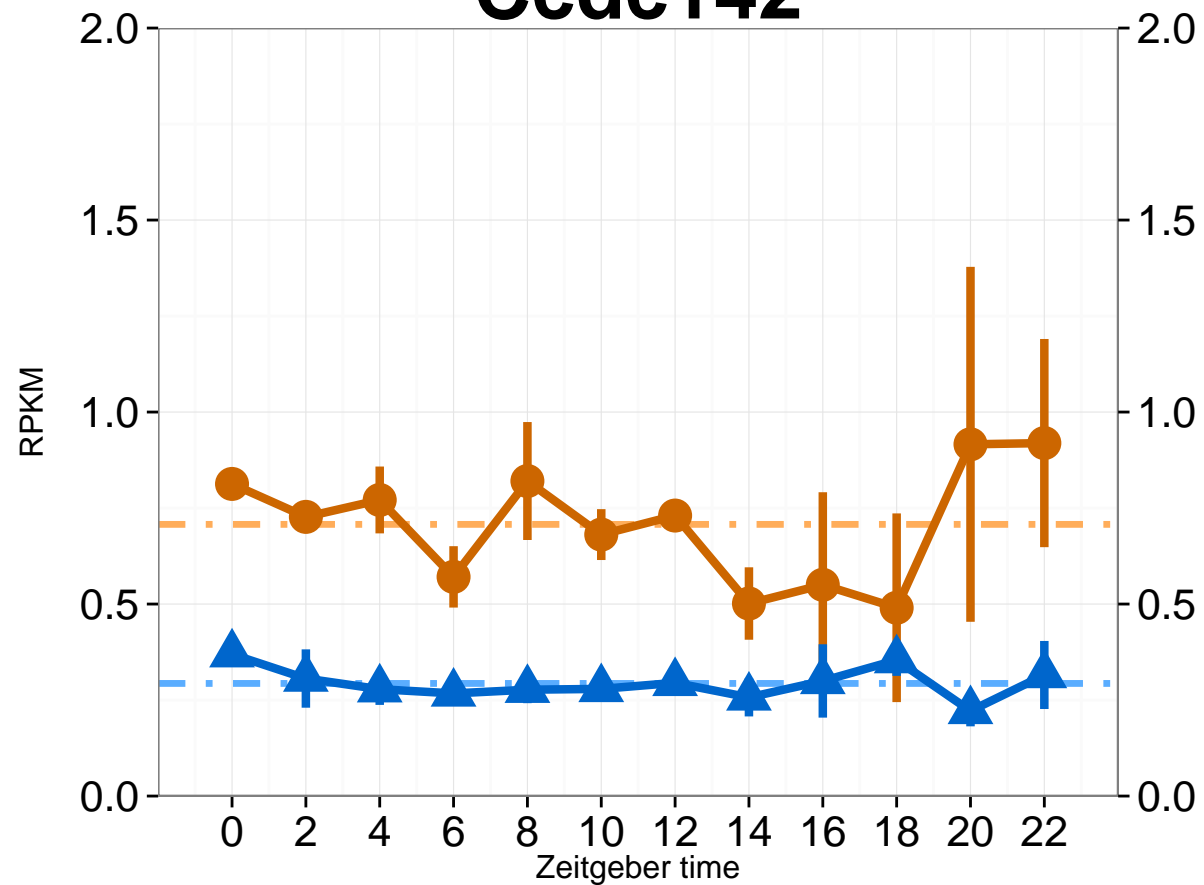

# Ccdc142

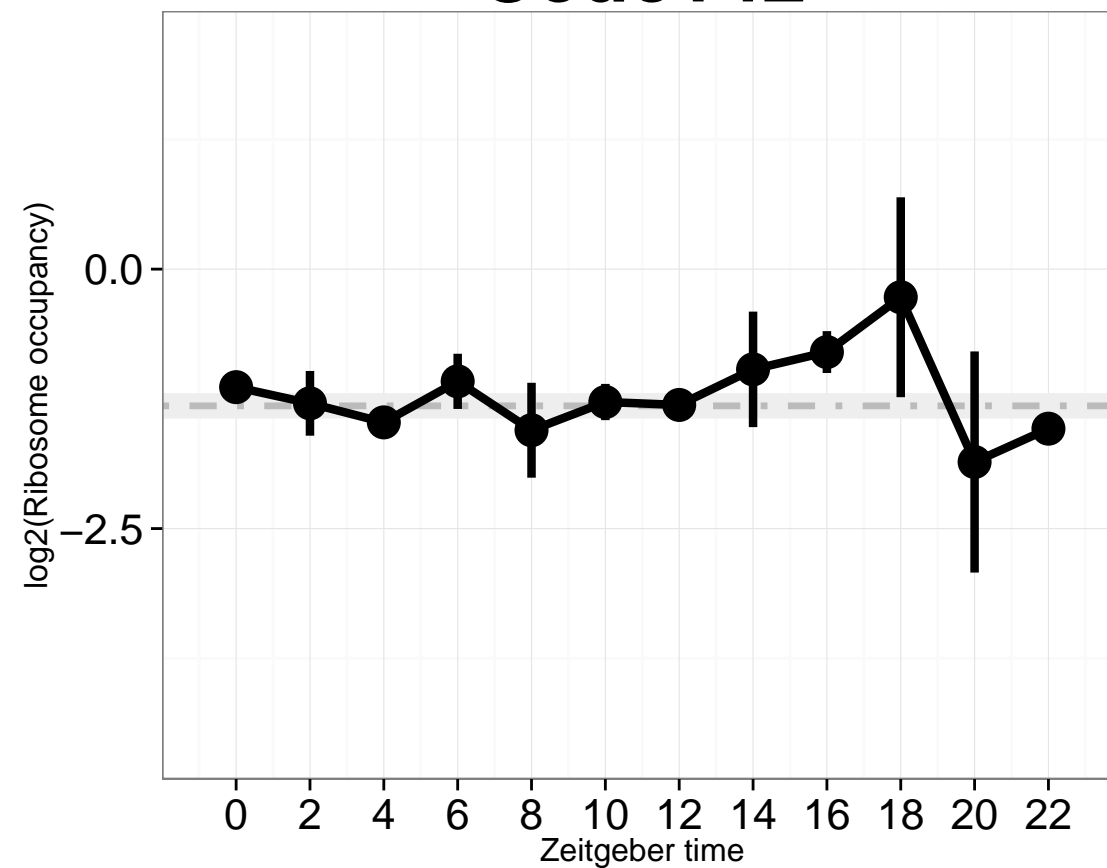

Supplement: SuppDataset_1.zip [file Ccdc142_set_A.pdf › Supplemental Dataset 1/A-mRNA_nonrhyth_translation_nonrhyth/Ccdc142_set_A.pdf]

## Ccdc148

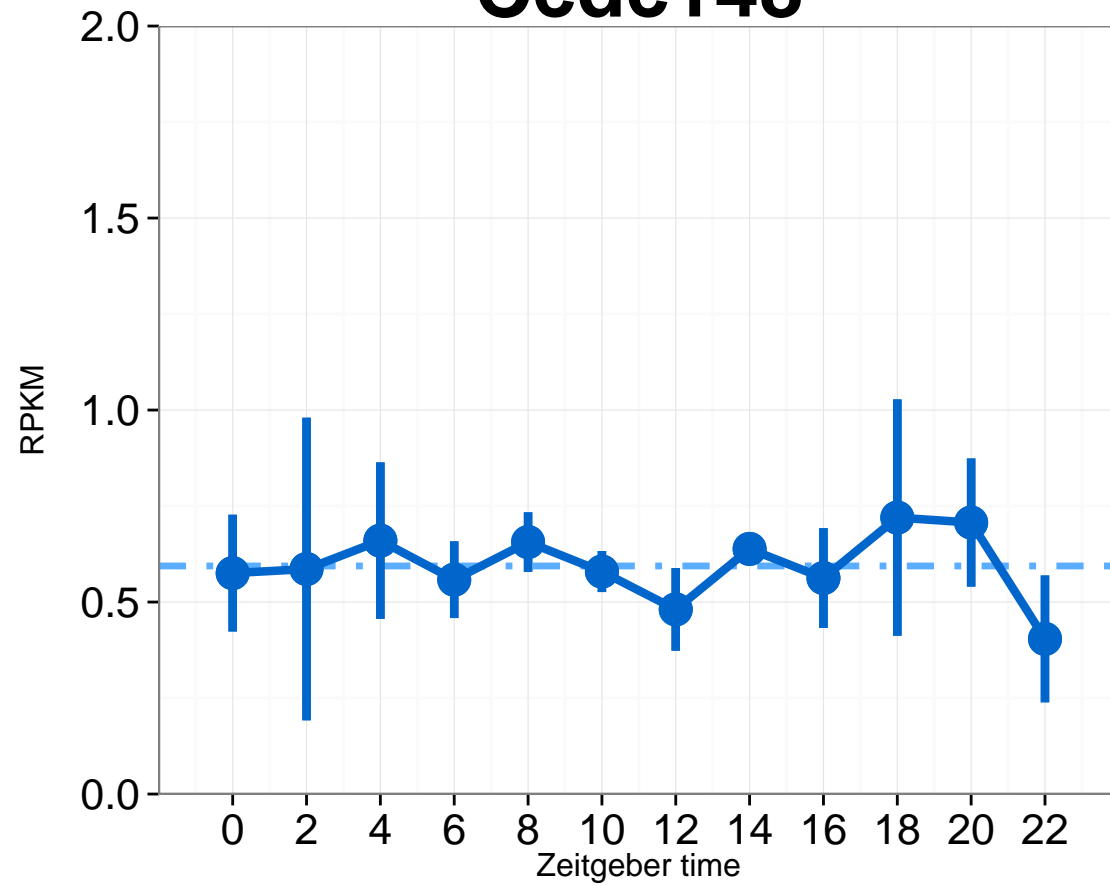

## Ccdc148 log2(Ribosome occupanc

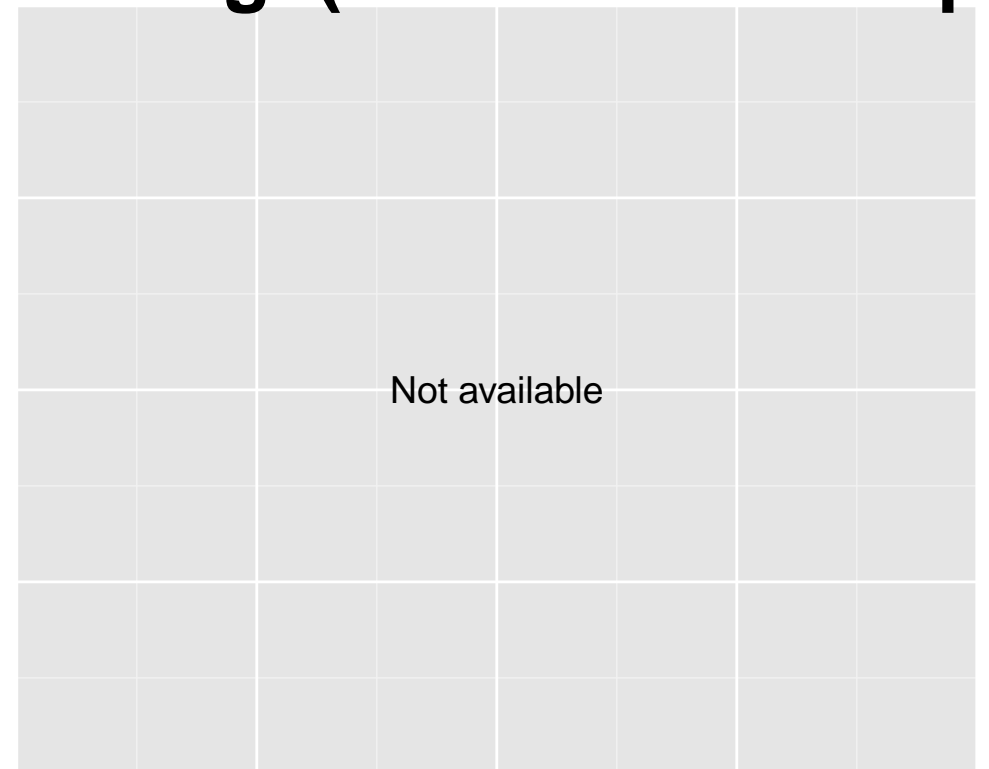

Supplement: SuppDataset_1.zip [file Ccdc148_set_A.pdf › Supplemental Dataset 1/A-mRNA_nonrhyth_translation_nonrhyth/Ccdc148_set_A.pdf]

# Ccdc149

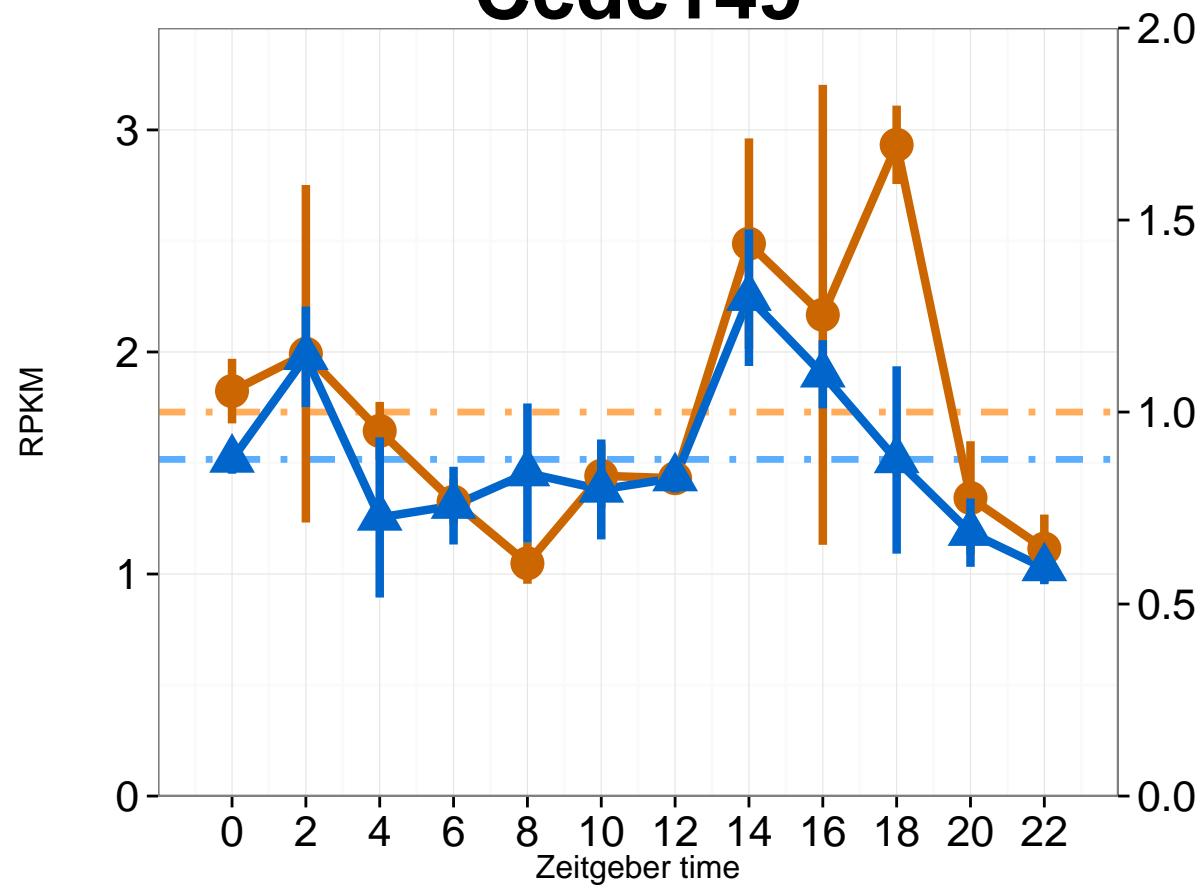

# Ccdc149

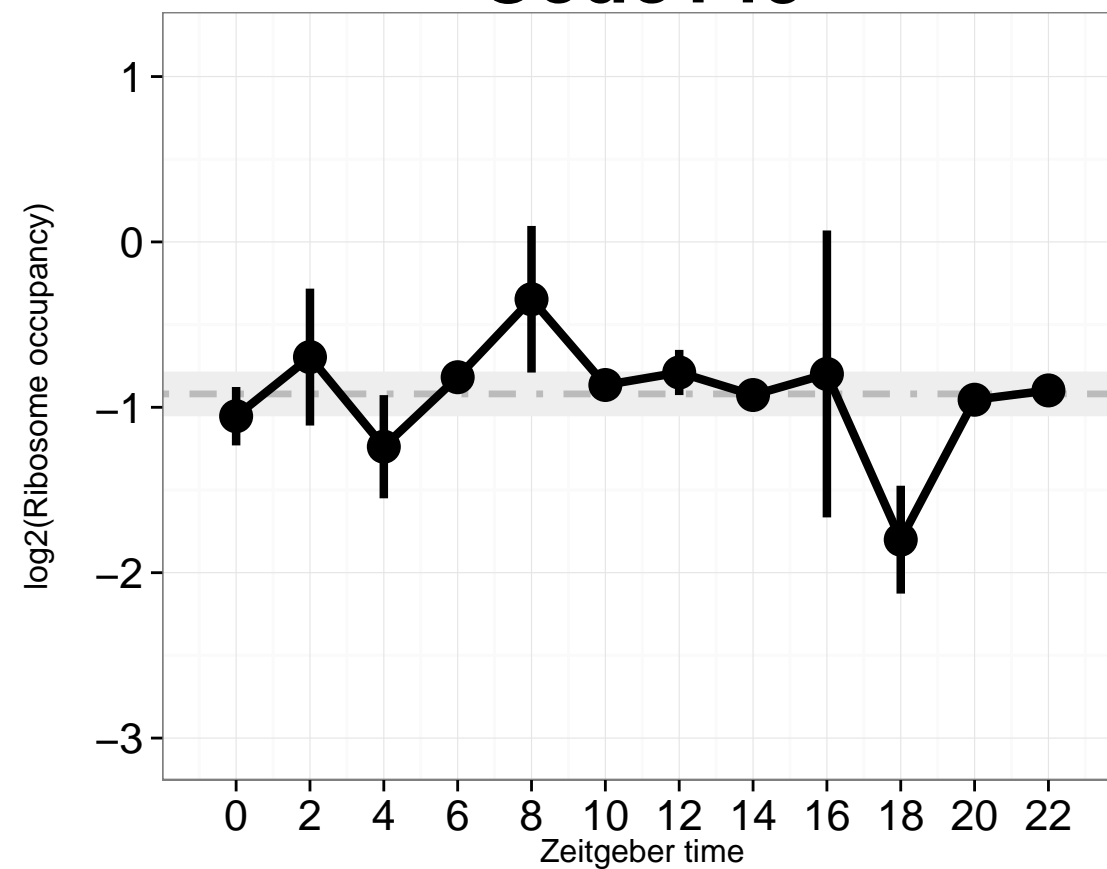

Supplement: SuppDataset_1.zip [file Ccdc149_set_A.pdf › Supplemental Dataset 1/A-mRNA_nonrhyth_translation_nonrhyth/Ccdc149_set_A.pdf]

# Ccdc14

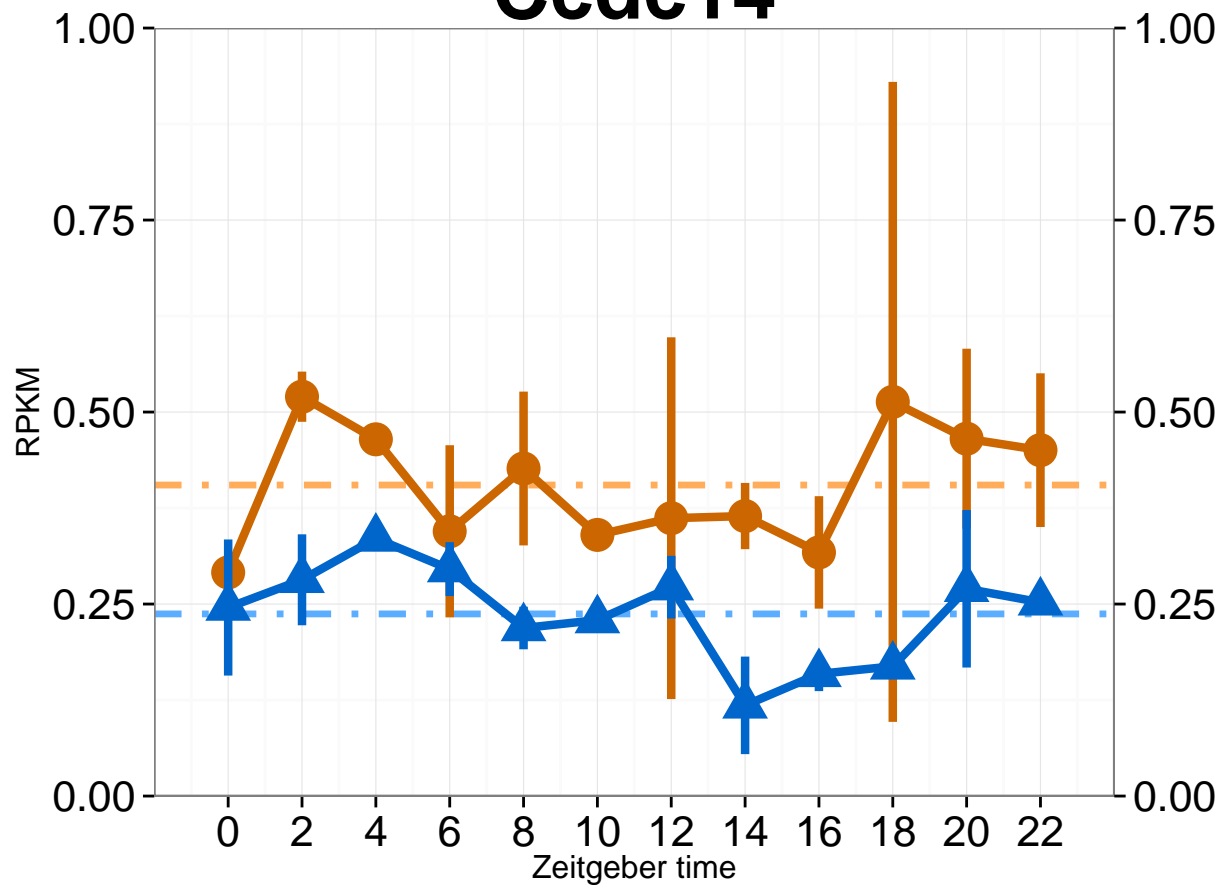

# Ccdc14

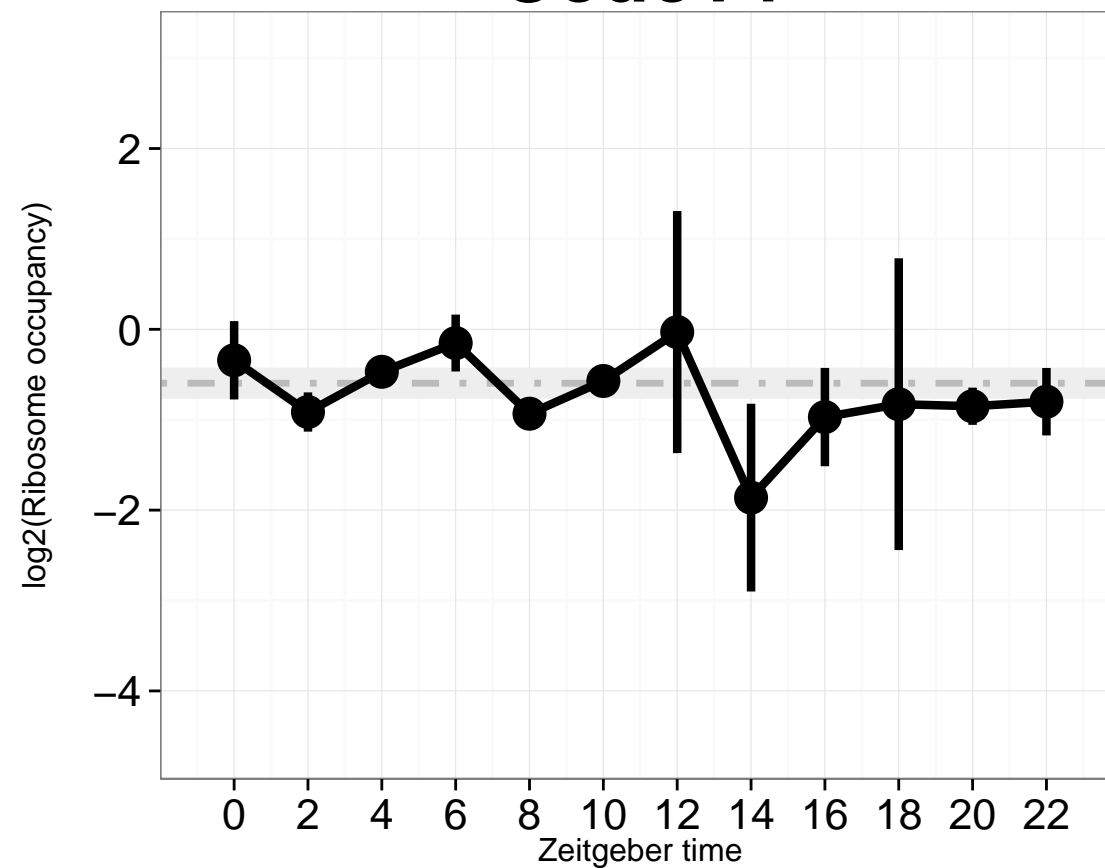

Supplement: SuppDataset_1.zip [file Ccdc14_set_A.pdf › Supplemental Dataset 1/A-mRNA_nonrhyth_translation_nonrhyth/Ccdc14_set_A.pdf]

## Ccdc157

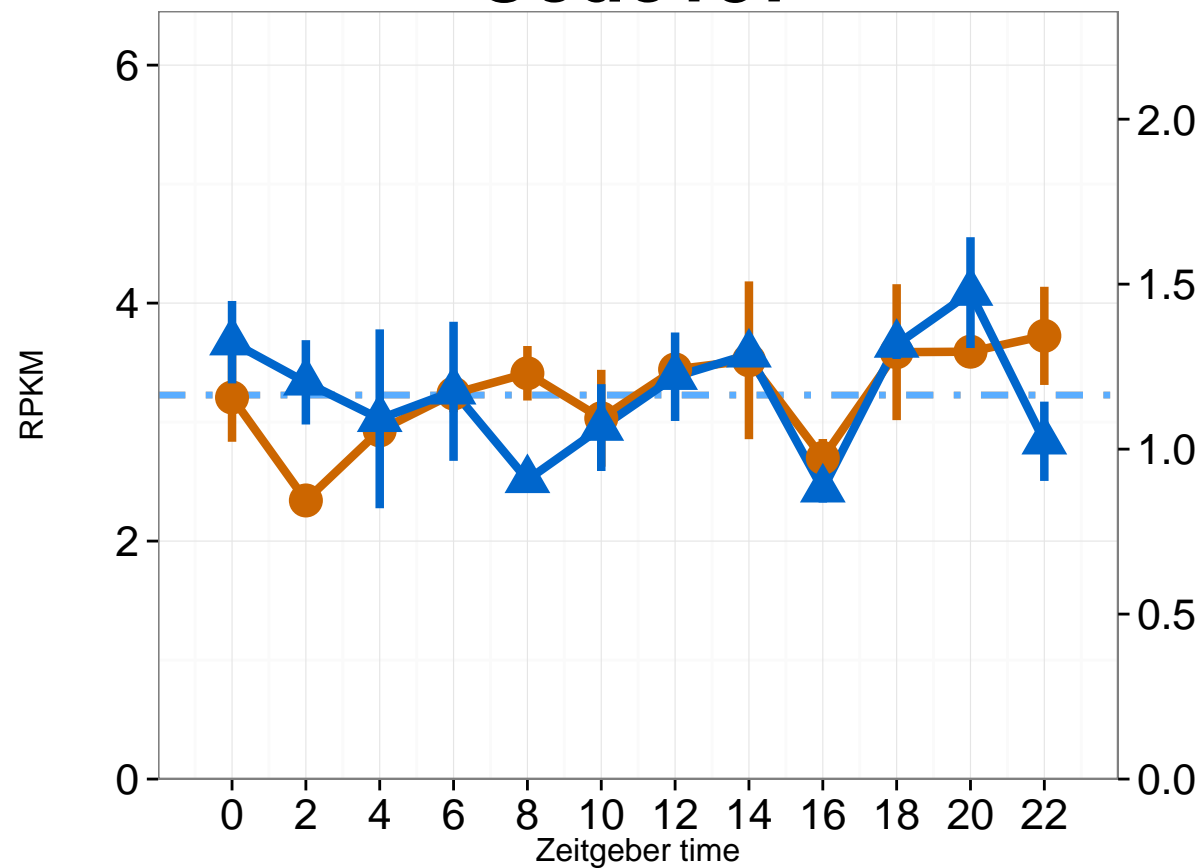

## Ccdc157

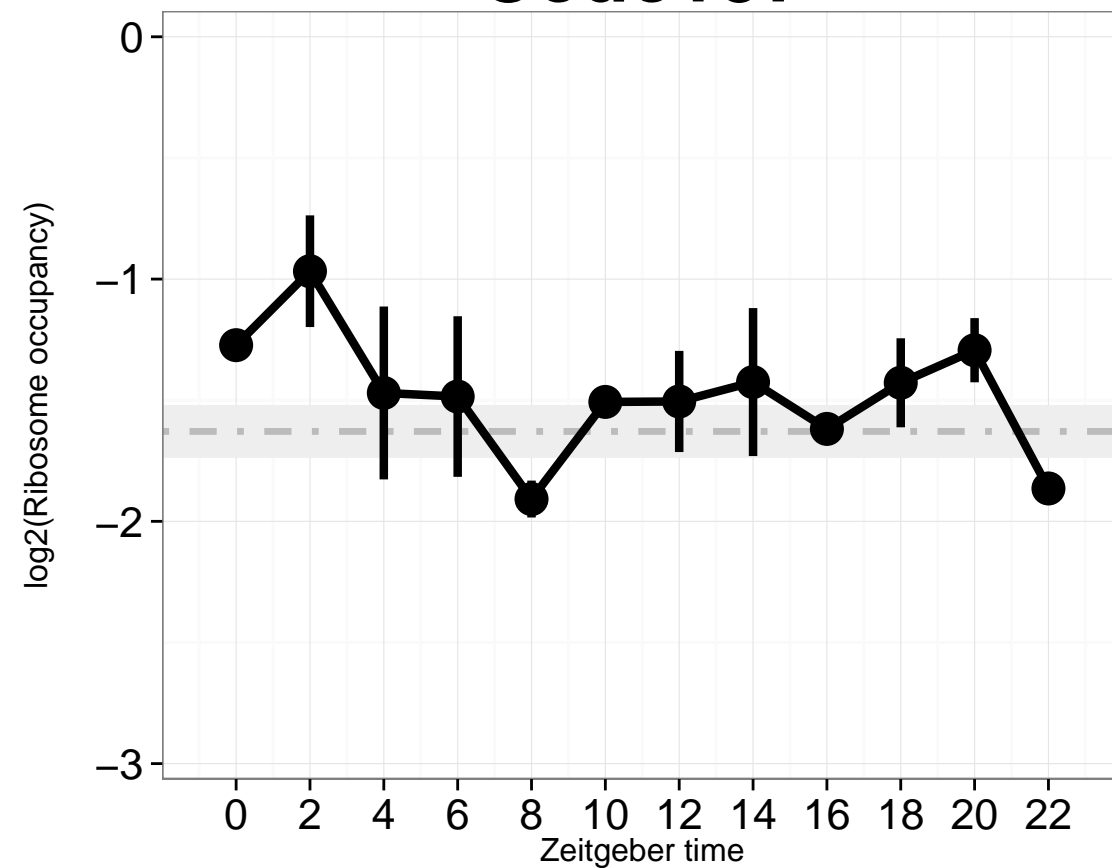

Supplement: SuppDataset_1.zip [file Ccdc157_set_A.pdf › Supplemental Dataset 1/A-mRNA_nonrhyth_translation_nonrhyth/Ccdc157_set_A.pdf]

# Ccdc159

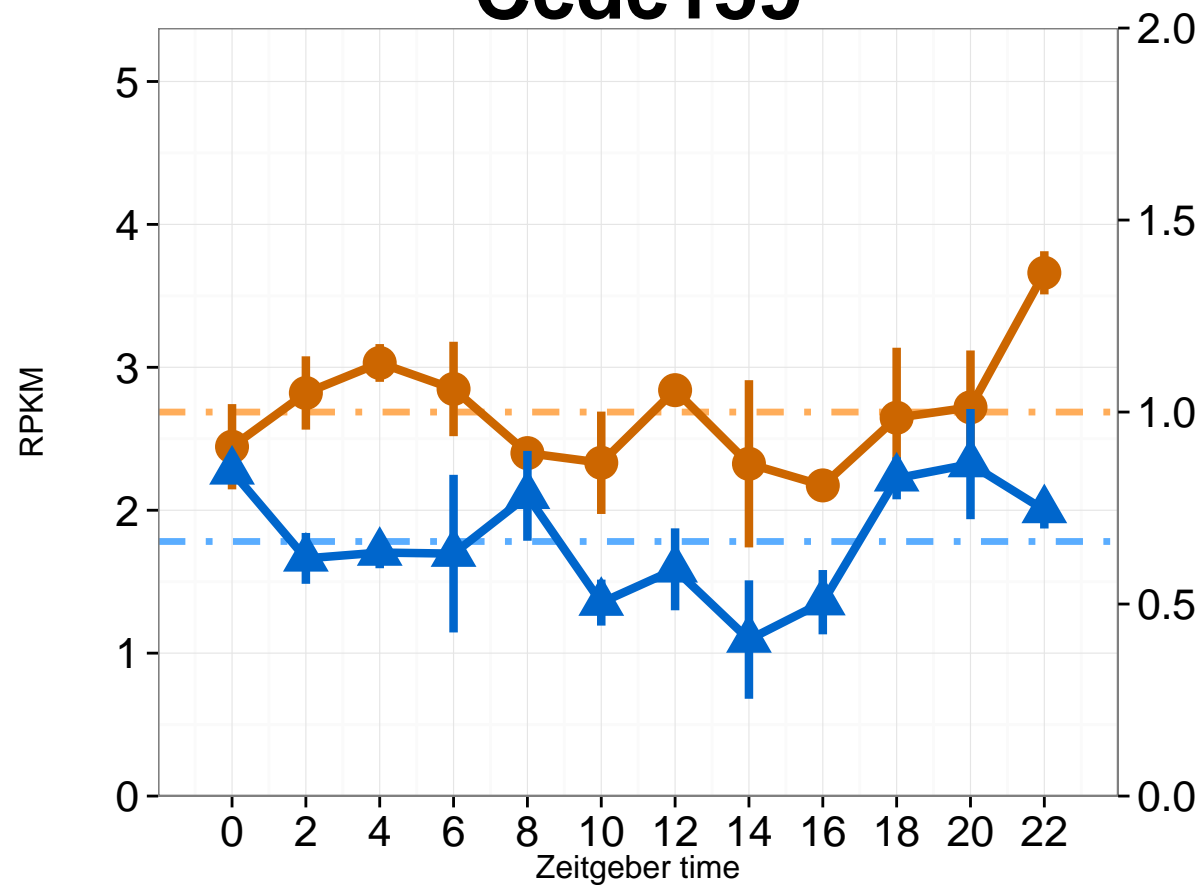

# Ccdc159

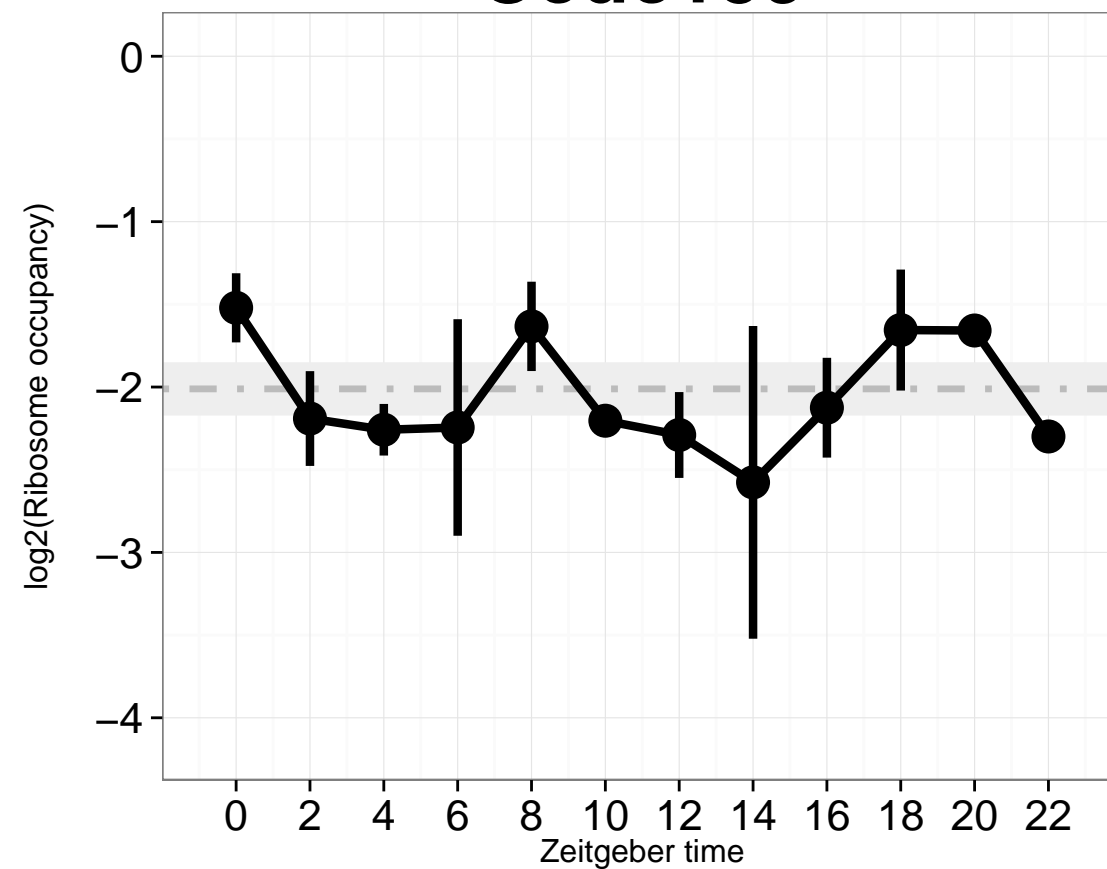

Supplement: SuppDataset_1.zip [file Ccdc159_set_A.pdf › Supplemental Dataset 1/A-mRNA_nonrhyth_translation_nonrhyth/Ccdc159_set_A.pdf]

## Ccdc15

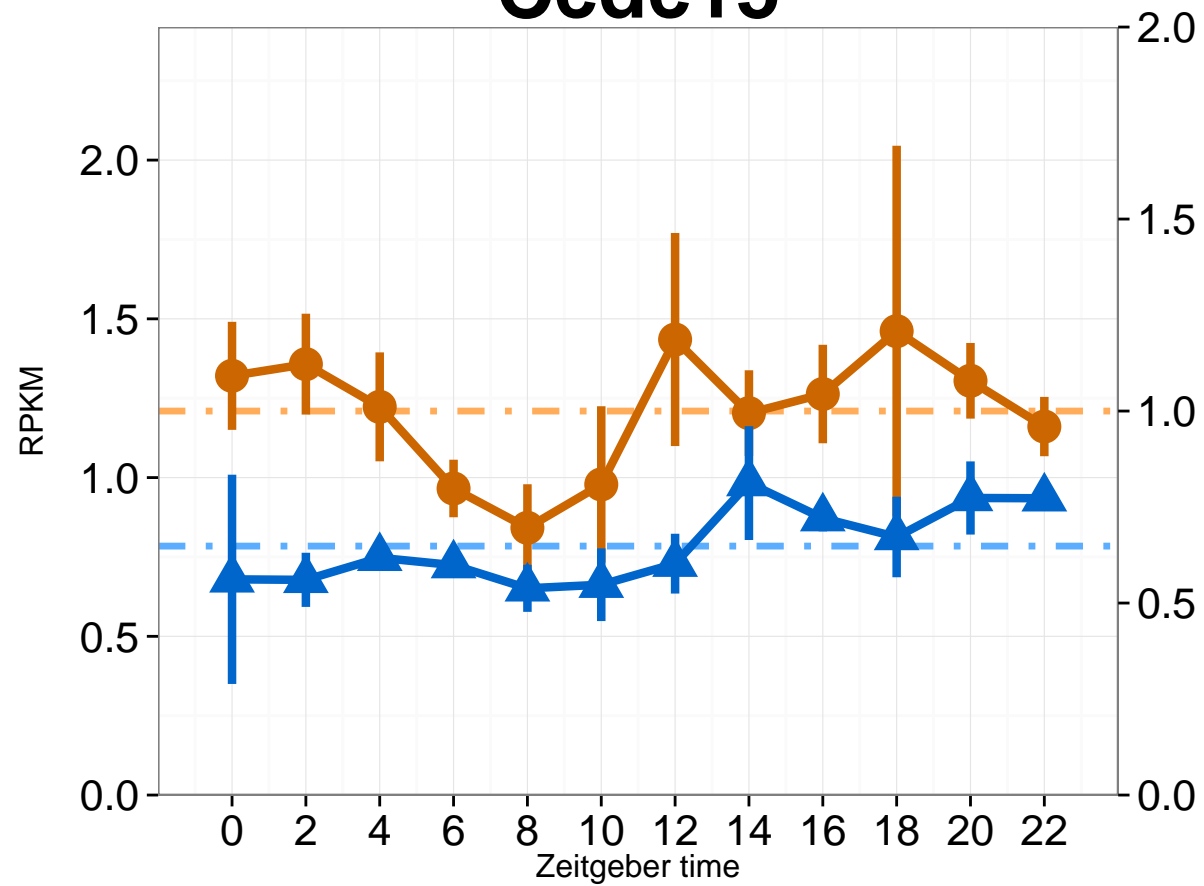

## Ccdc15

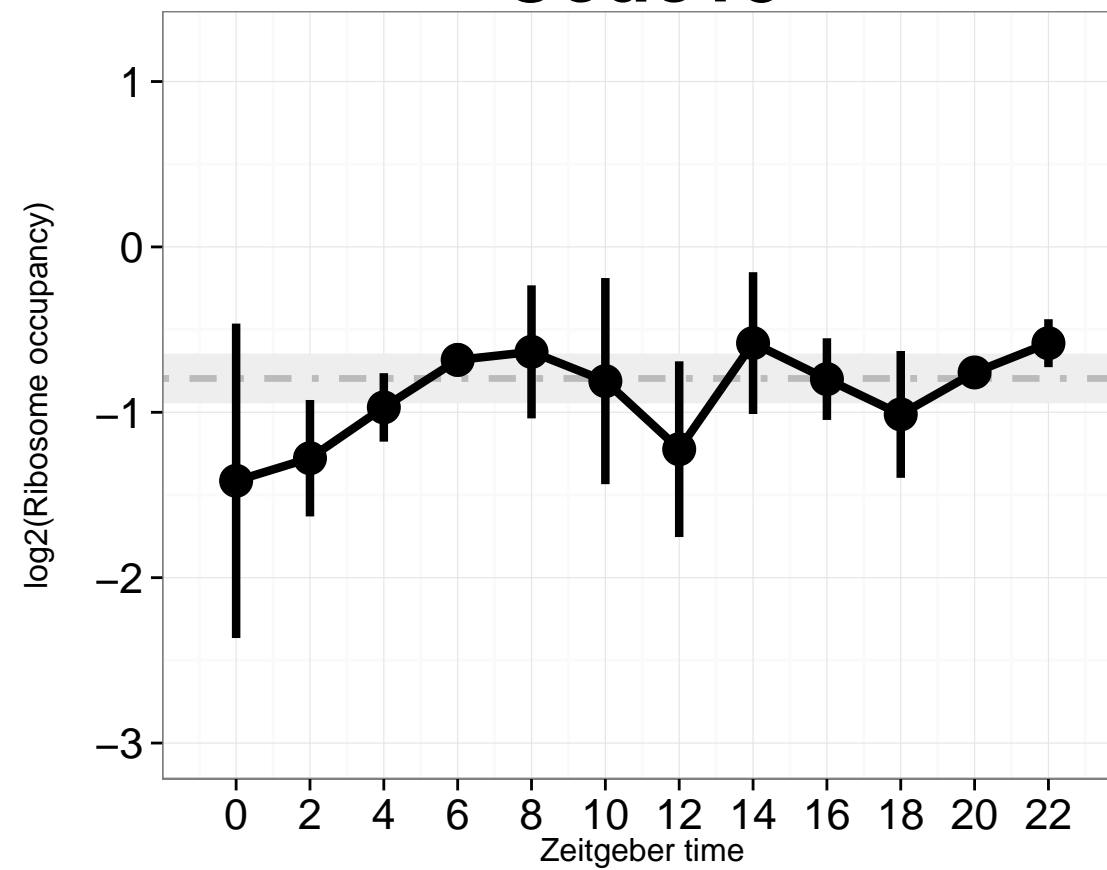

Supplement: SuppDataset_1.zip [file Ccdc15_set_A.pdf › Supplemental Dataset 1/A-mRNA_nonrhyth_translation_nonrhyth/Ccdc15_set_A.pdf]

Ccdc163

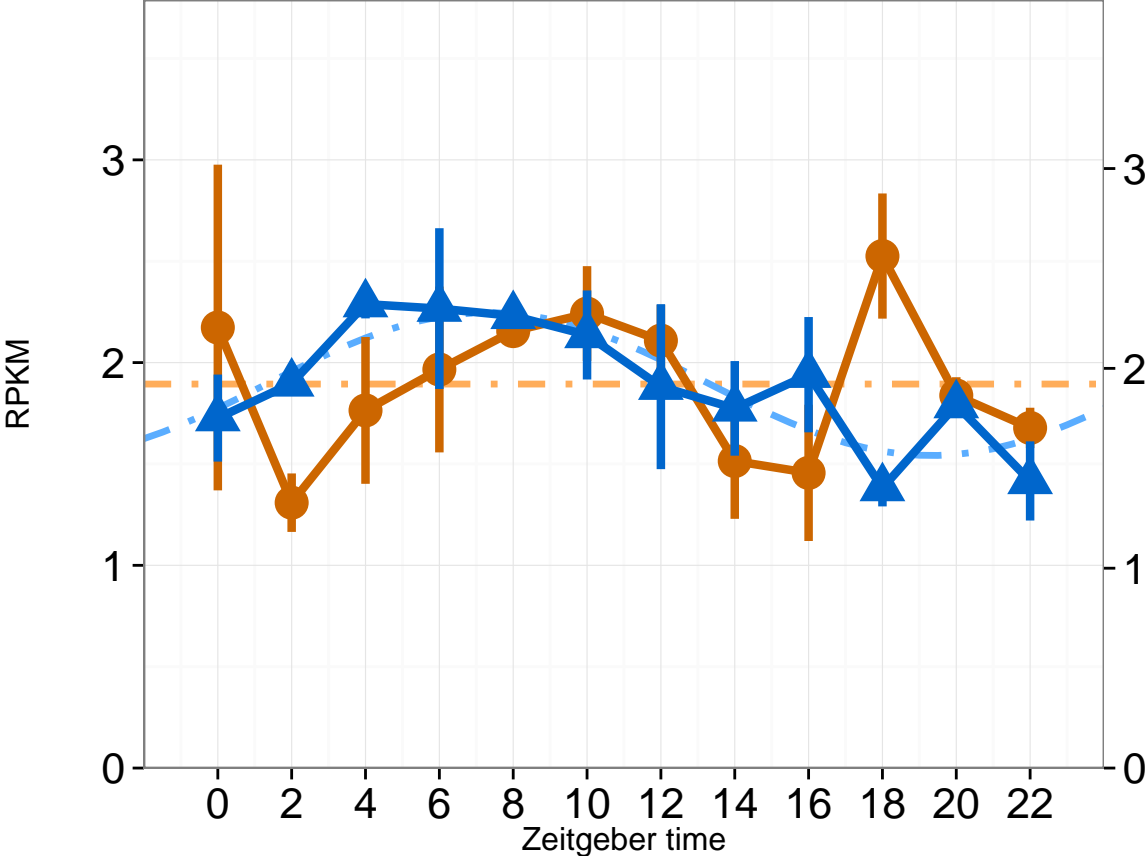

Ccdc163

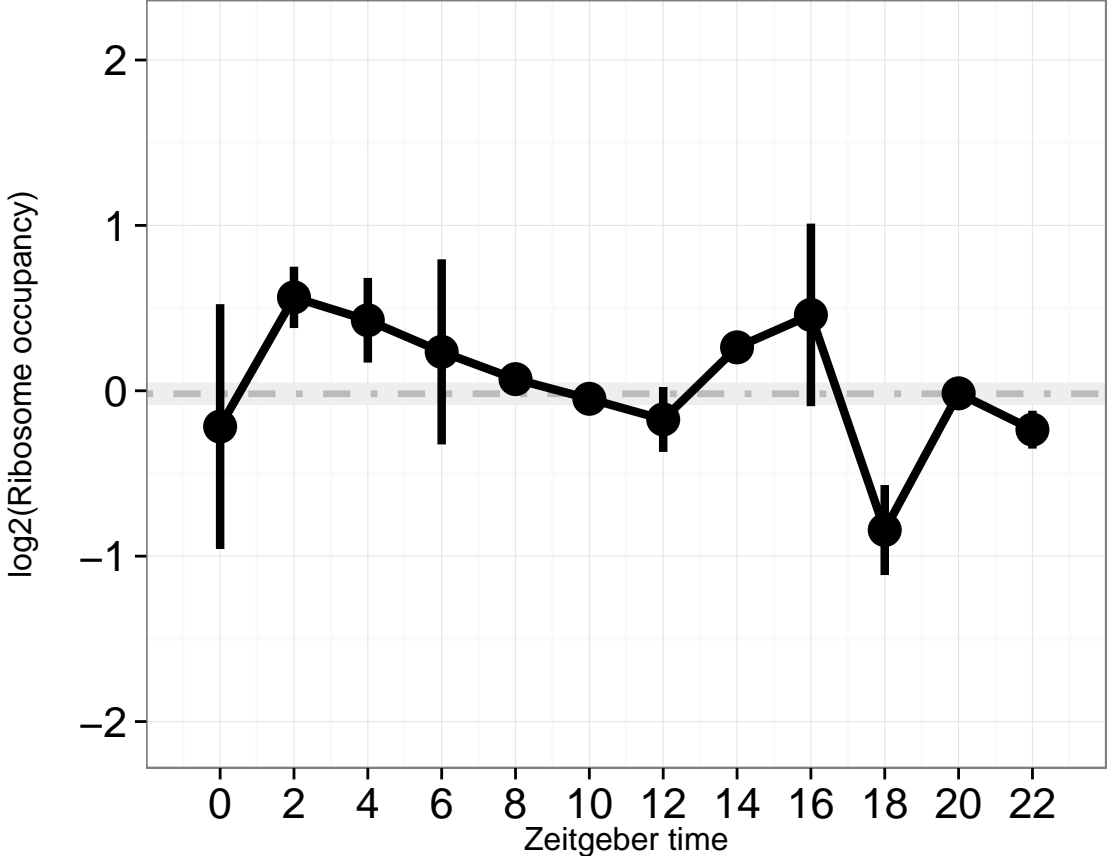

Supplement: SuppDataset_1.zip [file Ccdc163_set_A.pdf › Supplemental Dataset 1/A-mRNA_nonrhyth_translation_nonrhyth/Ccdc163_set_A.pdf]

## Ccdc167

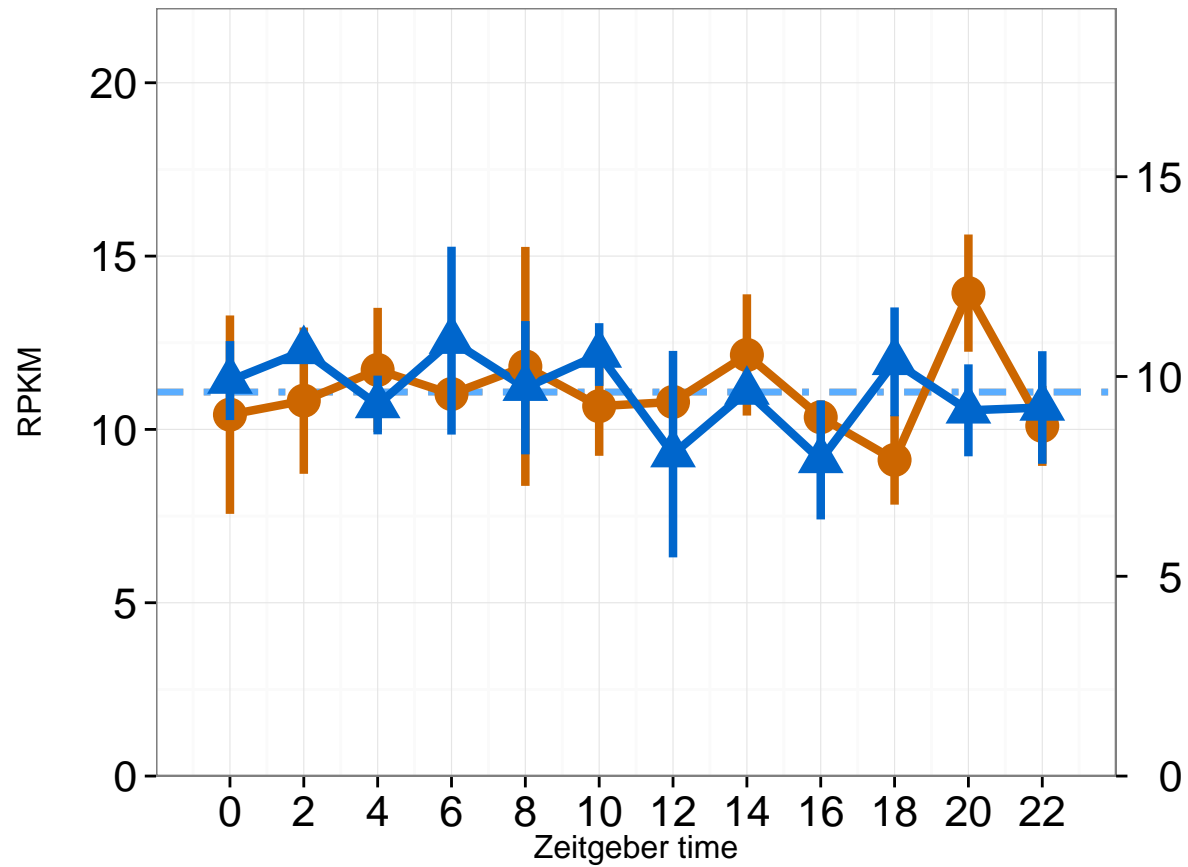

## Ccdc167

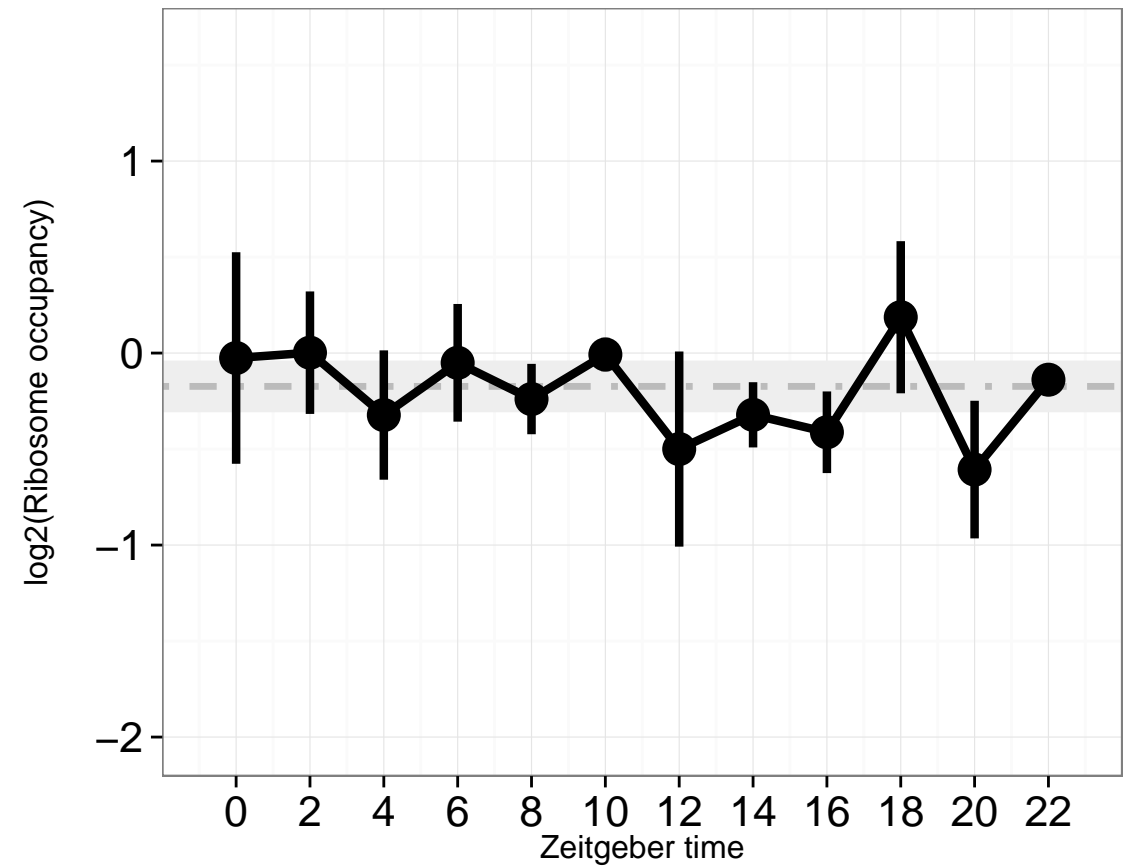

Supplement: SuppDataset_1.zip [file Ccdc167_set_A.pdf › Supplemental Dataset 1/A-mRNA_nonrhyth_translation_nonrhyth/Ccdc167_set_A.pdf]

# Ccdc181

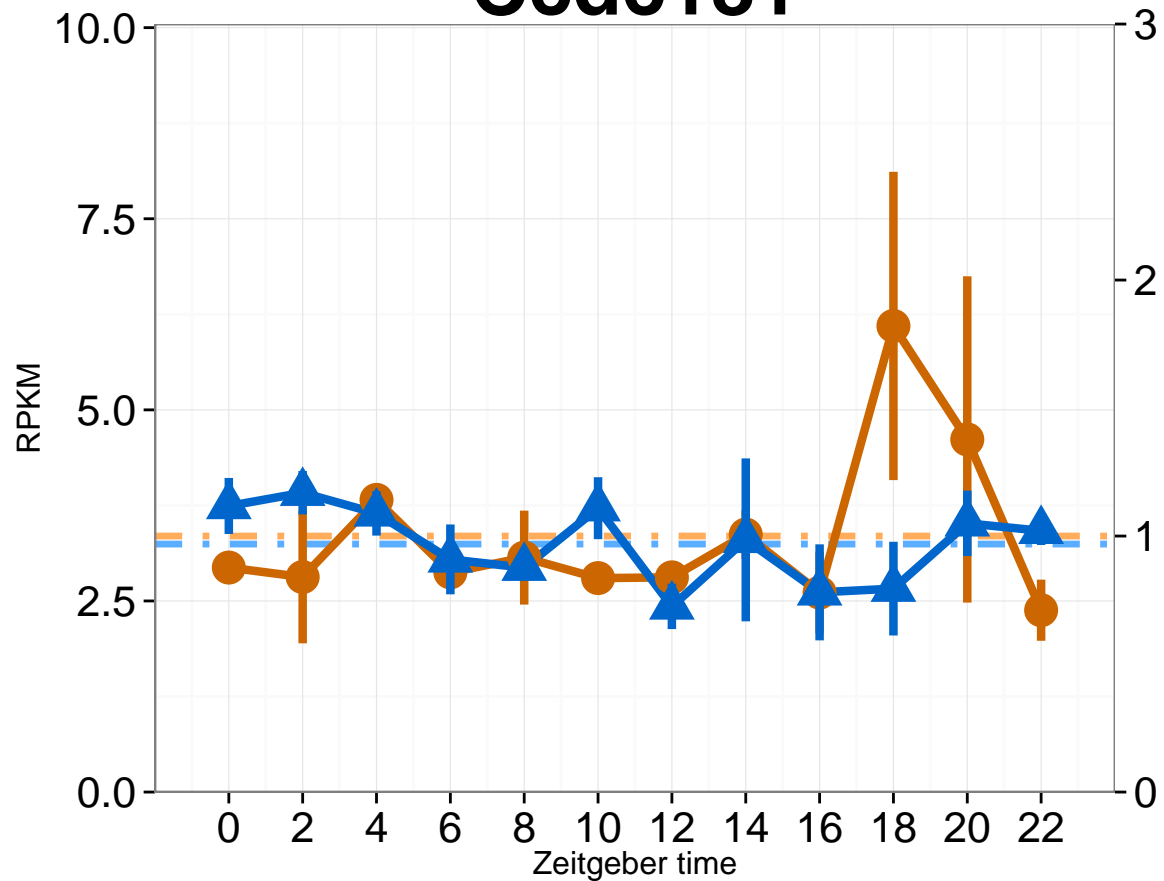

# Ccdc181

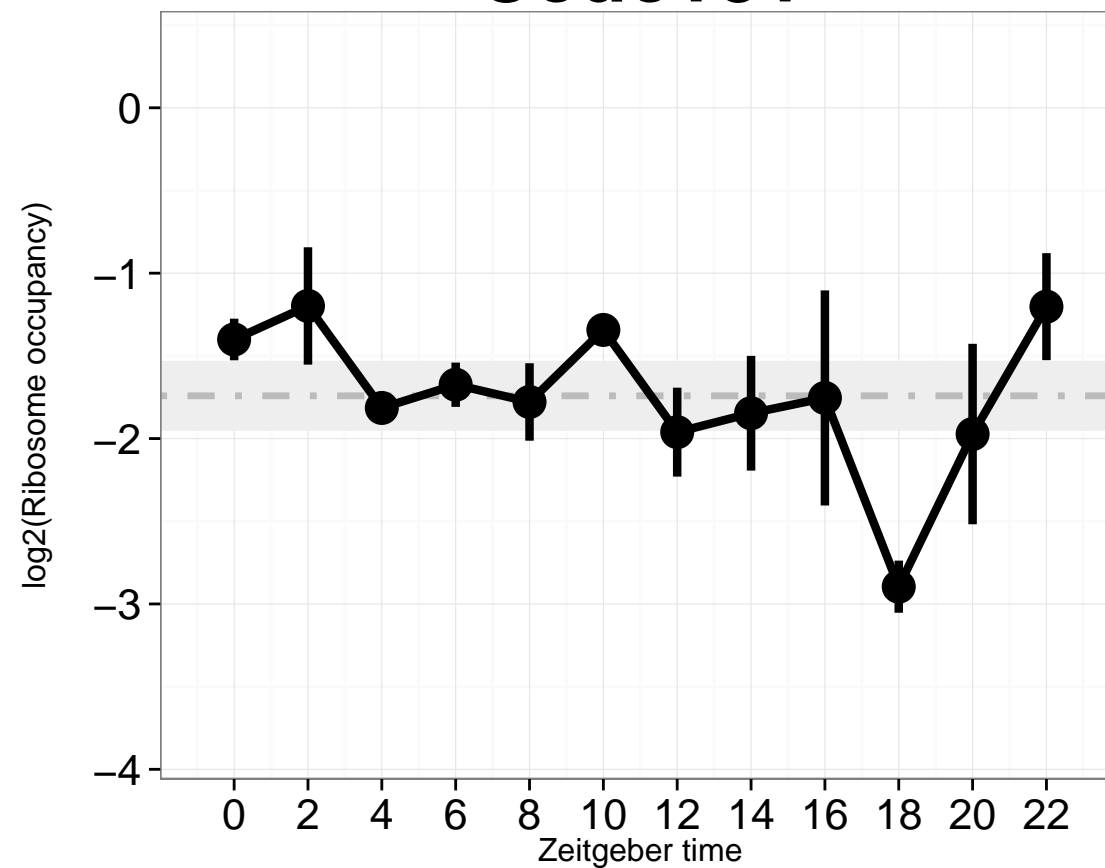

Supplement: SuppDataset_1.zip [file Ccdc181_set_A.pdf › Supplemental Dataset 1/A-mRNA_nonrhyth_translation_nonrhyth/Ccdc181_set_A.pdf]

## Ccdc22

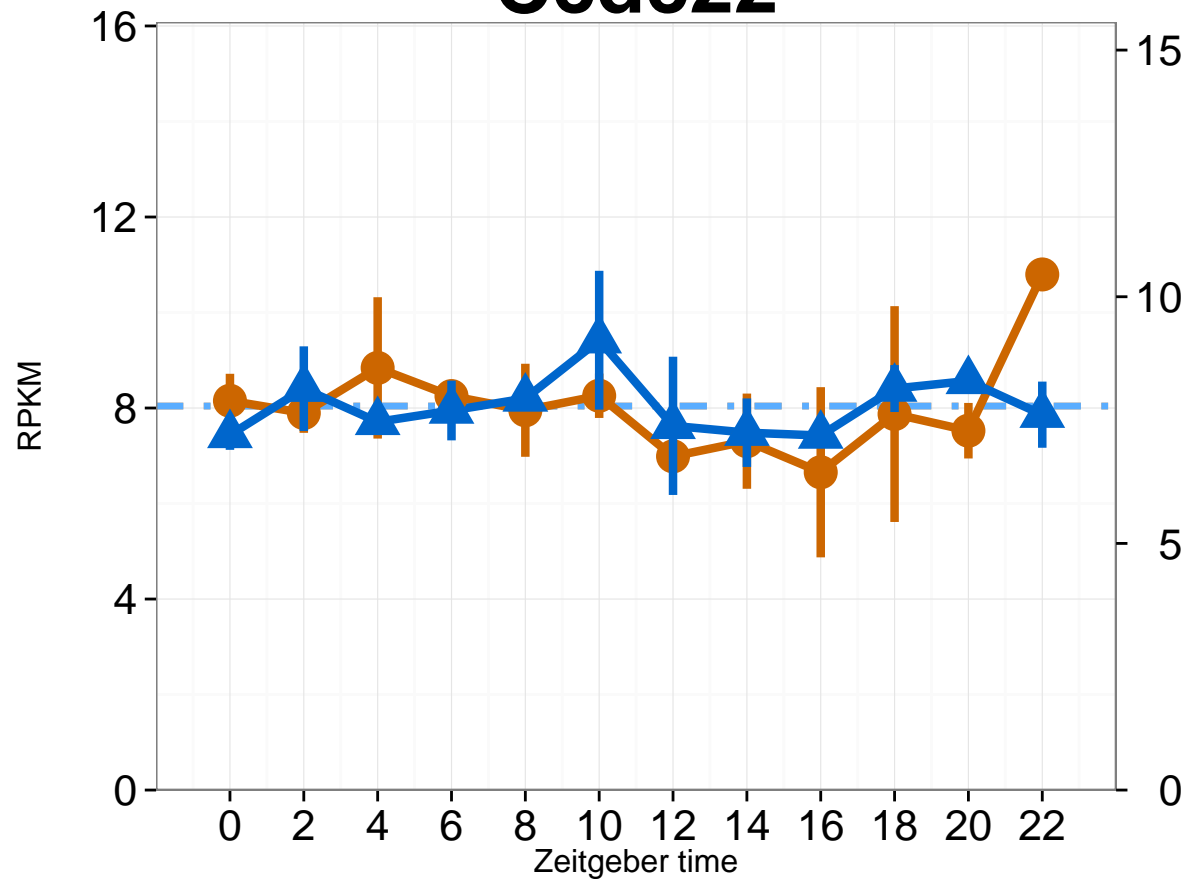

## Ccdc22

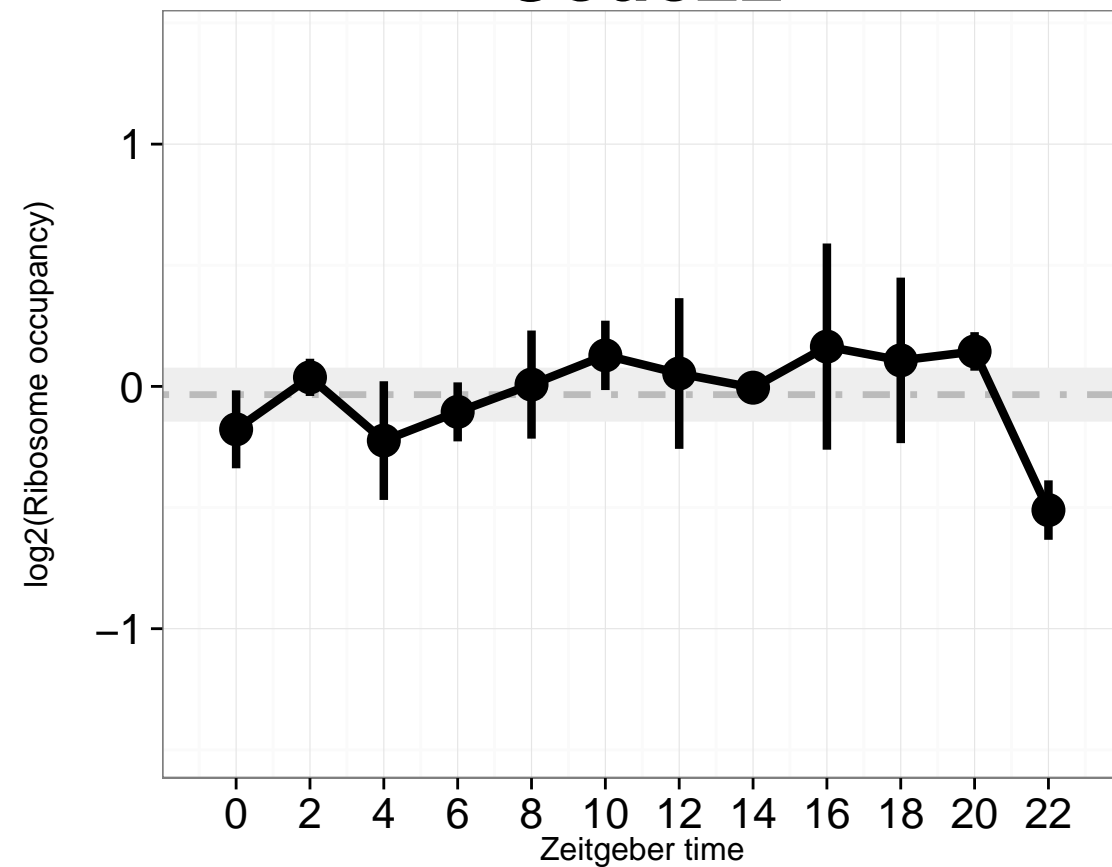

Supplement: SuppDataset_1.zip [file Ccdc22_set_A.pdf › Supplemental Dataset 1/A-mRNA_nonrhyth_translation_nonrhyth/Ccdc22_set_A.pdf]

## Ccdc25

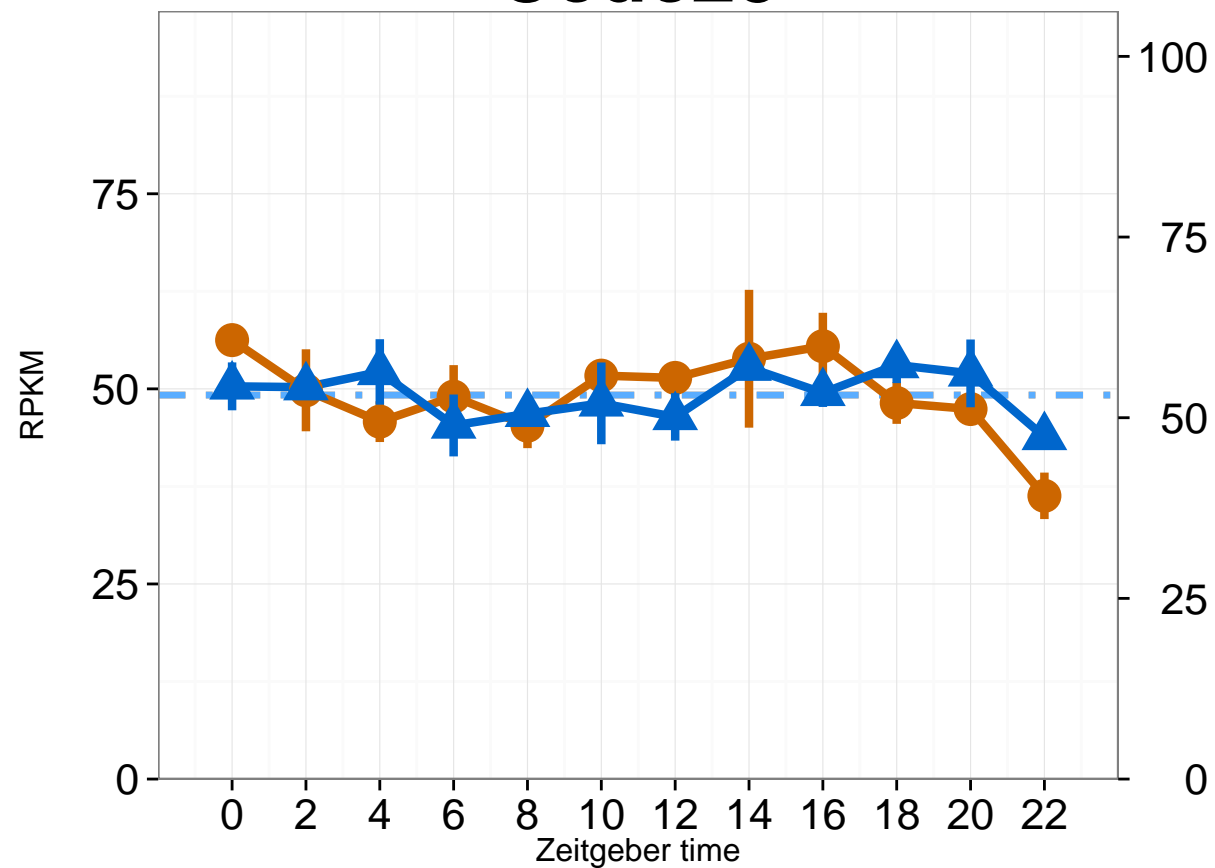

## Ccdc25

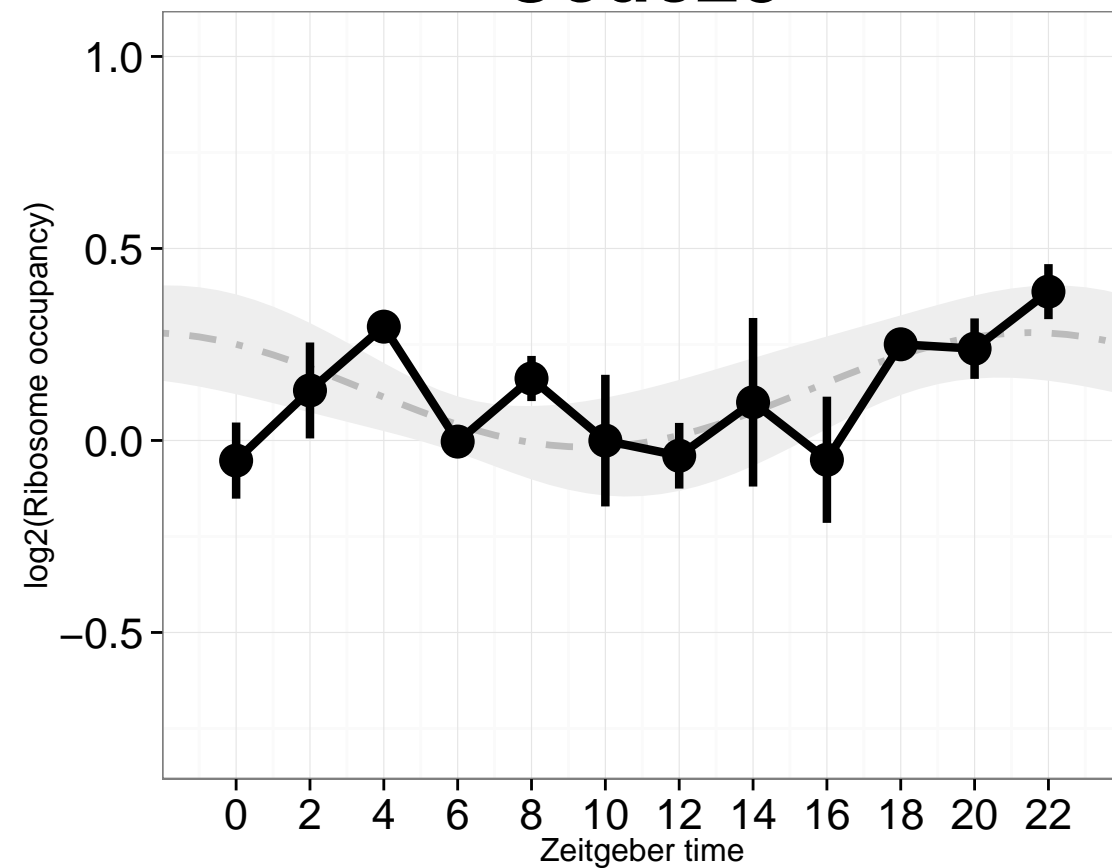

Supplement: SuppDataset_1.zip [file Ccdc25_set_A.pdf › Supplemental Dataset 1/A-mRNA_nonrhyth_translation_nonrhyth/Ccdc25_set_A.pdf]

# Ccdc28a

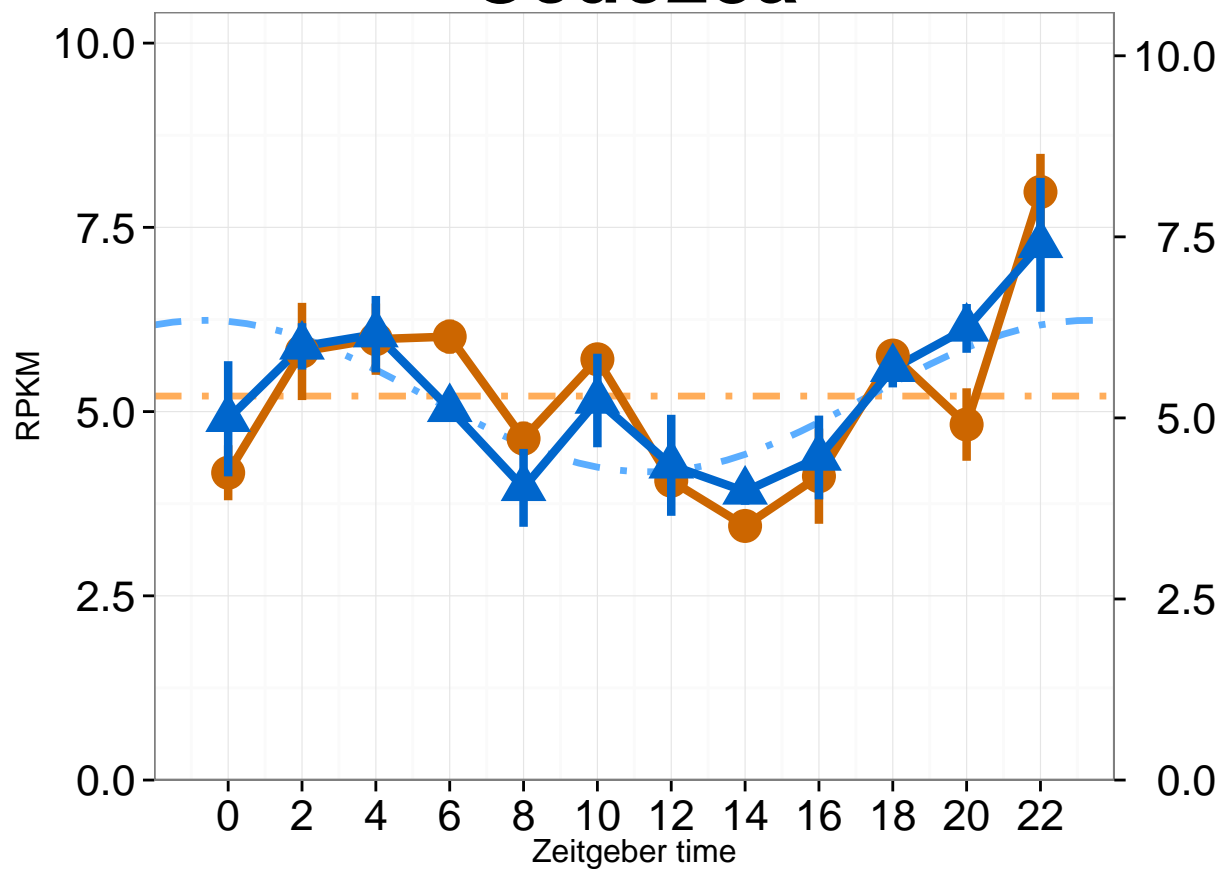

# Ccdc28a

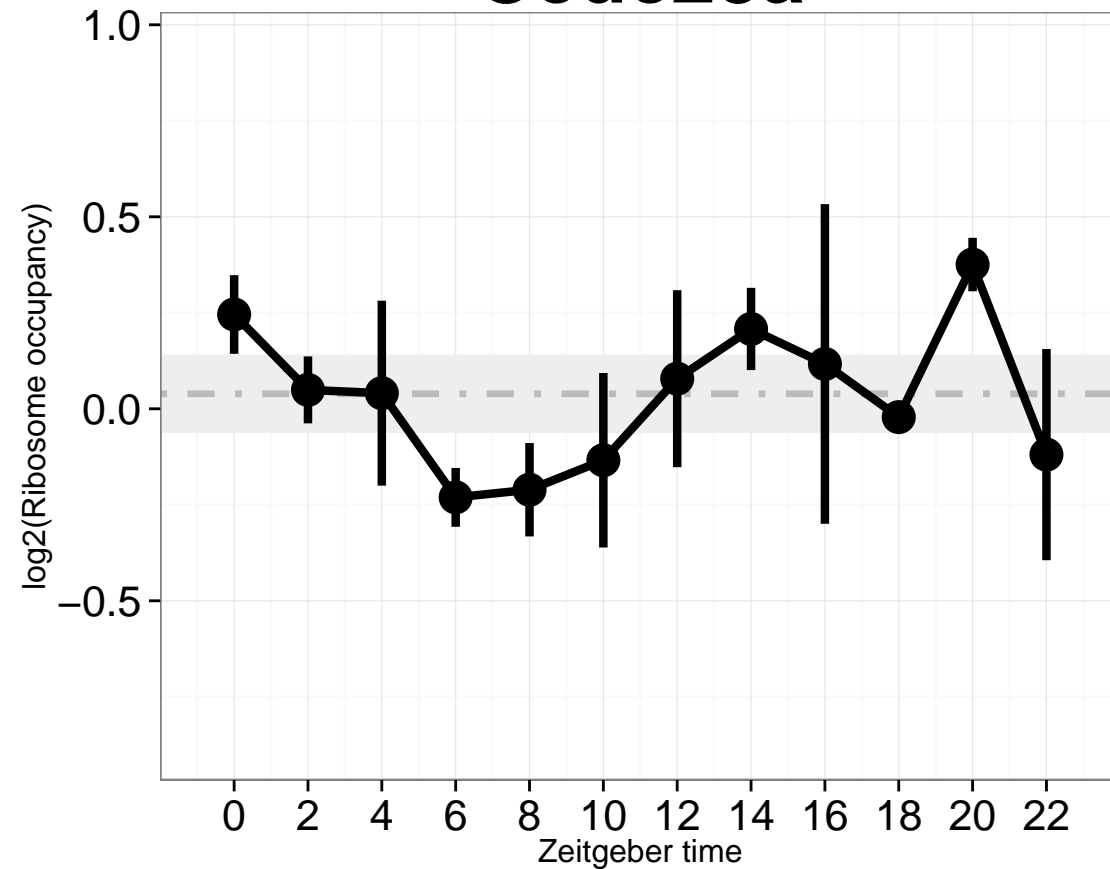

Supplement: SuppDataset_1.zip [file Ccdc28a_set_A.pdf › Supplemental Dataset 1/A-mRNA_nonrhyth_translation_nonrhyth/Ccdc28a_set_A.pdf]

# Ccdc28b

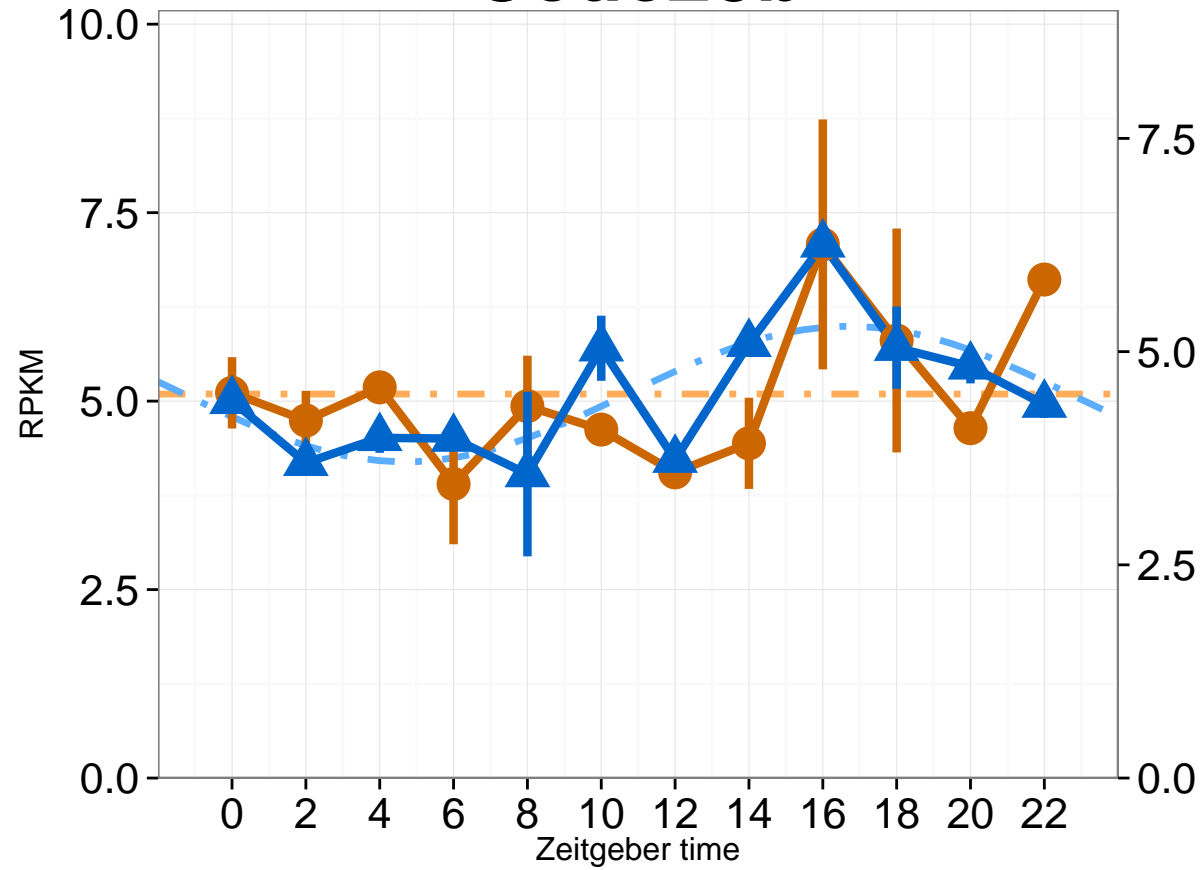

# Ccdc28b

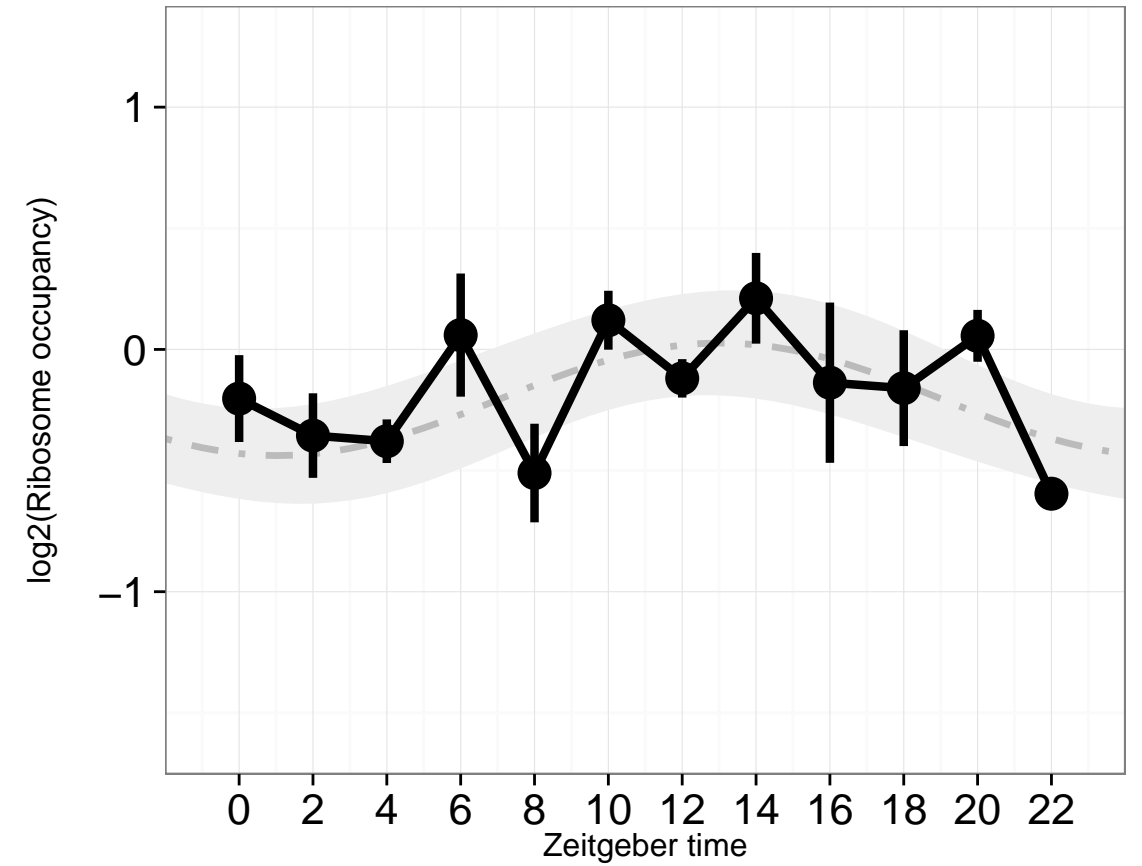

Supplement: SuppDataset_1.zip [file Ccdc28b_set_A.pdf › Supplemental Dataset 1/A-mRNA_nonrhyth_translation_nonrhyth/Ccdc28b_set_A.pdf]

## Ccdc32

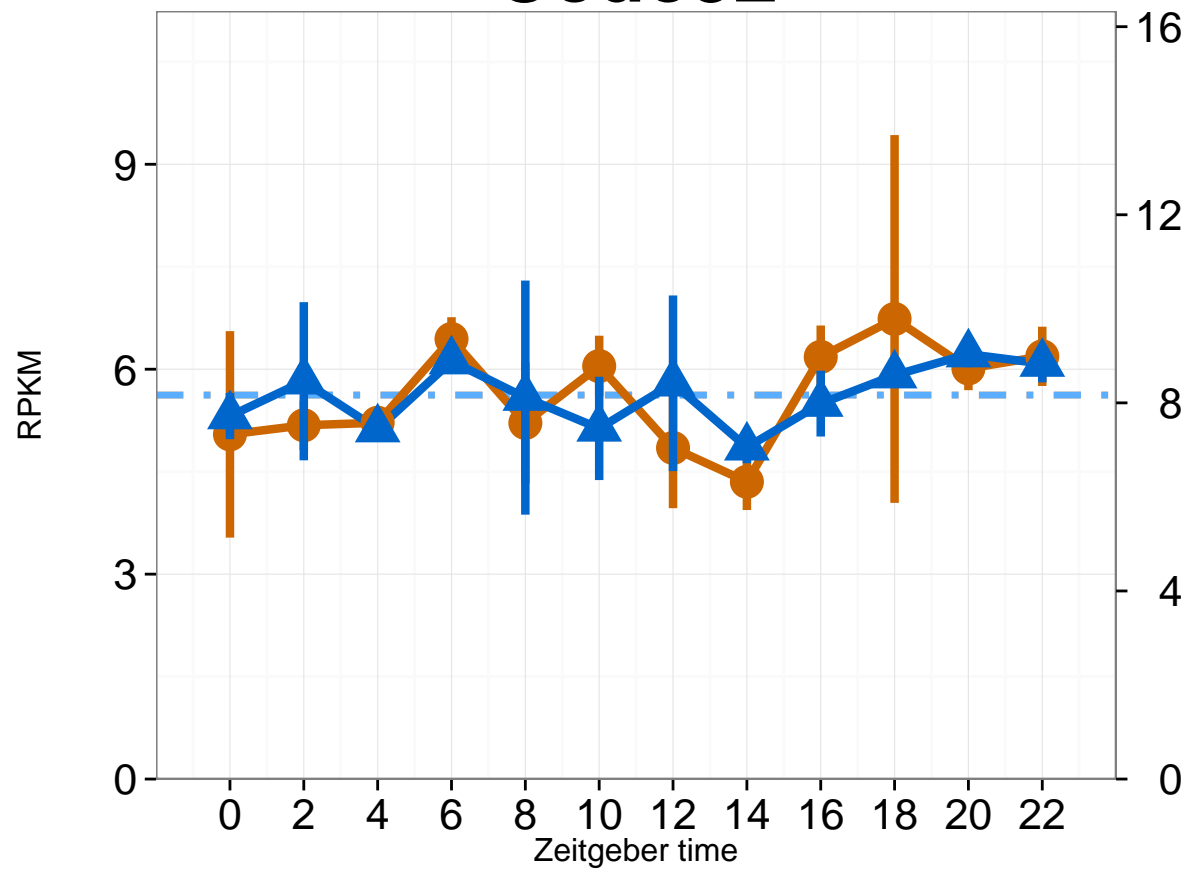

## Ccdc32

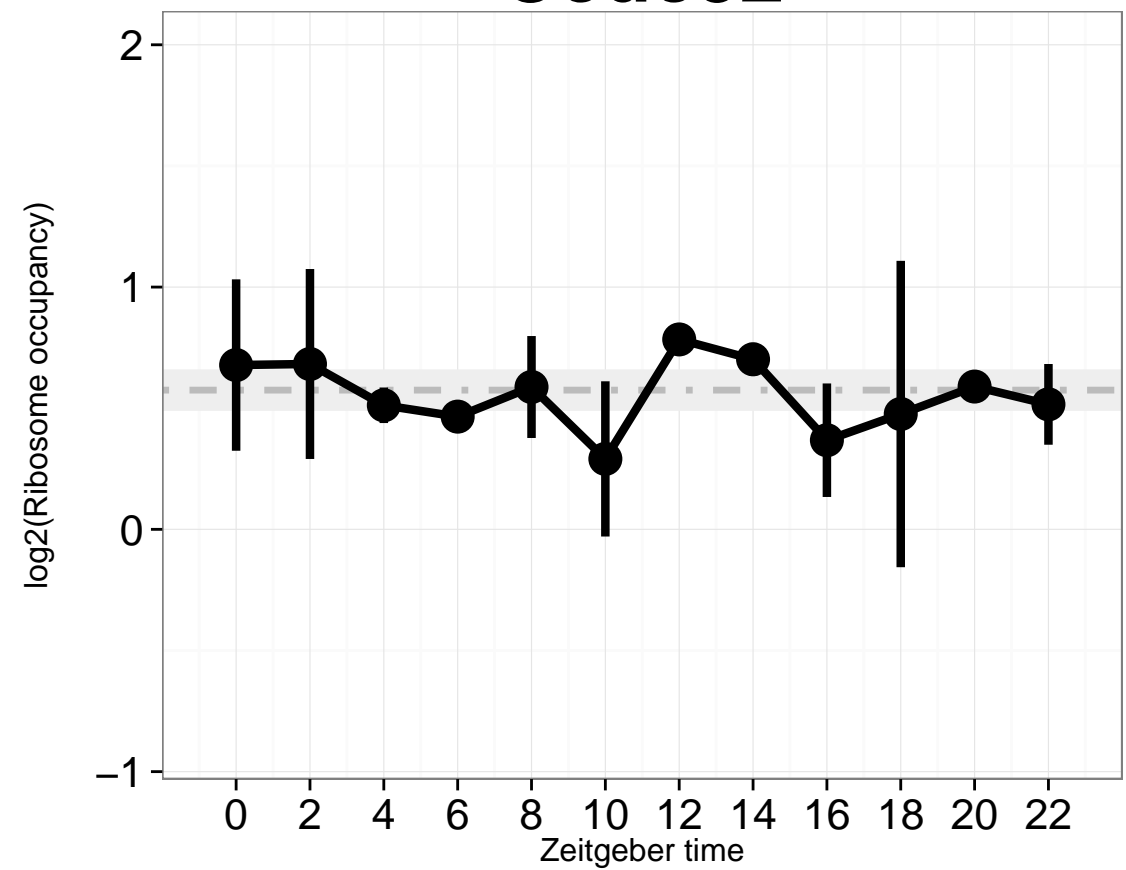

Supplement: SuppDataset_1.zip [file Ccdc32_set_A.pdf › Supplemental Dataset 1/A-mRNA_nonrhyth_translation_nonrhyth/Ccdc32_set_A.pdf]

## Ccdc34

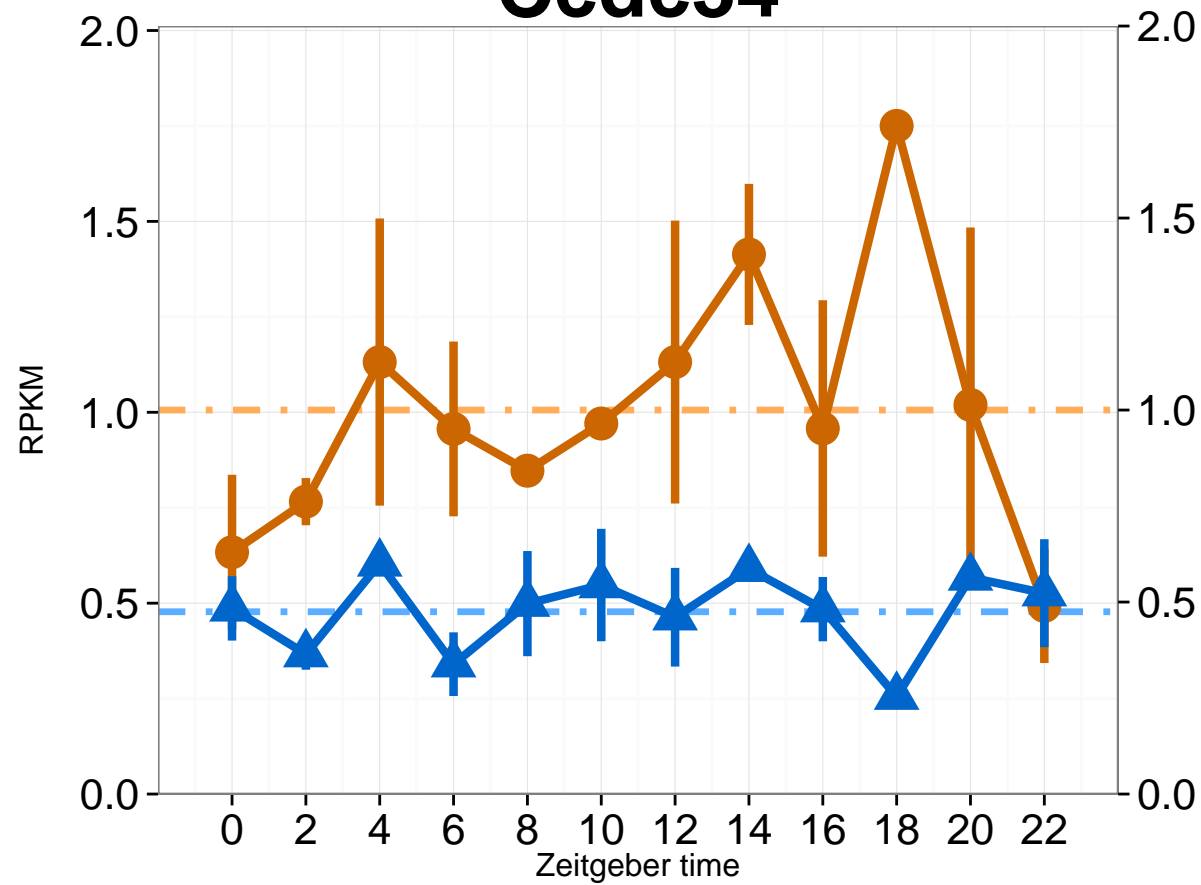

## Ccdc34

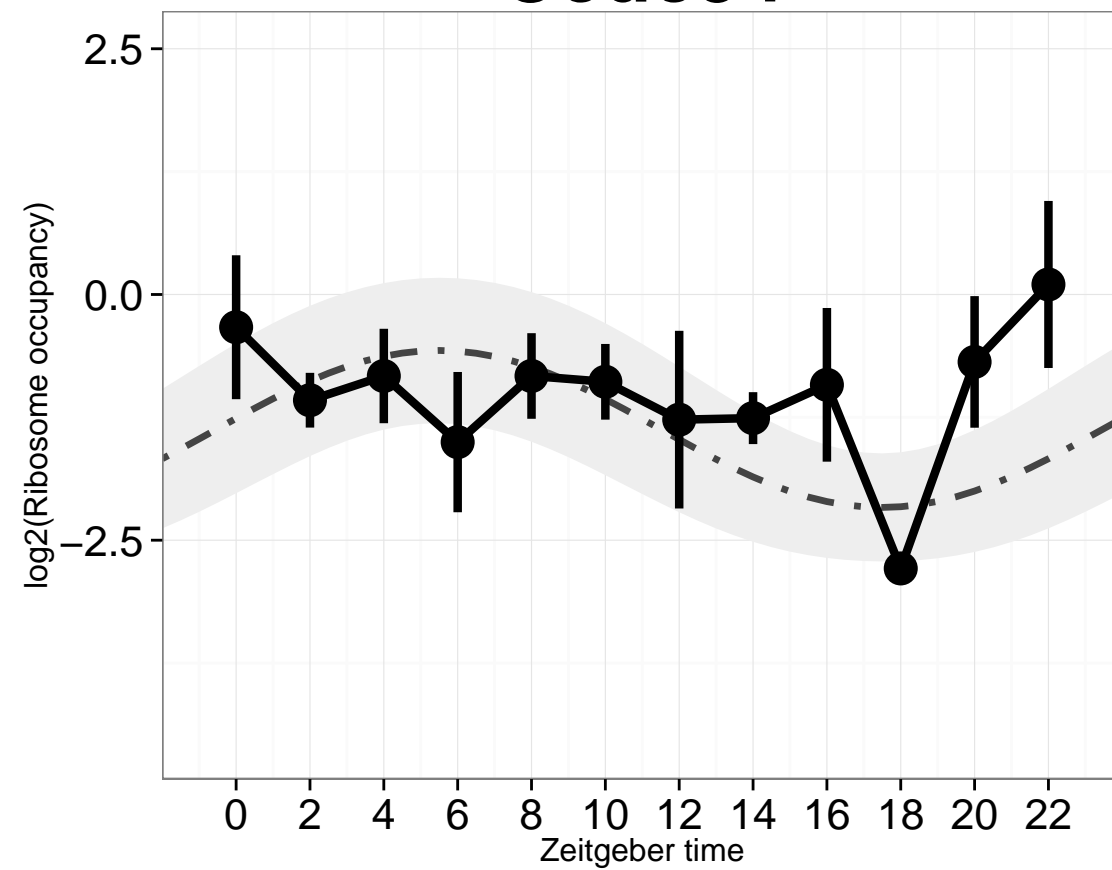

Supplement: SuppDataset_1.zip [file Ccdc34_set_A.pdf › Supplemental Dataset 1/A-mRNA_nonrhyth_translation_nonrhyth/Ccdc34_set_A.pdf]

## Ccdc3

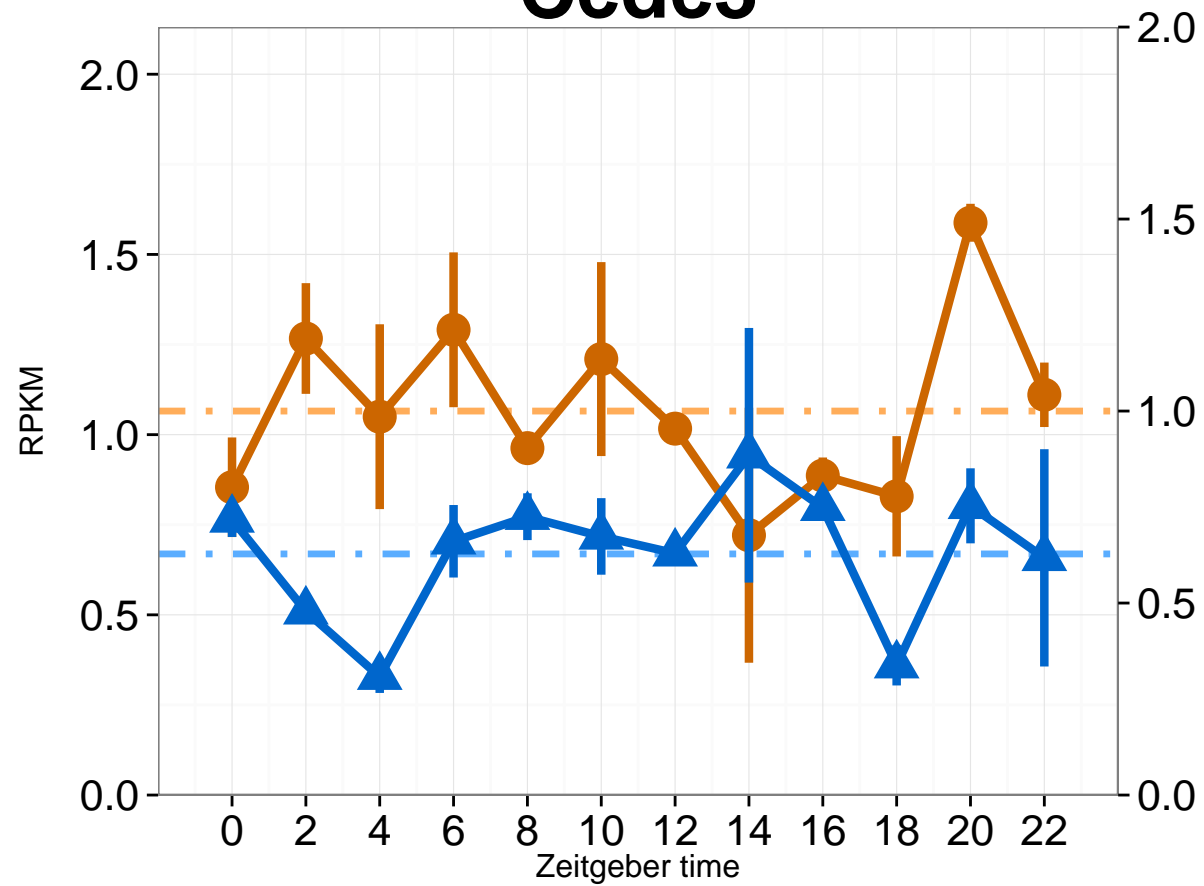

## Ccdc3

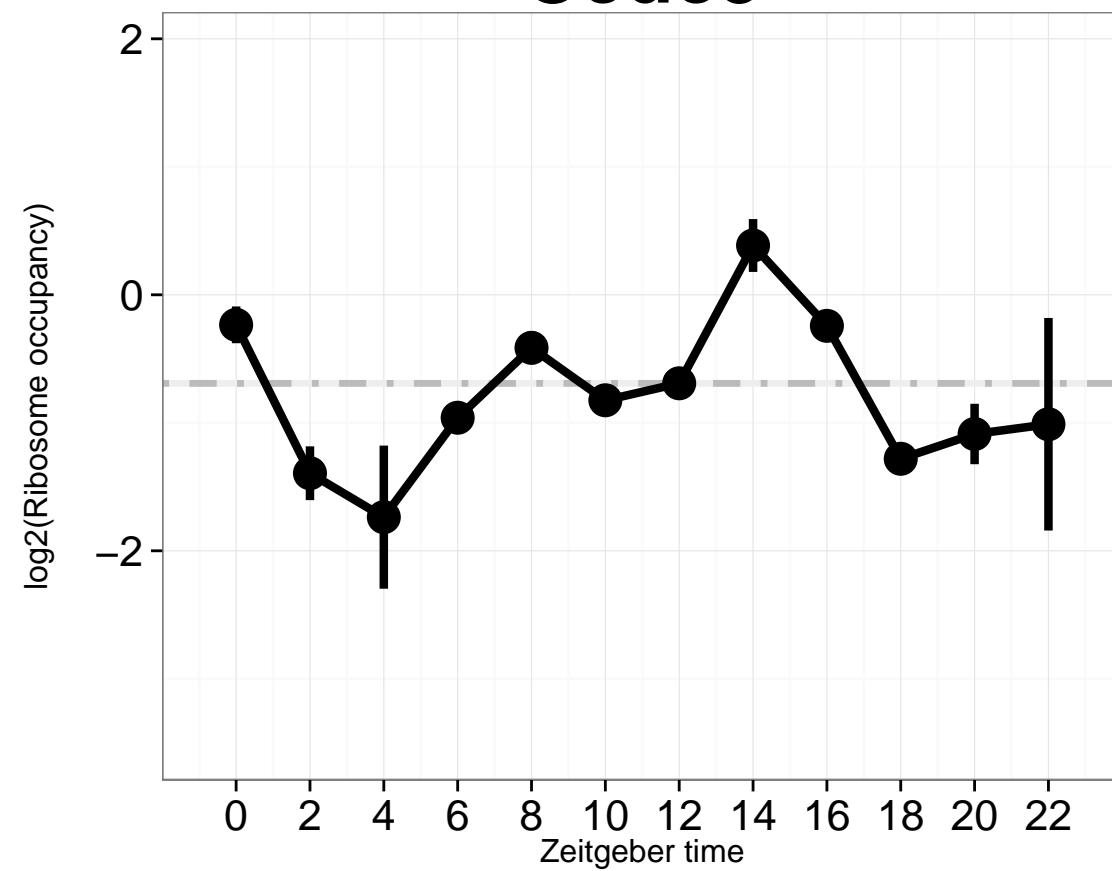

Supplement: SuppDataset_1.zip [file Ccdc3_set_A.pdf › Supplemental Dataset 1/A-mRNA_nonrhyth_translation_nonrhyth/Ccdc3_set_A.pdf]

# Ccdc41

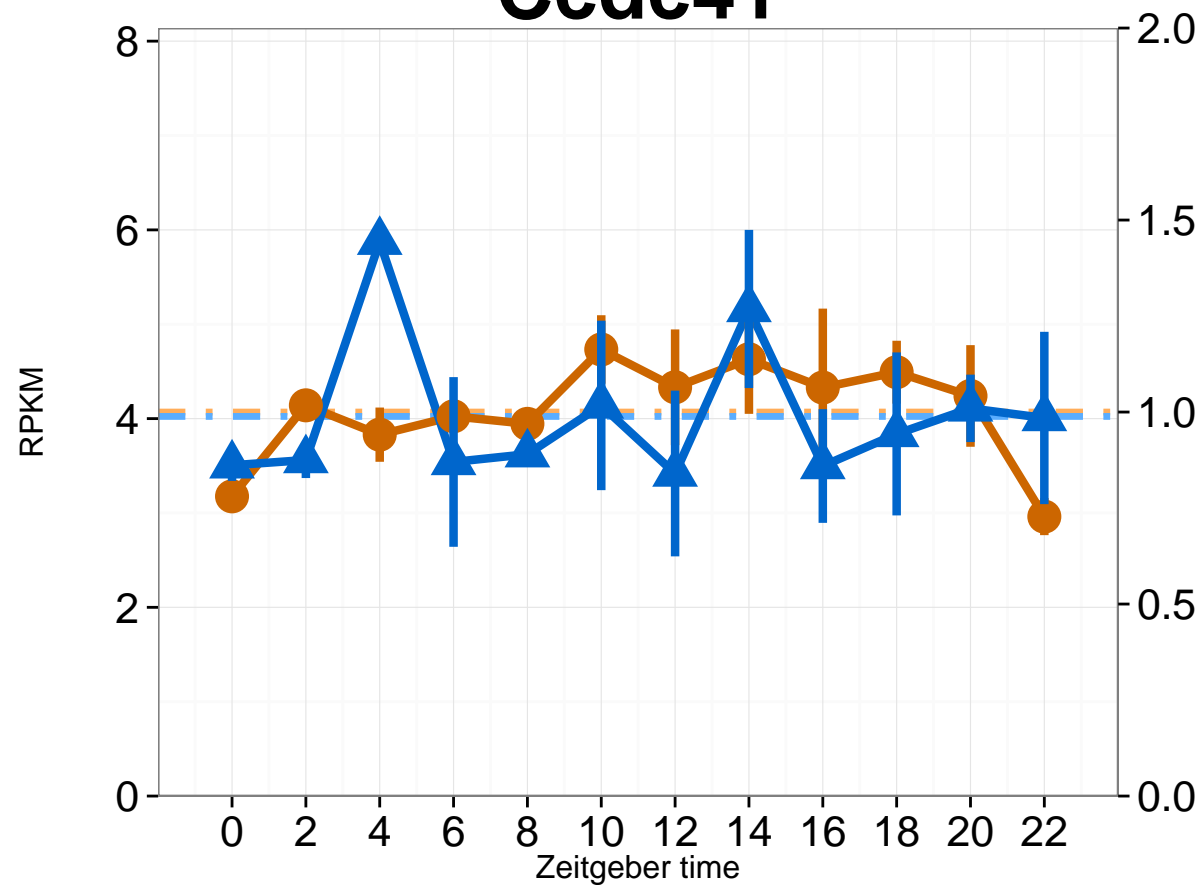

# Ccdc41

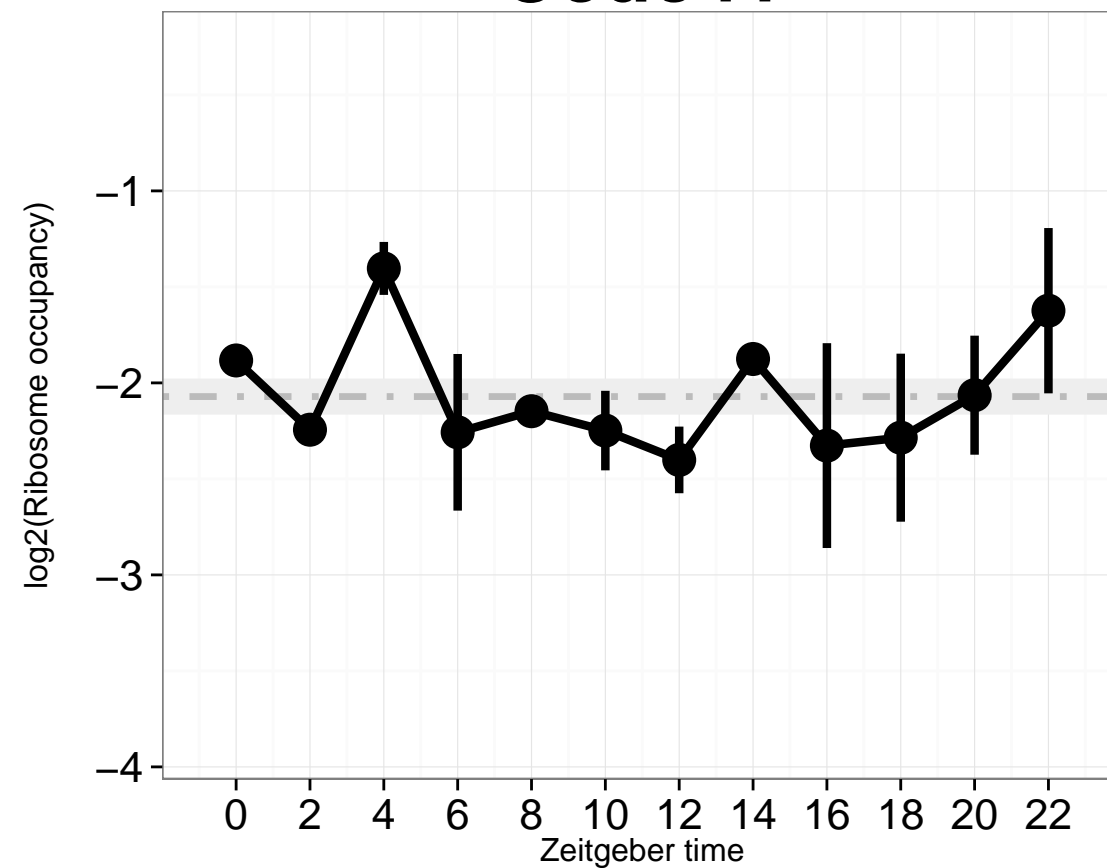

Supplement: SuppDataset_1.zip [file Ccdc41_set_A.pdf › Supplemental Dataset 1/A-mRNA_nonrhyth_translation_nonrhyth/Ccdc41_set_A.pdf]

## Ccdc43

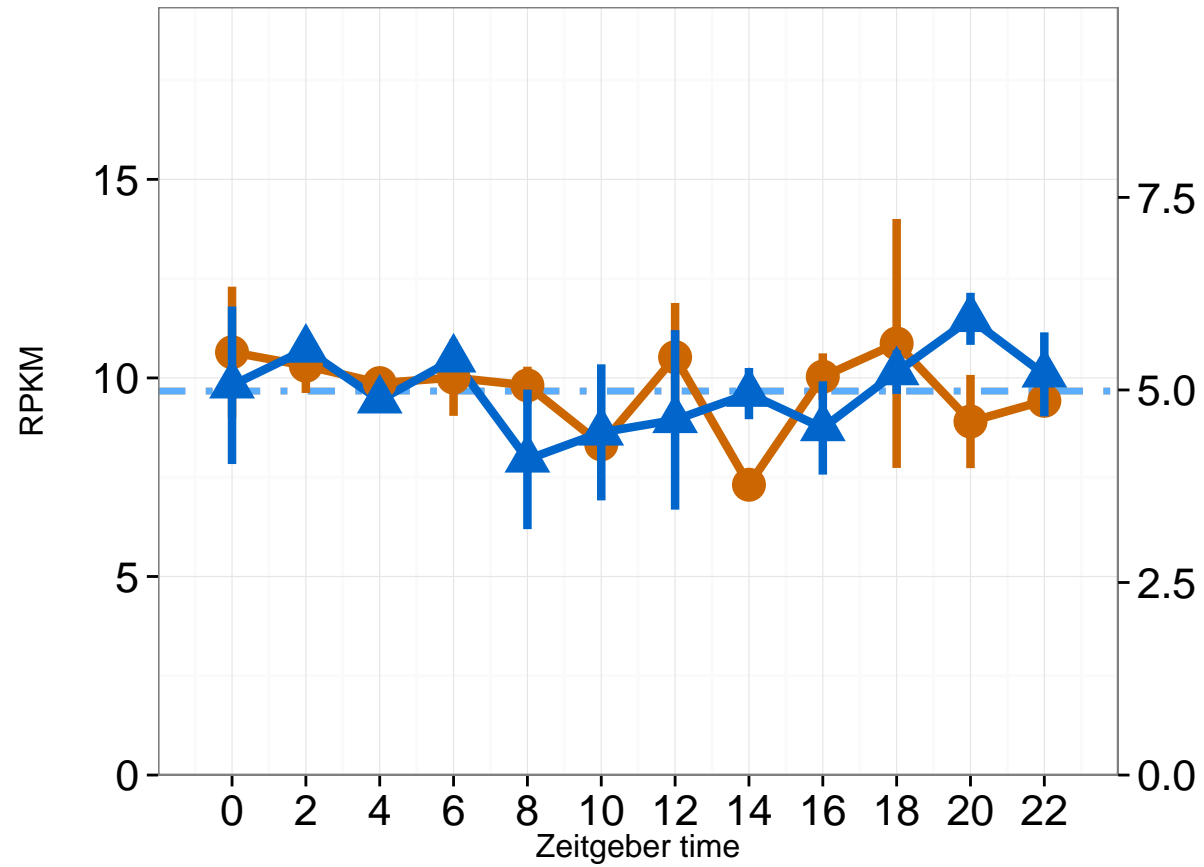

## Ccdc43

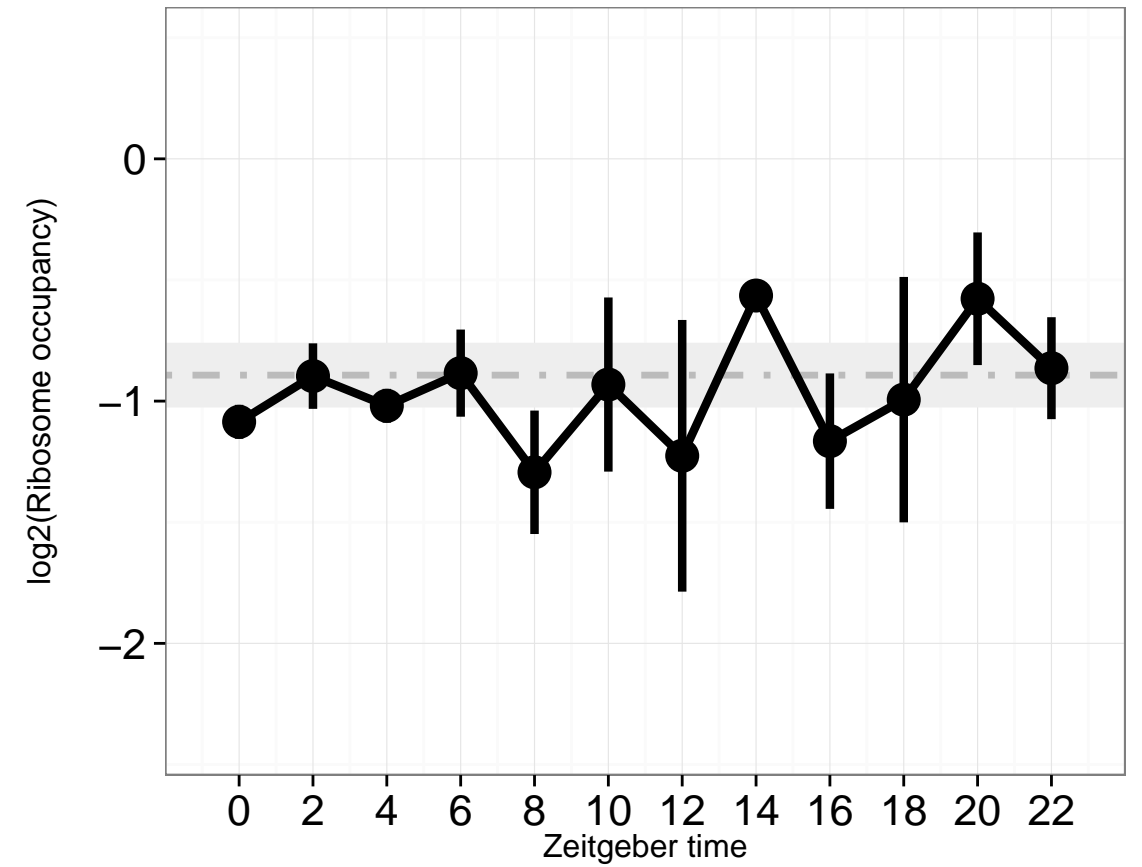

Supplement: SuppDataset_1.zip [file Ccdc43_set_A.pdf › Supplemental Dataset 1/A-mRNA_nonrhyth_translation_nonrhyth/Ccdc43_set_A.pdf]

## Ccdc47

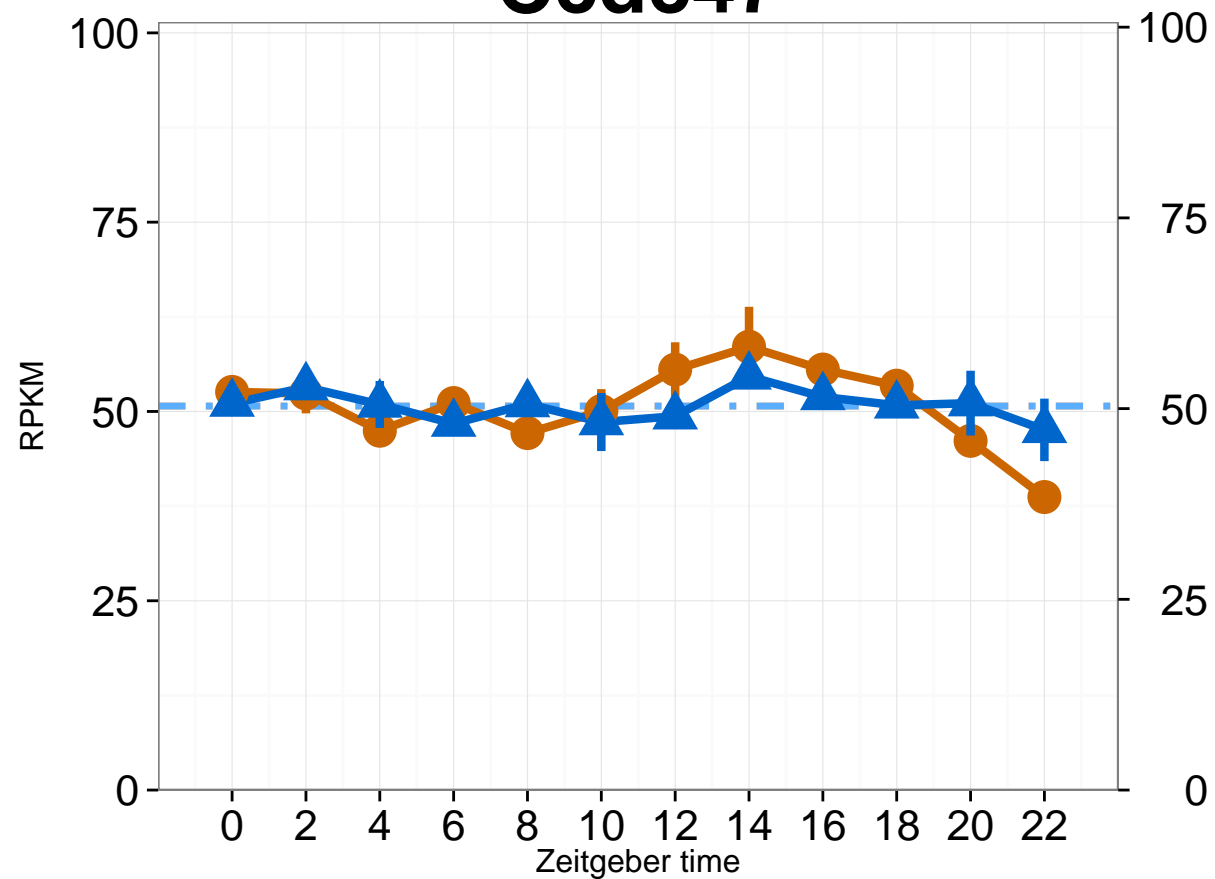

## Ccdc47

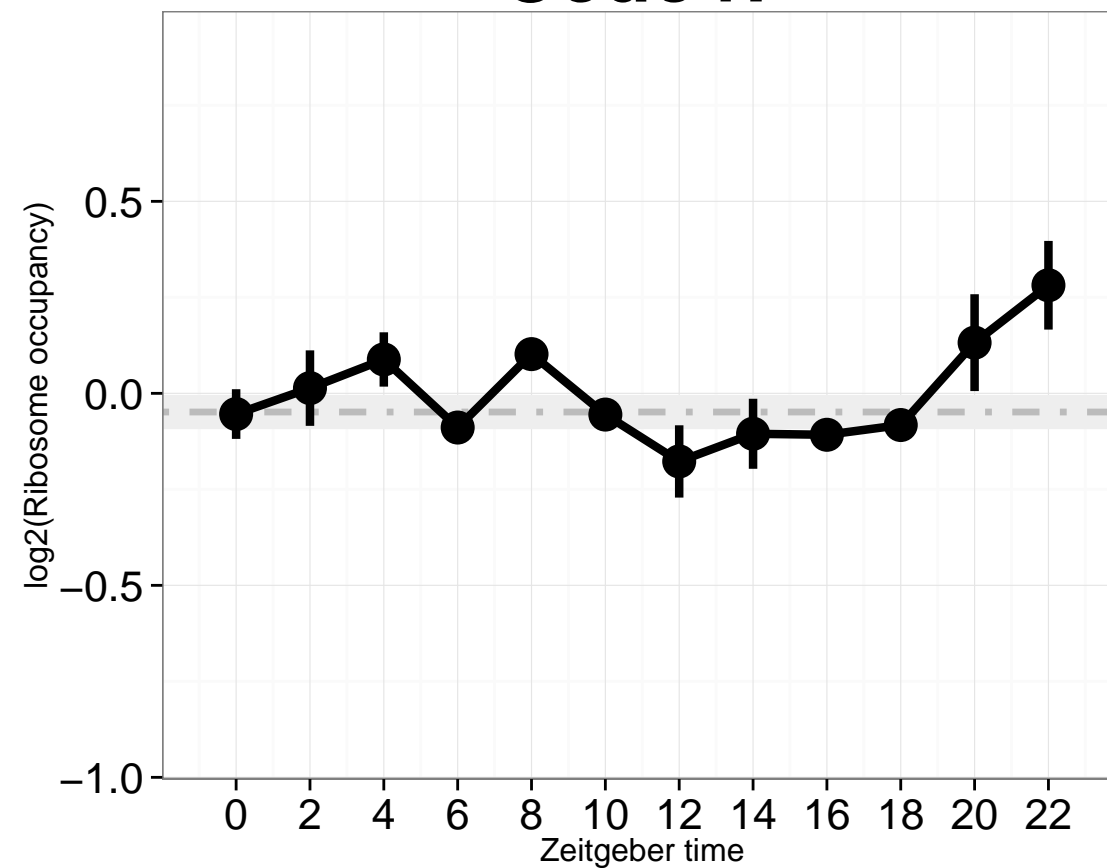

Supplement: SuppDataset_1.zip [file Ccdc47_set_A.pdf › Supplemental Dataset 1/A-mRNA_nonrhyth_translation_nonrhyth/Ccdc47_set_A.pdf]

## Ccdc50

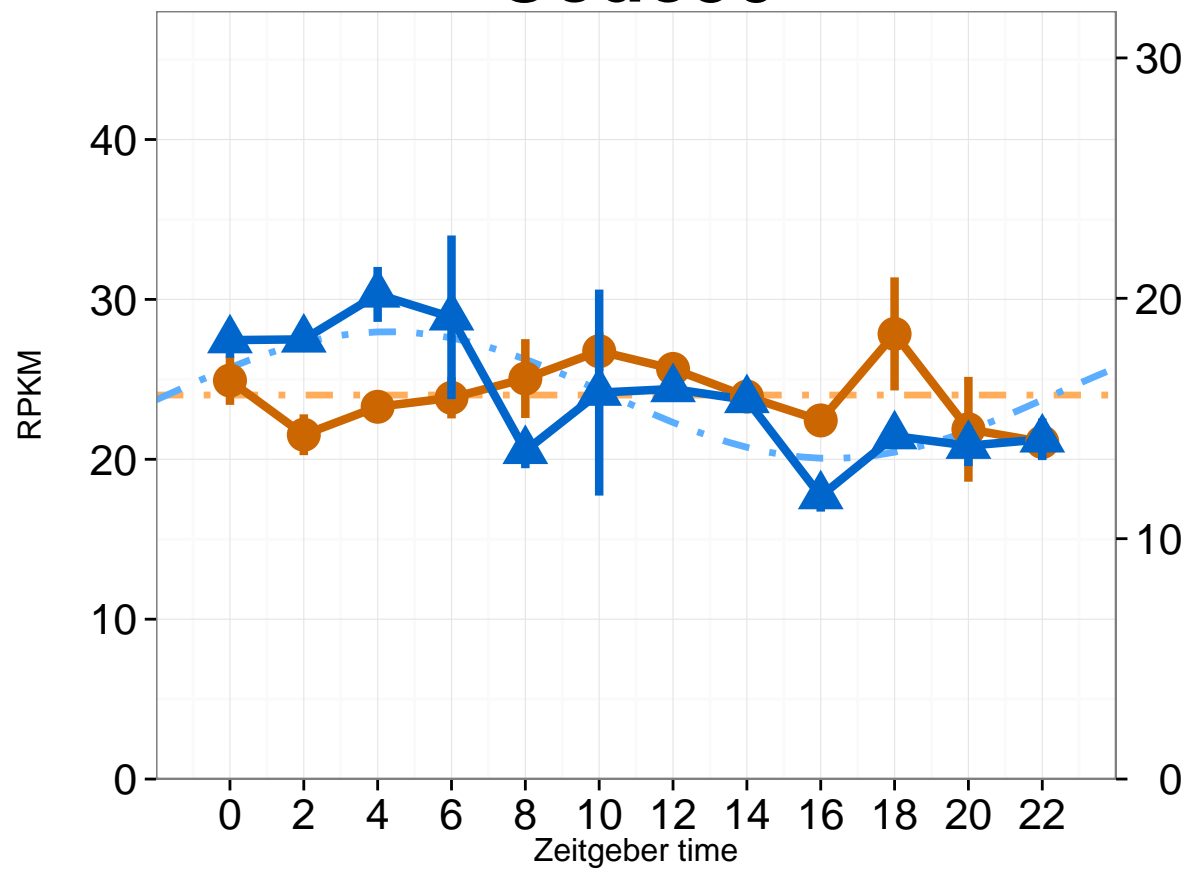

## Ccdc50

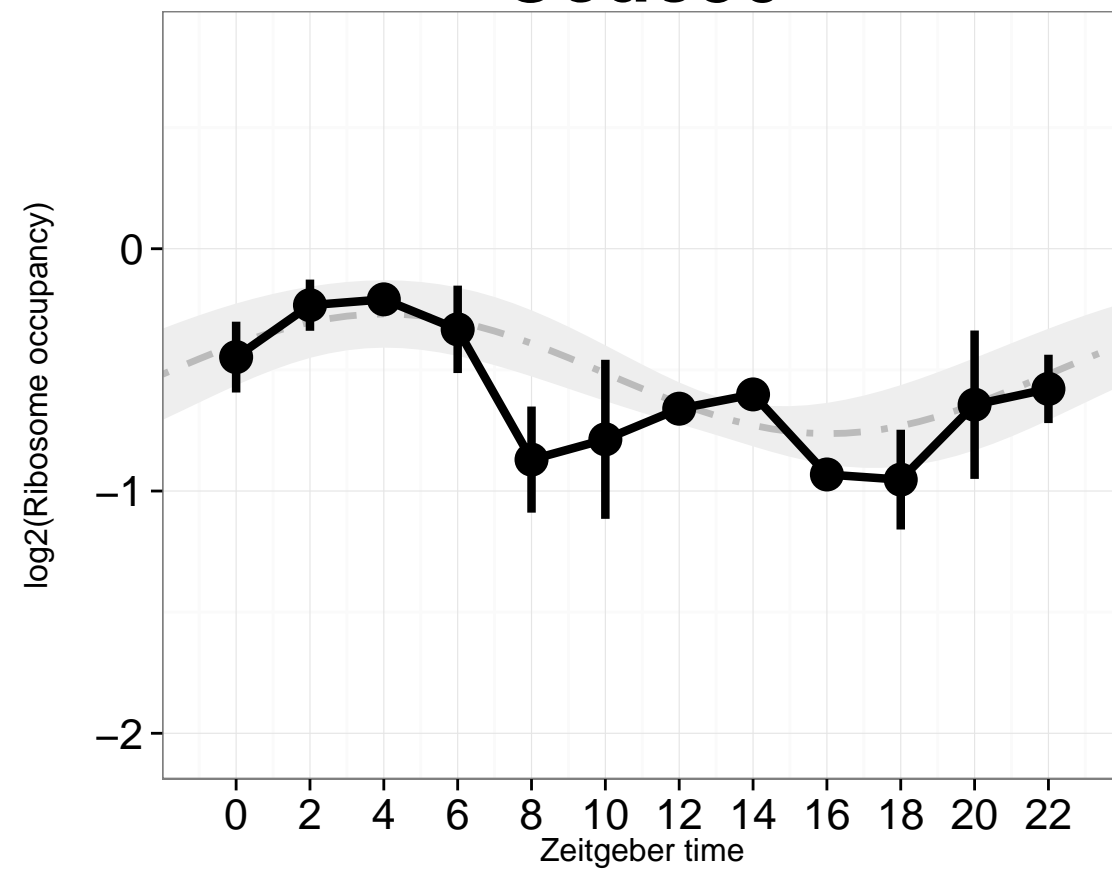

Supplement: SuppDataset_1.zip [file Ccdc50_set_A.pdf › Supplemental Dataset 1/A-mRNA_nonrhyth_translation_nonrhyth/Ccdc50_set_A.pdf]

## Ccdc51

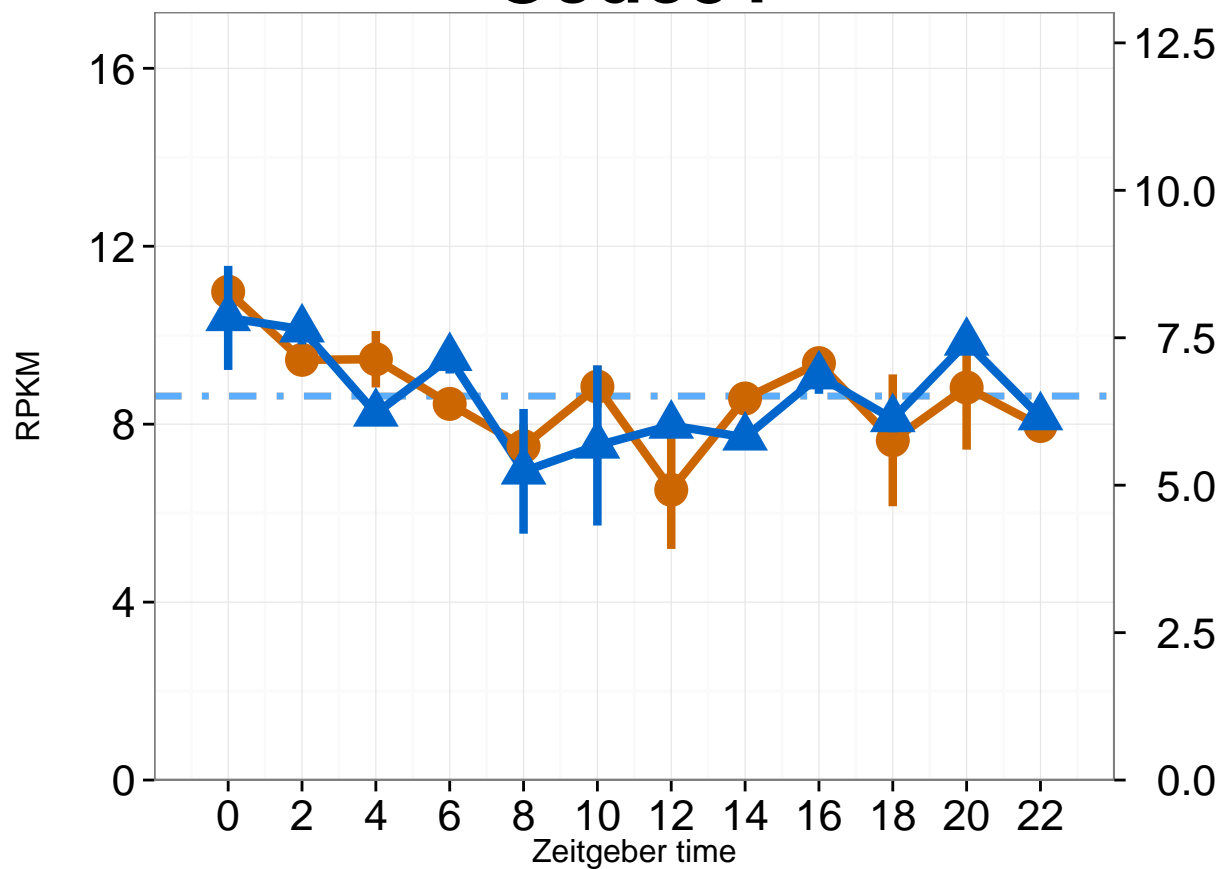

## Ccdc51

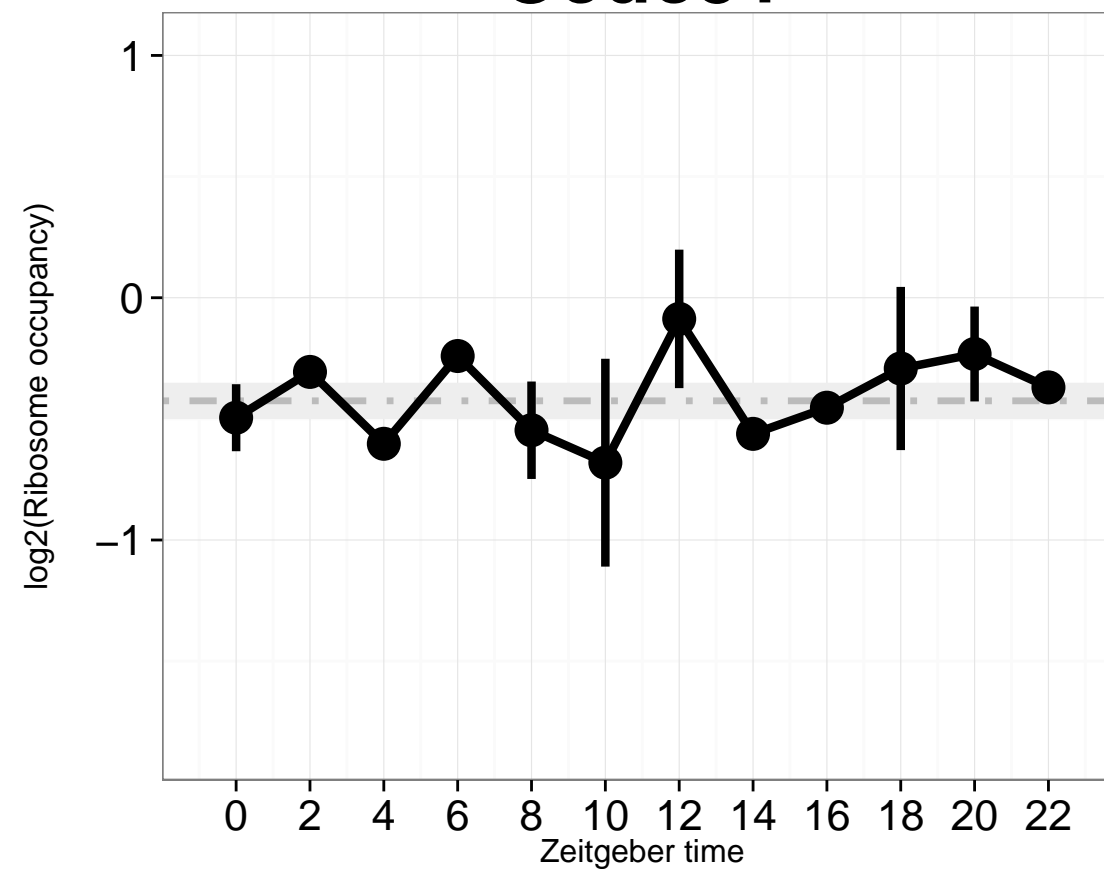

Supplement: SuppDataset_1.zip [file Ccdc51_set_A.pdf › Supplemental Dataset 1/A-mRNA_nonrhyth_translation_nonrhyth/Ccdc51_set_A.pdf]

## Ccdc53

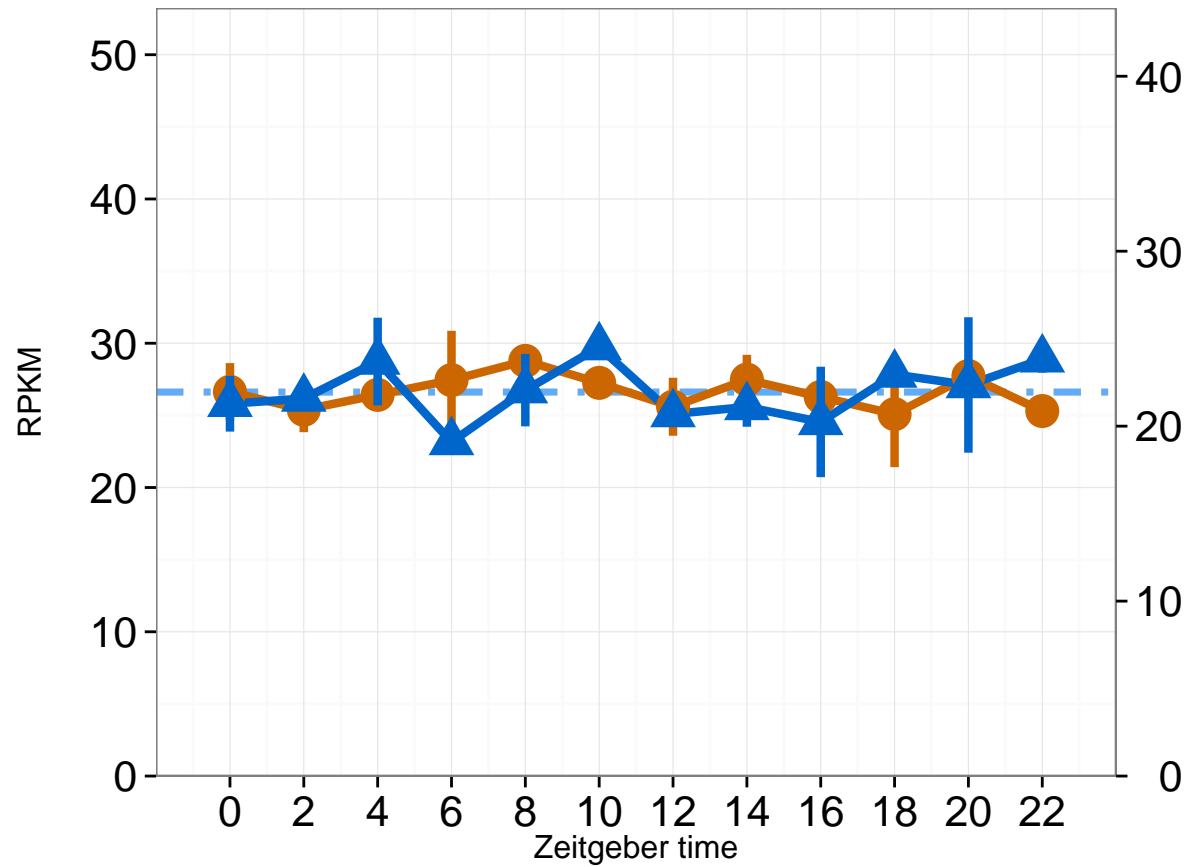

## Ccdc53

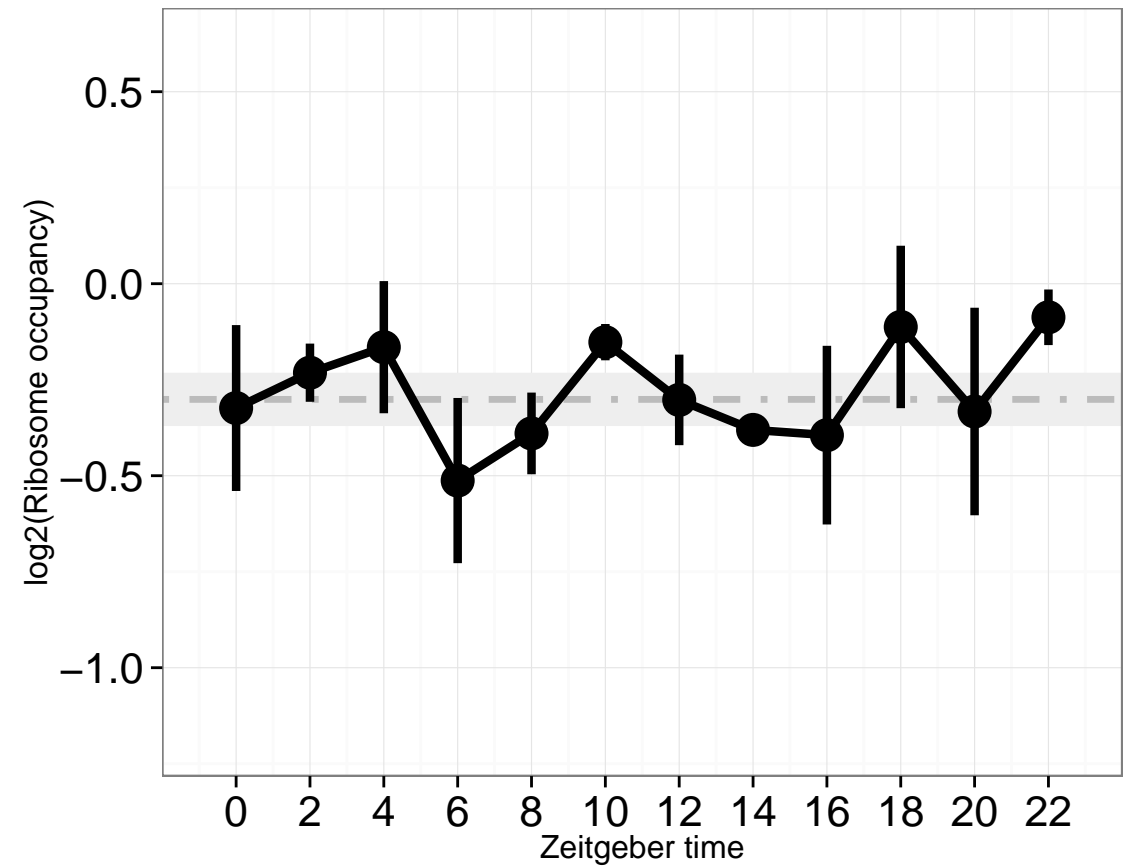

Supplement: SuppDataset_1.zip [file Ccdc53_set_A.pdf › Supplemental Dataset 1/A-mRNA_nonrhyth_translation_nonrhyth/Ccdc53_set_A.pdf]

## Ccdc55

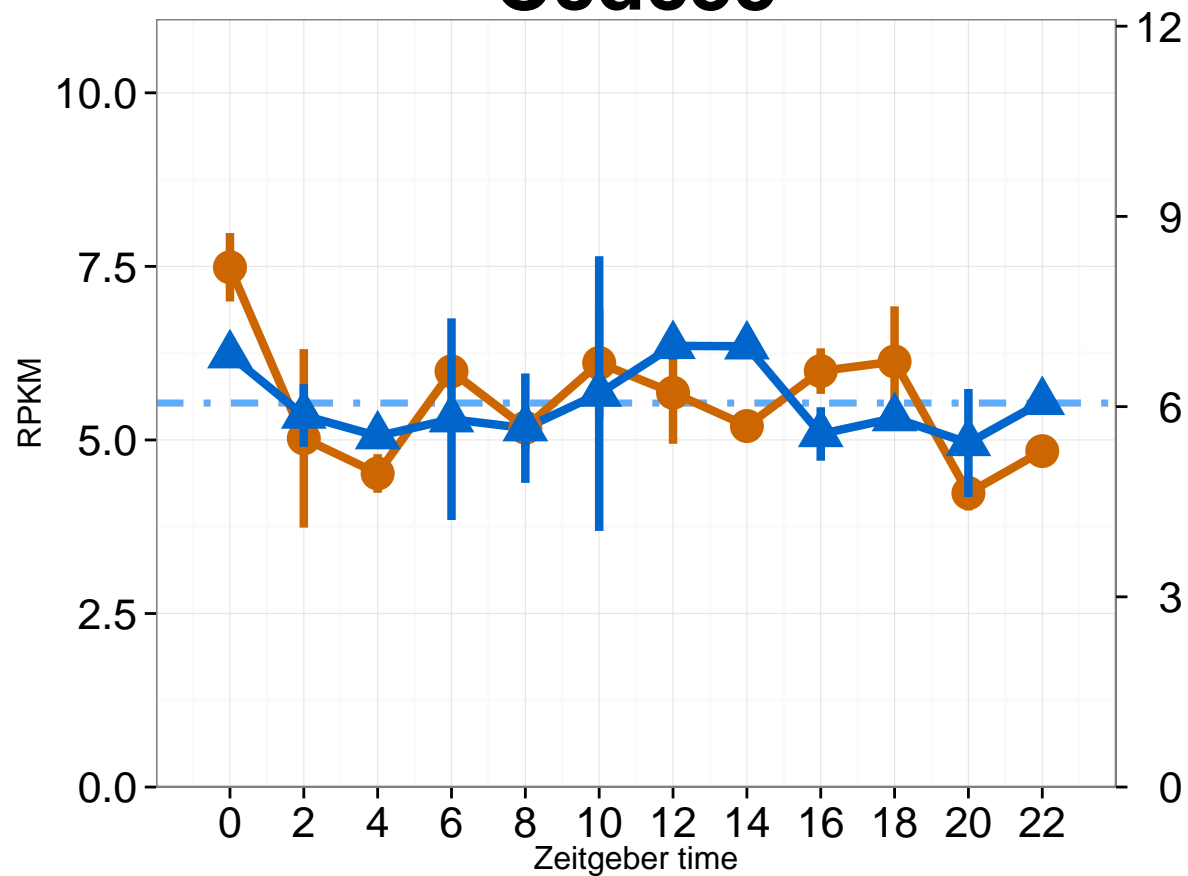

## Ccdc55

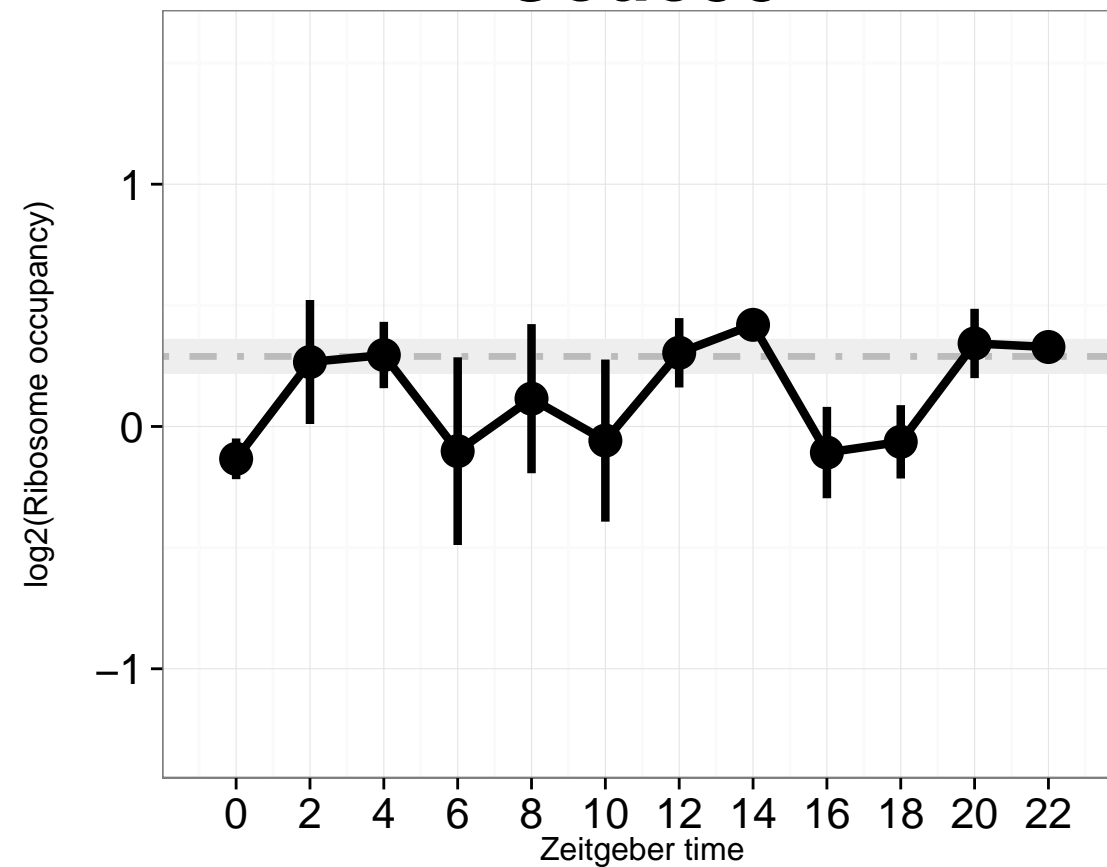

Supplement: SuppDataset_1.zip [file Ccdc55_set_A.pdf › Supplemental Dataset 1/A-mRNA_nonrhyth_translation_nonrhyth/Ccdc55_set_A.pdf]

## Ccdc58

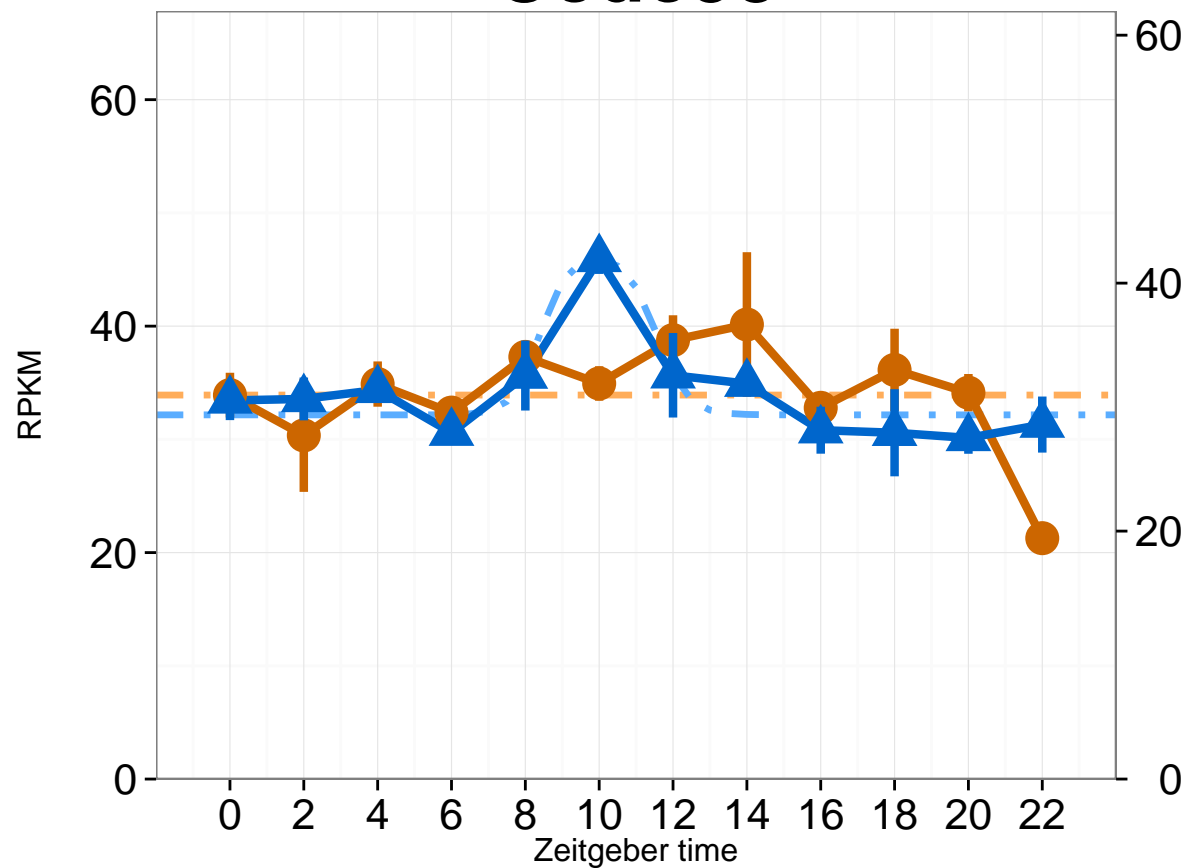

## Ccdc58

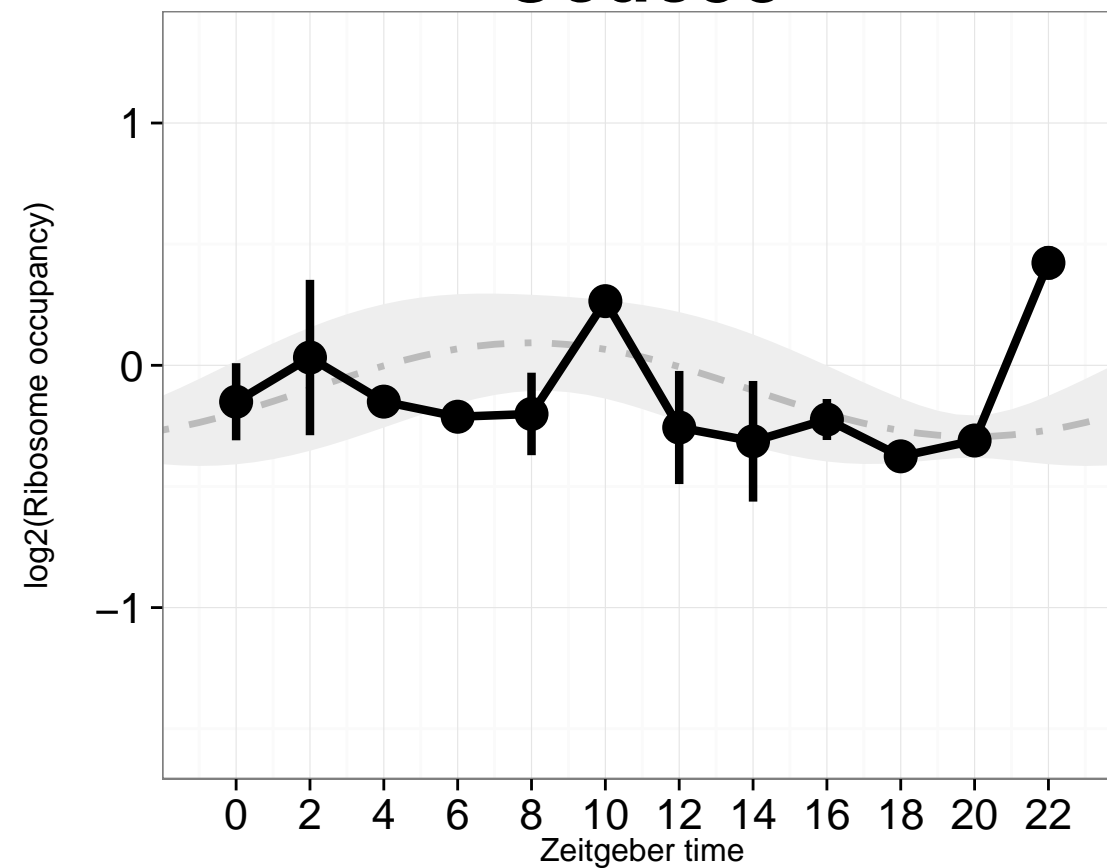

Supplement: SuppDataset_1.zip [file Ccdc58_set_A.pdf › Supplemental Dataset 1/A-mRNA_nonrhyth_translation_nonrhyth/Ccdc58_set_A.pdf]

## Ccdc59

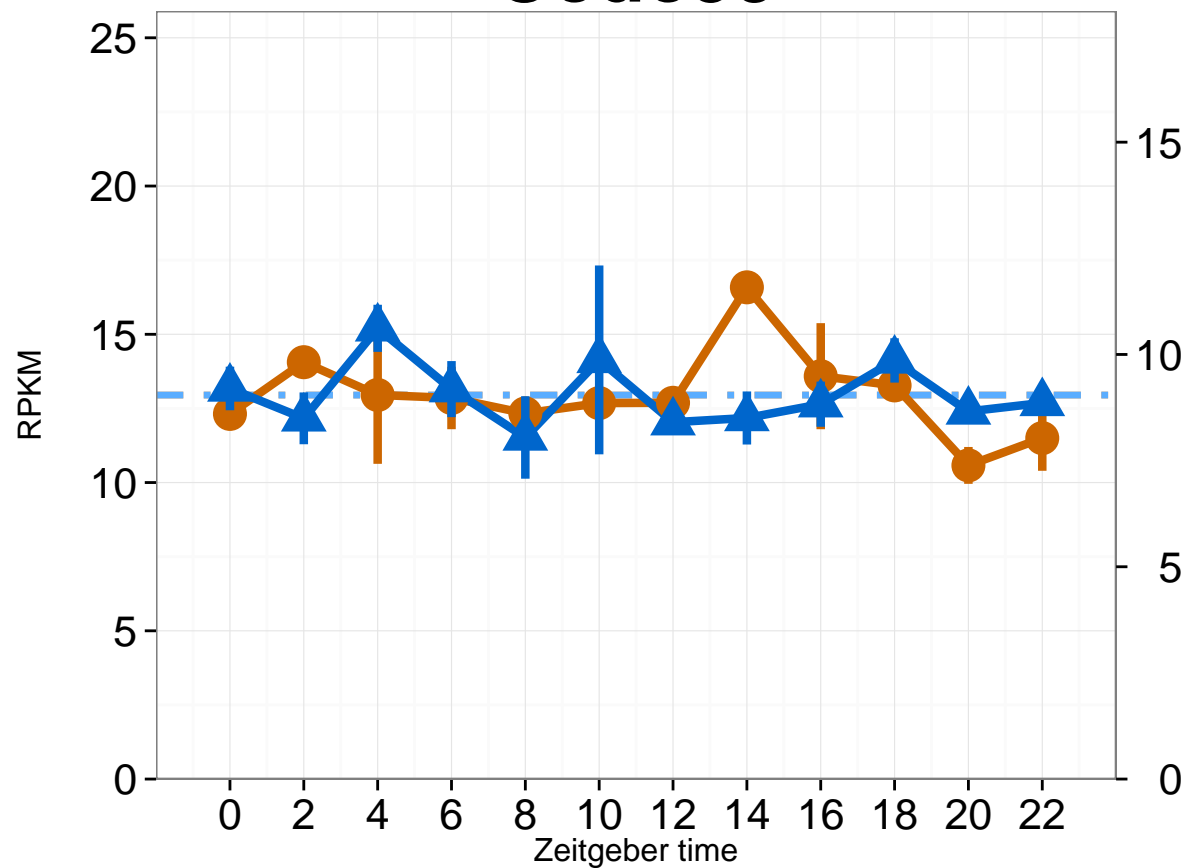

## Ccdc59

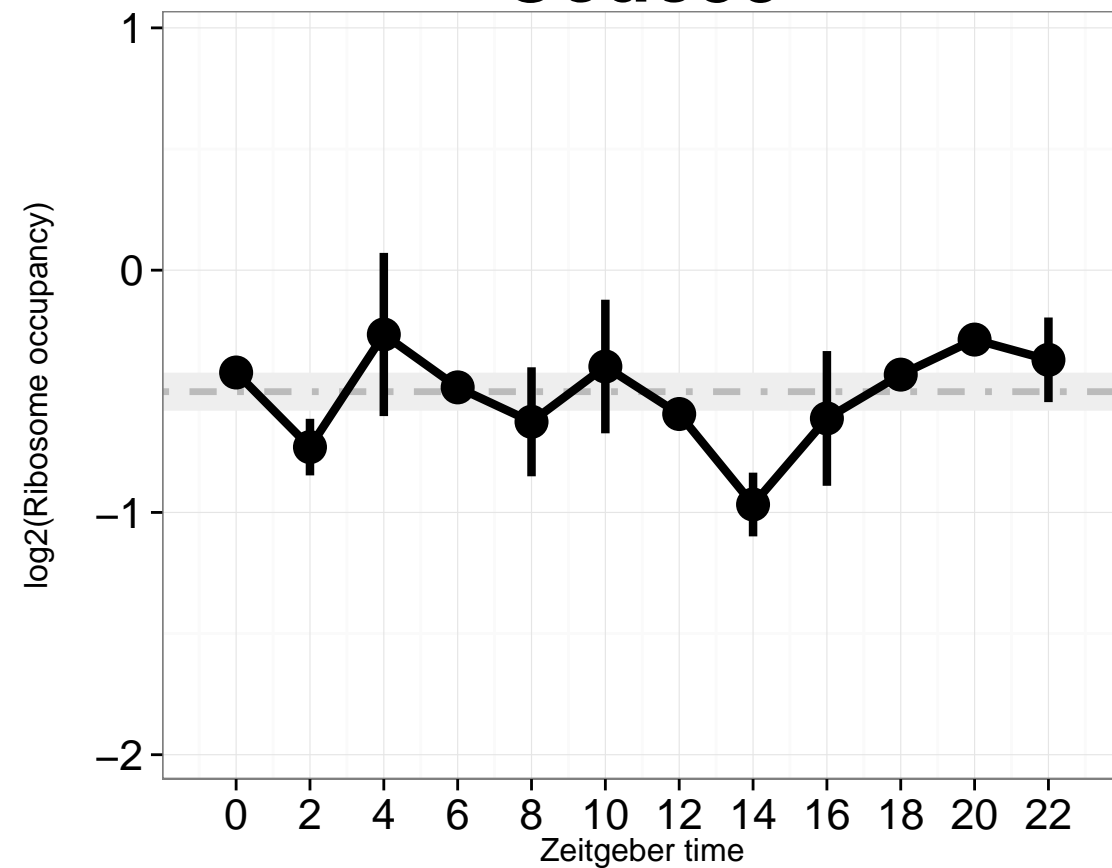

Supplement: SuppDataset_1.zip [file Ccdc59_set_A.pdf › Supplemental Dataset 1/A-mRNA_nonrhyth_translation_nonrhyth/Ccdc59_set_A.pdf]

## Ccdc68

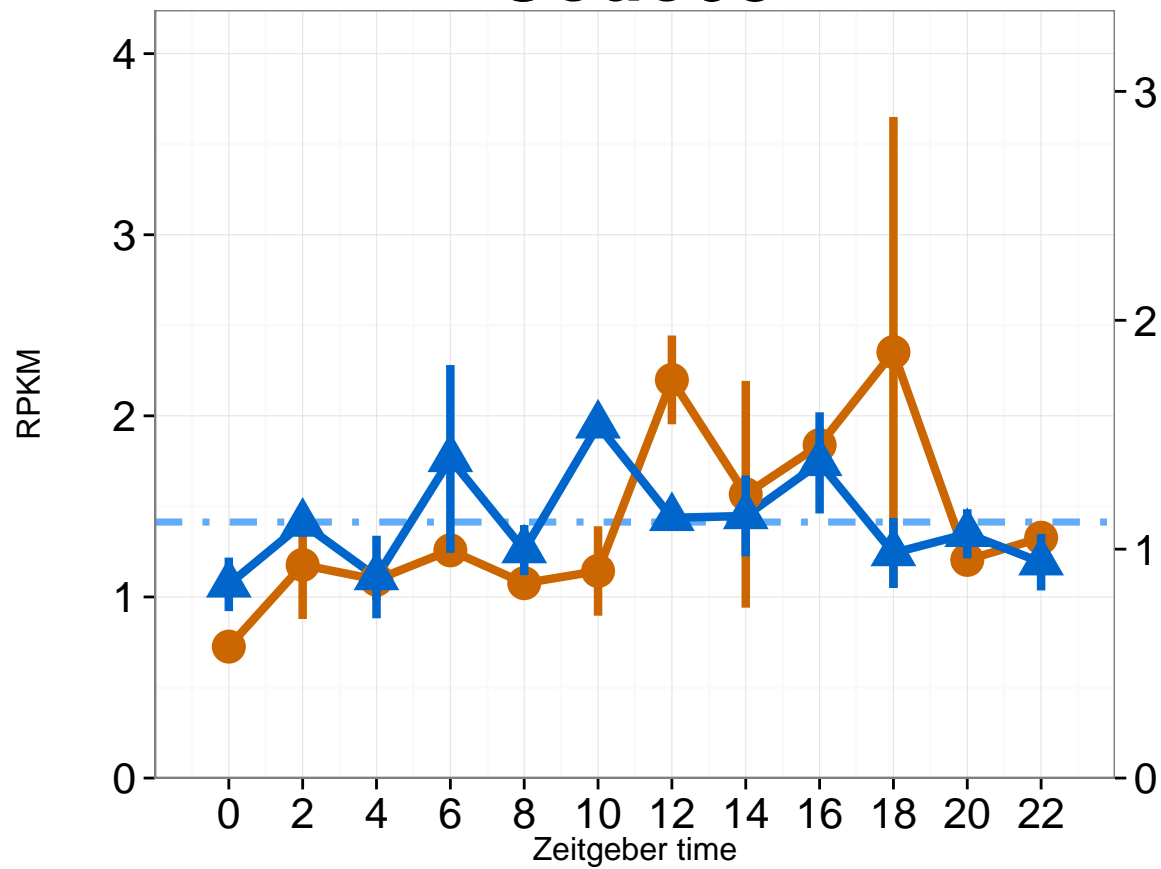

## Ccdc68

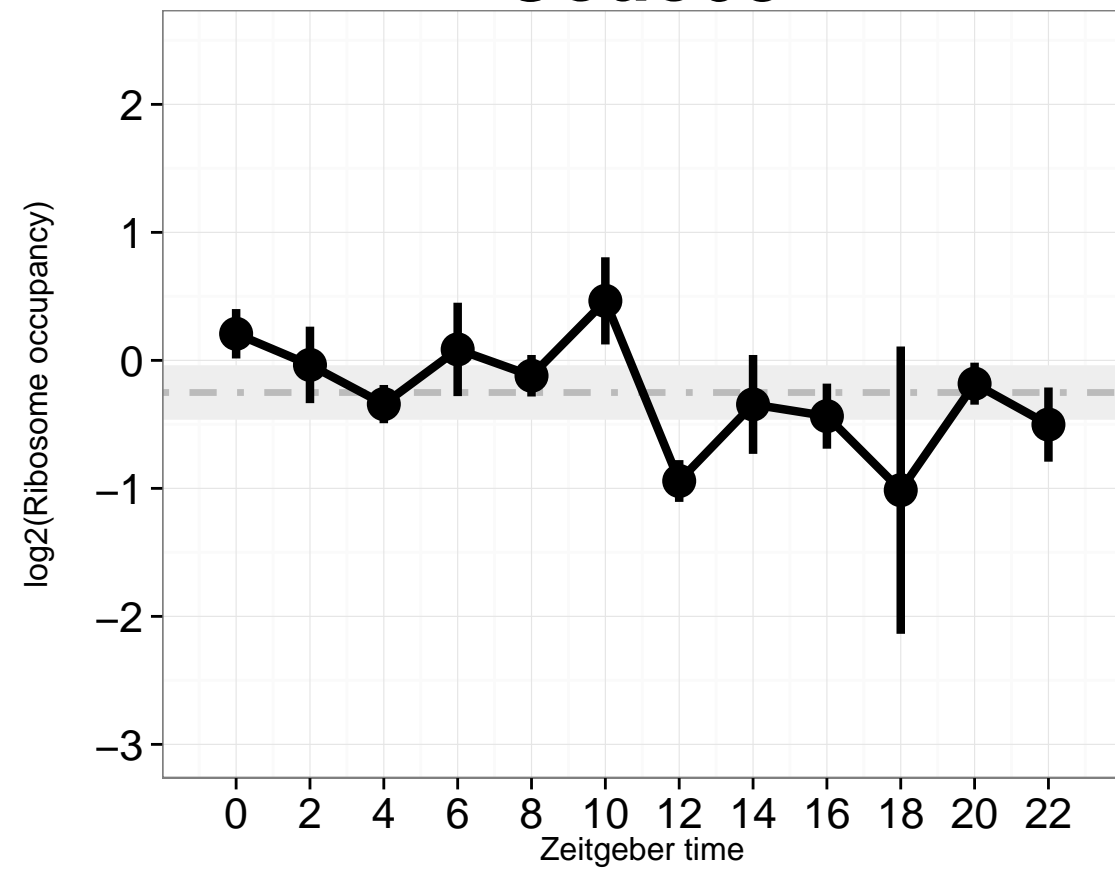

Supplement: SuppDataset_1.zip [file Ccdc68_set_A.pdf › Supplemental Dataset 1/A-mRNA_nonrhyth_translation_nonrhyth/Ccdc68_set_A.pdf]

## Ccdc6

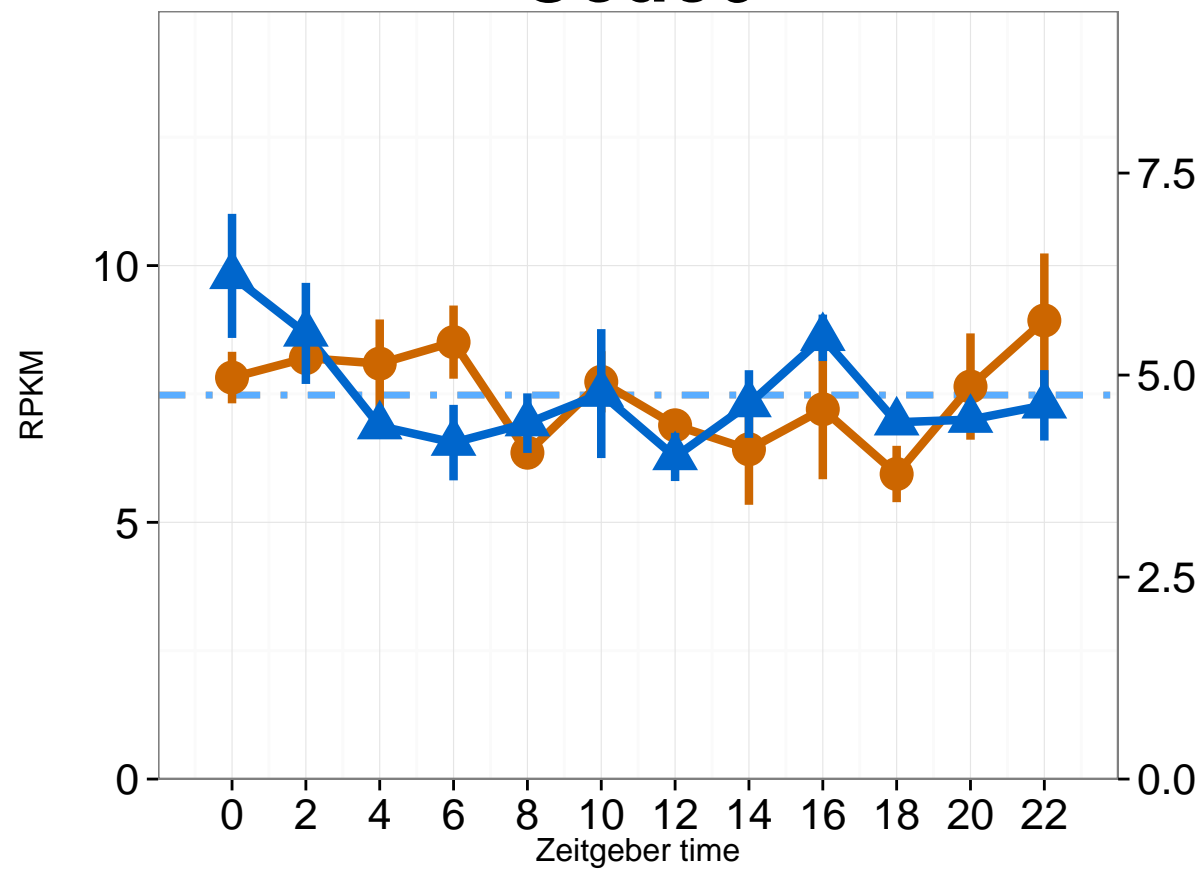

## Ccdc6

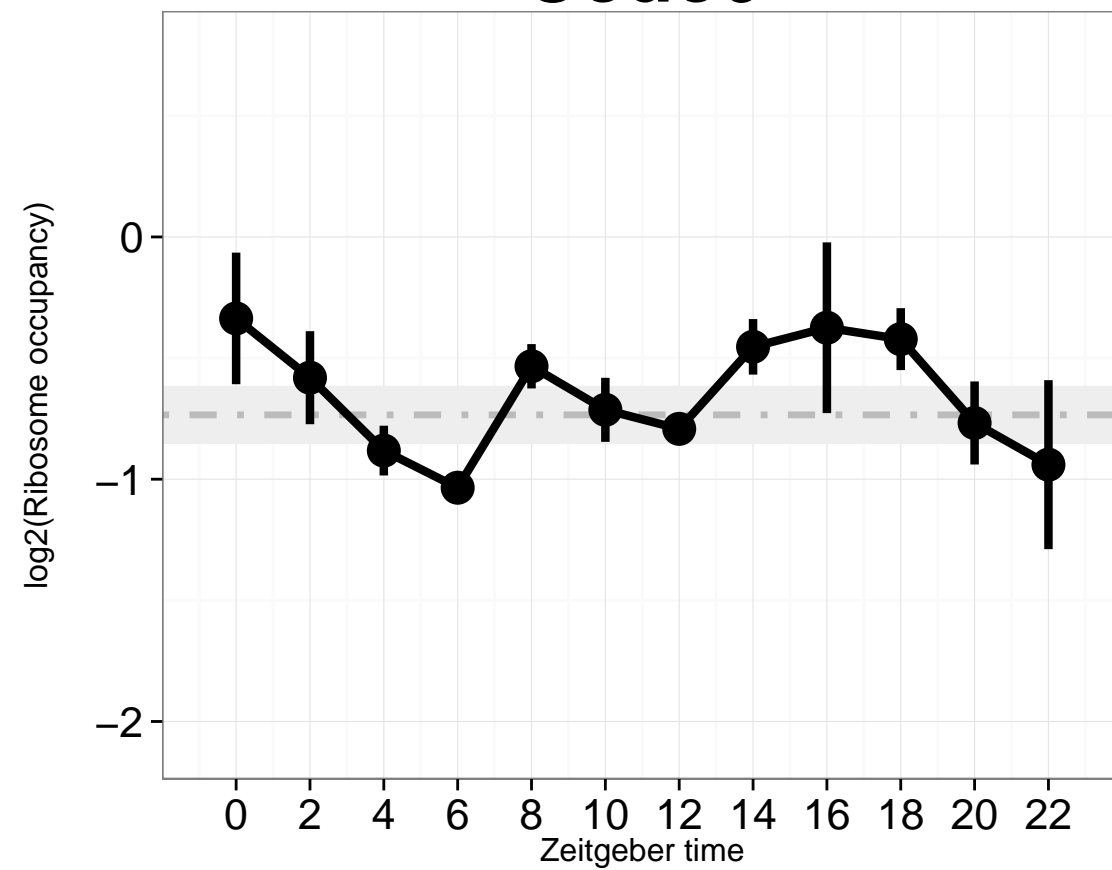

Supplement: SuppDataset_1.zip [file Ccdc6_set_A.pdf › Supplemental Dataset 1/A-mRNA_nonrhyth_translation_nonrhyth/Ccdc6_set_A.pdf]

## Ccdc77

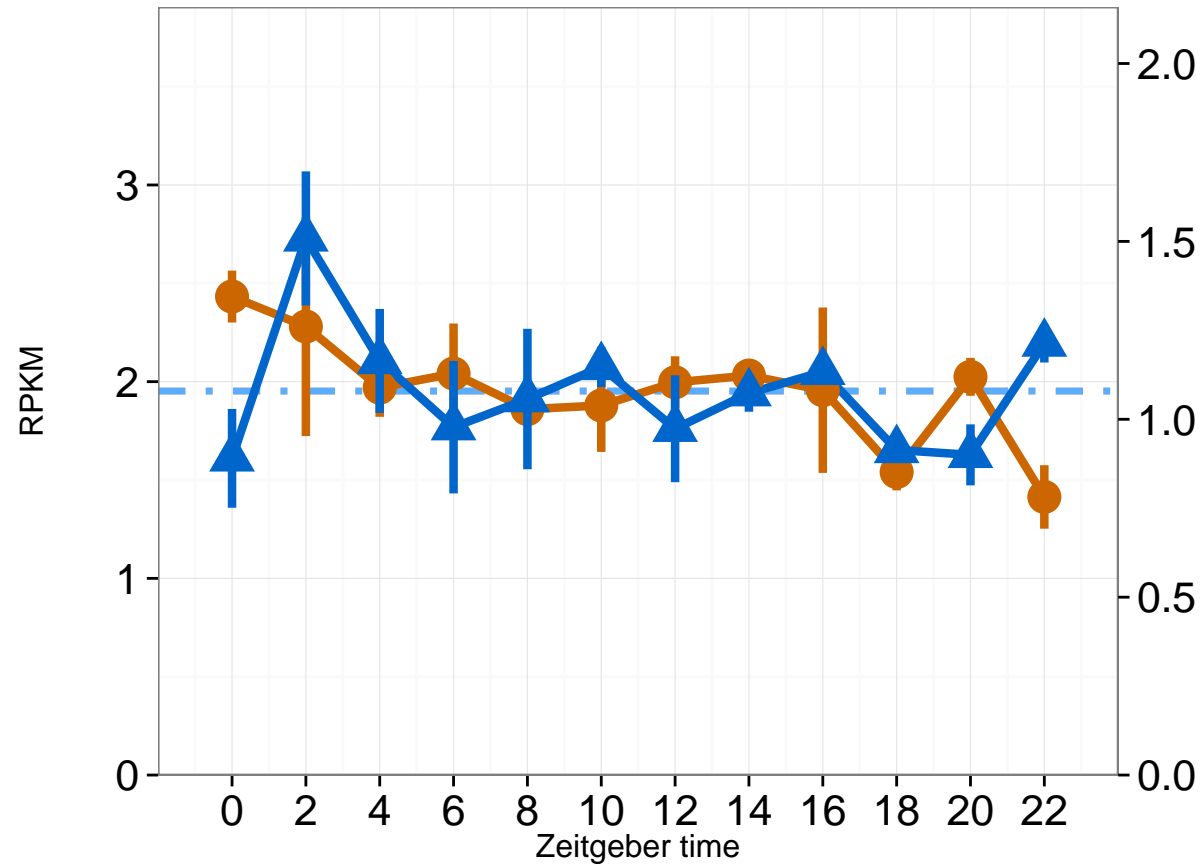

## Ccdc77

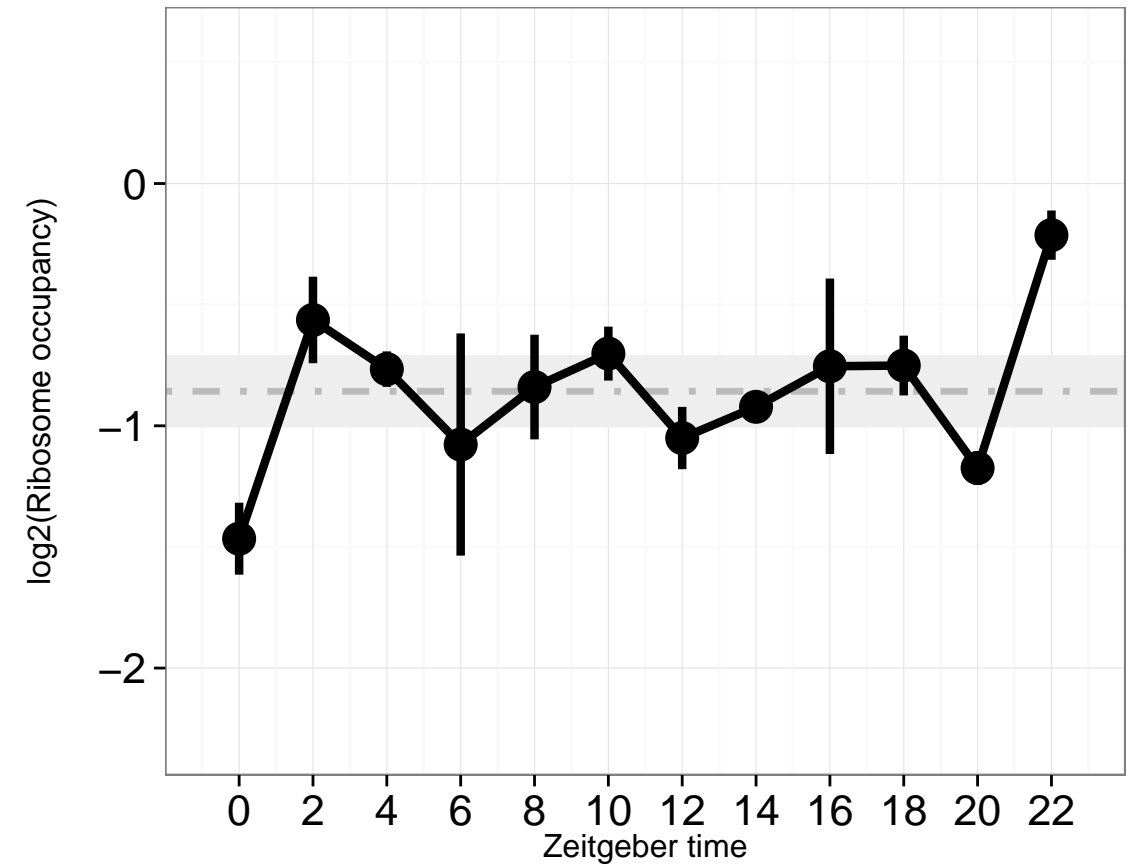

Supplement: SuppDataset_1.zip [file Ccdc77_set_A.pdf › Supplemental Dataset 1/A-mRNA_nonrhyth_translation_nonrhyth/Ccdc77_set_A.pdf]

## Ccdc80

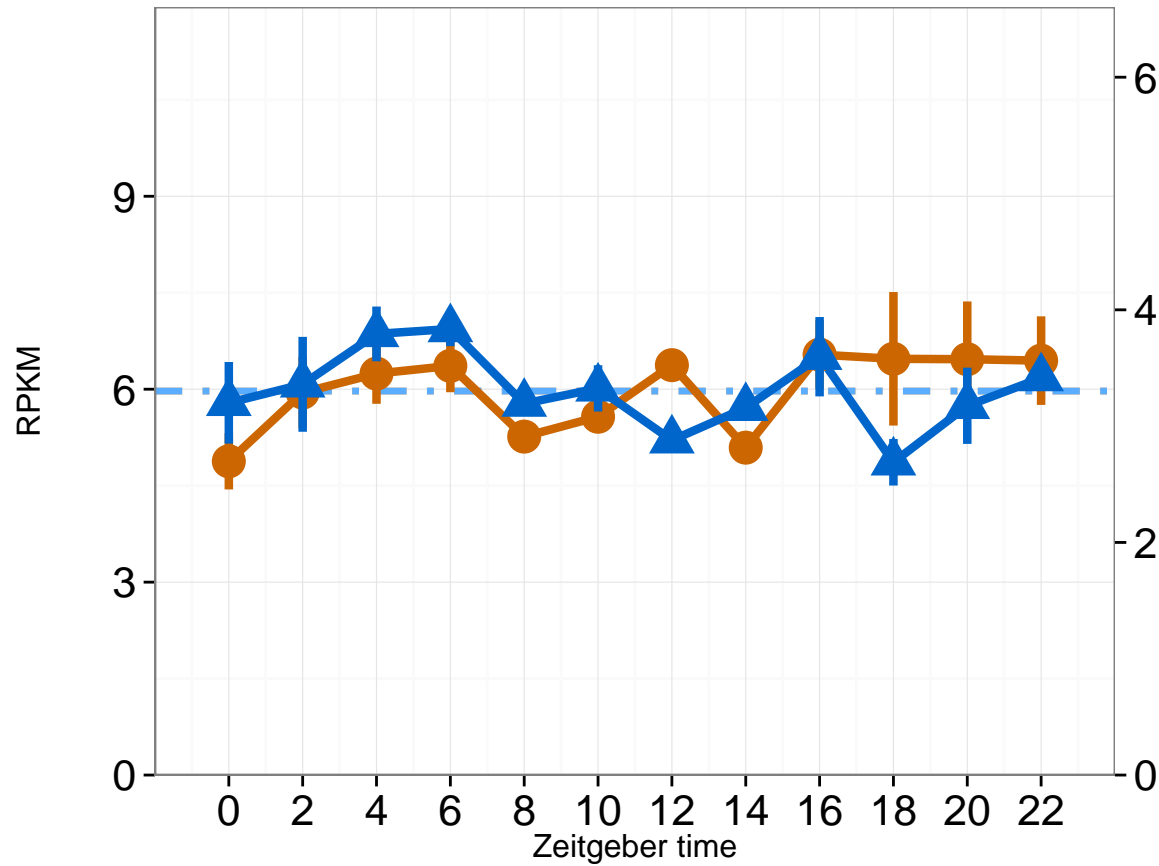

## Ccdc80

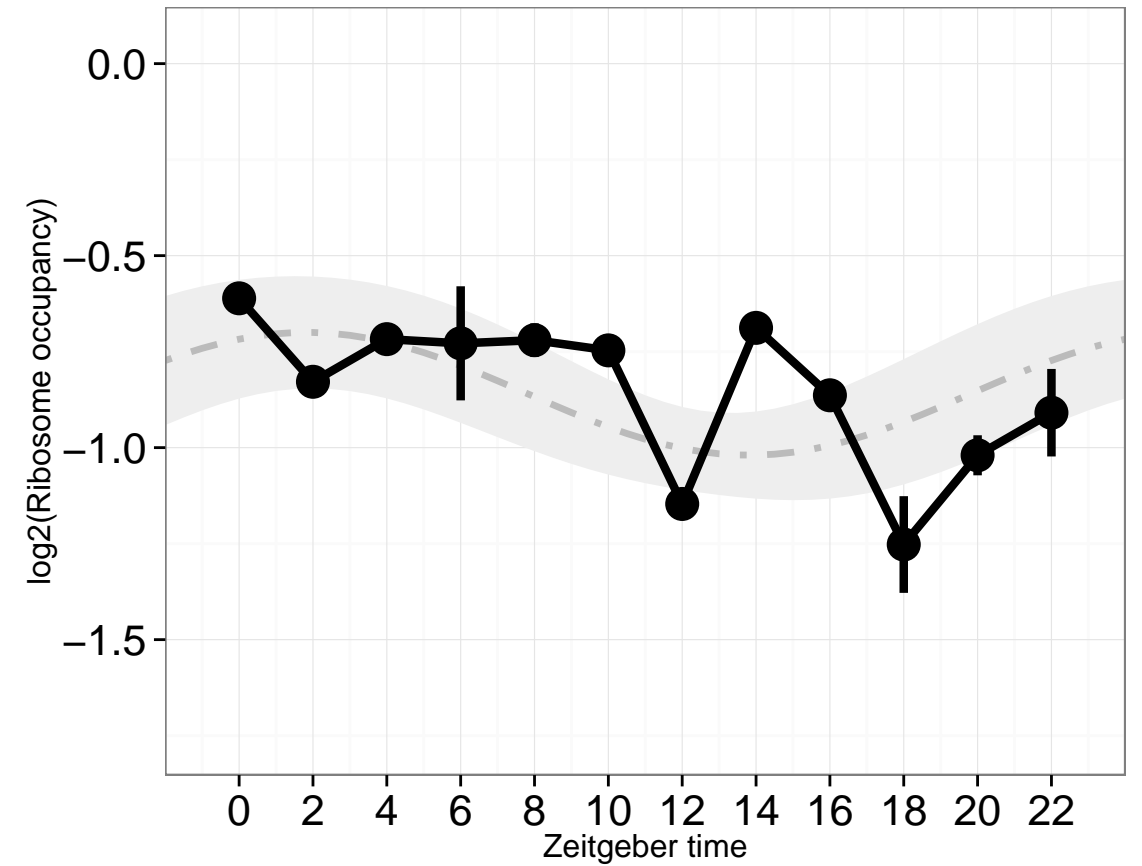

Supplement: SuppDataset_1.zip [file Ccdc80_set_A.pdf › Supplemental Dataset 1/A-mRNA_nonrhyth_translation_nonrhyth/Ccdc80_set_A.pdf]

## Ccdc82

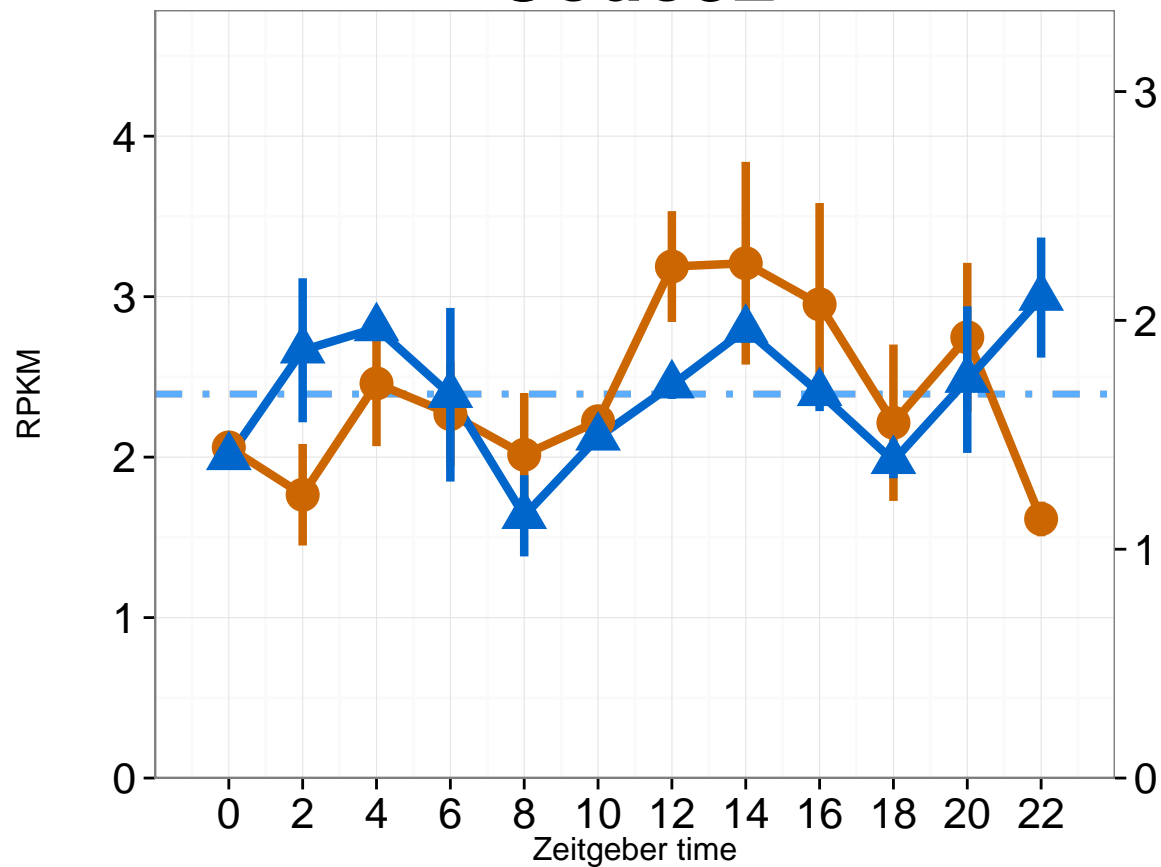

## Ccdc82

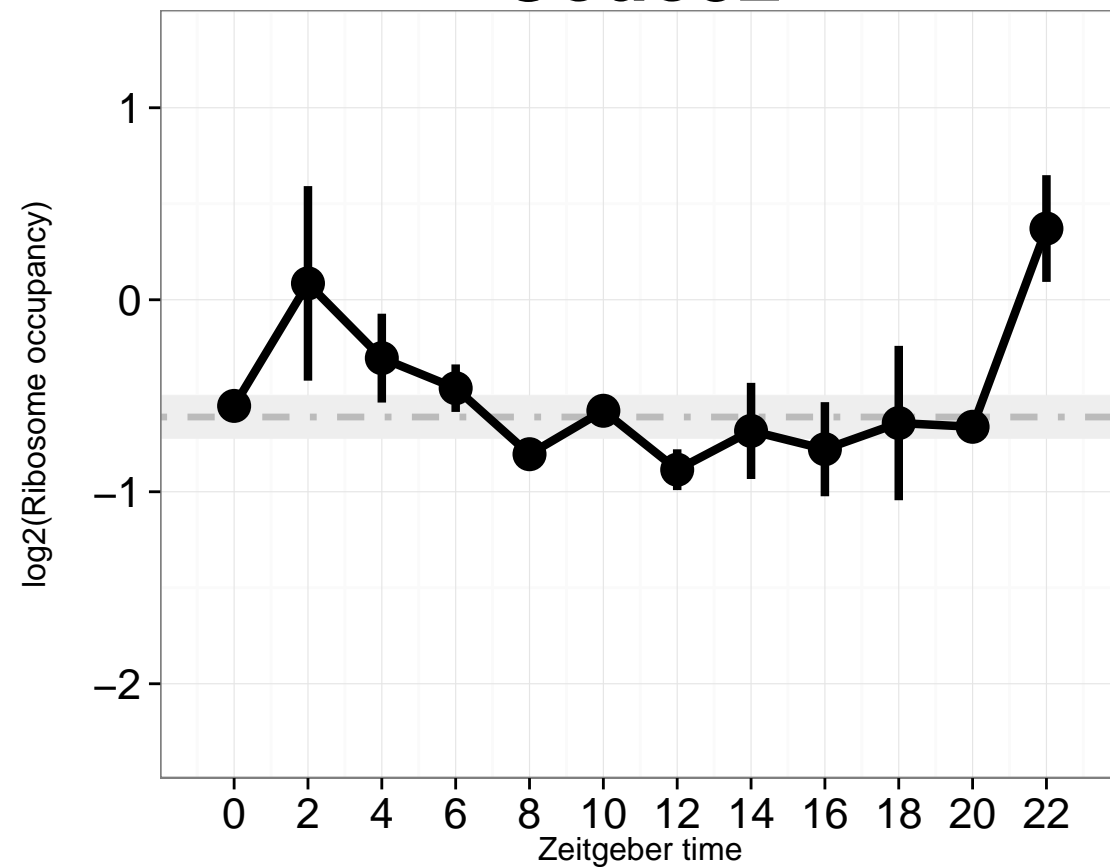

Supplement: SuppDataset_1.zip [file Ccdc82_set_A.pdf › Supplemental Dataset 1/A-mRNA_nonrhyth_translation_nonrhyth/Ccdc82_set_A.pdf]

## Ccdc84

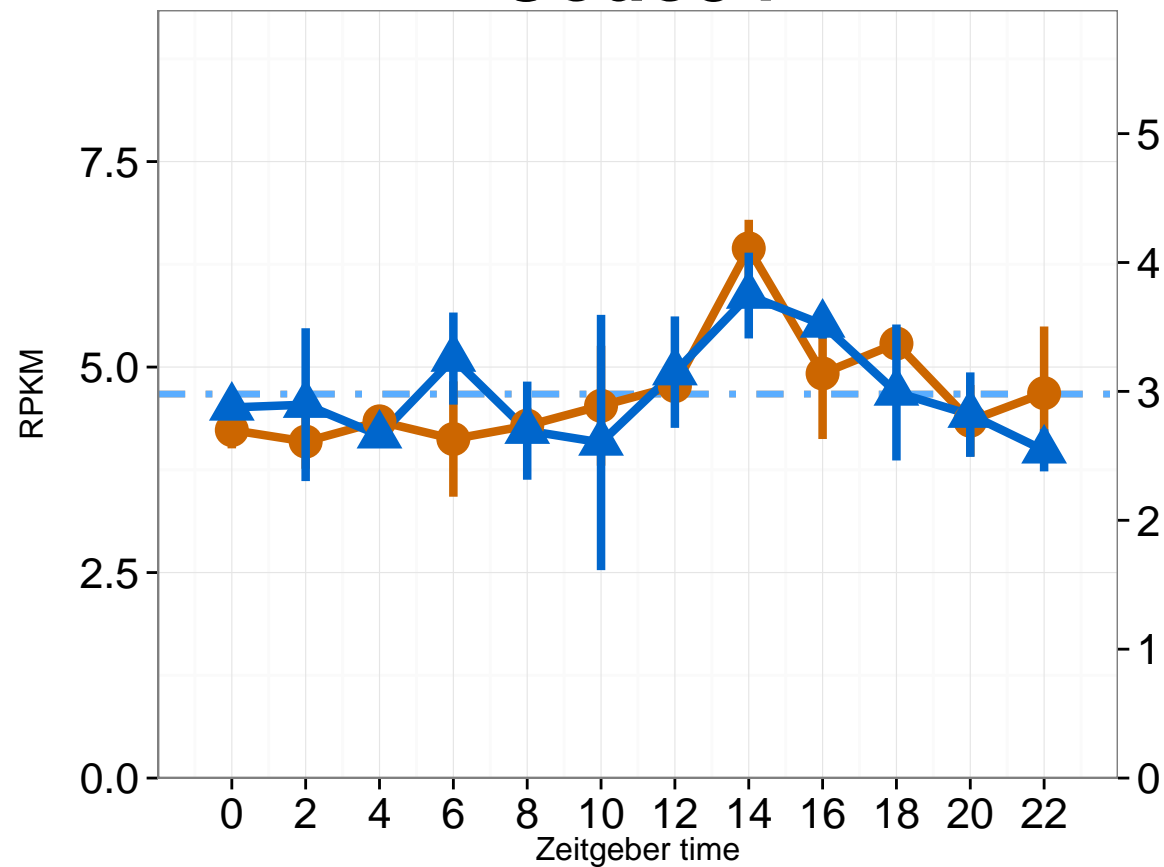

## Ccdc84

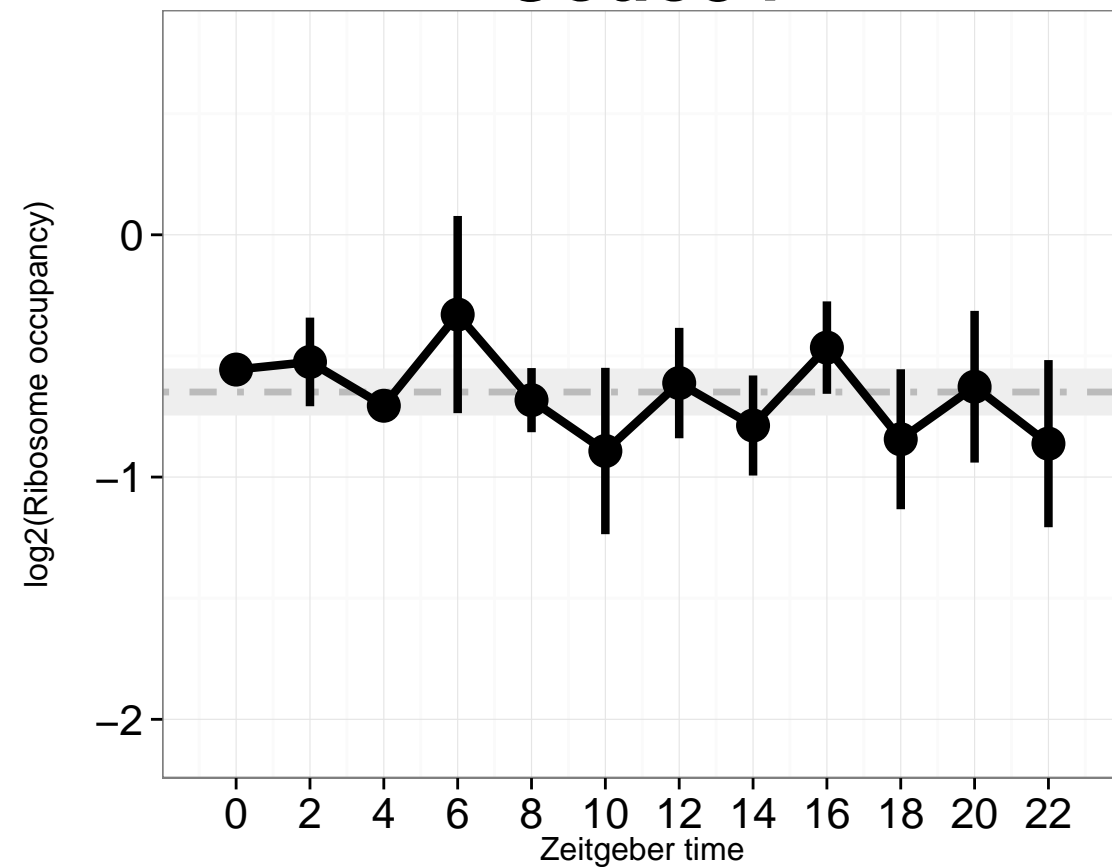

Supplement: SuppDataset_1.zip [file Ccdc84_set_A.pdf › Supplemental Dataset 1/A-mRNA_nonrhyth_translation_nonrhyth/Ccdc84_set_A.pdf]

# Ccdc85b

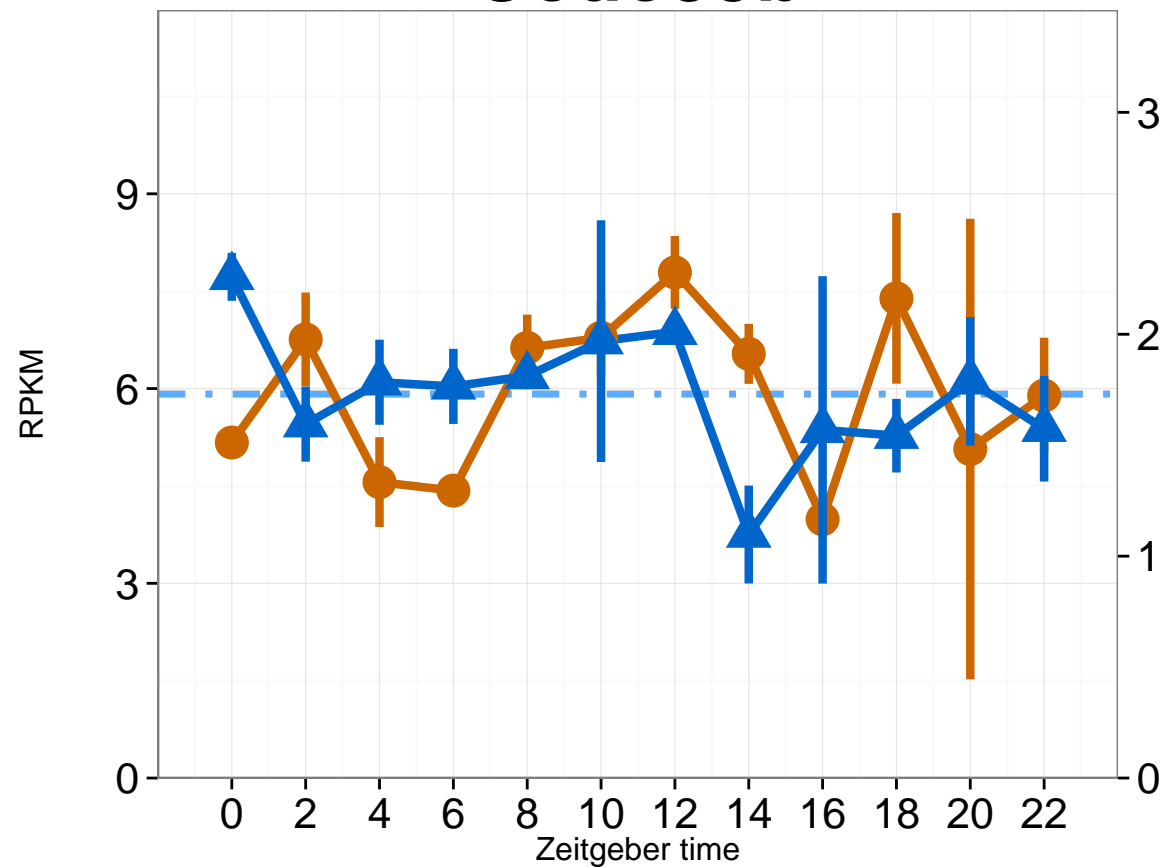

# Ccdc85b

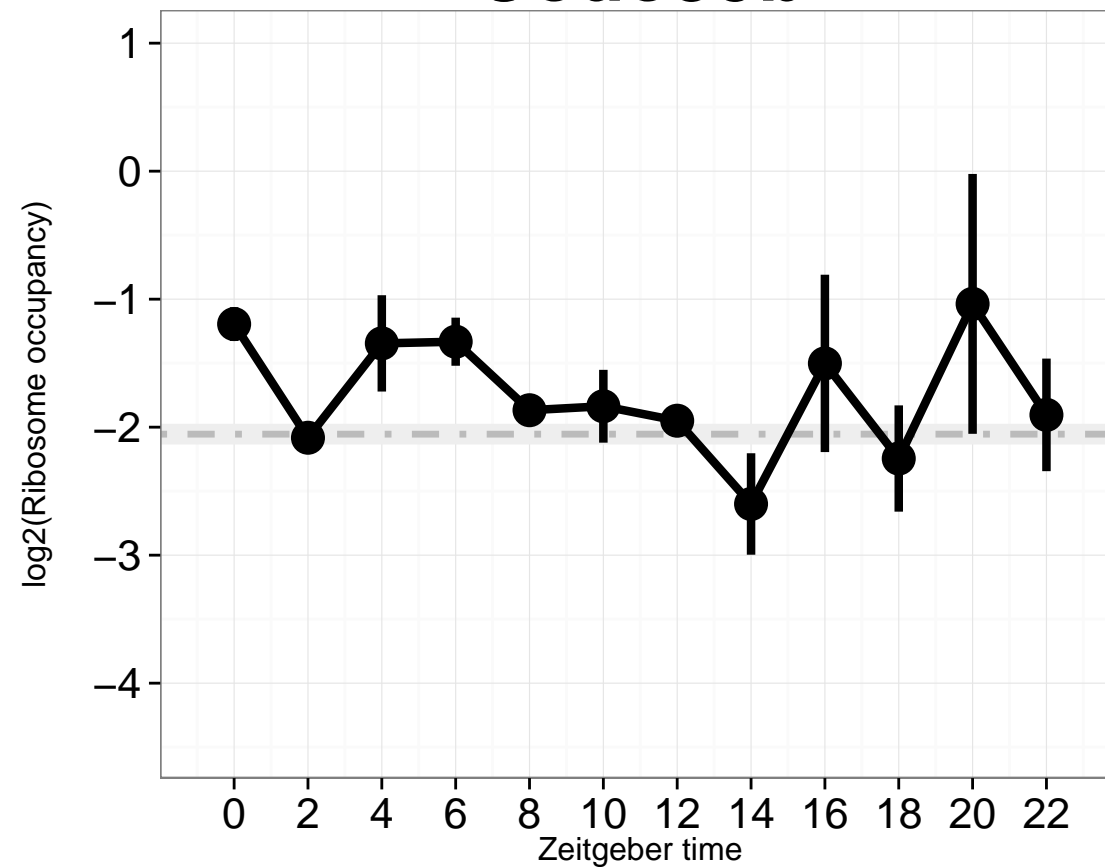

Supplement: SuppDataset_1.zip [file Ccdc85b_set_A.pdf › Supplemental Dataset 1/A-mRNA_nonrhyth_translation_nonrhyth/Ccdc85b_set_A.pdf]

## Ccdc86

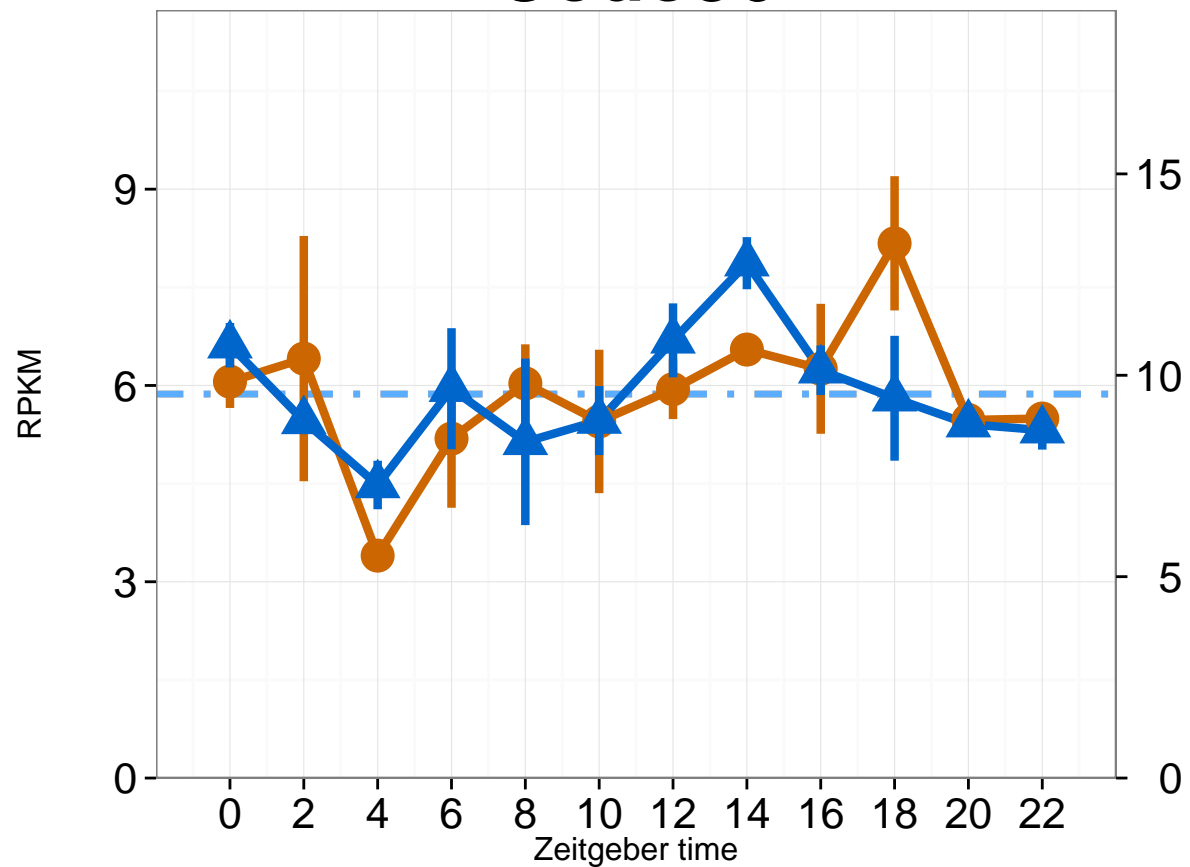

## Ccdc86

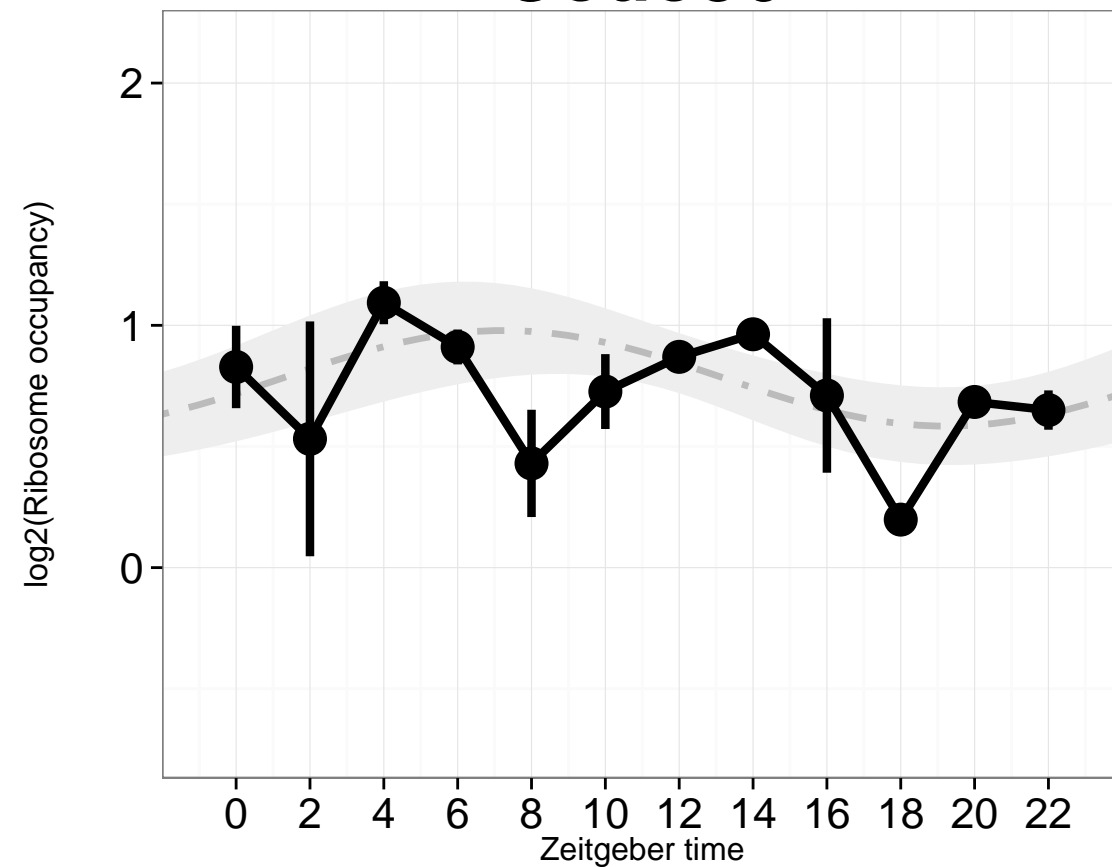

Supplement: SuppDataset_1.zip [file Ccdc86_set_A.pdf › Supplemental Dataset 1/A-mRNA_nonrhyth_translation_nonrhyth/Ccdc86_set_A.pdf]

# Ccdc88a

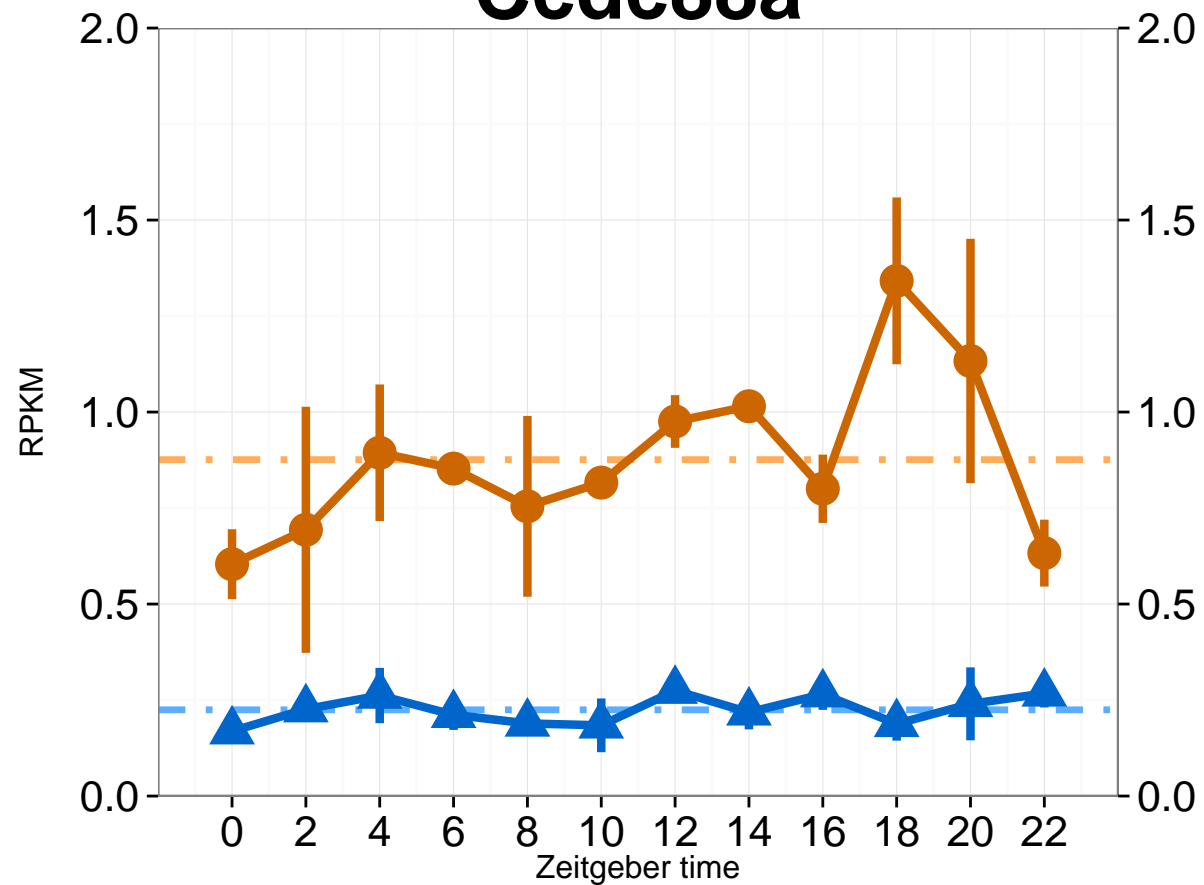

# Ccdc88a

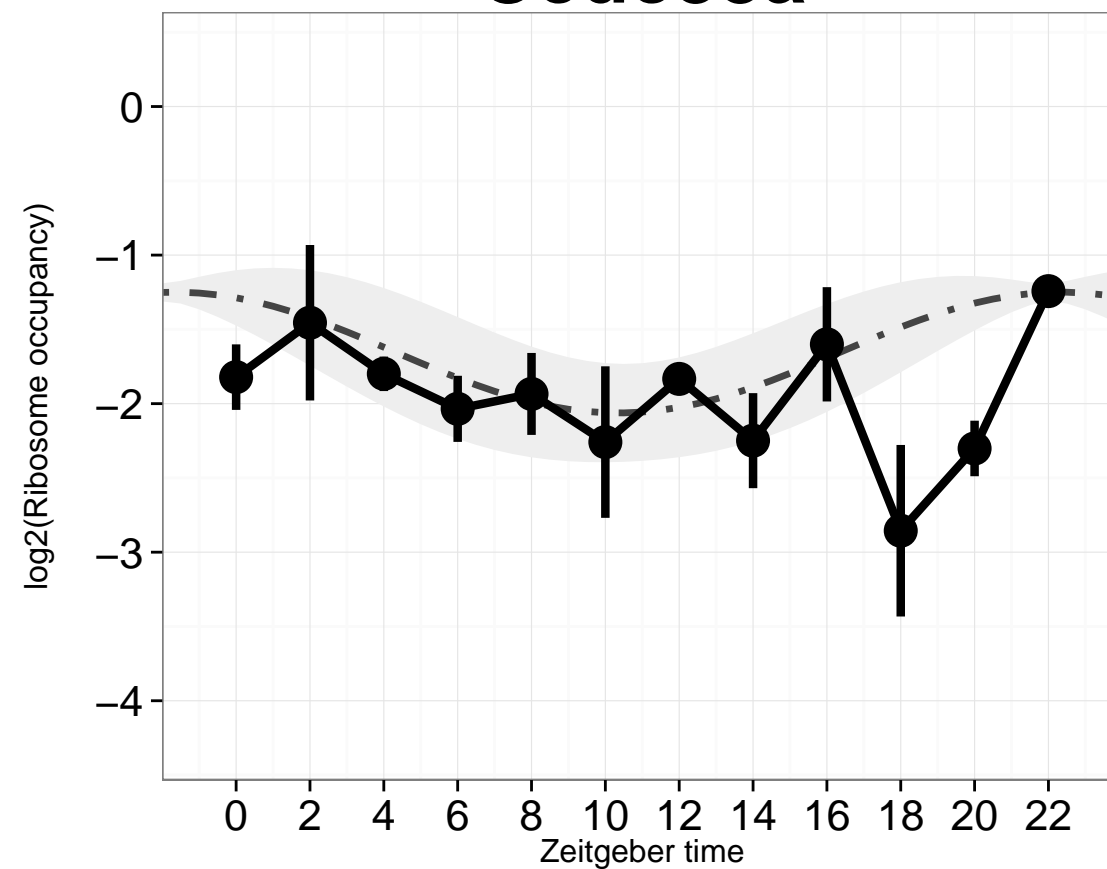

Supplement: SuppDataset_1.zip [file Ccdc88a_set_A.pdf › Supplemental Dataset 1/A-mRNA_nonrhyth_translation_nonrhyth/Ccdc88a_set_A.pdf]

# Ccdc88b

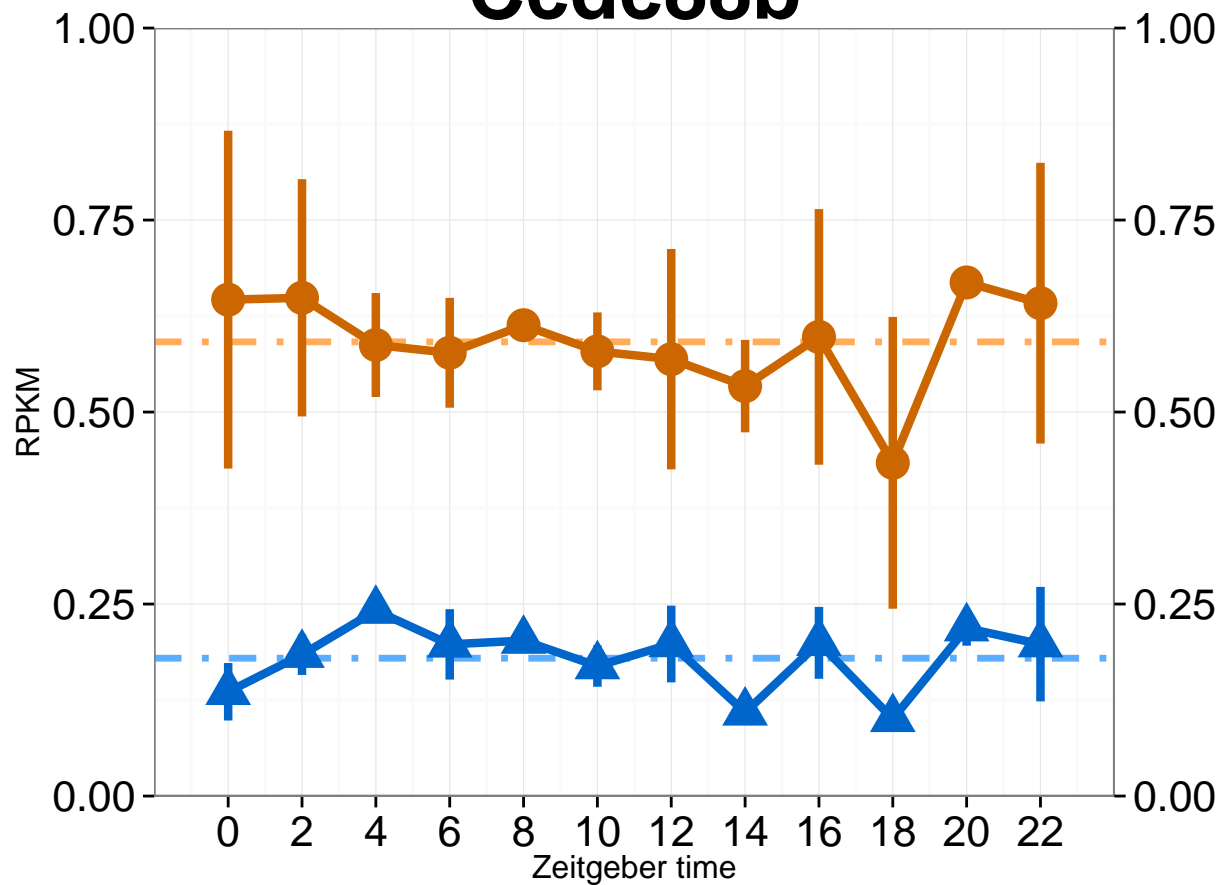

# Ccdc88b

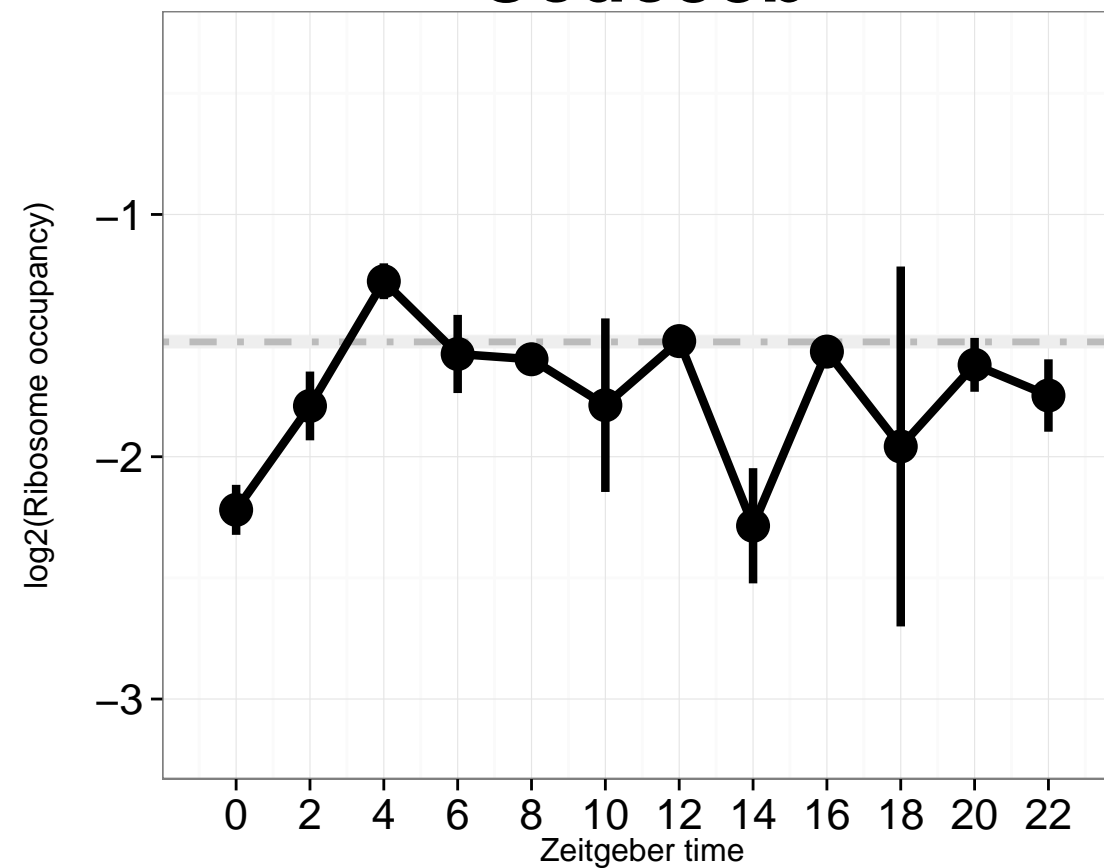

Supplement: SuppDataset_1.zip [file Ccdc88b_set_A.pdf › Supplemental Dataset 1/A-mRNA_nonrhyth_translation_nonrhyth/Ccdc88b_set_A.pdf]

# Ccdc88c

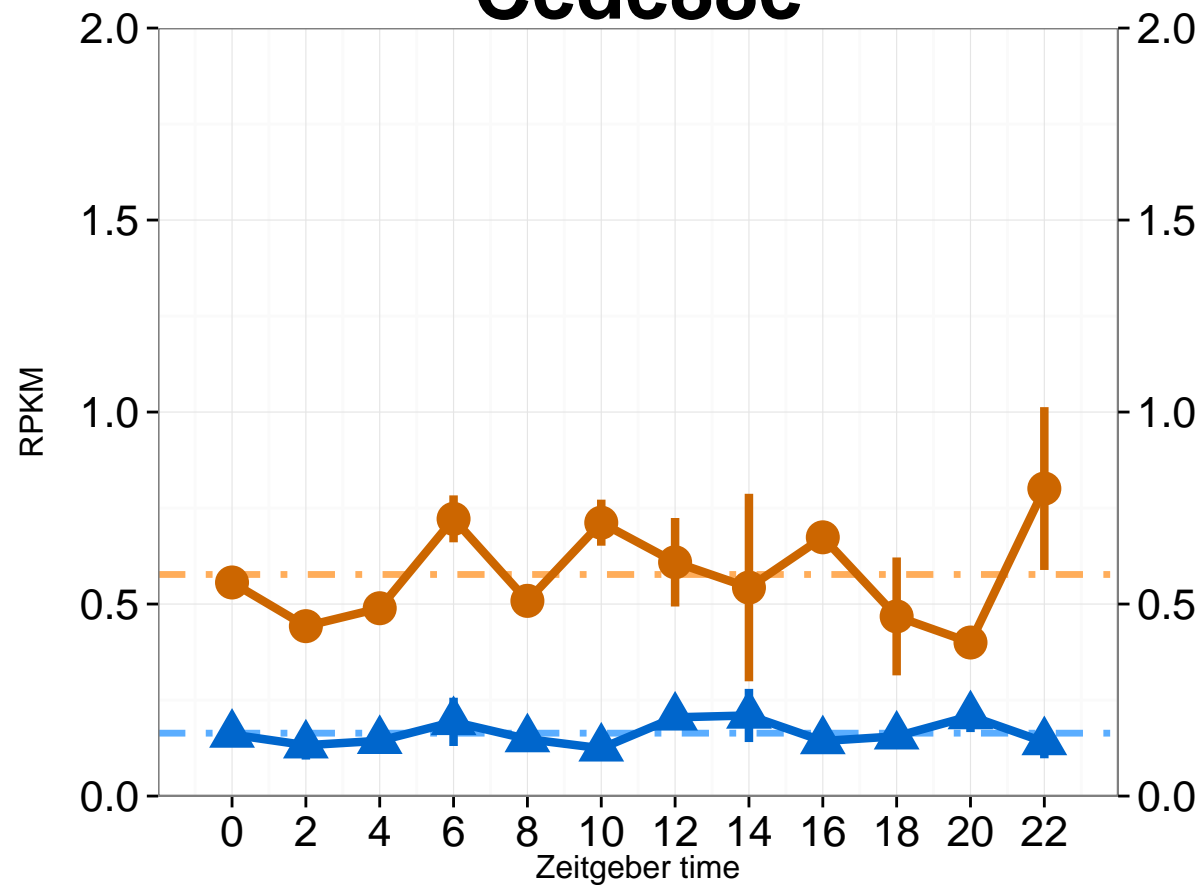

# Ccdc88c

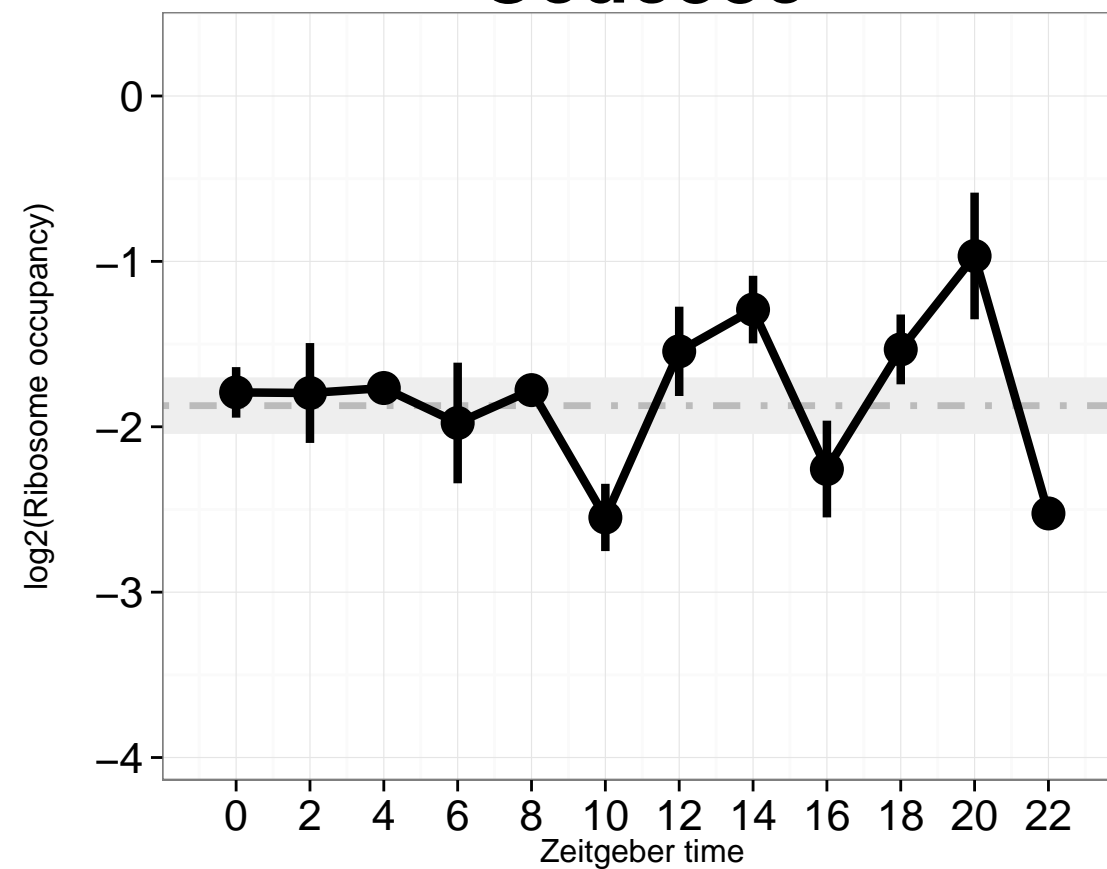

Supplement: SuppDataset_1.zip [file Ccdc88c_set_A.pdf › Supplemental Dataset 1/A-mRNA_nonrhyth_translation_nonrhyth/Ccdc88c_set_A.pdf]

## Ccdc91

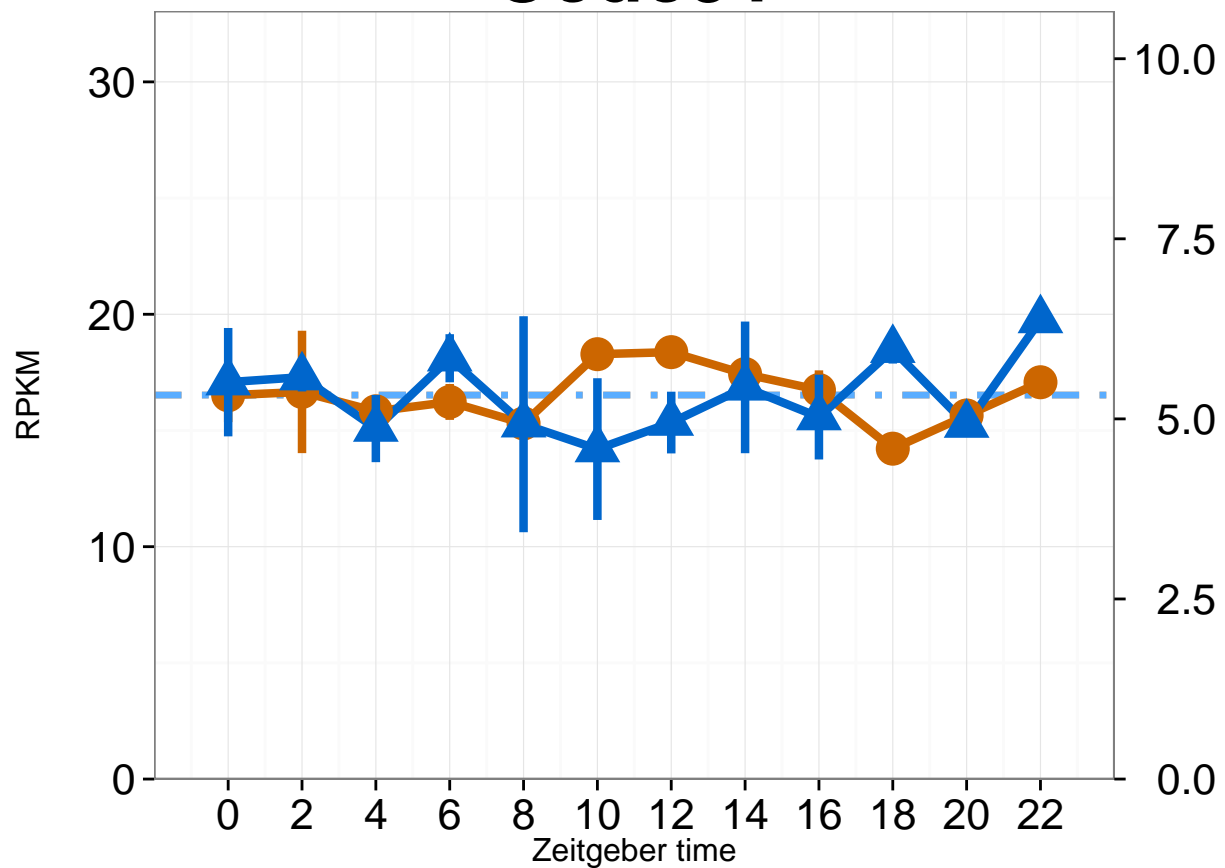

## Ccdc91

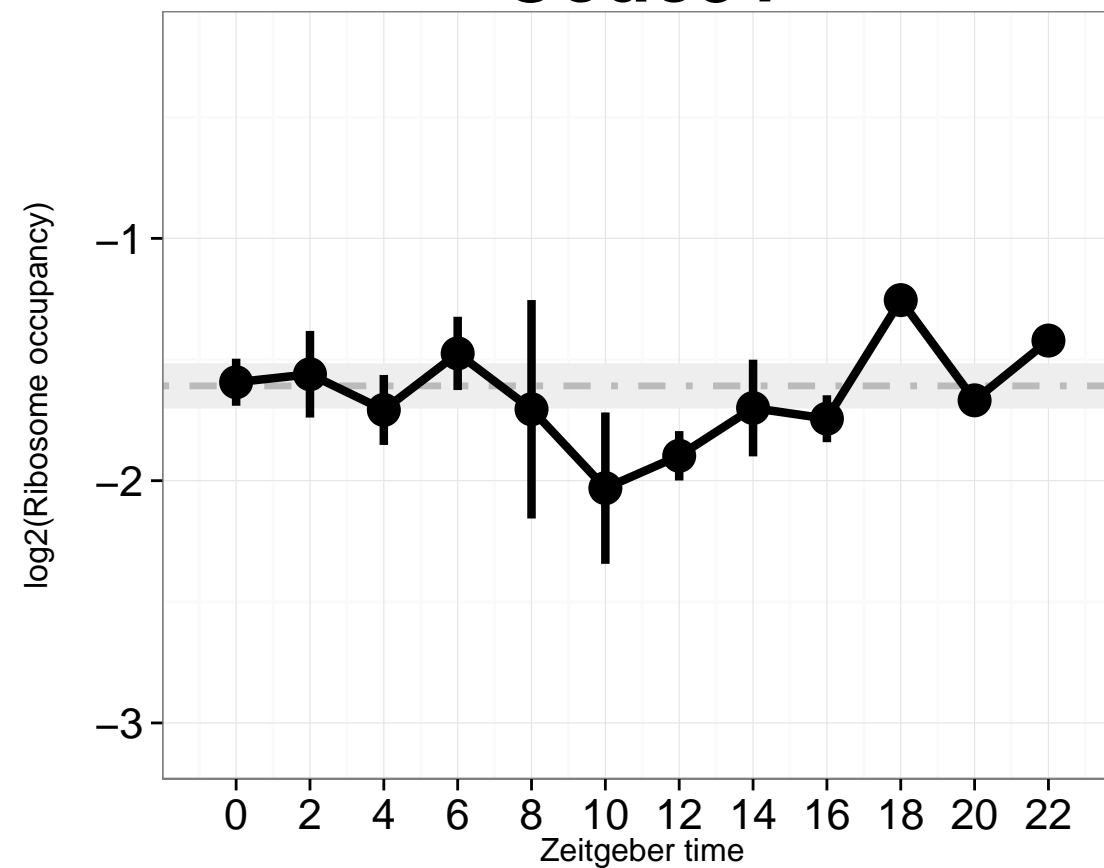

Supplement: SuppDataset_1.zip [file Ccdc91_set_A.pdf › Supplemental Dataset 1/A-mRNA_nonrhyth_translation_nonrhyth/Ccdc91_set_A.pdf]

## Ccdc93

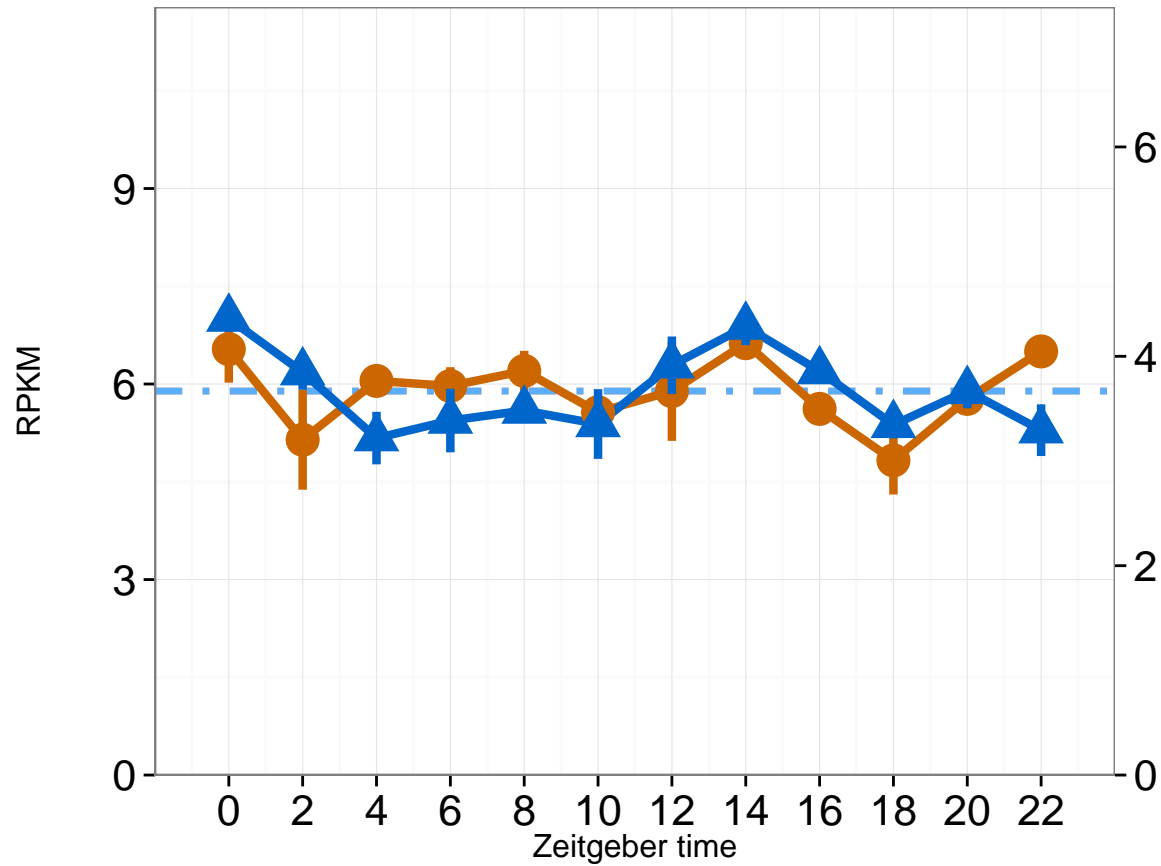

## Ccdc93

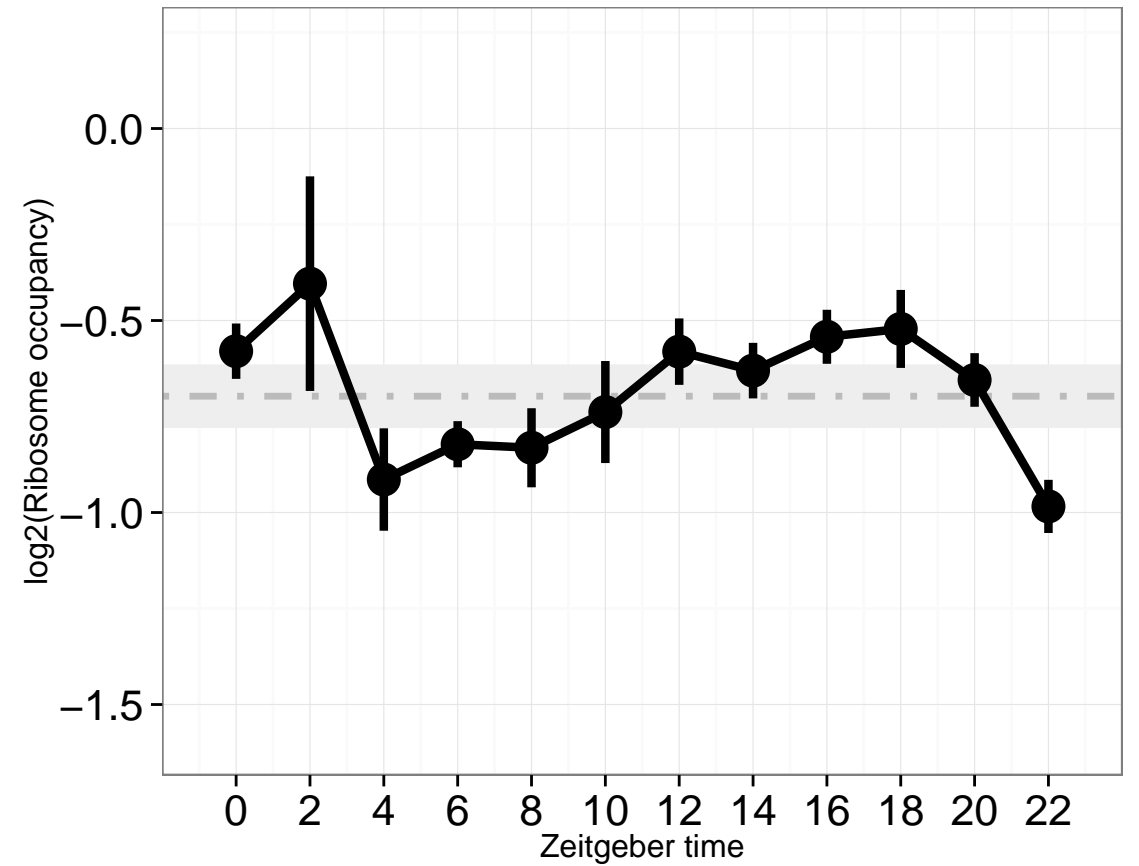

Supplement: SuppDataset_1.zip [file Ccdc93_set_A.pdf › Supplemental Dataset 1/A-mRNA_nonrhyth_translation_nonrhyth/Ccdc93_set_A.pdf]

## Ccdc94

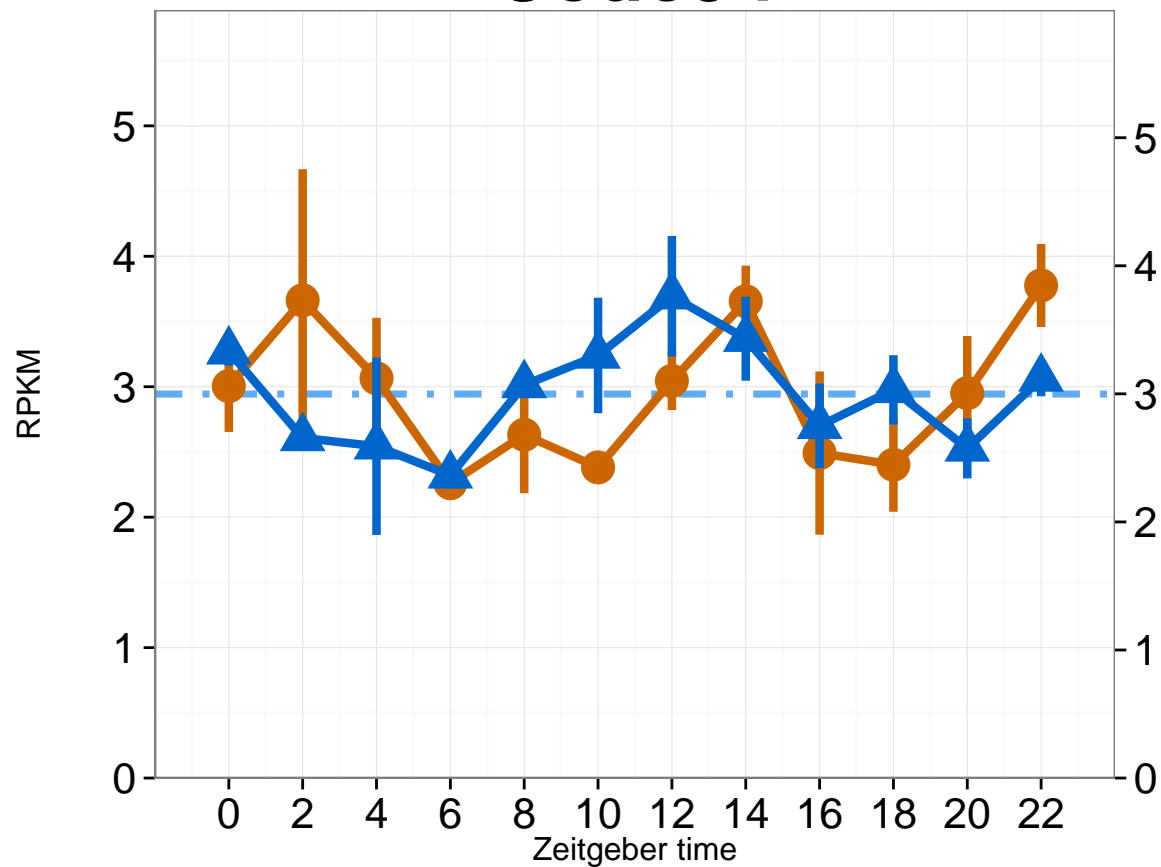

## Ccdc94

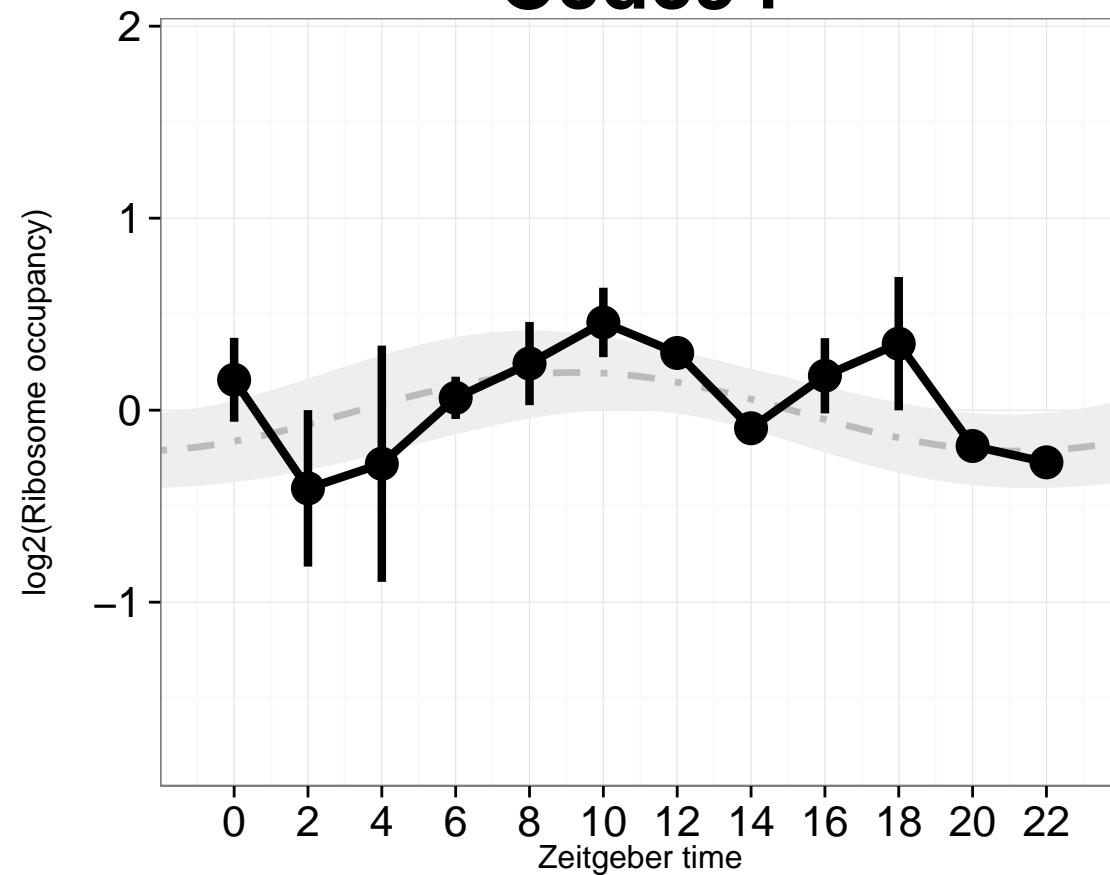

Supplement: SuppDataset_1.zip [file Ccdc94_set_A.pdf › Supplemental Dataset 1/A-mRNA_nonrhyth_translation_nonrhyth/Ccdc94_set_A.pdf]

## Ccdc97

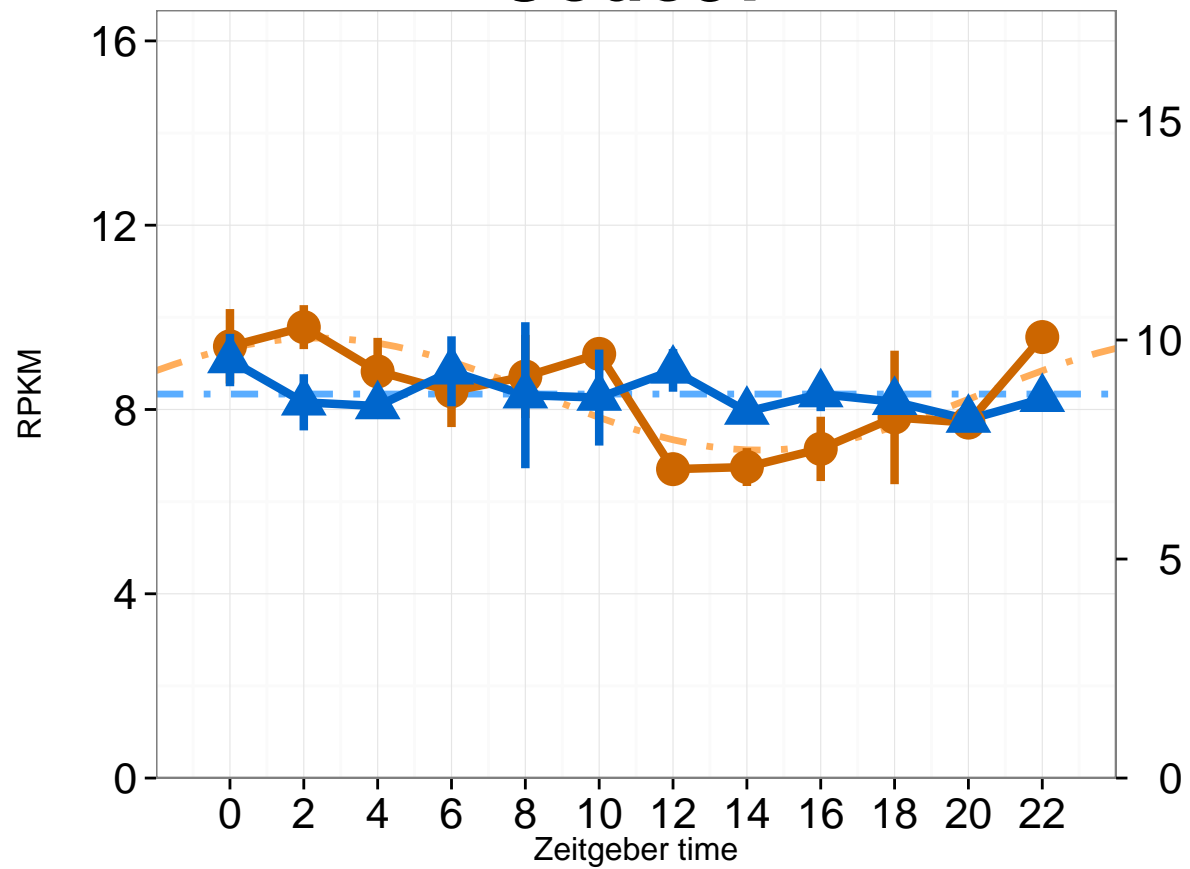

## Ccdc97

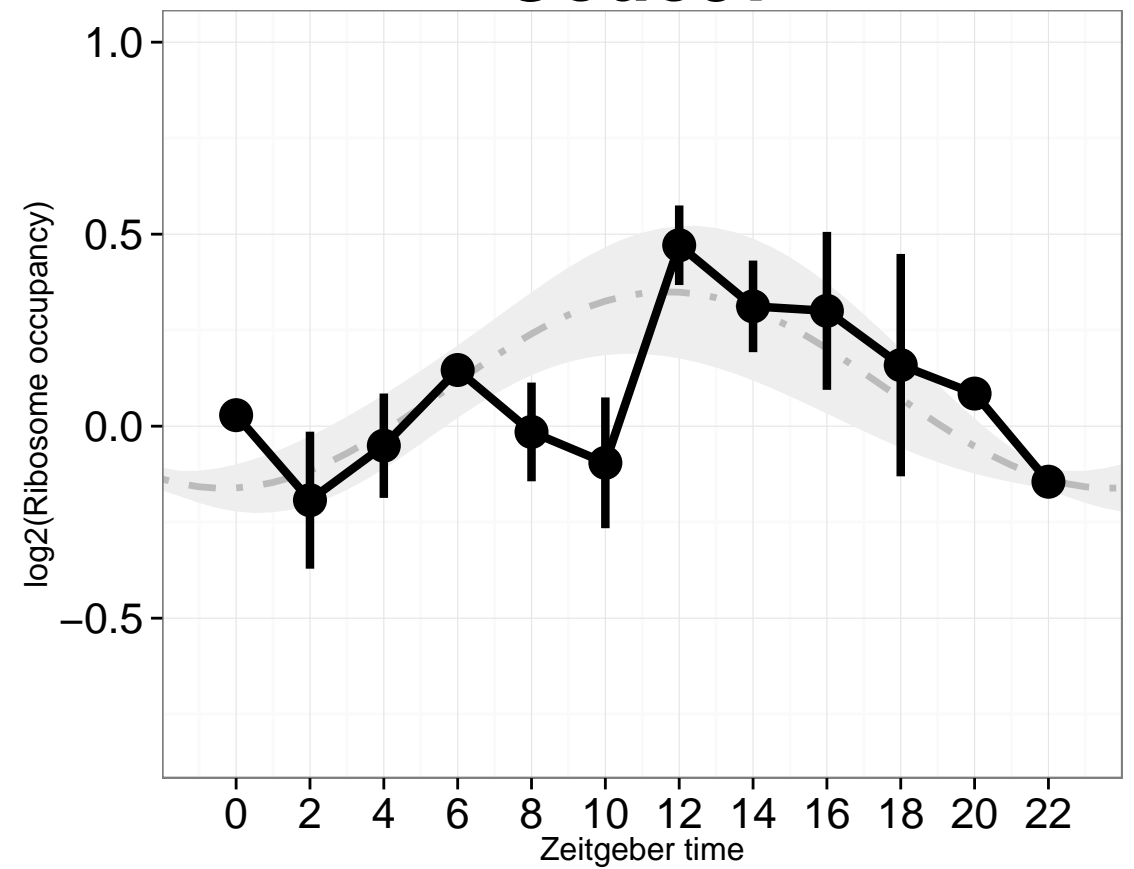

Supplement: SuppDataset_1.zip [file Ccdc97_set_A.pdf › Supplemental Dataset 1/A-mRNA_nonrhyth_translation_nonrhyth/Ccdc97_set_A.pdf]

## Ccdc9

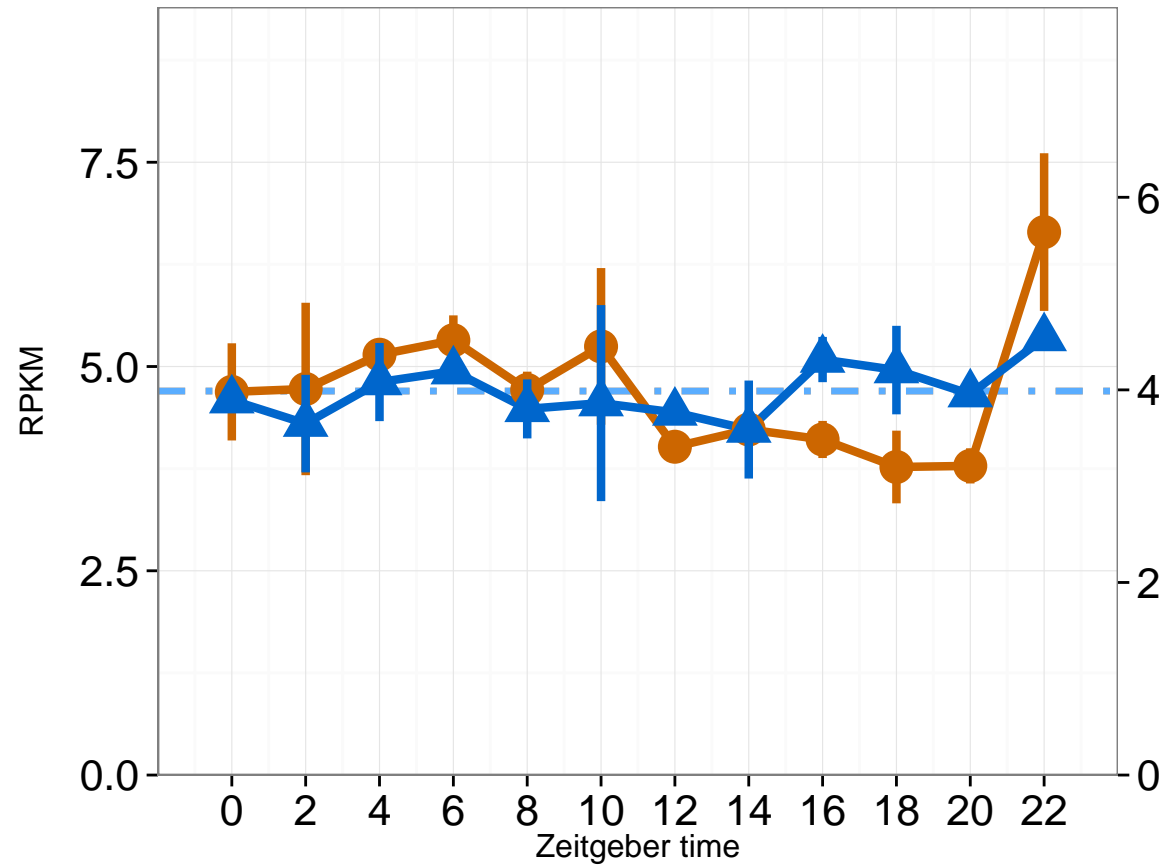

## Ccdc9

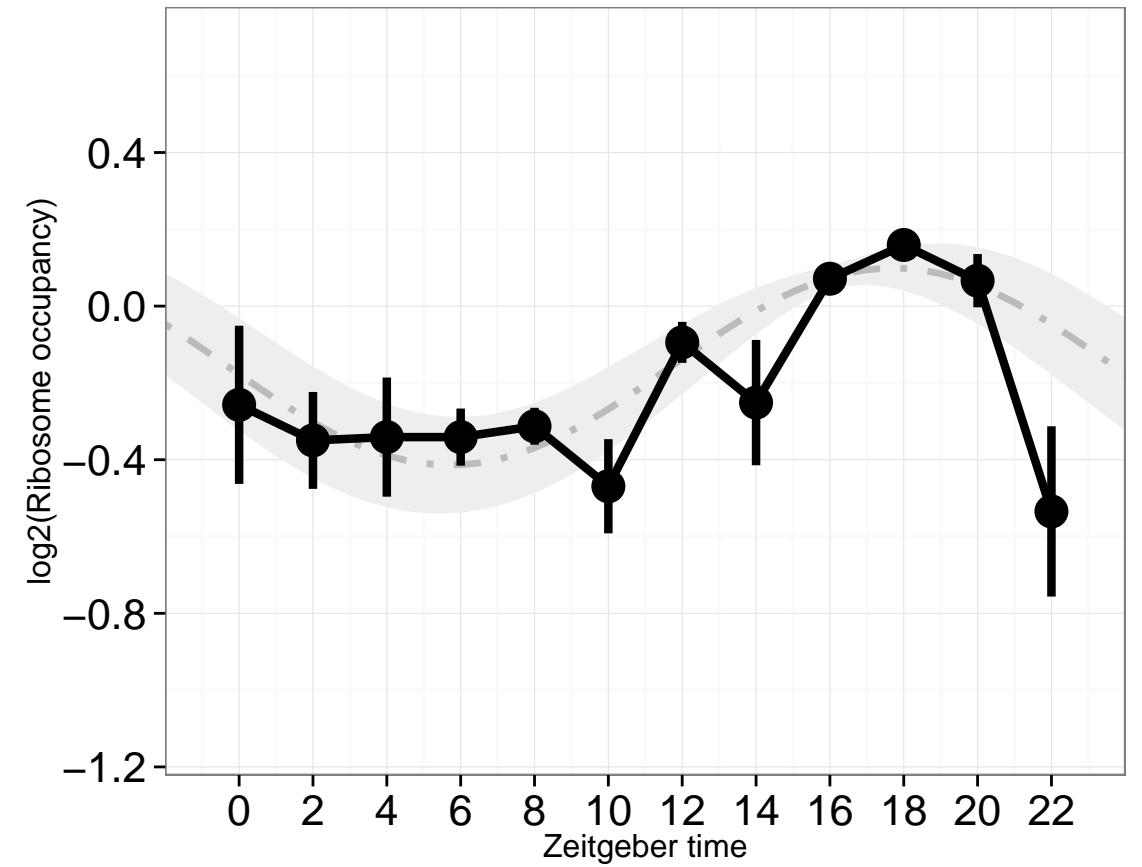

Supplement: SuppDataset_1.zip [file Ccdc9_set_A.pdf › Supplemental Dataset 1/A-mRNA_nonrhyth_translation_nonrhyth/Ccdc9_set_A.pdf]

## Ccl24

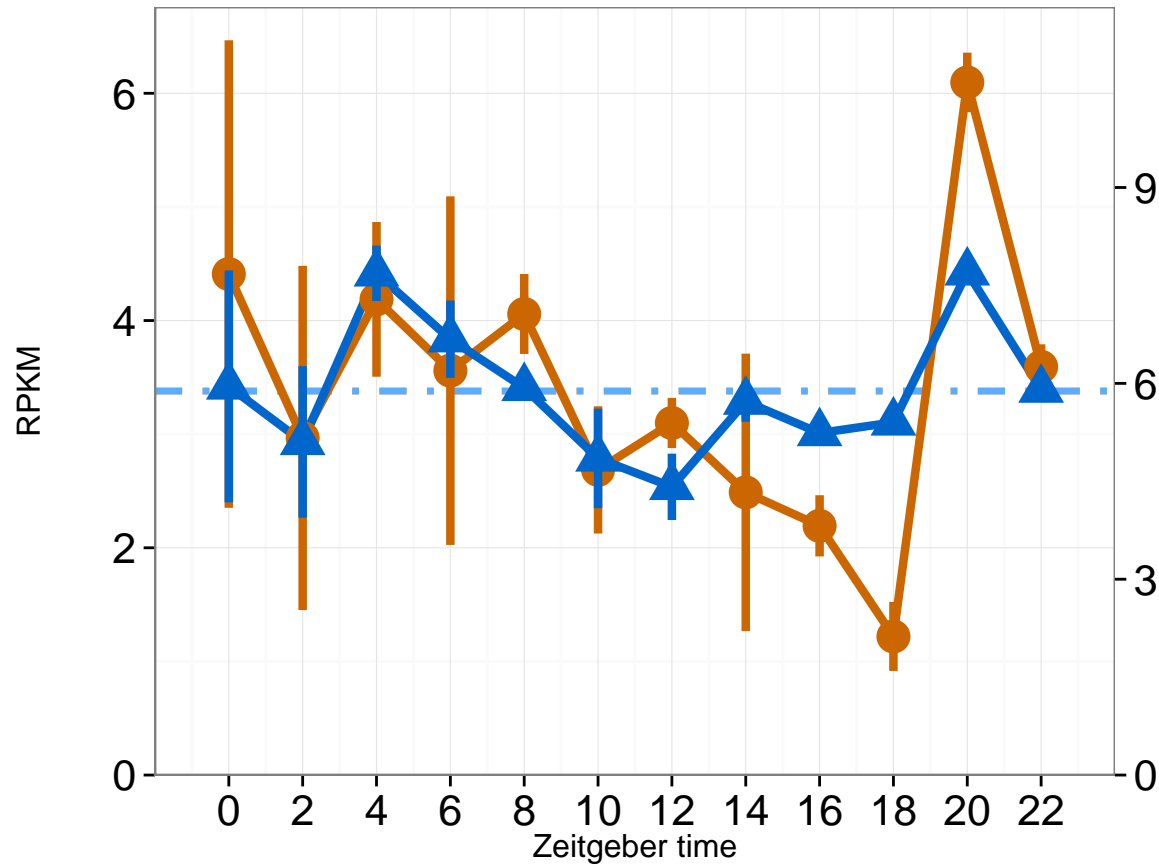

## Ccl24

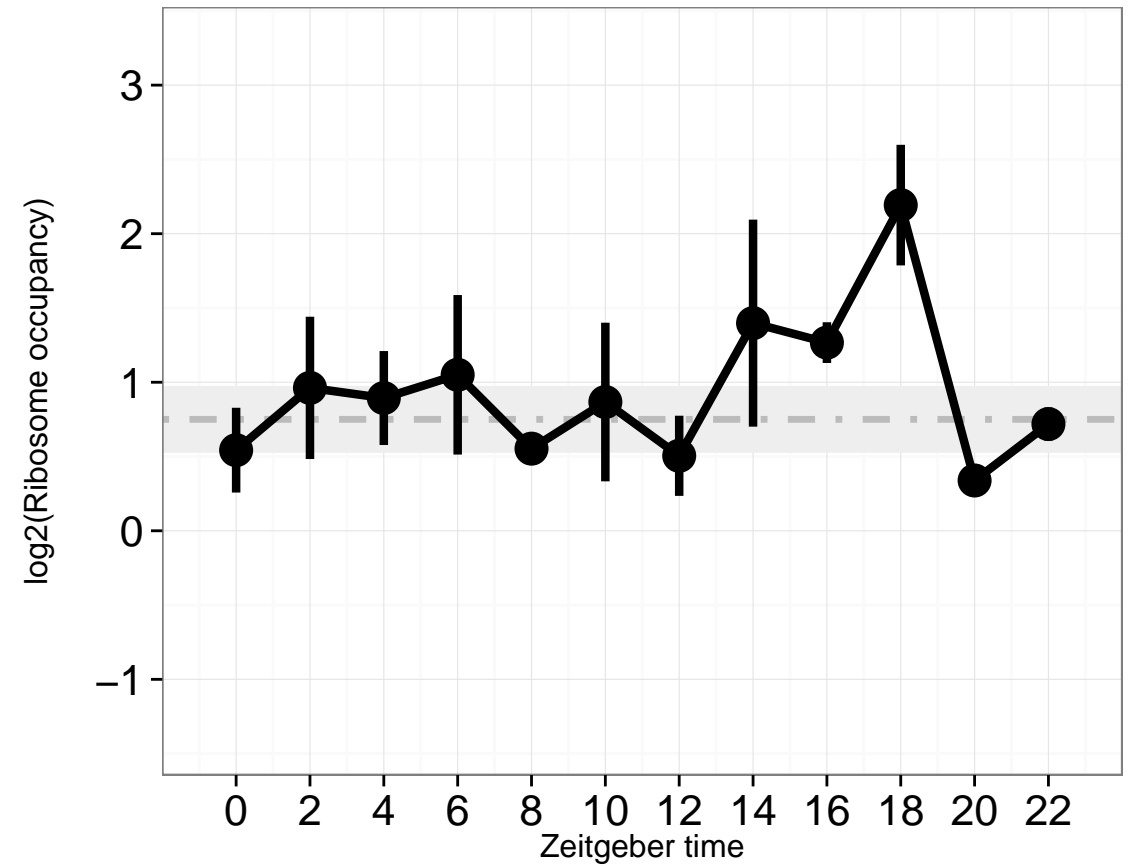

Supplement: SuppDataset_1.zip [file Ccl24_set_A.pdf › Supplemental Dataset 1/A-mRNA_nonrhyth_translation_nonrhyth/Ccl24_set_A.pdf]

## Ccl25

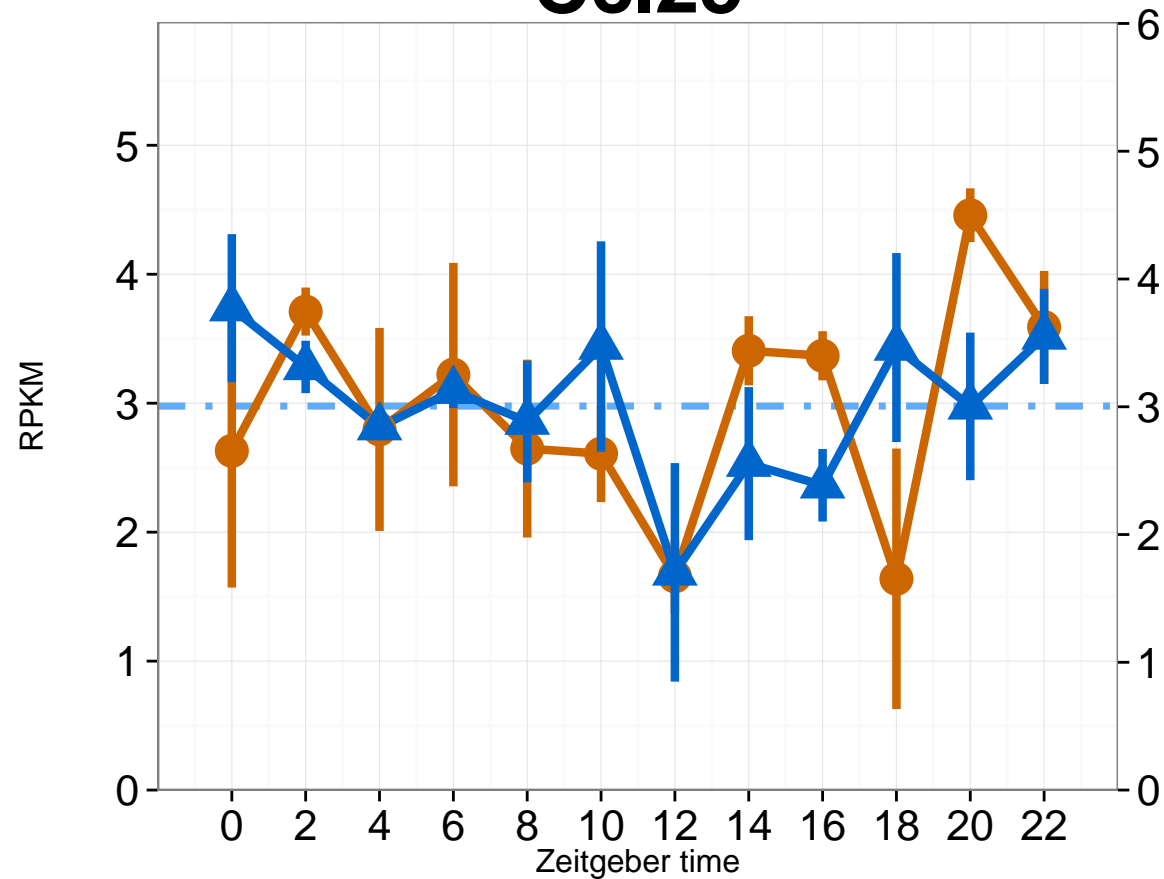

## Ccl25

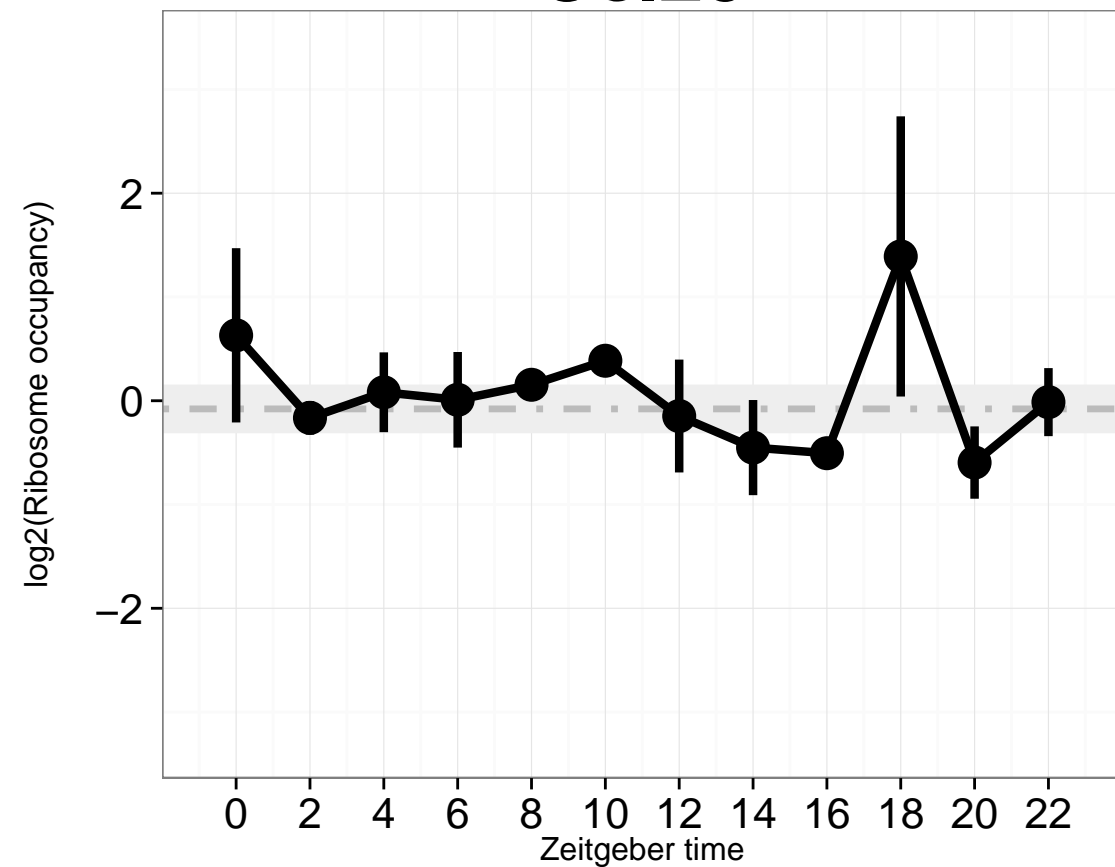

Supplement: SuppDataset_1.zip [file Ccl25_set_A.pdf › Supplemental Dataset 1/A-mRNA_nonrhyth_translation_nonrhyth/Ccl25_set_A.pdf]

# Ccl27a

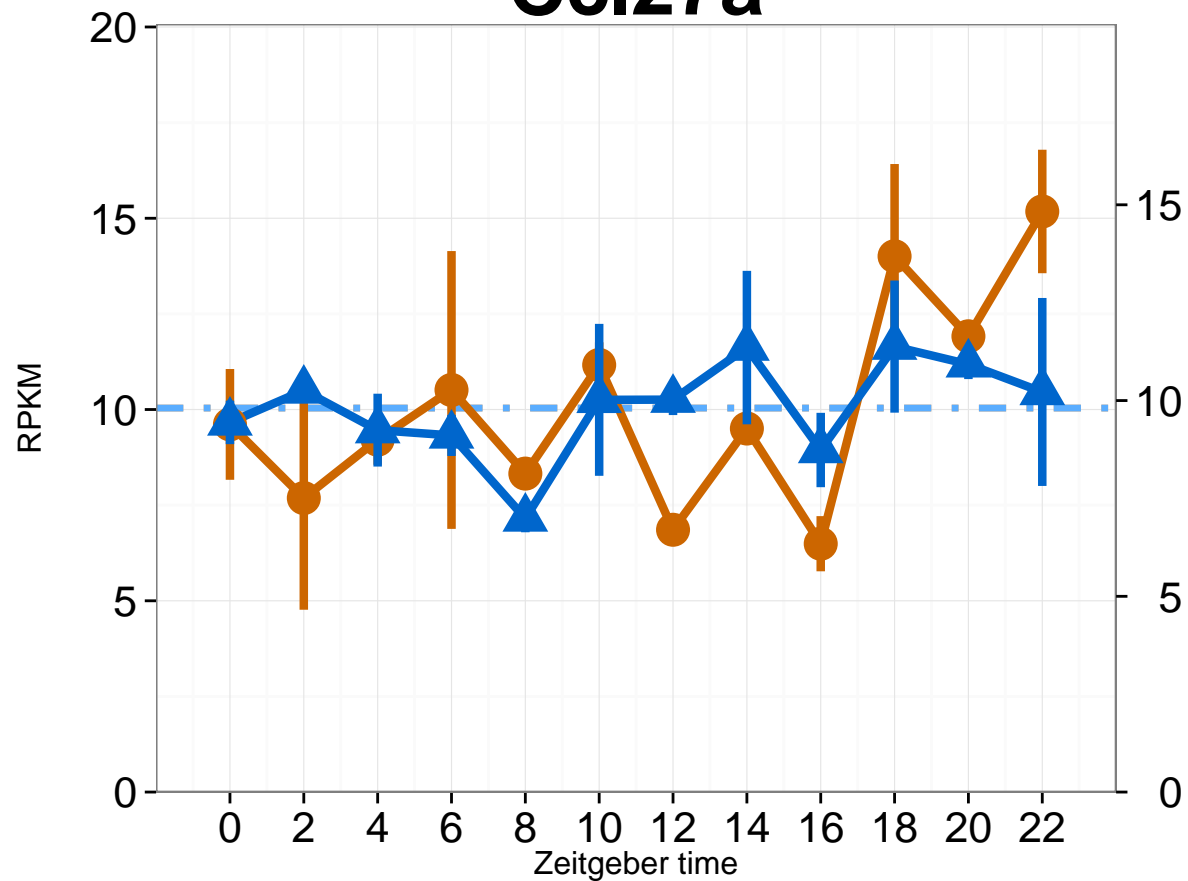

# Ccl27a

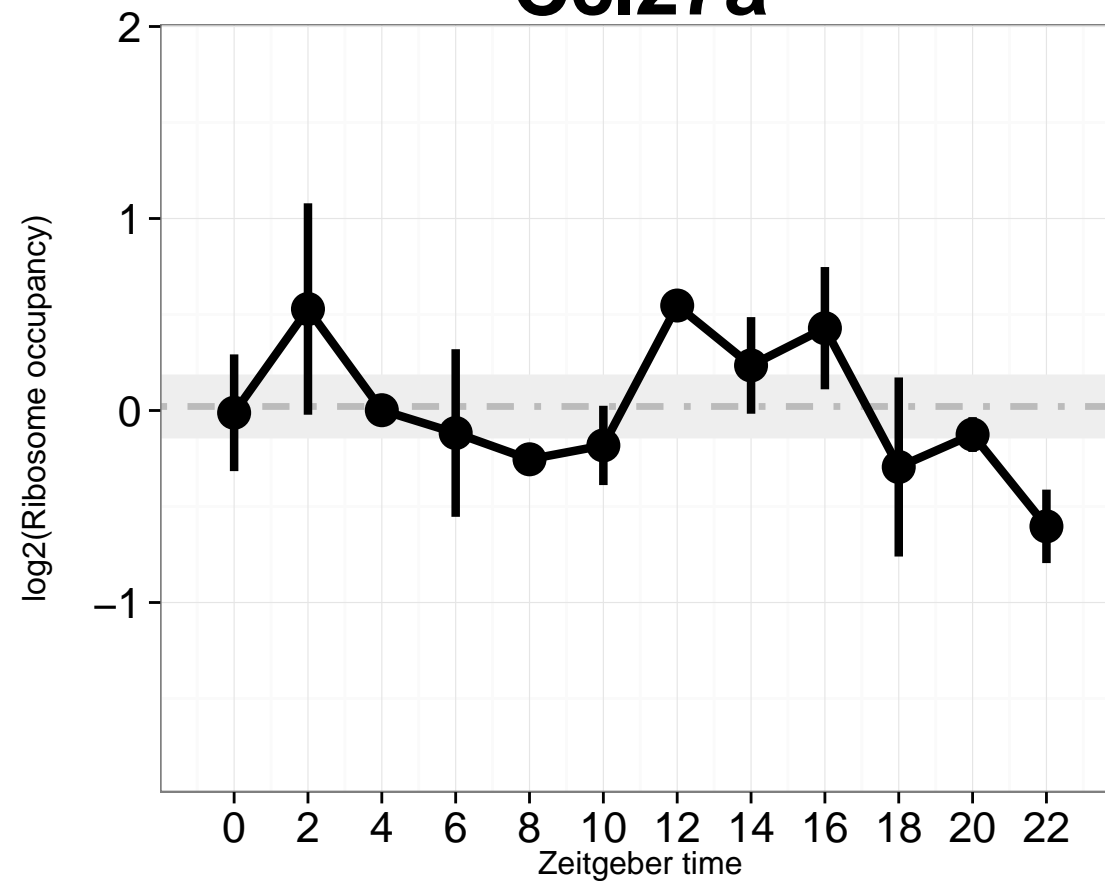

Supplement: SuppDataset_1.zip [file Ccl27a_set_A.pdf › Supplemental Dataset 1/A-mRNA_nonrhyth_translation_nonrhyth/Ccl27a_set_A.pdf]

## Ccl9

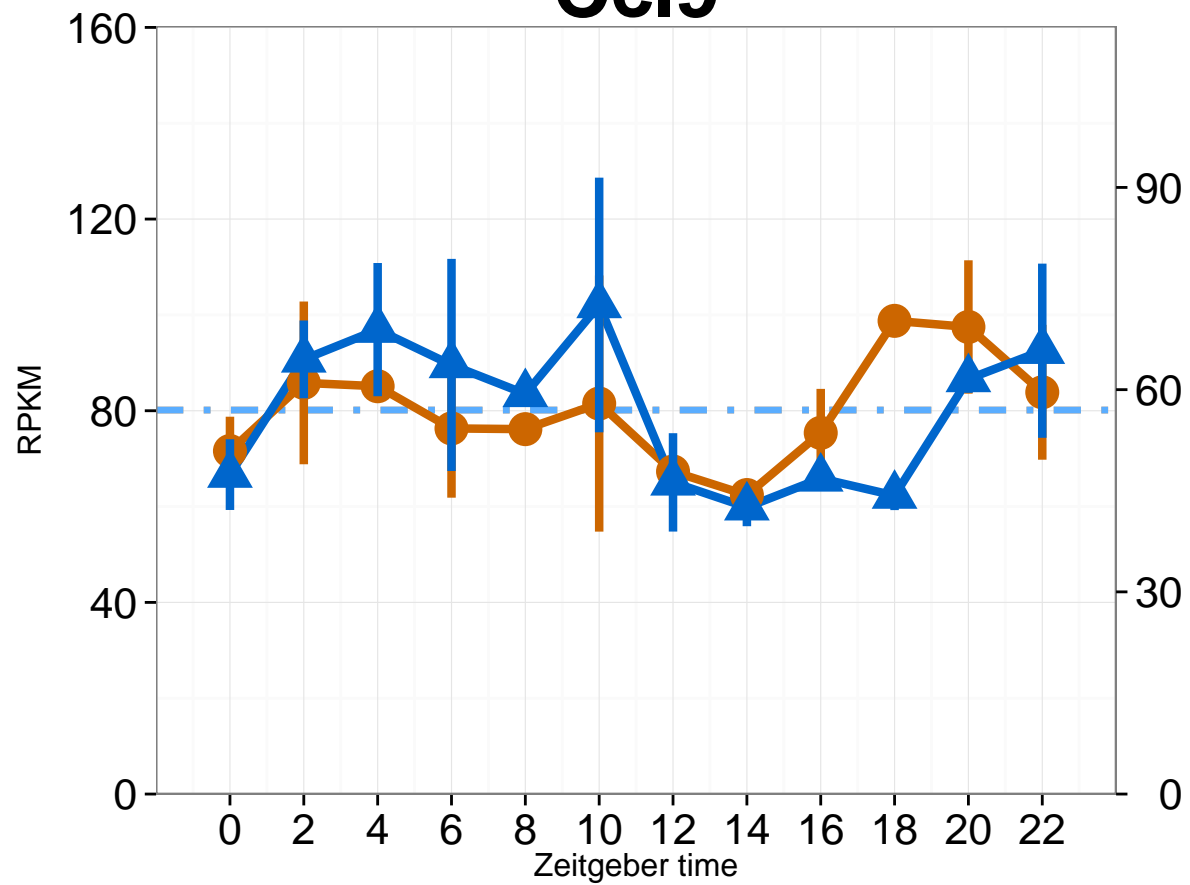

## Ccl9

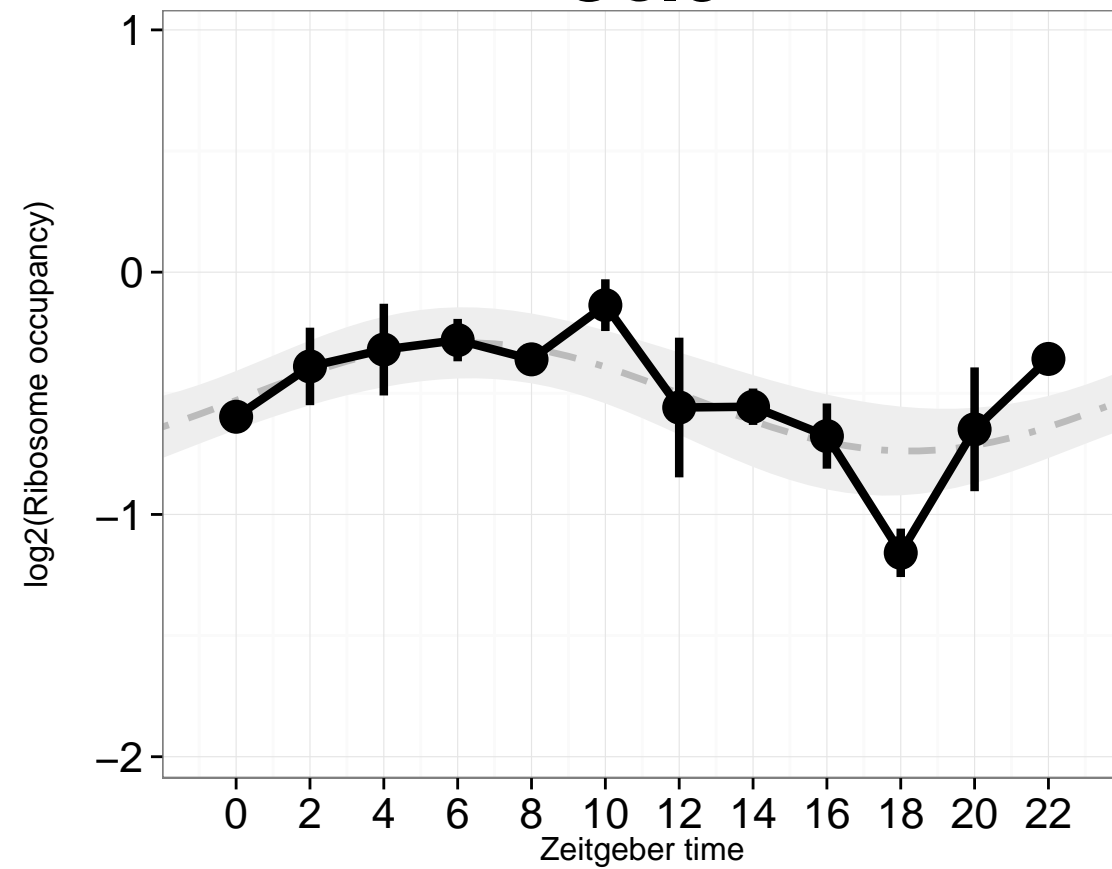

Supplement: SuppDataset_1.zip [file Ccl9_set_A.pdf › Supplemental Dataset 1/A-mRNA_nonrhyth_translation_nonrhyth/Ccl9_set_A.pdf]

## Ccm2

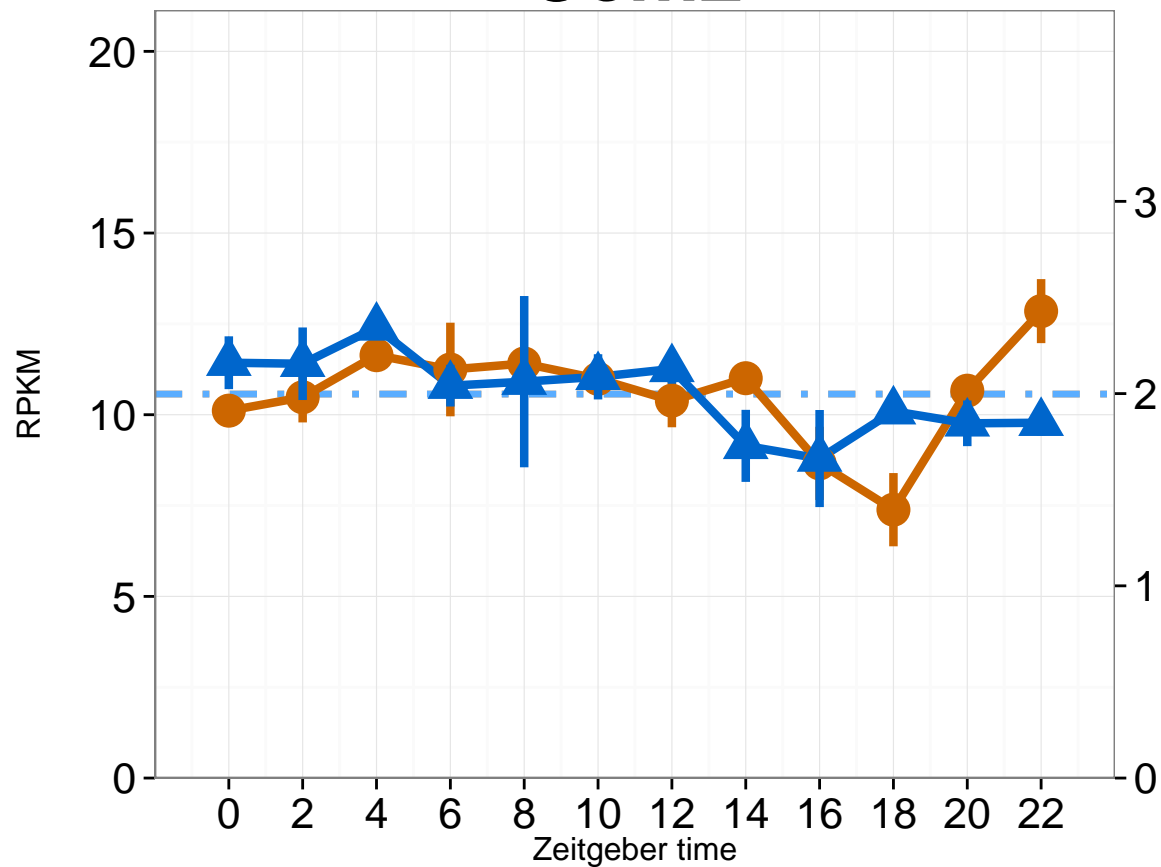

## Ccm2

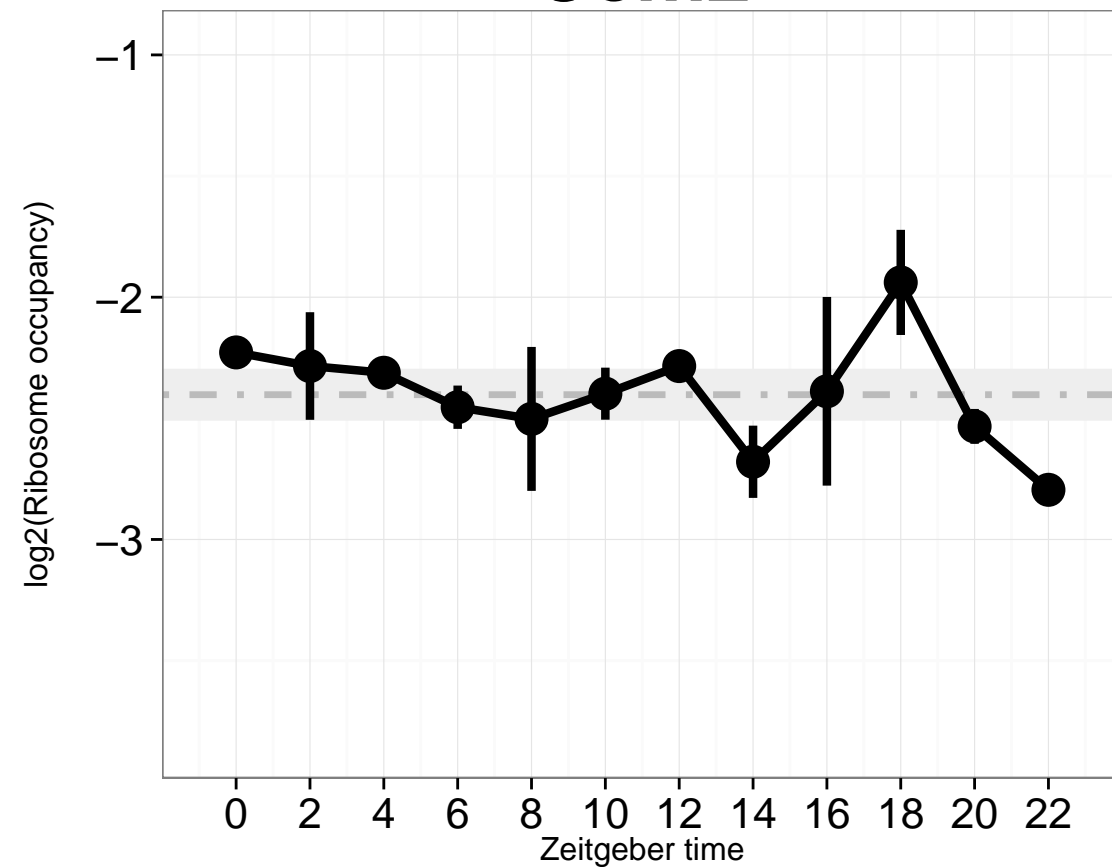

Supplement: SuppDataset_1.zip [file Ccm2_set_A.pdf › Supplemental Dataset 1/A-mRNA_nonrhyth_translation_nonrhyth/Ccm2_set_A.pdf]

## Ccm2l

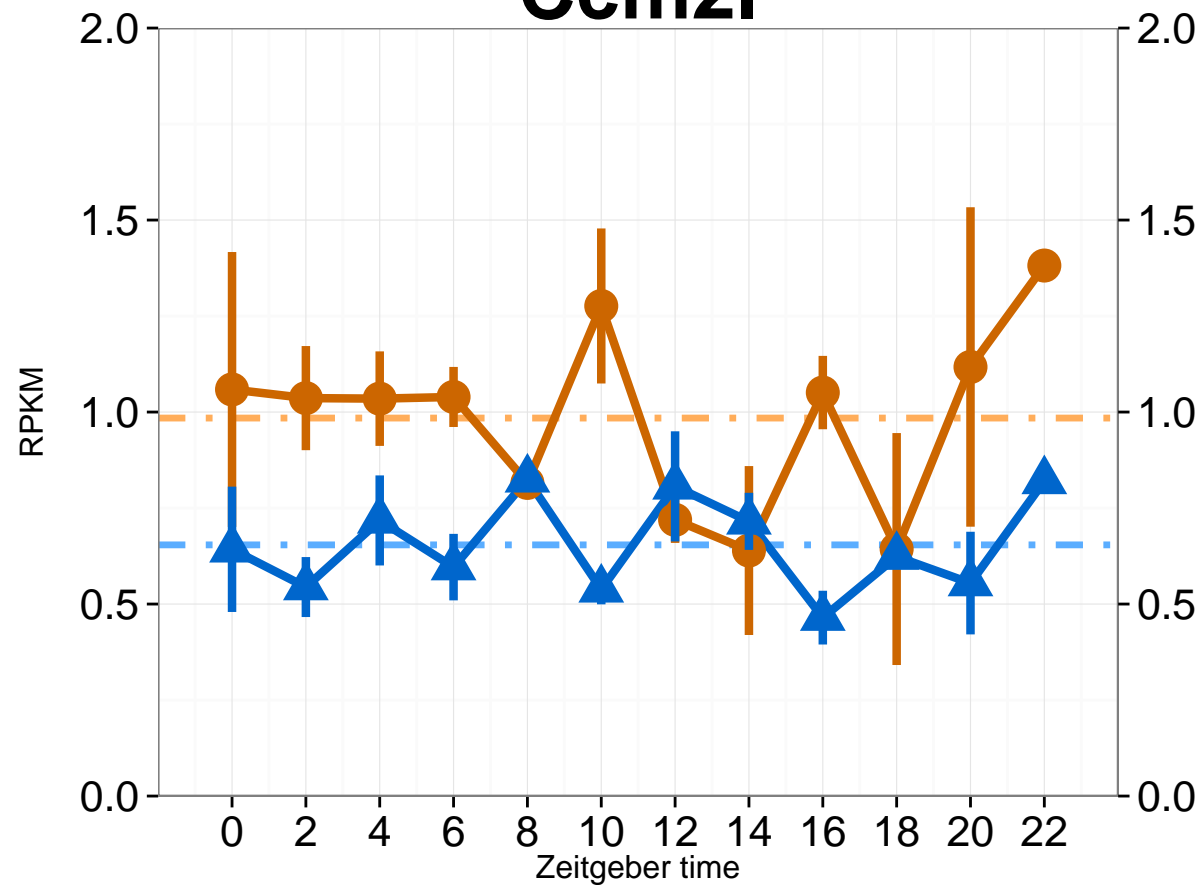

## Ccm2l

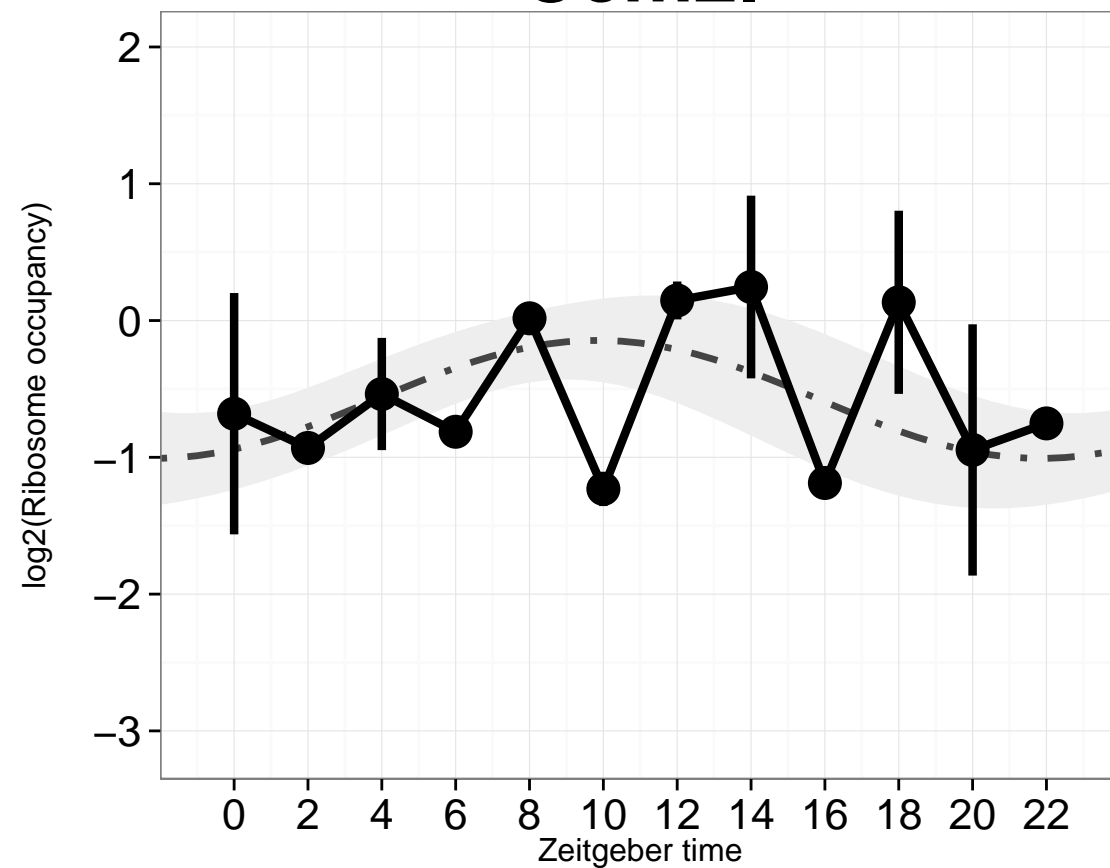

Supplement: SuppDataset_1.zip [file Ccm2l_set_A.pdf › Supplemental Dataset 1/A-mRNA_nonrhyth_translation_nonrhyth/Ccm2l_set_A.pdf]

# Ccna2

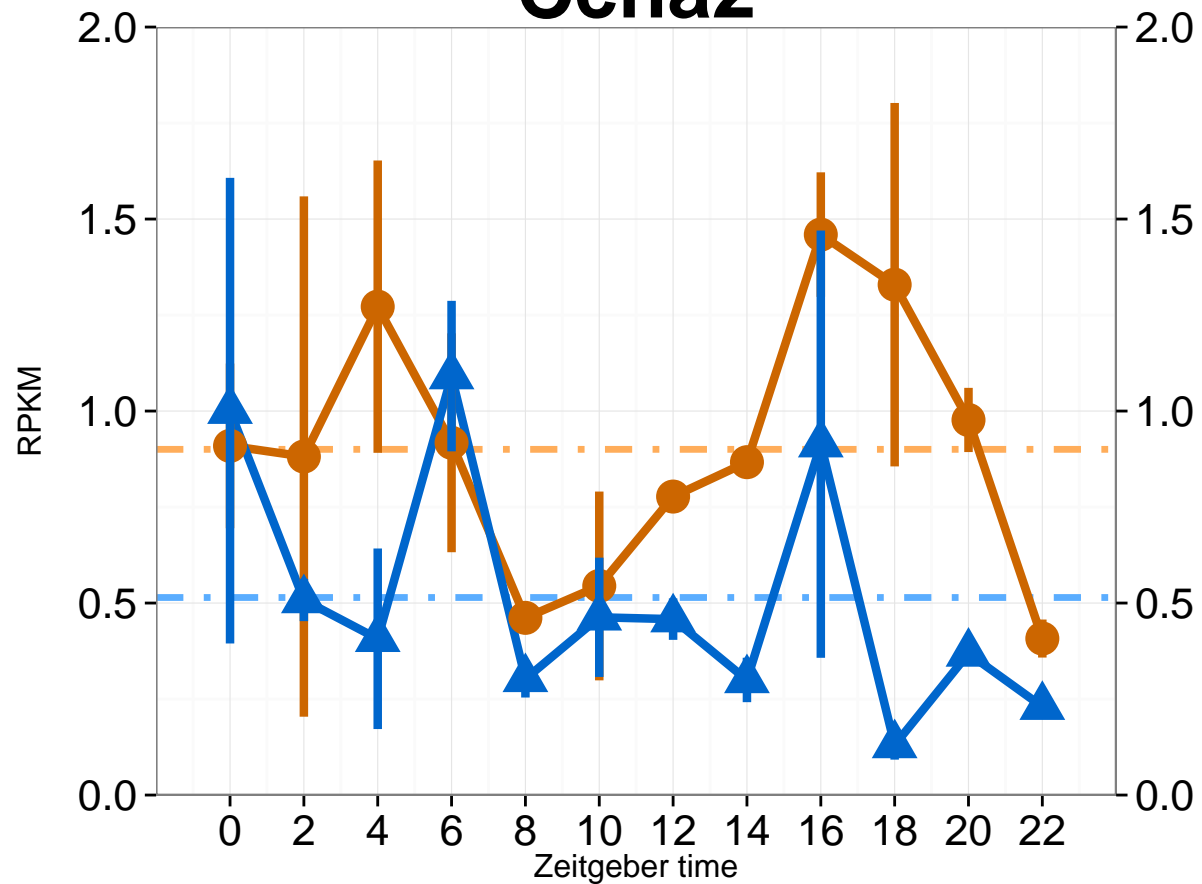

# Ccna2

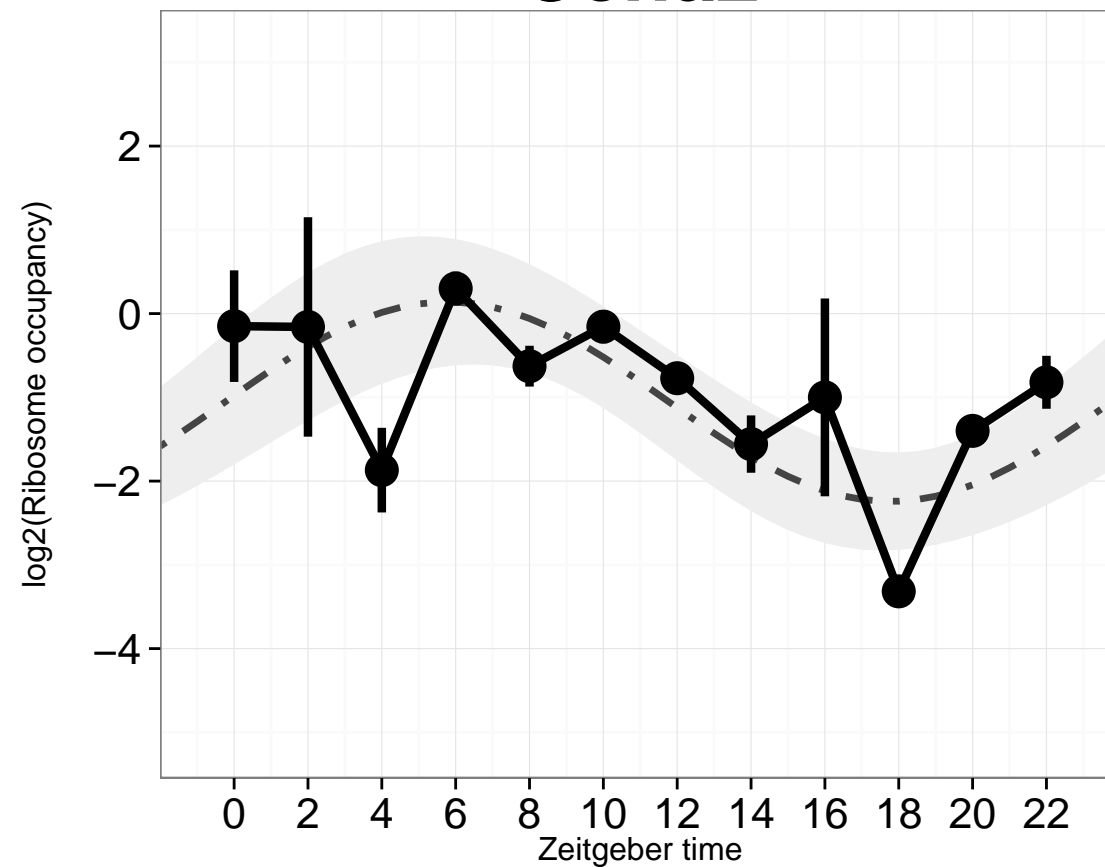

Supplement: SuppDataset_1.zip [file Ccna2_set_A.pdf › Supplemental Dataset 1/A-mRNA_nonrhyth_translation_nonrhyth/Ccna2_set_A.pdf]

# Ccnb2

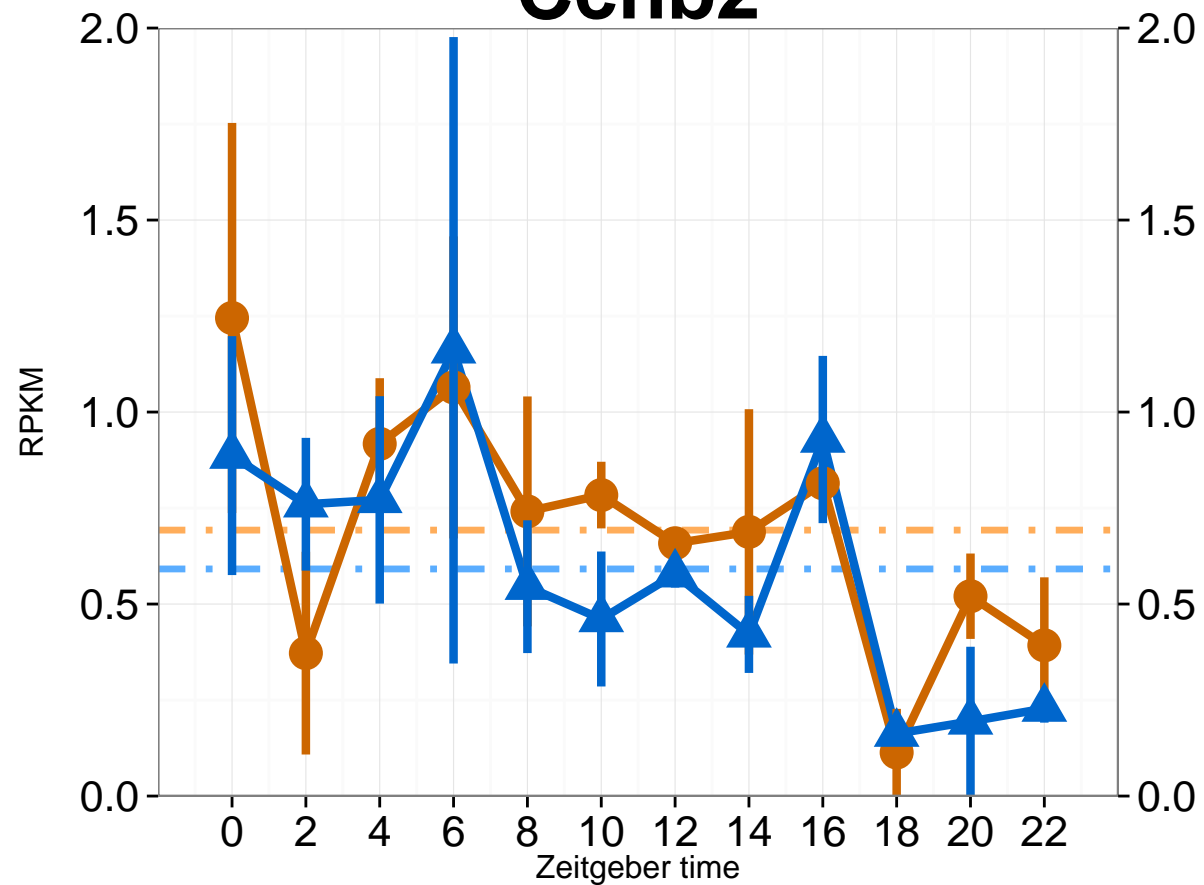

# Ccnb2

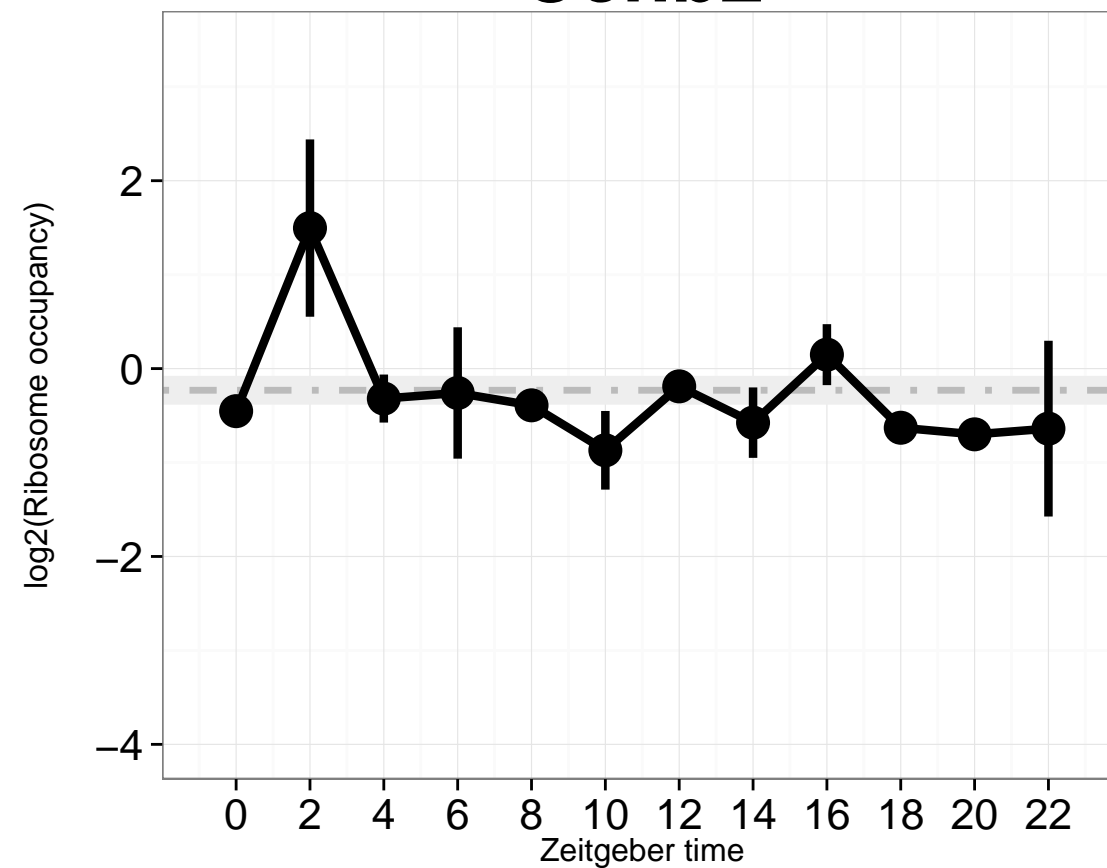

Supplement: SuppDataset_1.zip [file Ccnb2_set_A.pdf › Supplemental Dataset 1/A-mRNA_nonrhyth_translation_nonrhyth/Ccnb2_set_A.pdf]

## Ccnc

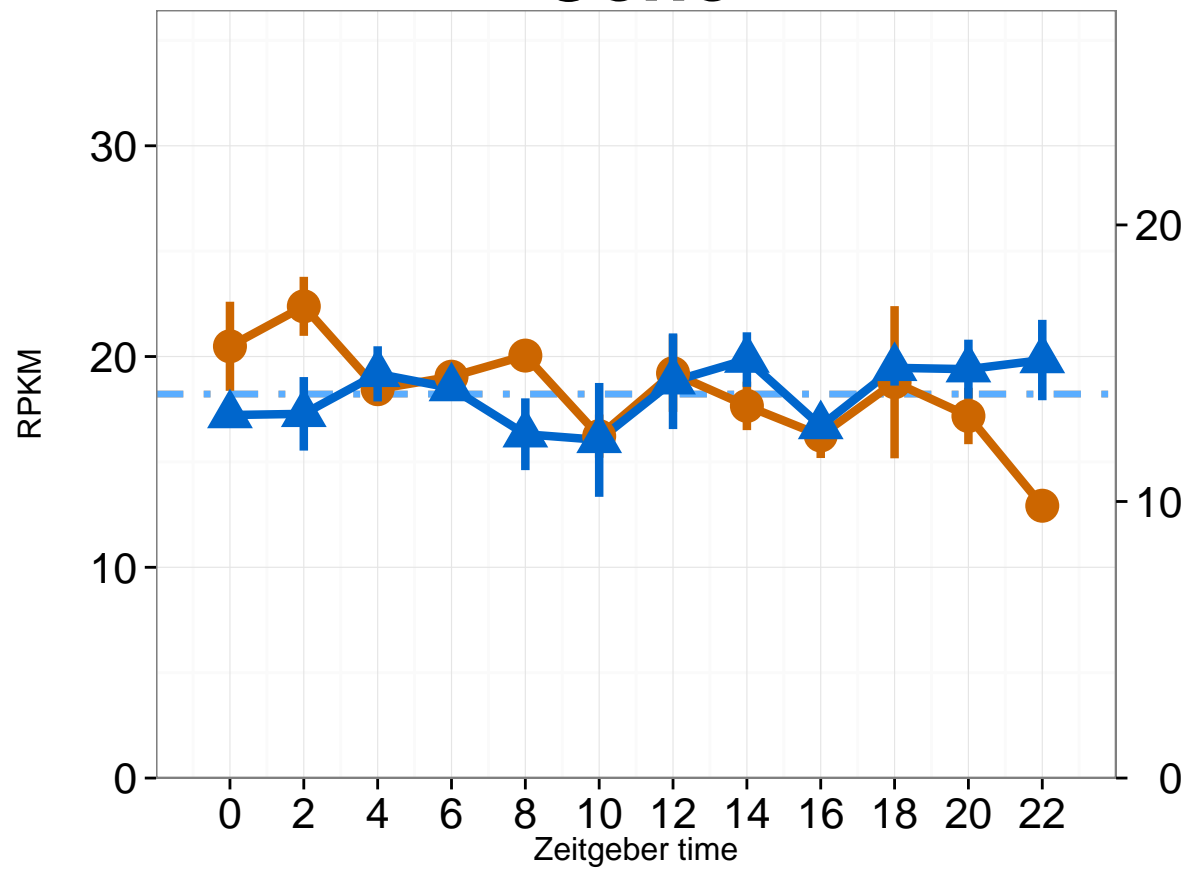

## Ccnc

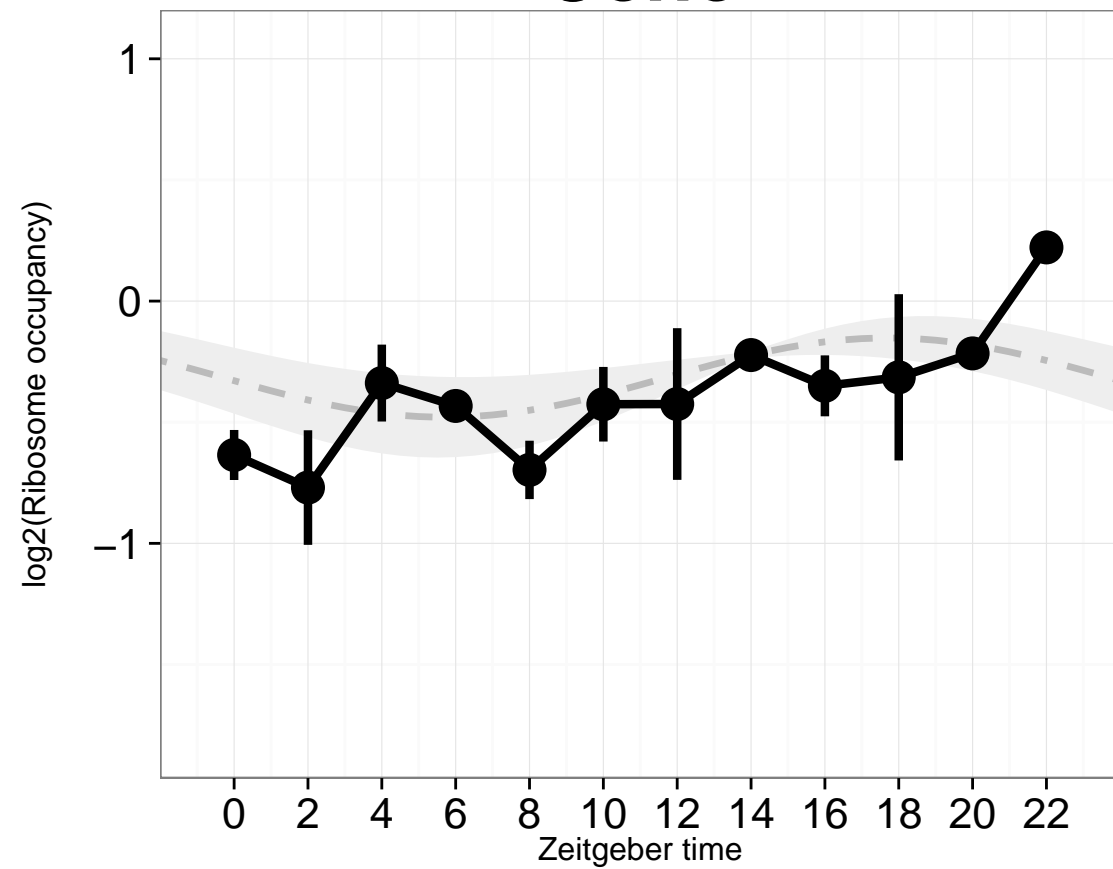

Supplement: SuppDataset_1.zip [file Ccnc_set_A.pdf › Supplemental Dataset 1/A-mRNA_nonrhyth_translation_nonrhyth/Ccnc_set_A.pdf]

## Ccnd2

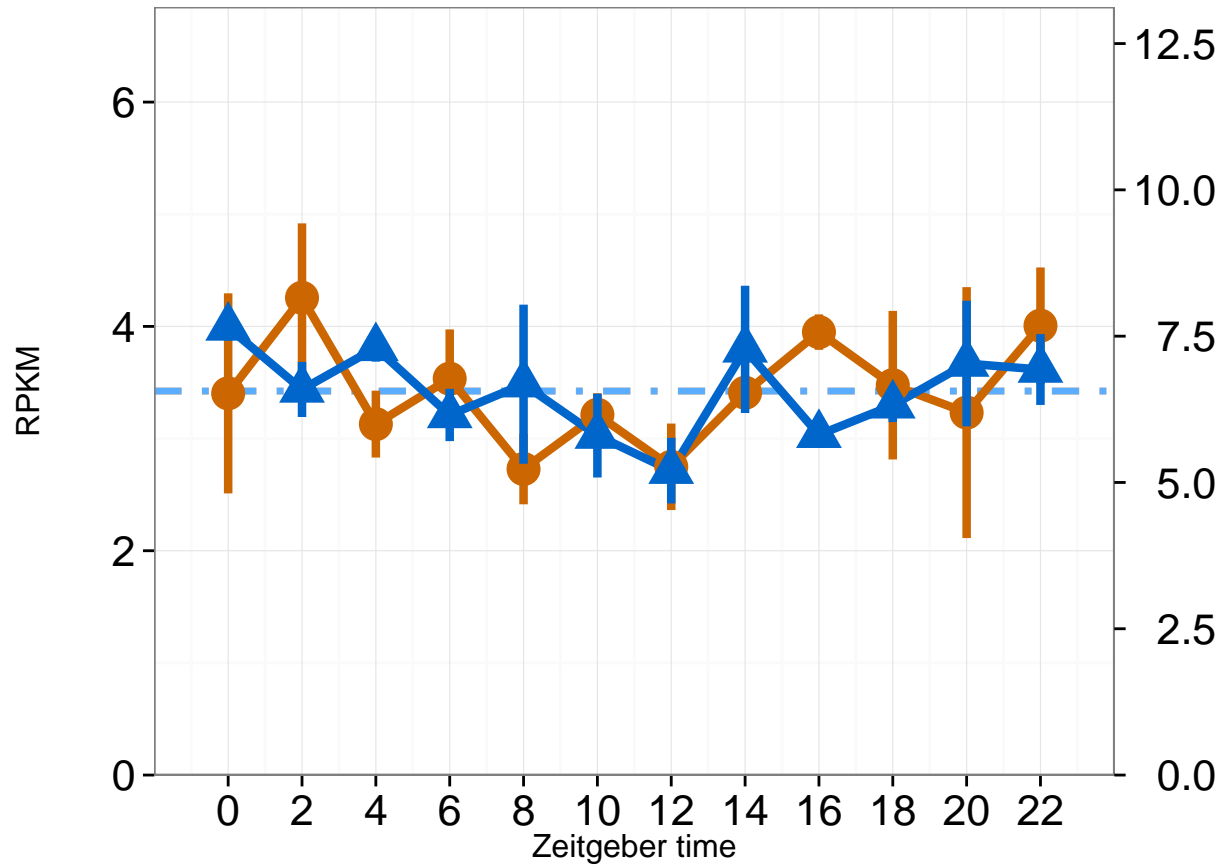

## Ccnd2

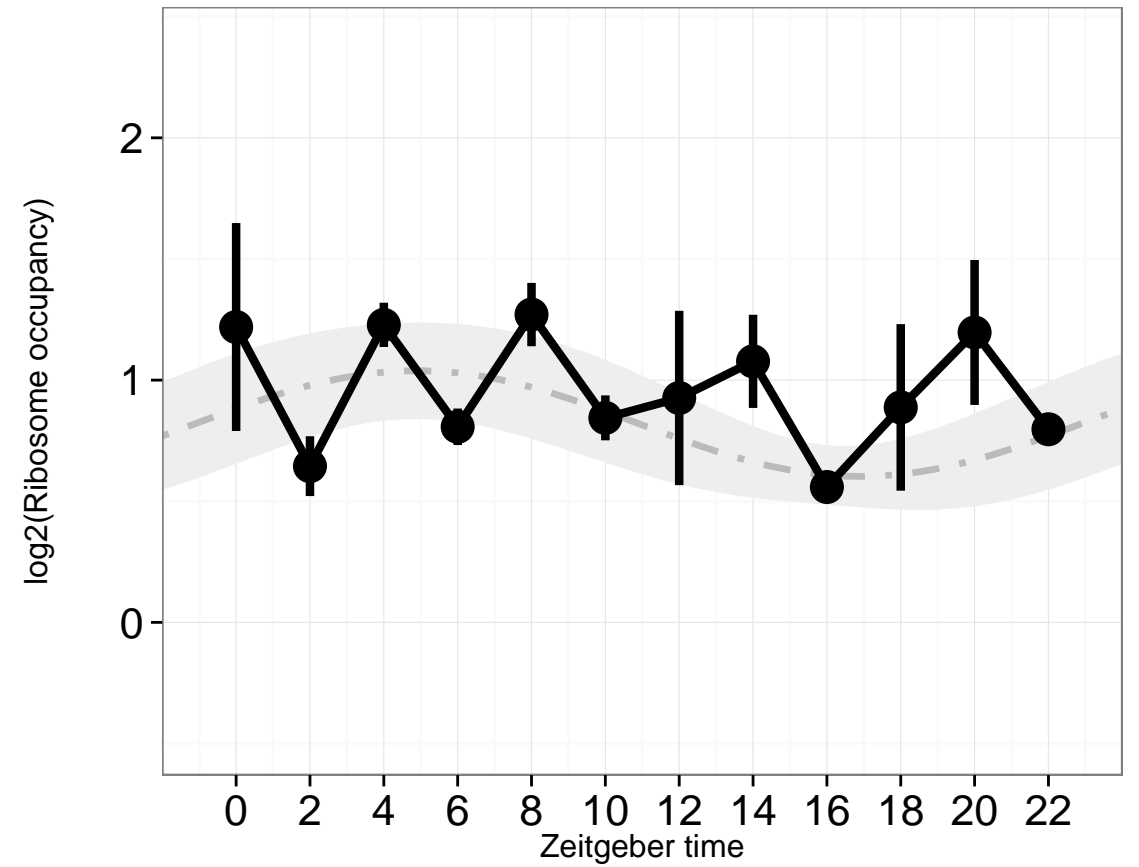

Supplement: SuppDataset_1.zip [file Ccnd2_set_A.pdf › Supplemental Dataset 1/A-mRNA_nonrhyth_translation_nonrhyth/Ccnd2_set_A.pdf]

## Ccnd3

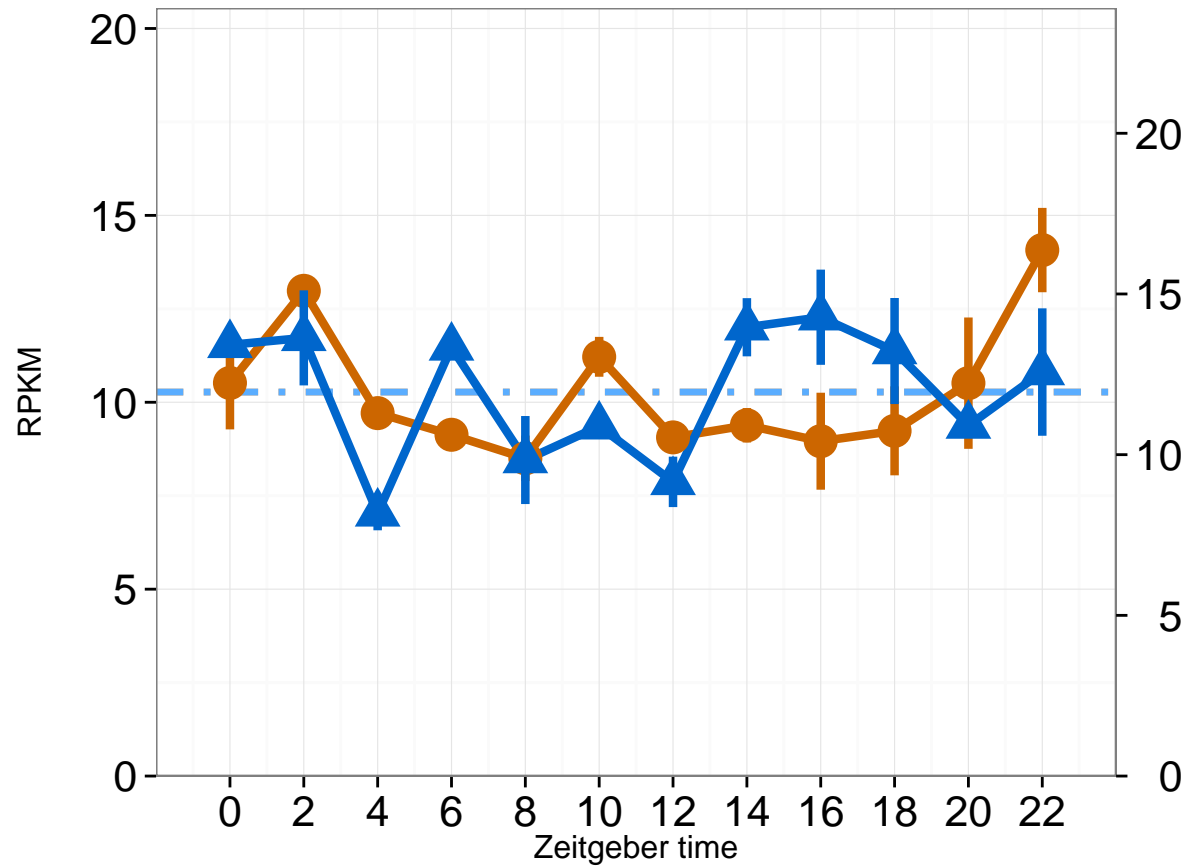

## Ccnd3

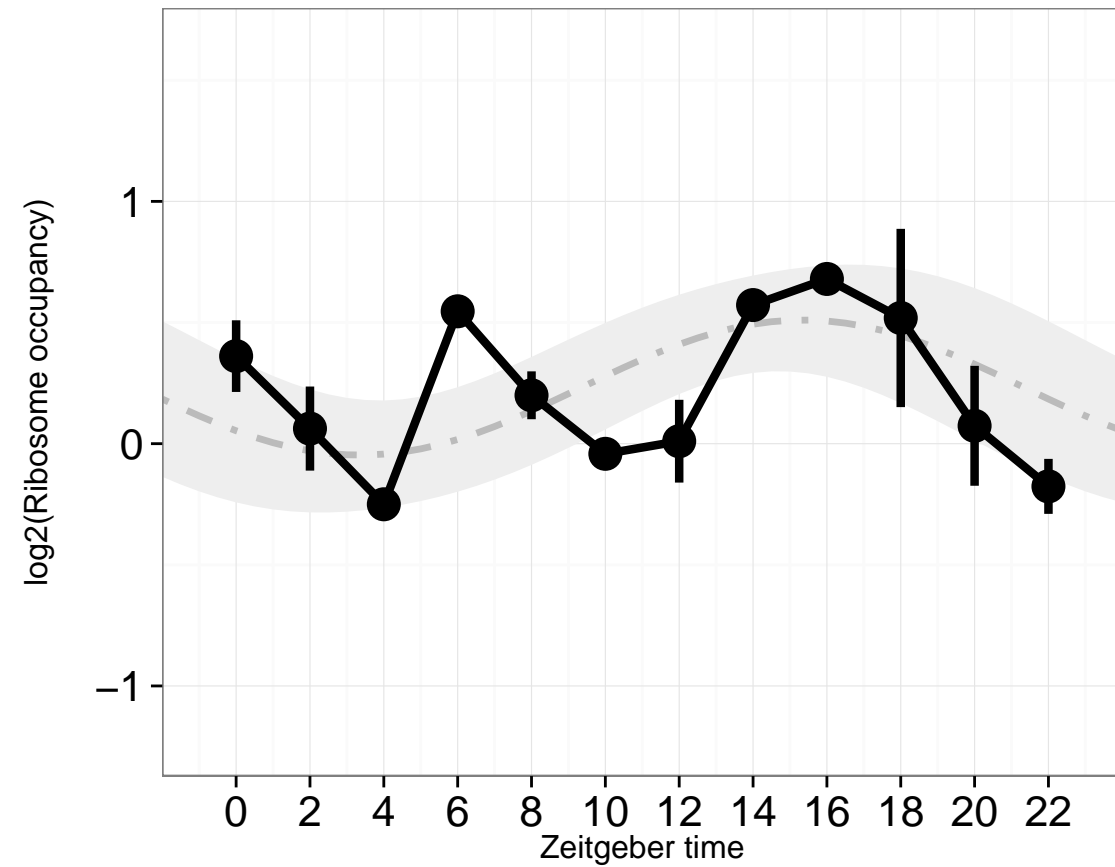

Supplement: SuppDataset_1.zip [file Ccnd3_set_A.pdf › Supplemental Dataset 1/A-mRNA_nonrhyth_translation_nonrhyth/Ccnd3_set_A.pdf]

## Ccndbp1

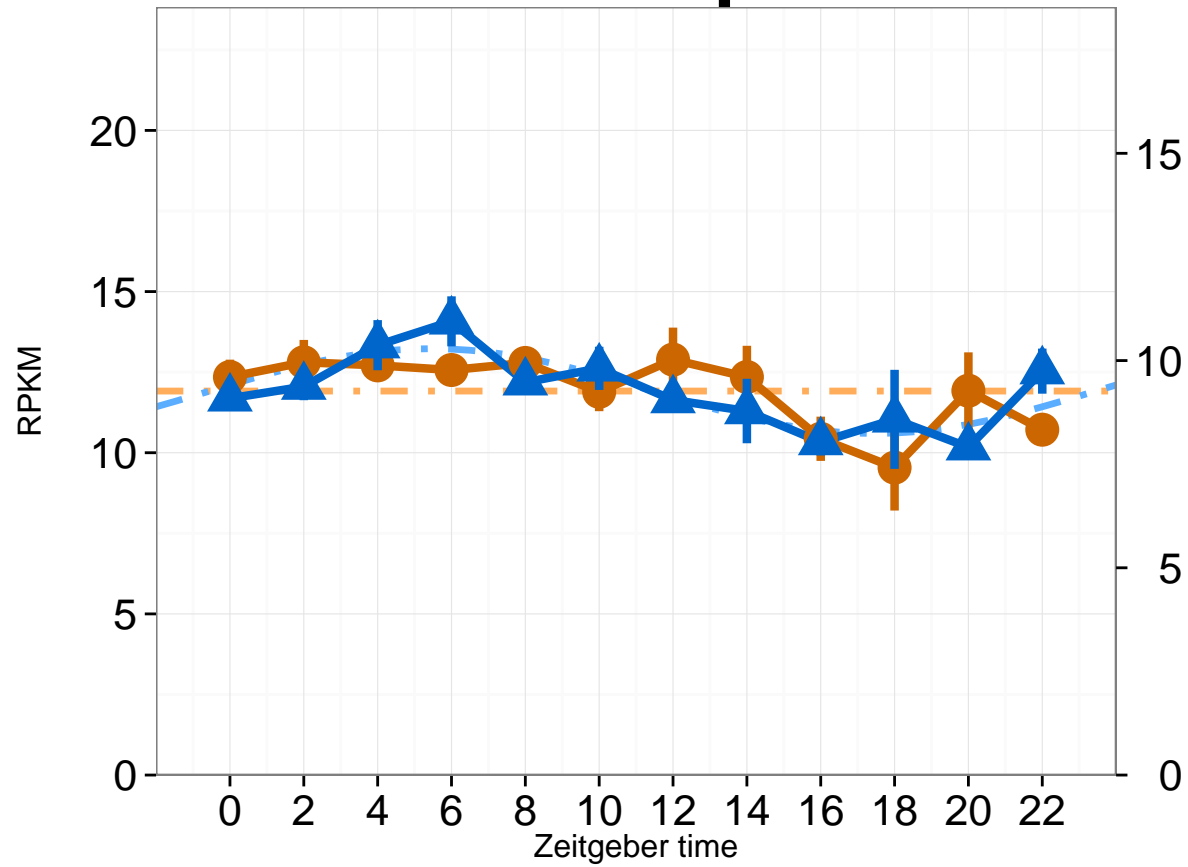

## Ccndbp1

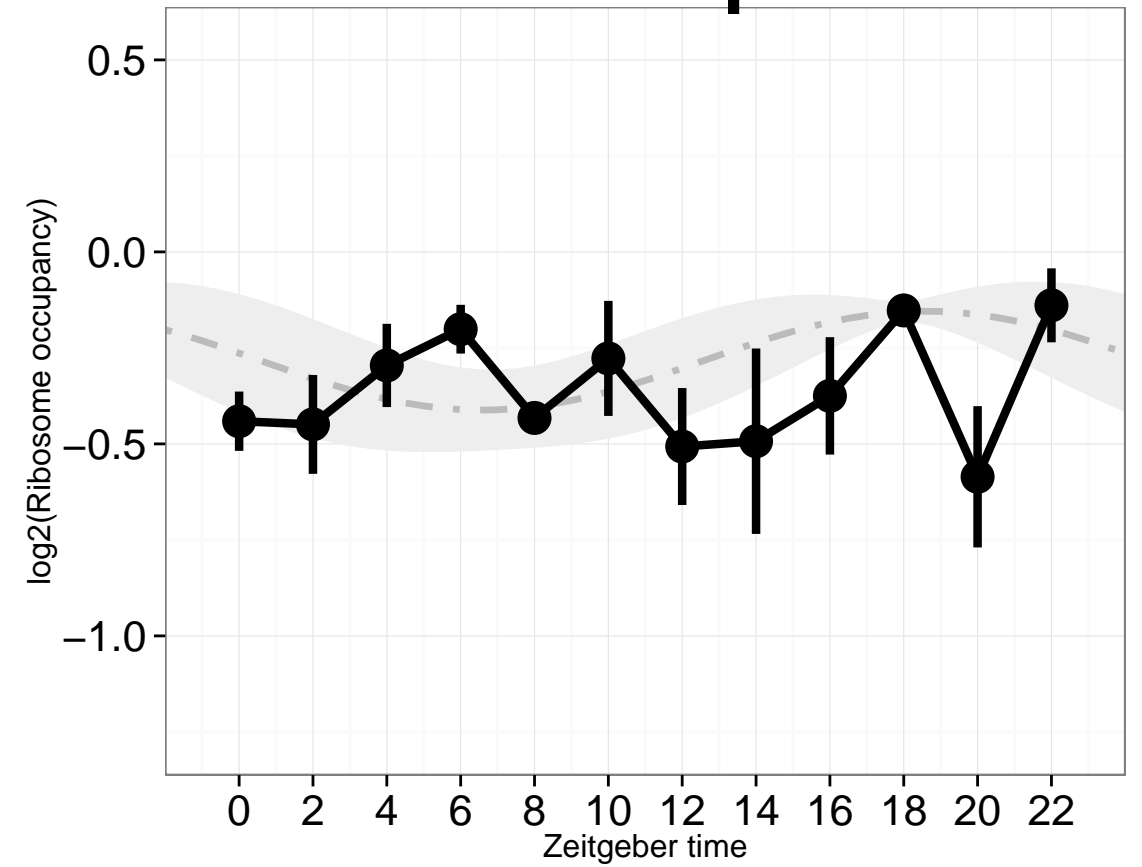

Supplement: SuppDataset_1.zip [file Ccndbp1_set_A.pdf › Supplemental Dataset 1/A-mRNA_nonrhyth_translation_nonrhyth/Ccndbp1_set_A.pdf]

# Ccng1

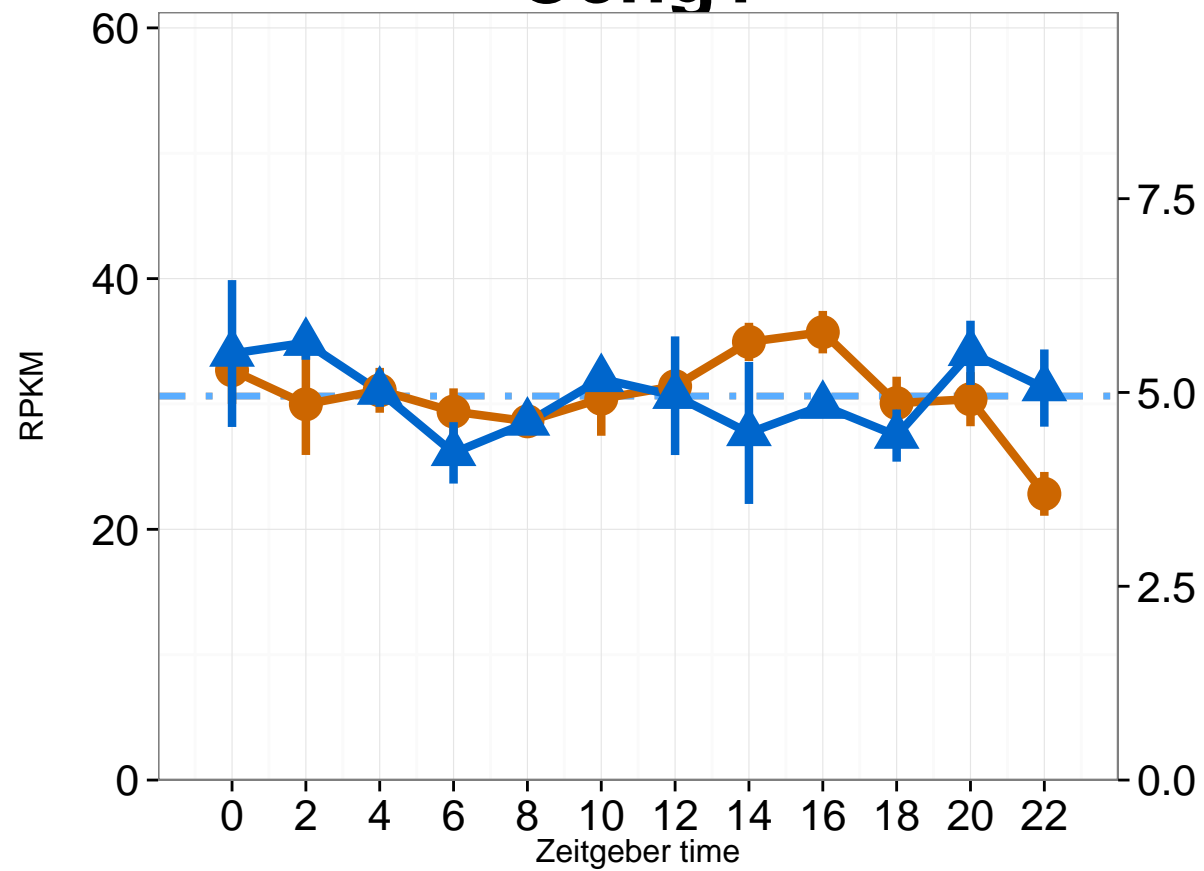

# Ccng1

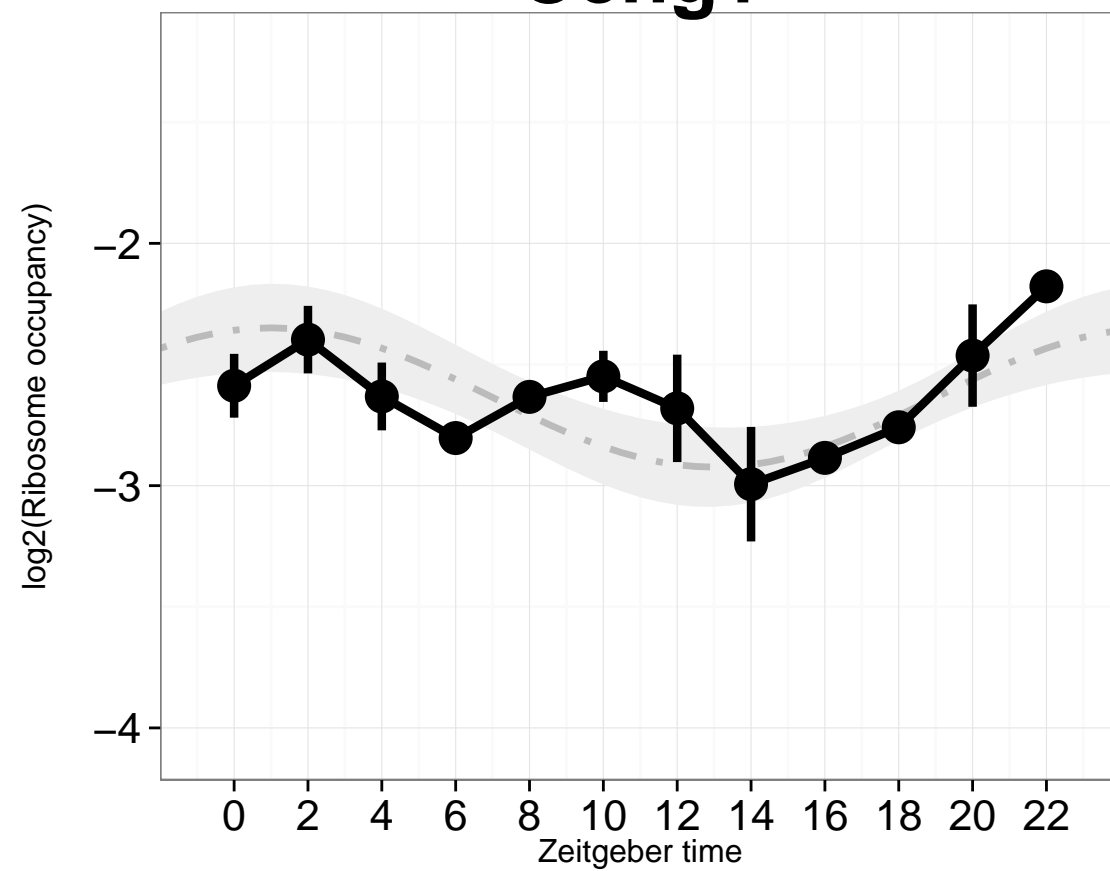

Supplement: SuppDataset_1.zip [file Ccng1_set_A.pdf › Supplemental Dataset 1/A-mRNA_nonrhyth_translation_nonrhyth/Ccng1_set_A.pdf]

## Ccnh

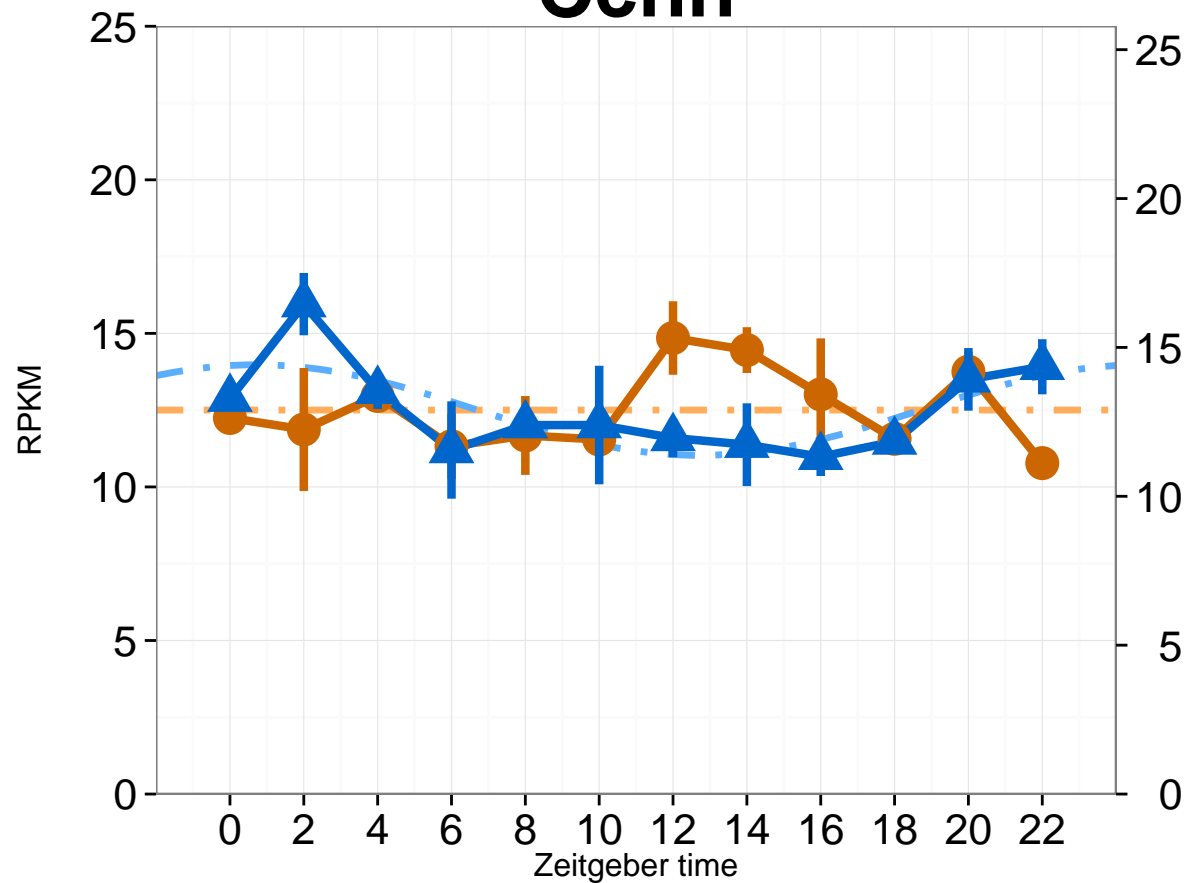

## Ccnh

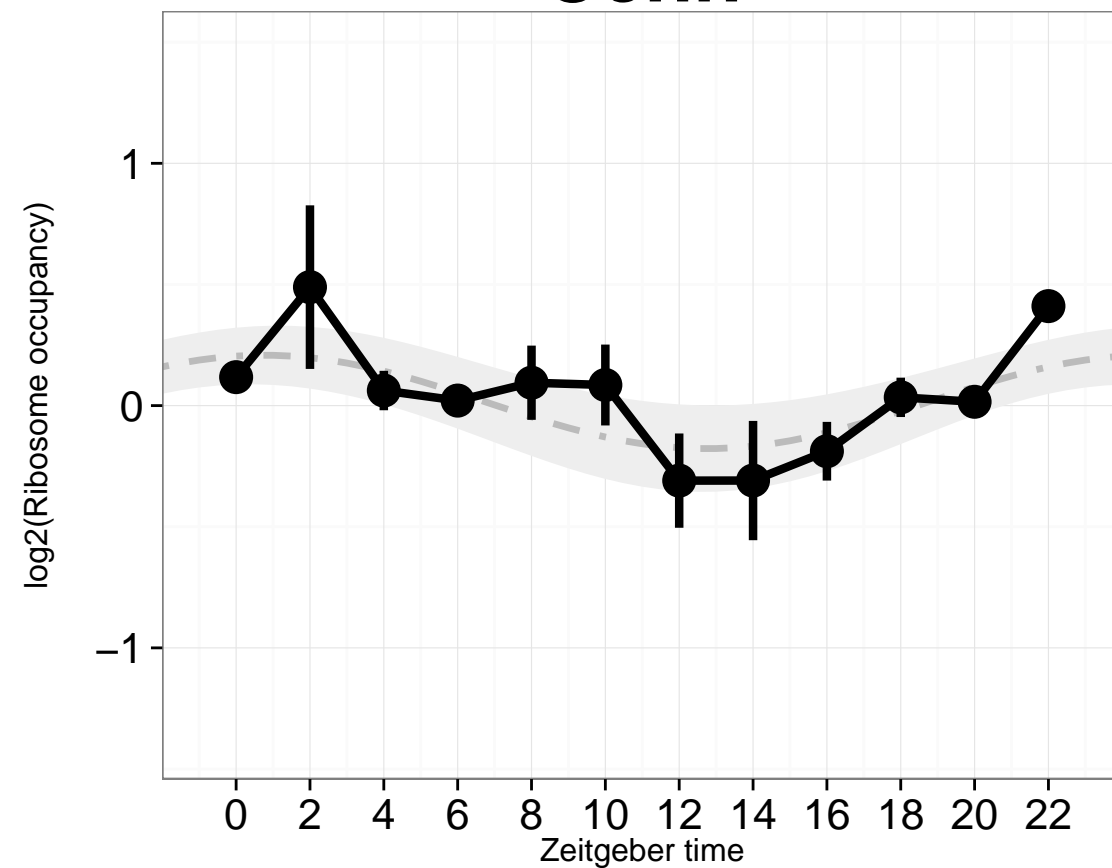

Supplement: SuppDataset_1.zip [file Ccnh_set_A.pdf › Supplemental Dataset 1/A-mRNA_nonrhyth_translation_nonrhyth/Ccnh_set_A.pdf]

# Ccnj

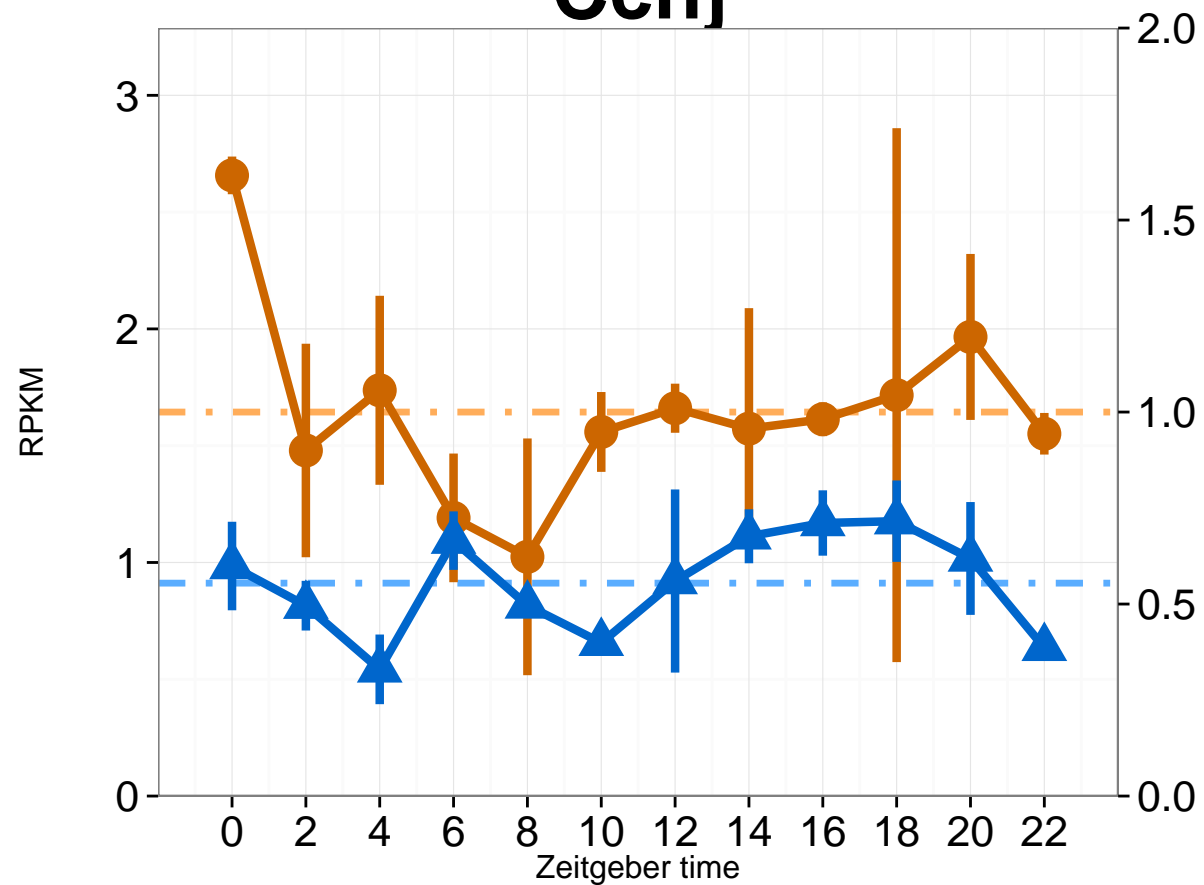

# Ccnj

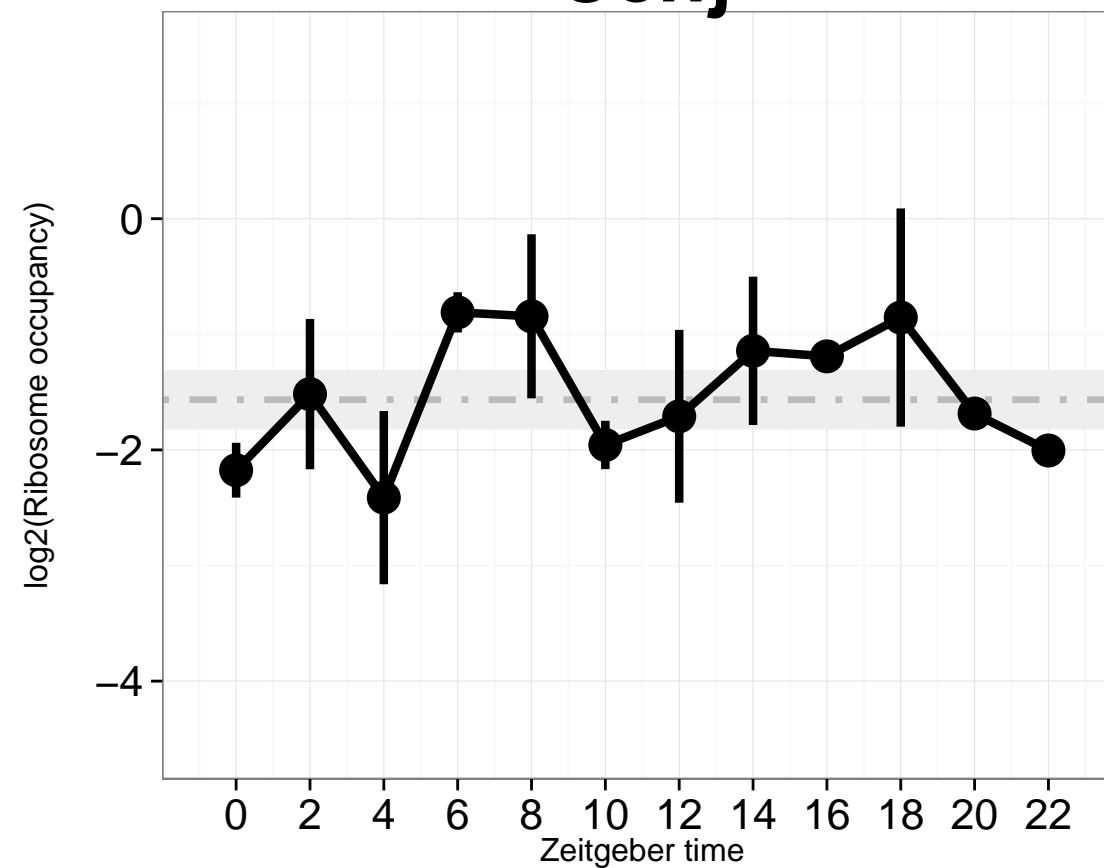

Supplement: SuppDataset_1.zip [file Ccnj_set_A.pdf › Supplemental Dataset 1/A-mRNA_nonrhyth_translation_nonrhyth/Ccnj_set_A.pdf]

## Ccnk

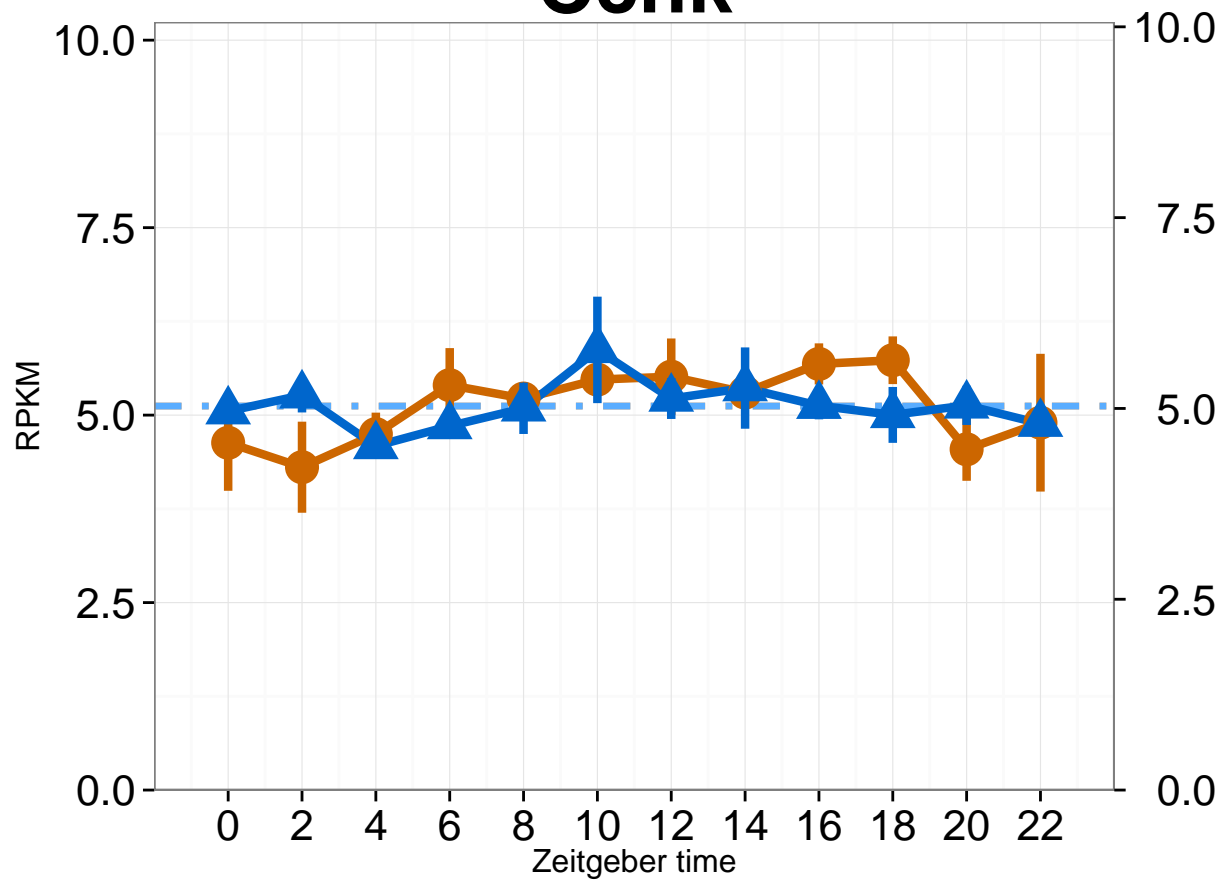

## Ccnk

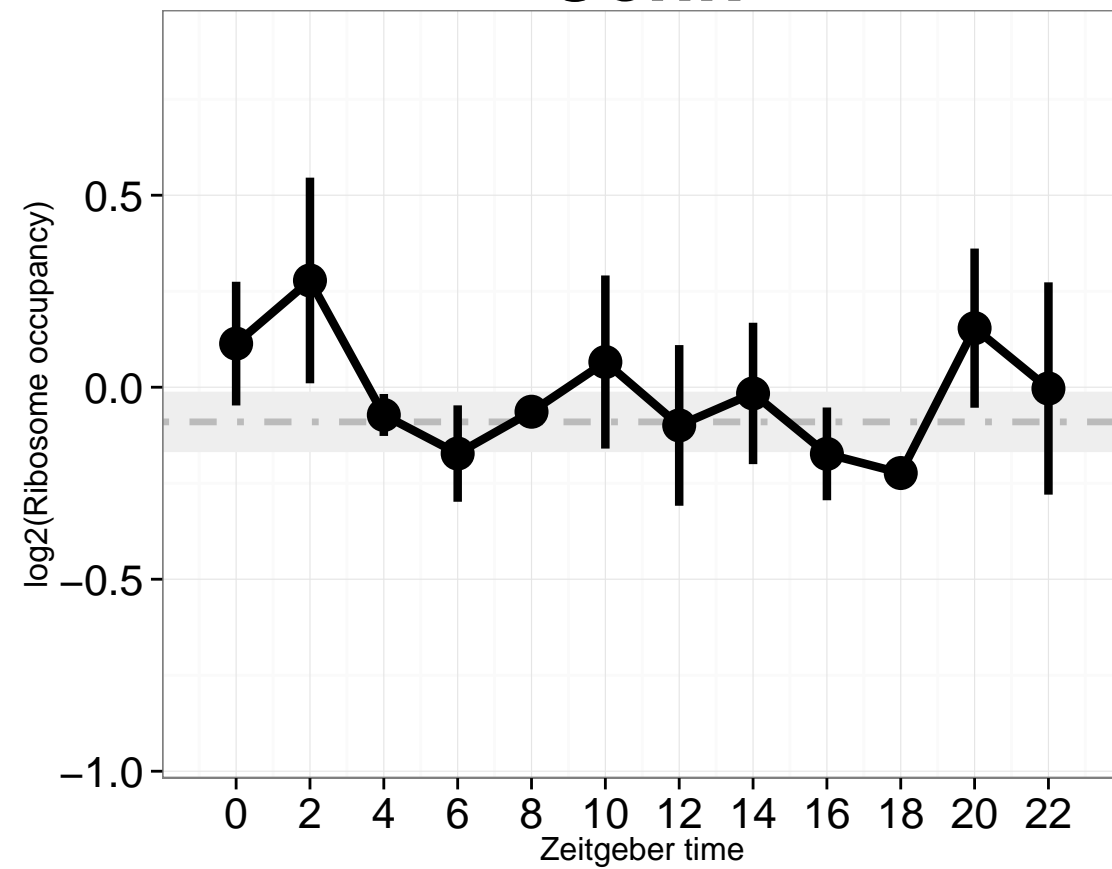

Supplement: SuppDataset_1.zip [file Ccnk_set_A.pdf › Supplemental Dataset 1/A-mRNA_nonrhyth_translation_nonrhyth/Ccnk_set_A.pdf]

# Ccn1

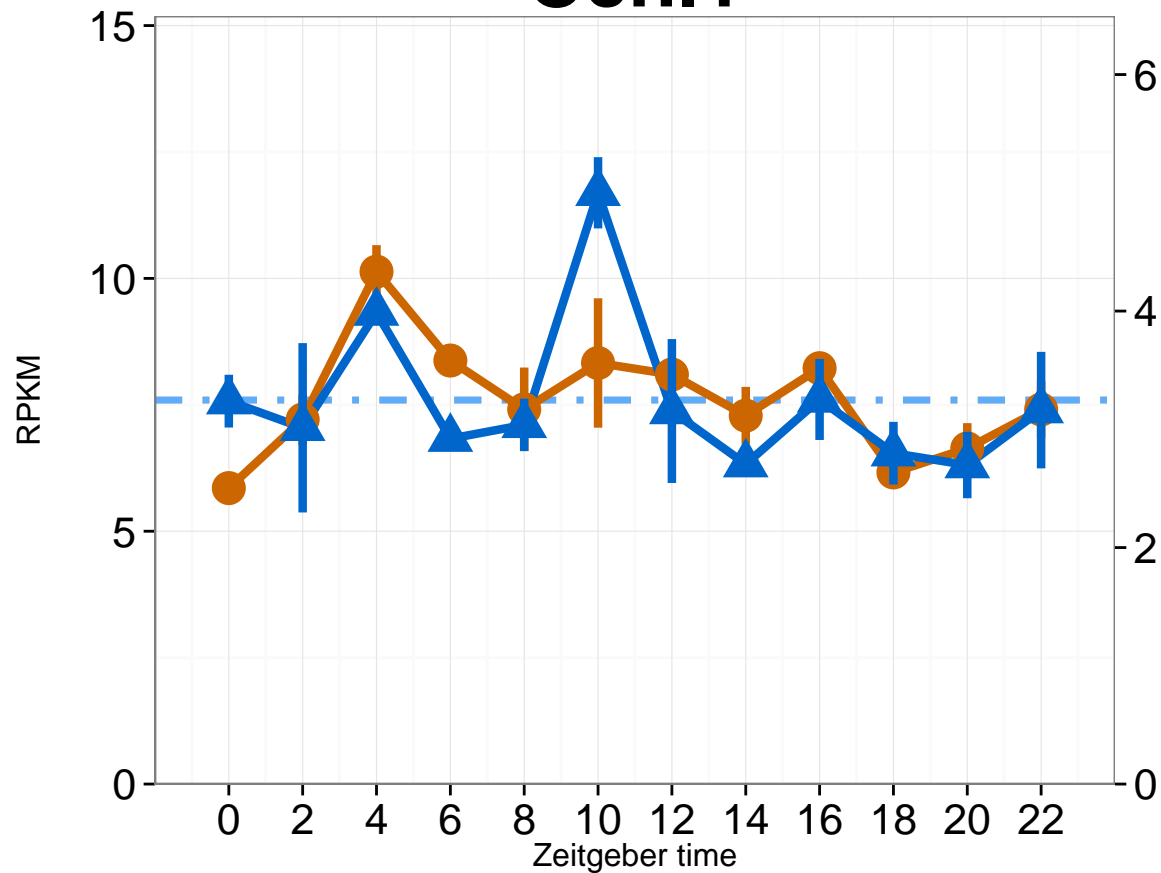

# Ccn1

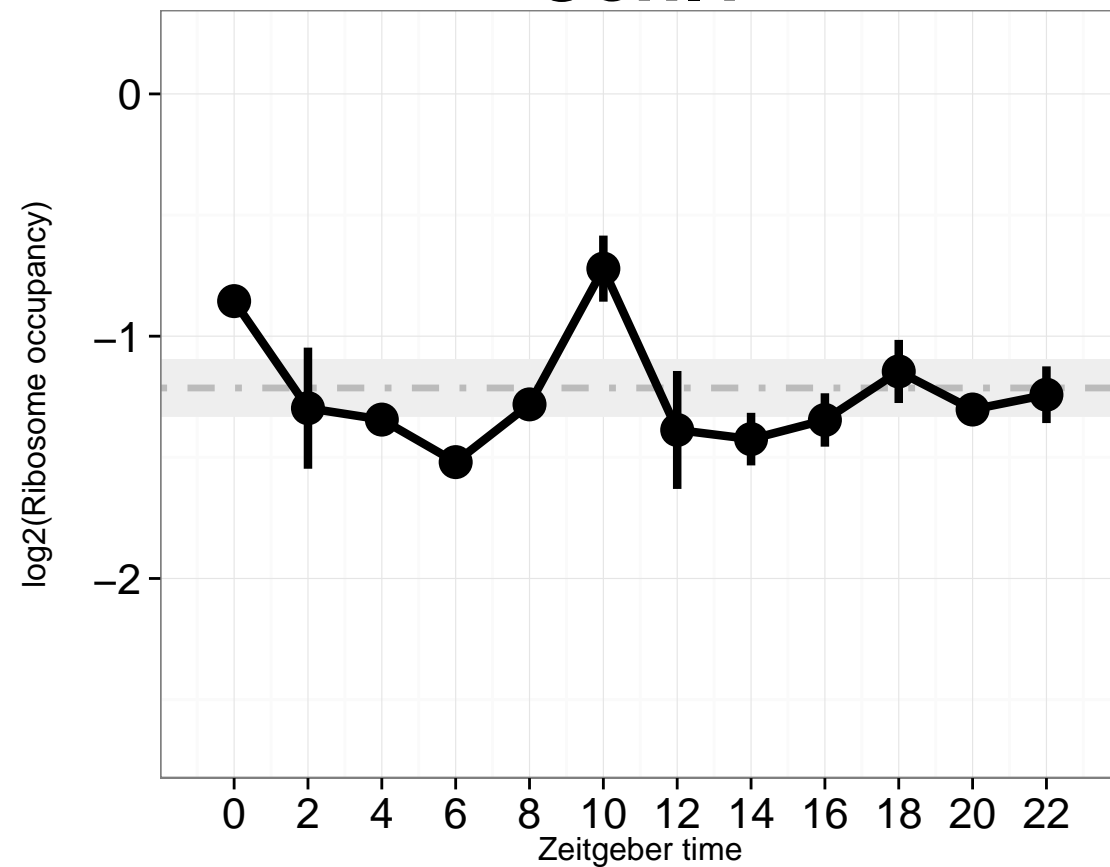

Supplement: SuppDataset_1.zip [file Ccnl1_set_A.pdf › Supplemental Dataset 1/A-mRNA_nonrhyth_translation_nonrhyth/Ccnl1_set_A.pdf]

## Ccnl2

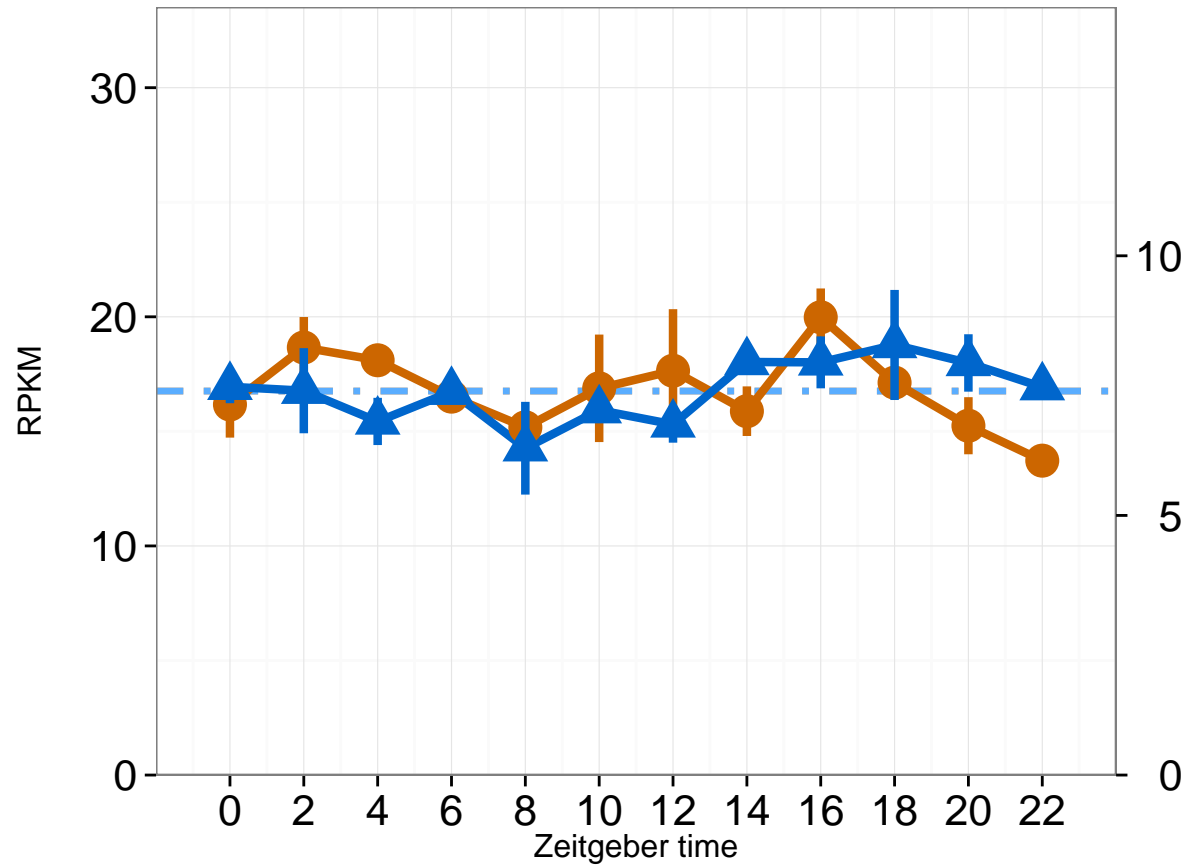

## Ccnl2

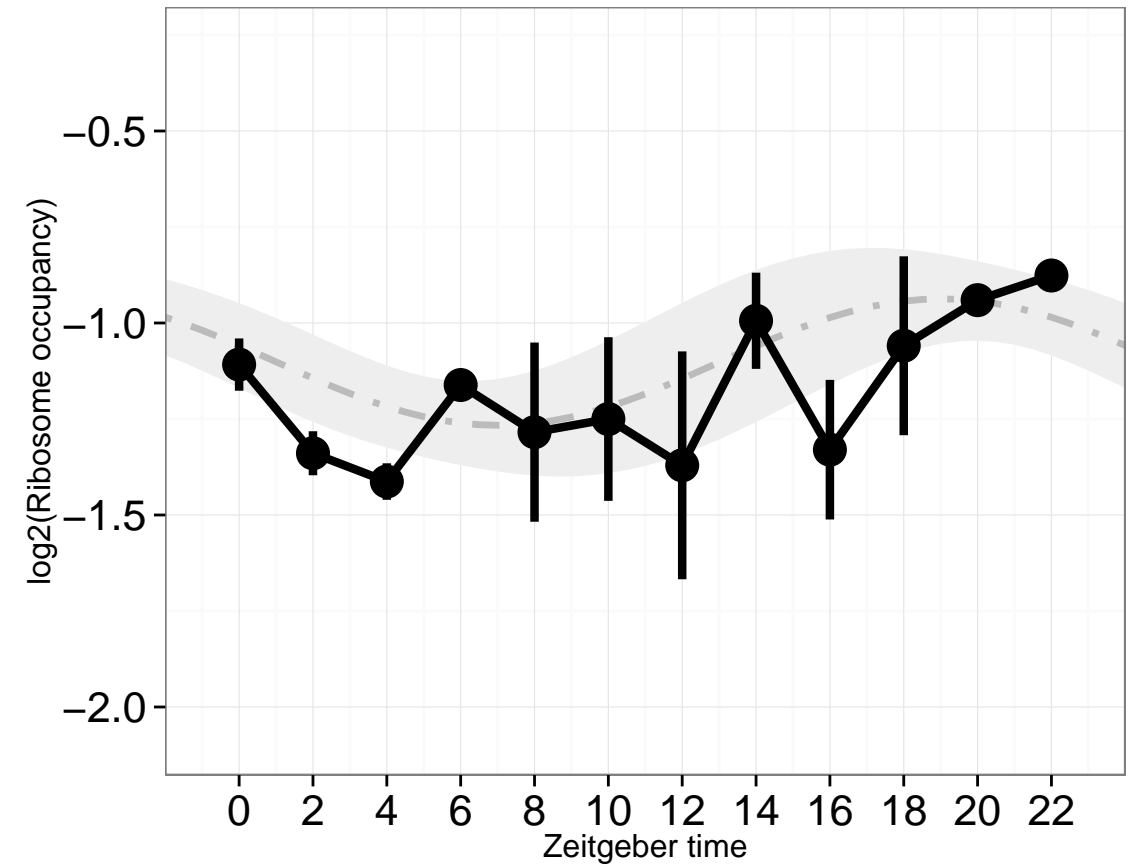

Supplement: SuppDataset_1.zip [file Ccnl2_set_A.pdf › Supplemental Dataset 1/A-mRNA_nonrhyth_translation_nonrhyth/Ccnl2_set_A.pdf]

# Ccnt1

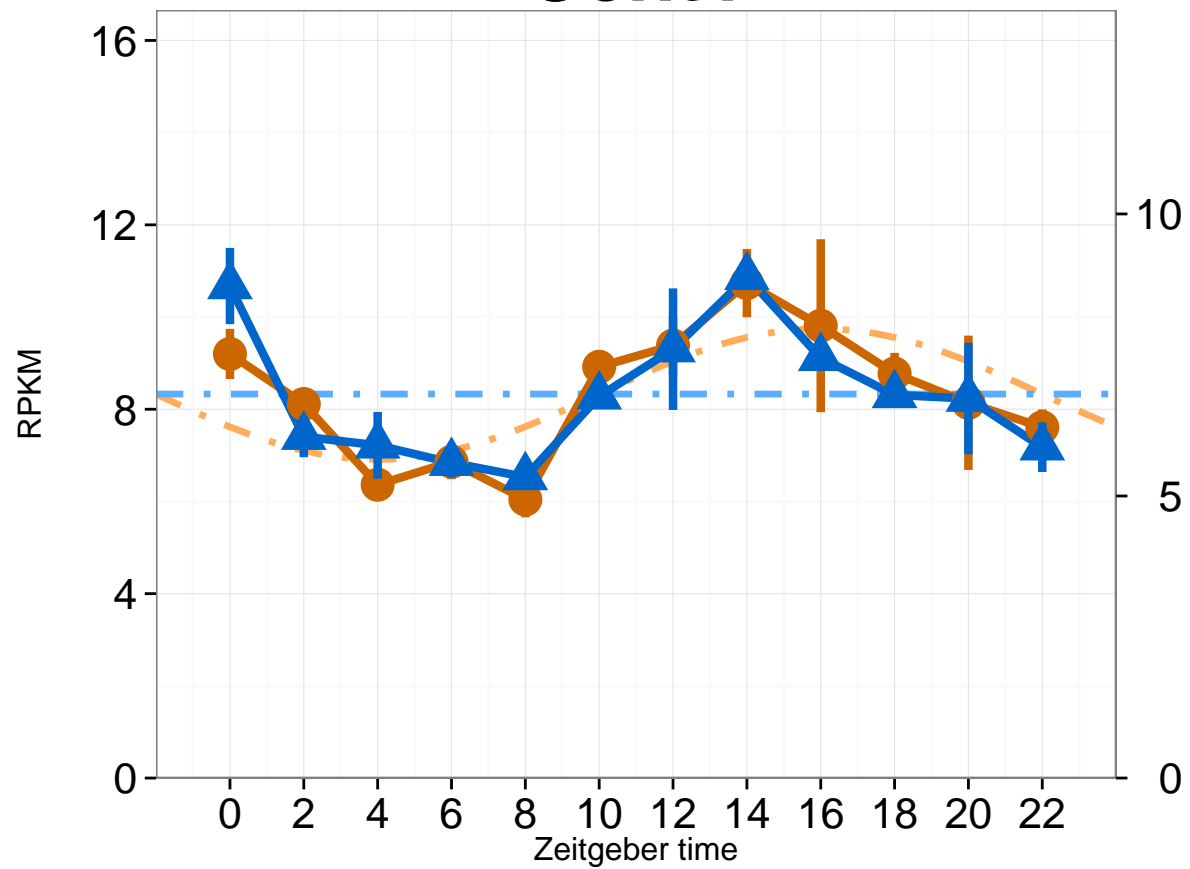

# Ccnt1

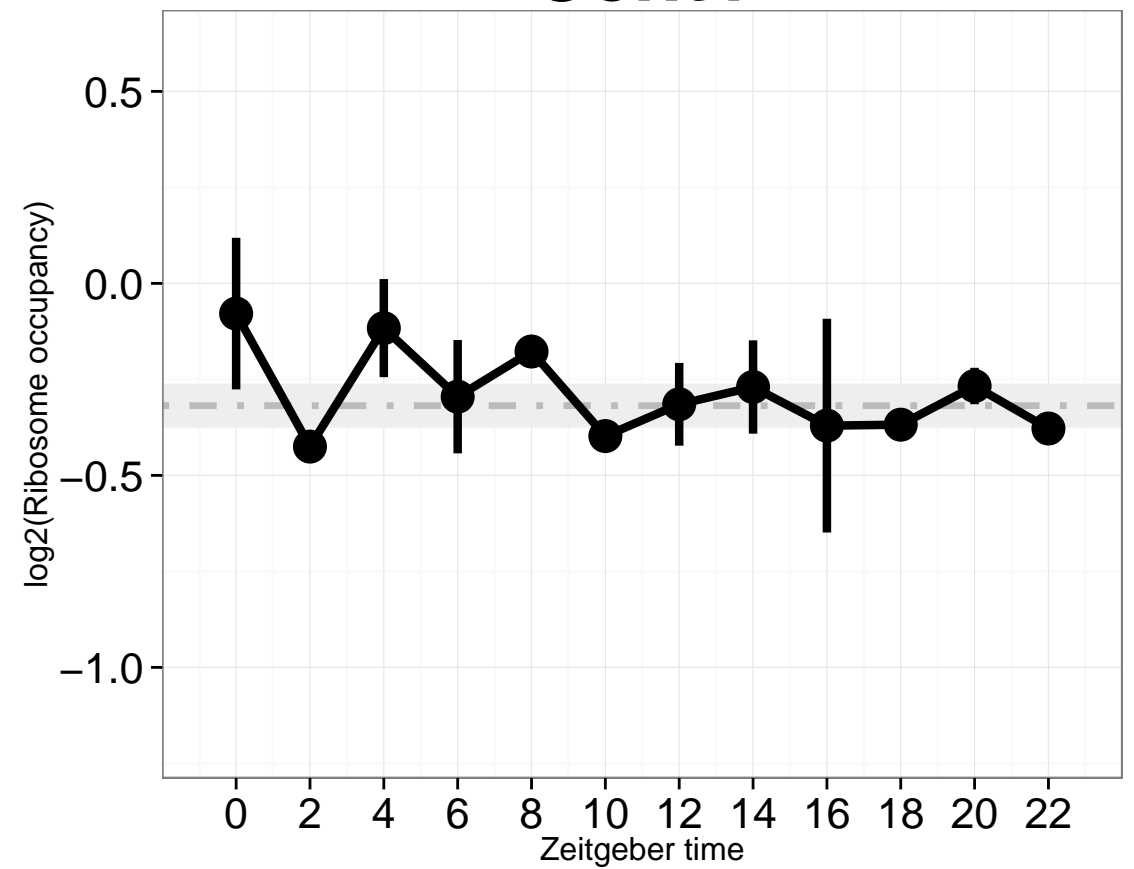

Supplement: SuppDataset_1.zip [file Ccnt1_set_A.pdf › Supplemental Dataset 1/A-mRNA_nonrhyth_translation_nonrhyth/Ccnt1_set_A.pdf]

# Ccnt2

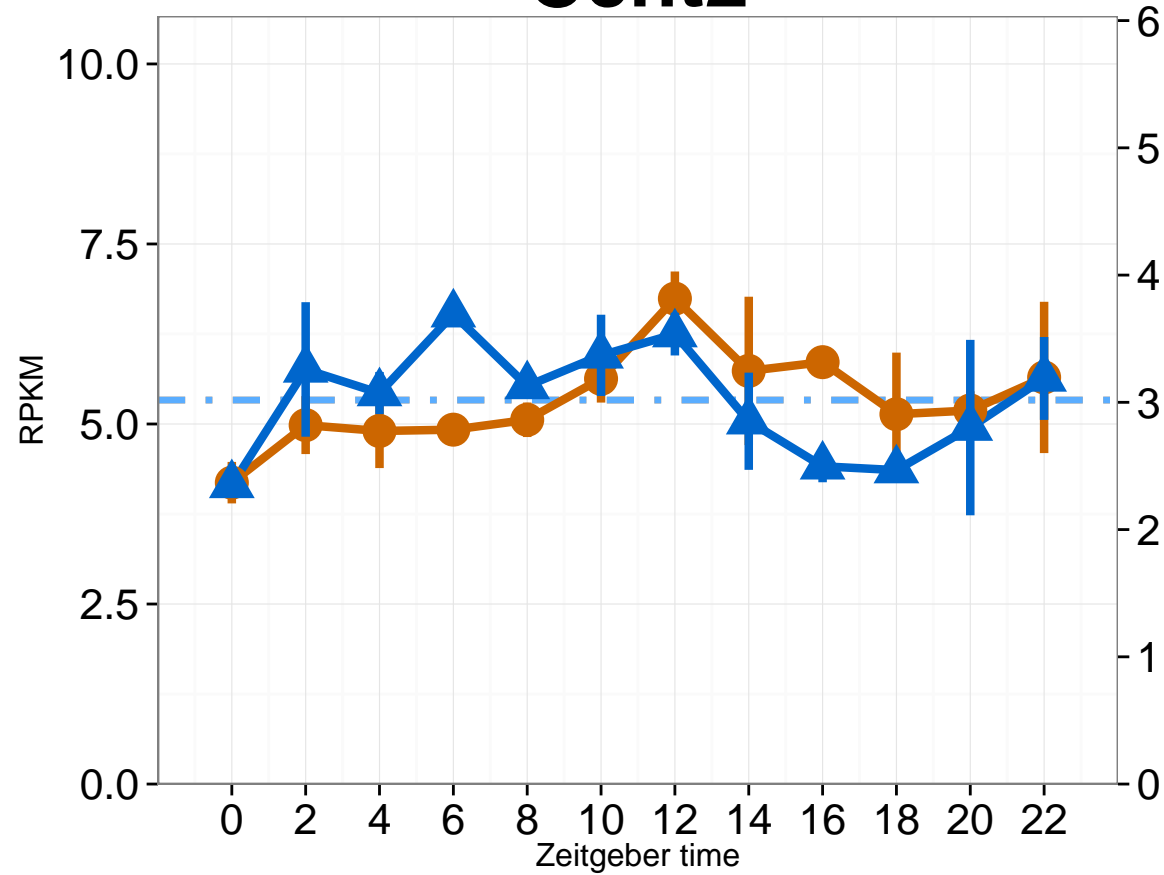

# Ccnt2

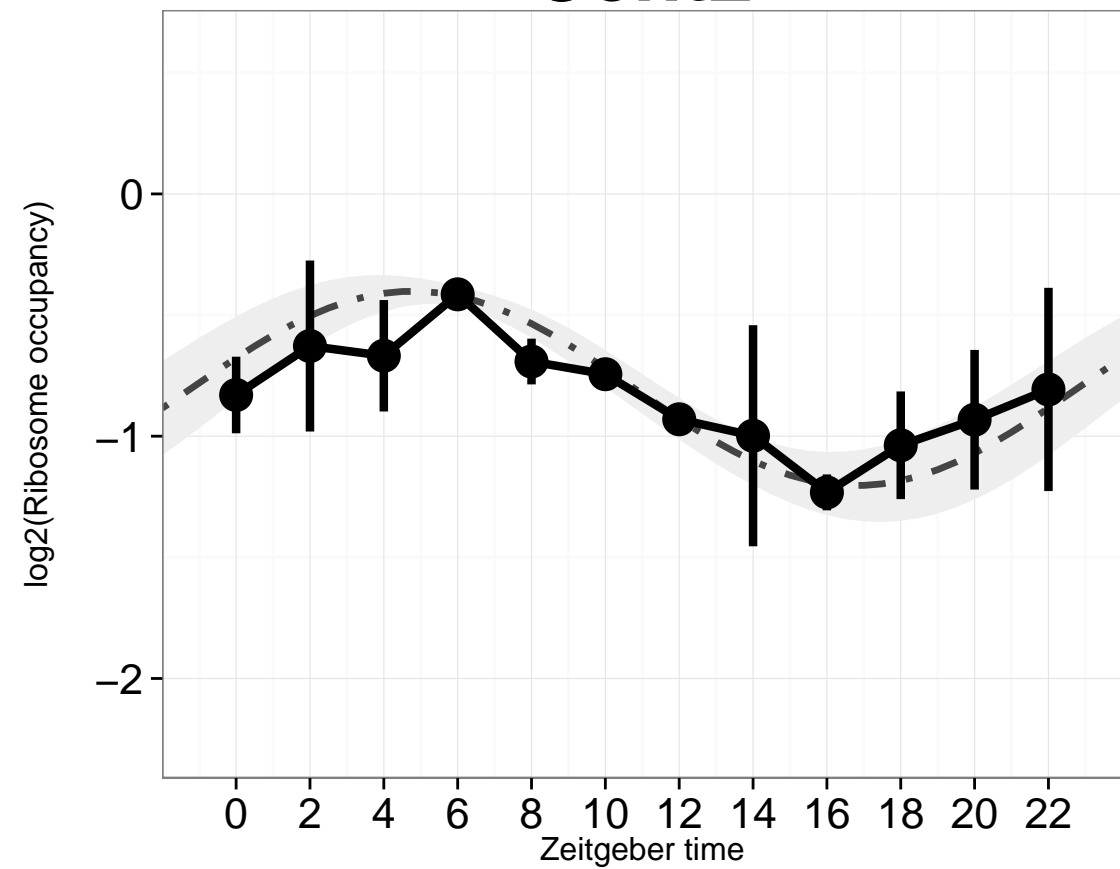

Supplement: SuppDataset_1.zip [file Ccnt2_set_A.pdf › Supplemental Dataset 1/A-mRNA_nonrhyth_translation_nonrhyth/Ccnt2_set_A.pdf]

## Ccny

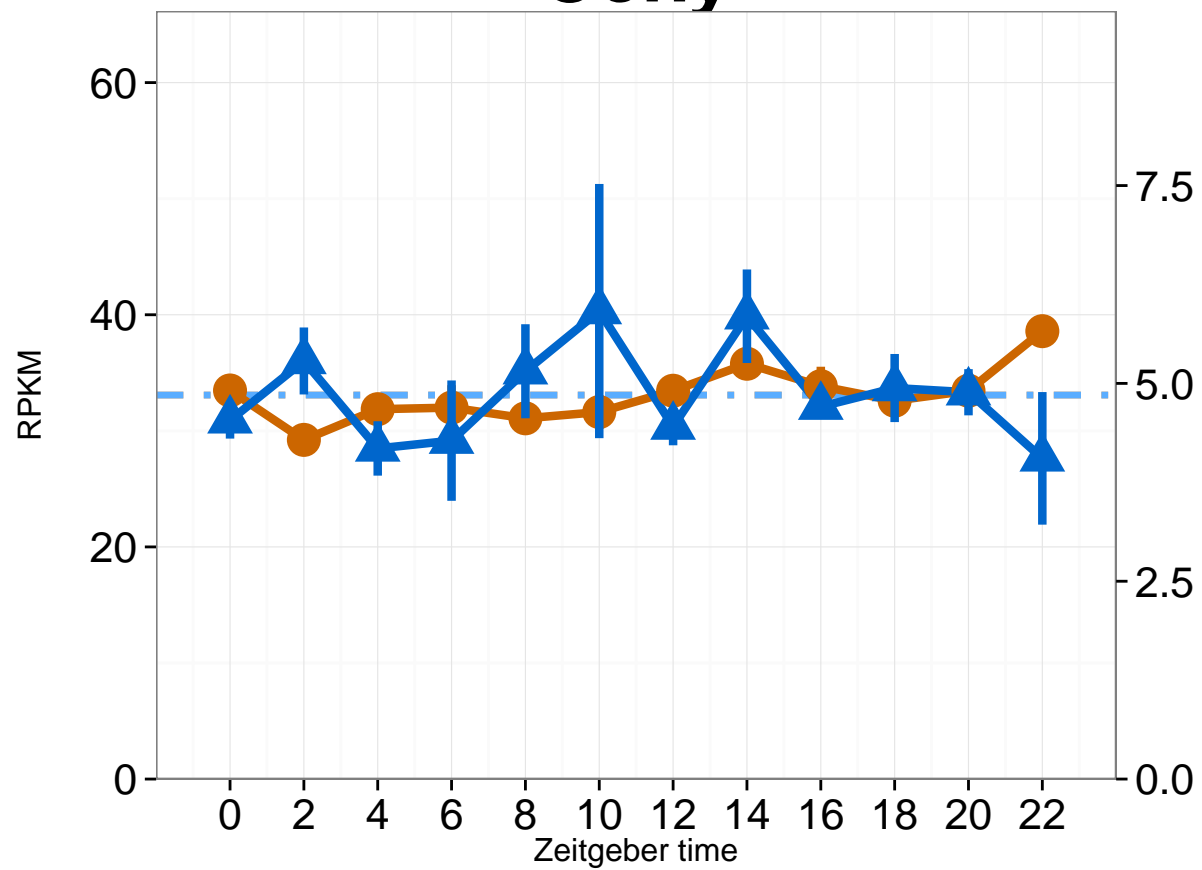

## Ccny

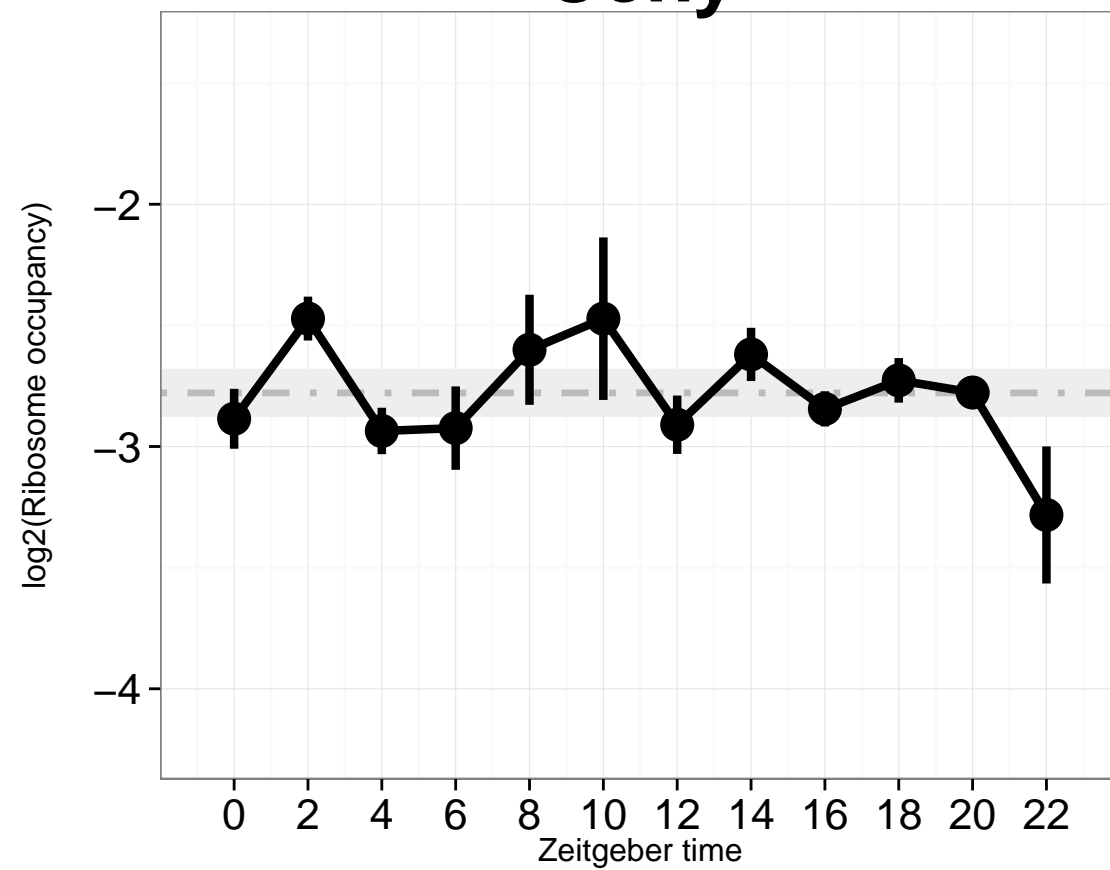

Supplement: SuppDataset_1.zip [file Ccny_set_A.pdf › Supplemental Dataset 1/A-mRNA_nonrhyth_translation_nonrhyth/Ccny_set_A.pdf]

# Ccpg1

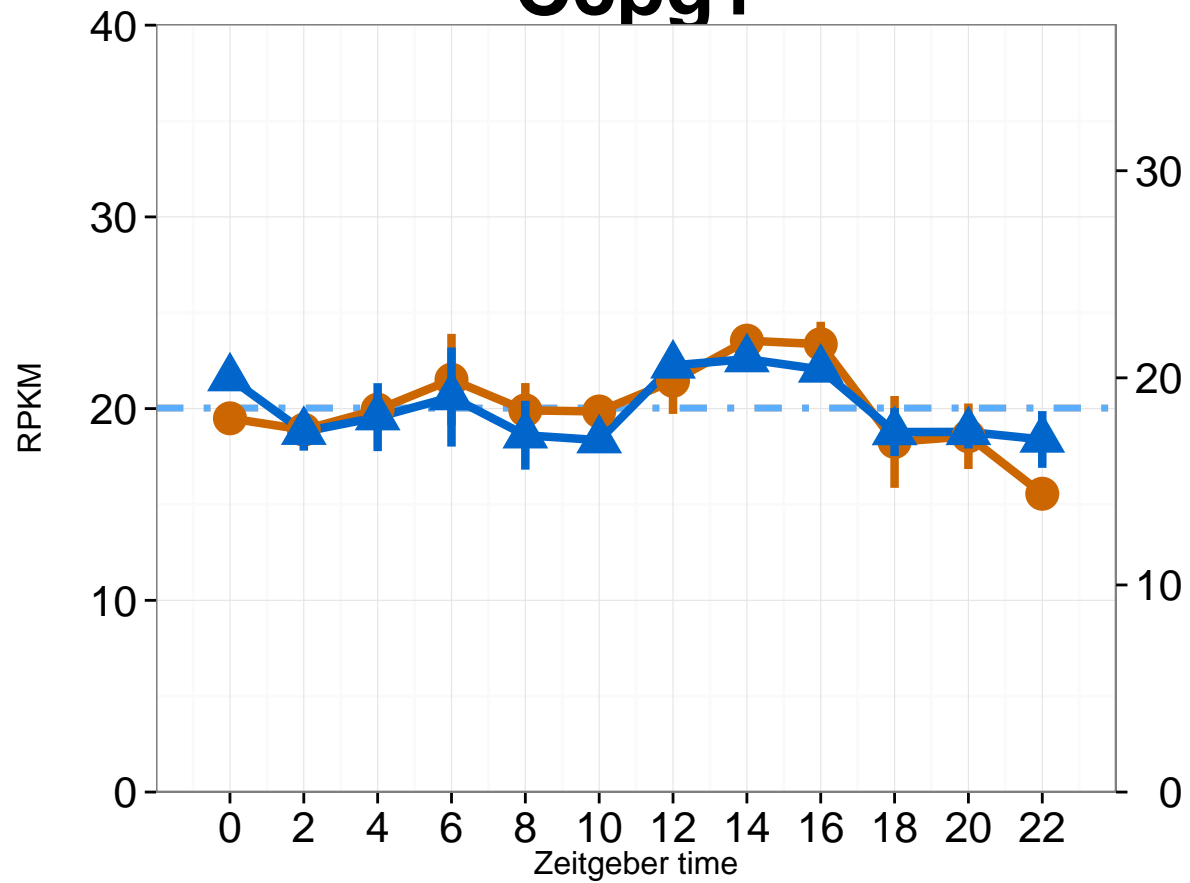

# Ccpg1

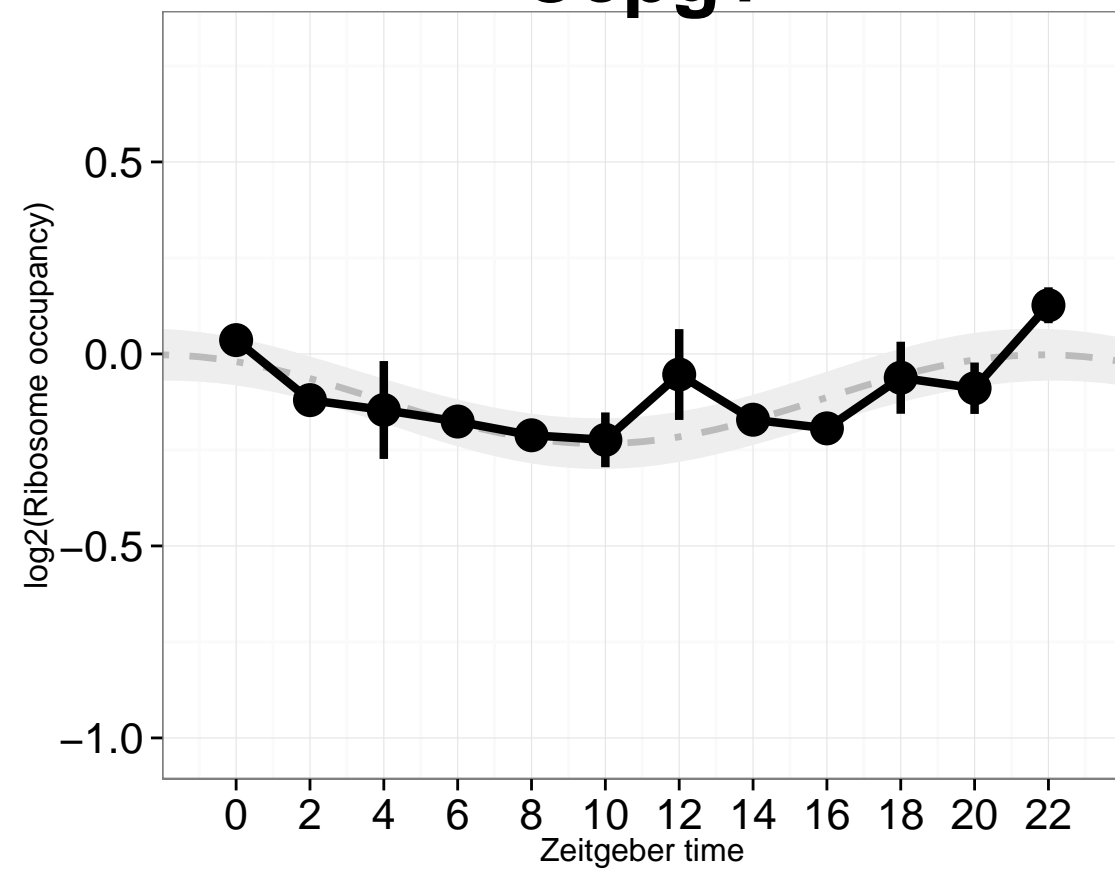

Supplement: SuppDataset_1.zip [file Ccpg1_set_A.pdf › Supplemental Dataset 1/A-mRNA_nonrhyth_translation_nonrhyth/Ccpg1_set_A.pdf]

## Ccr2

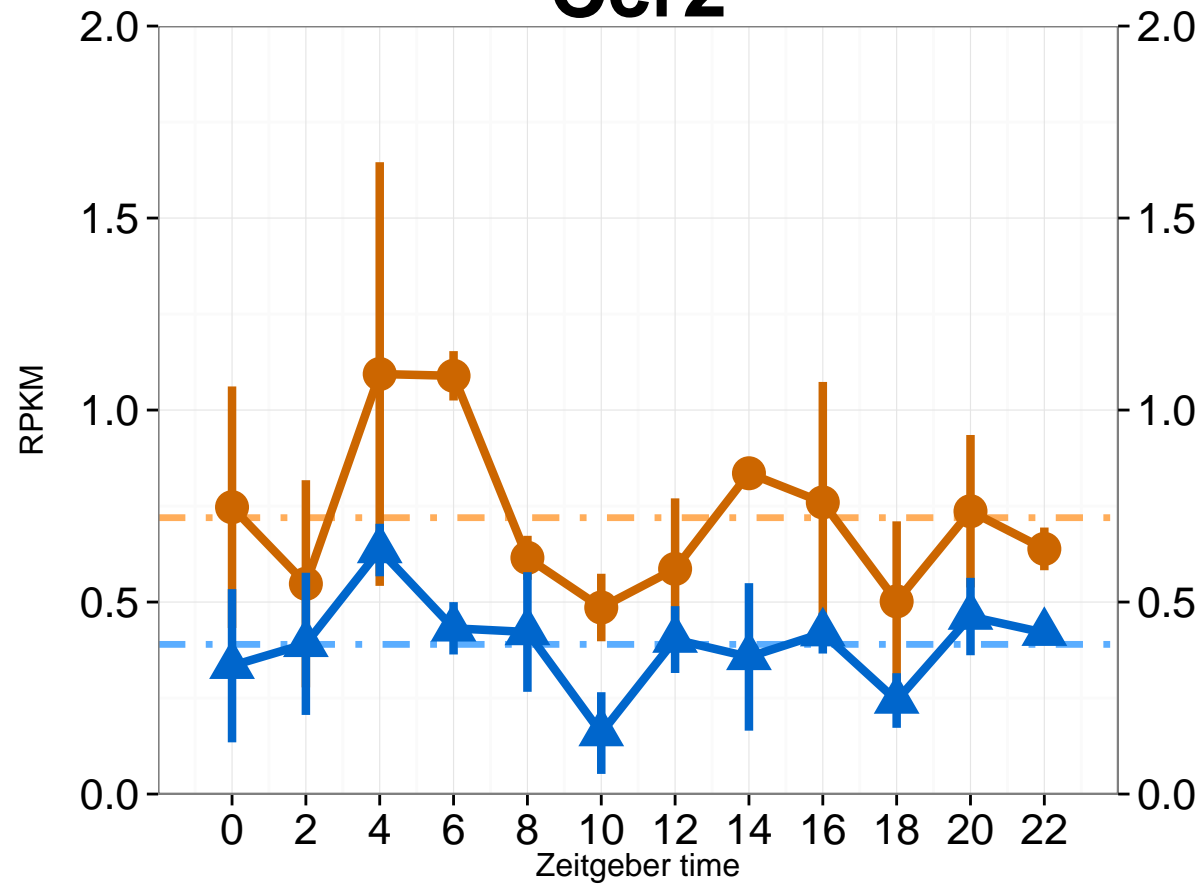

## Ccr2

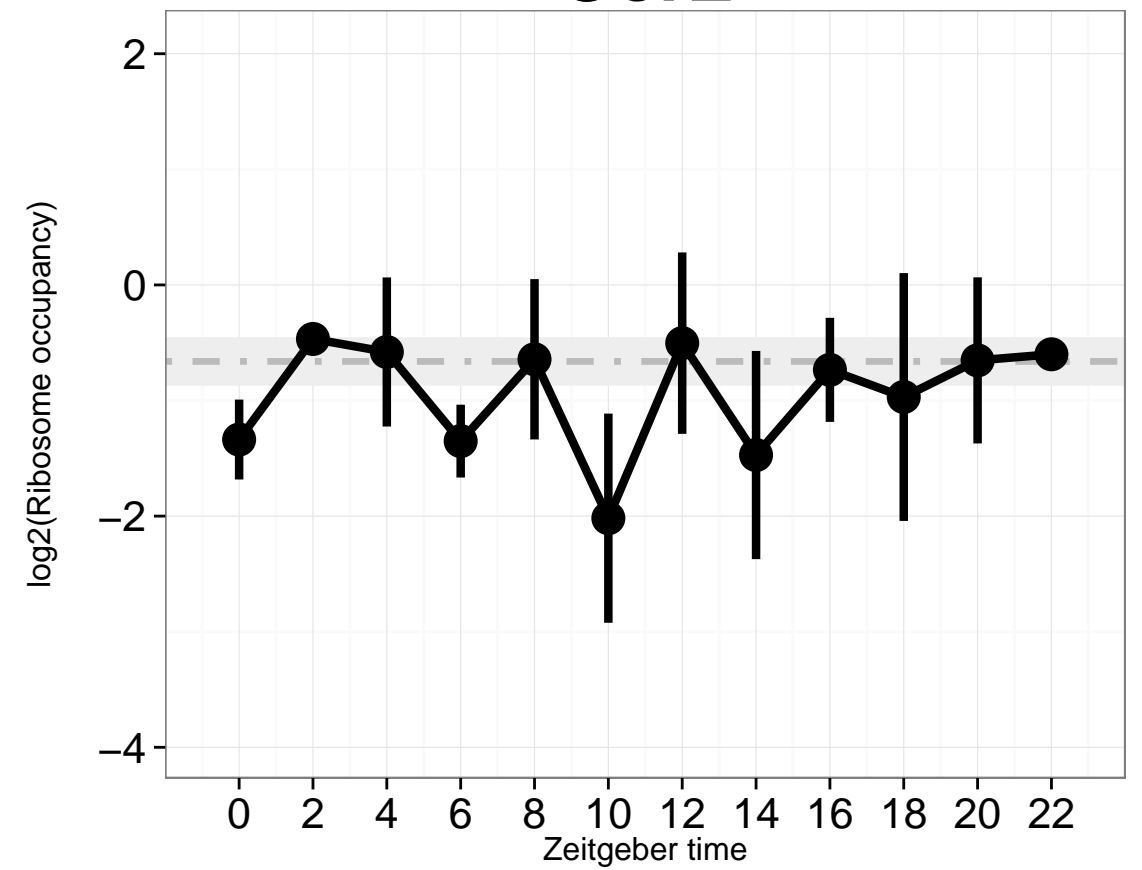

Supplement: SuppDataset_1.zip [file Ccr2_set_A.pdf › Supplemental Dataset 1/A-mRNA_nonrhyth_translation_nonrhyth/Ccr2_set_A.pdf]

## Ccr5

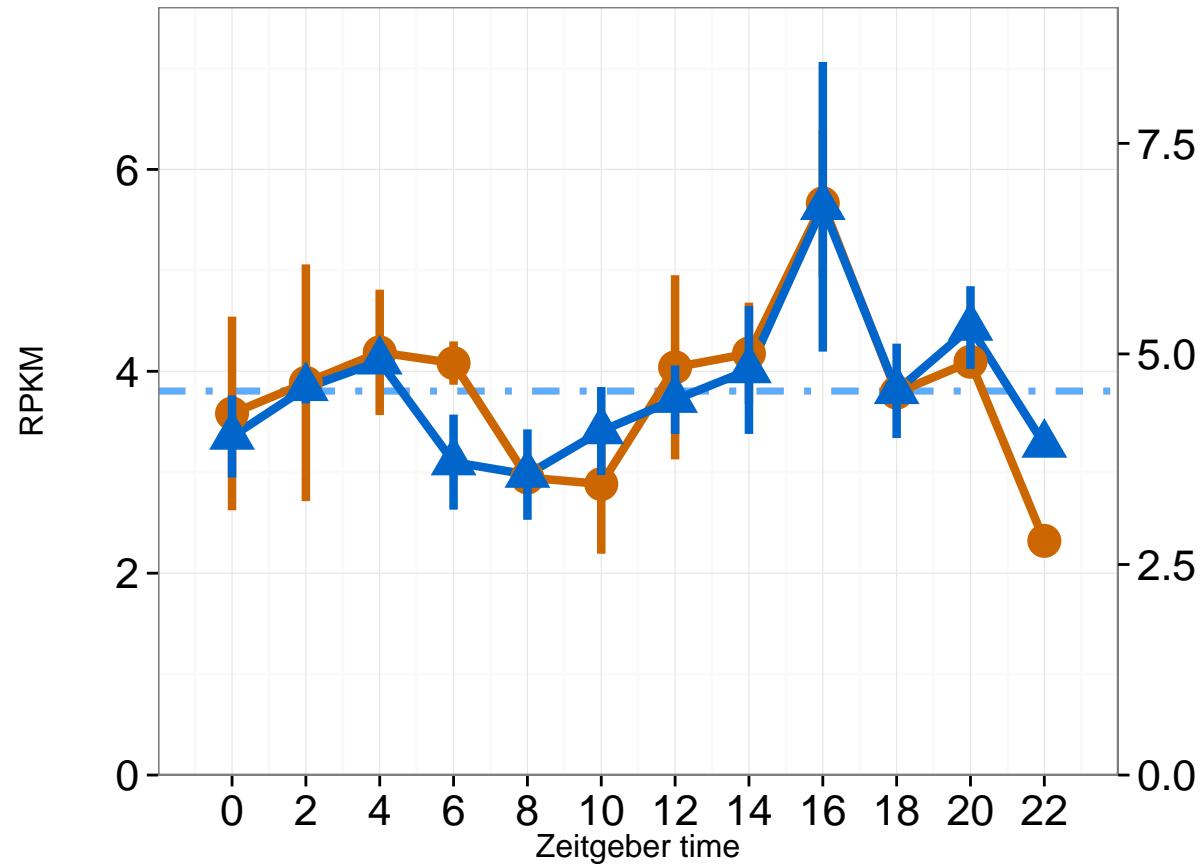

## Ccr5

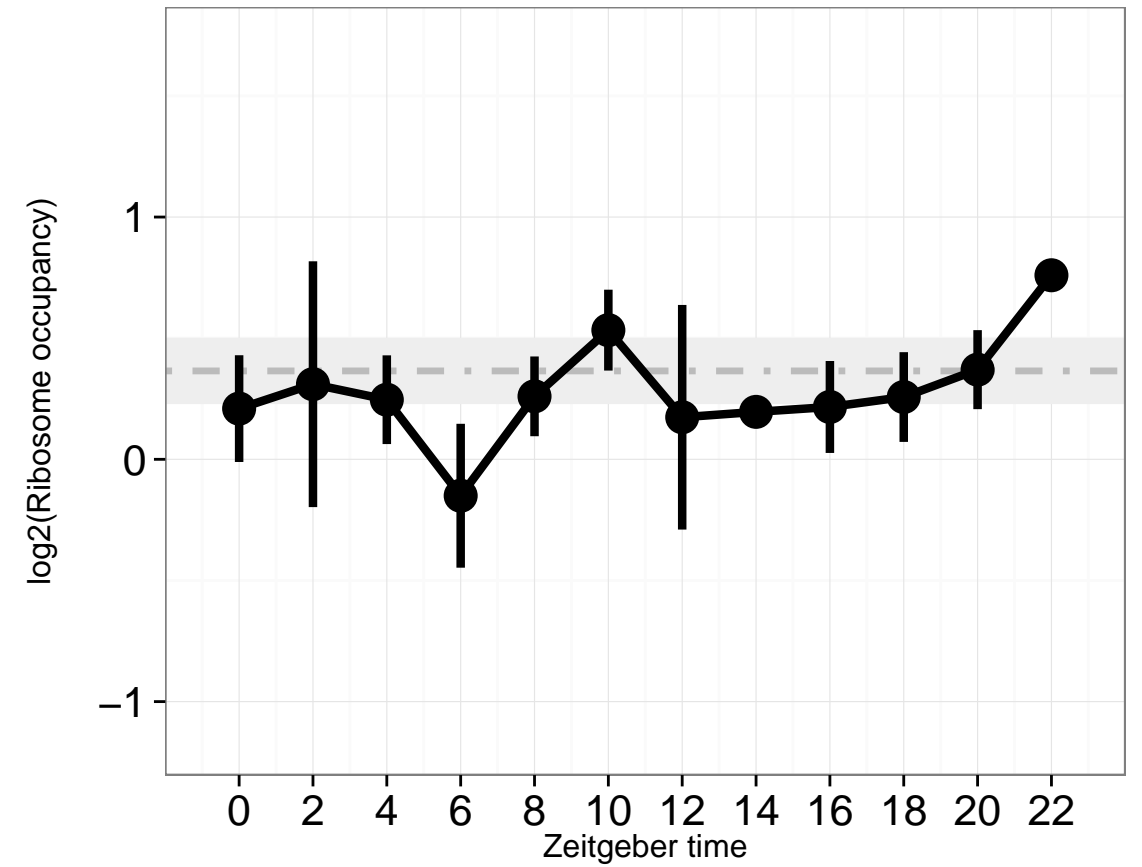

Supplement: SuppDataset_1.zip [file Ccr5_set_A.pdf › Supplemental Dataset 1/A-mRNA_nonrhyth_translation_nonrhyth/Ccr5_set_A.pdf]

## Ccr12

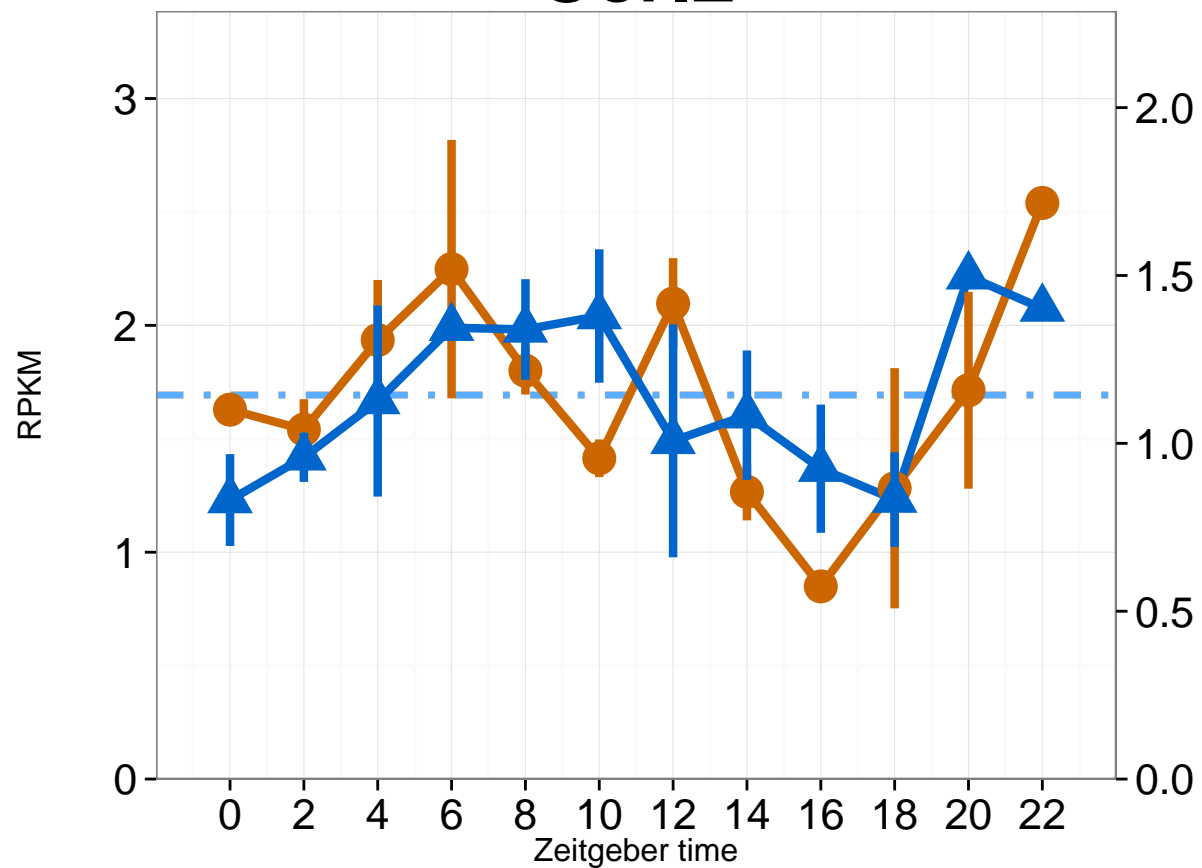

## Ccr12

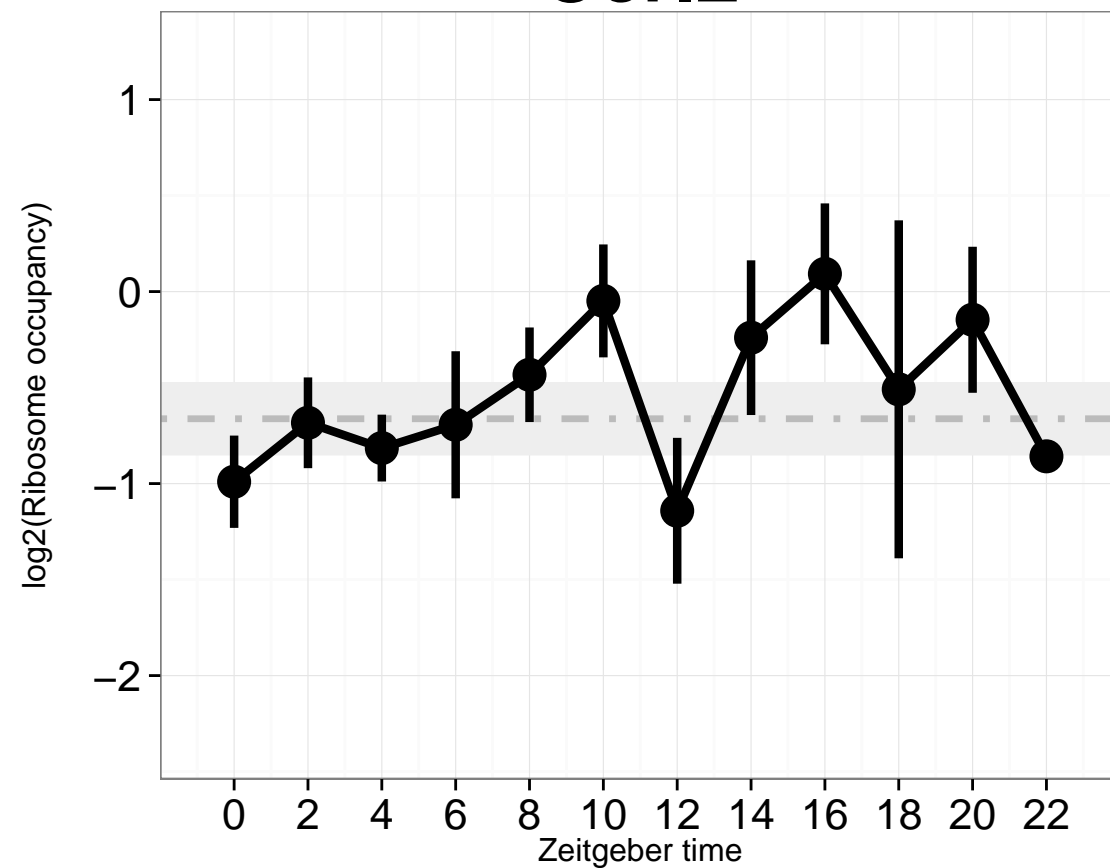

Supplement: SuppDataset_1.zip [file Ccrl2_set_A.pdf › Supplemental Dataset 1/A-mRNA_nonrhyth_translation_nonrhyth/Ccrl2_set_A.pdf]

## Ccs

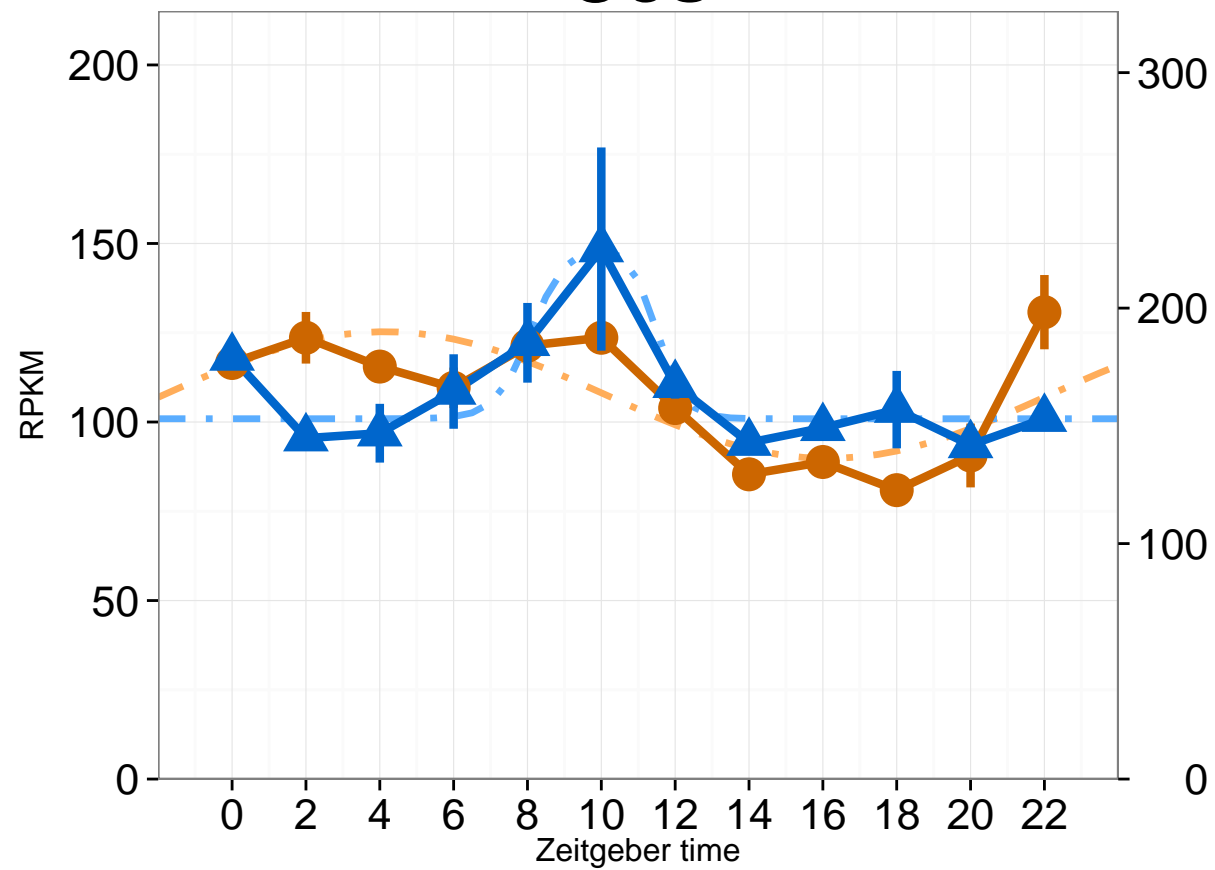

## Ccs

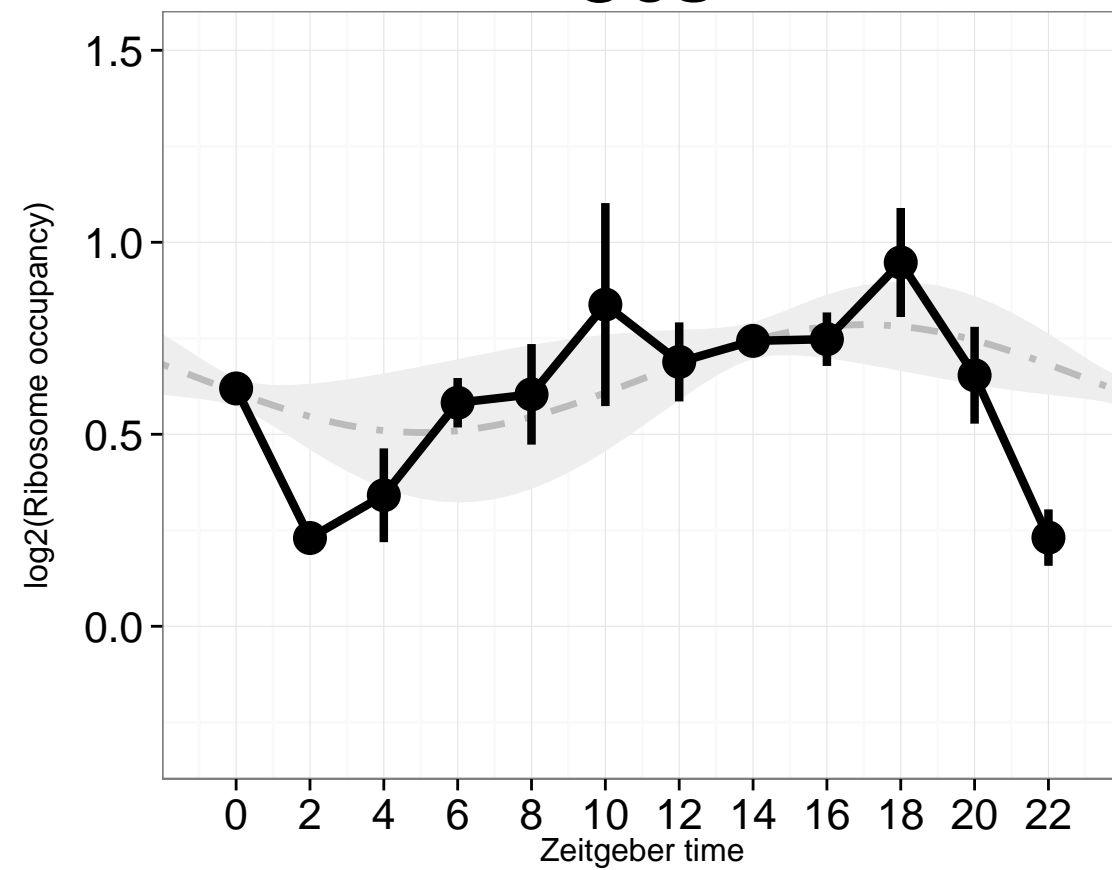

Supplement: SuppDataset_1.zip [file Ccs_set_A.pdf › Supplemental Dataset 1/A-mRNA_nonrhyth_translation_nonrhyth/Ccs_set_A.pdf]

# Ccser2

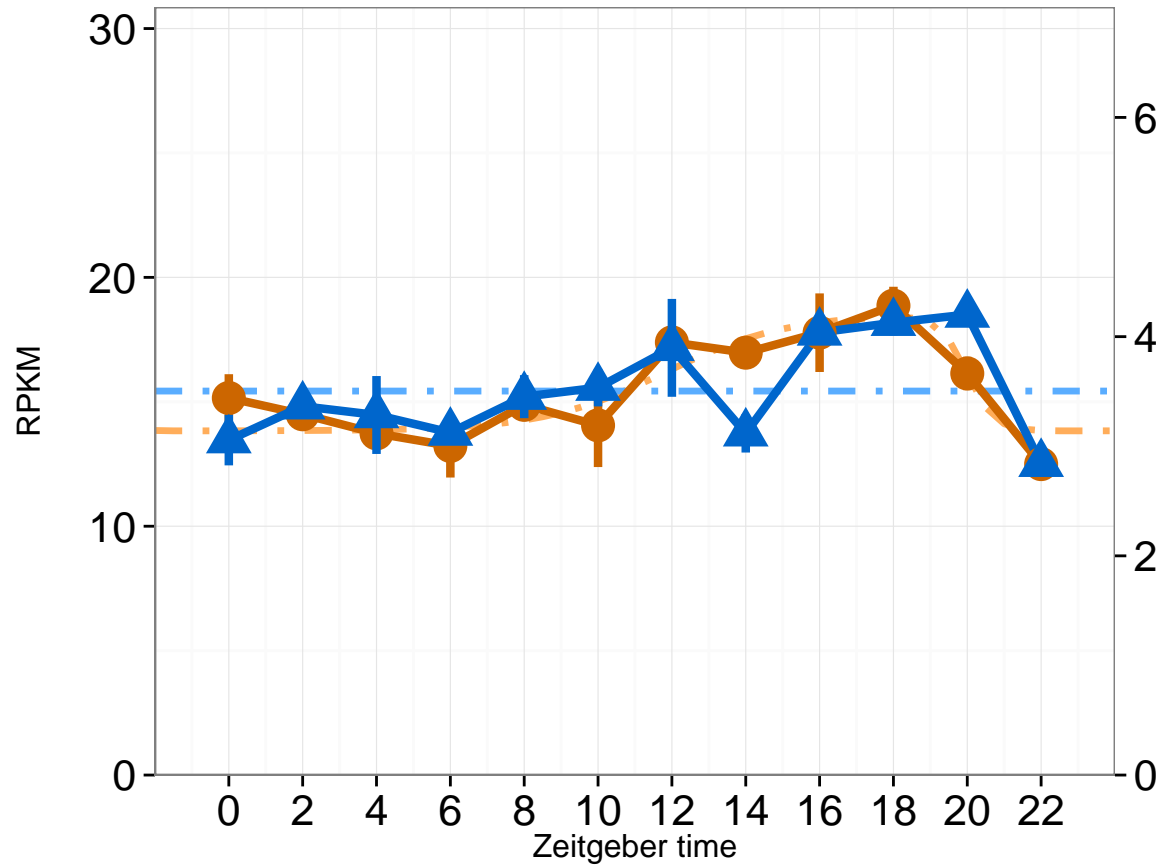

# Ccser2

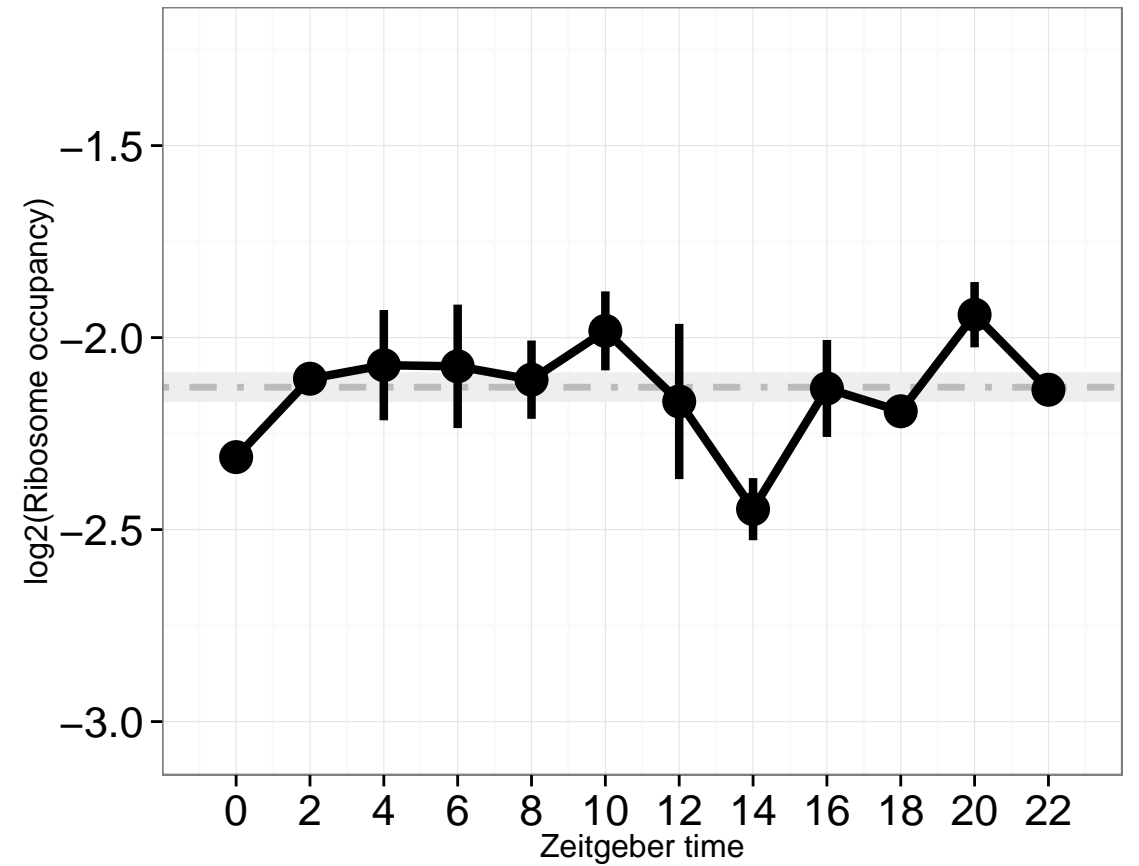

Supplement: SuppDataset_1.zip [file Ccser2_set_A.pdf › Supplemental Dataset 1/A-mRNA_nonrhyth_translation_nonrhyth/Ccser2_set_A.pdf]

## Cct2

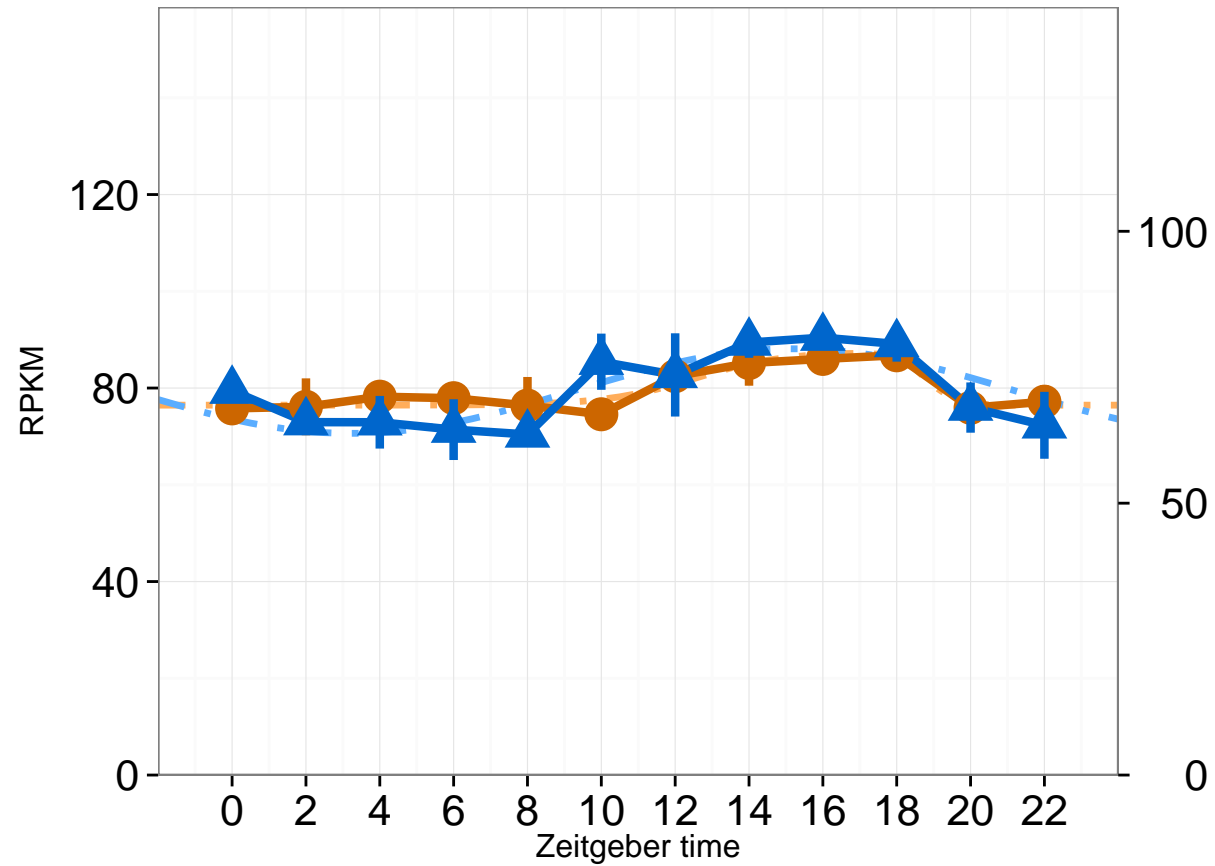

## Cct2

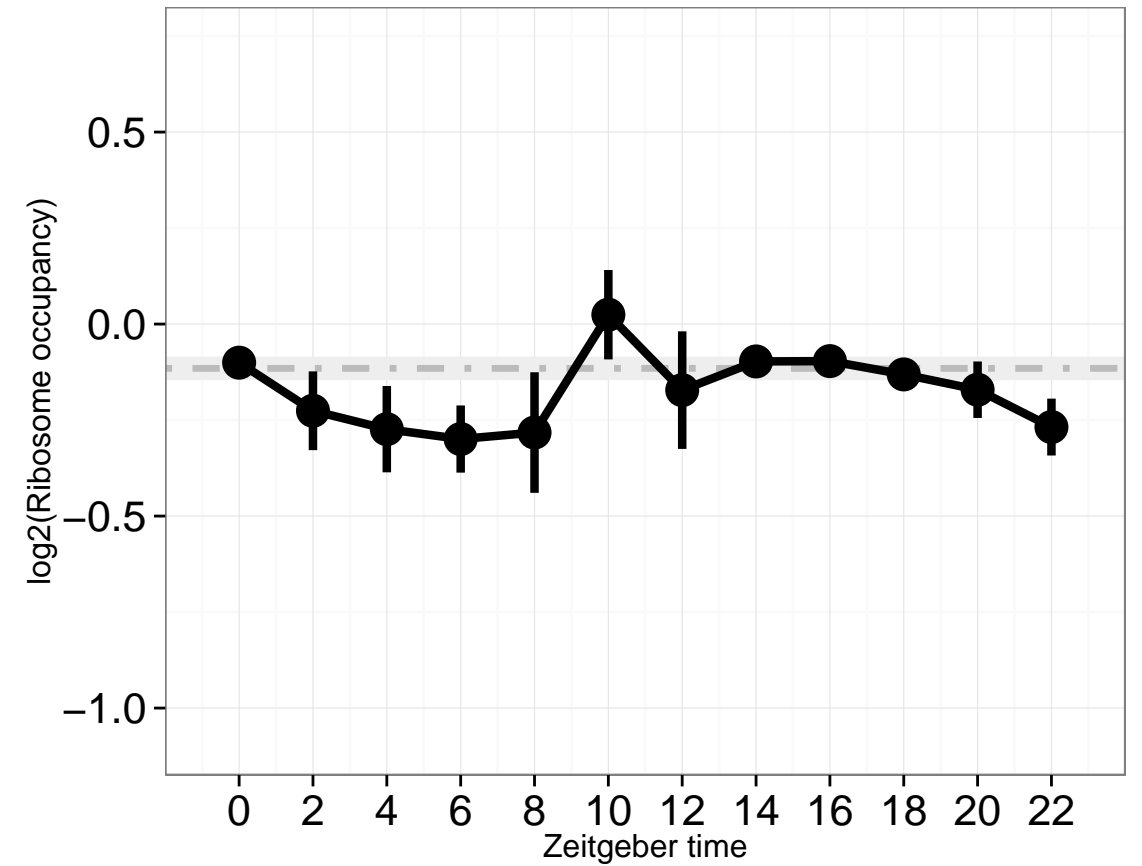

Supplement: SuppDataset_1.zip [file Cct2_set_A.pdf › Supplemental Dataset 1/A-mRNA_nonrhyth_translation_nonrhyth/Cct2_set_A.pdf]

## Cct3

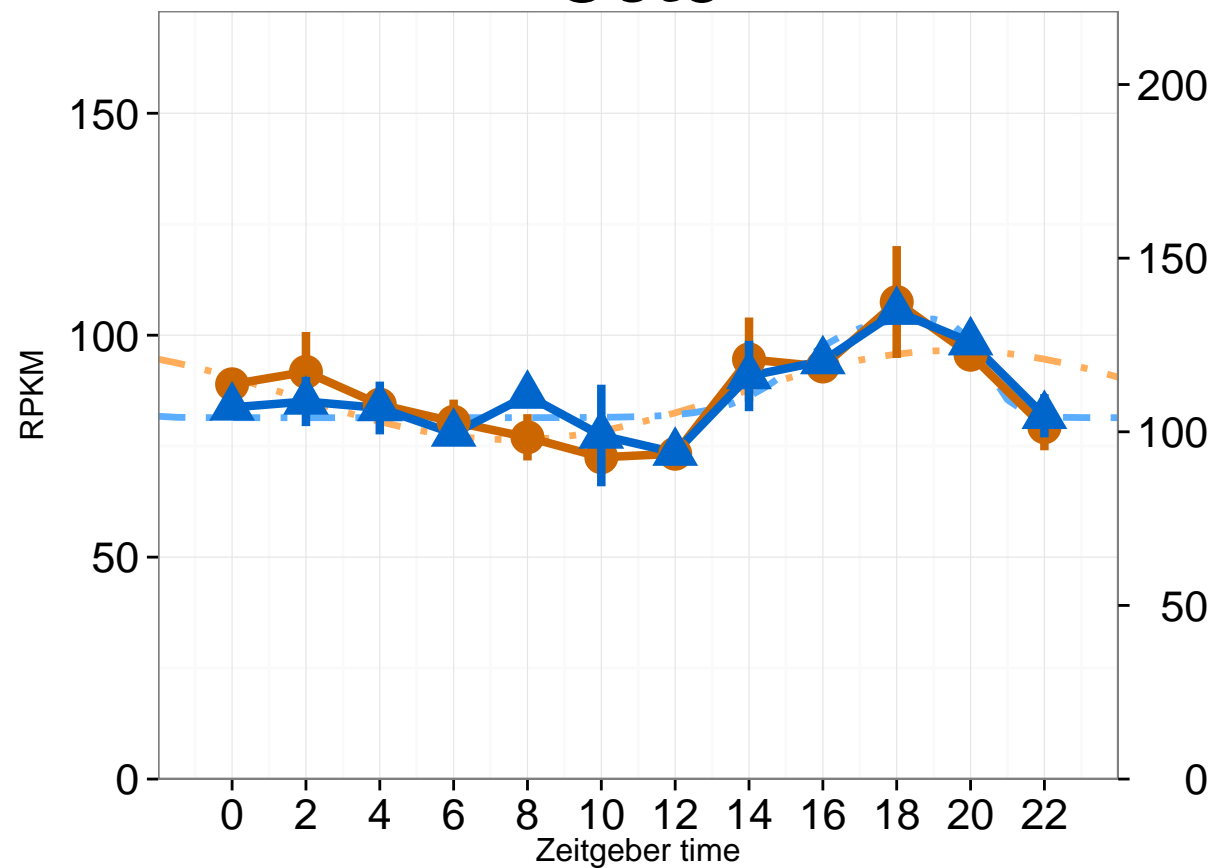

## Cct3

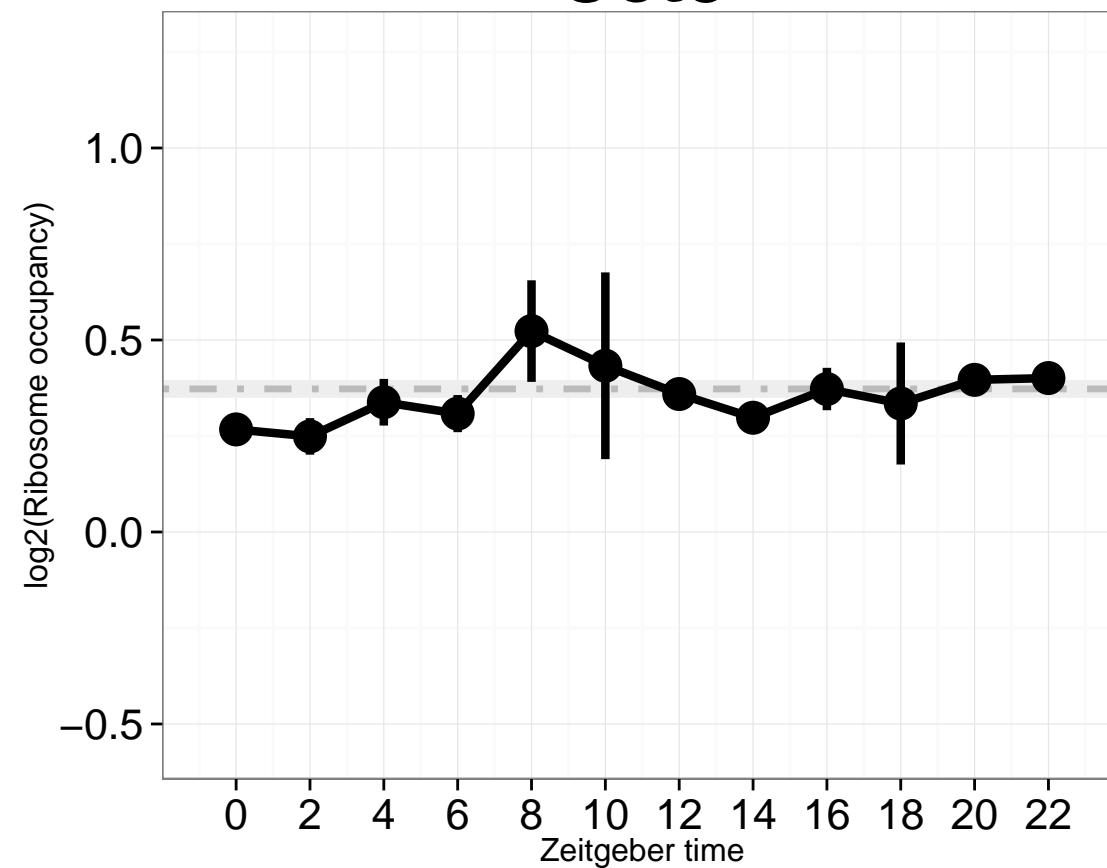

Supplement: SuppDataset_1.zip [file Cct3_set_A.pdf › Supplemental Dataset 1/A-mRNA_nonrhyth_translation_nonrhyth/Cct3_set_A.pdf]

# Cct4

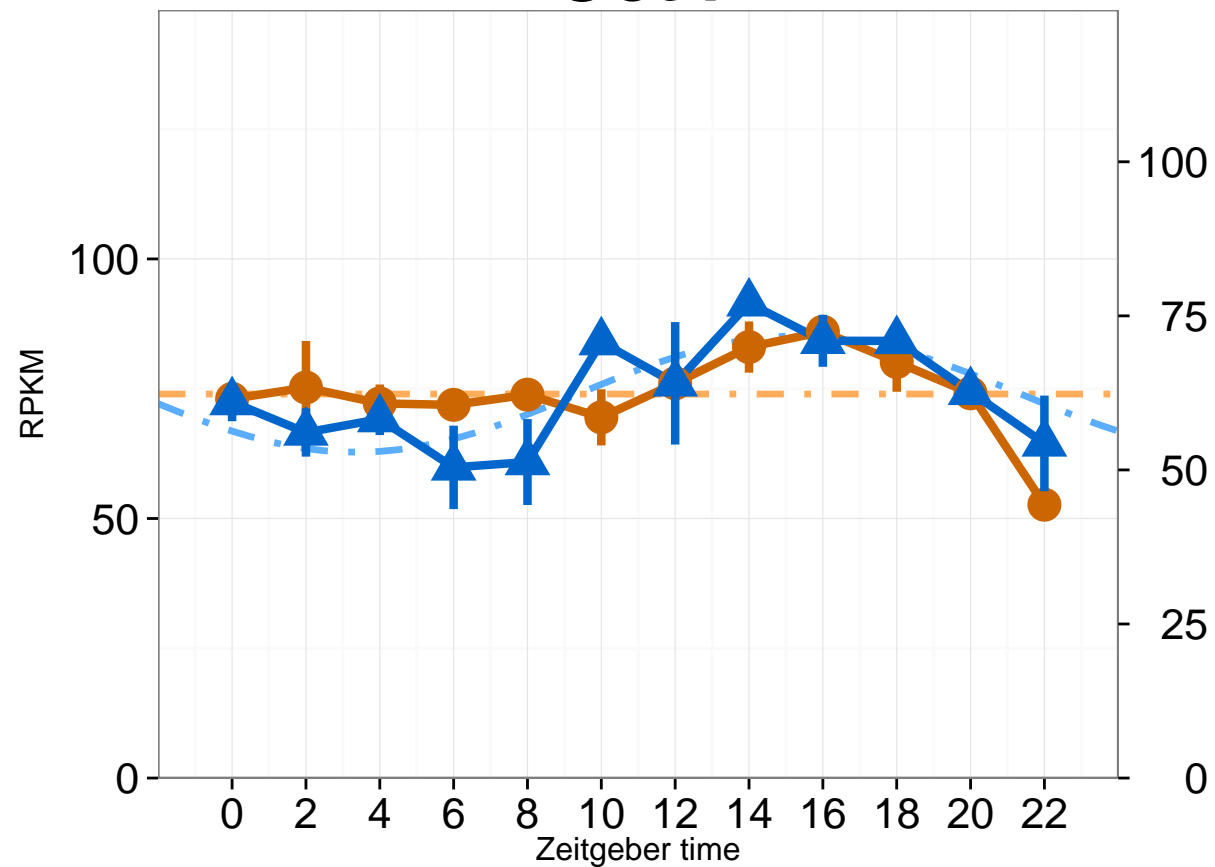

# Cct4

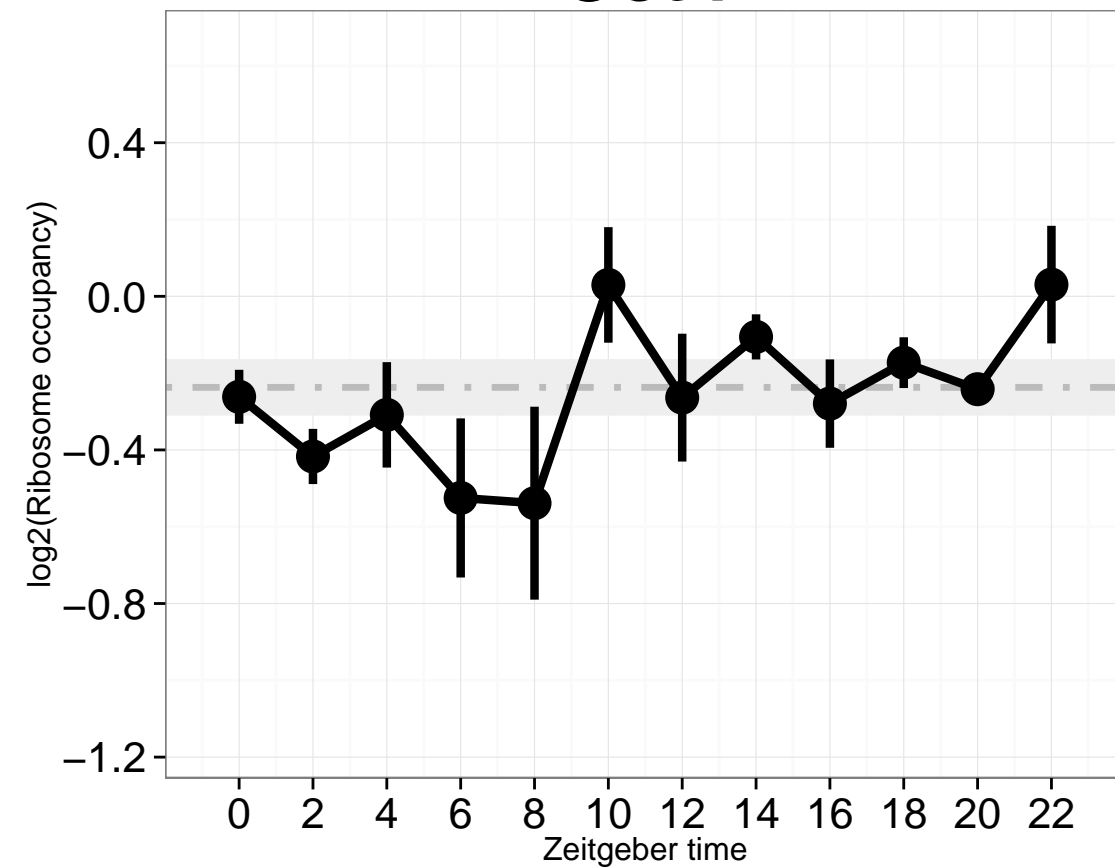

Supplement: SuppDataset_1.zip [file Cct4_set_A.pdf › Supplemental Dataset 1/A-mRNA_nonrhyth_translation_nonrhyth/Cct4_set_A.pdf]

## Cct5

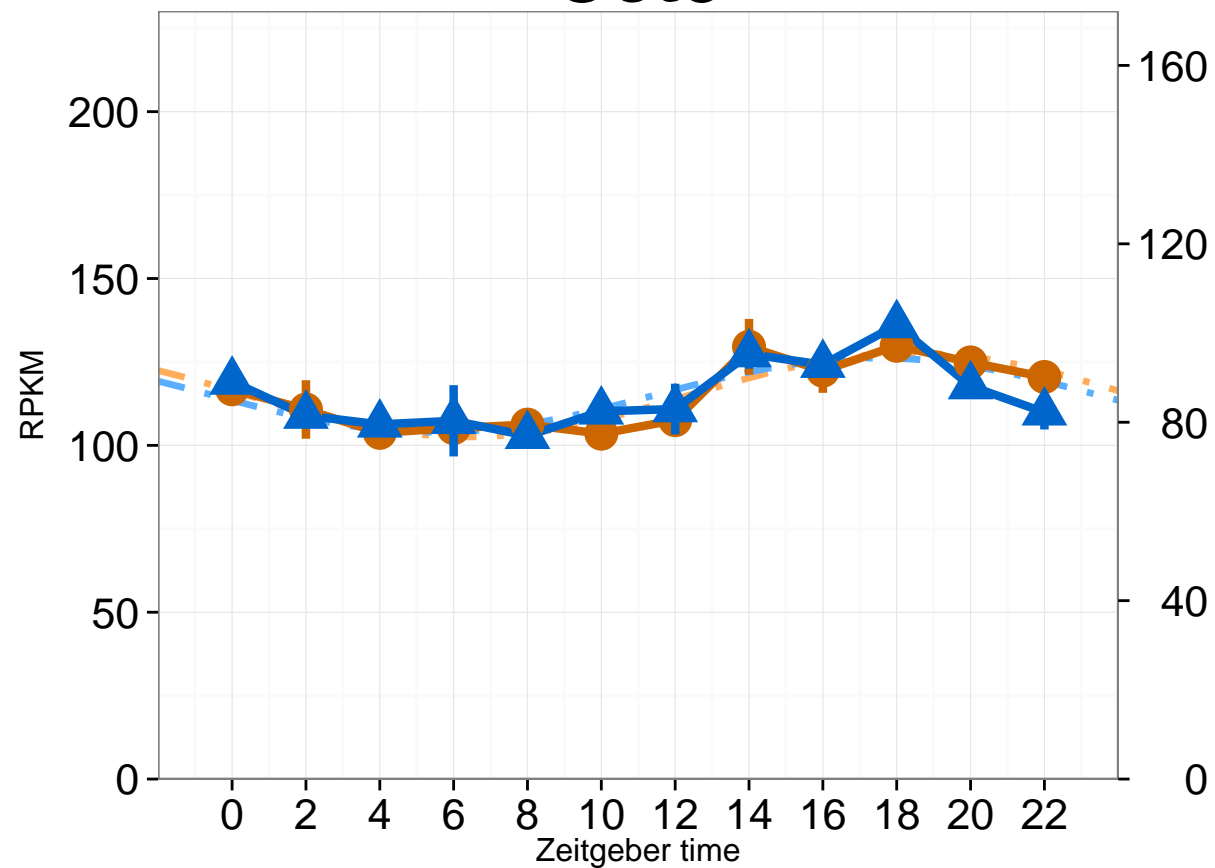

## Cct5

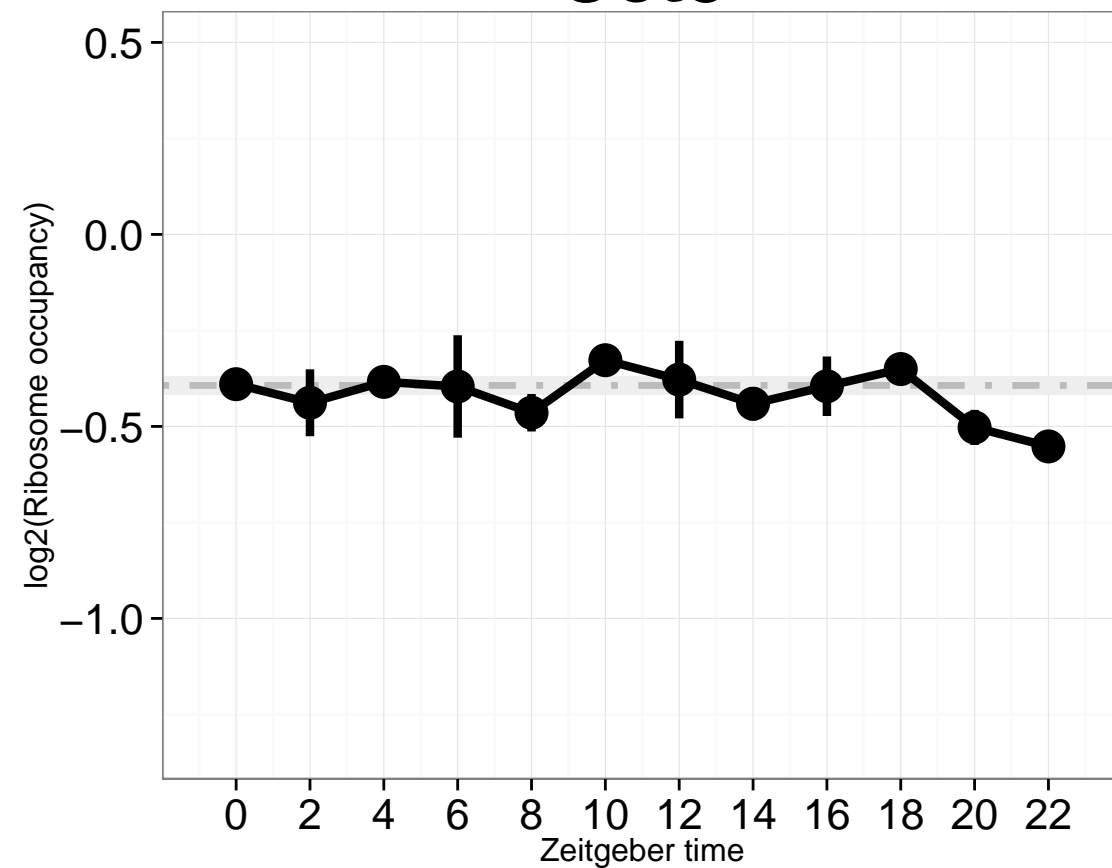

Supplement: SuppDataset_1.zip [file Cct5_set_A.pdf › Supplemental Dataset 1/A-mRNA_nonrhyth_translation_nonrhyth/Cct5_set_A.pdf]

# Cct6a

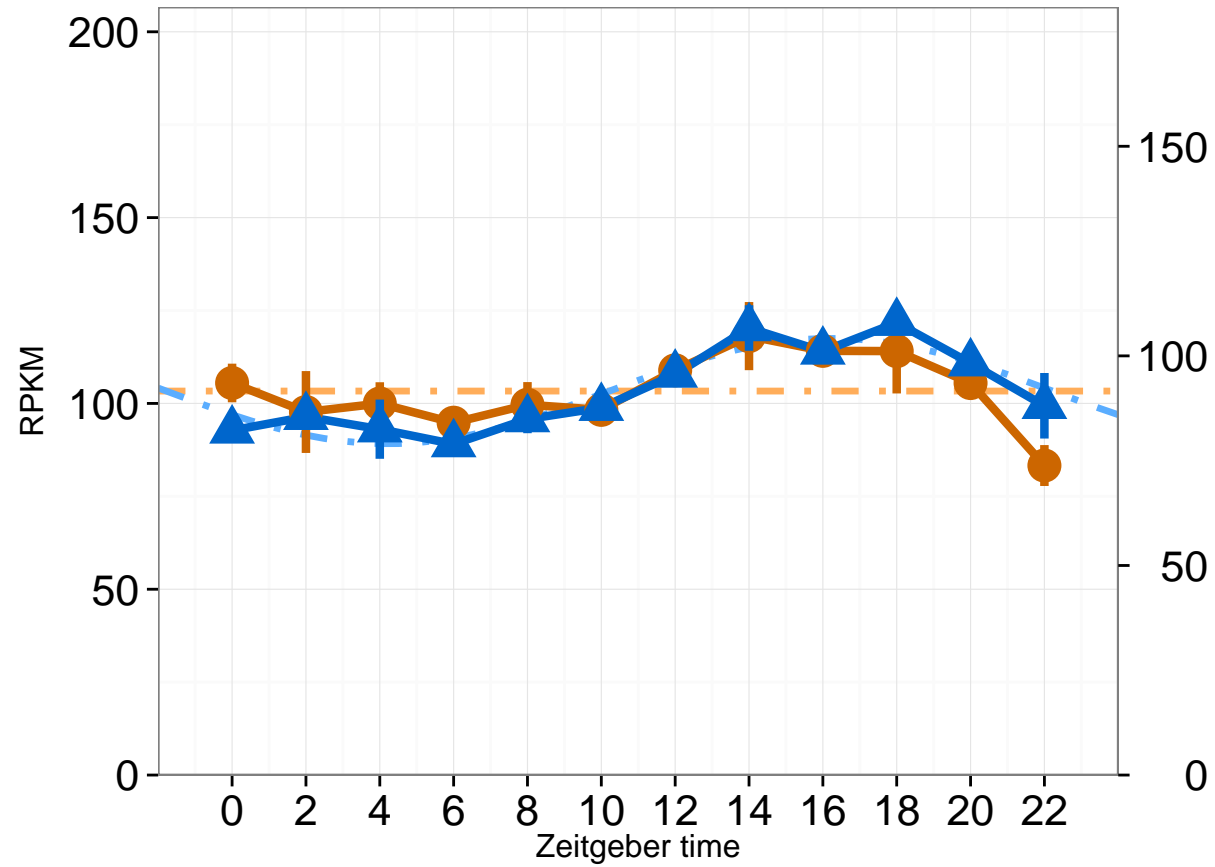

# Cct6a

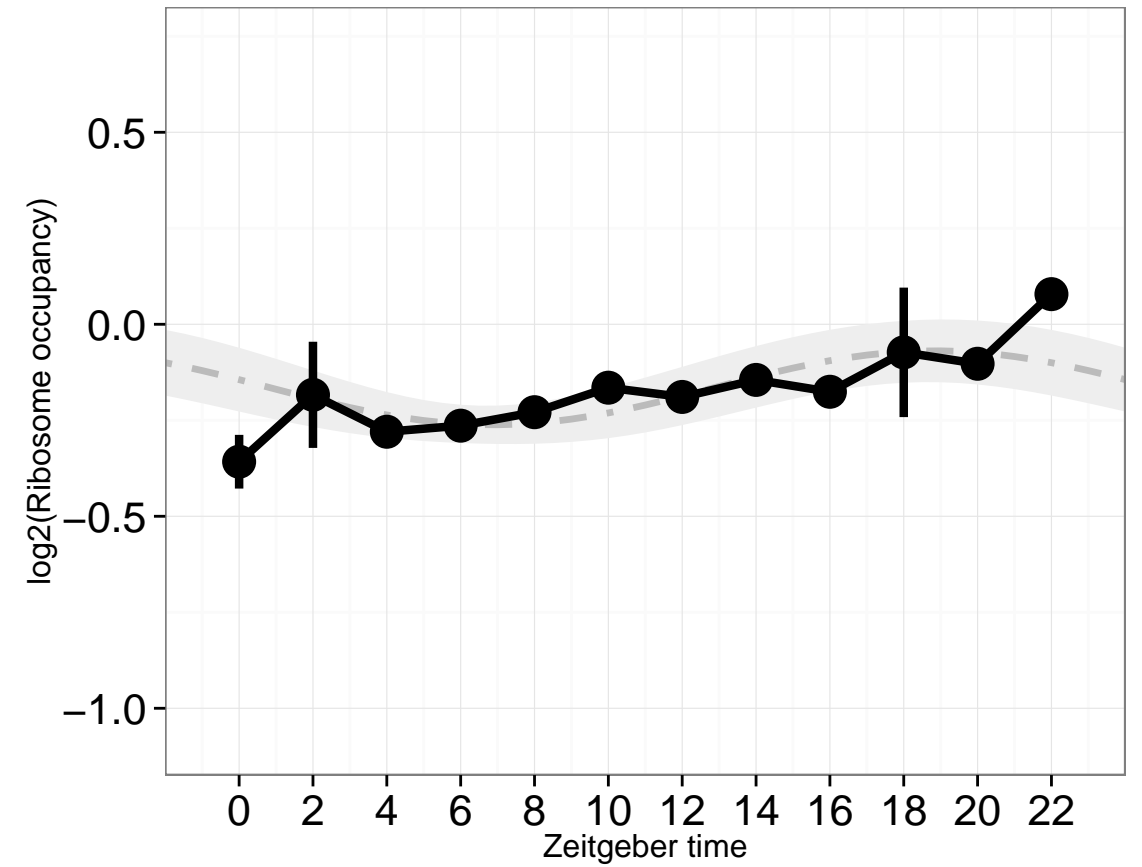

Supplement: SuppDataset_1.zip [file Cct6a_set_A.pdf › Supplemental Dataset 1/A-mRNA_nonrhyth_translation_nonrhyth/Cct6a_set_A.pdf]

# Cct6b

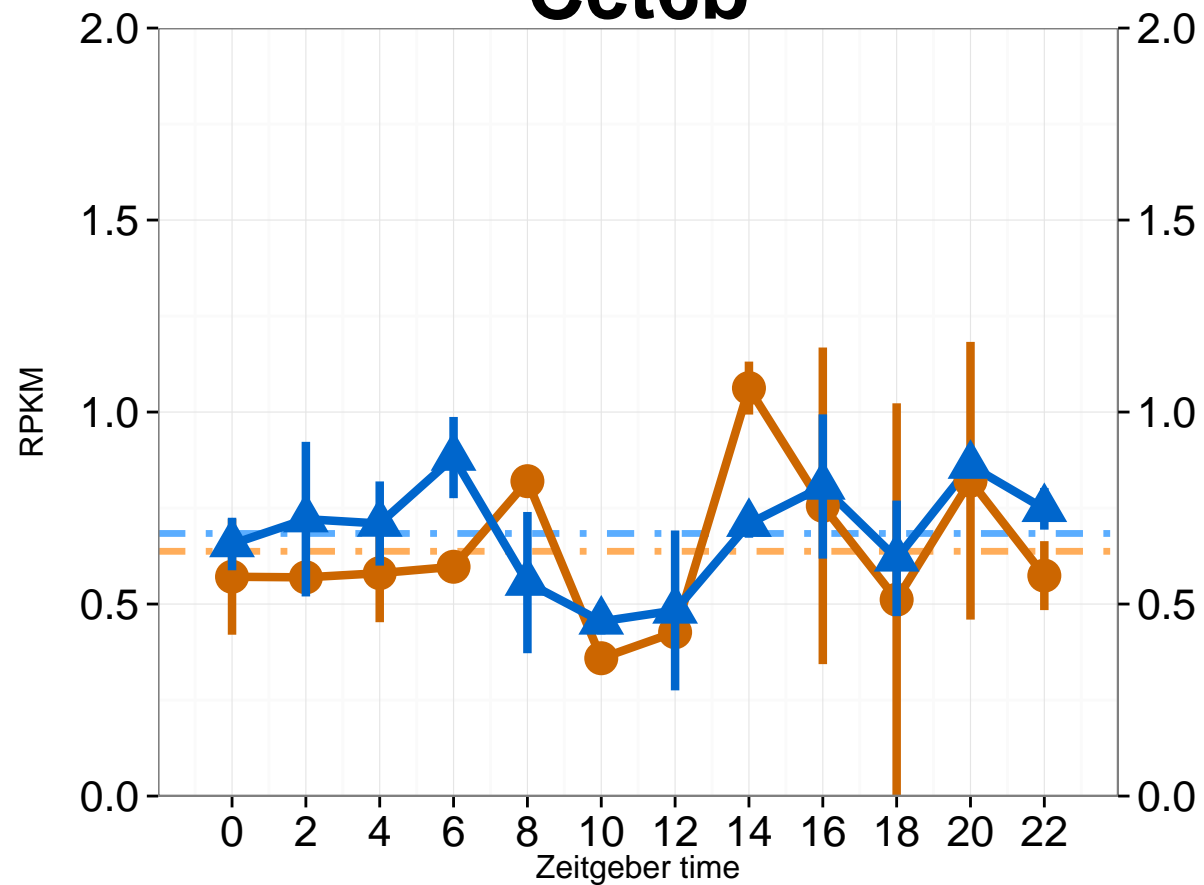

# Cct6b

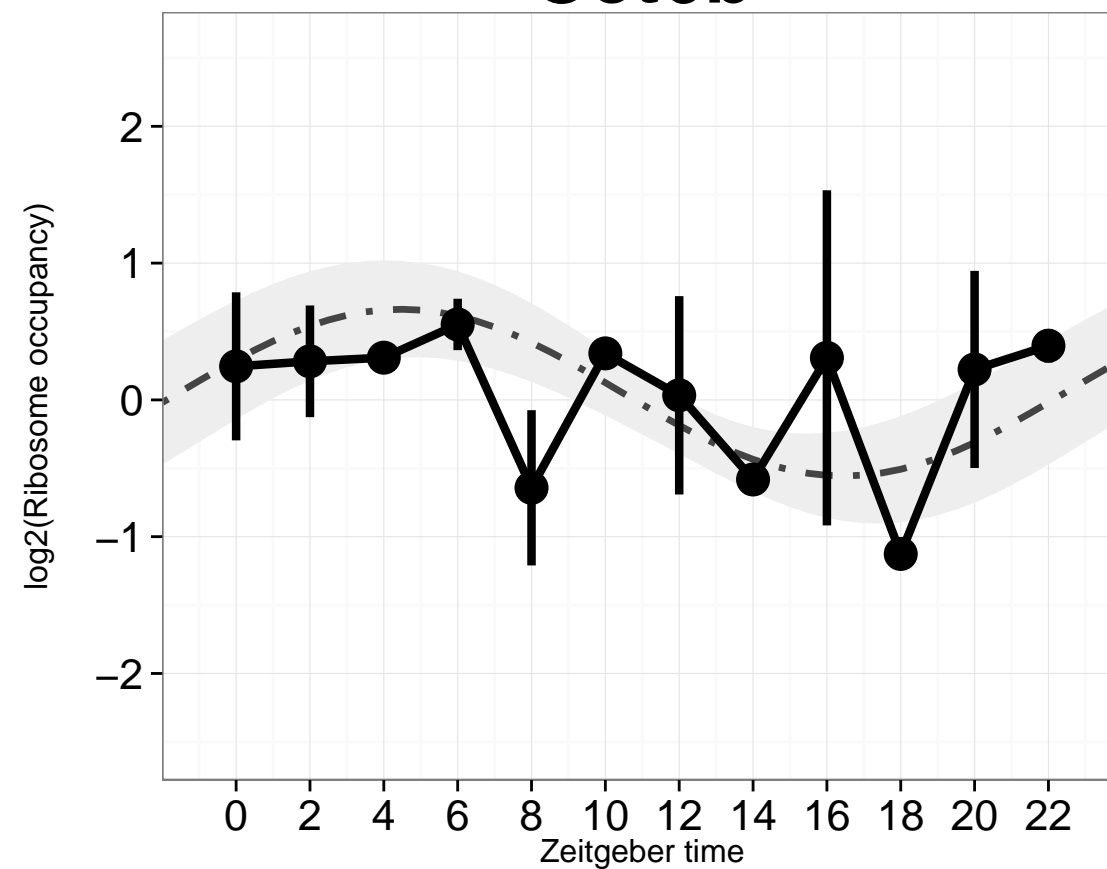

Supplement: SuppDataset_1.zip [file Cct6b_set_A.pdf › Supplemental Dataset 1/A-mRNA_nonrhyth_translation_nonrhyth/Cct6b_set_A.pdf]

# Cct7

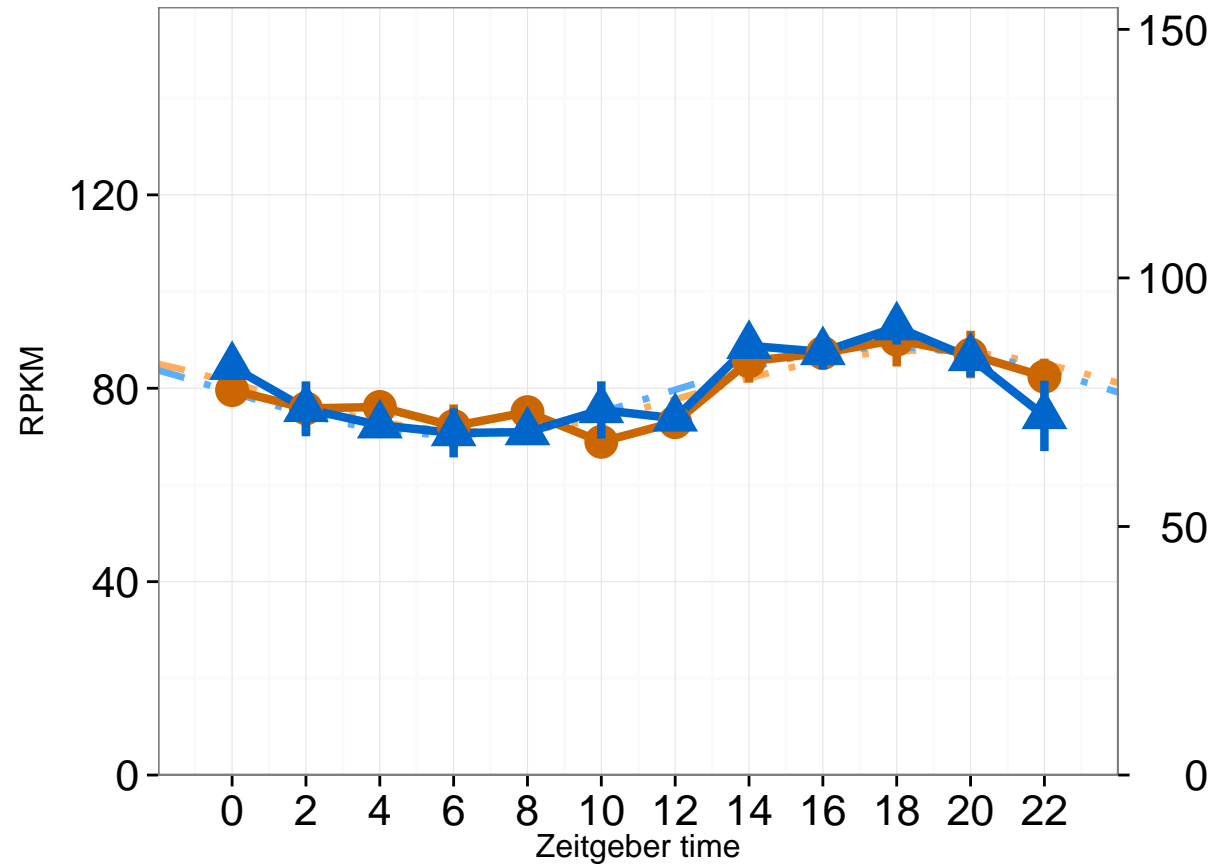

# Cct7

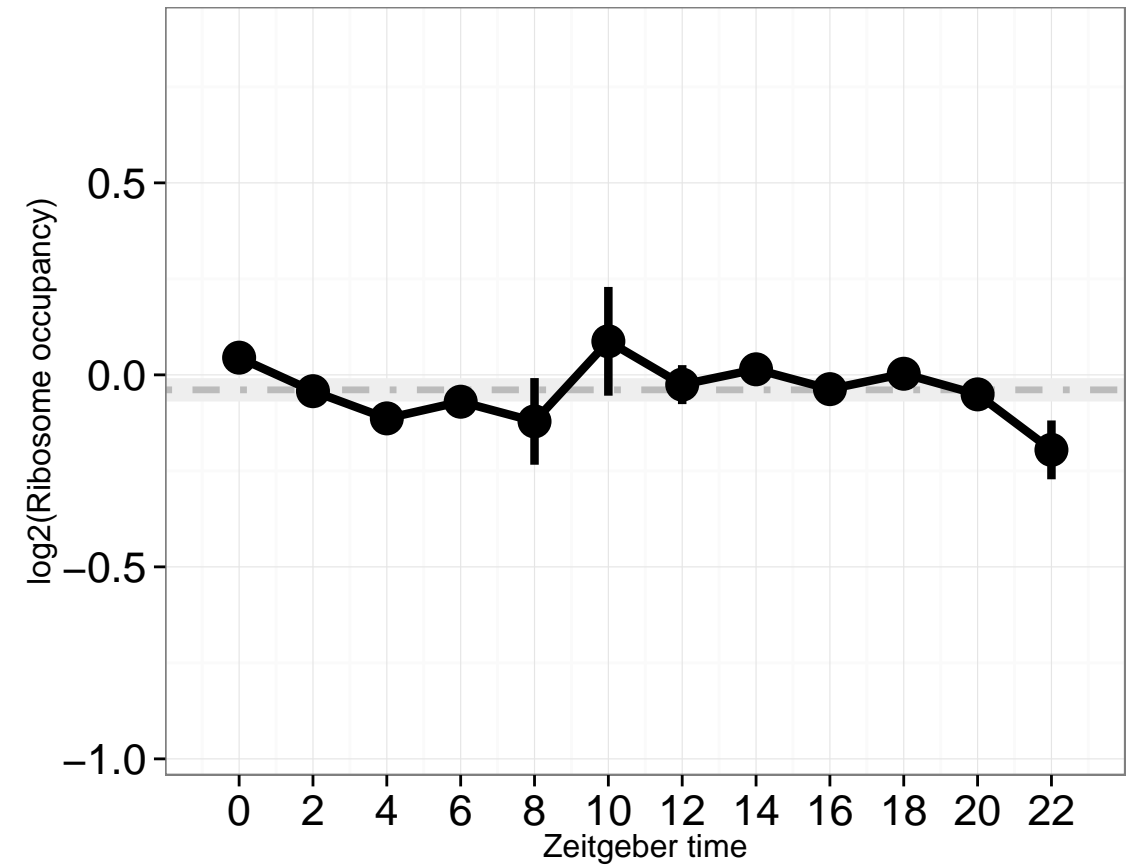

Supplement: SuppDataset_1.zip [file Cct7_set_A.pdf › Supplemental Dataset 1/A-mRNA_nonrhyth_translation_nonrhyth/Cct7_set_A.pdf]

## Cct8

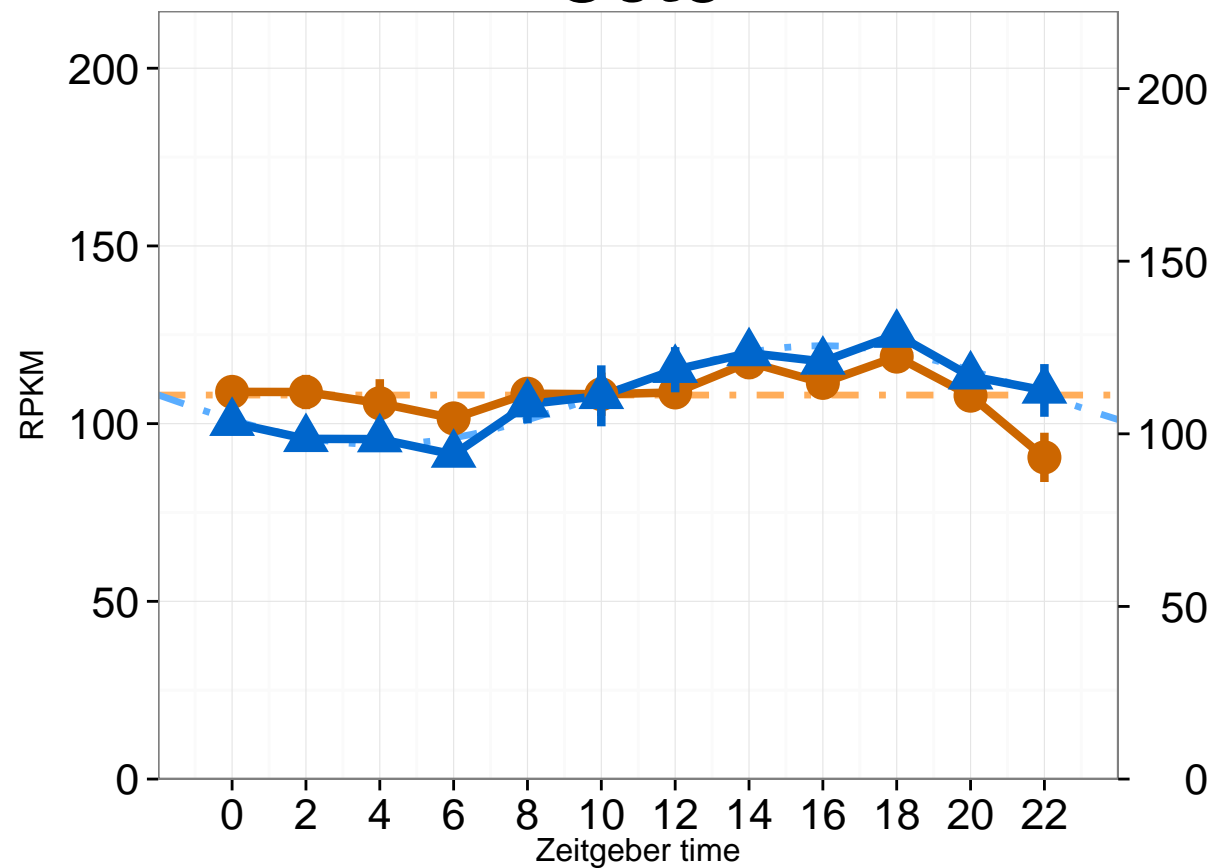

## Cct8

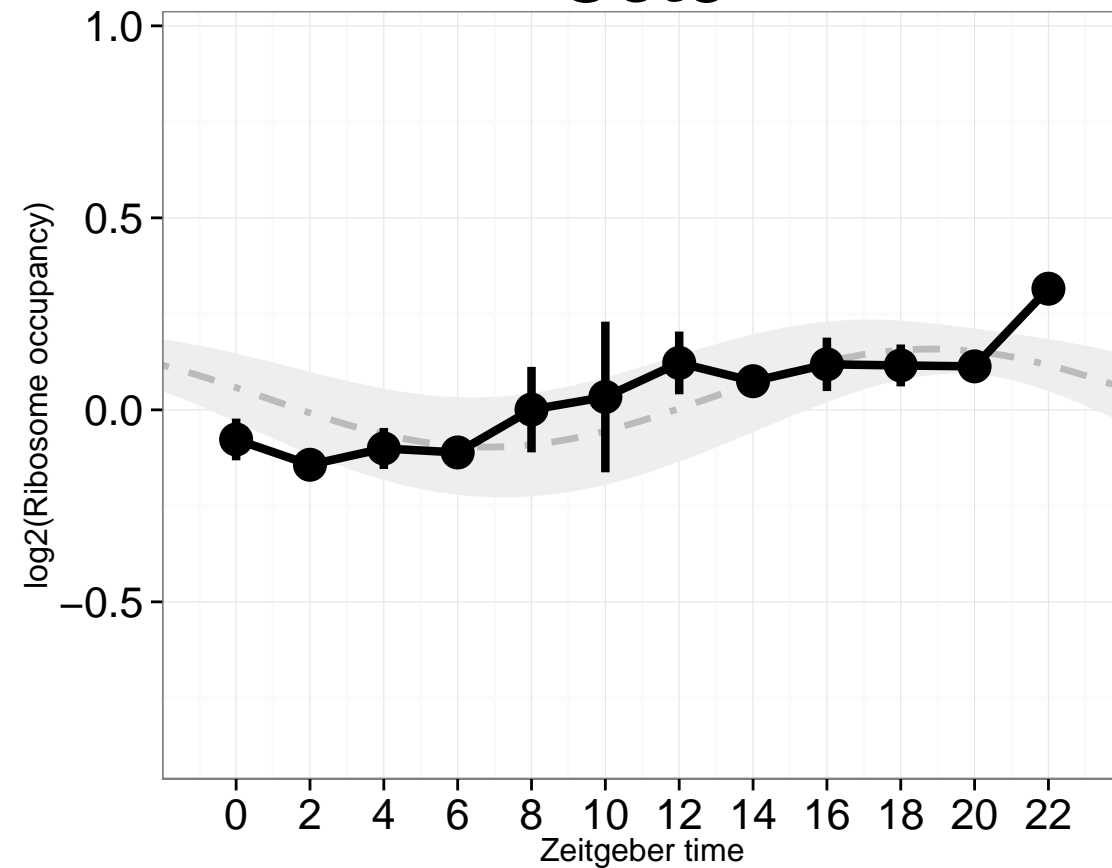

Supplement: SuppDataset_1.zip [file Cct8_set_A.pdf › Supplemental Dataset 1/A-mRNA_nonrhyth_translation_nonrhyth/Cct8_set_A.pdf]

## Ccz1

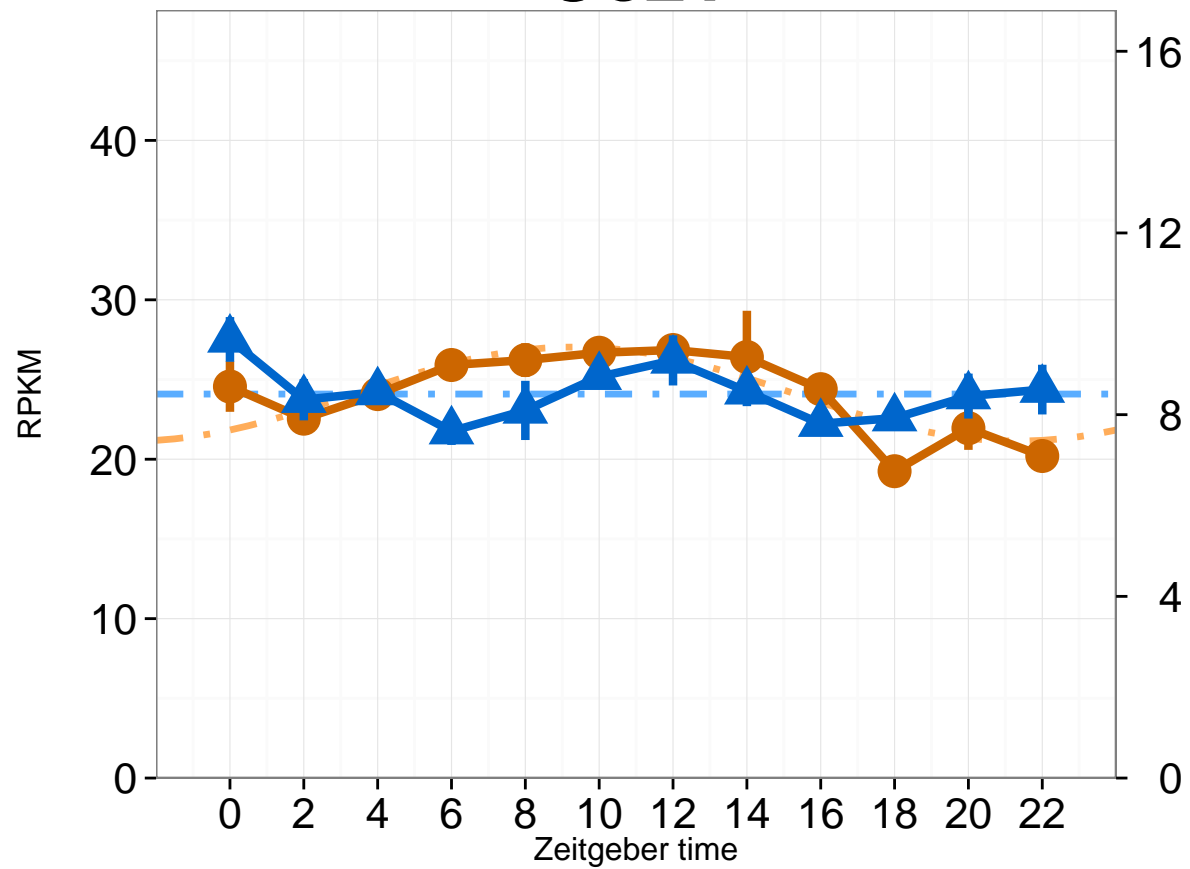

## Ccz1

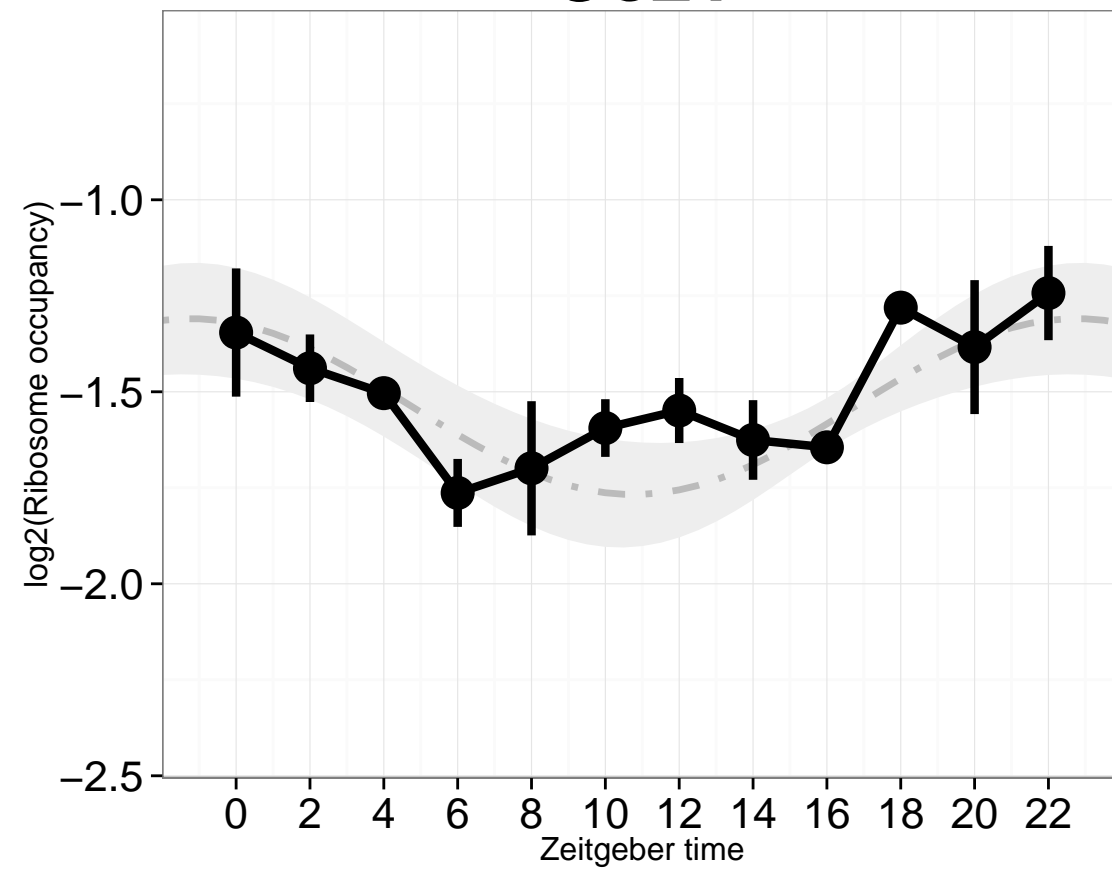

Supplement: SuppDataset_1.zip [file Ccz1_set_A.pdf › Supplemental Dataset 1/A-mRNA_nonrhyth_translation_nonrhyth/Ccz1_set_A.pdf]

## Cd14

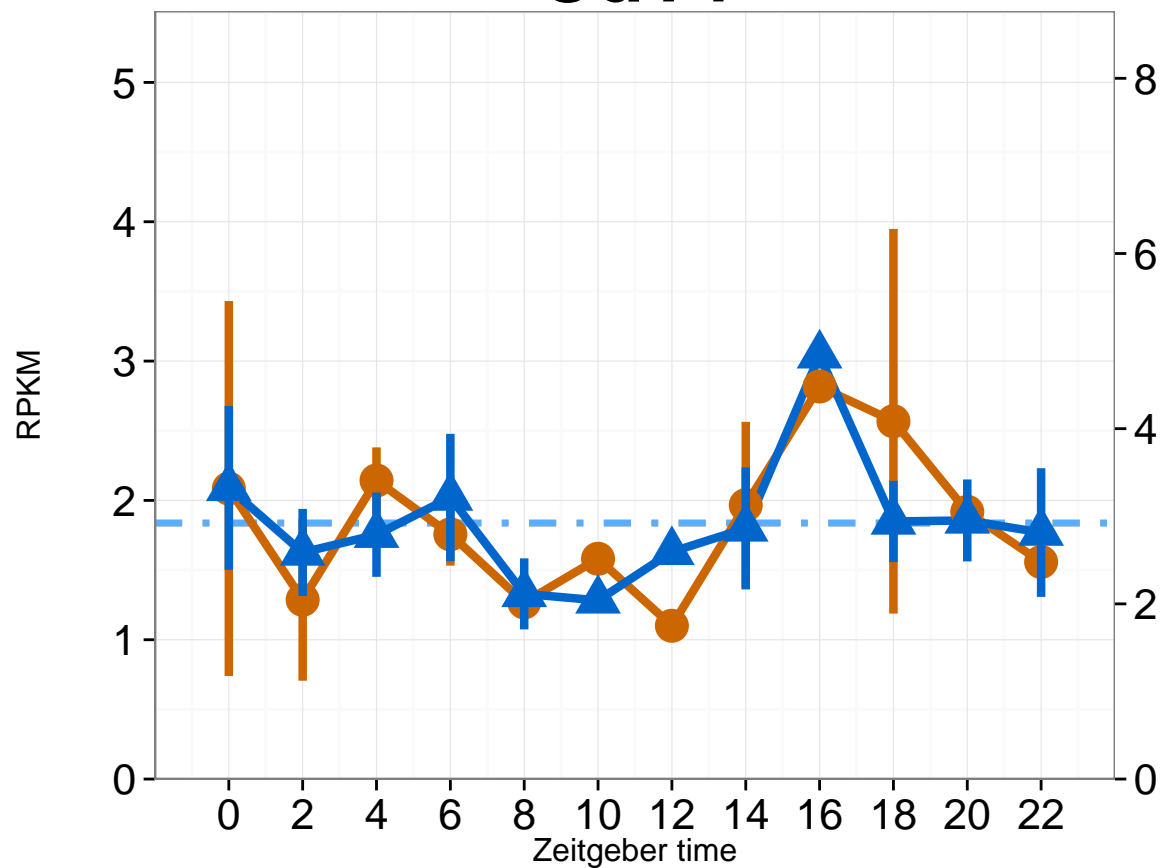

## Cd14

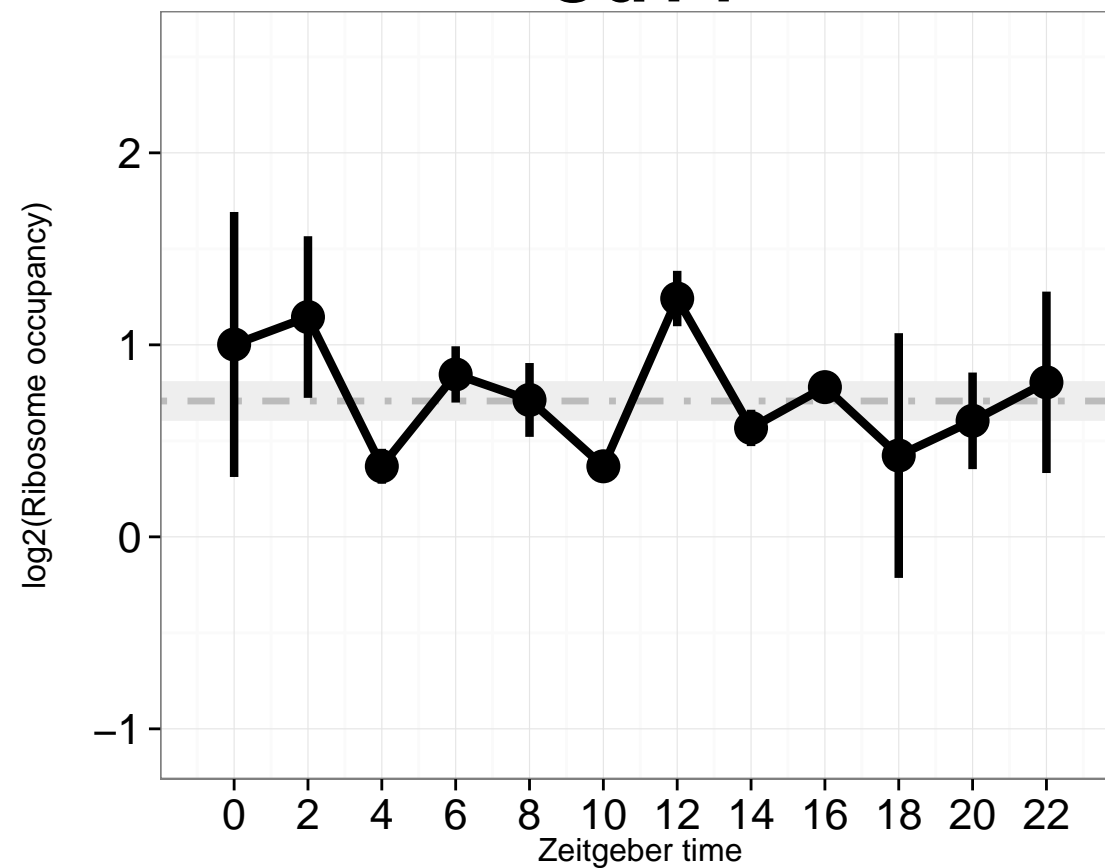

Supplement: SuppDataset_1.zip [file Cd14_set_A.pdf › Supplemental Dataset 1/A-mRNA_nonrhyth_translation_nonrhyth/Cd14_set_A.pdf]

## Cd151

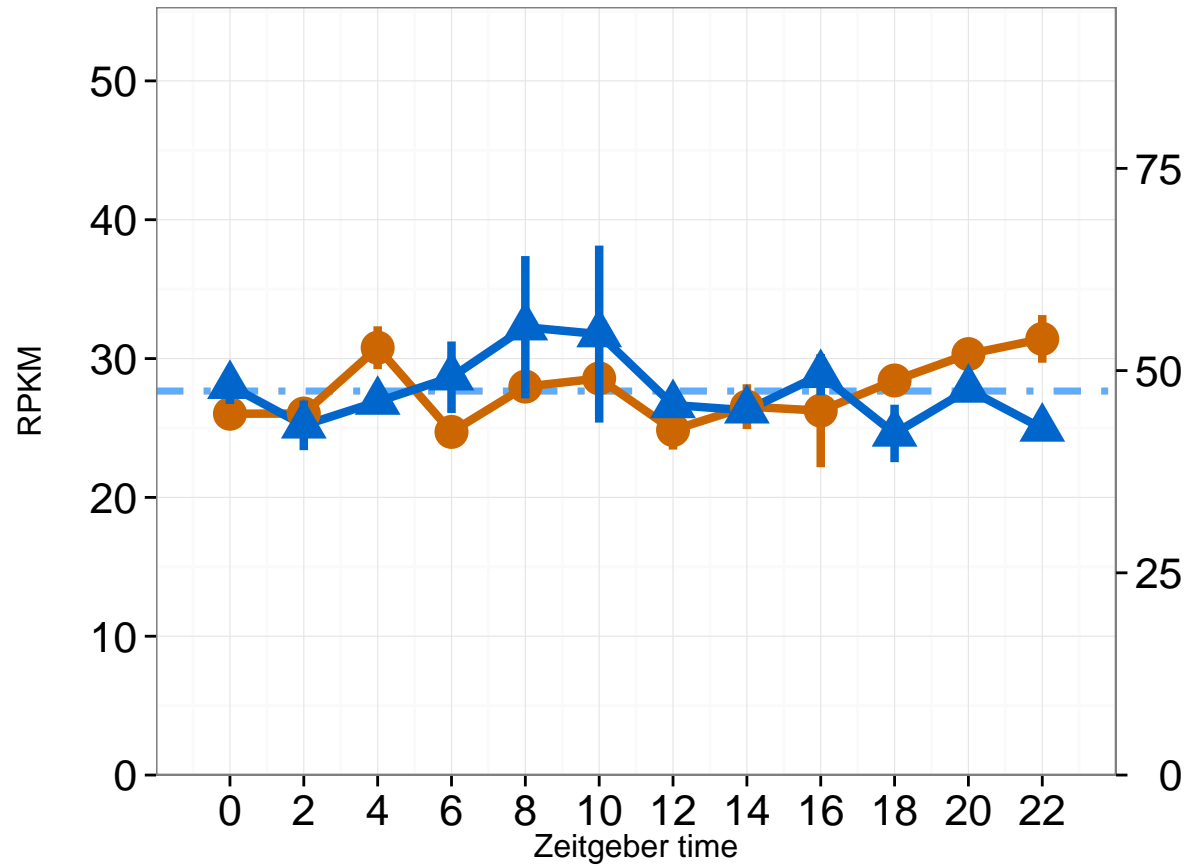

## Cd151

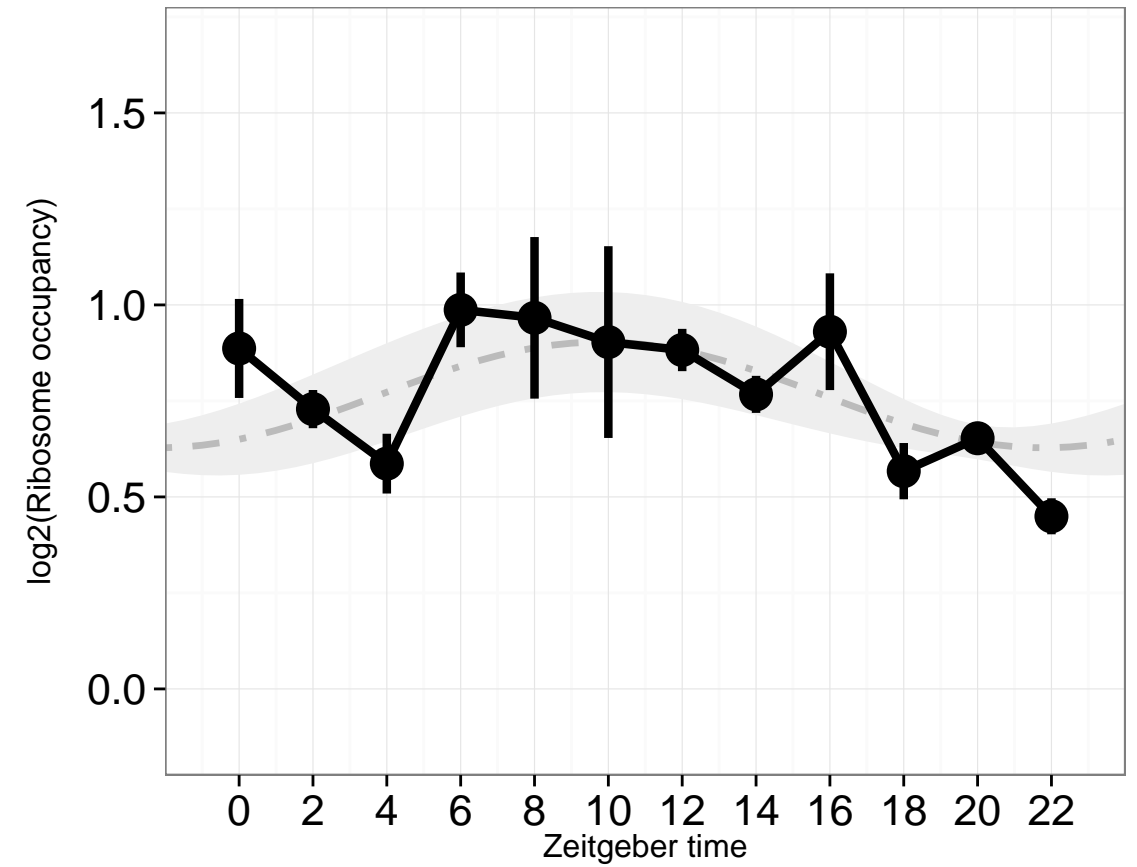

Supplement: SuppDataset_1.zip [file Cd151_set_A.pdf › Supplemental Dataset 1/A-mRNA_nonrhyth_translation_nonrhyth/Cd151_set_A.pdf]

## Cd164

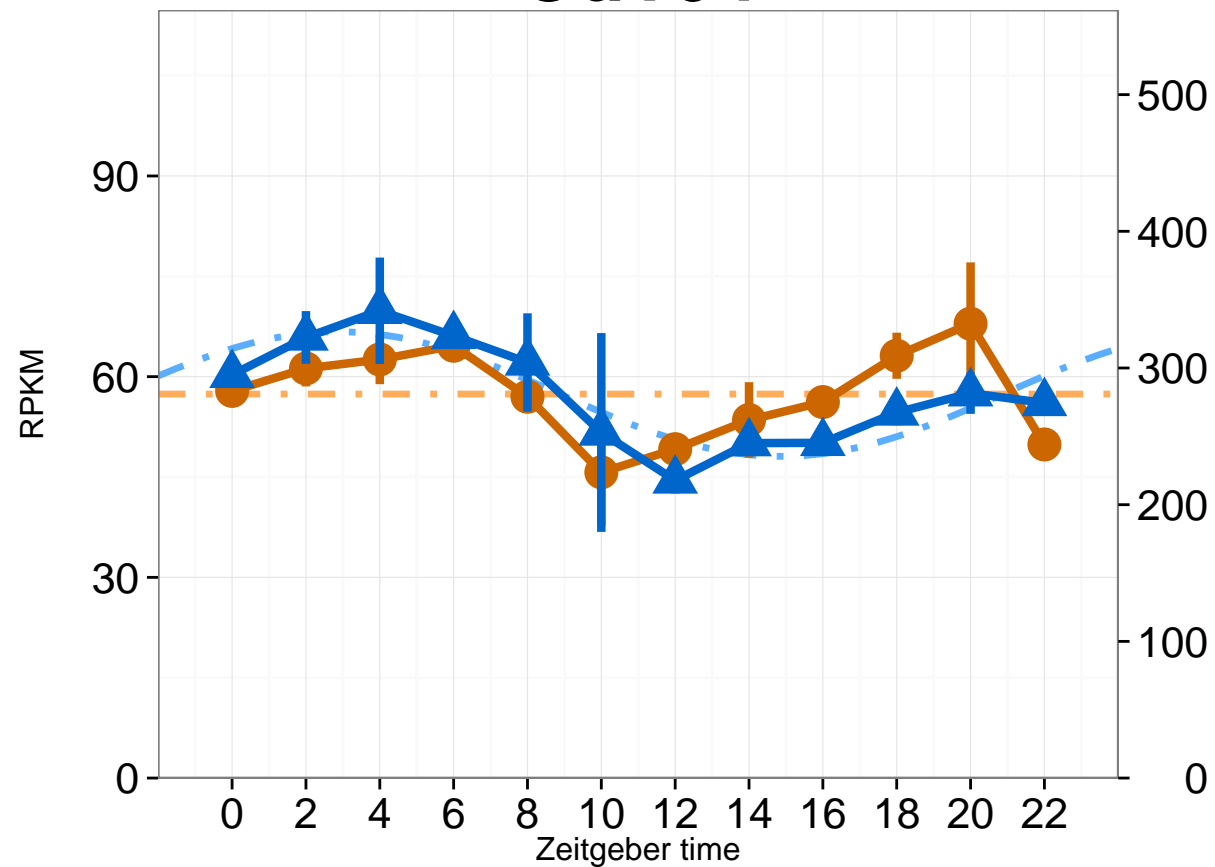

## Cd164

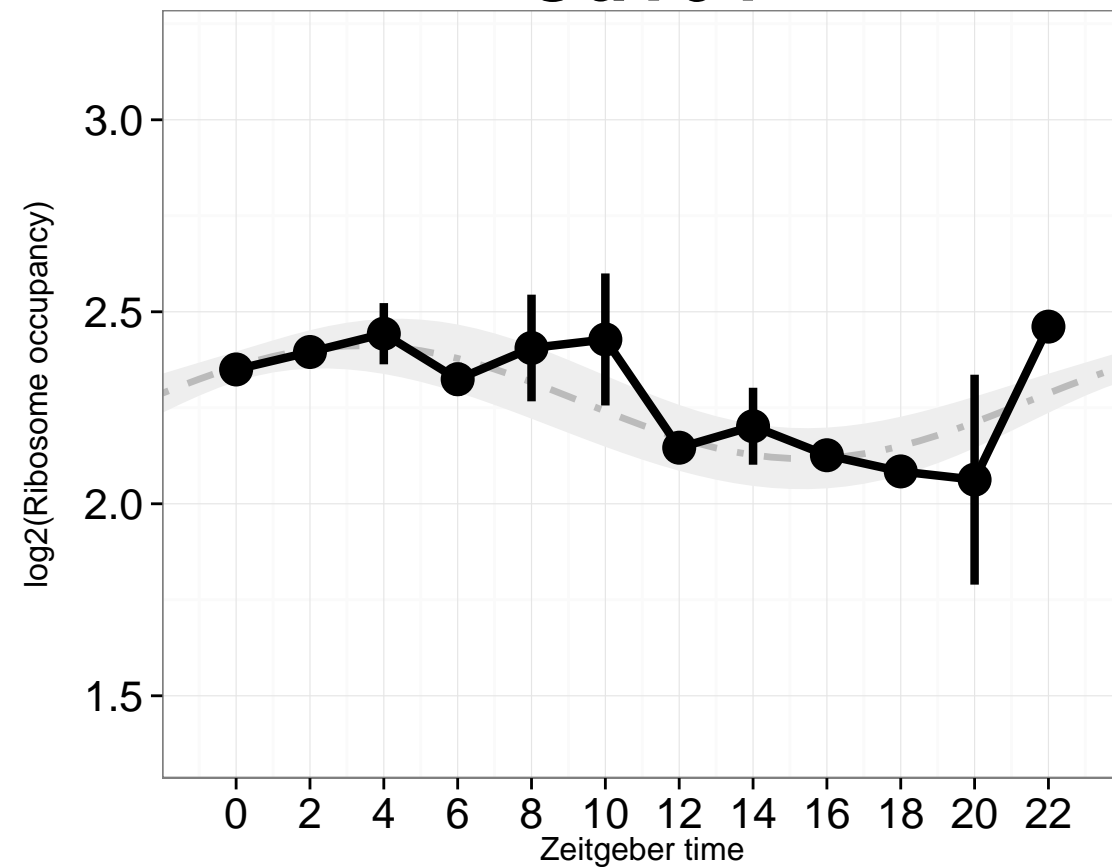

Supplement: SuppDataset_1.zip [file Cd164_set_A.pdf › Supplemental Dataset 1/A-mRNA_nonrhyth_translation_nonrhyth/Cd164_set_A.pdf]

## Cd1d1

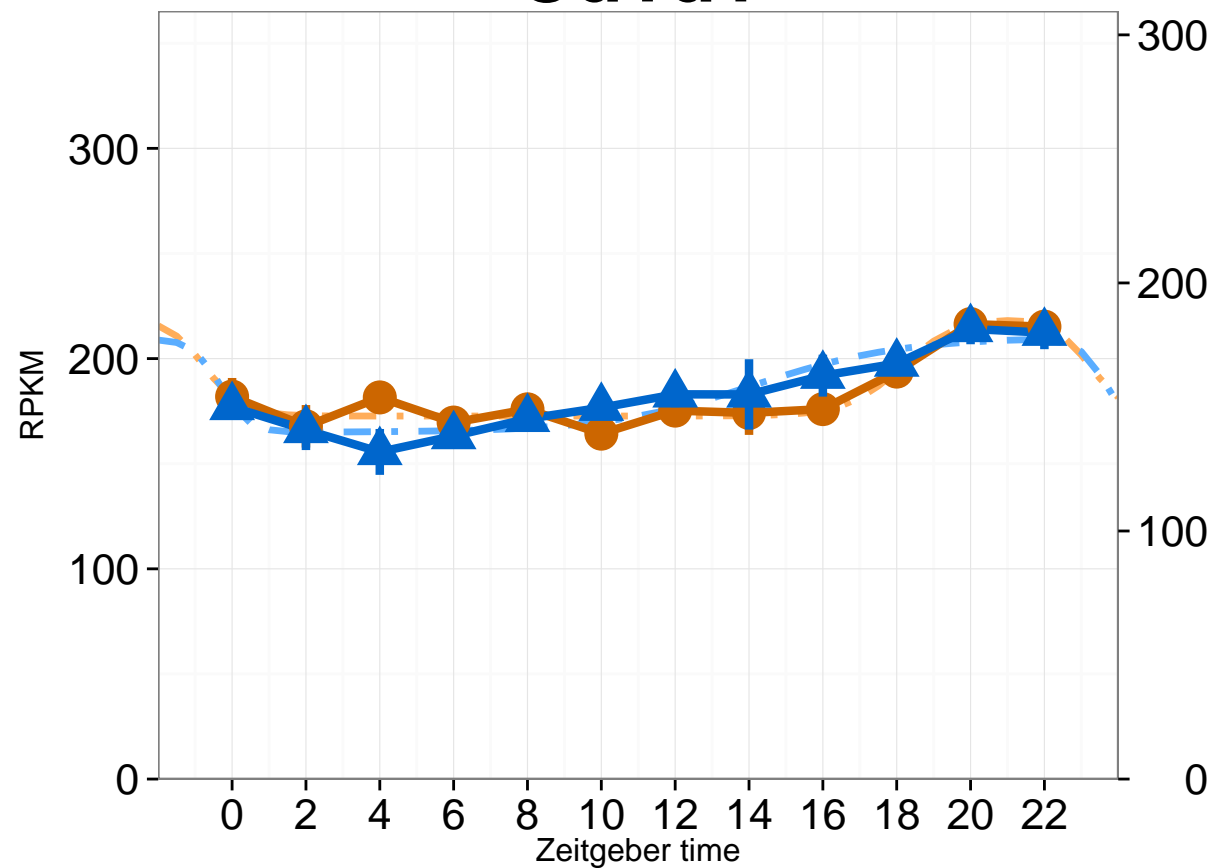

## Cd1d1

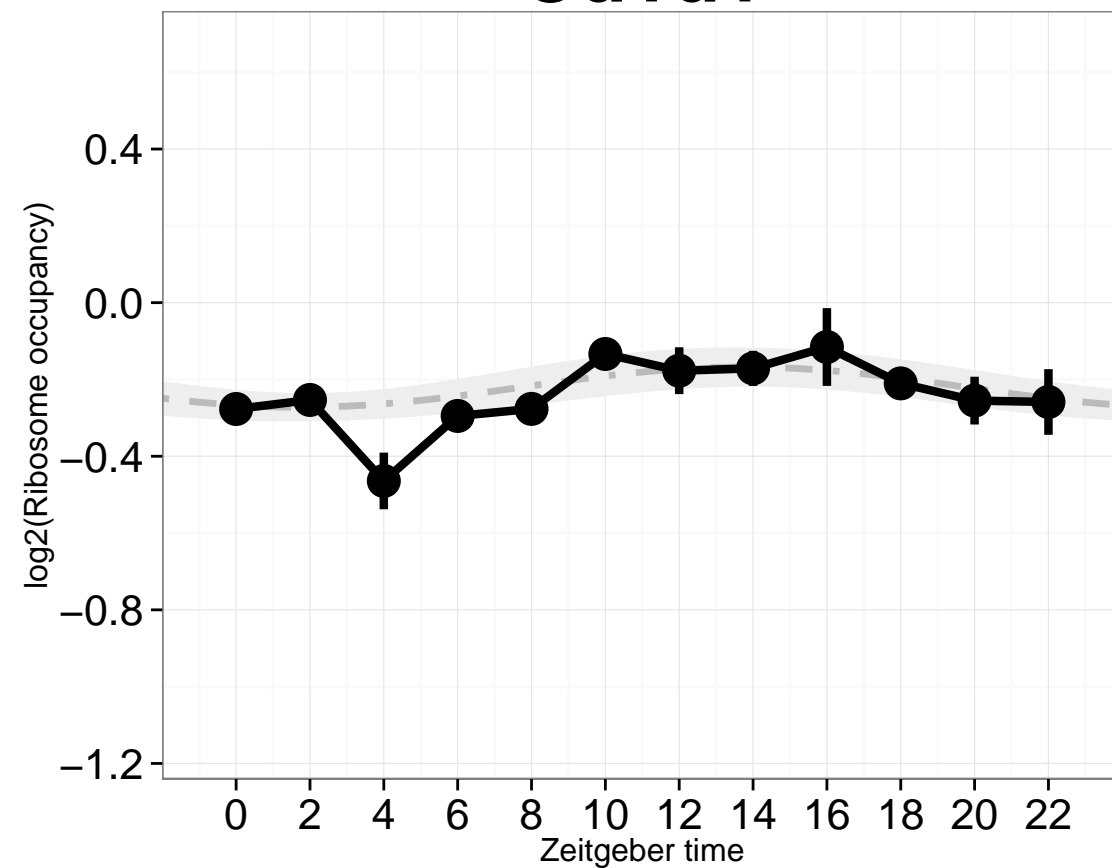

Supplement: SuppDataset_1.zip [file Cd1d1_set_A.pdf › Supplemental Dataset 1/A-mRNA_nonrhyth_translation_nonrhyth/Cd1d1_set_A.pdf]

# Cd200r1

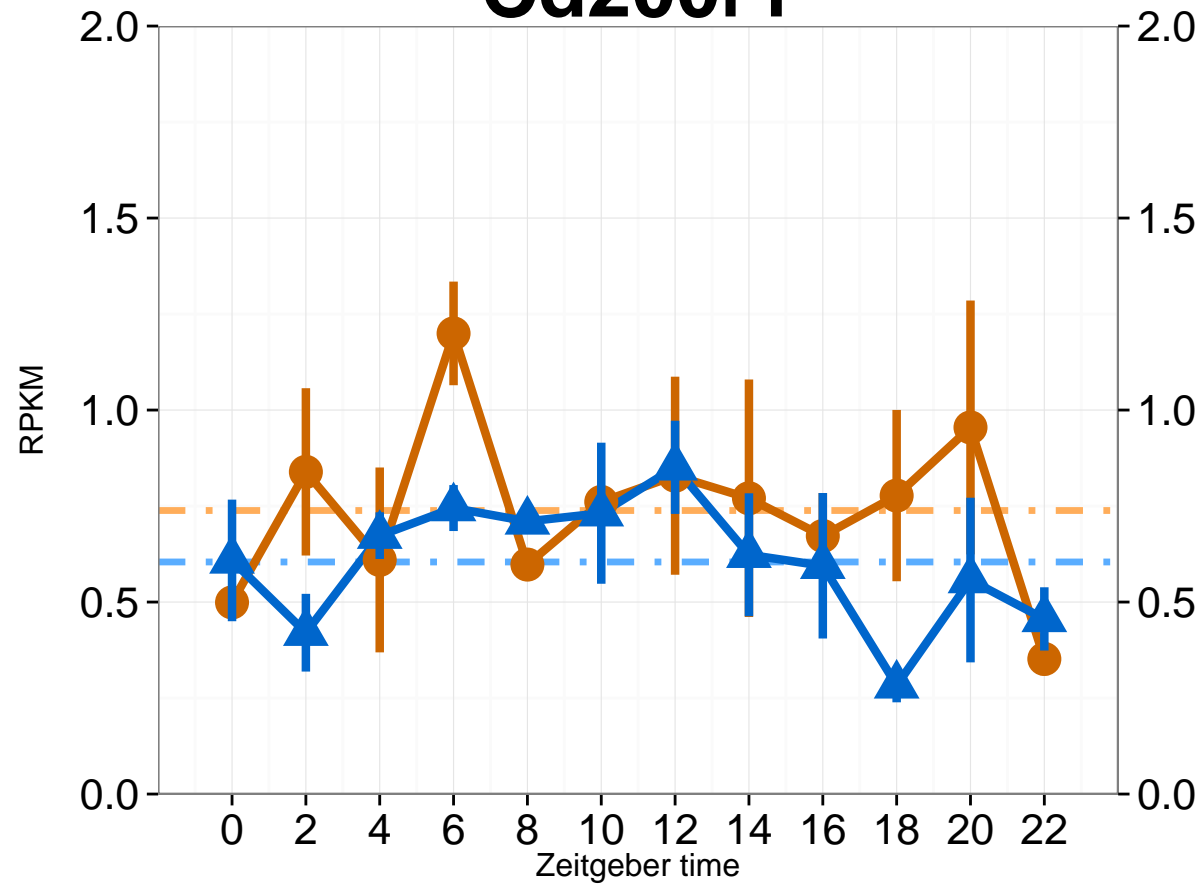

# Cd200r1

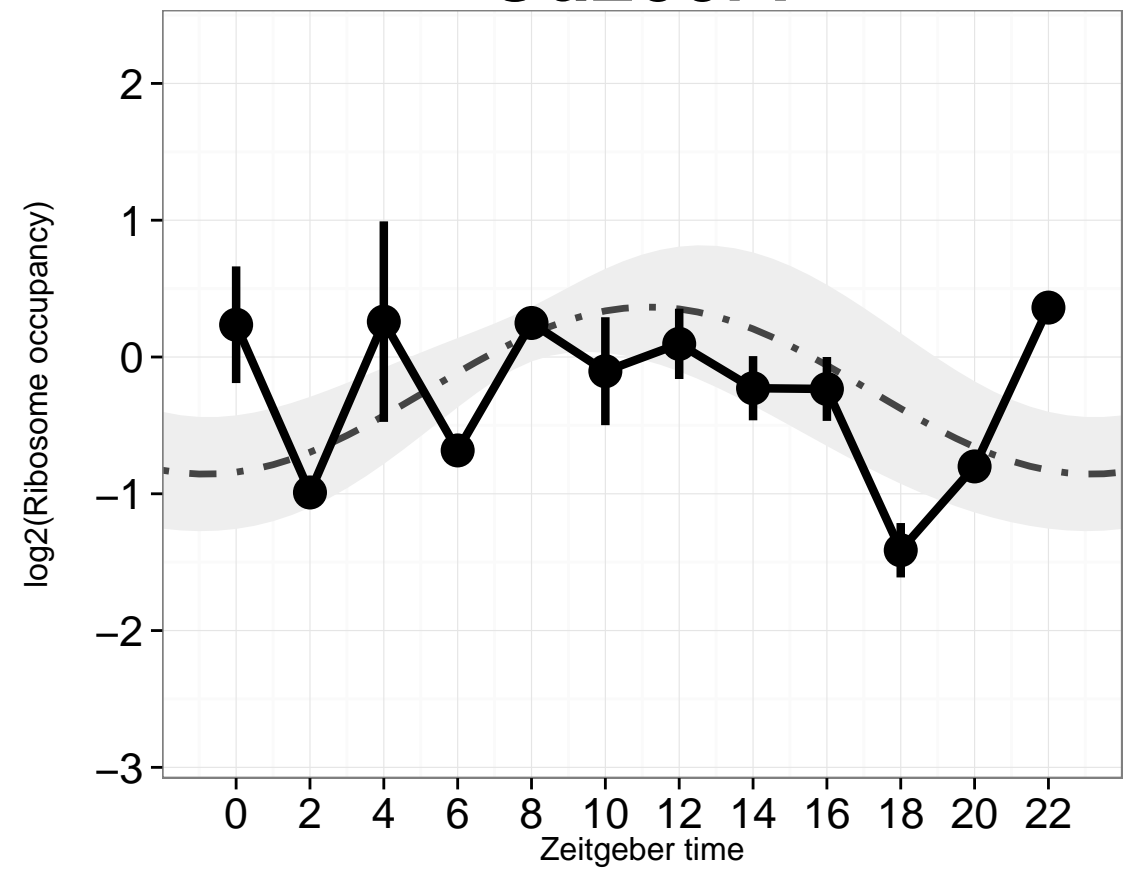

Supplement: SuppDataset_1.zip [file Cd200r1_set_A.pdf › Supplemental Dataset 1/A-mRNA_nonrhyth_translation_nonrhyth/Cd200r1_set_A.pdf]

## Cd22

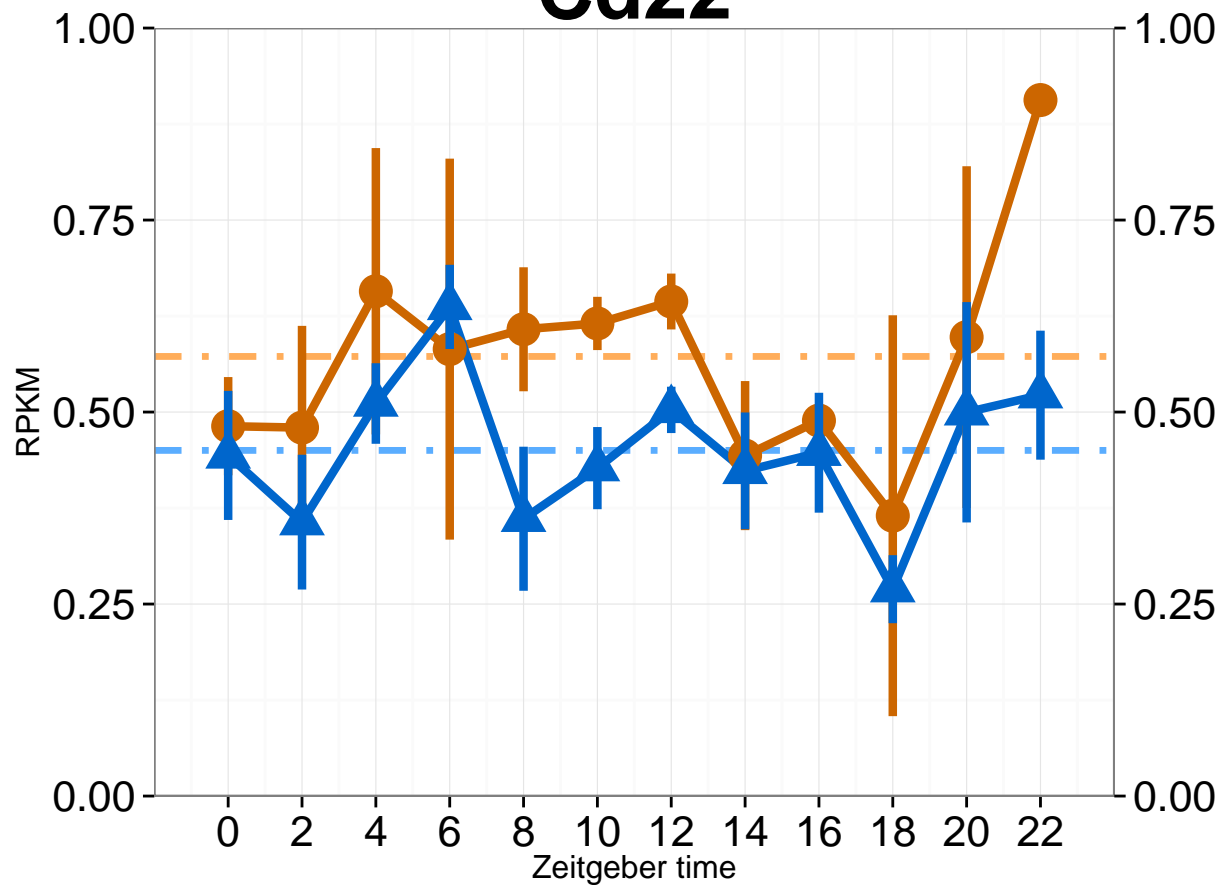

## Cd22

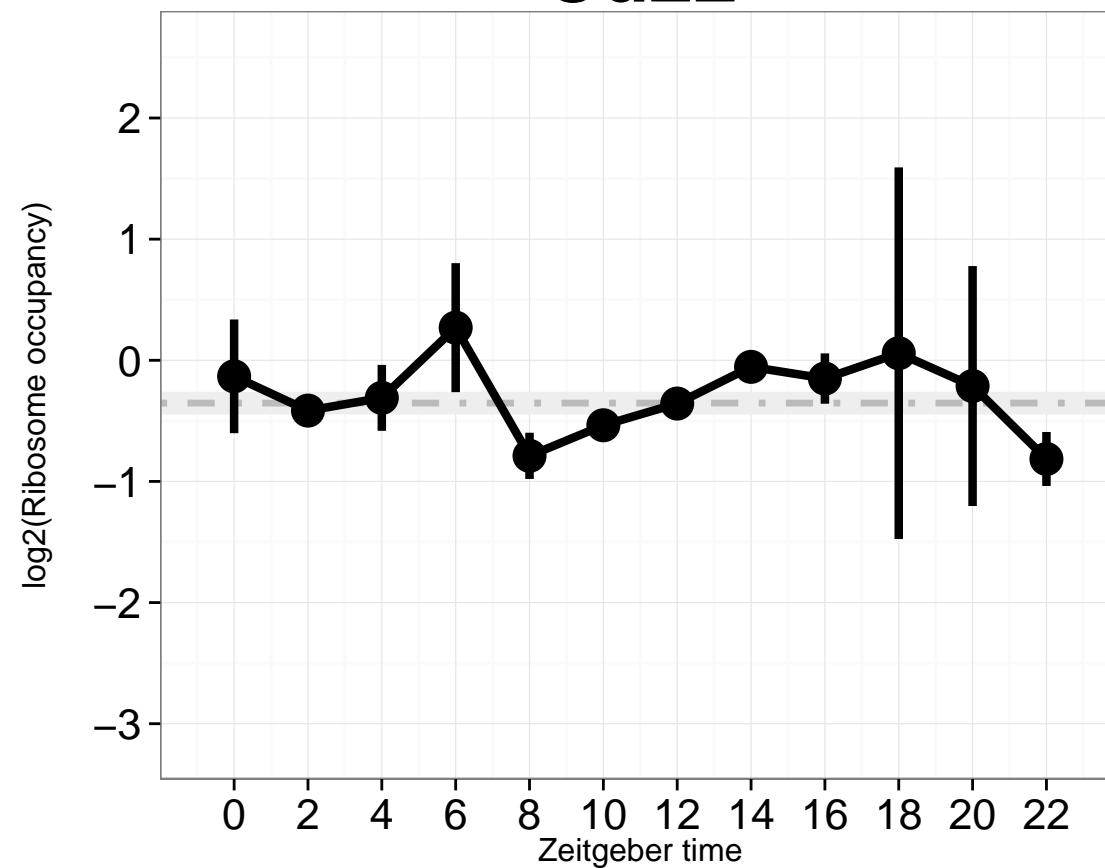

Supplement: SuppDataset_1.zip [file Cd22_set_A.pdf › Supplemental Dataset 1/A-mRNA_nonrhyth_translation_nonrhyth/Cd22_set_A.pdf]

## Cd248

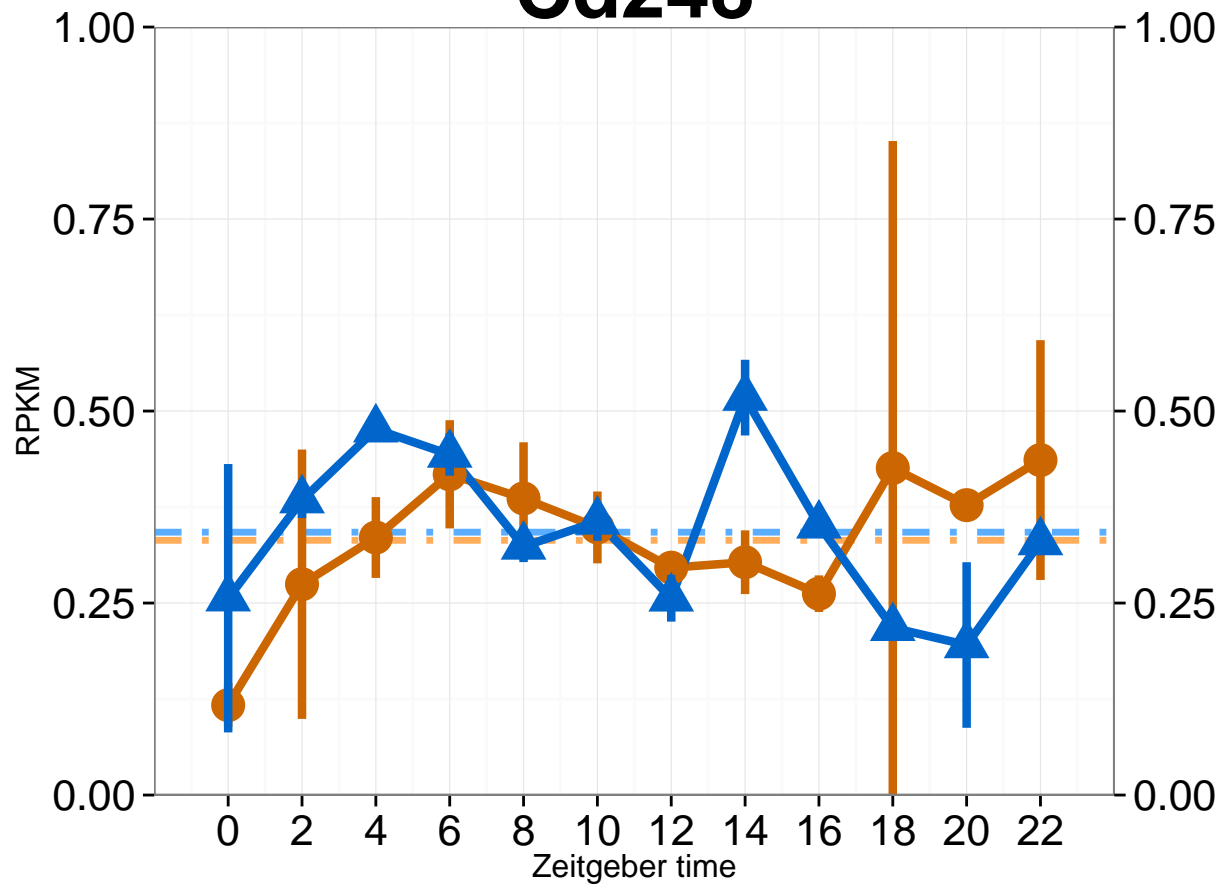

## Cd248

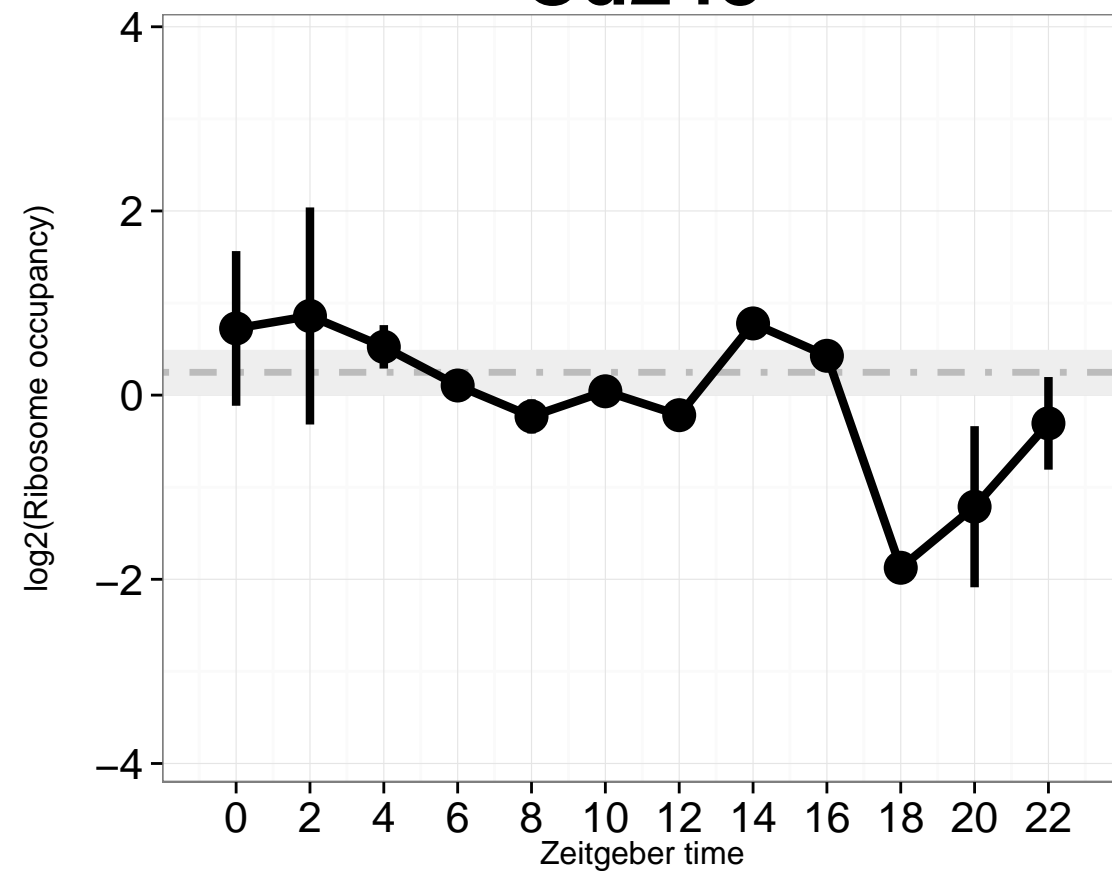

Supplement: SuppDataset_1.zip [file Cd248_set_A.pdf › Supplemental Dataset 1/A-mRNA_nonrhyth_translation_nonrhyth/Cd248_set_A.pdf]

## Cd274

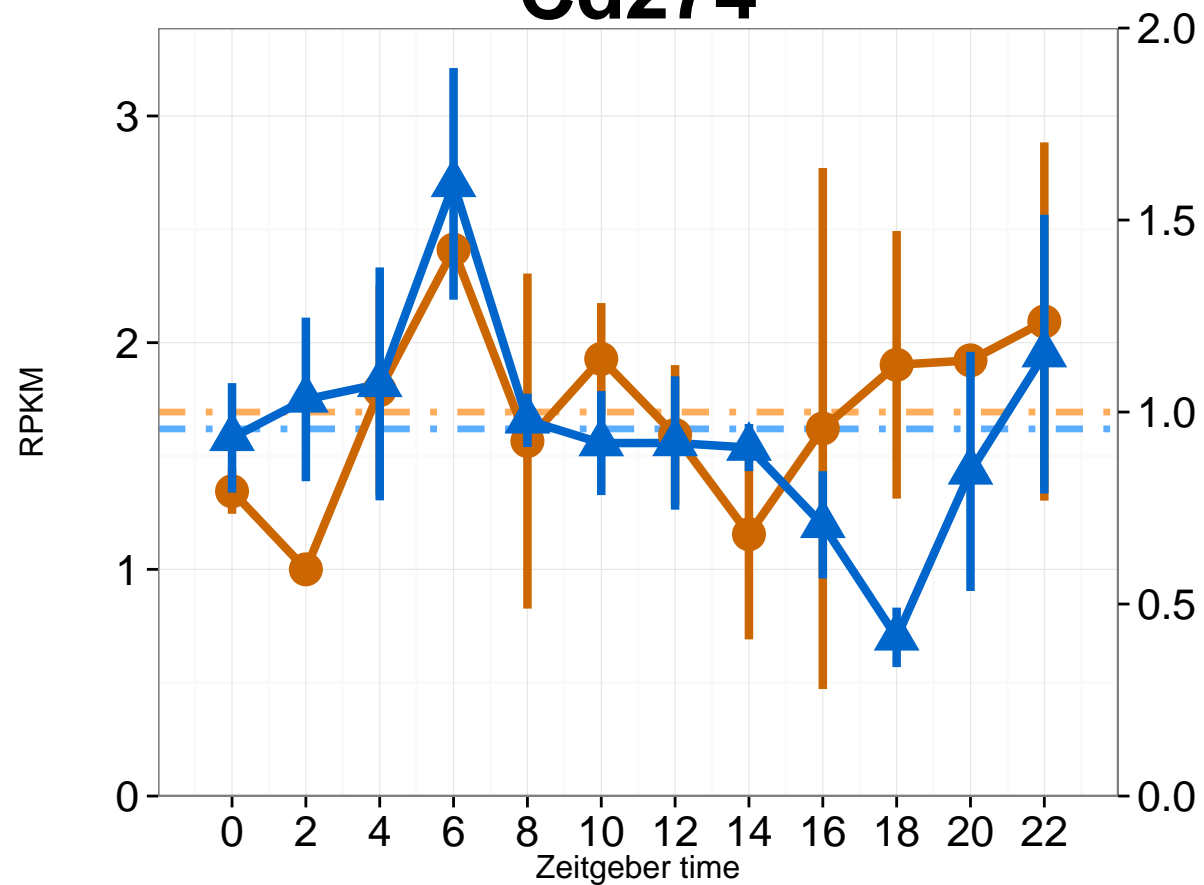

## Cd274

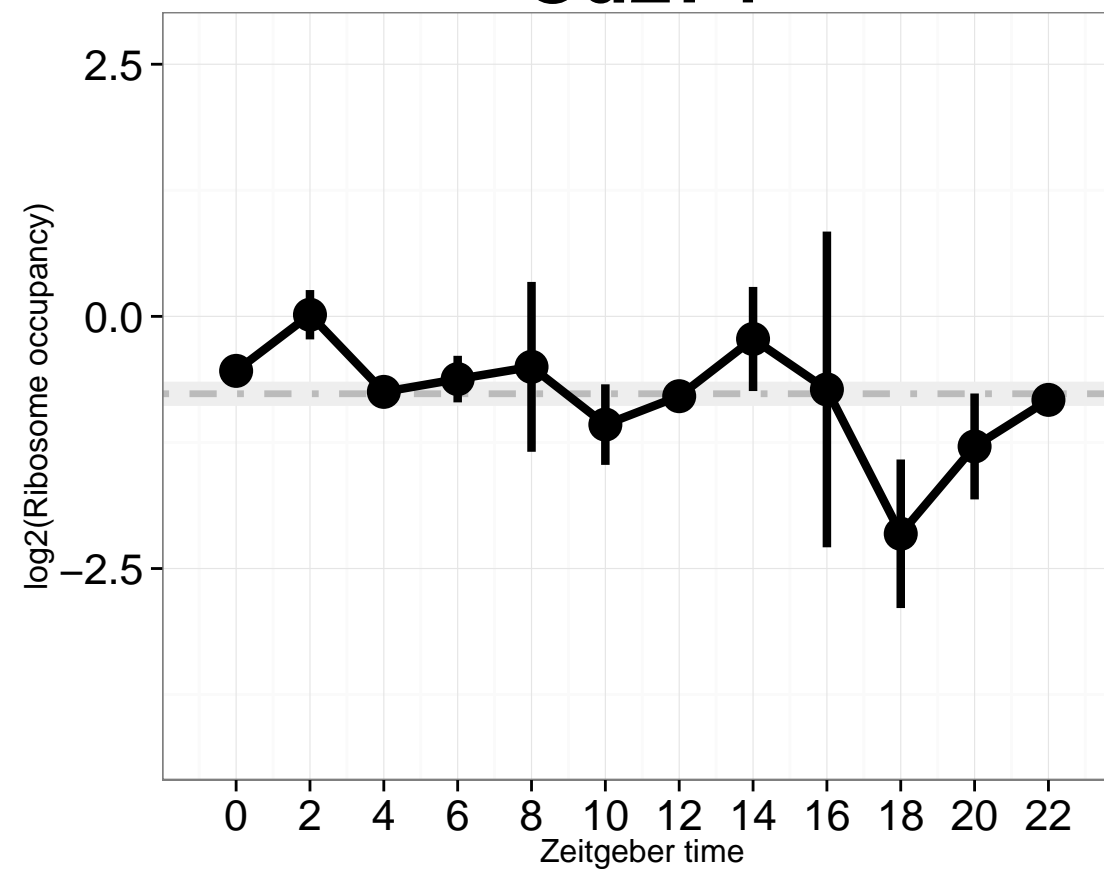

Supplement: SuppDataset_1.zip [file Cd274_set_A.pdf › Supplemental Dataset 1/A-mRNA_nonrhyth_translation_nonrhyth/Cd274_set_A.pdf]

# Cd2ap

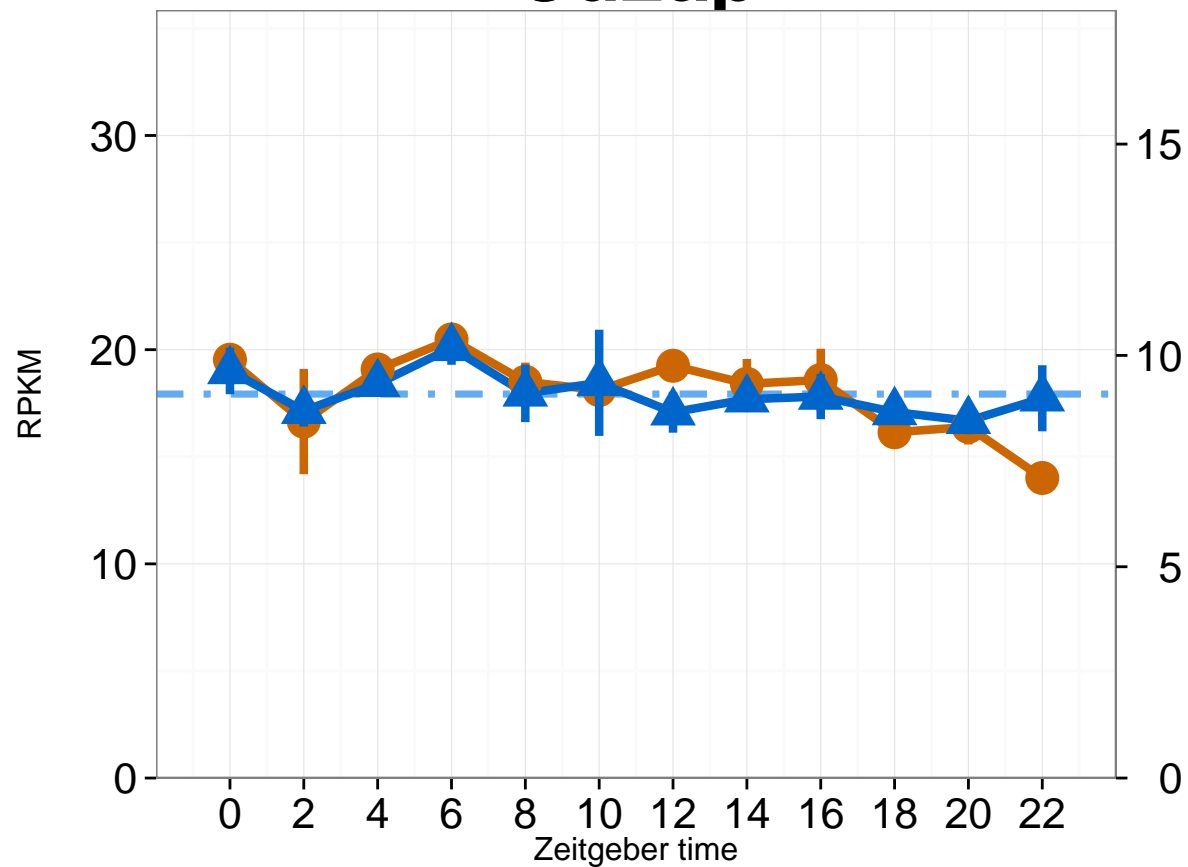

# Cd2ap

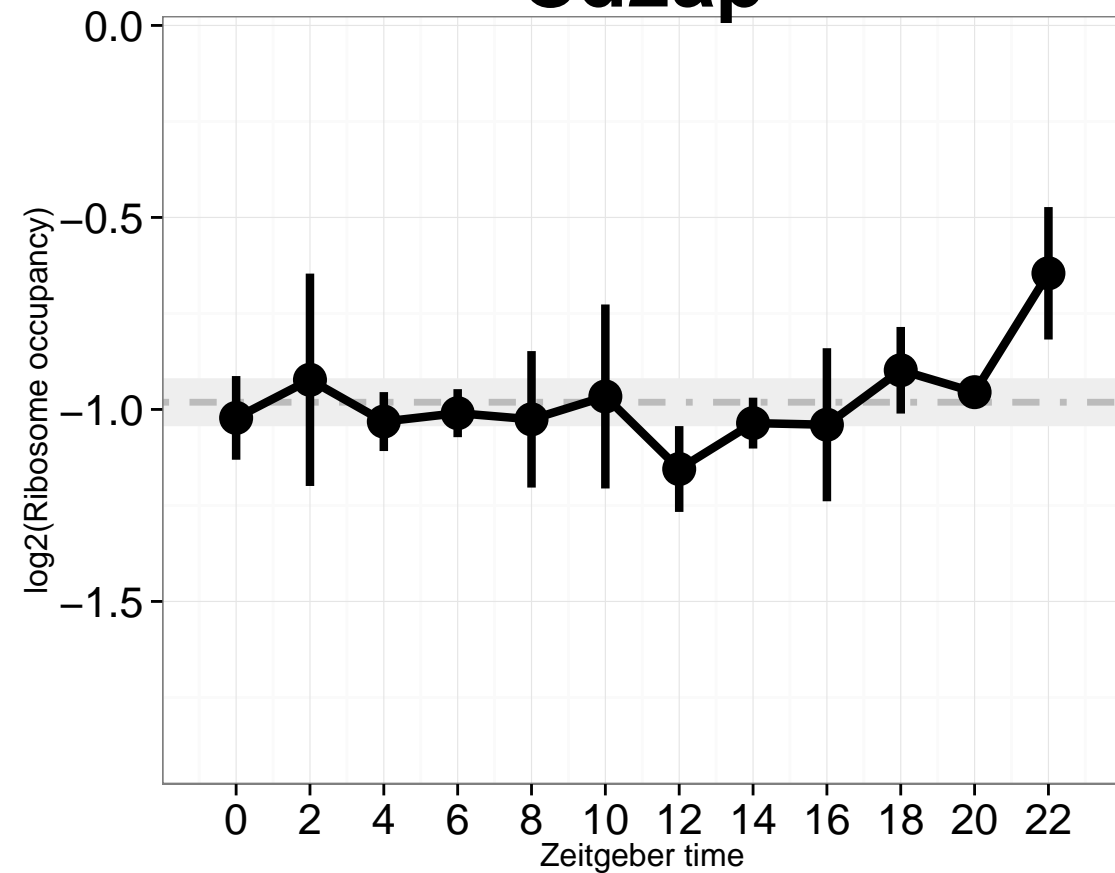

Supplement: SuppDataset_1.zip [file Cd2ap_set_A.pdf › Supplemental Dataset 1/A-mRNA_nonrhyth_translation_nonrhyth/Cd2ap_set_A.pdf]
