# Supplementary figures and images for: Ribosome profiling reveals the rhythmic liver translatome and circadian clock regulation by upstream open reading frames (part 14 of 113)
Source: HighWire-hosted journal article supplement (doi:10.1101/gr.195404.115), 2015-10-20

## Cd2bp2

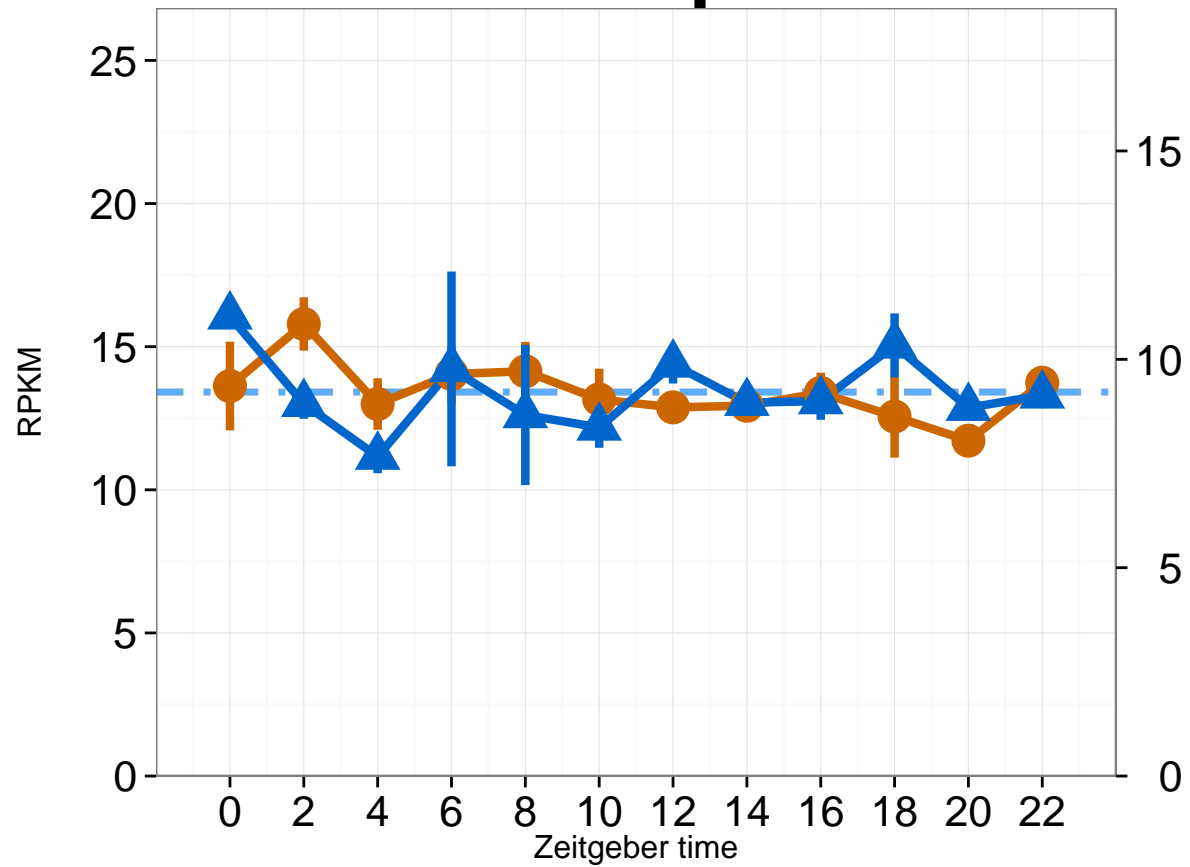

## Cd2bp2

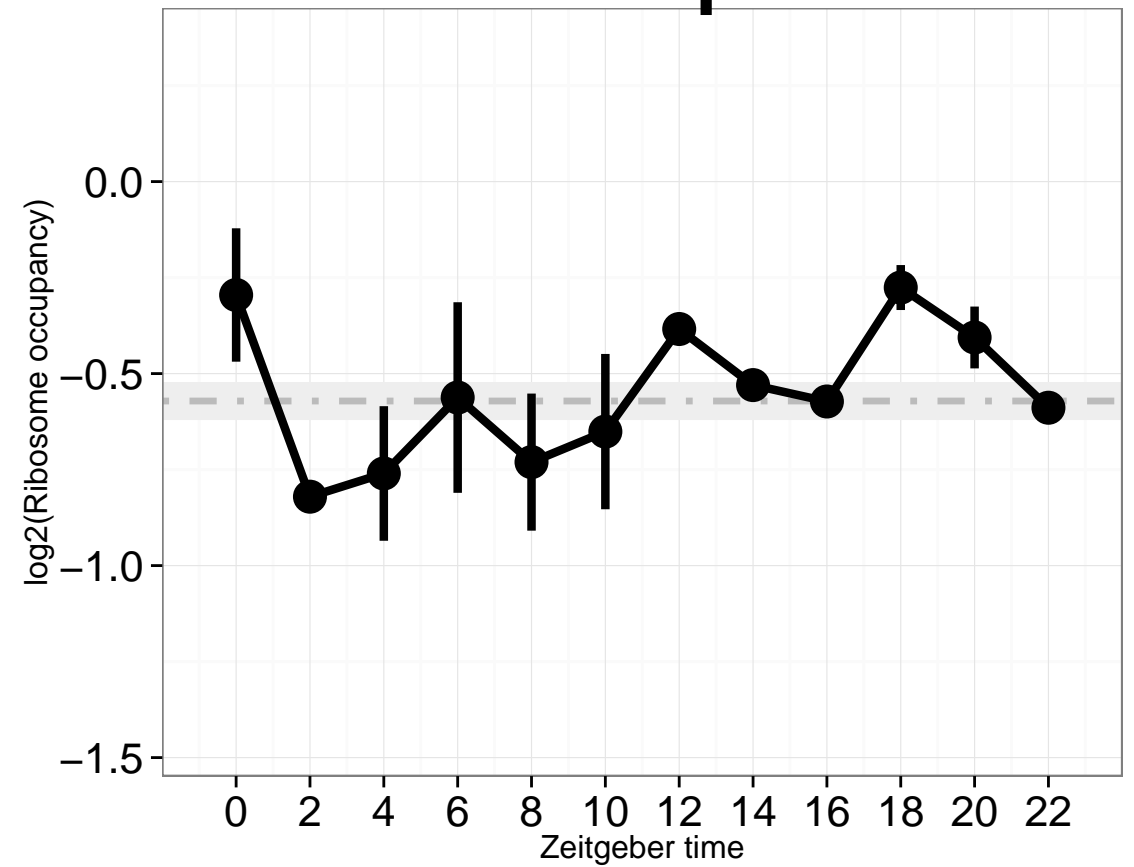

Supplement: SuppDataset_1.zip [file Cd2bp2_set_A.pdf › Supplemental Dataset 1/A-mRNA_nonrhyth_translation_nonrhyth/Cd2bp2_set_A.pdf]

# Cd300a

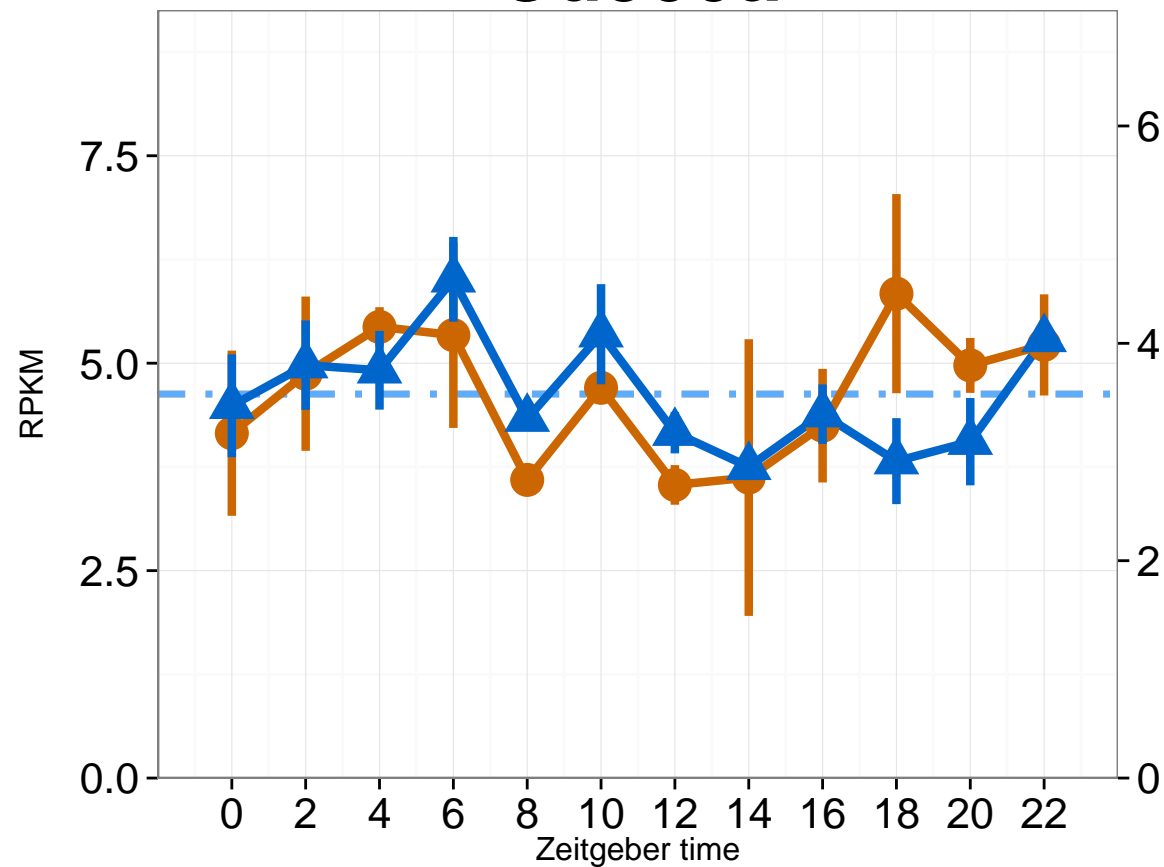

# Cd300a

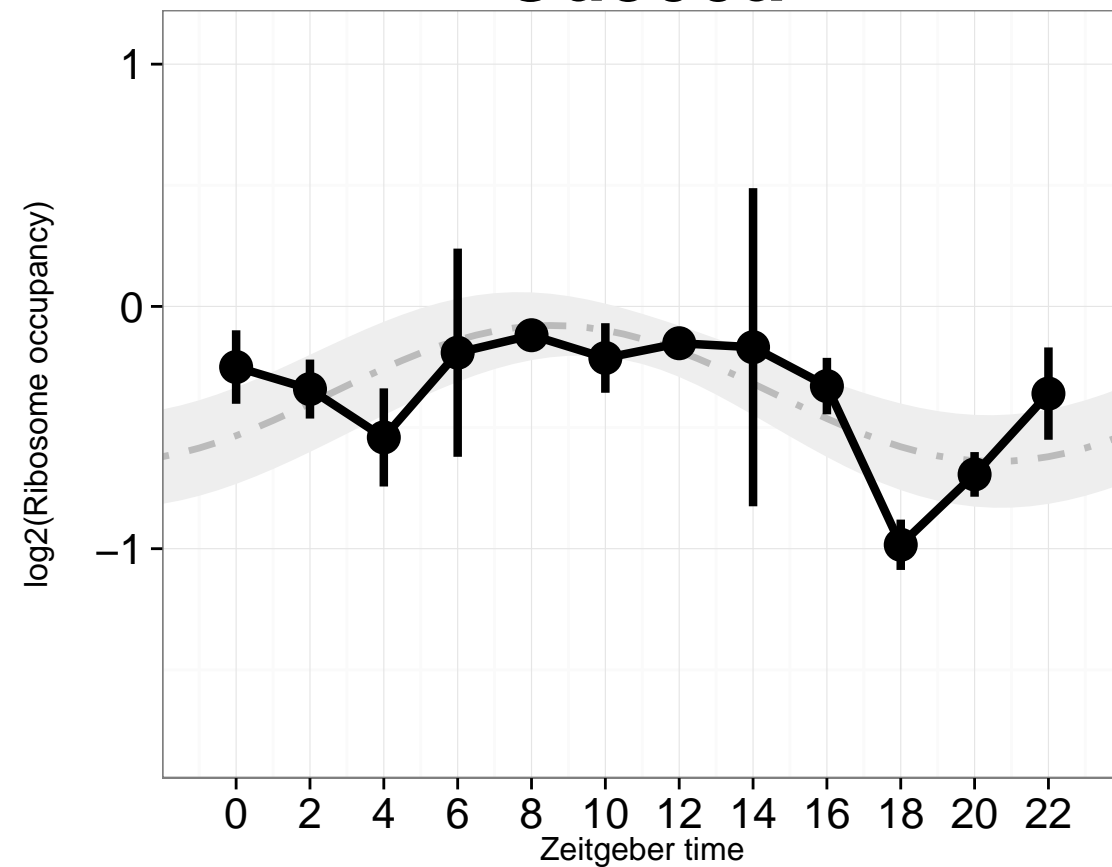

Supplement: SuppDataset_1.zip [file Cd300a_set_A.pdf › Supplemental Dataset 1/A-mRNA_nonrhyth_translation_nonrhyth/Cd300a_set_A.pdf]

# Cd300e

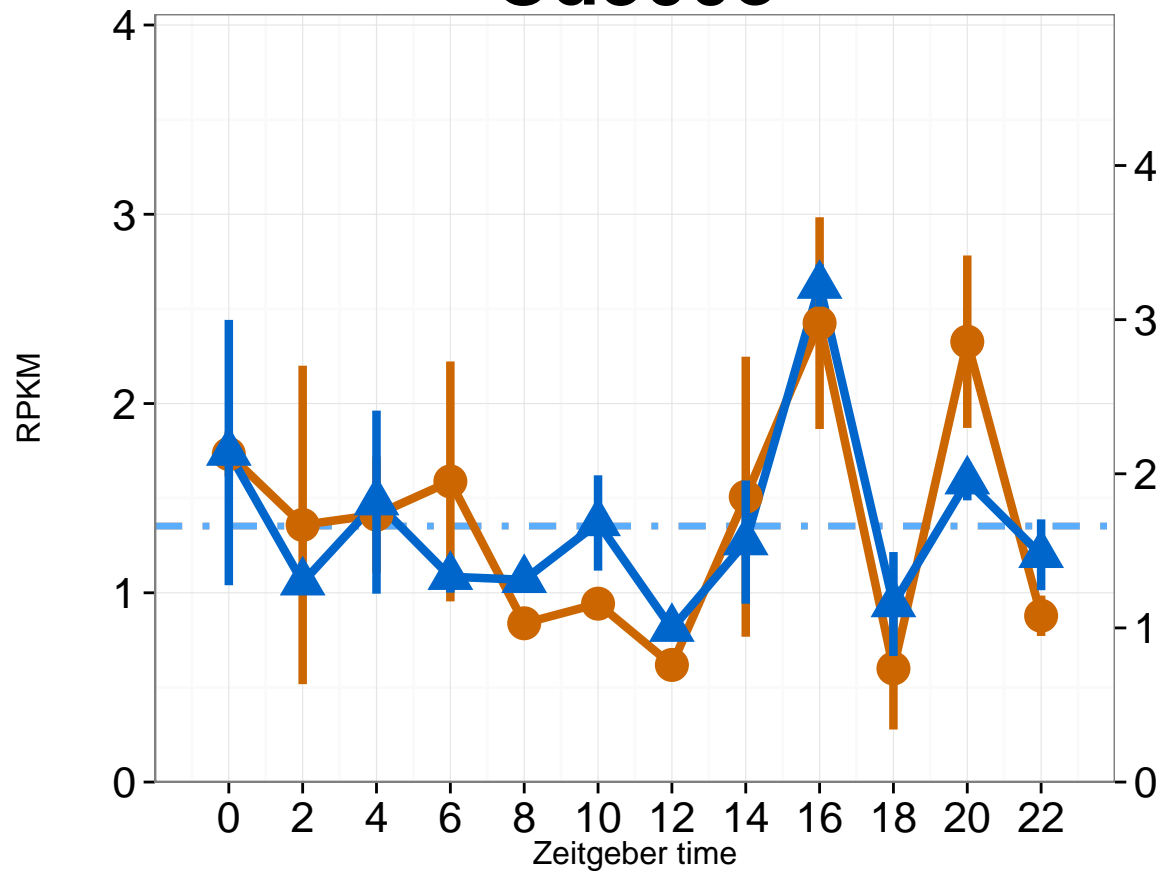

# Cd300e

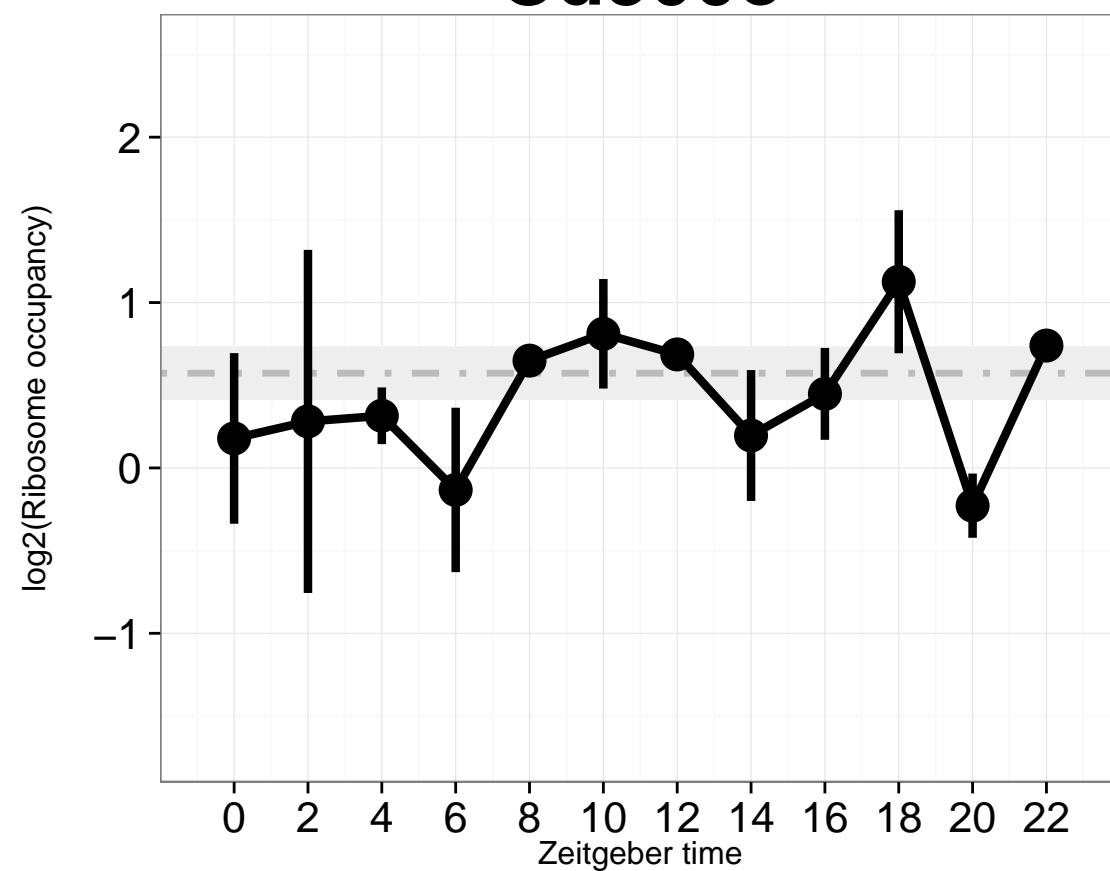

Supplement: SuppDataset_1.zip [file Cd300e_set_A.pdf › Supplemental Dataset 1/A-mRNA_nonrhyth_translation_nonrhyth/Cd300e_set_A.pdf]

Cd300lg

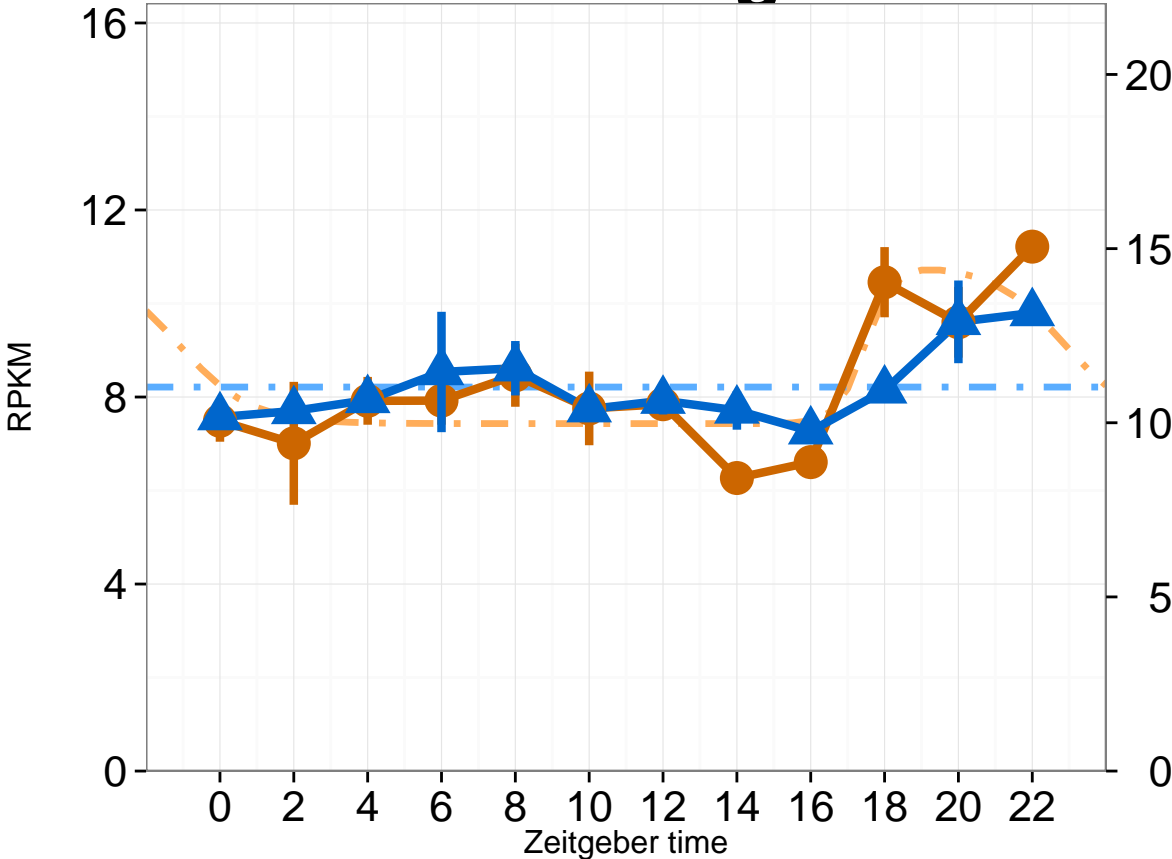

Cd300lg

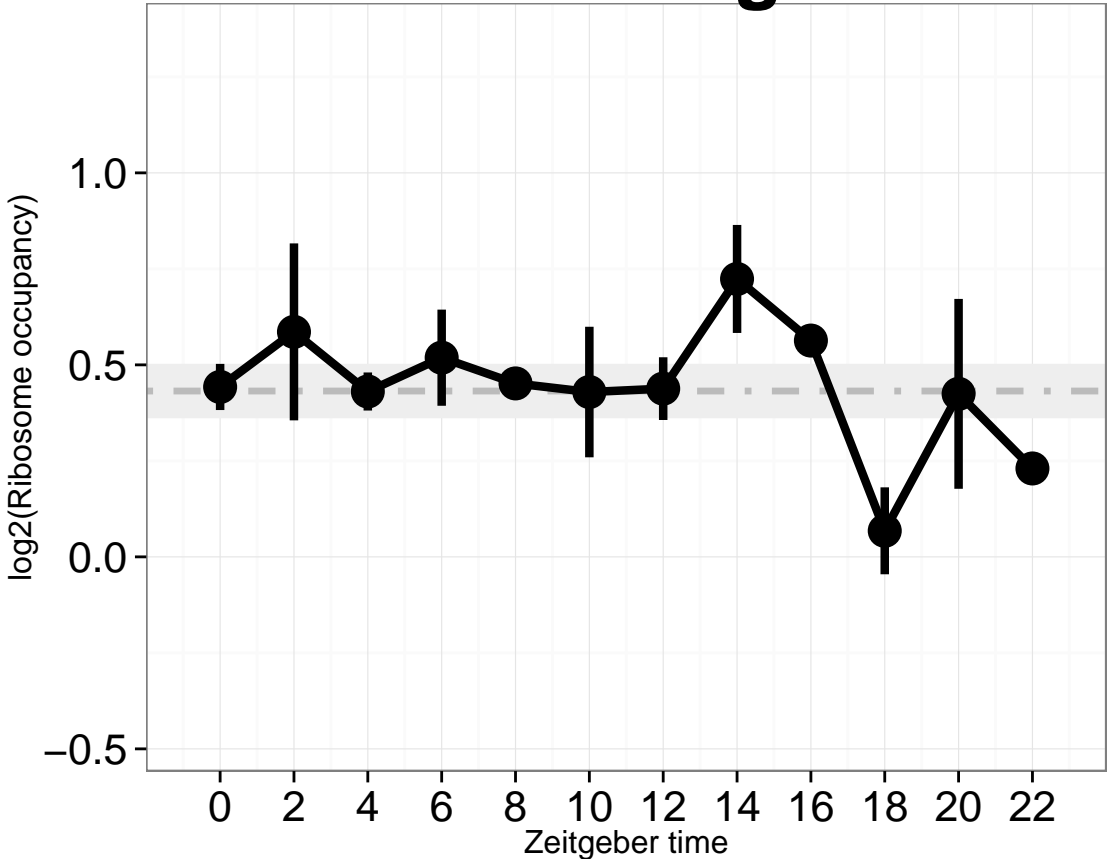

Supplement: SuppDataset_1.zip [file Cd300lg_set_A.pdf › Supplemental Dataset 1/A-mRNA_nonrhyth_translation_nonrhyth/Cd300lg_set_A.pdf]

## Cd320

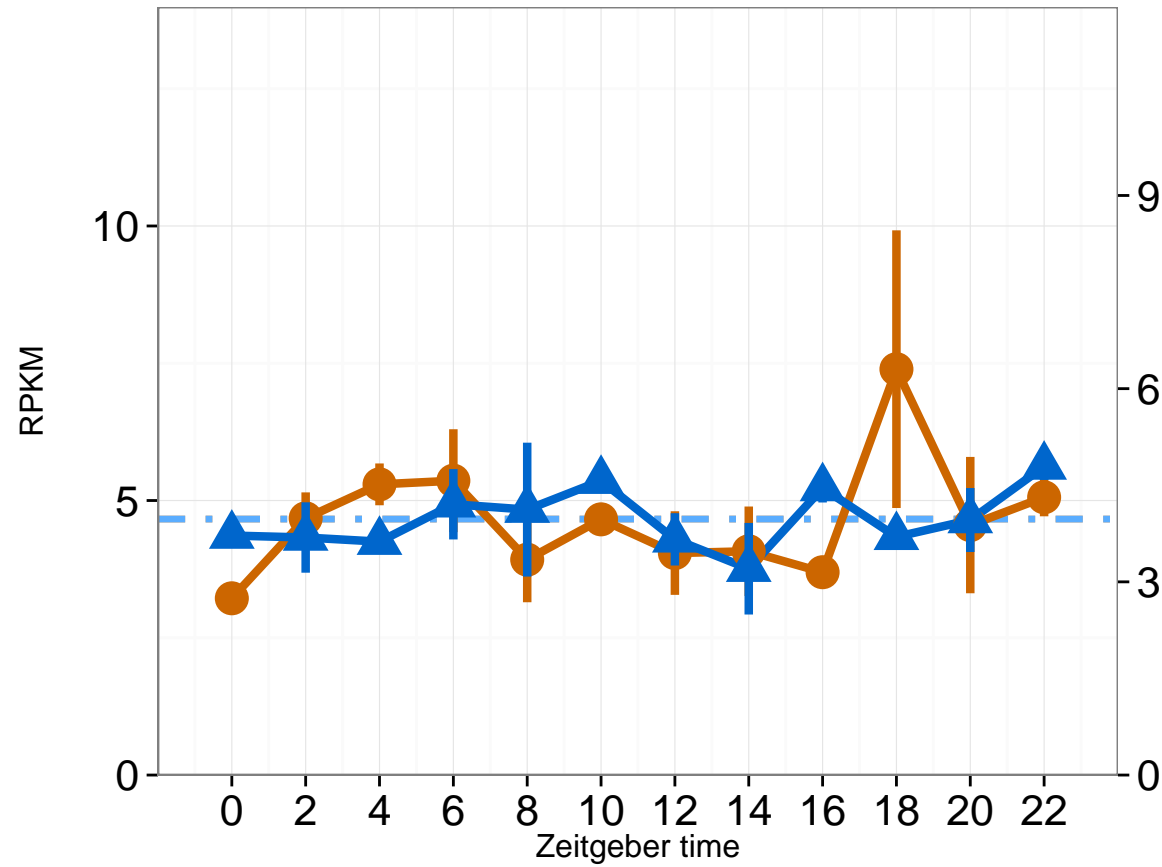

## Cd320

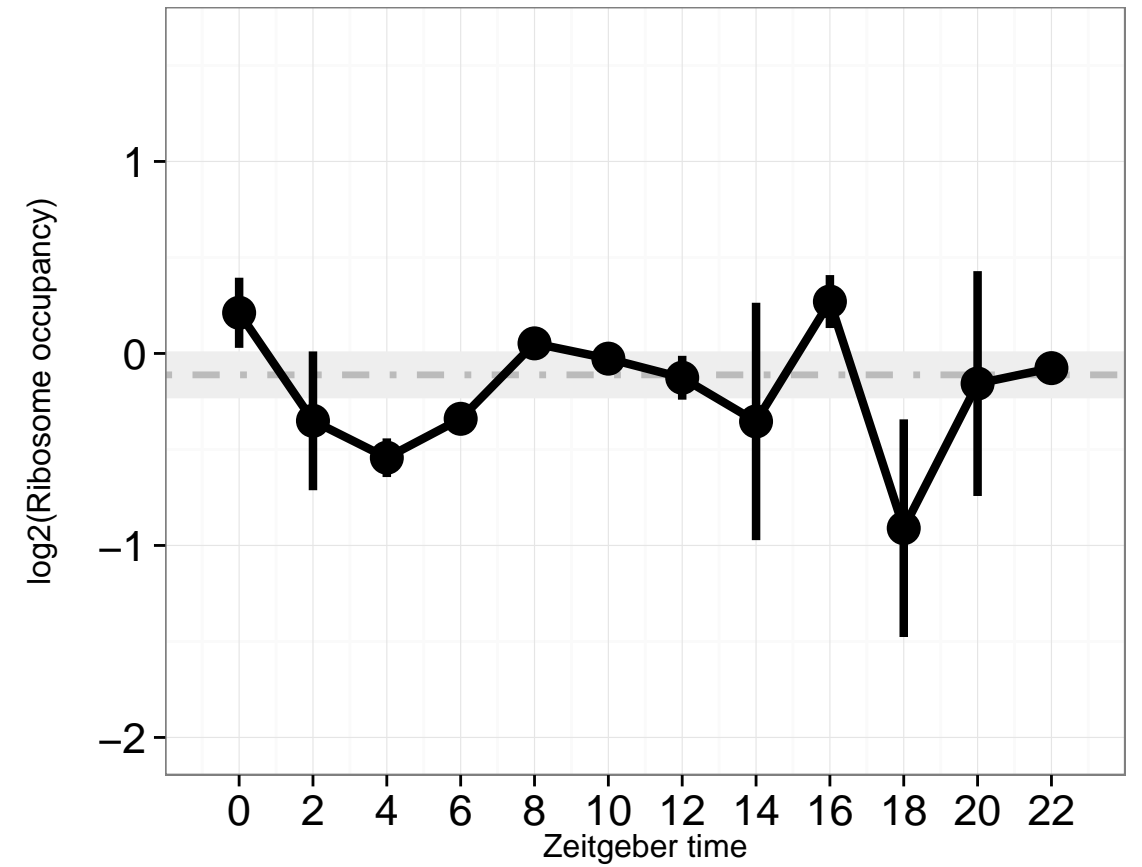

Supplement: SuppDataset_1.zip [file Cd320_set_A.pdf › Supplemental Dataset 1/A-mRNA_nonrhyth_translation_nonrhyth/Cd320_set_A.pdf]

## Cd34

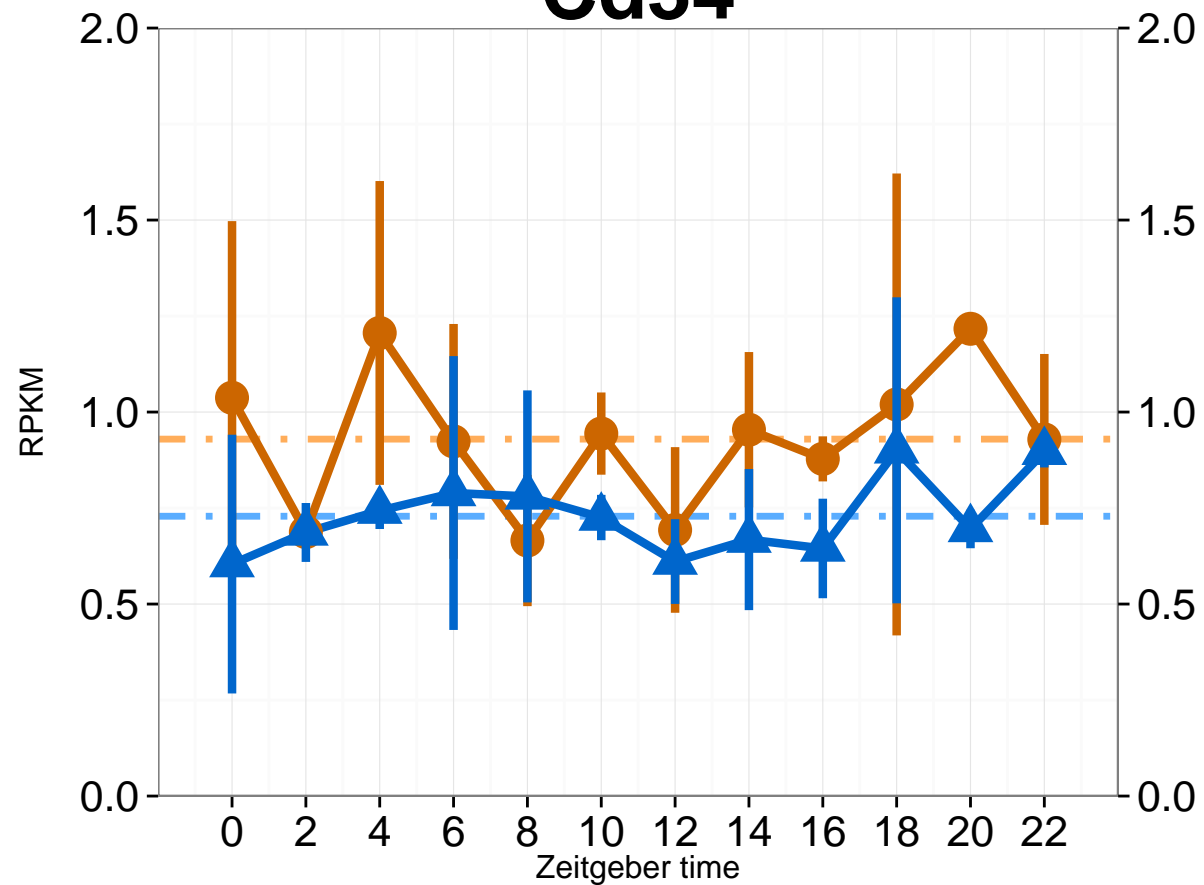

## Cd34

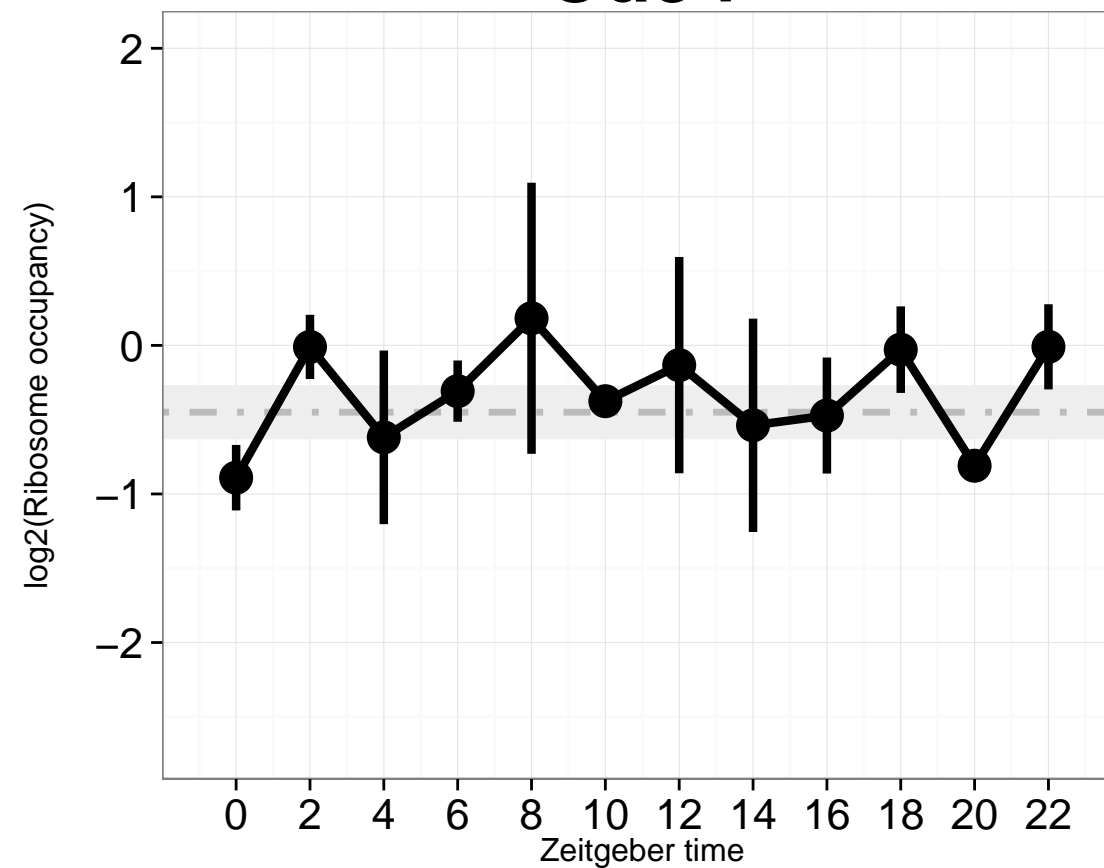

Supplement: SuppDataset_1.zip [file Cd34_set_A.pdf › Supplemental Dataset 1/A-mRNA_nonrhyth_translation_nonrhyth/Cd34_set_A.pdf]

## Cd36

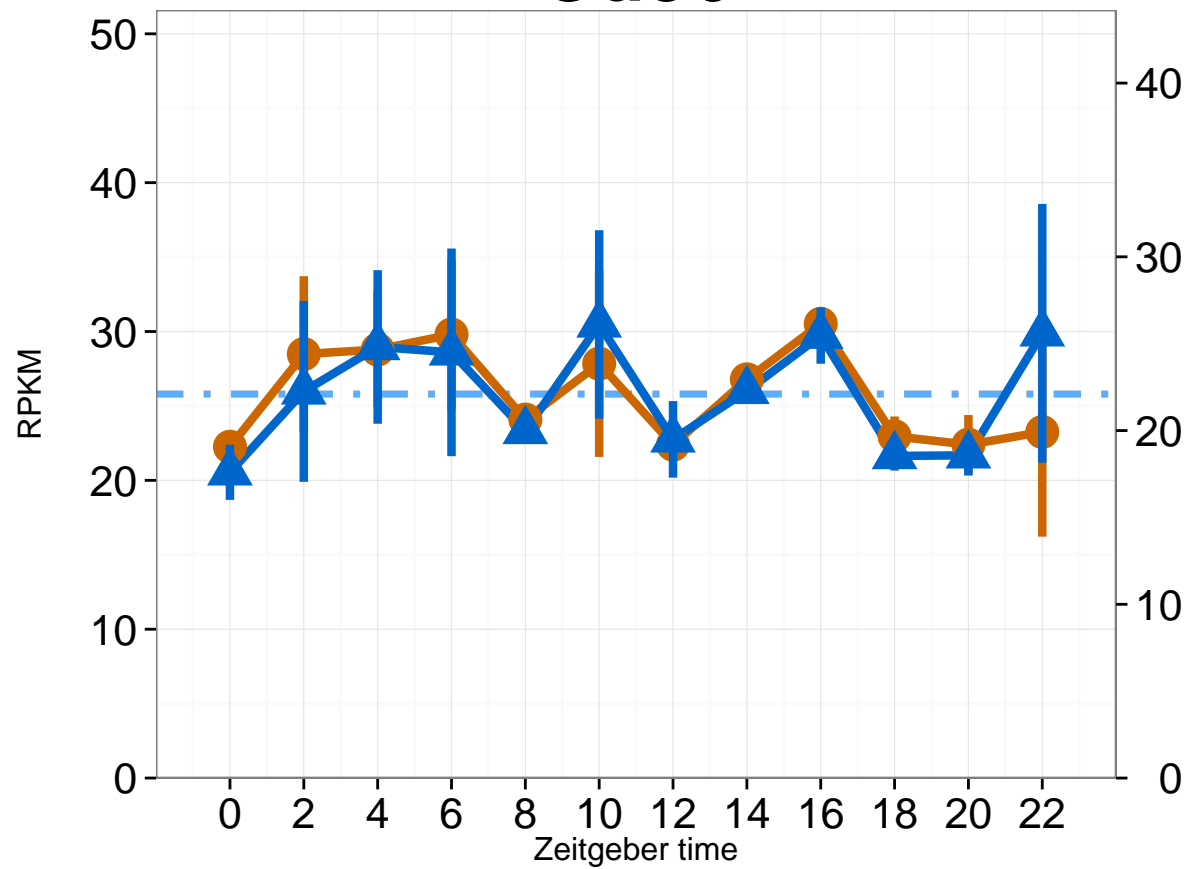

## Cd36

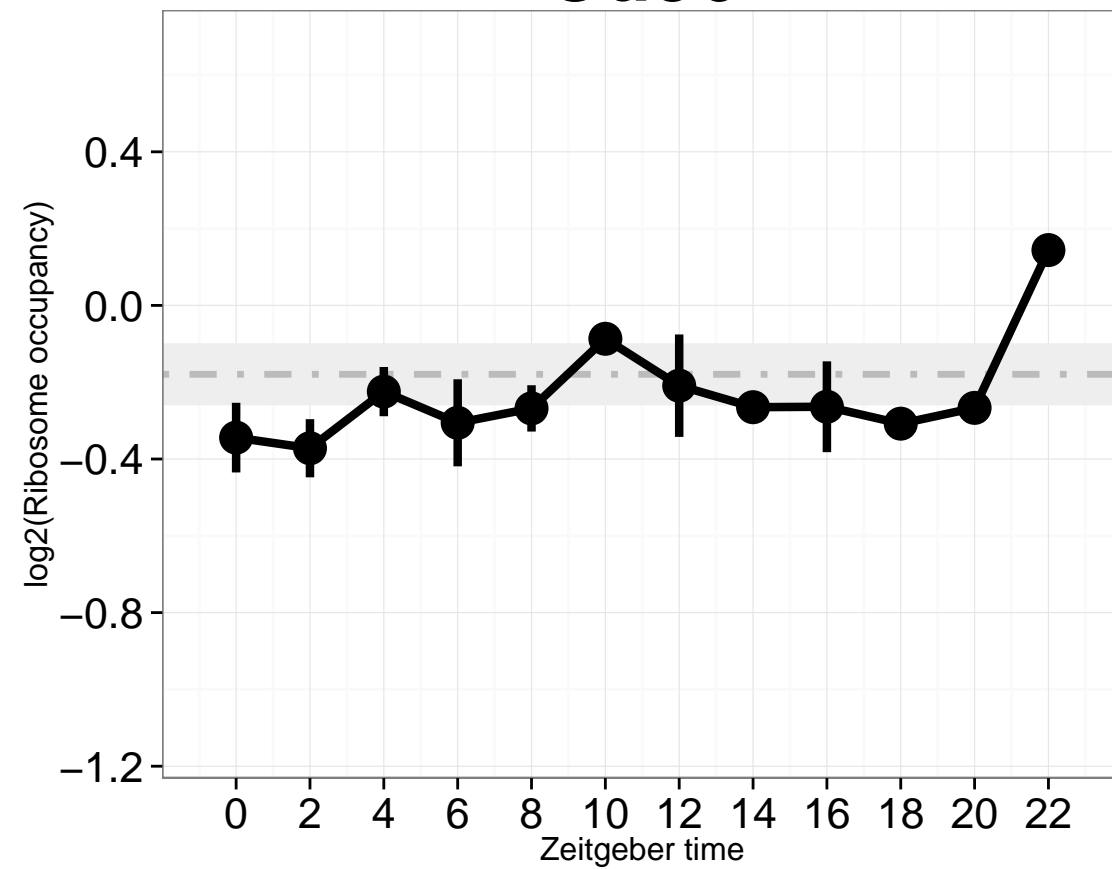

Supplement: SuppDataset_1.zip [file Cd36_set_A.pdf › Supplemental Dataset 1/A-mRNA_nonrhyth_translation_nonrhyth/Cd36_set_A.pdf]

## Cd38

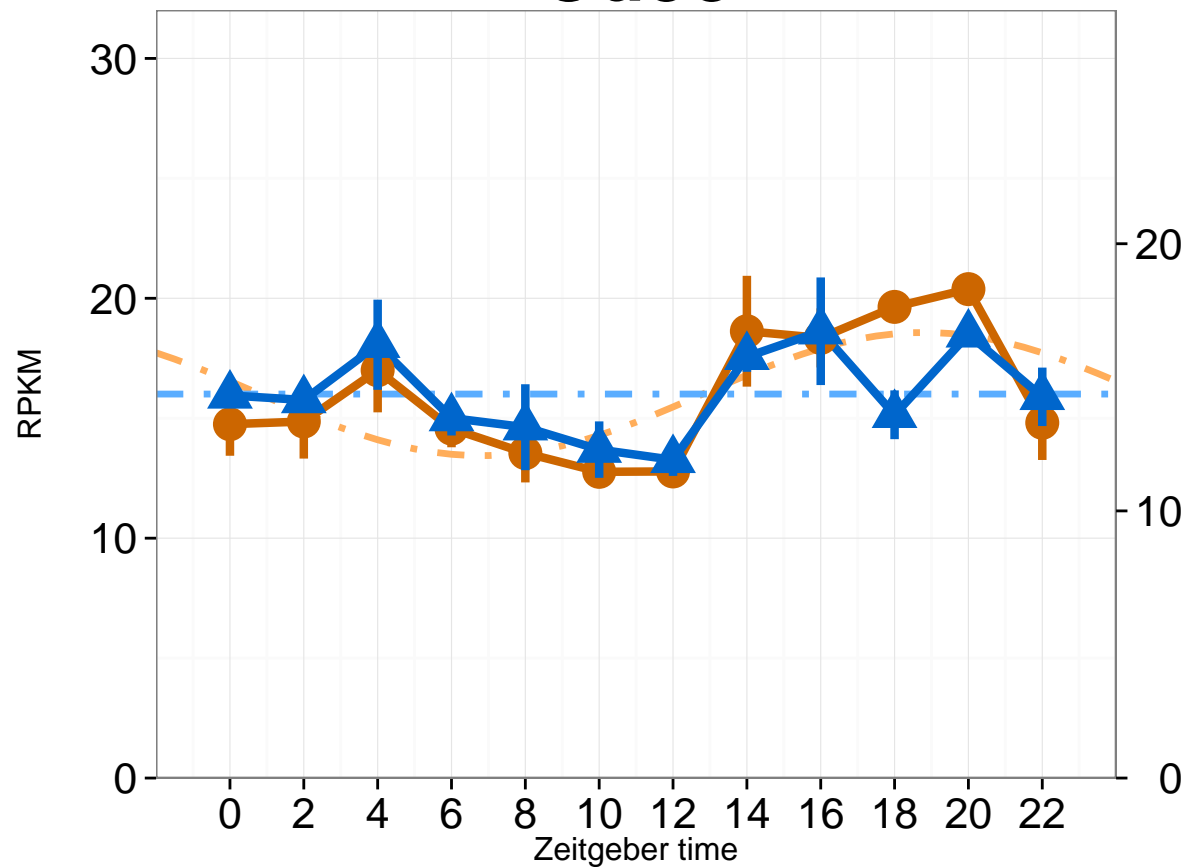

## Cd38

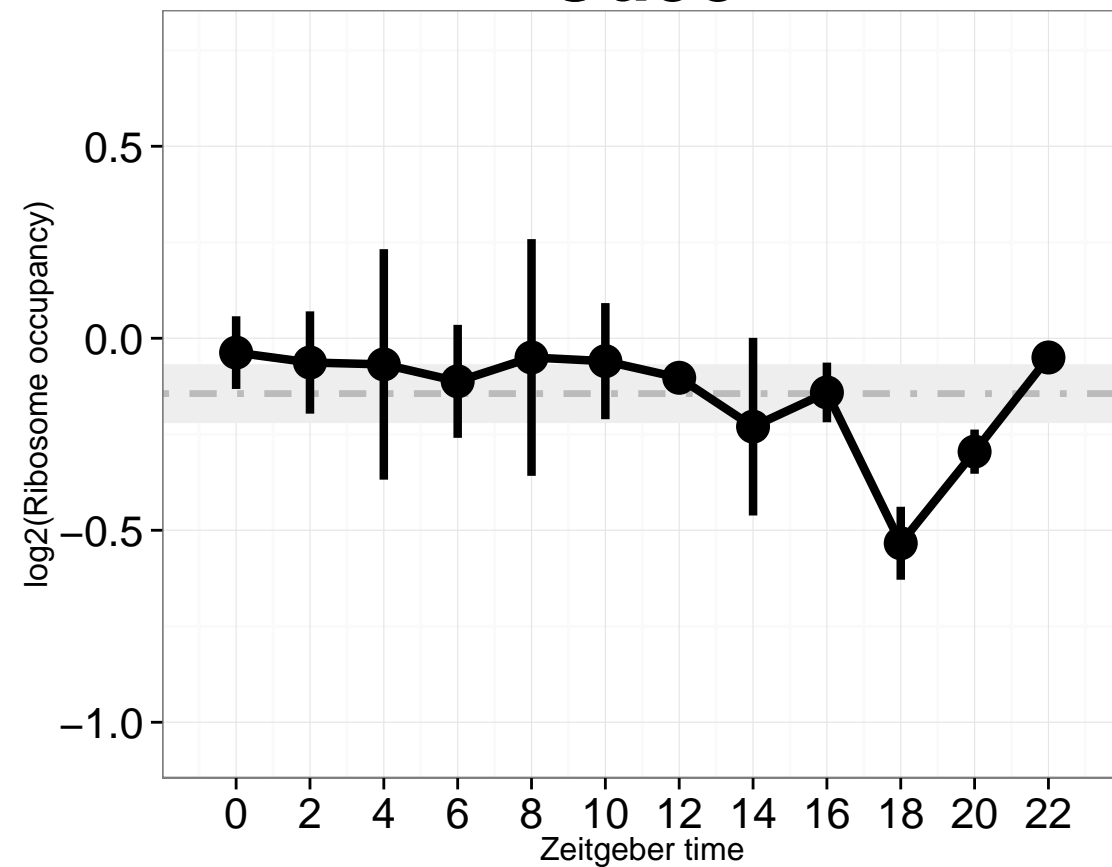

Supplement: SuppDataset_1.zip [file Cd38_set_A.pdf › Supplemental Dataset 1/A-mRNA_nonrhyth_translation_nonrhyth/Cd38_set_A.pdf]

# Cd3eap

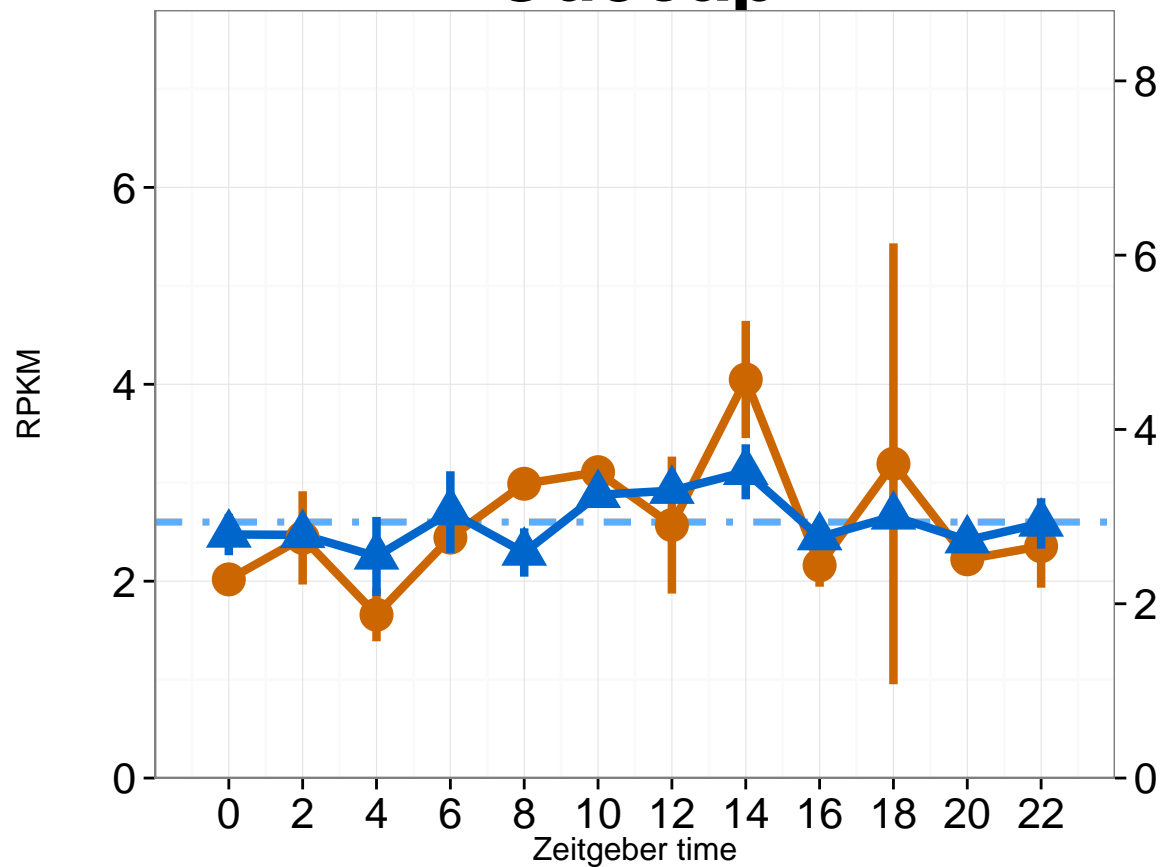

# Cd3eap

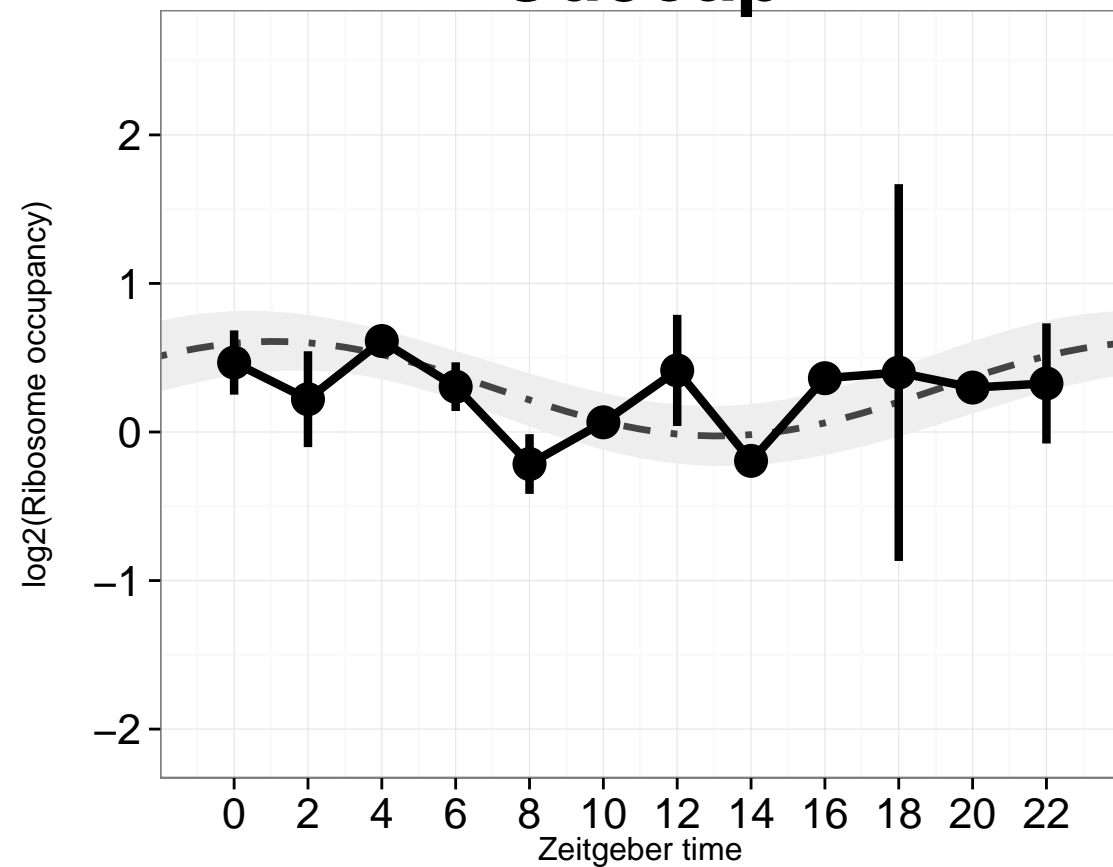

Supplement: SuppDataset_1.zip [file Cd3eap_set_A.pdf › Supplemental Dataset 1/A-mRNA_nonrhyth_translation_nonrhyth/Cd3eap_set_A.pdf]

## Cd44

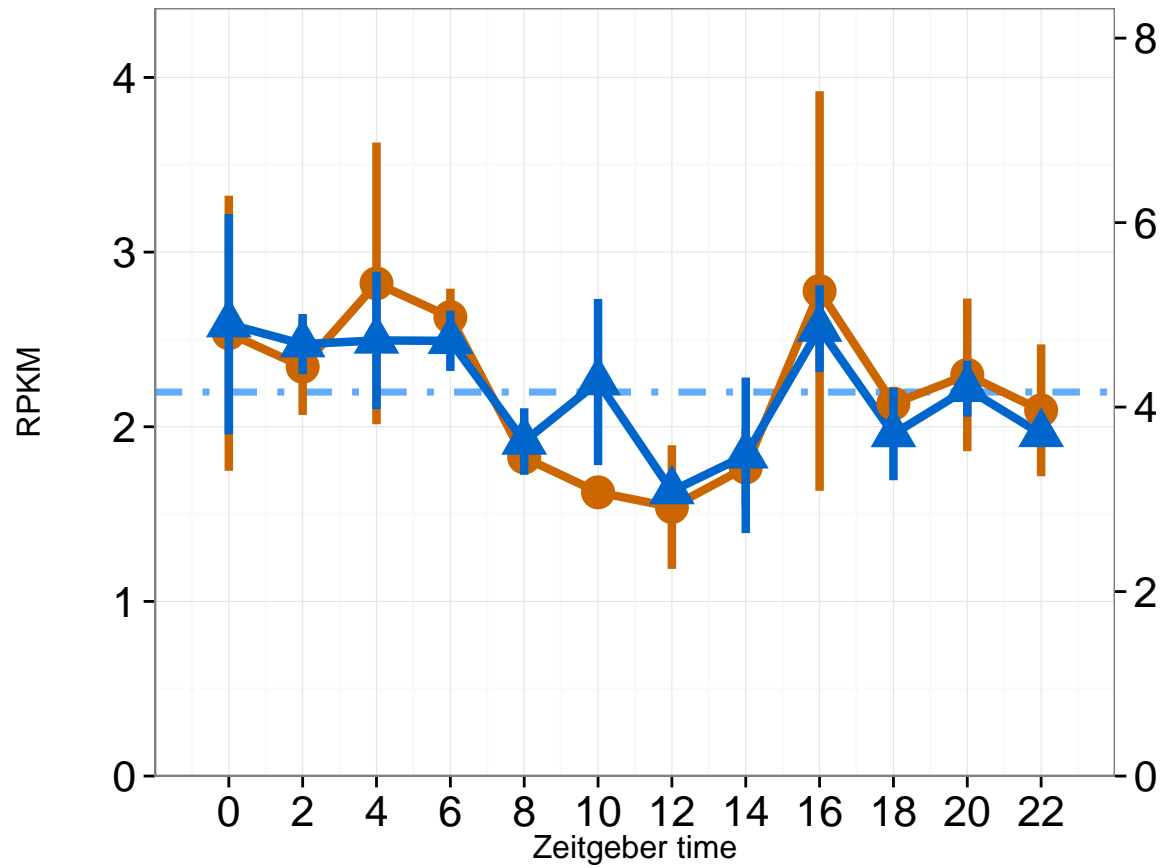

## Cd44

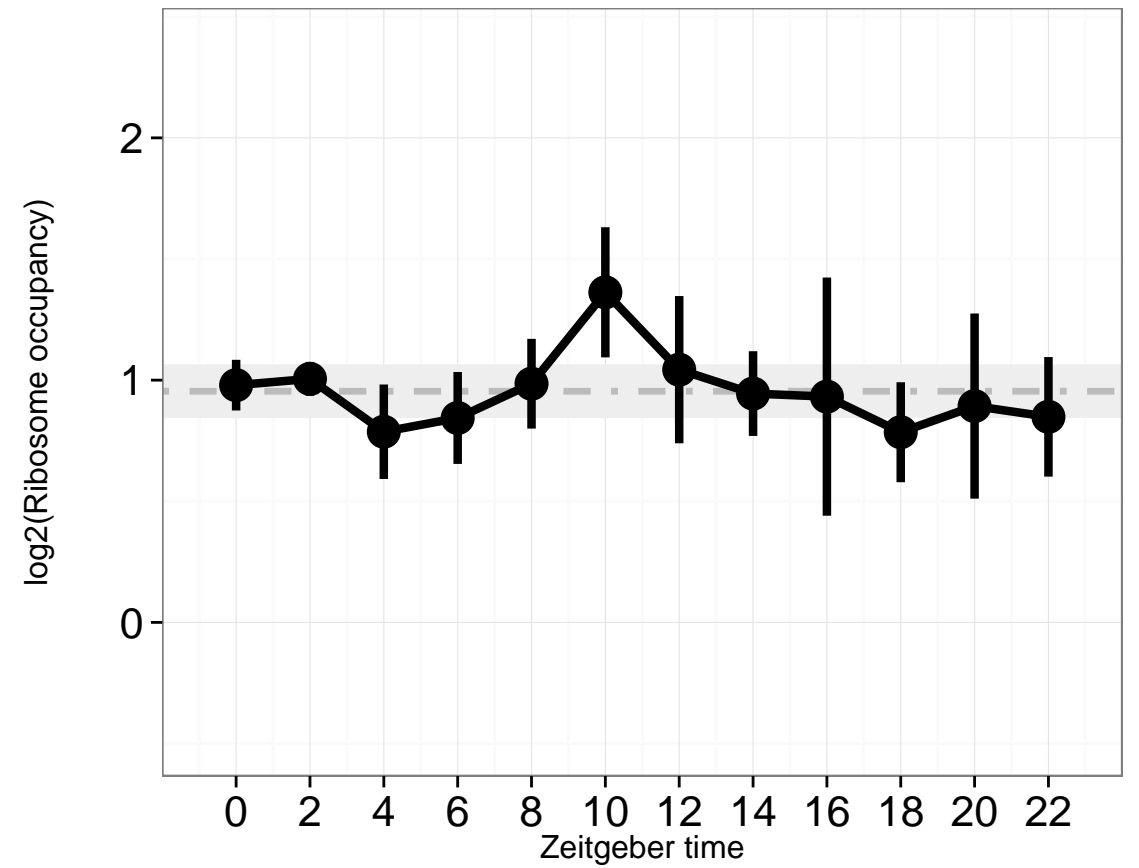

Supplement: SuppDataset_1.zip [file Cd44_set_A.pdf › Supplemental Dataset 1/A-mRNA_nonrhyth_translation_nonrhyth/Cd44_set_A.pdf]

## Cd47

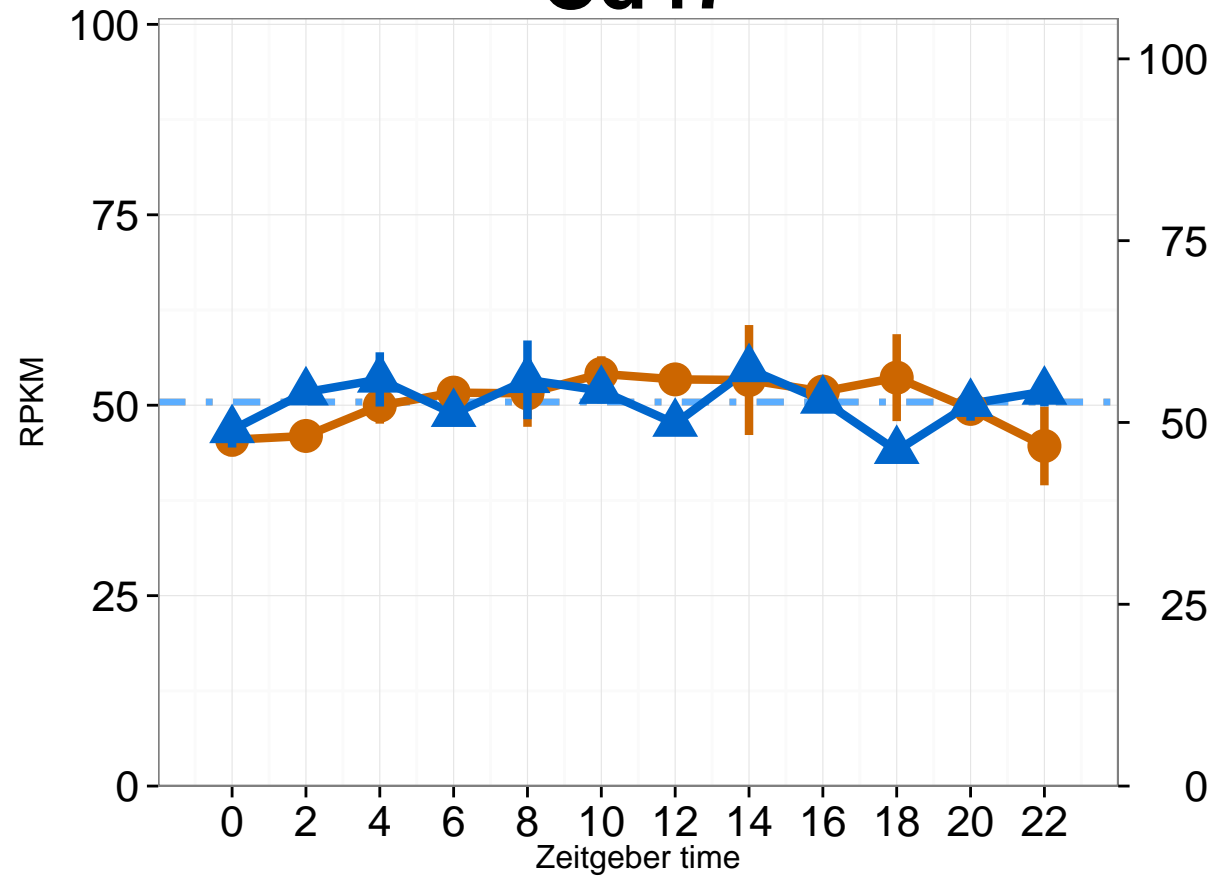

## Cd47

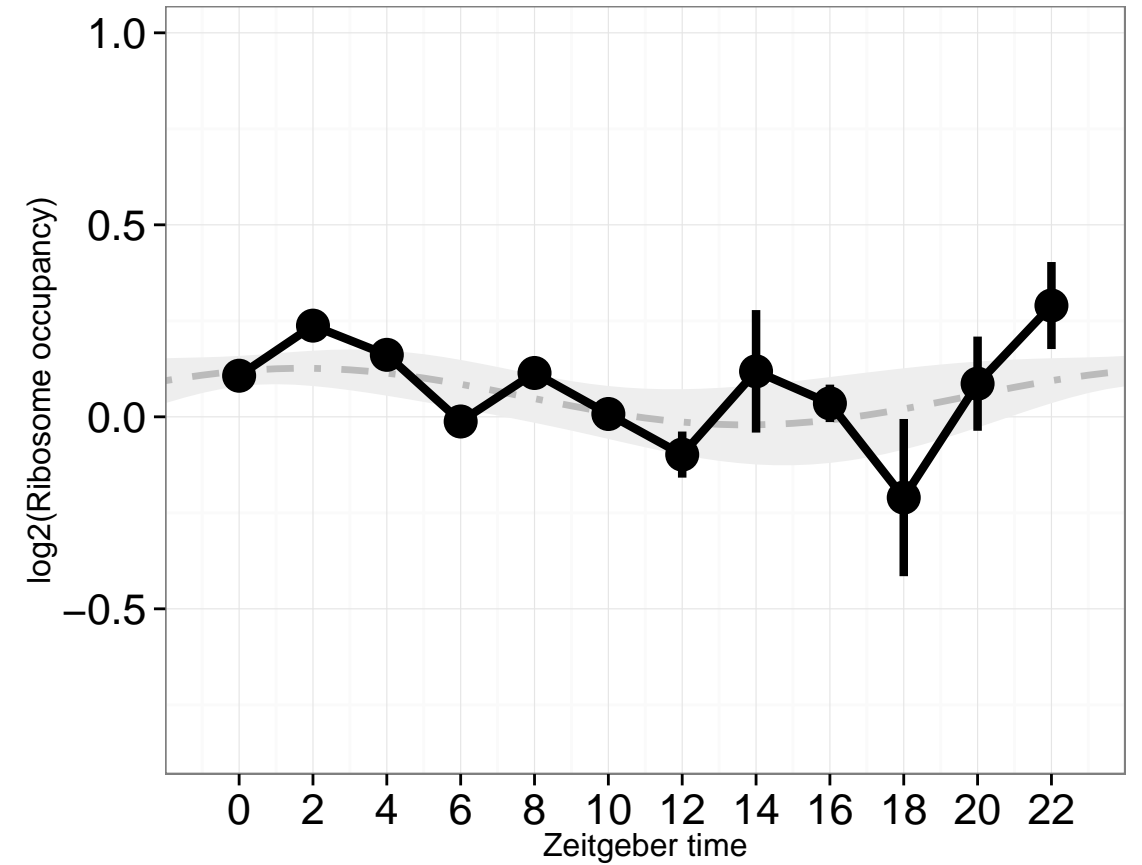

Supplement: SuppDataset_1.zip [file Cd47_set_A.pdf › Supplemental Dataset 1/A-mRNA_nonrhyth_translation_nonrhyth/Cd47_set_A.pdf]

## Cd48

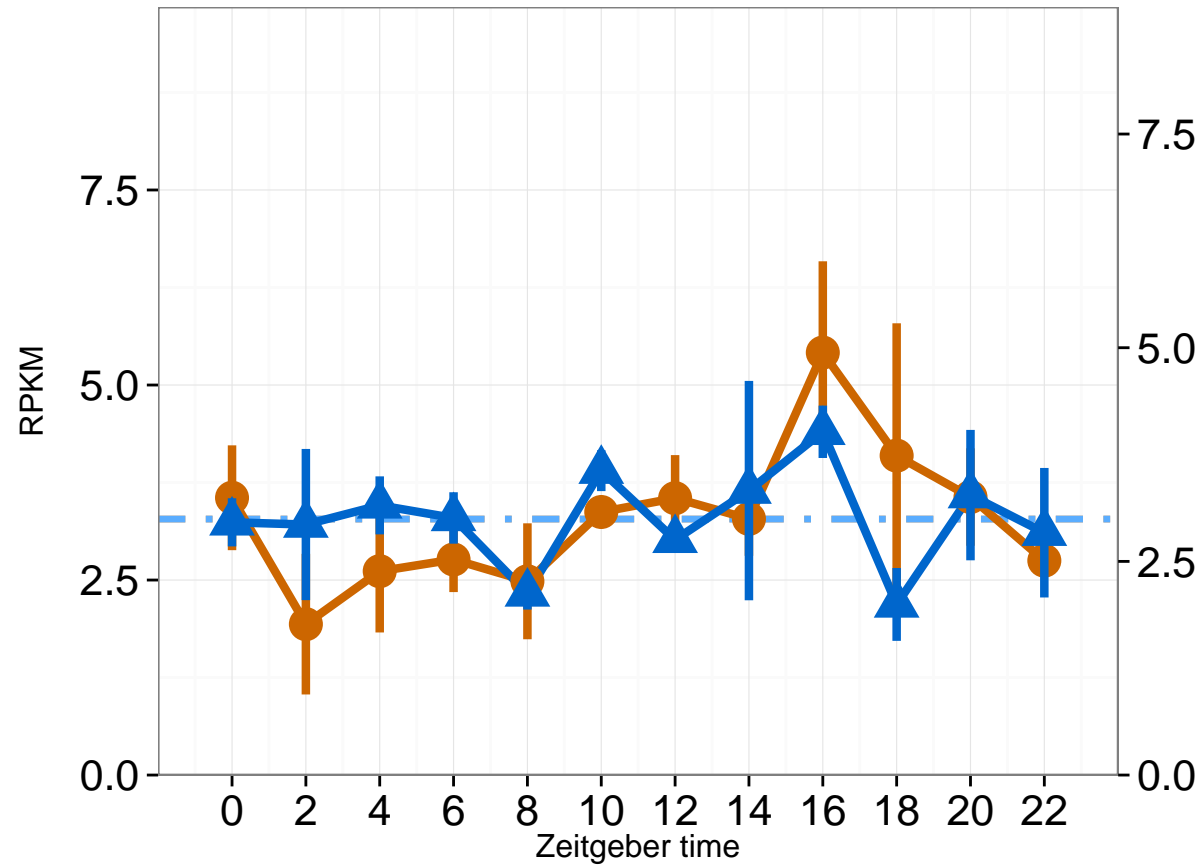

## Cd48

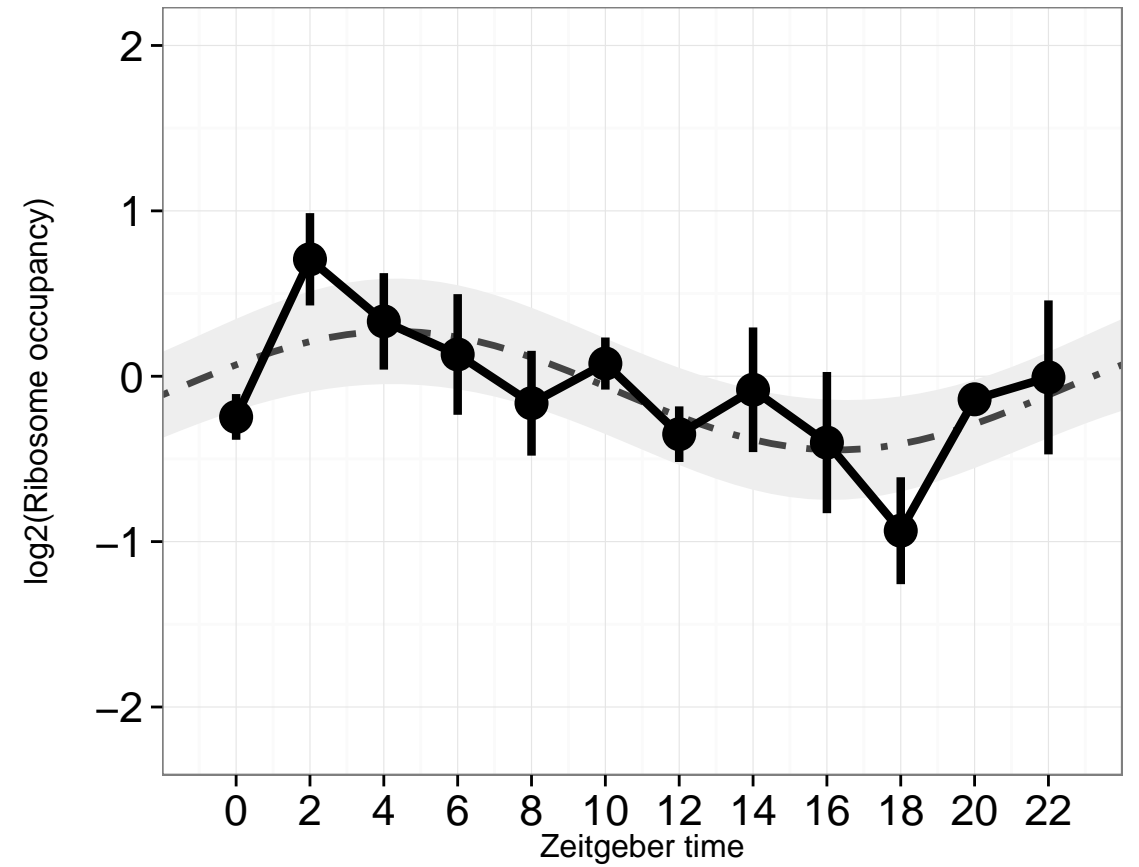

Supplement: SuppDataset_1.zip [file Cd48_set_A.pdf › Supplemental Dataset 1/A-mRNA_nonrhyth_translation_nonrhyth/Cd48_set_A.pdf]

## Cd52

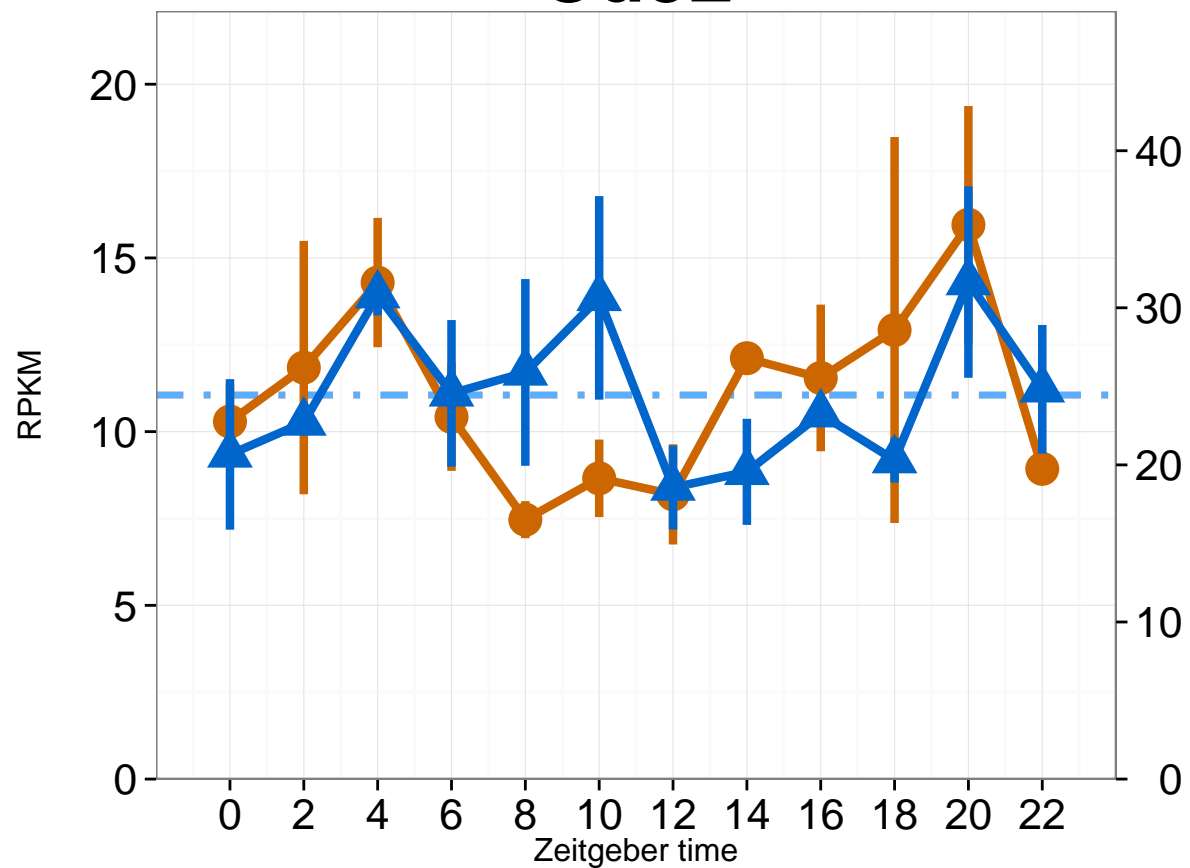

## Cd52

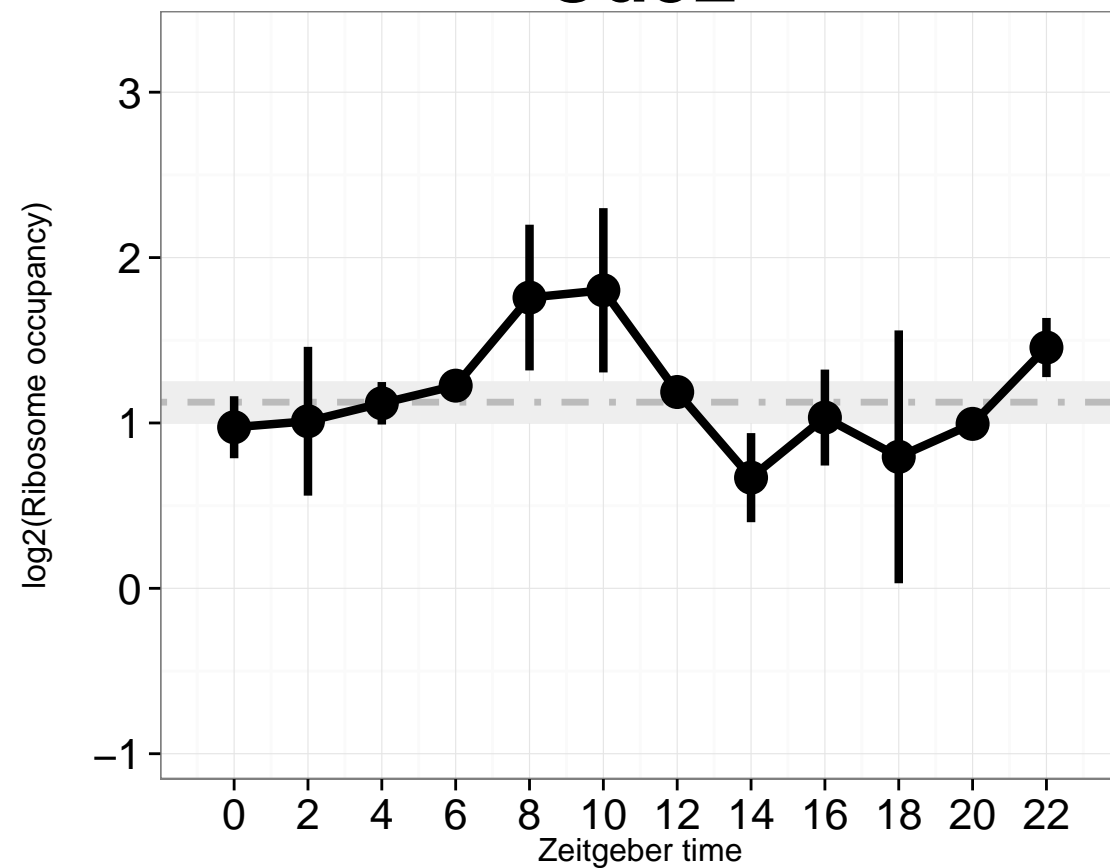

Supplement: SuppDataset_1.zip [file Cd52_set_A.pdf › Supplemental Dataset 1/A-mRNA_nonrhyth_translation_nonrhyth/Cd52_set_A.pdf]

## Cd53

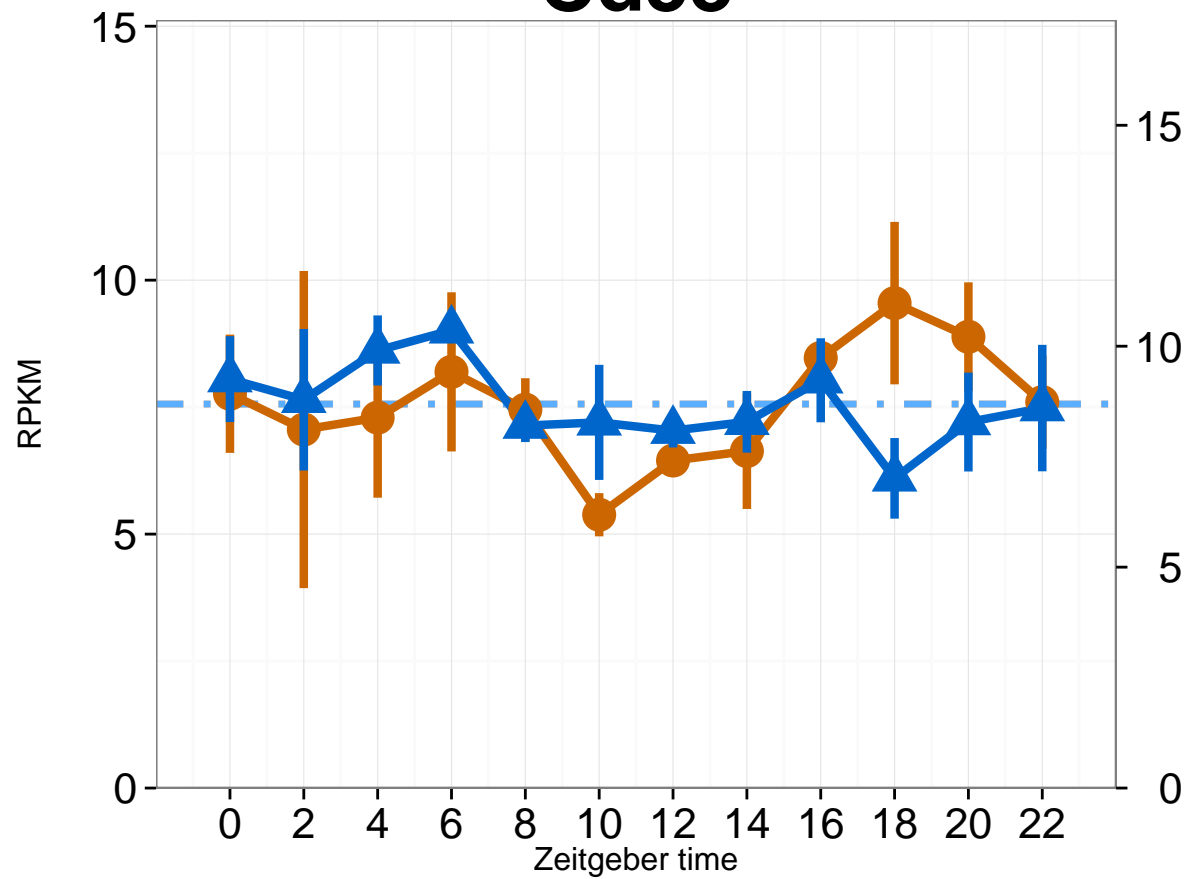

## Cd53

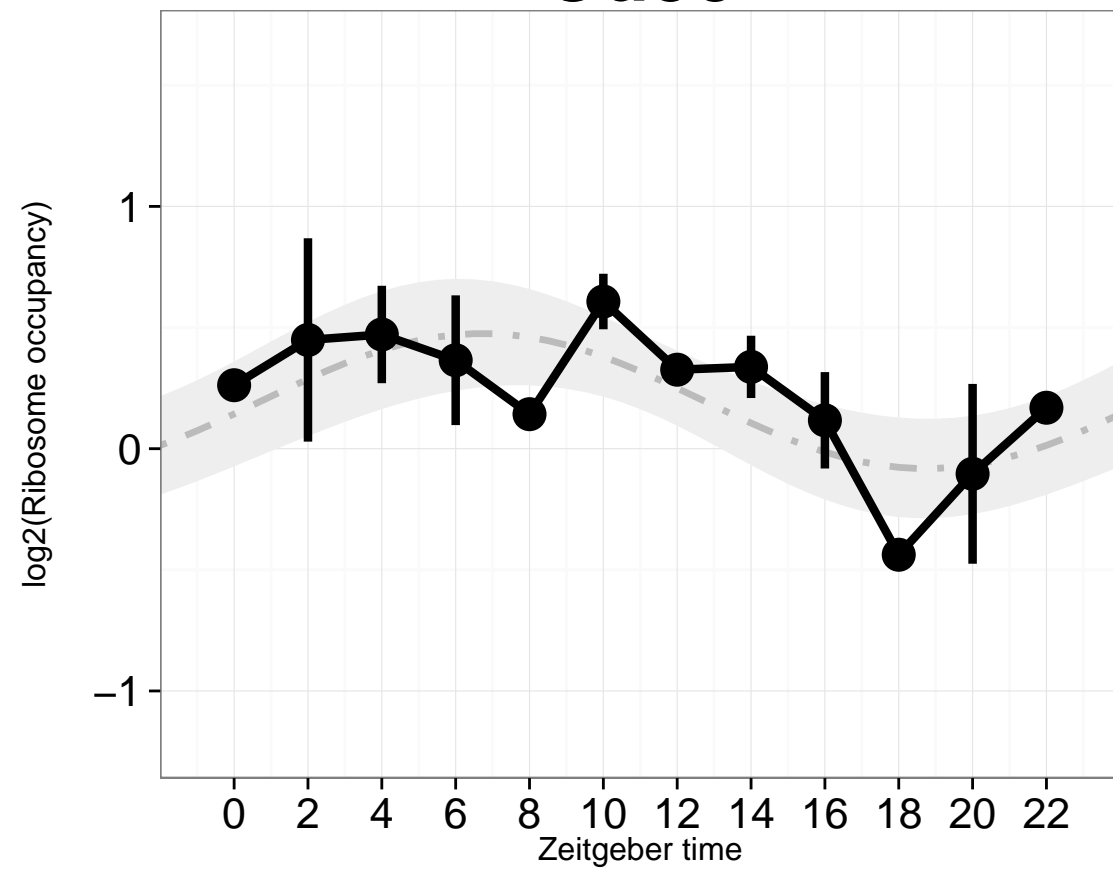

Supplement: SuppDataset_1.zip [file Cd53_set_A.pdf › Supplemental Dataset 1/A-mRNA_nonrhyth_translation_nonrhyth/Cd53_set_A.pdf]

## Cd55

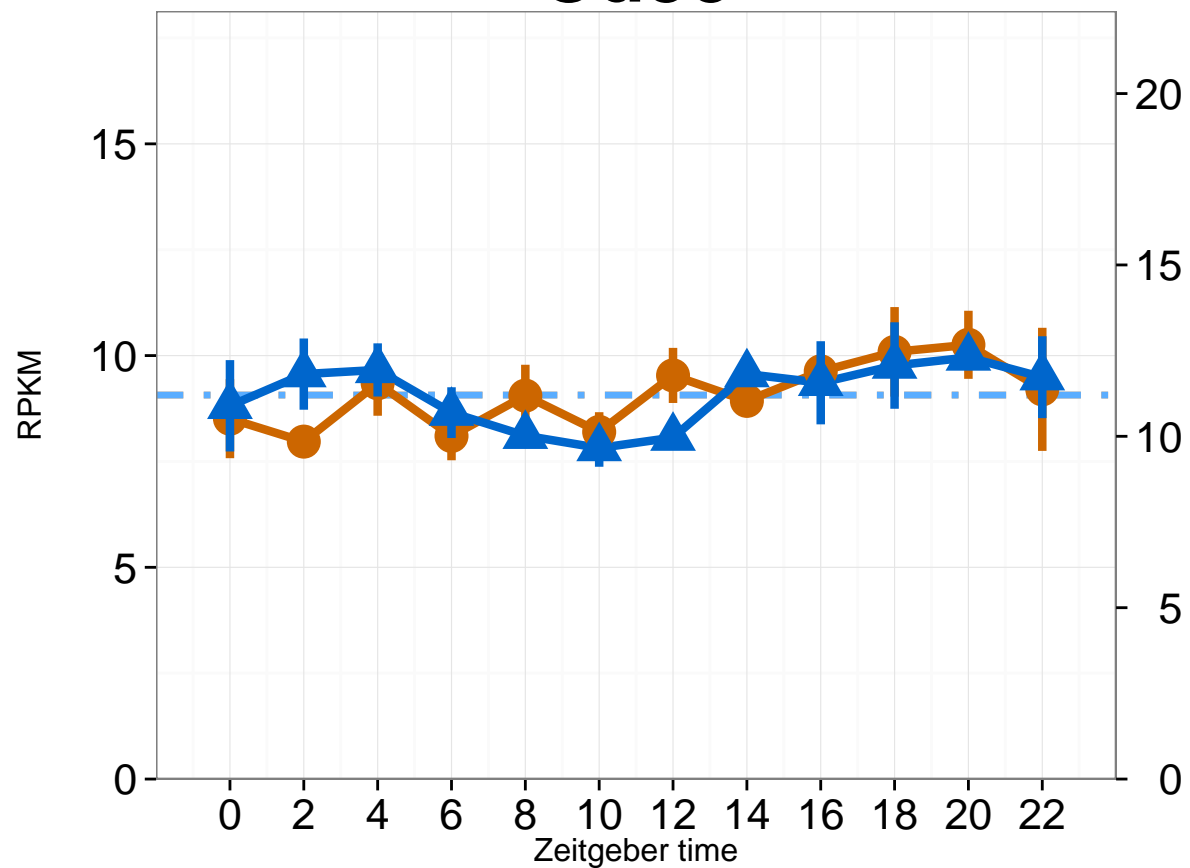

## Cd55

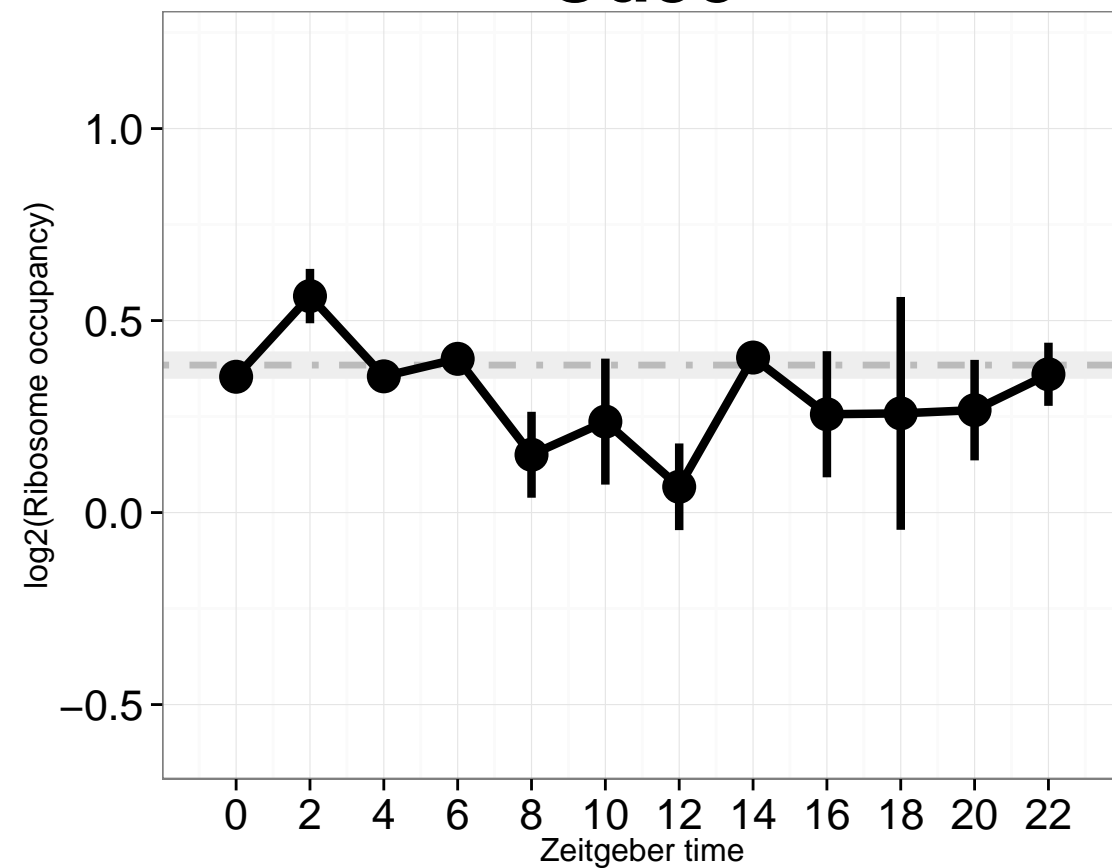

Supplement: SuppDataset_1.zip [file Cd55_set_A.pdf › Supplemental Dataset 1/A-mRNA_nonrhyth_translation_nonrhyth/Cd55_set_A.pdf]

## Cd59b

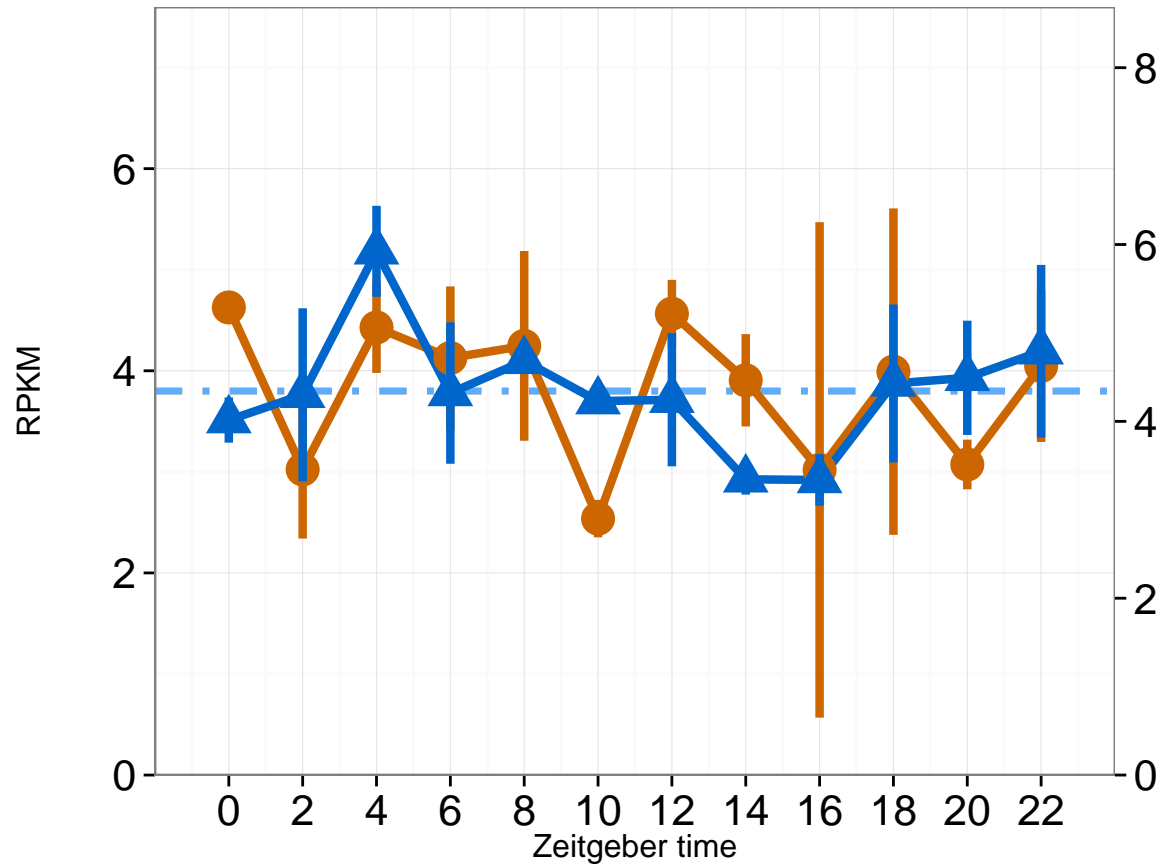

## Cd59b

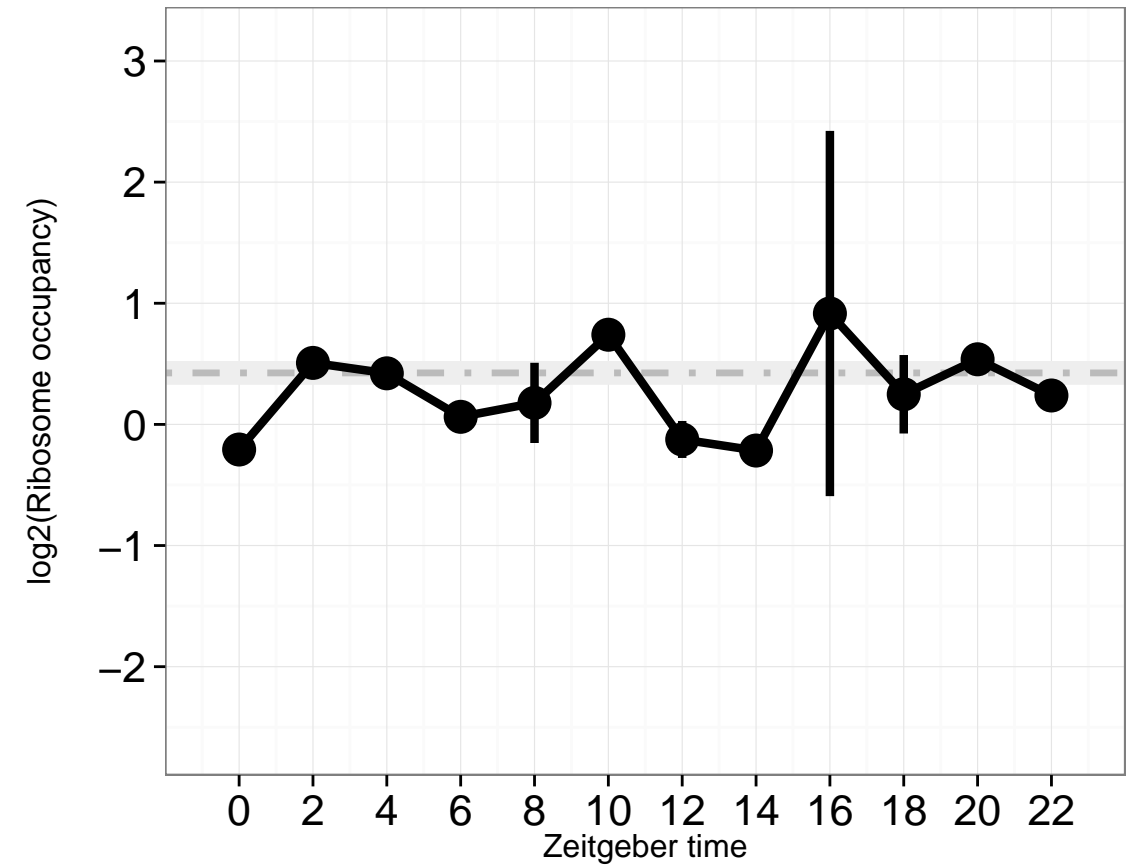

Supplement: SuppDataset_1.zip [file Cd59b_set_A.pdf › Supplemental Dataset 1/A-mRNA_nonrhyth_translation_nonrhyth/Cd59b_set_A.pdf]

## Cd5l

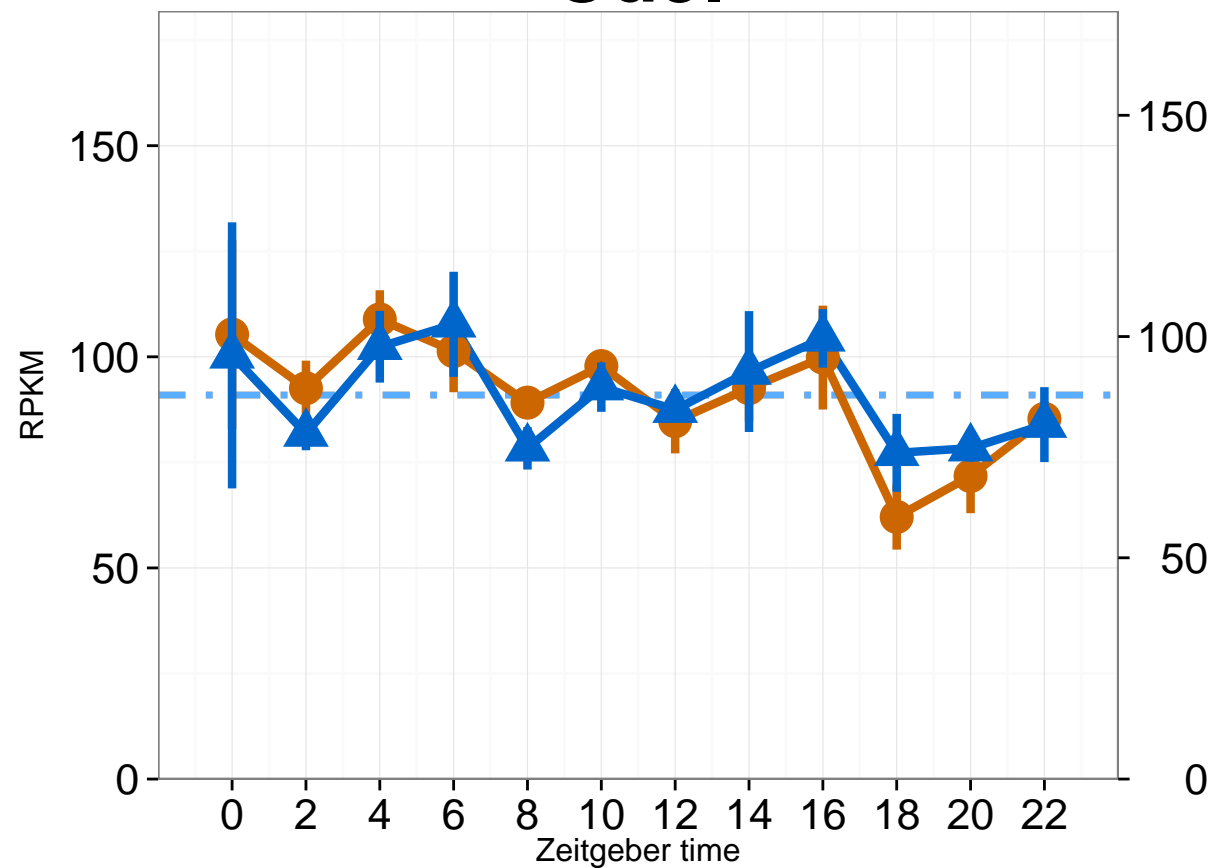

## Cd5l

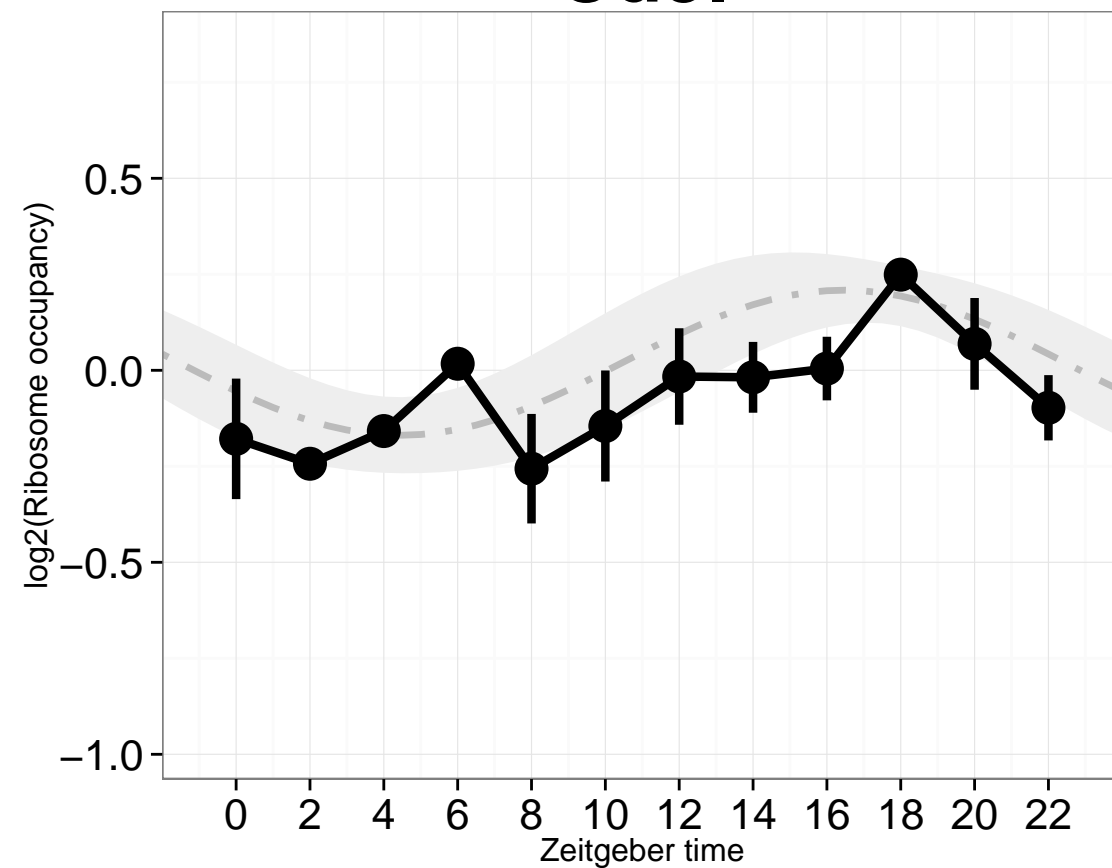

Supplement: SuppDataset_1.zip [file Cd5l_set_A.pdf › Supplemental Dataset 1/A-mRNA_nonrhyth_translation_nonrhyth/Cd5l_set_A.pdf]

## Cd68

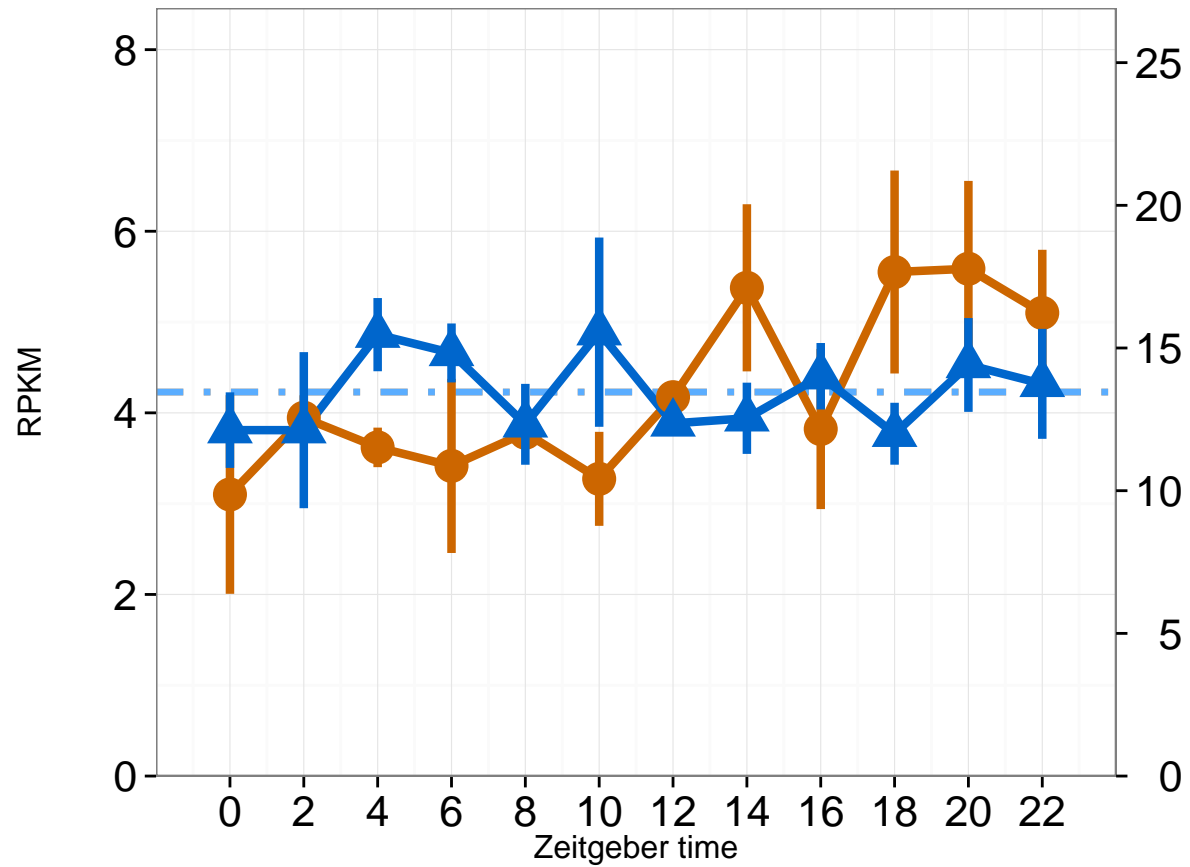

## Cd68

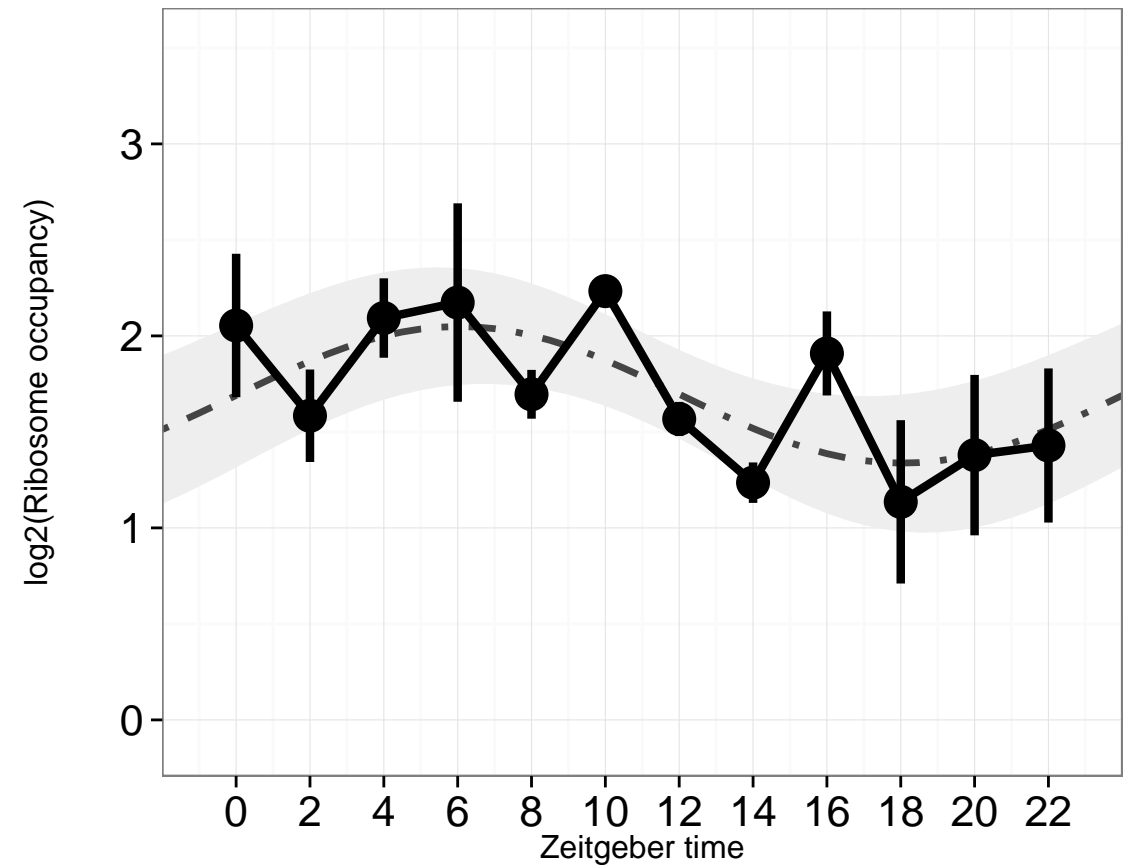

Supplement: SuppDataset_1.zip [file Cd68_set_A.pdf › Supplemental Dataset 1/A-mRNA_nonrhyth_translation_nonrhyth/Cd68_set_A.pdf]

## Cd74

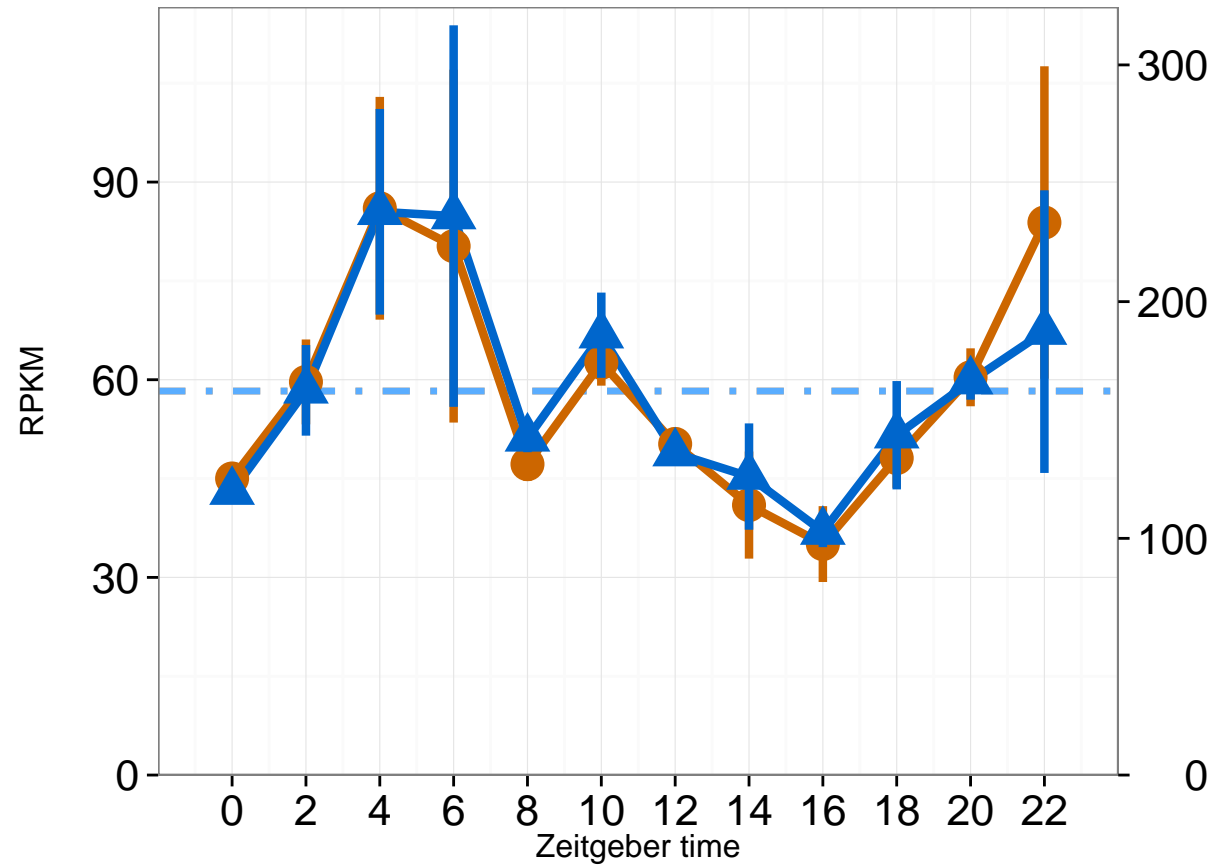

## Cd74

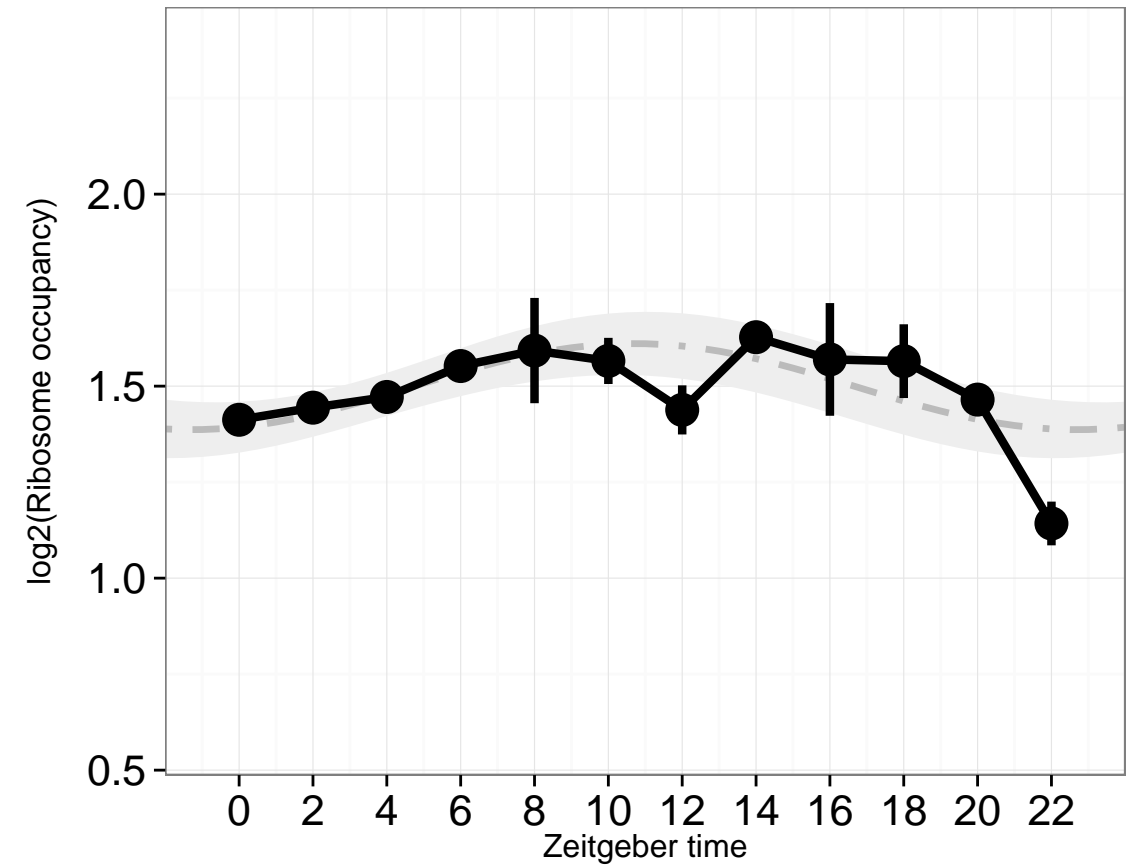

Supplement: SuppDataset_1.zip [file Cd74_set_A.pdf › Supplemental Dataset 1/A-mRNA_nonrhyth_translation_nonrhyth/Cd74_set_A.pdf]

**Cd79a TR**

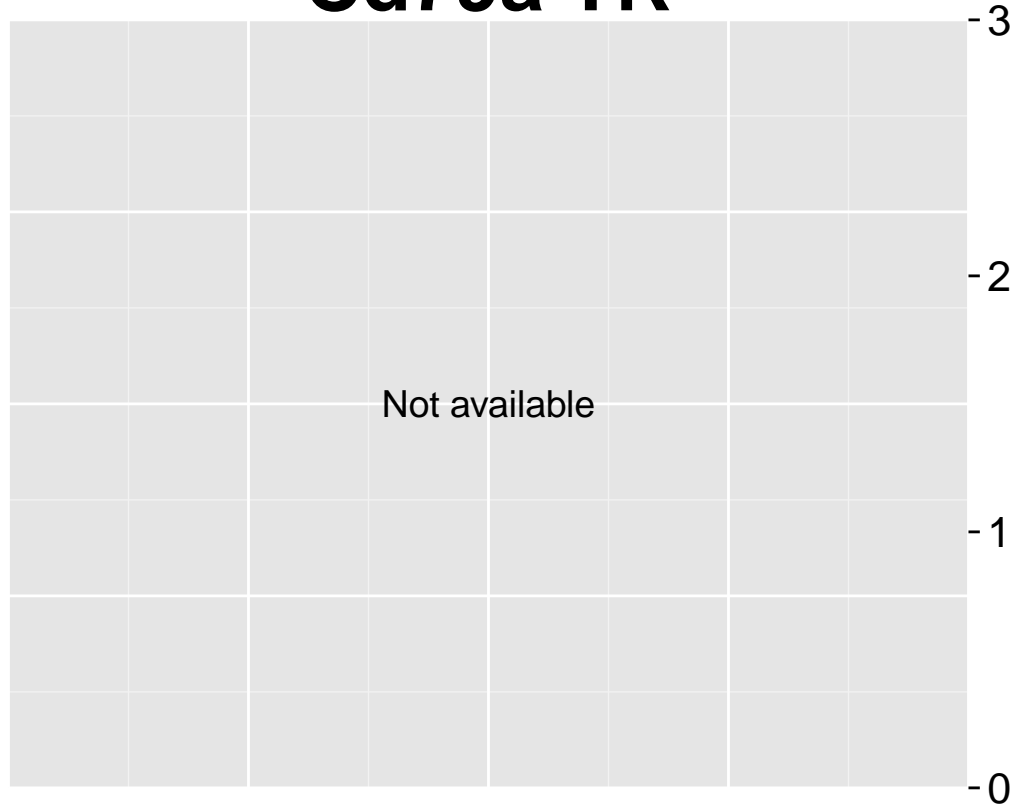

**Cd79a log2(Ribosome occupancy**

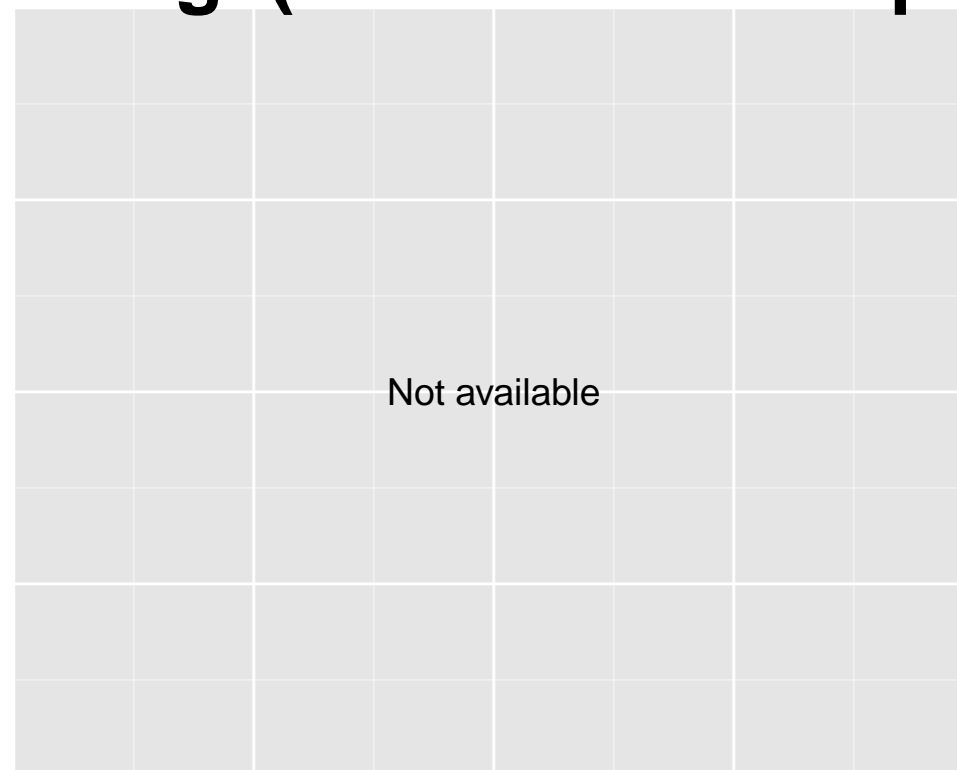

Supplement: SuppDataset_1.zip [file Cd79a_set_A.pdf › Supplemental Dataset 1/A-mRNA_nonrhyth_translation_nonrhyth/Cd79a_set_A.pdf]

## Cd81

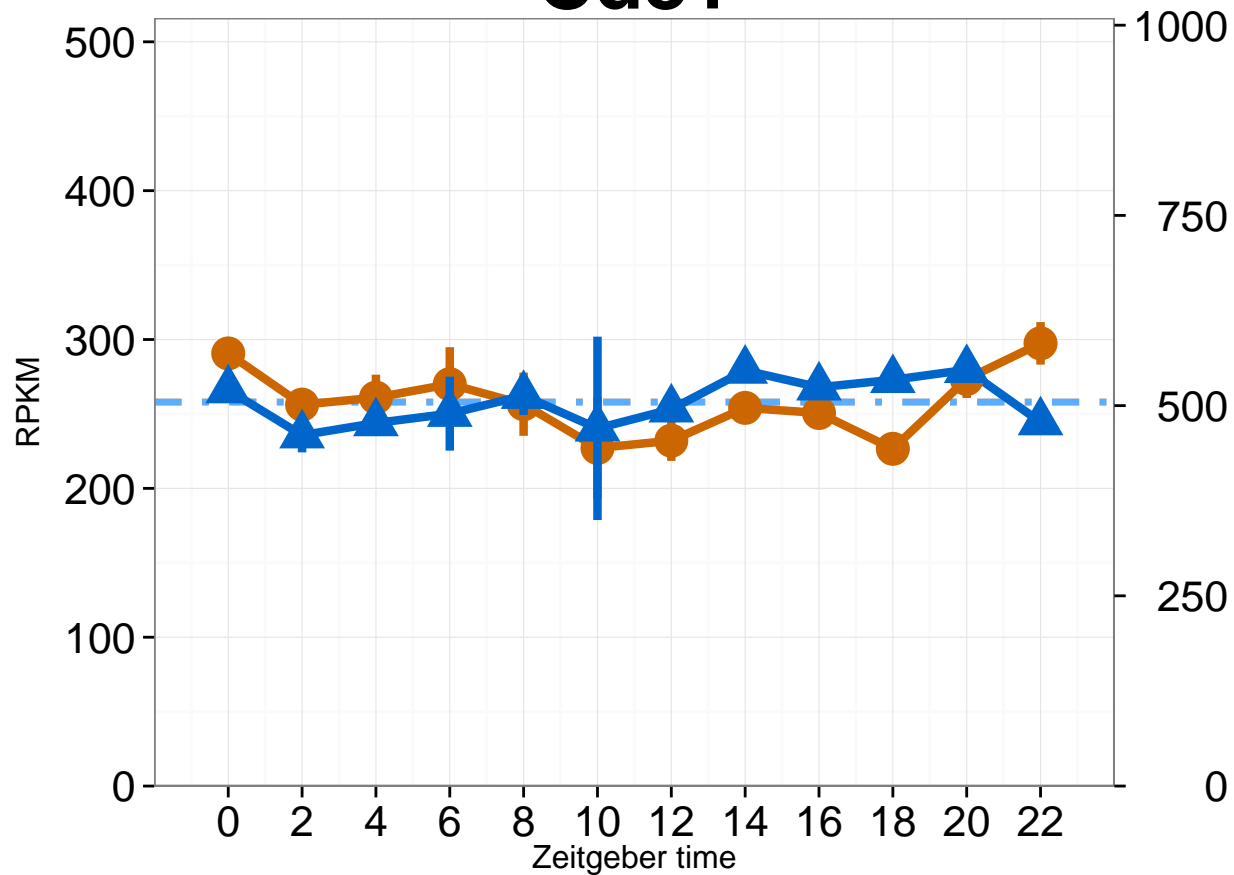

## Cd81

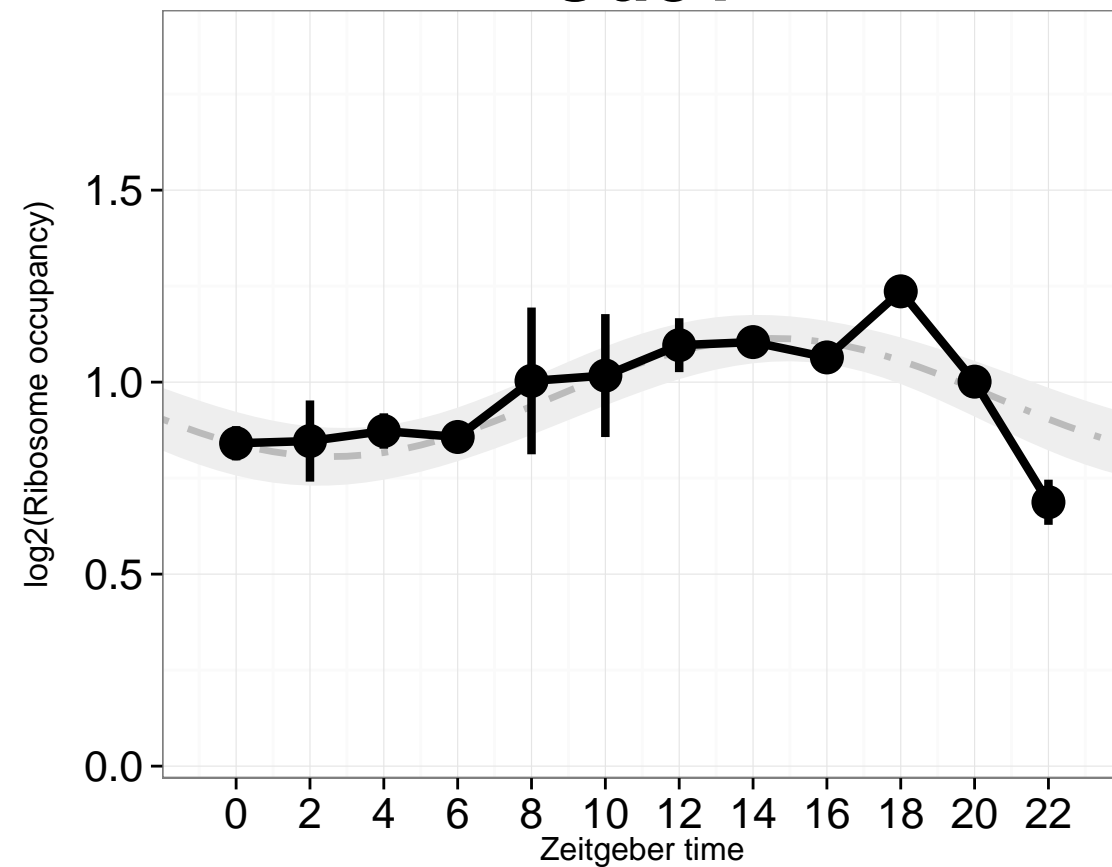

Supplement: SuppDataset_1.zip [file Cd81_set_A.pdf › Supplemental Dataset 1/A-mRNA_nonrhyth_translation_nonrhyth/Cd81_set_A.pdf]

## Cd82

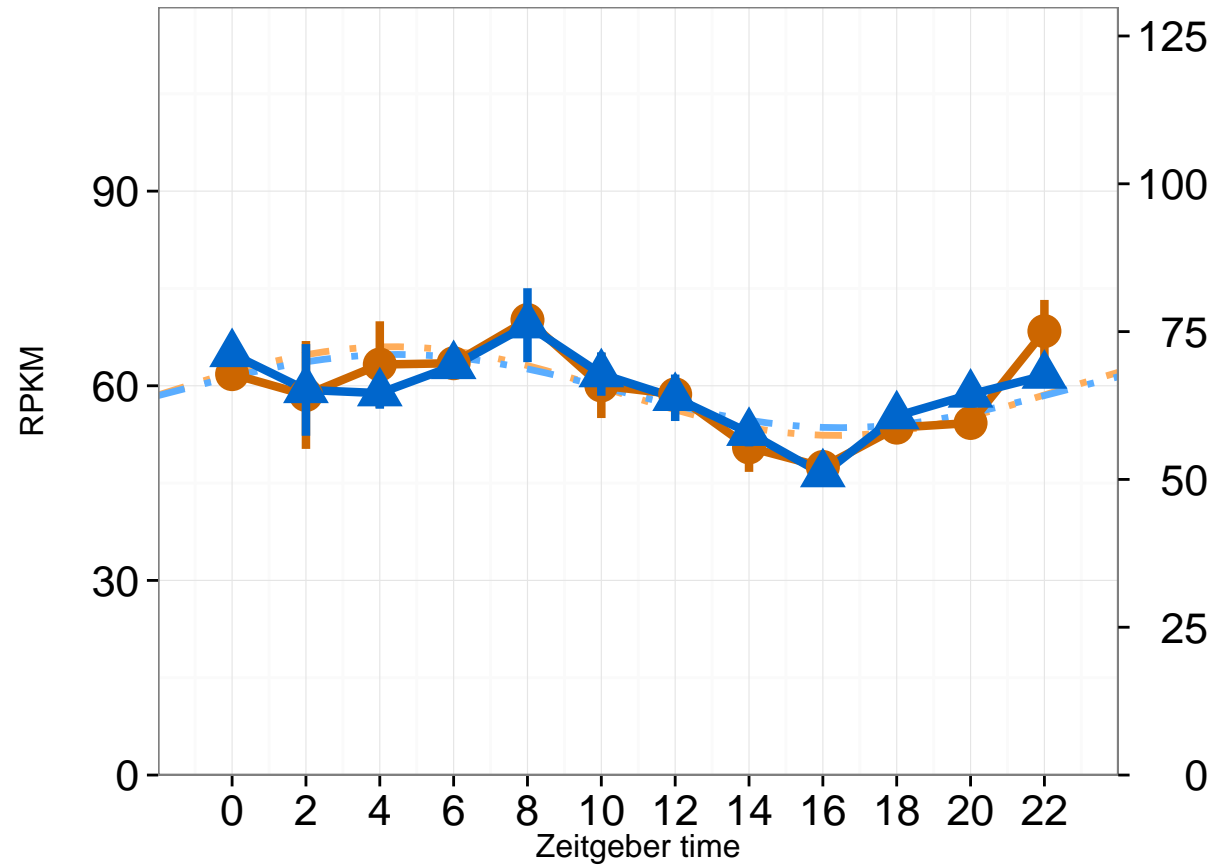

## Cd82

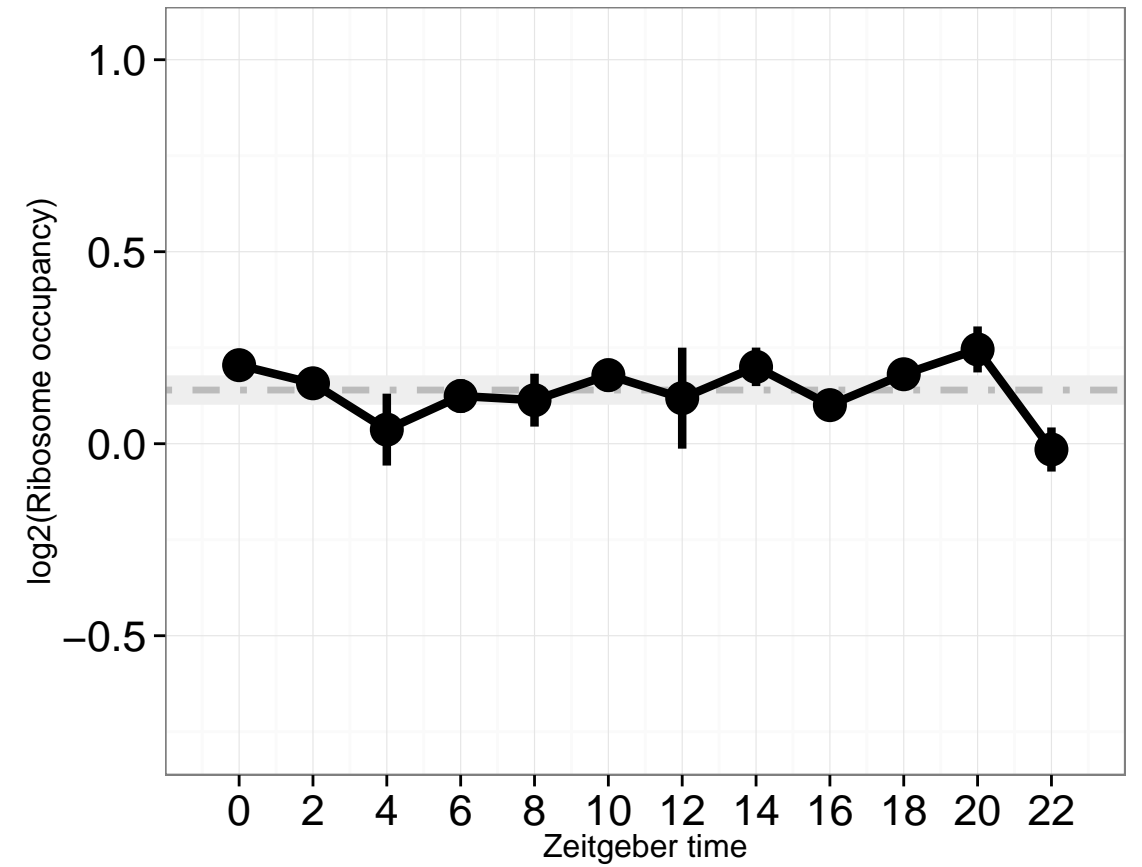

Supplement: SuppDataset_1.zip [file Cd82_set_A.pdf › Supplemental Dataset 1/A-mRNA_nonrhyth_translation_nonrhyth/Cd82_set_A.pdf]

## Cd84

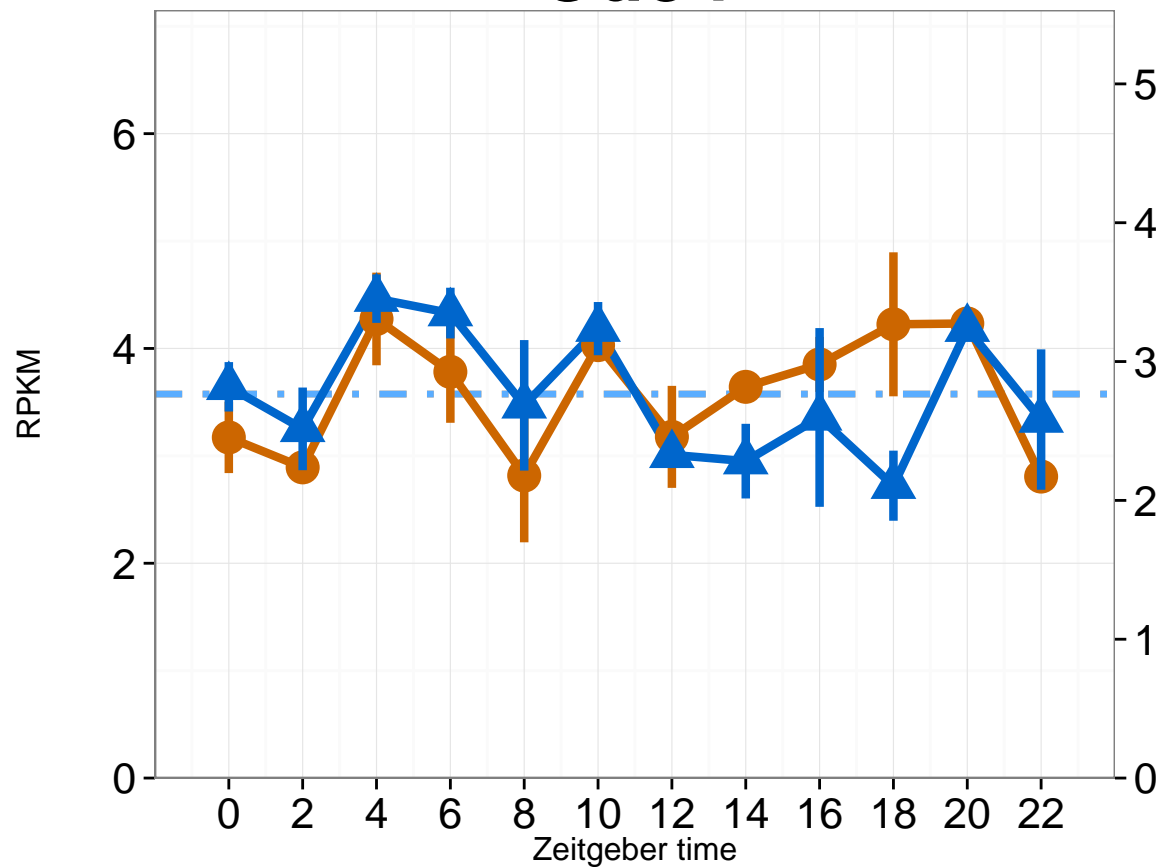

## Cd84

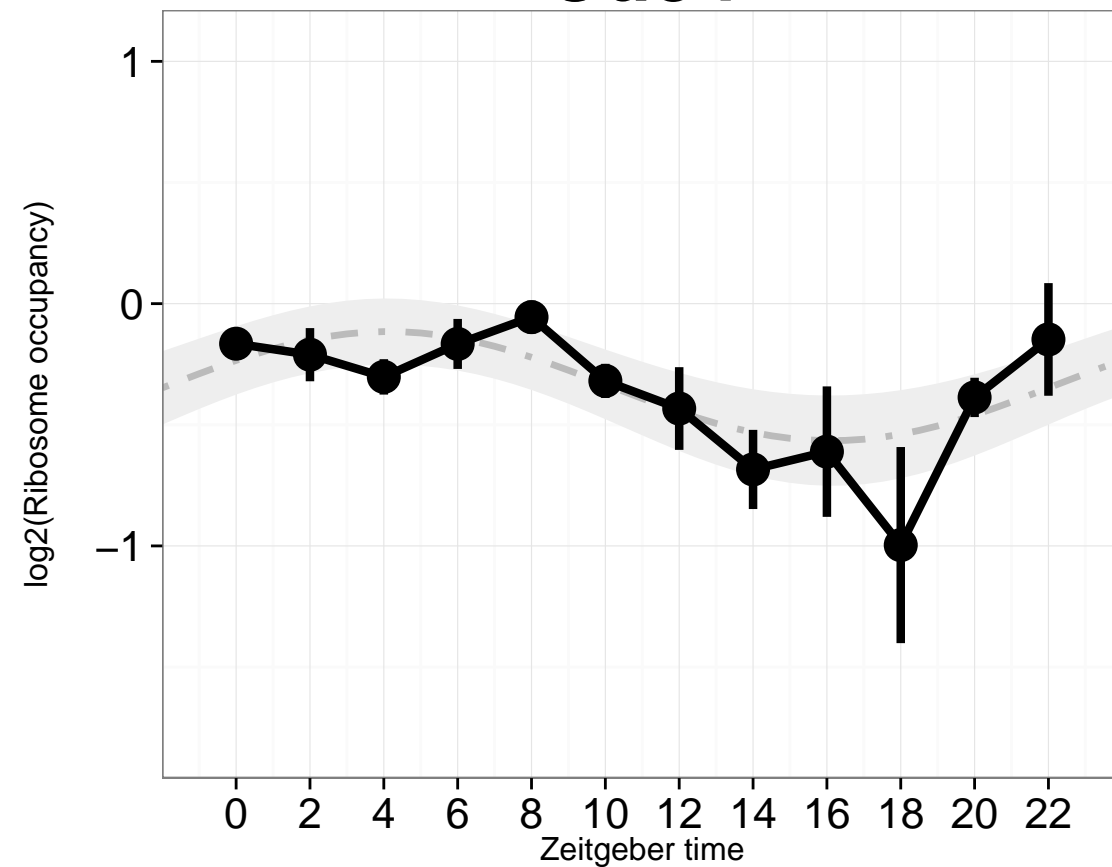

Supplement: SuppDataset_1.zip [file Cd84_set_A.pdf › Supplemental Dataset 1/A-mRNA_nonrhyth_translation_nonrhyth/Cd84_set_A.pdf]

## Cd86

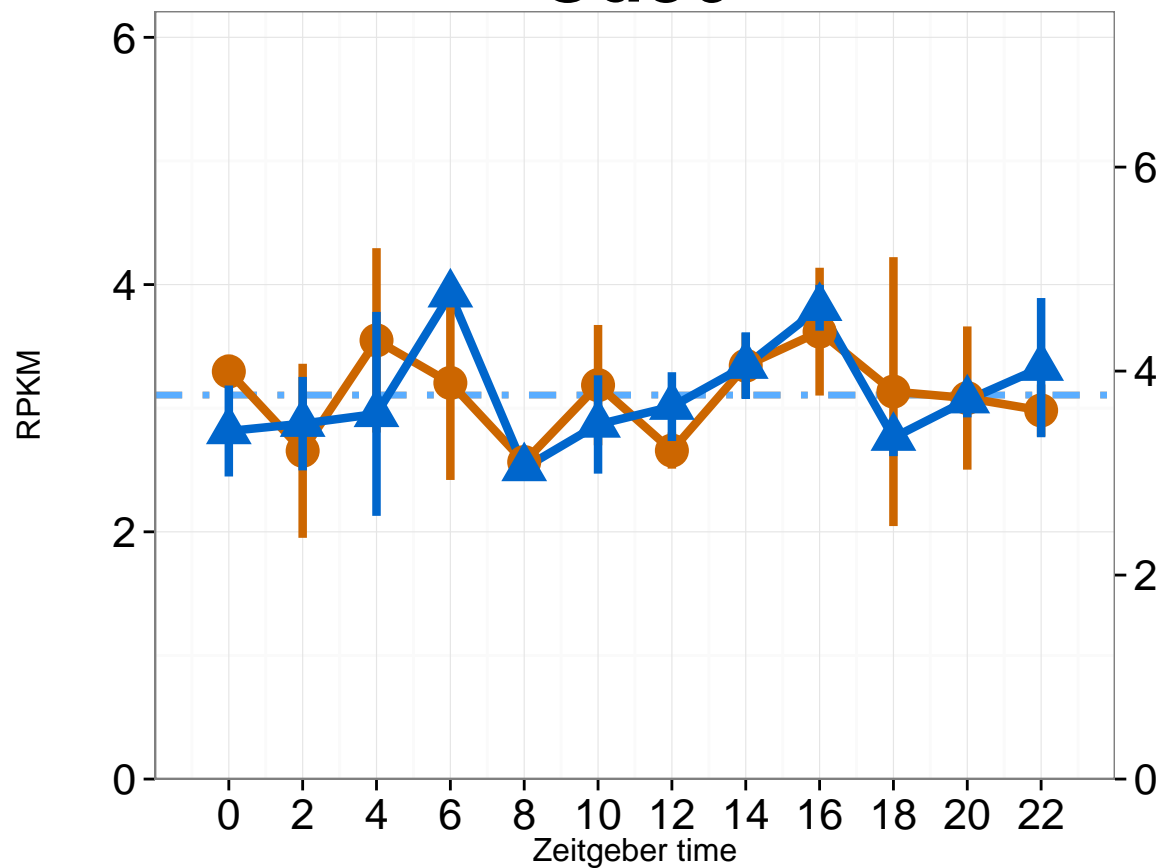

## Cd86

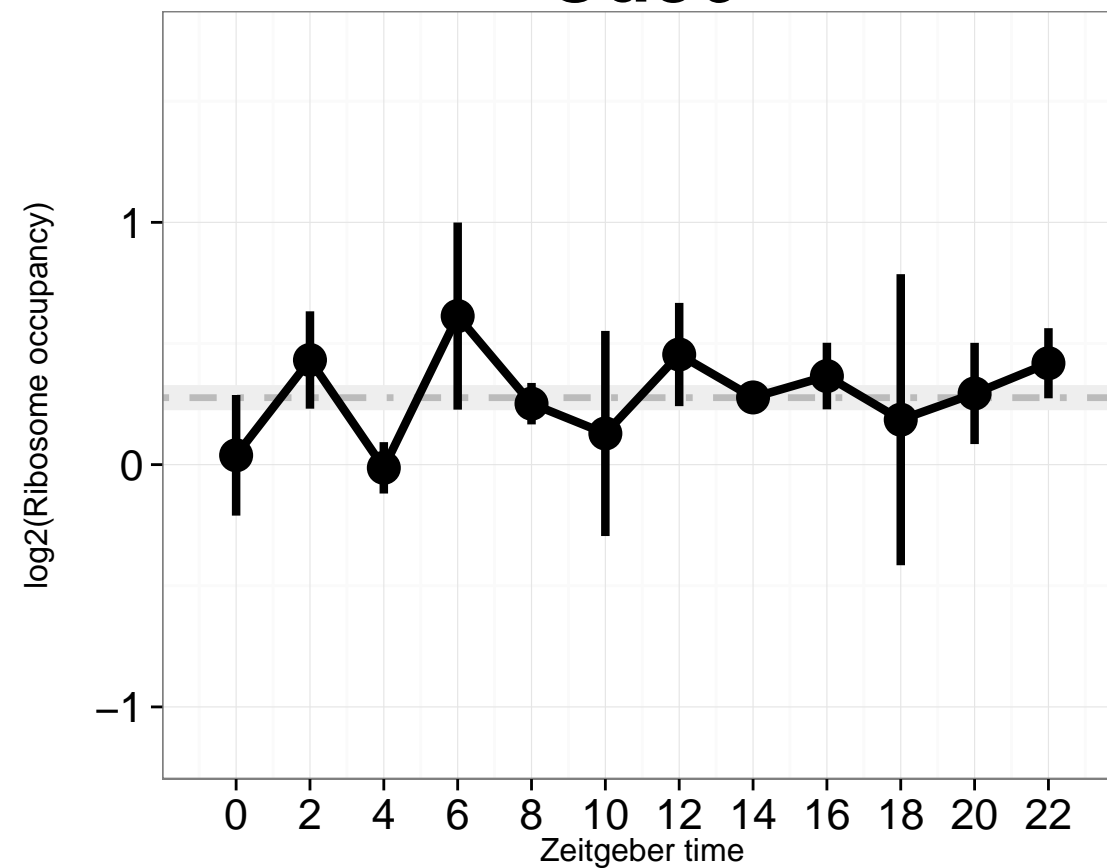

Supplement: SuppDataset_1.zip [file Cd86_set_A.pdf › Supplemental Dataset 1/A-mRNA_nonrhyth_translation_nonrhyth/Cd86_set_A.pdf]

## Cd93

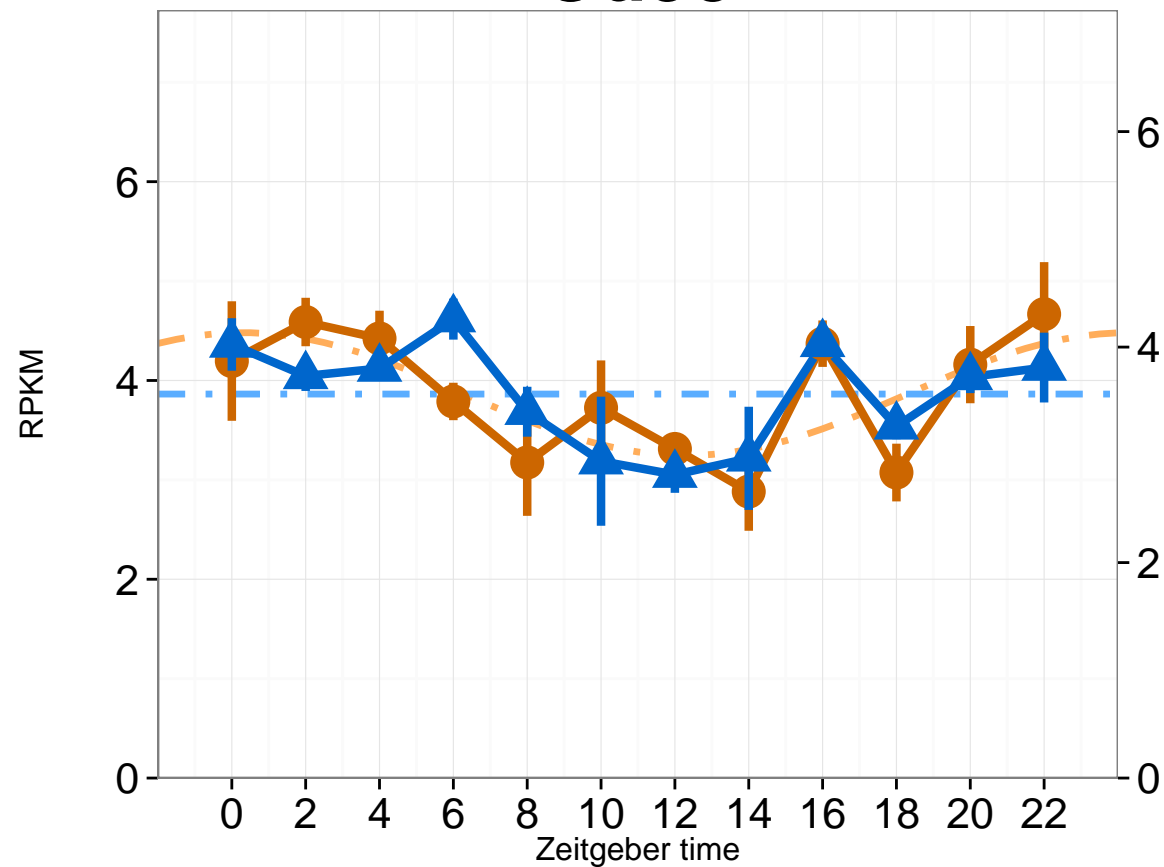

## Cd93

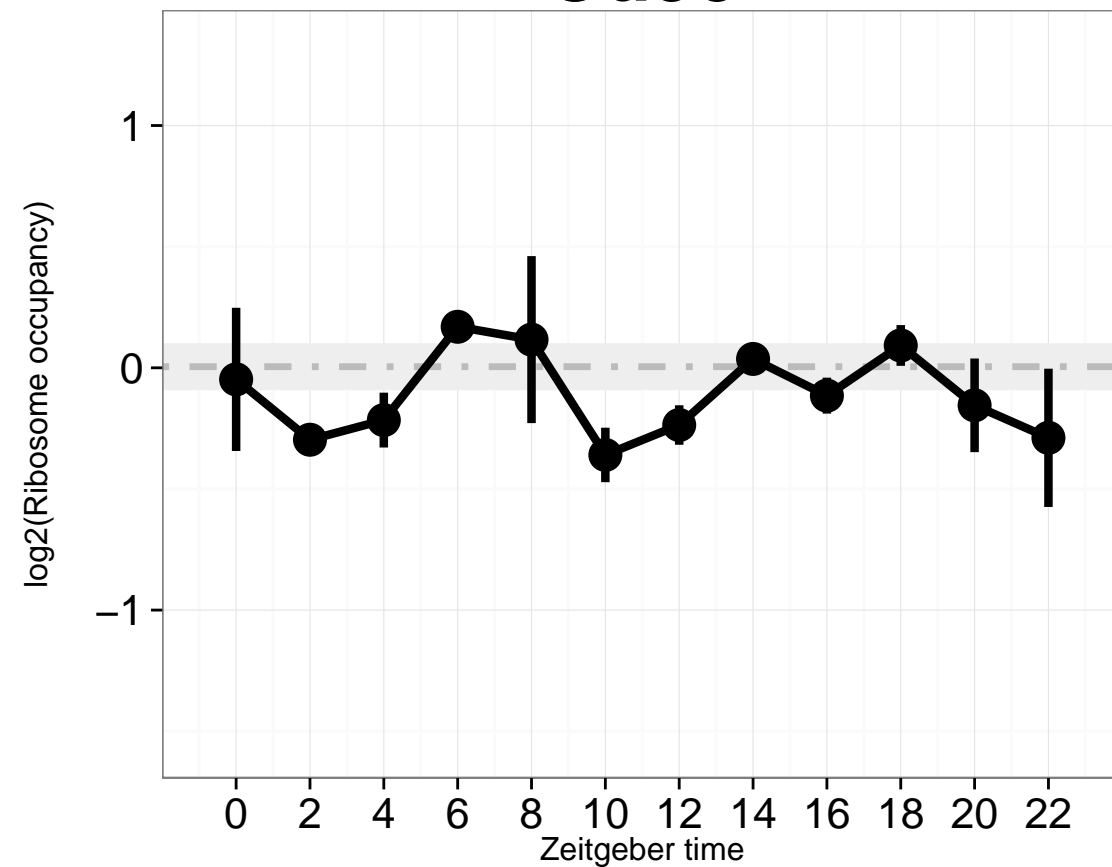

Supplement: SuppDataset_1.zip [file Cd93_set_A.pdf › Supplemental Dataset 1/A-mRNA_nonrhyth_translation_nonrhyth/Cd93_set_A.pdf]

## Cd97

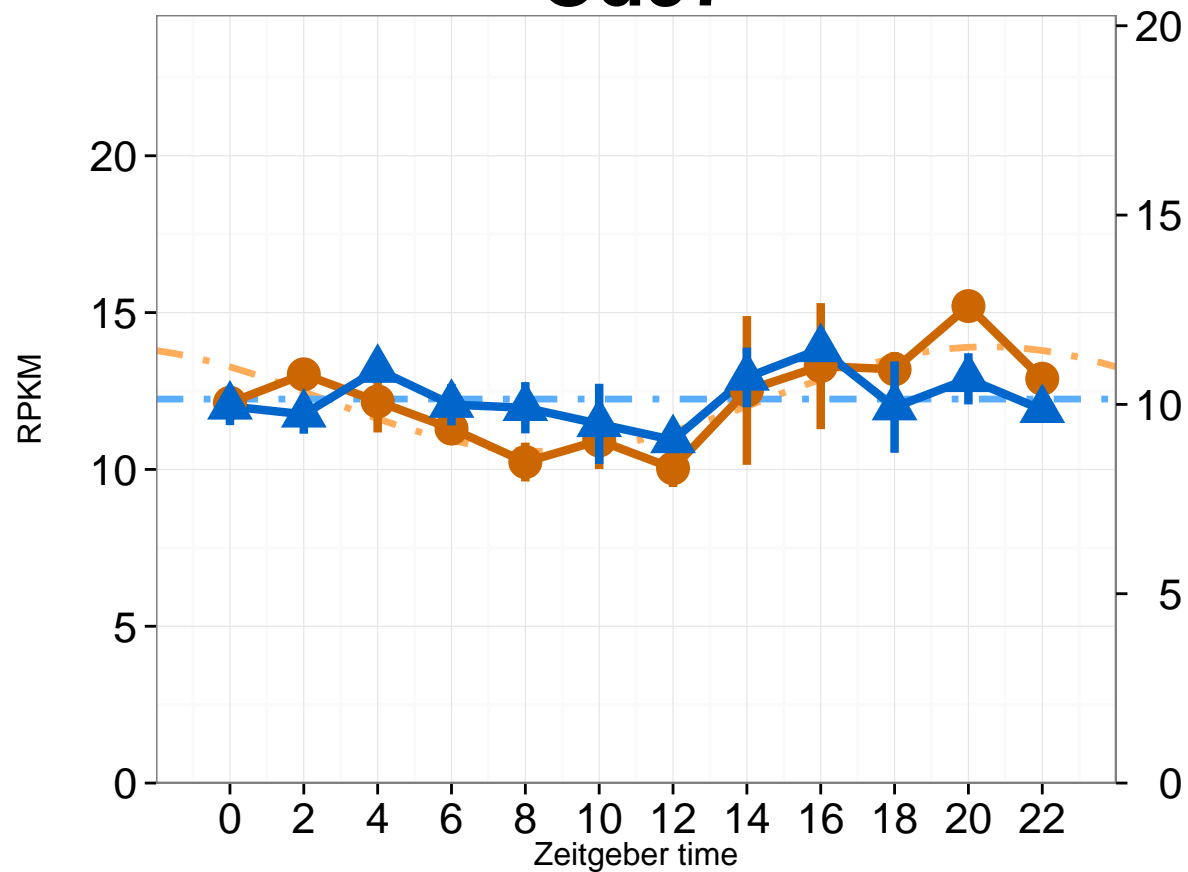

## Cd97

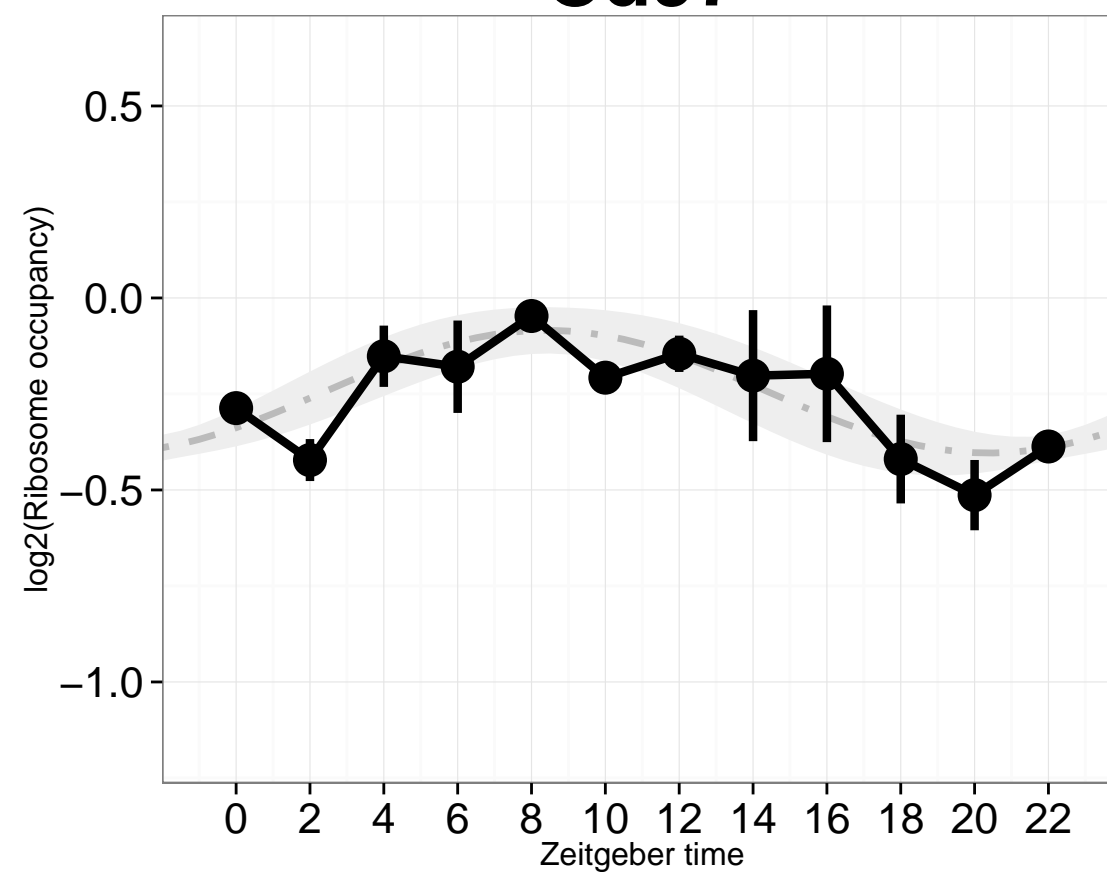

Supplement: SuppDataset_1.zip [file Cd97_set_A.pdf › Supplemental Dataset 1/A-mRNA_nonrhyth_translation_nonrhyth/Cd97_set_A.pdf]

## Cd99l2

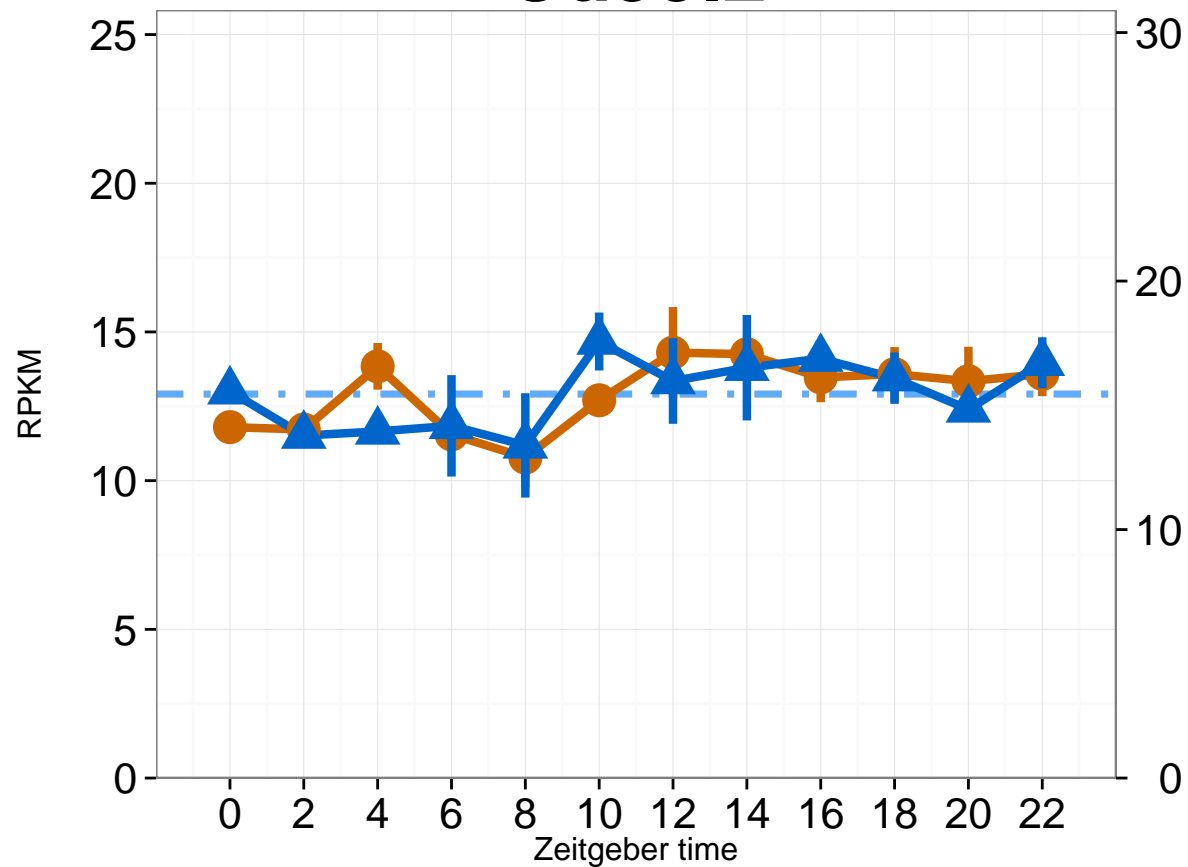

## Cd99l2

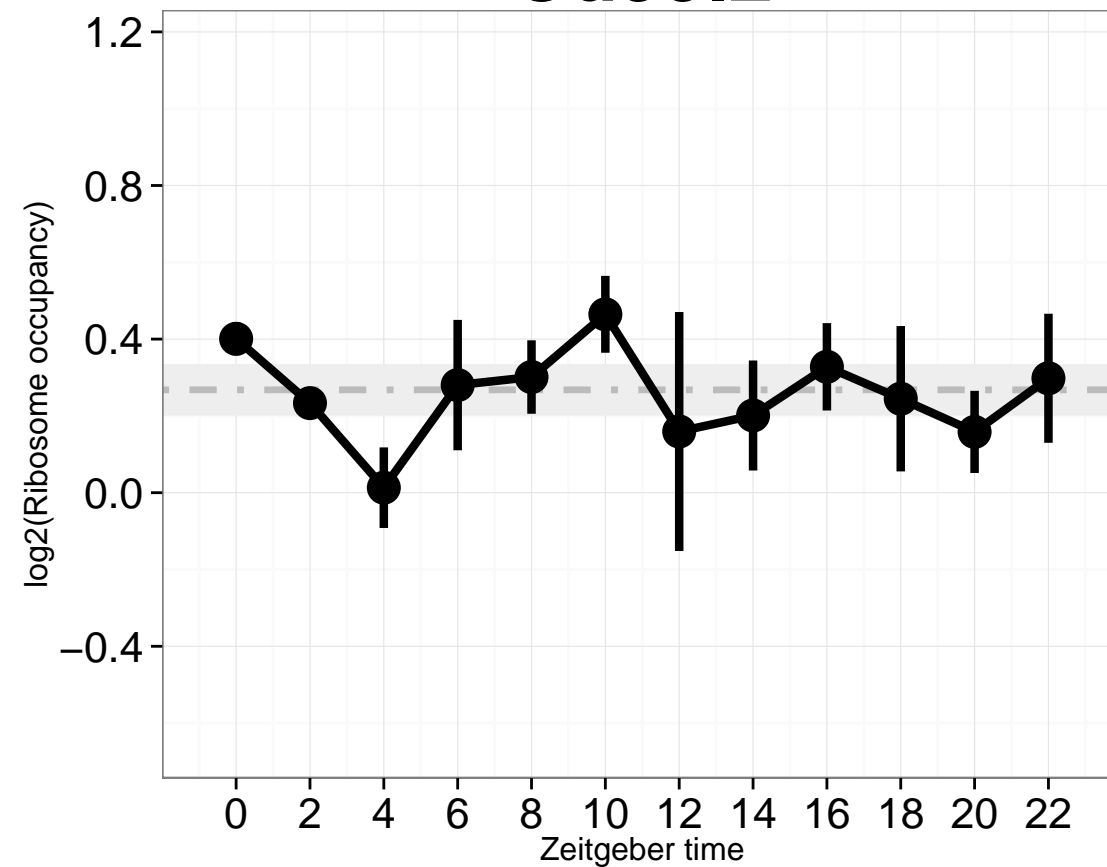

Supplement: SuppDataset_1.zip [file Cd99l2_set_A.pdf › Supplemental Dataset 1/A-mRNA_nonrhyth_translation_nonrhyth/Cd99l2_set_A.pdf]

## Cdadc1

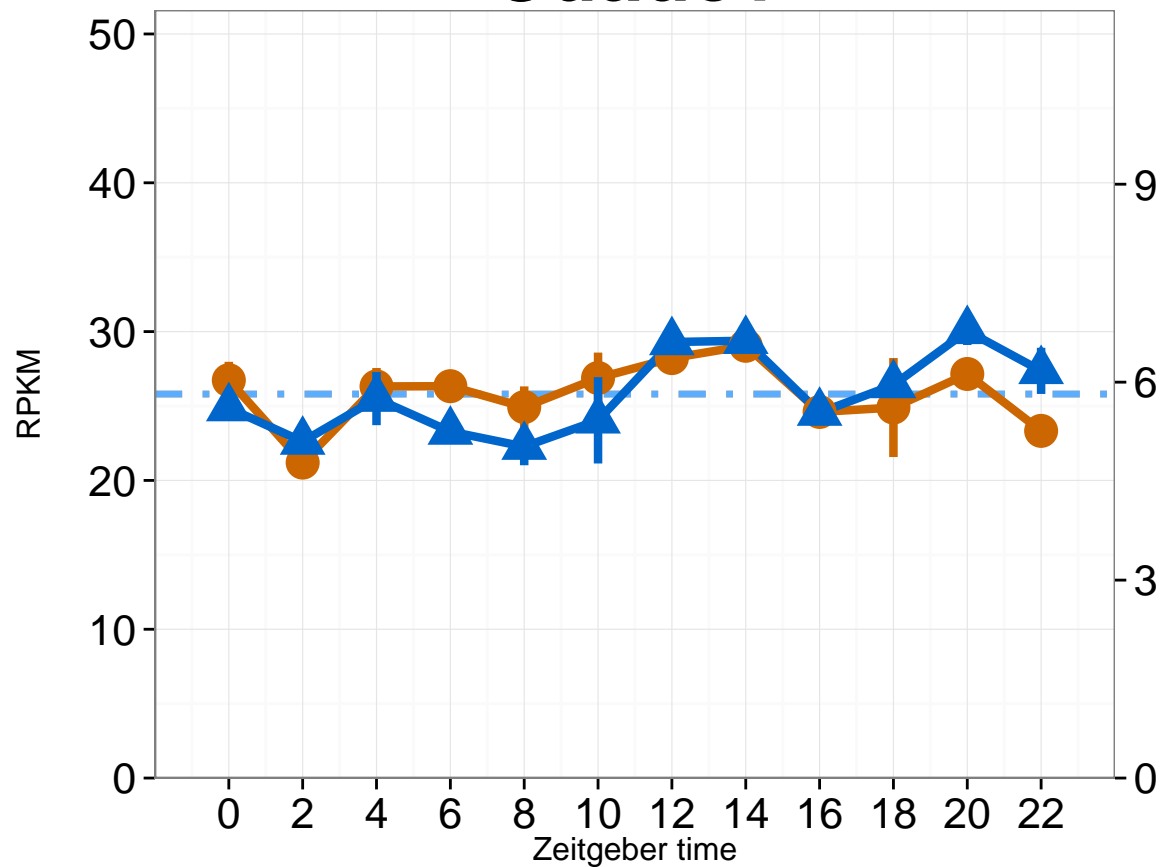

## Cdadc1

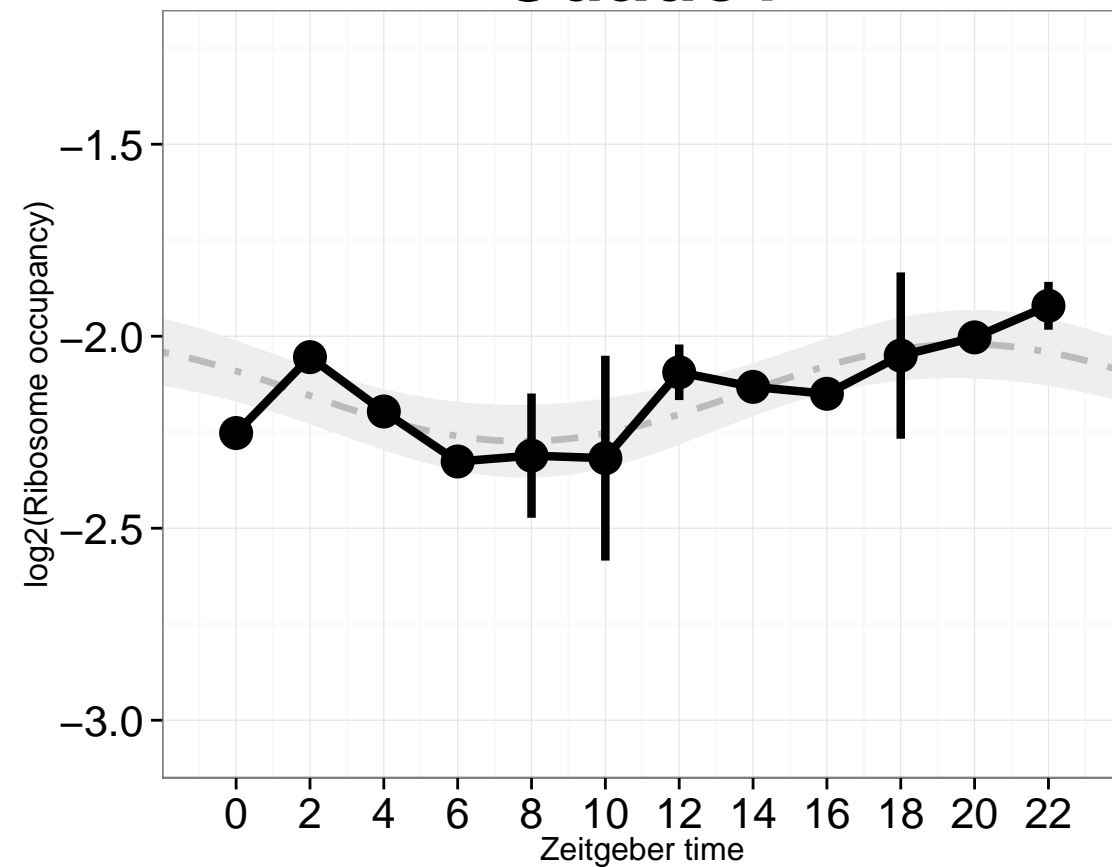

Supplement: SuppDataset_1.zip [file Cdadc1_set_A.pdf › Supplemental Dataset 1/A-mRNA_nonrhyth_translation_nonrhyth/Cdadc1_set_A.pdf]

# Cdan1

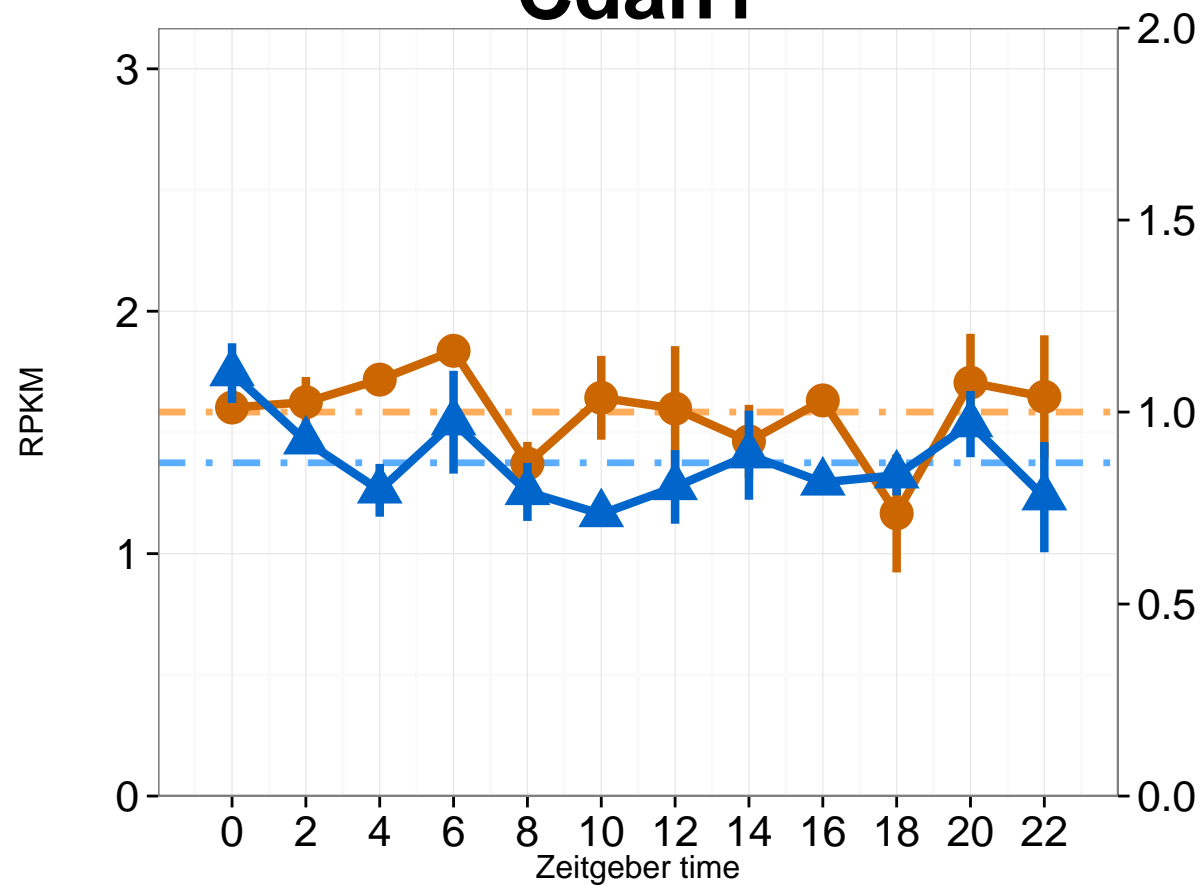

# Cdan1

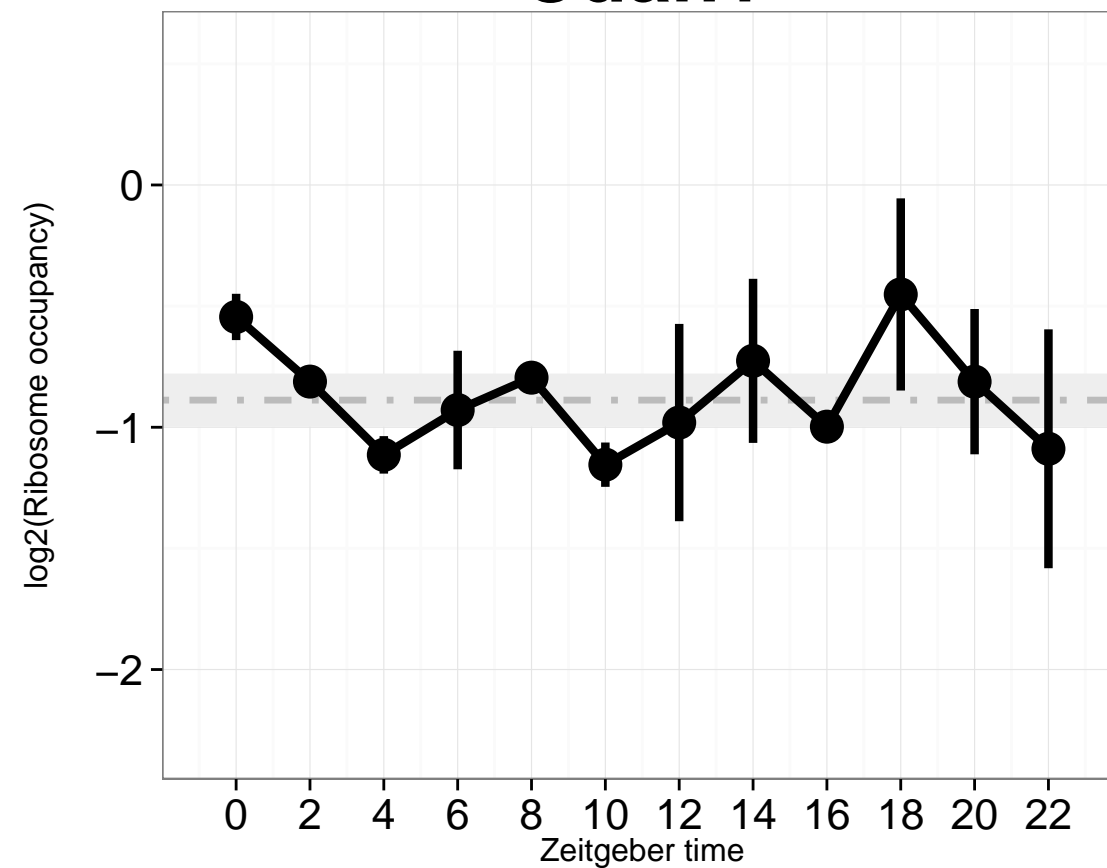

Supplement: SuppDataset_1.zip [file Cdan1_set_A.pdf › Supplemental Dataset 1/A-mRNA_nonrhyth_translation_nonrhyth/Cdan1_set_A.pdf]

## Cdc123

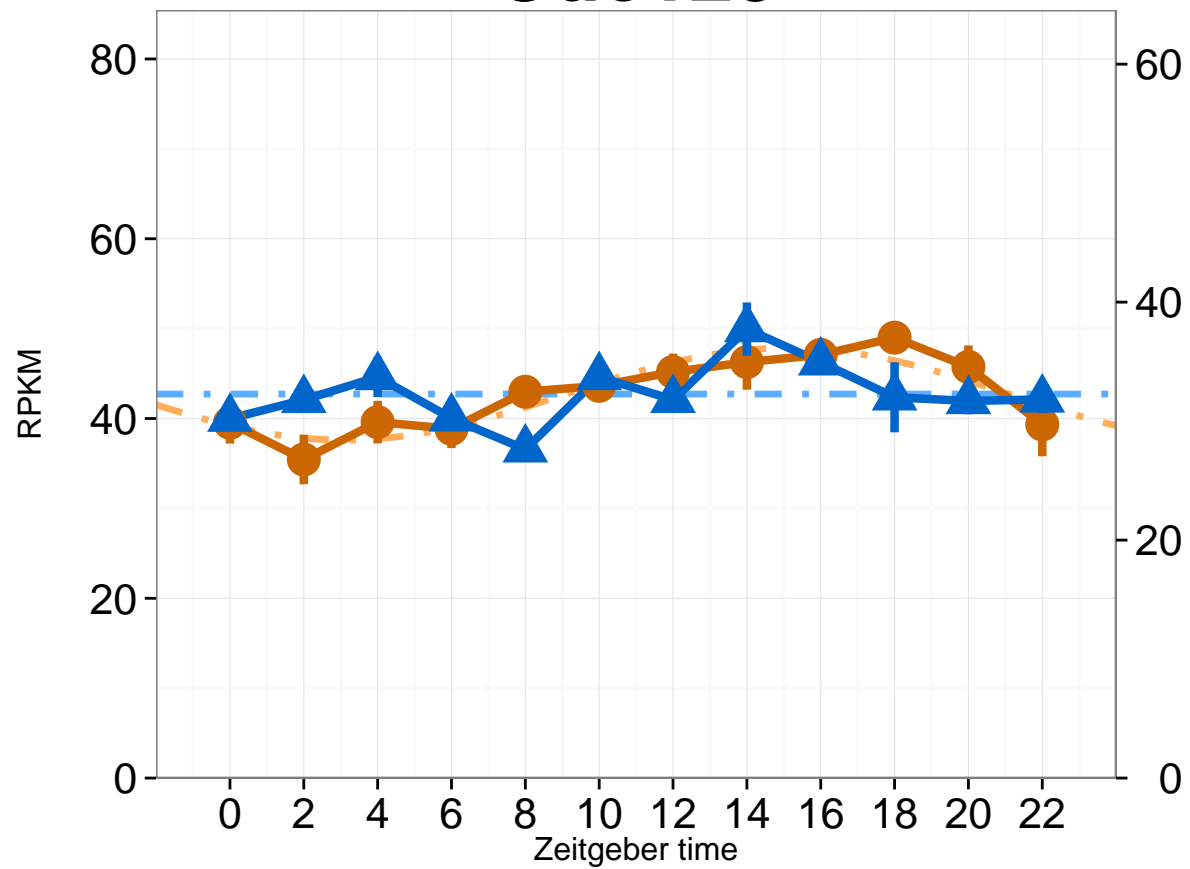

## Cdc123

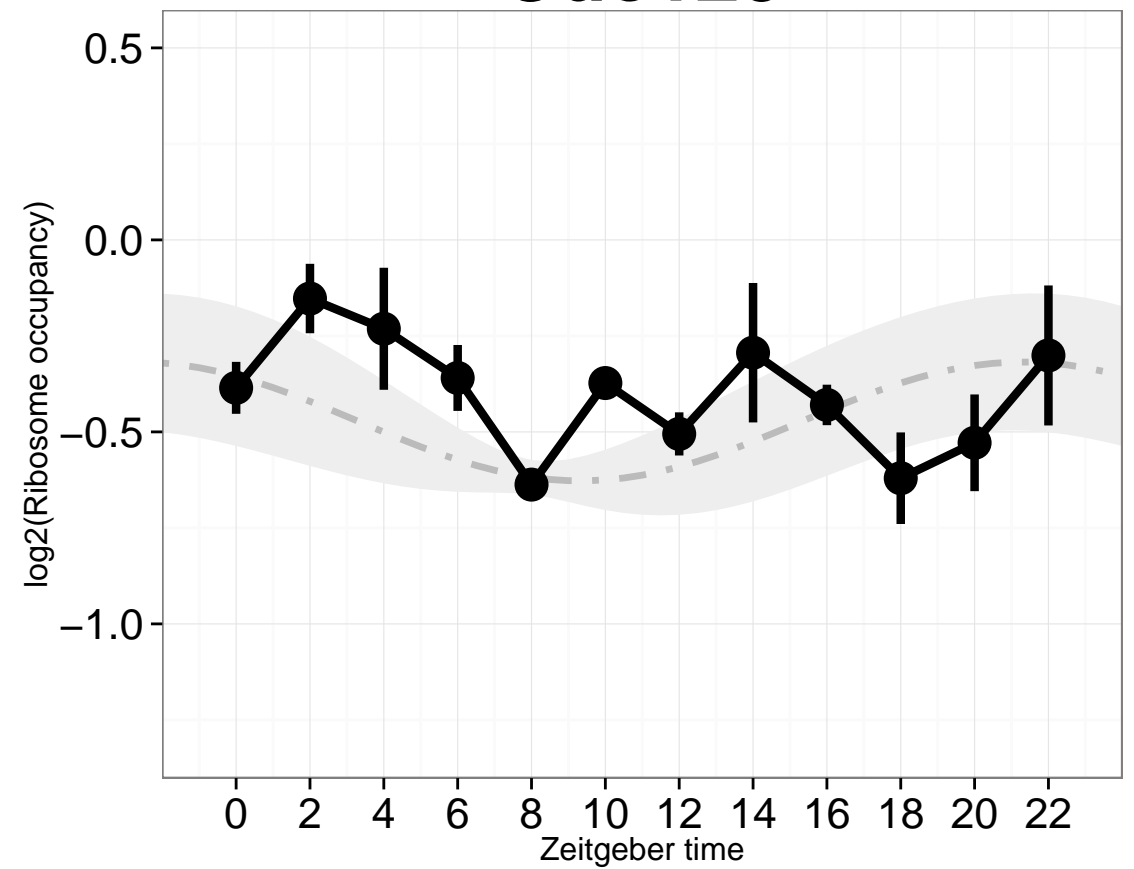

Supplement: SuppDataset_1.zip [file Cdc123_set_A.pdf › Supplemental Dataset 1/A-mRNA_nonrhyth_translation_nonrhyth/Cdc123_set_A.pdf]

# Cdc14a

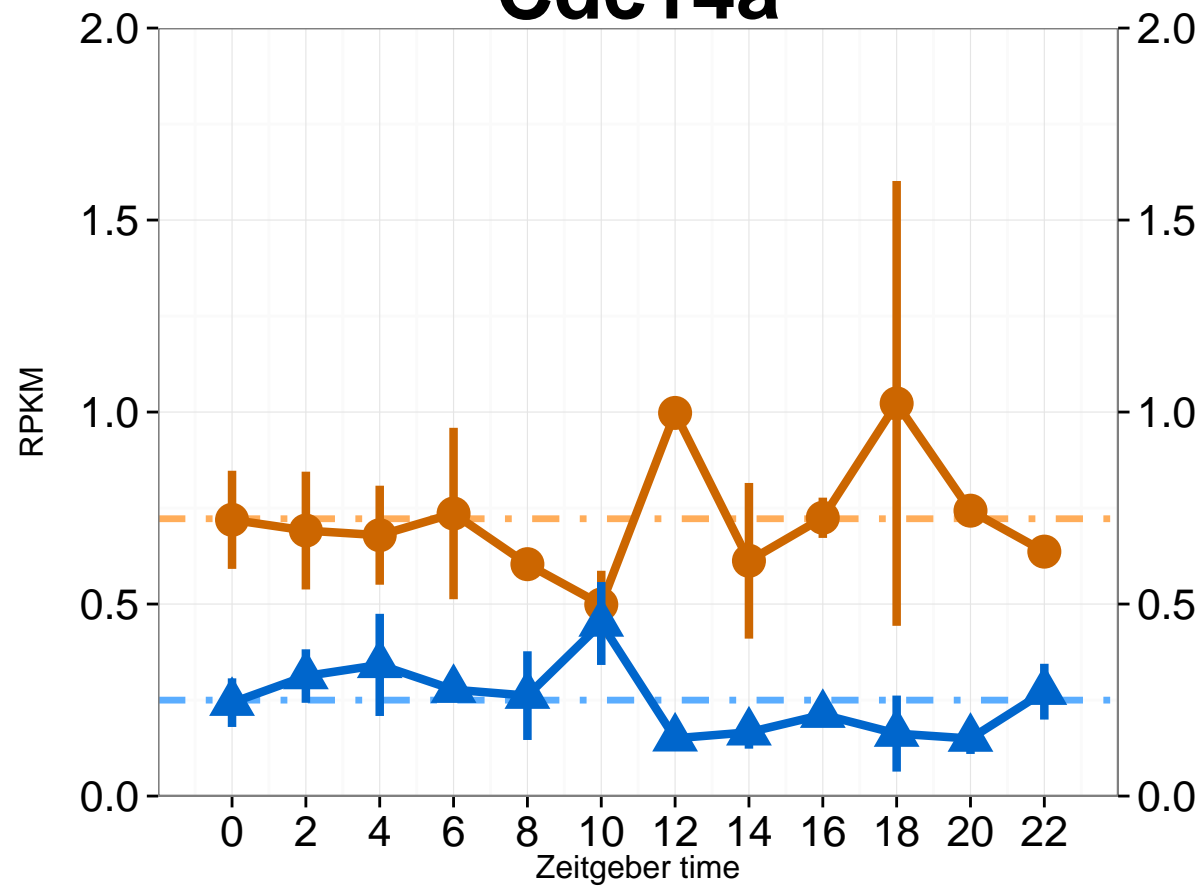

# Cdc14a

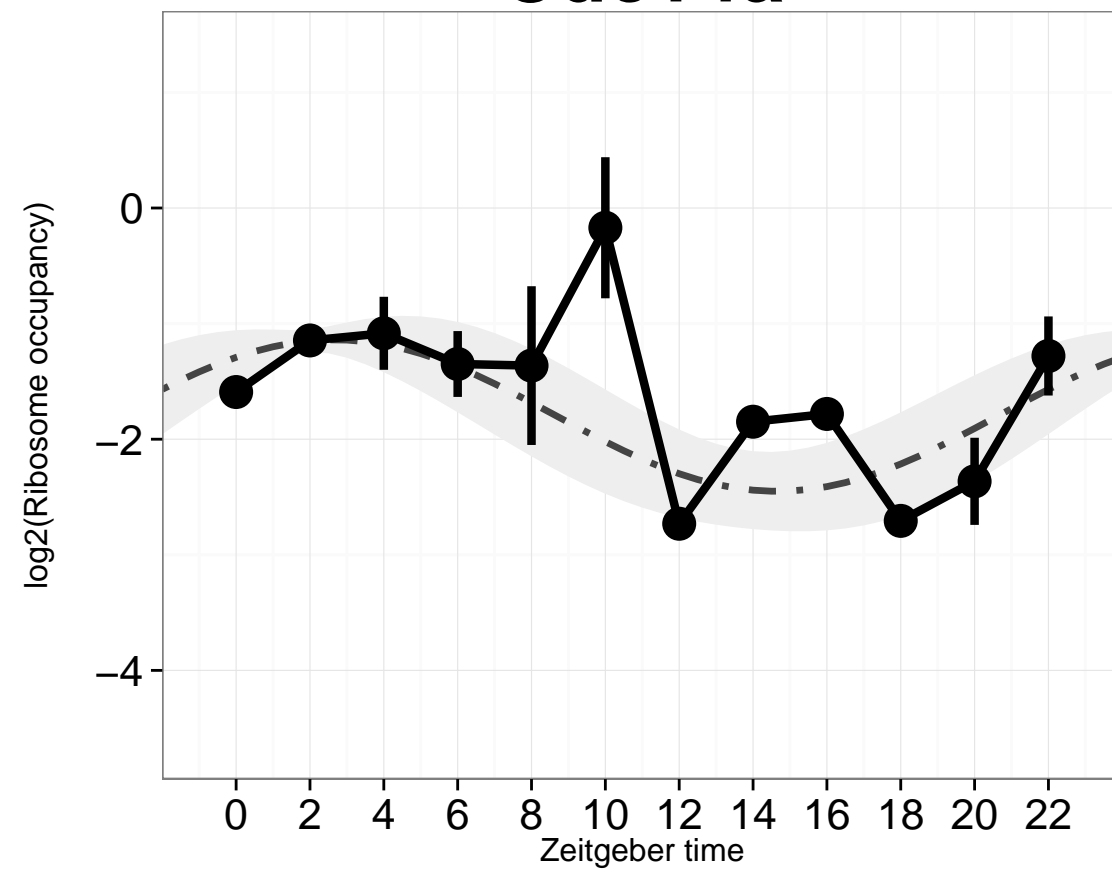

Supplement: SuppDataset_1.zip [file Cdc14a_set_A.pdf › Supplemental Dataset 1/A-mRNA_nonrhyth_translation_nonrhyth/Cdc14a_set_A.pdf]

# Cdc16

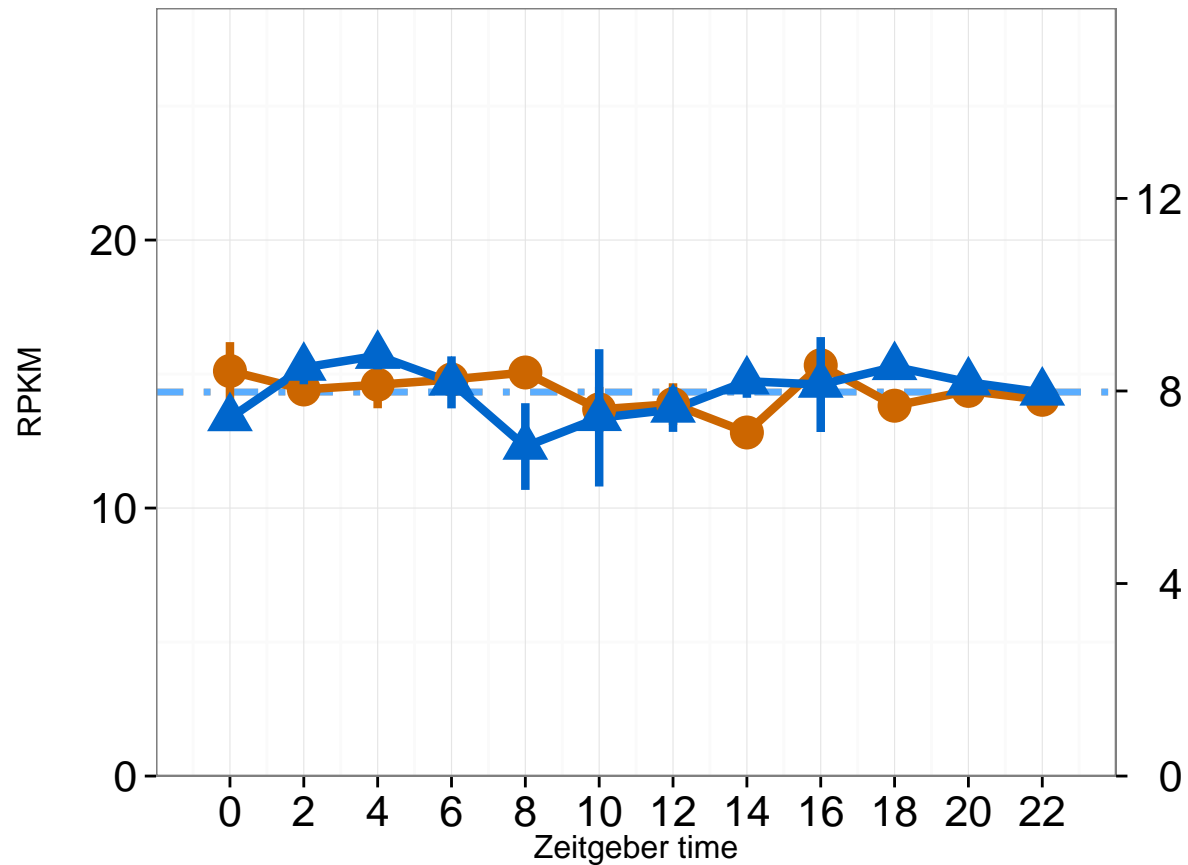

# Cdc16

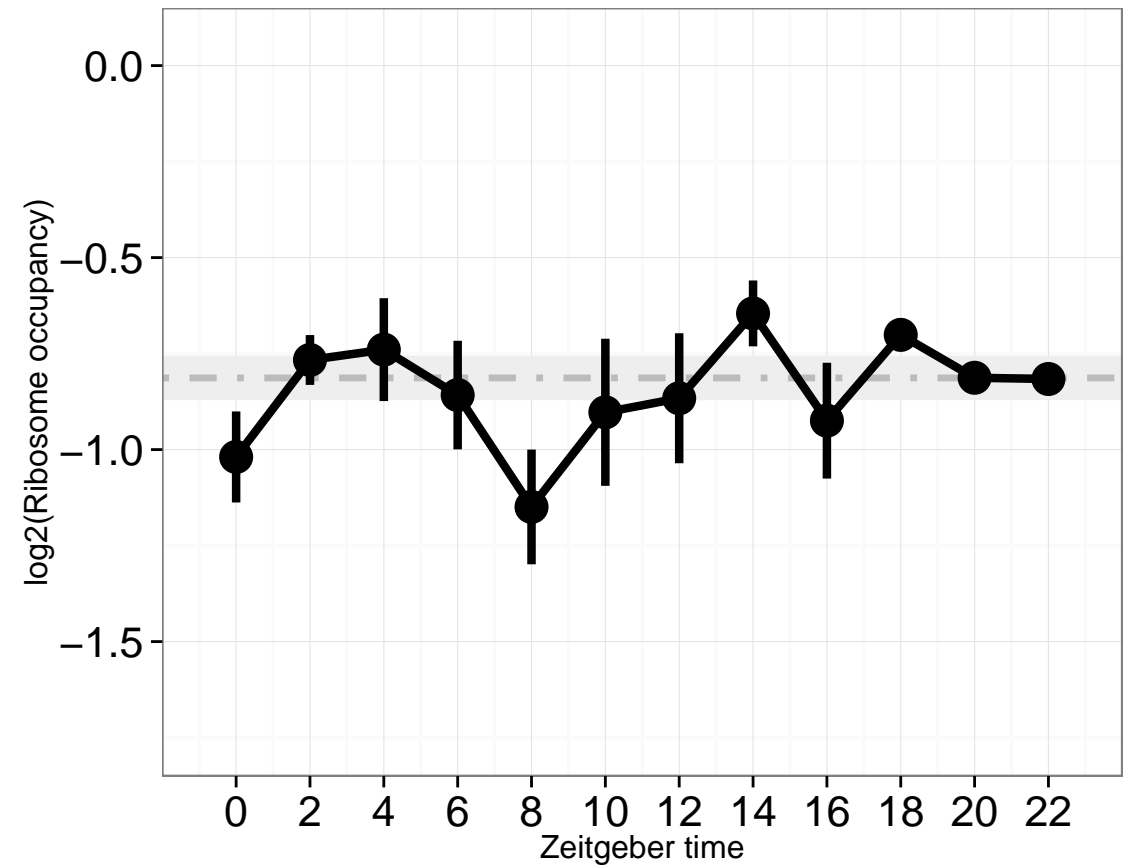

Supplement: SuppDataset_1.zip [file Cdc16_set_A.pdf › Supplemental Dataset 1/A-mRNA_nonrhyth_translation_nonrhyth/Cdc16_set_A.pdf]

## Cdc20

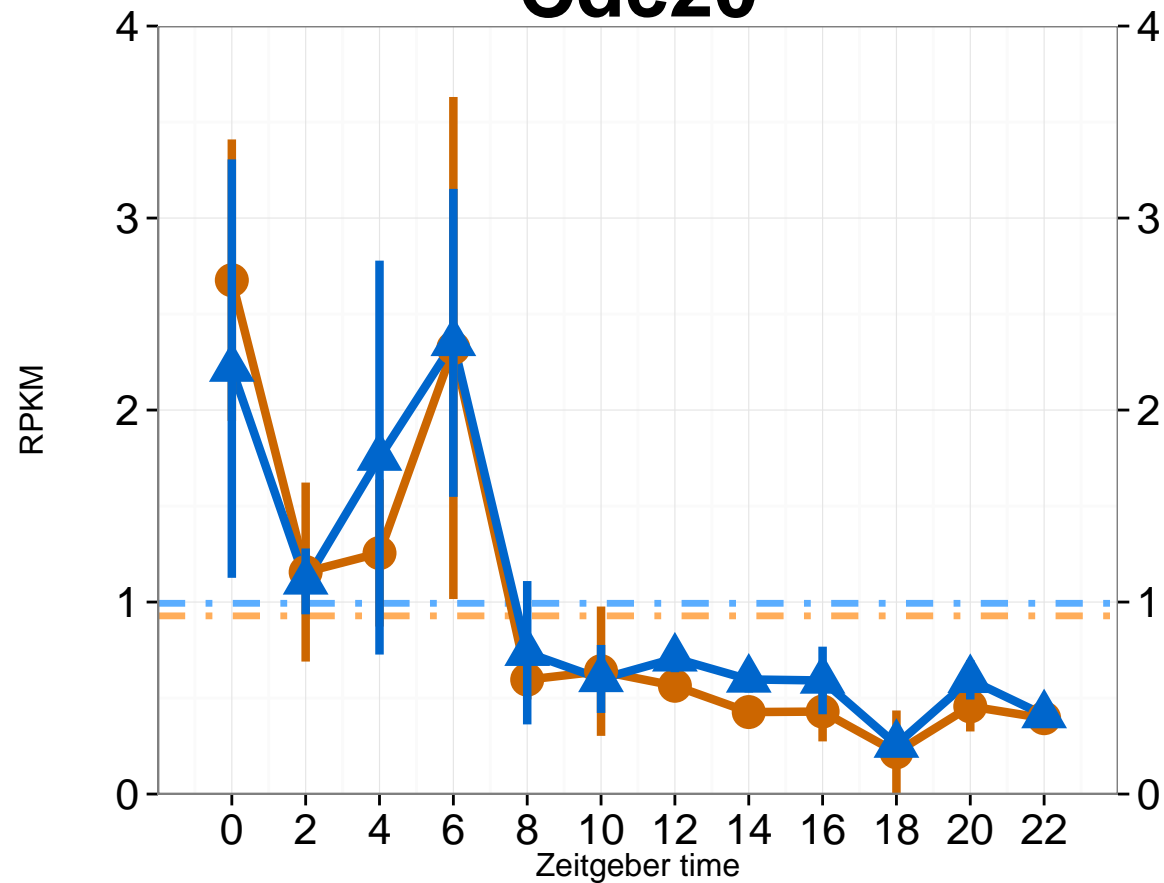

## Cdc20

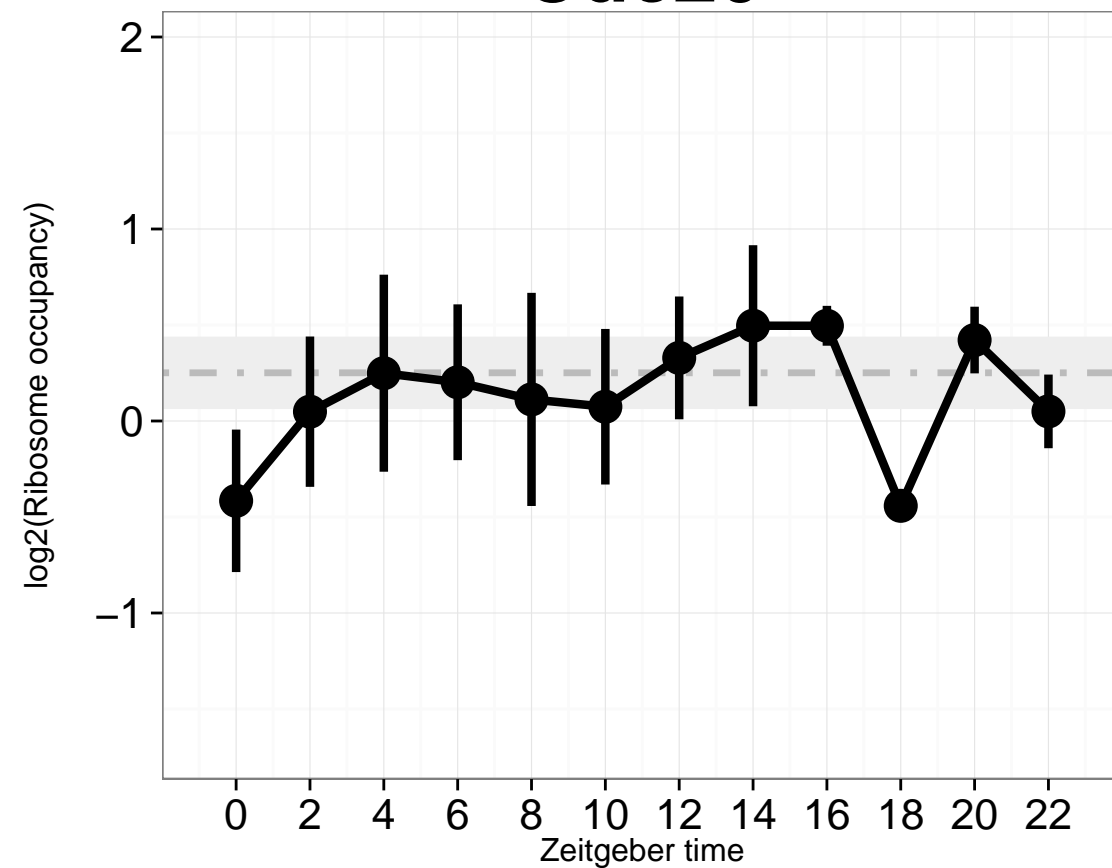

Supplement: SuppDataset_1.zip [file Cdc20_set_A.pdf › Supplemental Dataset 1/A-mRNA_nonrhyth_translation_nonrhyth/Cdc20_set_A.pdf]

## Cdc23

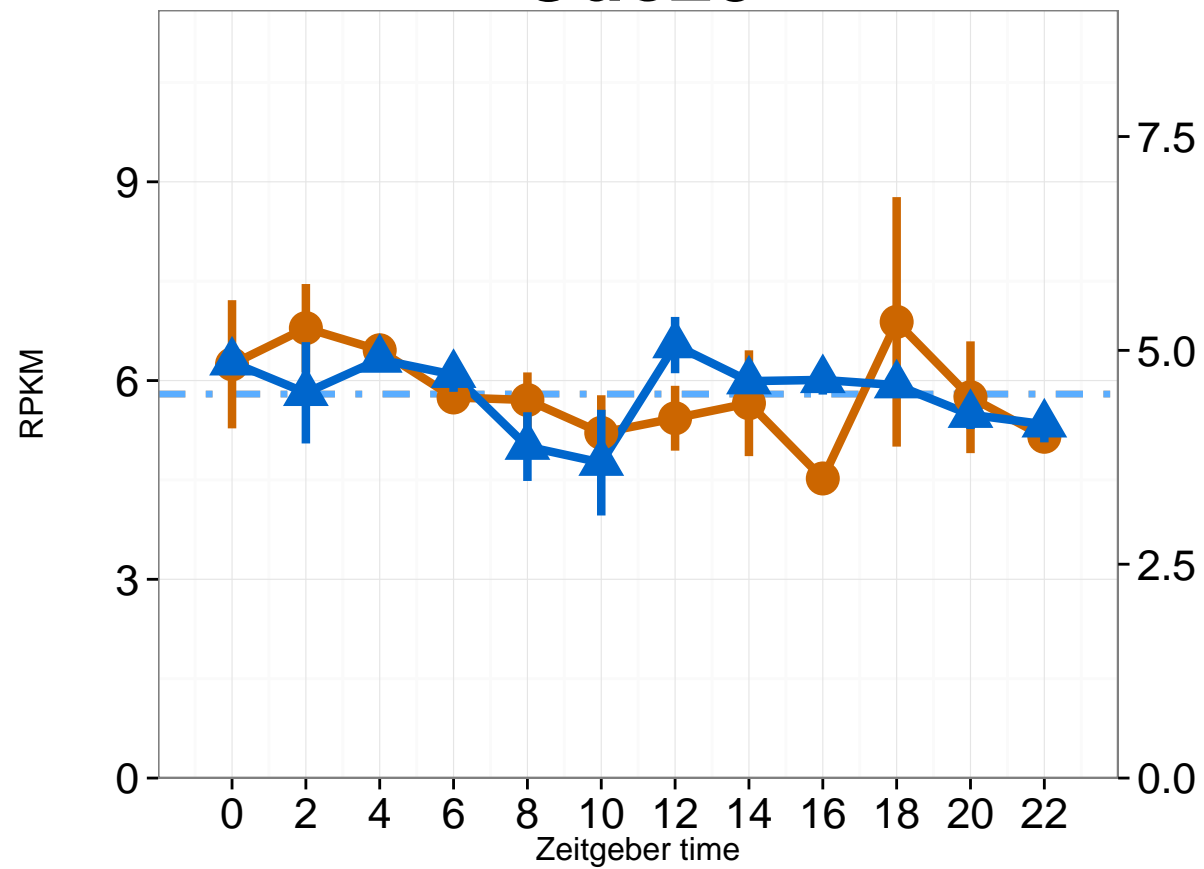

## Cdc23

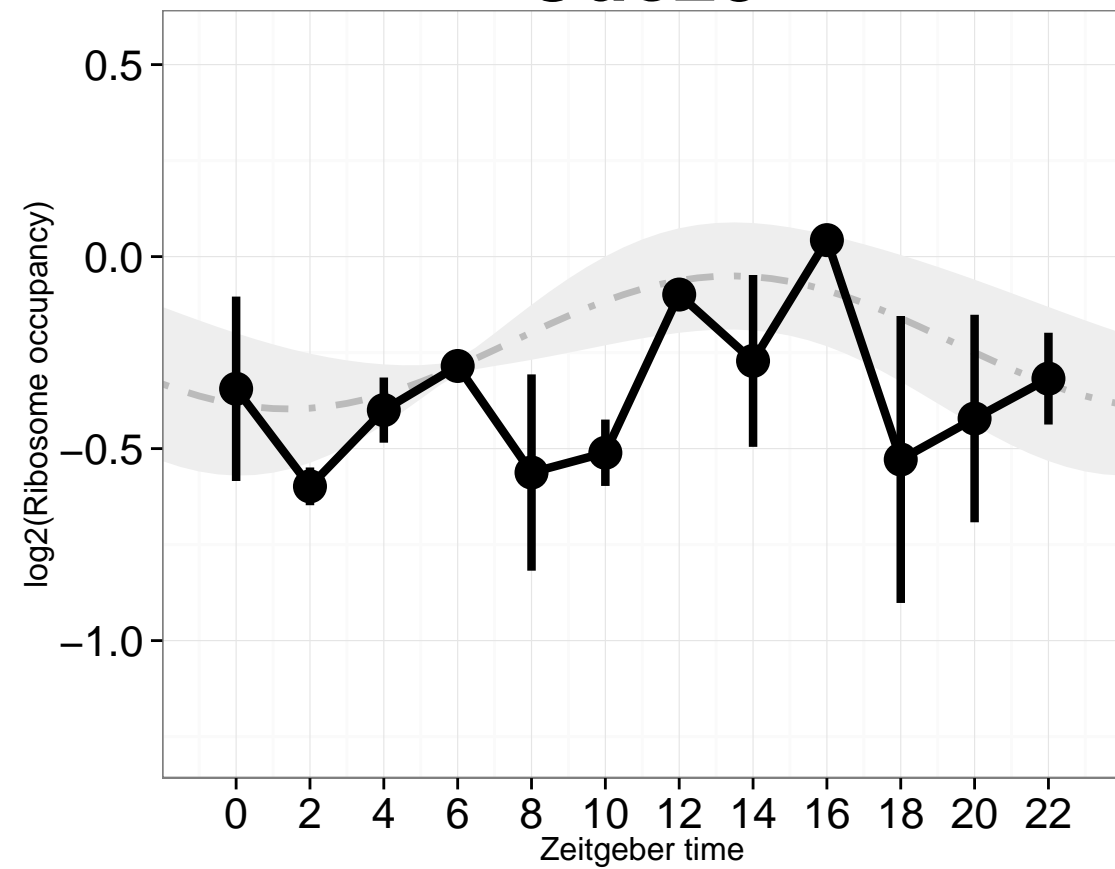

Supplement: SuppDataset_1.zip [file Cdc23_set_A.pdf › Supplemental Dataset 1/A-mRNA_nonrhyth_translation_nonrhyth/Cdc23_set_A.pdf]

## Cdc26

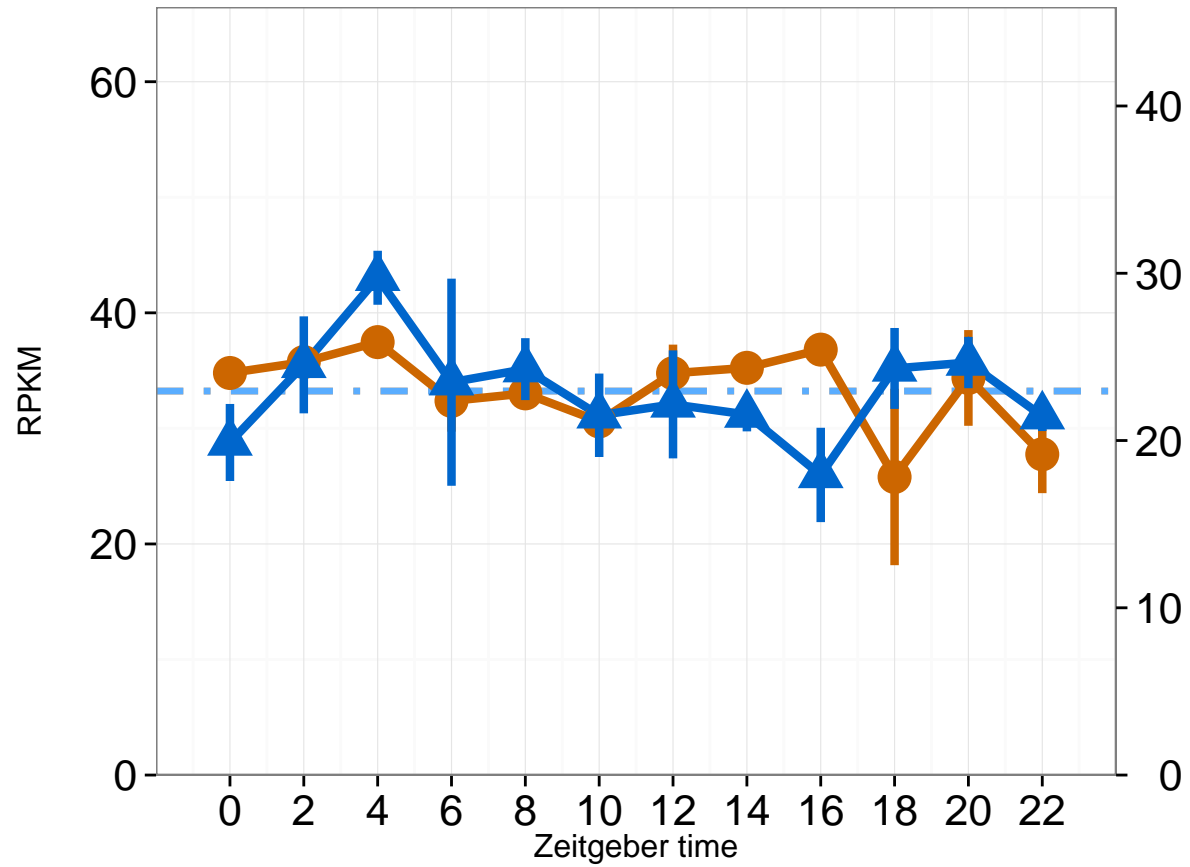

## Cdc26

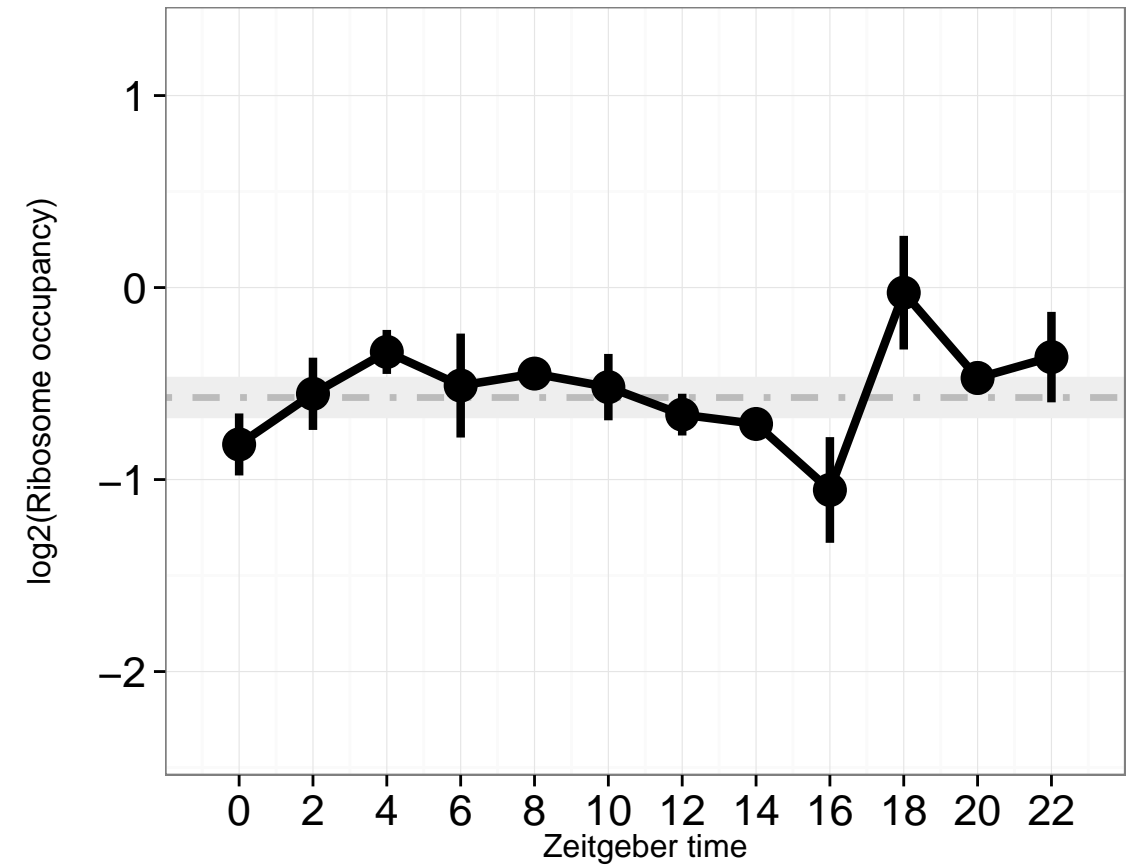

Supplement: SuppDataset_1.zip [file Cdc26_set_A.pdf › Supplemental Dataset 1/A-mRNA_nonrhyth_translation_nonrhyth/Cdc26_set_A.pdf]

## Cdc27

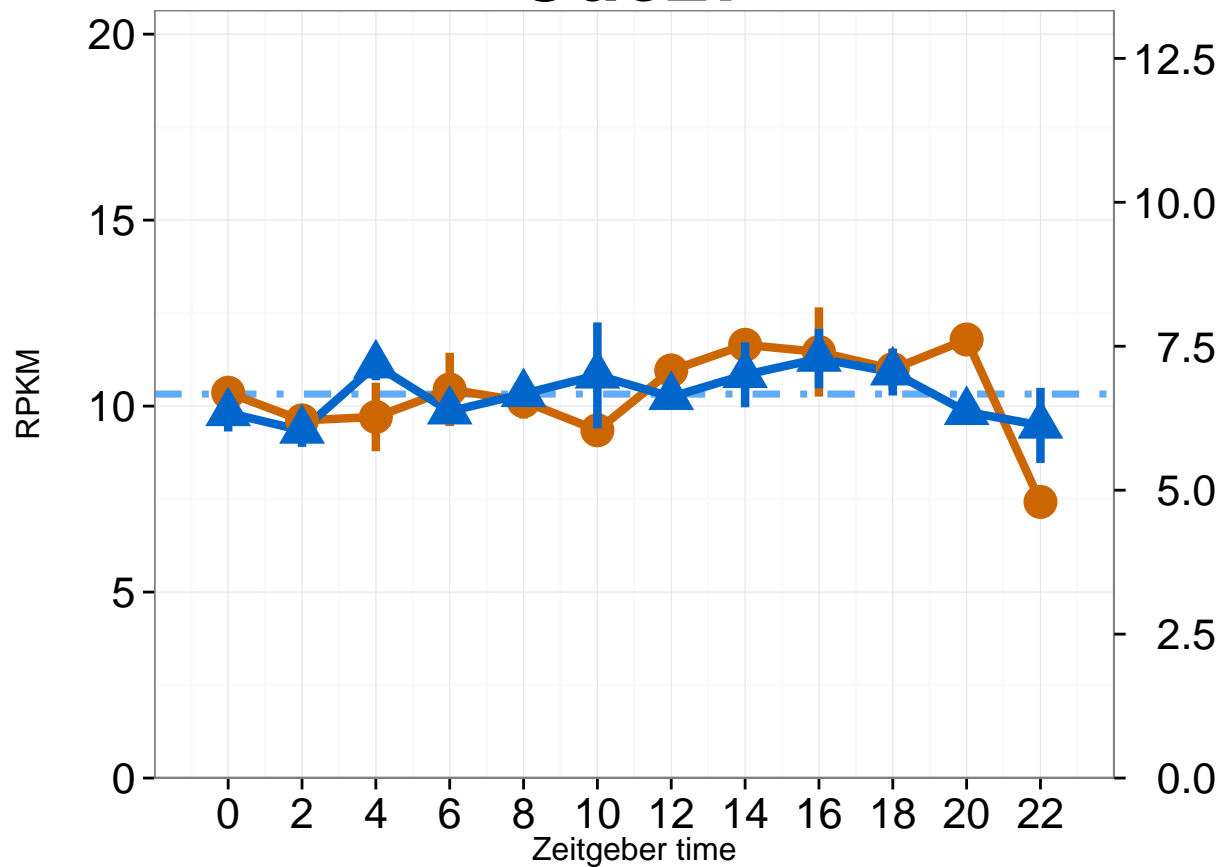

## Cdc27

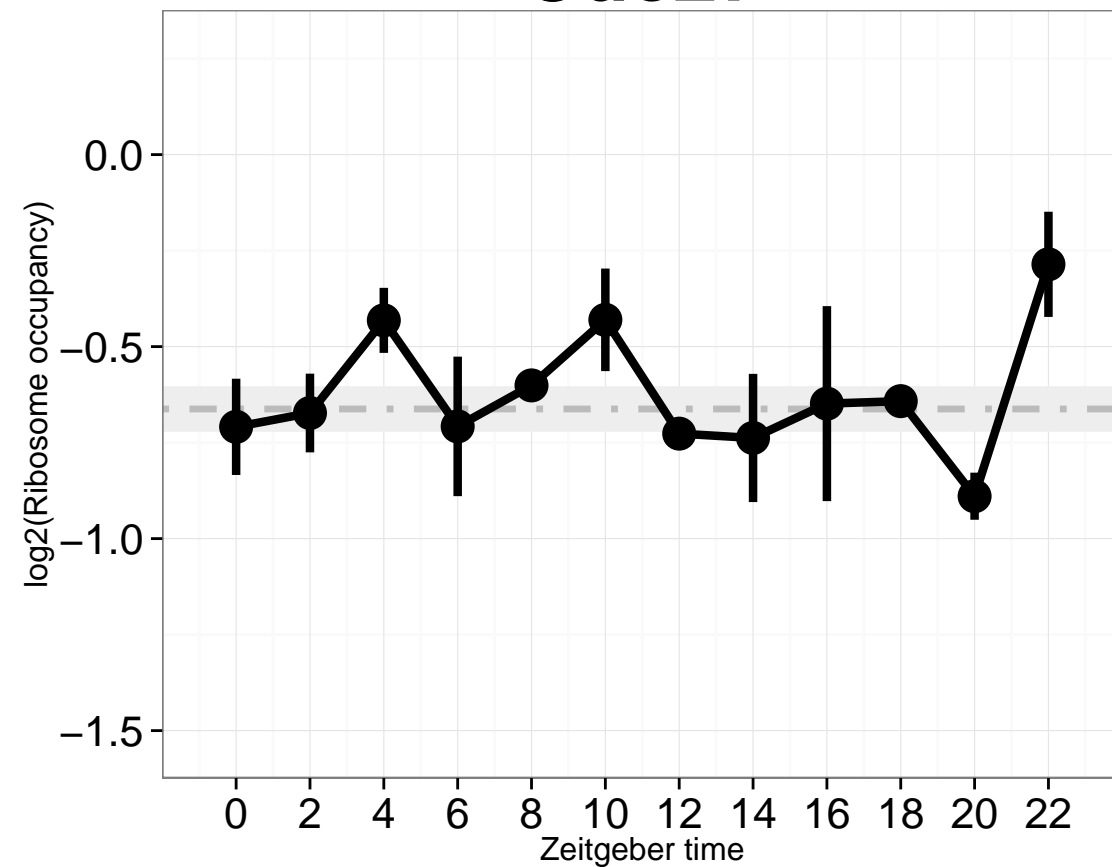

Supplement: SuppDataset_1.zip [file Cdc27_set_A.pdf › Supplemental Dataset 1/A-mRNA_nonrhyth_translation_nonrhyth/Cdc27_set_A.pdf]

## Cdc34

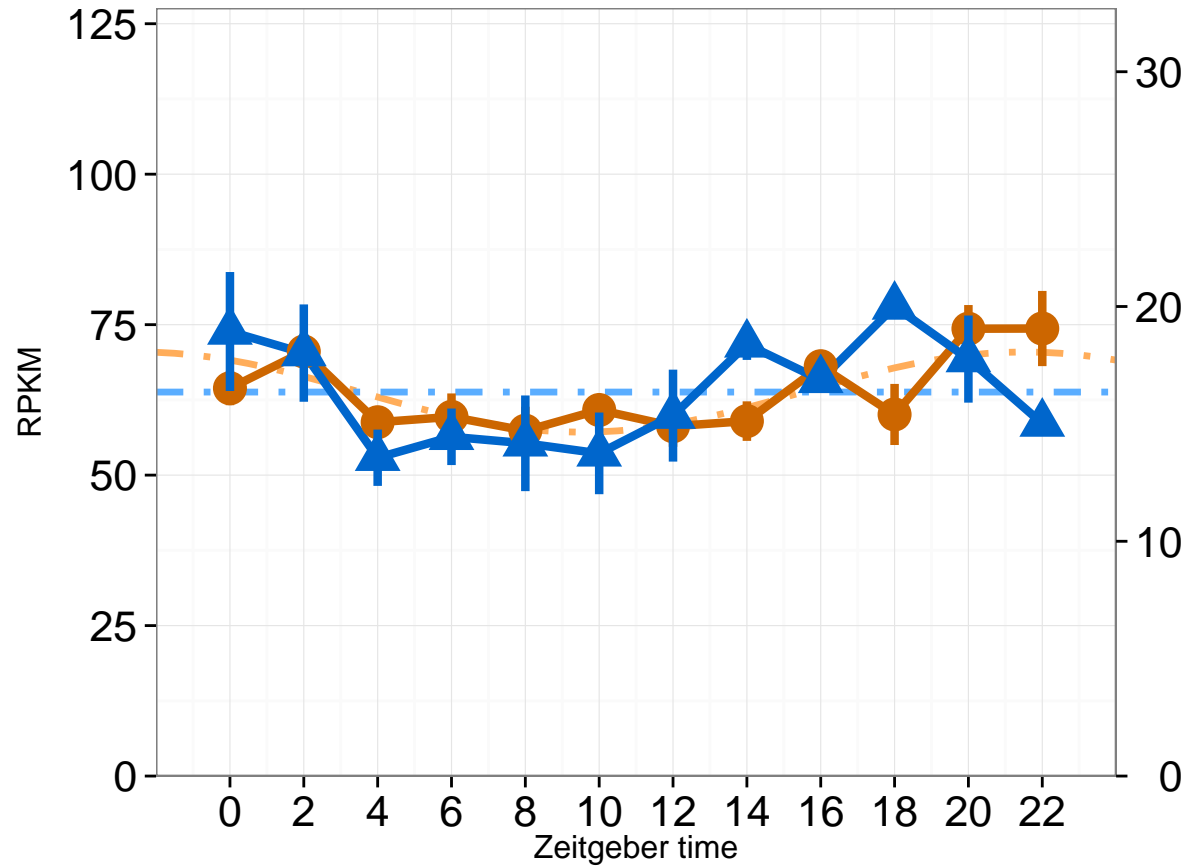

## Cdc34

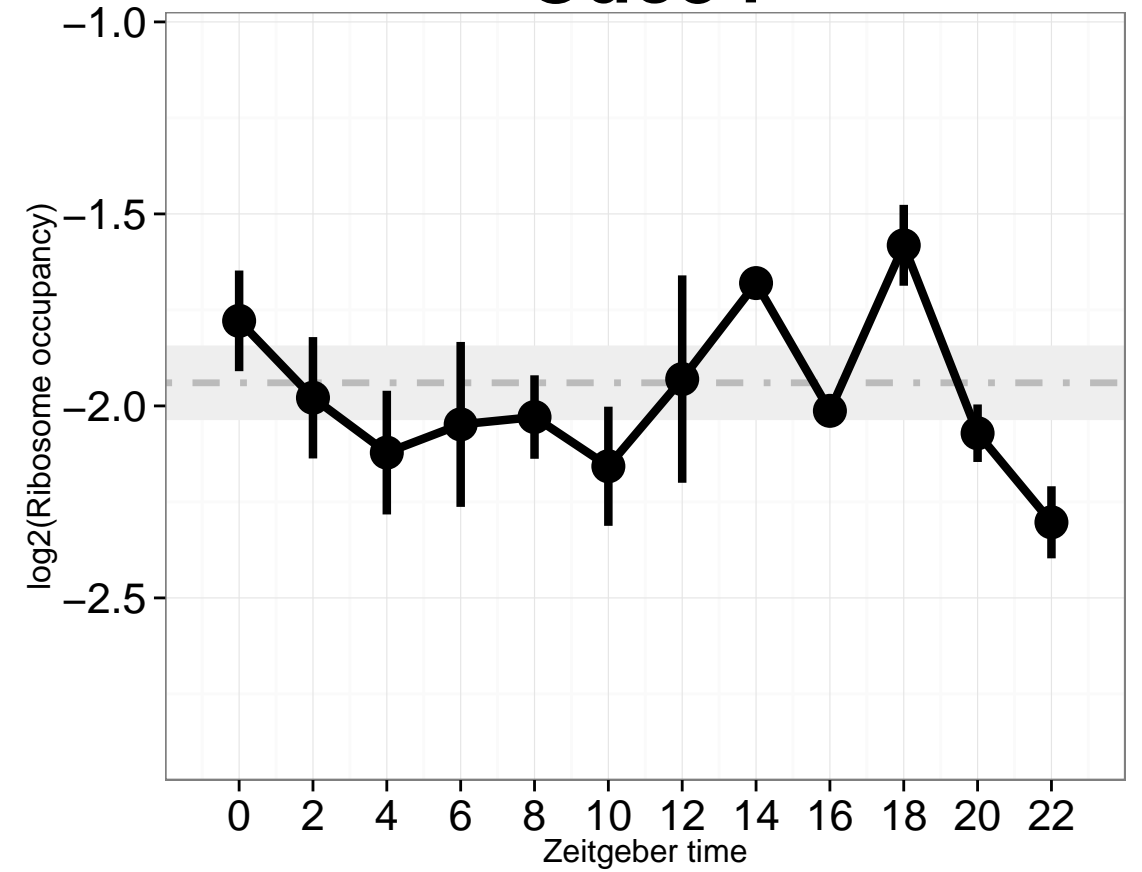

Supplement: SuppDataset_1.zip [file Cdc34_set_A.pdf › Supplemental Dataset 1/A-mRNA_nonrhyth_translation_nonrhyth/Cdc34_set_A.pdf]

## Cdc37

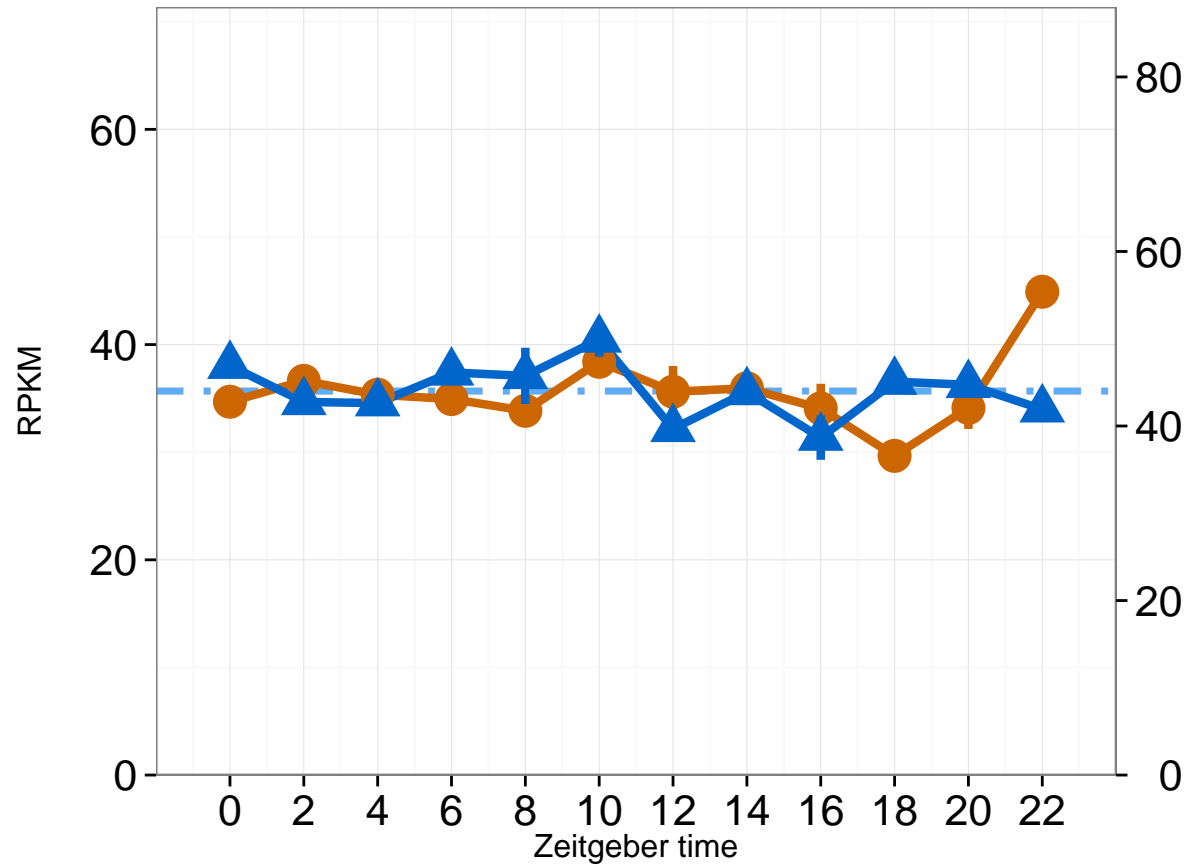

## Cdc37

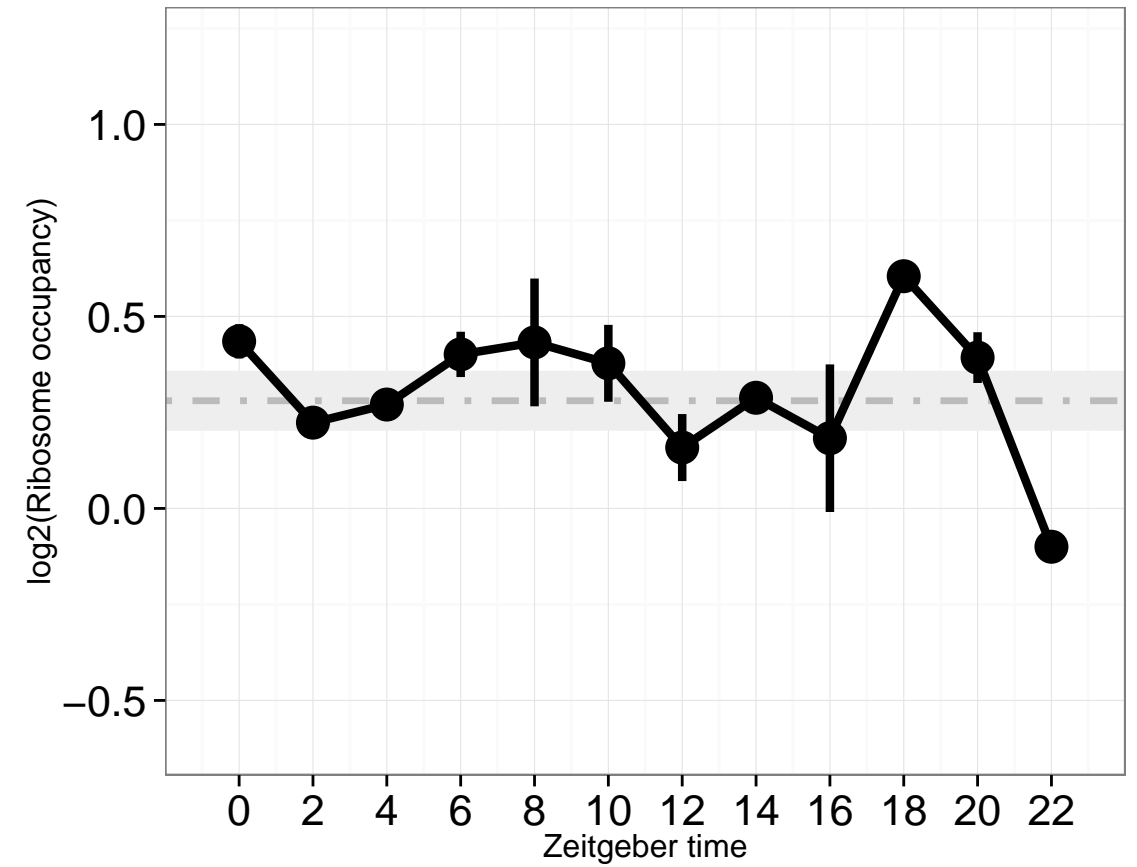

Supplement: SuppDataset_1.zip [file Cdc37_set_A.pdf › Supplemental Dataset 1/A-mRNA_nonrhyth_translation_nonrhyth/Cdc37_set_A.pdf]

# Cdc37I1

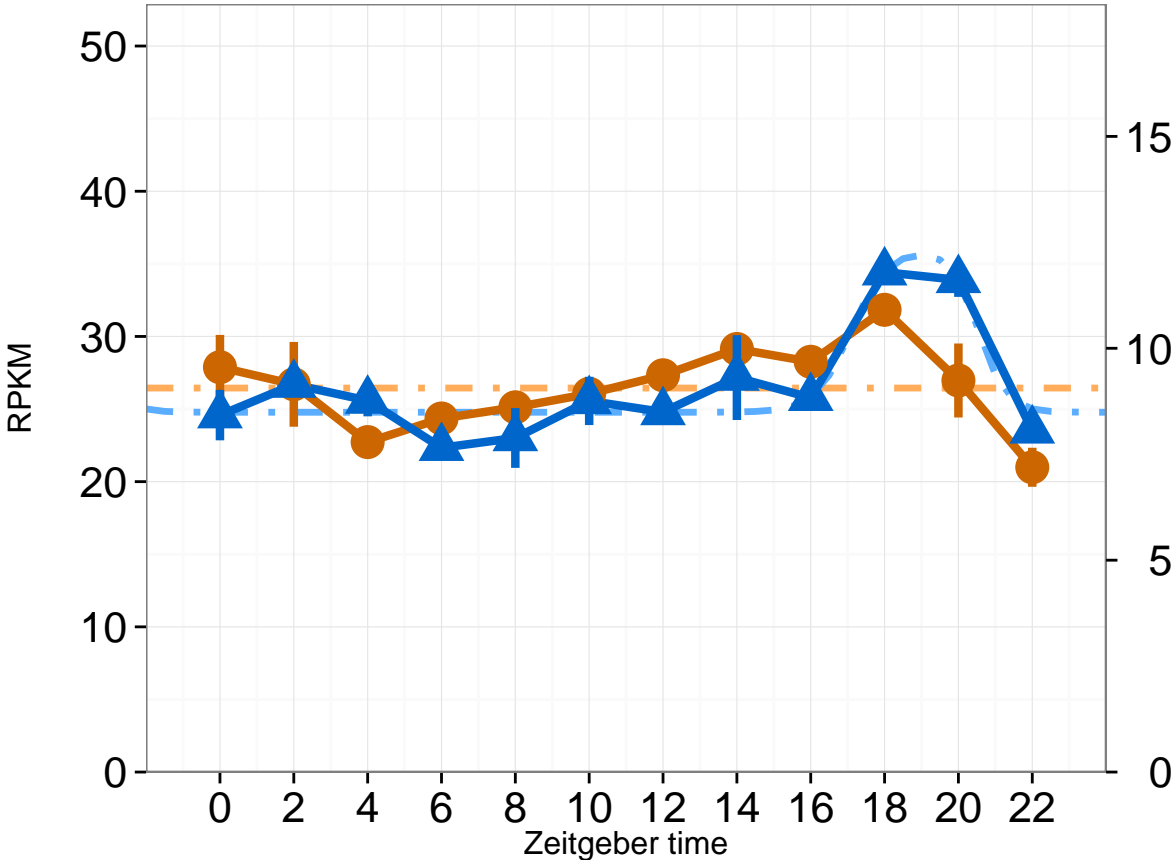

# Cdc37I1

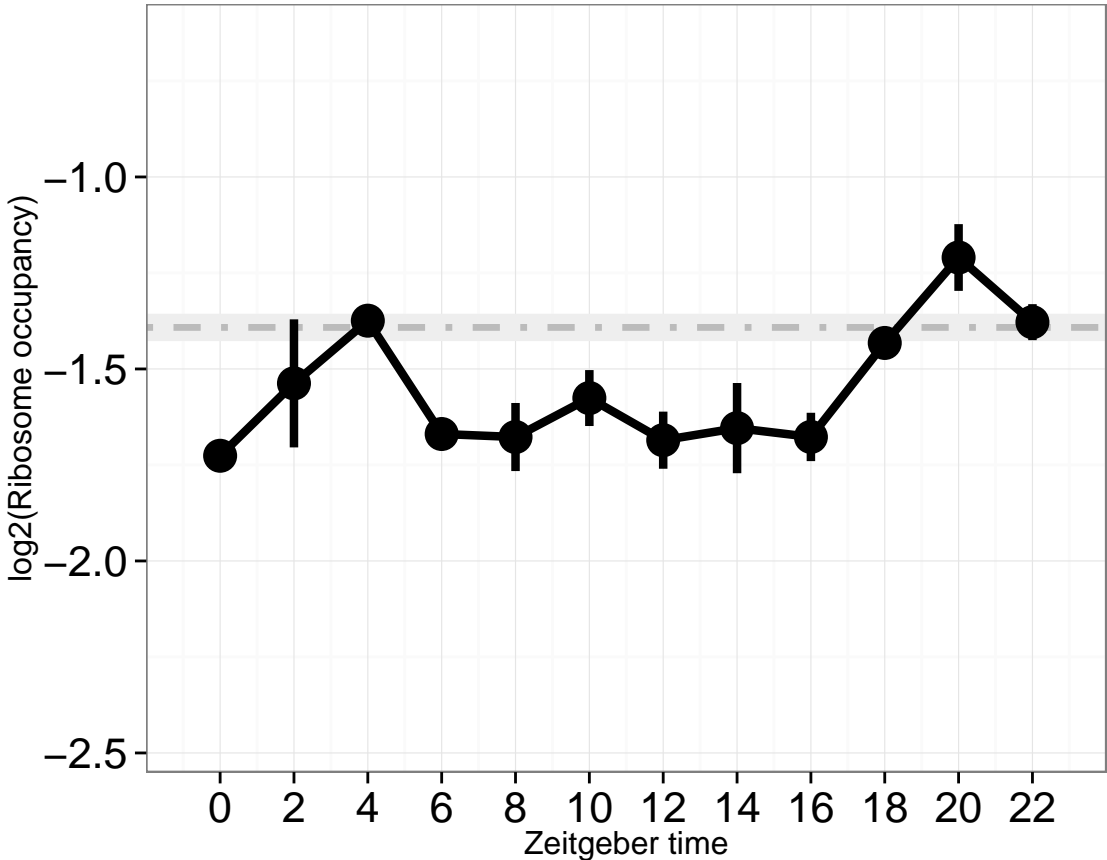

Supplement: SuppDataset_1.zip [file Cdc37l1_set_A.pdf › Supplemental Dataset 1/A-mRNA_nonrhyth_translation_nonrhyth/Cdc37l1_set_A.pdf]

## Cdc40

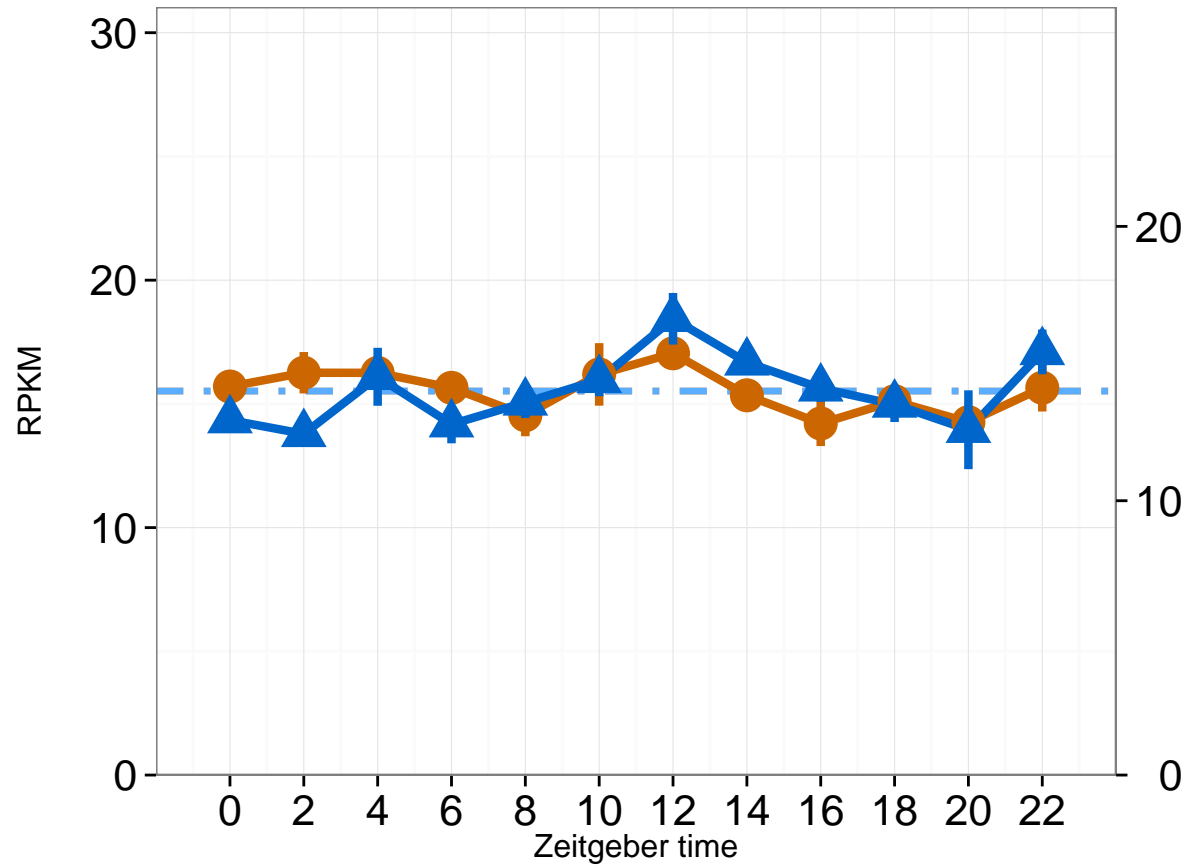

## Cdc40

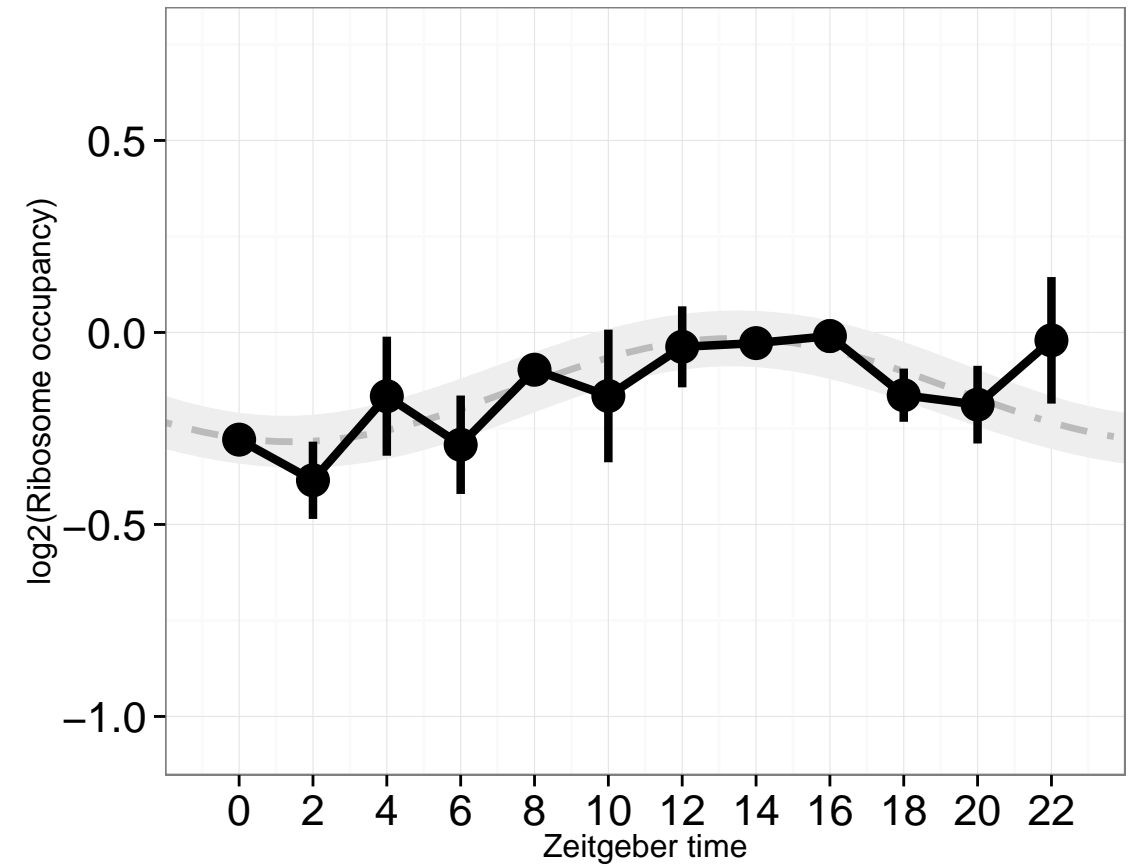

Supplement: SuppDataset_1.zip [file Cdc40_set_A.pdf › Supplemental Dataset 1/A-mRNA_nonrhyth_translation_nonrhyth/Cdc40_set_A.pdf]

## Cdc42

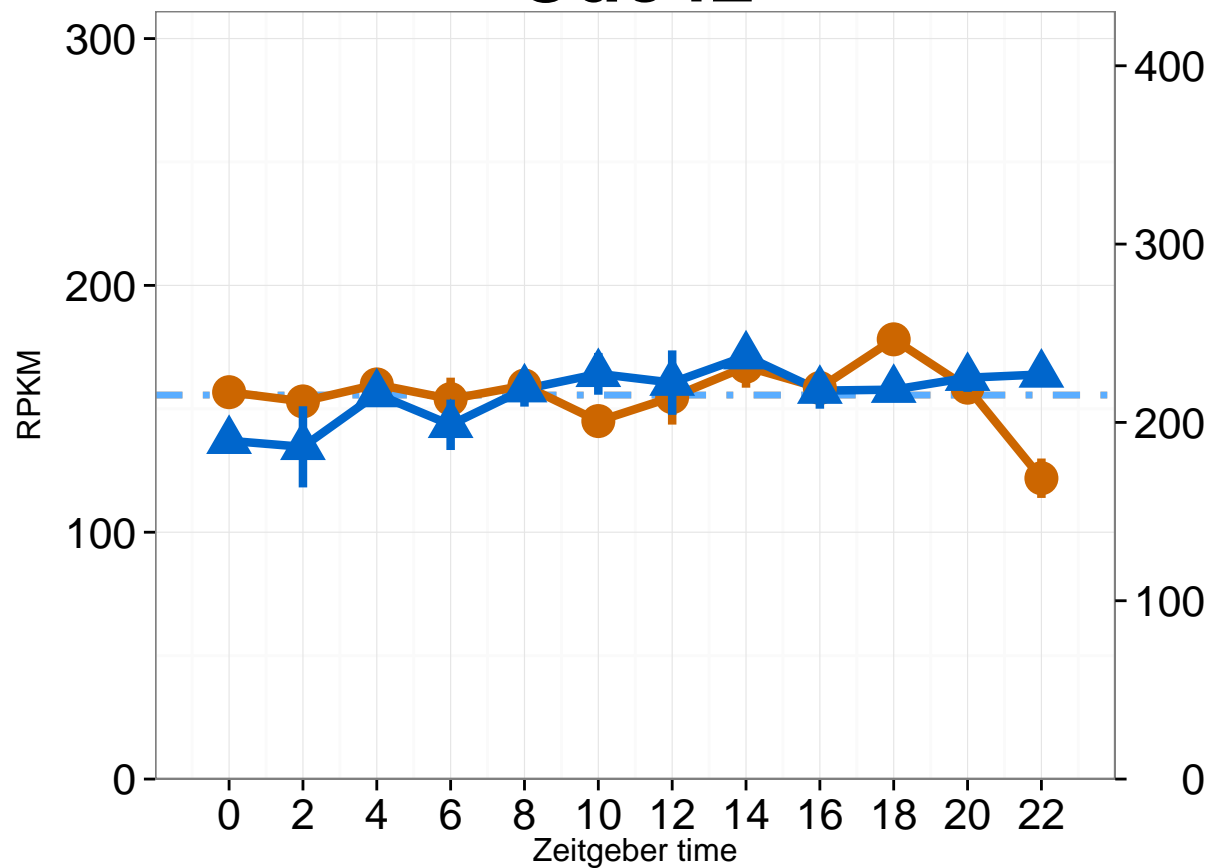

## Cdc42

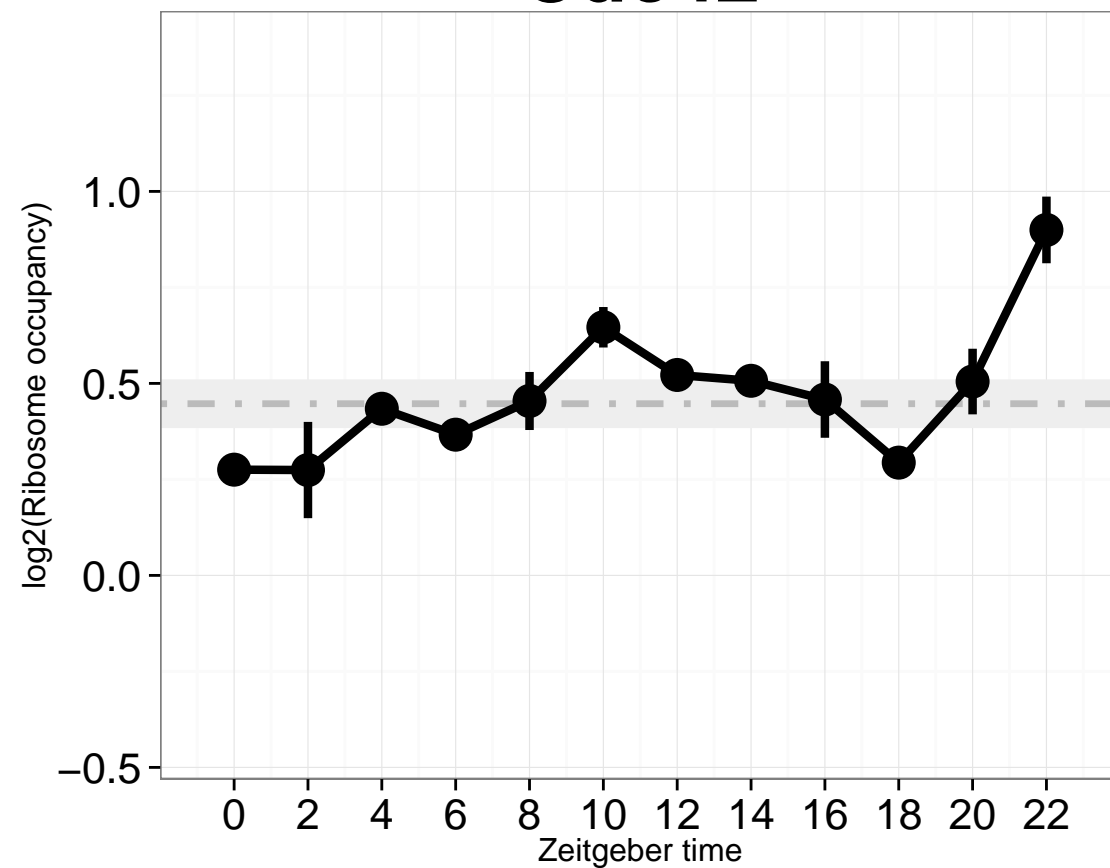

Supplement: SuppDataset_1.zip [file Cdc42_set_A.pdf › Supplemental Dataset 1/A-mRNA_nonrhyth_translation_nonrhyth/Cdc42_set_A.pdf]

# Cdc42bpb

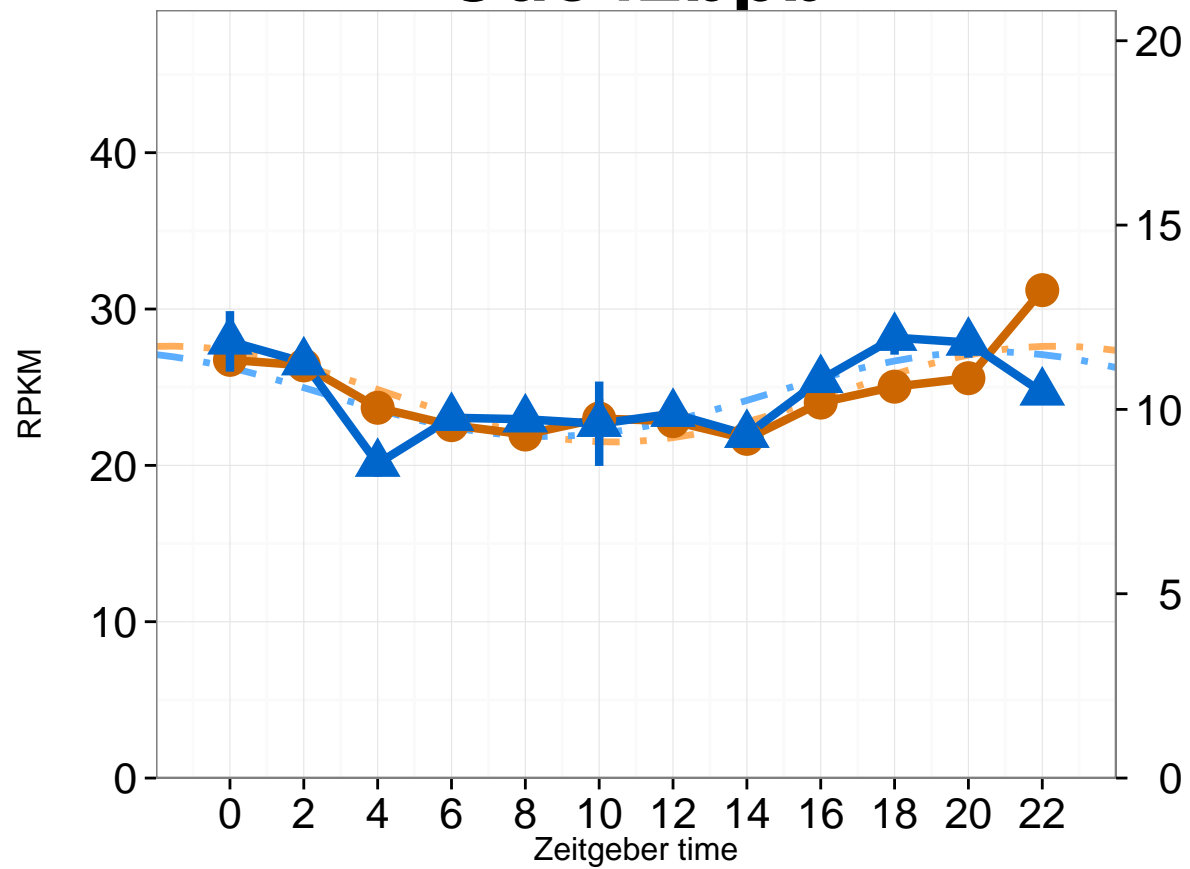

# Cdc42bpb

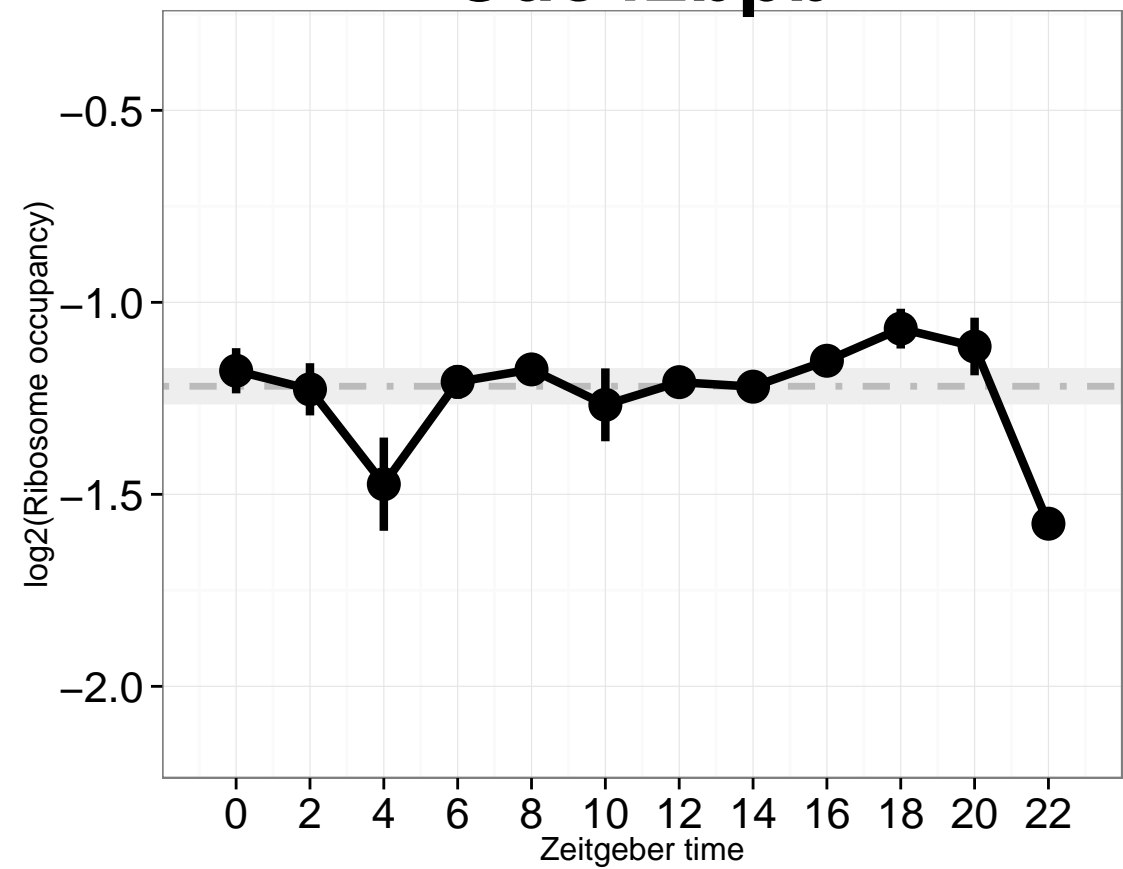

Supplement: SuppDataset_1.zip [file Cdc42bpb_set_A.pdf › Supplemental Dataset 1/A-mRNA_nonrhyth_translation_nonrhyth/Cdc42bpb_set_A.pdf]

# Cdc42bpg

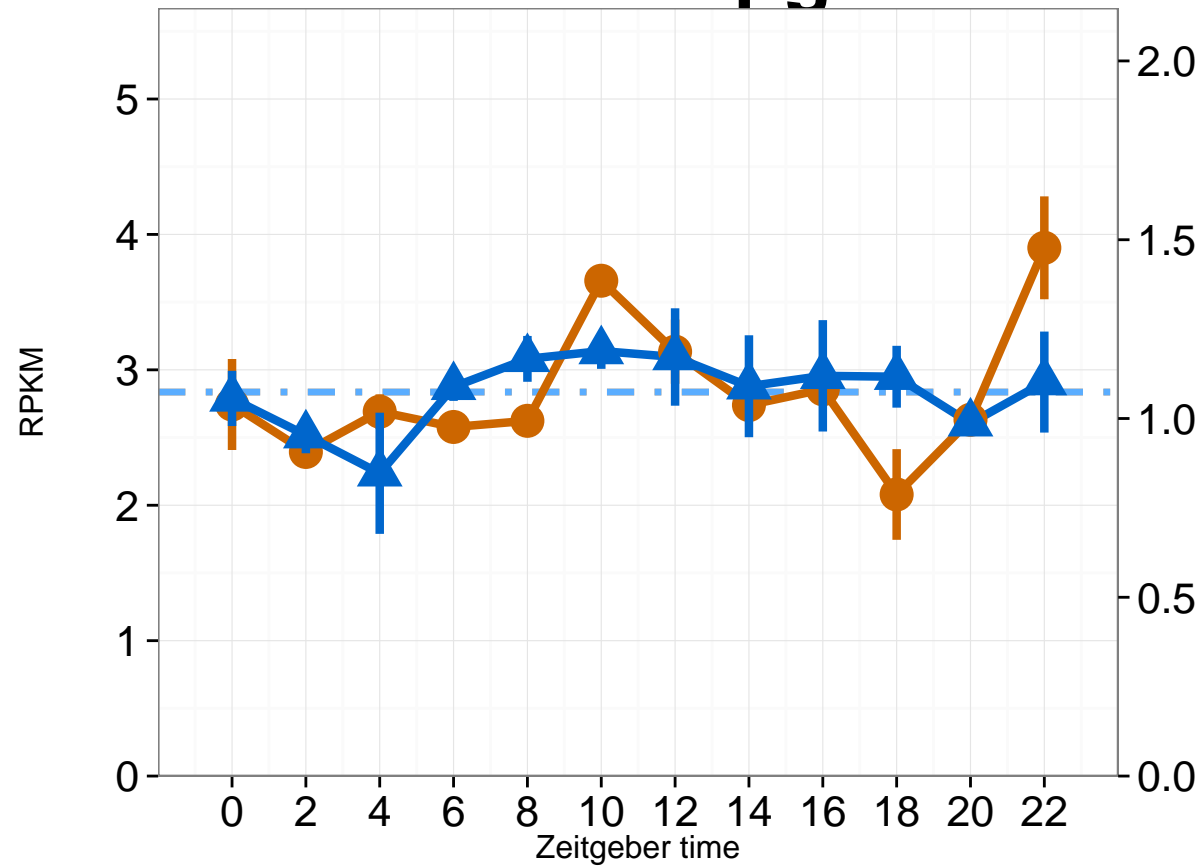

# Cdc42bpg

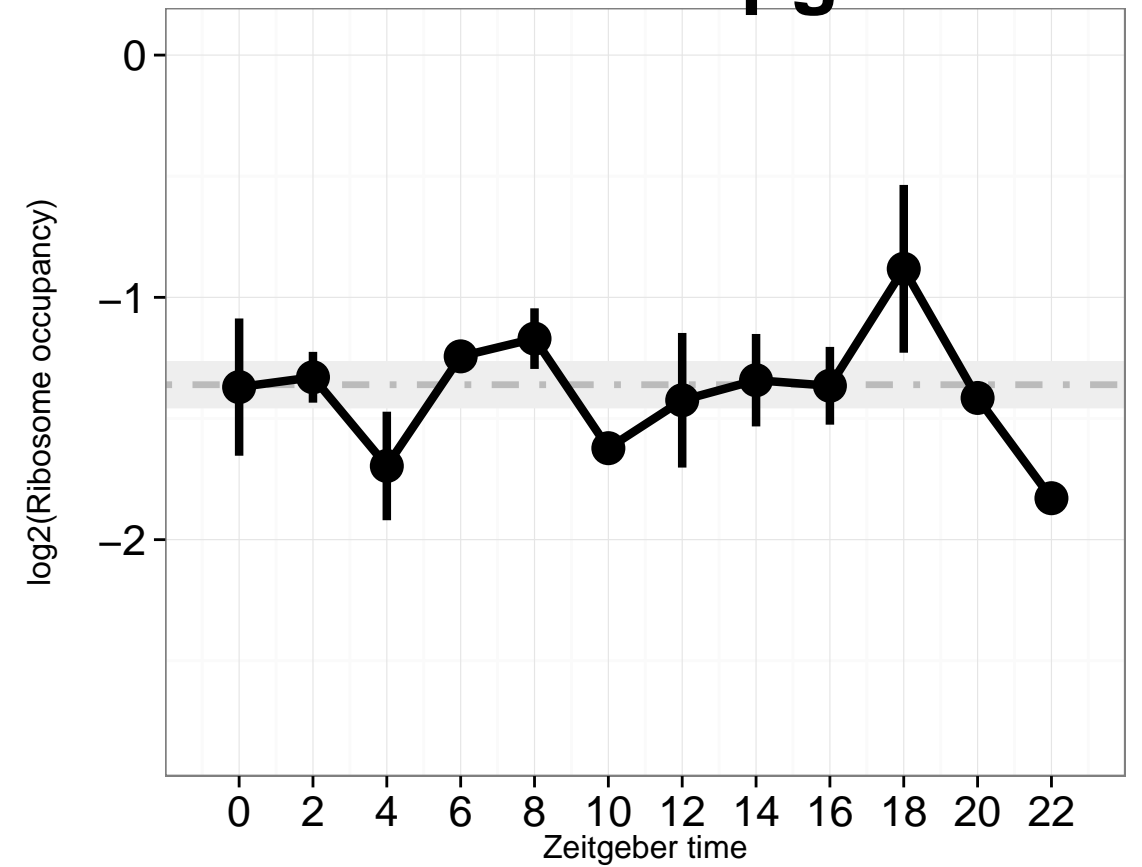

Supplement: SuppDataset_1.zip [file Cdc42bpg_set_A.pdf › Supplemental Dataset 1/A-mRNA_nonrhyth_translation_nonrhyth/Cdc42bpg_set_A.pdf]

# Cdc42ep1

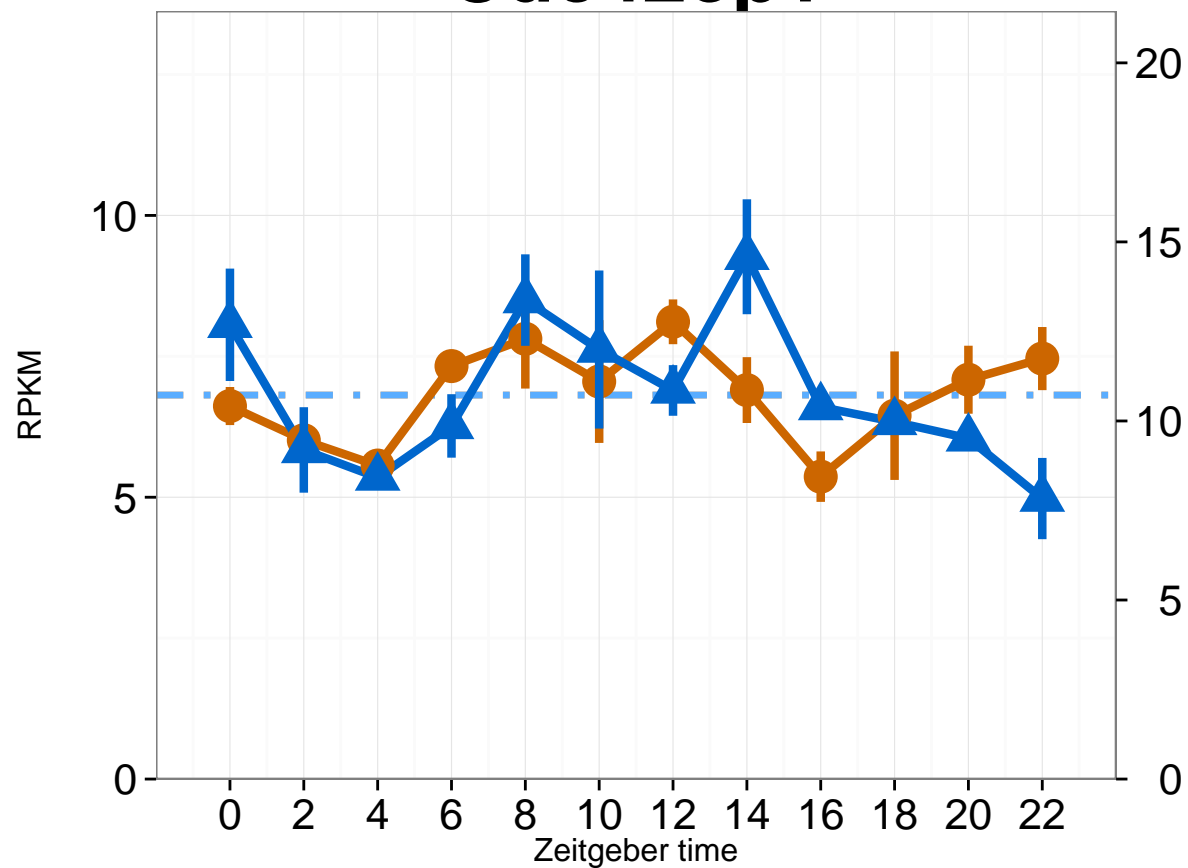

# Cdc42ep1

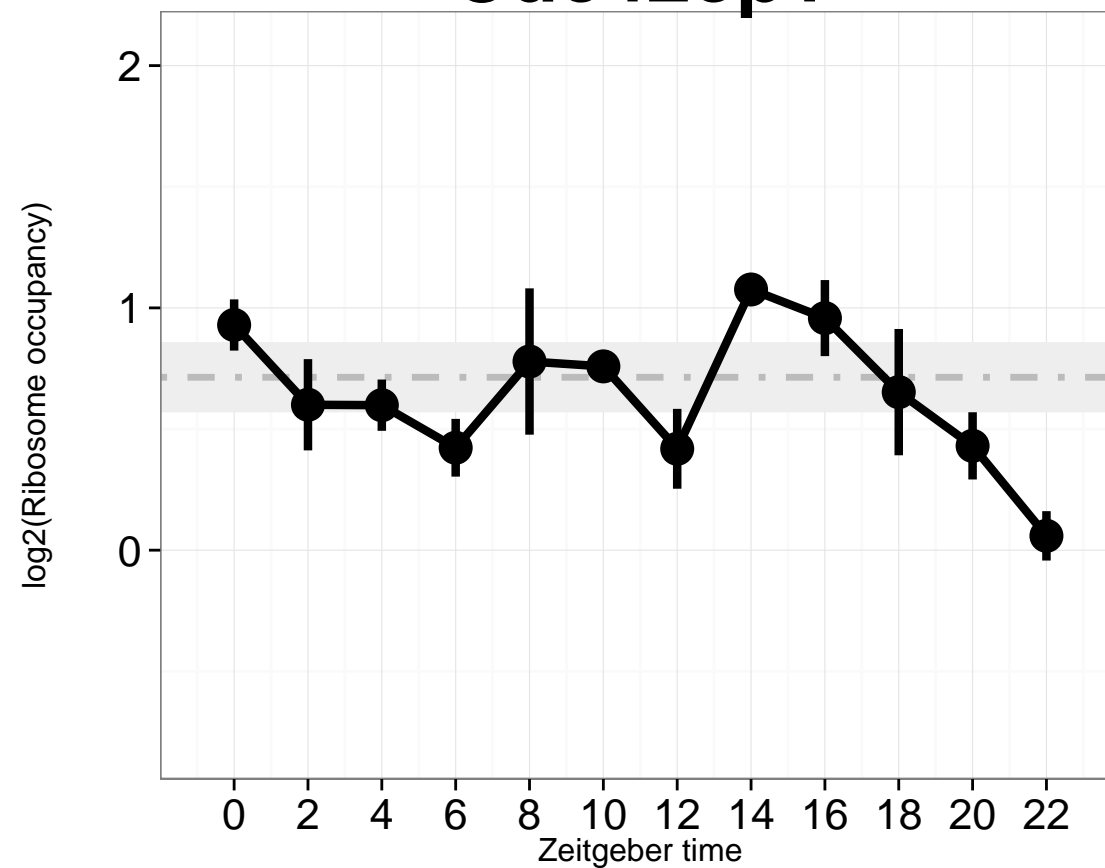

Supplement: SuppDataset_1.zip [file Cdc42ep1_set_A.pdf › Supplemental Dataset 1/A-mRNA_nonrhyth_translation_nonrhyth/Cdc42ep1_set_A.pdf]

# Cdc42ep2

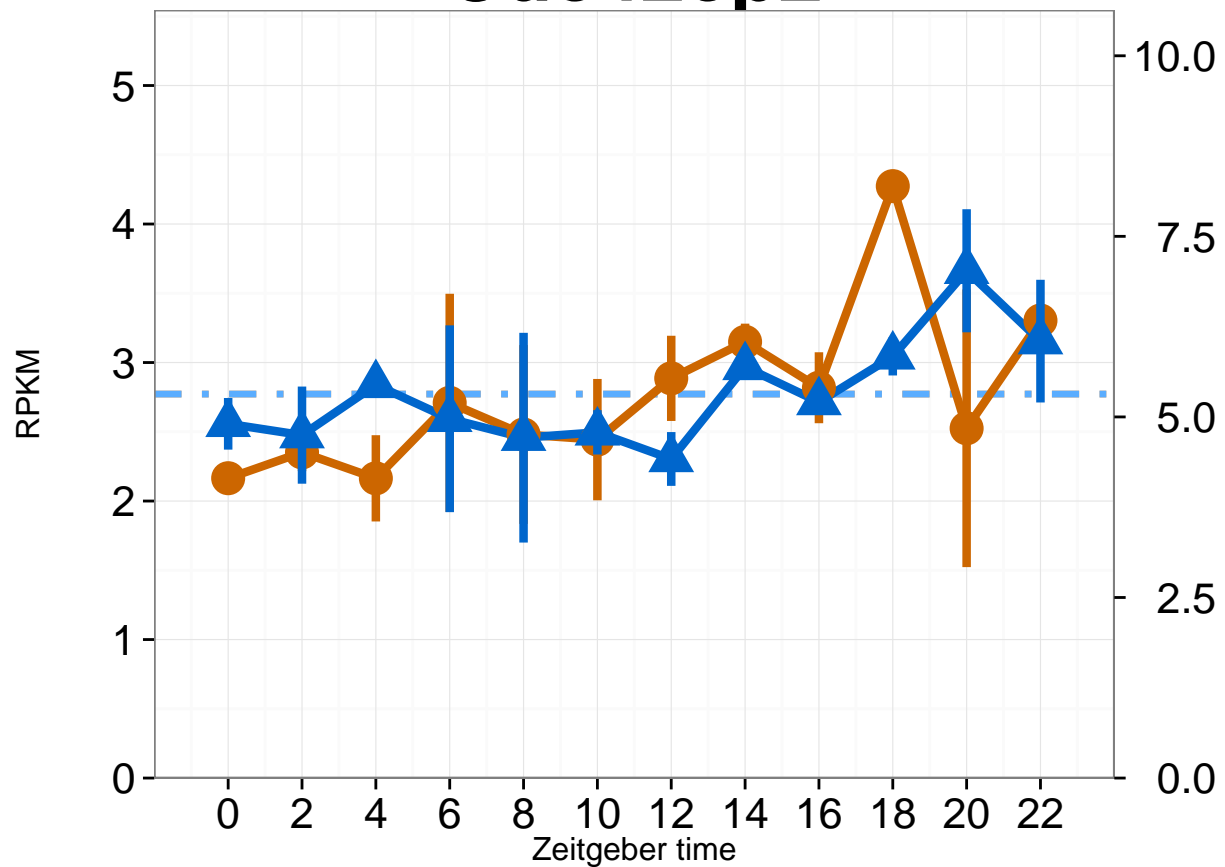

# Cdc42ep2

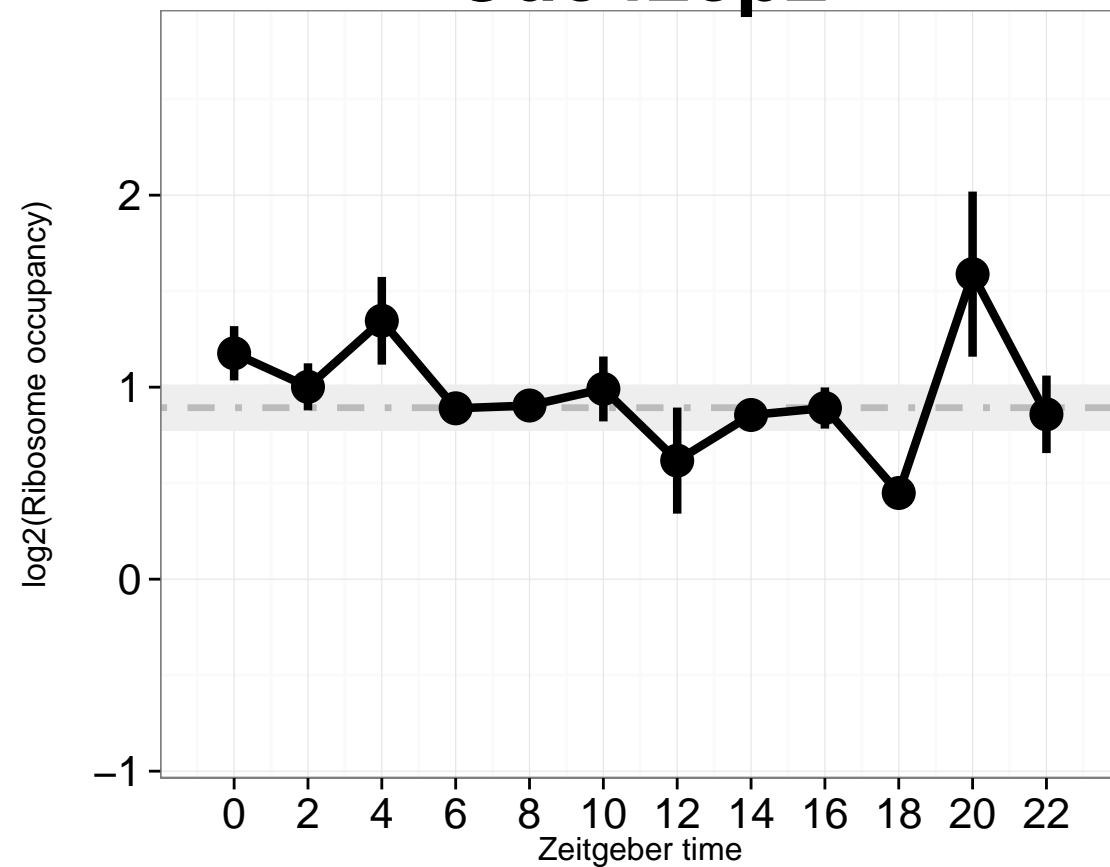

Supplement: SuppDataset_1.zip [file Cdc42ep2_set_A.pdf › Supplemental Dataset 1/A-mRNA_nonrhyth_translation_nonrhyth/Cdc42ep2_set_A.pdf]

# Cdc42ep3

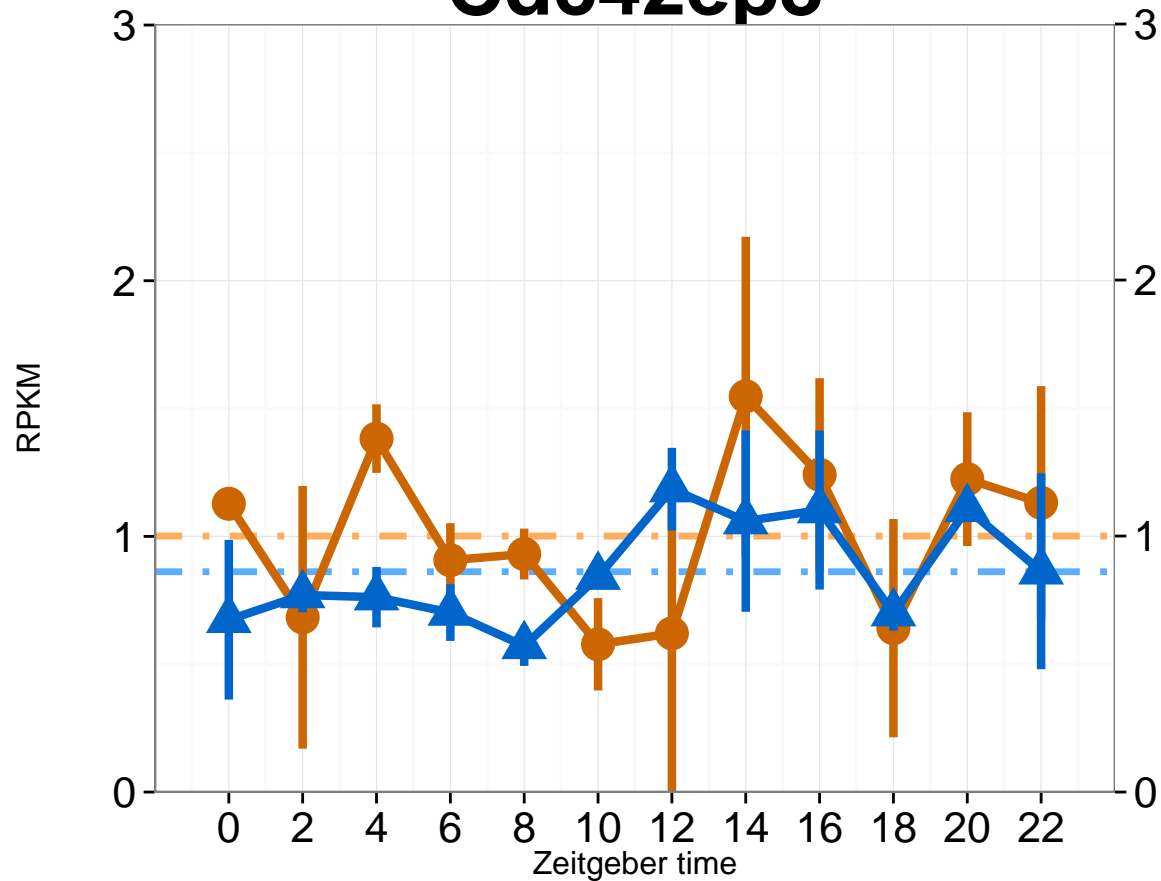

# Cdc42ep3

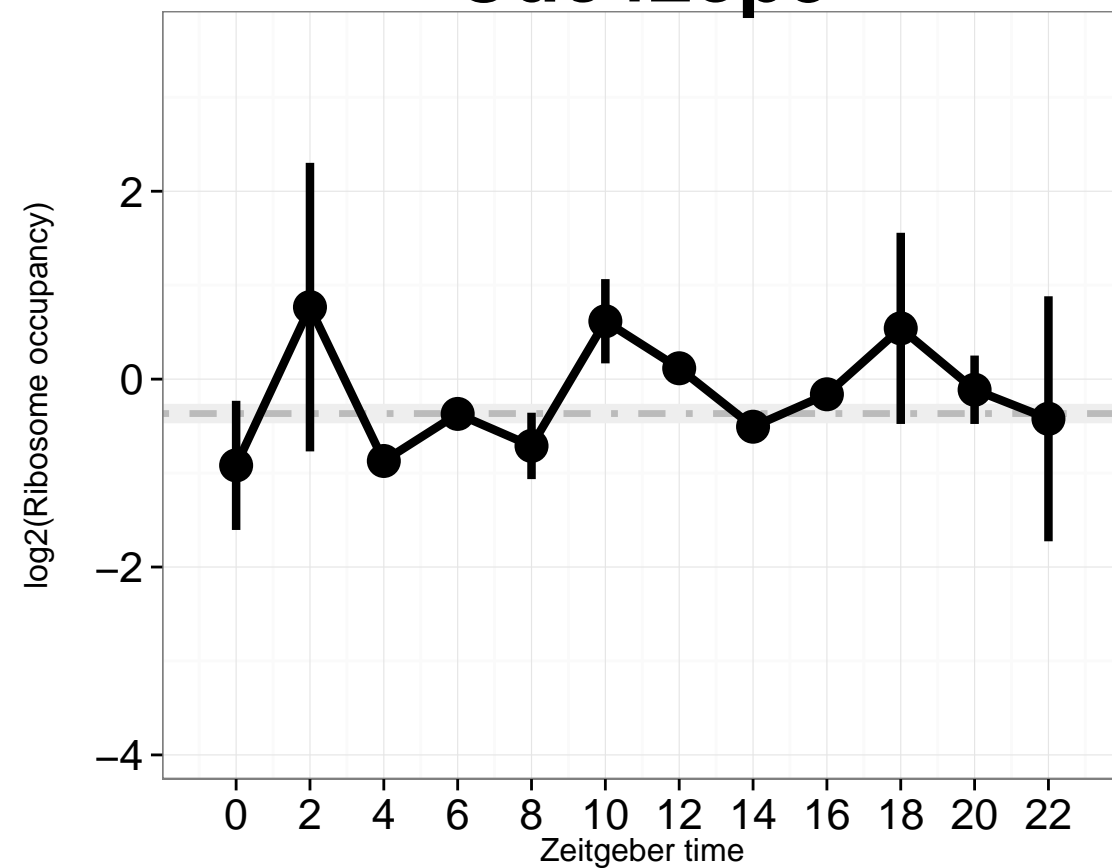

Supplement: SuppDataset_1.zip [file Cdc42ep3_set_A.pdf › Supplemental Dataset 1/A-mRNA_nonrhyth_translation_nonrhyth/Cdc42ep3_set_A.pdf]

## Cdc42ep4

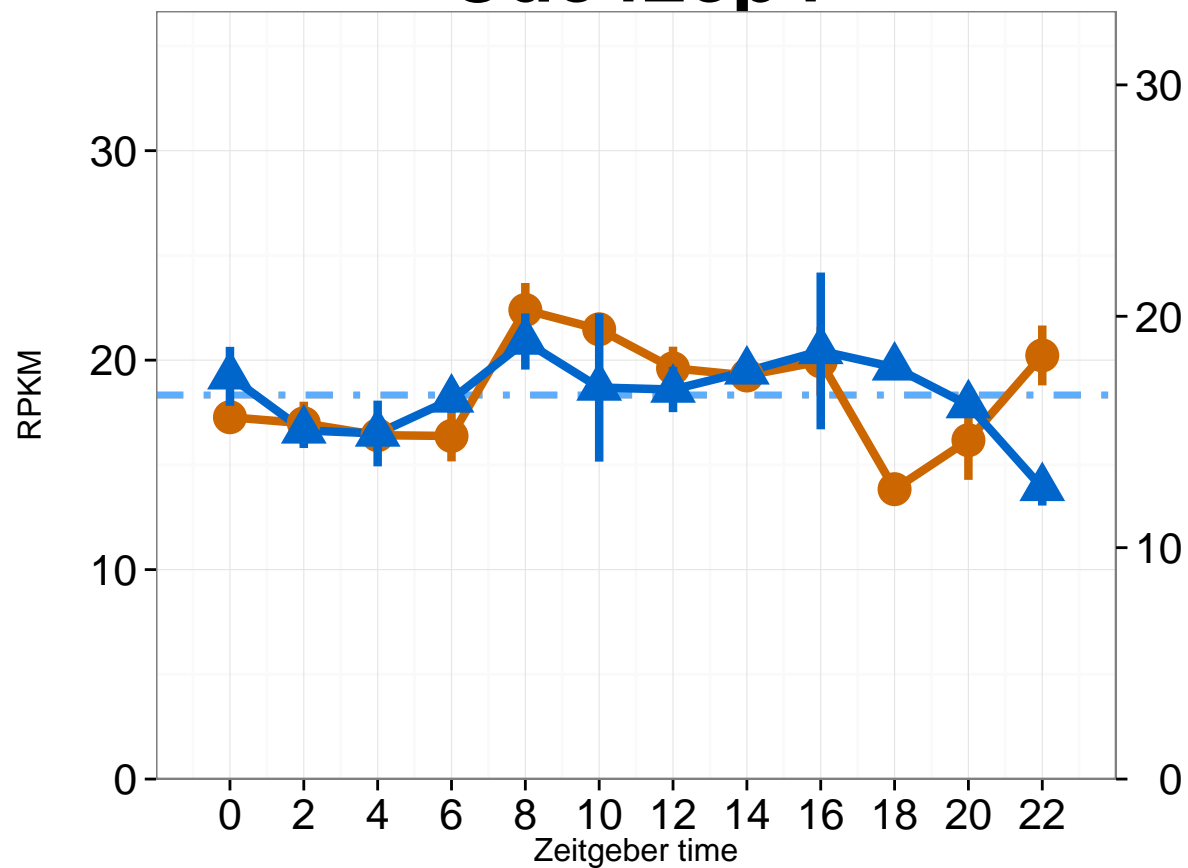

## Cdc42ep4

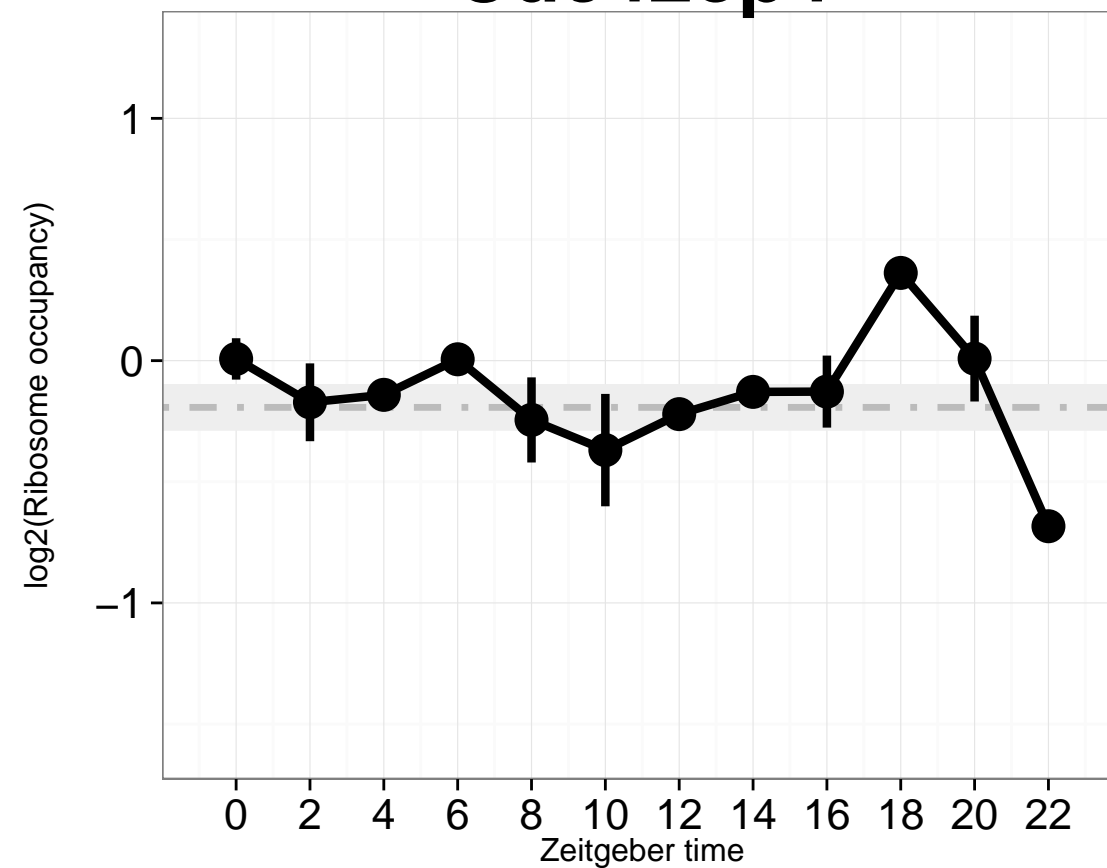

Supplement: SuppDataset_1.zip [file Cdc42ep4_set_A.pdf › Supplemental Dataset 1/A-mRNA_nonrhyth_translation_nonrhyth/Cdc42ep4_set_A.pdf]

## Cdc42se1

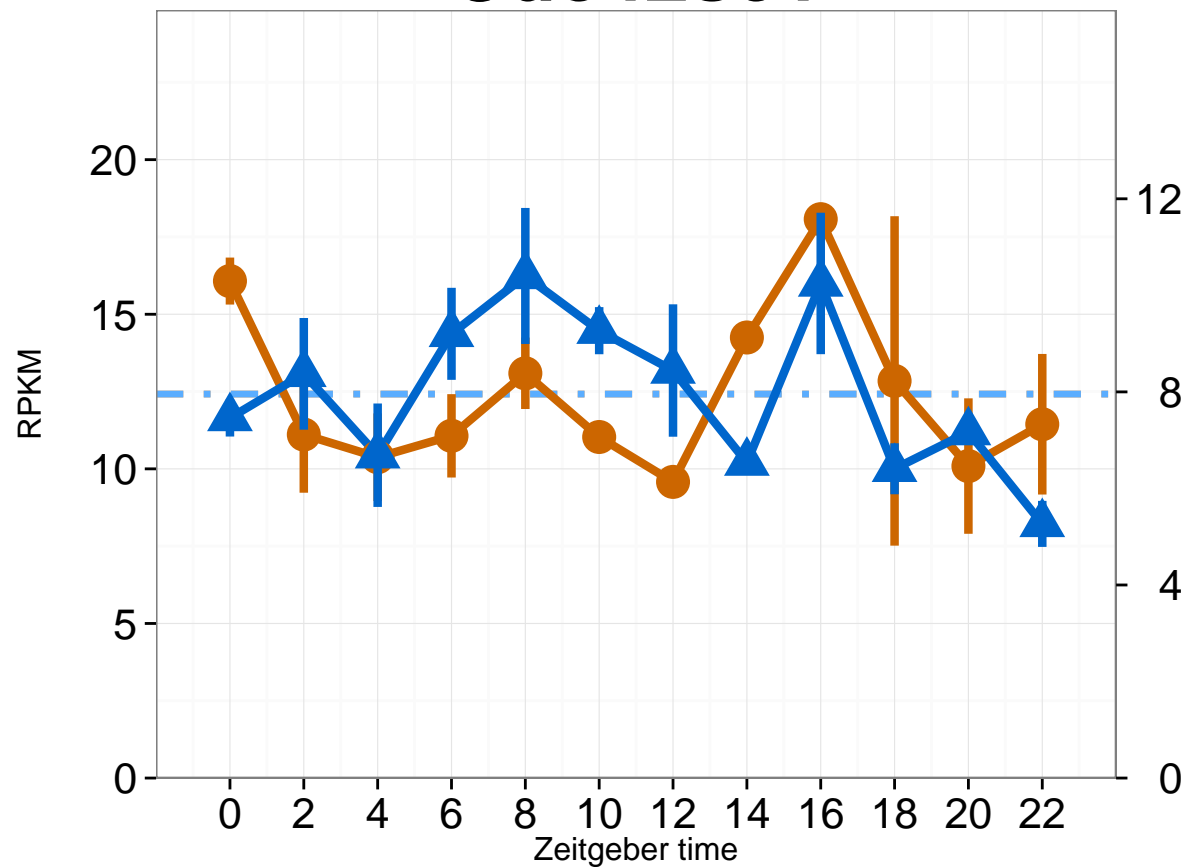

## Cdc42se1

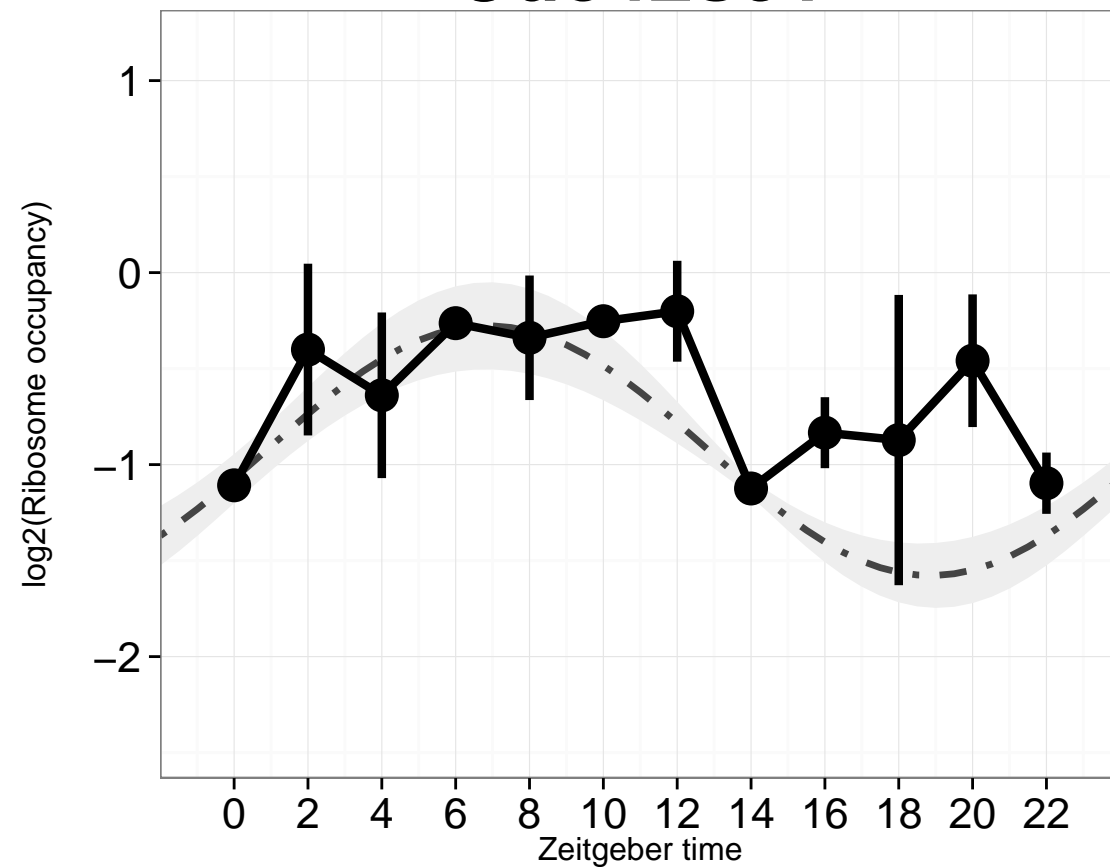

Supplement: SuppDataset_1.zip [file Cdc42se1_set_A.pdf › Supplemental Dataset 1/A-mRNA_nonrhyth_translation_nonrhyth/Cdc42se1_set_A.pdf]

# Cdc42se2

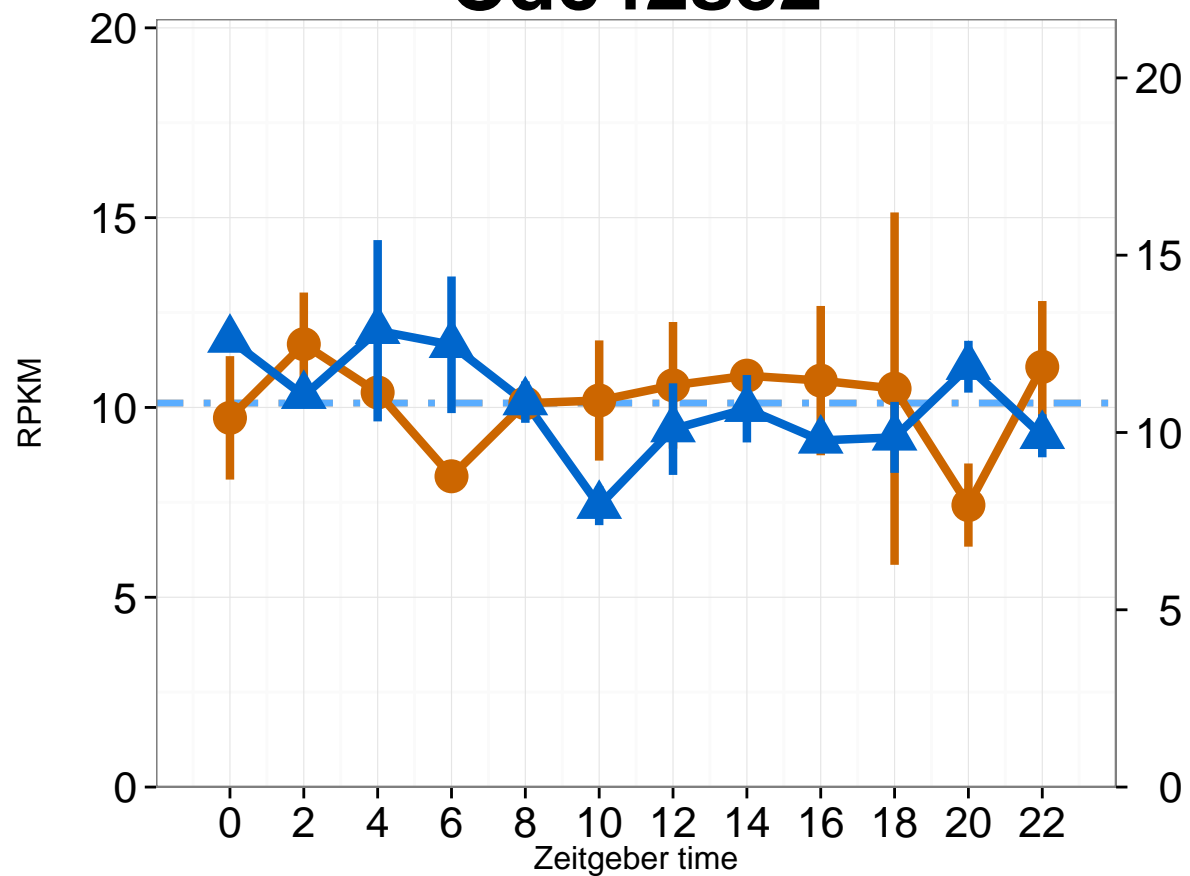

# Cdc42se2

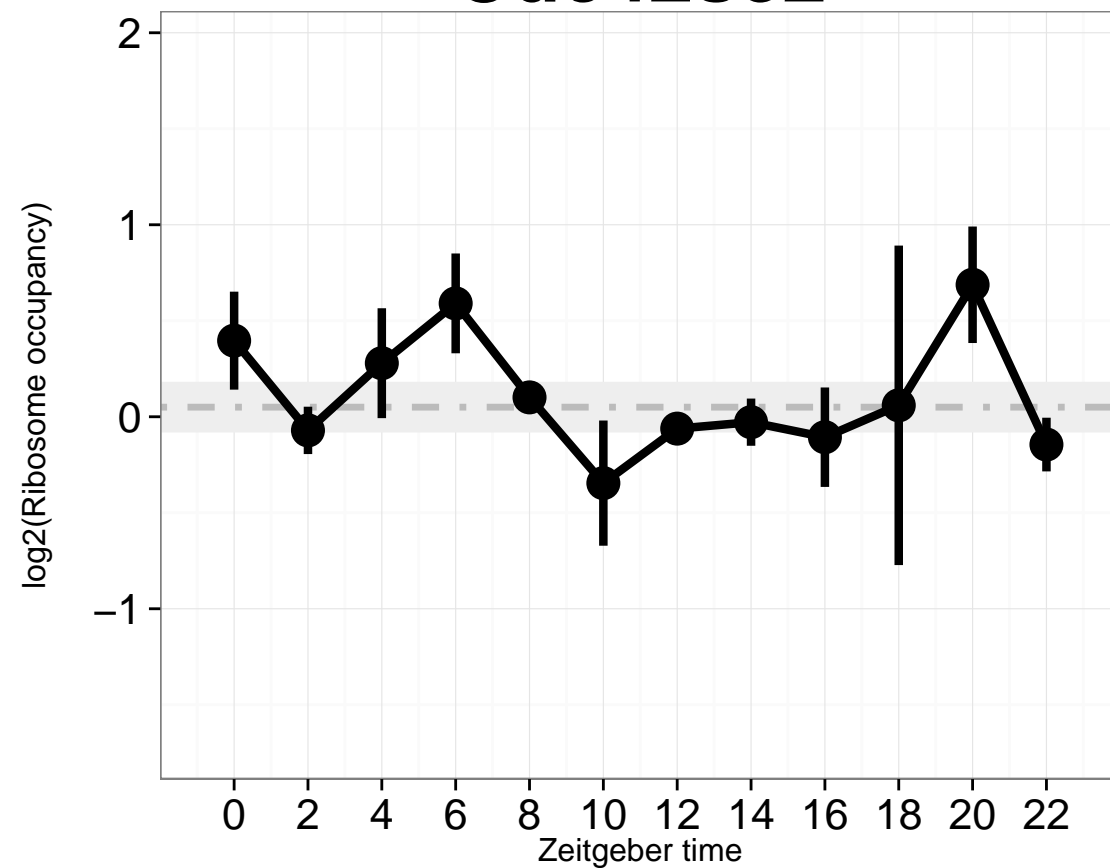

Supplement: SuppDataset_1.zip [file Cdc42se2_set_A.pdf › Supplemental Dataset 1/A-mRNA_nonrhyth_translation_nonrhyth/Cdc42se2_set_A.pdf]

## Cdc45

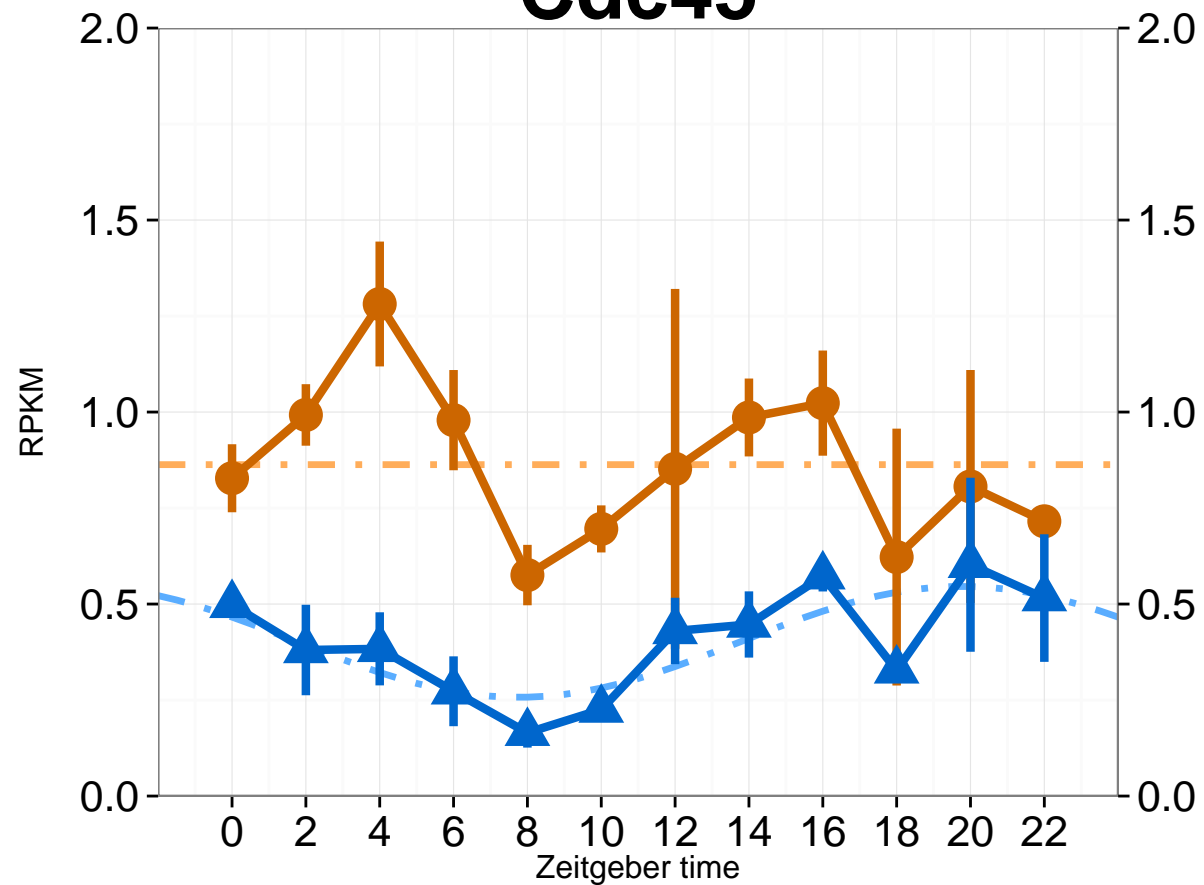

## Cdc45

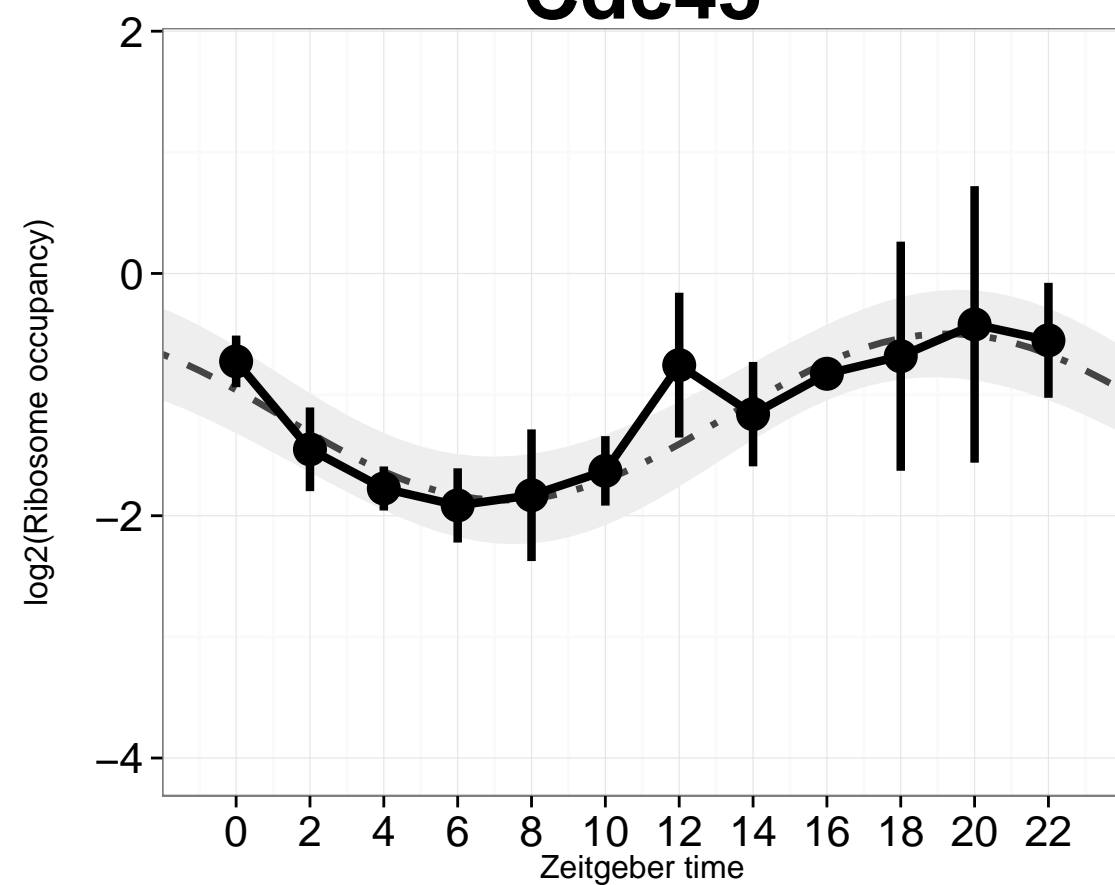

Supplement: SuppDataset_1.zip [file Cdc45_set_A.pdf › Supplemental Dataset 1/A-mRNA_nonrhyth_translation_nonrhyth/Cdc45_set_A.pdf]

## Cdc5l

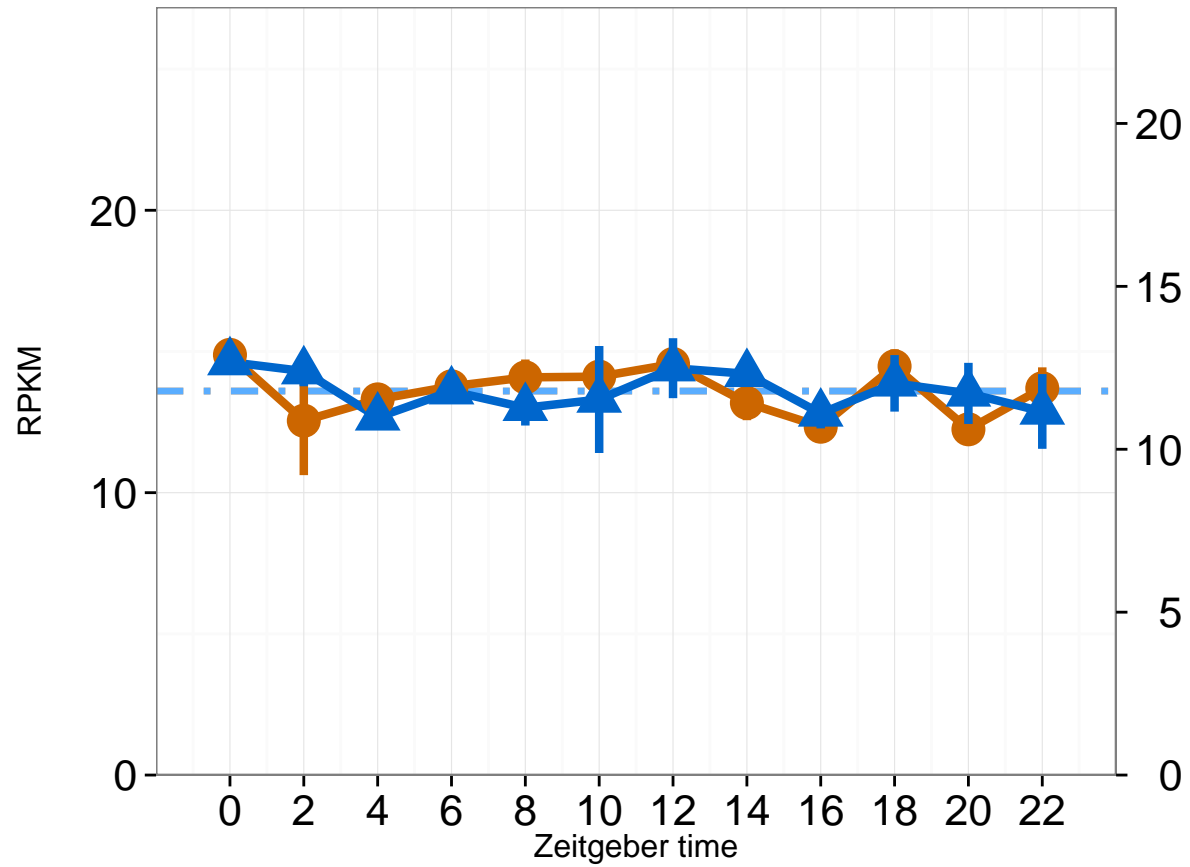

## Cdc5l

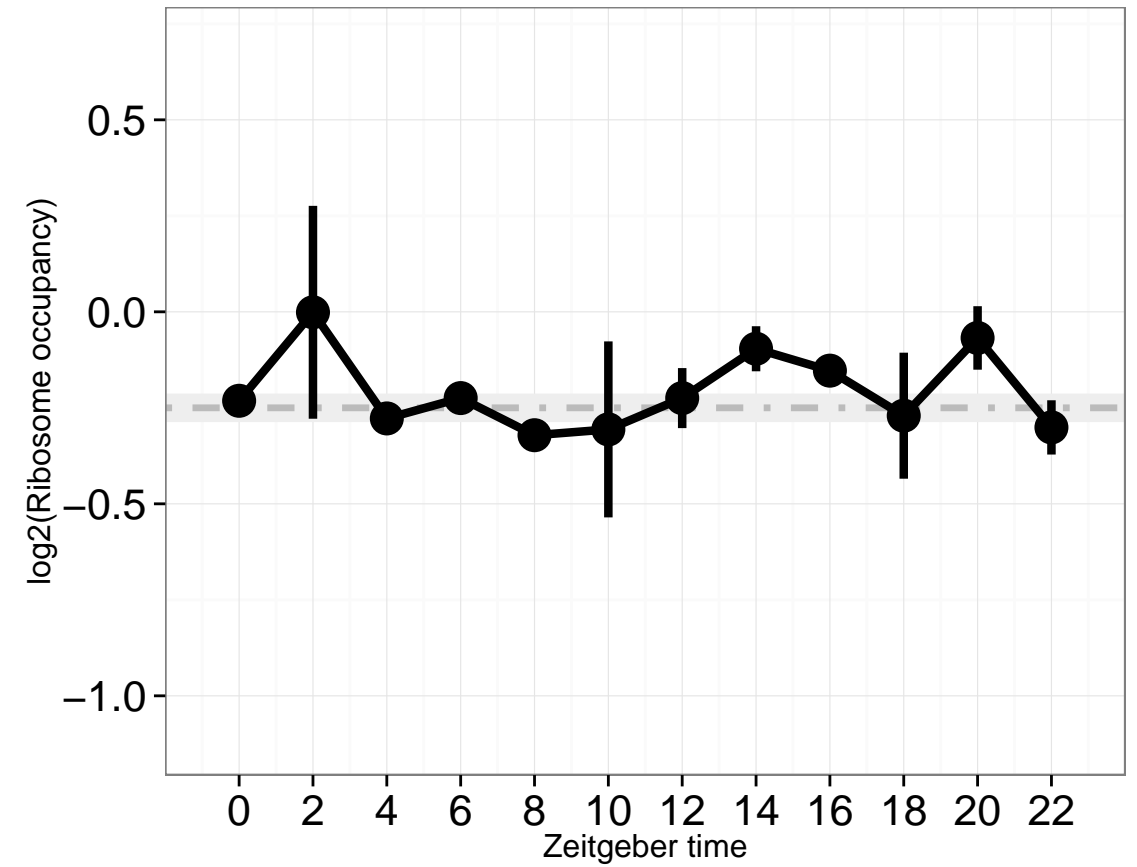

Supplement: SuppDataset_1.zip [file Cdc5l_set_A.pdf › Supplemental Dataset 1/A-mRNA_nonrhyth_translation_nonrhyth/Cdc5l_set_A.pdf]

## Cdc73

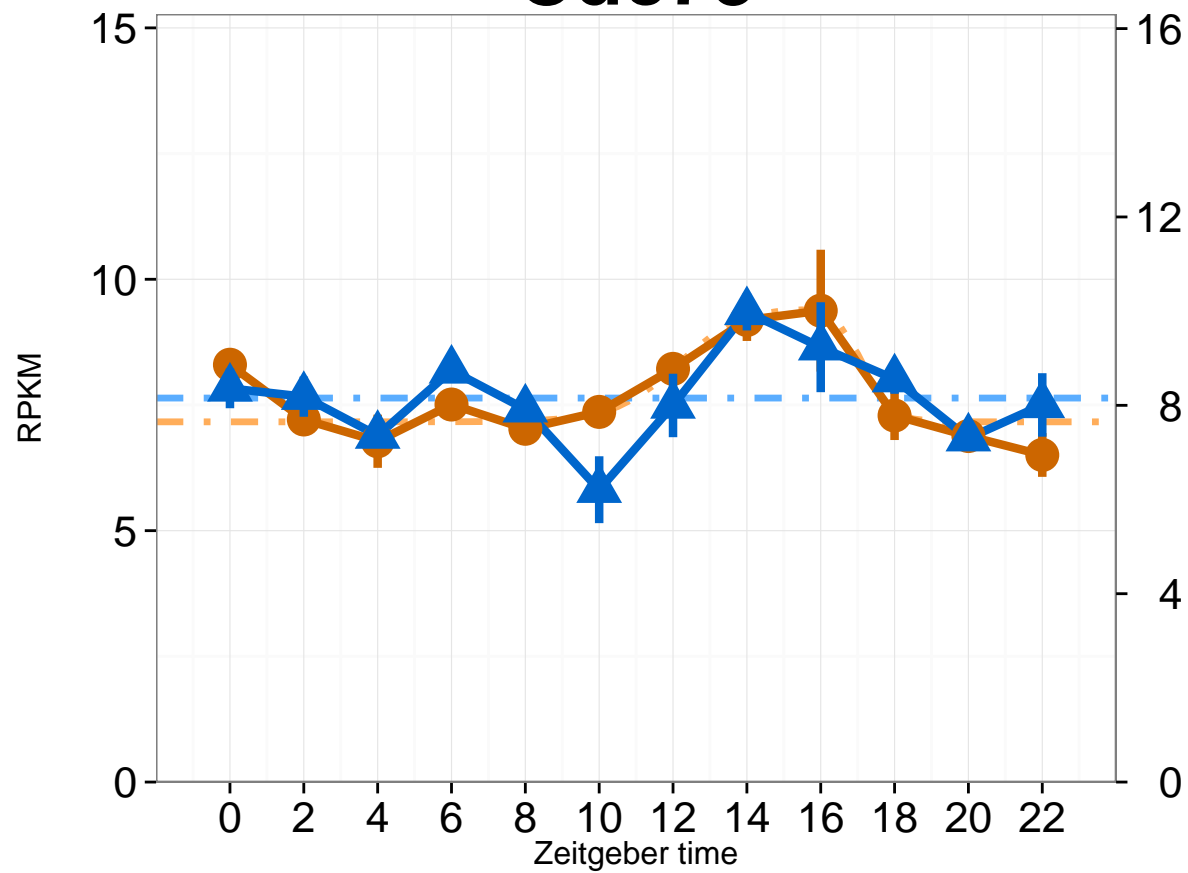

## Cdc73

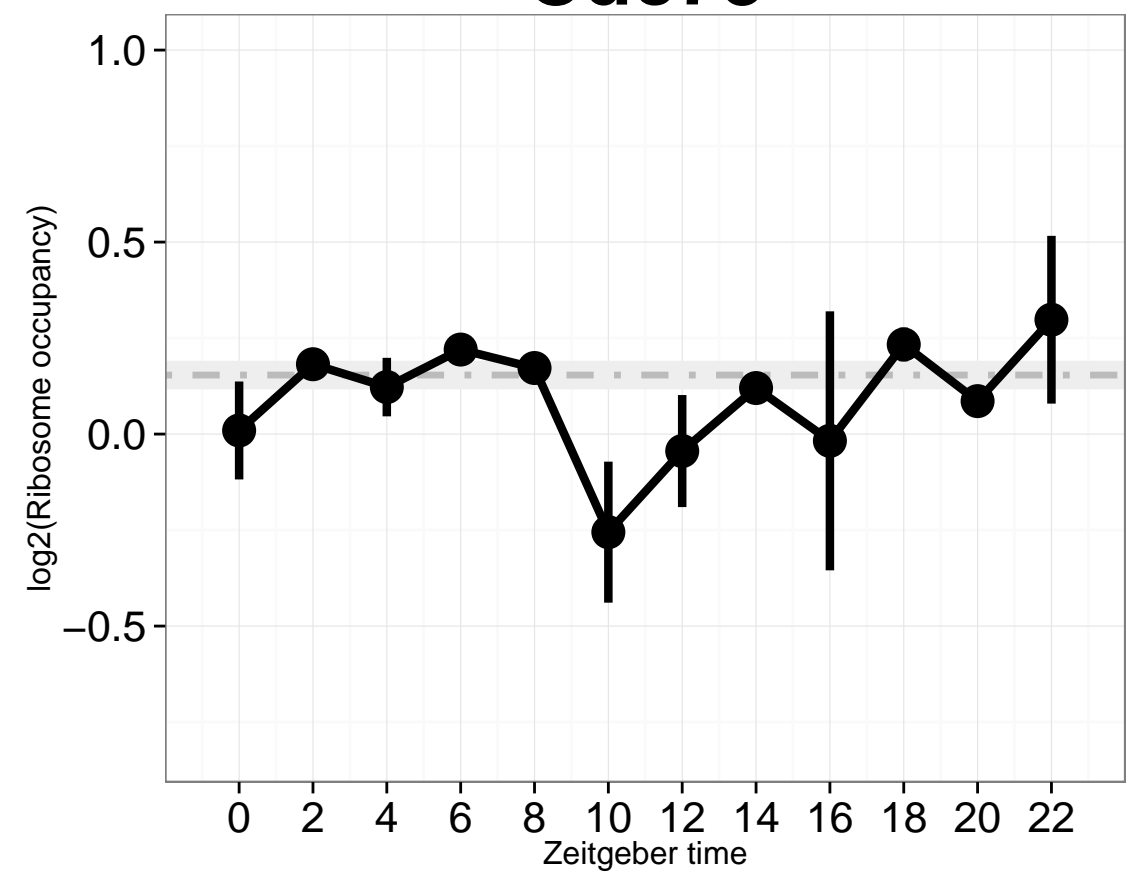

Supplement: SuppDataset_1.zip [file Cdc73_set_A.pdf › Supplemental Dataset 1/A-mRNA_nonrhyth_translation_nonrhyth/Cdc73_set_A.pdf]

# Cdca2

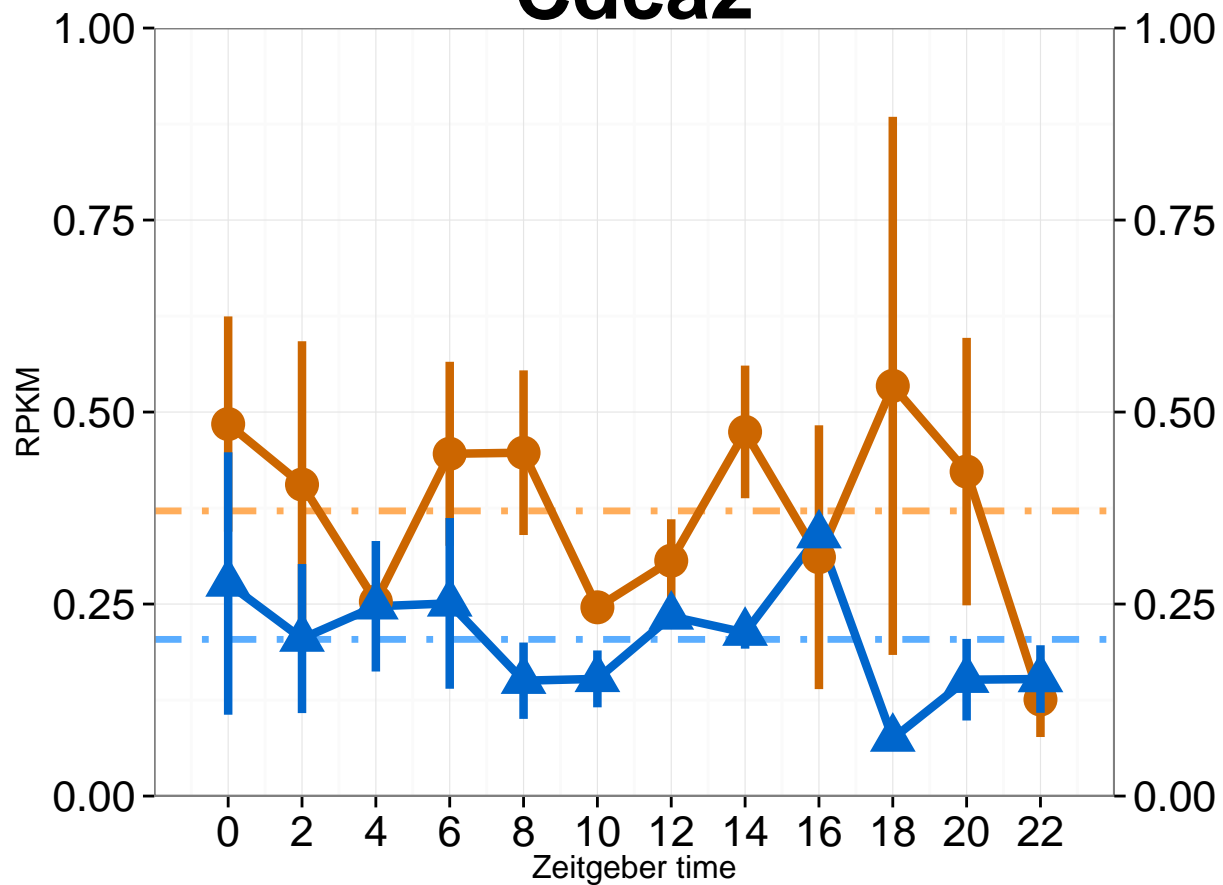

# Cdca2

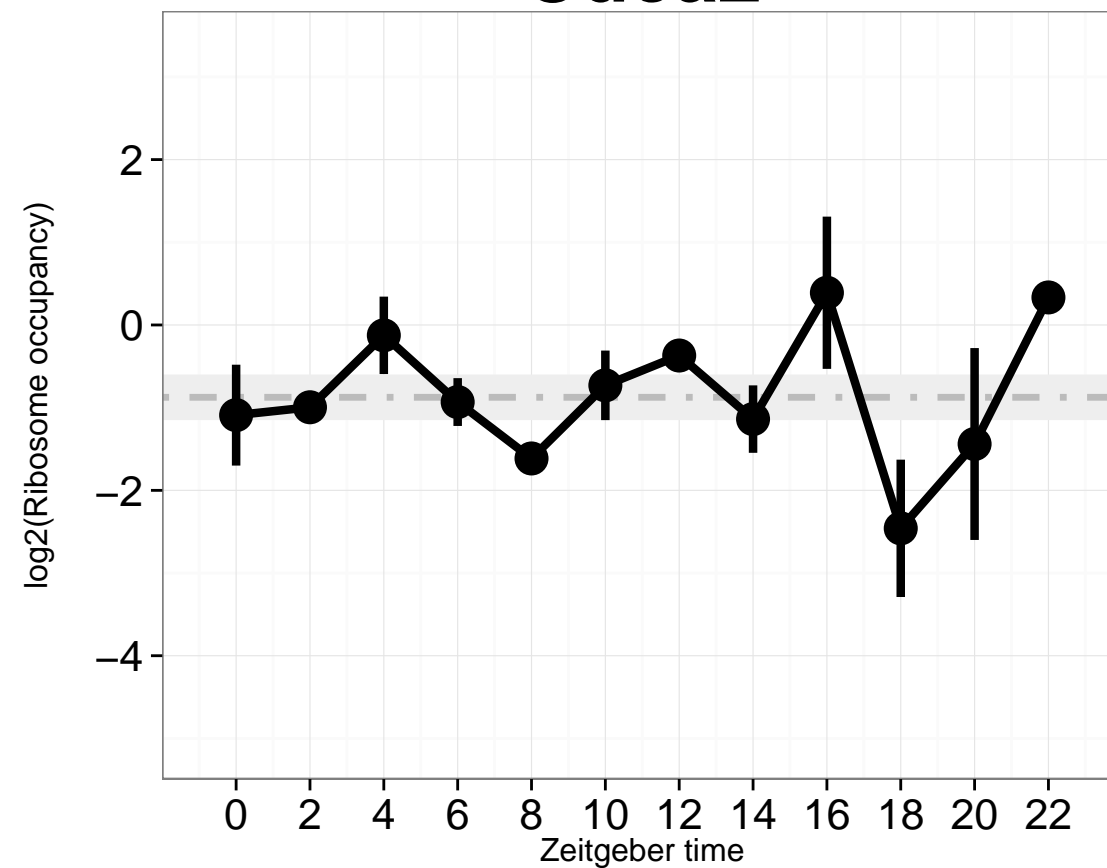

Supplement: SuppDataset_1.zip [file Cdca2_set_A.pdf › Supplemental Dataset 1/A-mRNA_nonrhyth_translation_nonrhyth/Cdca2_set_A.pdf]

# Cdca3

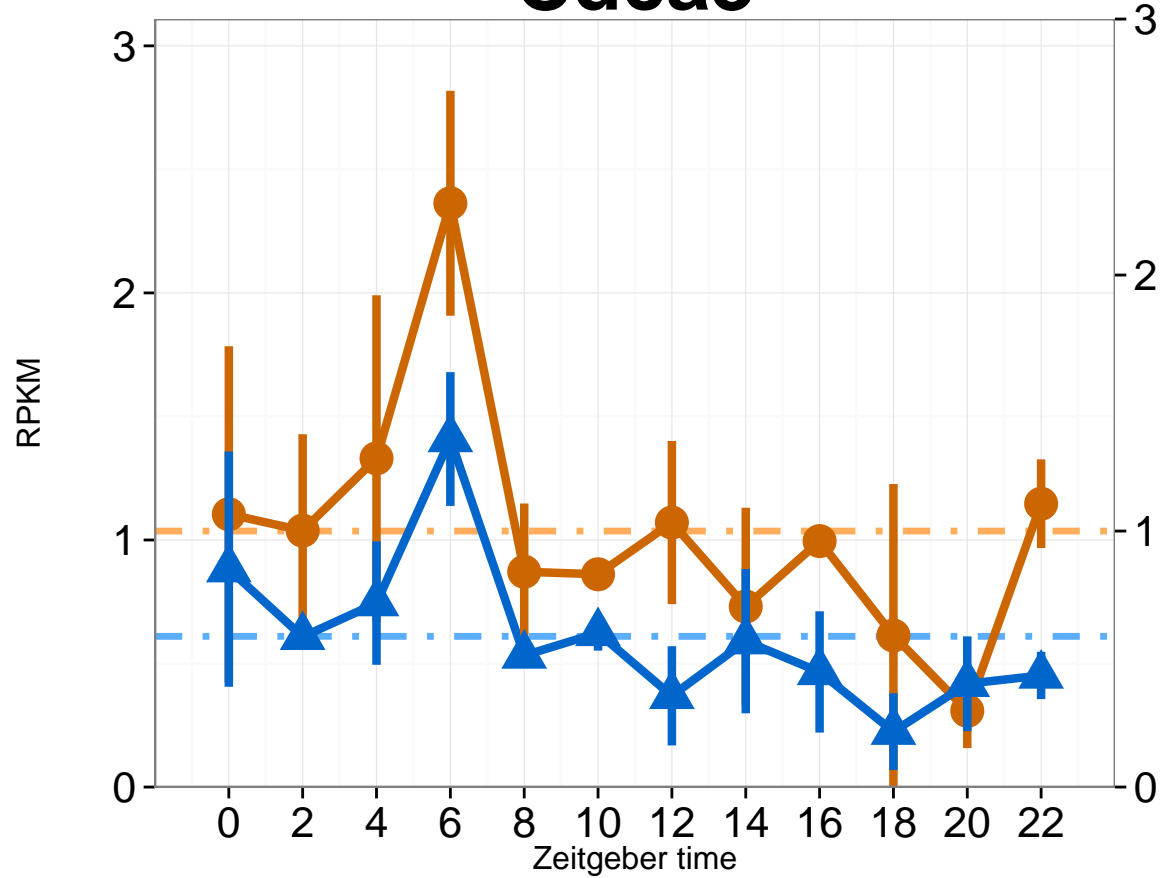

# Cdca3

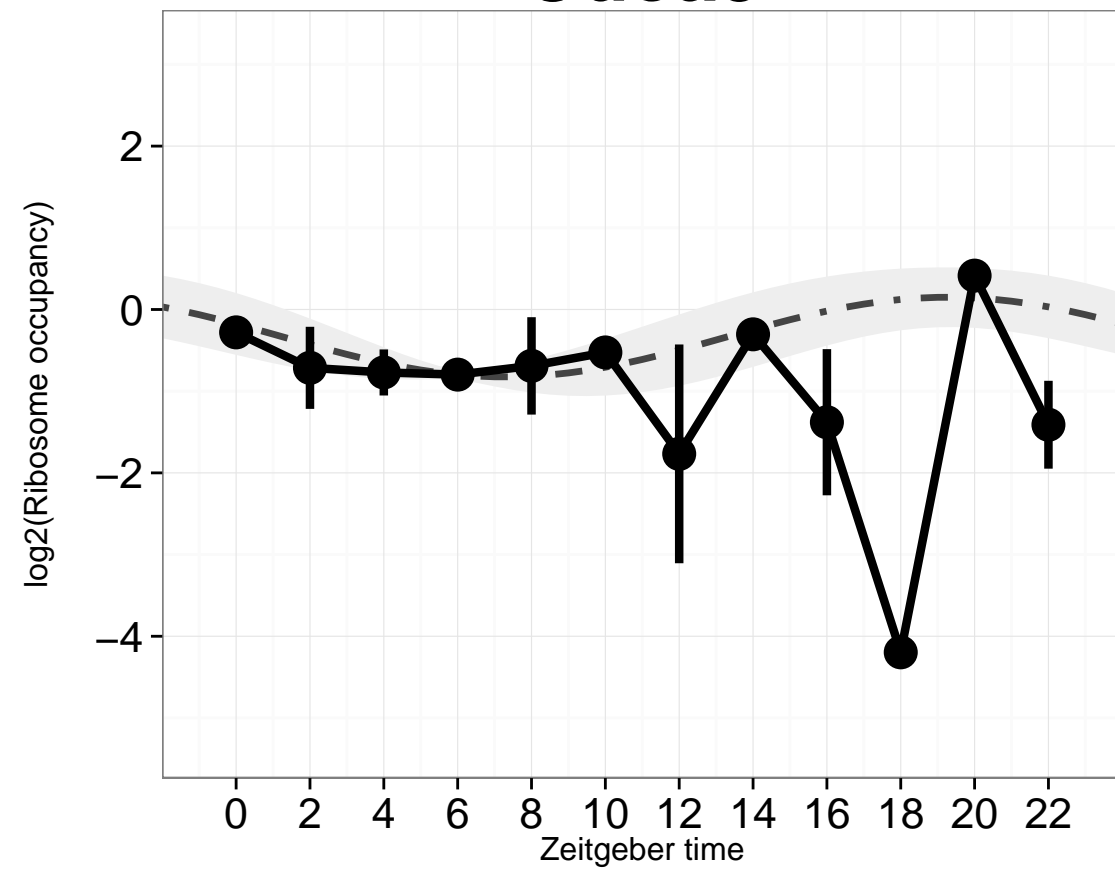

Supplement: SuppDataset_1.zip [file Cdca3_set_A.pdf › Supplemental Dataset 1/A-mRNA_nonrhyth_translation_nonrhyth/Cdca3_set_A.pdf]

## Cdca4

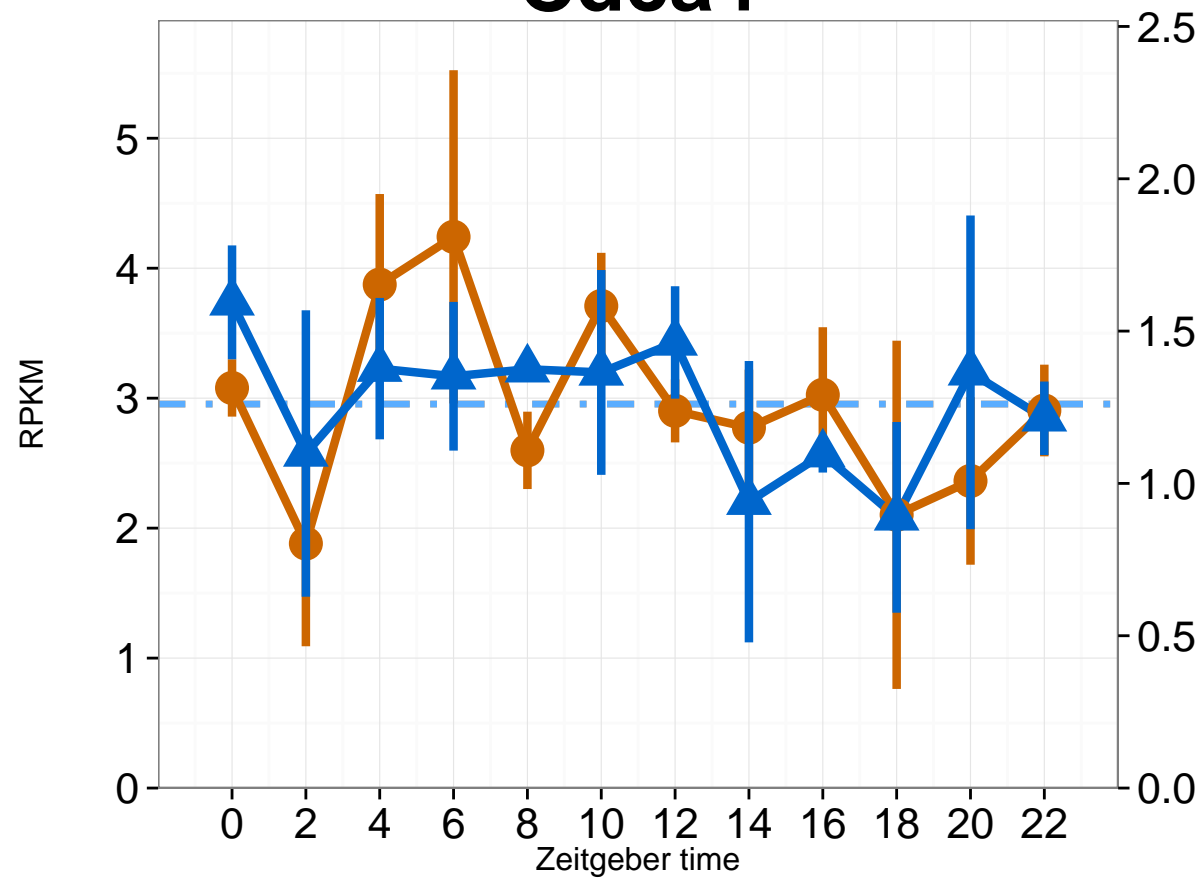

## Cdca4

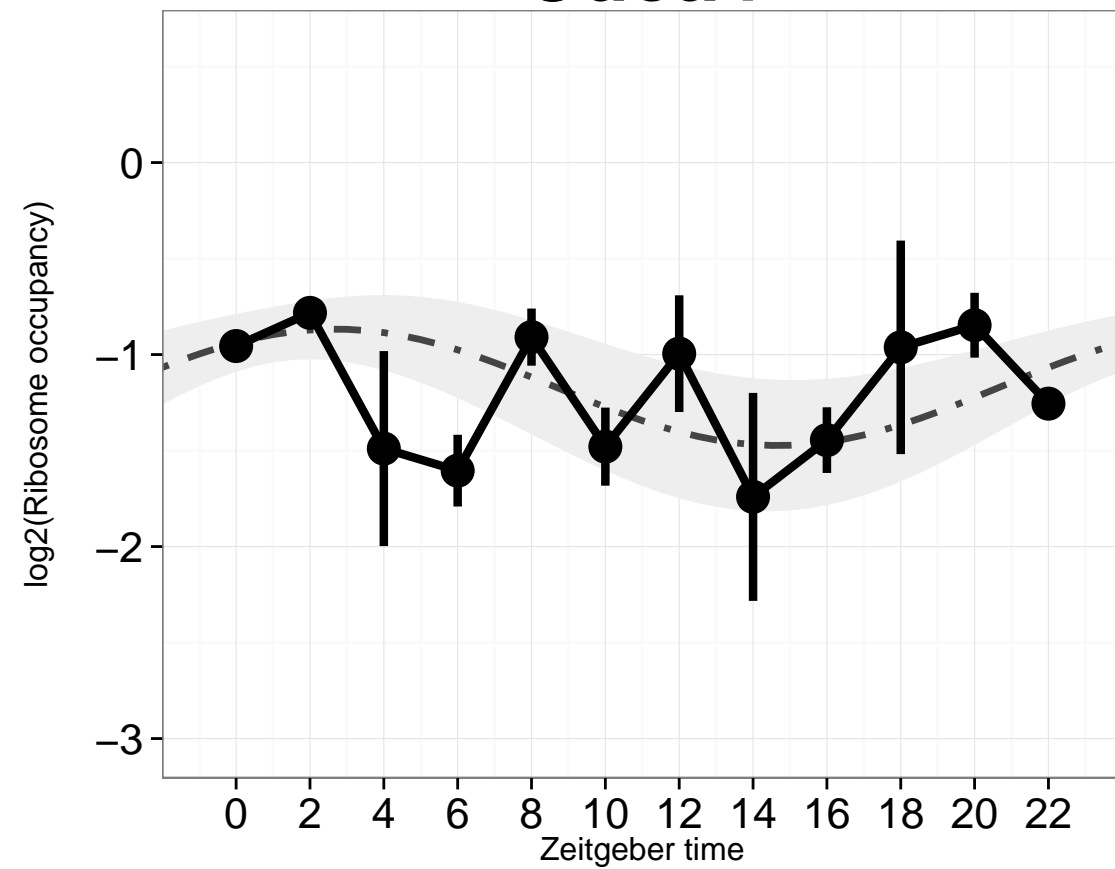

Supplement: SuppDataset_1.zip [file Cdca4_set_A.pdf › Supplemental Dataset 1/A-mRNA_nonrhyth_translation_nonrhyth/Cdca4_set_A.pdf]

# Cdca8

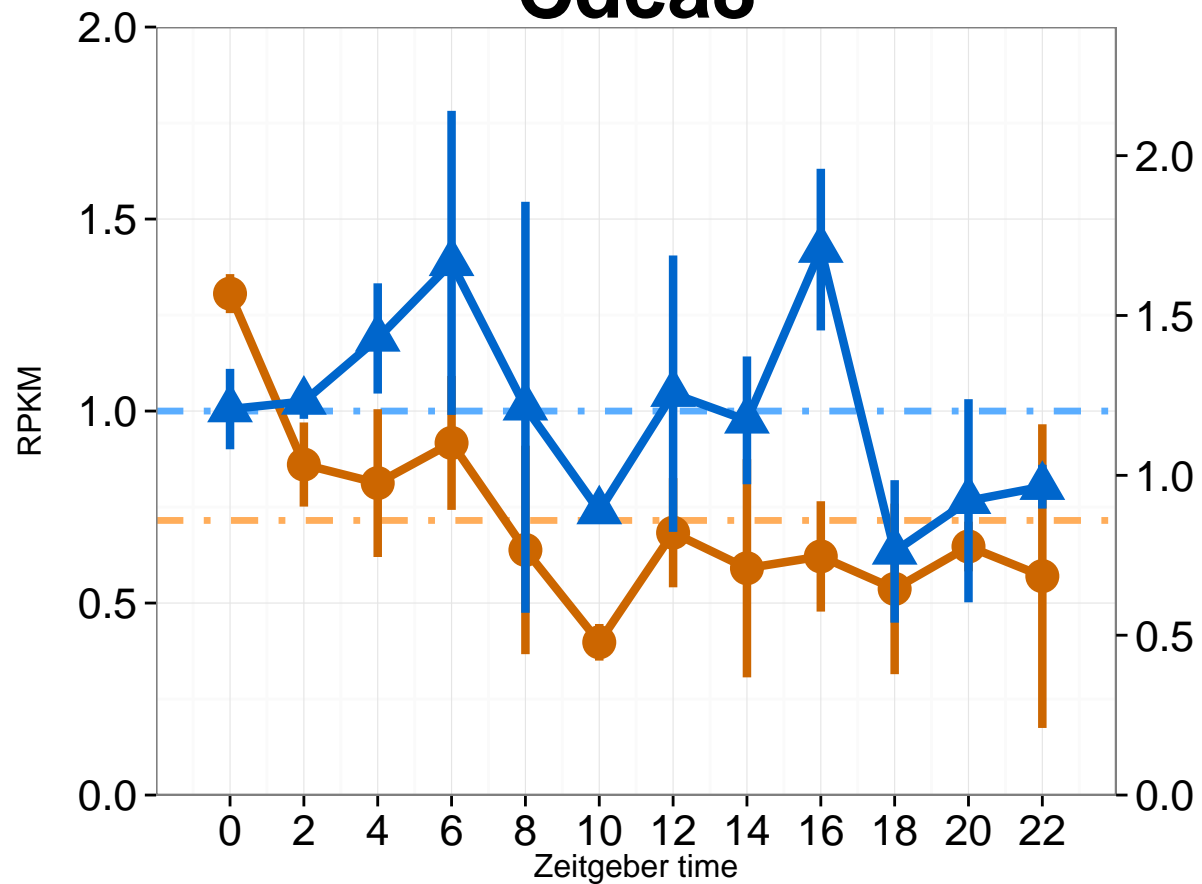

# Cdca8

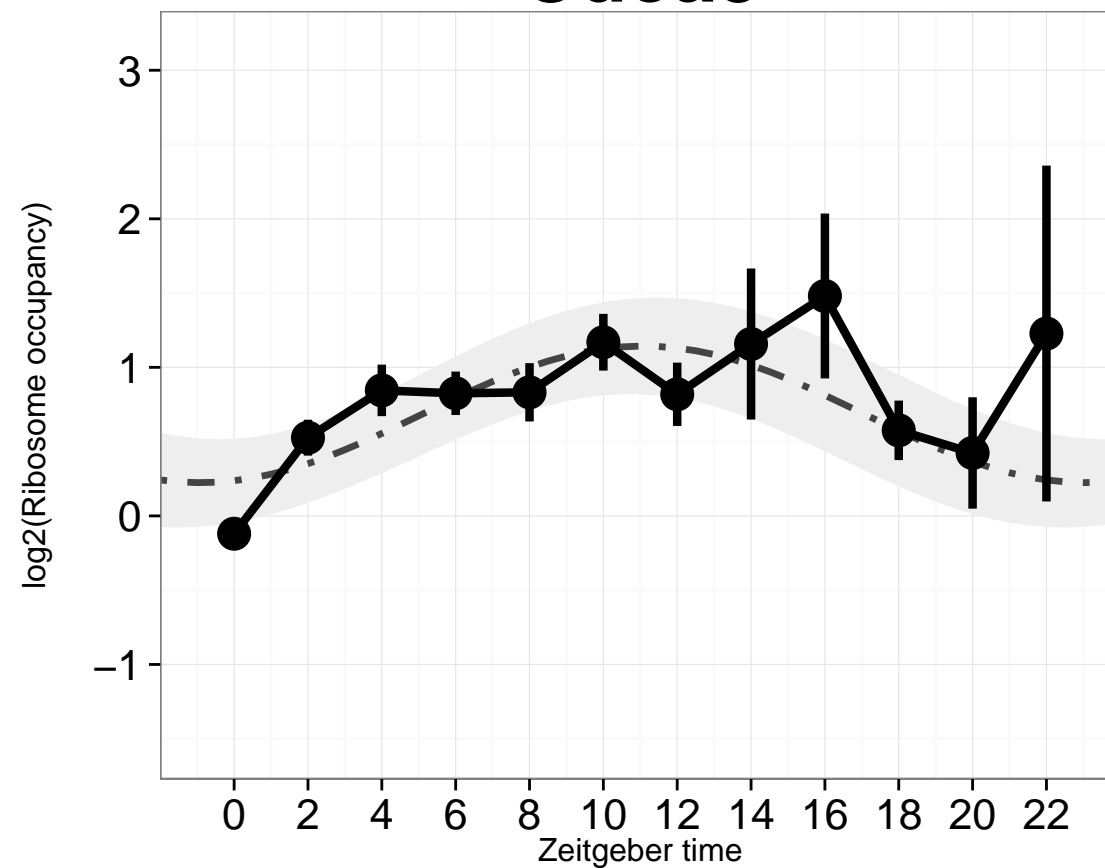

Supplement: SuppDataset_1.zip [file Cdca8_set_A.pdf › Supplemental Dataset 1/A-mRNA_nonrhyth_translation_nonrhyth/Cdca8_set_A.pdf]

# Cdh13

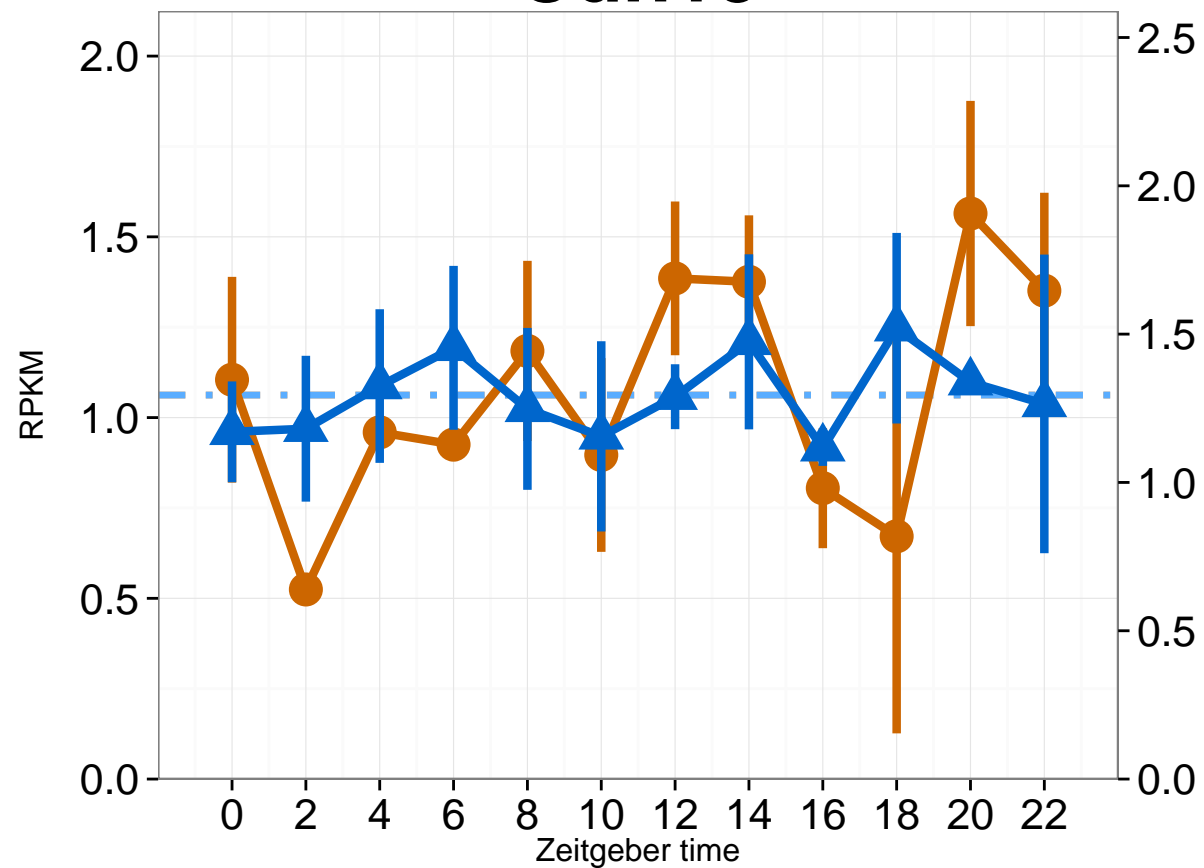

# Cdh13

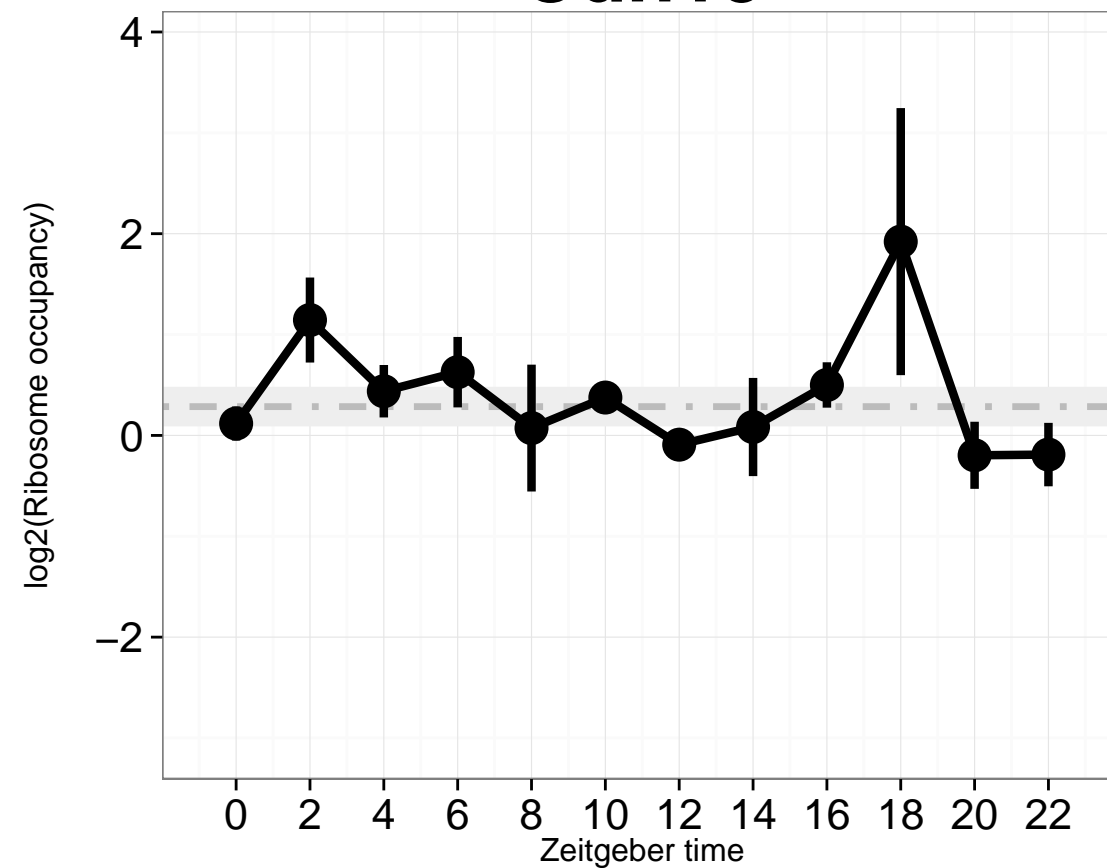

Supplement: SuppDataset_1.zip [file Cdh13_set_A.pdf › Supplemental Dataset 1/A-mRNA_nonrhyth_translation_nonrhyth/Cdh13_set_A.pdf]

## Cdh2

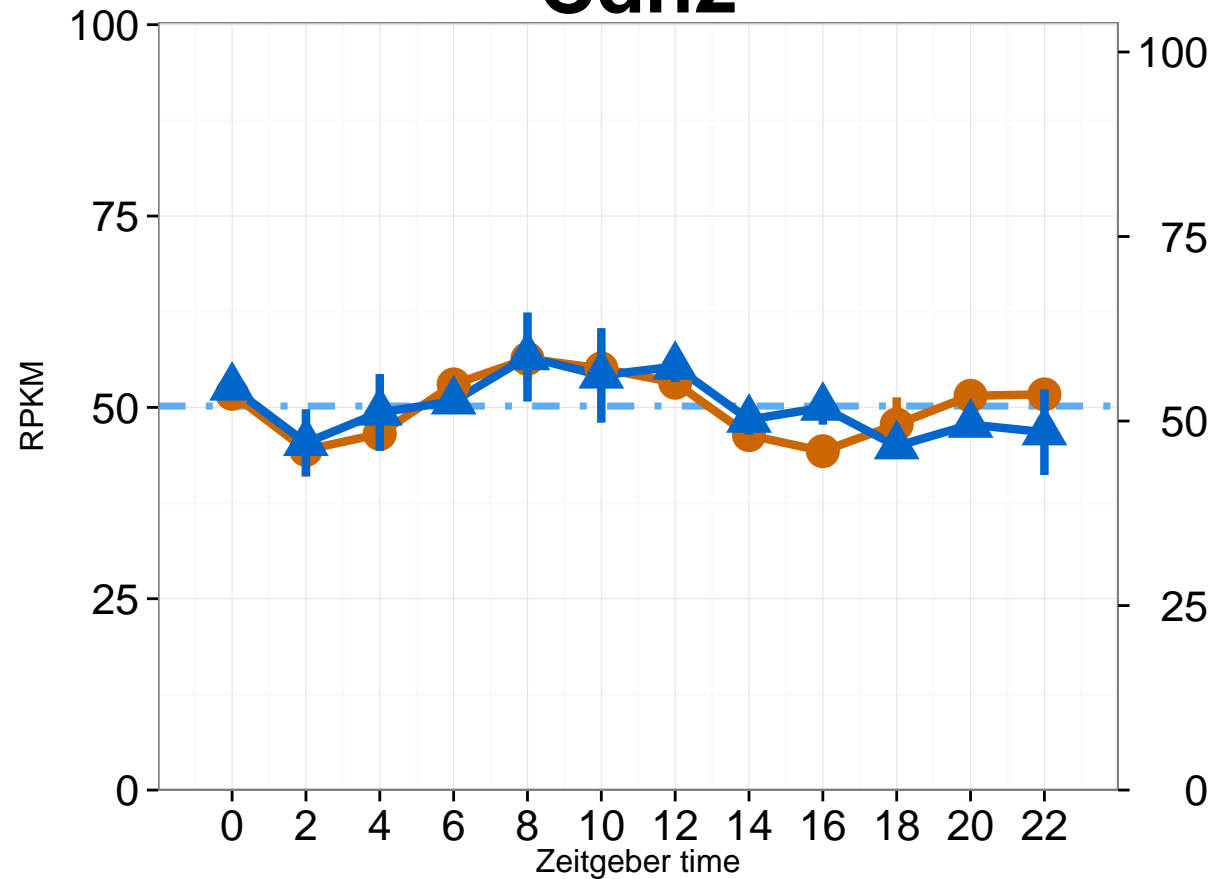

## Cdh2

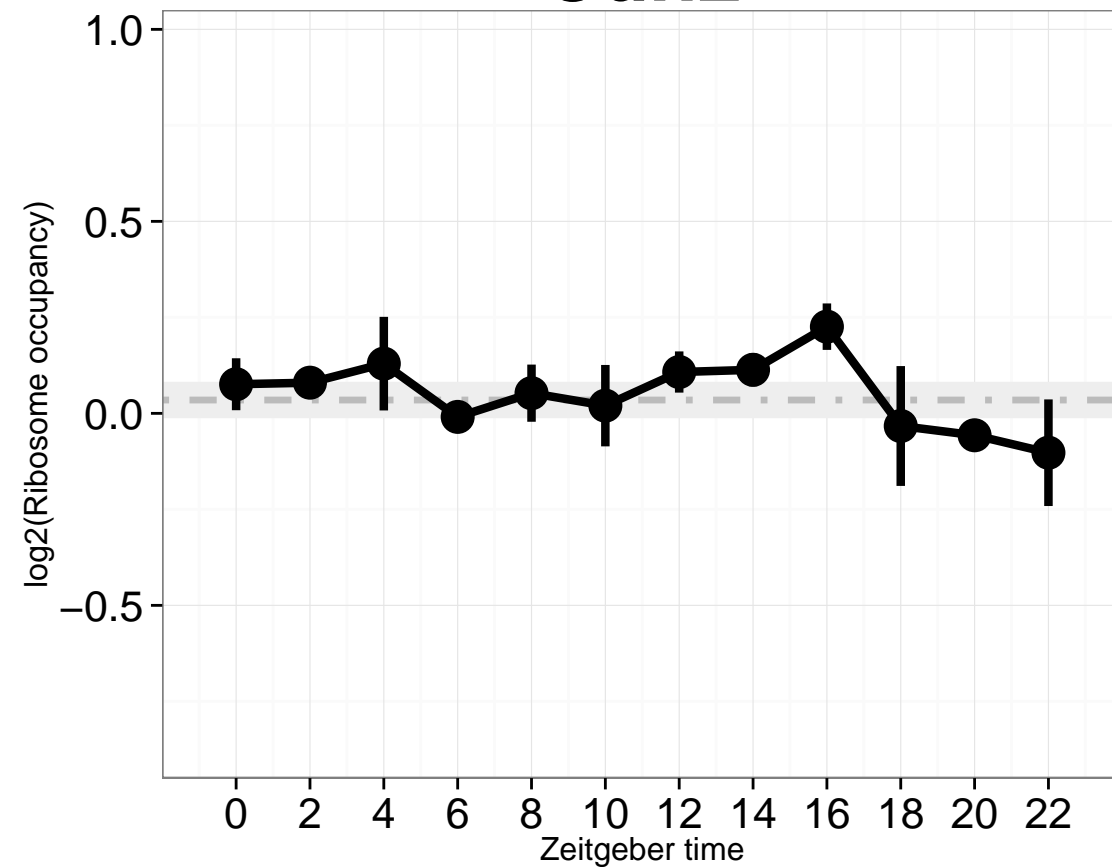

Supplement: SuppDataset_1.zip [file Cdh2_set_A.pdf › Supplemental Dataset 1/A-mRNA_nonrhyth_translation_nonrhyth/Cdh2_set_A.pdf]

## Cdh4

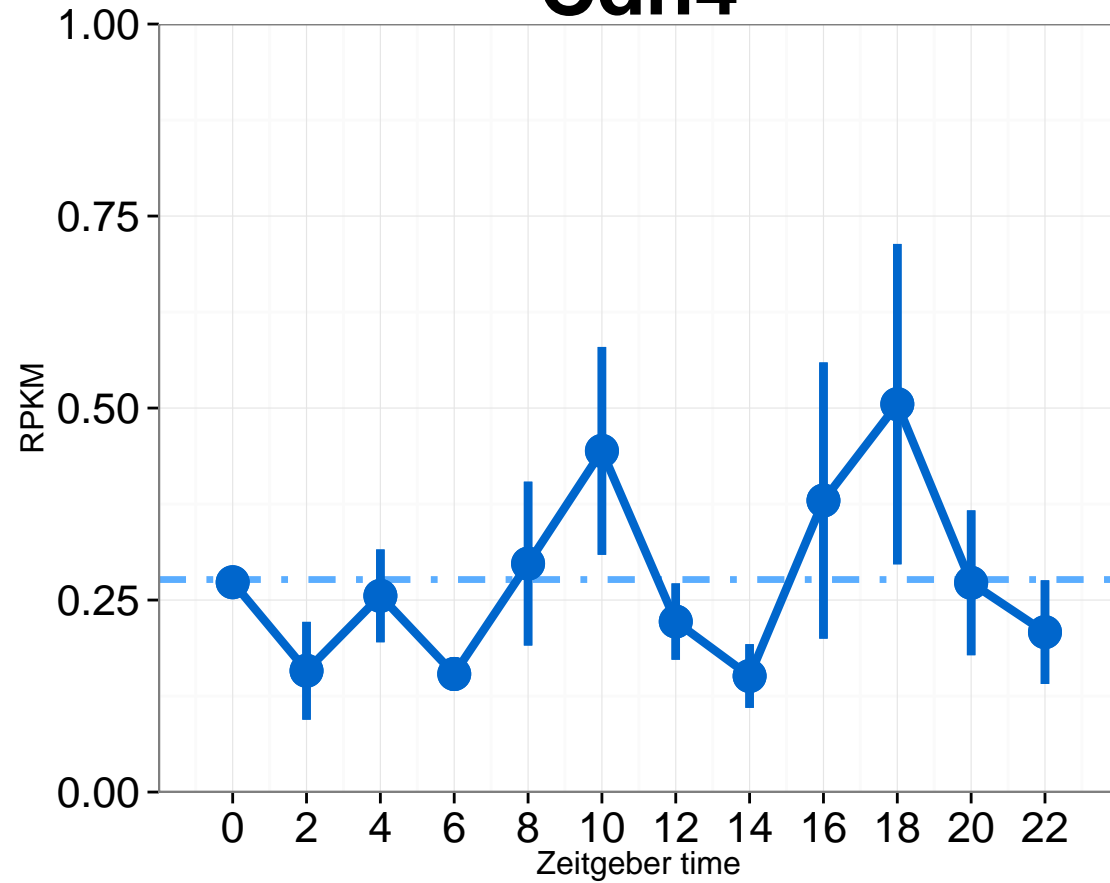

## Cdh4 log2(Ribosome occupancy)

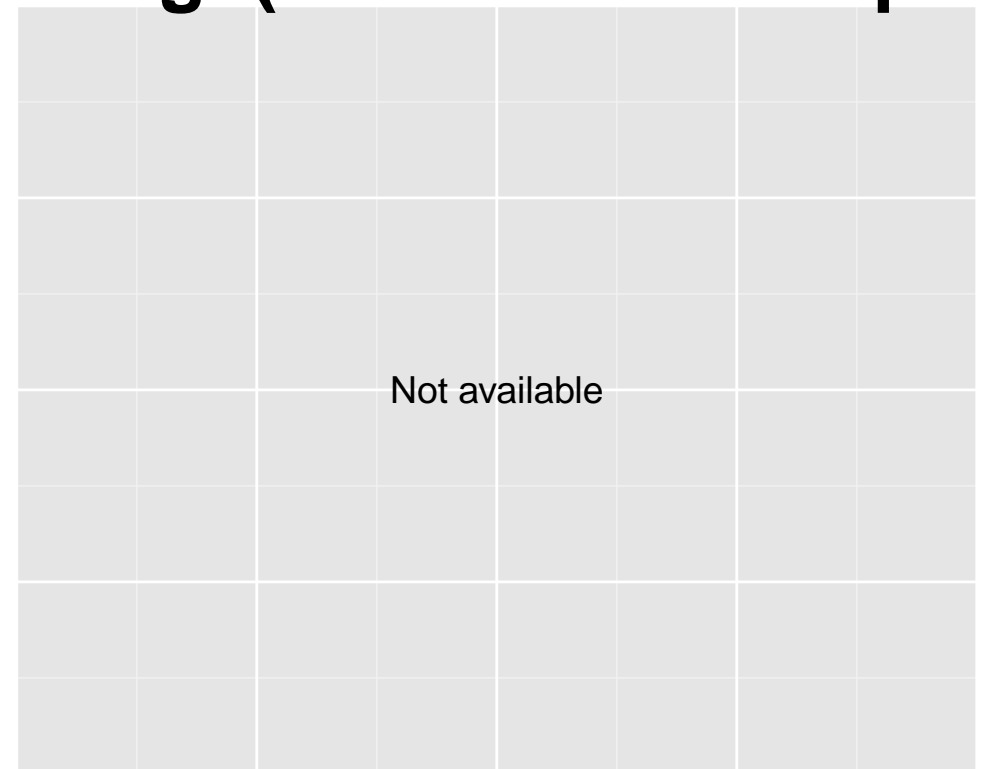

Supplement: SuppDataset_1.zip [file Cdh4_set_A.pdf › Supplemental Dataset 1/A-mRNA_nonrhyth_translation_nonrhyth/Cdh4_set_A.pdf]

## Cdh5

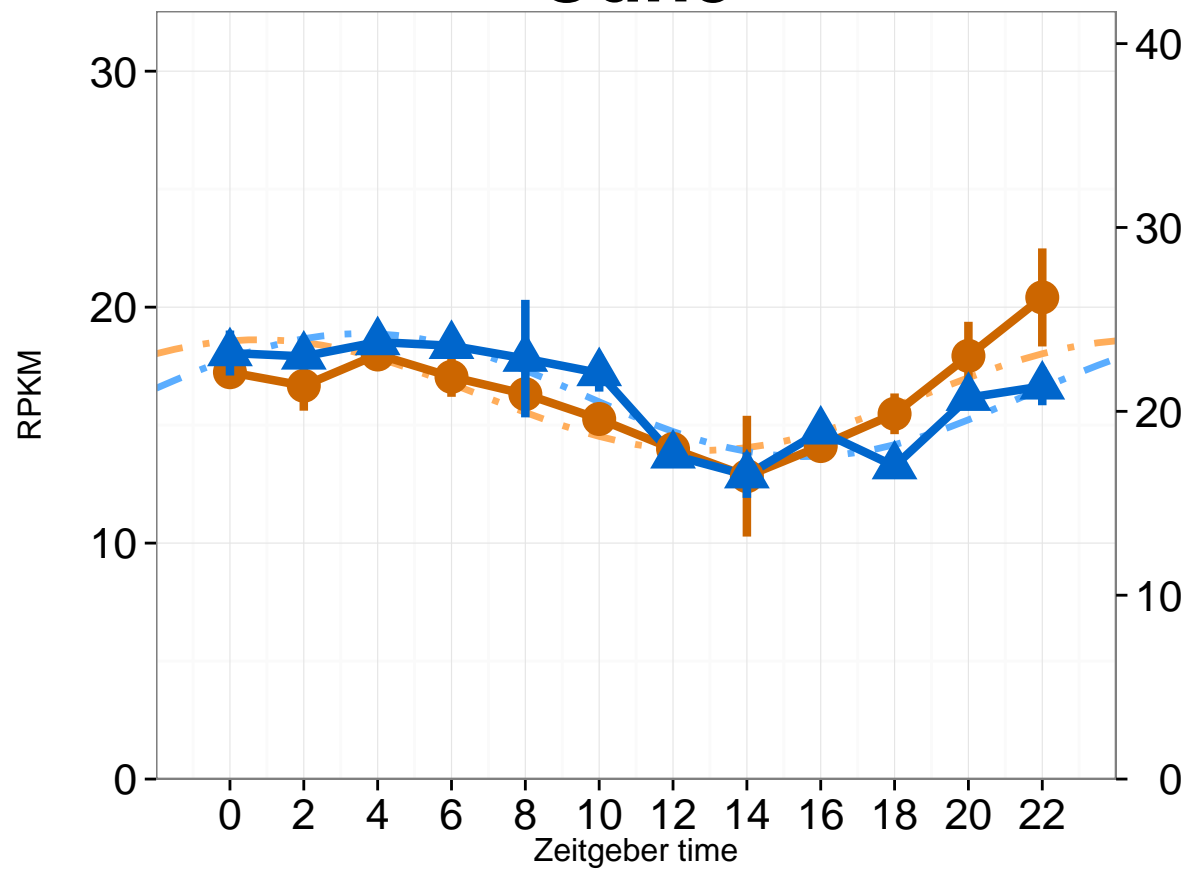

## Cdh5

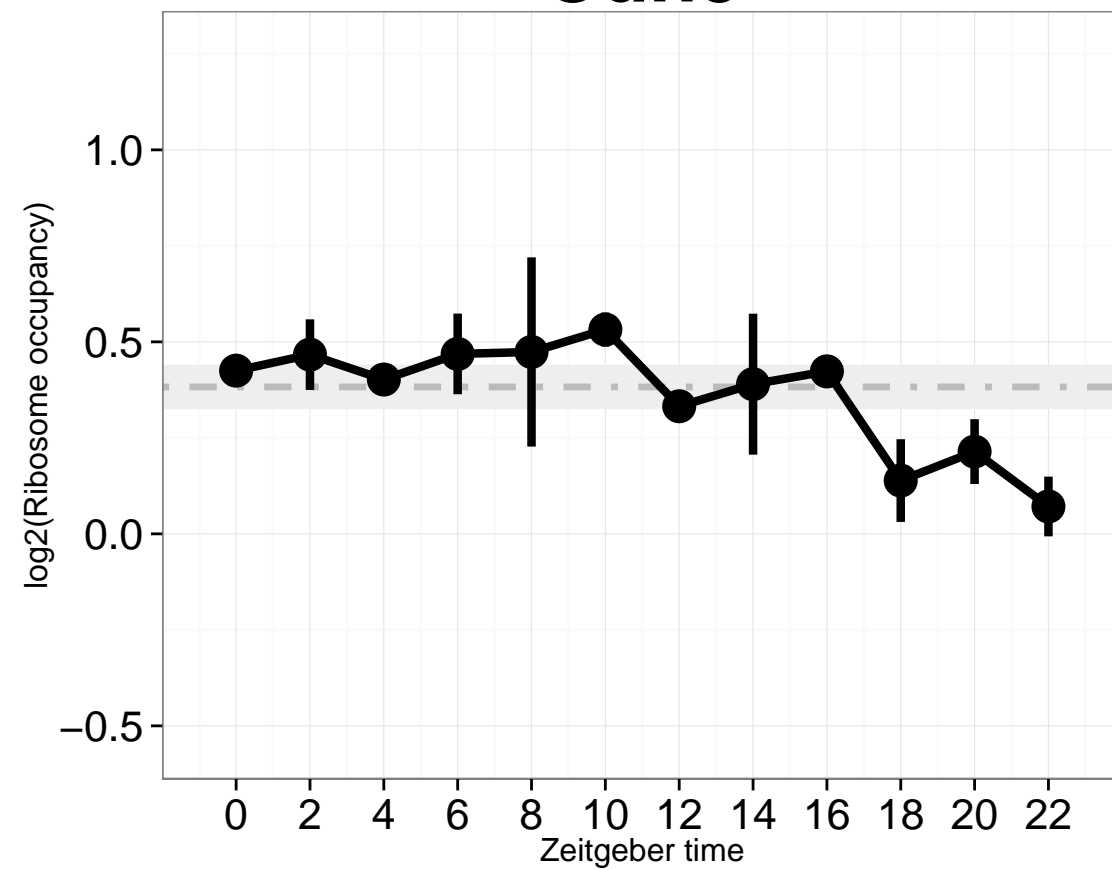

Supplement: SuppDataset_1.zip [file Cdh5_set_A.pdf › Supplemental Dataset 1/A-mRNA_nonrhyth_translation_nonrhyth/Cdh5_set_A.pdf]

## Cdhr5

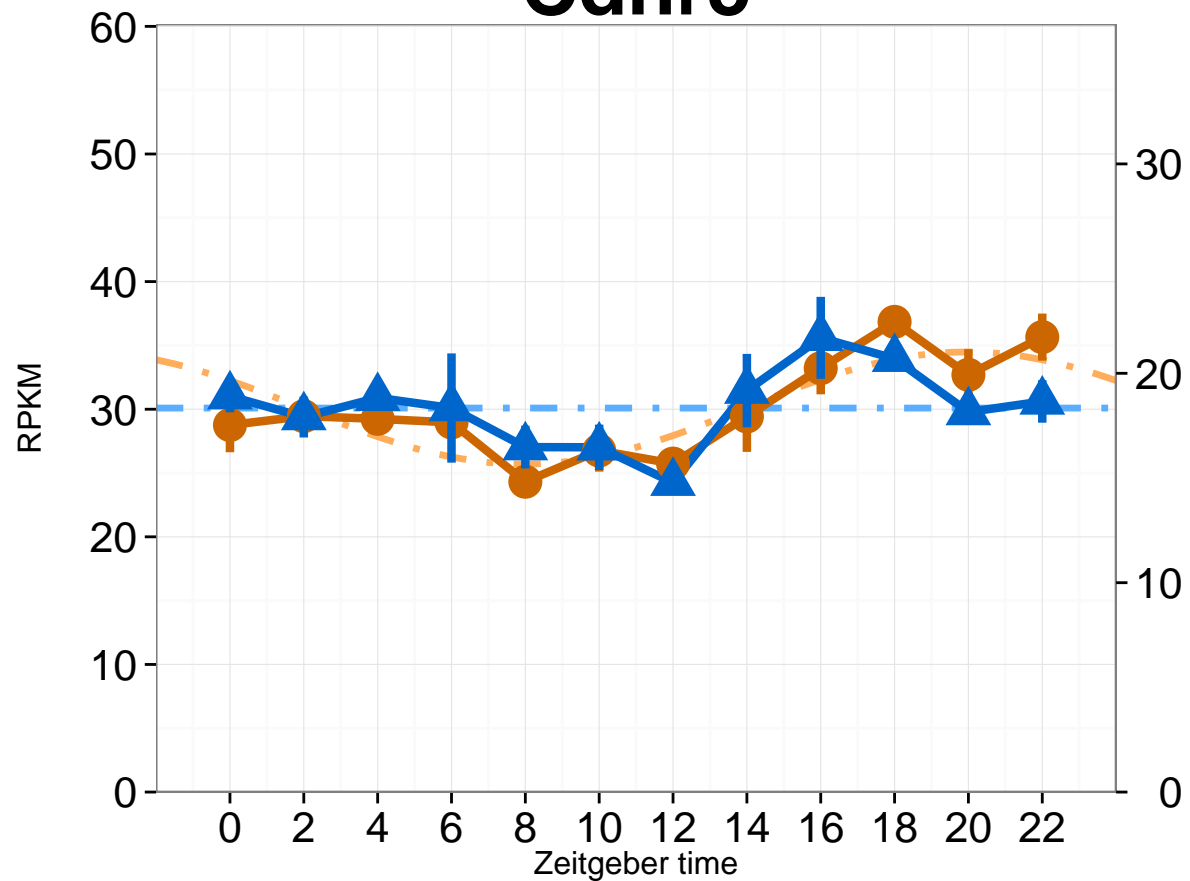

## Cdhr5

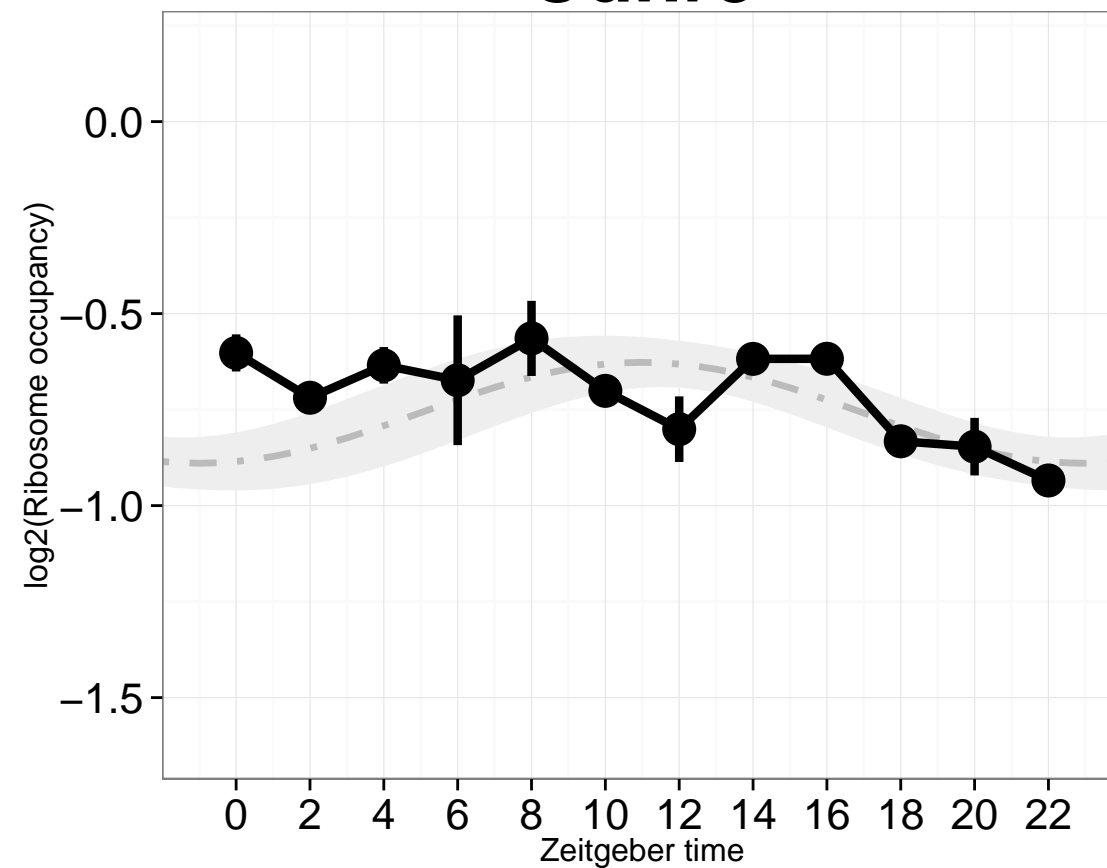

Supplement: SuppDataset_1.zip [file Cdhr5_set_A.pdf › Supplemental Dataset 1/A-mRNA_nonrhyth_translation_nonrhyth/Cdhr5_set_A.pdf]

## Cdipt

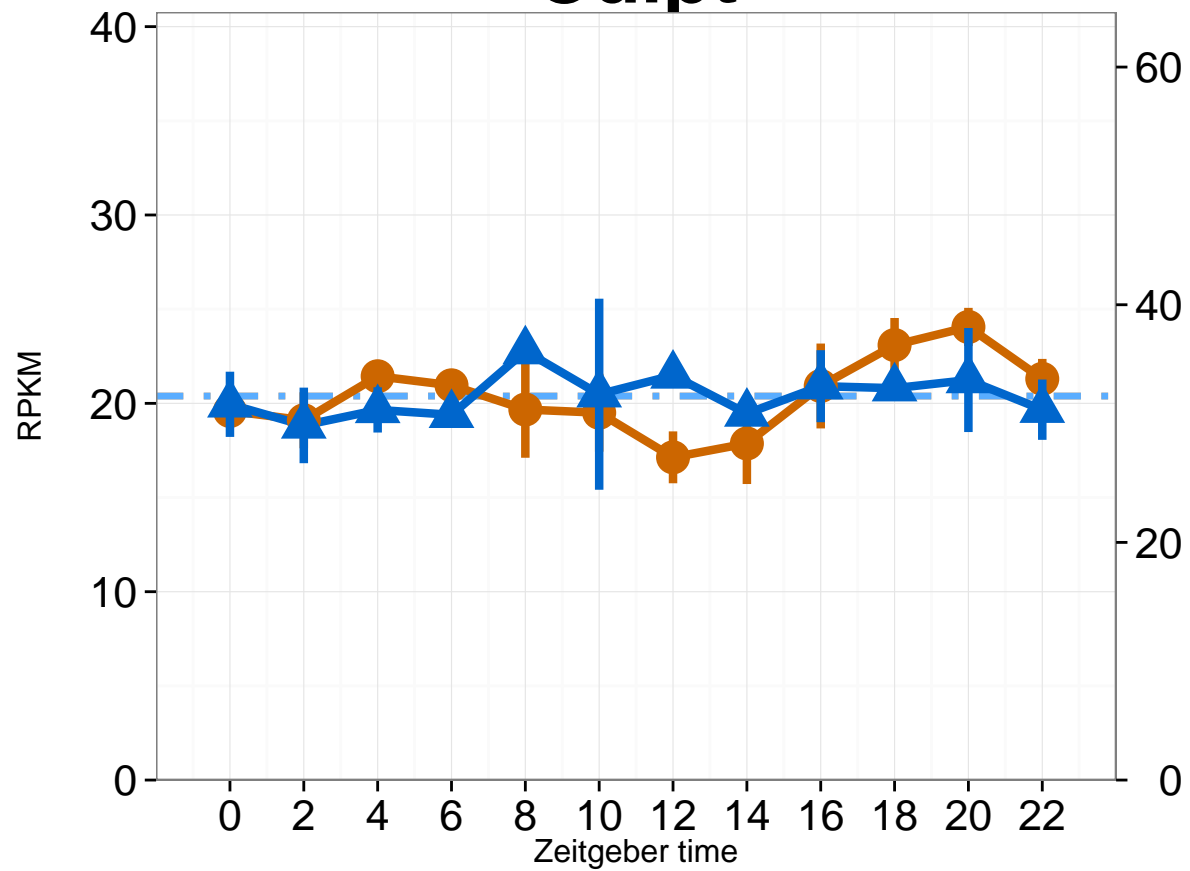

## Cdipt

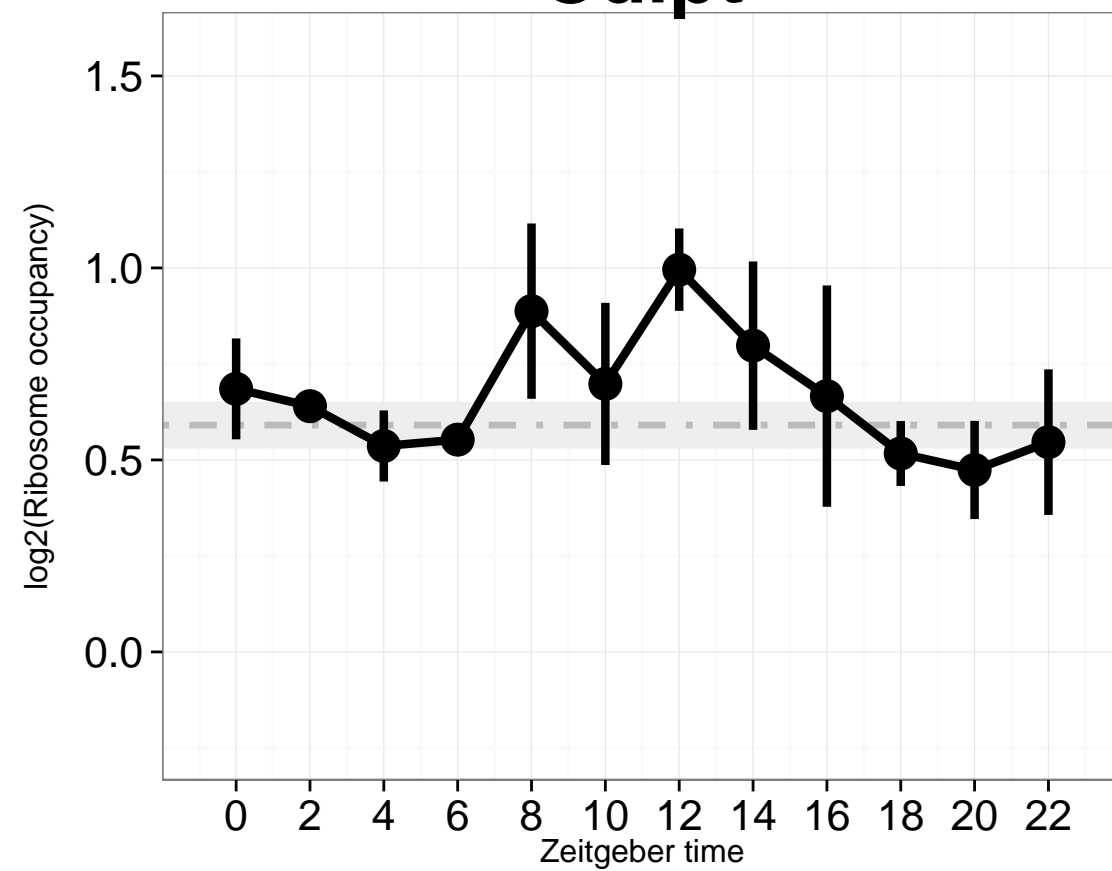

Supplement: SuppDataset_1.zip [file Cdipt_set_A.pdf › Supplemental Dataset 1/A-mRNA_nonrhyth_translation_nonrhyth/Cdipt_set_A.pdf]

## Cdk11b

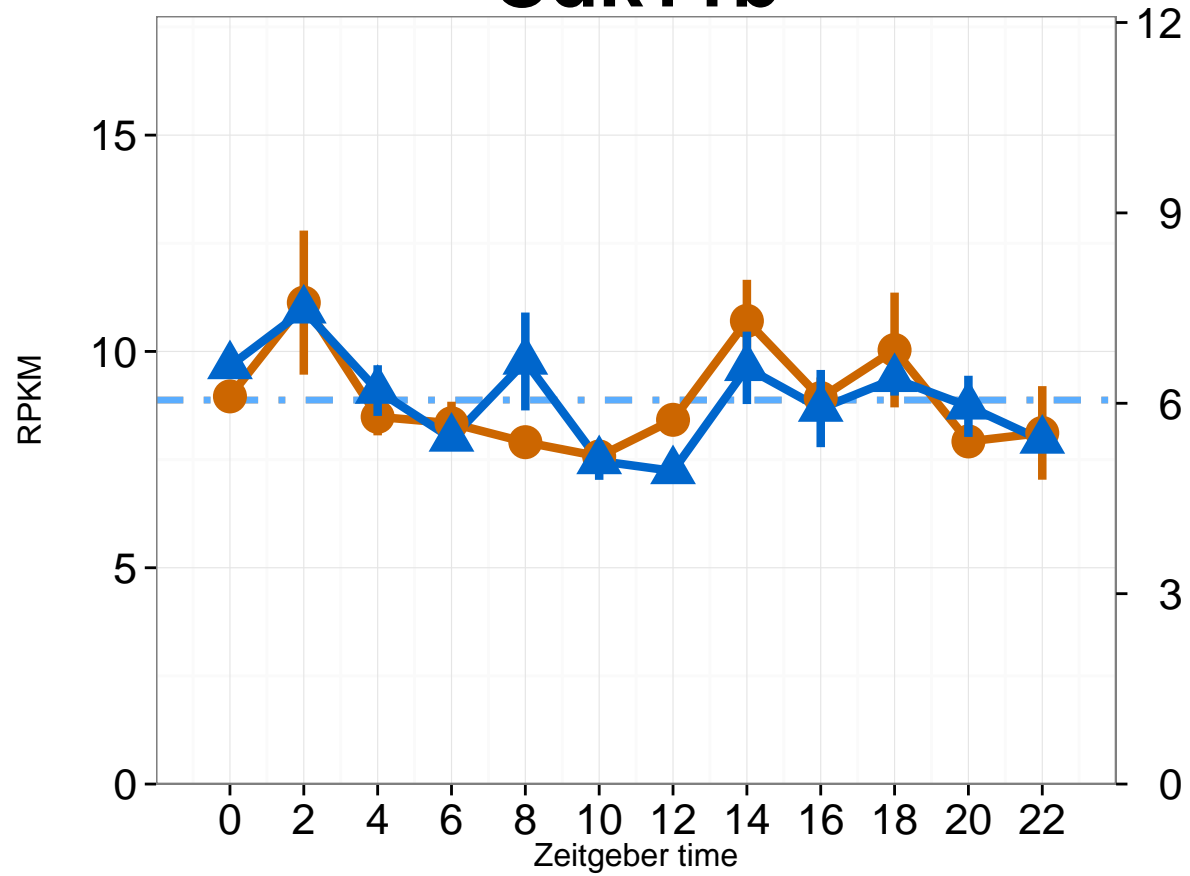

## Cdk11b

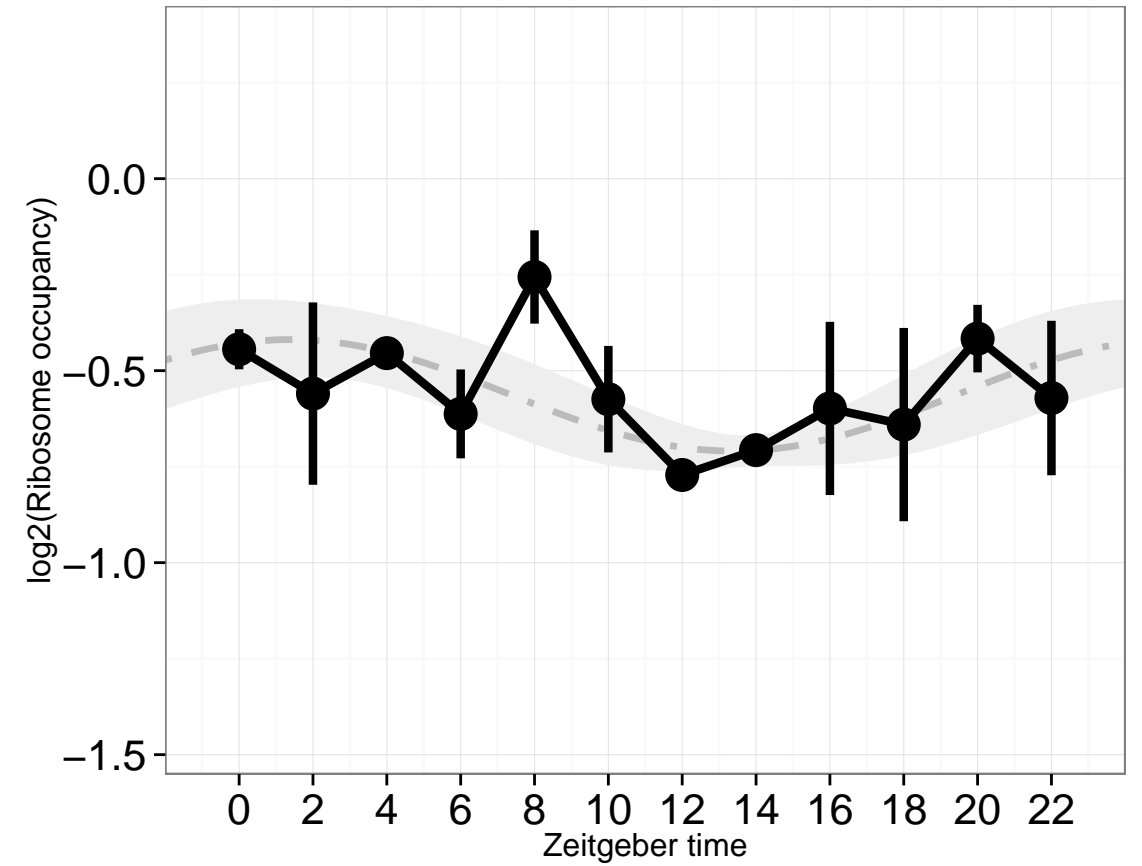

Supplement: SuppDataset_1.zip [file Cdk11b_set_A.pdf › Supplemental Dataset 1/A-mRNA_nonrhyth_translation_nonrhyth/Cdk11b_set_A.pdf]

## Cdk12

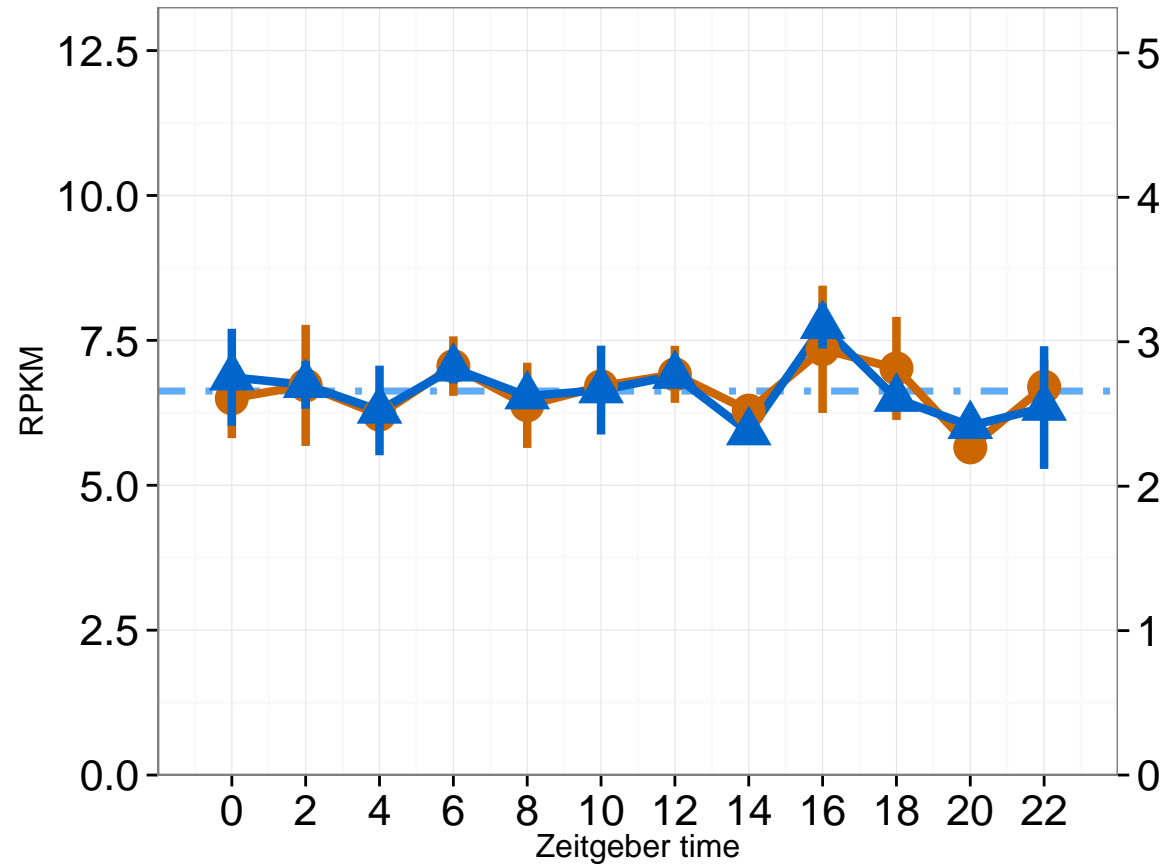

## Cdk12

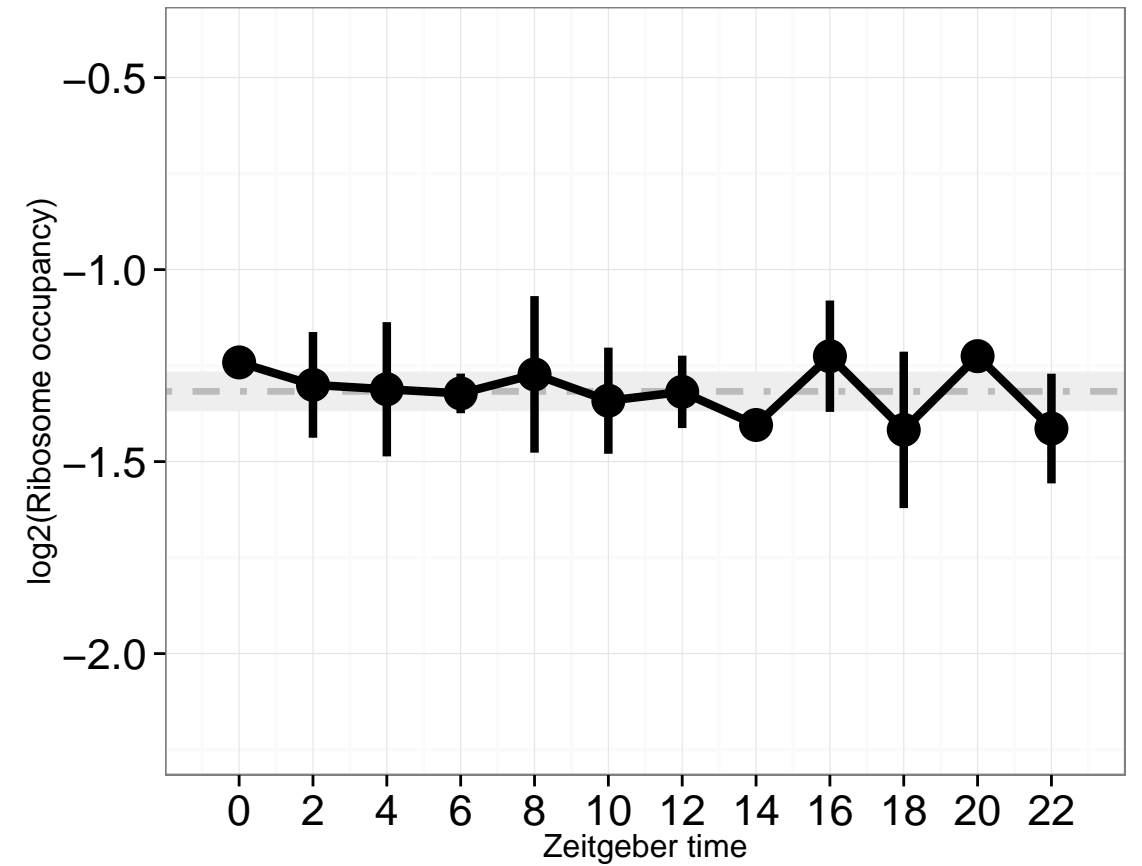

Supplement: SuppDataset_1.zip [file Cdk12_set_A.pdf › Supplemental Dataset 1/A-mRNA_nonrhyth_translation_nonrhyth/Cdk12_set_A.pdf]

## Cdk13

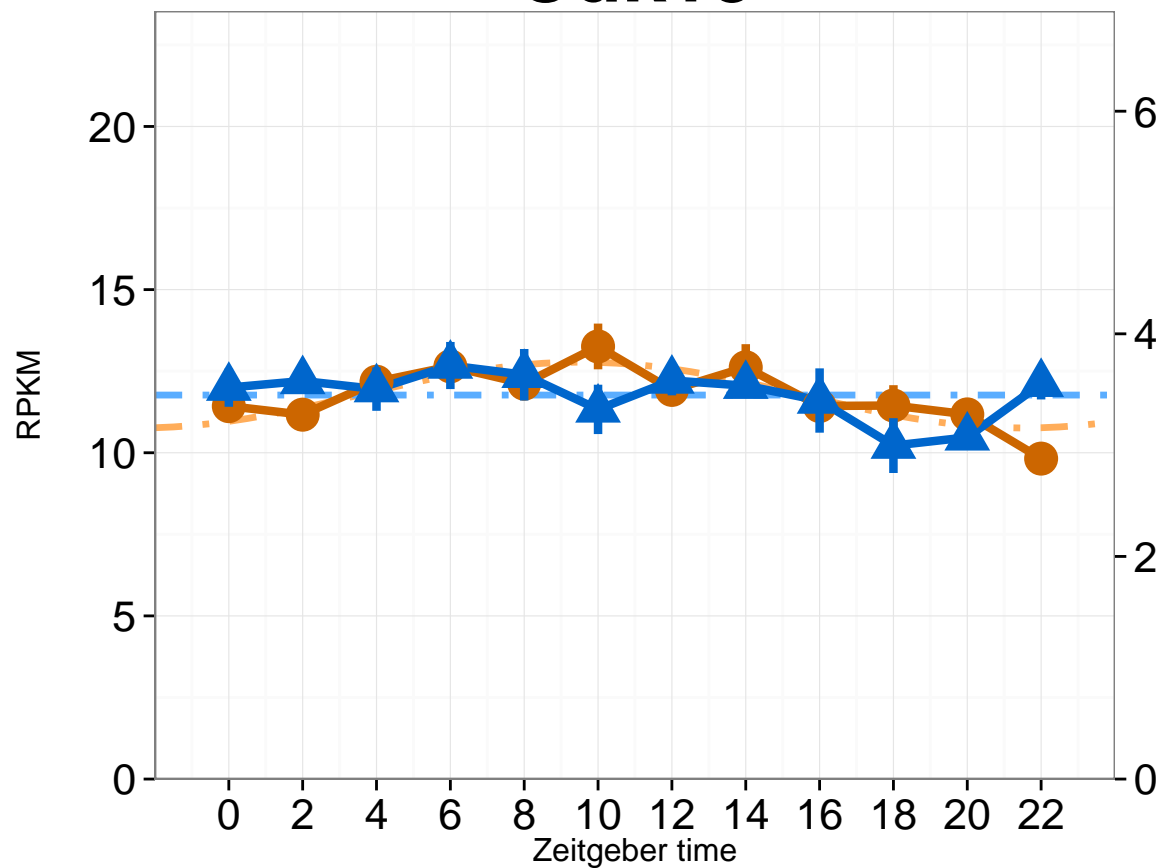

## Cdk13

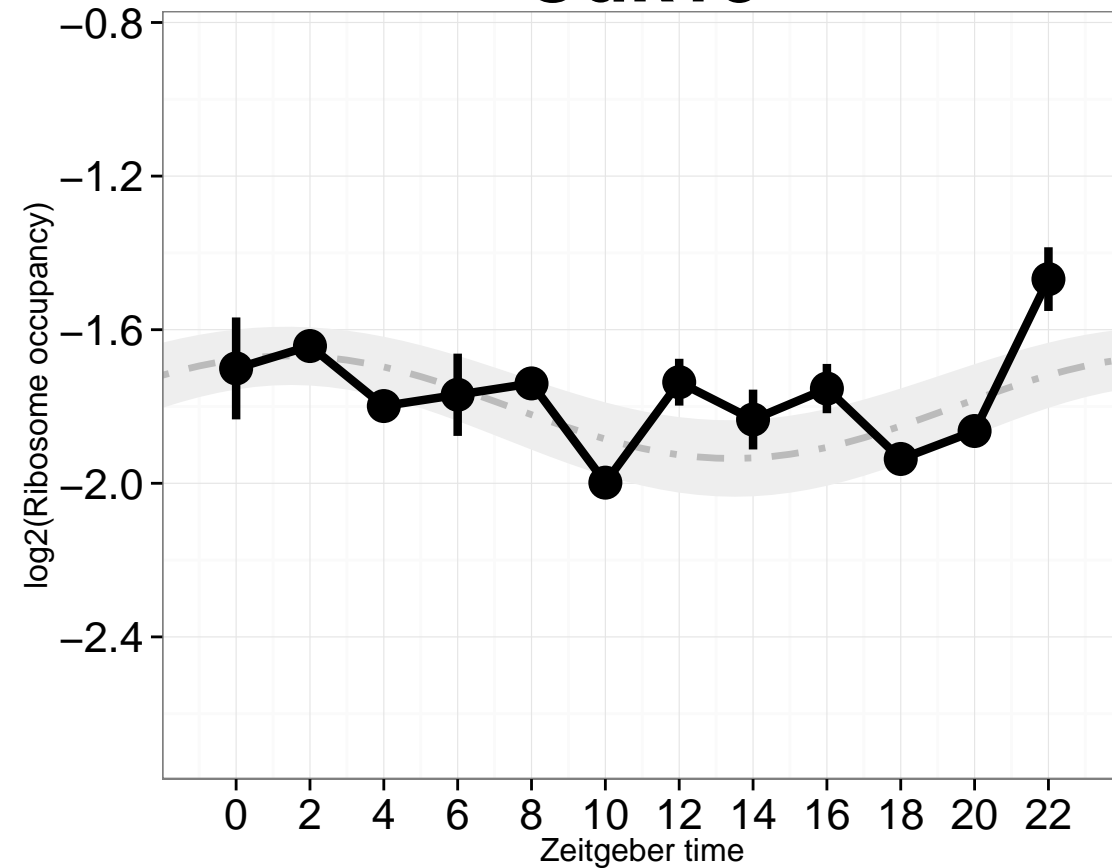

Supplement: SuppDataset_1.zip [file Cdk13_set_A.pdf › Supplemental Dataset 1/A-mRNA_nonrhyth_translation_nonrhyth/Cdk13_set_A.pdf]

## Cdk16

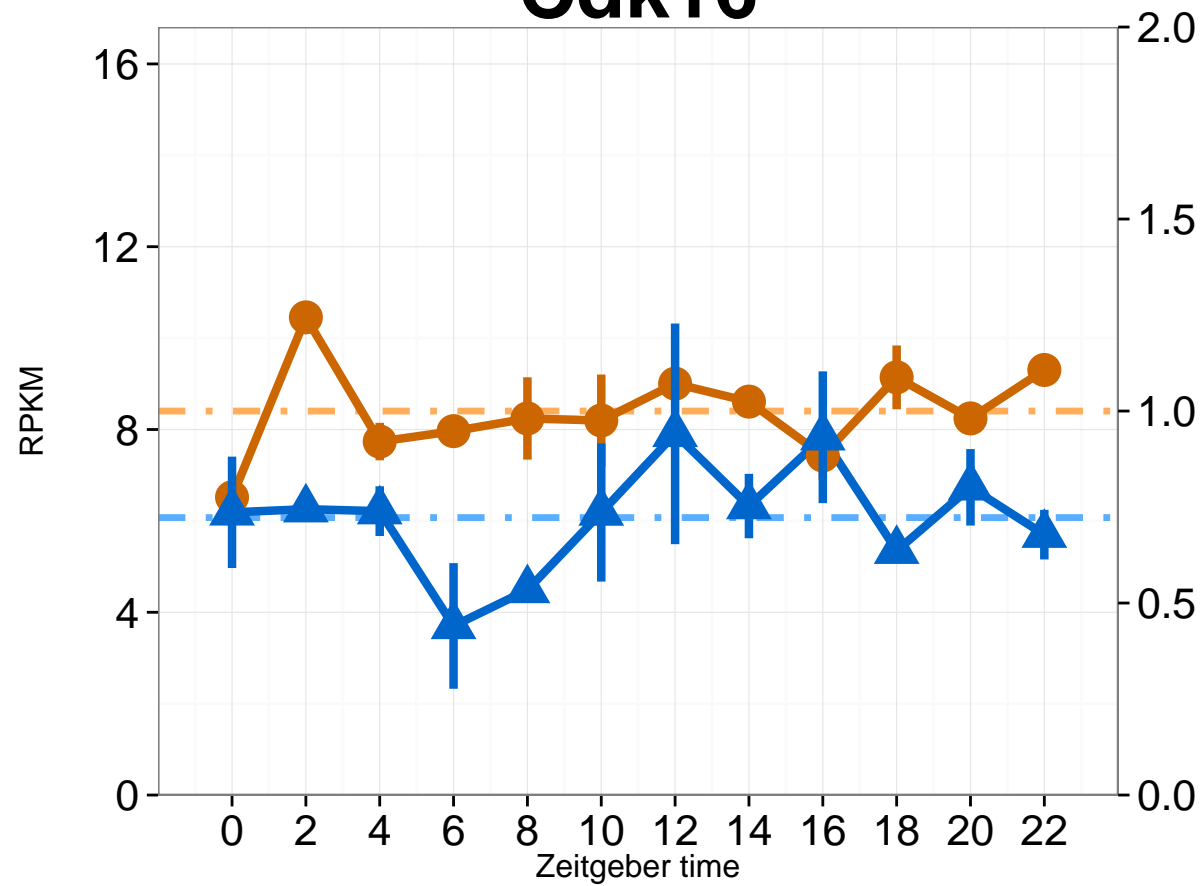

## Cdk16

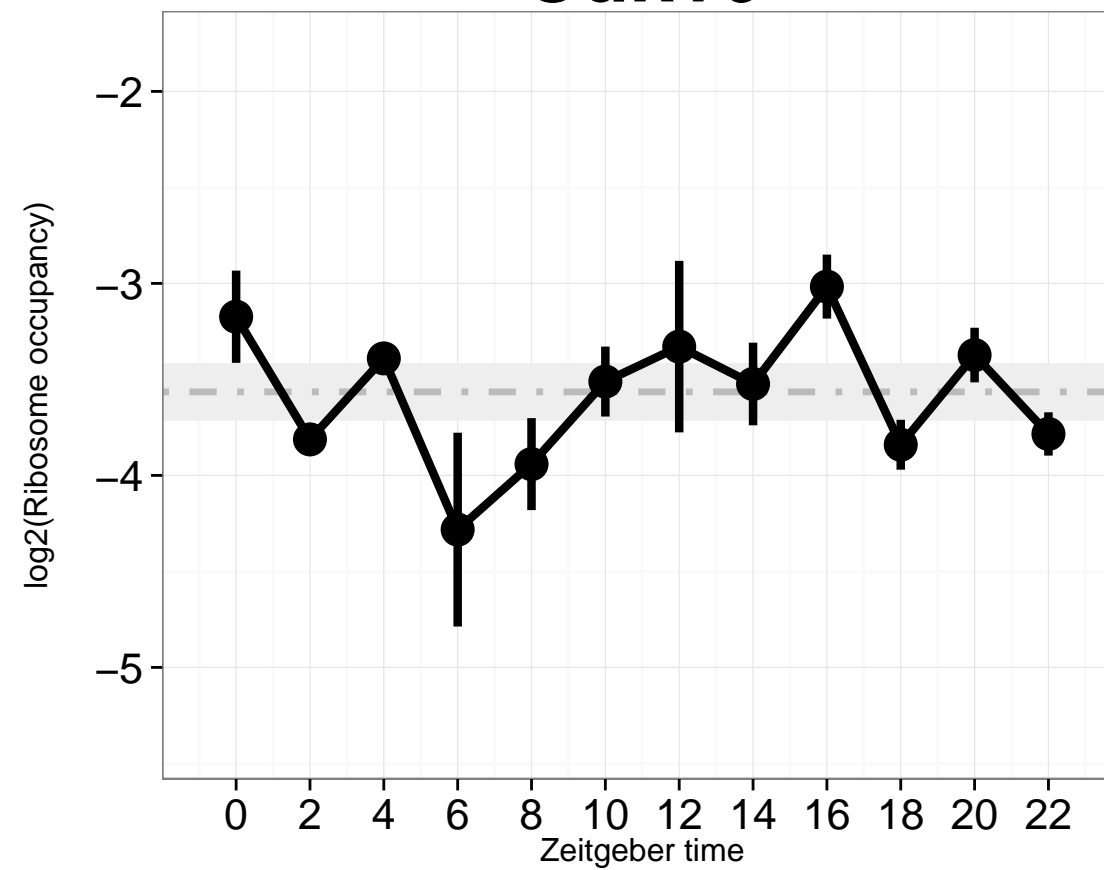

Supplement: SuppDataset_1.zip [file Cdk16_set_A.pdf › Supplemental Dataset 1/A-mRNA_nonrhyth_translation_nonrhyth/Cdk16_set_A.pdf]

## Cdk17

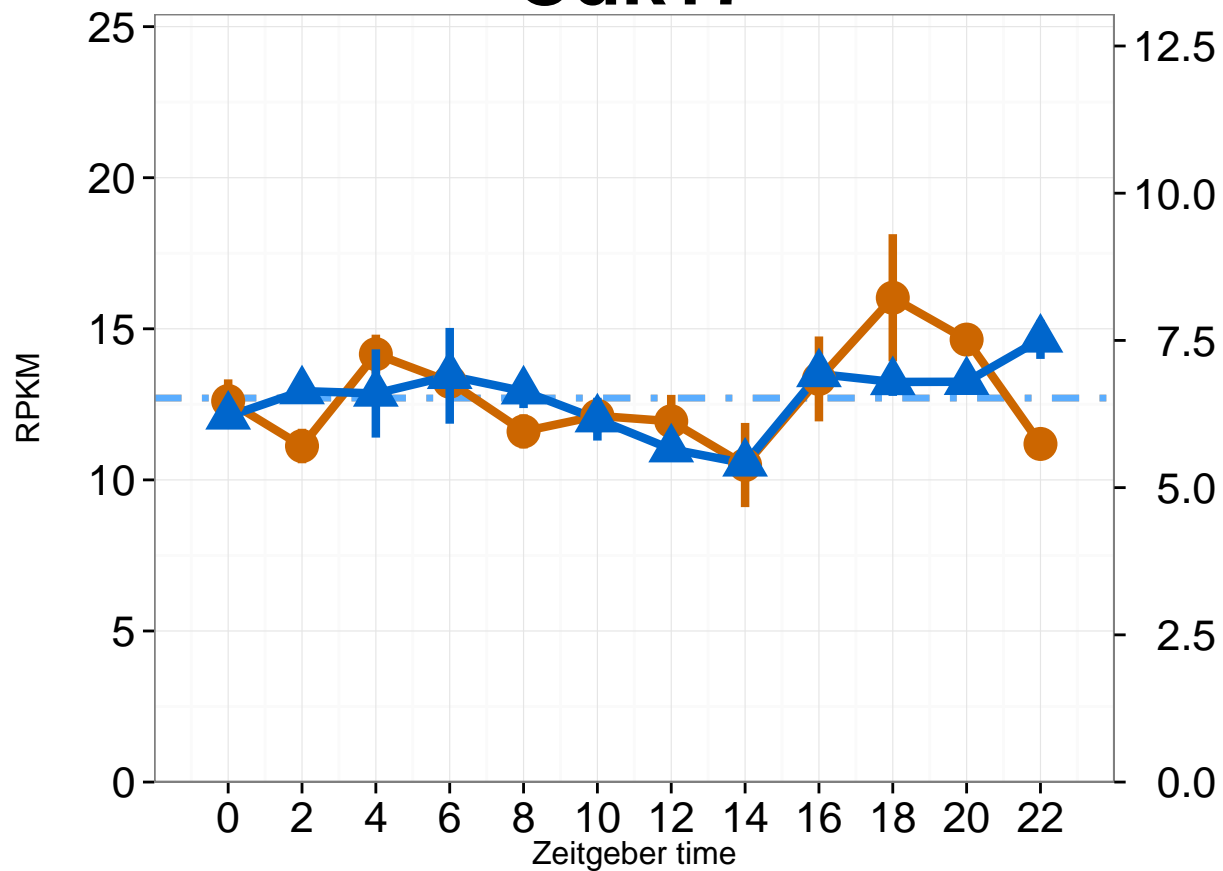

## Cdk17

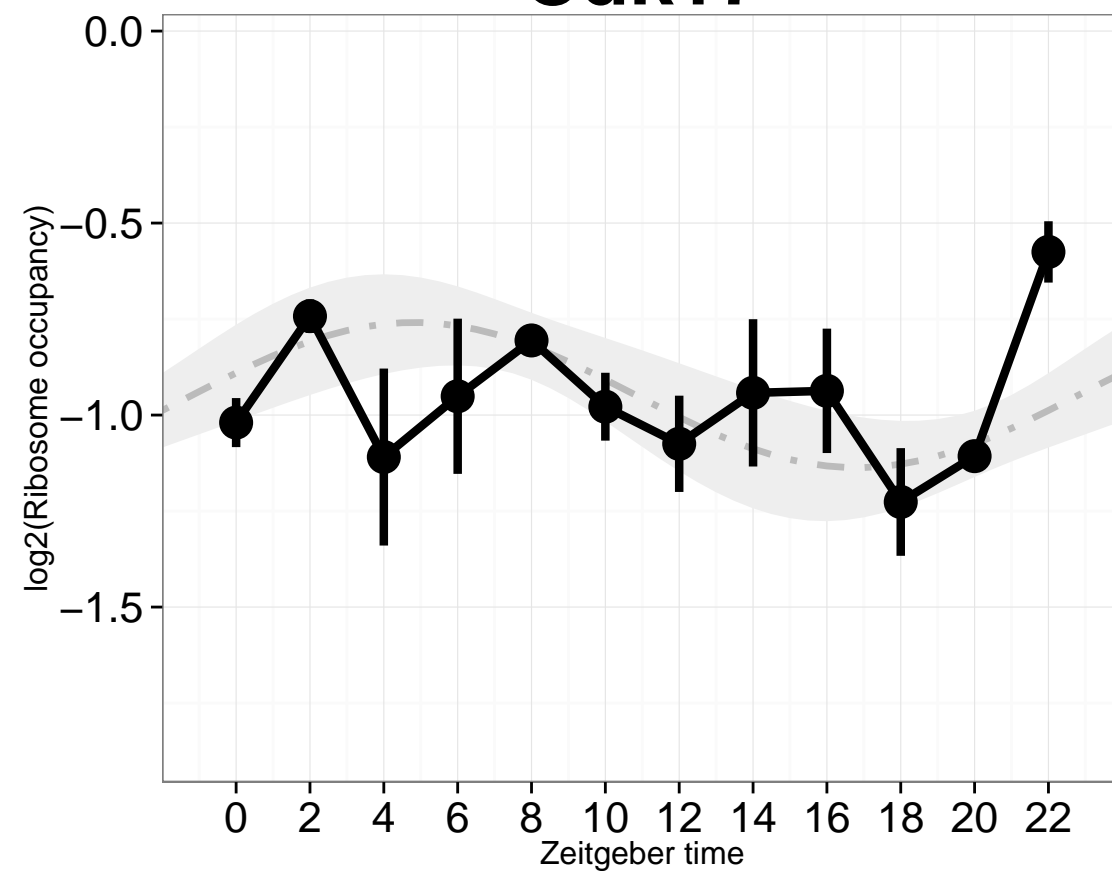

Supplement: SuppDataset_1.zip [file Cdk17_set_A.pdf › Supplemental Dataset 1/A-mRNA_nonrhyth_translation_nonrhyth/Cdk17_set_A.pdf]

## Cdk19

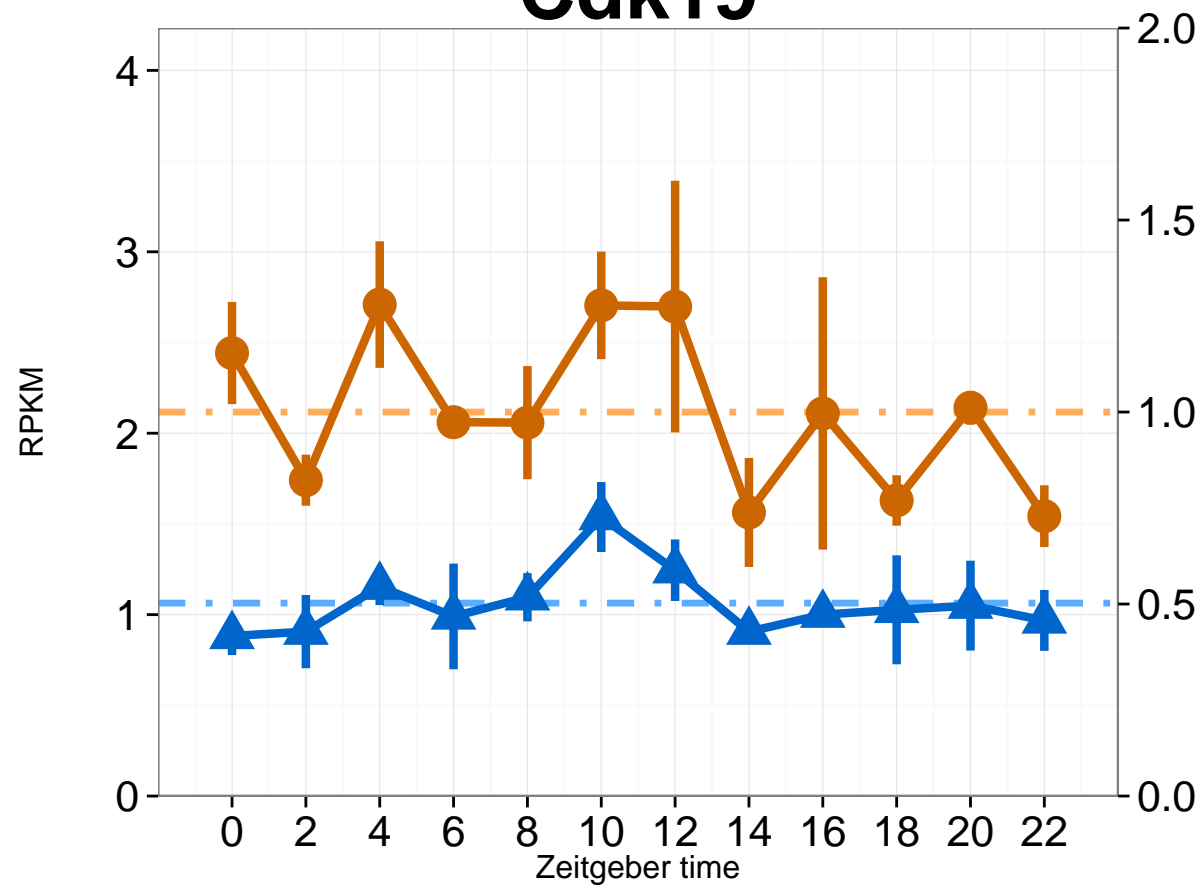

## Cdk19

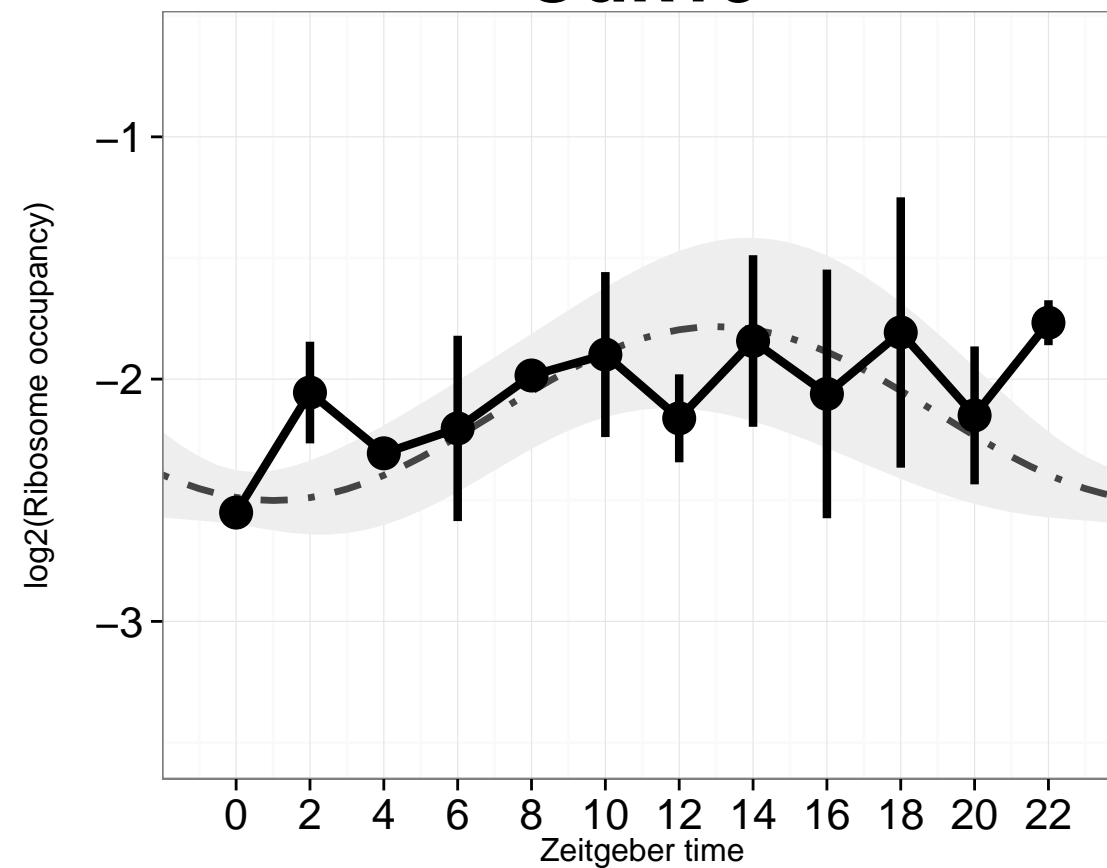

Supplement: SuppDataset_1.zip [file Cdk19_set_A.pdf › Supplemental Dataset 1/A-mRNA_nonrhyth_translation_nonrhyth/Cdk19_set_A.pdf]

# Cdk1

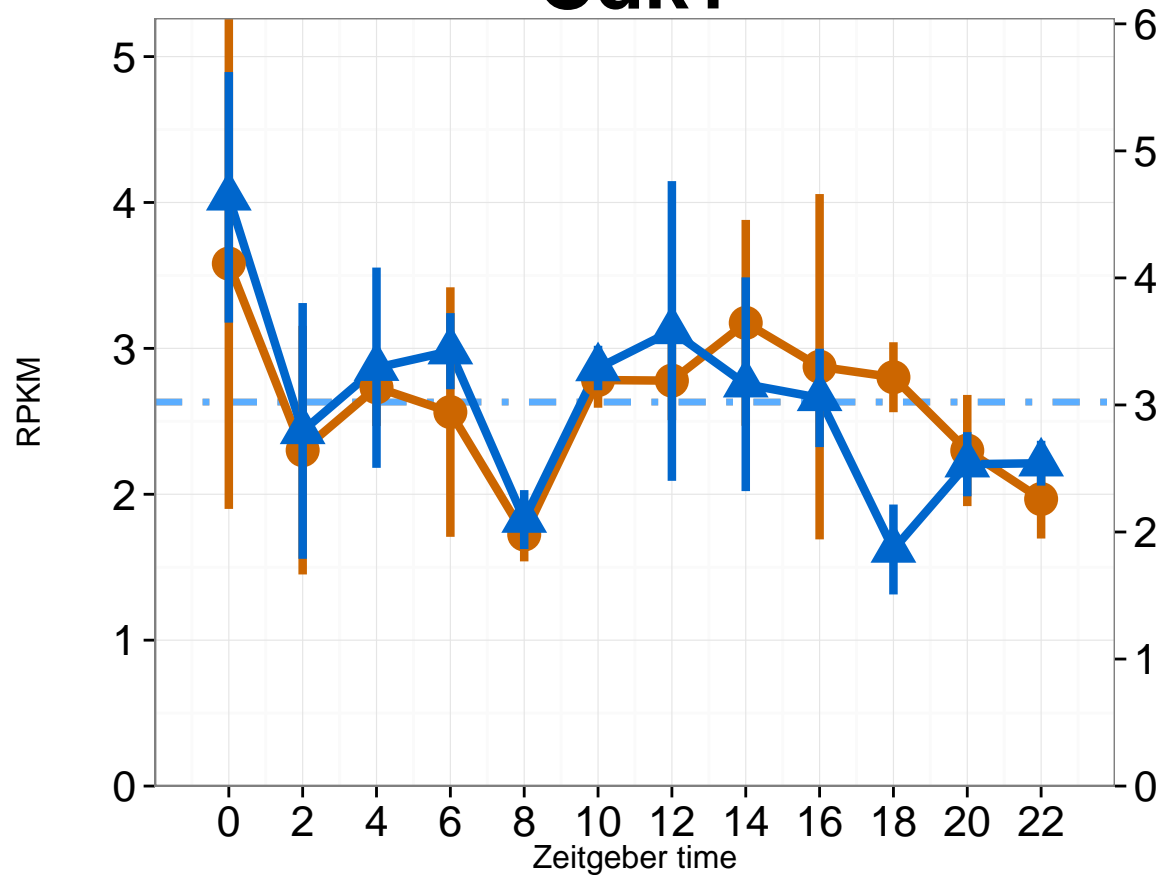

# Cdk1

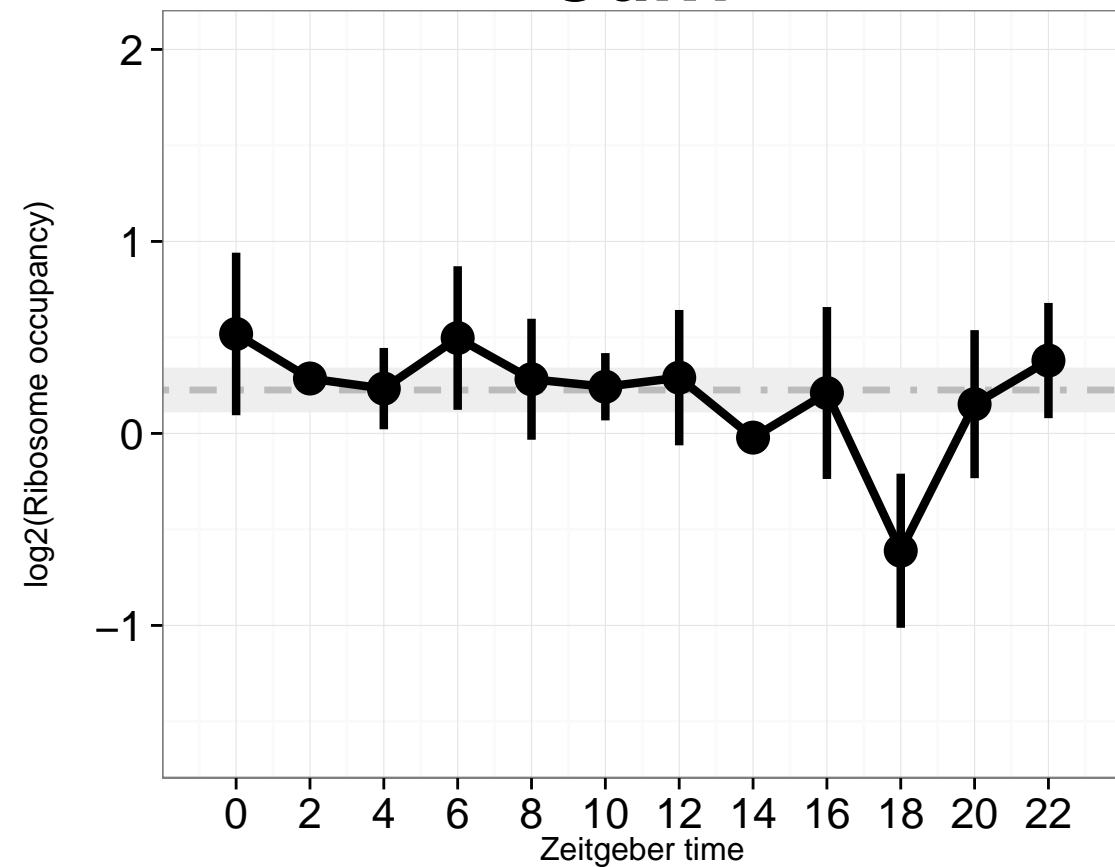

Supplement: SuppDataset_1.zip [file Cdk1_set_A.pdf › Supplemental Dataset 1/A-mRNA_nonrhyth_translation_nonrhyth/Cdk1_set_A.pdf]

# Cdk2ap1

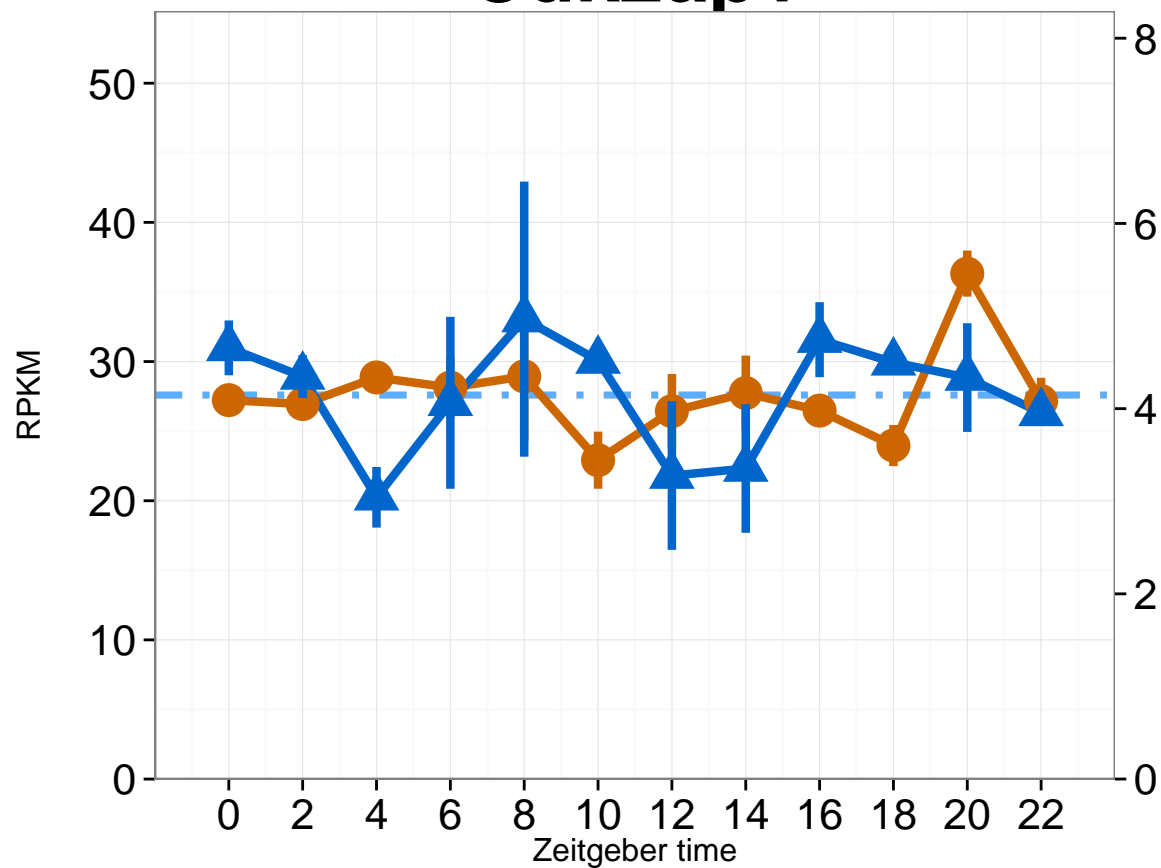

# Cdk2ap1

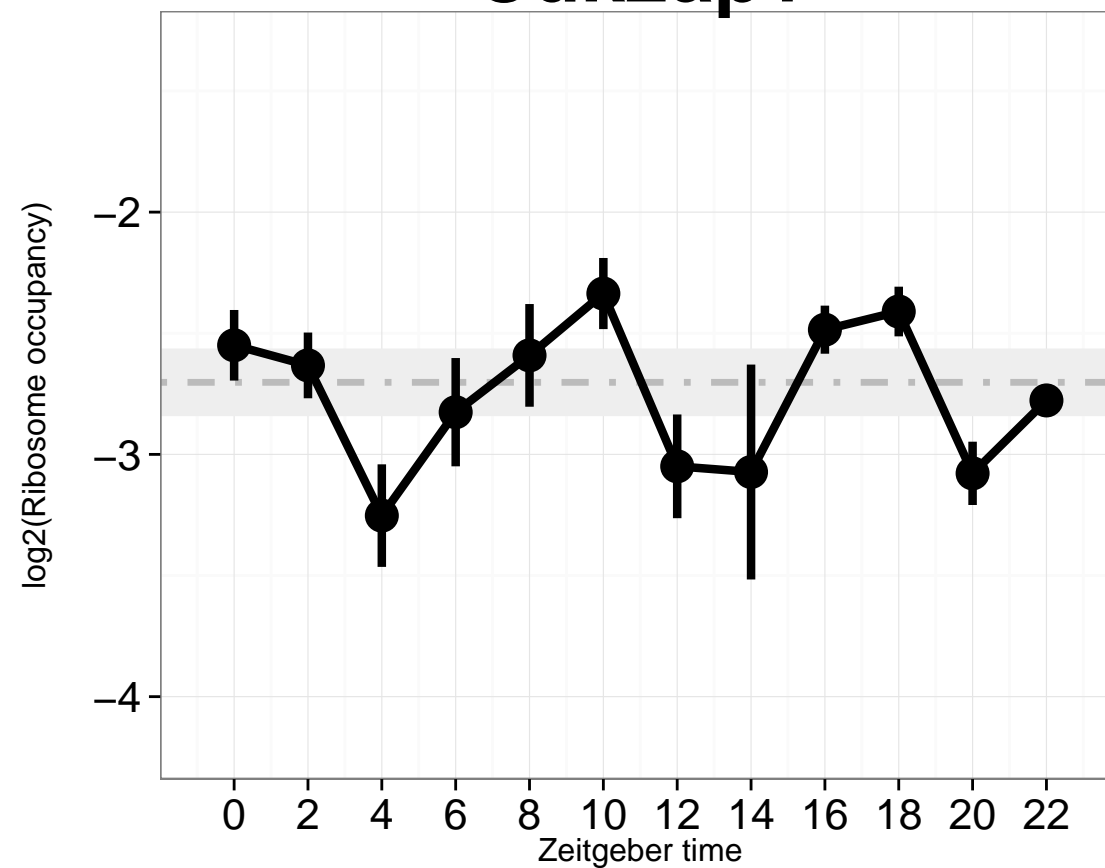

Supplement: SuppDataset_1.zip [file Cdk2ap1_set_A.pdf › Supplemental Dataset 1/A-mRNA_nonrhyth_translation_nonrhyth/Cdk2ap1_set_A.pdf]

## Cdk4

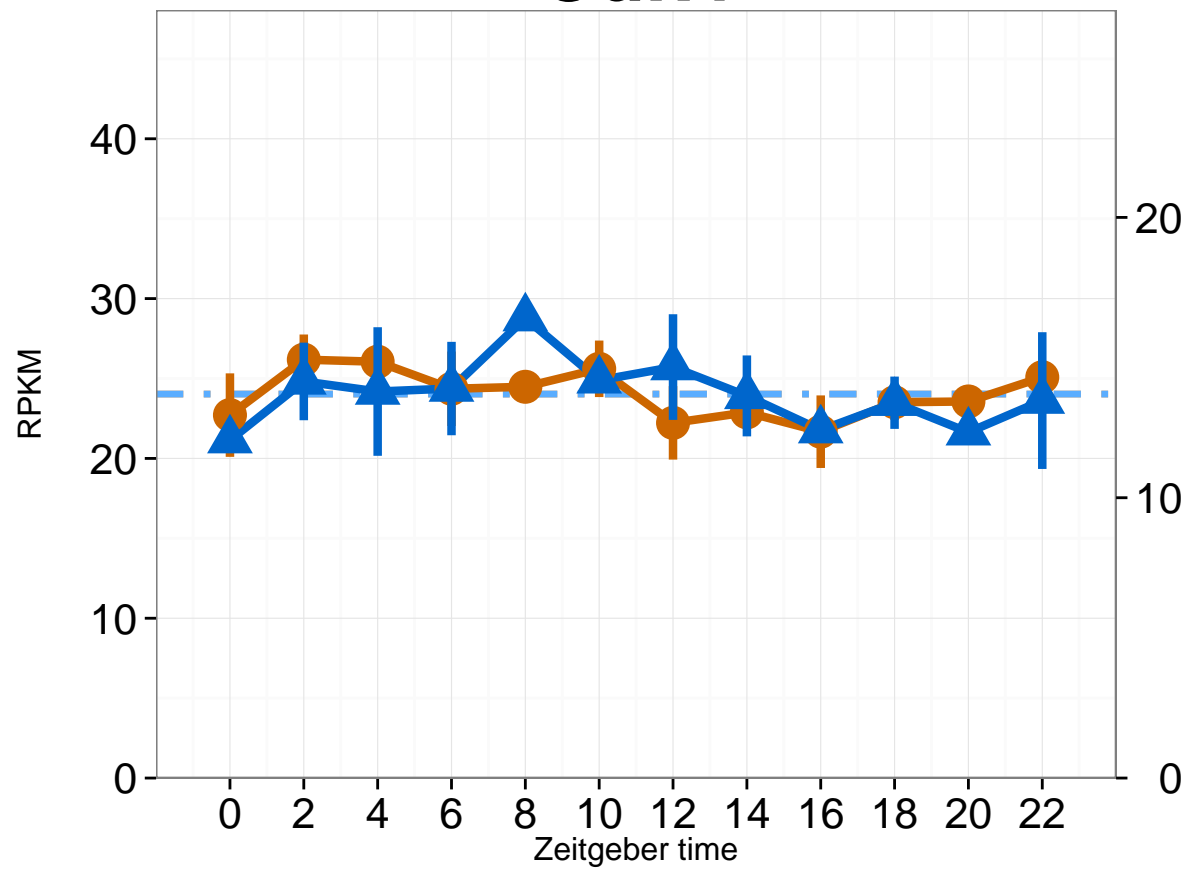

## Cdk4

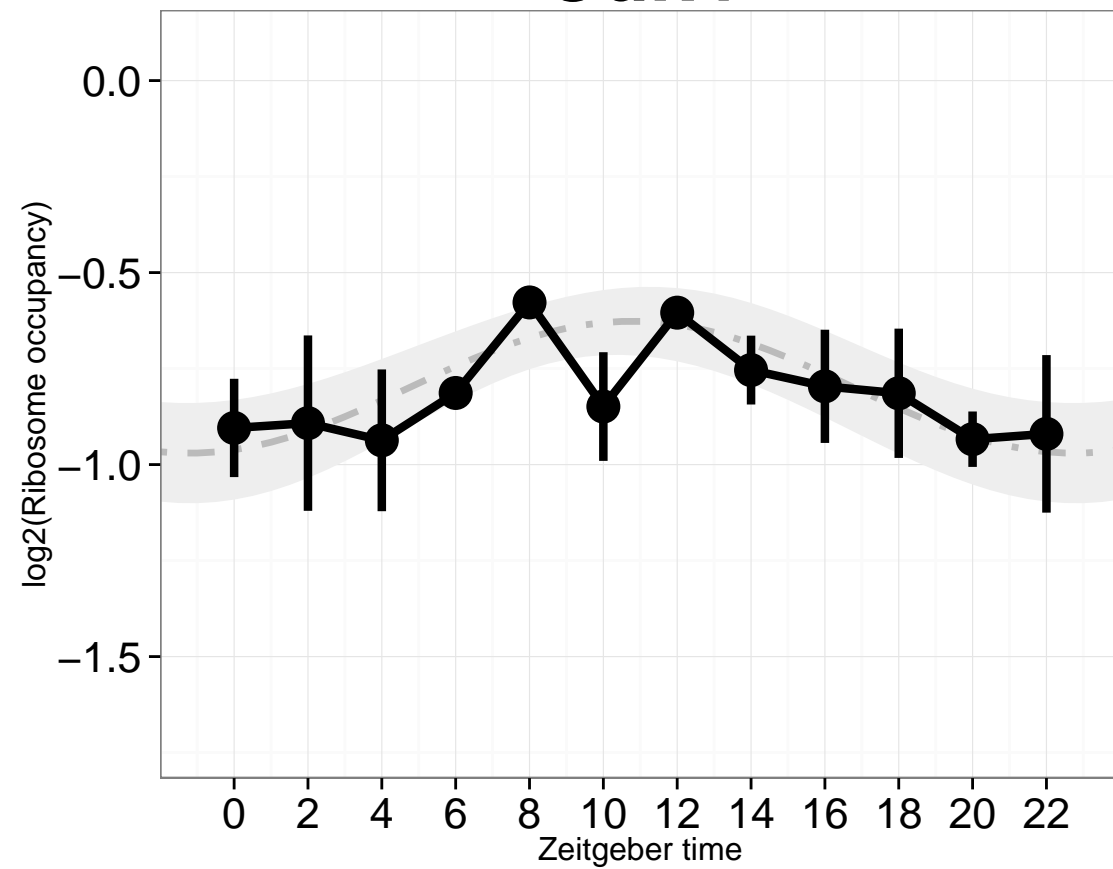

Supplement: SuppDataset_1.zip [file Cdk4_set_A.pdf › Supplemental Dataset 1/A-mRNA_nonrhyth_translation_nonrhyth/Cdk4_set_A.pdf]

## Cdk5

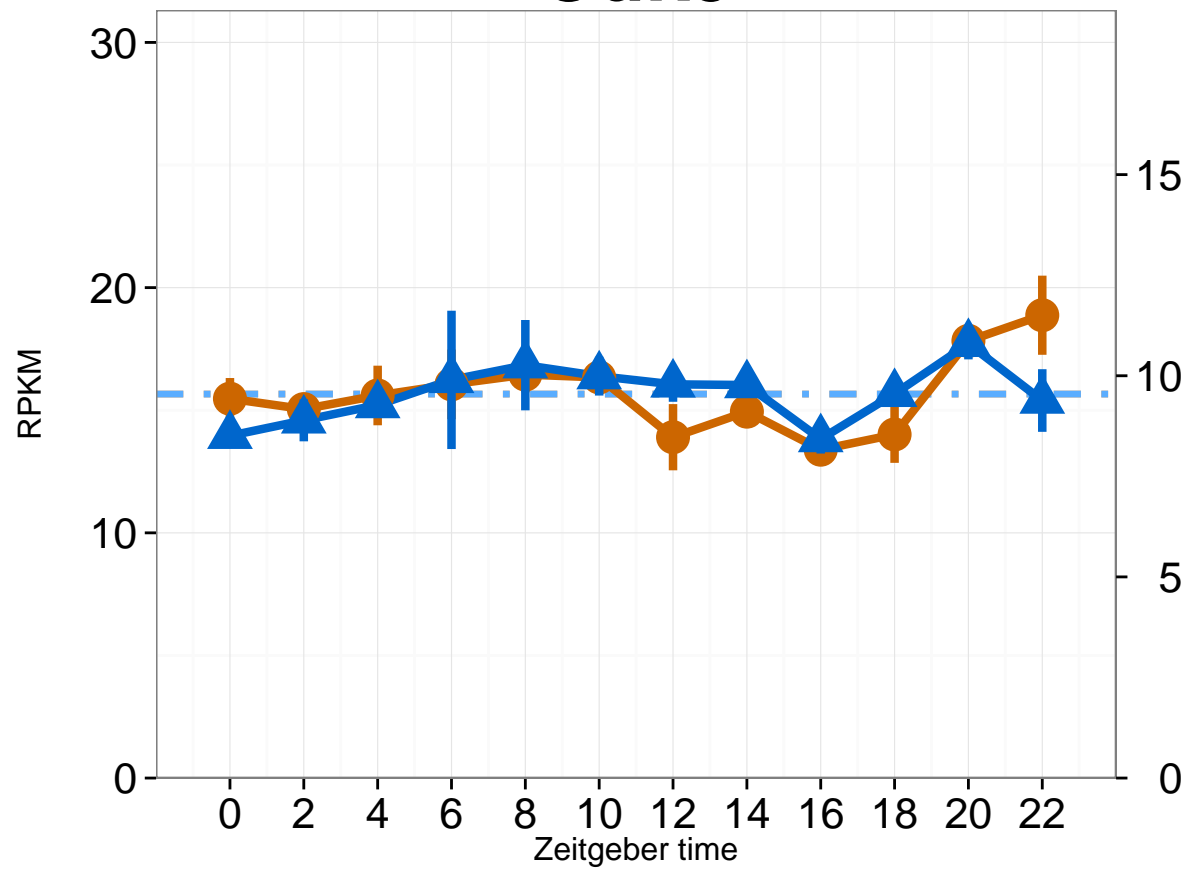

## Cdk5

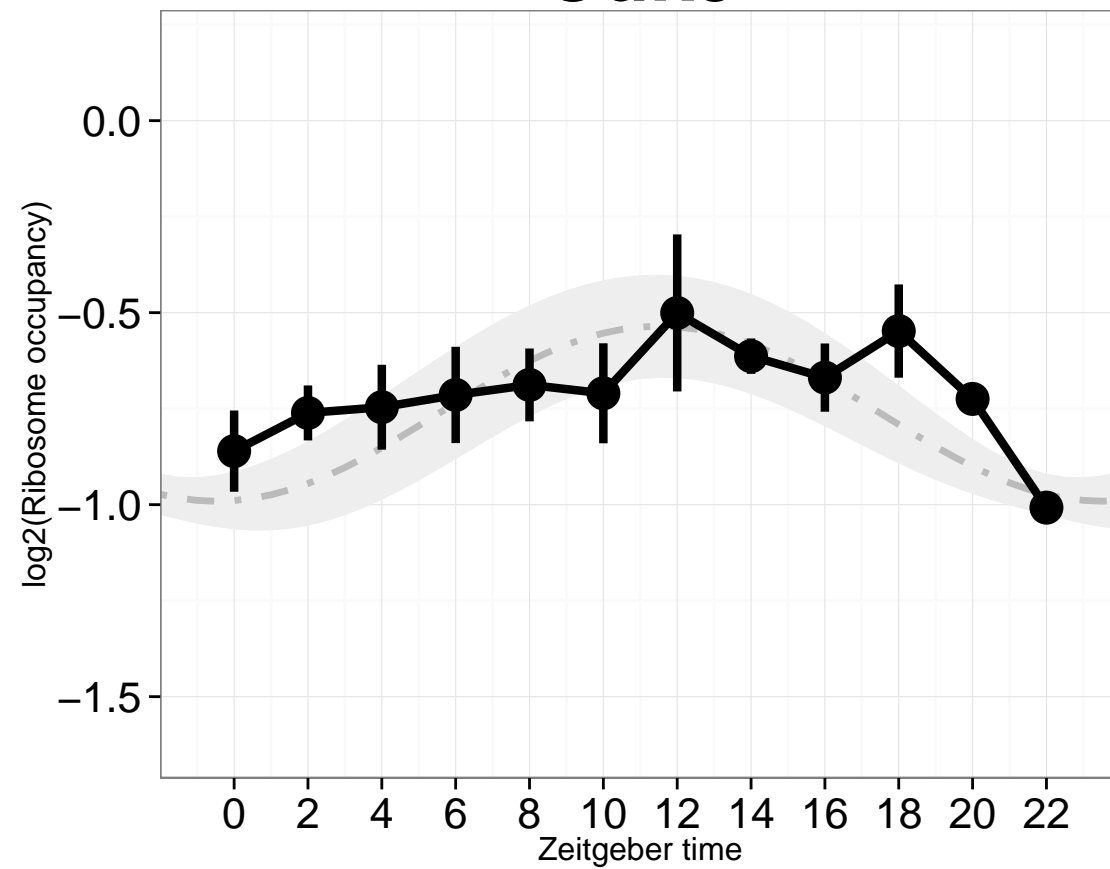

Supplement: SuppDataset_1.zip [file Cdk5_set_A.pdf › Supplemental Dataset 1/A-mRNA_nonrhyth_translation_nonrhyth/Cdk5_set_A.pdf]

# Cdk5rap1

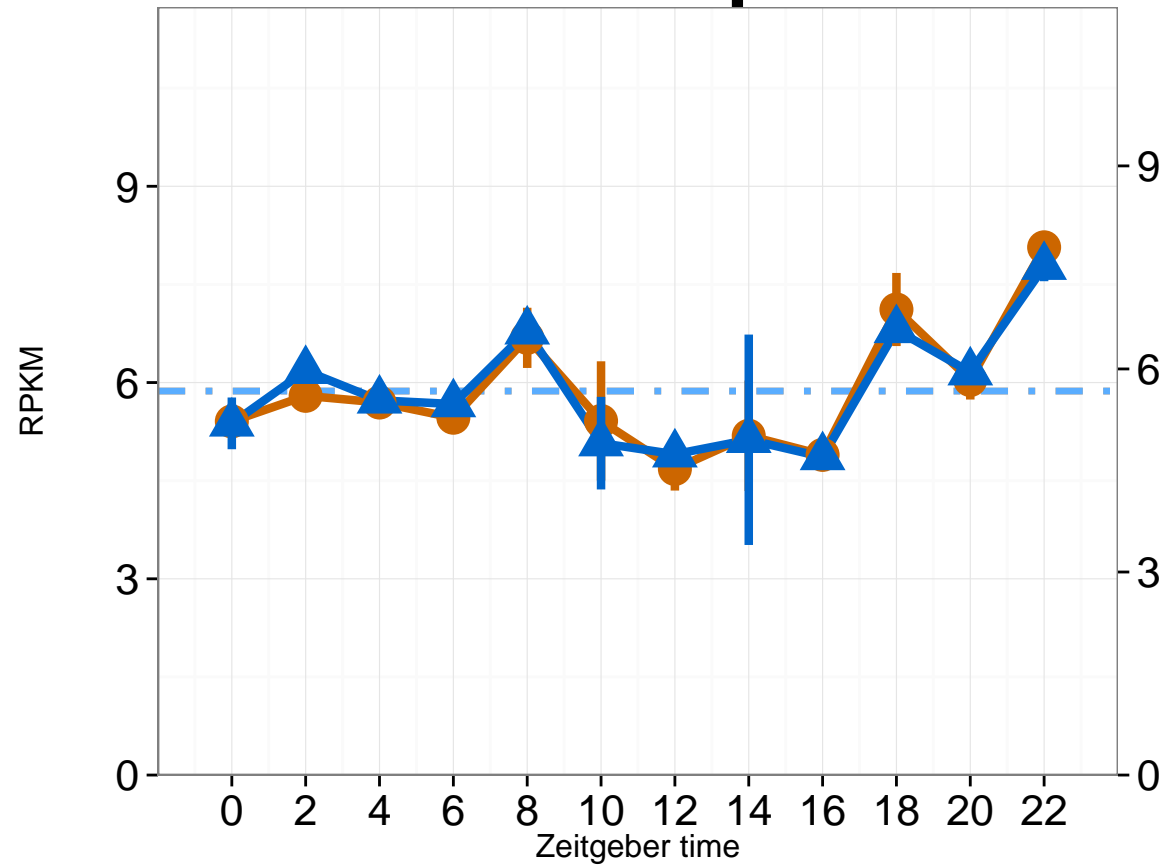

# Cdk5rap1

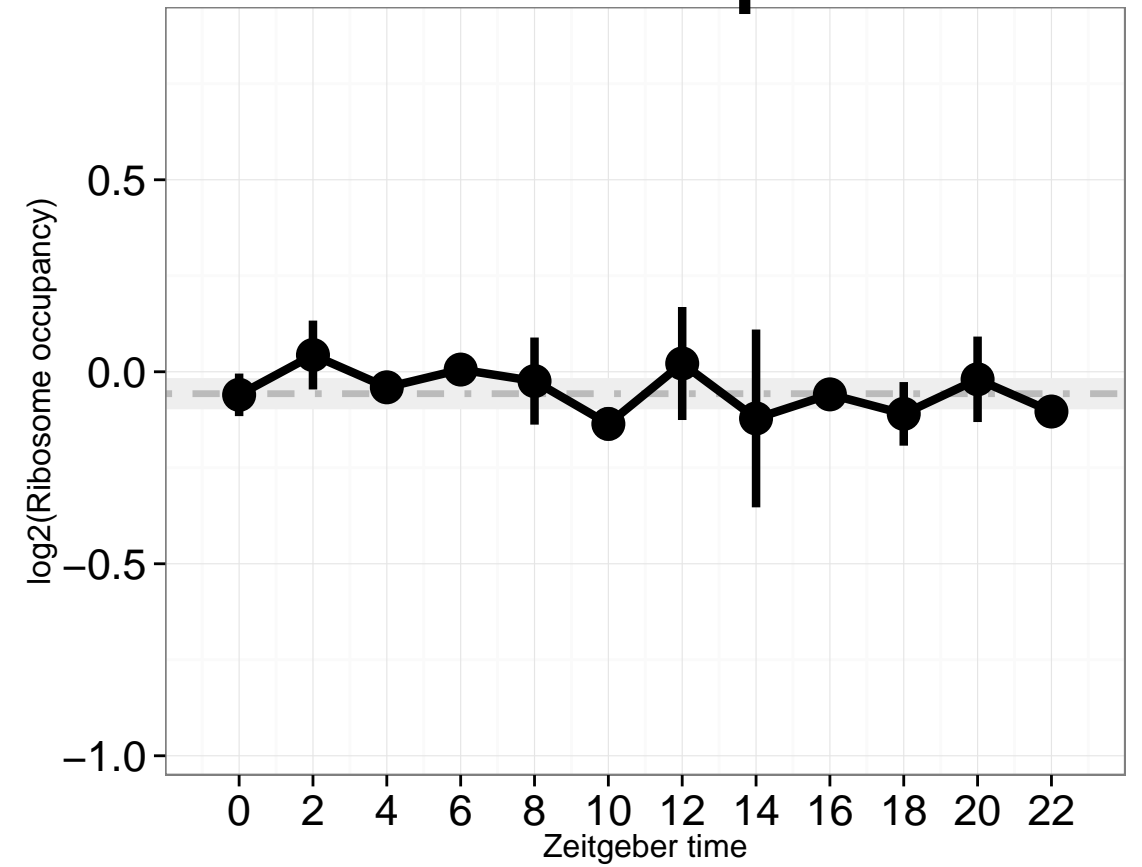

Supplement: SuppDataset_1.zip [file Cdk5rap1_set_A.pdf › Supplemental Dataset 1/A-mRNA_nonrhyth_translation_nonrhyth/Cdk5rap1_set_A.pdf]

## Cdk5rap3

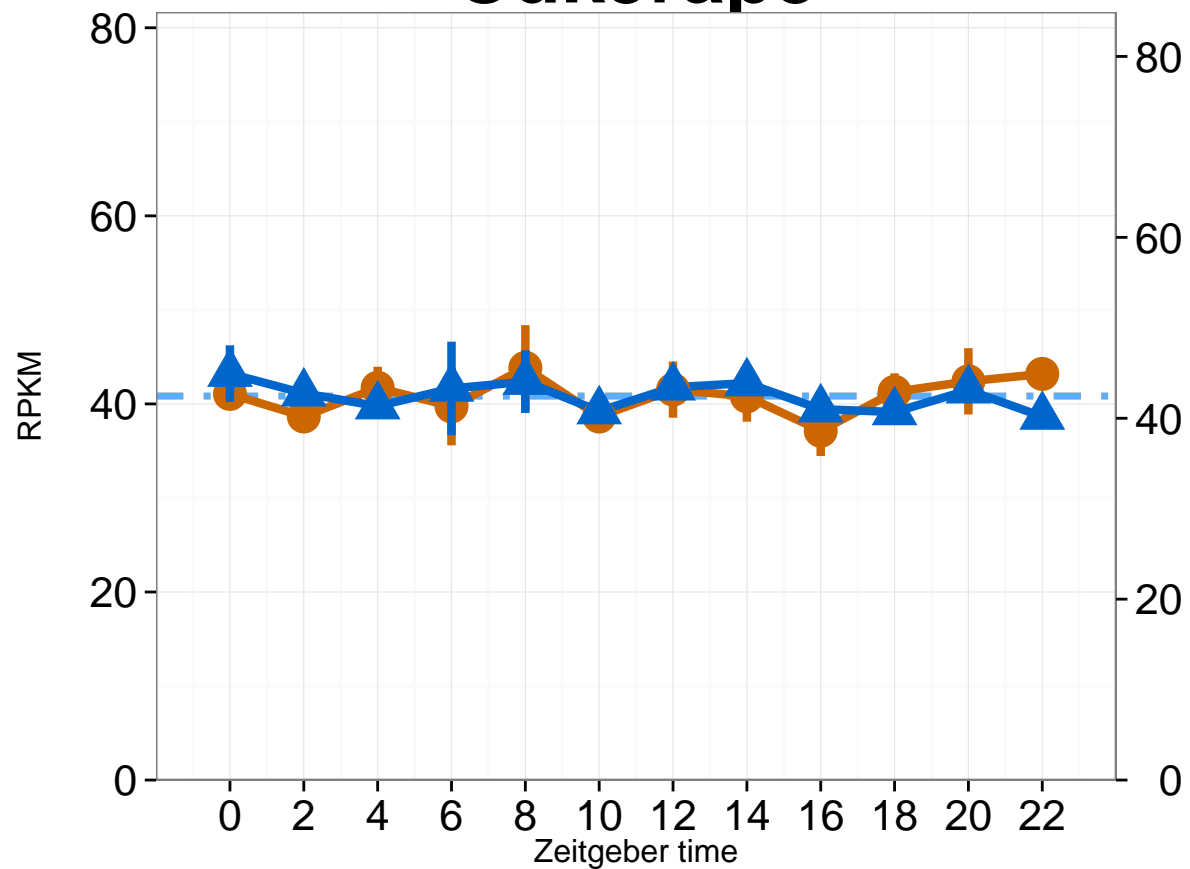

## Cdk5rap3

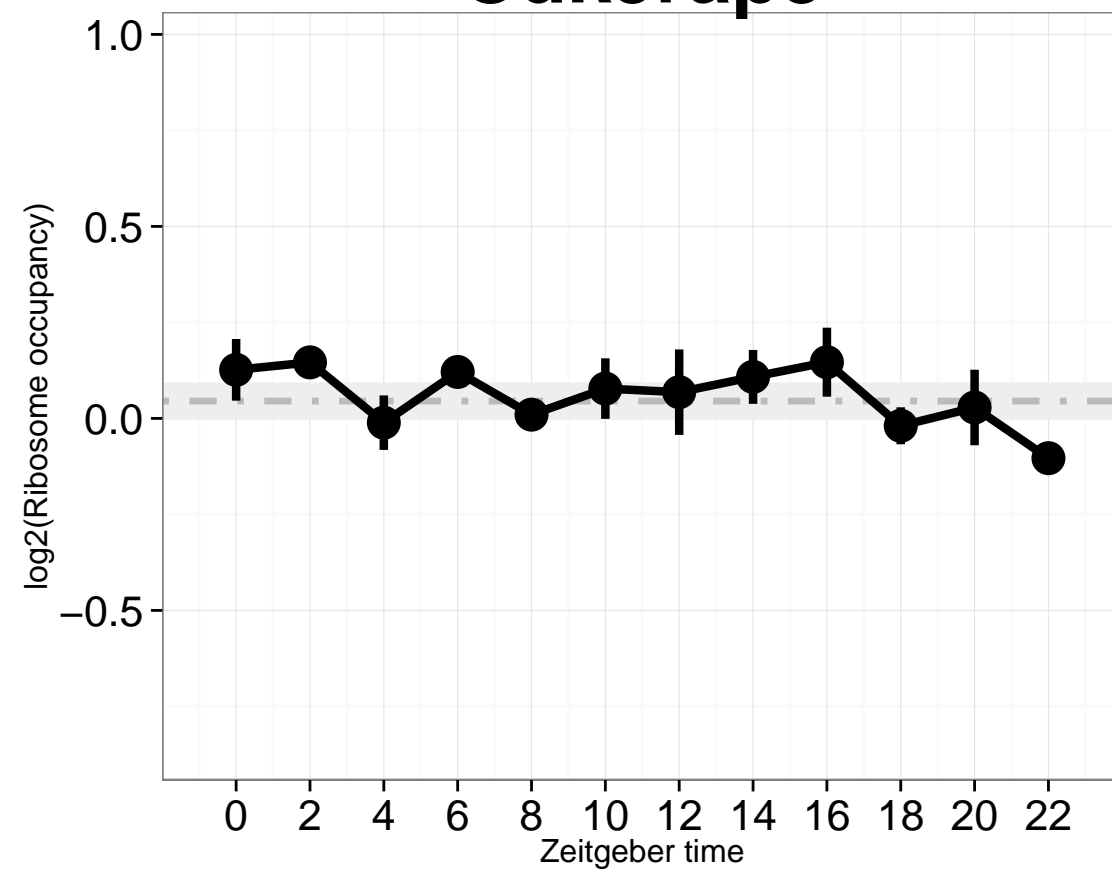

Supplement: SuppDataset_1.zip [file Cdk5rap3_set_A.pdf › Supplemental Dataset 1/A-mRNA_nonrhyth_translation_nonrhyth/Cdk5rap3_set_A.pdf]

## Cdk6

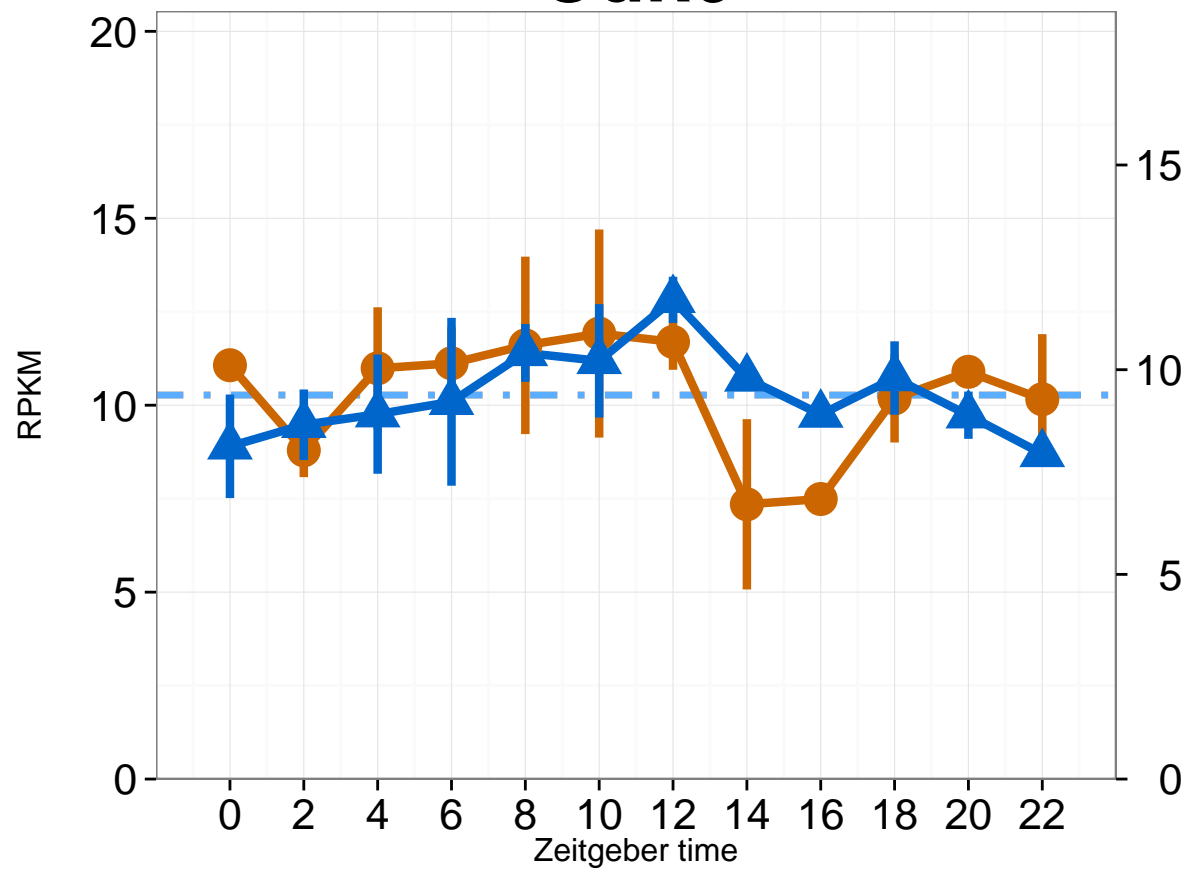

## Cdk6

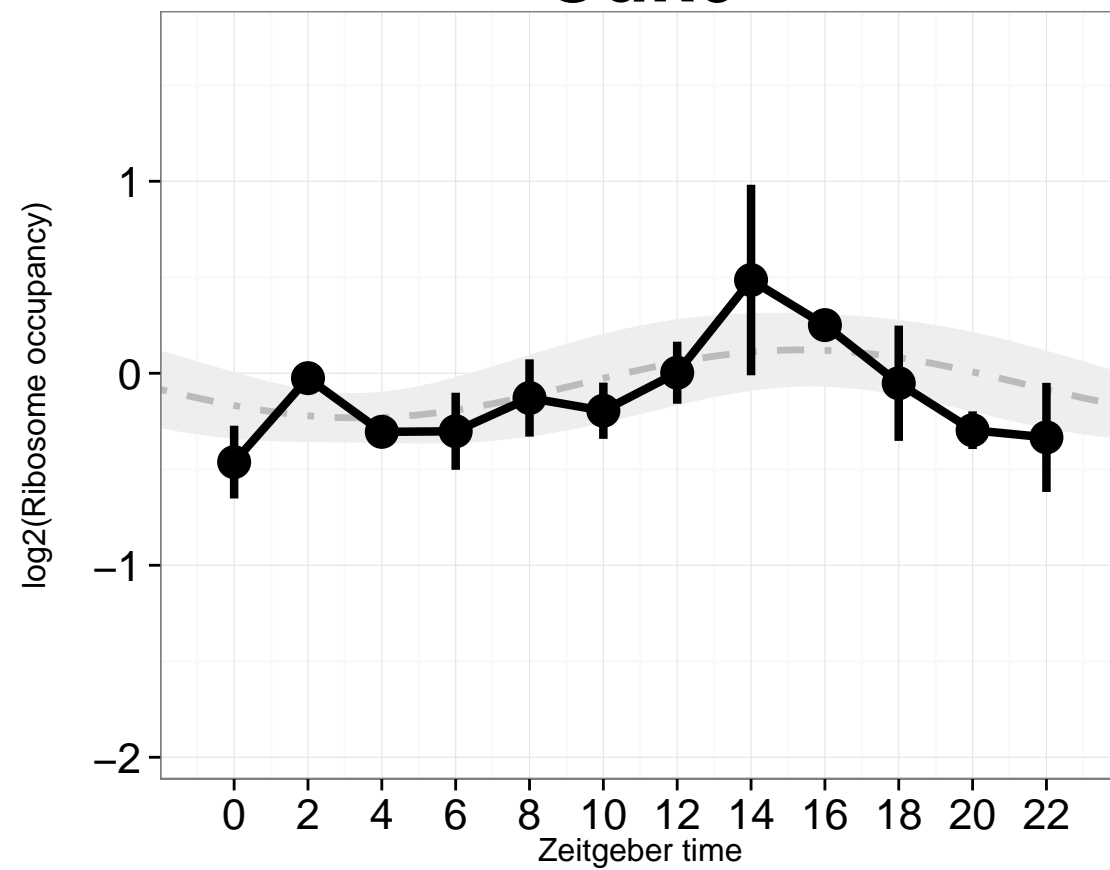

Supplement: SuppDataset_1.zip [file Cdk6_set_A.pdf › Supplemental Dataset 1/A-mRNA_nonrhyth_translation_nonrhyth/Cdk6_set_A.pdf]

## Cdk7

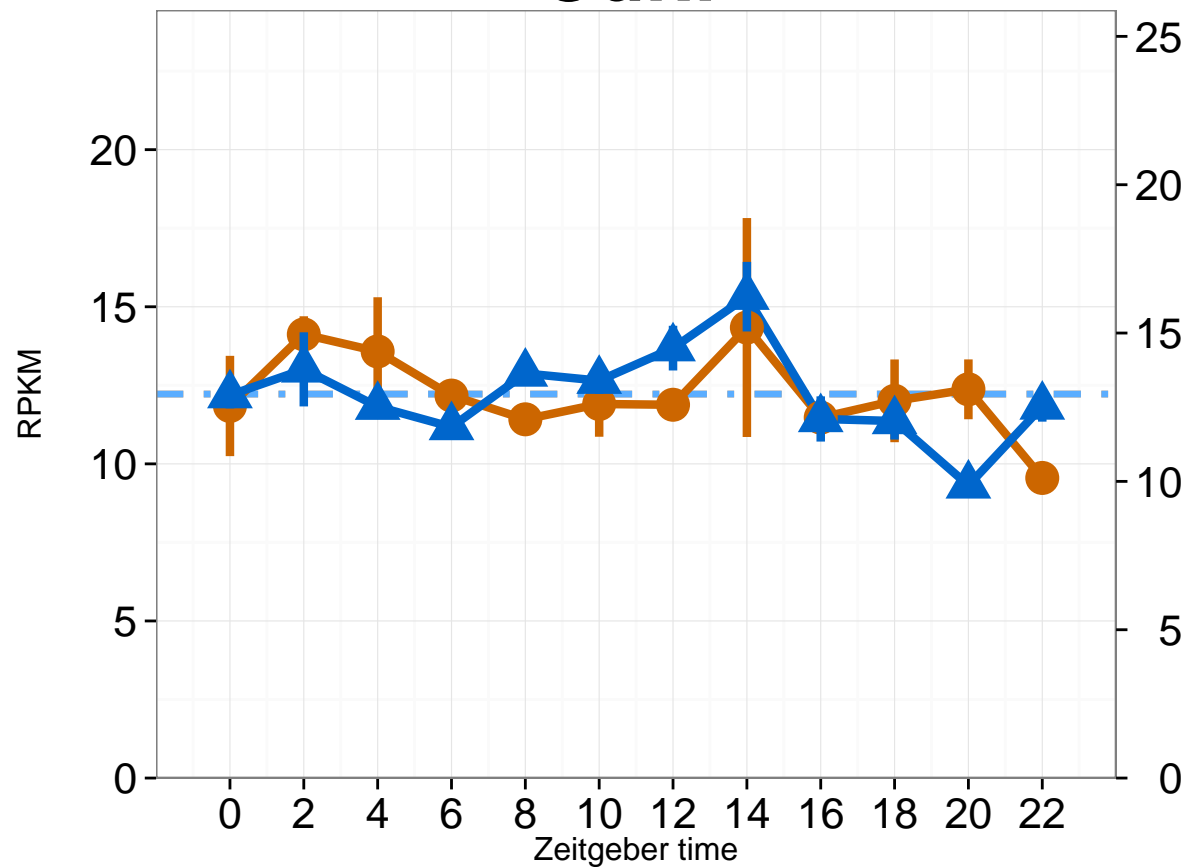

## Cdk7

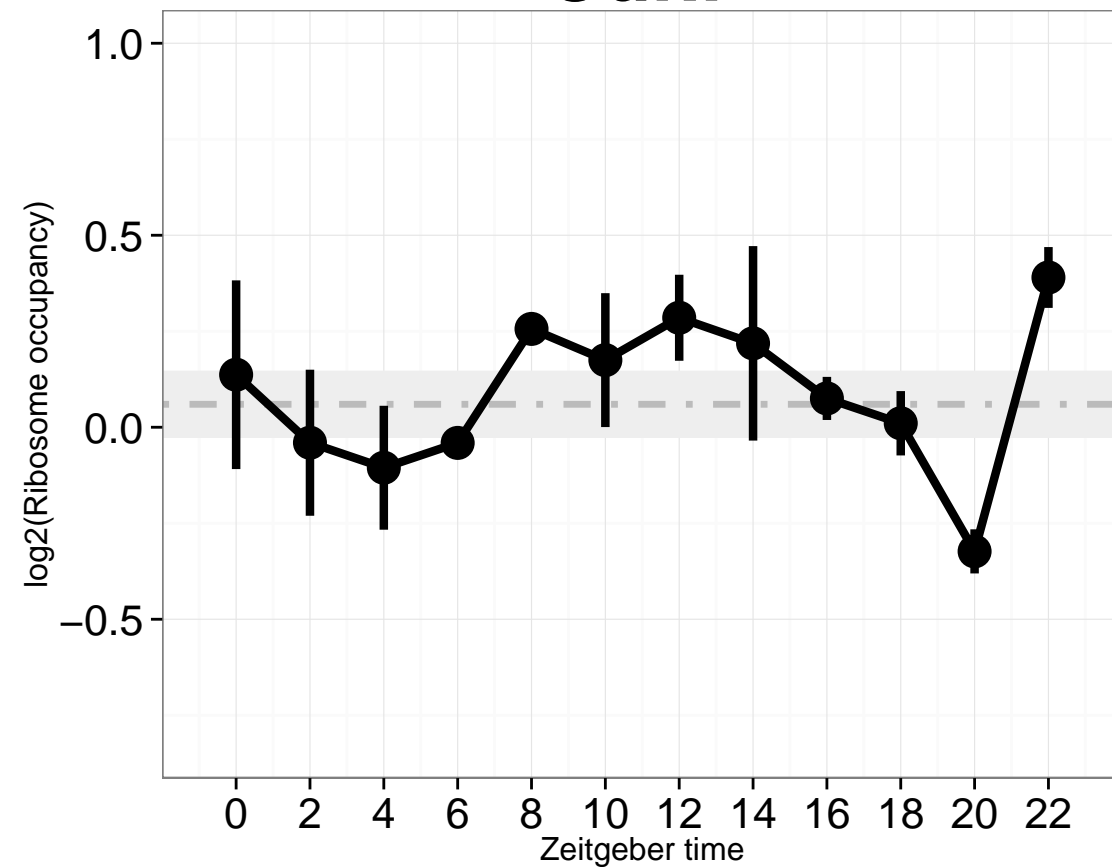

Supplement: SuppDataset_1.zip [file Cdk7_set_A.pdf › Supplemental Dataset 1/A-mRNA_nonrhyth_translation_nonrhyth/Cdk7_set_A.pdf]

## Cdk8

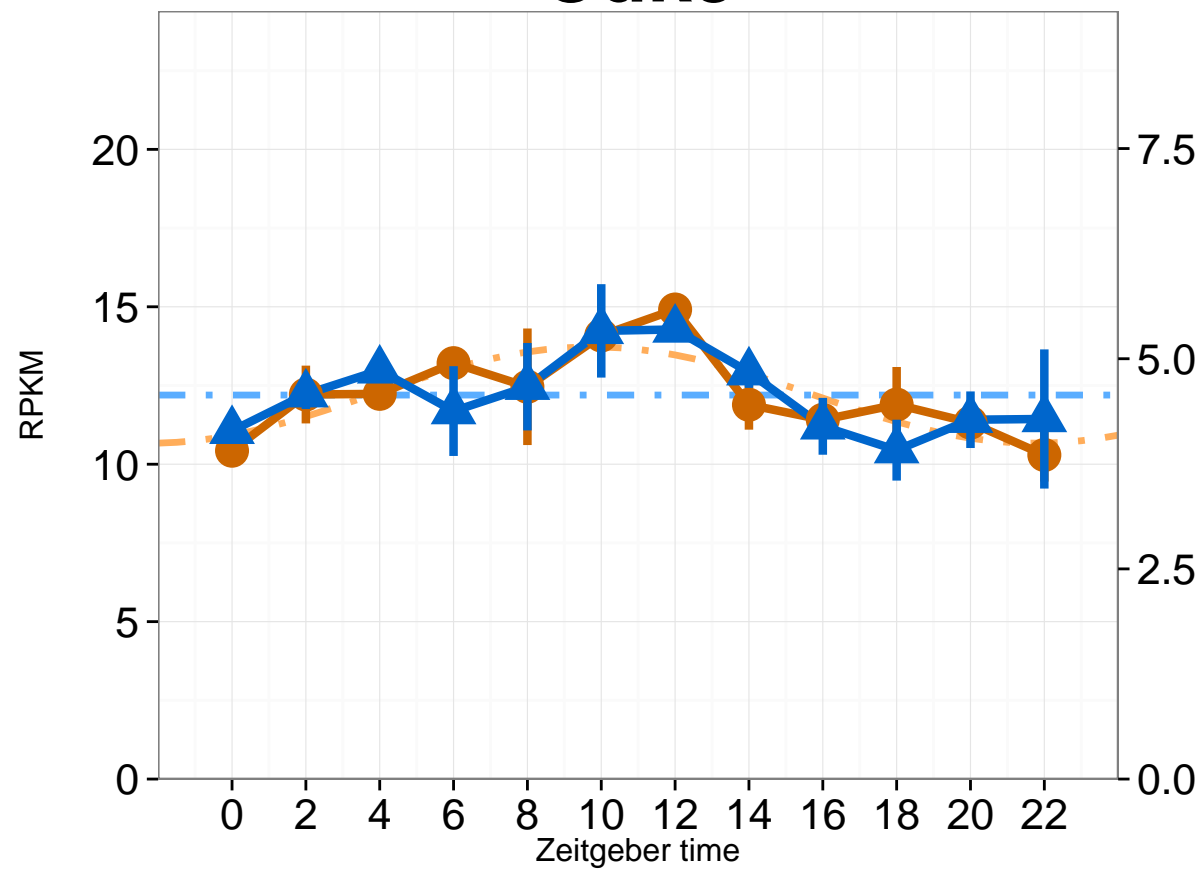

## Cdk8

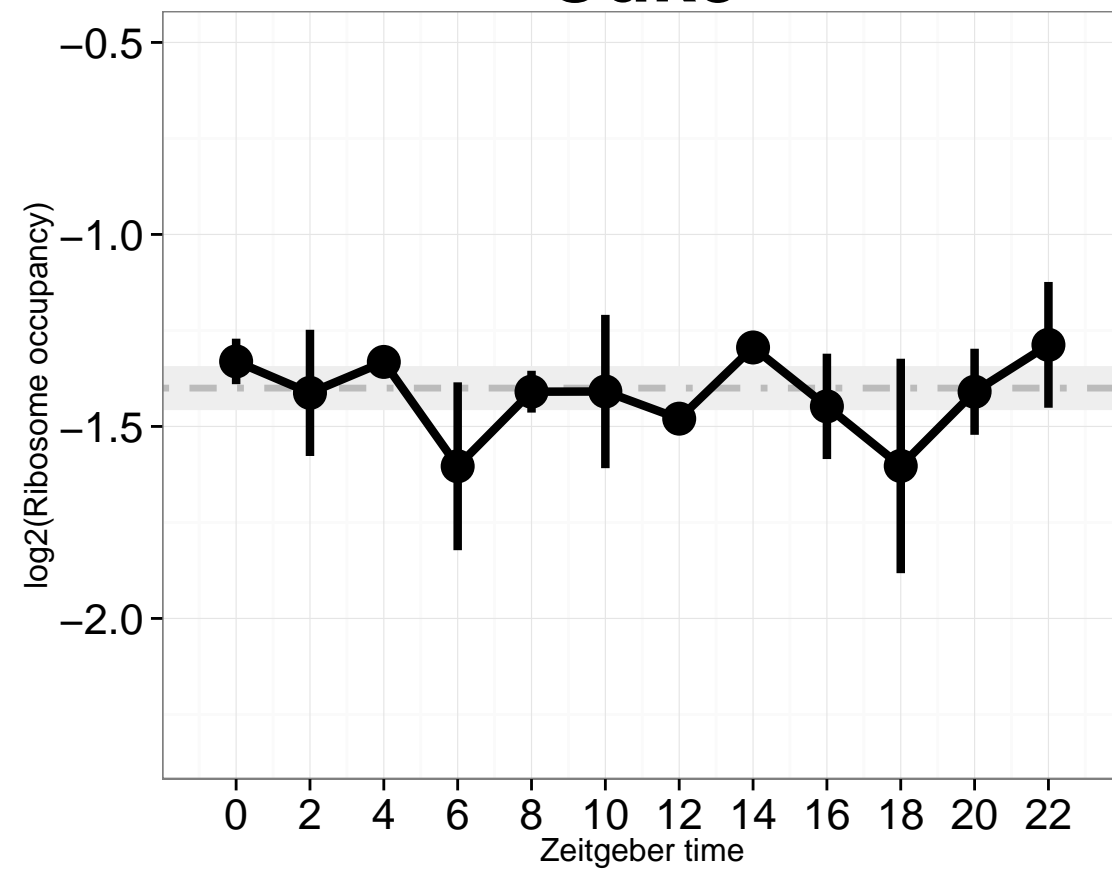

Supplement: SuppDataset_1.zip [file Cdk8_set_A.pdf › Supplemental Dataset 1/A-mRNA_nonrhyth_translation_nonrhyth/Cdk8_set_A.pdf]

## Cdk9

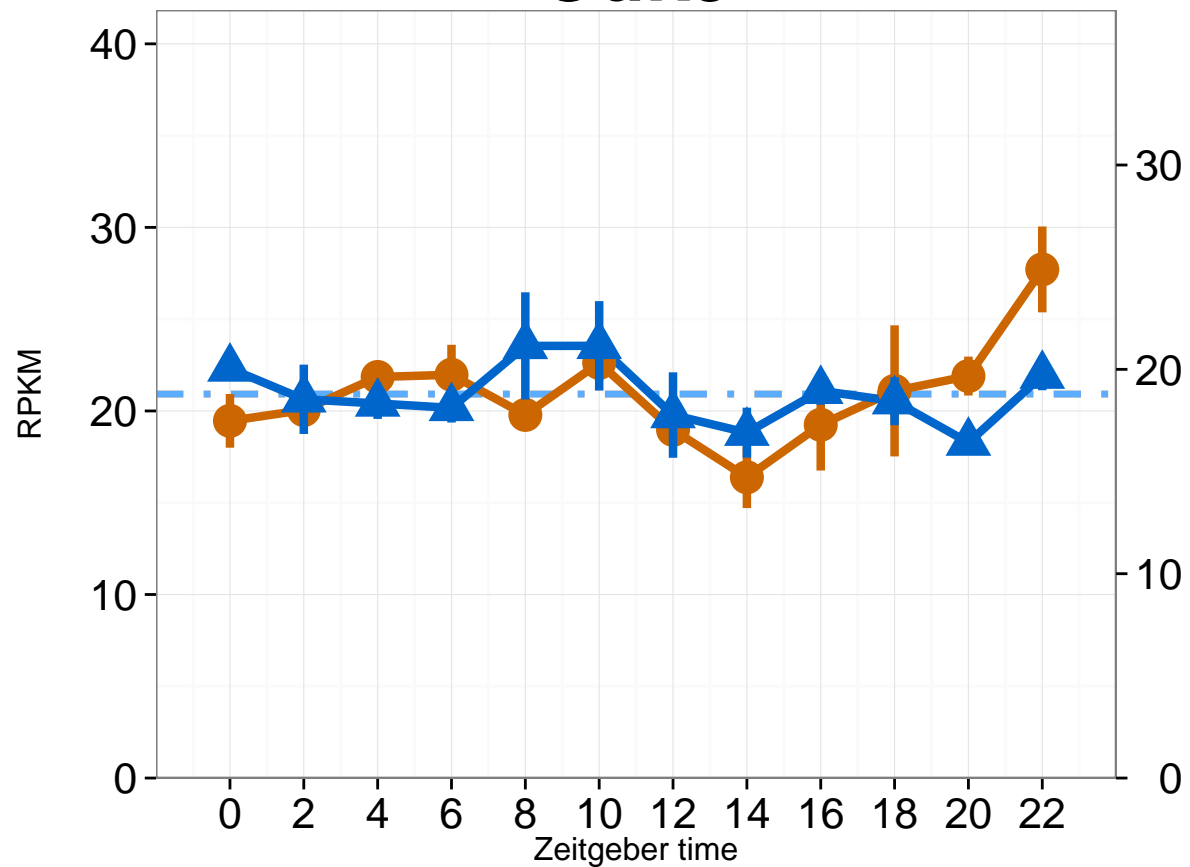

## Cdk9

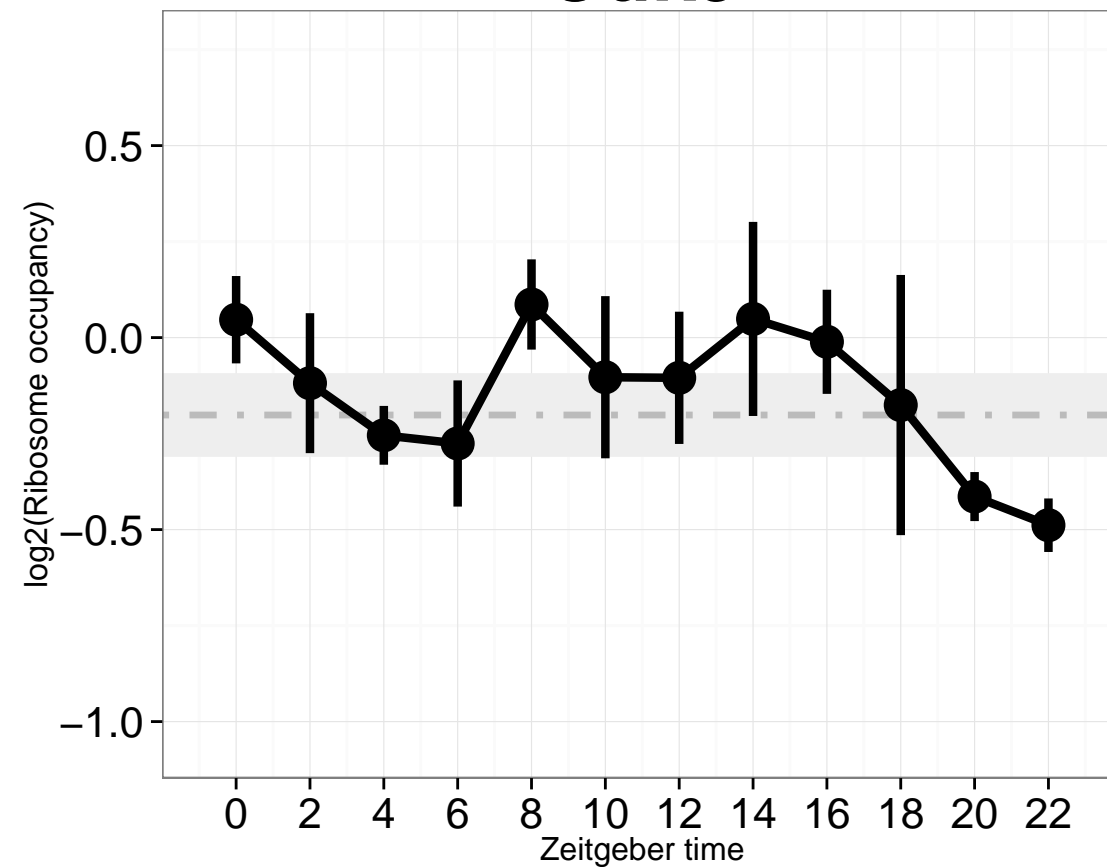

Supplement: SuppDataset_1.zip [file Cdk9_set_A.pdf › Supplemental Dataset 1/A-mRNA_nonrhyth_translation_nonrhyth/Cdk9_set_A.pdf]

## Cdkal1

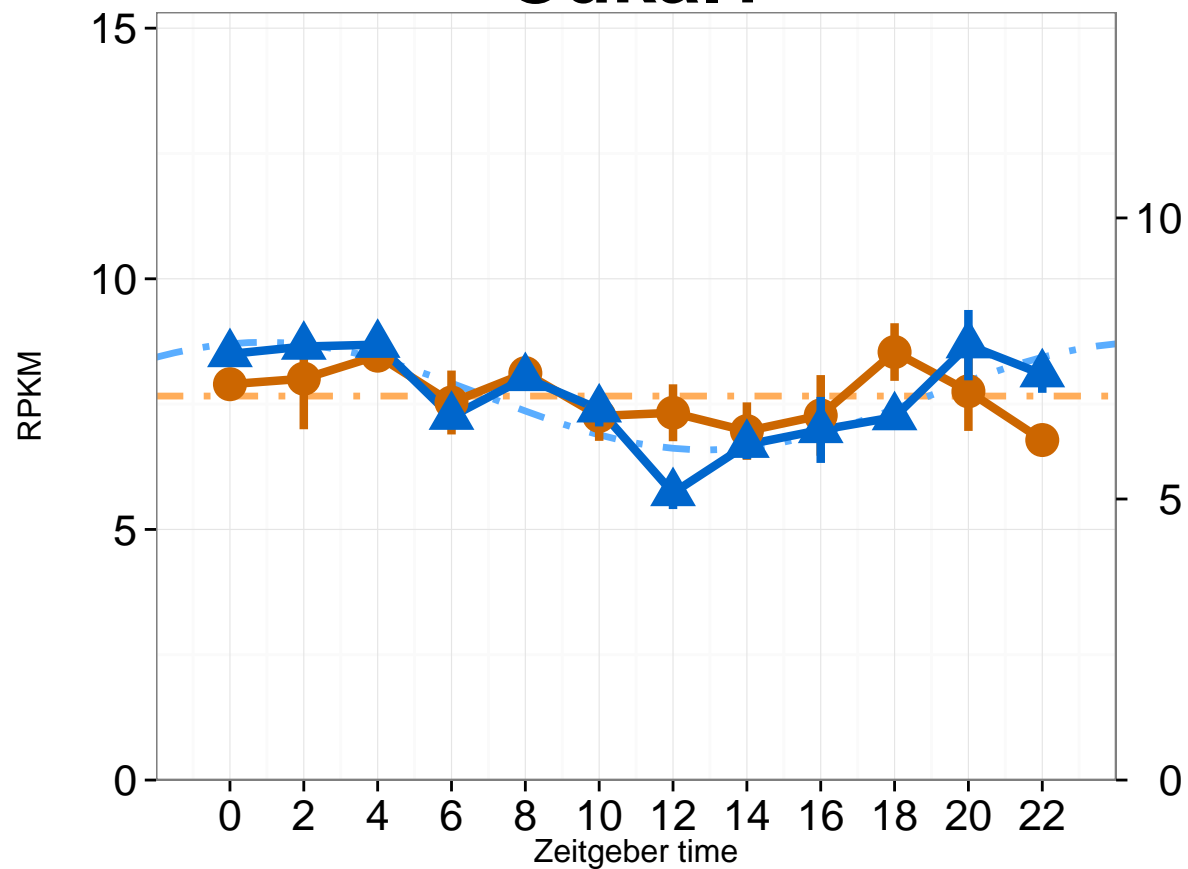

## Cdkal1

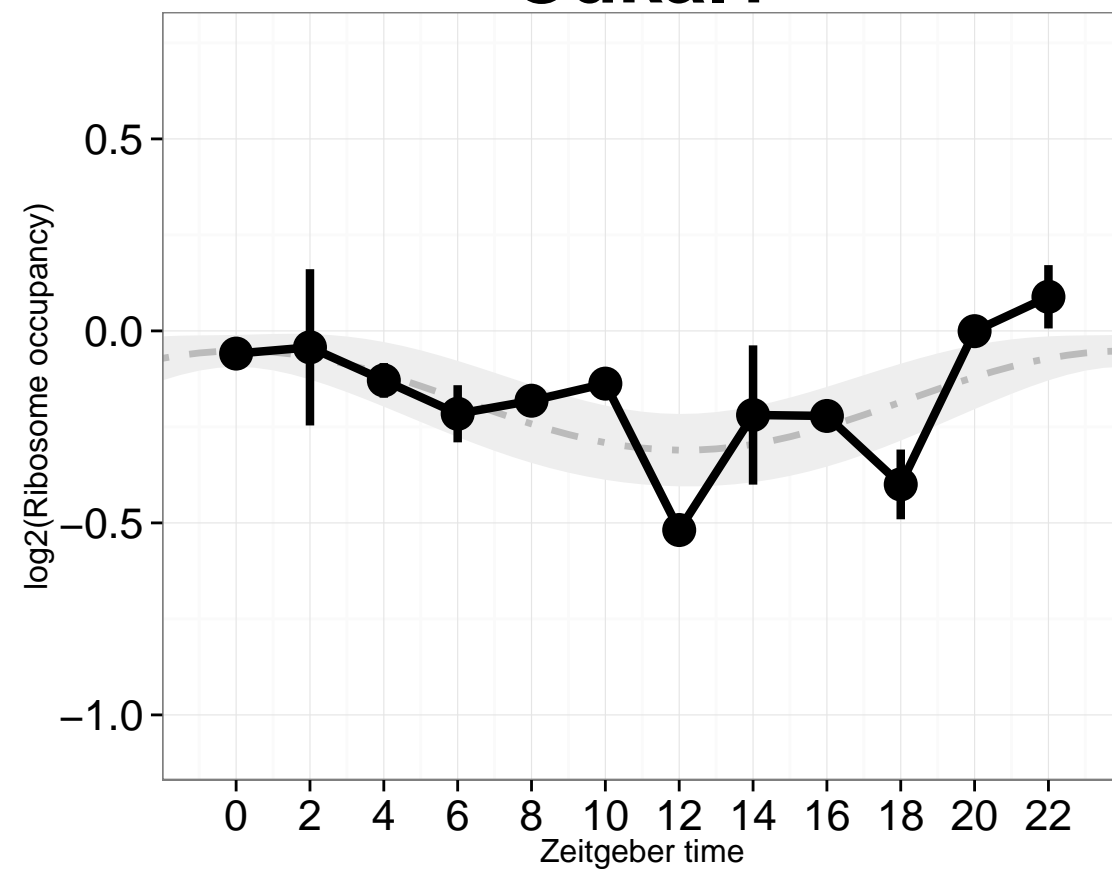

Supplement: SuppDataset_1.zip [file Cdkal1_set_A.pdf › Supplemental Dataset 1/A-mRNA_nonrhyth_translation_nonrhyth/Cdkal1_set_A.pdf]

# Cdkn1b

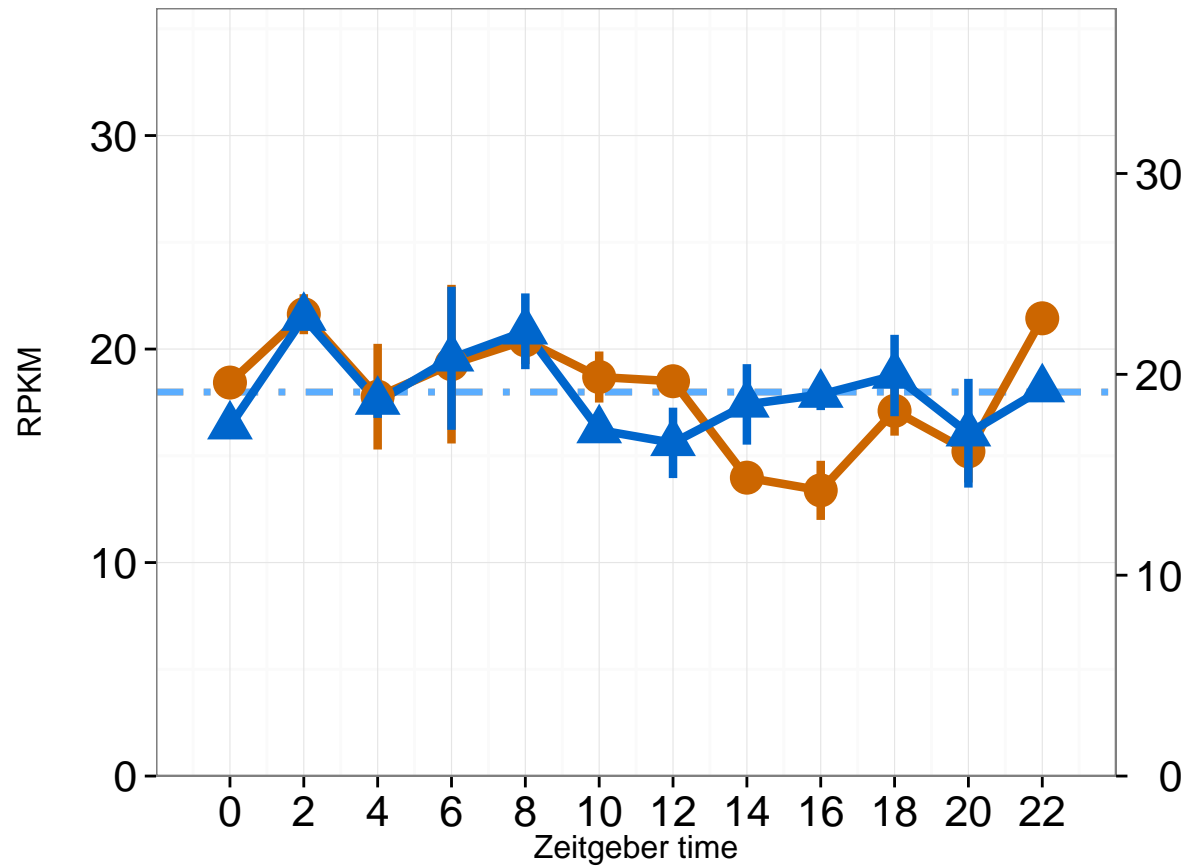

# Cdkn1b

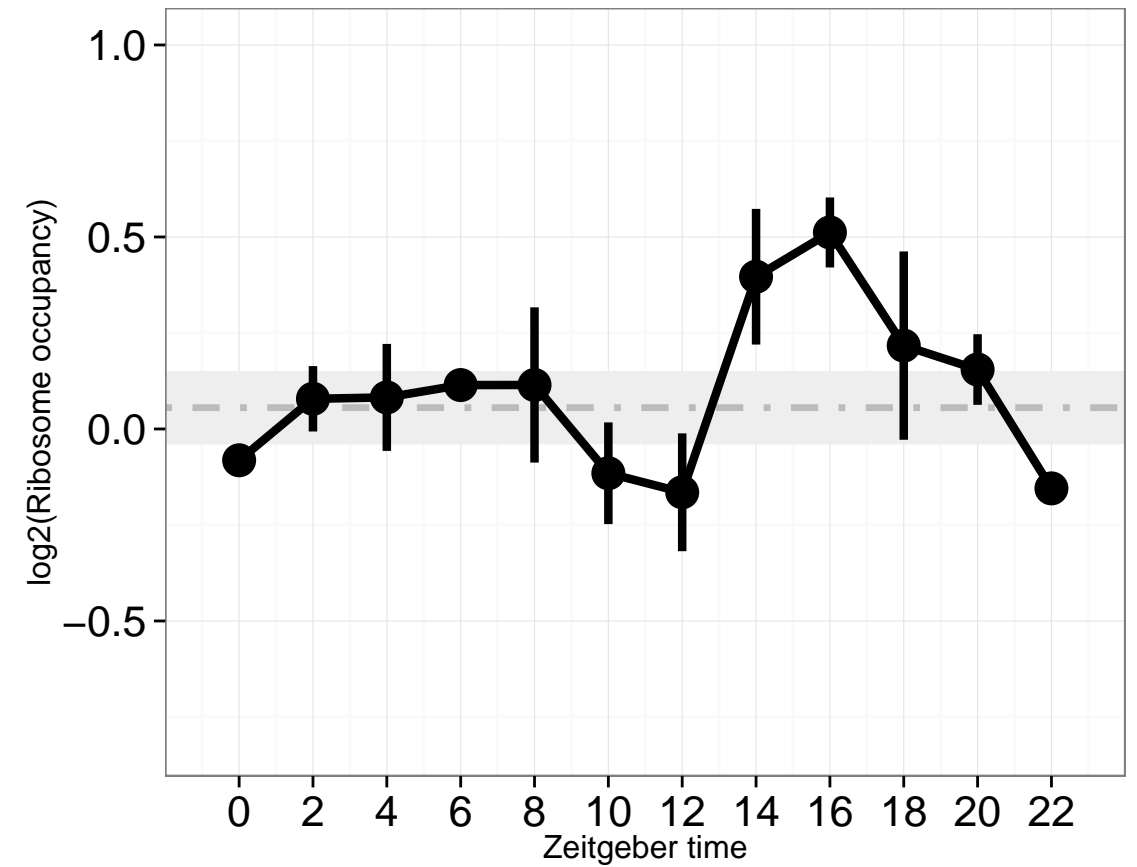

Supplement: SuppDataset_1.zip [file Cdkn1b_set_A.pdf › Supplemental Dataset 1/A-mRNA_nonrhyth_translation_nonrhyth/Cdkn1b_set_A.pdf]

**Cdkn1c TR**

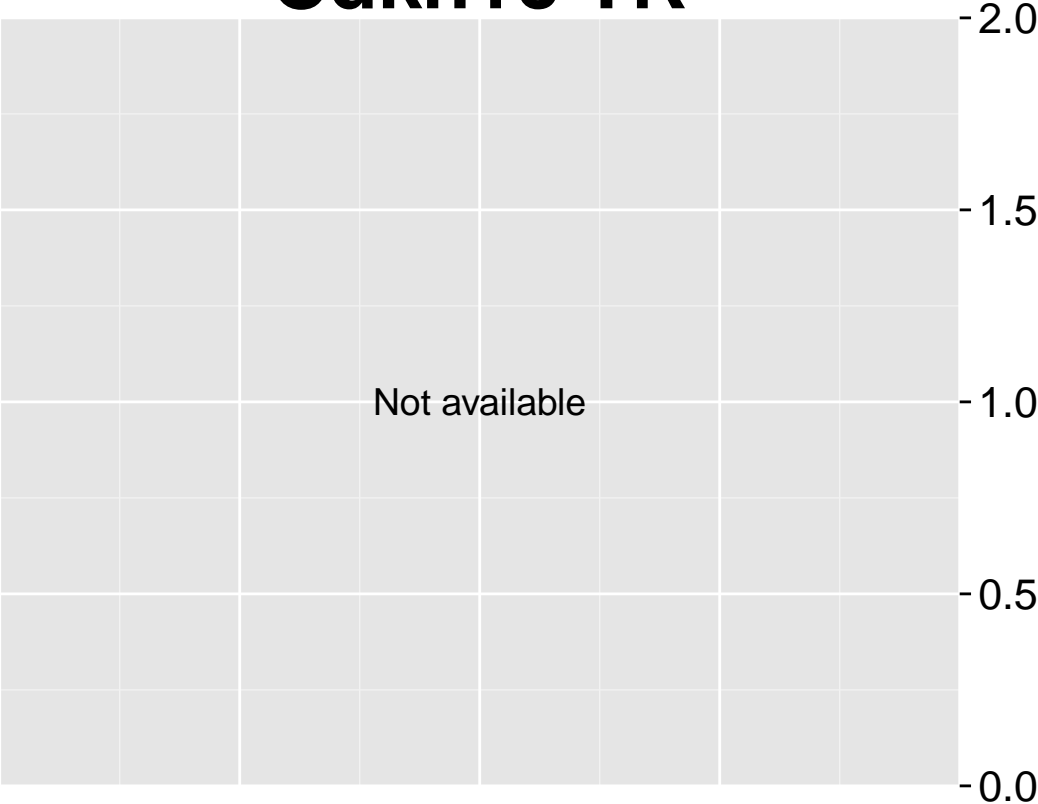

**Cdkn1c log2(Ribosome occupancy**

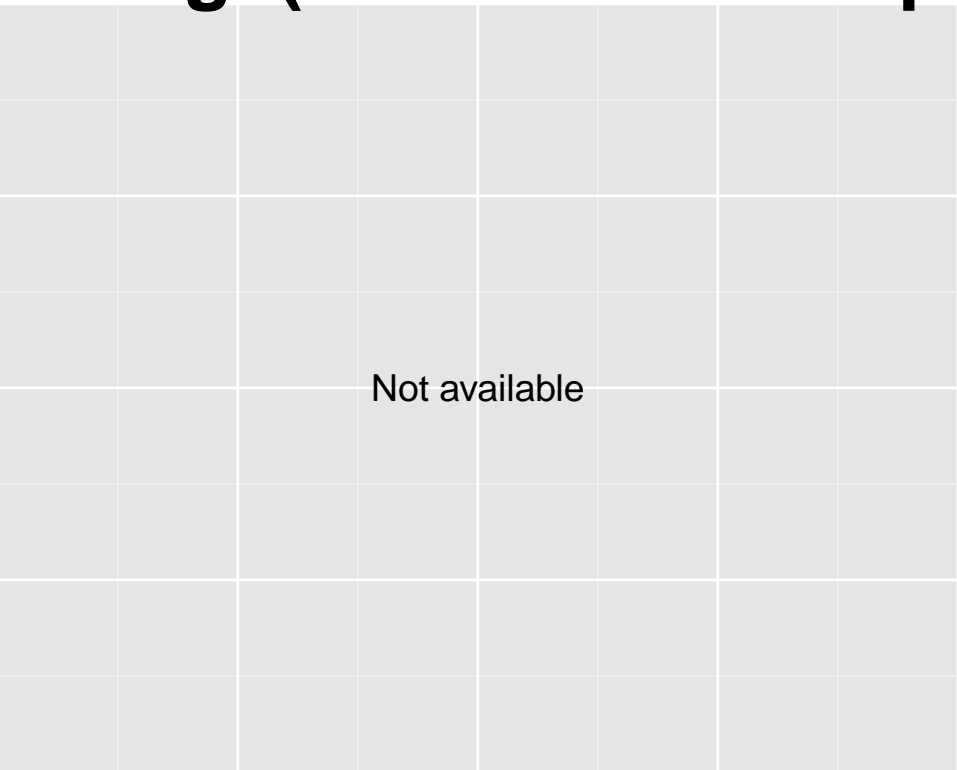

Supplement: SuppDataset_1.zip [file Cdkn1c_set_A.pdf › Supplemental Dataset 1/A-mRNA_nonrhyth_translation_nonrhyth/Cdkn1c_set_A.pdf]

# Cdkn2aip

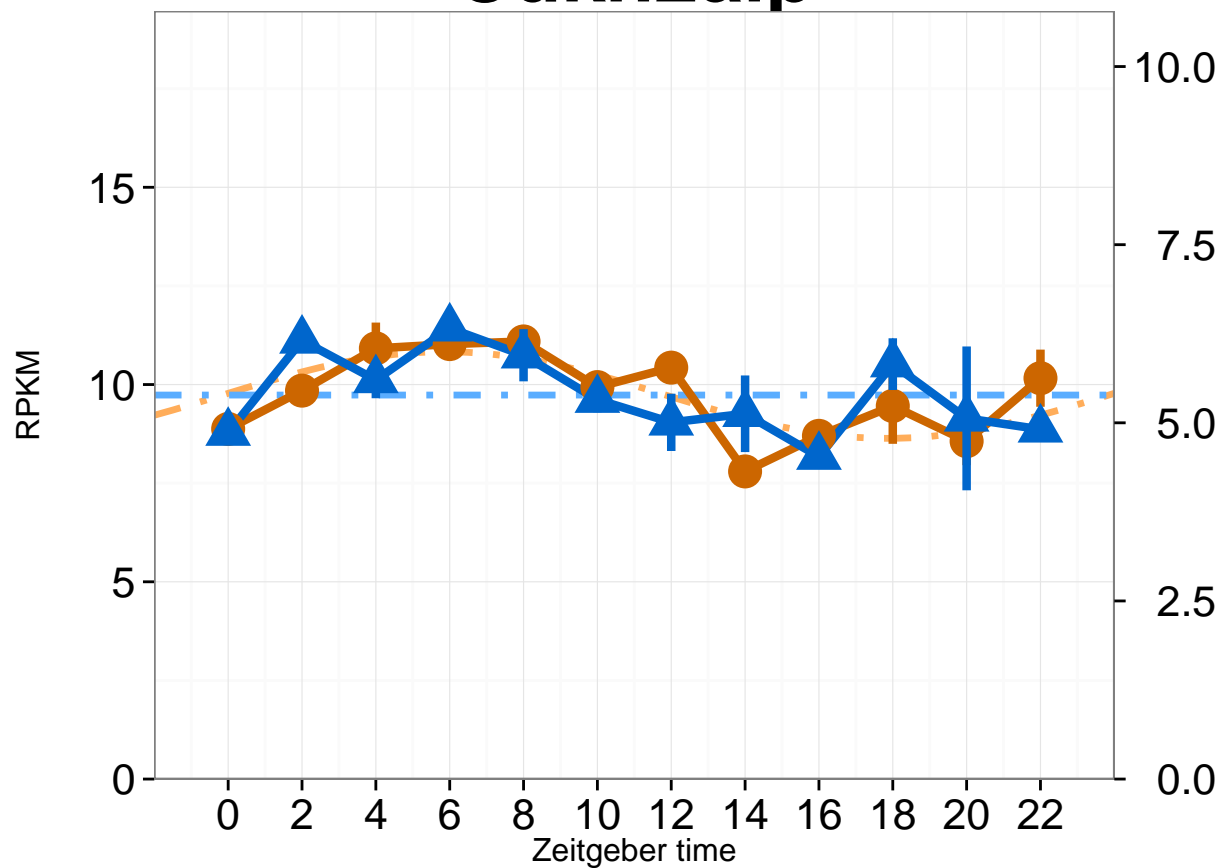

# Cdkn2aip

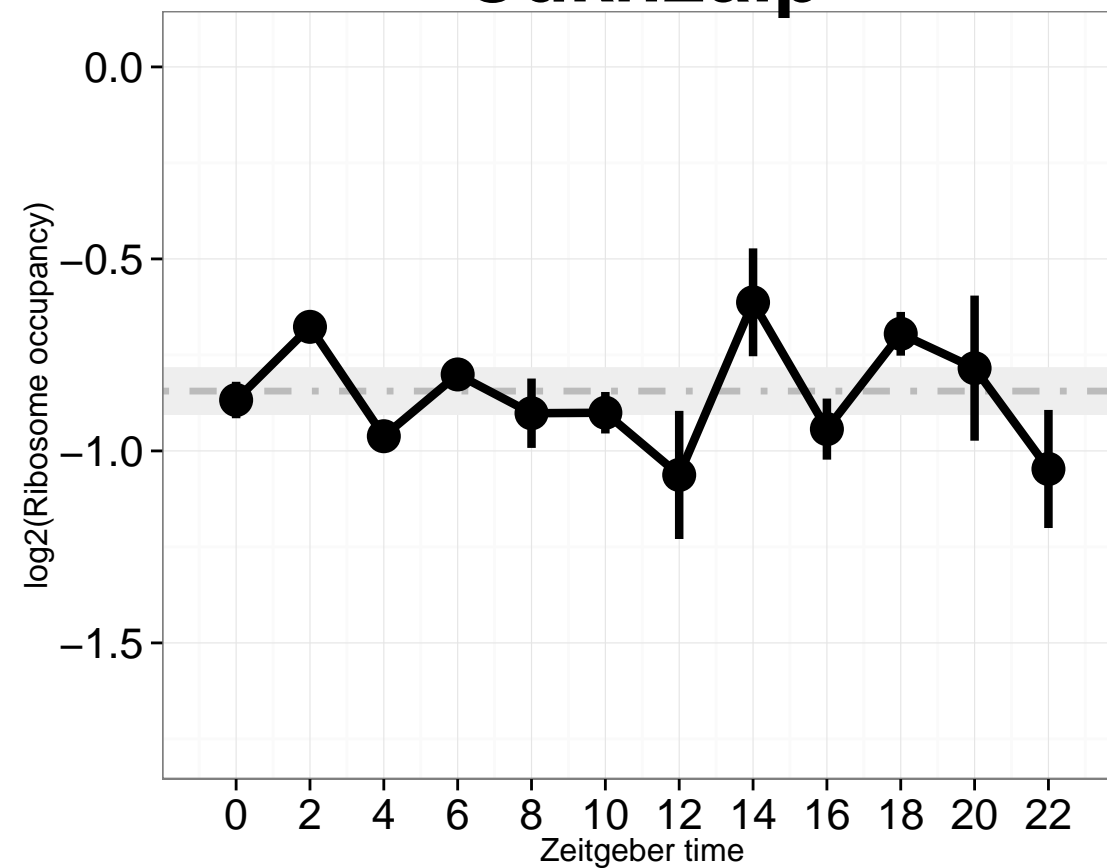

Supplement: SuppDataset_1.zip [file Cdkn2aip_set_A.pdf › Supplemental Dataset 1/A-mRNA_nonrhyth_translation_nonrhyth/Cdkn2aip_set_A.pdf]

# Cdkn2aipnl

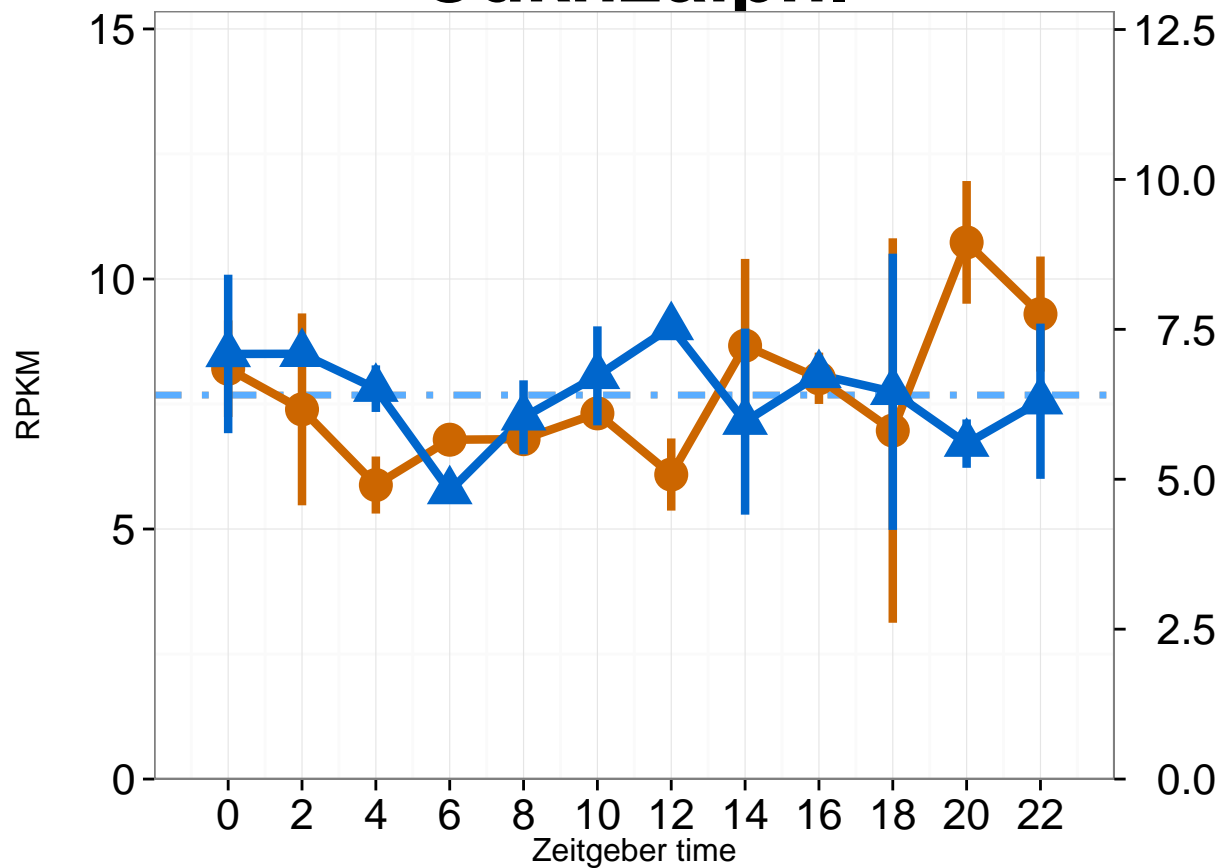

# Cdkn2aipnl

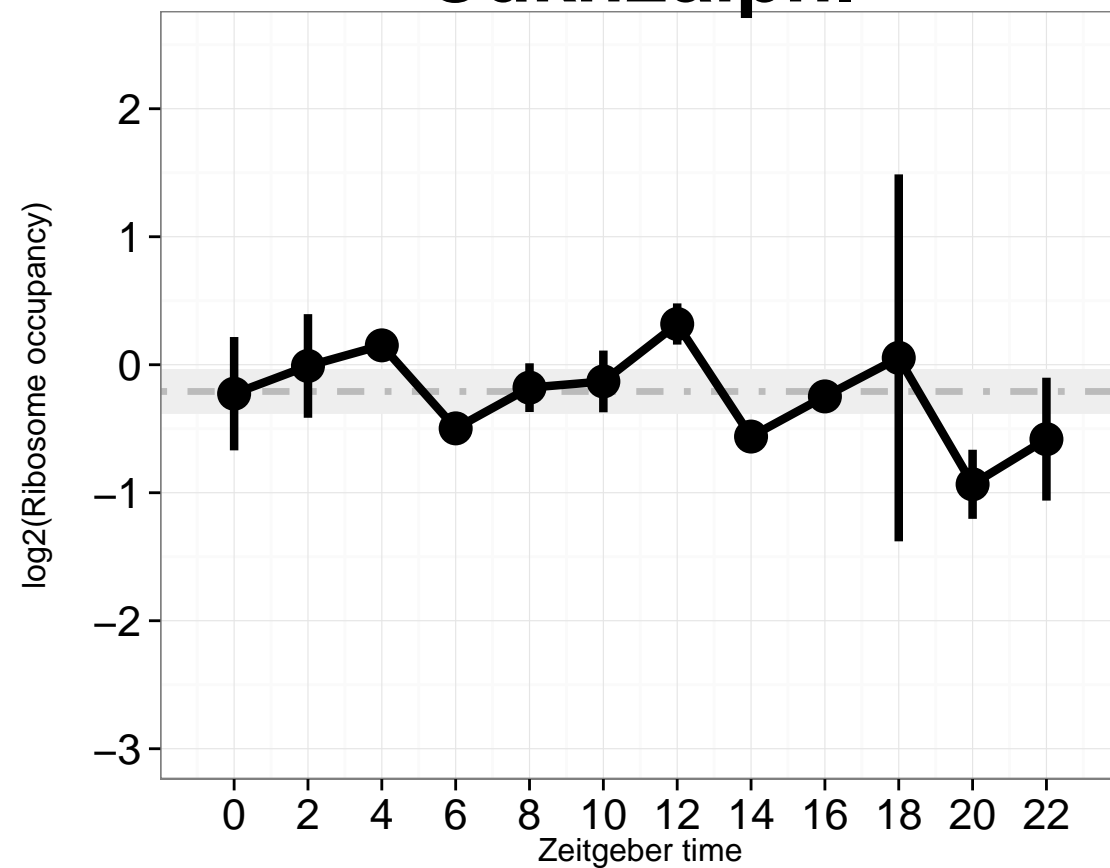

Supplement: SuppDataset_1.zip [file Cdkn2aipnl_set_A.pdf › Supplemental Dataset 1/A-mRNA_nonrhyth_translation_nonrhyth/Cdkn2aipnl_set_A.pdf]

# Cdkn2c

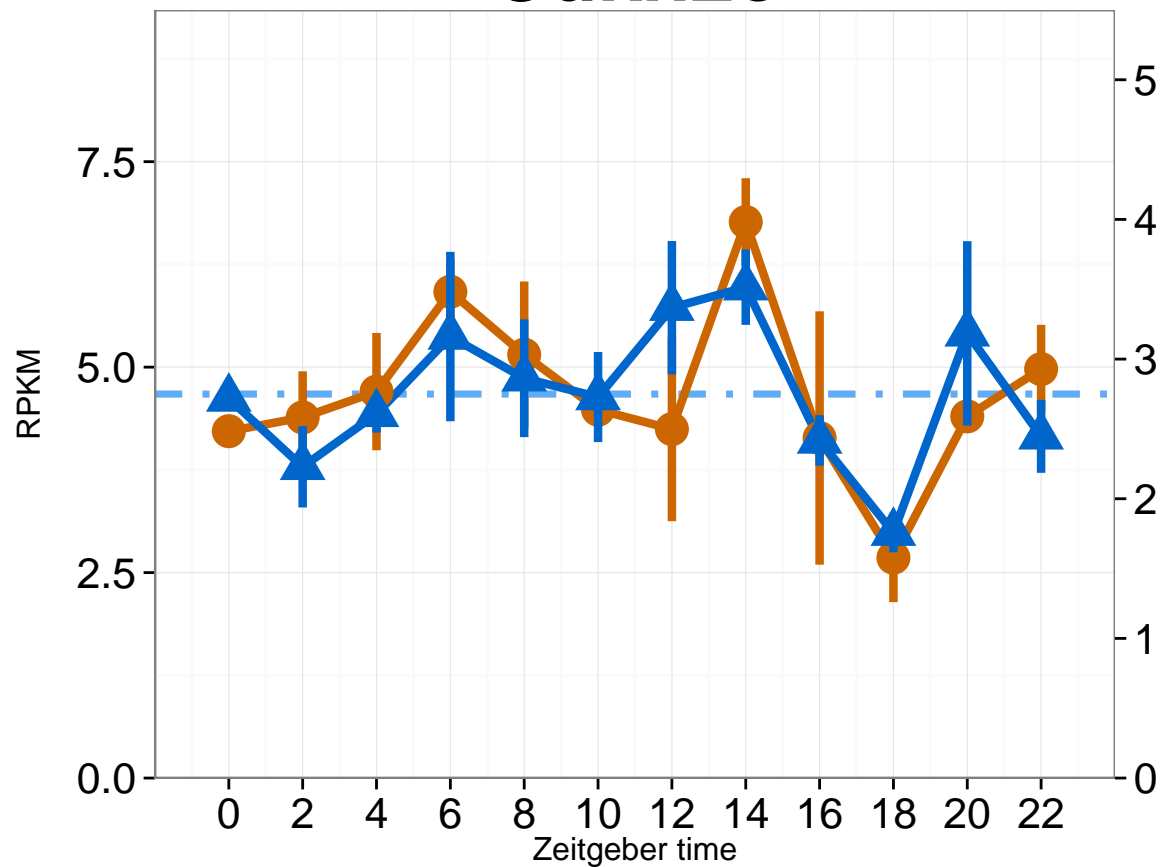

# Cdkn2c

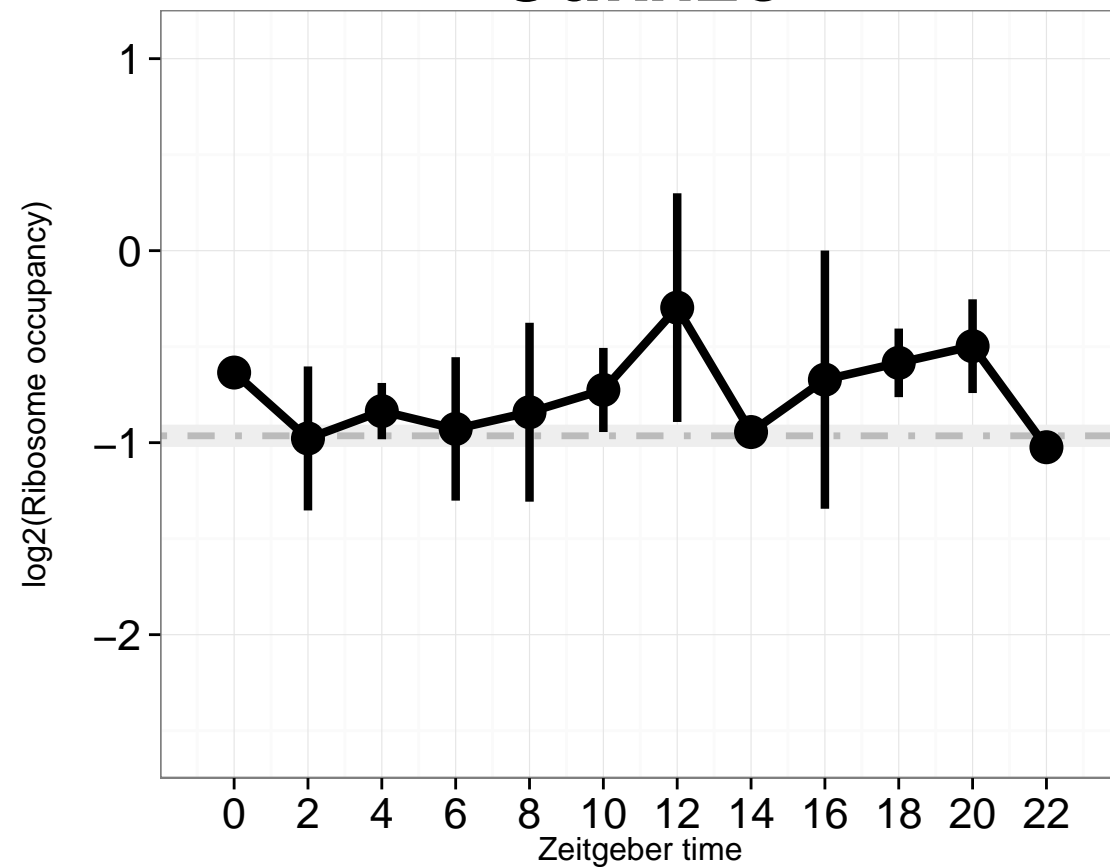

Supplement: SuppDataset_1.zip [file Cdkn2c_set_A.pdf › Supplemental Dataset 1/A-mRNA_nonrhyth_translation_nonrhyth/Cdkn2c_set_A.pdf]

# Cdkn2d

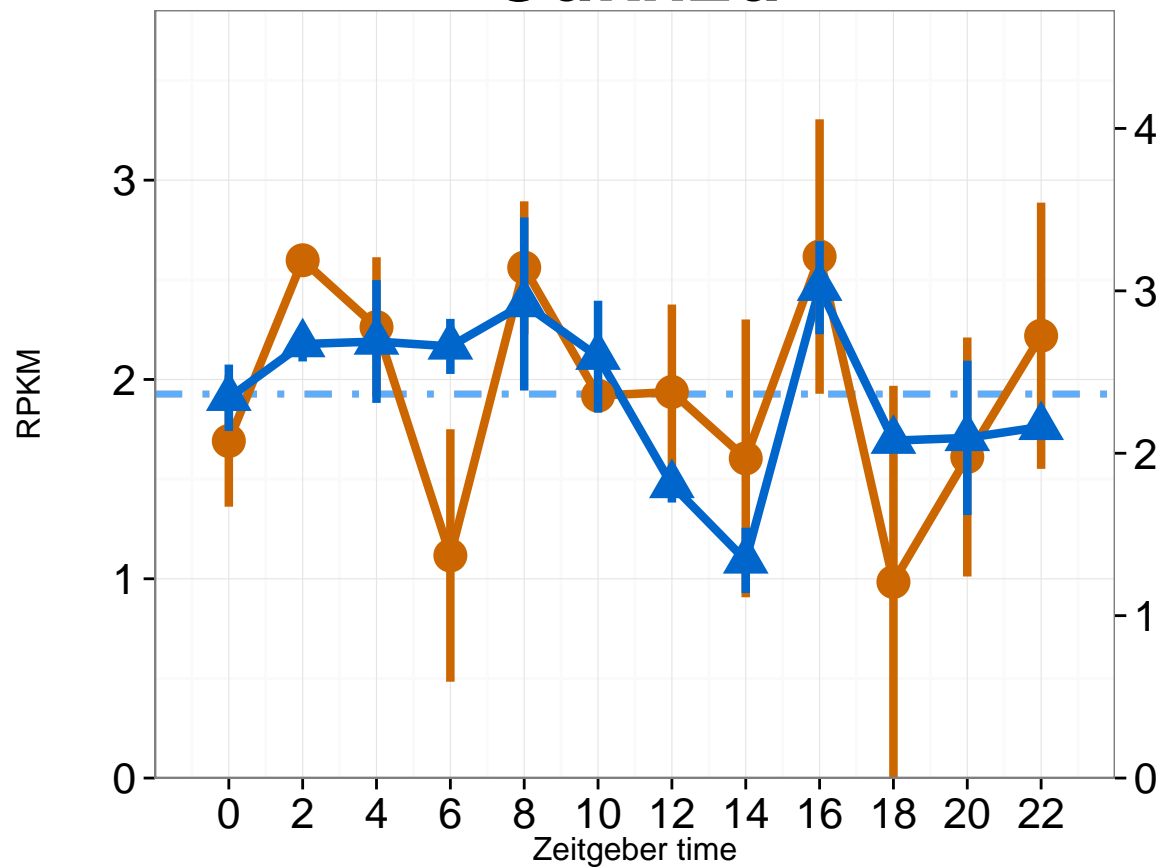

# Cdkn2d

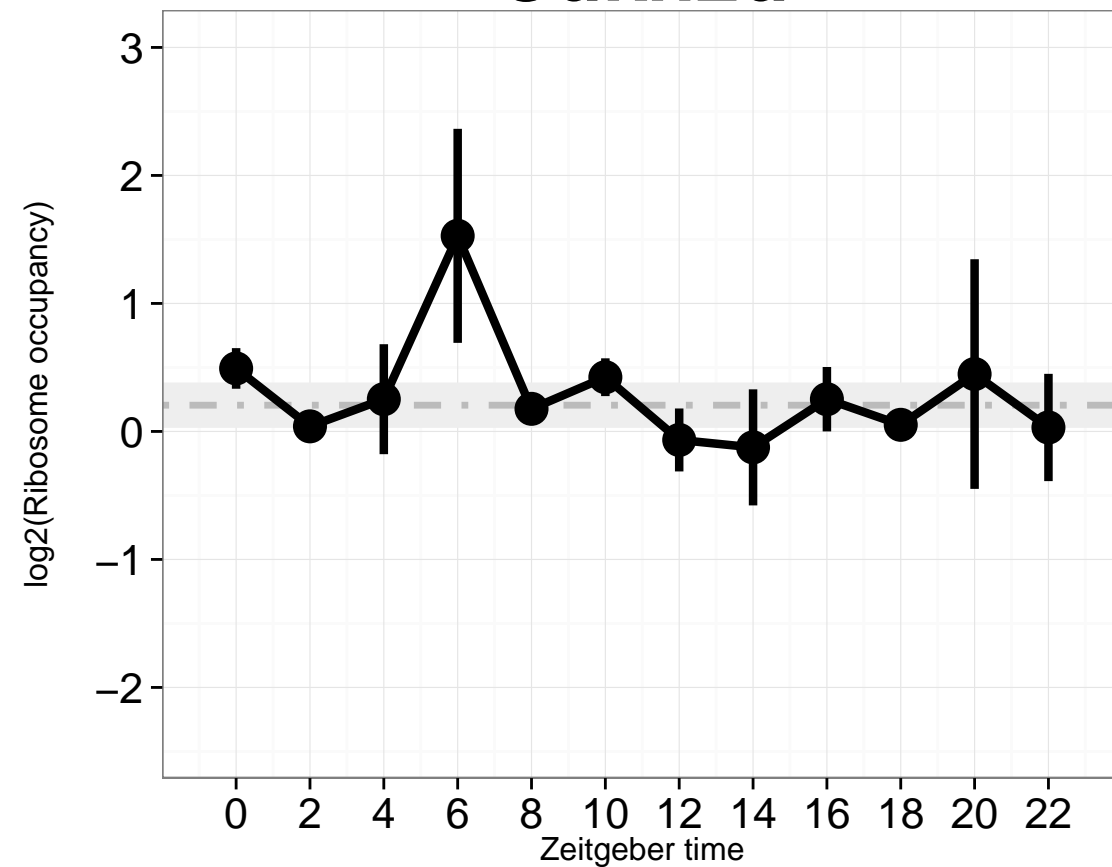

Supplement: SuppDataset_1.zip [file Cdkn2d_set_A.pdf › Supplemental Dataset 1/A-mRNA_nonrhyth_translation_nonrhyth/Cdkn2d_set_A.pdf]

## Cdo1

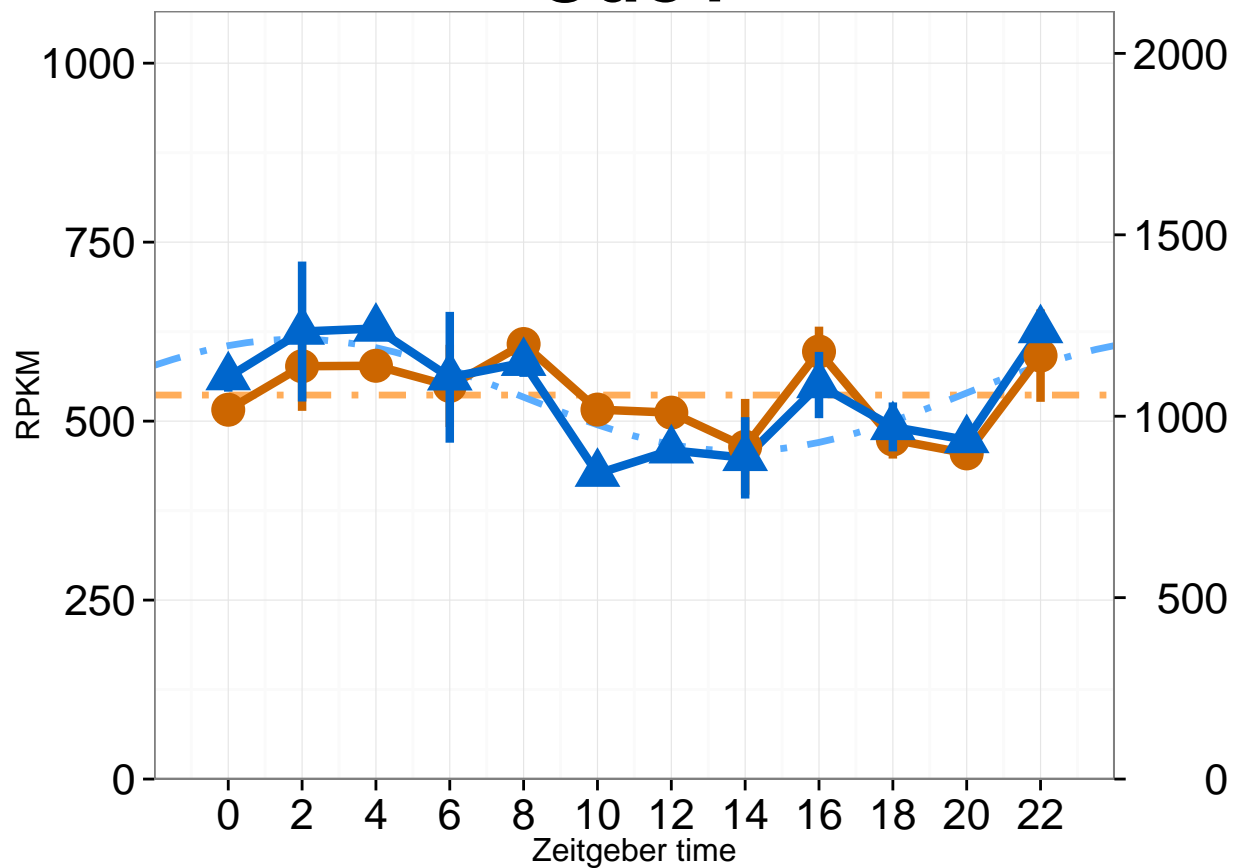

## Cdo1

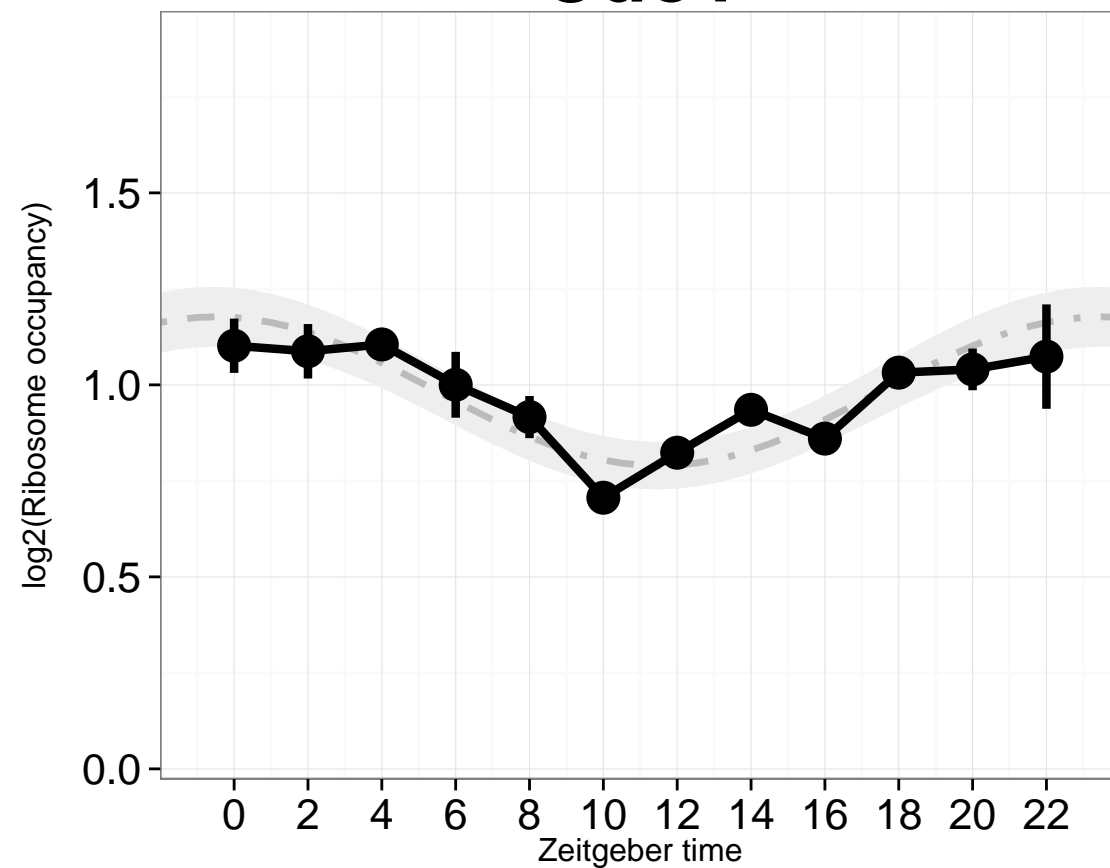

Supplement: SuppDataset_1.zip [file Cdo1_set_A.pdf › Supplemental Dataset 1/A-mRNA_nonrhyth_translation_nonrhyth/Cdo1_set_A.pdf]

## Cdon

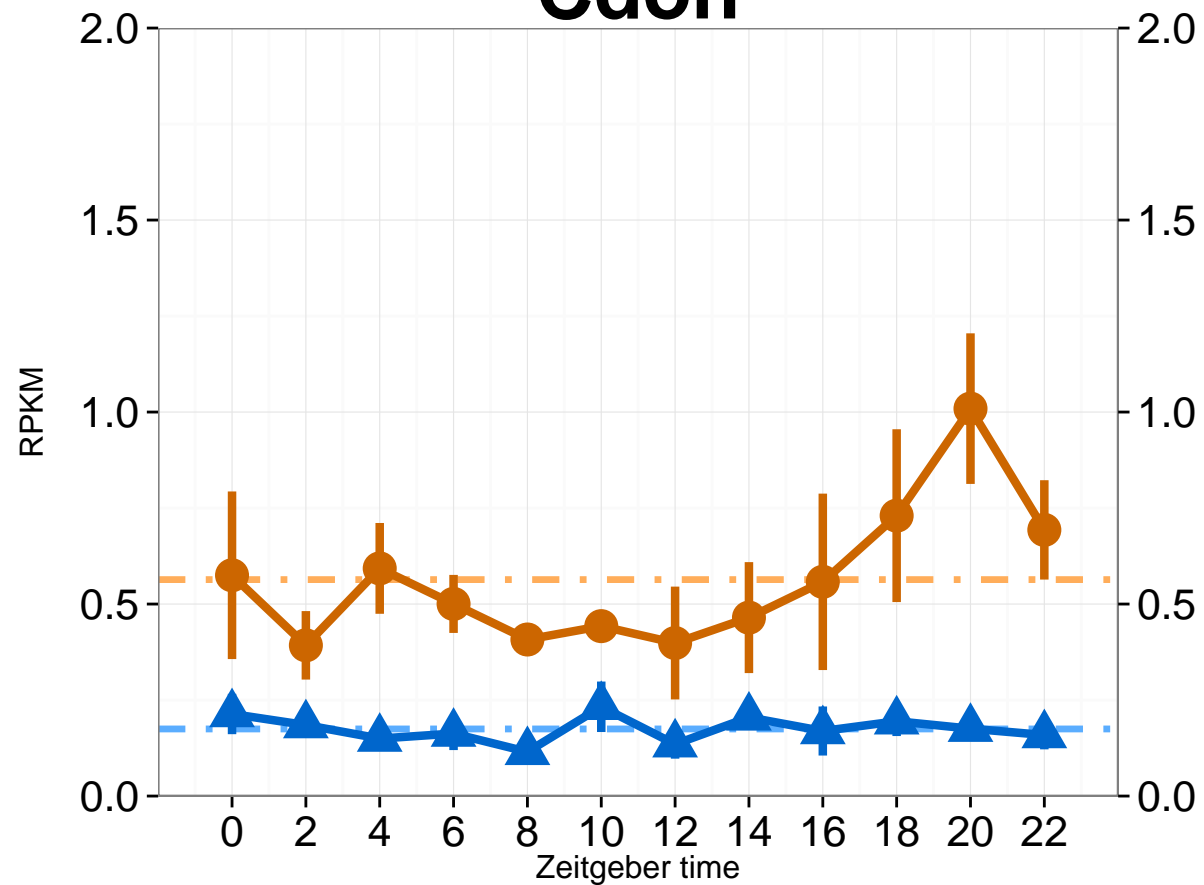

## Cdon

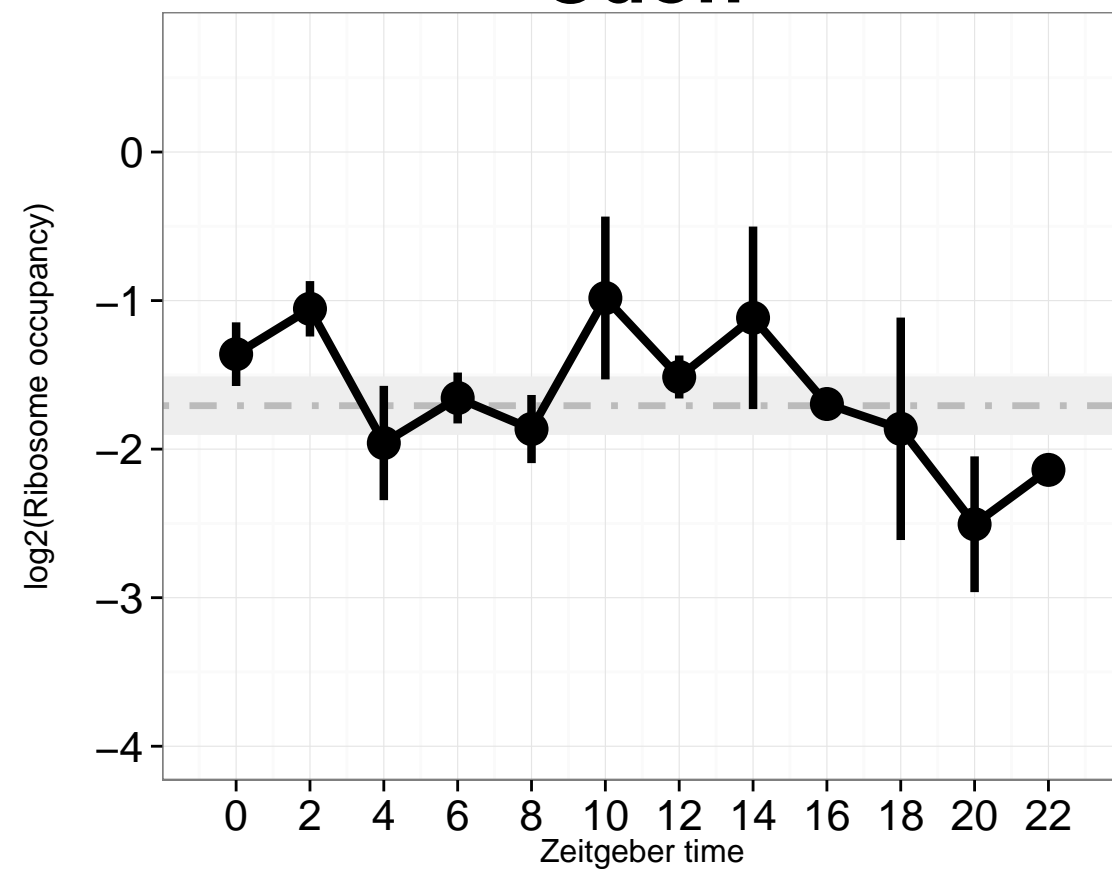

Supplement: SuppDataset_1.zip [file Cdon_set_A.pdf › Supplemental Dataset 1/A-mRNA_nonrhyth_translation_nonrhyth/Cdon_set_A.pdf]

## Cdr2

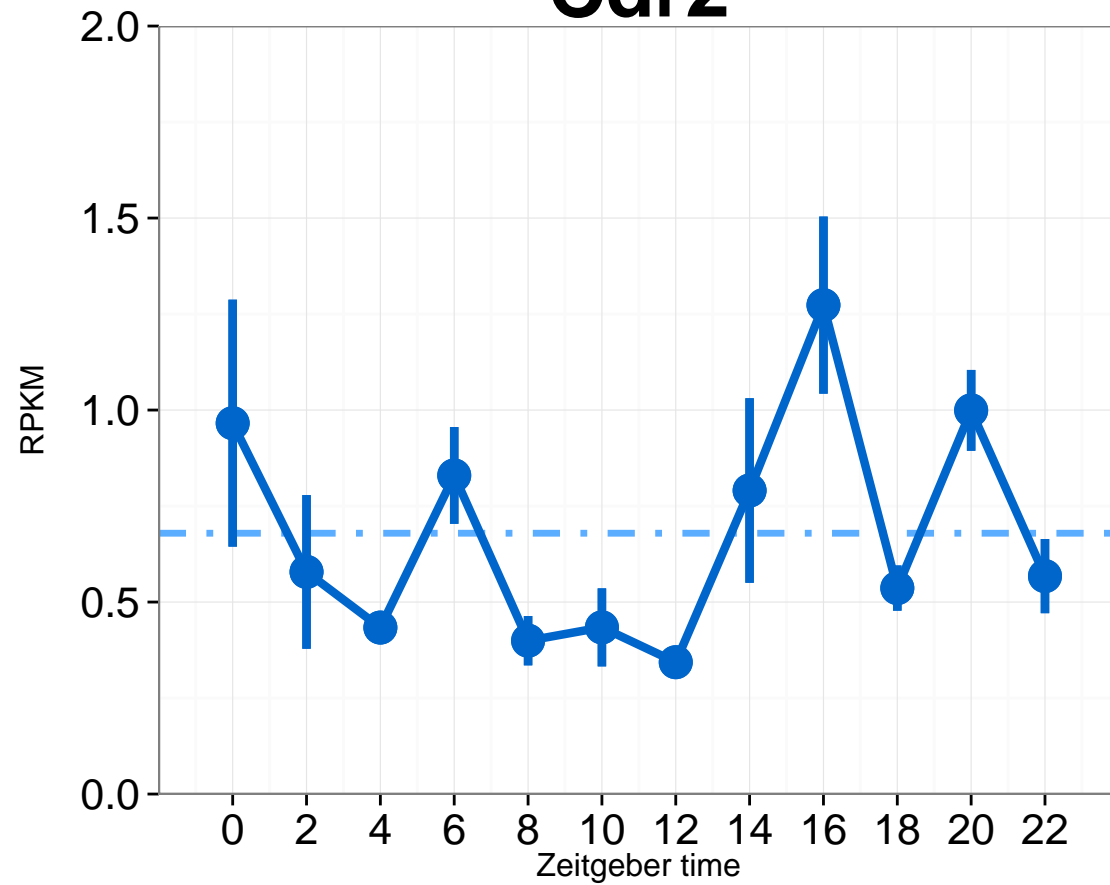

## Cdr2 log2(Ribosome occupancy)

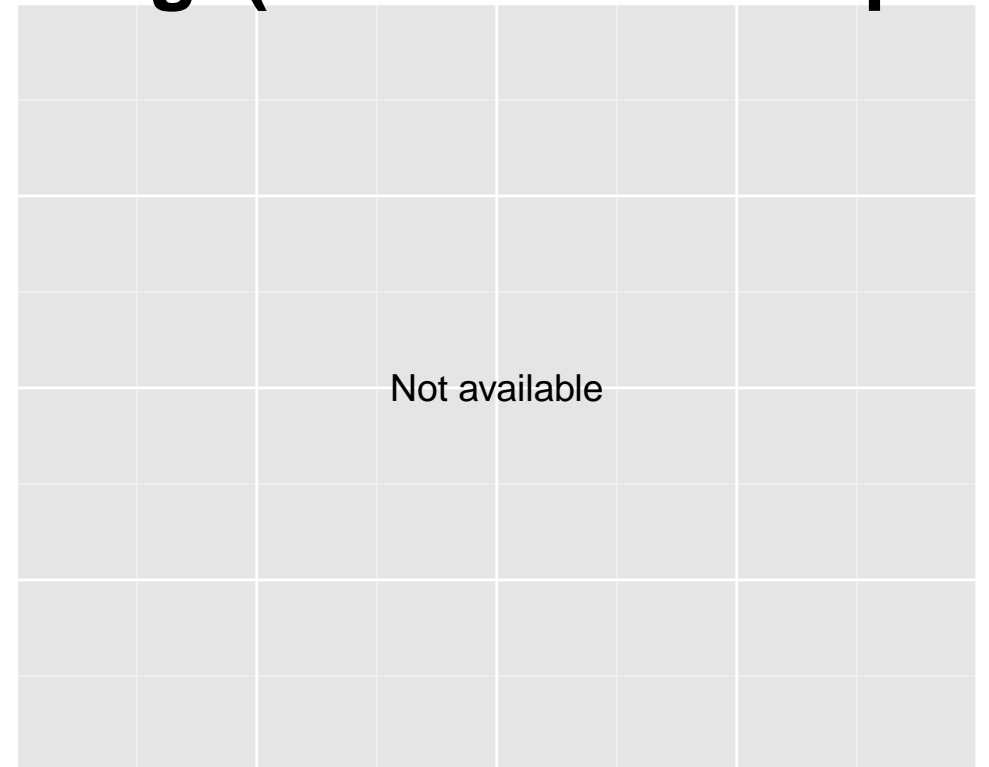

Supplement: SuppDataset_1.zip [file Cdr2_set_A.pdf › Supplemental Dataset 1/A-mRNA_nonrhyth_translation_nonrhyth/Cdr2_set_A.pdf]

## Cds2

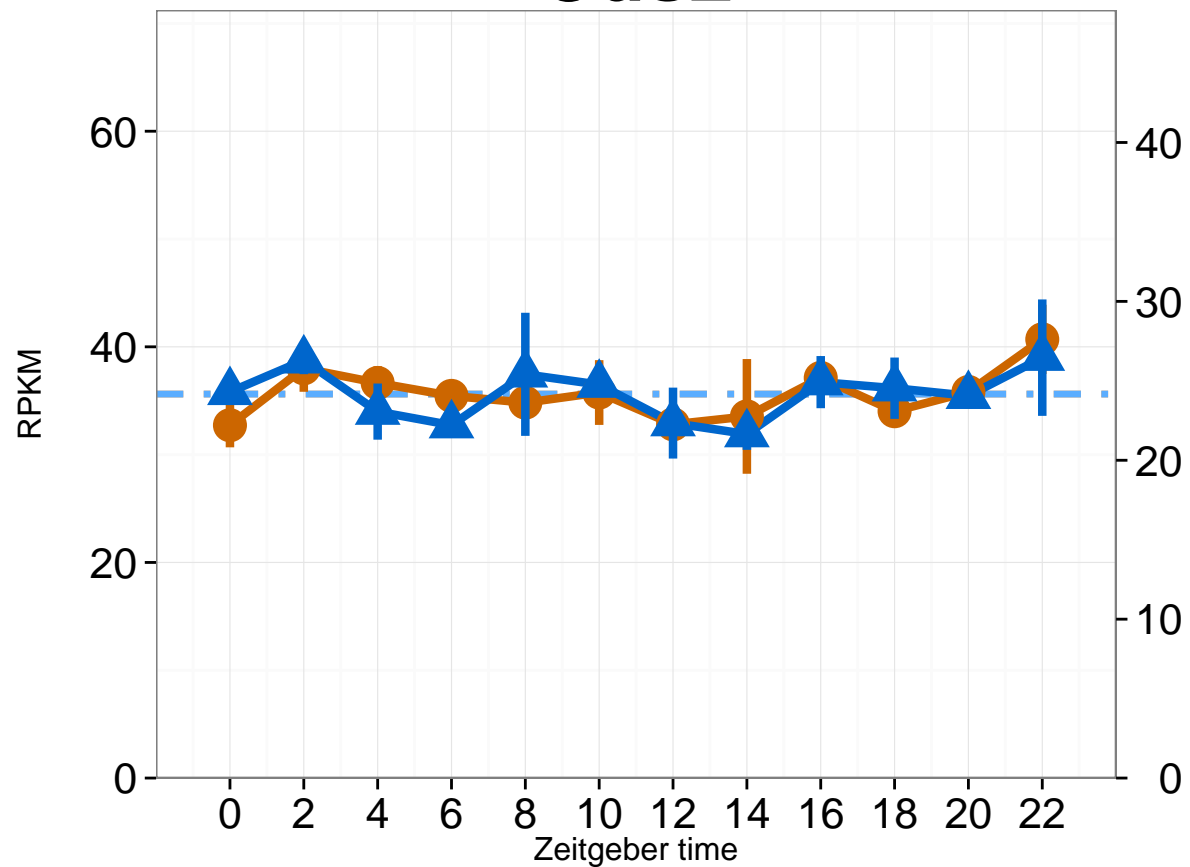

## Cds2

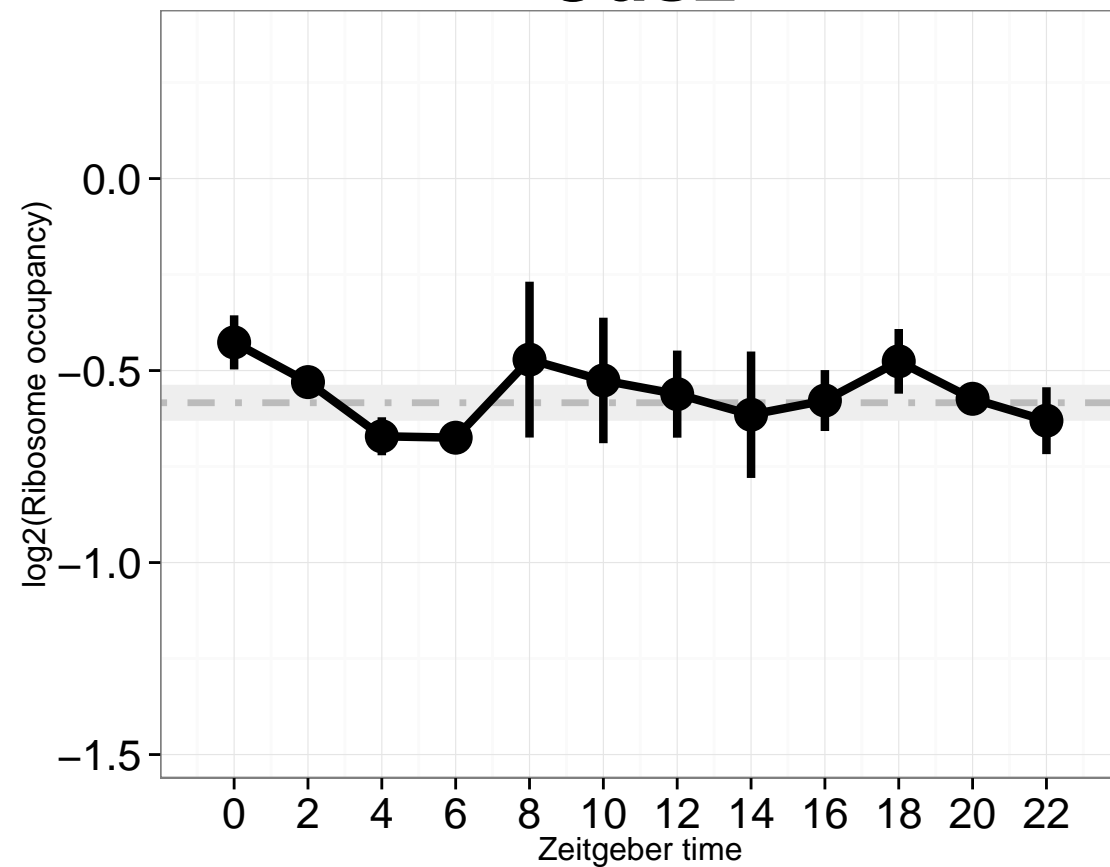

Supplement: SuppDataset_1.zip [file Cds2_set_A.pdf › Supplemental Dataset 1/A-mRNA_nonrhyth_translation_nonrhyth/Cds2_set_A.pdf]

## Cdyl2

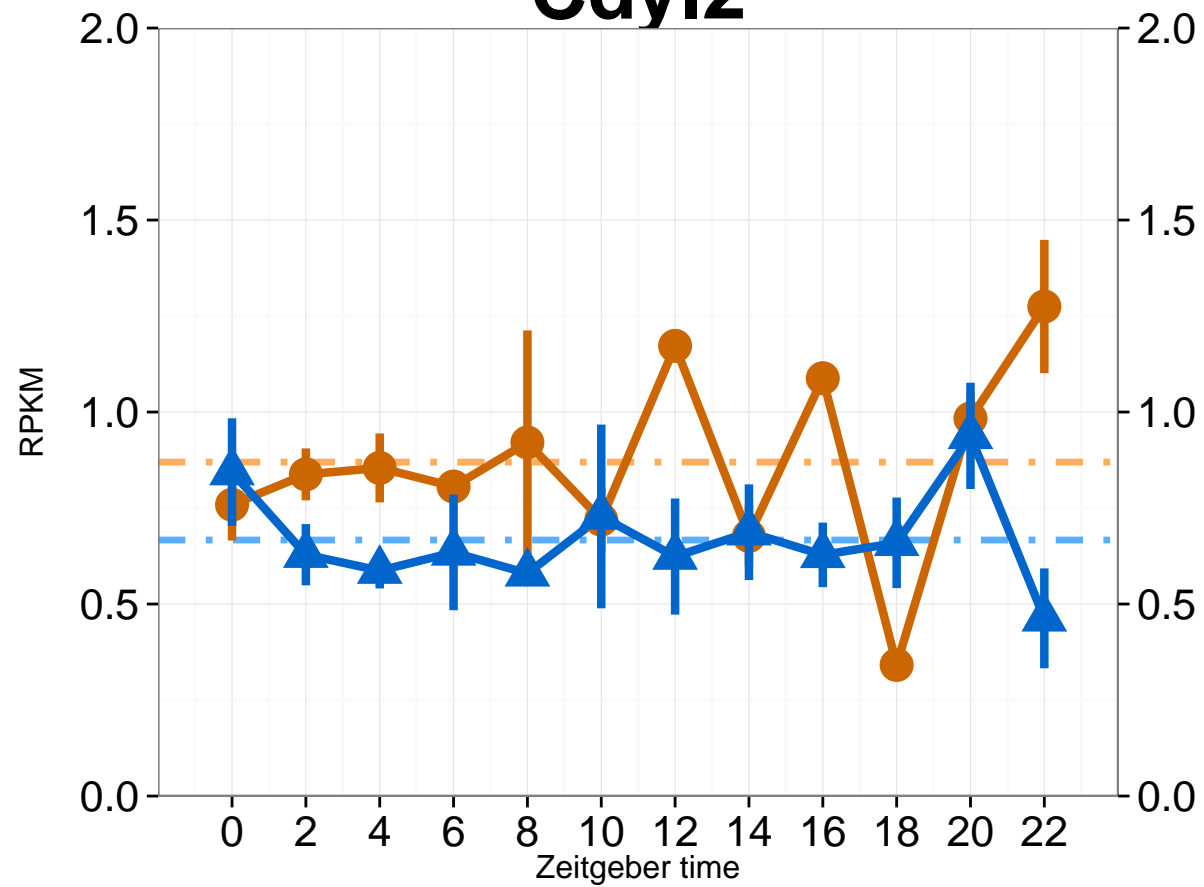

## Cdyl2

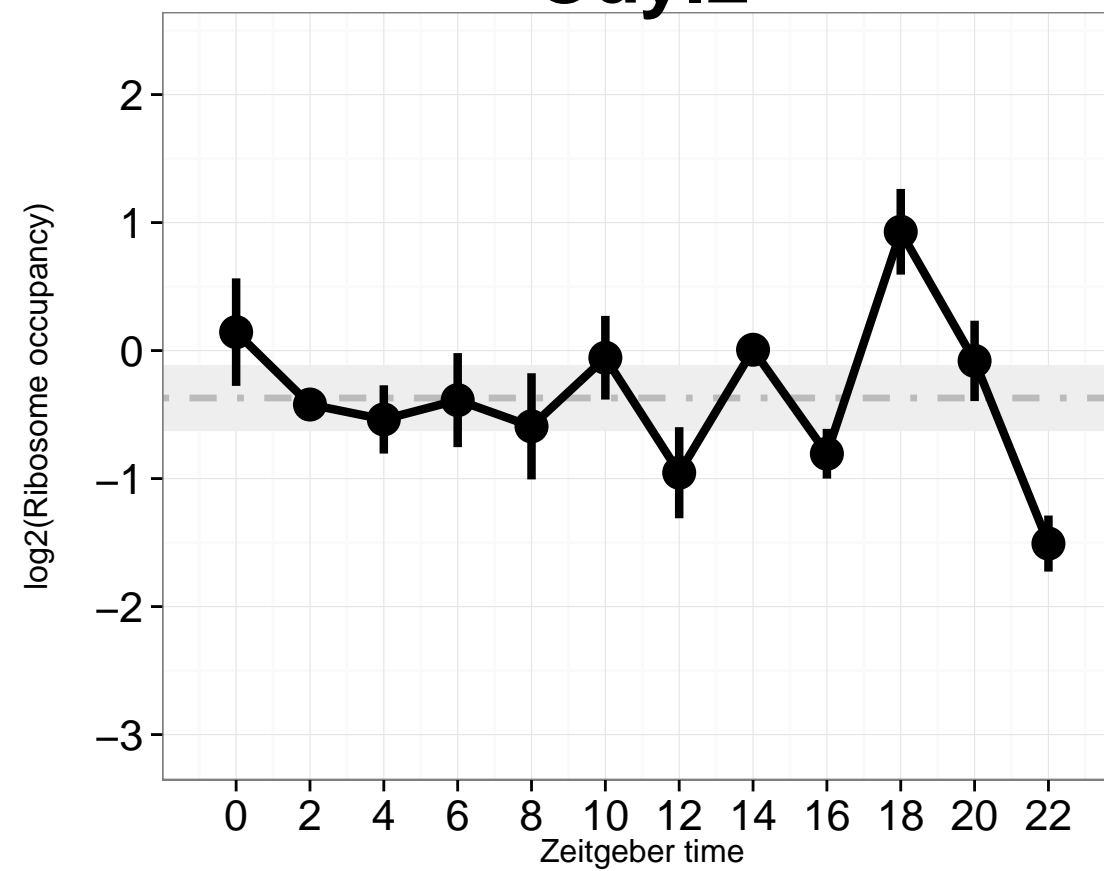

Supplement: SuppDataset_1.zip [file Cdyl2_set_A.pdf › Supplemental Dataset 1/A-mRNA_nonrhyth_translation_nonrhyth/Cdyl2_set_A.pdf]

## Cdyl

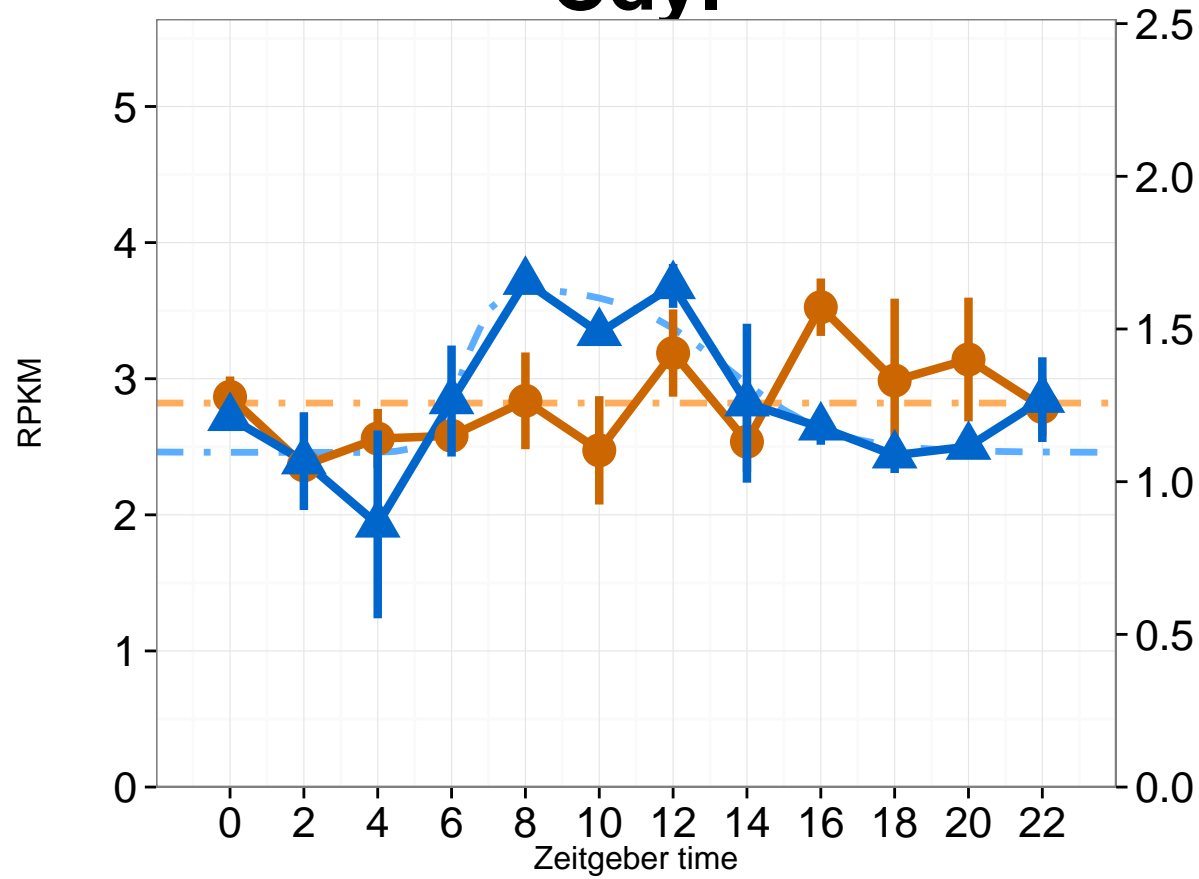

## Cdyl

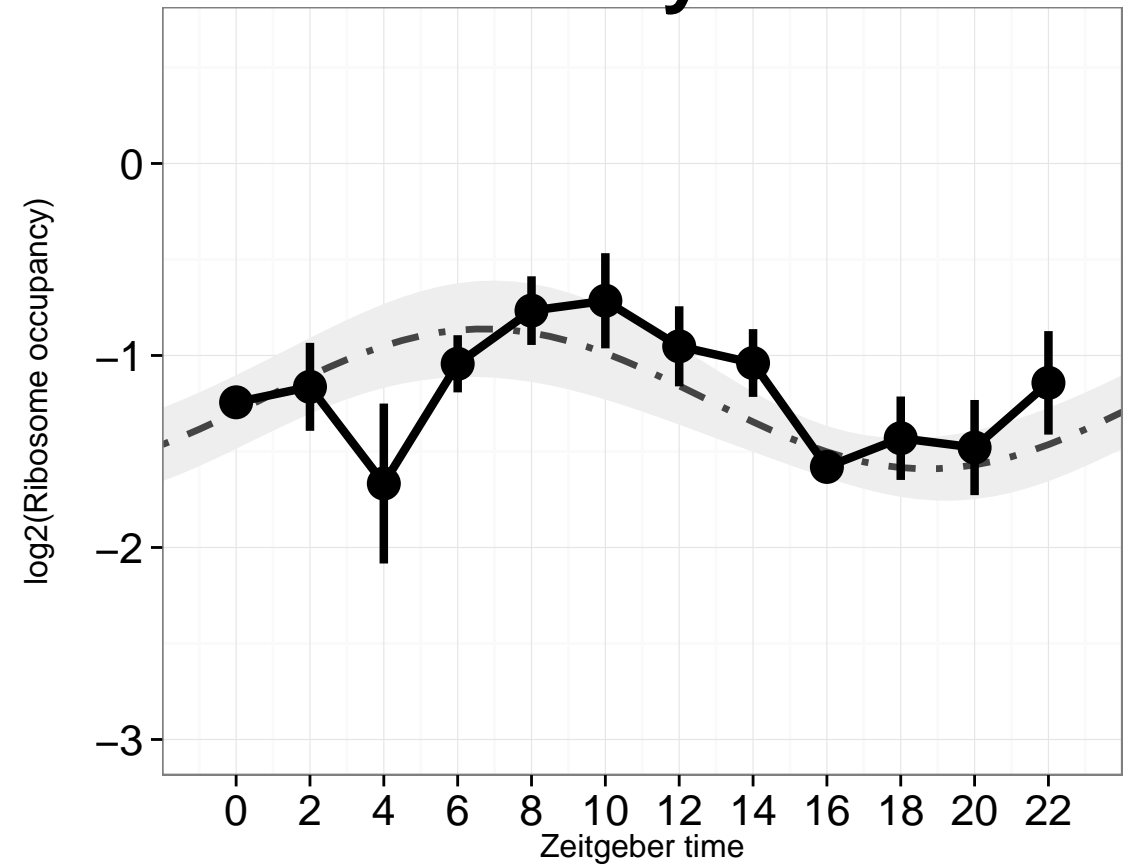

Supplement: SuppDataset_1.zip [file Cdyl_set_A.pdf › Supplemental Dataset 1/A-mRNA_nonrhyth_translation_nonrhyth/Cdyl_set_A.pdf]

# Ceacam1

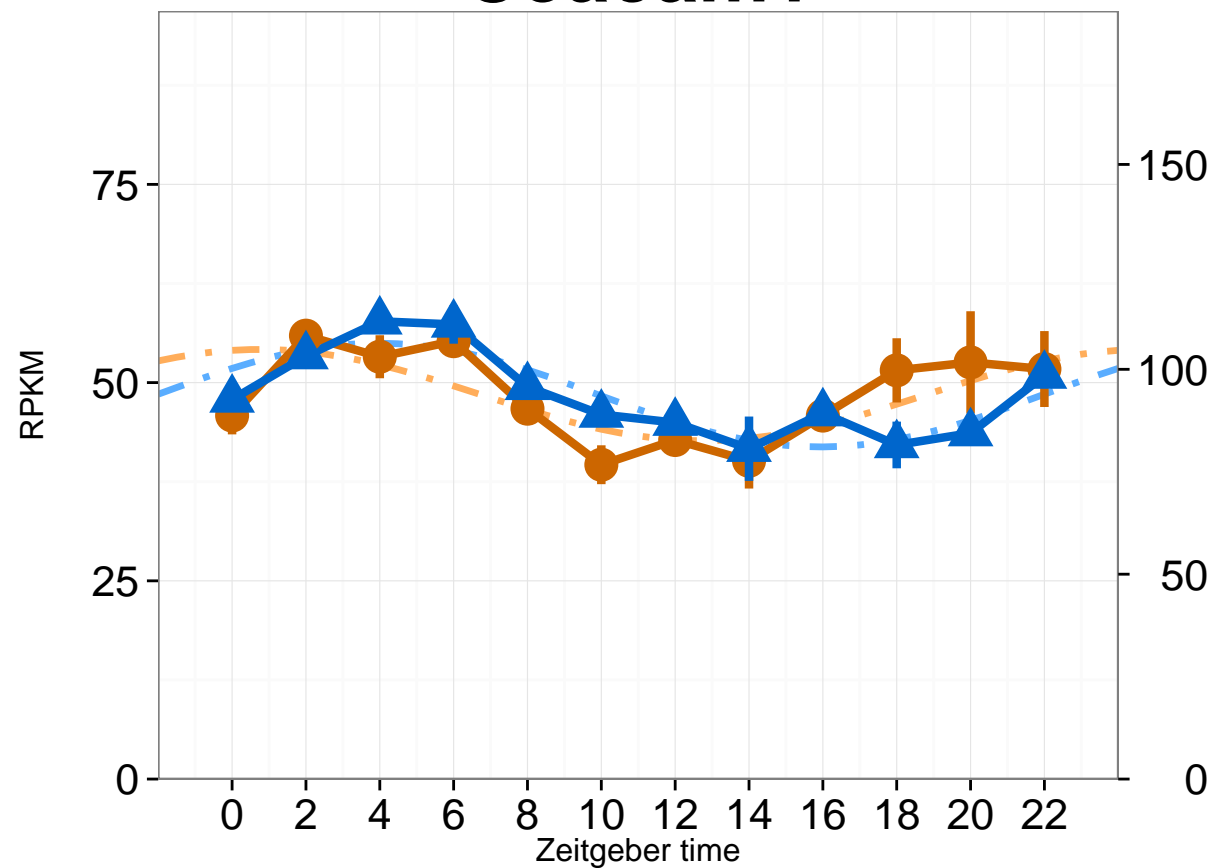

# Ceacam1

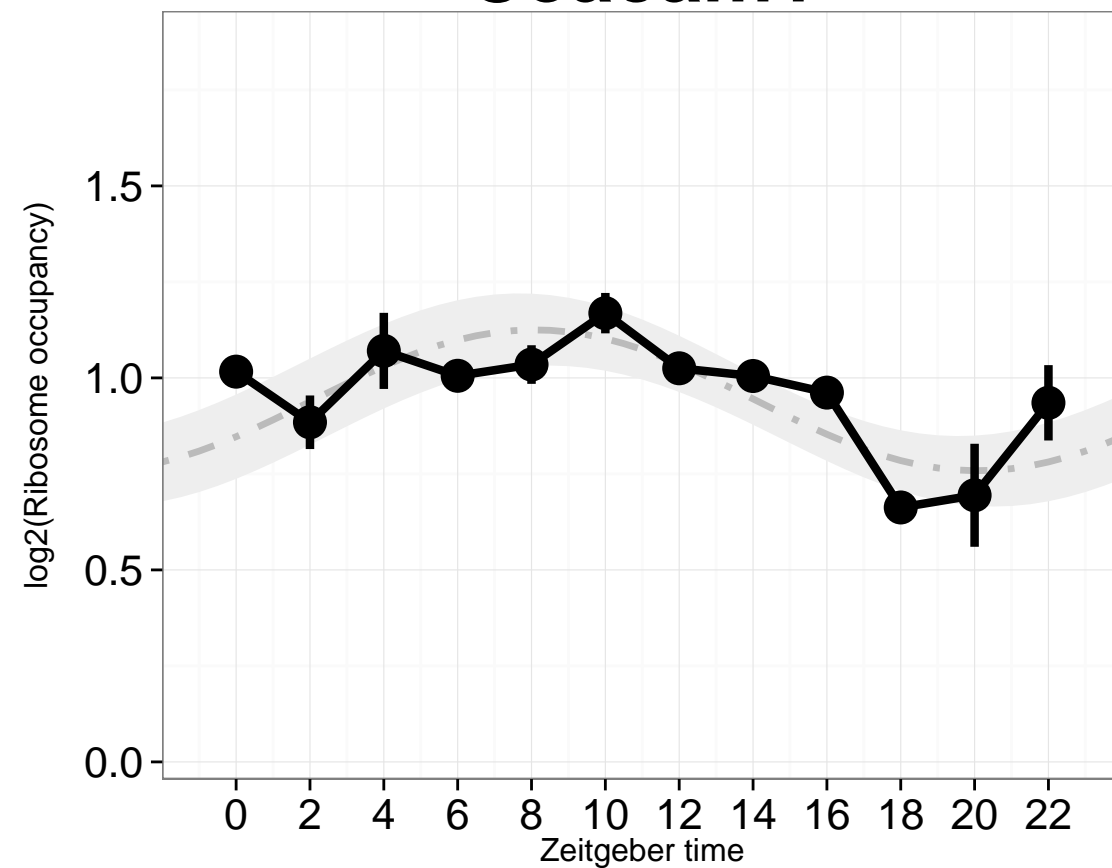

Supplement: SuppDataset_1.zip [file Ceacam1_set_A.pdf › Supplemental Dataset 1/A-mRNA_nonrhyth_translation_nonrhyth/Ceacam1_set_A.pdf]

## Cebpa

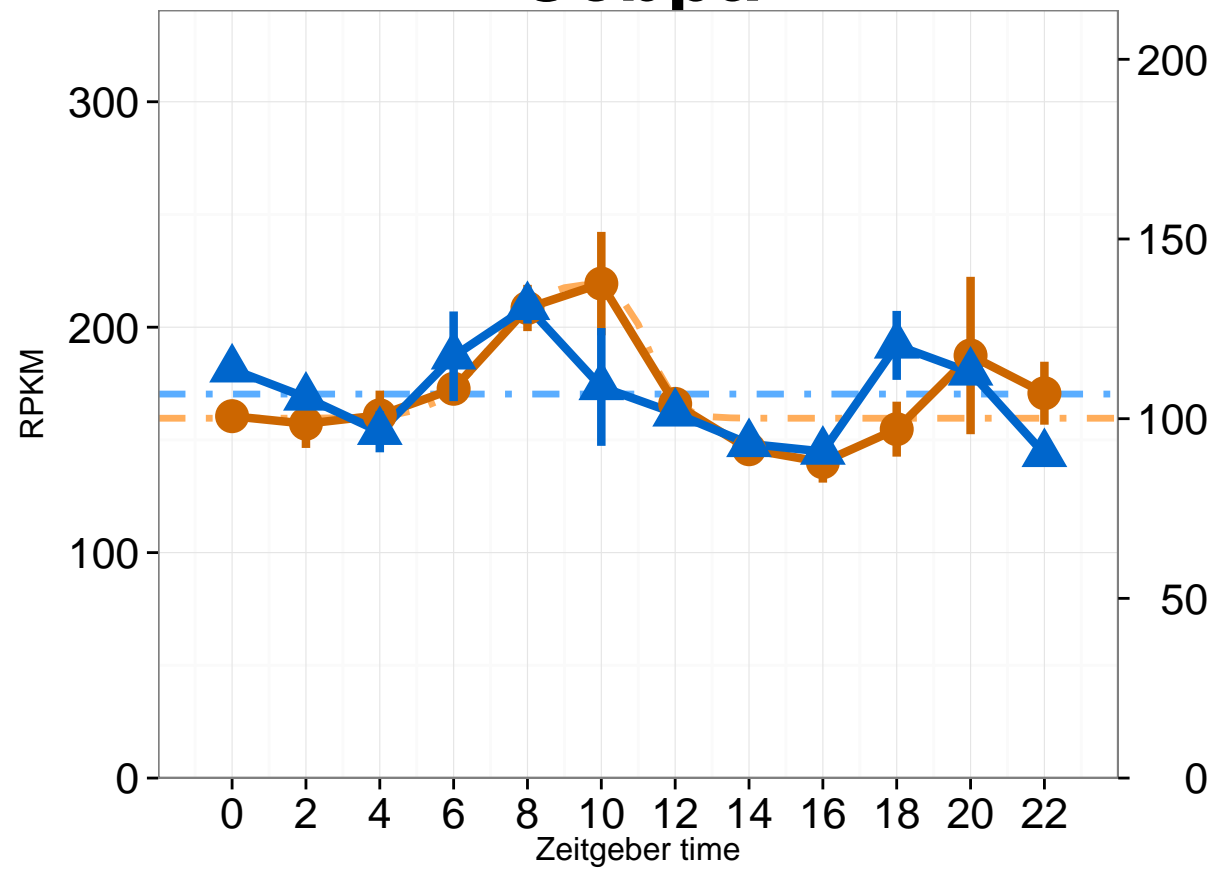

## Cebpa

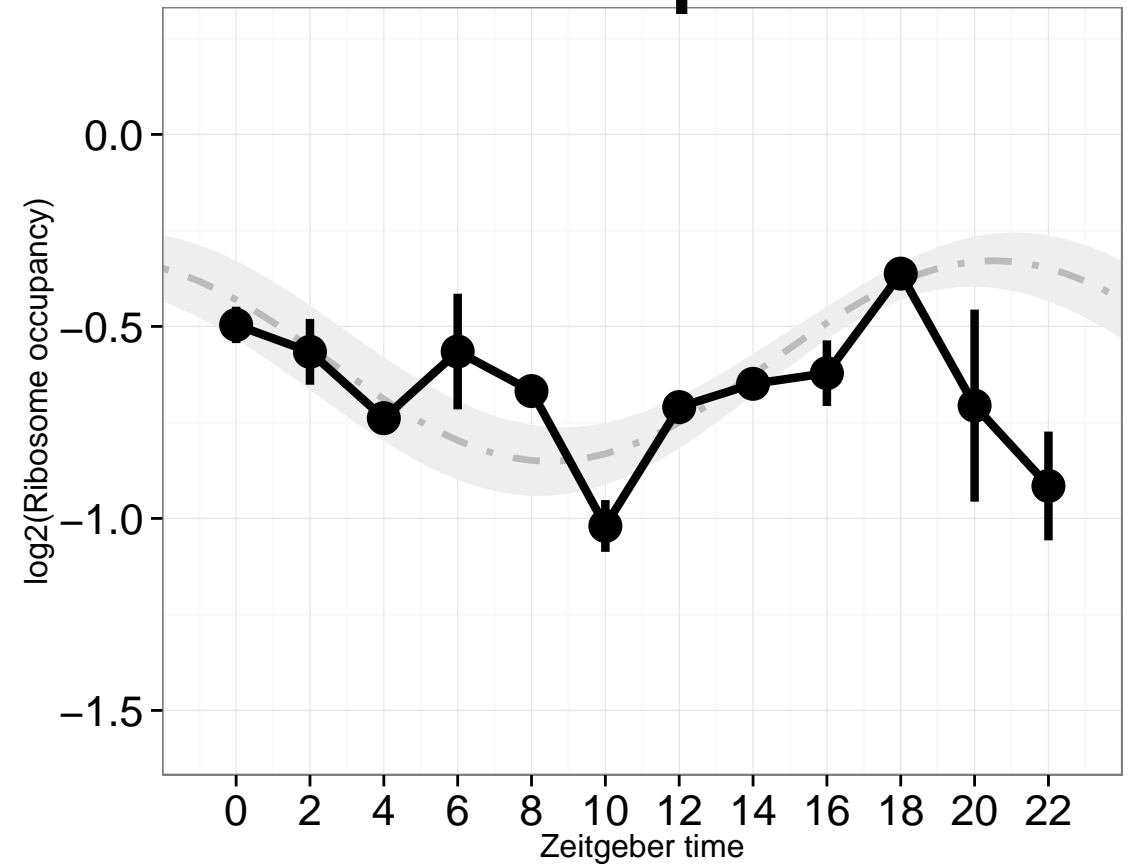

Supplement: SuppDataset_1.zip [file Cebpa_set_A.pdf › Supplemental Dataset 1/A-mRNA_nonrhyth_translation_nonrhyth/Cebpa_set_A.pdf]

## Cebpg

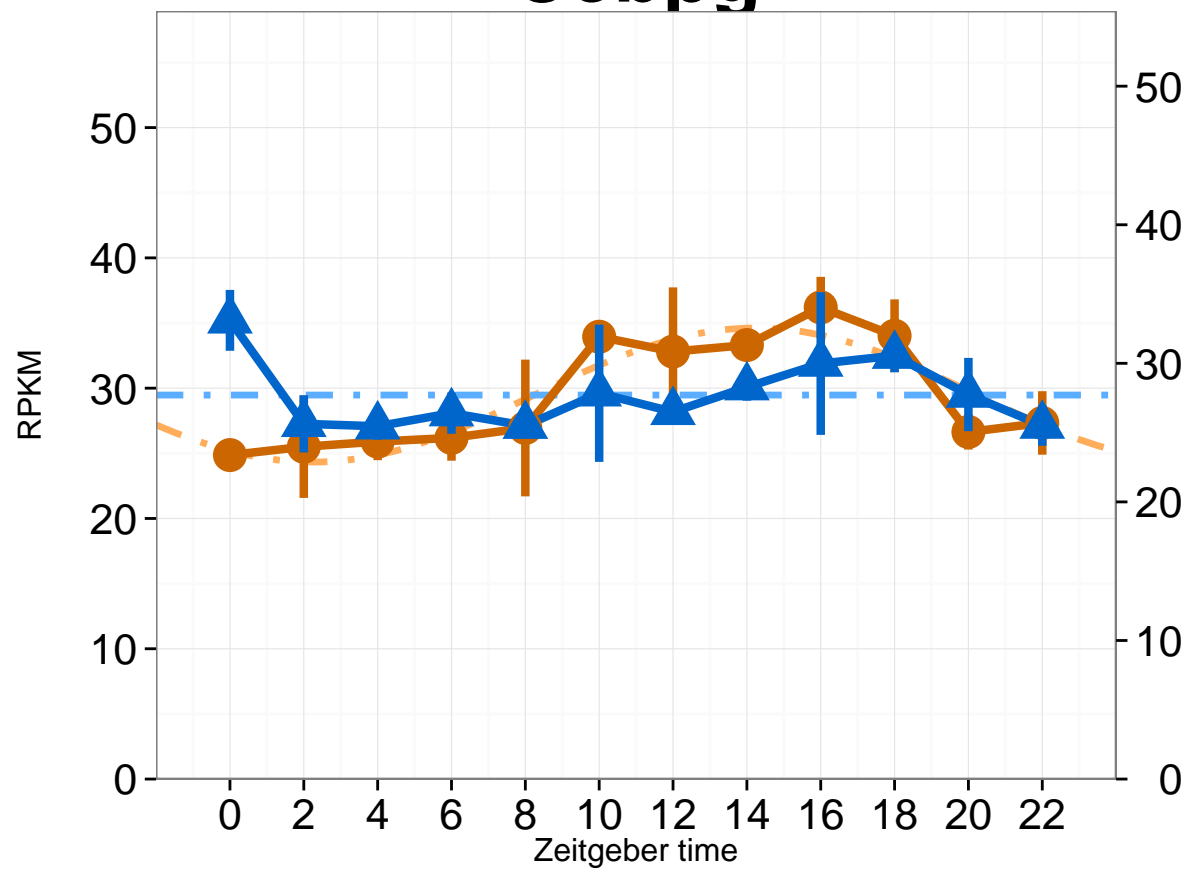

## Cebpg

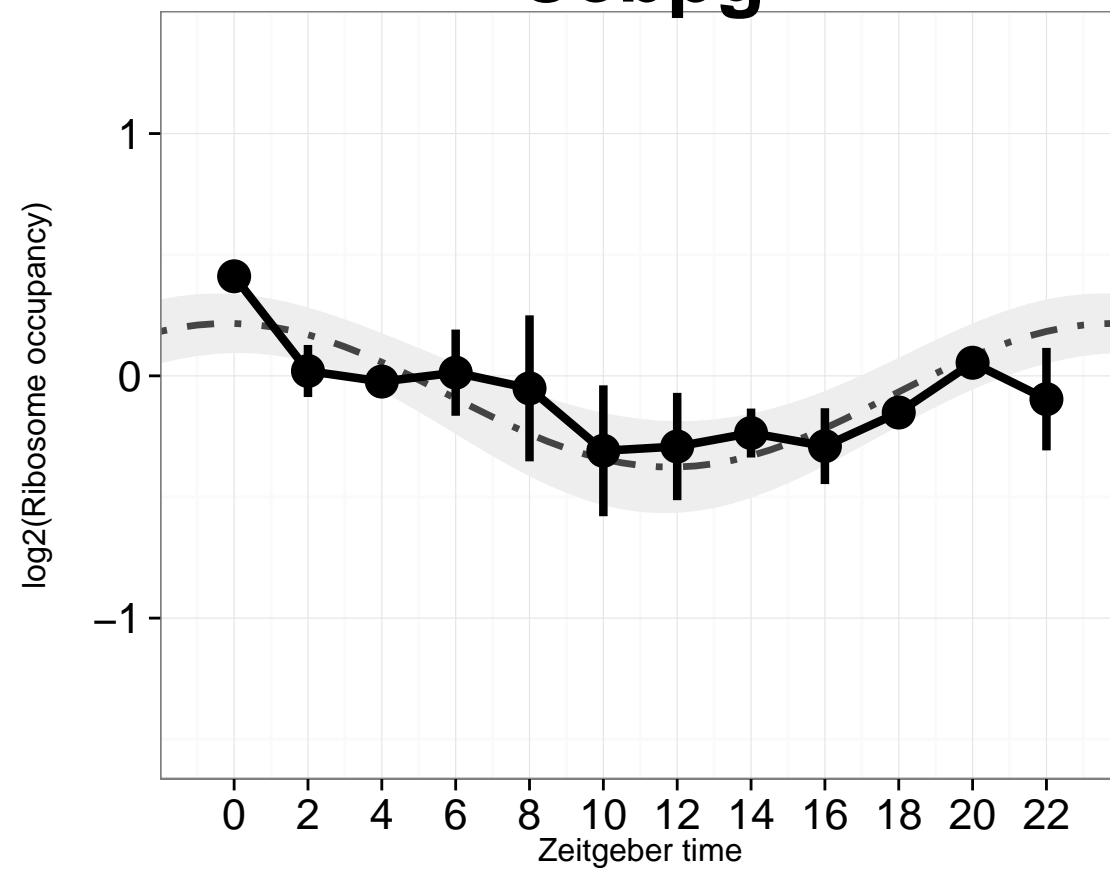

Supplement: SuppDataset_1.zip [file Cebpg_set_A.pdf › Supplemental Dataset 1/A-mRNA_nonrhyth_translation_nonrhyth/Cebpg_set_A.pdf]

## Cebpz

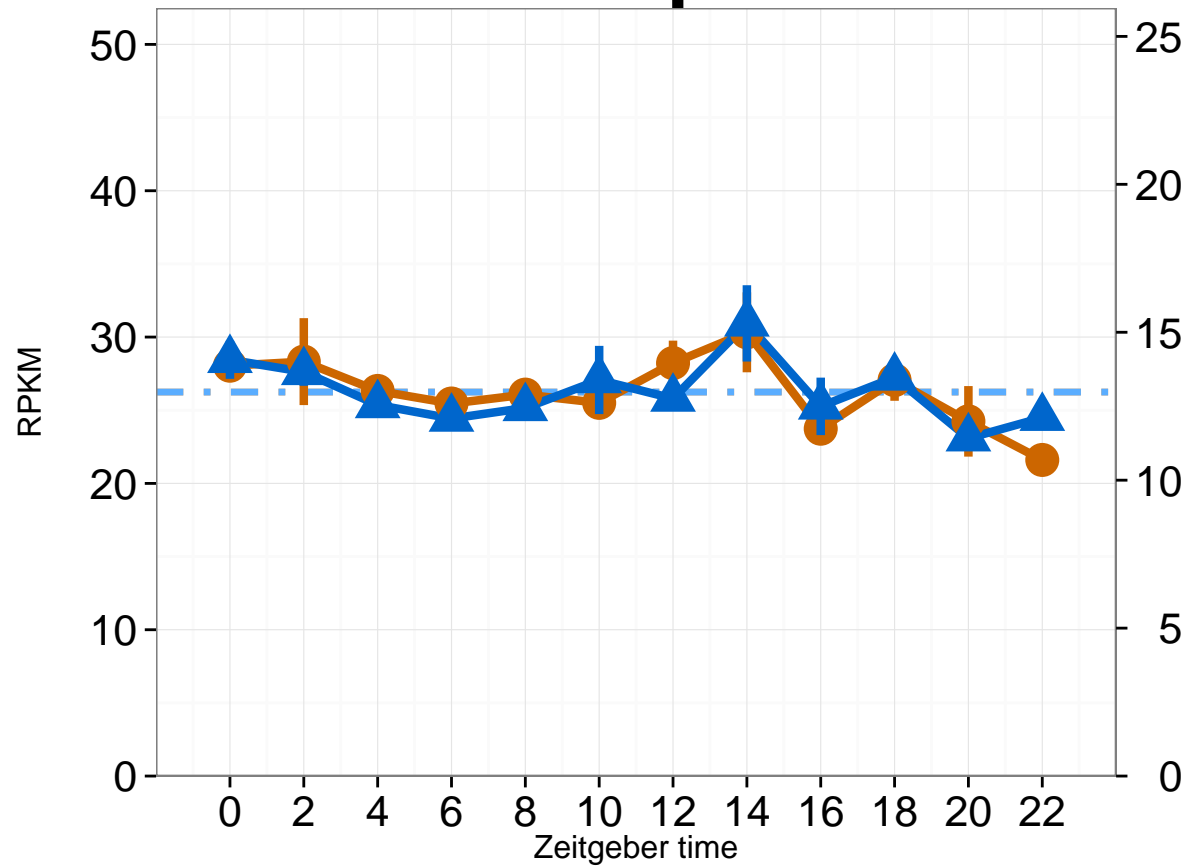

## Cebpz

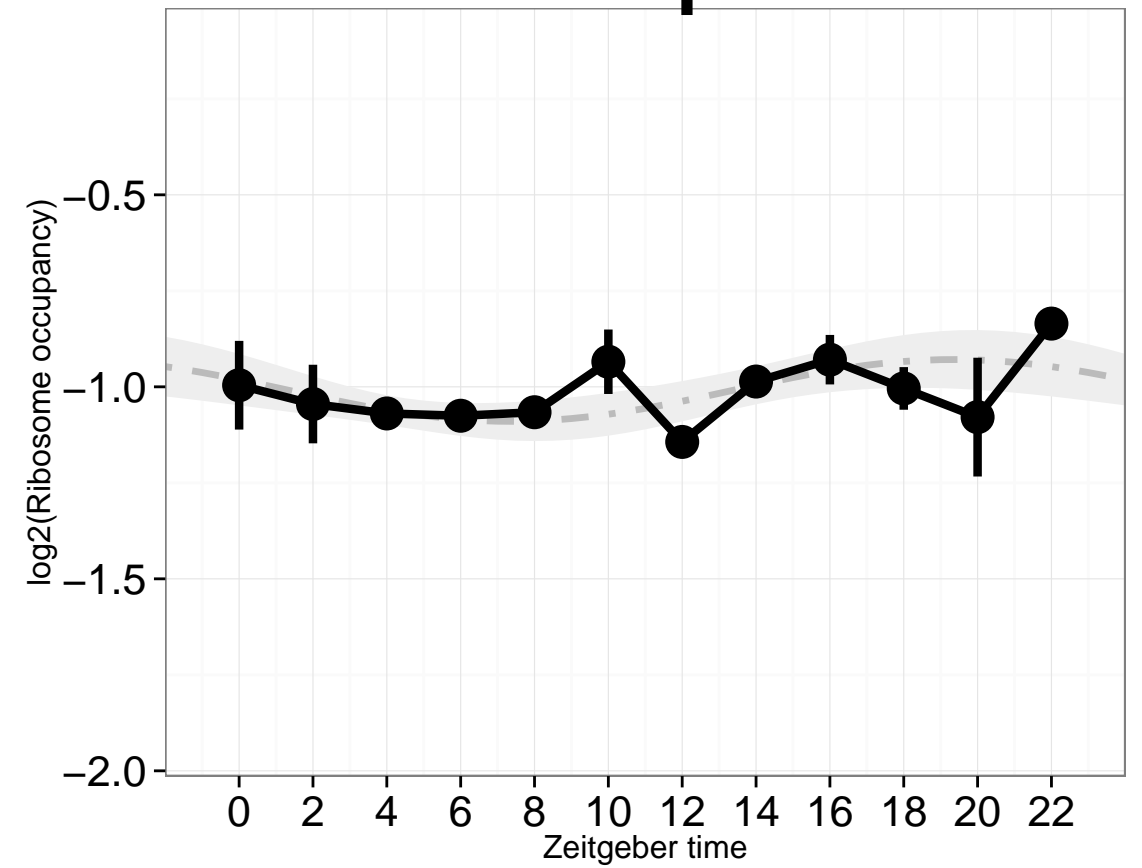

Supplement: SuppDataset_1.zip [file Cebpz_set_A.pdf › Supplemental Dataset 1/A-mRNA_nonrhyth_translation_nonrhyth/Cebpz_set_A.pdf]

## Cel

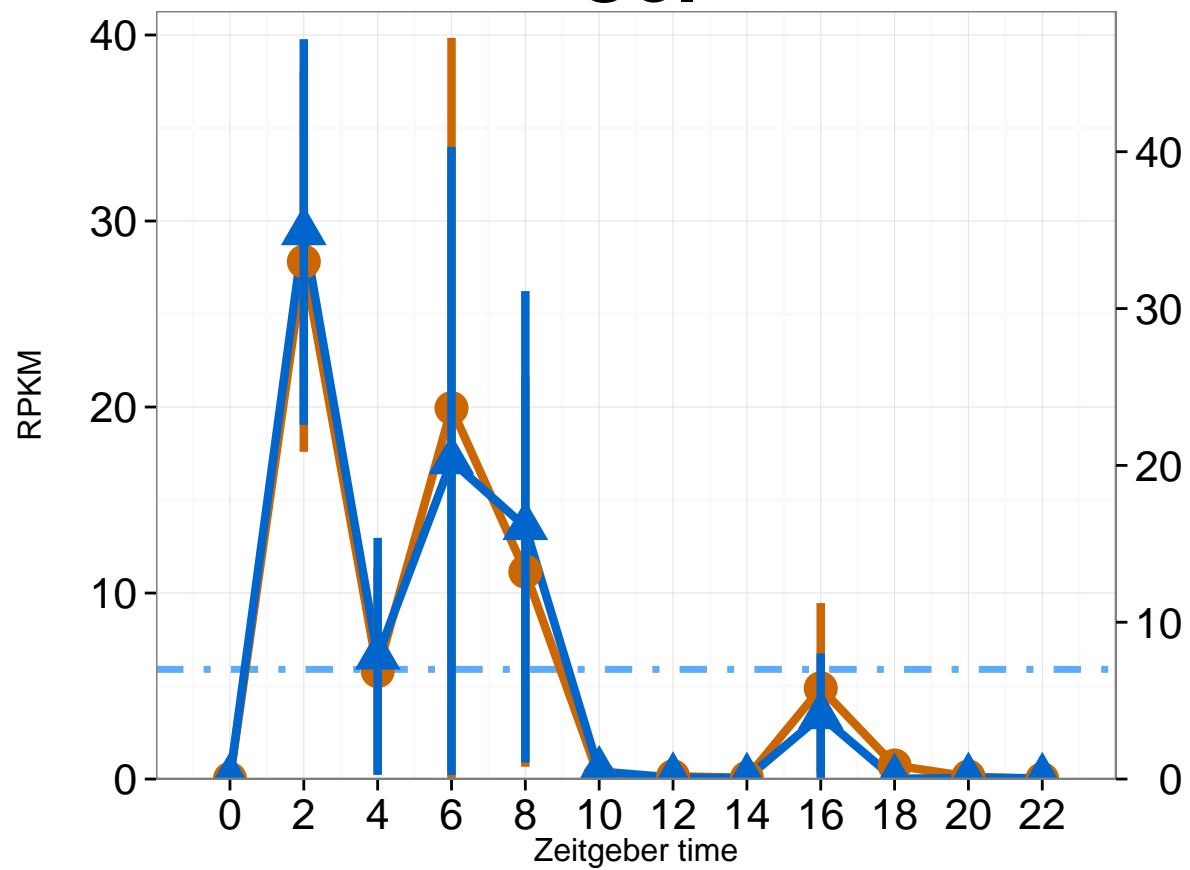

## Cel

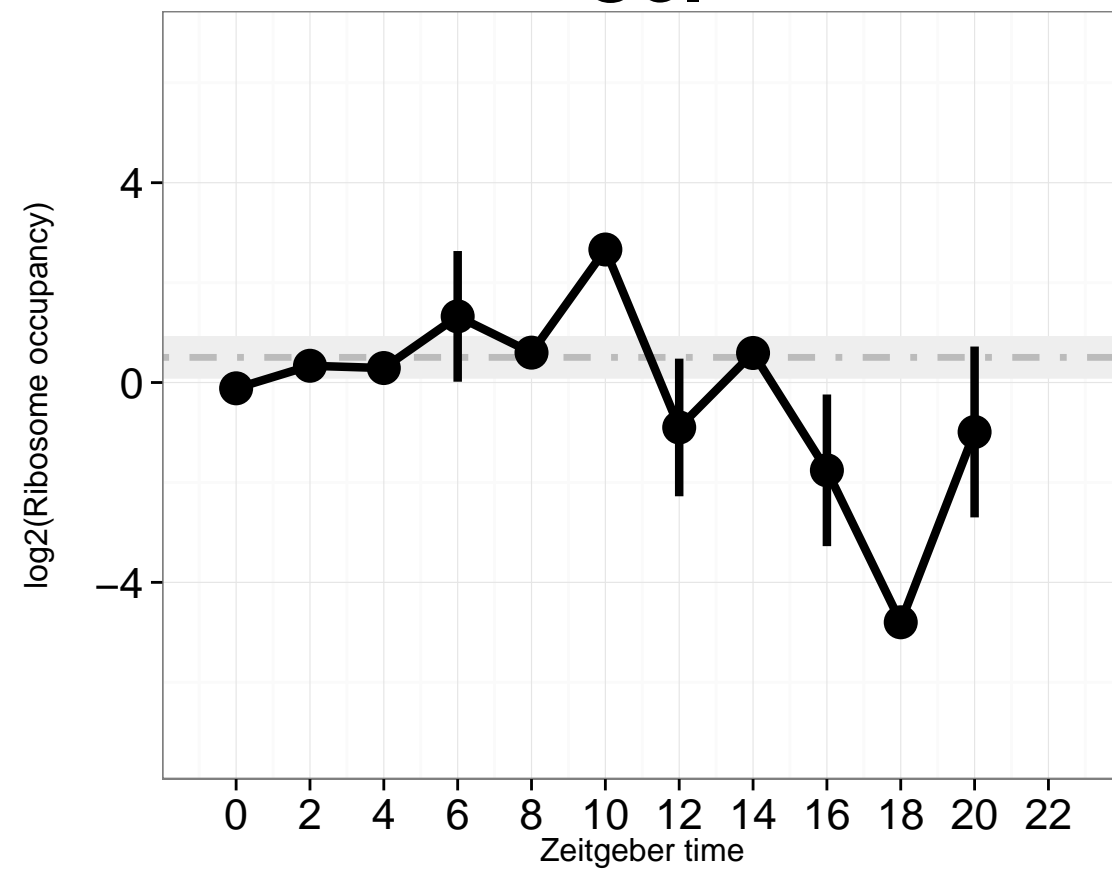

Supplement: SuppDataset_1.zip [file Cel_set_A.pdf › Supplemental Dataset 1/A-mRNA_nonrhyth_translation_nonrhyth/Cel_set_A.pdf]

# Cela1

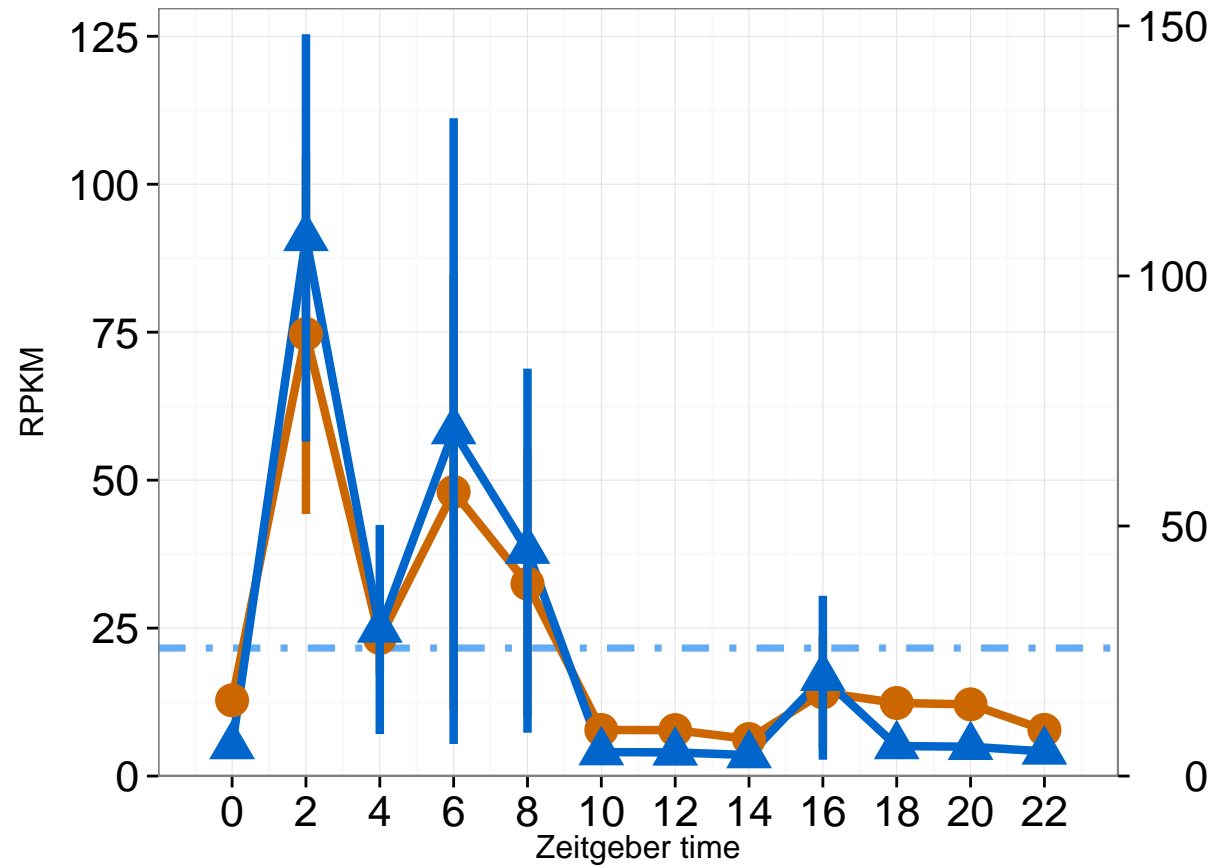

# Cela1

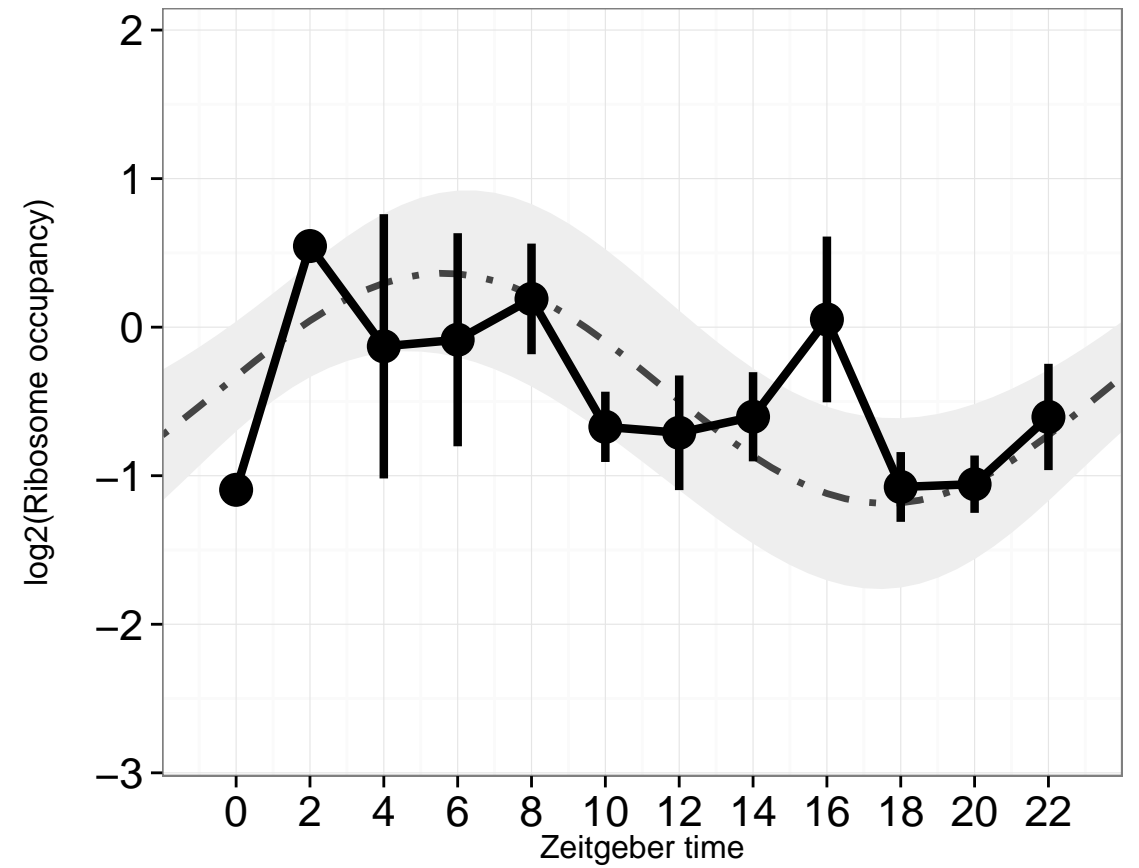

Supplement: SuppDataset_1.zip [file Cela1_set_A.pdf › Supplemental Dataset 1/A-mRNA_nonrhyth_translation_nonrhyth/Cela1_set_A.pdf]

# Cela2a

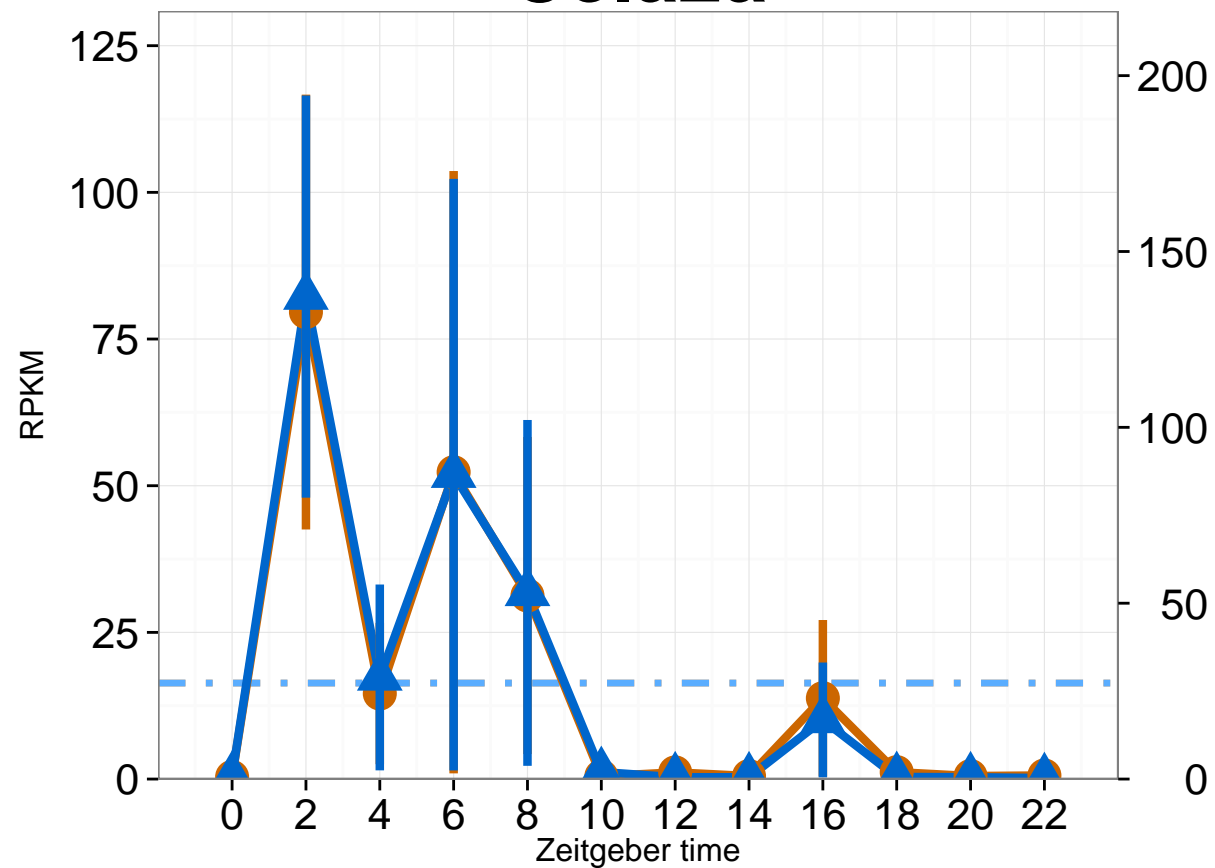

# Cela2a

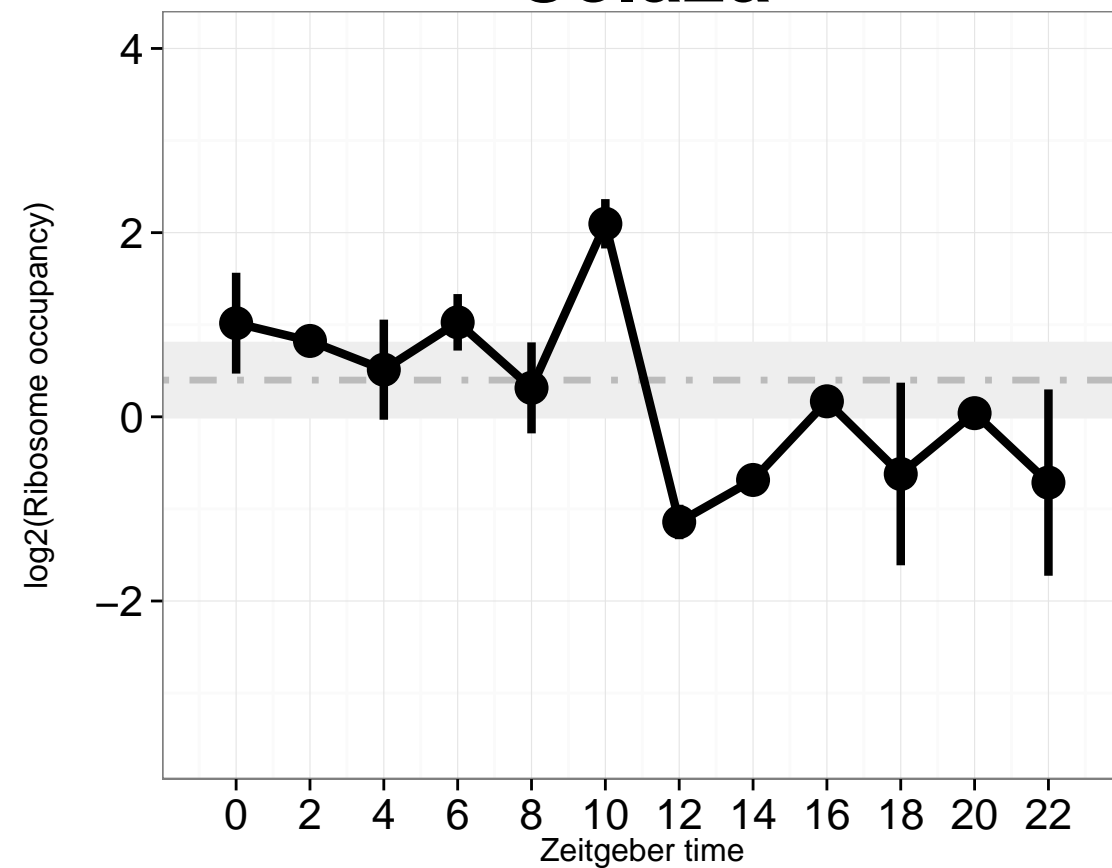

Supplement: SuppDataset_1.zip [file Cela2a_set_A.pdf › Supplemental Dataset 1/A-mRNA_nonrhyth_translation_nonrhyth/Cela2a_set_A.pdf]

## Cela3b

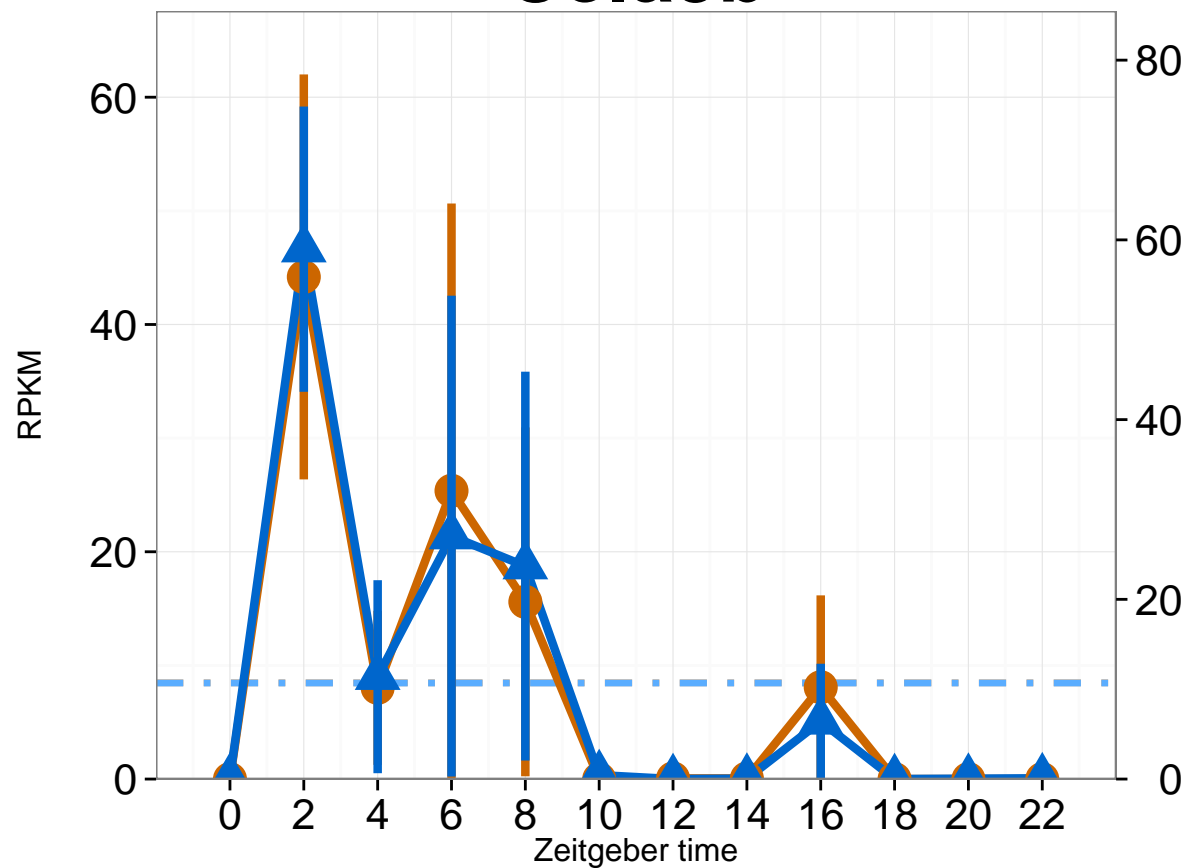

## Cela3b

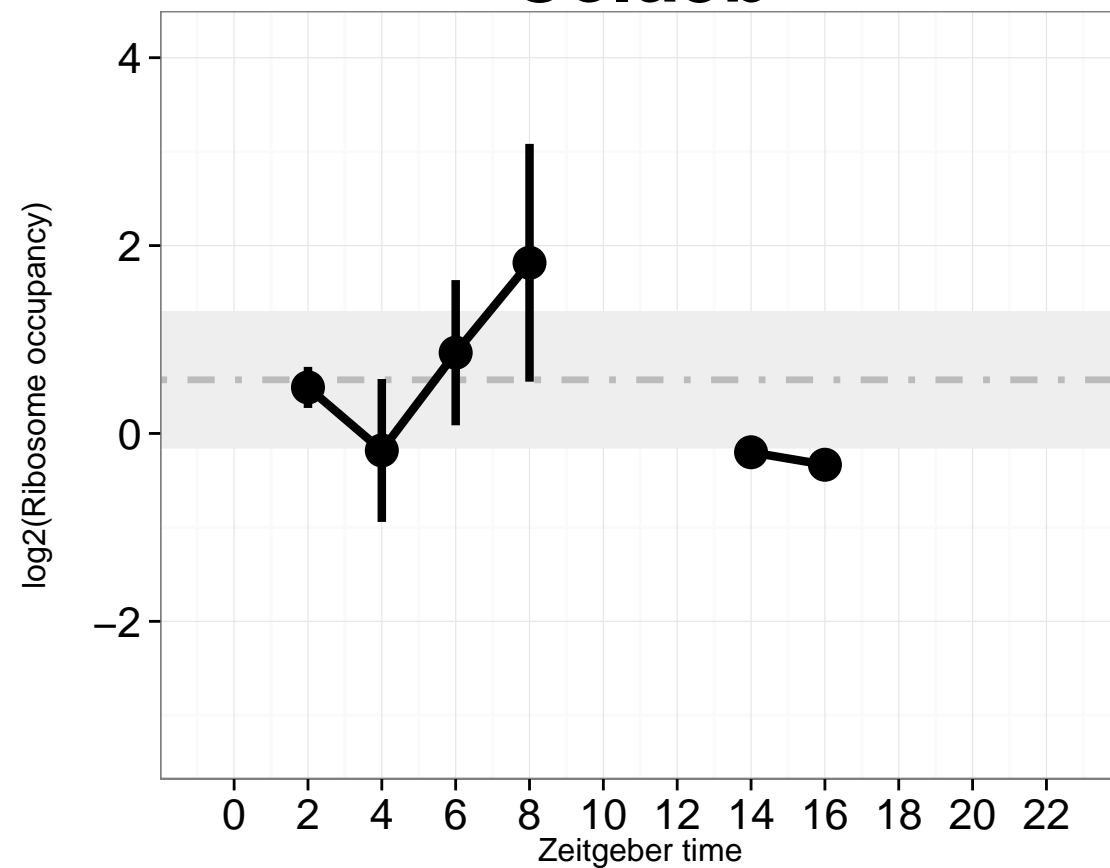

Supplement: SuppDataset_1.zip [file Cela3b_set_A.pdf › Supplemental Dataset 1/A-mRNA_nonrhyth_translation_nonrhyth/Cela3b_set_A.pdf]

## Celf1

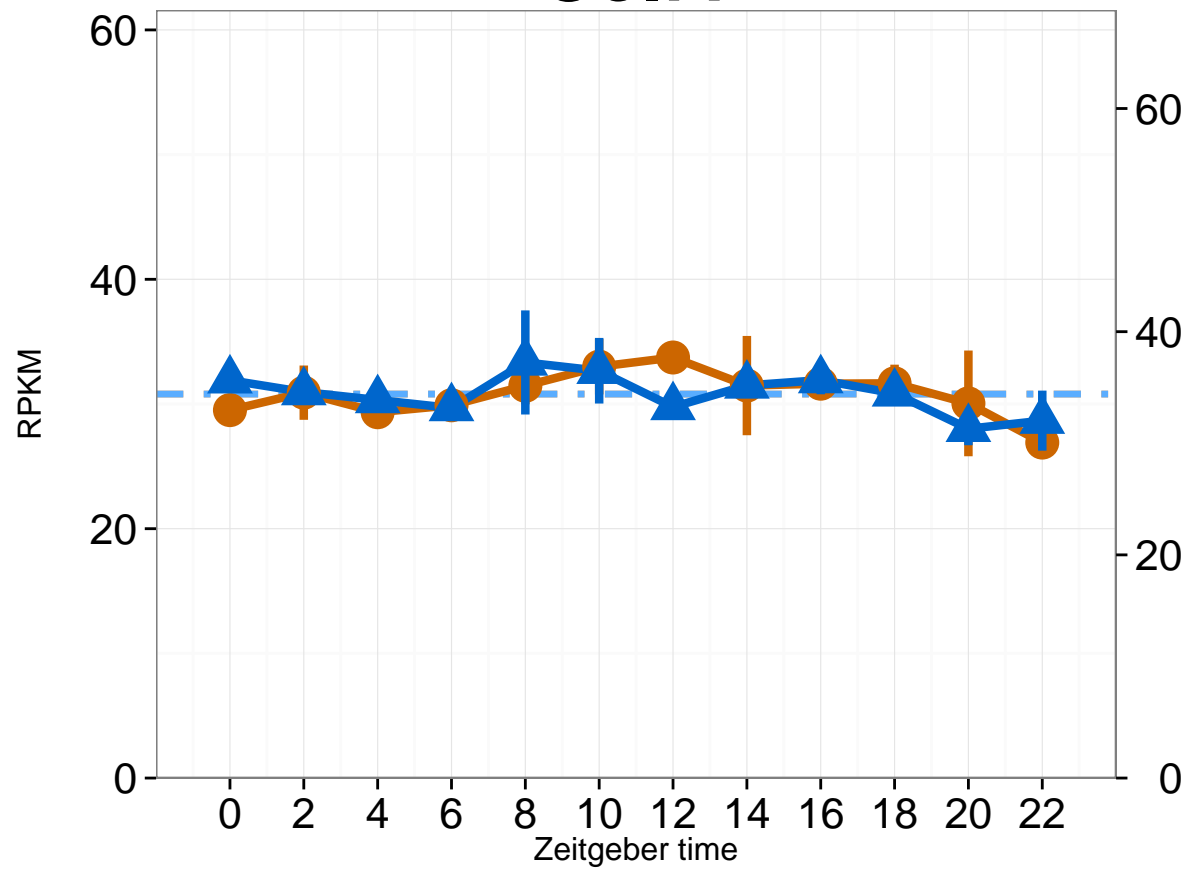

## Celf1

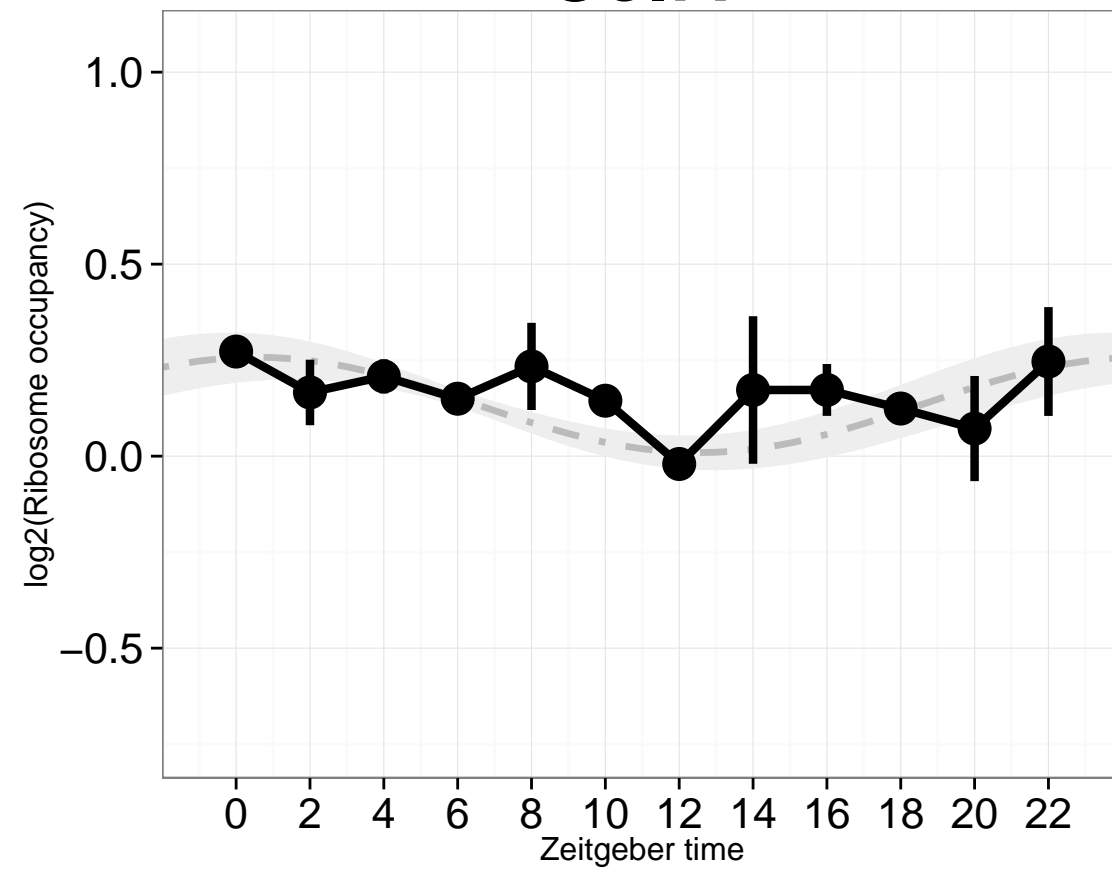

Supplement: SuppDataset_1.zip [file Celf1_set_A.pdf › Supplemental Dataset 1/A-mRNA_nonrhyth_translation_nonrhyth/Celf1_set_A.pdf]
