# Supplementary figures and images for: Ribosome profiling reveals the rhythmic liver translatome and circadian clock regulation by upstream open reading frames (part 15 of 113)
Source: HighWire-hosted journal article supplement (doi:10.1101/gr.195404.115), 2015-10-20

## Celf2

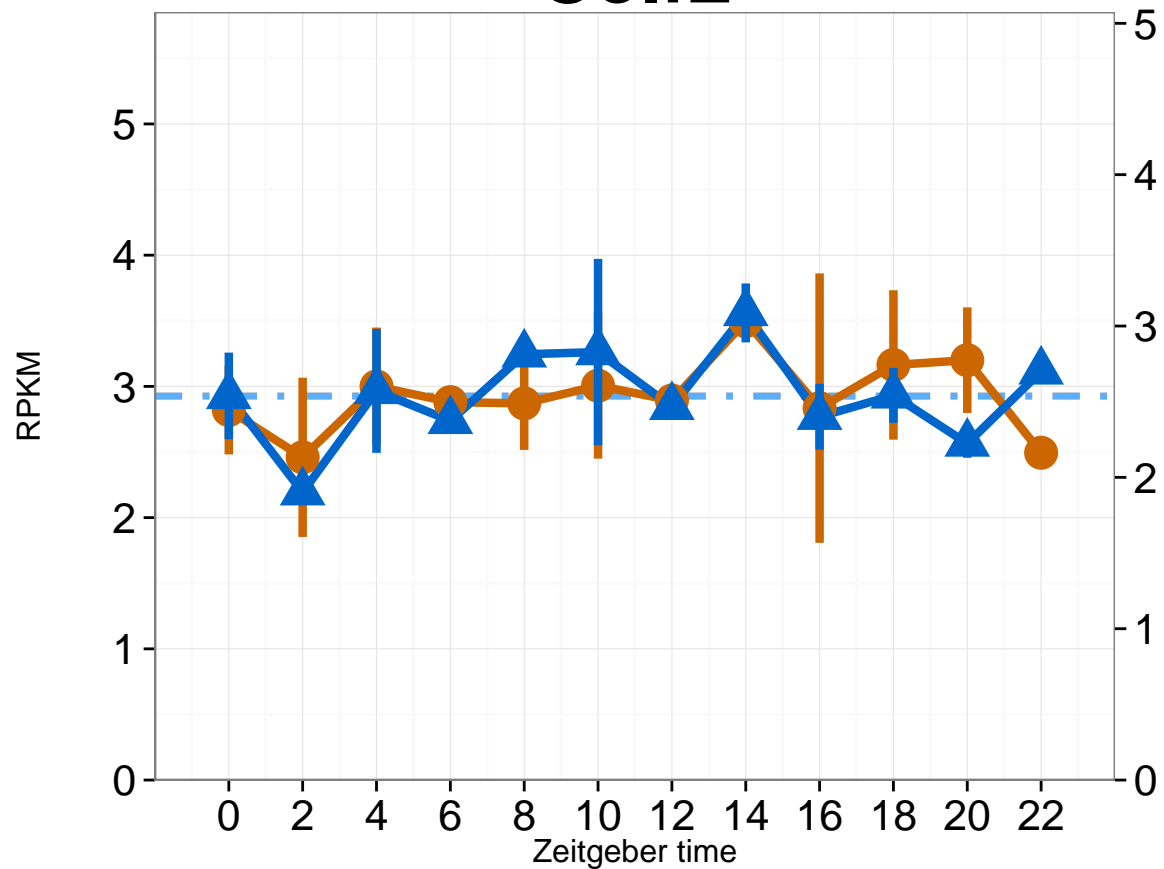

## Celf2

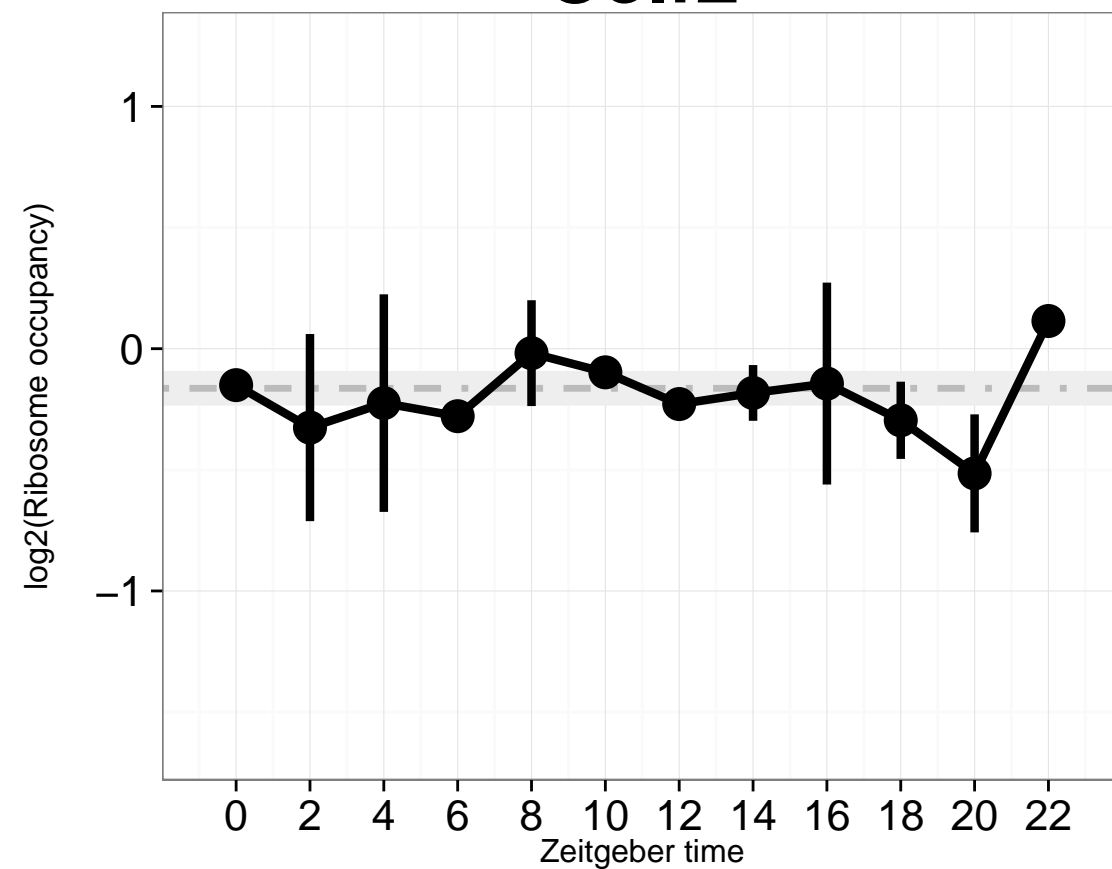

Supplement: SuppDataset_1.zip [file Celf2_set_A.pdf › Supplemental Dataset 1/A-mRNA_nonrhyth_translation_nonrhyth/Celf2_set_A.pdf]

## Cenpa

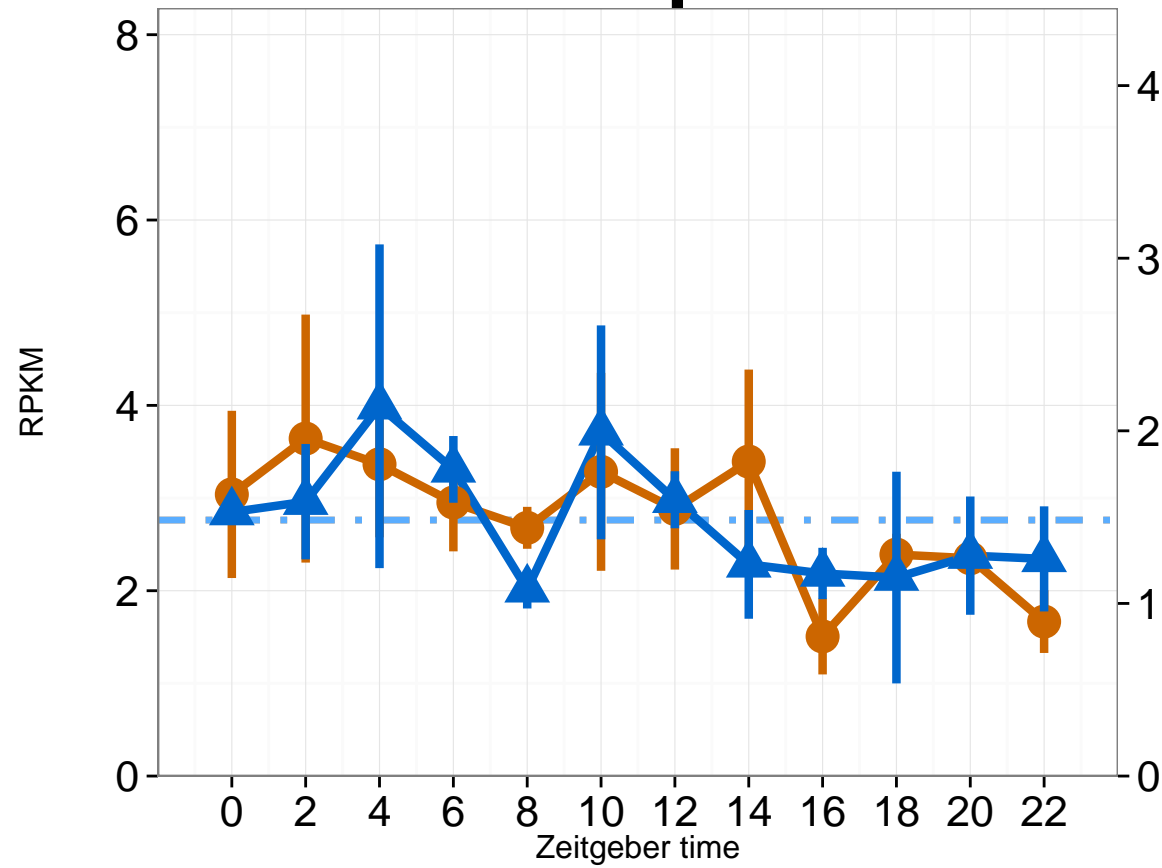

## Cenpa

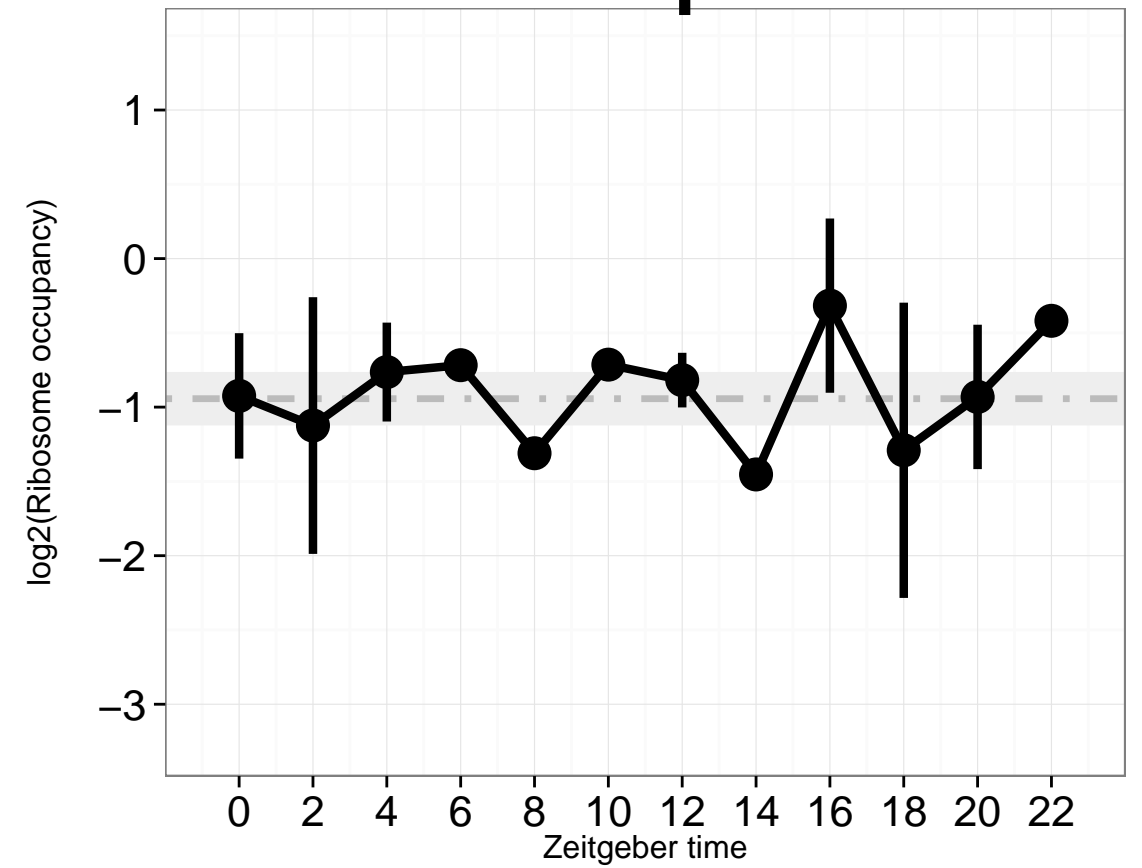

Supplement: SuppDataset_1.zip [file Cenpa_set_A.pdf › Supplemental Dataset 1/A-mRNA_nonrhyth_translation_nonrhyth/Cenpa_set_A.pdf]

## Cenpb

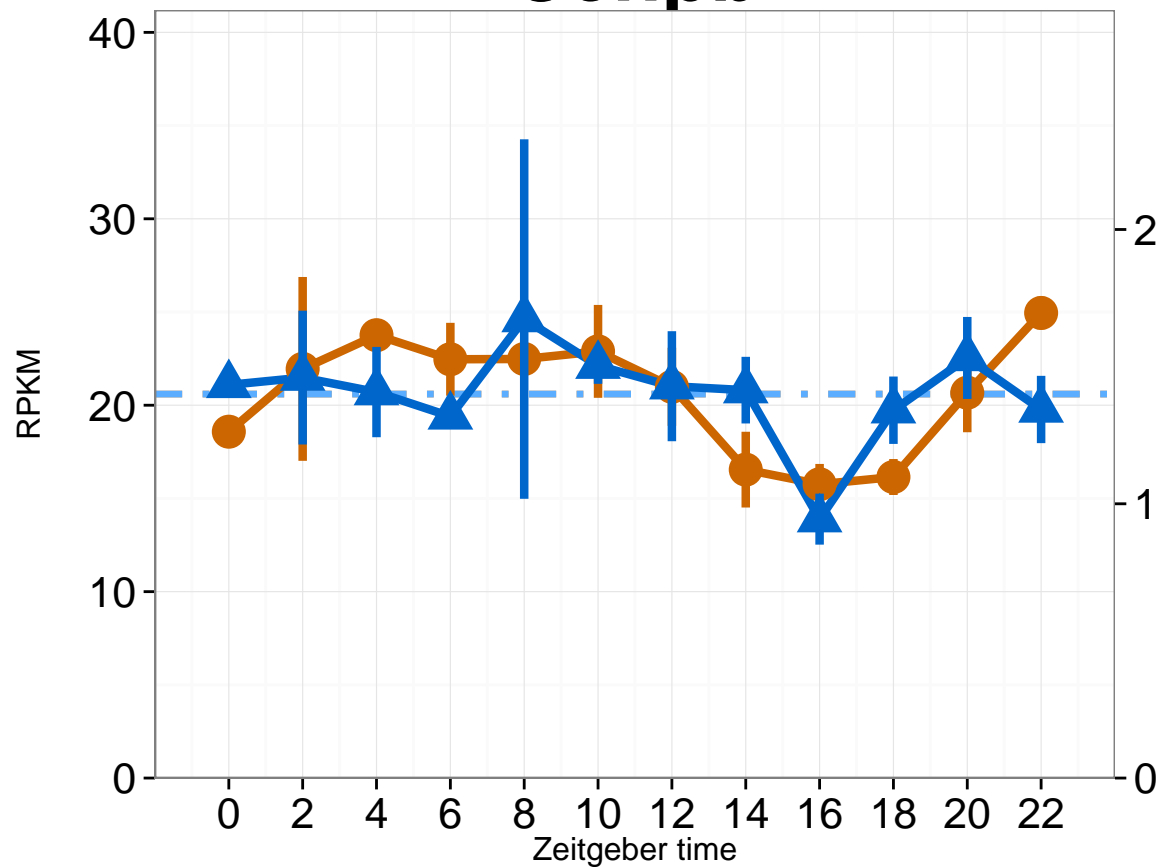

## Cenpb

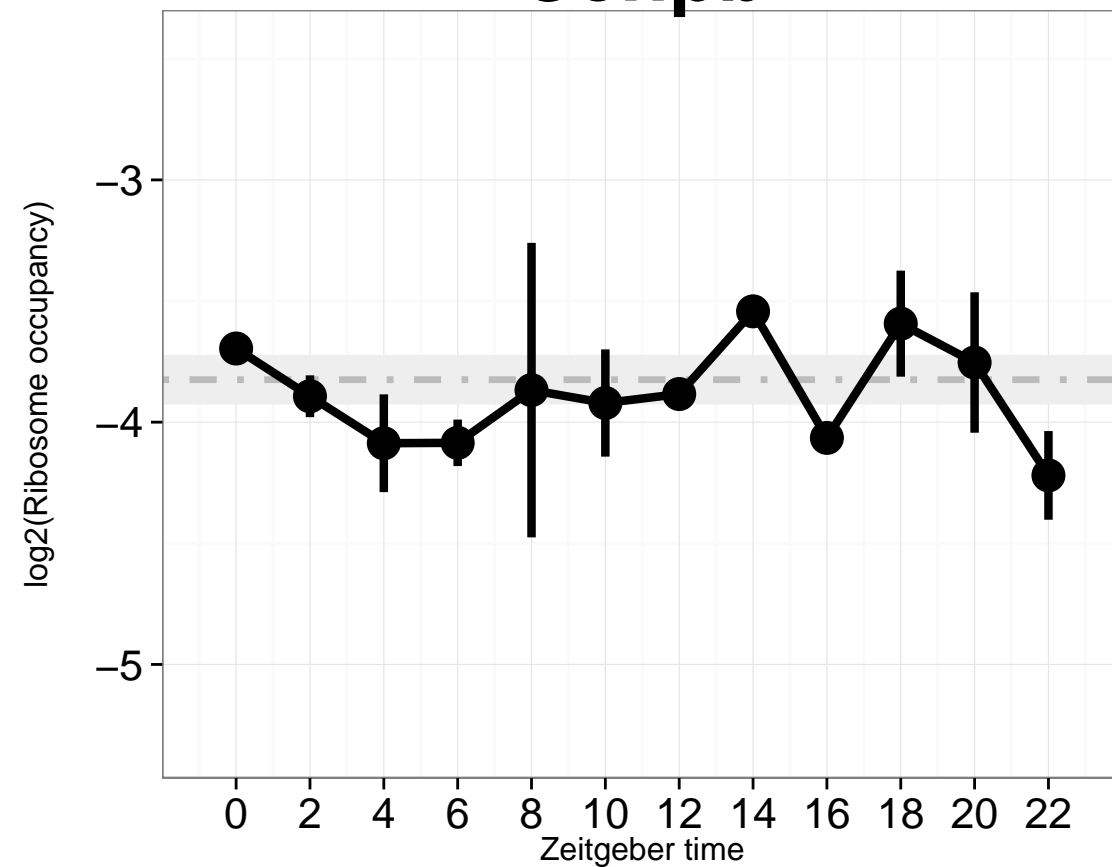

Supplement: SuppDataset_1.zip [file Cenpb_set_A.pdf › Supplemental Dataset 1/A-mRNA_nonrhyth_translation_nonrhyth/Cenpb_set_A.pdf]

# Cenpc1

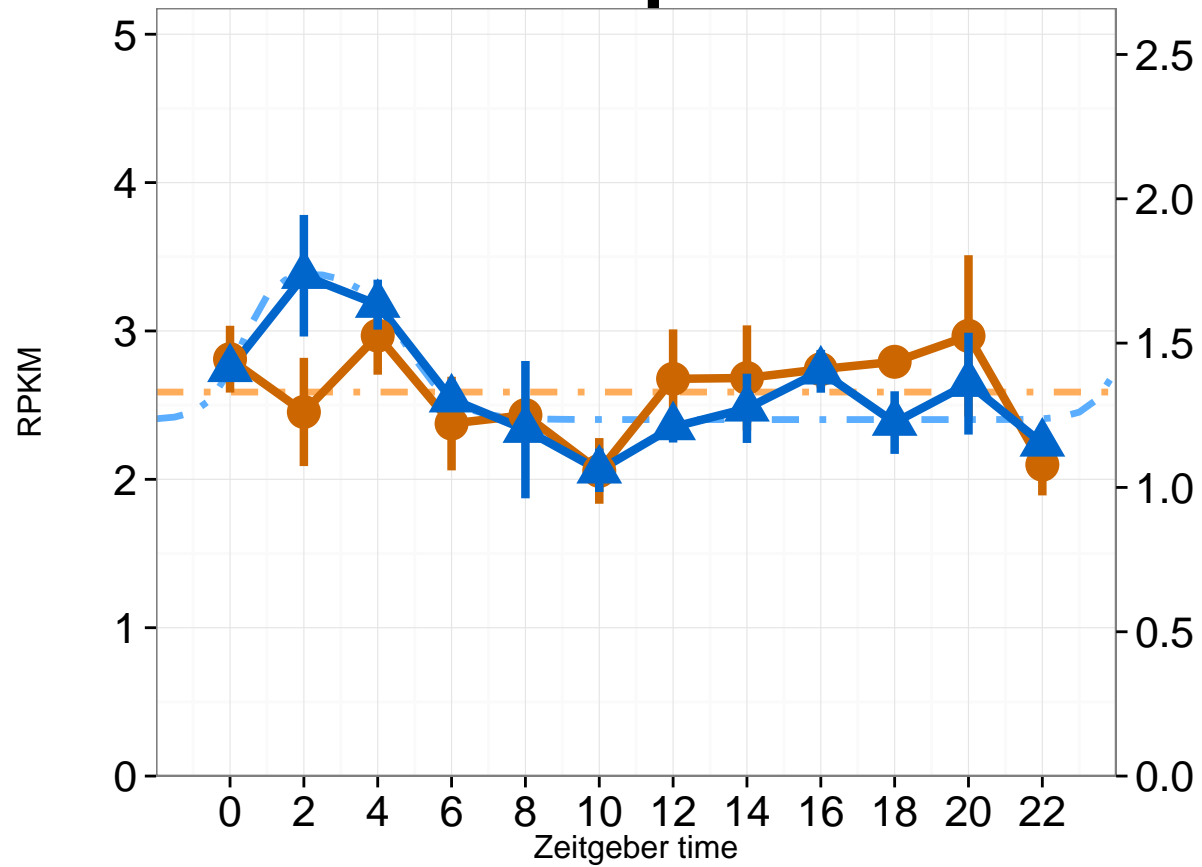

# Cenpc1

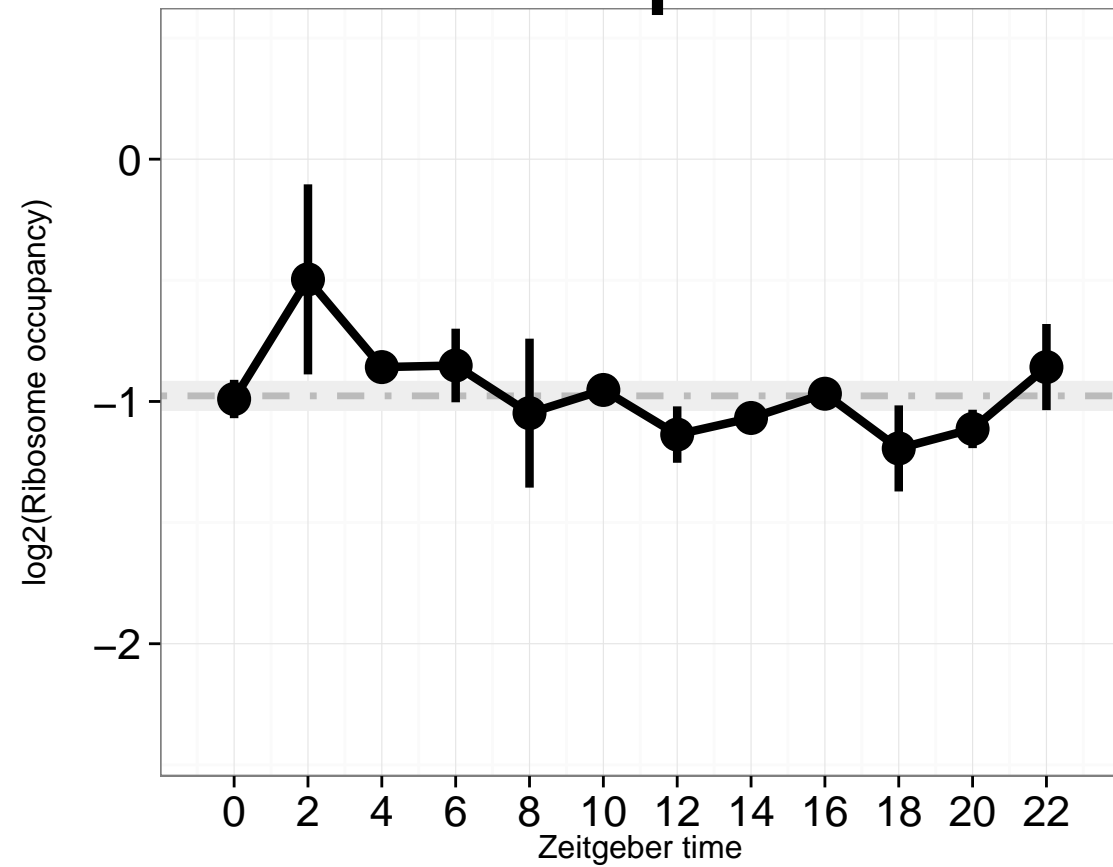

Supplement: SuppDataset_1.zip [file Cenpc1_set_A.pdf › Supplemental Dataset 1/A-mRNA_nonrhyth_translation_nonrhyth/Cenpc1_set_A.pdf]

## Cenpf

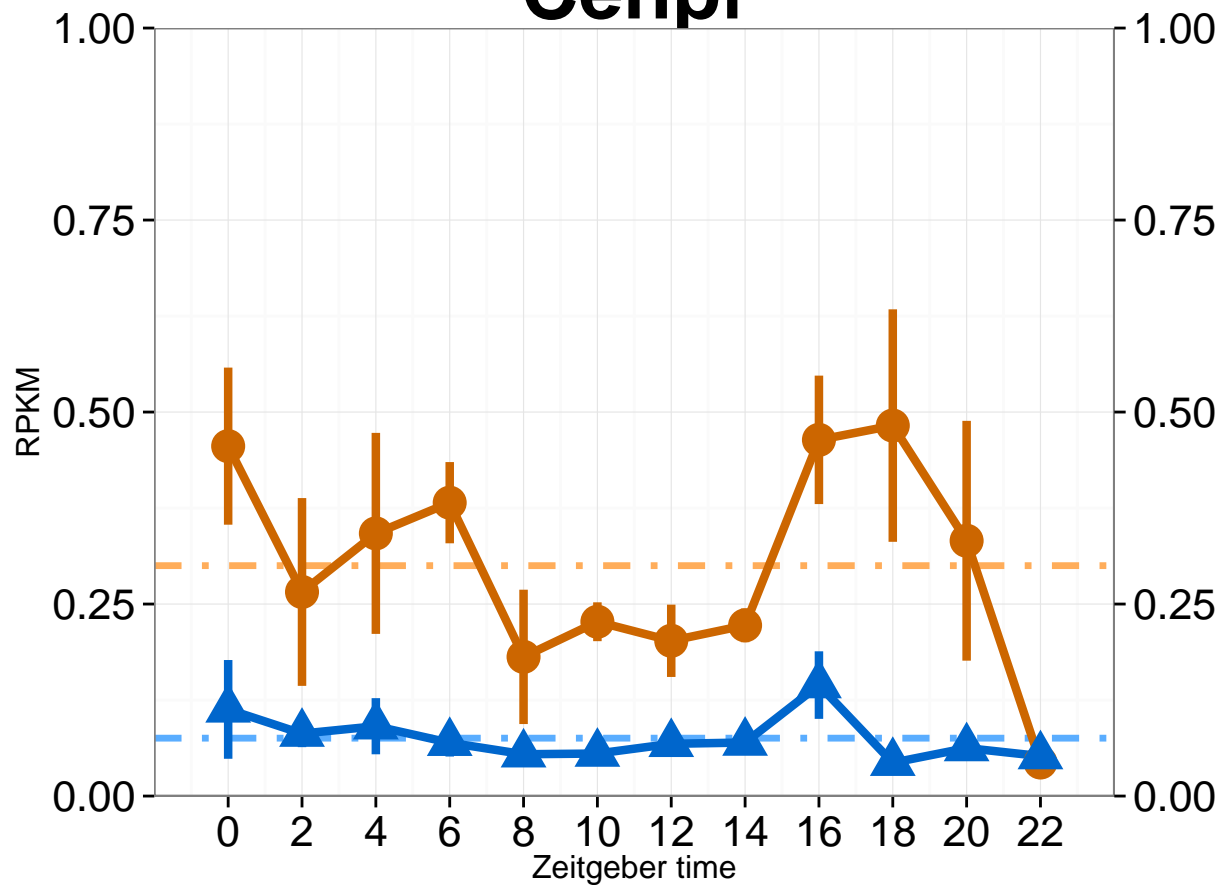

## Cenpf

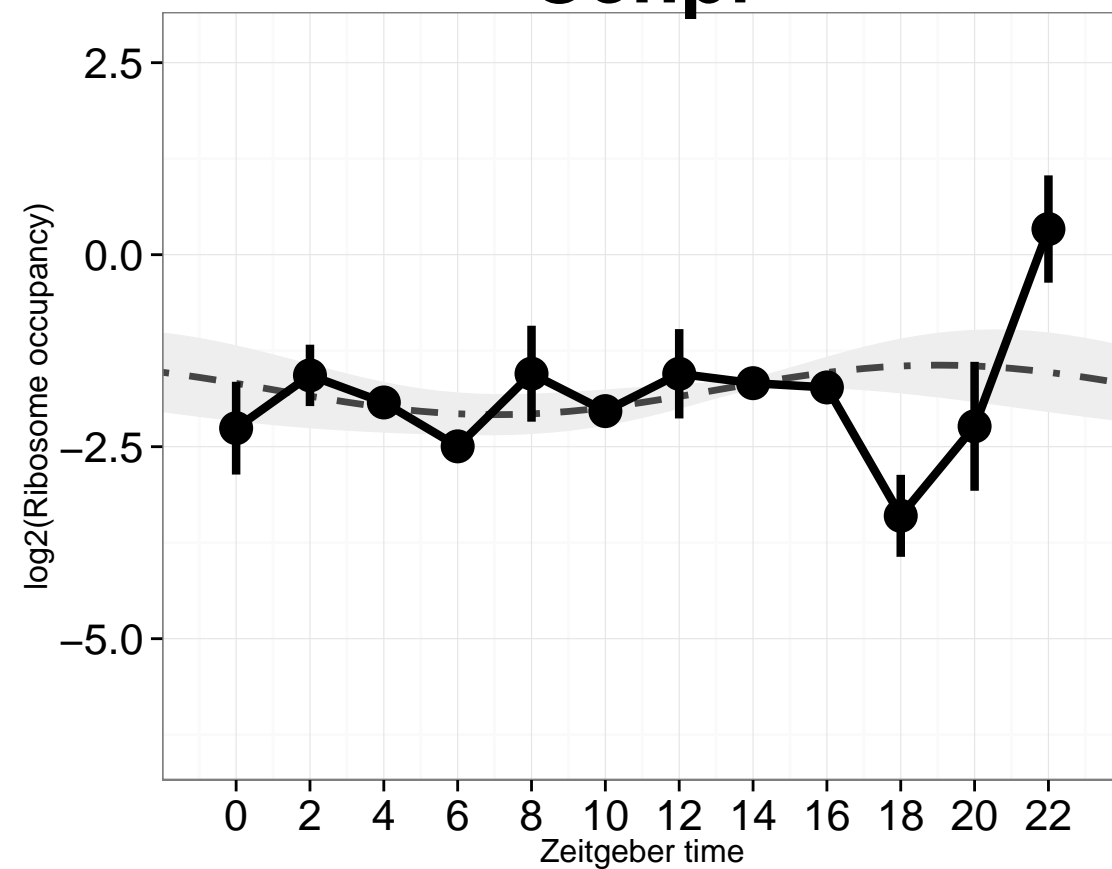

Supplement: SuppDataset_1.zip [file Cenpf_set_A.pdf › Supplemental Dataset 1/A-mRNA_nonrhyth_translation_nonrhyth/Cenpf_set_A.pdf]

## Cenpj

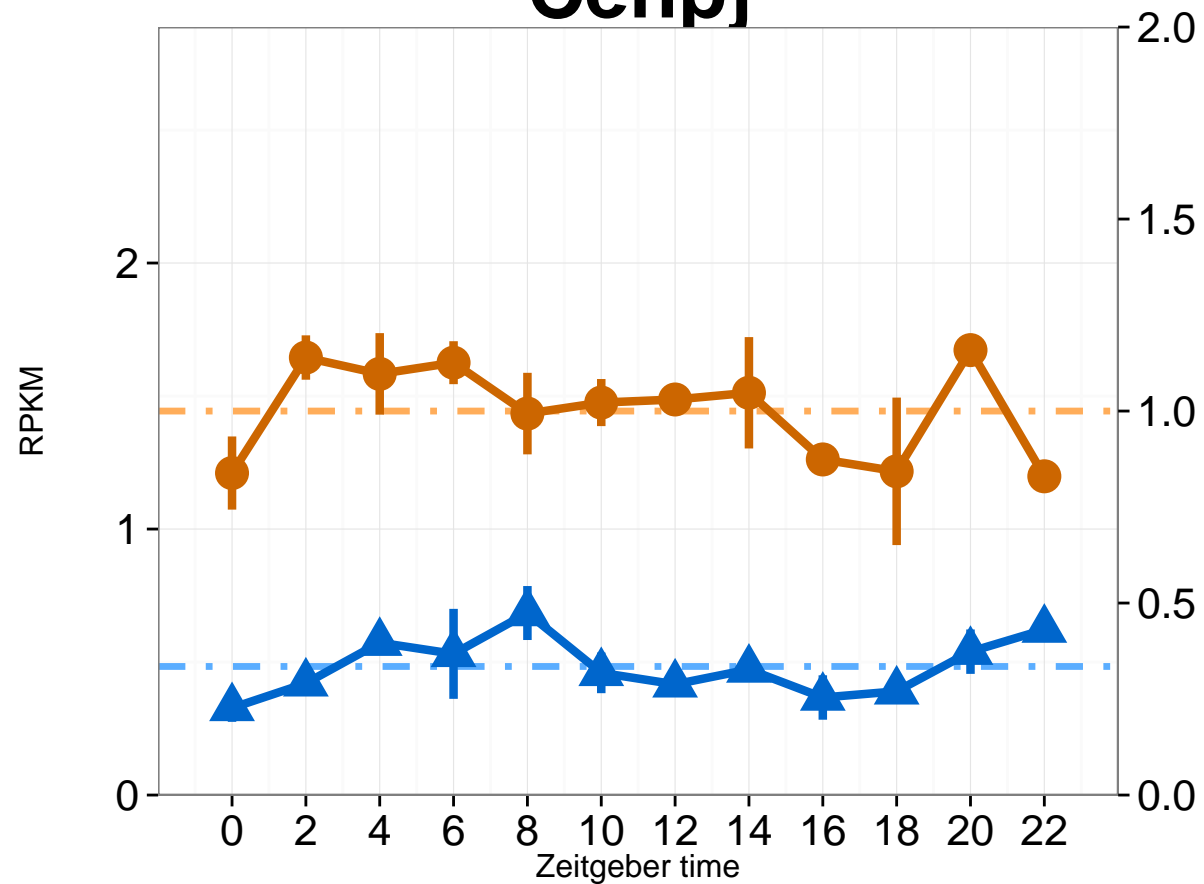

## Cenpj

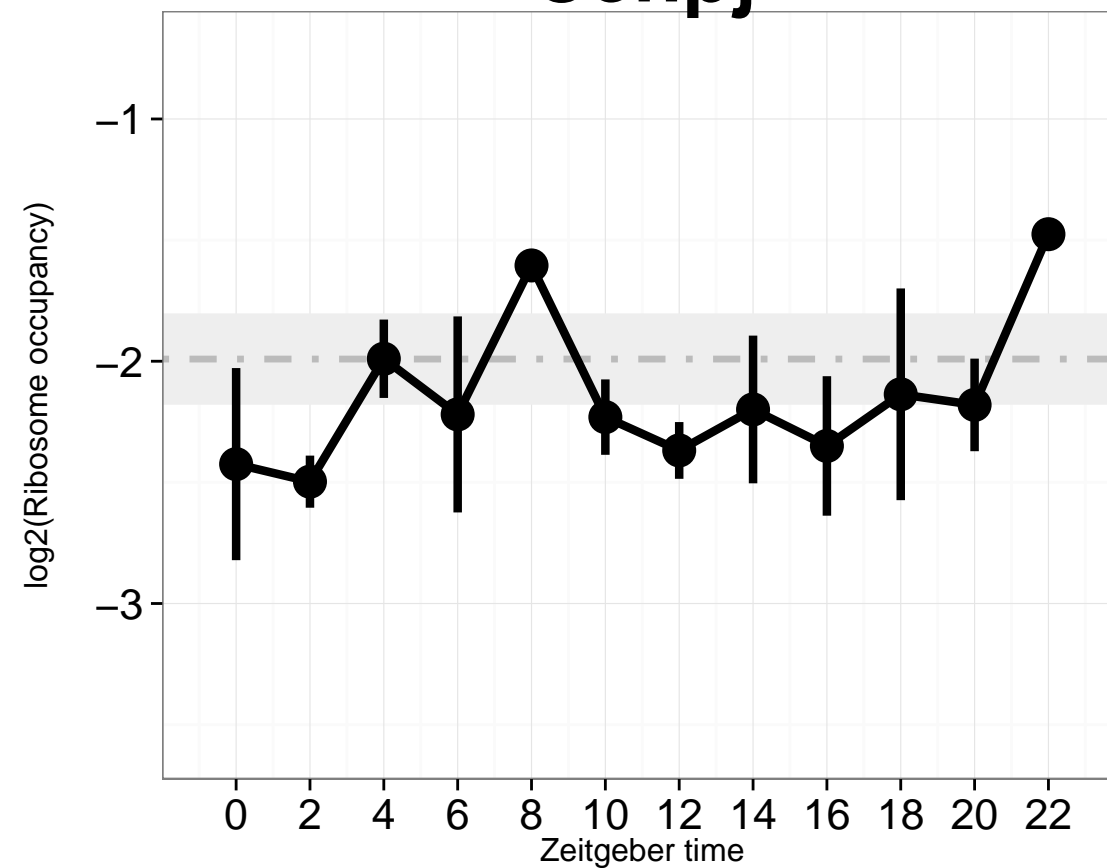

Supplement: SuppDataset_1.zip [file Cenpj_set_A.pdf › Supplemental Dataset 1/A-mRNA_nonrhyth_translation_nonrhyth/Cenpj_set_A.pdf]

## Cenpk

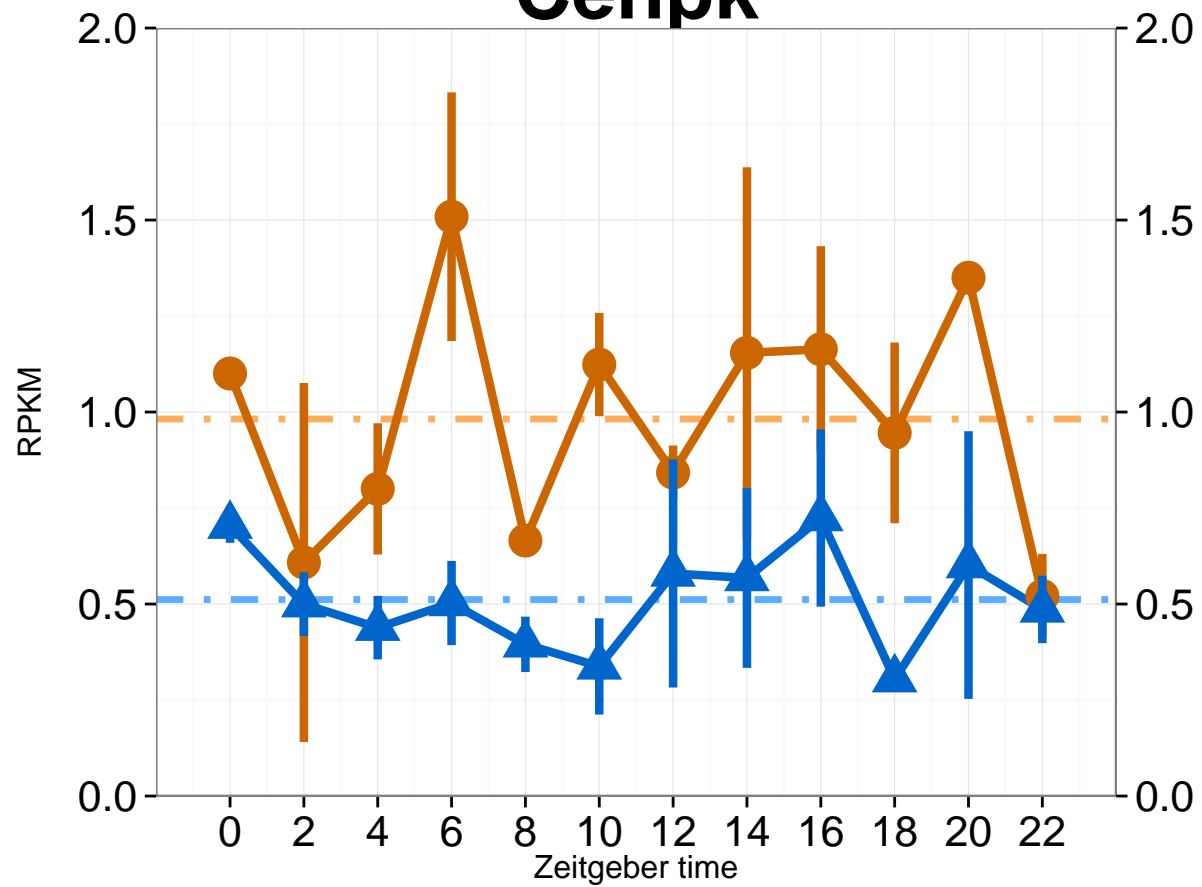

## Cenpk

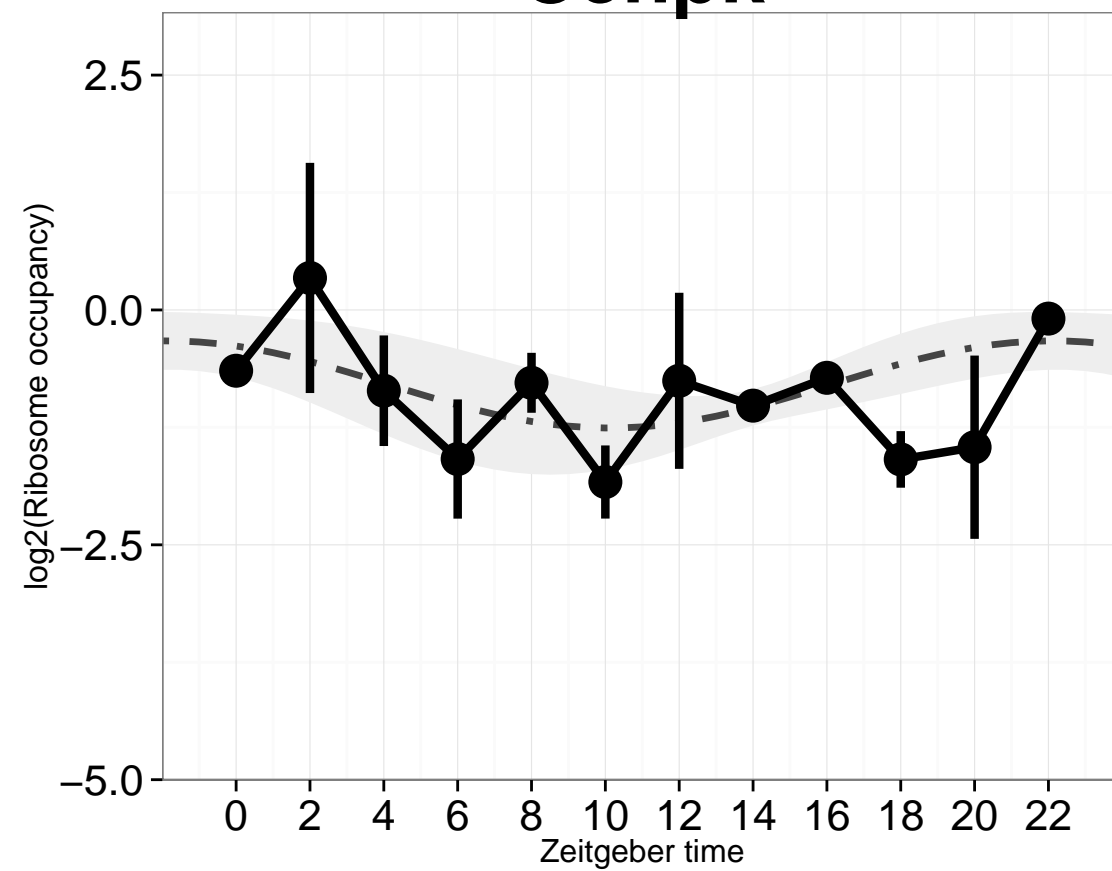

Supplement: SuppDataset_1.zip [file Cenpk_set_A.pdf › Supplemental Dataset 1/A-mRNA_nonrhyth_translation_nonrhyth/Cenpk_set_A.pdf]

# Cenpm

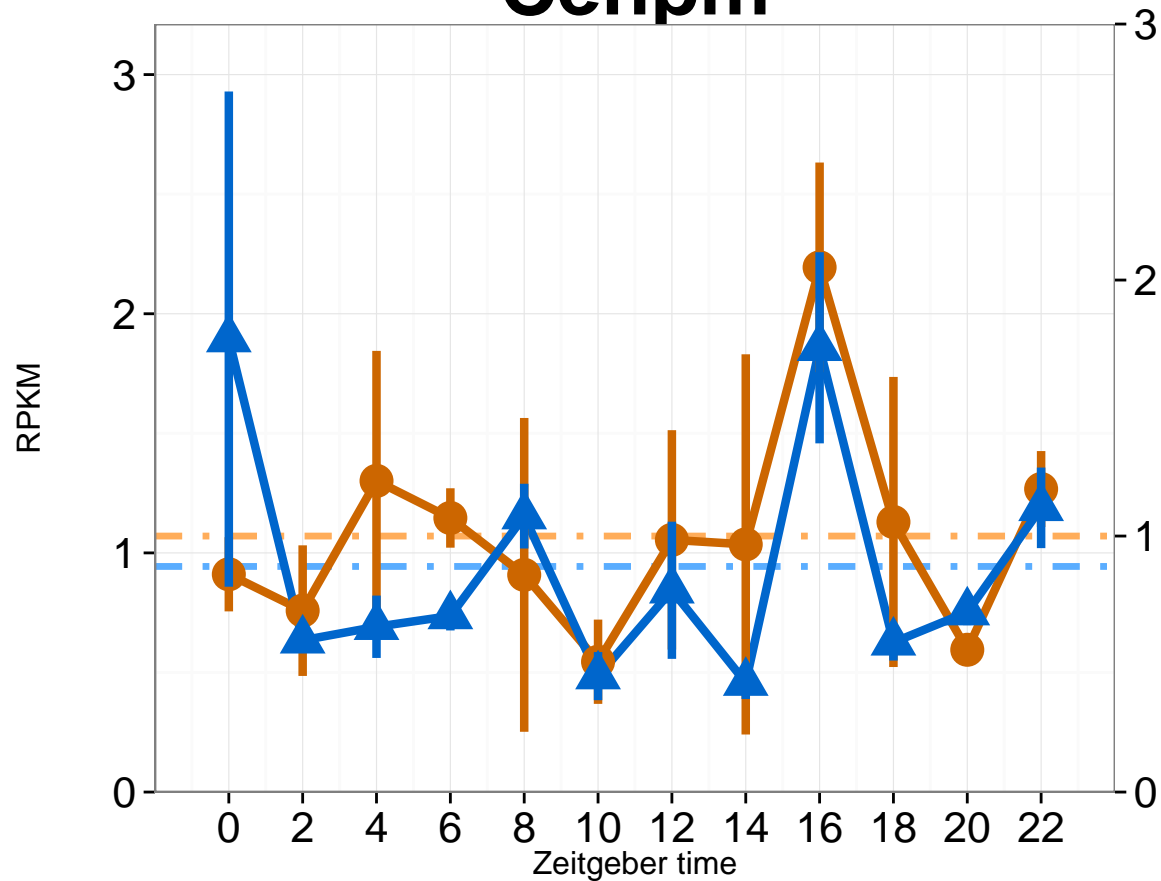

# Cenpm

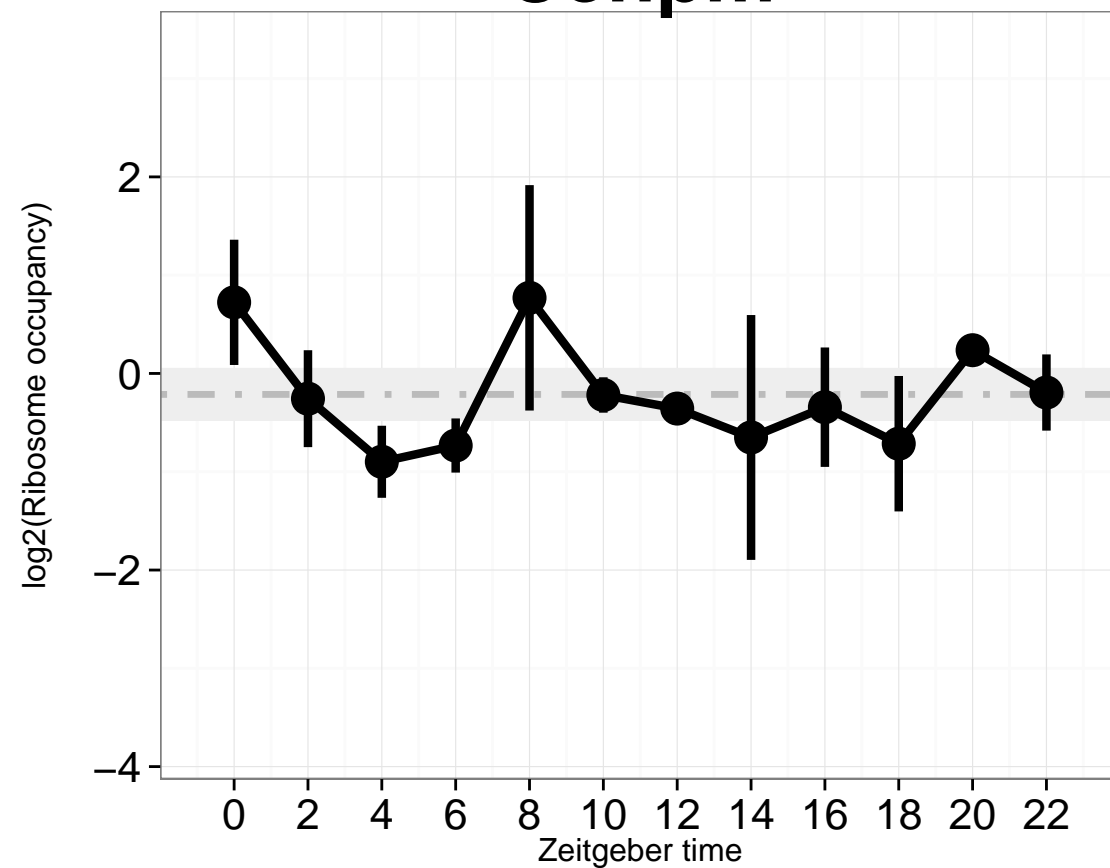

Supplement: SuppDataset_1.zip [file Cenpm_set_A.pdf › Supplemental Dataset 1/A-mRNA_nonrhyth_translation_nonrhyth/Cenpm_set_A.pdf]

## Cenpo

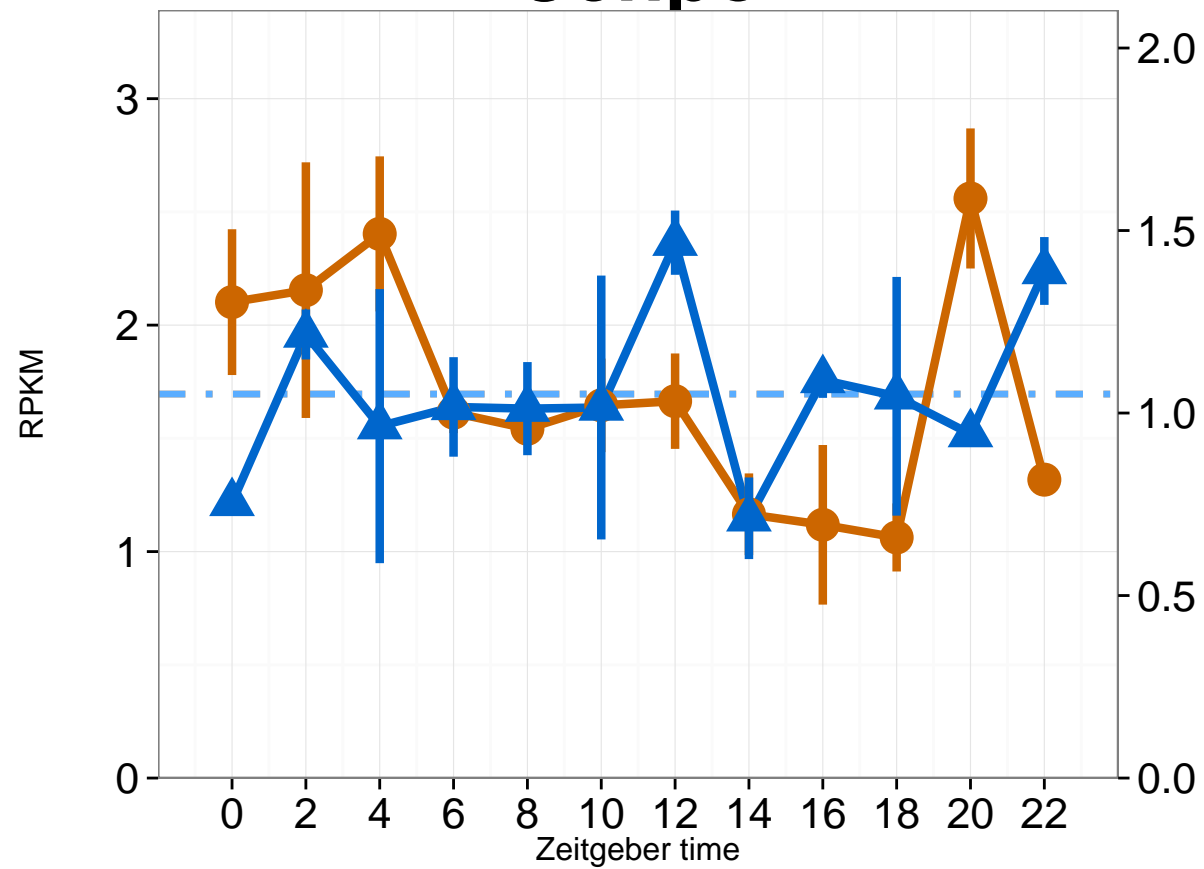

## Cenpo

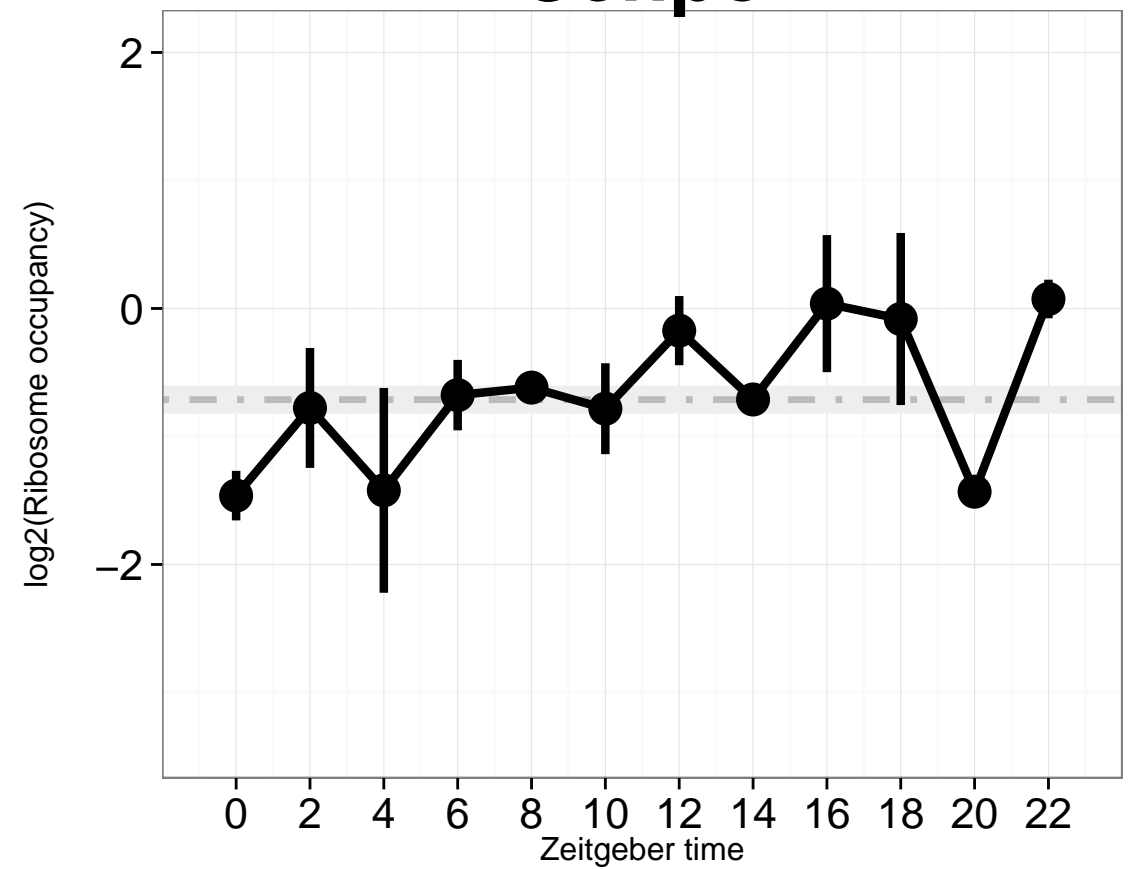

Supplement: SuppDataset_1.zip [file Cenpo_set_A.pdf › Supplemental Dataset 1/A-mRNA_nonrhyth_translation_nonrhyth/Cenpo_set_A.pdf]

## Cenpq

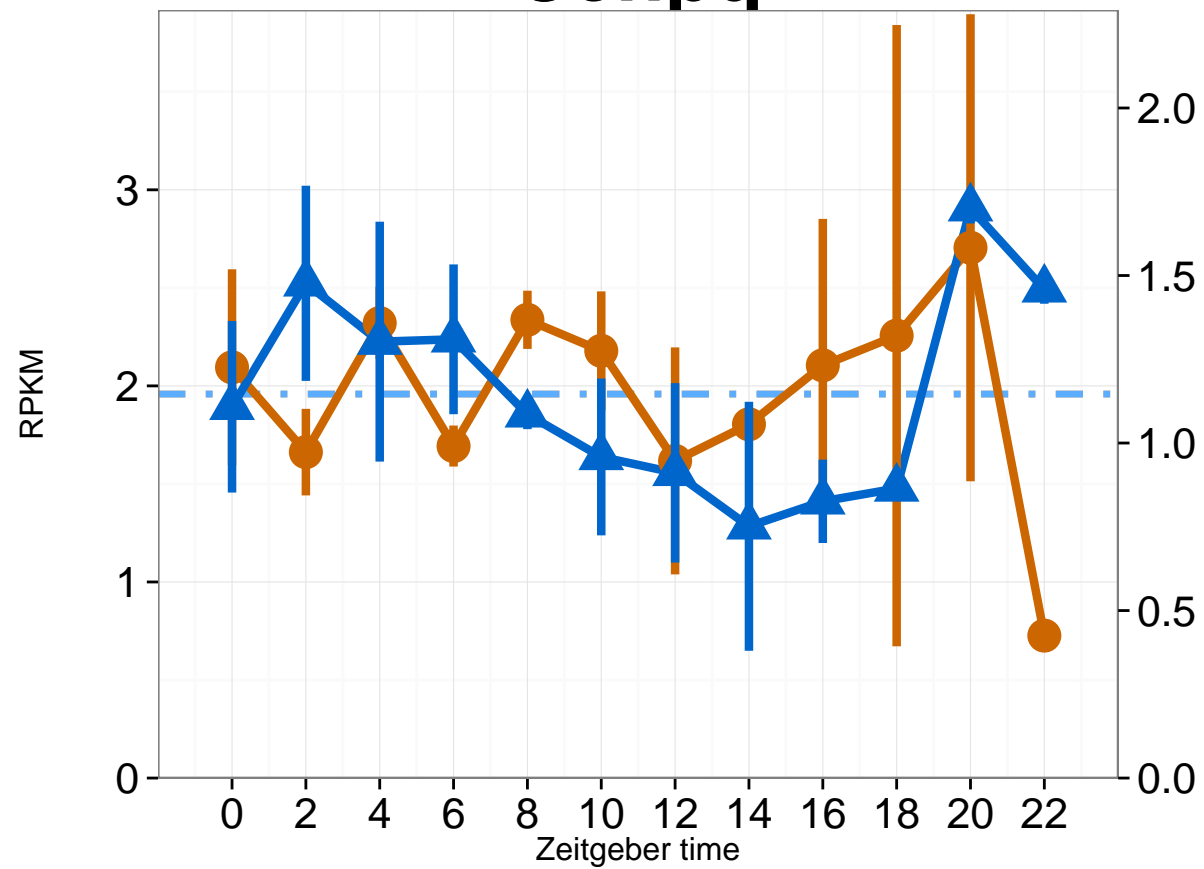

## Cenpq

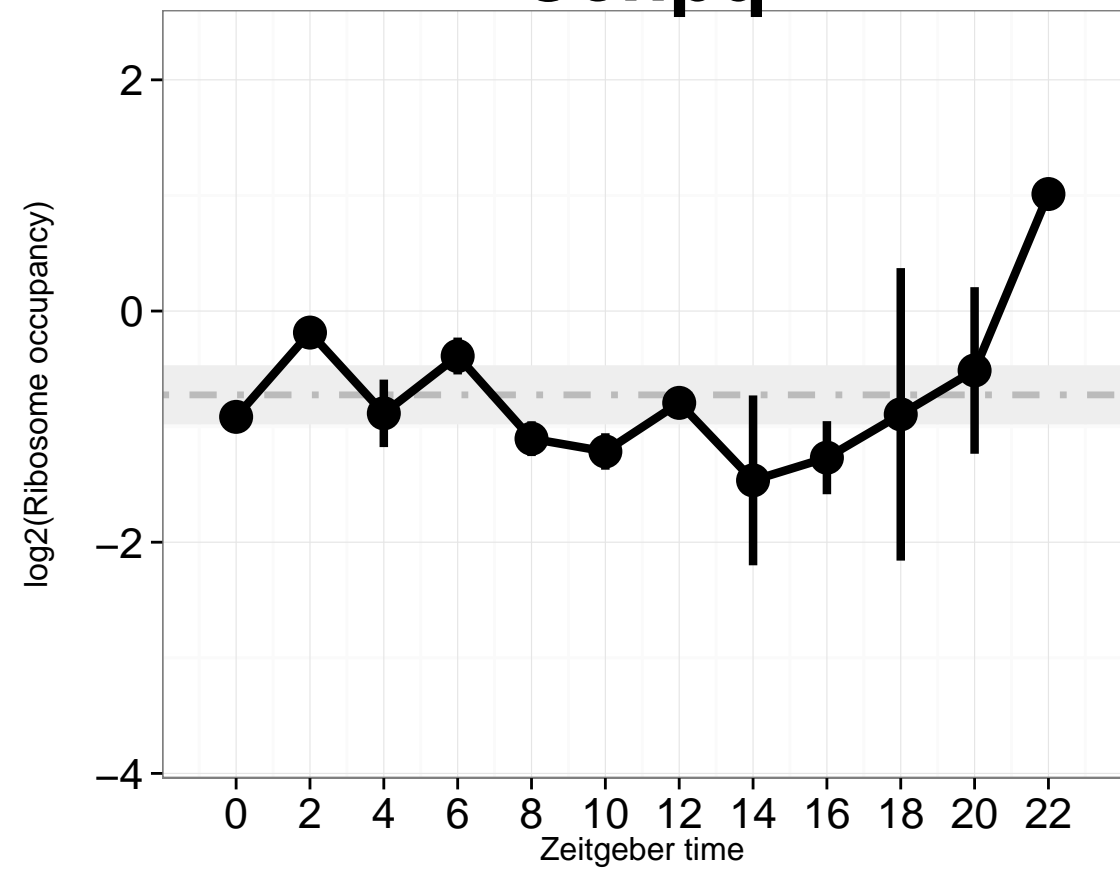

Supplement: SuppDataset_1.zip [file Cenpq_set_A.pdf › Supplemental Dataset 1/A-mRNA_nonrhyth_translation_nonrhyth/Cenpq_set_A.pdf]

## Cenpt

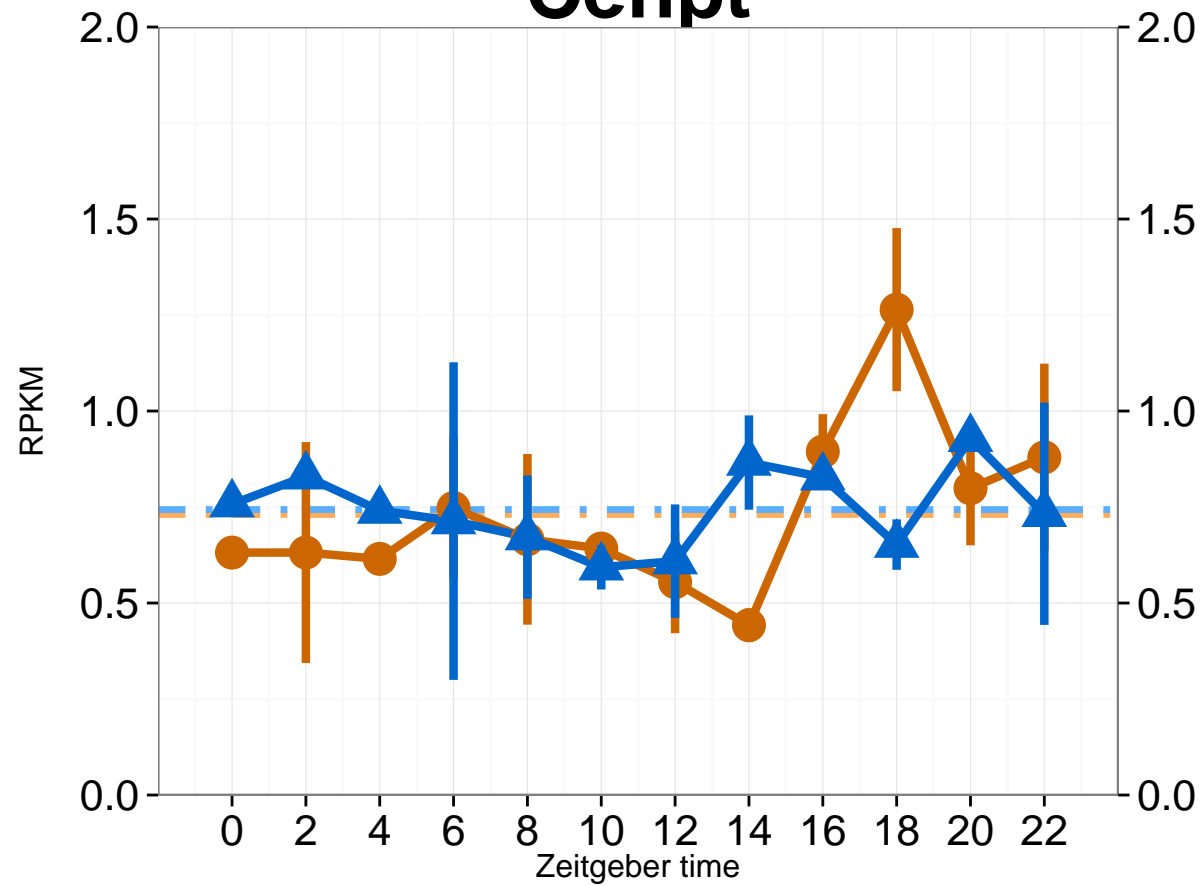

## Cenpt

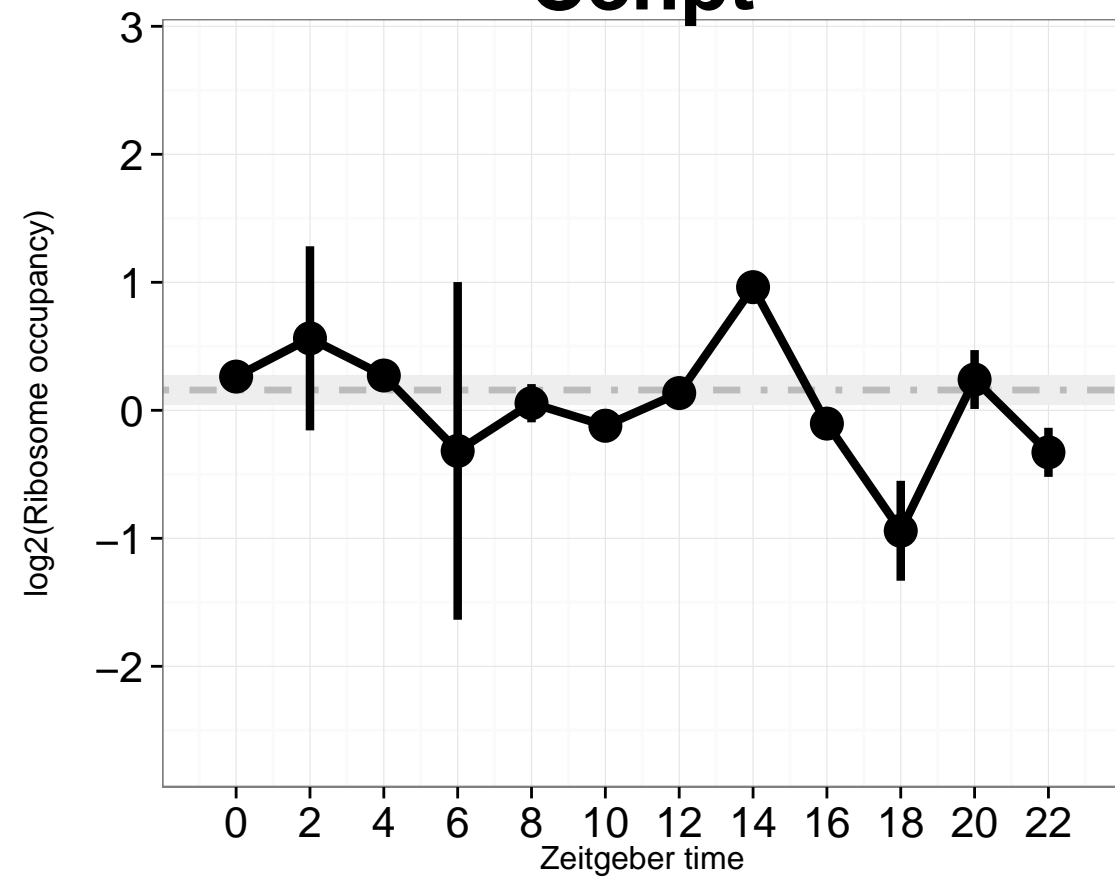

Supplement: SuppDataset_1.zip [file Cenpt_set_A.pdf › Supplemental Dataset 1/A-mRNA_nonrhyth_translation_nonrhyth/Cenpt_set_A.pdf]

## Cenpv

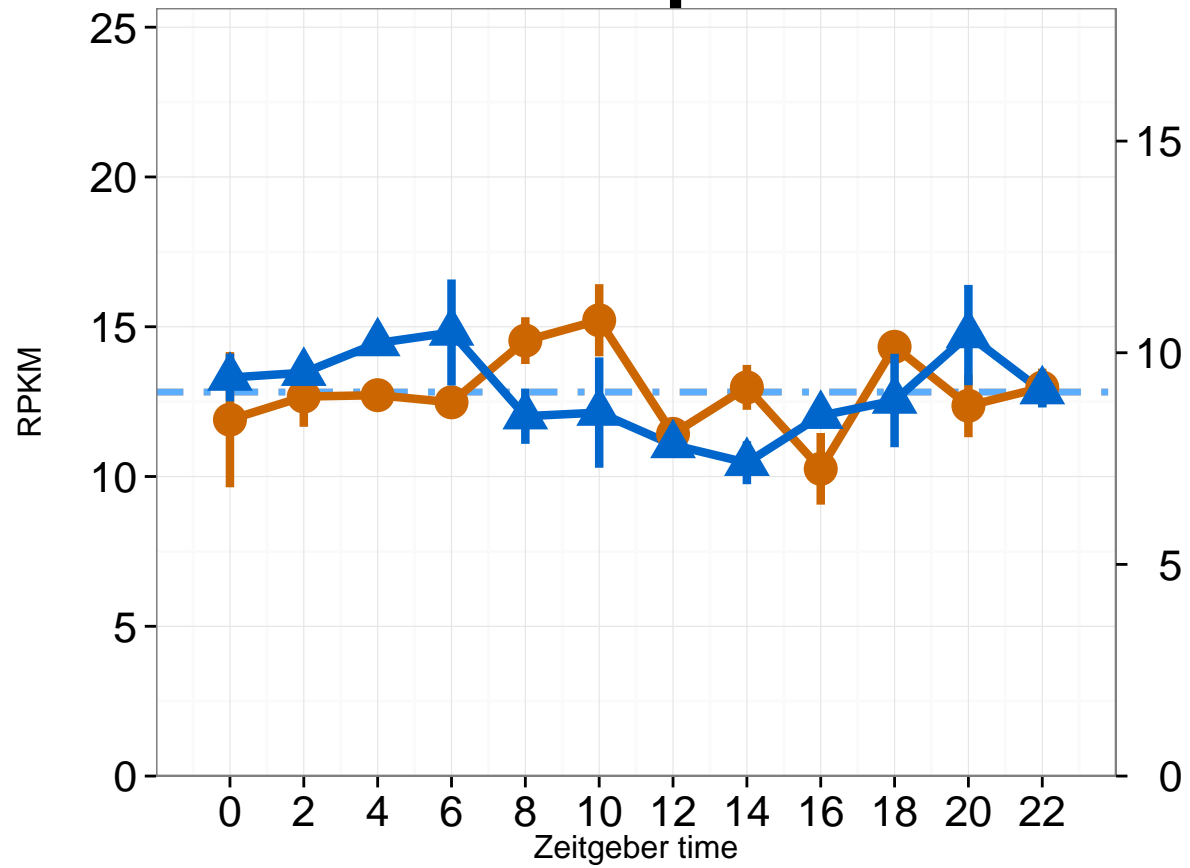

## Cenpv

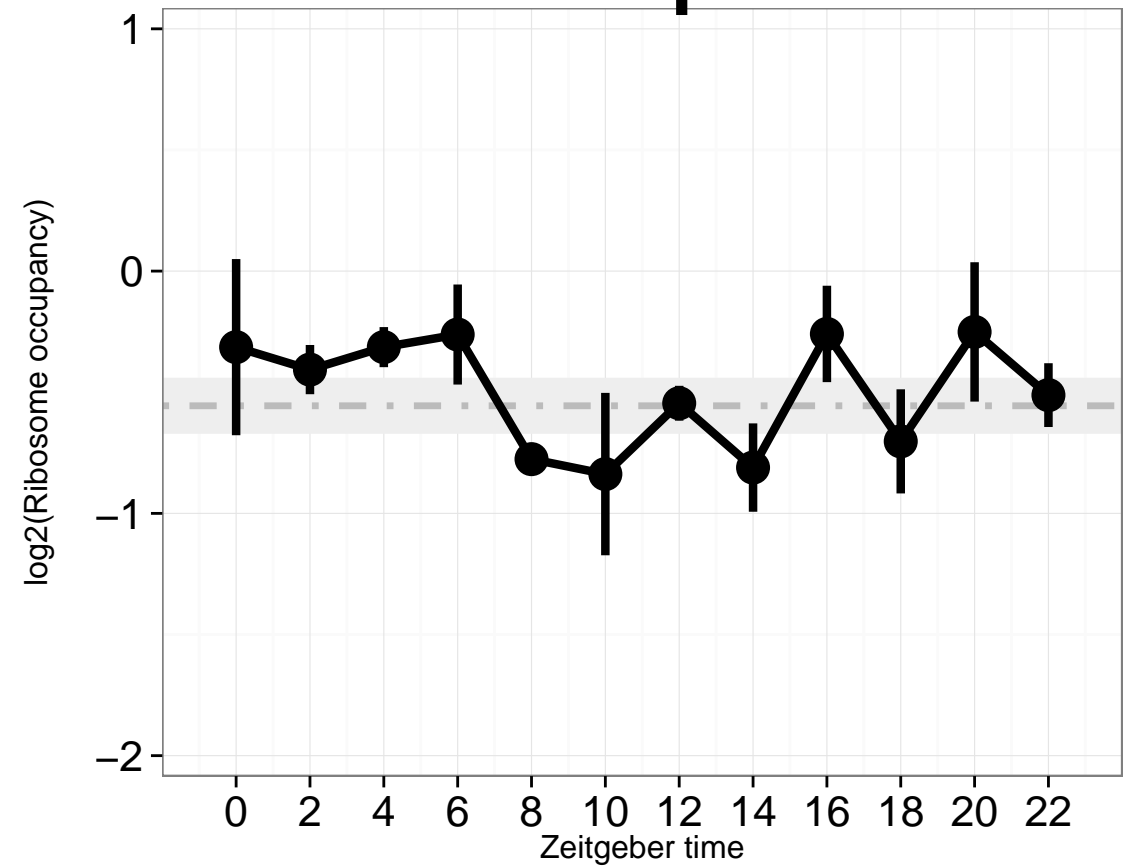

Supplement: SuppDataset_1.zip [file Cenpv_set_A.pdf › Supplemental Dataset 1/A-mRNA_nonrhyth_translation_nonrhyth/Cenpv_set_A.pdf]

# Cenpw

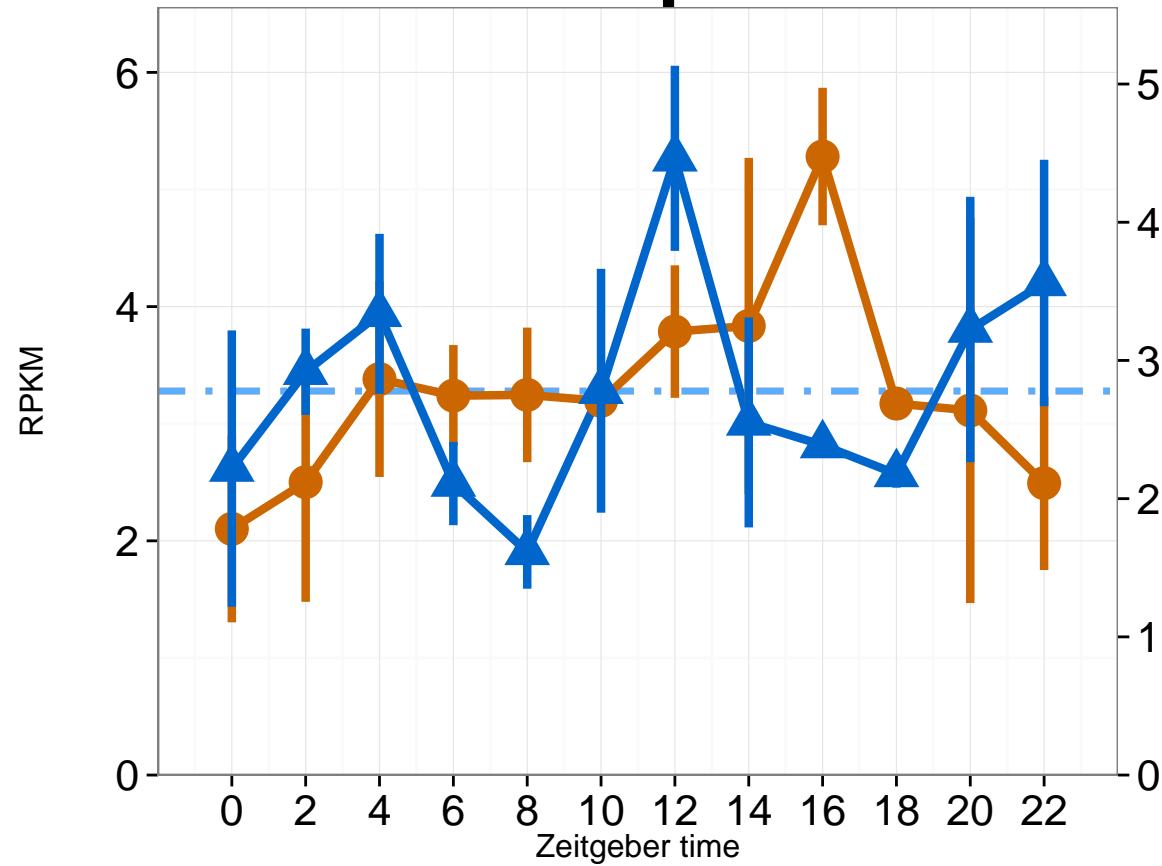

# Cenpw

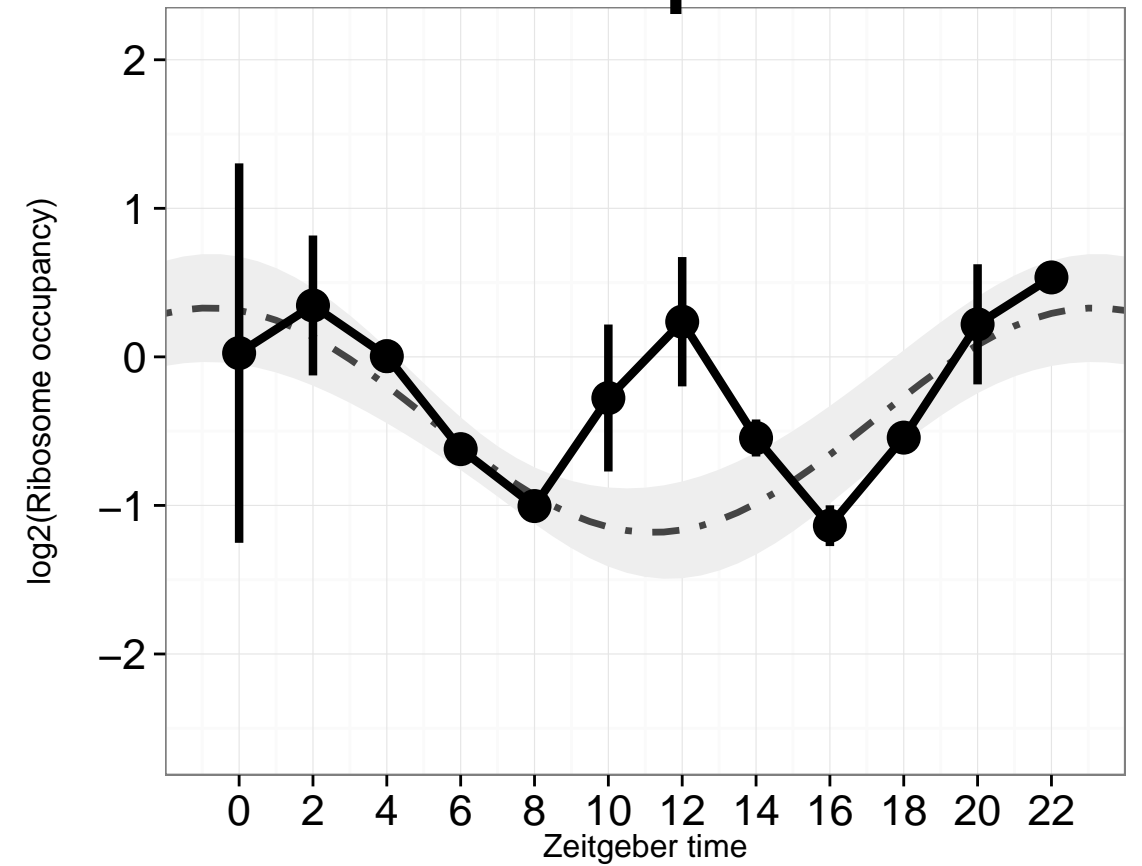

Supplement: SuppDataset_1.zip [file Cenpw_set_A.pdf › Supplemental Dataset 1/A-mRNA_nonrhyth_translation_nonrhyth/Cenpw_set_A.pdf]

# Cep104

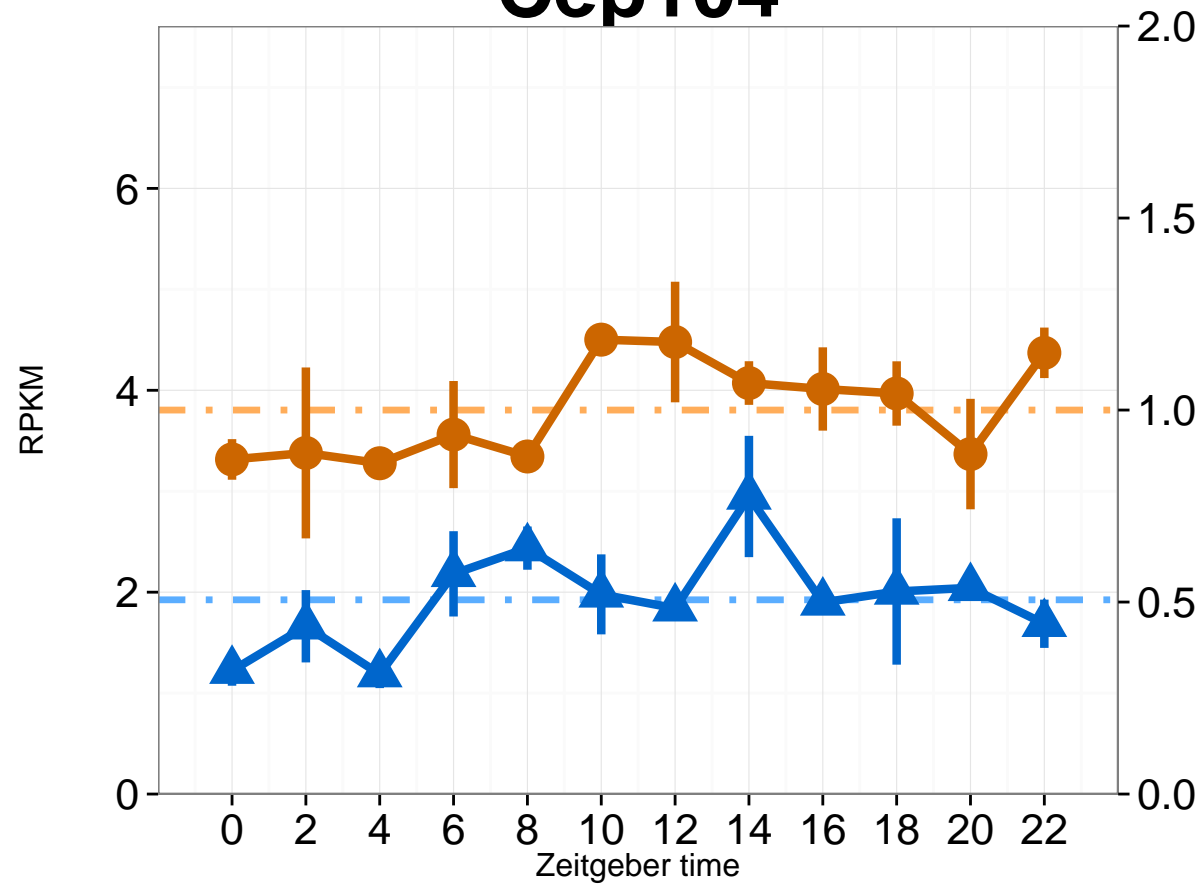

# Cep104

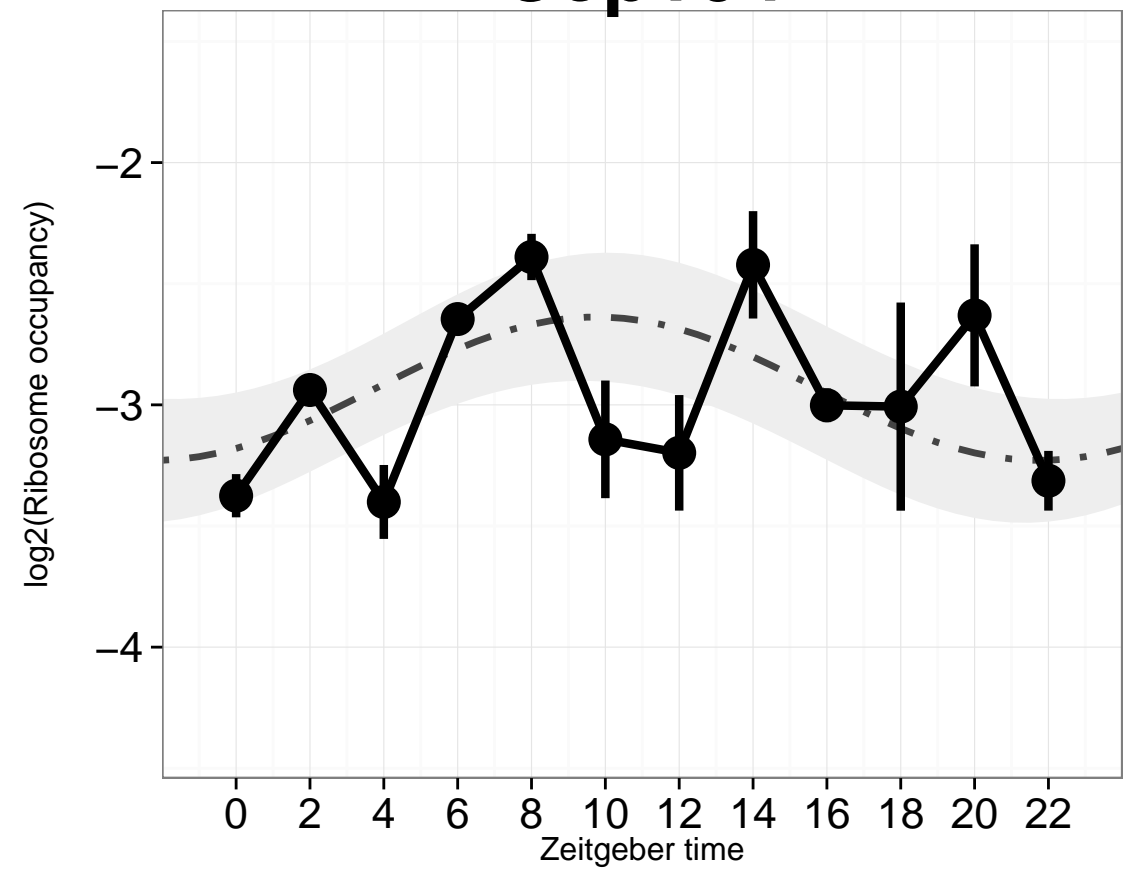

Supplement: SuppDataset_1.zip [file Cep104_set_A.pdf › Supplemental Dataset 1/A-mRNA_nonrhyth_translation_nonrhyth/Cep104_set_A.pdf]

# Cep110

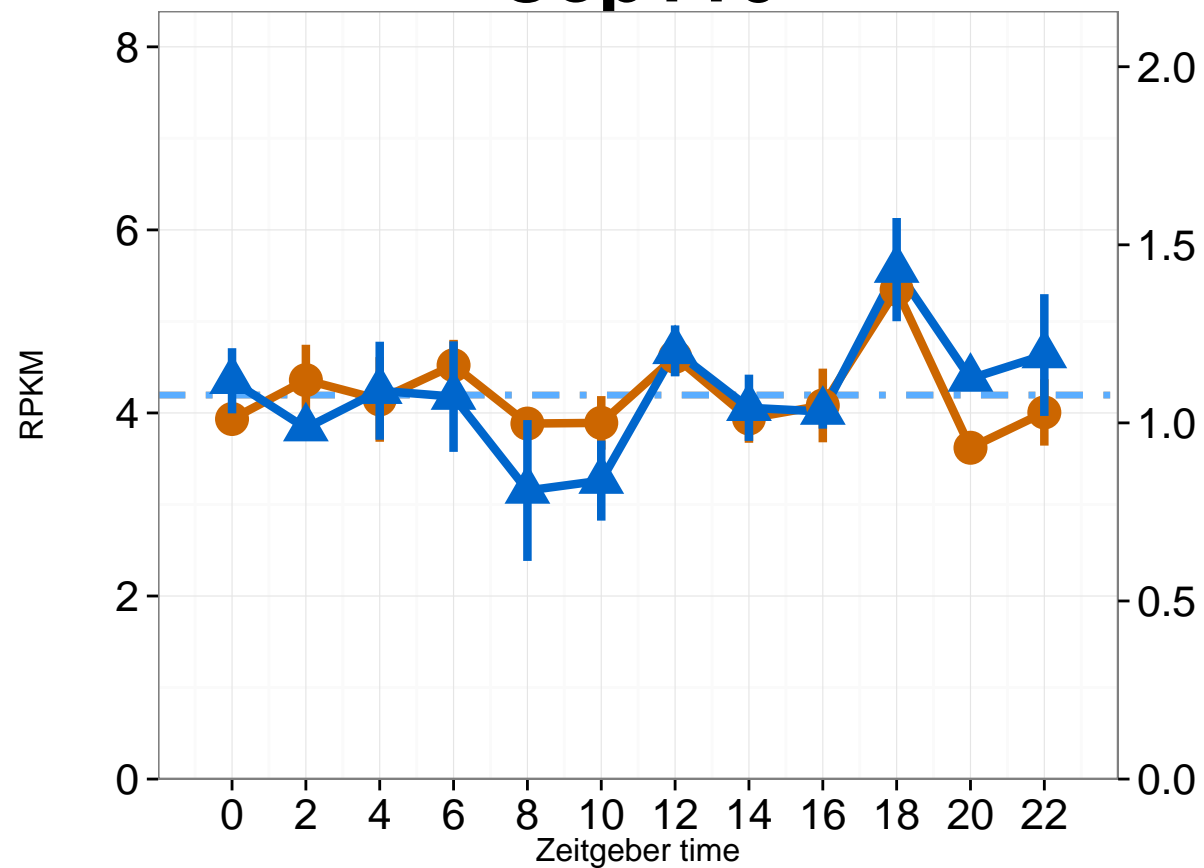

# Cep110

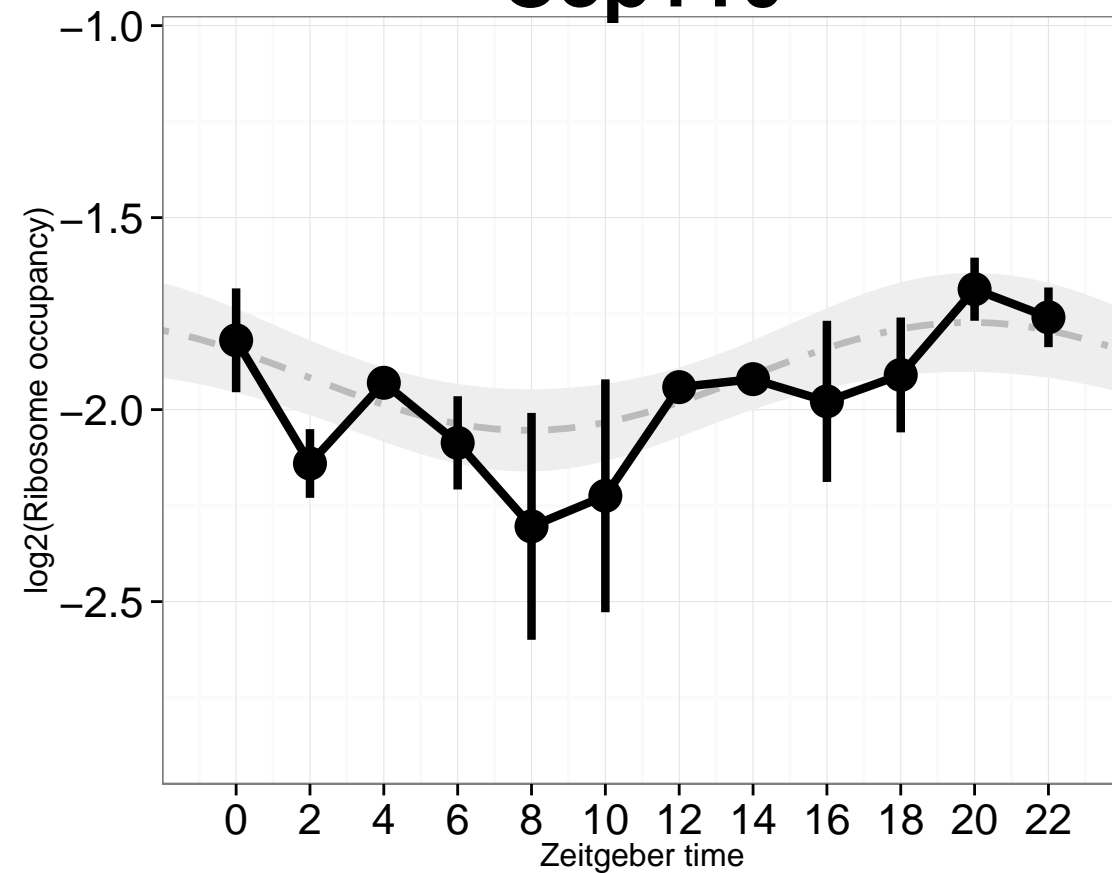

Supplement: SuppDataset_1.zip [file Cep110_set_A.pdf › Supplemental Dataset 1/A-mRNA_nonrhyth_translation_nonrhyth/Cep110_set_A.pdf]

# Cep120

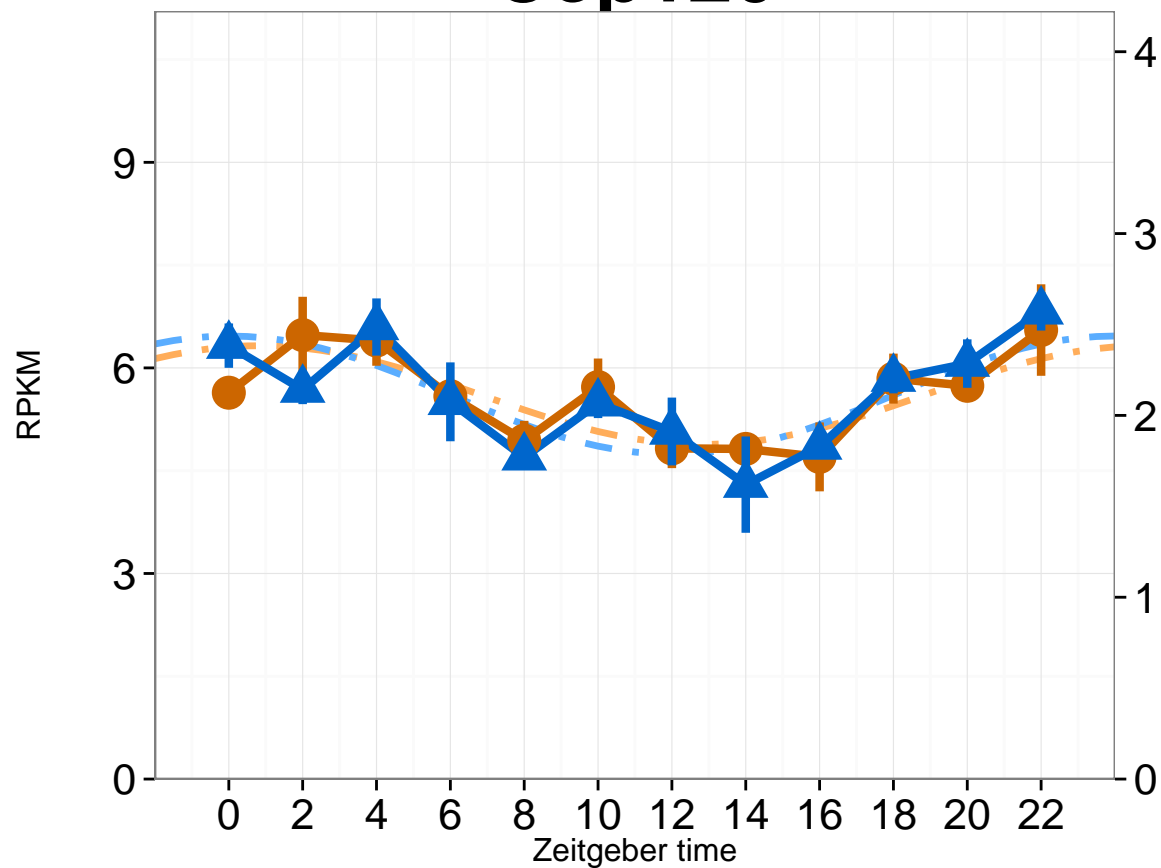

# Cep120

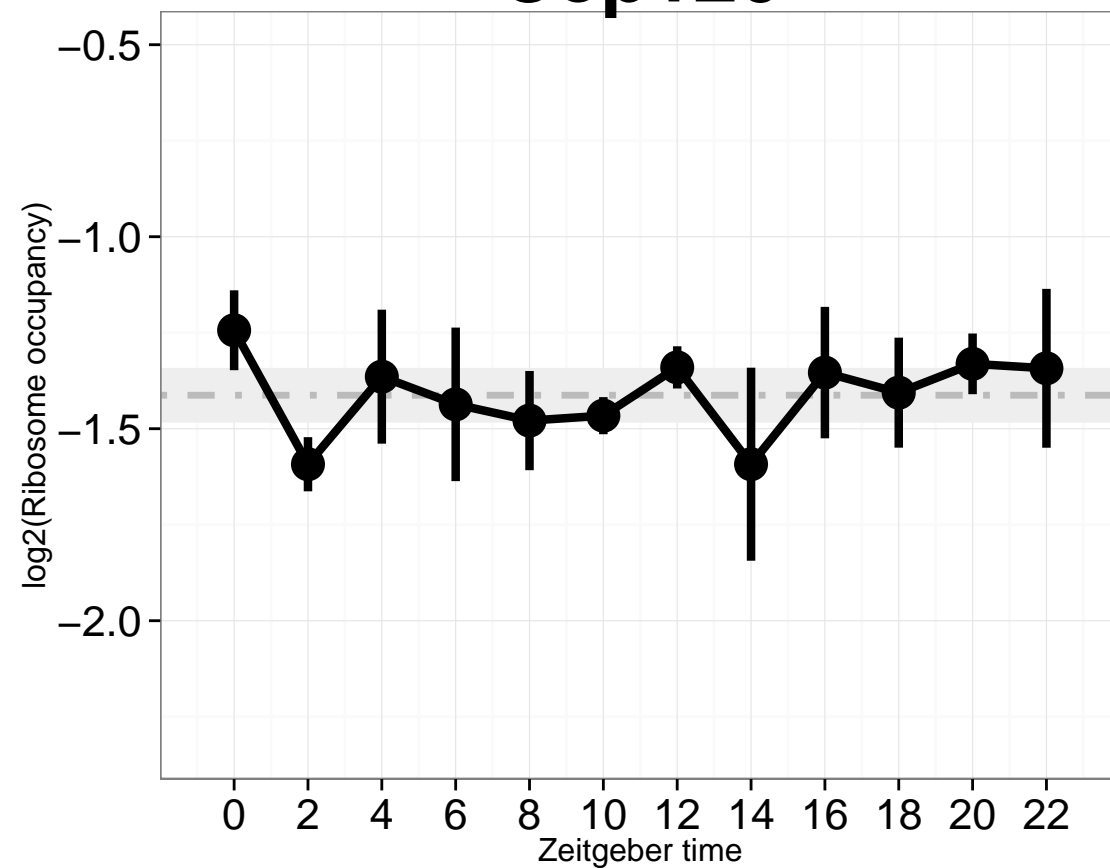

Supplement: SuppDataset_1.zip [file Cep120_set_A.pdf › Supplemental Dataset 1/A-mRNA_nonrhyth_translation_nonrhyth/Cep120_set_A.pdf]

## Cep128

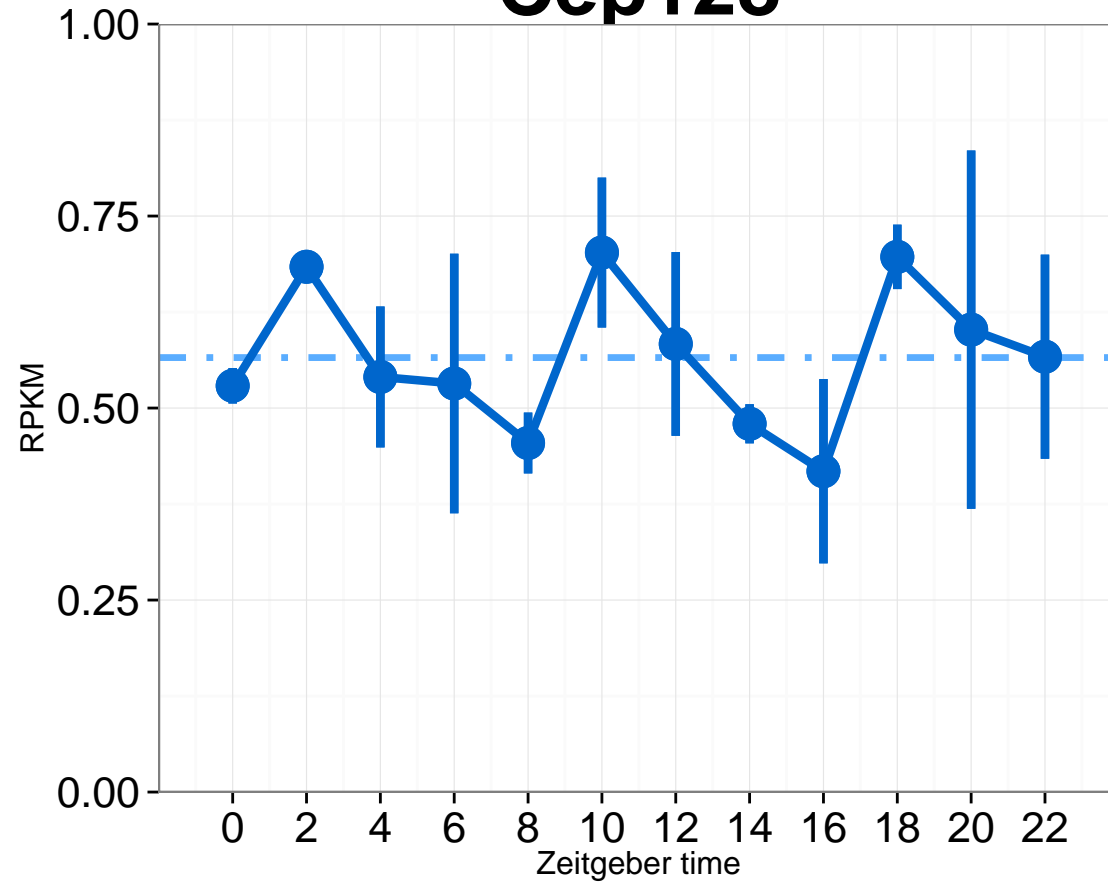

## Cep128 log2(Ribosome occupancy)

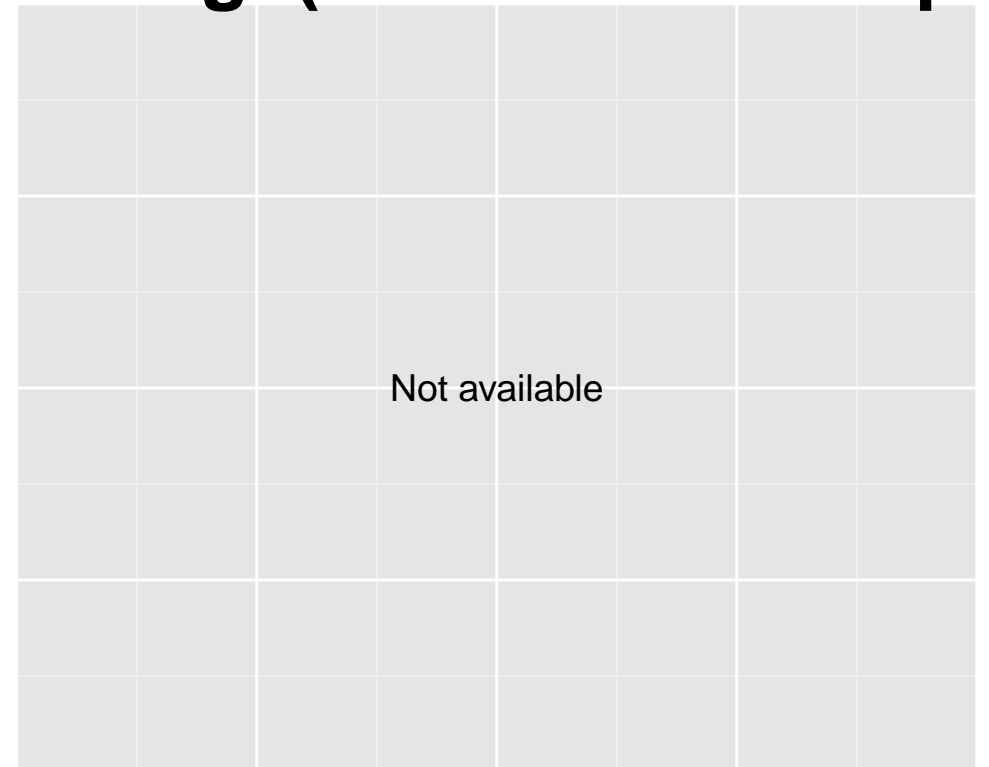

Supplement: SuppDataset_1.zip [file Cep128_set_A.pdf › Supplemental Dataset 1/A-mRNA_nonrhyth_translation_nonrhyth/Cep128_set_A.pdf]

# Cep135

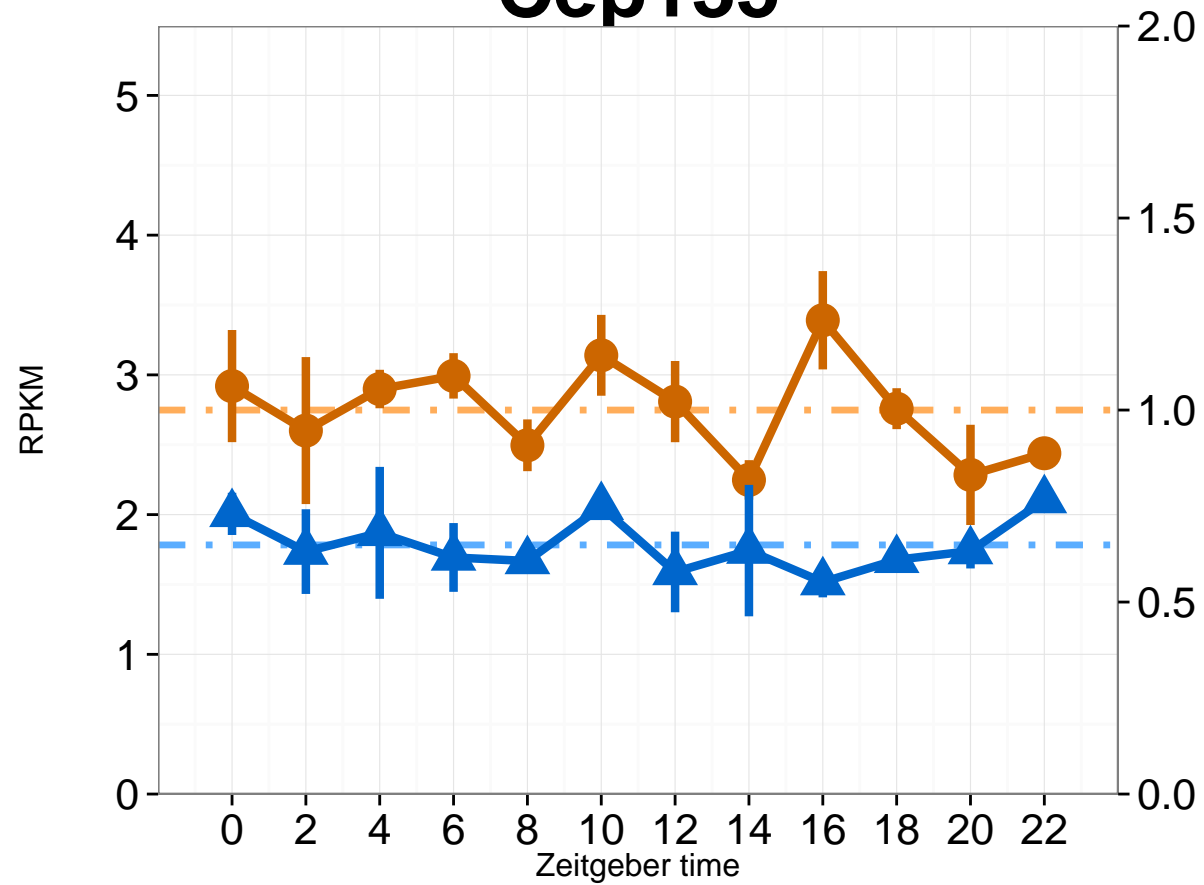

# Cep135

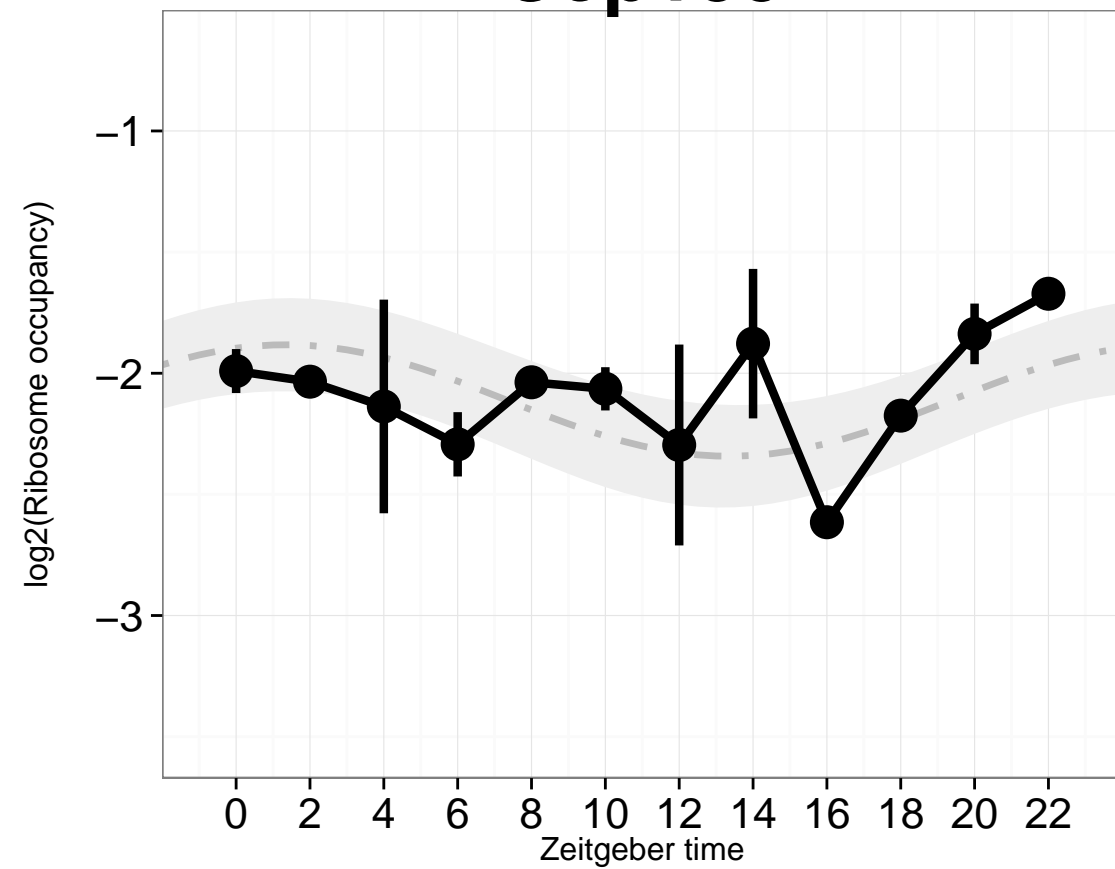

Supplement: SuppDataset_1.zip [file Cep135_set_A.pdf › Supplemental Dataset 1/A-mRNA_nonrhyth_translation_nonrhyth/Cep135_set_A.pdf]

# Cep164

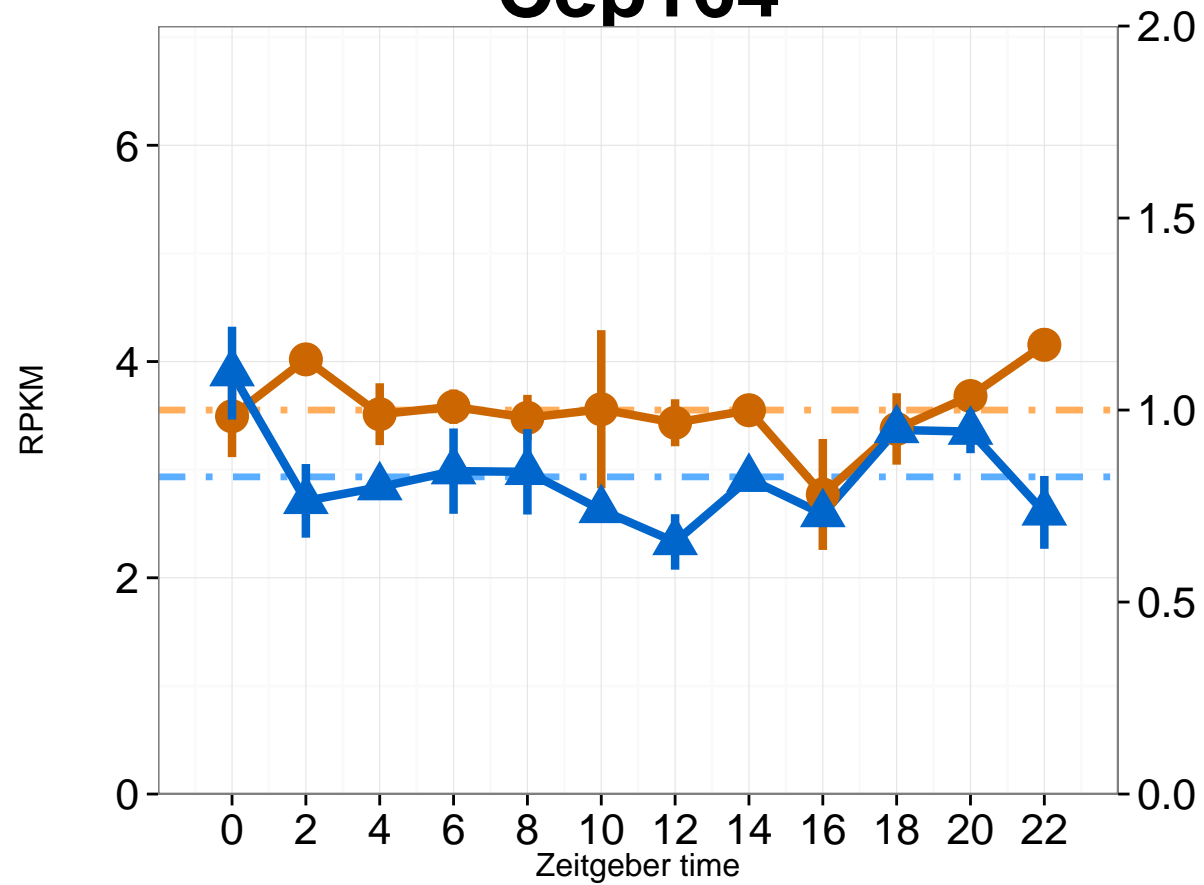

# Cep164

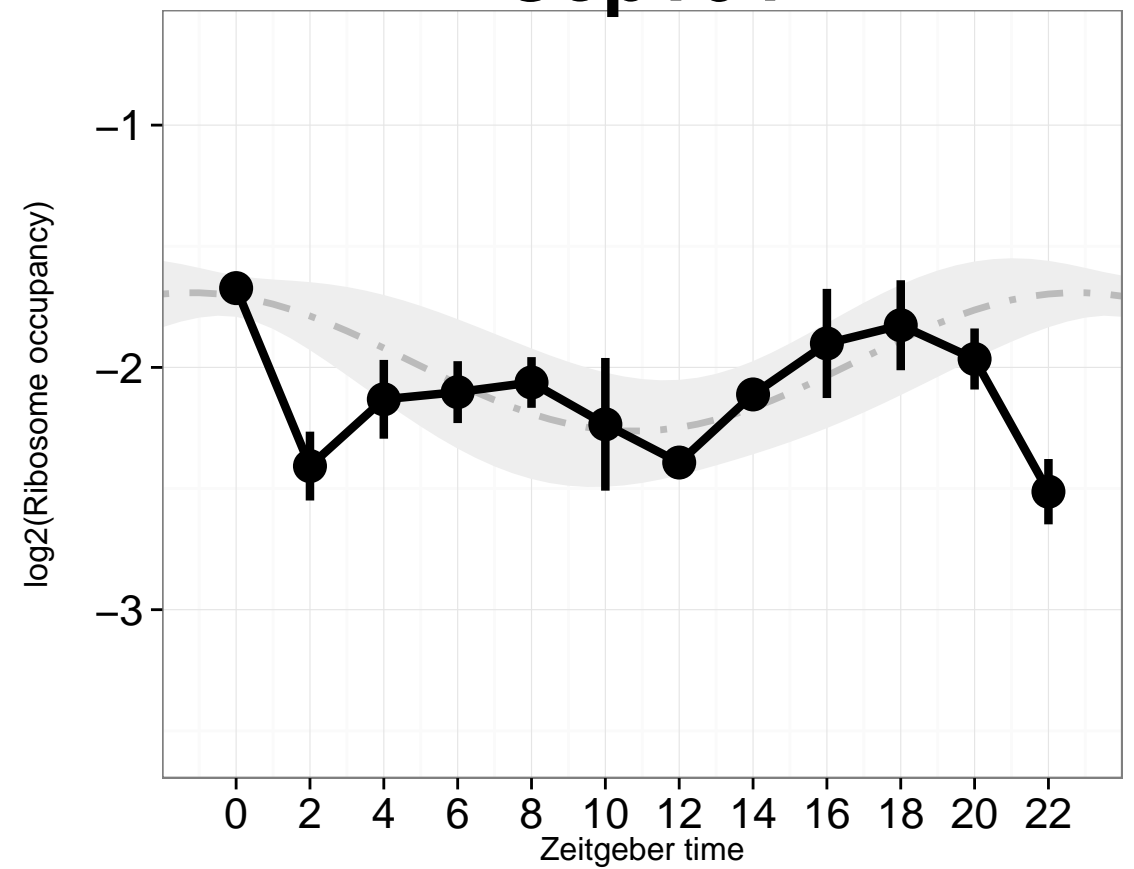

Supplement: SuppDataset_1.zip [file Cep164_set_A.pdf › Supplemental Dataset 1/A-mRNA_nonrhyth_translation_nonrhyth/Cep164_set_A.pdf]

# Cep170

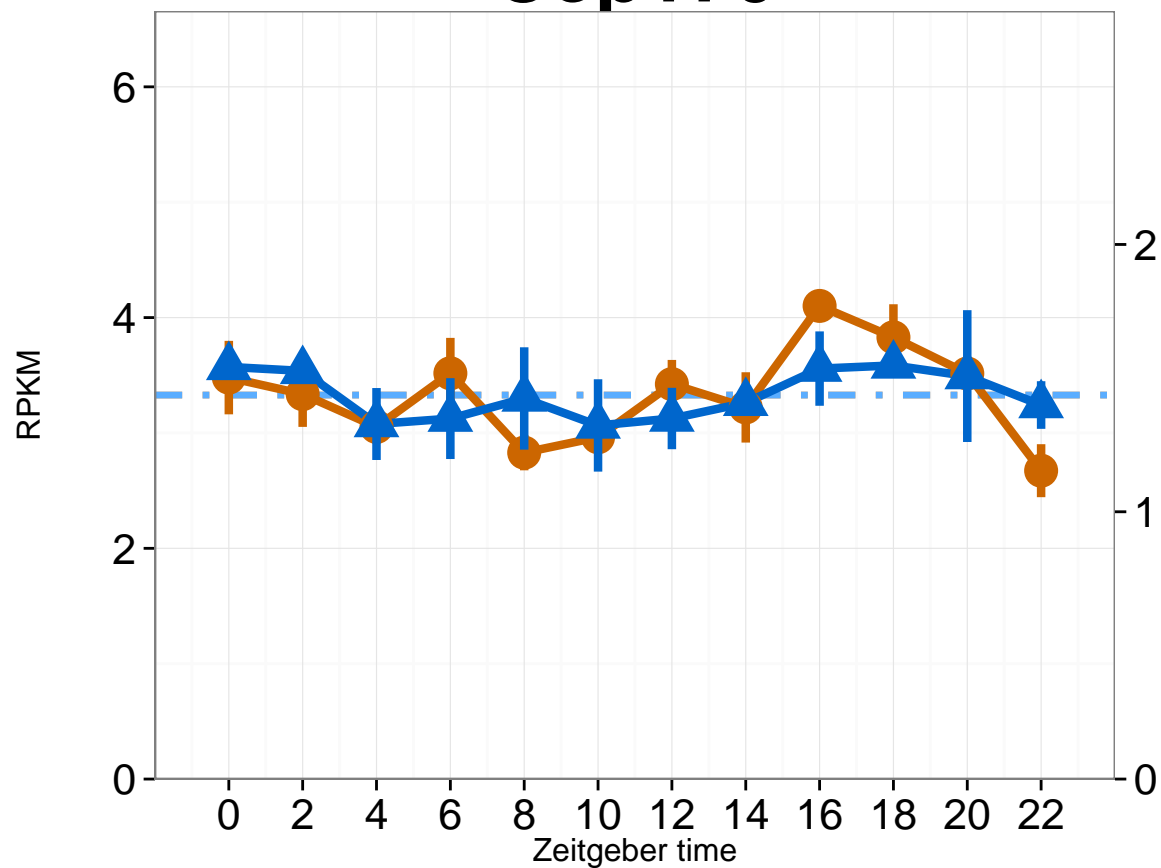

# Cep170

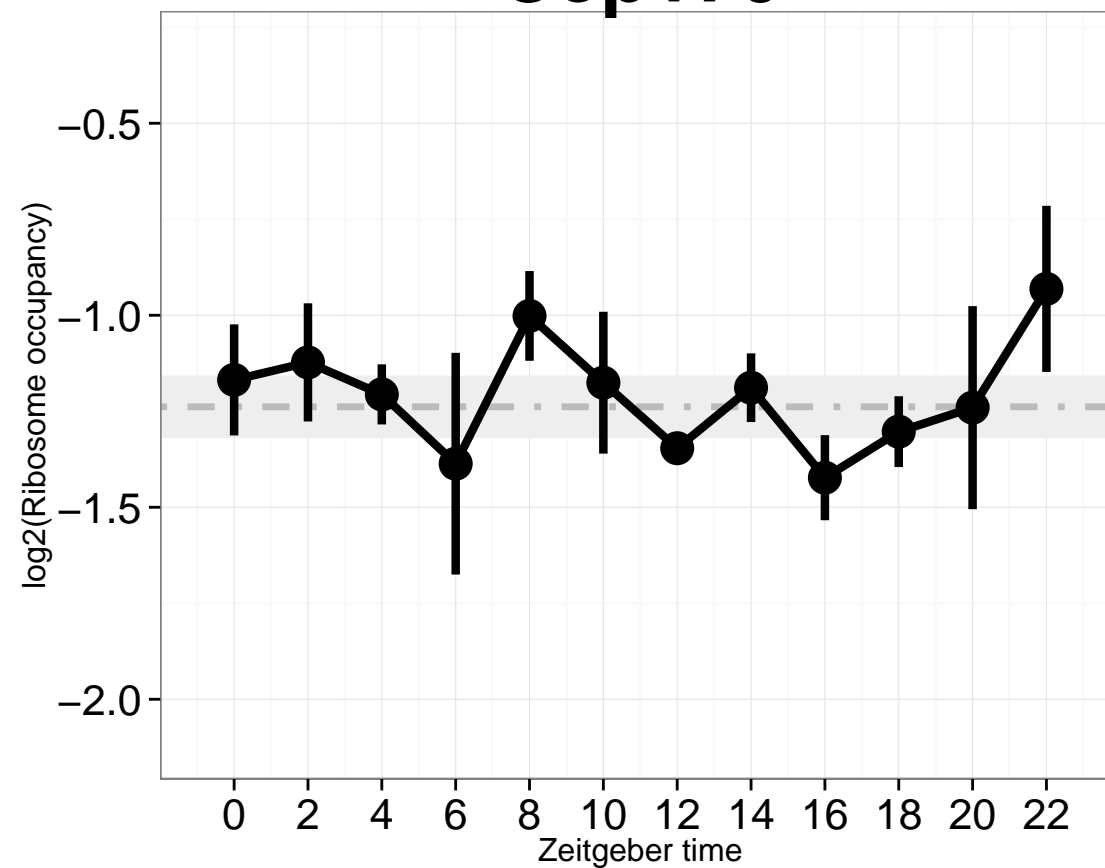

Supplement: SuppDataset_1.zip [file Cep170_set_A.pdf › Supplemental Dataset 1/A-mRNA_nonrhyth_translation_nonrhyth/Cep170_set_A.pdf]

# Cep170b

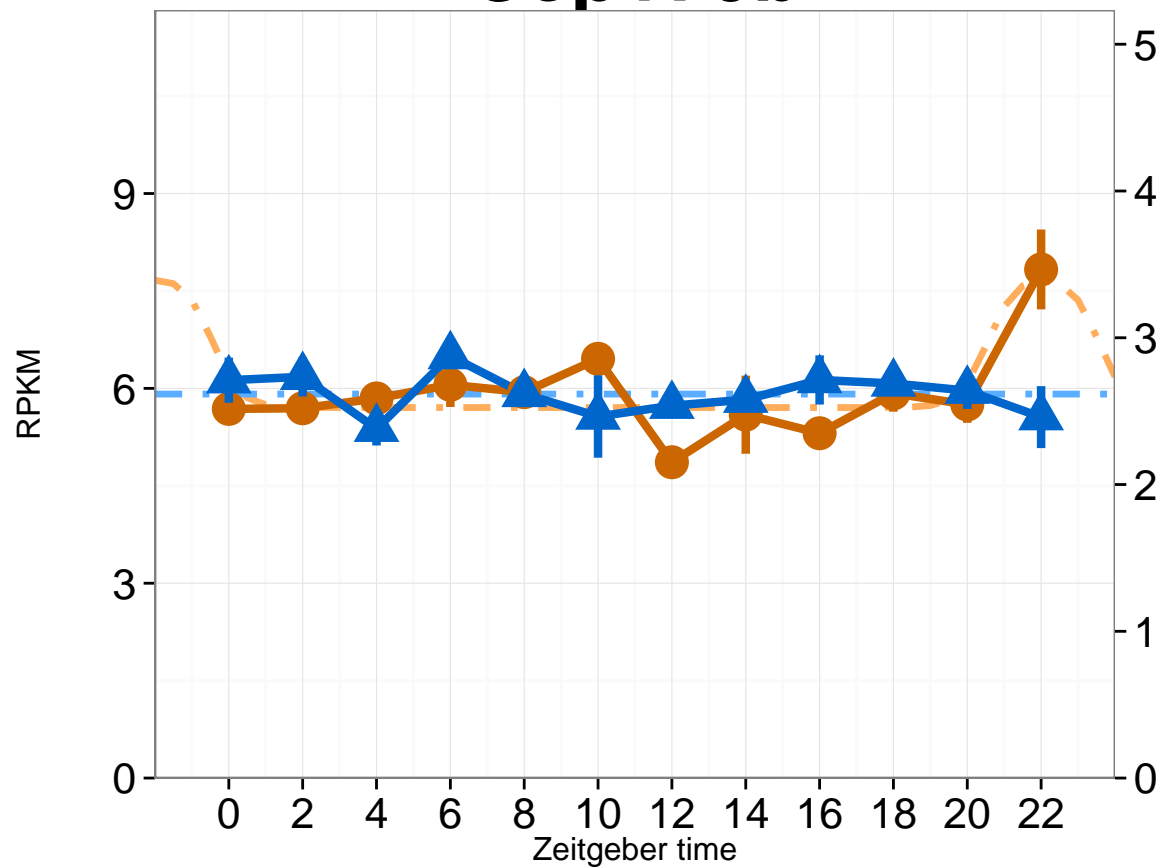

# Cep170b

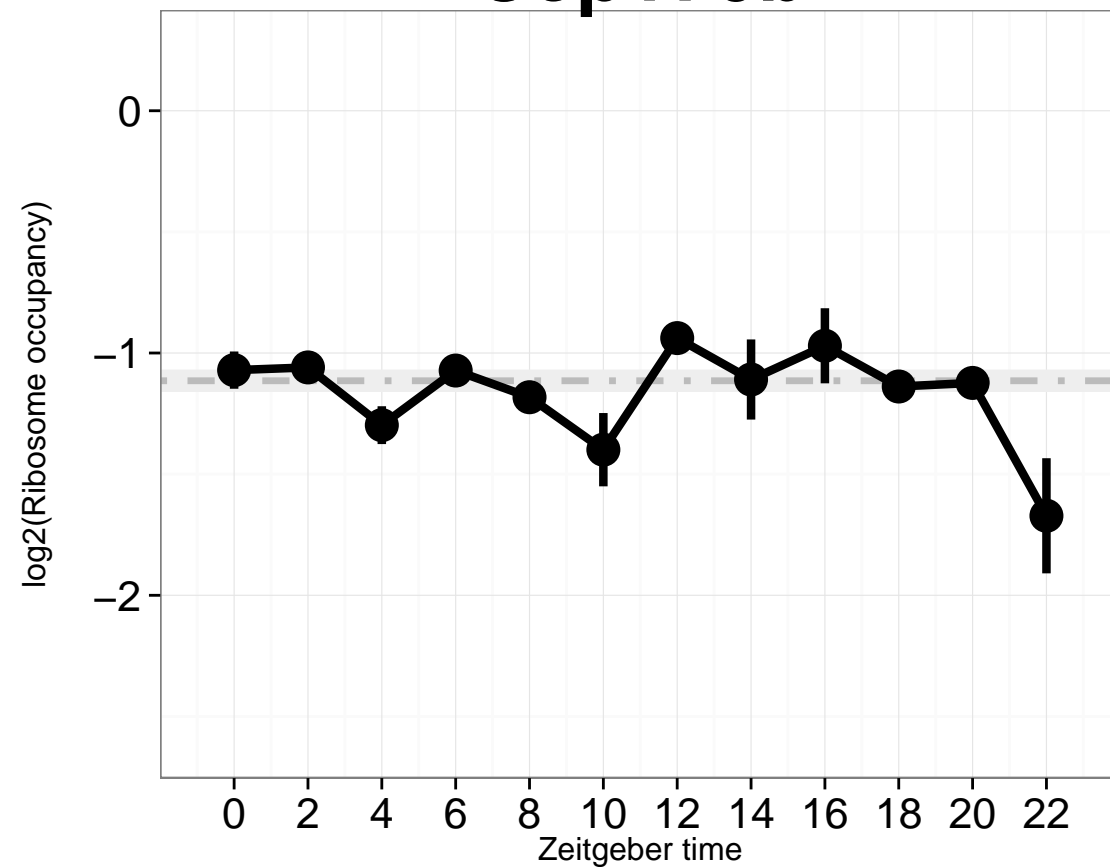

Supplement: SuppDataset_1.zip [file Cep170b_set_A.pdf › Supplemental Dataset 1/A-mRNA_nonrhyth_translation_nonrhyth/Cep170b_set_A.pdf]

# Cep192

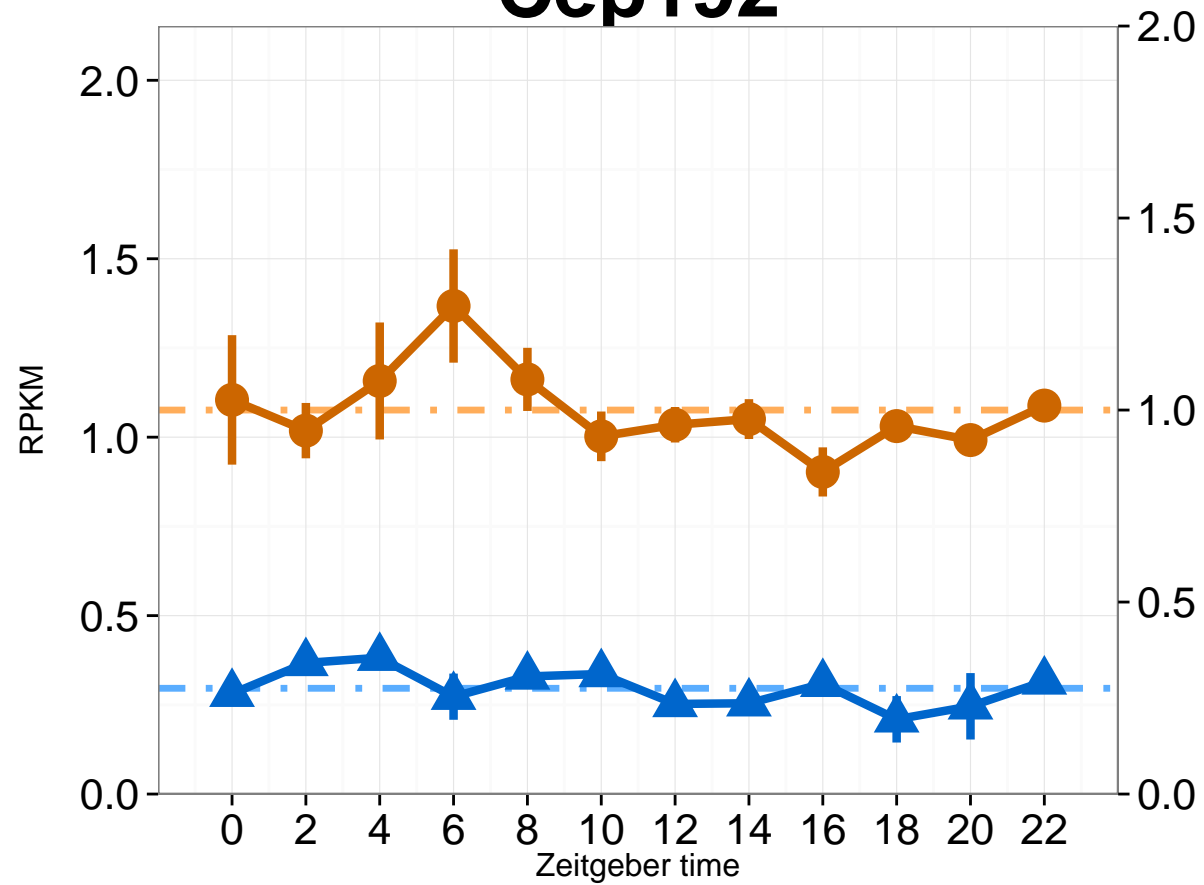

# Cep192

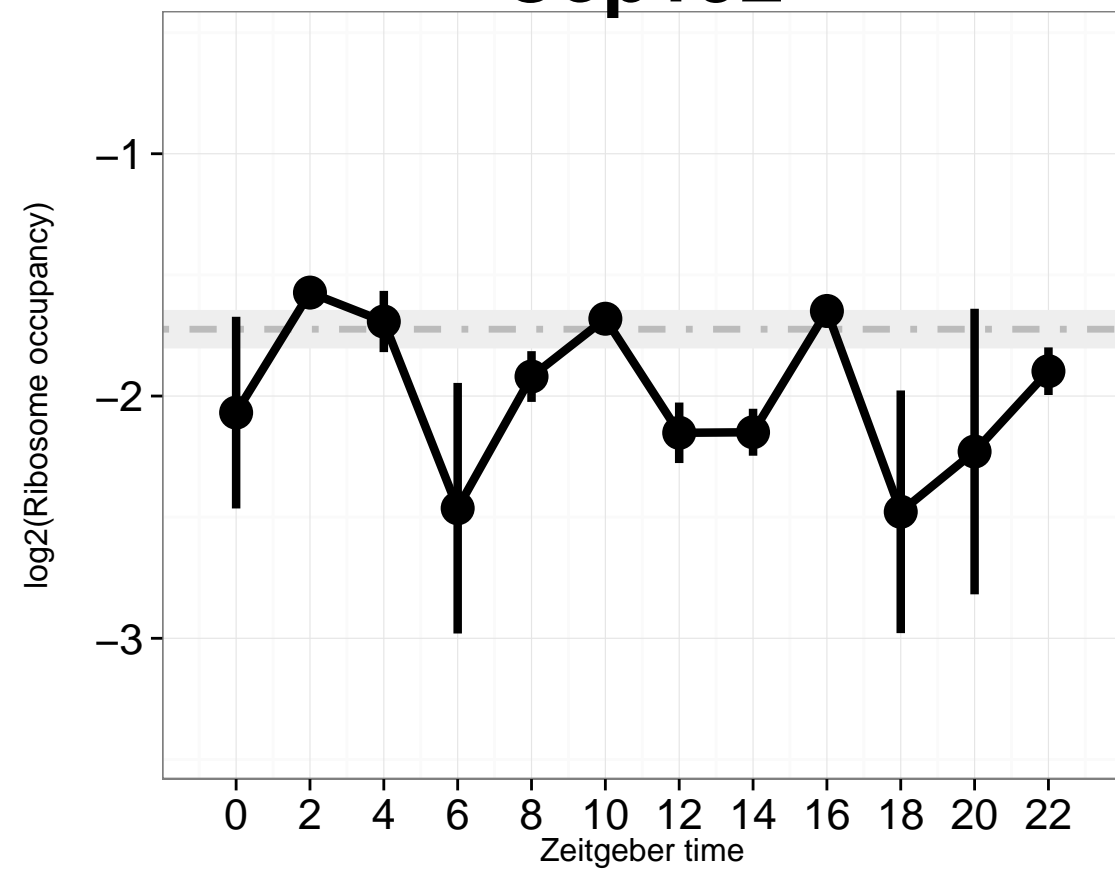

Supplement: SuppDataset_1.zip [file Cep192_set_A.pdf › Supplemental Dataset 1/A-mRNA_nonrhyth_translation_nonrhyth/Cep192_set_A.pdf]

## Cep19

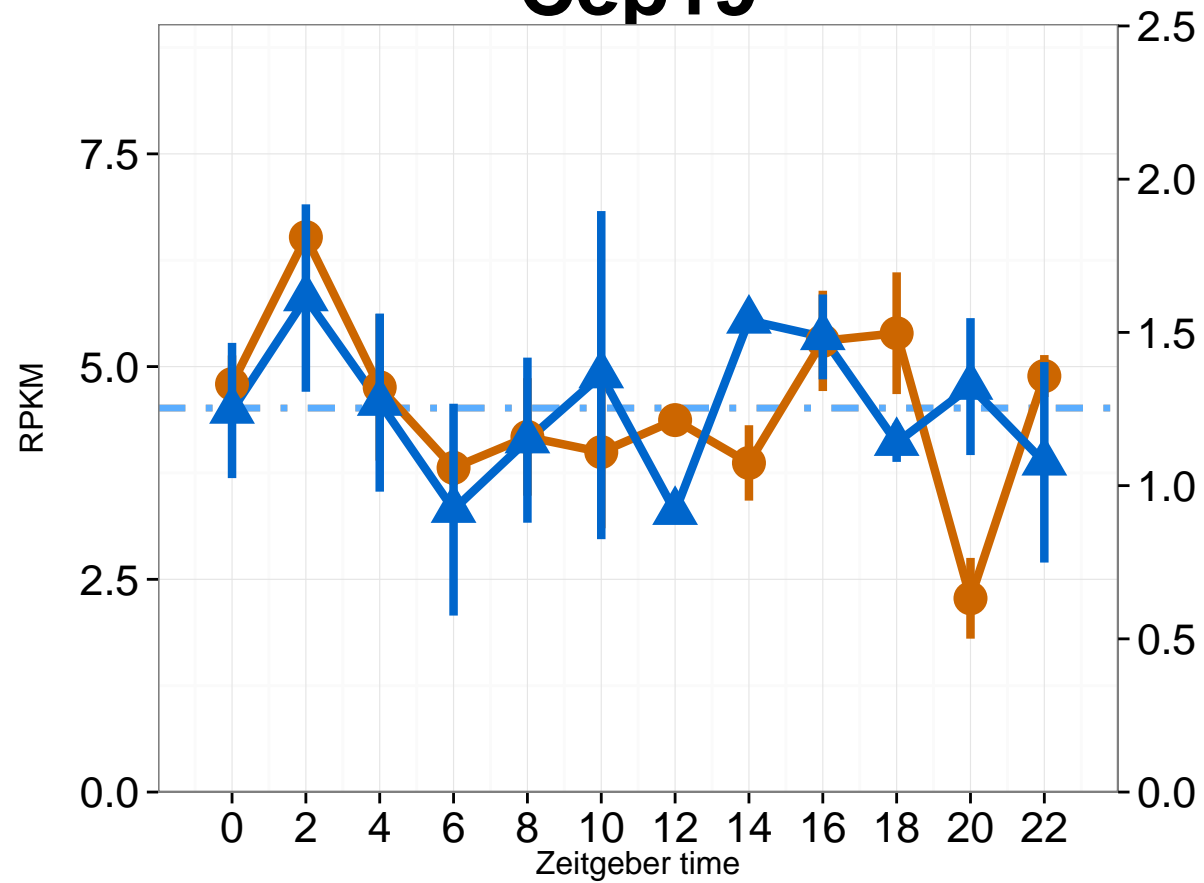

## Cep19

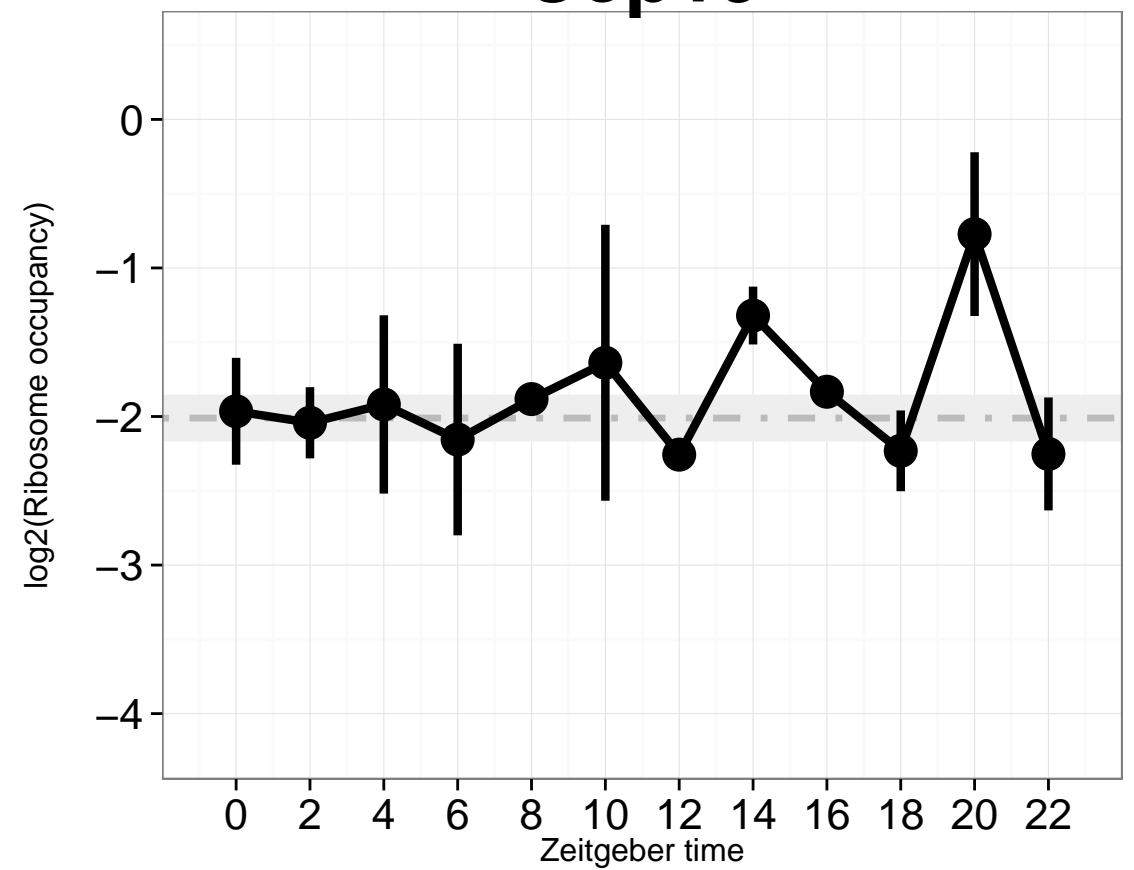

Supplement: SuppDataset_1.zip [file Cep19_set_A.pdf › Supplemental Dataset 1/A-mRNA_nonrhyth_translation_nonrhyth/Cep19_set_A.pdf]

## Cep250

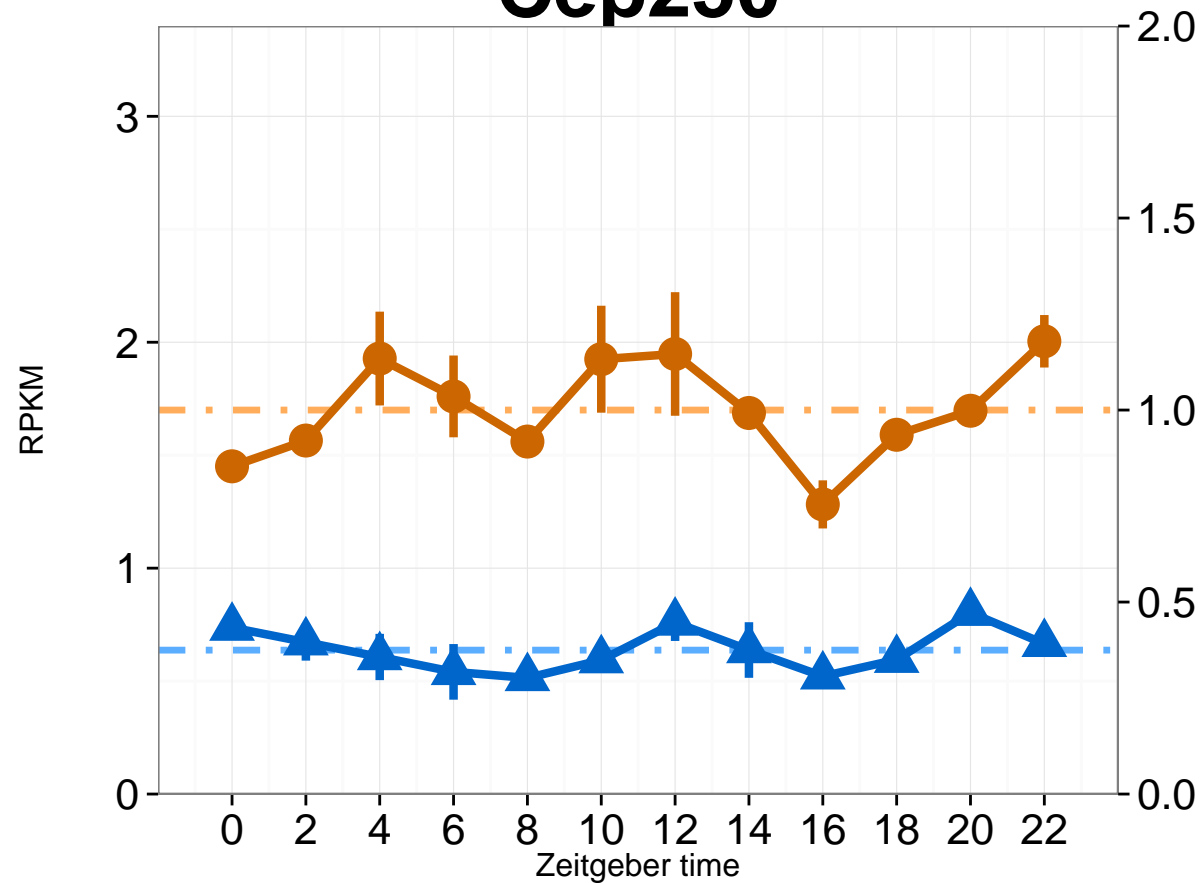

## Cep250

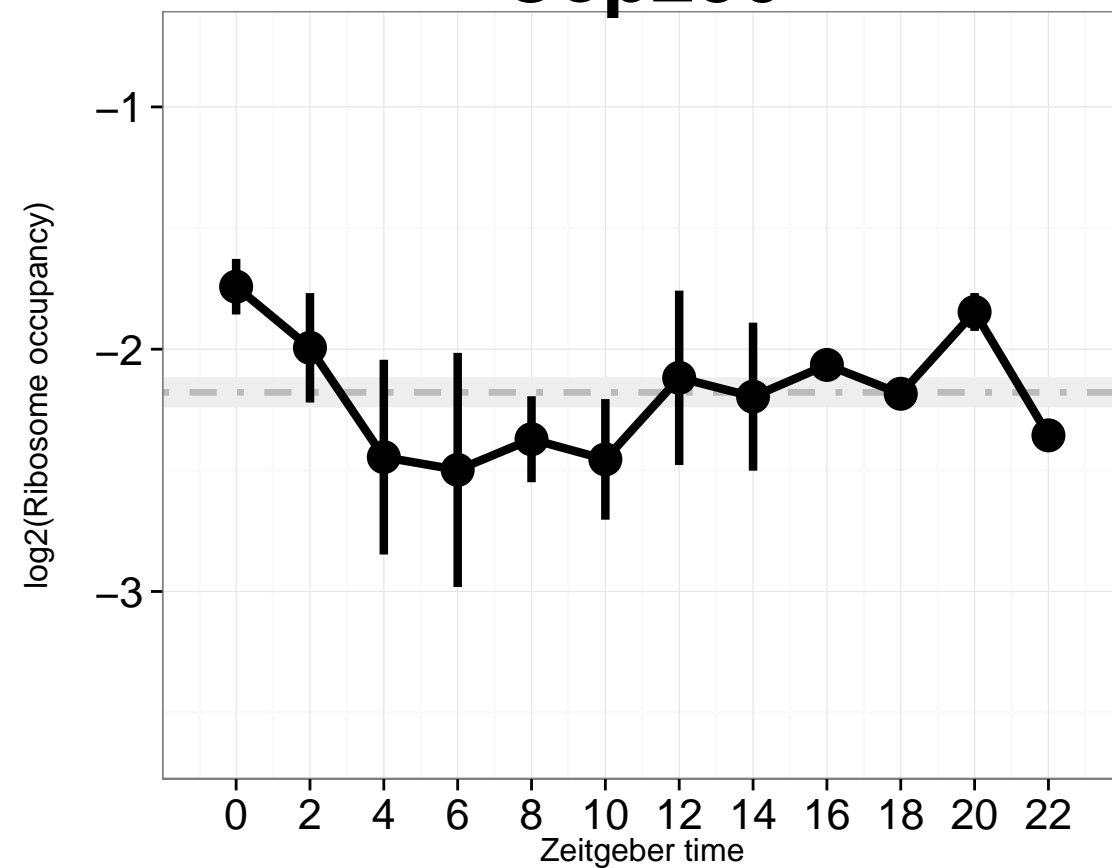

Supplement: SuppDataset_1.zip [file Cep250_set_A.pdf › Supplemental Dataset 1/A-mRNA_nonrhyth_translation_nonrhyth/Cep250_set_A.pdf]

# Cep290

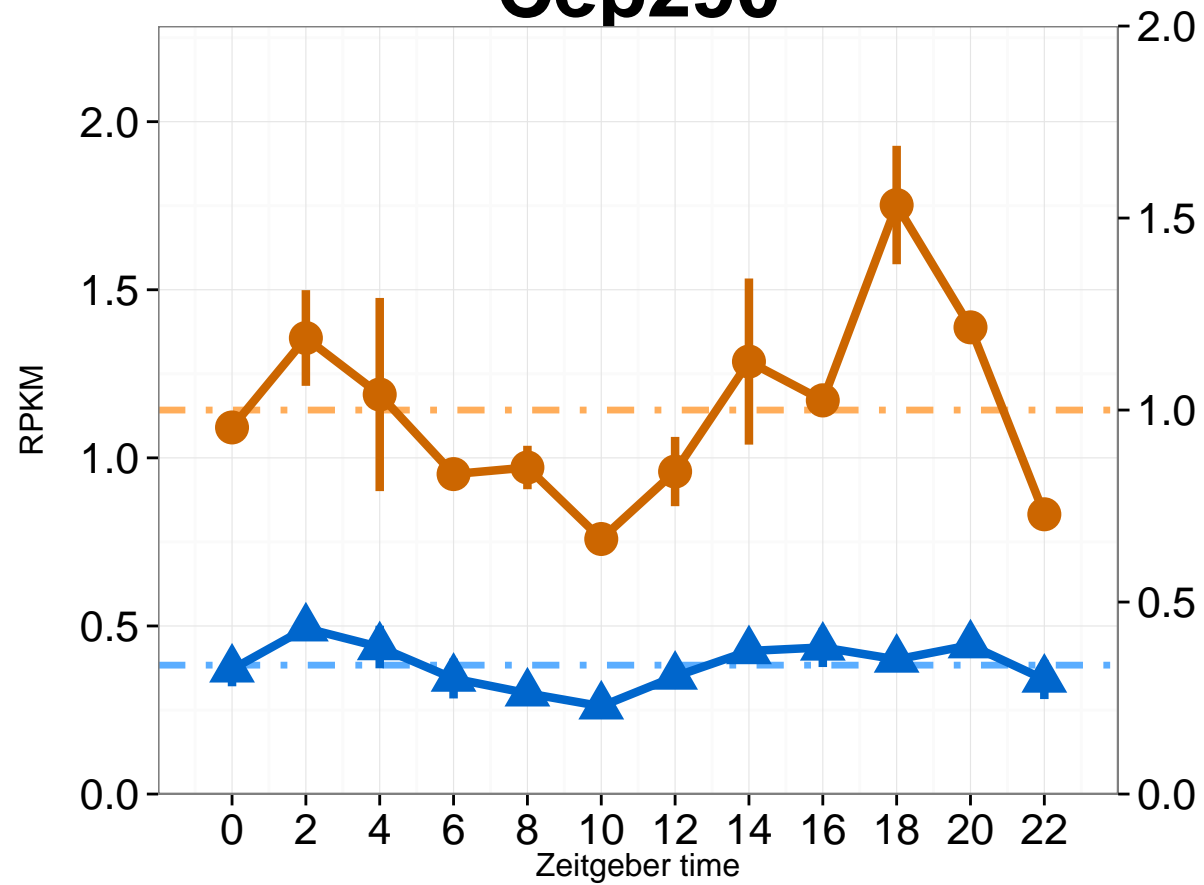

# Cep290

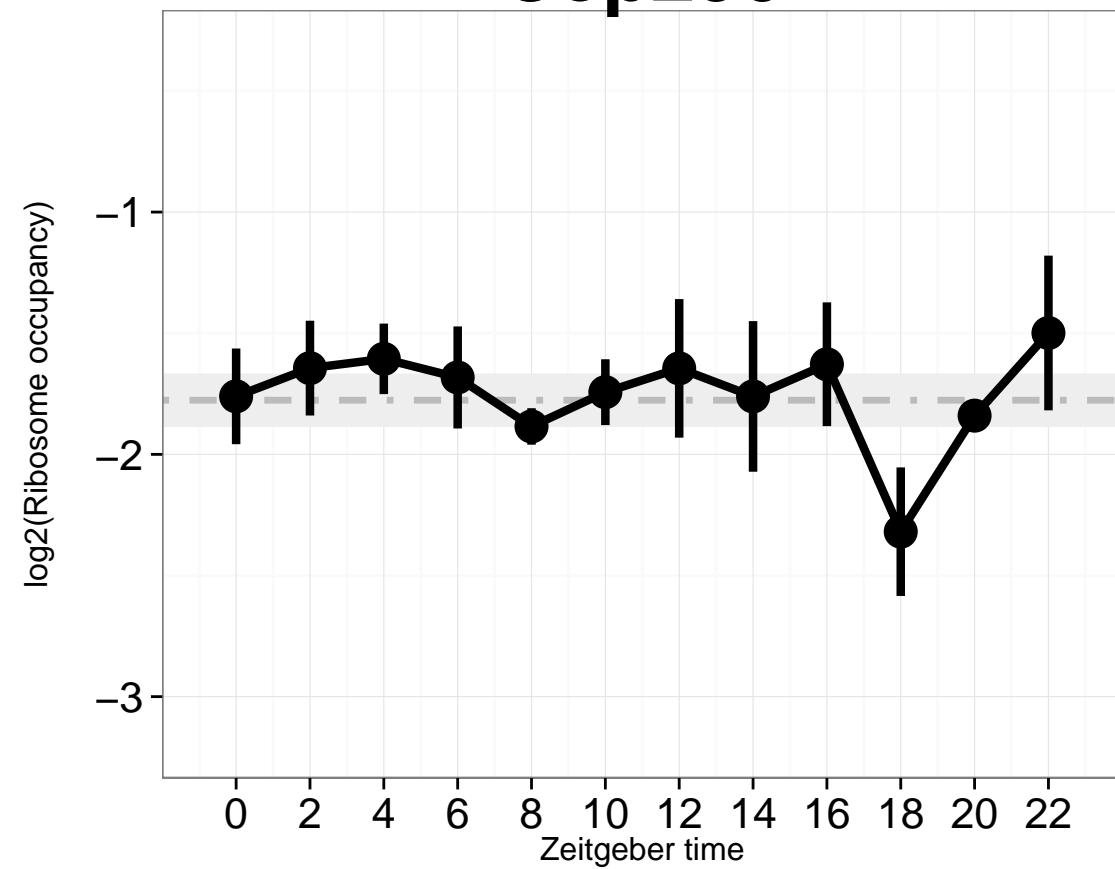

Supplement: SuppDataset_1.zip [file Cep290_set_A.pdf › Supplemental Dataset 1/A-mRNA_nonrhyth_translation_nonrhyth/Cep290_set_A.pdf]

# Cep41

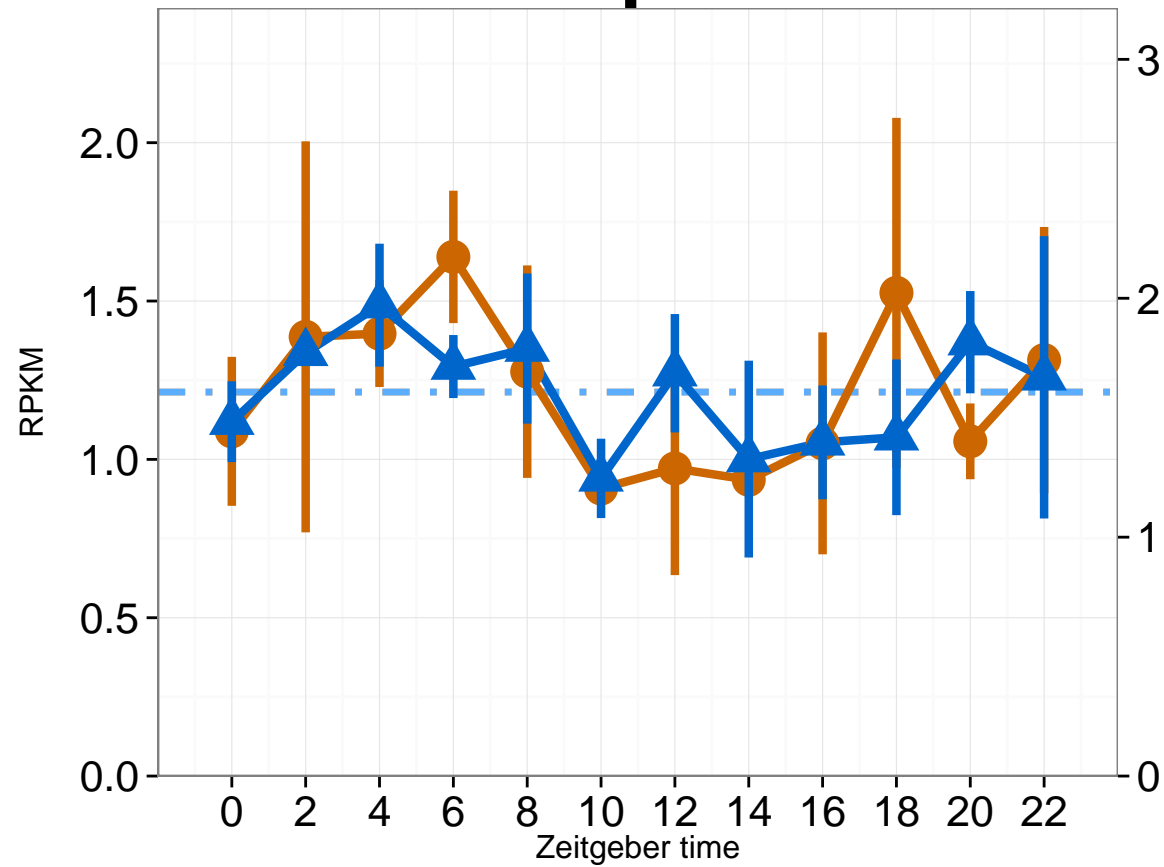

# Cep41

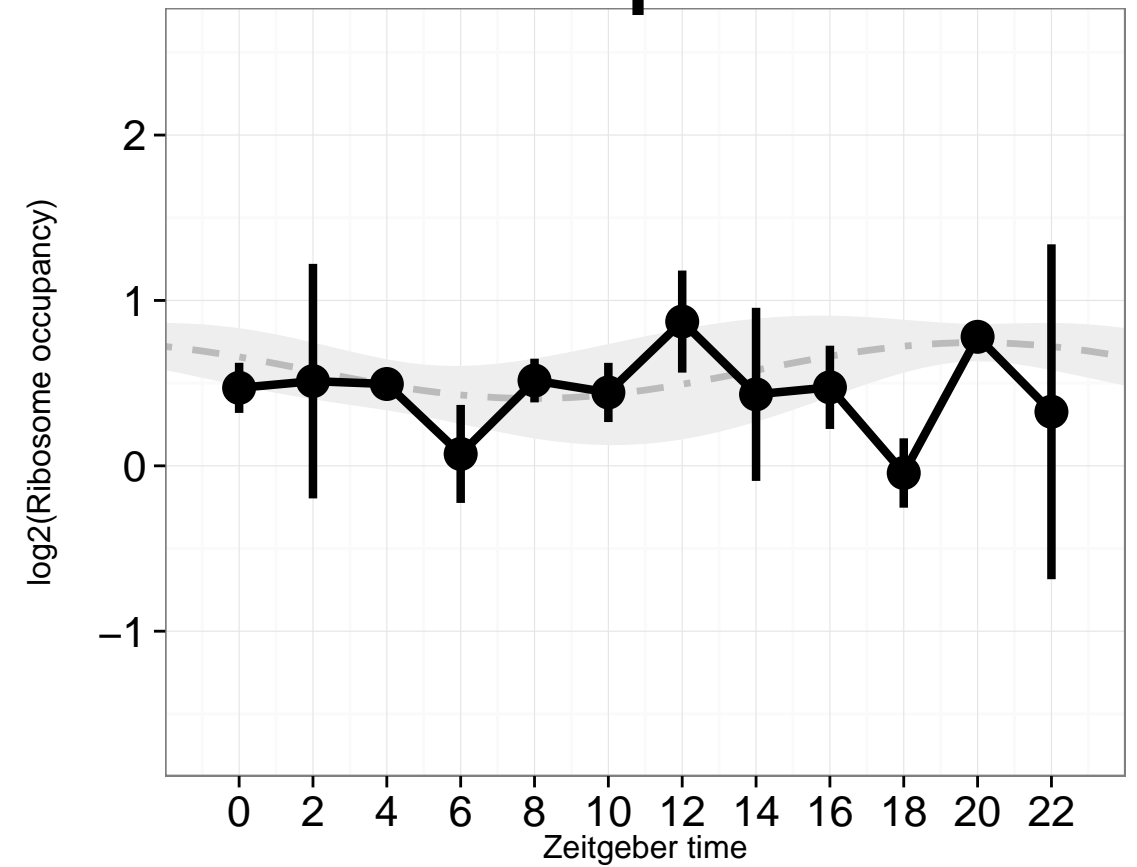

Supplement: SuppDataset_1.zip [file Cep41_set_A.pdf › Supplemental Dataset 1/A-mRNA_nonrhyth_translation_nonrhyth/Cep41_set_A.pdf]

# Cep44

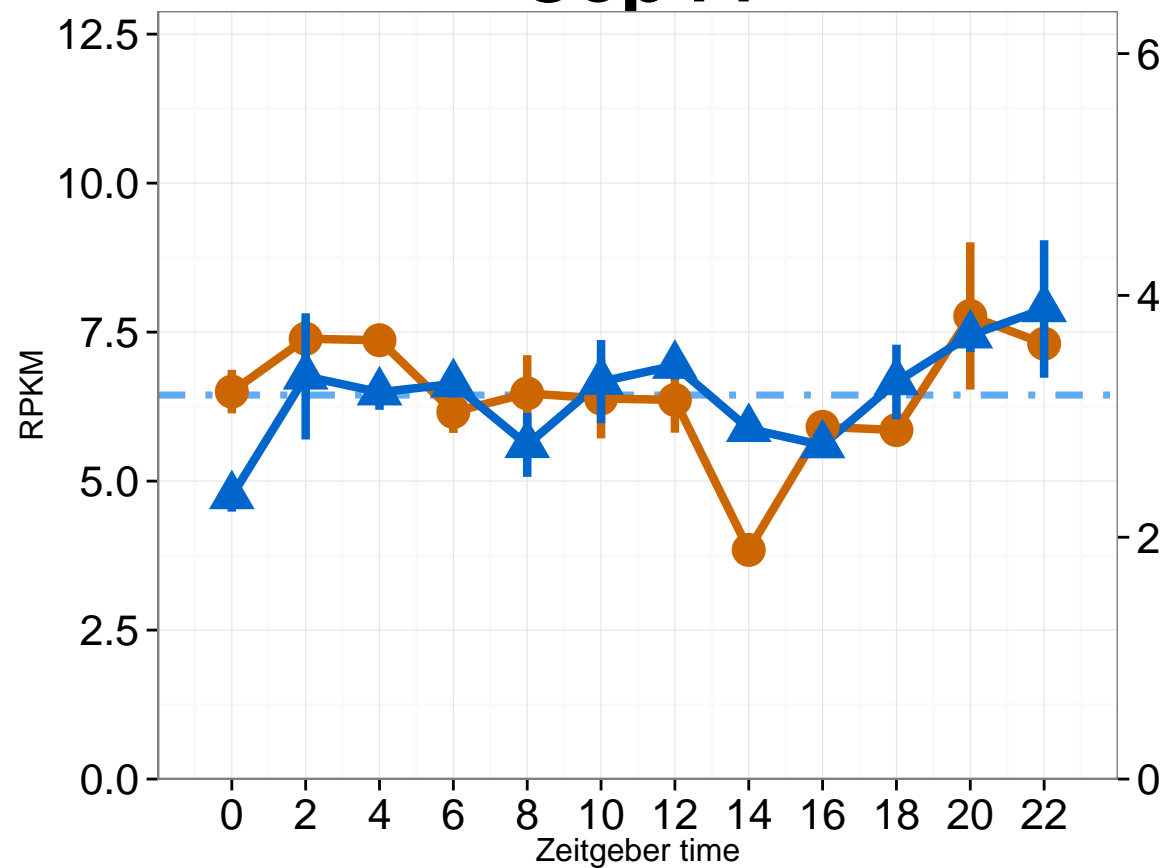

# Cep44

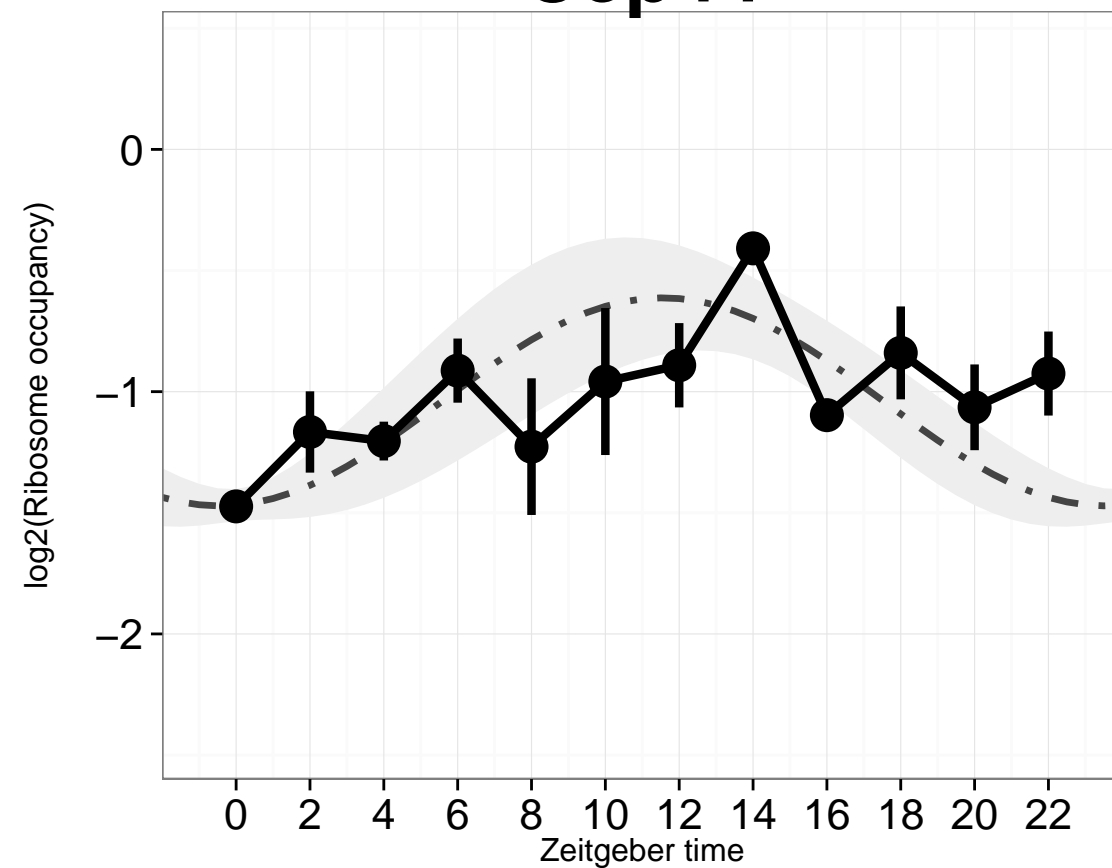

Supplement: SuppDataset_1.zip [file Cep44_set_A.pdf › Supplemental Dataset 1/A-mRNA_nonrhyth_translation_nonrhyth/Cep44_set_A.pdf]

# Cep57

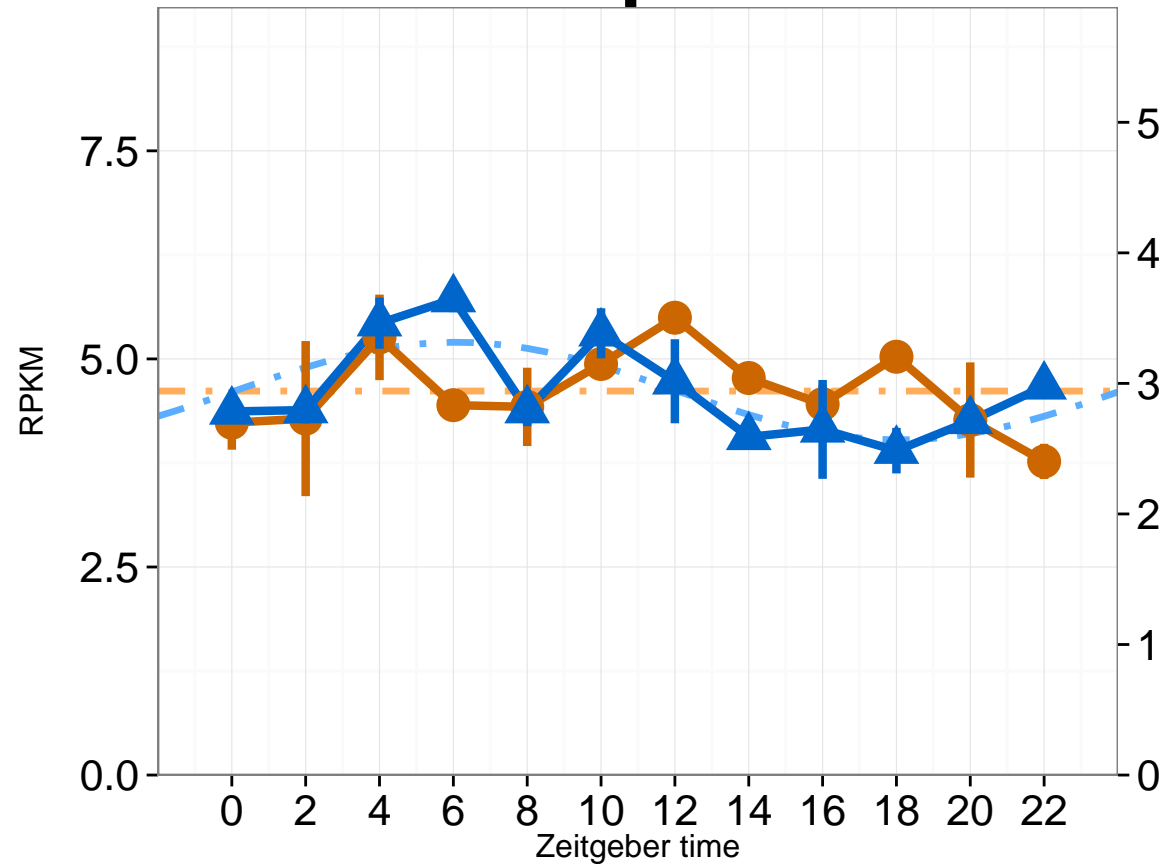

# Cep57

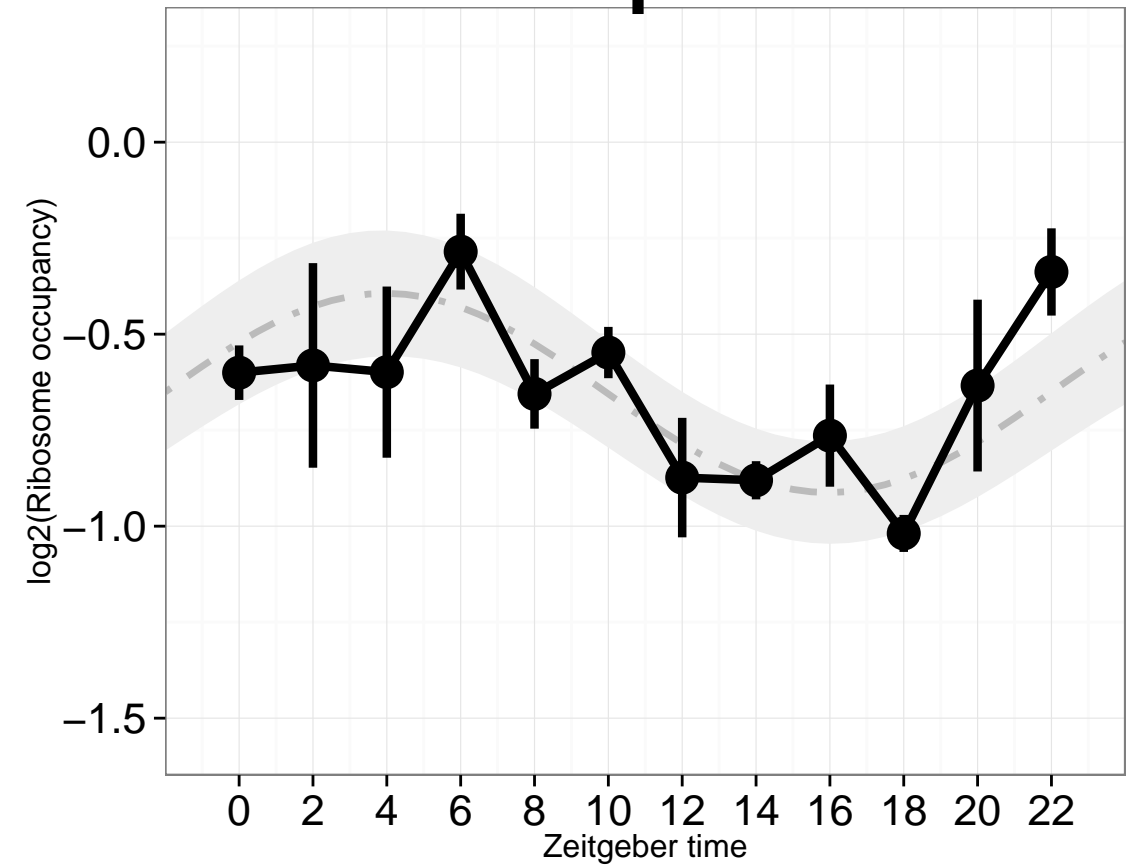

Supplement: SuppDataset_1.zip [file Cep57_set_A.pdf › Supplemental Dataset 1/A-mRNA_nonrhyth_translation_nonrhyth/Cep57_set_A.pdf]

# Cep63

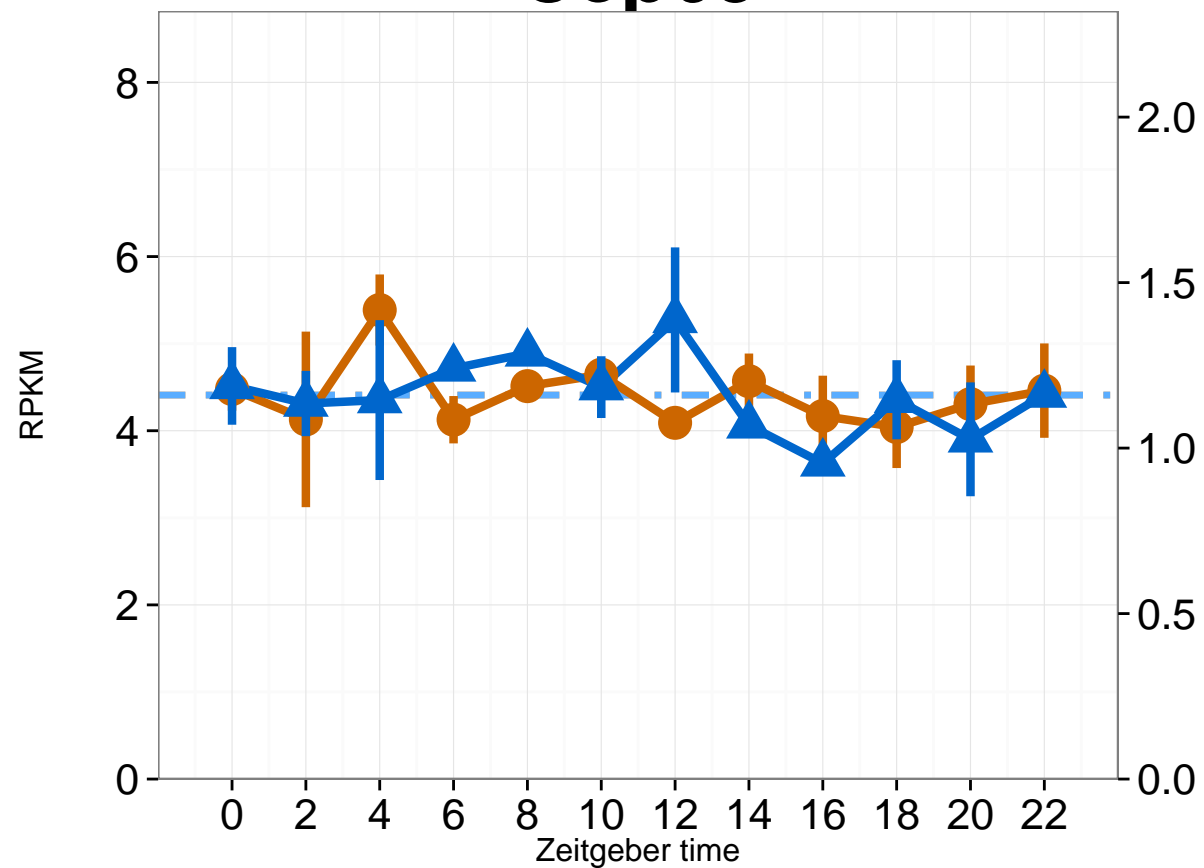

# Cep63

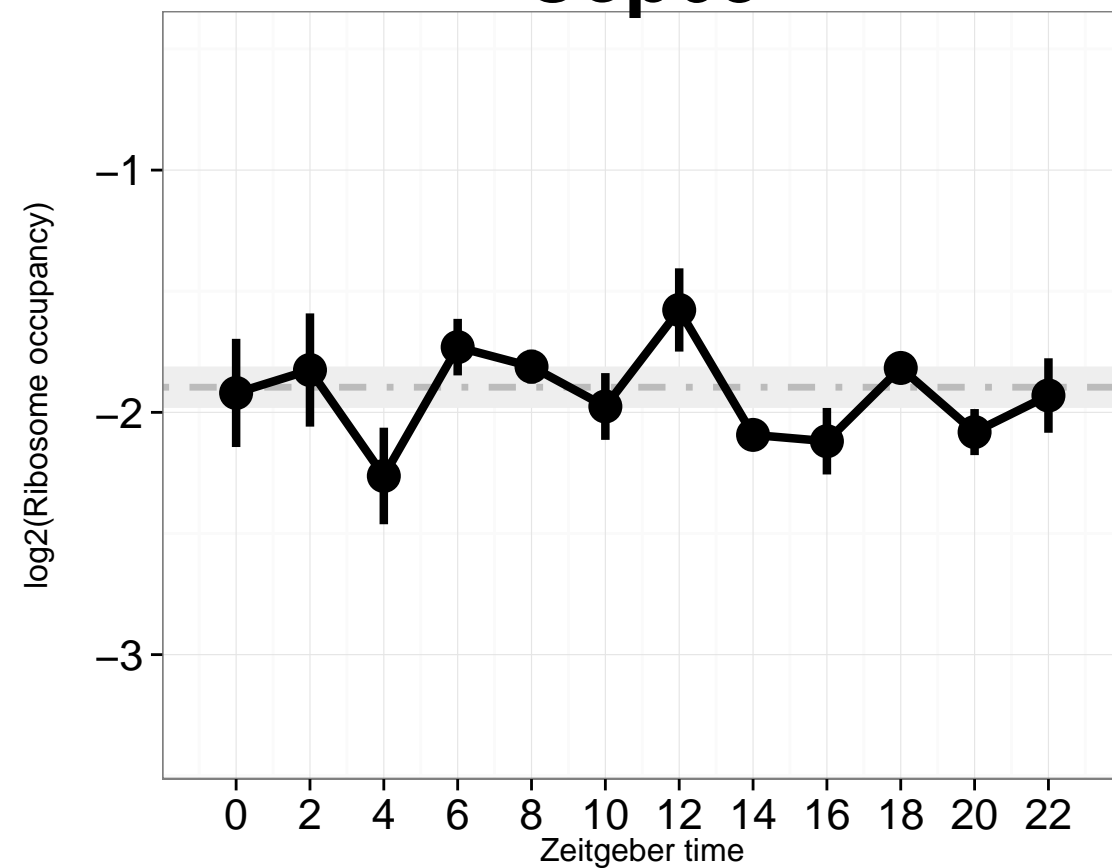

Supplement: SuppDataset_1.zip [file Cep63_set_A.pdf › Supplemental Dataset 1/A-mRNA_nonrhyth_translation_nonrhyth/Cep63_set_A.pdf]

# Cep68

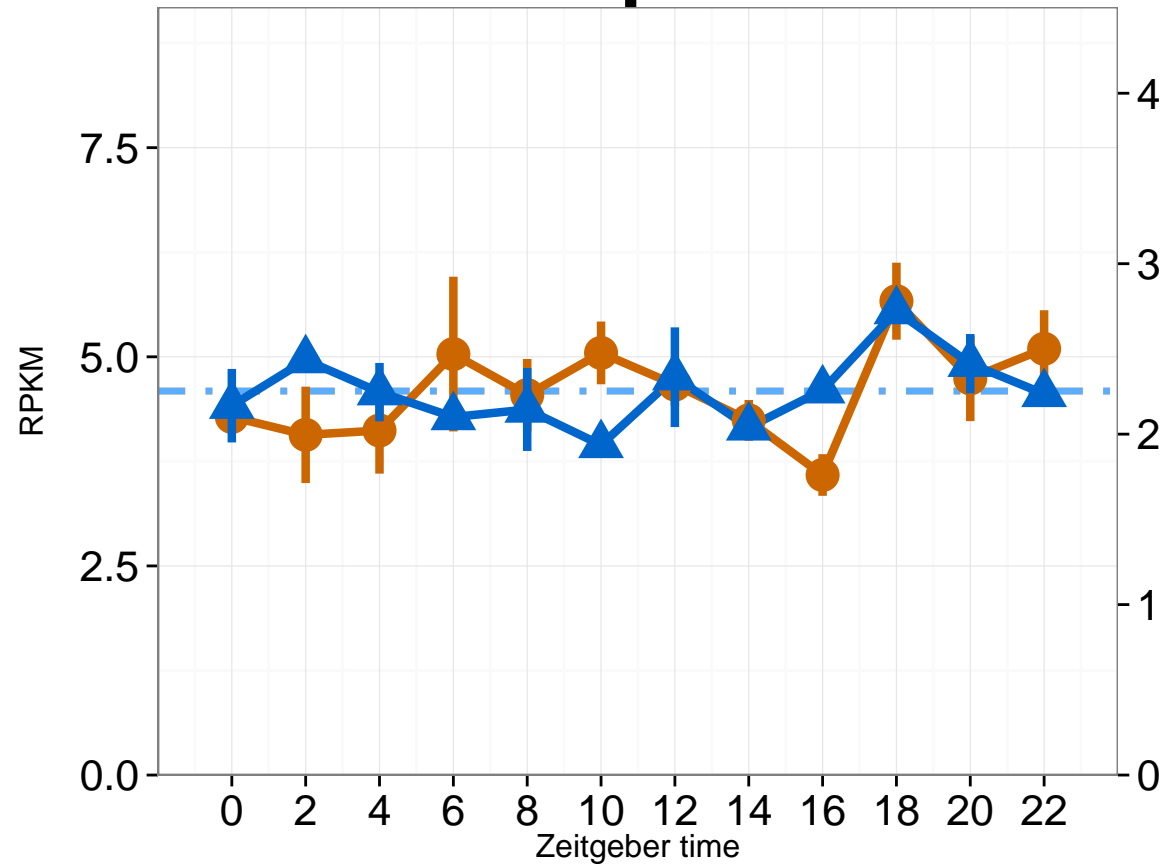

# Cep68

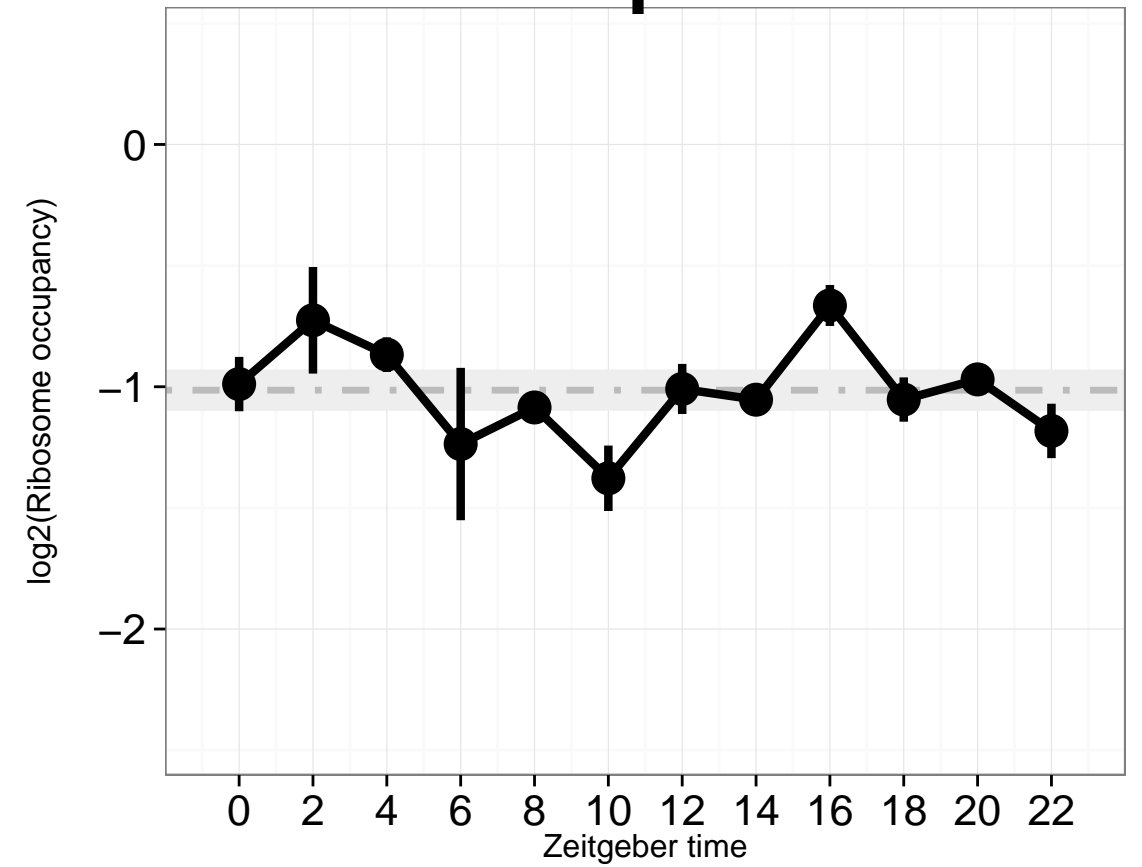

Supplement: SuppDataset_1.zip [file Cep68_set_A.pdf › Supplemental Dataset 1/A-mRNA_nonrhyth_translation_nonrhyth/Cep68_set_A.pdf]

# Cep70

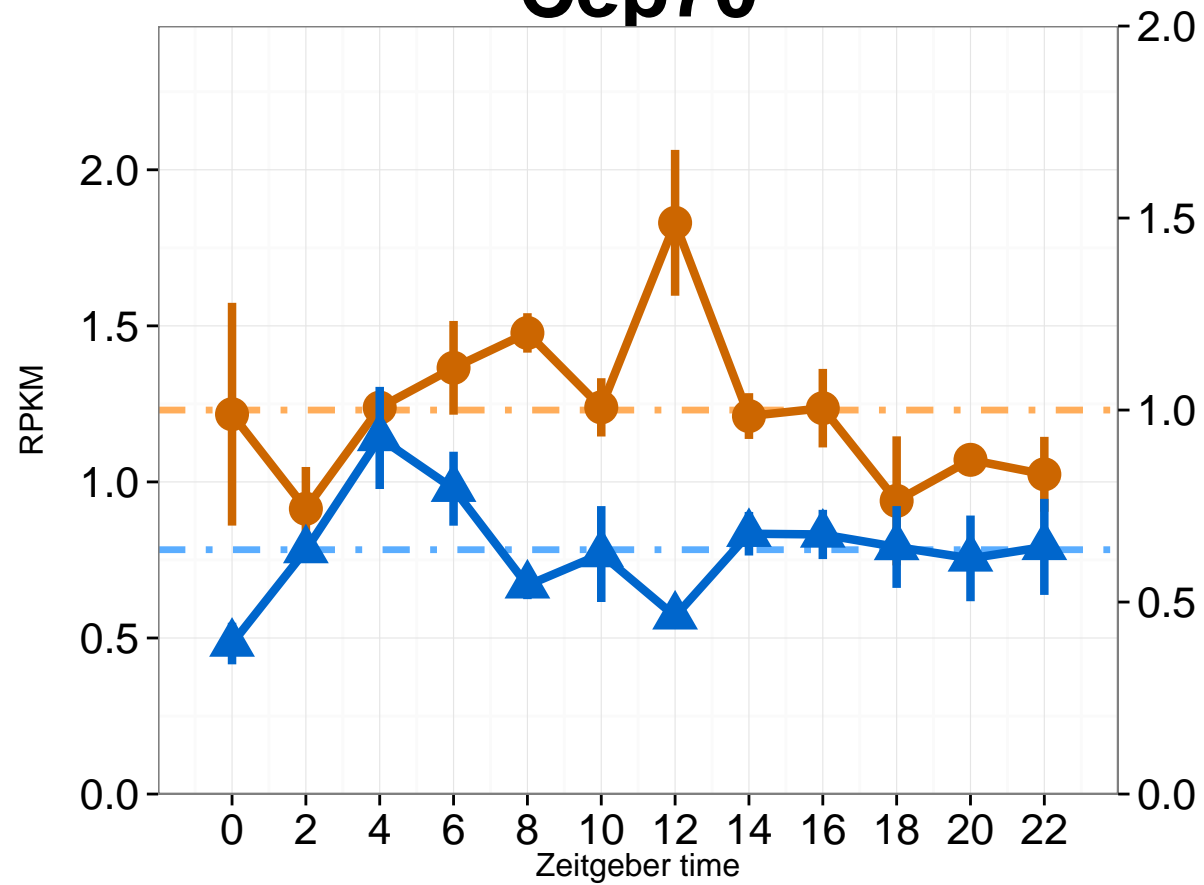

# Cep70

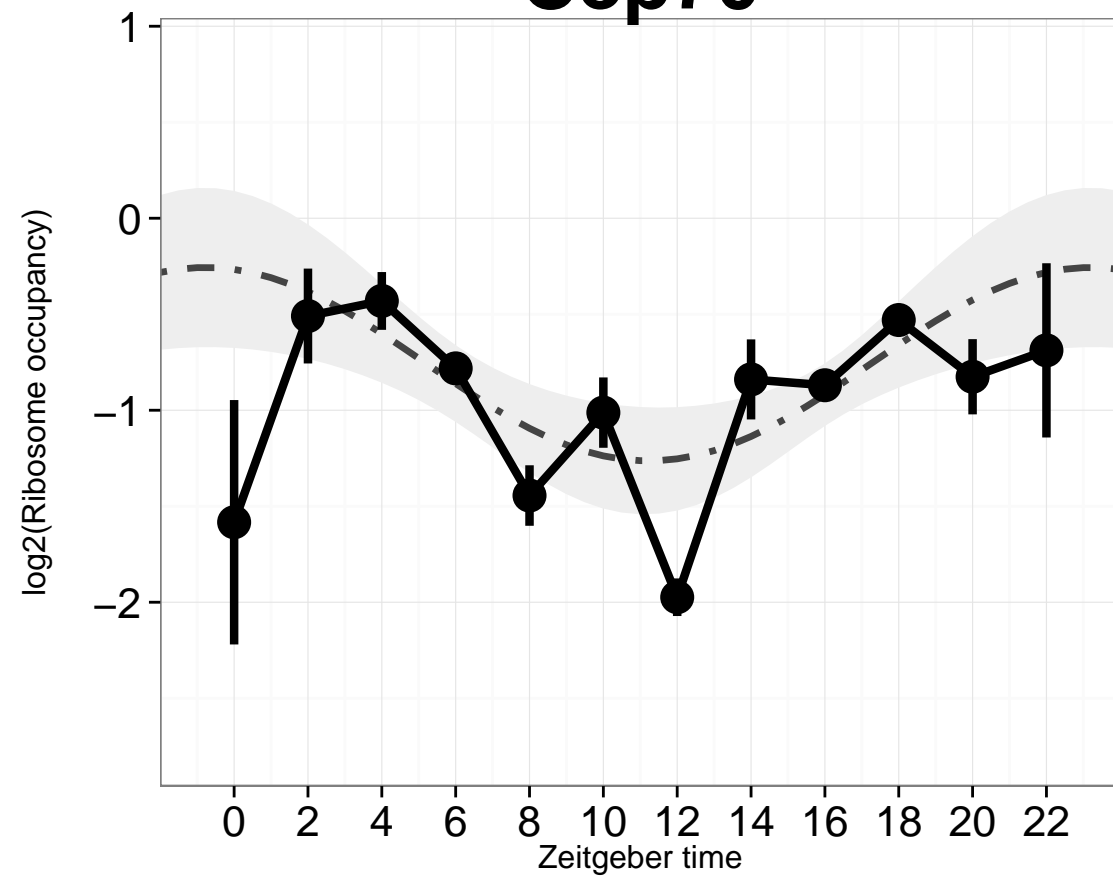

Supplement: SuppDataset_1.zip [file Cep70_set_A.pdf › Supplemental Dataset 1/A-mRNA_nonrhyth_translation_nonrhyth/Cep70_set_A.pdf]

# Cep72

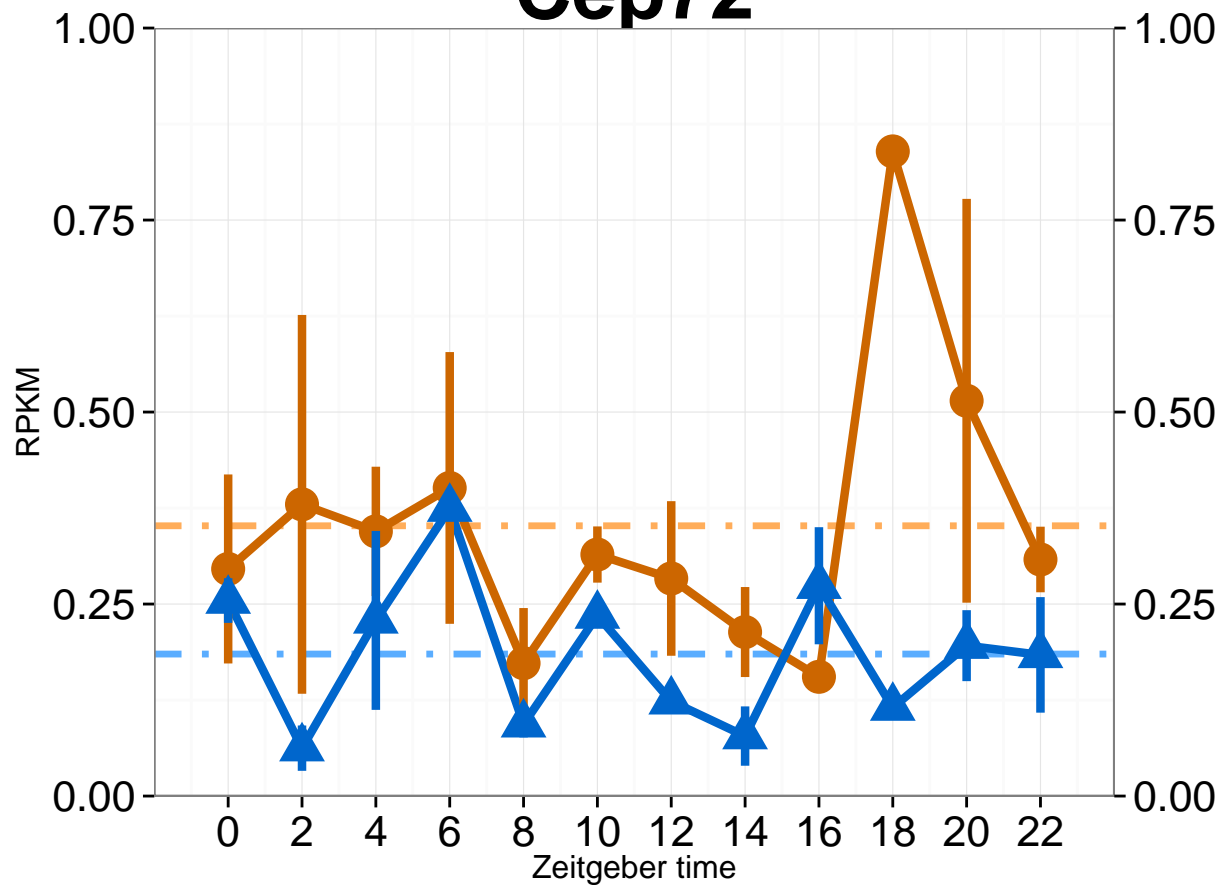

# Cep72

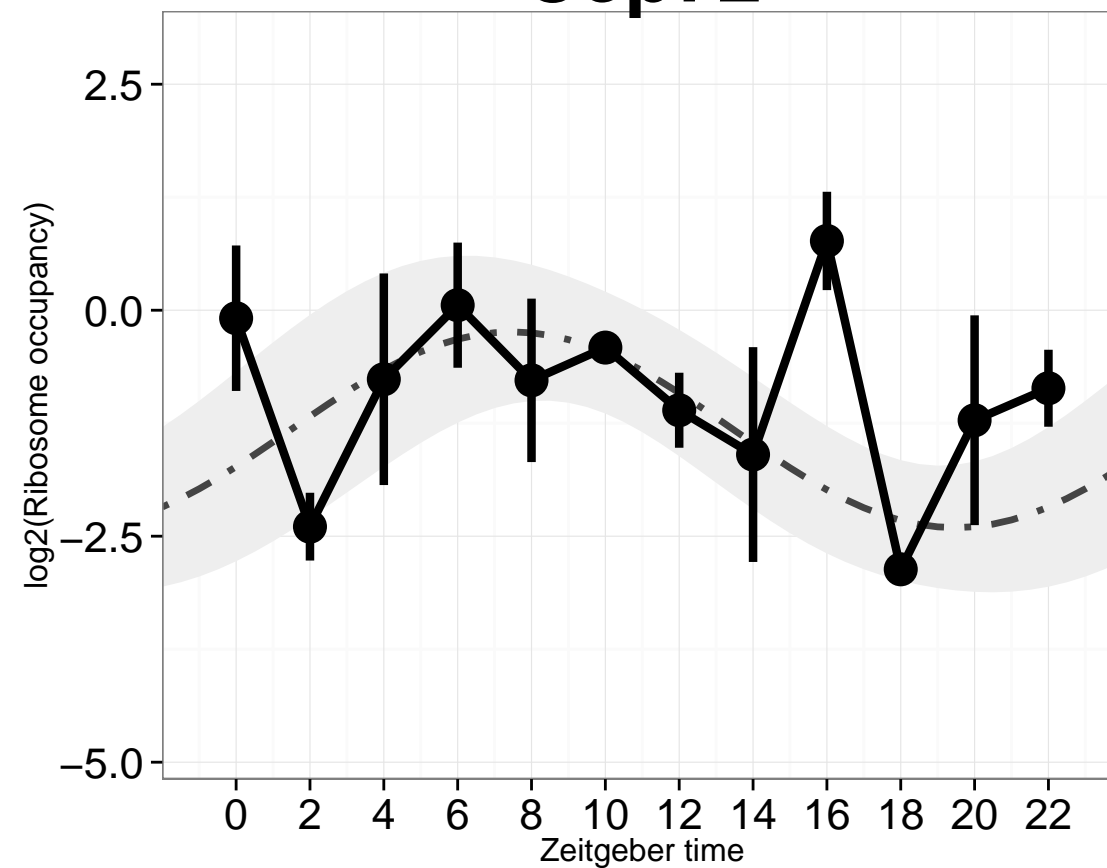

Supplement: SuppDataset_1.zip [file Cep72_set_A.pdf › Supplemental Dataset 1/A-mRNA_nonrhyth_translation_nonrhyth/Cep72_set_A.pdf]

# Cep78

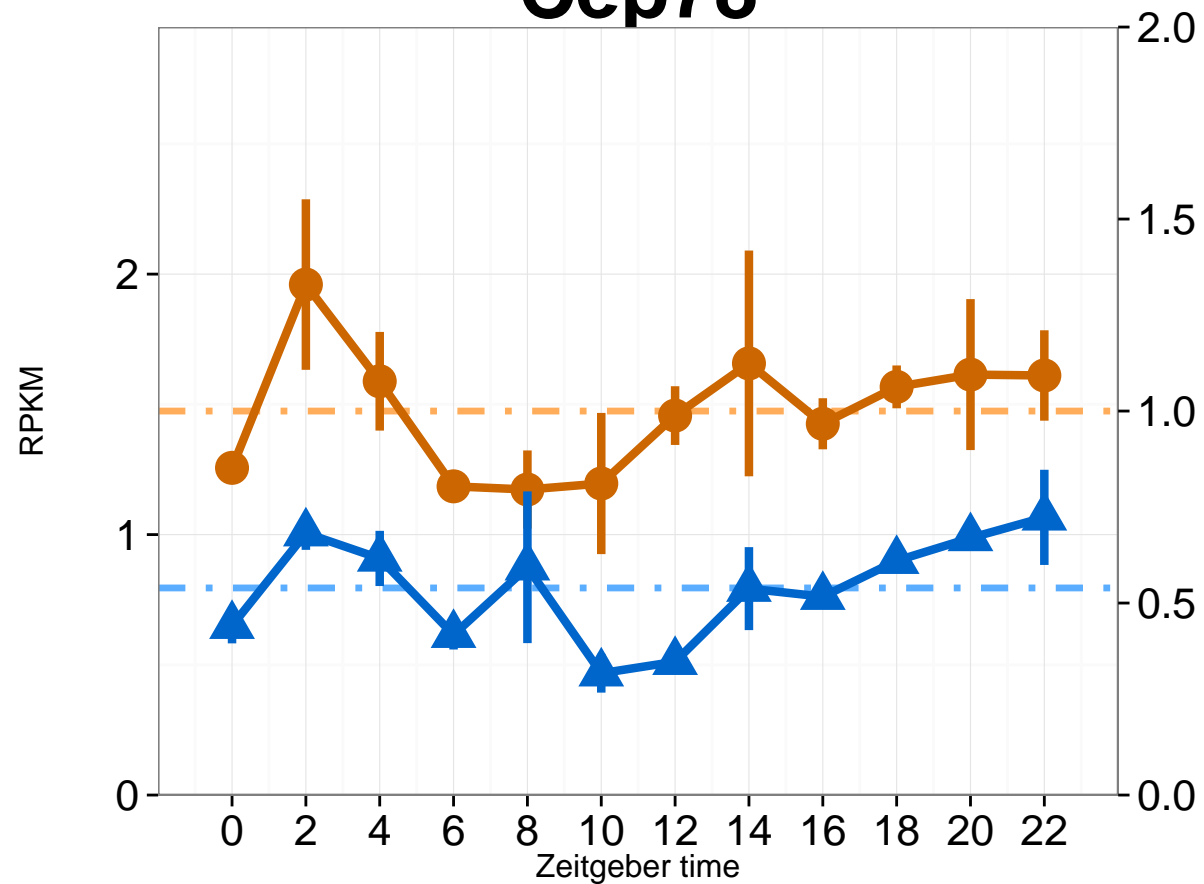

# Cep78

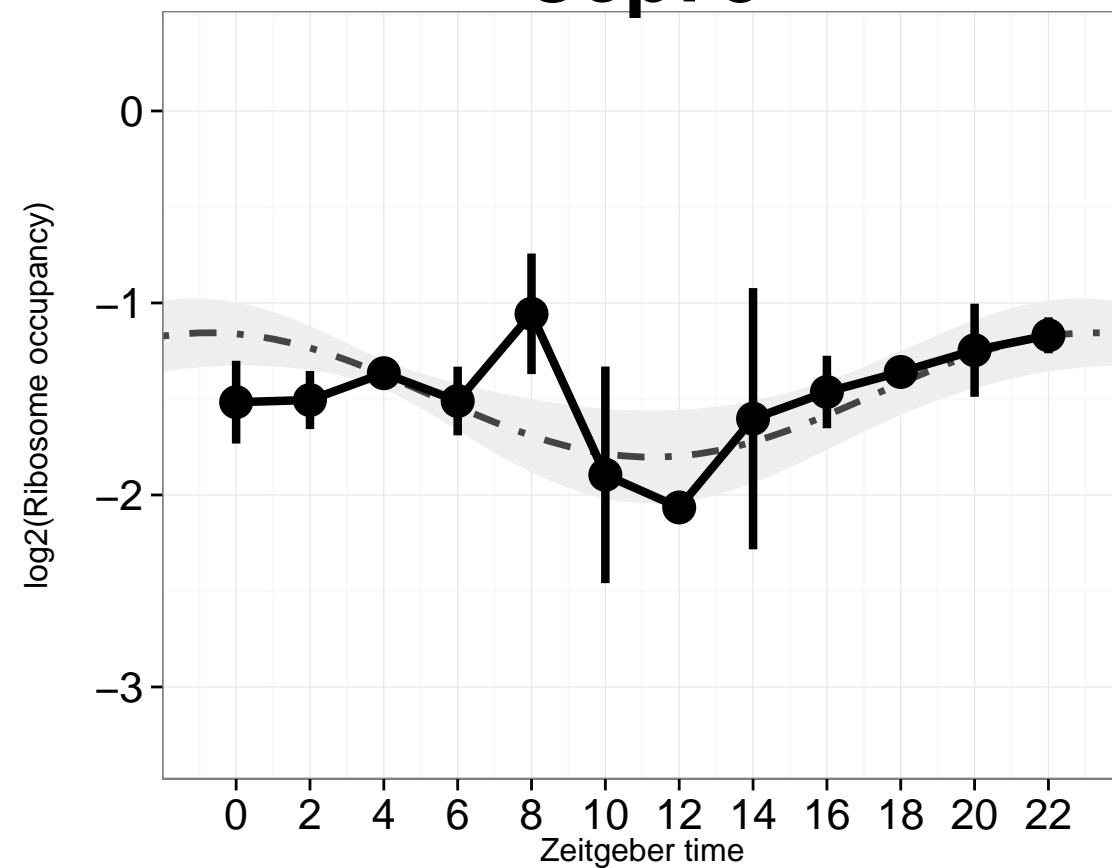

Supplement: SuppDataset_1.zip [file Cep78_set_A.pdf › Supplemental Dataset 1/A-mRNA_nonrhyth_translation_nonrhyth/Cep78_set_A.pdf]

## Cep85

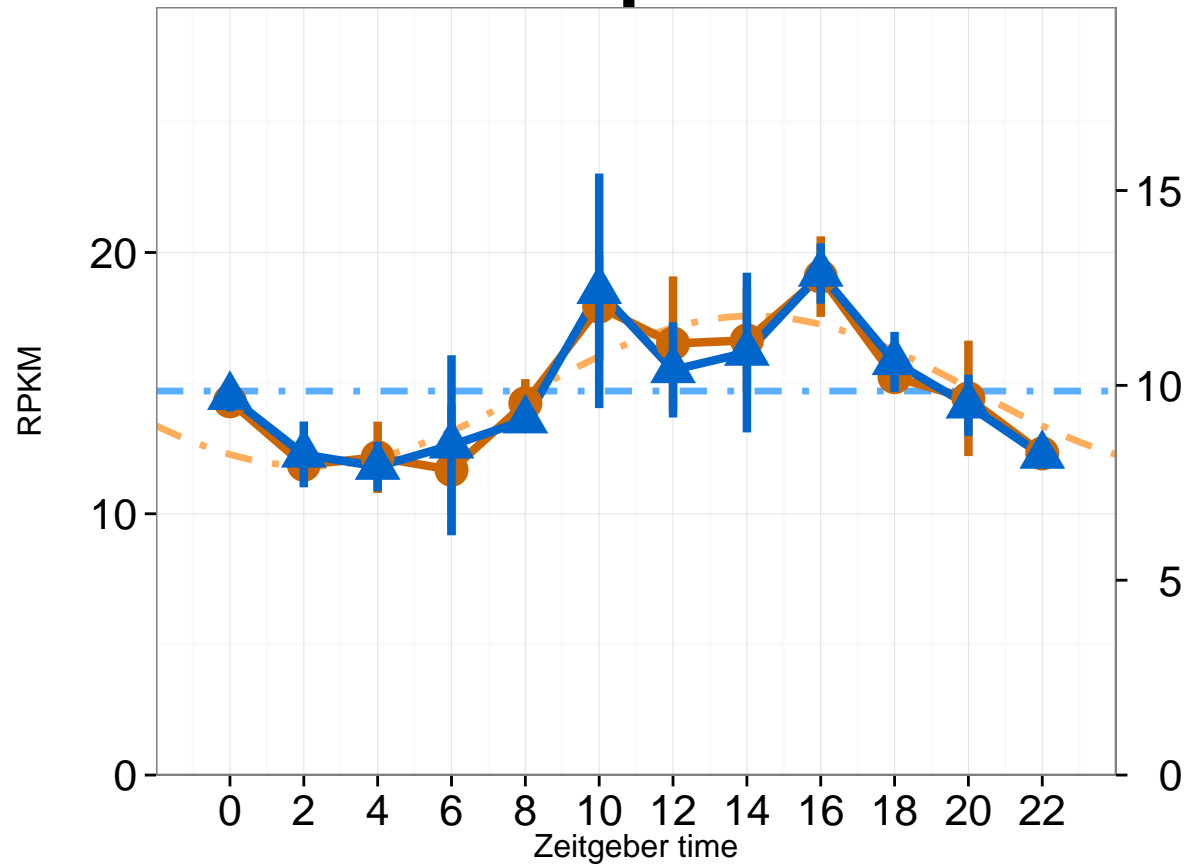

## Cep85

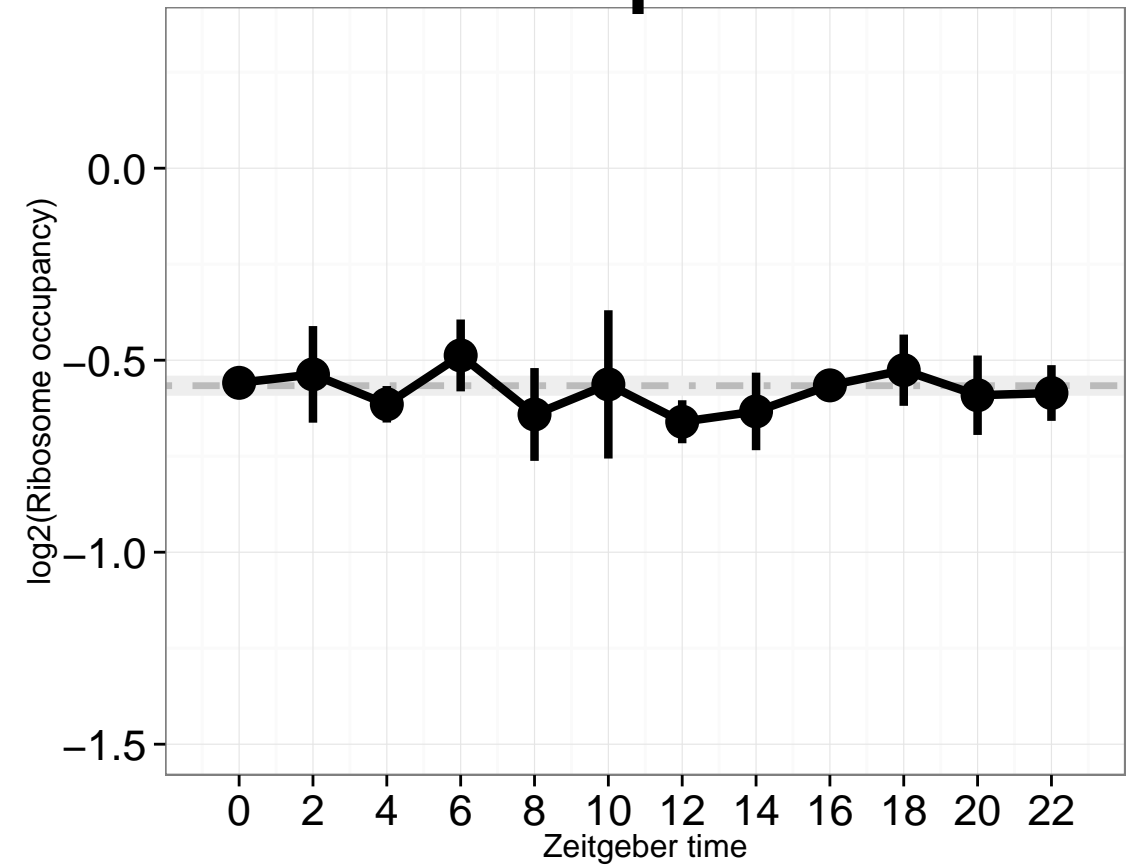

Supplement: SuppDataset_1.zip [file Cep85_set_A.pdf › Supplemental Dataset 1/A-mRNA_nonrhyth_translation_nonrhyth/Cep85_set_A.pdf]

# Cep85l

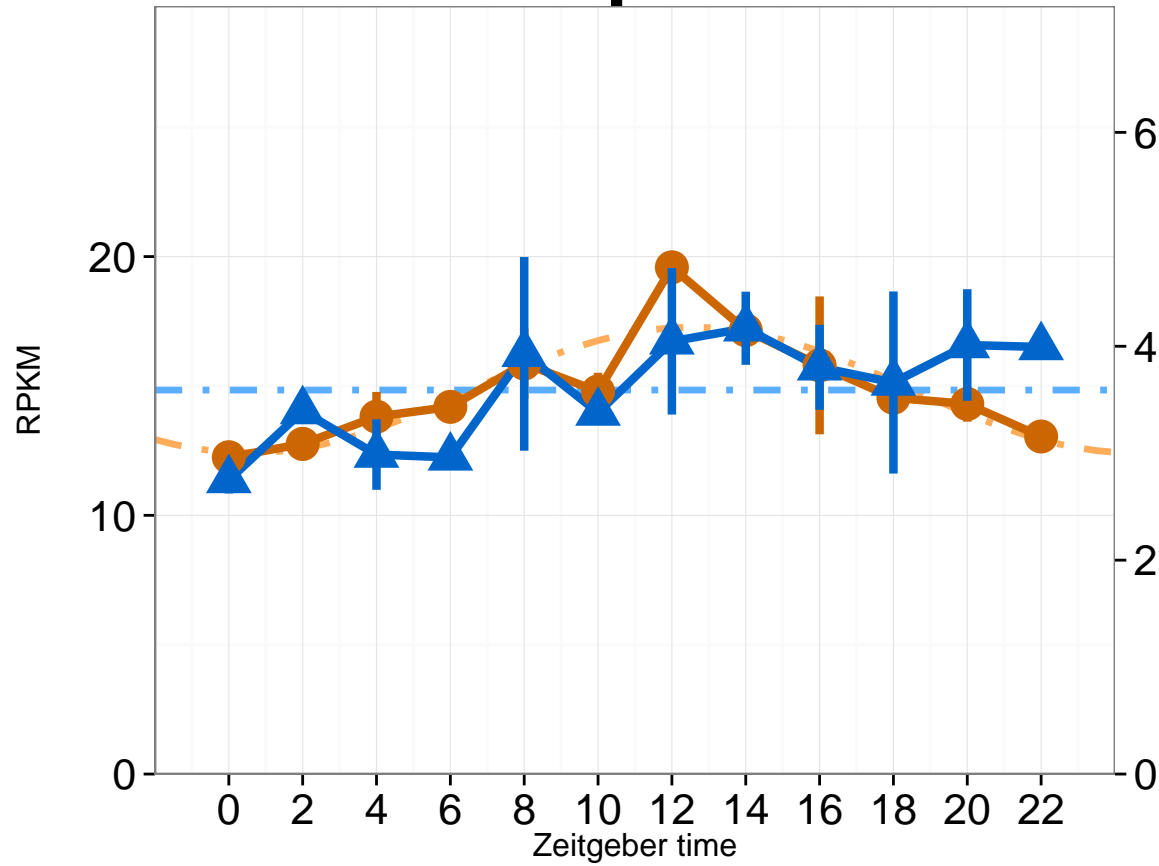

# Cep85l

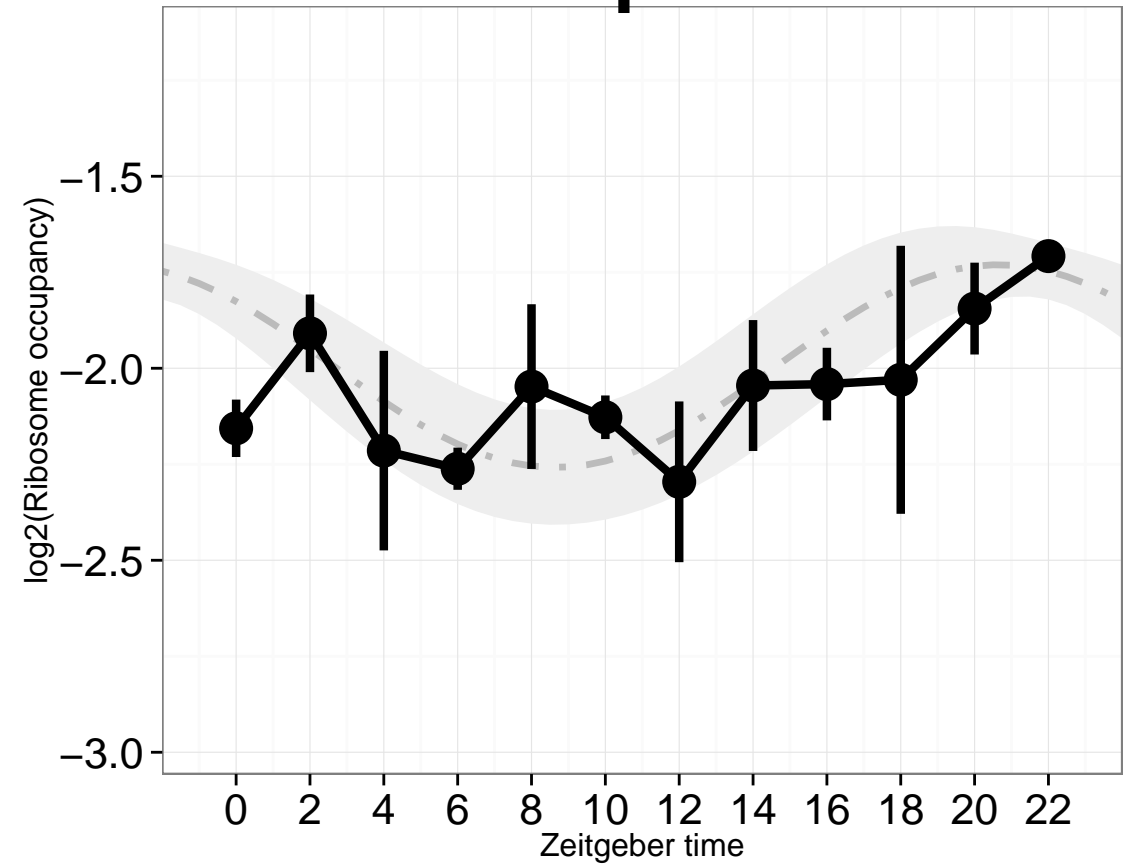

Supplement: SuppDataset_1.zip [file Cep85l_set_A.pdf › Supplemental Dataset 1/A-mRNA_nonrhyth_translation_nonrhyth/Cep85l_set_A.pdf]

# Cep89

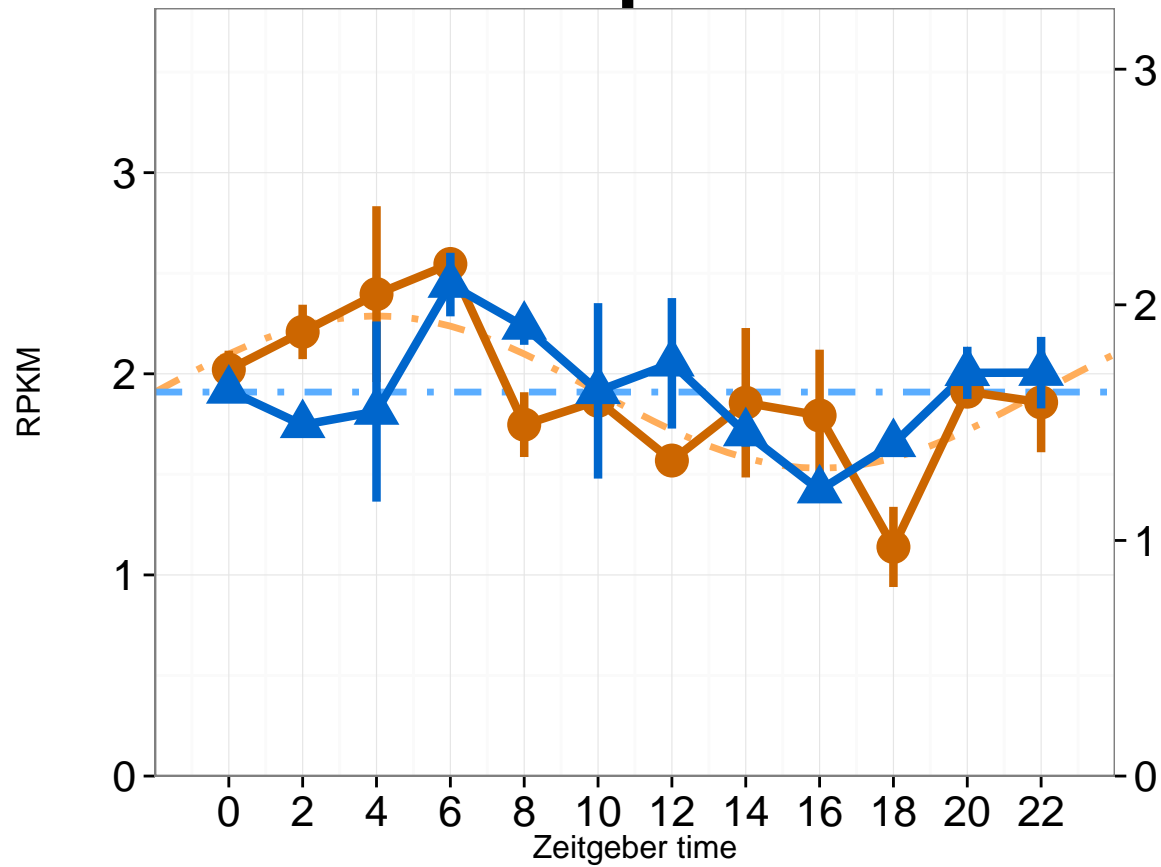

# Cep89

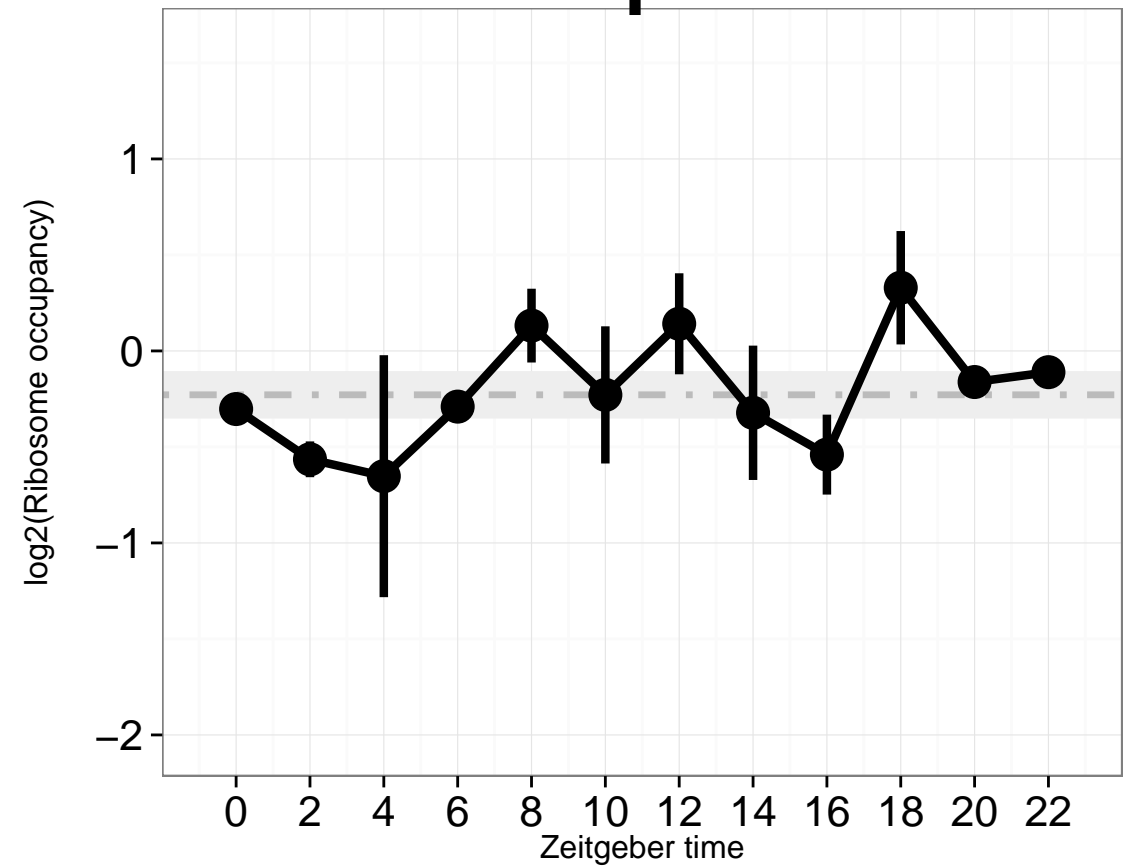

Supplement: SuppDataset_1.zip [file Cep89_set_A.pdf › Supplemental Dataset 1/A-mRNA_nonrhyth_translation_nonrhyth/Cep89_set_A.pdf]

# Cep95

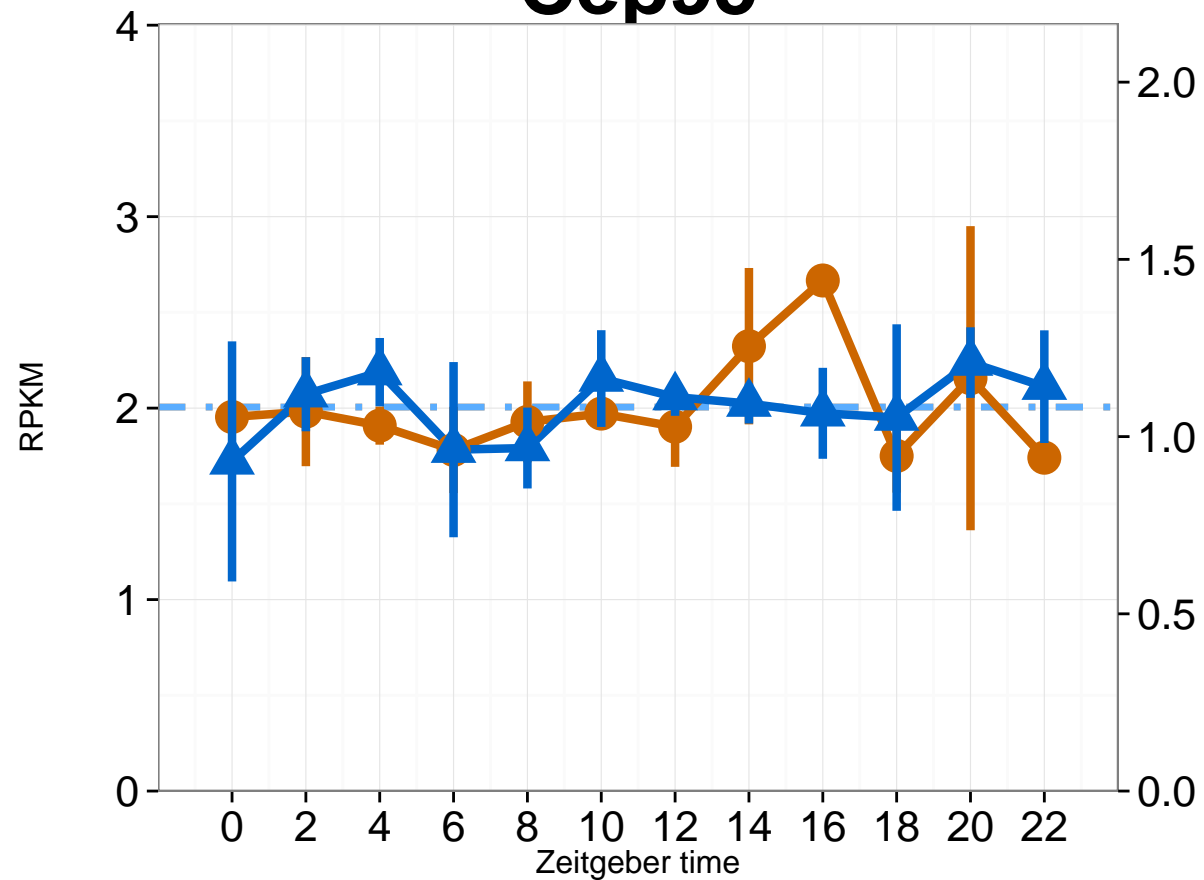

# Cep95

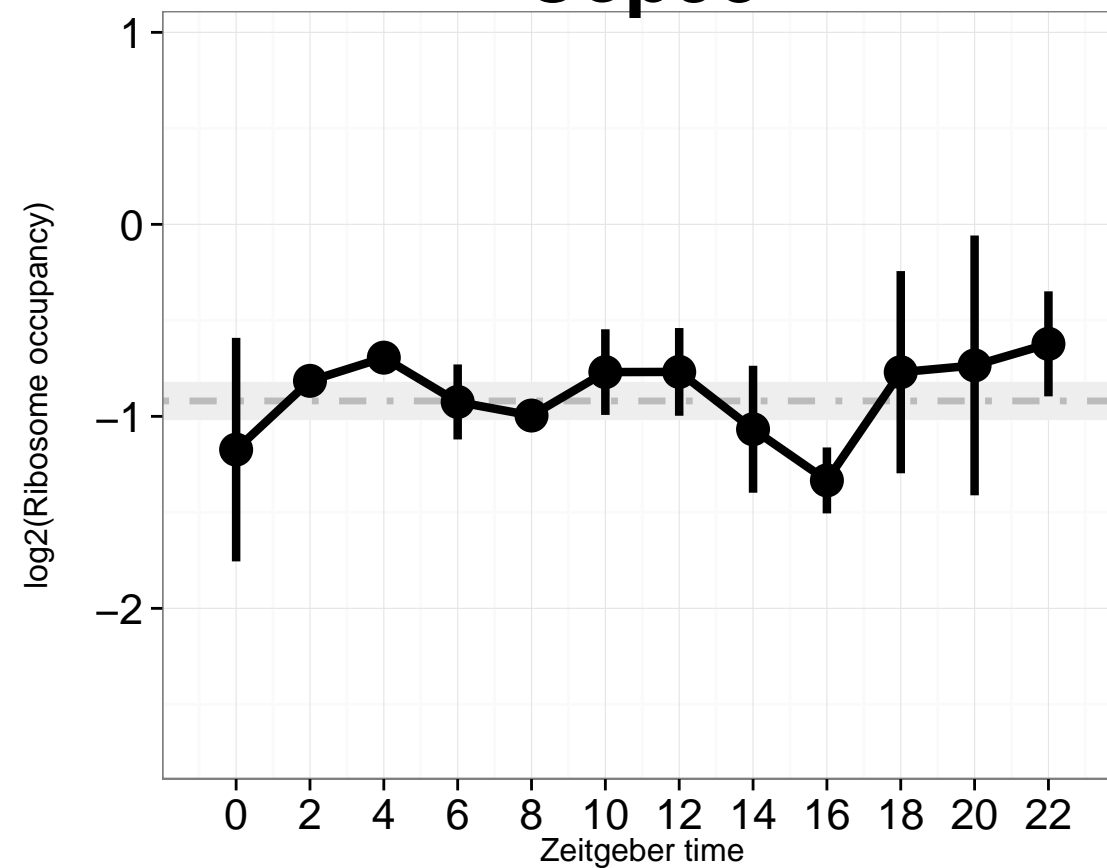

Supplement: SuppDataset_1.zip [file Cep95_set_A.pdf › Supplemental Dataset 1/A-mRNA_nonrhyth_translation_nonrhyth/Cep95_set_A.pdf]

# Cept1

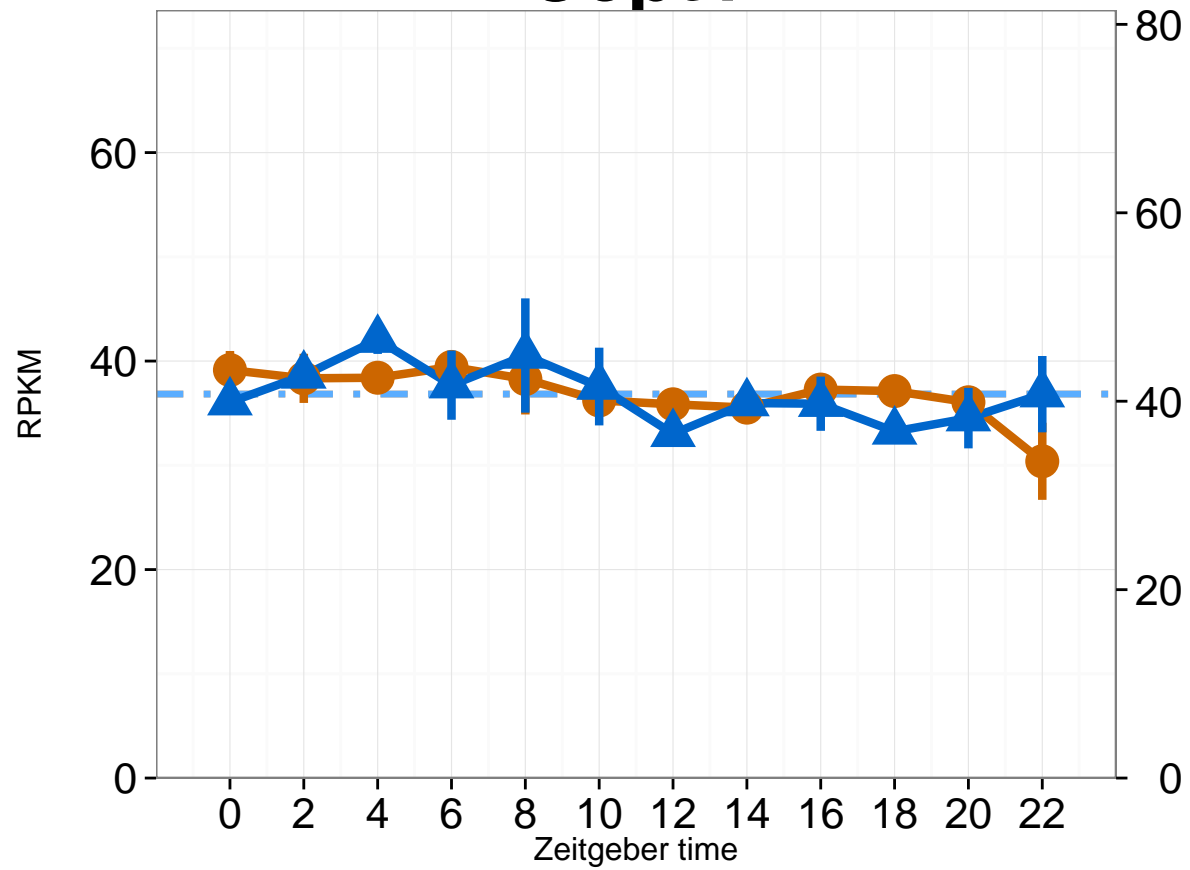

# Cept1

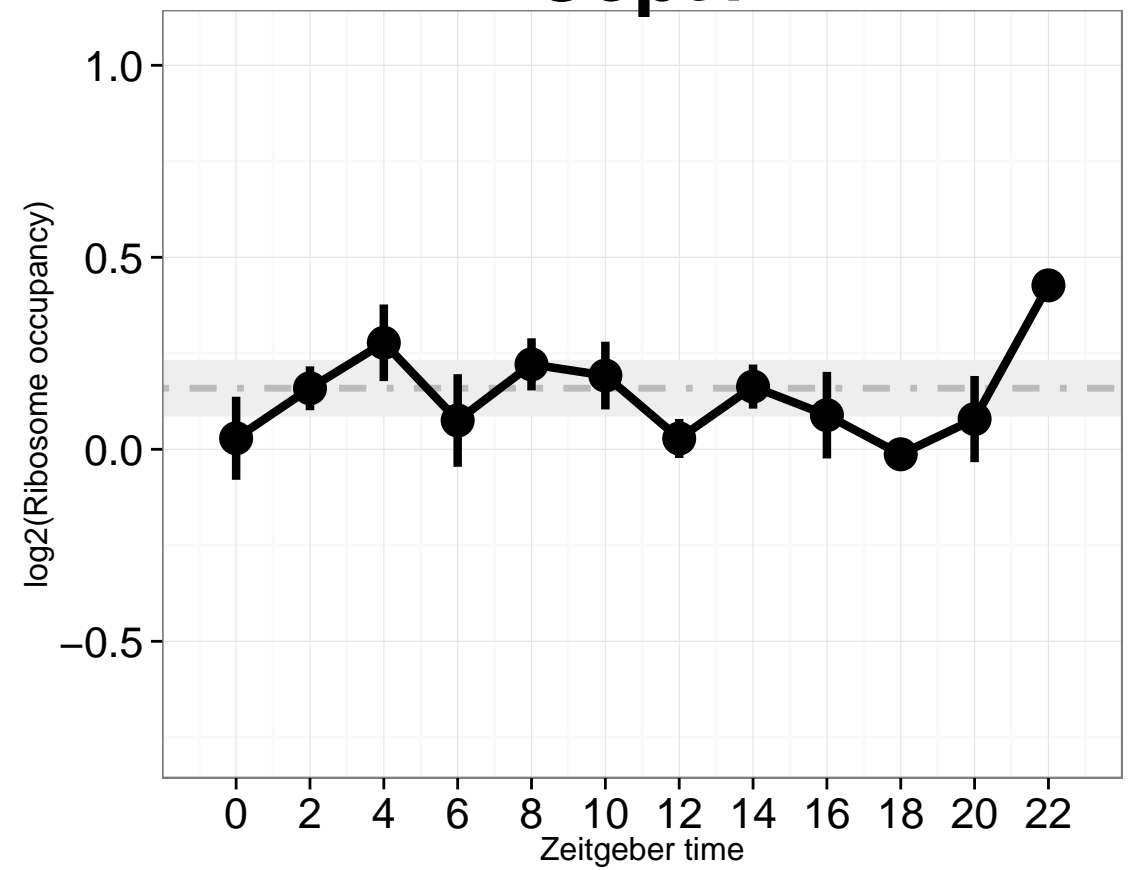

Supplement: SuppDataset_1.zip [file Cept1_set_A.pdf › Supplemental Dataset 1/A-mRNA_nonrhyth_translation_nonrhyth/Cept1_set_A.pdf]

## Cers2

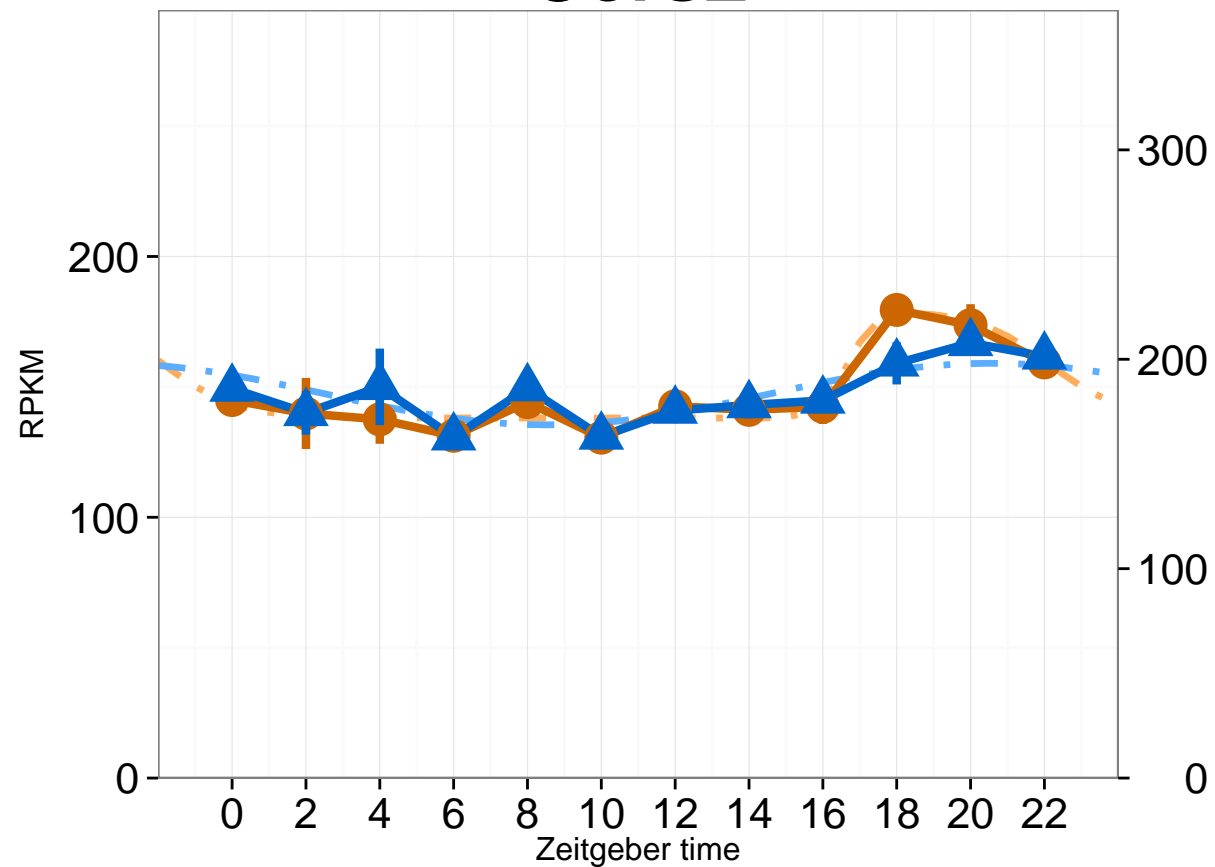

## Cers2

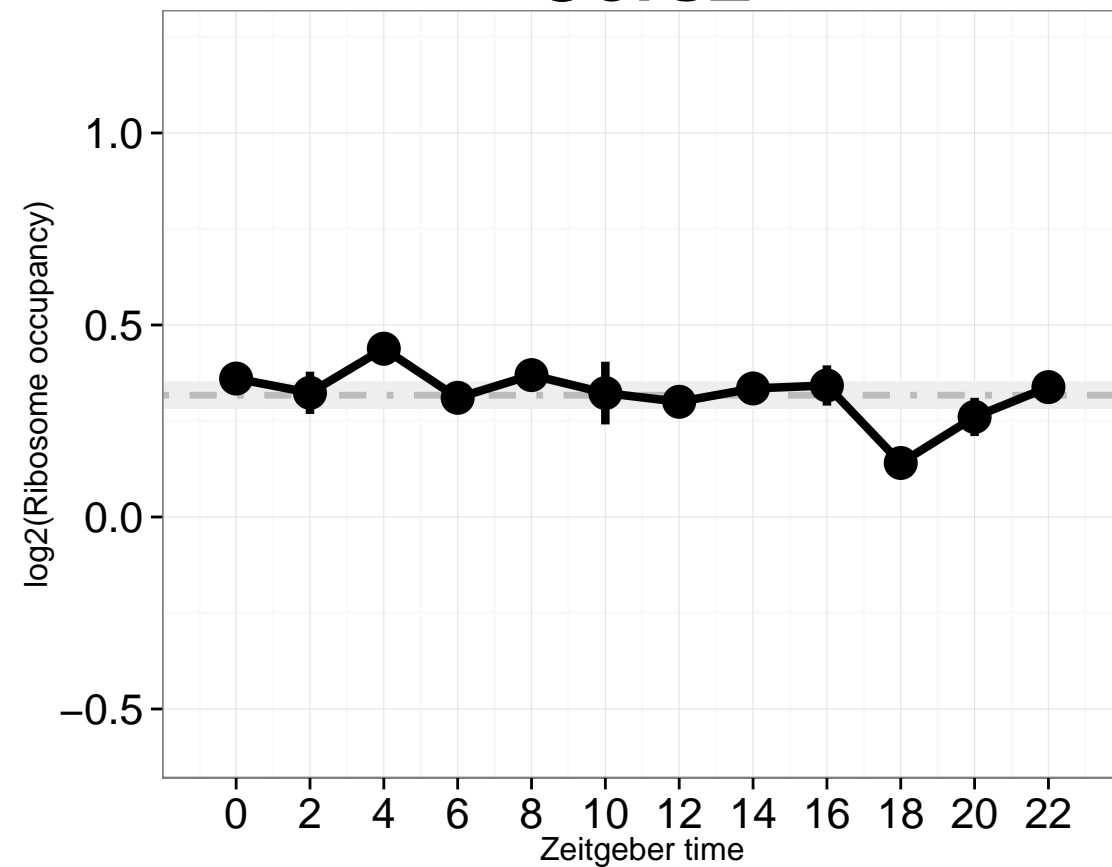

Supplement: SuppDataset_1.zip [file Cers2_set_A.pdf › Supplemental Dataset 1/A-mRNA_nonrhyth_translation_nonrhyth/Cers2_set_A.pdf]

# Cers5

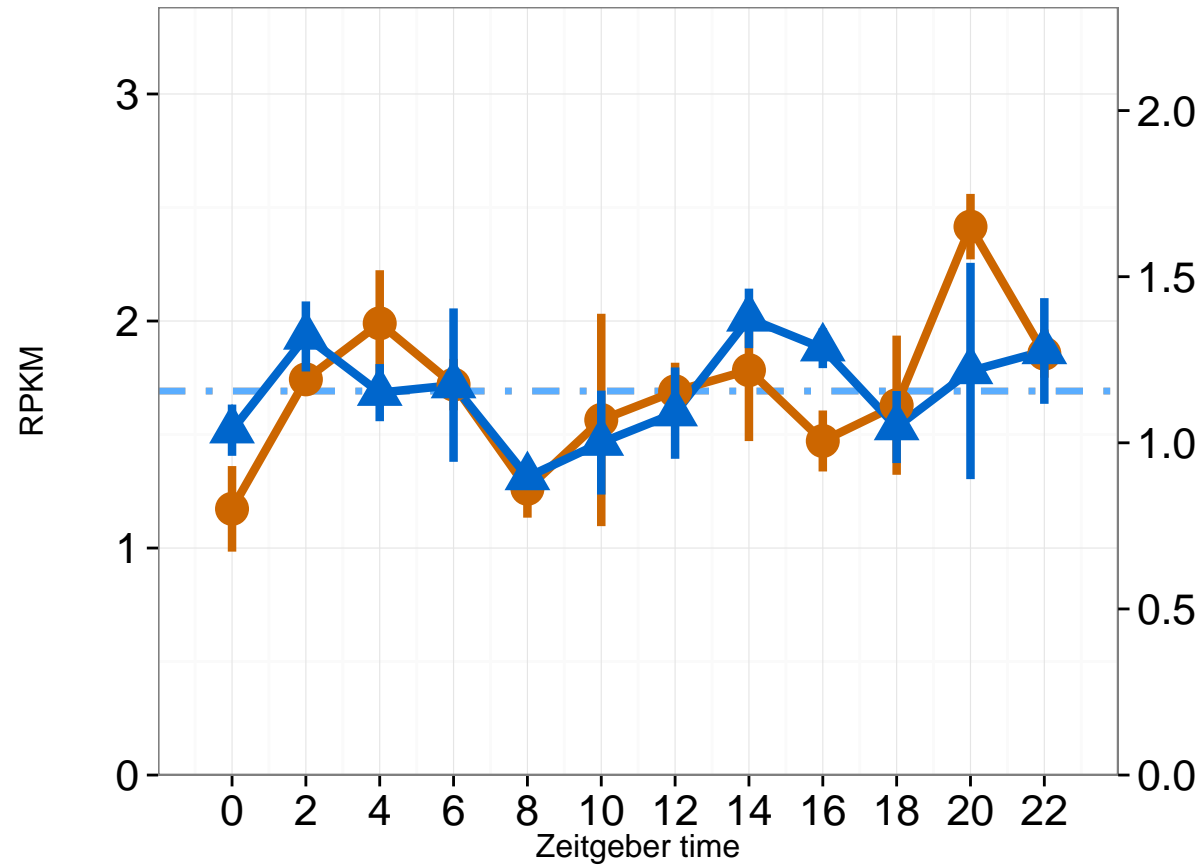

# Cers5

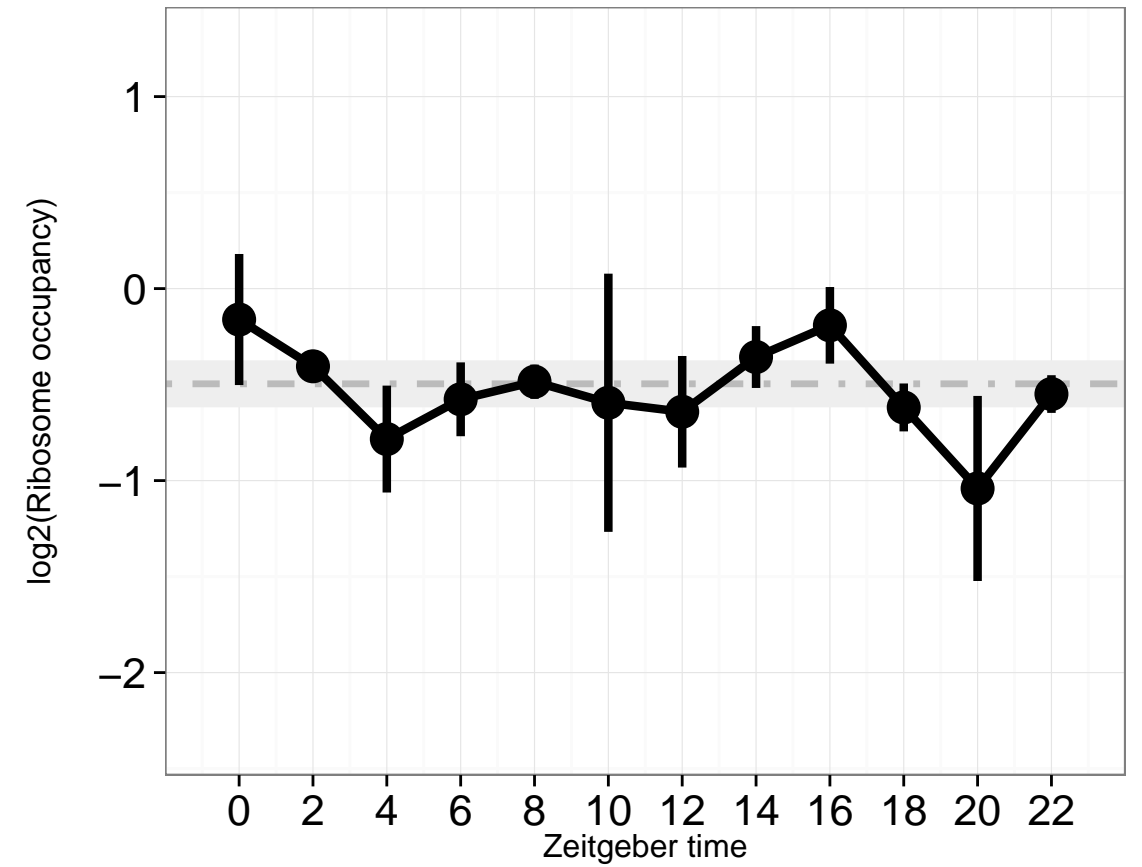

Supplement: SuppDataset_1.zip [file Cers5_set_A.pdf › Supplemental Dataset 1/A-mRNA_nonrhyth_translation_nonrhyth/Cers5_set_A.pdf]

# Ces1b

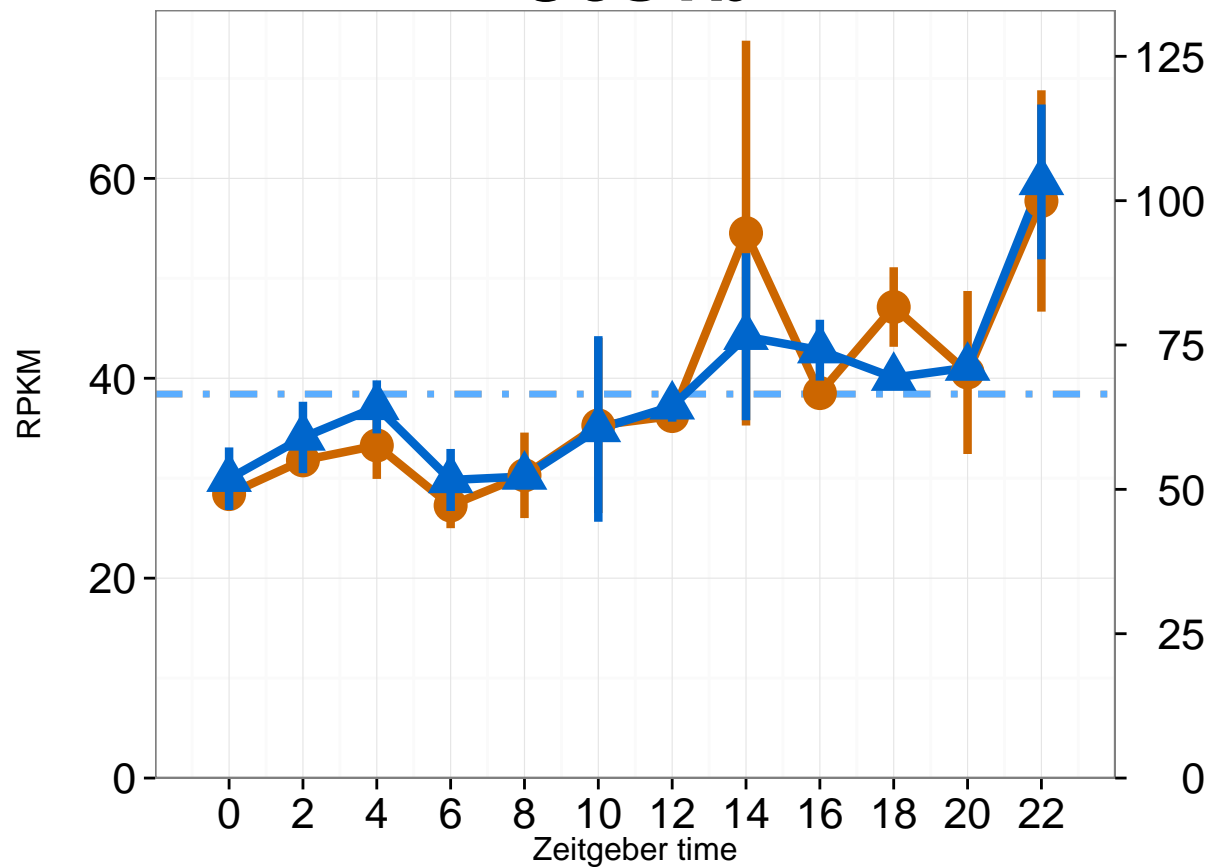

# Ces1b

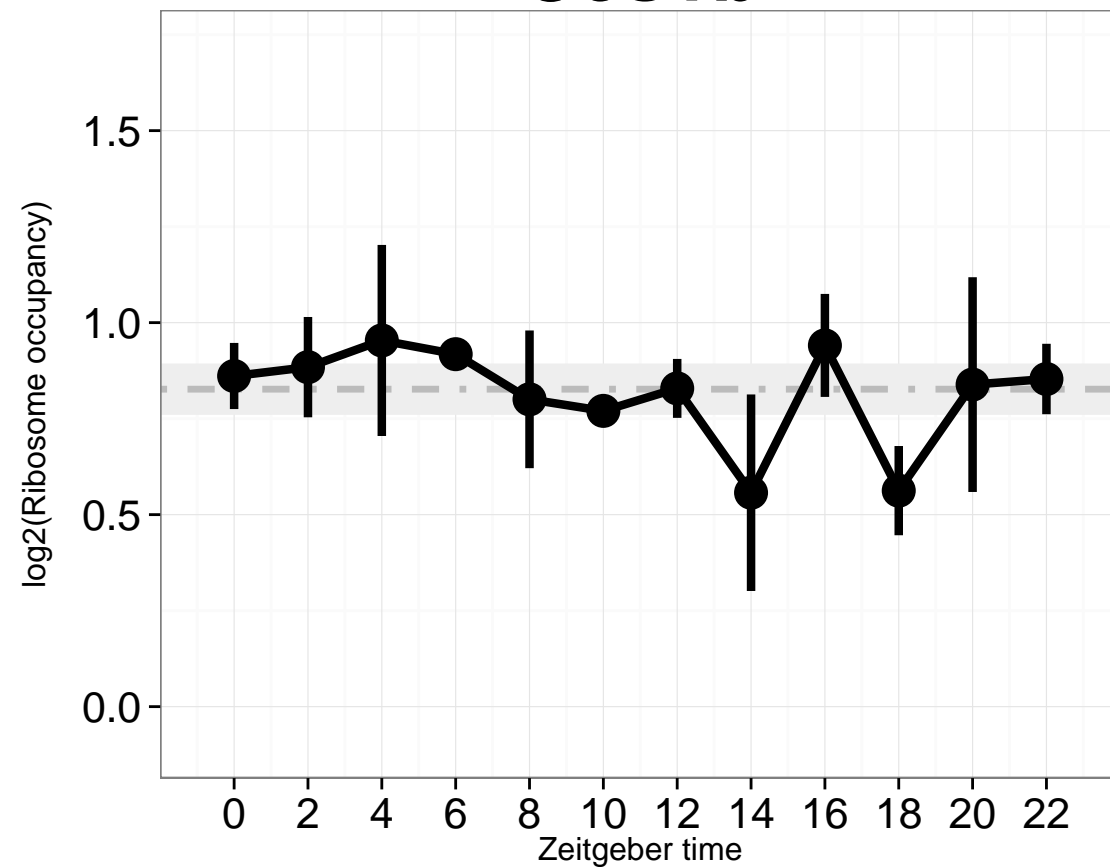

Supplement: SuppDataset_1.zip [file Ces1b_set_A.pdf › Supplemental Dataset 1/A-mRNA_nonrhyth_translation_nonrhyth/Ces1b_set_A.pdf]

# Ces1c

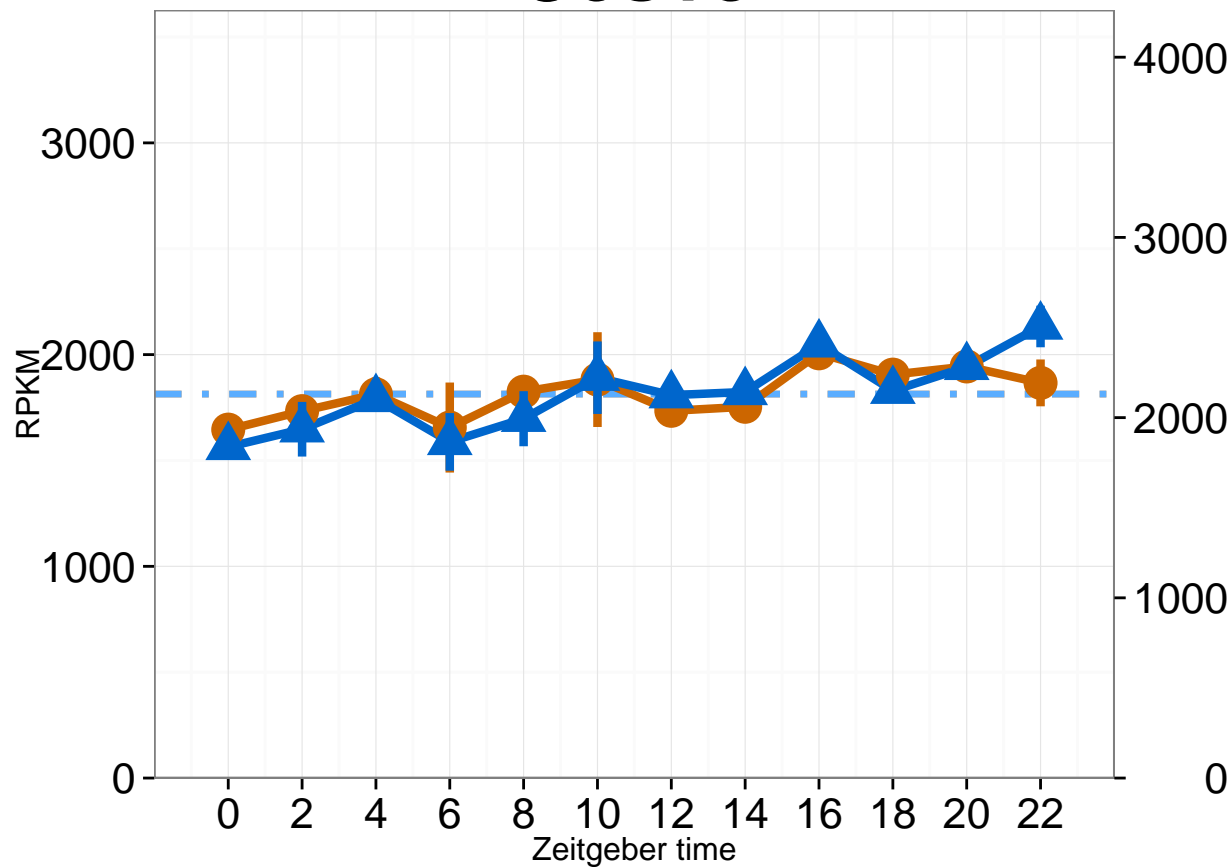

# Ces1c

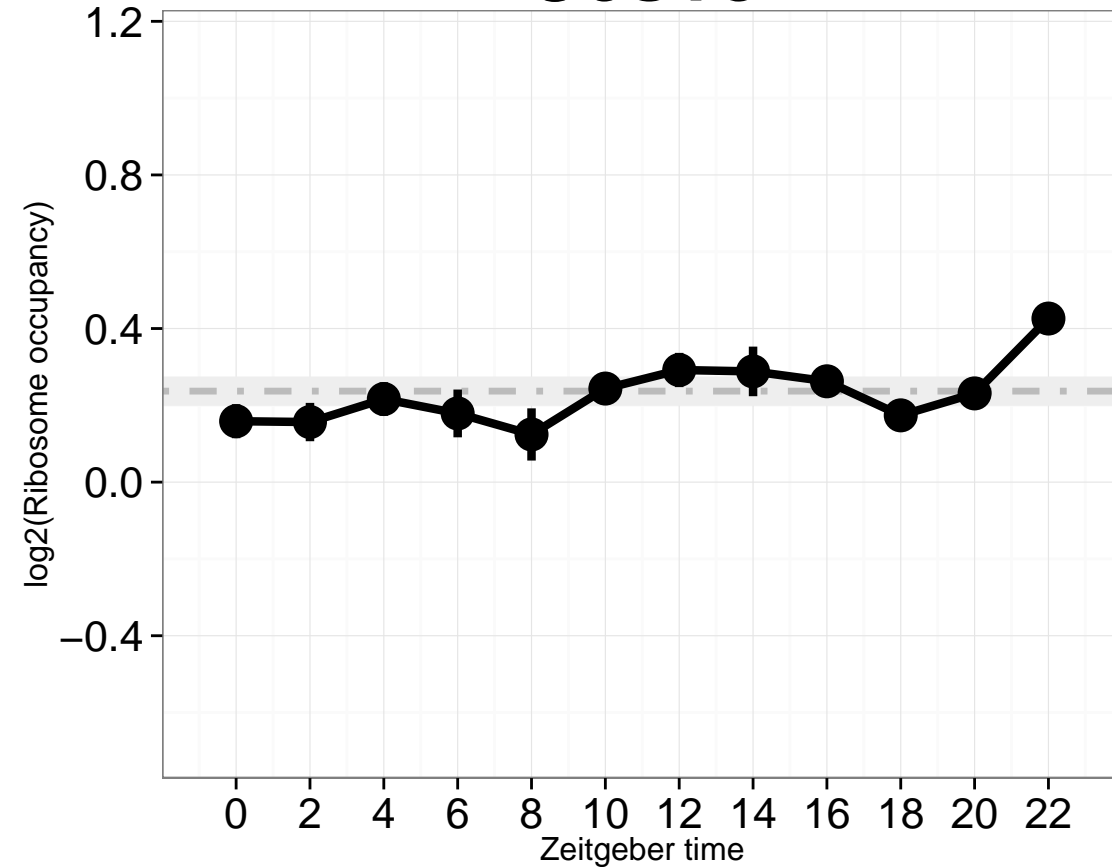

Supplement: SuppDataset_1.zip [file Ces1c_set_A.pdf › Supplemental Dataset 1/A-mRNA_nonrhyth_translation_nonrhyth/Ces1c_set_A.pdf]

## Ces1e

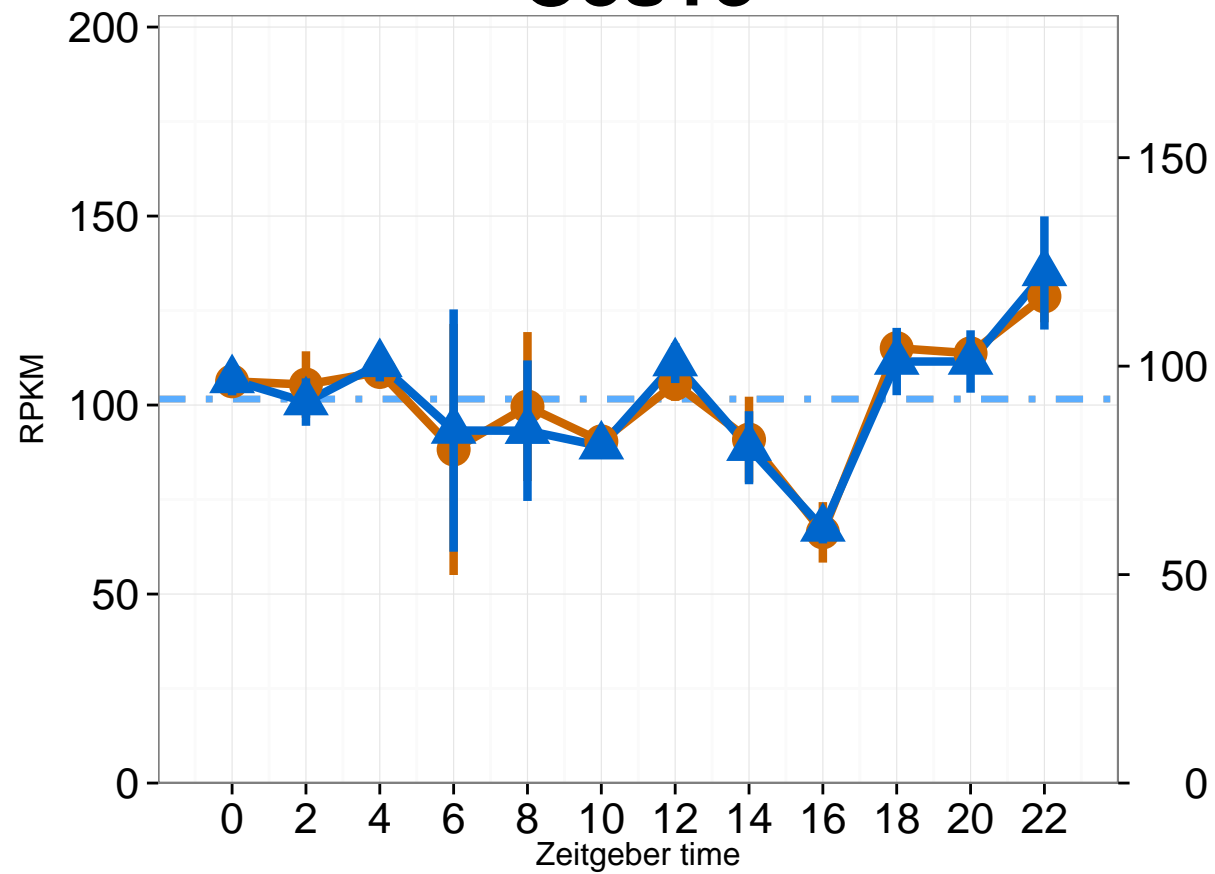

## Ces1e

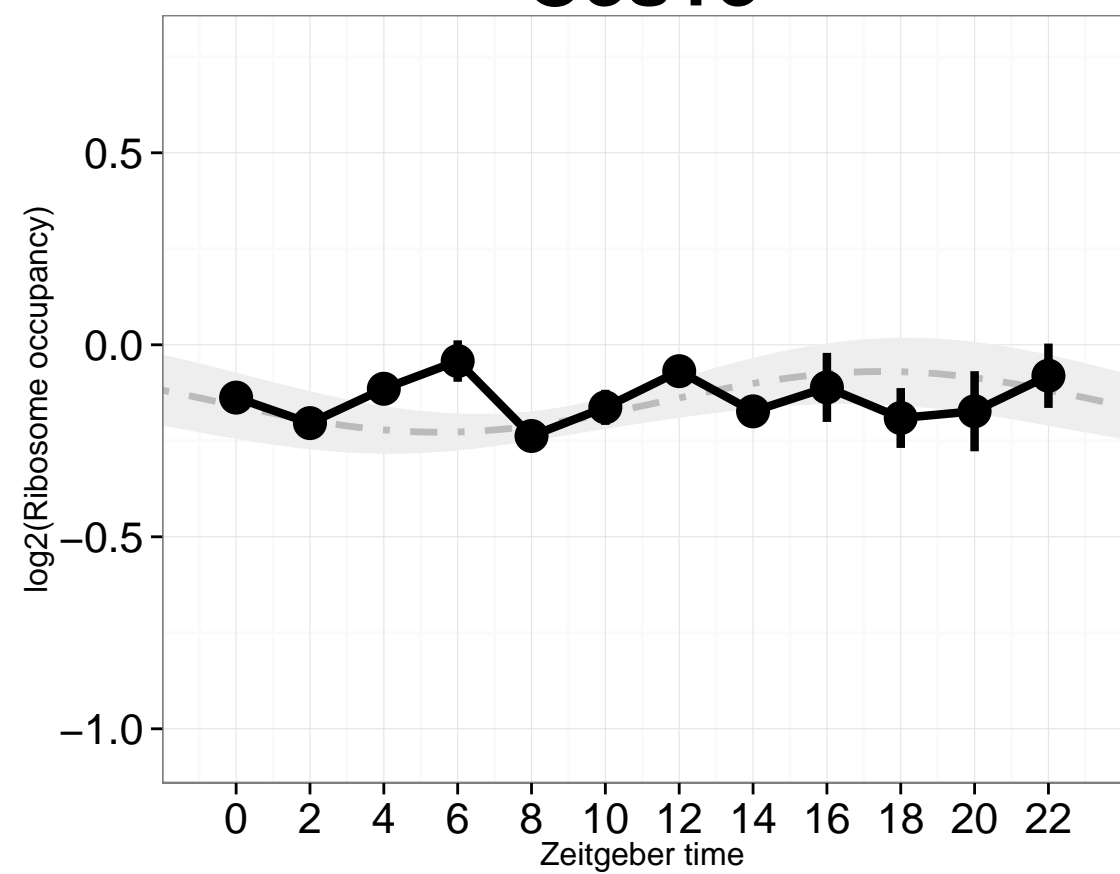

Supplement: SuppDataset_1.zip [file Ces1e_set_A.pdf › Supplemental Dataset 1/A-mRNA_nonrhyth_translation_nonrhyth/Ces1e_set_A.pdf]

# Ces1f

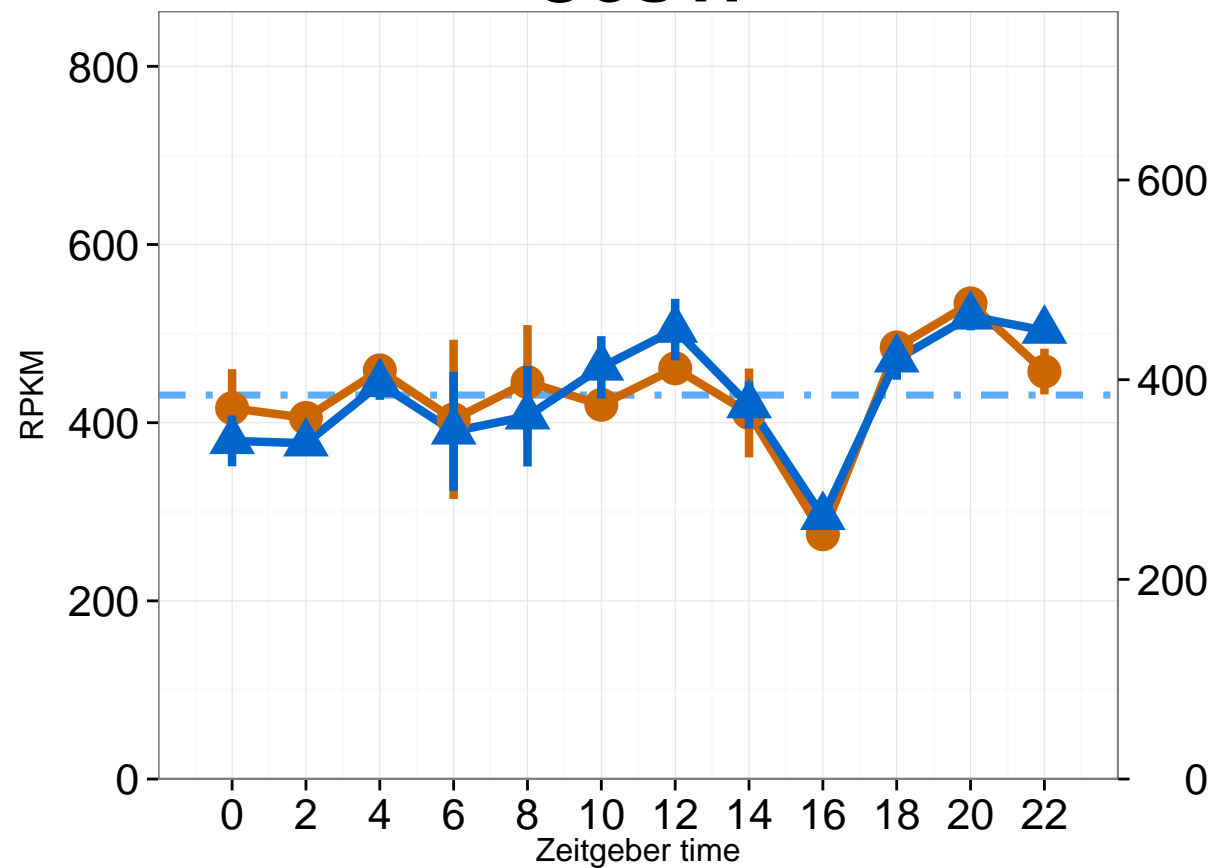

# Ces1f

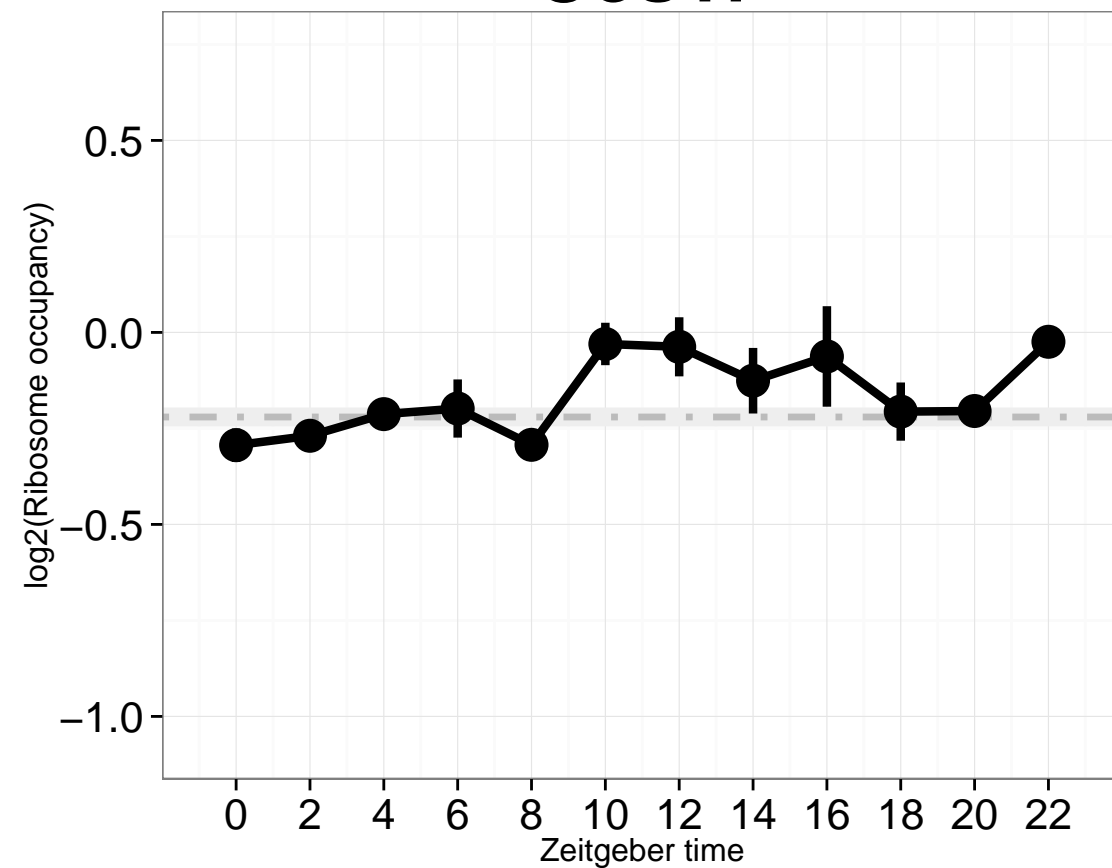

Supplement: SuppDataset_1.zip [file Ces1f_set_A.pdf › Supplemental Dataset 1/A-mRNA_nonrhyth_translation_nonrhyth/Ces1f_set_A.pdf]

## Ces1g

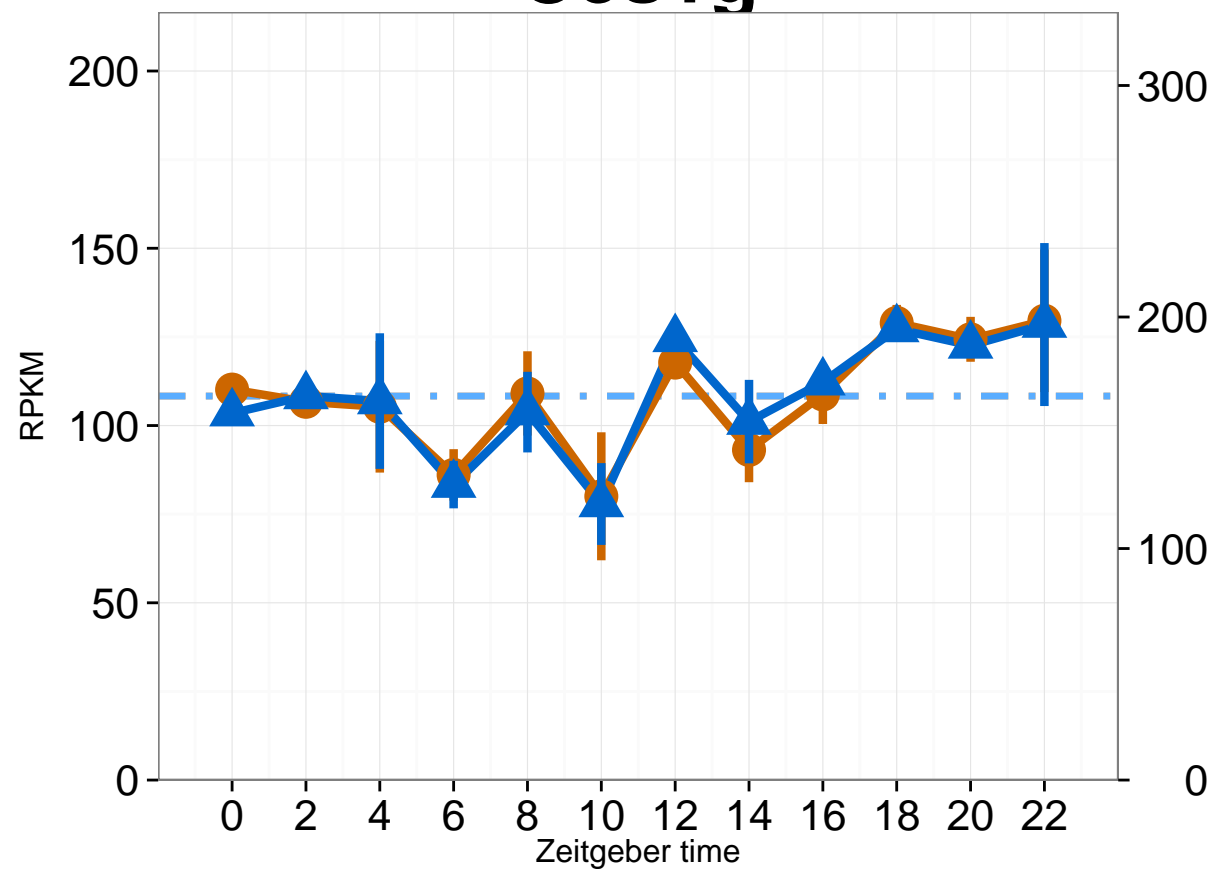

## Ces1g

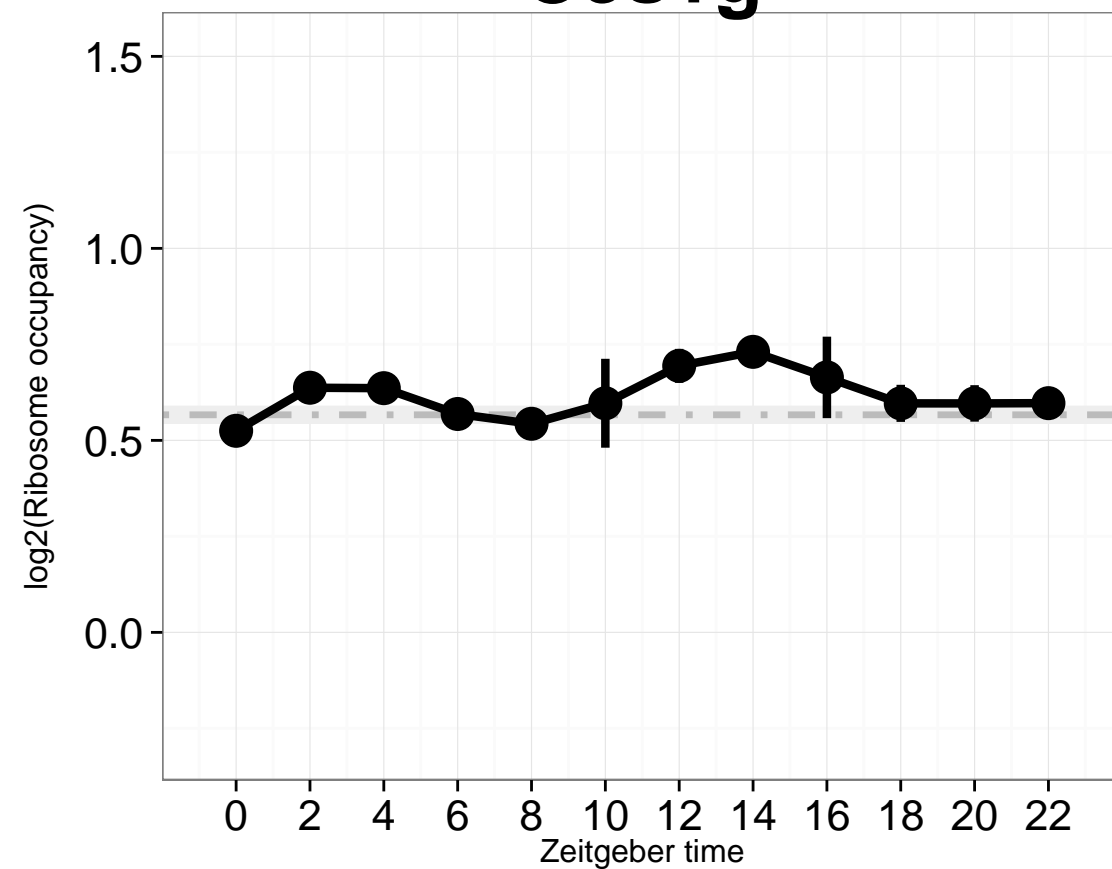

Supplement: SuppDataset_1.zip [file Ces1g_set_A.pdf › Supplemental Dataset 1/A-mRNA_nonrhyth_translation_nonrhyth/Ces1g_set_A.pdf]

# Ces2a

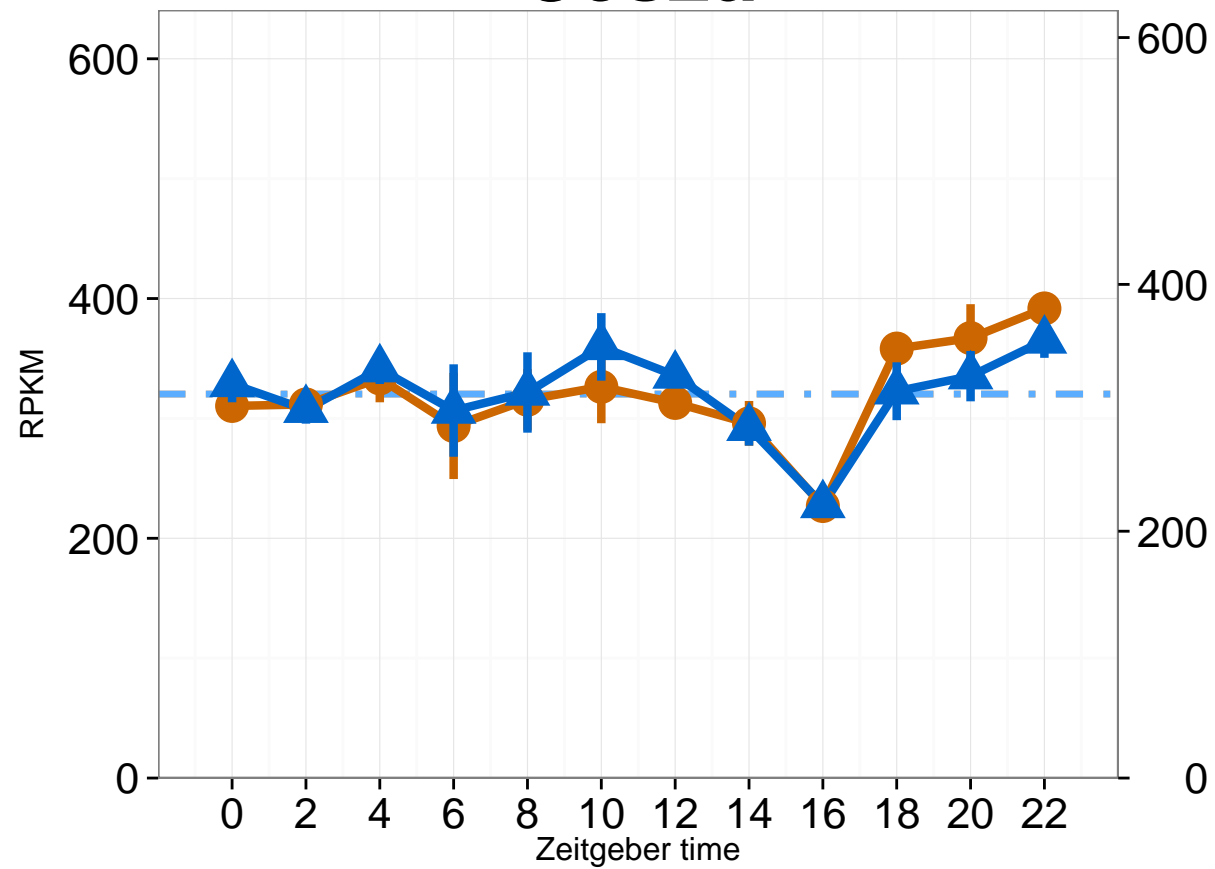

# Ces2a

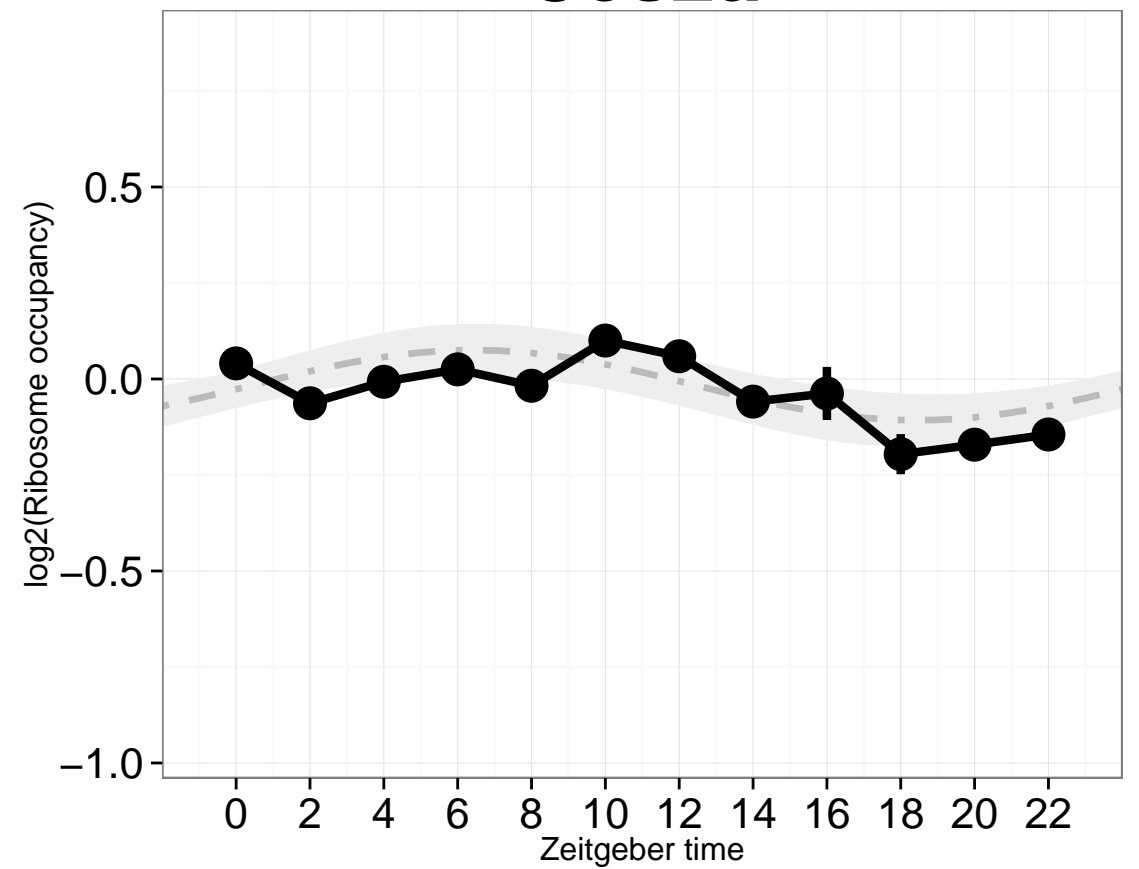

Supplement: SuppDataset_1.zip [file Ces2a_set_A.pdf › Supplemental Dataset 1/A-mRNA_nonrhyth_translation_nonrhyth/Ces2a_set_A.pdf]

# Ces2b

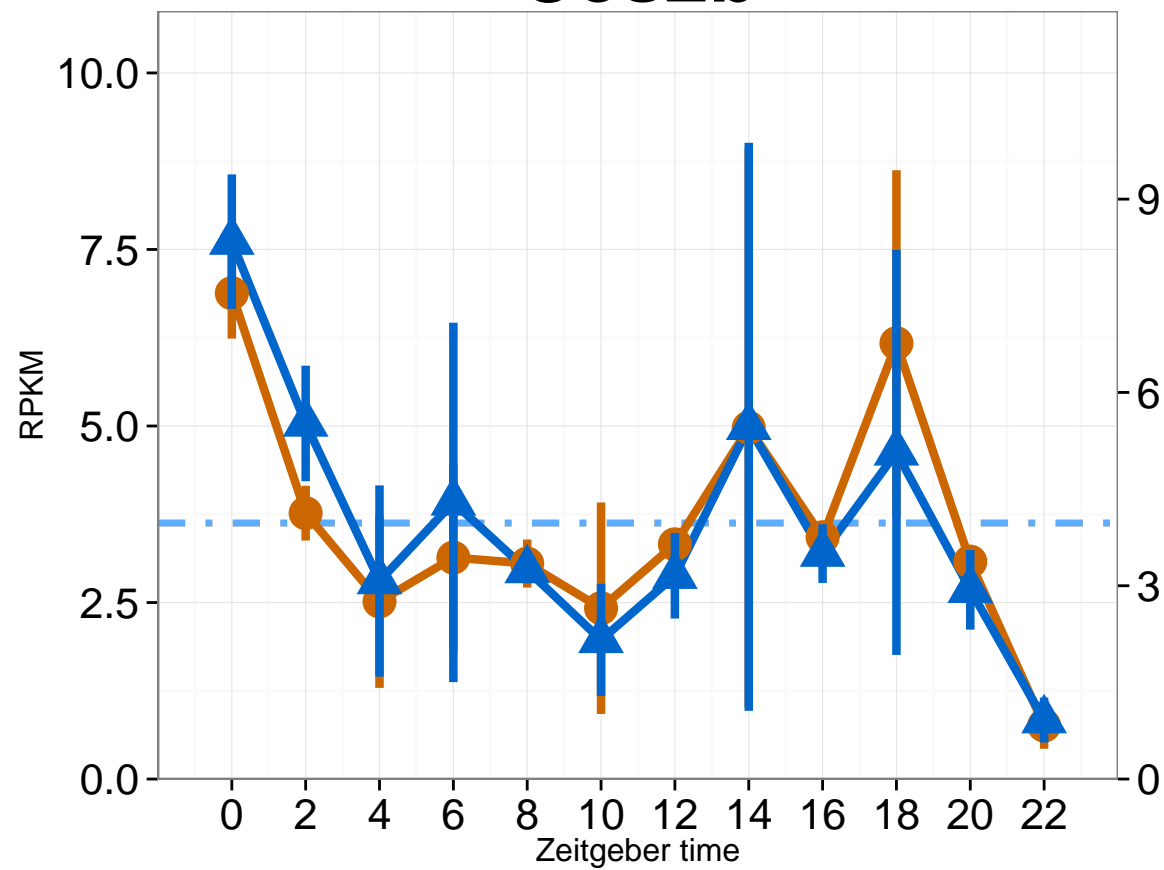

# Ces2b

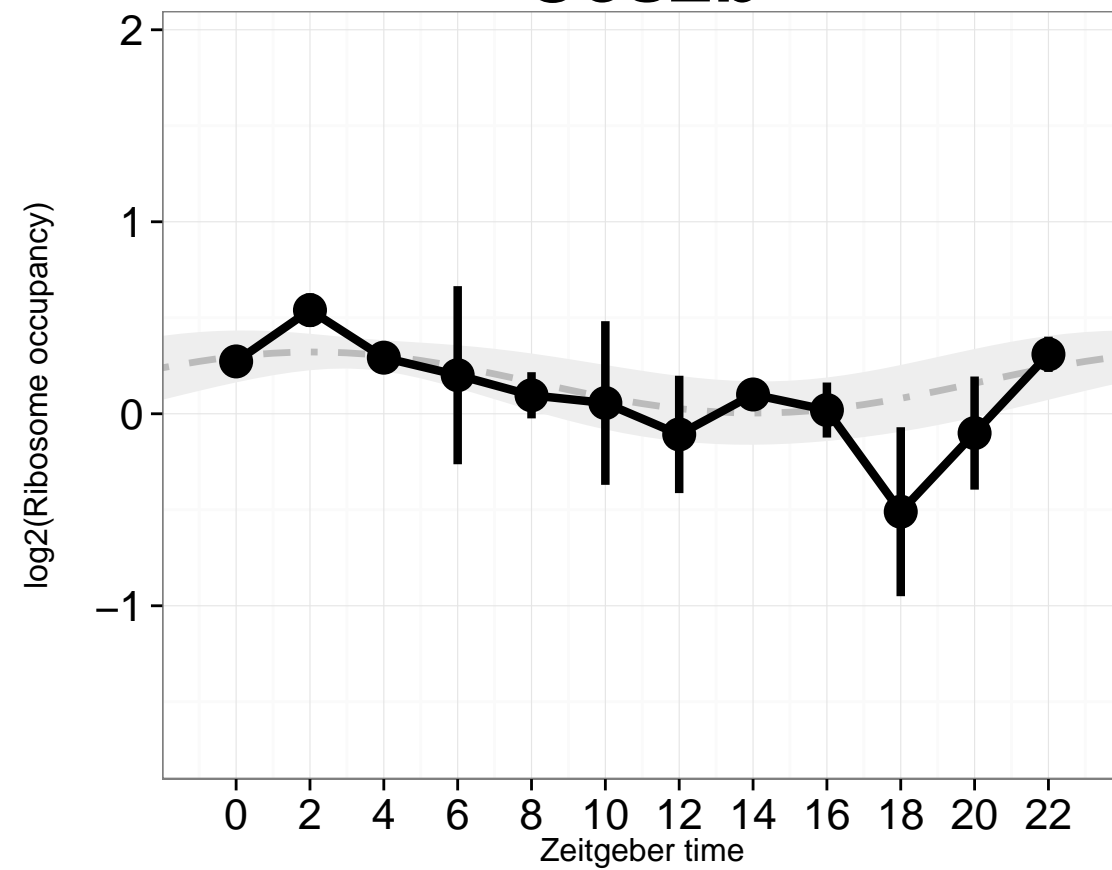

Supplement: SuppDataset_1.zip [file Ces2b_set_A.pdf › Supplemental Dataset 1/A-mRNA_nonrhyth_translation_nonrhyth/Ces2b_set_A.pdf]

# Ces2c

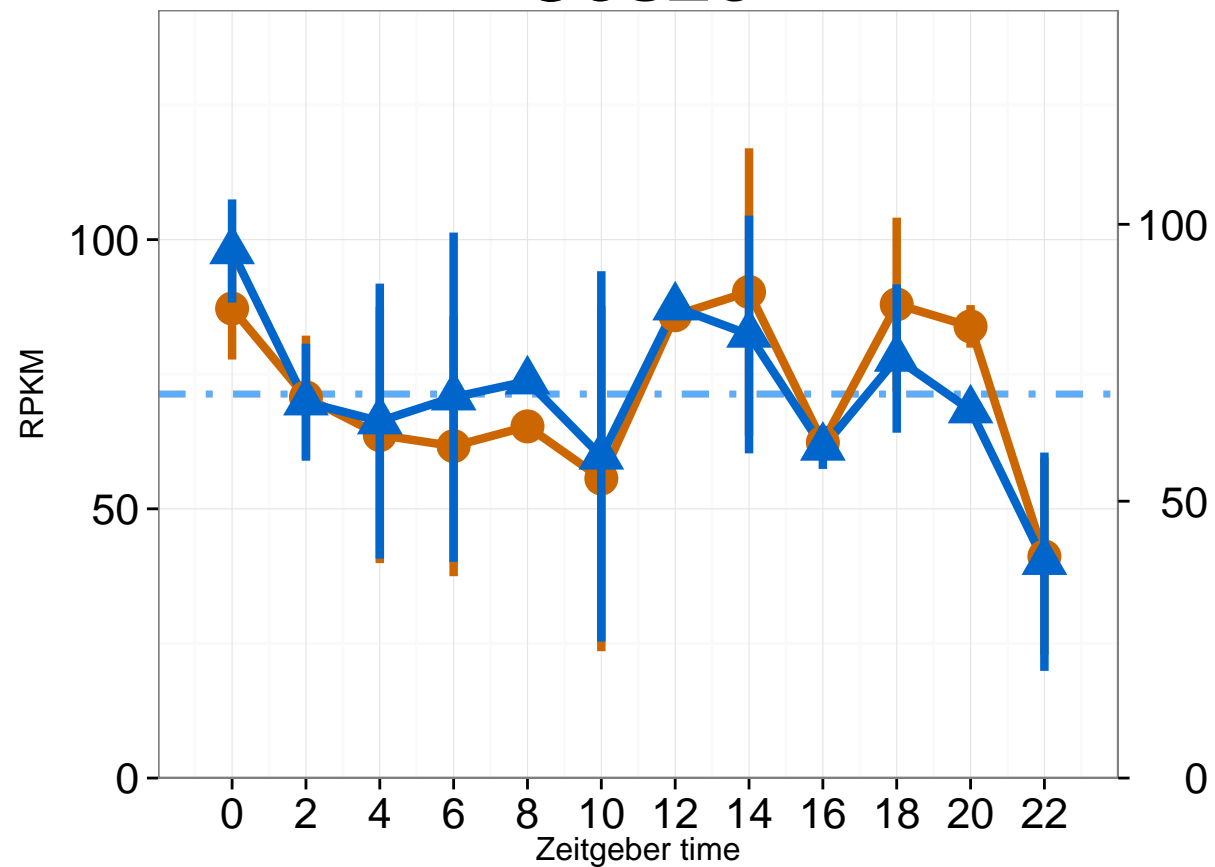

# Ces2c

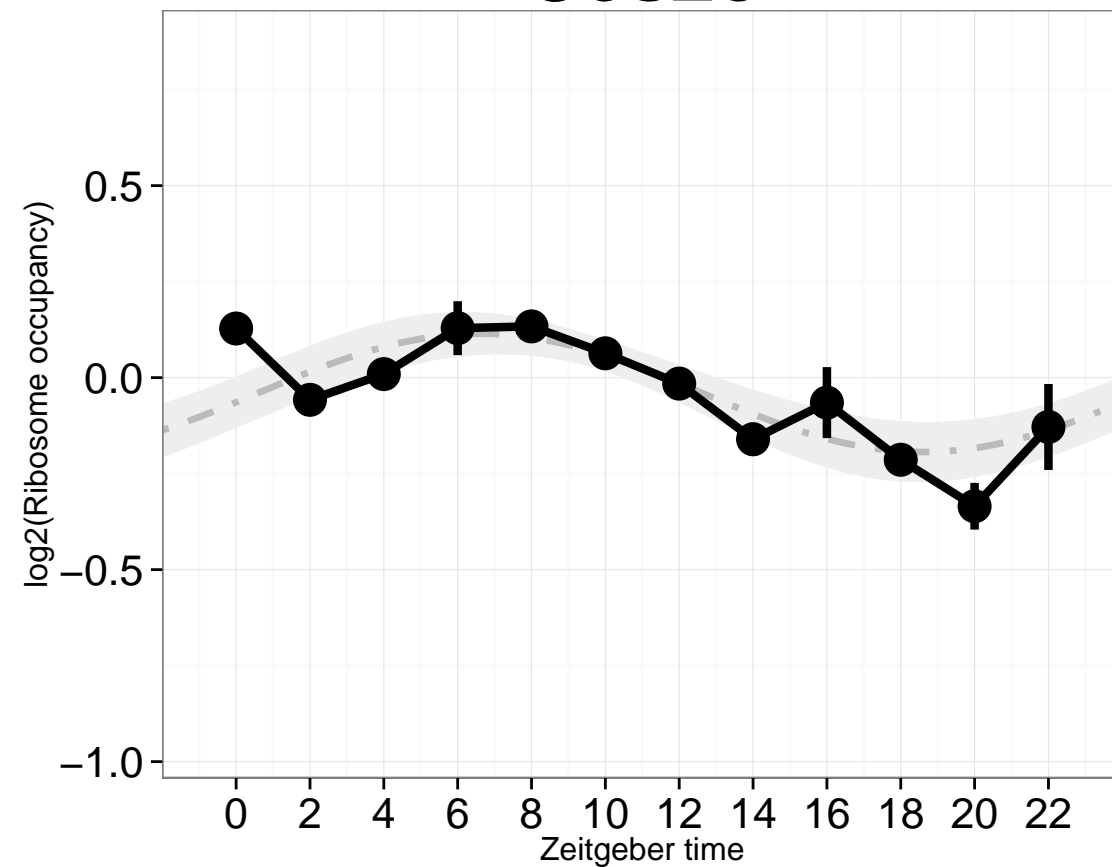

Supplement: SuppDataset_1.zip [file Ces2c_set_A.pdf › Supplemental Dataset 1/A-mRNA_nonrhyth_translation_nonrhyth/Ces2c_set_A.pdf]

# Ces2e

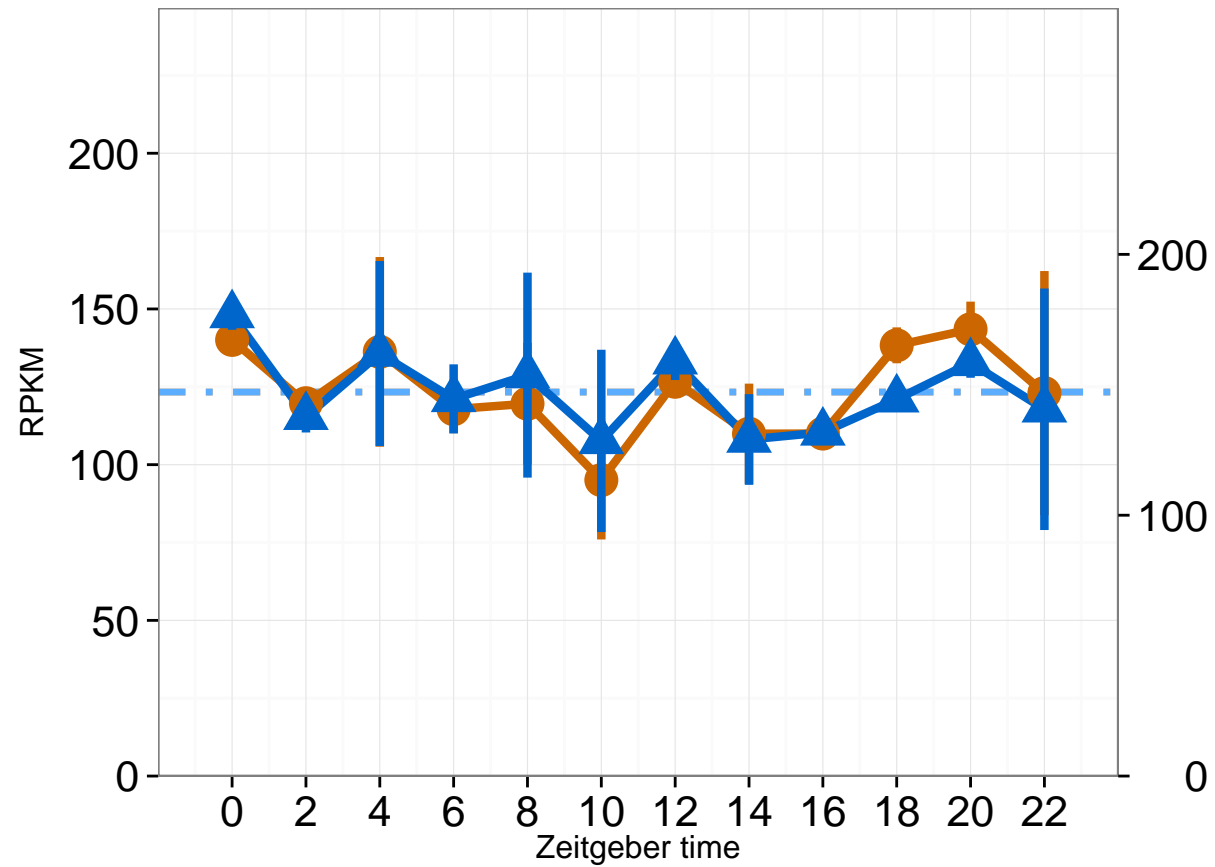

# Ces2e

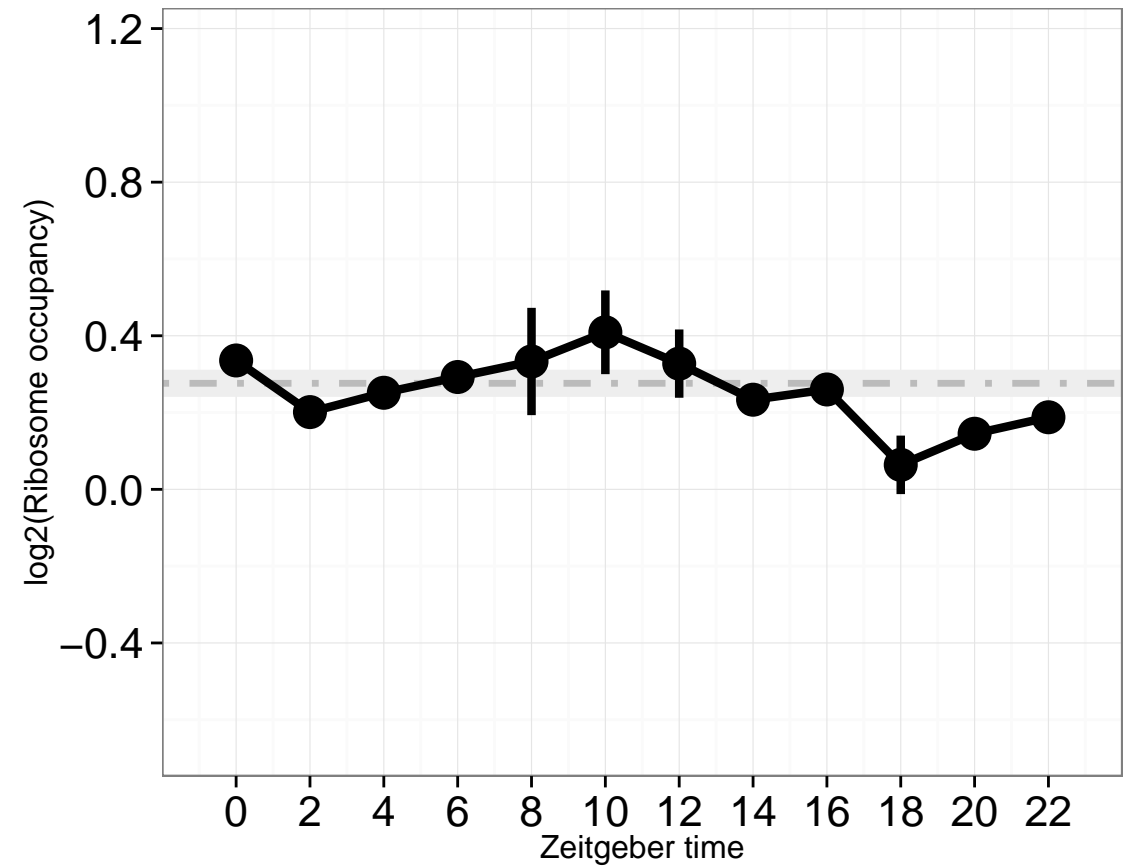

Supplement: SuppDataset_1.zip [file Ces2e_set_A.pdf › Supplemental Dataset 1/A-mRNA_nonrhyth_translation_nonrhyth/Ces2e_set_A.pdf]

# Ces2g

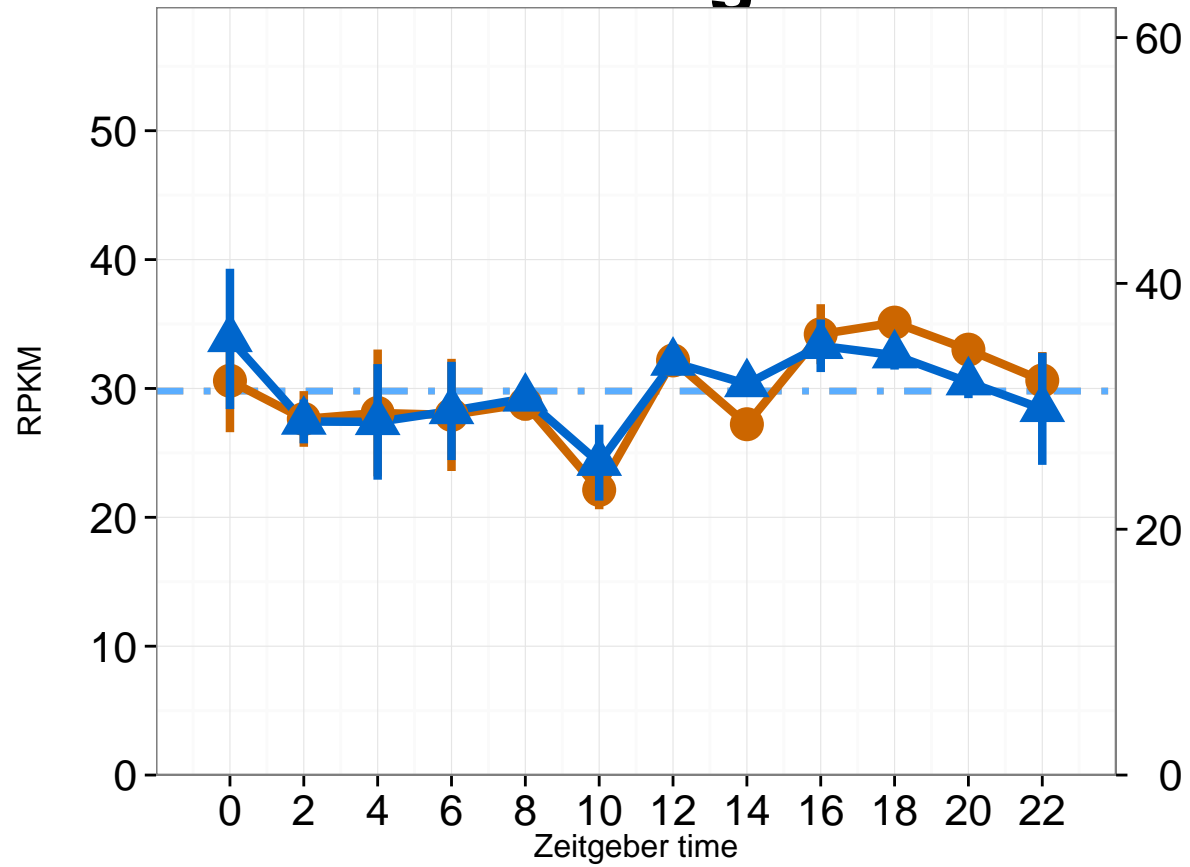

# Ces2g

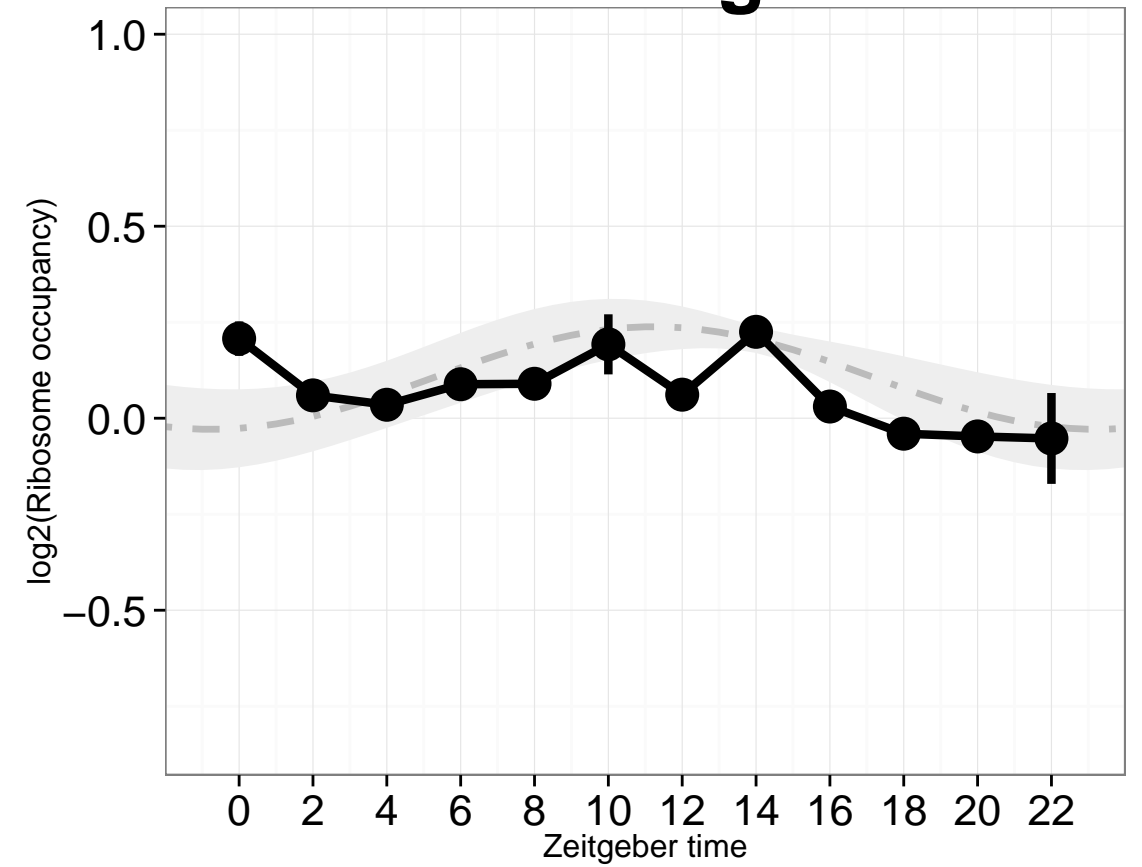

Supplement: SuppDataset_1.zip [file Ces2g_set_A.pdf › Supplemental Dataset 1/A-mRNA_nonrhyth_translation_nonrhyth/Ces2g_set_A.pdf]

# Ces3a

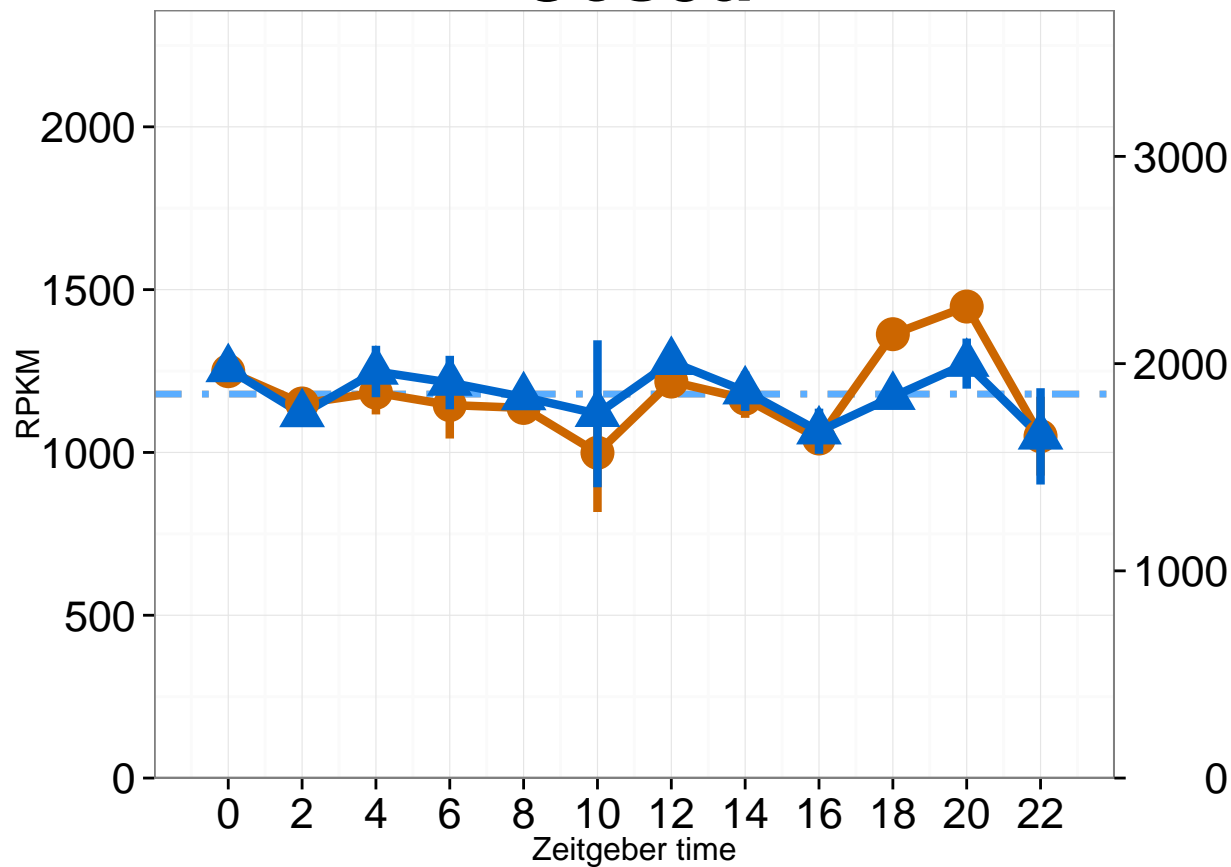

# Ces3a

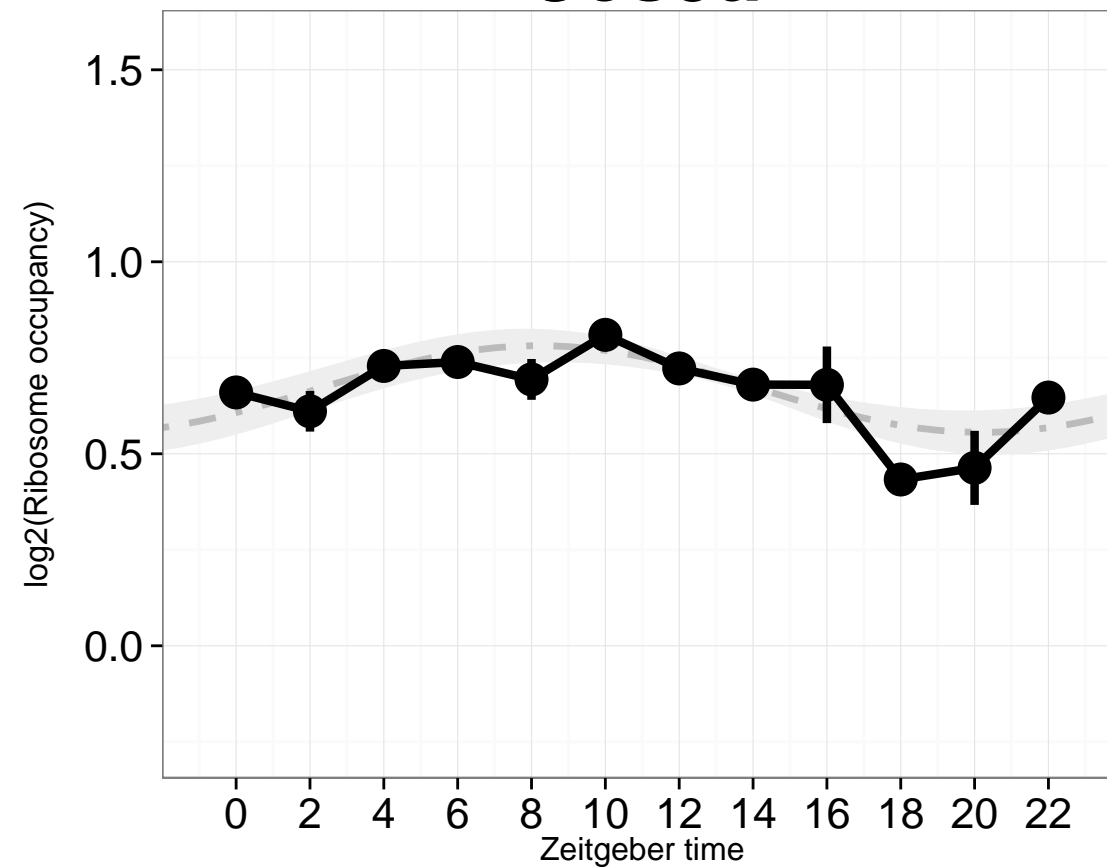

Supplement: SuppDataset_1.zip [file Ces3a_set_A.pdf › Supplemental Dataset 1/A-mRNA_nonrhyth_translation_nonrhyth/Ces3a_set_A.pdf]

## Ces3b

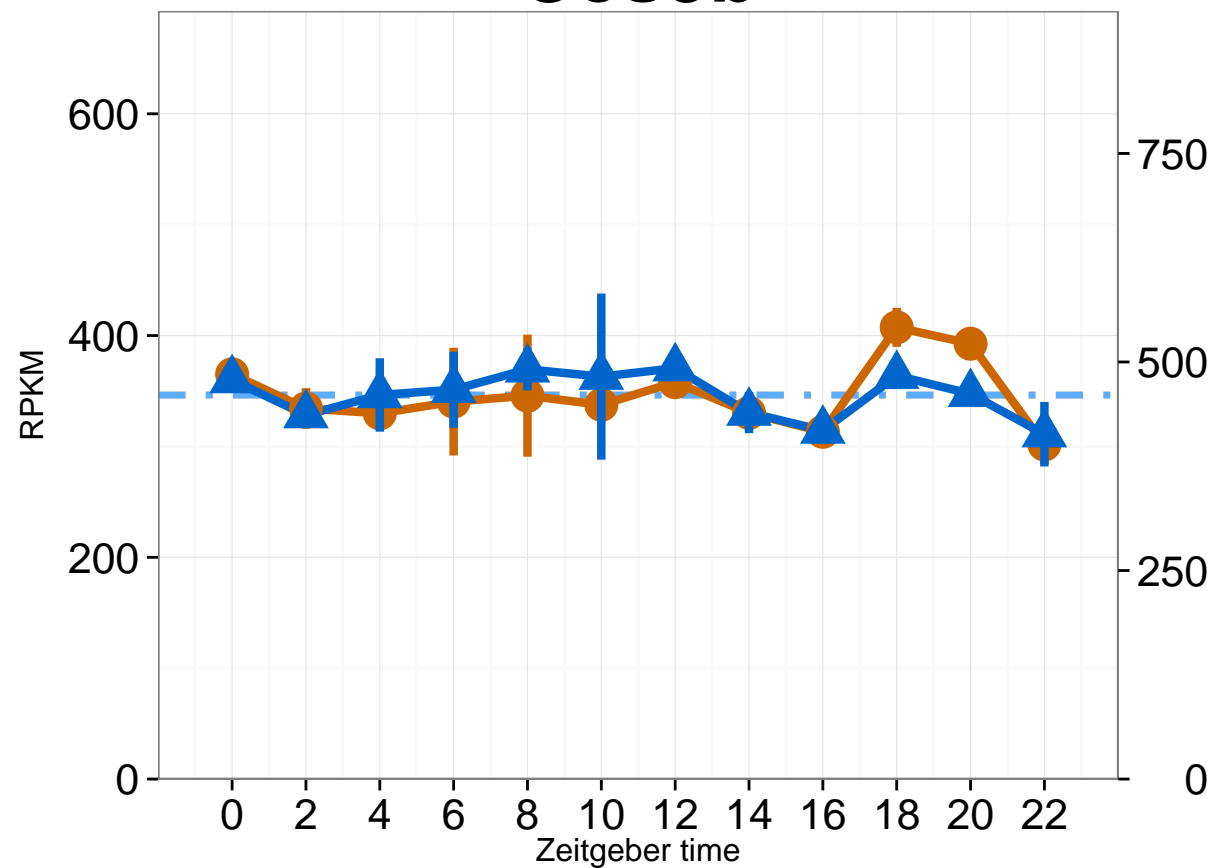

## Ces3b

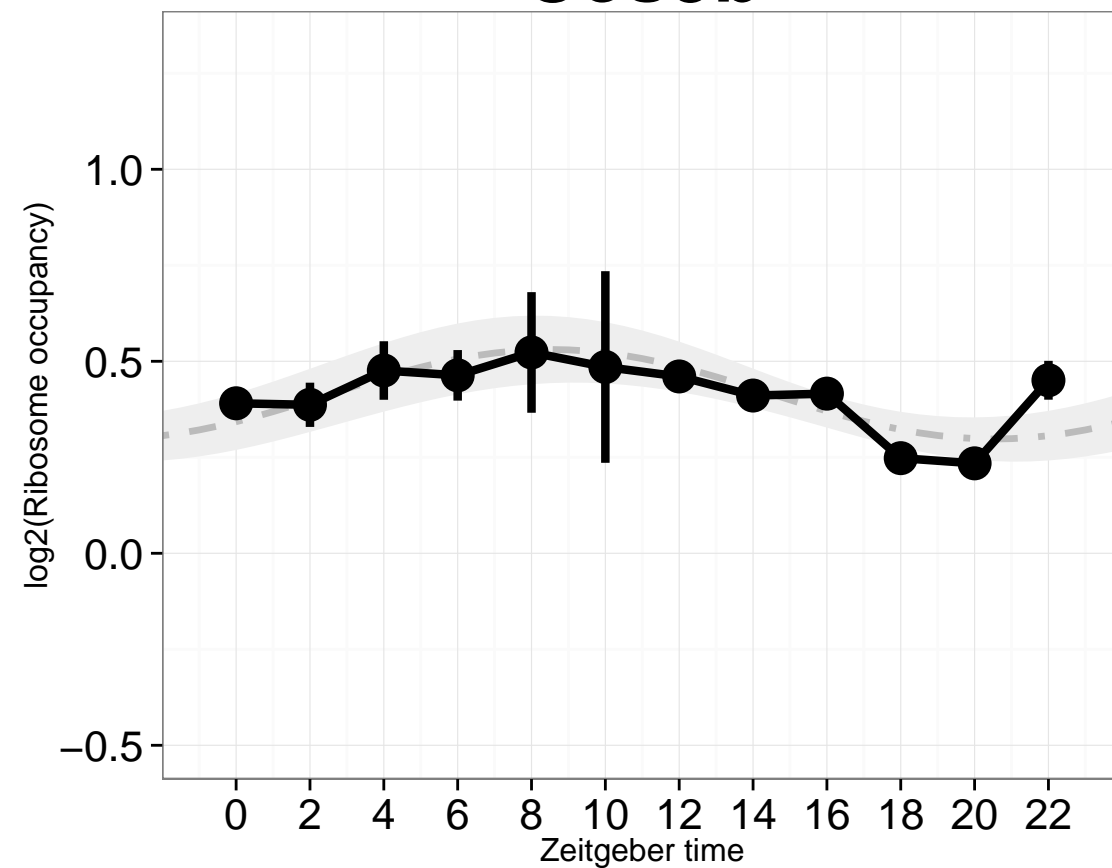

Supplement: SuppDataset_1.zip [file Ces3b_set_A.pdf › Supplemental Dataset 1/A-mRNA_nonrhyth_translation_nonrhyth/Ces3b_set_A.pdf]

# Ces4a

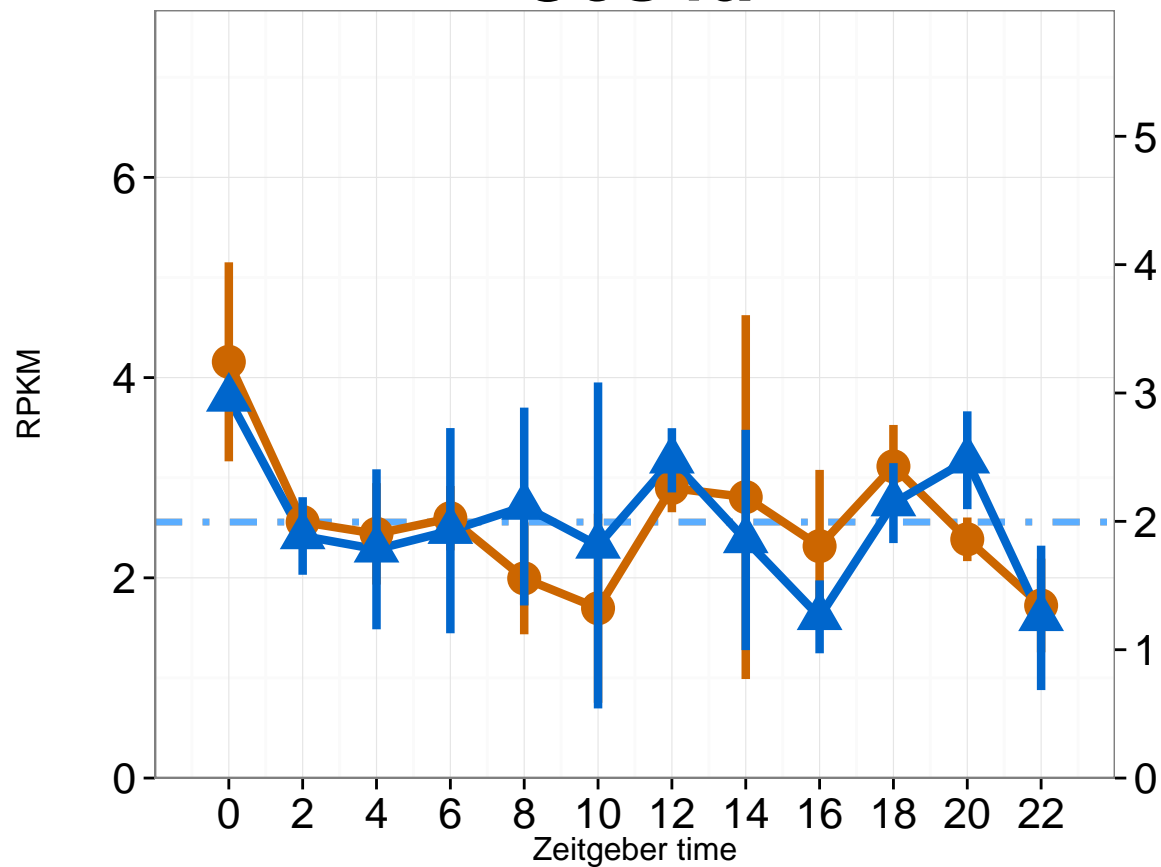

# Ces4a

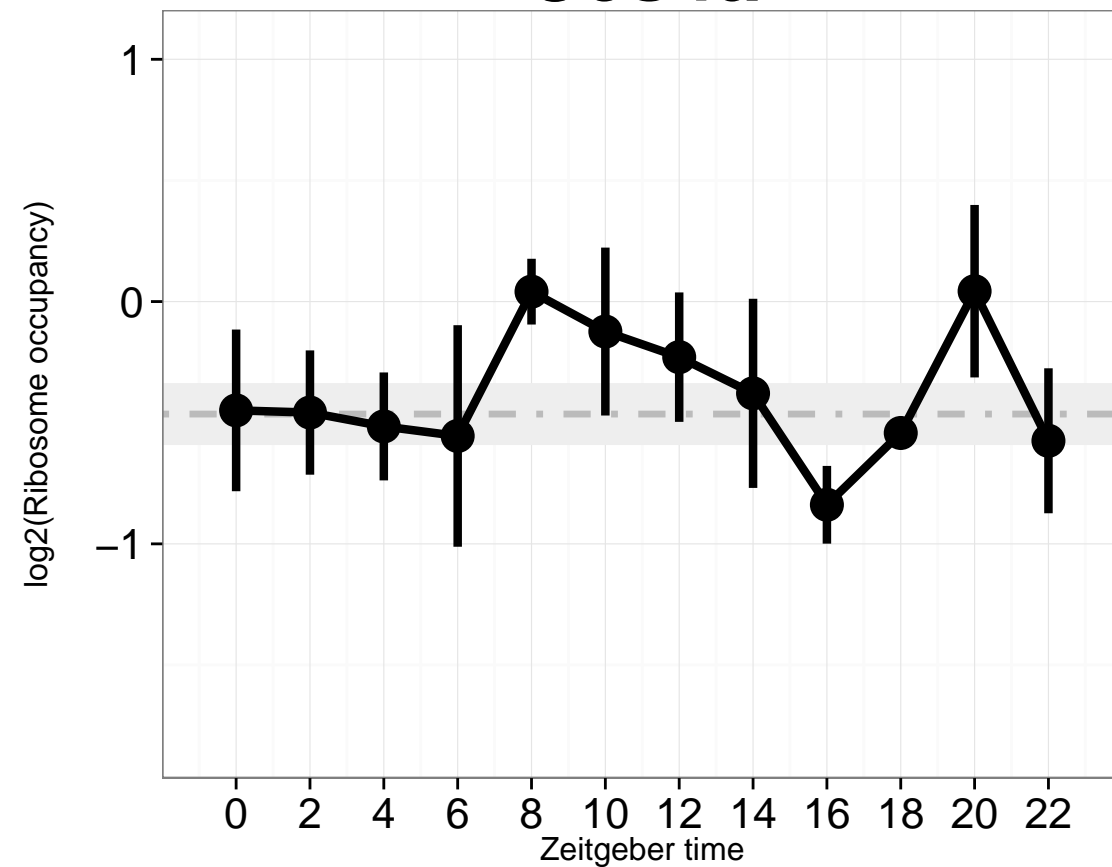

Supplement: SuppDataset_1.zip [file Ces4a_set_A.pdf › Supplemental Dataset 1/A-mRNA_nonrhyth_translation_nonrhyth/Ces4a_set_A.pdf]

# Cetn2

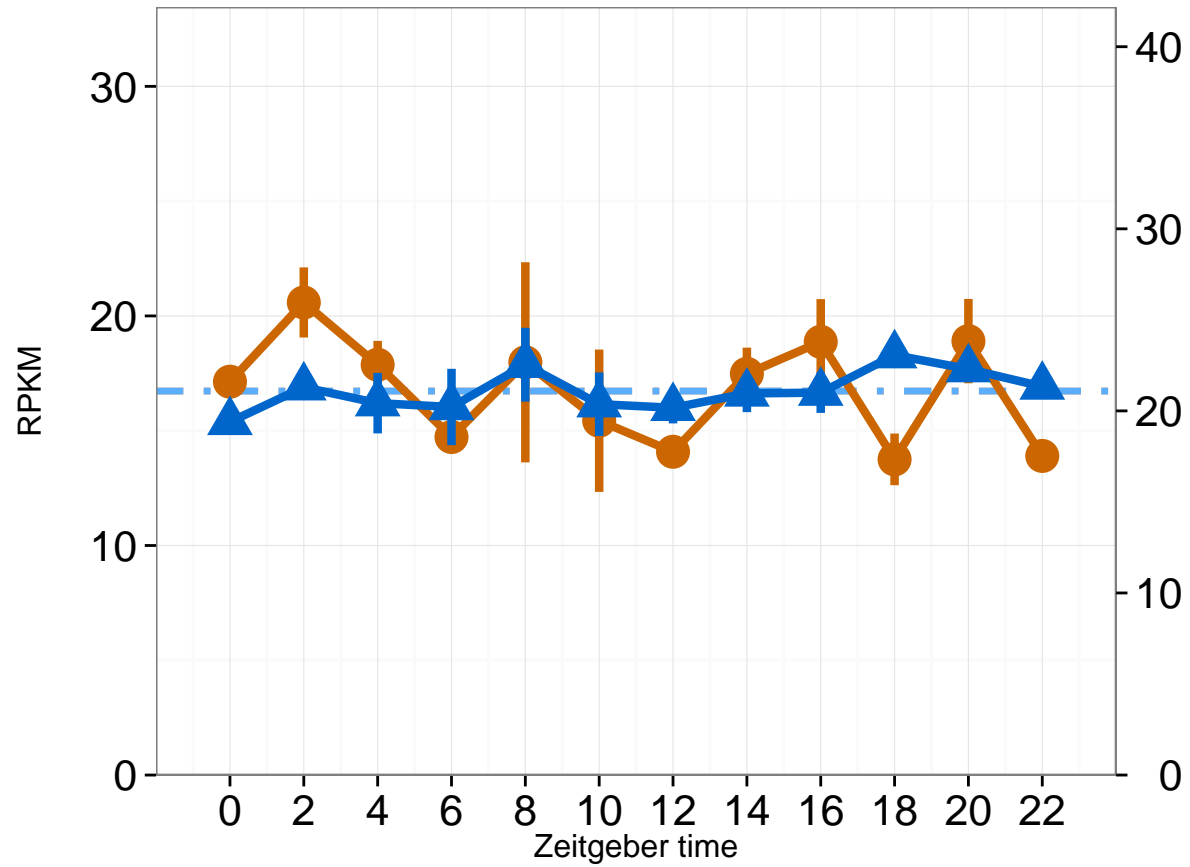

# Cetn2

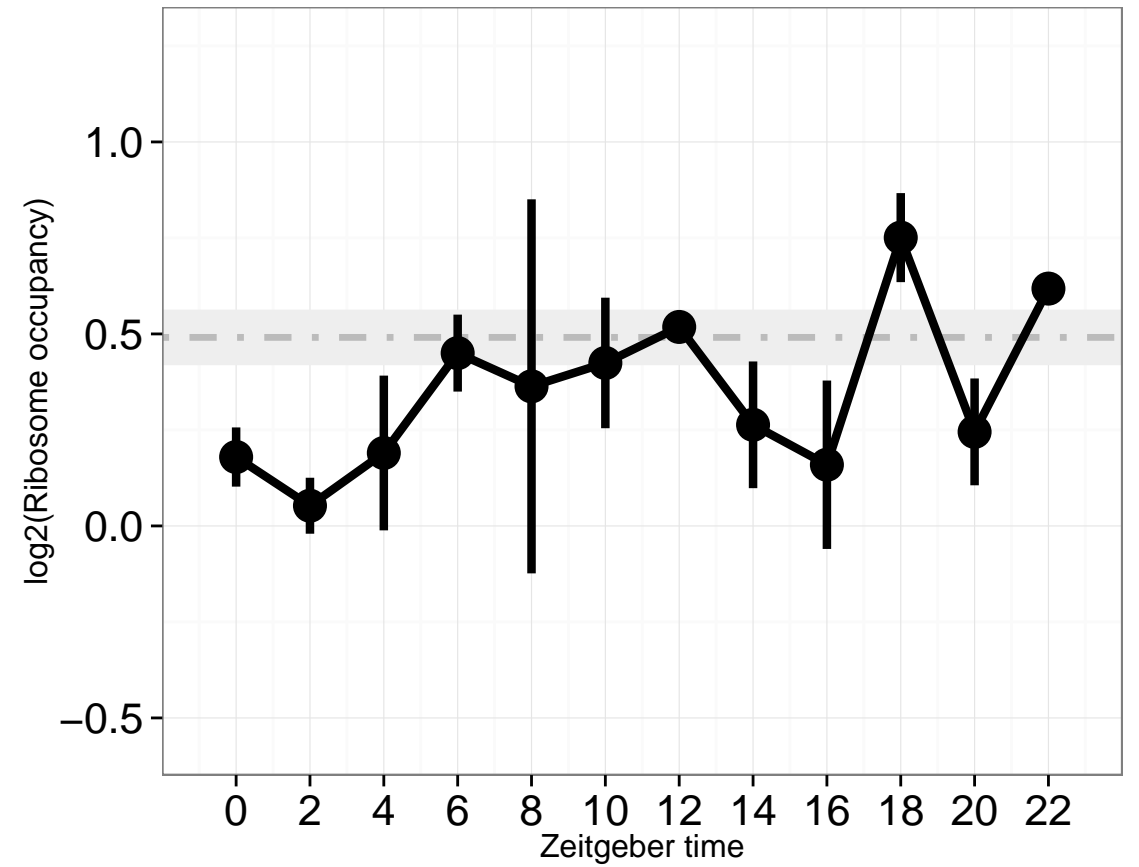

Supplement: SuppDataset_1.zip [file Cetn2_set_A.pdf › Supplemental Dataset 1/A-mRNA_nonrhyth_translation_nonrhyth/Cetn2_set_A.pdf]

# Cetn3

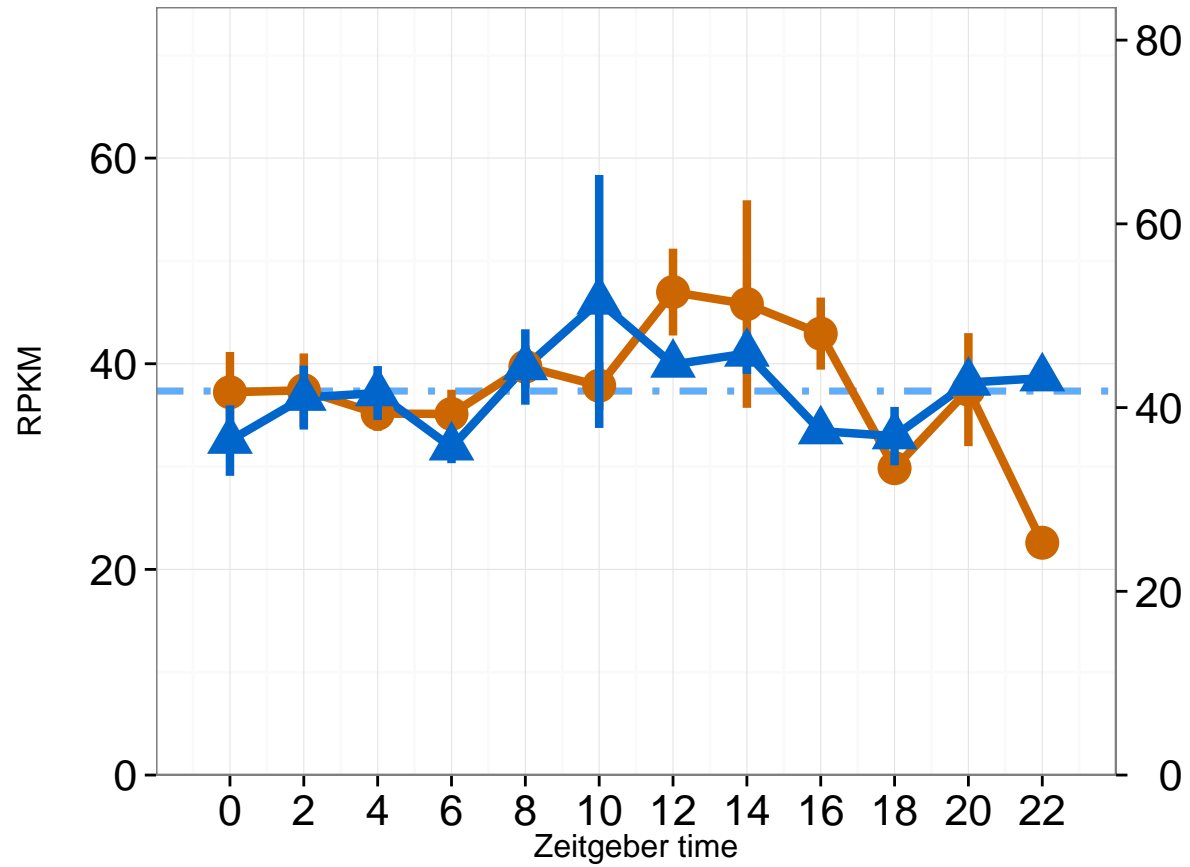

# Cetn3

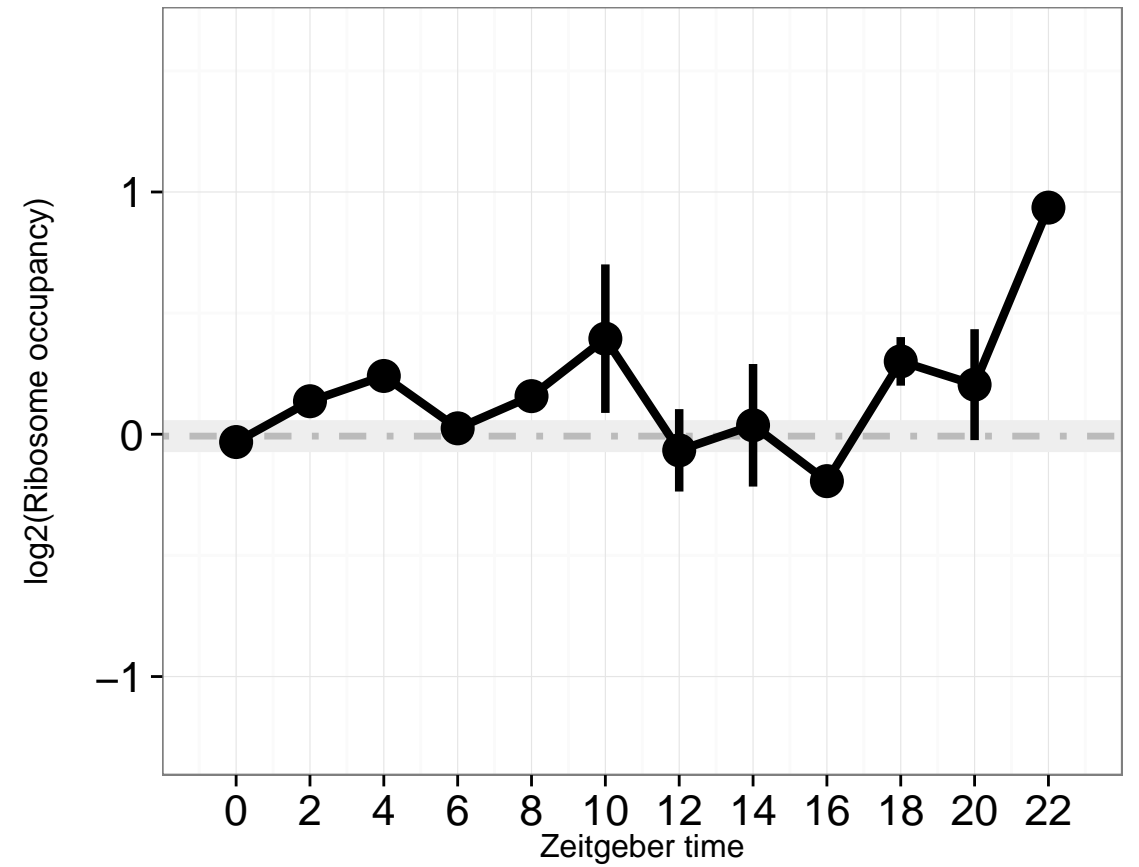

Supplement: SuppDataset_1.zip [file Cetn3_set_A.pdf › Supplemental Dataset 1/A-mRNA_nonrhyth_translation_nonrhyth/Cetn3_set_A.pdf]

## Cfd

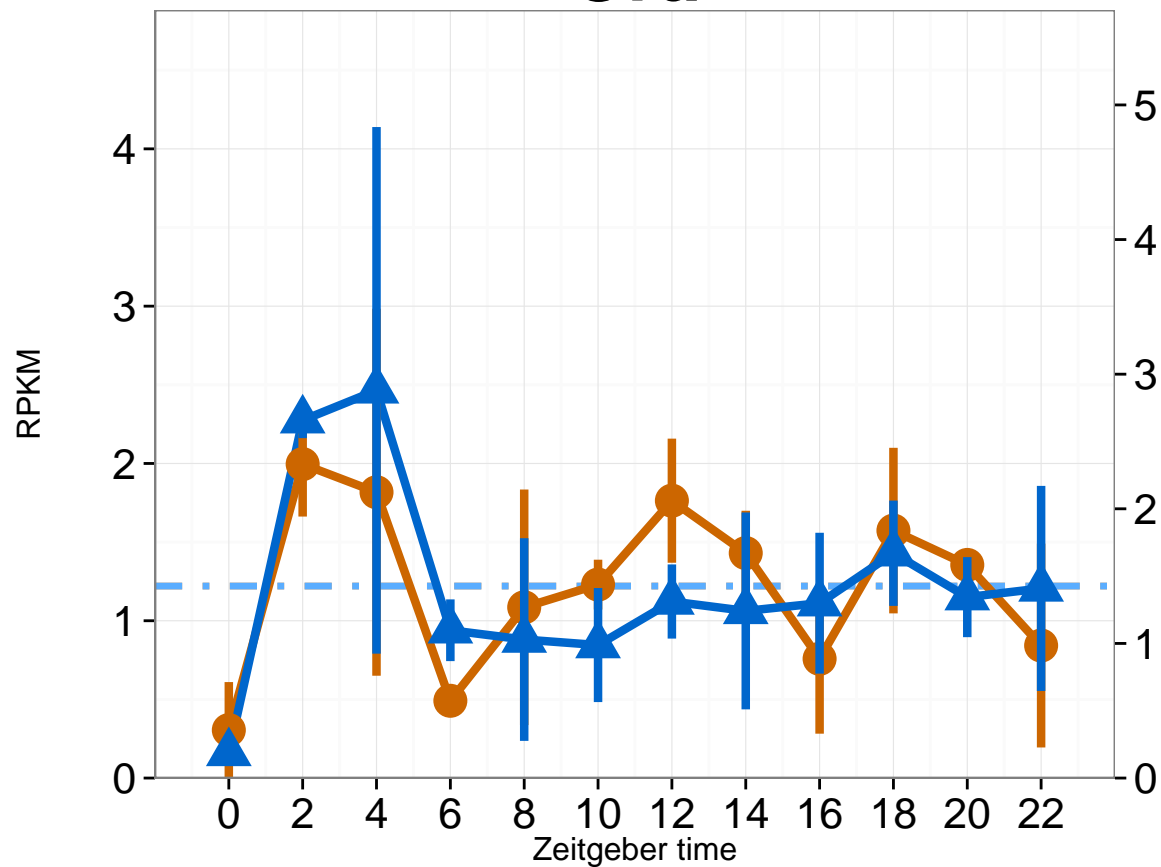

## Cfd

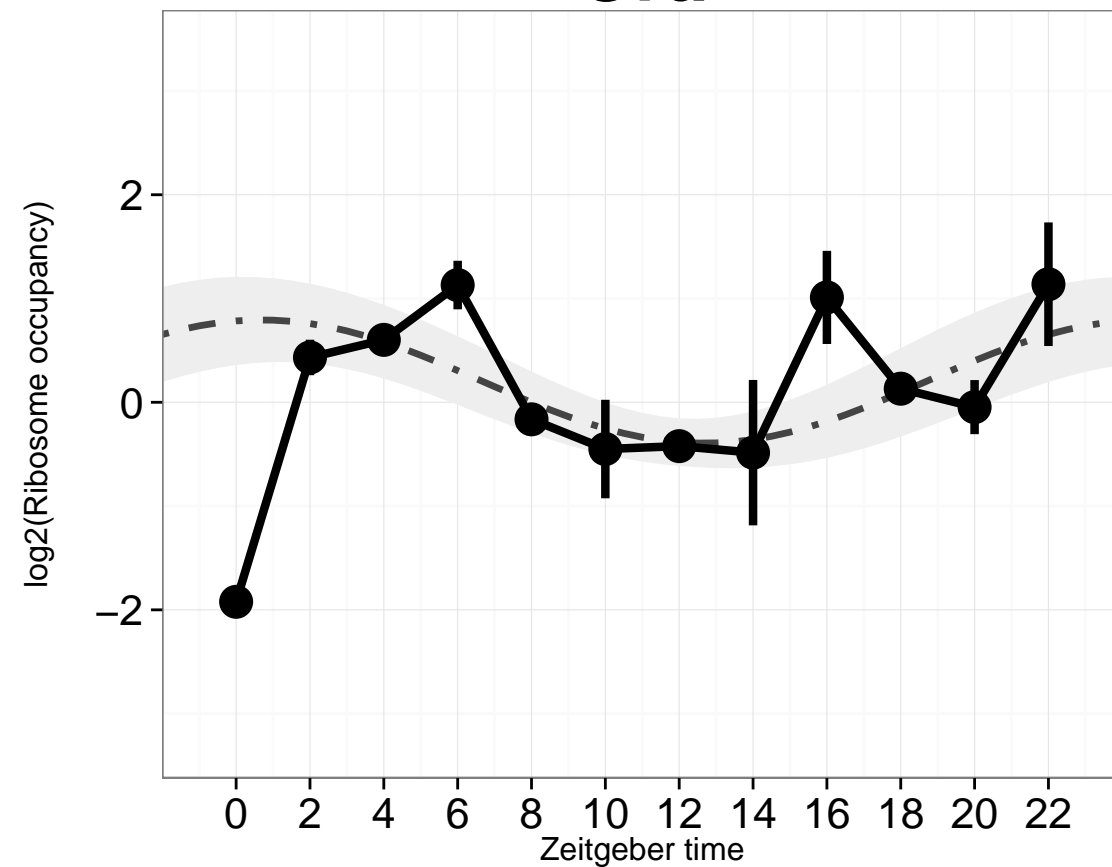

Supplement: SuppDataset_1.zip [file Cfd_set_A.pdf › Supplemental Dataset 1/A-mRNA_nonrhyth_translation_nonrhyth/Cfd_set_A.pdf]

# Cfdp1

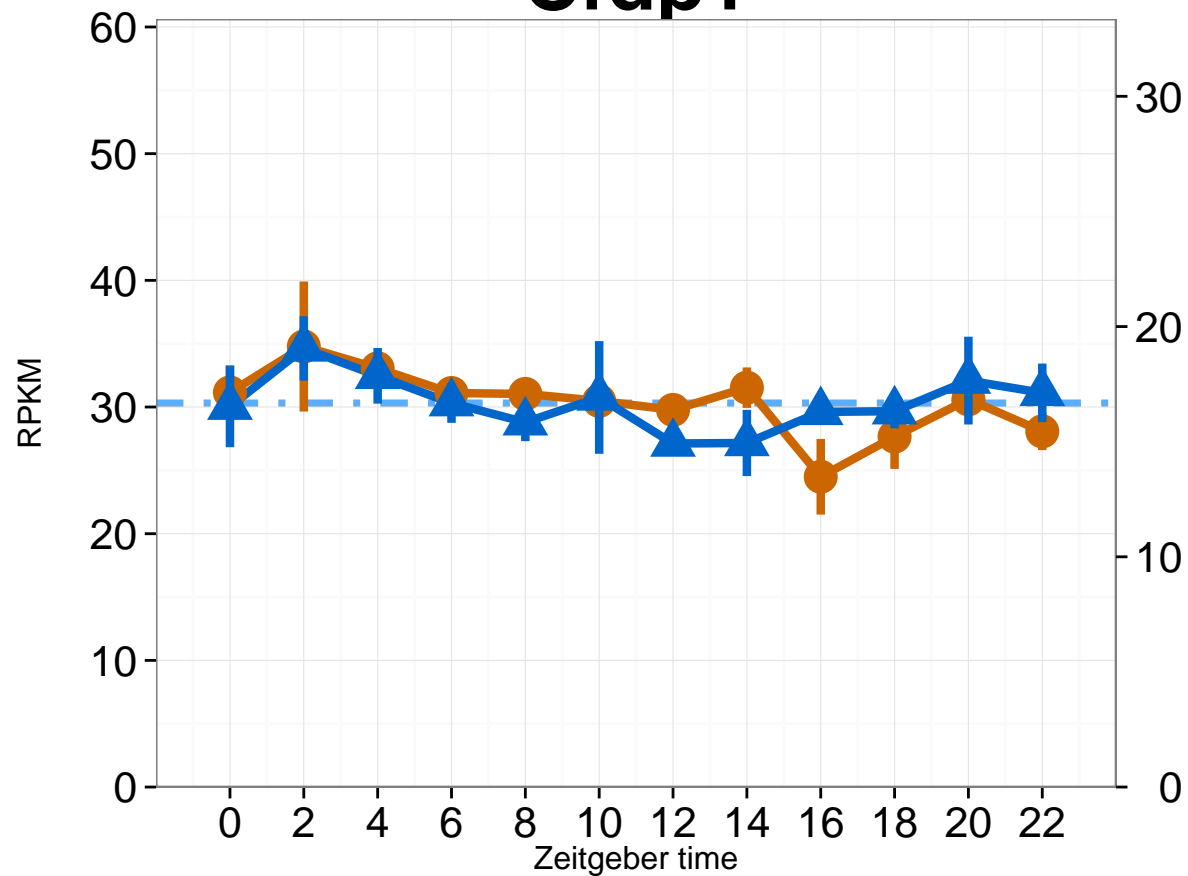

# Cfdp1

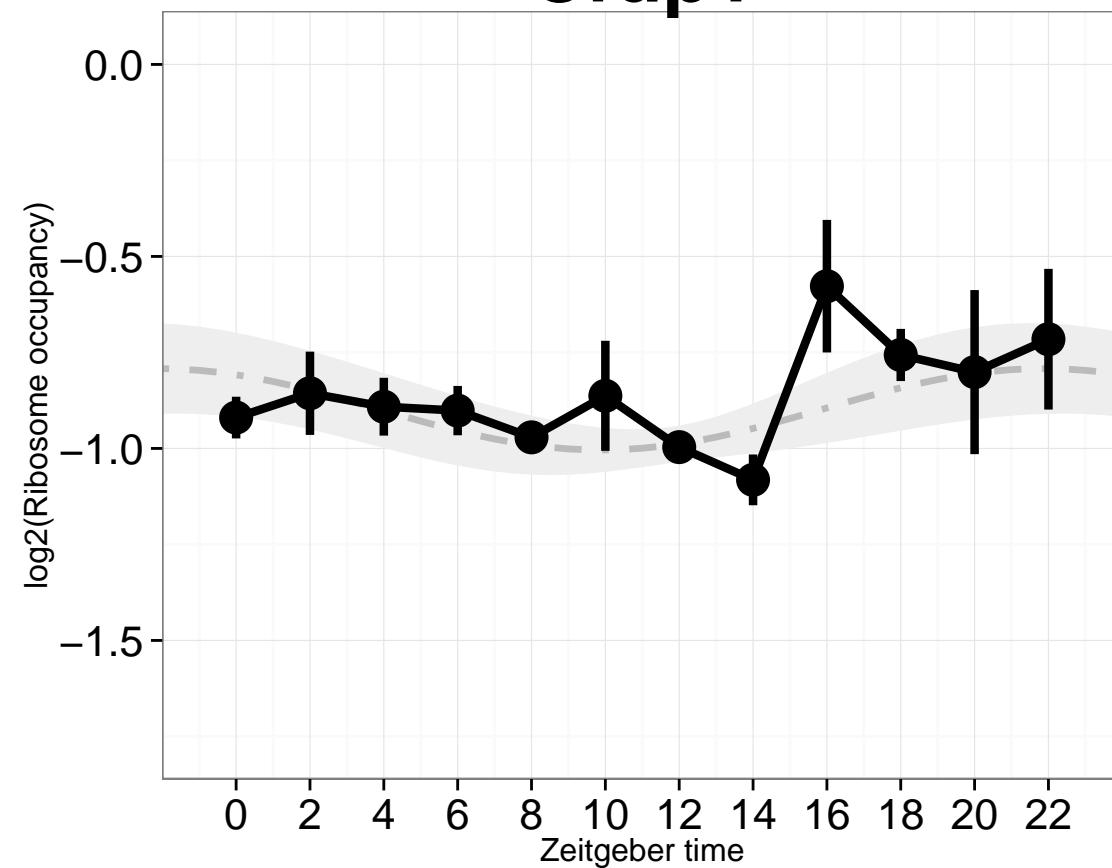

Supplement: SuppDataset_1.zip [file Cfdp1_set_A.pdf › Supplemental Dataset 1/A-mRNA_nonrhyth_translation_nonrhyth/Cfdp1_set_A.pdf]

## Cfhr1

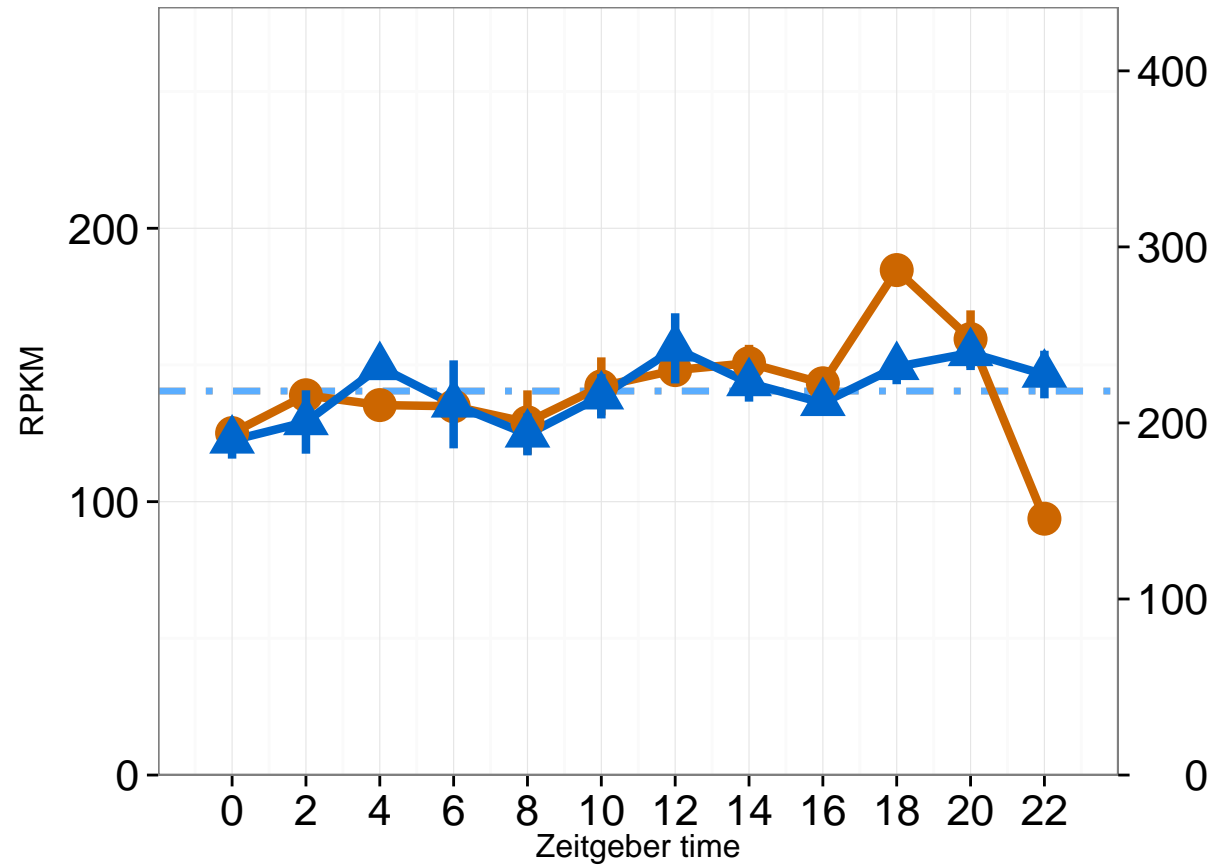

## Cfhr1

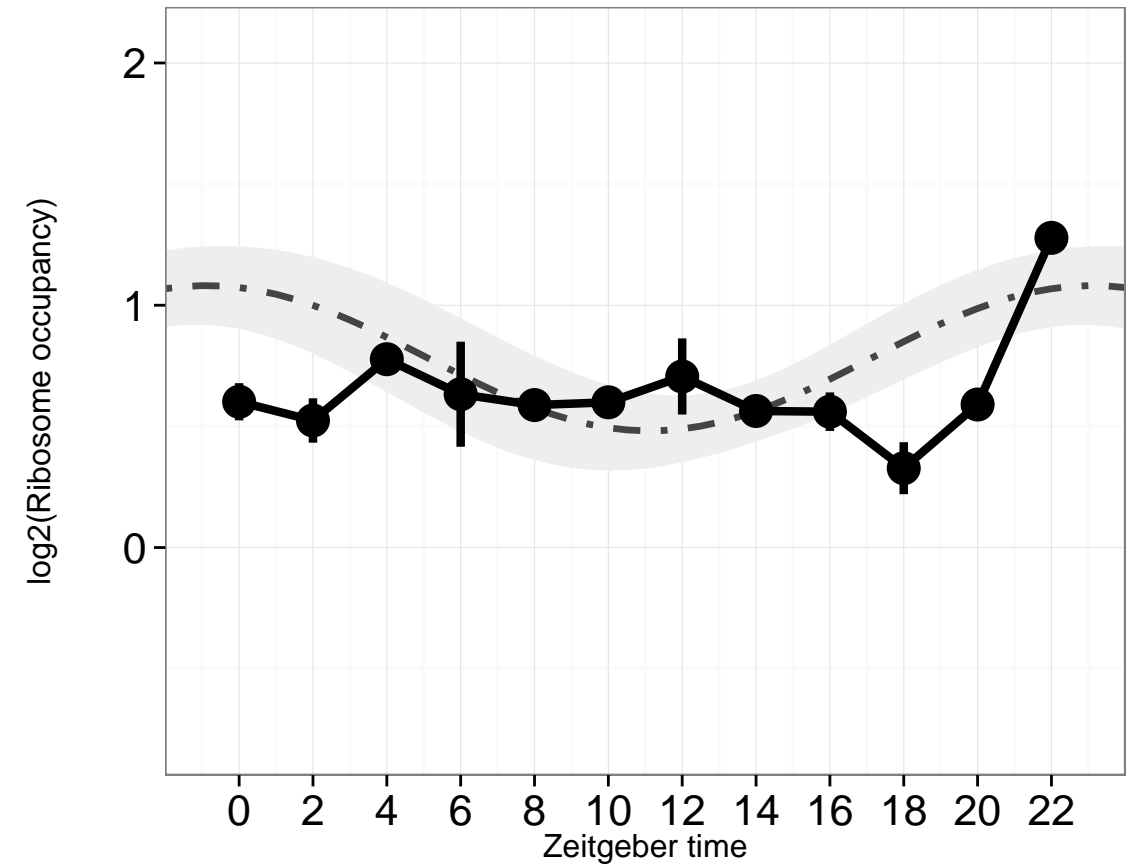

Supplement: SuppDataset_1.zip [file Cfhr1_set_A.pdf › Supplemental Dataset 1/A-mRNA_nonrhyth_translation_nonrhyth/Cfhr1_set_A.pdf]

# Cfhr2

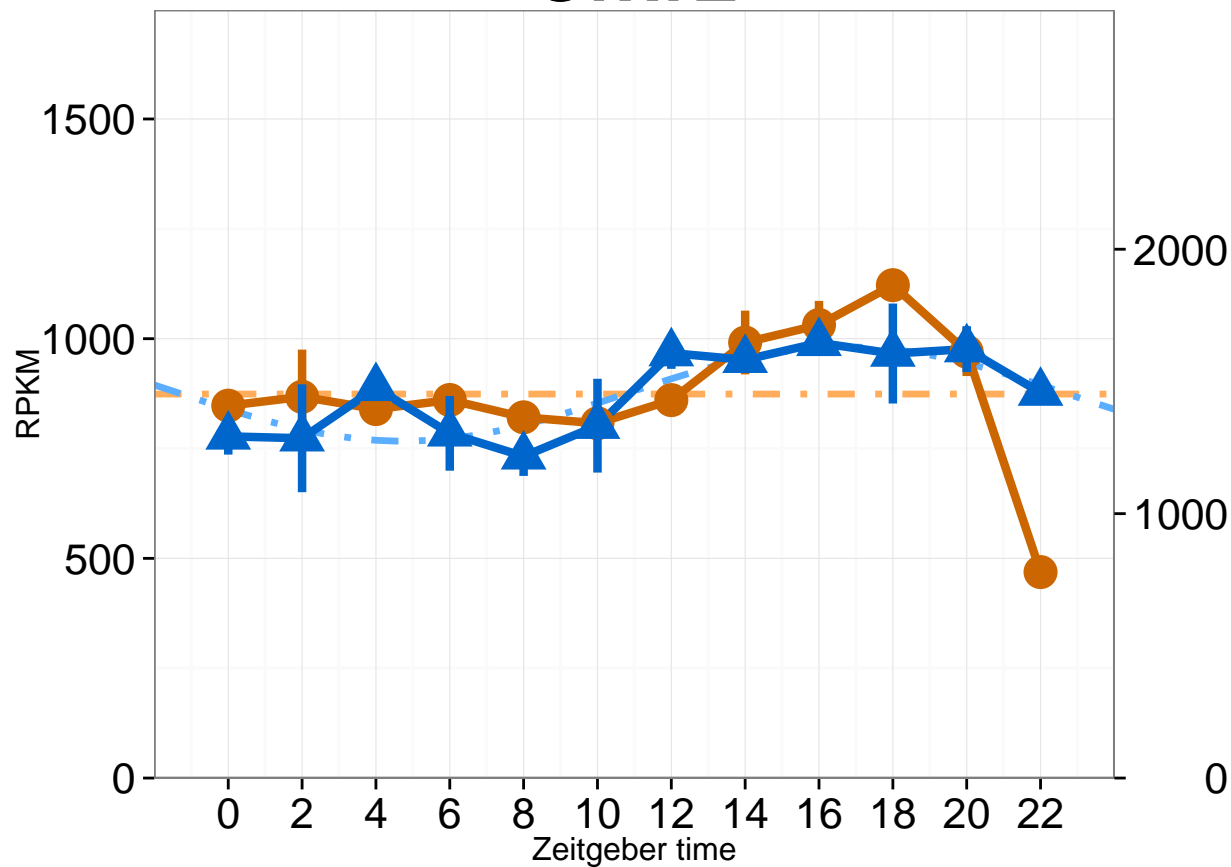

# Cfhr2

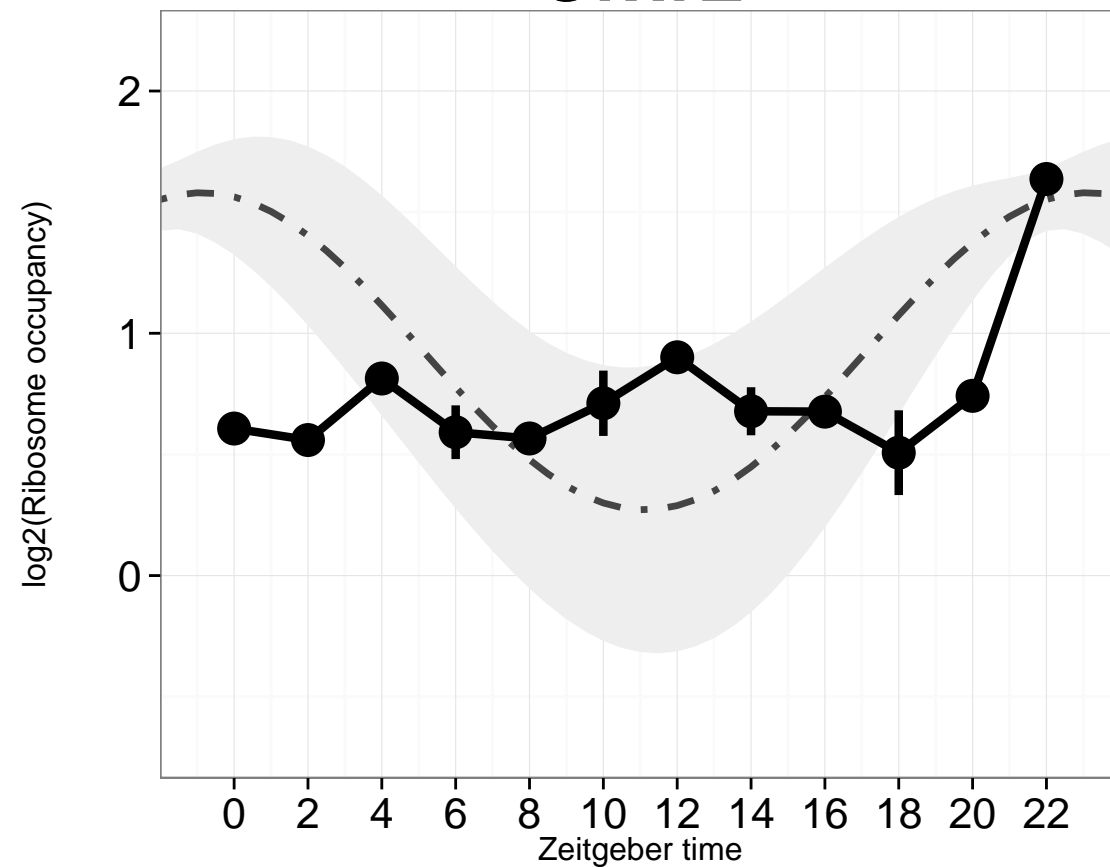

Supplement: SuppDataset_1.zip [file Cfhr2_set_A.pdf › Supplemental Dataset 1/A-mRNA_nonrhyth_translation_nonrhyth/Cfhr2_set_A.pdf]

## Cfl1

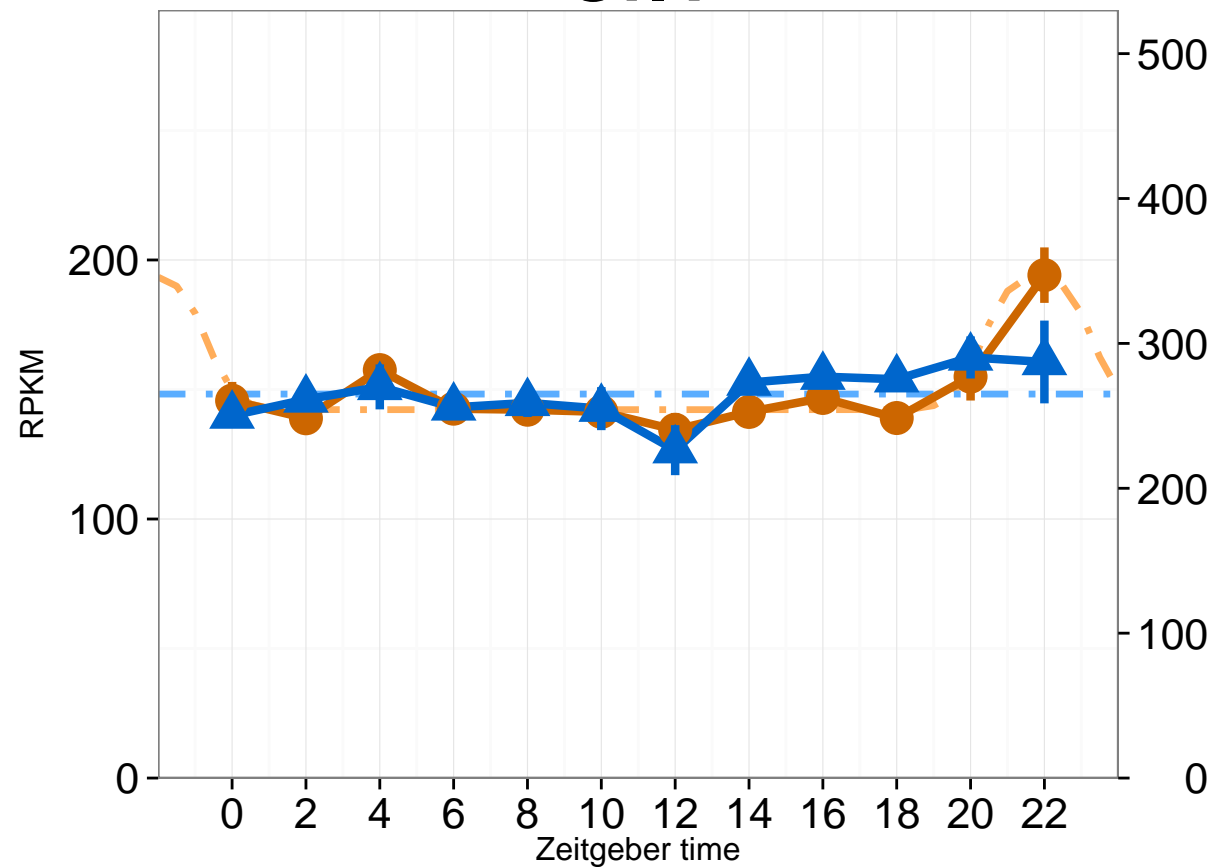

## Cfl1

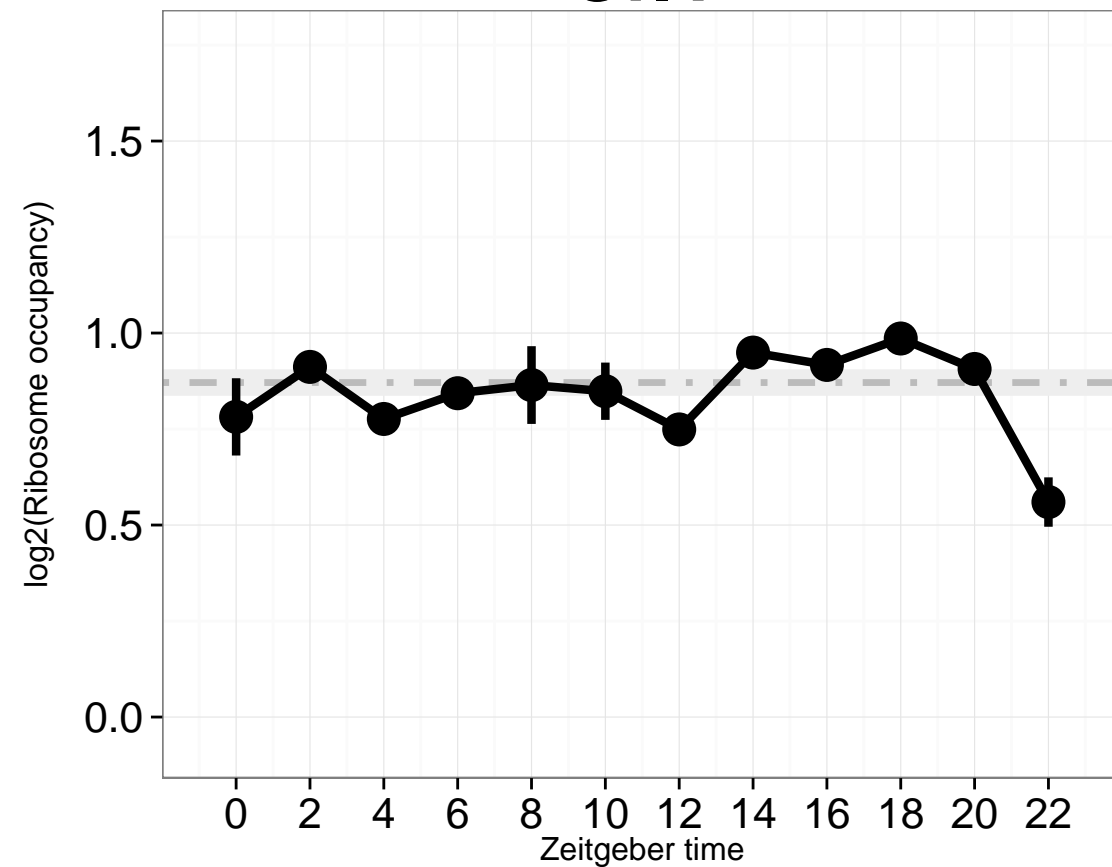

Supplement: SuppDataset_1.zip [file Cfl1_set_A.pdf › Supplemental Dataset 1/A-mRNA_nonrhyth_translation_nonrhyth/Cfl1_set_A.pdf]

## Cfl2

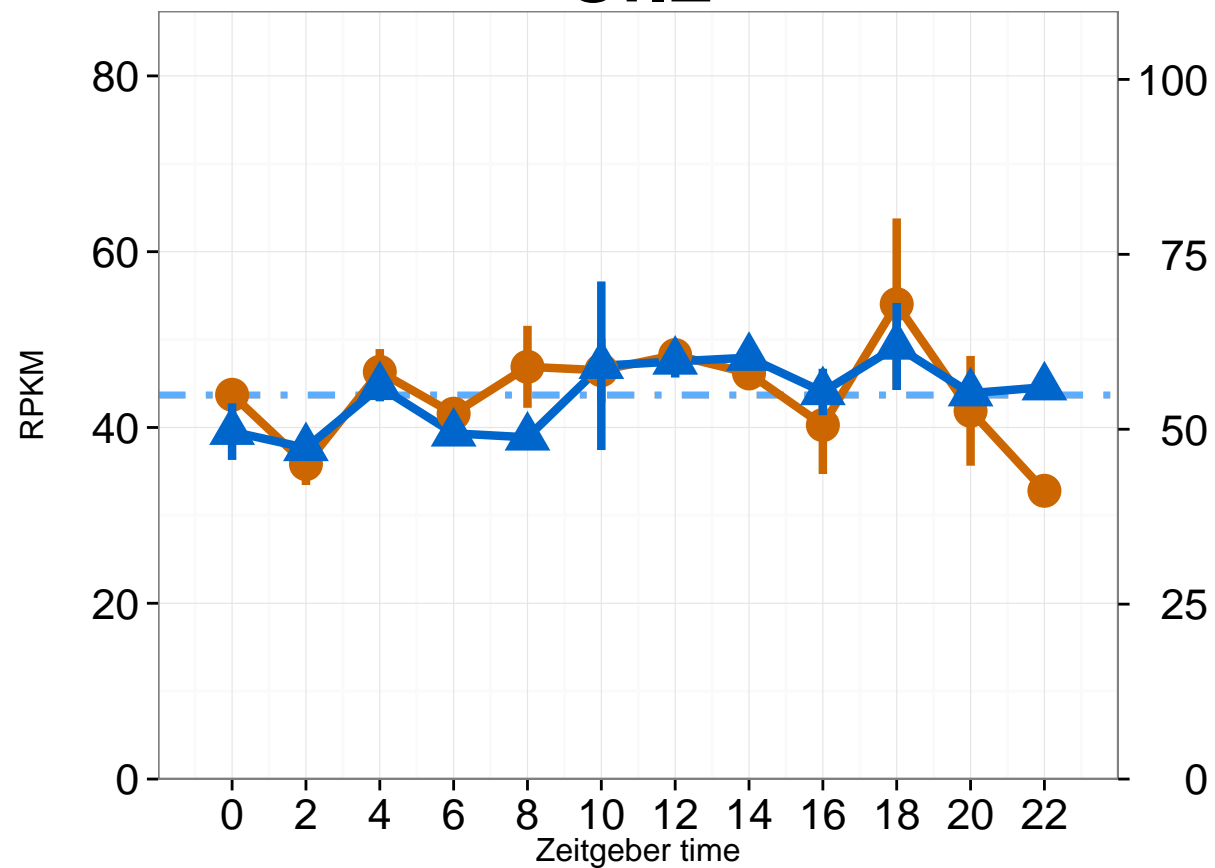

## Cfl2

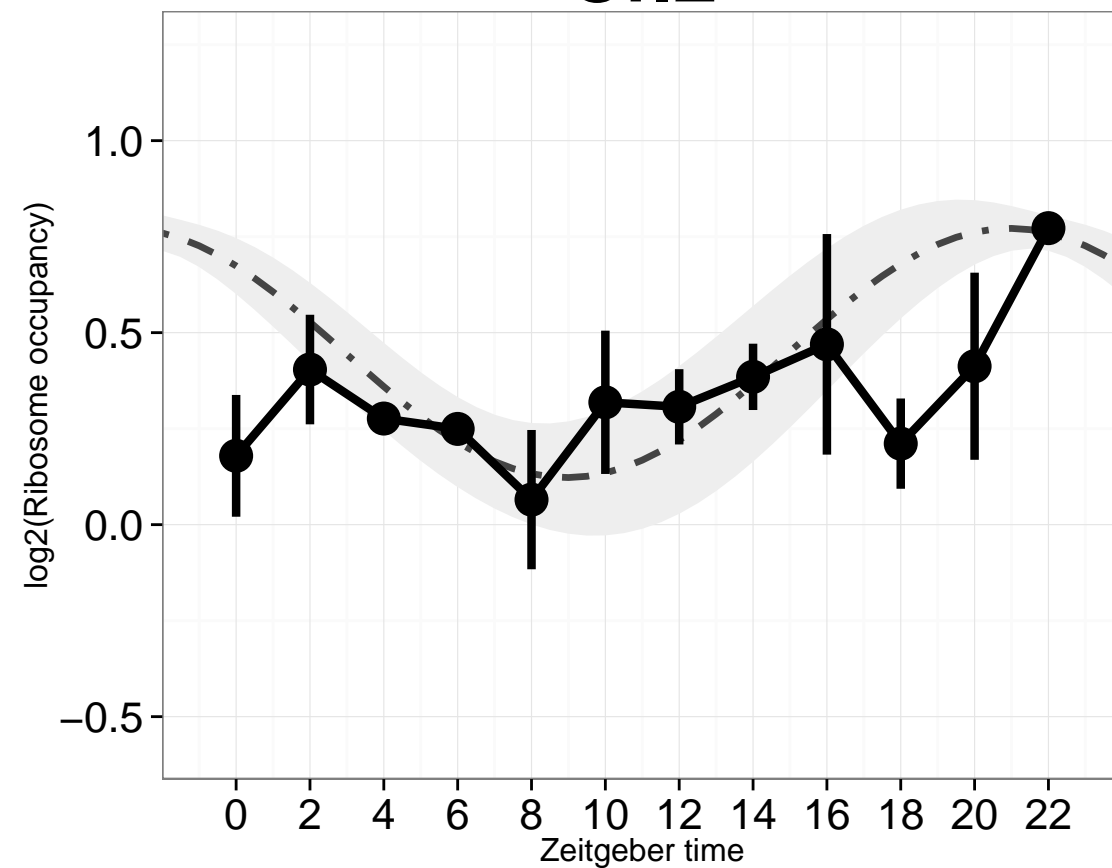

Supplement: SuppDataset_1.zip [file Cfl2_set_A.pdf › Supplemental Dataset 1/A-mRNA_nonrhyth_translation_nonrhyth/Cfl2_set_A.pdf]

## Cfp

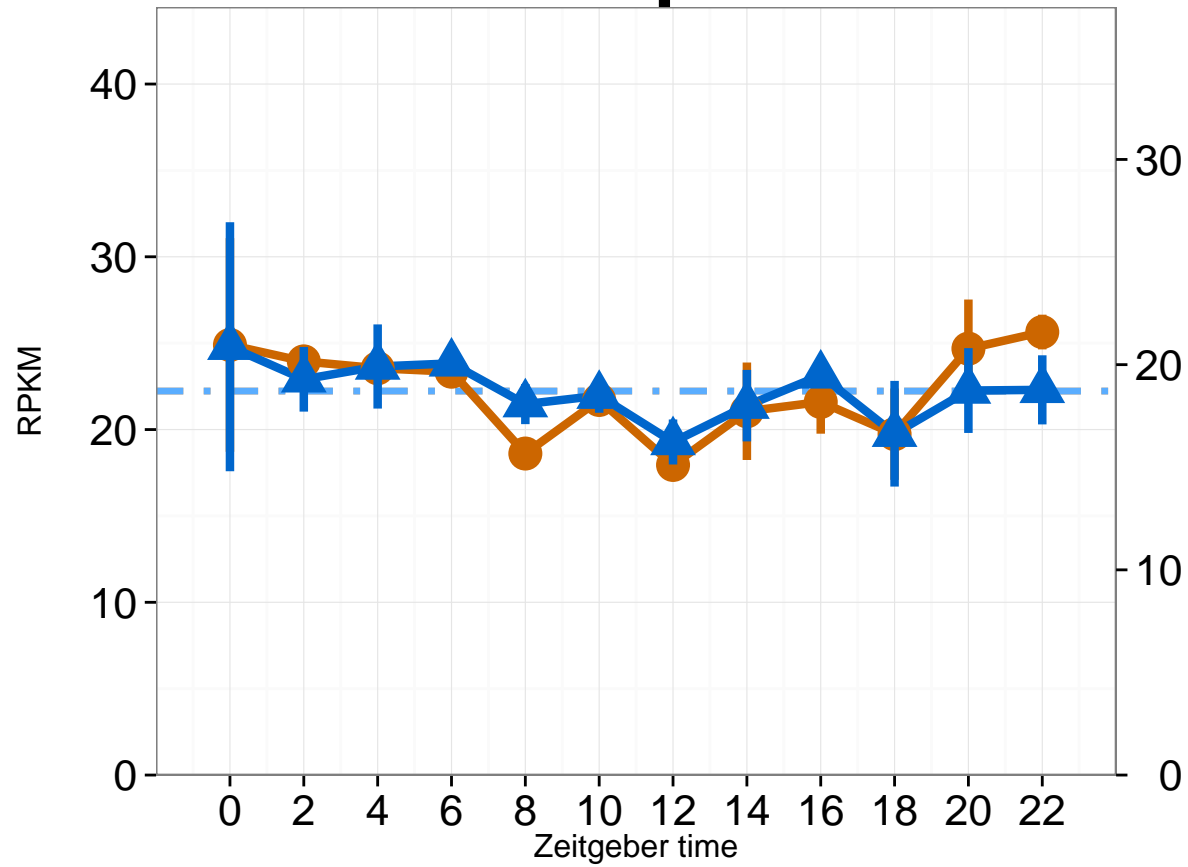

## Cfp

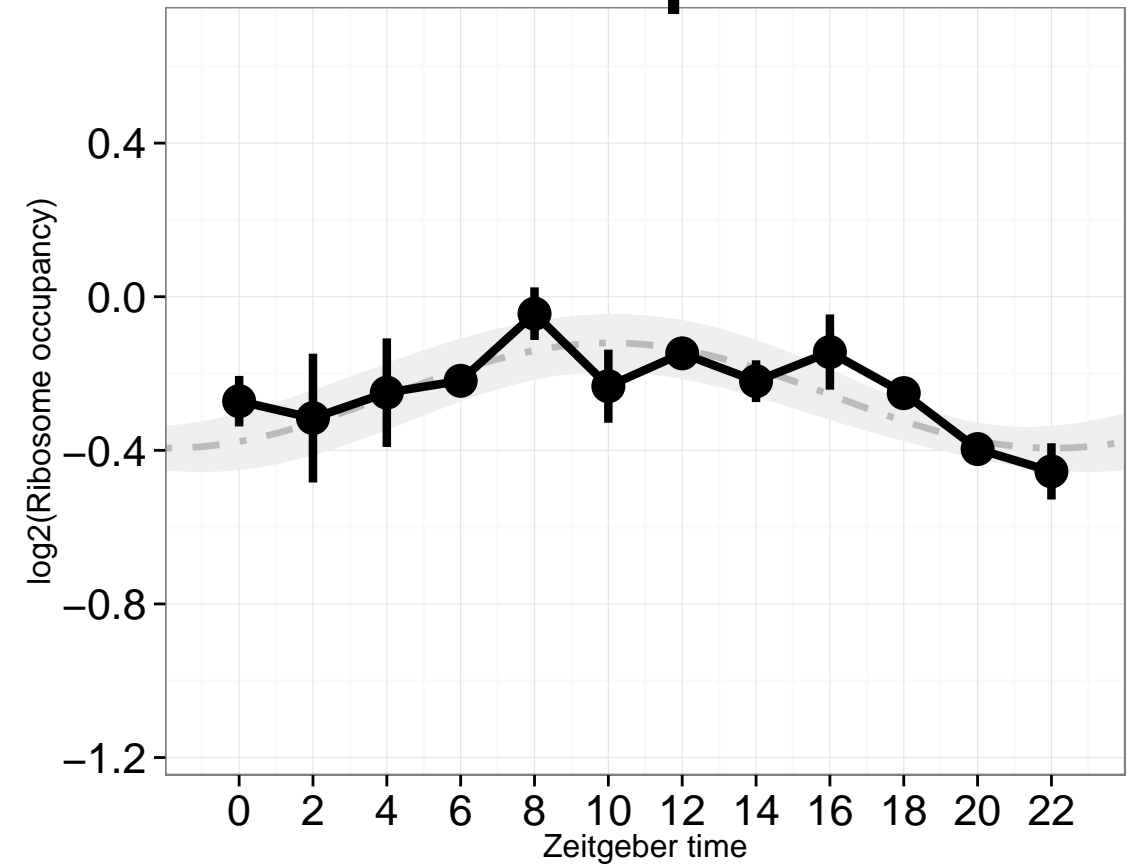

Supplement: SuppDataset_1.zip [file Cfp_set_A.pdf › Supplemental Dataset 1/A-mRNA_nonrhyth_translation_nonrhyth/Cfp_set_A.pdf]

# Cggbp1

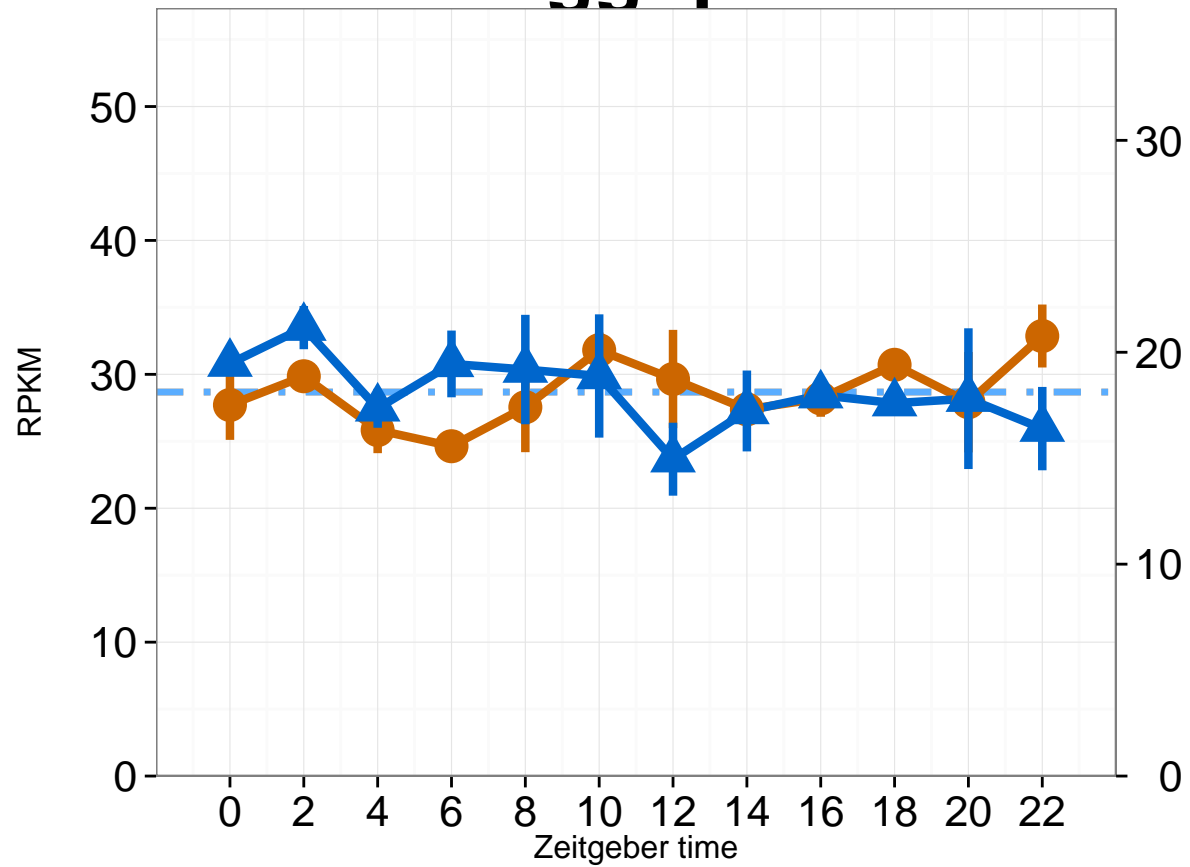

# Cggbp1

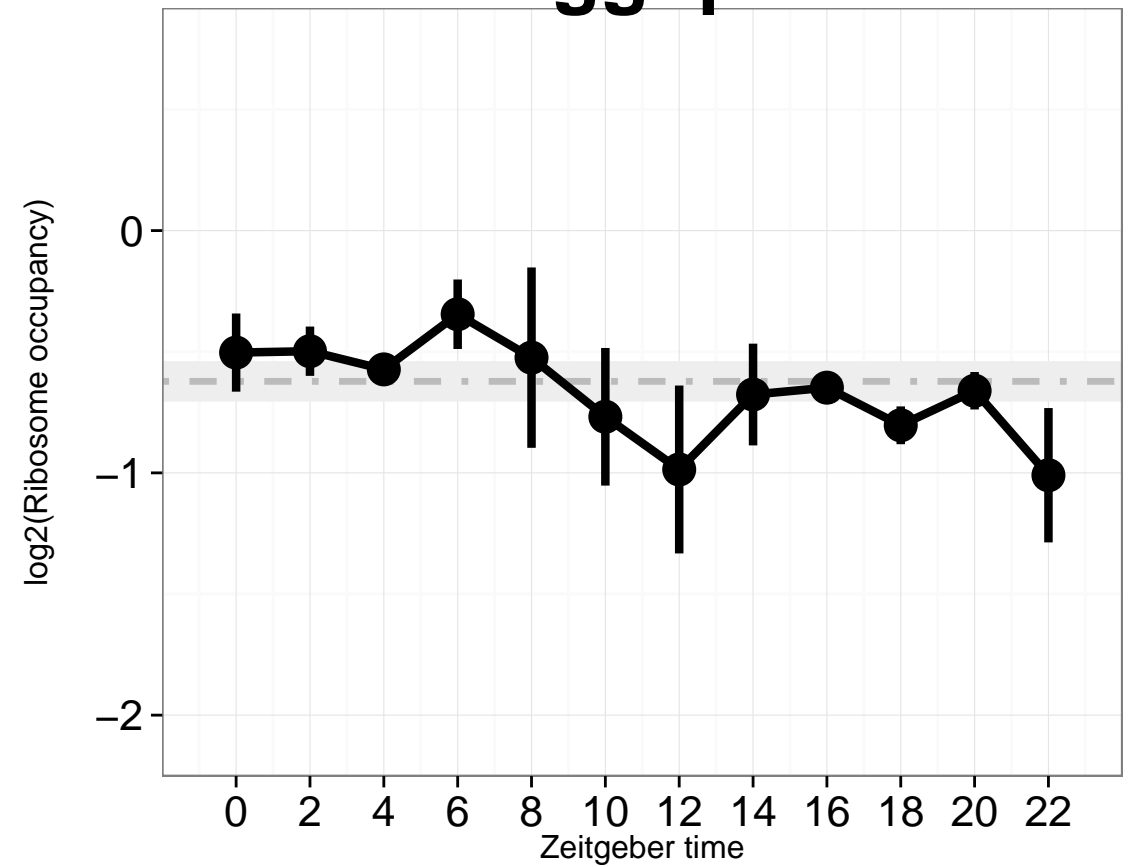

Supplement: SuppDataset_1.zip [file Cggbp1_set_A.pdf › Supplemental Dataset 1/A-mRNA_nonrhyth_translation_nonrhyth/Cggbp1_set_A.pdf]

# Cgnl1

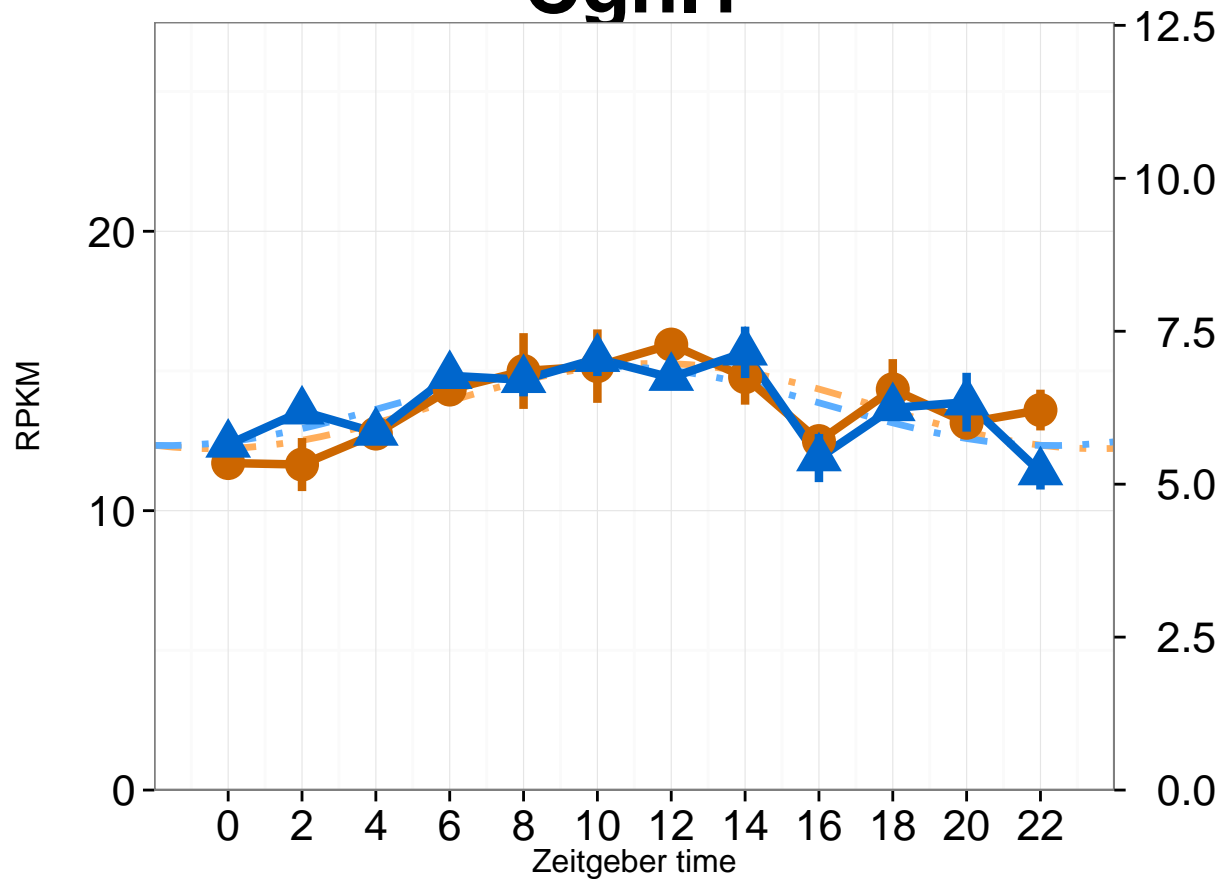

# Cgnl1

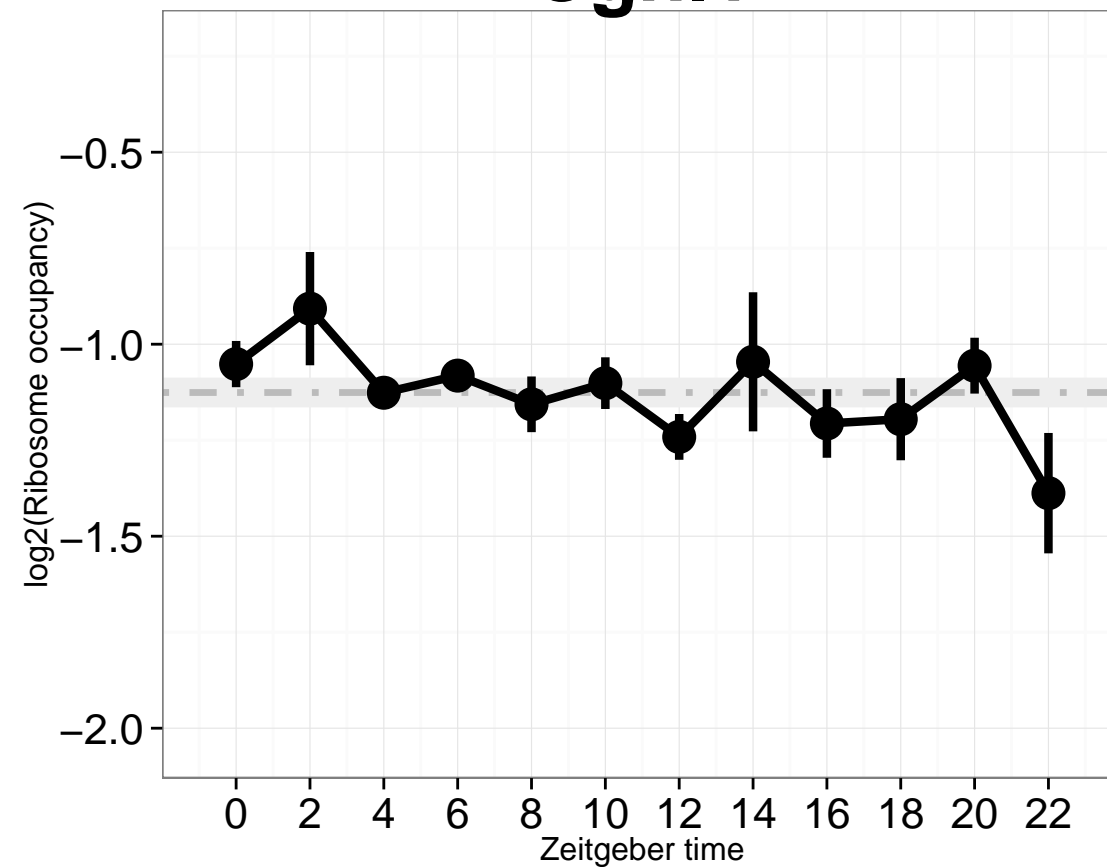

Supplement: SuppDataset_1.zip [file Cgnl1_set_A.pdf › Supplemental Dataset 1/A-mRNA_nonrhyth_translation_nonrhyth/Cgnl1_set_A.pdf]

# Chac1

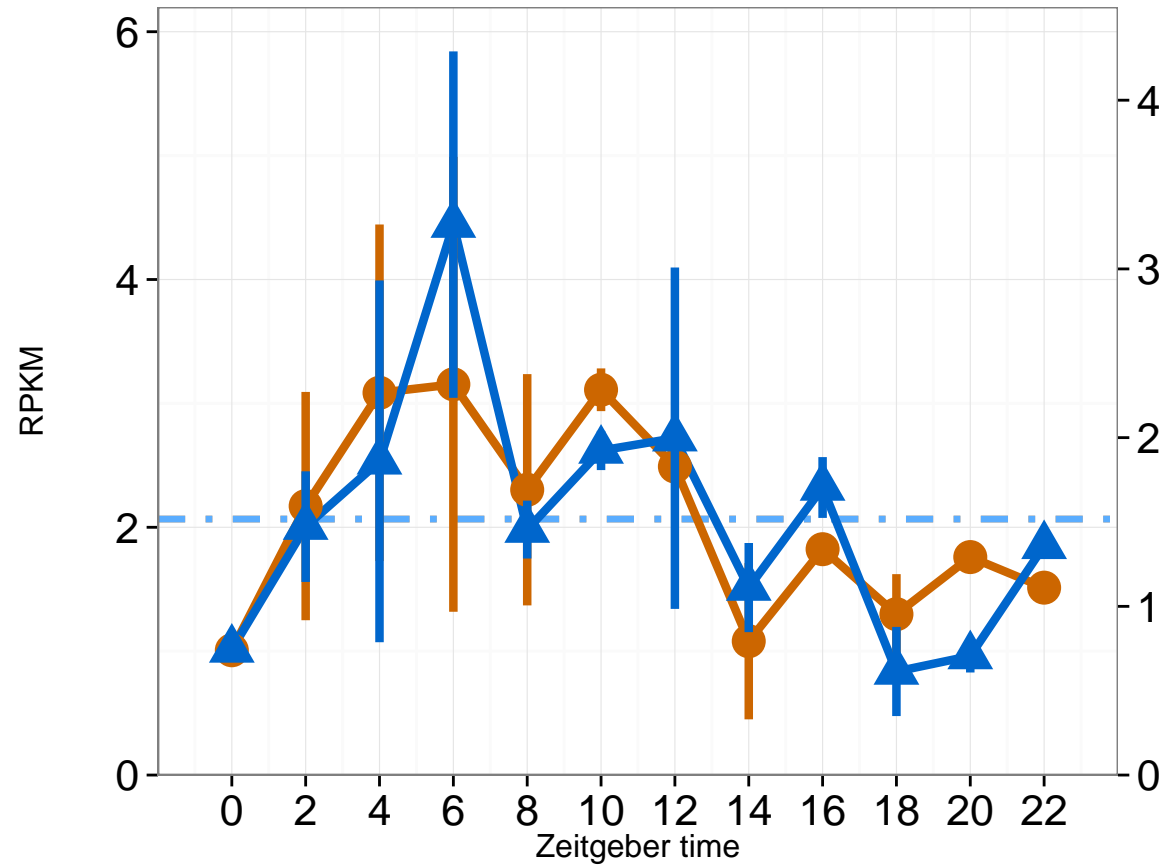

# Chac1

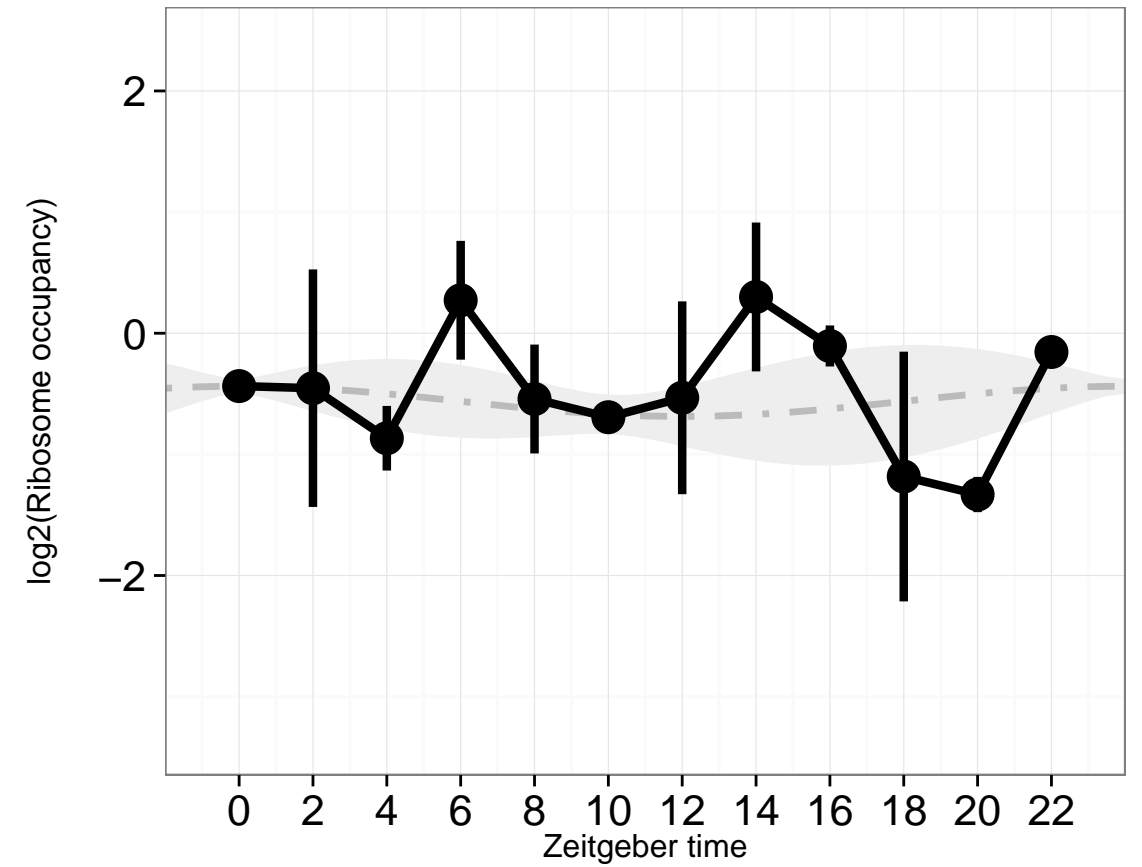

Supplement: SuppDataset_1.zip [file Chac1_set_A.pdf › Supplemental Dataset 1/A-mRNA_nonrhyth_translation_nonrhyth/Chac1_set_A.pdf]

## Chac2

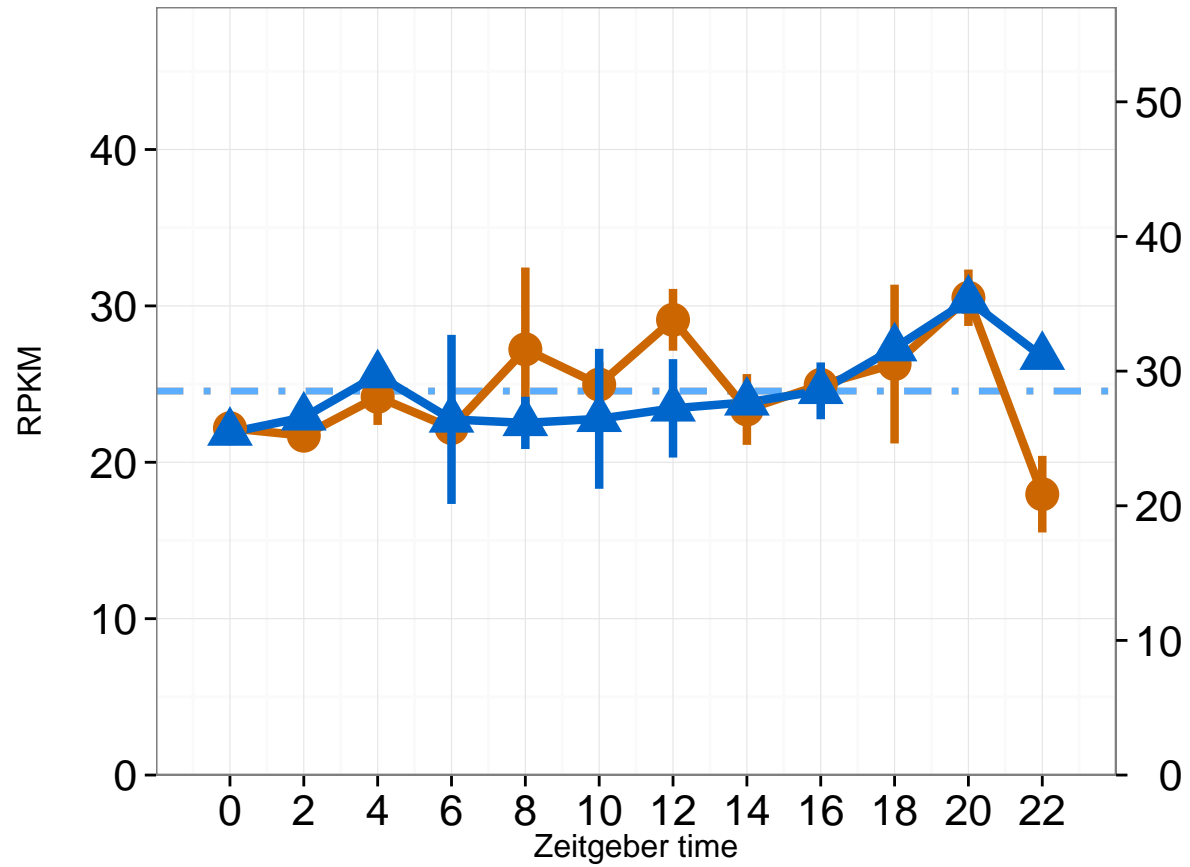

## Chac2

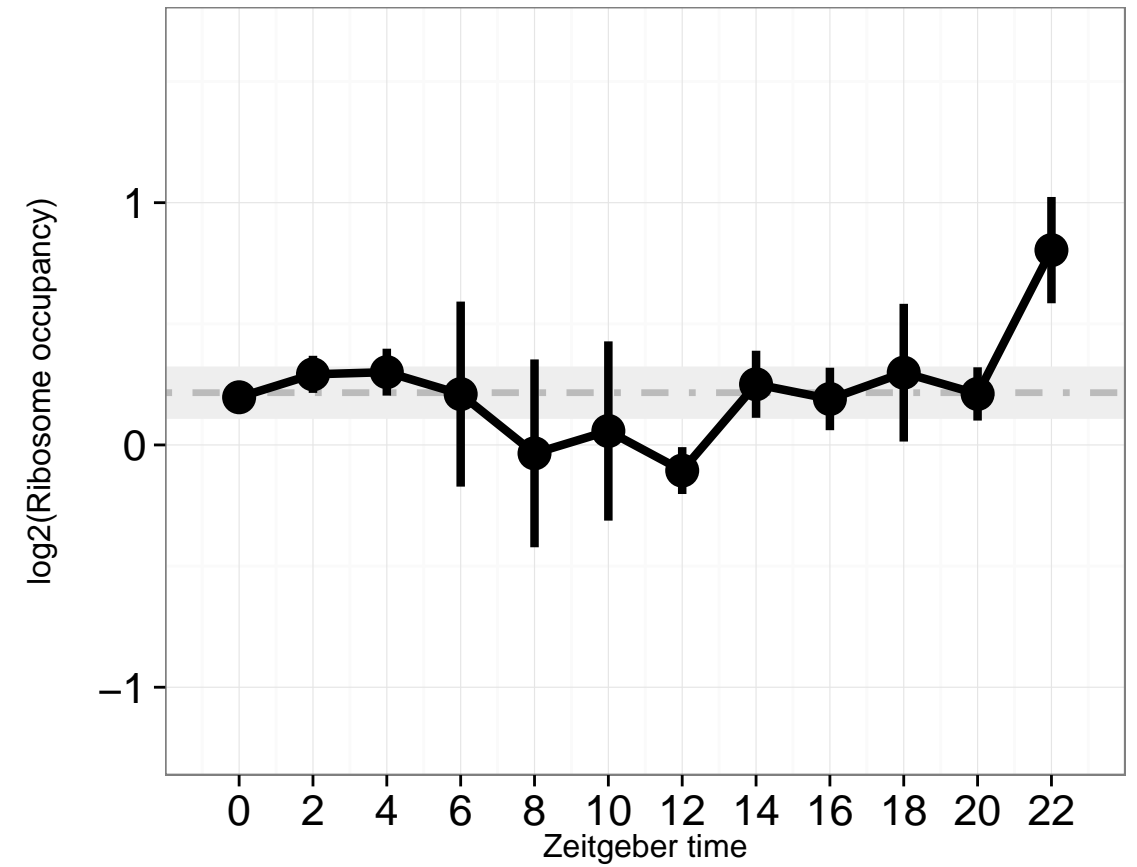

Supplement: SuppDataset_1.zip [file Chac2_set_A.pdf › Supplemental Dataset 1/A-mRNA_nonrhyth_translation_nonrhyth/Chac2_set_A.pdf]

# Chaf1a

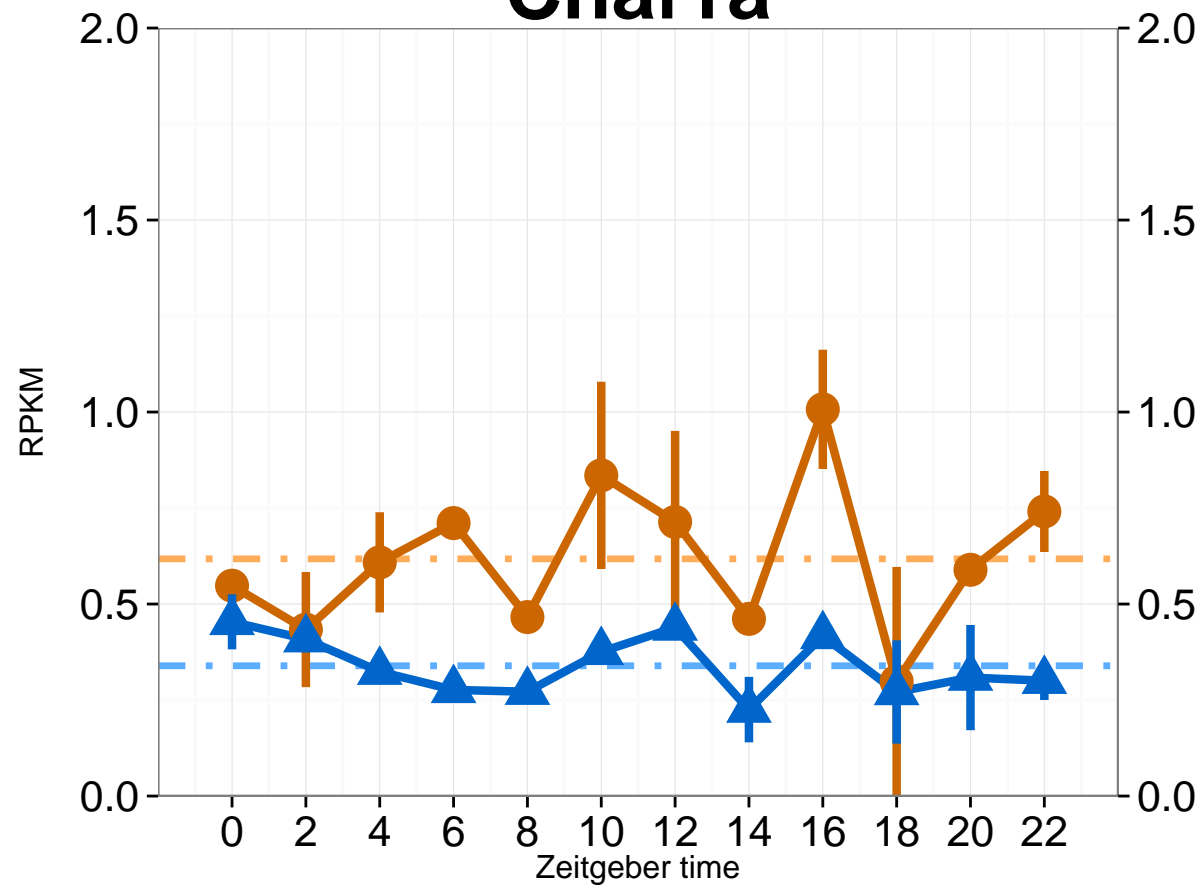

# Chaf1a

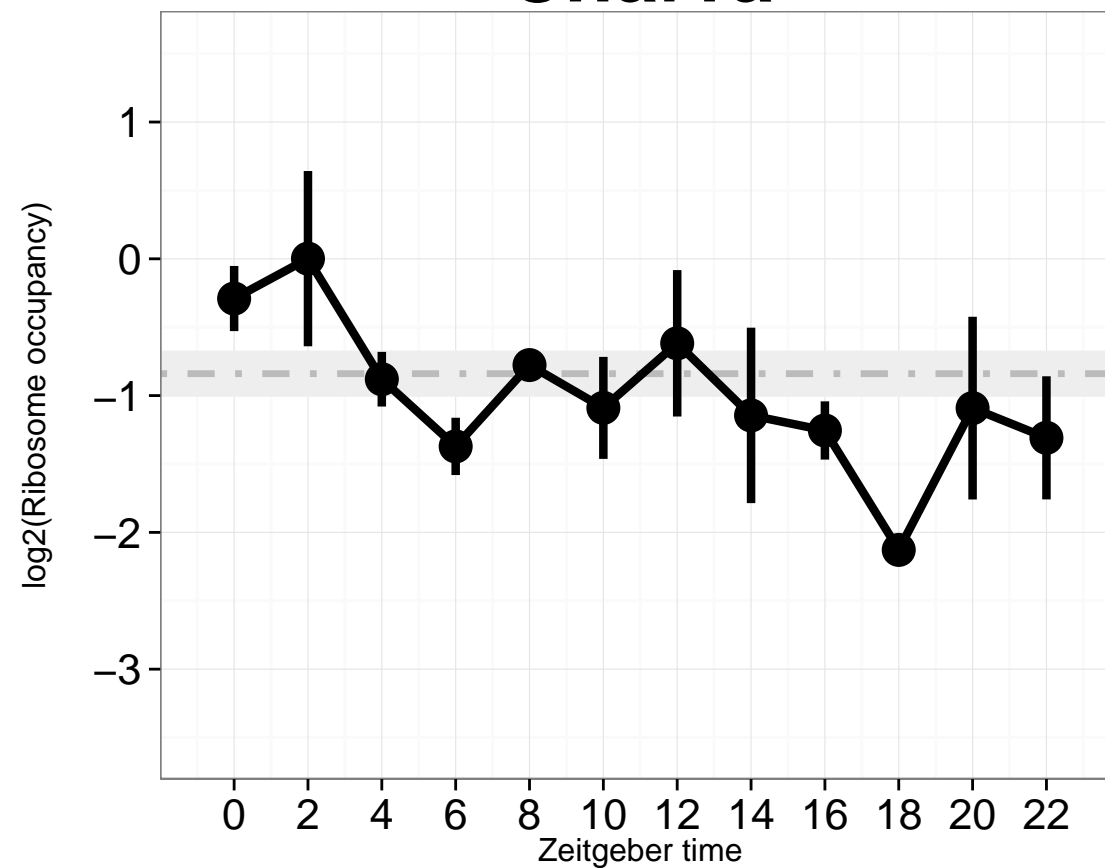

Supplement: SuppDataset_1.zip [file Chaf1a_set_A.pdf › Supplemental Dataset 1/A-mRNA_nonrhyth_translation_nonrhyth/Chaf1a_set_A.pdf]

# Chaf1b

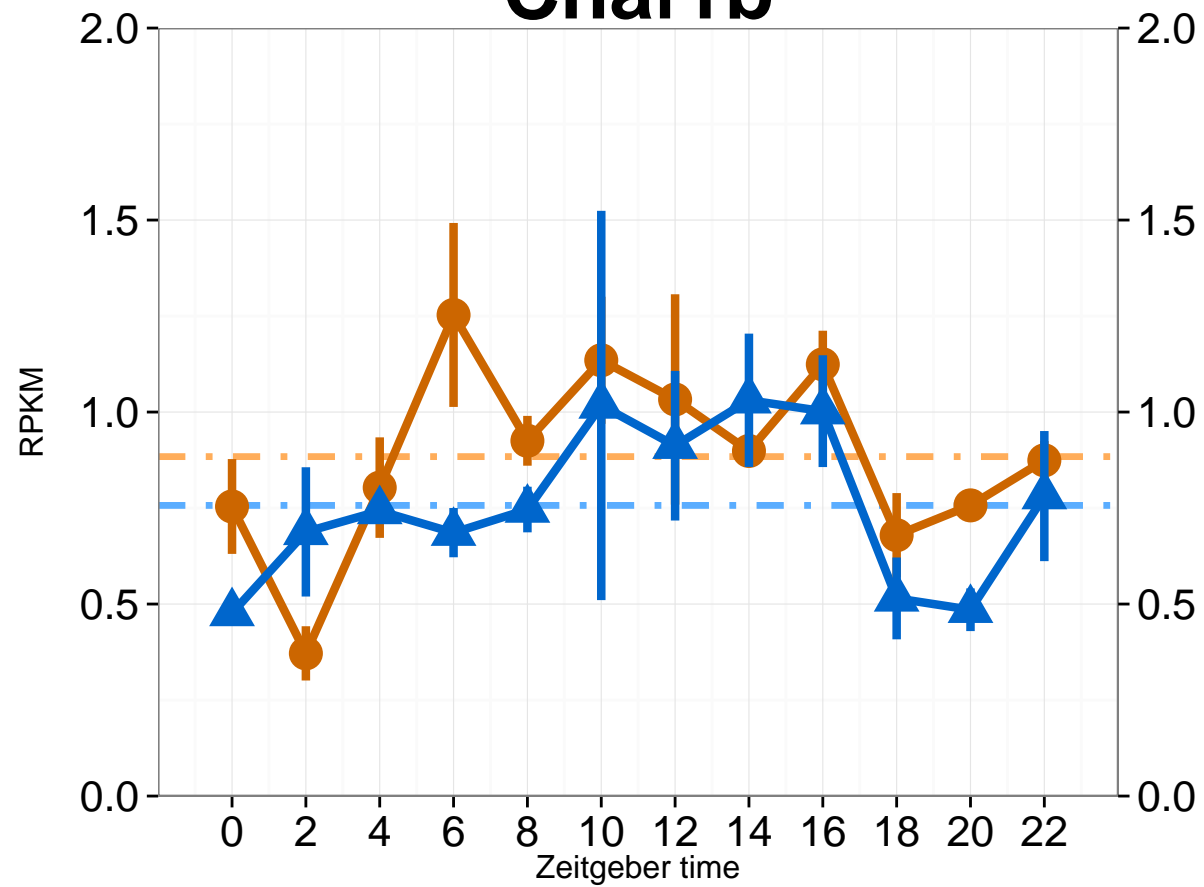

# Chaf1b

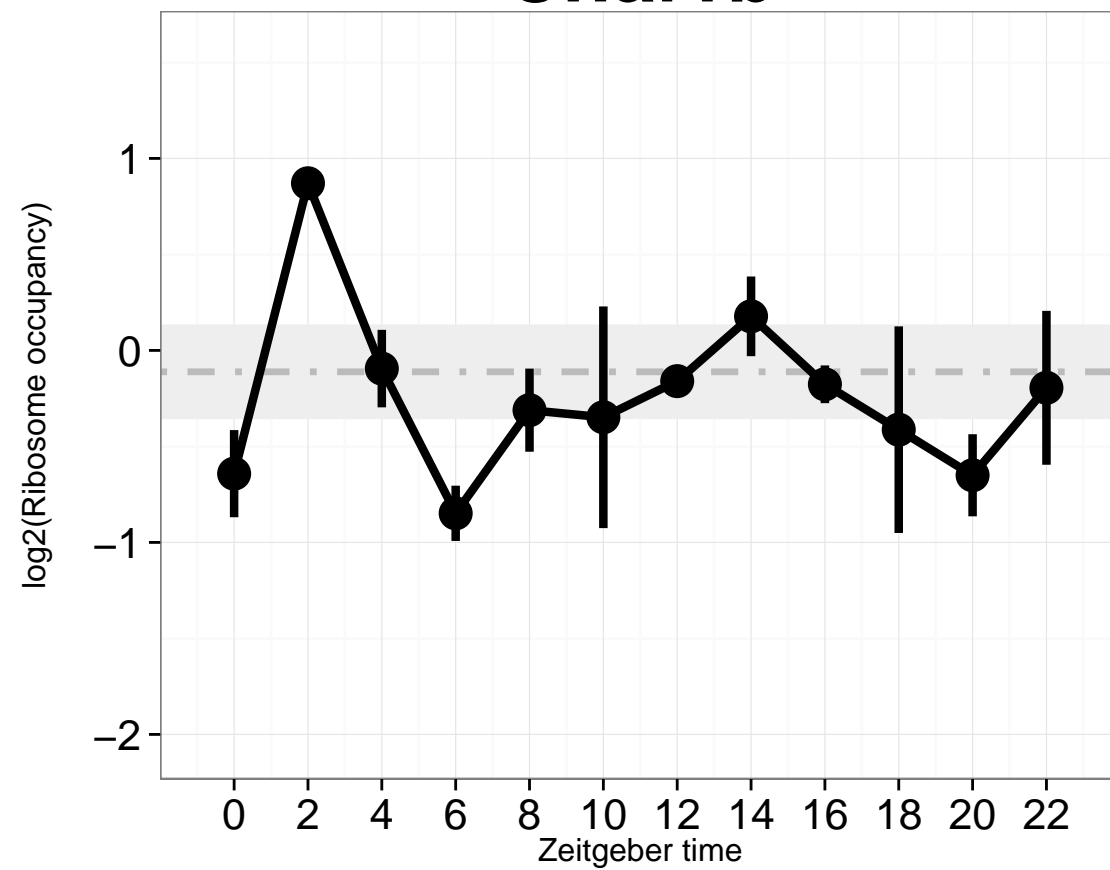

Supplement: SuppDataset_1.zip [file Chaf1b_set_A.pdf › Supplemental Dataset 1/A-mRNA_nonrhyth_translation_nonrhyth/Chaf1b_set_A.pdf]

## Champ1

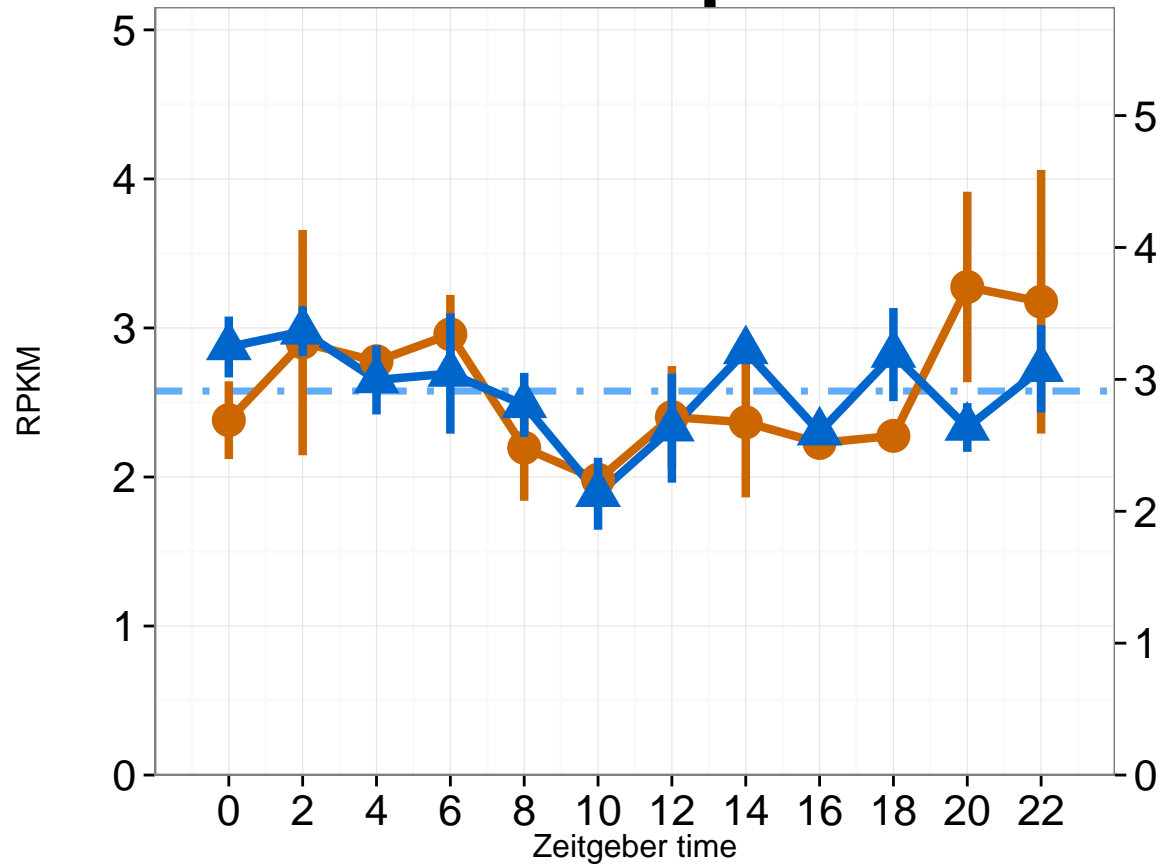

## Champ1

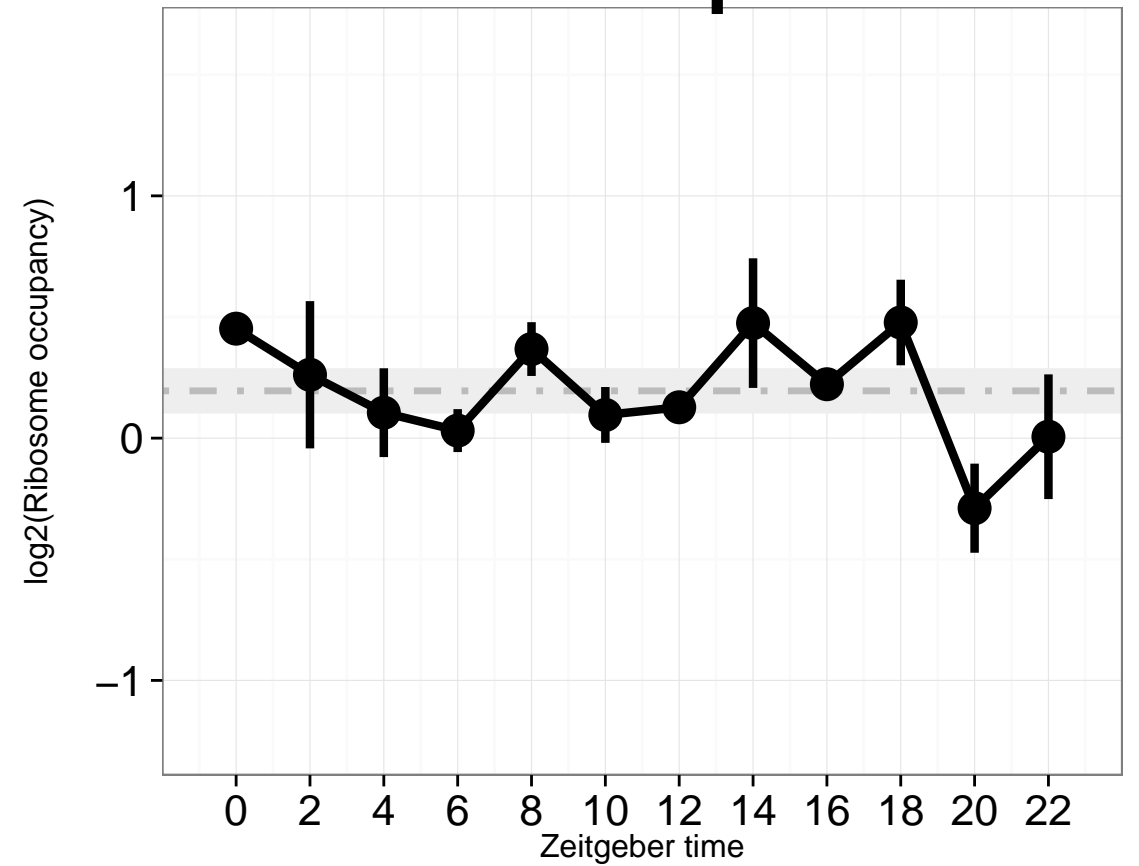

Supplement: SuppDataset_1.zip [file Champ1_set_A.pdf › Supplemental Dataset 1/A-mRNA_nonrhyth_translation_nonrhyth/Champ1_set_A.pdf]

## Chchd10

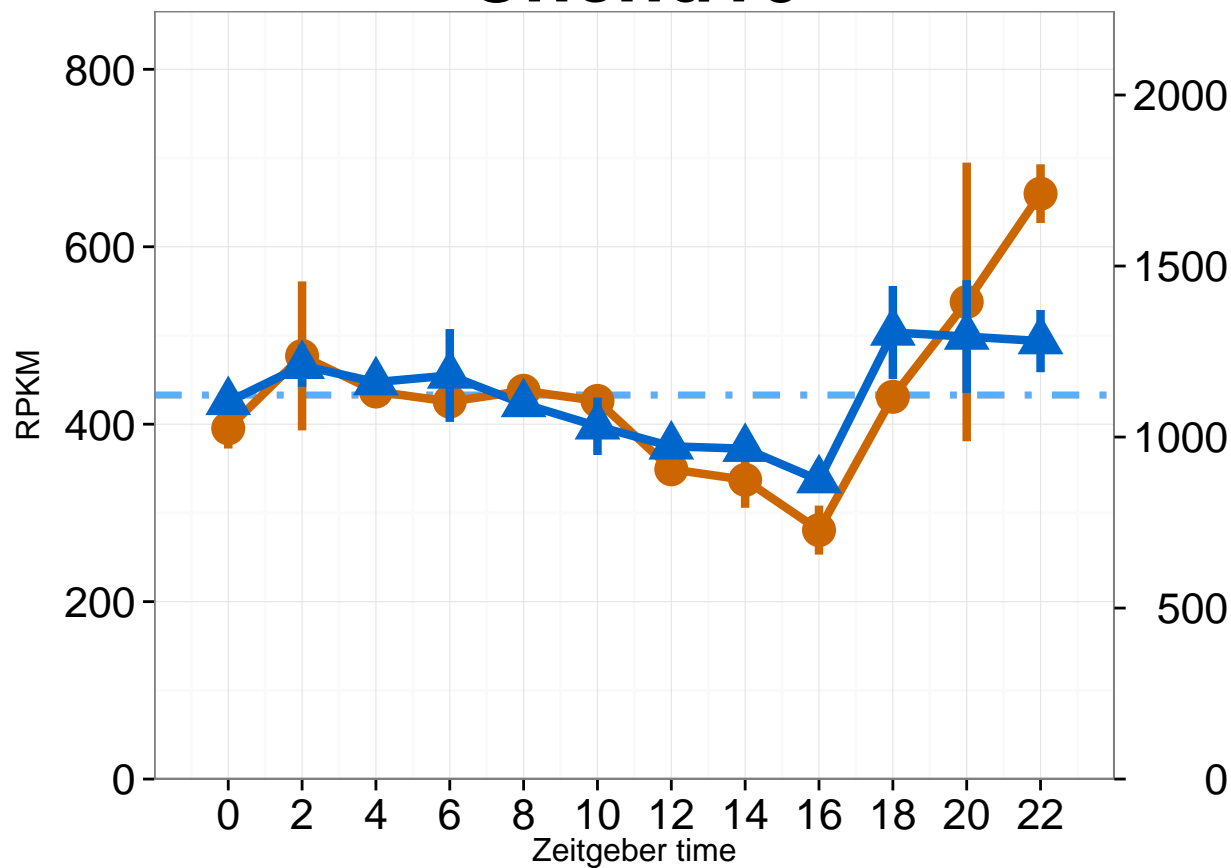

## Chchd10

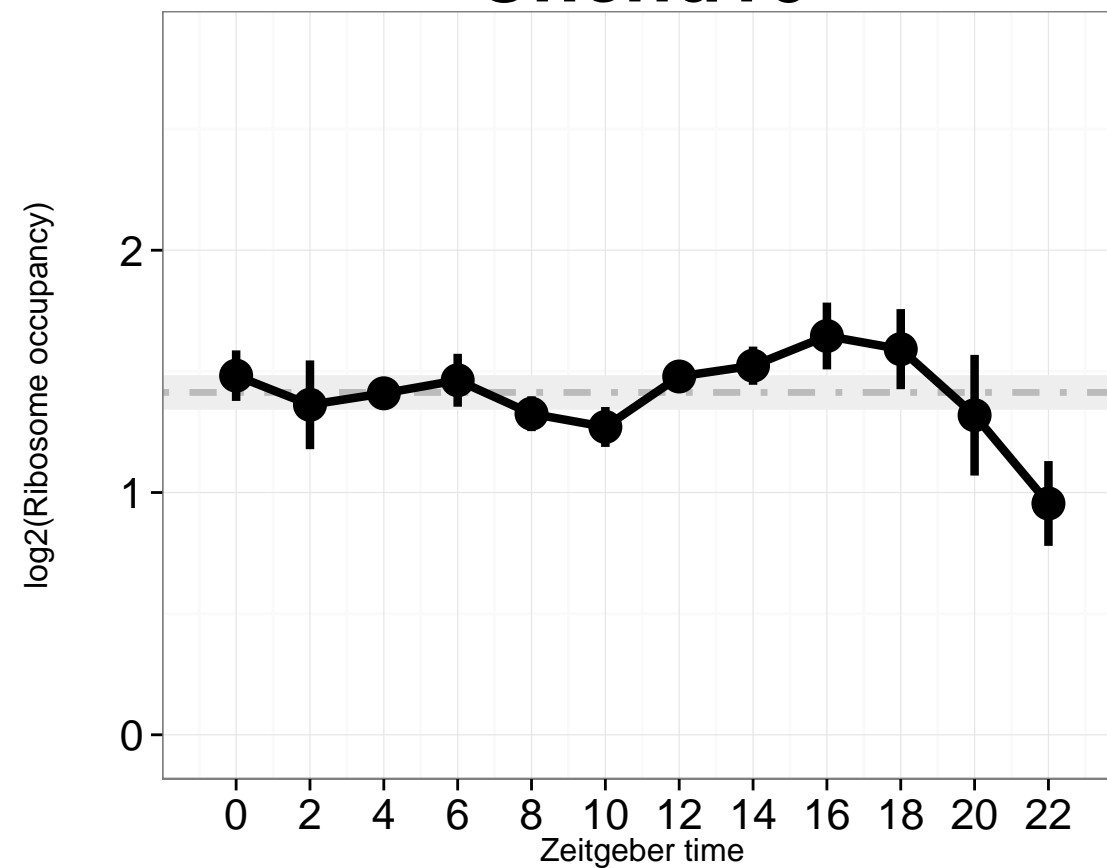

Supplement: SuppDataset_1.zip [file Chchd10_set_A.pdf › Supplemental Dataset 1/A-mRNA_nonrhyth_translation_nonrhyth/Chchd10_set_A.pdf]

# Chchd1

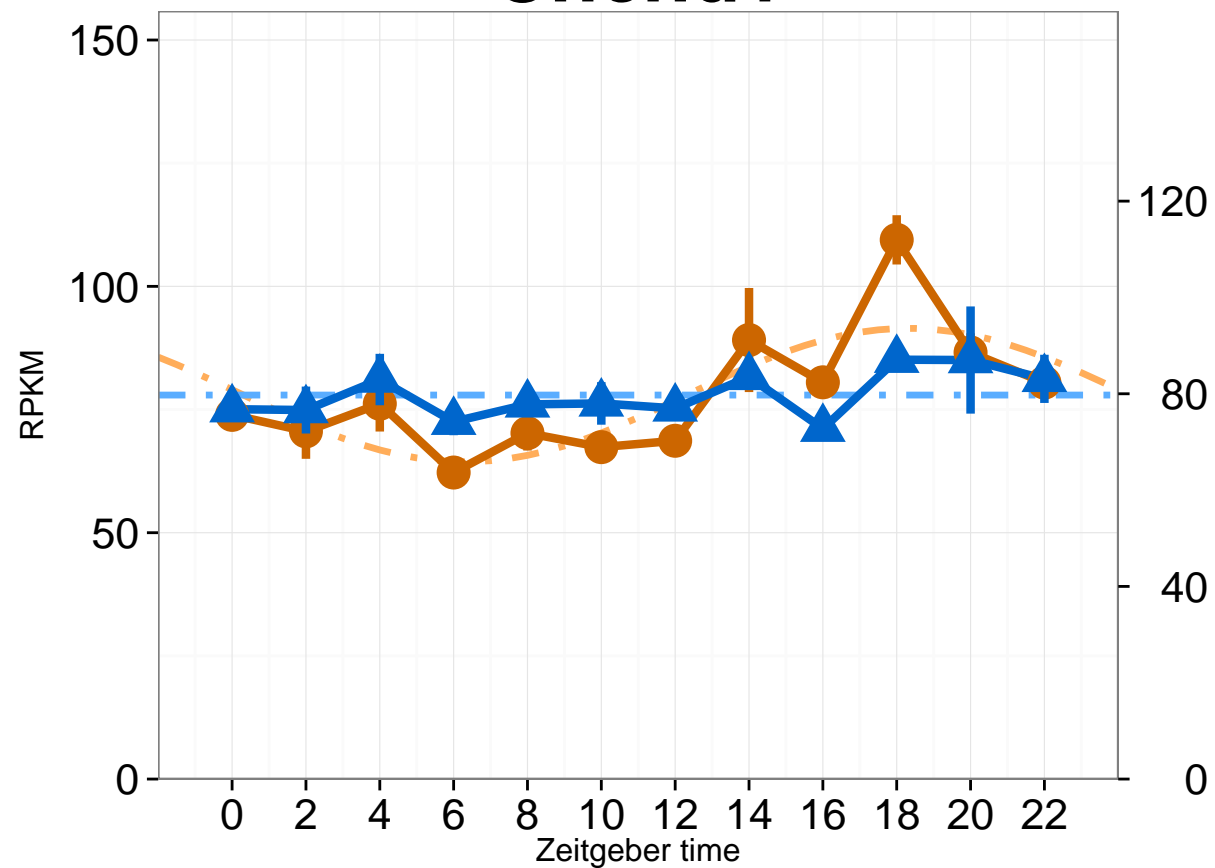

# Chchd1

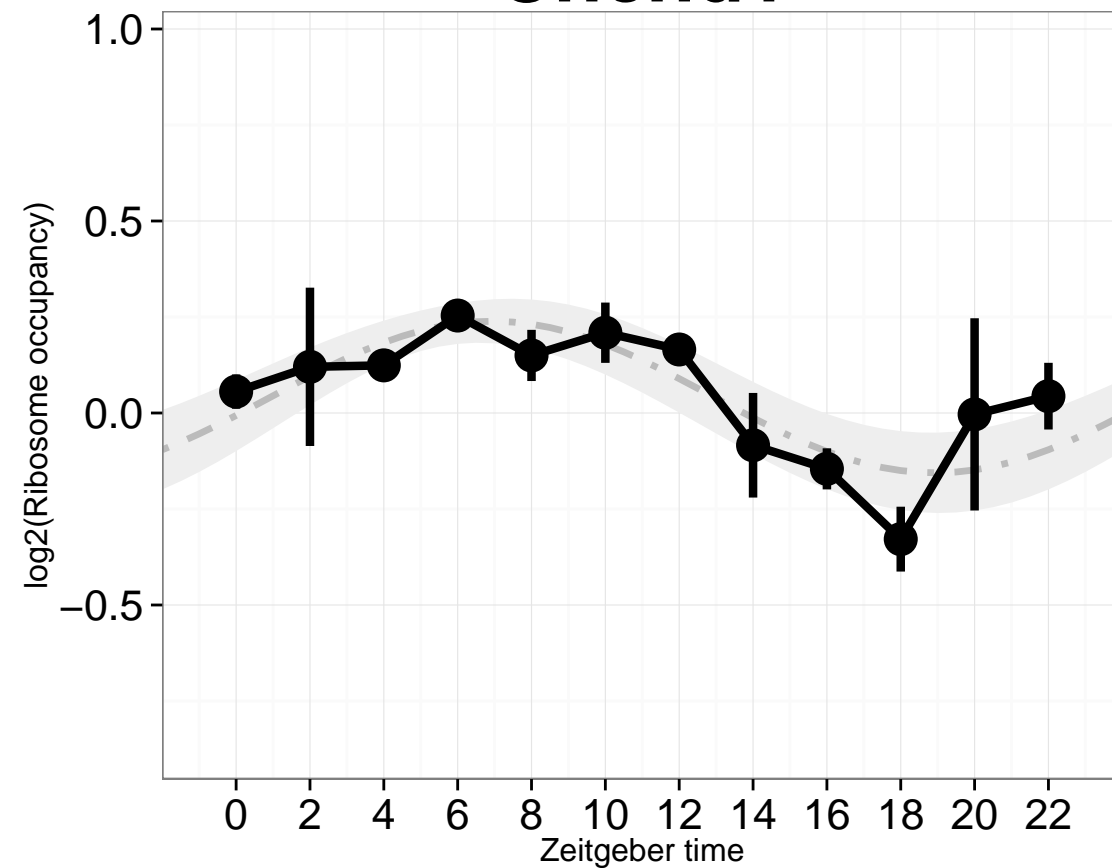

Supplement: SuppDataset_1.zip [file Chchd1_set_A.pdf › Supplemental Dataset 1/A-mRNA_nonrhyth_translation_nonrhyth/Chchd1_set_A.pdf]

## Chchd2

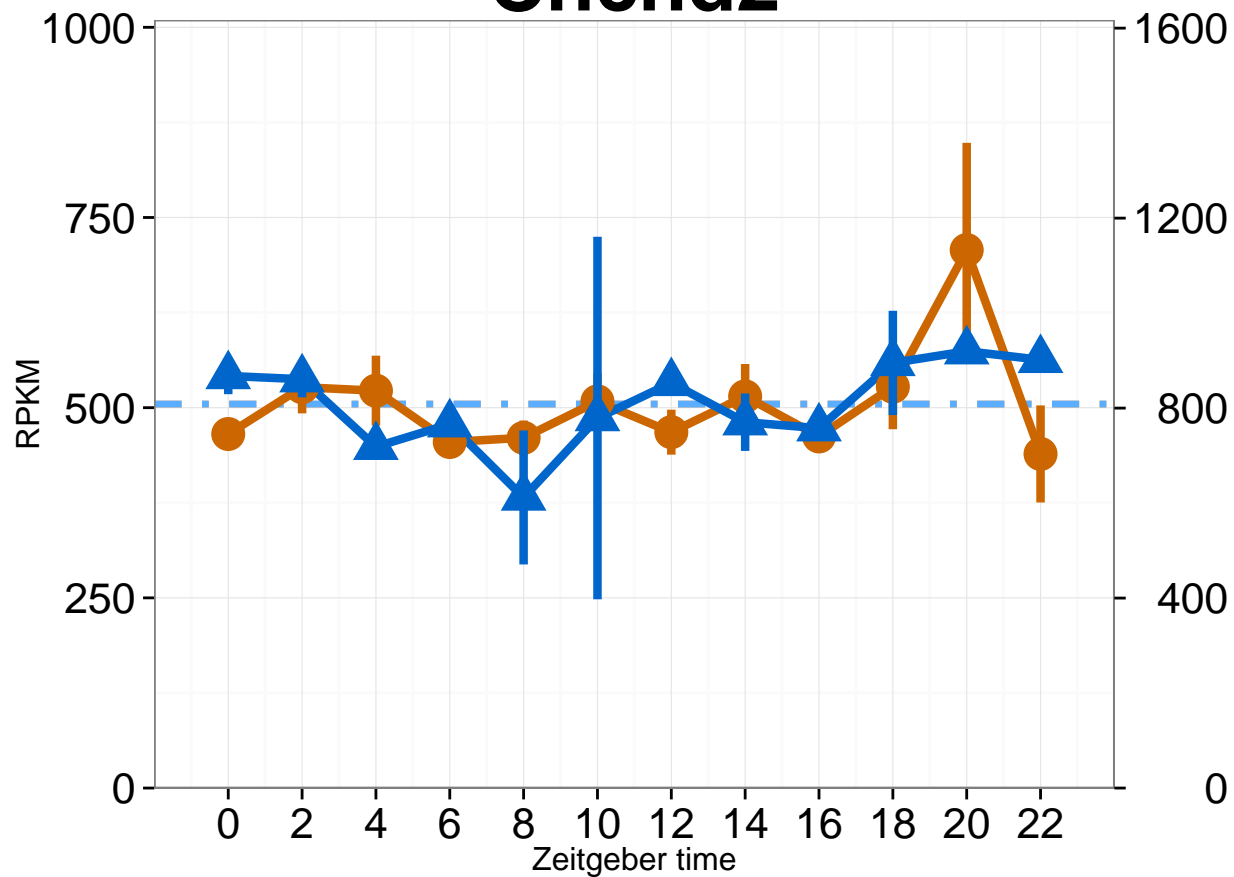

## Chchd2

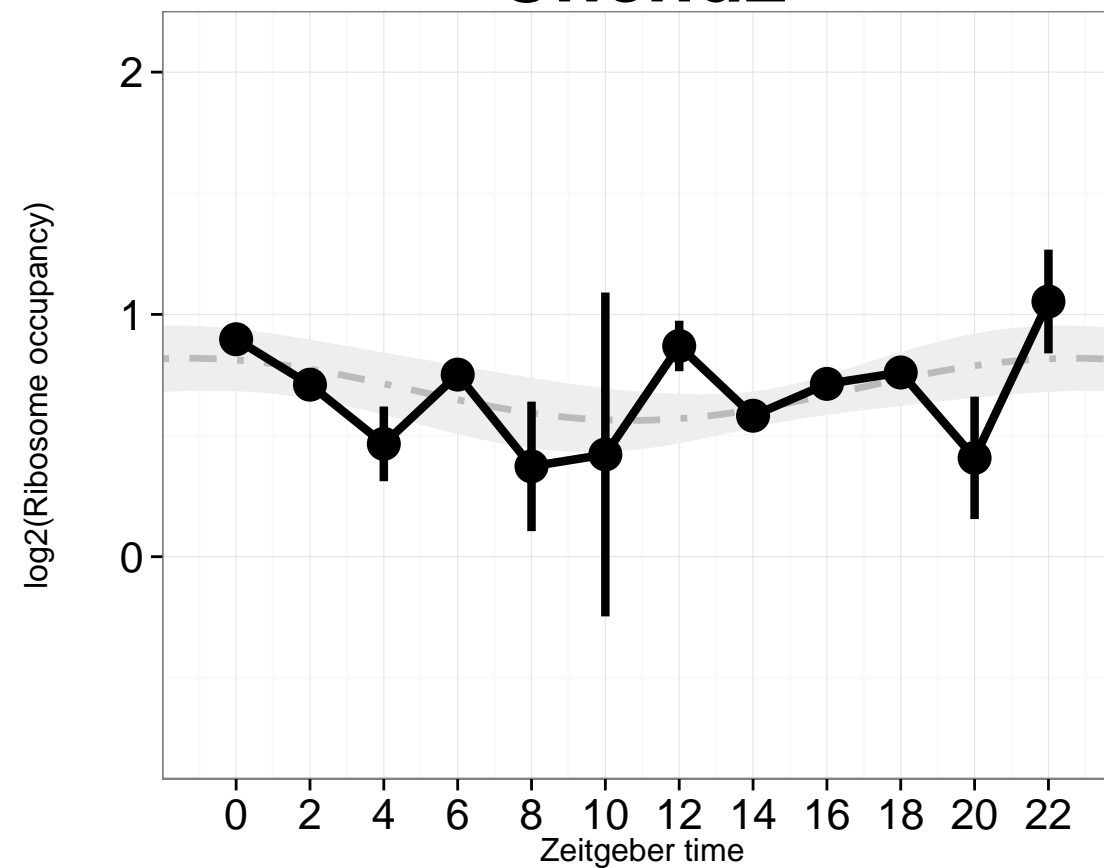

Supplement: SuppDataset_1.zip [file Chchd2_set_A.pdf › Supplemental Dataset 1/A-mRNA_nonrhyth_translation_nonrhyth/Chchd2_set_A.pdf]

# Chchd3

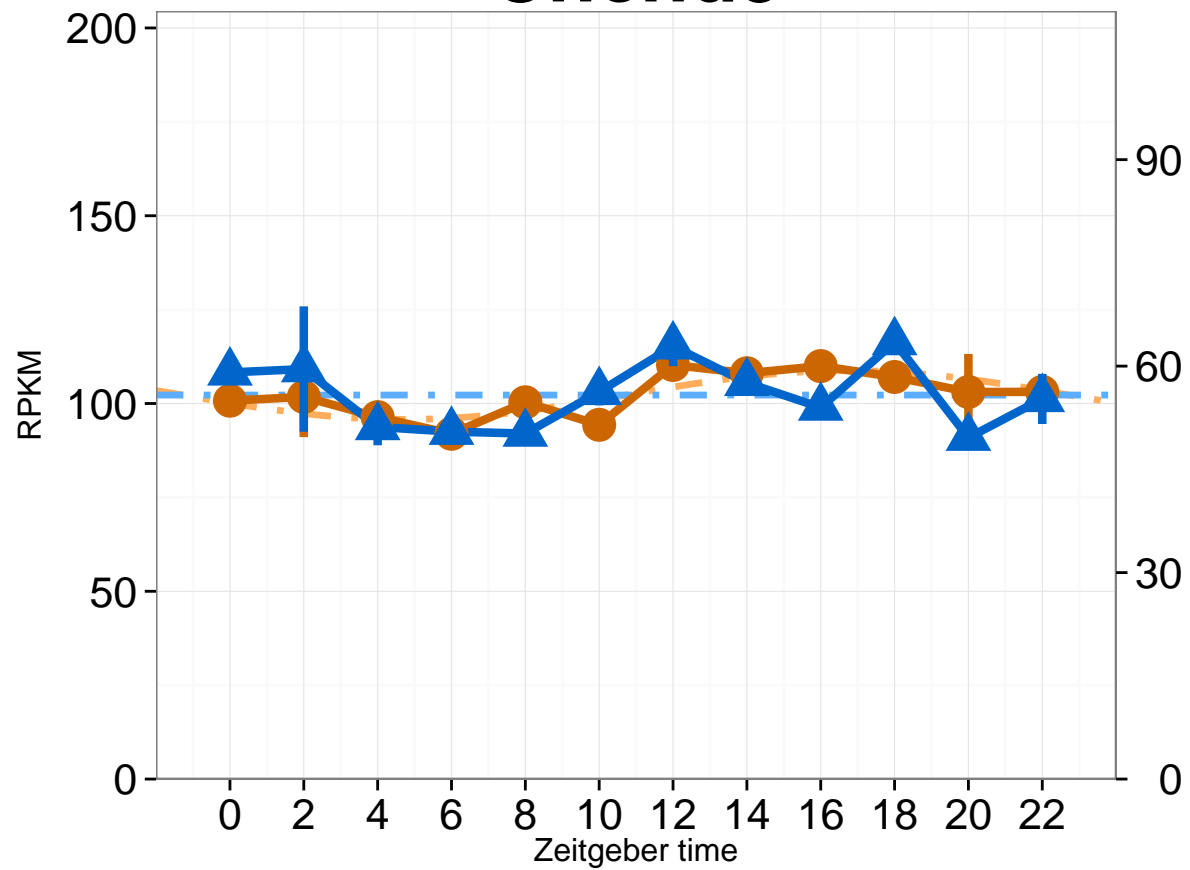

# Chchd3

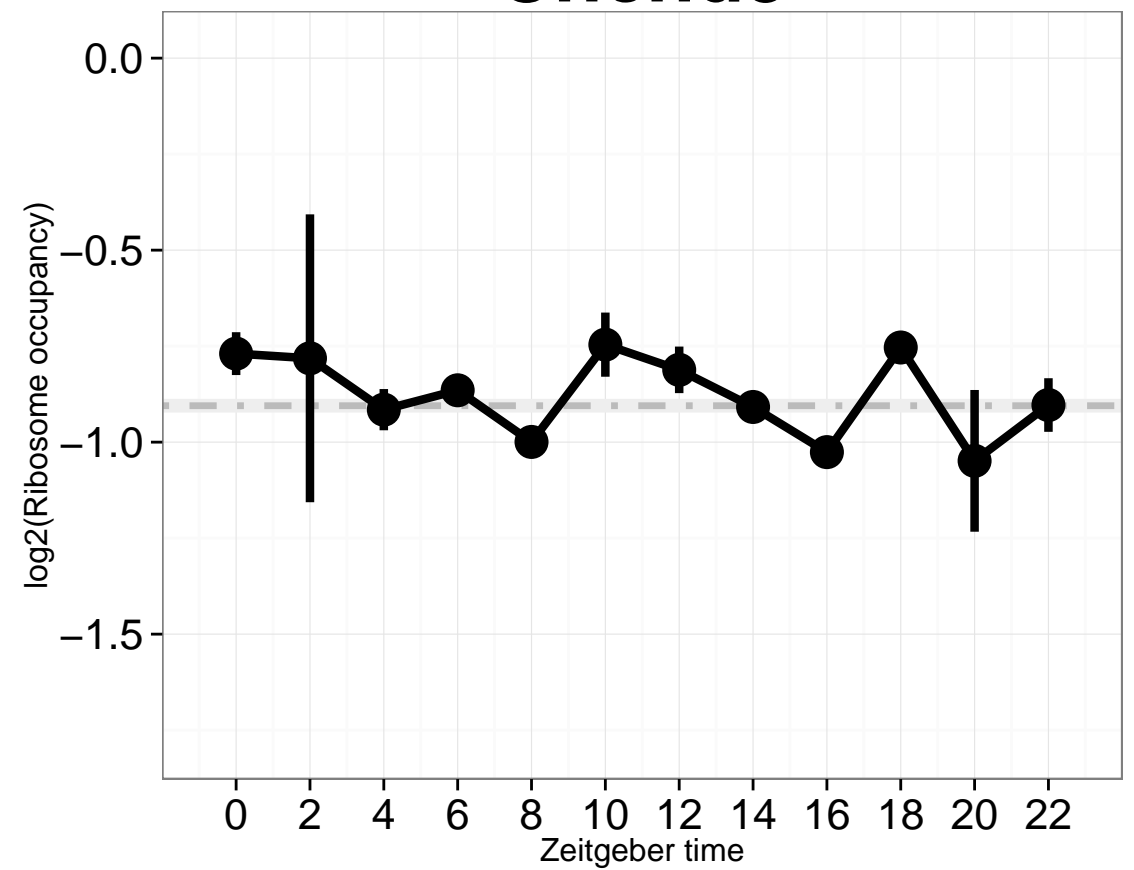

Supplement: SuppDataset_1.zip [file Chchd3_set_A.pdf › Supplemental Dataset 1/A-mRNA_nonrhyth_translation_nonrhyth/Chchd3_set_A.pdf]

## Chchd5

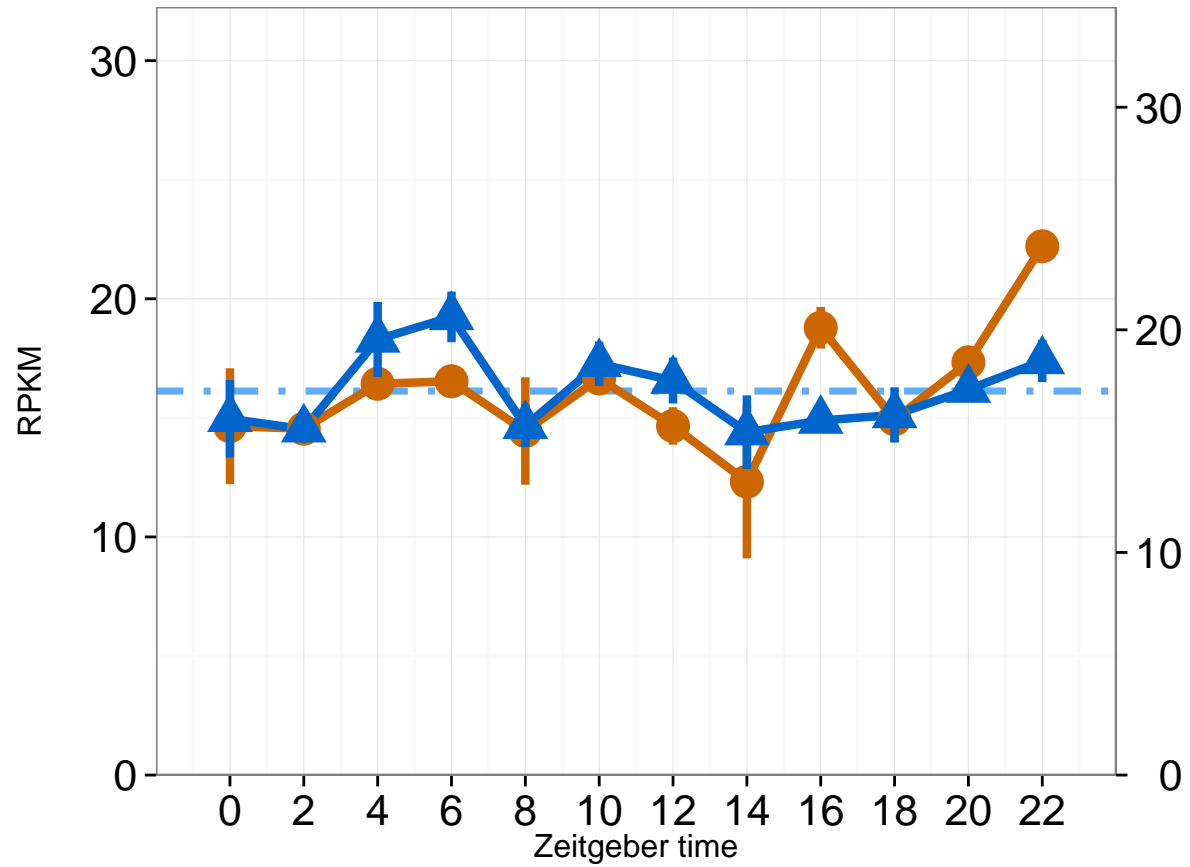

## Chchd5

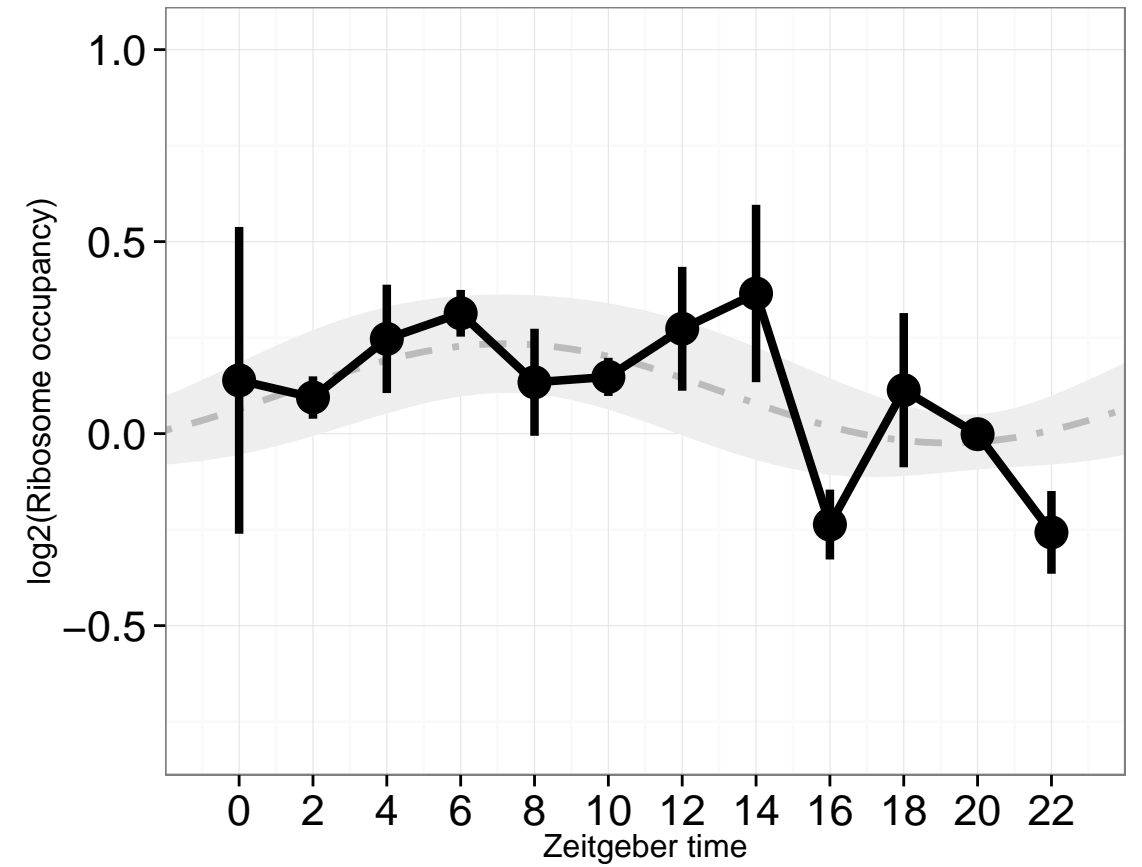

Supplement: SuppDataset_1.zip [file Chchd5_set_A.pdf › Supplemental Dataset 1/A-mRNA_nonrhyth_translation_nonrhyth/Chchd5_set_A.pdf]

# Chchd6

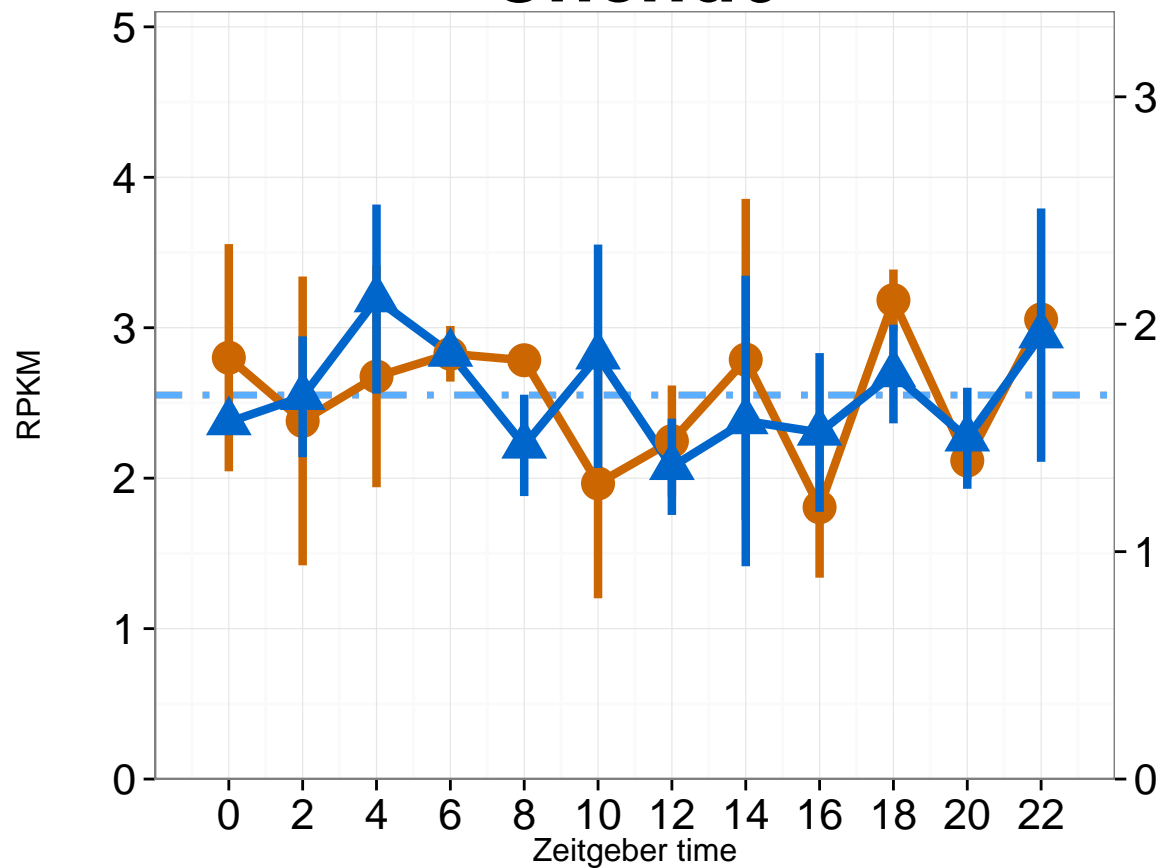

# Chchd6

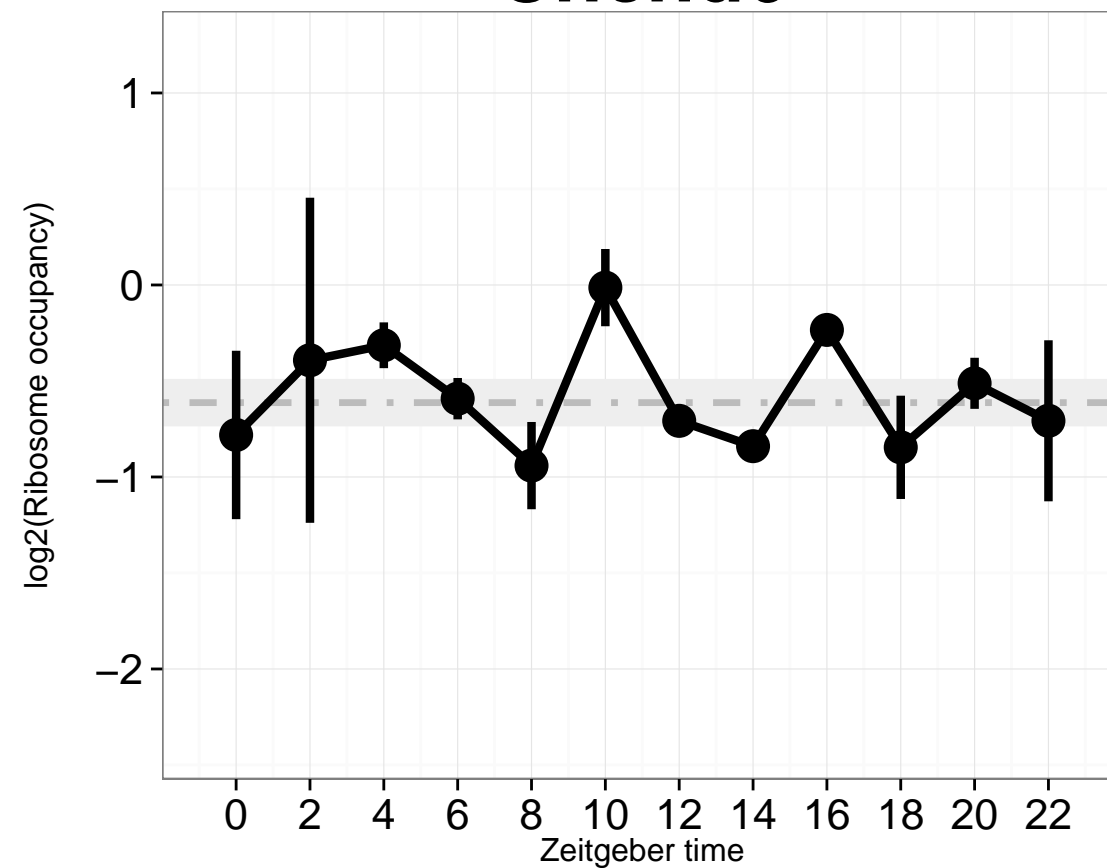

Supplement: SuppDataset_1.zip [file Chchd6_set_A.pdf › Supplemental Dataset 1/A-mRNA_nonrhyth_translation_nonrhyth/Chchd6_set_A.pdf]

## Chchd7

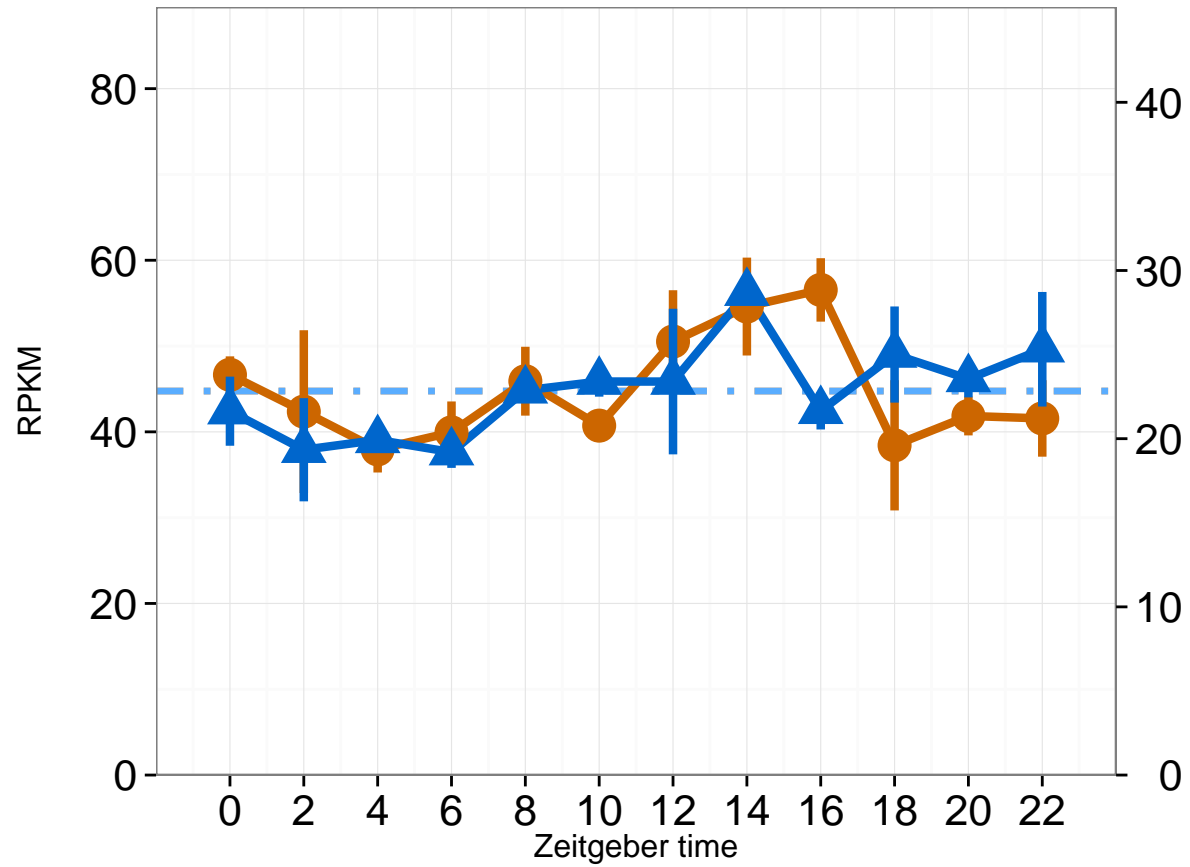

## Chchd7

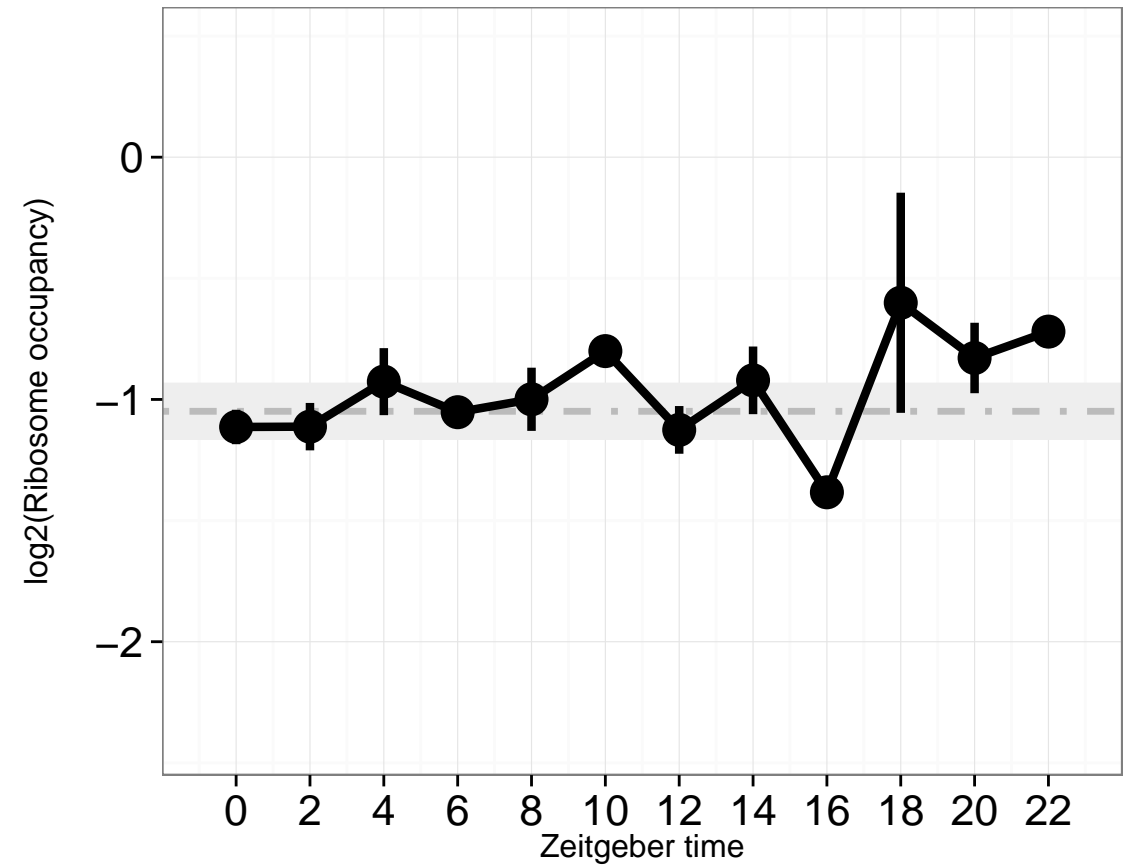

Supplement: SuppDataset_1.zip [file Chchd7_set_A.pdf › Supplemental Dataset 1/A-mRNA_nonrhyth_translation_nonrhyth/Chchd7_set_A.pdf]

# Chd1

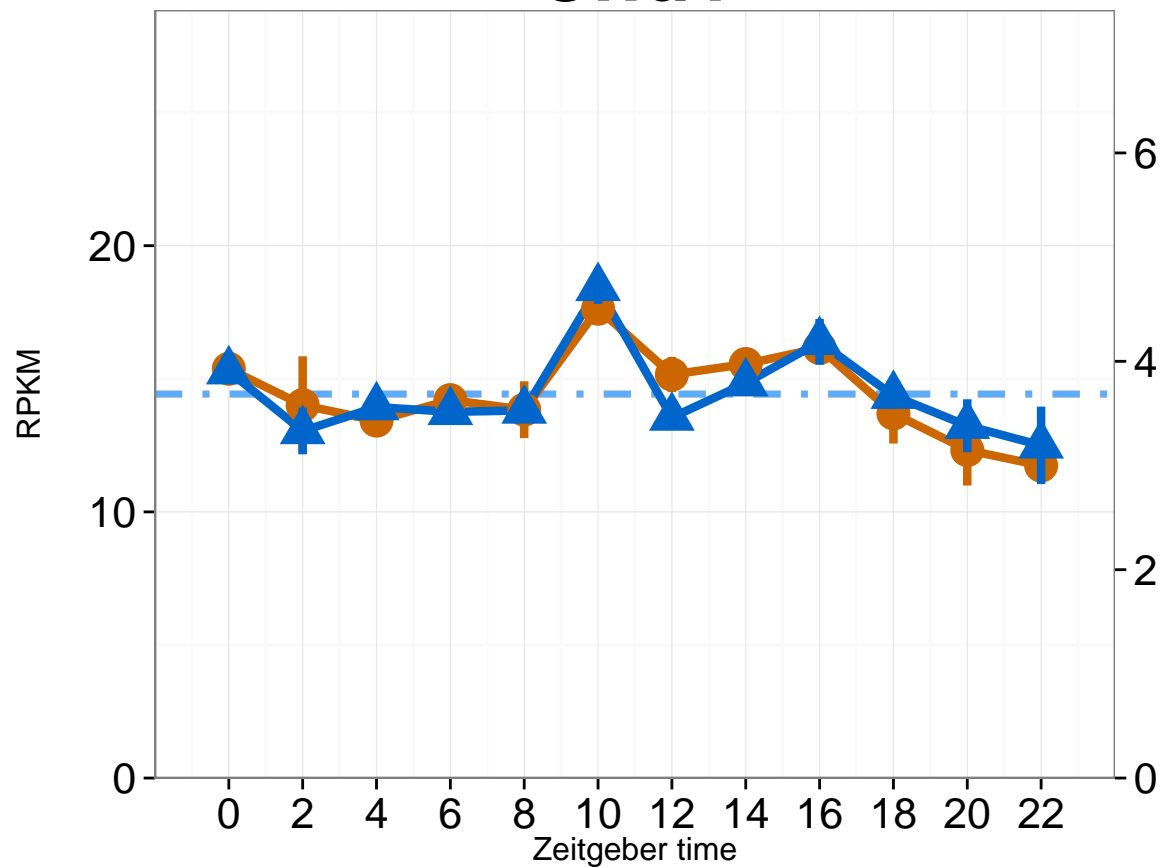

# Chd1

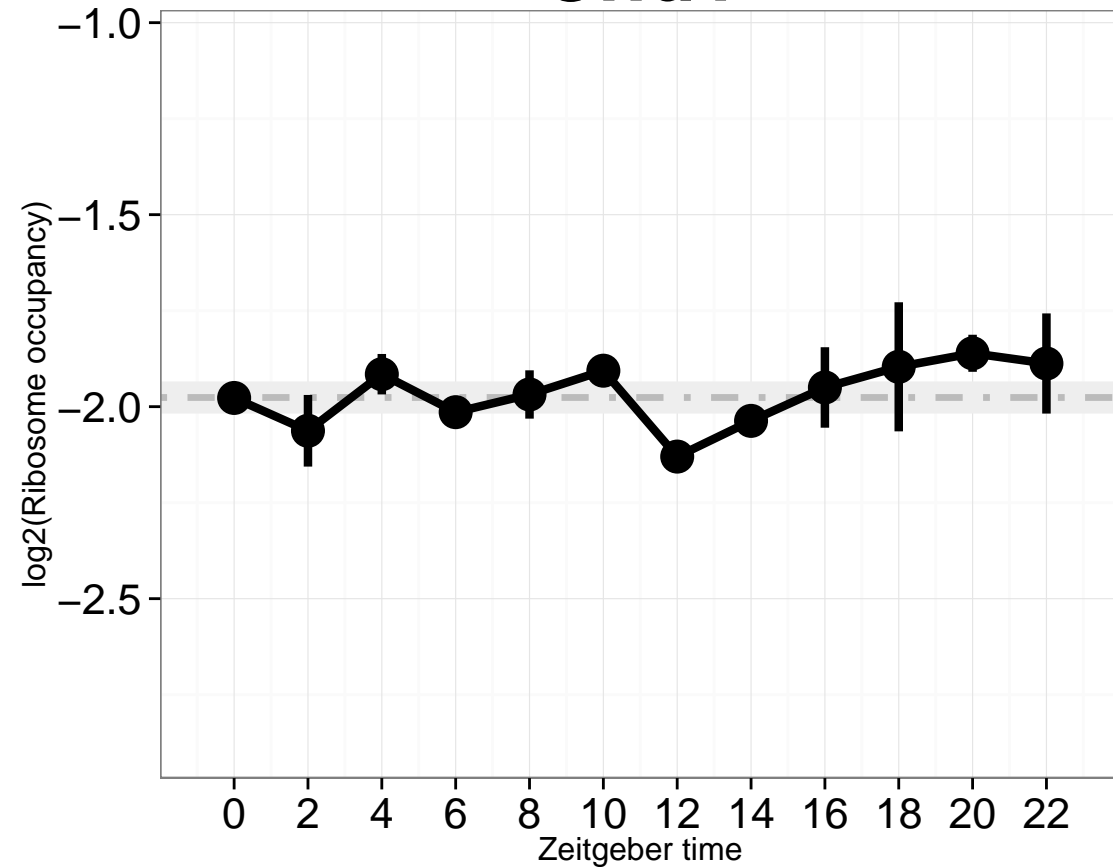

Supplement: SuppDataset_1.zip [file Chd1_set_A.pdf › Supplemental Dataset 1/A-mRNA_nonrhyth_translation_nonrhyth/Chd1_set_A.pdf]

## Chd1l

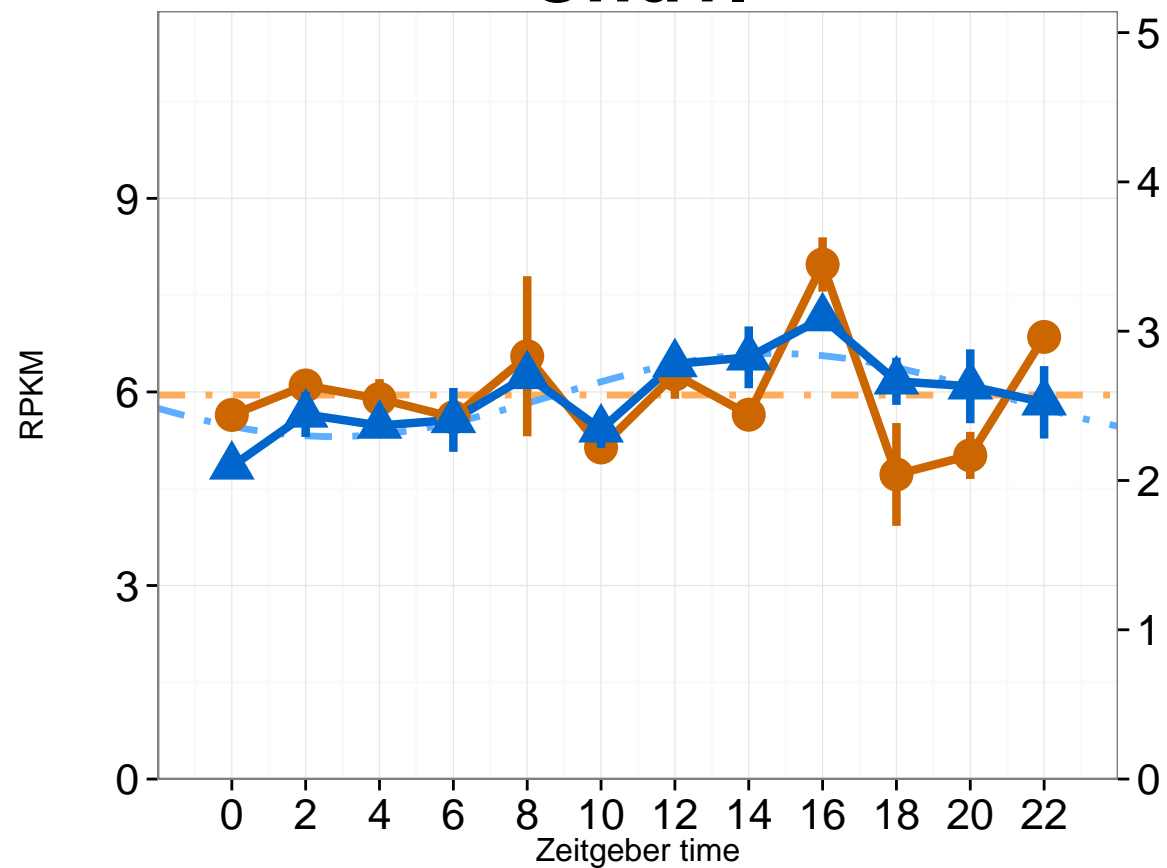

## Chd1l

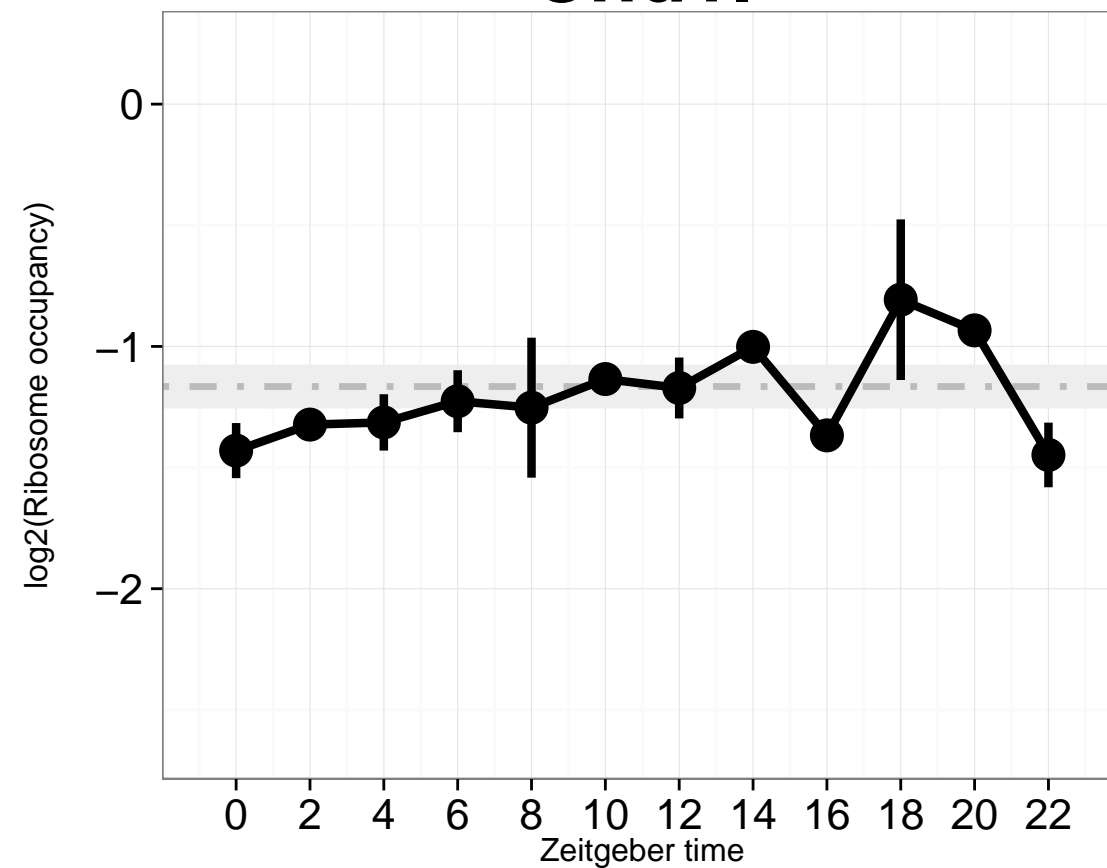

Supplement: SuppDataset_1.zip [file Chd1l_set_A.pdf › Supplemental Dataset 1/A-mRNA_nonrhyth_translation_nonrhyth/Chd1l_set_A.pdf]

# Chd2

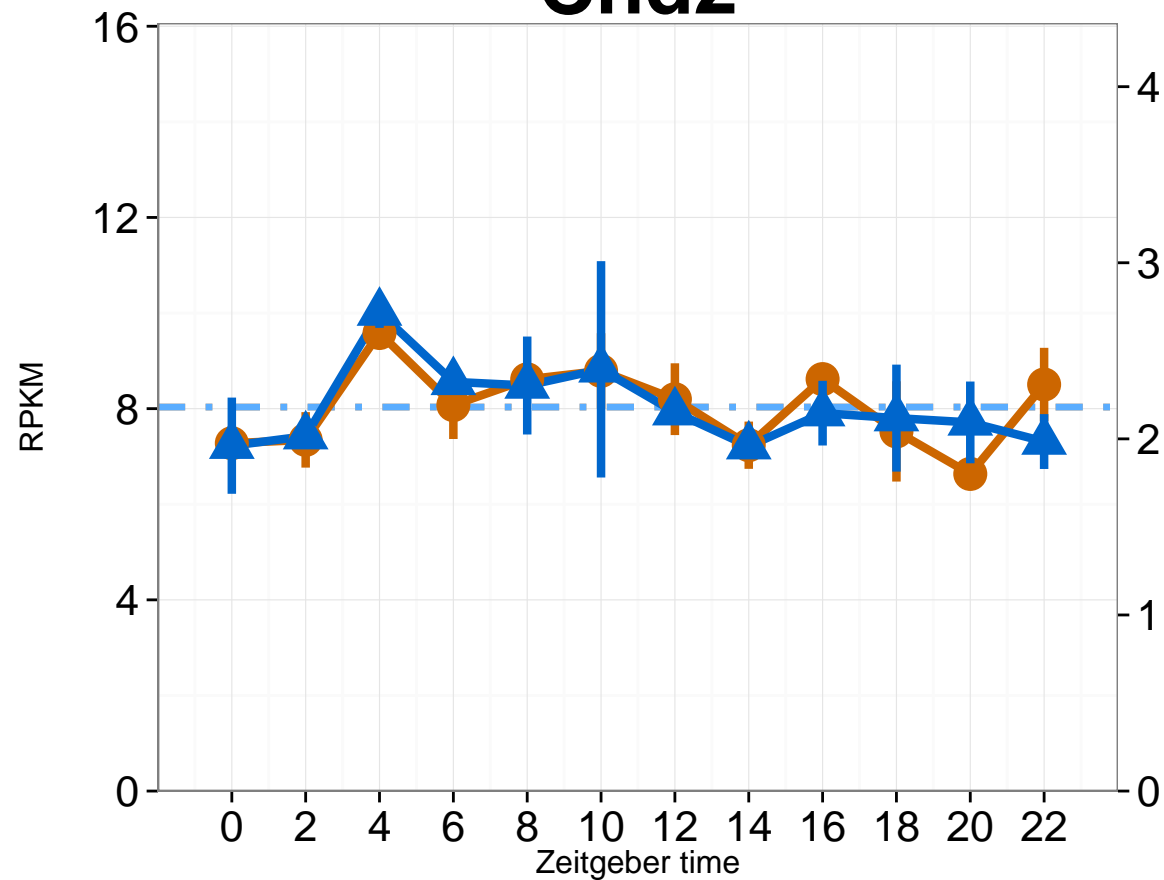

# Chd2

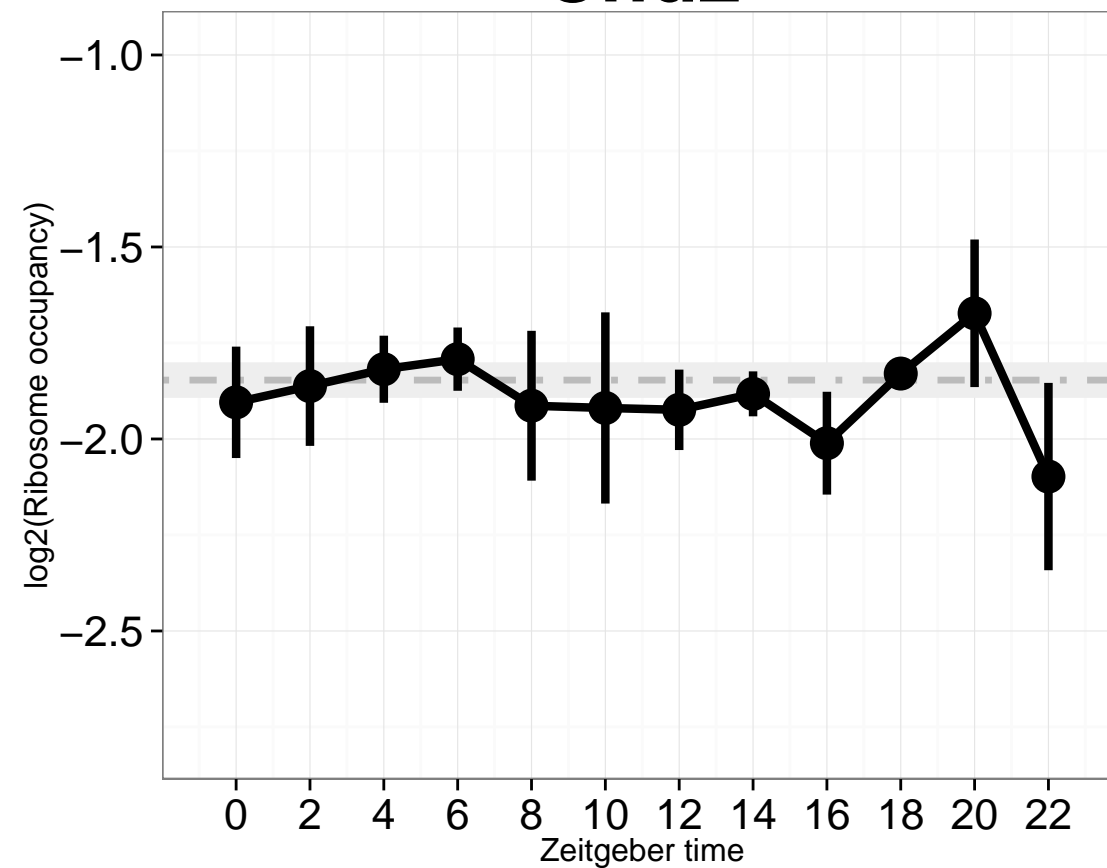

Supplement: SuppDataset_1.zip [file Chd2_set_A.pdf › Supplemental Dataset 1/A-mRNA_nonrhyth_translation_nonrhyth/Chd2_set_A.pdf]

## Chd3

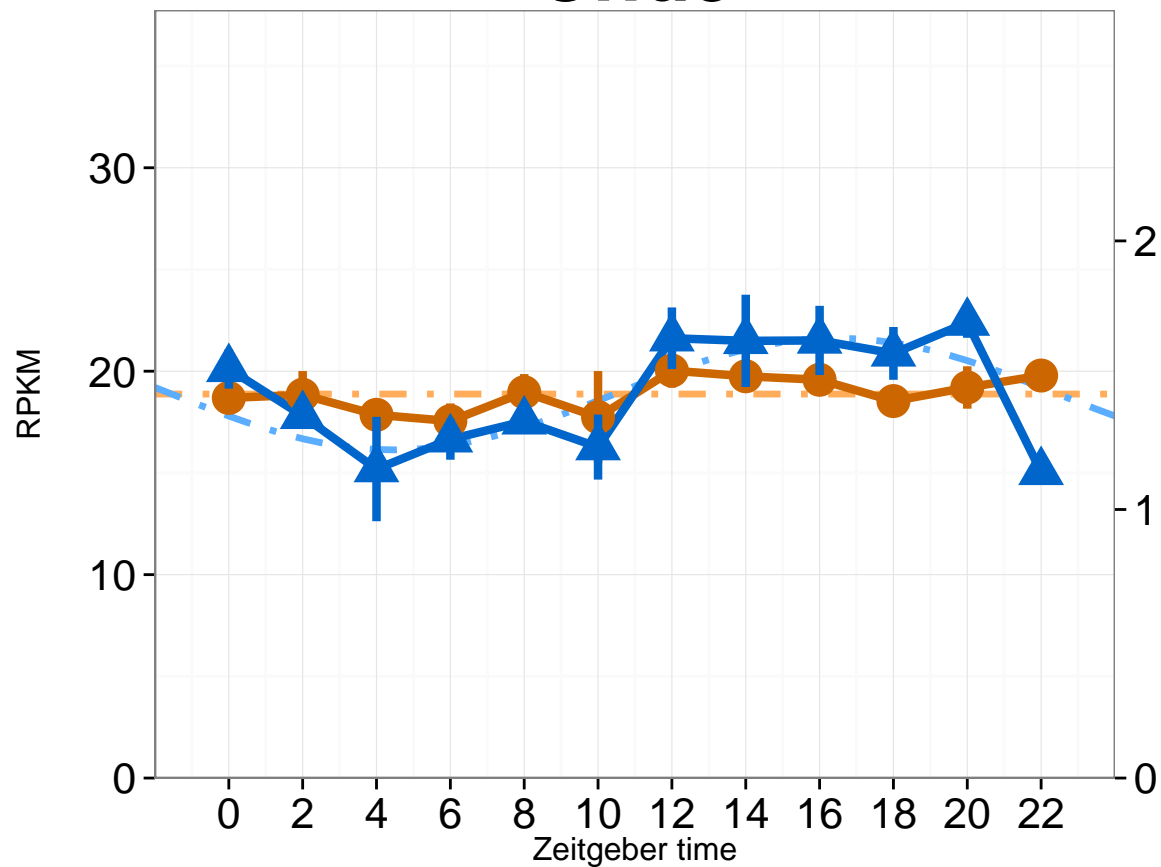

## Chd3

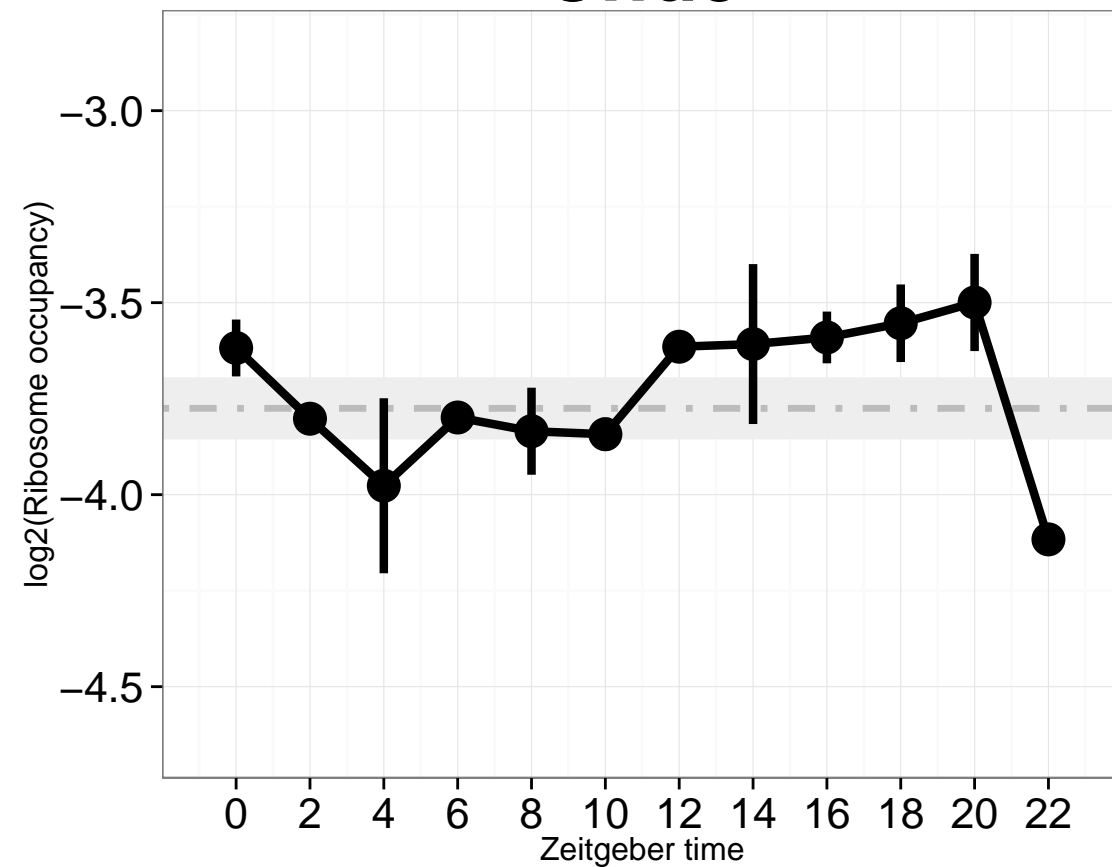

Supplement: SuppDataset_1.zip [file Chd3_set_A.pdf › Supplemental Dataset 1/A-mRNA_nonrhyth_translation_nonrhyth/Chd3_set_A.pdf]

## Chd6

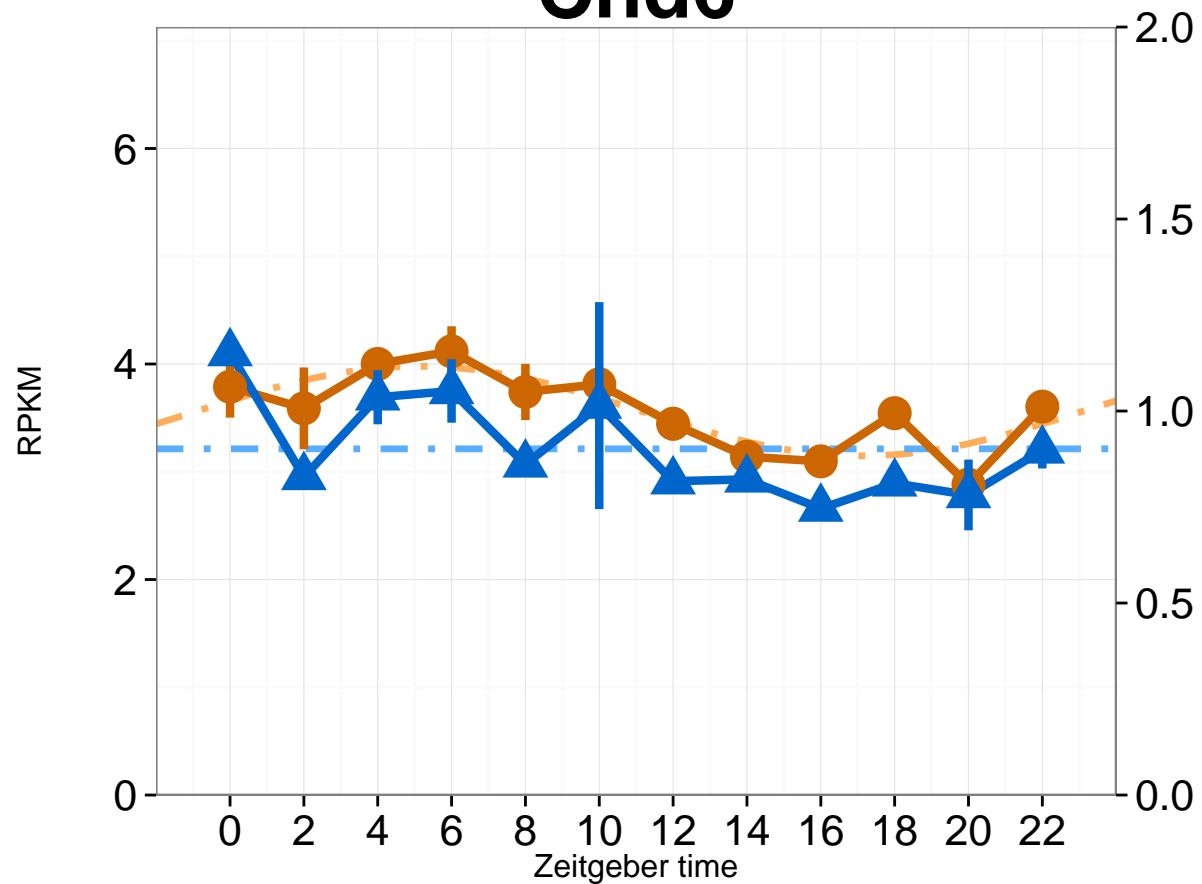

## Chd6

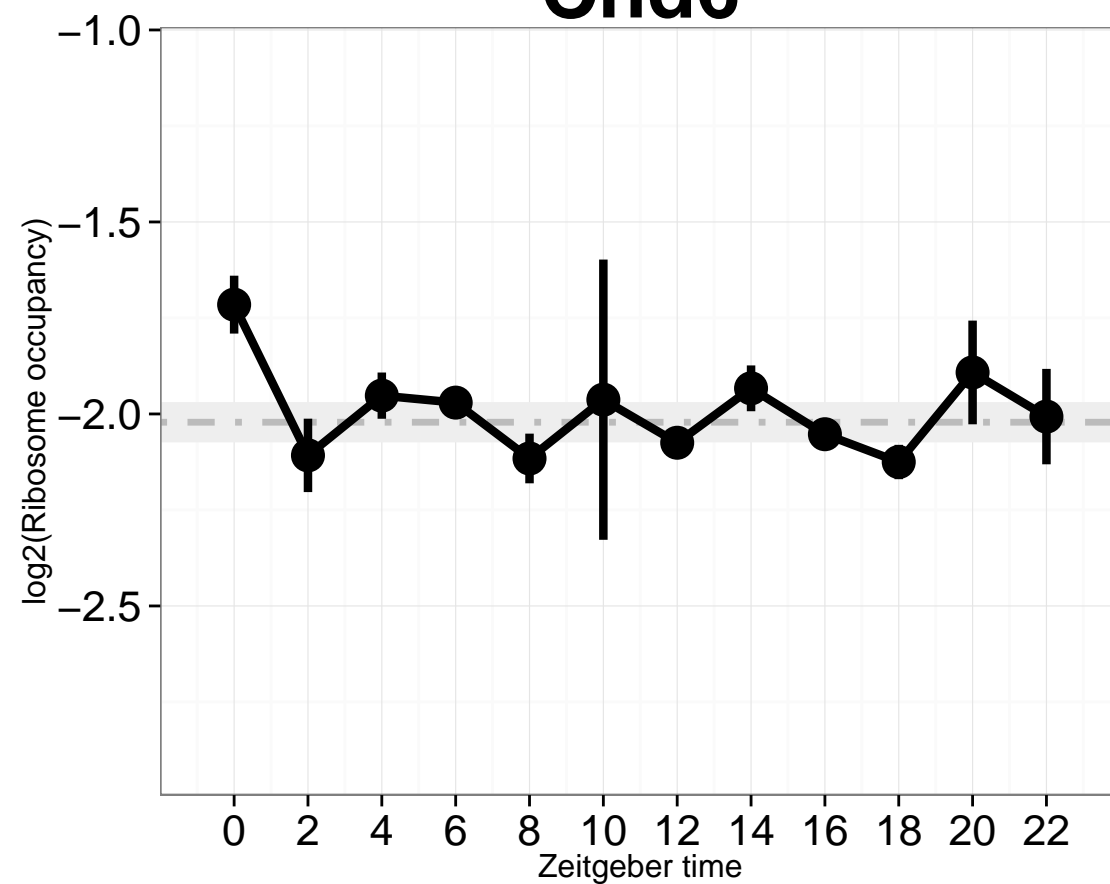

Supplement: SuppDataset_1.zip [file Chd6_set_A.pdf › Supplemental Dataset 1/A-mRNA_nonrhyth_translation_nonrhyth/Chd6_set_A.pdf]

## Chd7

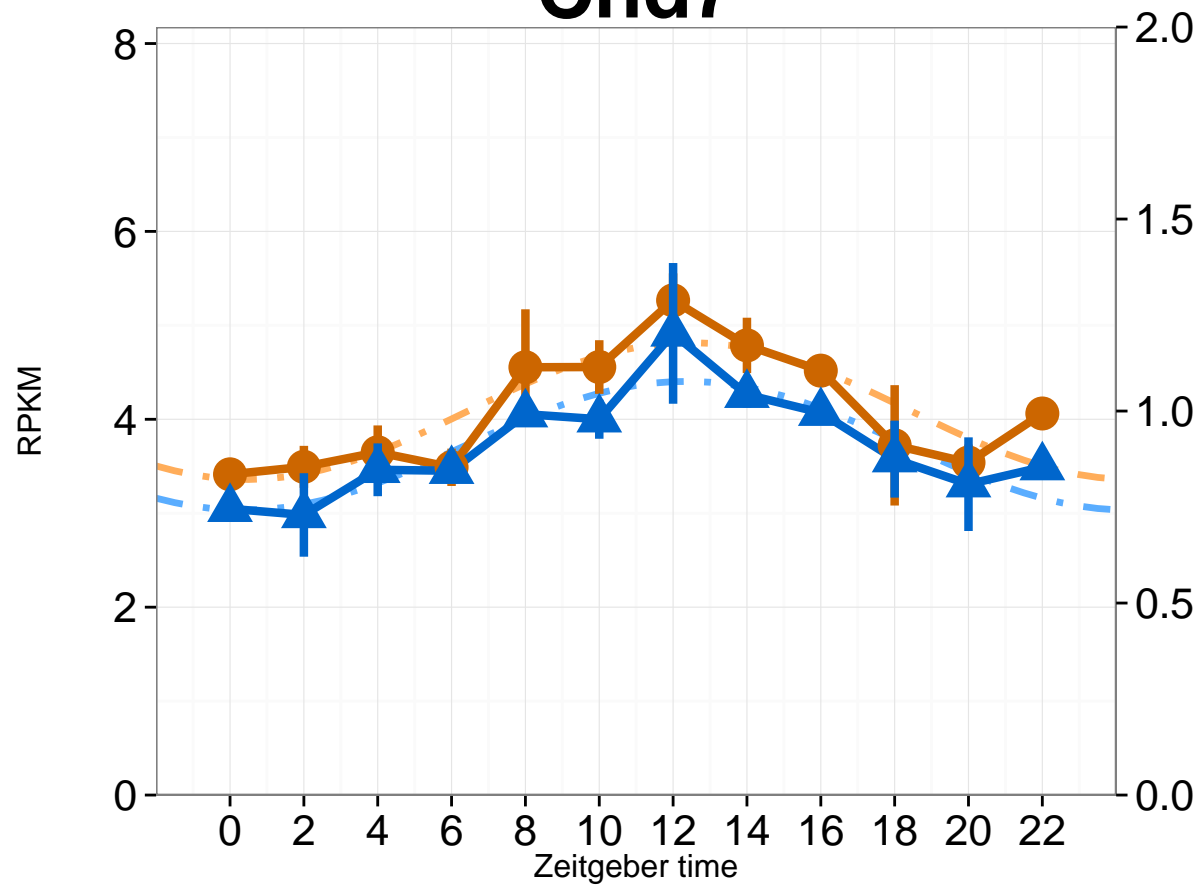

## Chd7

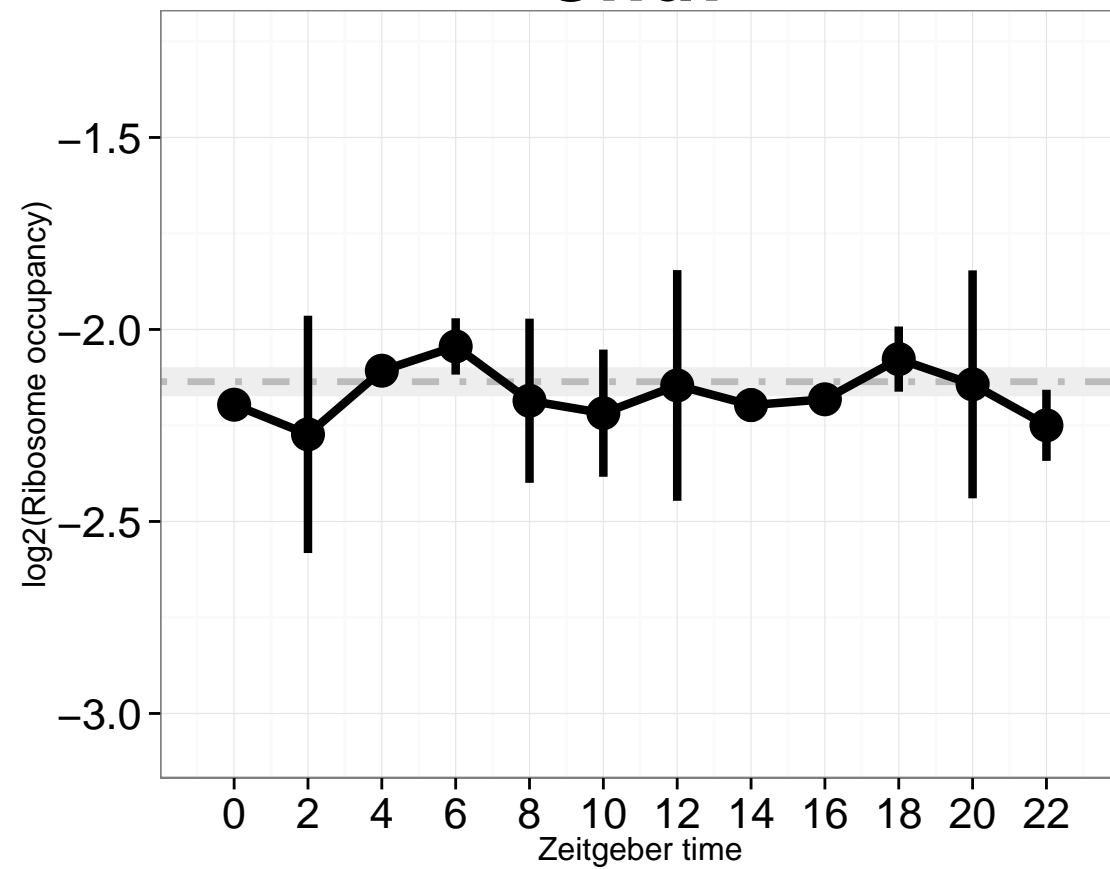

Supplement: SuppDataset_1.zip [file Chd7_set_A.pdf › Supplemental Dataset 1/A-mRNA_nonrhyth_translation_nonrhyth/Chd7_set_A.pdf]

## Chd9

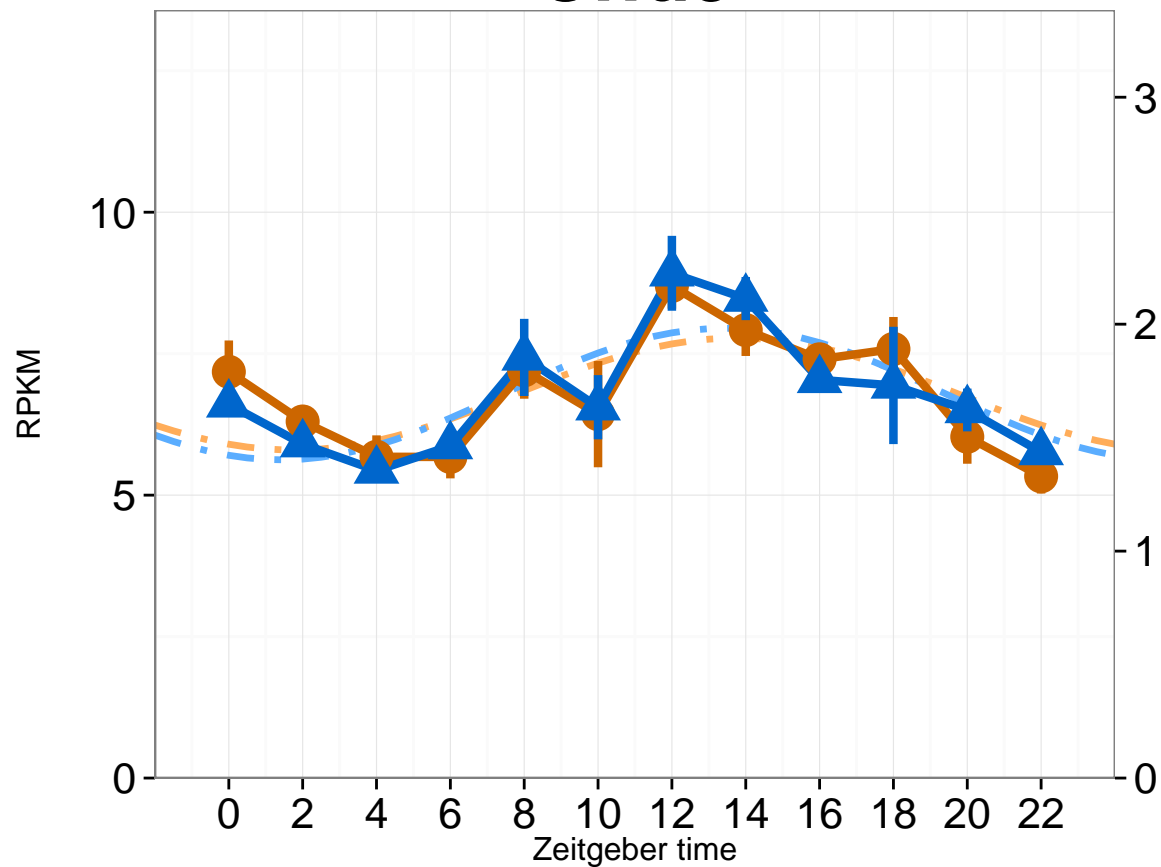

## Chd9

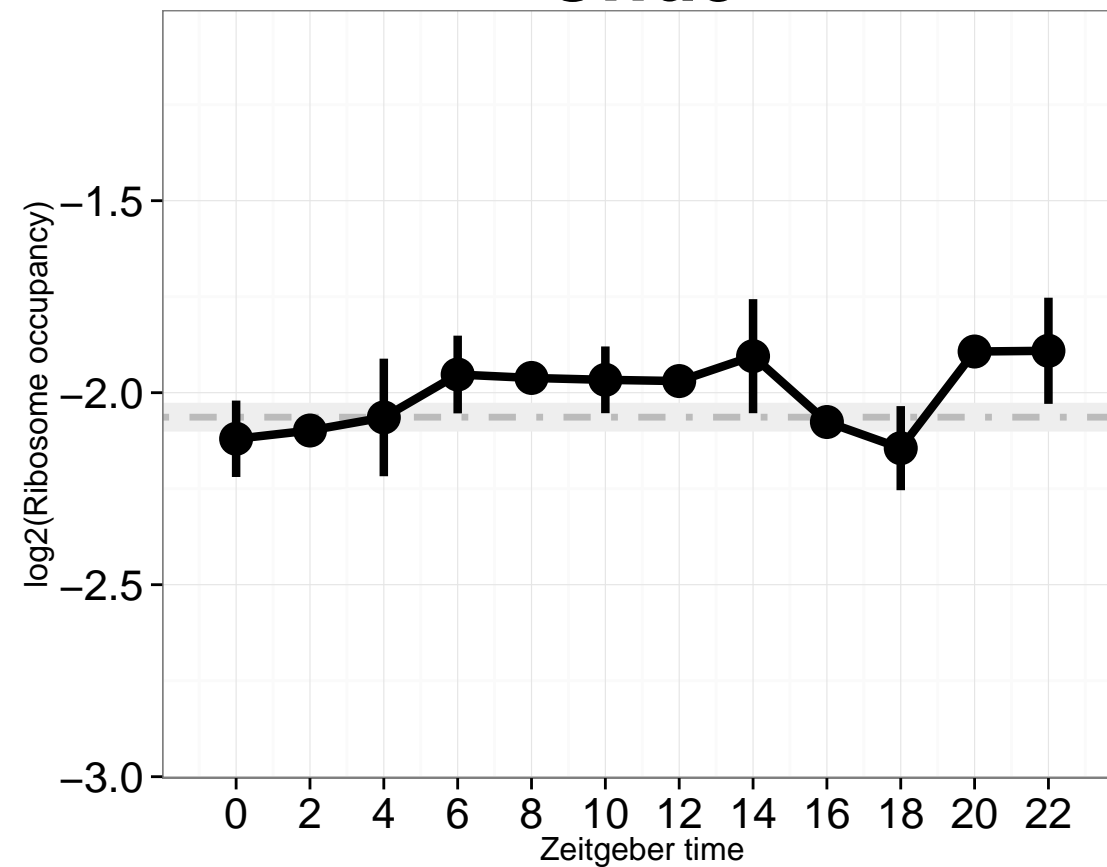

Supplement: SuppDataset_1.zip [file Chd9_set_A.pdf › Supplemental Dataset 1/A-mRNA_nonrhyth_translation_nonrhyth/Chd9_set_A.pdf]

## Chdh

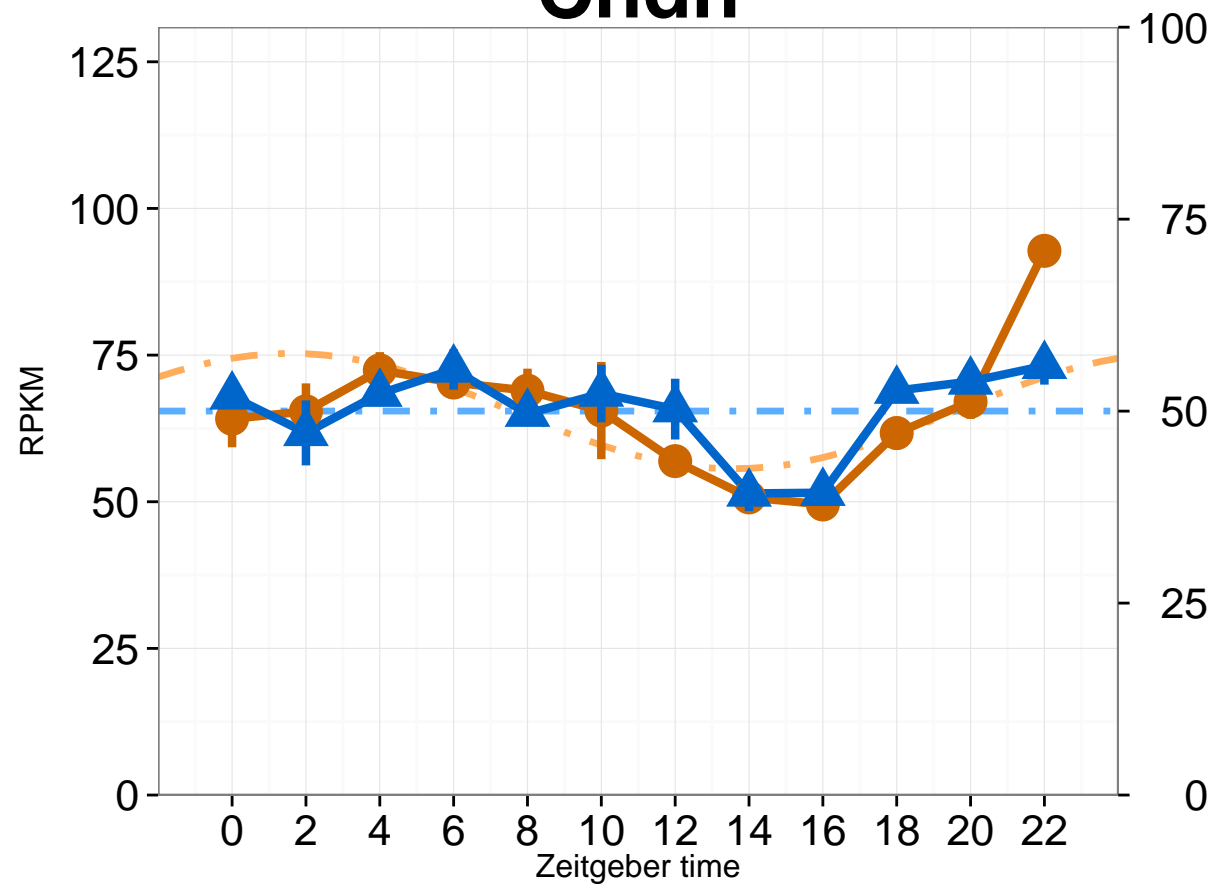

## Chdh

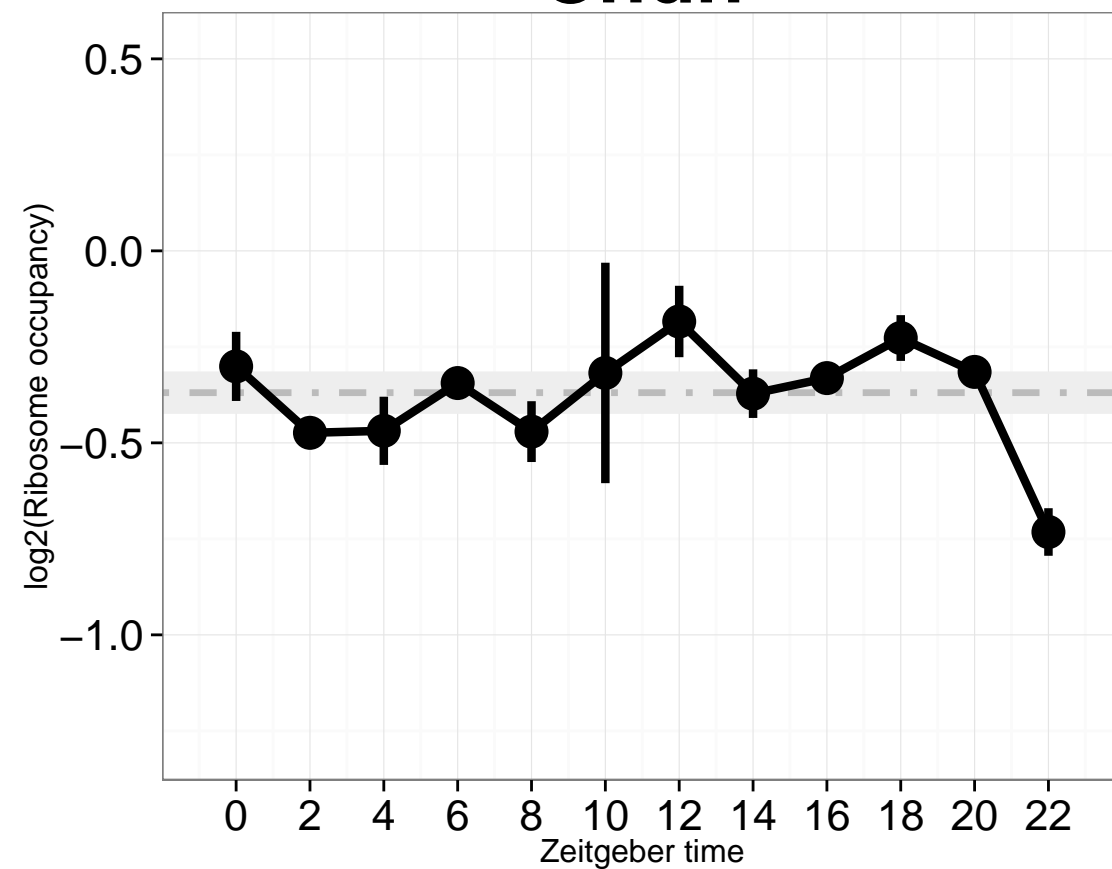

Supplement: SuppDataset_1.zip [file Chdh_set_A.pdf › Supplemental Dataset 1/A-mRNA_nonrhyth_translation_nonrhyth/Chdh_set_A.pdf]

## Chek2

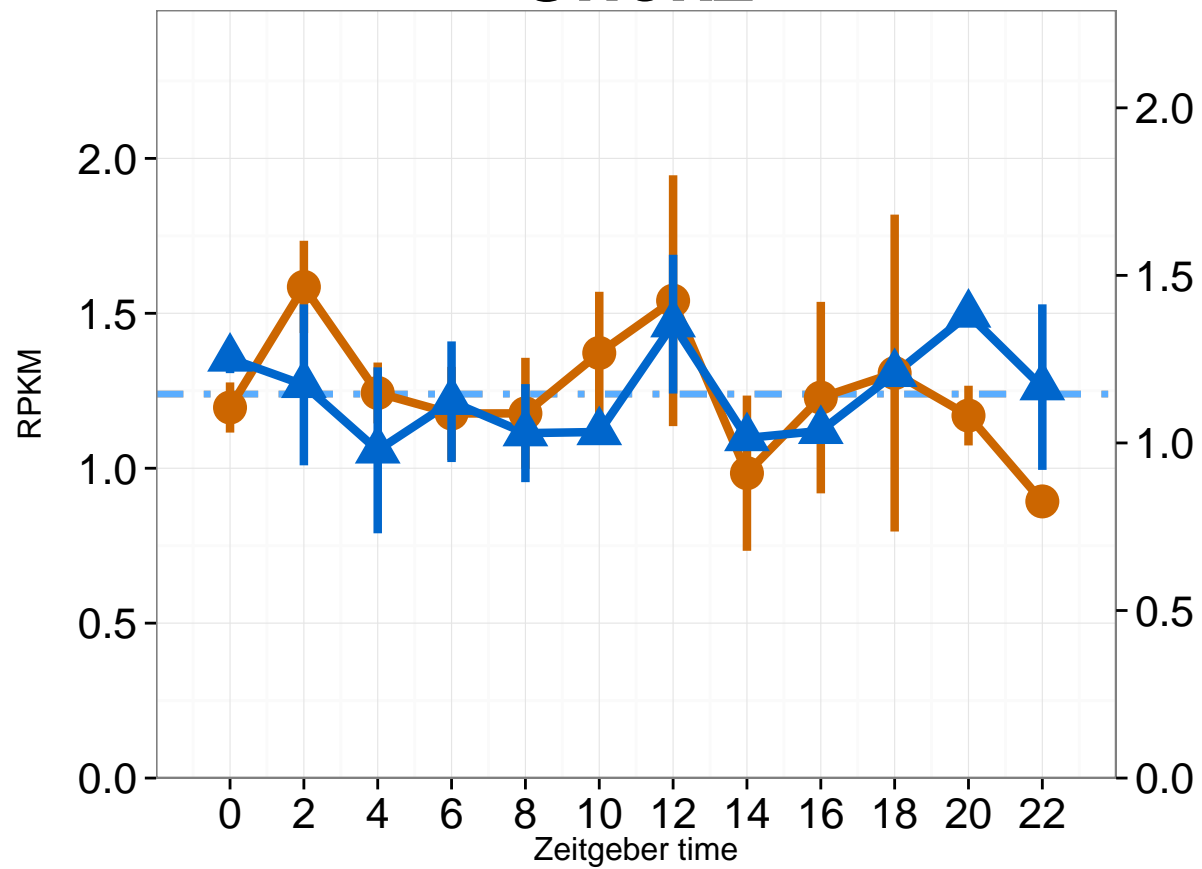

## Chek2

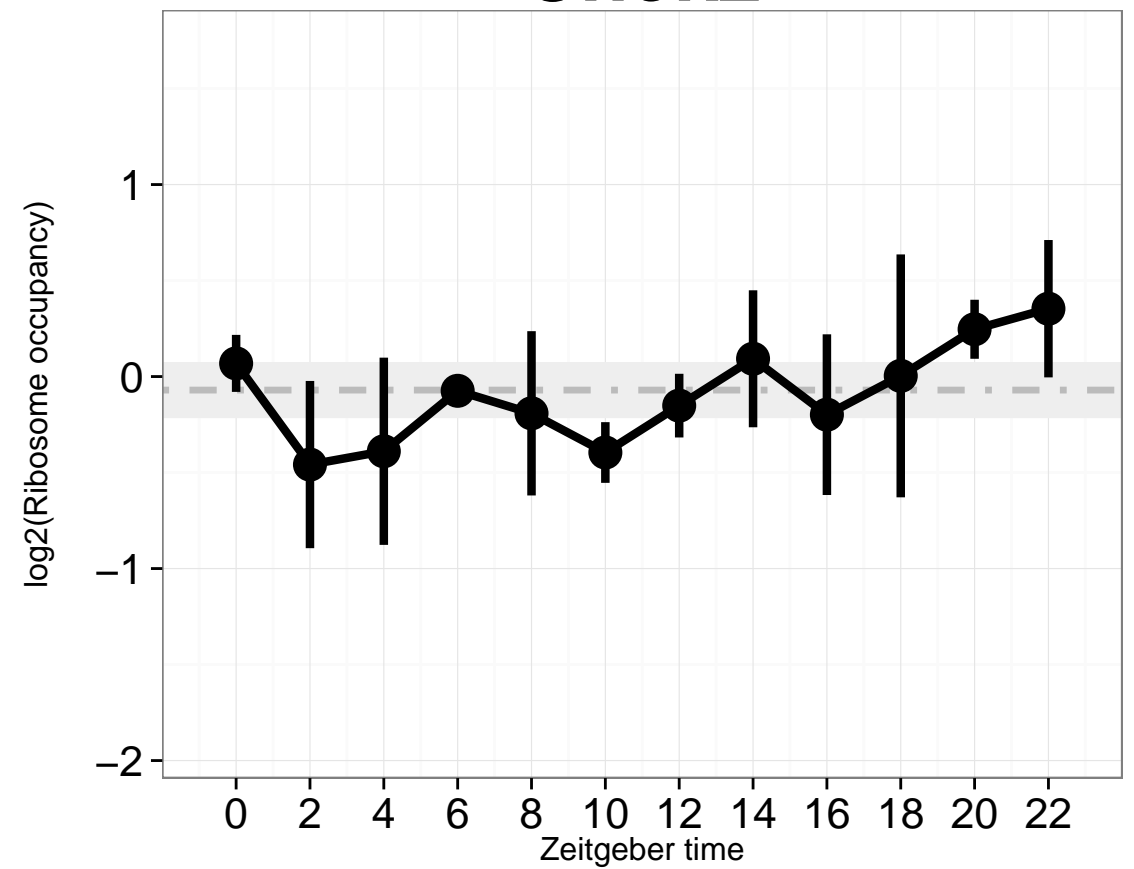

Supplement: SuppDataset_1.zip [file Chek2_set_A.pdf › Supplemental Dataset 1/A-mRNA_nonrhyth_translation_nonrhyth/Chek2_set_A.pdf]

## Cherp

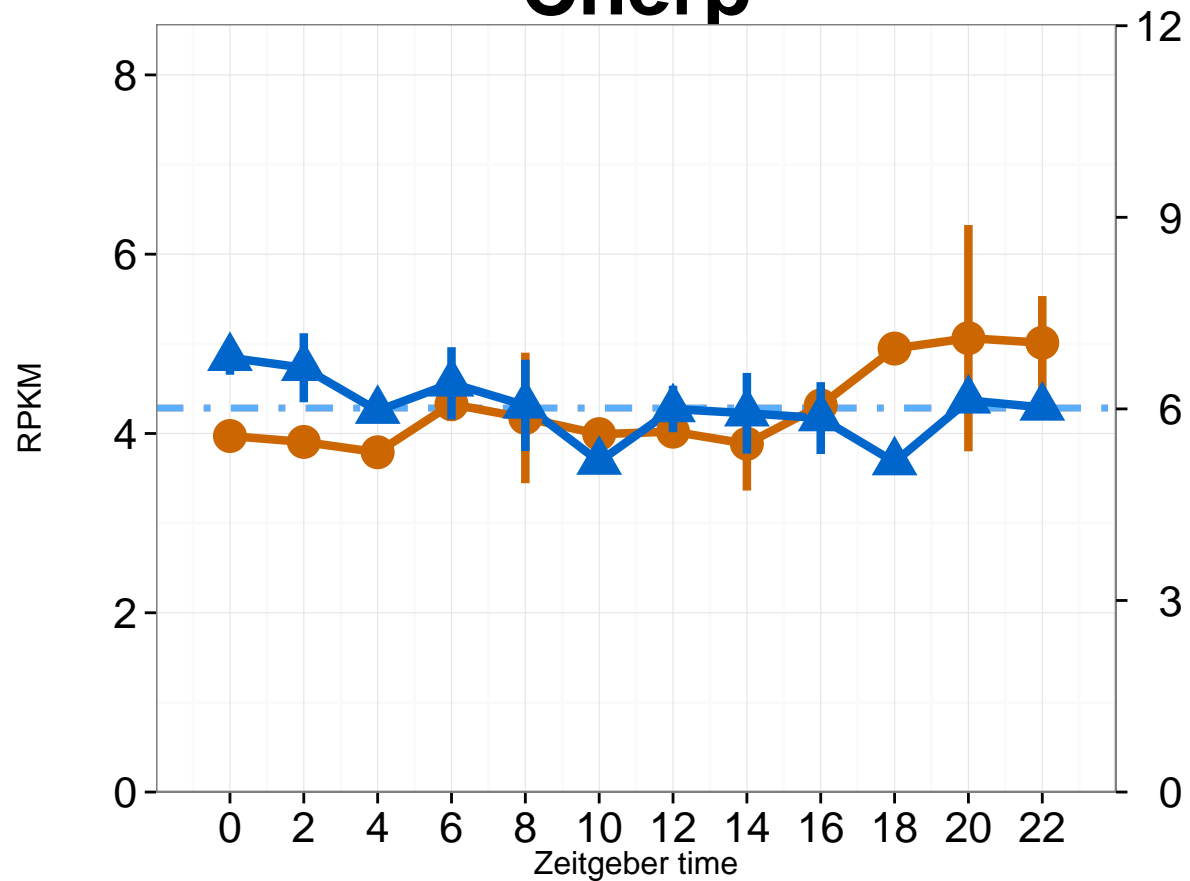

## Cherp

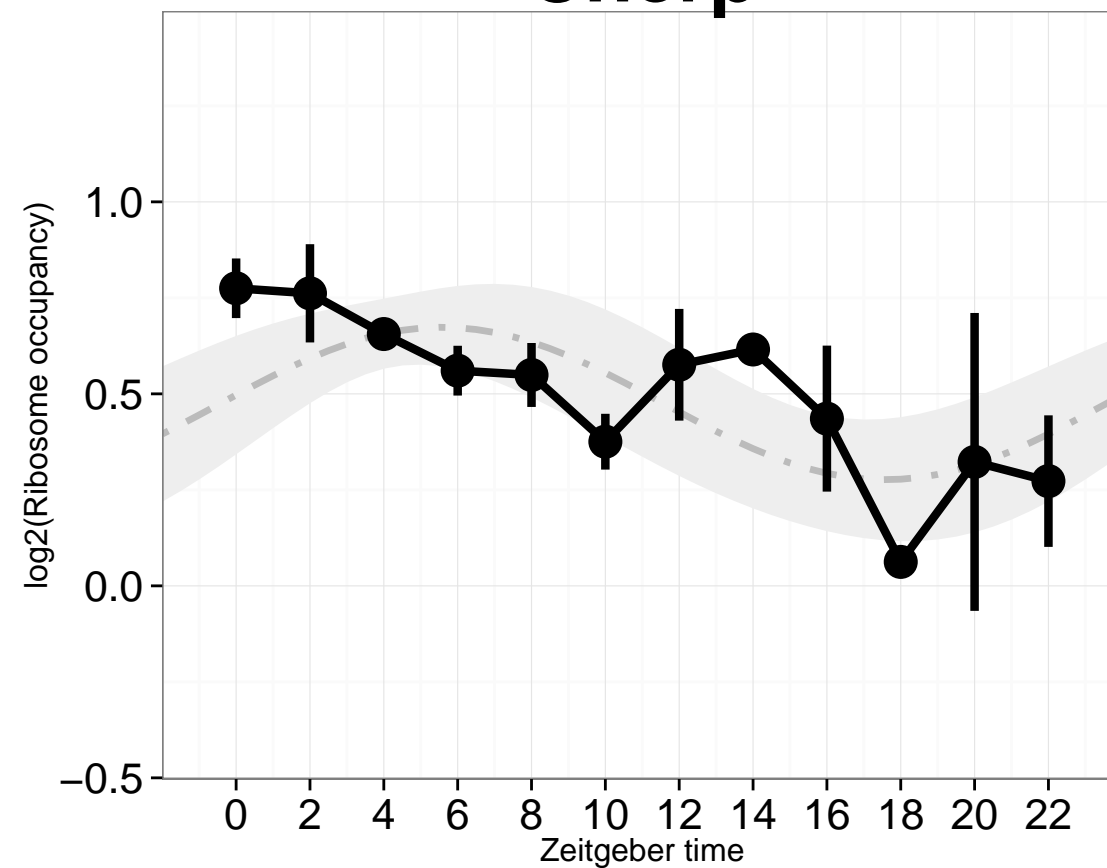

Supplement: SuppDataset_1.zip [file Cherp_set_A.pdf › Supplemental Dataset 1/A-mRNA_nonrhyth_translation_nonrhyth/Cherp_set_A.pdf]

## Chfr

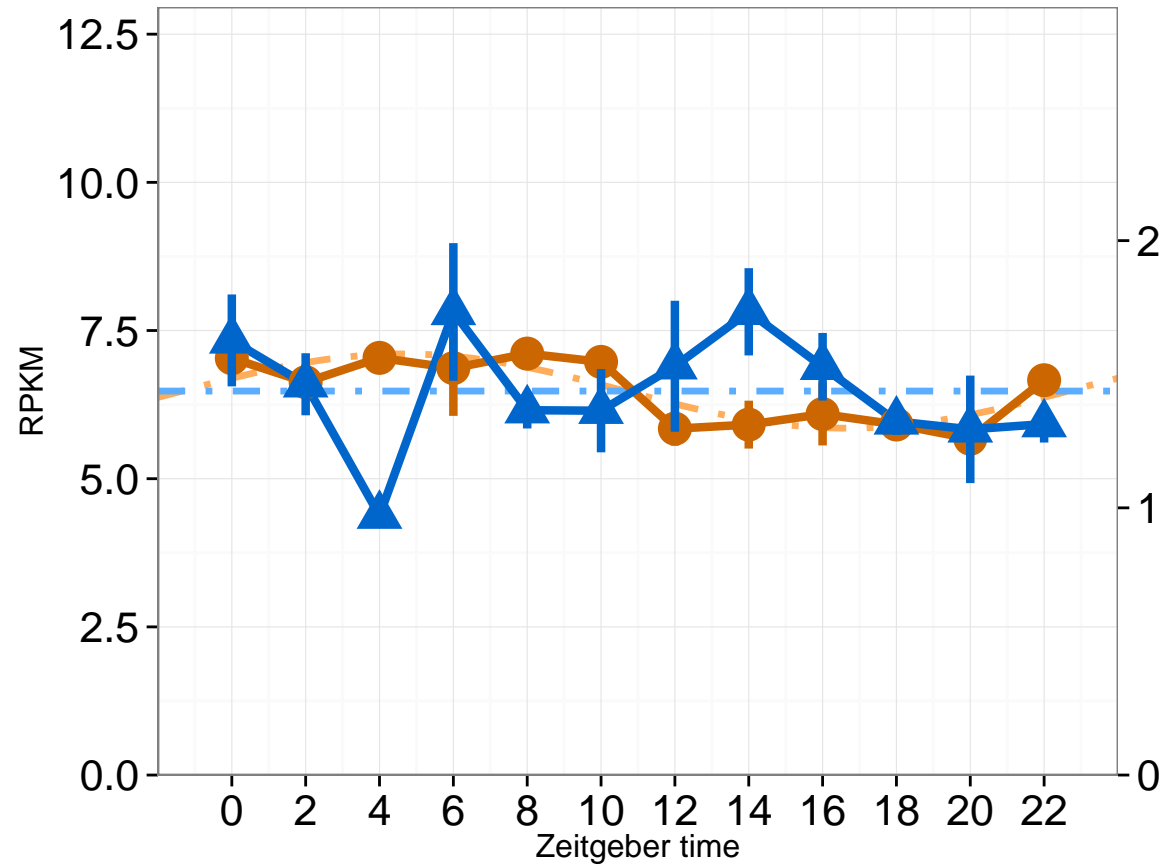

## Chfr

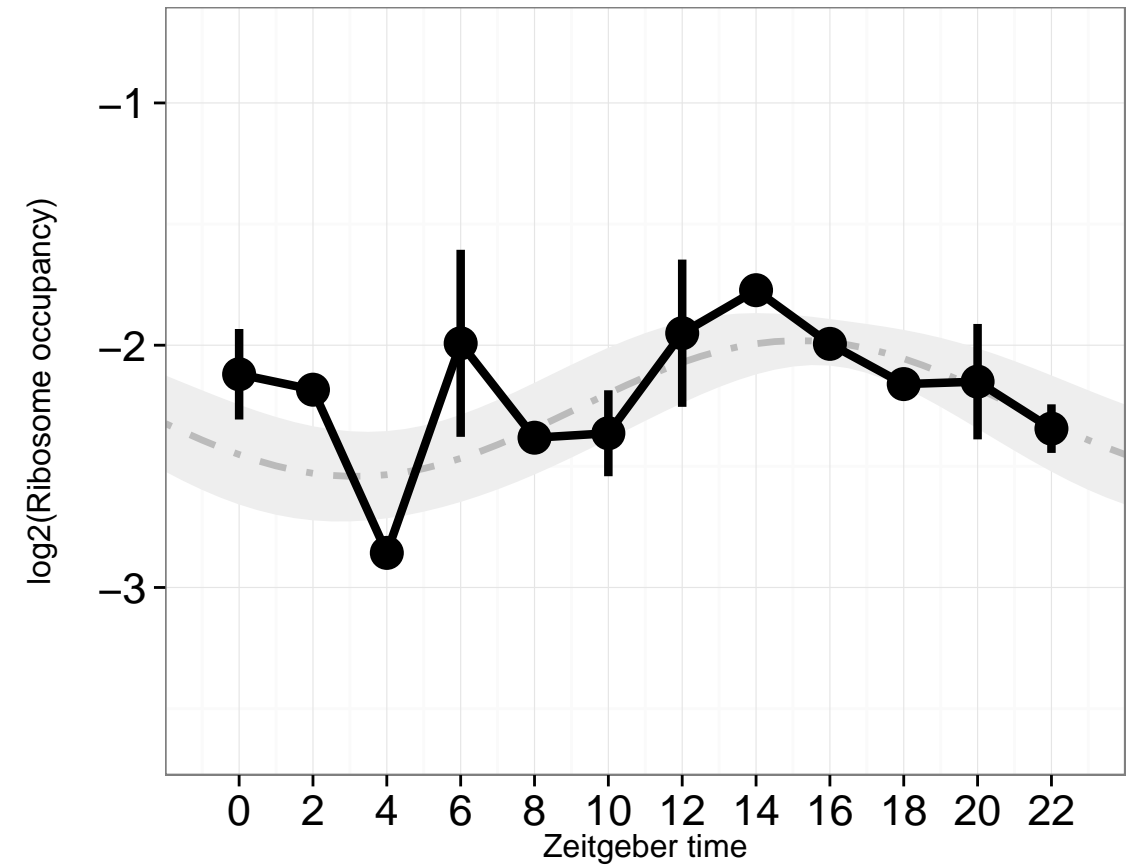

Supplement: SuppDataset_1.zip [file Chfr_set_A.pdf › Supplemental Dataset 1/A-mRNA_nonrhyth_translation_nonrhyth/Chfr_set_A.pdf]

## Chid1

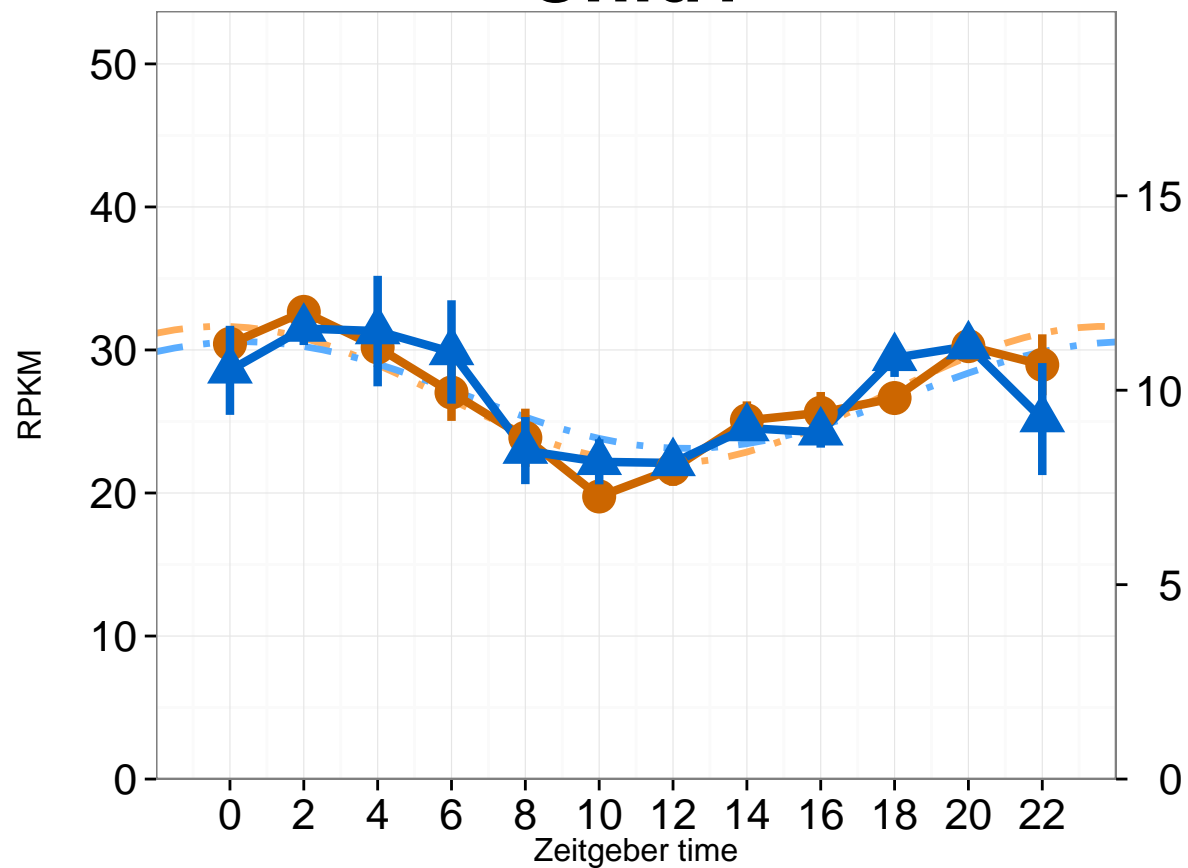

## Chid1

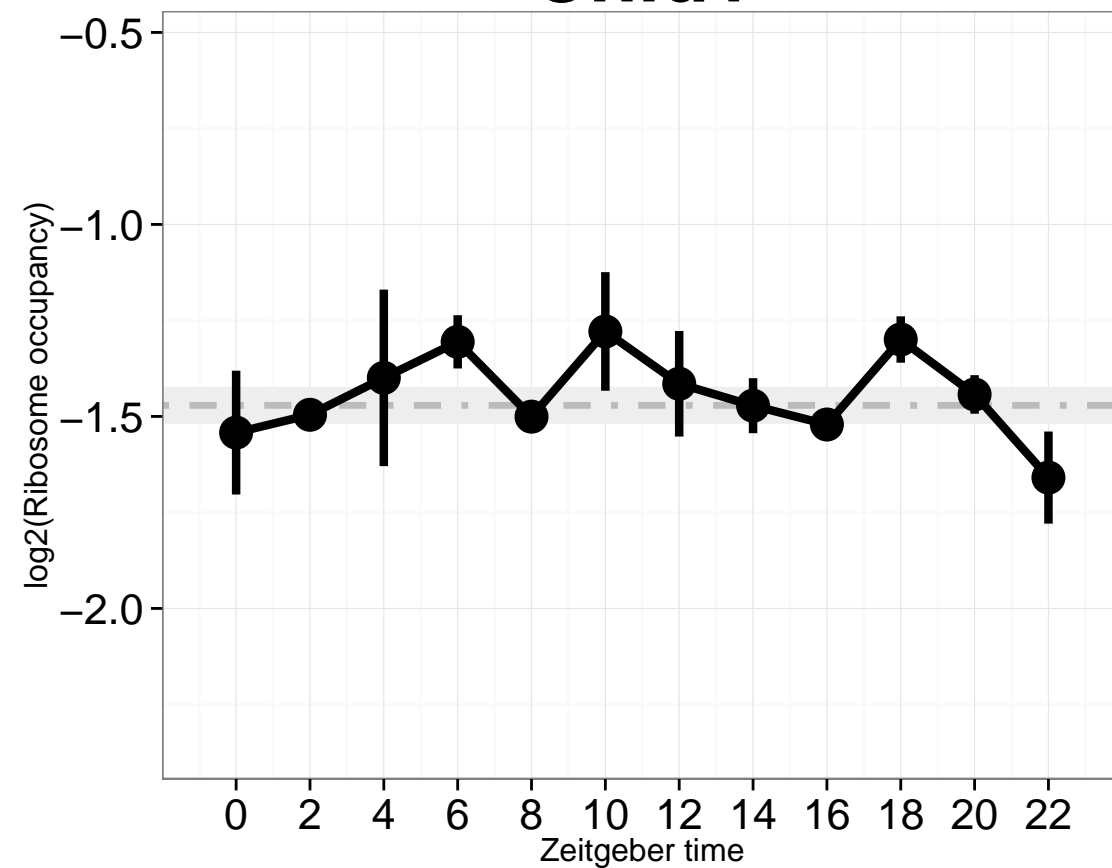

Supplement: SuppDataset_1.zip [file Chid1_set_A.pdf › Supplemental Dataset 1/A-mRNA_nonrhyth_translation_nonrhyth/Chid1_set_A.pdf]

## Chm

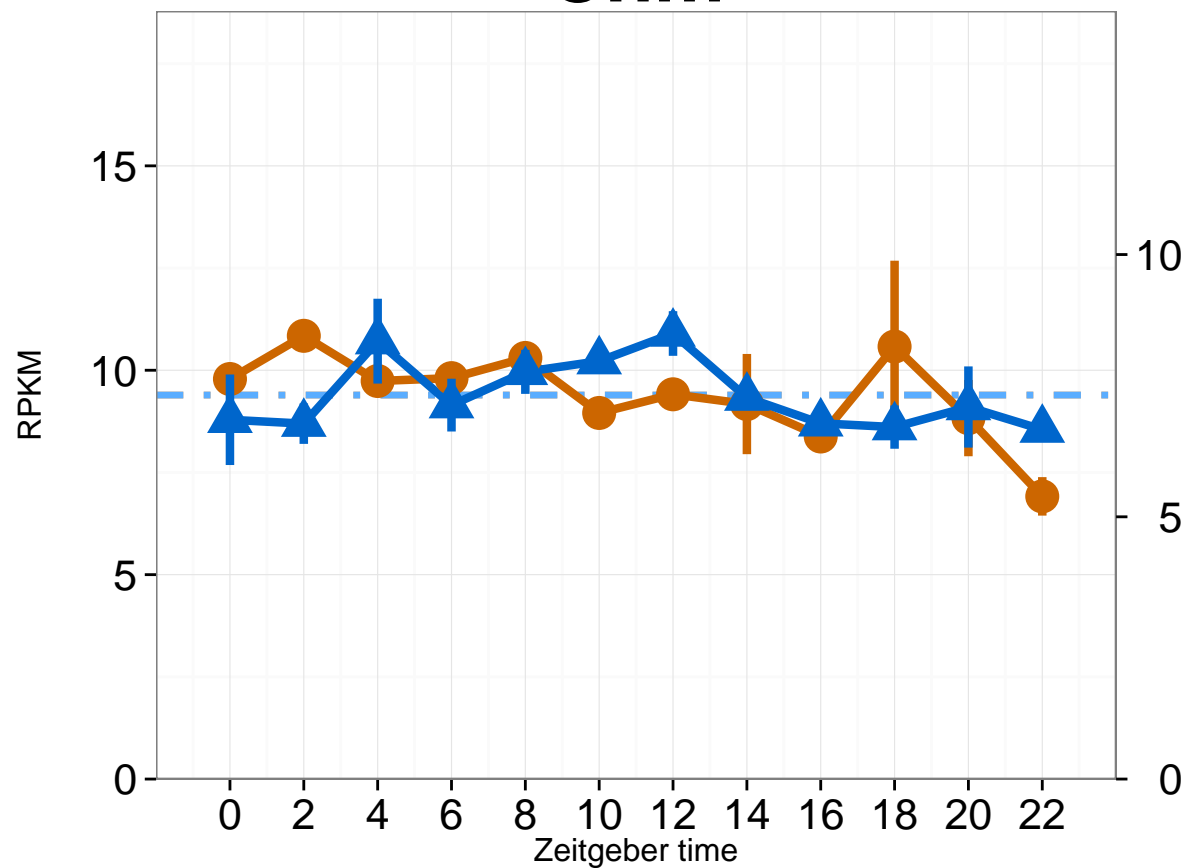

## Chm

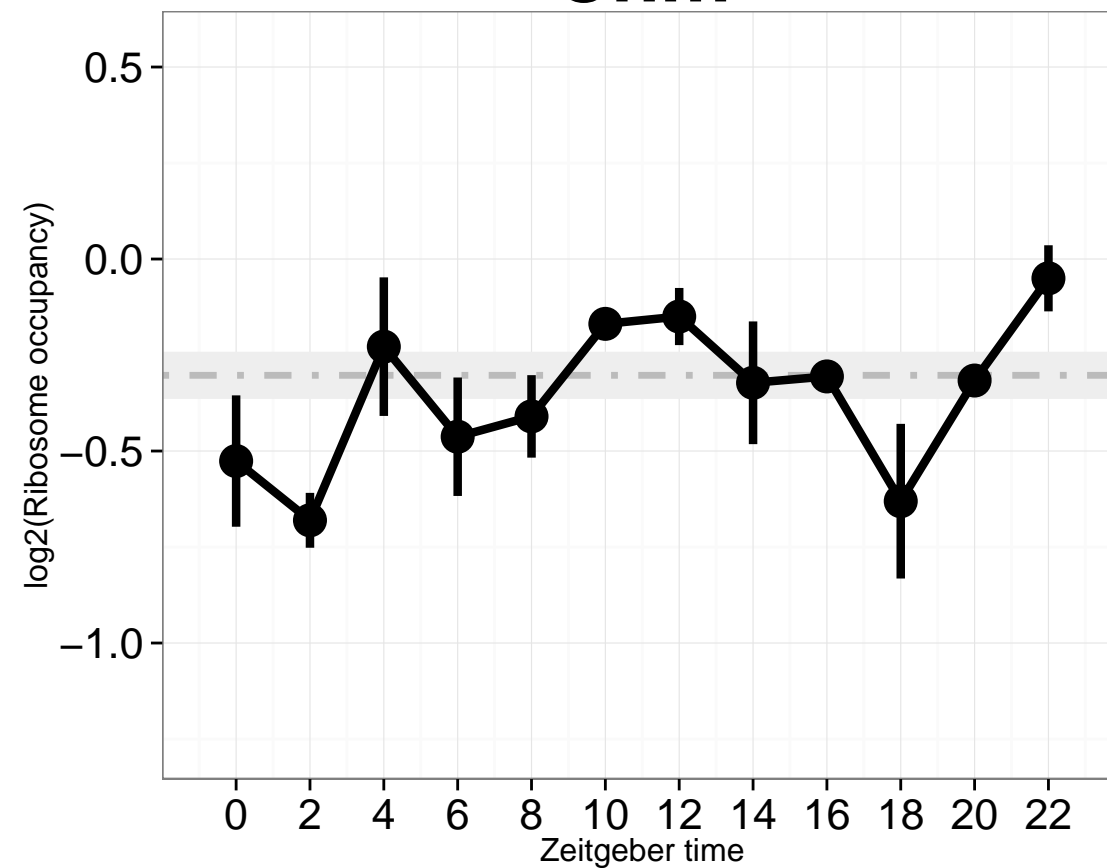

Supplement: SuppDataset_1.zip [file Chm_set_A.pdf › Supplemental Dataset 1/A-mRNA_nonrhyth_translation_nonrhyth/Chm_set_A.pdf]

## Chml

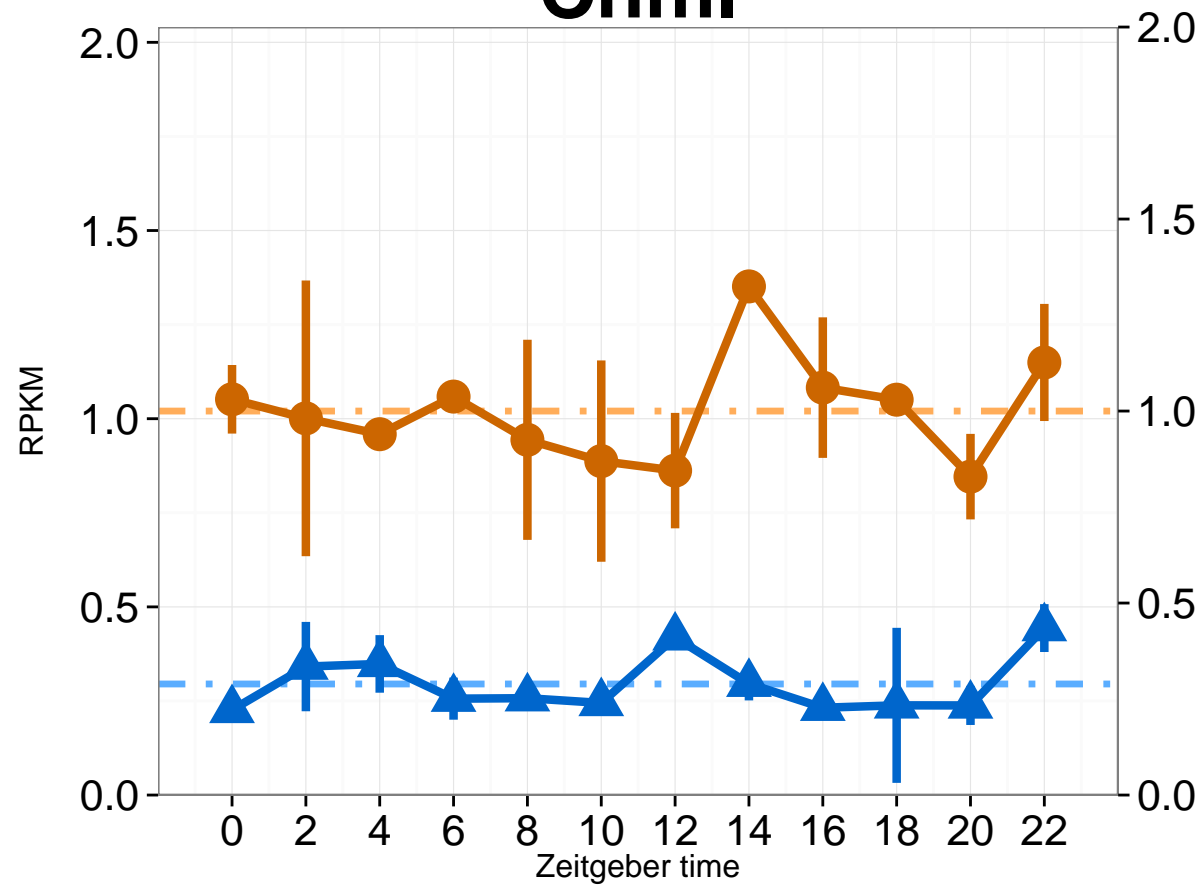

## Chml

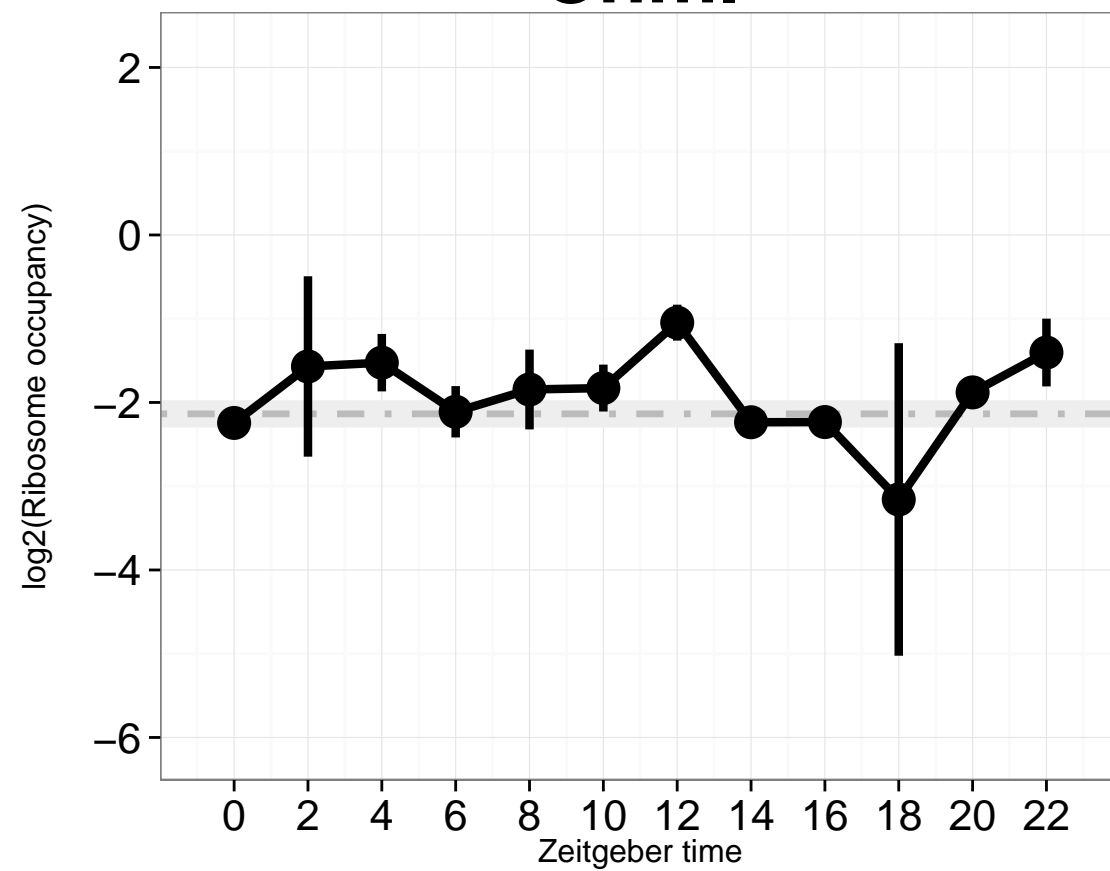

Supplement: SuppDataset_1.zip [file Chml_set_A.pdf › Supplemental Dataset 1/A-mRNA_nonrhyth_translation_nonrhyth/Chml_set_A.pdf]

## Chmp2a

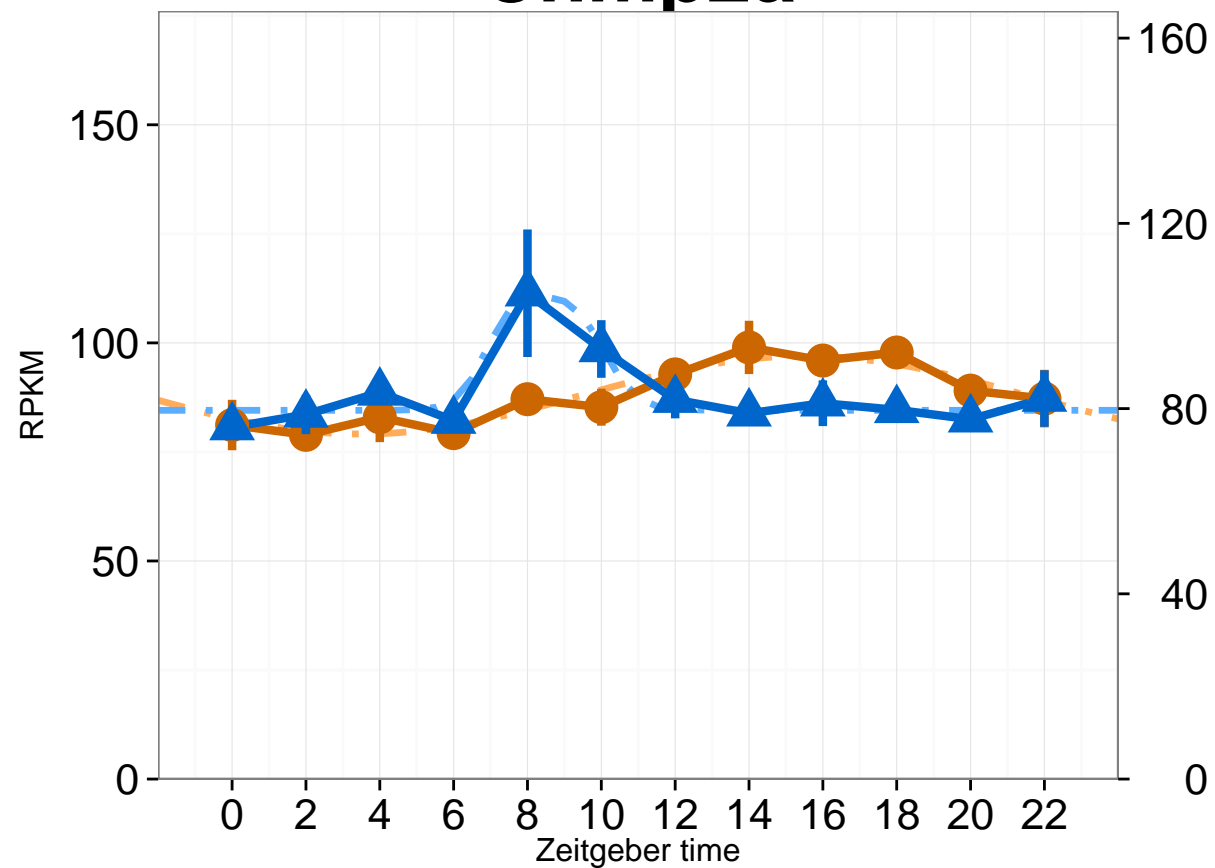

## Chmp2a

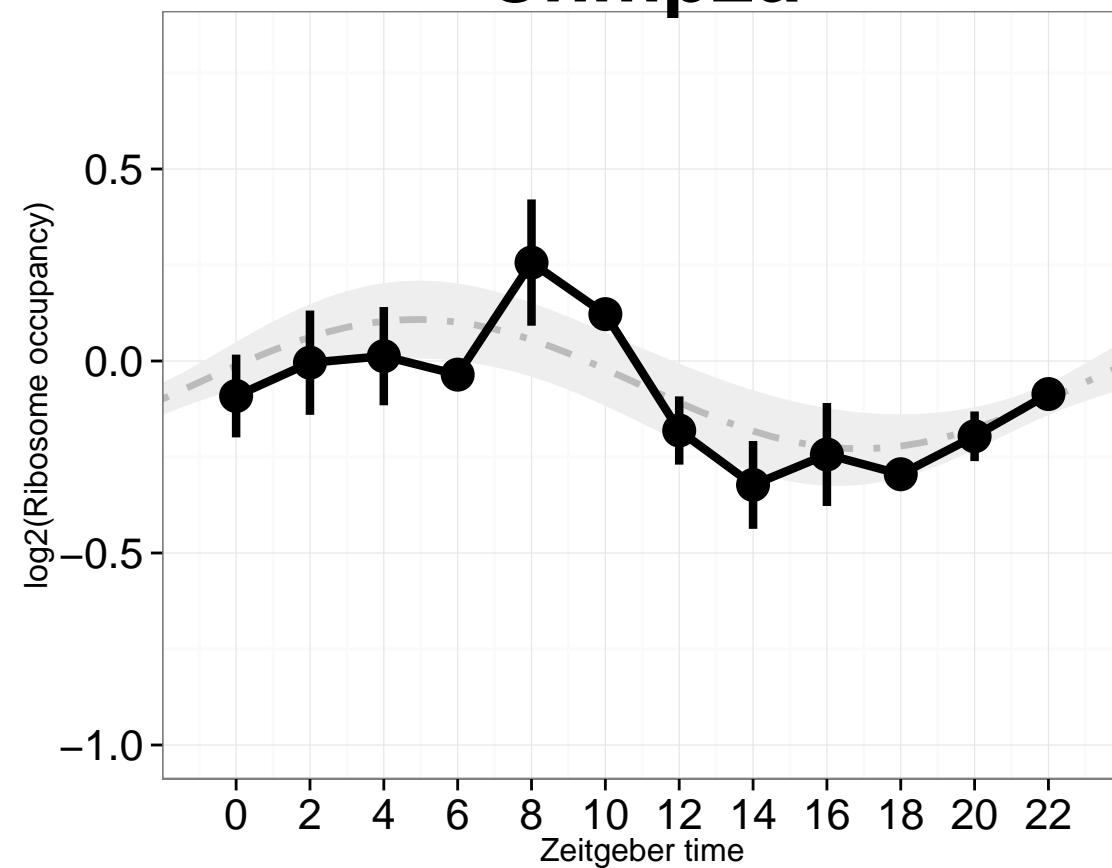

Supplement: SuppDataset_1.zip [file Chmp2a_set_A.pdf › Supplemental Dataset 1/A-mRNA_nonrhyth_translation_nonrhyth/Chmp2a_set_A.pdf]

## Chmp2b

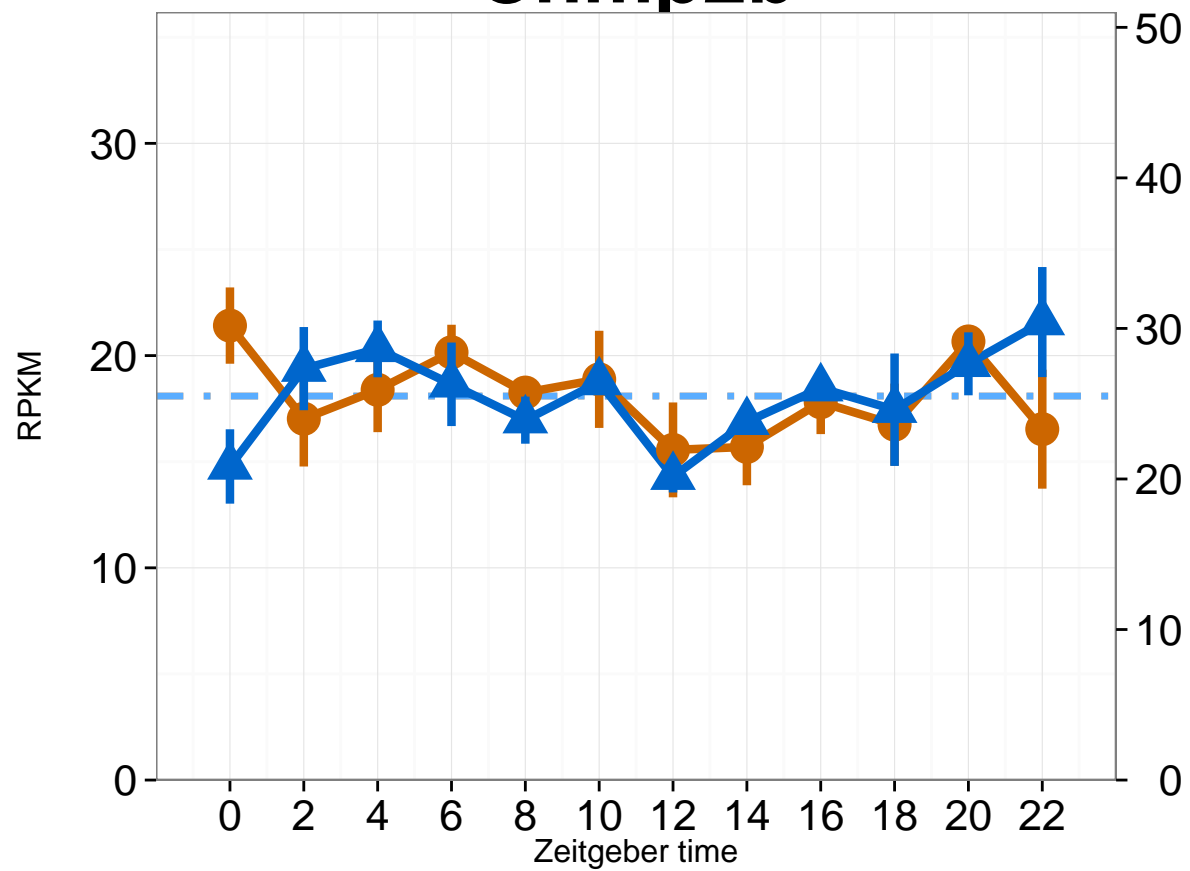

## Chmp2b

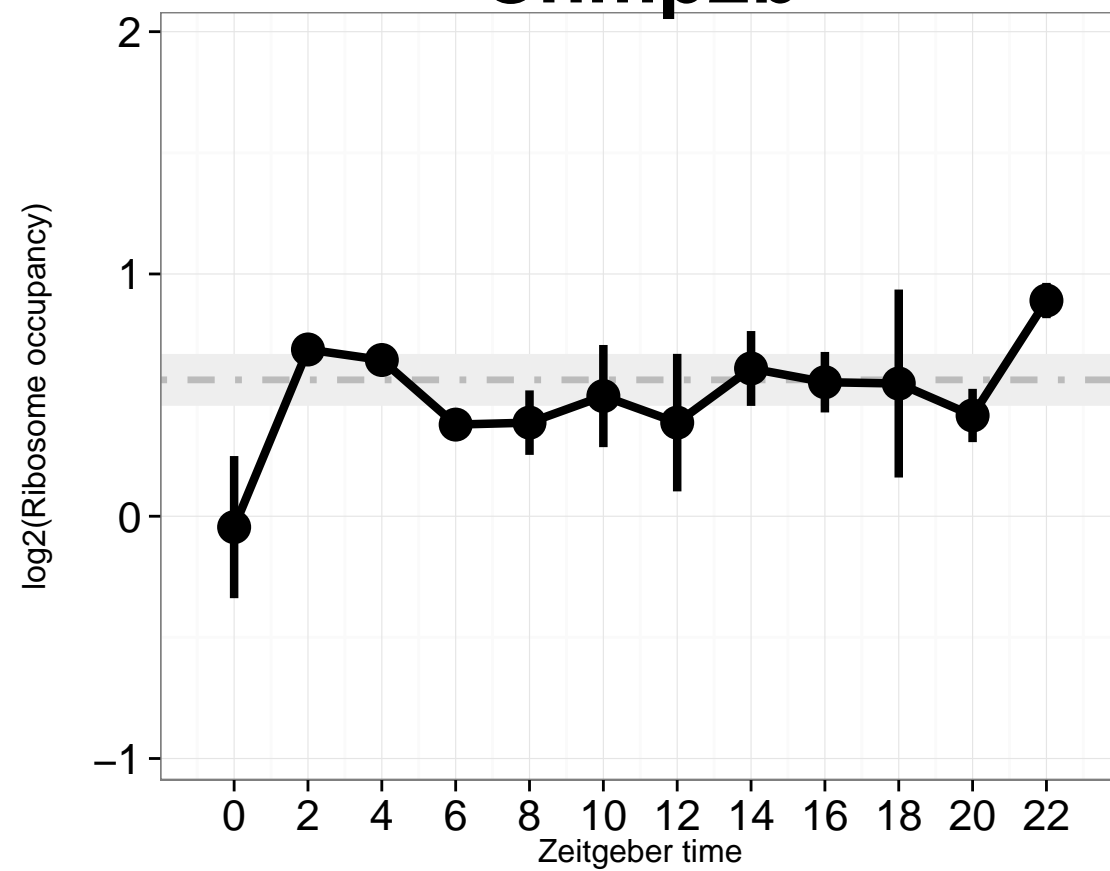

Supplement: SuppDataset_1.zip [file Chmp2b_set_A.pdf › Supplemental Dataset 1/A-mRNA_nonrhyth_translation_nonrhyth/Chmp2b_set_A.pdf]

## Chmp3

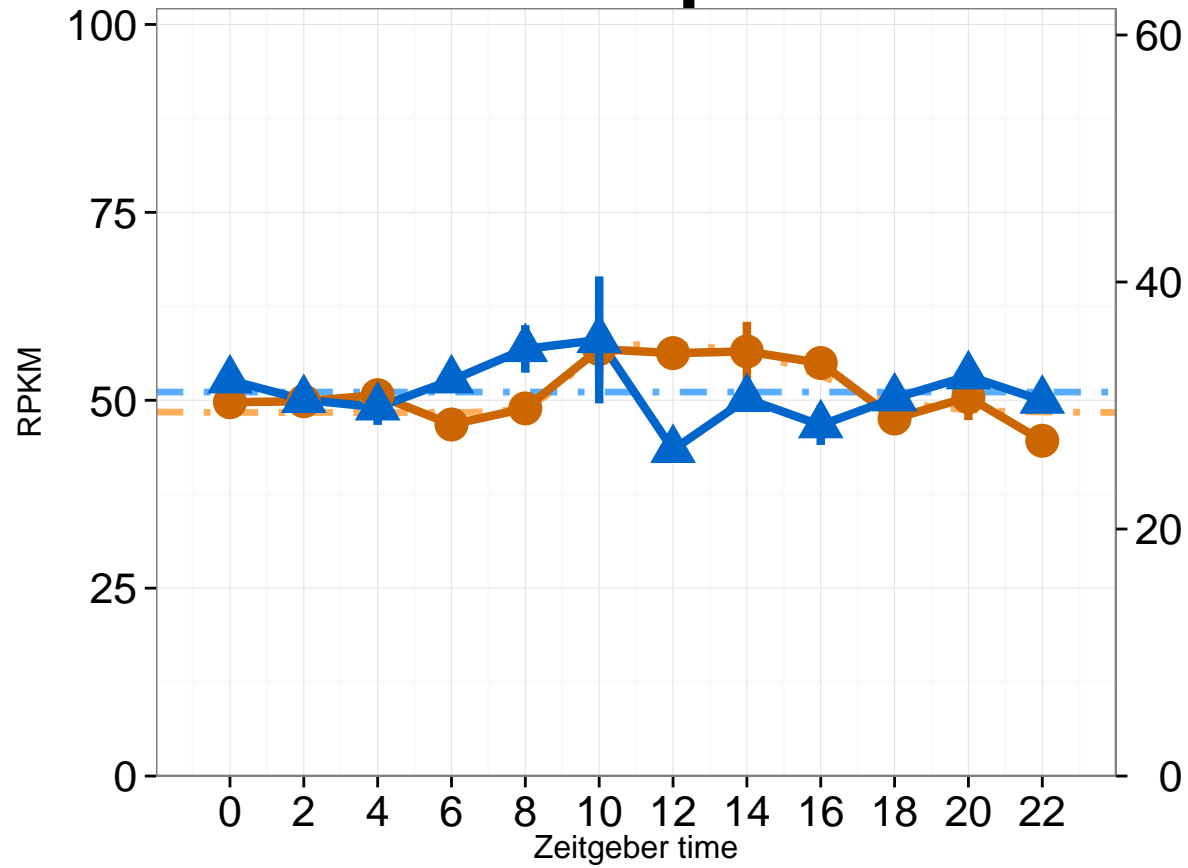

## Chmp3

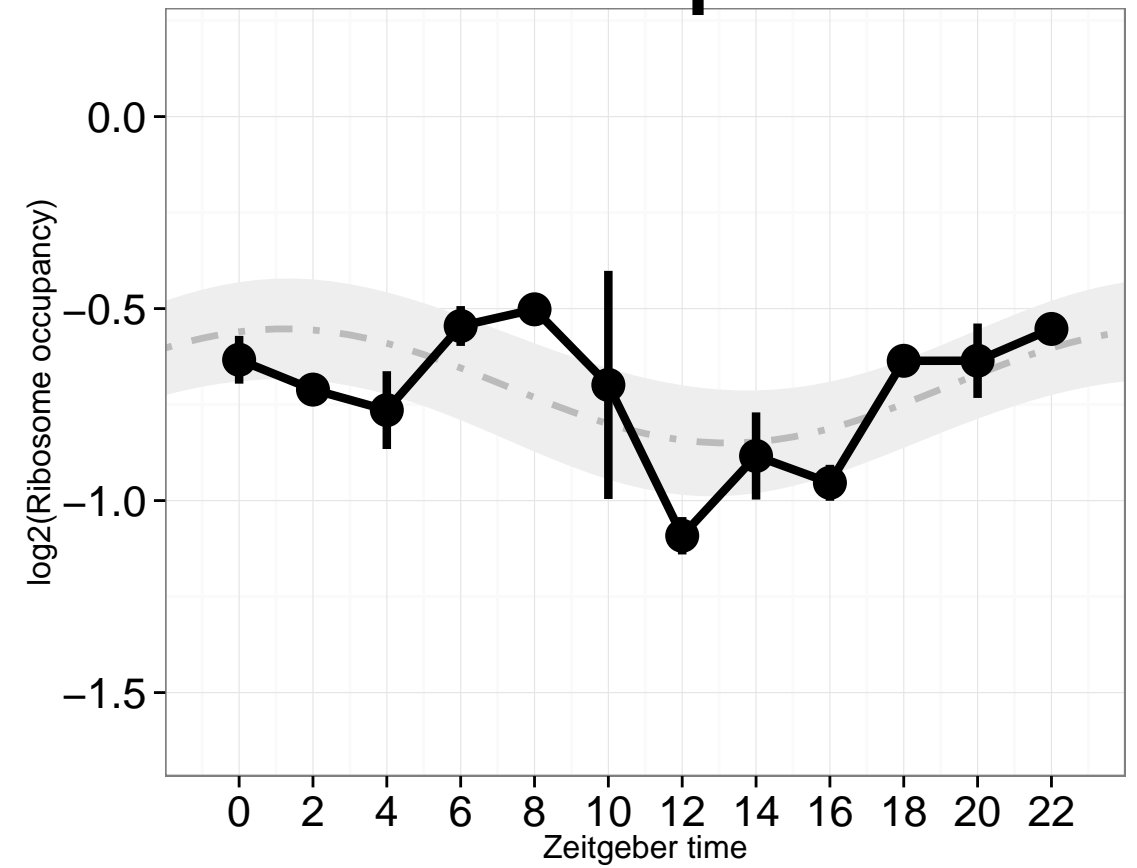

Supplement: SuppDataset_1.zip [file Chmp3_set_A.pdf › Supplemental Dataset 1/A-mRNA_nonrhyth_translation_nonrhyth/Chmp3_set_A.pdf]

# Chmp4b

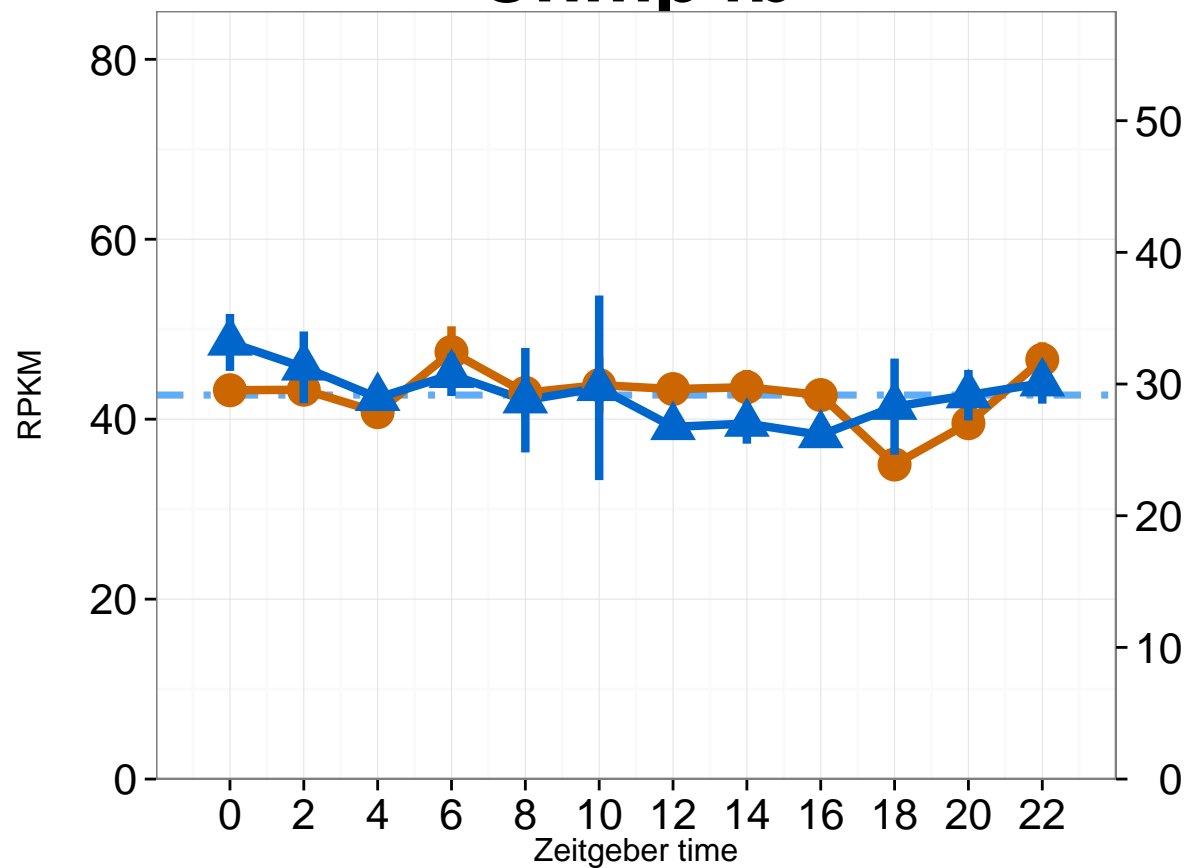

# Chmp4b

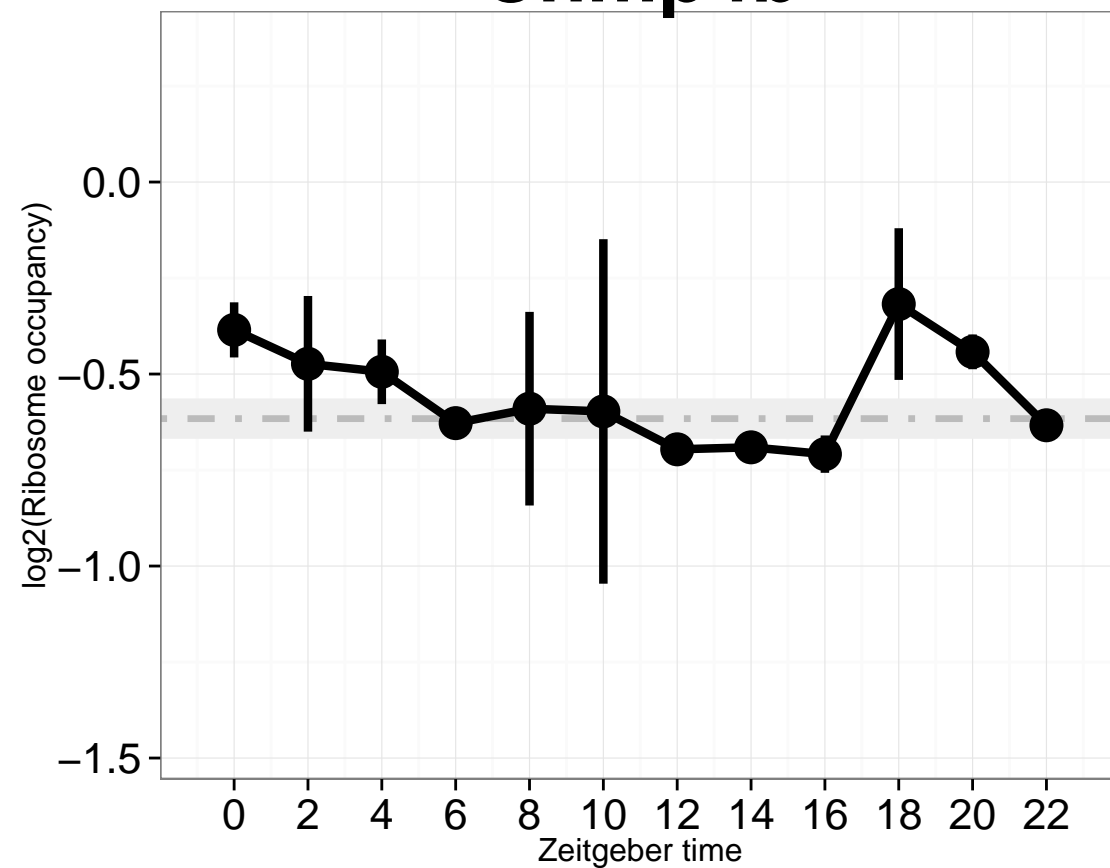

Supplement: SuppDataset_1.zip [file Chmp4b_set_A.pdf › Supplemental Dataset 1/A-mRNA_nonrhyth_translation_nonrhyth/Chmp4b_set_A.pdf]

**Chmp4c TR**

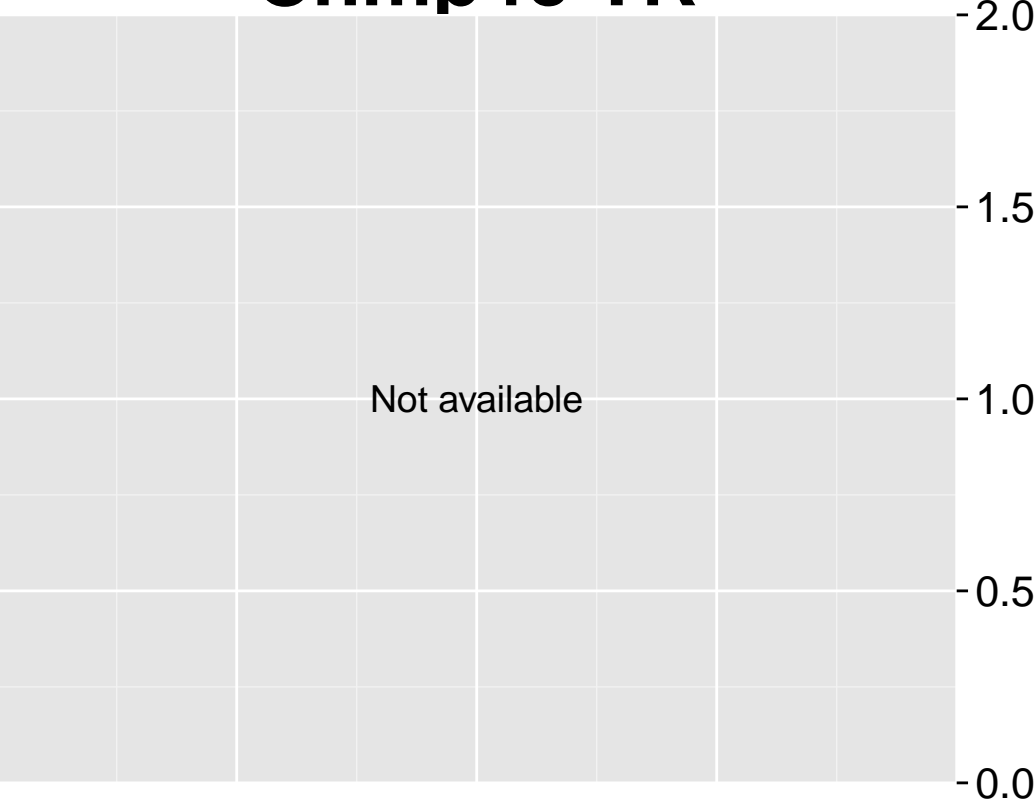

**Chmp4c log2(Ribosome occupanc**

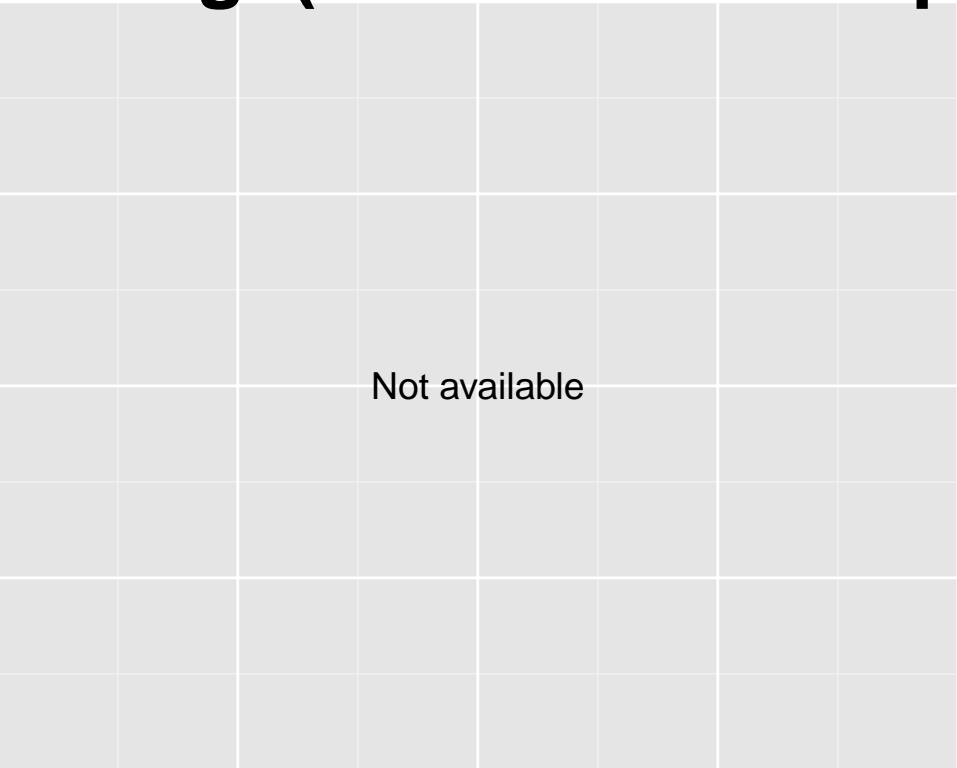

Supplement: SuppDataset_1.zip [file Chmp4c_set_A.pdf › Supplemental Dataset 1/A-mRNA_nonrhyth_translation_nonrhyth/Chmp4c_set_A.pdf]

## Chmp5

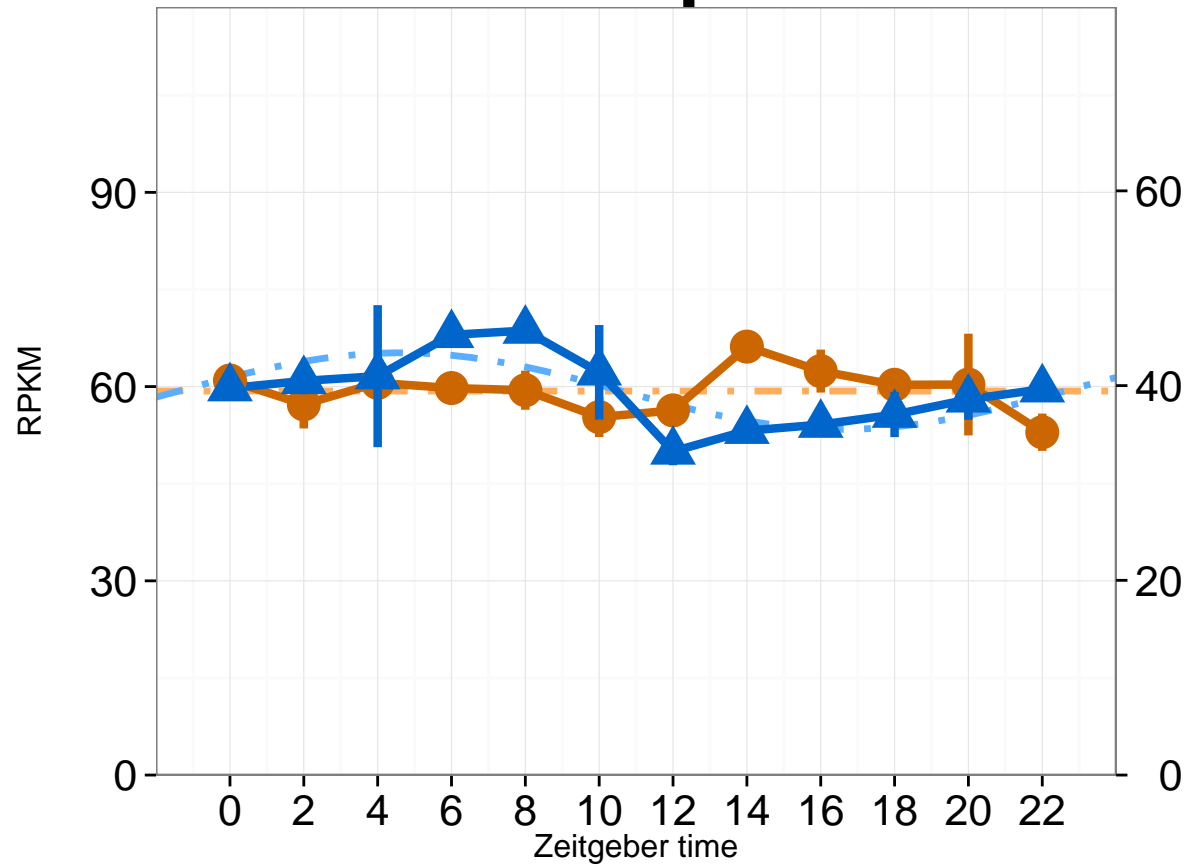

## Chmp5

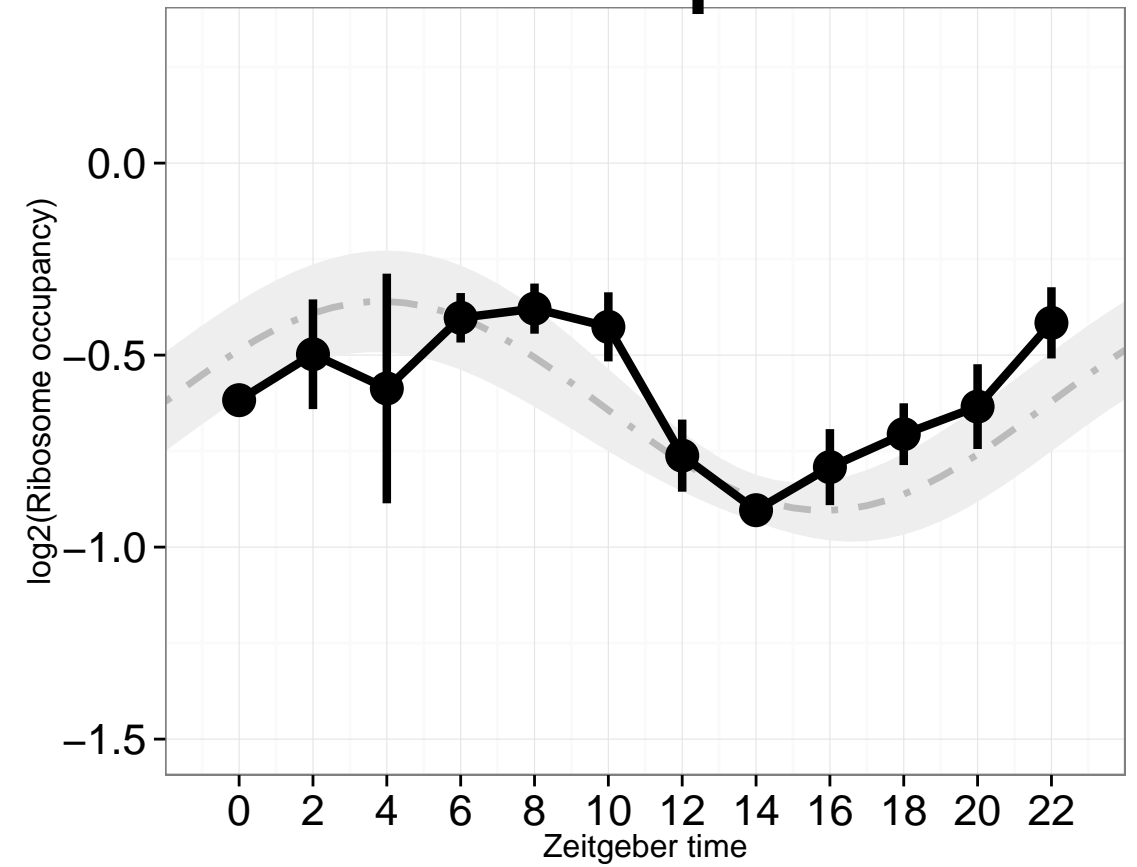

Supplement: SuppDataset_1.zip [file Chmp5_set_A.pdf › Supplemental Dataset 1/A-mRNA_nonrhyth_translation_nonrhyth/Chmp5_set_A.pdf]

## Chmp7

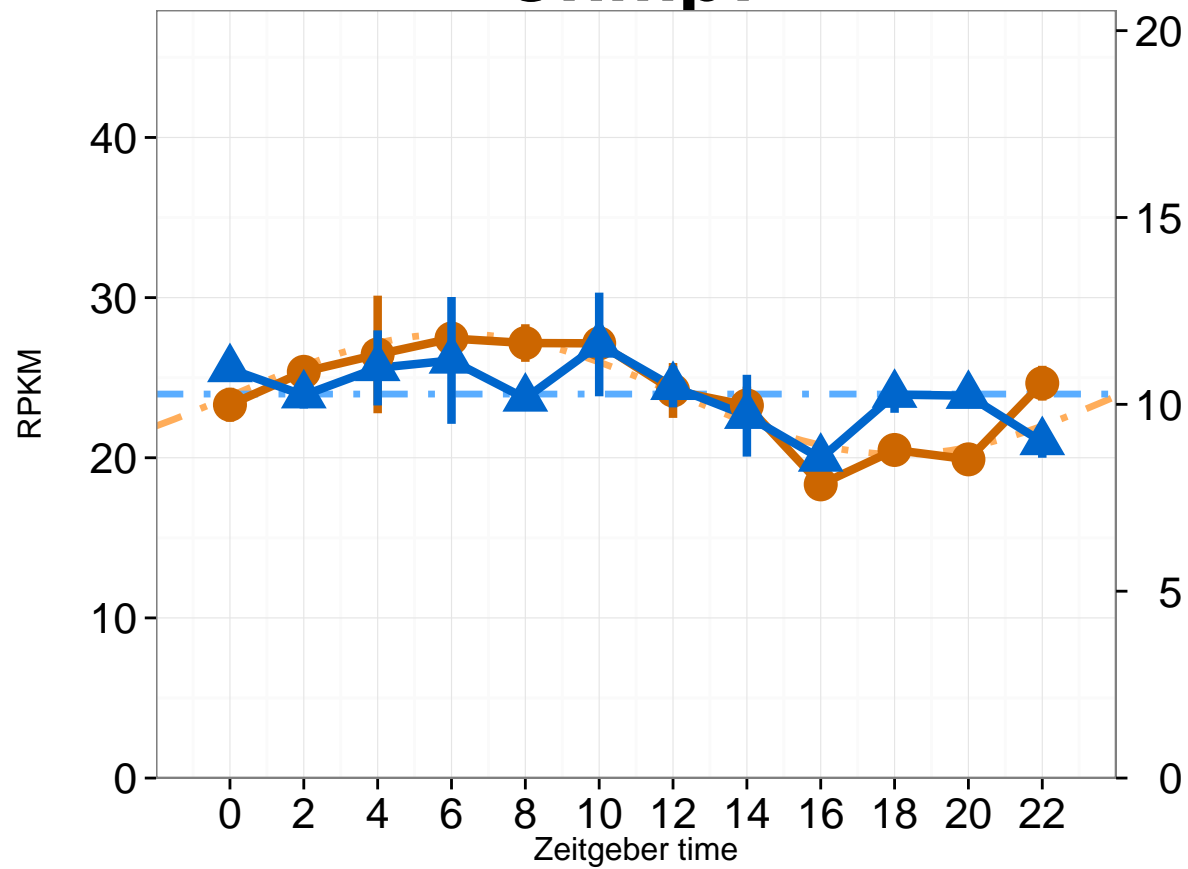

## Chmp7

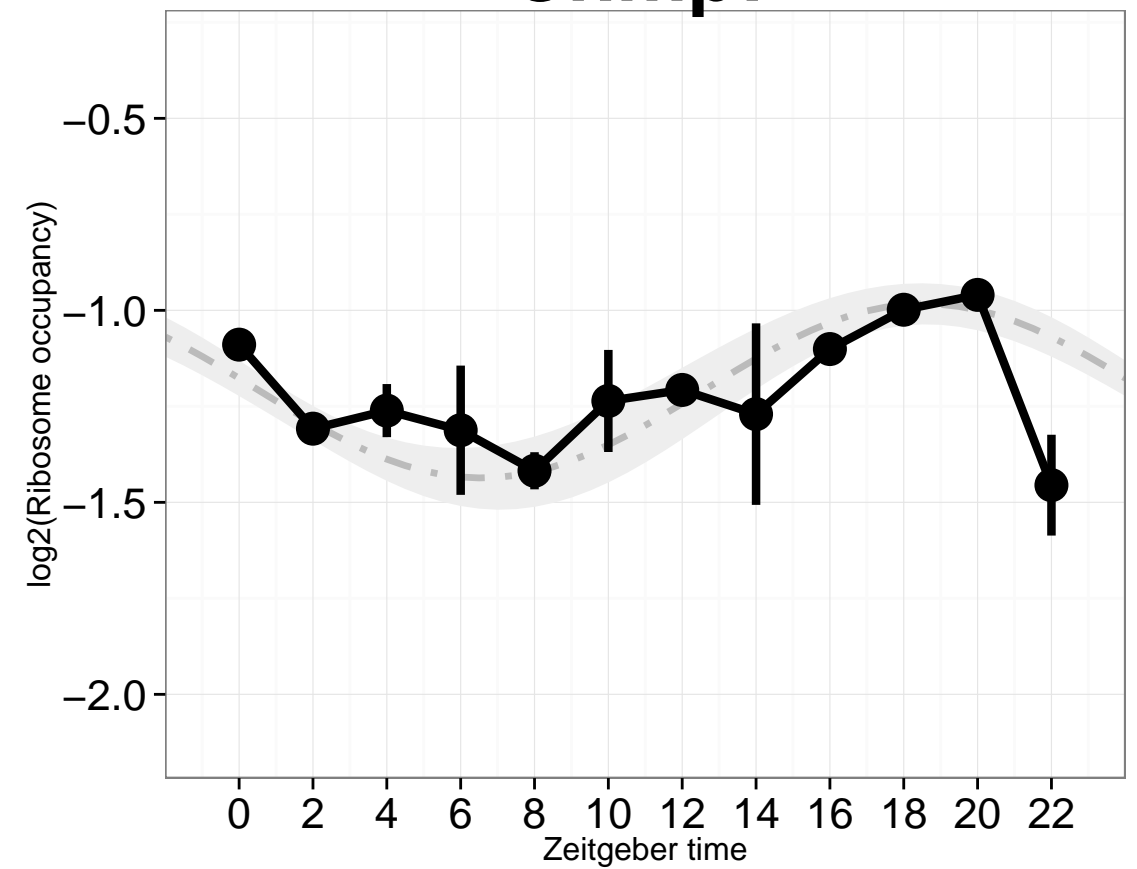

Supplement: SuppDataset_1.zip [file Chmp7_set_A.pdf › Supplemental Dataset 1/A-mRNA_nonrhyth_translation_nonrhyth/Chmp7_set_A.pdf]

# Chn2

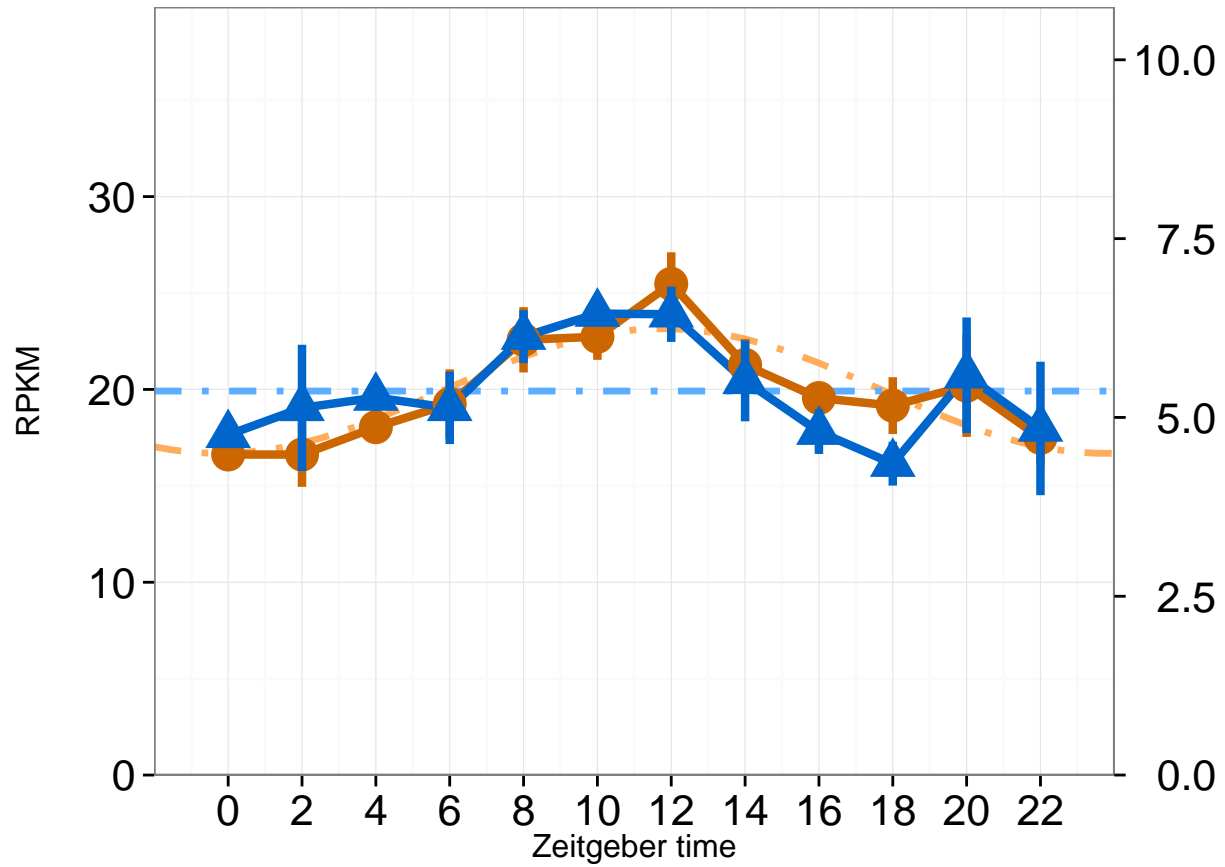

# Chn2

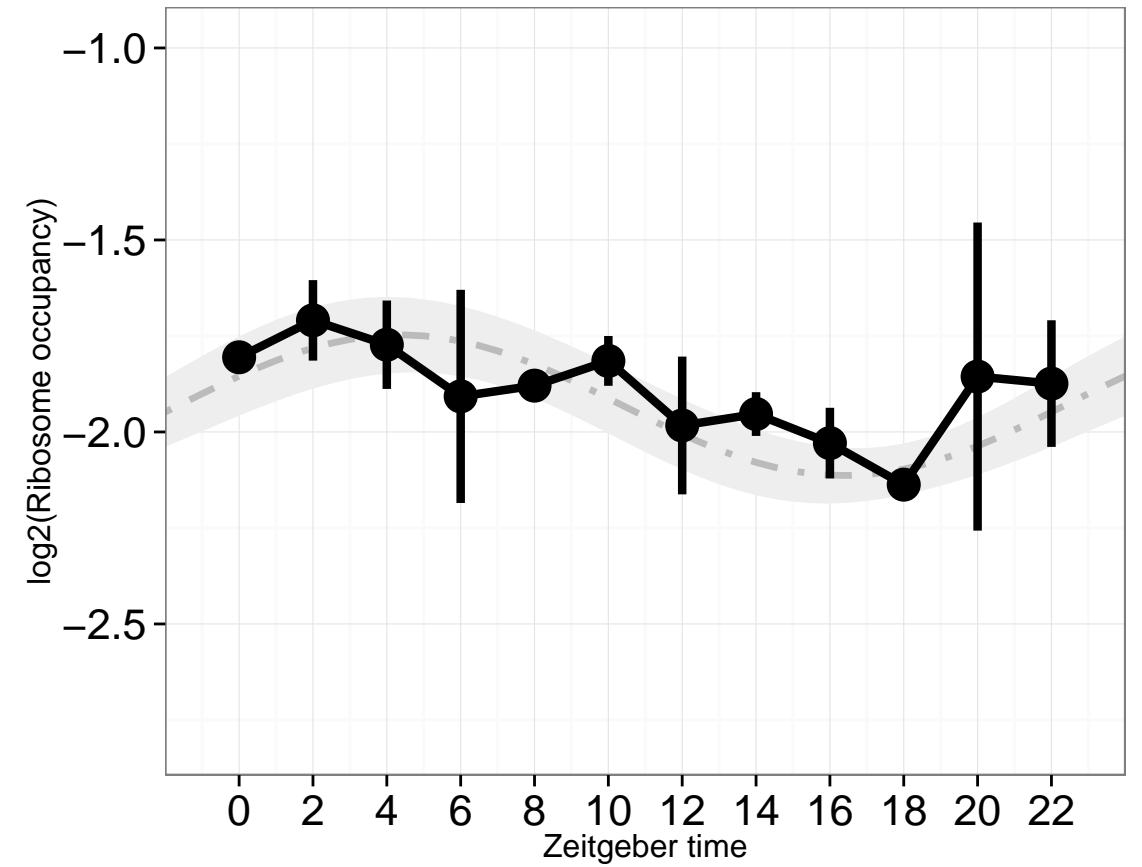

Supplement: SuppDataset_1.zip [file Chn2_set_A.pdf › Supplemental Dataset 1/A-mRNA_nonrhyth_translation_nonrhyth/Chn2_set_A.pdf]

## Chp2

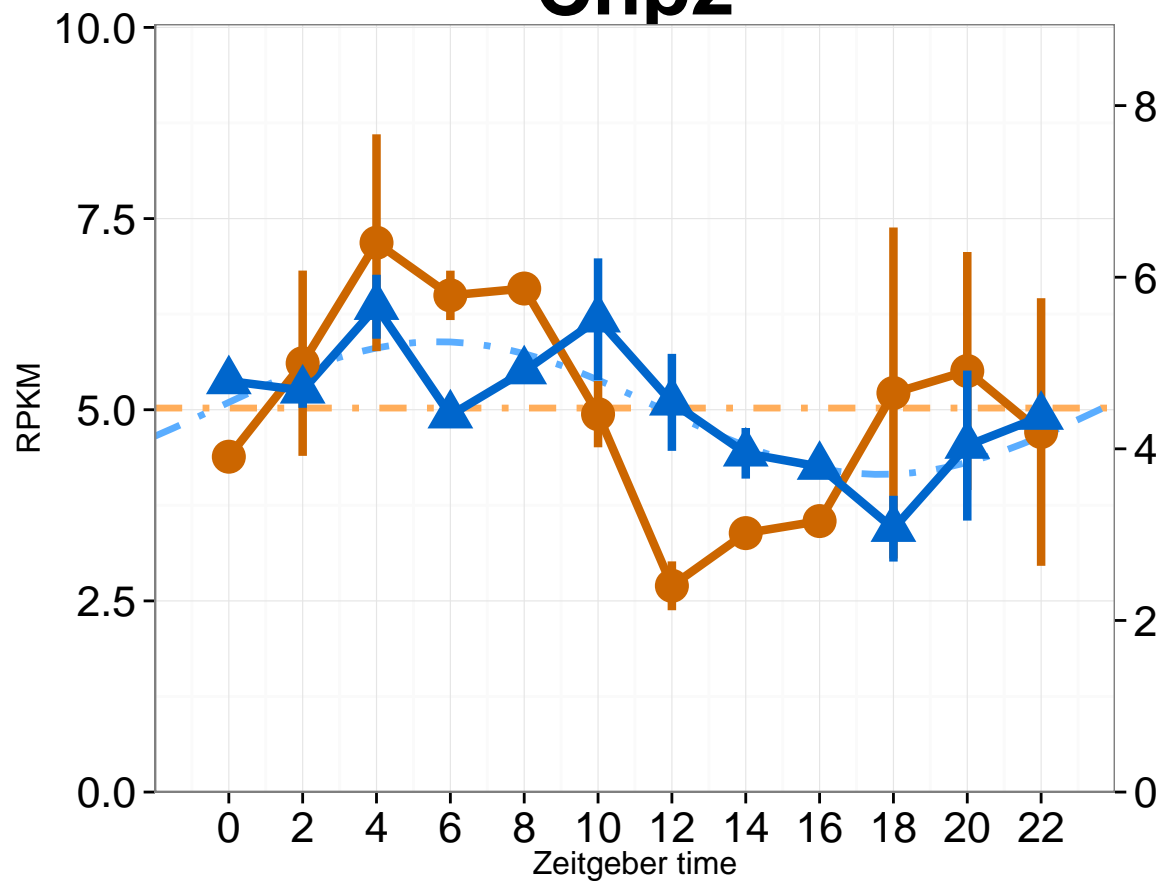

## Chp2

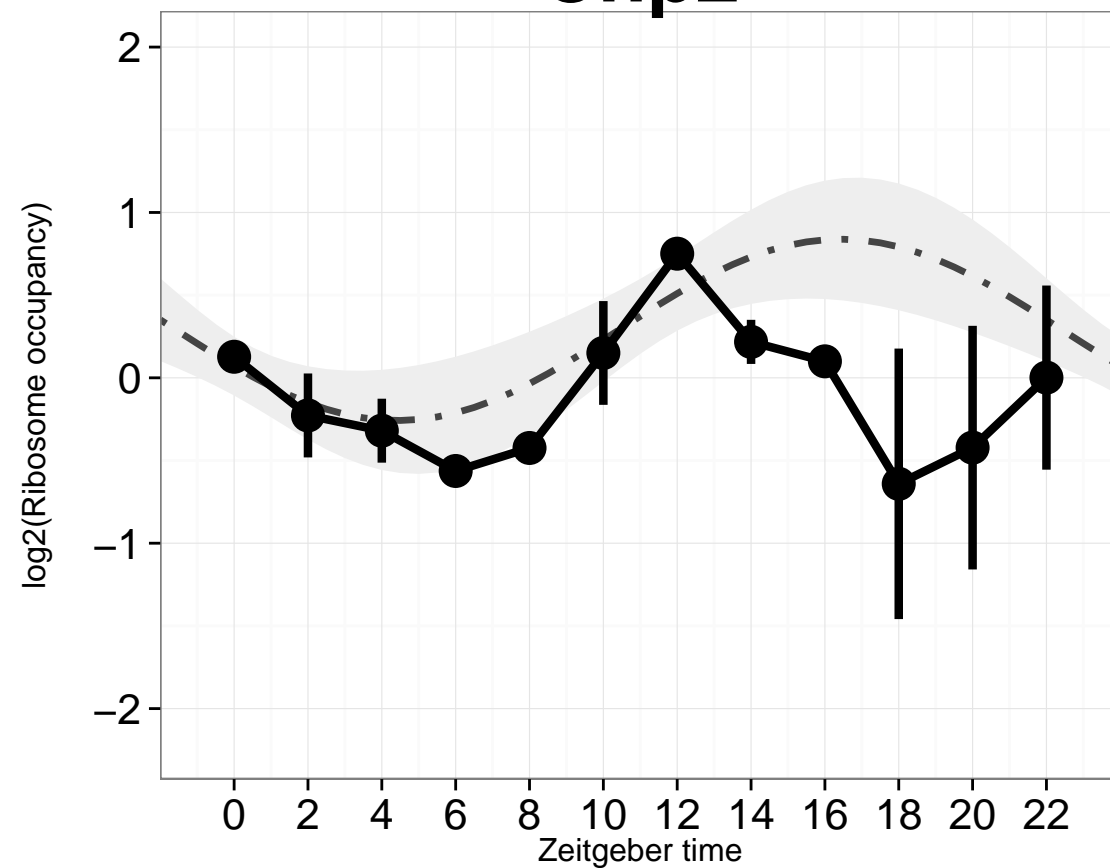

Supplement: SuppDataset_1.zip [file Chp2_set_A.pdf › Supplemental Dataset 1/A-mRNA_nonrhyth_translation_nonrhyth/Chp2_set_A.pdf]

# Chpf2

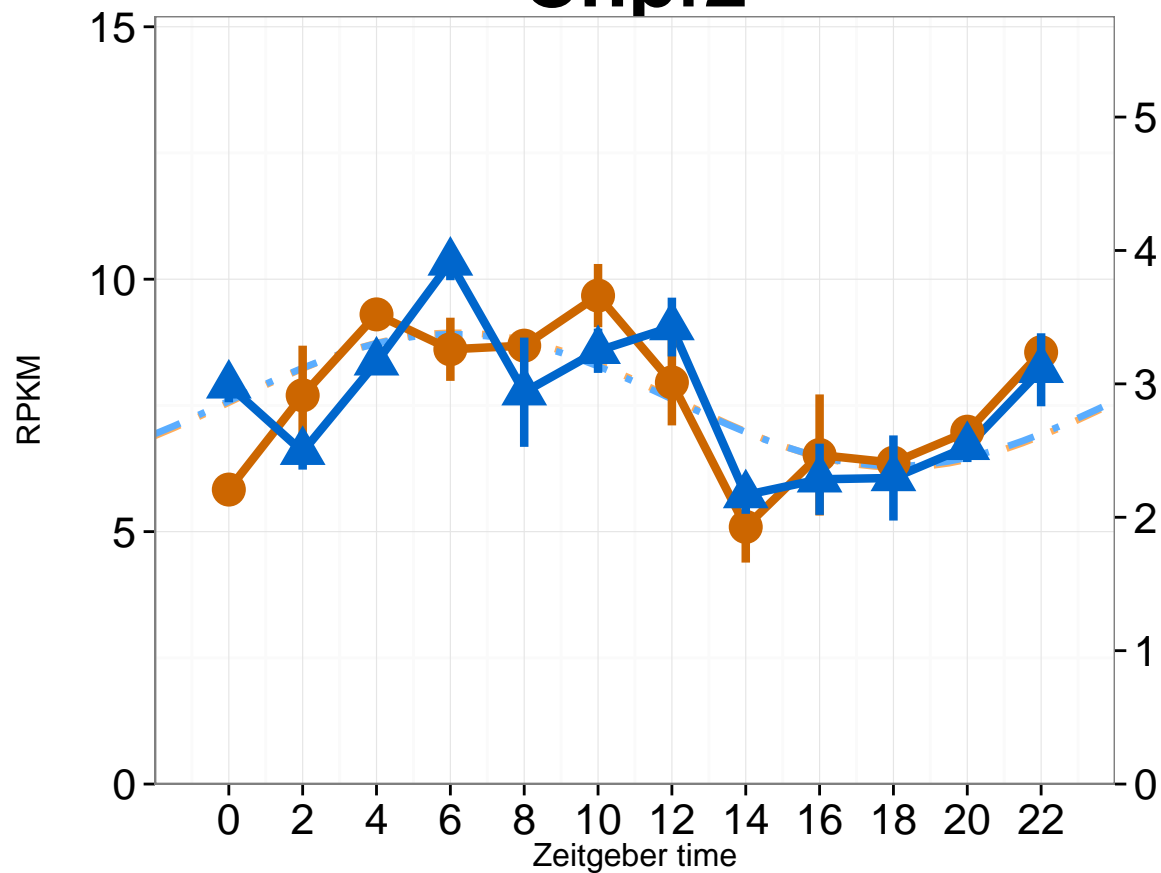

# Chpf2

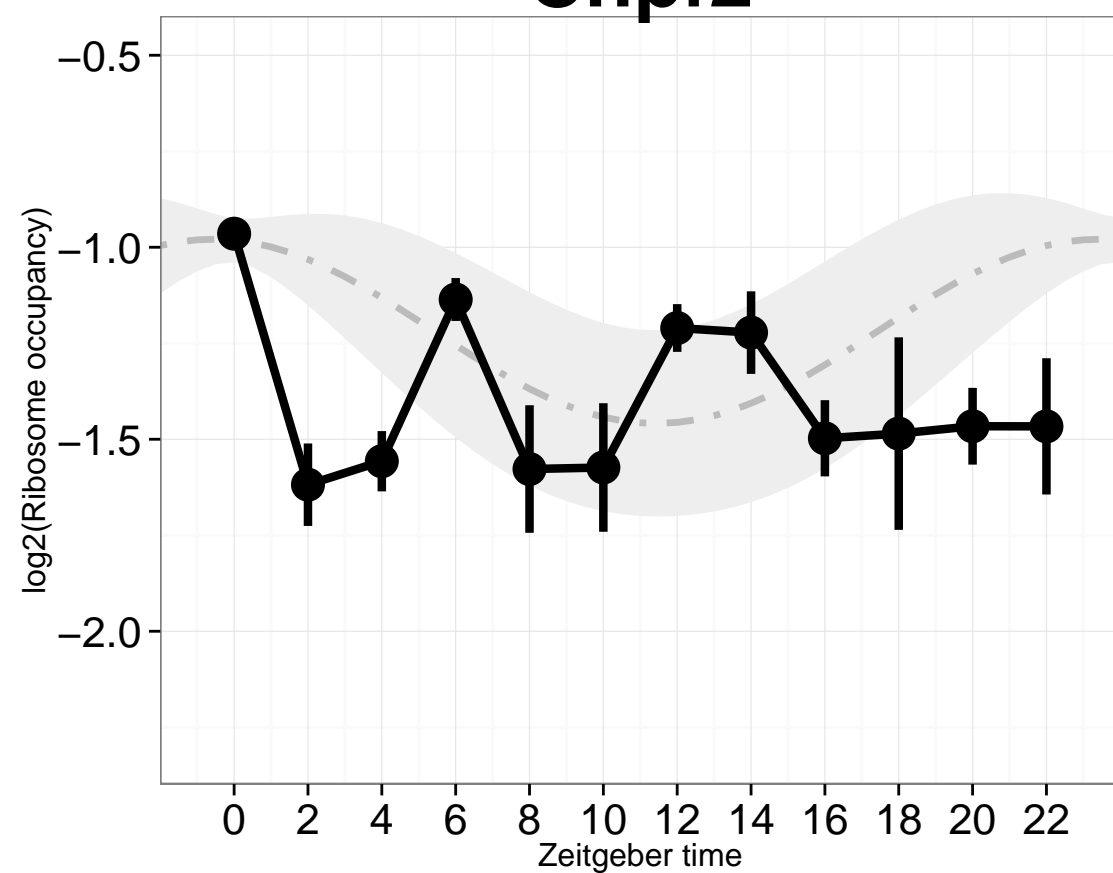

Supplement: SuppDataset_1.zip [file Chpf2_set_A.pdf › Supplemental Dataset 1/A-mRNA_nonrhyth_translation_nonrhyth/Chpf2_set_A.pdf]
