# Supplementary figures and images for: Ribosome profiling reveals the rhythmic liver translatome and circadian clock regulation by upstream open reading frames (part 16 of 113)
Source: HighWire-hosted journal article supplement (doi:10.1101/gr.195404.115), 2015-10-20

## Chpf

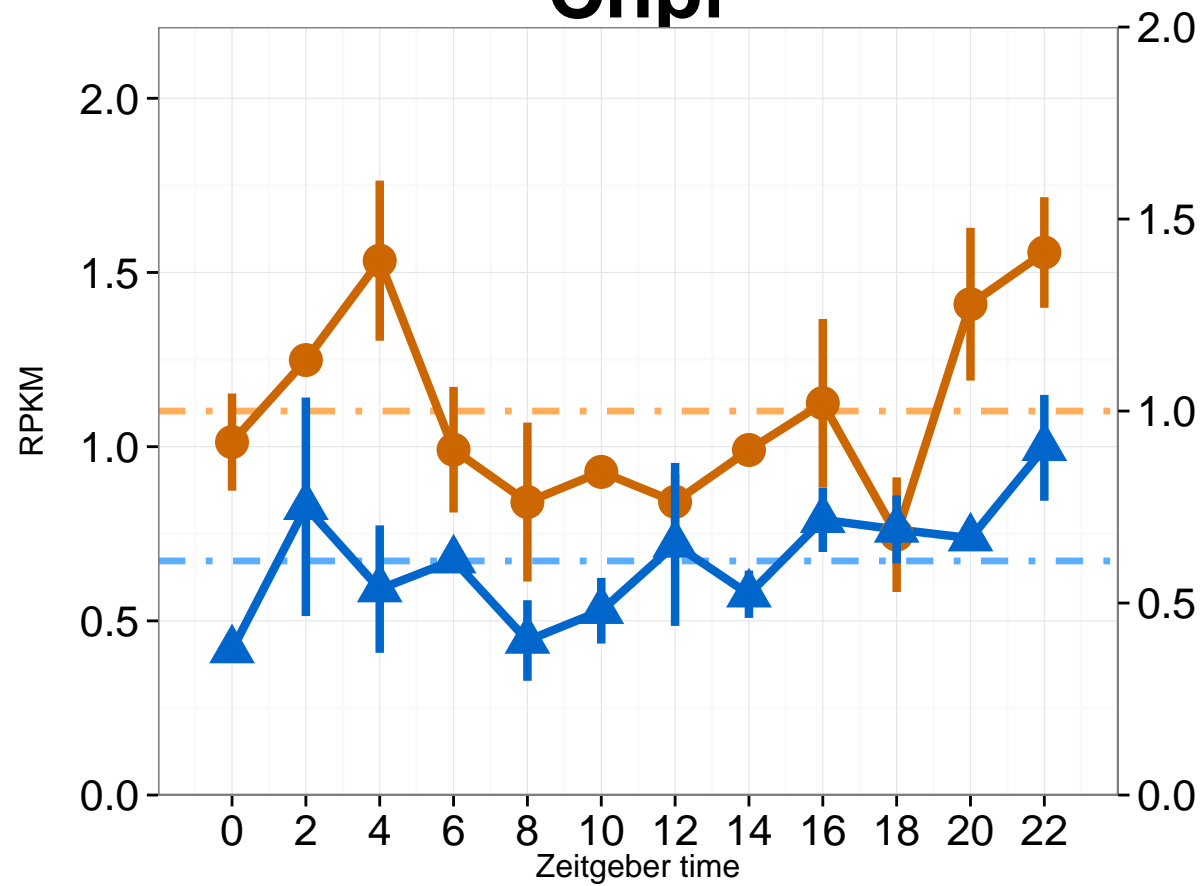

## Chpf

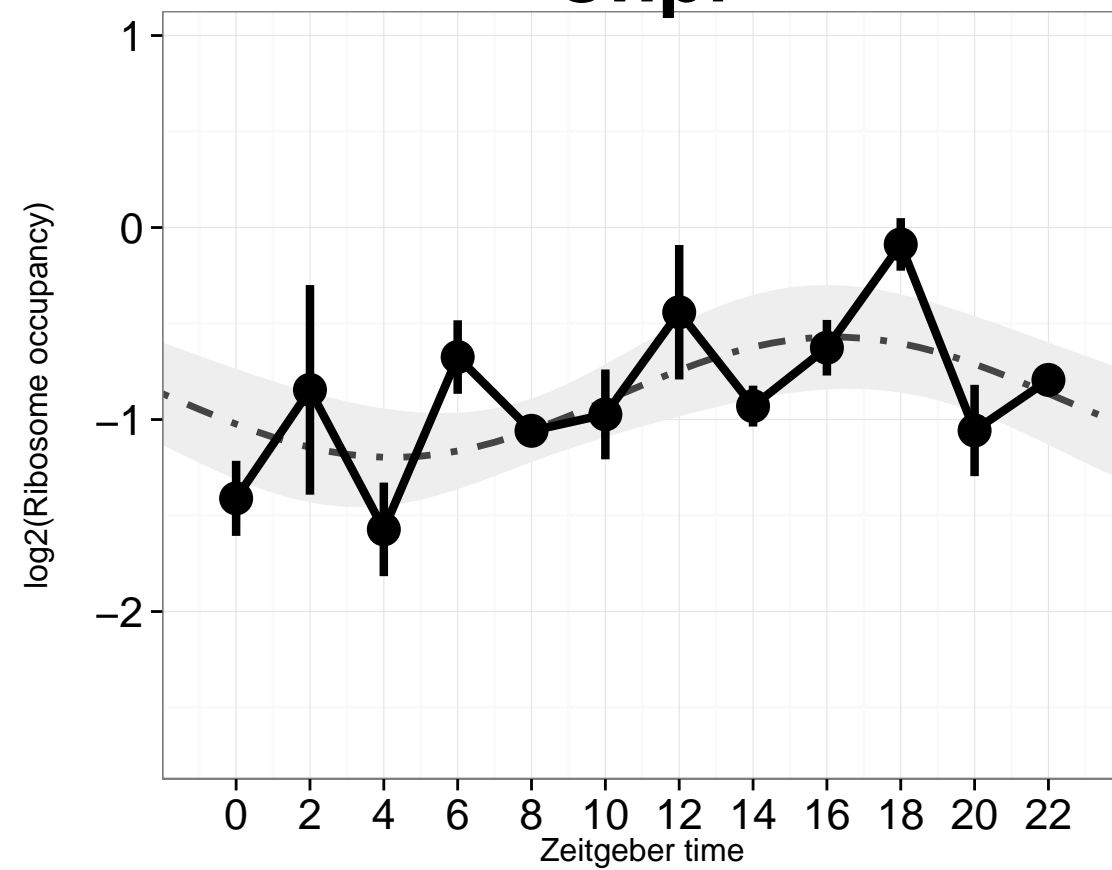

Supplement: SuppDataset_1.zip [file Chpf_set_A.pdf › Supplemental Dataset 1/A-mRNA_nonrhyth_translation_nonrhyth/Chpf_set_A.pdf]

# Chpt1

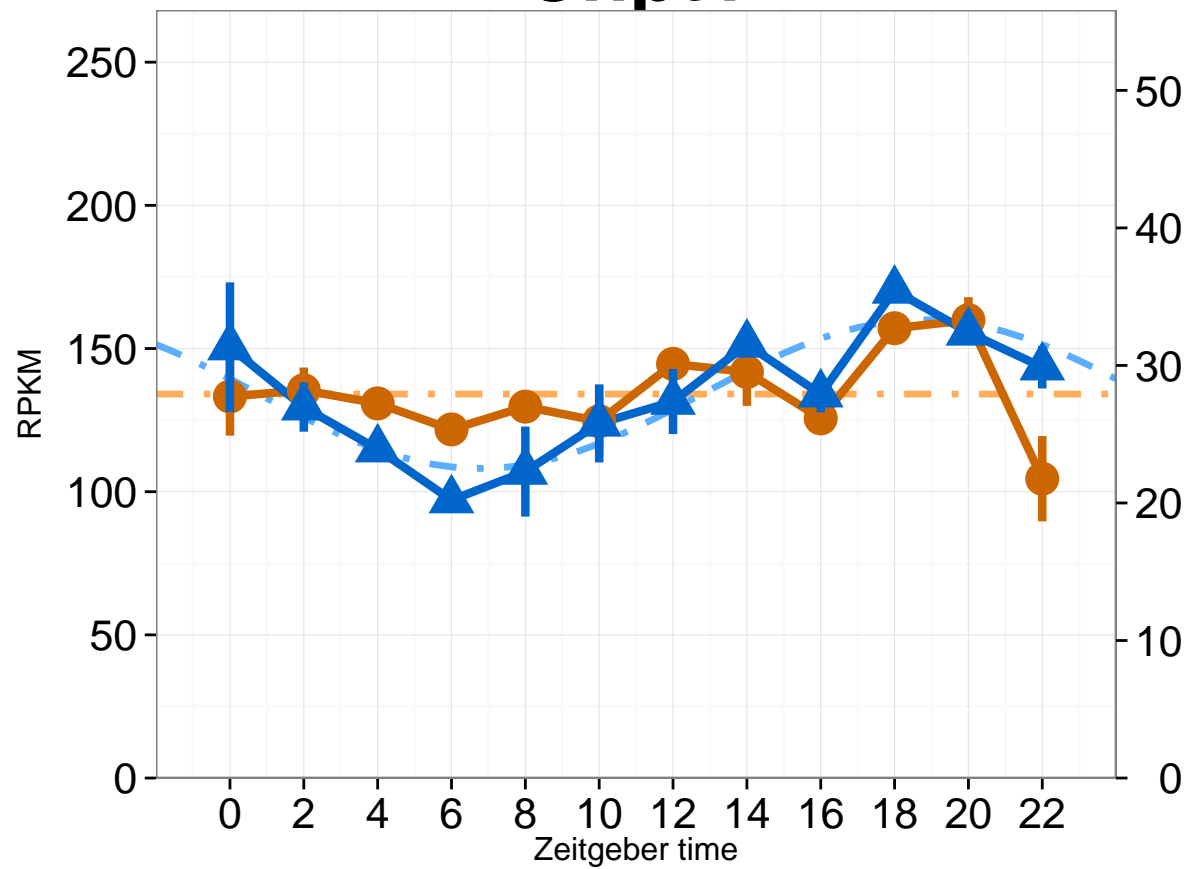

# Chpt1

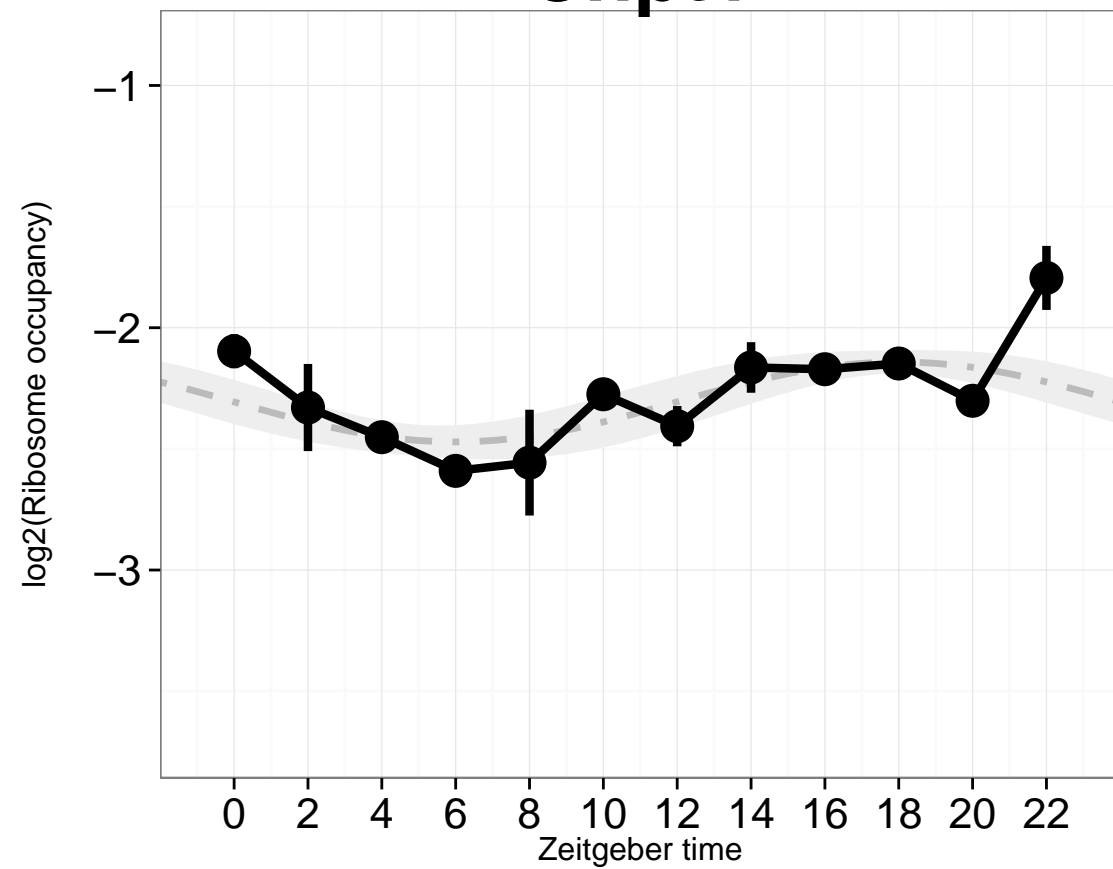

Supplement: SuppDataset_1.zip [file Chpt1_set_A.pdf › Supplemental Dataset 1/A-mRNA_nonrhyth_translation_nonrhyth/Chpt1_set_A.pdf]

# Chrac1

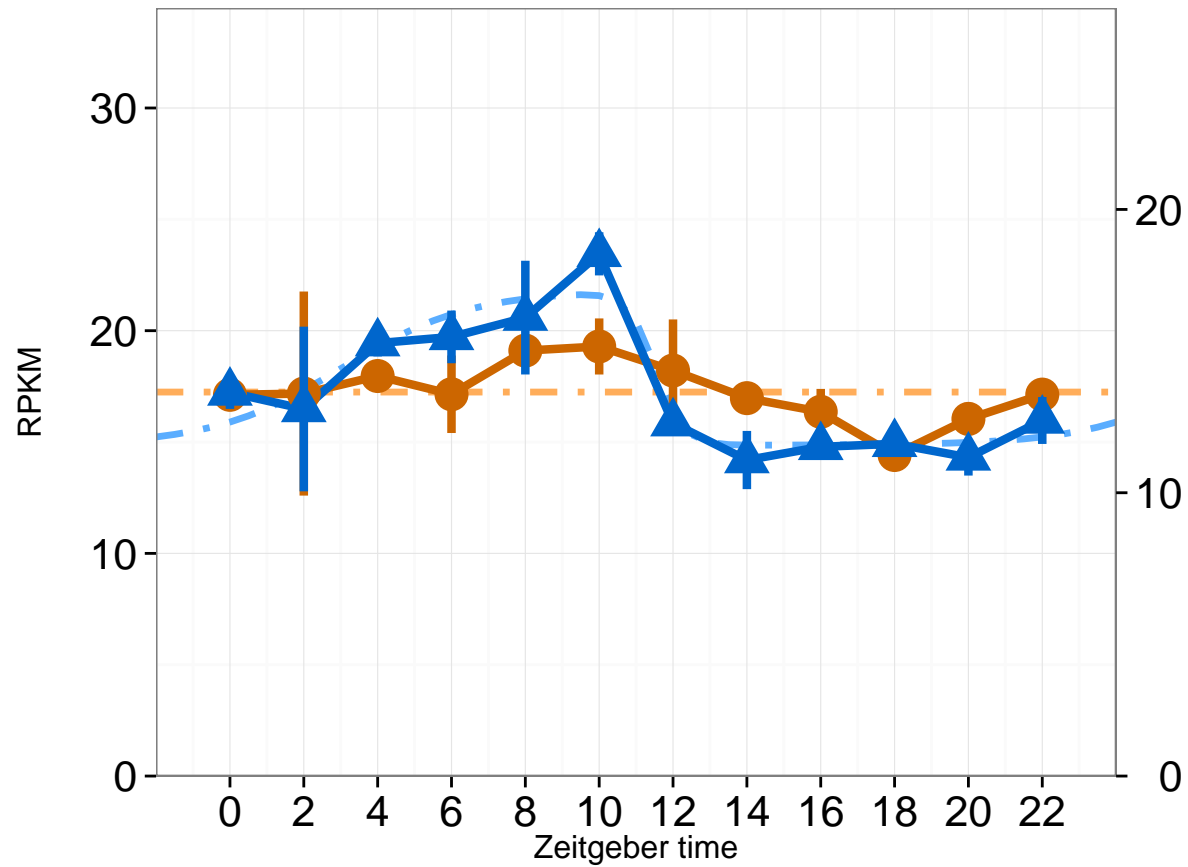

# Chrac1

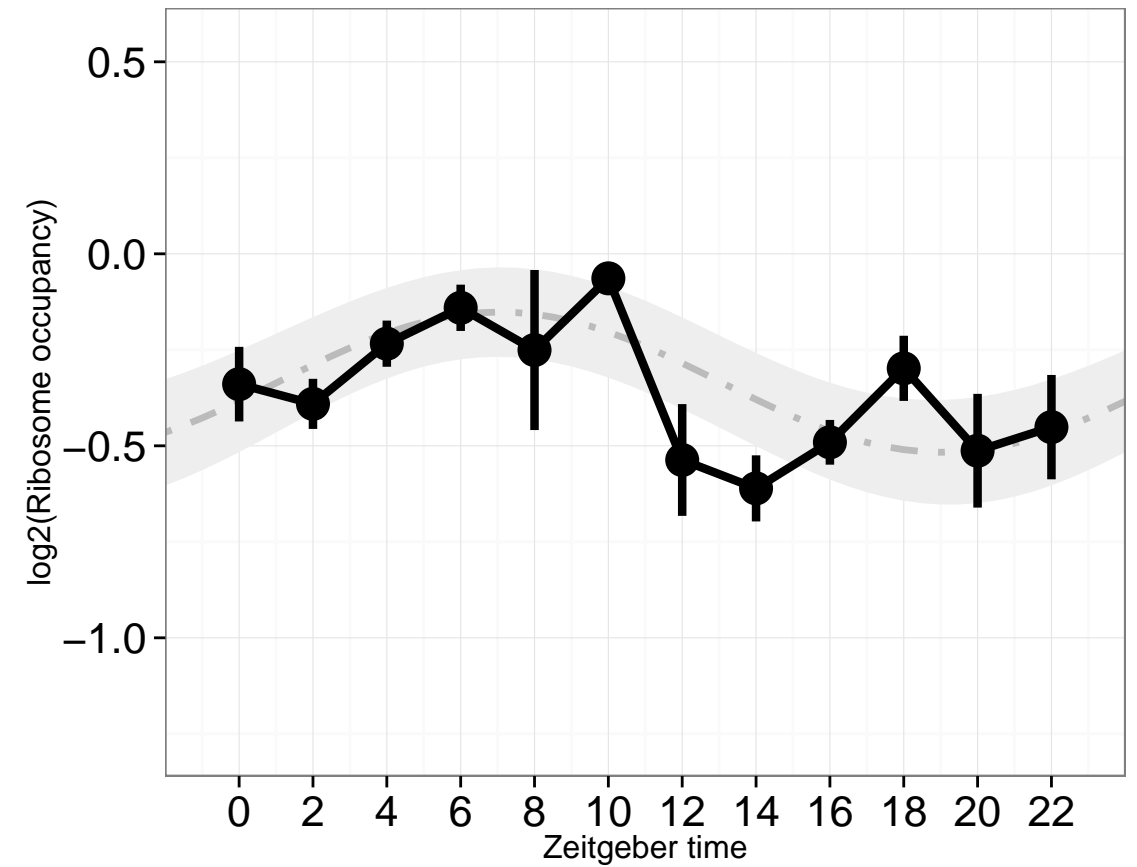

Supplement: SuppDataset_1.zip [file Chrac1_set_A.pdf › Supplemental Dataset 1/A-mRNA_nonrhyth_translation_nonrhyth/Chrac1_set_A.pdf]

# Chrd

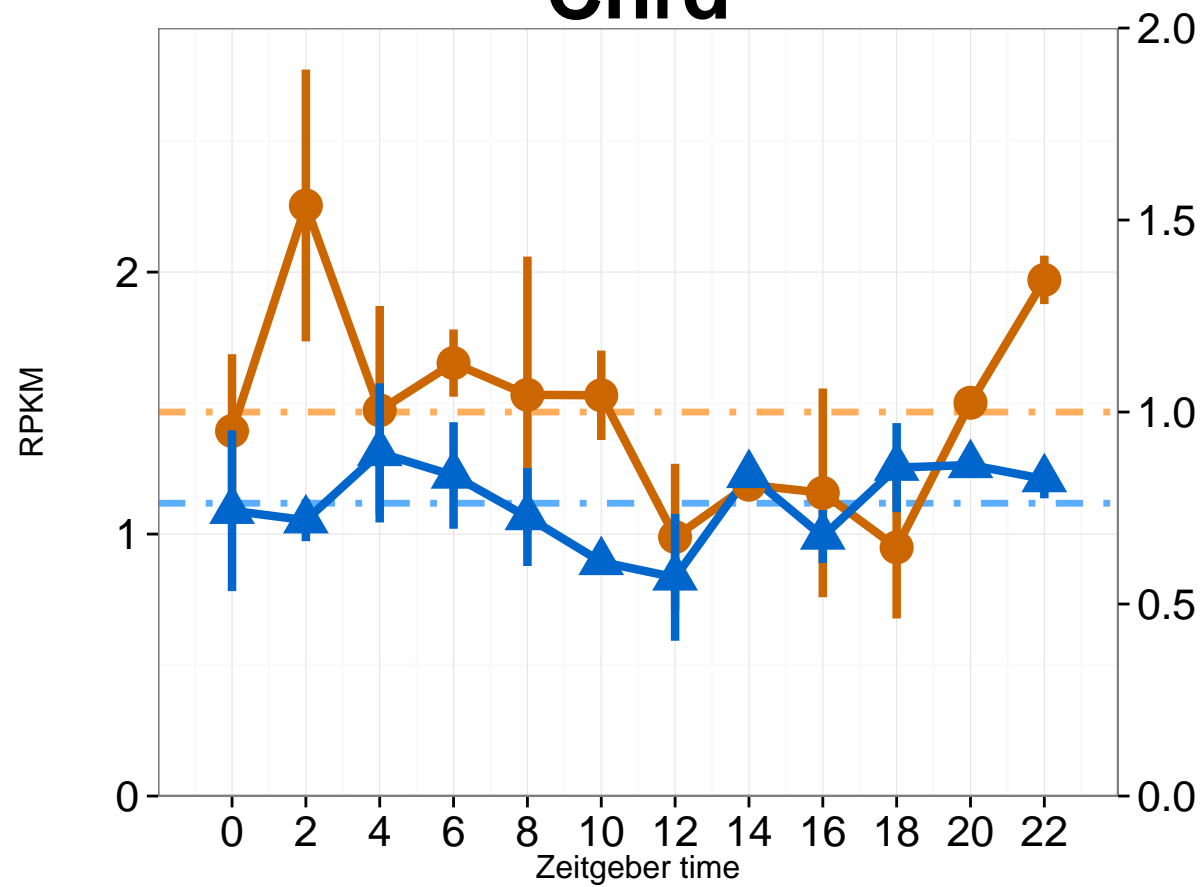

# Chrd

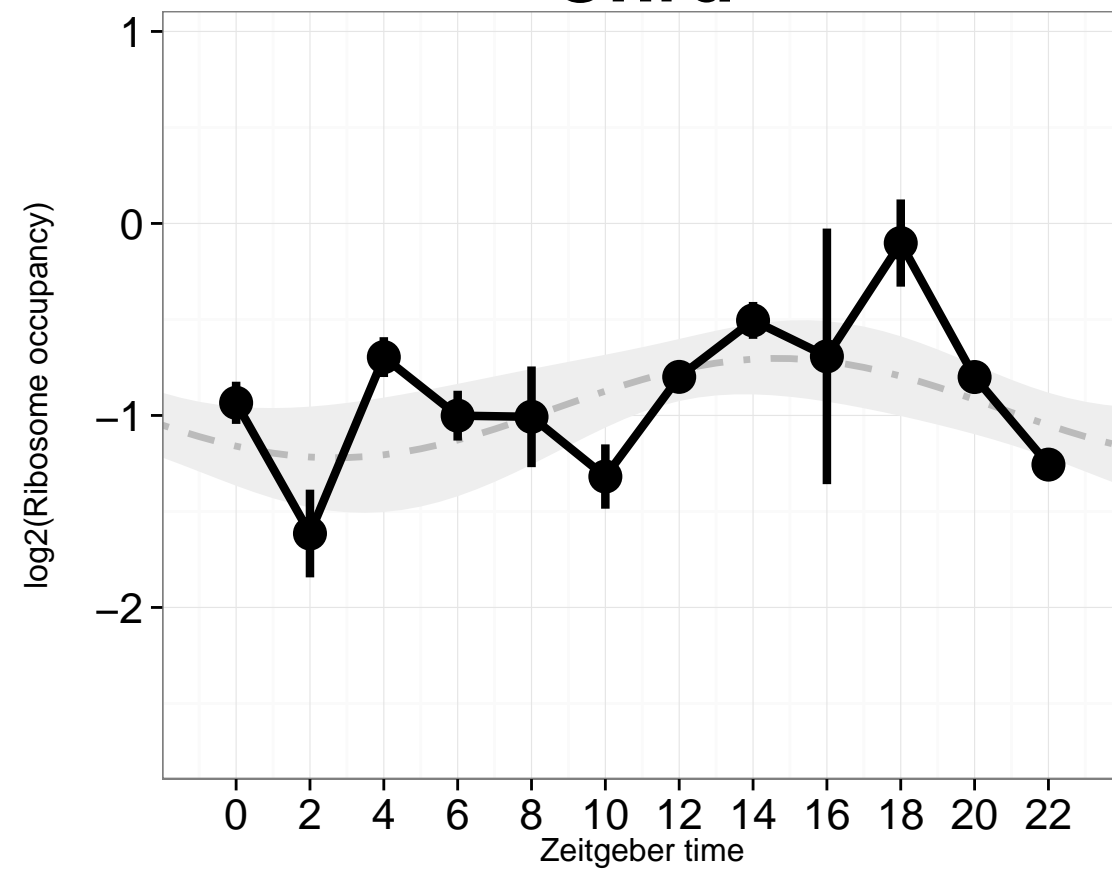

Supplement: SuppDataset_1.zip [file Chrd_set_A.pdf › Supplemental Dataset 1/A-mRNA_nonrhyth_translation_nonrhyth/Chrd_set_A.pdf]

# Chrm3

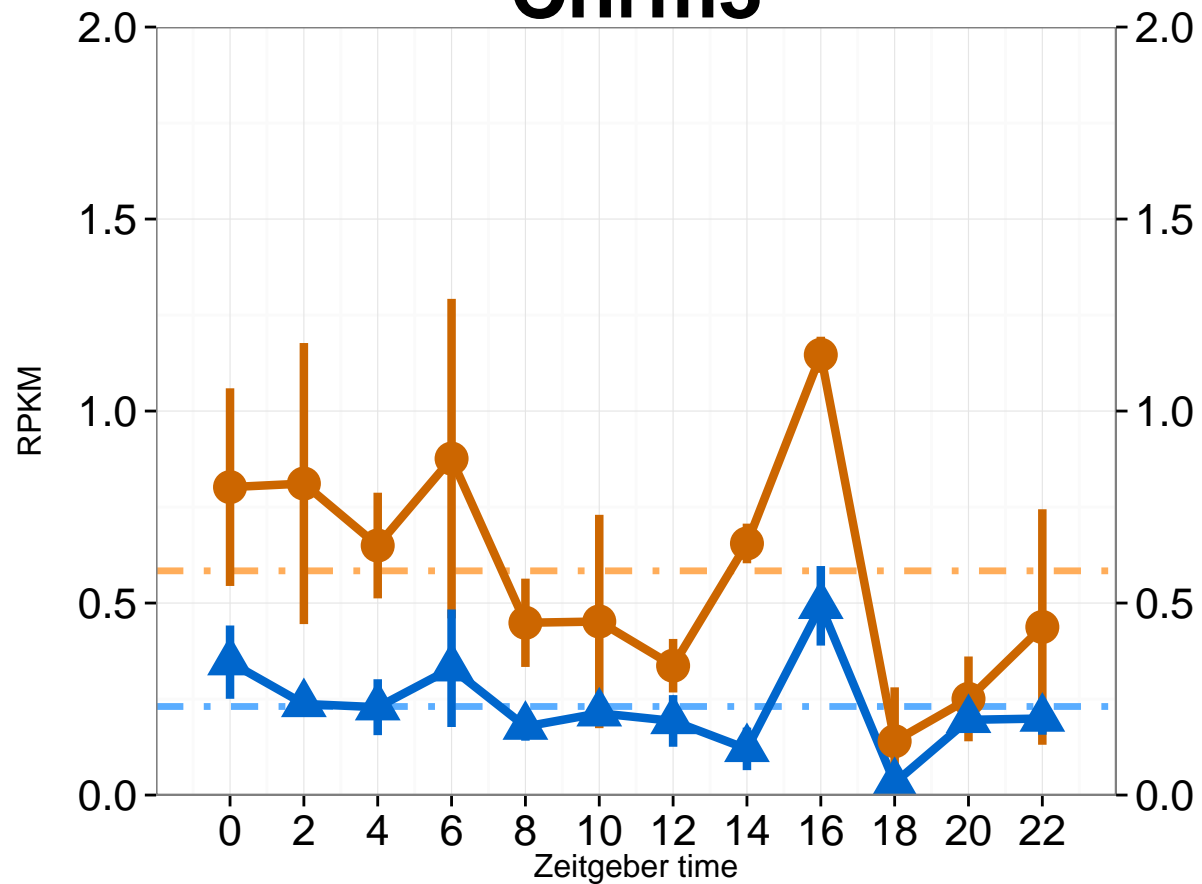

# Chrm3

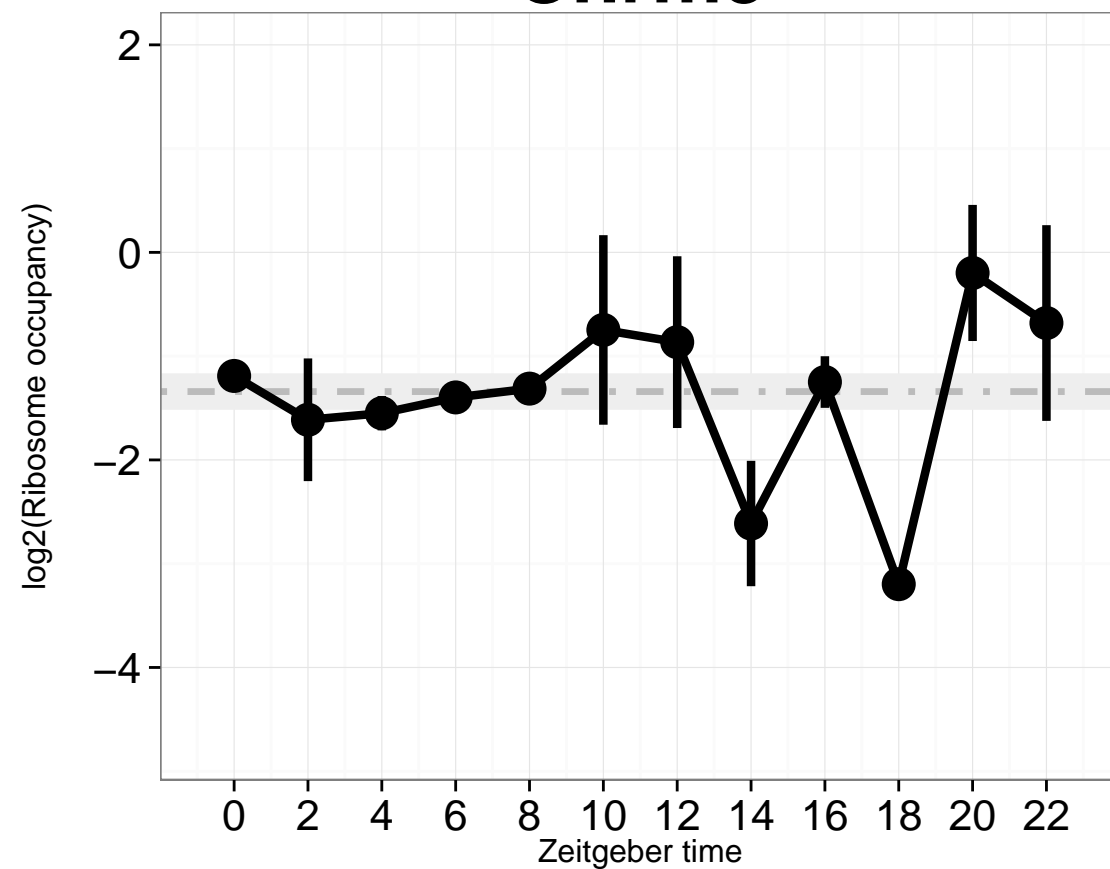

Supplement: SuppDataset_1.zip [file Chrm3_set_A.pdf › Supplemental Dataset 1/A-mRNA_nonrhyth_translation_nonrhyth/Chrm3_set_A.pdf]

# Chrna2

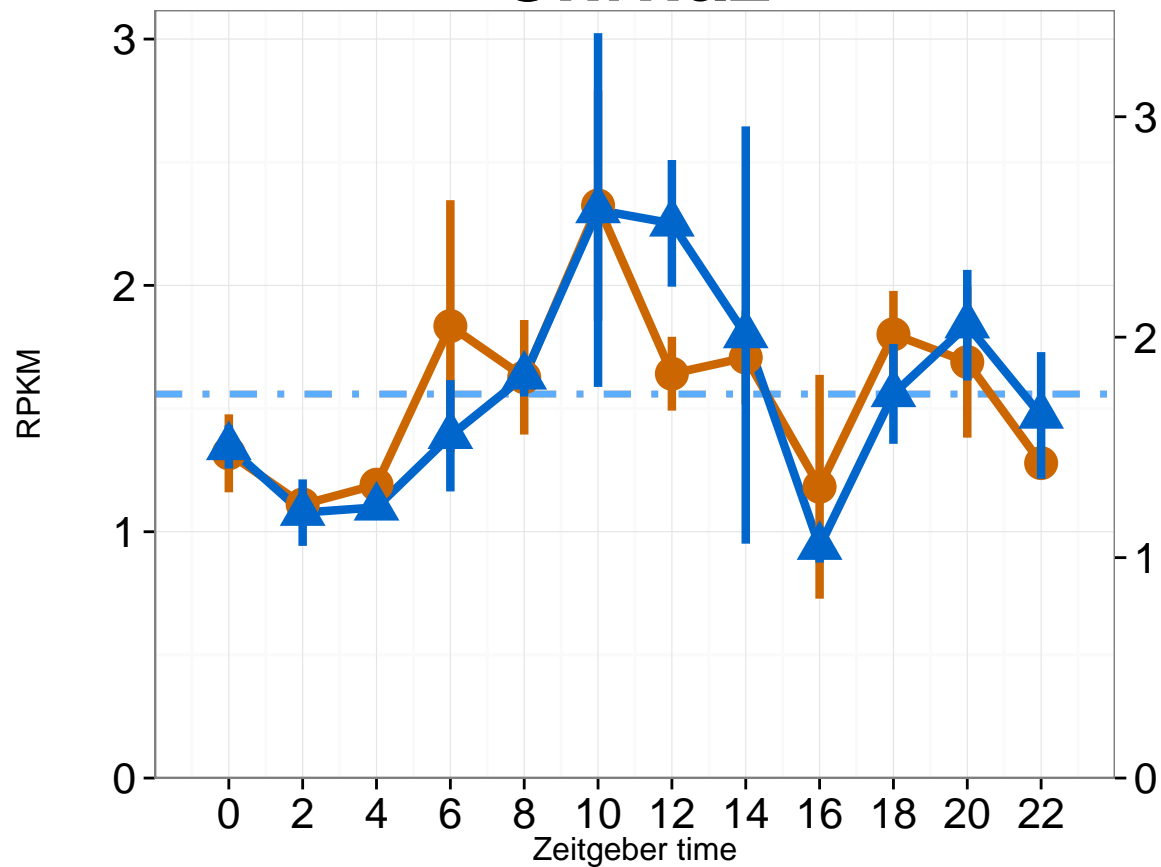

# Chrna2

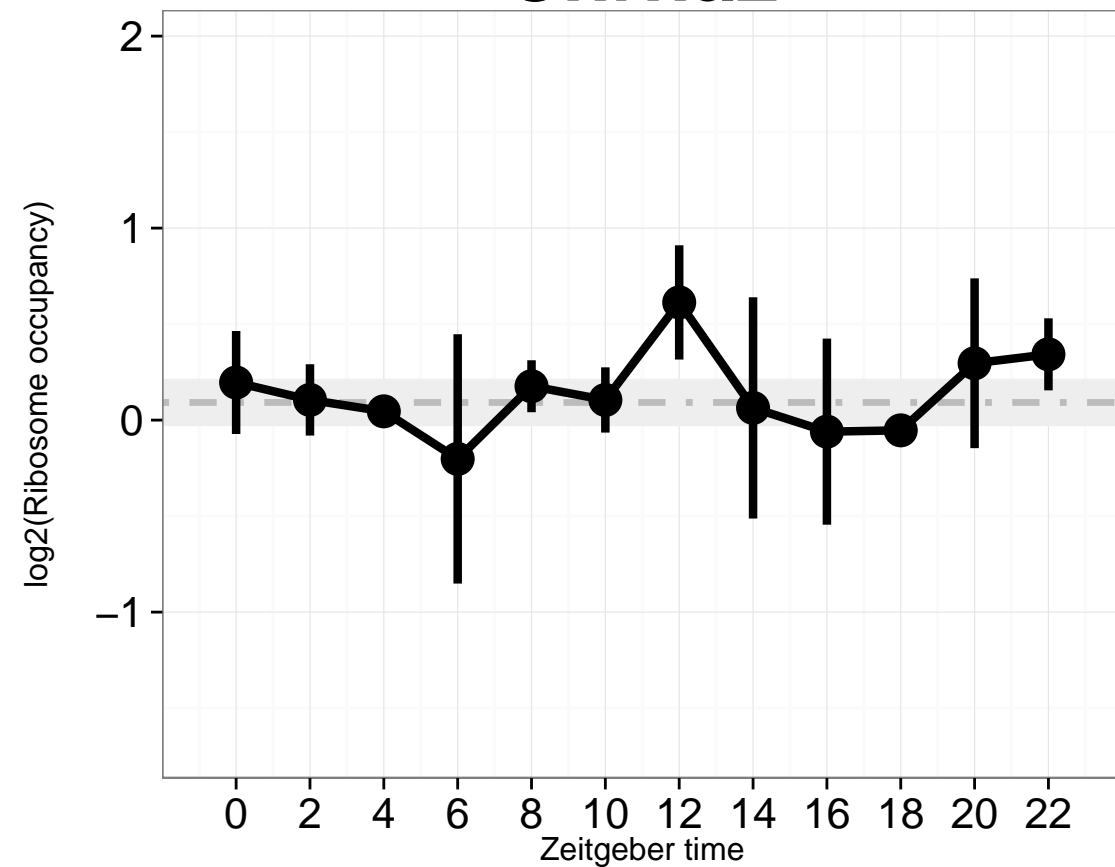

Supplement: SuppDataset_1.zip [file Chrna2_set_A.pdf › Supplemental Dataset 1/A-mRNA_nonrhyth_translation_nonrhyth/Chrna2_set_A.pdf]

# Chst14

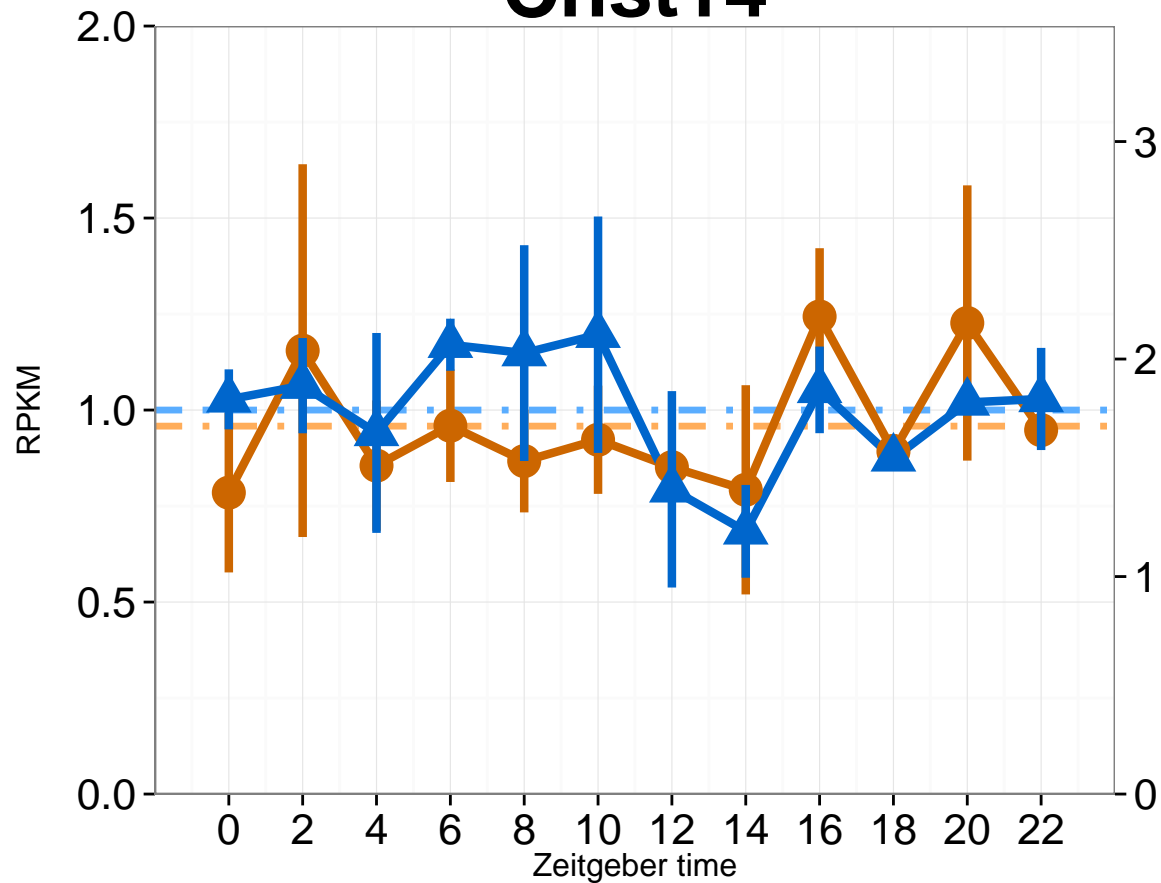

# Chst14

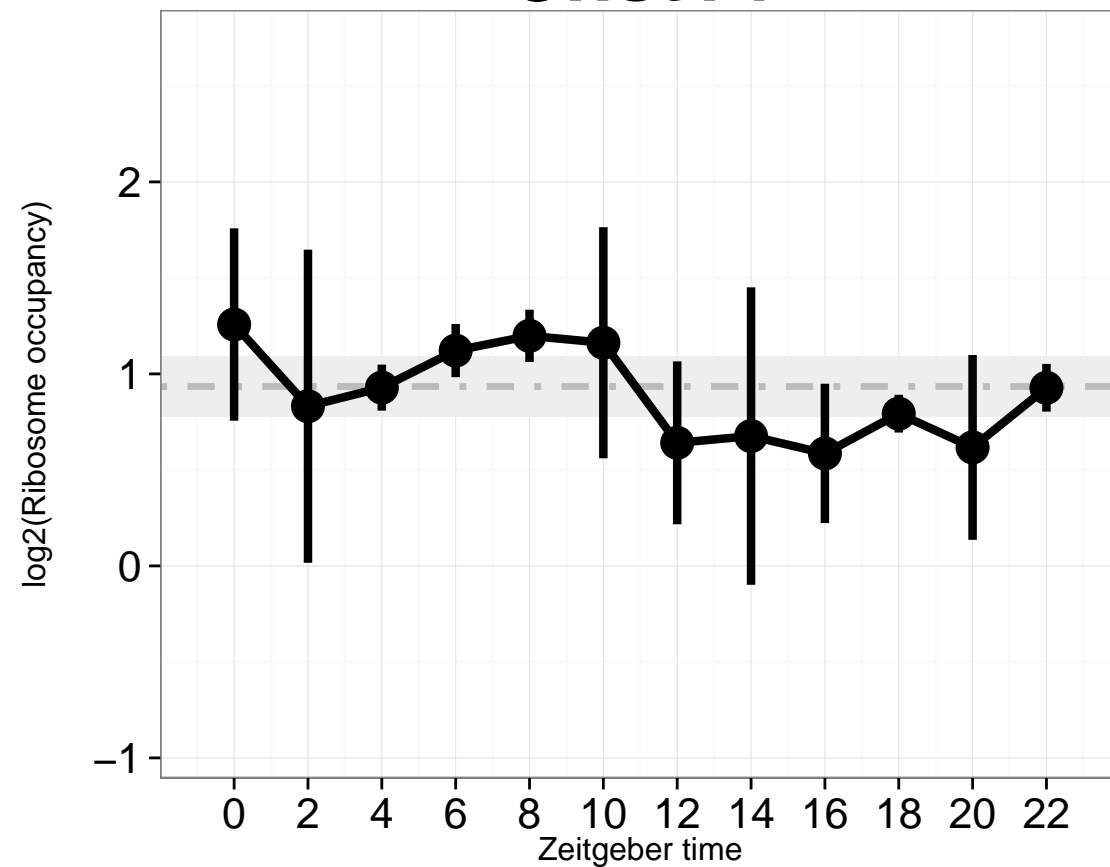

Supplement: SuppDataset_1.zip [file Chst14_set_A.pdf › Supplemental Dataset 1/A-mRNA_nonrhyth_translation_nonrhyth/Chst14_set_A.pdf]

# Chst15

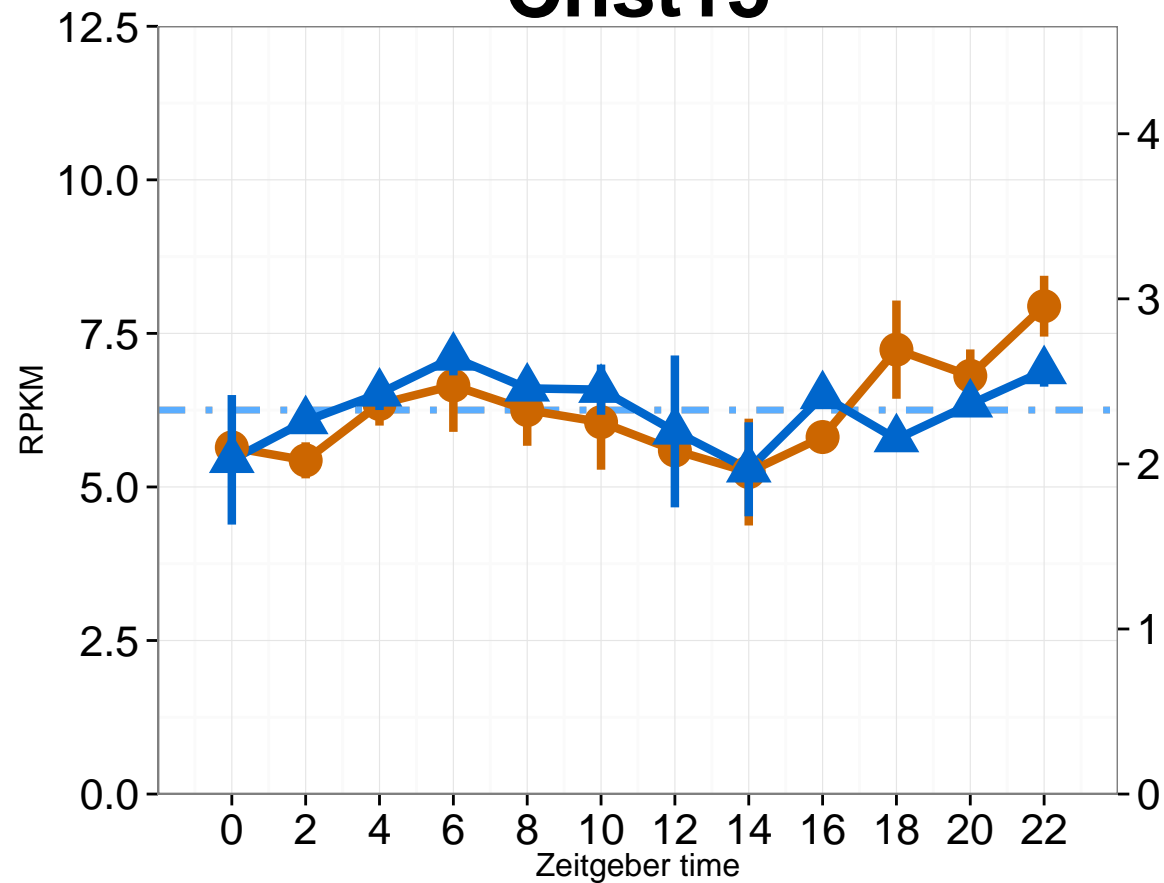

# Chst15

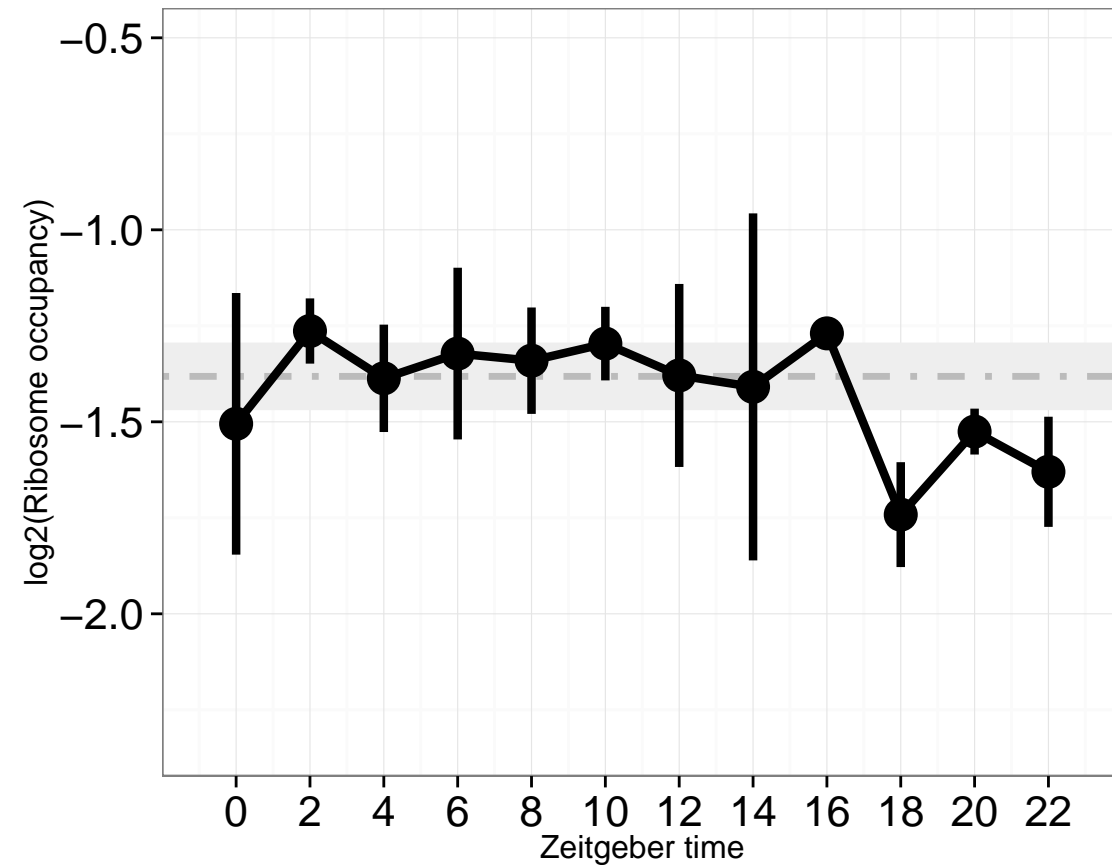

Supplement: SuppDataset_1.zip [file Chst15_set_A.pdf › Supplemental Dataset 1/A-mRNA_nonrhyth_translation_nonrhyth/Chst15_set_A.pdf]

# Chst7

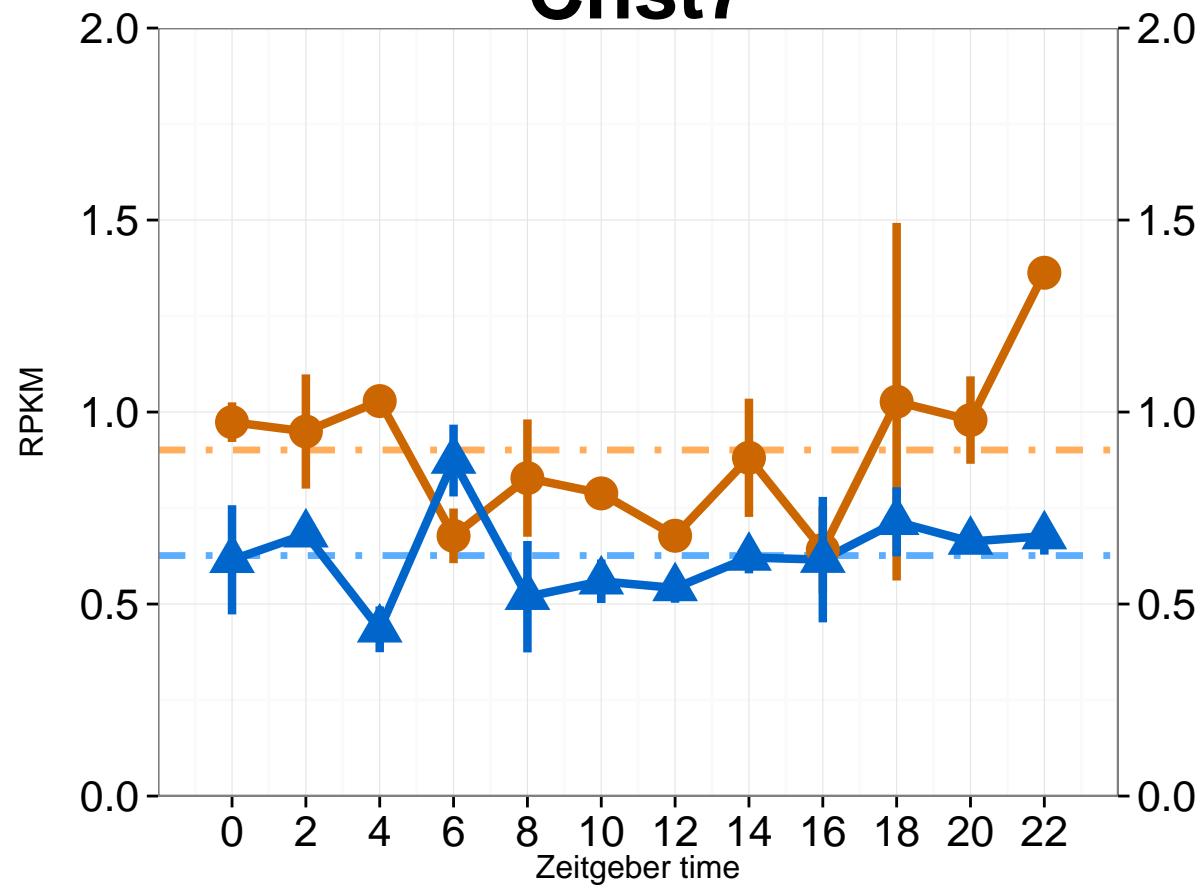

# Chst7

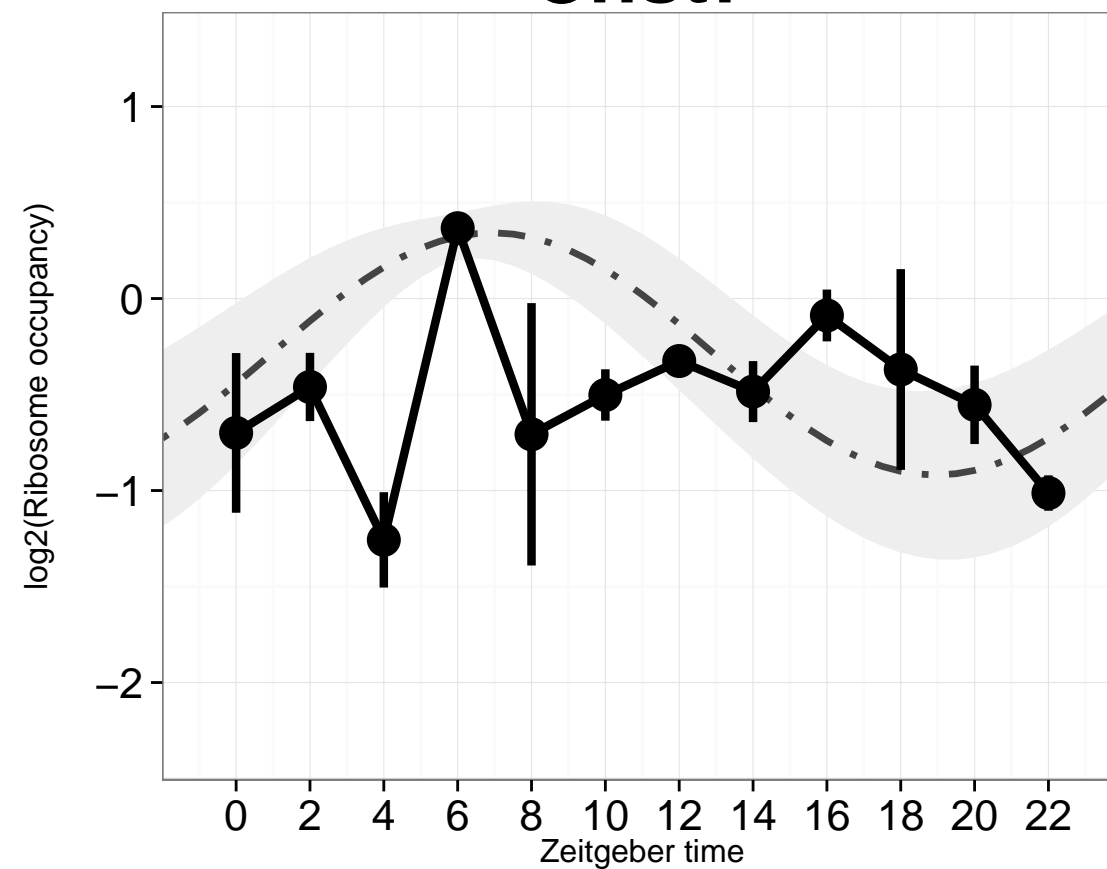

Supplement: SuppDataset_1.zip [file Chst7_set_A.pdf › Supplemental Dataset 1/A-mRNA_nonrhyth_translation_nonrhyth/Chst7_set_A.pdf]

# Chsy1

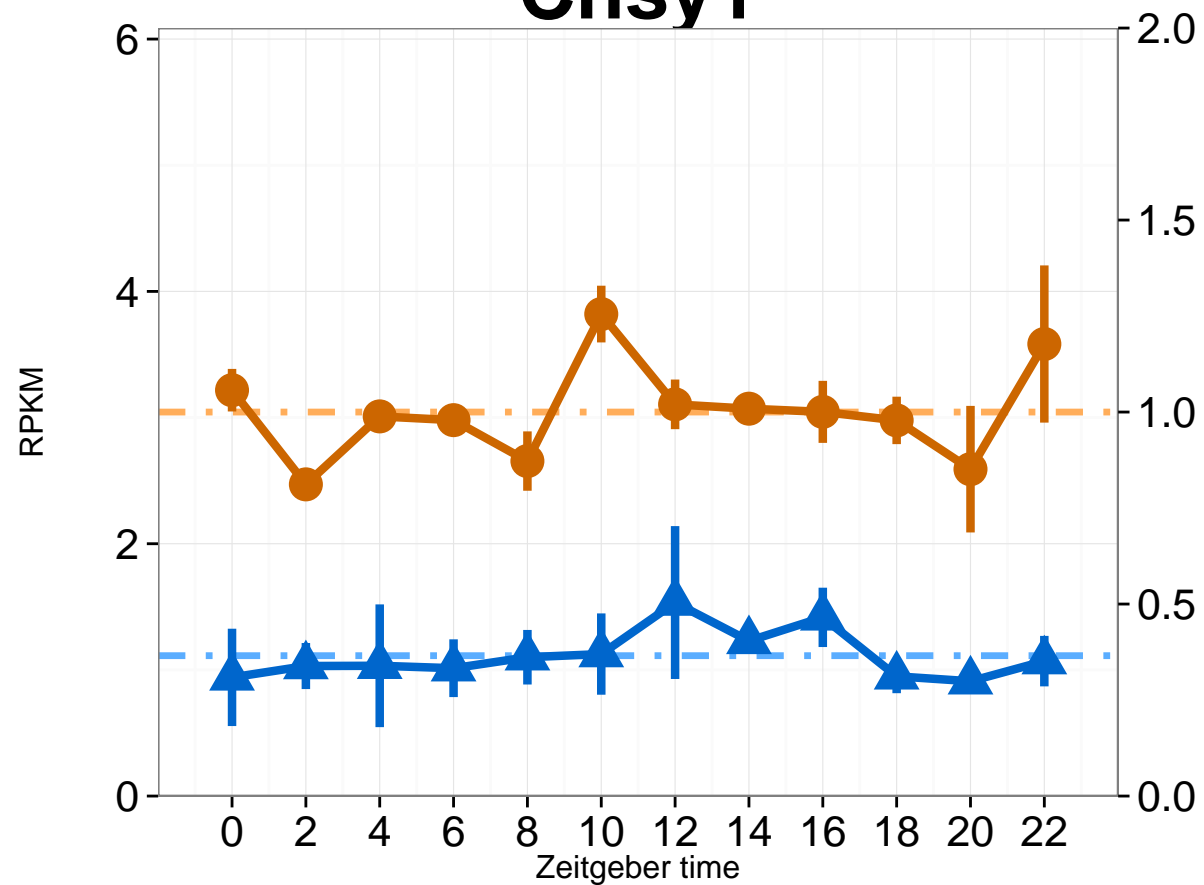

# Chsy1

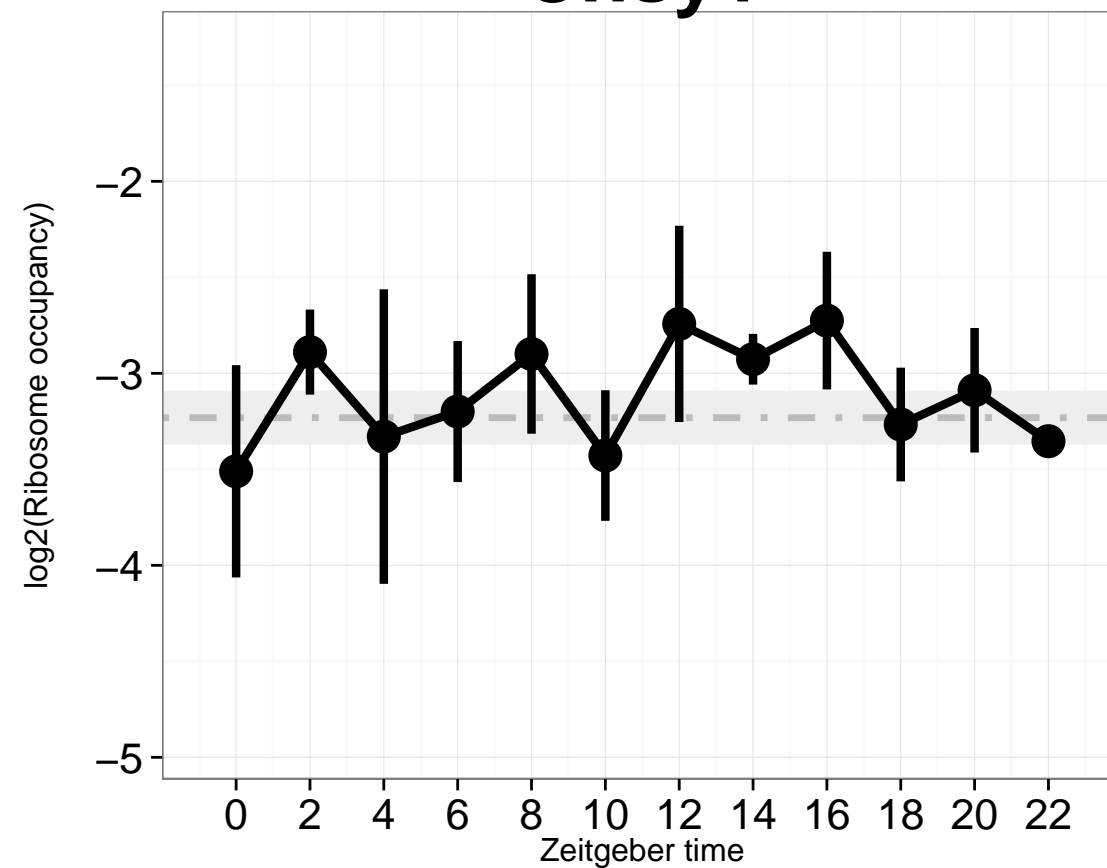

Supplement: SuppDataset_1.zip [file Chsy1_set_A.pdf › Supplemental Dataset 1/A-mRNA_nonrhyth_translation_nonrhyth/Chsy1_set_A.pdf]

## Chsy3

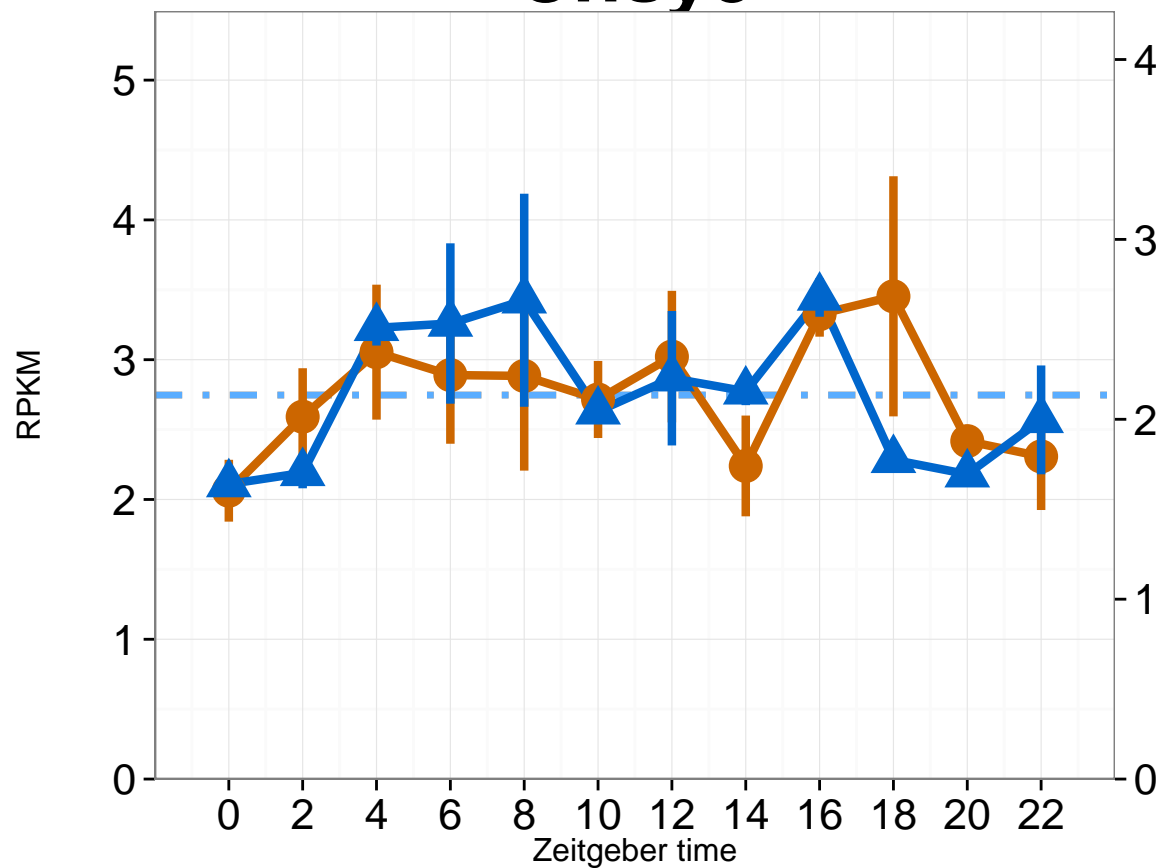

## Chsy3

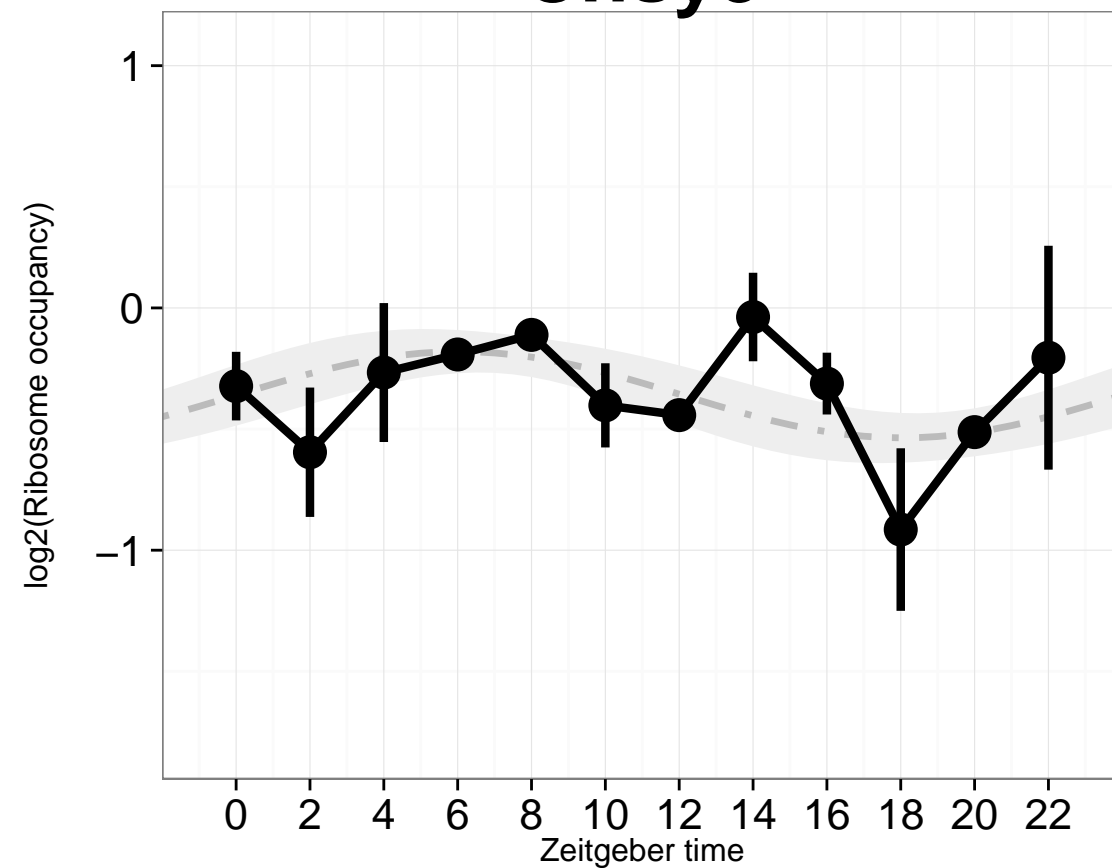

Supplement: SuppDataset_1.zip [file Chsy3_set_A.pdf › Supplemental Dataset 1/A-mRNA_nonrhyth_translation_nonrhyth/Chsy3_set_A.pdf]

# Chtf8

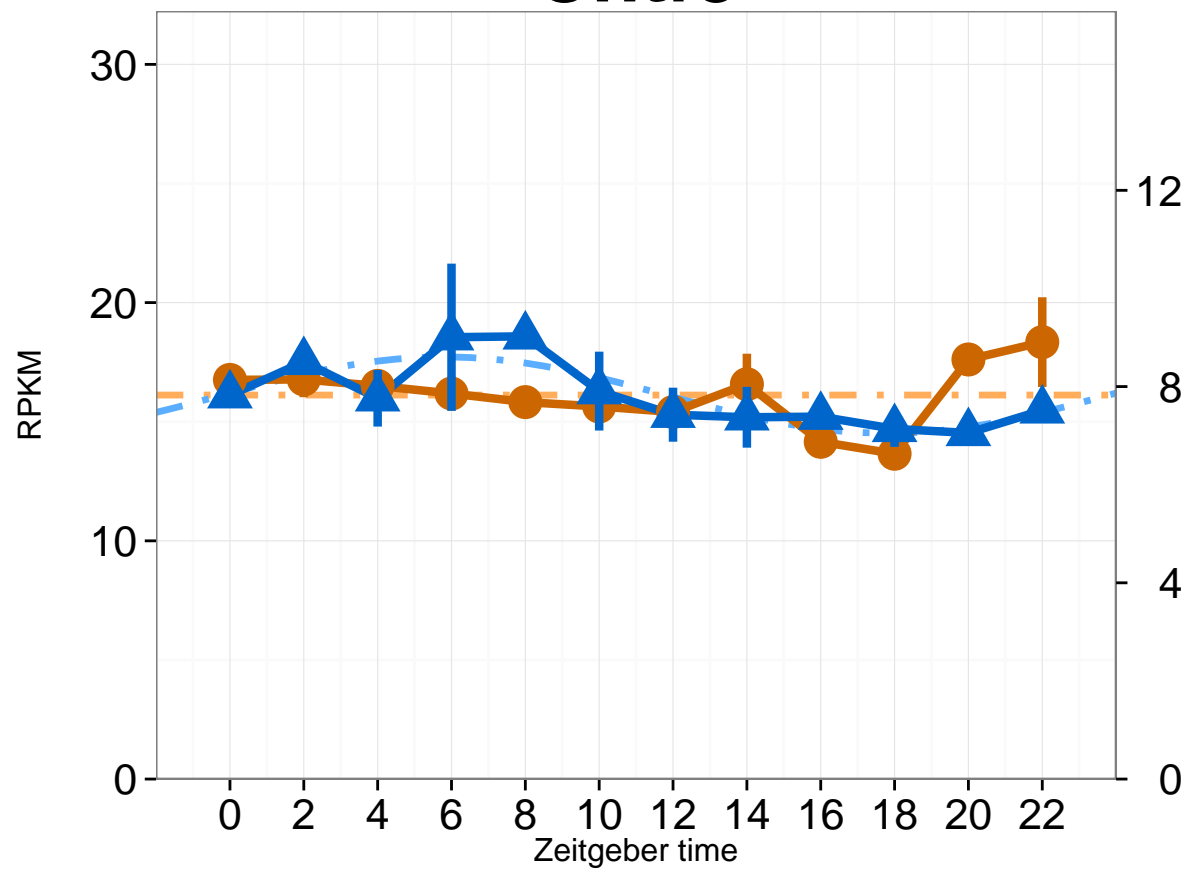

# Chtf8

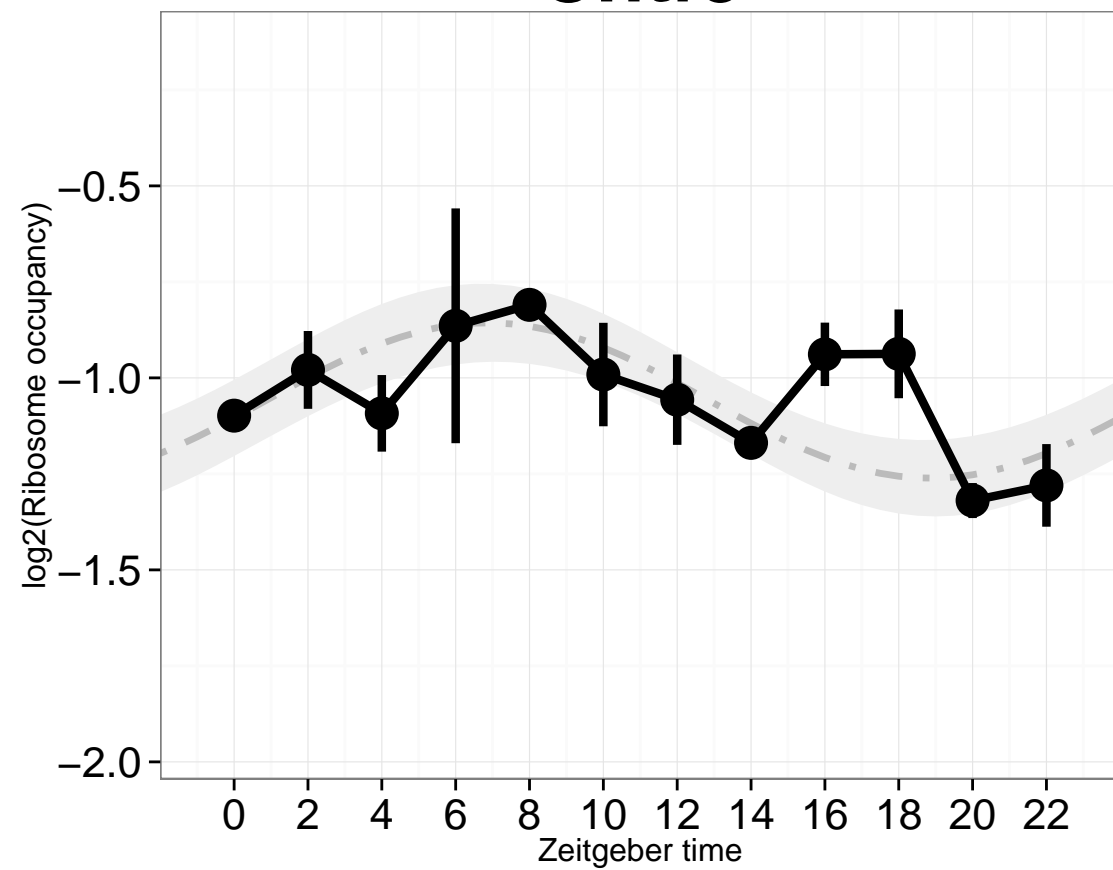

Supplement: SuppDataset_1.zip [file Chtf8_set_A.pdf › Supplemental Dataset 1/A-mRNA_nonrhyth_translation_nonrhyth/Chtf8_set_A.pdf]

## Chtop

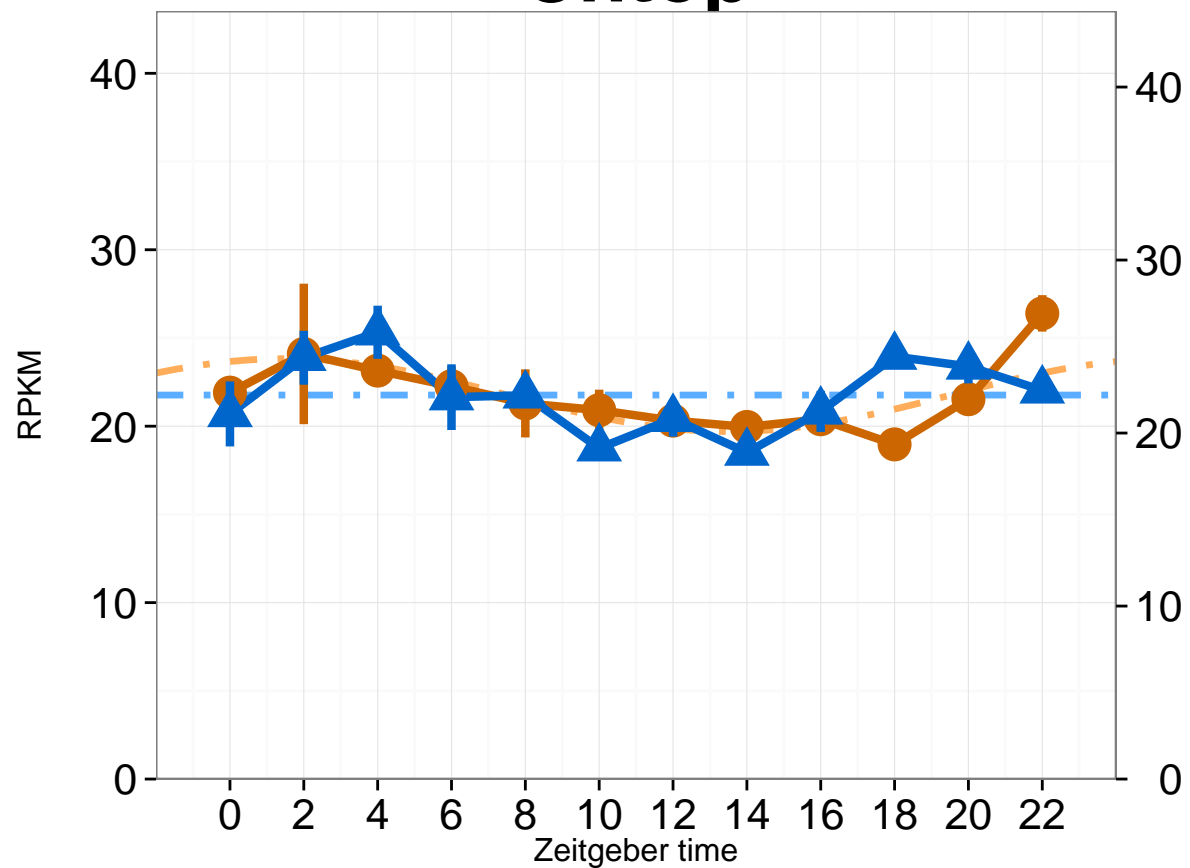

## Chtop

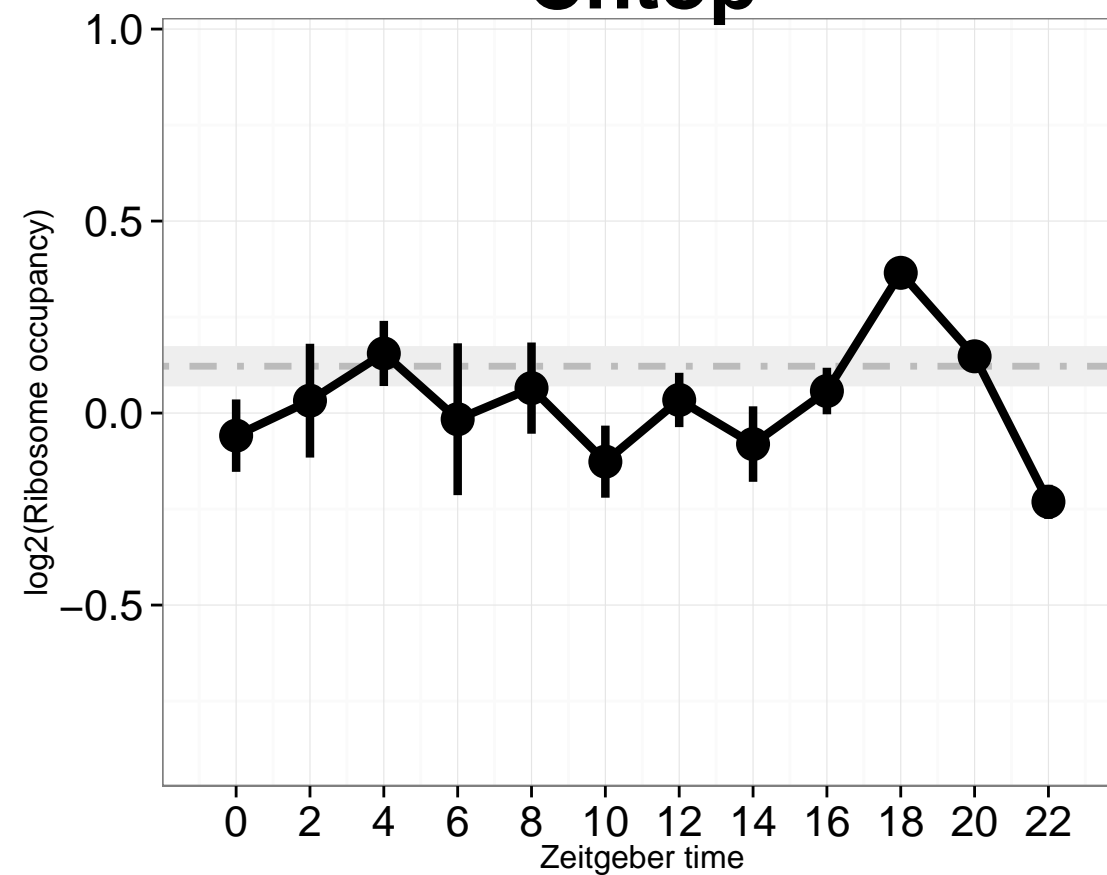

Supplement: SuppDataset_1.zip [file Chtop_set_A.pdf › Supplemental Dataset 1/A-mRNA_nonrhyth_translation_nonrhyth/Chtop_set_A.pdf]

# Churc1

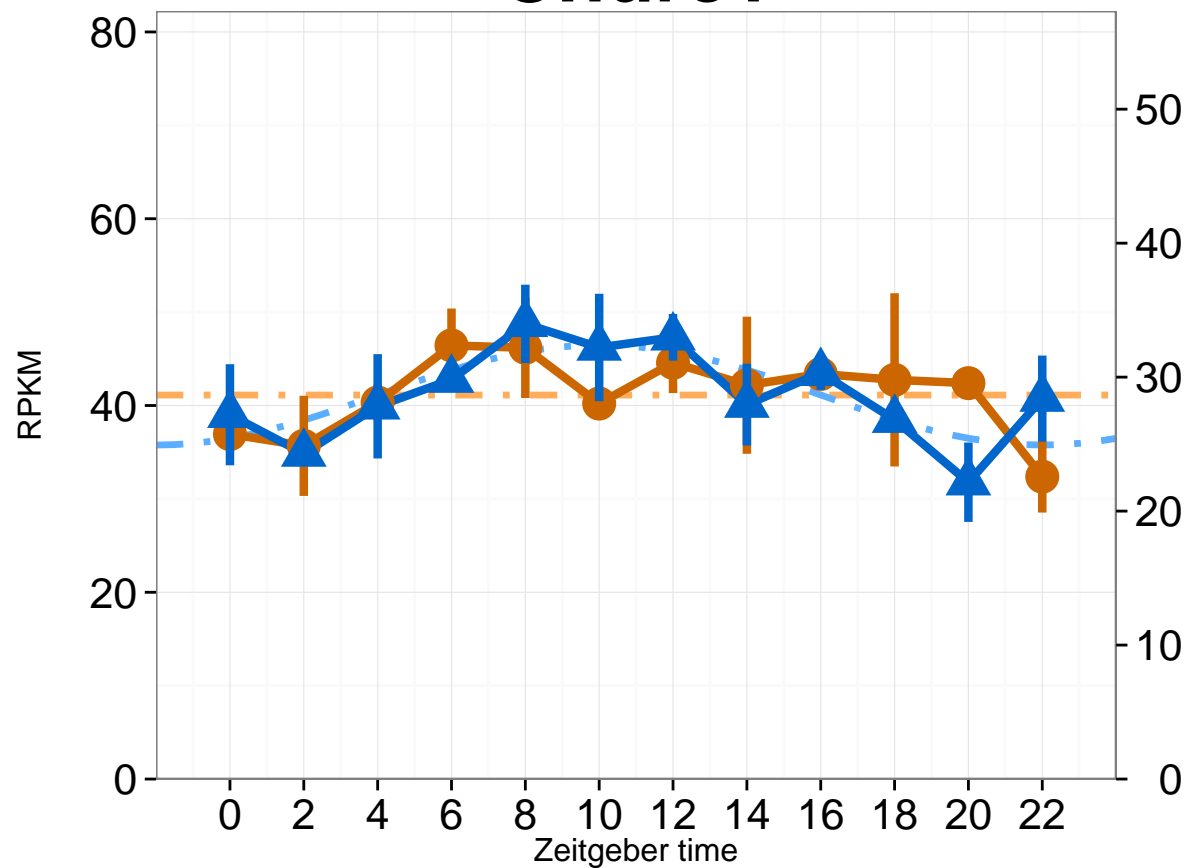

# Churc1

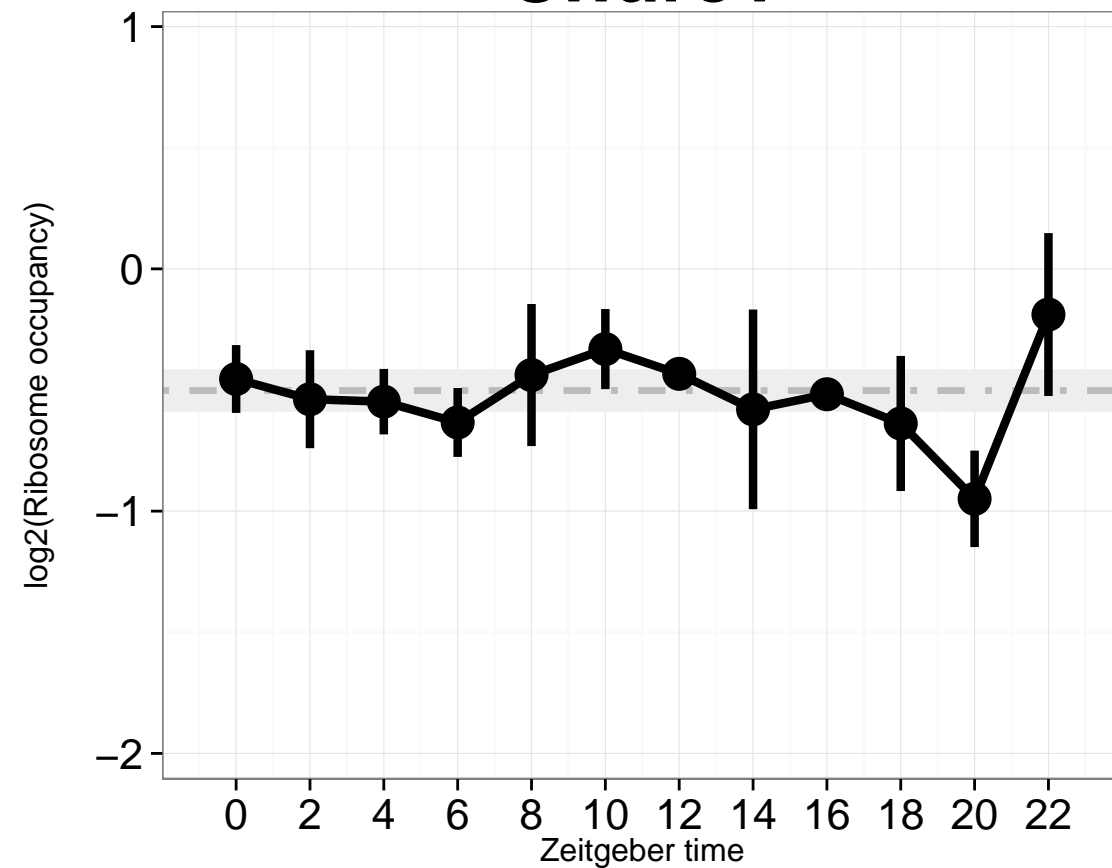

Supplement: SuppDataset_1.zip [file Churc1_set_A.pdf › Supplemental Dataset 1/A-mRNA_nonrhyth_translation_nonrhyth/Churc1_set_A.pdf]

# Ciao1

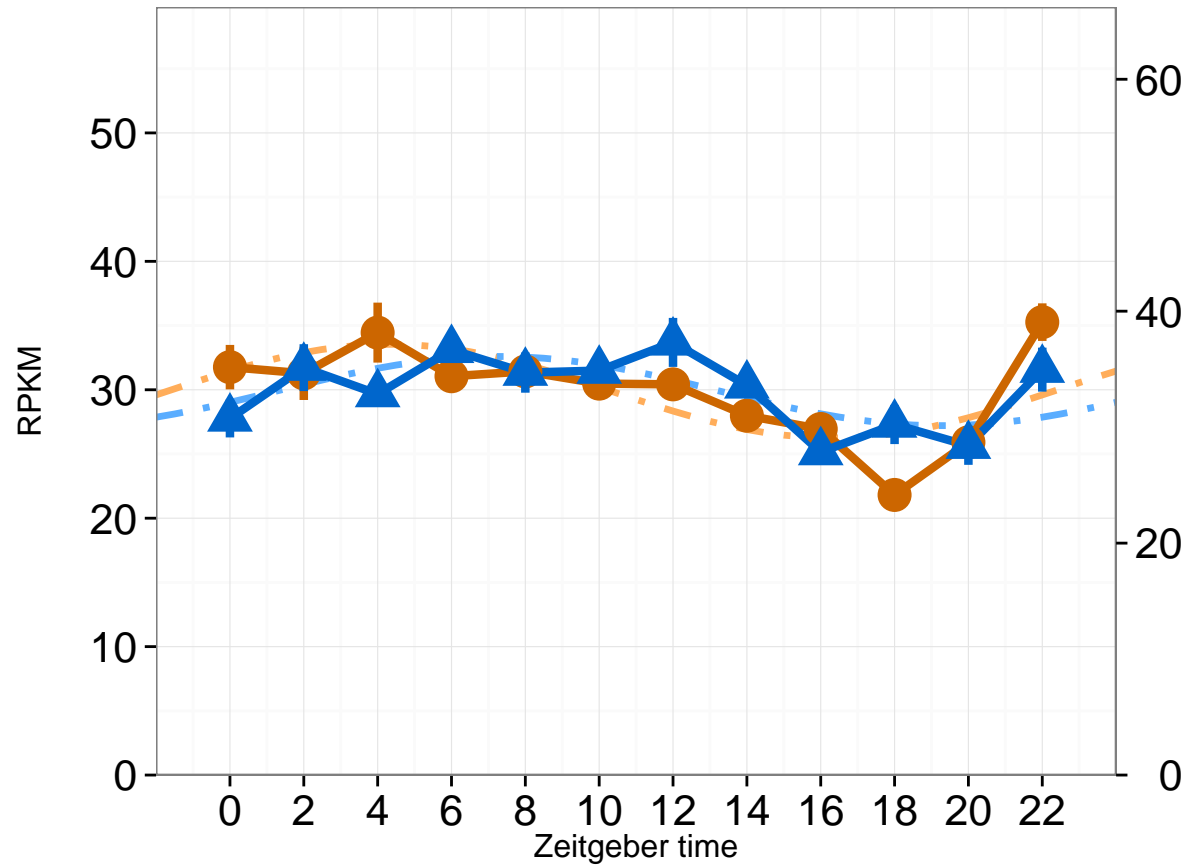

# Ciao1

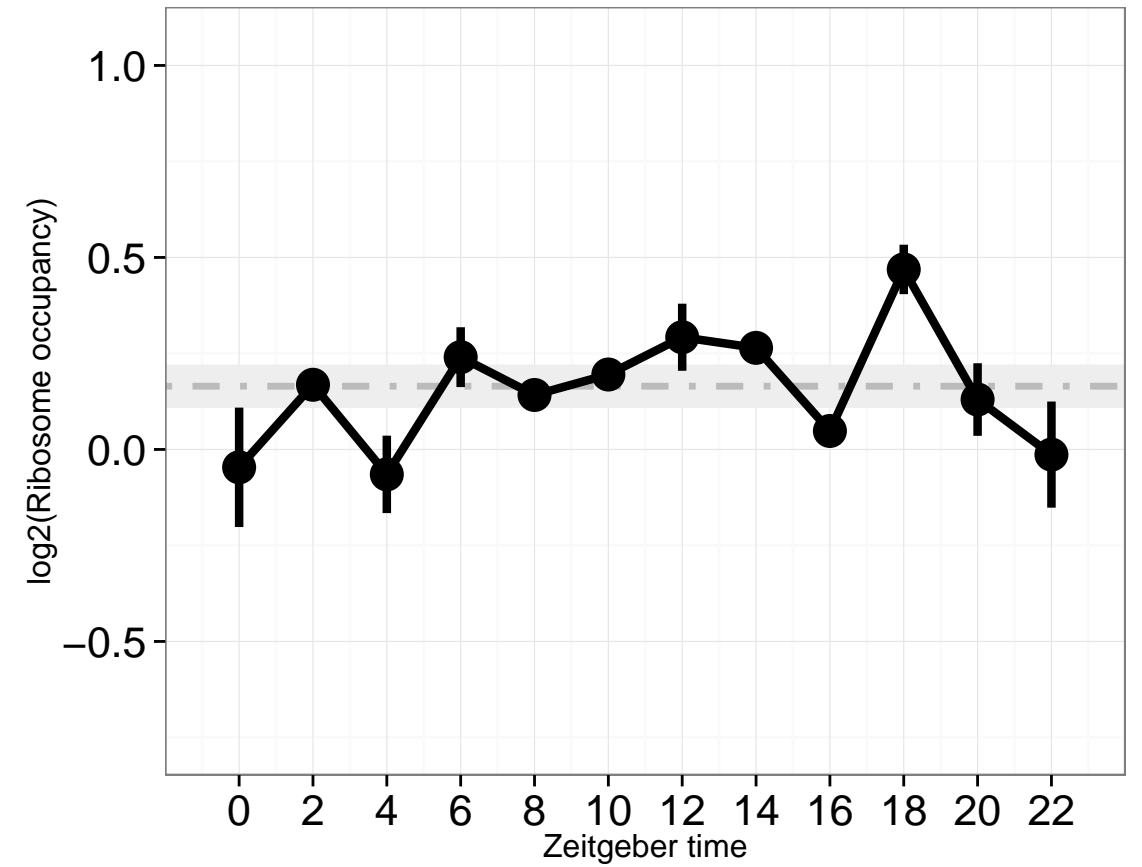

Supplement: SuppDataset_1.zip [file Ciao1_set_A.pdf › Supplemental Dataset 1/A-mRNA_nonrhyth_translation_nonrhyth/Ciao1_set_A.pdf]

## Ciapin1

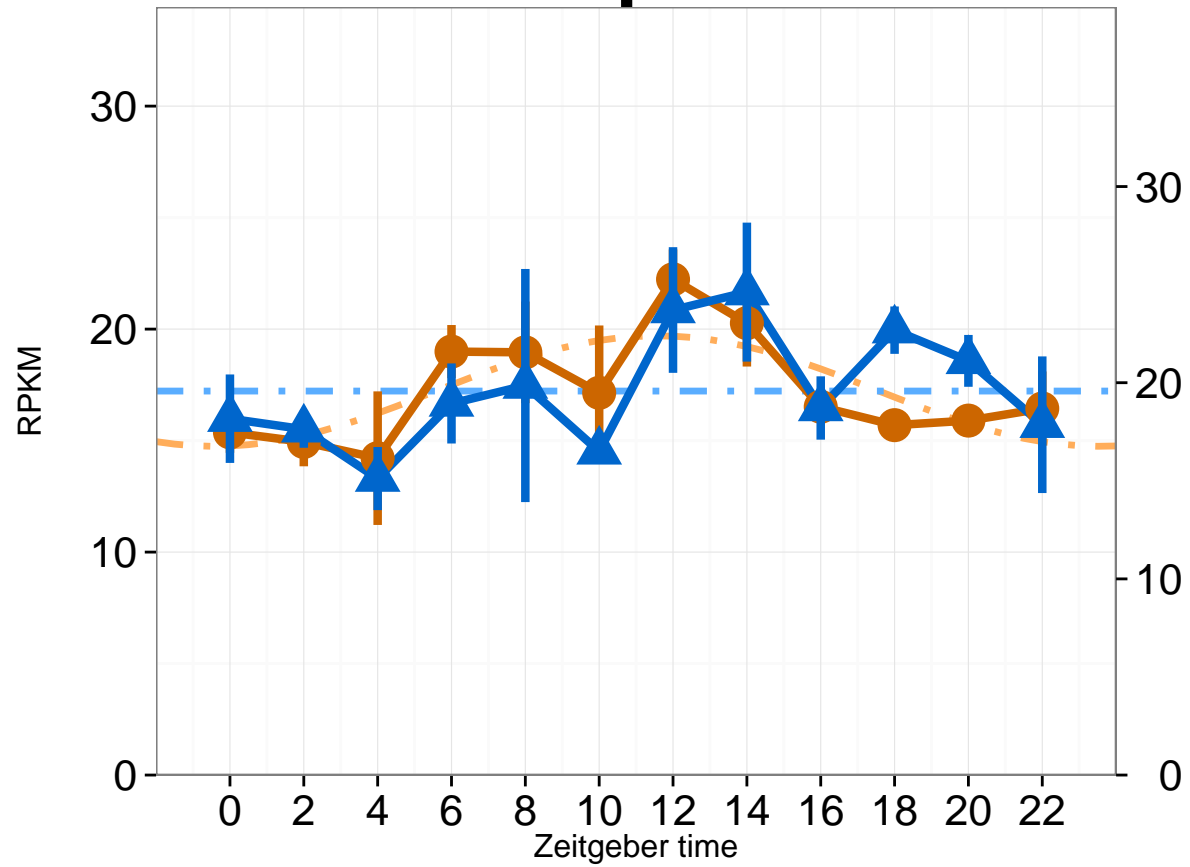

## Ciapin1

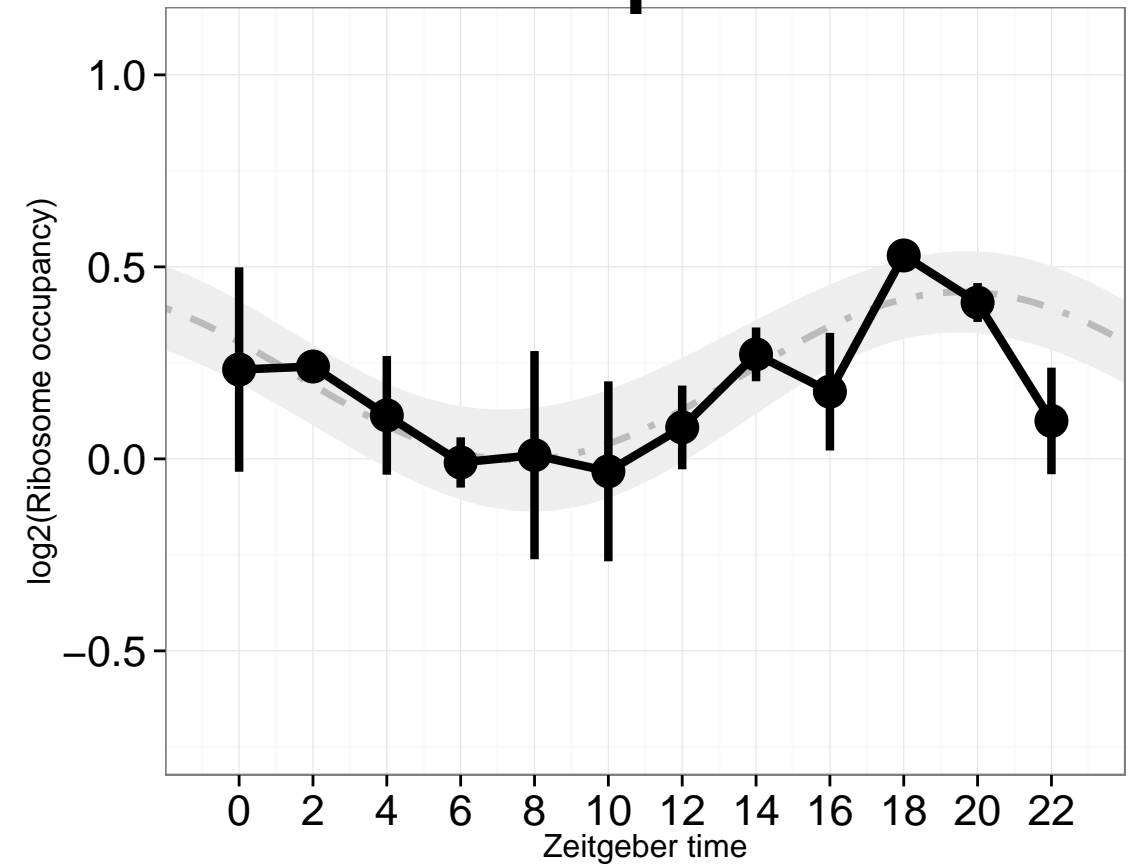

Supplement: SuppDataset_1.zip [file Ciapin1_set_A.pdf › Supplemental Dataset 1/A-mRNA_nonrhyth_translation_nonrhyth/Ciapin1_set_A.pdf]

## Cib1

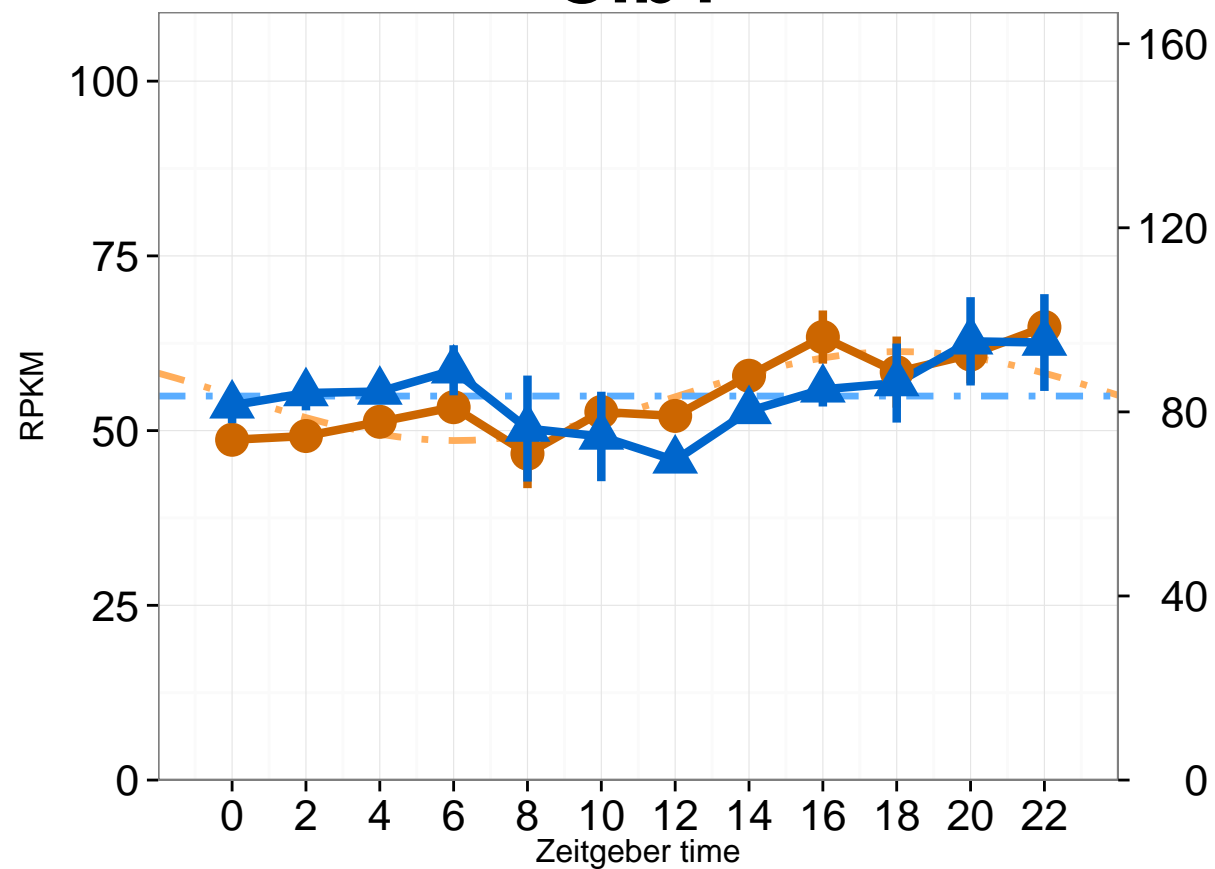

## Cib1

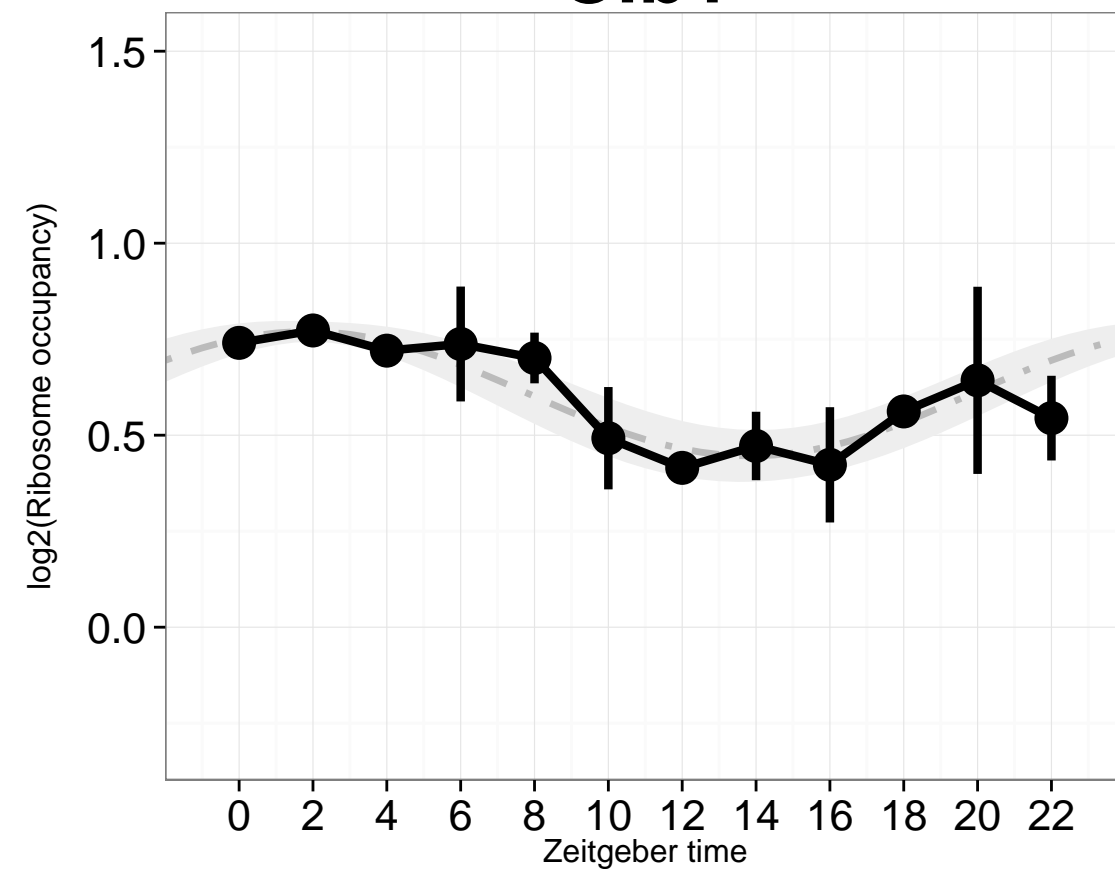

Supplement: SuppDataset_1.zip [file Cib1_set_A.pdf › Supplemental Dataset 1/A-mRNA_nonrhyth_translation_nonrhyth/Cib1_set_A.pdf]

## Cib2

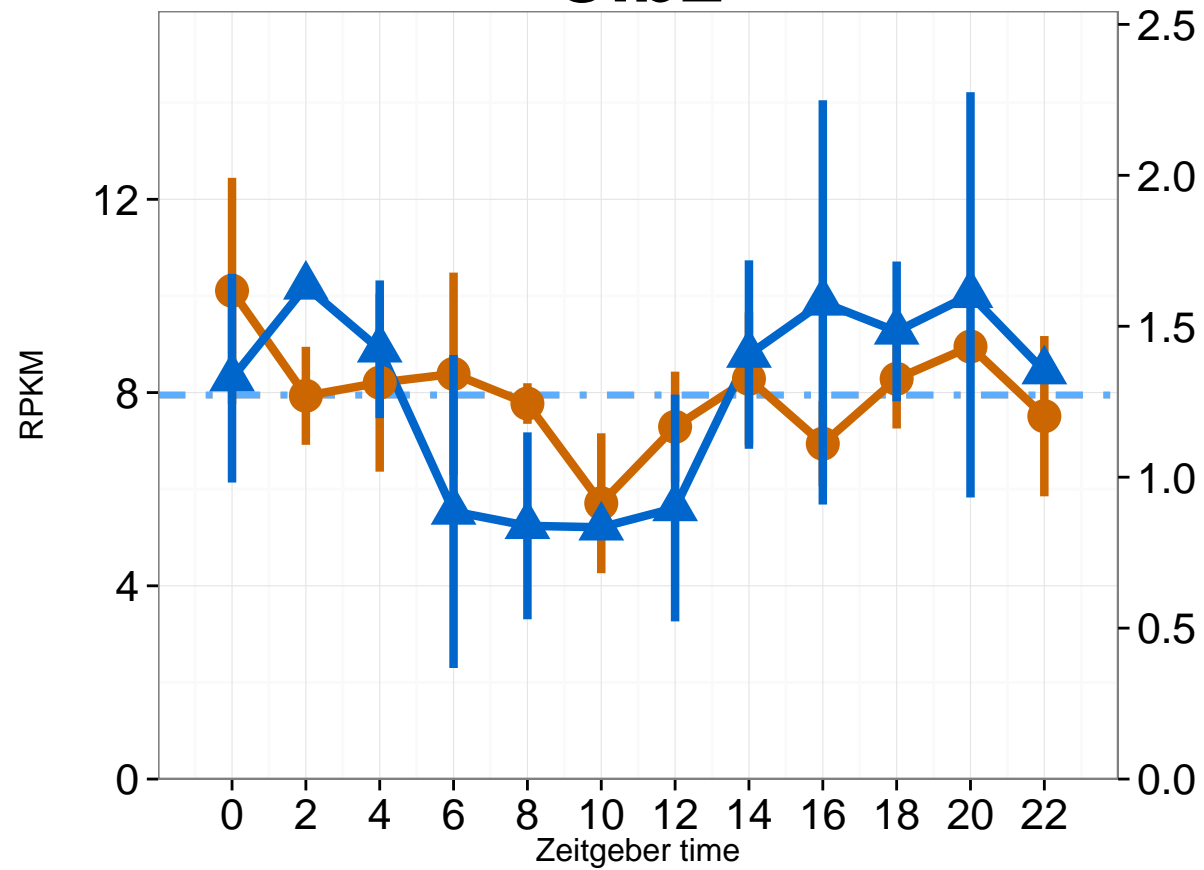

## Cib2

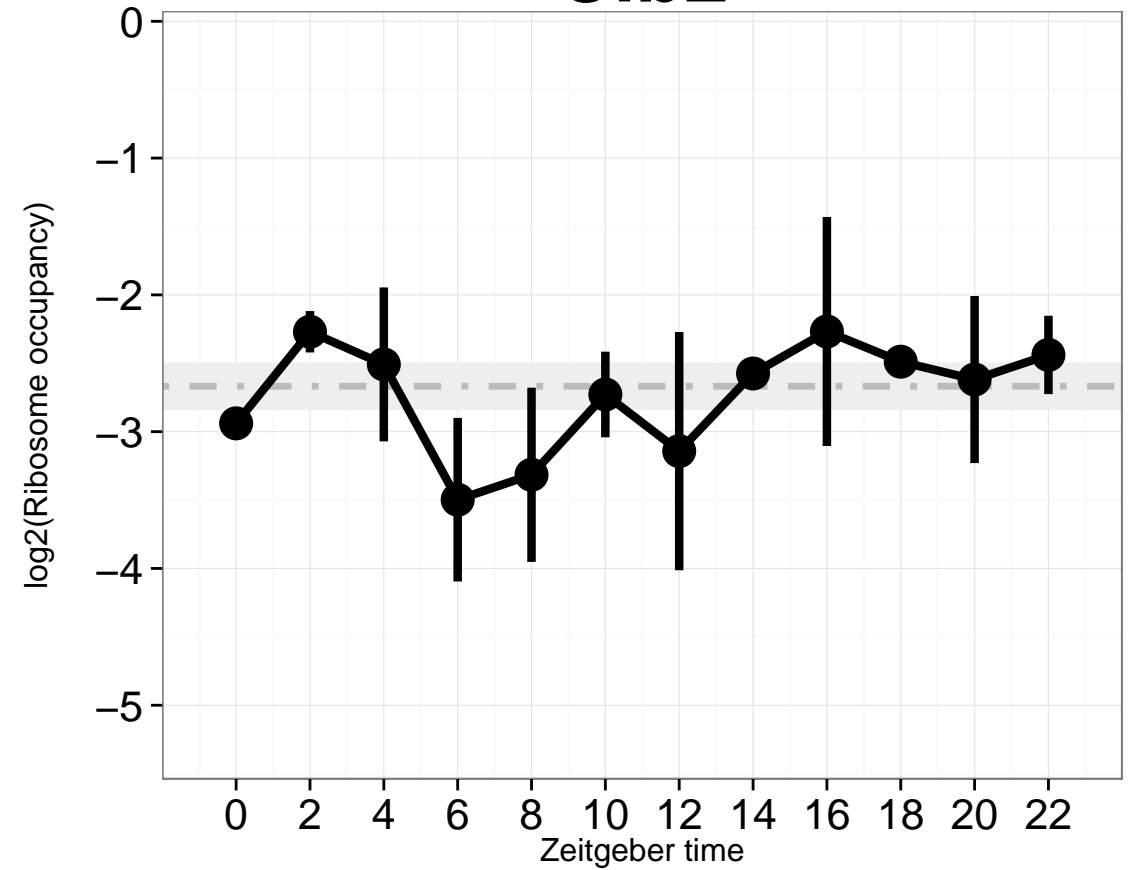

Supplement: SuppDataset_1.zip [file Cib2_set_A.pdf › Supplemental Dataset 1/A-mRNA_nonrhyth_translation_nonrhyth/Cib2_set_A.pdf]

## Cib3

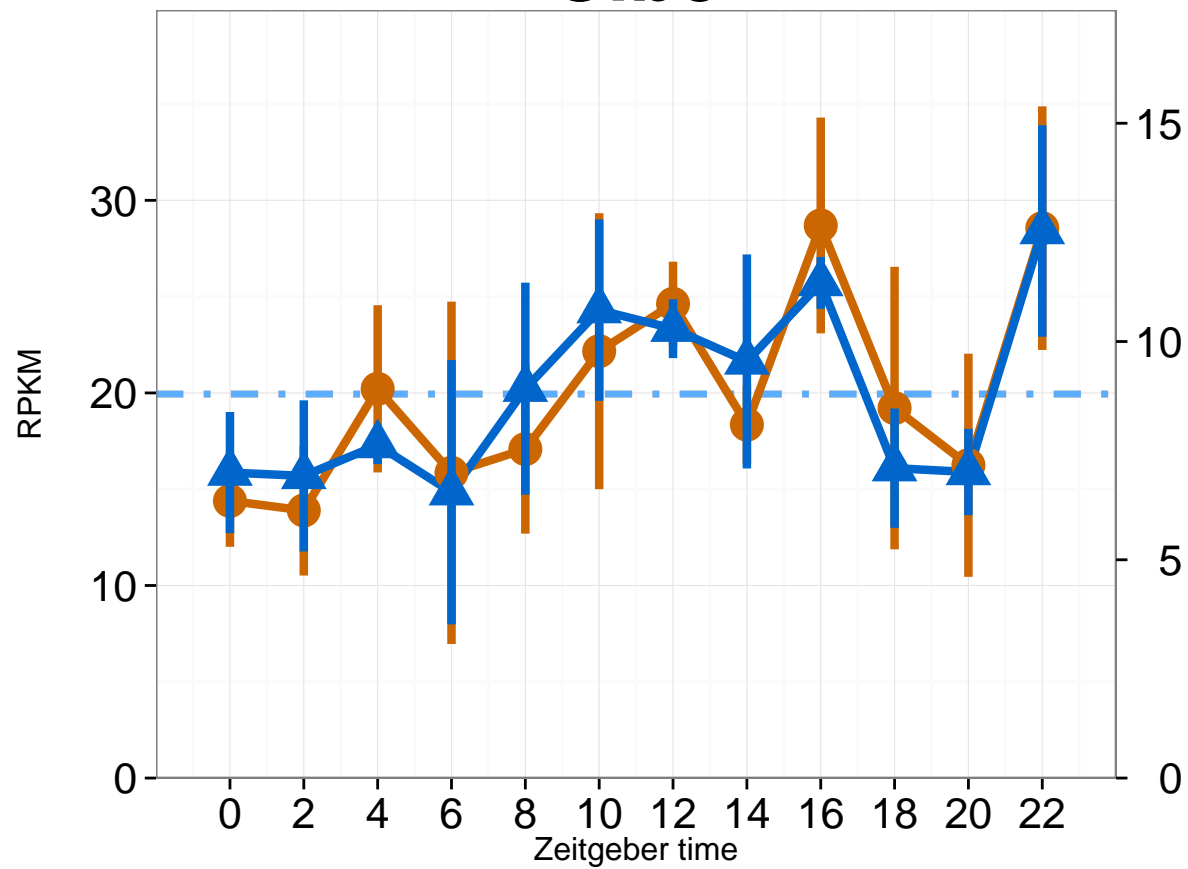

## Cib3

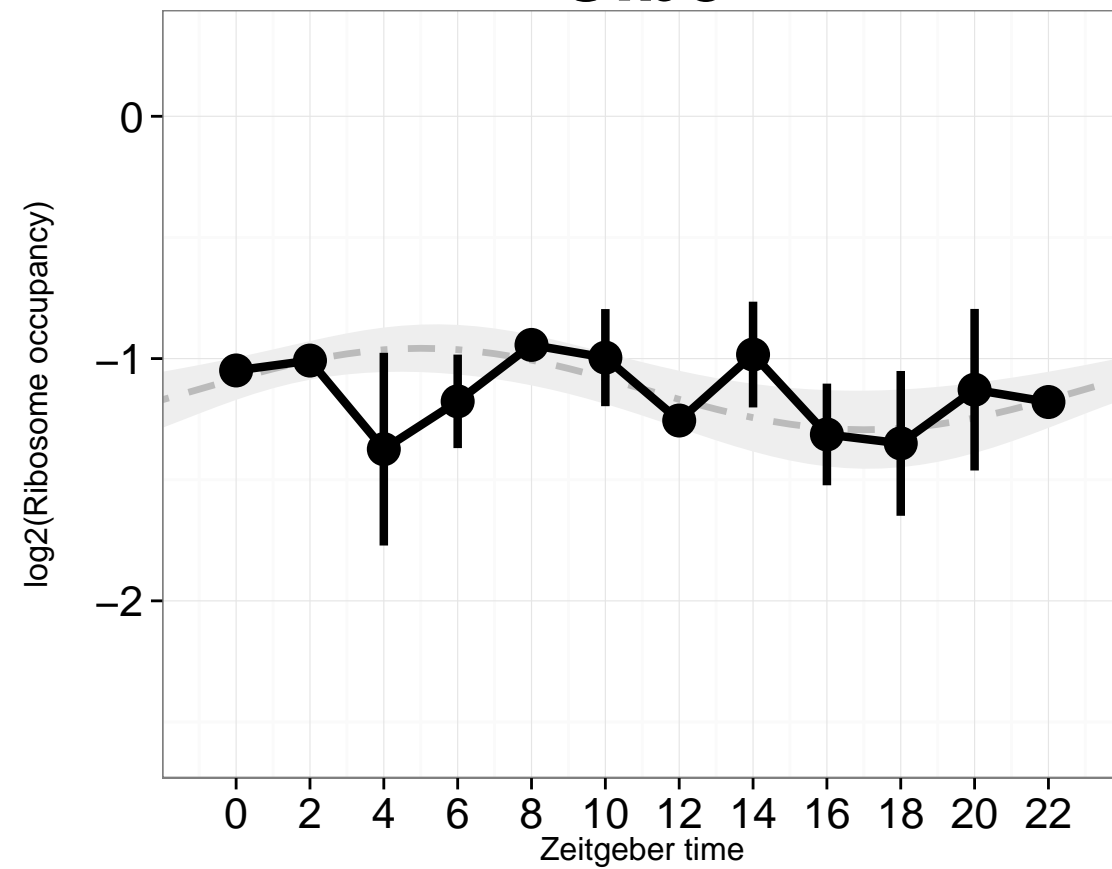

Supplement: SuppDataset_1.zip [file Cib3_set_A.pdf › Supplemental Dataset 1/A-mRNA_nonrhyth_translation_nonrhyth/Cib3_set_A.pdf]

## Cic

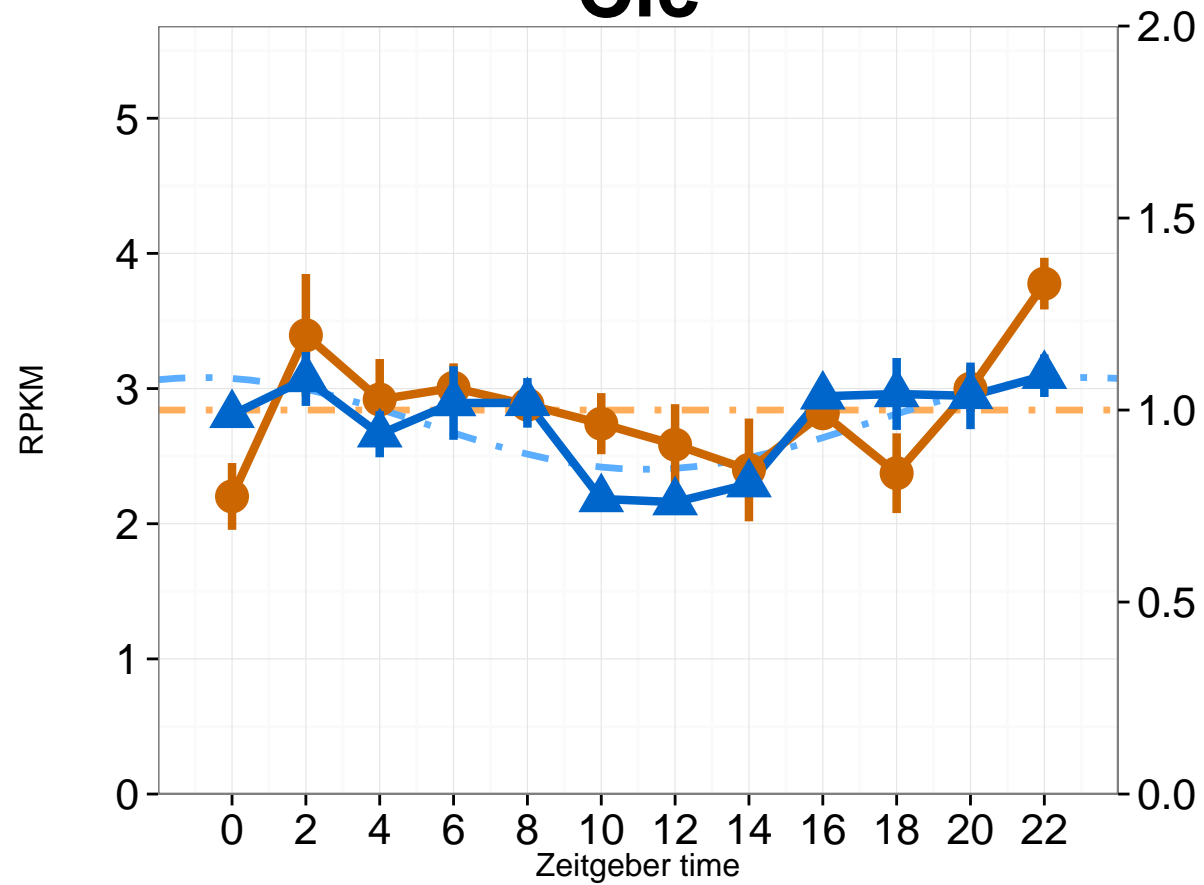

## Cic

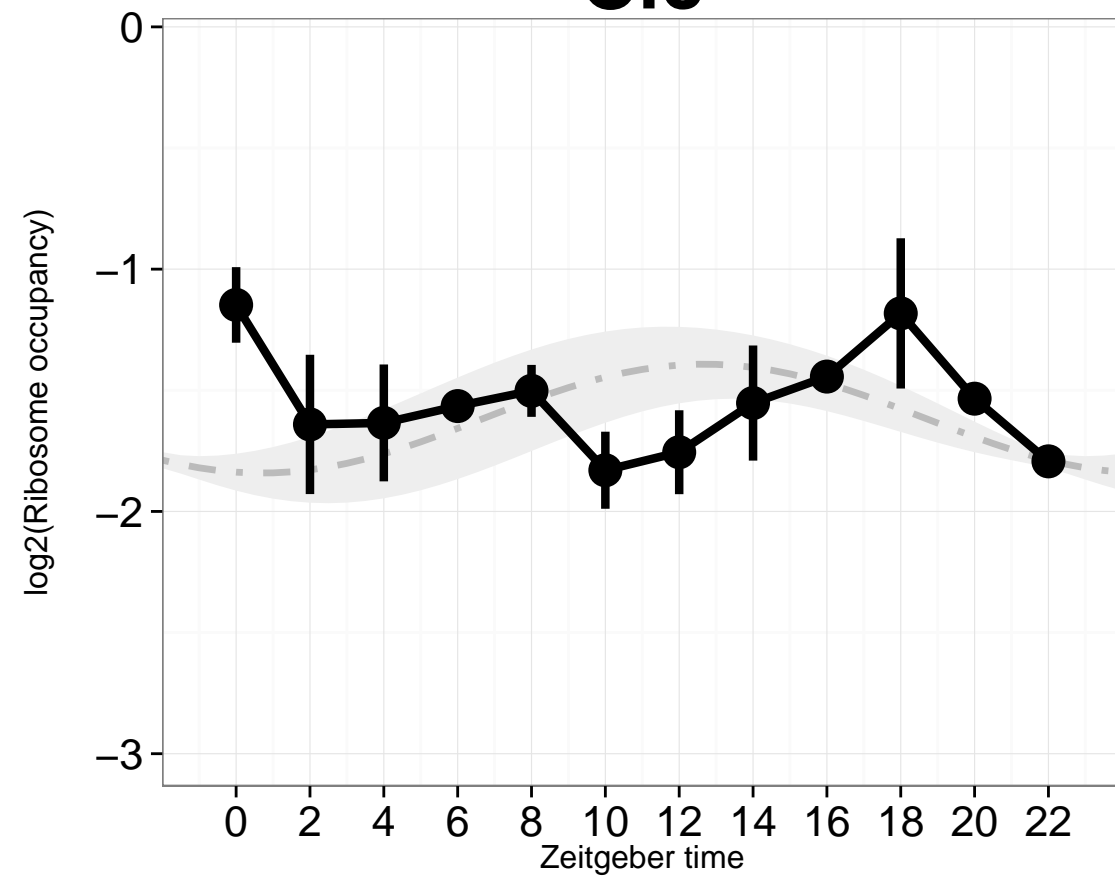

Supplement: SuppDataset_1.zip [file Cic_set_A.pdf › Supplemental Dataset 1/A-mRNA_nonrhyth_translation_nonrhyth/Cic_set_A.pdf]

## Cideb

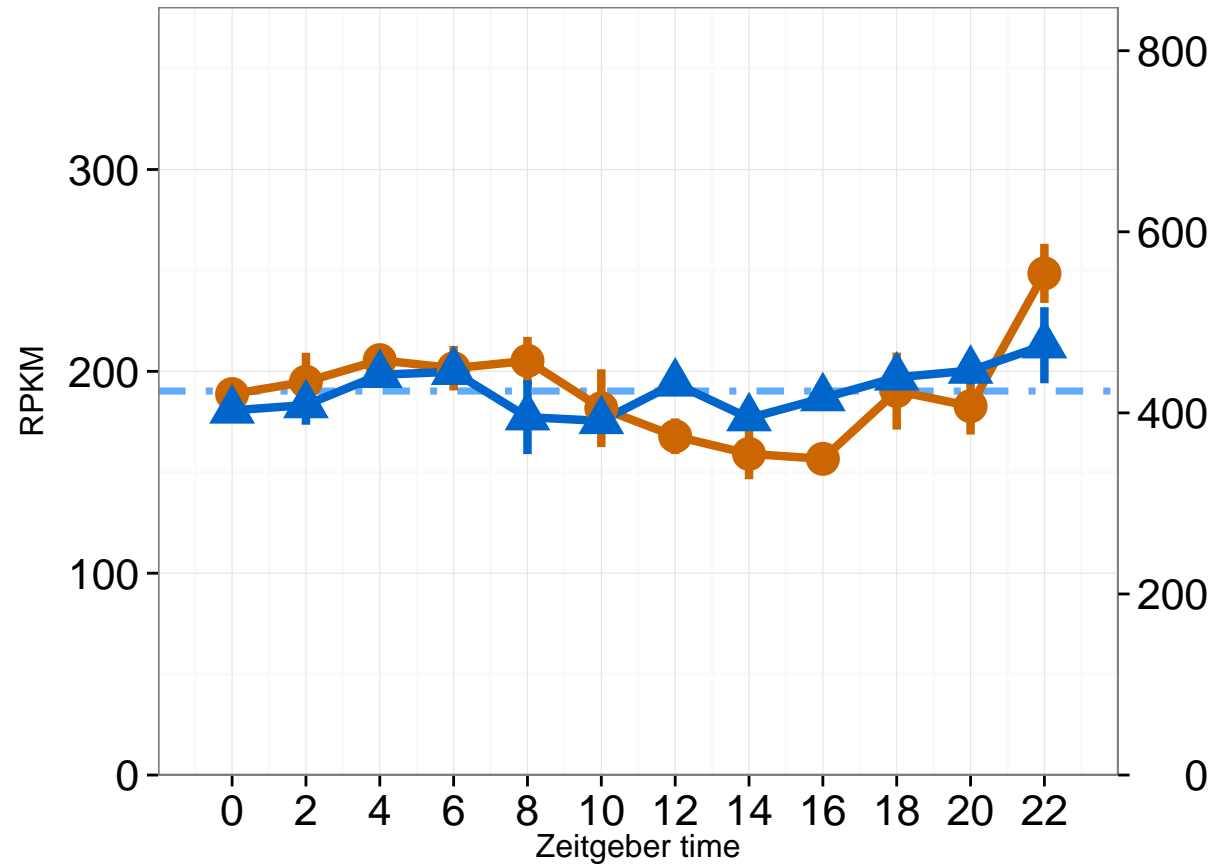

## Cideb

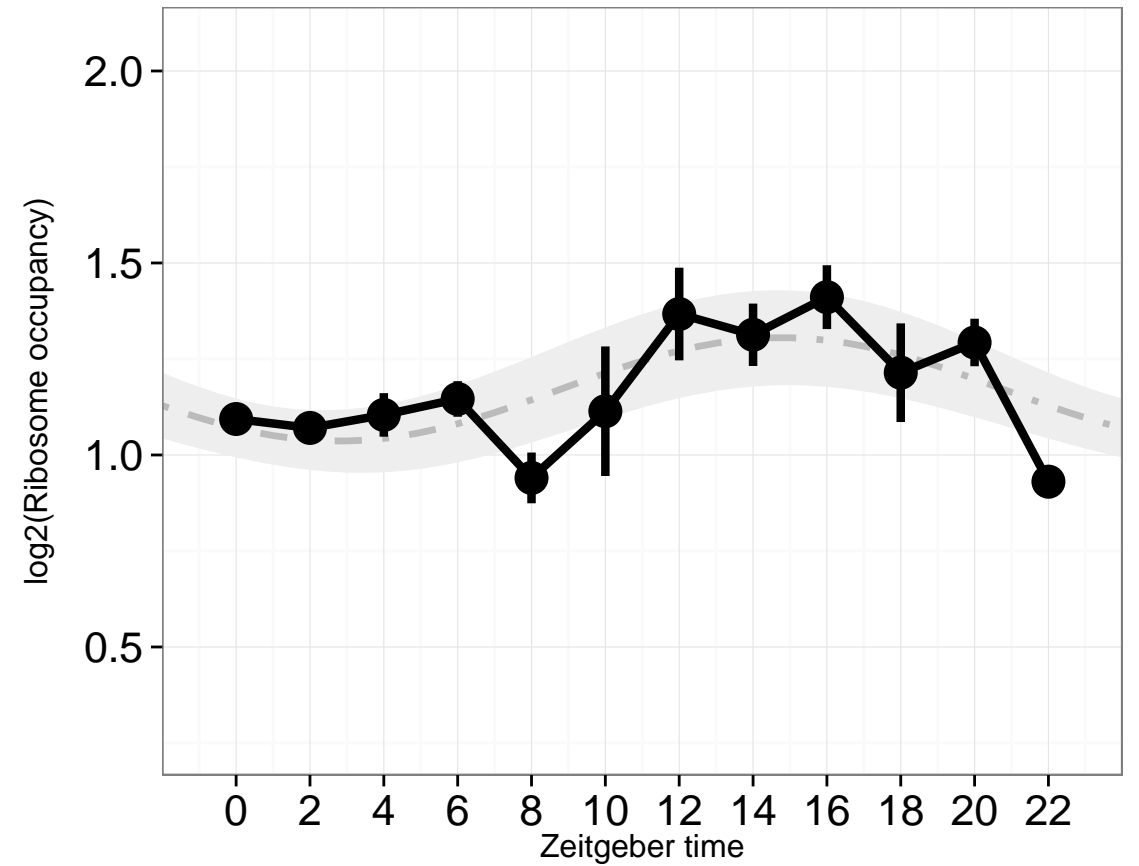

Supplement: SuppDataset_1.zip [file Cideb_set_A.pdf › Supplemental Dataset 1/A-mRNA_nonrhyth_translation_nonrhyth/Cideb_set_A.pdf]

# Cidec TR

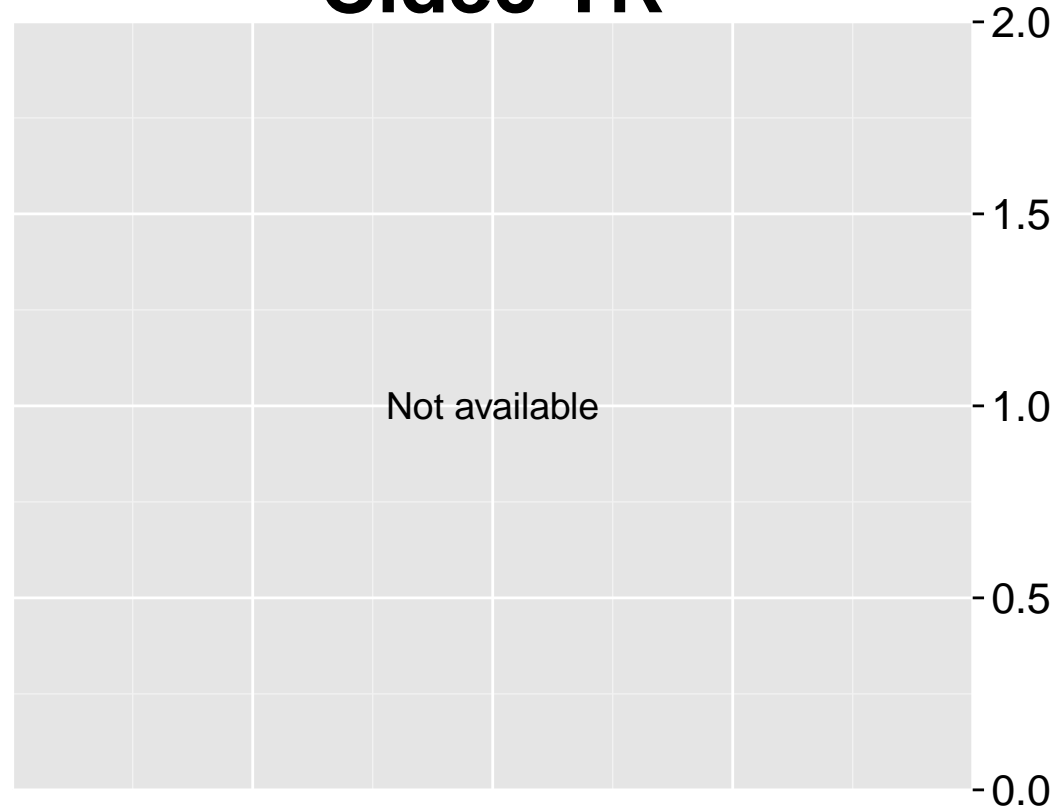

# Cidec log2(Ribosome occupancy)

Supplement: SuppDataset_1.zip [file Cidec_set_A.pdf › Supplemental Dataset 1/A-mRNA_nonrhyth_translation_nonrhyth/Cidec_set_A.pdf]

## Ciita

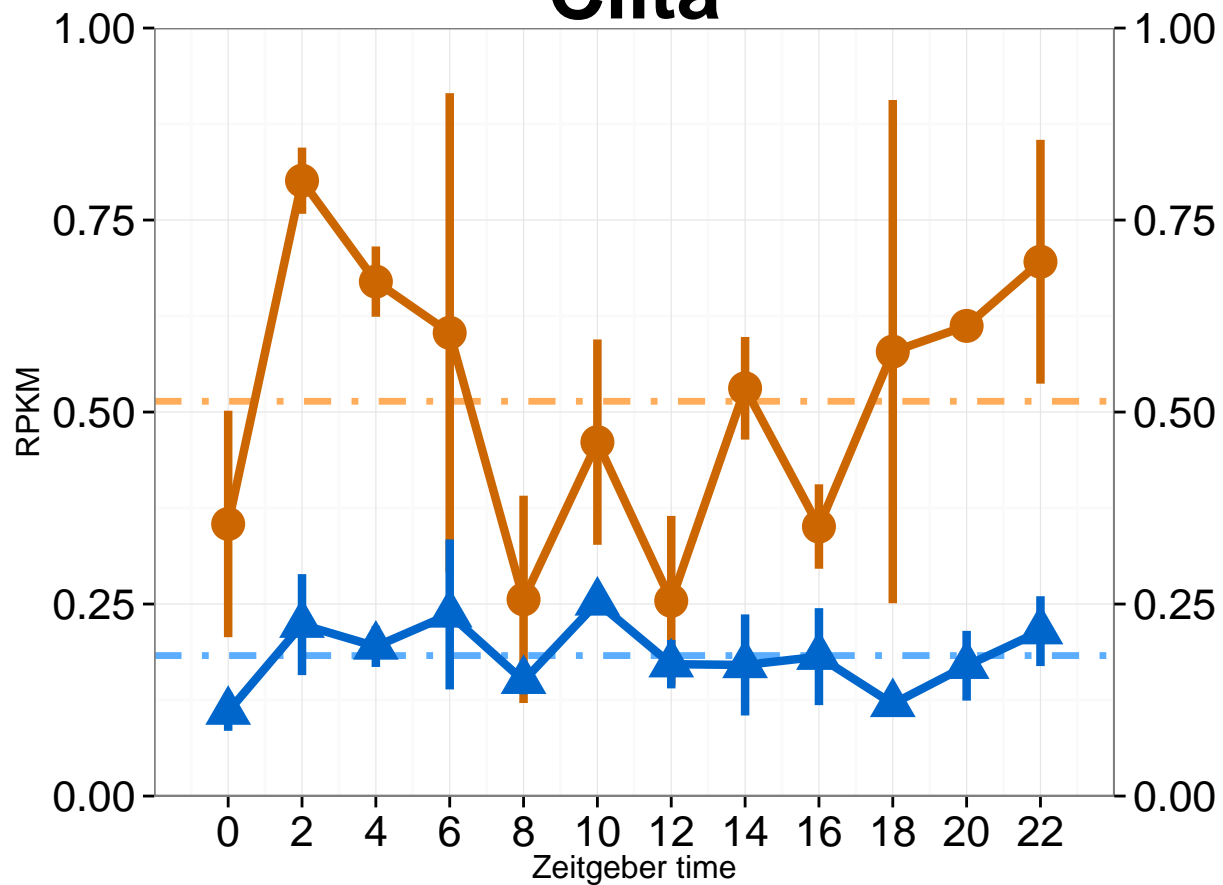

## Ciita

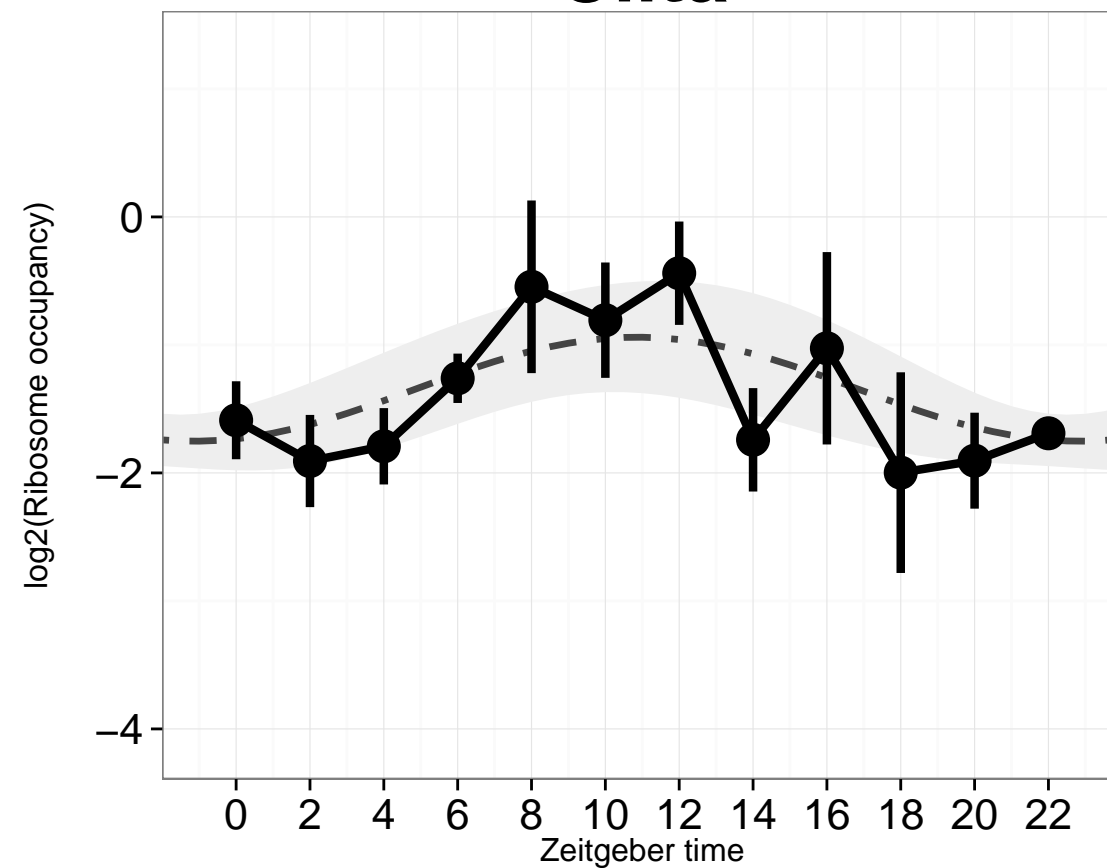

Supplement: SuppDataset_1.zip [file Ciita_set_A.pdf › Supplemental Dataset 1/A-mRNA_nonrhyth_translation_nonrhyth/Ciita_set_A.pdf]

## Cilp

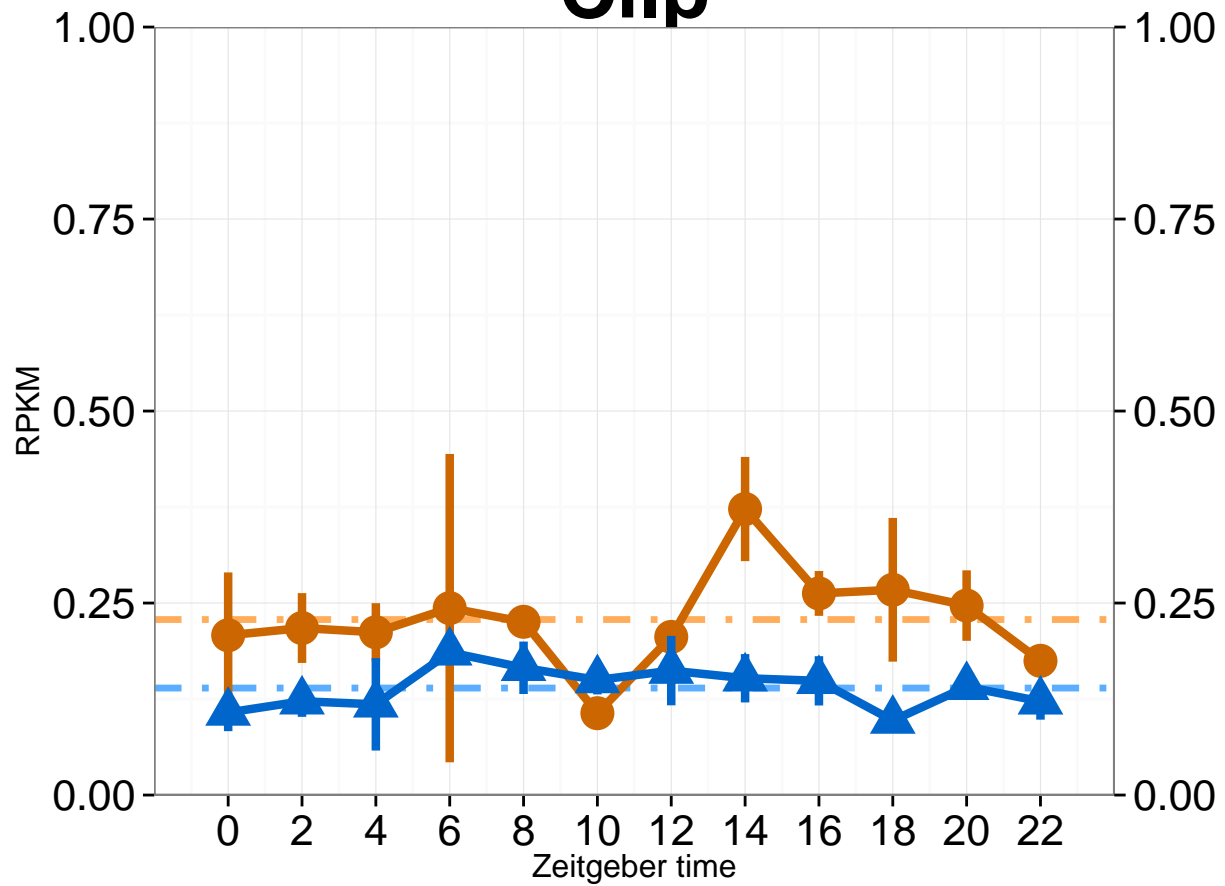

## Cilp

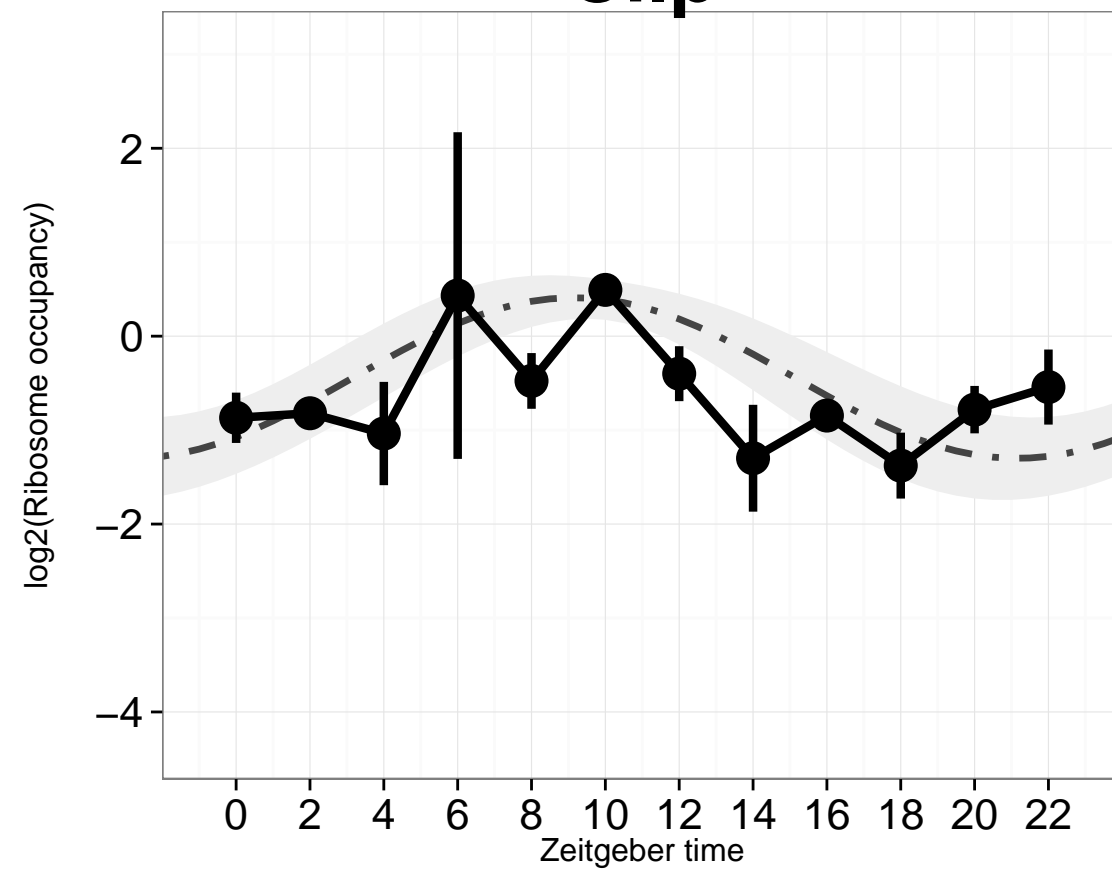

Supplement: SuppDataset_1.zip [file Cilp_set_A.pdf › Supplemental Dataset 1/A-mRNA_nonrhyth_translation_nonrhyth/Cilp_set_A.pdf]

## Cinp

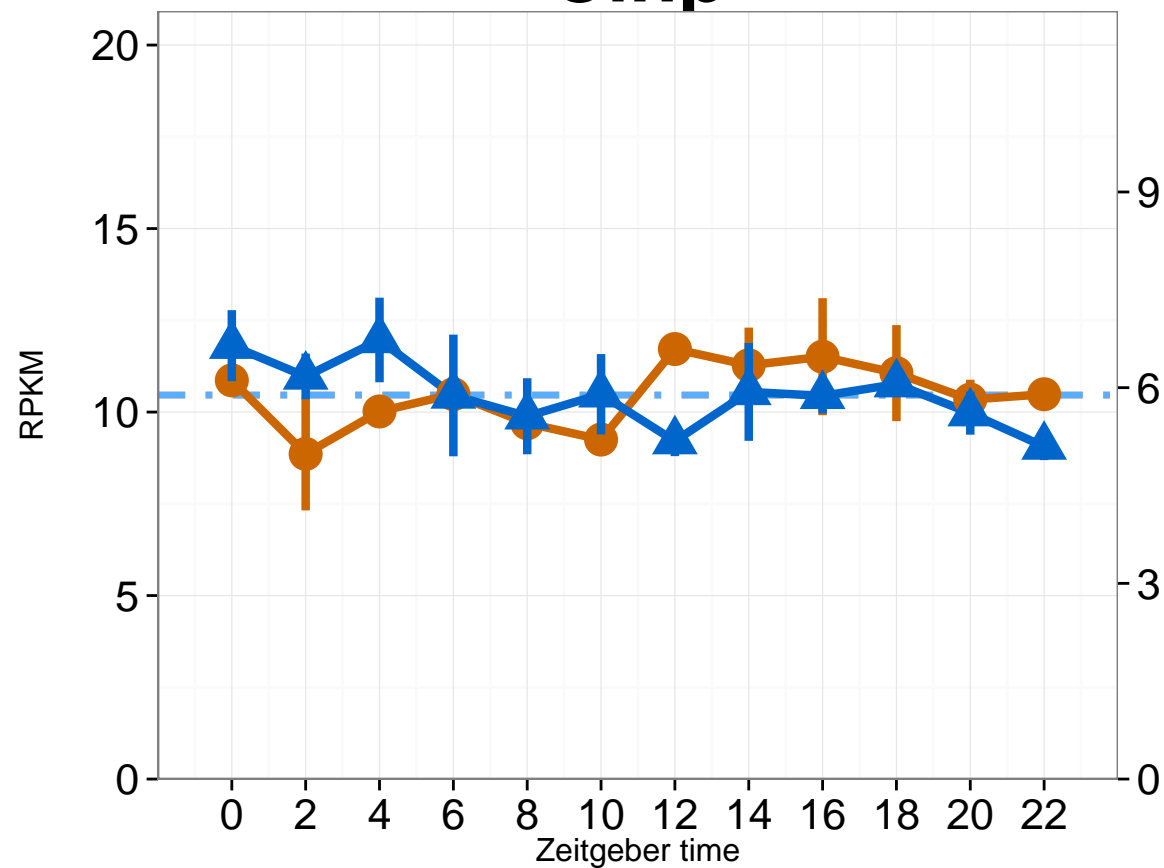

## Cinp

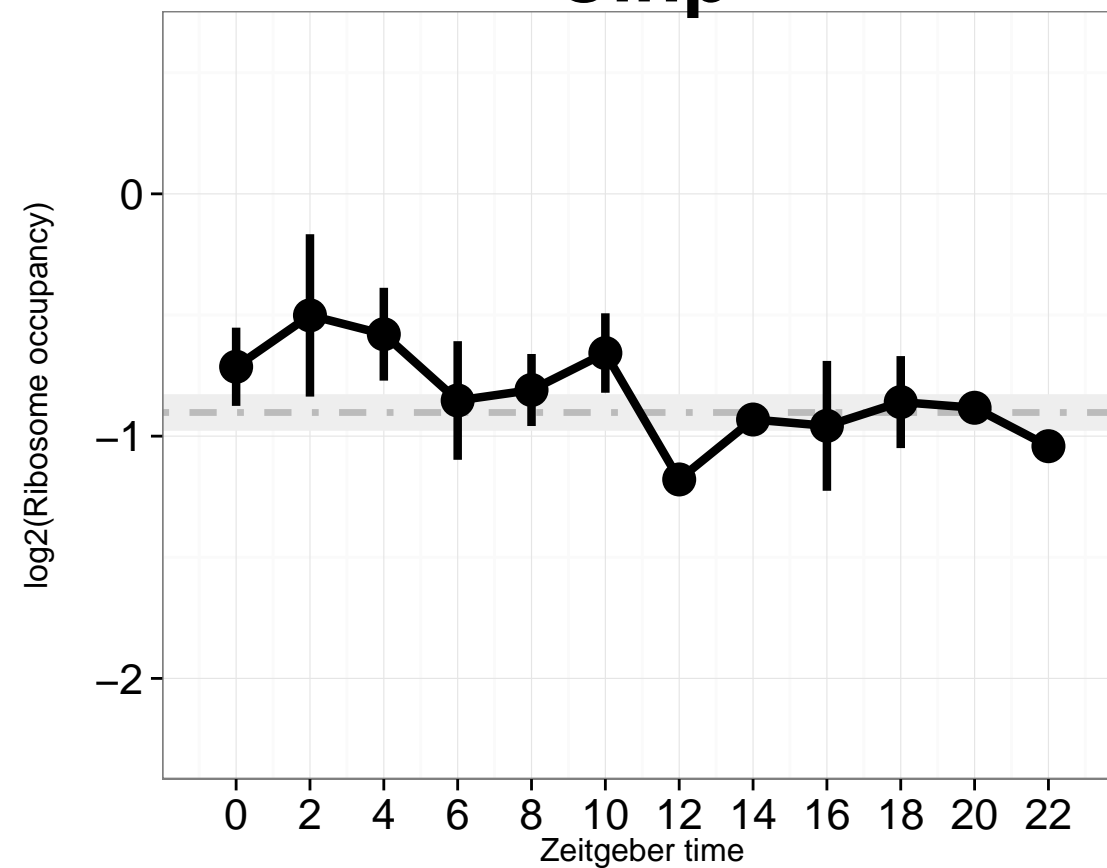

Supplement: SuppDataset_1.zip [file Cinp_set_A.pdf › Supplemental Dataset 1/A-mRNA_nonrhyth_translation_nonrhyth/Cinp_set_A.pdf]

# Cirh1a

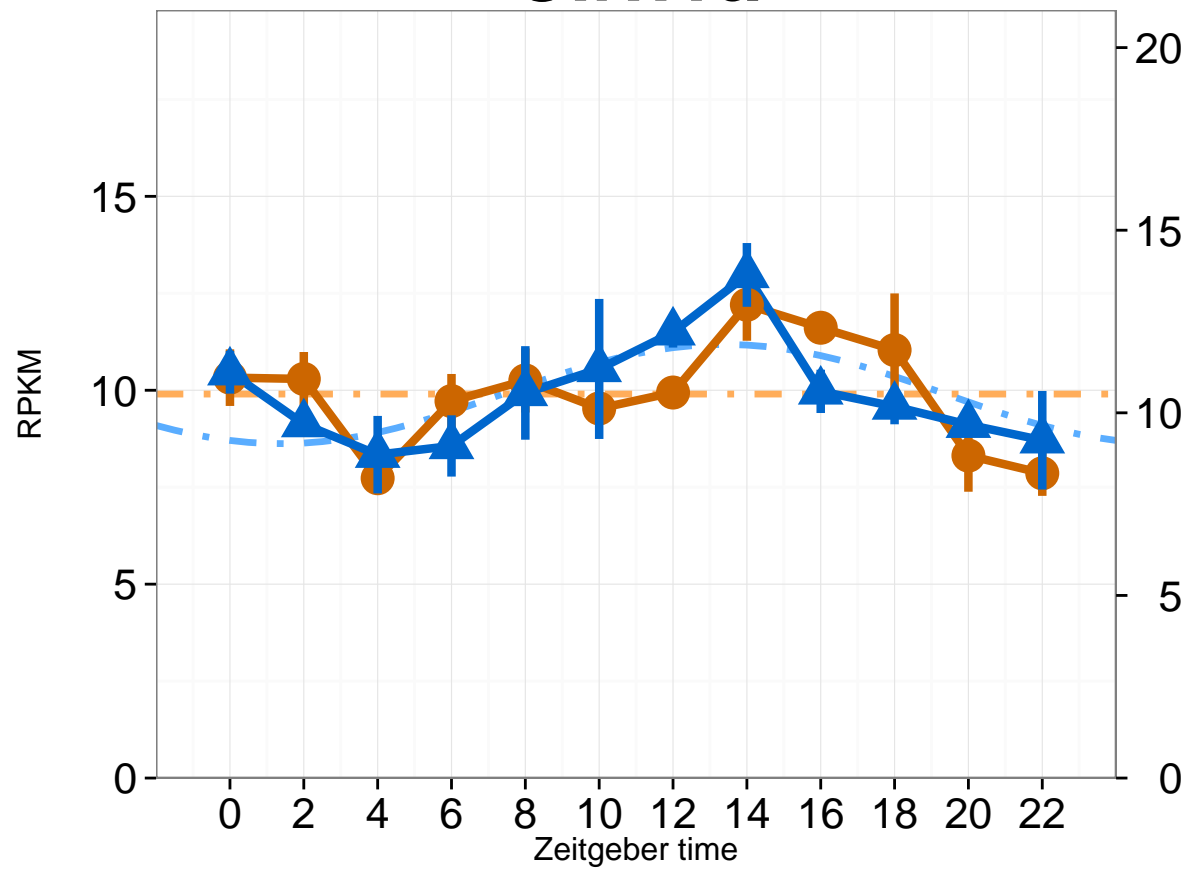

# Cirh1a

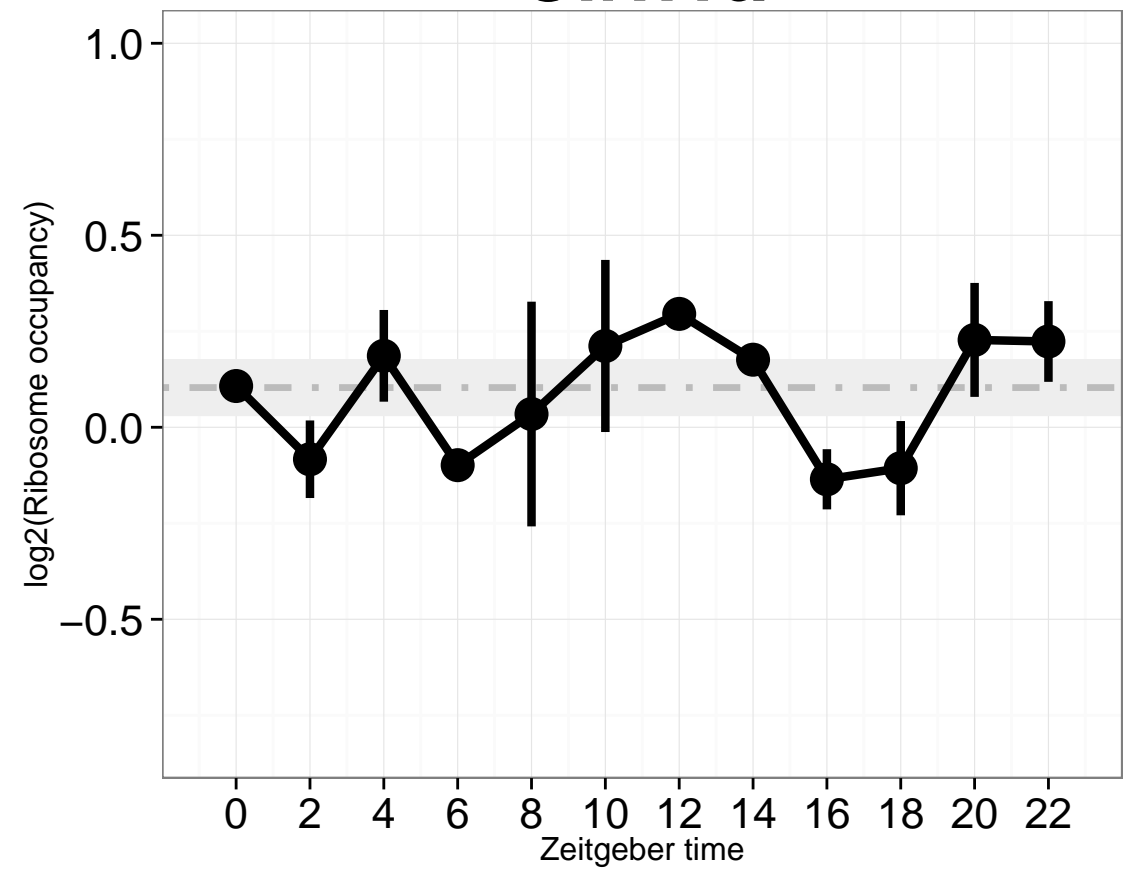

Supplement: SuppDataset_1.zip [file Cirh1a_set_A.pdf › Supplemental Dataset 1/A-mRNA_nonrhyth_translation_nonrhyth/Cirh1a_set_A.pdf]

## Cisd1

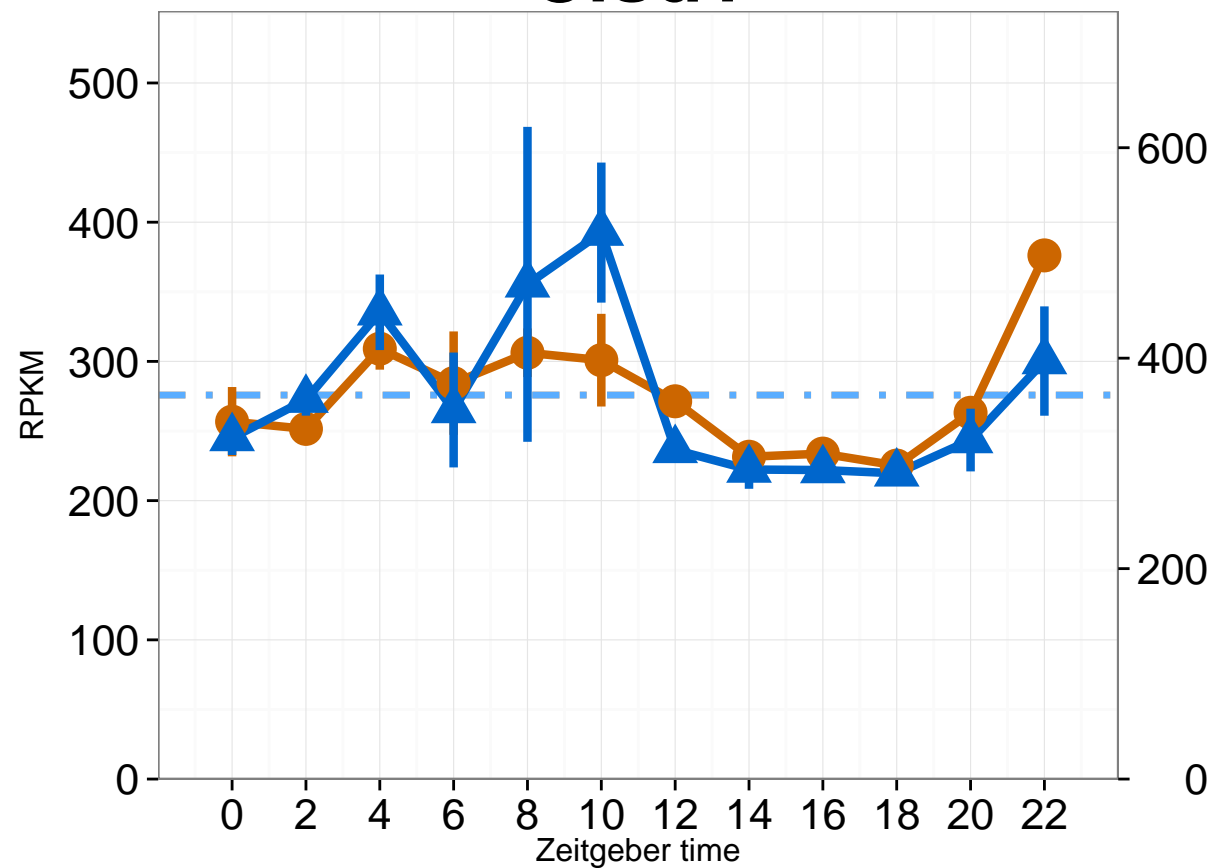

## Cisd1

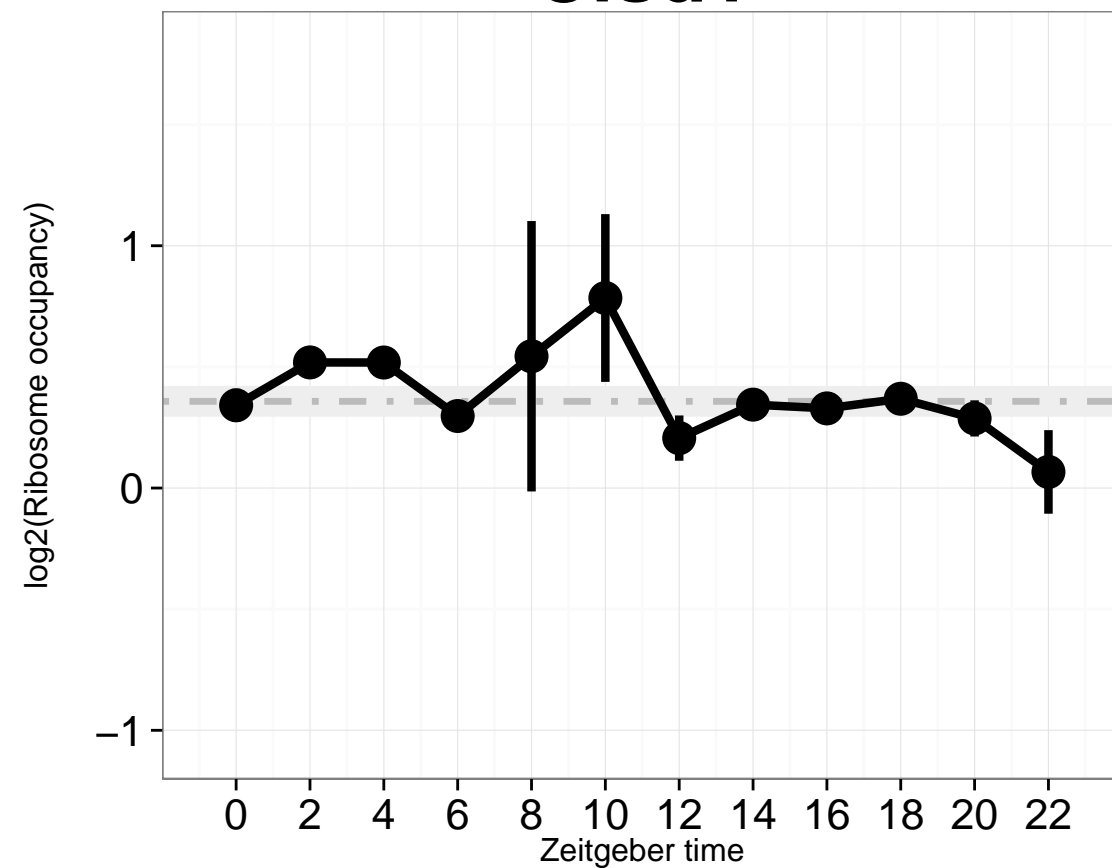

Supplement: SuppDataset_1.zip [file Cisd1_set_A.pdf › Supplemental Dataset 1/A-mRNA_nonrhyth_translation_nonrhyth/Cisd1_set_A.pdf]

## Cisd2

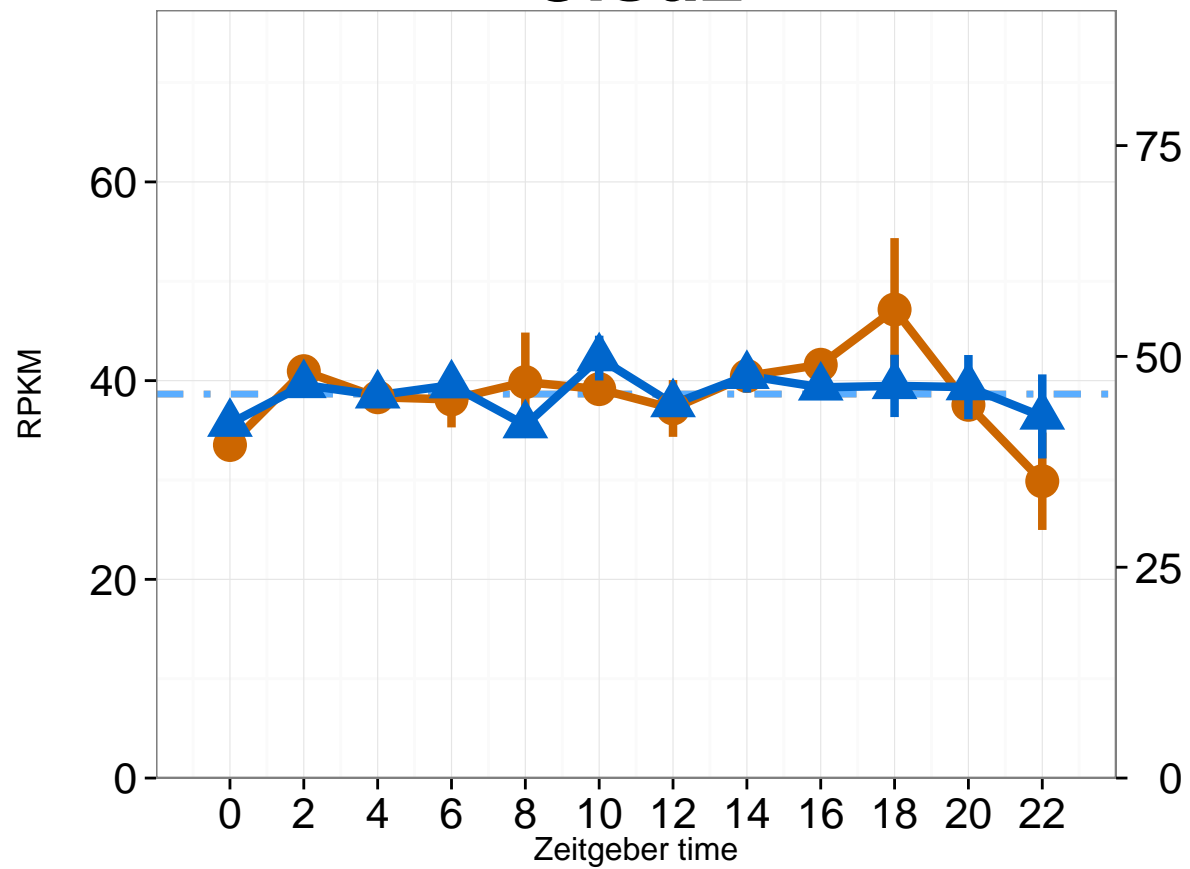

## Cisd2

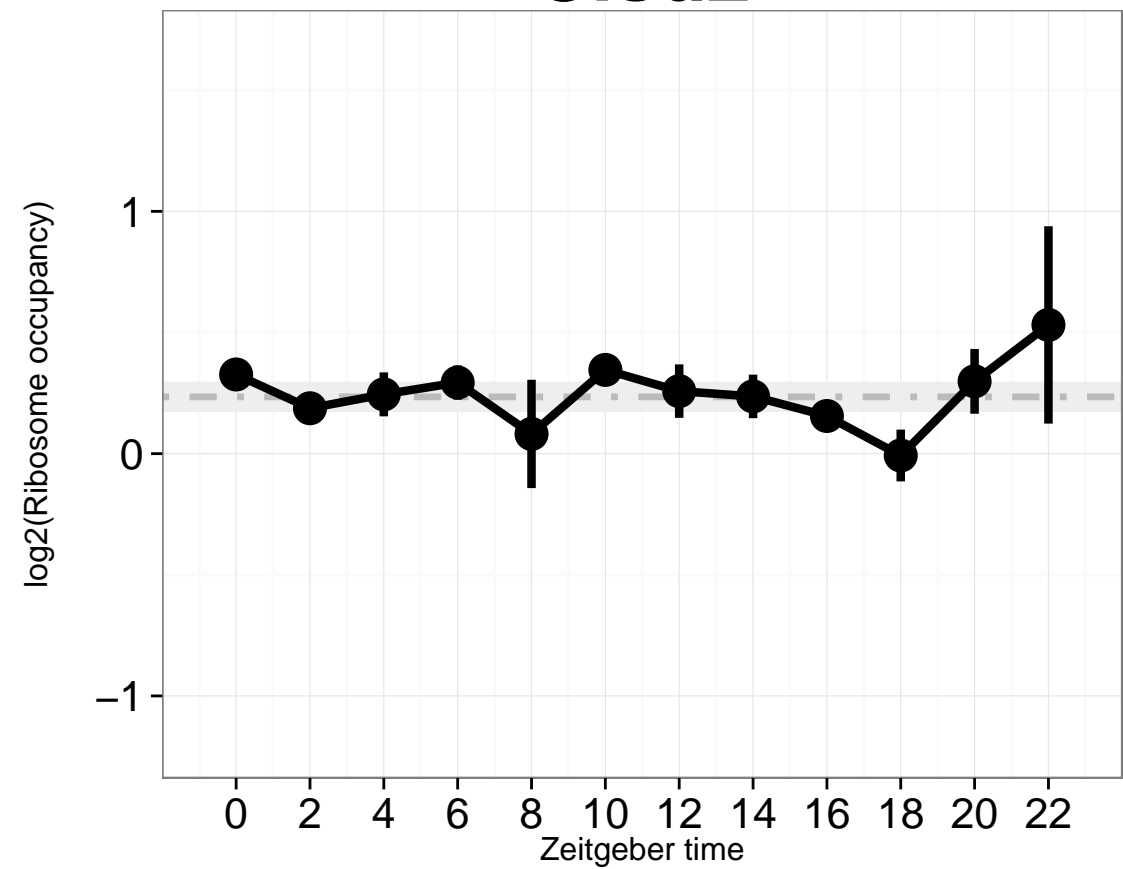

Supplement: SuppDataset_1.zip [file Cisd2_set_A.pdf › Supplemental Dataset 1/A-mRNA_nonrhyth_translation_nonrhyth/Cisd2_set_A.pdf]

## Cisd3

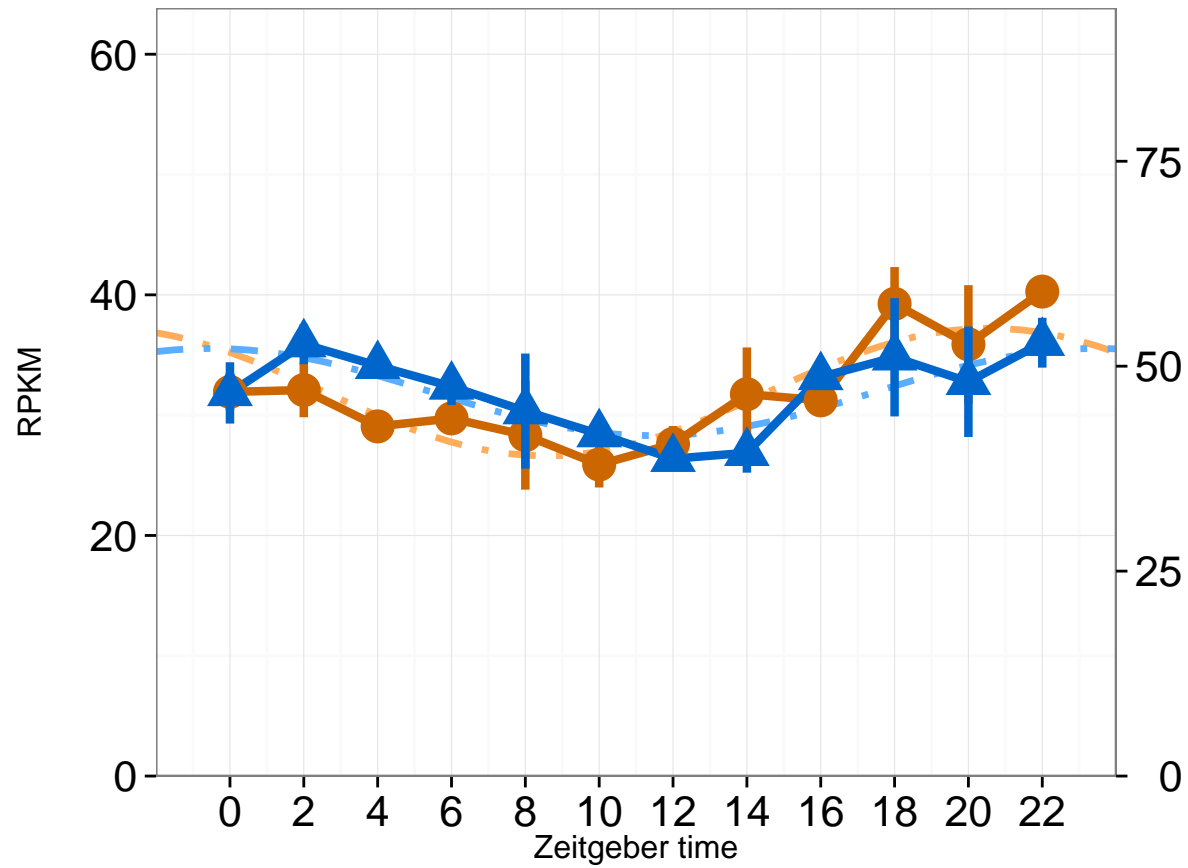

## Cisd3

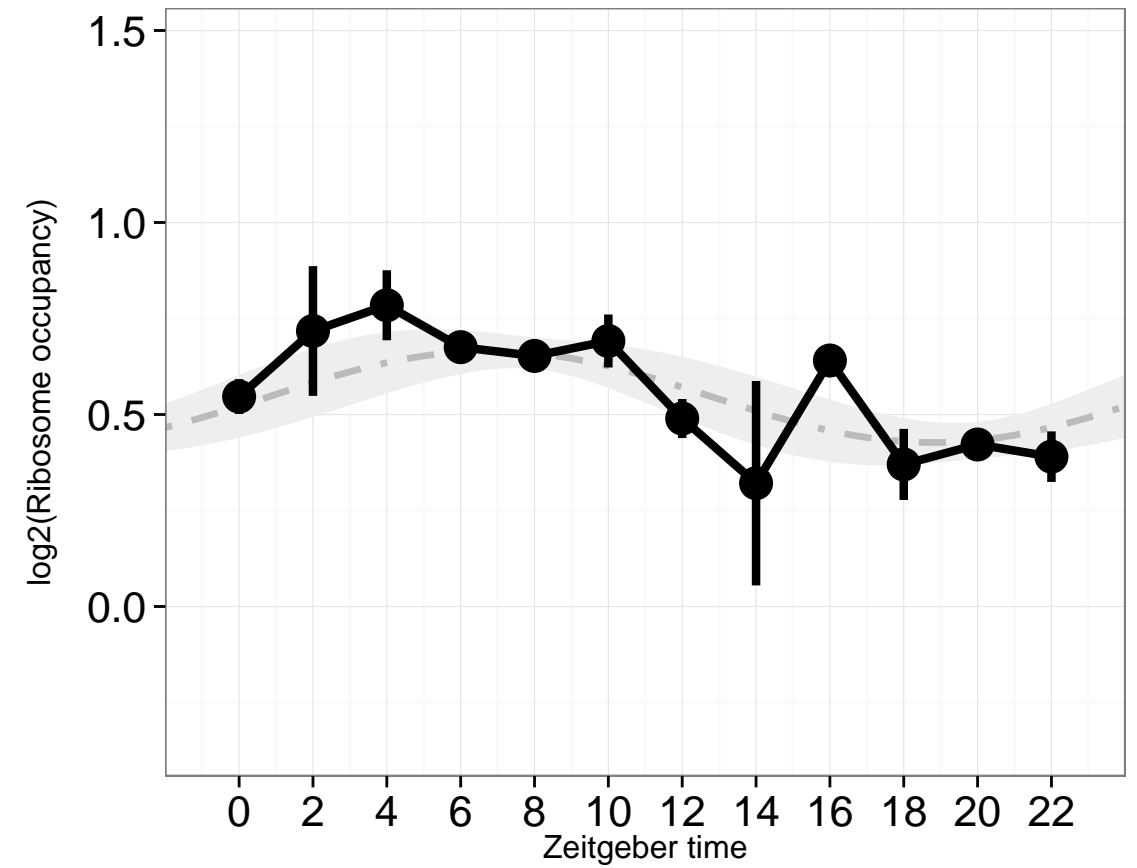

Supplement: SuppDataset_1.zip [file Cisd3_set_A.pdf › Supplemental Dataset 1/A-mRNA_nonrhyth_translation_nonrhyth/Cisd3_set_A.pdf]

## Cish

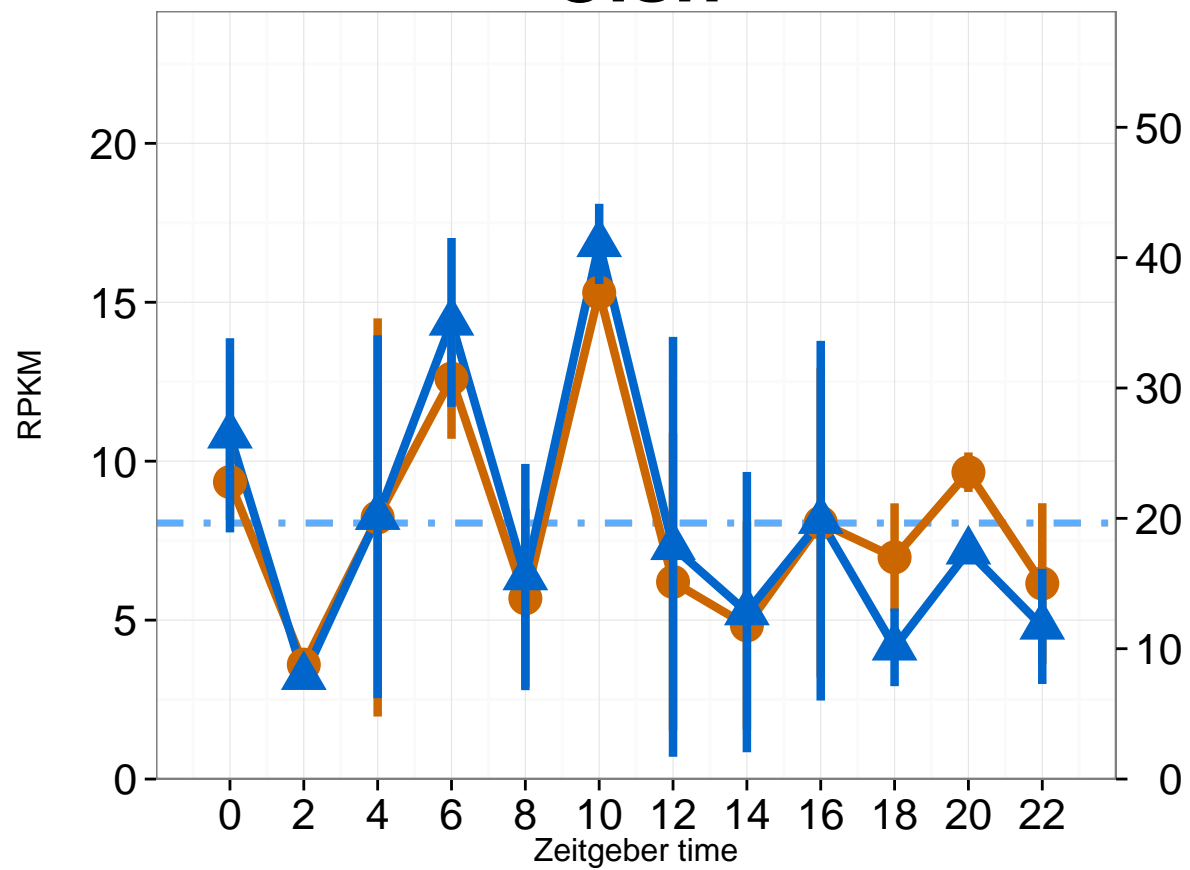

## Cish

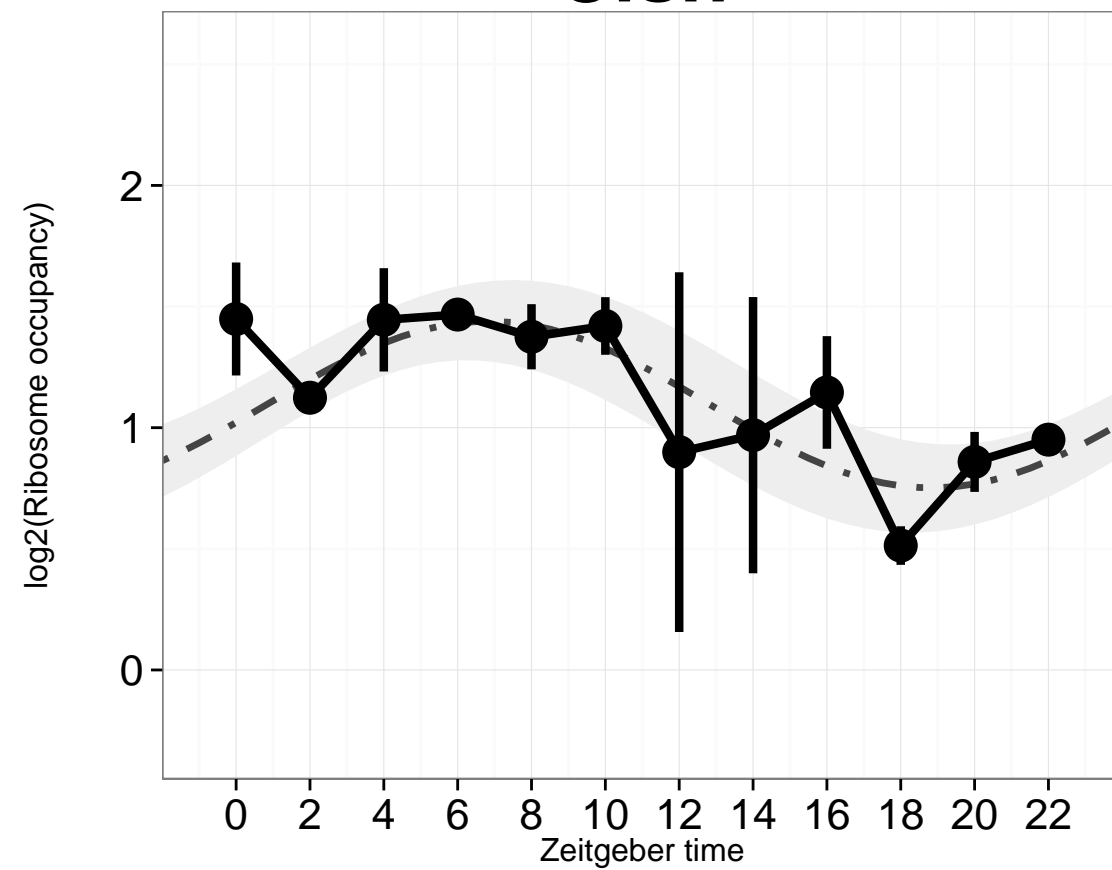

Supplement: SuppDataset_1.zip [file Cish_set_A.pdf › Supplemental Dataset 1/A-mRNA_nonrhyth_translation_nonrhyth/Cish_set_A.pdf]

# Cited2

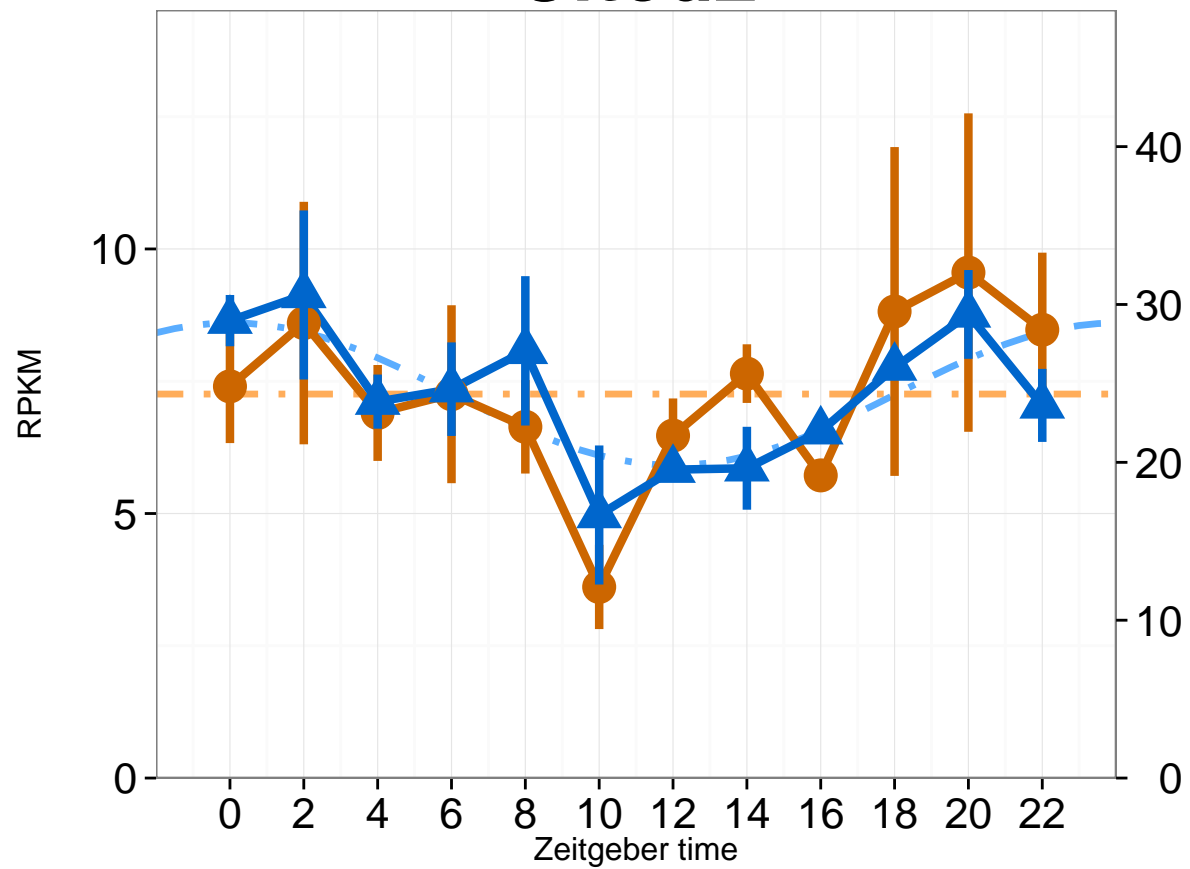

# Cited2

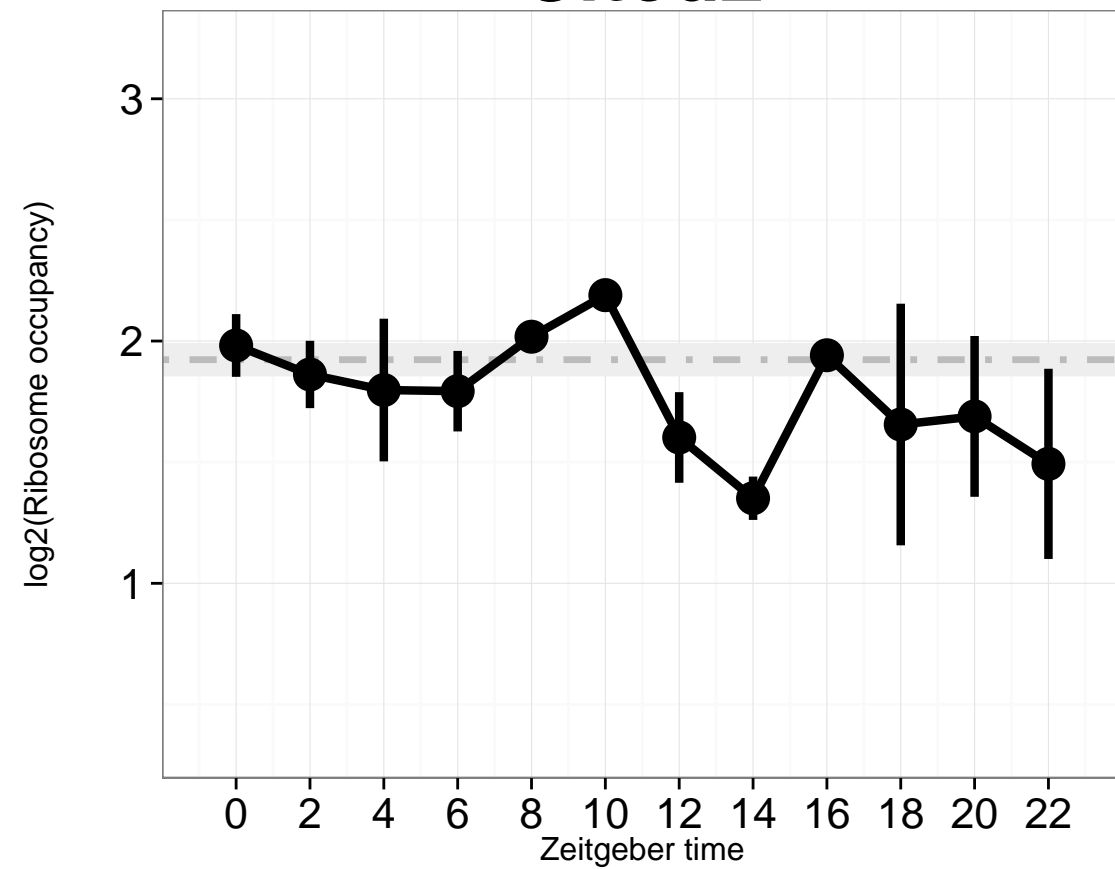

Supplement: SuppDataset_1.zip [file Cited2_set_A.pdf › Supplemental Dataset 1/A-mRNA_nonrhyth_translation_nonrhyth/Cited2_set_A.pdf]

# Ckap2

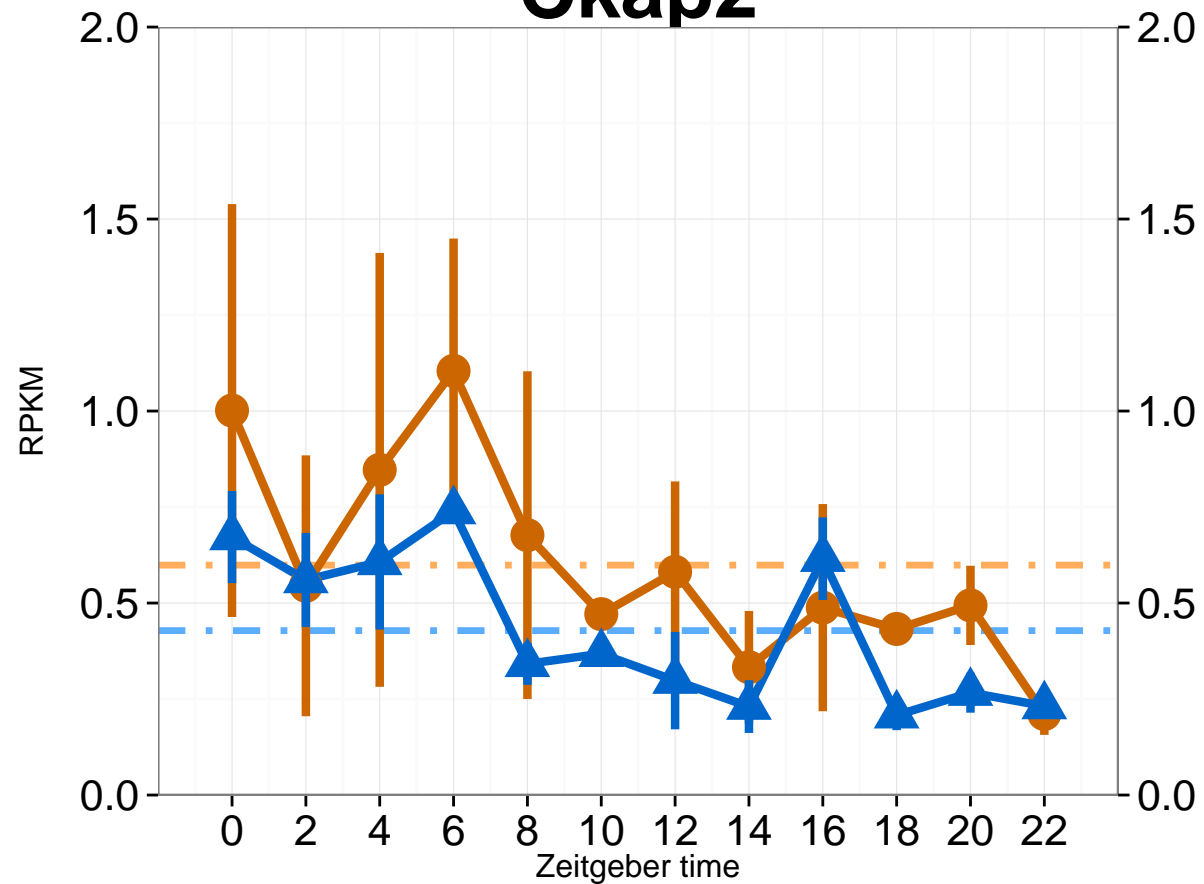

# Ckap2

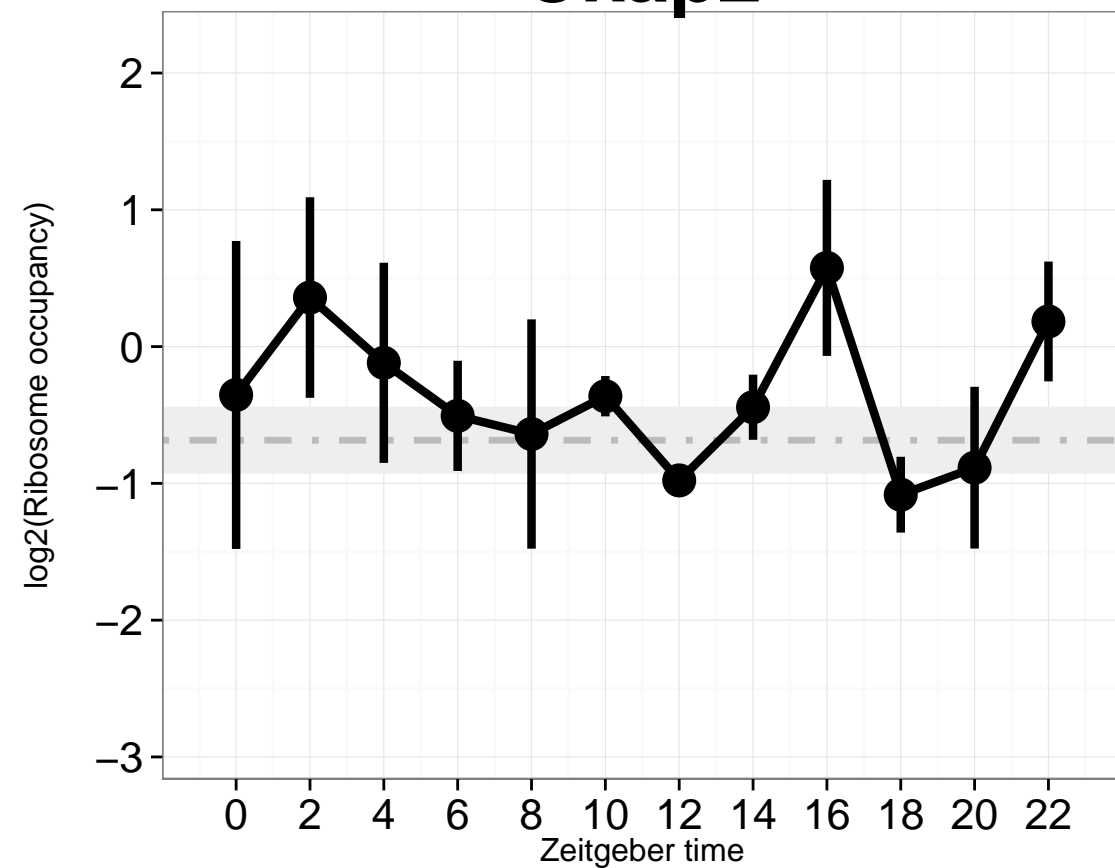

Supplement: SuppDataset_1.zip [file Ckap2_set_A.pdf › Supplemental Dataset 1/A-mRNA_nonrhyth_translation_nonrhyth/Ckap2_set_A.pdf]

# Ckap2l

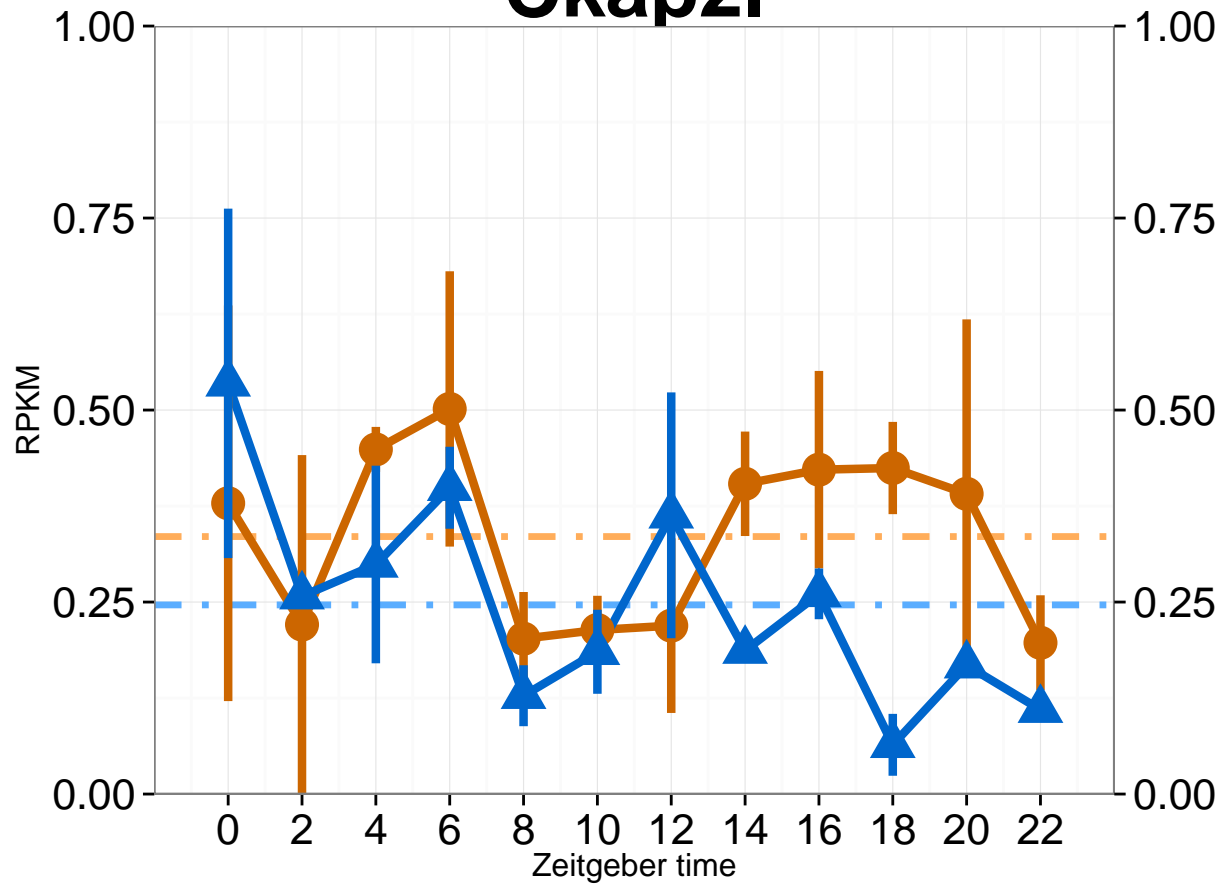

# Ckap2l

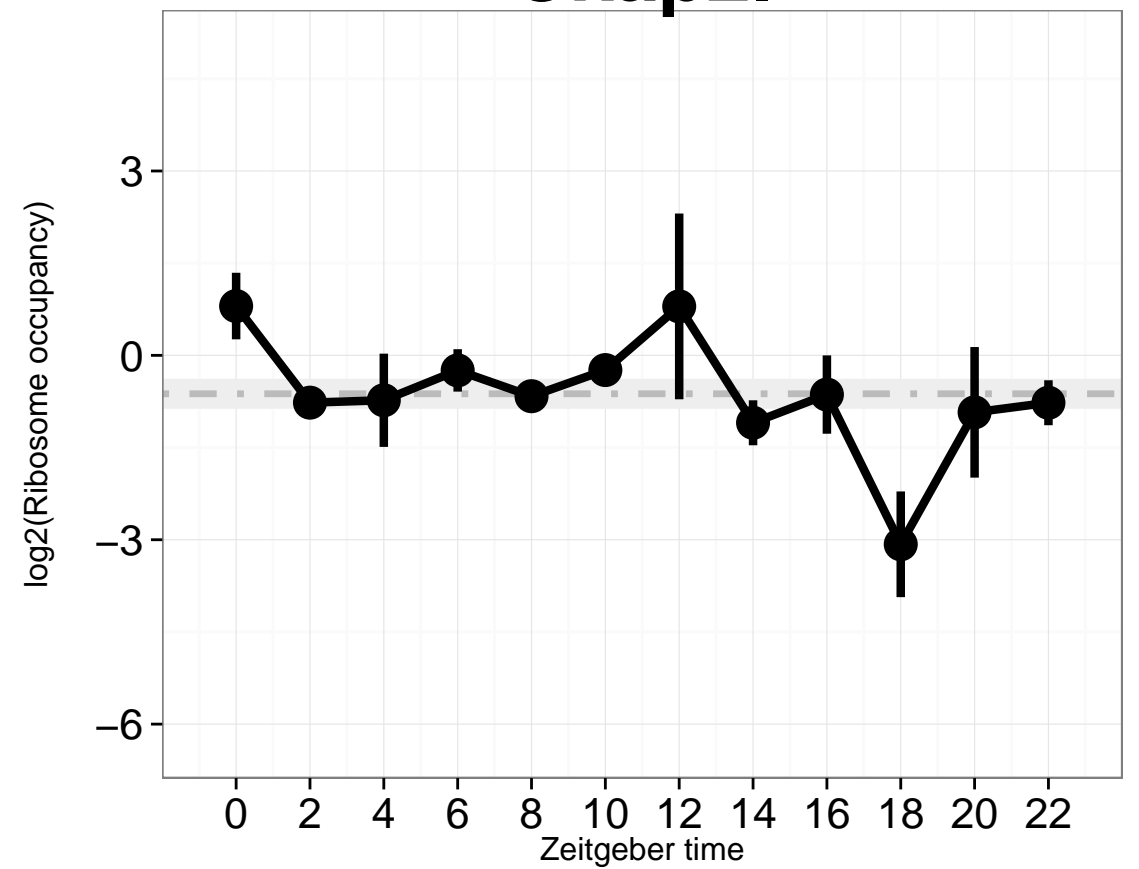

Supplement: SuppDataset_1.zip [file Ckap2l_set_A.pdf › Supplemental Dataset 1/A-mRNA_nonrhyth_translation_nonrhyth/Ckap2l_set_A.pdf]

# Ckap4

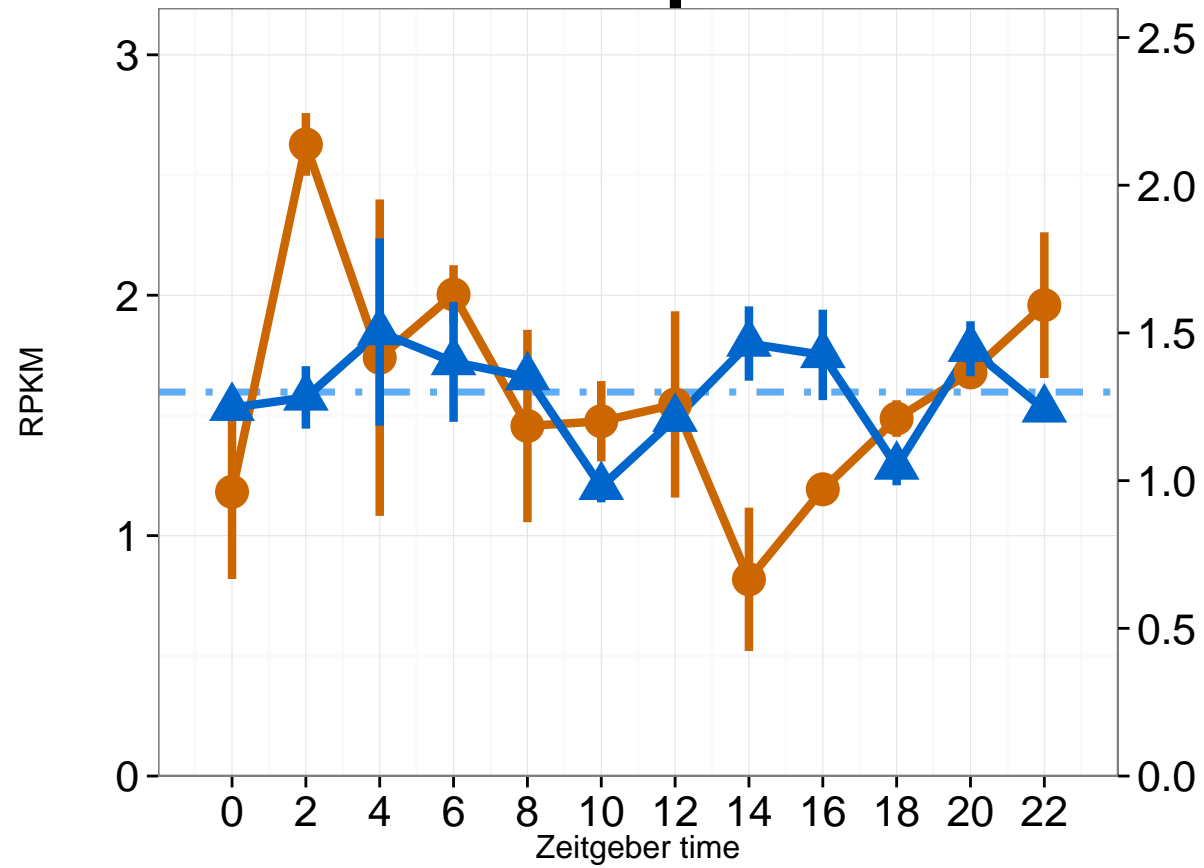

# Ckap4

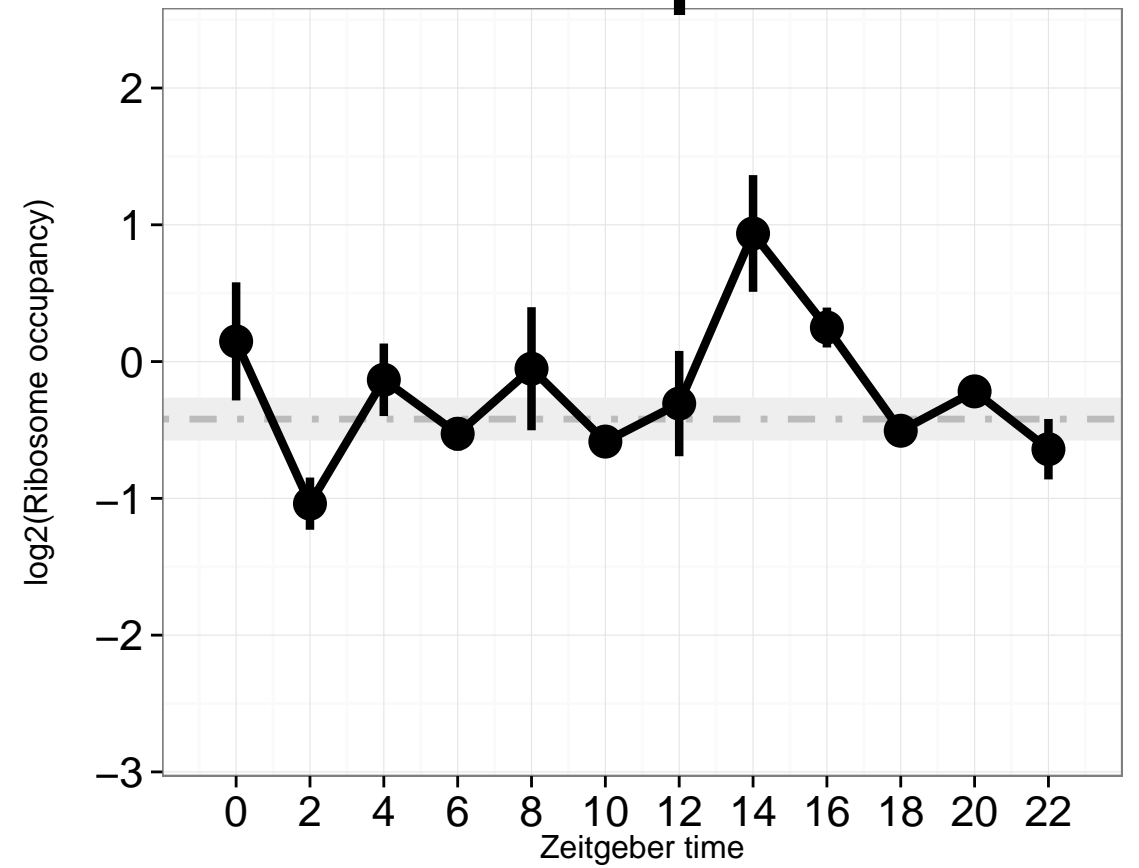

Supplement: SuppDataset_1.zip [file Ckap4_set_A.pdf › Supplemental Dataset 1/A-mRNA_nonrhyth_translation_nonrhyth/Ckap4_set_A.pdf]

# Ckap5

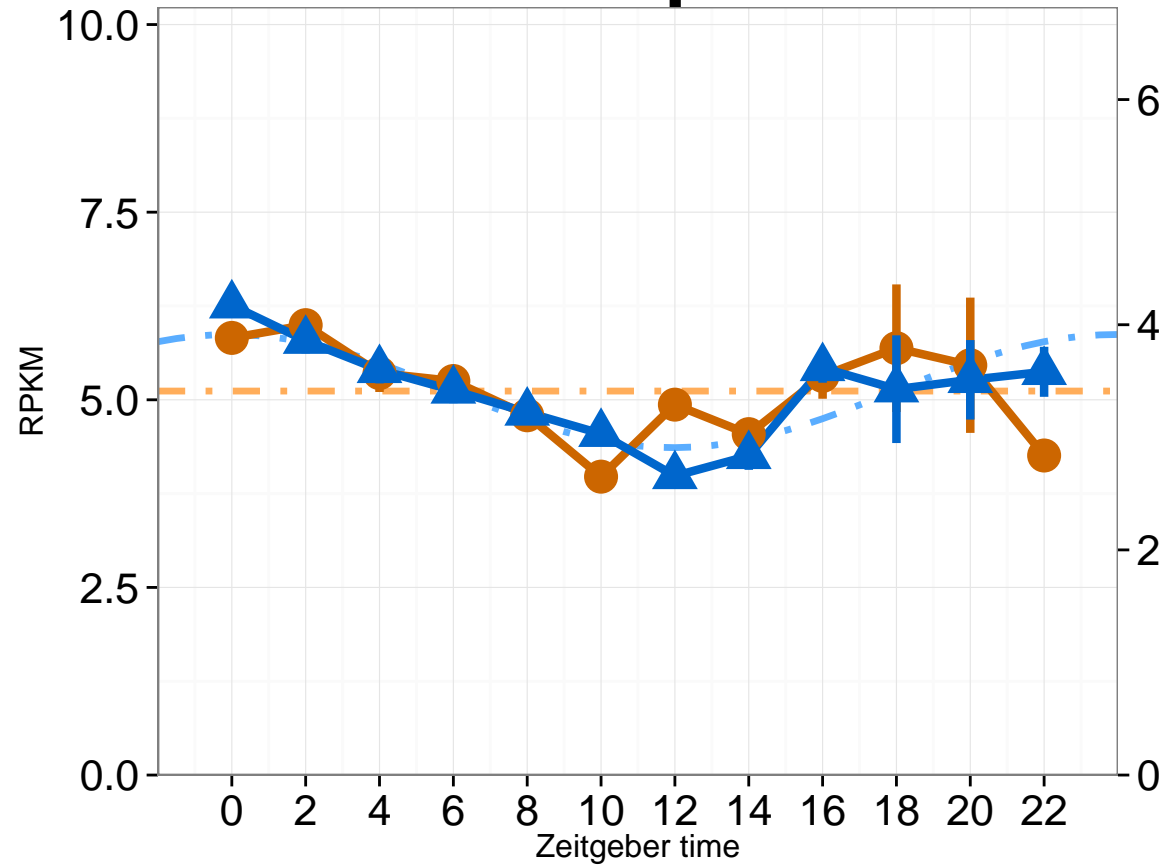

# Ckap5

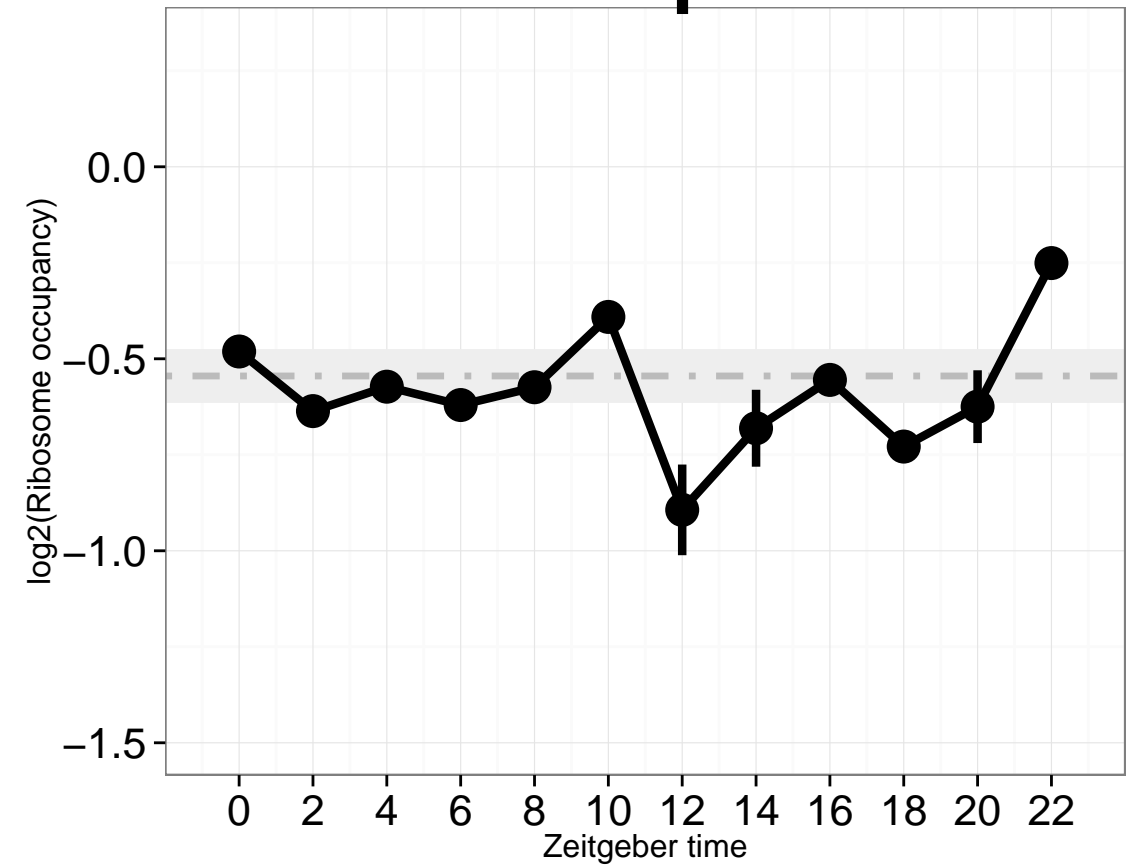

Supplement: SuppDataset_1.zip [file Ckap5_set_A.pdf › Supplemental Dataset 1/A-mRNA_nonrhyth_translation_nonrhyth/Ckap5_set_A.pdf]

**Cklf TR**

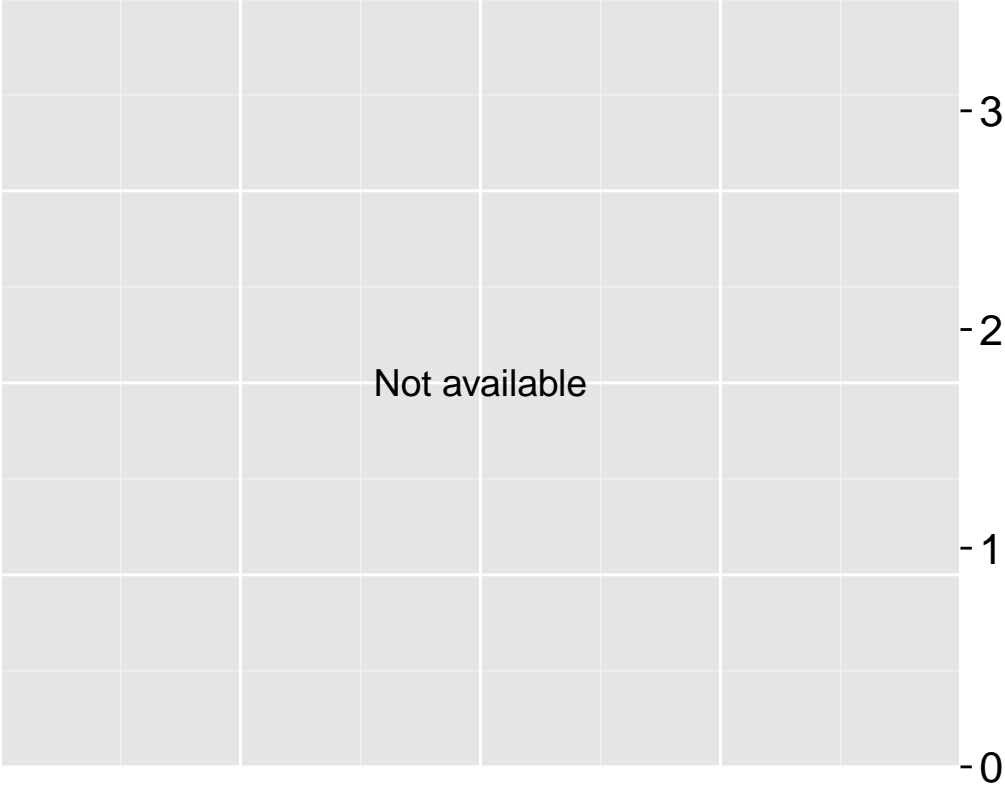

**Cklf log2(Ribosome occupancy)**

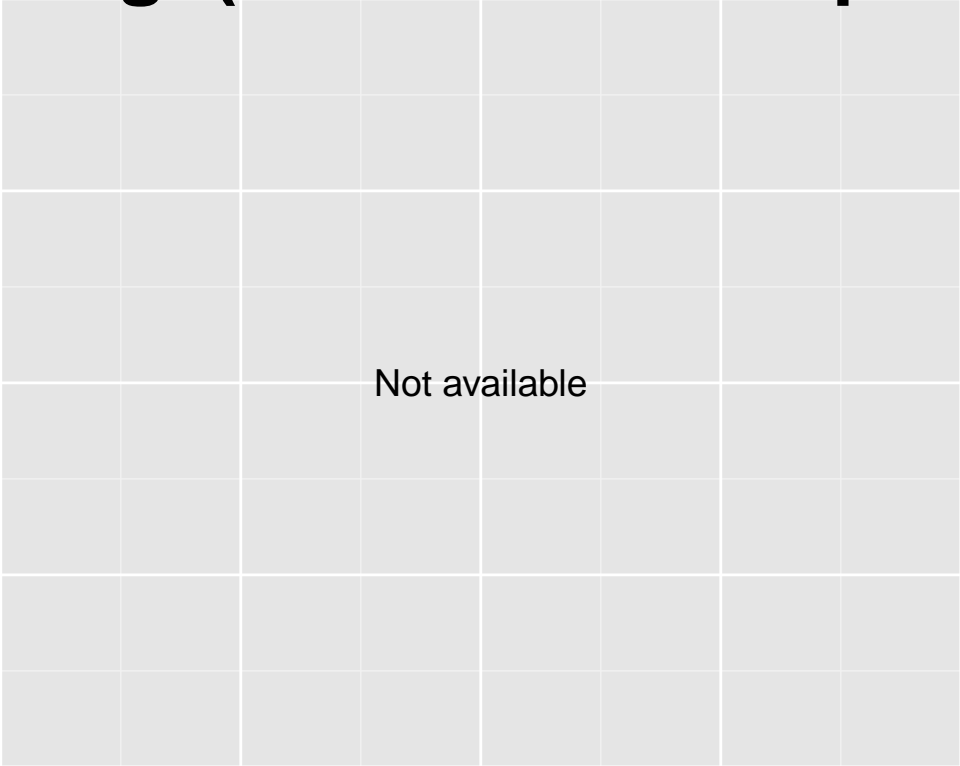

Supplement: SuppDataset_1.zip [file Cklf_set_A.pdf › Supplemental Dataset 1/A-mRNA_nonrhyth_translation_nonrhyth/Cklf_set_A.pdf]

# Clasp1

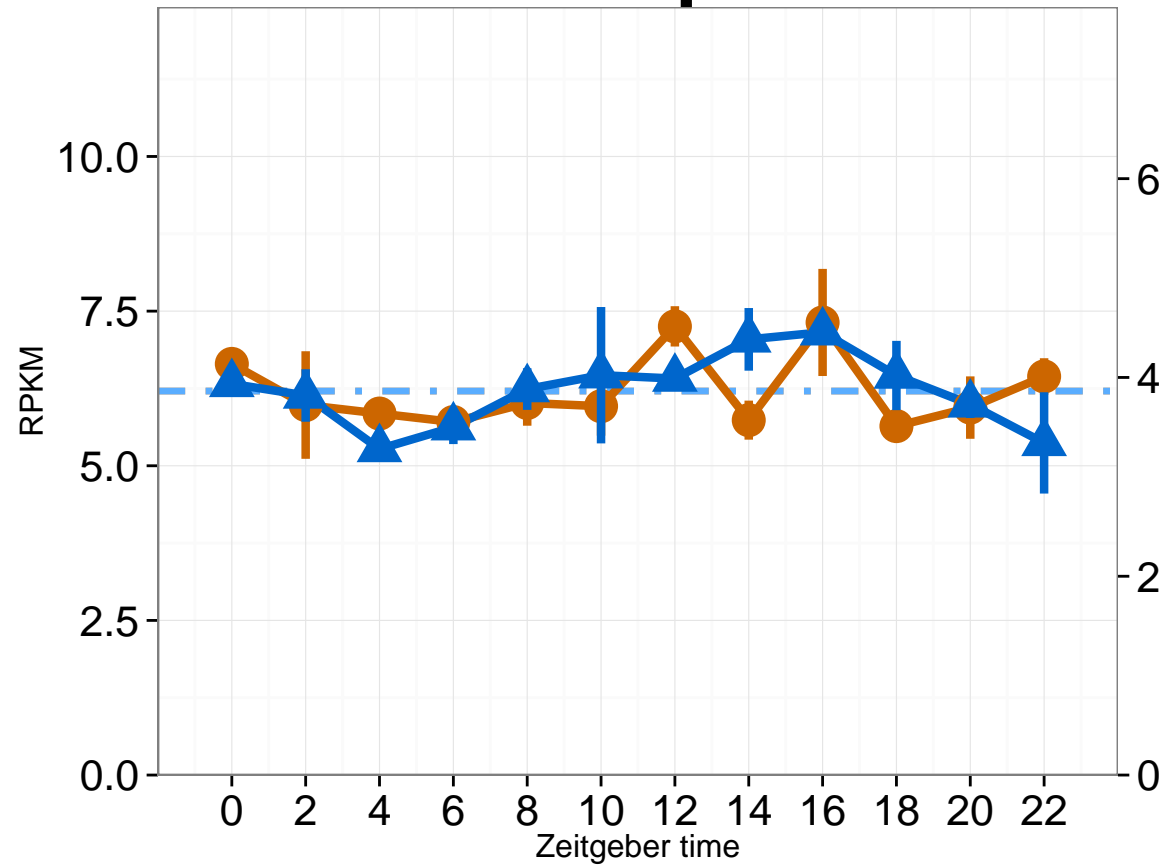

# Clasp1

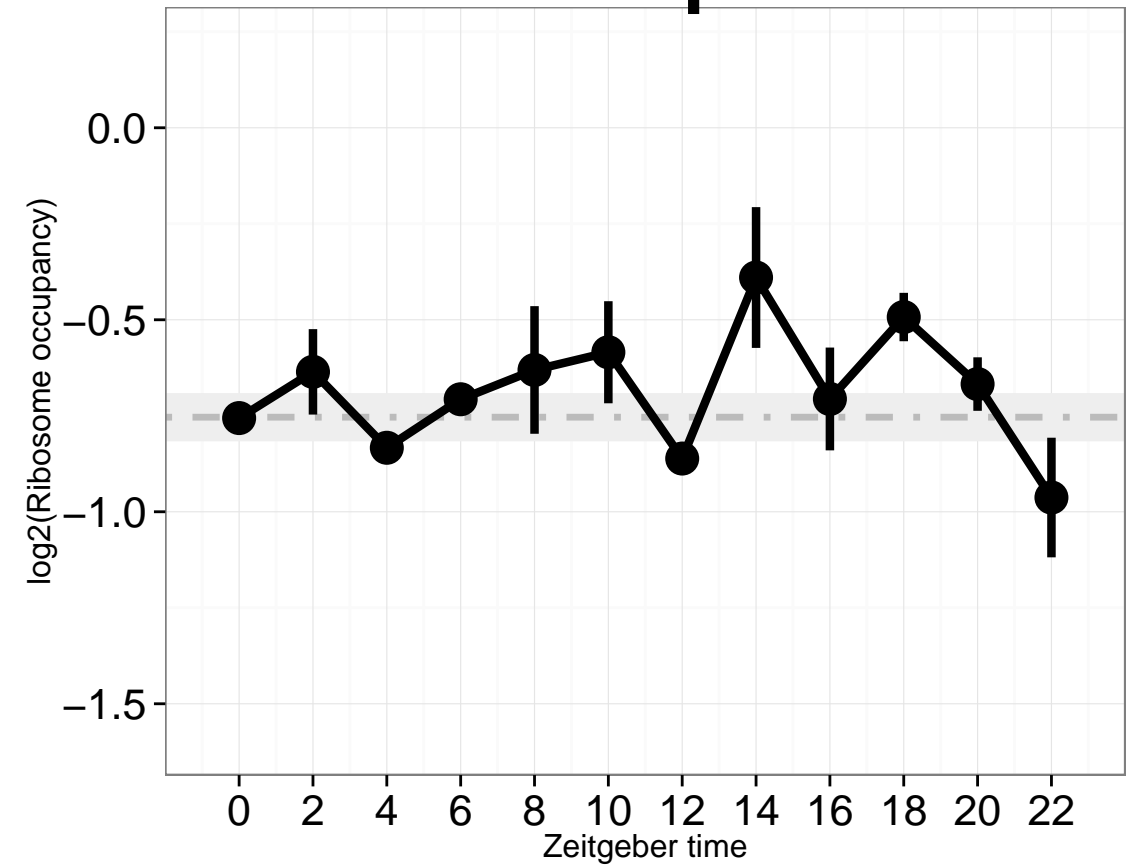

Supplement: SuppDataset_1.zip [file Clasp1_set_A.pdf › Supplemental Dataset 1/A-mRNA_nonrhyth_translation_nonrhyth/Clasp1_set_A.pdf]

## Clasp2

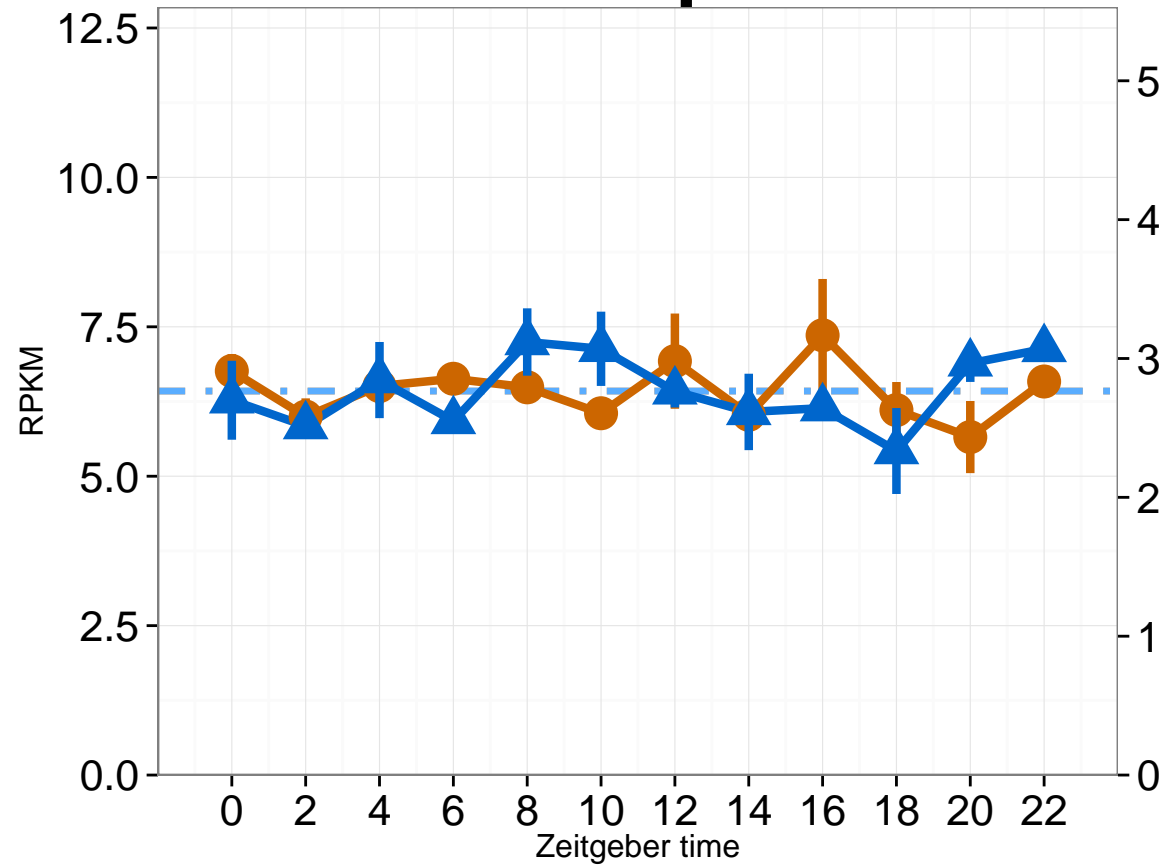

## Clasp2

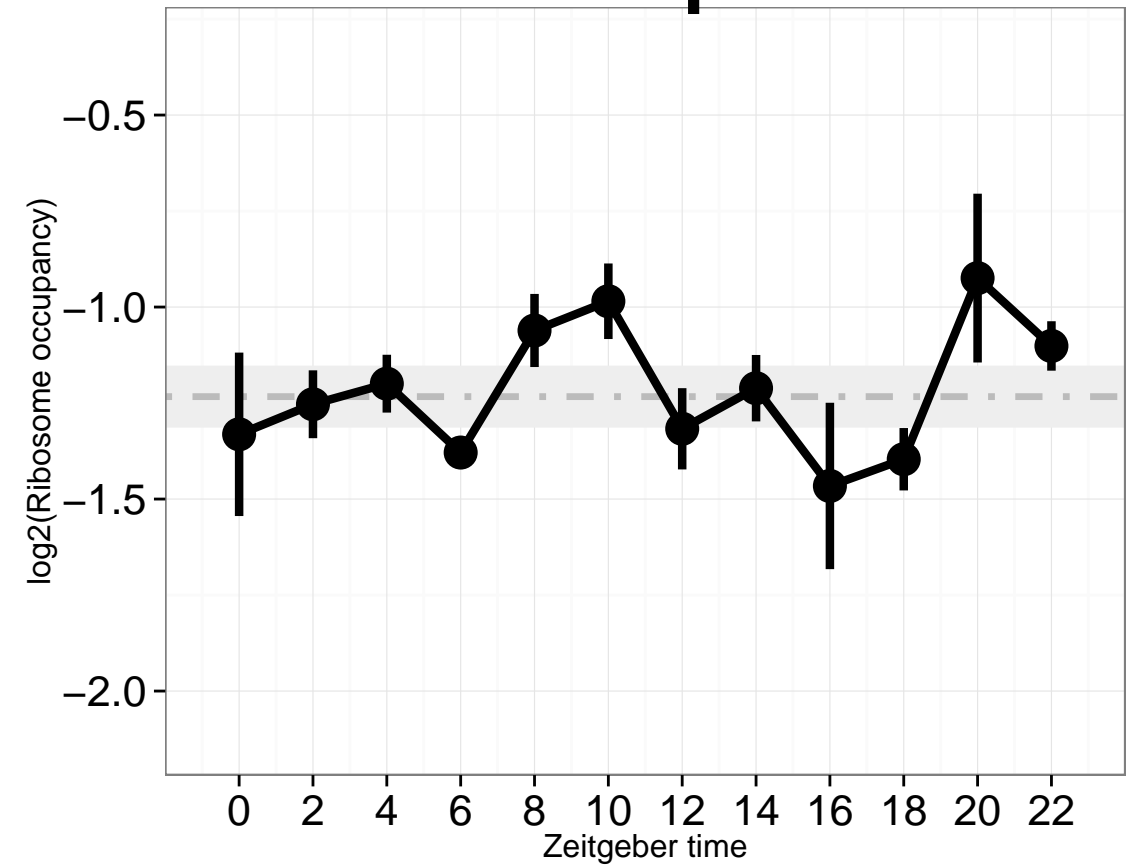

Supplement: SuppDataset_1.zip [file Clasp2_set_A.pdf › Supplemental Dataset 1/A-mRNA_nonrhyth_translation_nonrhyth/Clasp2_set_A.pdf]

## Clcc1

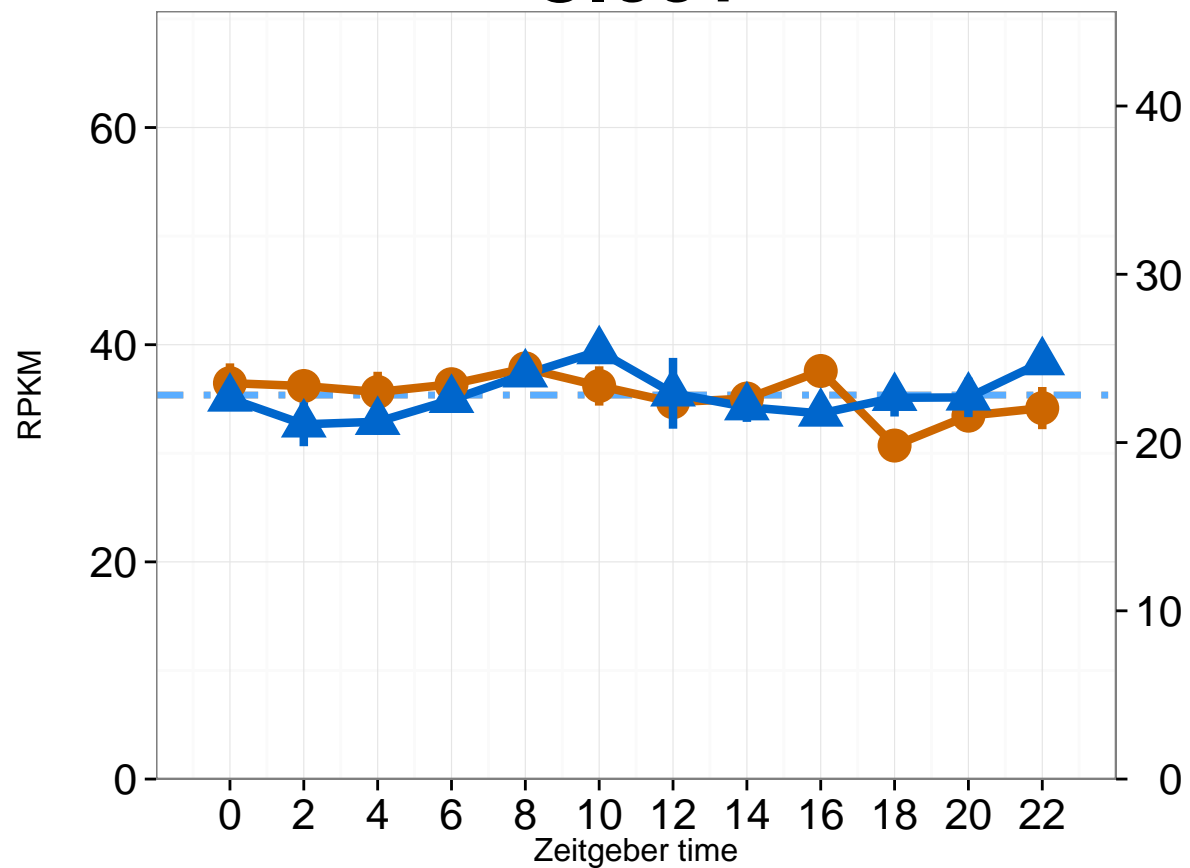

## Clcc1

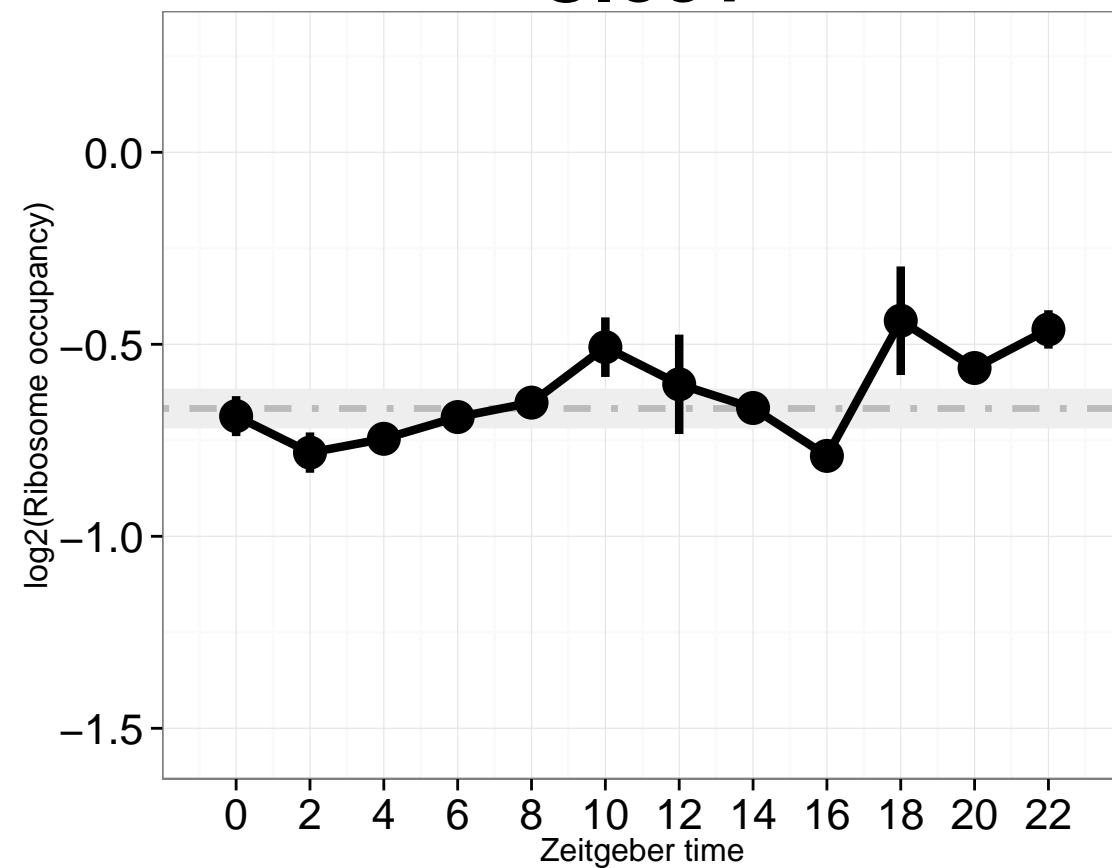

Supplement: SuppDataset_1.zip [file Clcc1_set_A.pdf › Supplemental Dataset 1/A-mRNA_nonrhyth_translation_nonrhyth/Clcc1_set_A.pdf]

## Clcn2

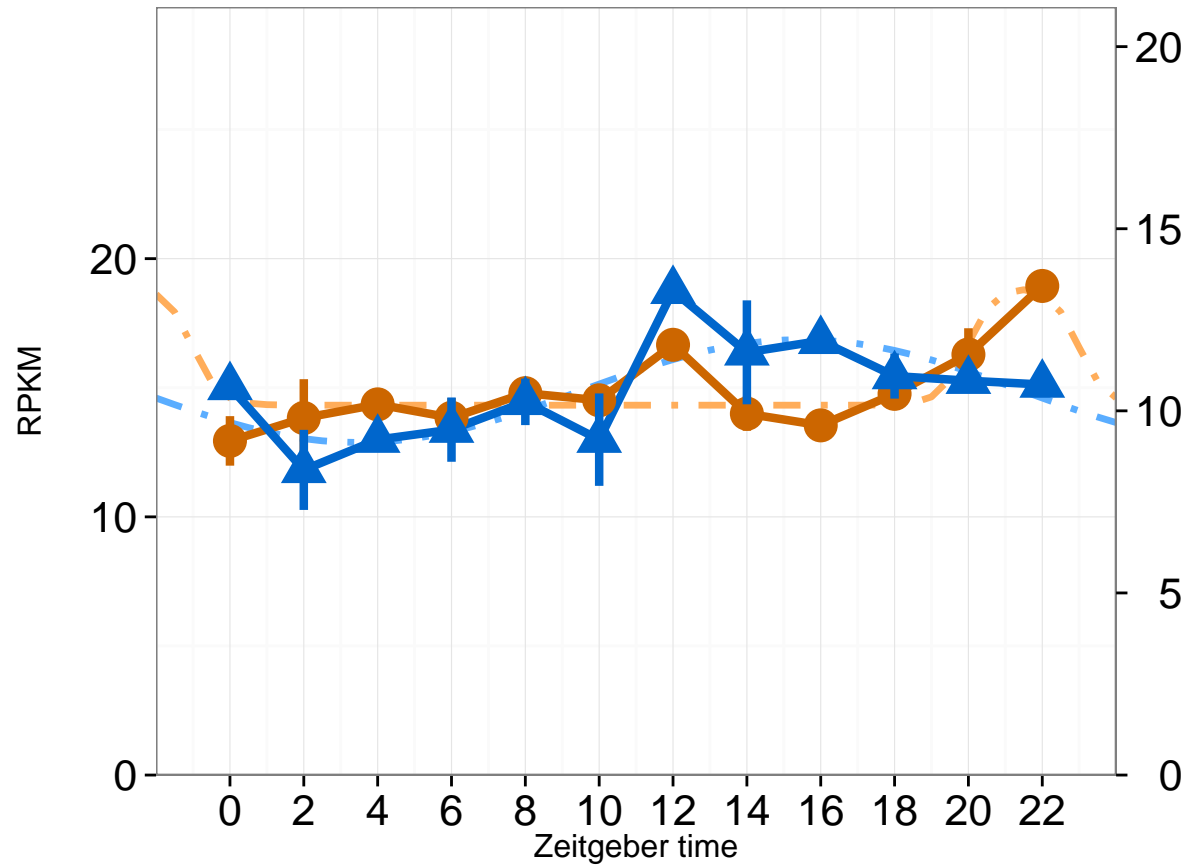

## Clcn2

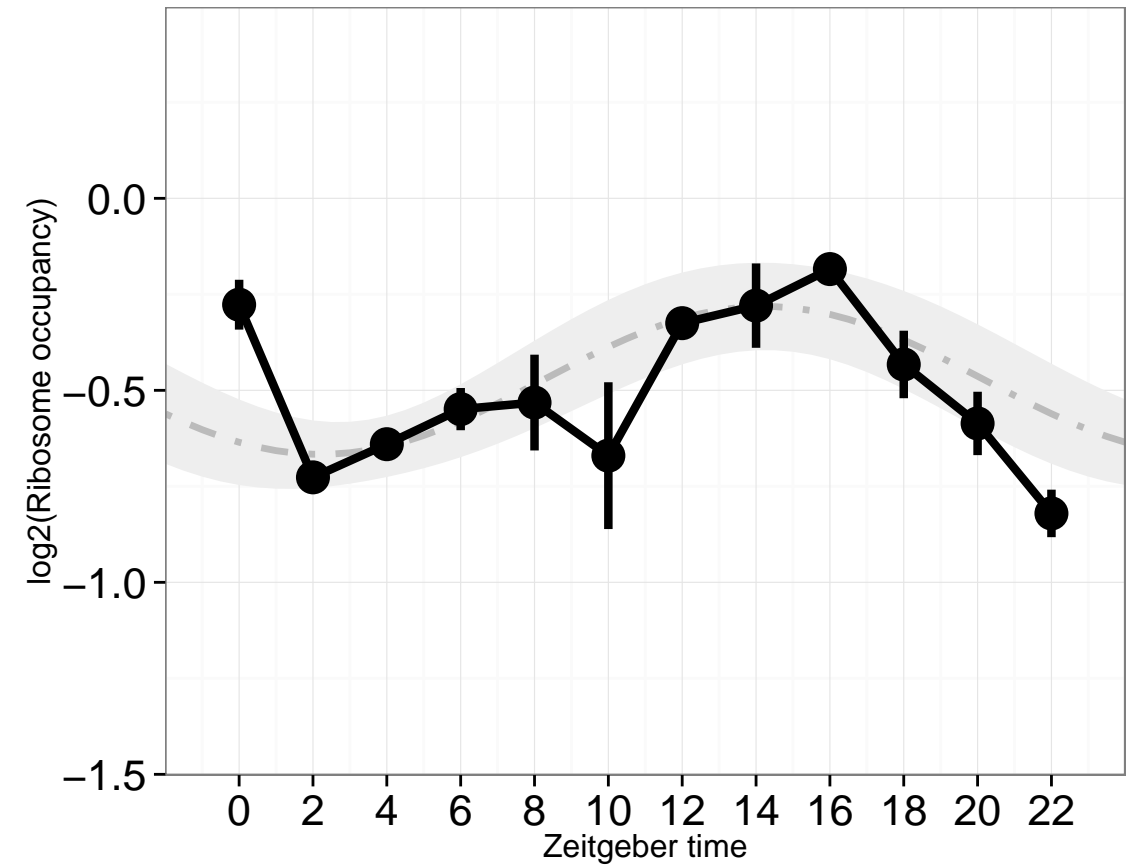

Supplement: SuppDataset_1.zip [file Clcn2_set_A.pdf › Supplemental Dataset 1/A-mRNA_nonrhyth_translation_nonrhyth/Clcn2_set_A.pdf]

## Clcn3

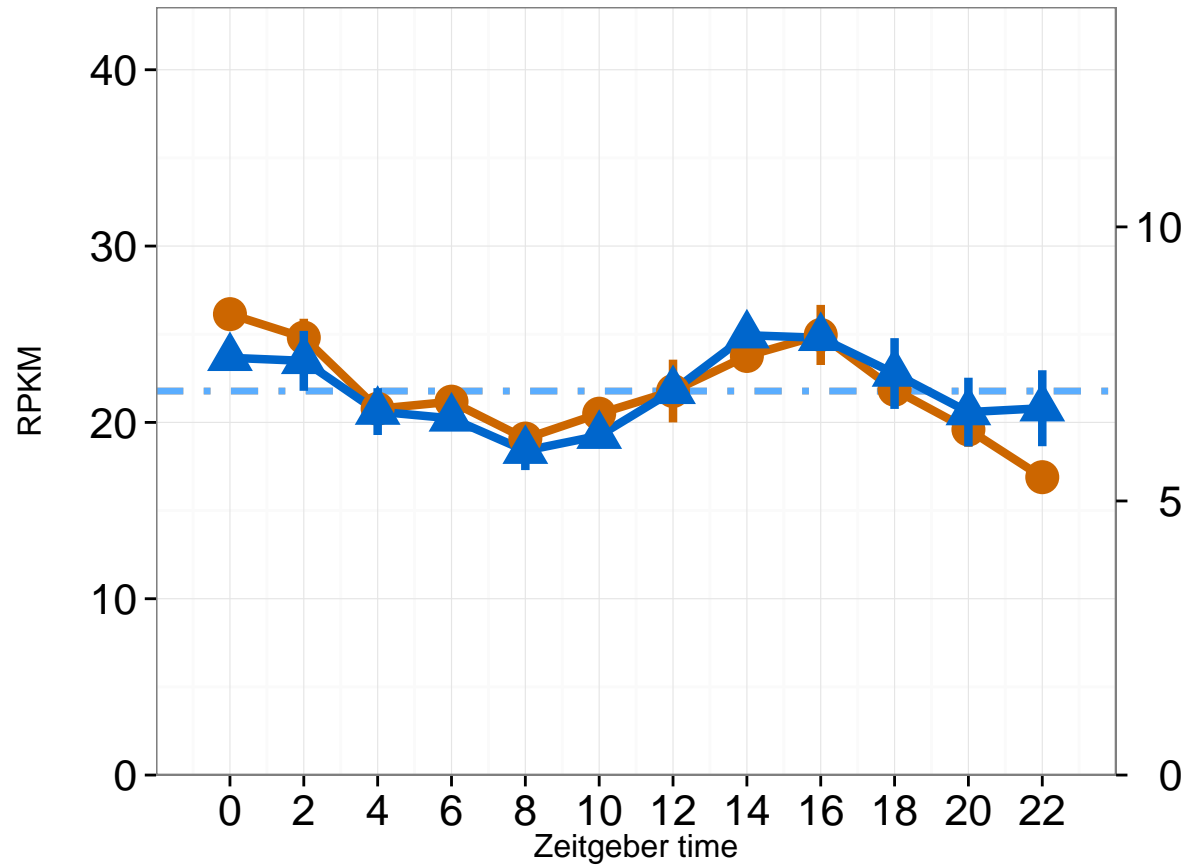

## Clcn3

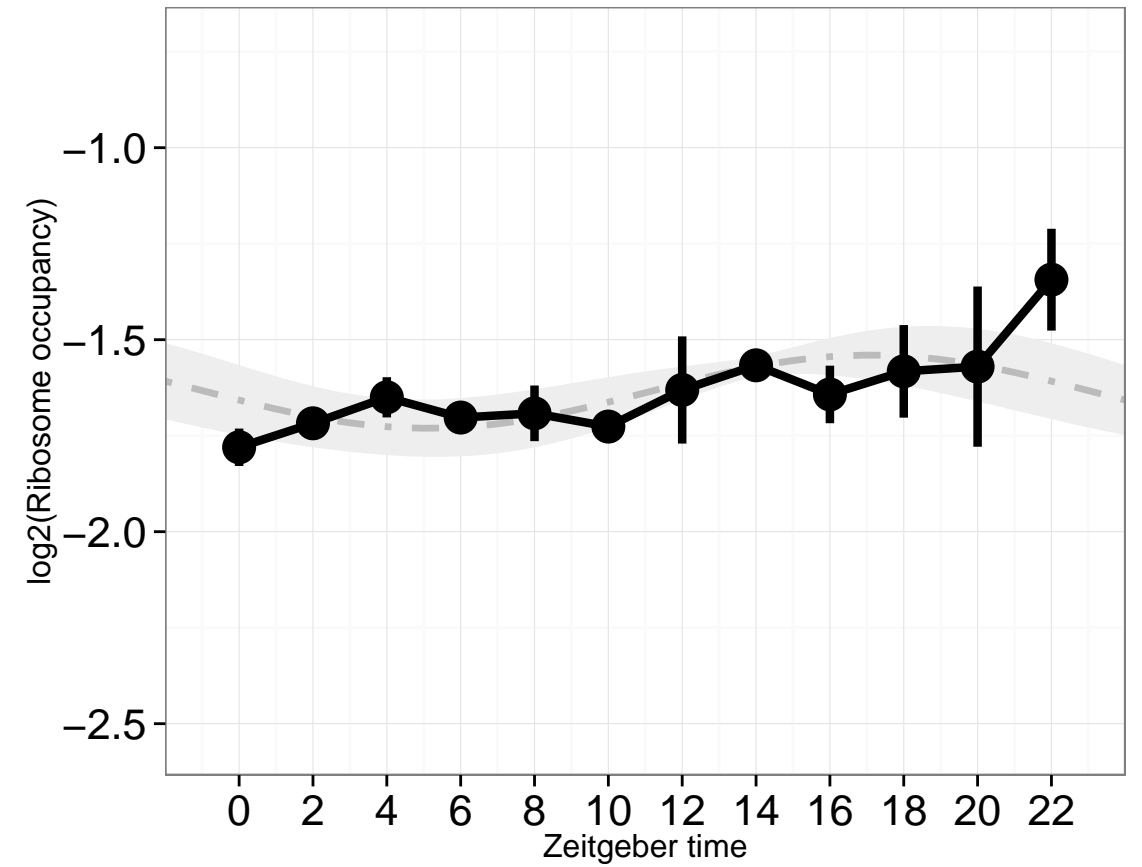

Supplement: SuppDataset_1.zip [file Clcn3_set_A.pdf › Supplemental Dataset 1/A-mRNA_nonrhyth_translation_nonrhyth/Clcn3_set_A.pdf]

# Clcn4-2

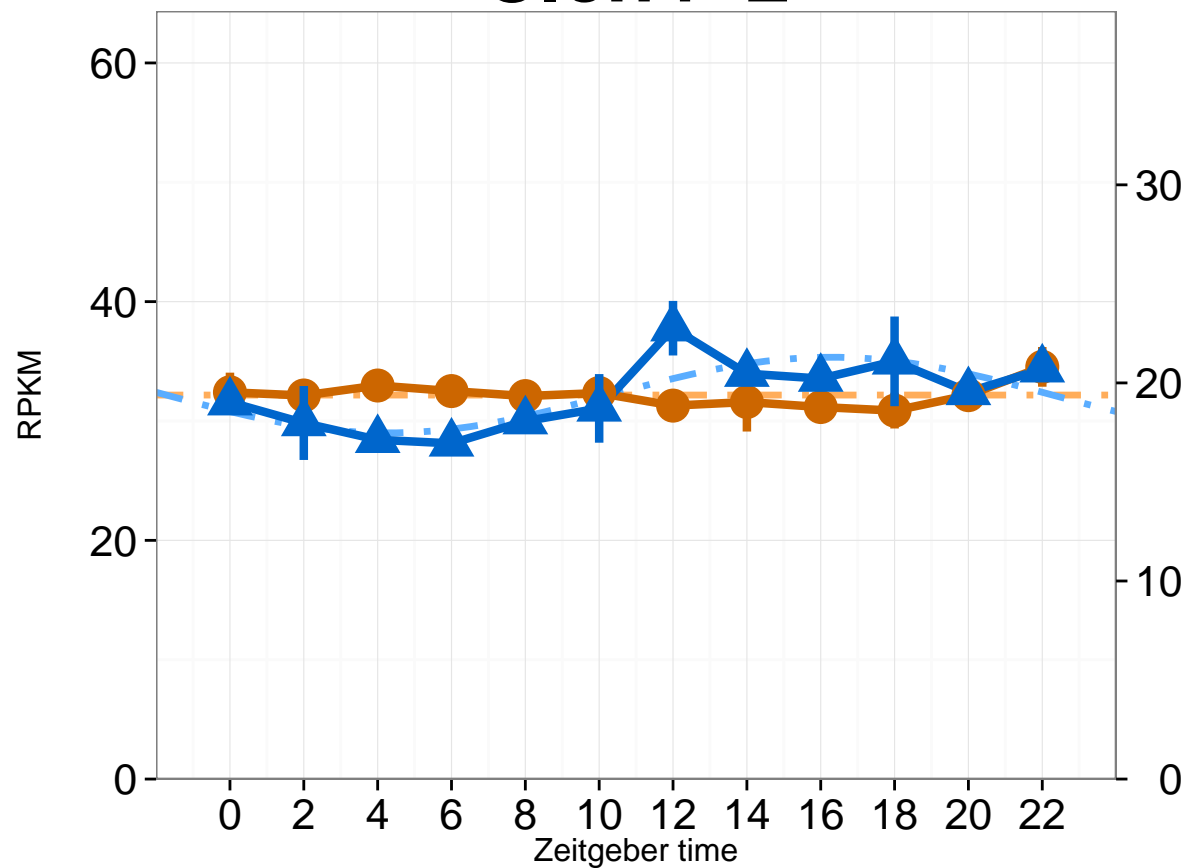

# Clcn4-2

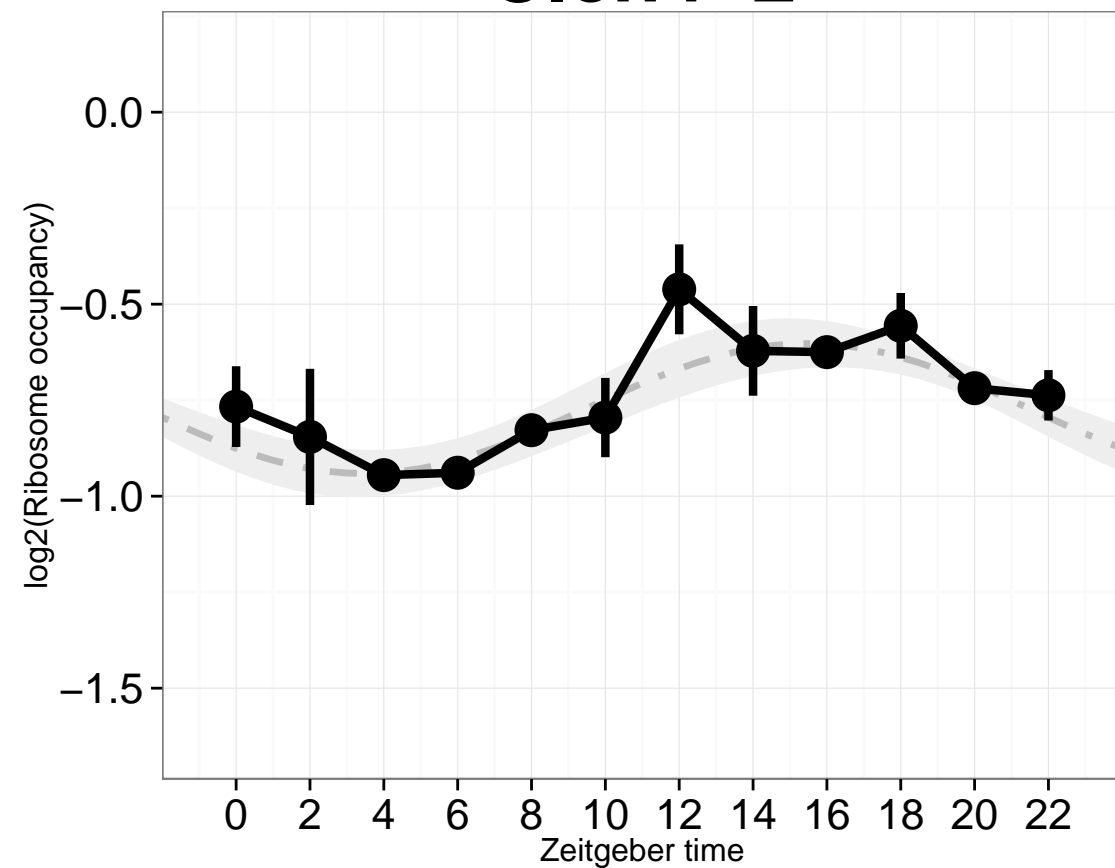

Supplement: SuppDataset_1.zip [file Clcn4-2_set_A.pdf › Supplemental Dataset 1/A-mRNA_nonrhyth_translation_nonrhyth/Clcn4-2_set_A.pdf]

## Clcn5

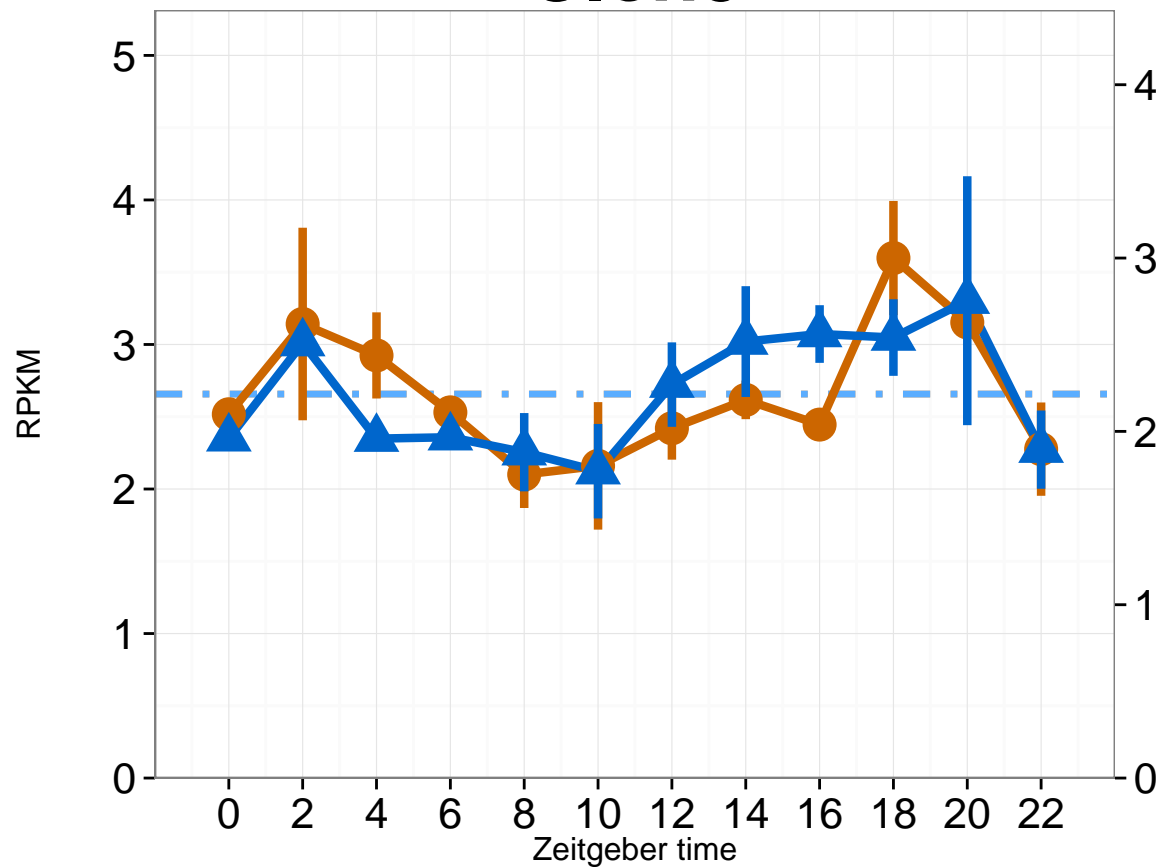

## Clcn5

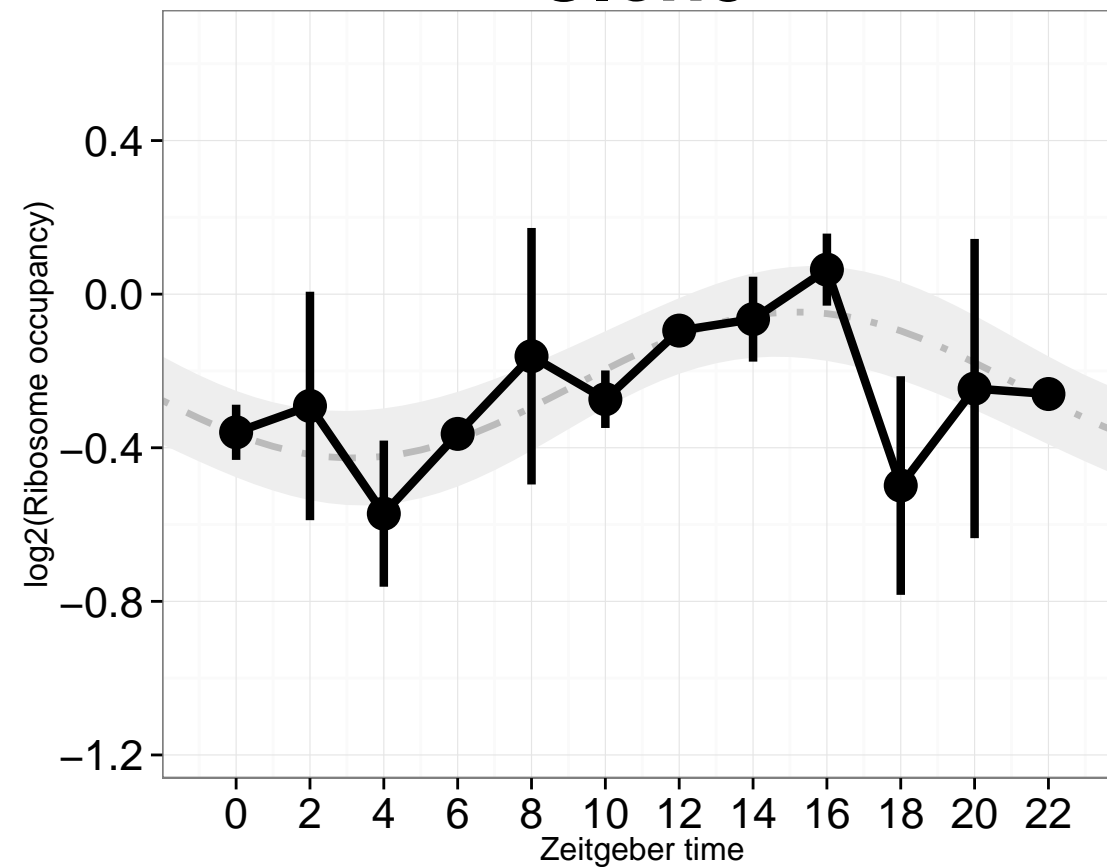

Supplement: SuppDataset_1.zip [file Clcn5_set_A.pdf › Supplemental Dataset 1/A-mRNA_nonrhyth_translation_nonrhyth/Clcn5_set_A.pdf]

# Clcn7

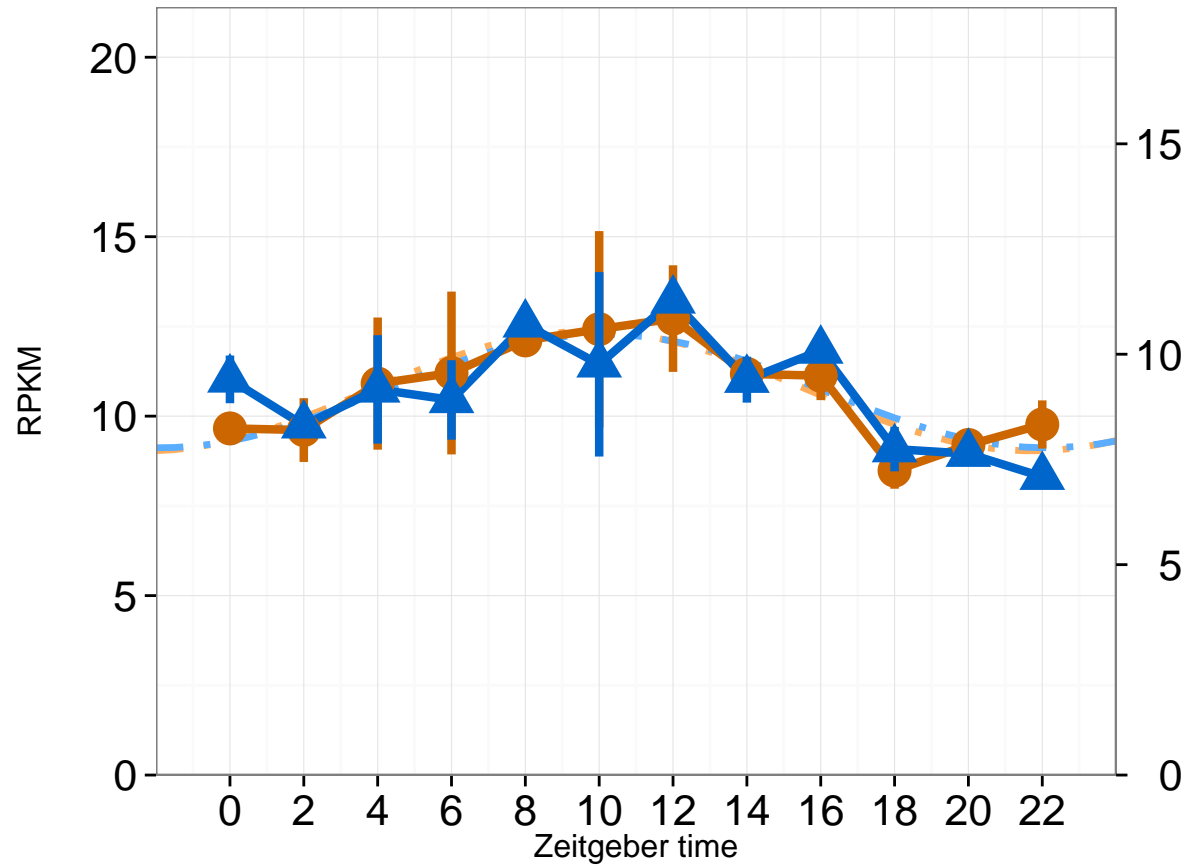

# Clcn7

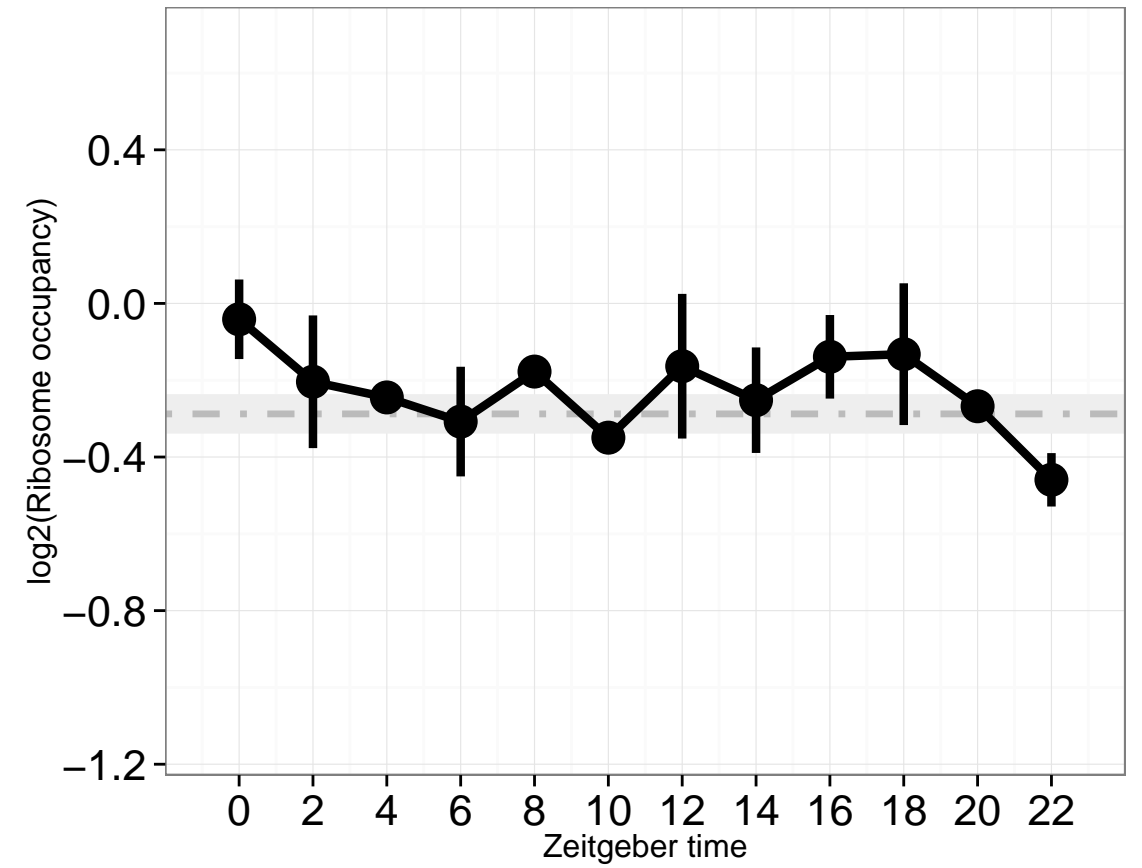

Supplement: SuppDataset_1.zip [file Clcn7_set_A.pdf › Supplemental Dataset 1/A-mRNA_nonrhyth_translation_nonrhyth/Clcn7_set_A.pdf]

## Cldn12

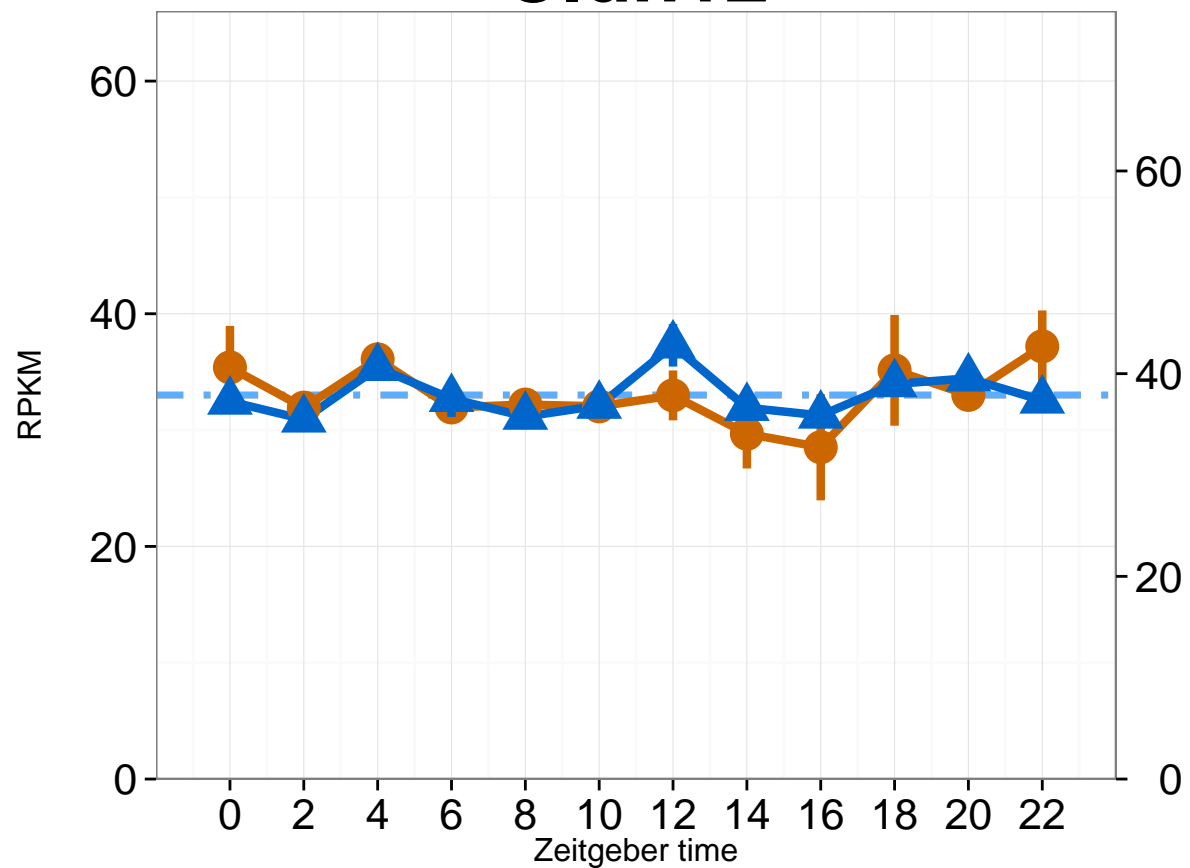

## Cldn12

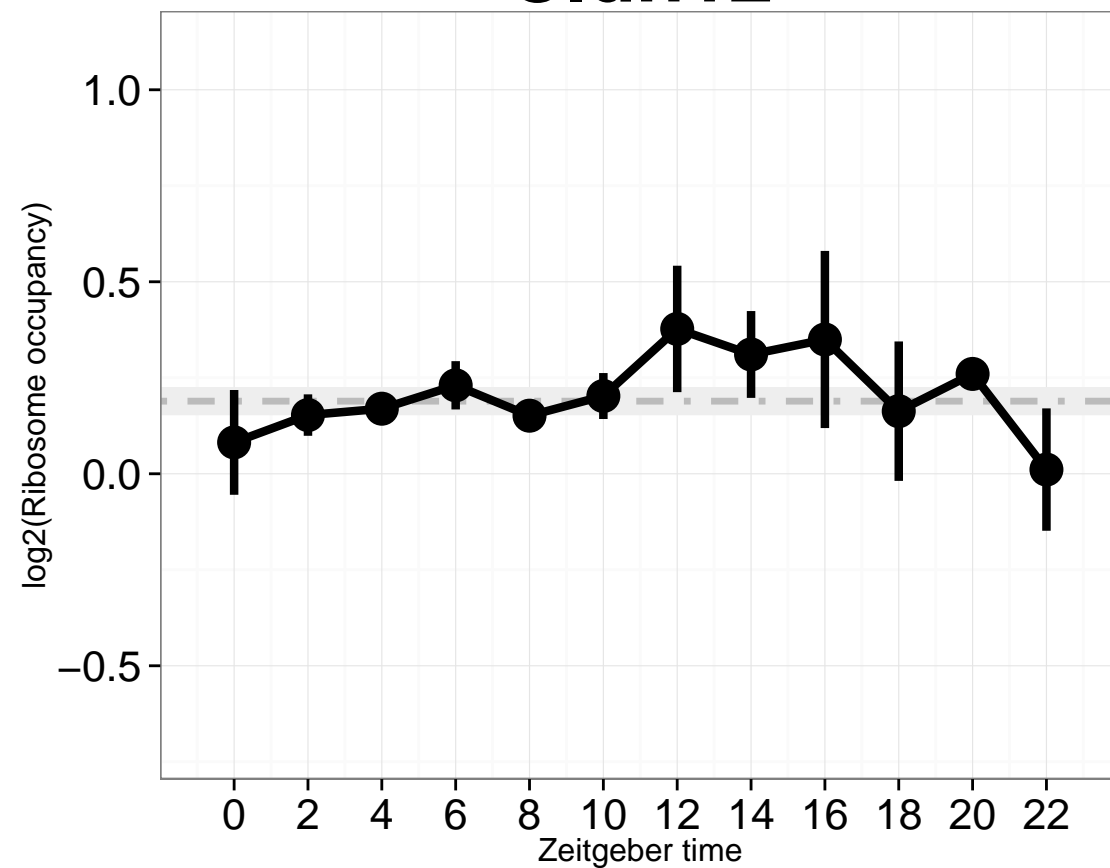

Supplement: SuppDataset_1.zip [file Cldn12_set_A.pdf › Supplemental Dataset 1/A-mRNA_nonrhyth_translation_nonrhyth/Cldn12_set_A.pdf]

# Cldn14

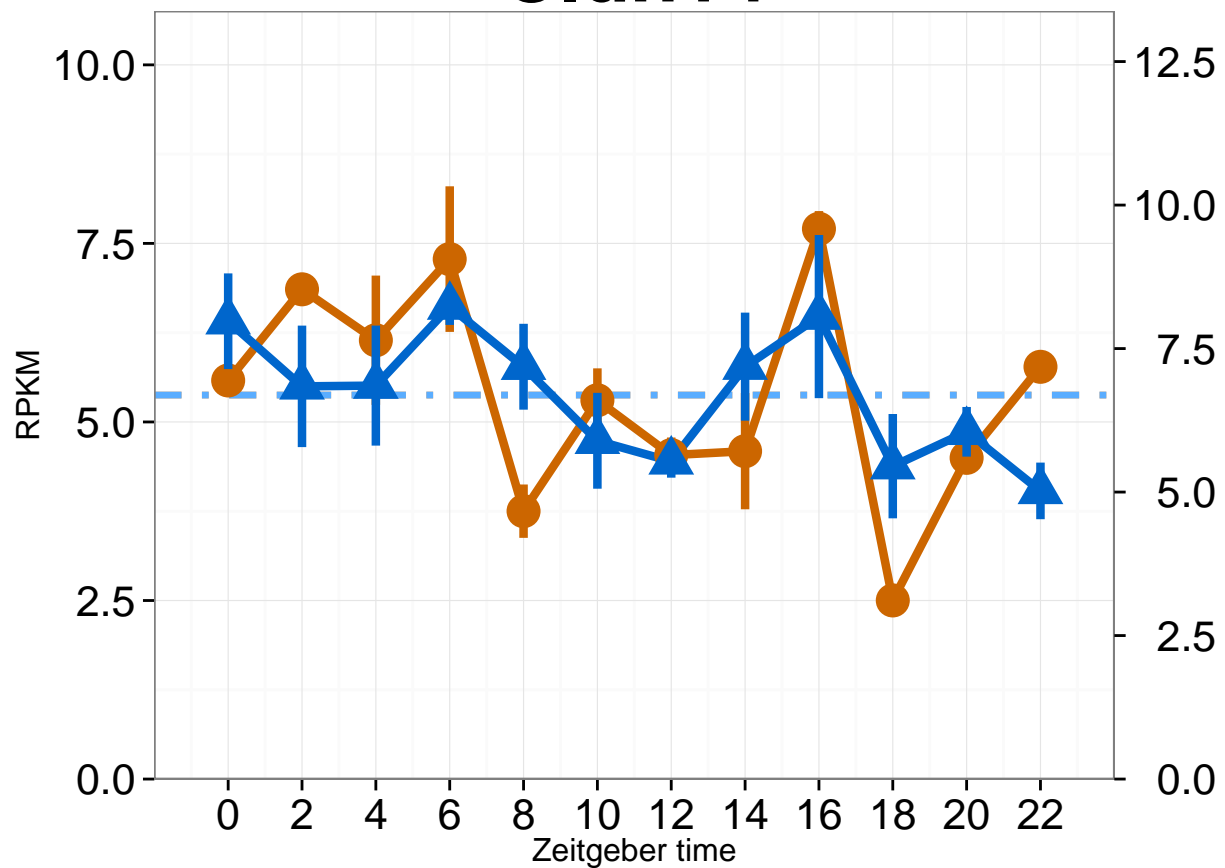

# Cldn14

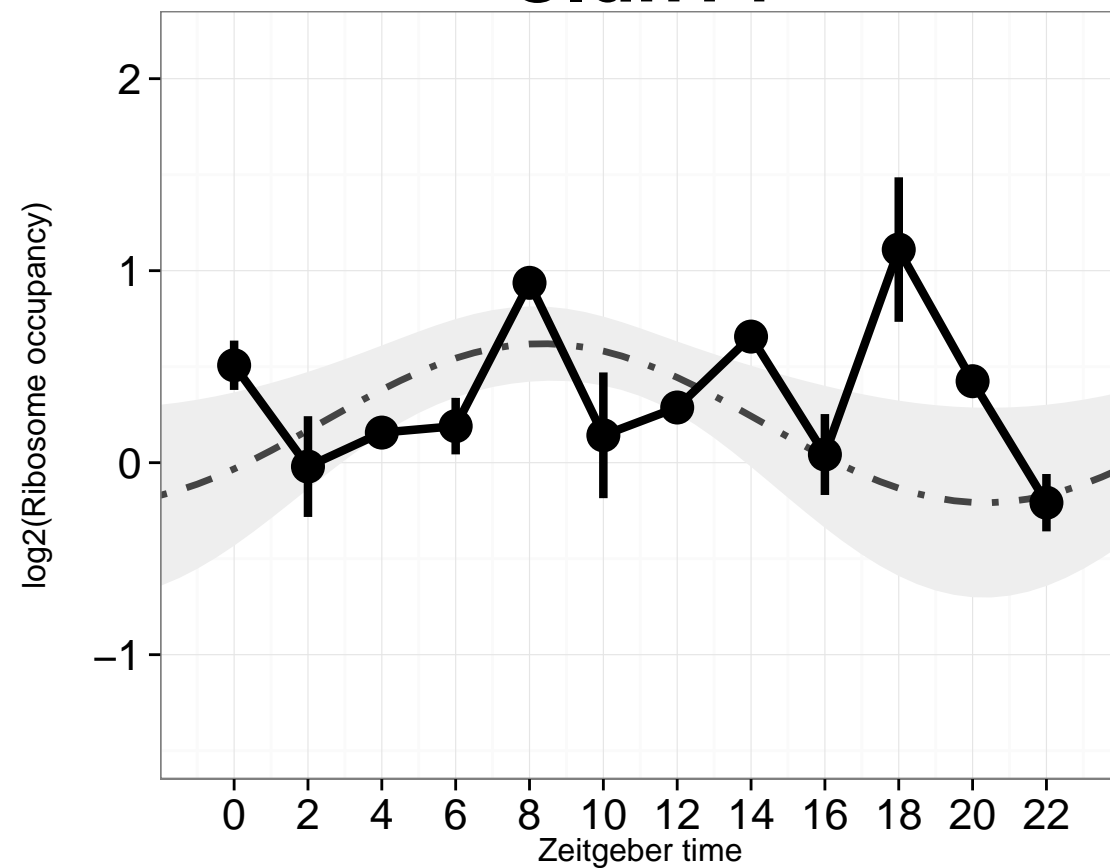

Supplement: SuppDataset_1.zip [file Cldn14_set_A.pdf › Supplemental Dataset 1/A-mRNA_nonrhyth_translation_nonrhyth/Cldn14_set_A.pdf]

## Cldn25

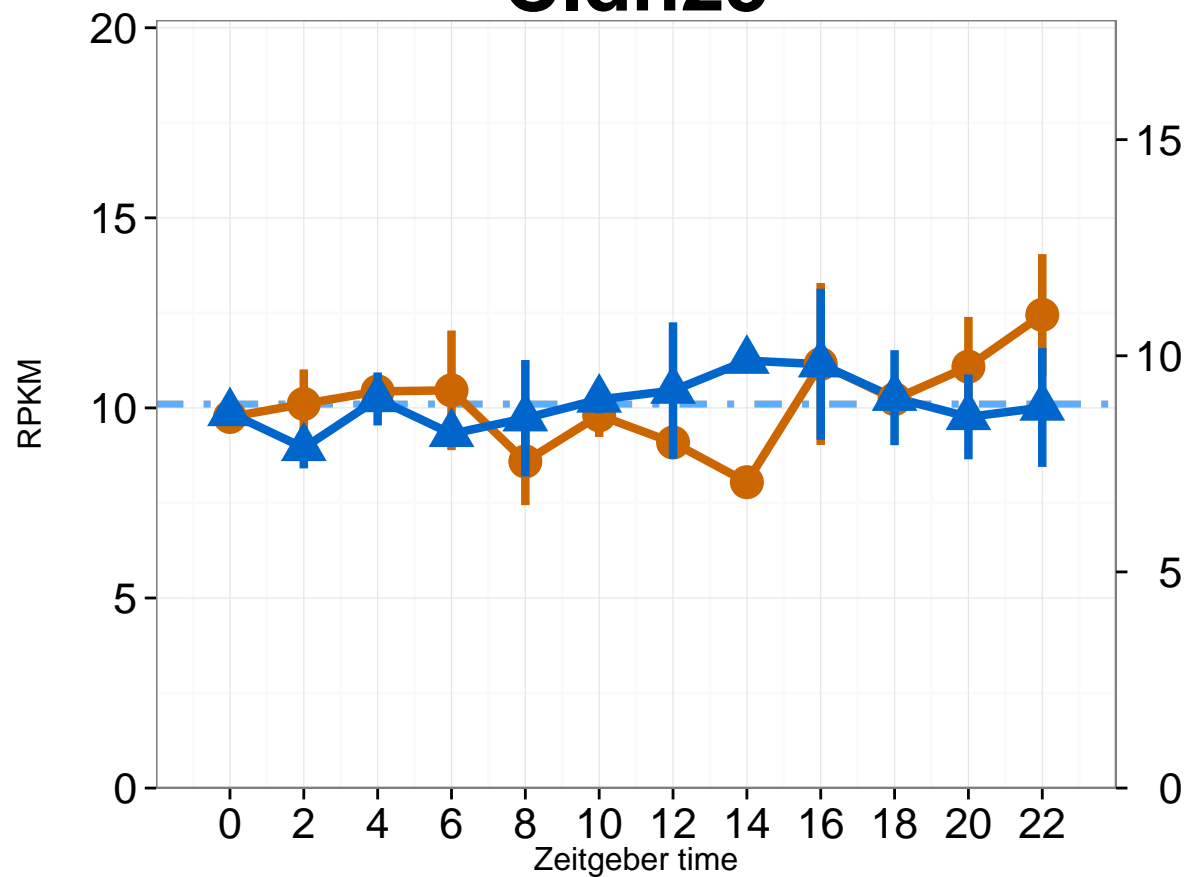

## Cldn25

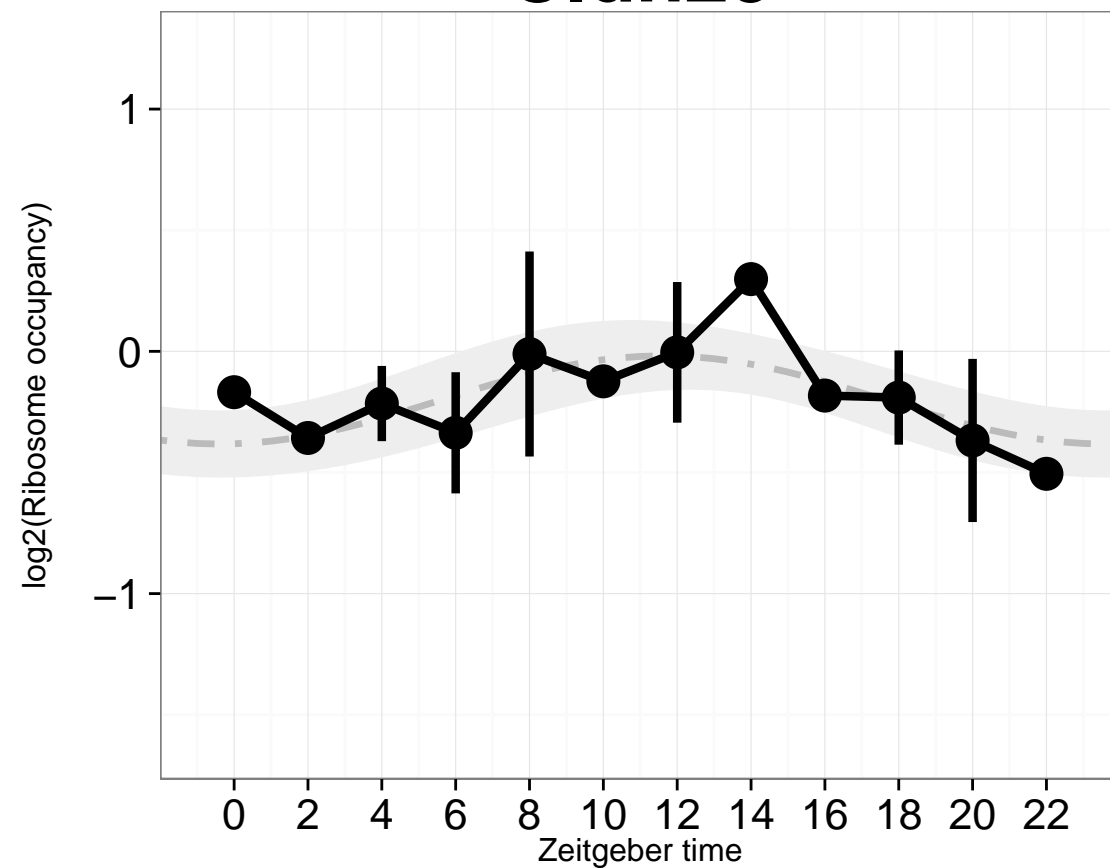

Supplement: SuppDataset_1.zip [file Cldn25_set_A.pdf › Supplemental Dataset 1/A-mRNA_nonrhyth_translation_nonrhyth/Cldn25_set_A.pdf]

# Clec11a

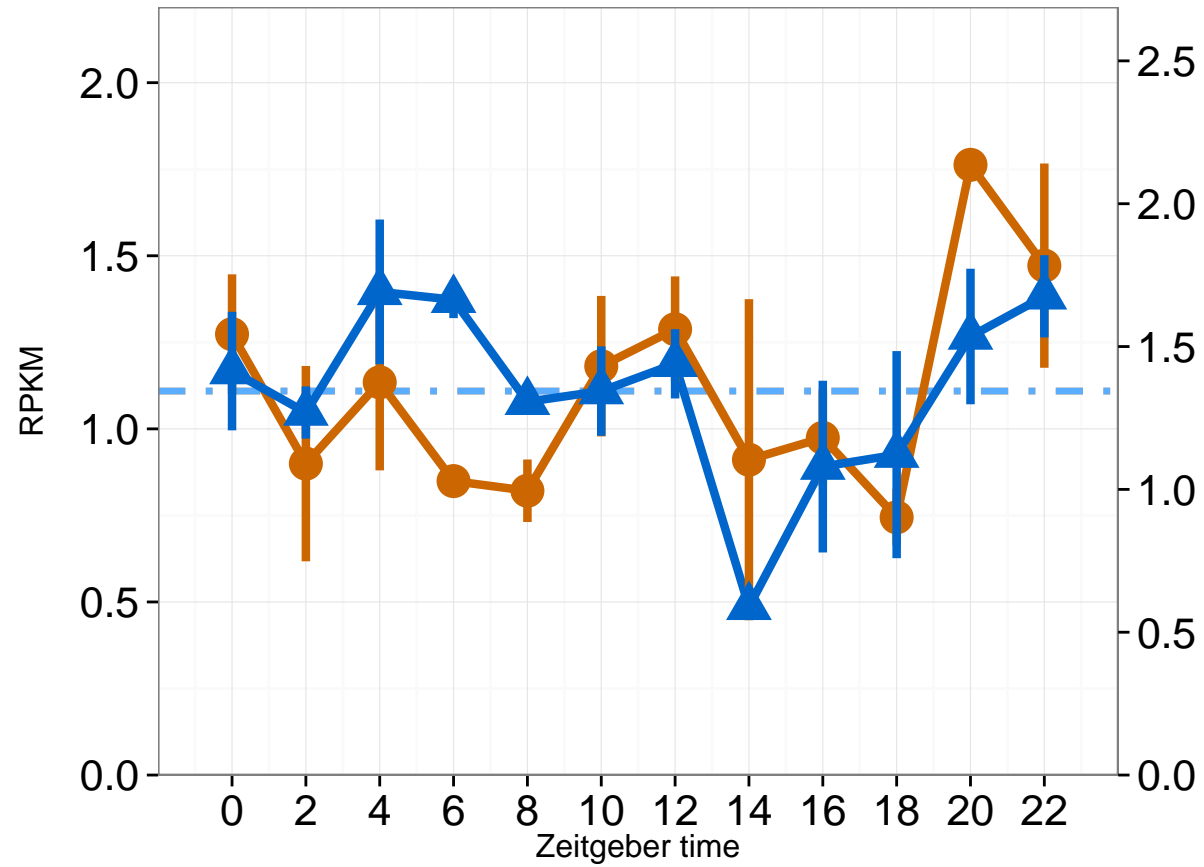

# Clec11a

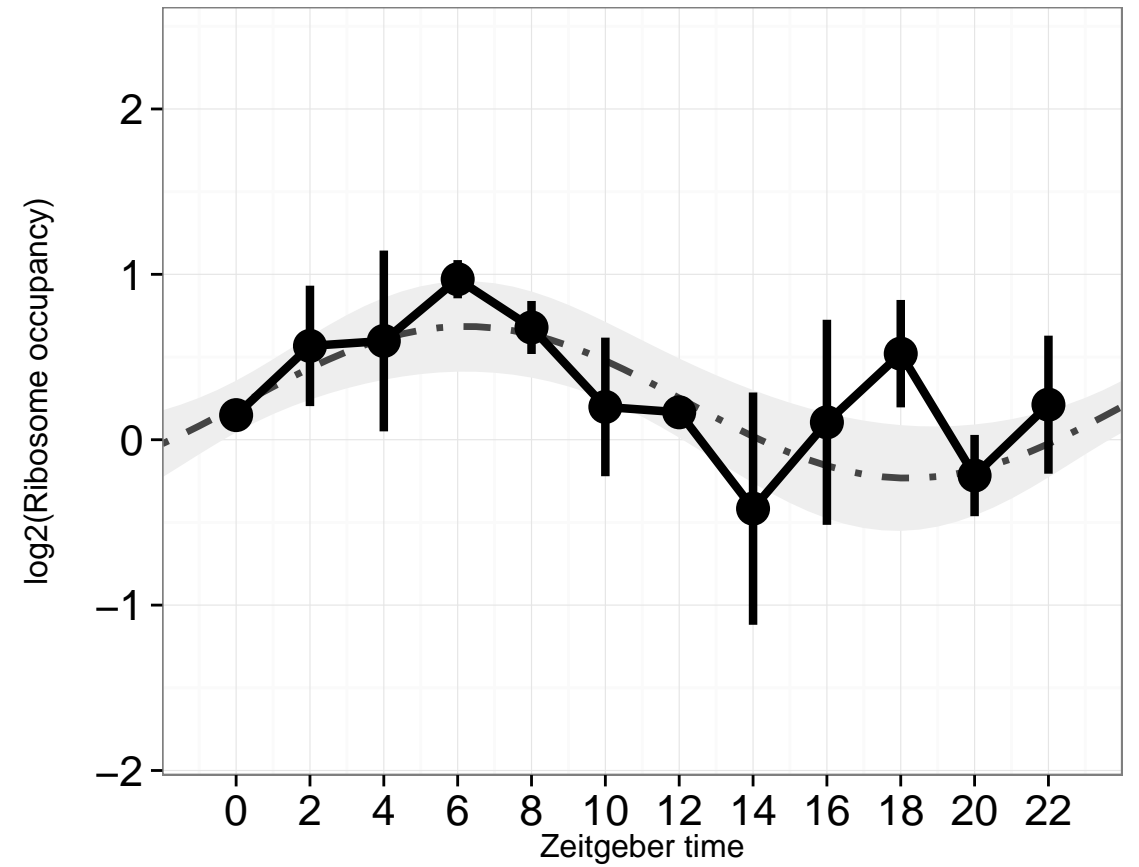

Supplement: SuppDataset_1.zip [file Clec11a_set_A.pdf › Supplemental Dataset 1/A-mRNA_nonrhyth_translation_nonrhyth/Clec11a_set_A.pdf]

# Clec12a

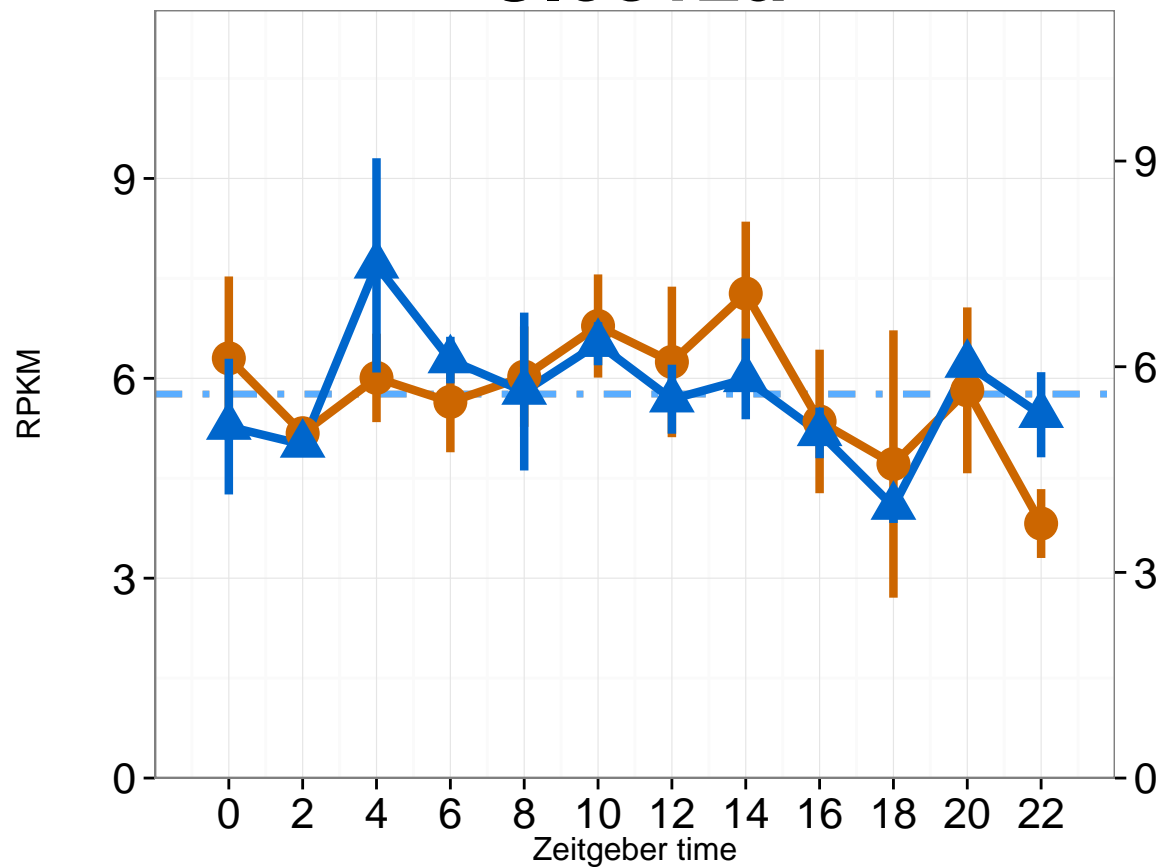

# Clec12a

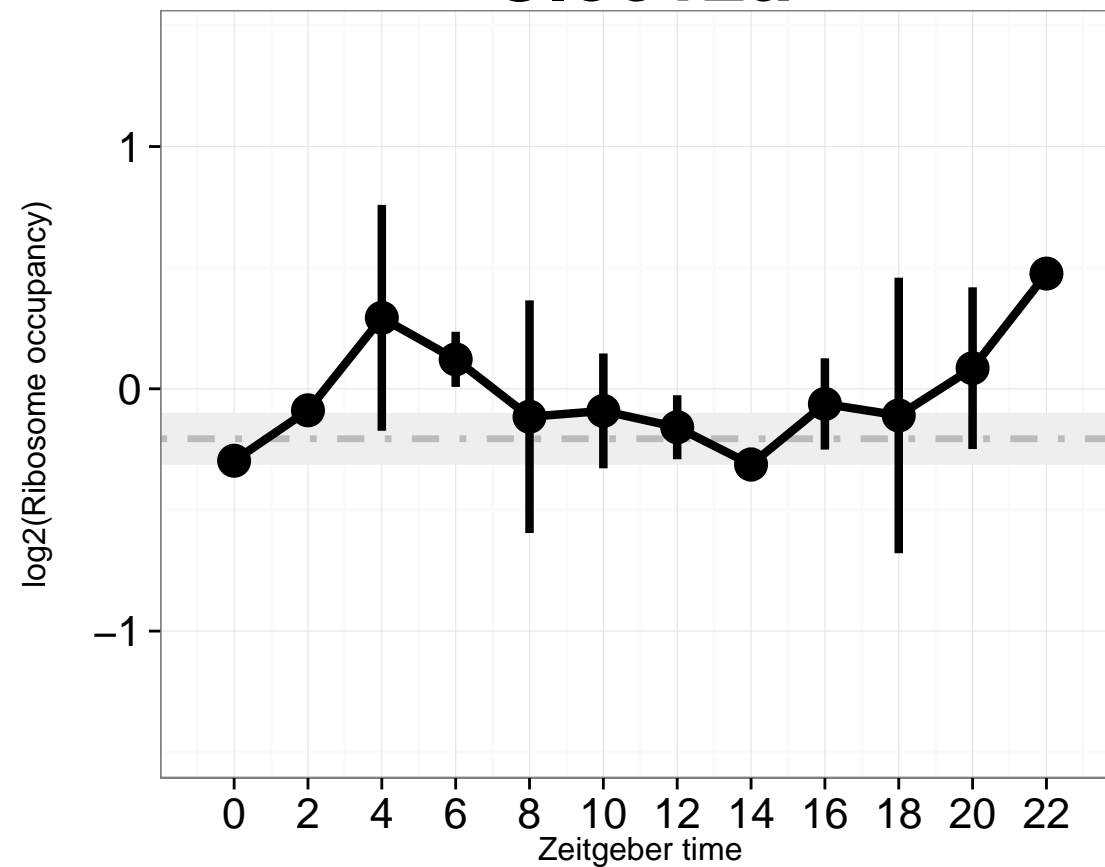

Supplement: SuppDataset_1.zip [file Clec12a_set_A.pdf › Supplemental Dataset 1/A-mRNA_nonrhyth_translation_nonrhyth/Clec12a_set_A.pdf]

## Clec14a

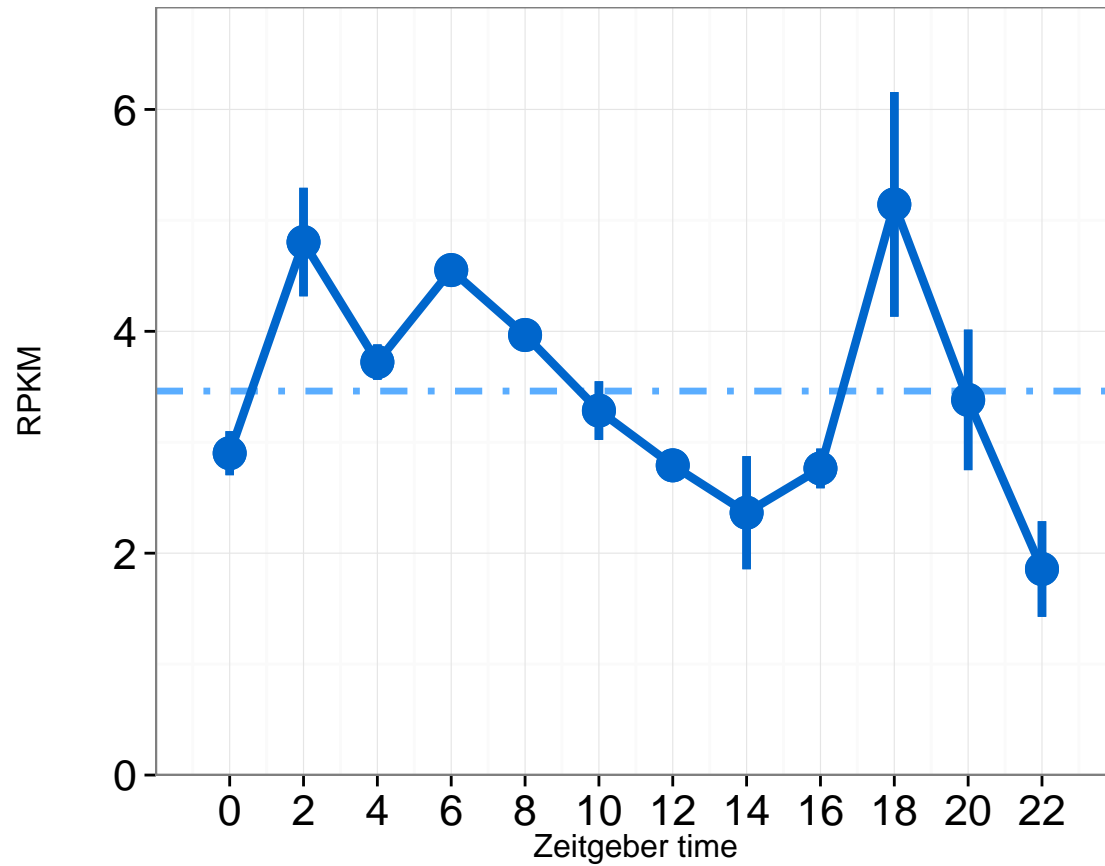

## Clec14a log2(Ribosome occupancy)

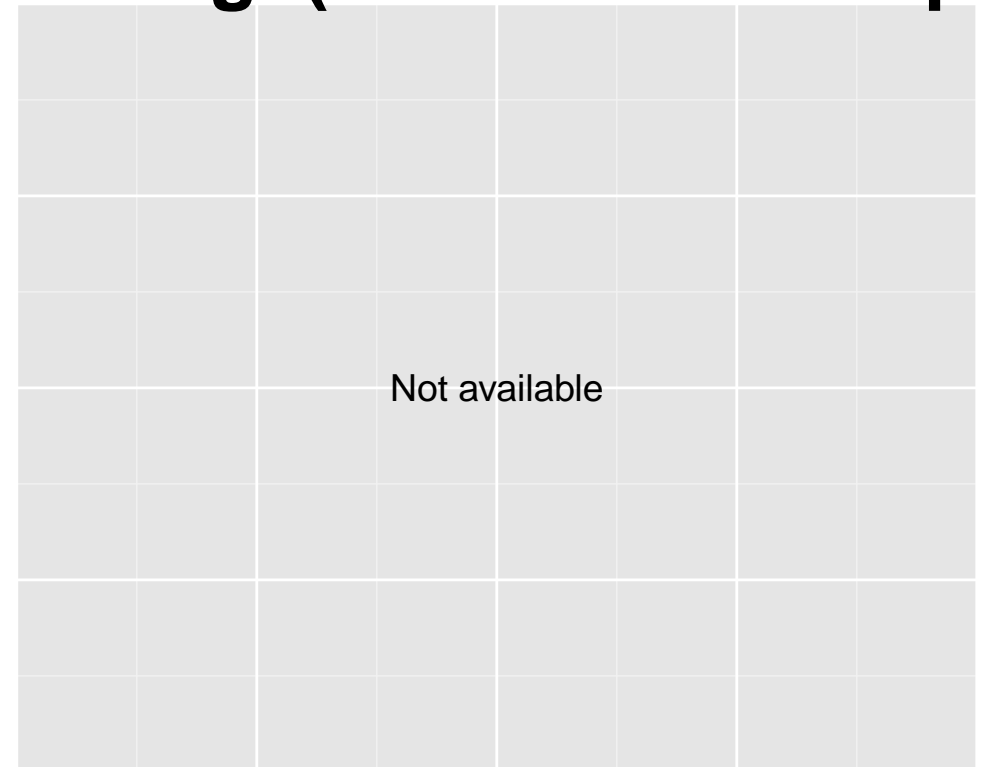

Supplement: SuppDataset_1.zip [file Clec14a_set_A.pdf › Supplemental Dataset 1/A-mRNA_nonrhyth_translation_nonrhyth/Clec14a_set_A.pdf]

# Clec16a

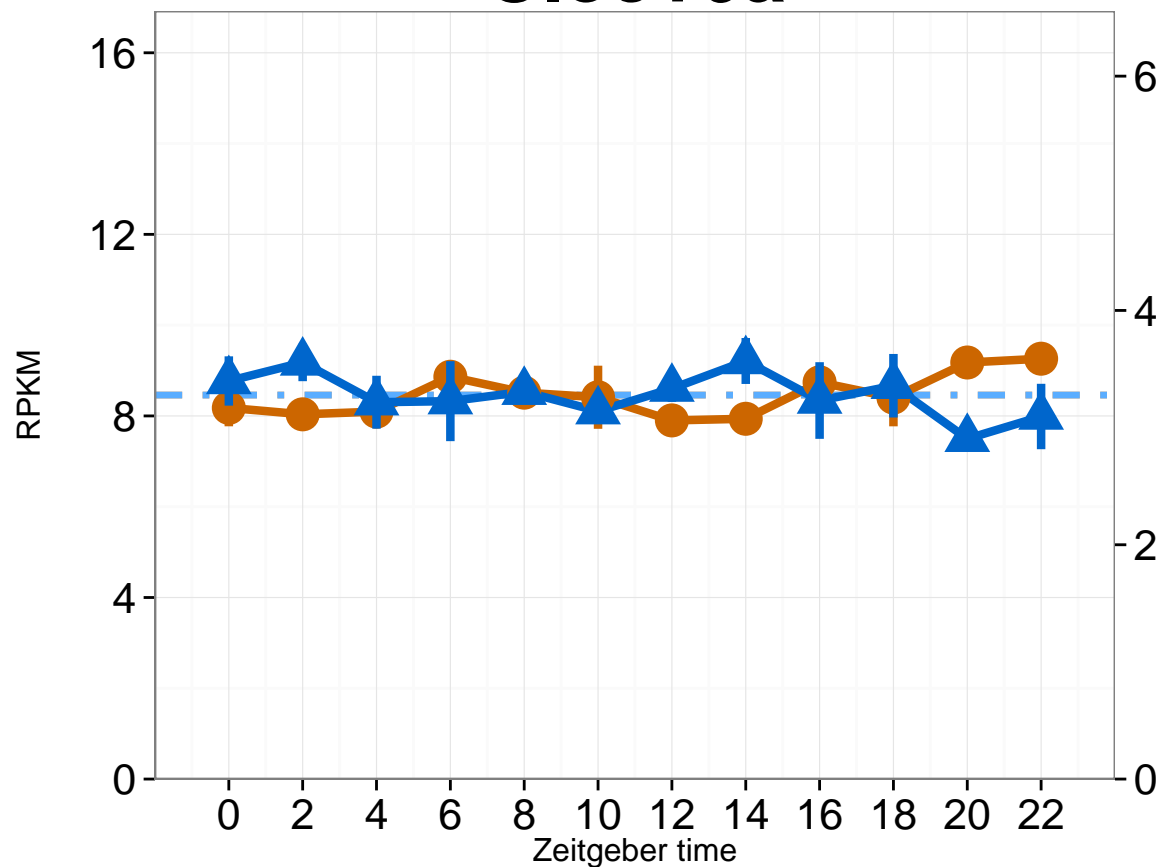

# Clec16a

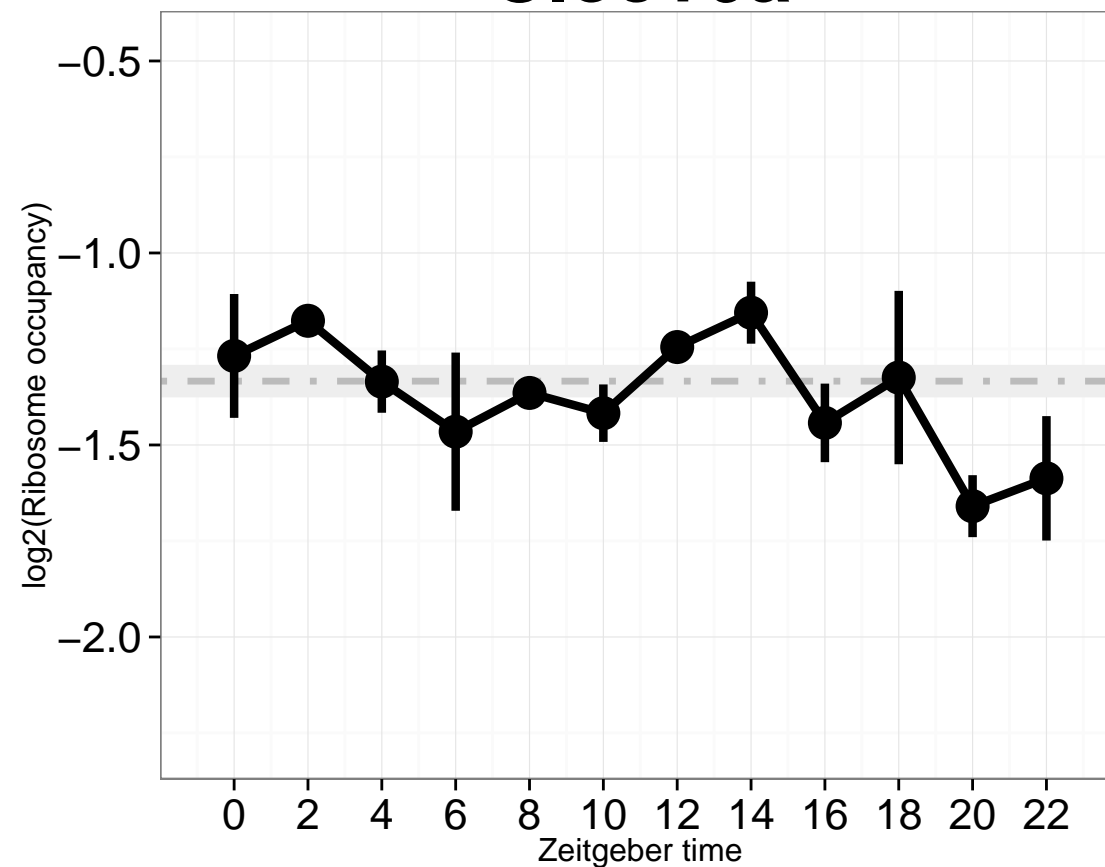

Supplement: SuppDataset_1.zip [file Clec16a_set_A.pdf › Supplemental Dataset 1/A-mRNA_nonrhyth_translation_nonrhyth/Clec16a_set_A.pdf]

# Clec1a

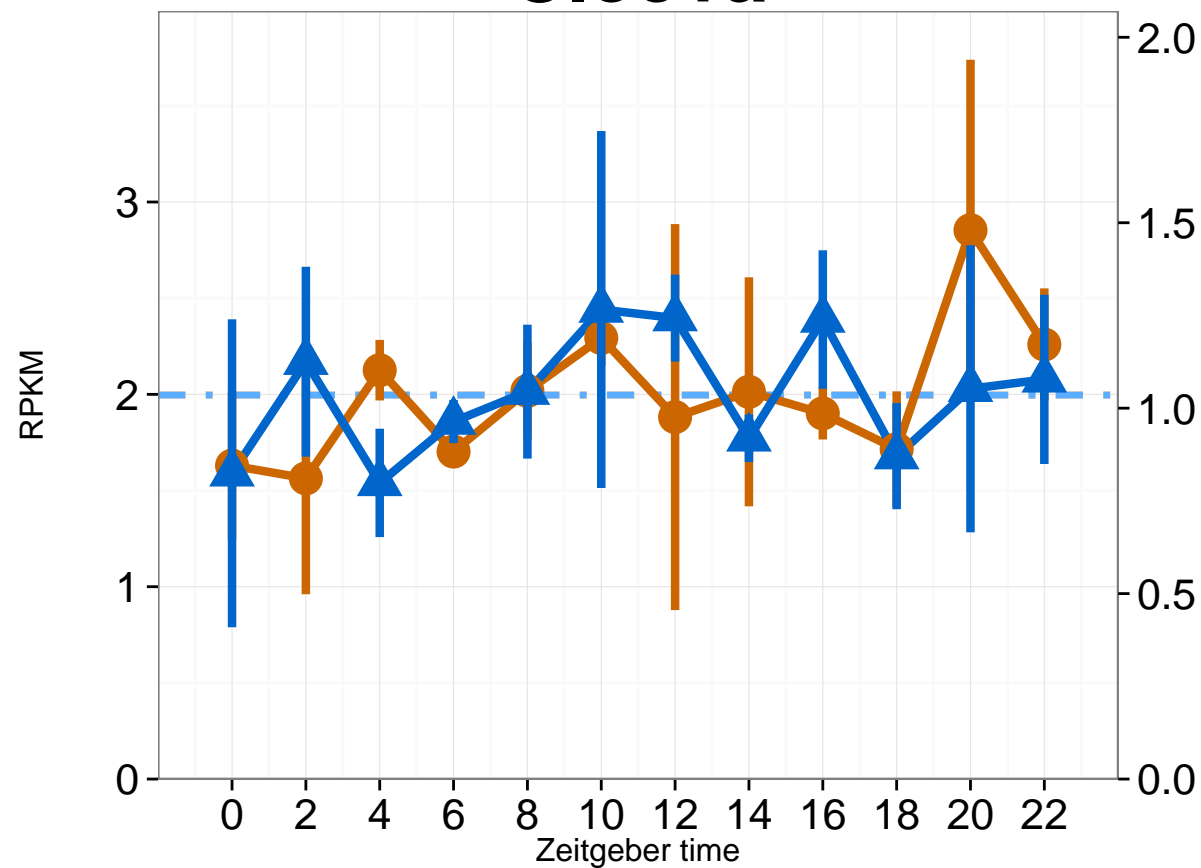

# Clec1a

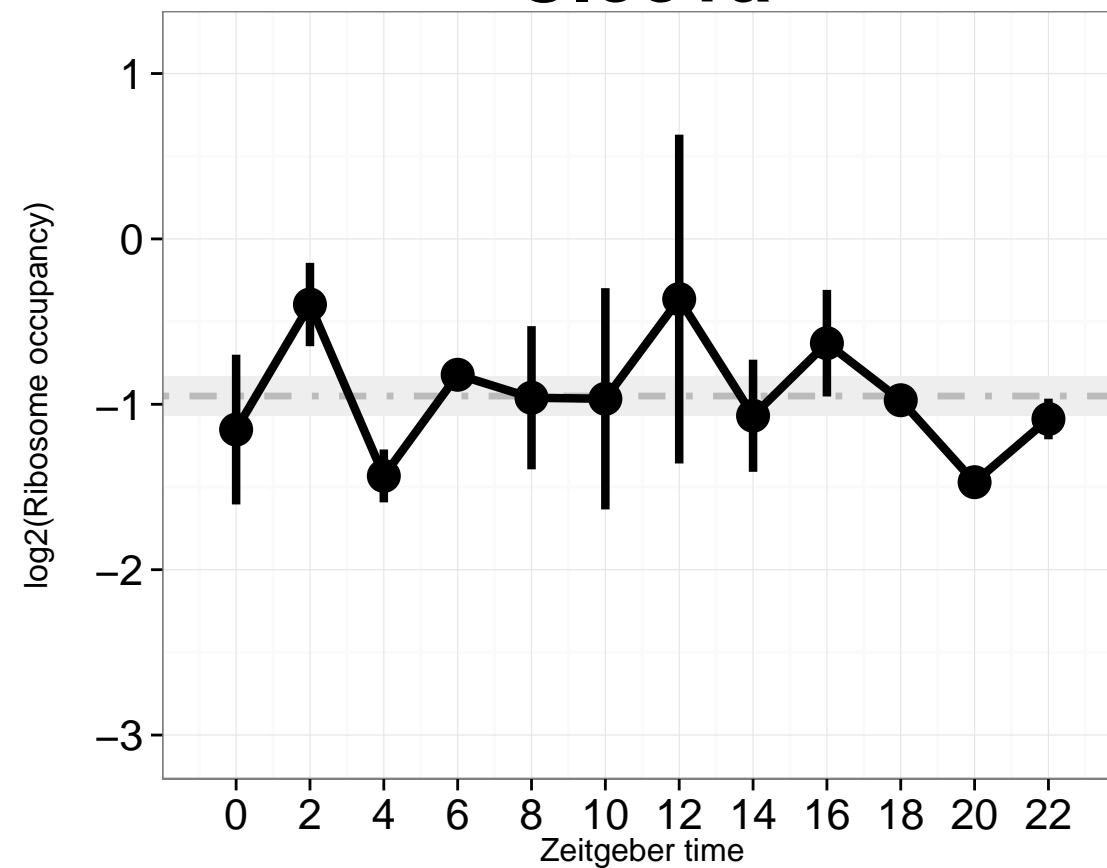

Supplement: SuppDataset_1.zip [file Clec1a_set_A.pdf › Supplemental Dataset 1/A-mRNA_nonrhyth_translation_nonrhyth/Clec1a_set_A.pdf]

# Clec1b

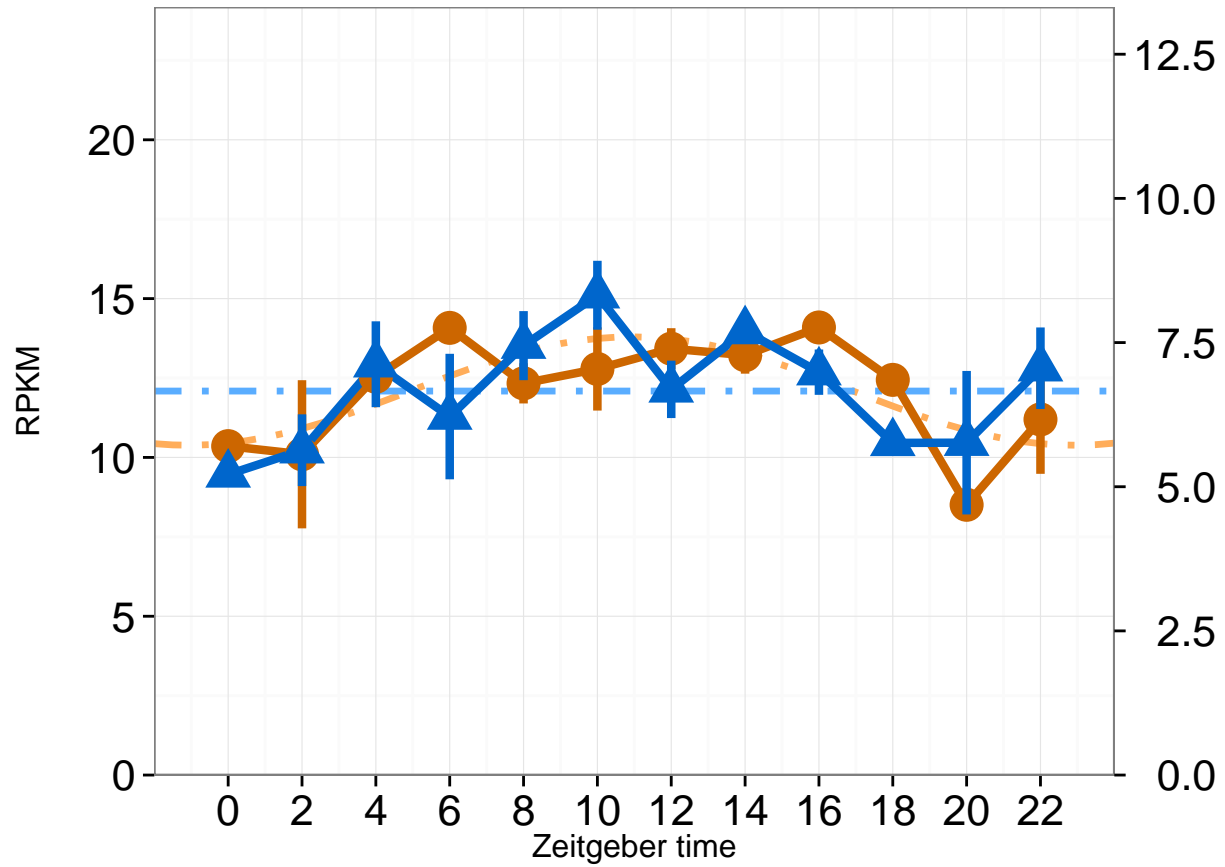

# Clec1b

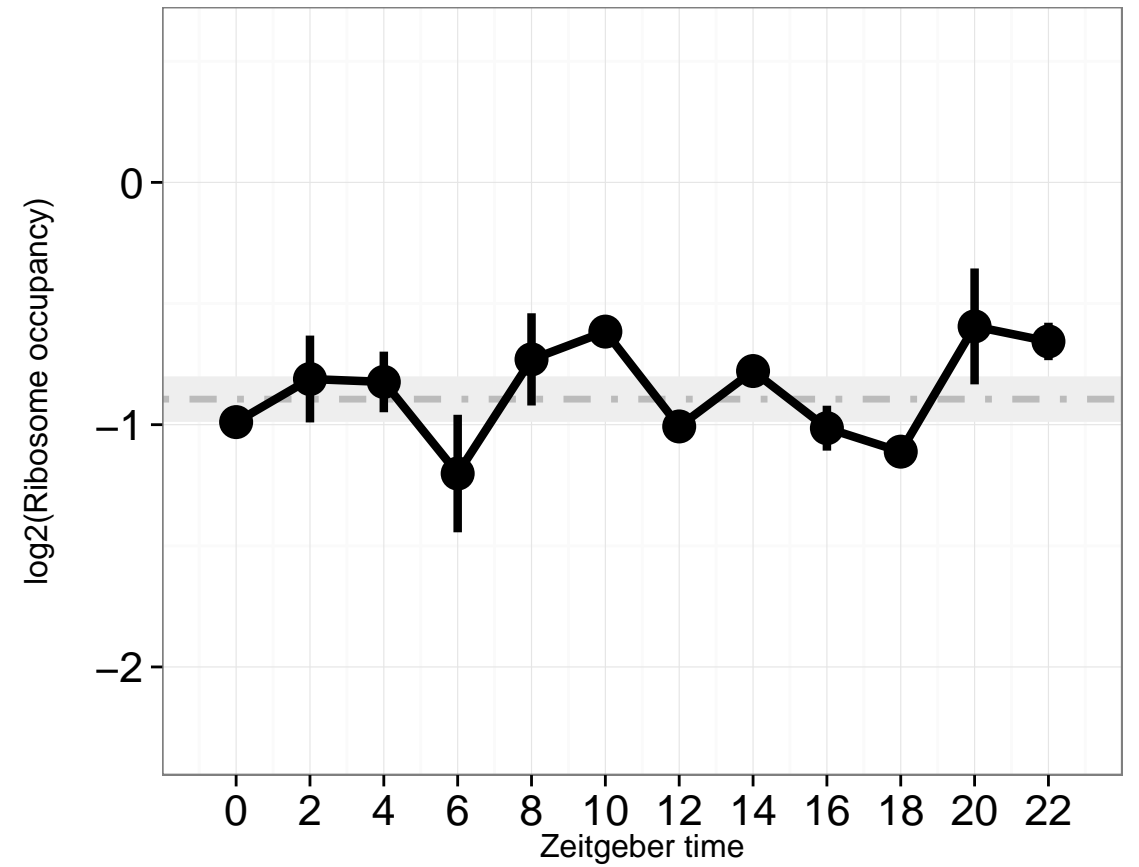

Supplement: SuppDataset_1.zip [file Clec1b_set_A.pdf › Supplemental Dataset 1/A-mRNA_nonrhyth_translation_nonrhyth/Clec1b_set_A.pdf]

## Clec2d

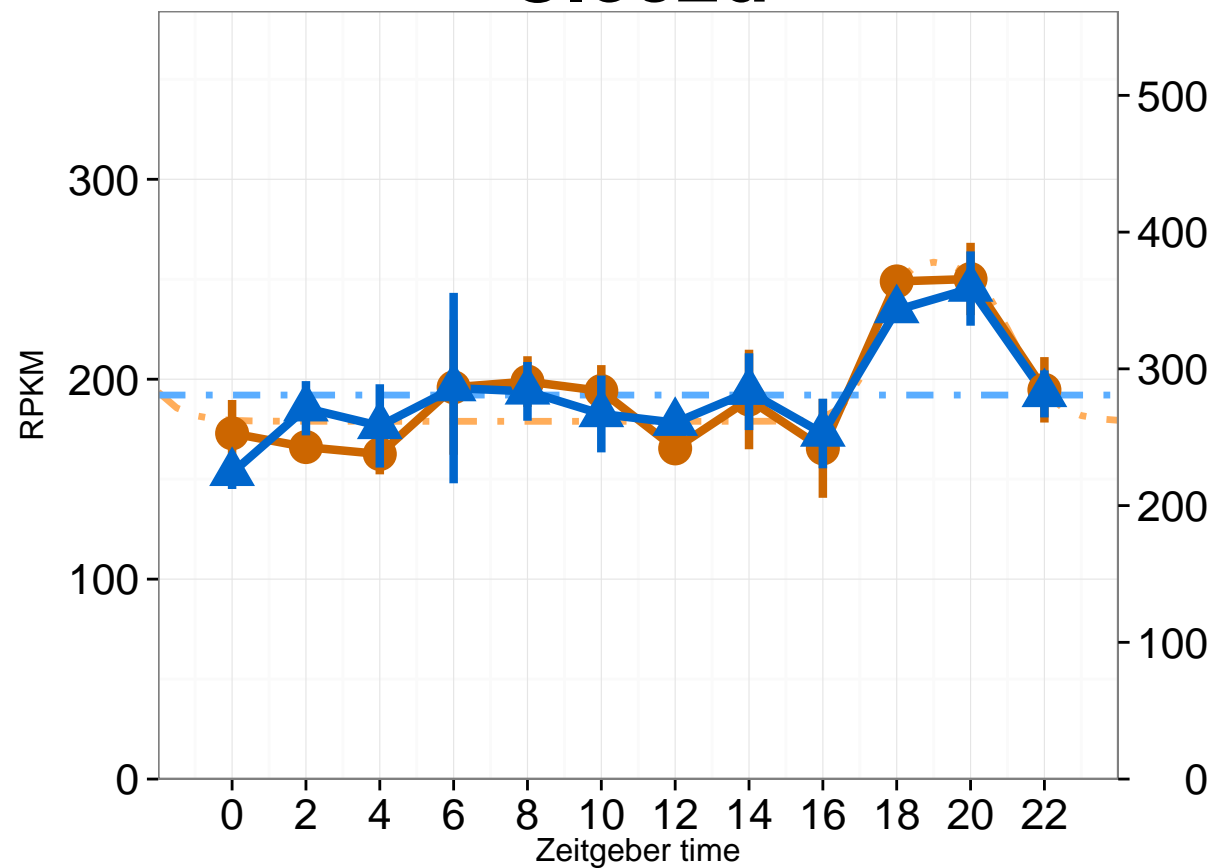

## Clec2d

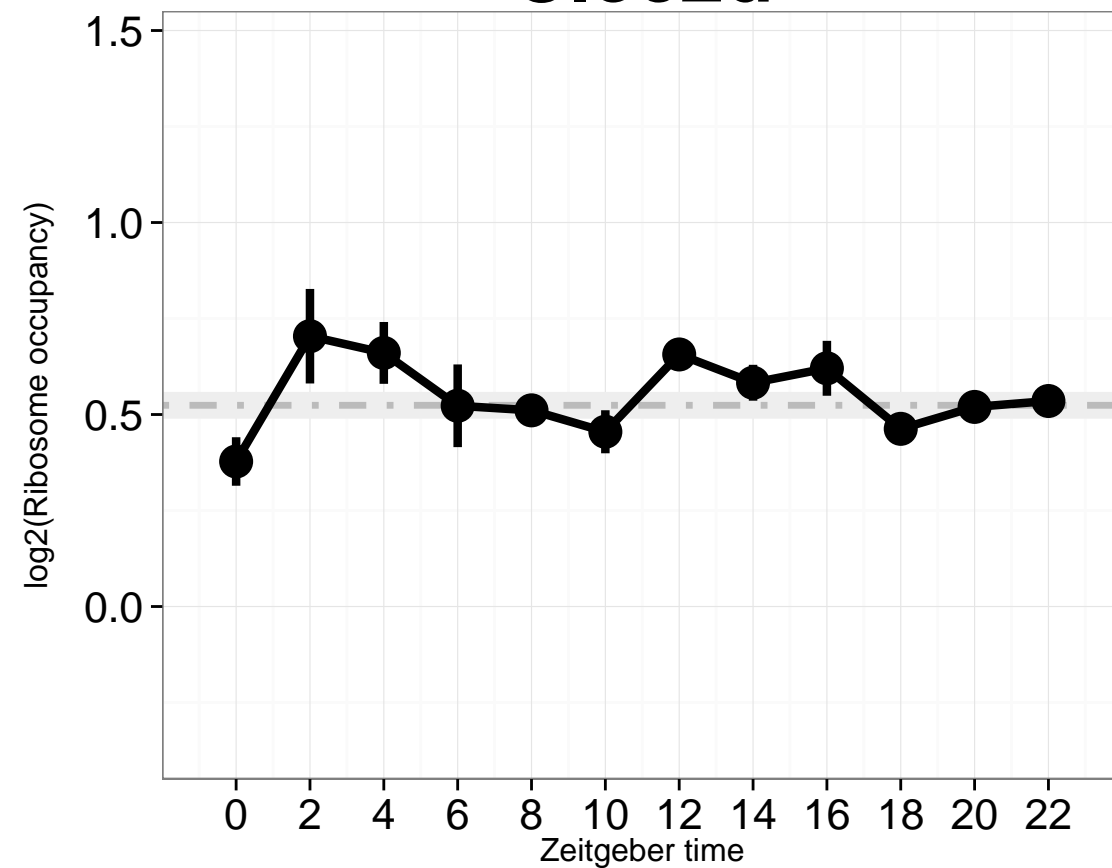

Supplement: SuppDataset_1.zip [file Clec2d_set_A.pdf › Supplemental Dataset 1/A-mRNA_nonrhyth_translation_nonrhyth/Clec2d_set_A.pdf]

# Clec4a1

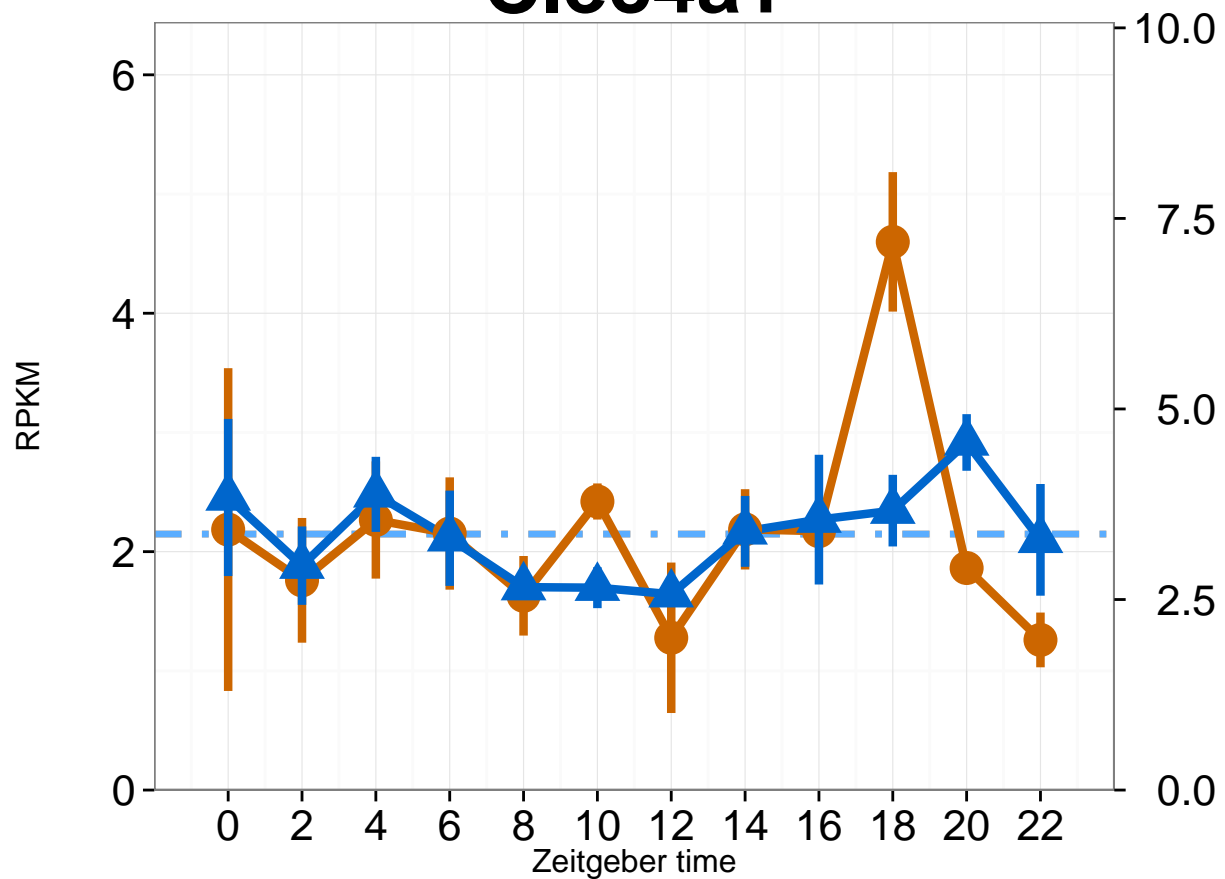

# Clec4a1

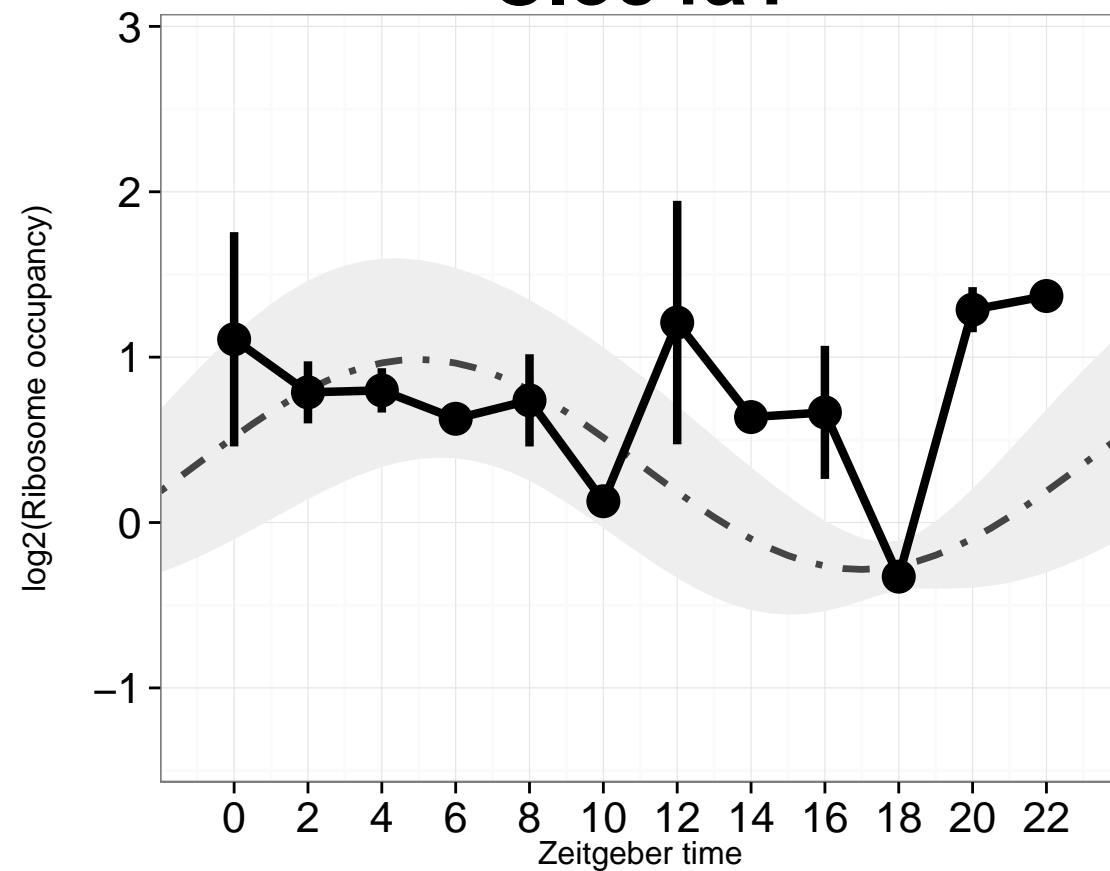

Supplement: SuppDataset_1.zip [file Clec4a1_set_A.pdf › Supplemental Dataset 1/A-mRNA_nonrhyth_translation_nonrhyth/Clec4a1_set_A.pdf]

## Clec4a2

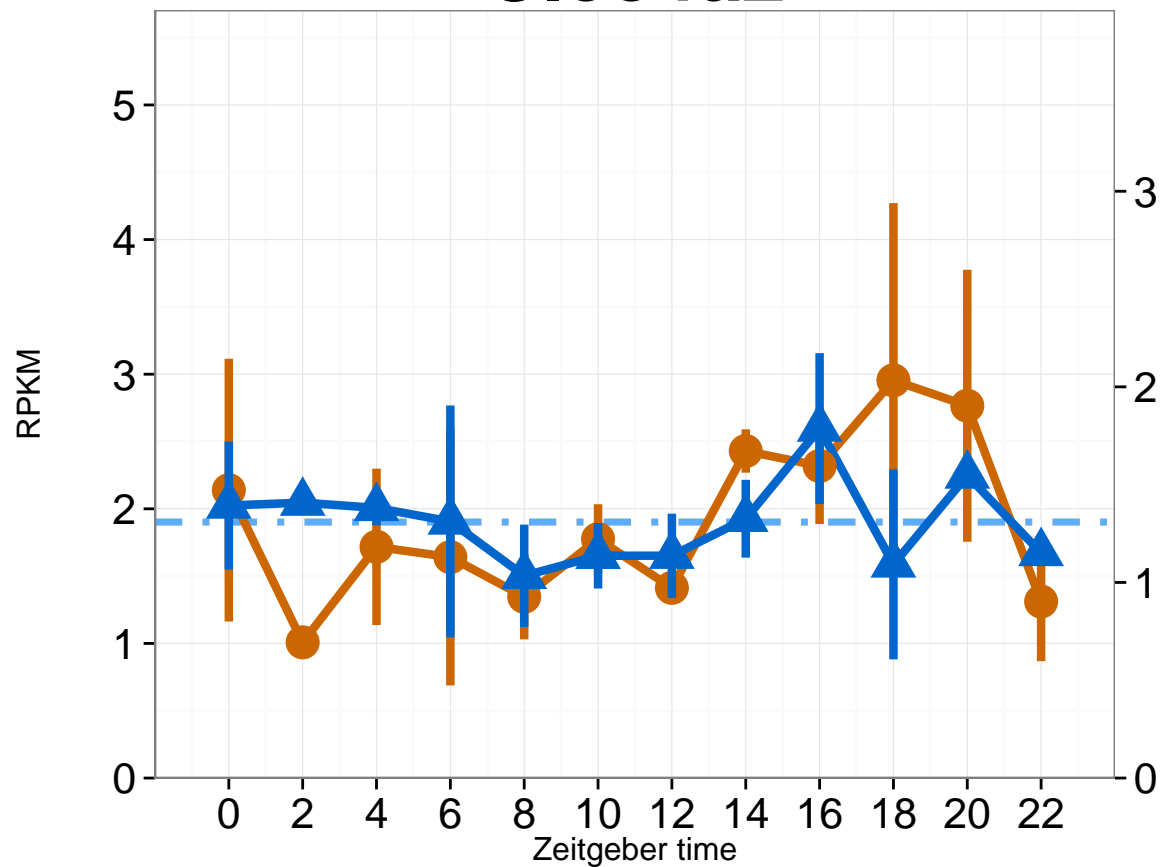

## Clec4a2

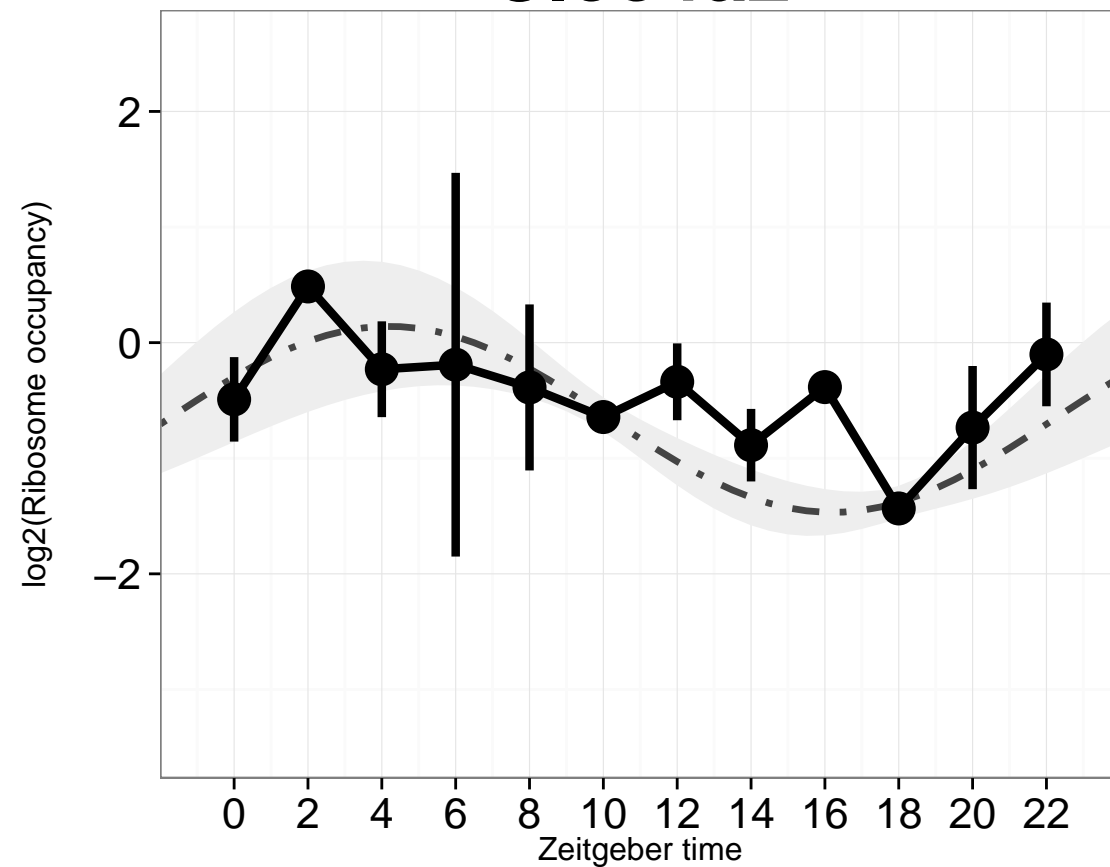

Supplement: SuppDataset_1.zip [file Clec4a2_set_A.pdf › Supplemental Dataset 1/A-mRNA_nonrhyth_translation_nonrhyth/Clec4a2_set_A.pdf]

# Clec4a3

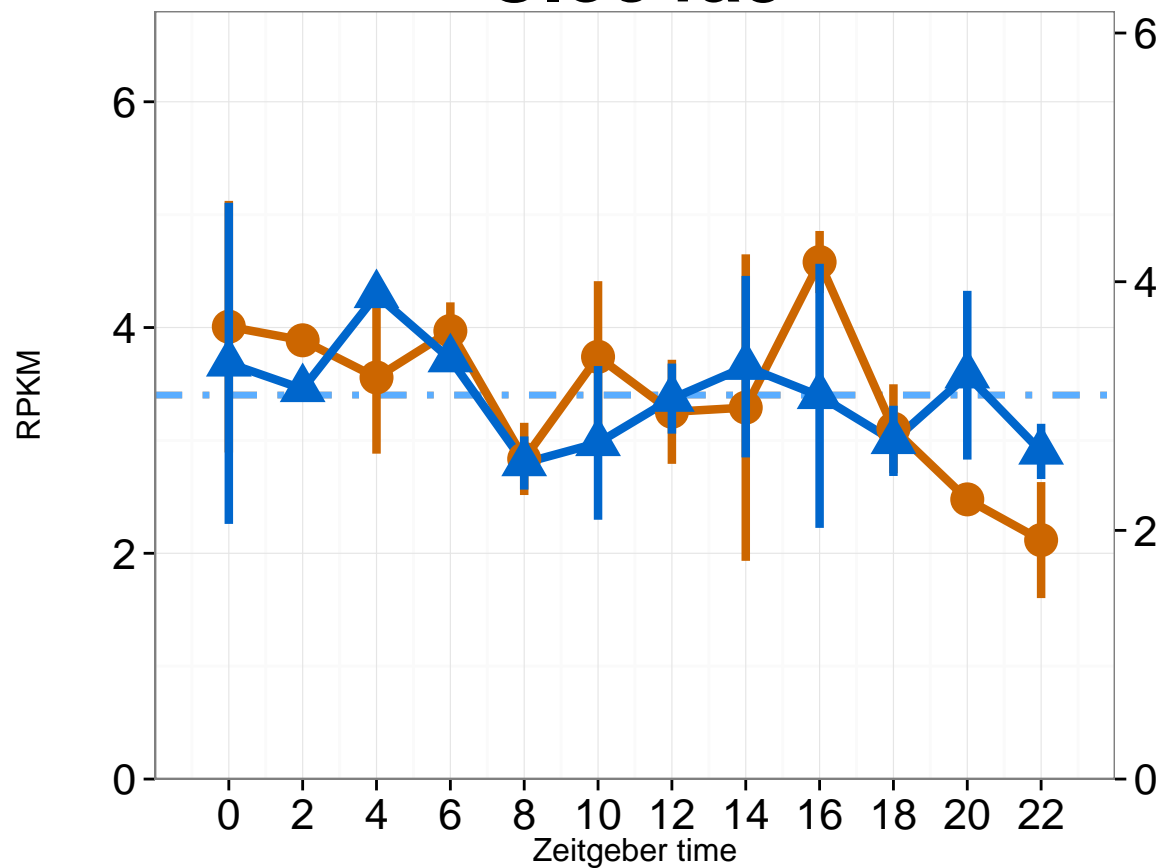

# Clec4a3

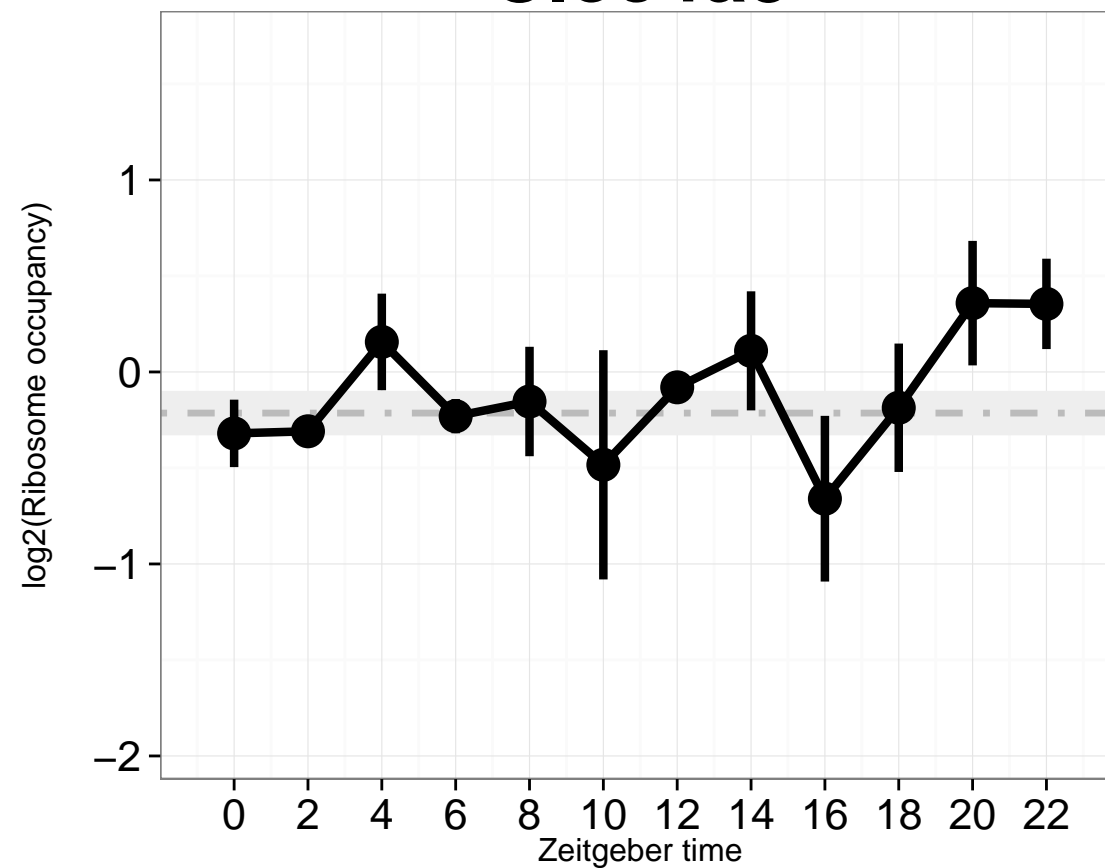

Supplement: SuppDataset_1.zip [file Clec4a3_set_A.pdf › Supplemental Dataset 1/A-mRNA_nonrhyth_translation_nonrhyth/Clec4a3_set_A.pdf]

## Clec4f

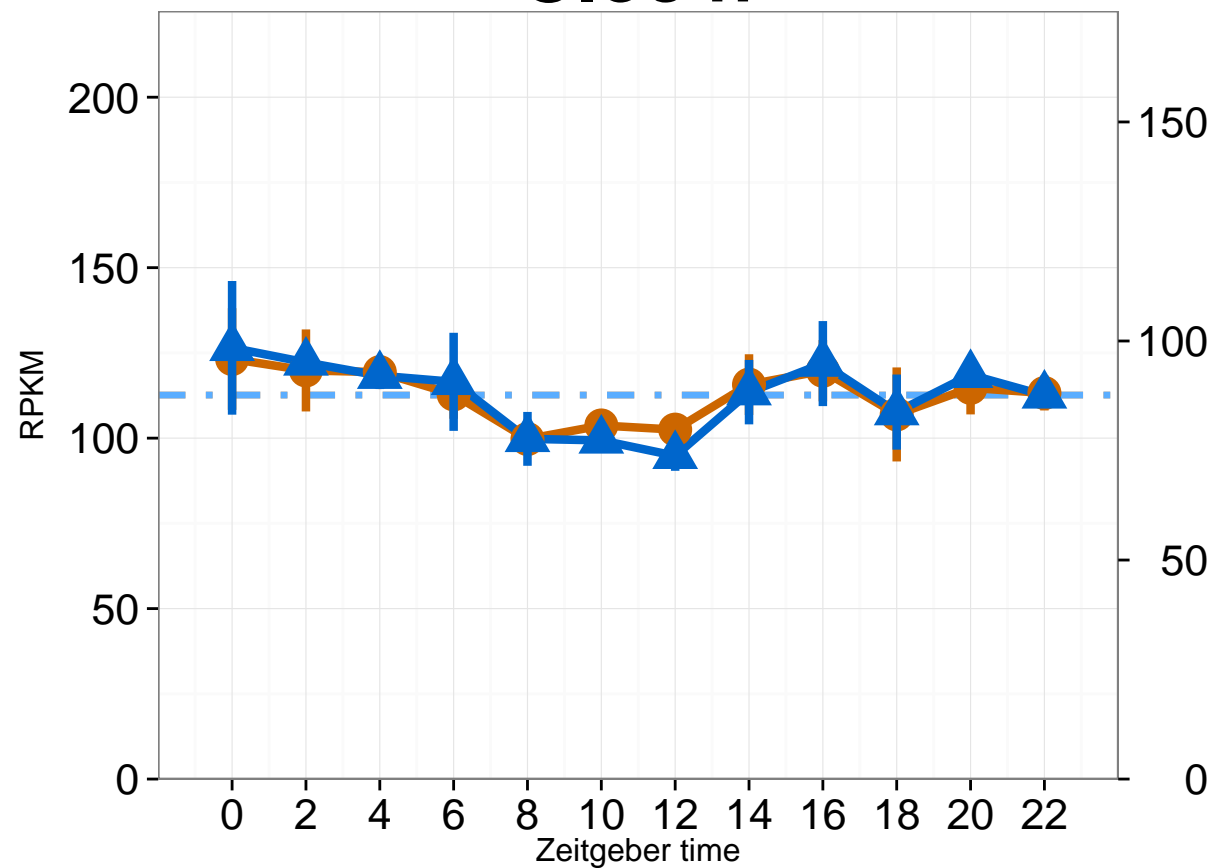

## Clec4f

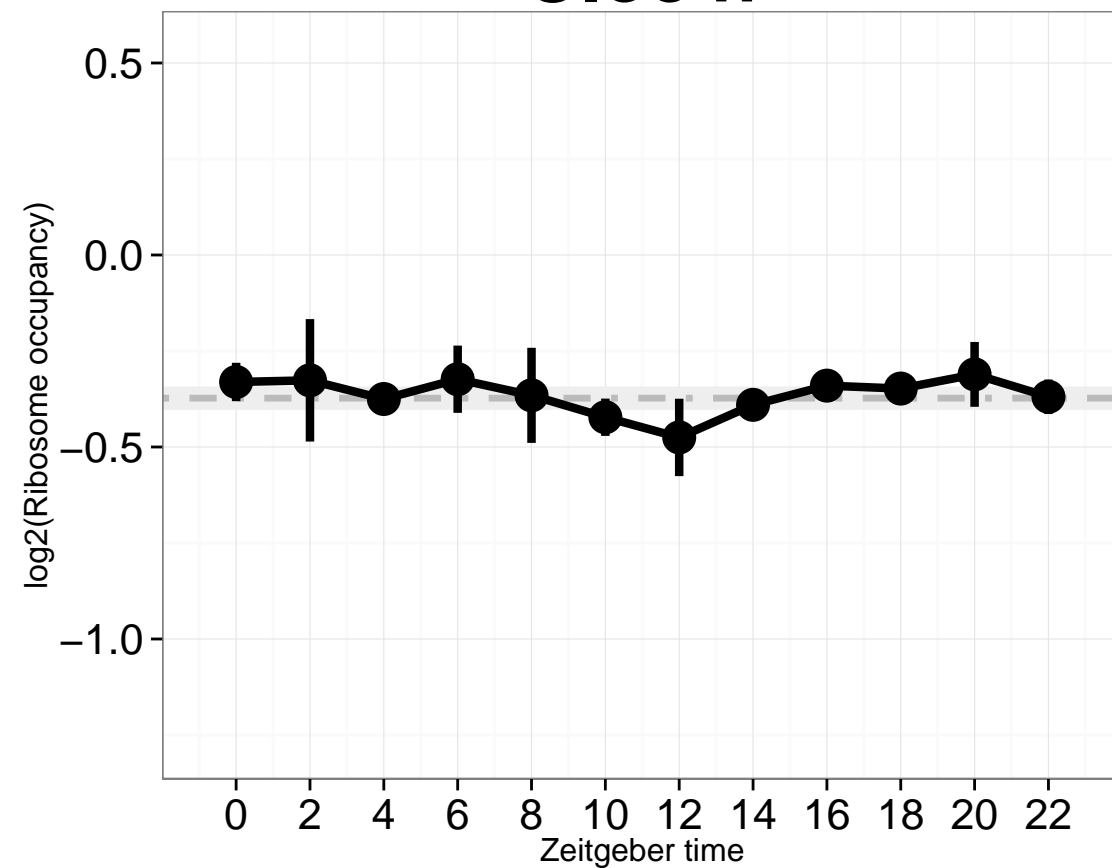

Supplement: SuppDataset_1.zip [file Clec4f_set_A.pdf › Supplemental Dataset 1/A-mRNA_nonrhyth_translation_nonrhyth/Clec4f_set_A.pdf]

## Clec4g

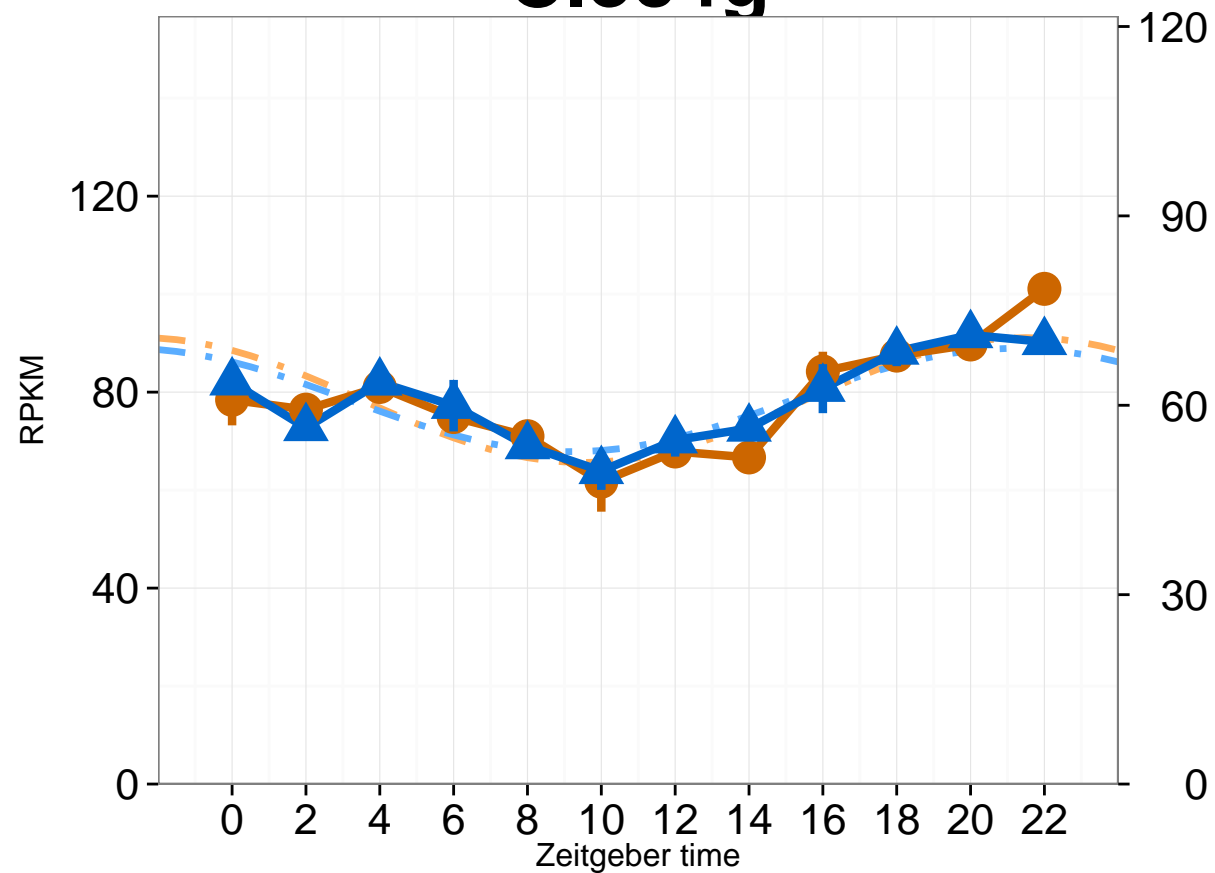

## Clec4g

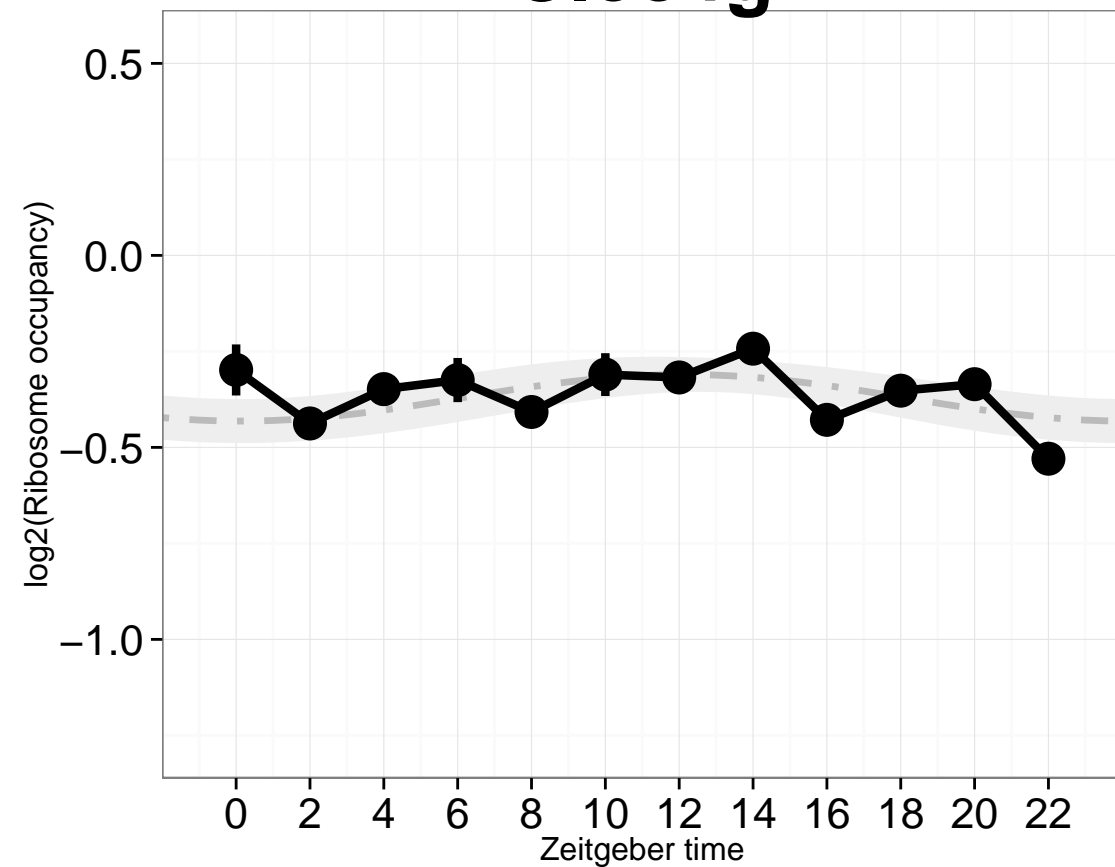

Supplement: SuppDataset_1.zip [file Clec4g_set_A.pdf › Supplemental Dataset 1/A-mRNA_nonrhyth_translation_nonrhyth/Clec4g_set_A.pdf]

# Clec4n

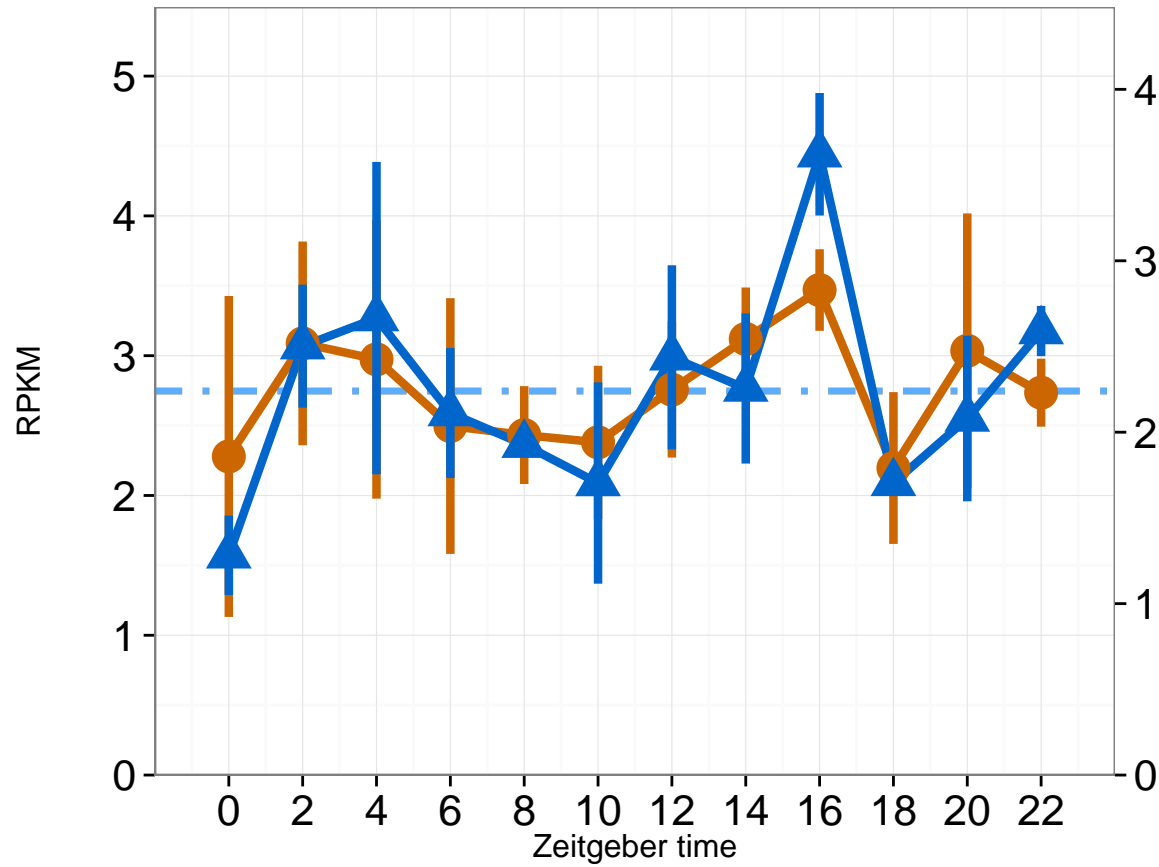

# Clec4n

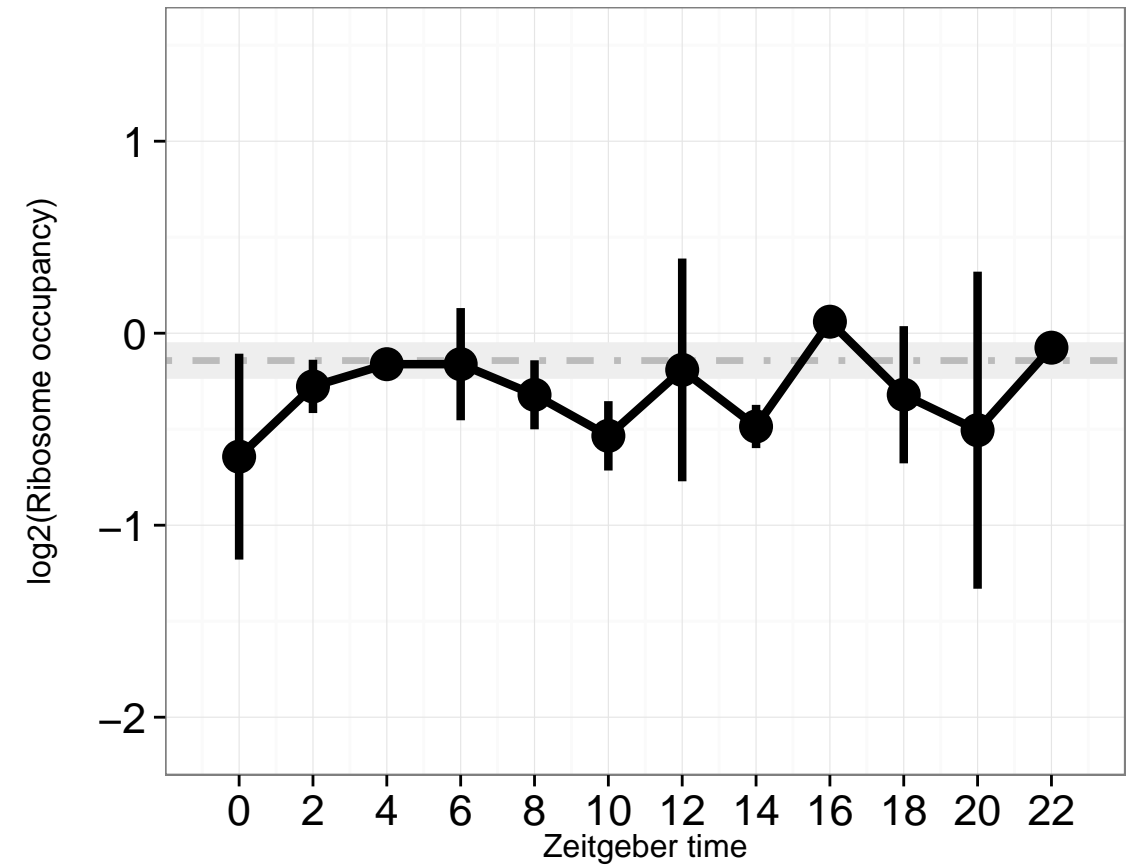

Supplement: SuppDataset_1.zip [file Clec4n_set_A.pdf › Supplemental Dataset 1/A-mRNA_nonrhyth_translation_nonrhyth/Clec4n_set_A.pdf]

## Clec9a

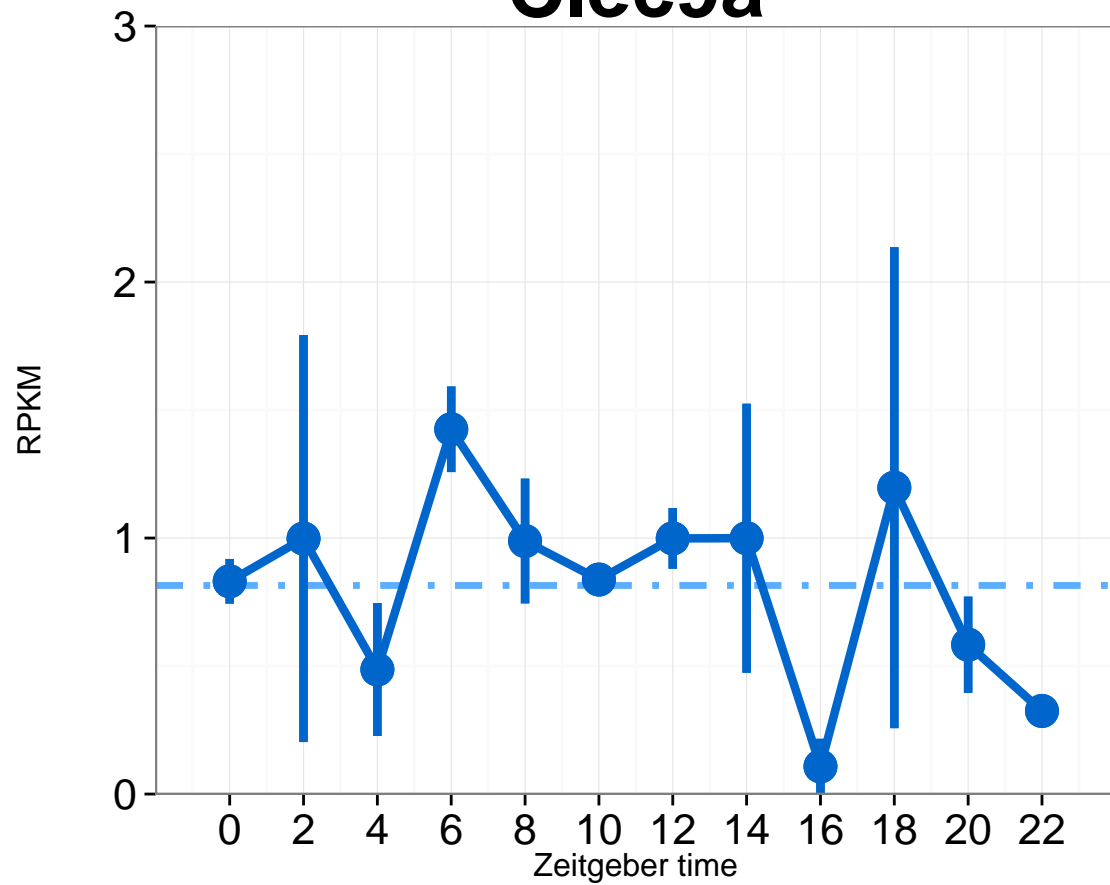

## Clec9a log2(Ribosome occupancy

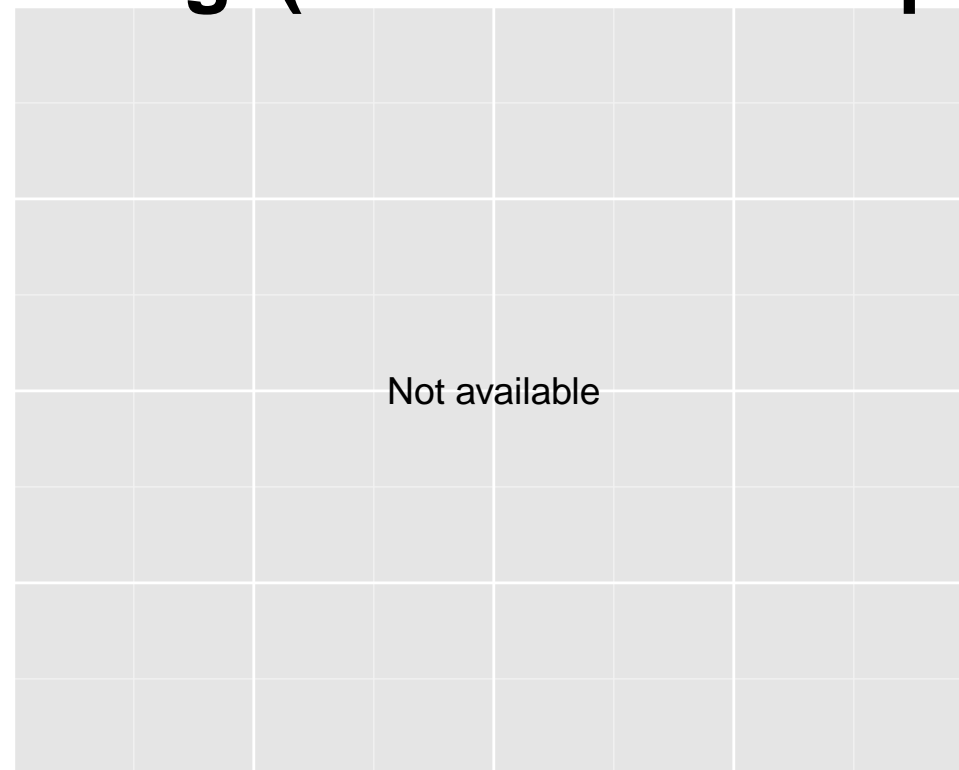

Supplement: SuppDataset_1.zip [file Clec9a_set_A.pdf › Supplemental Dataset 1/A-mRNA_nonrhyth_translation_nonrhyth/Clec9a_set_A.pdf]

## Clic1

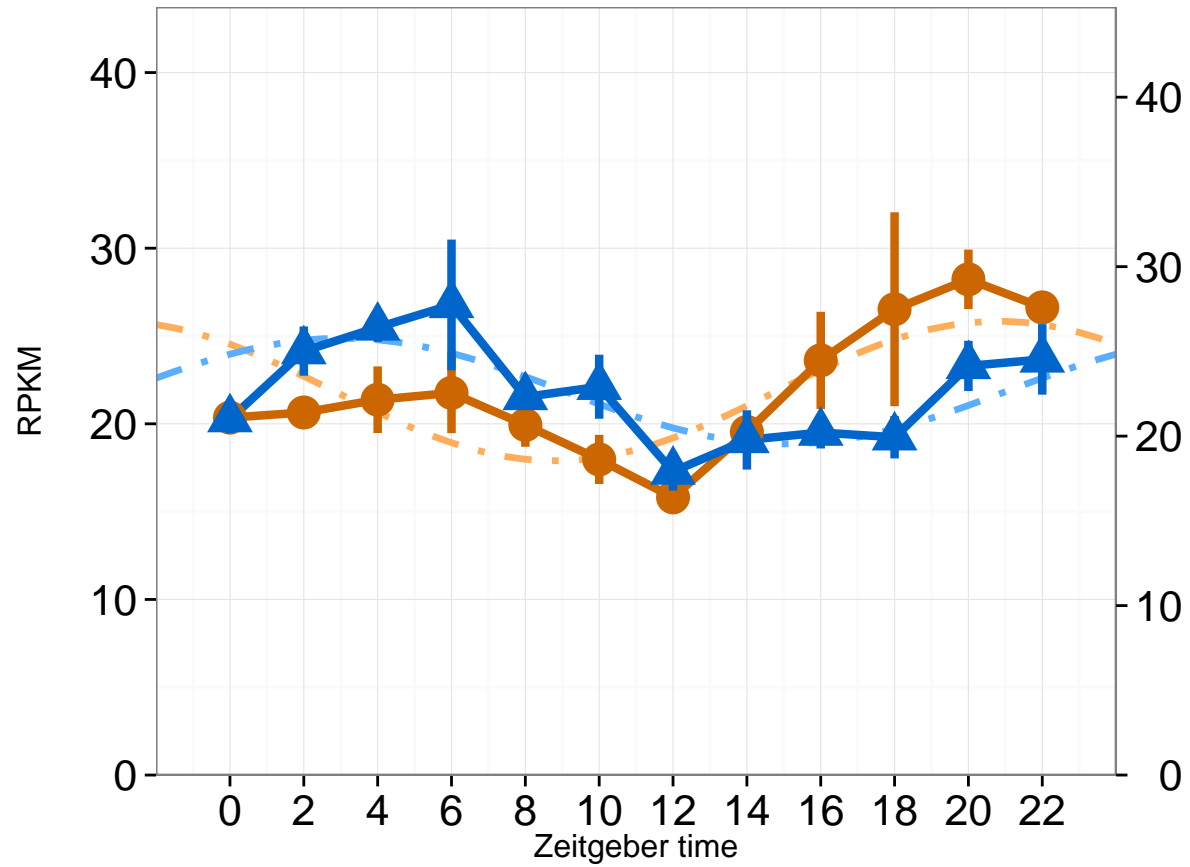

## Clic1

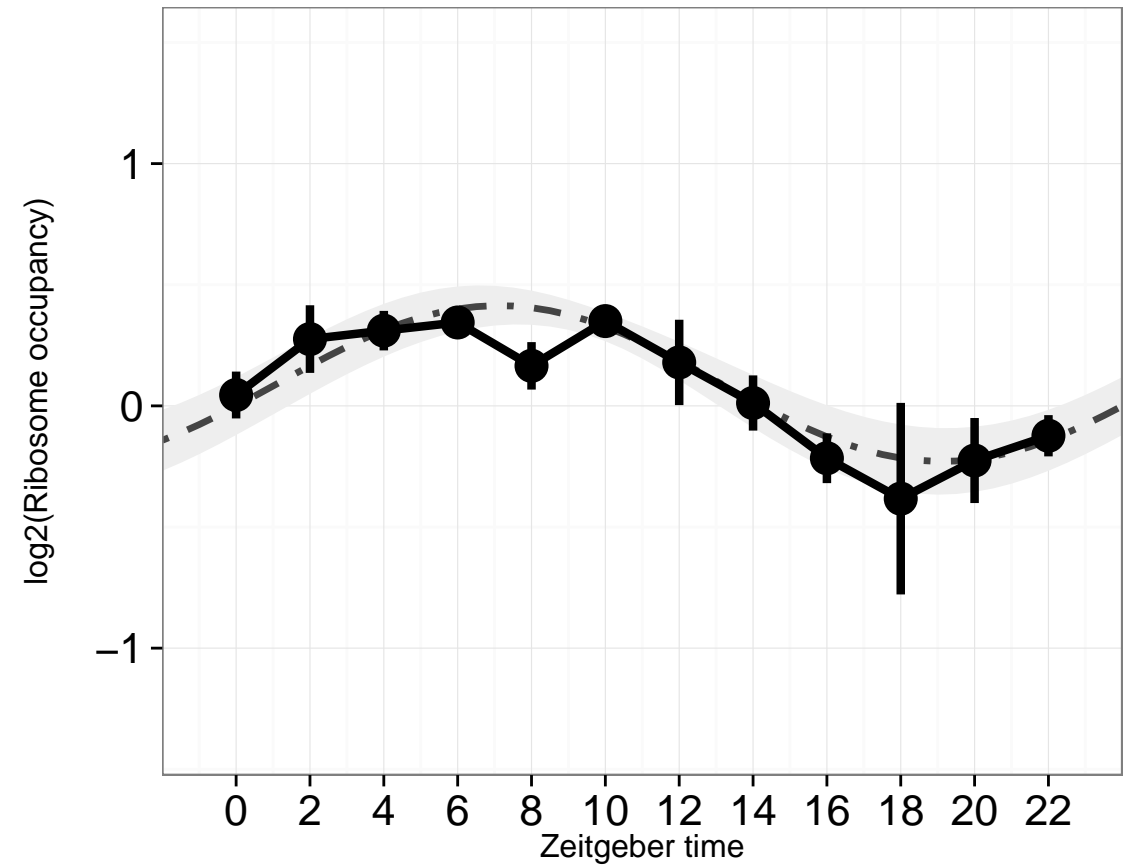

Supplement: SuppDataset_1.zip [file Clic1_set_A.pdf › Supplemental Dataset 1/A-mRNA_nonrhyth_translation_nonrhyth/Clic1_set_A.pdf]

# Clint1

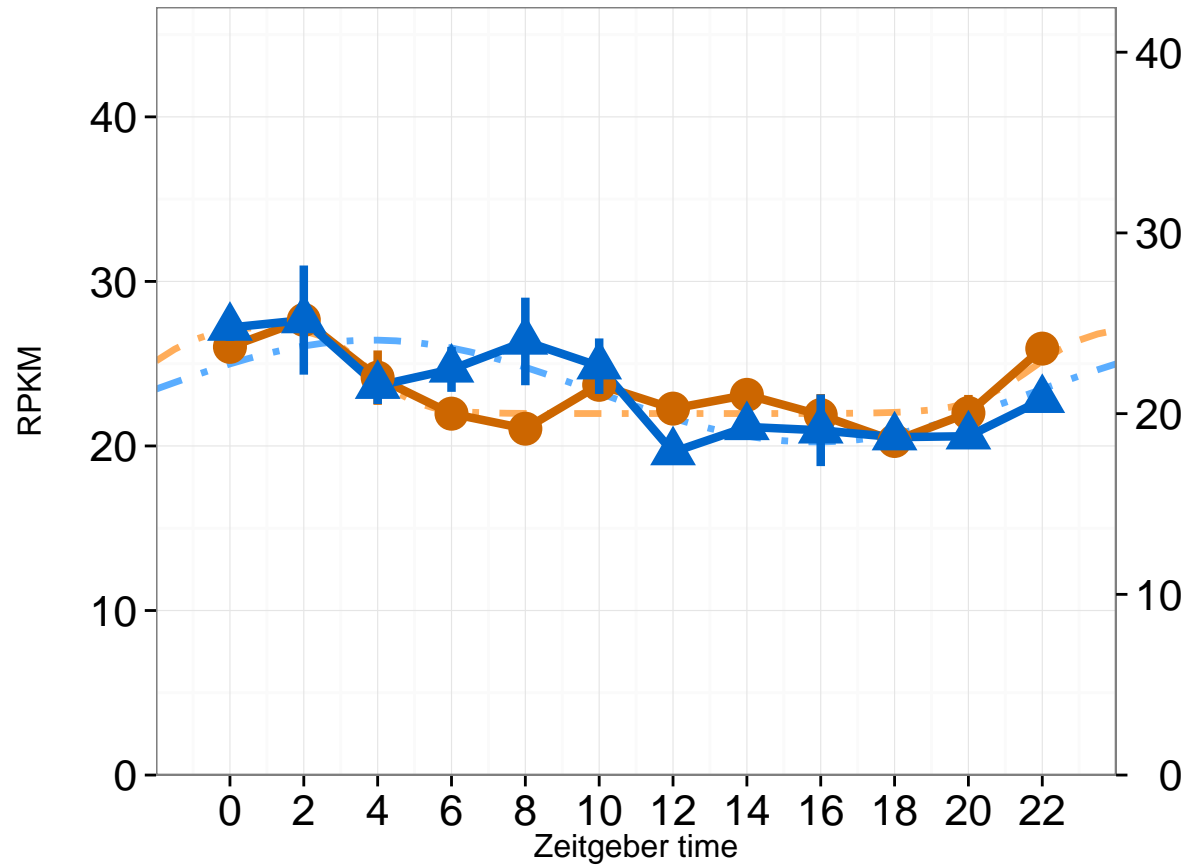

# Clint1

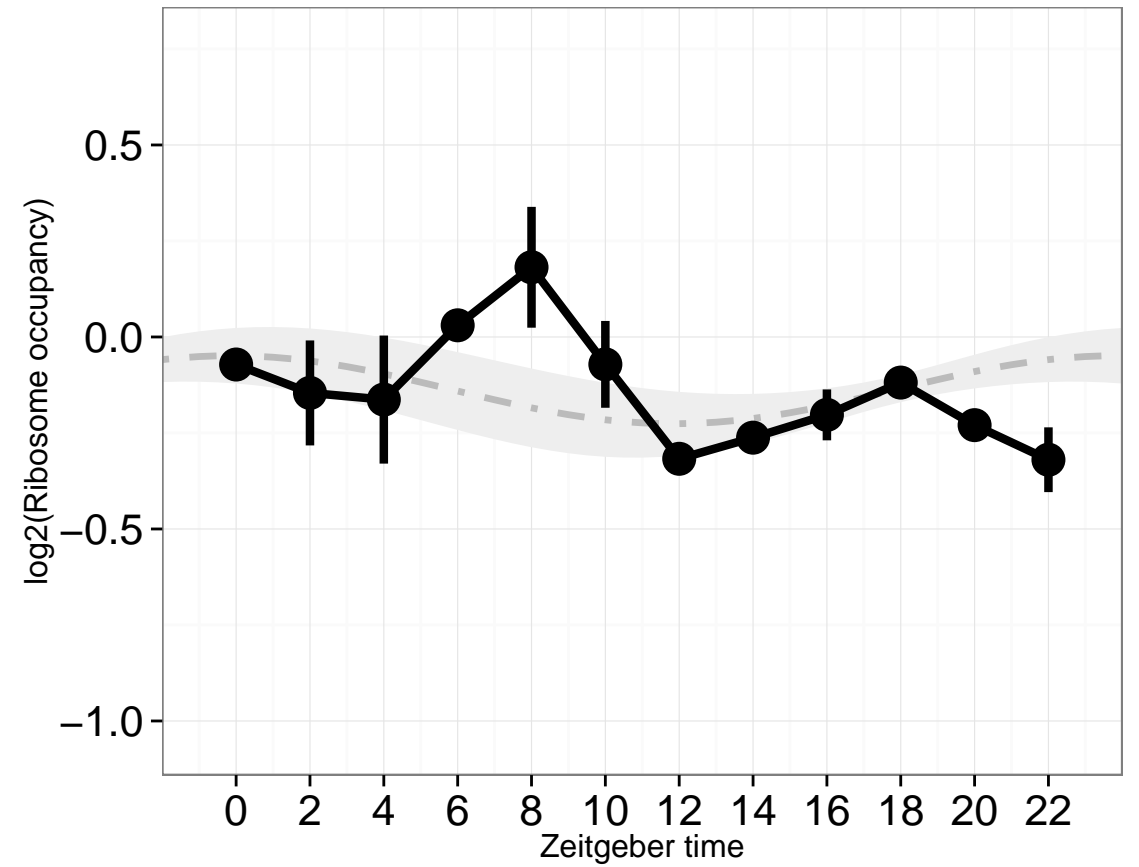

Supplement: SuppDataset_1.zip [file Clint1_set_A.pdf › Supplemental Dataset 1/A-mRNA_nonrhyth_translation_nonrhyth/Clint1_set_A.pdf]

# Clip1

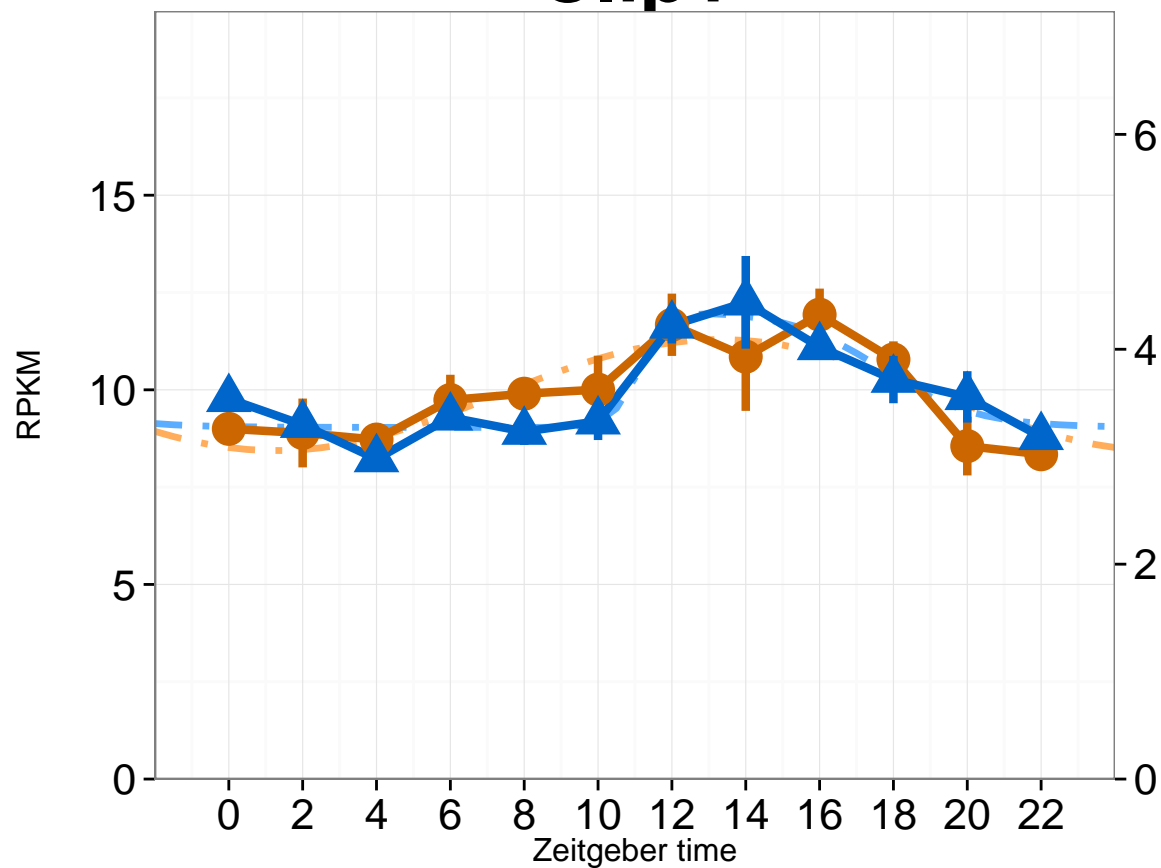

# Clip1

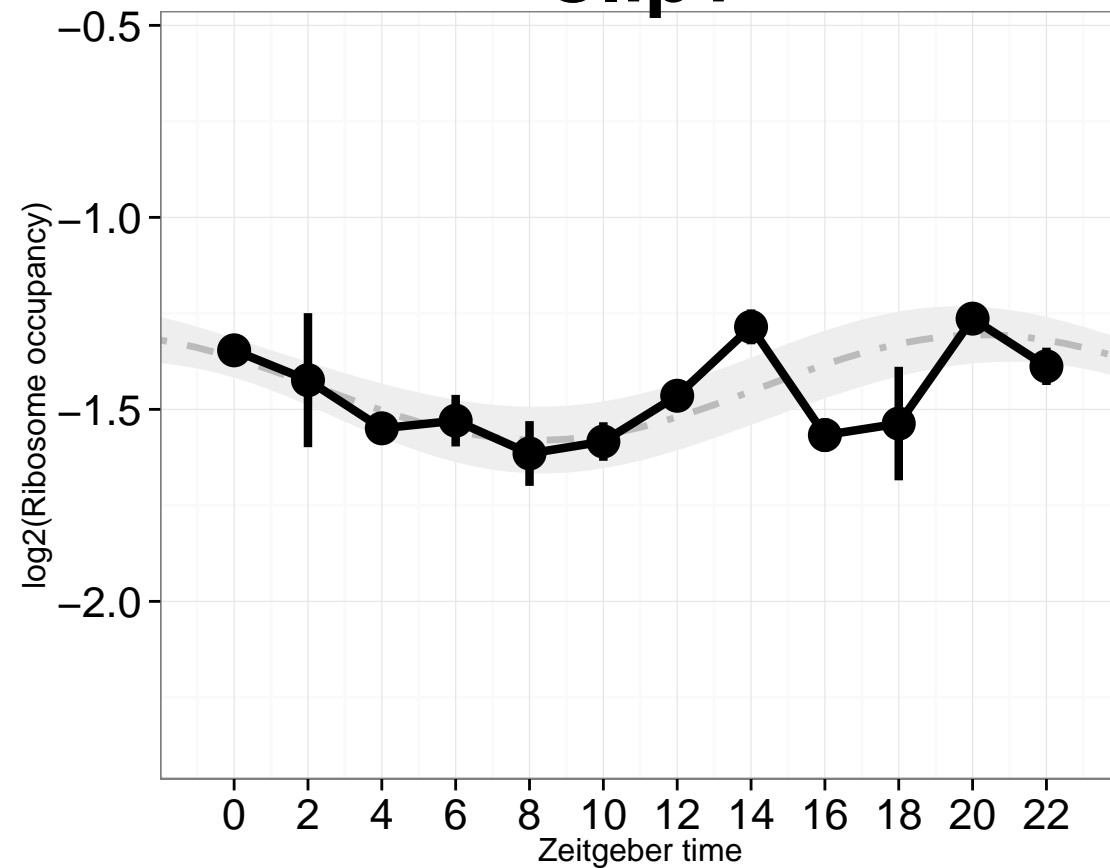

Supplement: SuppDataset_1.zip [file Clip1_set_A.pdf › Supplemental Dataset 1/A-mRNA_nonrhyth_translation_nonrhyth/Clip1_set_A.pdf]

## Clk1

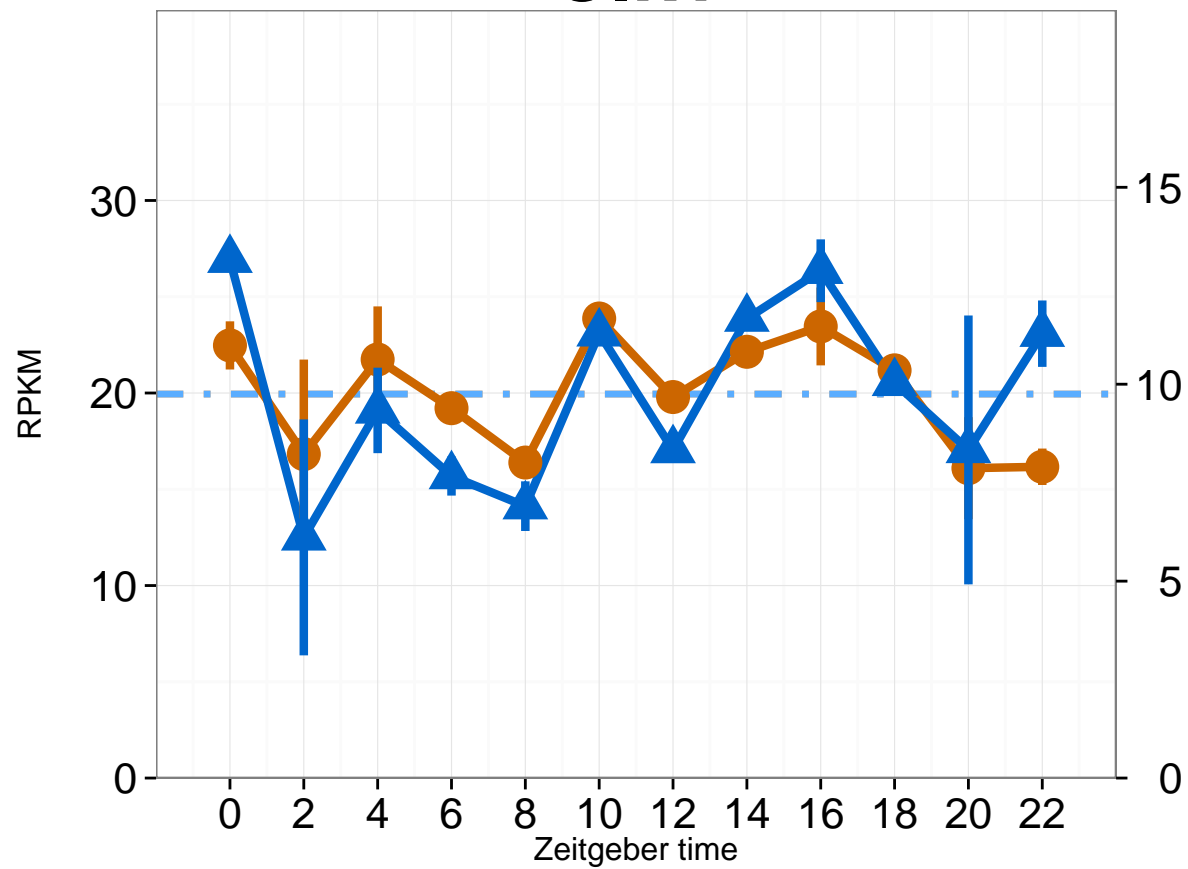

## Clk1

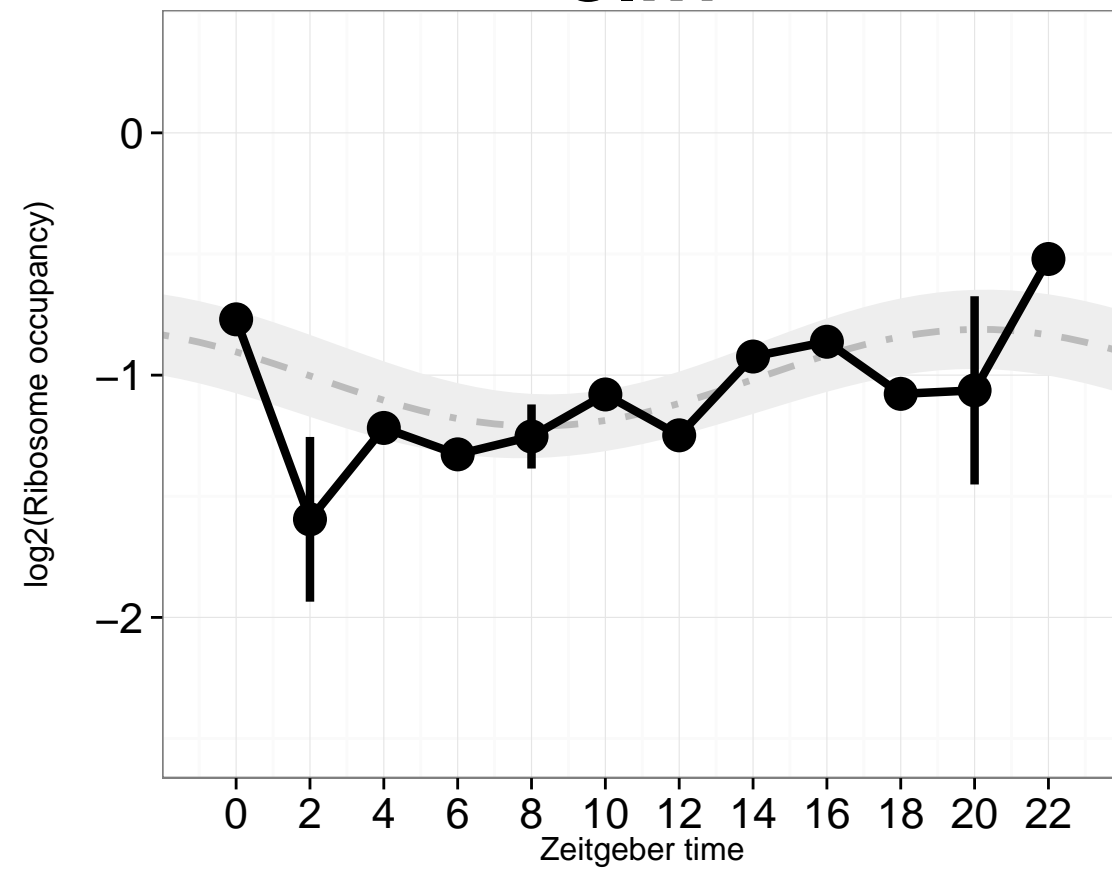

Supplement: SuppDataset_1.zip [file Clk1_set_A.pdf › Supplemental Dataset 1/A-mRNA_nonrhyth_translation_nonrhyth/Clk1_set_A.pdf]

## Clk2

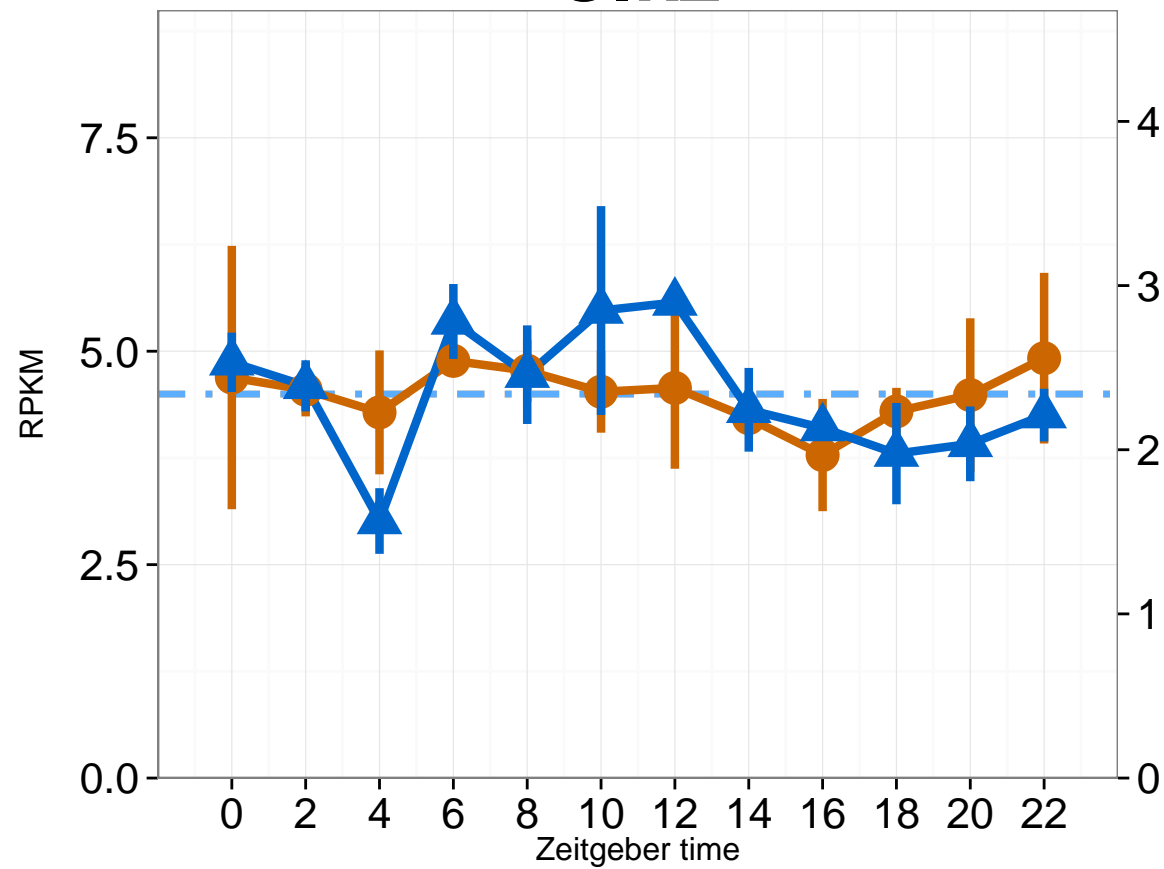

## Clk2

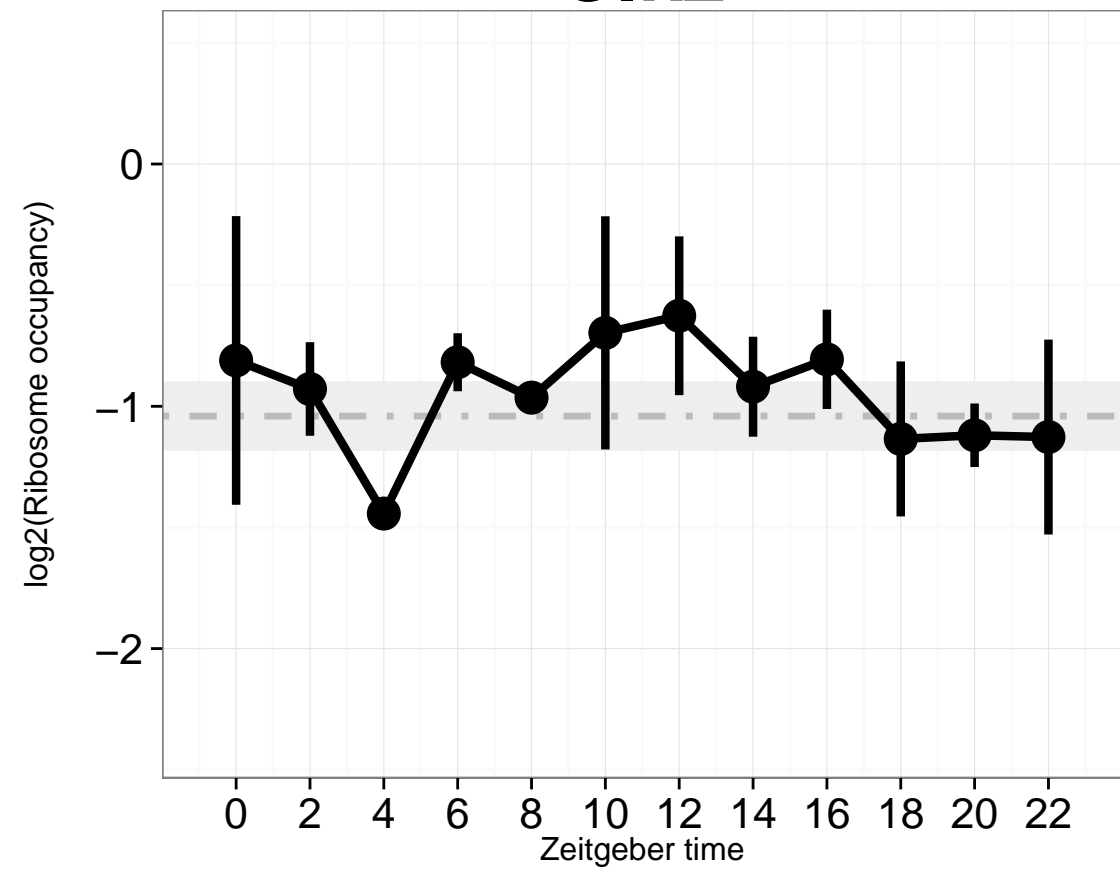

Supplement: SuppDataset_1.zip [file Clk2_set_A.pdf › Supplemental Dataset 1/A-mRNA_nonrhyth_translation_nonrhyth/Clk2_set_A.pdf]

## Clk3

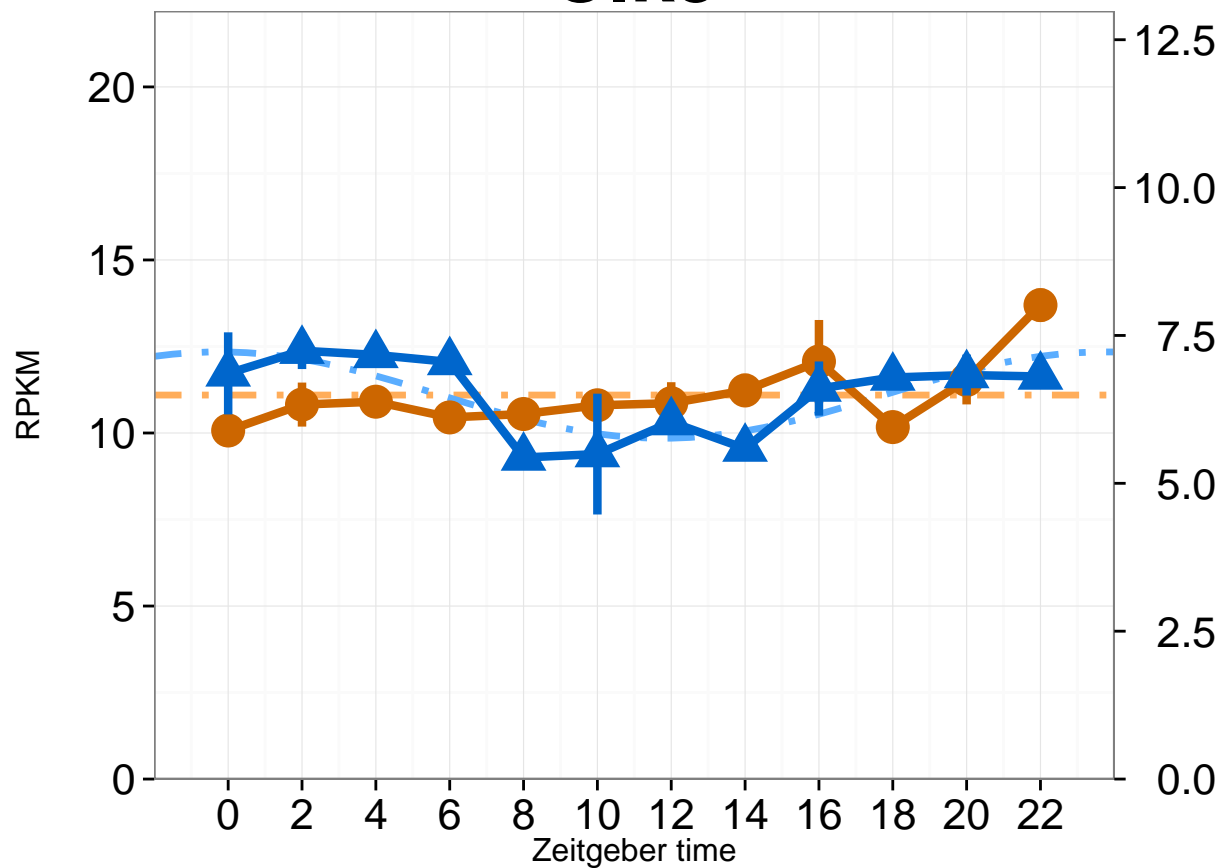

## Clk3

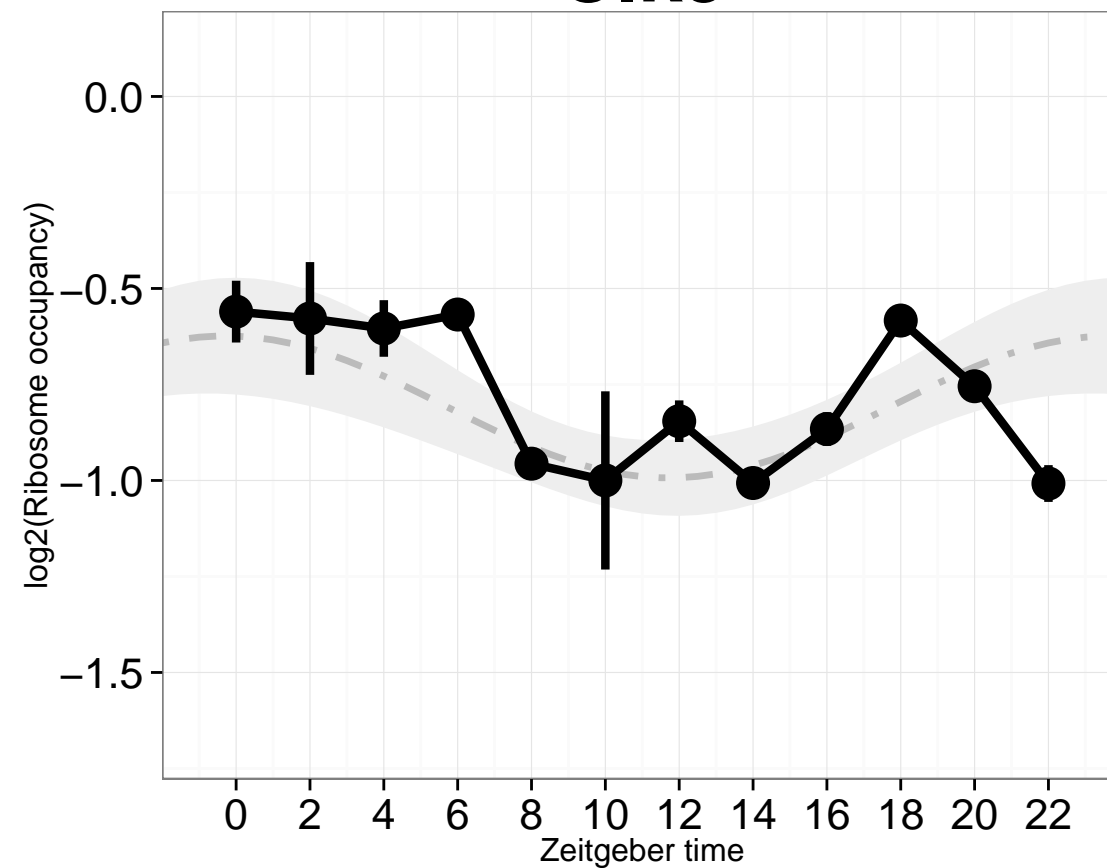

Supplement: SuppDataset_1.zip [file Clk3_set_A.pdf › Supplemental Dataset 1/A-mRNA_nonrhyth_translation_nonrhyth/Clk3_set_A.pdf]

## Cln3

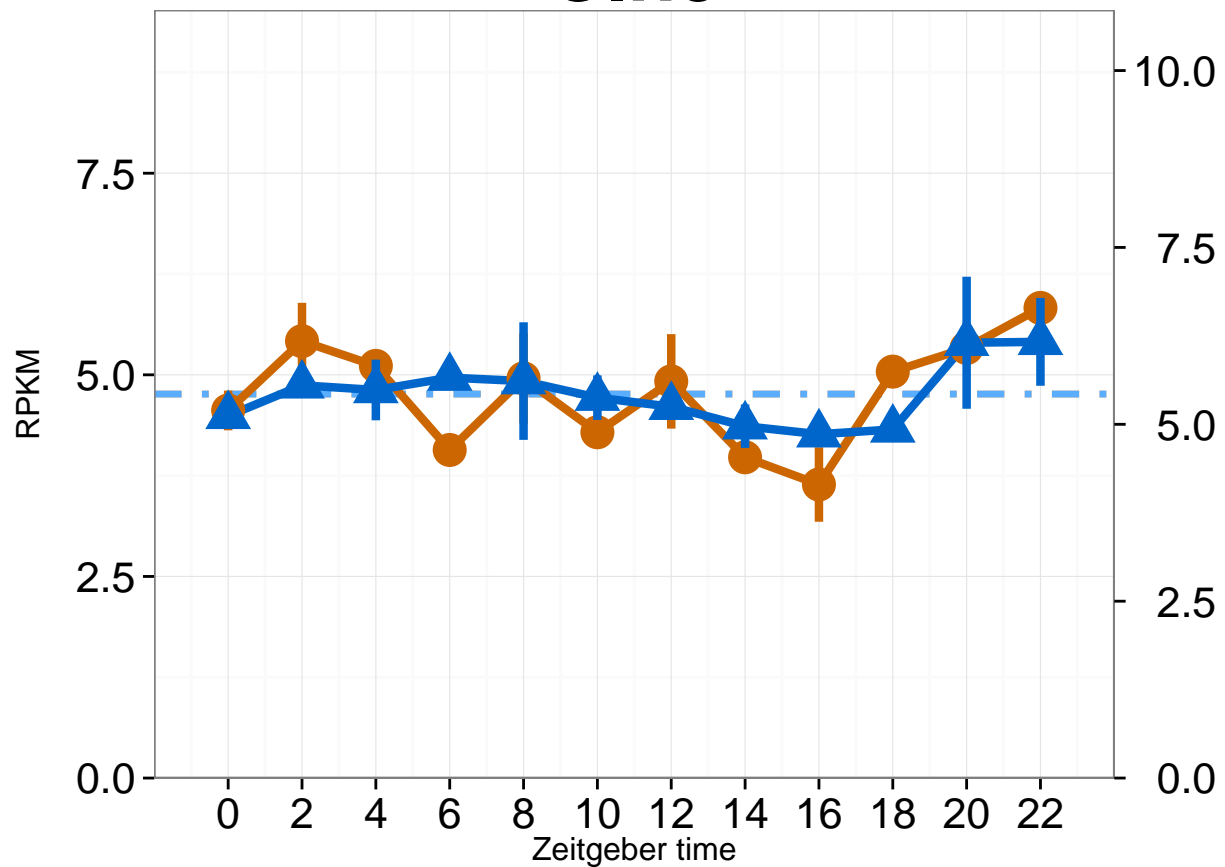

## Cln3

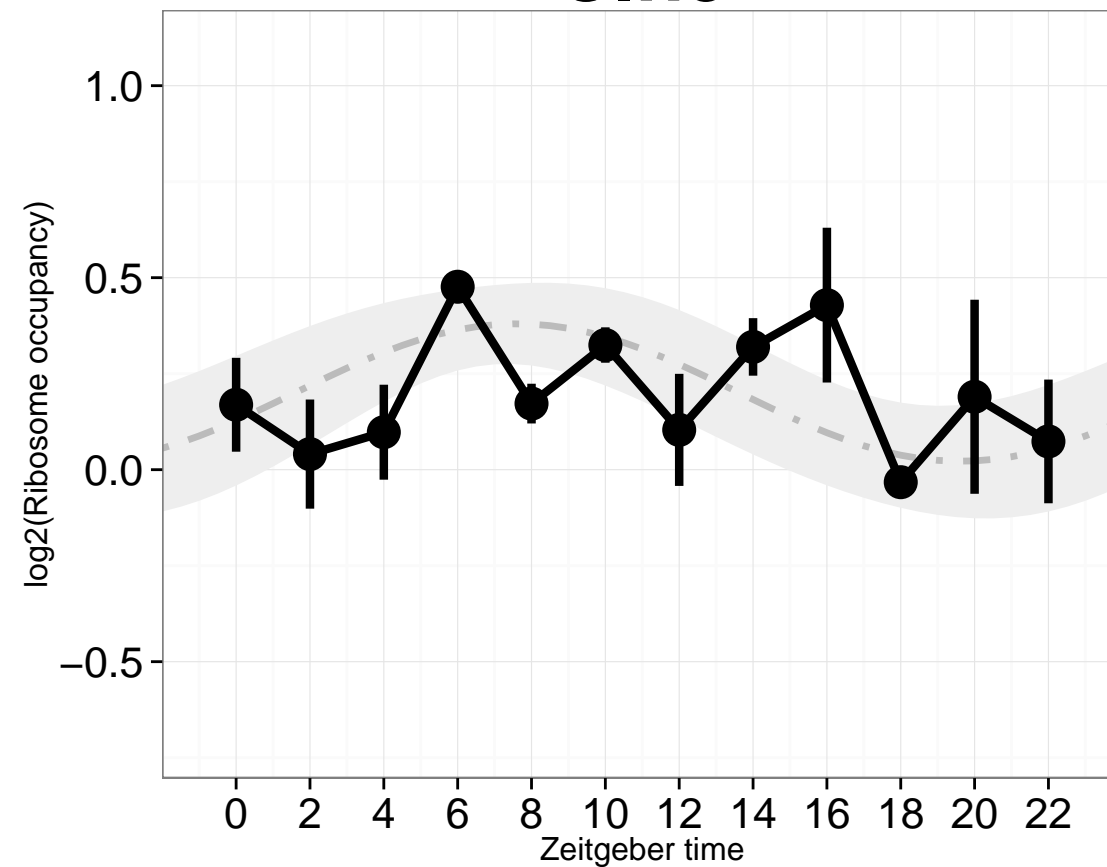

Supplement: SuppDataset_1.zip [file Cln3_set_A.pdf › Supplemental Dataset 1/A-mRNA_nonrhyth_translation_nonrhyth/Cln3_set_A.pdf]

# Cln6

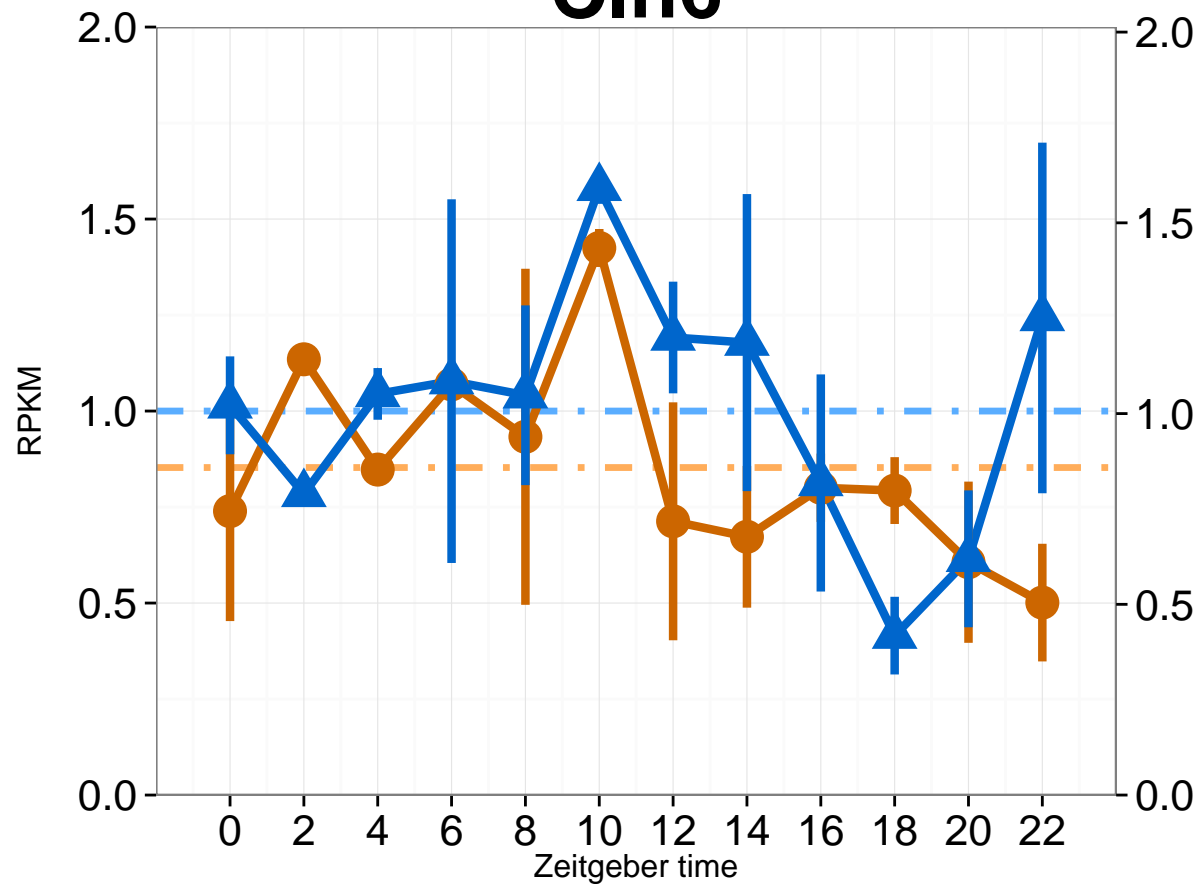

# Cln6

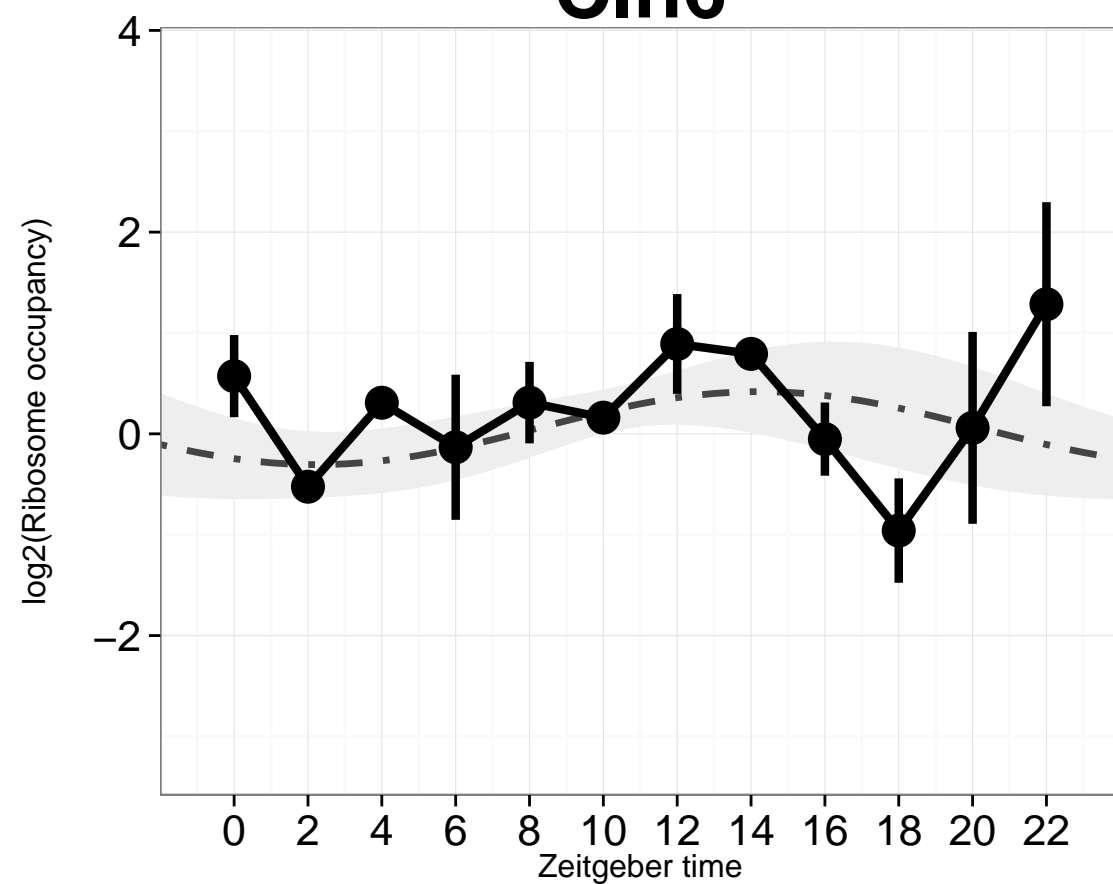

Supplement: SuppDataset_1.zip [file Cln6_set_A.pdf › Supplemental Dataset 1/A-mRNA_nonrhyth_translation_nonrhyth/Cln6_set_A.pdf]

# Clns1a

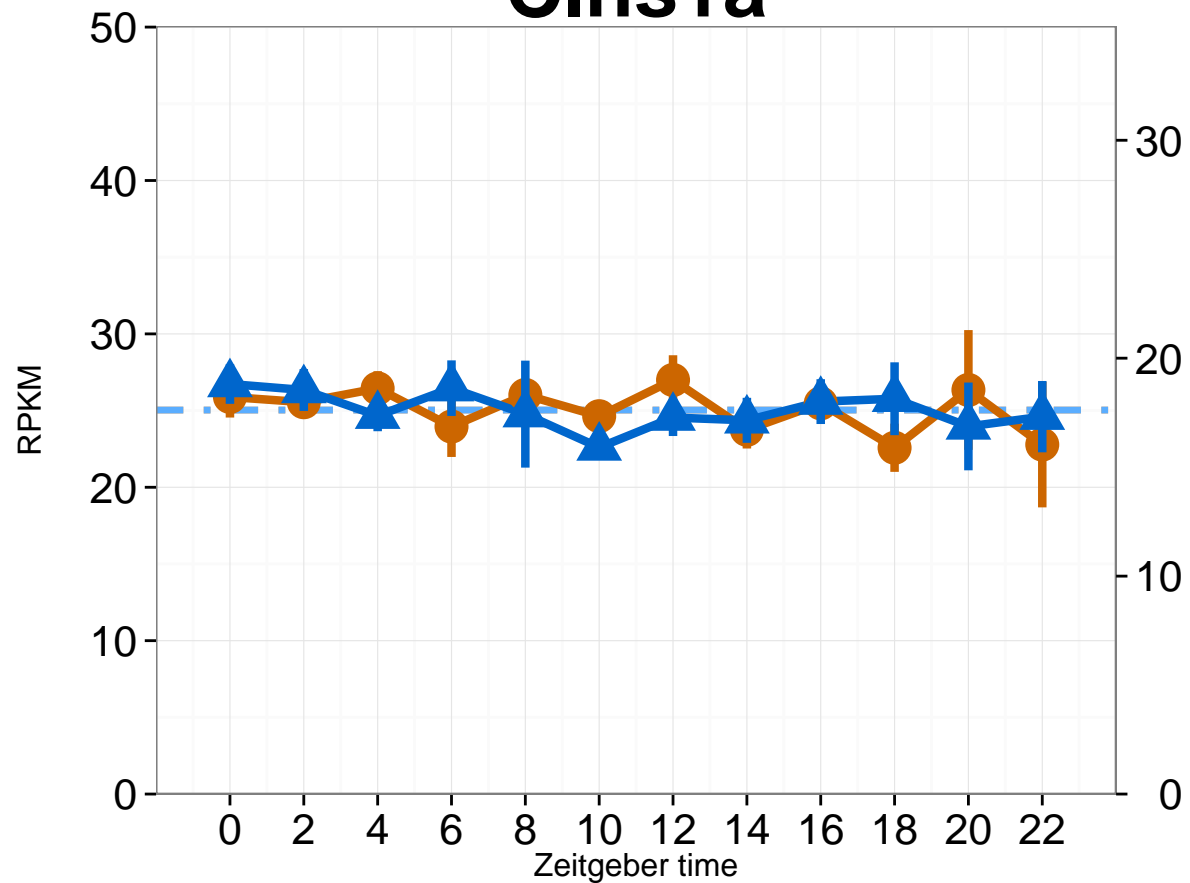

# Clns1a

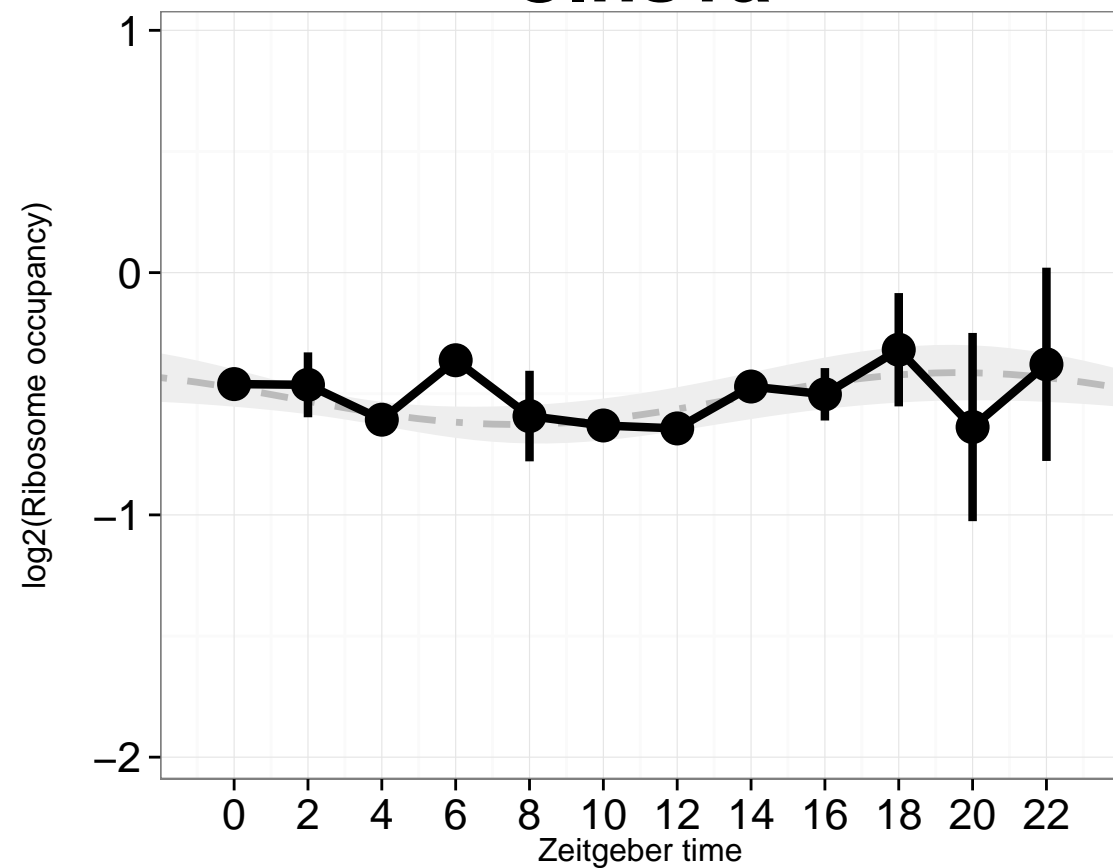

Supplement: SuppDataset_1.zip [file Clns1a_set_A.pdf › Supplemental Dataset 1/A-mRNA_nonrhyth_translation_nonrhyth/Clns1a_set_A.pdf]

## Clpb

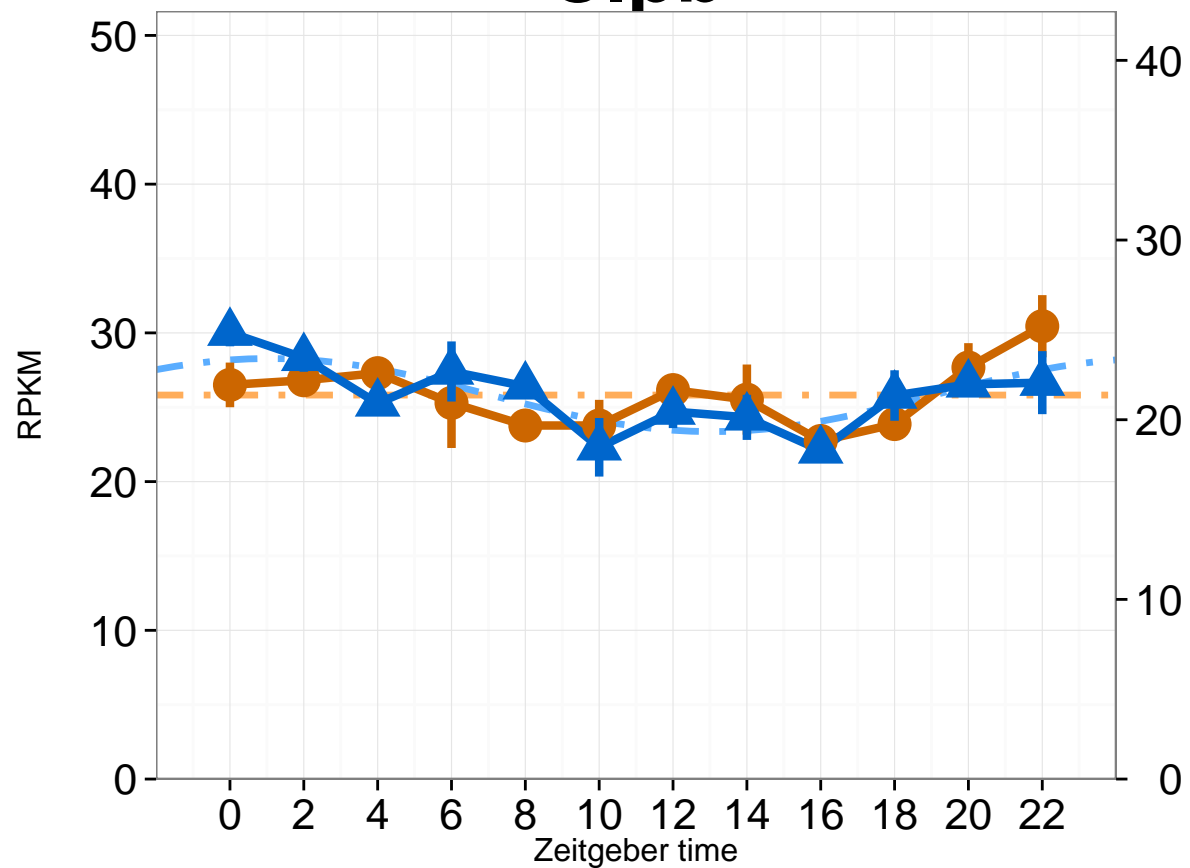

## Clpb

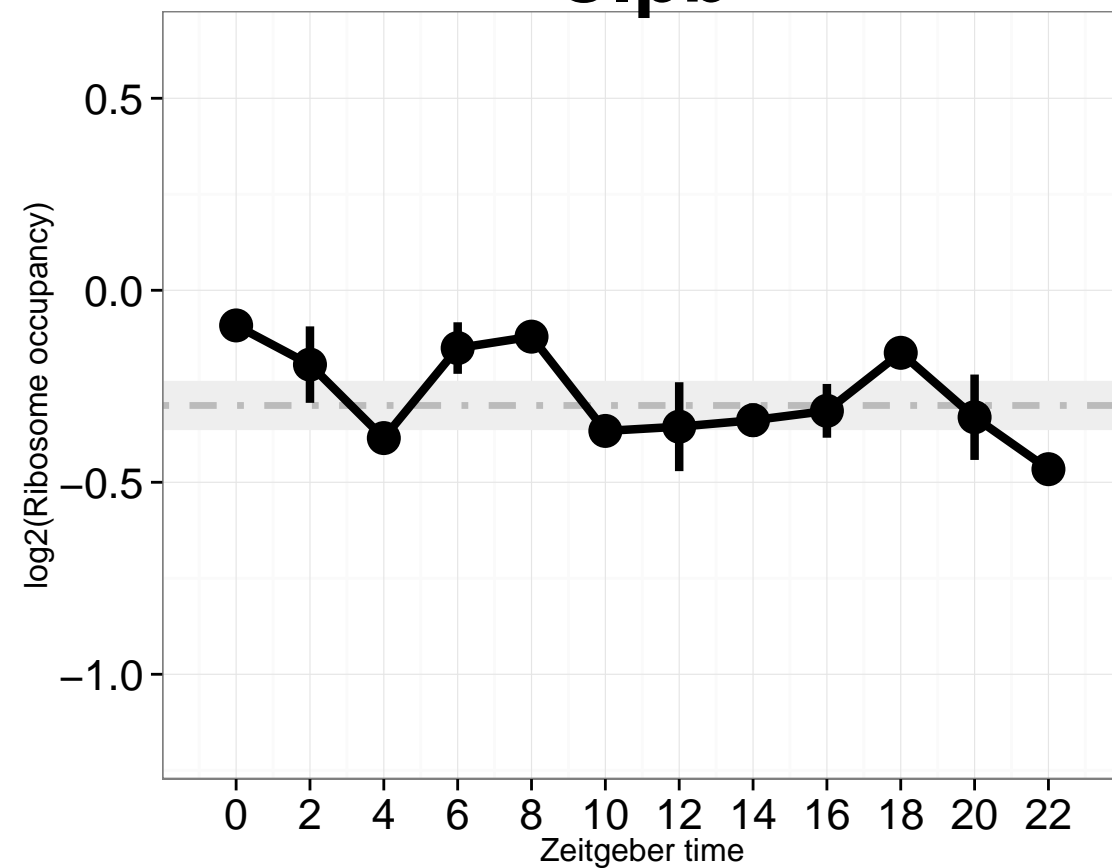

Supplement: SuppDataset_1.zip [file Clpb_set_A.pdf › Supplemental Dataset 1/A-mRNA_nonrhyth_translation_nonrhyth/Clpb_set_A.pdf]

# Clpp

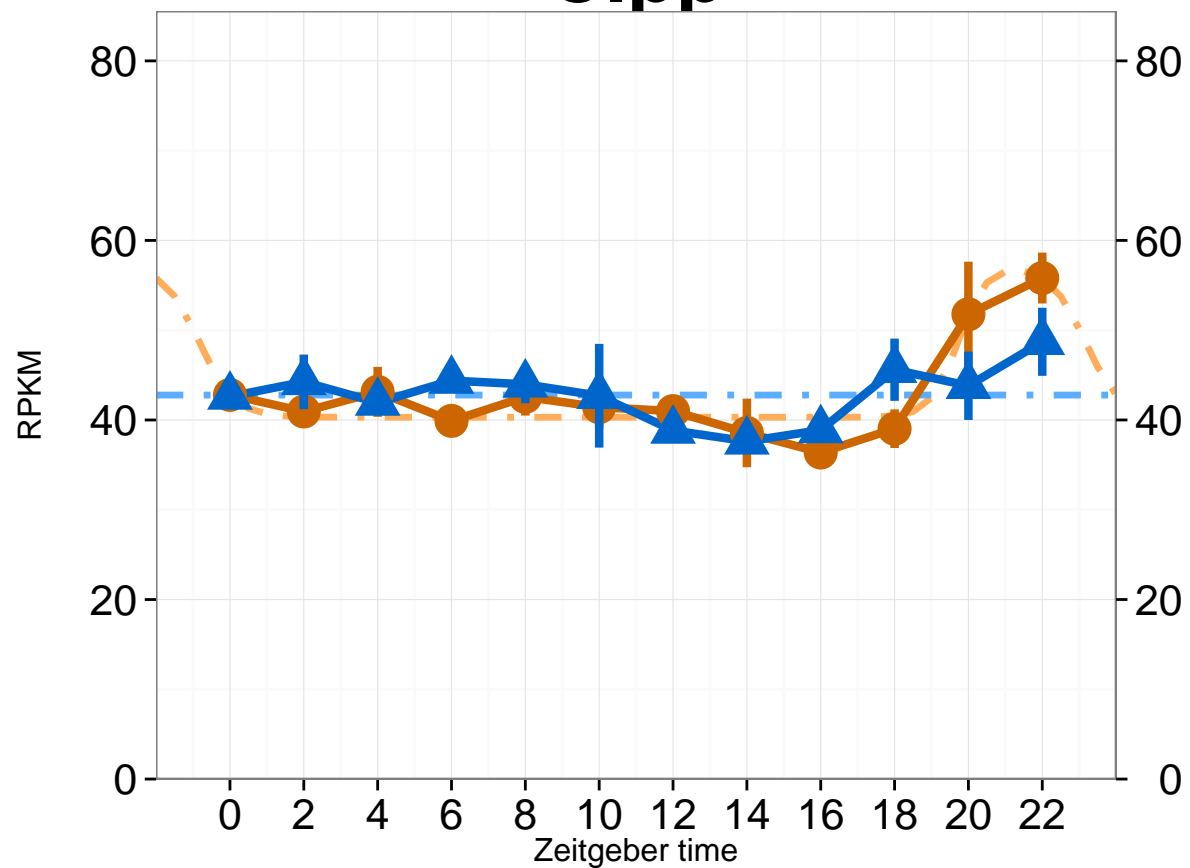

# Clpp

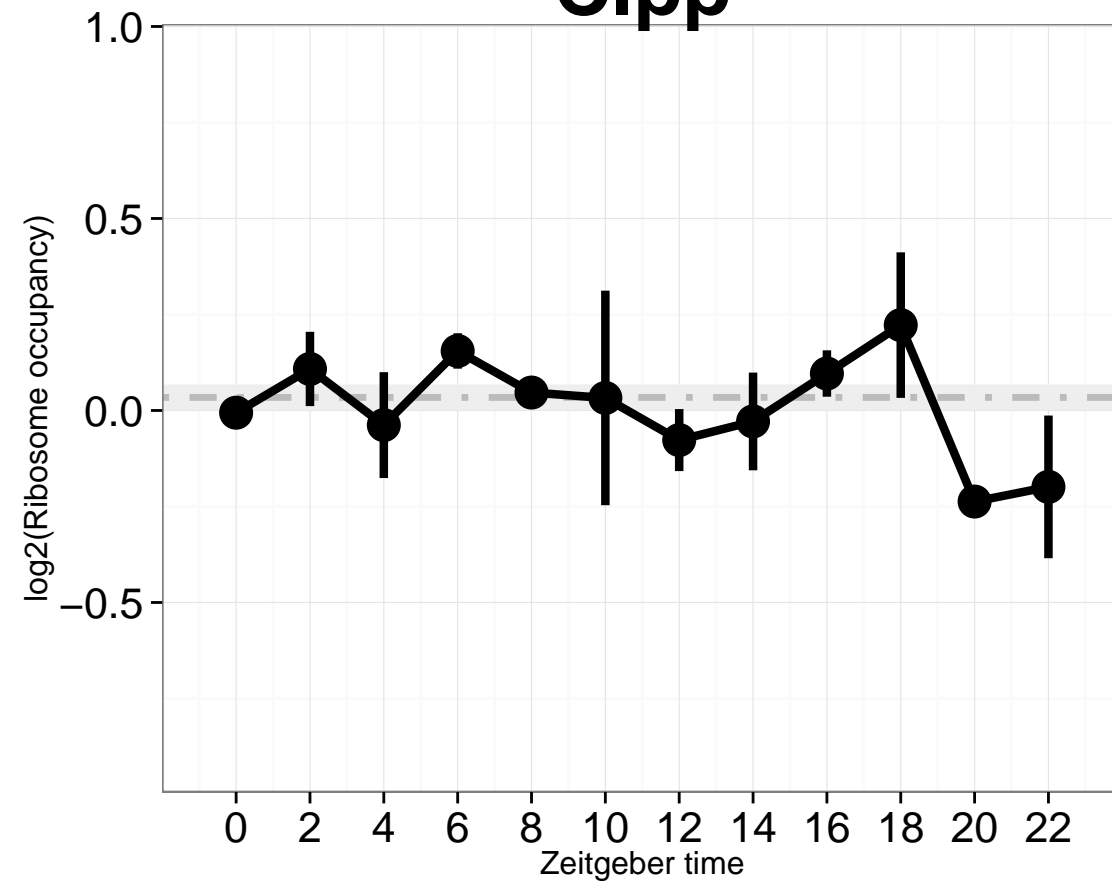

Supplement: SuppDataset_1.zip [file Clpp_set_A.pdf › Supplemental Dataset 1/A-mRNA_nonrhyth_translation_nonrhyth/Clpp_set_A.pdf]

**Clps TR**

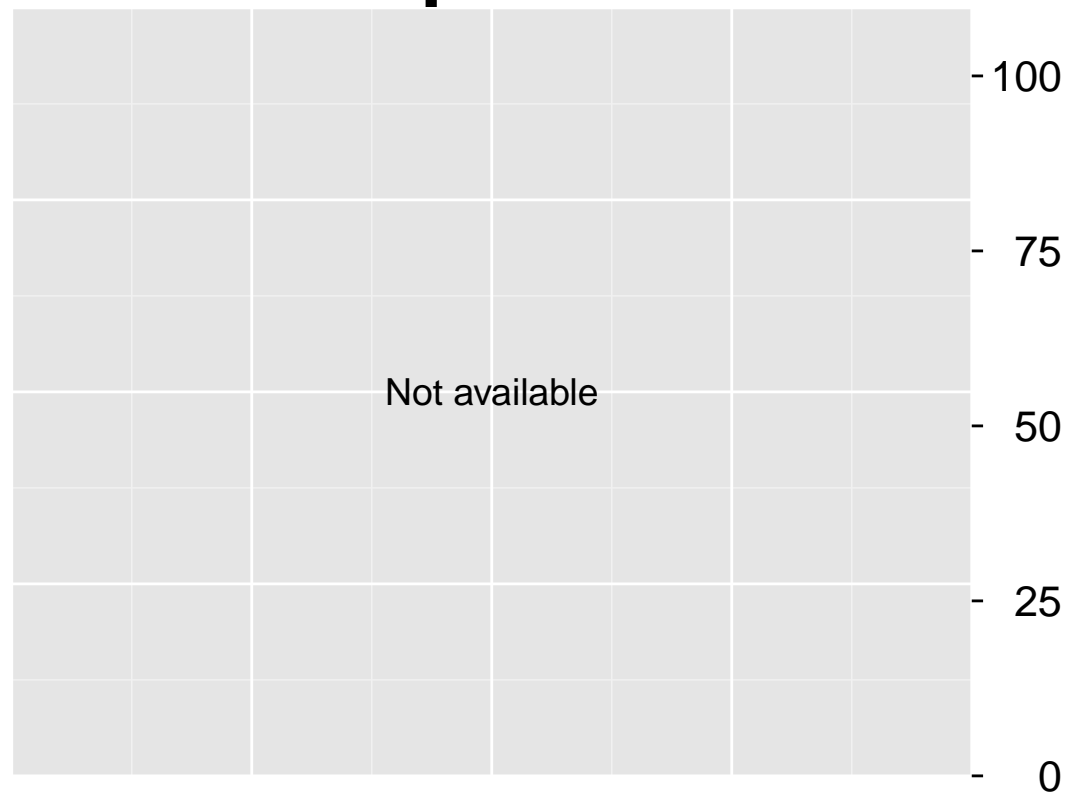

**Clps log2(Ribosome occupancy)**

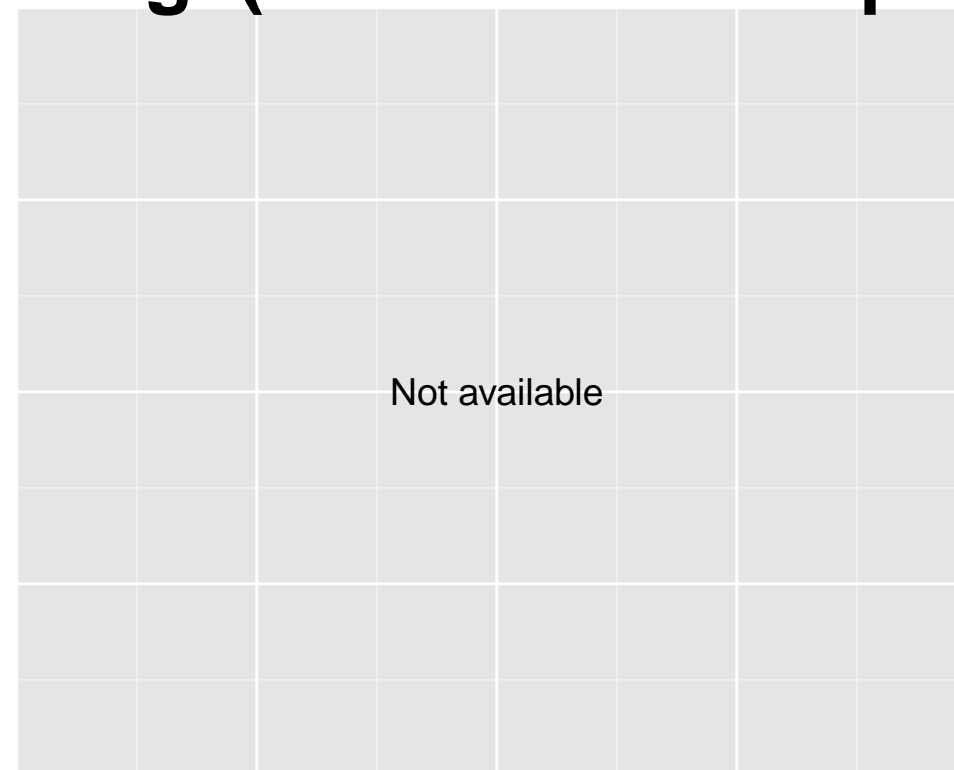

Supplement: SuppDataset_1.zip [file Clps_set_A.pdf › Supplemental Dataset 1/A-mRNA_nonrhyth_translation_nonrhyth/Clps_set_A.pdf]

# Clptm1

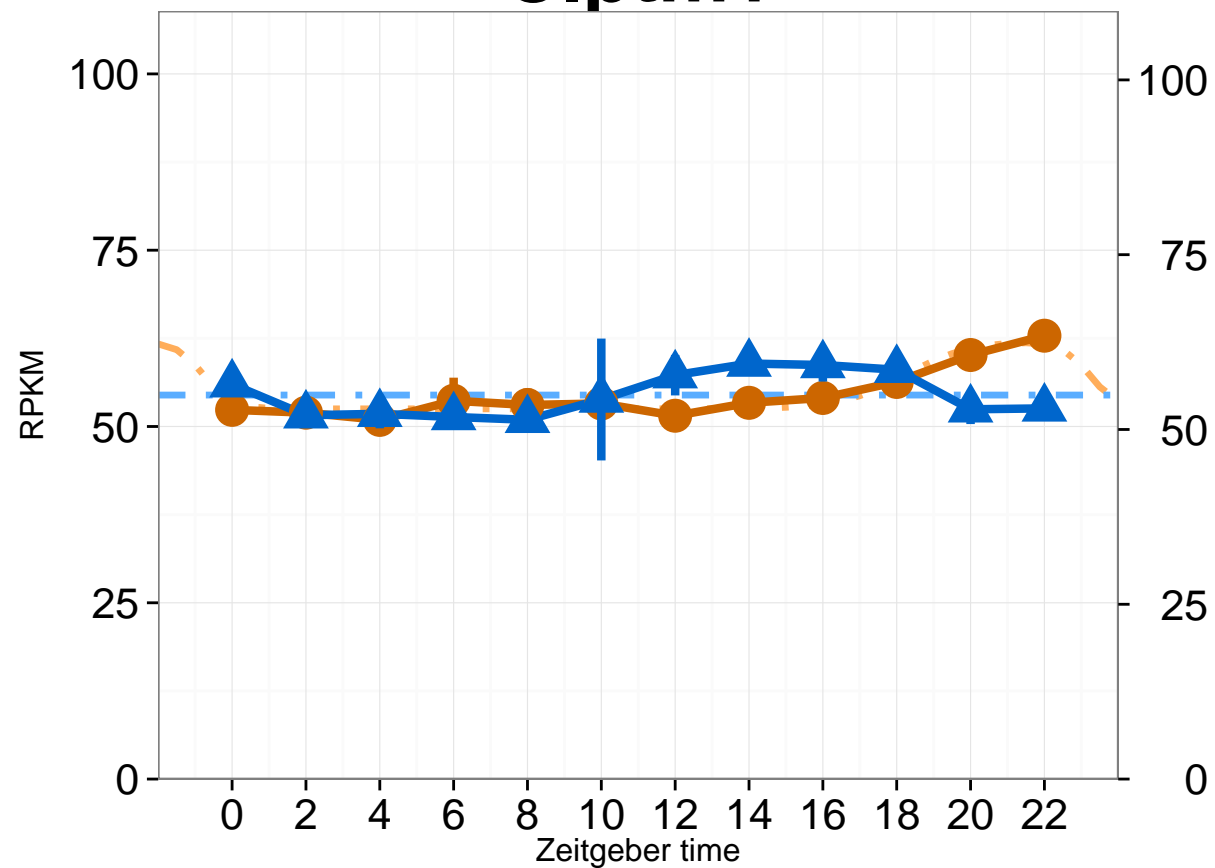

# Clptm1

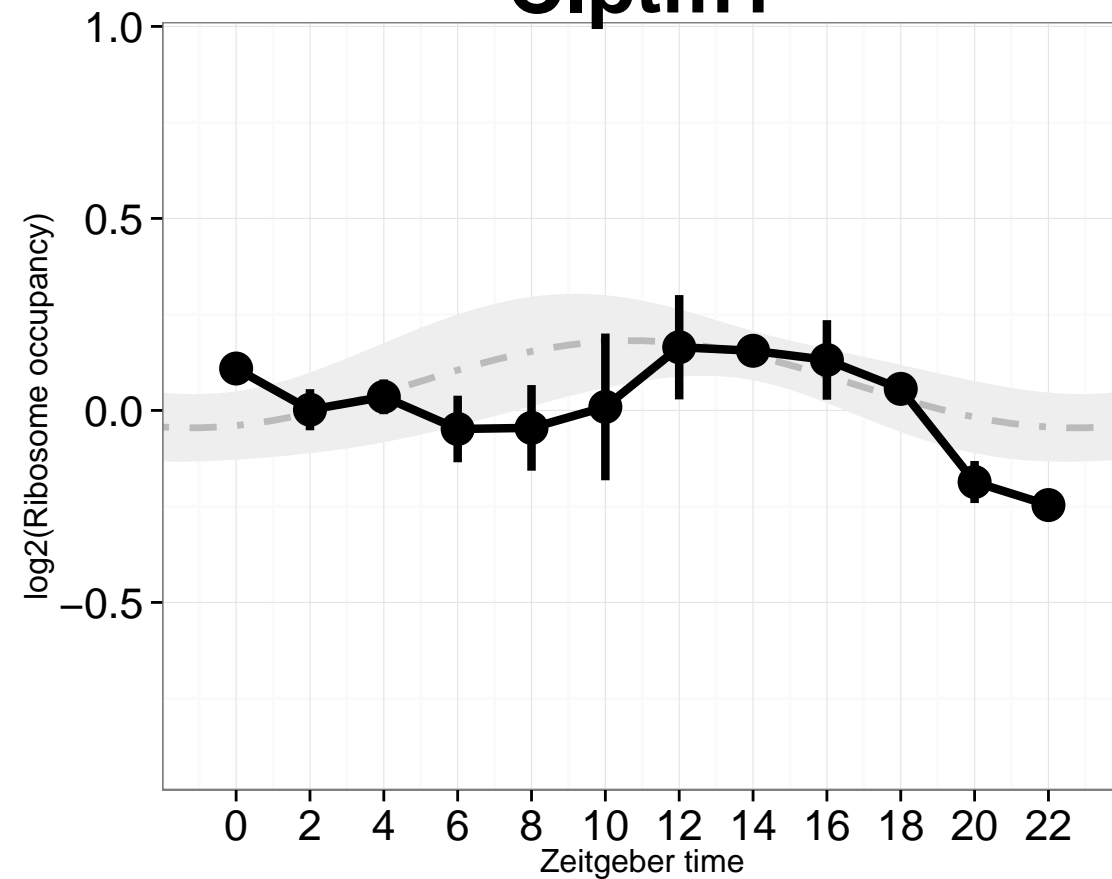

Supplement: SuppDataset_1.zip [file Clptm1_set_A.pdf › Supplemental Dataset 1/A-mRNA_nonrhyth_translation_nonrhyth/Clptm1_set_A.pdf]

# Clptm1l

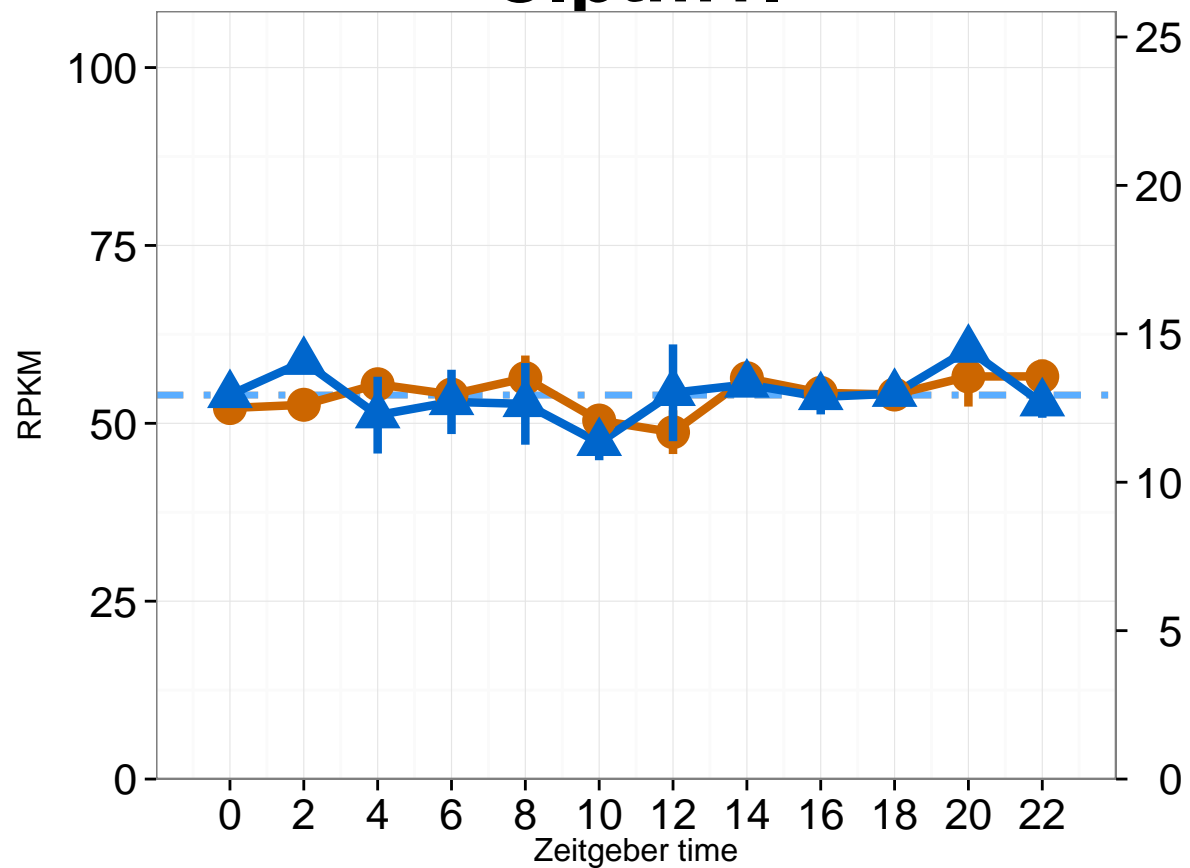

# Clptm1l

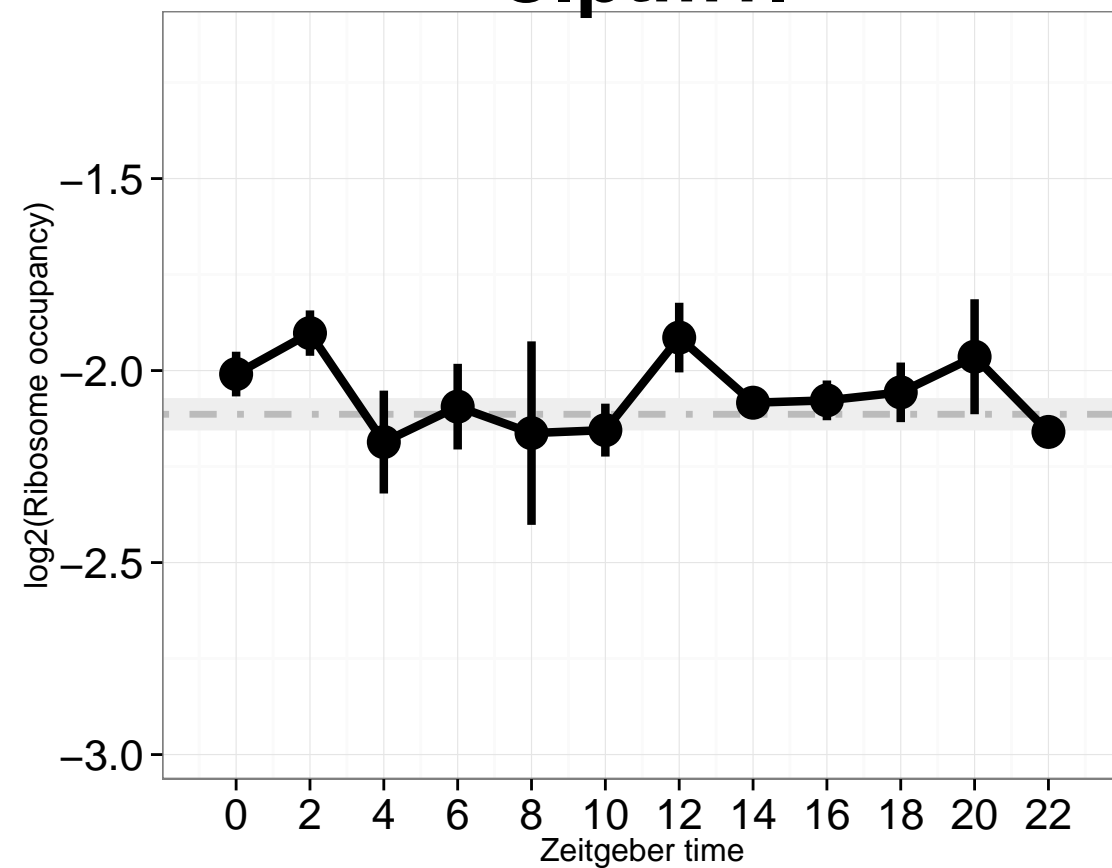

Supplement: SuppDataset_1.zip [file Clptm1l_set_A.pdf › Supplemental Dataset 1/A-mRNA_nonrhyth_translation_nonrhyth/Clptm1l_set_A.pdf]

# Clstn1

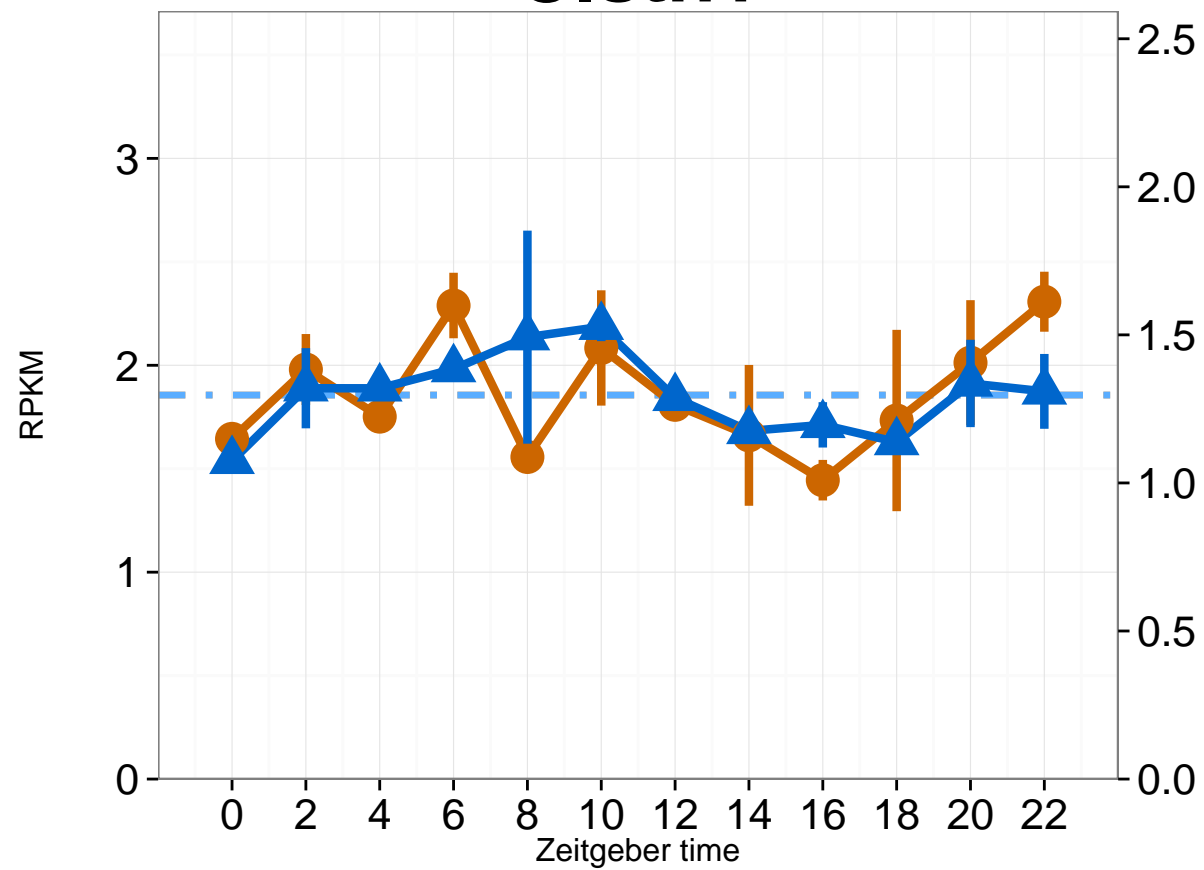

# Clstn1

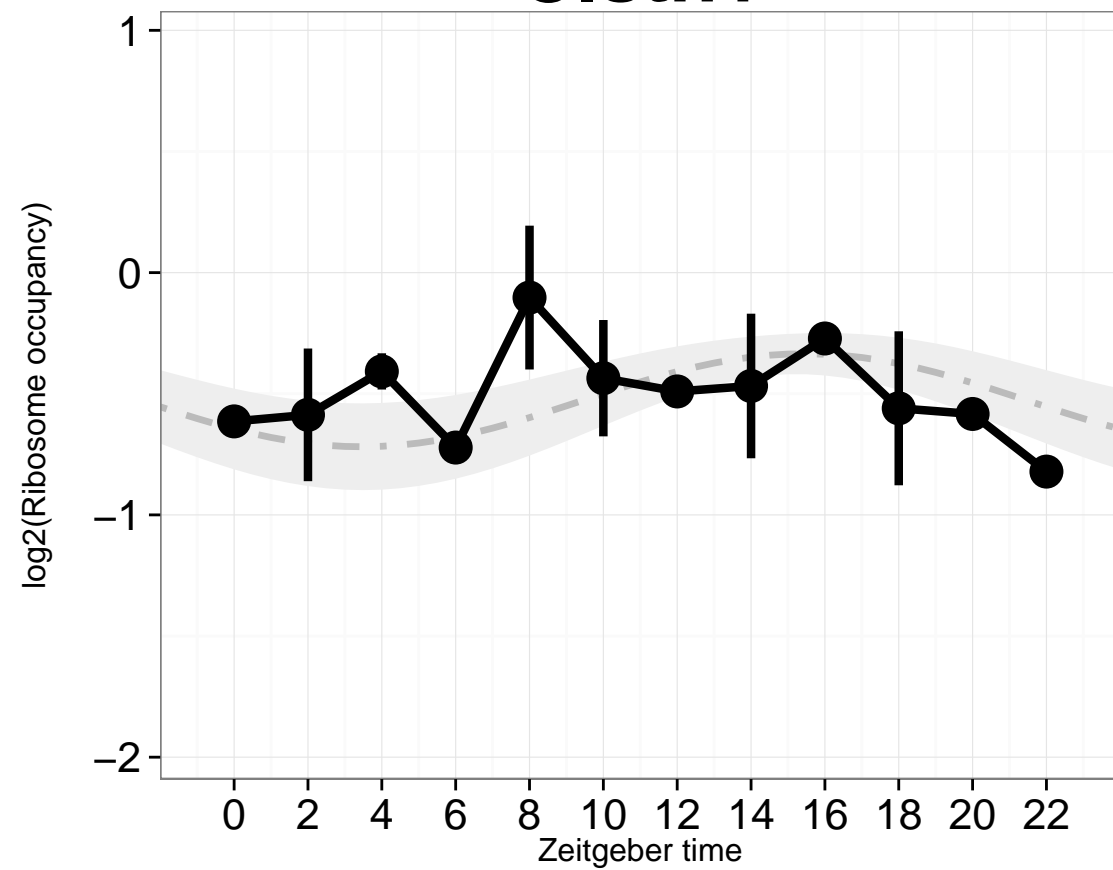

Supplement: SuppDataset_1.zip [file Clstn1_set_A.pdf › Supplemental Dataset 1/A-mRNA_nonrhyth_translation_nonrhyth/Clstn1_set_A.pdf]

## Clta

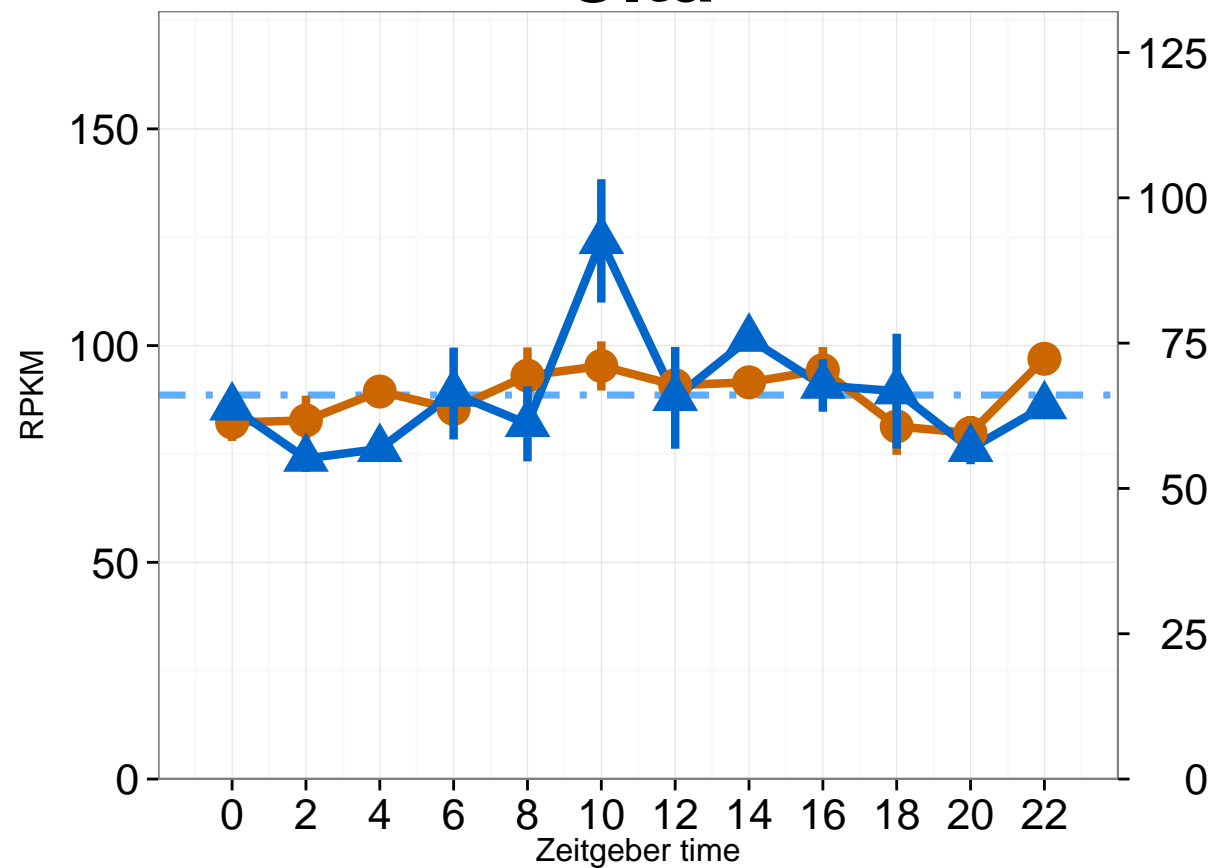

## Clta

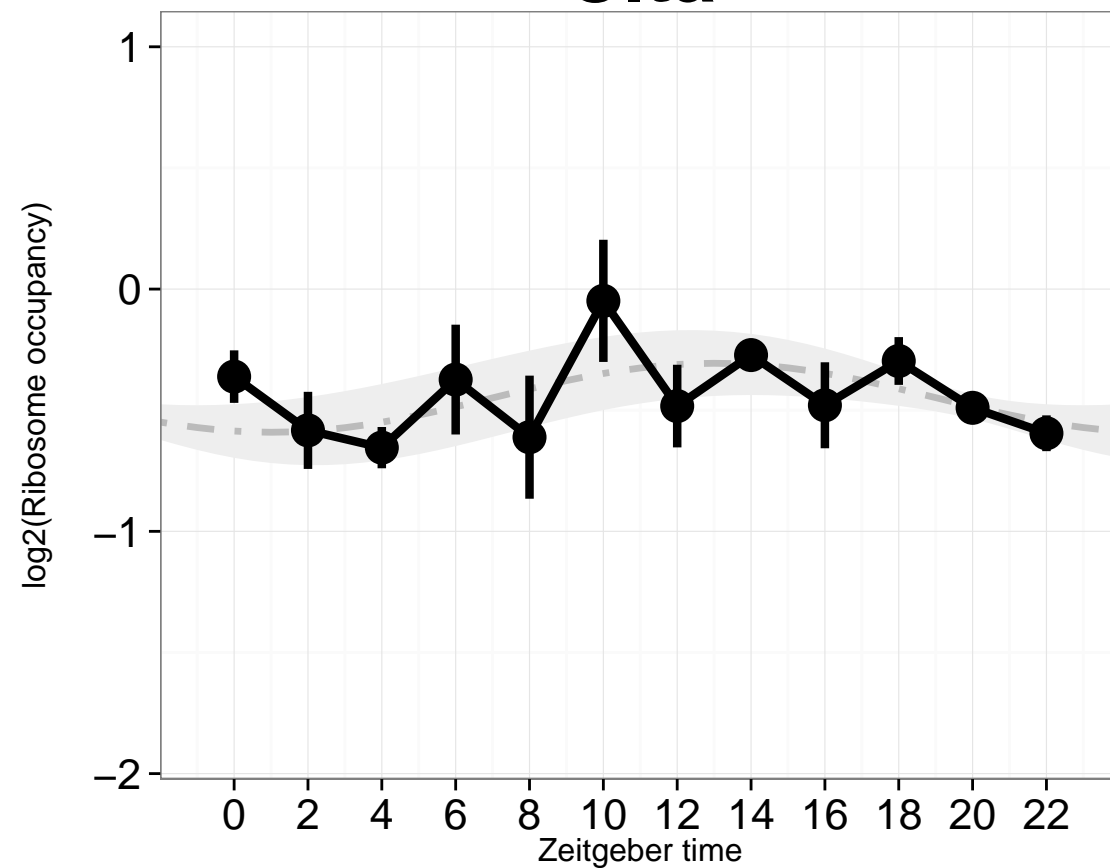

Supplement: SuppDataset_1.zip [file Clta_set_A.pdf › Supplemental Dataset 1/A-mRNA_nonrhyth_translation_nonrhyth/Clta_set_A.pdf]

## Cltb

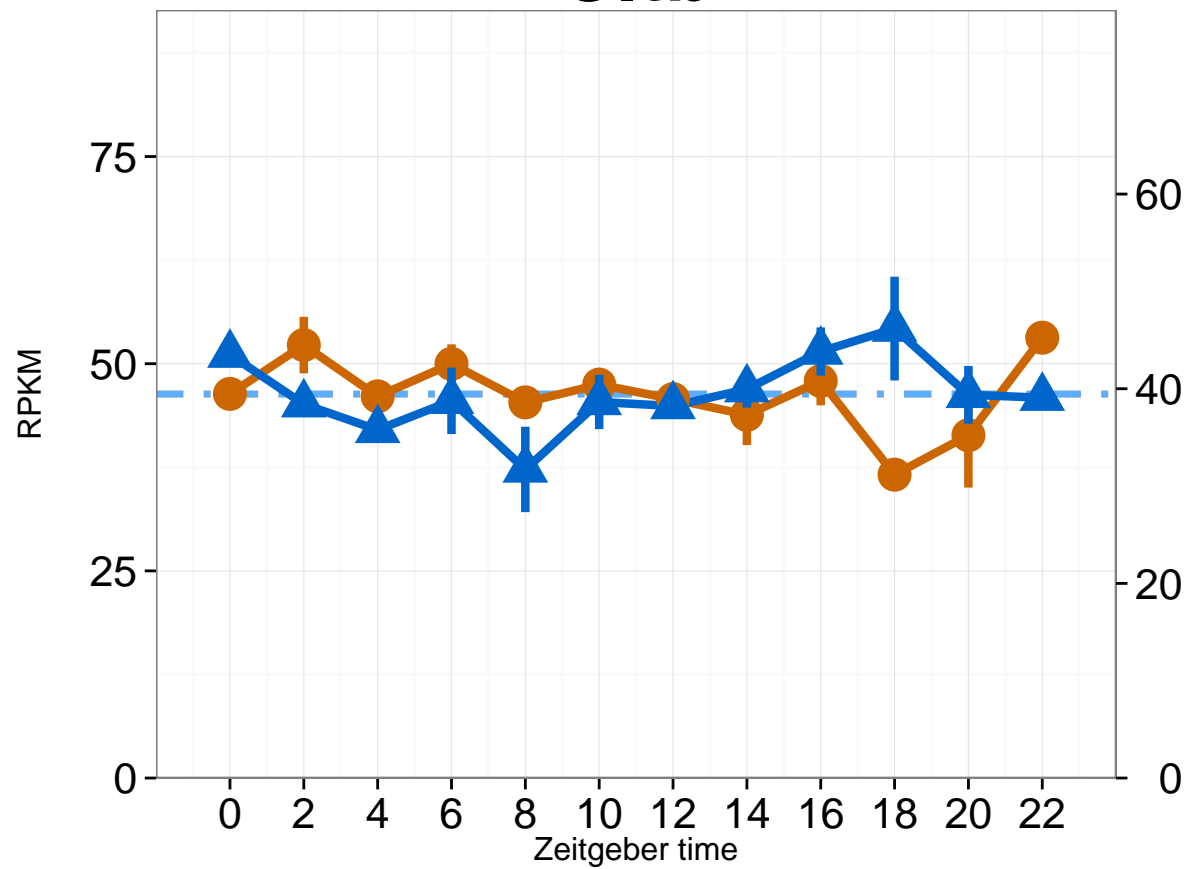

## Cltb

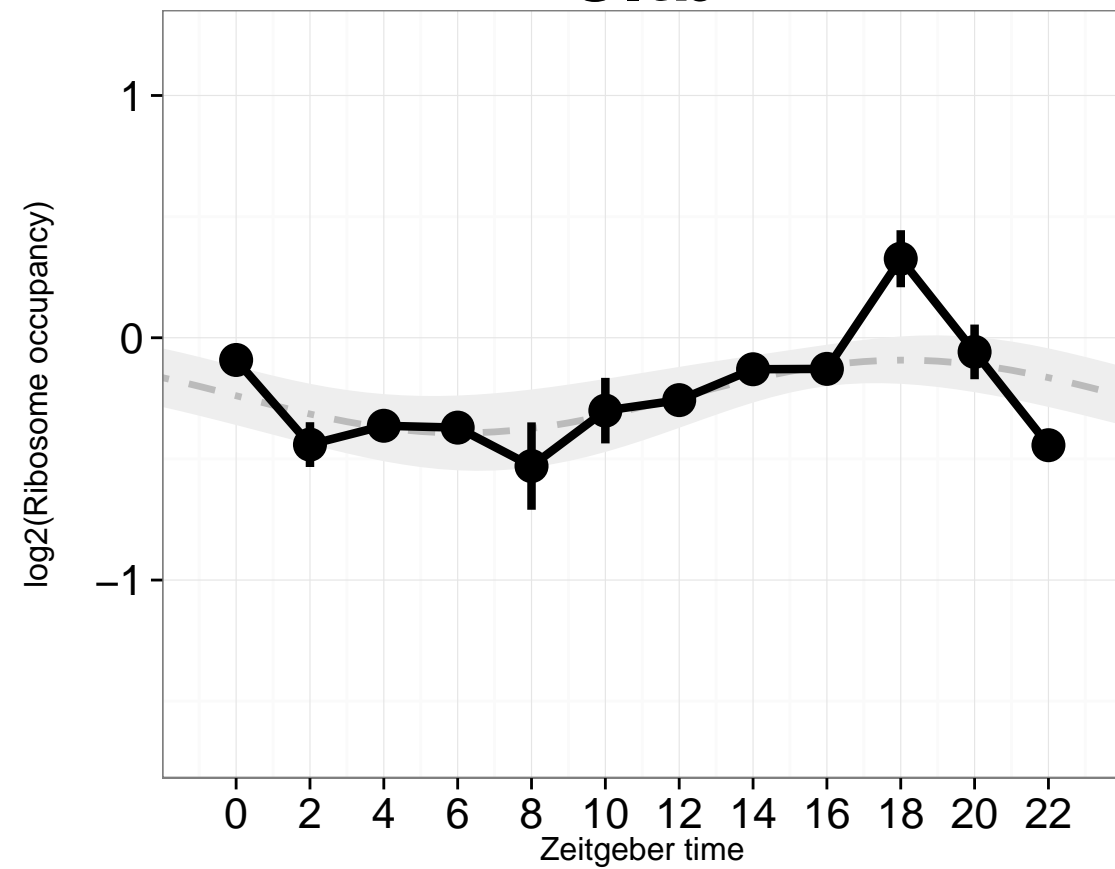

Supplement: SuppDataset_1.zip [file Cltb_set_A.pdf › Supplemental Dataset 1/A-mRNA_nonrhyth_translation_nonrhyth/Cltb_set_A.pdf]

## Cltc

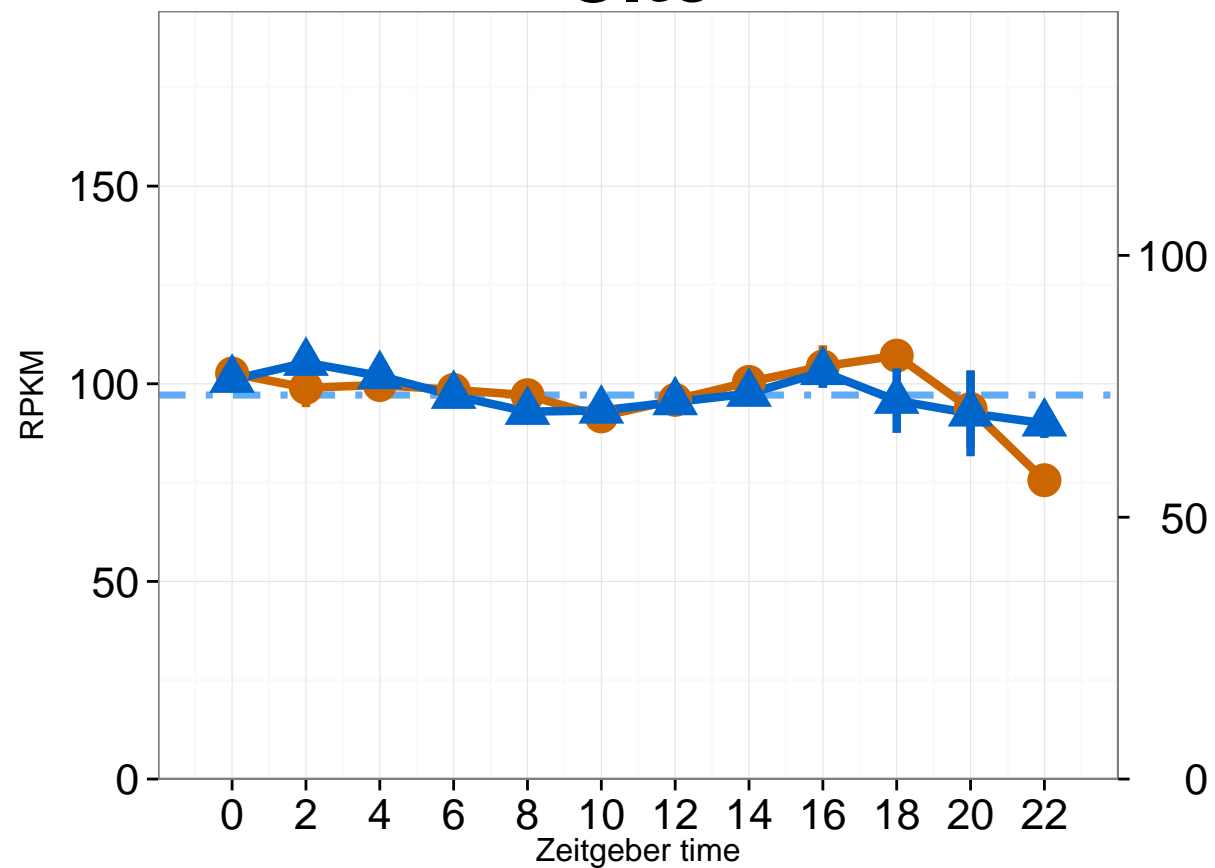

## Cltc

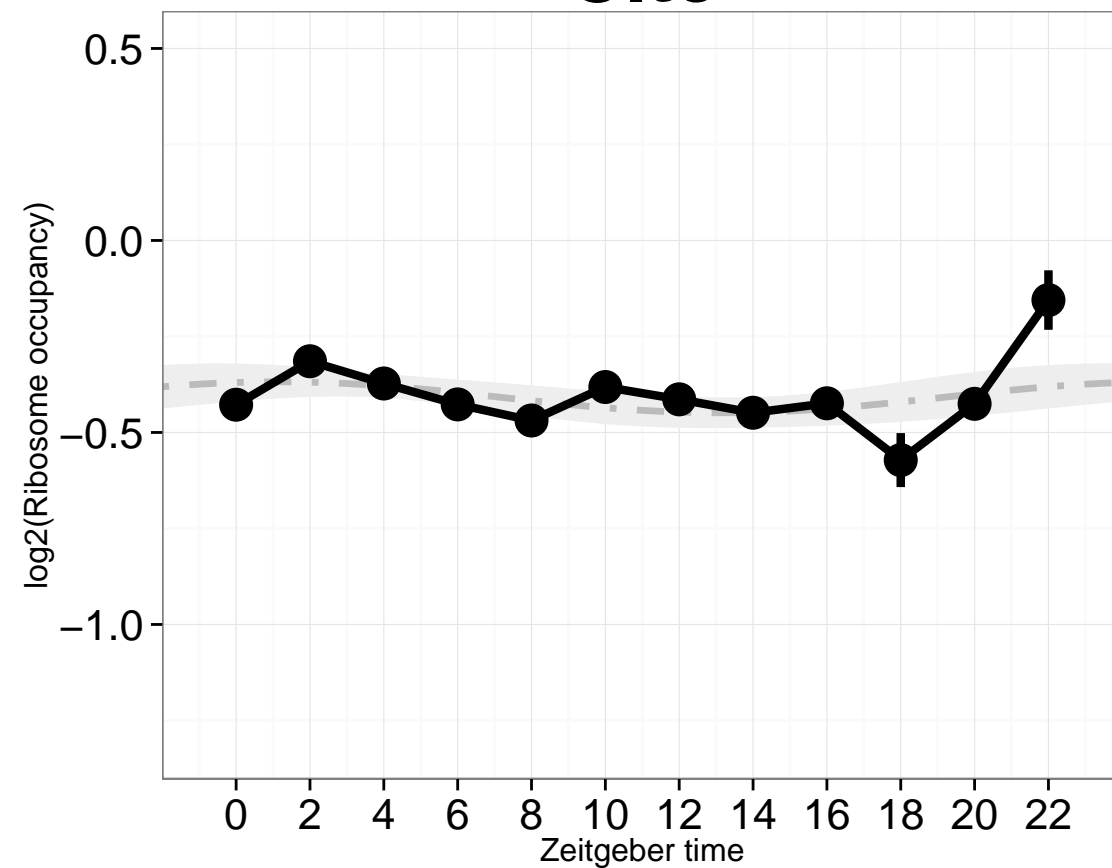

Supplement: SuppDataset_1.zip [file Cltc_set_A.pdf › Supplemental Dataset 1/A-mRNA_nonrhyth_translation_nonrhyth/Cltc_set_A.pdf]

# Clu

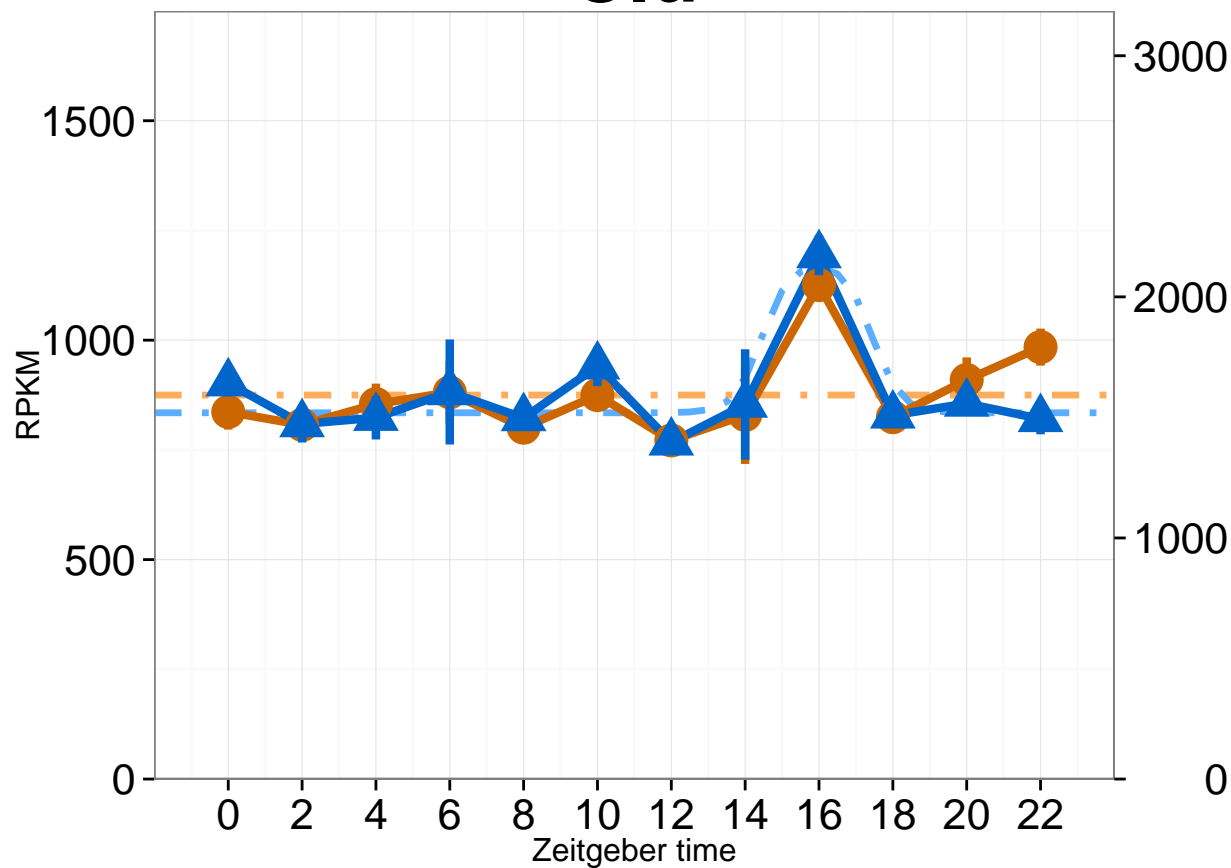

# Clu

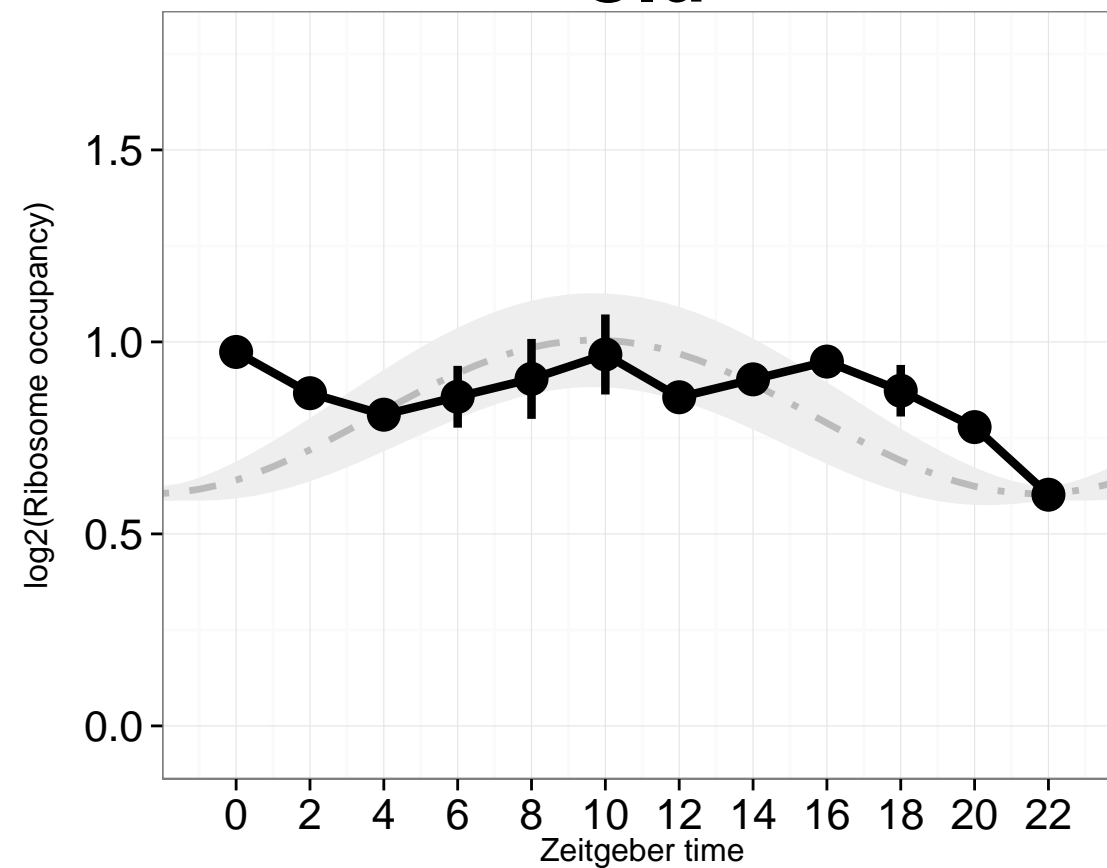

Supplement: SuppDataset_1.zip [file Clu_set_A.pdf › Supplemental Dataset 1/A-mRNA_nonrhyth_translation_nonrhyth/Clu_set_A.pdf]

## Clybl

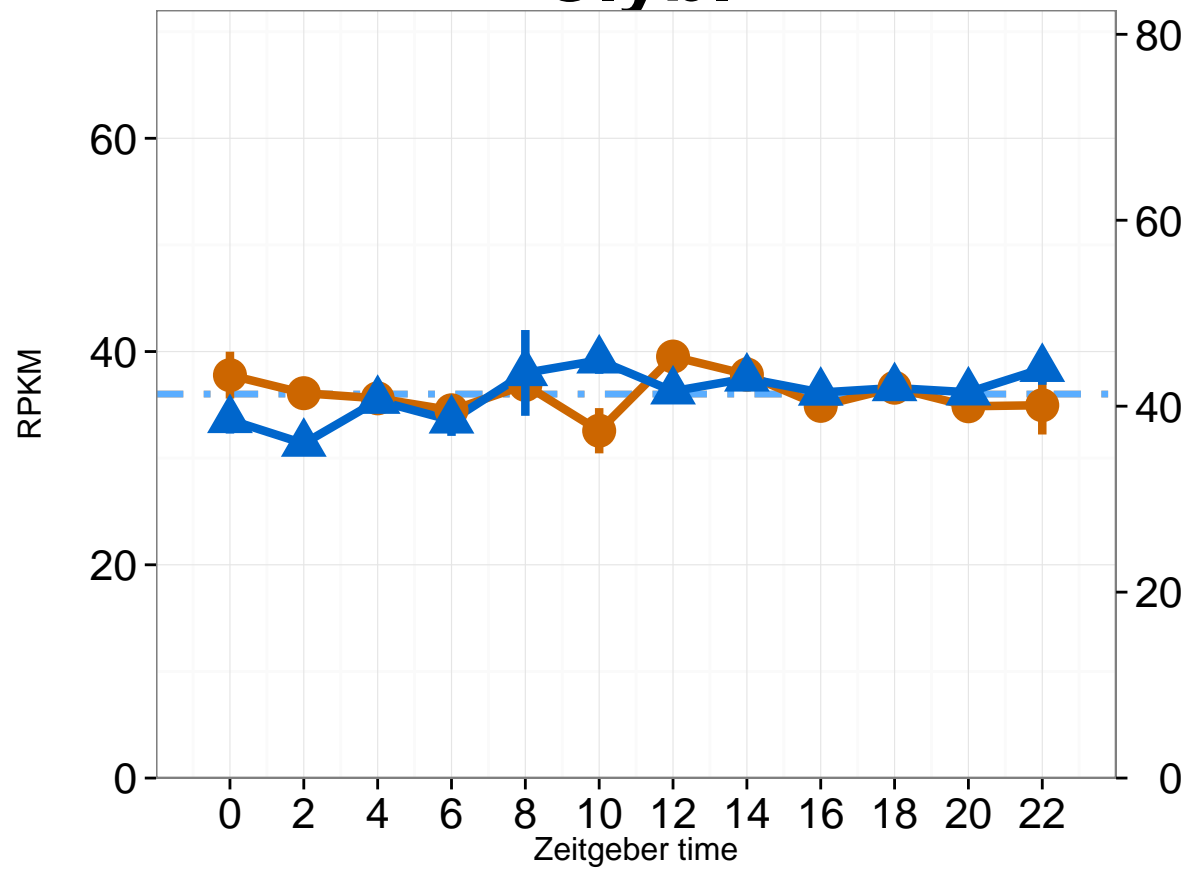

## Clybl

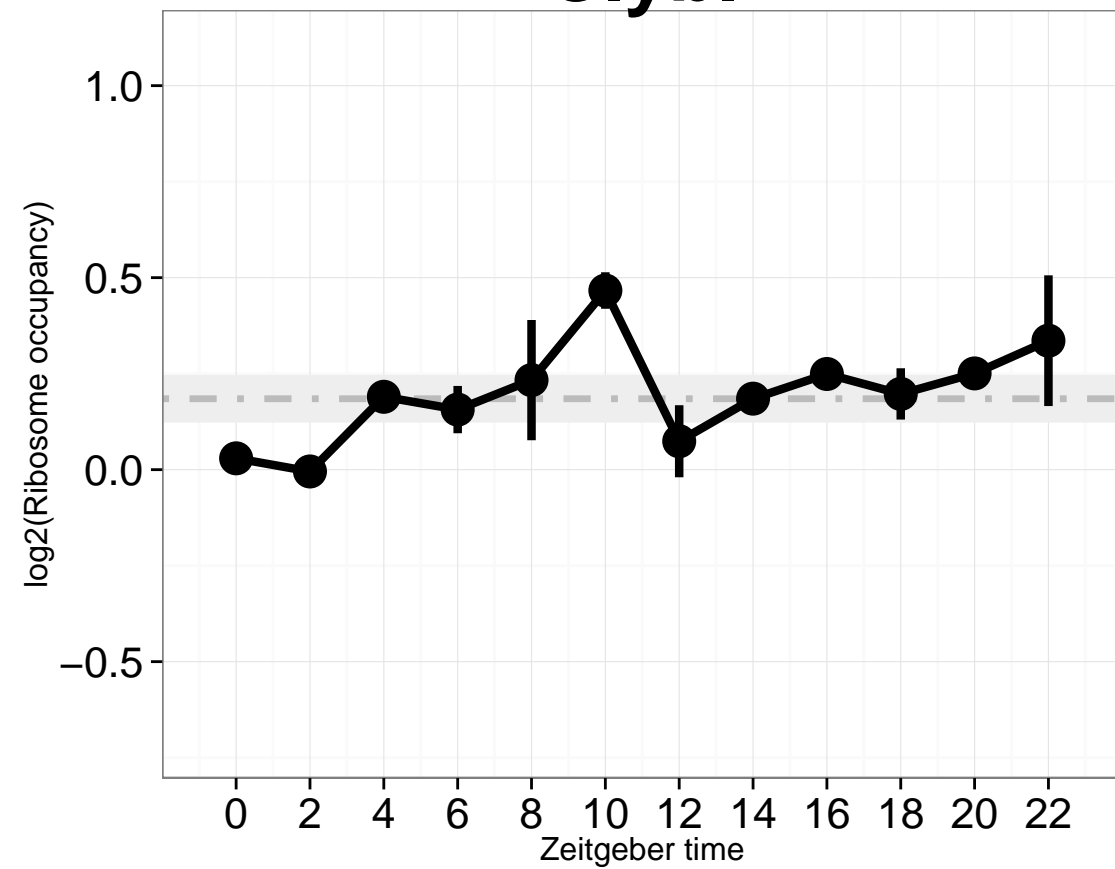

Supplement: SuppDataset_1.zip [file Clybl_set_A.pdf › Supplemental Dataset 1/A-mRNA_nonrhyth_translation_nonrhyth/Clybl_set_A.pdf]

## Cmah

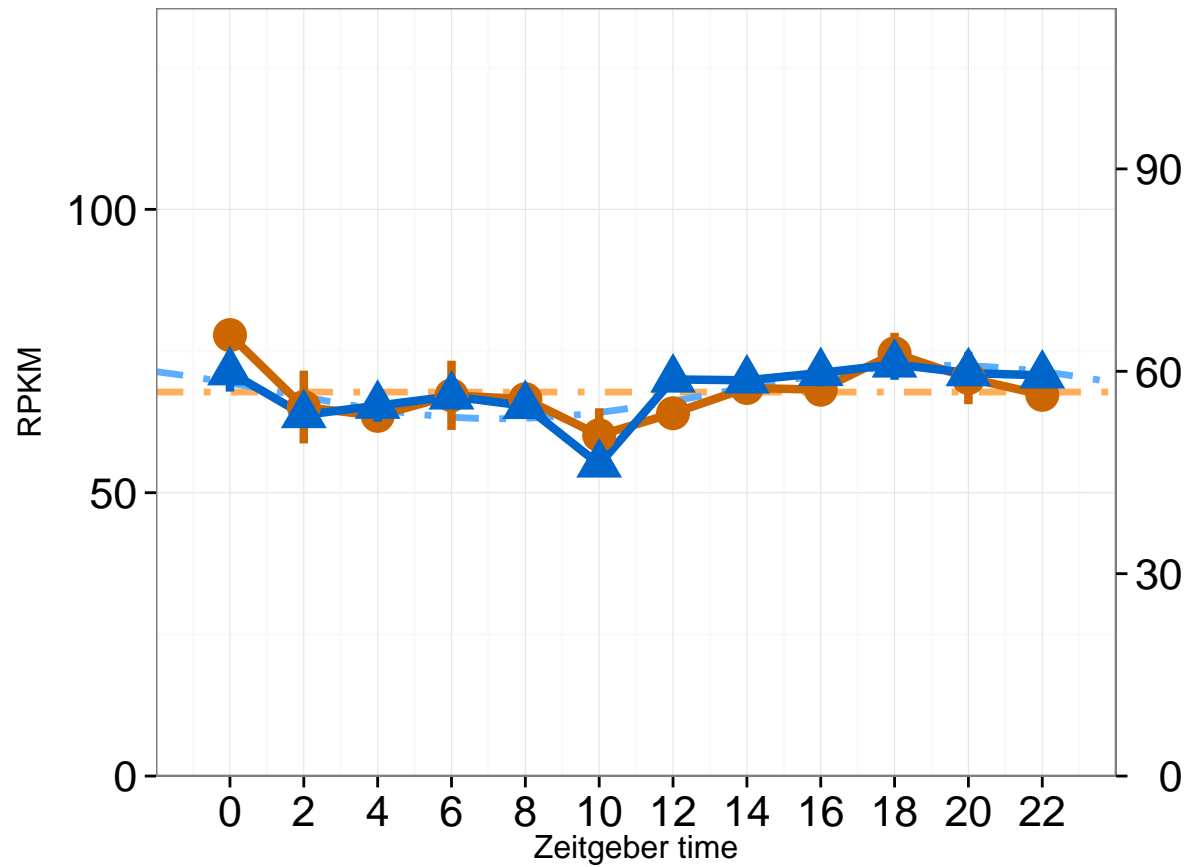

## Cmah

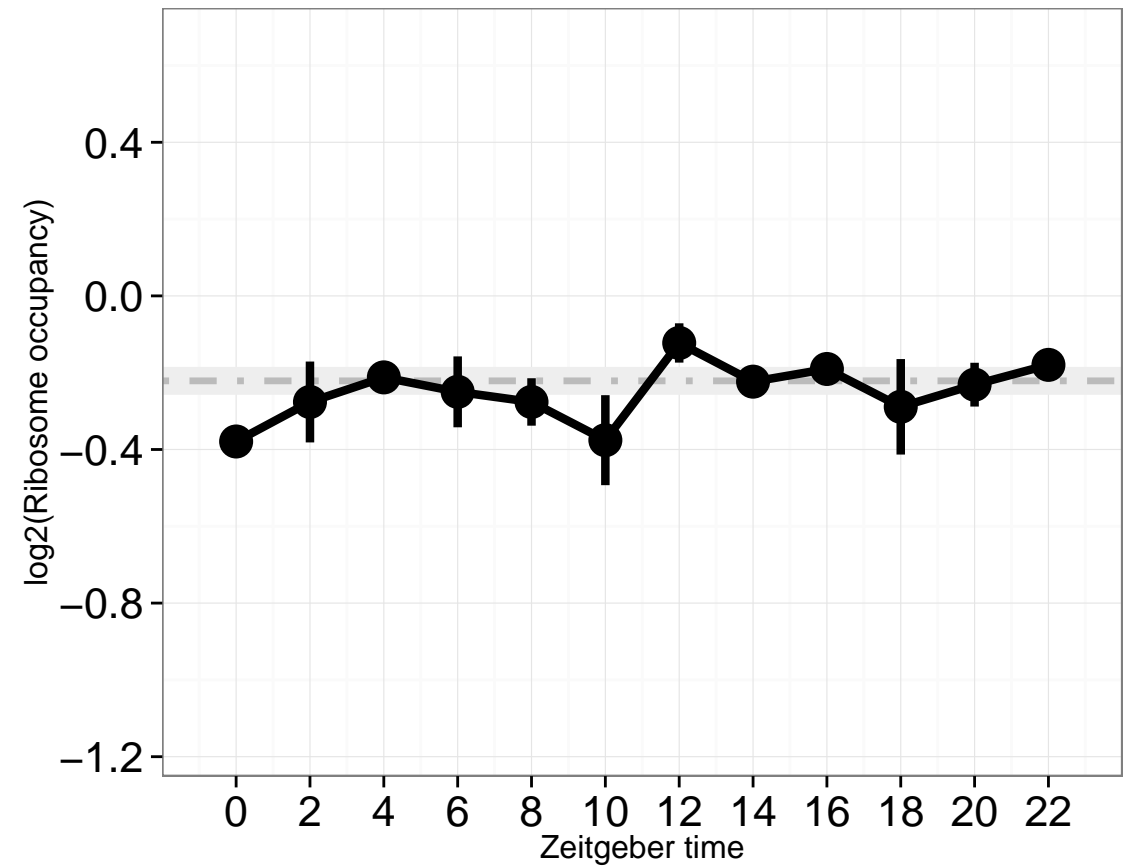

Supplement: SuppDataset_1.zip [file Cmah_set_A.pdf › Supplemental Dataset 1/A-mRNA_nonrhyth_translation_nonrhyth/Cmah_set_A.pdf]

## Cmas

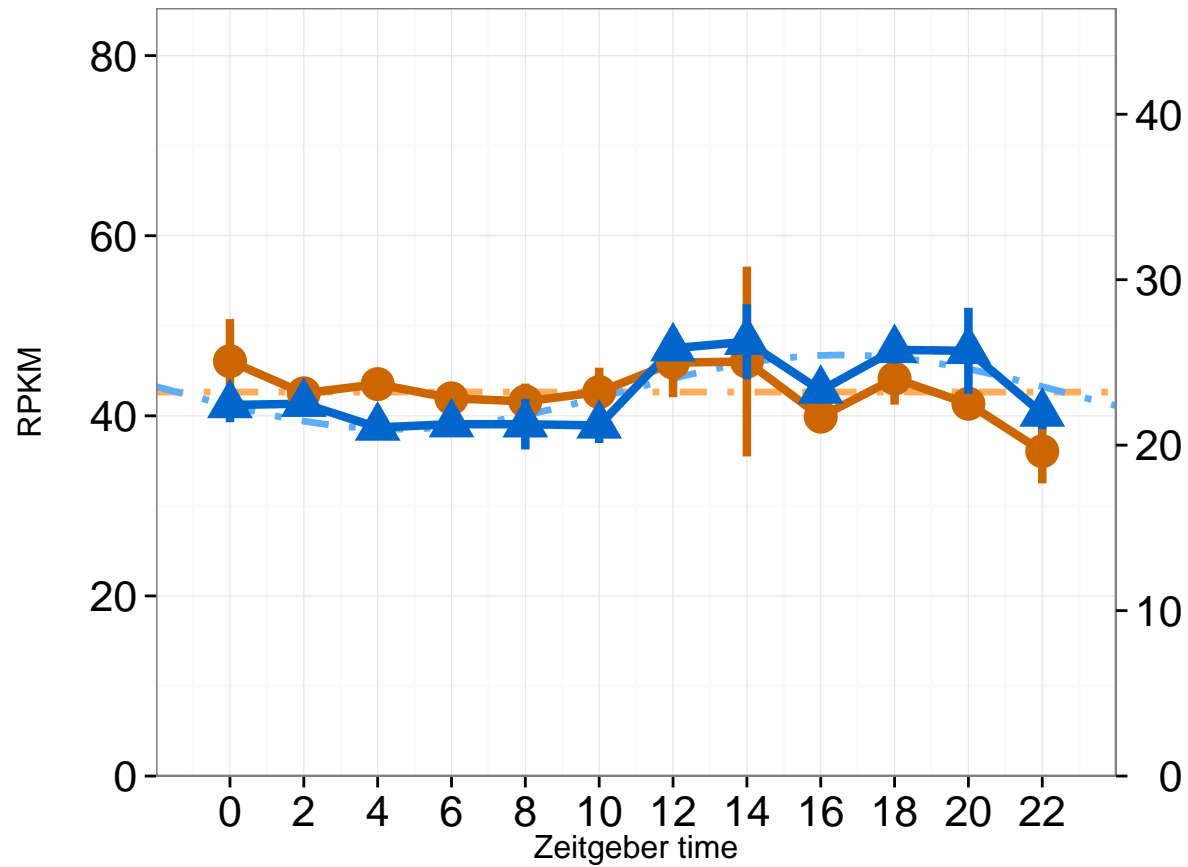

## Cmas

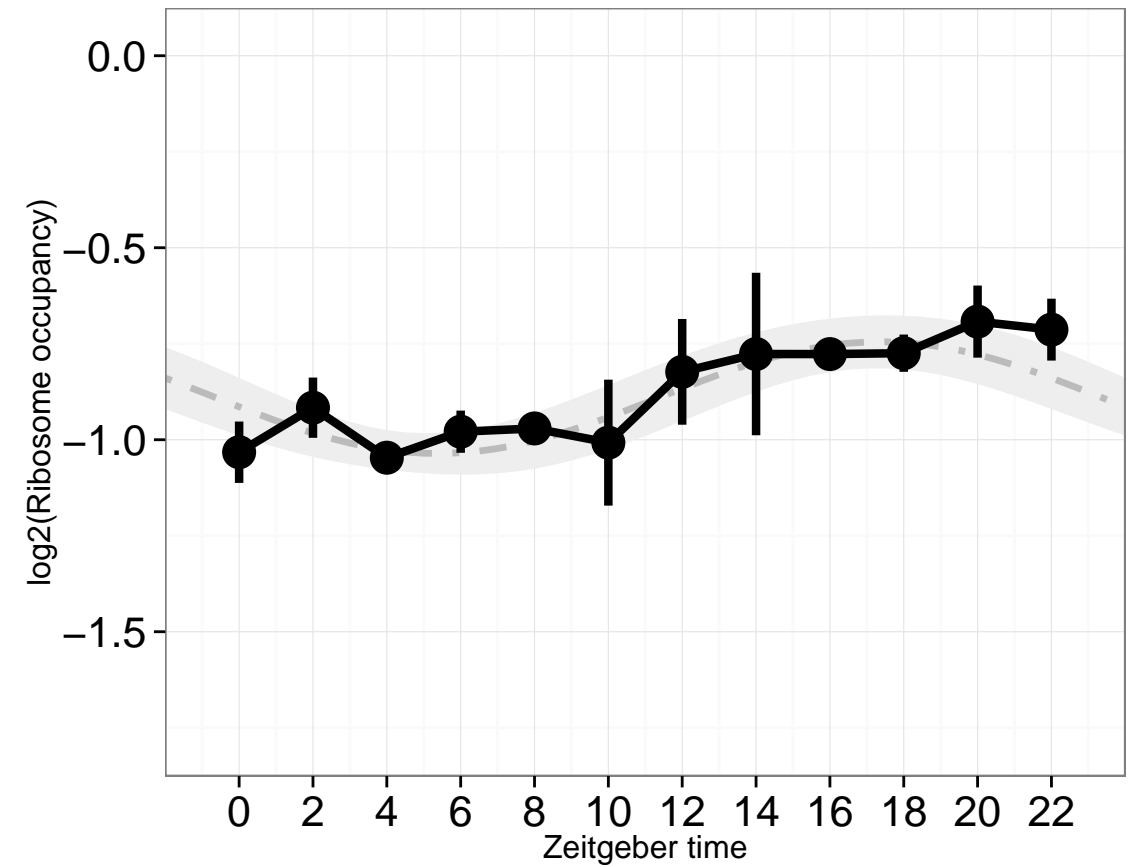

Supplement: SuppDataset_1.zip [file Cmas_set_A.pdf › Supplemental Dataset 1/A-mRNA_nonrhyth_translation_nonrhyth/Cmas_set_A.pdf]

## Cmb1

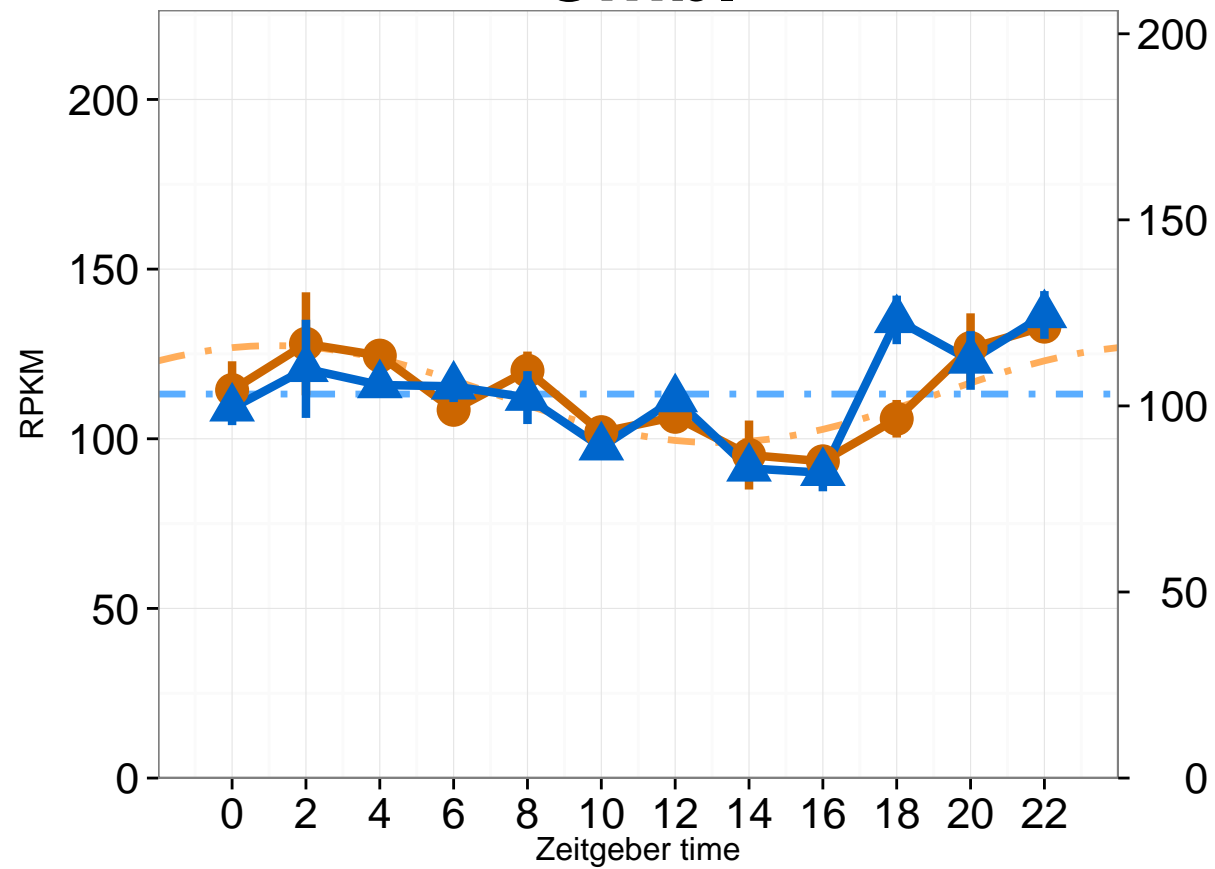

## Cmb1

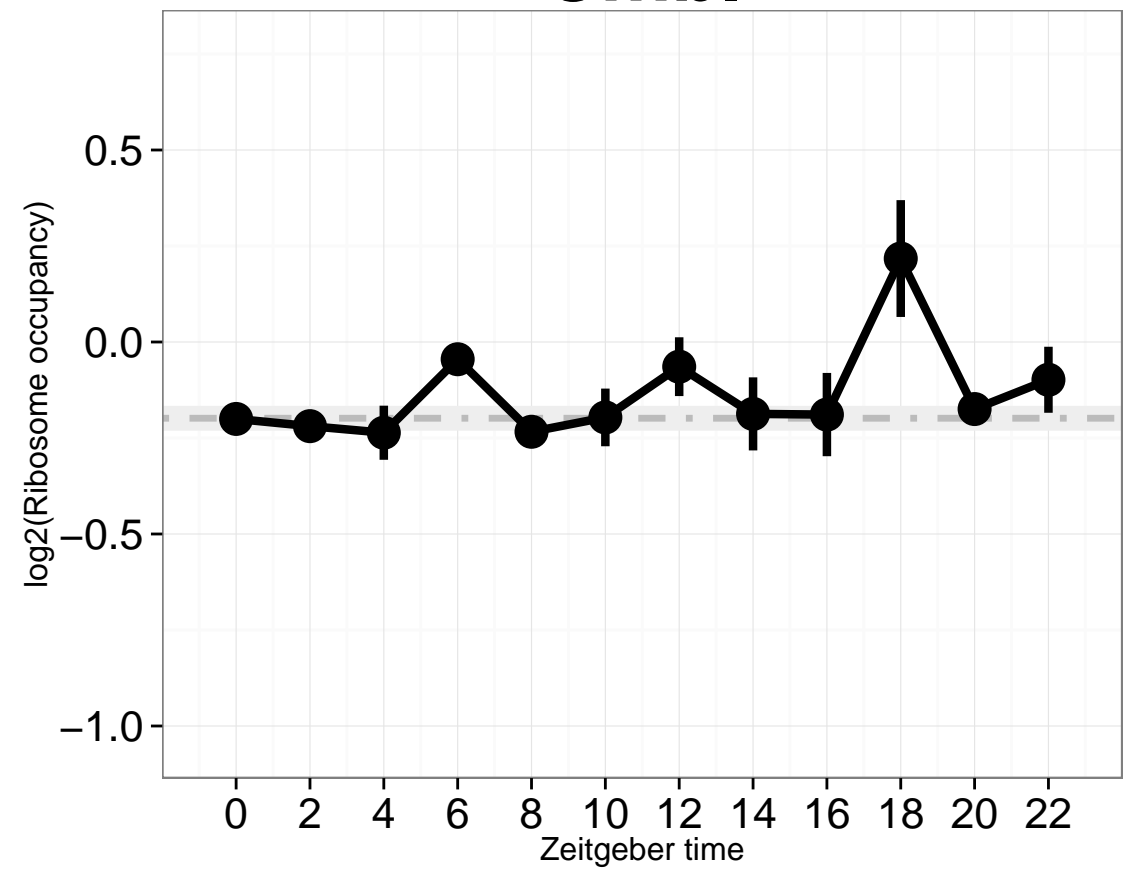

Supplement: SuppDataset_1.zip [file Cmbl_set_A.pdf › Supplemental Dataset 1/A-mRNA_nonrhyth_translation_nonrhyth/Cmbl_set_A.pdf]

## Cmc1

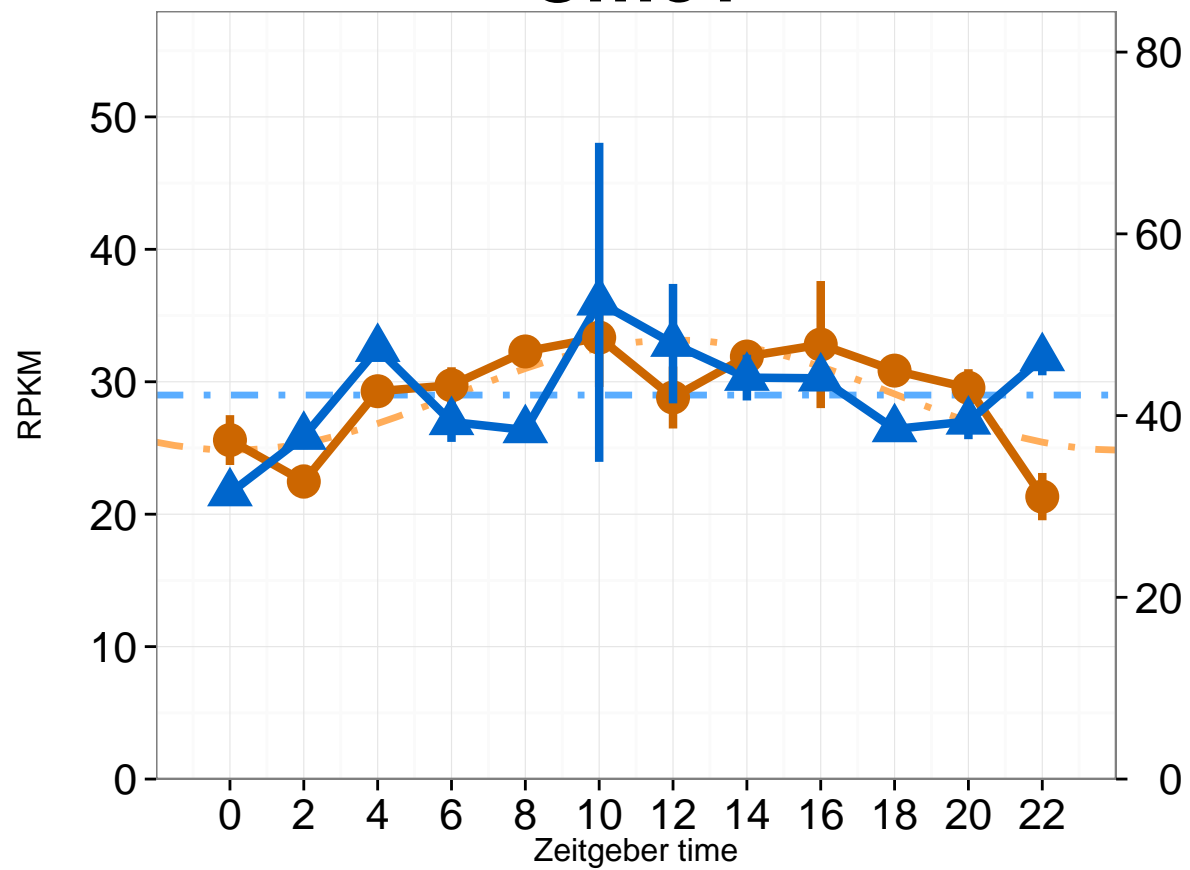

## Cmc1

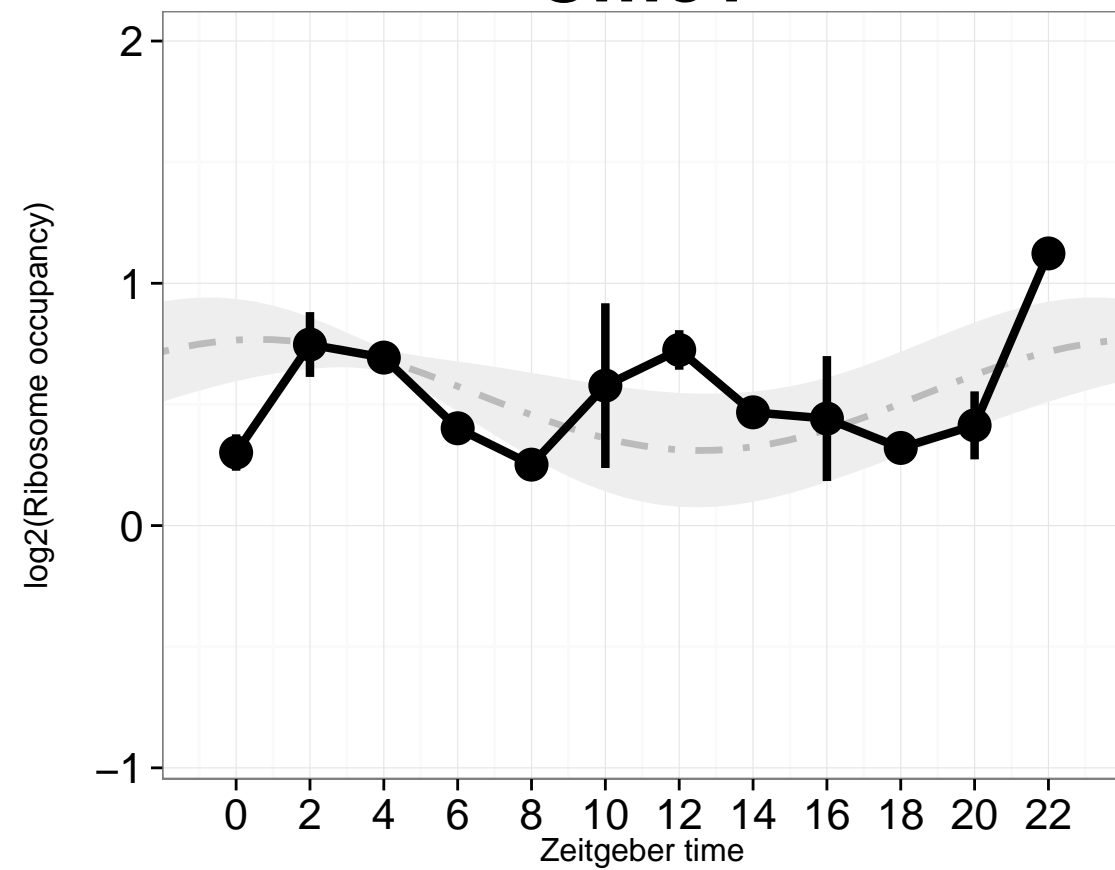

Supplement: SuppDataset_1.zip [file Cmc1_set_A.pdf › Supplemental Dataset 1/A-mRNA_nonrhyth_translation_nonrhyth/Cmc1_set_A.pdf]

# Cmc2

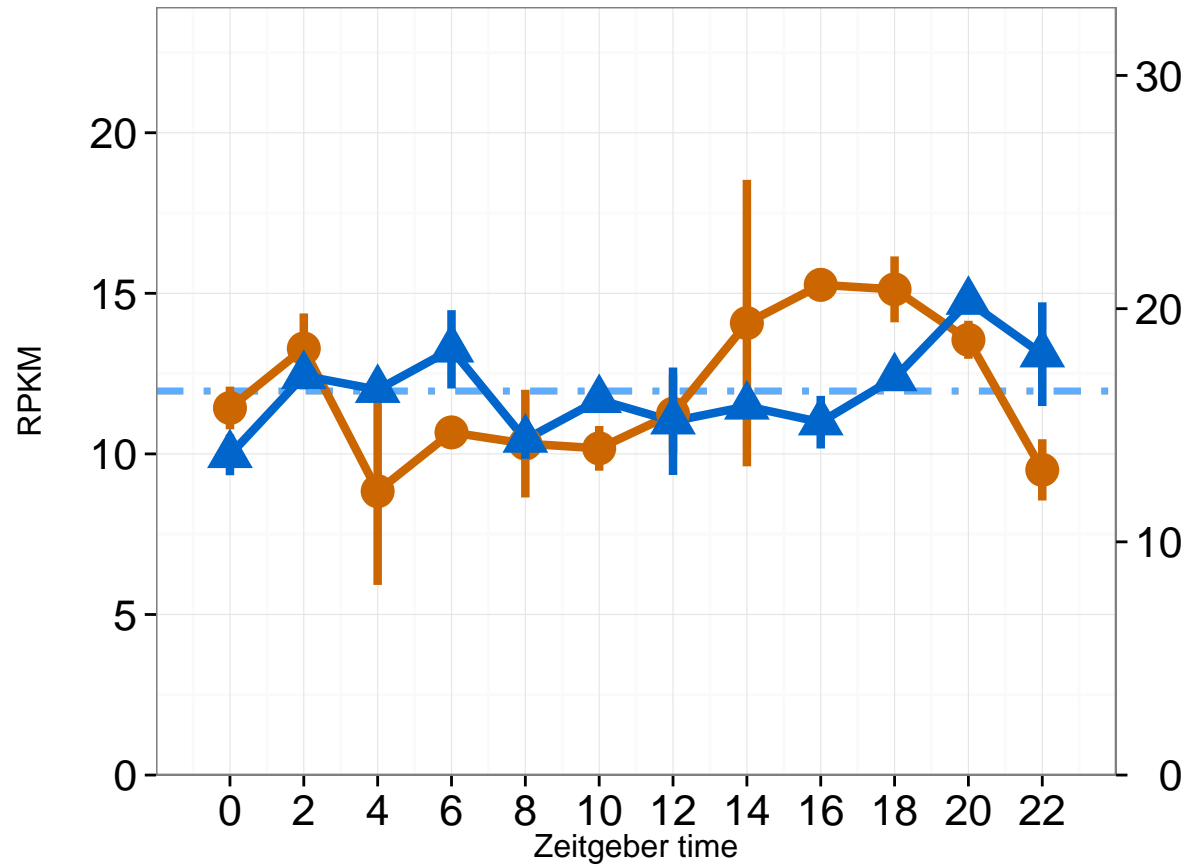

# Cmc2

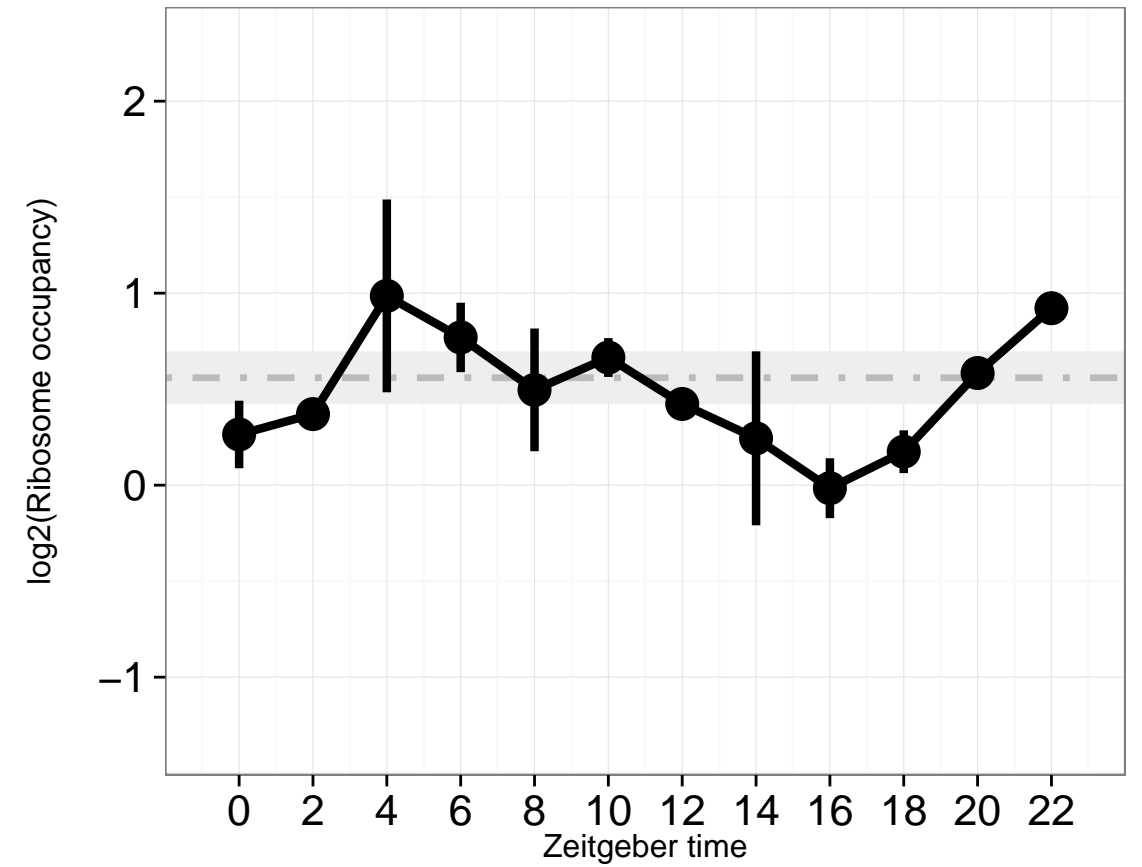

Supplement: SuppDataset_1.zip [file Cmc2_set_A.pdf › Supplemental Dataset 1/A-mRNA_nonrhyth_translation_nonrhyth/Cmc2_set_A.pdf]

## Cmip

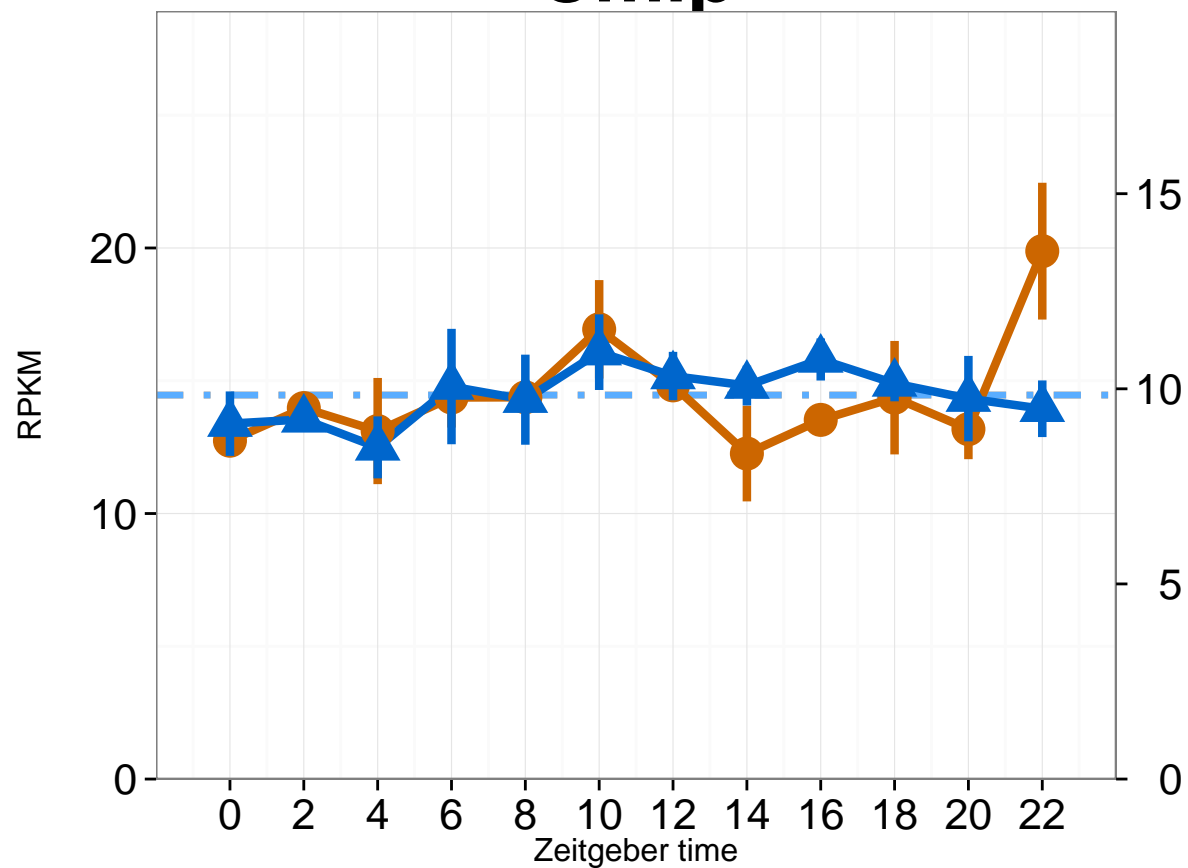

## Cmip

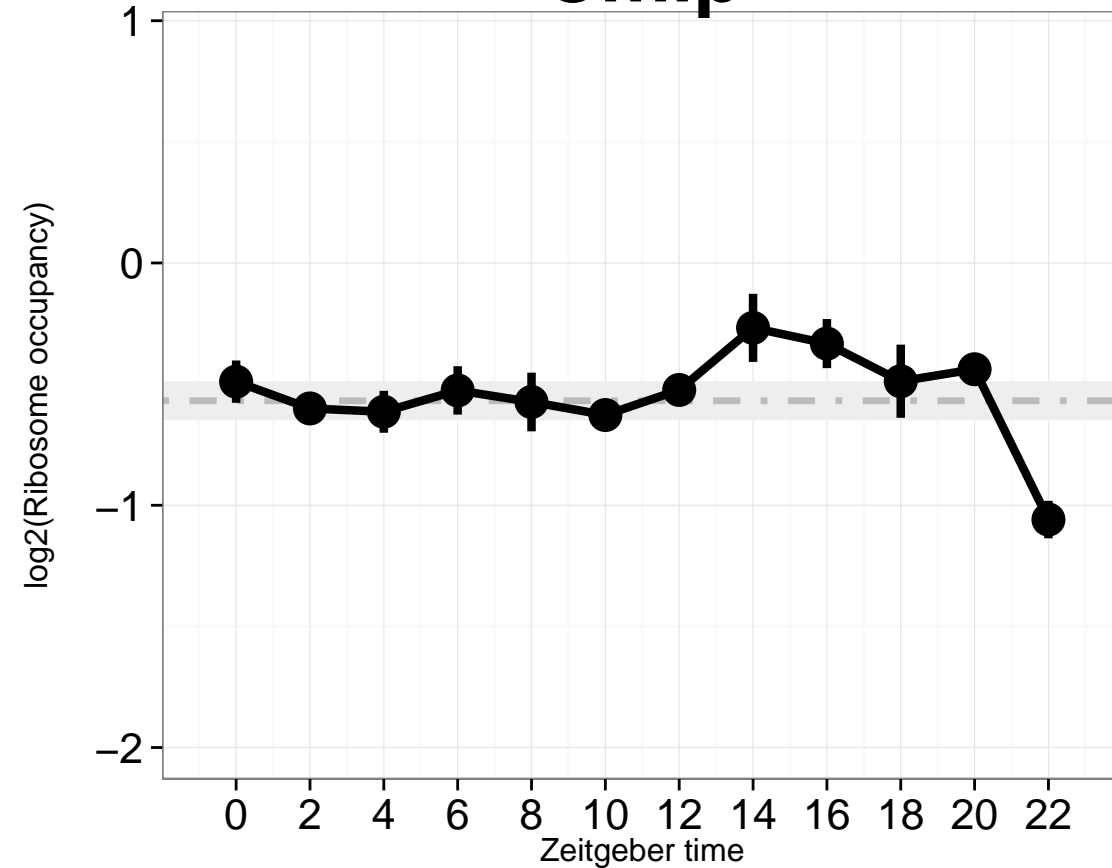

Supplement: SuppDataset_1.zip [file Cmip_set_A.pdf › Supplemental Dataset 1/A-mRNA_nonrhyth_translation_nonrhyth/Cmip_set_A.pdf]

## Cmklr1

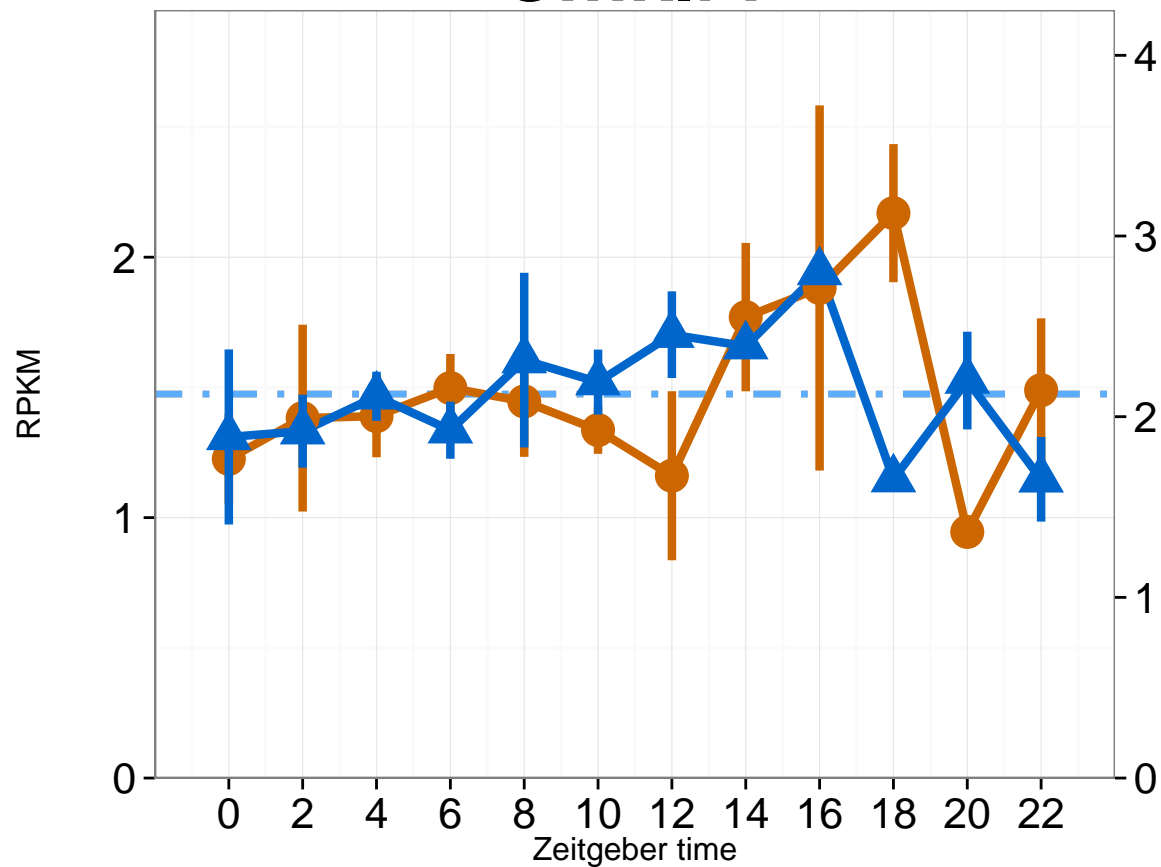

## Cmklr1

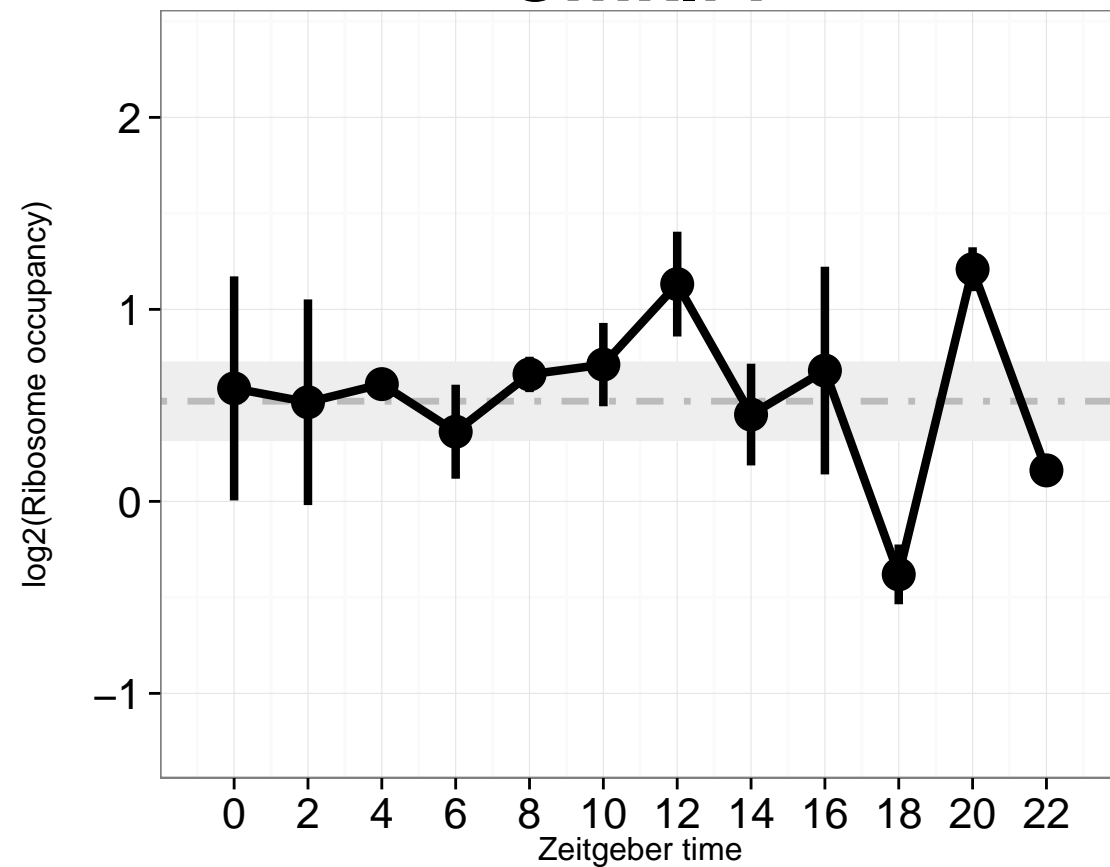

Supplement: SuppDataset_1.zip [file Cmklr1_set_A.pdf › Supplemental Dataset 1/A-mRNA_nonrhyth_translation_nonrhyth/Cmklr1_set_A.pdf]

## Cml1

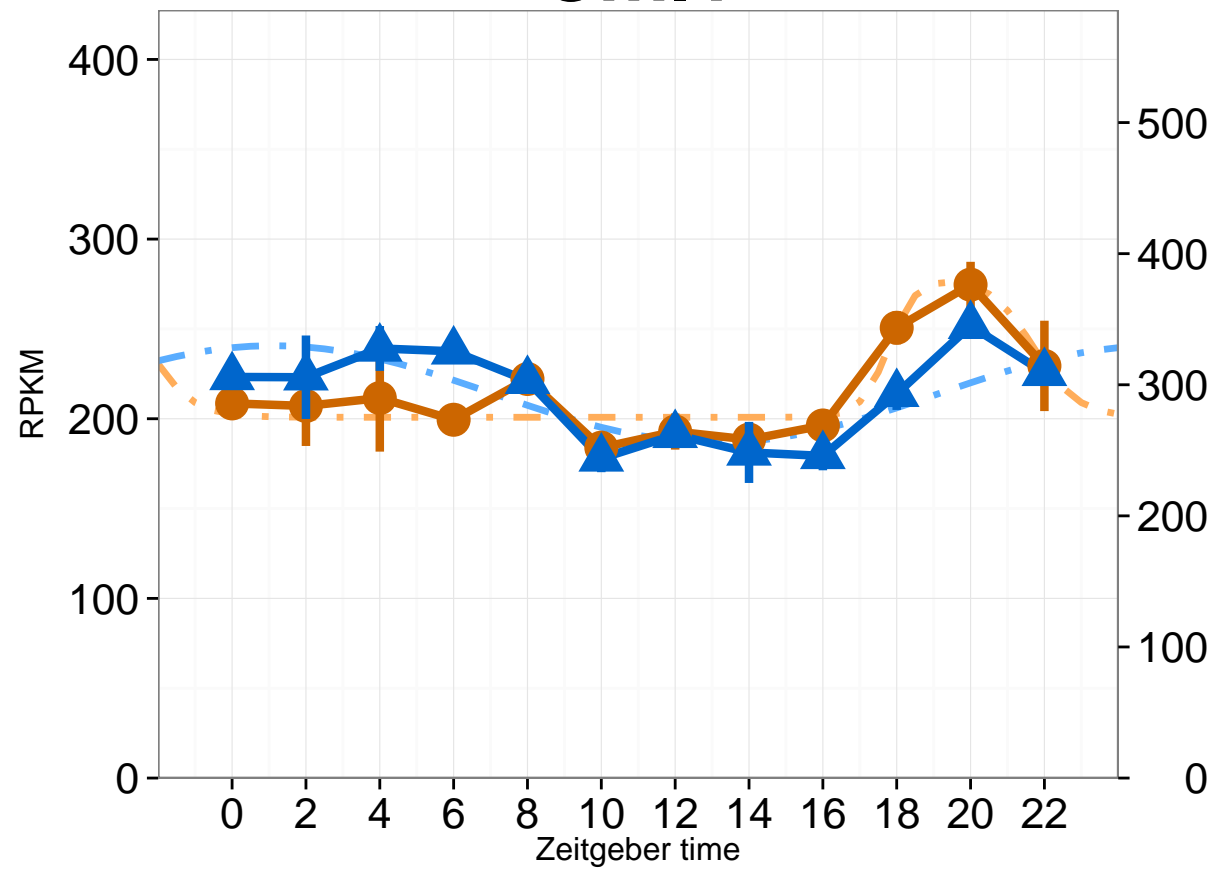

## Cml1

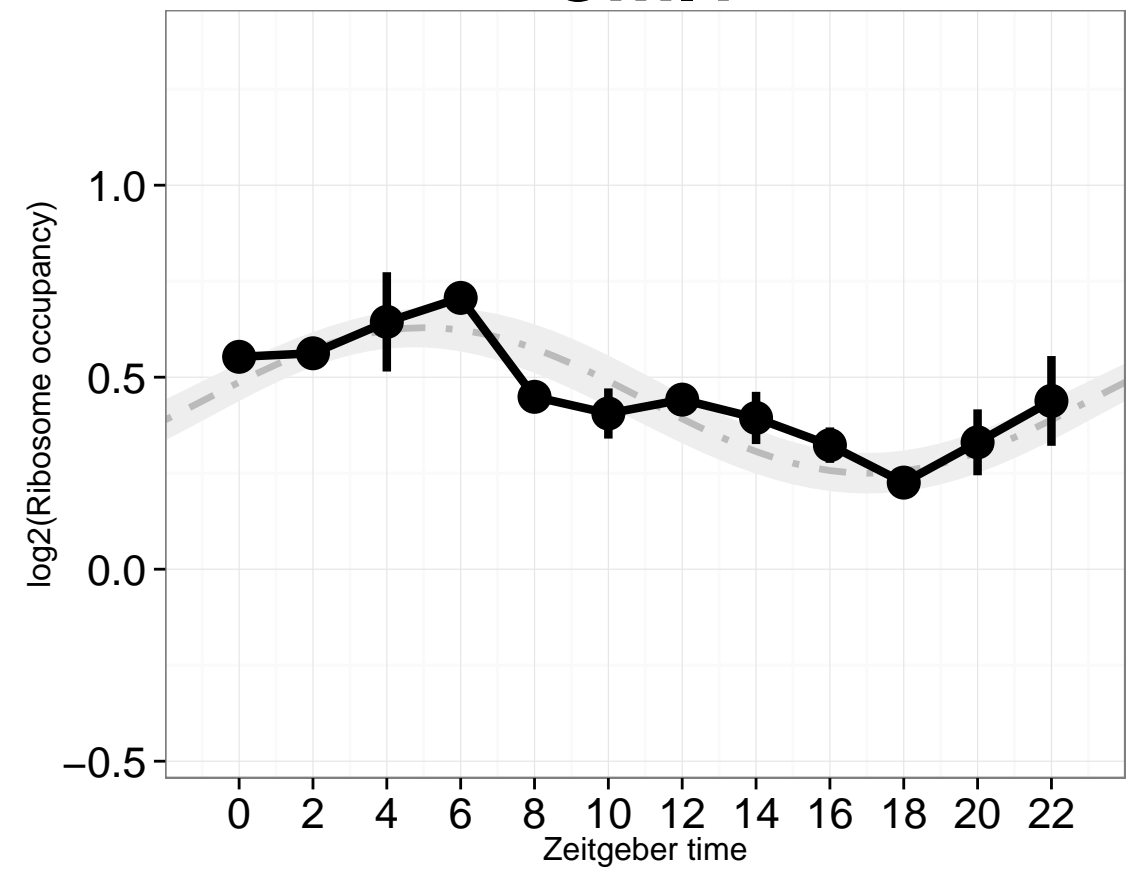

Supplement: SuppDataset_1.zip [file Cml1_set_A.pdf › Supplemental Dataset 1/A-mRNA_nonrhyth_translation_nonrhyth/Cml1_set_A.pdf]

## Cml2

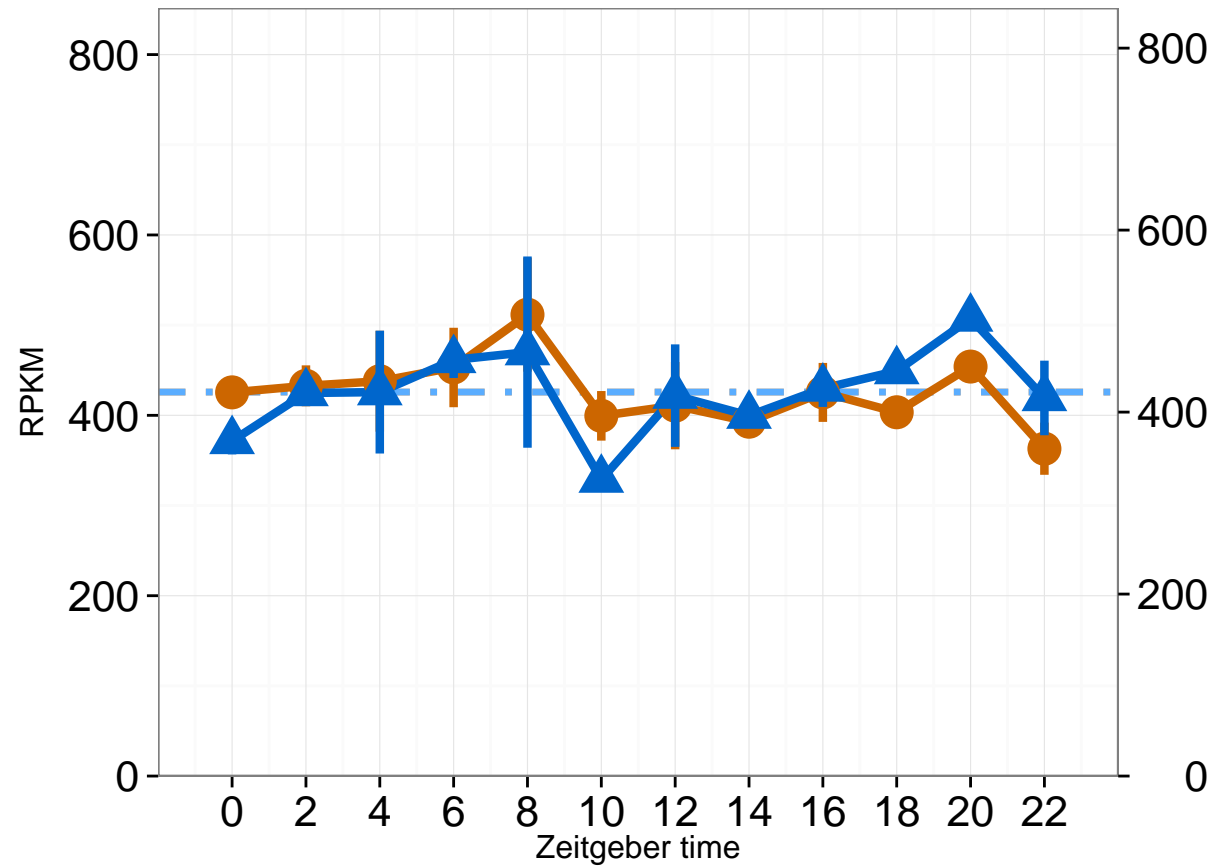

## Cml2

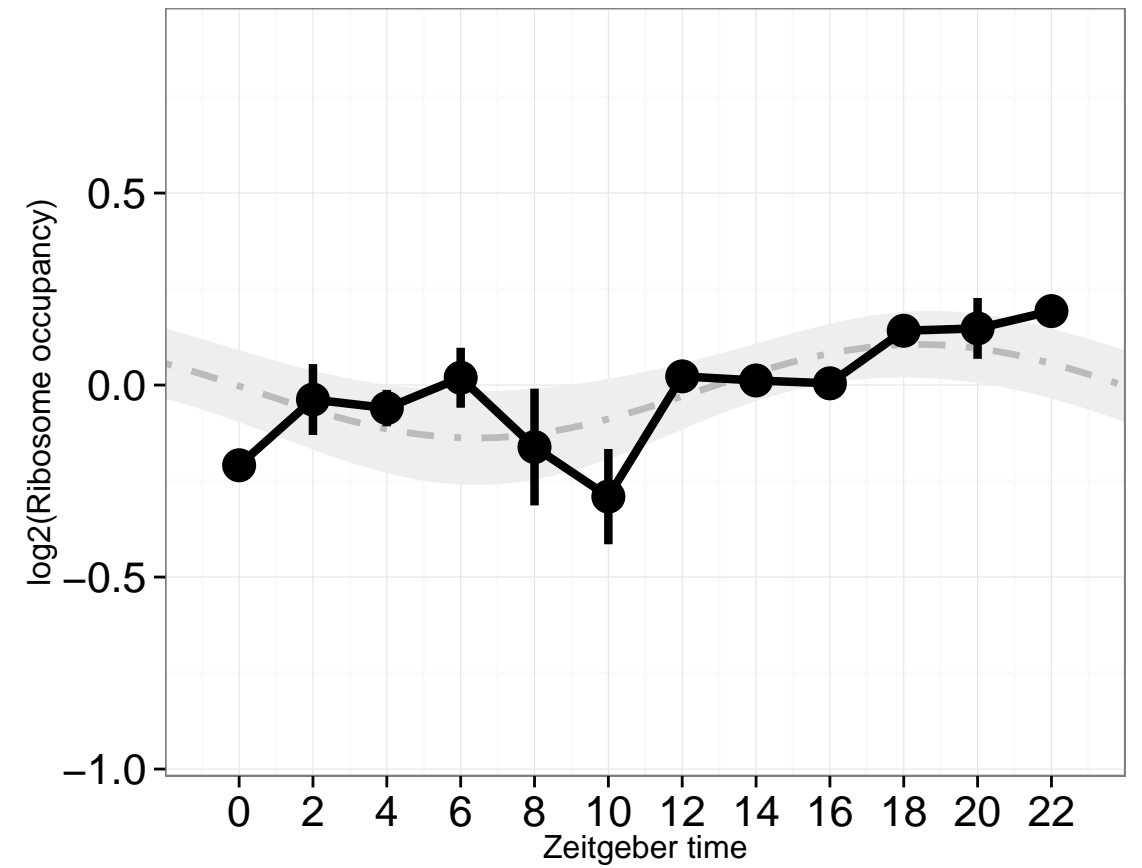

Supplement: SuppDataset_1.zip [file Cml2_set_A.pdf › Supplemental Dataset 1/A-mRNA_nonrhyth_translation_nonrhyth/Cml2_set_A.pdf]

# Cmpk1

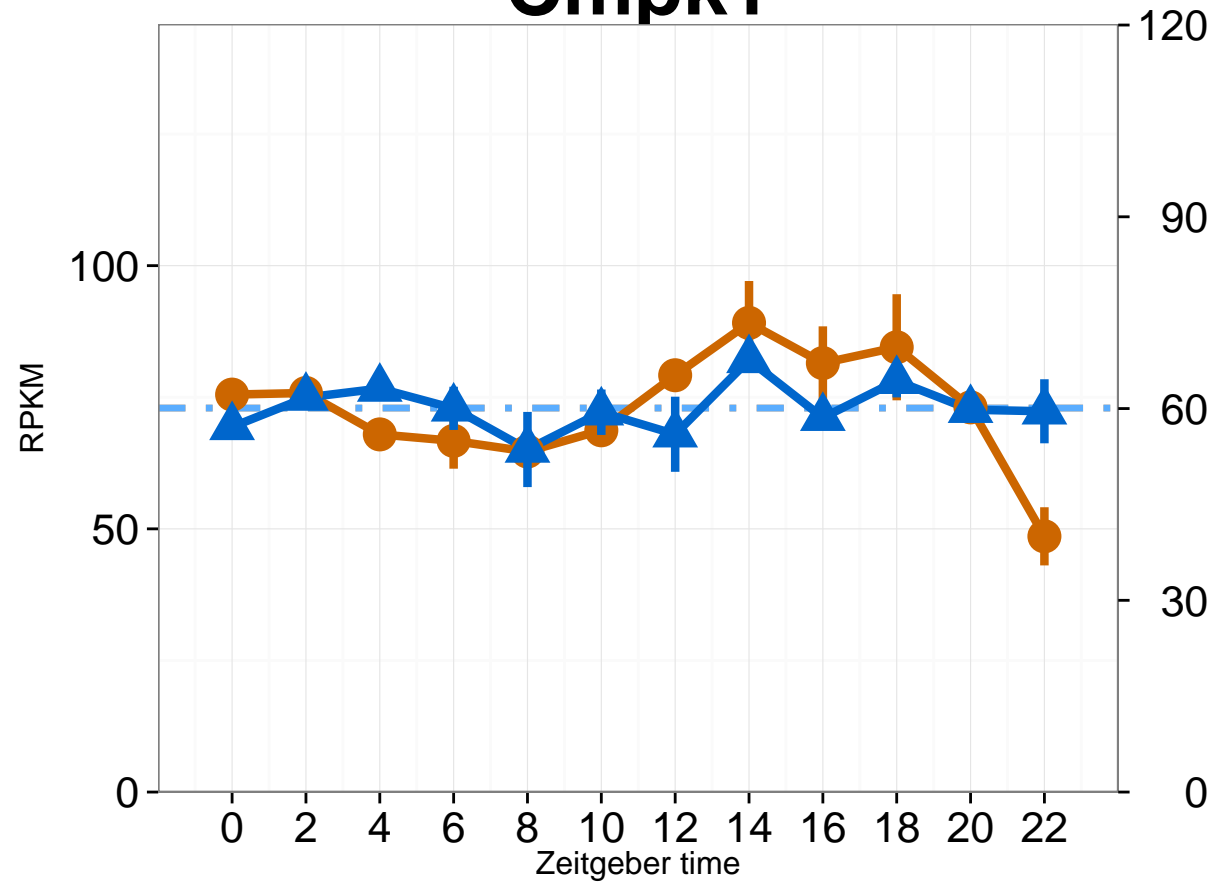

# Cmpk1

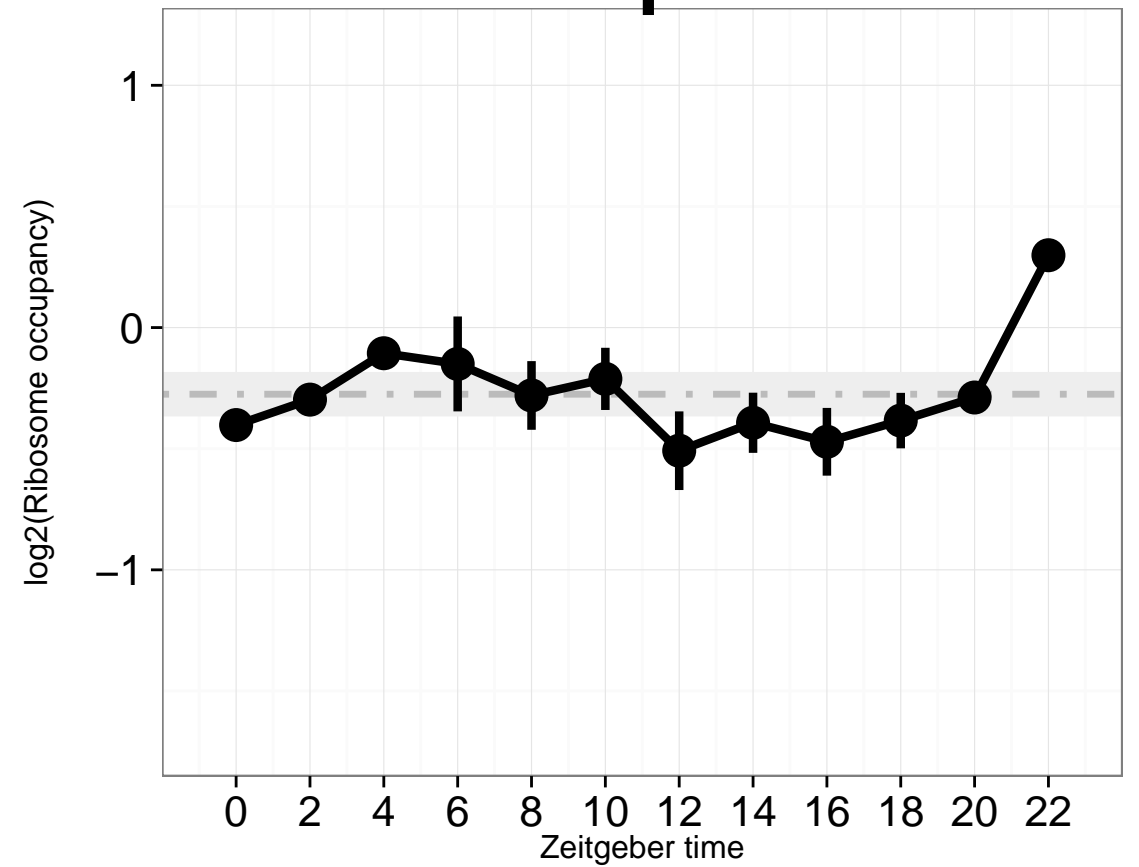

Supplement: SuppDataset_1.zip [file Cmpk1_set_A.pdf › Supplemental Dataset 1/A-mRNA_nonrhyth_translation_nonrhyth/Cmpk1_set_A.pdf]

# Cmss1

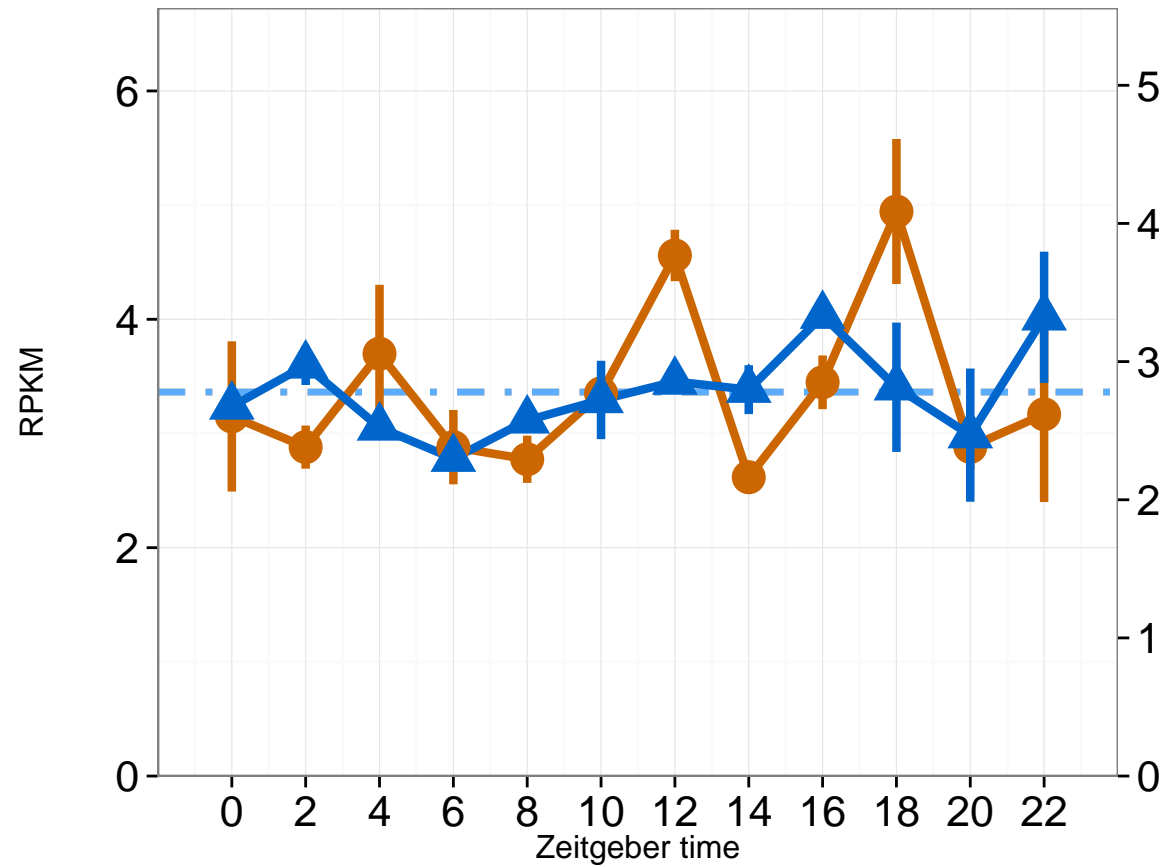

# Cmss1

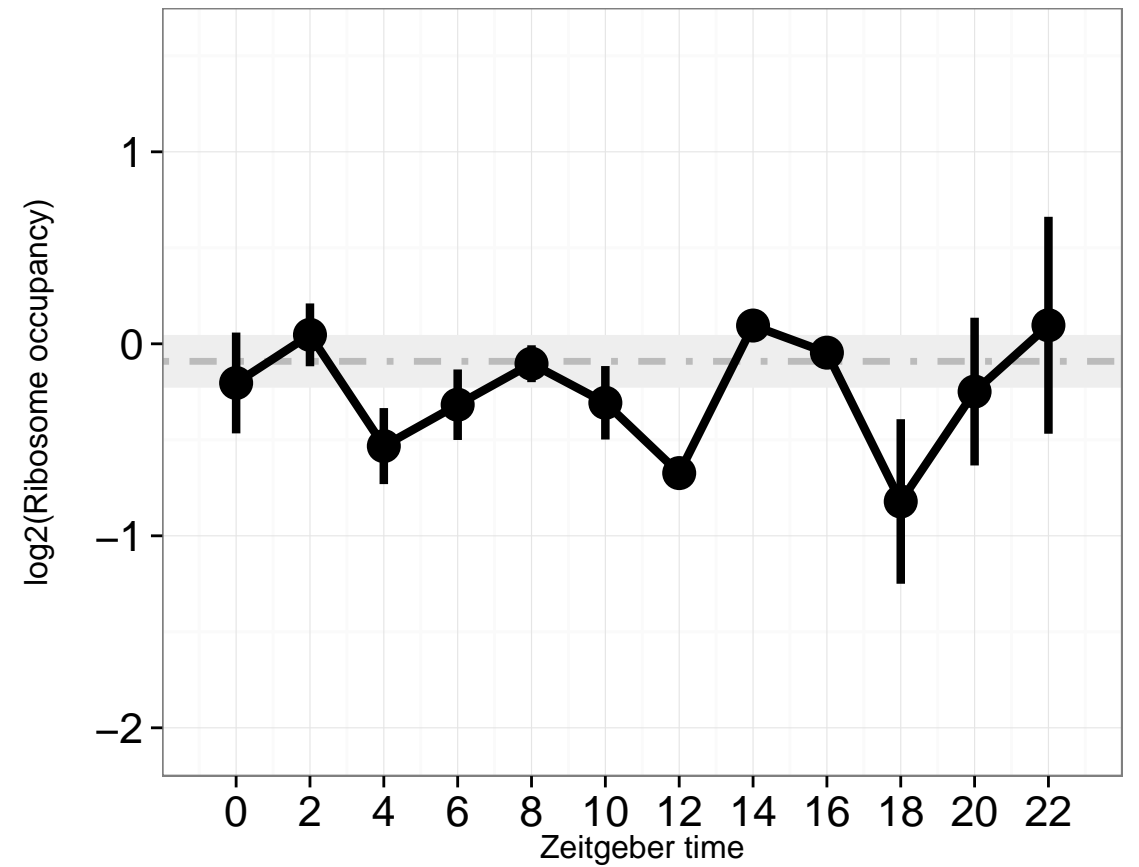

Supplement: SuppDataset_1.zip [file Cmss1_set_A.pdf › Supplemental Dataset 1/A-mRNA_nonrhyth_translation_nonrhyth/Cmss1_set_A.pdf]

# Cmtm3

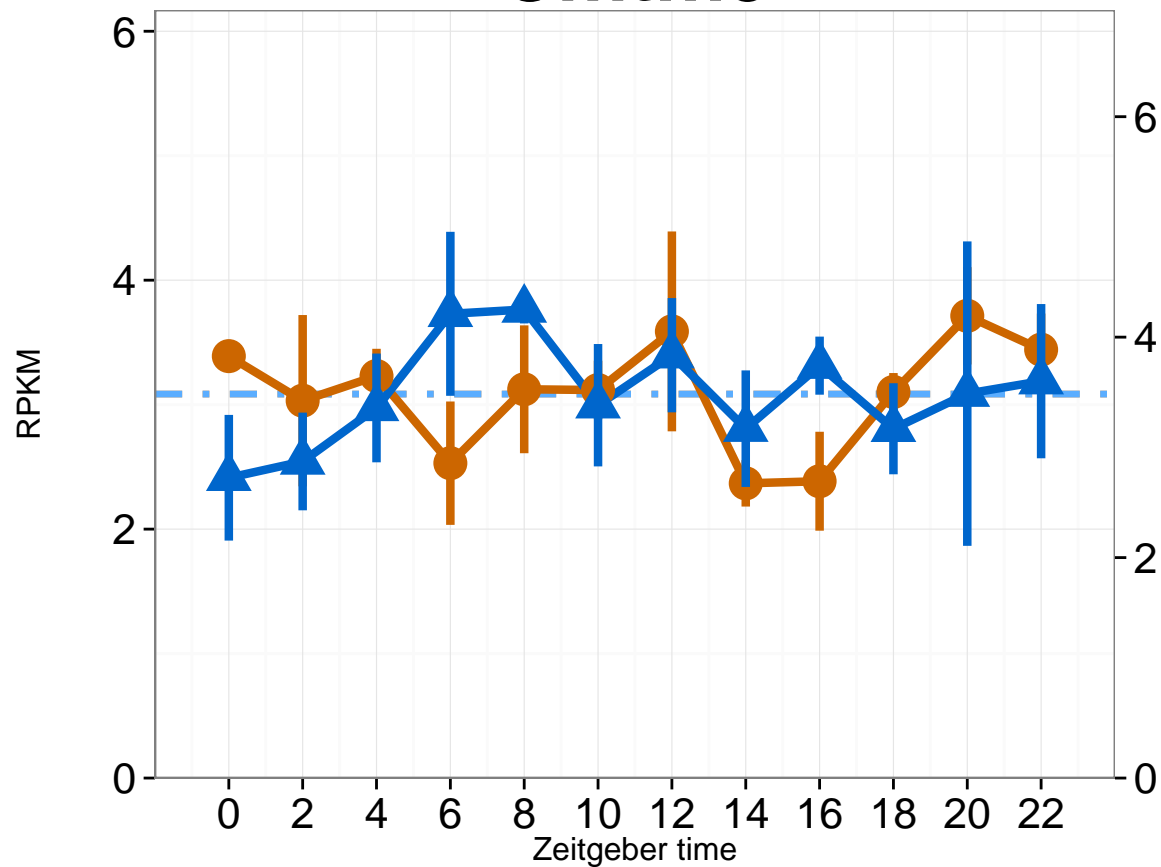

# Cmtm3

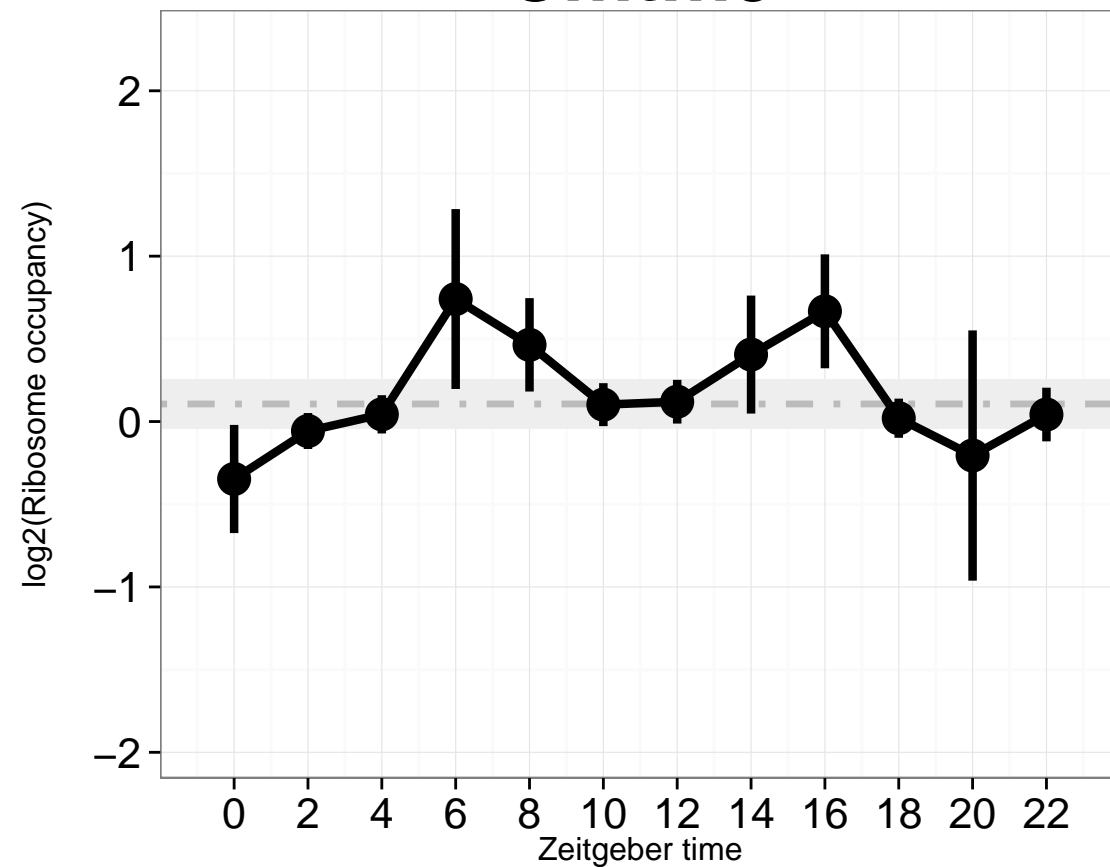

Supplement: SuppDataset_1.zip [file Cmtm3_set_A.pdf › Supplemental Dataset 1/A-mRNA_nonrhyth_translation_nonrhyth/Cmtm3_set_A.pdf]

# Cmtm4

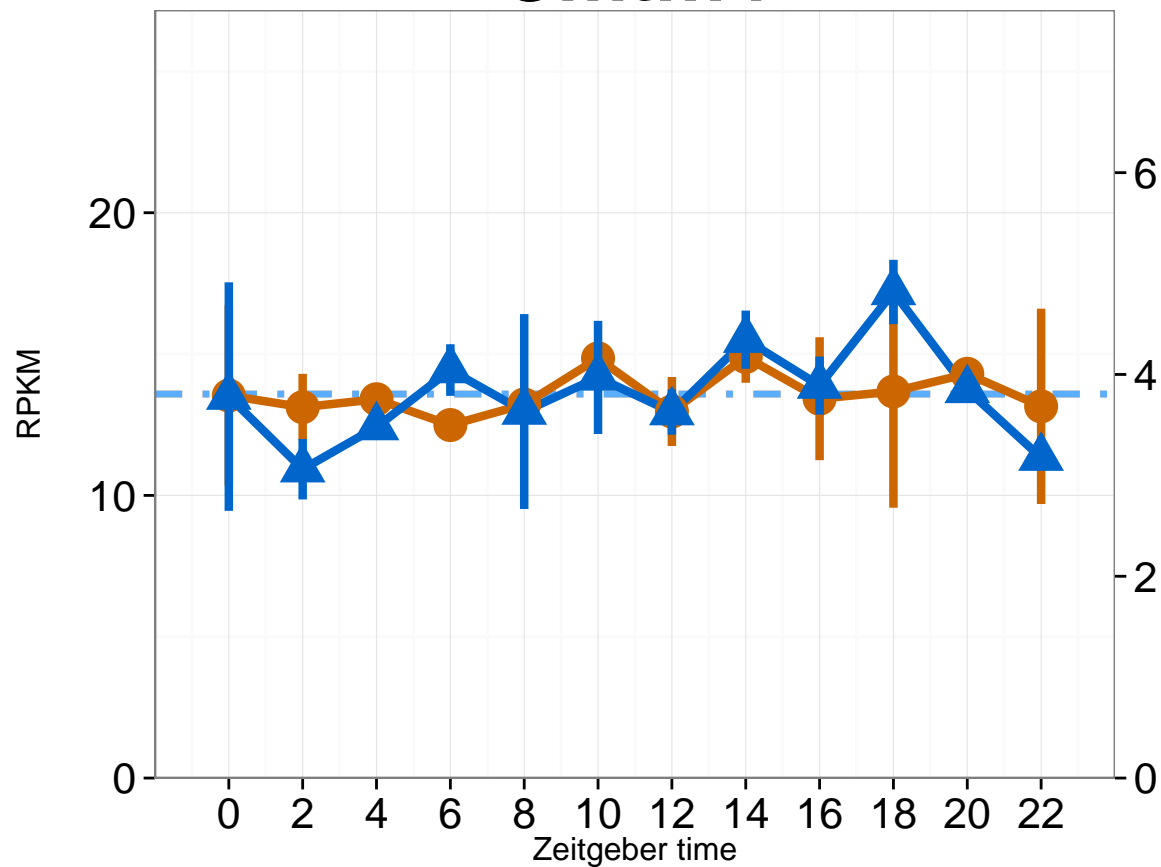

# Cmtm4

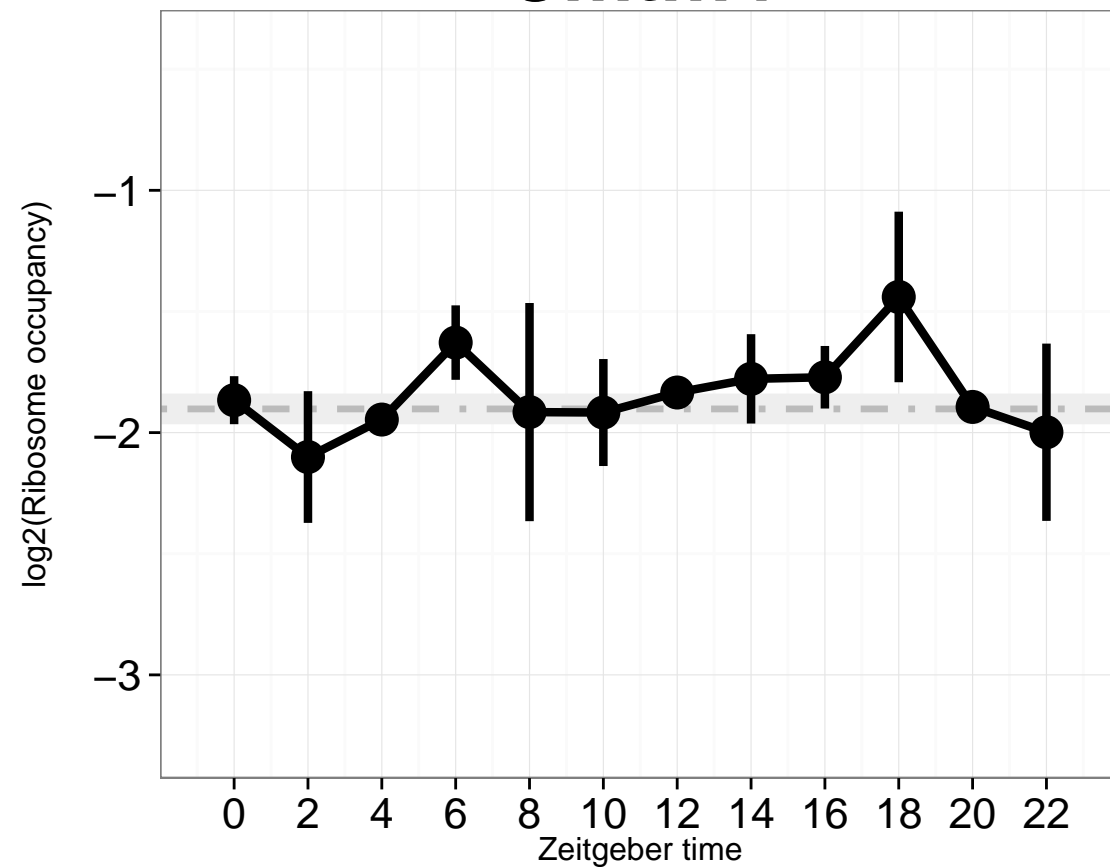

Supplement: SuppDataset_1.zip [file Cmtm4_set_A.pdf › Supplemental Dataset 1/A-mRNA_nonrhyth_translation_nonrhyth/Cmtm4_set_A.pdf]

## Cmtm7

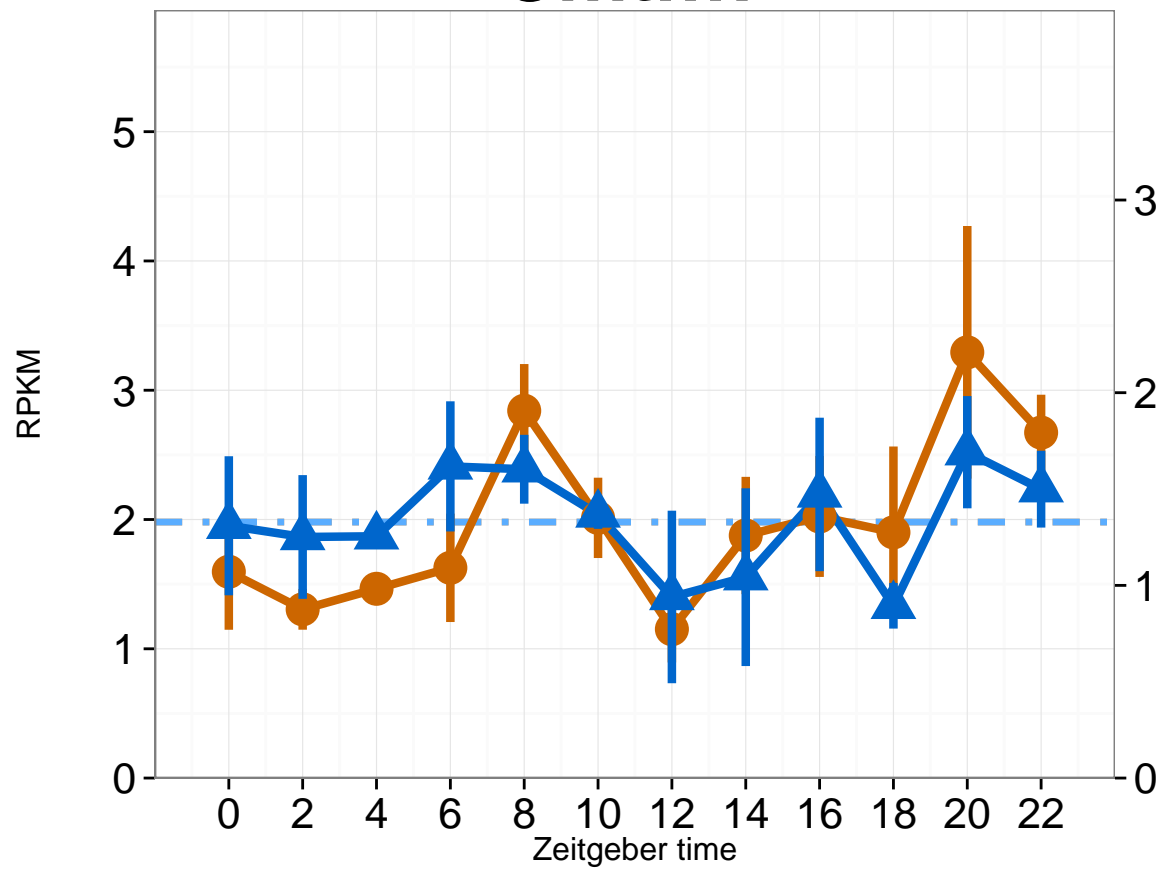

## Cmtm7

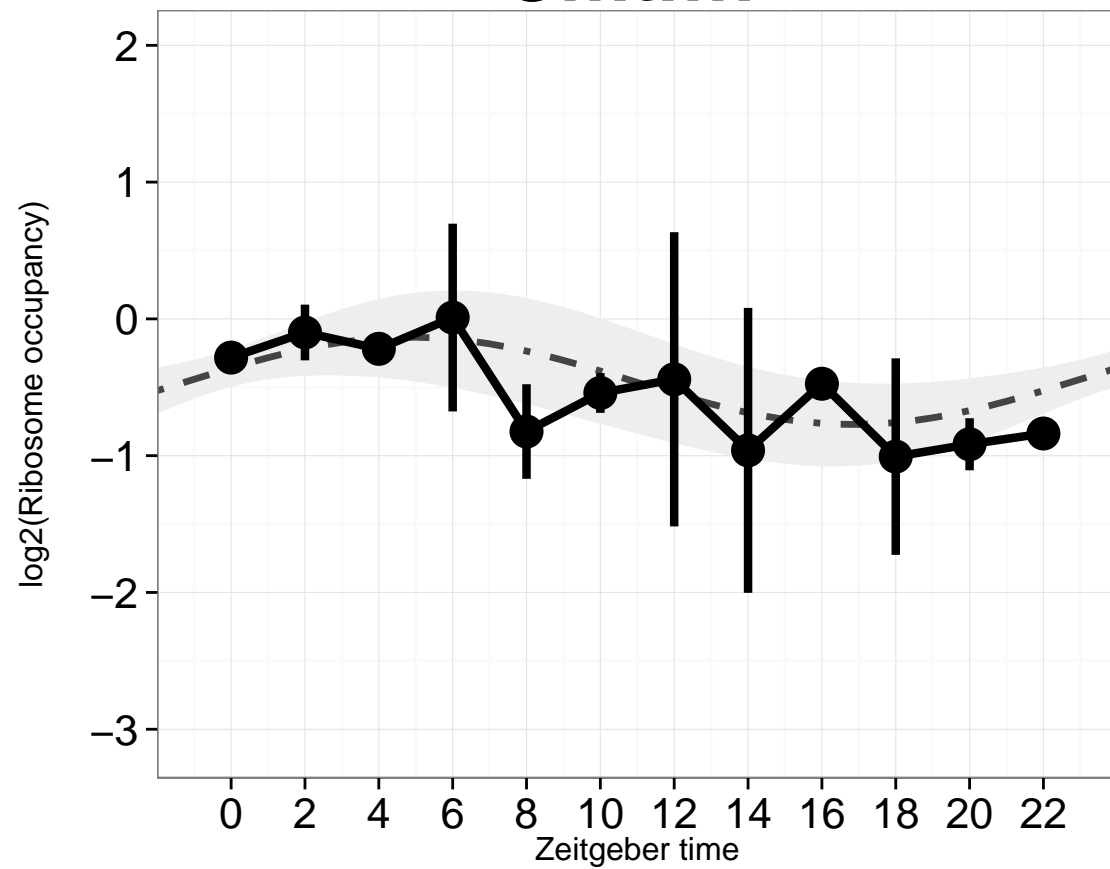

Supplement: SuppDataset_1.zip [file Cmtm7_set_A.pdf › Supplemental Dataset 1/A-mRNA_nonrhyth_translation_nonrhyth/Cmtm7_set_A.pdf]

## Cmtm8

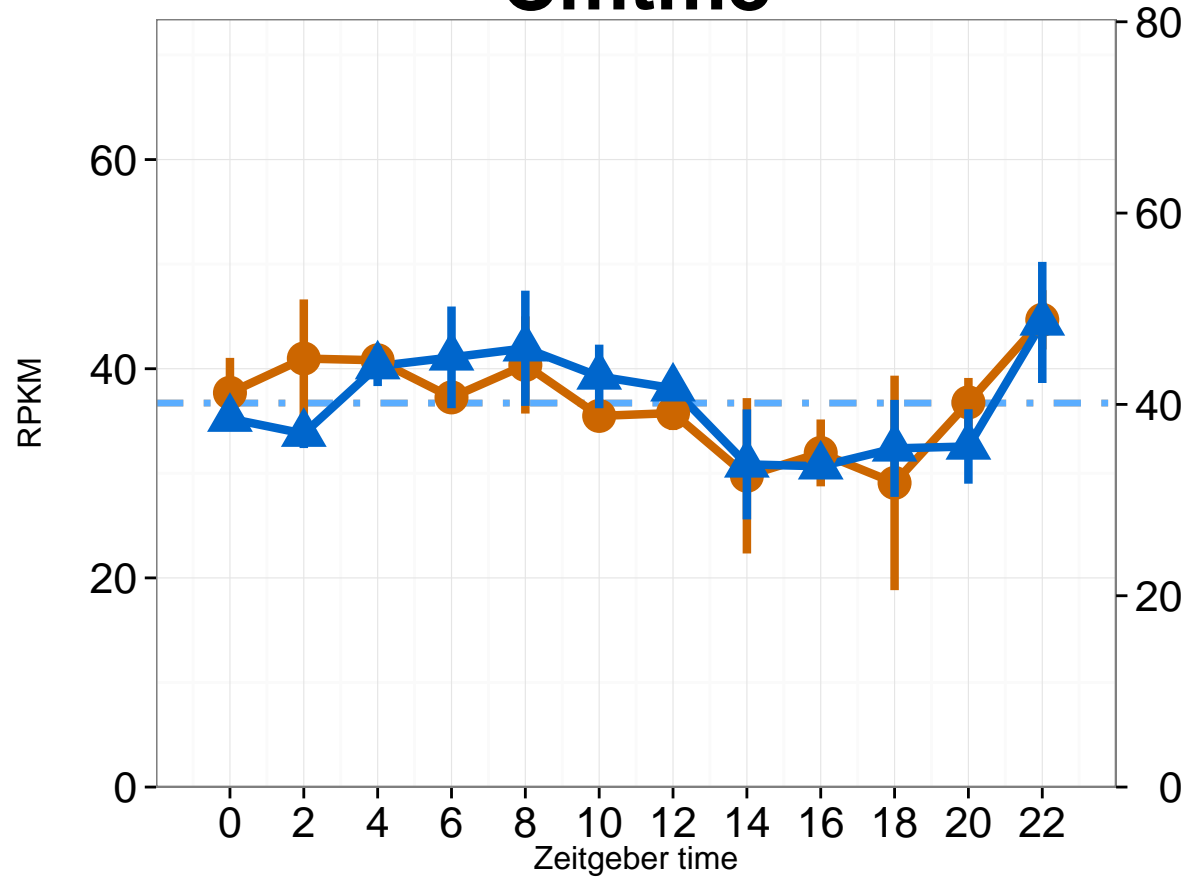

## Cmtm8

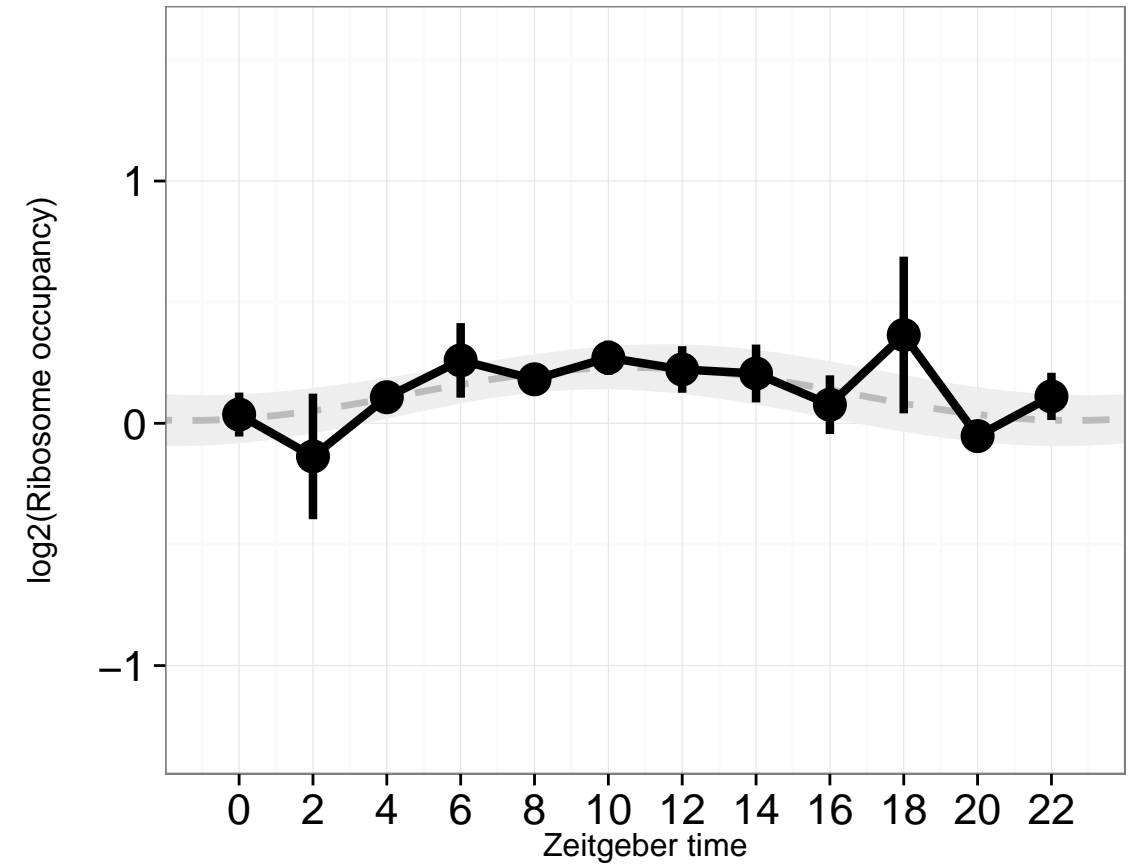

Supplement: SuppDataset_1.zip [file Cmtm8_set_A.pdf › Supplemental Dataset 1/A-mRNA_nonrhyth_translation_nonrhyth/Cmtm8_set_A.pdf]

# Cmtr2

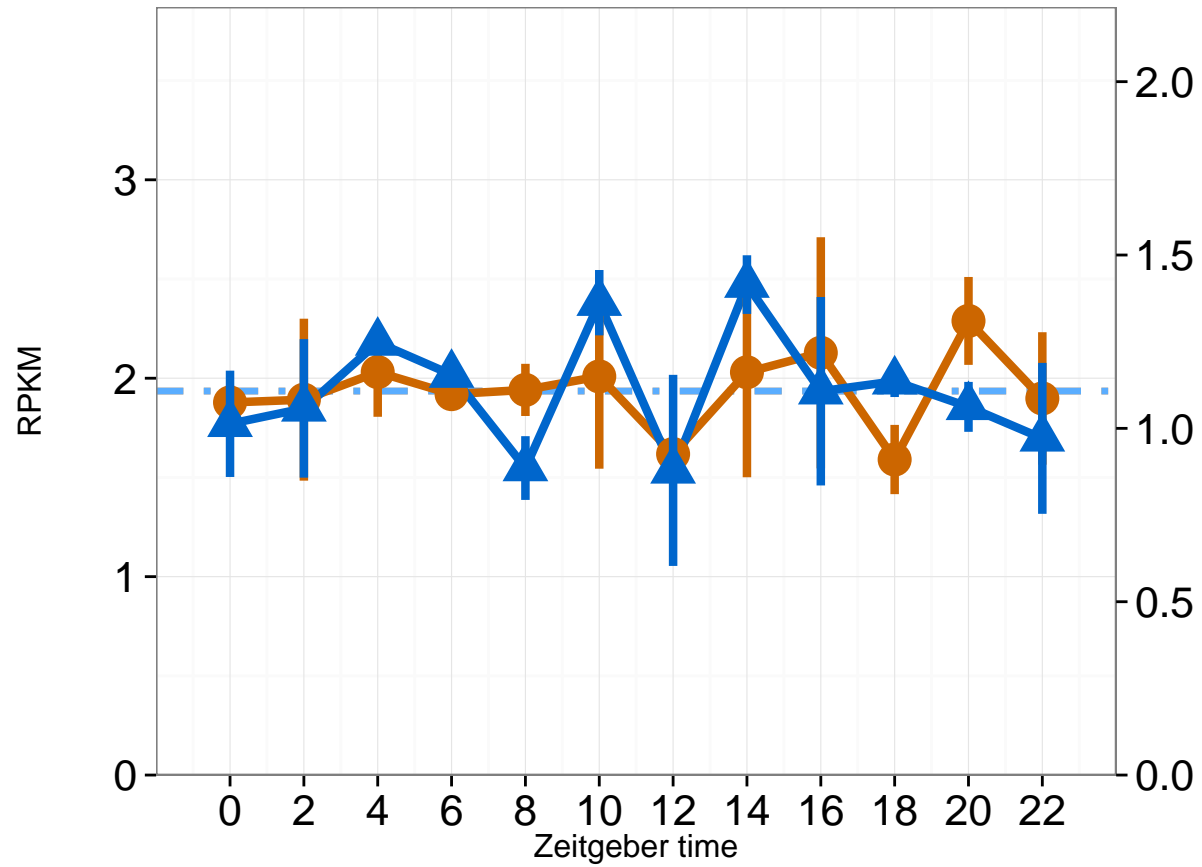

# Cmtr2

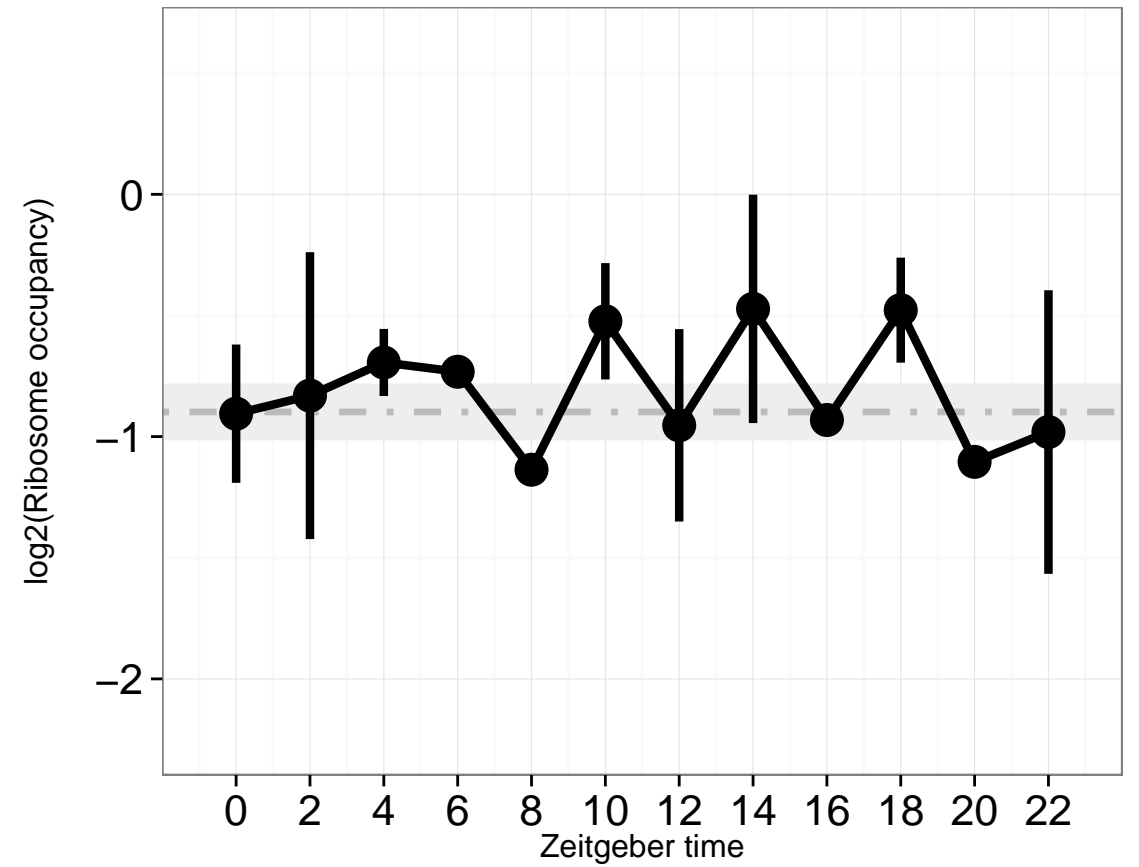

Supplement: SuppDataset_1.zip [file Cmtr2_set_A.pdf › Supplemental Dataset 1/A-mRNA_nonrhyth_translation_nonrhyth/Cmtr2_set_A.pdf]

## Cnbp

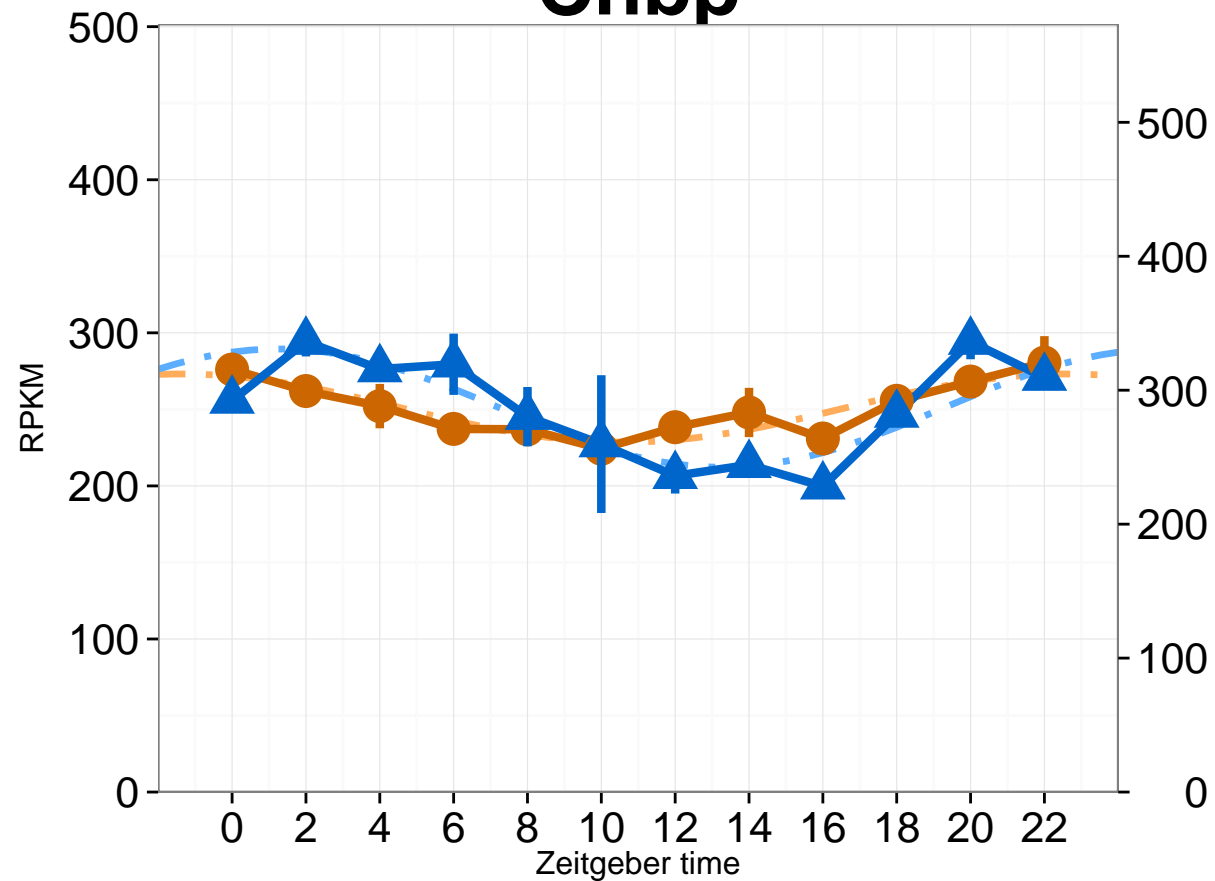

## Cnbp

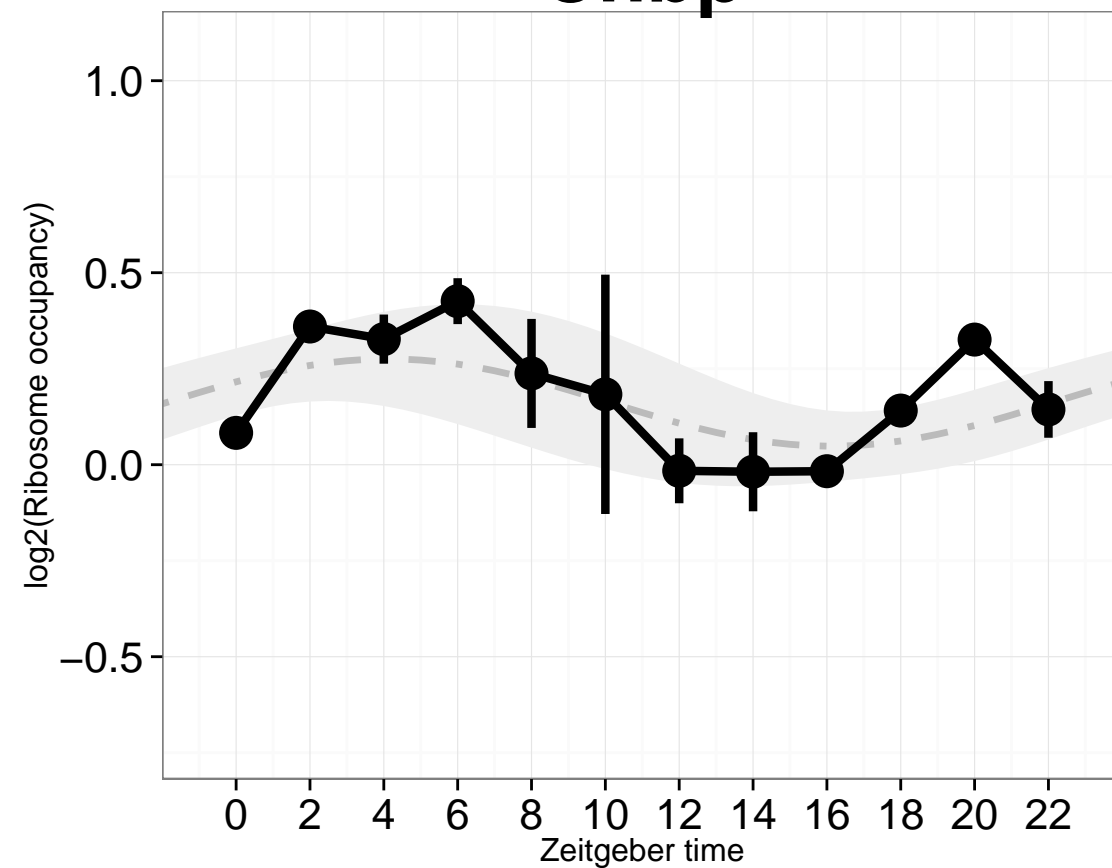

Supplement: SuppDataset_1.zip [file Cnbp_set_A.pdf › Supplemental Dataset 1/A-mRNA_nonrhyth_translation_nonrhyth/Cnbp_set_A.pdf]

## Cndp2

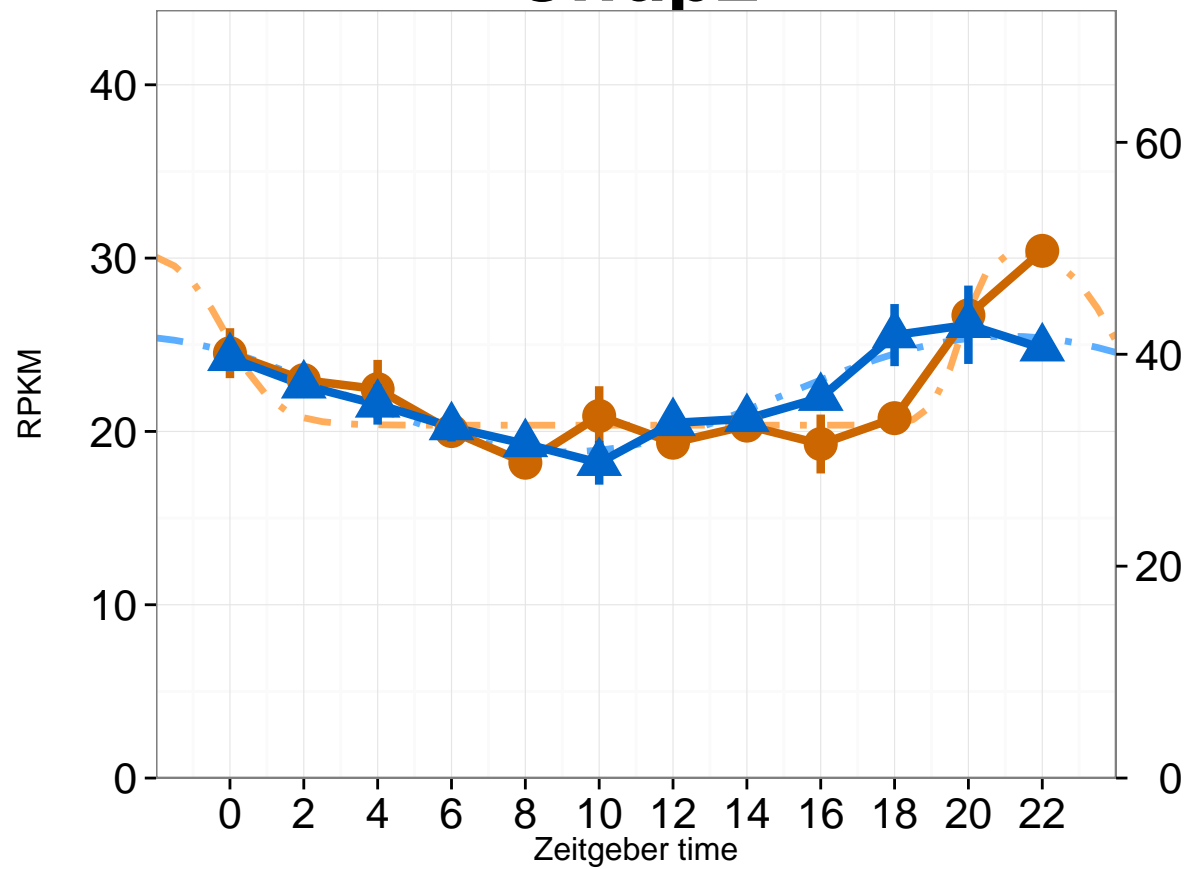

## Cndp2

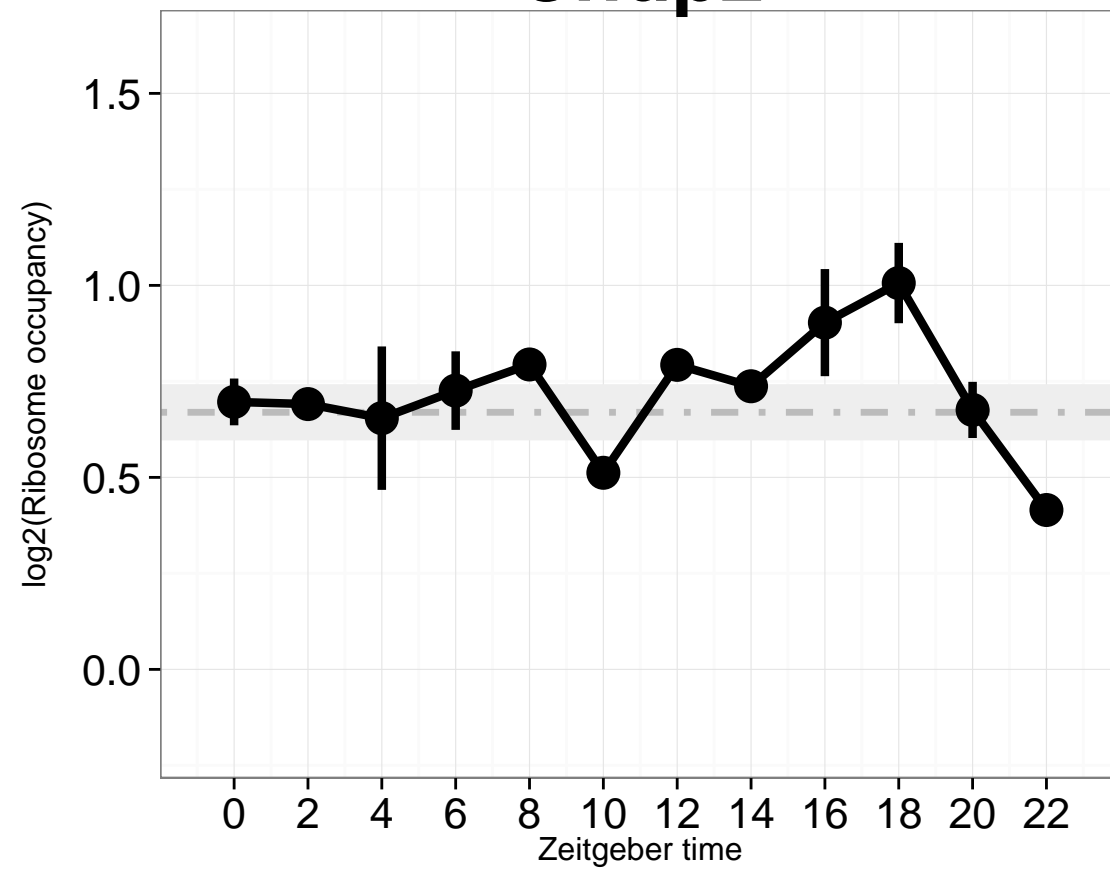

Supplement: SuppDataset_1.zip [file Cndp2_set_A.pdf › Supplemental Dataset 1/A-mRNA_nonrhyth_translation_nonrhyth/Cndp2_set_A.pdf]

# Cnep1r1

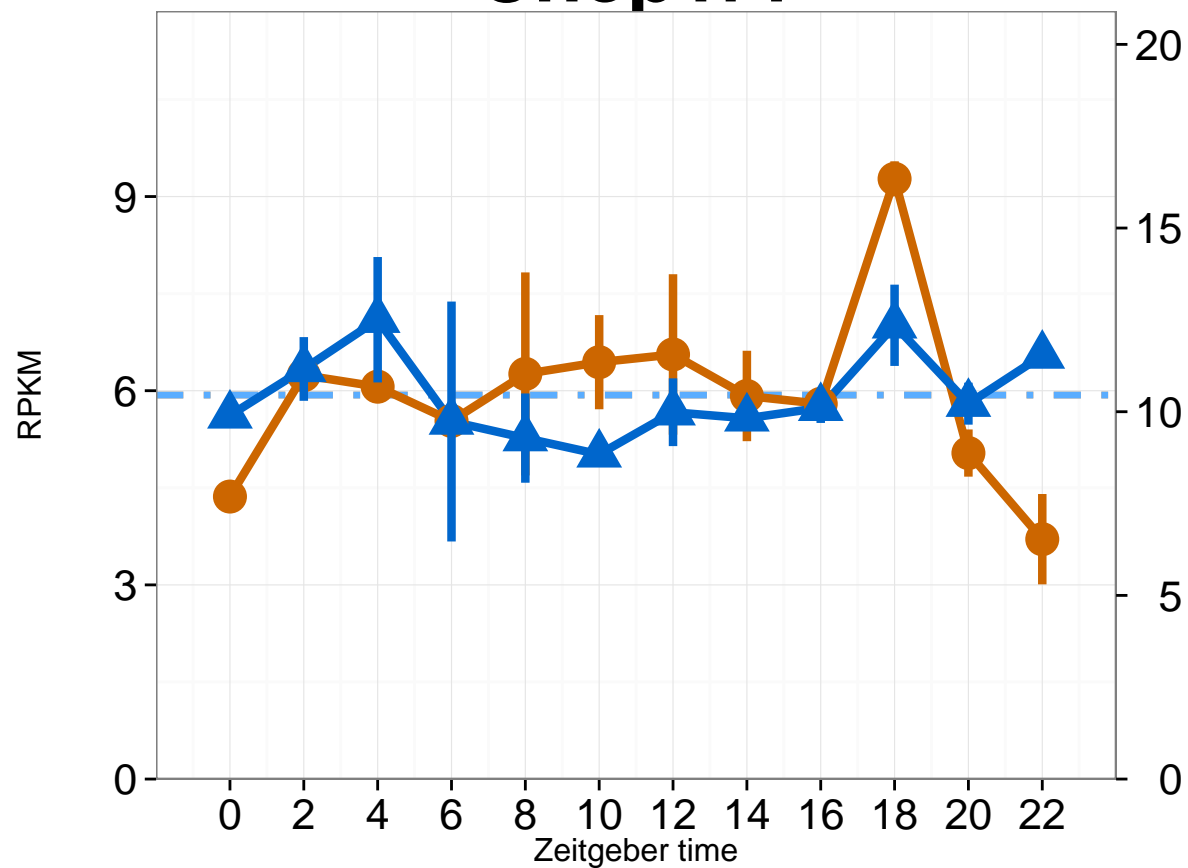

# Cnep1r1

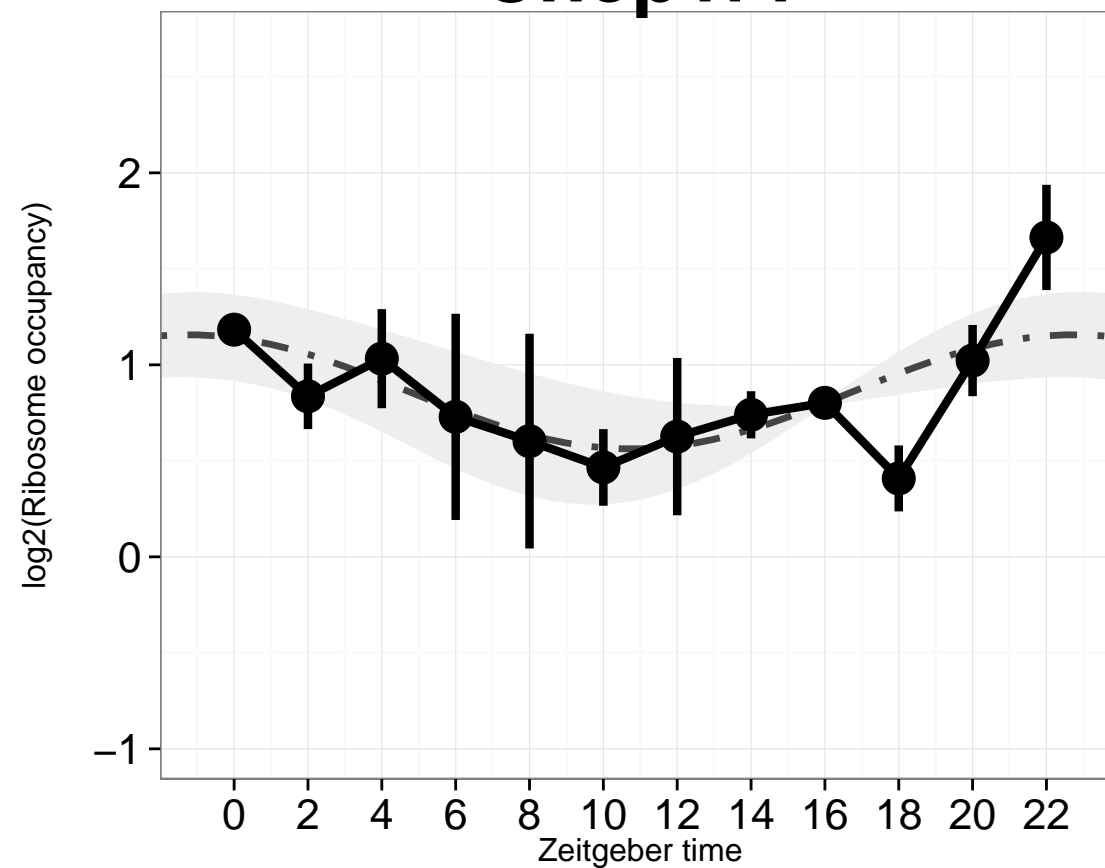

Supplement: SuppDataset_1.zip [file Cnep1r1_set_A.pdf › Supplemental Dataset 1/A-mRNA_nonrhyth_translation_nonrhyth/Cnep1r1_set_A.pdf]
