# Supplementary figures and images for: Ribosome profiling reveals the rhythmic liver translatome and circadian clock regulation by upstream open reading frames (part 17 of 113)
Source: HighWire-hosted journal article supplement (doi:10.1101/gr.195404.115), 2015-10-20

## Cnih1

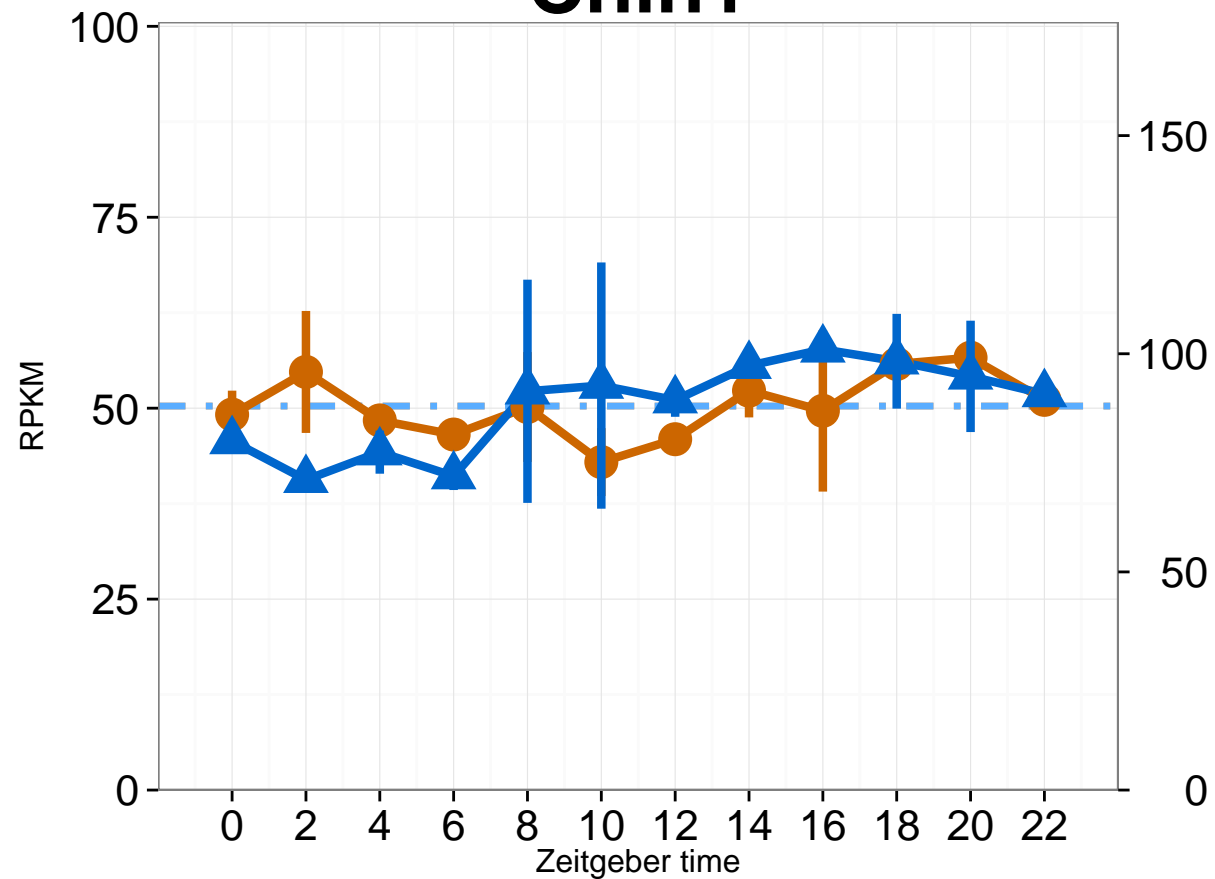

## Cnih1

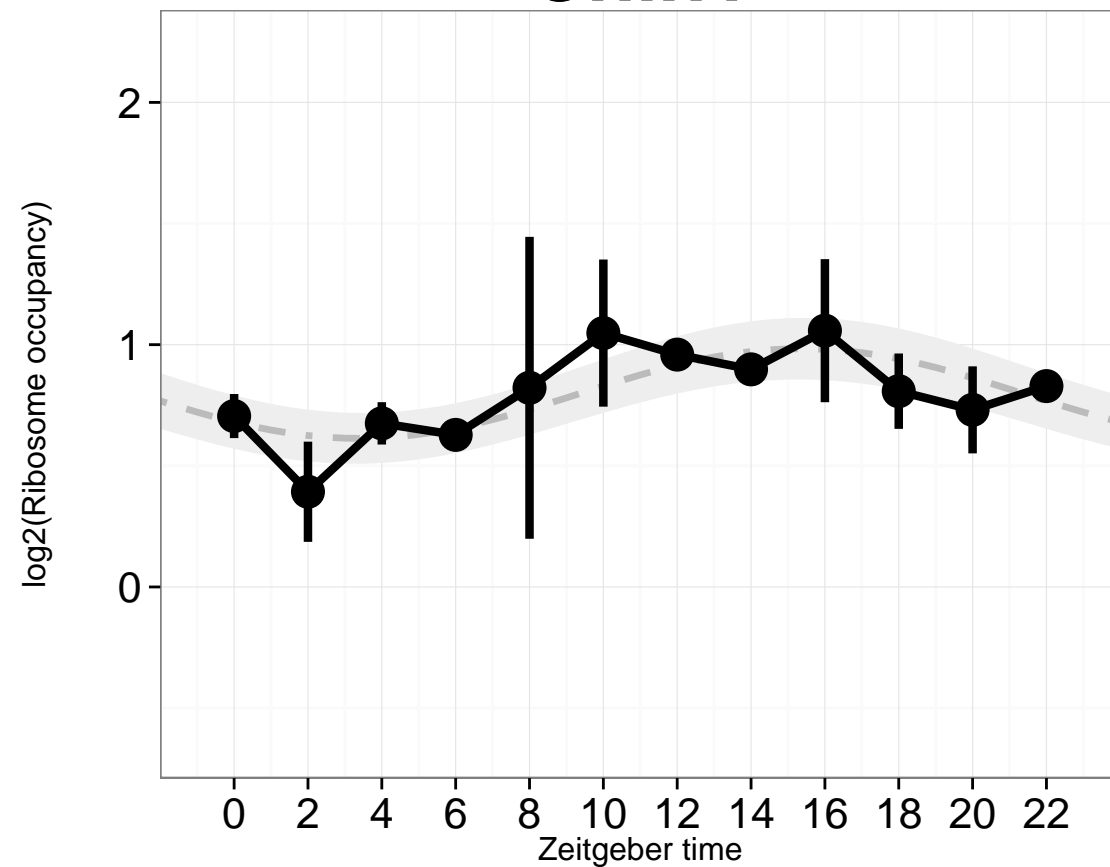

Supplement: SuppDataset_1.zip [file Cnih1_set_A.pdf › Supplemental Dataset 1/A-mRNA_nonrhyth_translation_nonrhyth/Cnih1_set_A.pdf]

## Cnih4

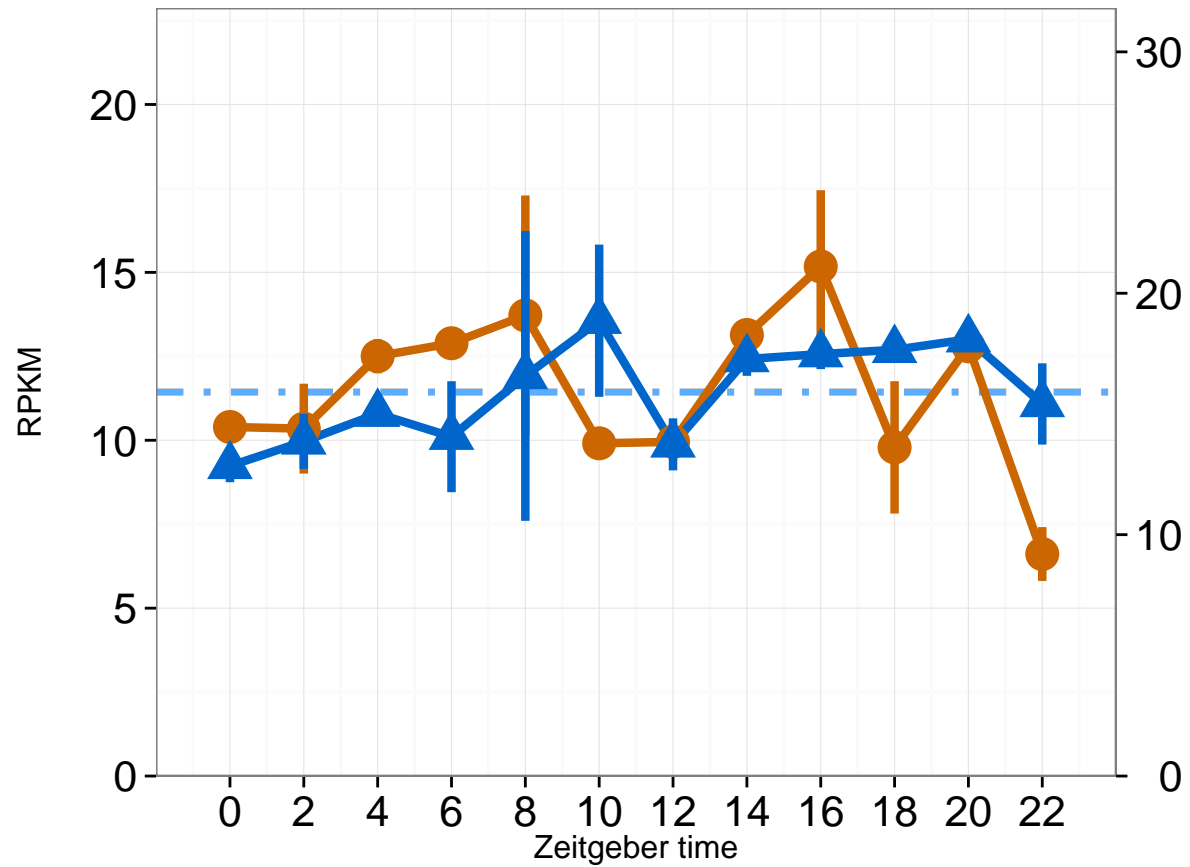

## Cnih4

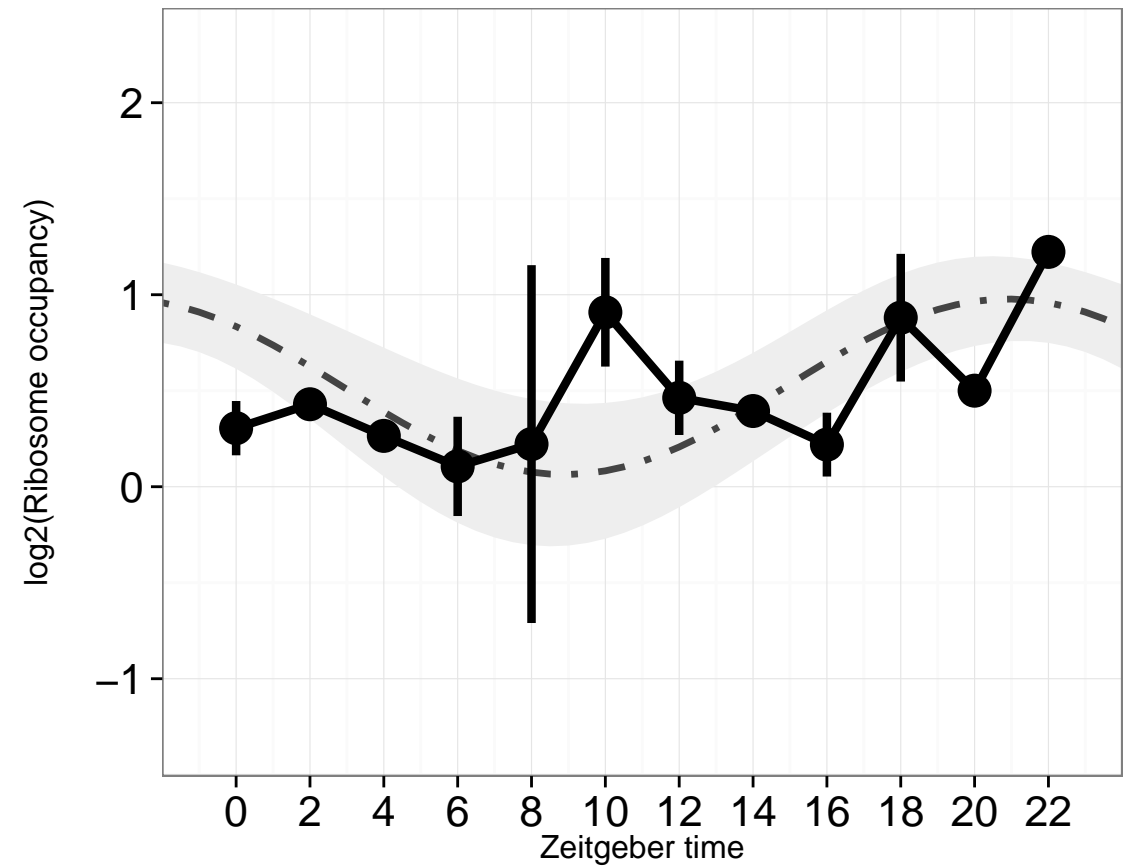

Supplement: SuppDataset_1.zip [file Cnih4_set_A.pdf › Supplemental Dataset 1/A-mRNA_nonrhyth_translation_nonrhyth/Cnih4_set_A.pdf]

# Cnn3

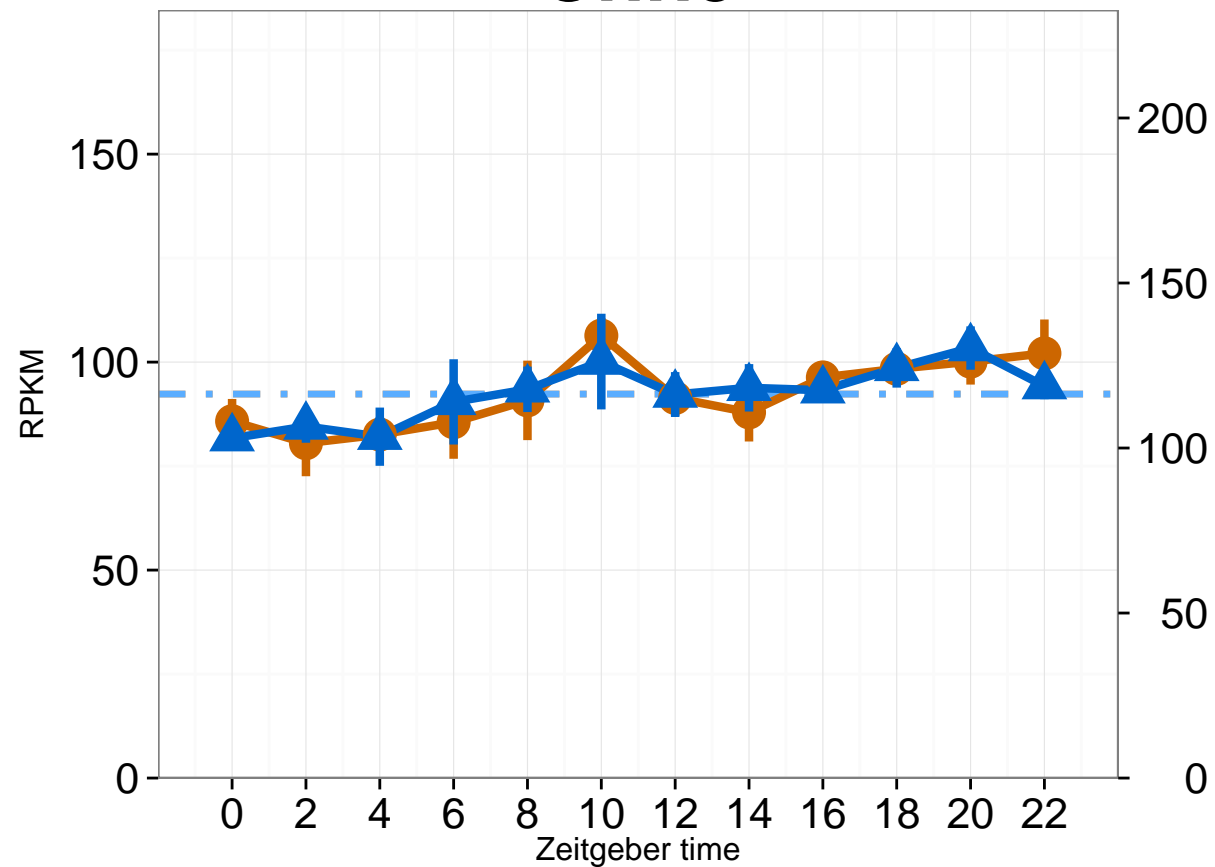

# Cnn3

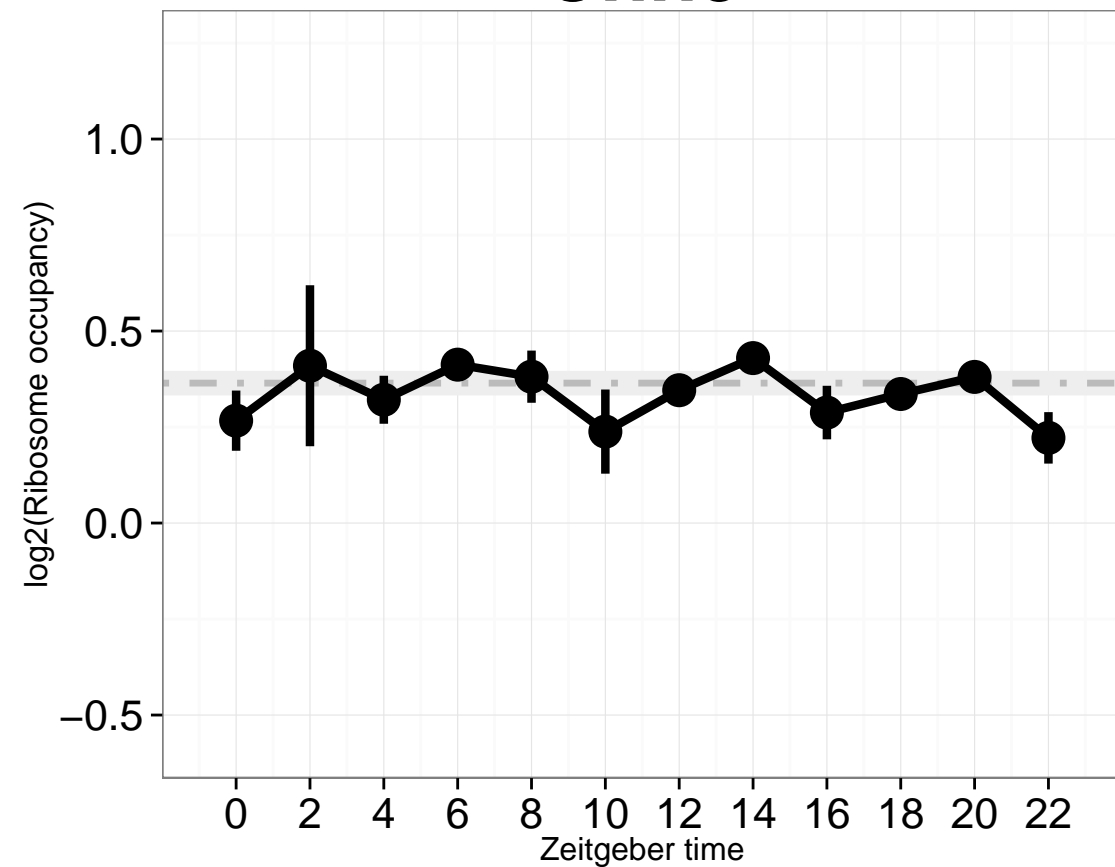

Supplement: SuppDataset_1.zip [file Cnn3_set_A.pdf › Supplemental Dataset 1/A-mRNA_nonrhyth_translation_nonrhyth/Cnn3_set_A.pdf]

## Cnnm2

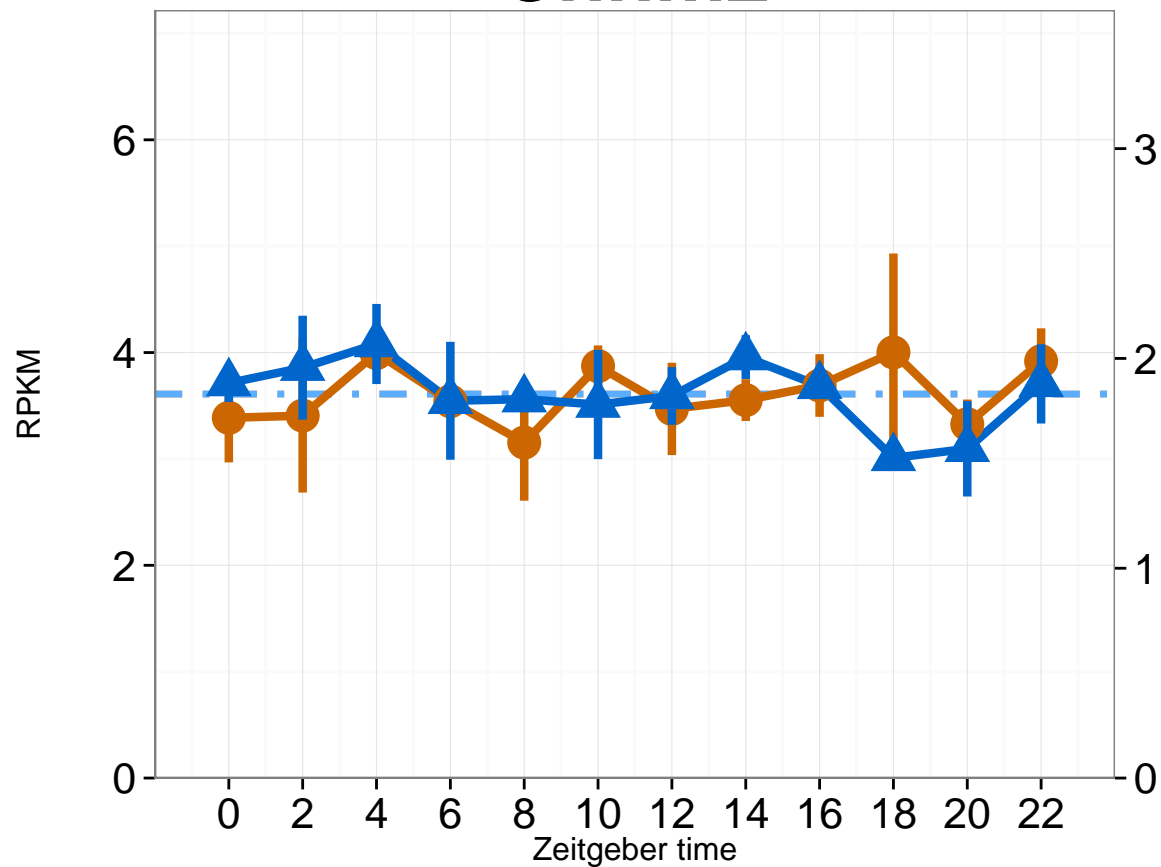

## Cnnm2

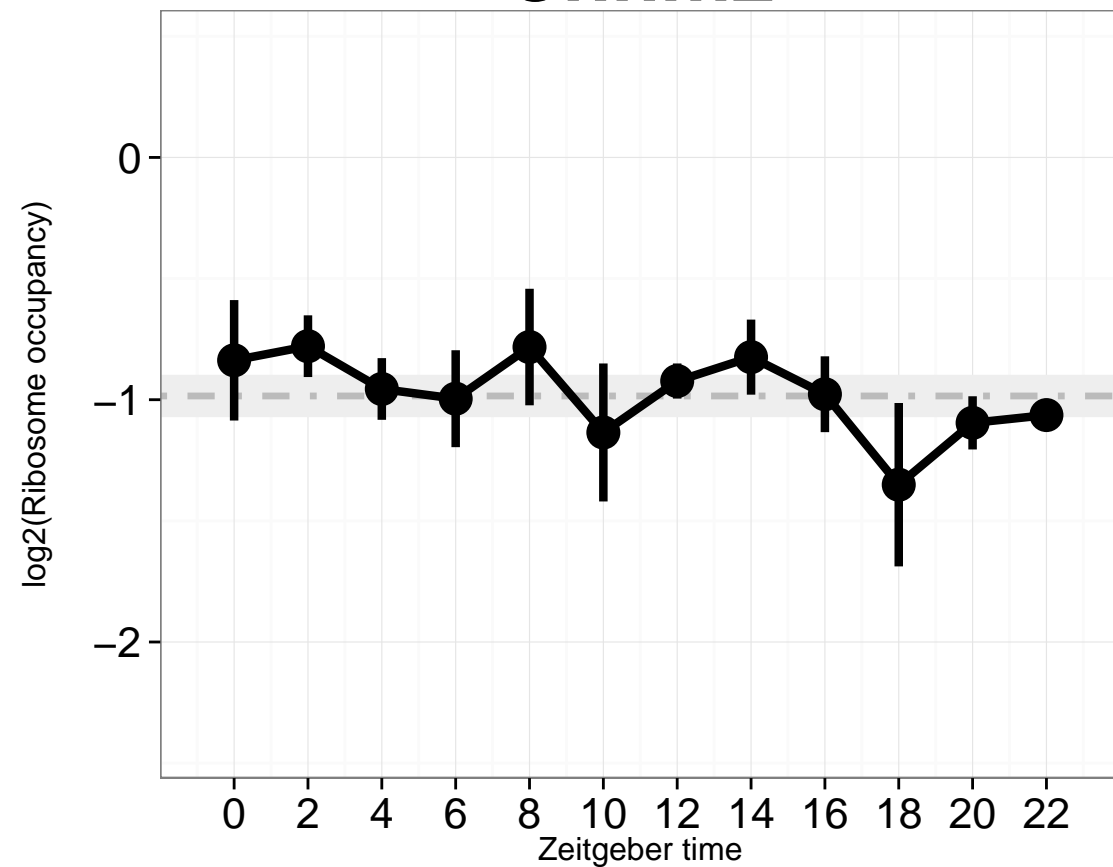

Supplement: SuppDataset_1.zip [file Cnnm2_set_A.pdf › Supplemental Dataset 1/A-mRNA_nonrhyth_translation_nonrhyth/Cnnm2_set_A.pdf]

# Cnot10

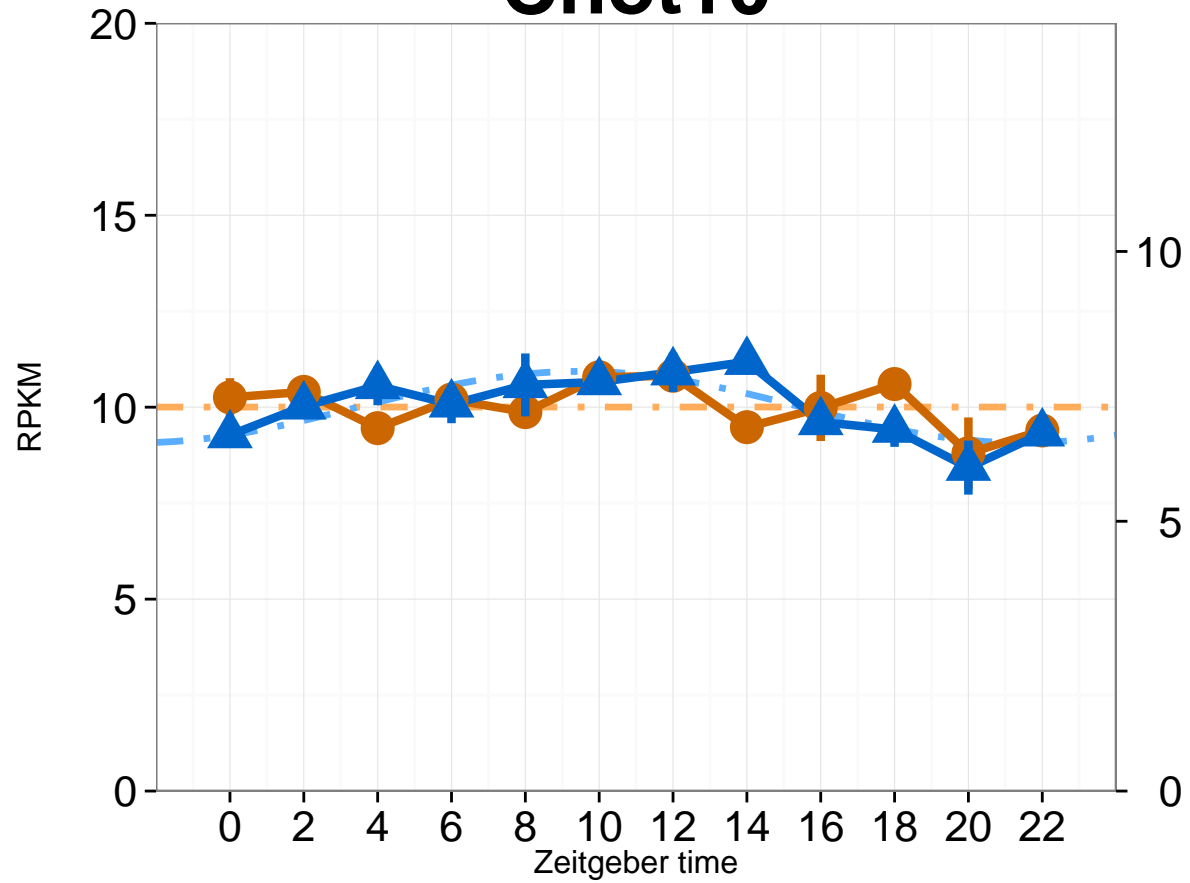

# Cnot10

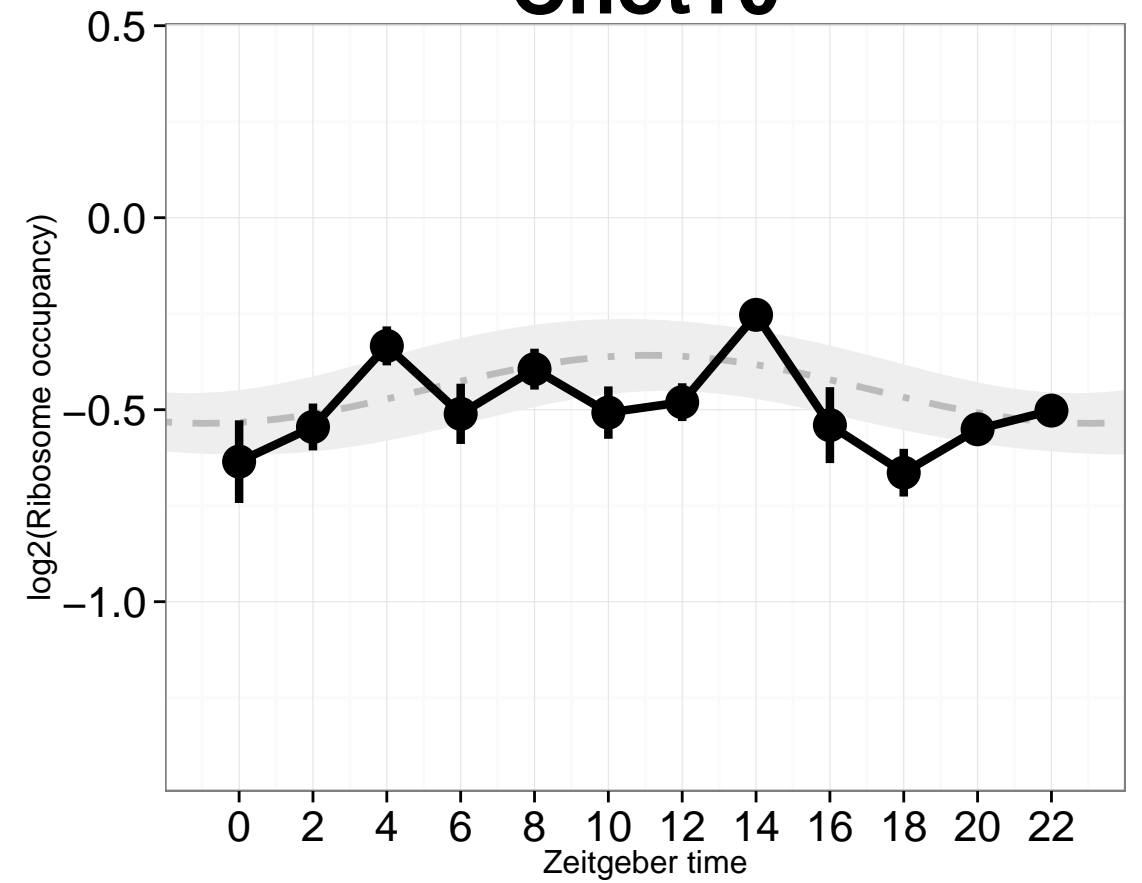

Supplement: SuppDataset_1.zip [file Cnot10_set_A.pdf › Supplemental Dataset 1/A-mRNA_nonrhyth_translation_nonrhyth/Cnot10_set_A.pdf]

# Cnot11

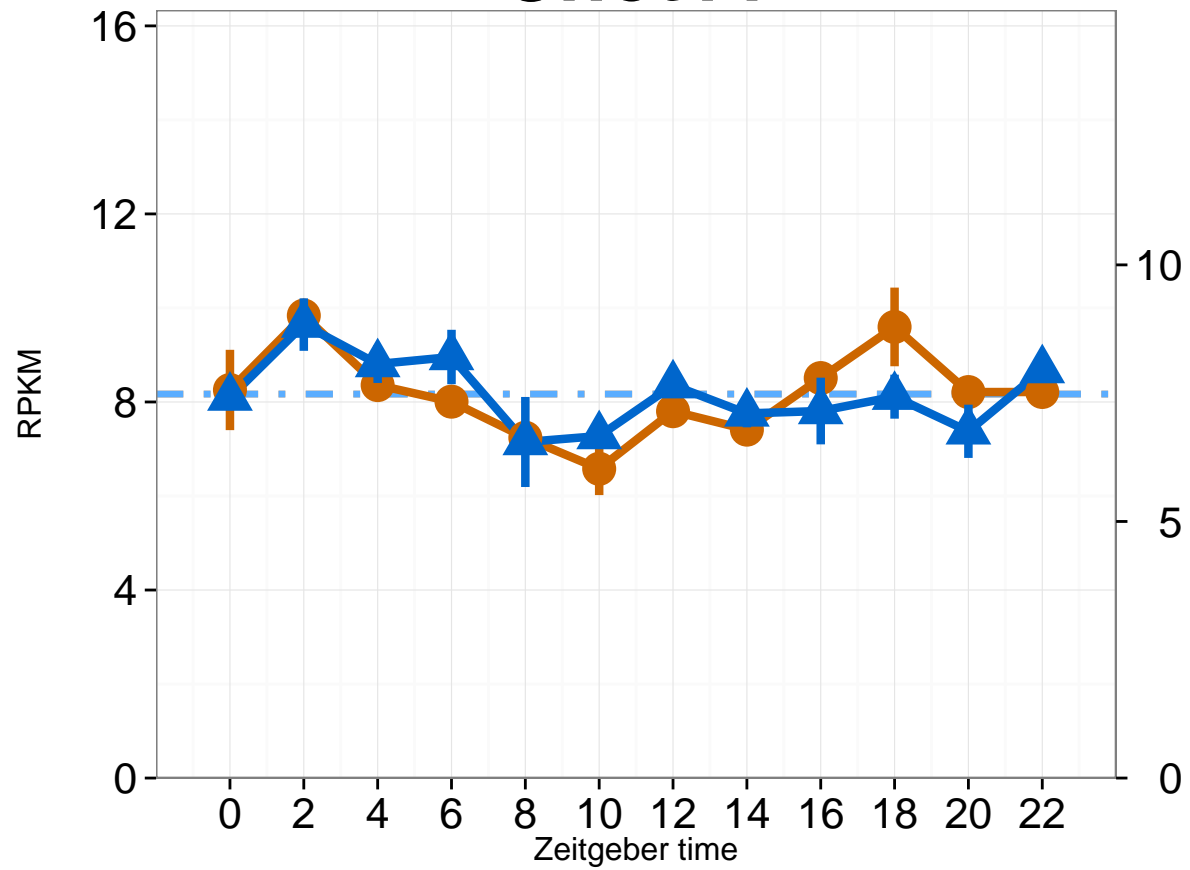

# Cnot11

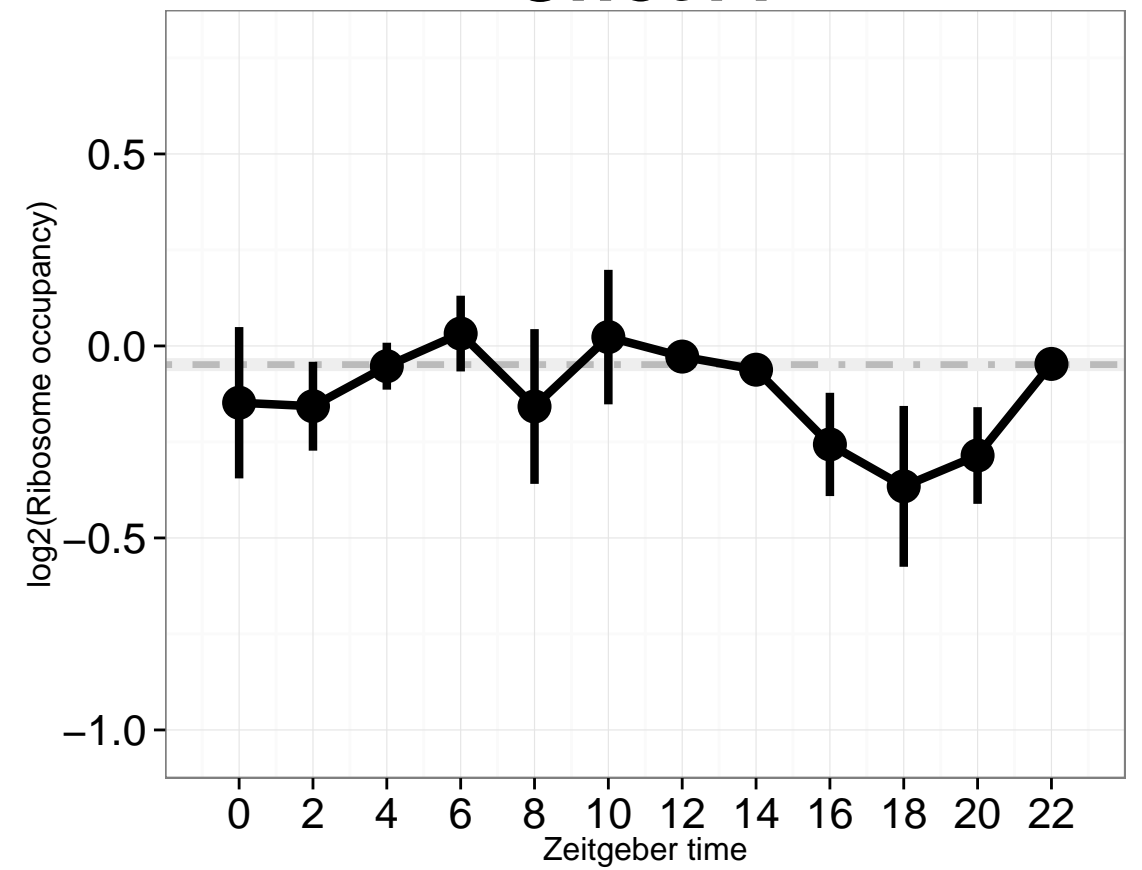

Supplement: SuppDataset_1.zip [file Cnot11_set_A.pdf › Supplemental Dataset 1/A-mRNA_nonrhyth_translation_nonrhyth/Cnot11_set_A.pdf]

# Cnot1

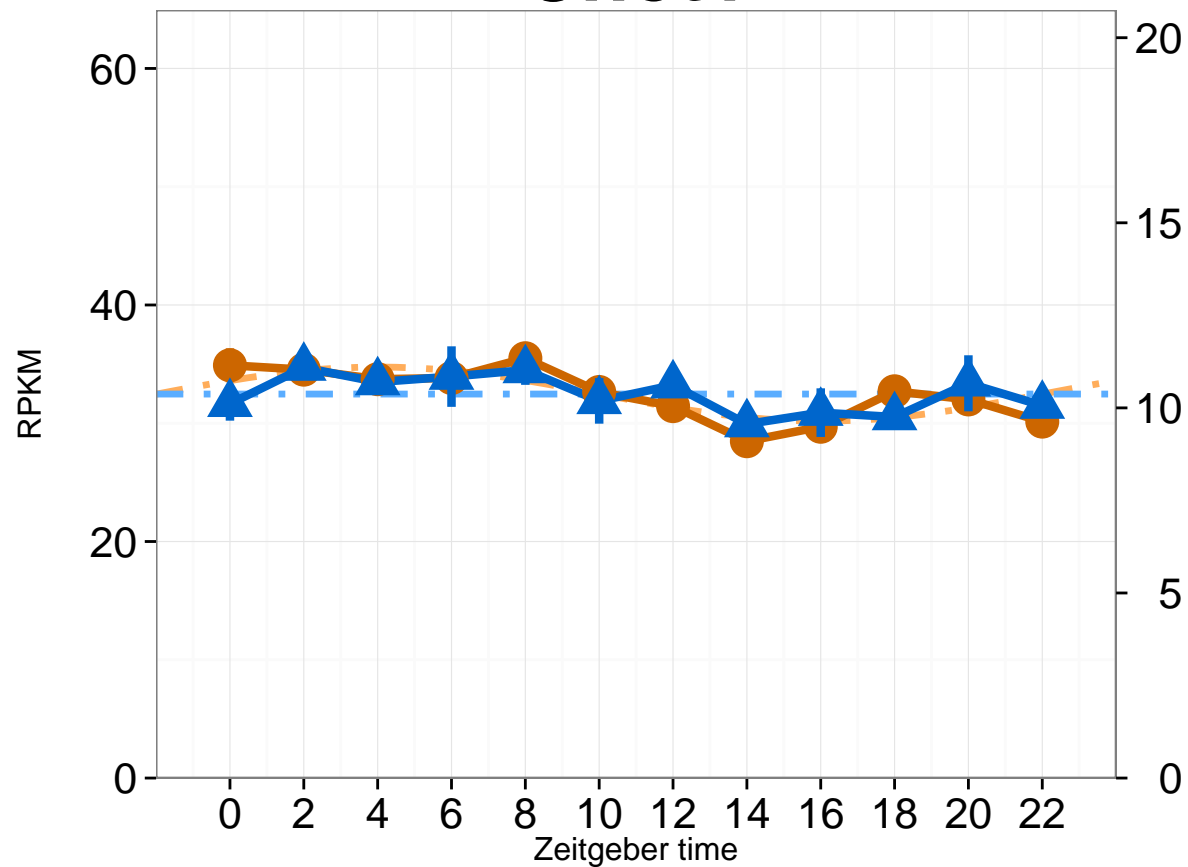

# Cnot1

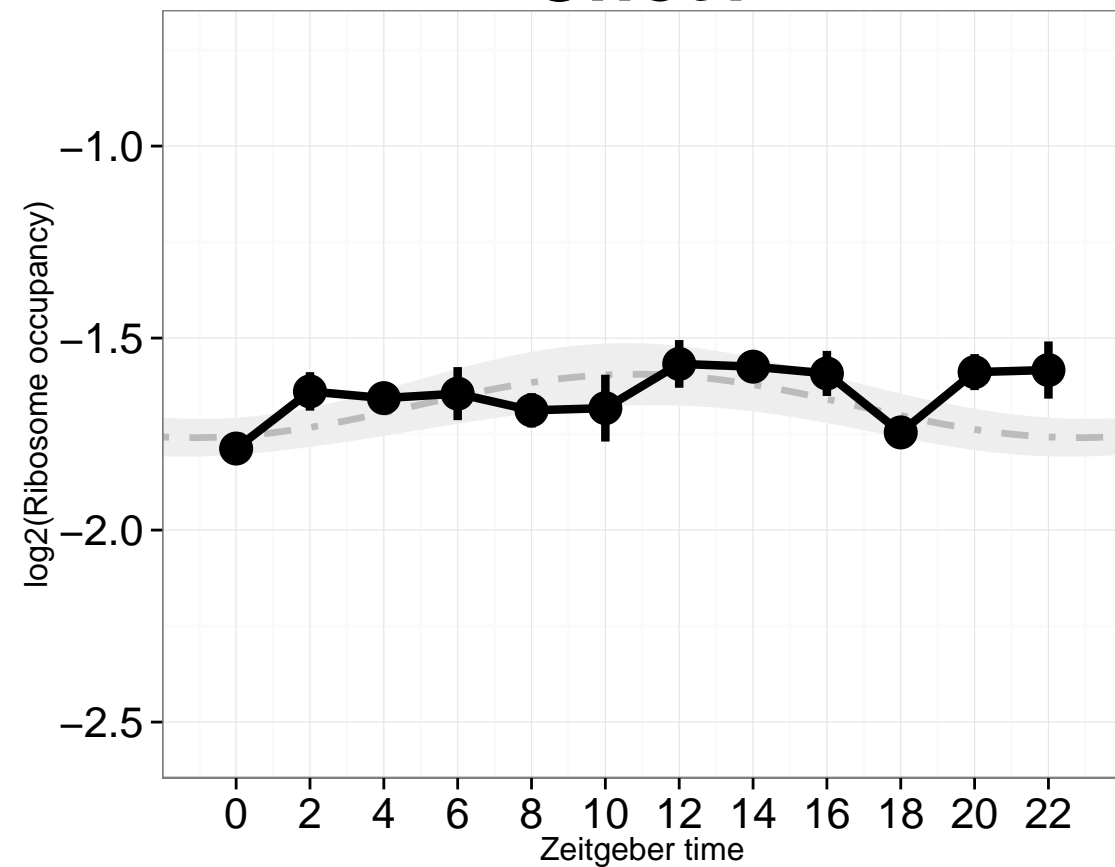

Supplement: SuppDataset_1.zip [file Cnot1_set_A.pdf › Supplemental Dataset 1/A-mRNA_nonrhyth_translation_nonrhyth/Cnot1_set_A.pdf]

## Cnot2

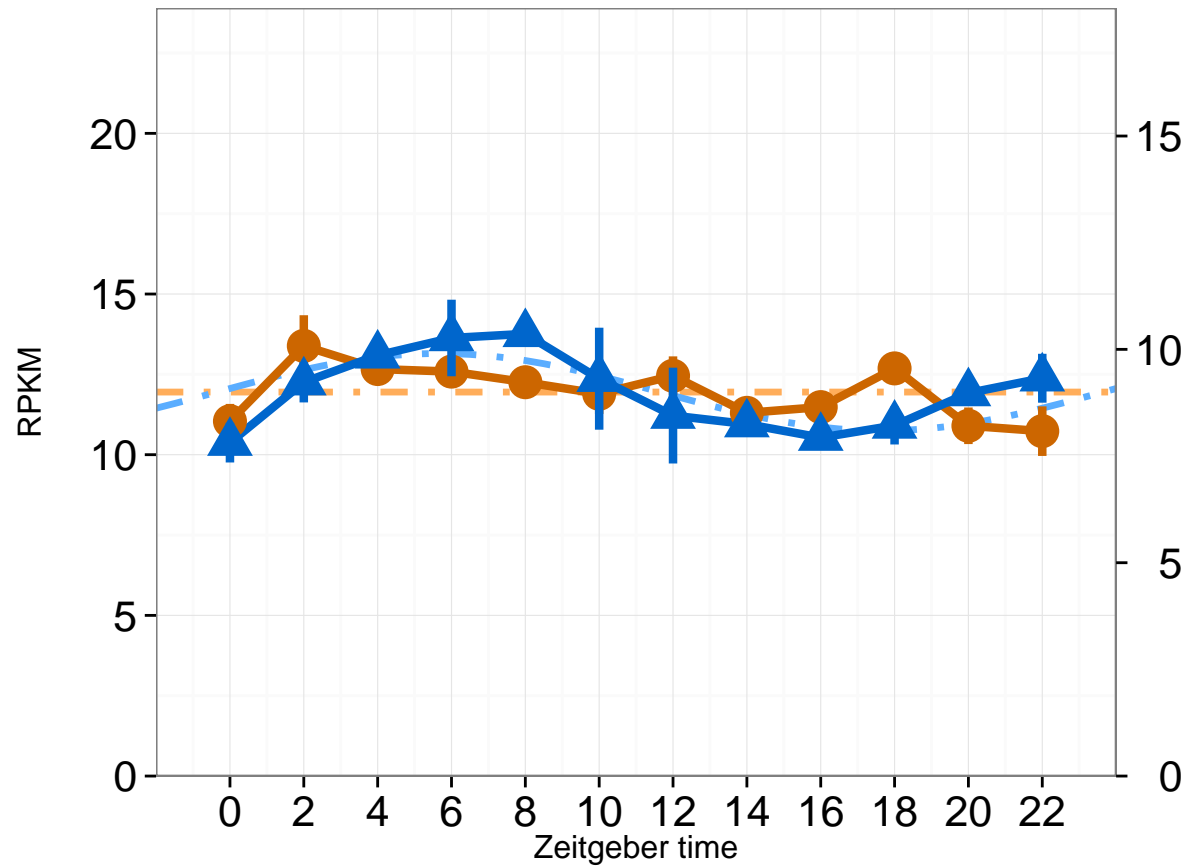

## Cnot2

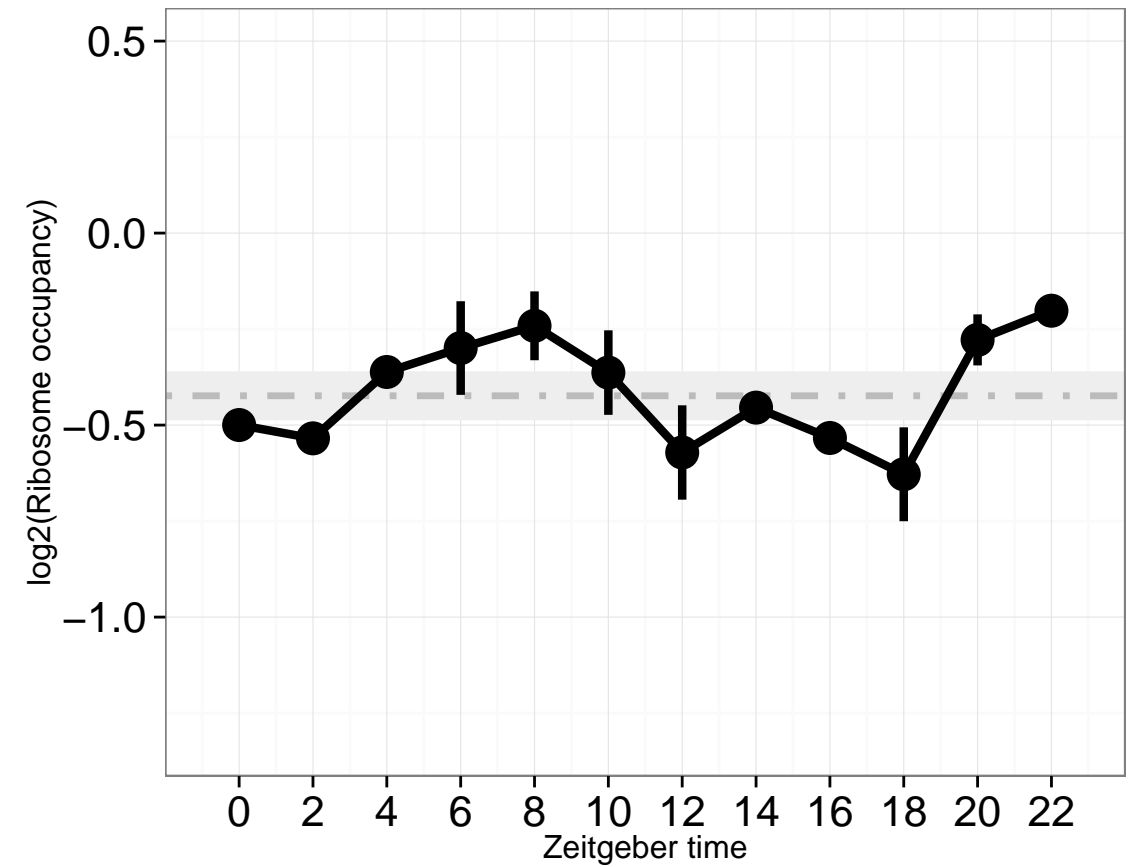

Supplement: SuppDataset_1.zip [file Cnot2_set_A.pdf › Supplemental Dataset 1/A-mRNA_nonrhyth_translation_nonrhyth/Cnot2_set_A.pdf]

## Cnot3

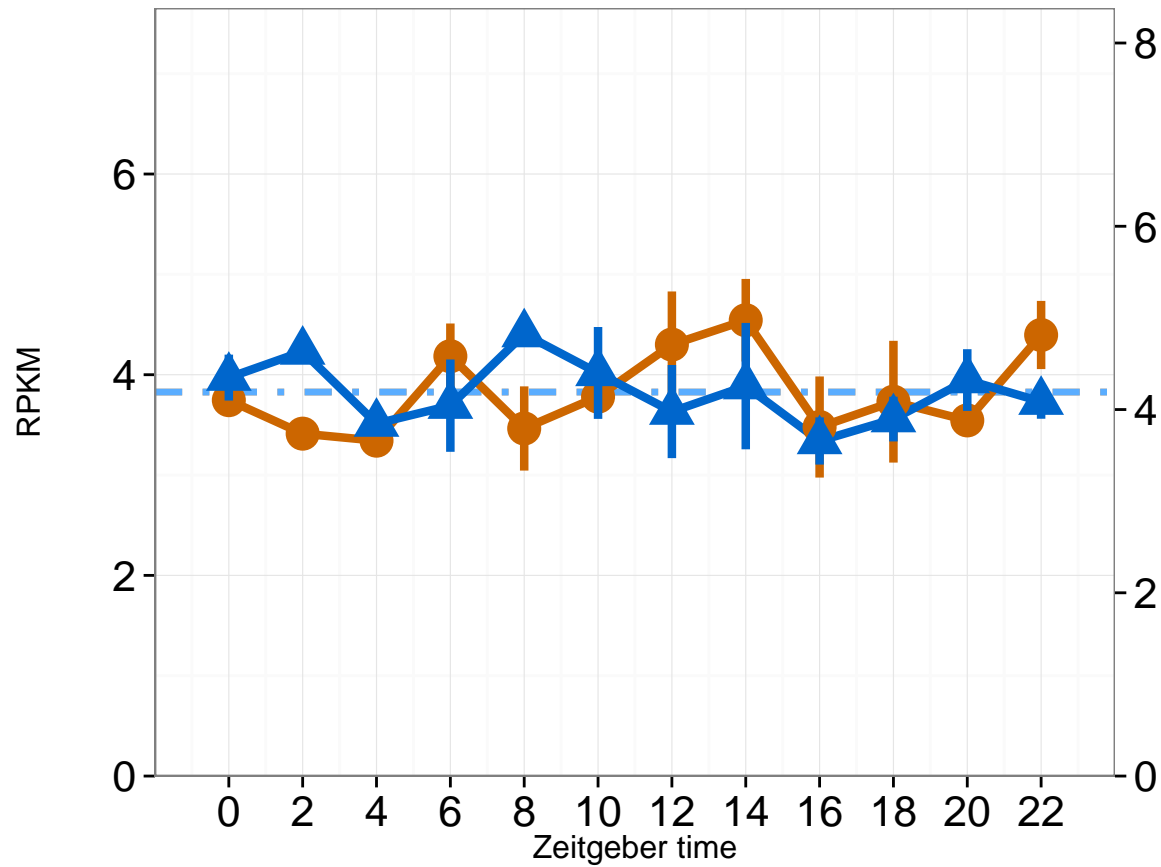

## Cnot3

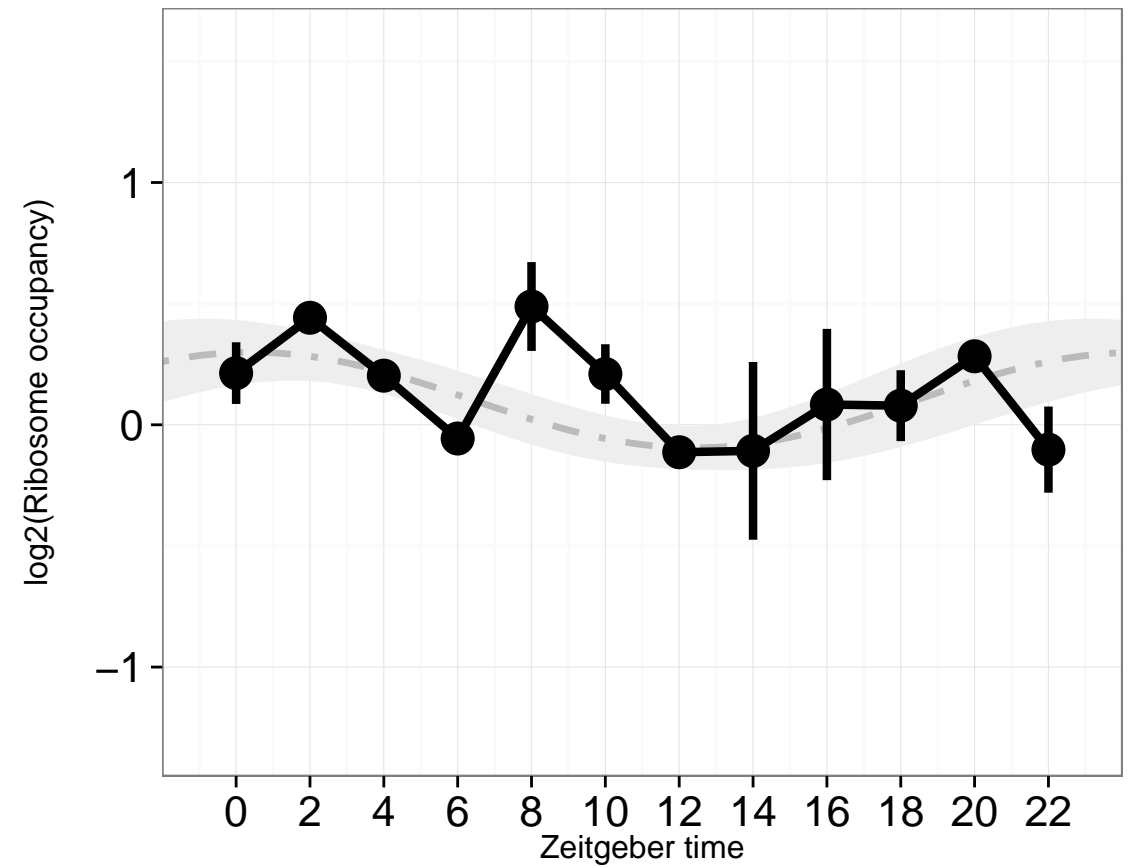

Supplement: SuppDataset_1.zip [file Cnot3_set_A.pdf › Supplemental Dataset 1/A-mRNA_nonrhyth_translation_nonrhyth/Cnot3_set_A.pdf]

## Cnot4

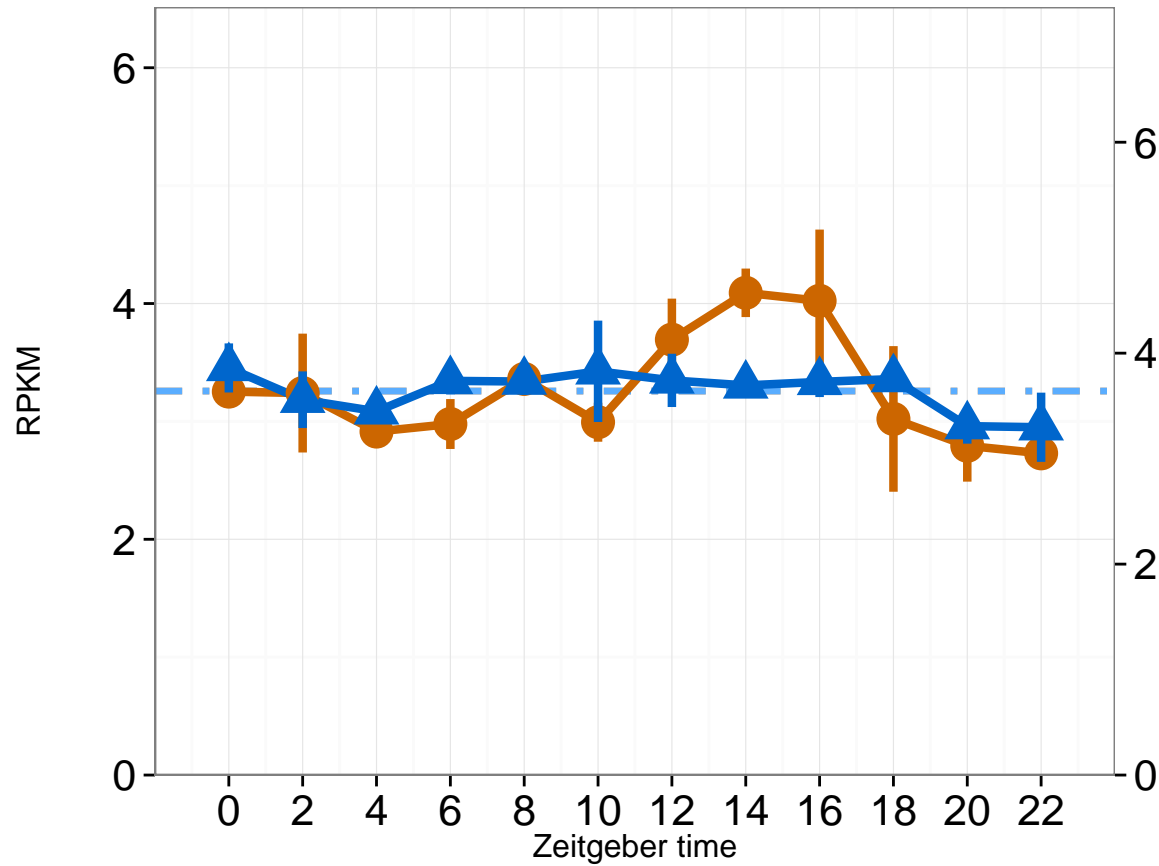

## Cnot4

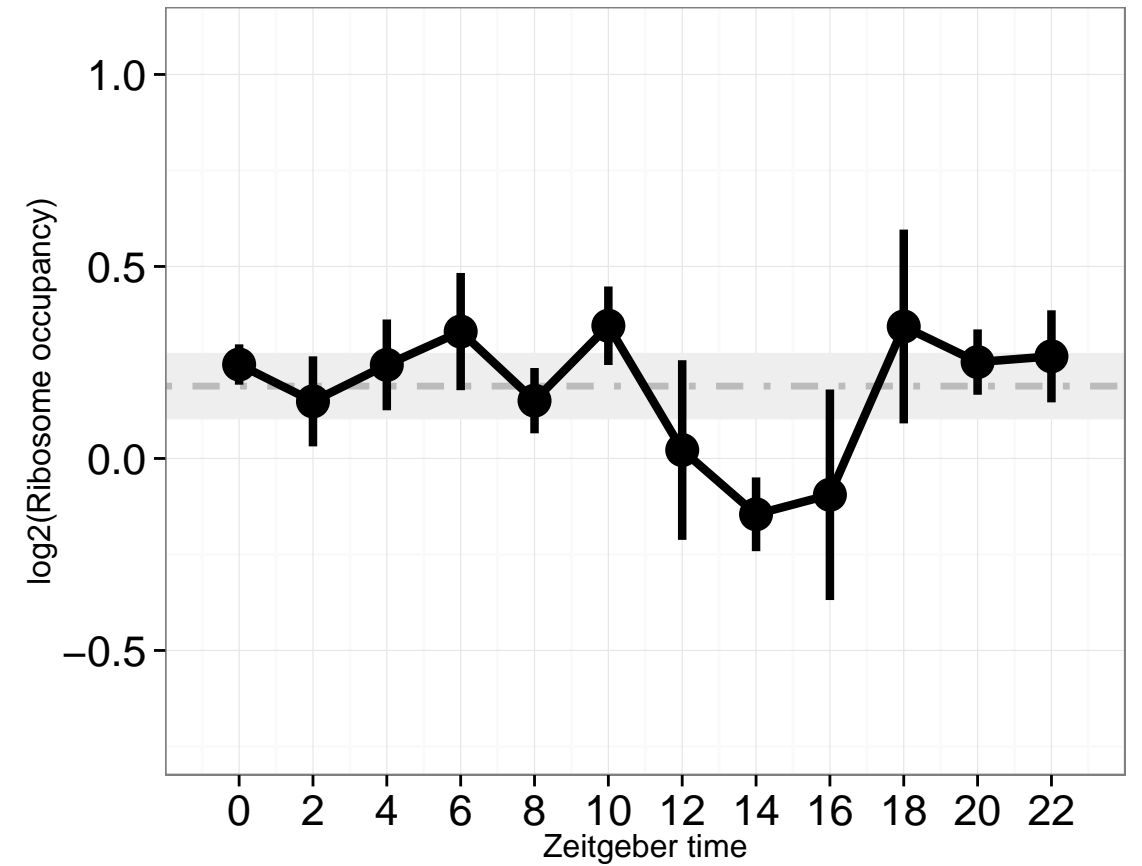

Supplement: SuppDataset_1.zip [file Cnot4_set_A.pdf › Supplemental Dataset 1/A-mRNA_nonrhyth_translation_nonrhyth/Cnot4_set_A.pdf]

# Cnot6

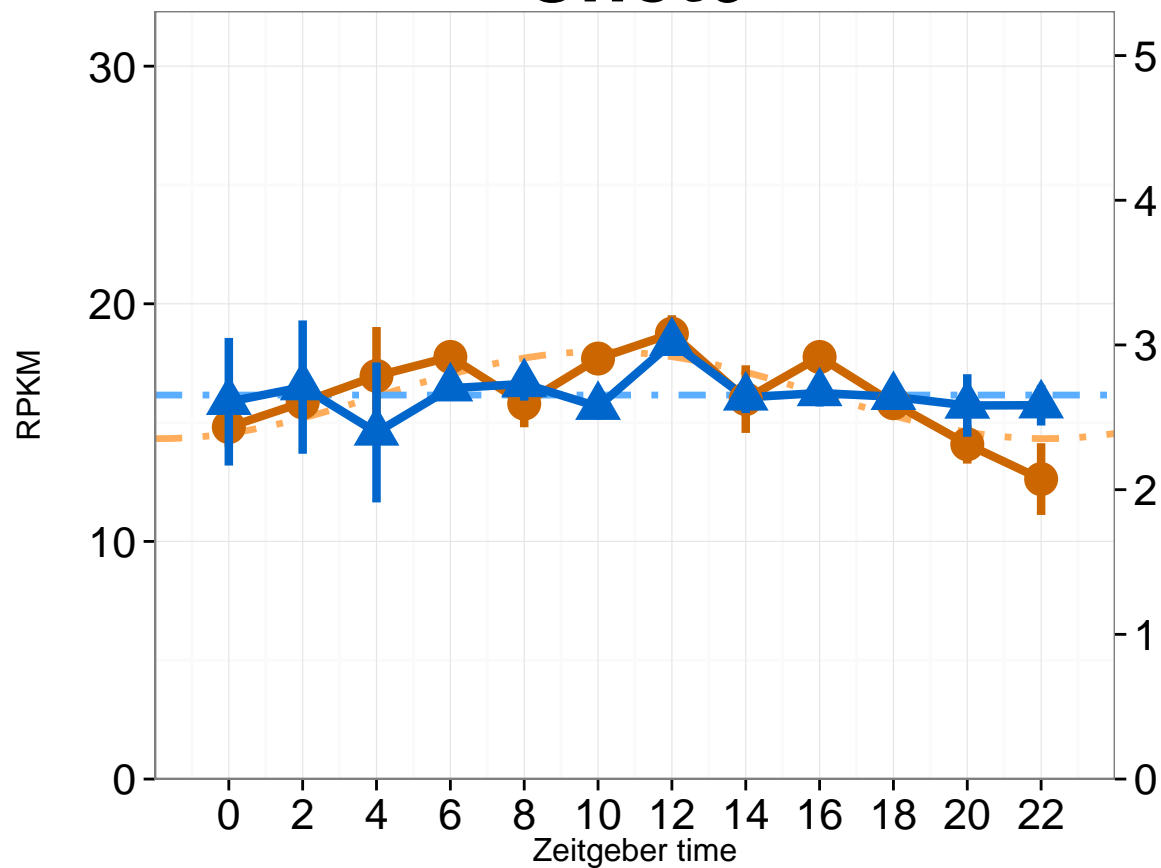

# Cnot6

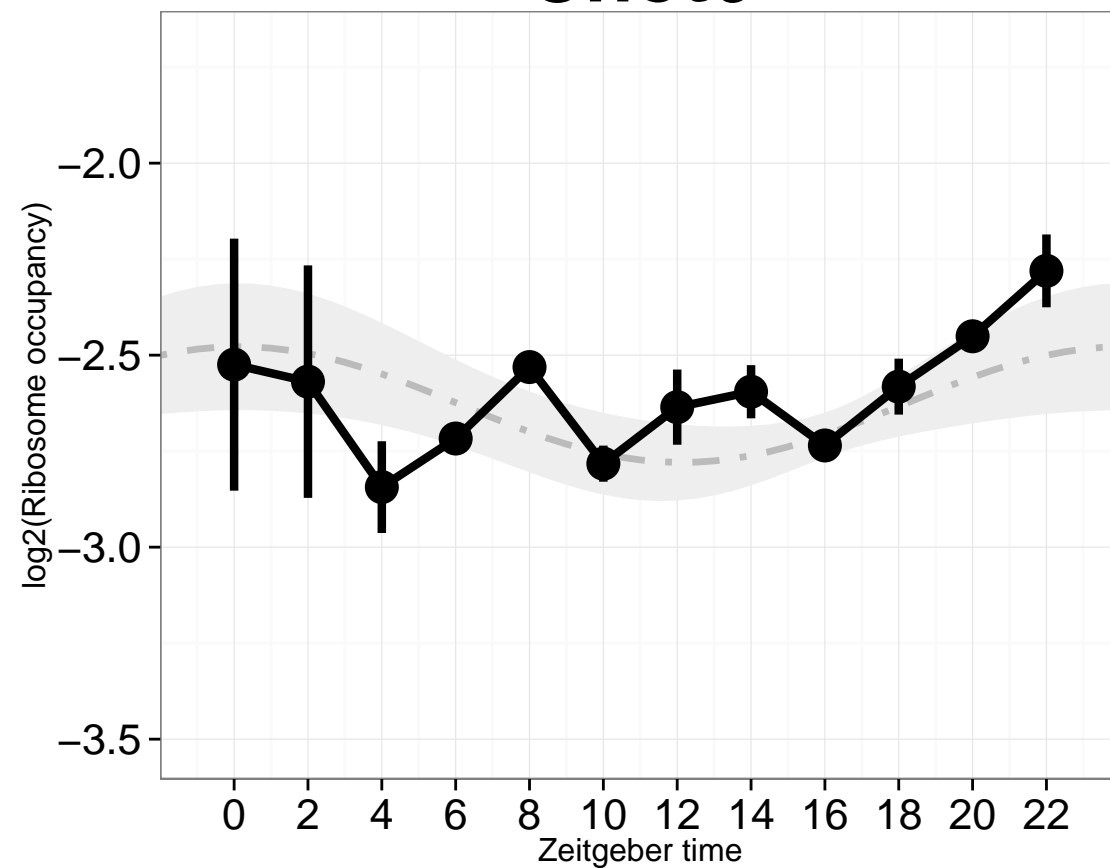

Supplement: SuppDataset_1.zip [file Cnot6_set_A.pdf › Supplemental Dataset 1/A-mRNA_nonrhyth_translation_nonrhyth/Cnot6_set_A.pdf]

## Cnot6l

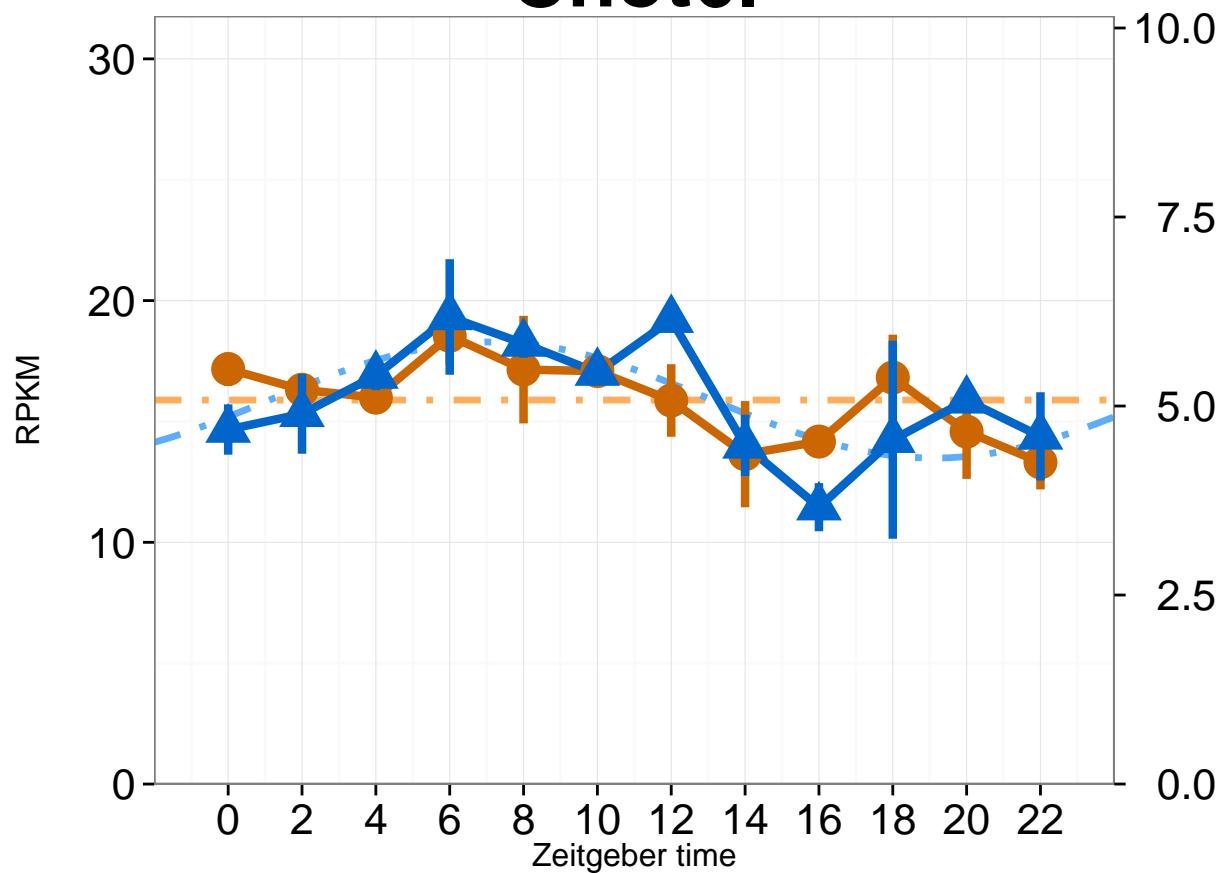

## Cnot6l

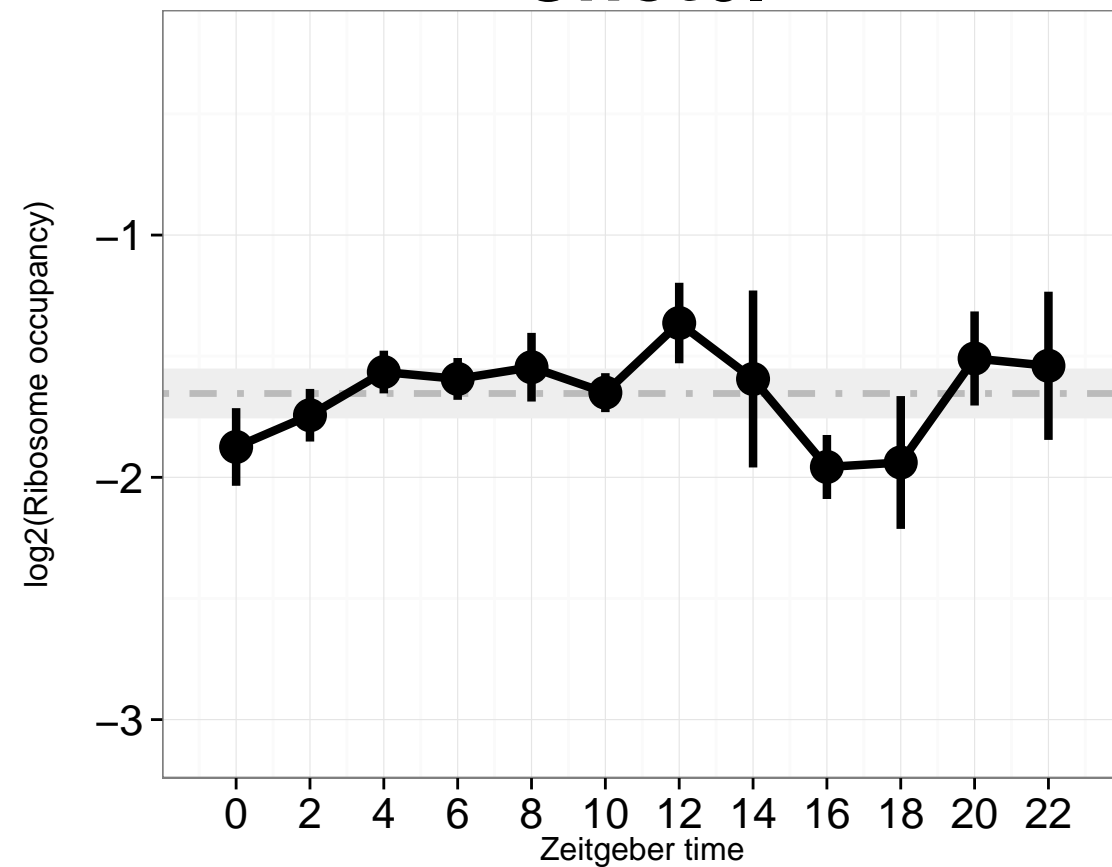

Supplement: SuppDataset_1.zip [file Cnot6l_set_A.pdf › Supplemental Dataset 1/A-mRNA_nonrhyth_translation_nonrhyth/Cnot6l_set_A.pdf]

## Cnot8

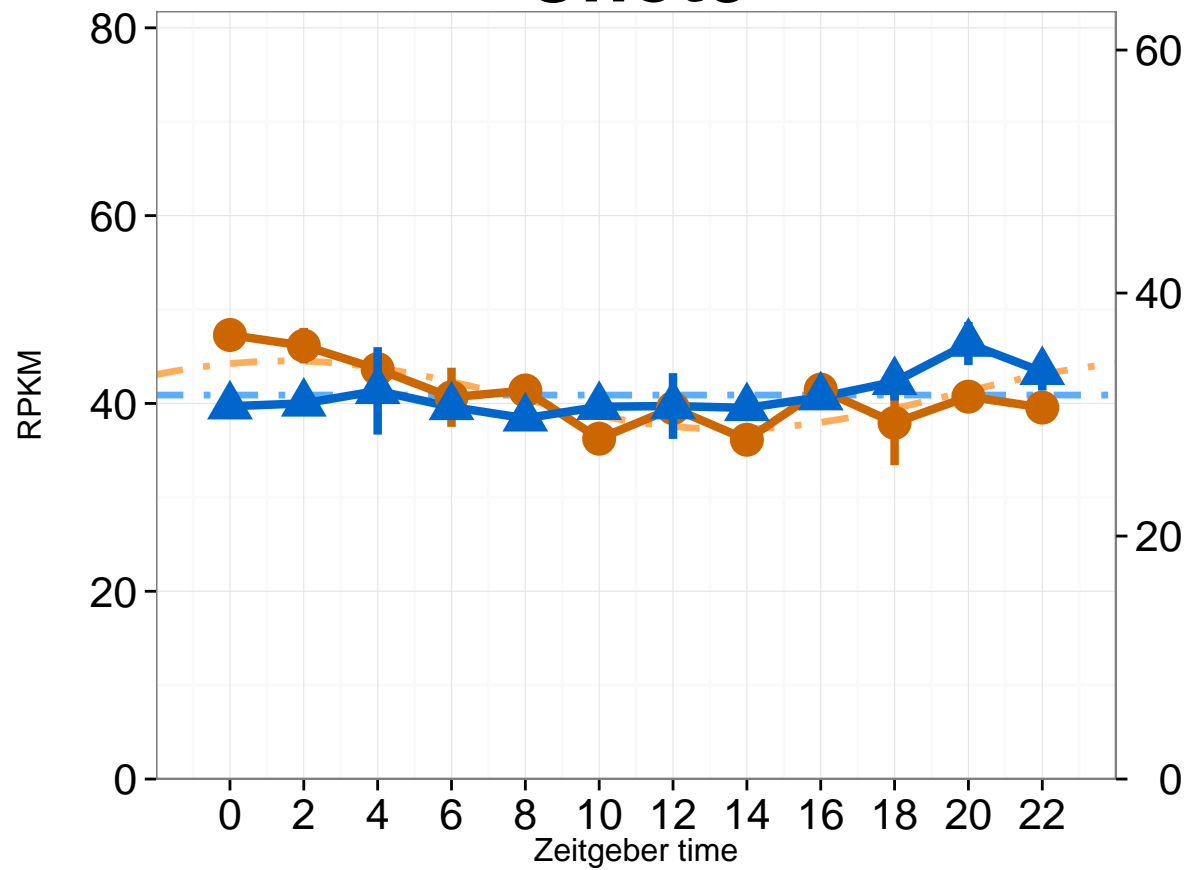

## Cnot8

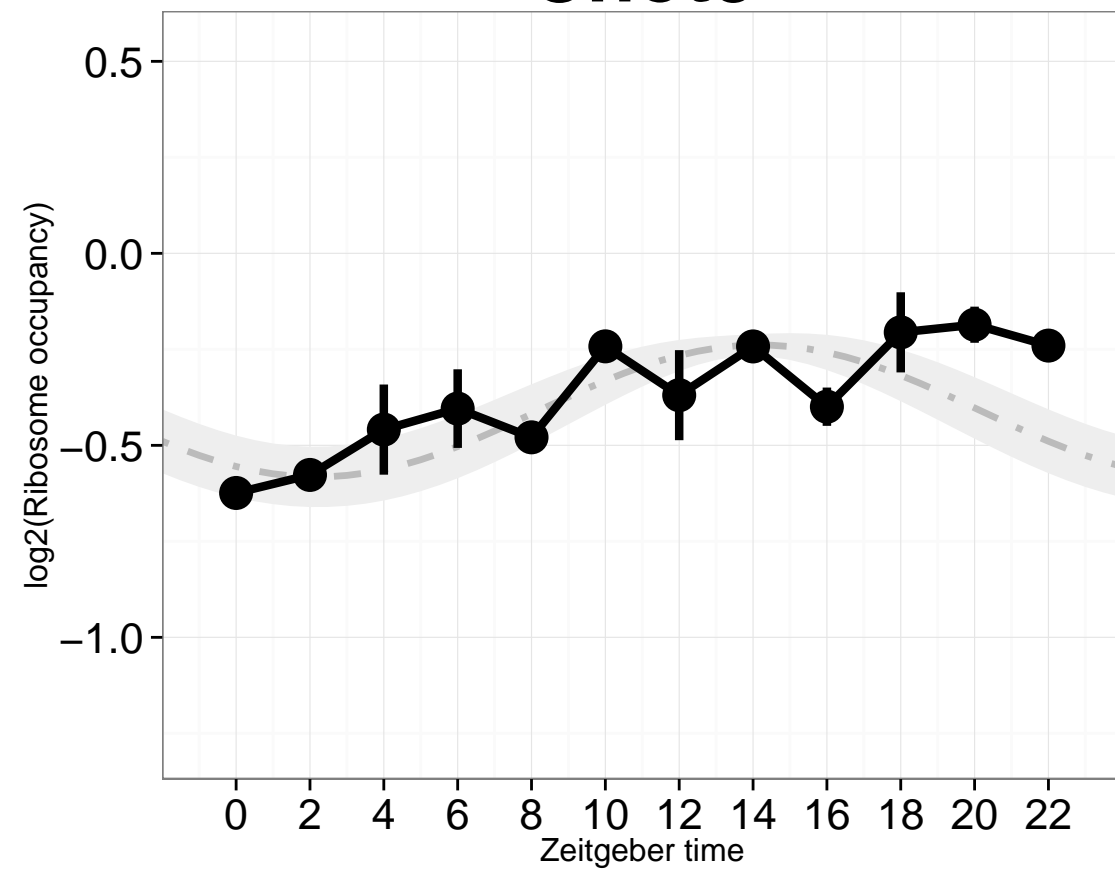

Supplement: SuppDataset_1.zip [file Cnot8_set_A.pdf › Supplemental Dataset 1/A-mRNA_nonrhyth_translation_nonrhyth/Cnot8_set_A.pdf]

# Cnpy2

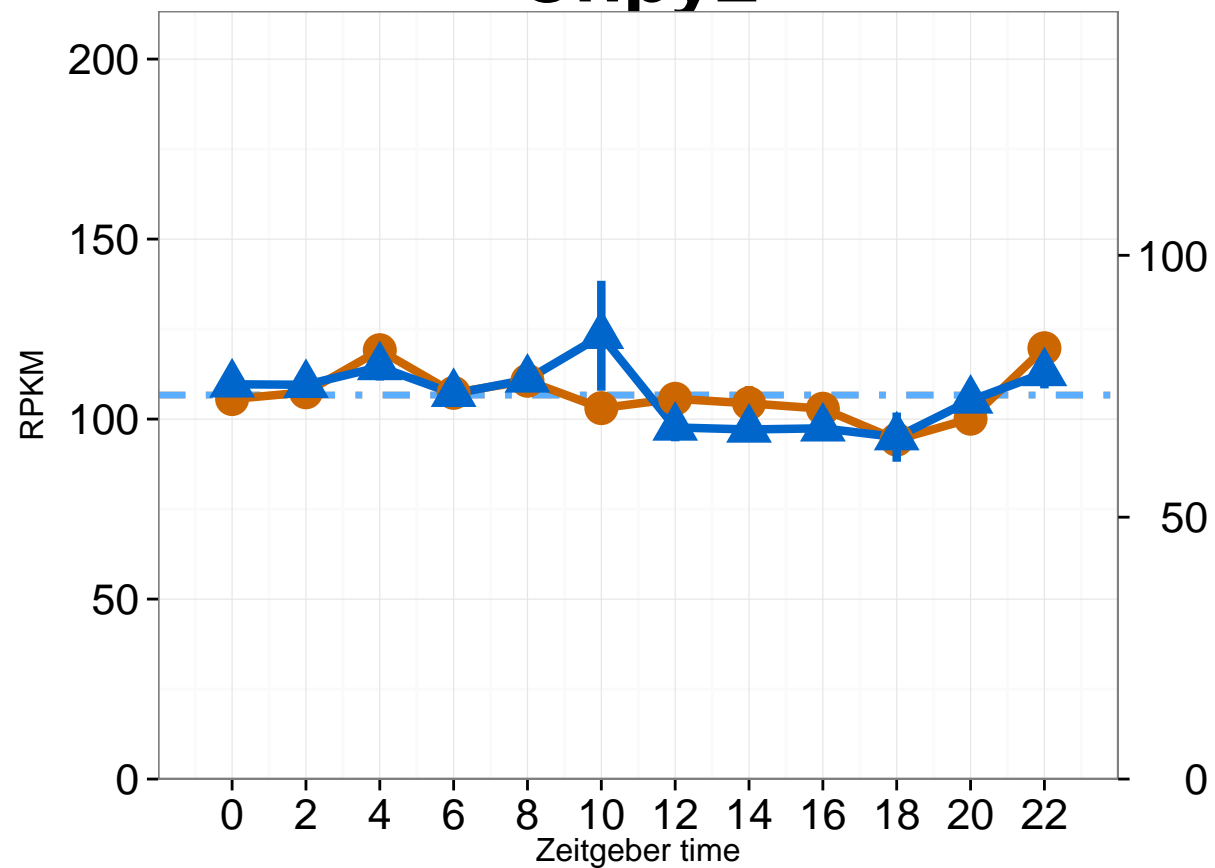

# Cnpy2

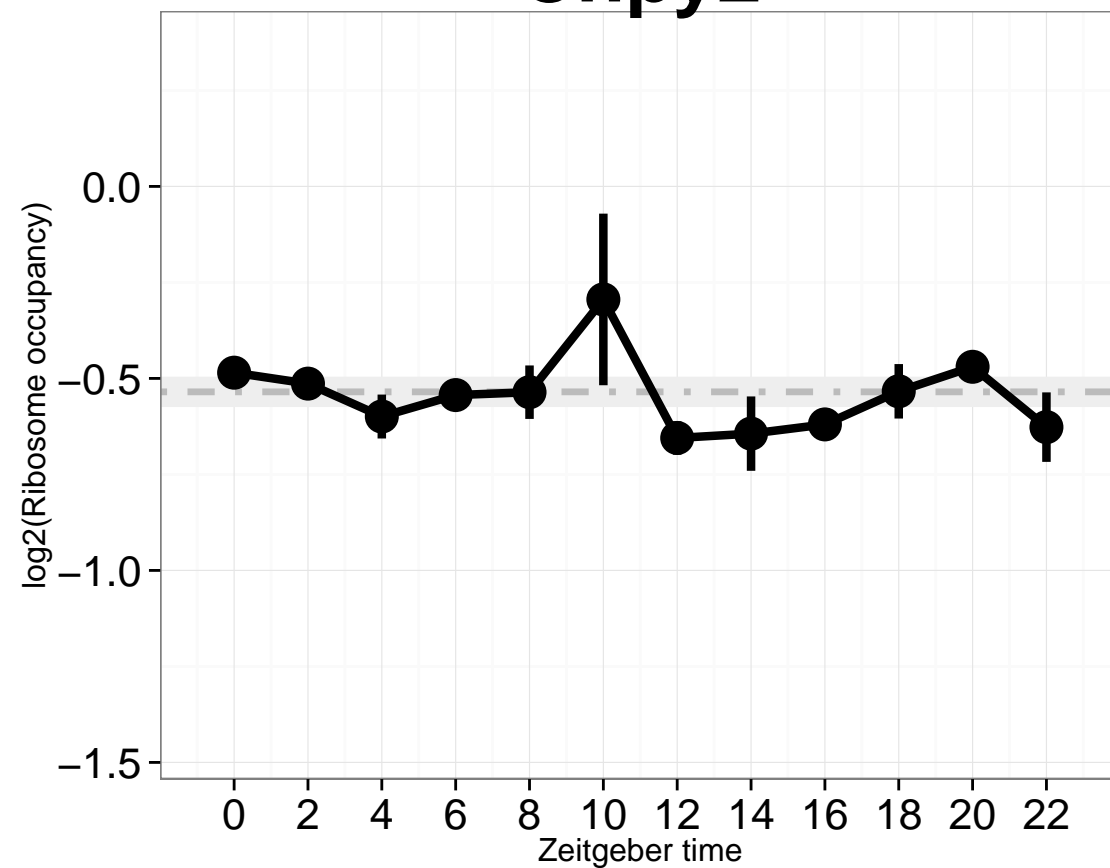

Supplement: SuppDataset_1.zip [file Cnpy2_set_A.pdf › Supplemental Dataset 1/A-mRNA_nonrhyth_translation_nonrhyth/Cnpy2_set_A.pdf]

# Cnpy3

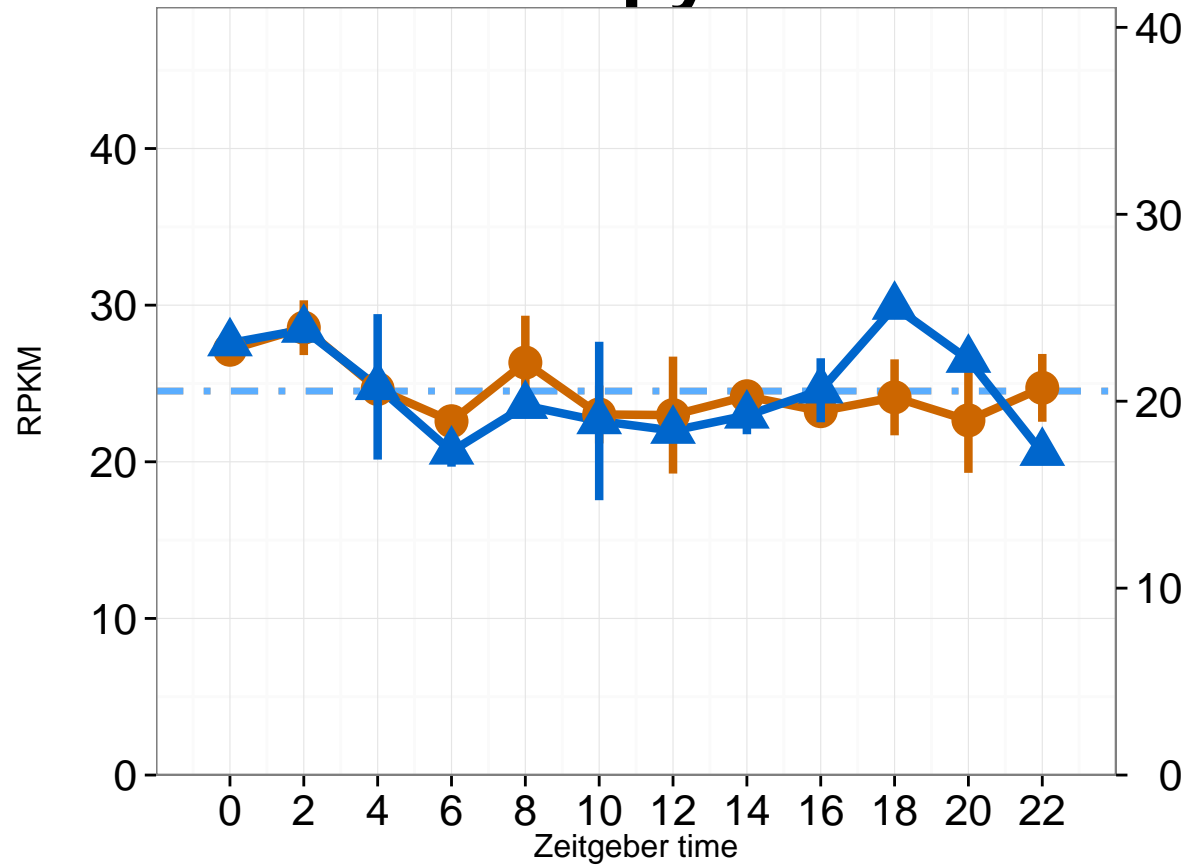

# Cnpy3

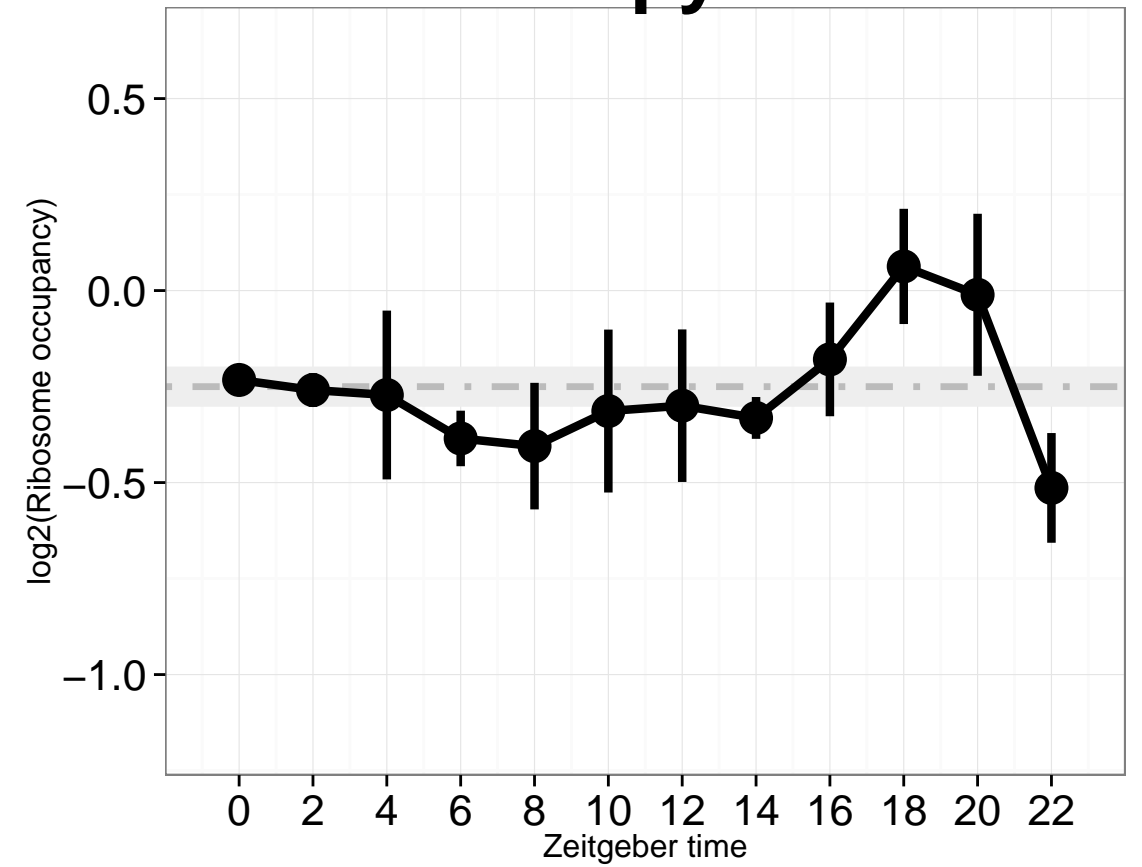

Supplement: SuppDataset_1.zip [file Cnpy3_set_A.pdf › Supplemental Dataset 1/A-mRNA_nonrhyth_translation_nonrhyth/Cnpy3_set_A.pdf]

## Cnr2

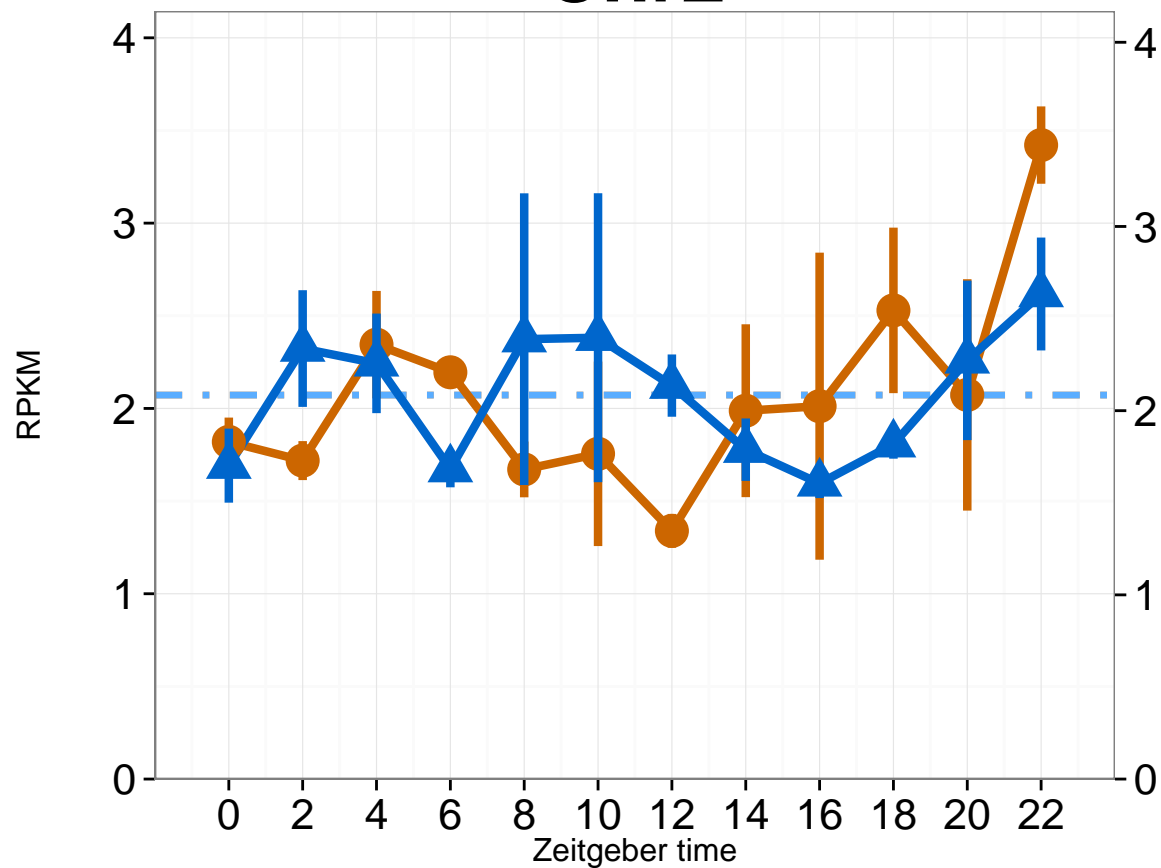

## Cnr2

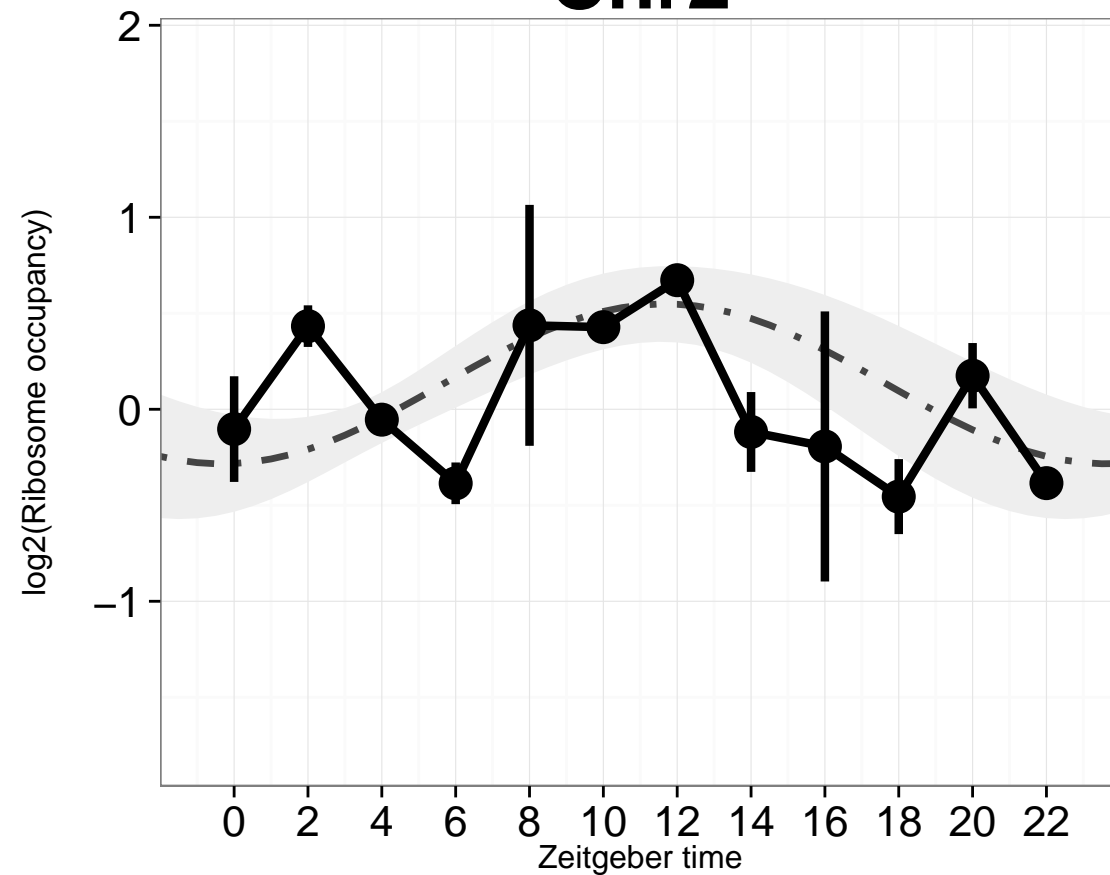

Supplement: SuppDataset_1.zip [file Cnr2_set_A.pdf › Supplemental Dataset 1/A-mRNA_nonrhyth_translation_nonrhyth/Cnr2_set_A.pdf]

## Cnst

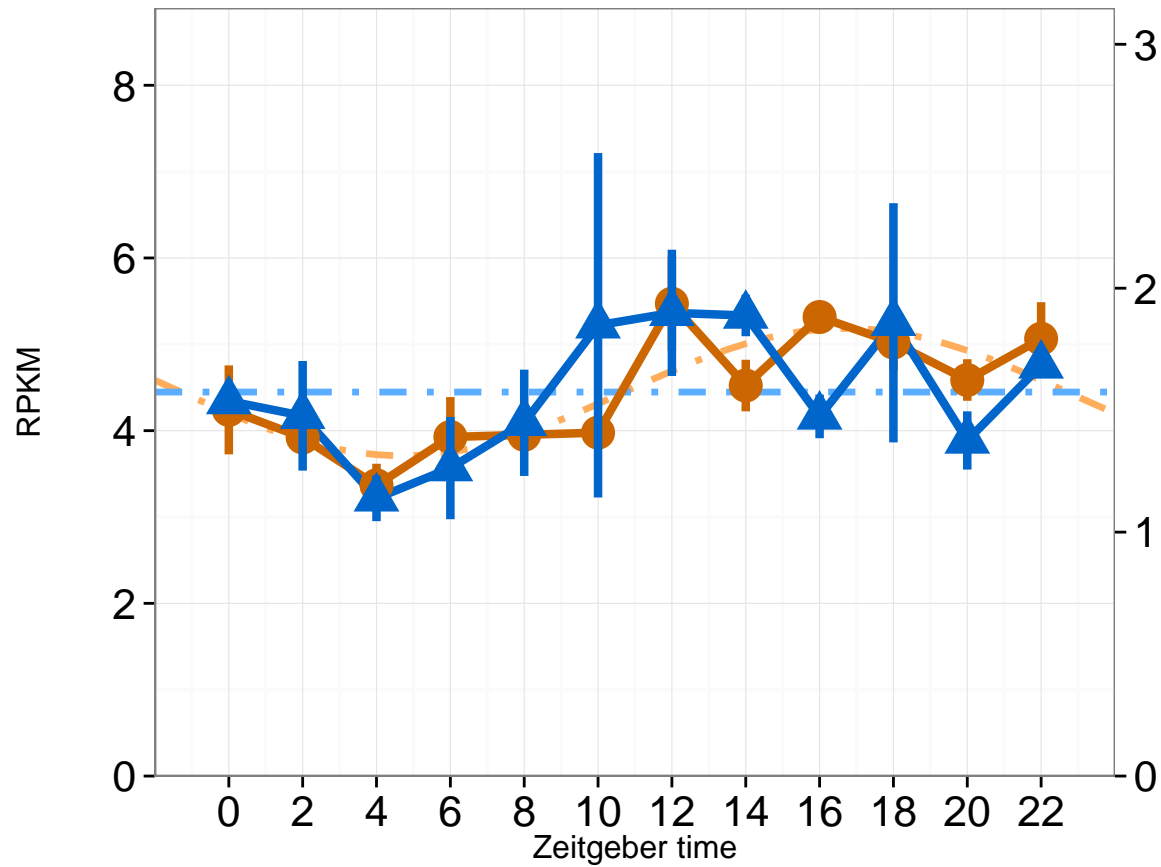

## Cnst

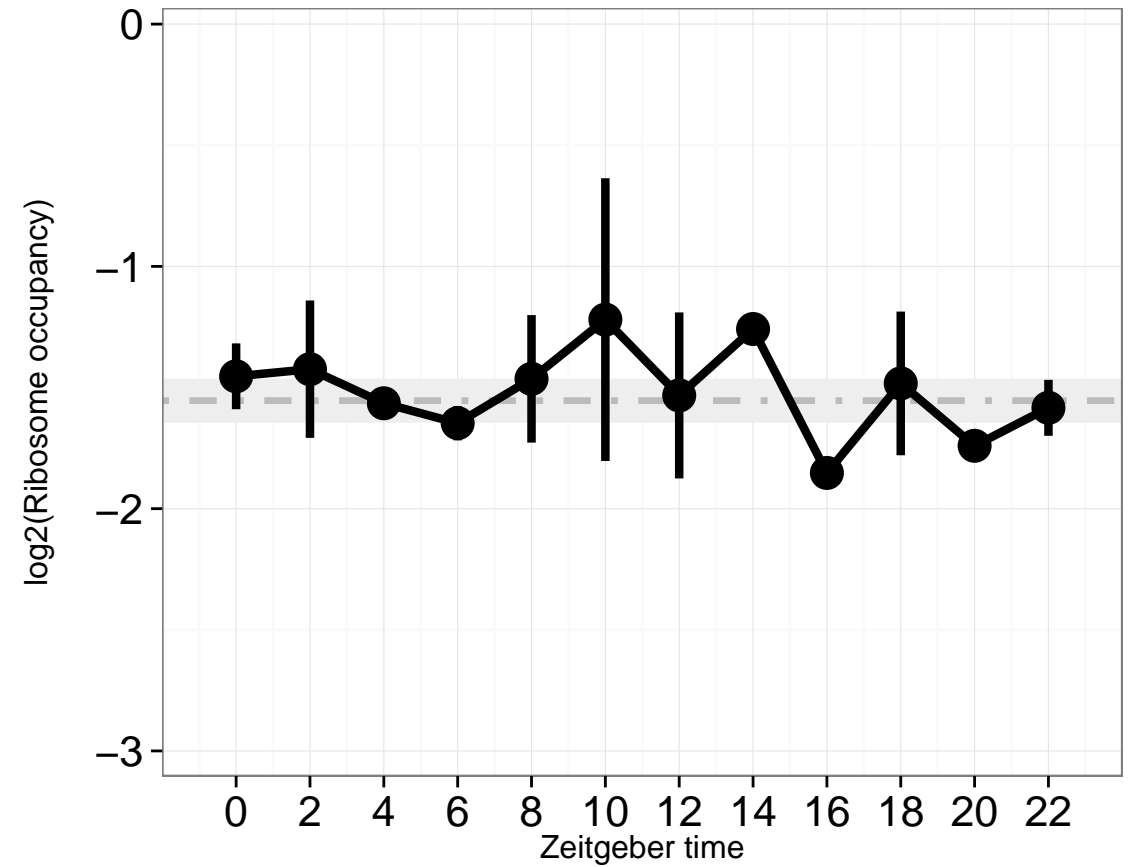

Supplement: SuppDataset_1.zip [file Cnst_set_A.pdf › Supplemental Dataset 1/A-mRNA_nonrhyth_translation_nonrhyth/Cnst_set_A.pdf]

# Cntf

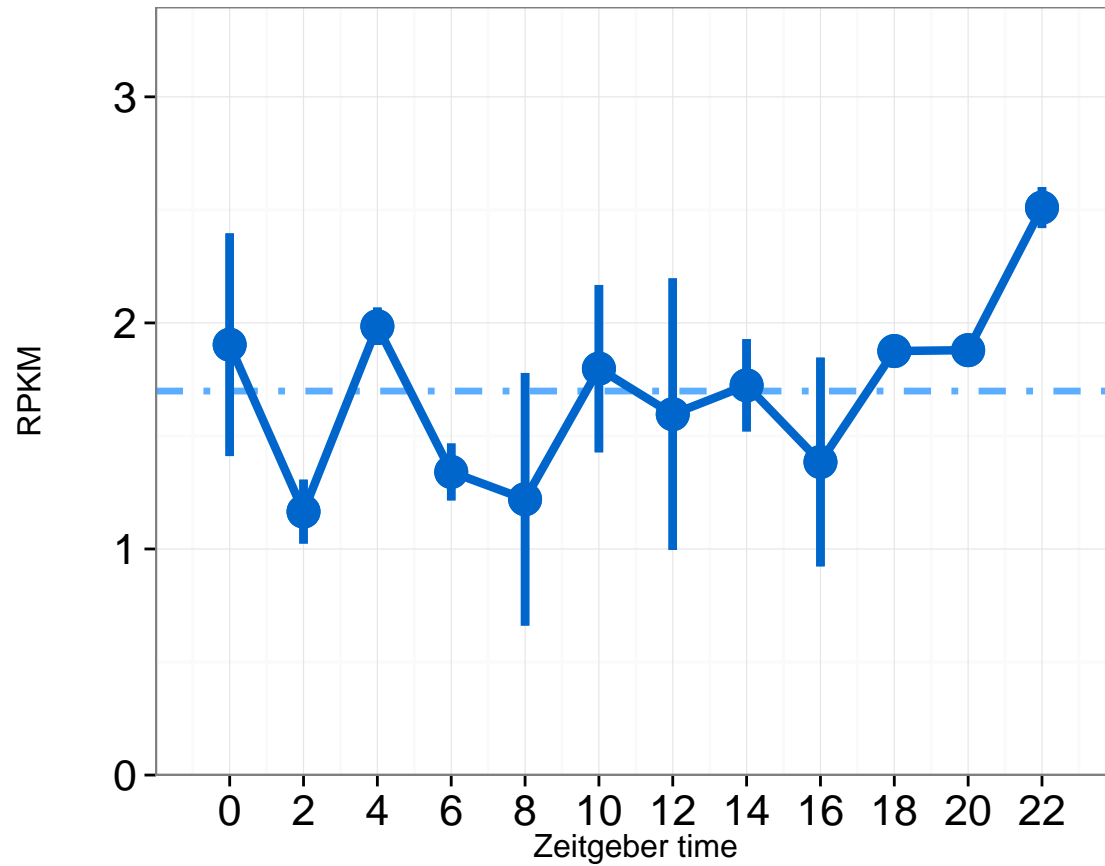

# Cntf log2(Ribosome occupancy)

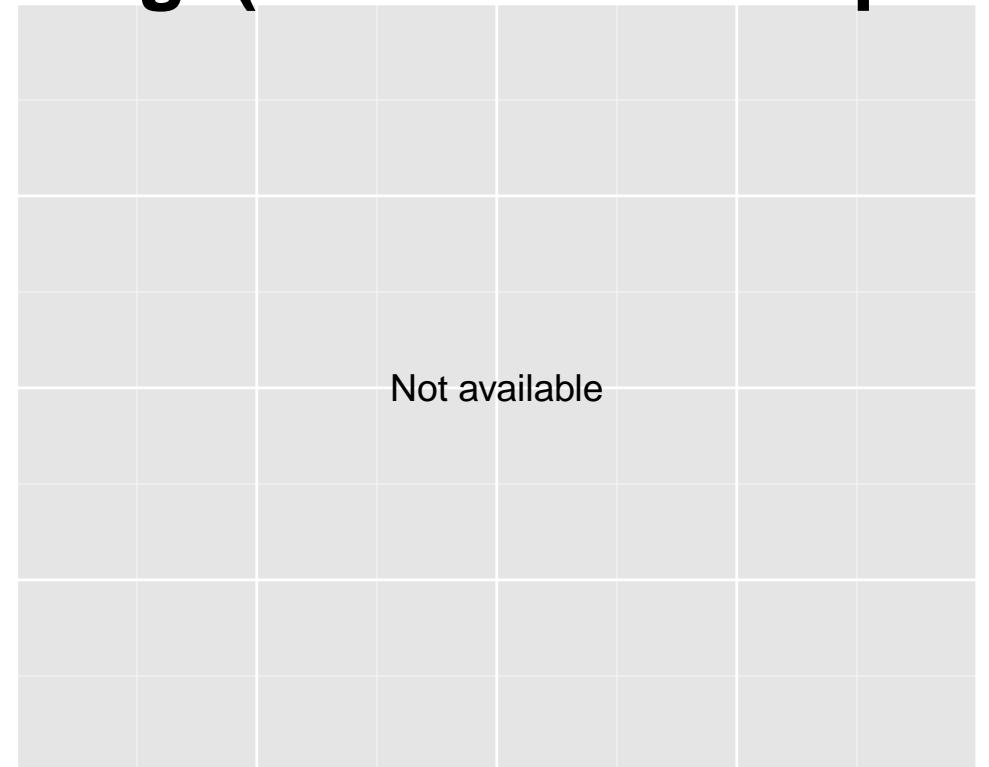

Supplement: SuppDataset_1.zip [file Cntf_set_A.pdf › Supplemental Dataset 1/A-mRNA_nonrhyth_translation_nonrhyth/Cntf_set_A.pdf]

## CntIn

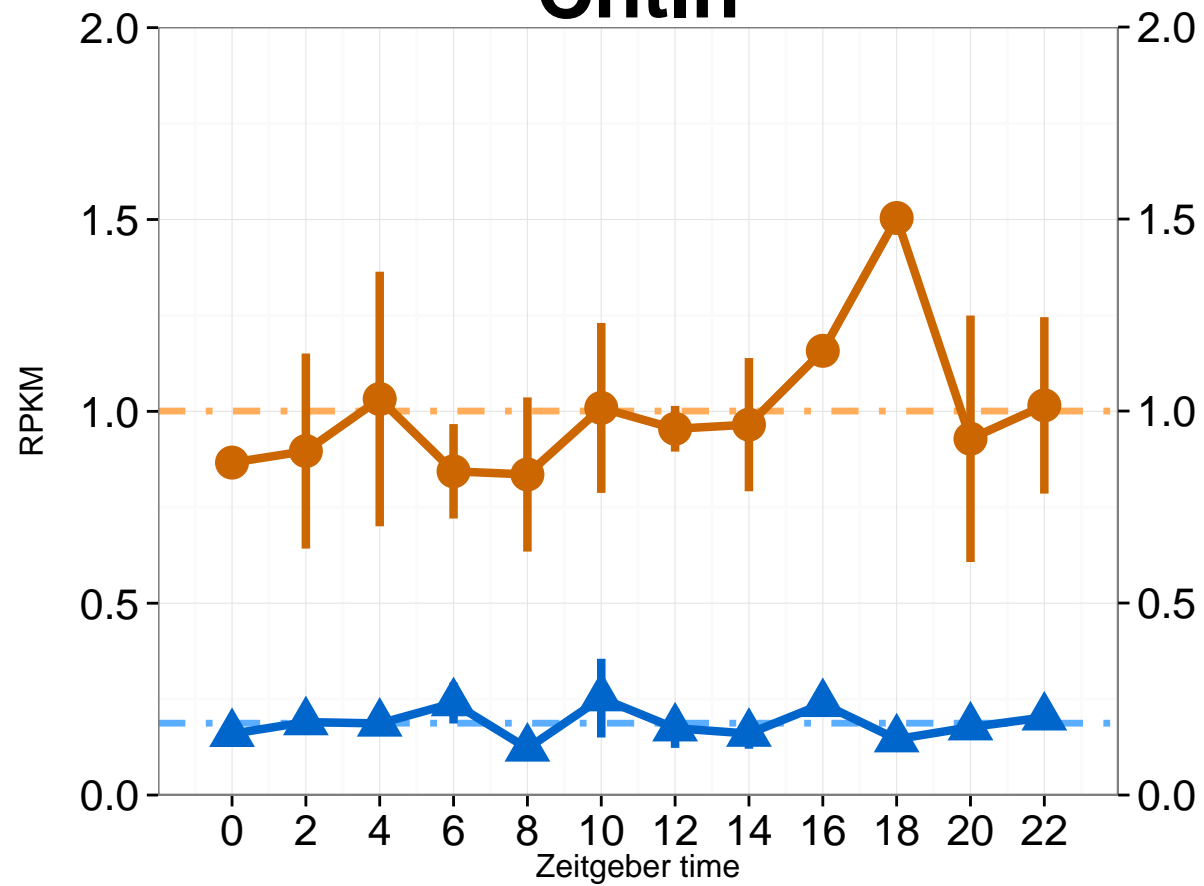

## CntIn

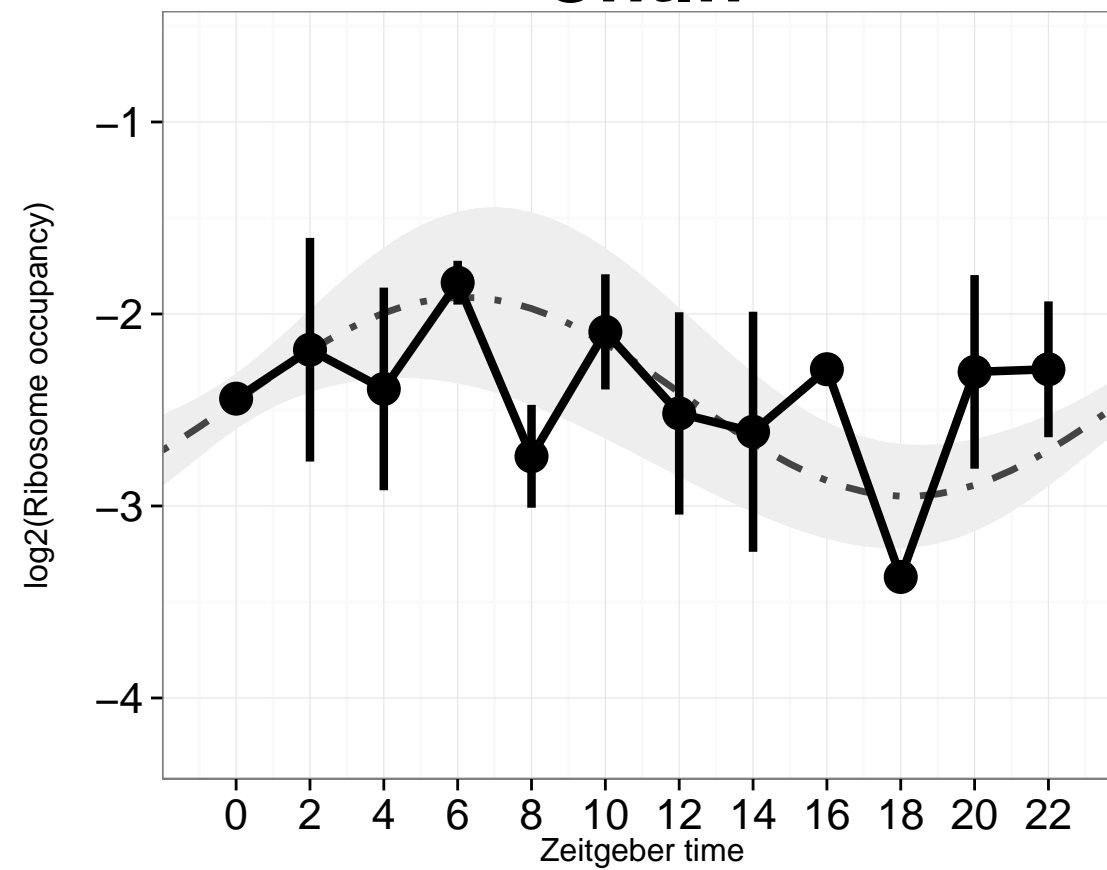

Supplement: SuppDataset_1.zip [file Cntln_set_A.pdf › Supplemental Dataset 1/A-mRNA_nonrhyth_translation_nonrhyth/Cntln_set_A.pdf]

## Cntnap1

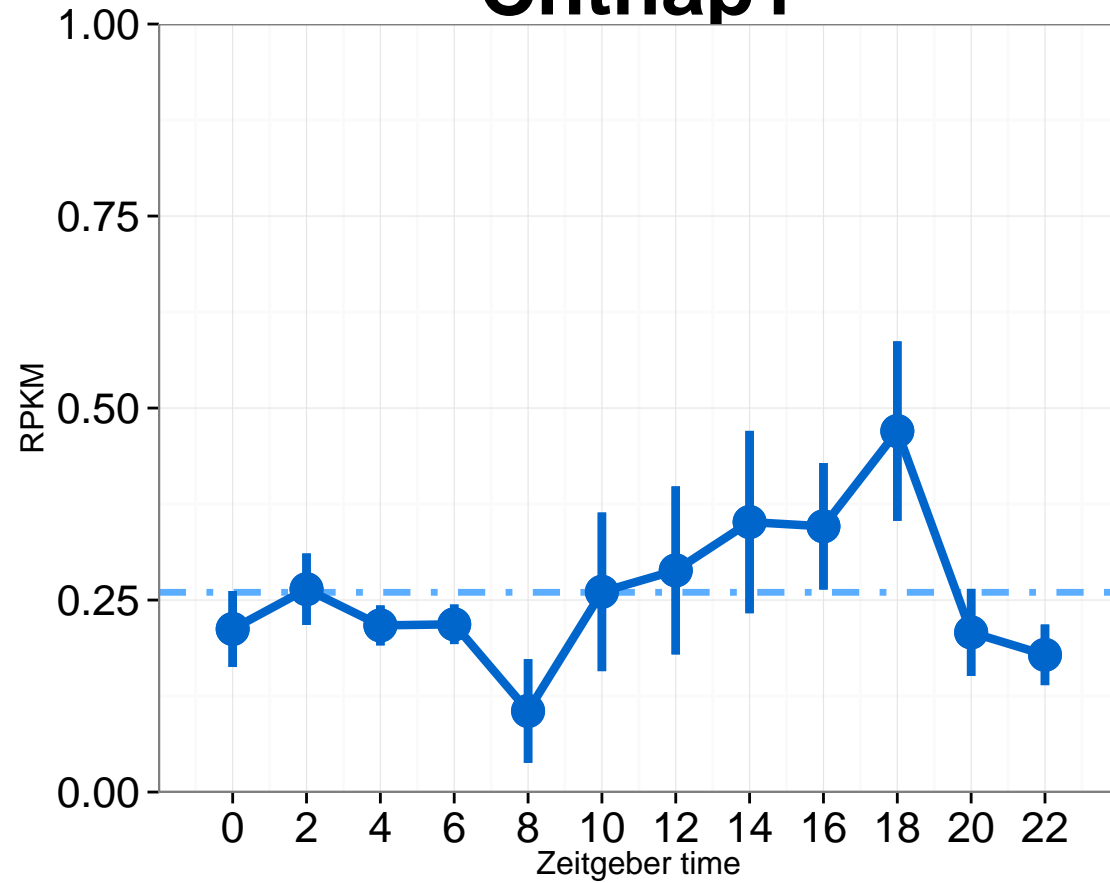

## Cntnap1 log2(Ribosome occupanc

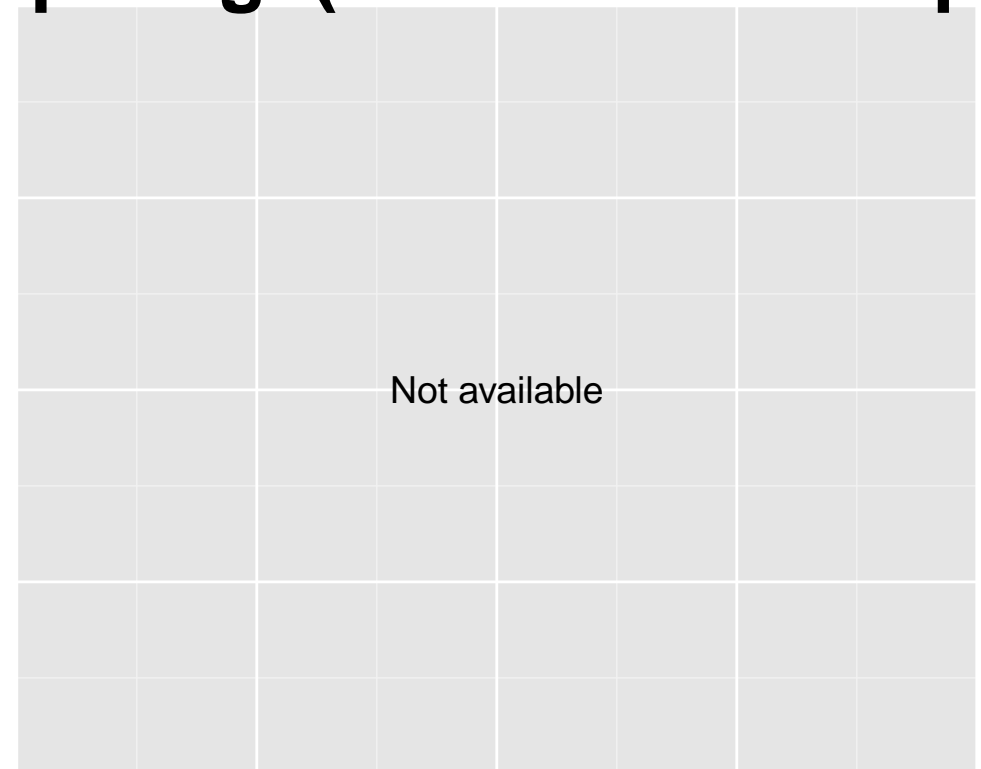

Supplement: SuppDataset_1.zip [file Cntnap1_set_A.pdf › Supplemental Dataset 1/A-mRNA_nonrhyth_translation_nonrhyth/Cntnap1_set_A.pdf]

## Coa3

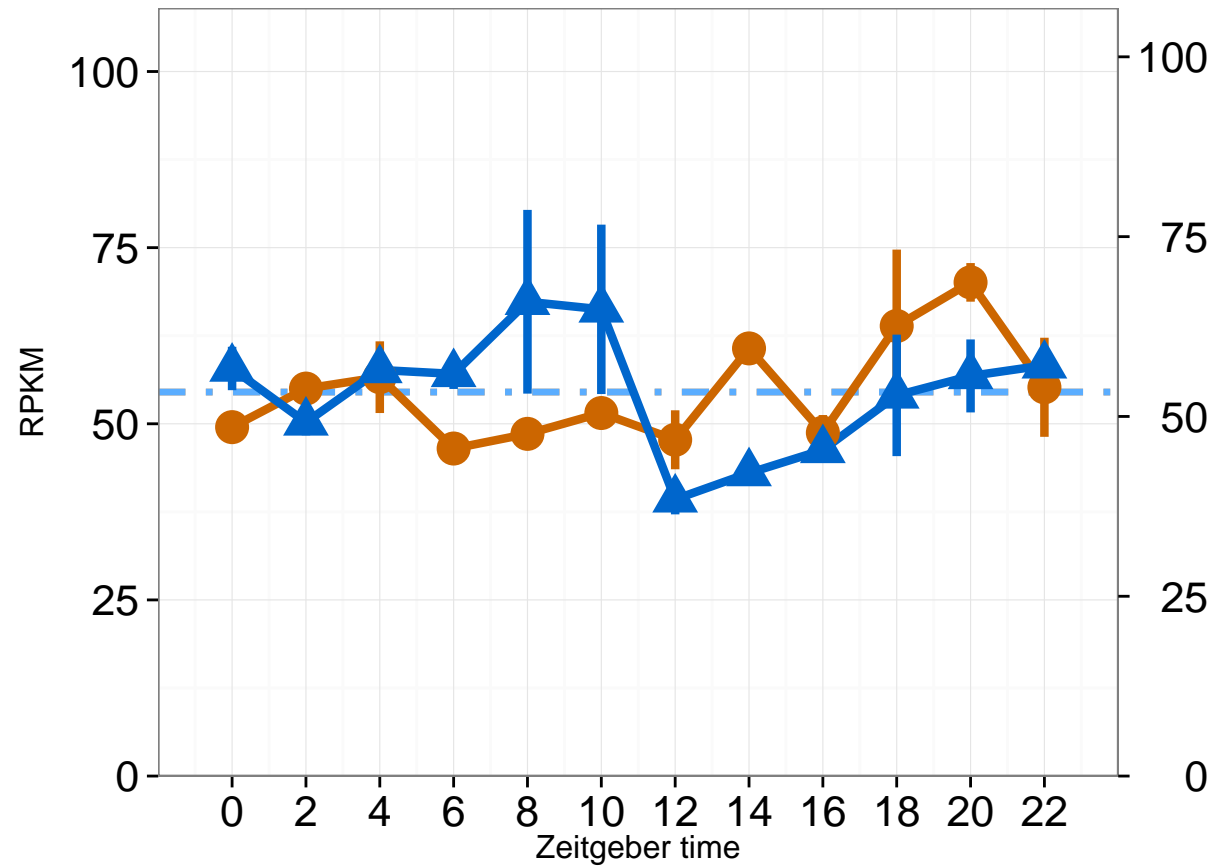

## Coa3

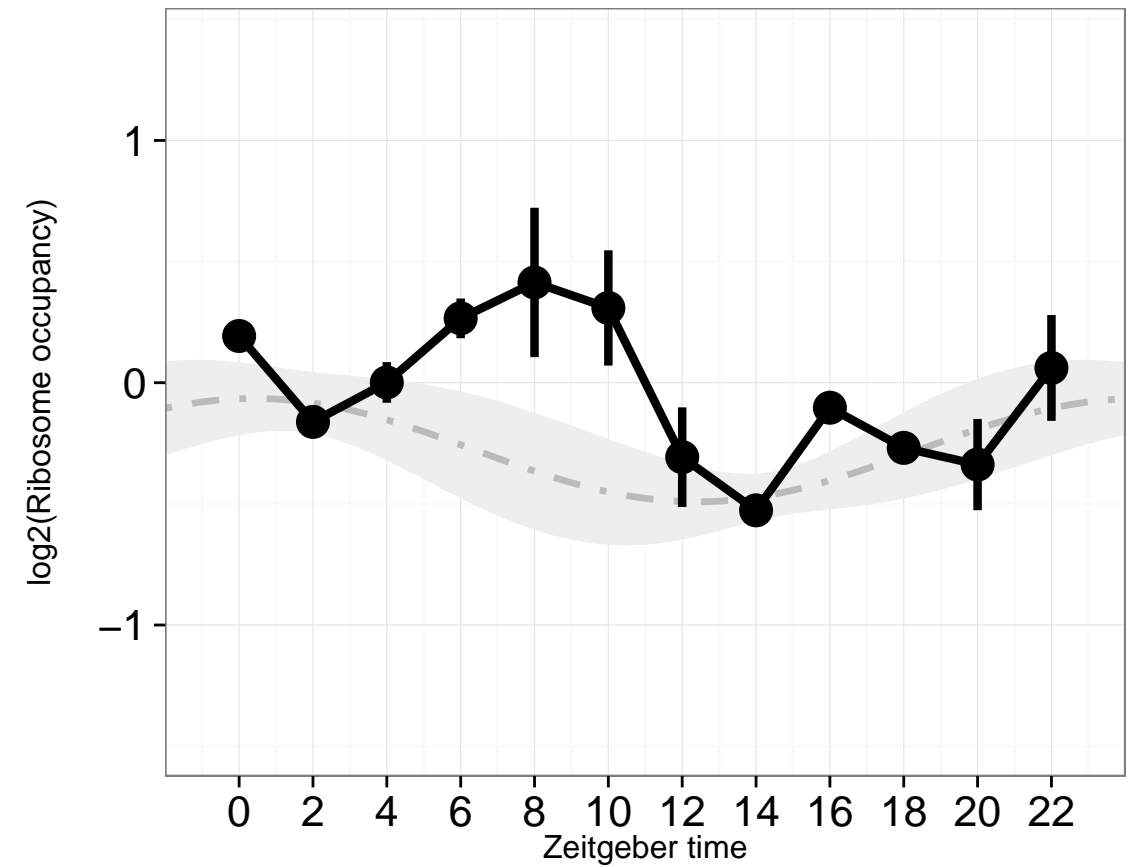

Supplement: SuppDataset_1.zip [file Coa3_set_A.pdf › Supplemental Dataset 1/A-mRNA_nonrhyth_translation_nonrhyth/Coa3_set_A.pdf]

## Coa5

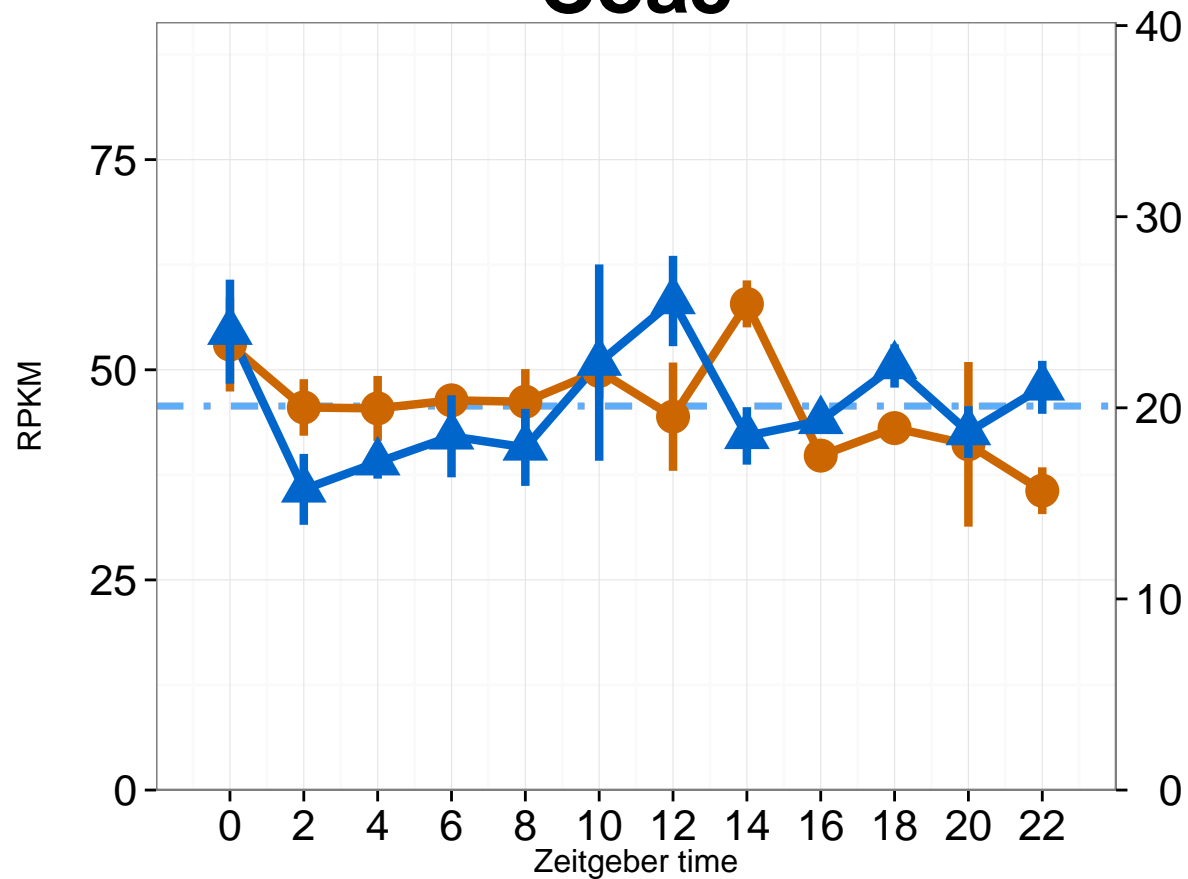

## Coa5

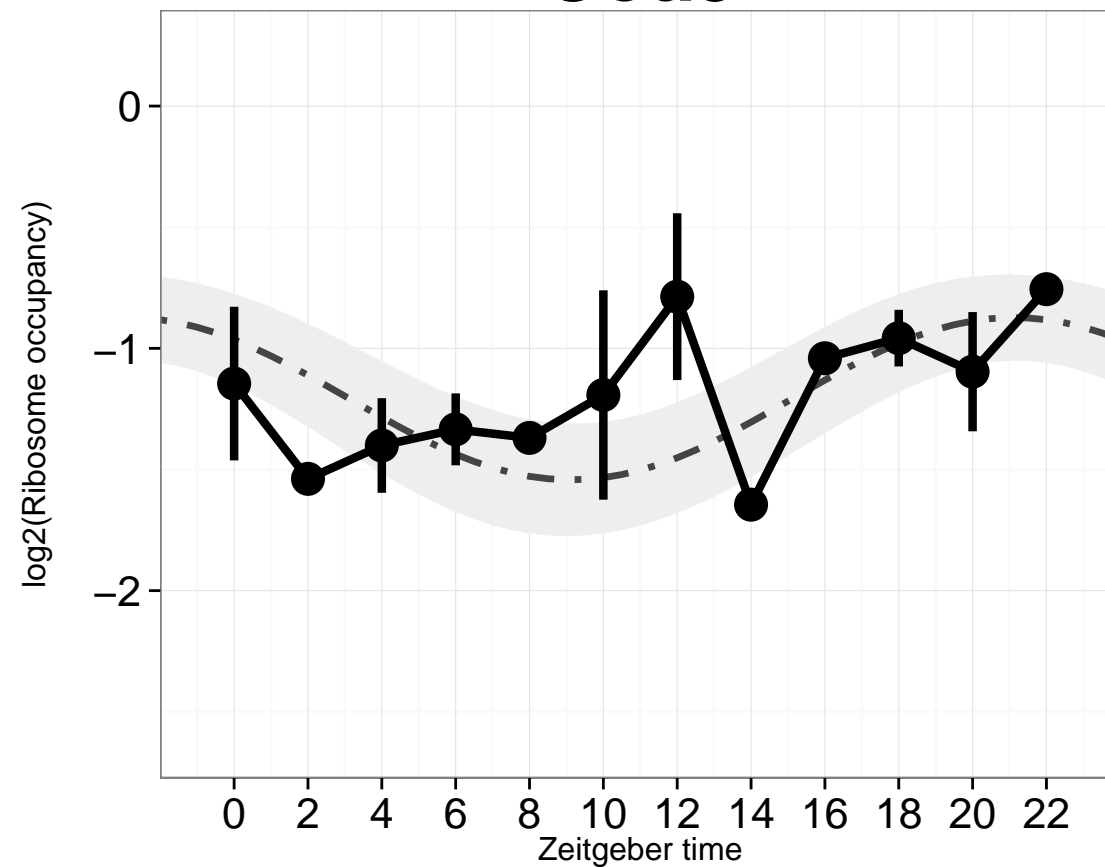

Supplement: SuppDataset_1.zip [file Coa5_set_A.pdf › Supplemental Dataset 1/A-mRNA_nonrhyth_translation_nonrhyth/Coa5_set_A.pdf]

## Coasy

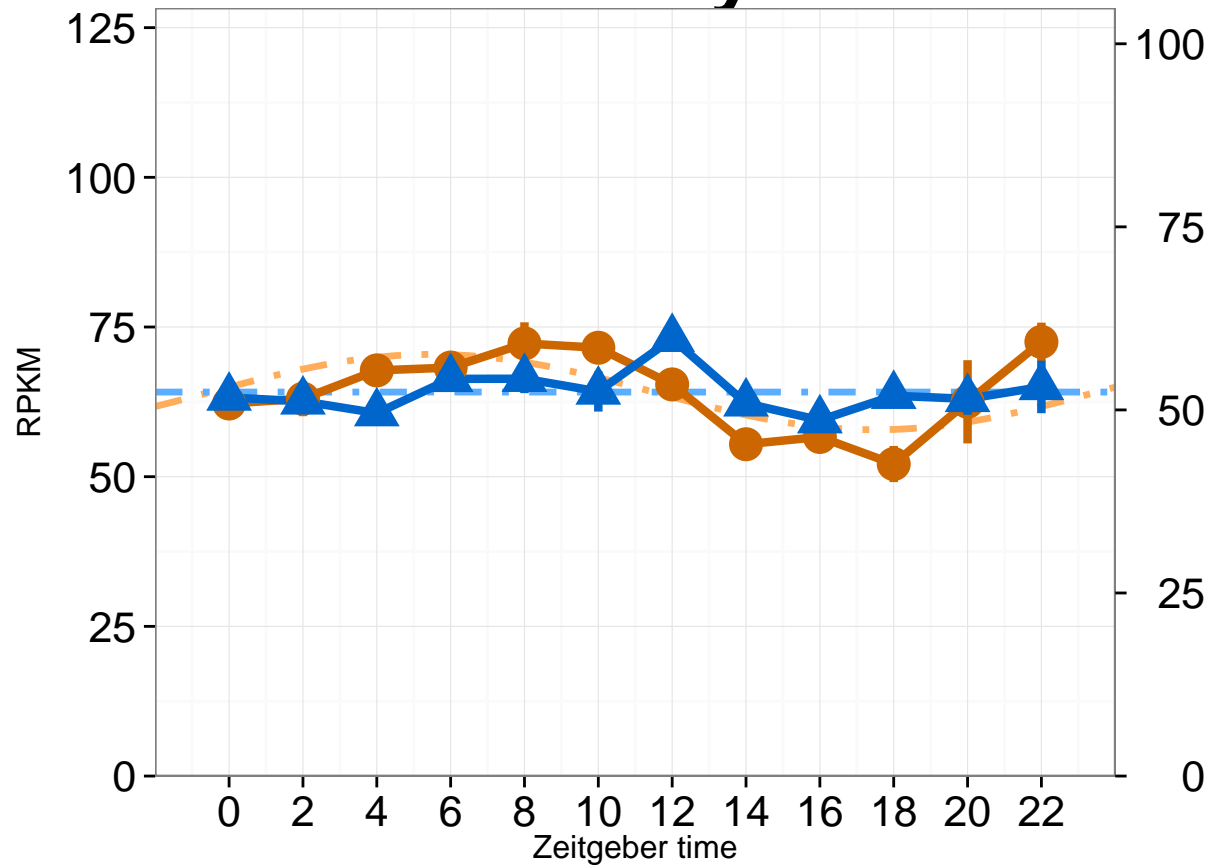

## Coasy

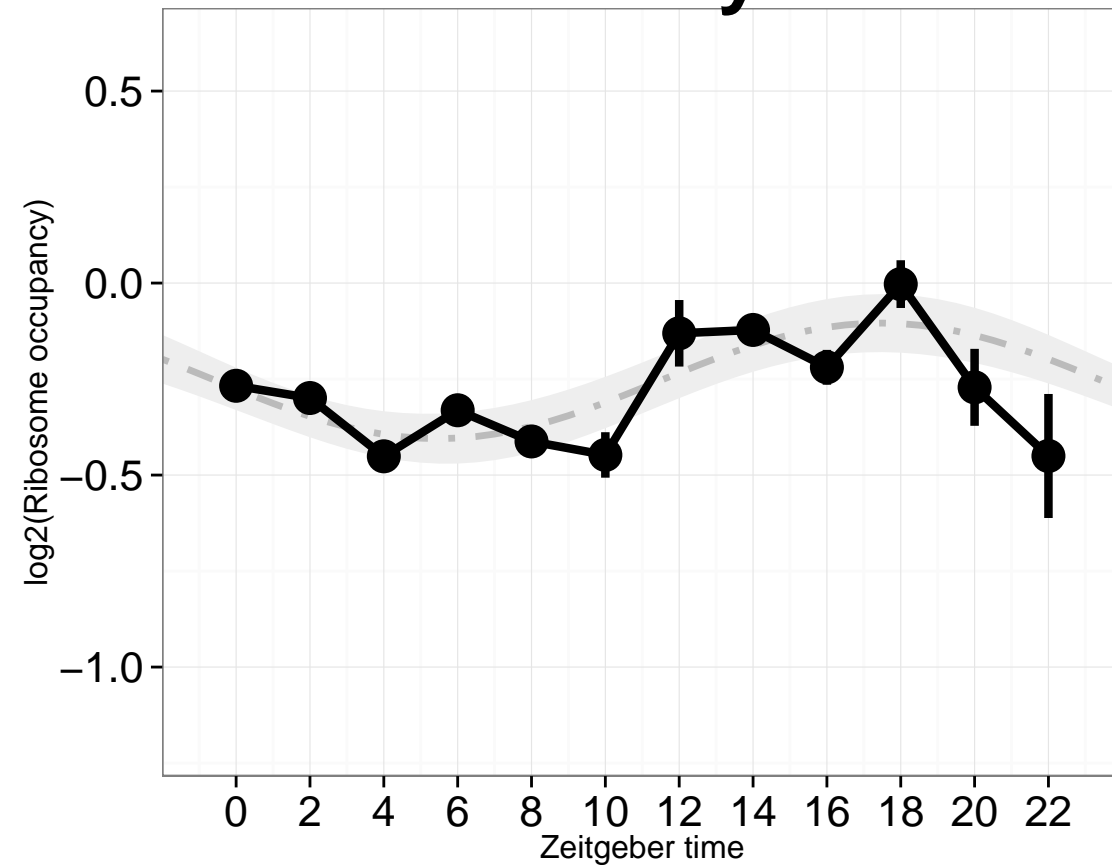

Supplement: SuppDataset_1.zip [file Coasy_set_A.pdf › Supplemental Dataset 1/A-mRNA_nonrhyth_translation_nonrhyth/Coasy_set_A.pdf]

# Cog1

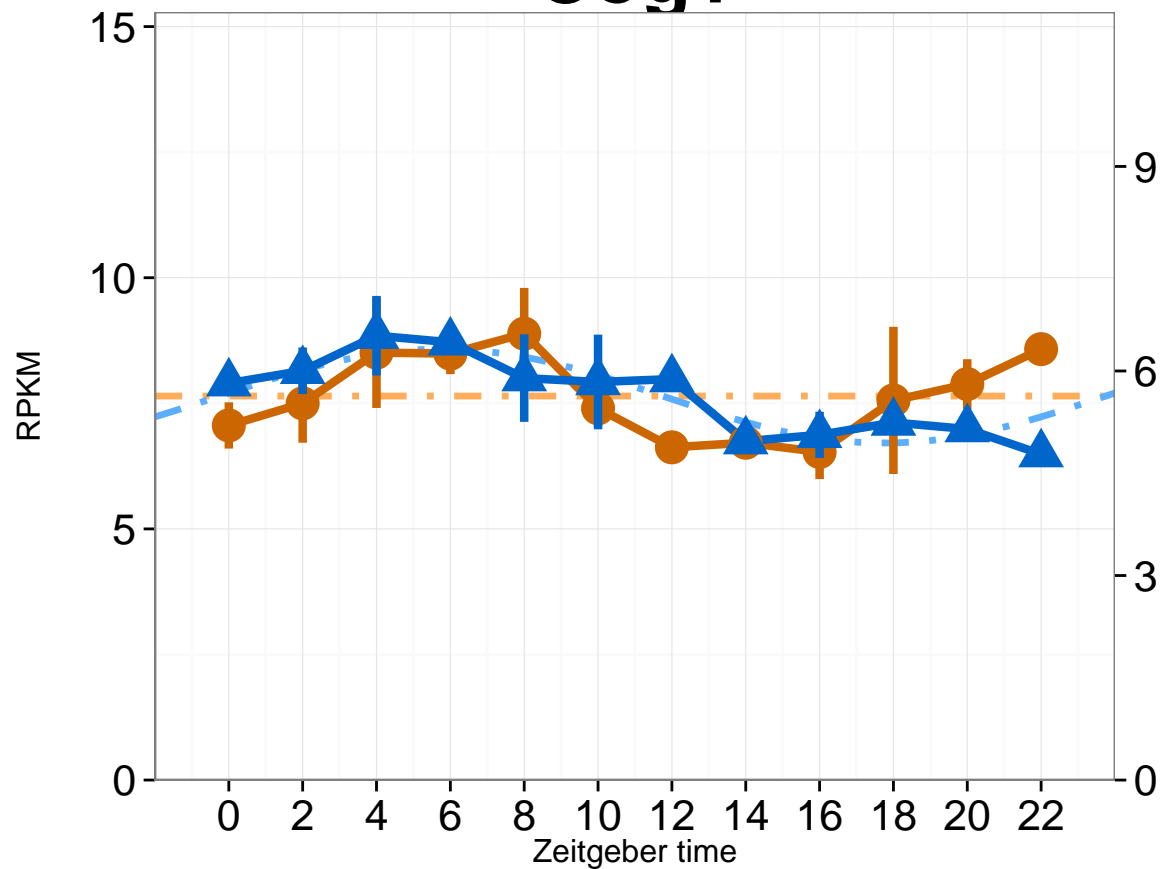

# Cog1

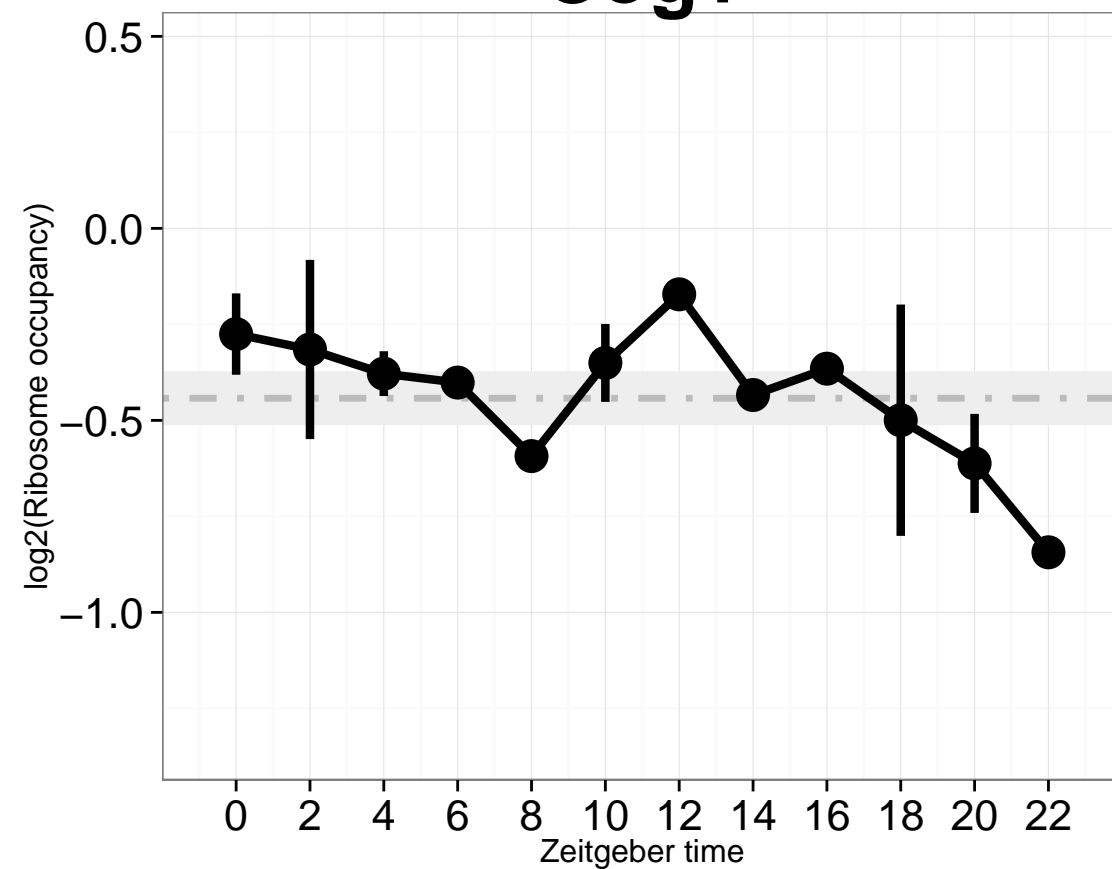

Supplement: SuppDataset_1.zip [file Cog1_set_A.pdf › Supplemental Dataset 1/A-mRNA_nonrhyth_translation_nonrhyth/Cog1_set_A.pdf]

## Cog2

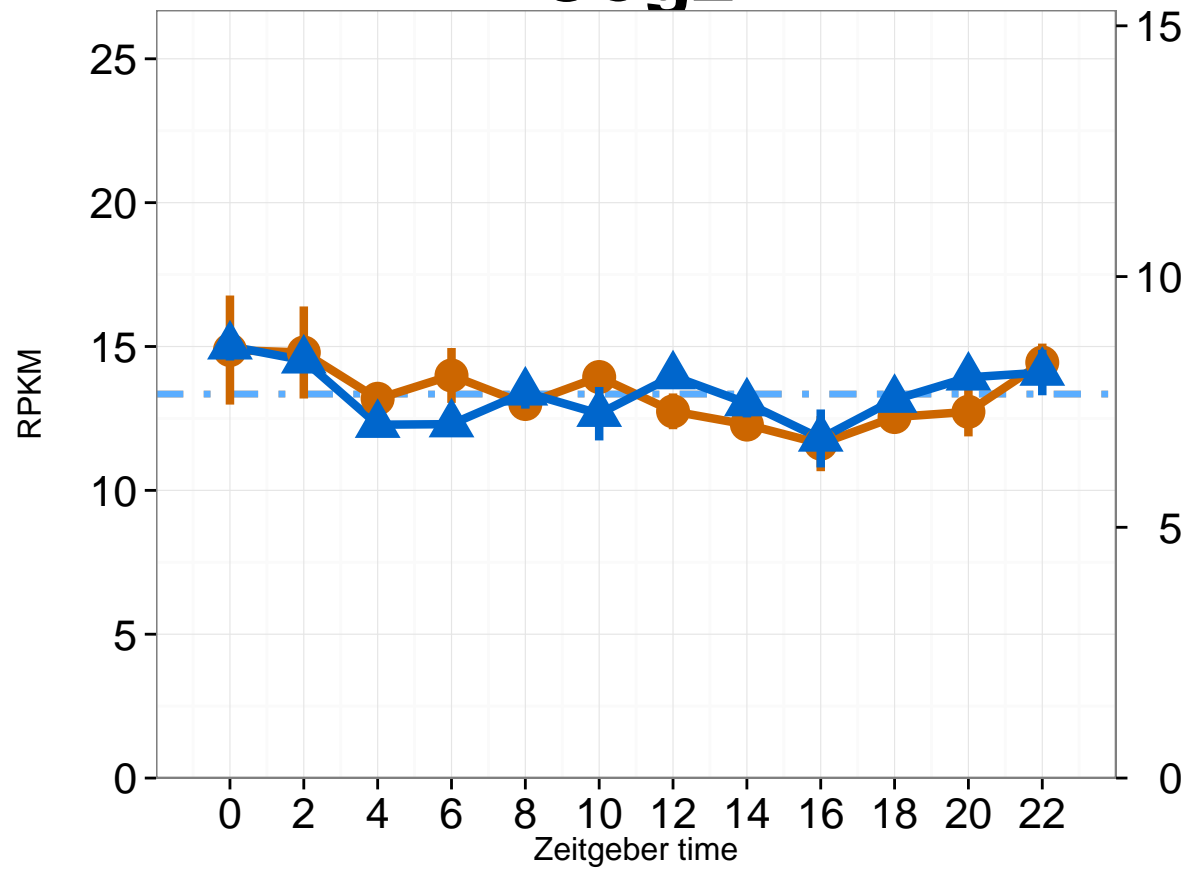

## Cog2

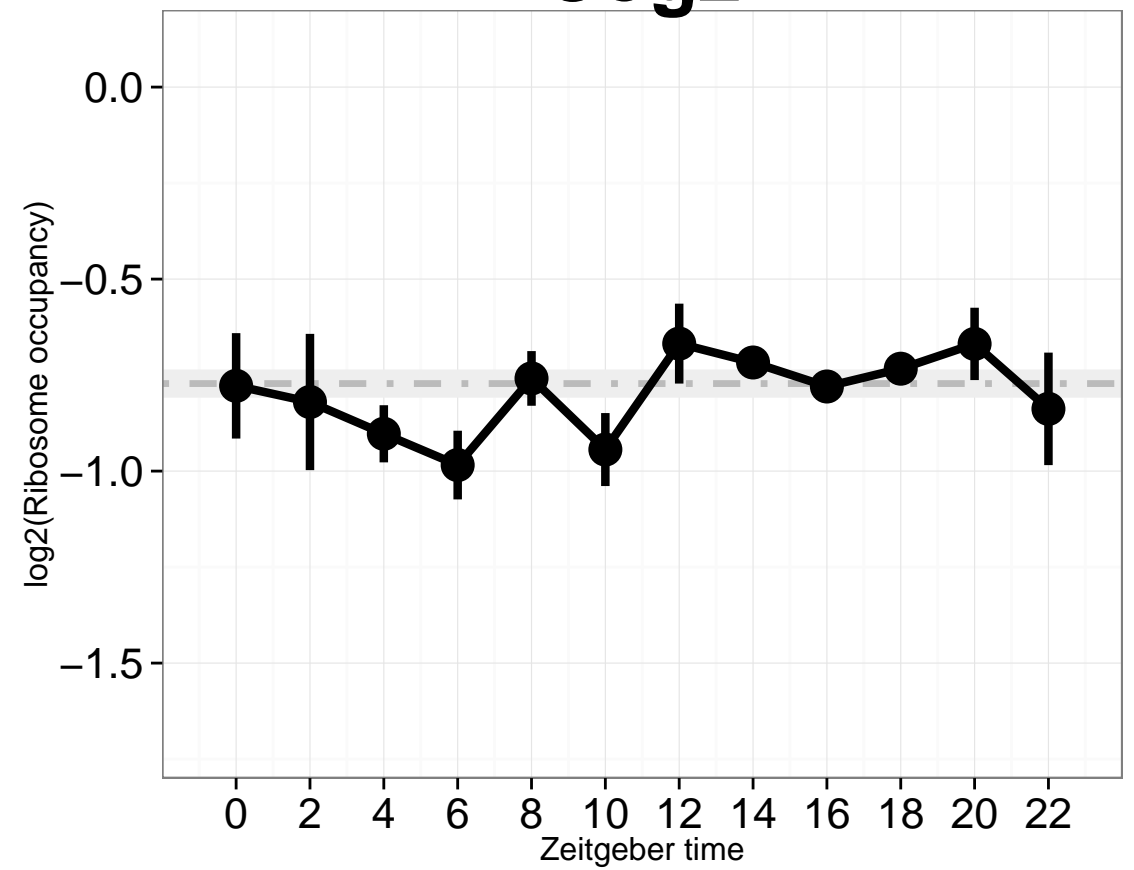

Supplement: SuppDataset_1.zip [file Cog2_set_A.pdf › Supplemental Dataset 1/A-mRNA_nonrhyth_translation_nonrhyth/Cog2_set_A.pdf]

# Cog3

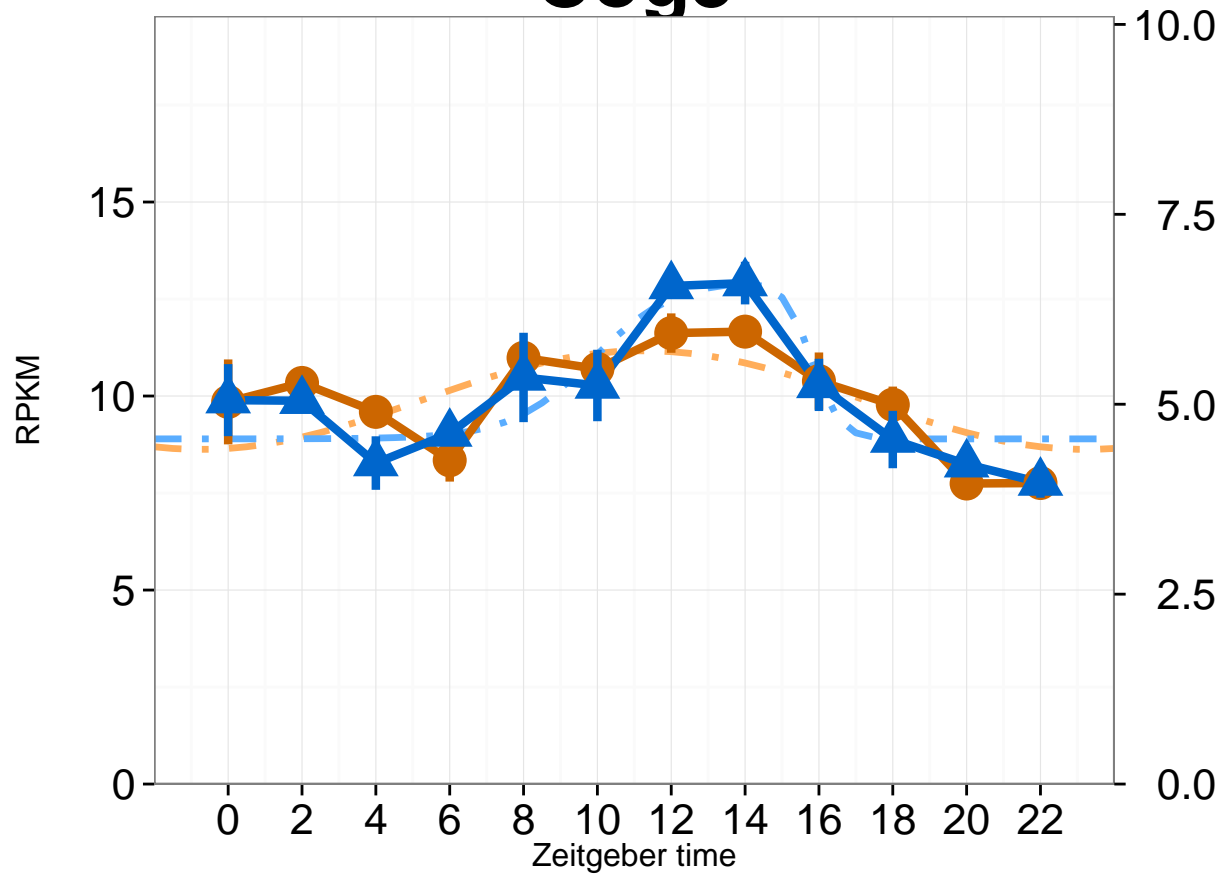

# Cog3

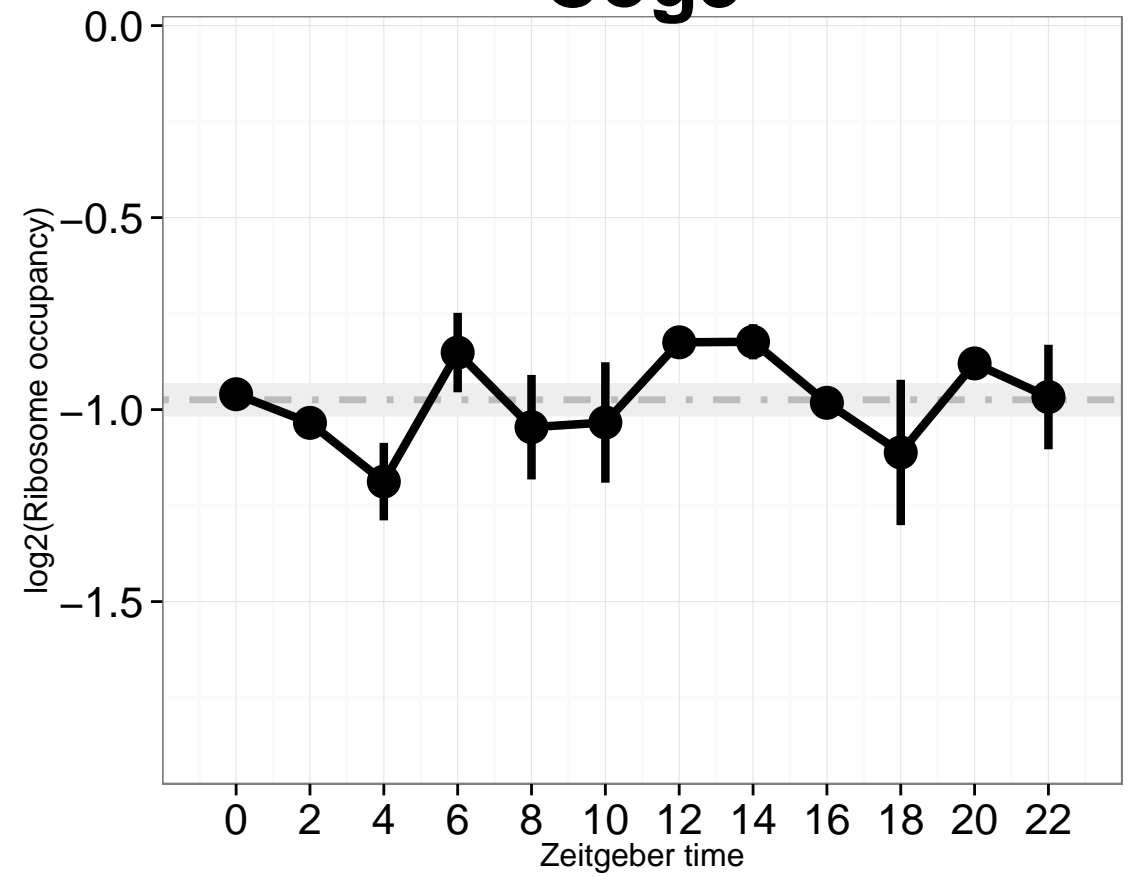

Supplement: SuppDataset_1.zip [file Cog3_set_A.pdf › Supplemental Dataset 1/A-mRNA_nonrhyth_translation_nonrhyth/Cog3_set_A.pdf]

## Cog4

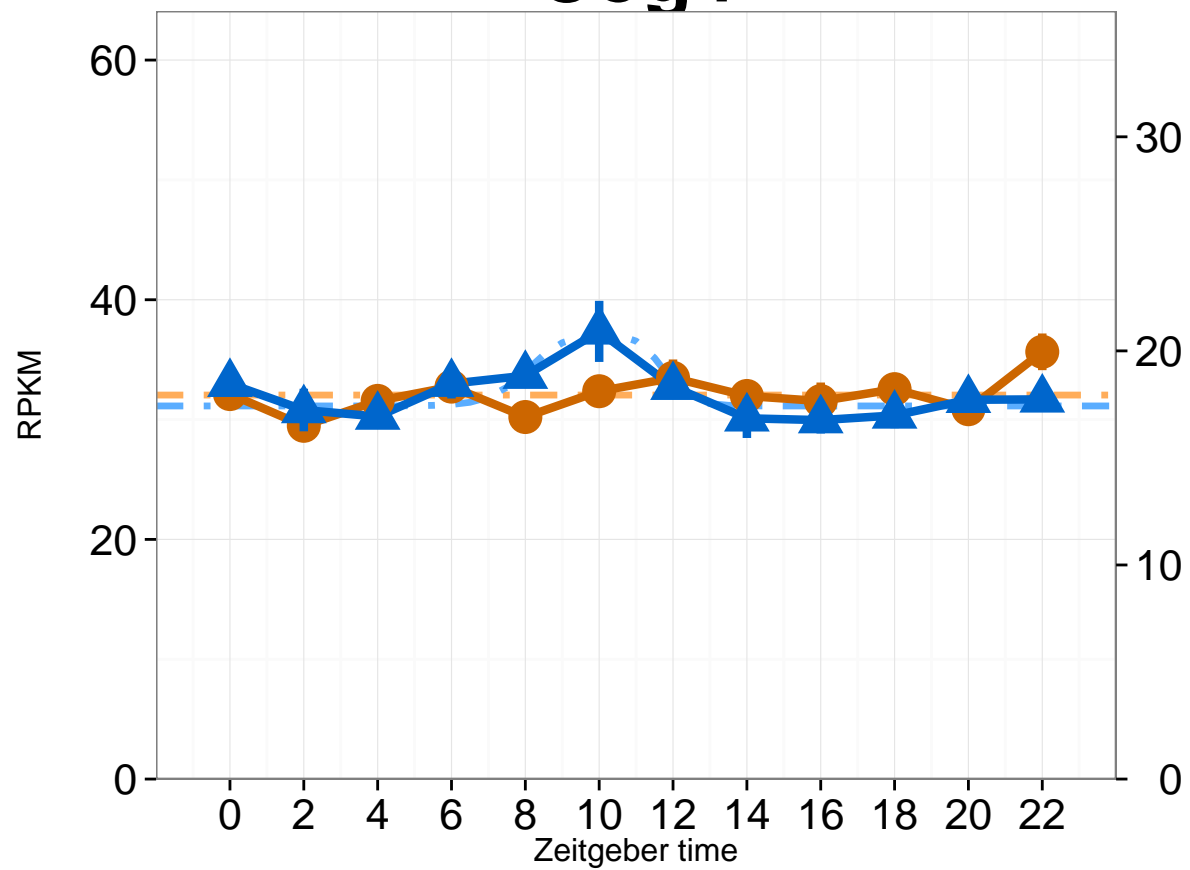

## Cog4

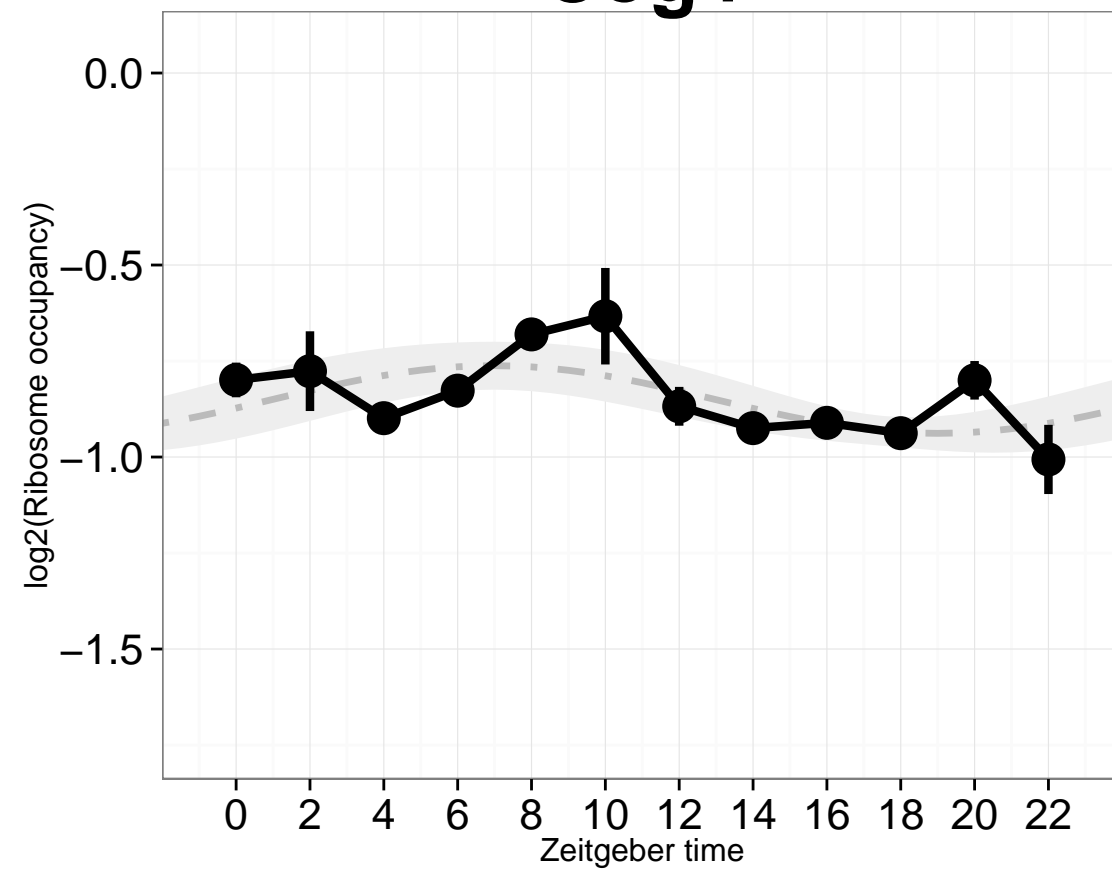

Supplement: SuppDataset_1.zip [file Cog4_set_A.pdf › Supplemental Dataset 1/A-mRNA_nonrhyth_translation_nonrhyth/Cog4_set_A.pdf]

# Cog5

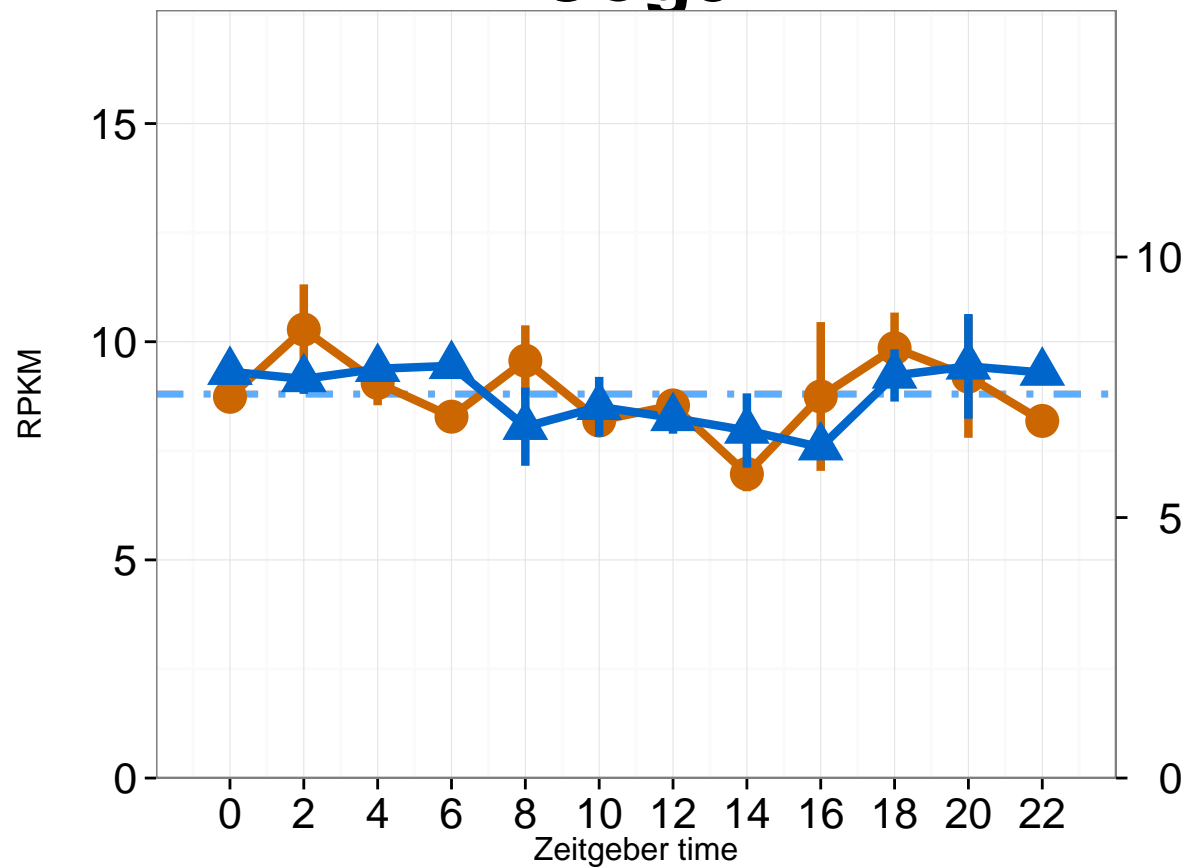

# Cog5

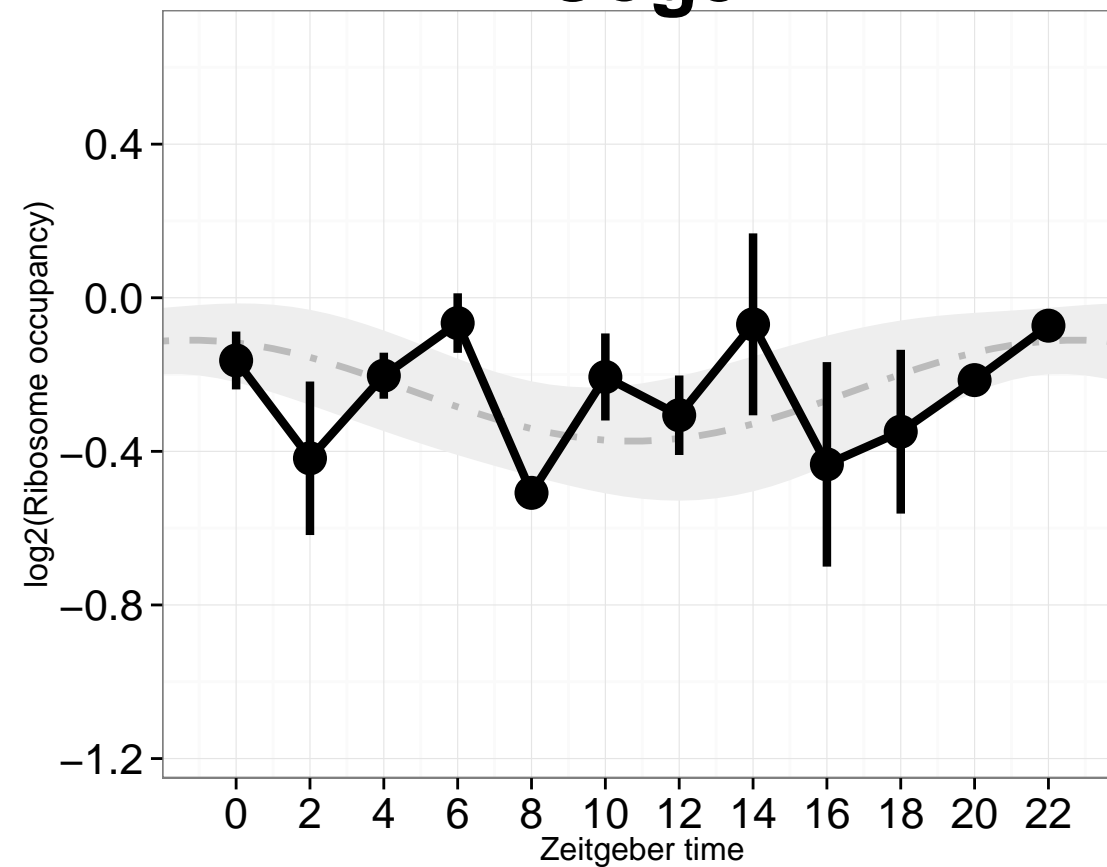

Supplement: SuppDataset_1.zip [file Cog5_set_A.pdf › Supplemental Dataset 1/A-mRNA_nonrhyth_translation_nonrhyth/Cog5_set_A.pdf]

## Cog6

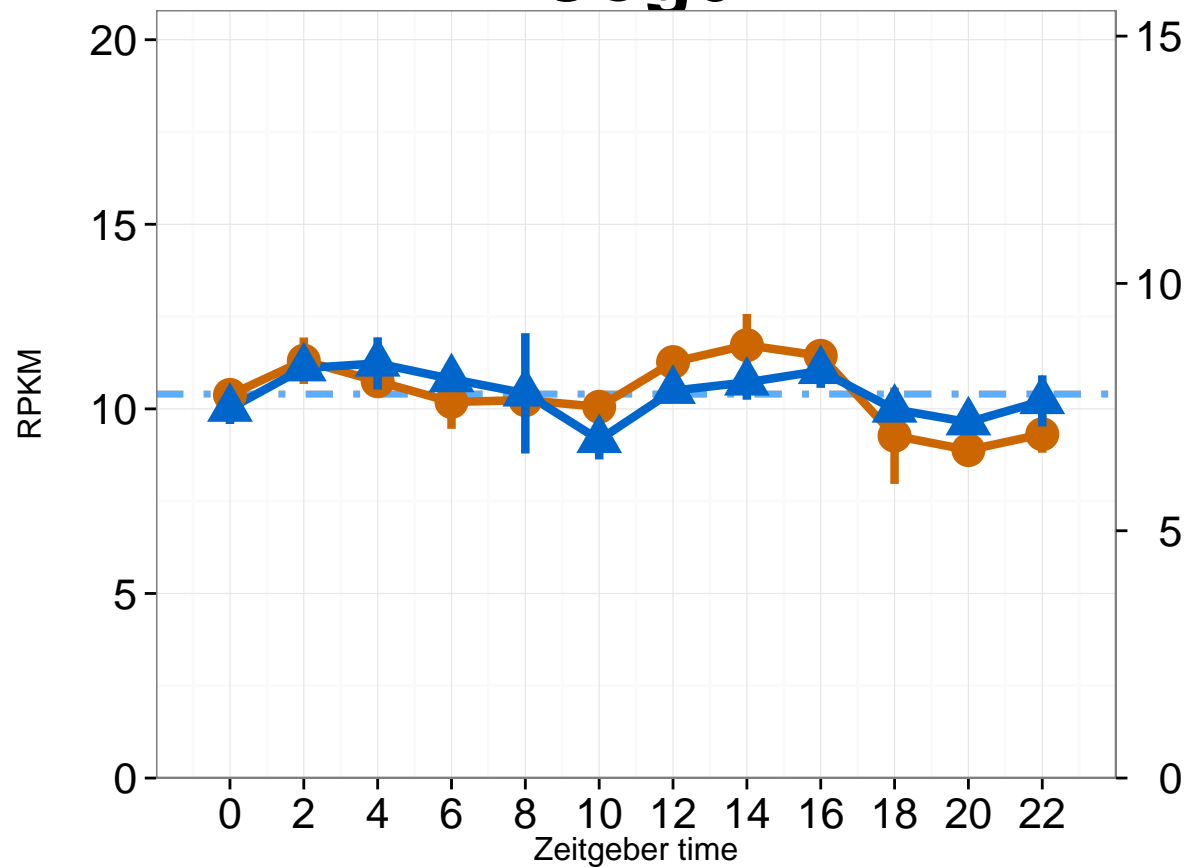

## Cog6

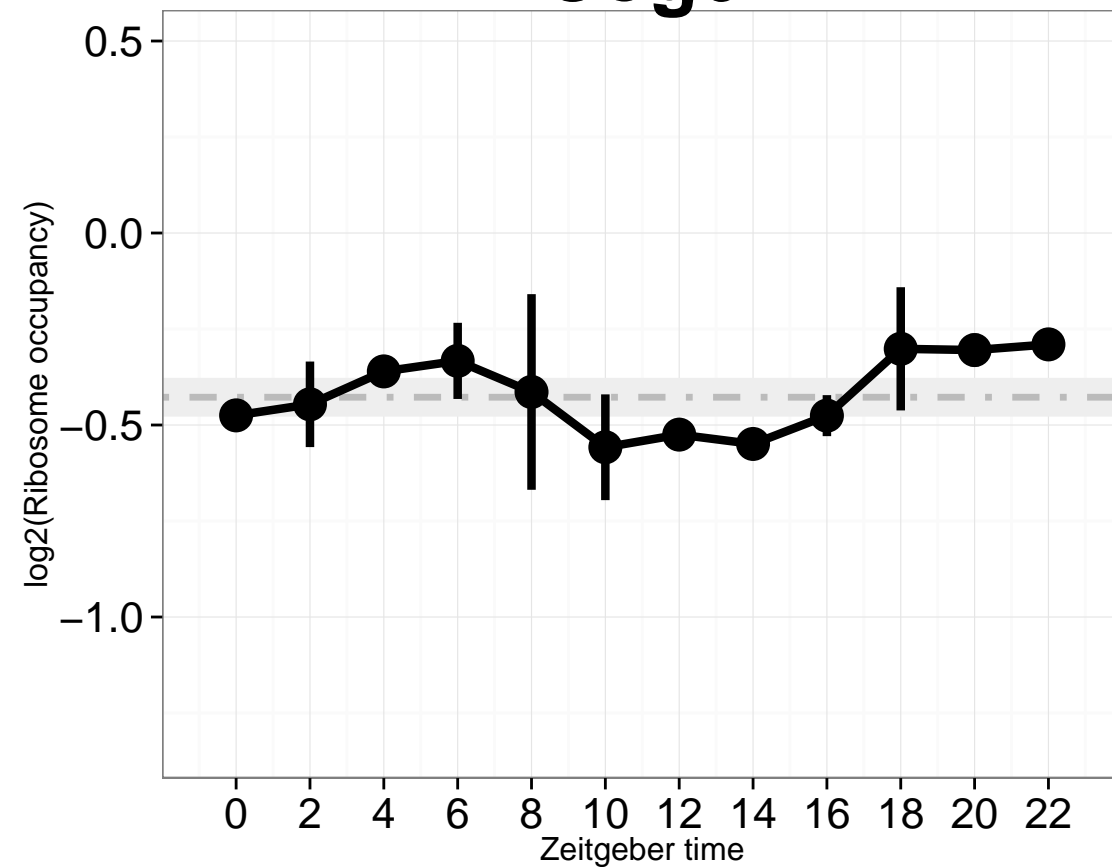

Supplement: SuppDataset_1.zip [file Cog6_set_A.pdf › Supplemental Dataset 1/A-mRNA_nonrhyth_translation_nonrhyth/Cog6_set_A.pdf]

# Cog7

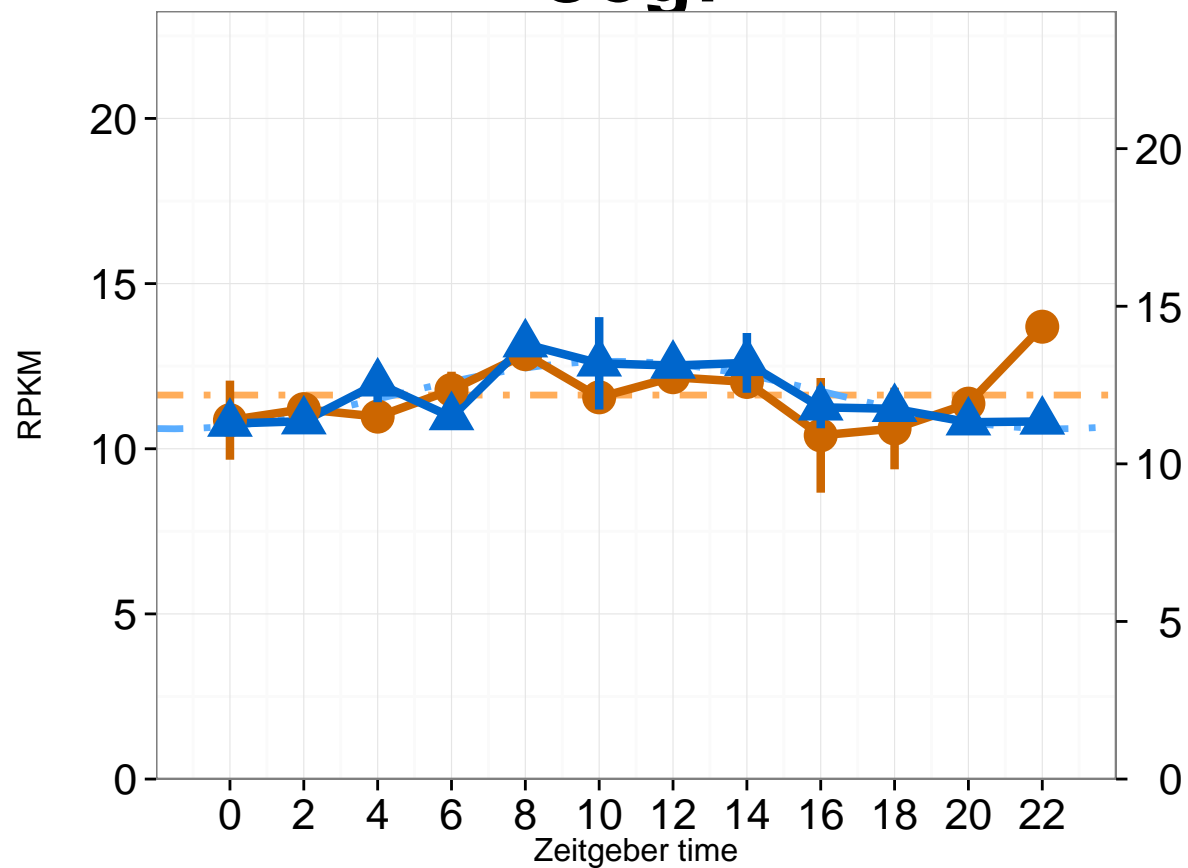

# Cog7

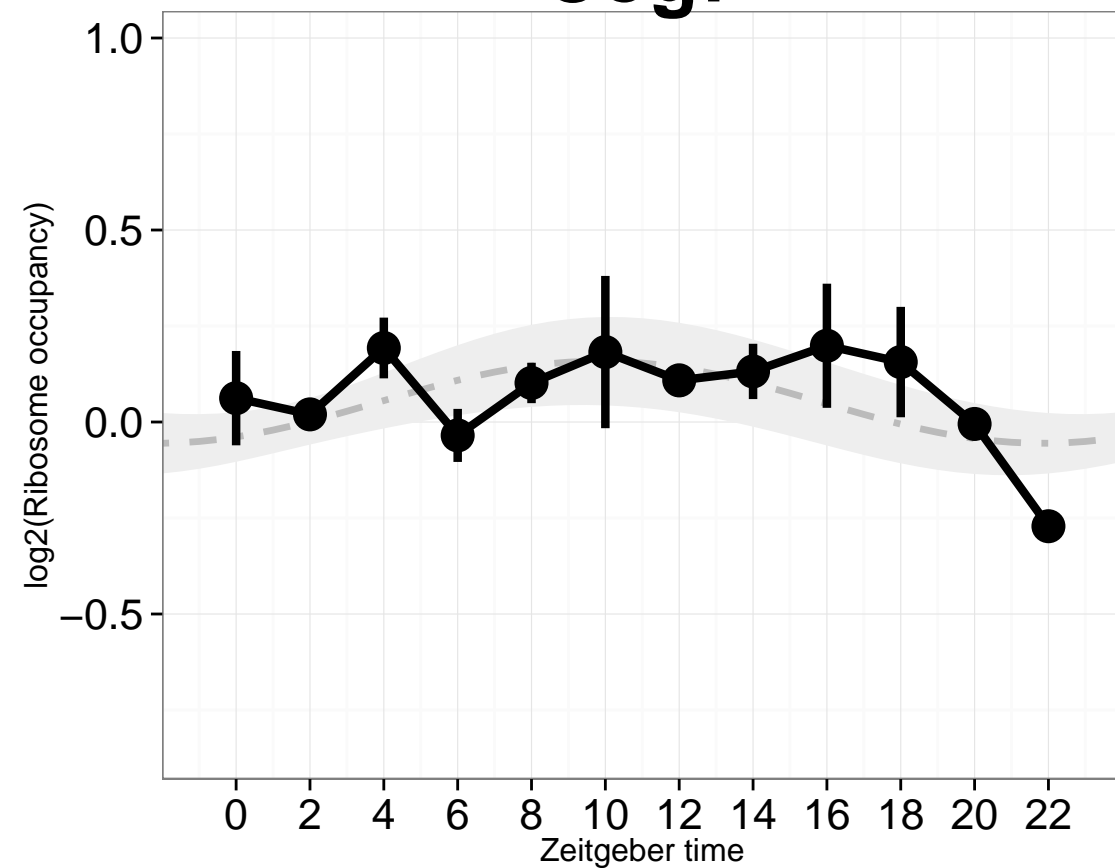

Supplement: SuppDataset_1.zip [file Cog7_set_A.pdf › Supplemental Dataset 1/A-mRNA_nonrhyth_translation_nonrhyth/Cog7_set_A.pdf]

## Cog8

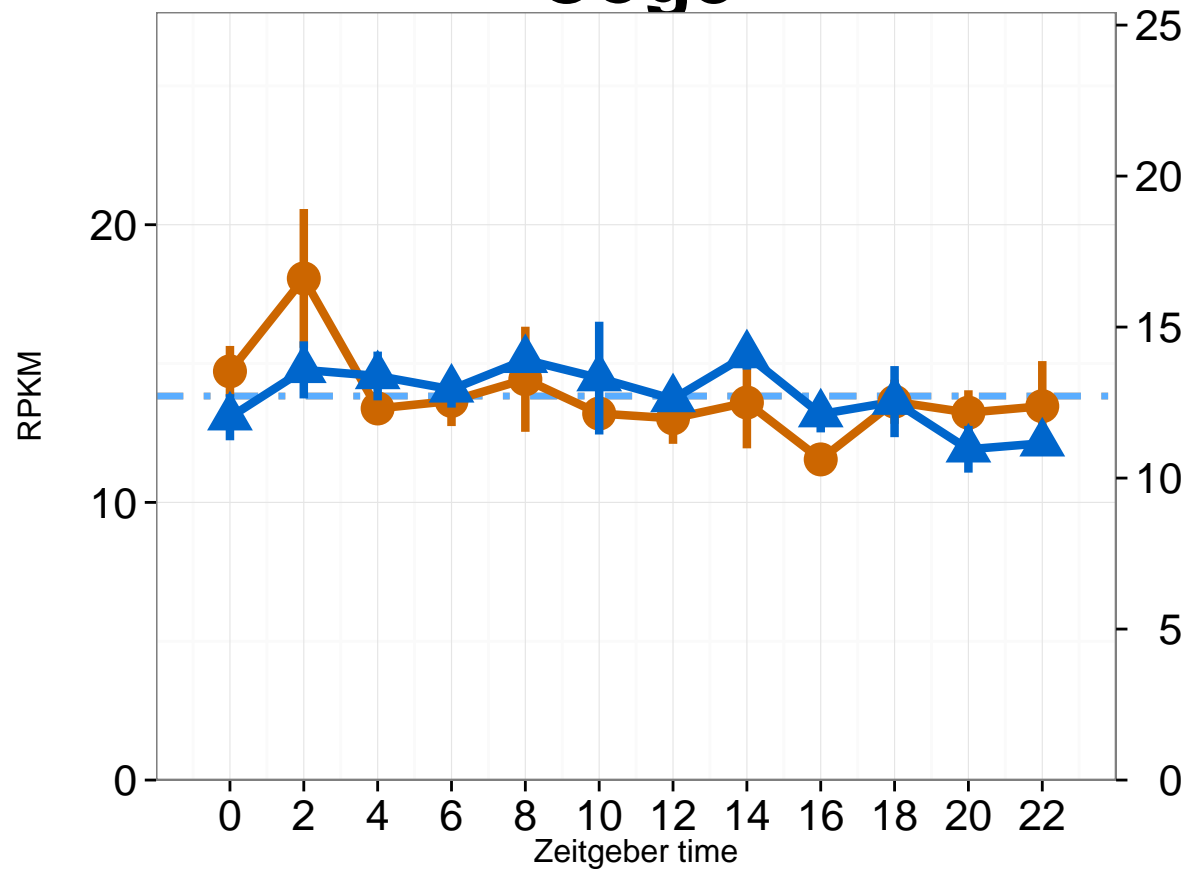

## Cog8

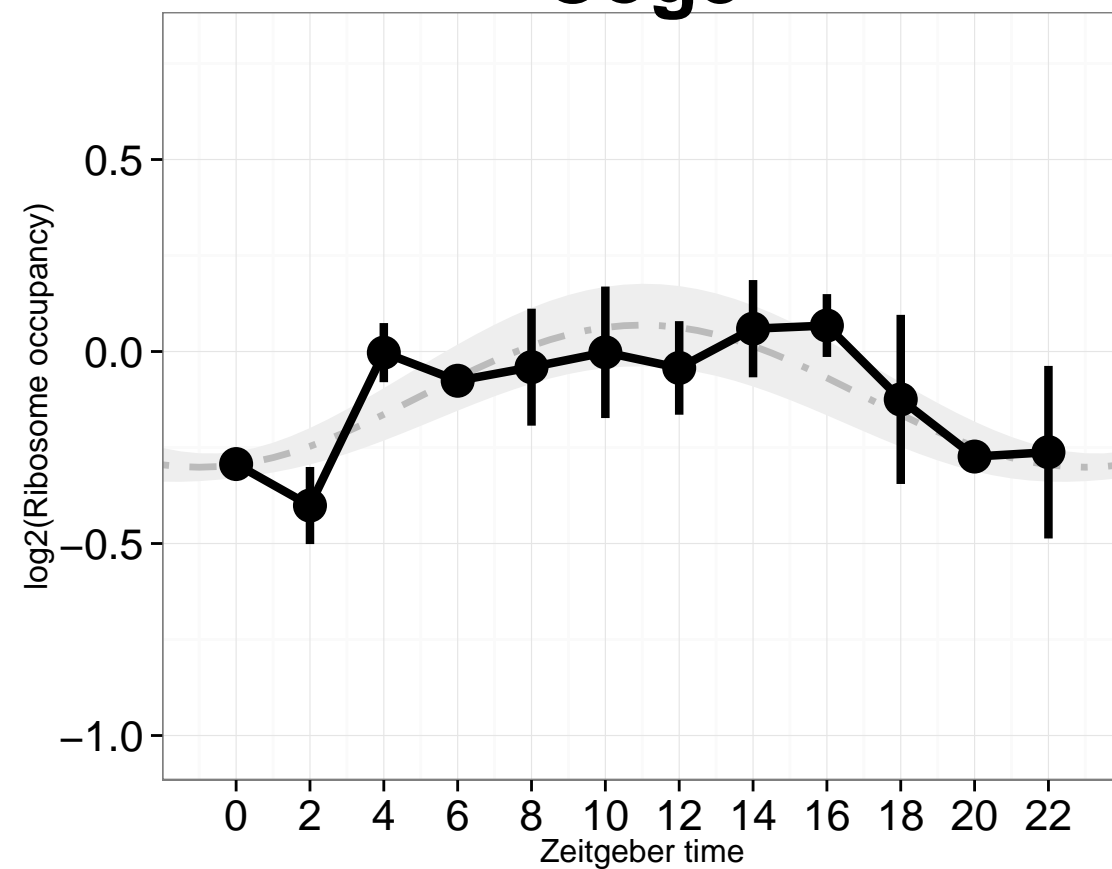

Supplement: SuppDataset_1.zip [file Cog8_set_A.pdf › Supplemental Dataset 1/A-mRNA_nonrhyth_translation_nonrhyth/Cog8_set_A.pdf]

# Coil

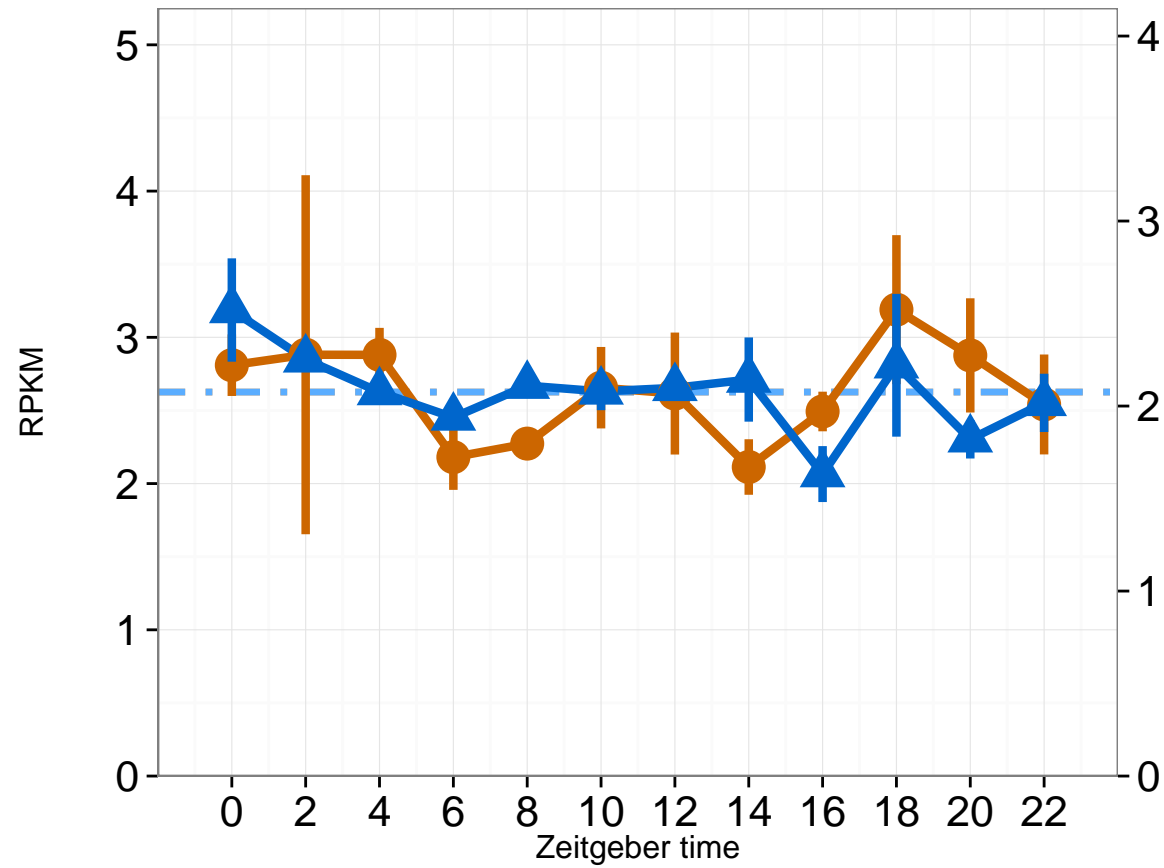

# Coil

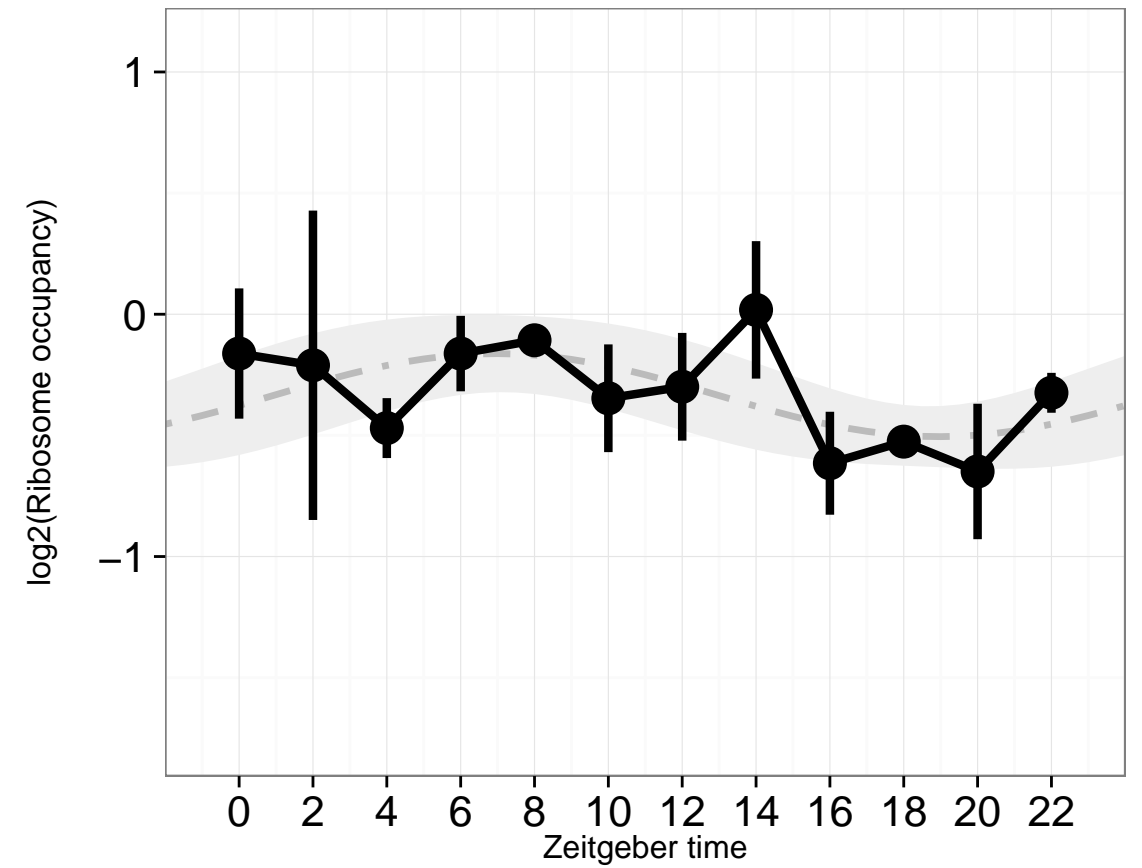

Supplement: SuppDataset_1.zip [file Coil_set_A.pdf › Supplemental Dataset 1/A-mRNA_nonrhyth_translation_nonrhyth/Coil_set_A.pdf]

# Col12a1

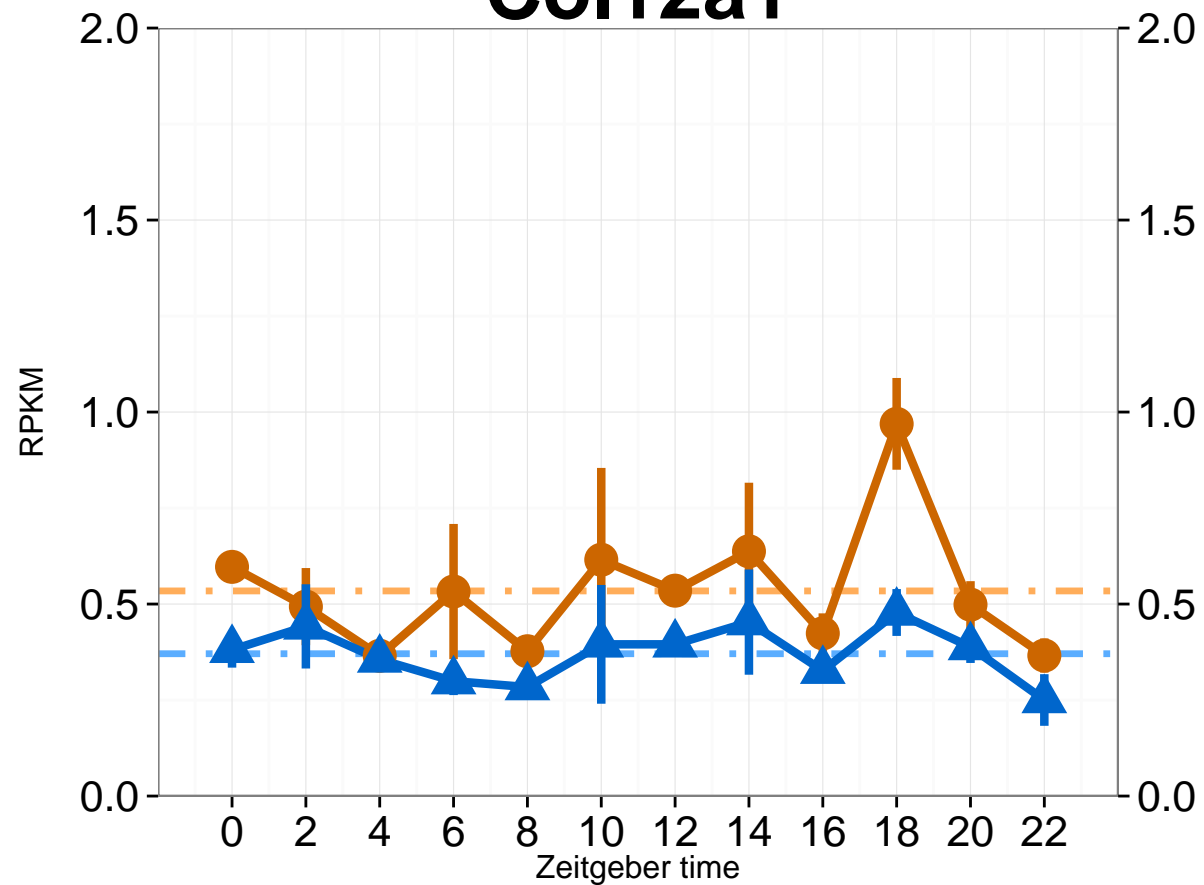

# Col12a1

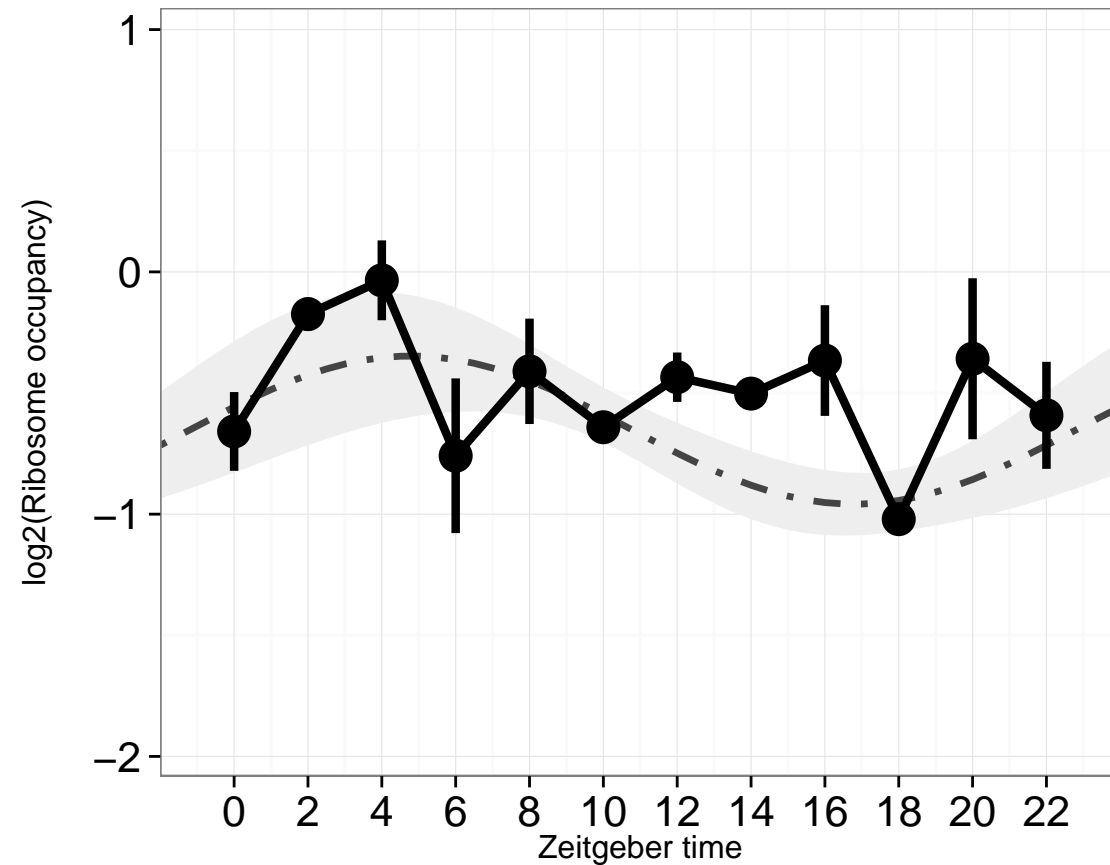

Supplement: SuppDataset_1.zip [file Col12a1_set_A.pdf › Supplemental Dataset 1/A-mRNA_nonrhyth_translation_nonrhyth/Col12a1_set_A.pdf]

# Col13a1

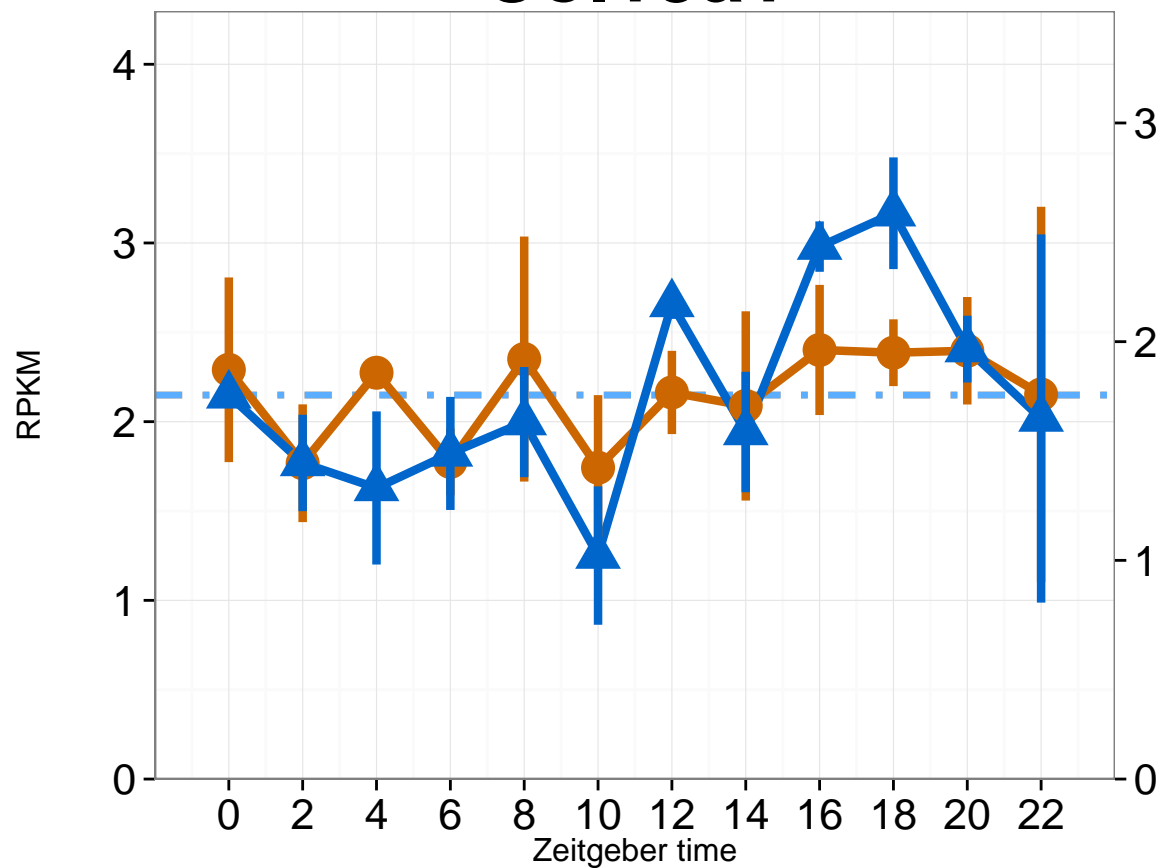

# Col13a1

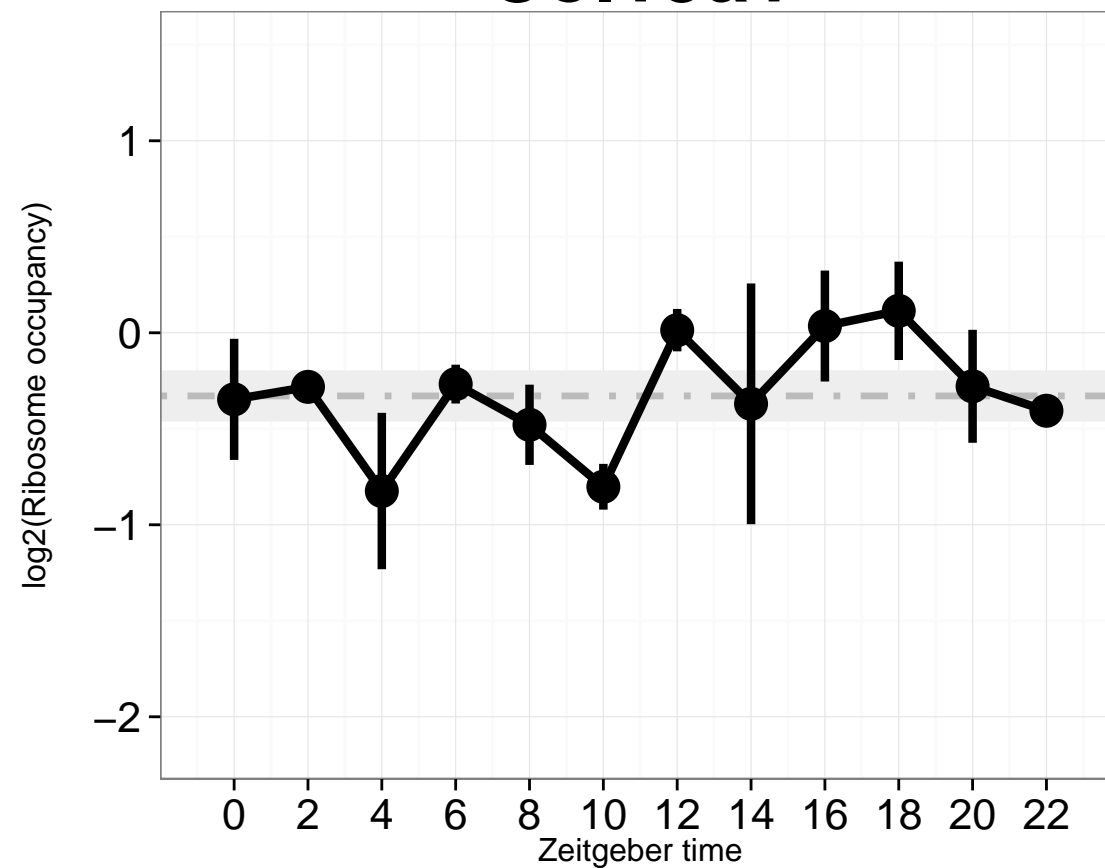

Supplement: SuppDataset_1.zip [file Col13a1_set_A.pdf › Supplemental Dataset 1/A-mRNA_nonrhyth_translation_nonrhyth/Col13a1_set_A.pdf]

**Col14a1**

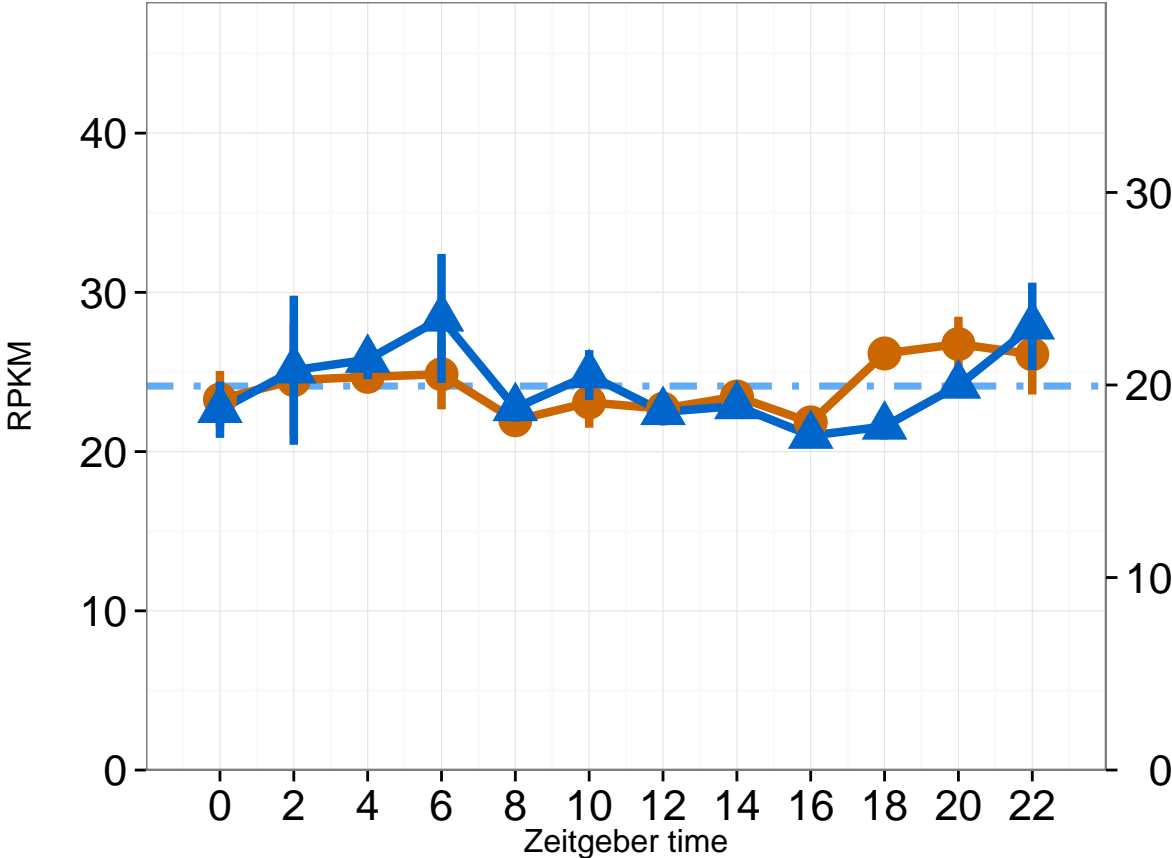

**Col14a1**

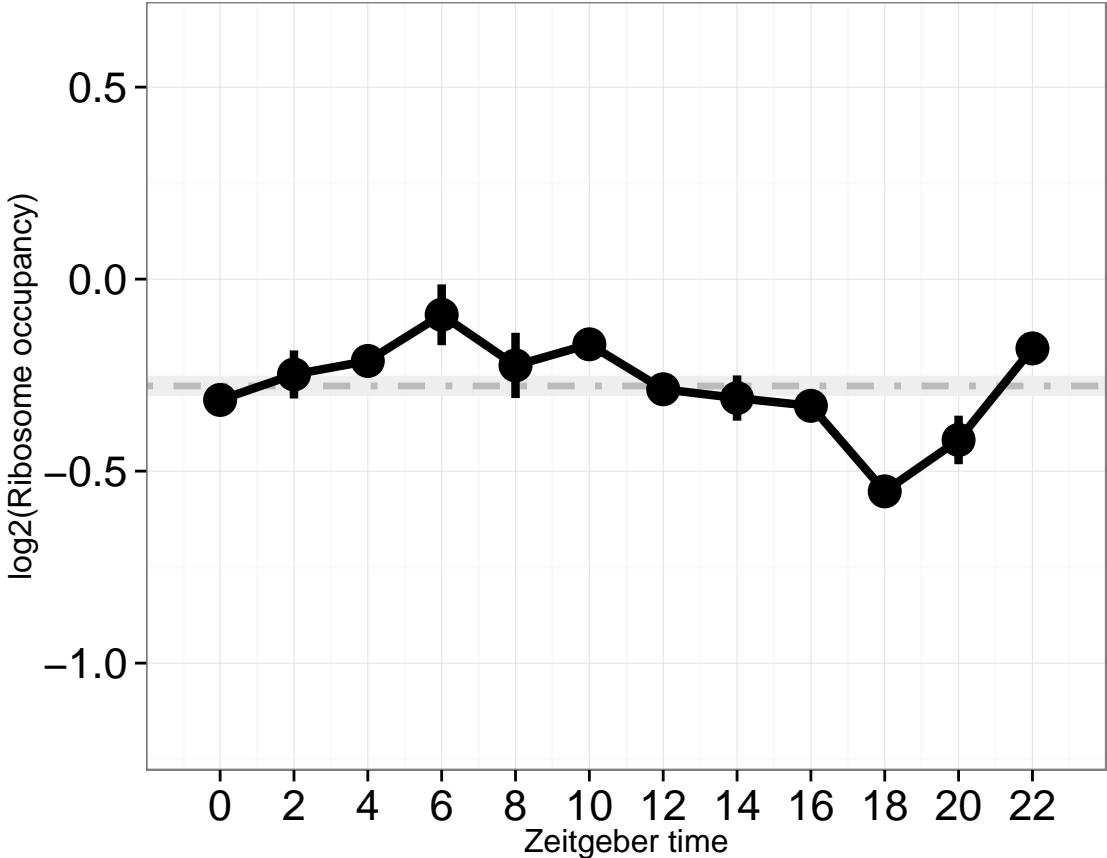

Supplement: SuppDataset_1.zip [file Col14a1_set_A.pdf › Supplemental Dataset 1/A-mRNA_nonrhyth_translation_nonrhyth/Col14a1_set_A.pdf]

# Col16a1

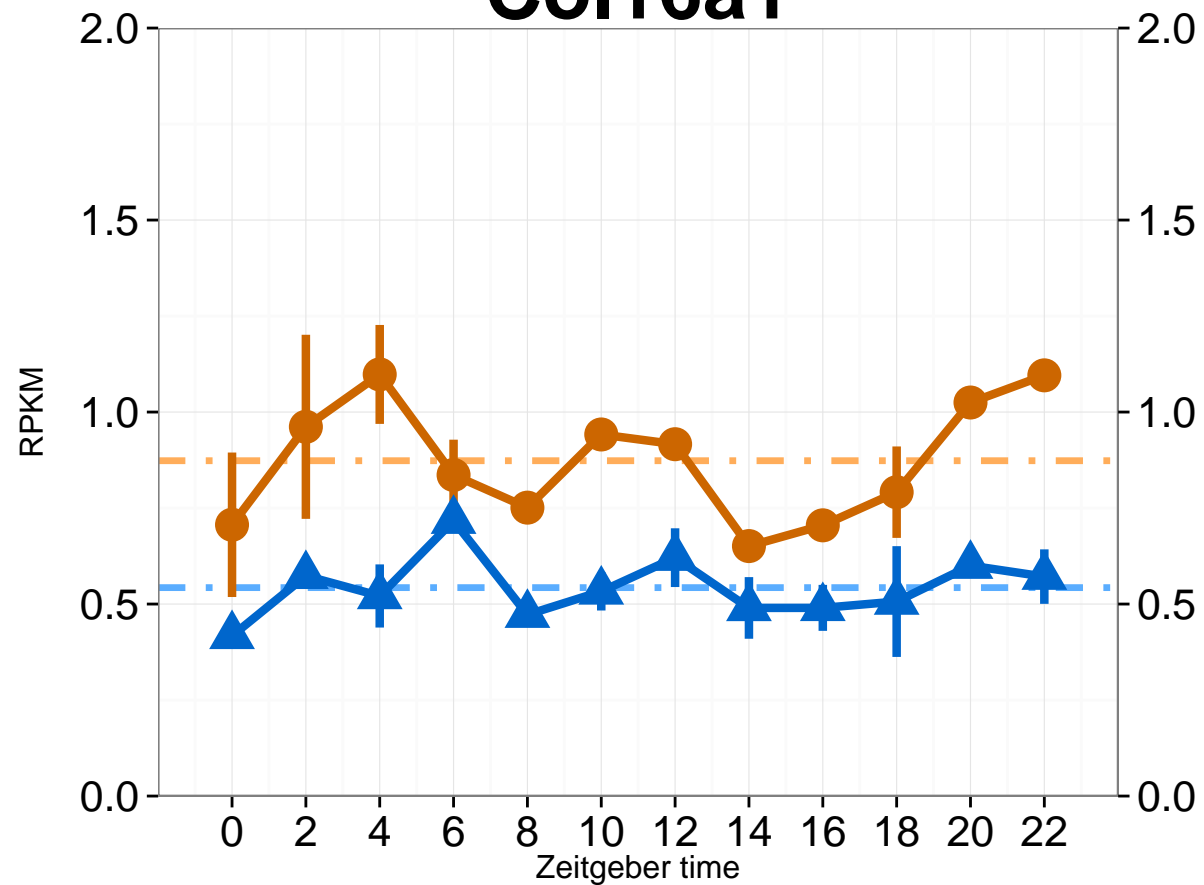

# Col16a1

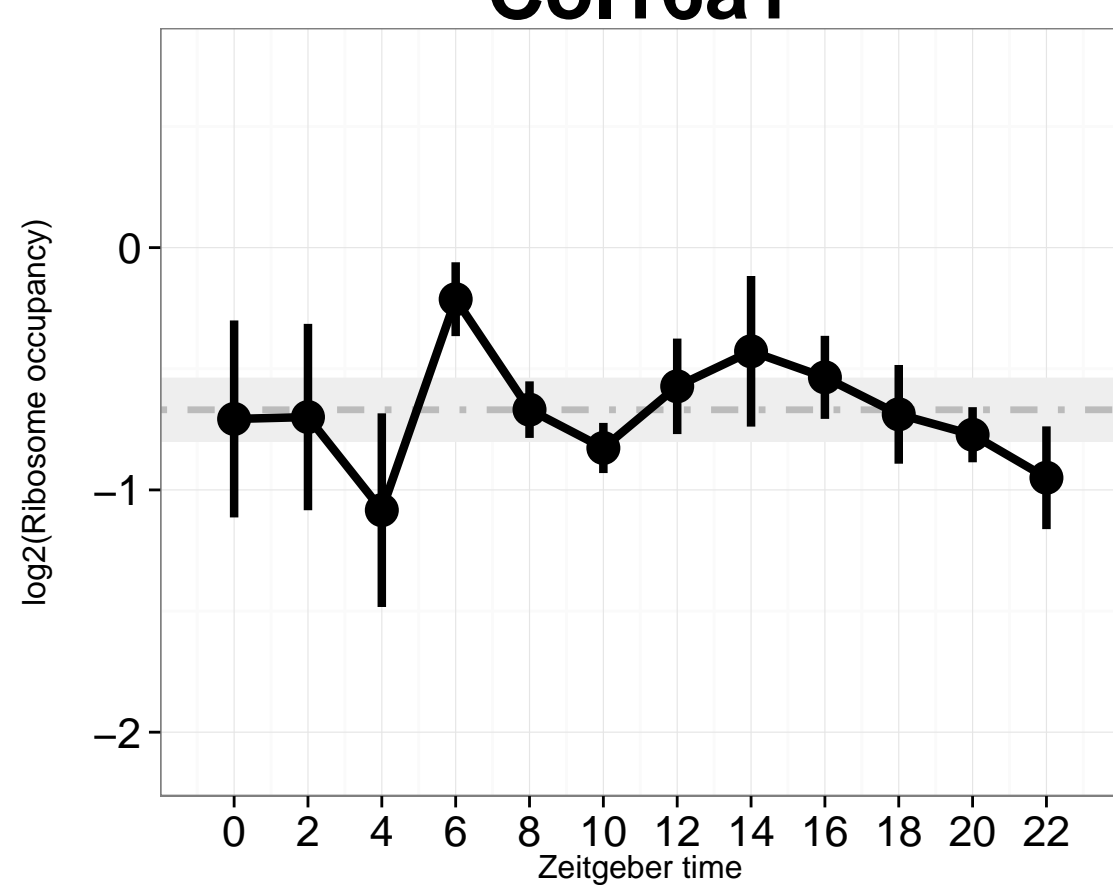

Supplement: SuppDataset_1.zip [file Col16a1_set_A.pdf › Supplemental Dataset 1/A-mRNA_nonrhyth_translation_nonrhyth/Col16a1_set_A.pdf]

# Col18a1

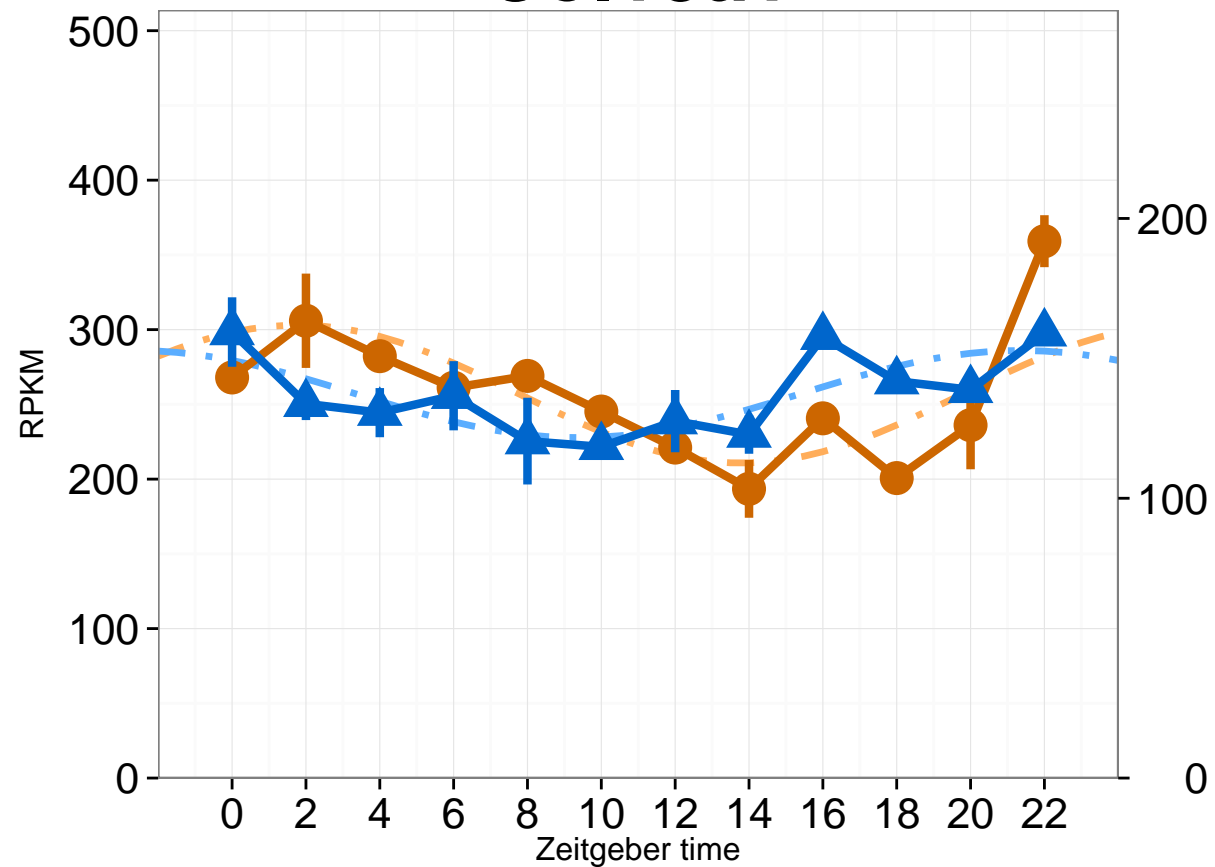

# Col18a1

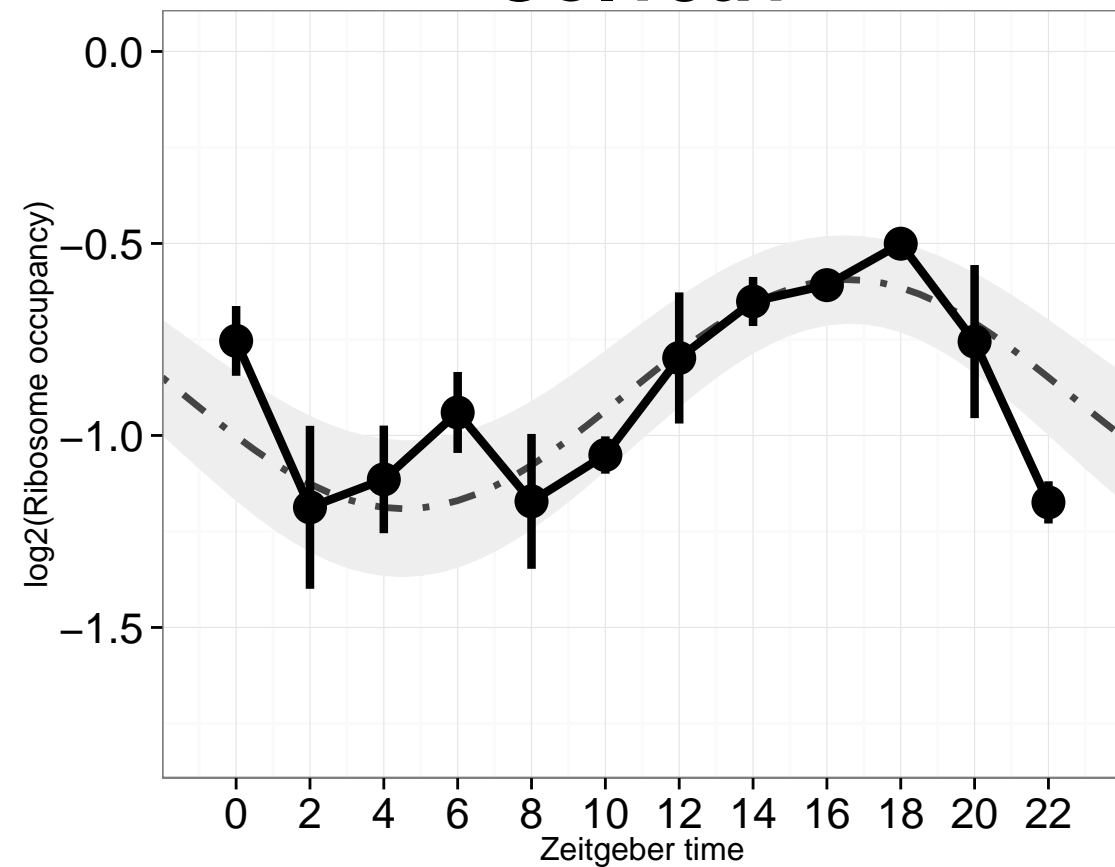

Supplement: SuppDataset_1.zip [file Col18a1_set_A.pdf › Supplemental Dataset 1/A-mRNA_nonrhyth_translation_nonrhyth/Col18a1_set_A.pdf]

# Col1a2

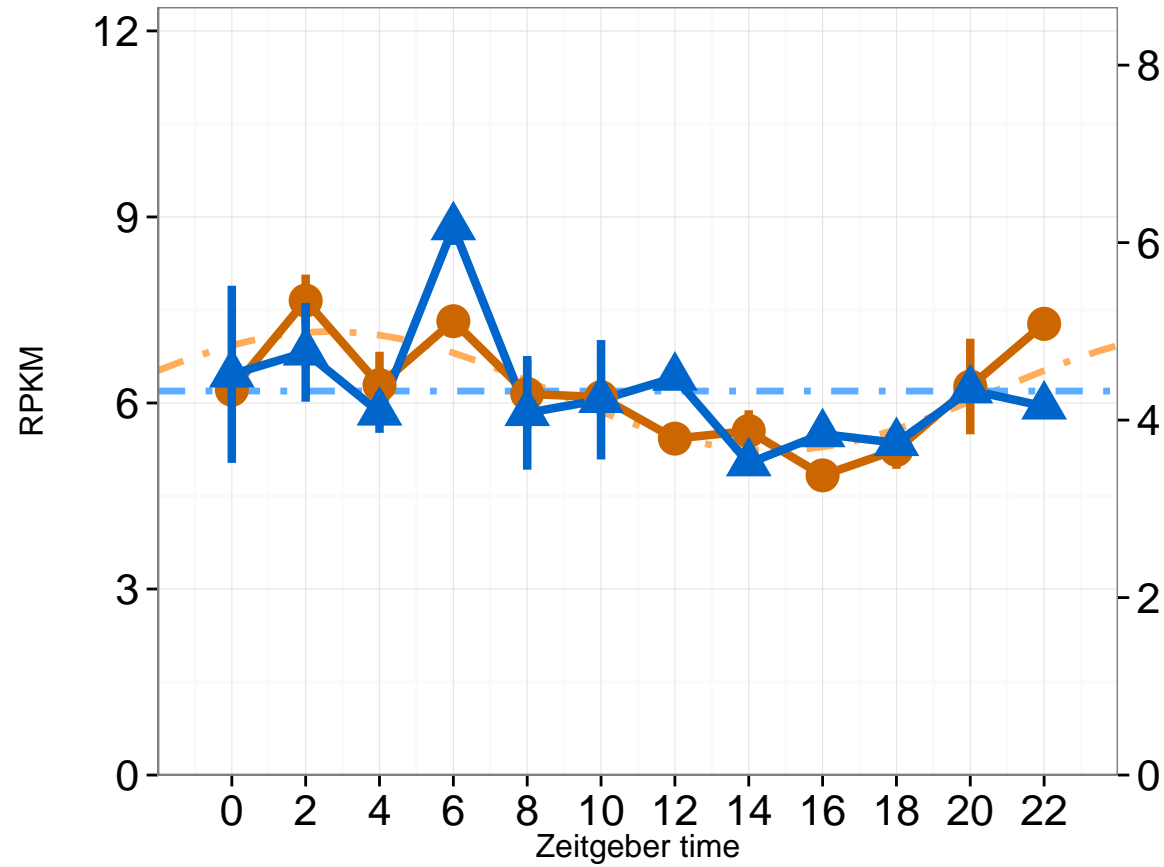

# Col1a2

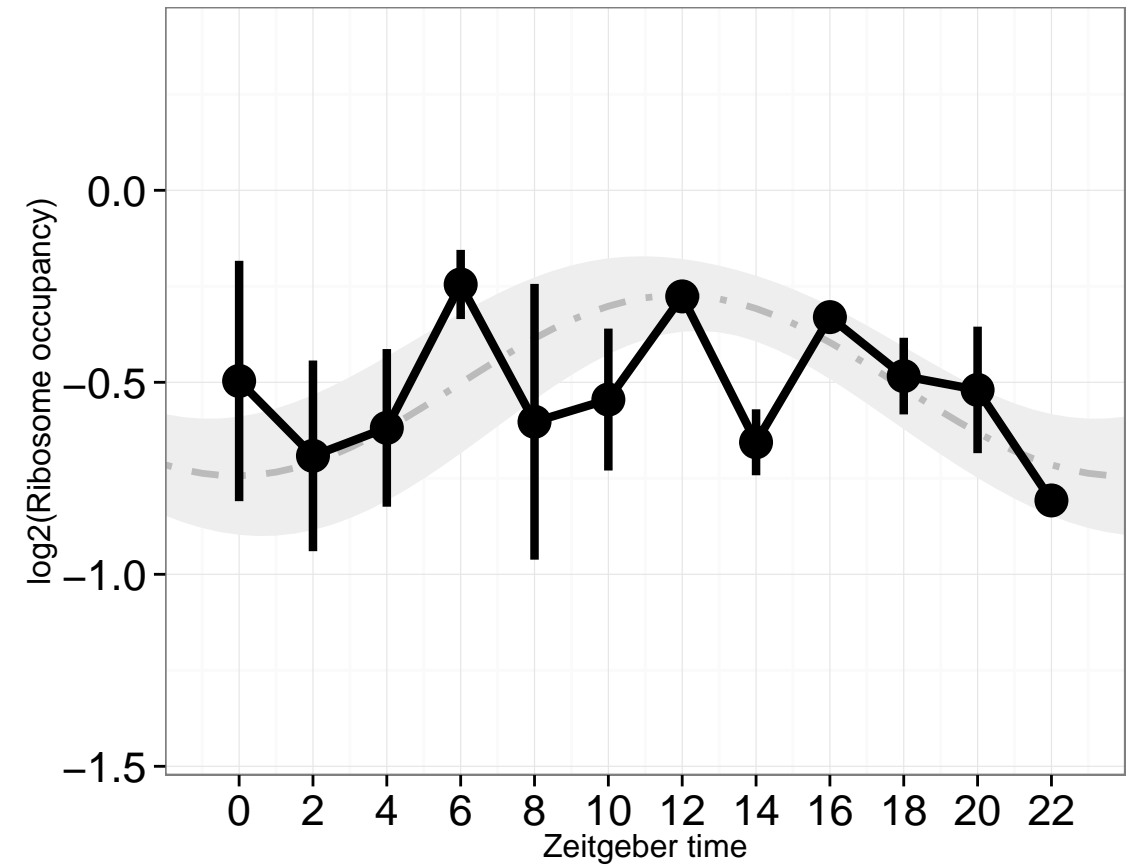

Supplement: SuppDataset_1.zip [file Col1a2_set_A.pdf › Supplemental Dataset 1/A-mRNA_nonrhyth_translation_nonrhyth/Col1a2_set_A.pdf]

# Col4a3bp

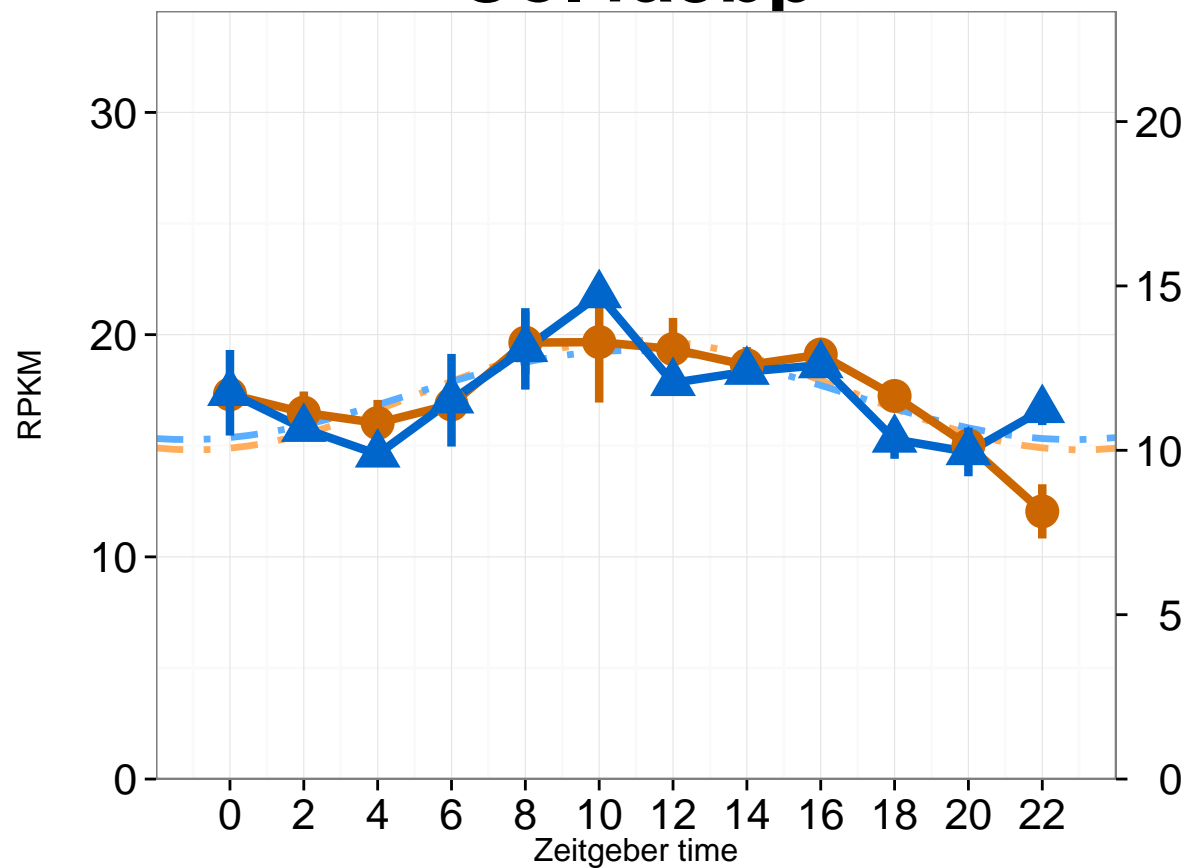

# Col4a3bp

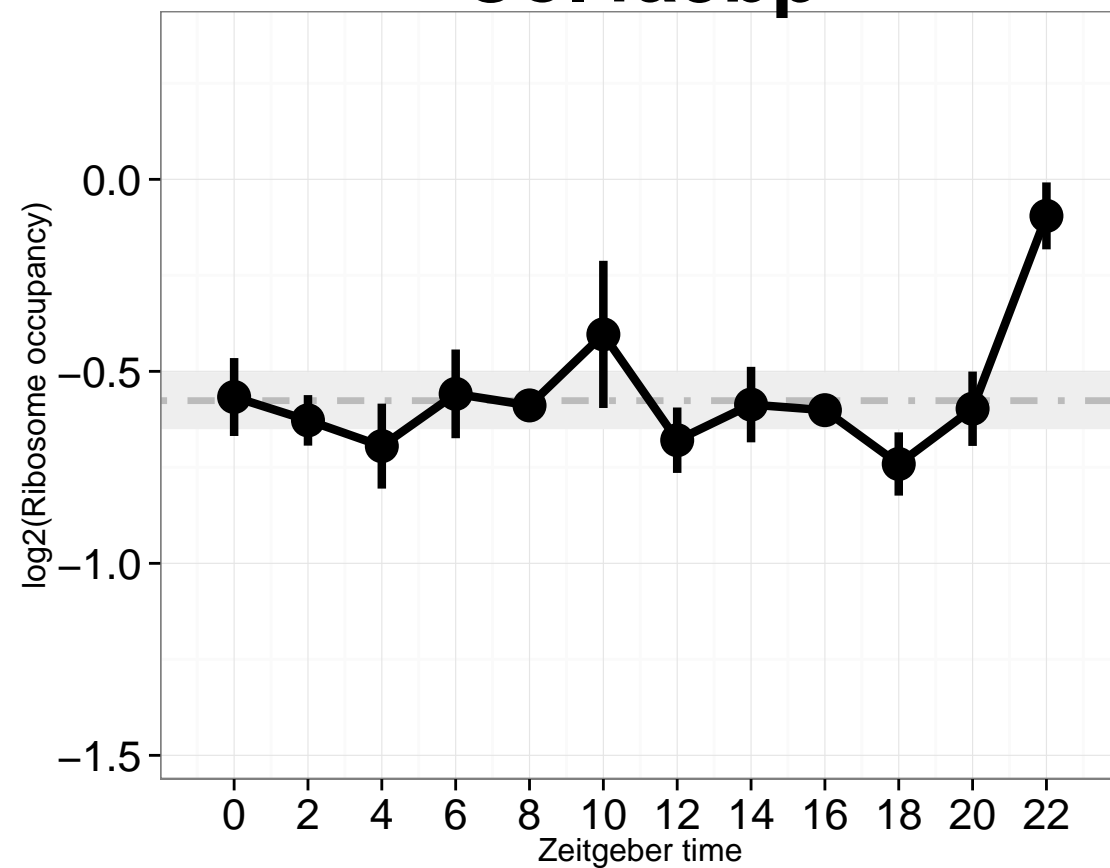

Supplement: SuppDataset_1.zip [file Col4a3bp_set_A.pdf › Supplemental Dataset 1/A-mRNA_nonrhyth_translation_nonrhyth/Col4a3bp_set_A.pdf]

# Col4a5

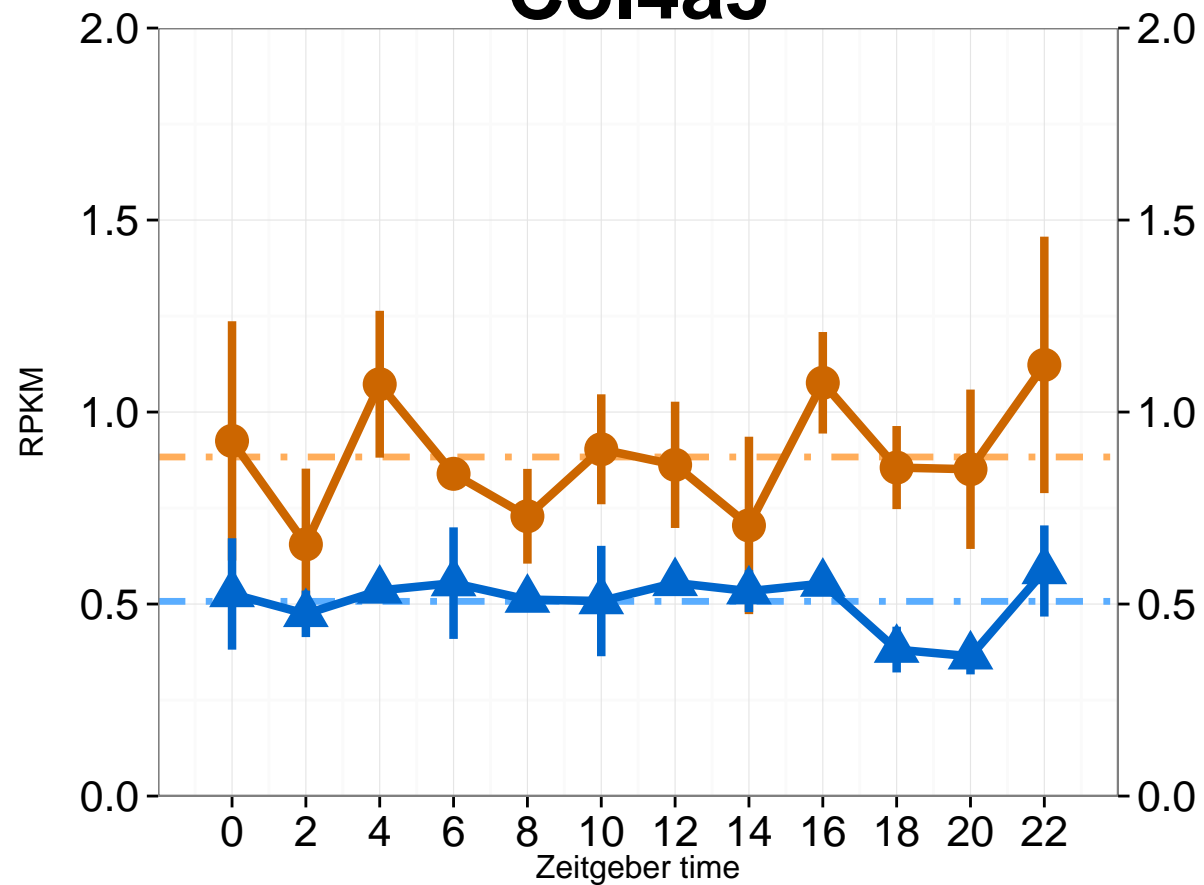

# Col4a5

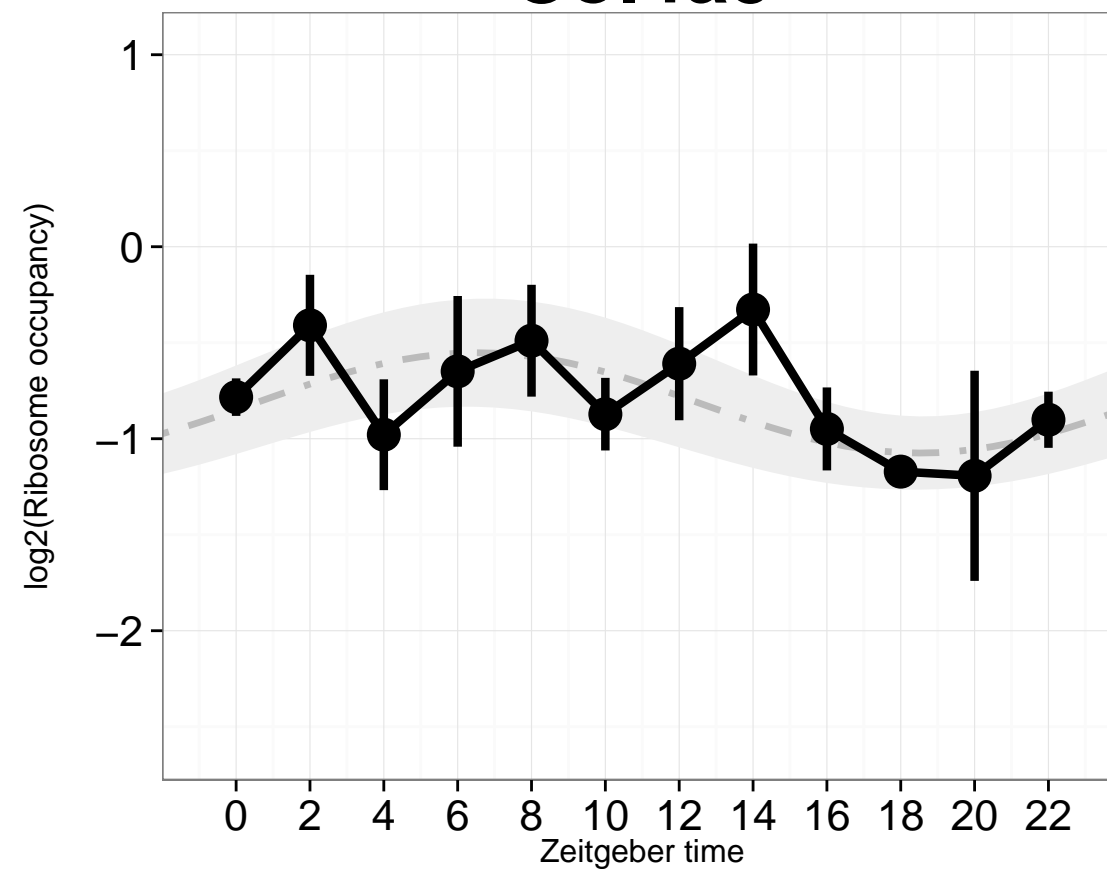

Supplement: SuppDataset_1.zip [file Col4a5_set_A.pdf › Supplemental Dataset 1/A-mRNA_nonrhyth_translation_nonrhyth/Col4a5_set_A.pdf]

# Col6a1

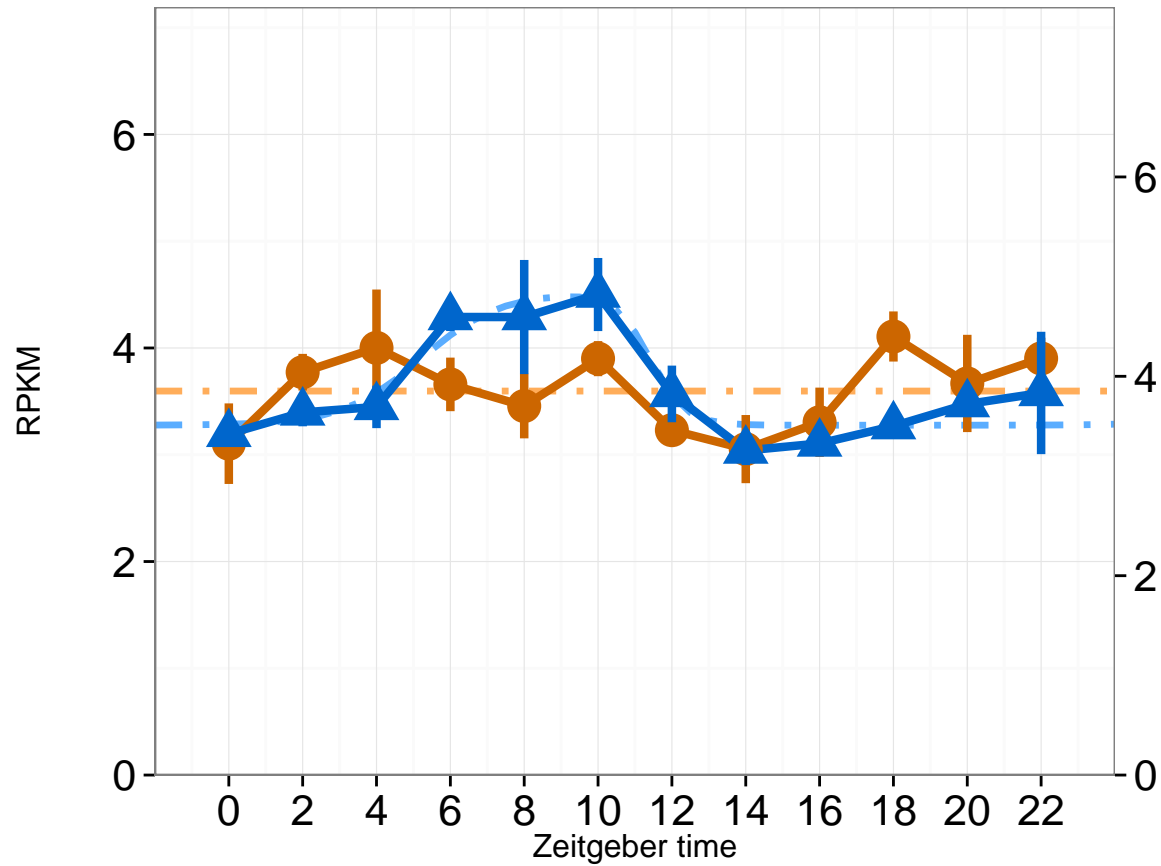

# Col6a1

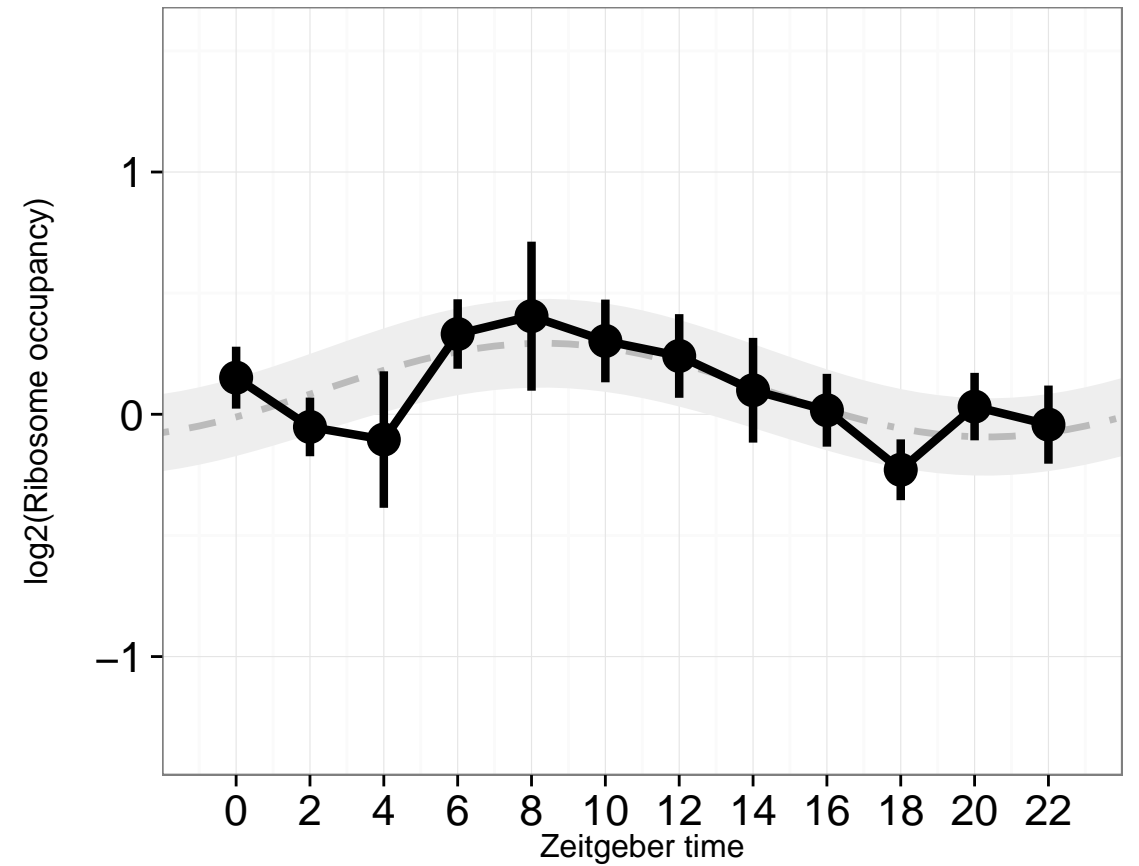

Supplement: SuppDataset_1.zip [file Col6a1_set_A.pdf › Supplemental Dataset 1/A-mRNA_nonrhyth_translation_nonrhyth/Col6a1_set_A.pdf]

# Col6a2

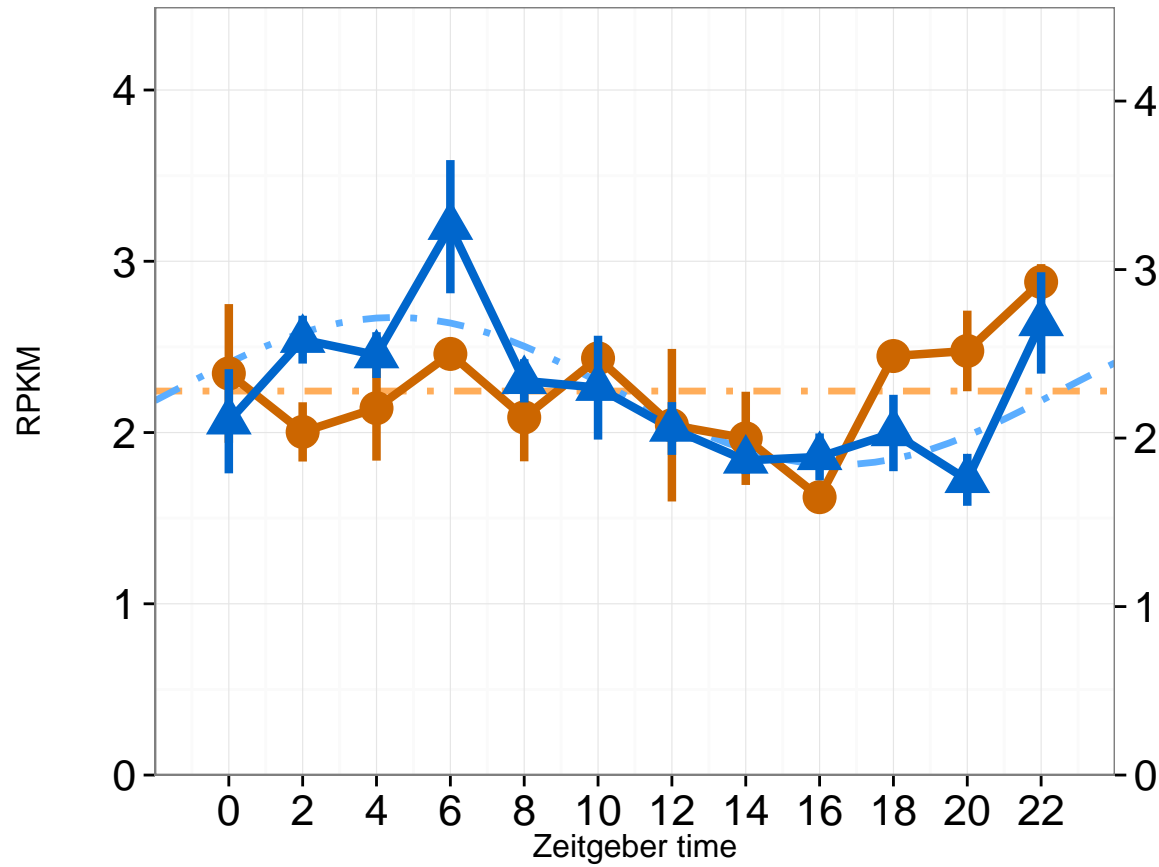

# Col6a2

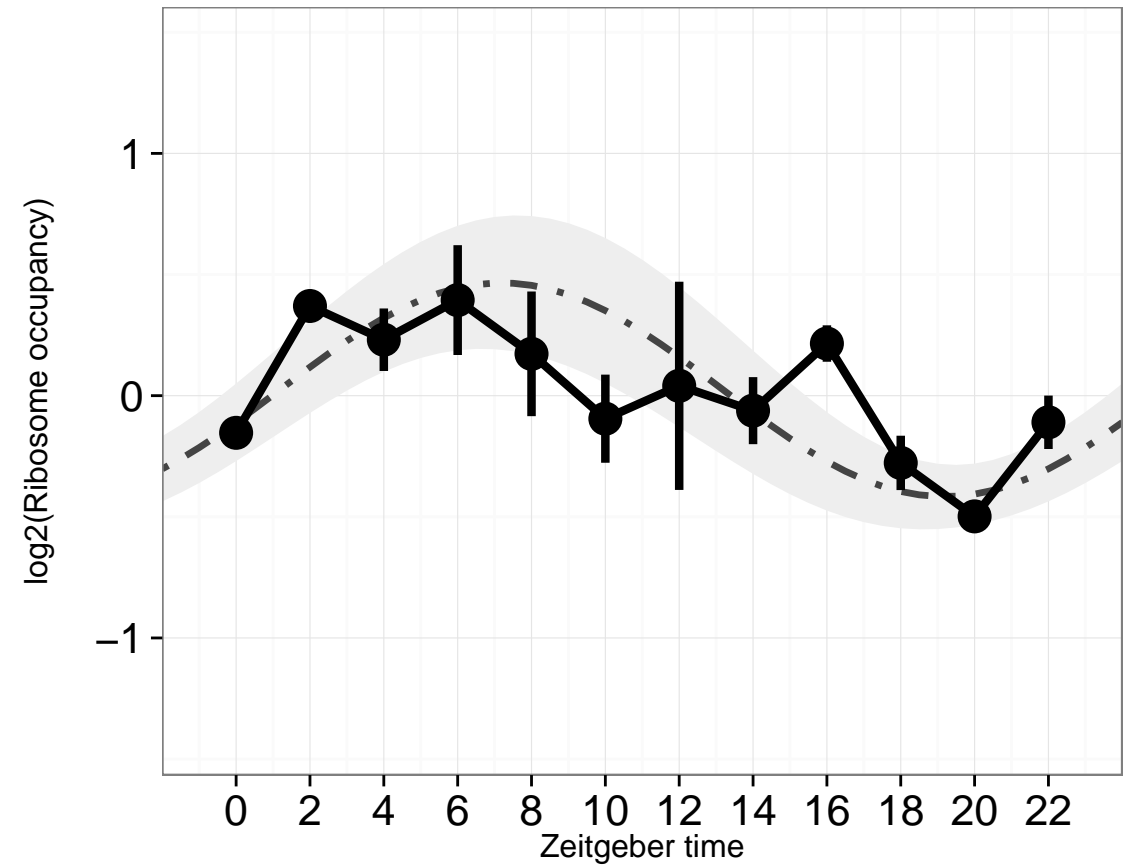

Supplement: SuppDataset_1.zip [file Col6a2_set_A.pdf › Supplemental Dataset 1/A-mRNA_nonrhyth_translation_nonrhyth/Col6a2_set_A.pdf]

**Col8a1 TR**

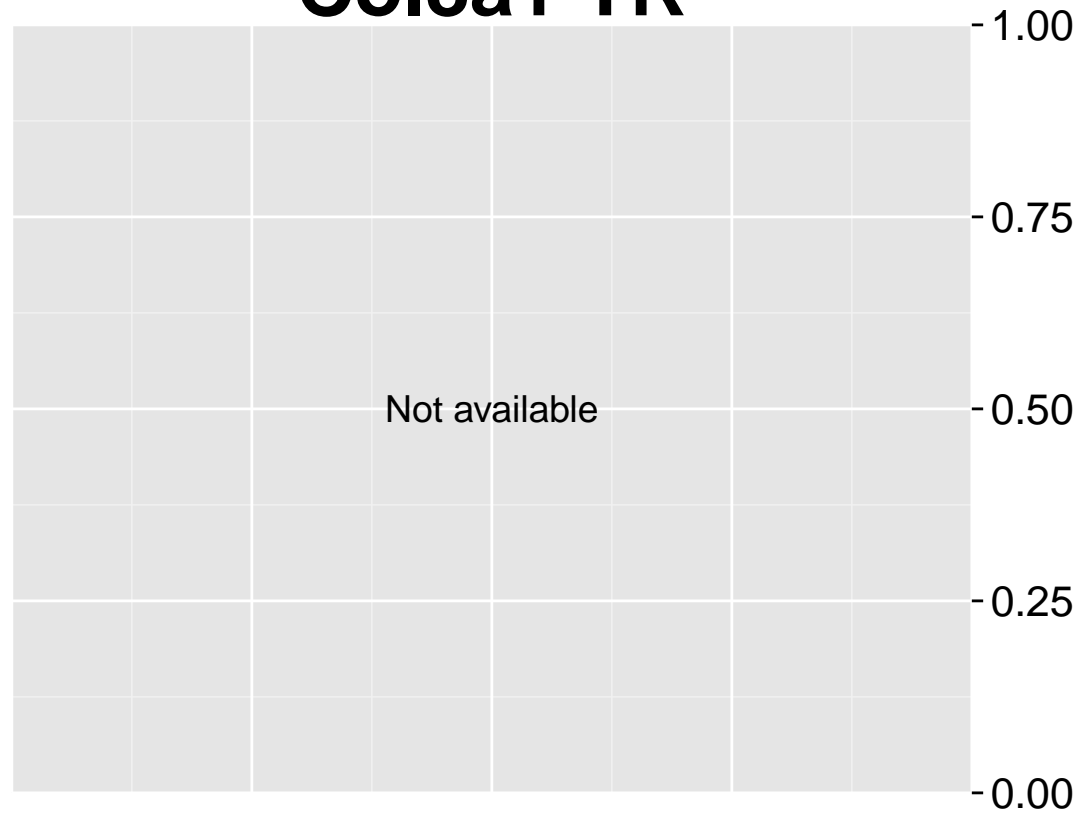

**Col8a1 log2(Ribosome occupancy**

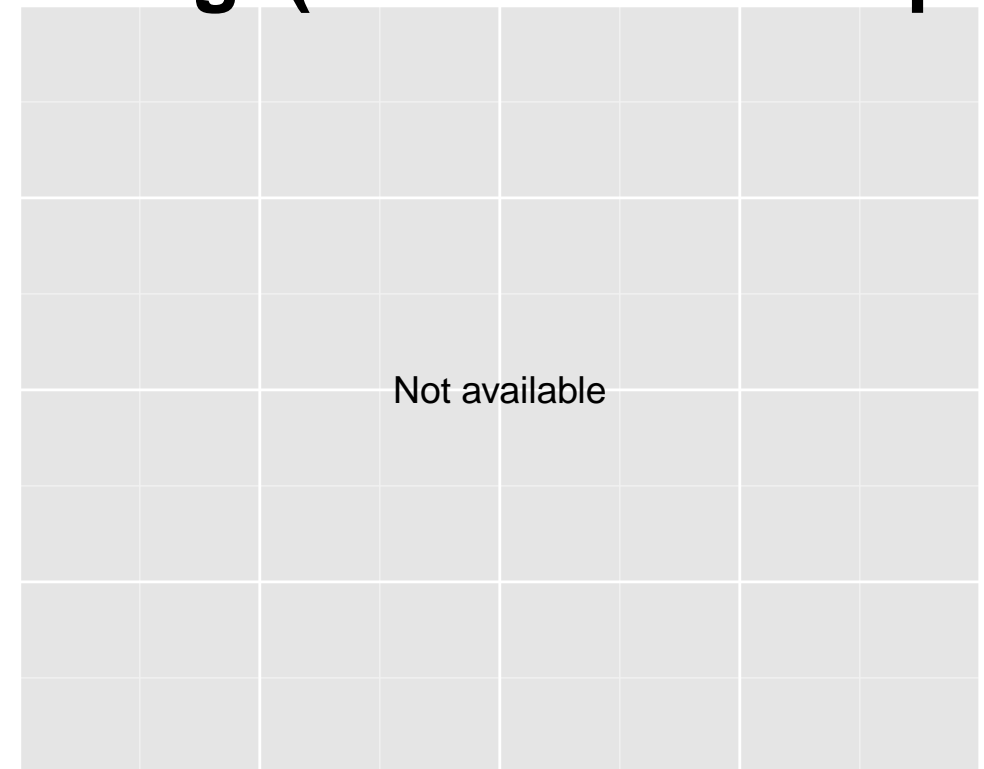

Supplement: SuppDataset_1.zip [file Col8a1_set_A.pdf › Supplemental Dataset 1/A-mRNA_nonrhyth_translation_nonrhyth/Col8a1_set_A.pdf]

# Colec10

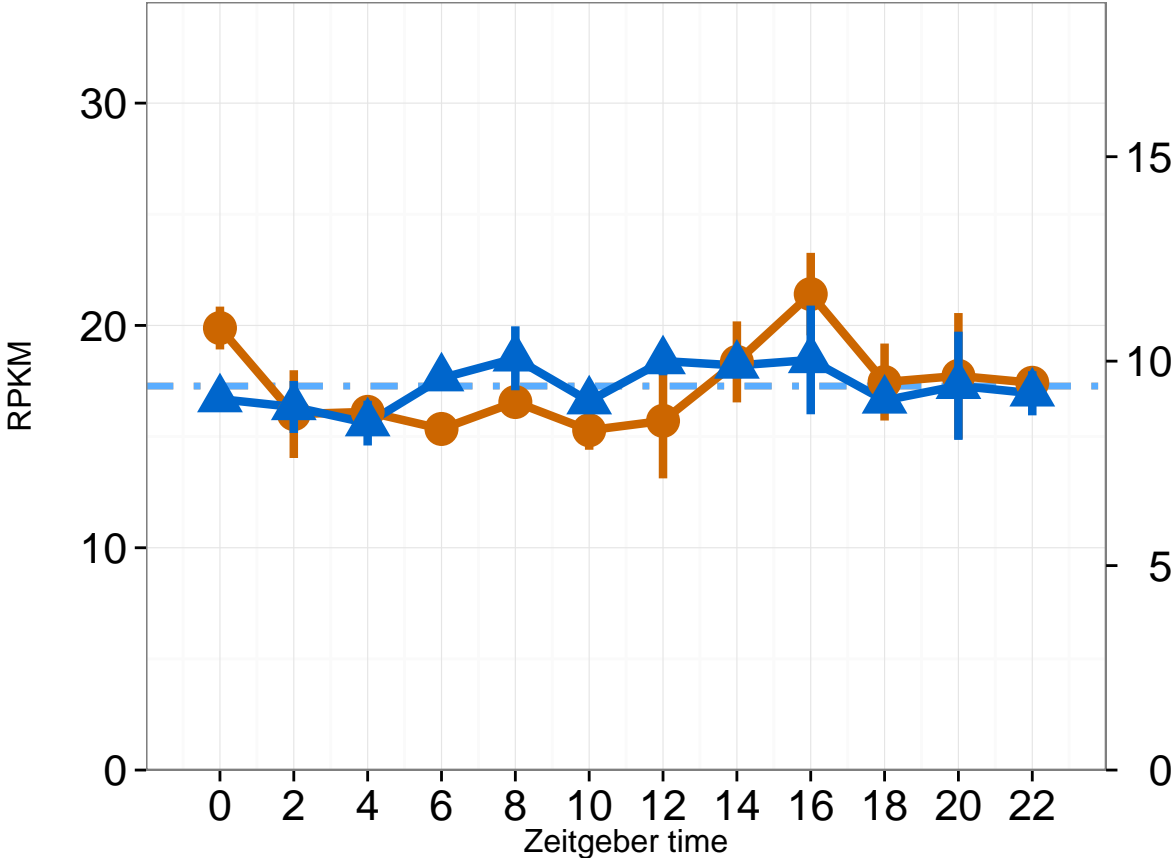

# Colec10

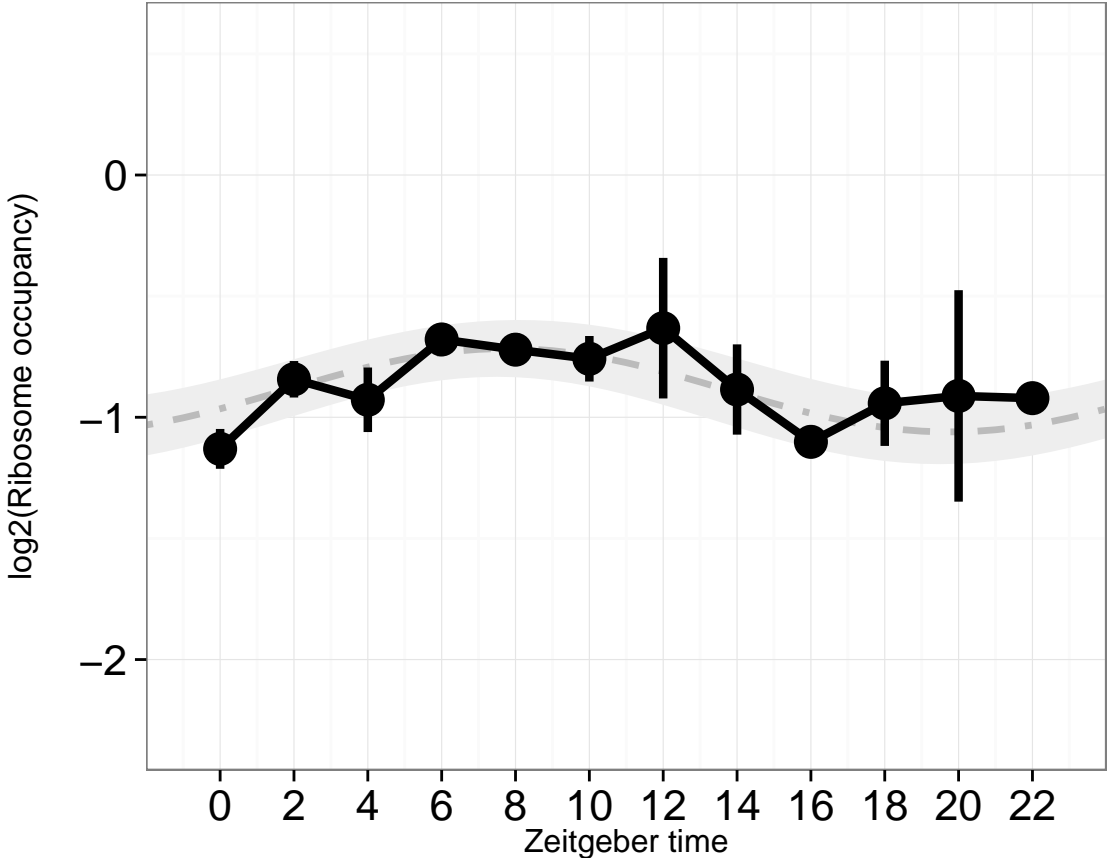

Supplement: SuppDataset_1.zip [file Colec10_set_A.pdf › Supplemental Dataset 1/A-mRNA_nonrhyth_translation_nonrhyth/Colec10_set_A.pdf]

Colec11

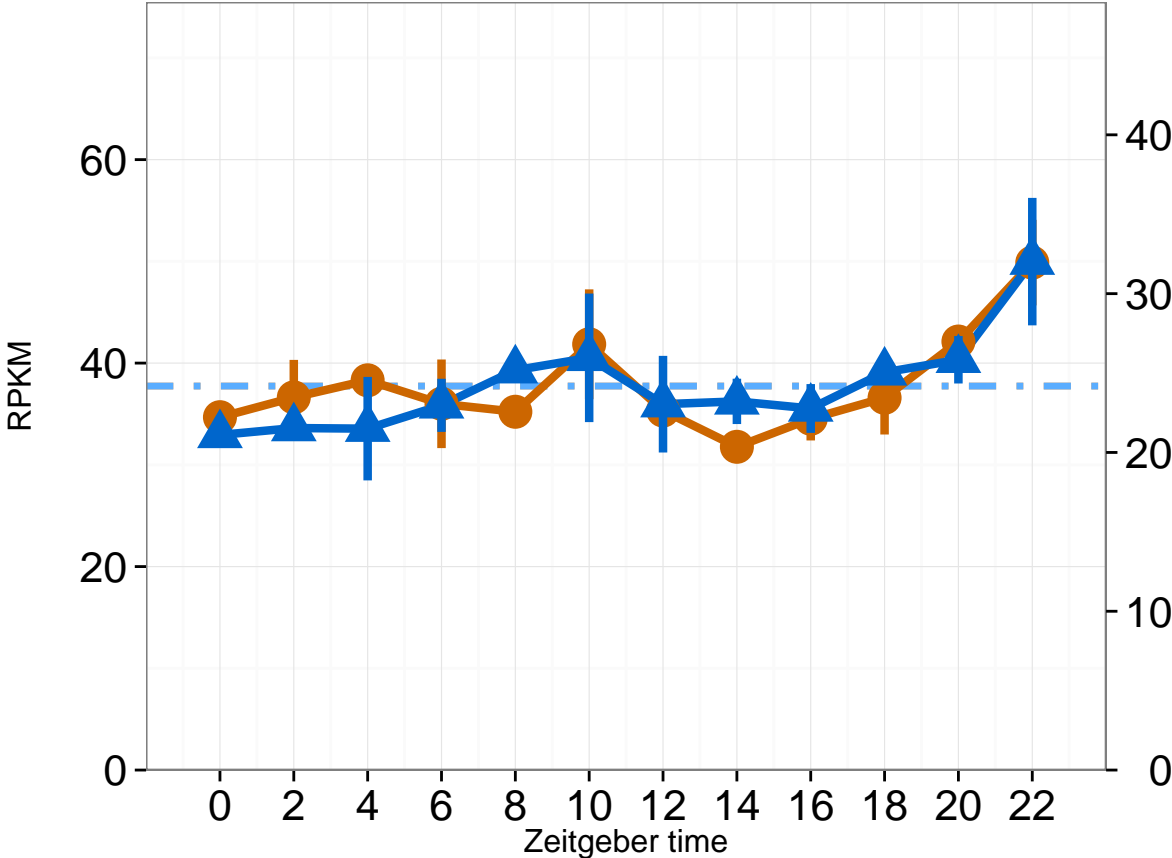

Colec11

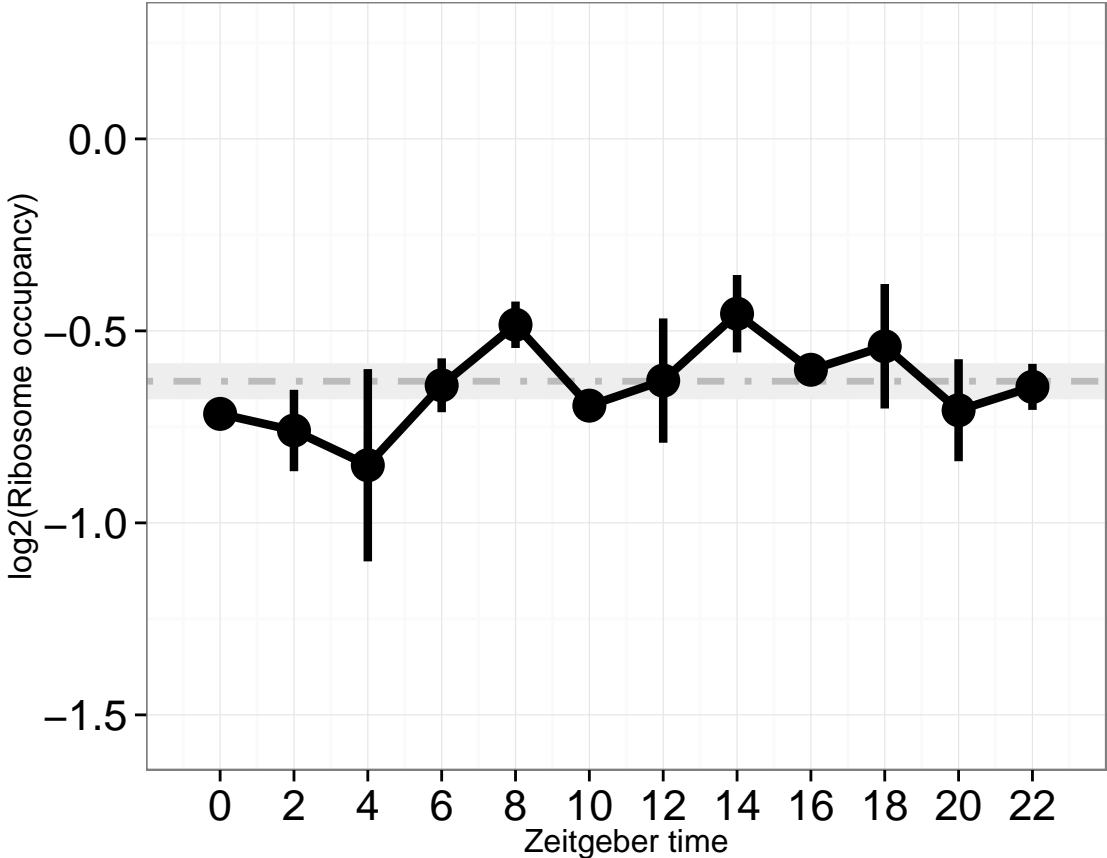

Supplement: SuppDataset_1.zip [file Colec11_set_A.pdf › Supplemental Dataset 1/A-mRNA_nonrhyth_translation_nonrhyth/Colec11_set_A.pdf]

## Colec12

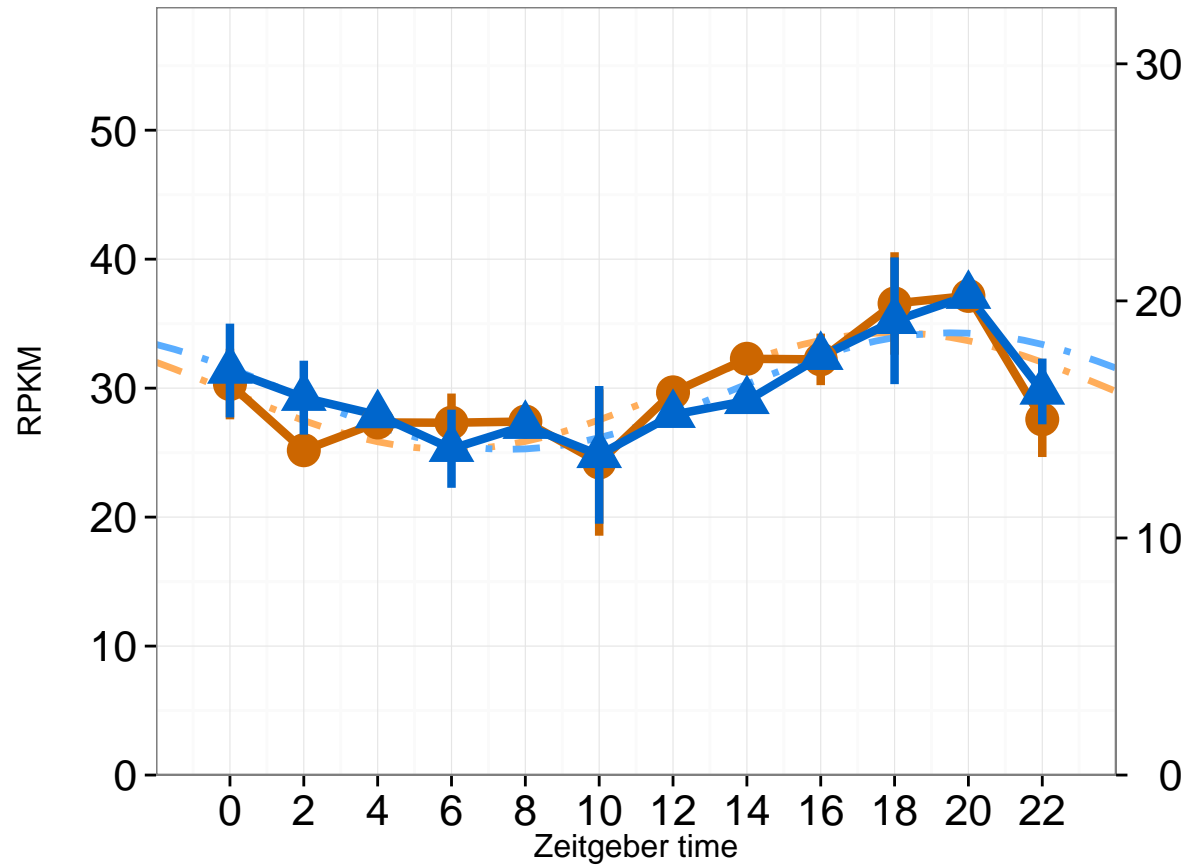

## Colec12

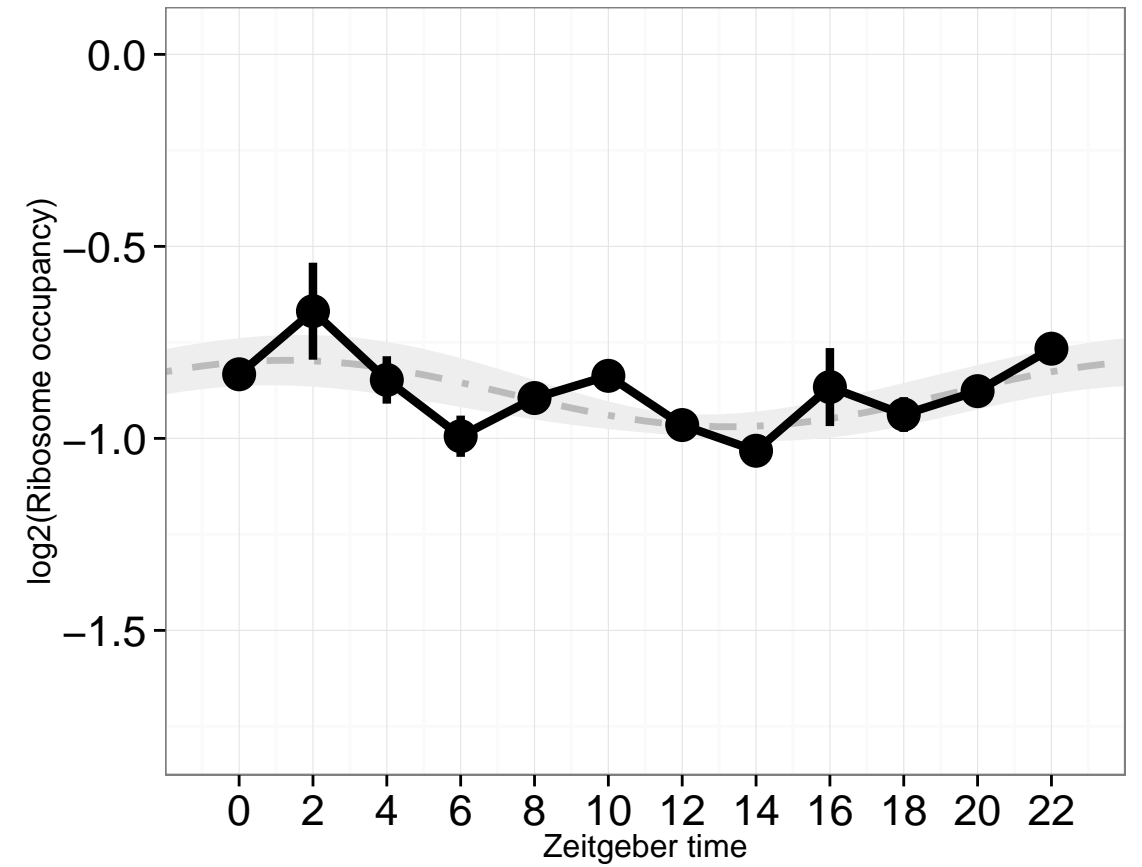

Supplement: SuppDataset_1.zip [file Colec12_set_A.pdf › Supplemental Dataset 1/A-mRNA_nonrhyth_translation_nonrhyth/Colec12_set_A.pdf]

## Colgalt1

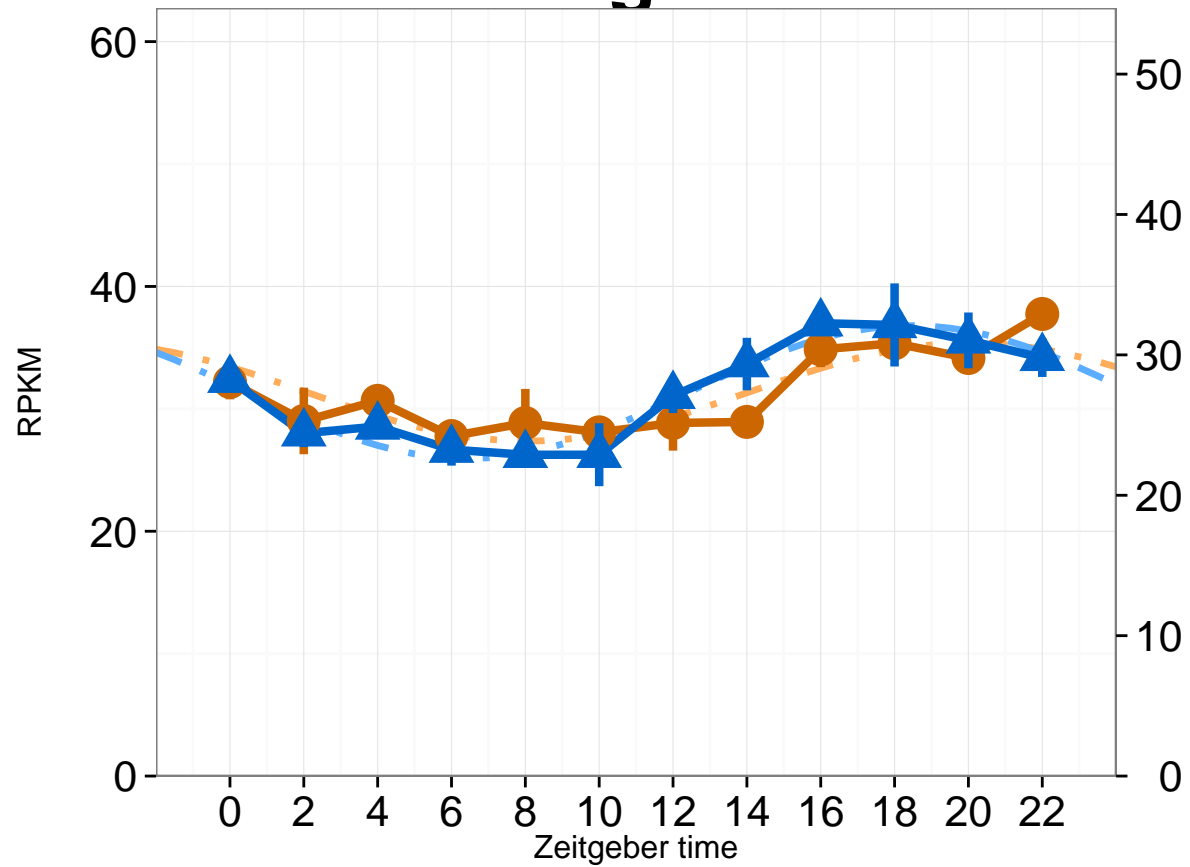

## Colgalt1

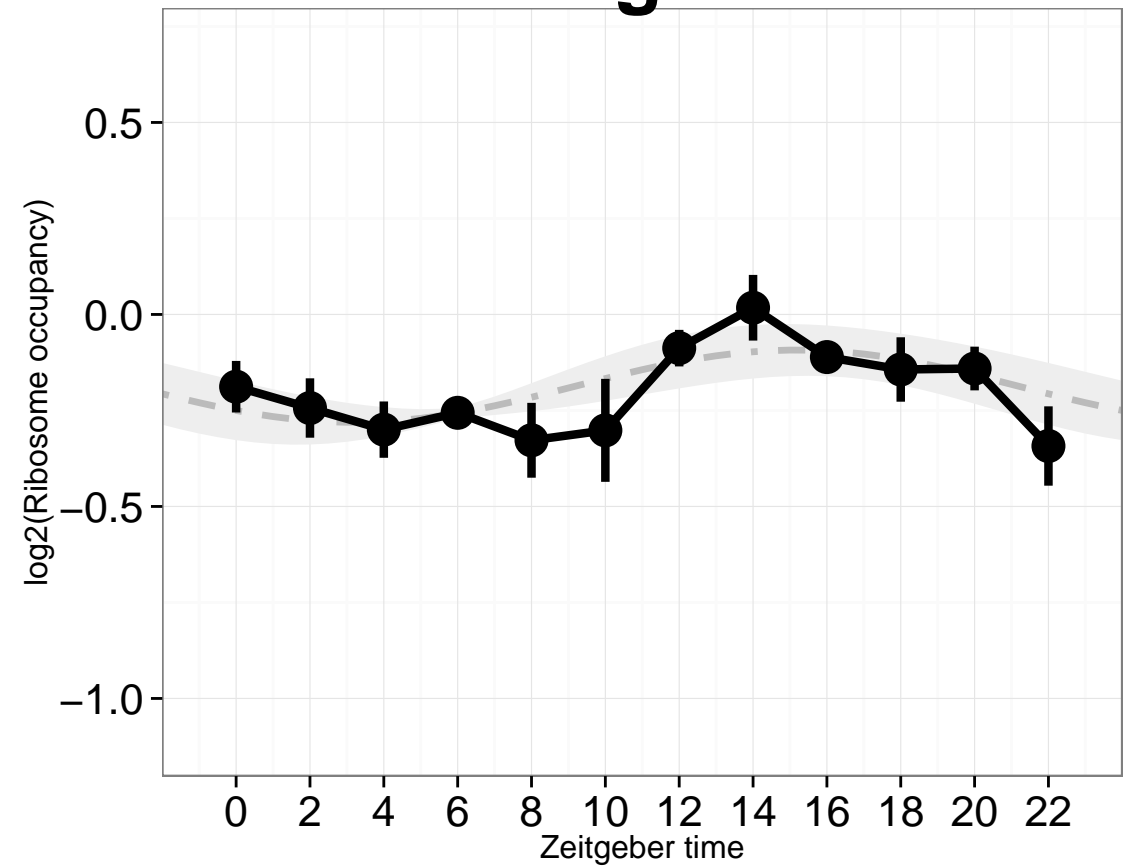

Supplement: SuppDataset_1.zip [file Colgalt1_set_A.pdf › Supplemental Dataset 1/A-mRNA_nonrhyth_translation_nonrhyth/Colgalt1_set_A.pdf]

## Commd10

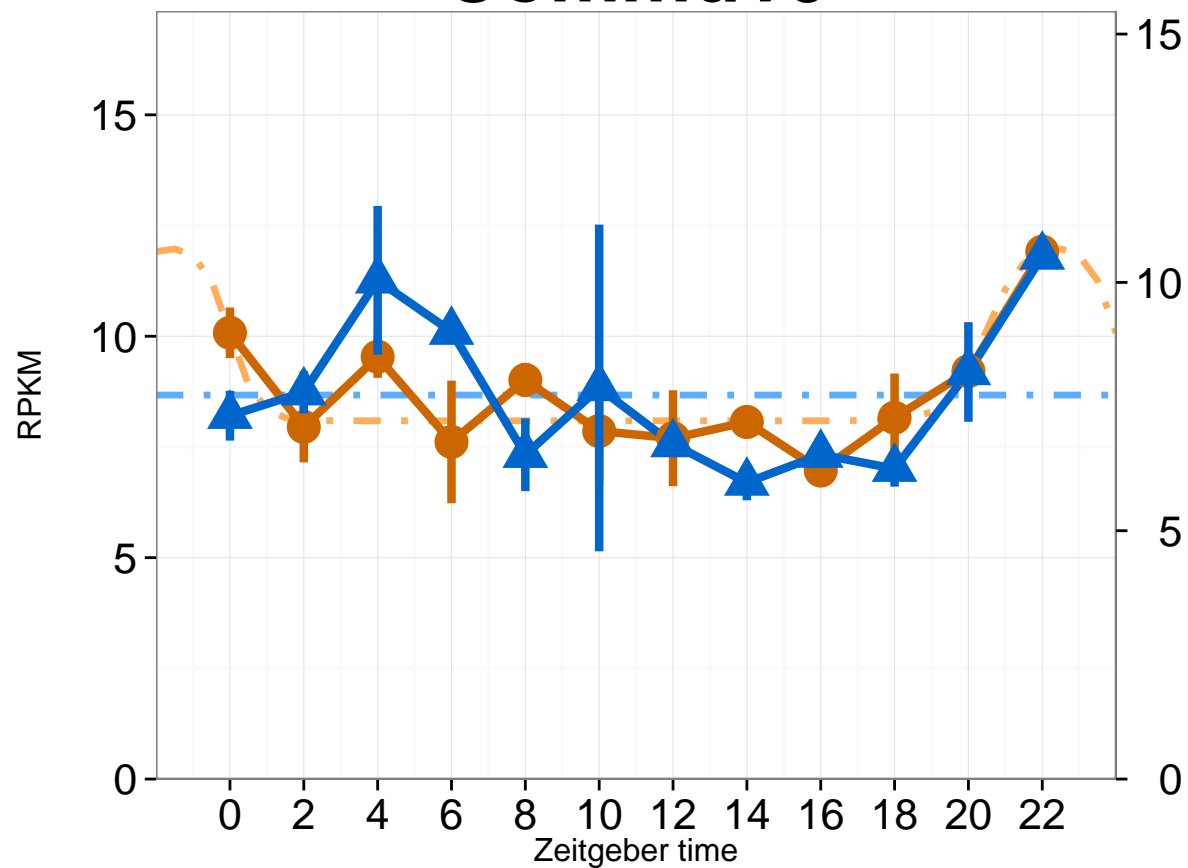

## Commd10

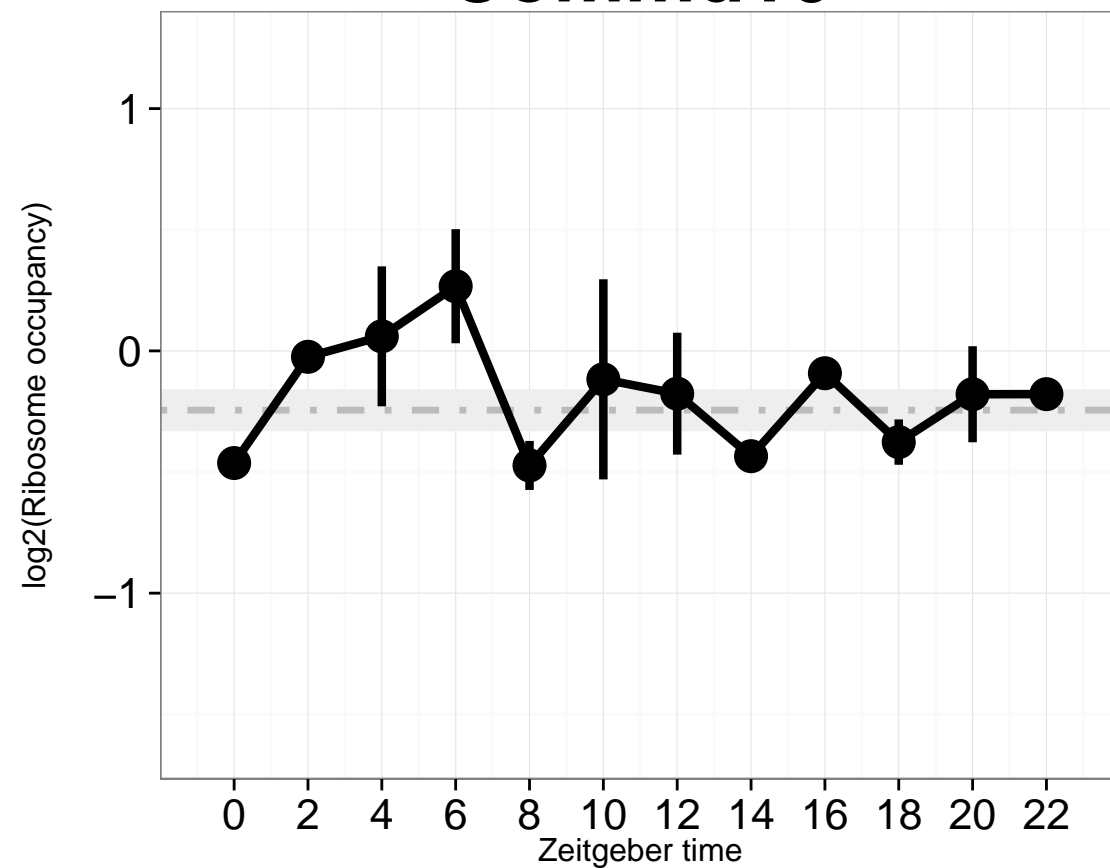

Supplement: SuppDataset_1.zip [file Commd10_set_A.pdf › Supplemental Dataset 1/A-mRNA_nonrhyth_translation_nonrhyth/Commd10_set_A.pdf]

# Commd1

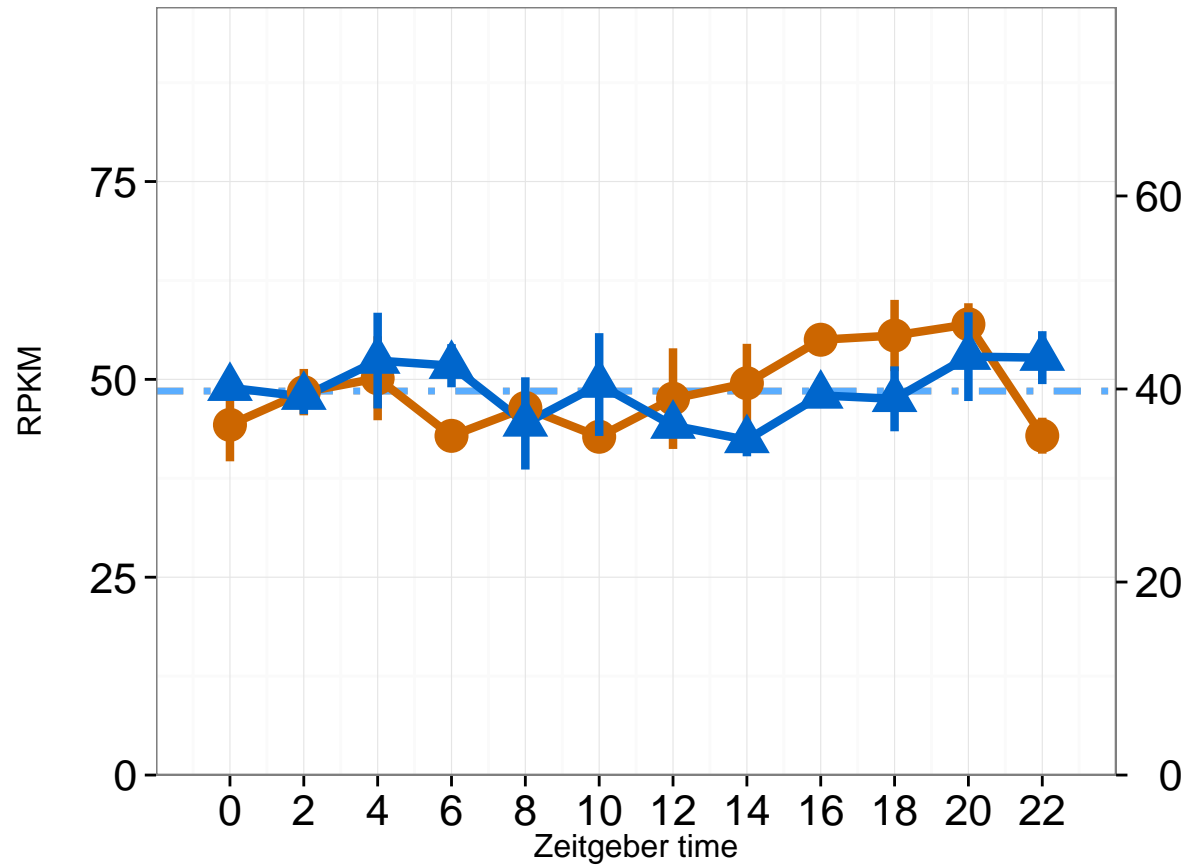

# Commd1

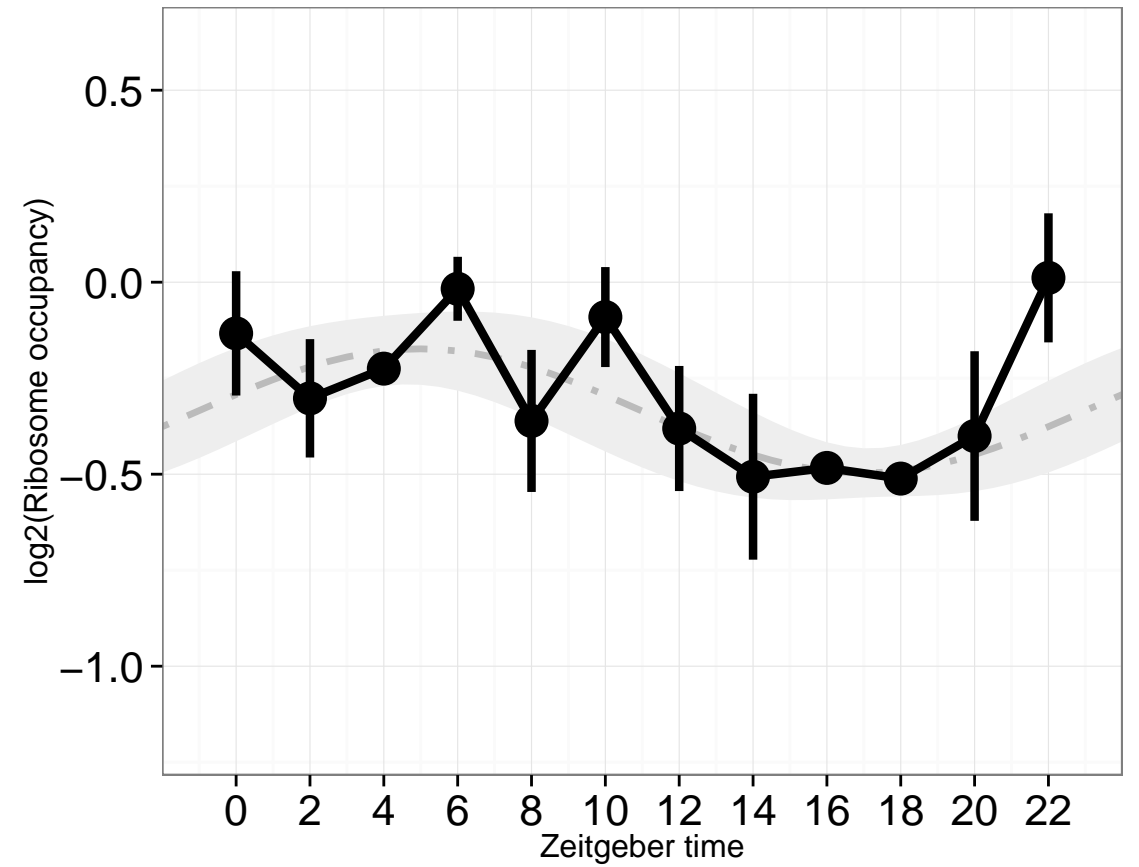

Supplement: SuppDataset_1.zip [file Commd1_set_A.pdf › Supplemental Dataset 1/A-mRNA_nonrhyth_translation_nonrhyth/Commd1_set_A.pdf]

## Commd2

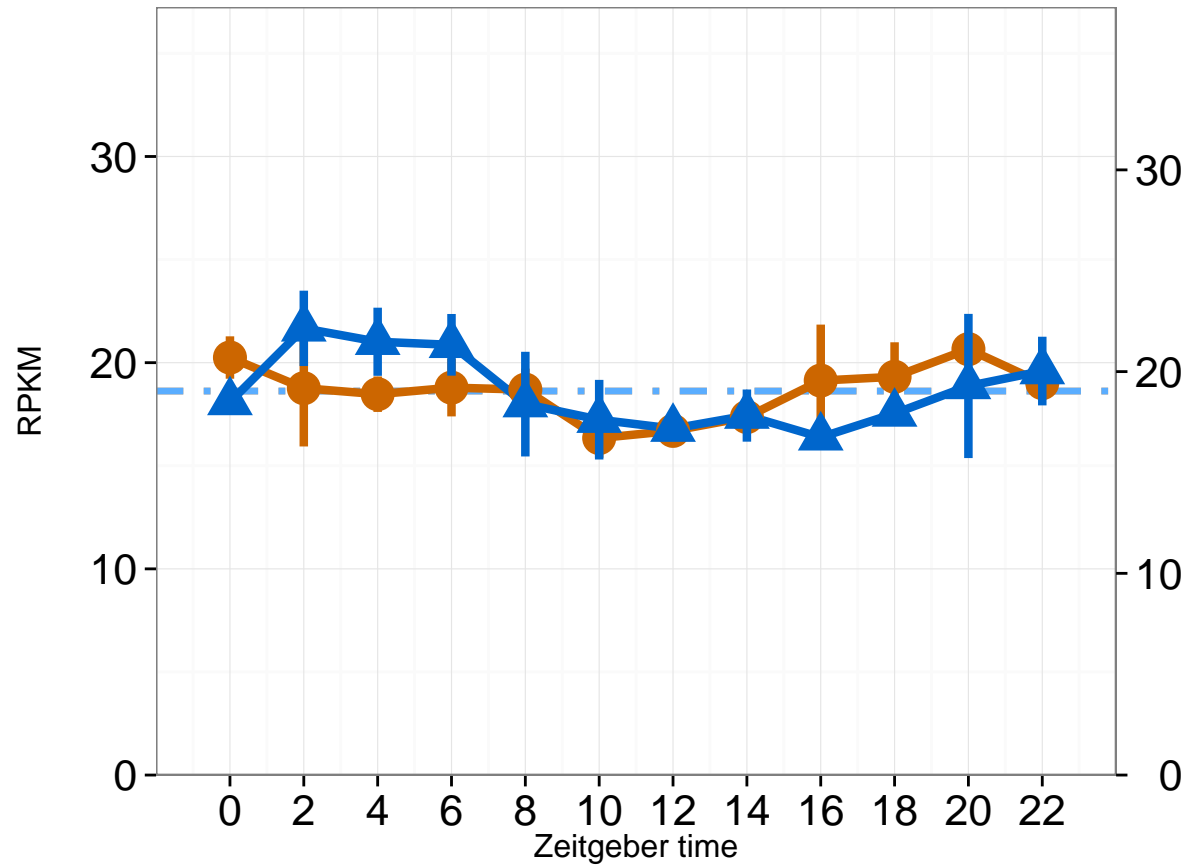

## Commd2

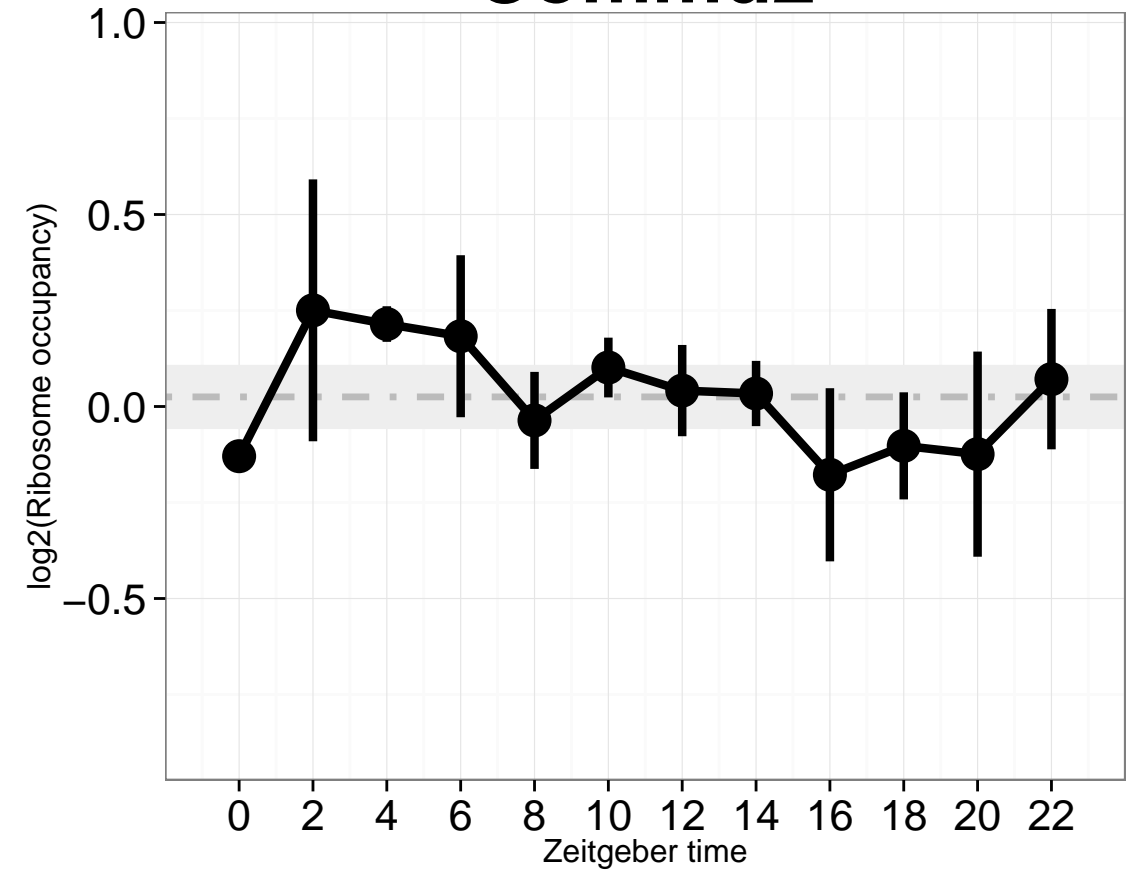

Supplement: SuppDataset_1.zip [file Commd2_set_A.pdf › Supplemental Dataset 1/A-mRNA_nonrhyth_translation_nonrhyth/Commd2_set_A.pdf]

## Commd3

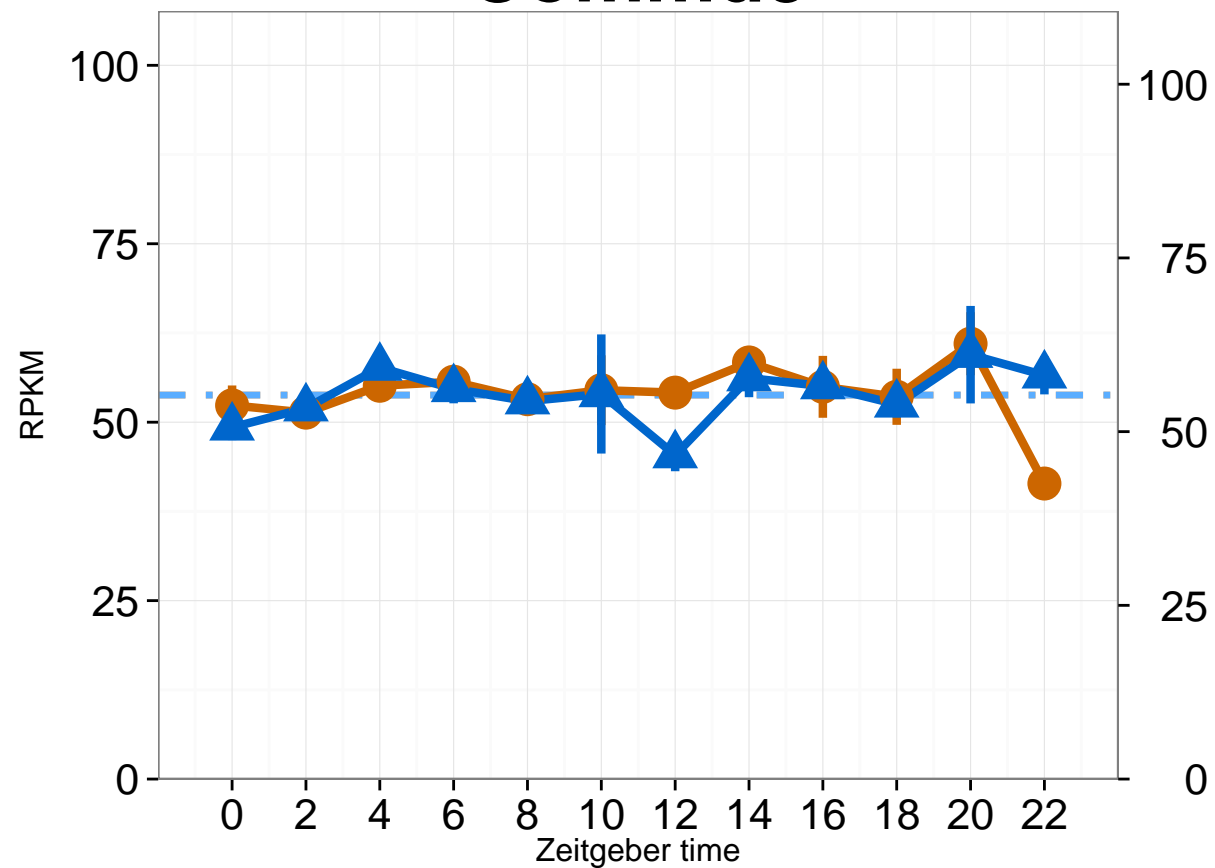

## Commd3

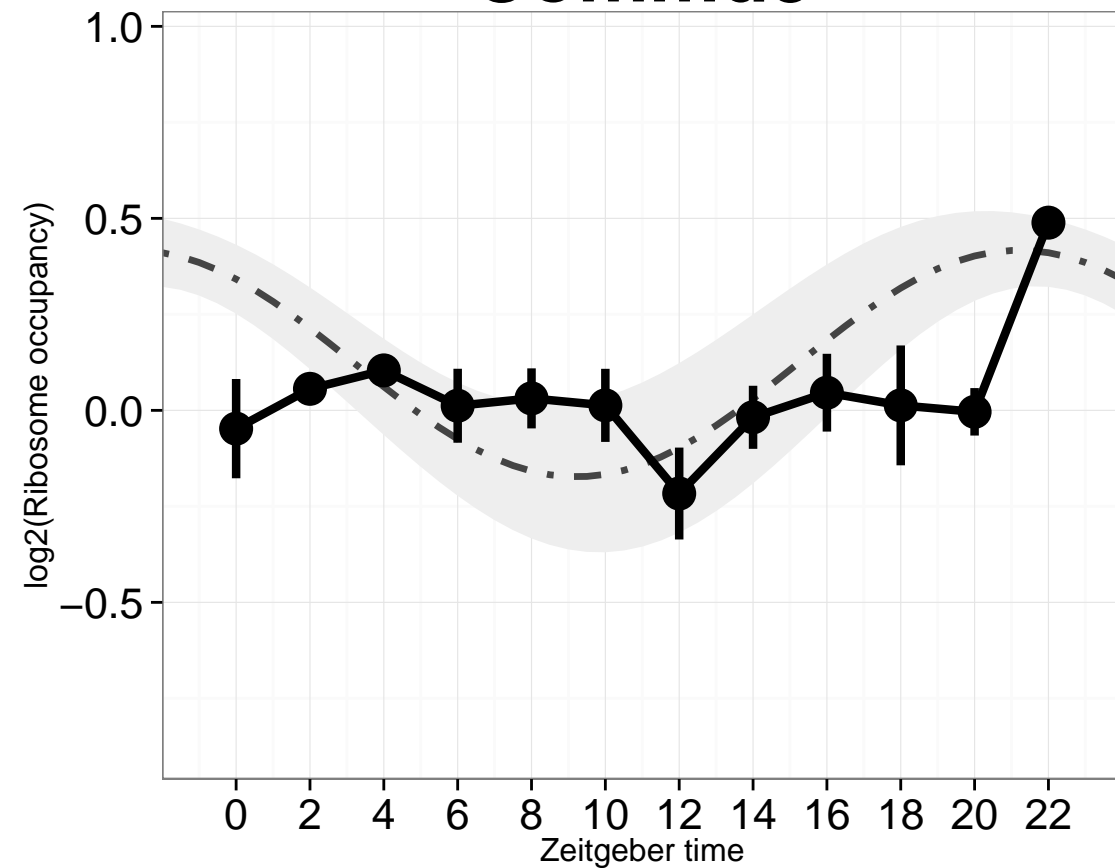

Supplement: SuppDataset_1.zip [file Commd3_set_A.pdf › Supplemental Dataset 1/A-mRNA_nonrhyth_translation_nonrhyth/Commd3_set_A.pdf]

## Commd4

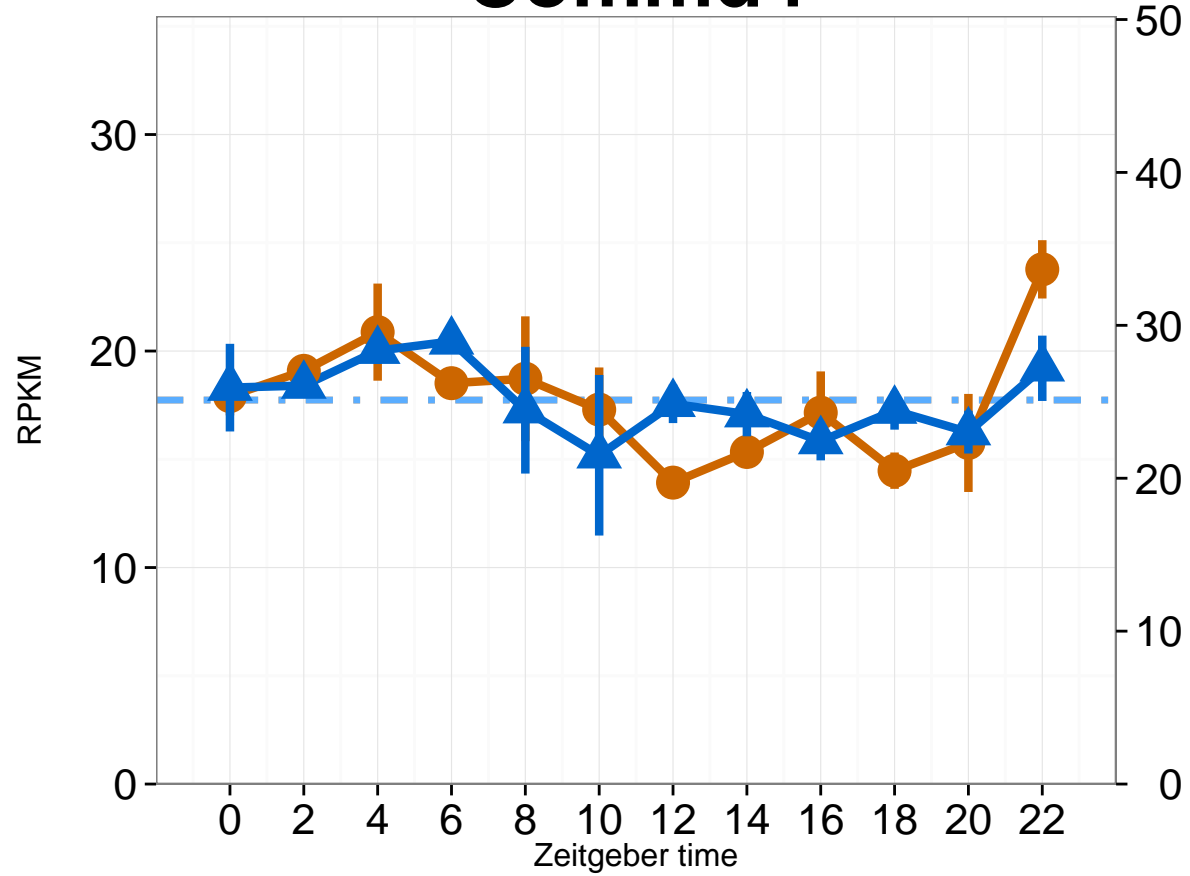

## Commd4

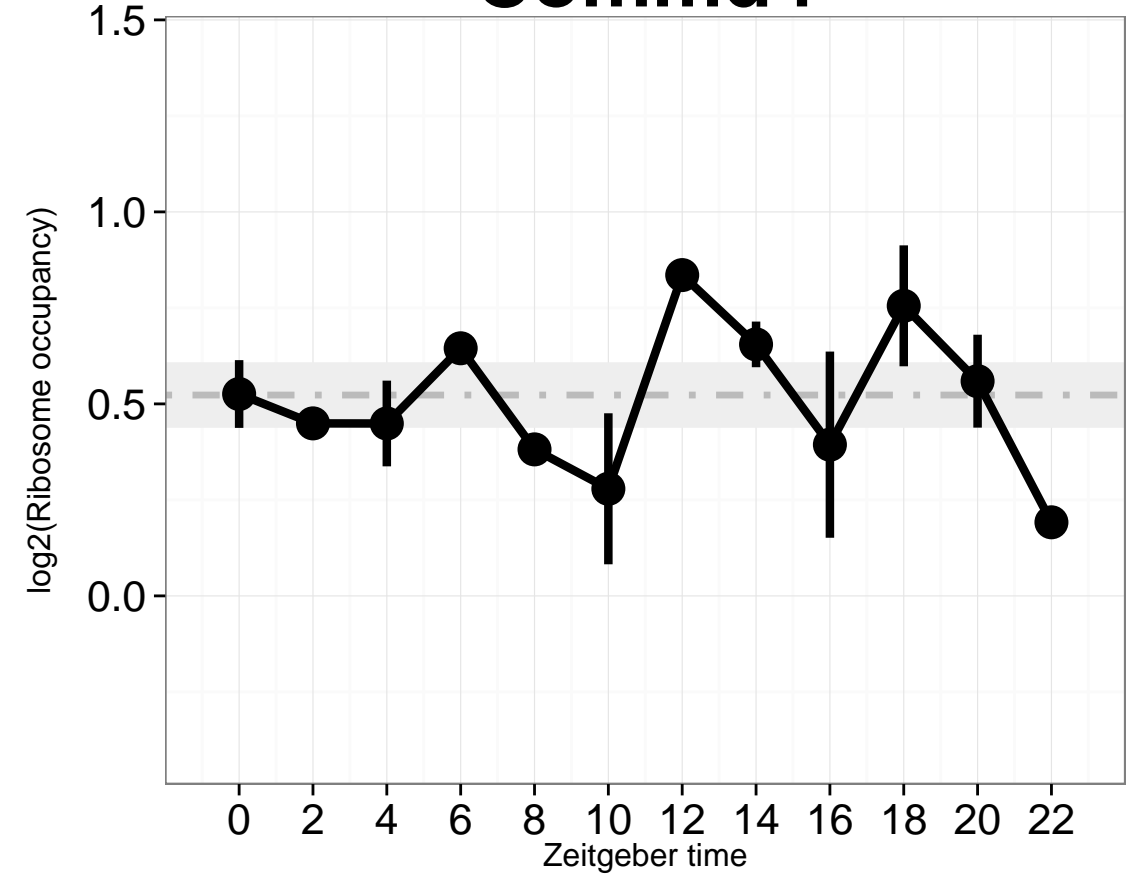

Supplement: SuppDataset_1.zip [file Commd4_set_A.pdf › Supplemental Dataset 1/A-mRNA_nonrhyth_translation_nonrhyth/Commd4_set_A.pdf]

## Commd5

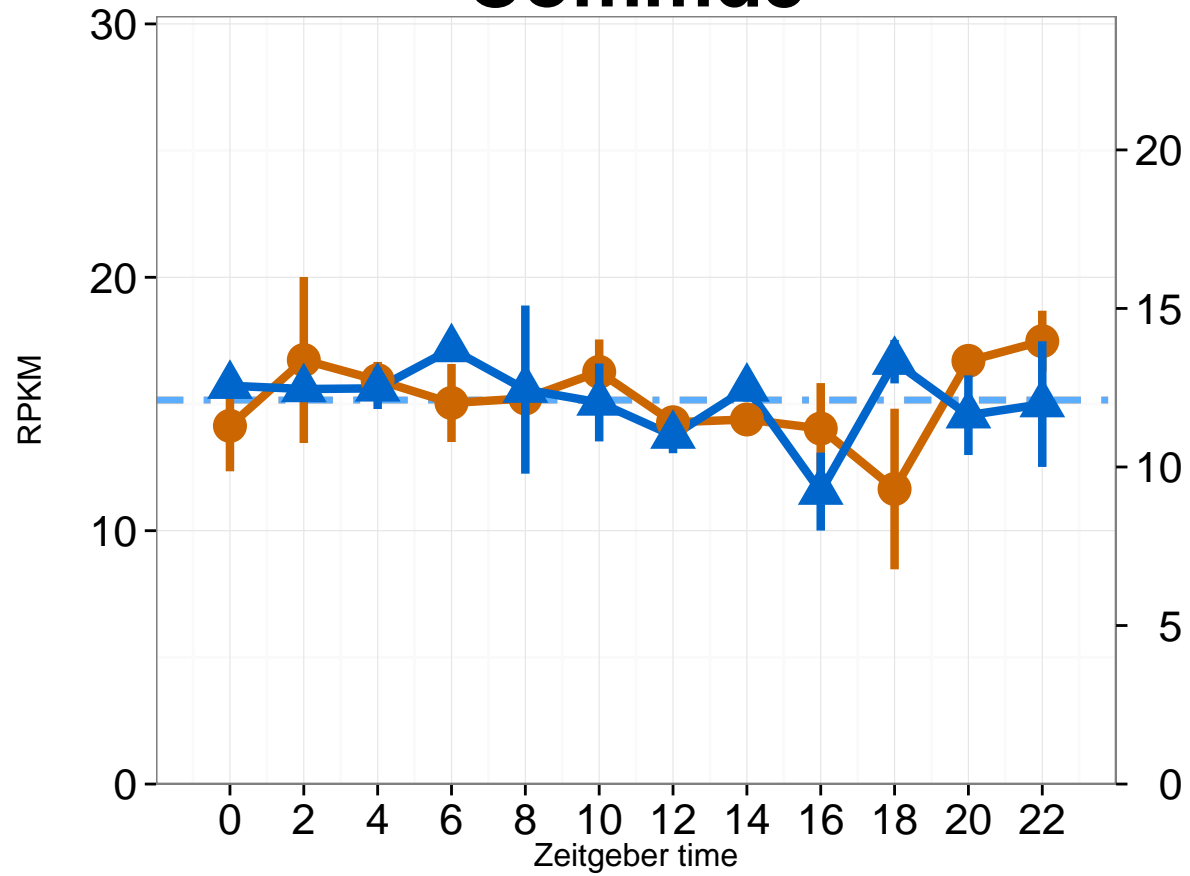

## Commd5

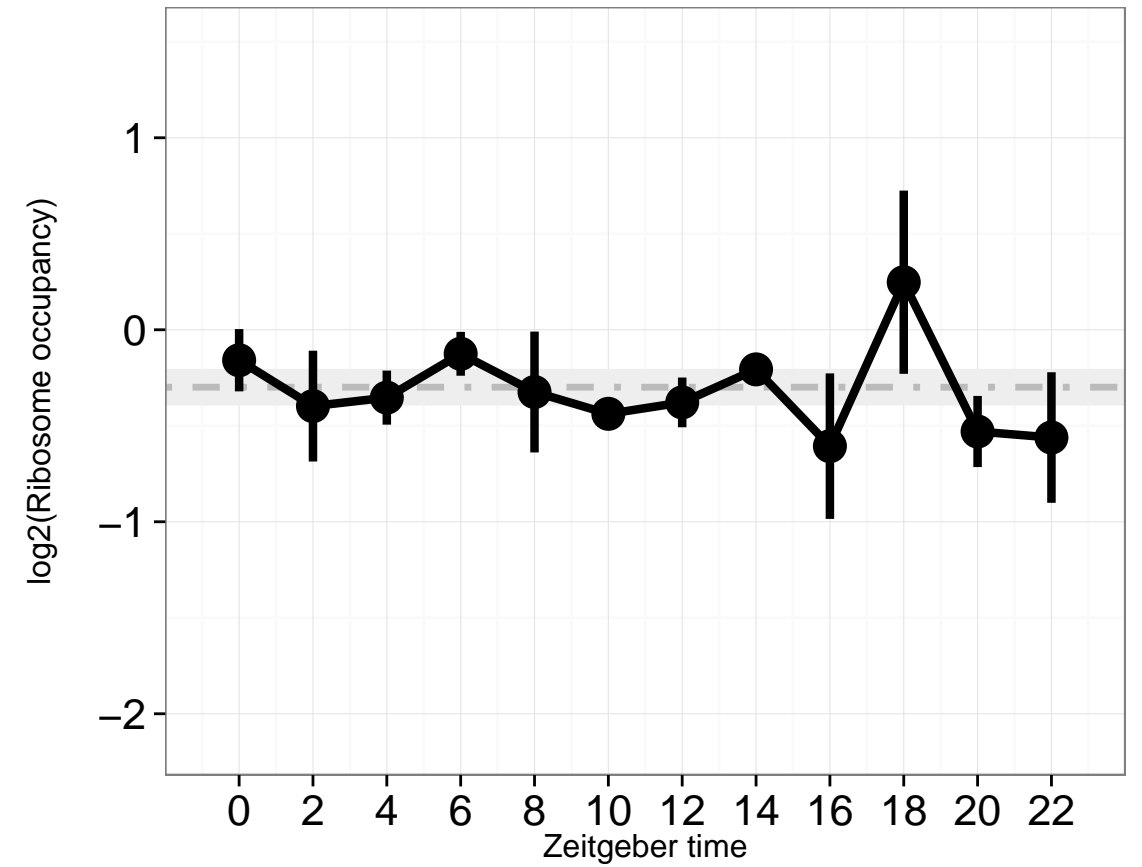

Supplement: SuppDataset_1.zip [file Commd5_set_A.pdf › Supplemental Dataset 1/A-mRNA_nonrhyth_translation_nonrhyth/Commd5_set_A.pdf]

## Commd6

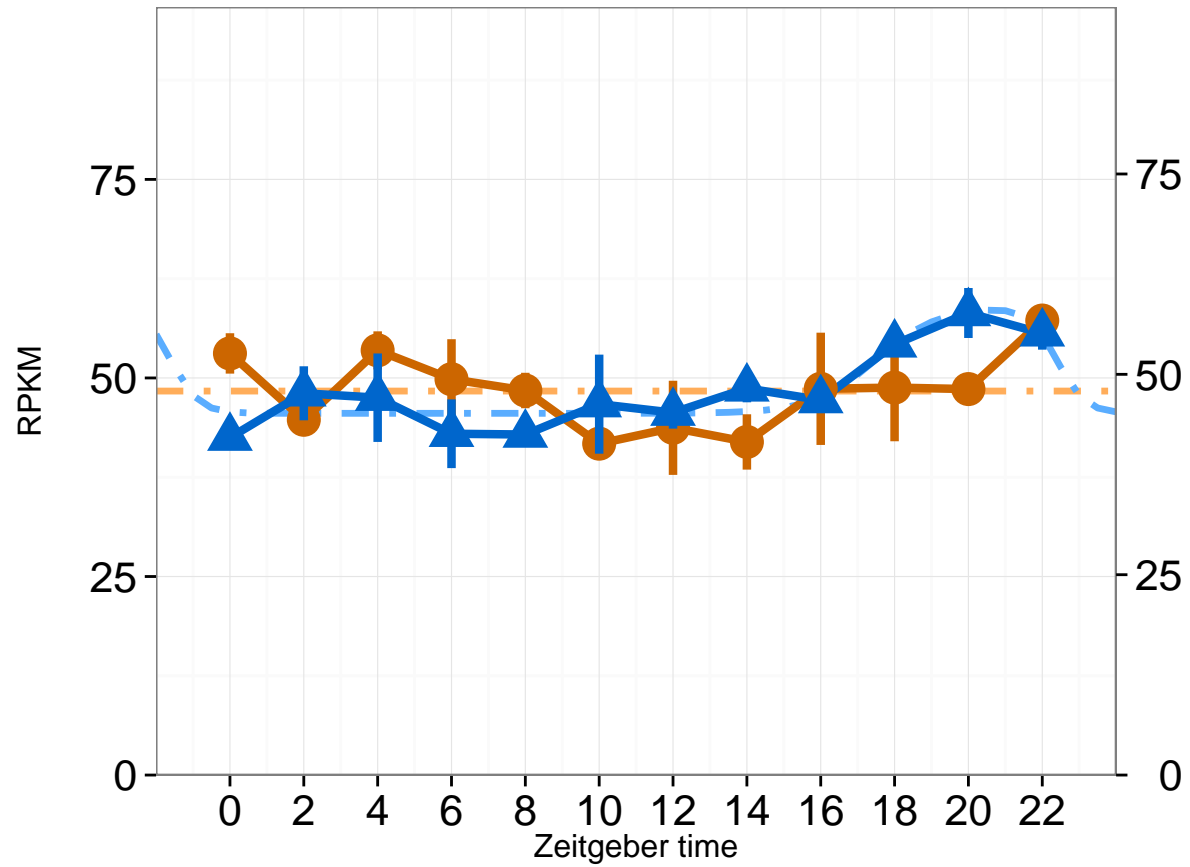

## Commd6

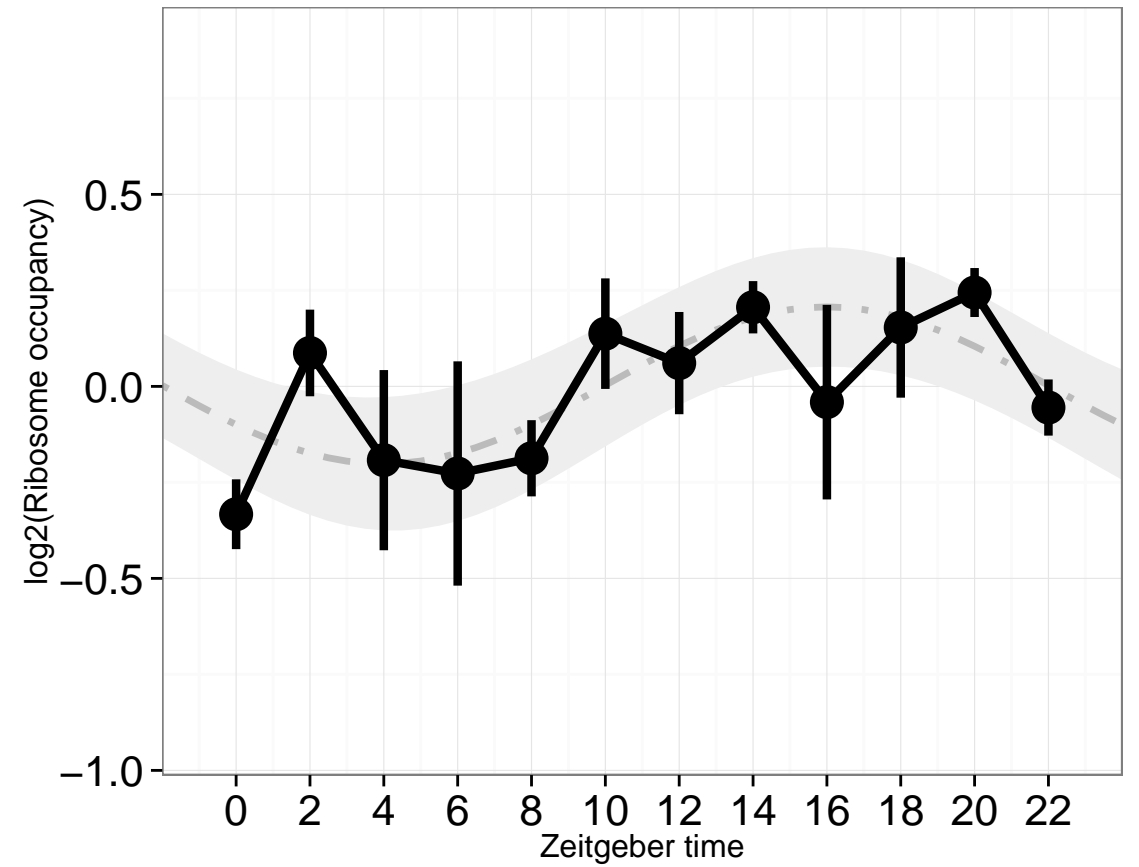

Supplement: SuppDataset_1.zip [file Commd6_set_A.pdf › Supplemental Dataset 1/A-mRNA_nonrhyth_translation_nonrhyth/Commd6_set_A.pdf]

# Commd8

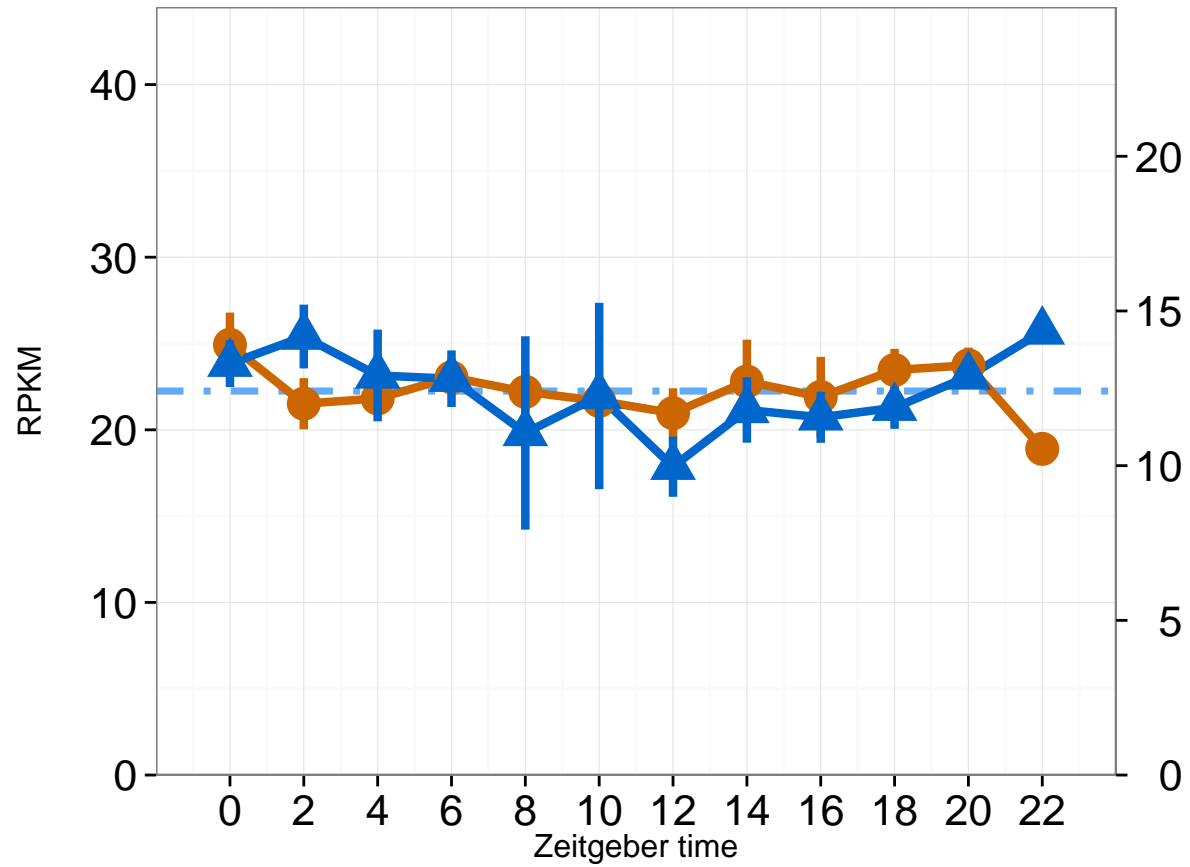

# Commd8

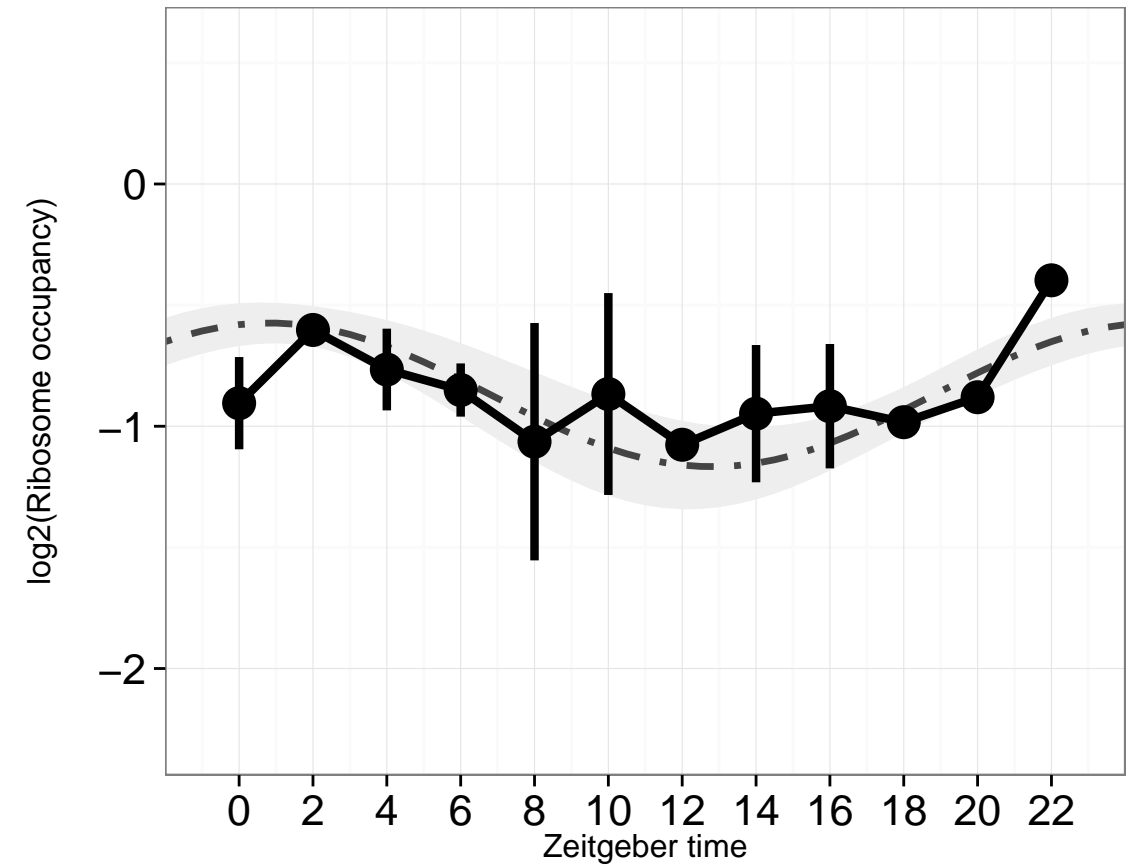

Supplement: SuppDataset_1.zip [file Commd8_set_A.pdf › Supplemental Dataset 1/A-mRNA_nonrhyth_translation_nonrhyth/Commd8_set_A.pdf]

## Commd9

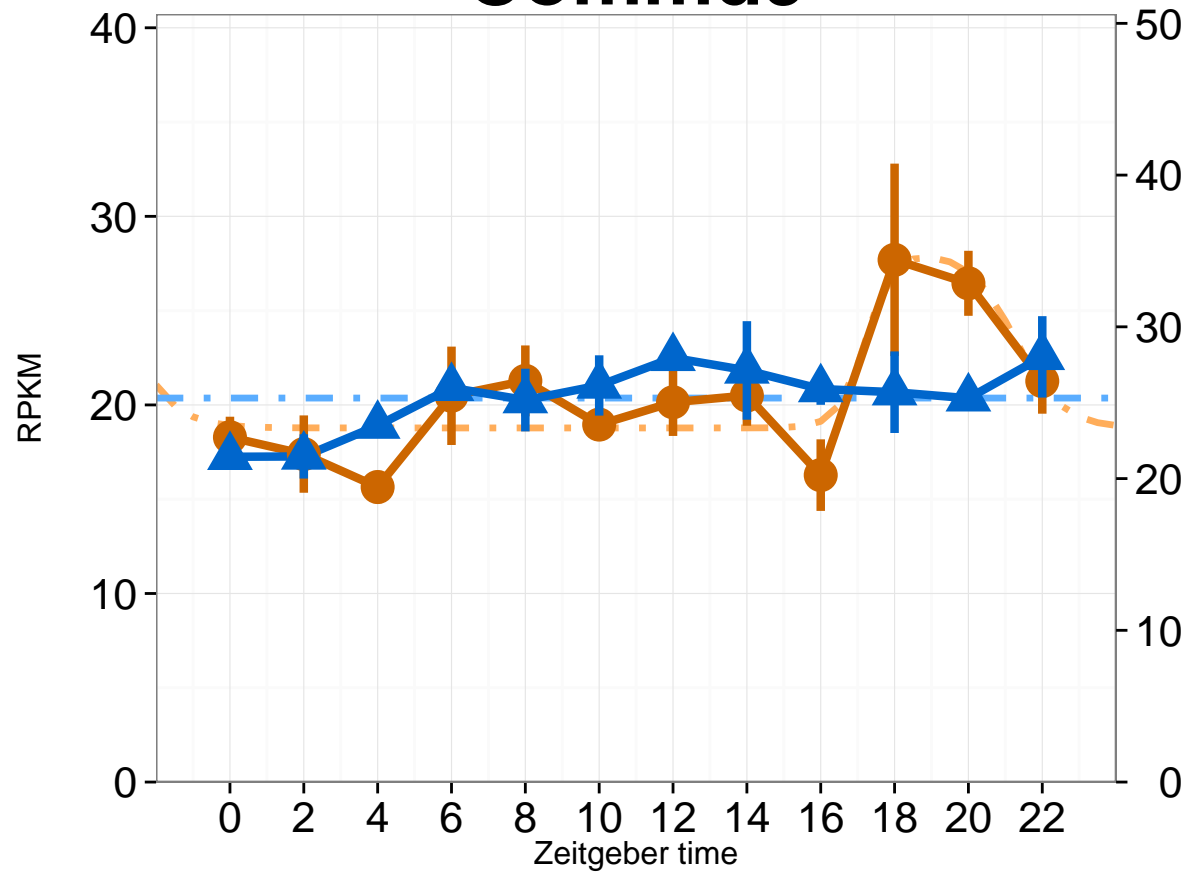

## Commd9

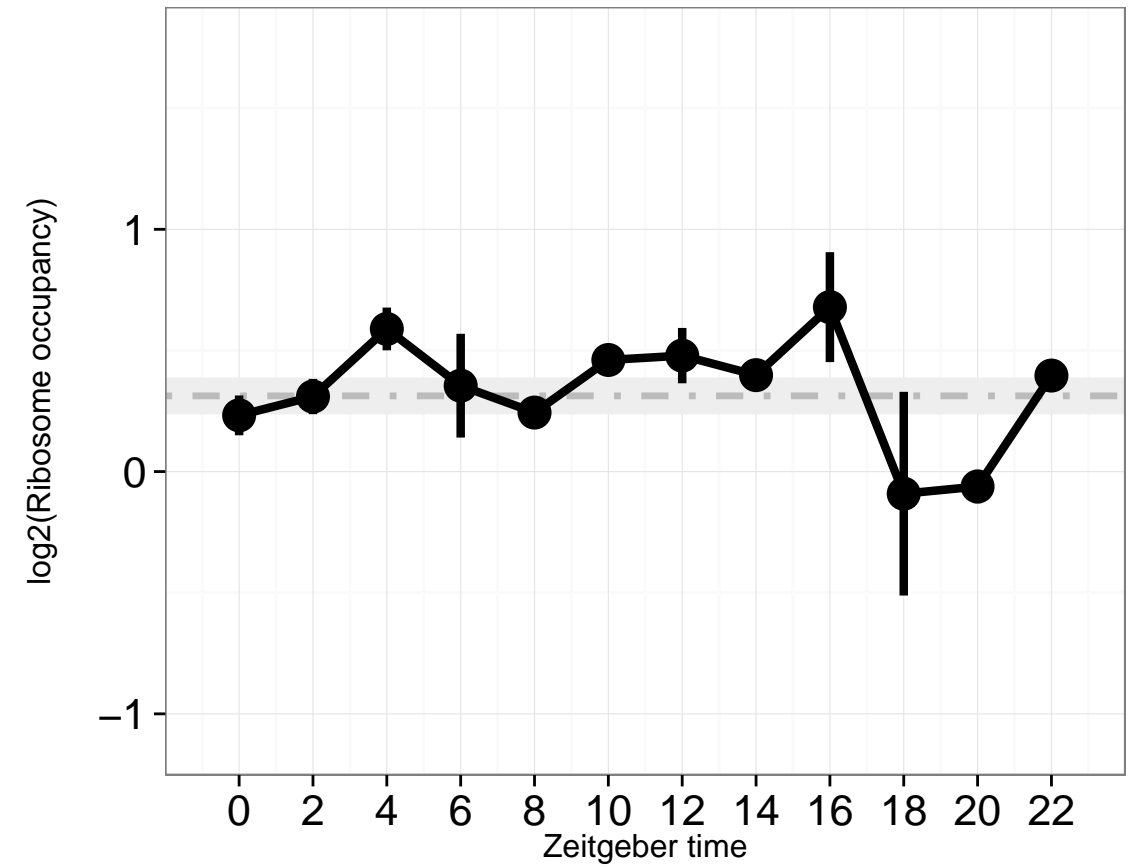

Supplement: SuppDataset_1.zip [file Commd9_set_A.pdf › Supplemental Dataset 1/A-mRNA_nonrhyth_translation_nonrhyth/Commd9_set_A.pdf]

# Copa

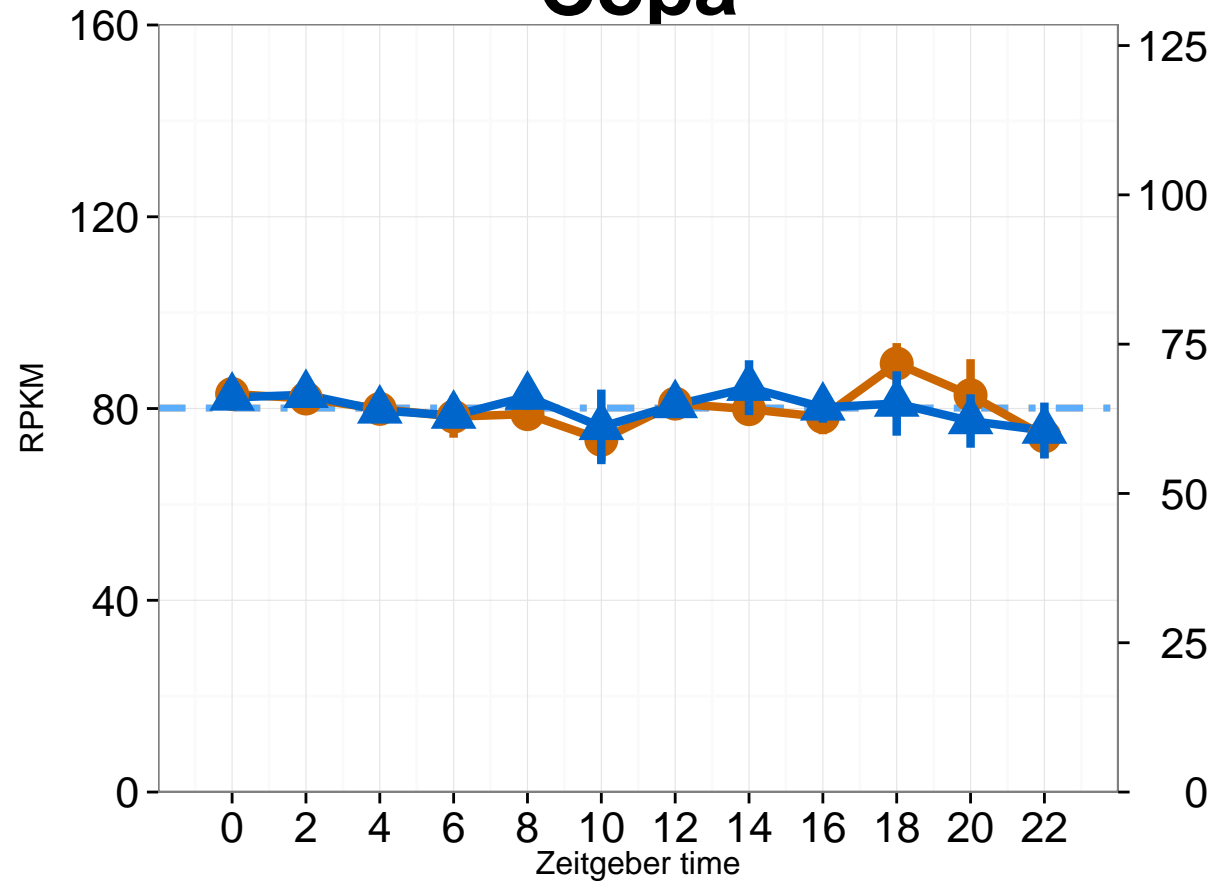

# Copa

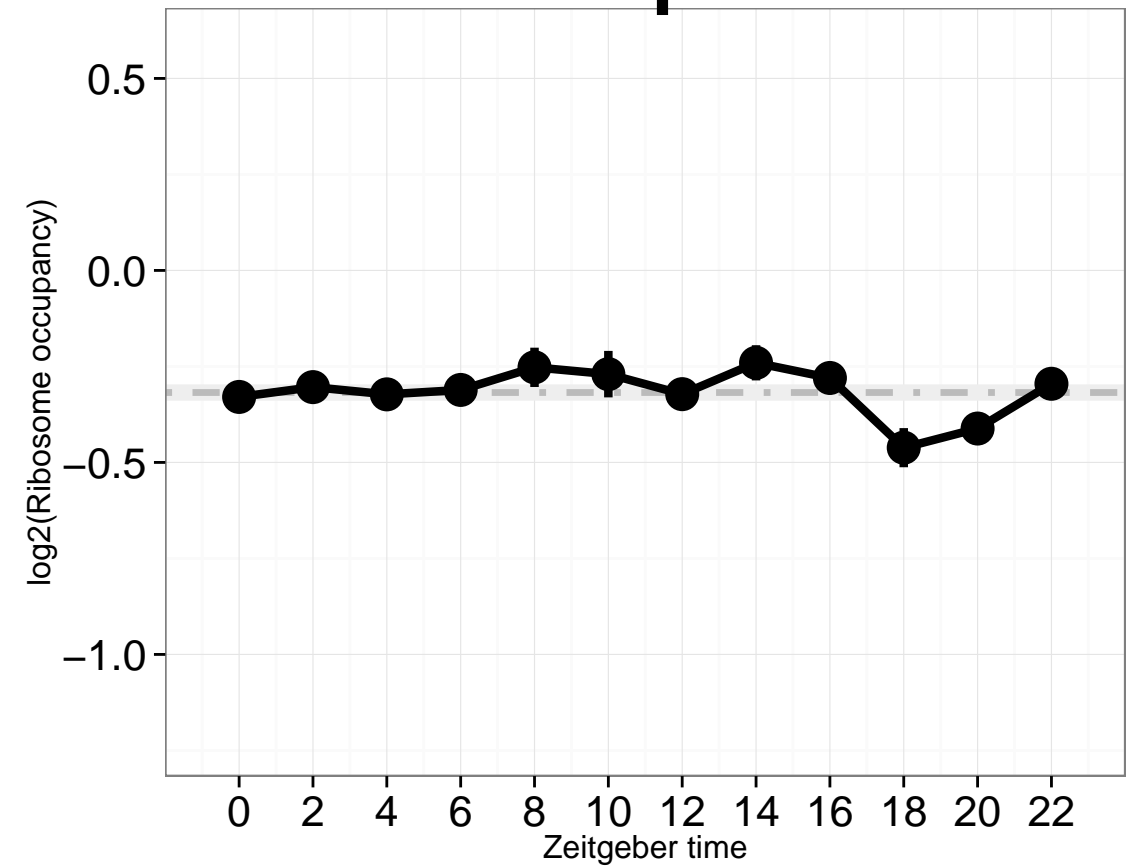

Supplement: SuppDataset_1.zip [file Copa_set_A.pdf › Supplemental Dataset 1/A-mRNA_nonrhyth_translation_nonrhyth/Copa_set_A.pdf]

# Copb1

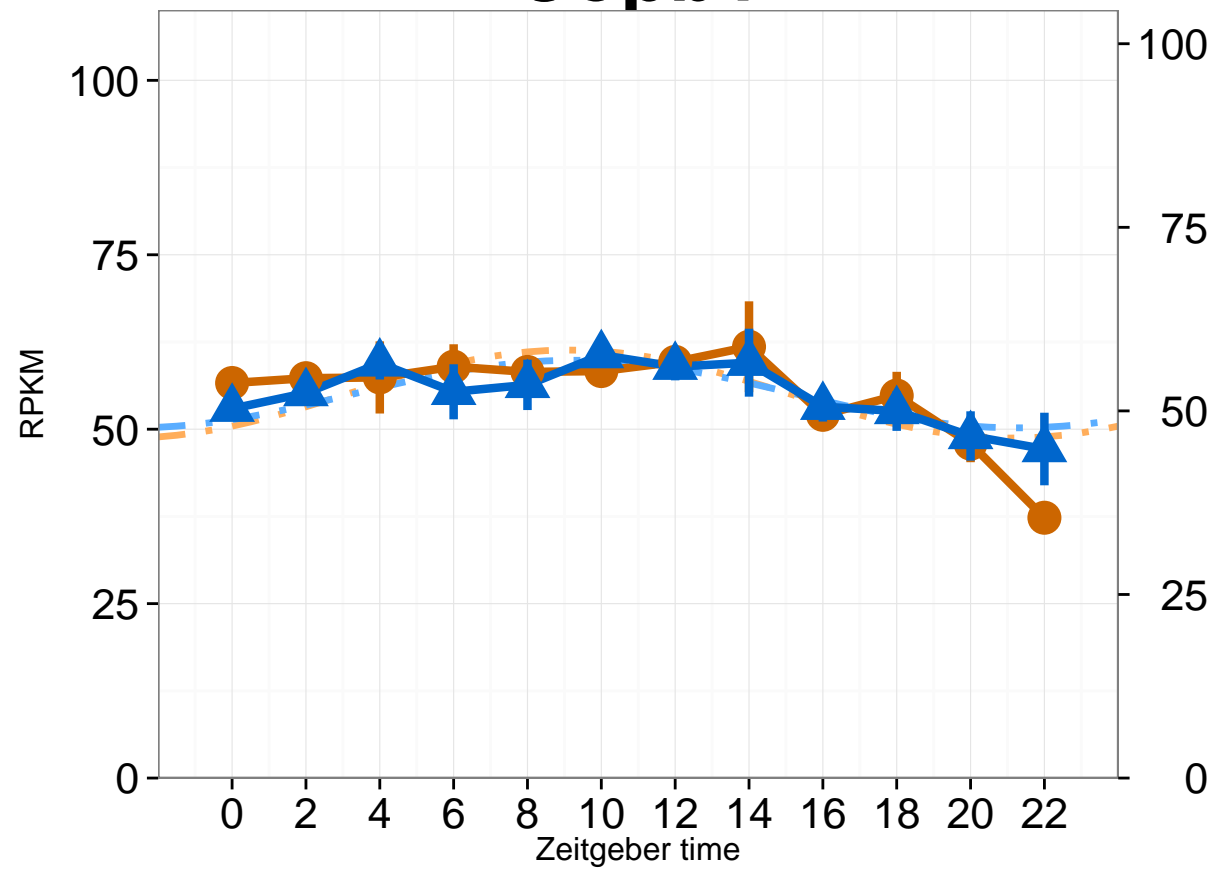

# Copb1

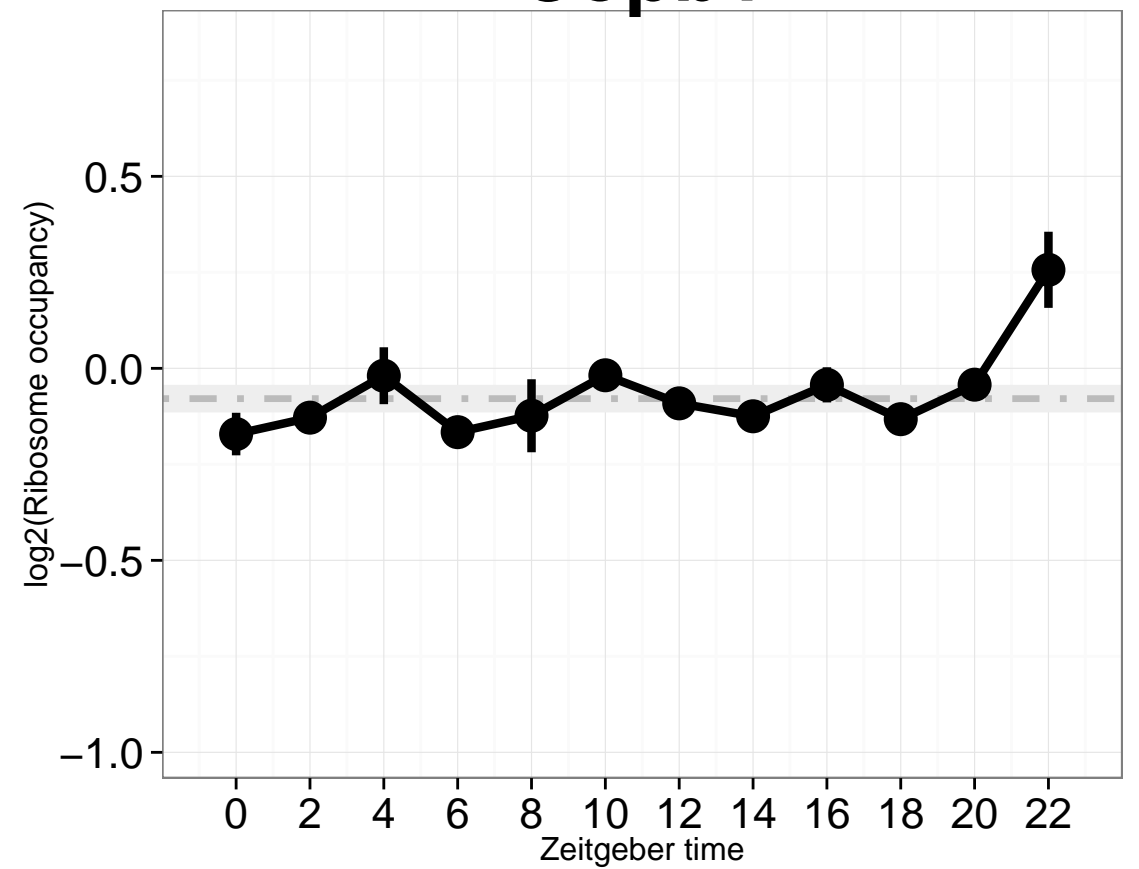

Supplement: SuppDataset_1.zip [file Copb1_set_A.pdf › Supplemental Dataset 1/A-mRNA_nonrhyth_translation_nonrhyth/Copb1_set_A.pdf]

## Copb2

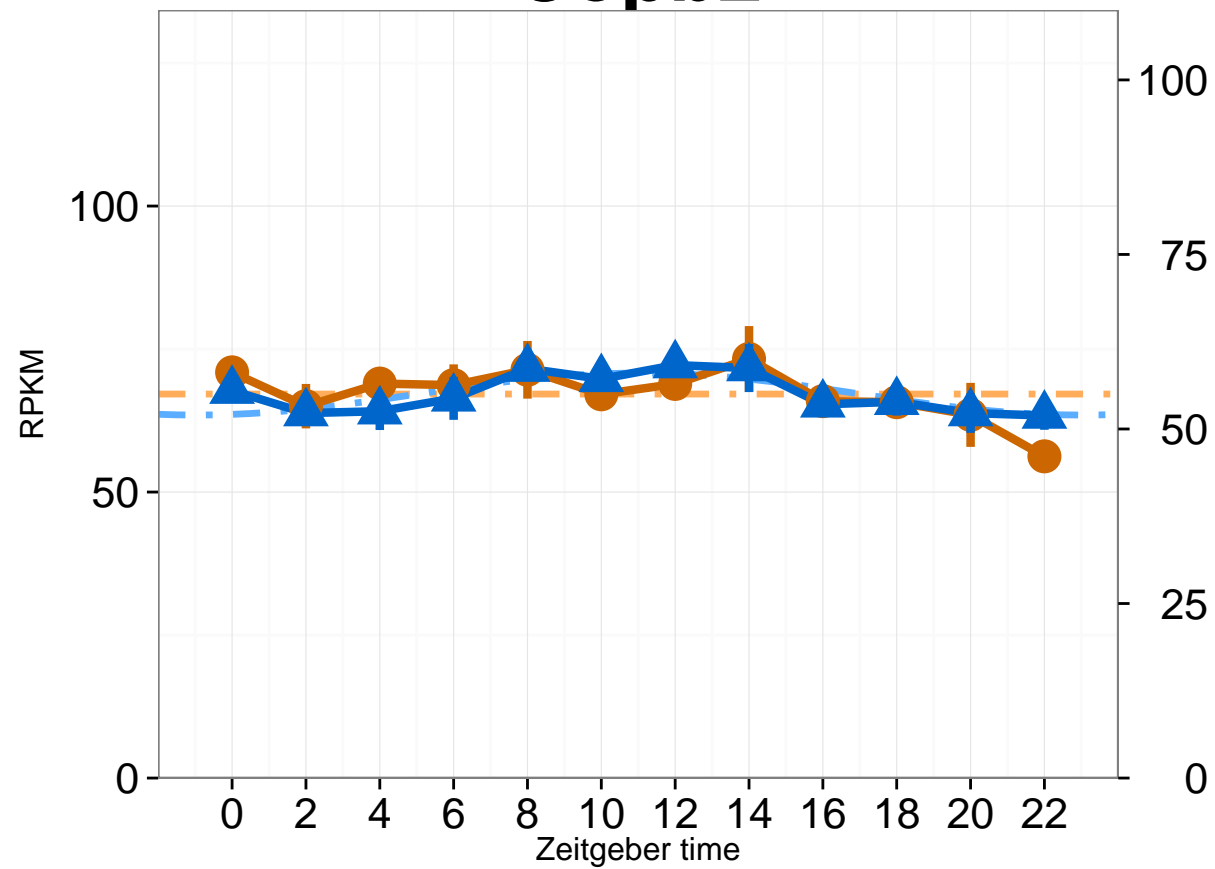

## Copb2

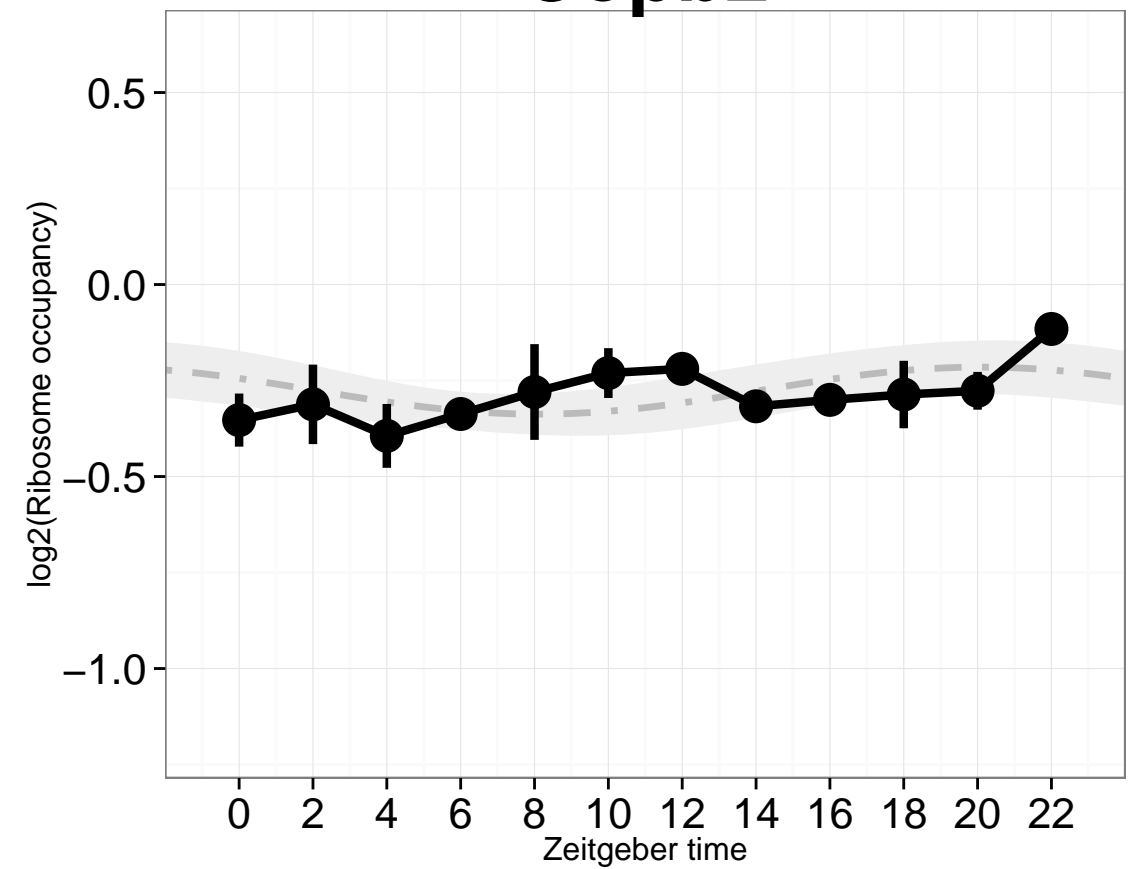

Supplement: SuppDataset_1.zip [file Copb2_set_A.pdf › Supplemental Dataset 1/A-mRNA_nonrhyth_translation_nonrhyth/Copb2_set_A.pdf]

## Cope

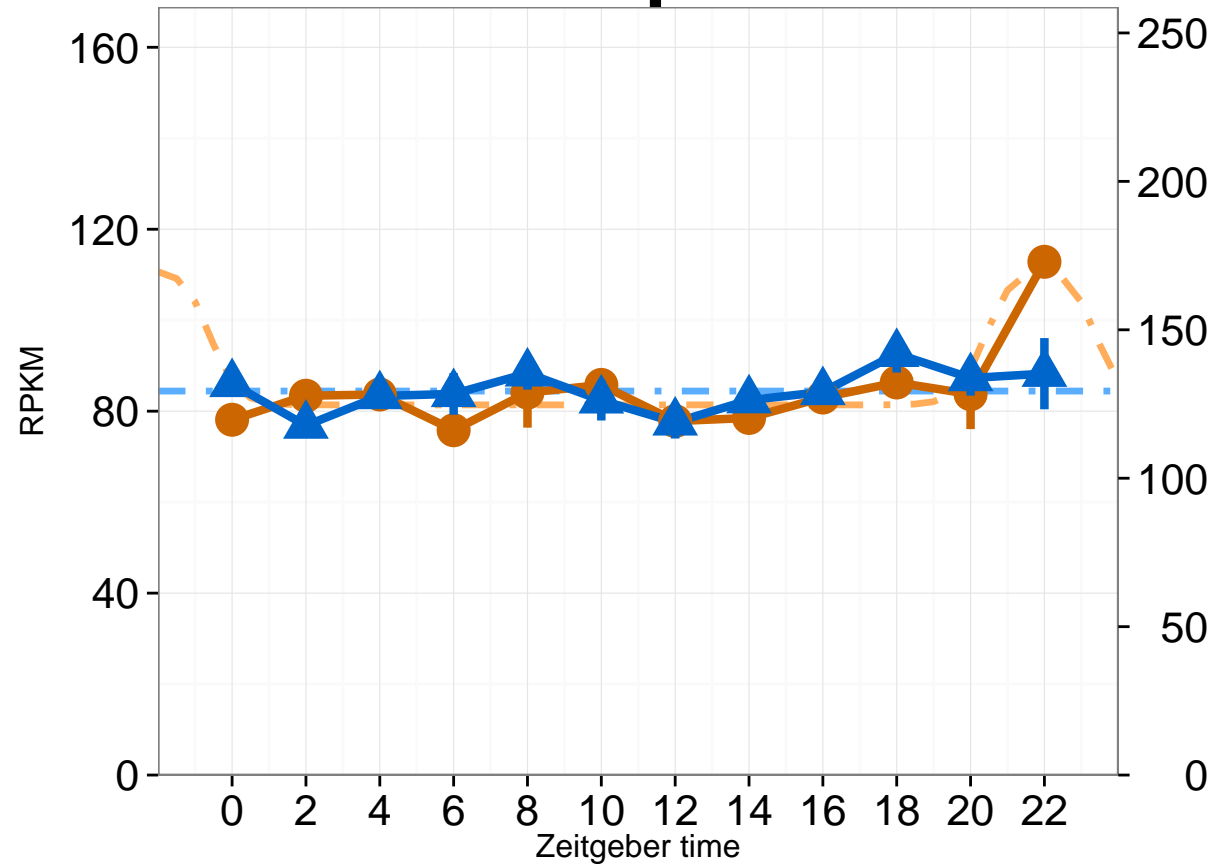

## Cope

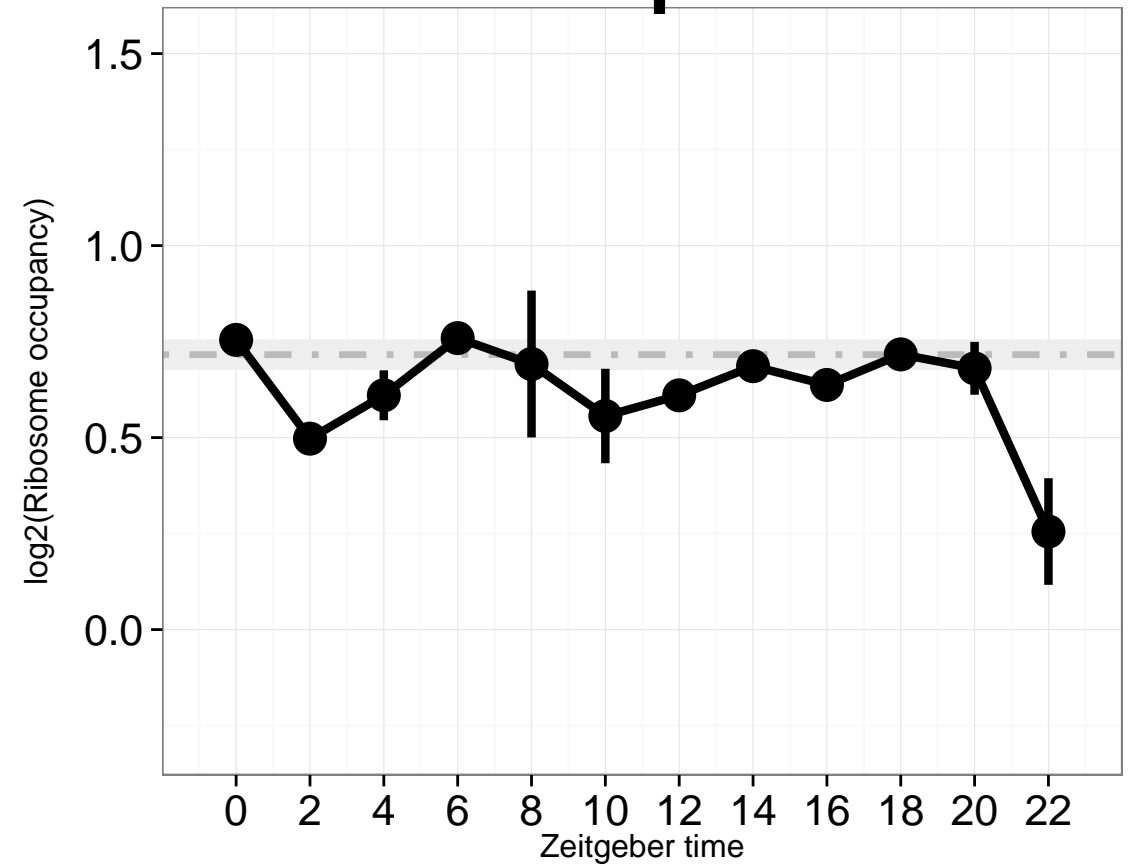

Supplement: SuppDataset_1.zip [file Cope_set_A.pdf › Supplemental Dataset 1/A-mRNA_nonrhyth_translation_nonrhyth/Cope_set_A.pdf]

# Copg1

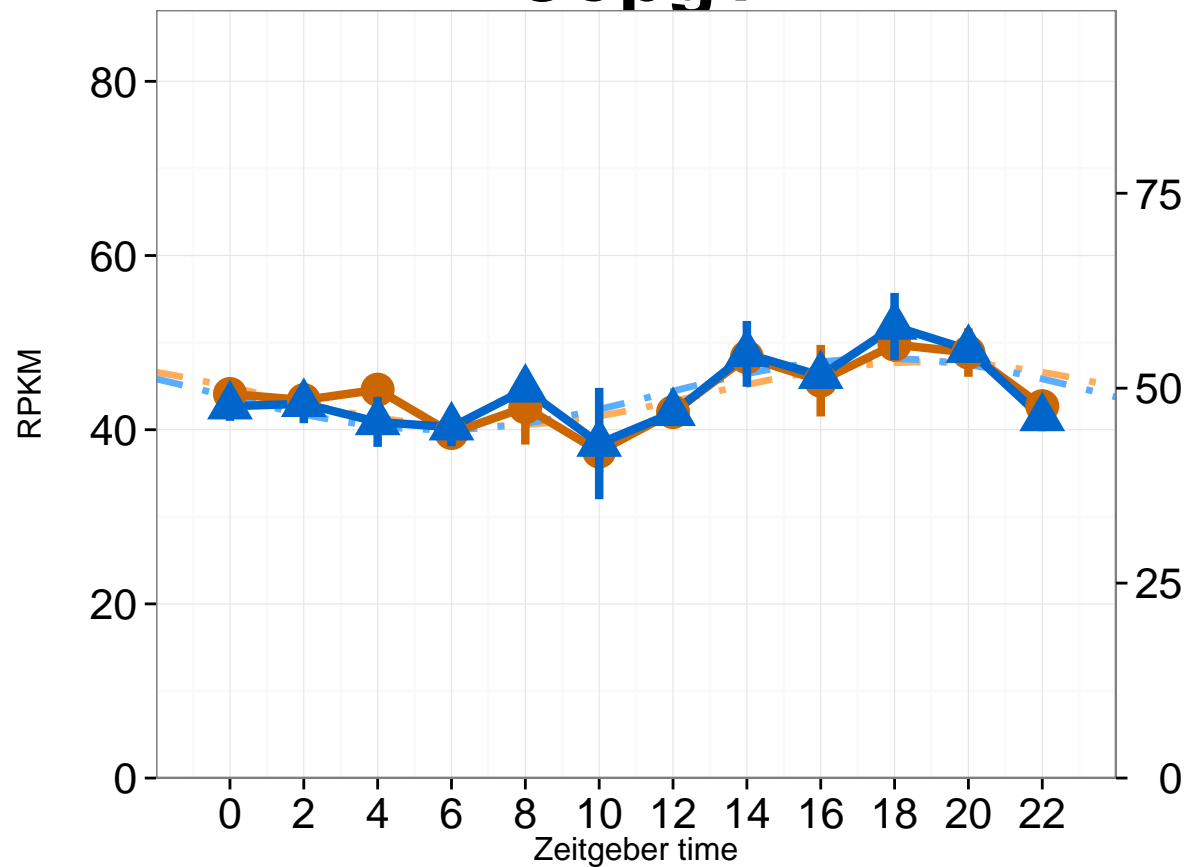

# Copg1

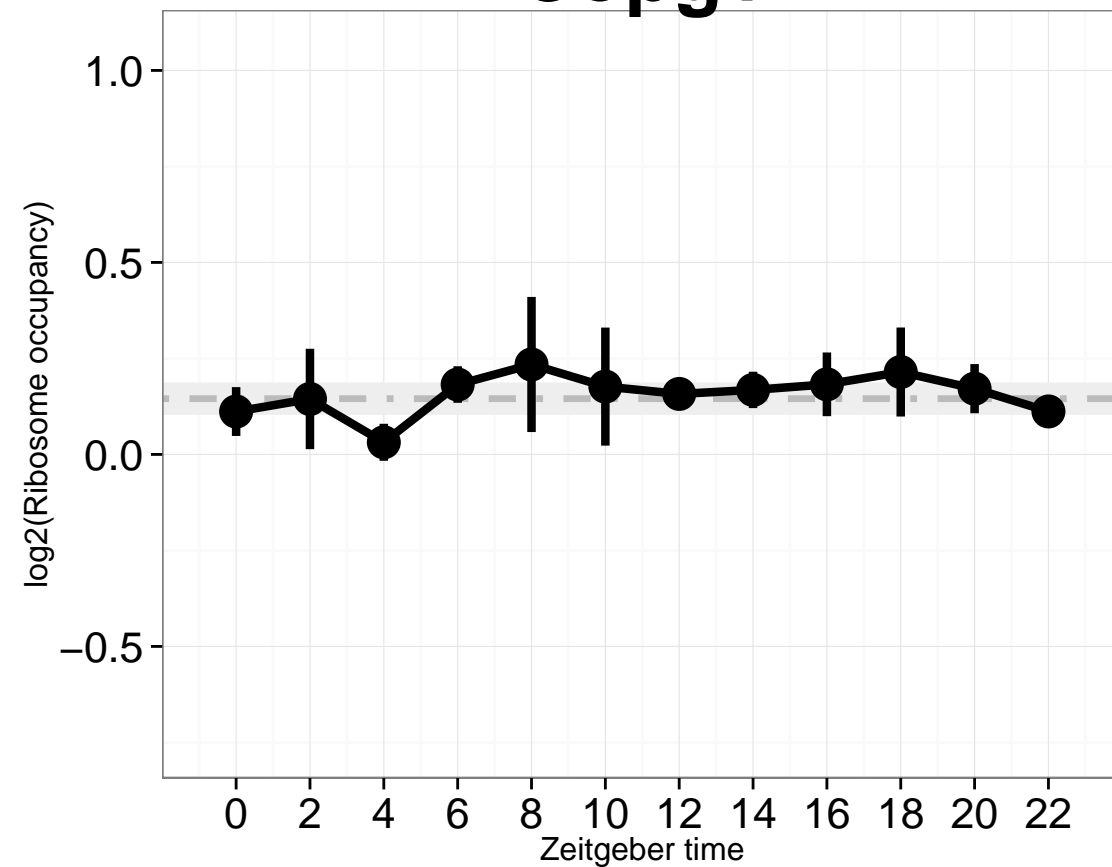

Supplement: SuppDataset_1.zip [file Copg1_set_A.pdf › Supplemental Dataset 1/A-mRNA_nonrhyth_translation_nonrhyth/Copg1_set_A.pdf]

# Copg2

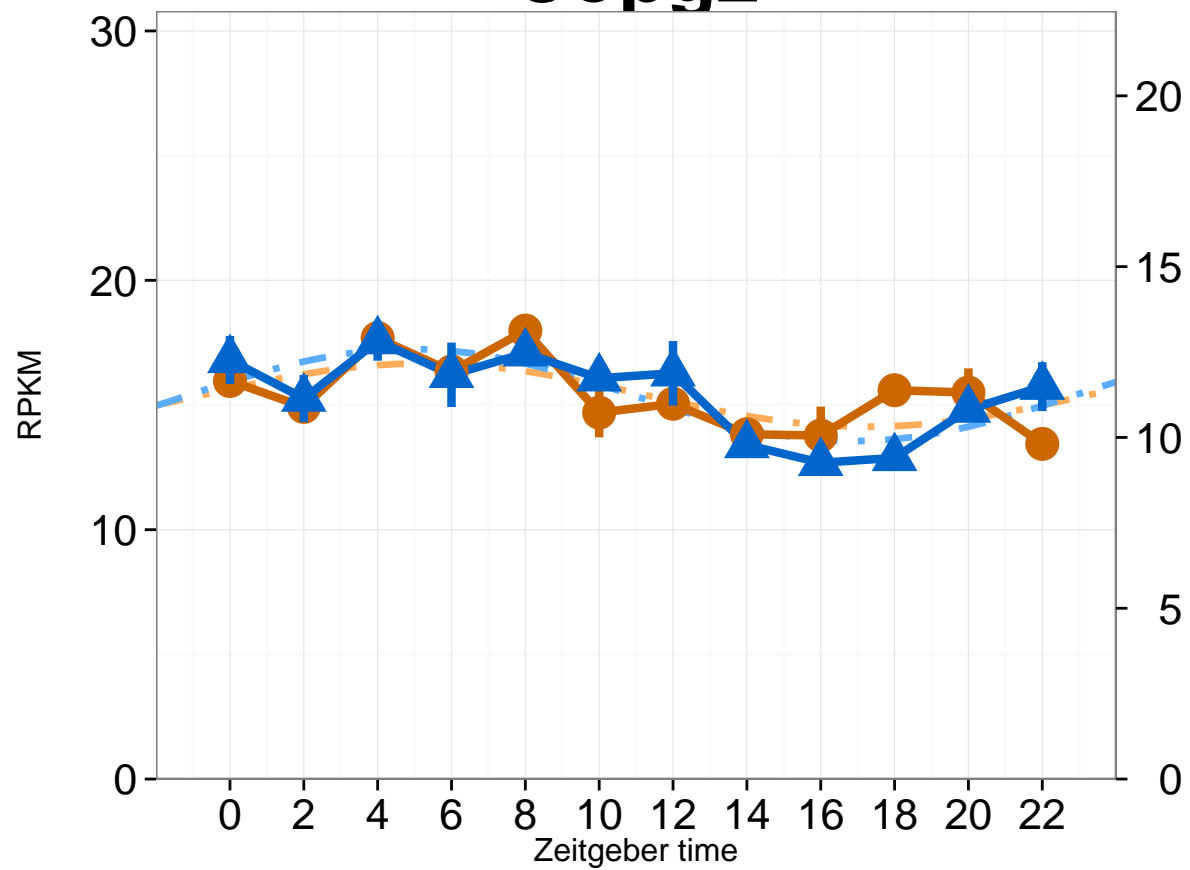

# Copg2

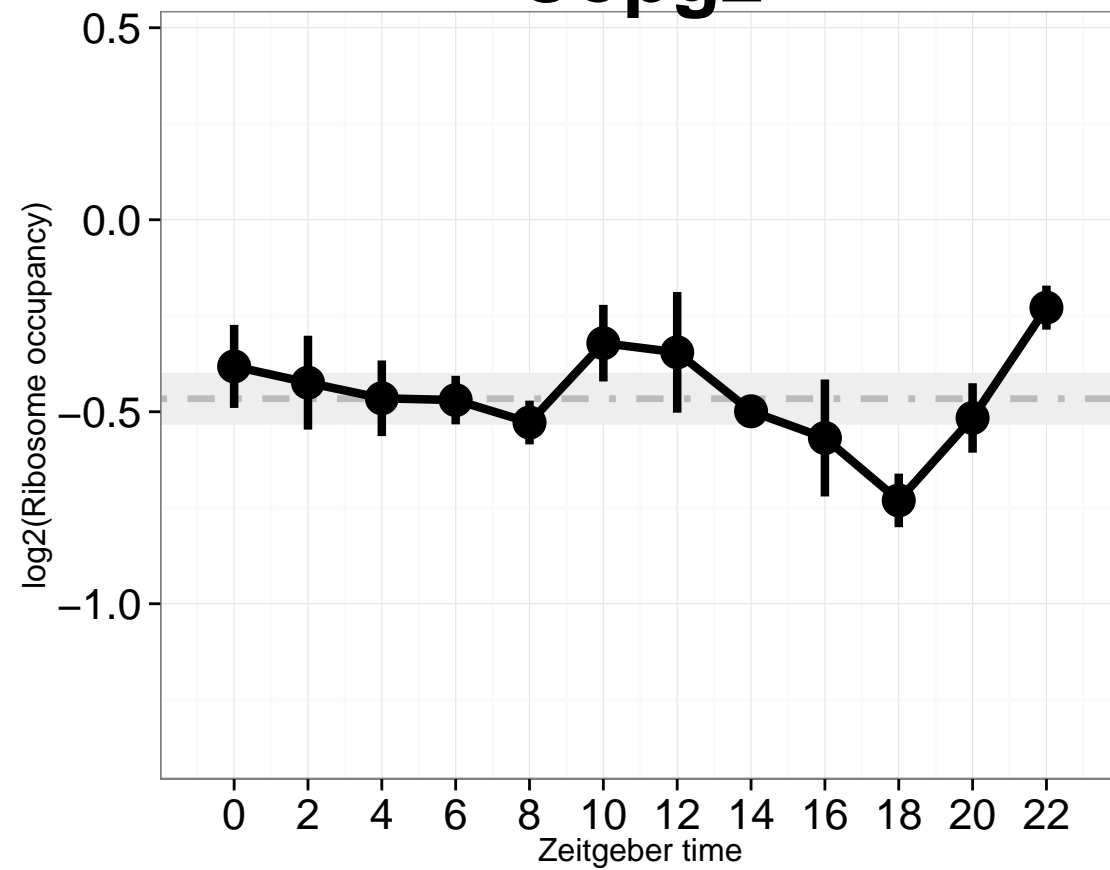

Supplement: SuppDataset_1.zip [file Copg2_set_A.pdf › Supplemental Dataset 1/A-mRNA_nonrhyth_translation_nonrhyth/Copg2_set_A.pdf]

## Coprs

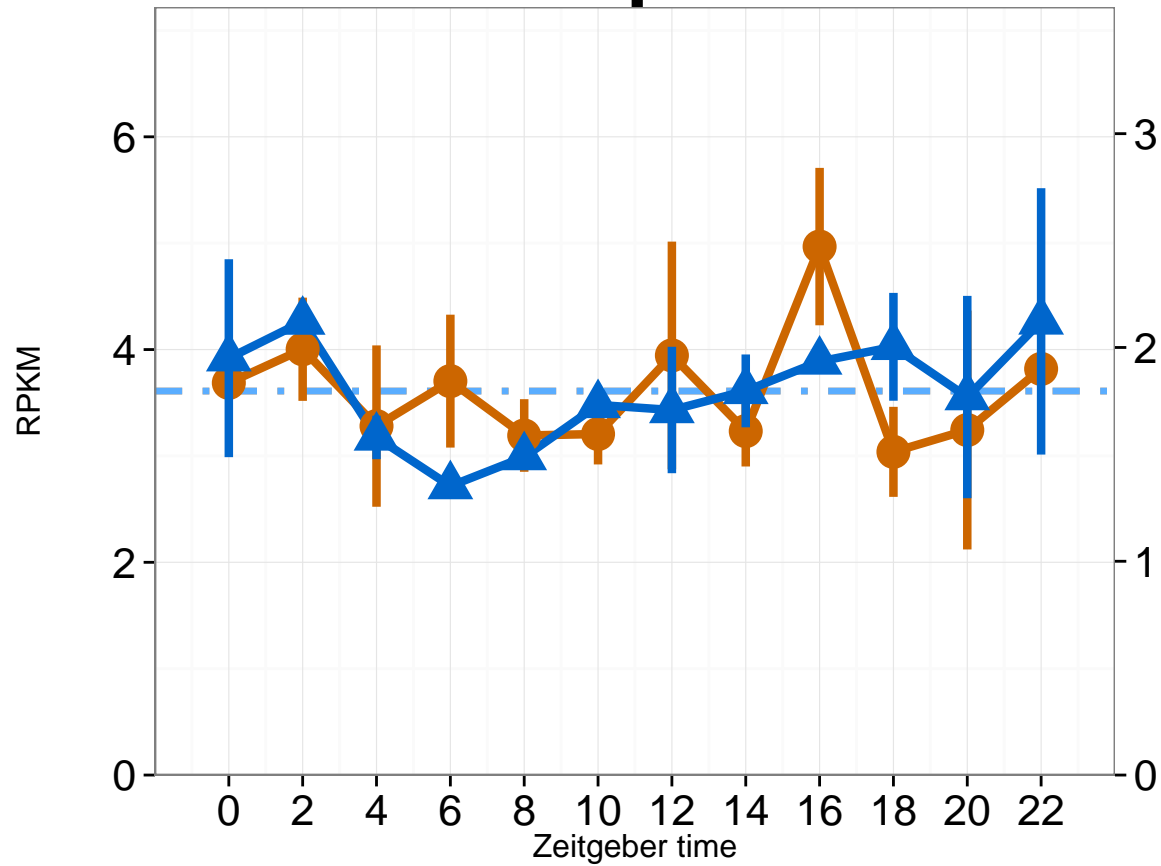

## Coprs

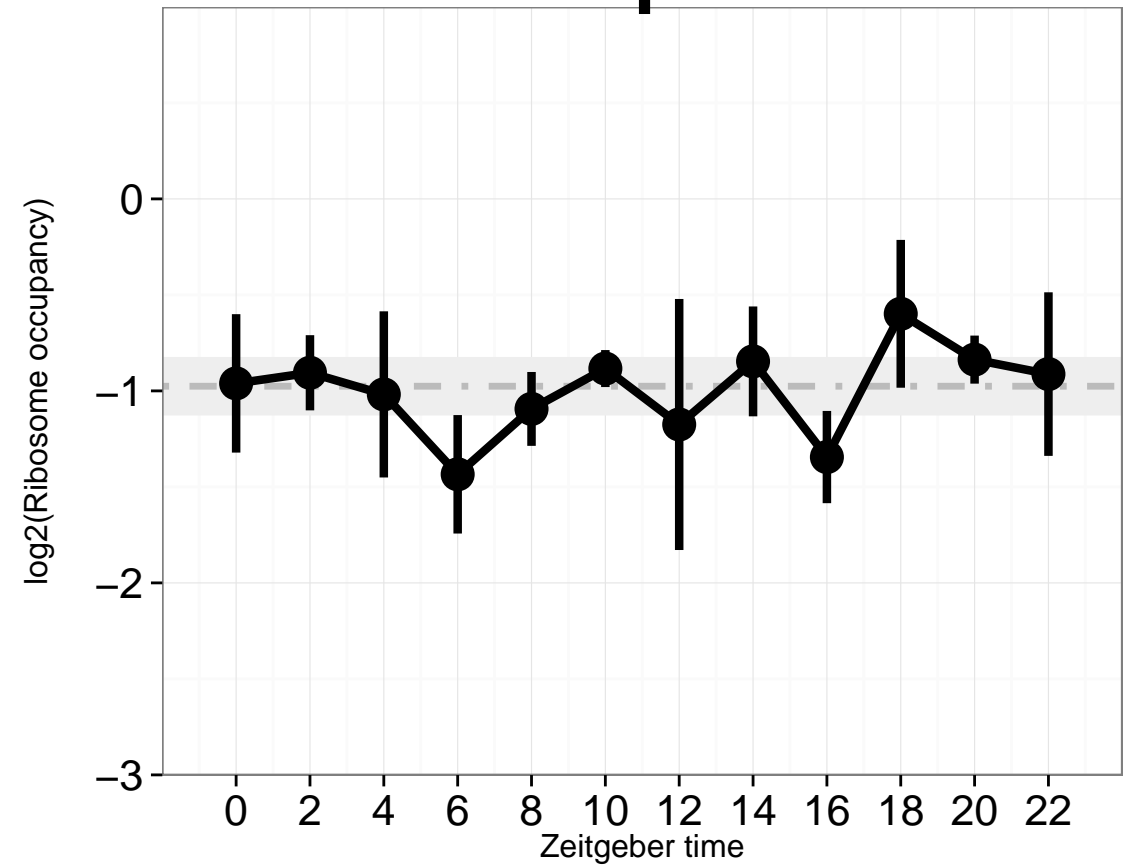

Supplement: SuppDataset_1.zip [file Coprs_set_A.pdf › Supplemental Dataset 1/A-mRNA_nonrhyth_translation_nonrhyth/Coprs_set_A.pdf]

# Cops2

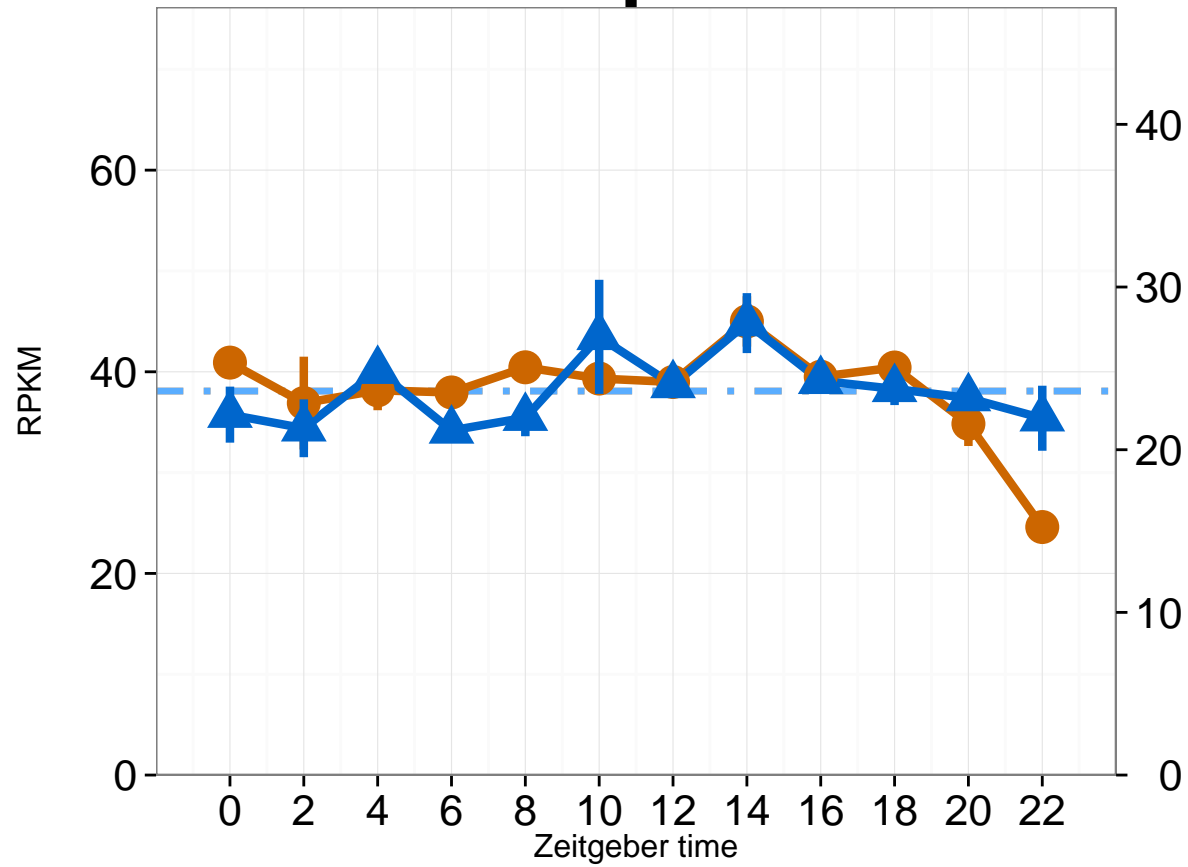

# Cops2

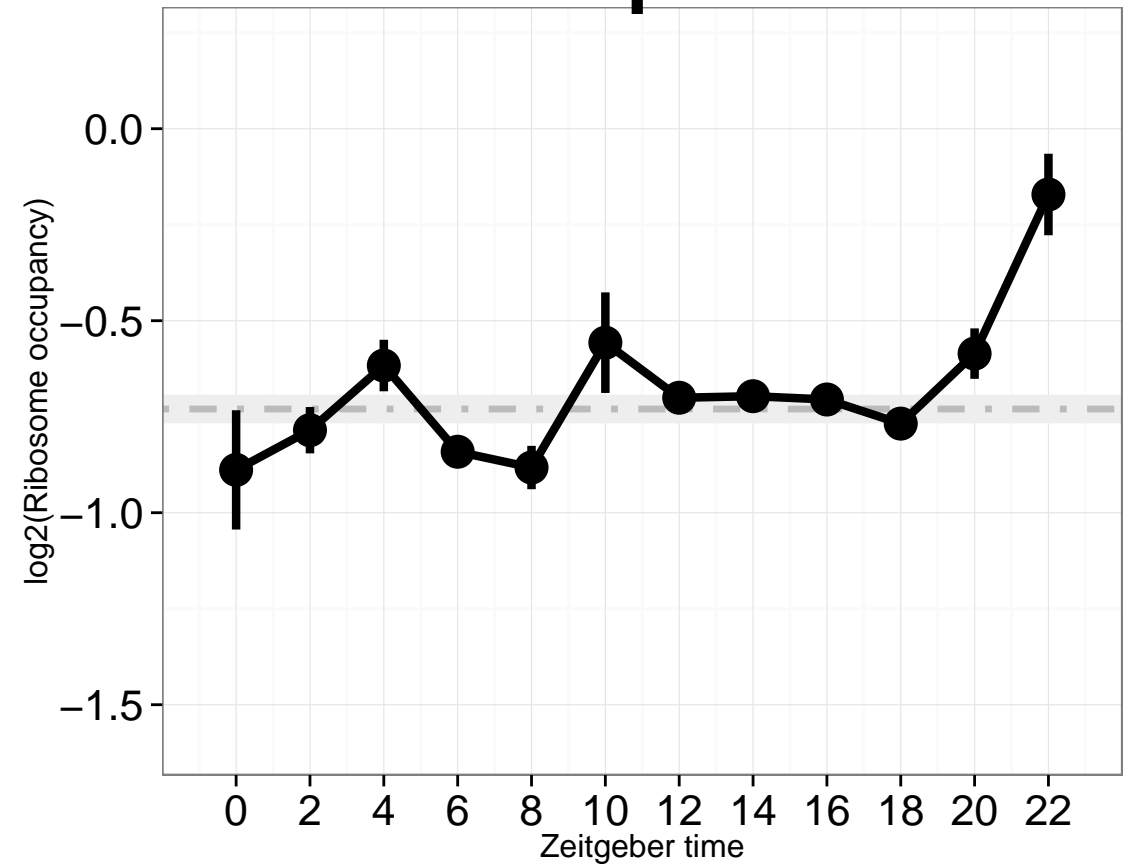

Supplement: SuppDataset_1.zip [file Cops2_set_A.pdf › Supplemental Dataset 1/A-mRNA_nonrhyth_translation_nonrhyth/Cops2_set_A.pdf]

# Cops3

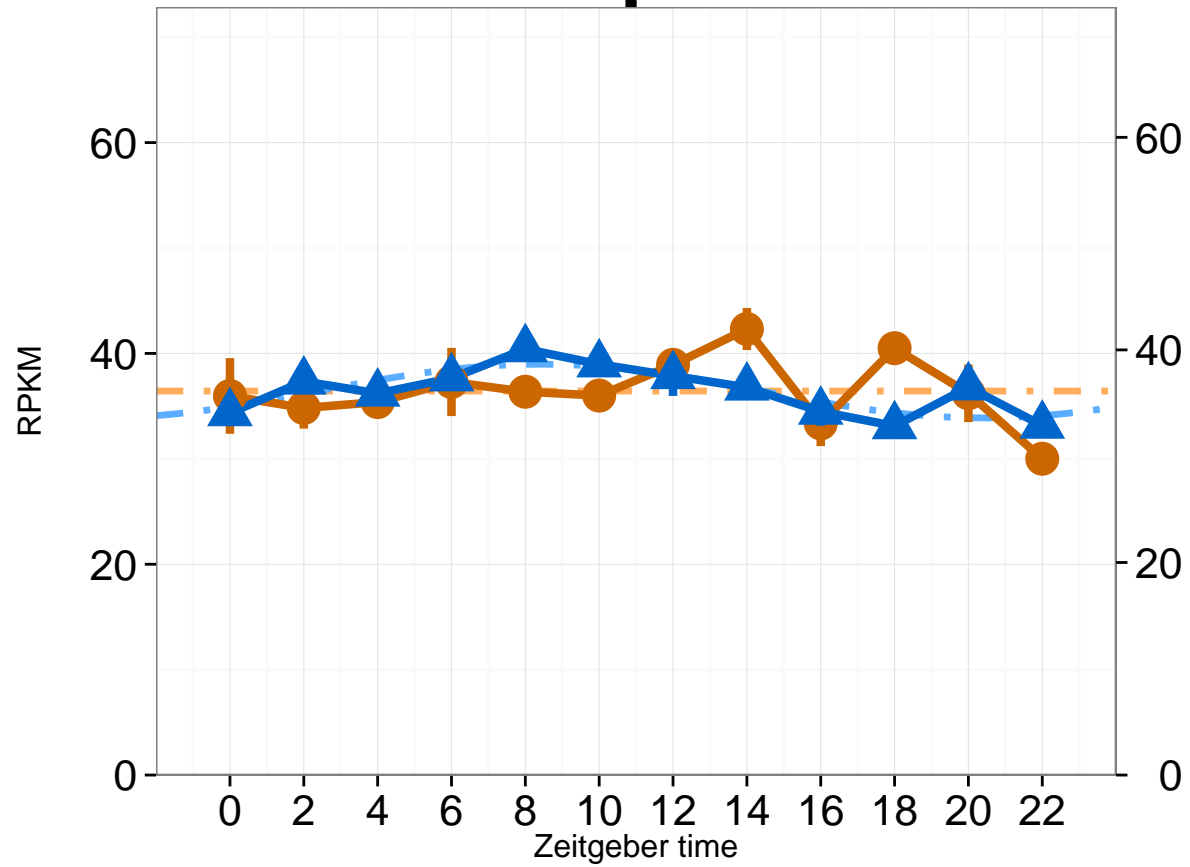

# Cops3

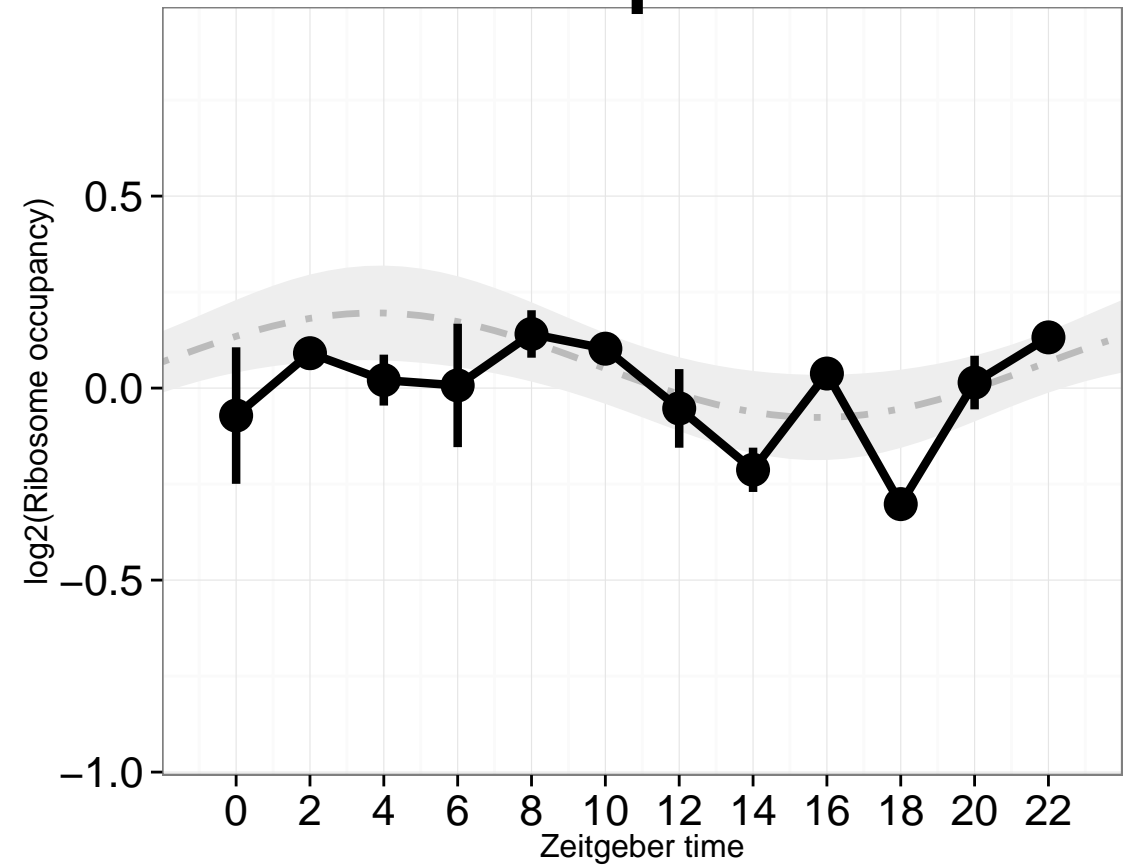

Supplement: SuppDataset_1.zip [file Cops3_set_A.pdf › Supplemental Dataset 1/A-mRNA_nonrhyth_translation_nonrhyth/Cops3_set_A.pdf]

# Cops4

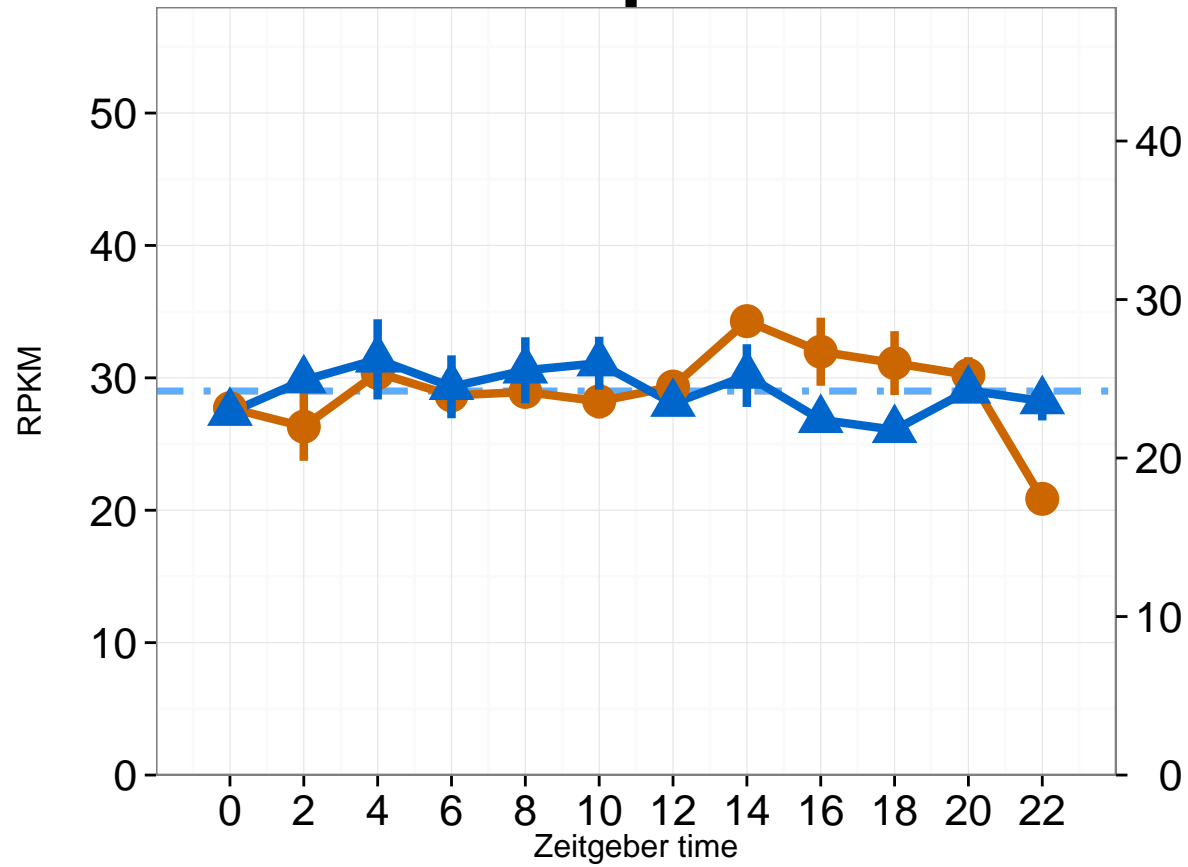

# Cops4

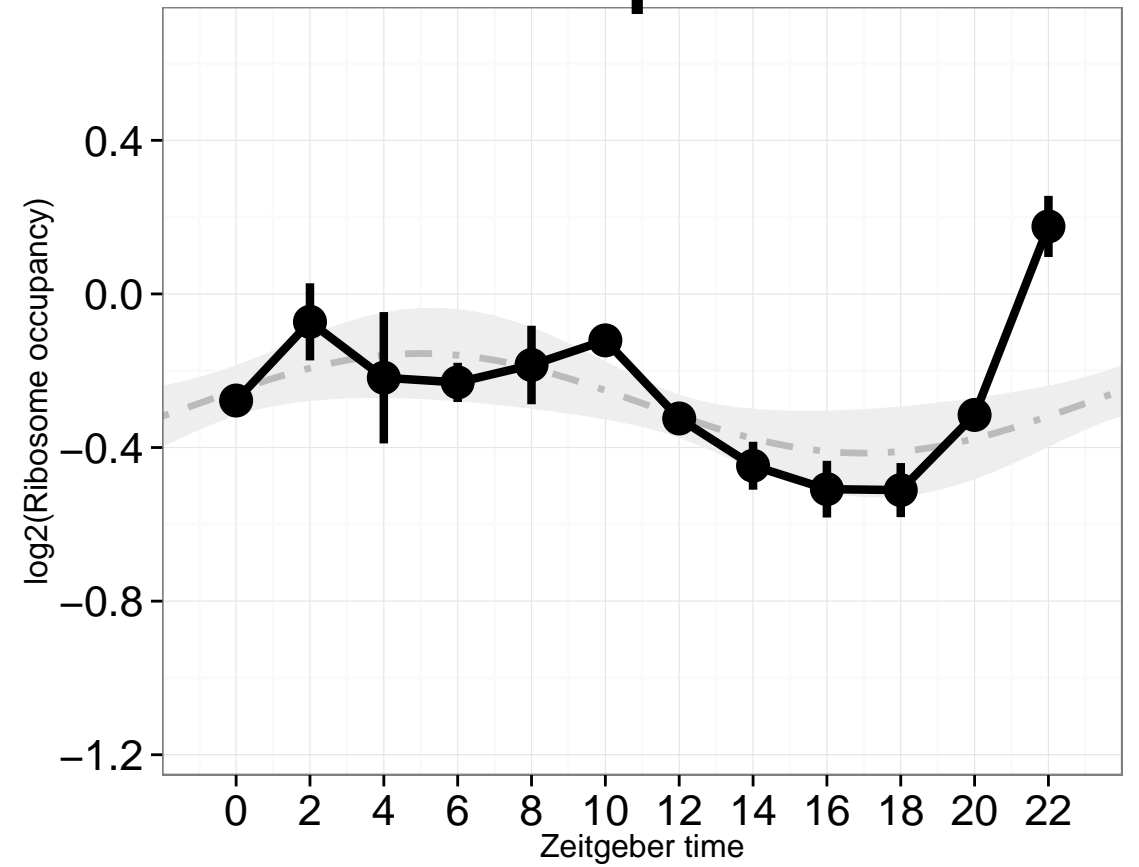

Supplement: SuppDataset_1.zip [file Cops4_set_A.pdf › Supplemental Dataset 1/A-mRNA_nonrhyth_translation_nonrhyth/Cops4_set_A.pdf]

## Cops5

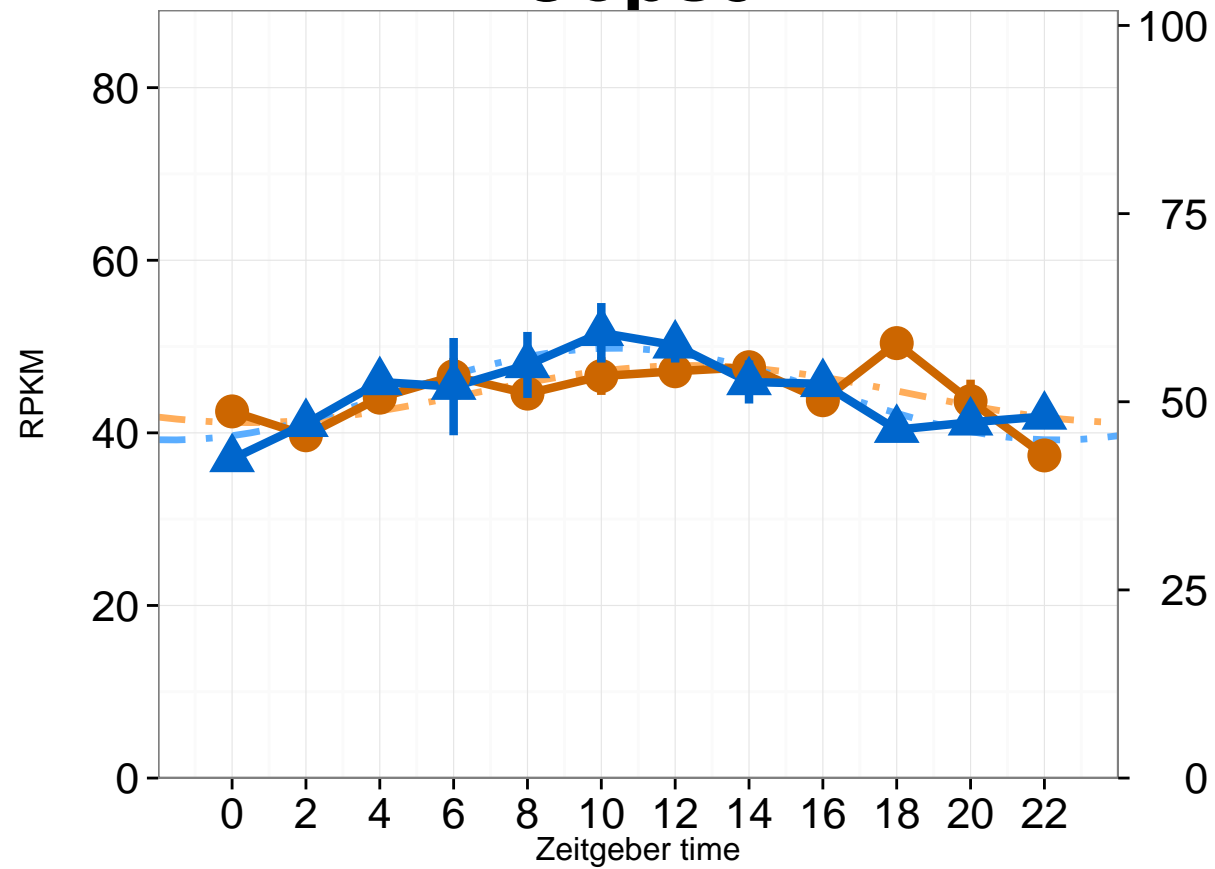

## Cops5

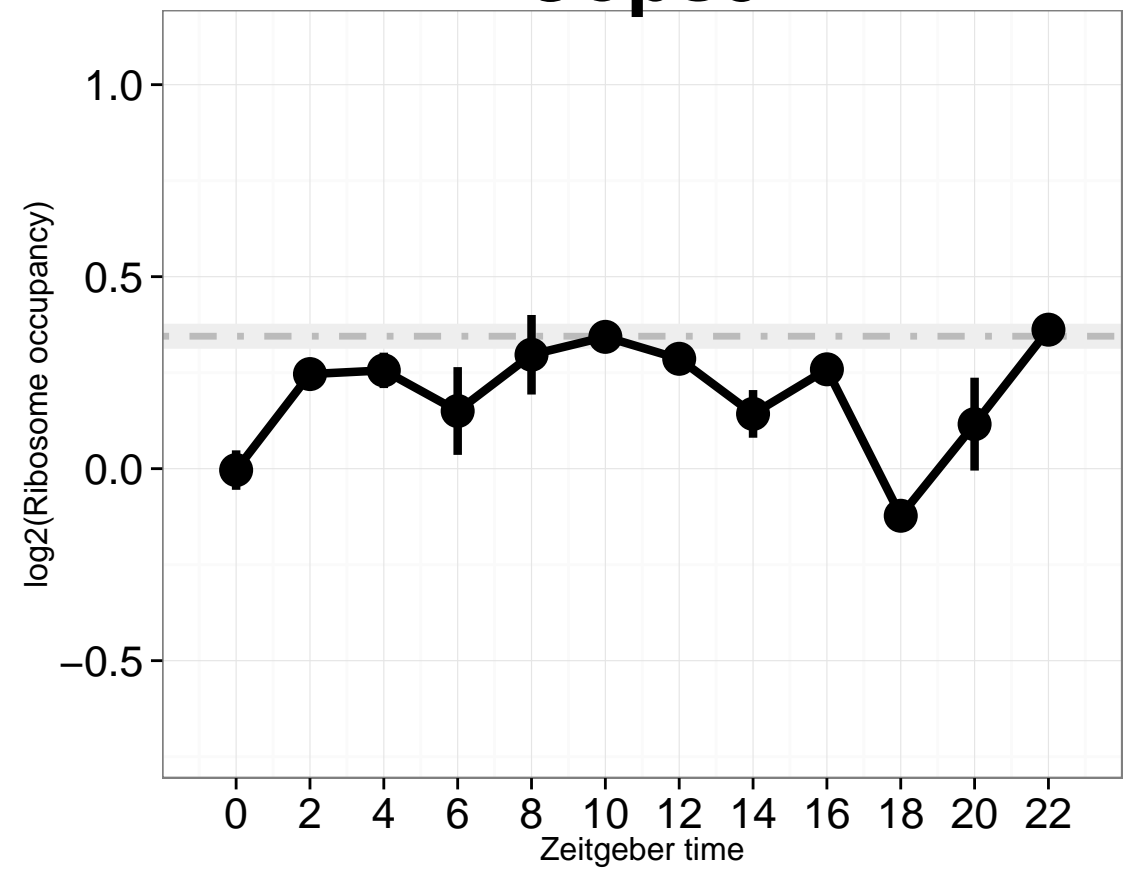

Supplement: SuppDataset_1.zip [file Cops5_set_A.pdf › Supplemental Dataset 1/A-mRNA_nonrhyth_translation_nonrhyth/Cops5_set_A.pdf]

# Cops6

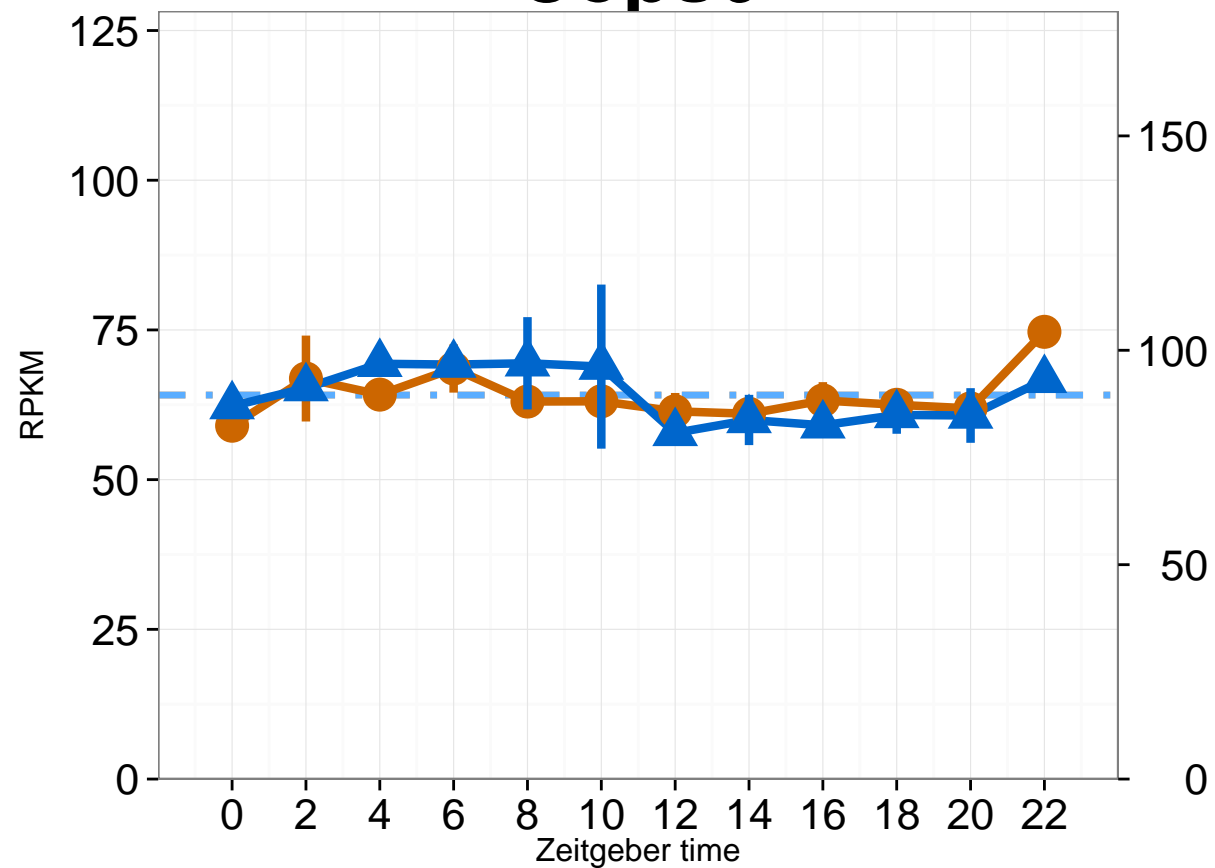

# Cops6

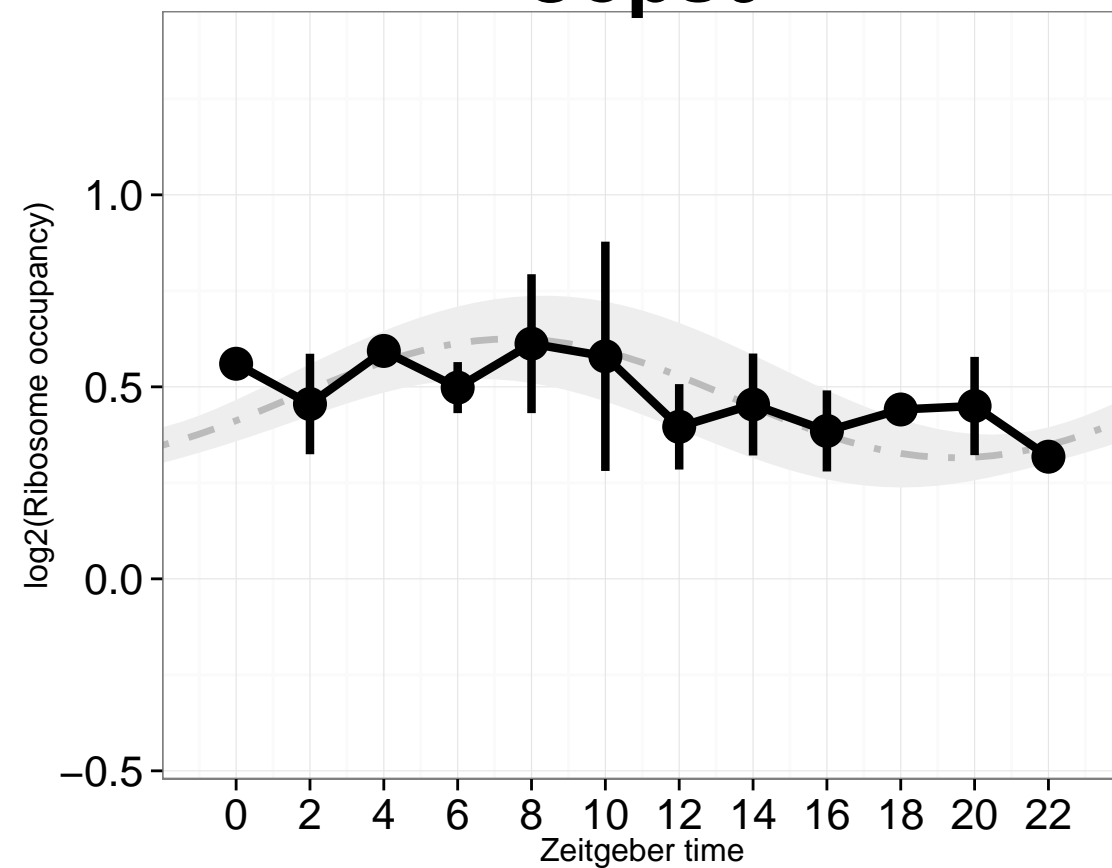

Supplement: SuppDataset_1.zip [file Cops6_set_A.pdf › Supplemental Dataset 1/A-mRNA_nonrhyth_translation_nonrhyth/Cops6_set_A.pdf]

# Cops7a

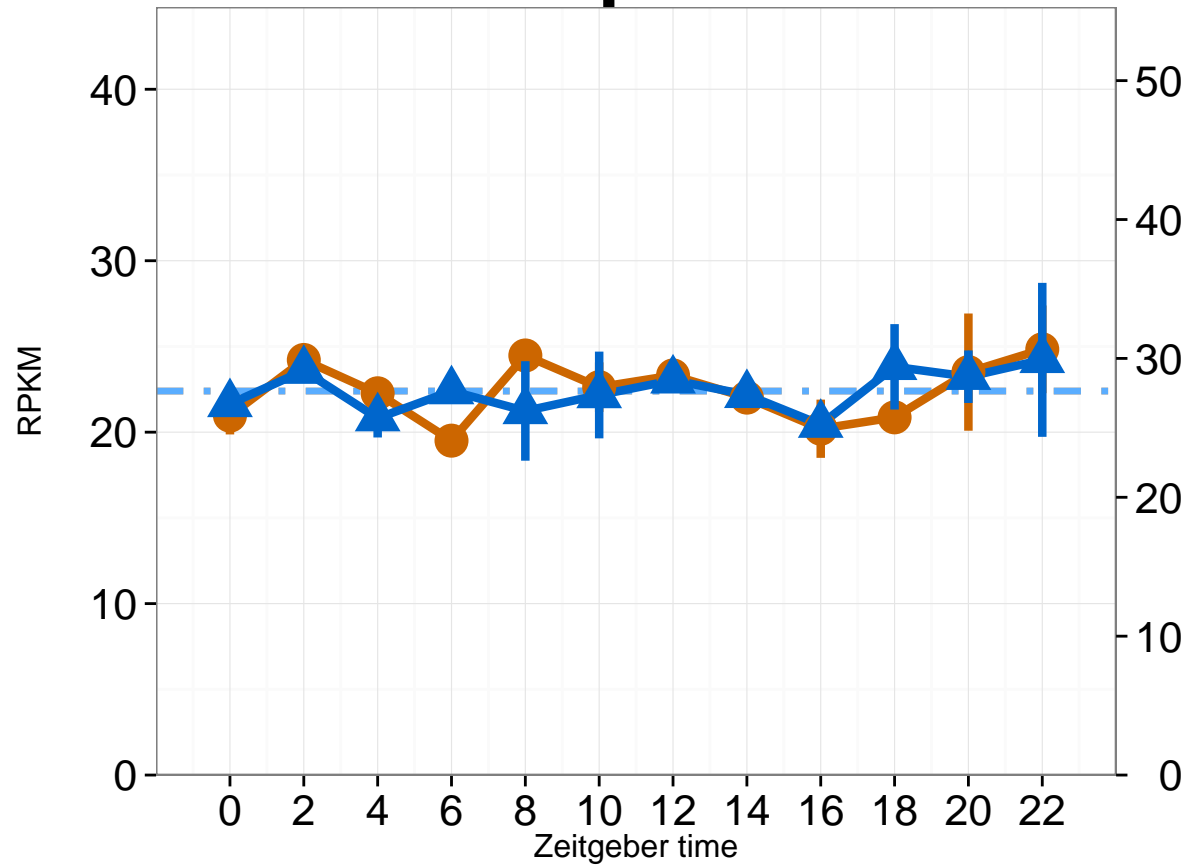

# Cops7a

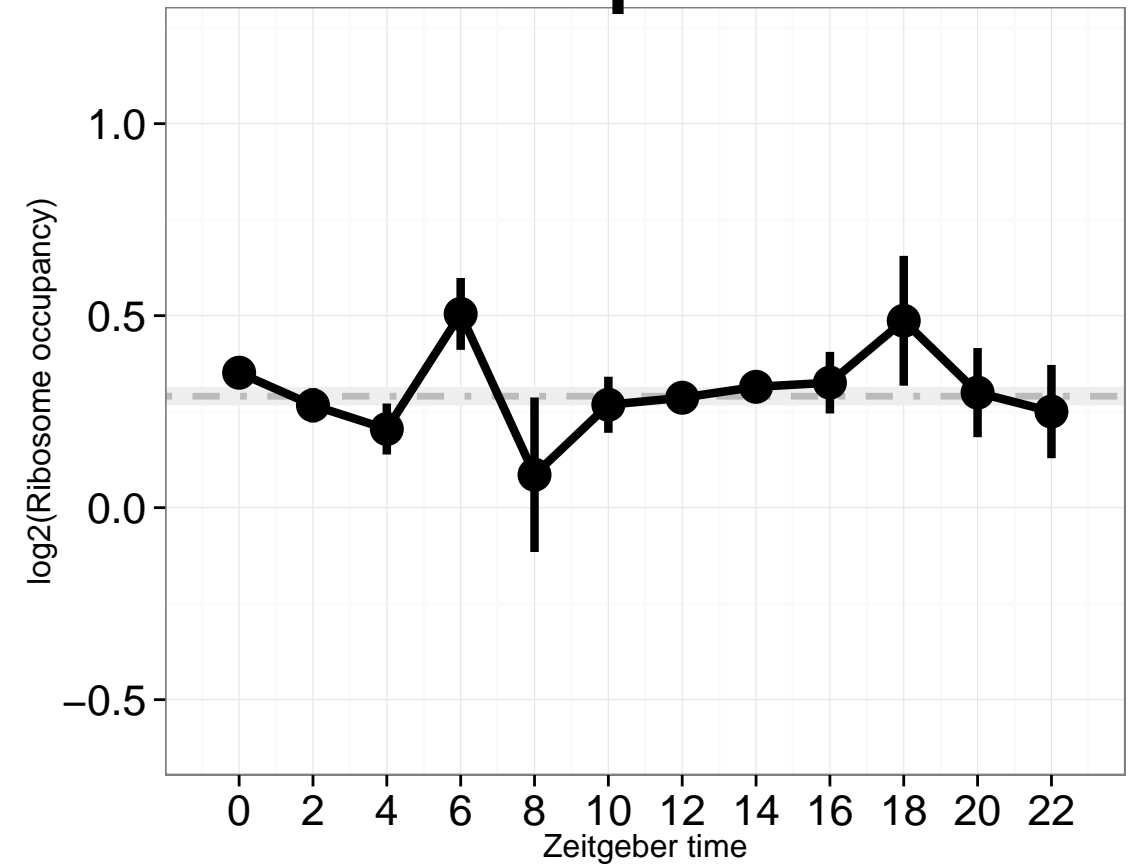

Supplement: SuppDataset_1.zip [file Cops7a_set_A.pdf › Supplemental Dataset 1/A-mRNA_nonrhyth_translation_nonrhyth/Cops7a_set_A.pdf]

# Cops7b

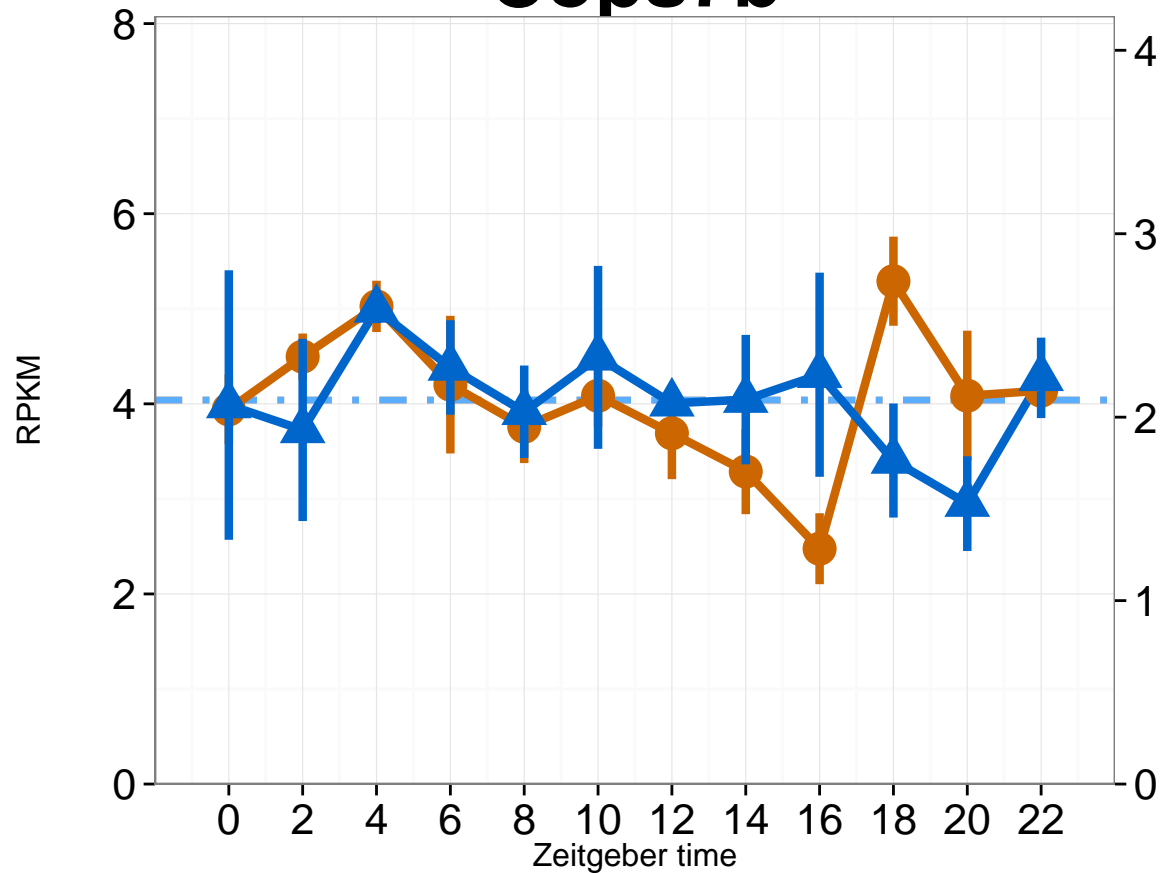

# Cops7b

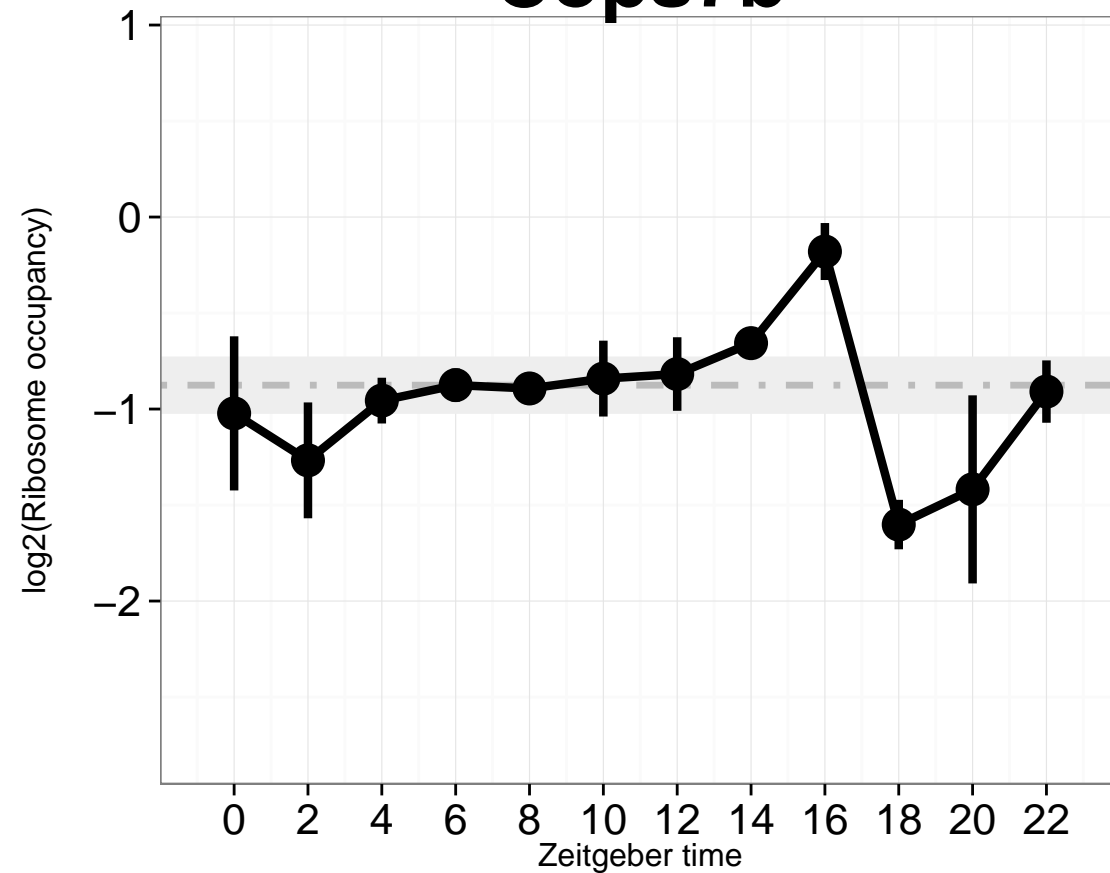

Supplement: SuppDataset_1.zip [file Cops7b_set_A.pdf › Supplemental Dataset 1/A-mRNA_nonrhyth_translation_nonrhyth/Cops7b_set_A.pdf]

## Cops8

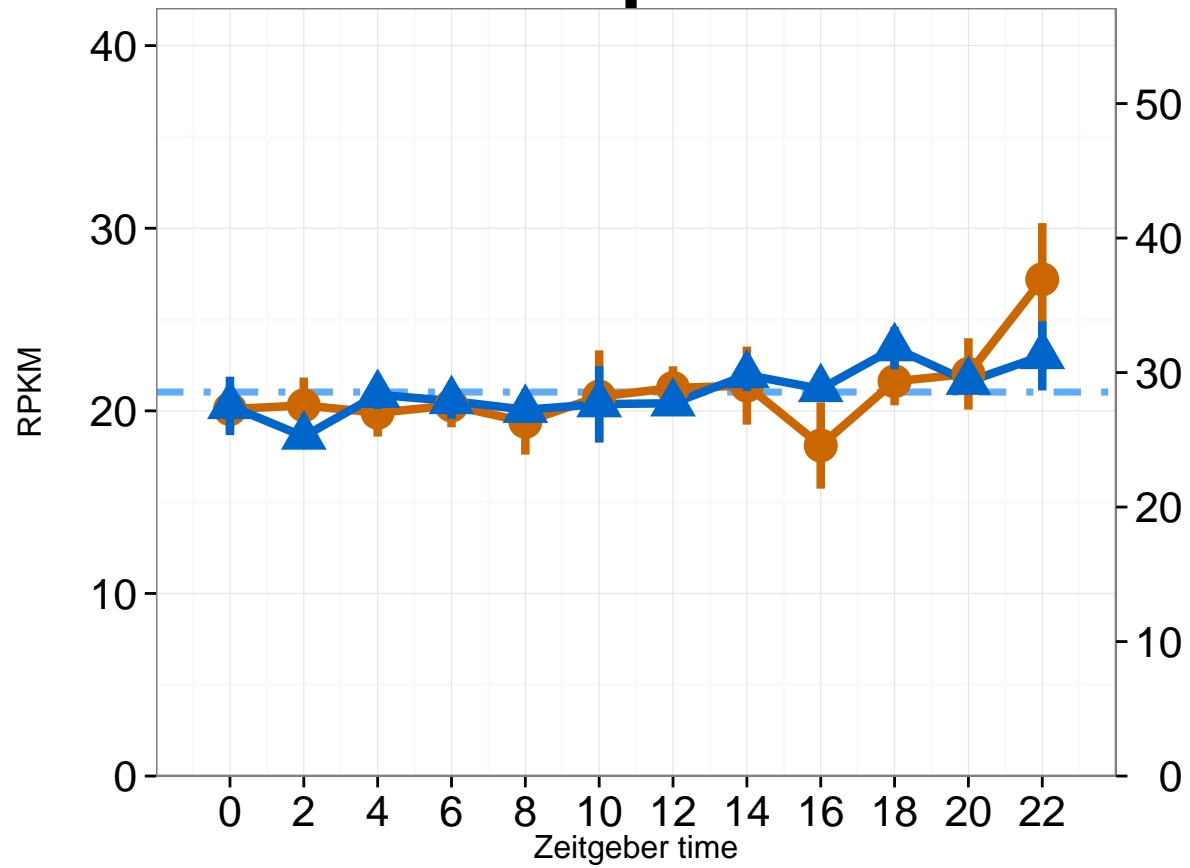

## Cops8

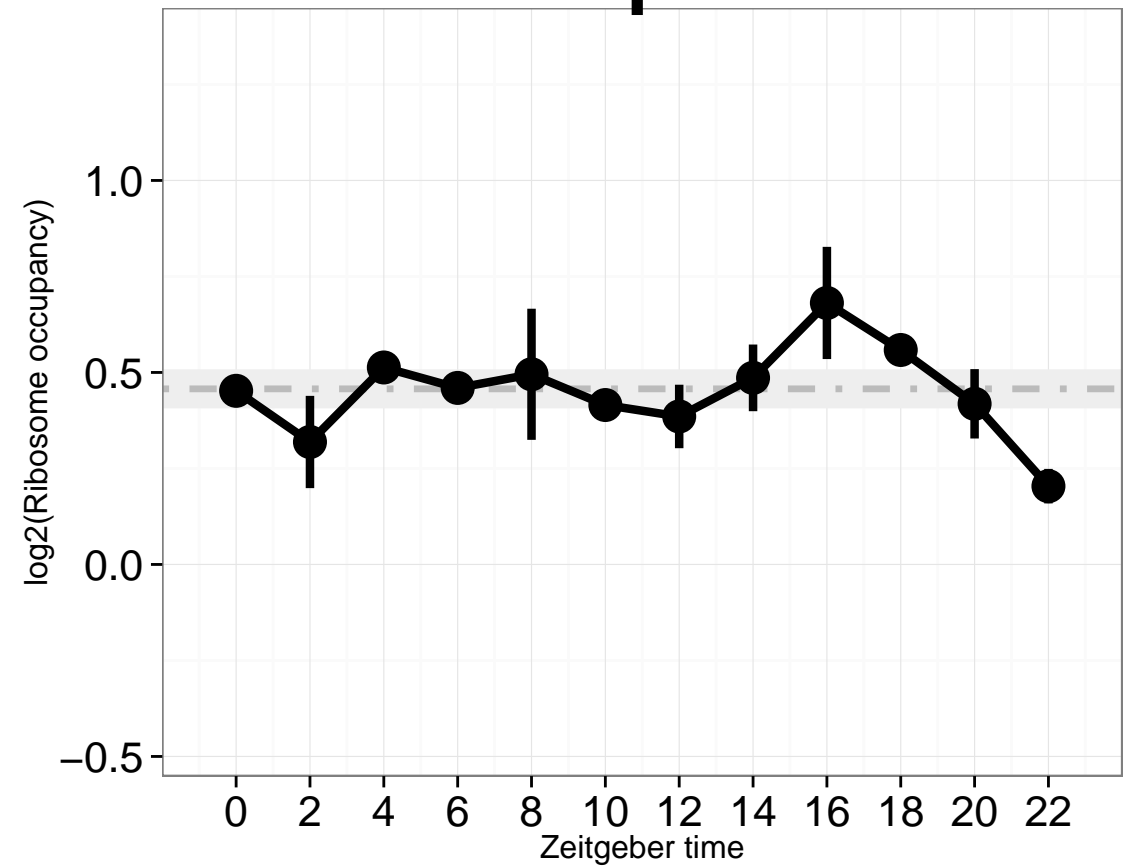

Supplement: SuppDataset_1.zip [file Cops8_set_A.pdf › Supplemental Dataset 1/A-mRNA_nonrhyth_translation_nonrhyth/Cops8_set_A.pdf]

## Copz1

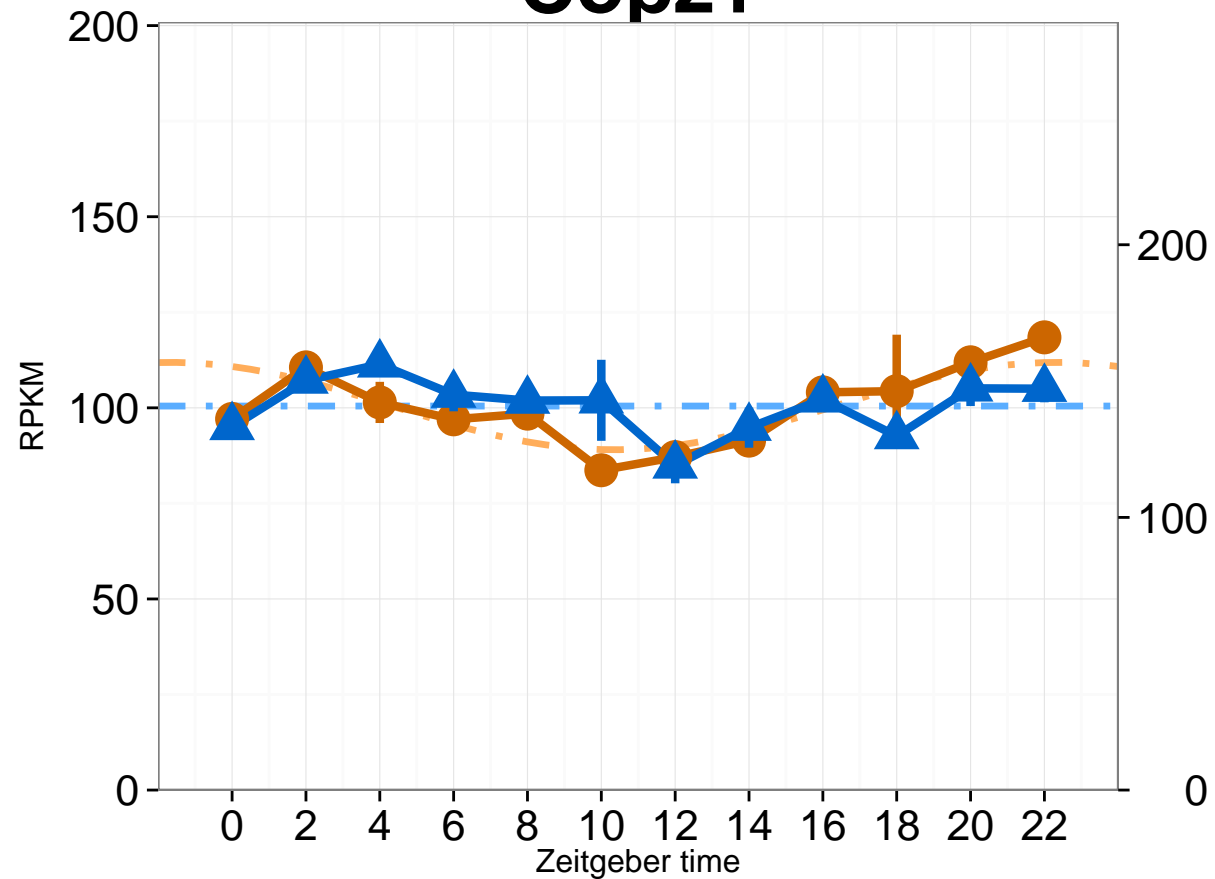

## Copz1

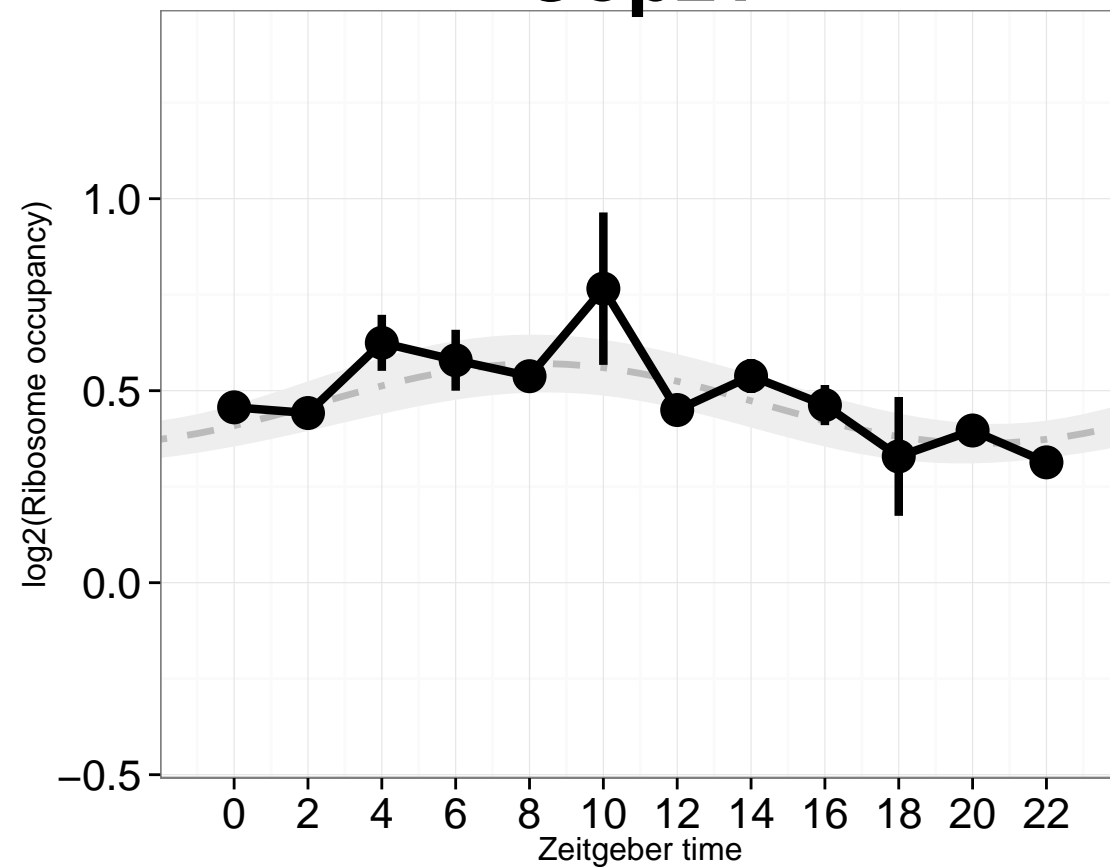

Supplement: SuppDataset_1.zip [file Copz1_set_A.pdf › Supplemental Dataset 1/A-mRNA_nonrhyth_translation_nonrhyth/Copz1_set_A.pdf]

# Copz2

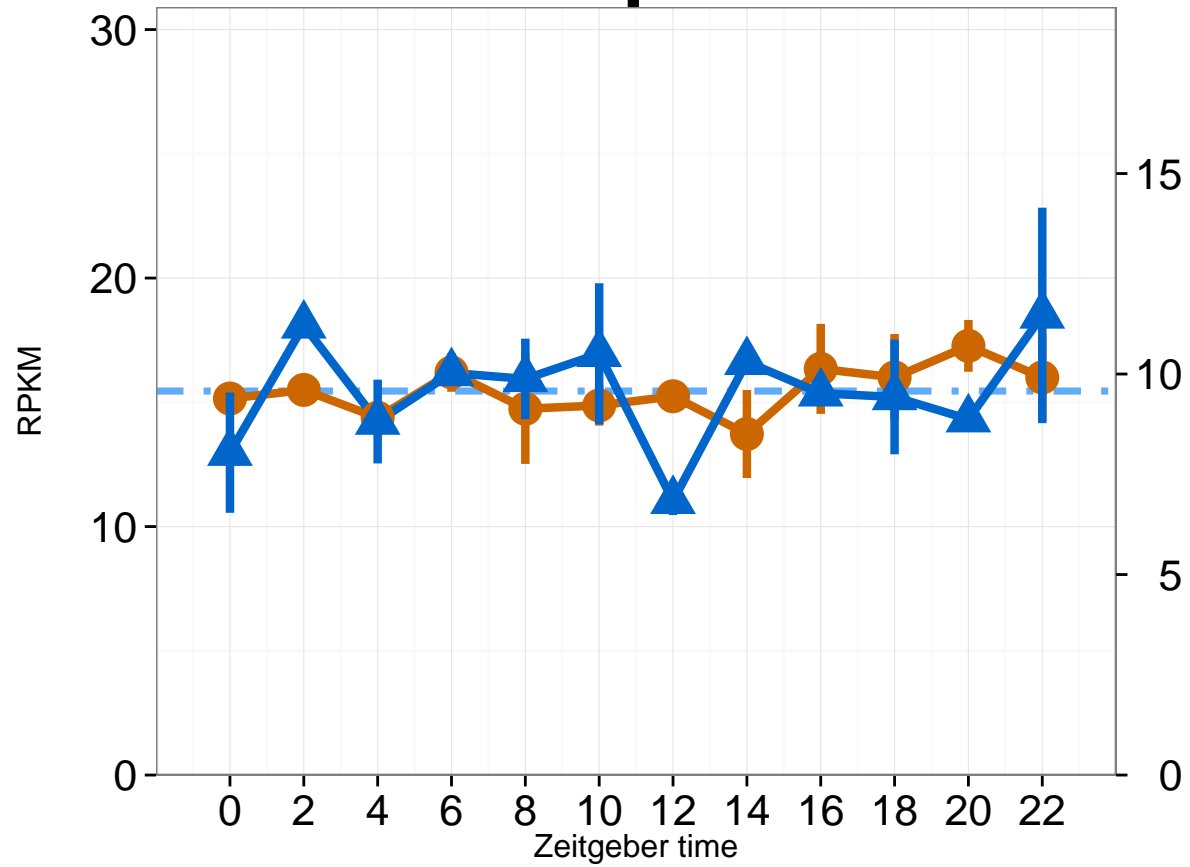

# Copz2

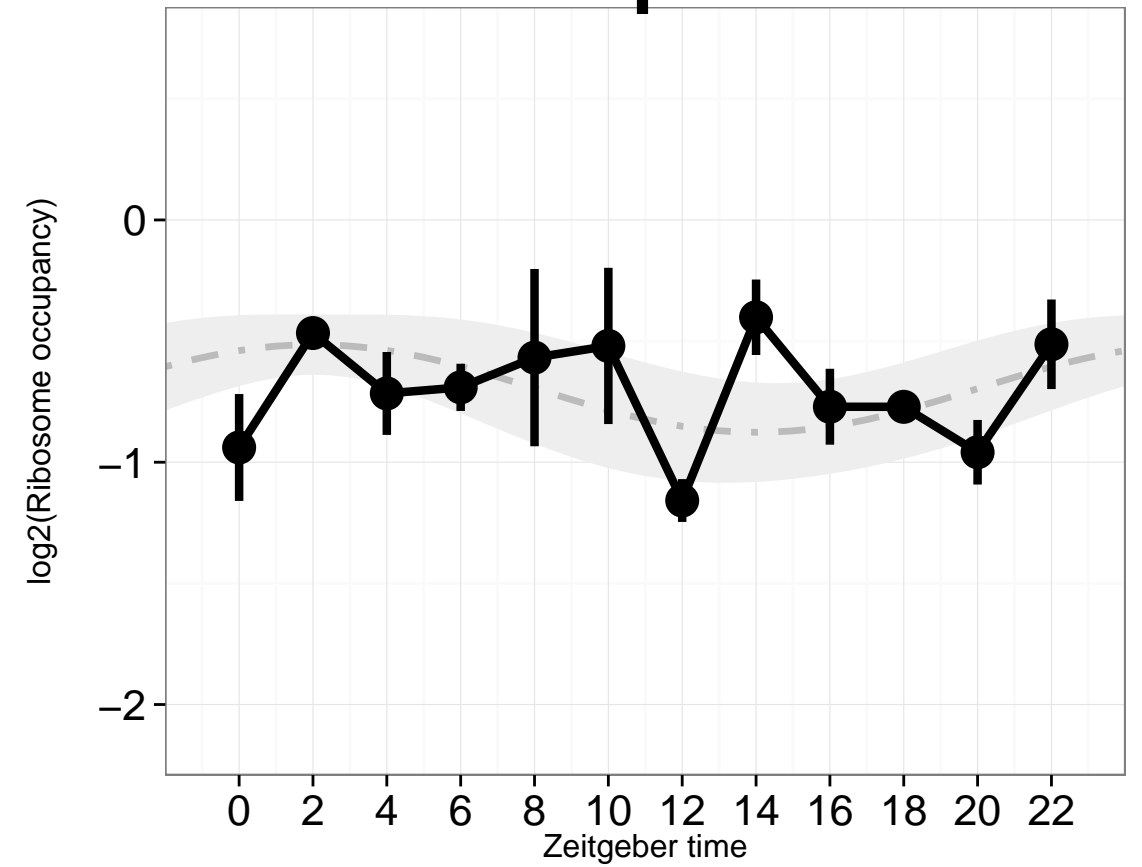

Supplement: SuppDataset_1.zip [file Copz2_set_A.pdf › Supplemental Dataset 1/A-mRNA_nonrhyth_translation_nonrhyth/Copz2_set_A.pdf]

# Coq10a

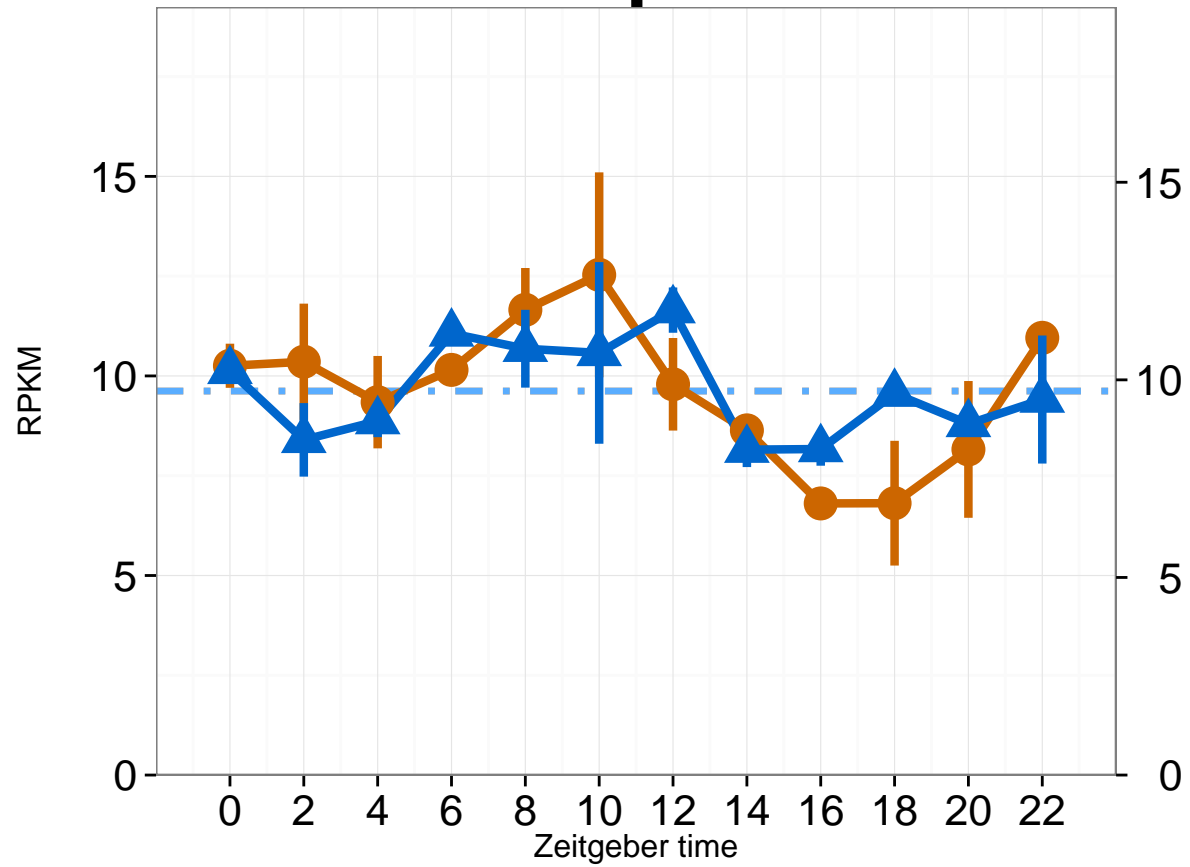

# Coq10a

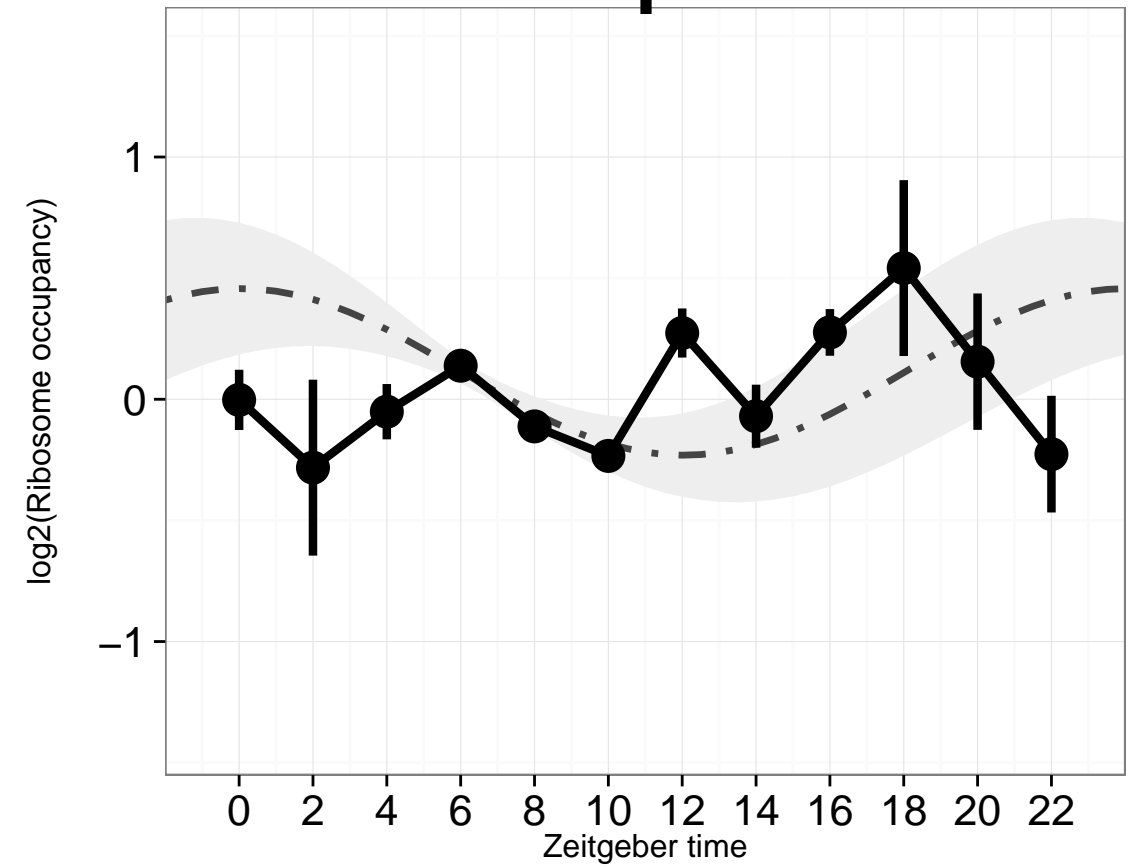

Supplement: SuppDataset_1.zip [file Coq10a_set_A.pdf › Supplemental Dataset 1/A-mRNA_nonrhyth_translation_nonrhyth/Coq10a_set_A.pdf]

## Coq2

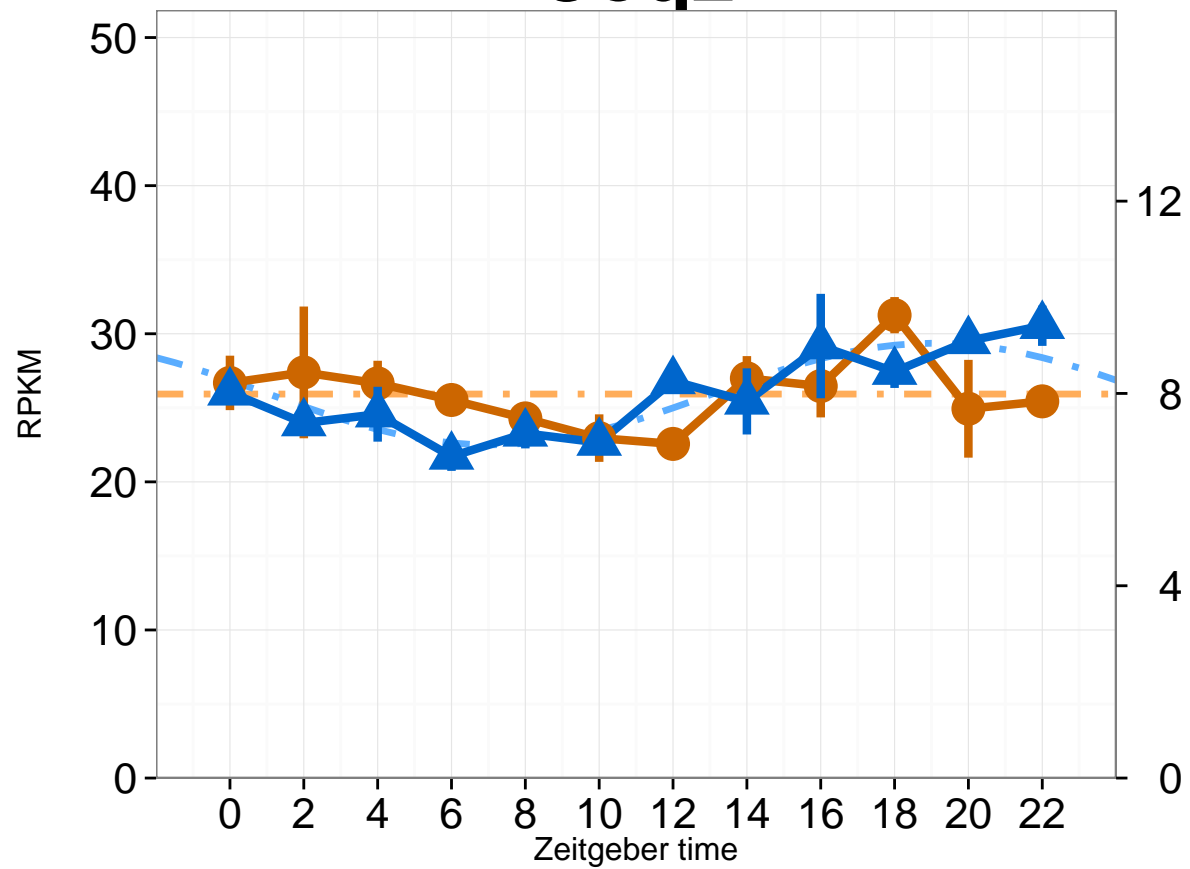

## Coq2

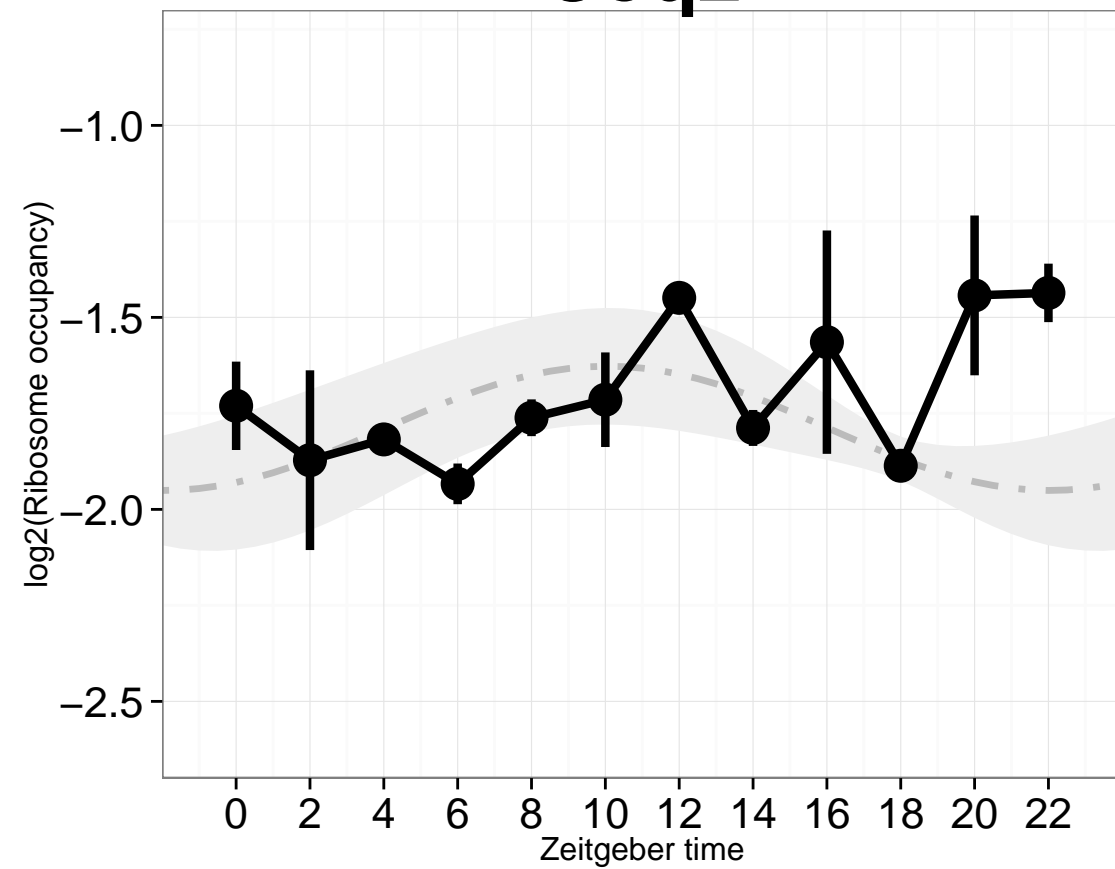

Supplement: SuppDataset_1.zip [file Coq2_set_A.pdf › Supplemental Dataset 1/A-mRNA_nonrhyth_translation_nonrhyth/Coq2_set_A.pdf]

# Coq3

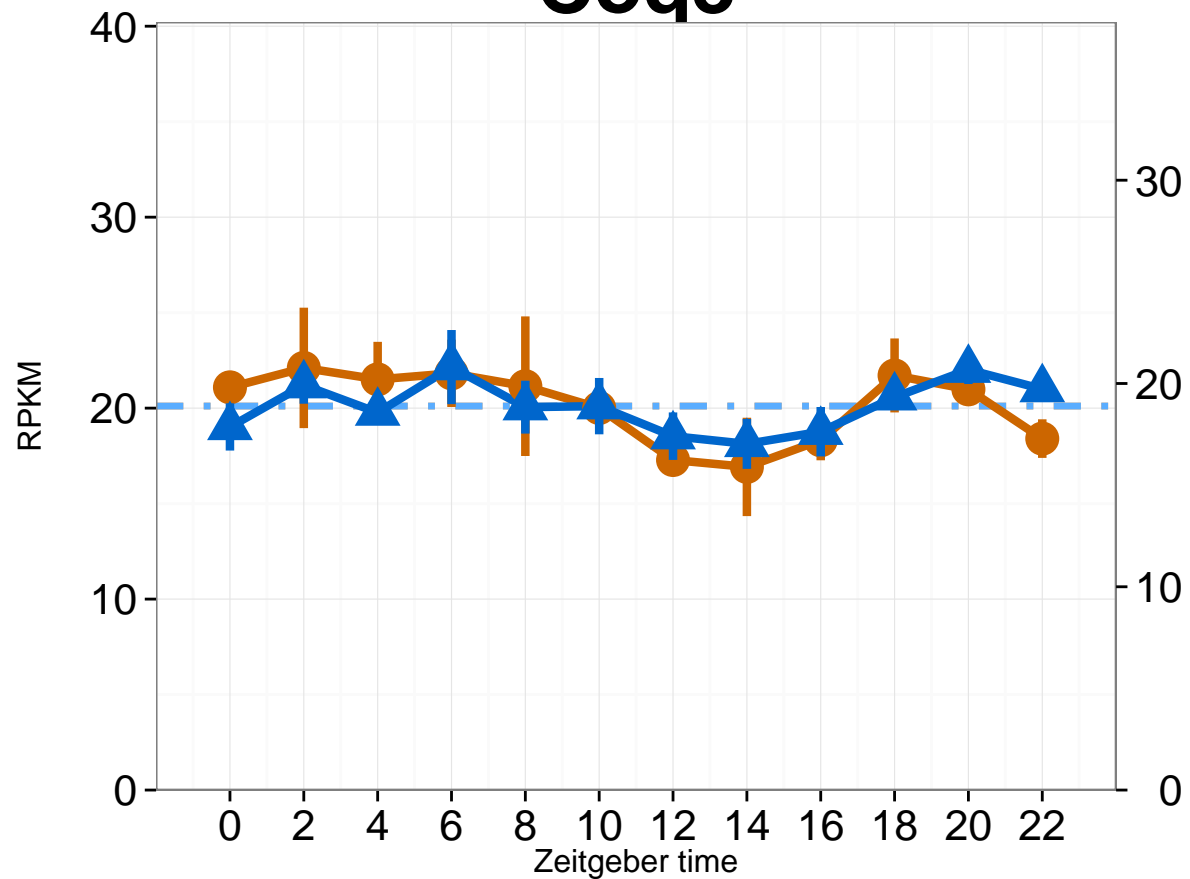

# Coq3

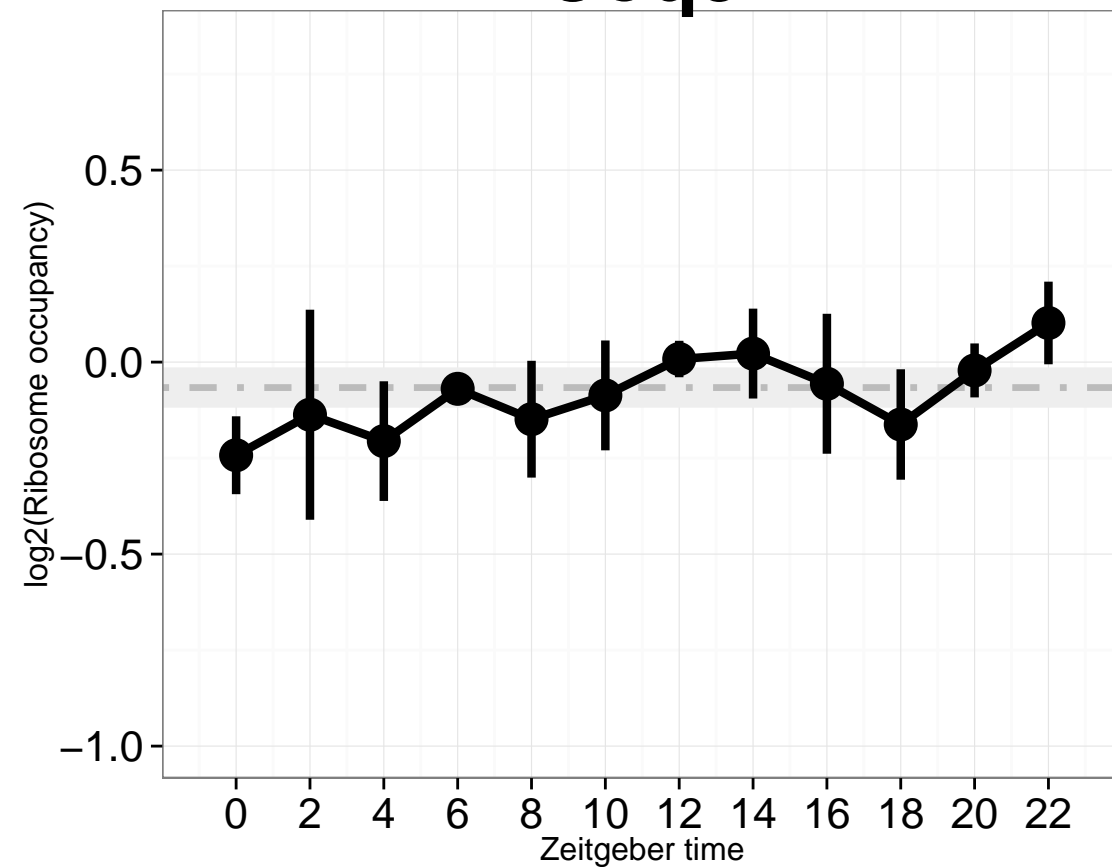

Supplement: SuppDataset_1.zip [file Coq3_set_A.pdf › Supplemental Dataset 1/A-mRNA_nonrhyth_translation_nonrhyth/Coq3_set_A.pdf]

# Coq5

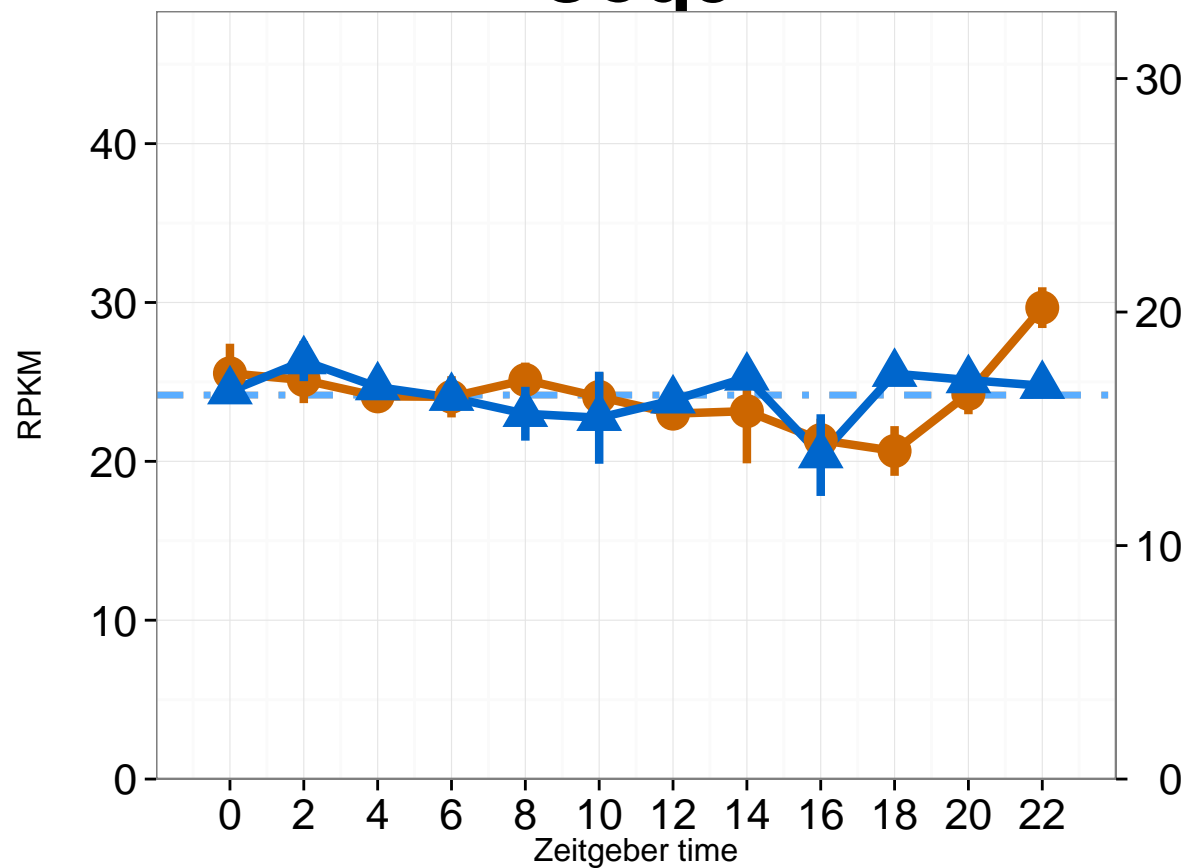

# Coq5

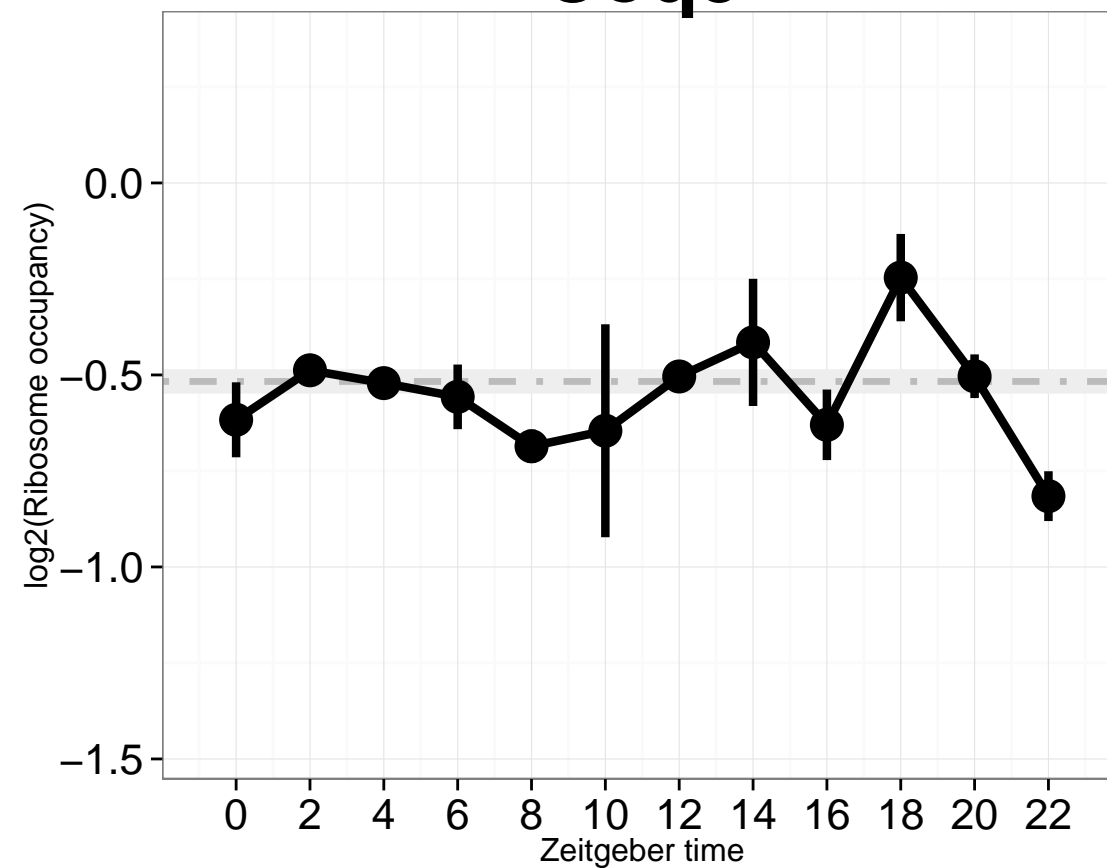

Supplement: SuppDataset_1.zip [file Coq5_set_A.pdf › Supplemental Dataset 1/A-mRNA_nonrhyth_translation_nonrhyth/Coq5_set_A.pdf]

# Coq6

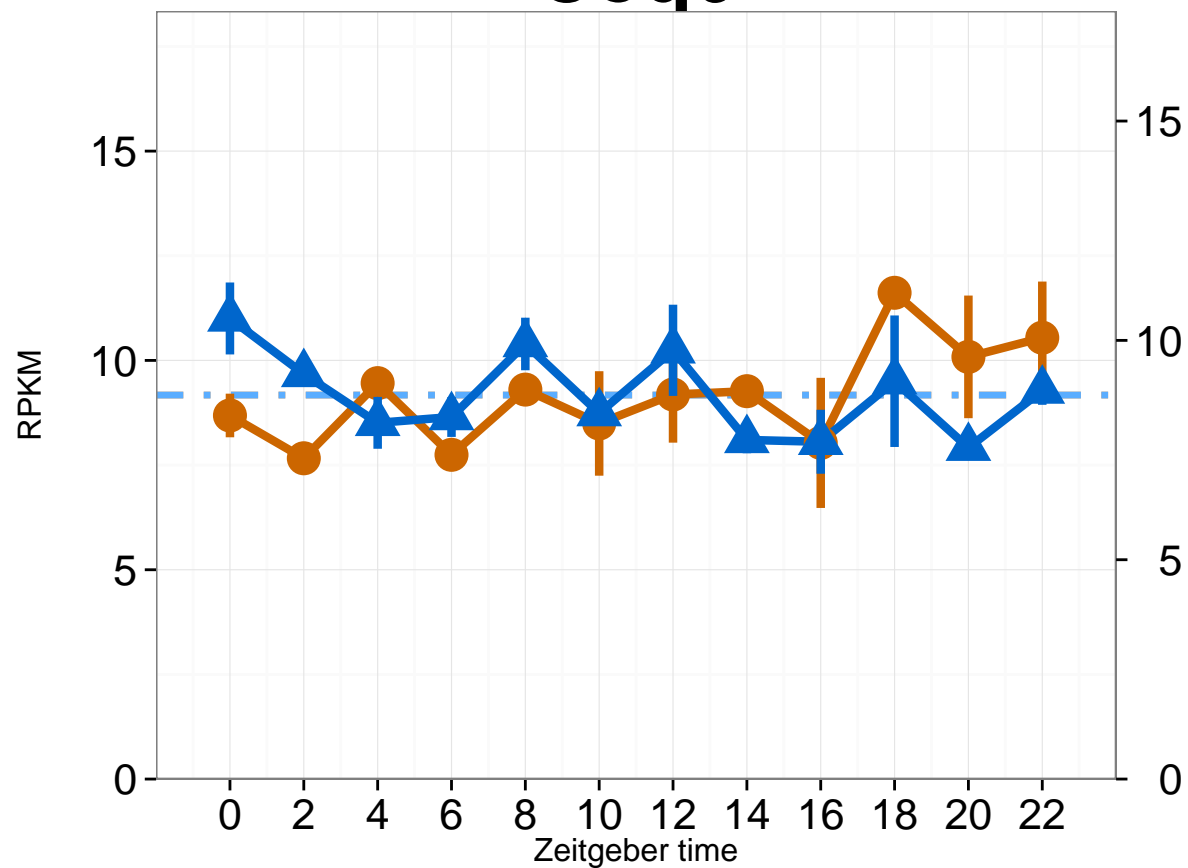

# Coq6

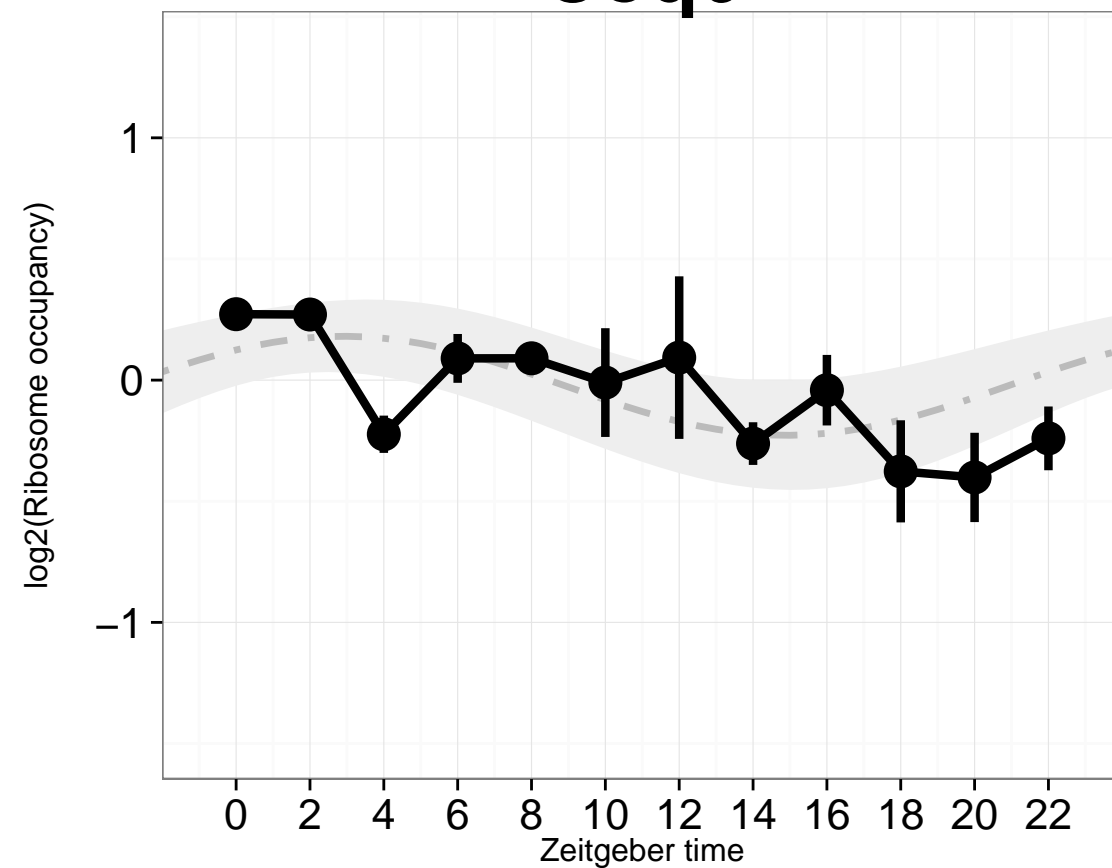

Supplement: SuppDataset_1.zip [file Coq6_set_A.pdf › Supplemental Dataset 1/A-mRNA_nonrhyth_translation_nonrhyth/Coq6_set_A.pdf]

## Coq7

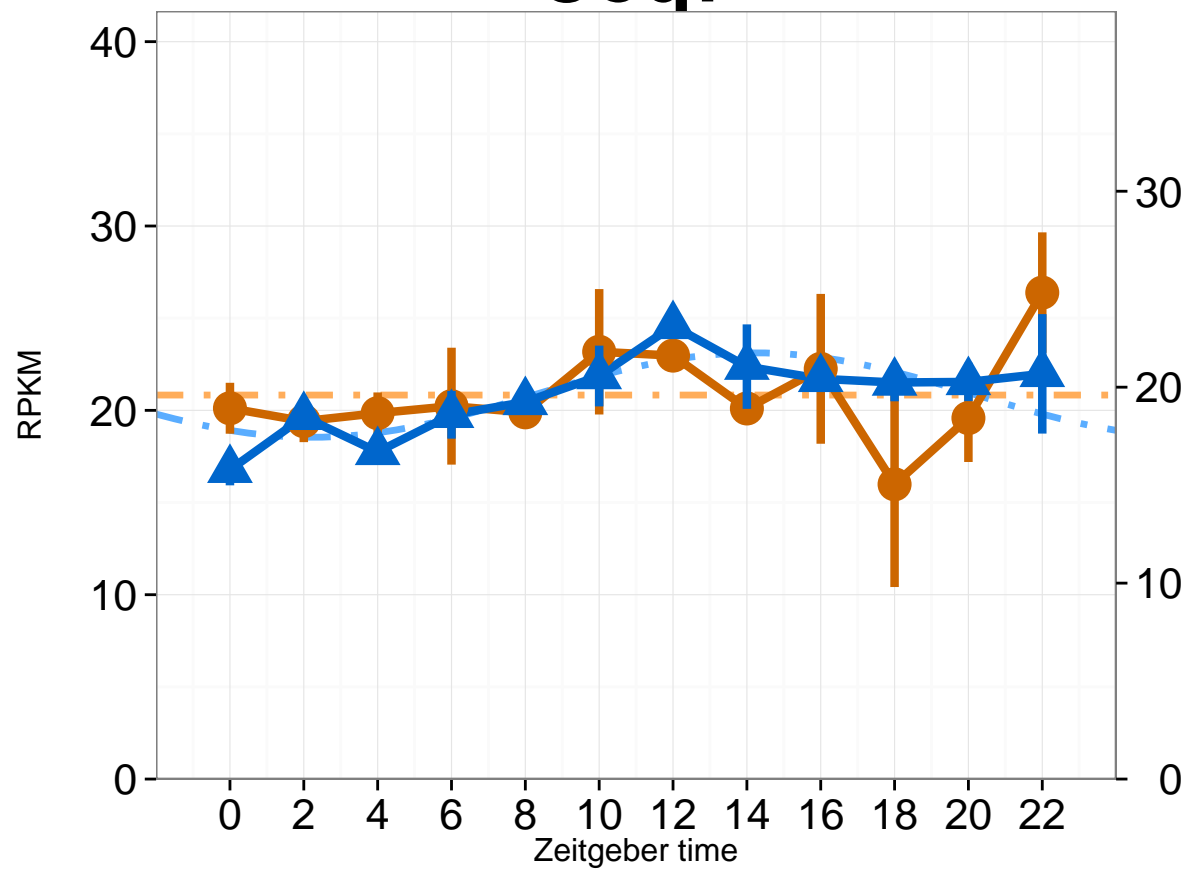

## Coq7

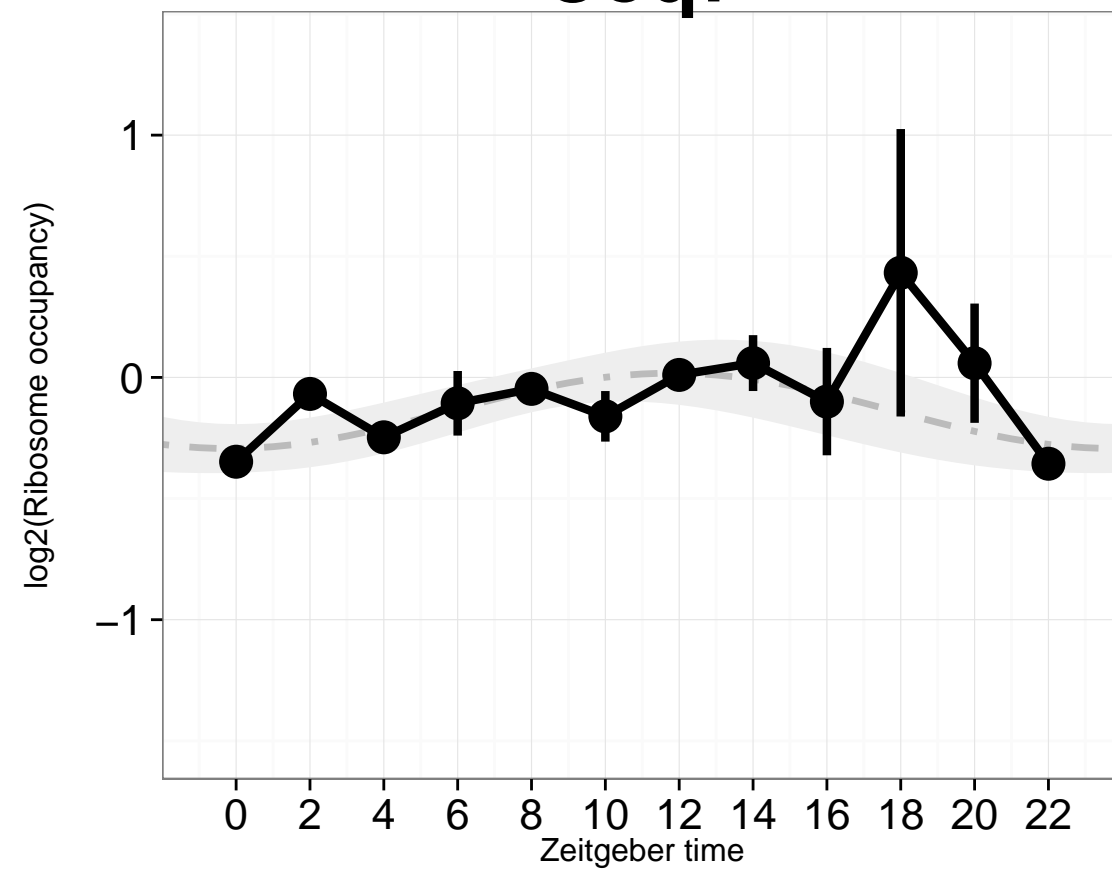

Supplement: SuppDataset_1.zip [file Coq7_set_A.pdf › Supplemental Dataset 1/A-mRNA_nonrhyth_translation_nonrhyth/Coq7_set_A.pdf]

# Coq9

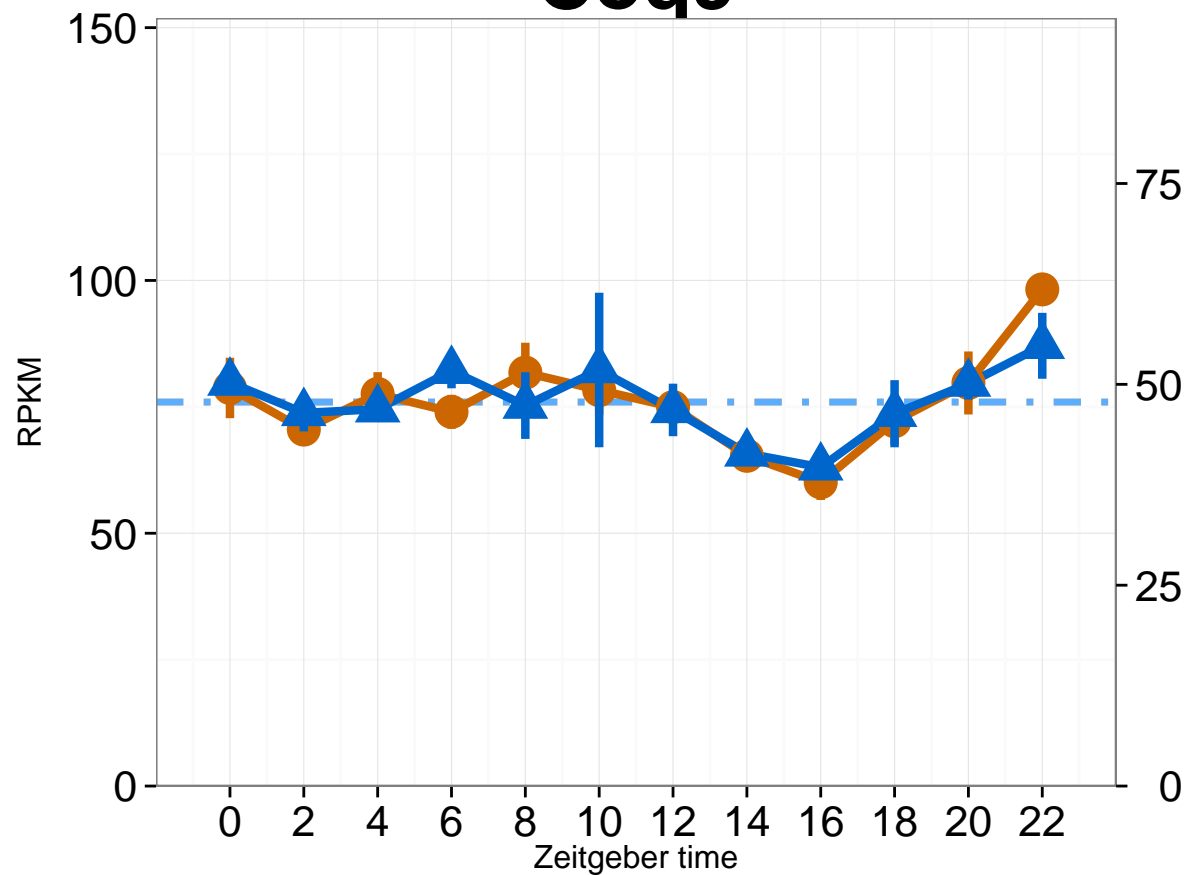

# Coq9

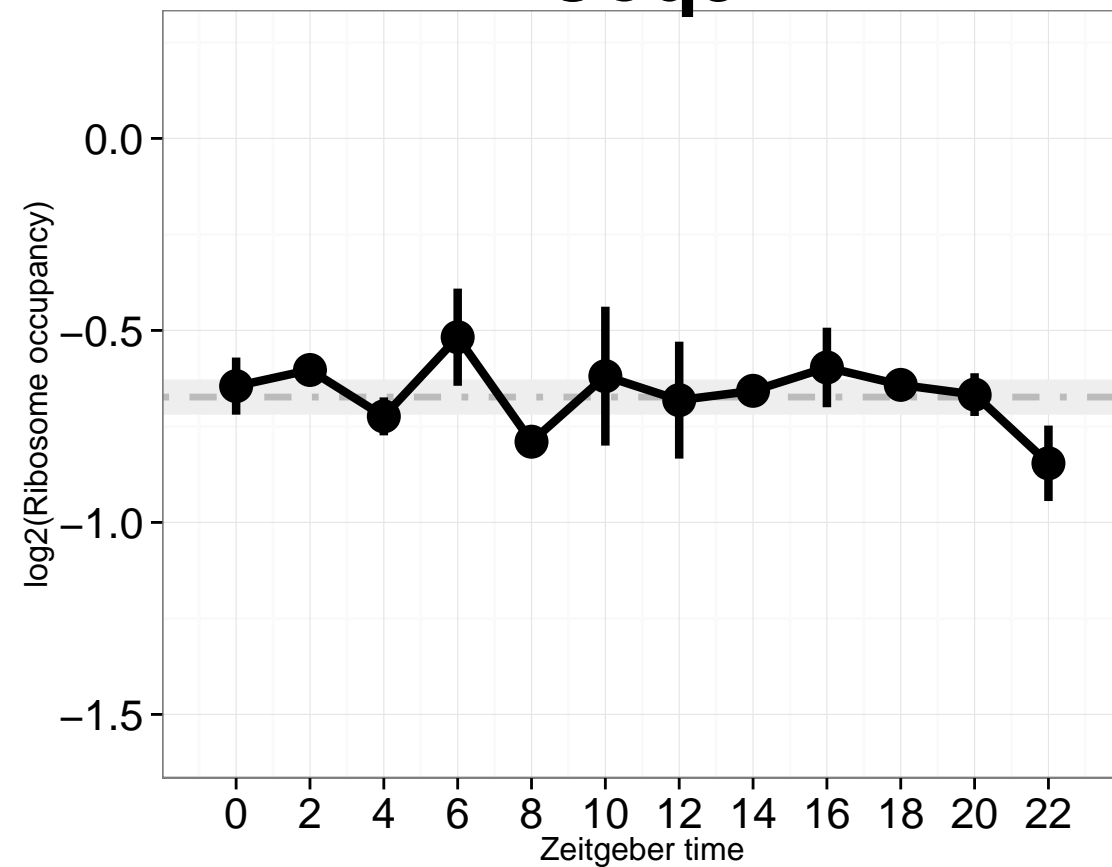

Supplement: SuppDataset_1.zip [file Coq9_set_A.pdf › Supplemental Dataset 1/A-mRNA_nonrhyth_translation_nonrhyth/Coq9_set_A.pdf]

# Coro1a

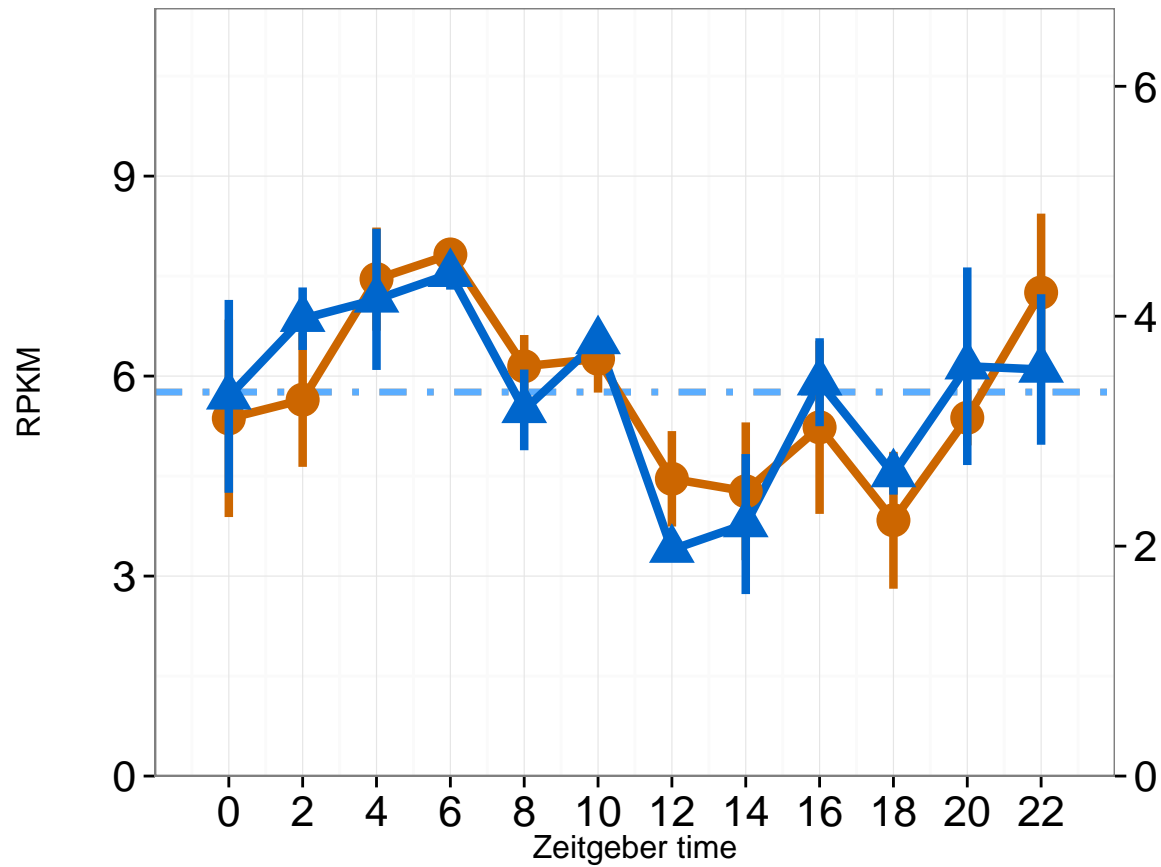

# Coro1a

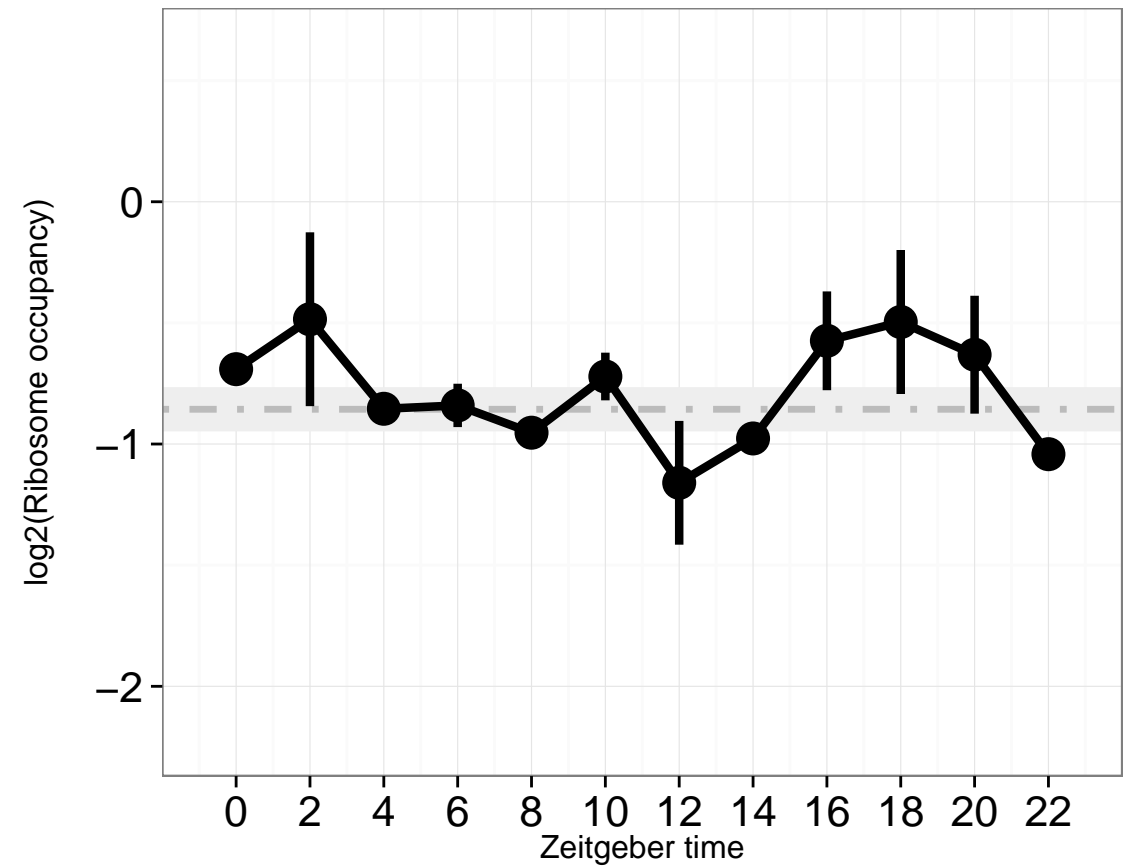

Supplement: SuppDataset_1.zip [file Coro1a_set_A.pdf › Supplemental Dataset 1/A-mRNA_nonrhyth_translation_nonrhyth/Coro1a_set_A.pdf]

# Coro1c

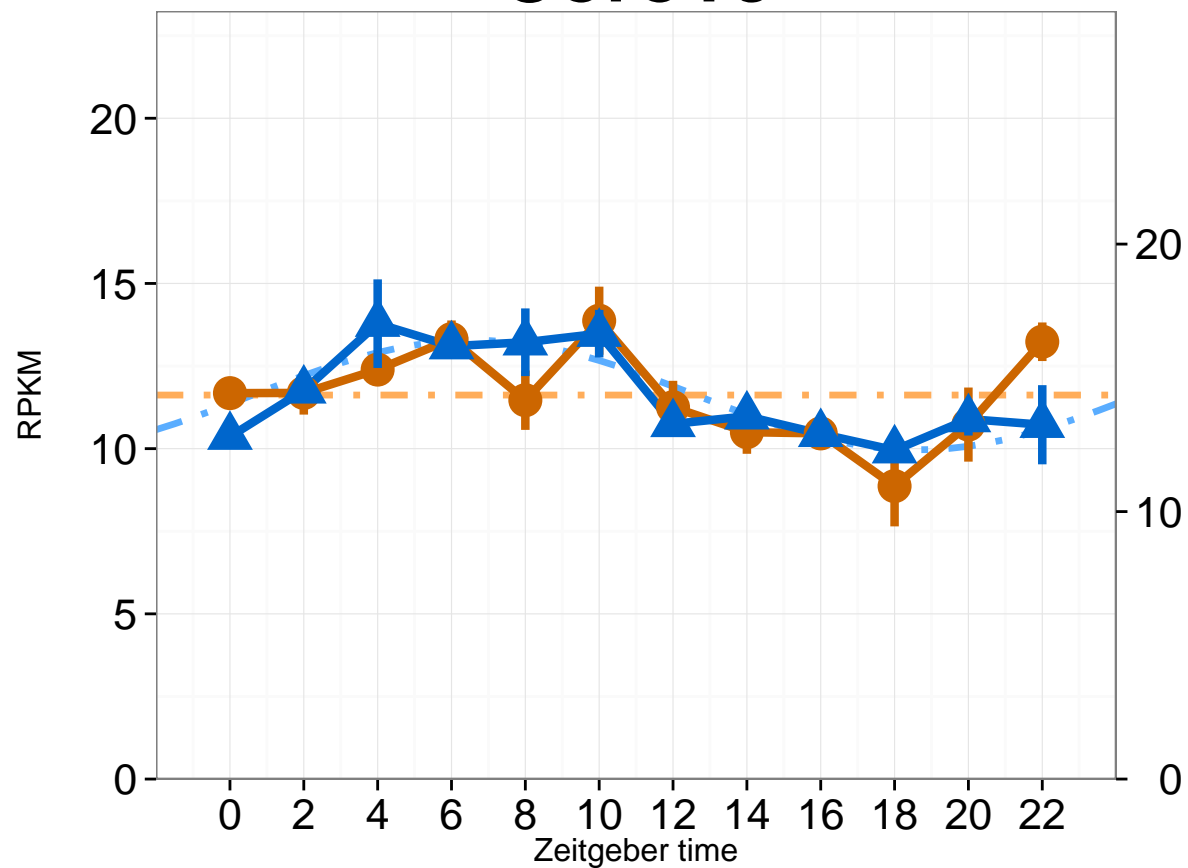

# Coro1c

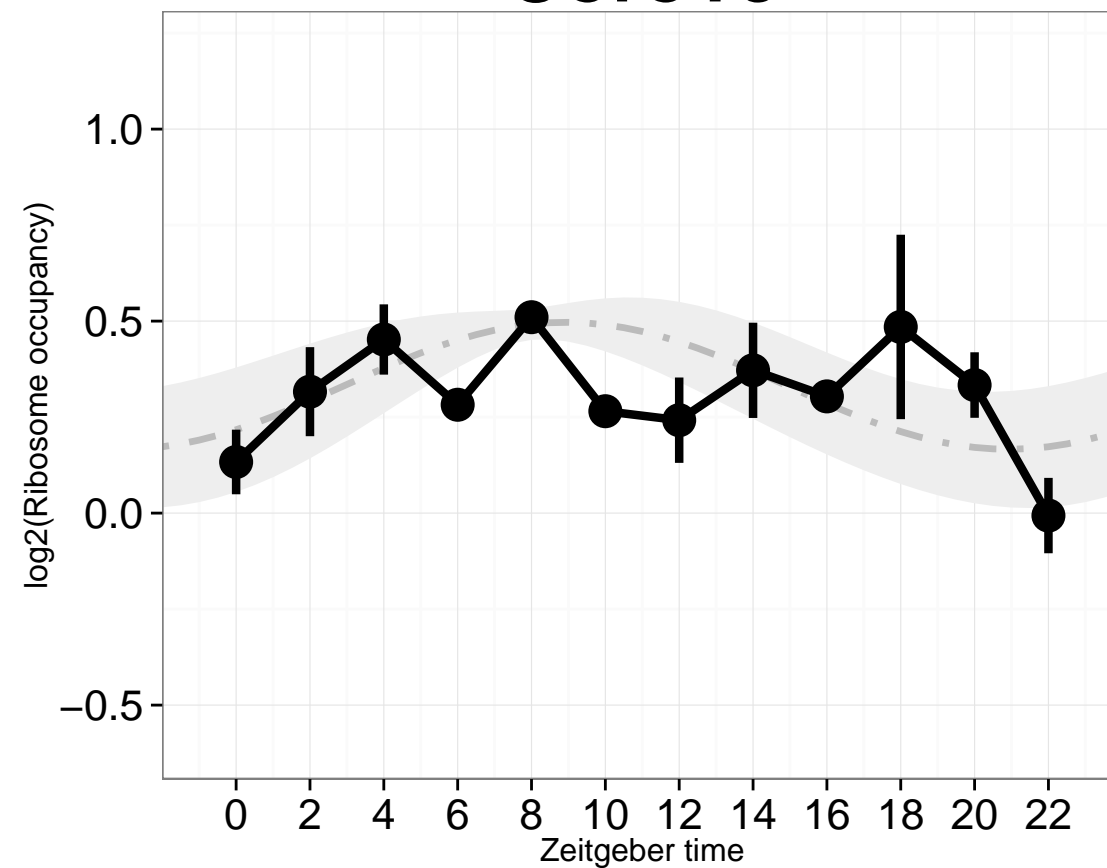

Supplement: SuppDataset_1.zip [file Coro1c_set_A.pdf › Supplemental Dataset 1/A-mRNA_nonrhyth_translation_nonrhyth/Coro1c_set_A.pdf]

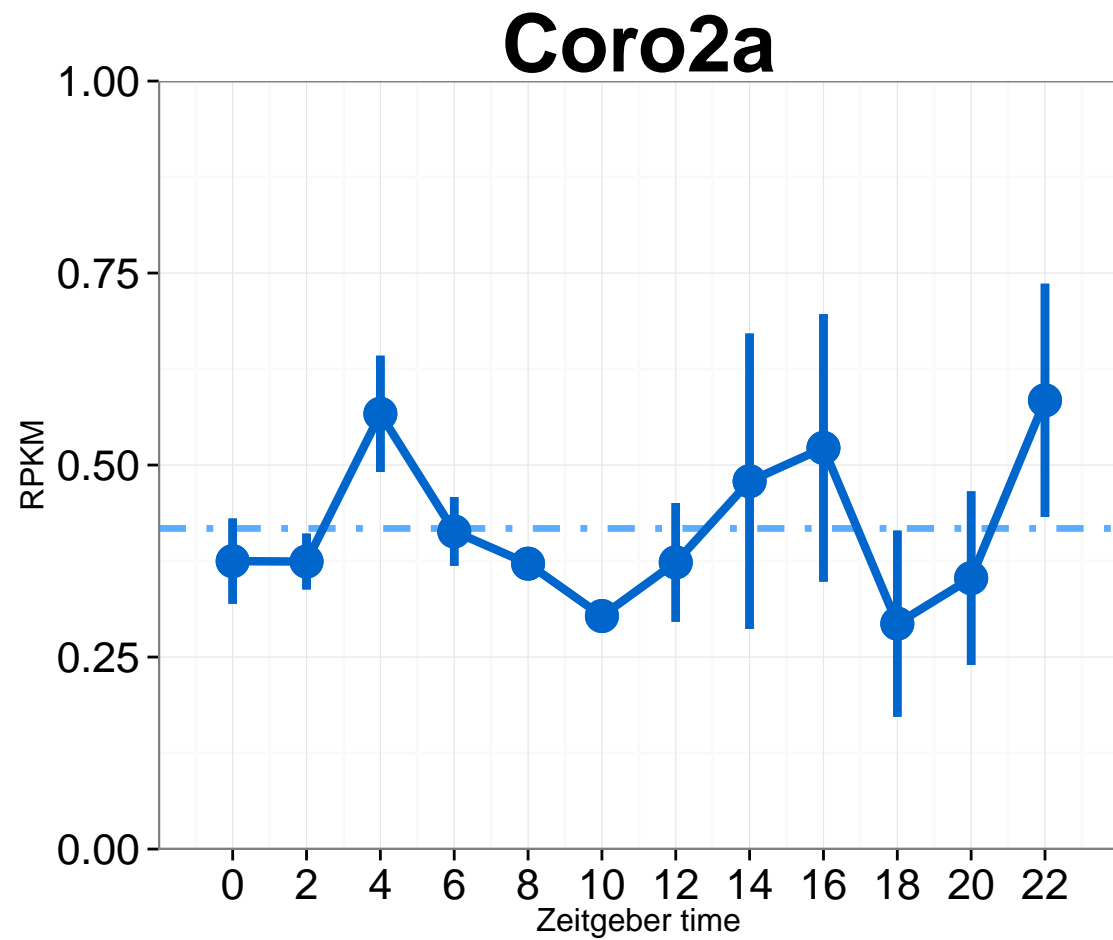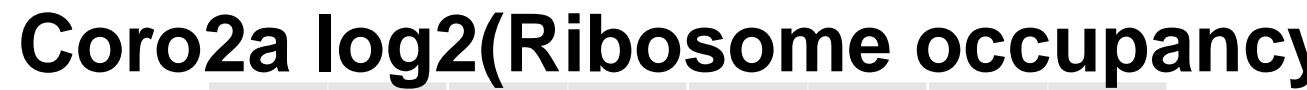

Supplement: SuppDataset_1.zip [file Coro2a_set_A.pdf › Supplemental Dataset 1/A-mRNA_nonrhyth_translation_nonrhyth/Coro2a_set_A.pdf]

## Coro7

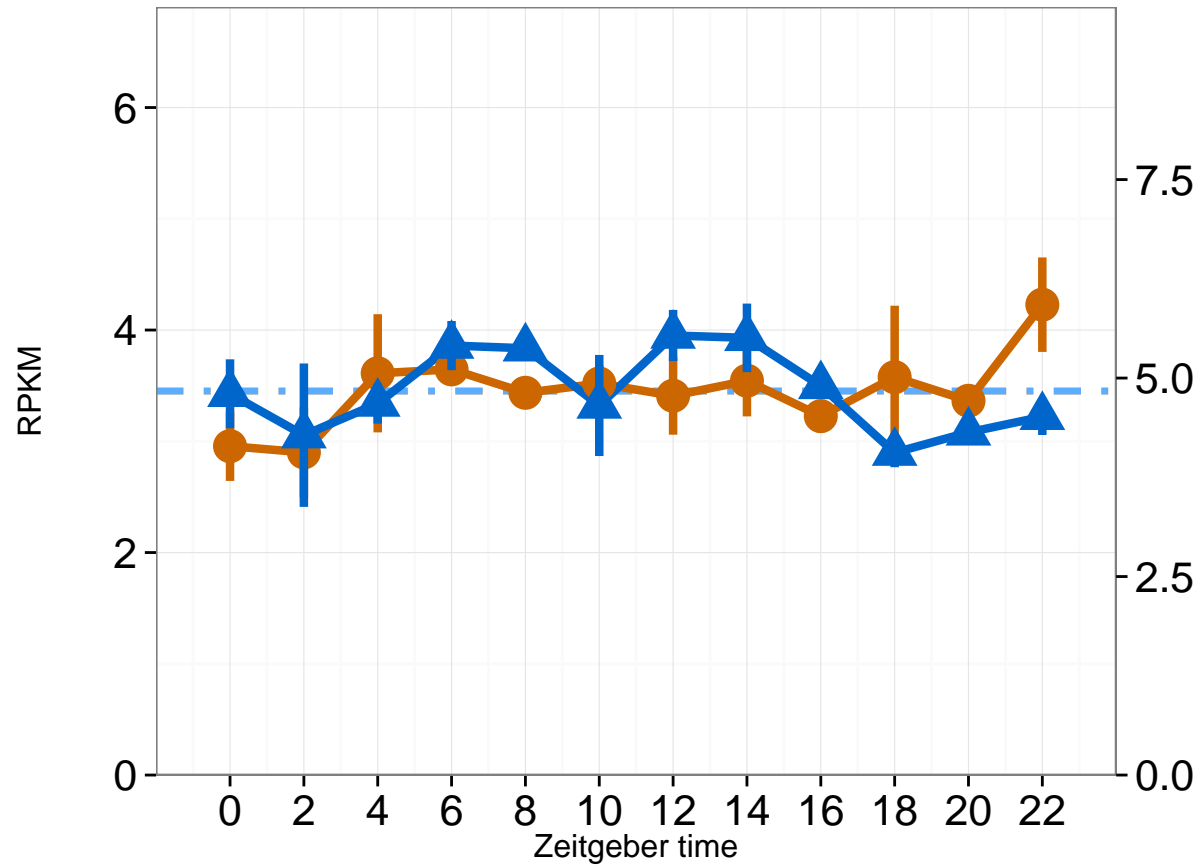

## Coro7

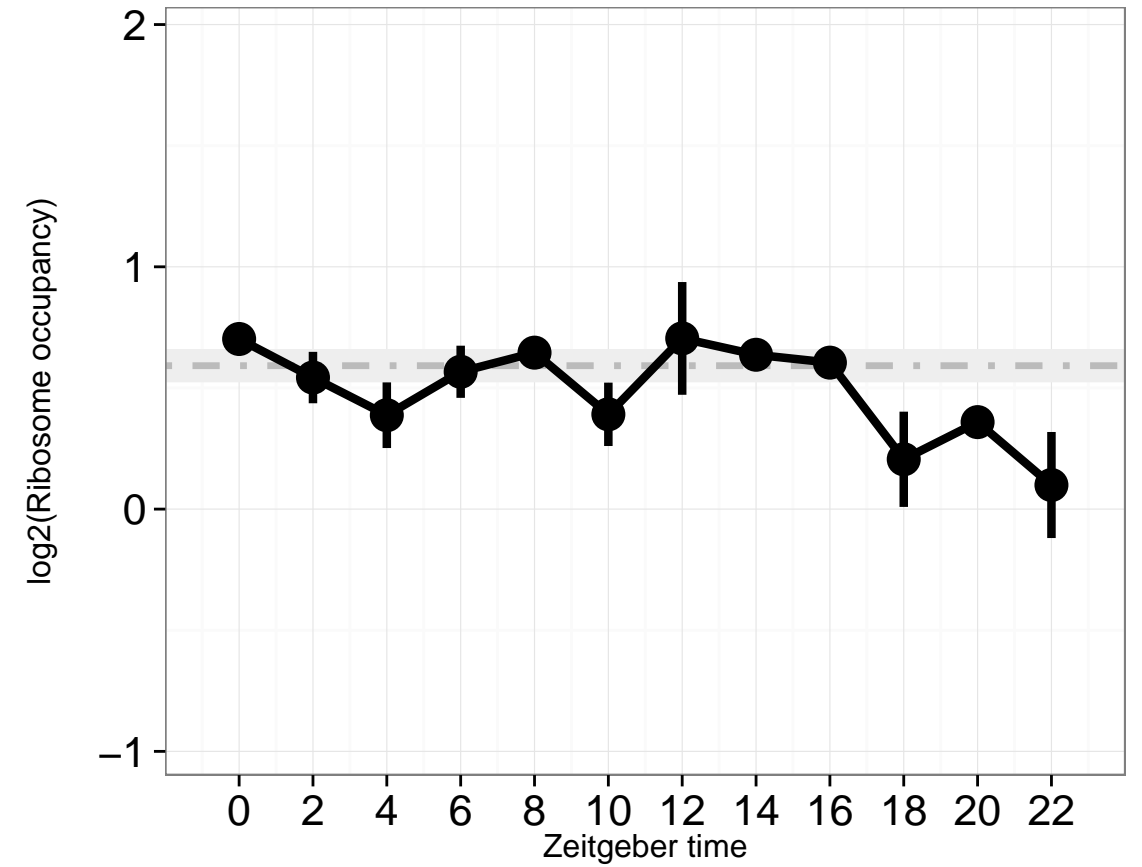

Supplement: SuppDataset_1.zip [file Coro7_set_A.pdf › Supplemental Dataset 1/A-mRNA_nonrhyth_translation_nonrhyth/Coro7_set_A.pdf]

# Cox10

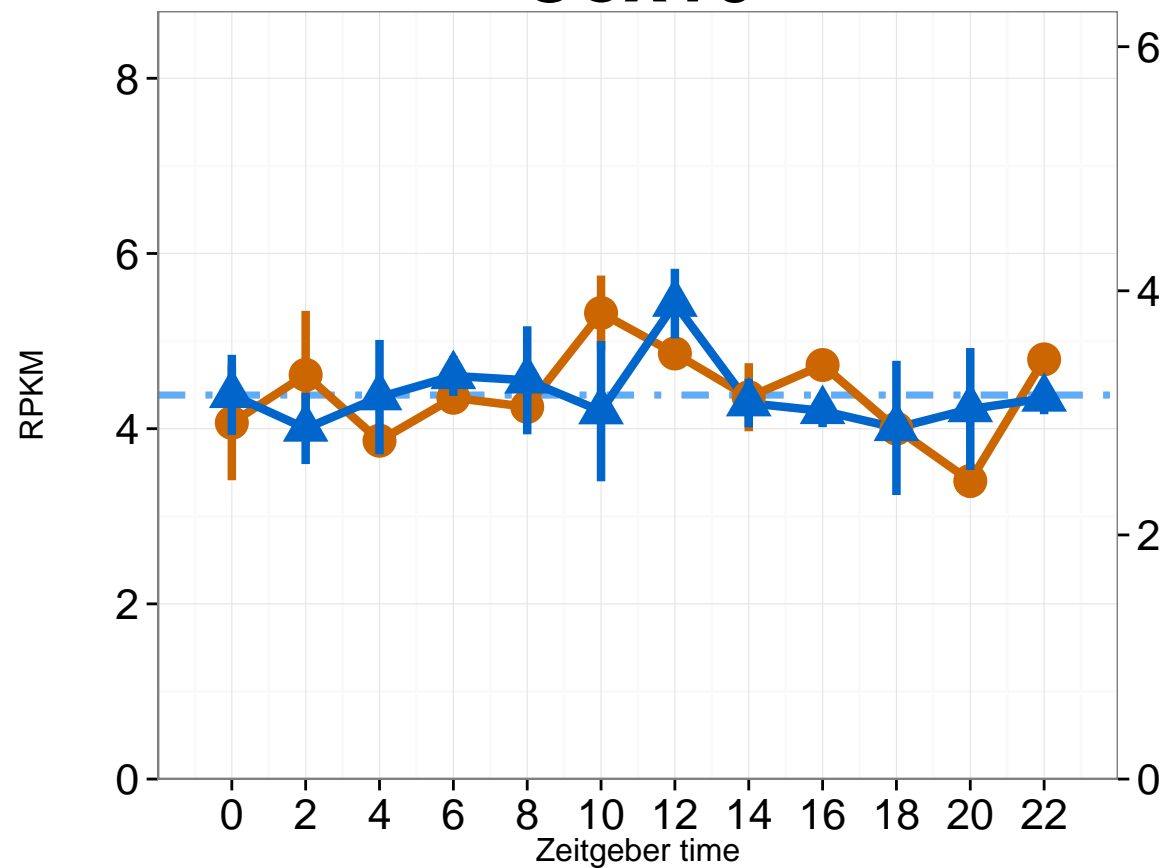

# Cox10

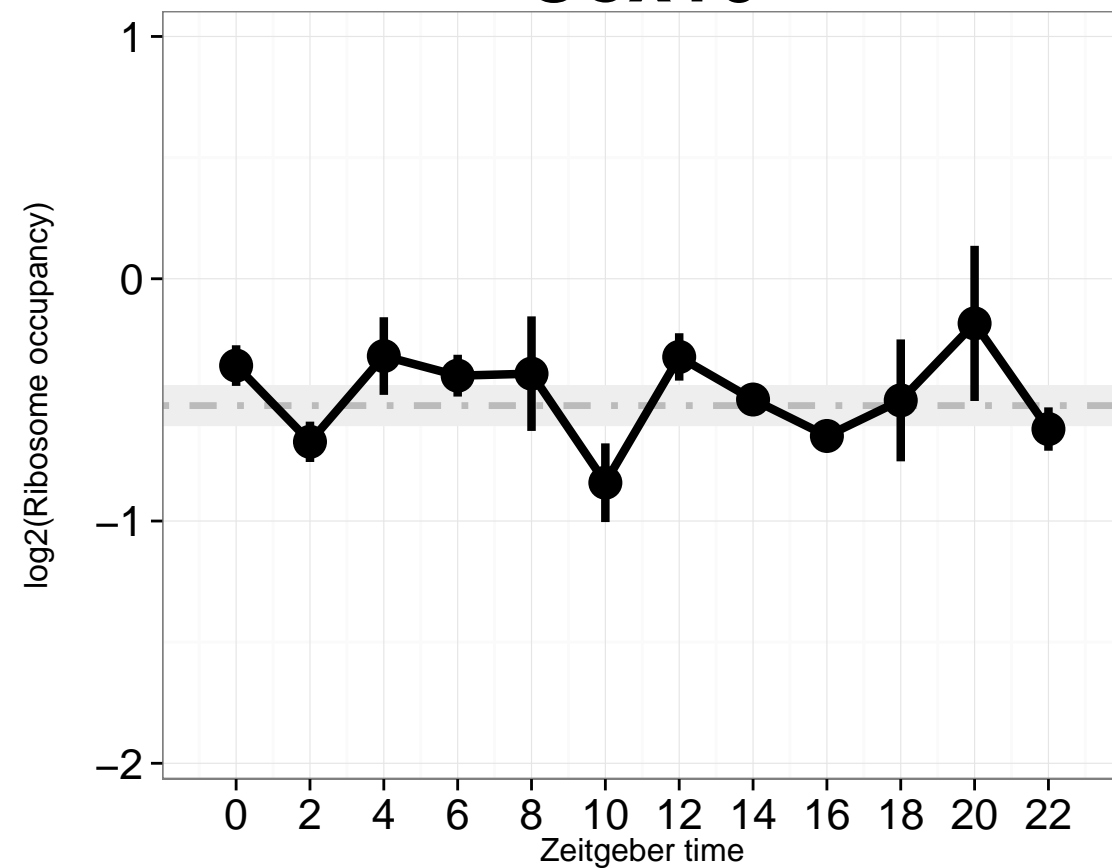

Supplement: SuppDataset_1.zip [file Cox10_set_A.pdf › Supplemental Dataset 1/A-mRNA_nonrhyth_translation_nonrhyth/Cox10_set_A.pdf]

# Cox11

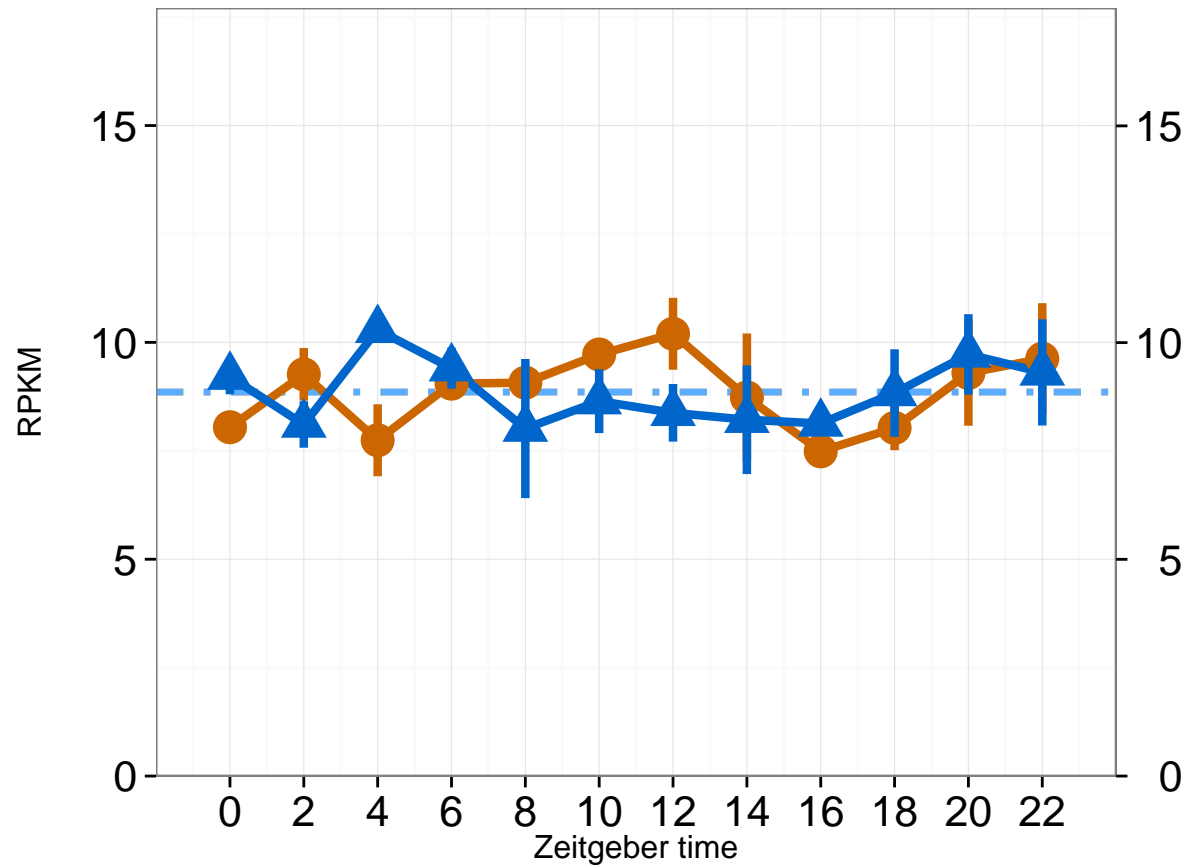

# Cox11

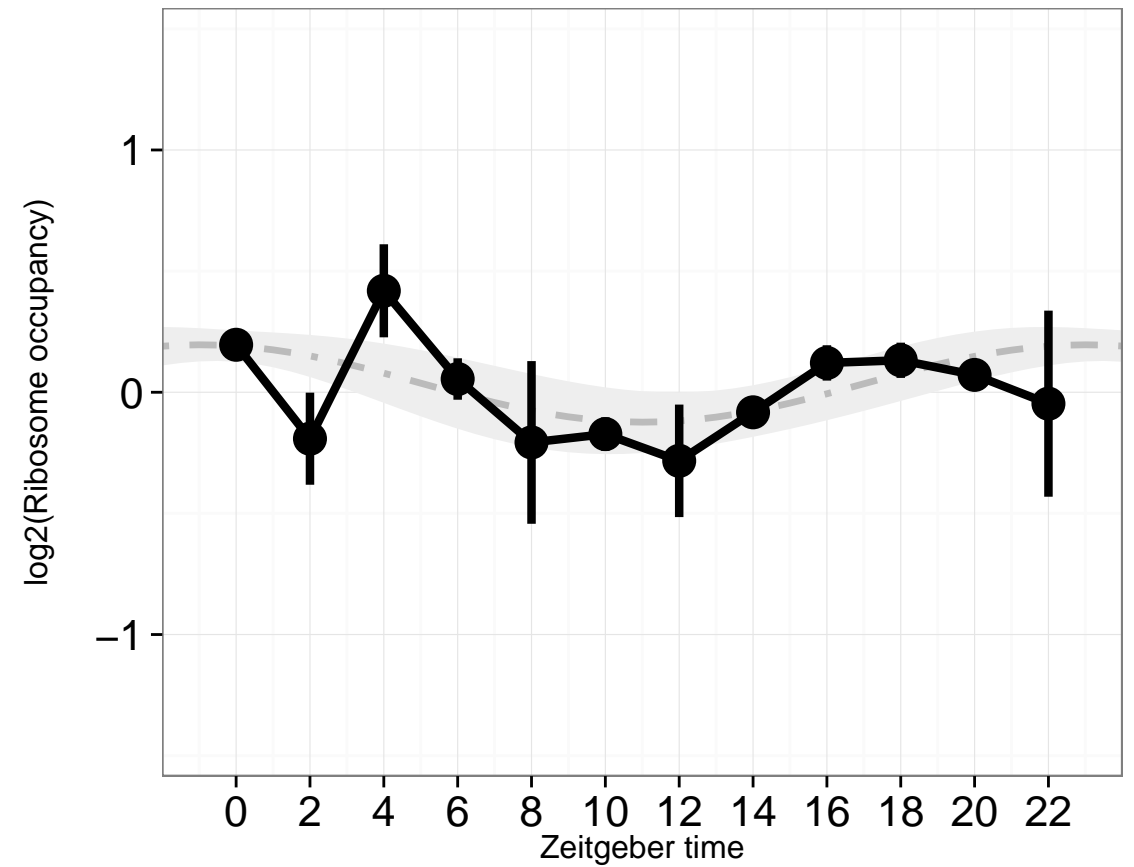

Supplement: SuppDataset_1.zip [file Cox11_set_A.pdf › Supplemental Dataset 1/A-mRNA_nonrhyth_translation_nonrhyth/Cox11_set_A.pdf]

# Cox15

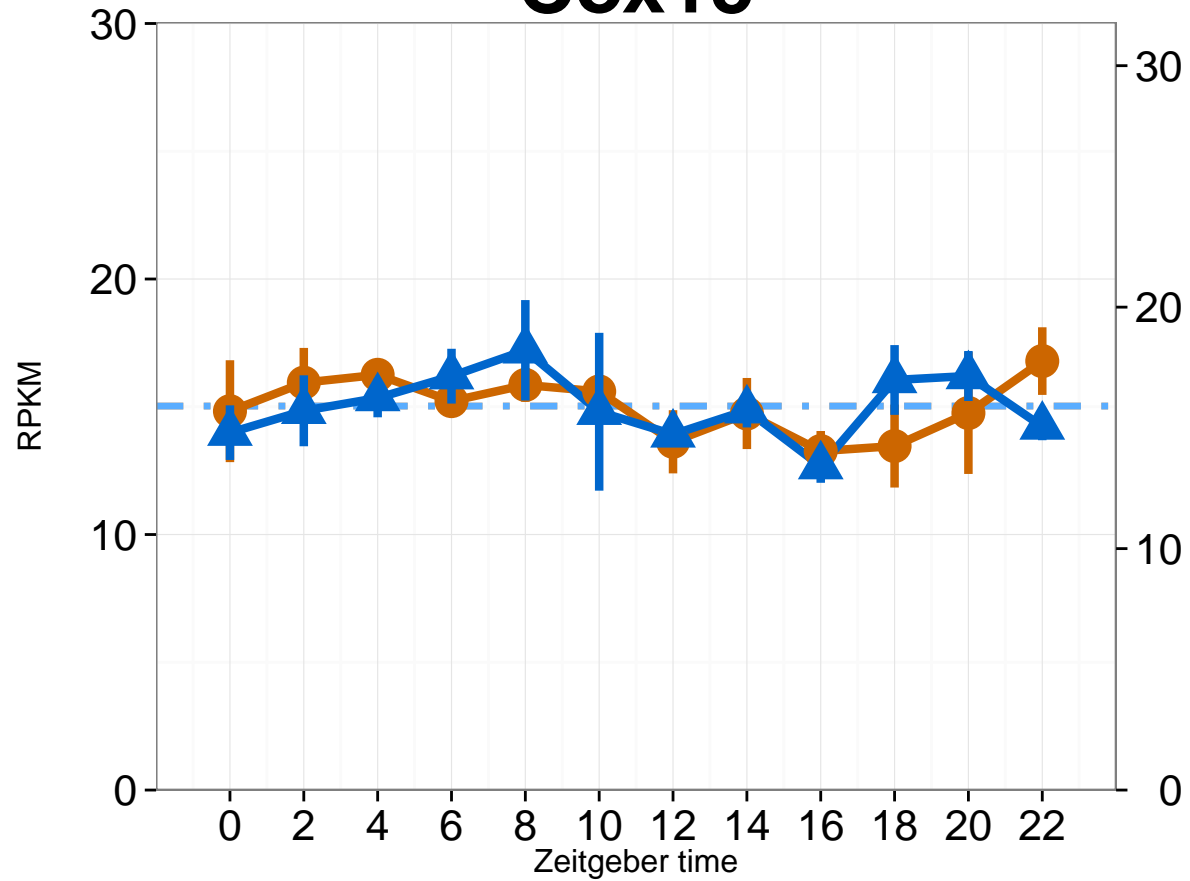

# Cox15

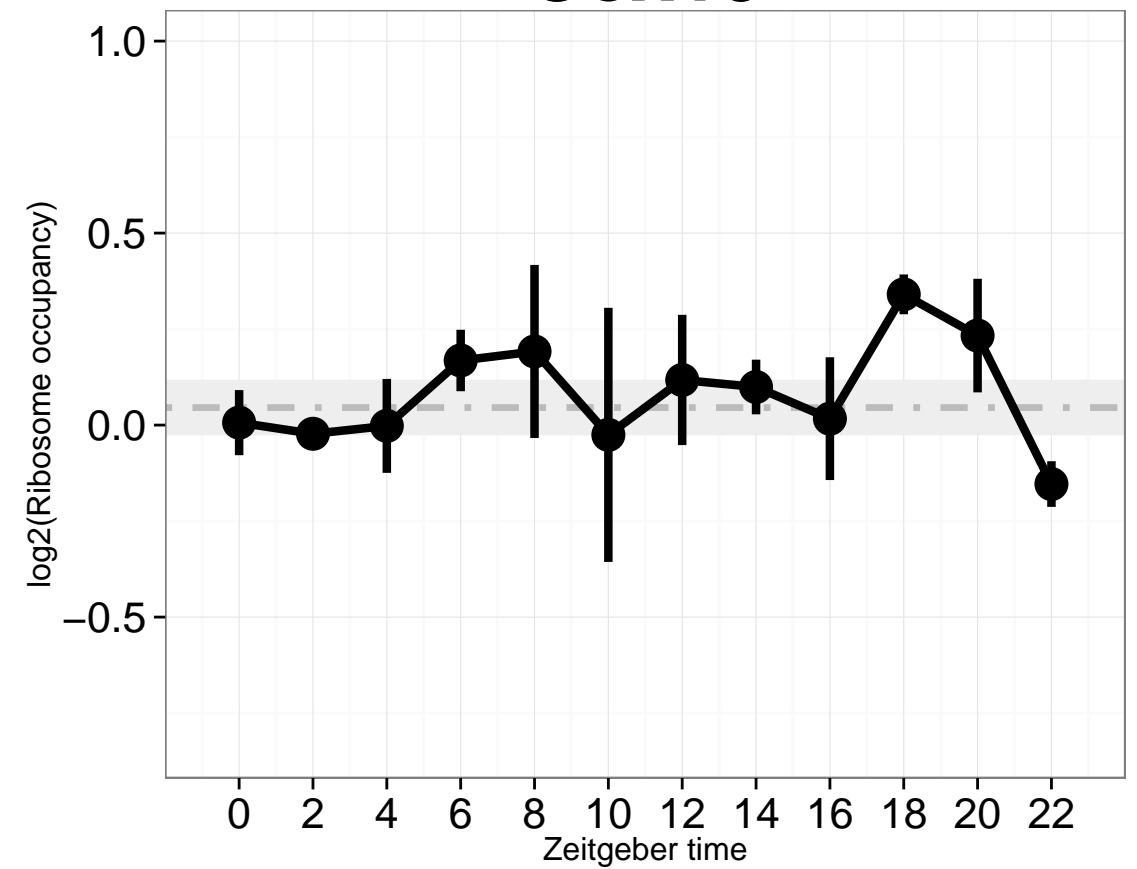

Supplement: SuppDataset_1.zip [file Cox15_set_A.pdf › Supplemental Dataset 1/A-mRNA_nonrhyth_translation_nonrhyth/Cox15_set_A.pdf]

# Cox16

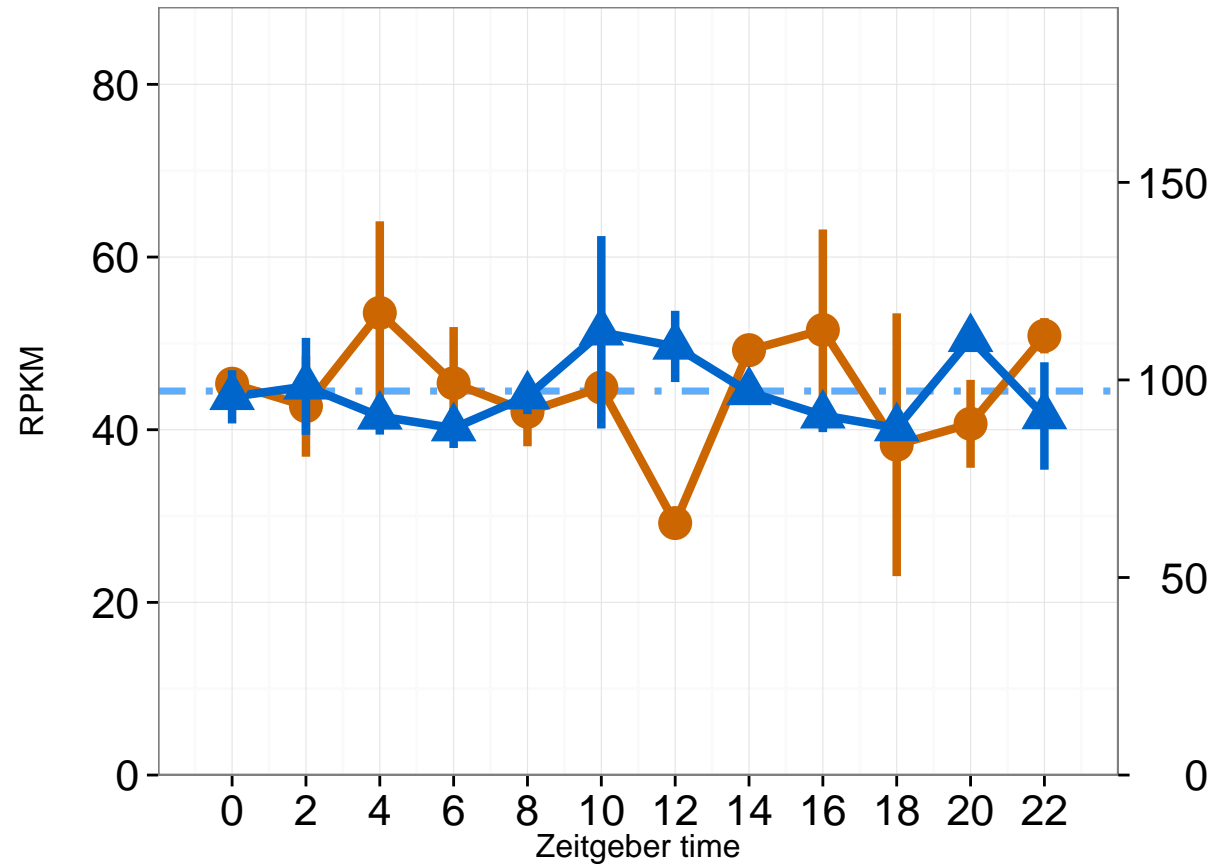

# Cox16

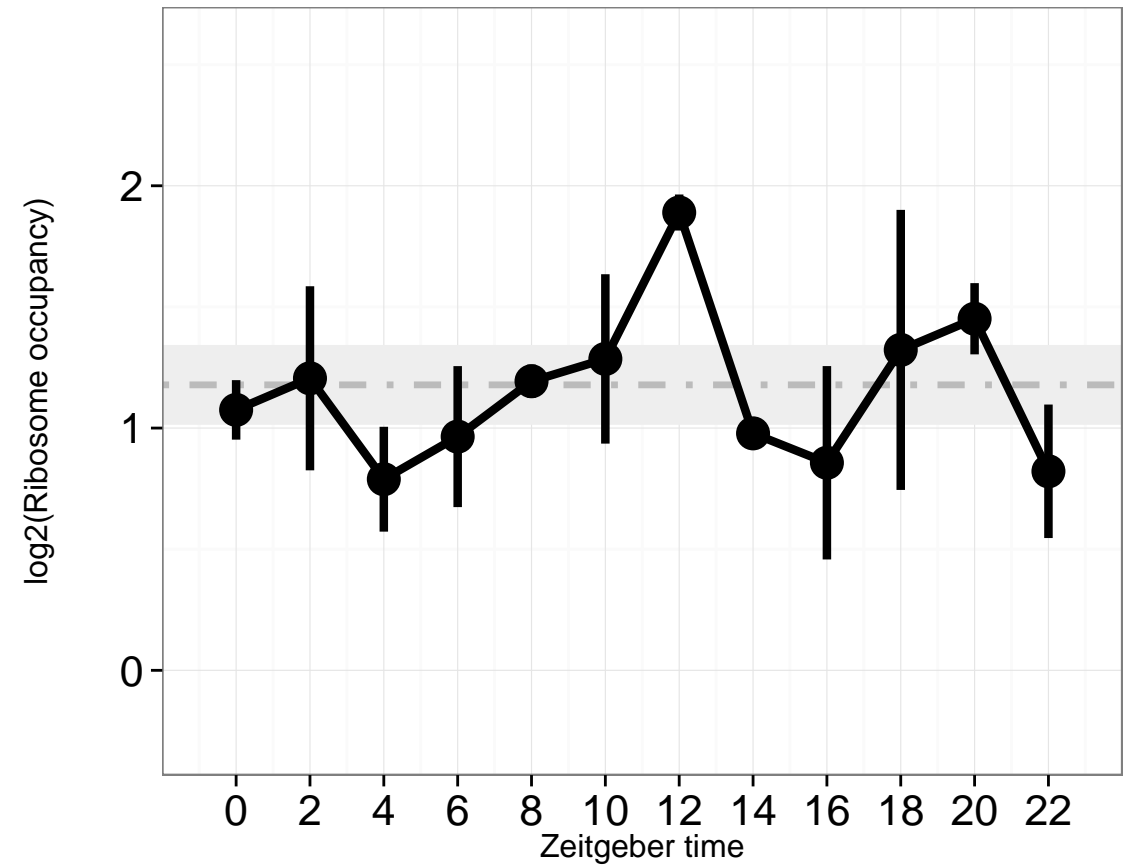

Supplement: SuppDataset_1.zip [file Cox16_set_A.pdf › Supplemental Dataset 1/A-mRNA_nonrhyth_translation_nonrhyth/Cox16_set_A.pdf]

# Cox17

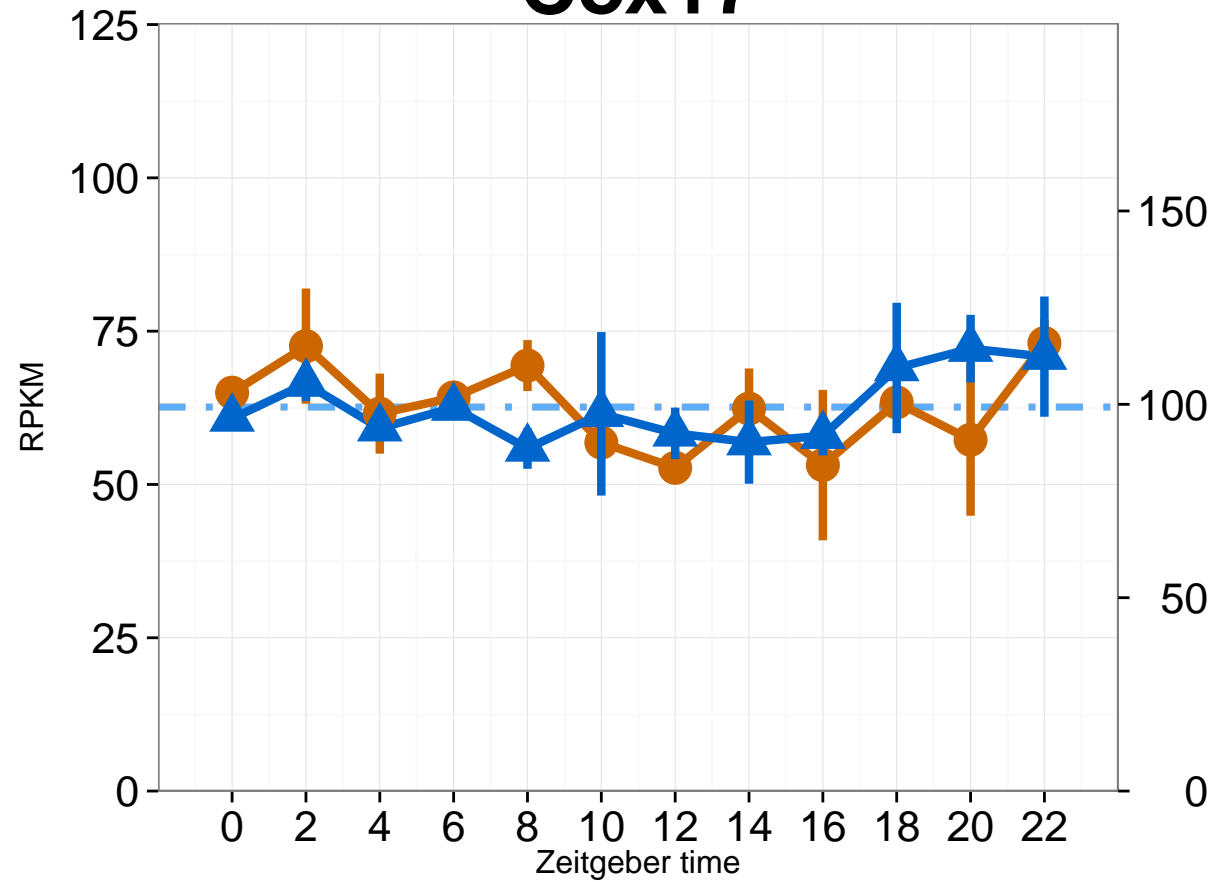

# Cox17

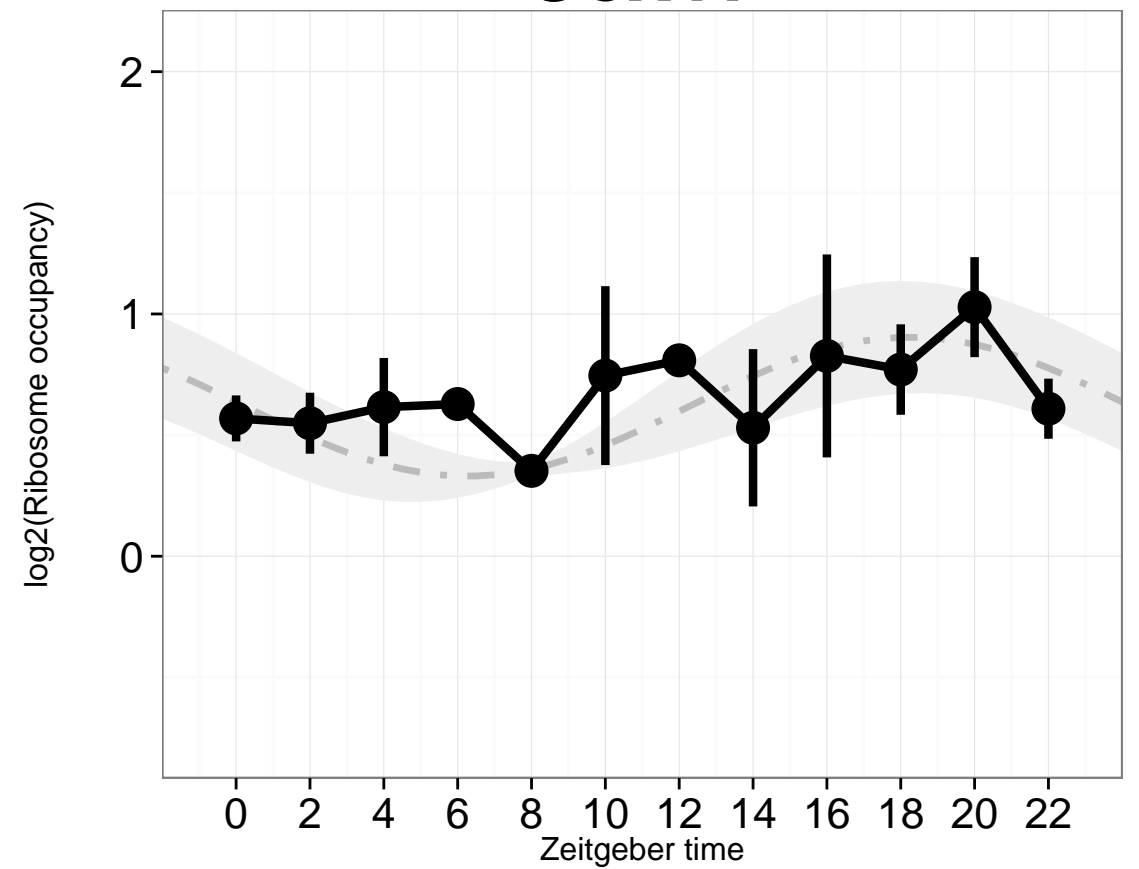

Supplement: SuppDataset_1.zip [file Cox17_set_A.pdf › Supplemental Dataset 1/A-mRNA_nonrhyth_translation_nonrhyth/Cox17_set_A.pdf]

# Cox18

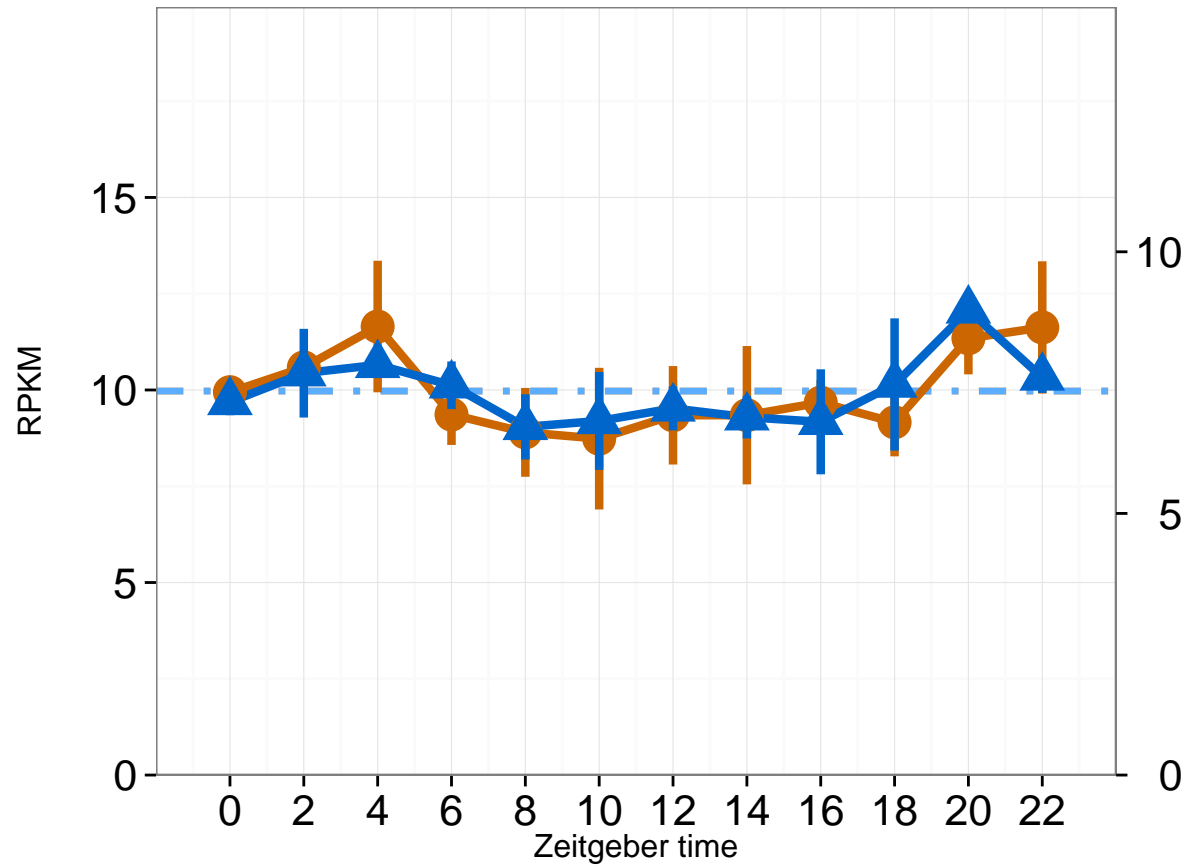

# Cox18

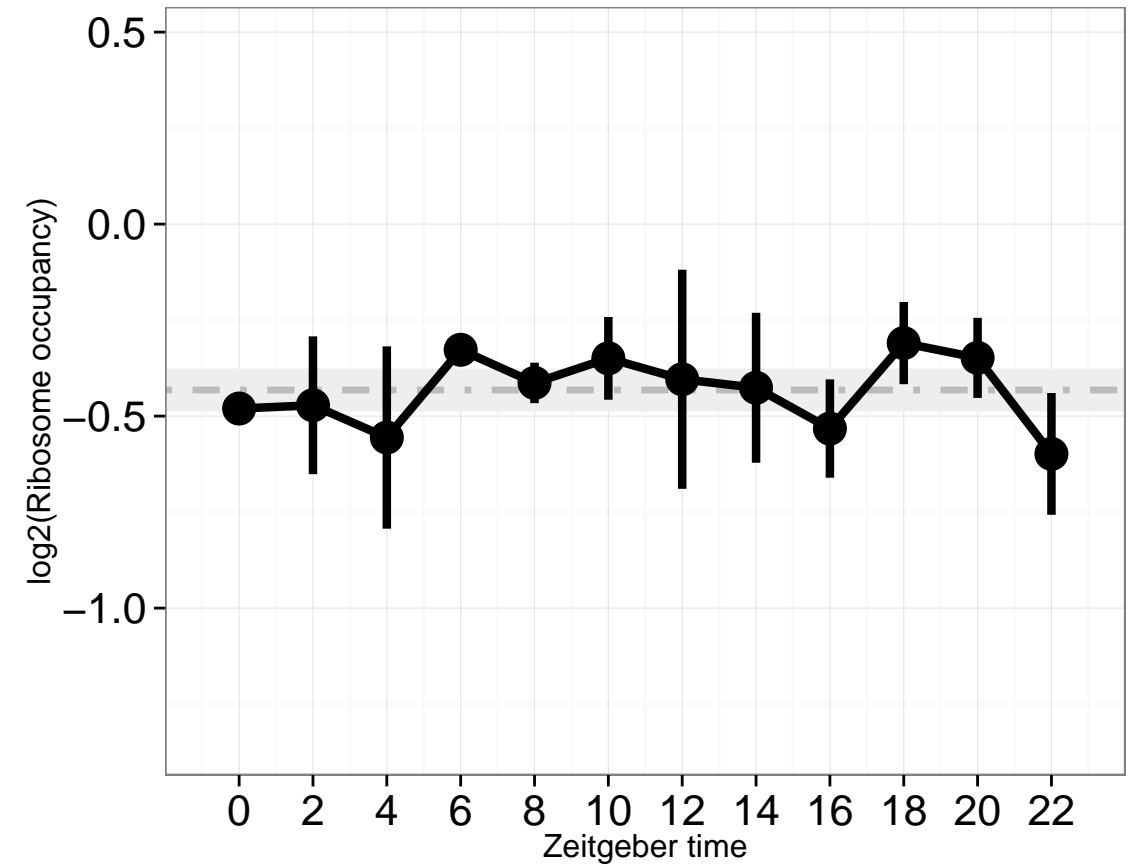

Supplement: SuppDataset_1.zip [file Cox18_set_A.pdf › Supplemental Dataset 1/A-mRNA_nonrhyth_translation_nonrhyth/Cox18_set_A.pdf]

# Cox19

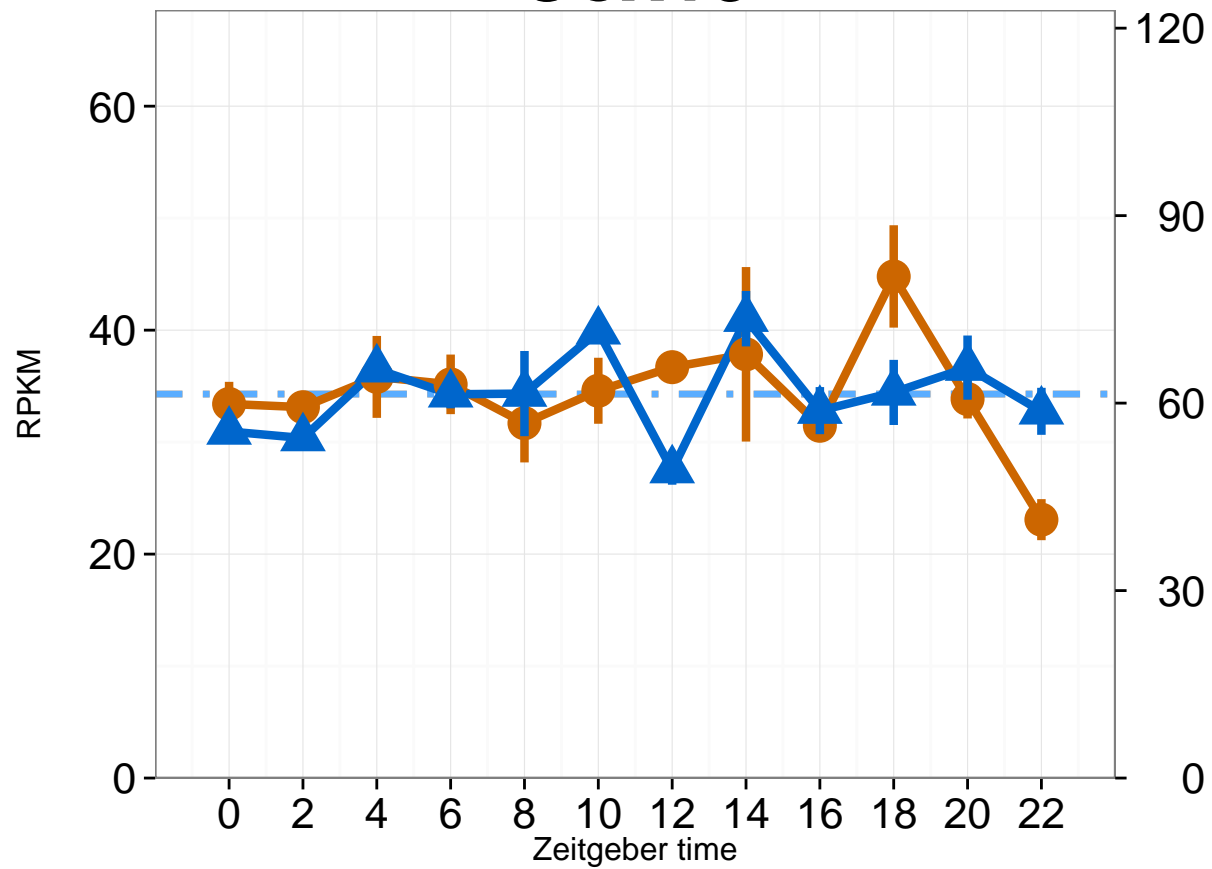

# Cox19

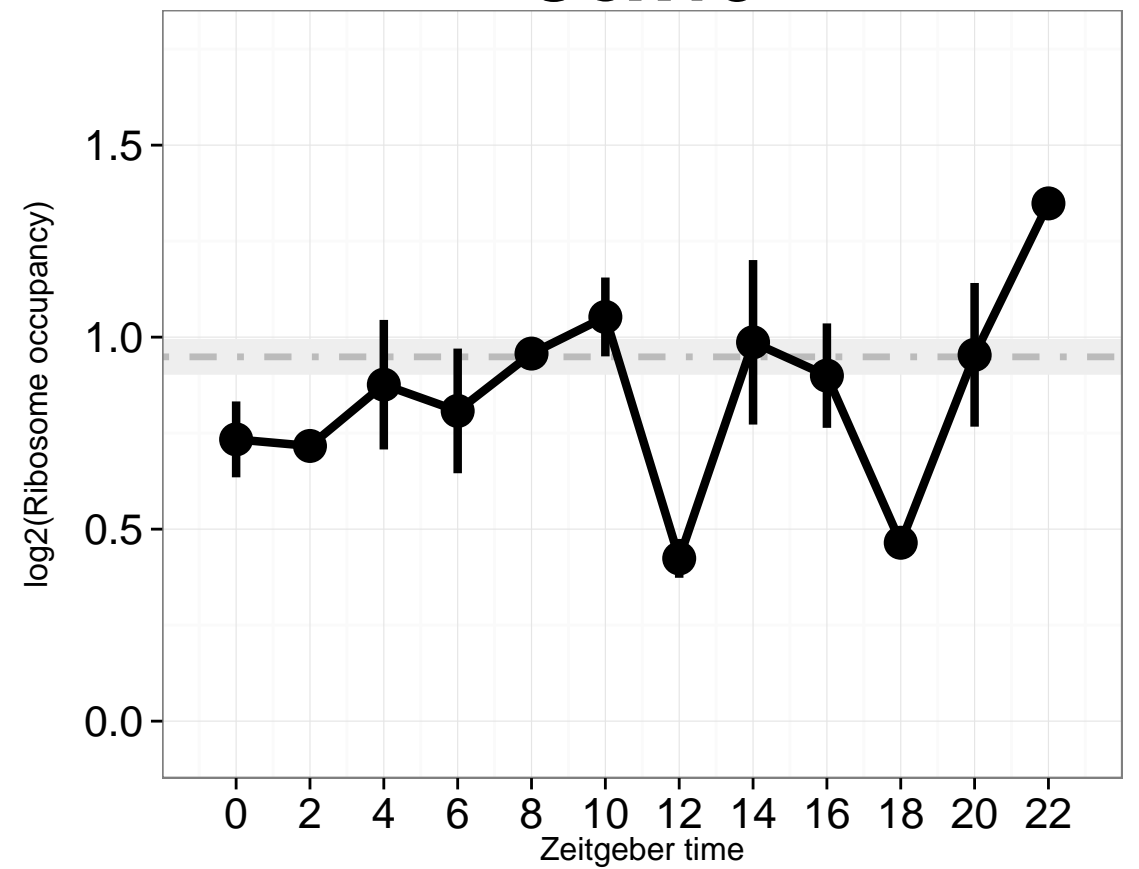

Supplement: SuppDataset_1.zip [file Cox19_set_A.pdf › Supplemental Dataset 1/A-mRNA_nonrhyth_translation_nonrhyth/Cox19_set_A.pdf]

# Cox20

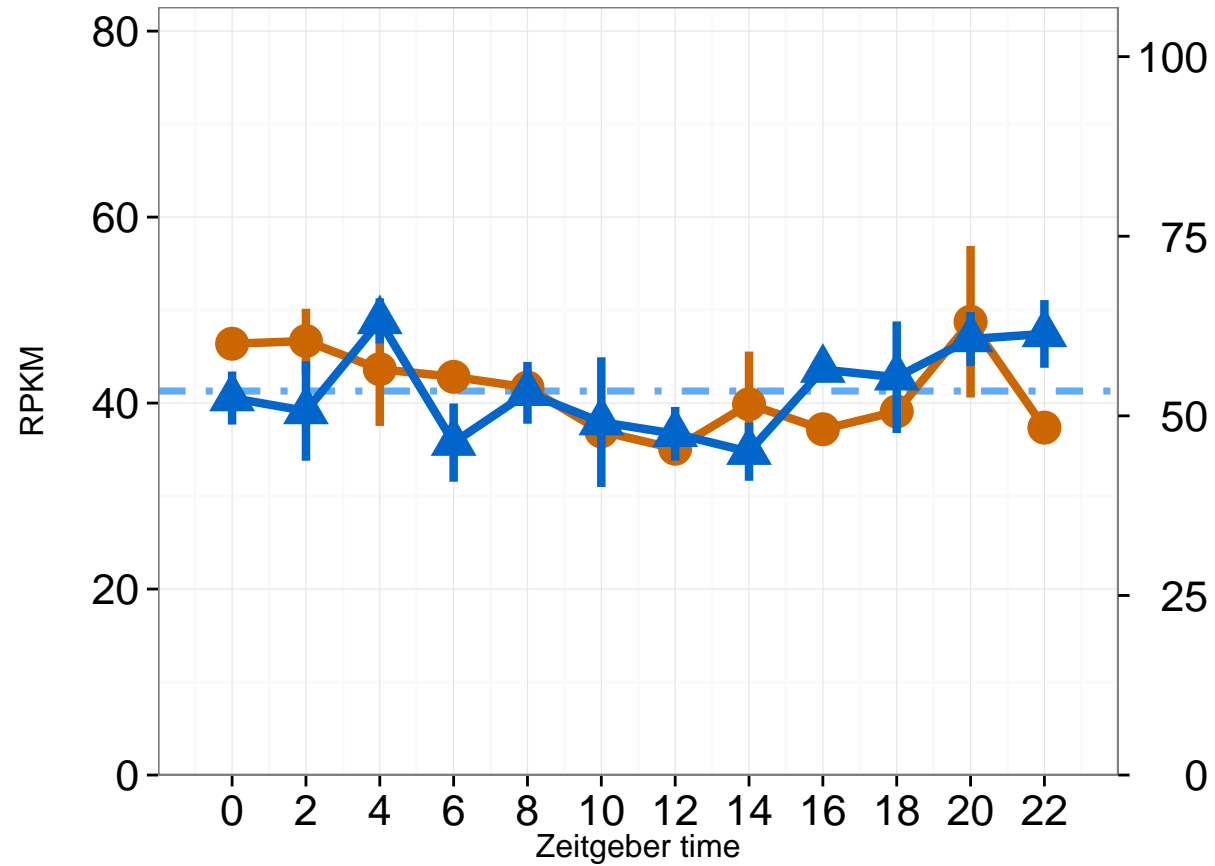

# Cox20

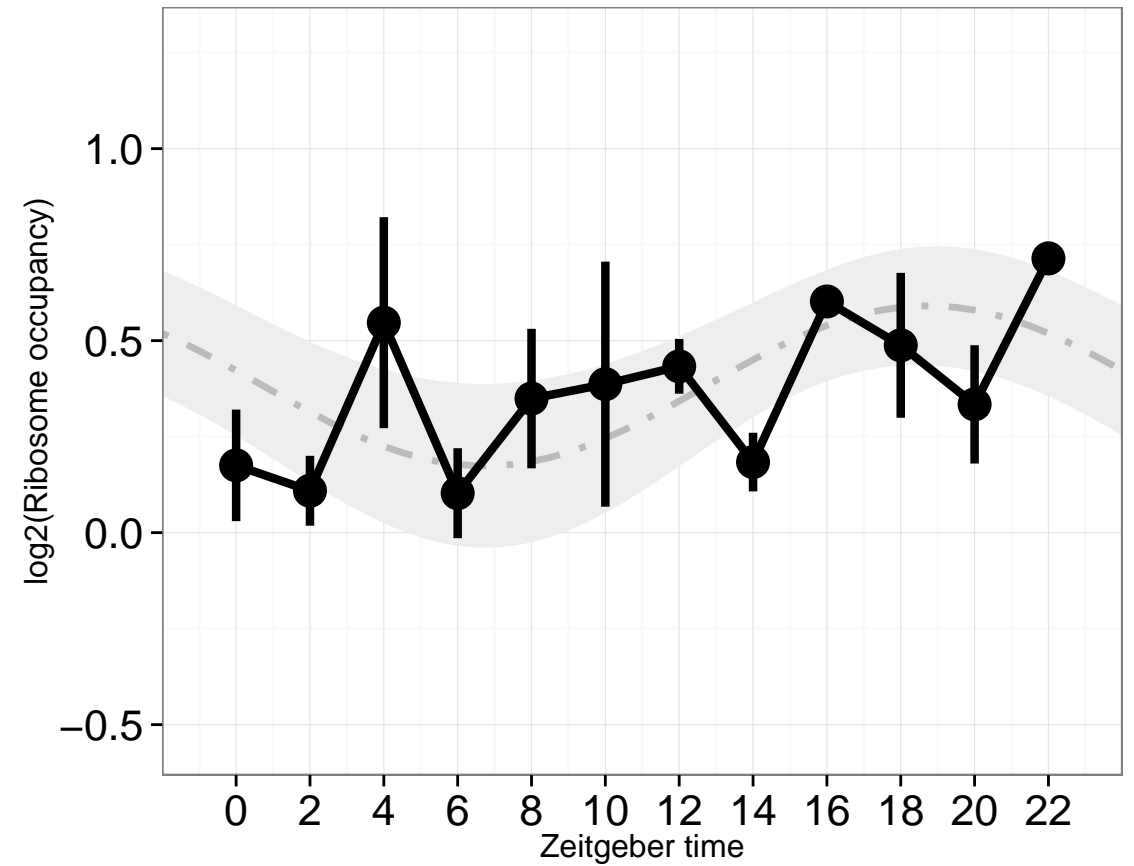

Supplement: SuppDataset_1.zip [file Cox20_set_A.pdf › Supplemental Dataset 1/A-mRNA_nonrhyth_translation_nonrhyth/Cox20_set_A.pdf]

# Cox5a

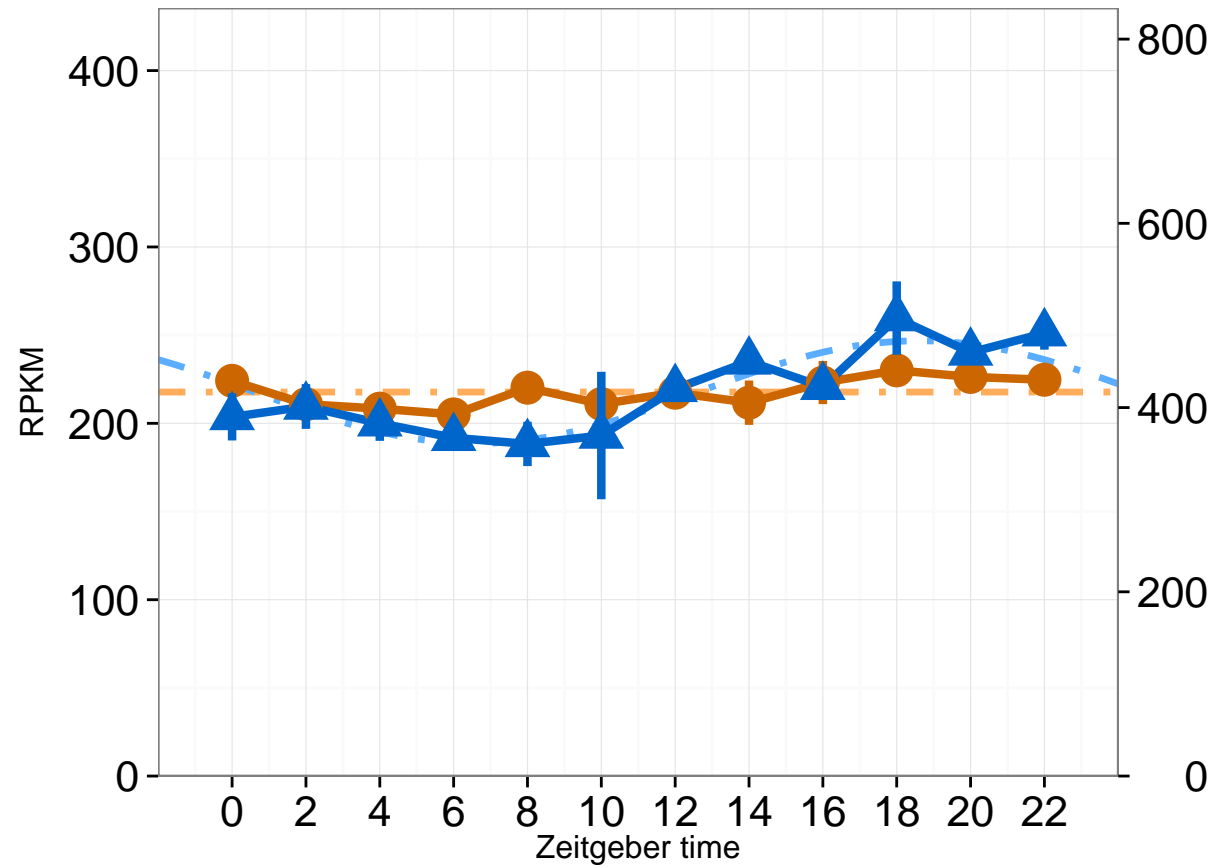

# Cox5a

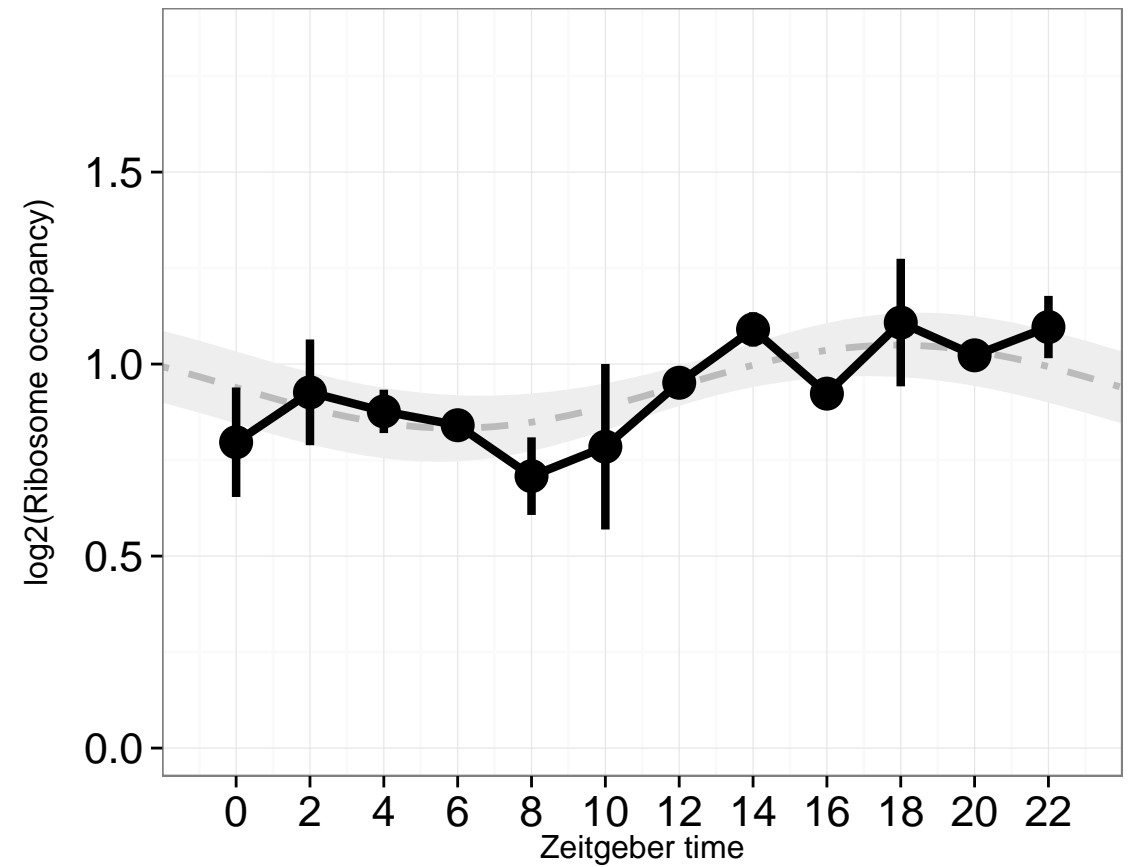

Supplement: SuppDataset_1.zip [file Cox5a_set_A.pdf › Supplemental Dataset 1/A-mRNA_nonrhyth_translation_nonrhyth/Cox5a_set_A.pdf]

# Cox5b

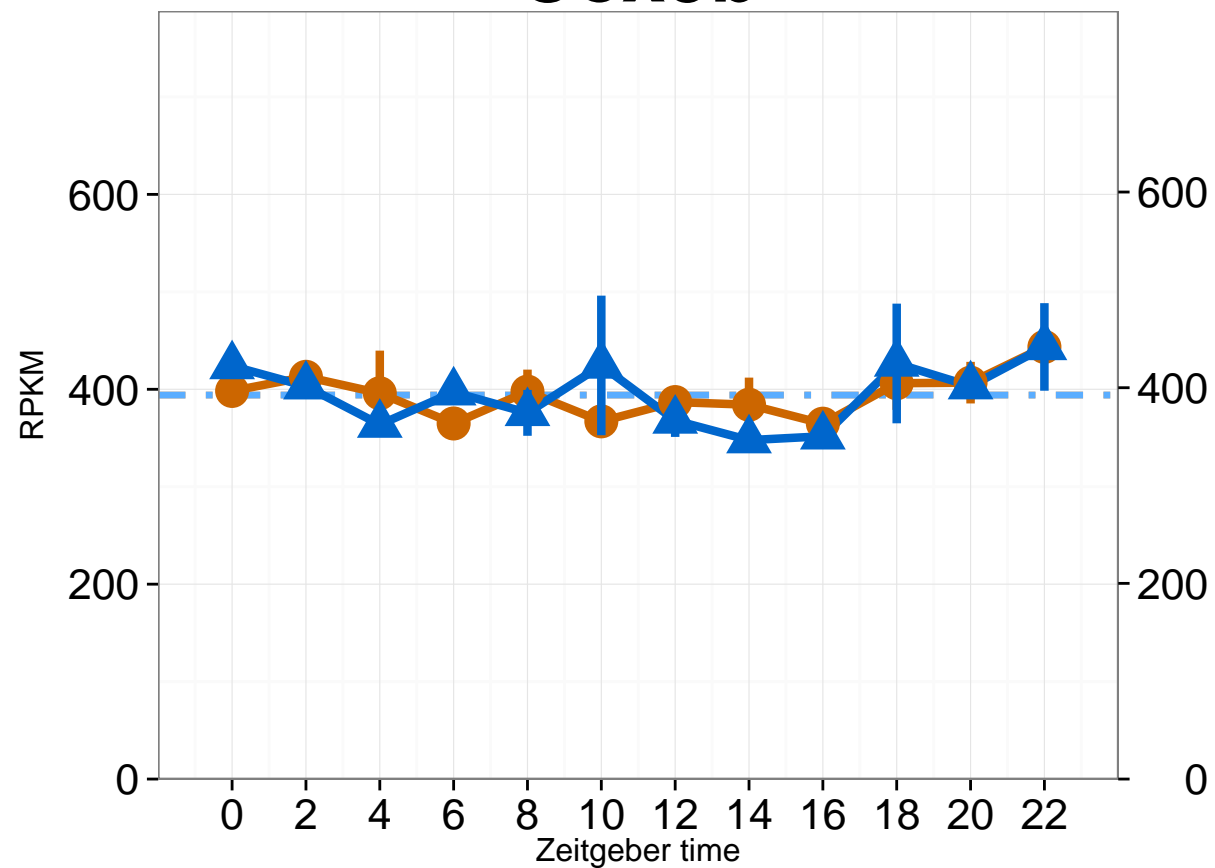

# Cox5b

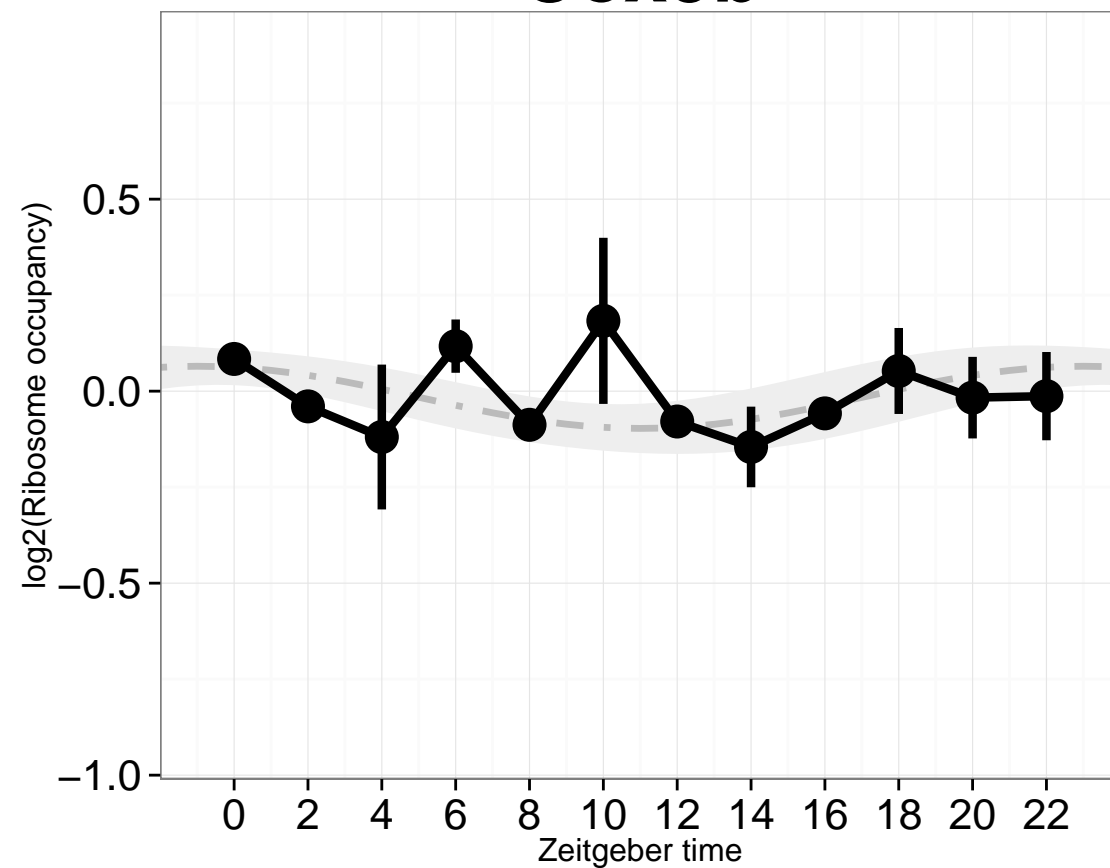

Supplement: SuppDataset_1.zip [file Cox5b_set_A.pdf › Supplemental Dataset 1/A-mRNA_nonrhyth_translation_nonrhyth/Cox5b_set_A.pdf]

# Cox6b1

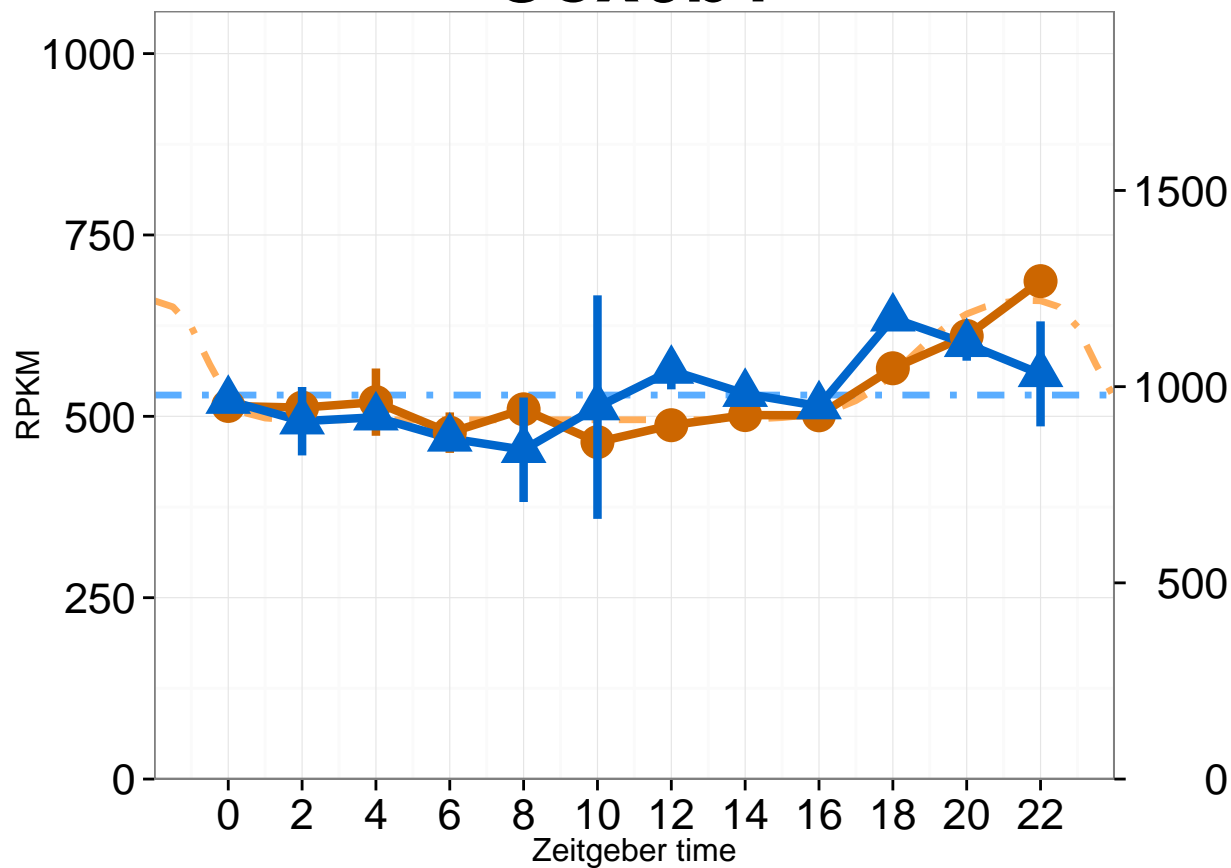

# Cox6b1

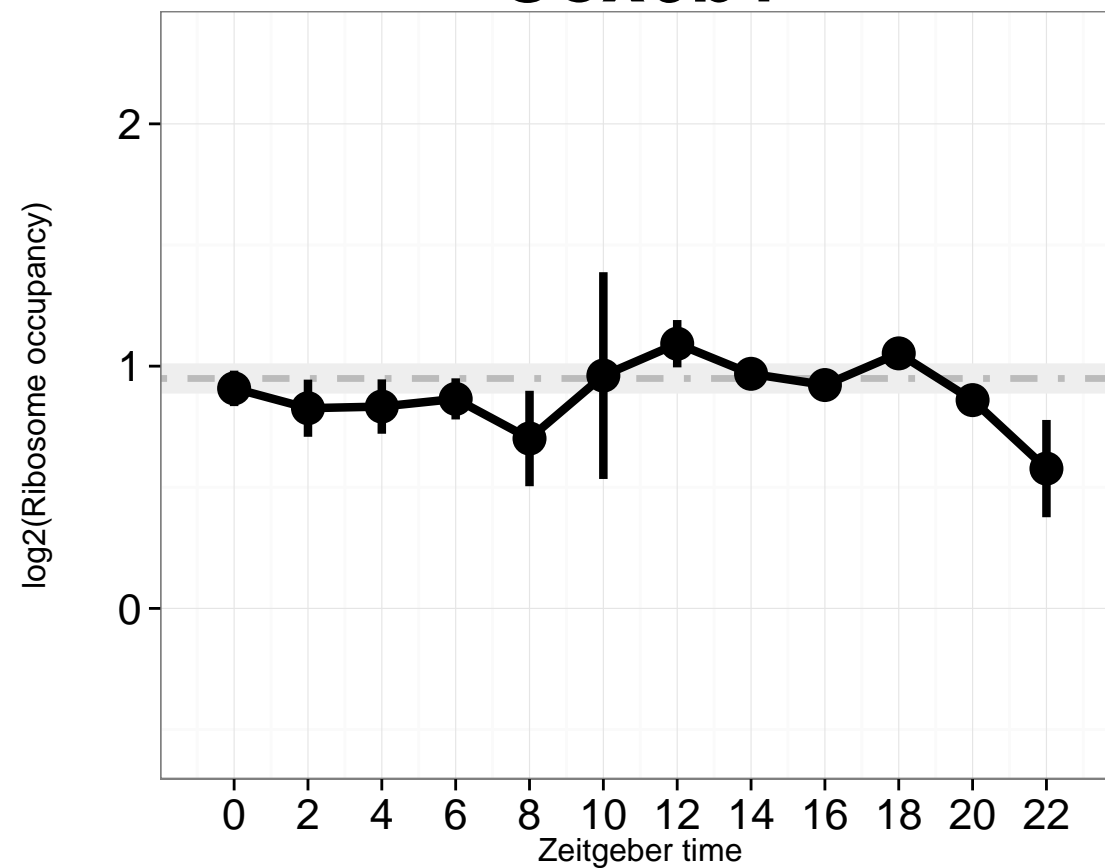

Supplement: SuppDataset_1.zip [file Cox6b1_set_A.pdf › Supplemental Dataset 1/A-mRNA_nonrhyth_translation_nonrhyth/Cox6b1_set_A.pdf]

# Cox6c

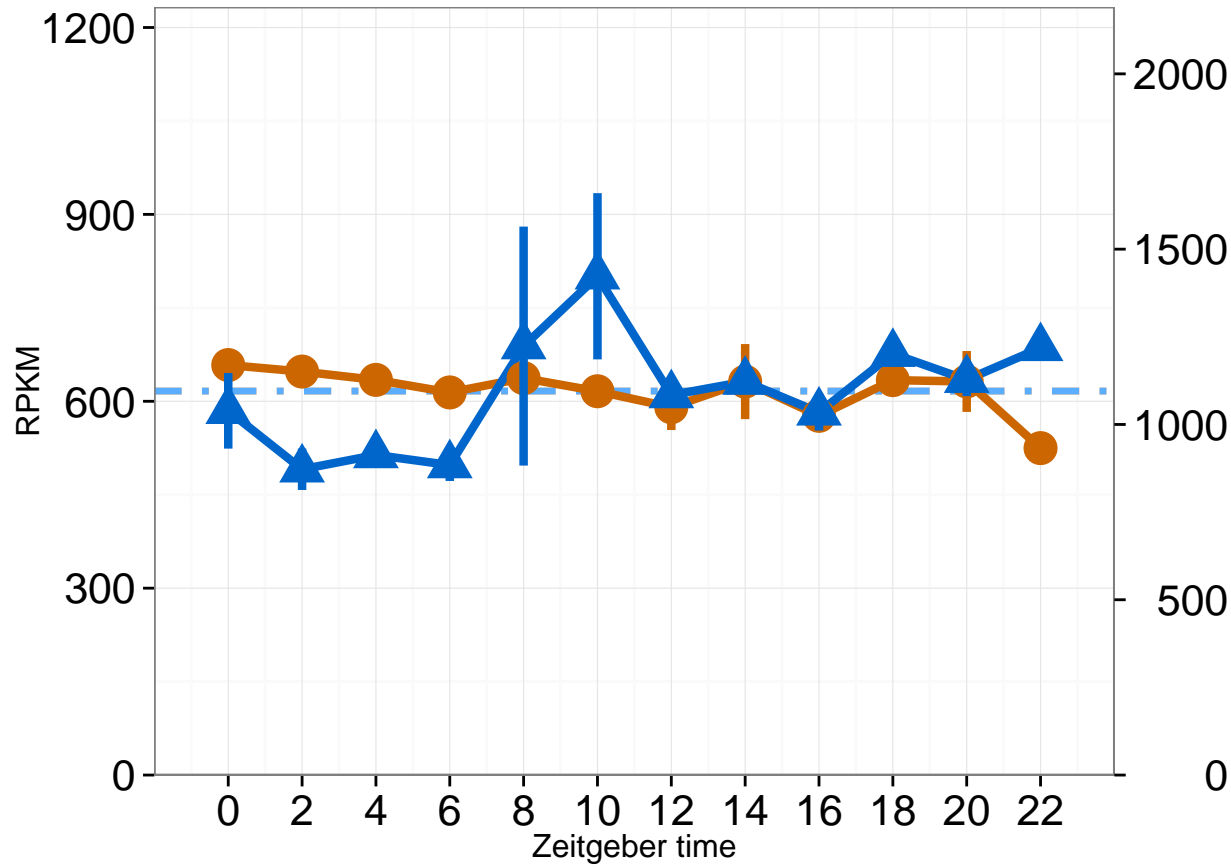

# Cox6c

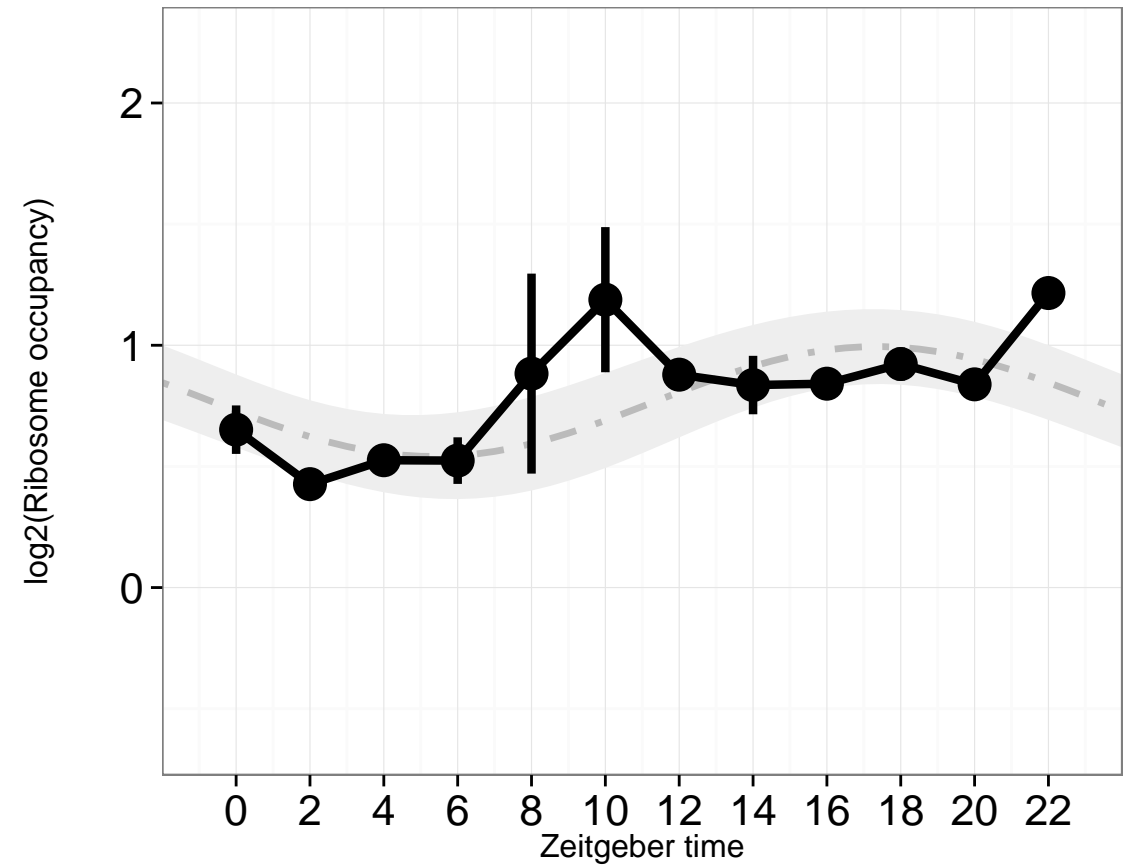

Supplement: SuppDataset_1.zip [file Cox6c_set_A.pdf › Supplemental Dataset 1/A-mRNA_nonrhyth_translation_nonrhyth/Cox6c_set_A.pdf]

# Cox7a1

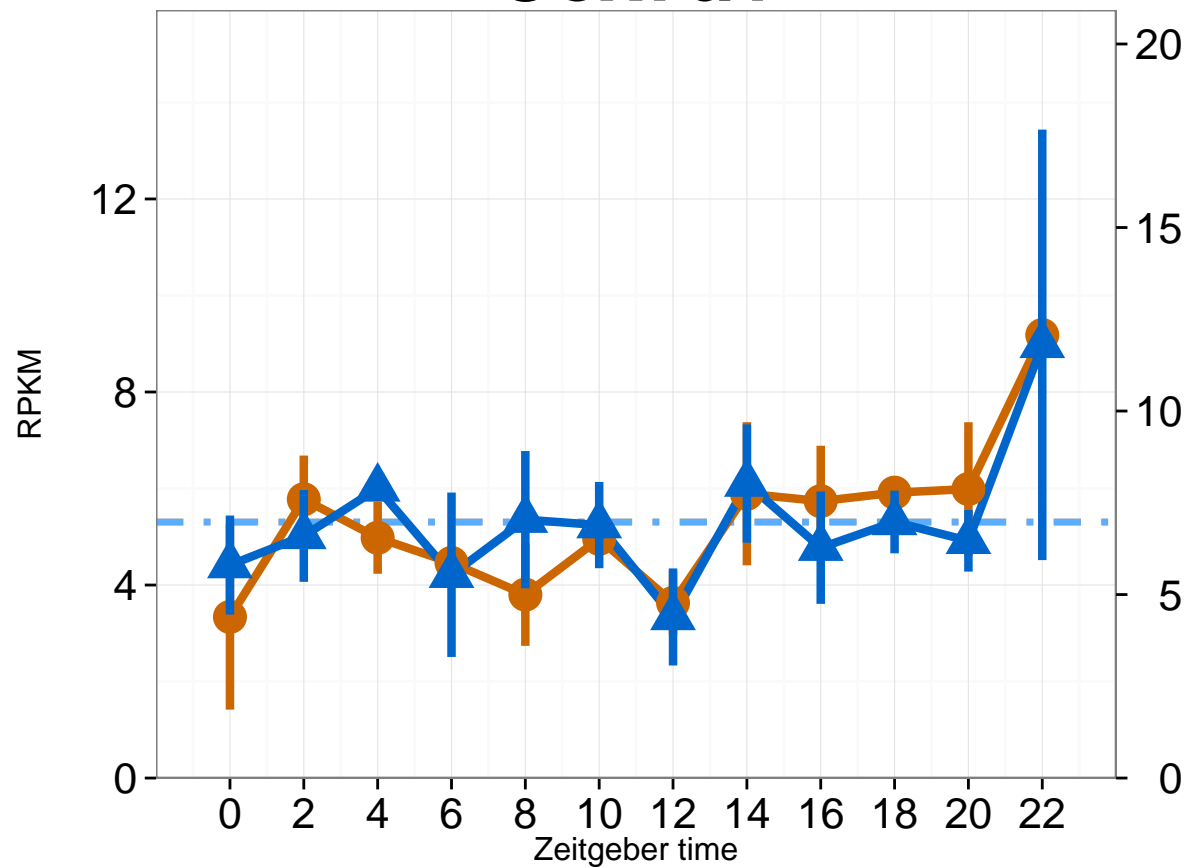

# Cox7a1

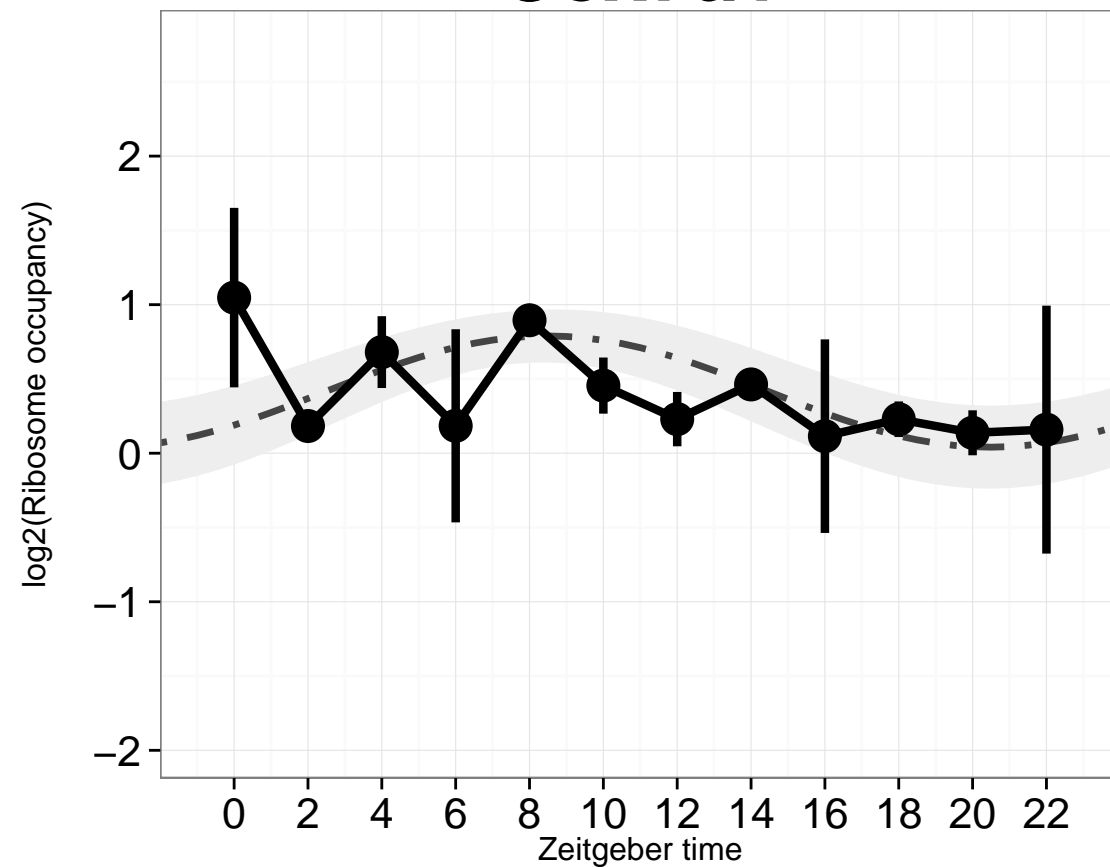

Supplement: SuppDataset_1.zip [file Cox7a1_set_A.pdf › Supplemental Dataset 1/A-mRNA_nonrhyth_translation_nonrhyth/Cox7a1_set_A.pdf]

# Cox7a2

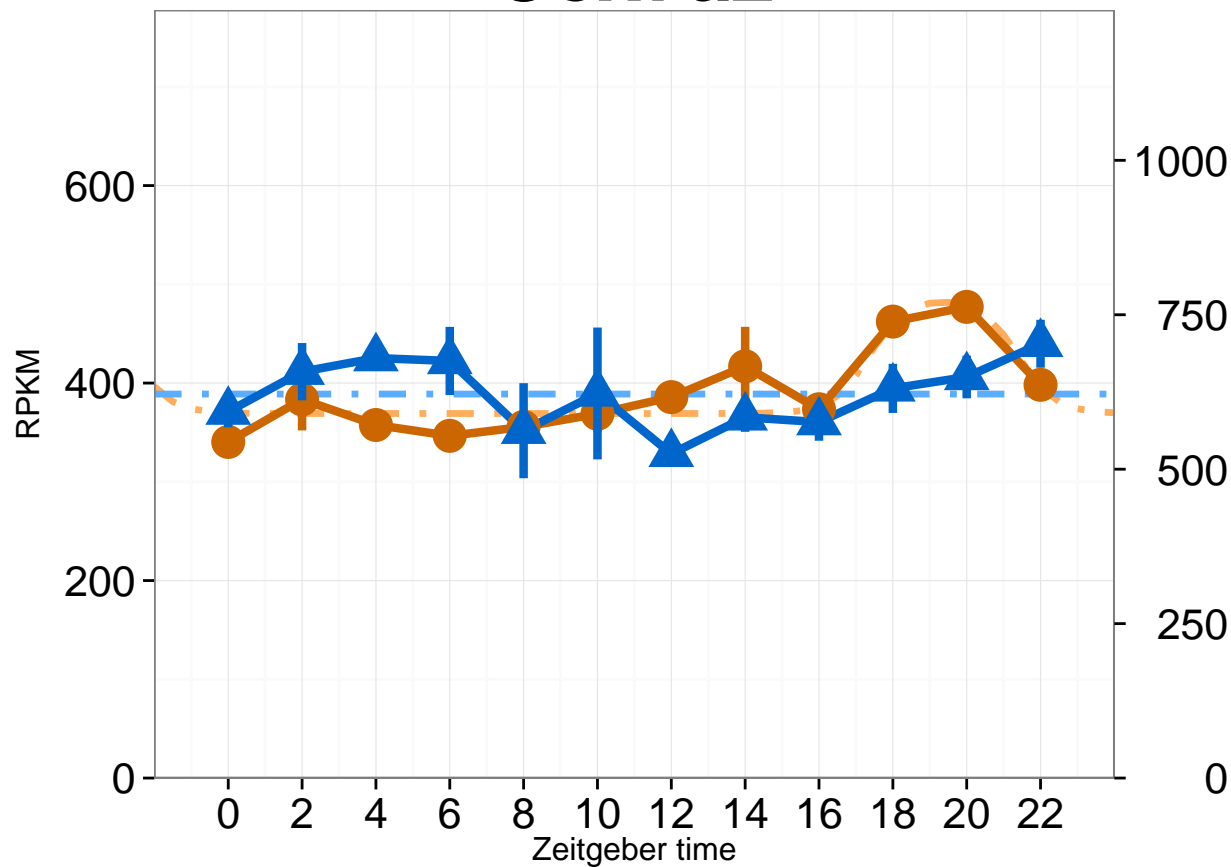

# Cox7a2

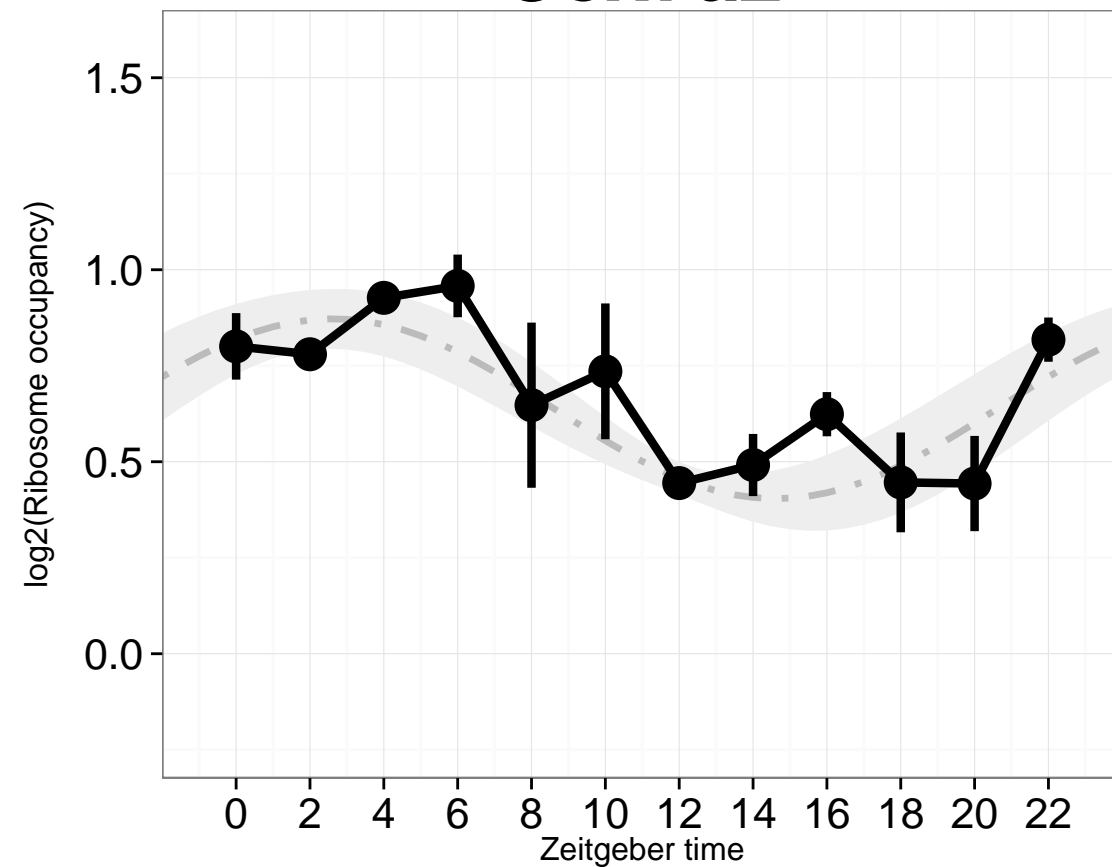

Supplement: SuppDataset_1.zip [file Cox7a2_set_A.pdf › Supplemental Dataset 1/A-mRNA_nonrhyth_translation_nonrhyth/Cox7a2_set_A.pdf]

# Cox7a2l

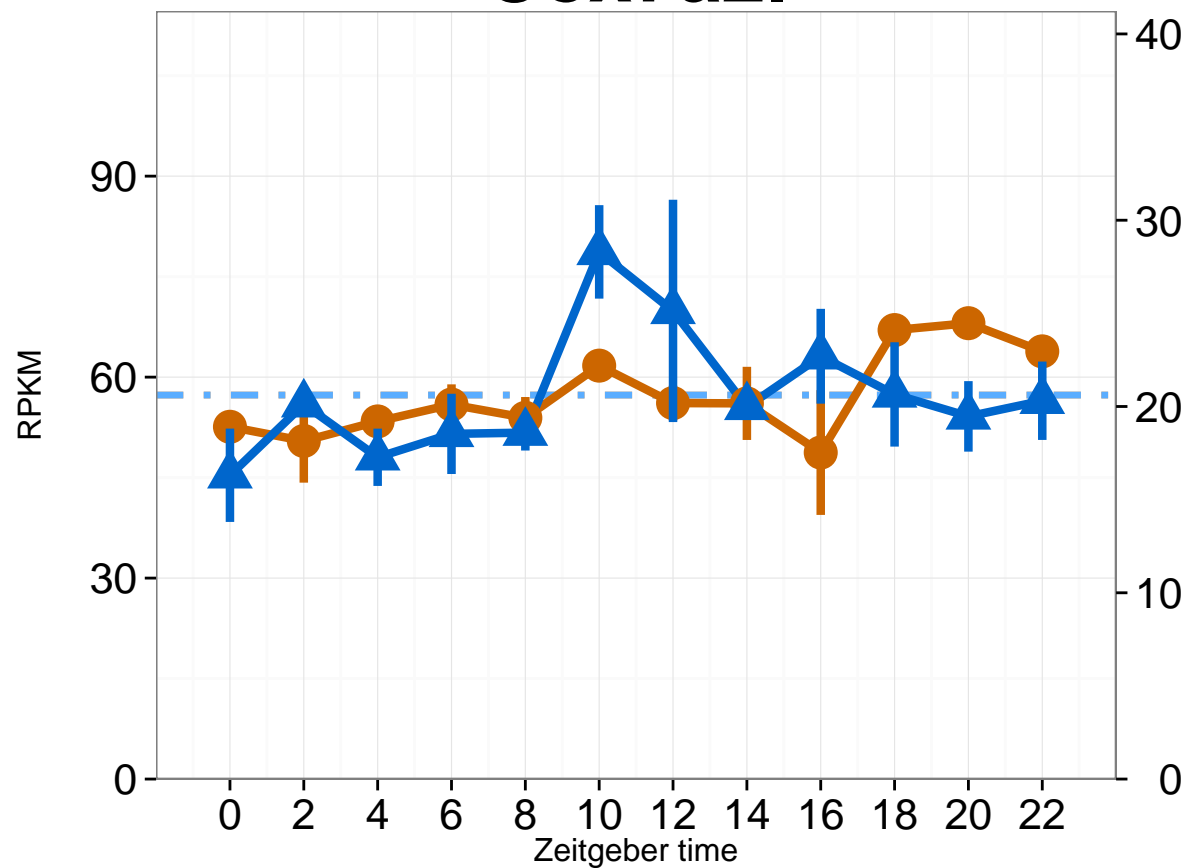

# Cox7a2l

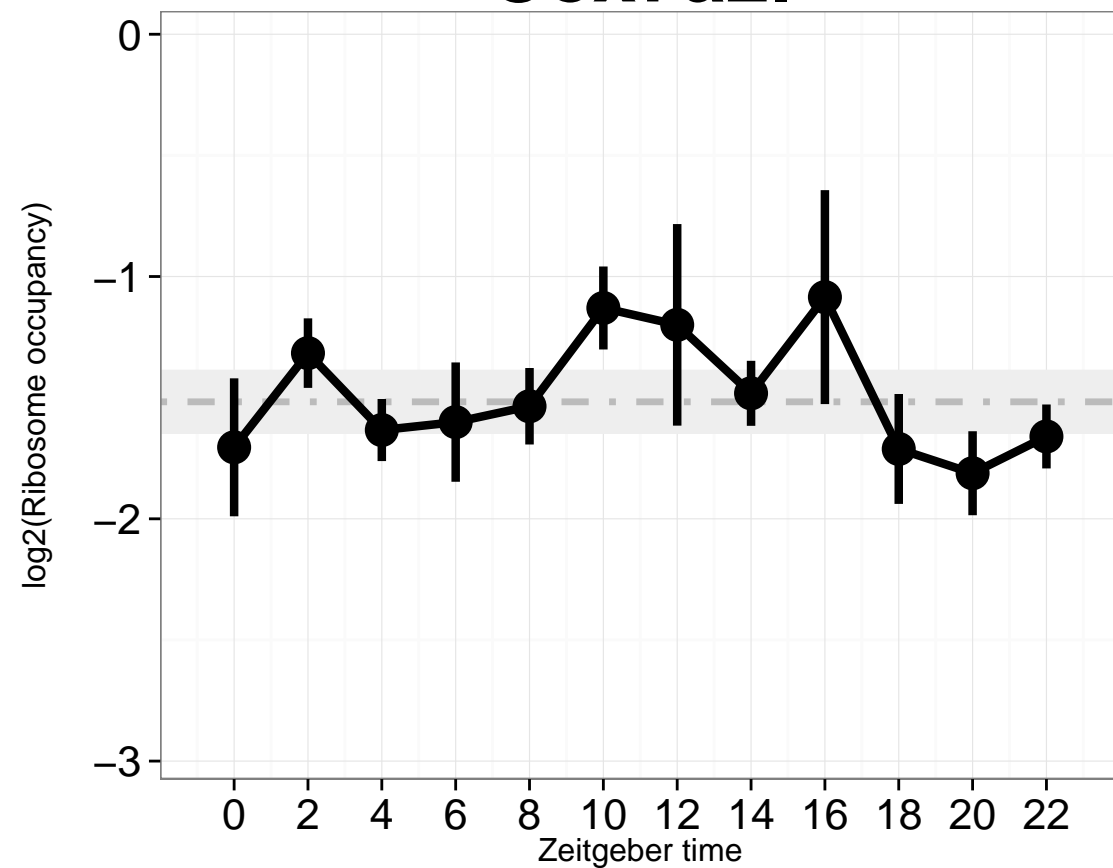

Supplement: SuppDataset_1.zip [file Cox7a2l_set_A.pdf › Supplemental Dataset 1/A-mRNA_nonrhyth_translation_nonrhyth/Cox7a2l_set_A.pdf]

# Cox7b

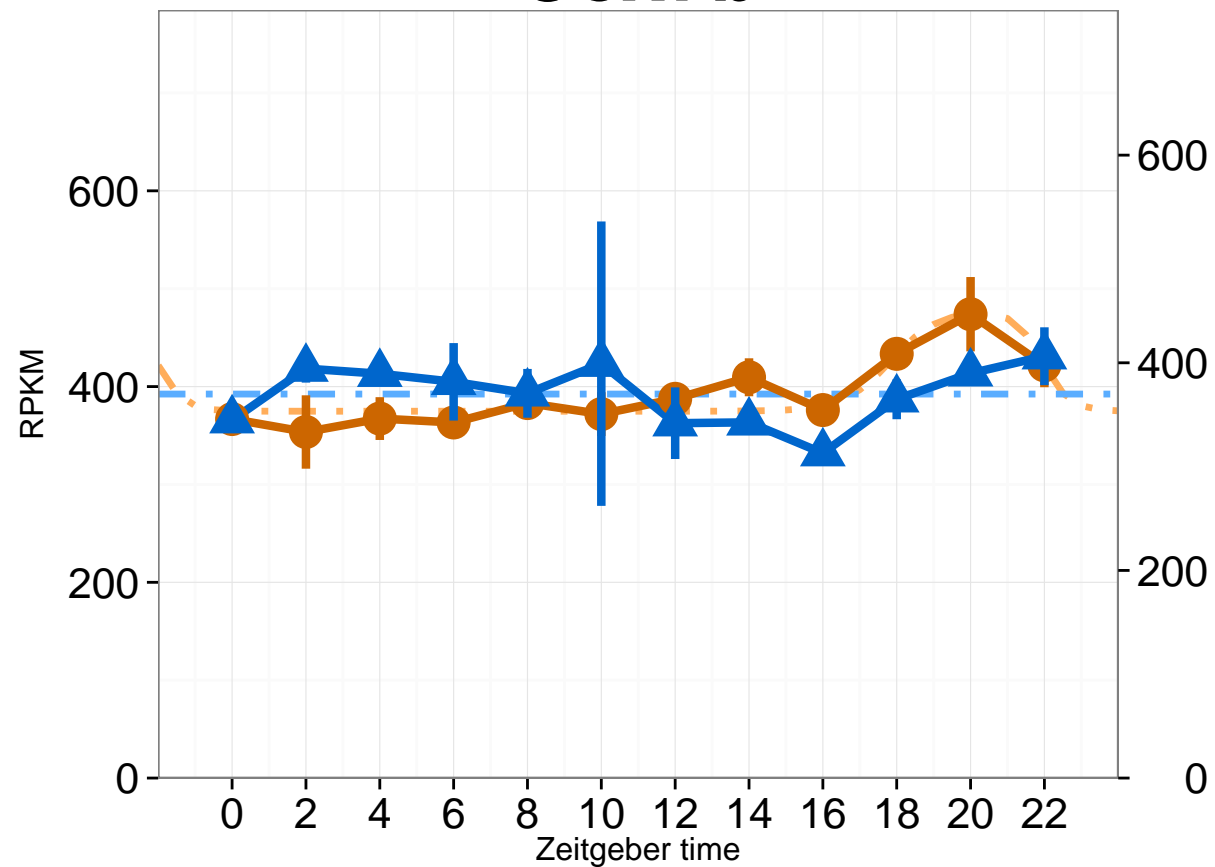

# Cox7b

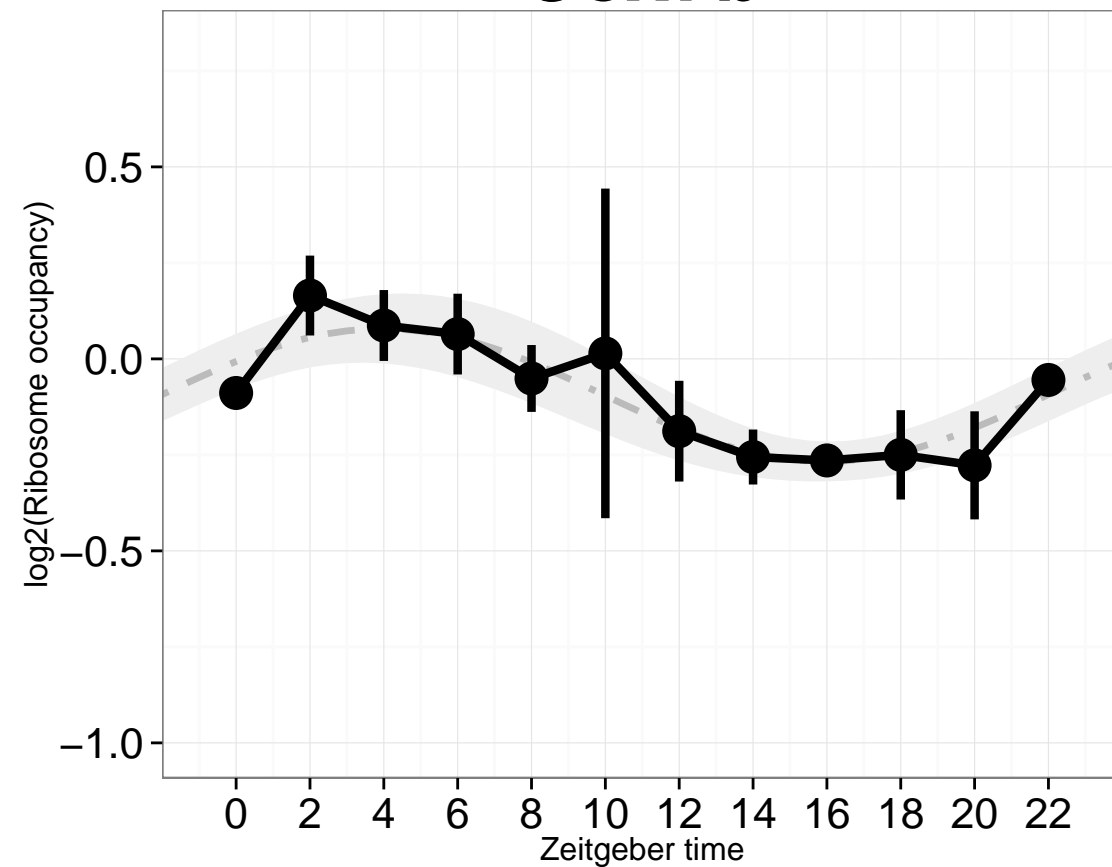

Supplement: SuppDataset_1.zip [file Cox7b_set_A.pdf › Supplemental Dataset 1/A-mRNA_nonrhyth_translation_nonrhyth/Cox7b_set_A.pdf]
