# Supplementary figures and images for: Ribosome profiling reveals the rhythmic liver translatome and circadian clock regulation by upstream open reading frames (part 104 of 113)
Source: HighWire-hosted journal article supplement (doi:10.1101/gr.195404.115), 2015-10-20

## Cnp

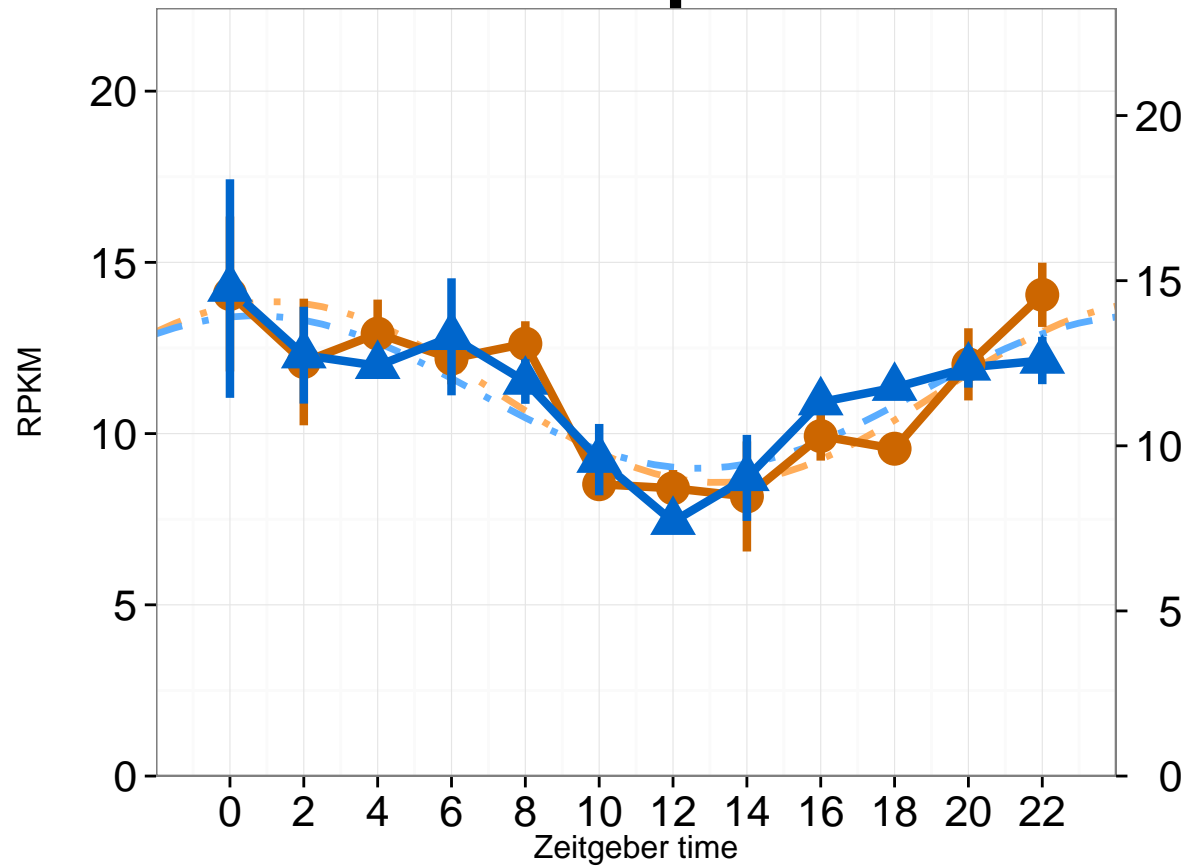

## Cnp

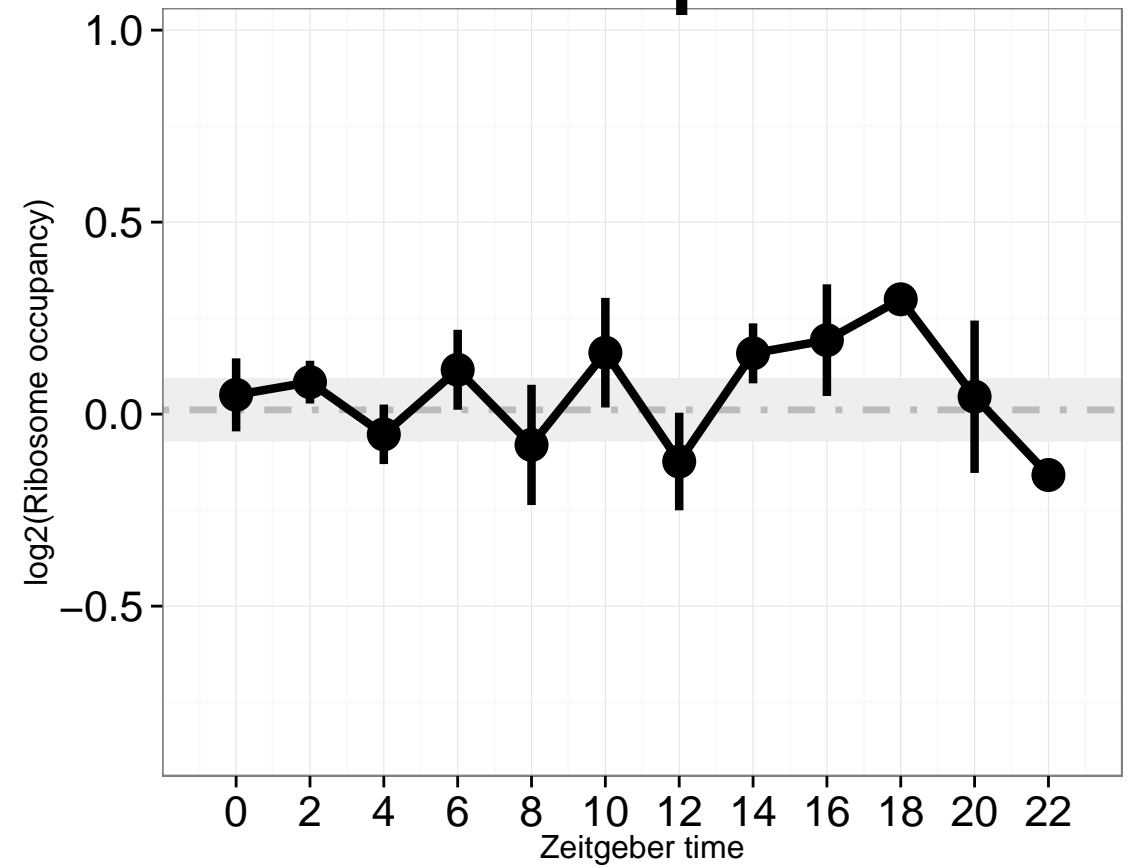

Supplement: SuppDataset_1.zip [file Cnp_set_D.pdf › Supplemental Dataset 1/D-mRNA_rhythm_translation_rhyth/Cnp_set_D.pdf]

# Cnpy4

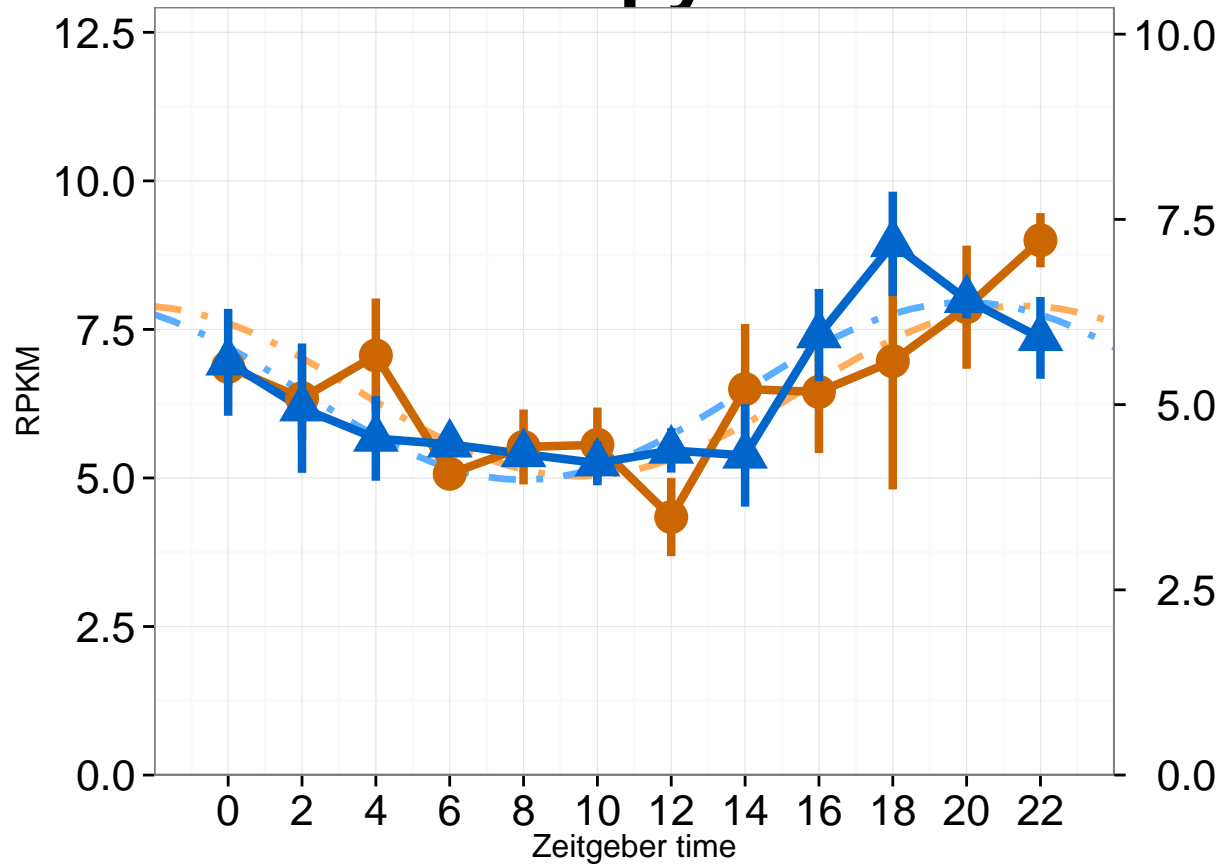

# Cnpy4

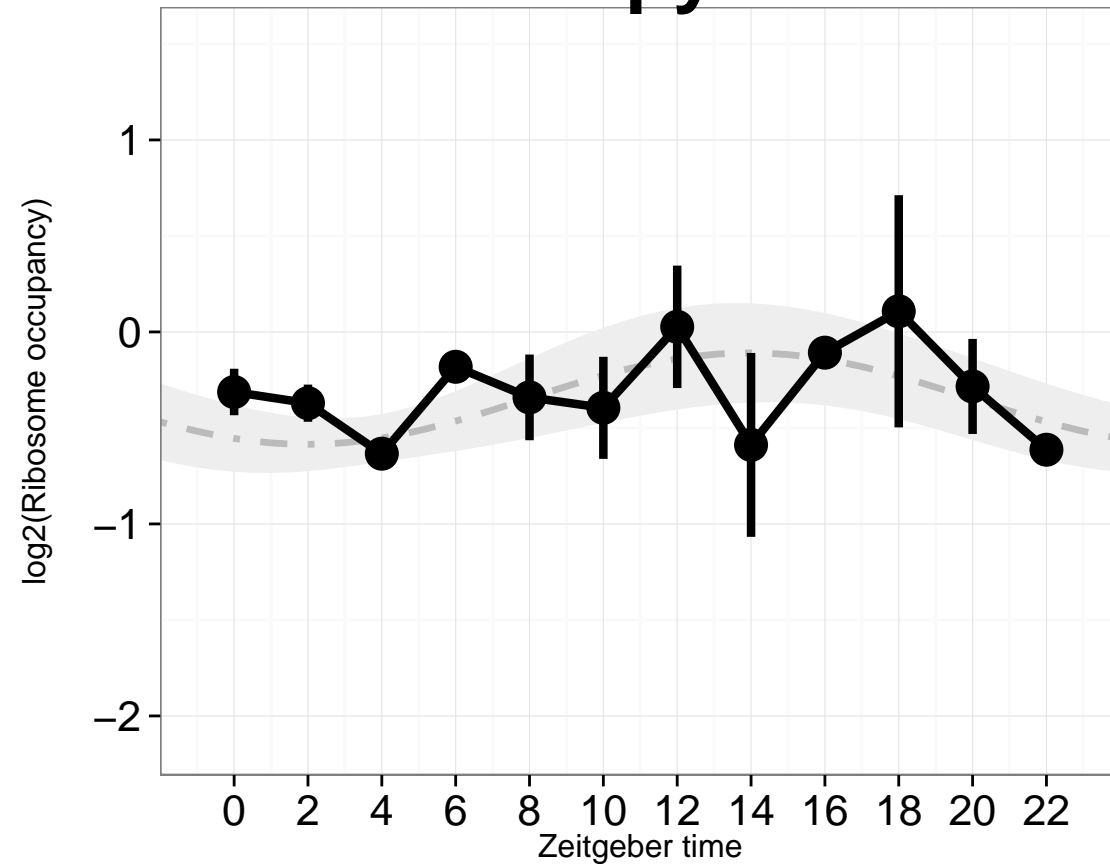

Supplement: SuppDataset_1.zip [file Cnpy4_set_D.pdf › Supplemental Dataset 1/D-mRNA_rhythm_translation_rhyth/Cnpy4_set_D.pdf]

# Coa6

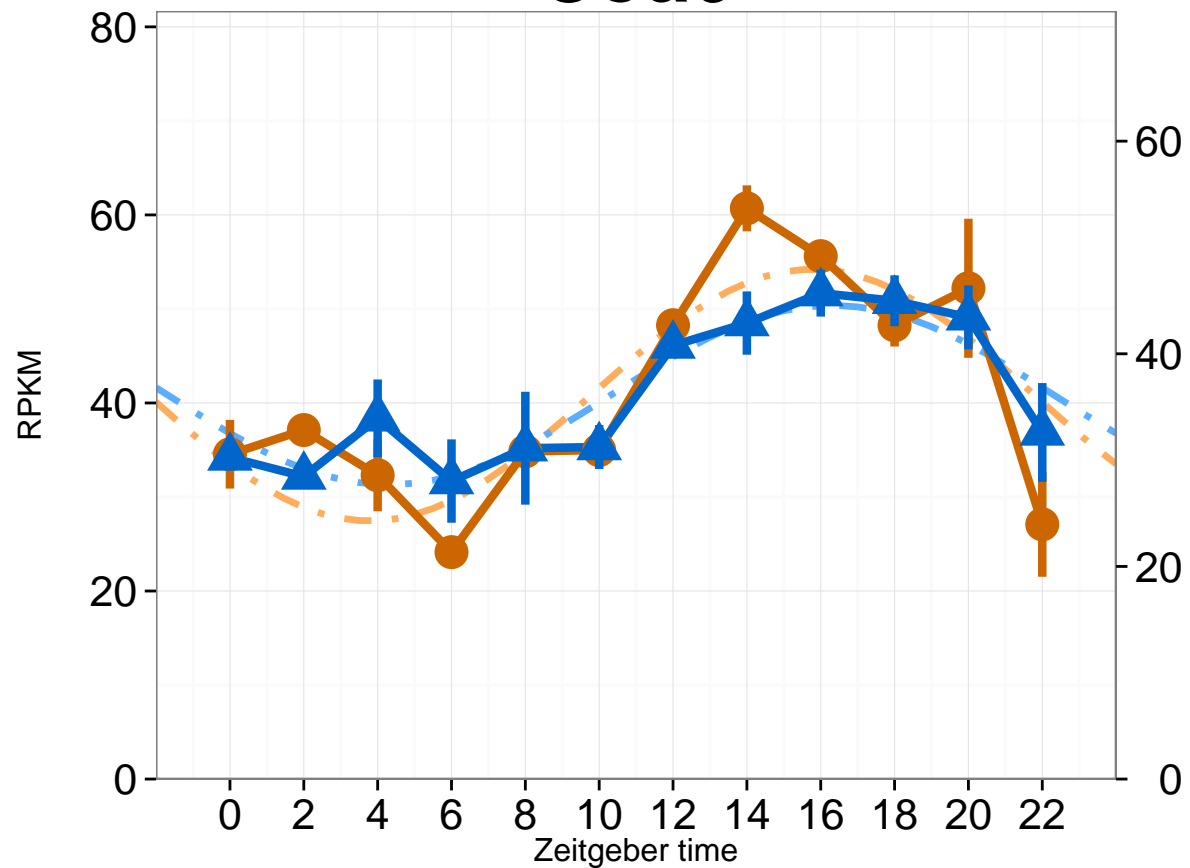

# Coa6

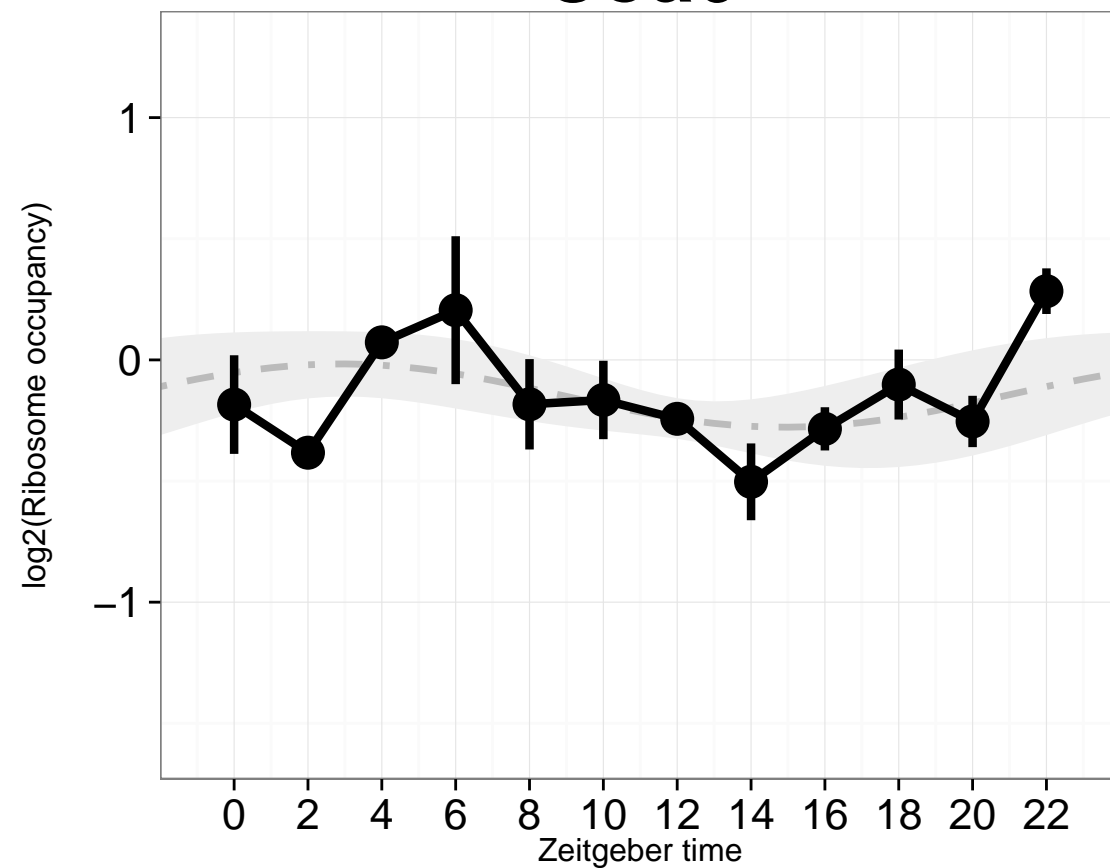

Supplement: SuppDataset_1.zip [file Coa6_set_D.pdf › Supplemental Dataset 1/D-mRNA_rhythm_translation_rhyth/Coa6_set_D.pdf]

# CobII1

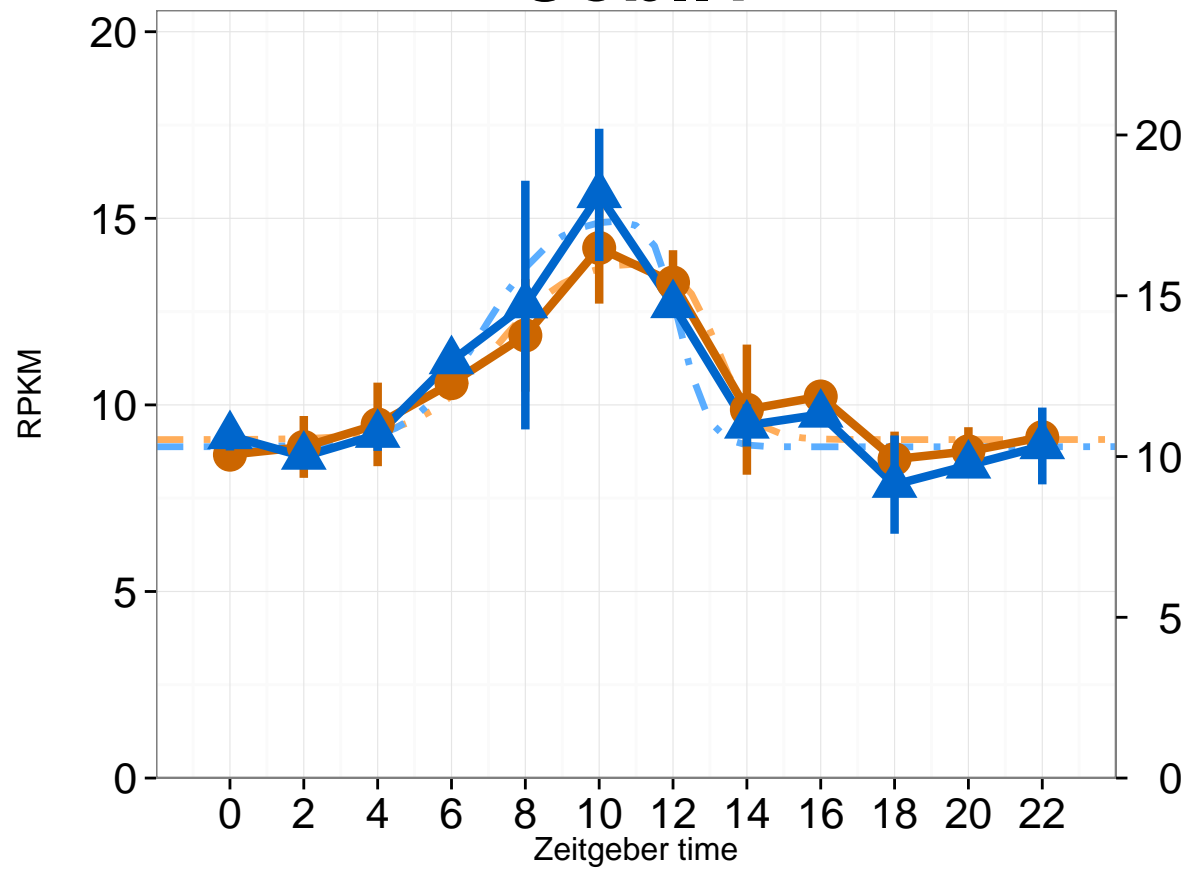

# CobII1

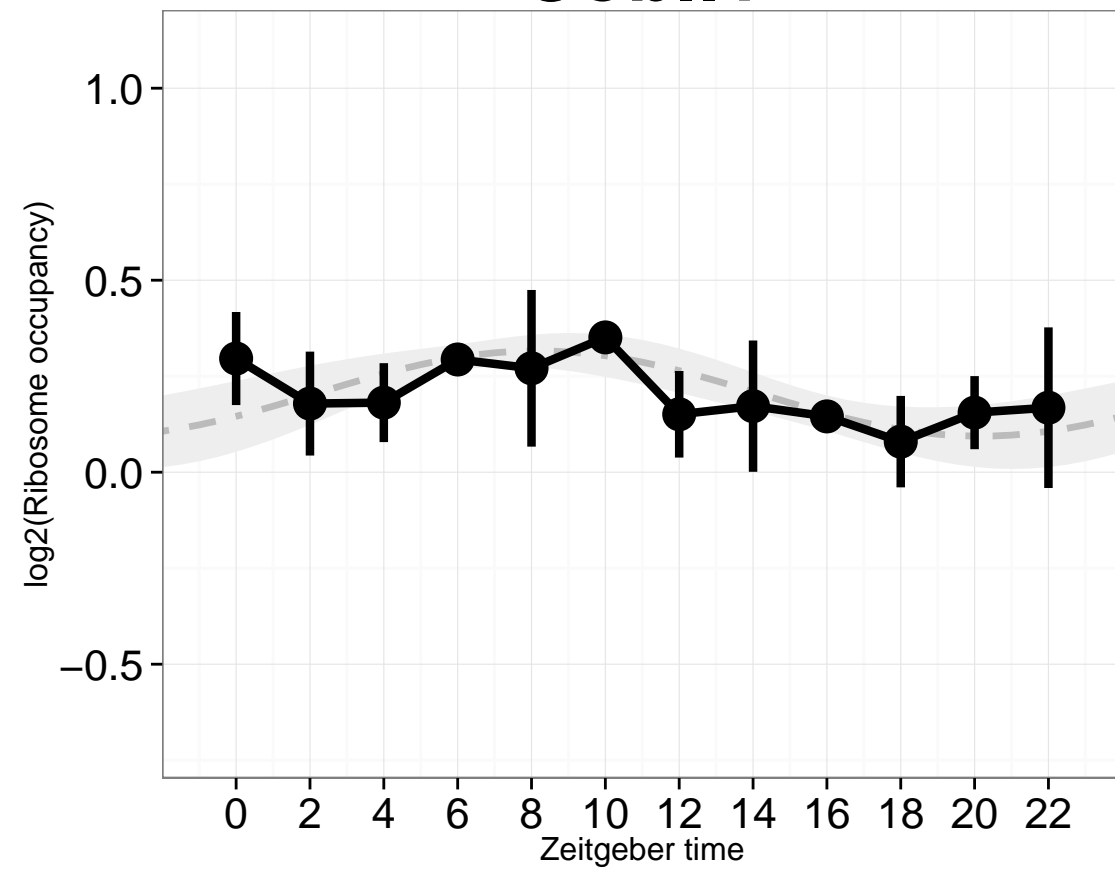

Supplement: SuppDataset_1.zip [file Cobll1_set_D.pdf › Supplemental Dataset 1/D-mRNA_rhythm_translation_rhyth/Cobll1_set_D.pdf]

# Col27a1

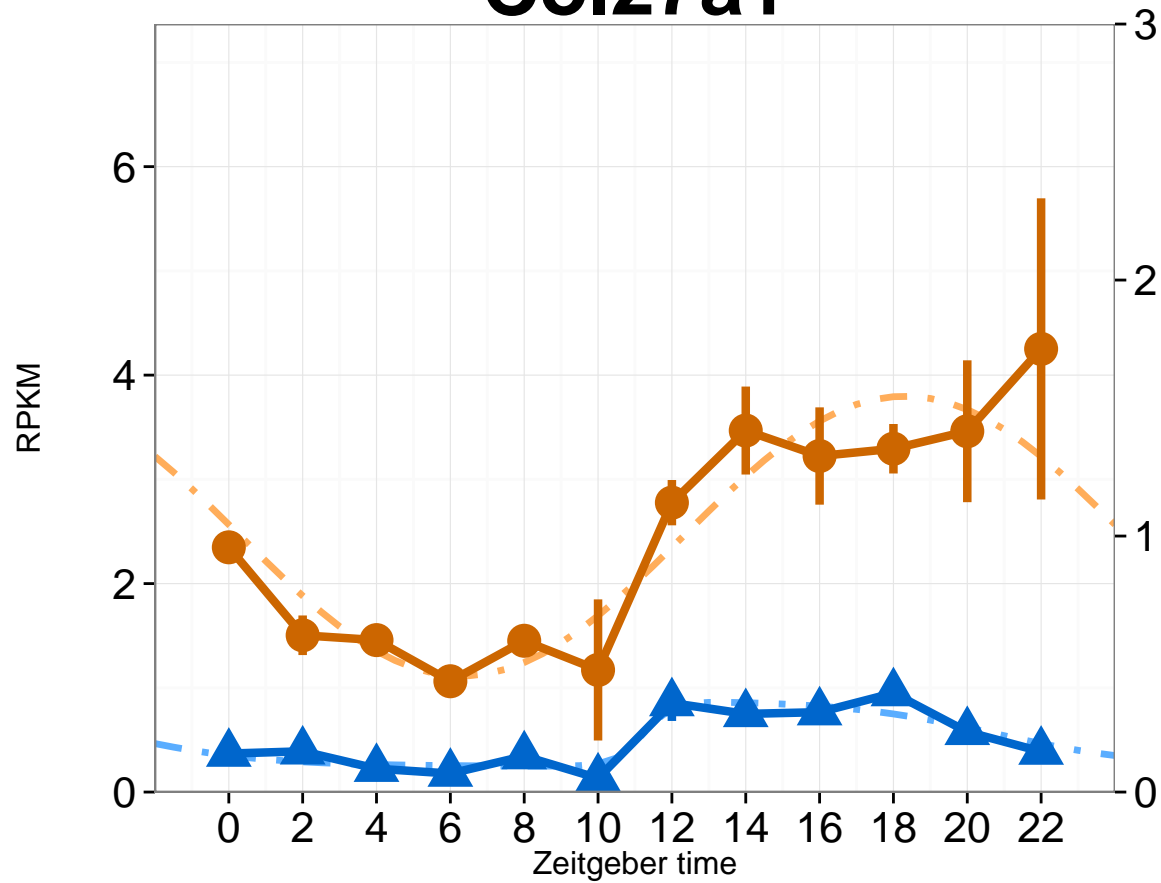

# Col27a1

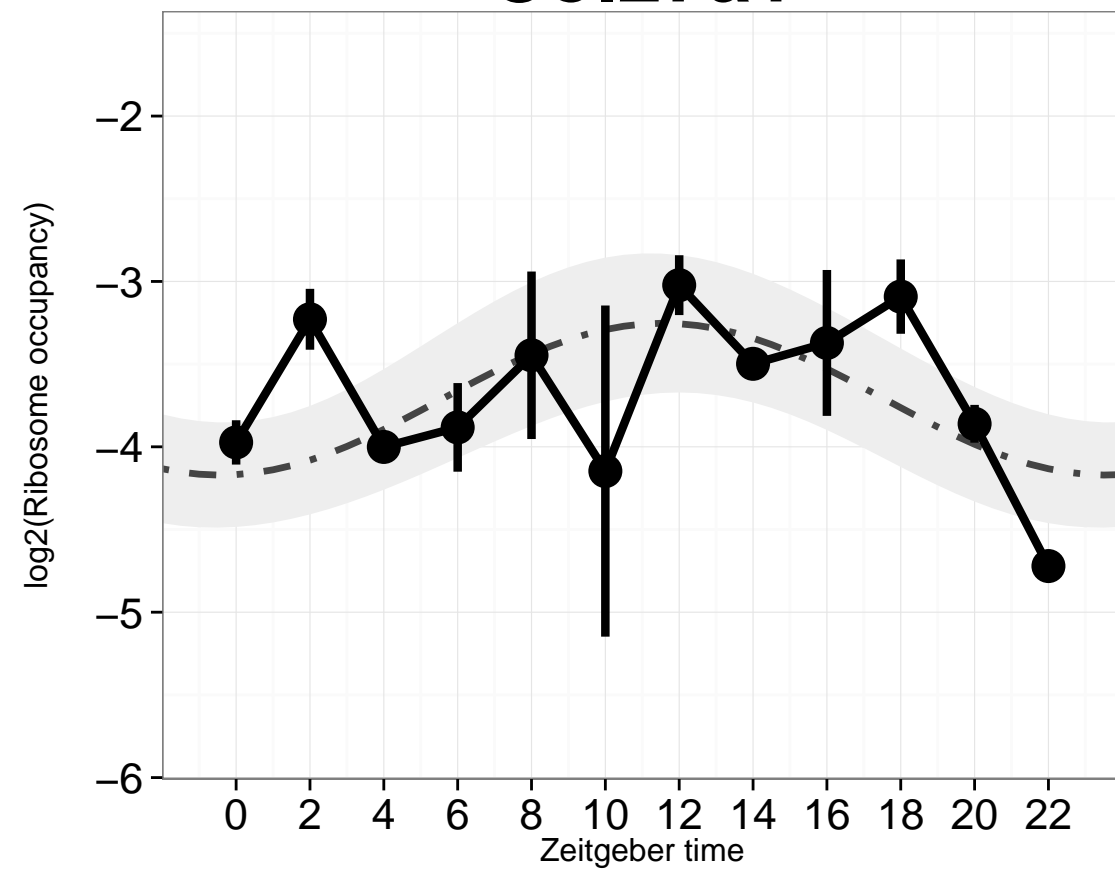

Supplement: SuppDataset_1.zip [file Col27a1_set_D.pdf › Supplemental Dataset 1/D-mRNA_rhythm_translation_rhyth/Col27a1_set_D.pdf]

# Col4a1

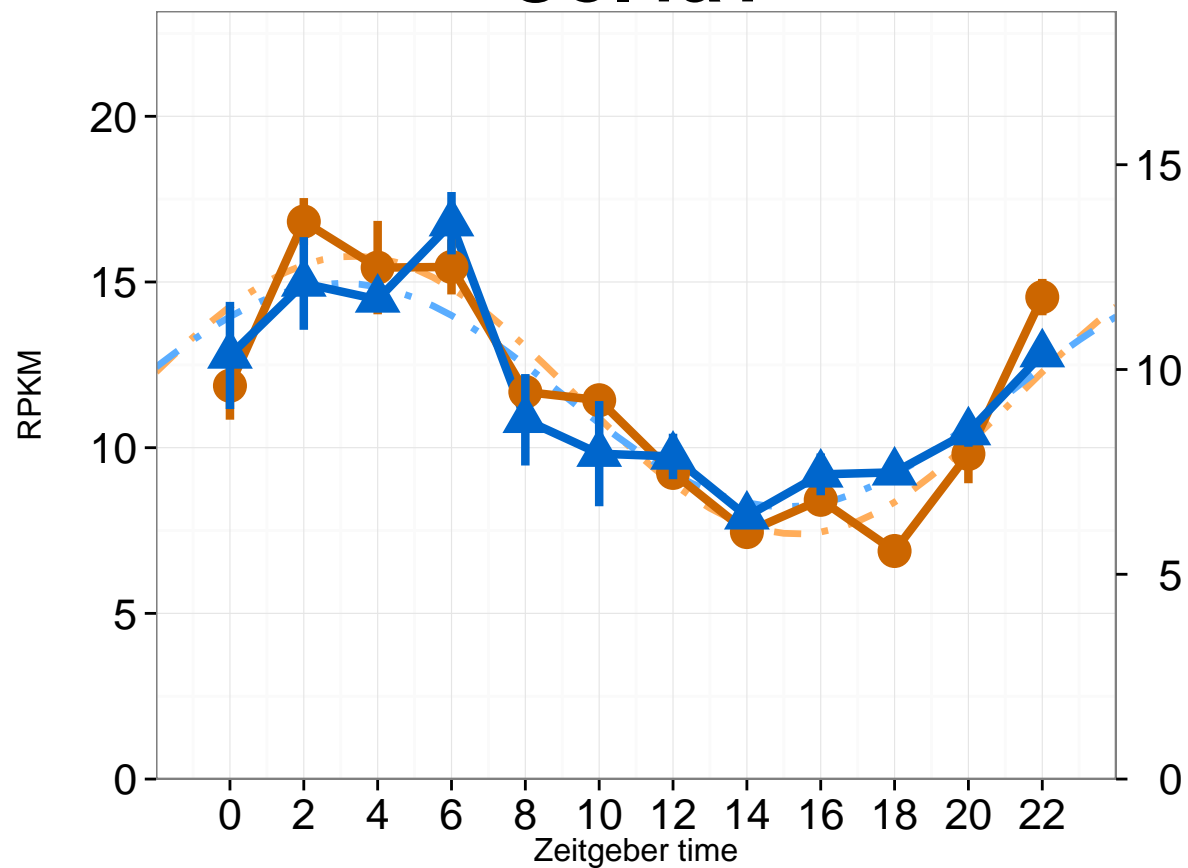

# Col4a1

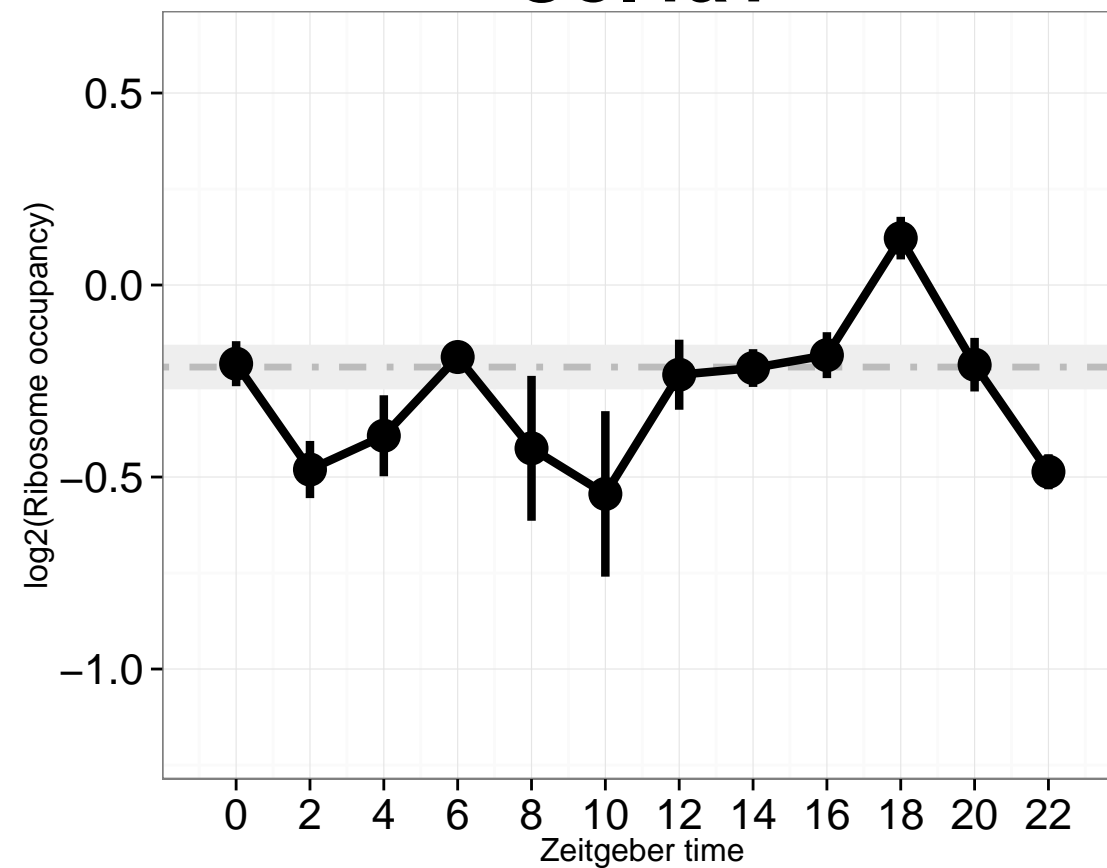

Supplement: SuppDataset_1.zip [file Col4a1_set_D.pdf › Supplemental Dataset 1/D-mRNA_rhythm_translation_rhyth/Col4a1_set_D.pdf]

# Col4a2

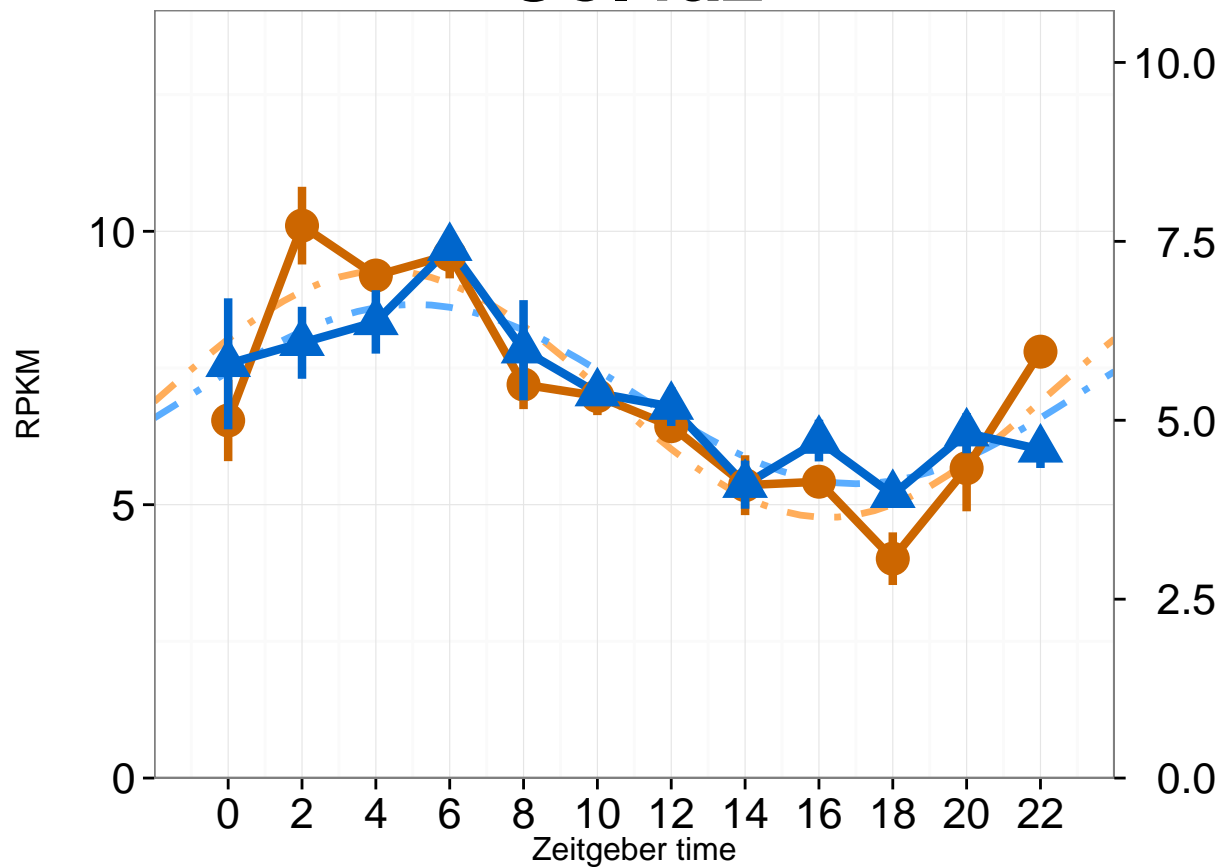

# Col4a2

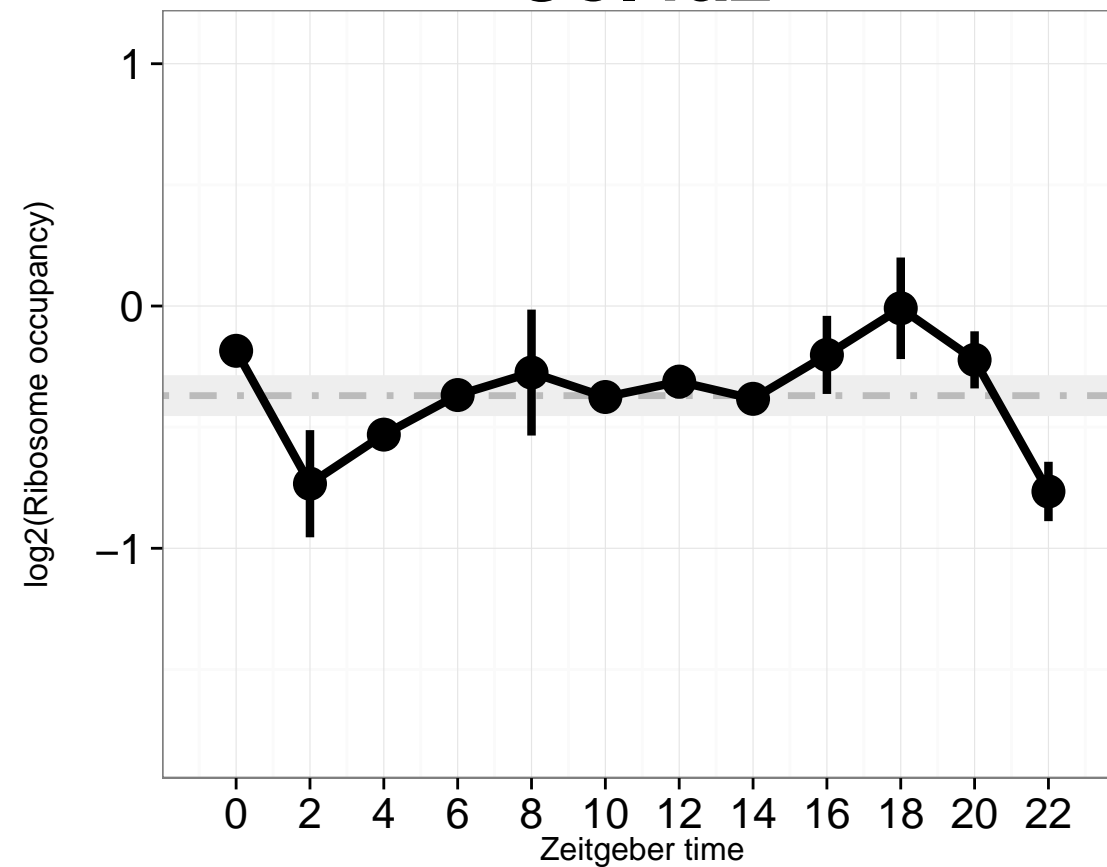

Supplement: SuppDataset_1.zip [file Col4a2_set_D.pdf › Supplemental Dataset 1/D-mRNA_rhythm_translation_rhyth/Col4a2_set_D.pdf]

## Col5a1

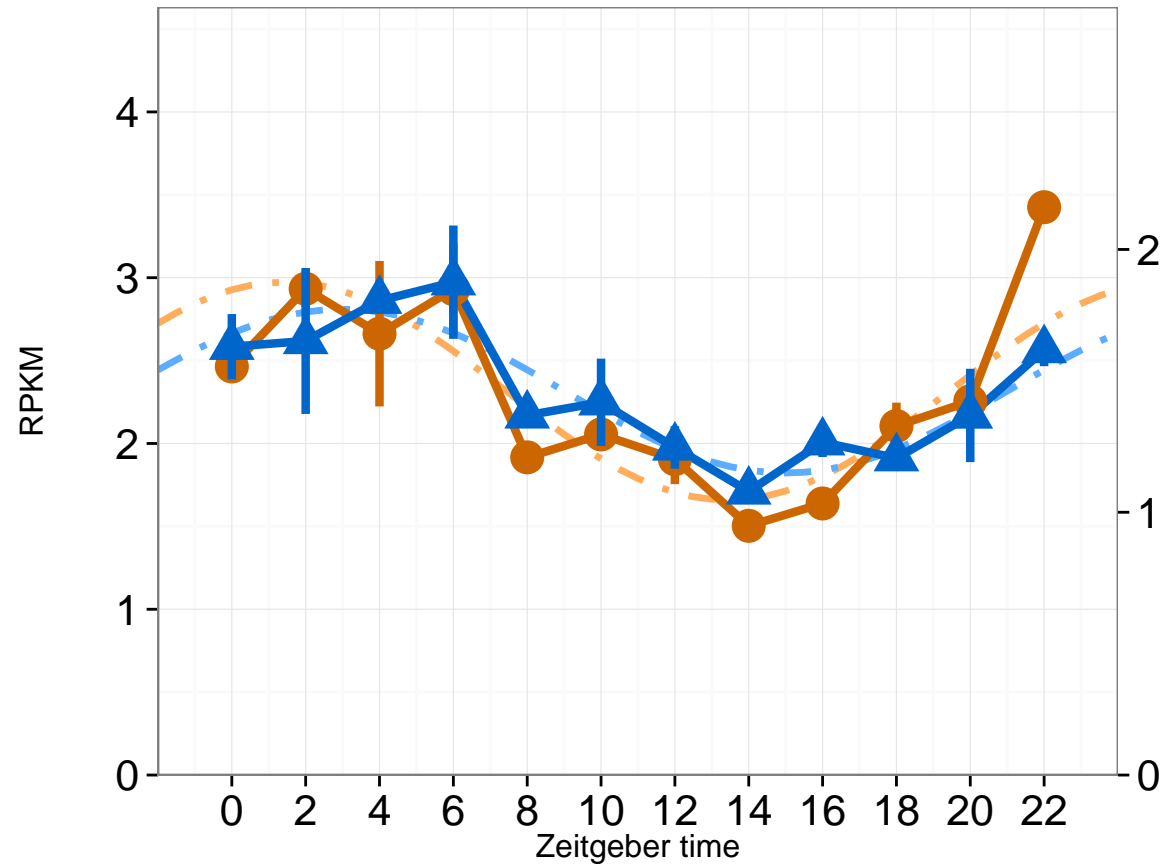

## Col5a1

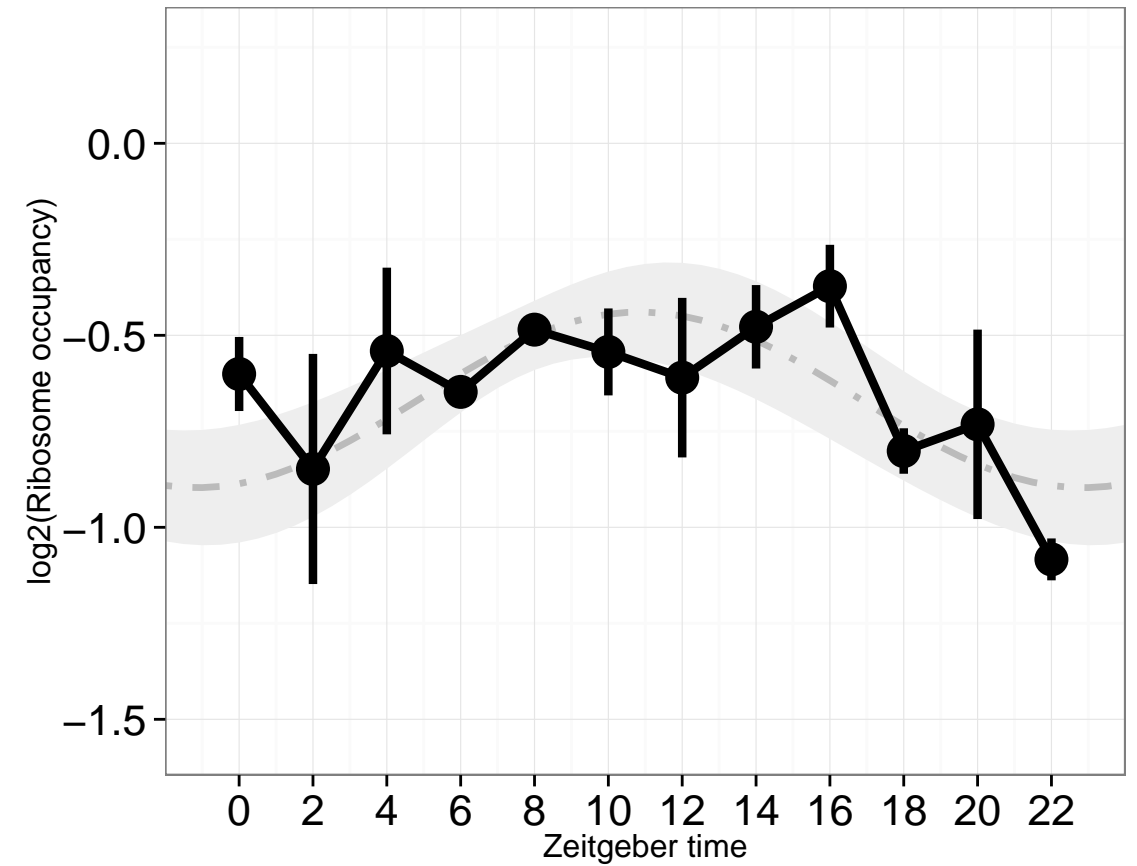

Supplement: SuppDataset_1.zip [file Col5a1_set_D.pdf › Supplemental Dataset 1/D-mRNA_rhythm_translation_rhyth/Col5a1_set_D.pdf]

# Col5a3

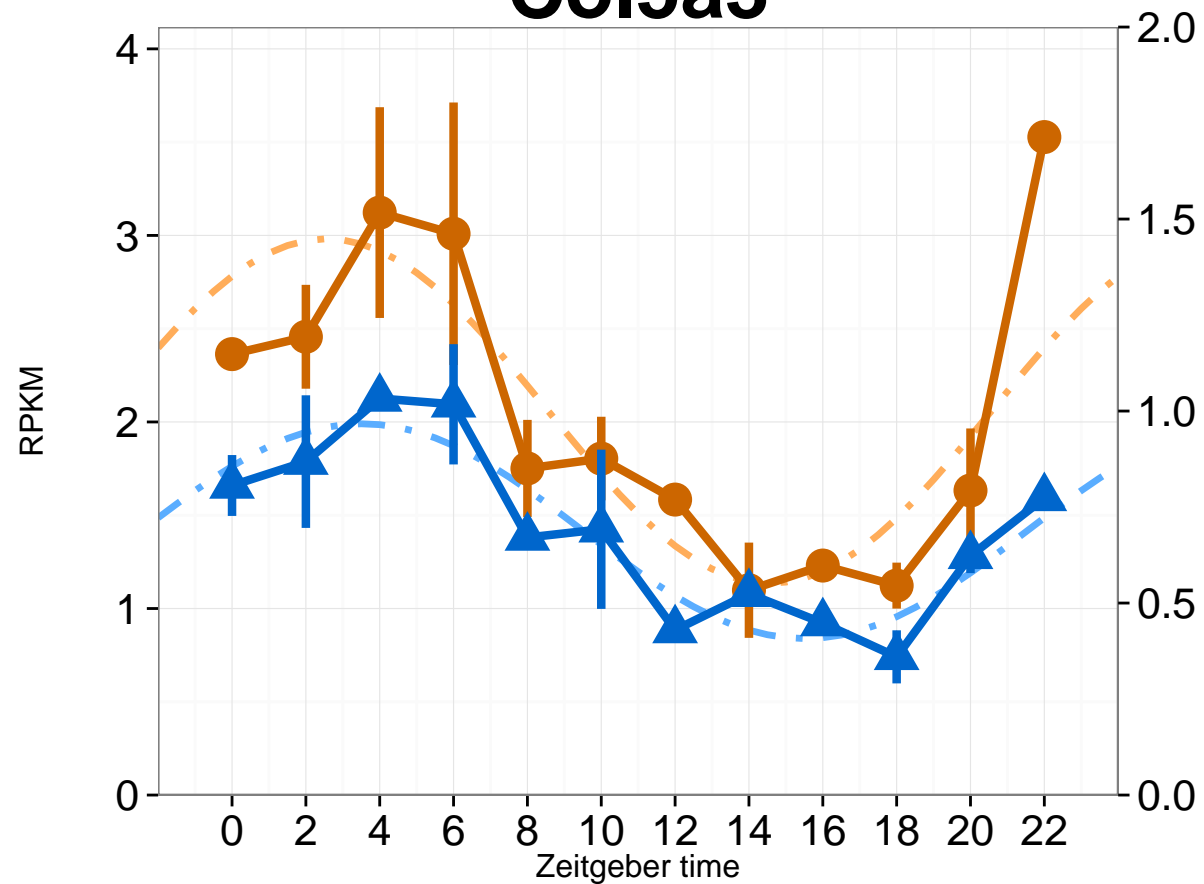

# Col5a3

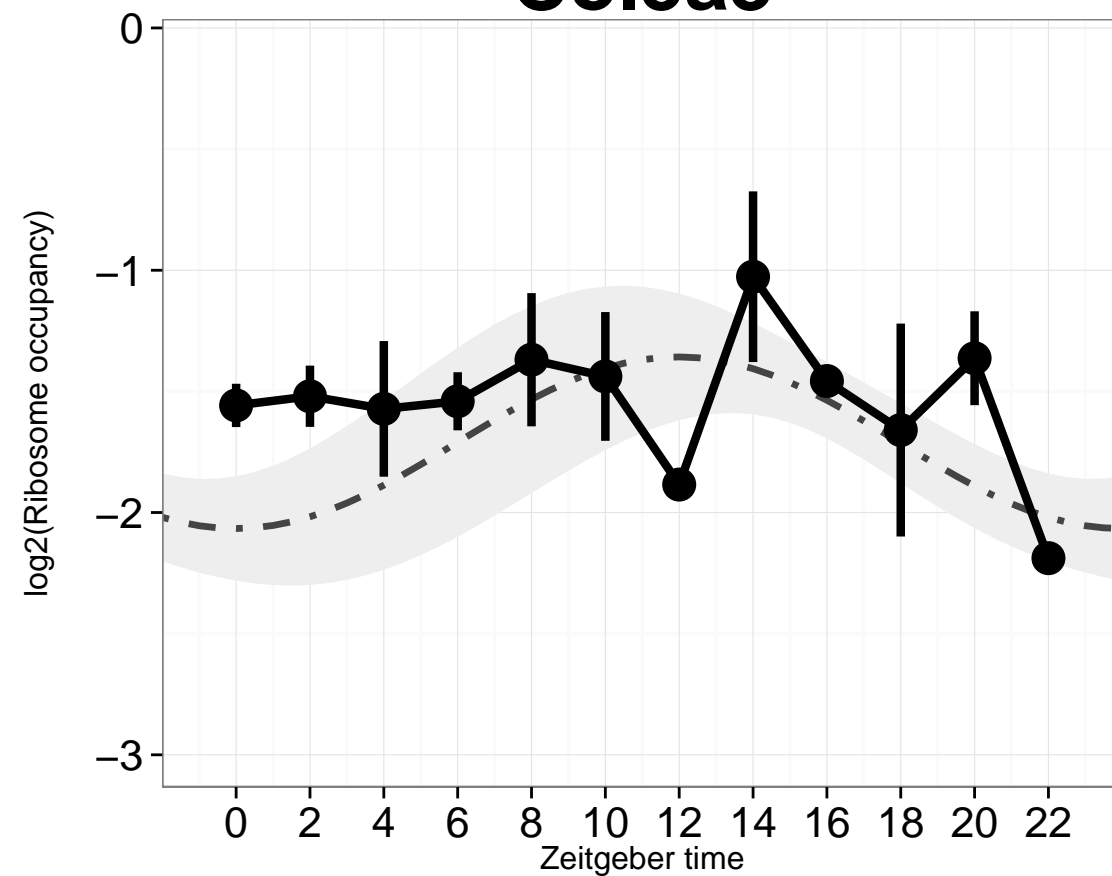

Supplement: SuppDataset_1.zip [file Col5a3_set_D.pdf › Supplemental Dataset 1/D-mRNA_rhythm_translation_rhyth/Col5a3_set_D.pdf]

## Commd7

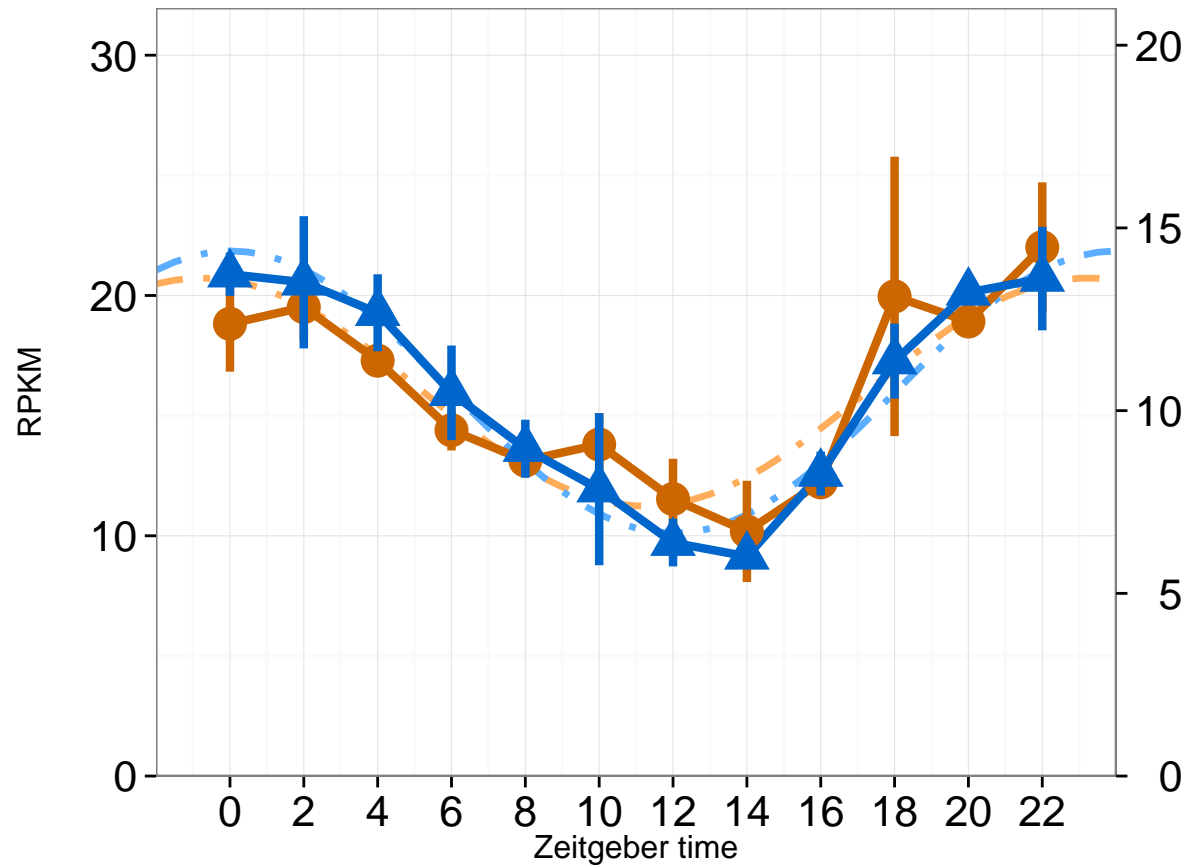

## Commd7

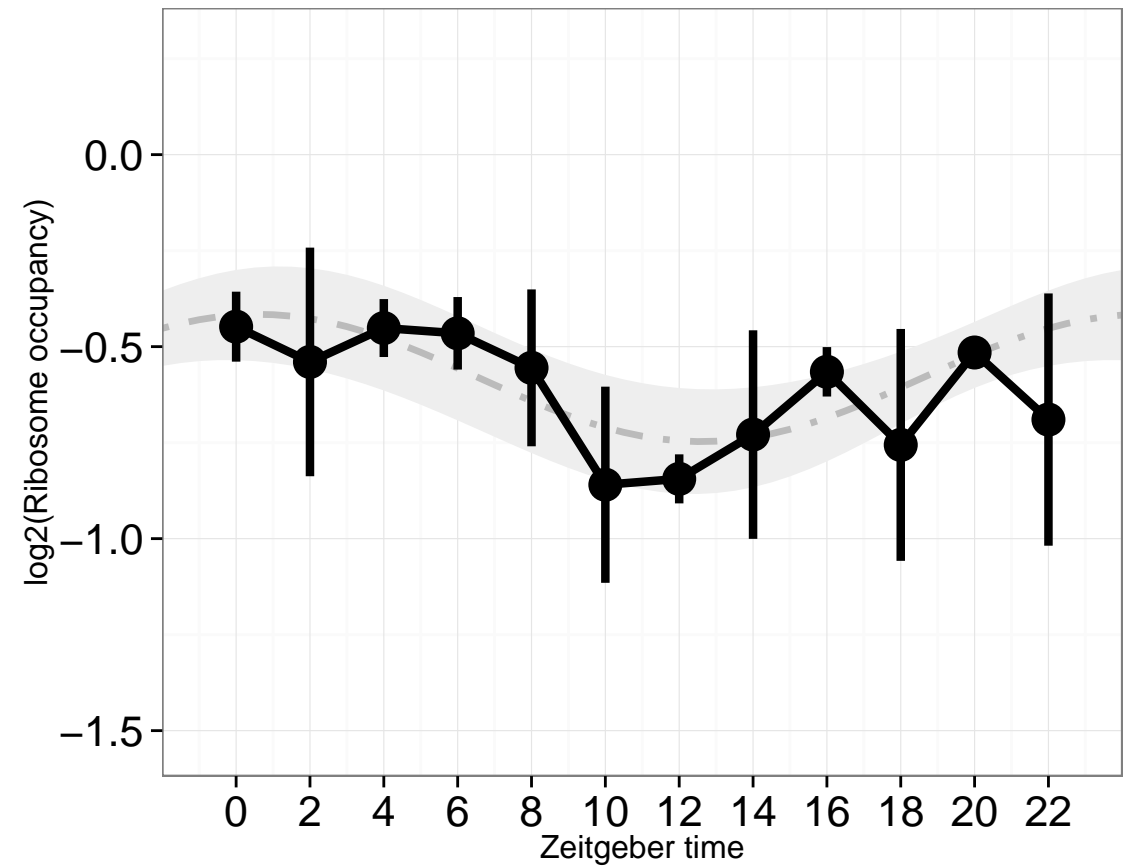

Supplement: SuppDataset_1.zip [file Commd7_set_D.pdf › Supplemental Dataset 1/D-mRNA_rhythm_translation_rhyth/Commd7_set_D.pdf]

# Coq10b

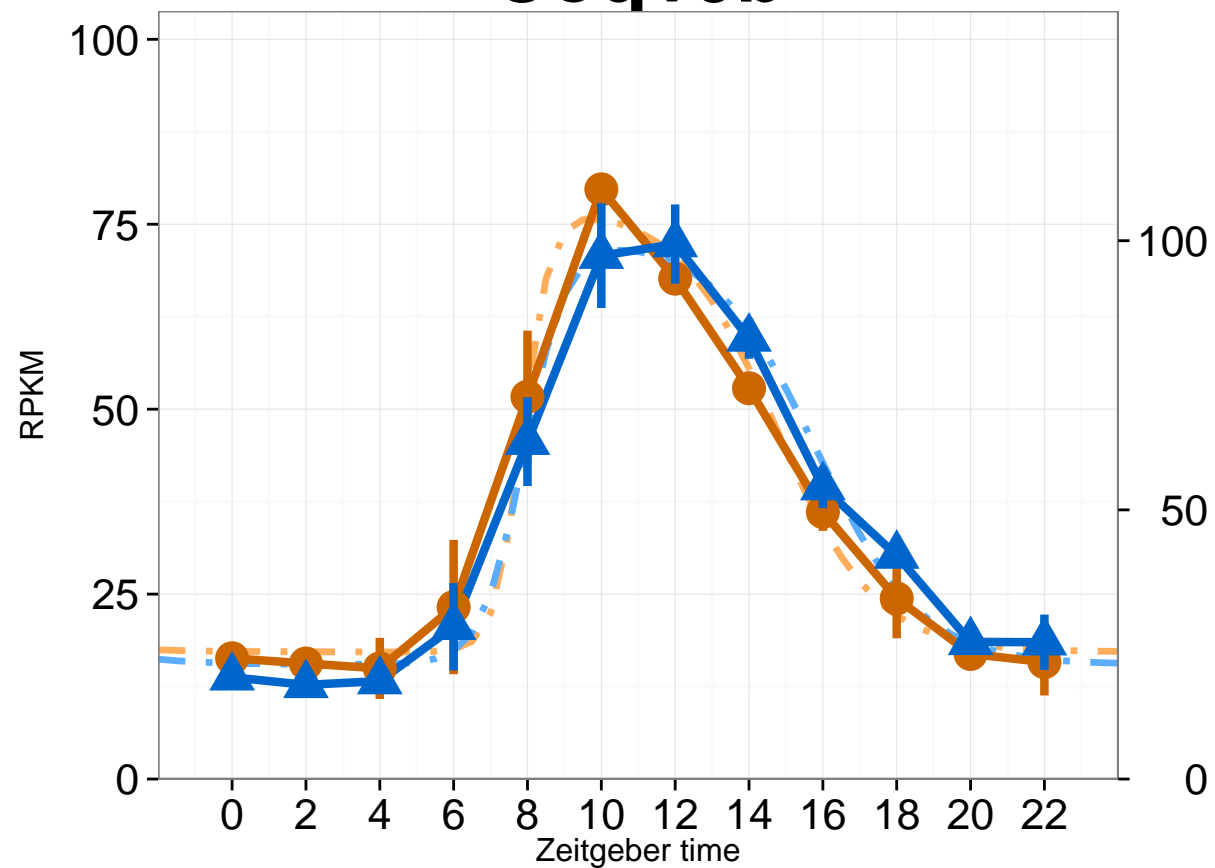

# Coq10b

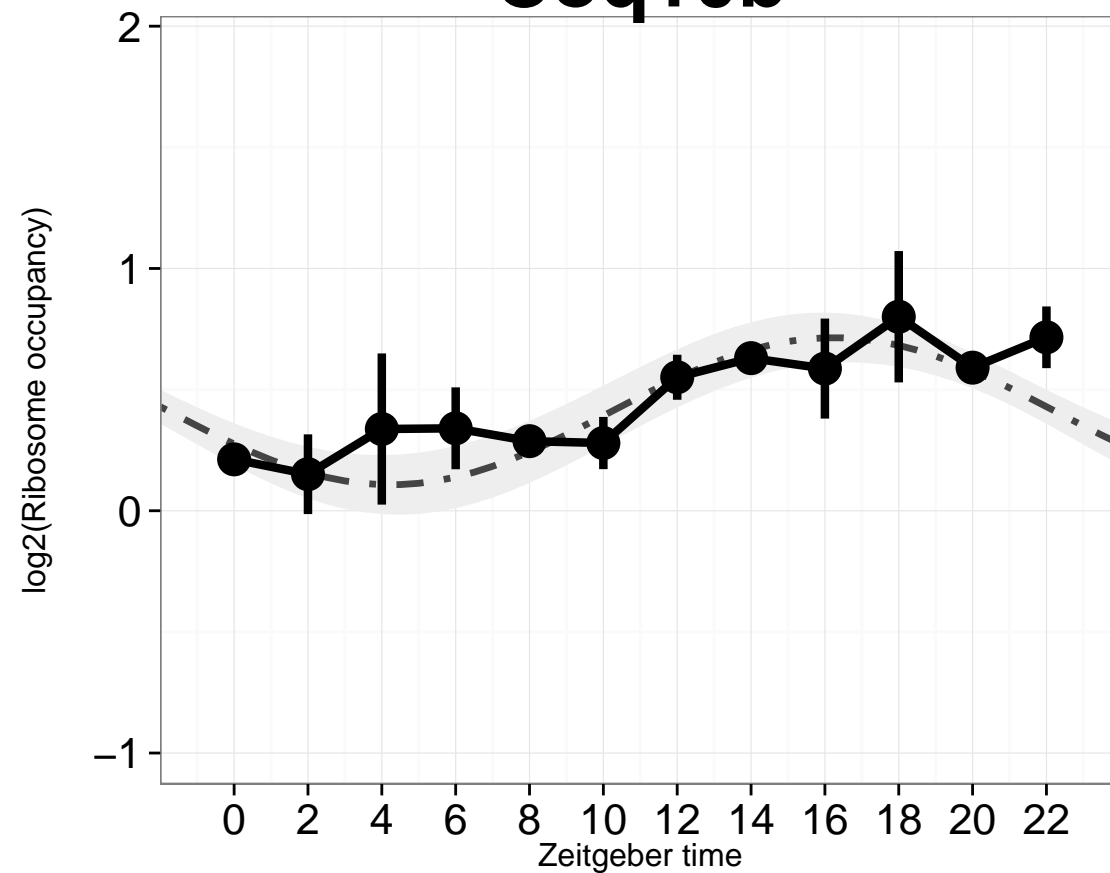

Supplement: SuppDataset_1.zip [file Coq10b_set_D.pdf › Supplemental Dataset 1/D-mRNA_rhythm_translation_rhyth/Coq10b_set_D.pdf]

# Coq4

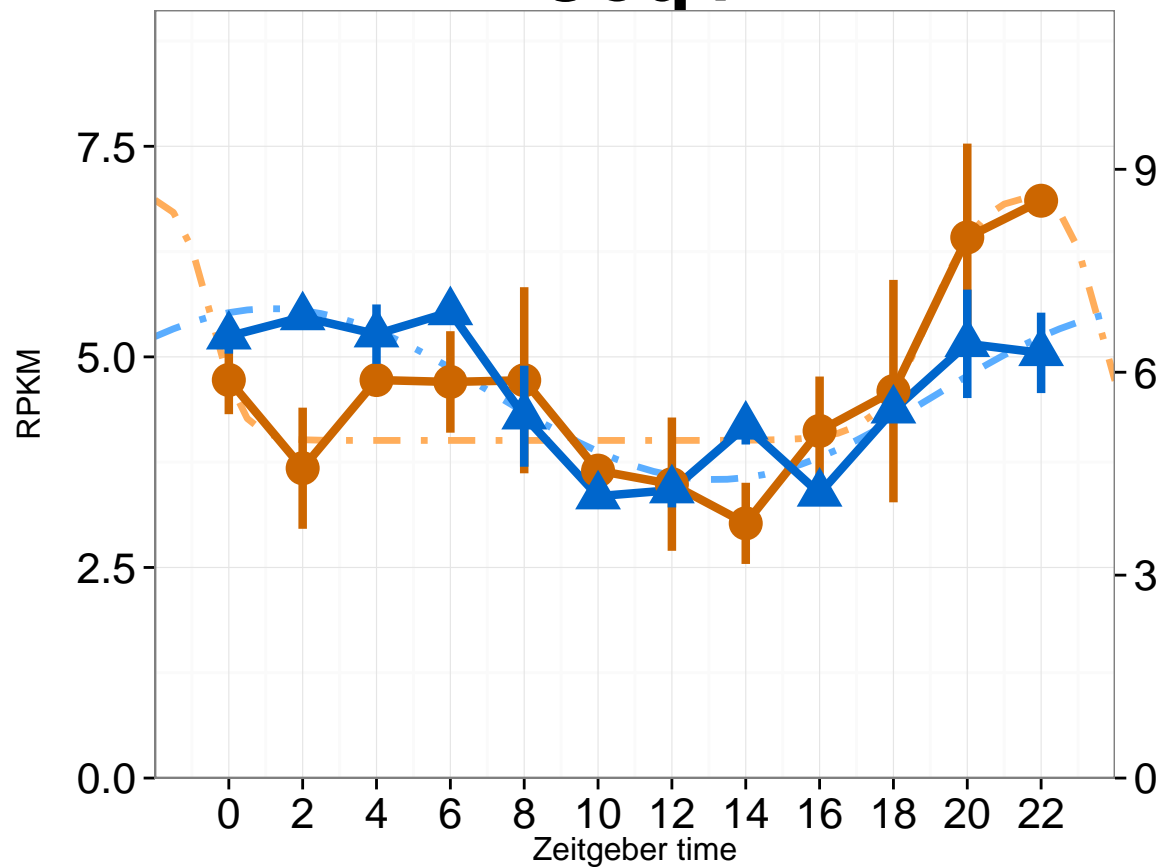

# Coq4

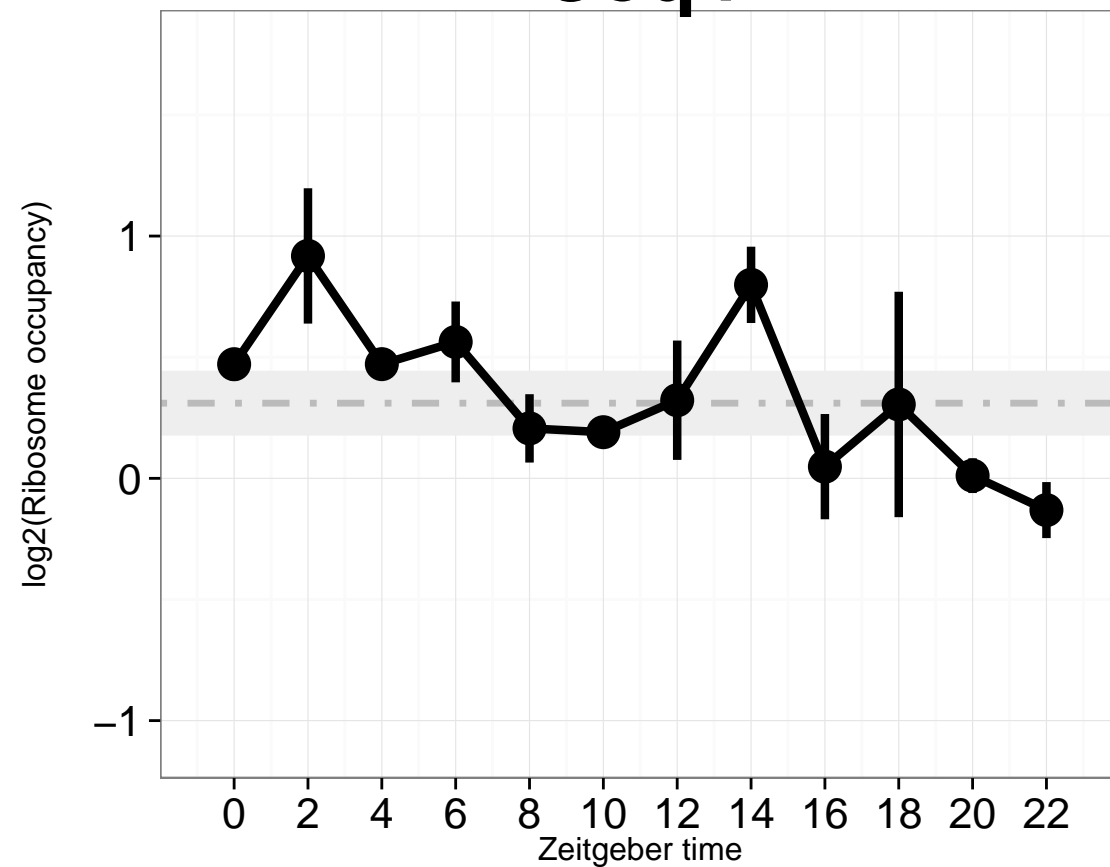

Supplement: SuppDataset_1.zip [file Coq4_set_D.pdf › Supplemental Dataset 1/D-mRNA_rhythm_translation_rhyth/Coq4_set_D.pdf]

**Cp**

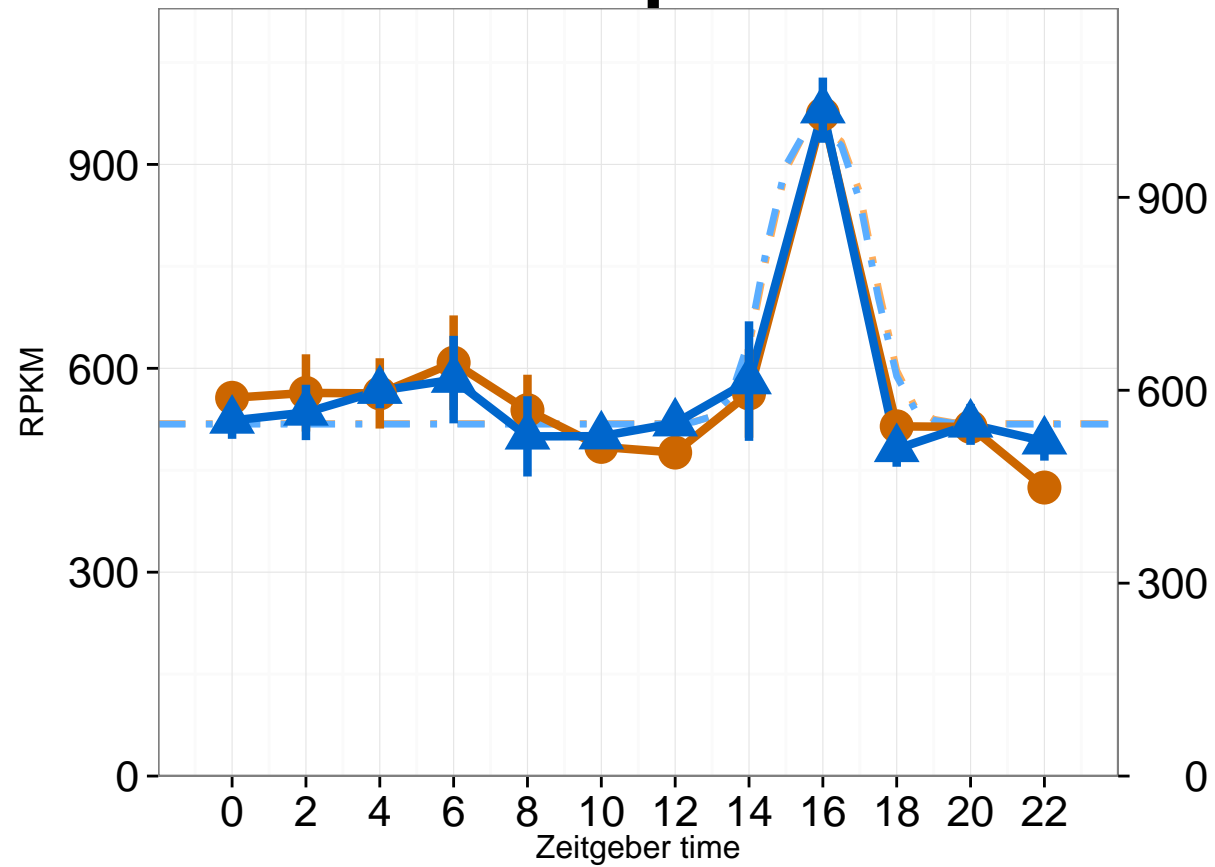

**Cp**

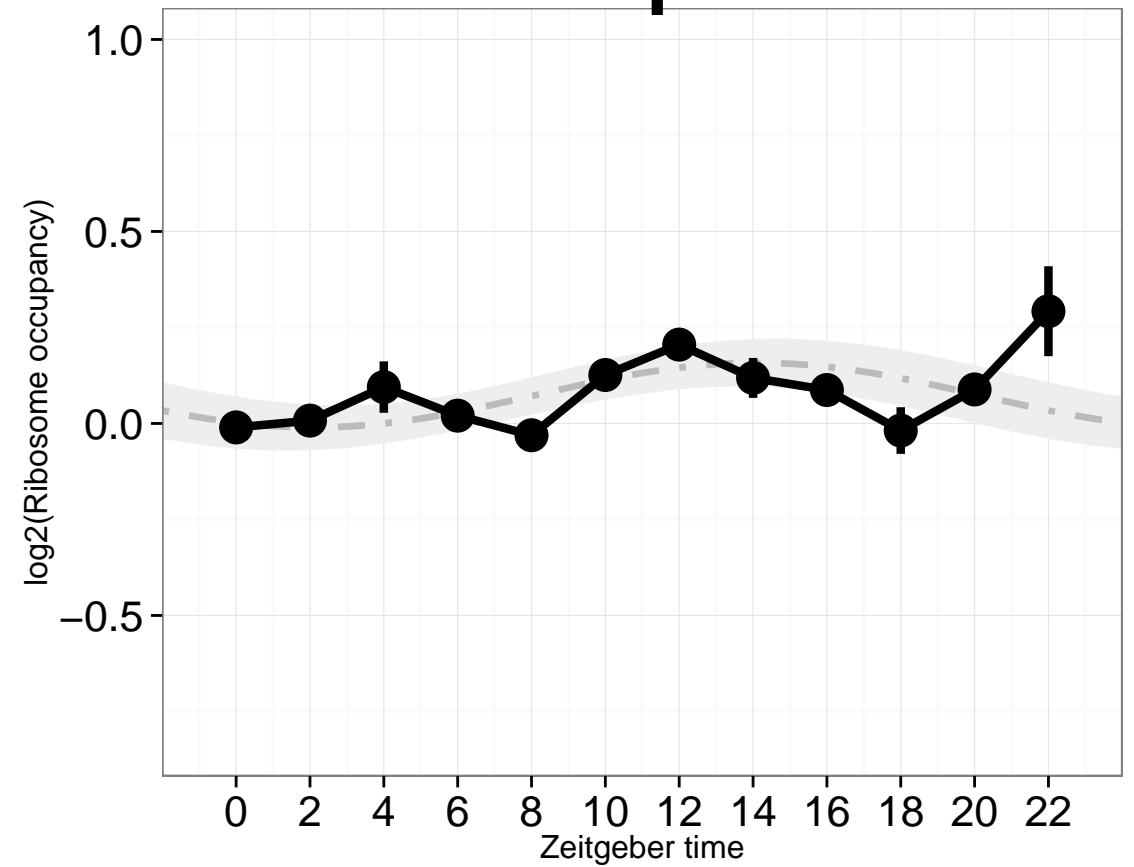

Supplement: SuppDataset_1.zip [file Cp_set_D.pdf › Supplemental Dataset 1/D-mRNA_rhythm_translation_rhyth/Cp_set_D.pdf]

## Cpb2

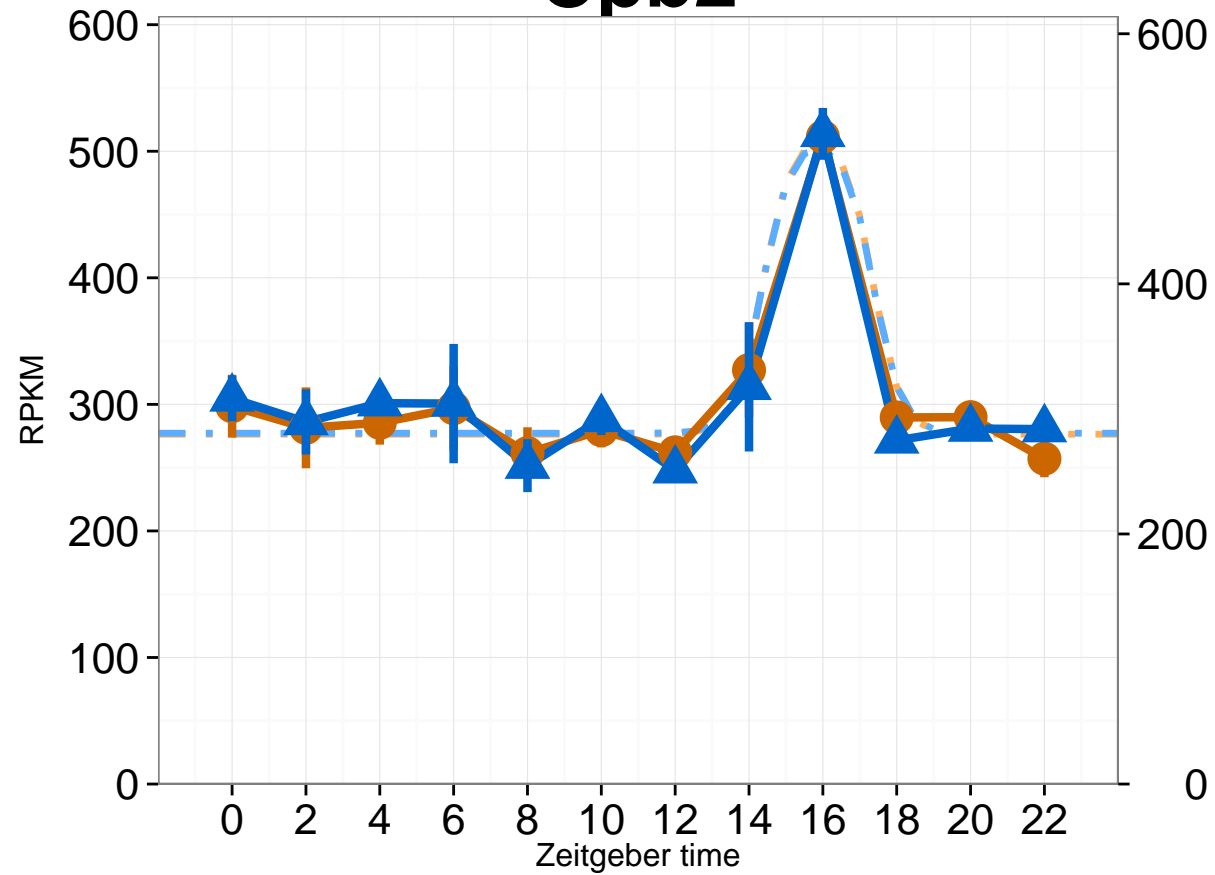

## Cpb2

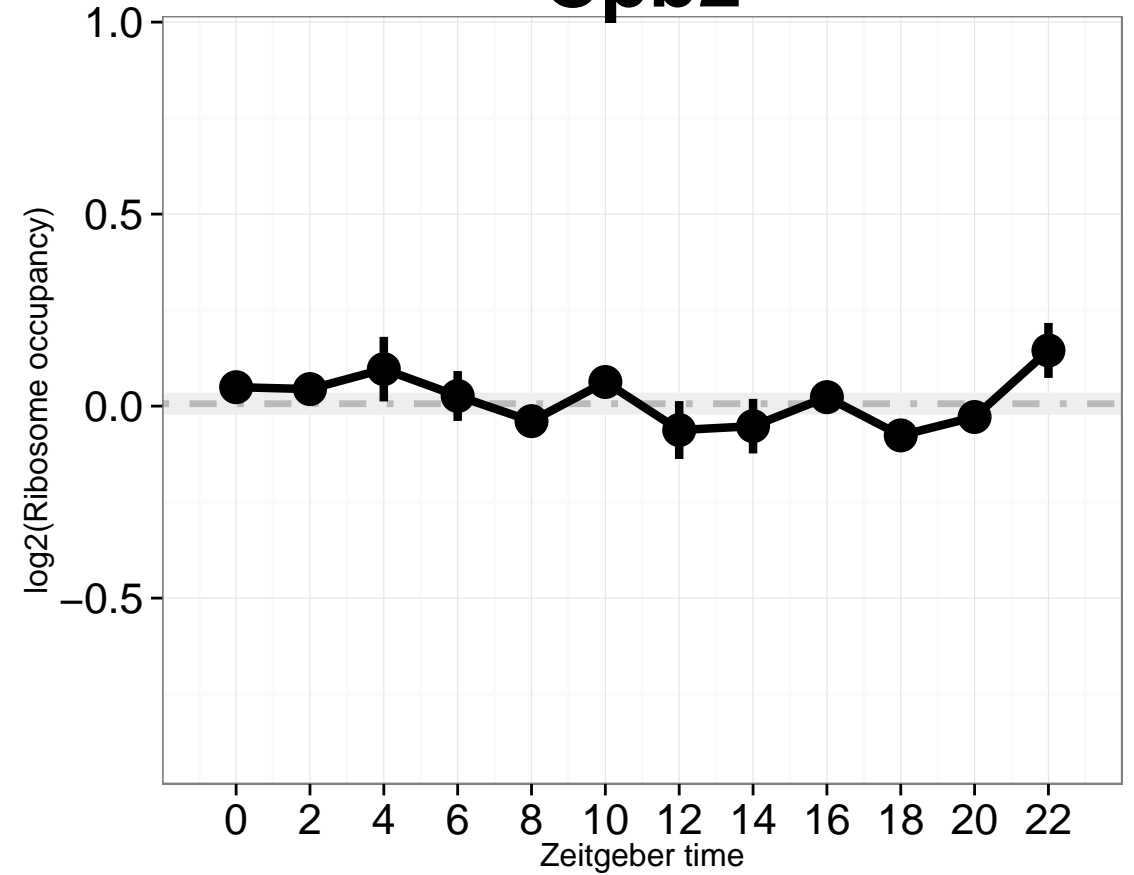

Supplement: SuppDataset_1.zip [file Cpb2_set_D.pdf › Supplemental Dataset 1/D-mRNA_rhythm_translation_rhyth/Cpb2_set_D.pdf]

# Cpeb4

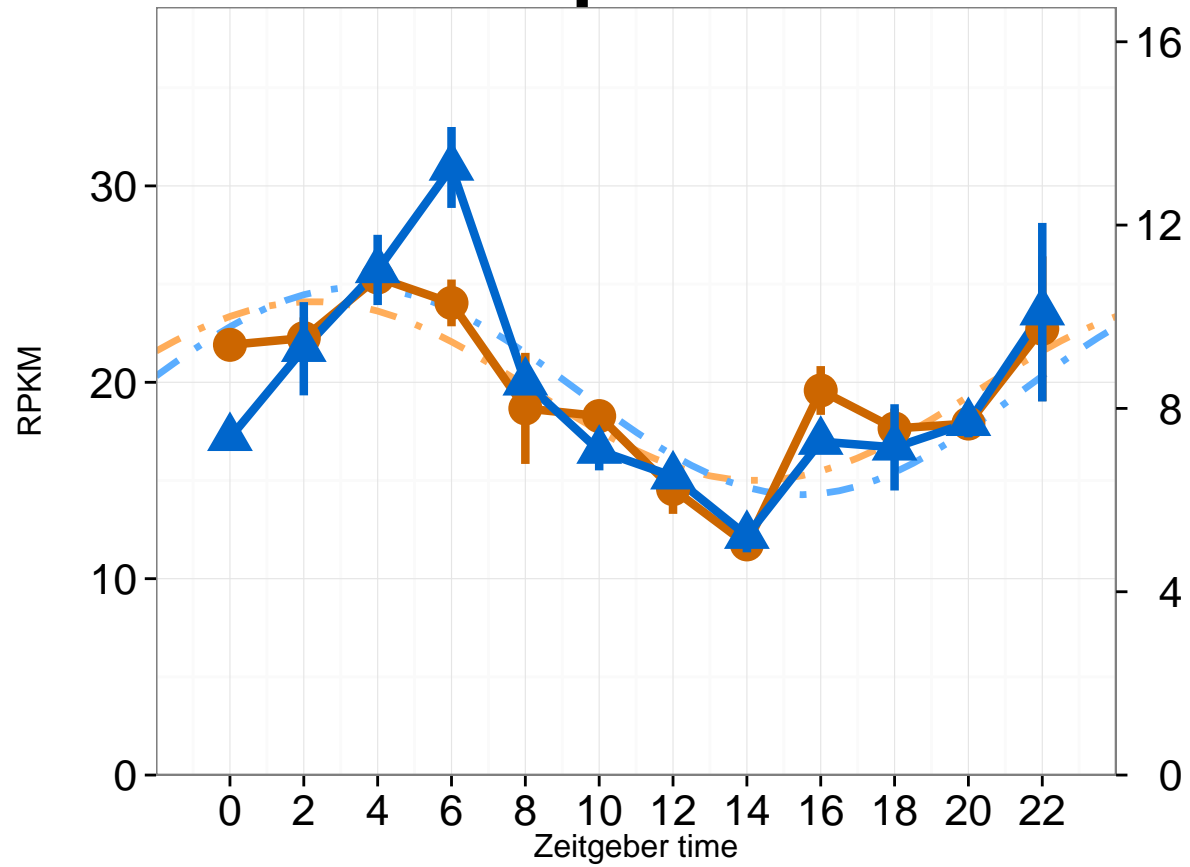

# Cpeb4

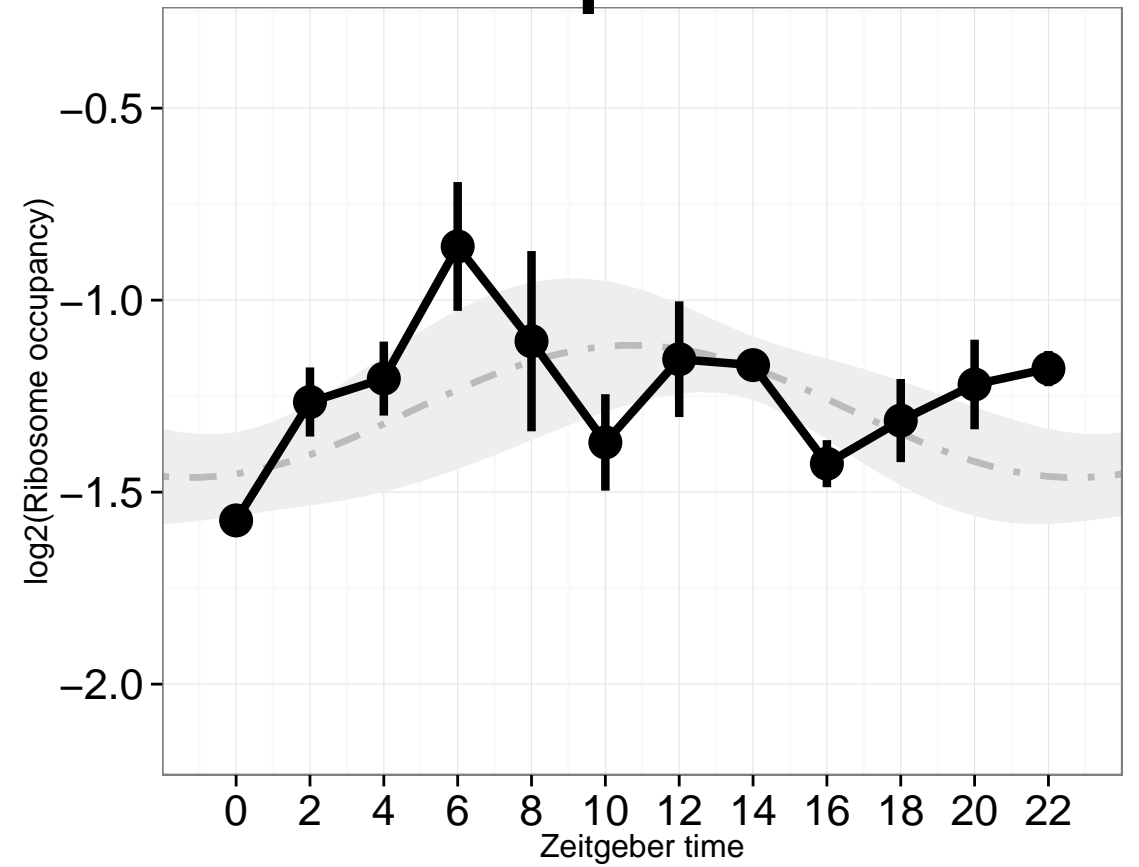

Supplement: SuppDataset_1.zip [file Cpeb4_set_D.pdf › Supplemental Dataset 1/D-mRNA_rhythm_translation_rhyth/Cpeb4_set_D.pdf]

# Cpne8

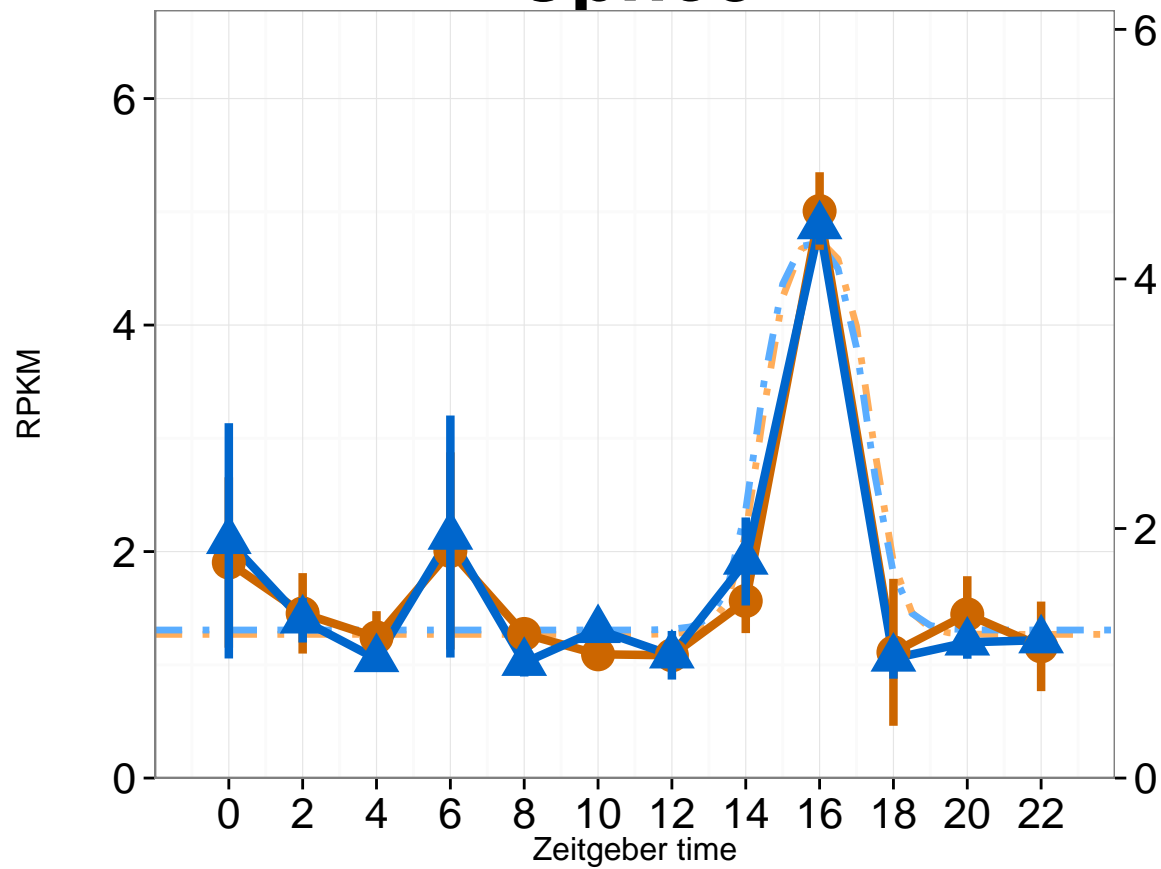

# Cpne8

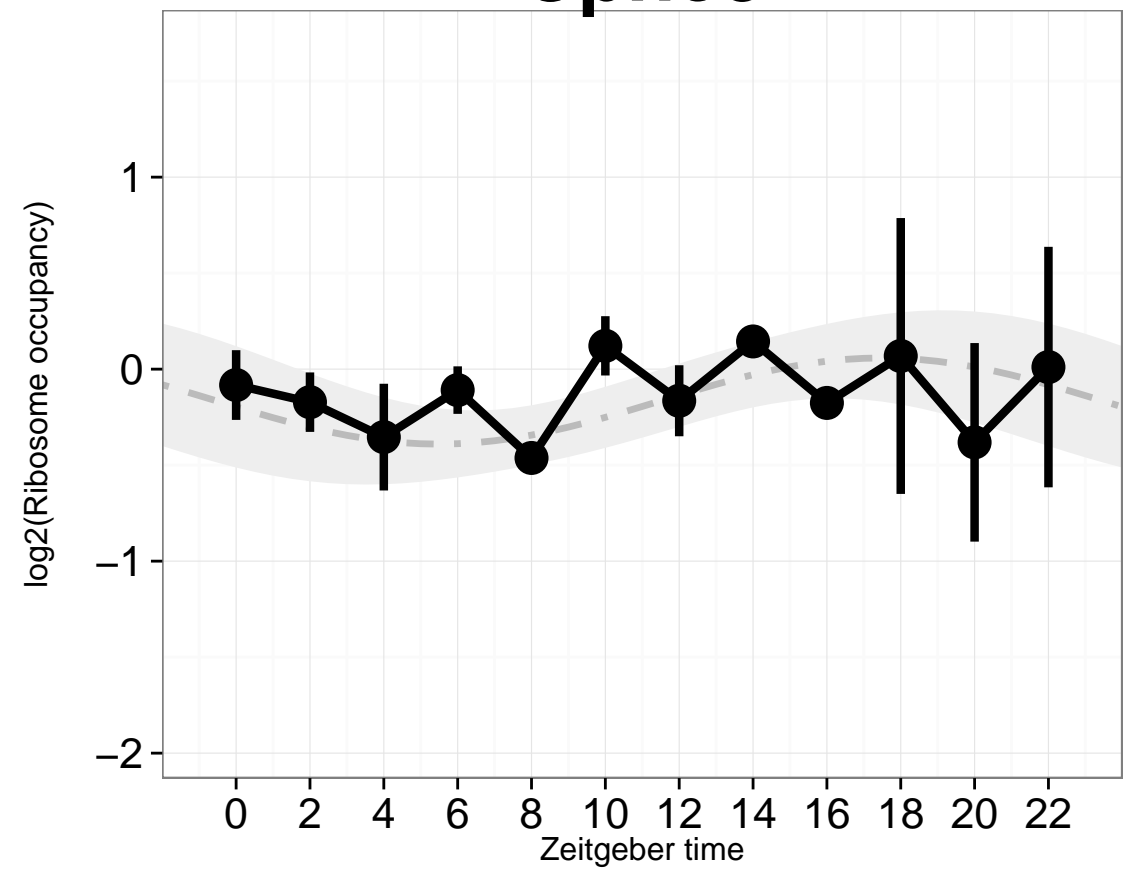

Supplement: SuppDataset_1.zip [file Cpne8_set_D.pdf › Supplemental Dataset 1/D-mRNA_rhythm_translation_rhyth/Cpne8_set_D.pdf]

# Cpt1a

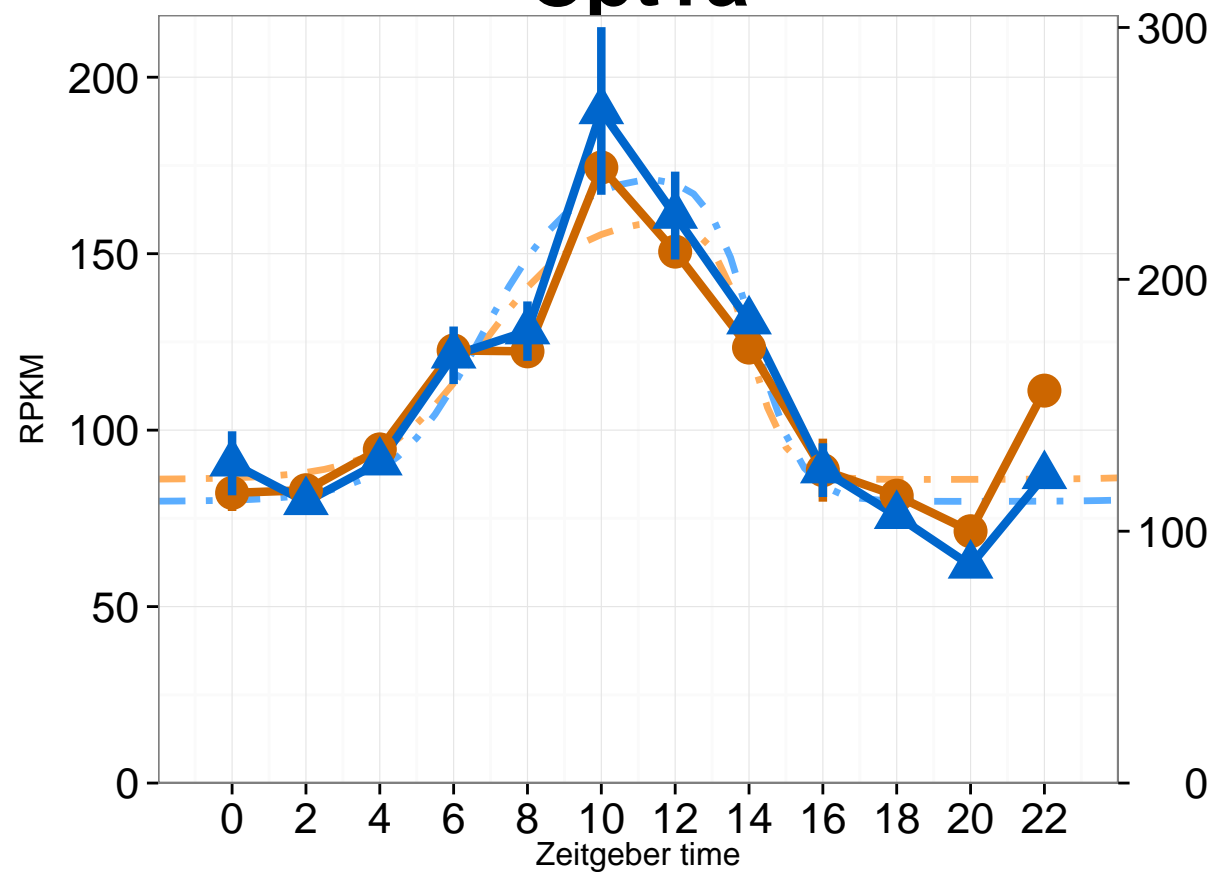

# Cpt1a

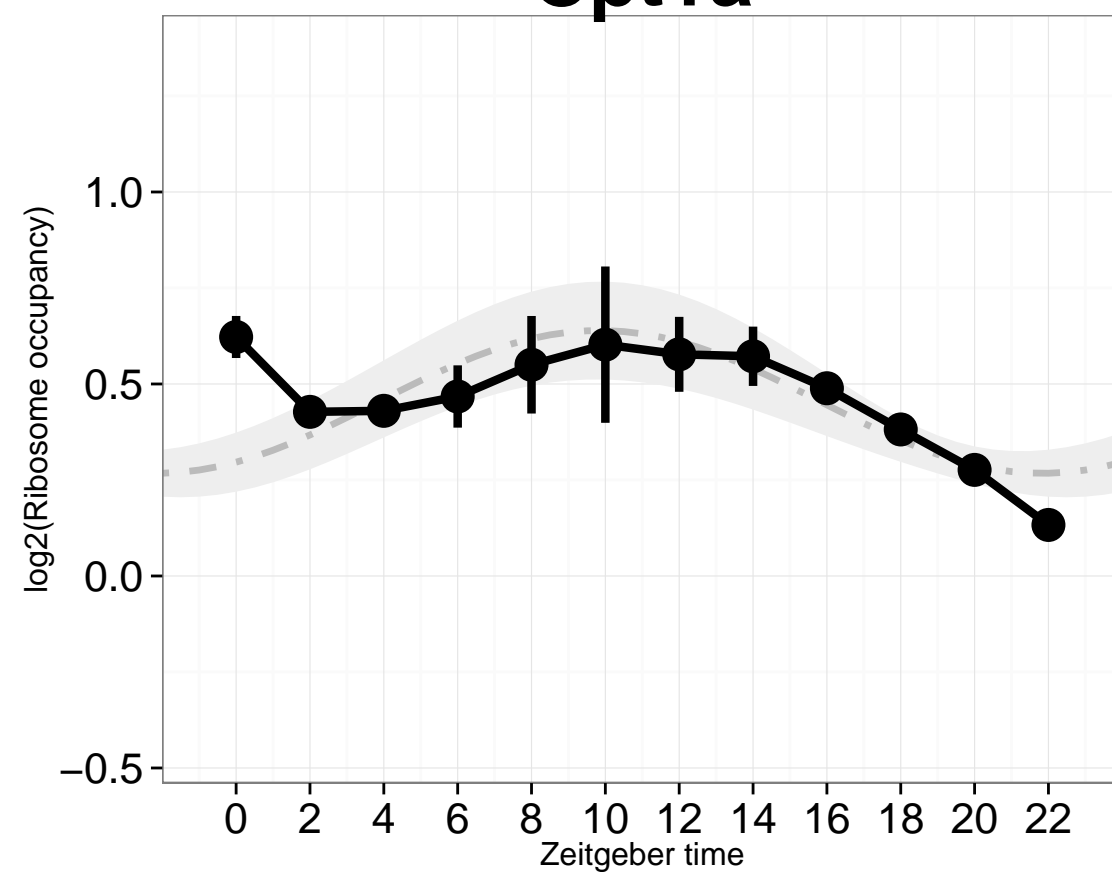

Supplement: SuppDataset_1.zip [file Cpt1a_set_D.pdf › Supplemental Dataset 1/D-mRNA_rhythm_translation_rhyth/Cpt1a_set_D.pdf]

# Cpxm1

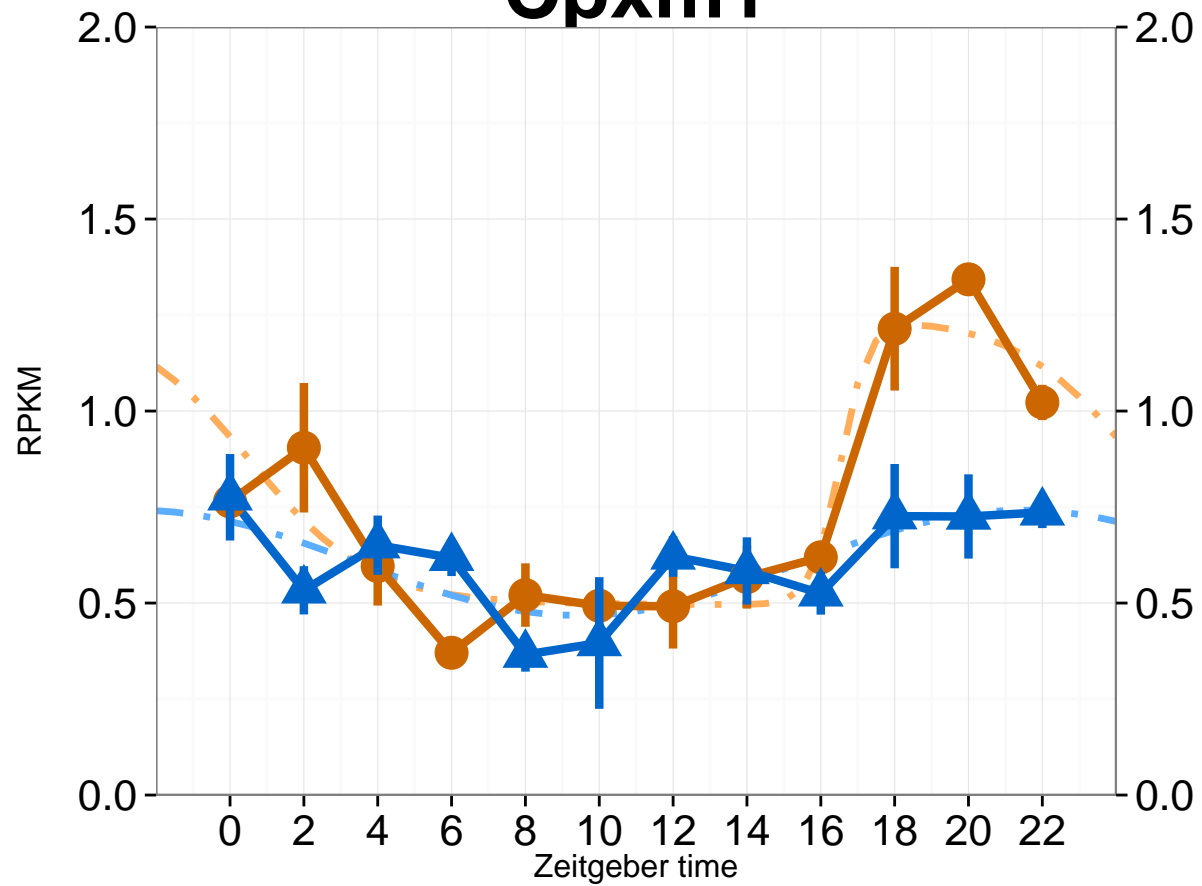

# Cpxm1

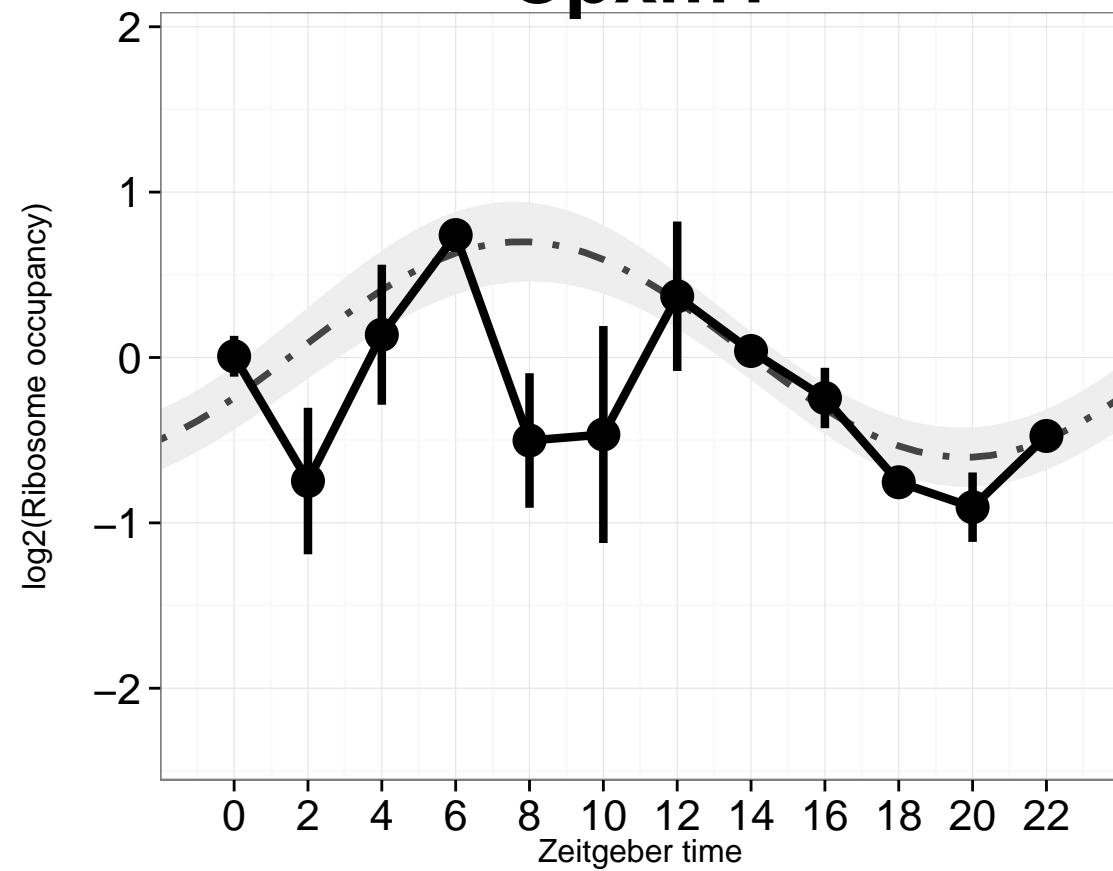

Supplement: SuppDataset_1.zip [file Cpxm1_set_D.pdf › Supplemental Dataset 1/D-mRNA_rhythm_translation_rhyth/Cpxm1_set_D.pdf]

## Crat

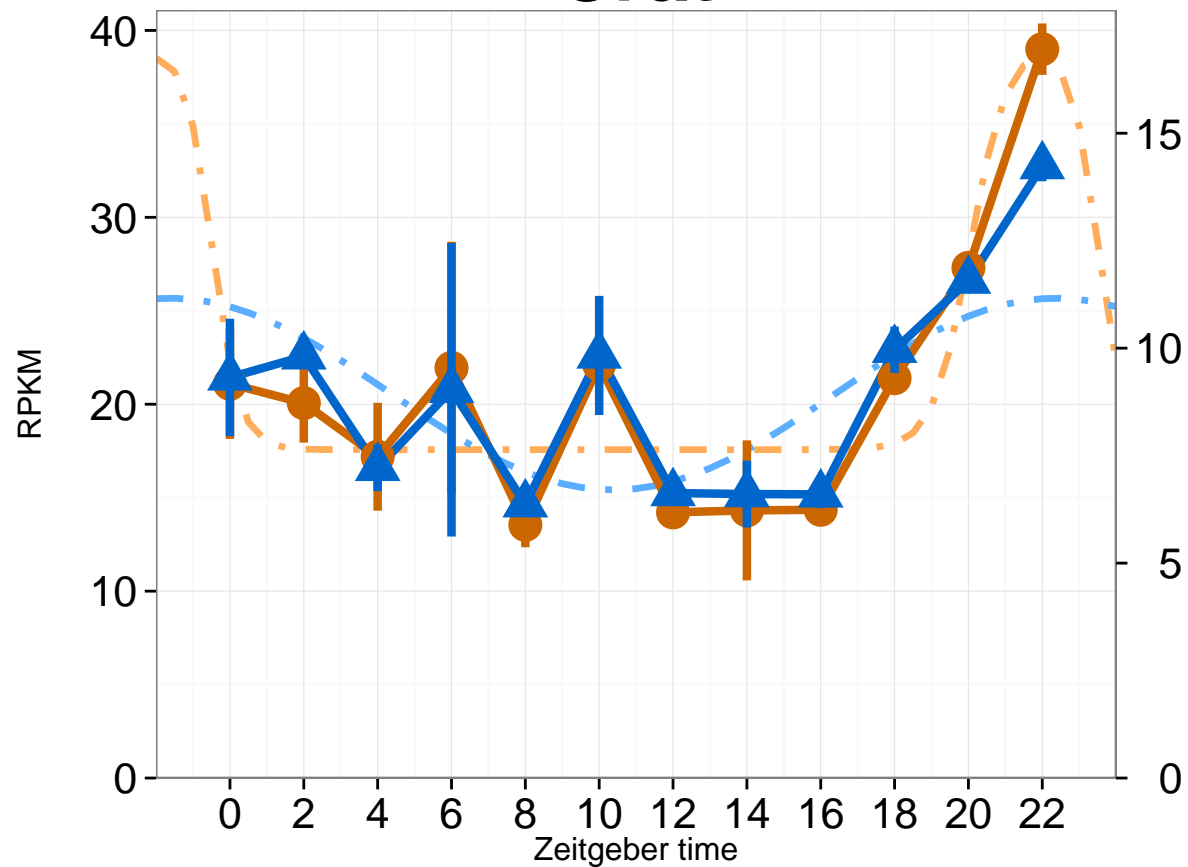

## Crat

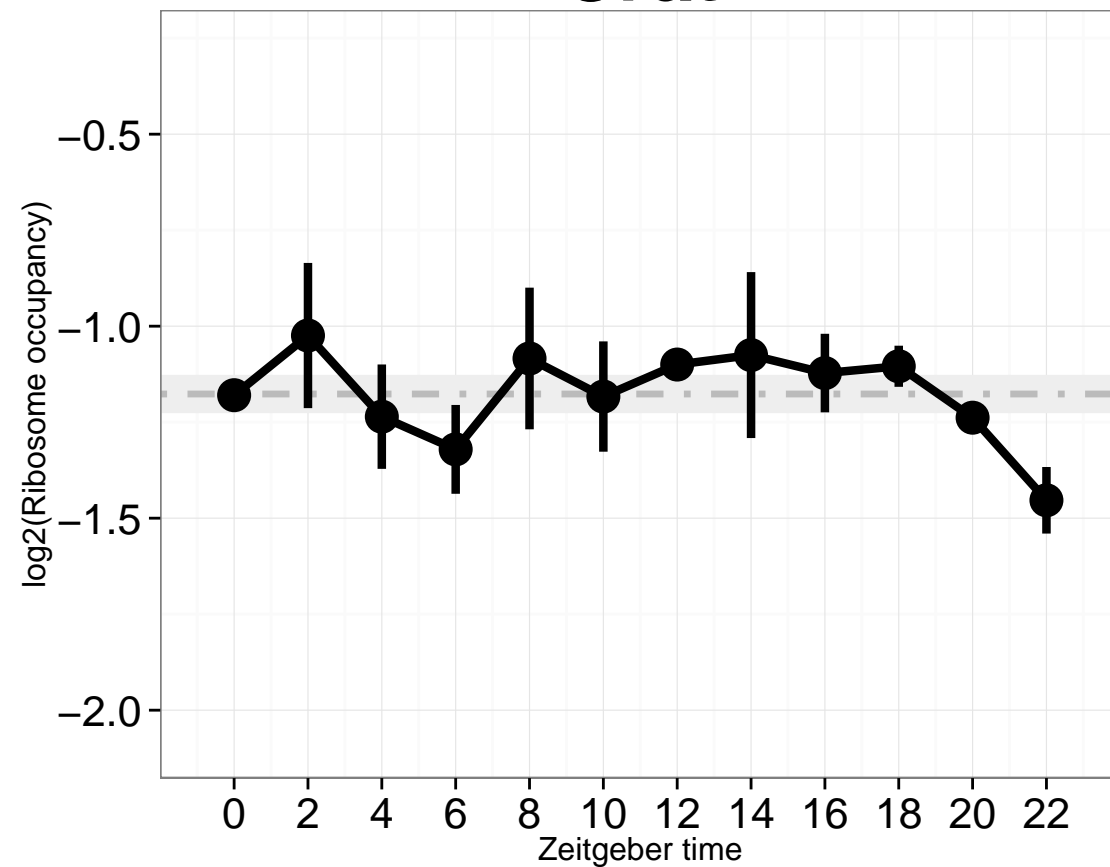

Supplement: SuppDataset_1.zip [file Crat_set_D.pdf › Supplemental Dataset 1/D-mRNA_rhythm_translation_rhyth/Crat_set_D.pdf]

## Crb3

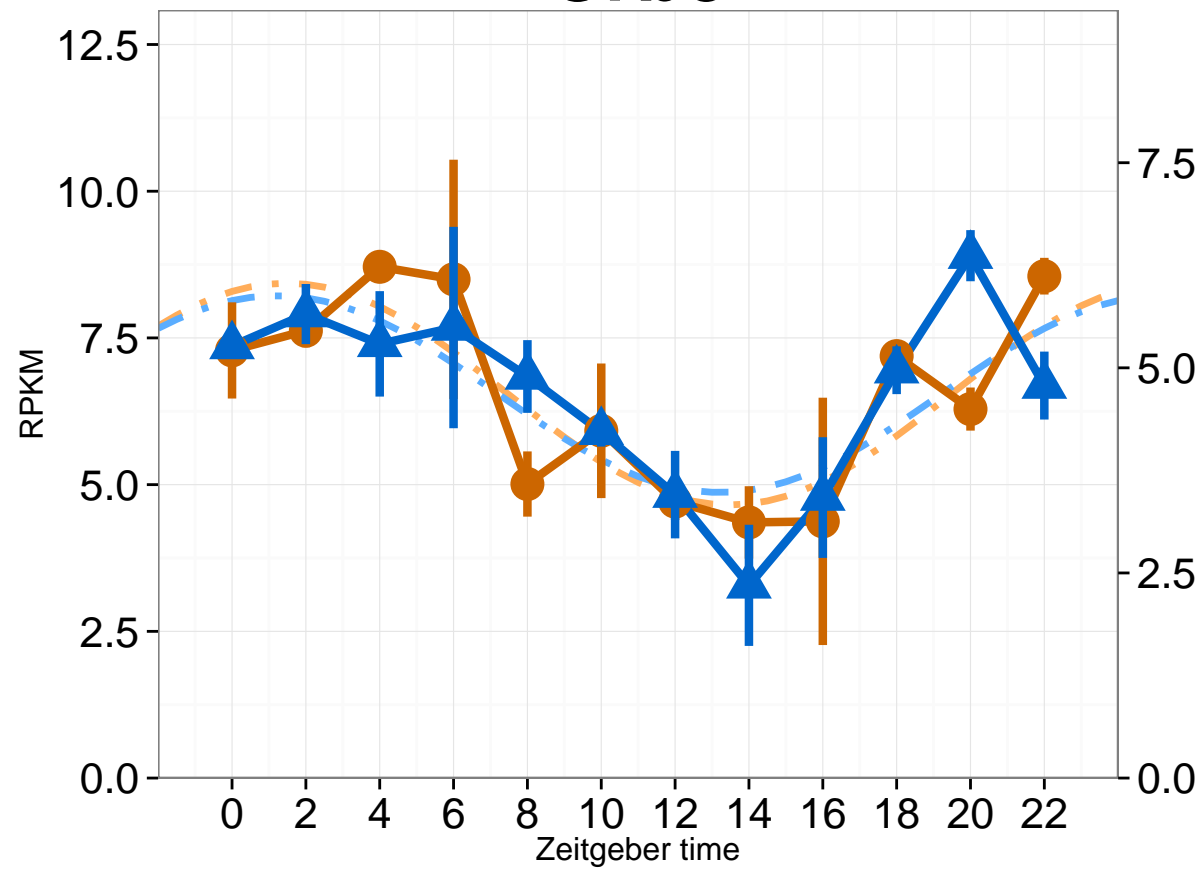

## Crb3

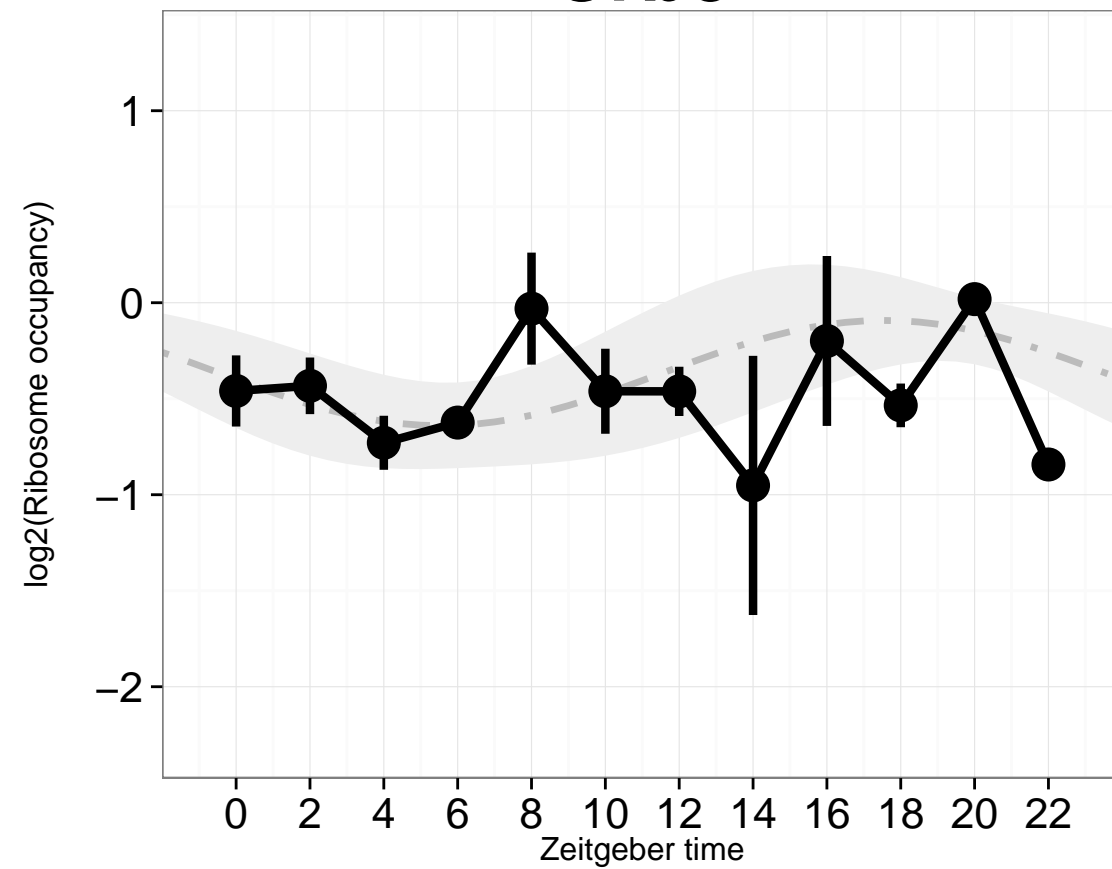

Supplement: SuppDataset_1.zip [file Crb3_set_D.pdf › Supplemental Dataset 1/D-mRNA_rhythm_translation_rhyth/Crb3_set_D.pdf]

## Crcp

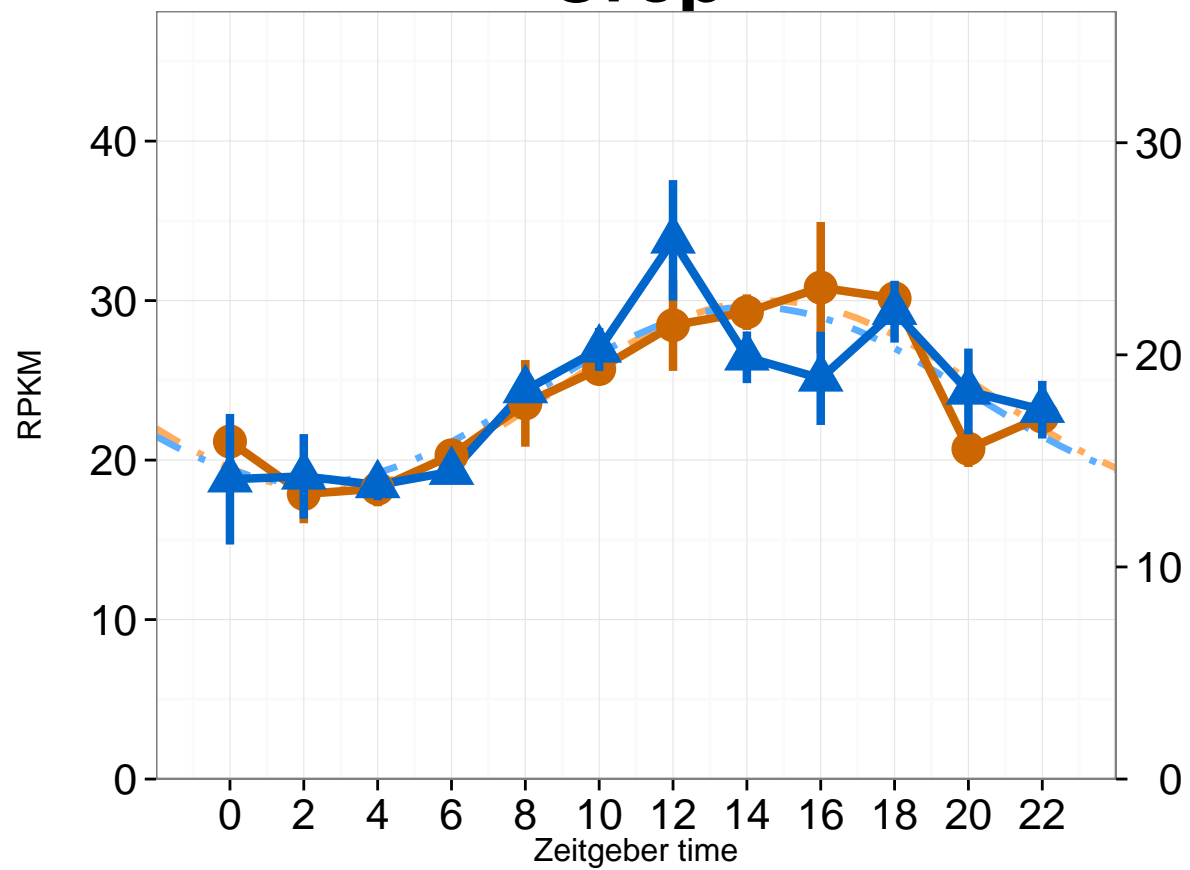

## Crcp

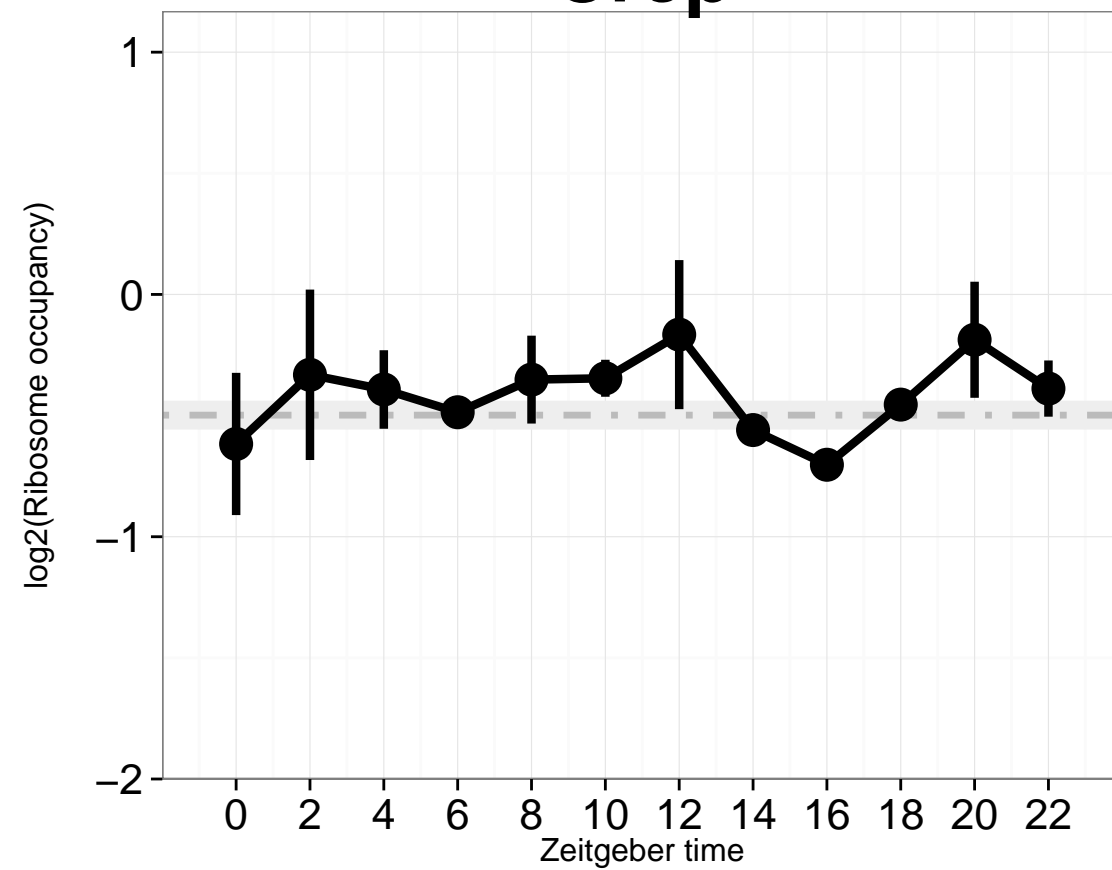

Supplement: SuppDataset_1.zip [file Crcp_set_D.pdf › Supplemental Dataset 1/D-mRNA_rhythm_translation_rhyth/Crcp_set_D.pdf]

## Crebzf

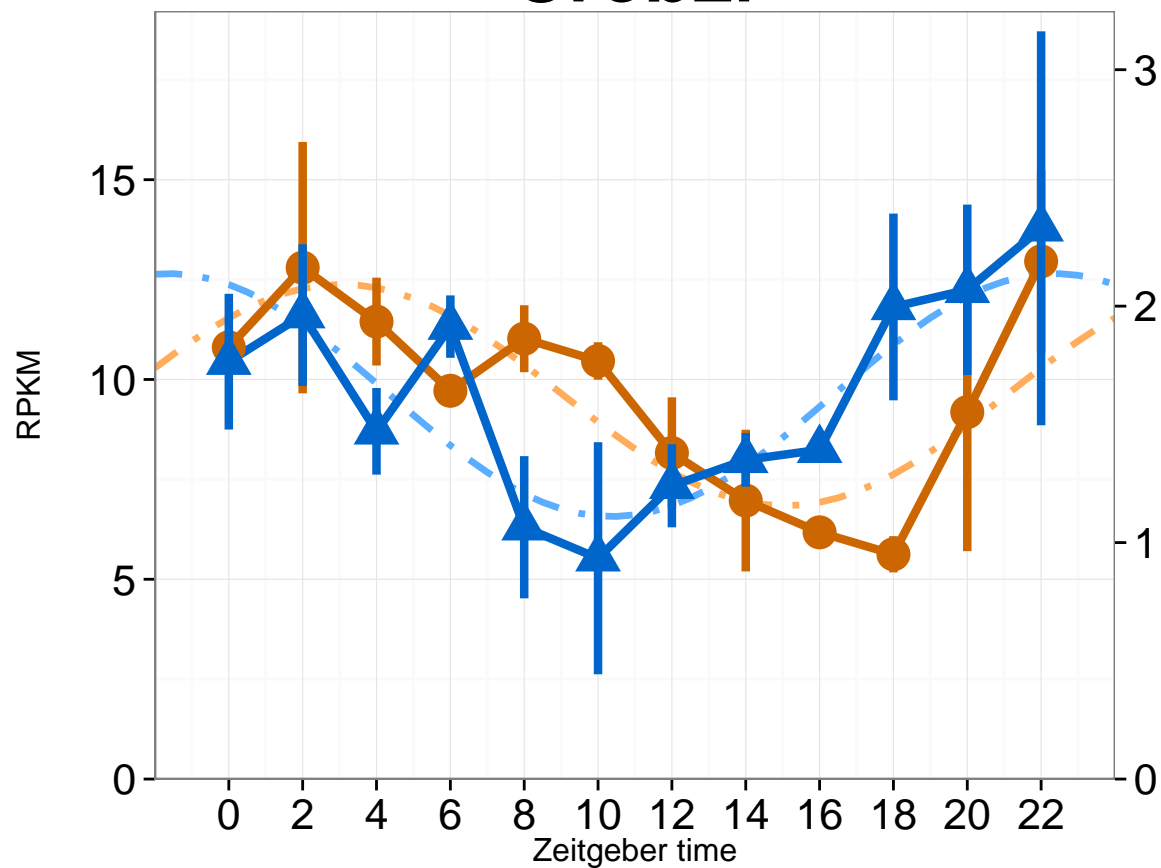

## Crebzf

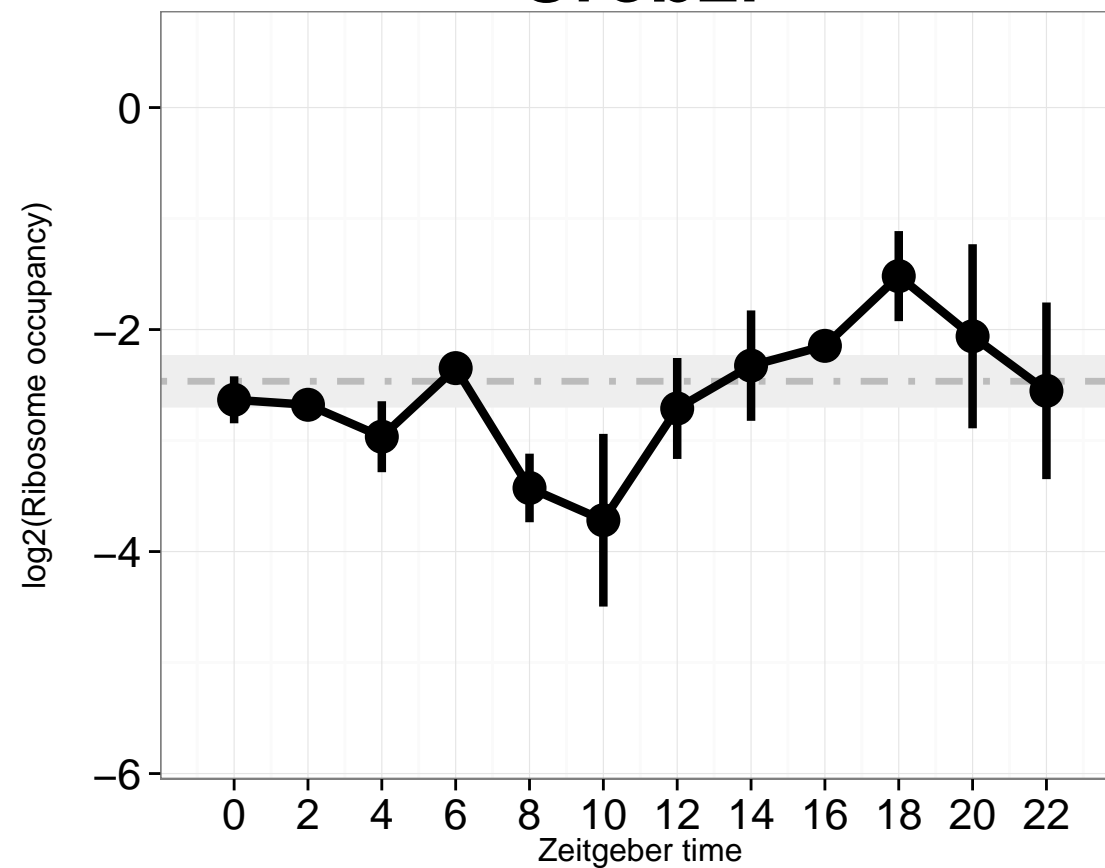

Supplement: SuppDataset_1.zip [file Crebzf_set_D.pdf › Supplemental Dataset 1/D-mRNA_rhythm_translation_rhyth/Crebzf_set_D.pdf]

## Crip2

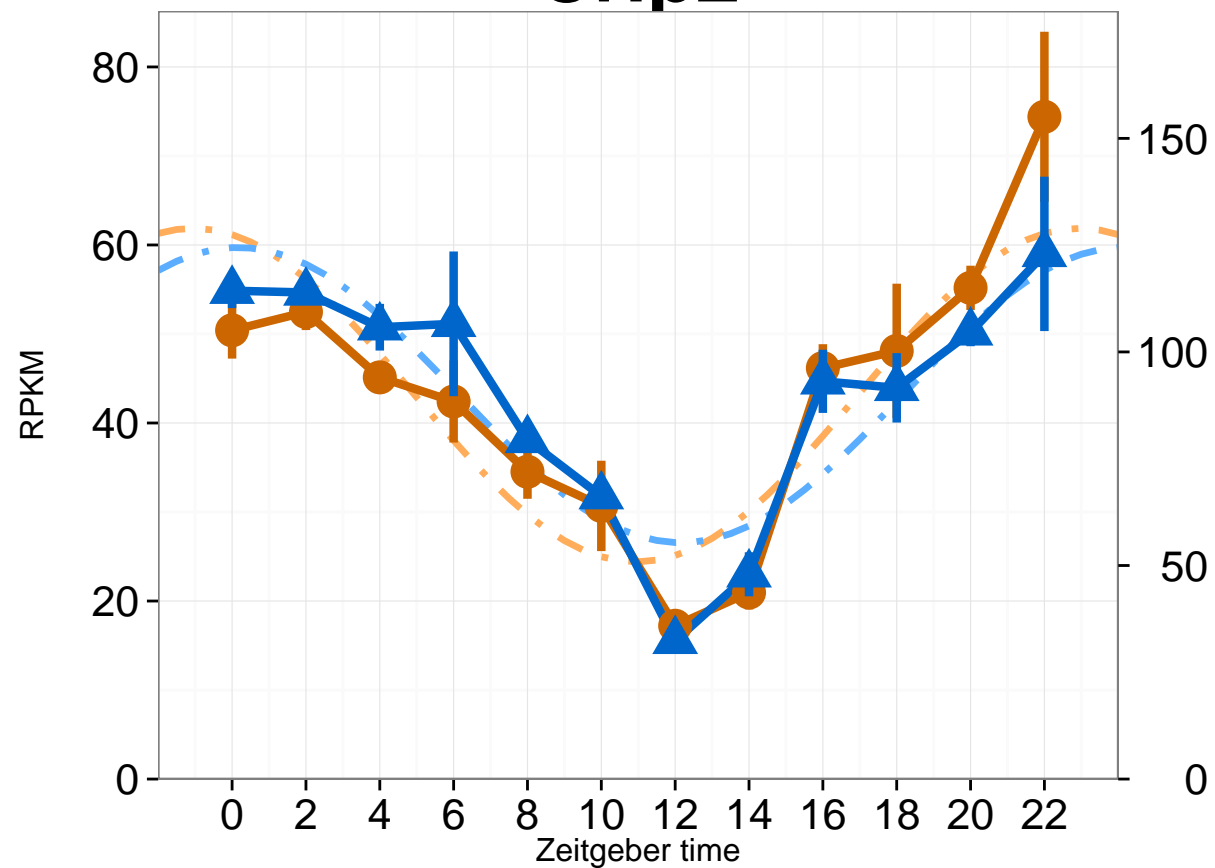

## Crip2

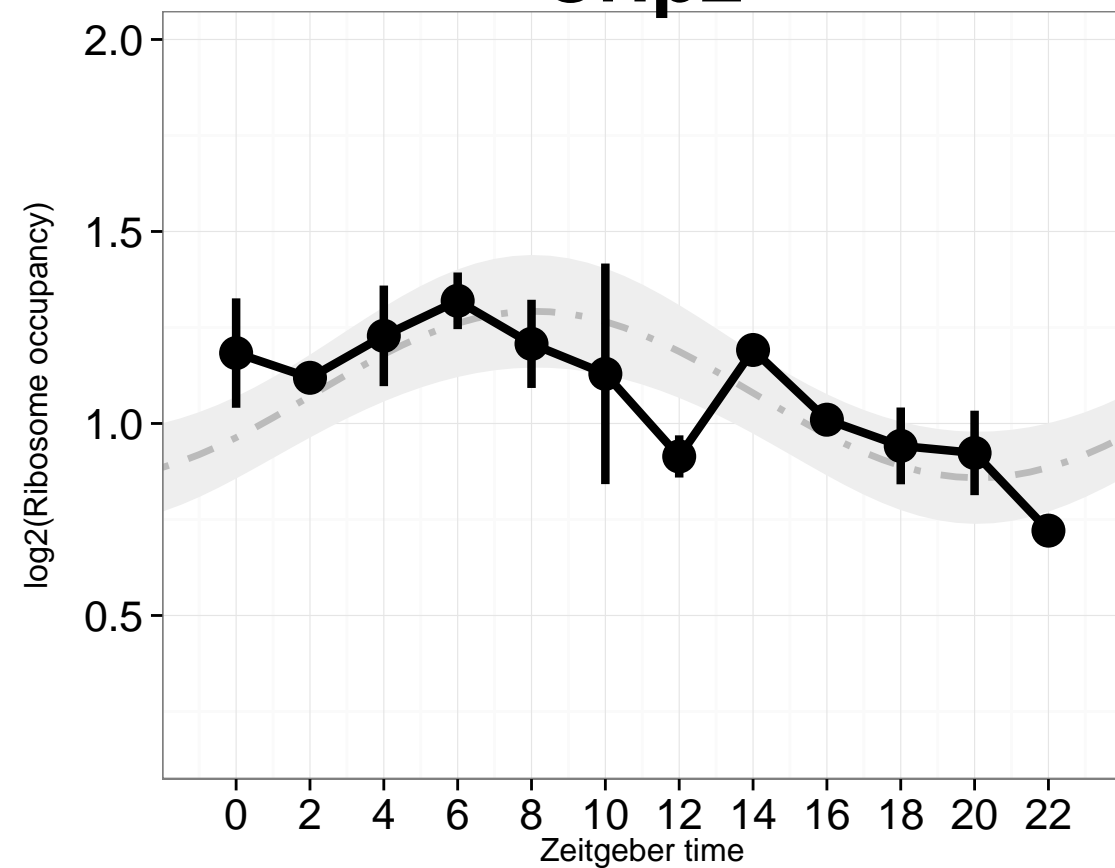

Supplement: SuppDataset_1.zip [file Crip2_set_D.pdf › Supplemental Dataset 1/D-mRNA_rhythm_translation_rhyth/Crip2_set_D.pdf]

## Crot

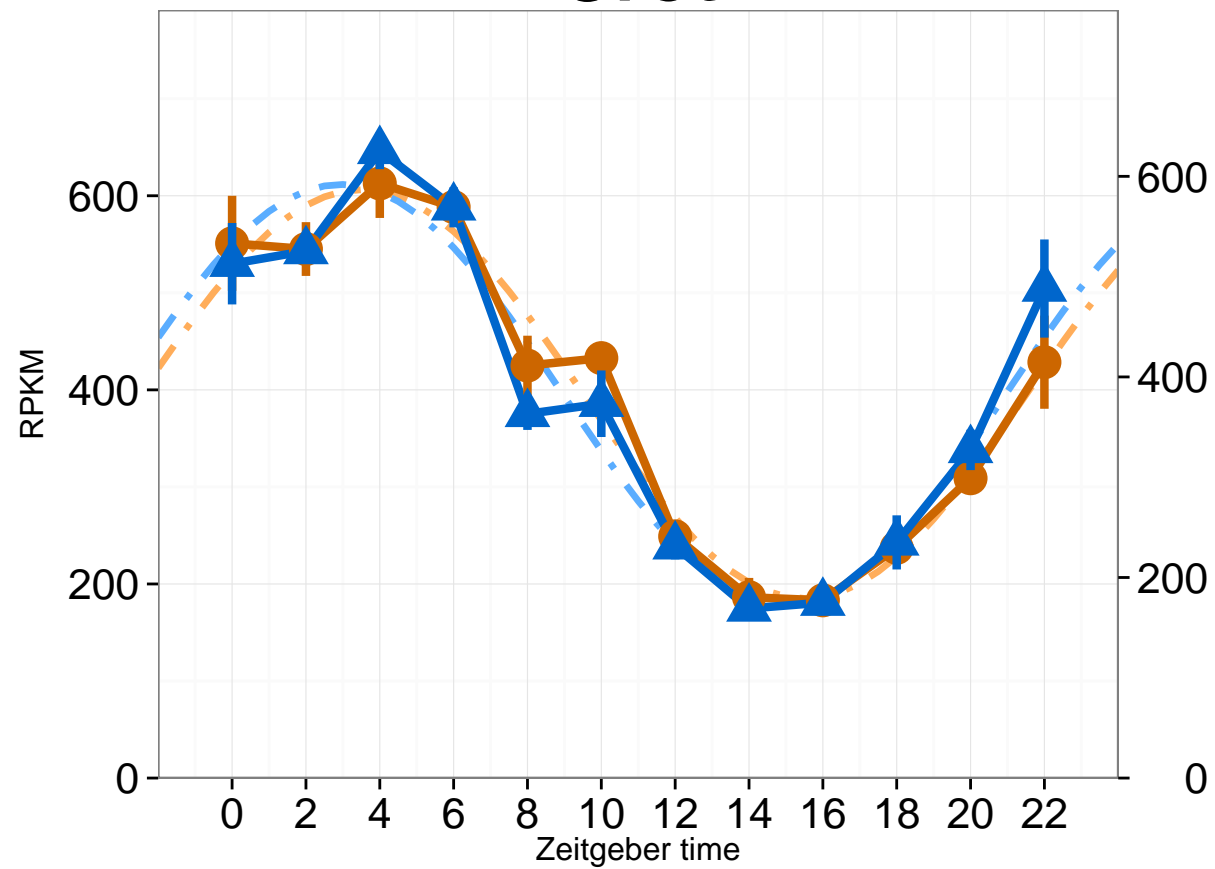

## Crot

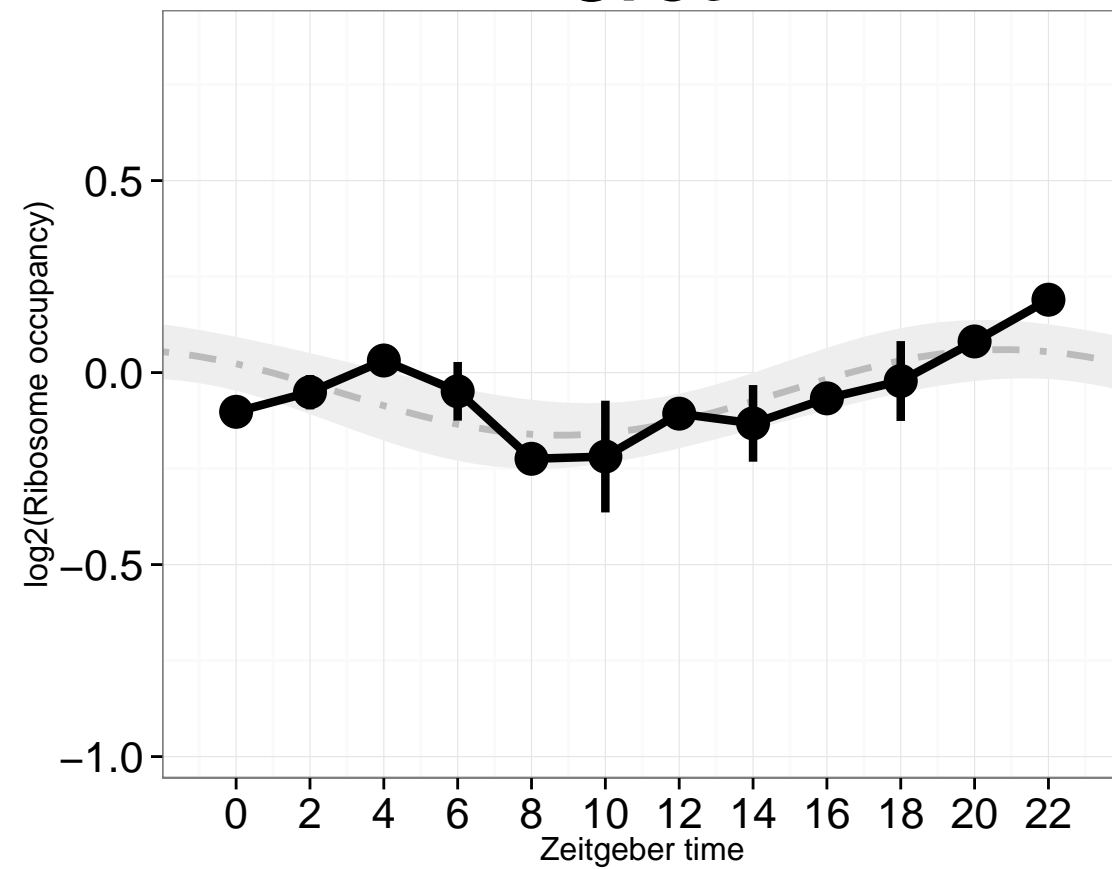

Supplement: SuppDataset_1.zip [file Crot_set_D.pdf › Supplemental Dataset 1/D-mRNA_rhythm_translation_rhyth/Crot_set_D.pdf]

# Cry1

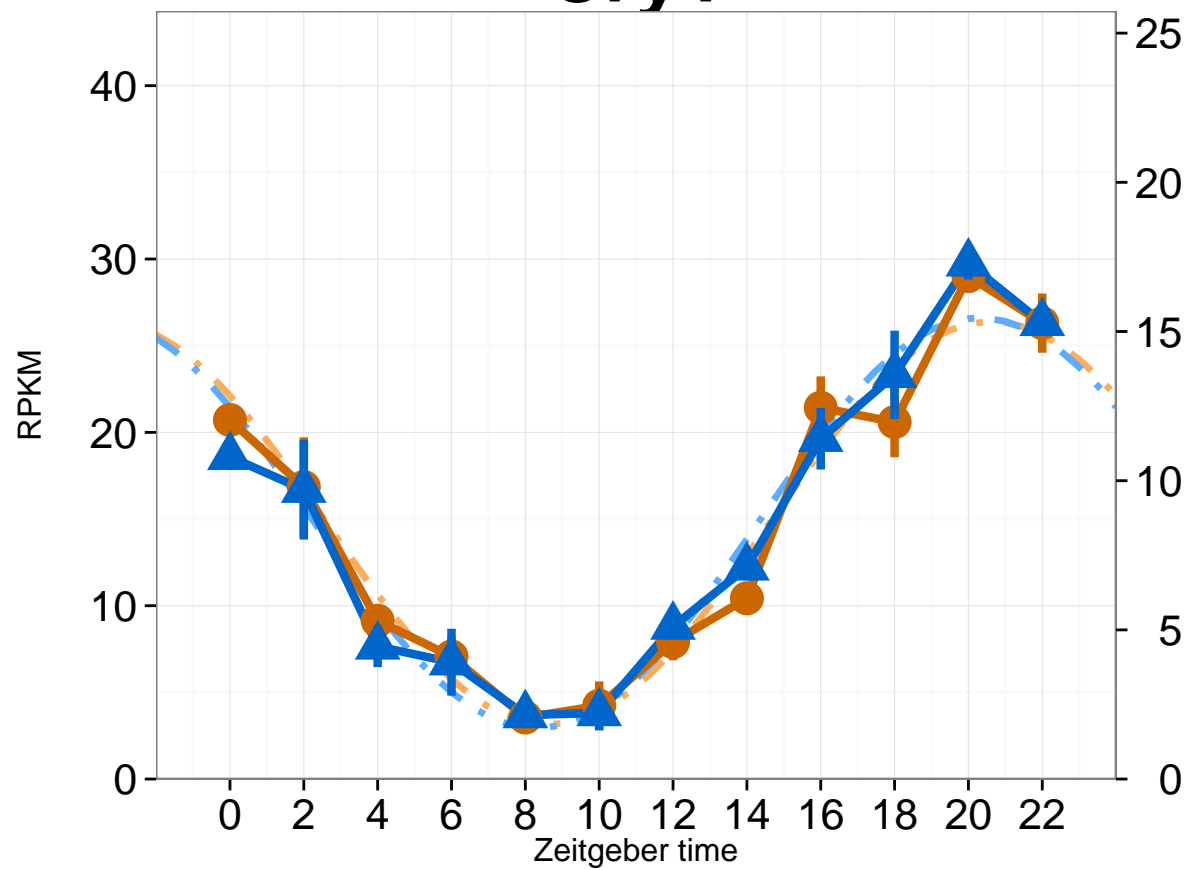

# Cry1

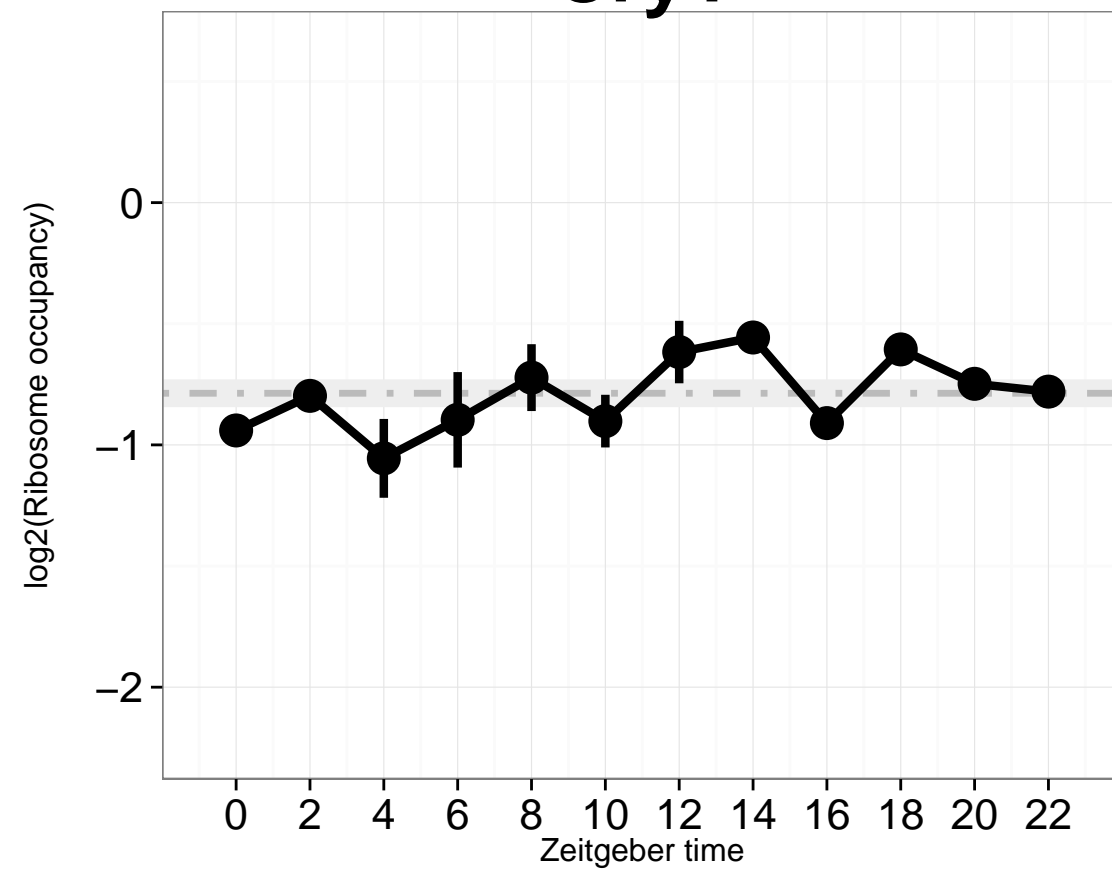

Supplement: SuppDataset_1.zip [file Cry1_set_D.pdf › Supplemental Dataset 1/D-mRNA_rhythm_translation_rhyth/Cry1_set_D.pdf]

## Cry2

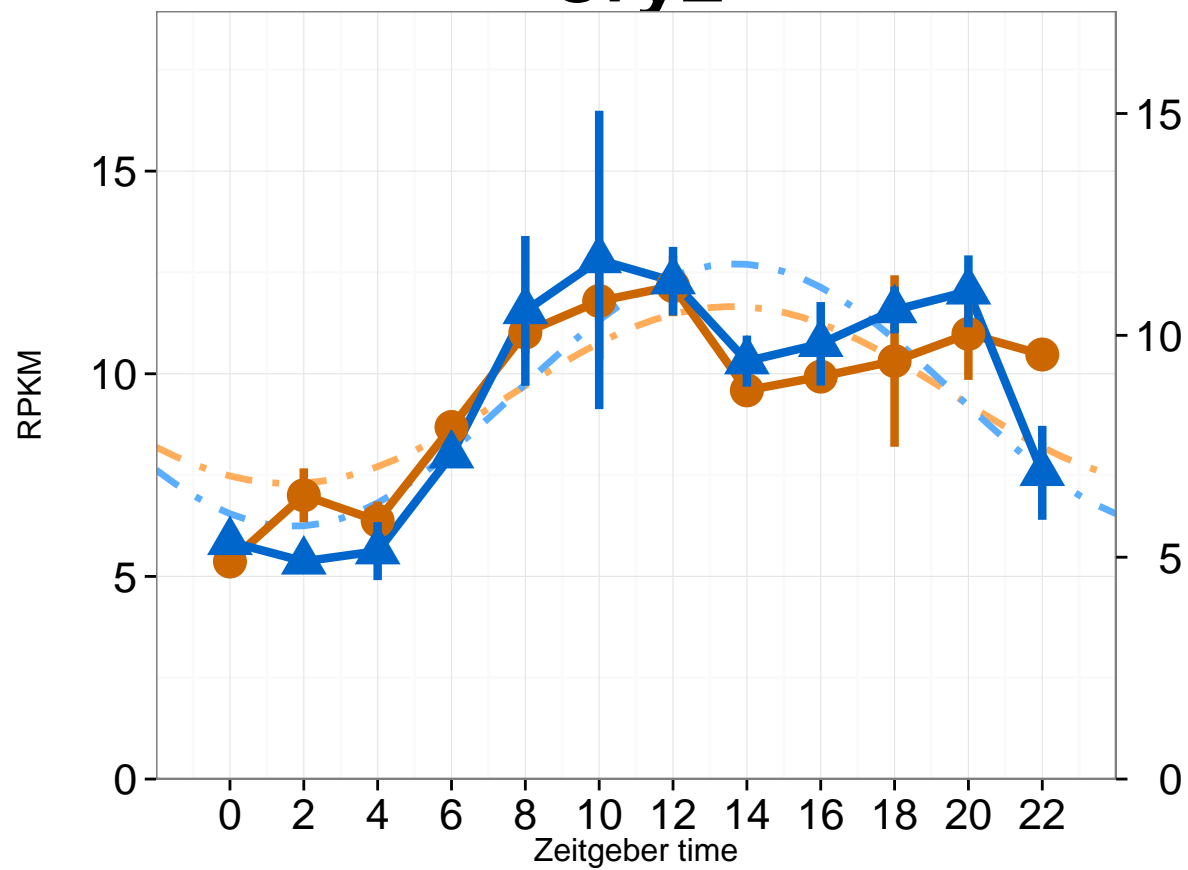

## Cry2

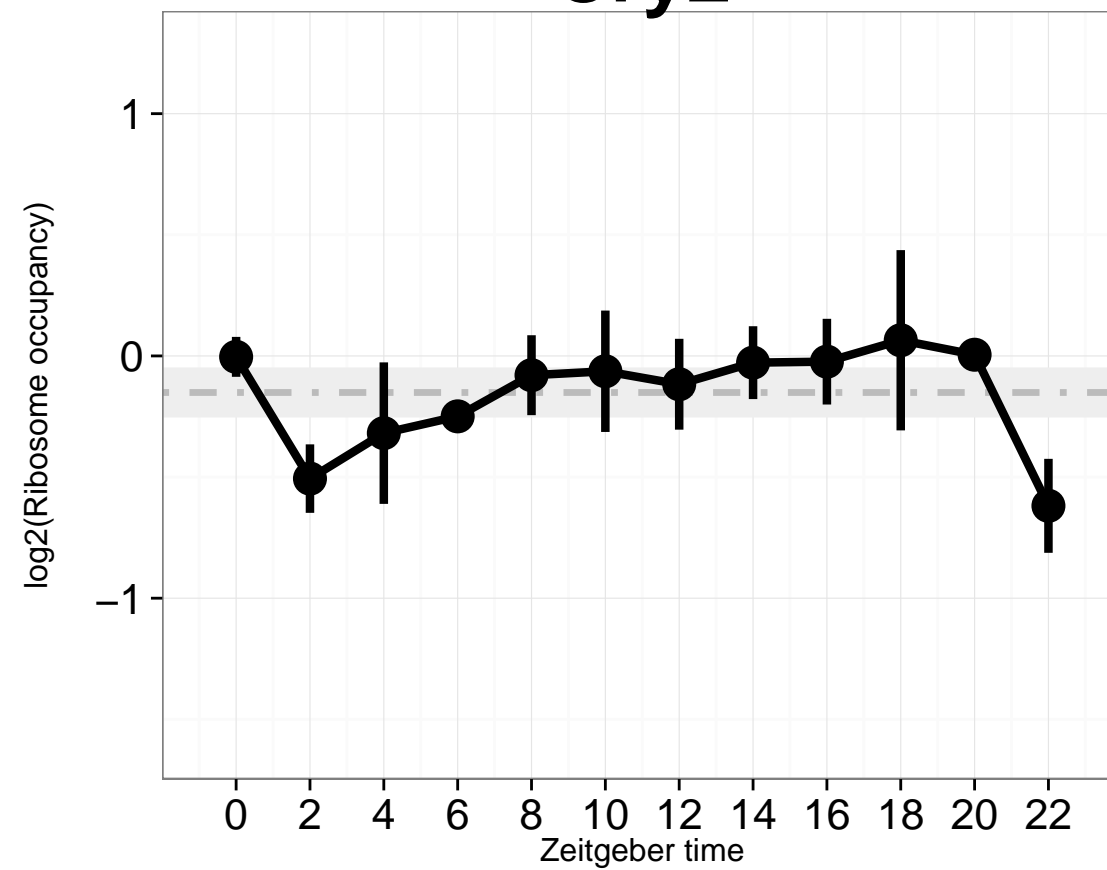

Supplement: SuppDataset_1.zip [file Cry2_set_D.pdf › Supplemental Dataset 1/D-mRNA_rhythm_translation_rhyth/Cry2_set_D.pdf]

# Crybg3

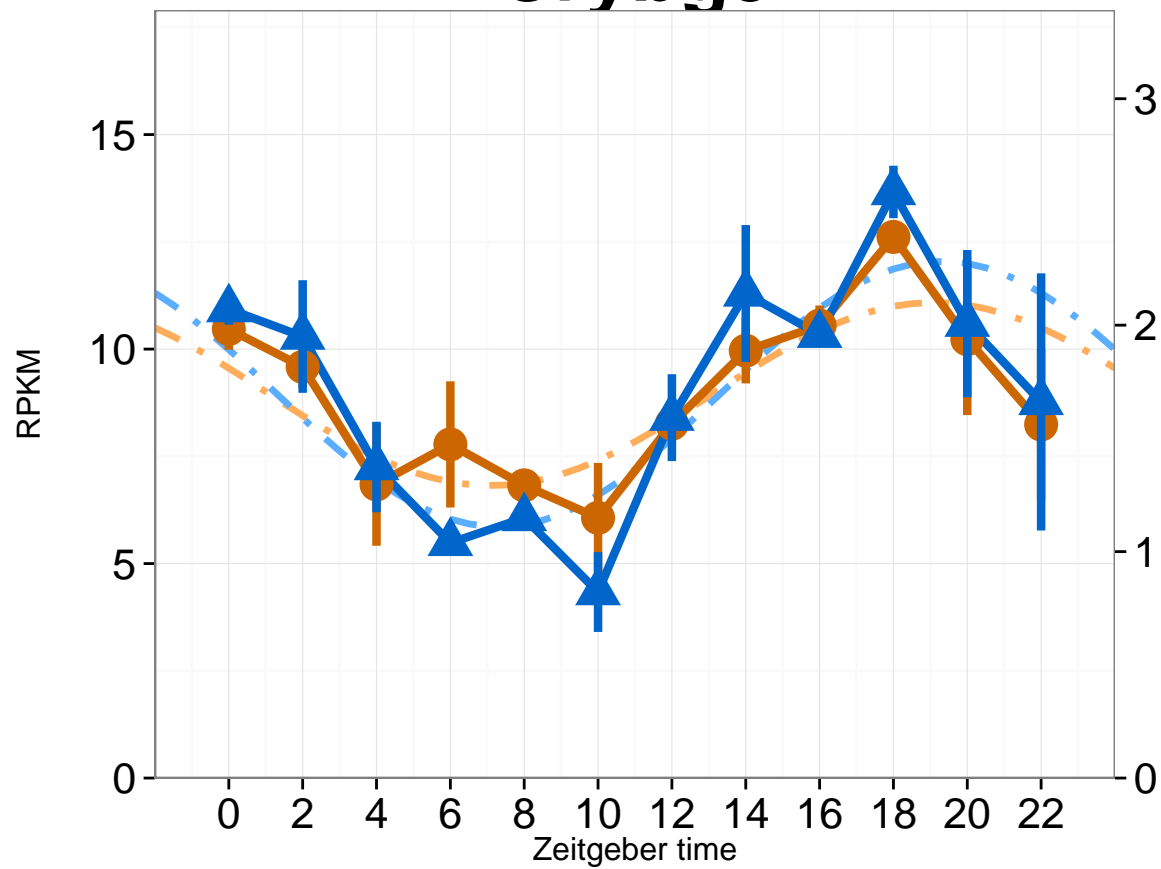

# Crybg3

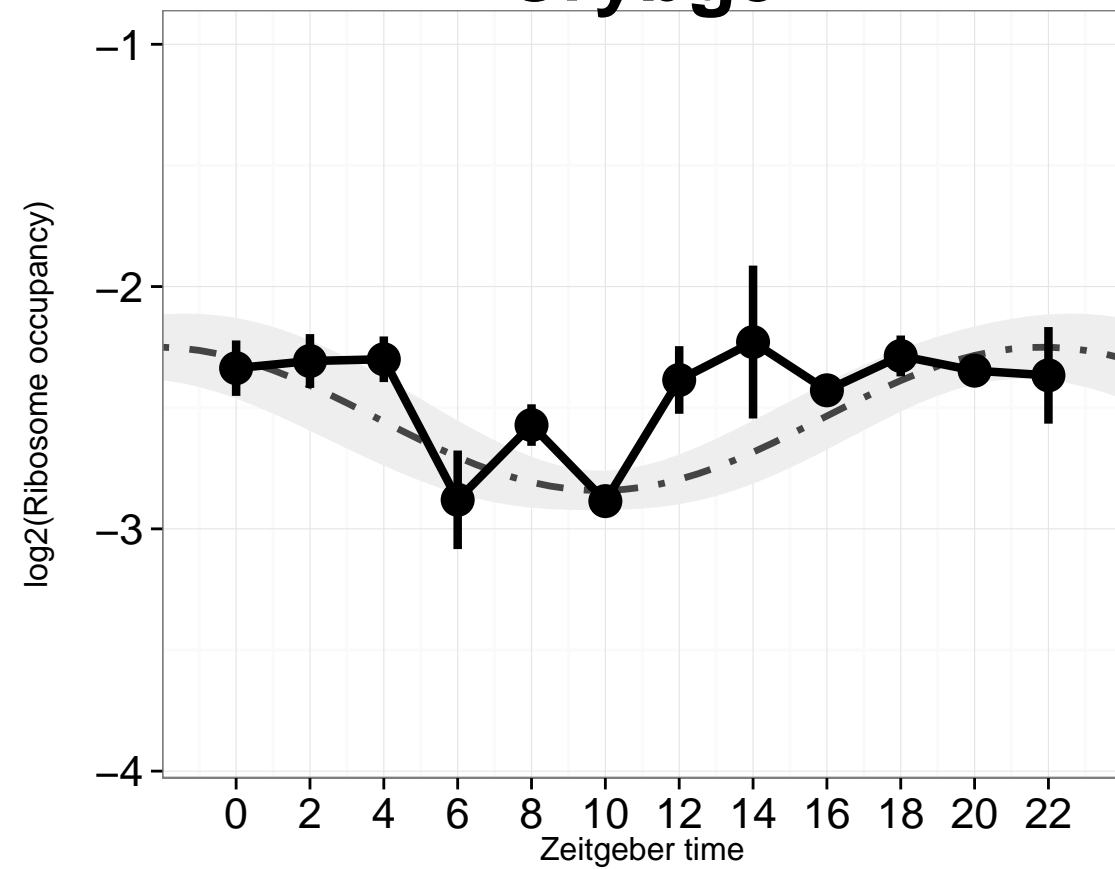

Supplement: SuppDataset_1.zip [file Crybg3_set_D.pdf › Supplemental Dataset 1/D-mRNA_rhythm_translation_rhyth/Crybg3_set_D.pdf]

## Csad

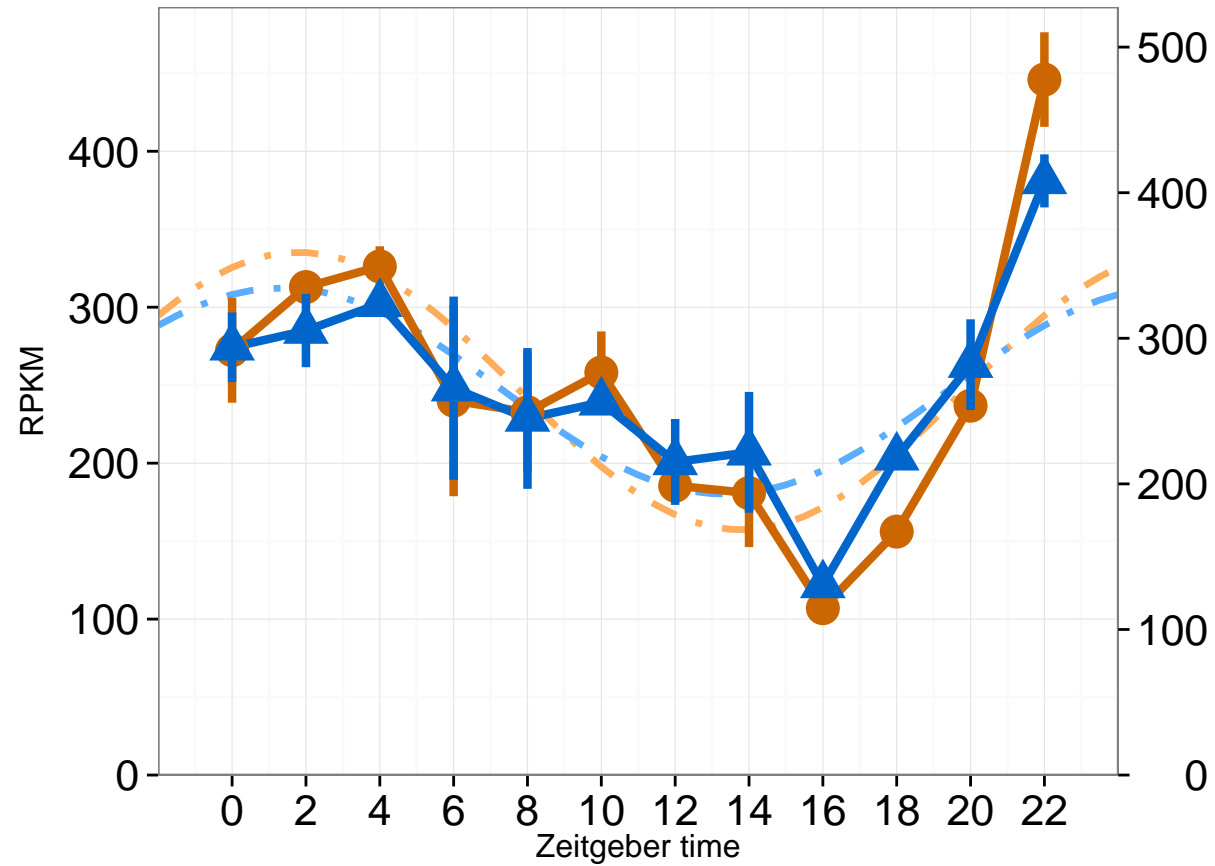

## Csad

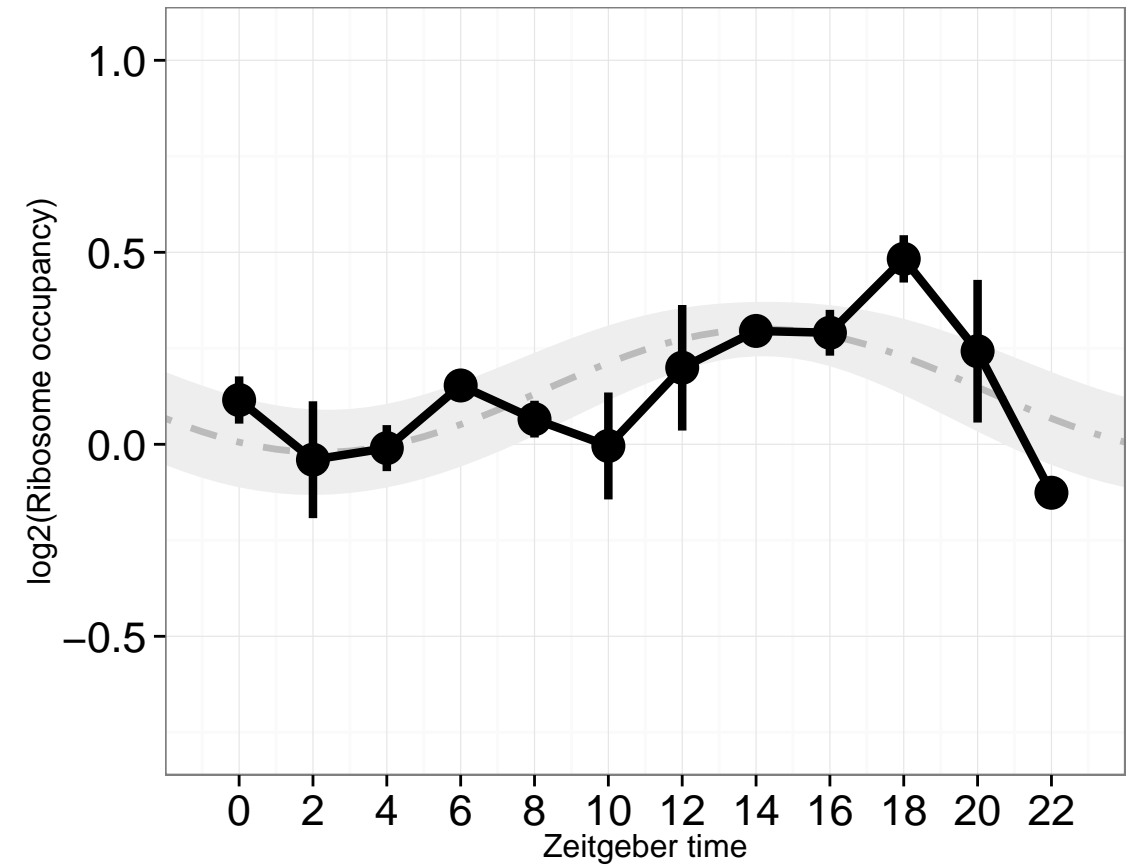

Supplement: SuppDataset_1.zip [file Csad_set_D.pdf › Supplemental Dataset 1/D-mRNA_rhythm_translation_rhyth/Csad_set_D.pdf]

## Csf1

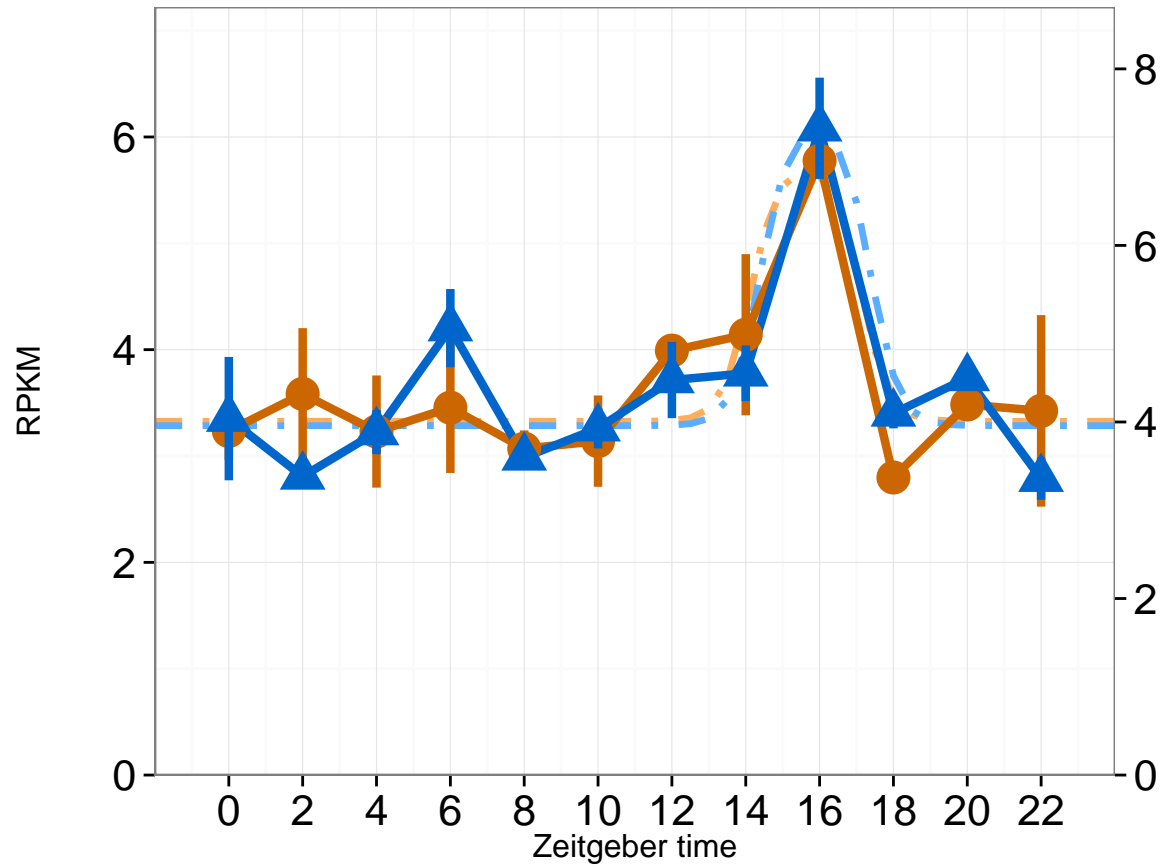

## Csf1

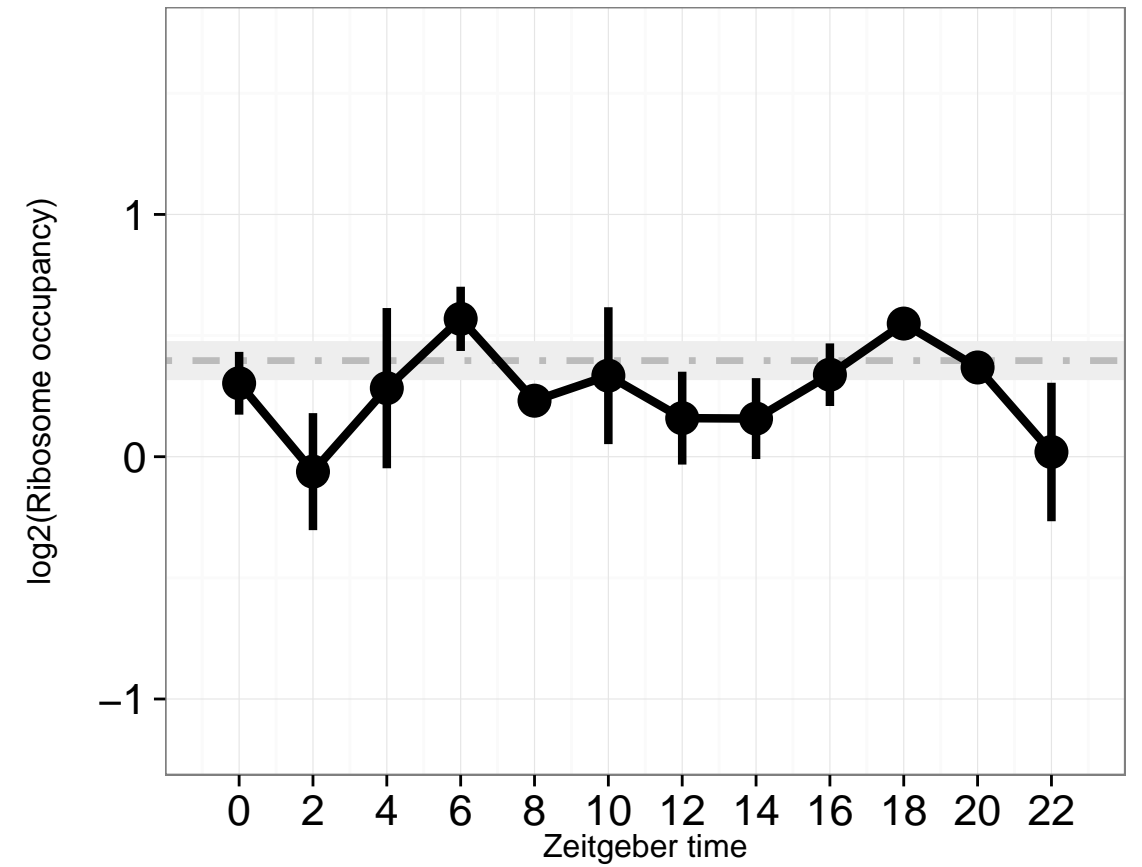

Supplement: SuppDataset_1.zip [file Csf1_set_D.pdf › Supplemental Dataset 1/D-mRNA_rhythm_translation_rhyth/Csf1_set_D.pdf]

# Csnk1g3

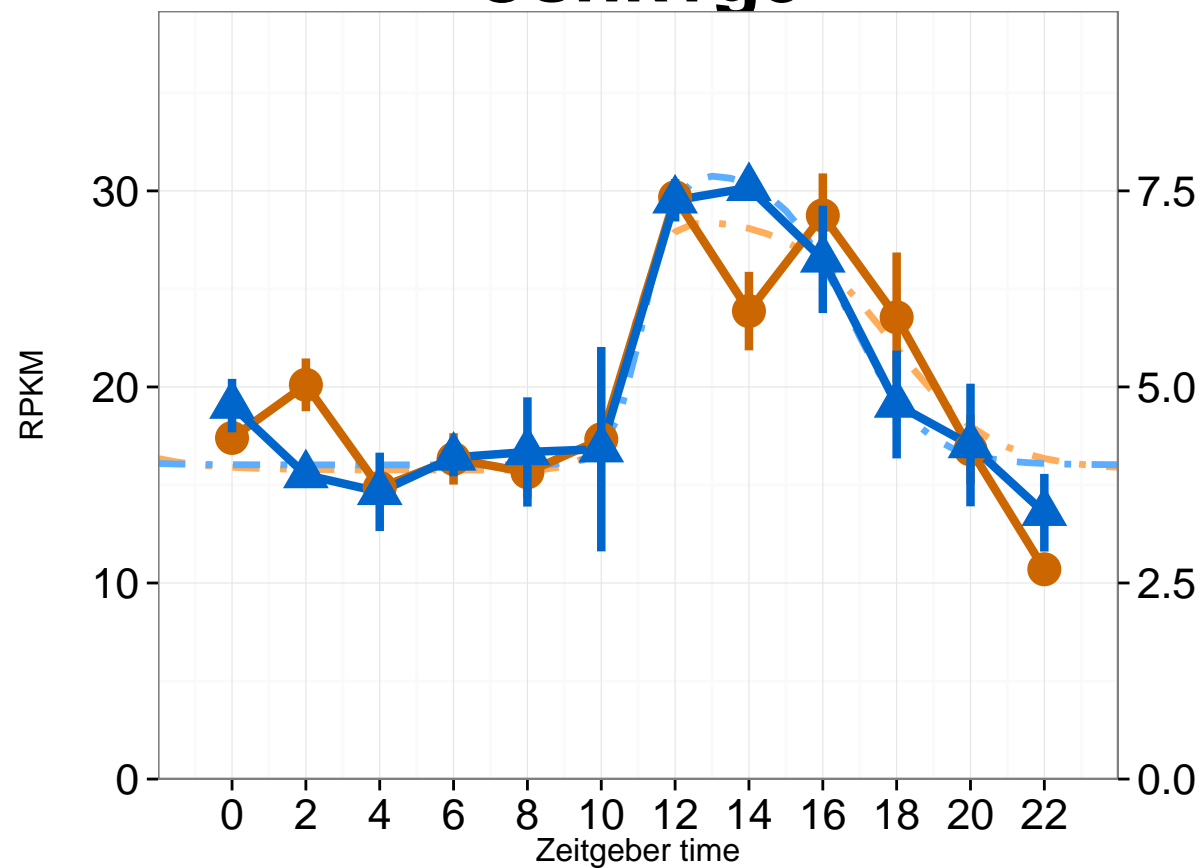

# Csnk1g3

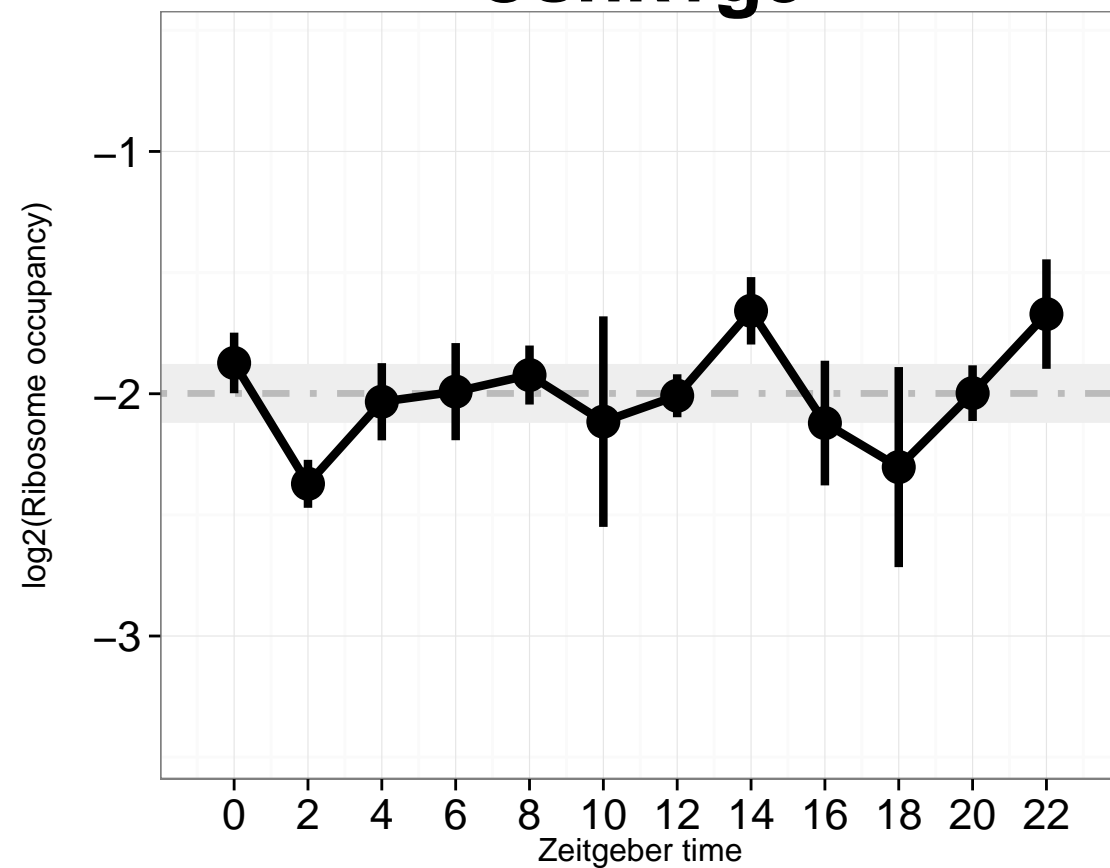

Supplement: SuppDataset_1.zip [file Csnk1g3_set_D.pdf › Supplemental Dataset 1/D-mRNA_rhythm_translation_rhyth/Csnk1g3_set_D.pdf]

# Csrnp1

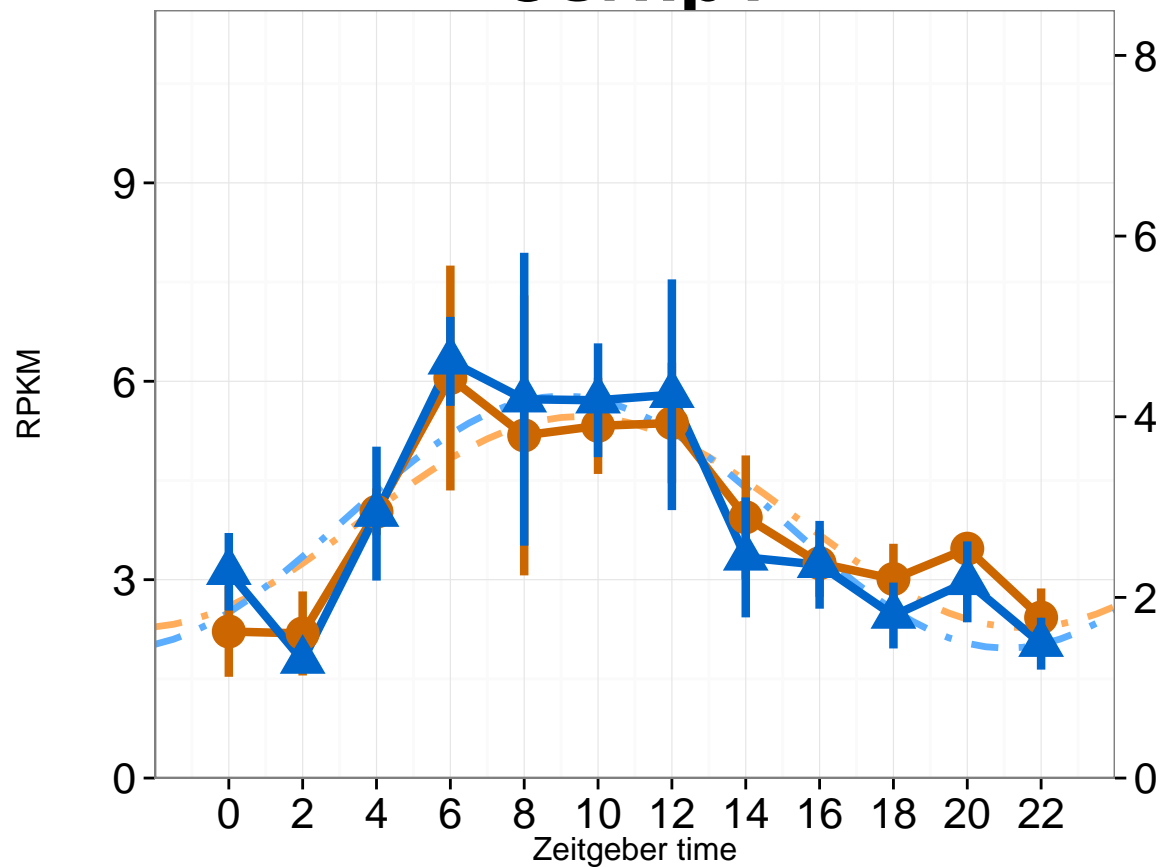

# Csrnp1

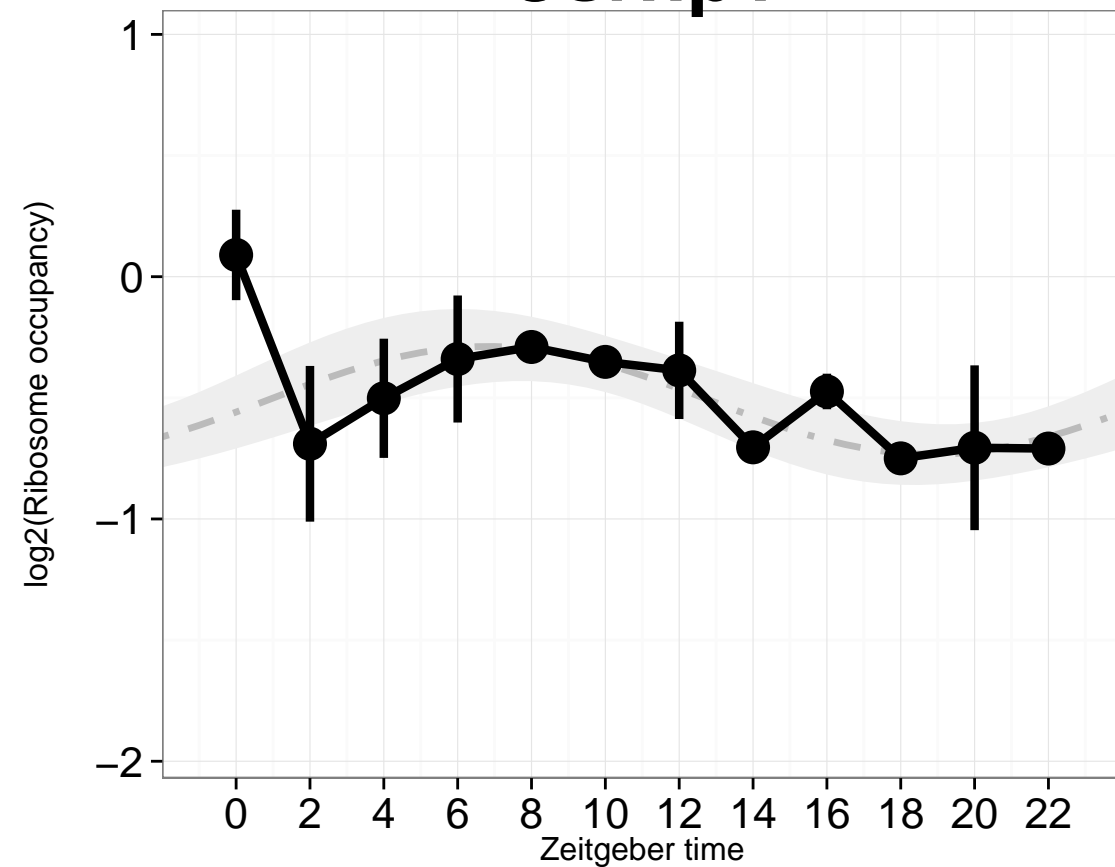

Supplement: SuppDataset_1.zip [file Csrnp1_set_D.pdf › Supplemental Dataset 1/D-mRNA_rhythm_translation_rhyth/Csrnp1_set_D.pdf]

# Csrp3

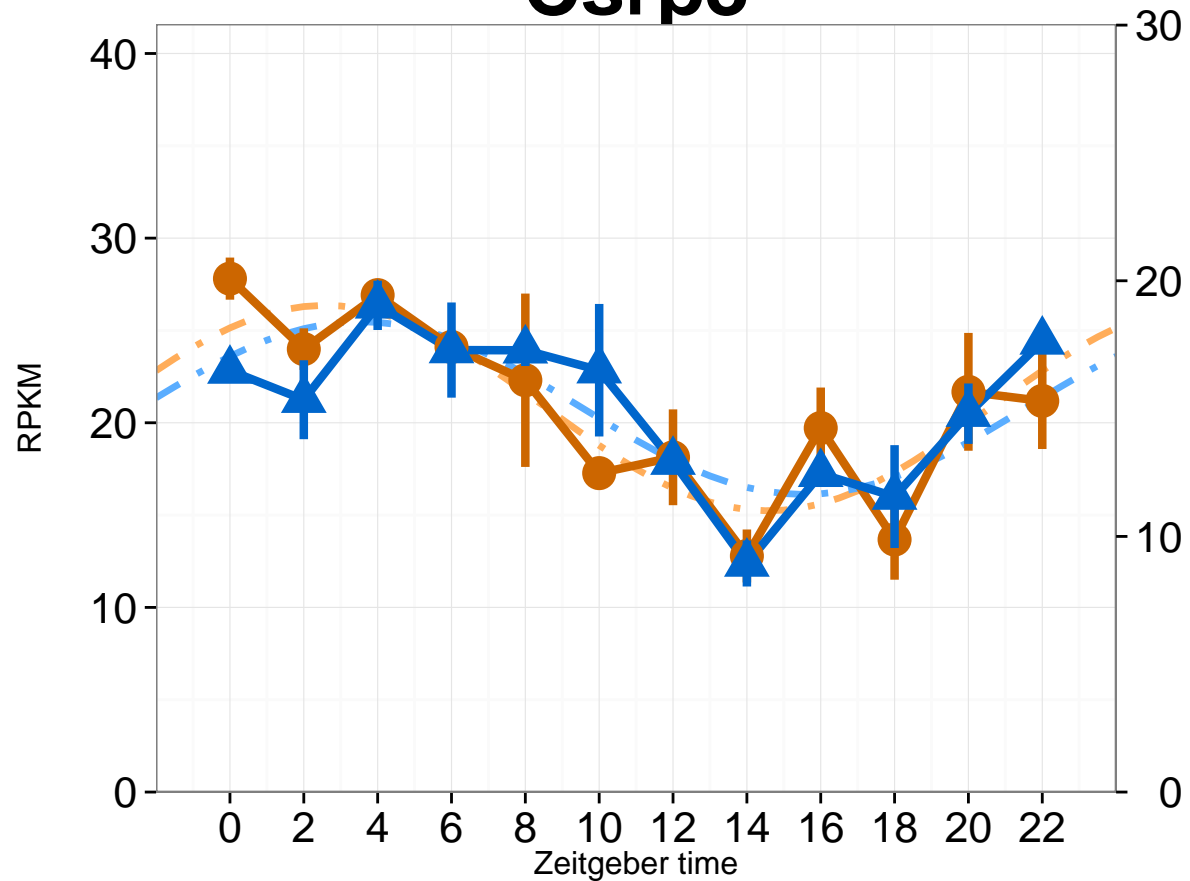

# Csrp3

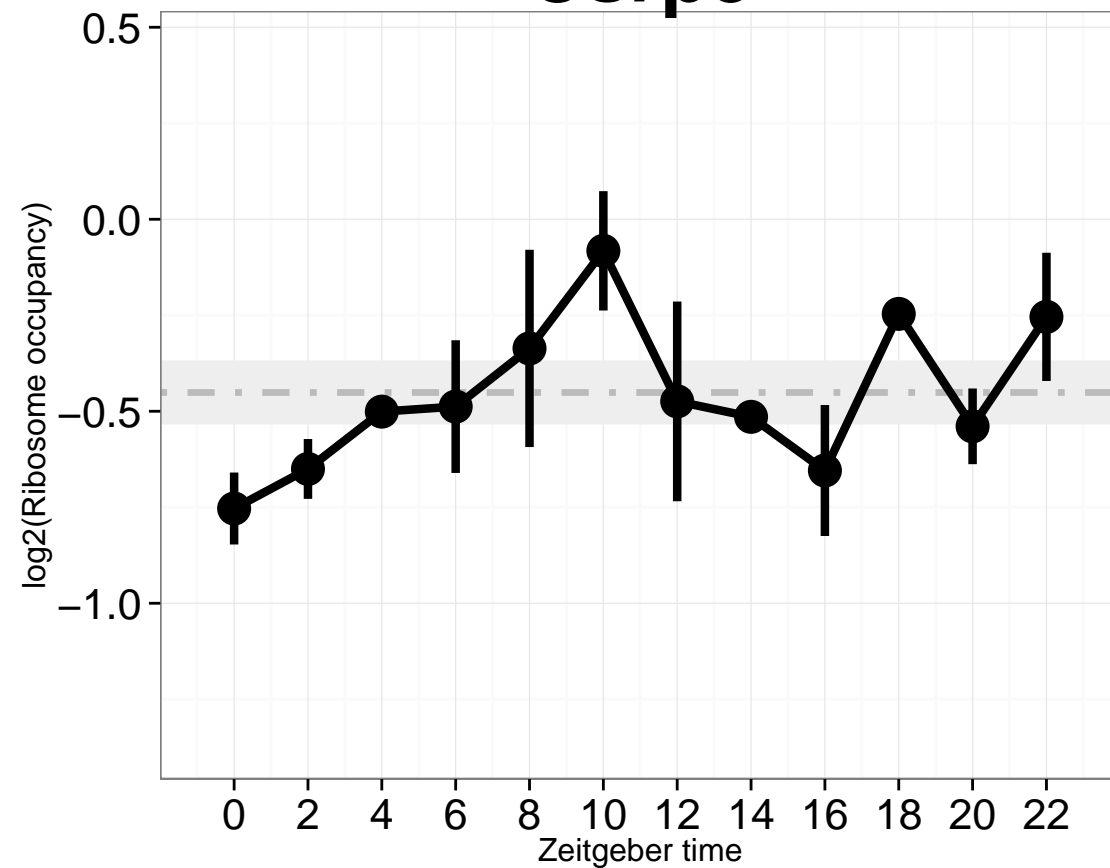

Supplement: SuppDataset_1.zip [file Csrp3_set_D.pdf › Supplemental Dataset 1/D-mRNA_rhythm_translation_rhyth/Csrp3_set_D.pdf]

## Cth

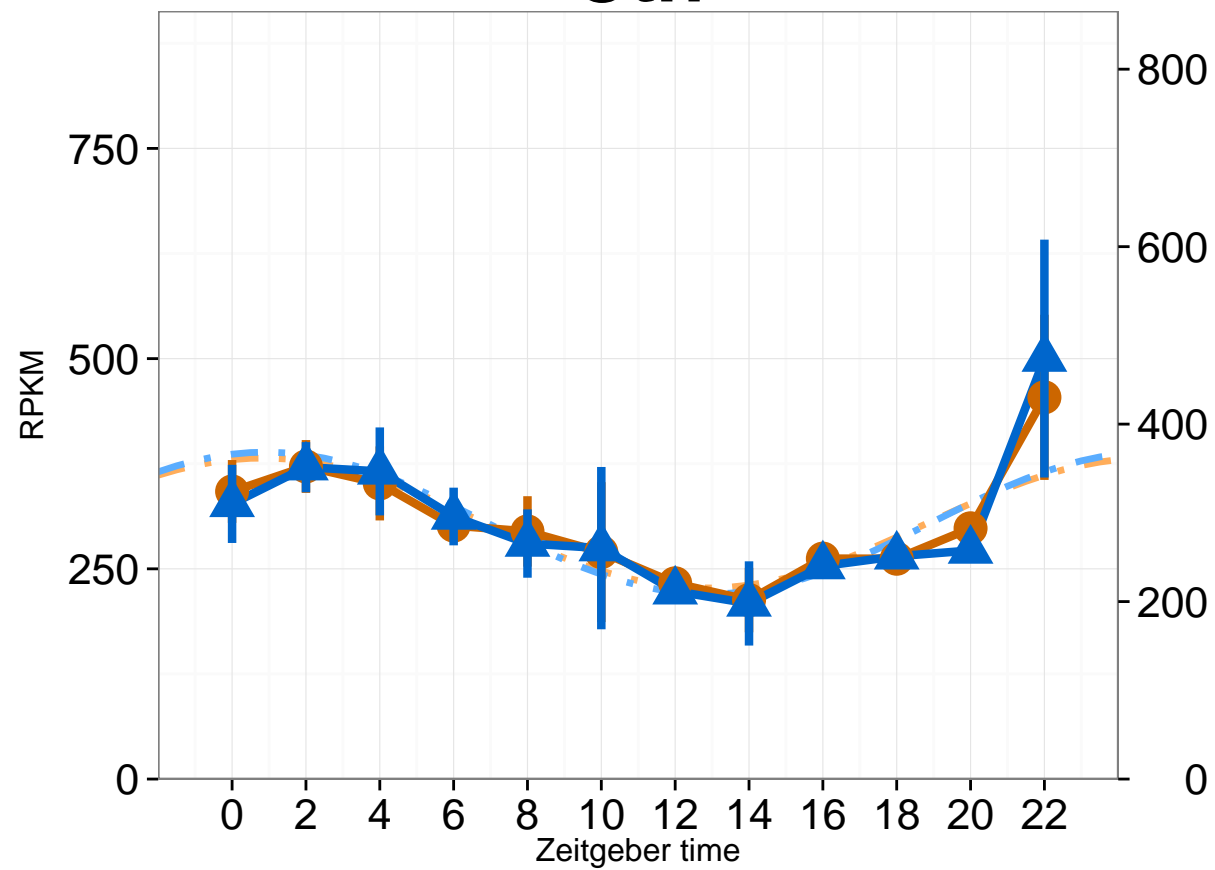

## Cth

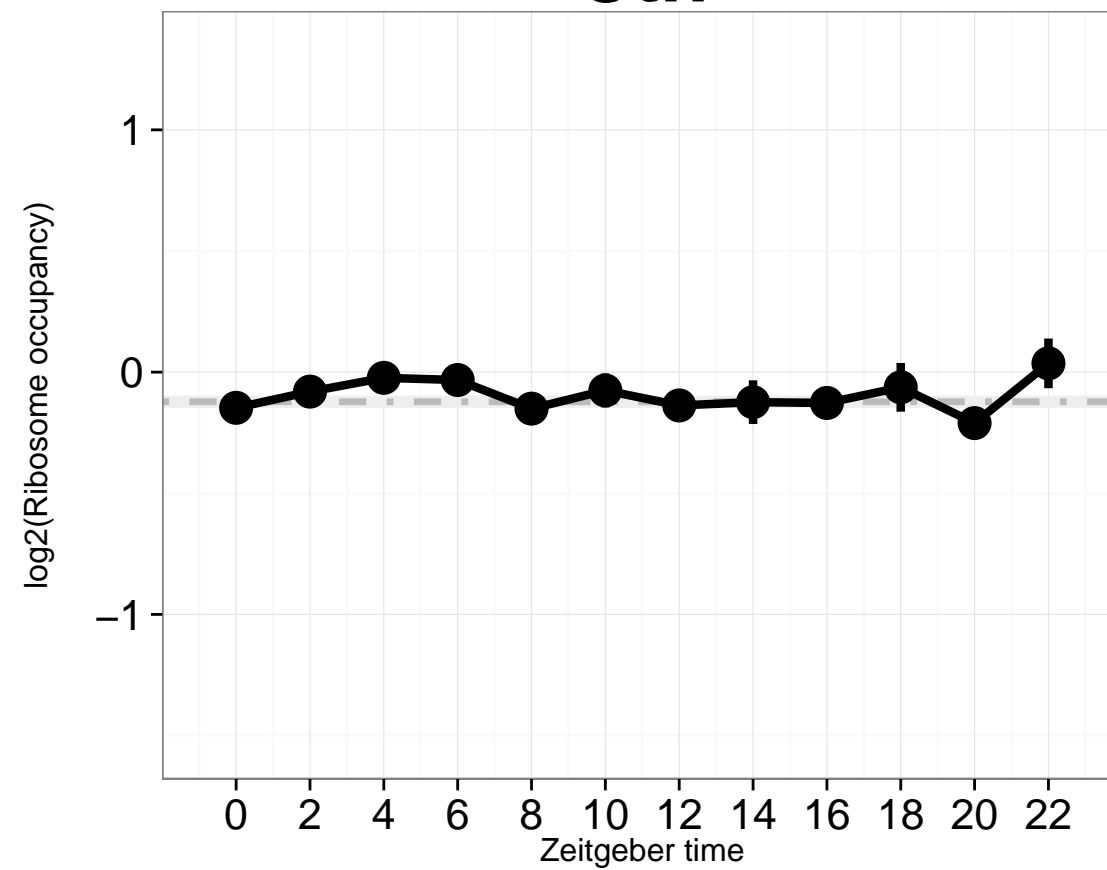

Supplement: SuppDataset_1.zip [file Cth_set_D.pdf › Supplemental Dataset 1/D-mRNA_rhythm_translation_rhyth/Cth_set_D.pdf]

# Ctps

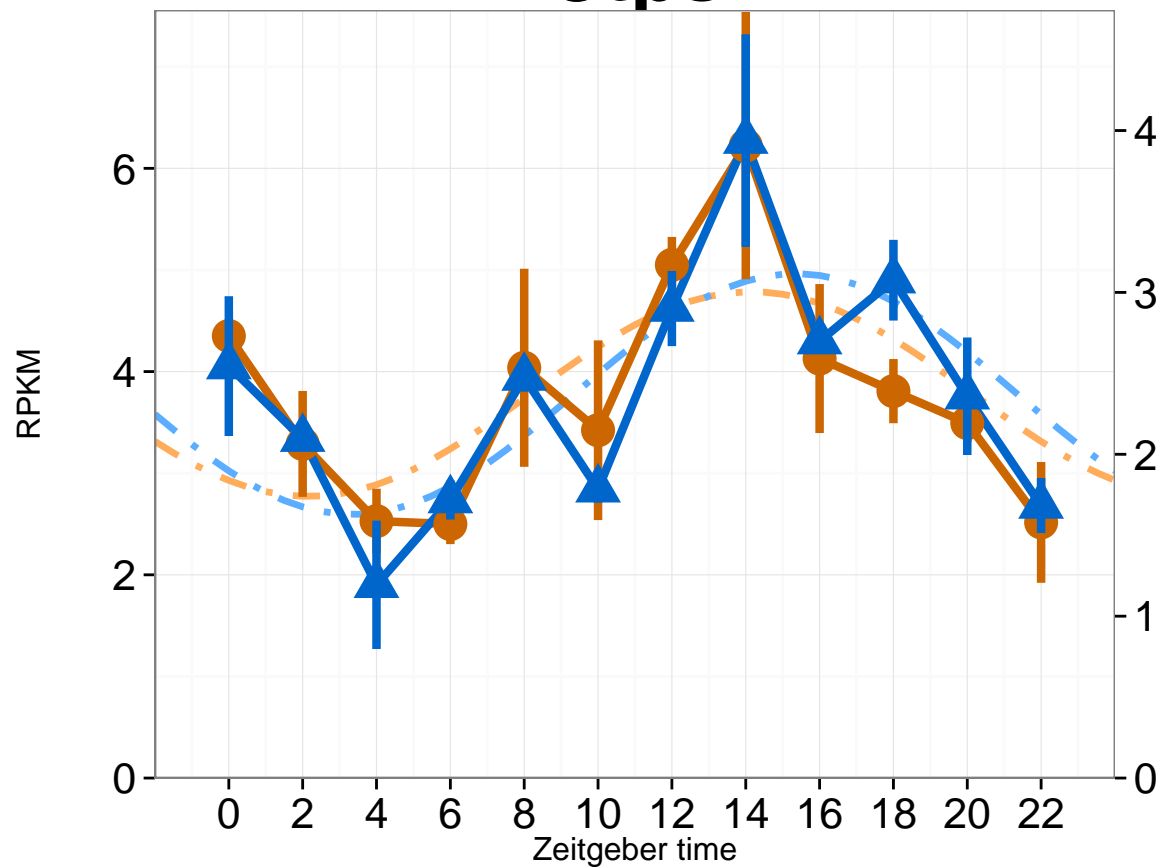

# Ctps

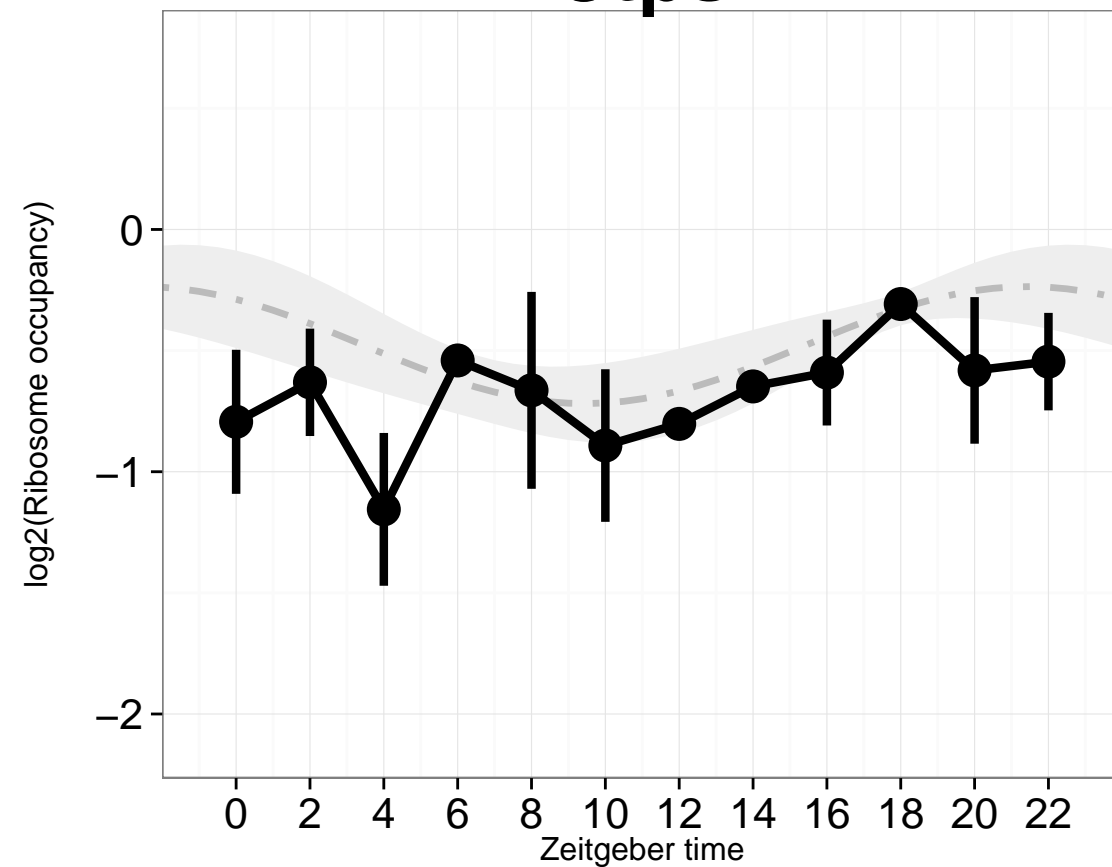

Supplement: SuppDataset_1.zip [file Ctps_set_D.pdf › Supplemental Dataset 1/D-mRNA_rhythm_translation_rhyth/Ctps_set_D.pdf]

## Cxadr

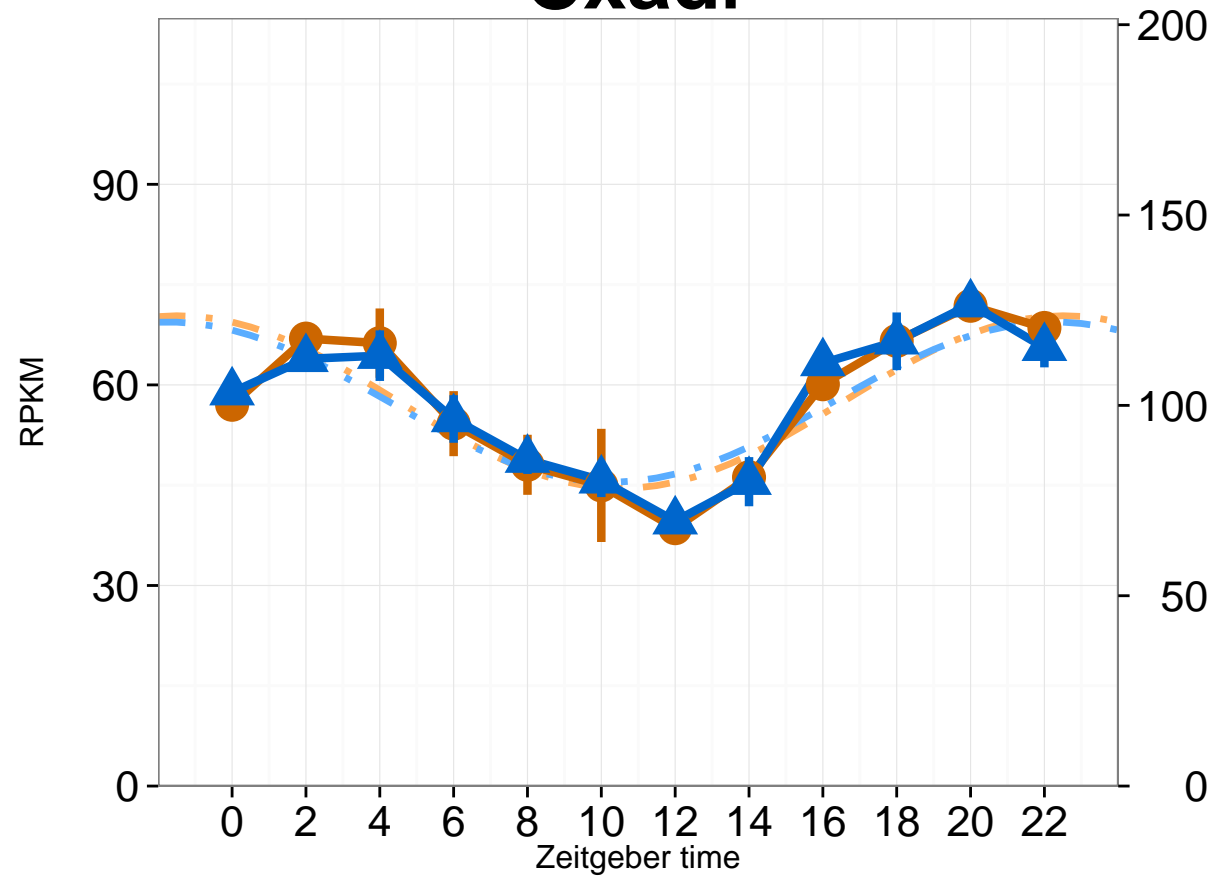

## Cxadr

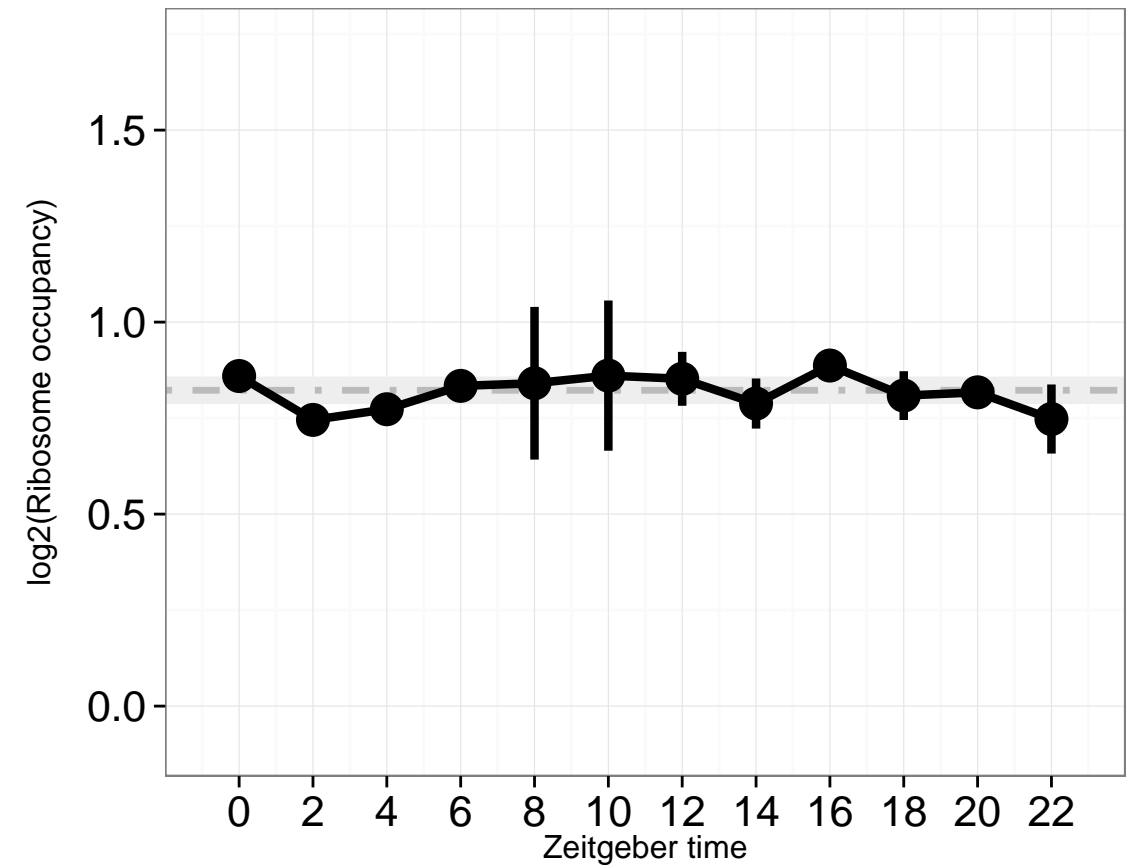

Supplement: SuppDataset_1.zip [file Cxadr_set_D.pdf › Supplemental Dataset 1/D-mRNA_rhythm_translation_rhyth/Cxadr_set_D.pdf]

## Cxcl12

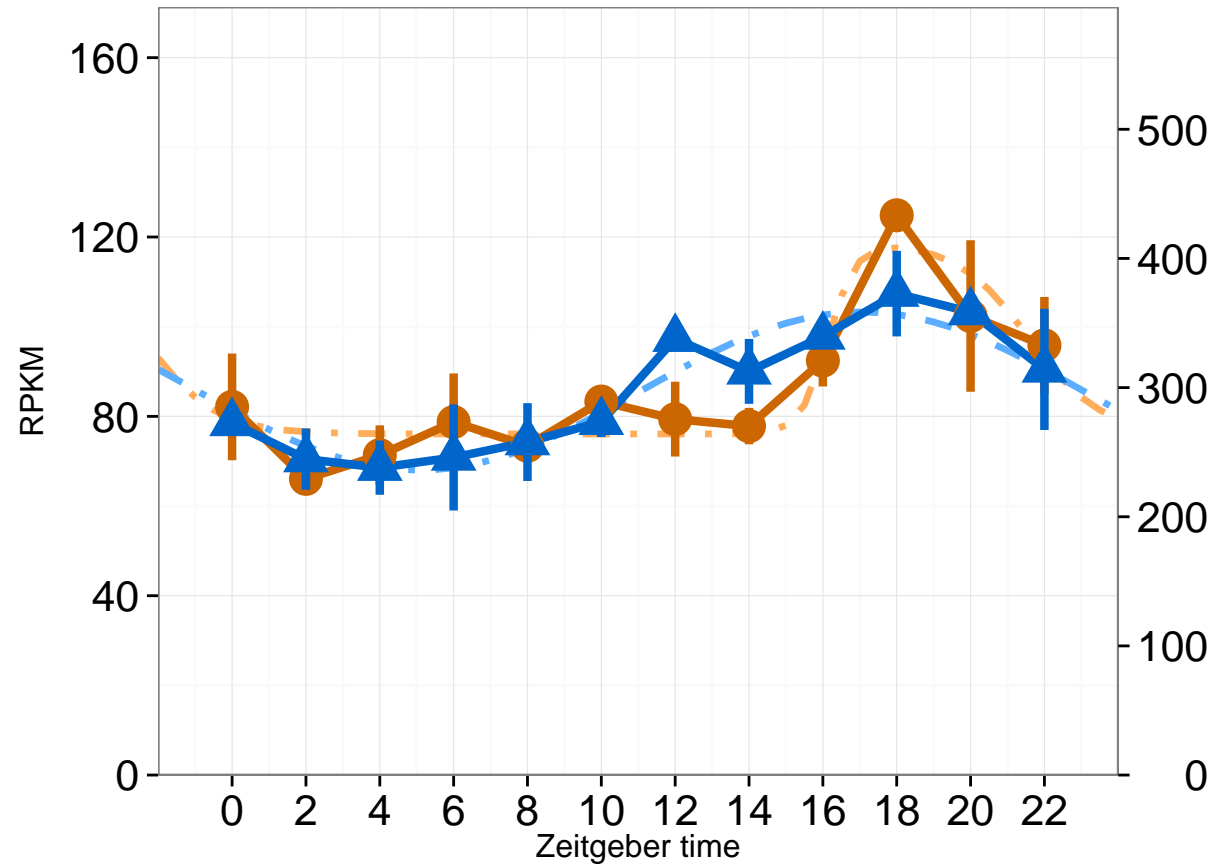

## Cxcl12

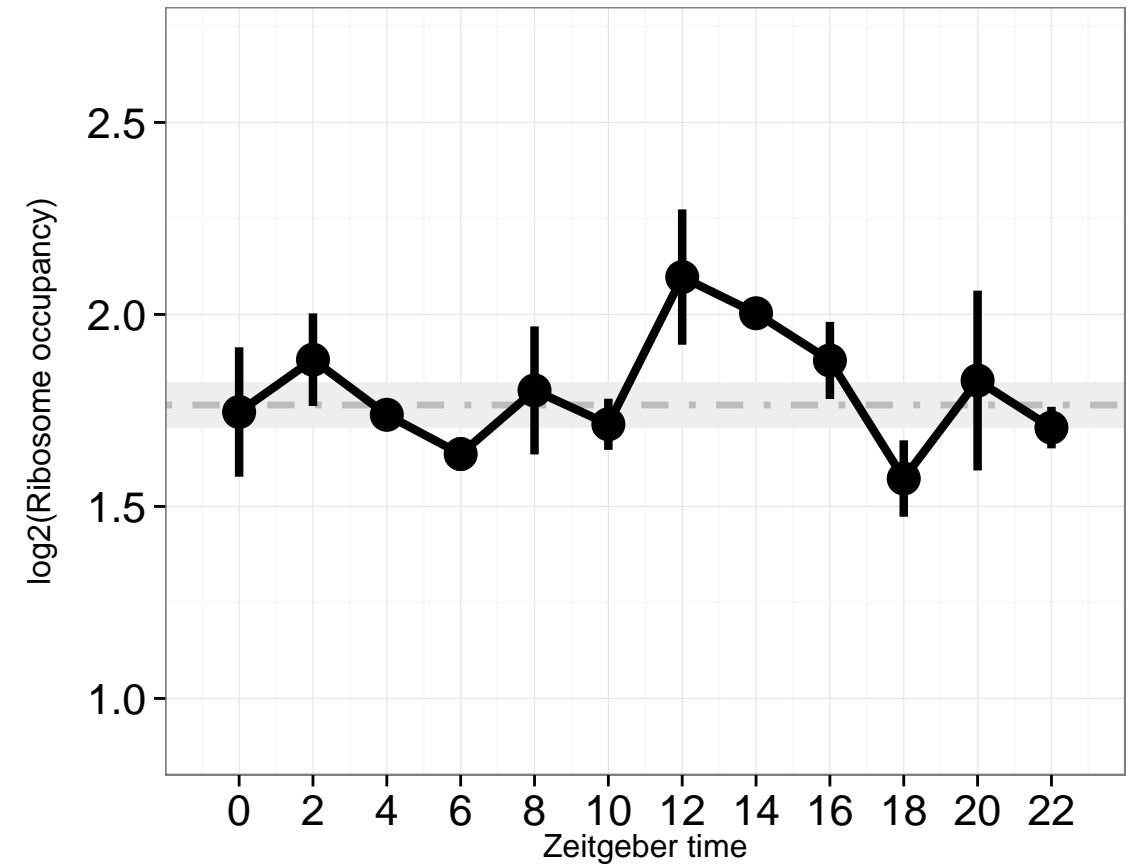

Supplement: SuppDataset_1.zip [file Cxcl12_set_D.pdf › Supplemental Dataset 1/D-mRNA_rhythm_translation_rhyth/Cxcl12_set_D.pdf]

## Cxcl14

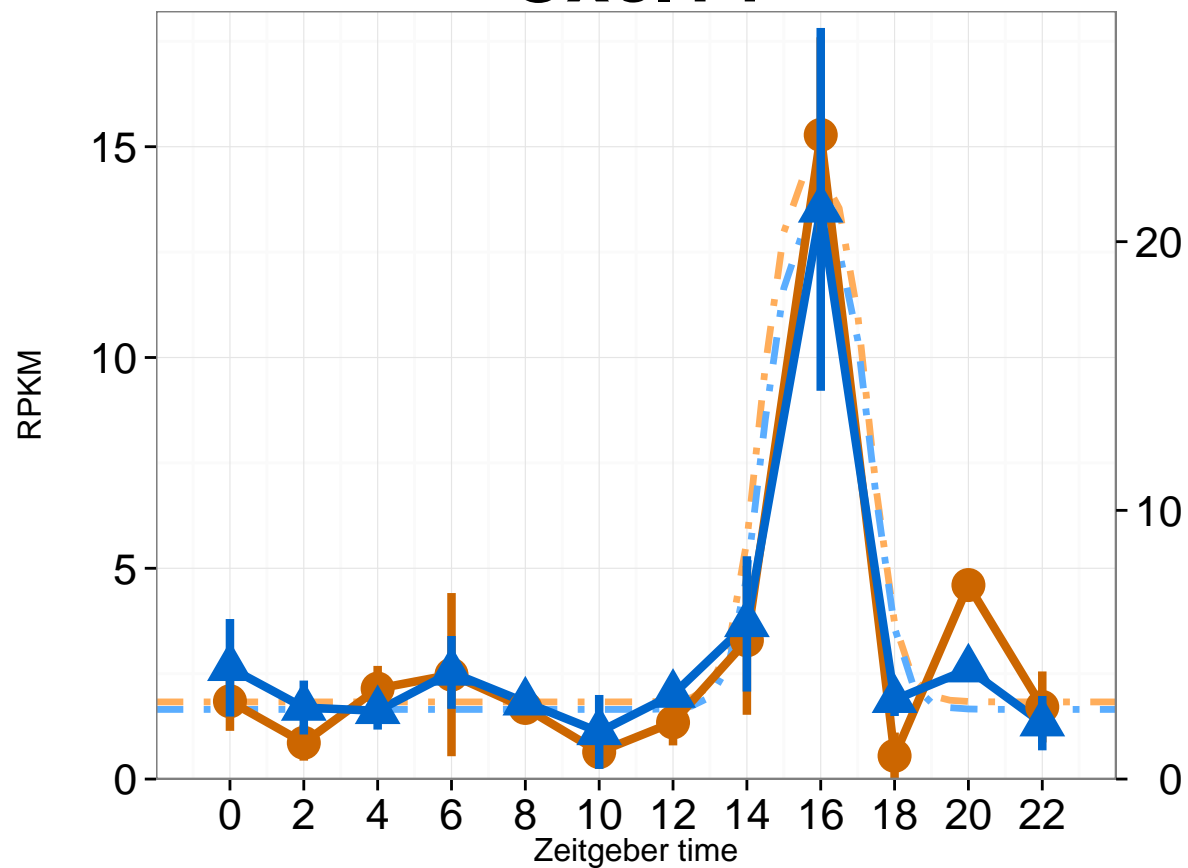

## Cxcl14

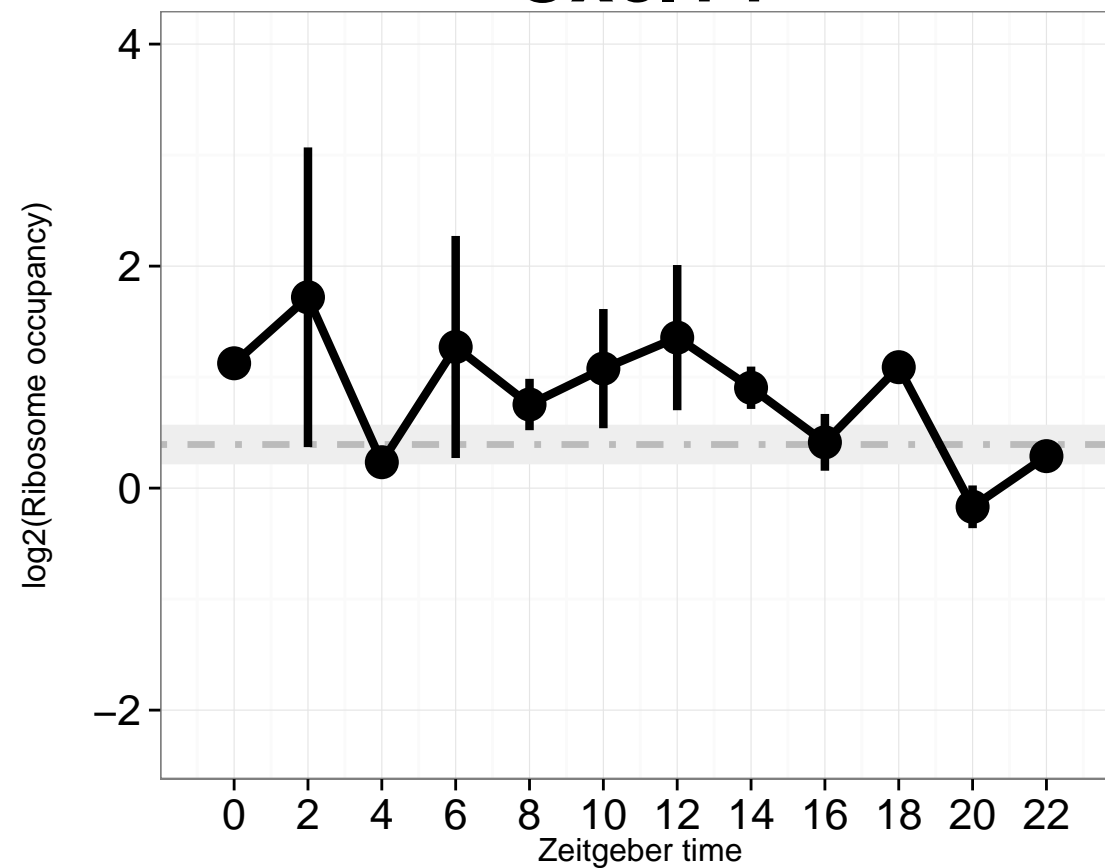

Supplement: SuppDataset_1.zip [file Cxcl14_set_D.pdf › Supplemental Dataset 1/D-mRNA_rhythm_translation_rhyth/Cxcl14_set_D.pdf]

## Cxxc5

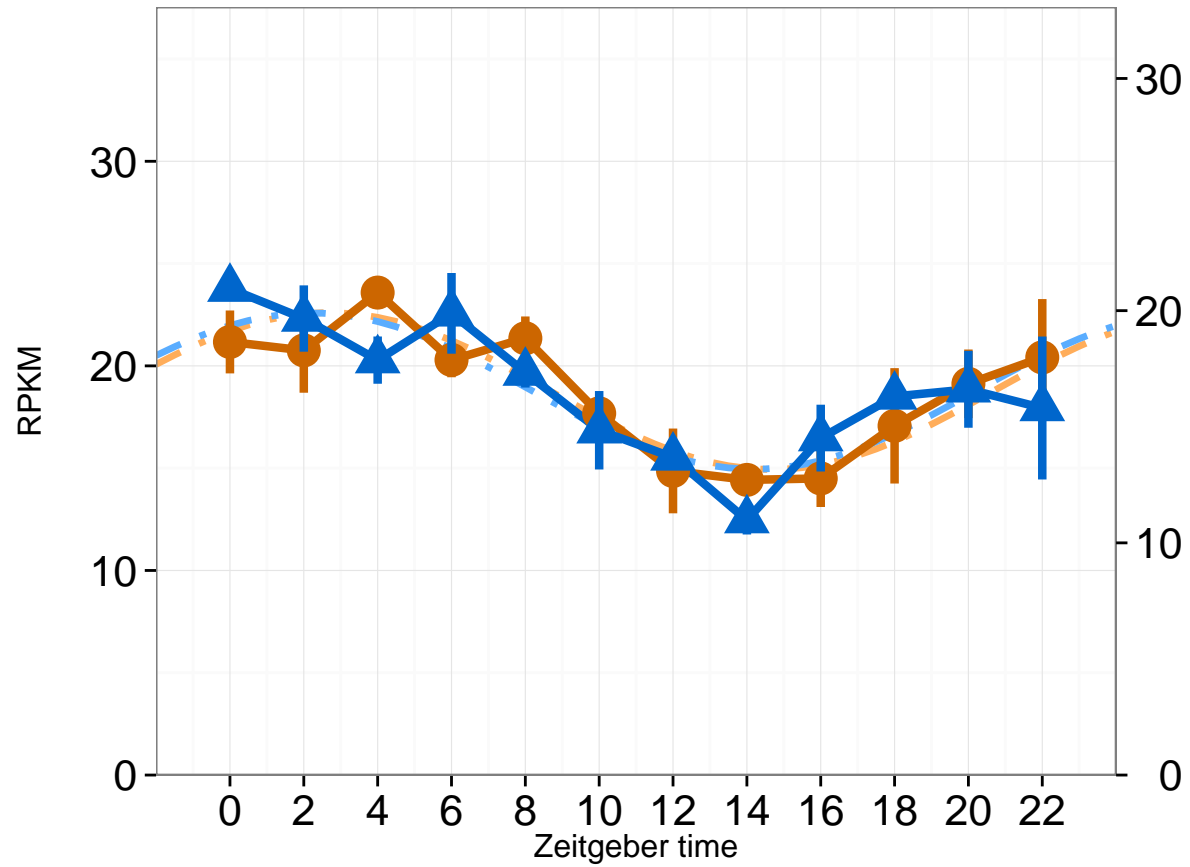

## Cxxc5

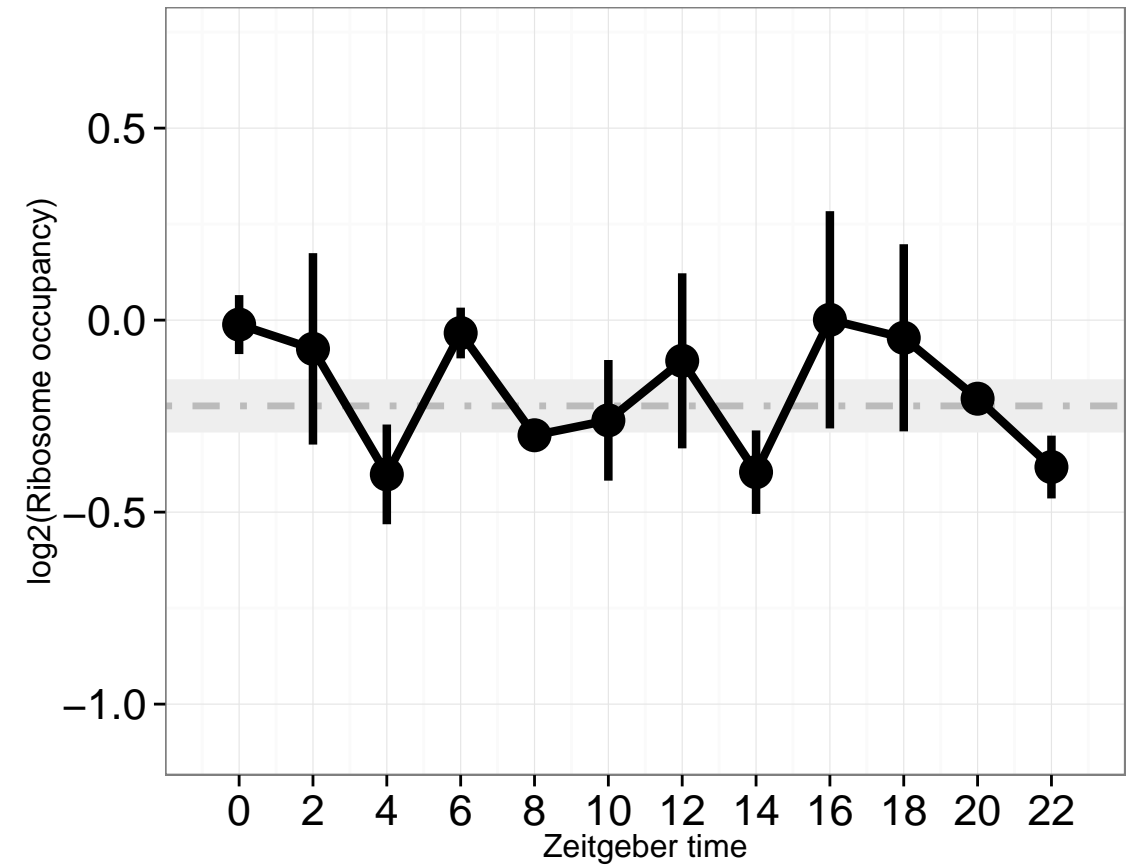

Supplement: SuppDataset_1.zip [file Cxxc5_set_D.pdf › Supplemental Dataset 1/D-mRNA_rhythm_translation_rhyth/Cxxc5_set_D.pdf]

# Cyb561

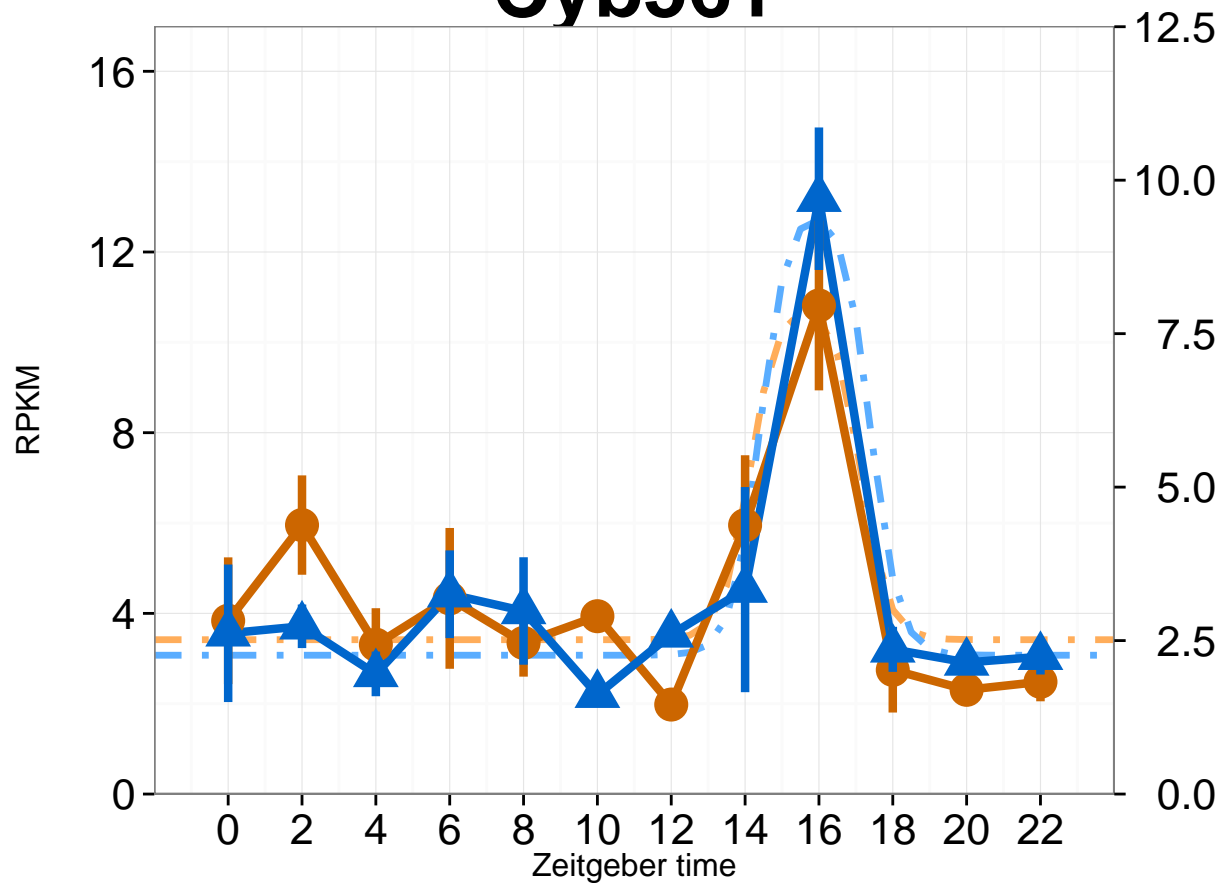

# Cyb561

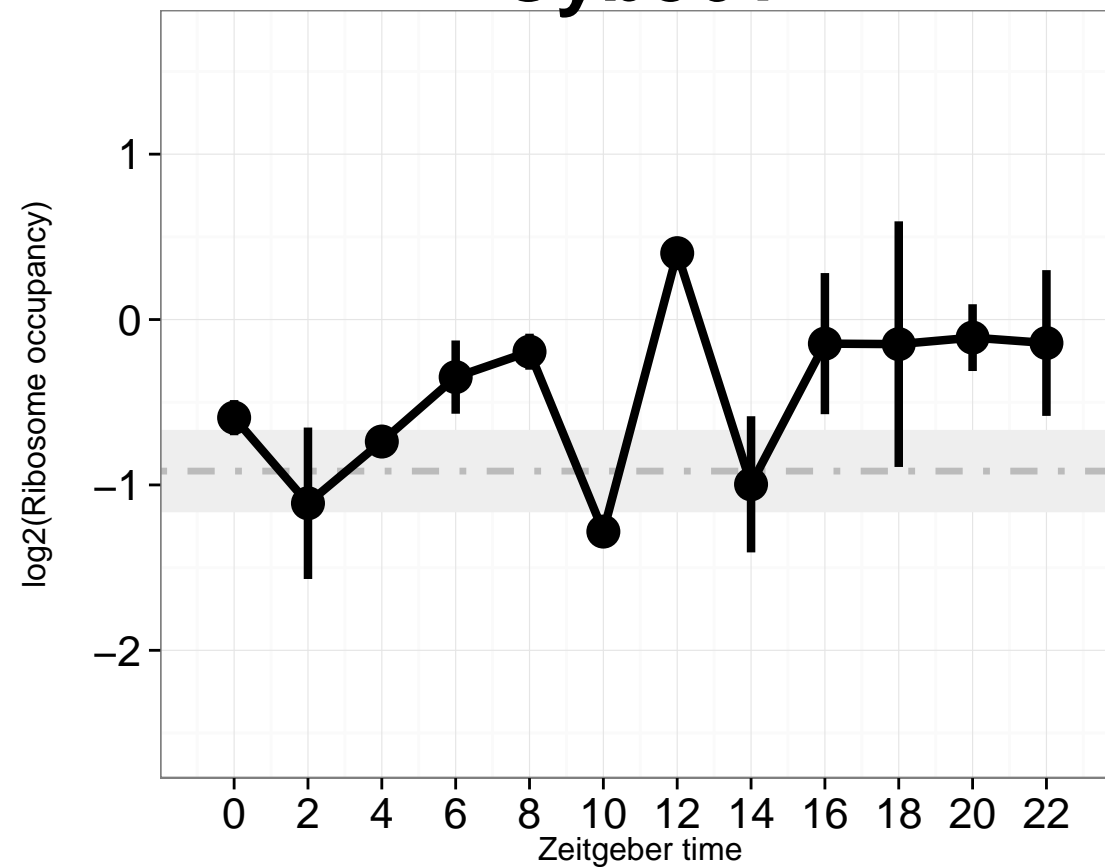

Supplement: SuppDataset_1.zip [file Cyb561_set_D.pdf › Supplemental Dataset 1/D-mRNA_rhythm_translation_rhyth/Cyb561_set_D.pdf]

# Cyb5b

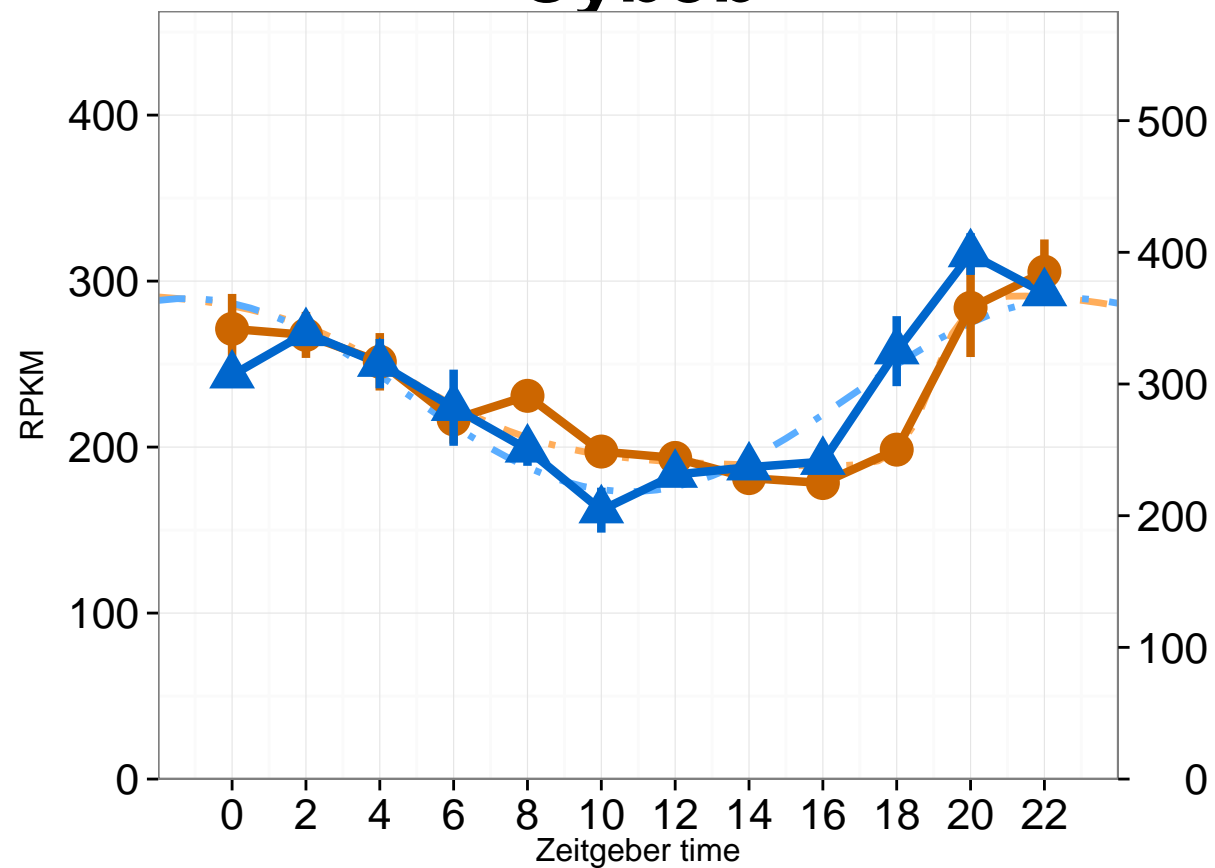

# Cyb5b

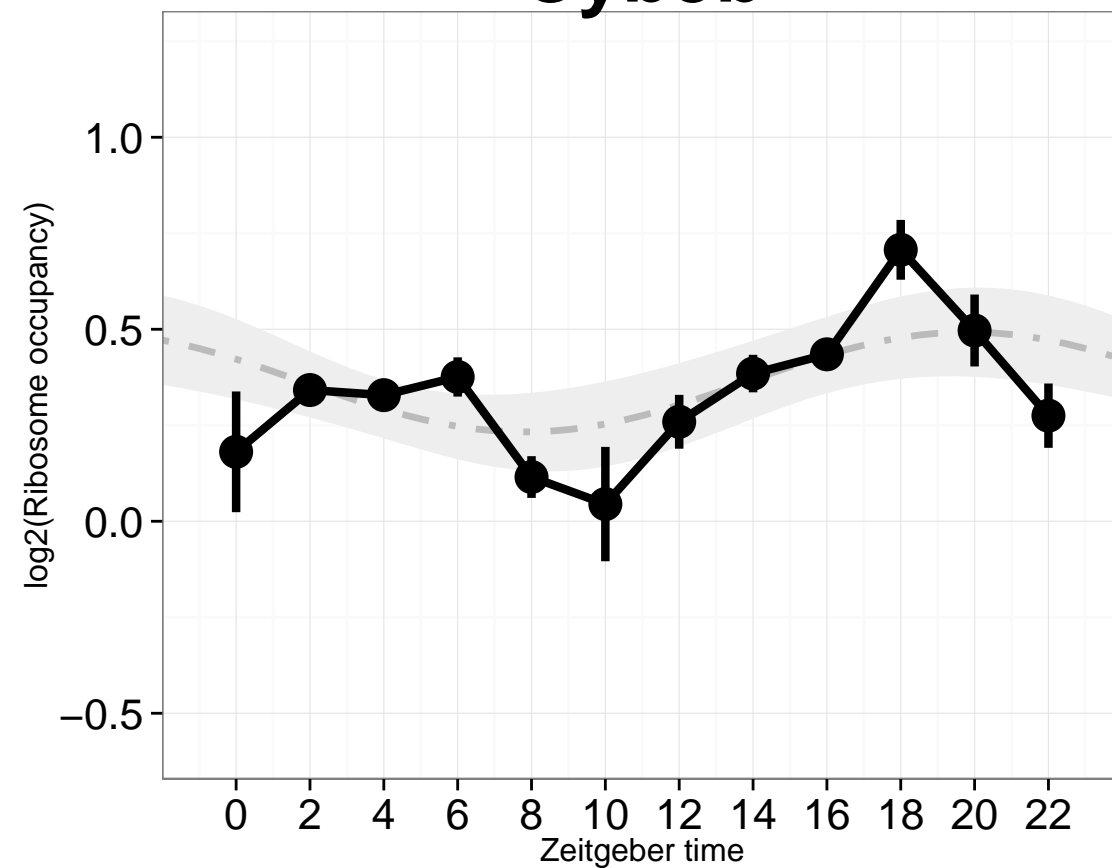

Supplement: SuppDataset_1.zip [file Cyb5b_set_D.pdf › Supplemental Dataset 1/D-mRNA_rhythm_translation_rhyth/Cyb5b_set_D.pdf]

# Cyp2a5

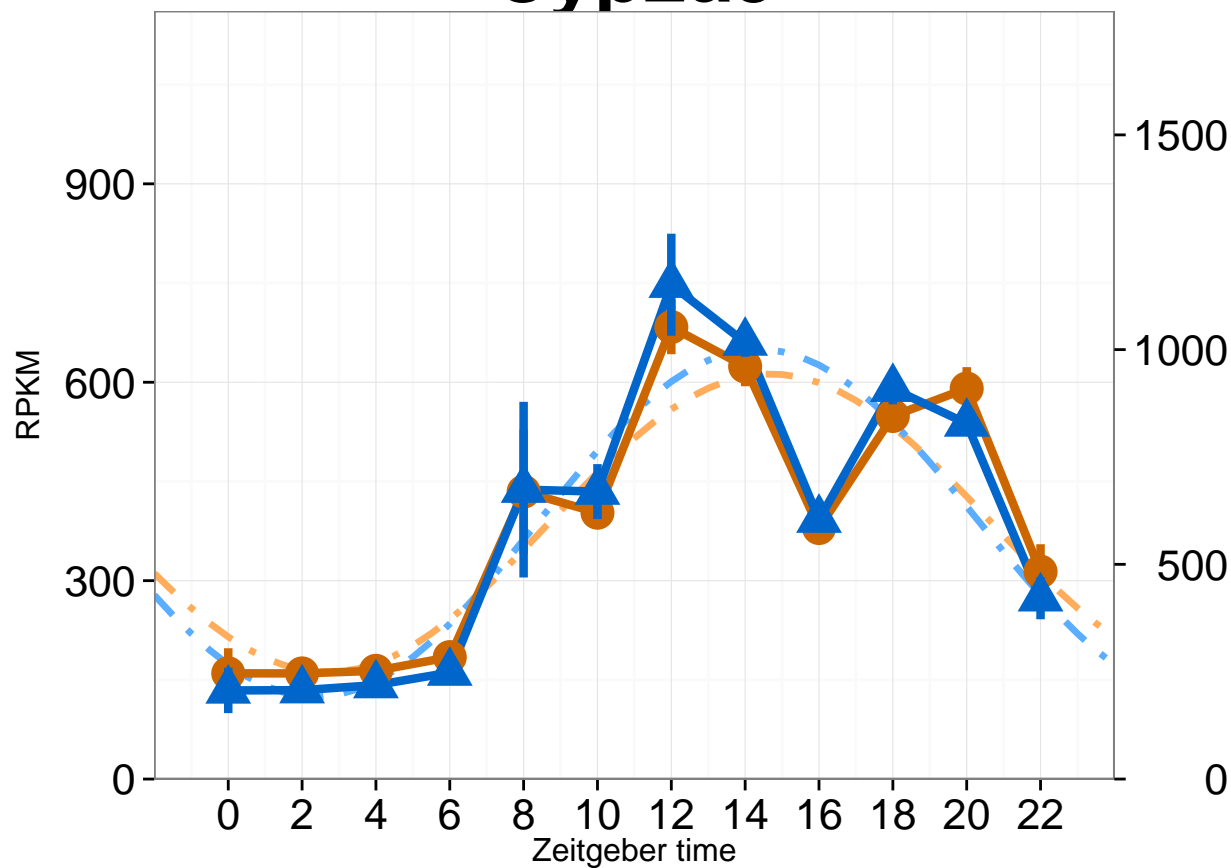

# Cyp2a5

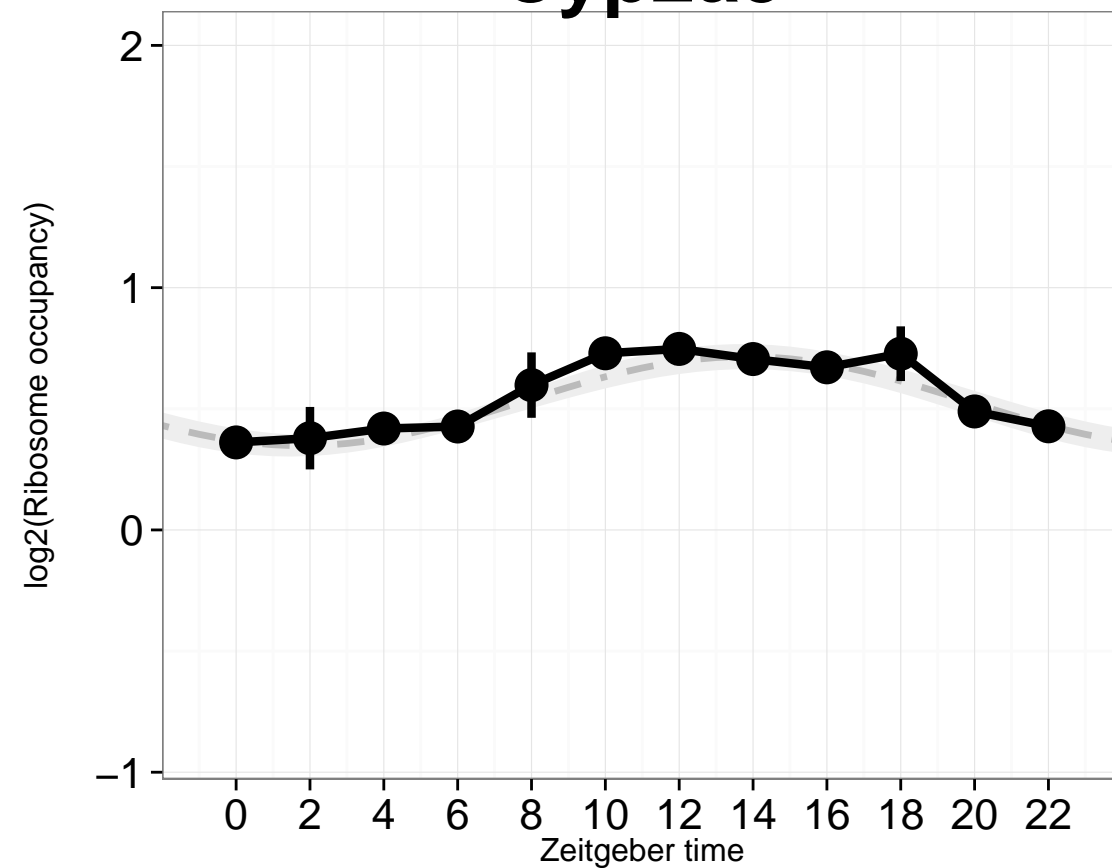

Supplement: SuppDataset_1.zip [file Cyp2a5_set_D.pdf › Supplemental Dataset 1/D-mRNA_rhythm_translation_rhyth/Cyp2a5_set_D.pdf]

# Cyp2b10

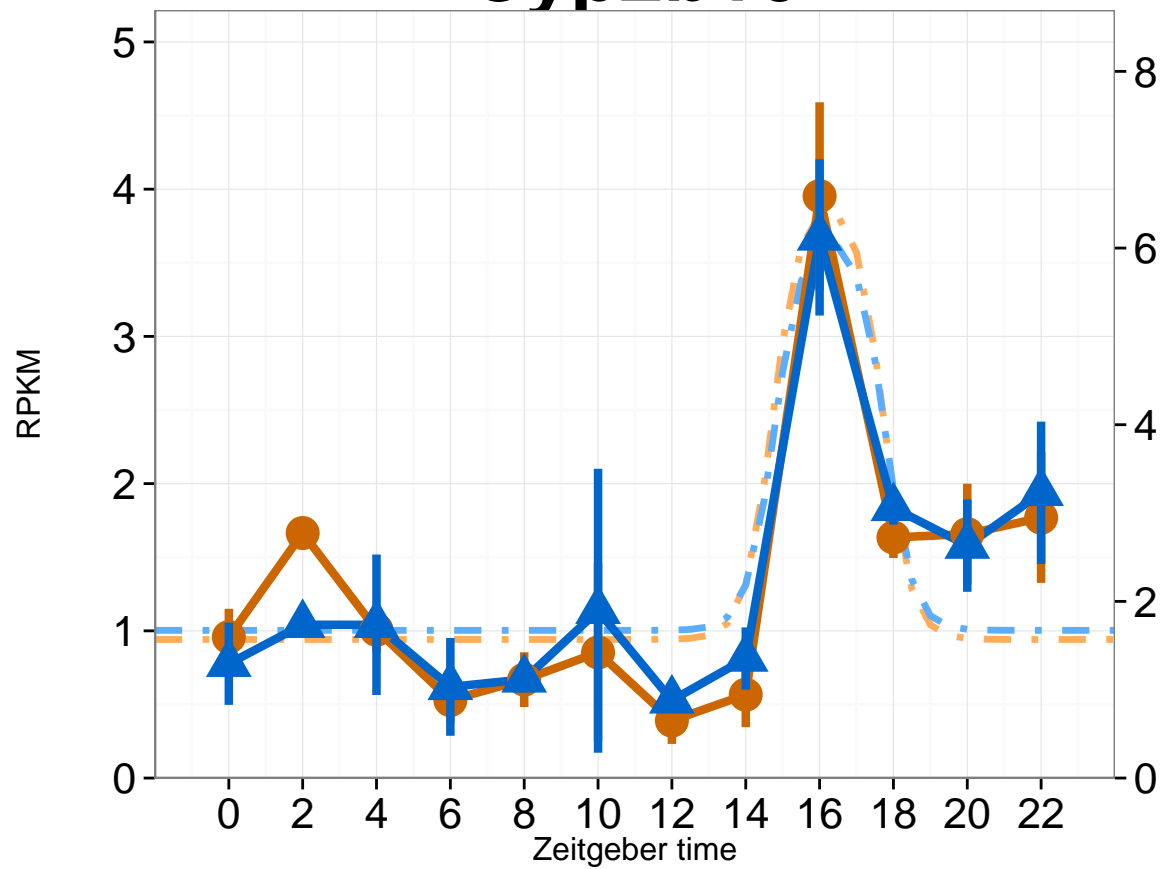

# Cyp2b10

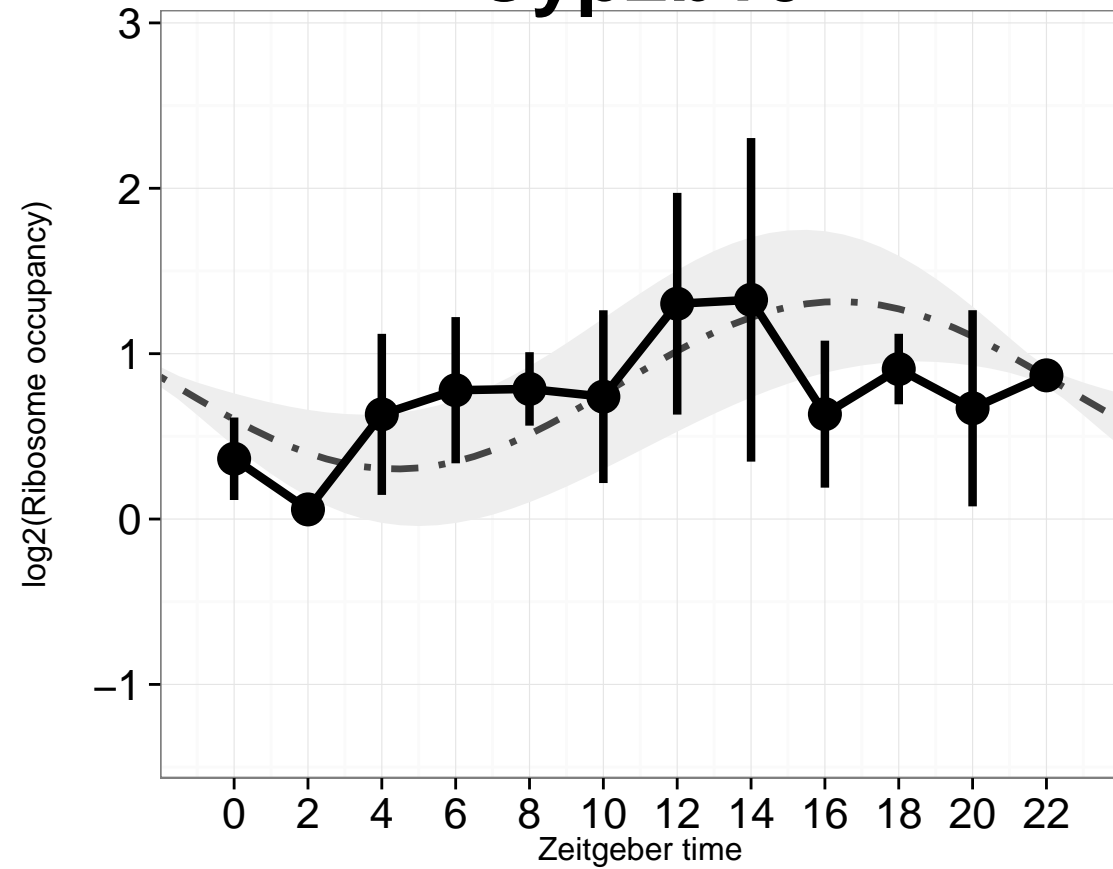

Supplement: SuppDataset_1.zip [file Cyp2b10_set_D.pdf › Supplemental Dataset 1/D-mRNA_rhythm_translation_rhyth/Cyp2b10_set_D.pdf]

# Cyp2c37

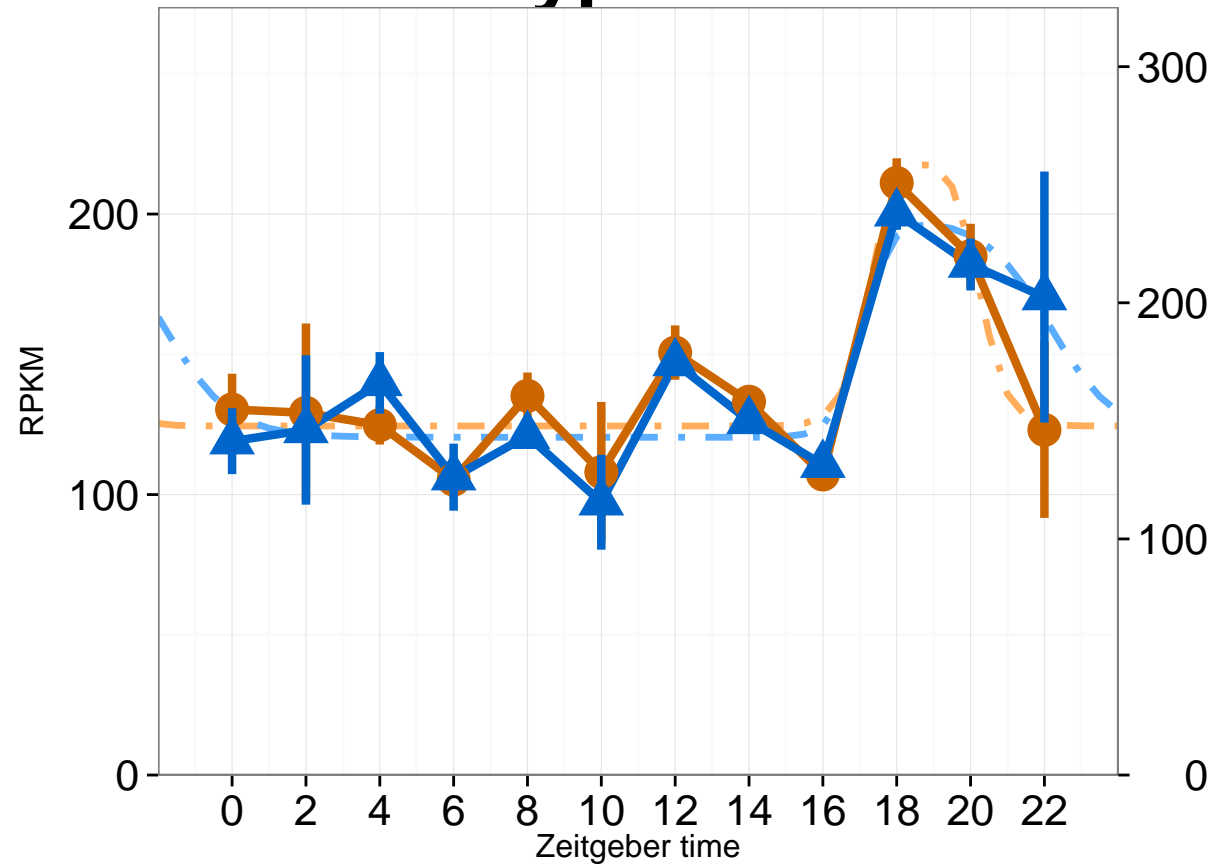

# Cyp2c37

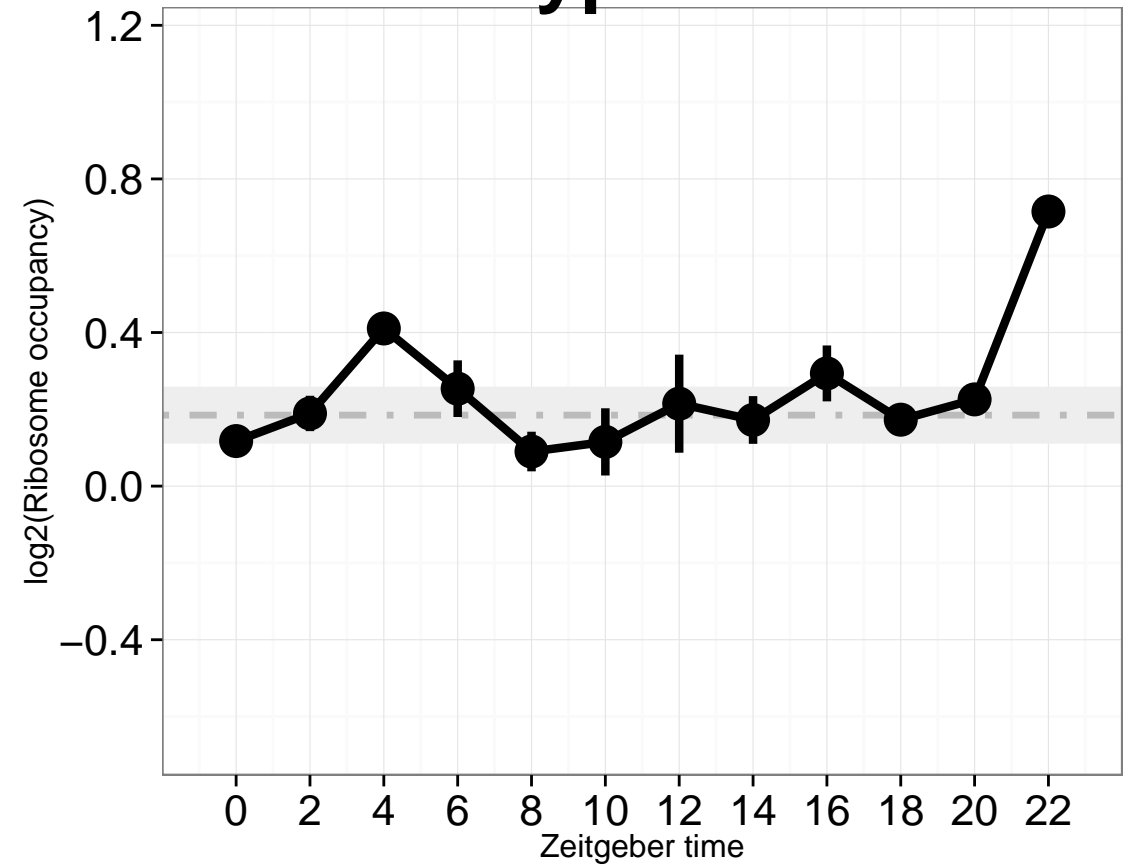

Supplement: SuppDataset_1.zip [file Cyp2c37_set_D.pdf › Supplemental Dataset 1/D-mRNA_rhythm_translation_rhyth/Cyp2c37_set_D.pdf]

# Cyp2c70

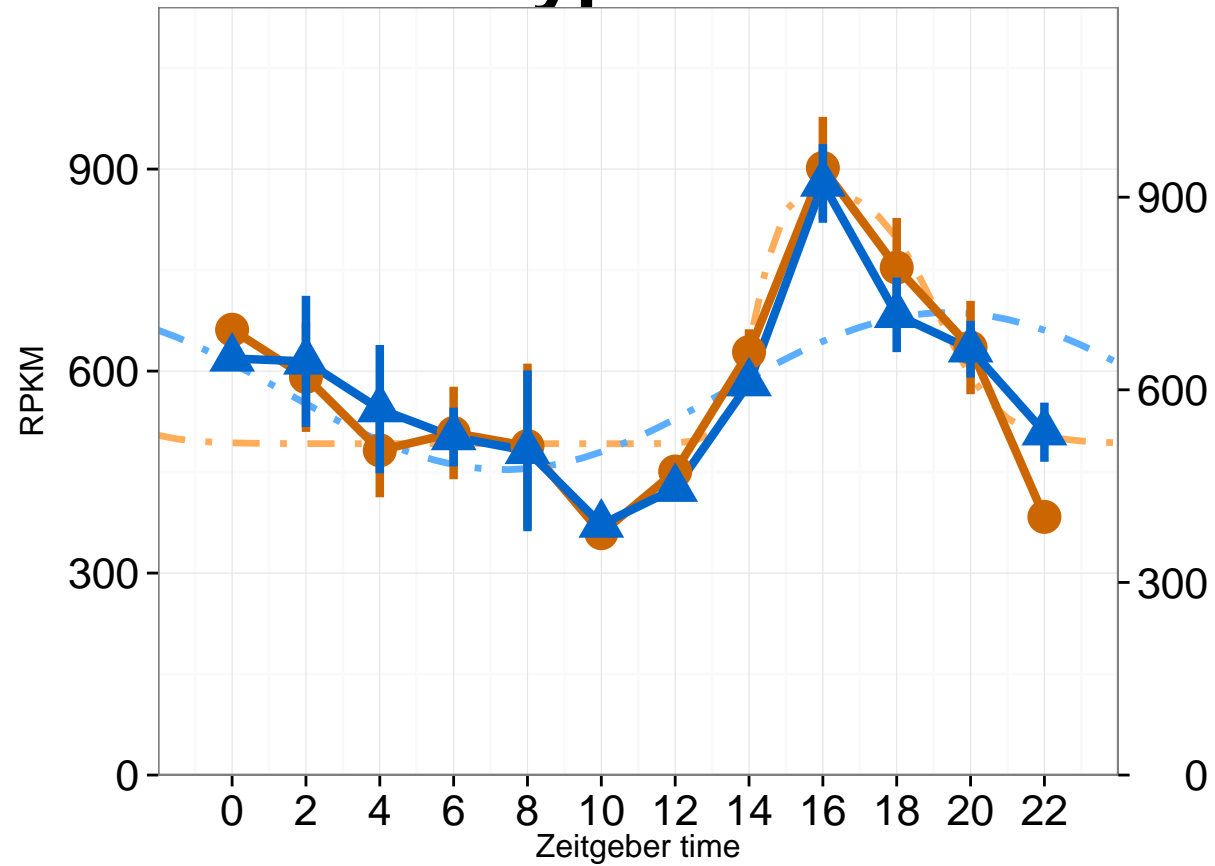

# Cyp2c70

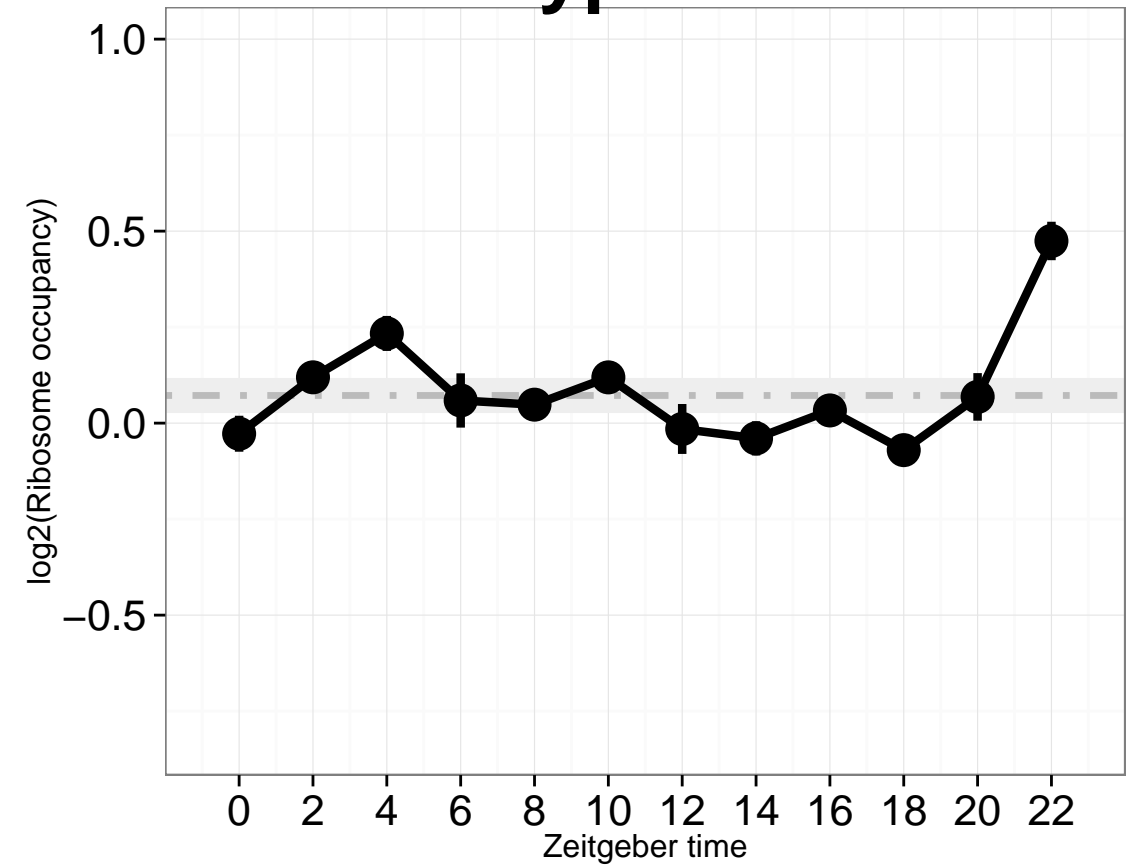

Supplement: SuppDataset_1.zip [file Cyp2c70_set_D.pdf › Supplemental Dataset 1/D-mRNA_rhythm_translation_rhyth/Cyp2c70_set_D.pdf]

# Cyp2e1

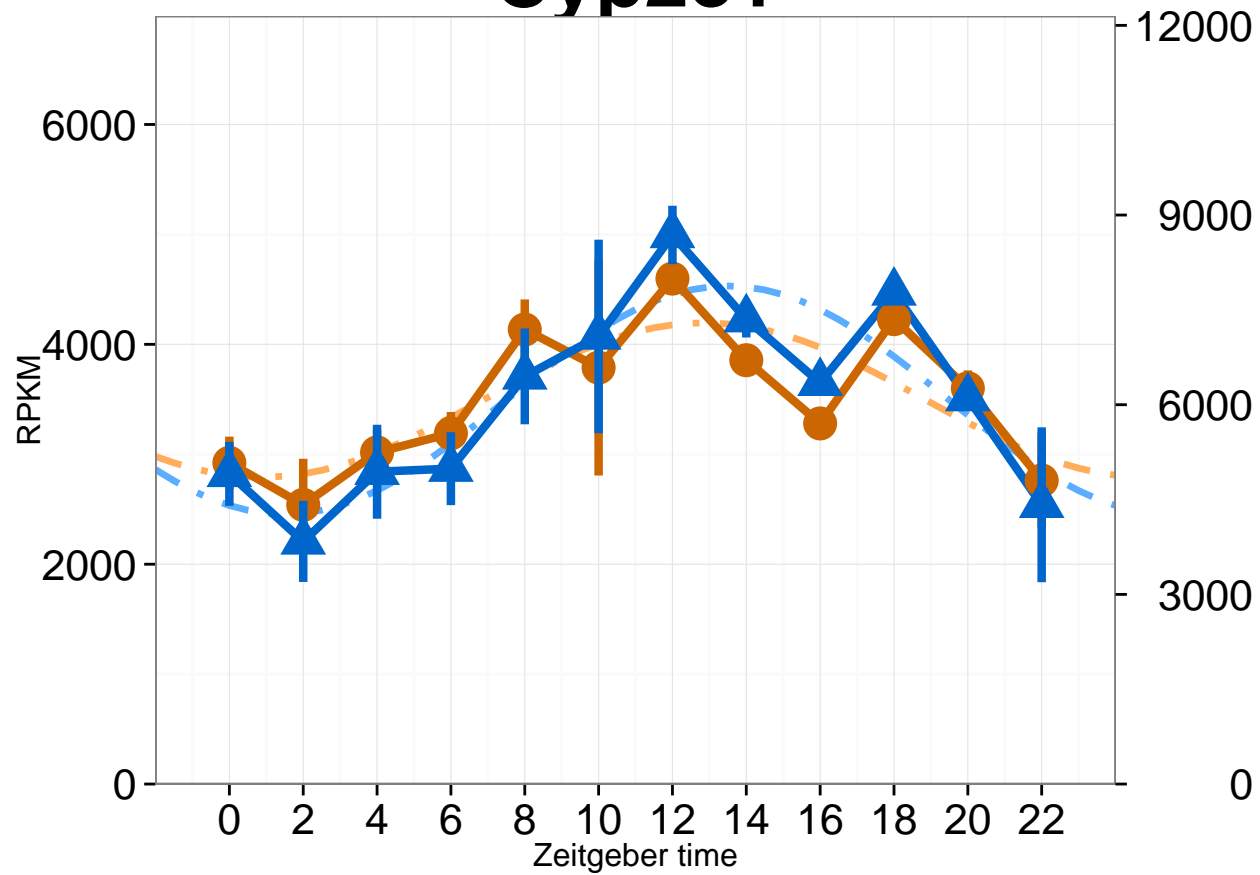

# Cyp2e1

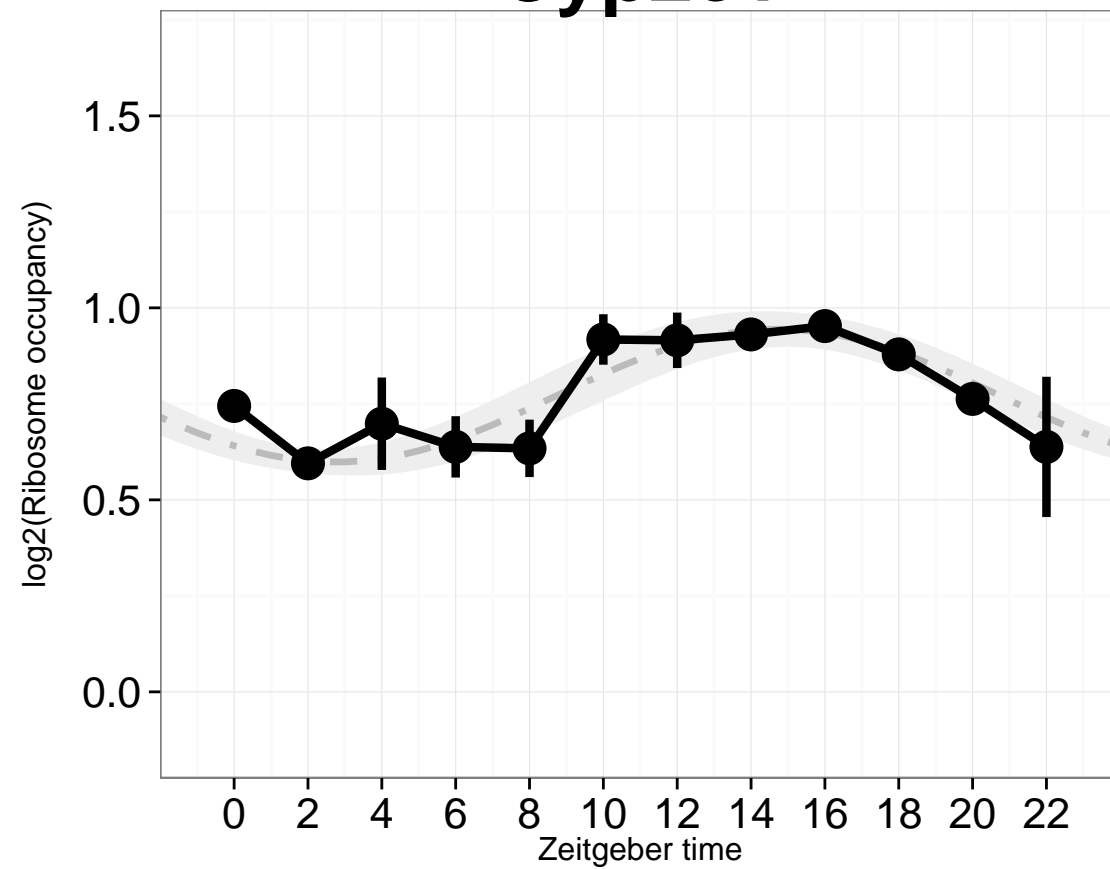

Supplement: SuppDataset_1.zip [file Cyp2e1_set_D.pdf › Supplemental Dataset 1/D-mRNA_rhythm_translation_rhyth/Cyp2e1_set_D.pdf]

## Cyp39a1

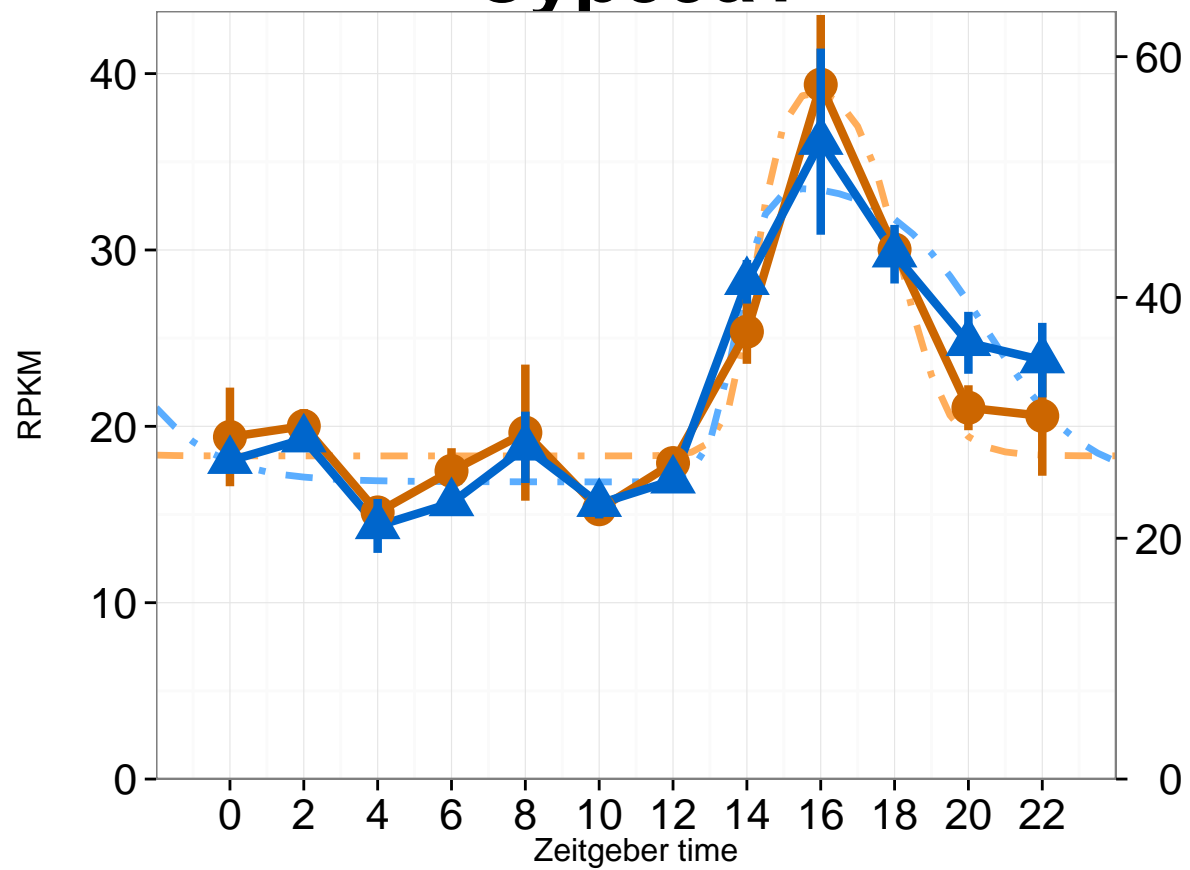

## Cyp39a1

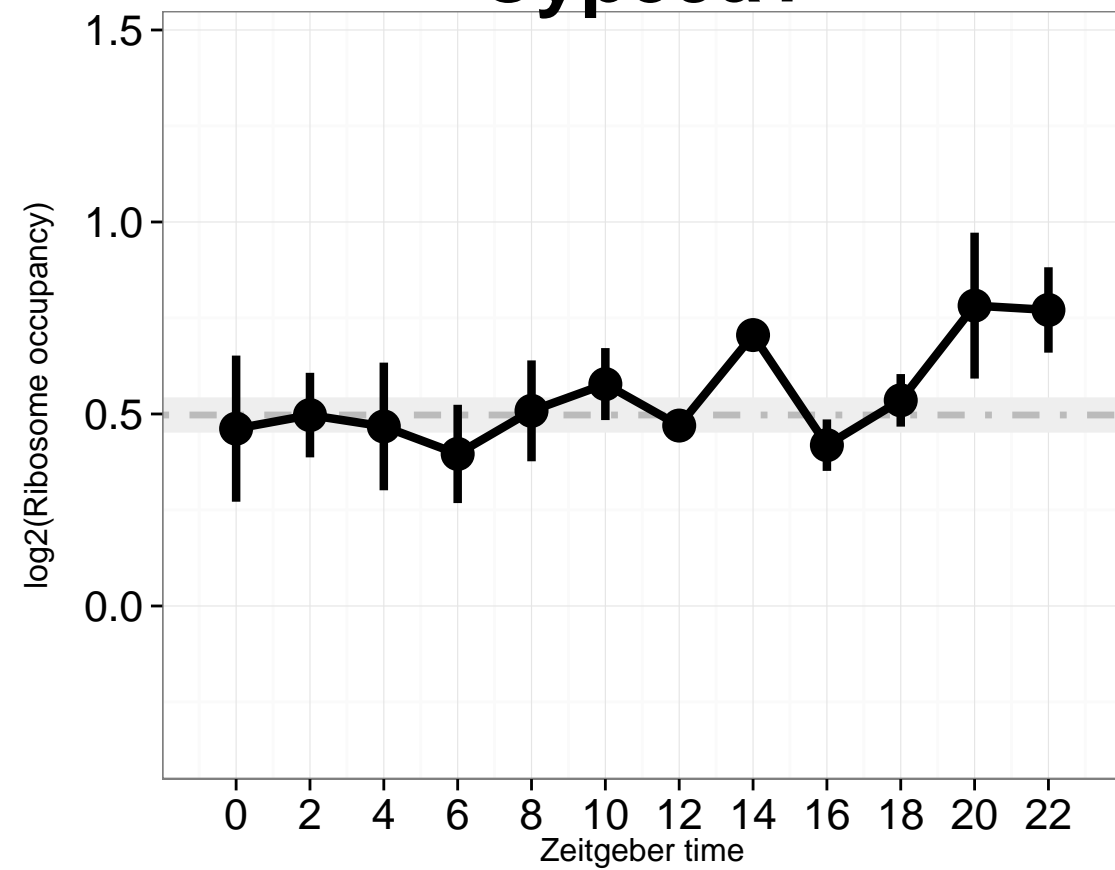

Supplement: SuppDataset_1.zip [file Cyp39a1_set_D.pdf › Supplemental Dataset 1/D-mRNA_rhythm_translation_rhyth/Cyp39a1_set_D.pdf]

# Cyp3a13

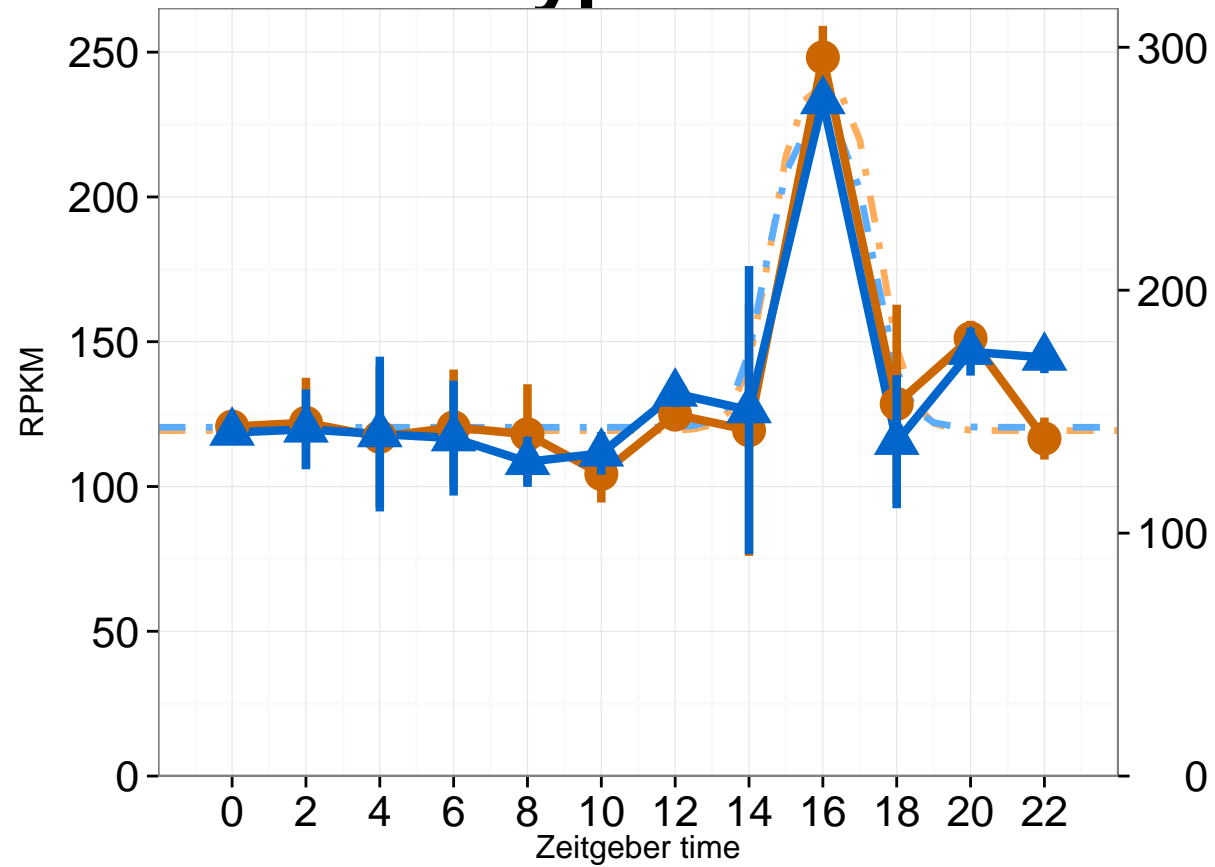

# Cyp3a13

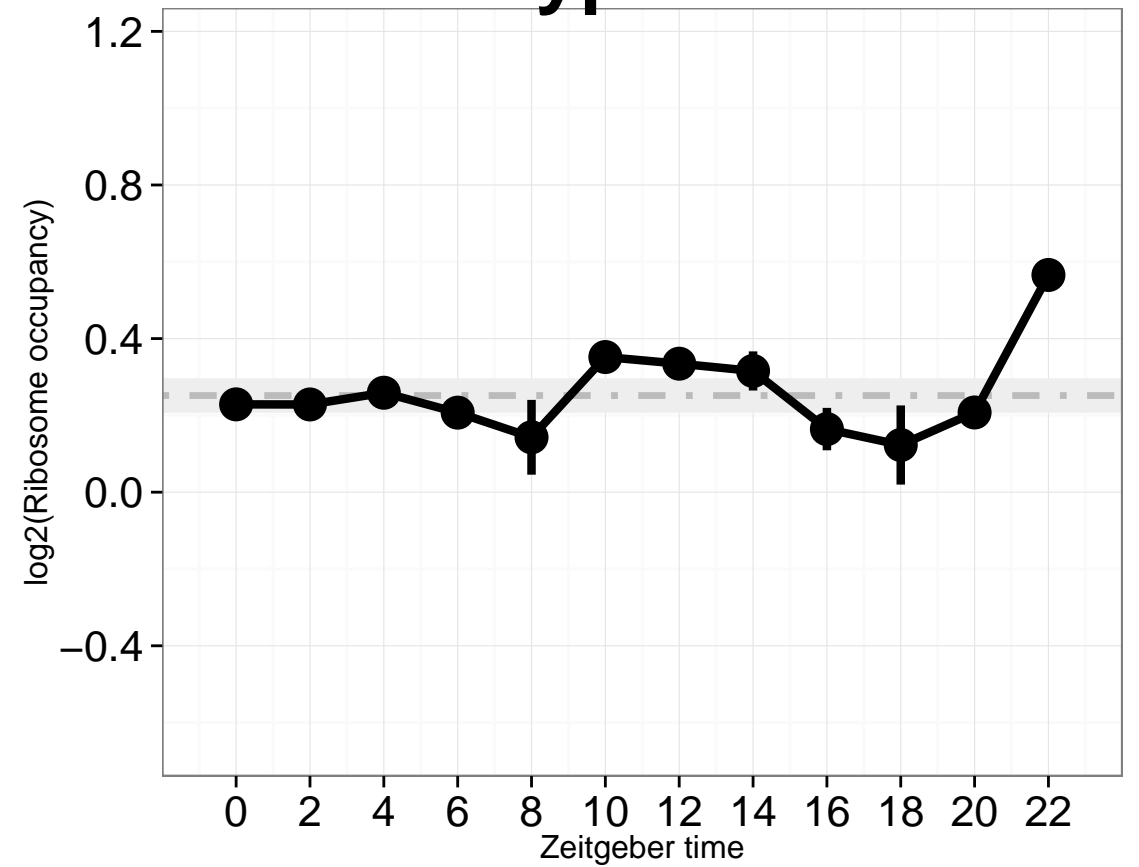

Supplement: SuppDataset_1.zip [file Cyp3a13_set_D.pdf › Supplemental Dataset 1/D-mRNA_rhythm_translation_rhyth/Cyp3a13_set_D.pdf]

# Cyp3a16

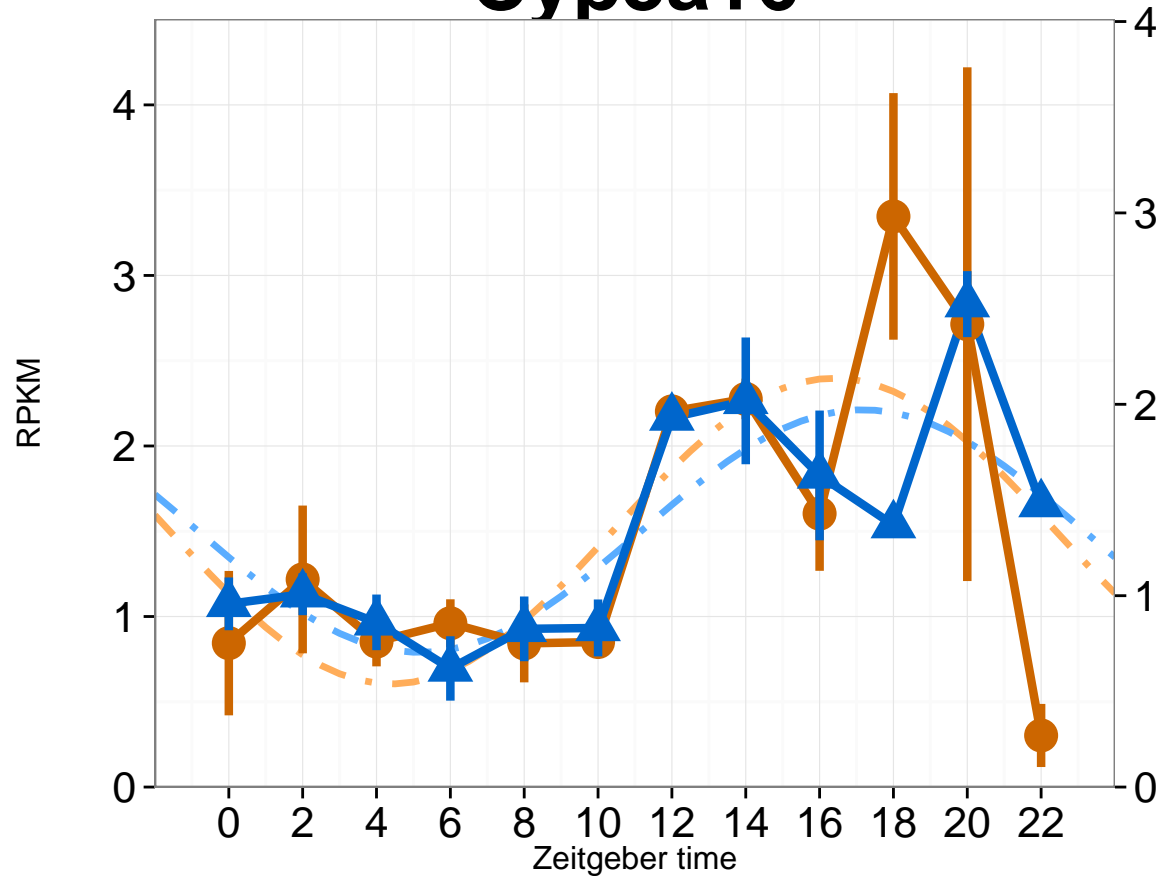

# Cyp3a16

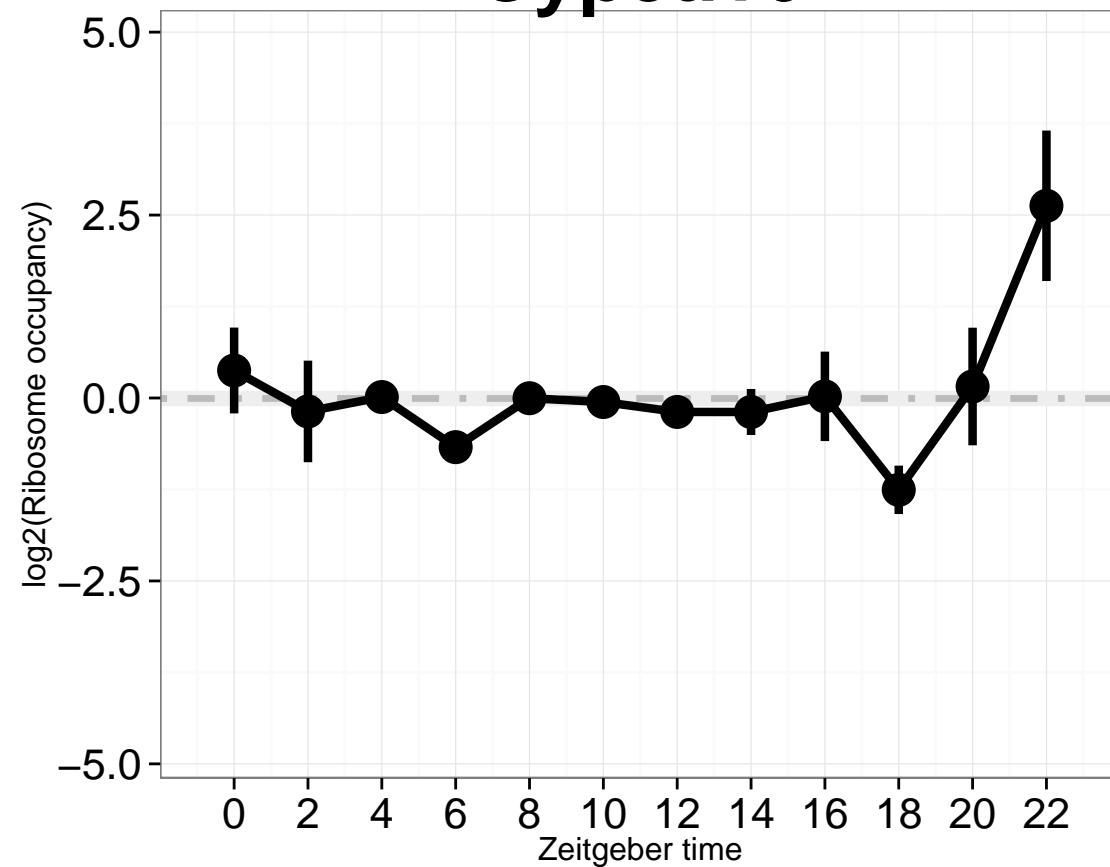

Supplement: SuppDataset_1.zip [file Cyp3a16_set_D.pdf › Supplemental Dataset 1/D-mRNA_rhythm_translation_rhyth/Cyp3a16_set_D.pdf]

# Cyp3a44

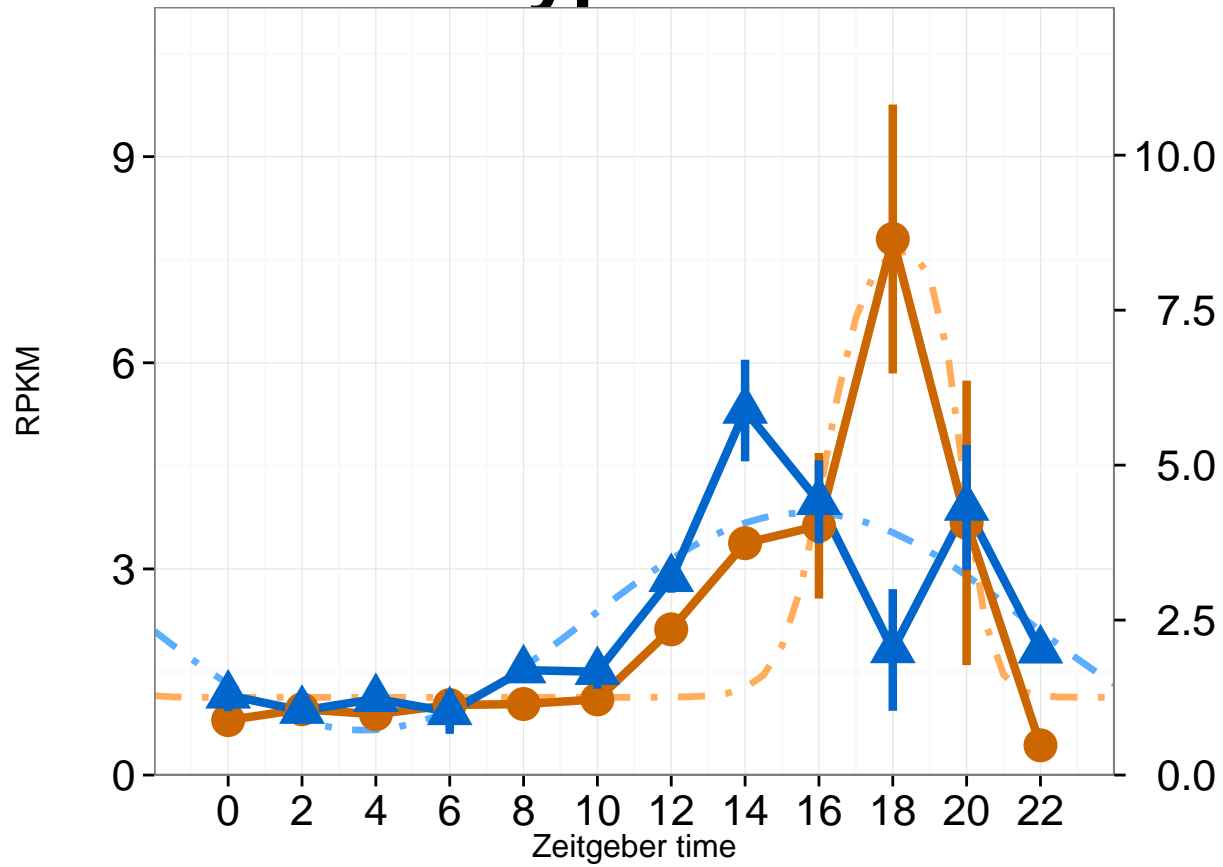

# Cyp3a44

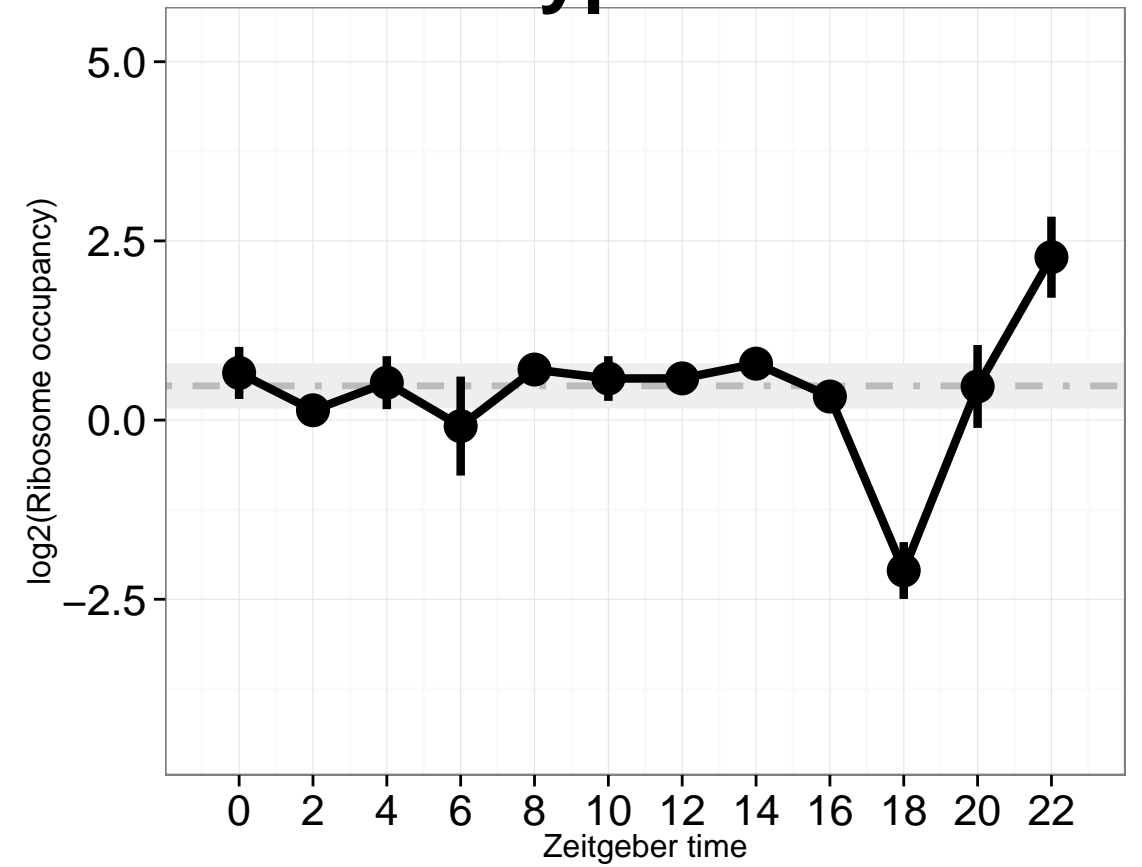

Supplement: SuppDataset_1.zip [file Cyp3a44_set_D.pdf › Supplemental Dataset 1/D-mRNA_rhythm_translation_rhyth/Cyp3a44_set_D.pdf]

Cyp4f17

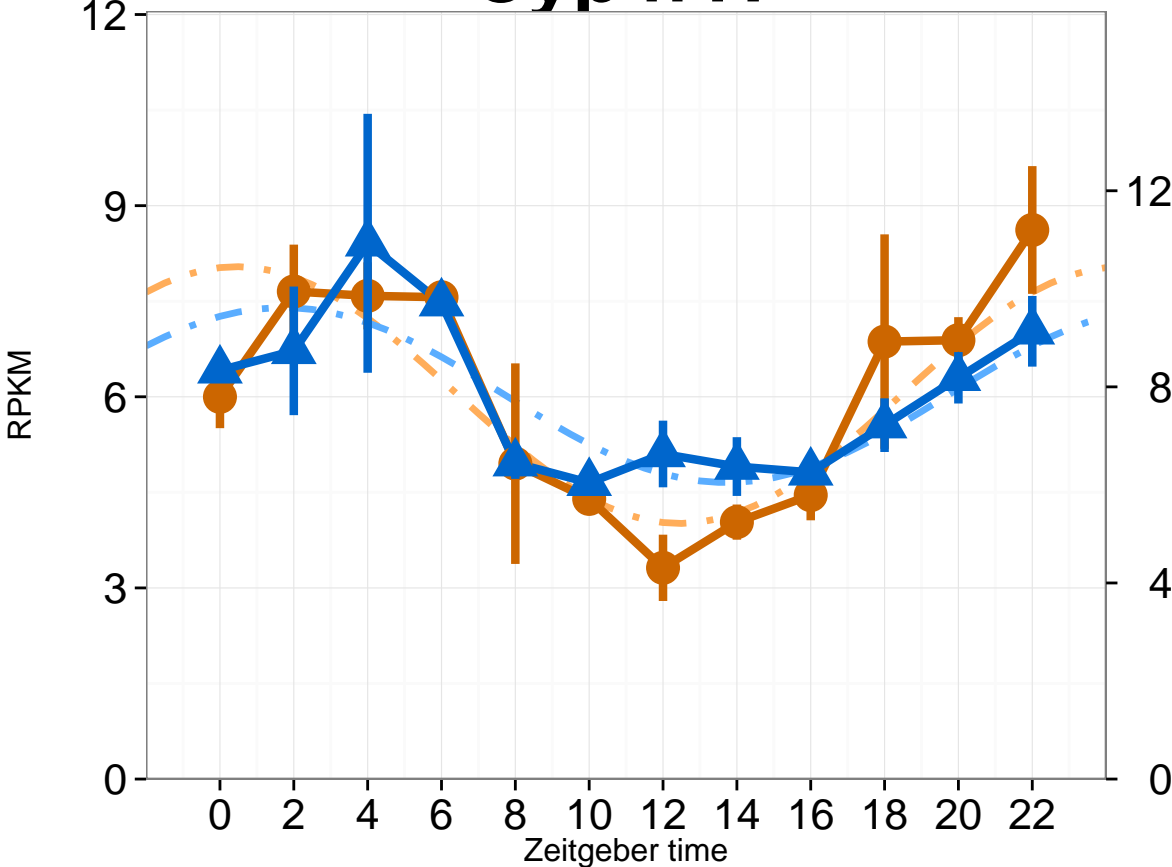

Cyp4f17

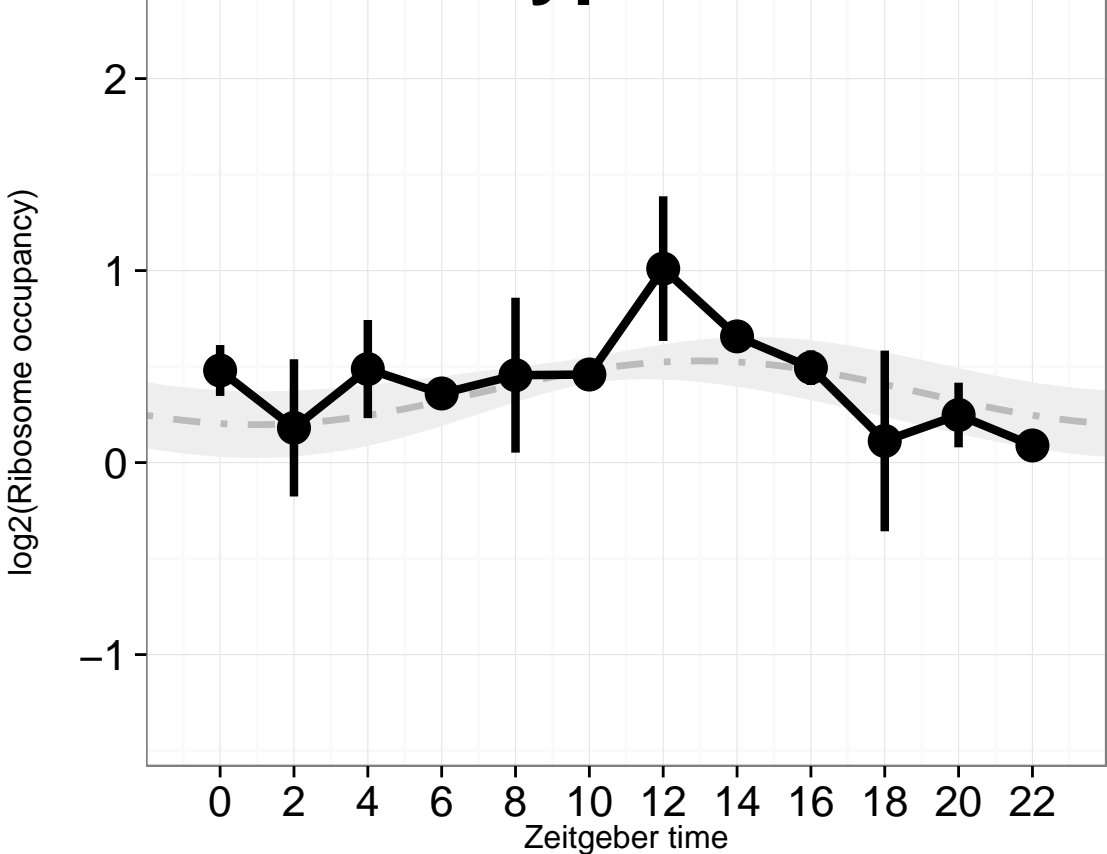

Supplement: SuppDataset_1.zip [file Cyp4f17_set_D.pdf › Supplemental Dataset 1/D-mRNA_rhythm_translation_rhyth/Cyp4f17_set_D.pdf]

# Cyp7a1

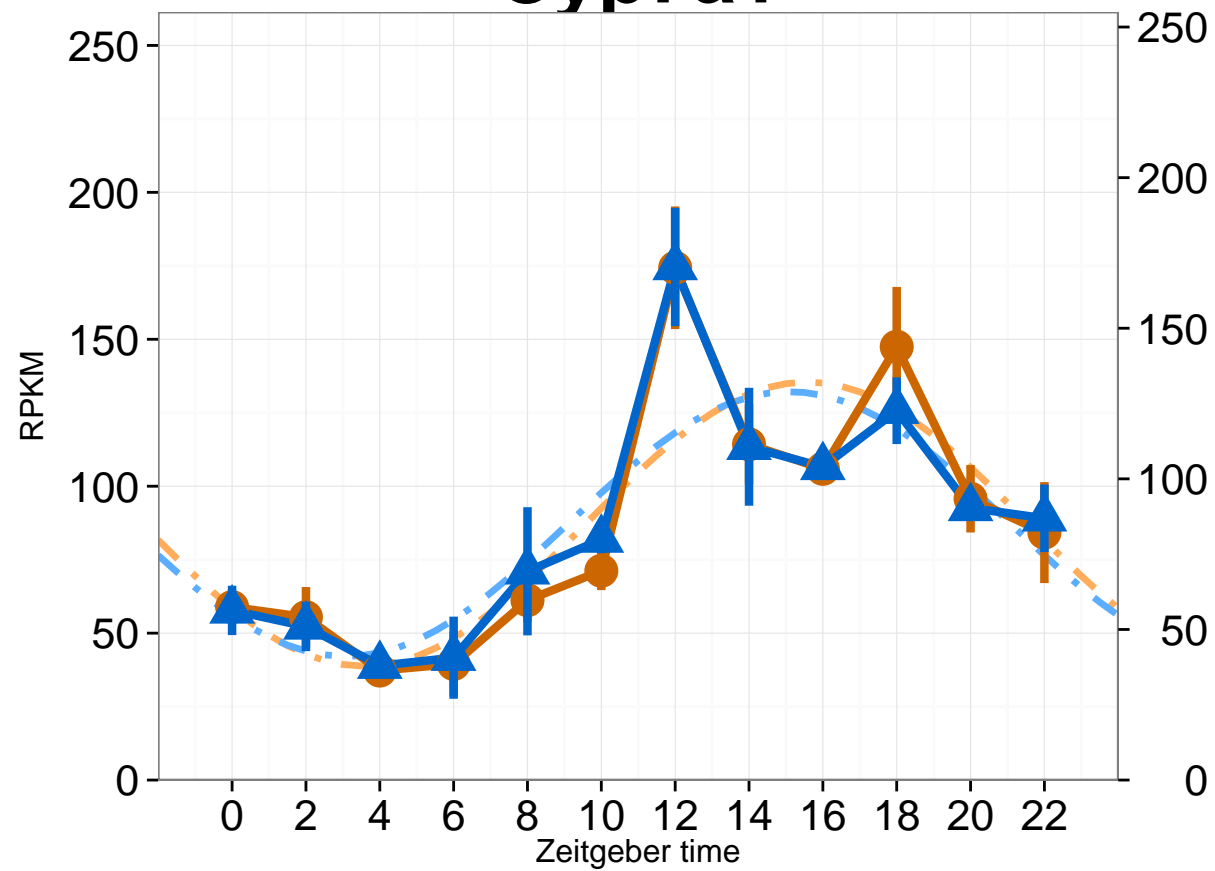

# Cyp7a1

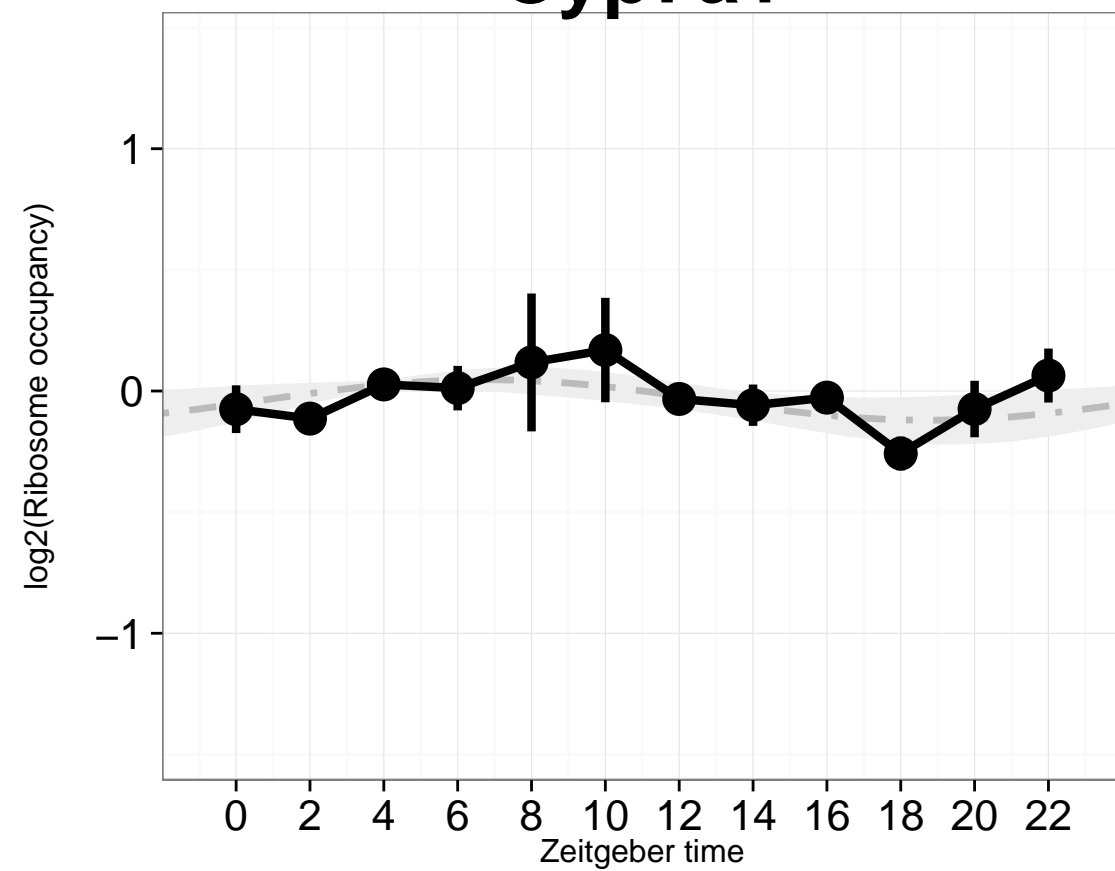

Supplement: SuppDataset_1.zip [file Cyp7a1_set_D.pdf › Supplemental Dataset 1/D-mRNA_rhythm_translation_rhyth/Cyp7a1_set_D.pdf]

# Cyp8b1

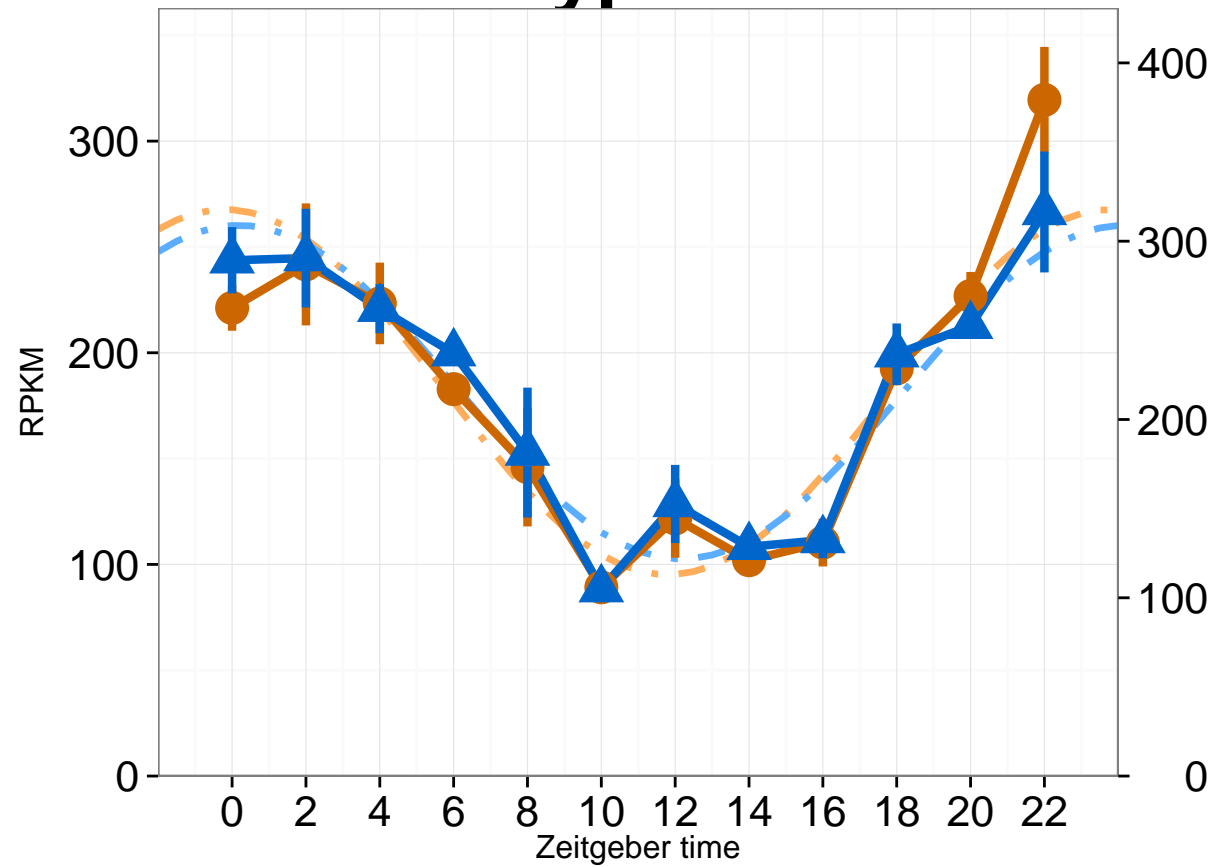

# Cyp8b1

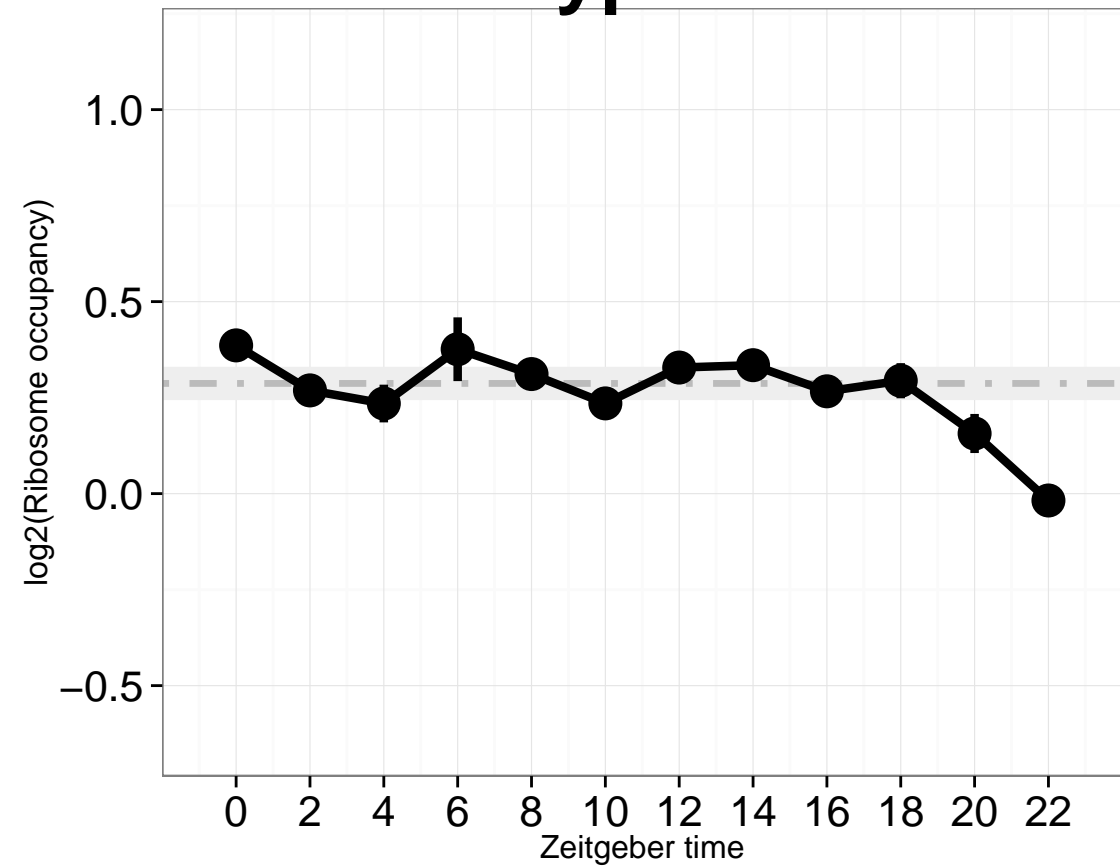

Supplement: SuppDataset_1.zip [file Cyp8b1_set_D.pdf › Supplemental Dataset 1/D-mRNA_rhythm_translation_rhyth/Cyp8b1_set_D.pdf]

## Cyth1

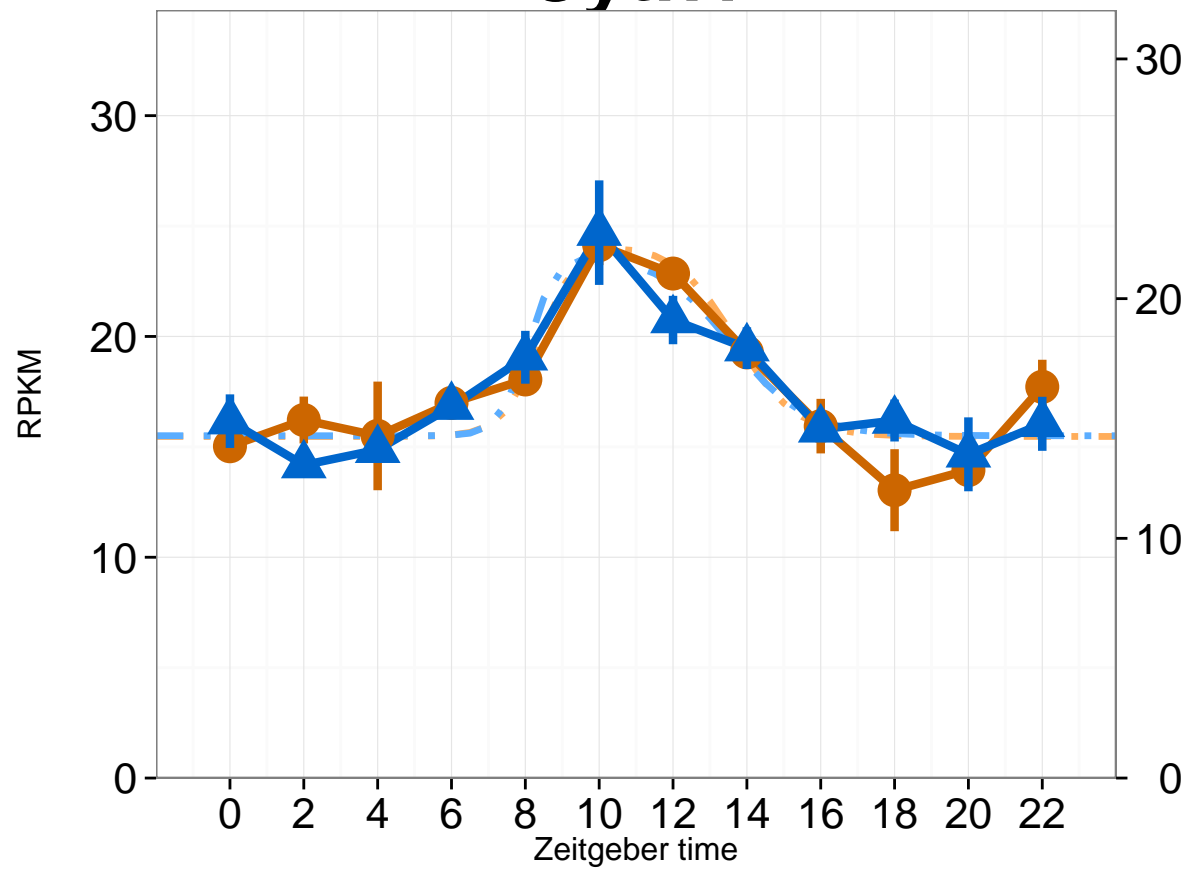

## Cyth1

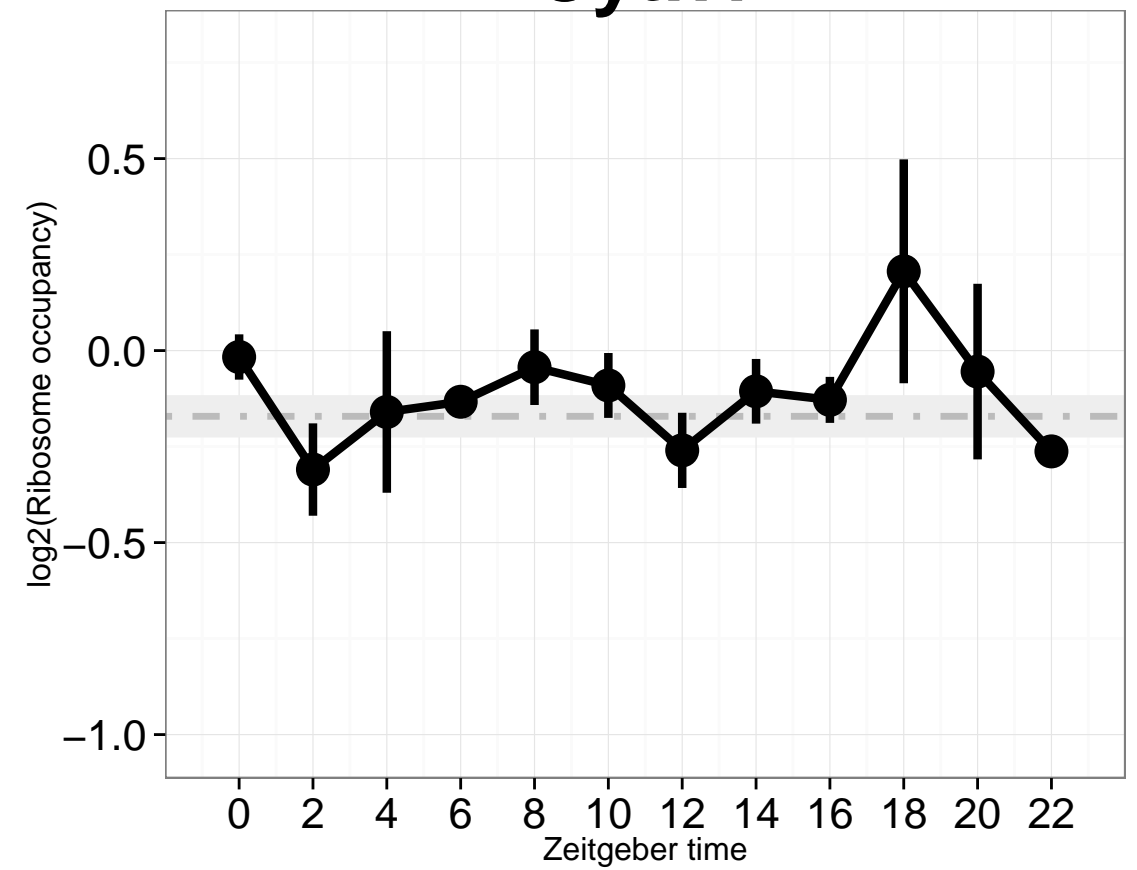

Supplement: SuppDataset_1.zip [file Cyth1_set_D.pdf › Supplemental Dataset 1/D-mRNA_rhythm_translation_rhyth/Cyth1_set_D.pdf]

# D430042O09Rik

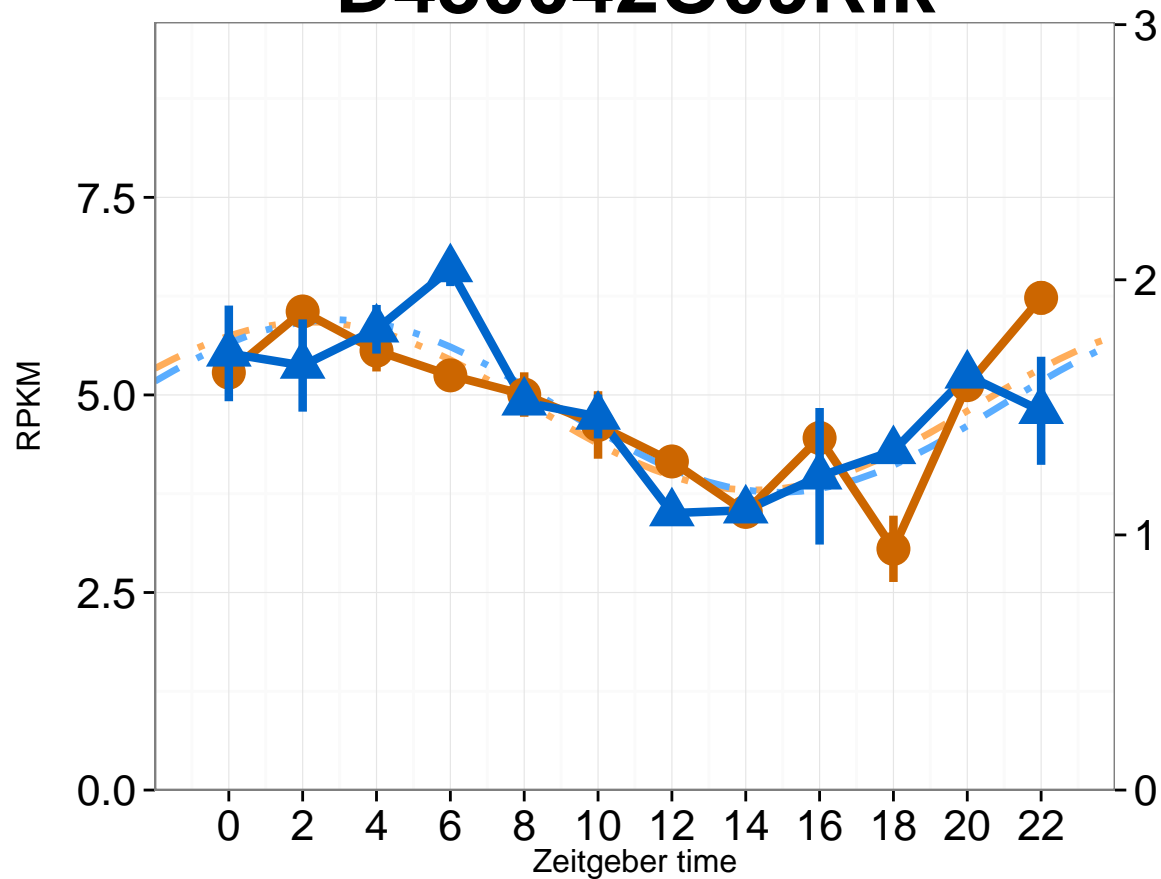

# D430042O09Rik

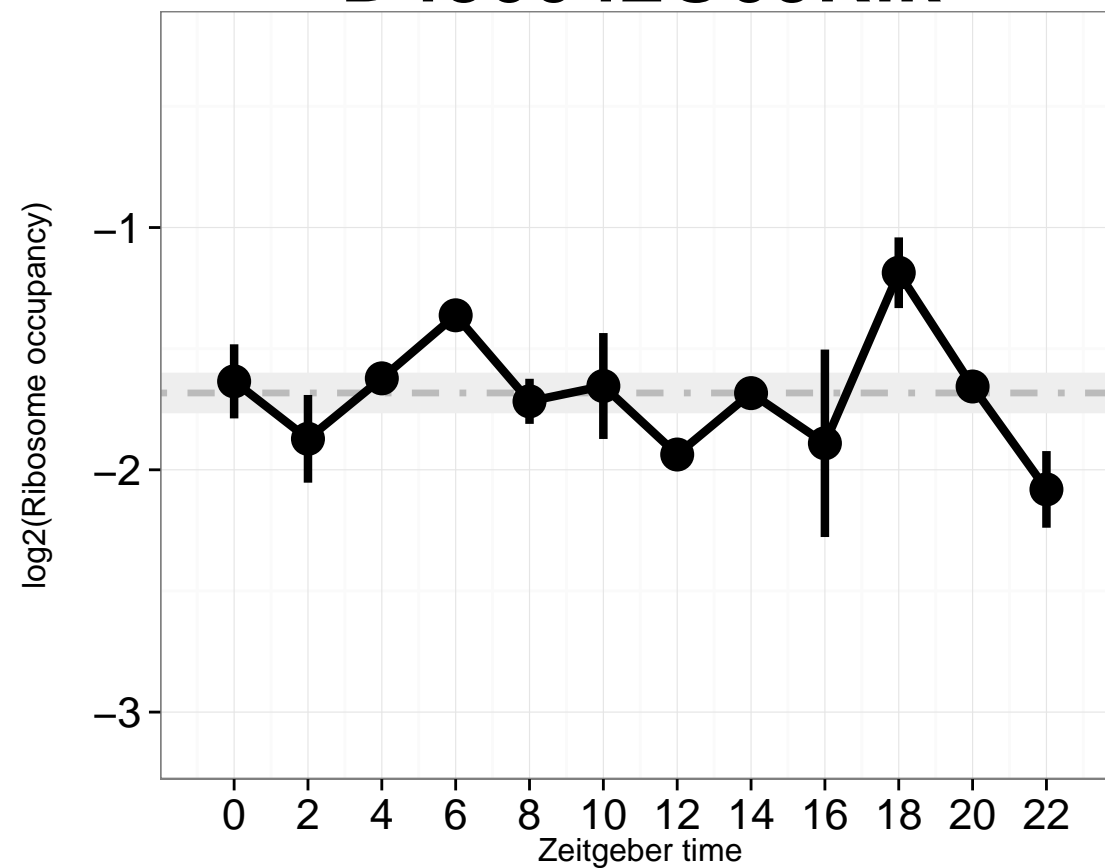

Supplement: SuppDataset_1.zip [file D430042O09Rik_set_D.pdf › Supplemental Dataset 1/D-mRNA_rhythm_translation_rhyth/D430042O09Rik_set_D.pdf]

# D630039A03Rik

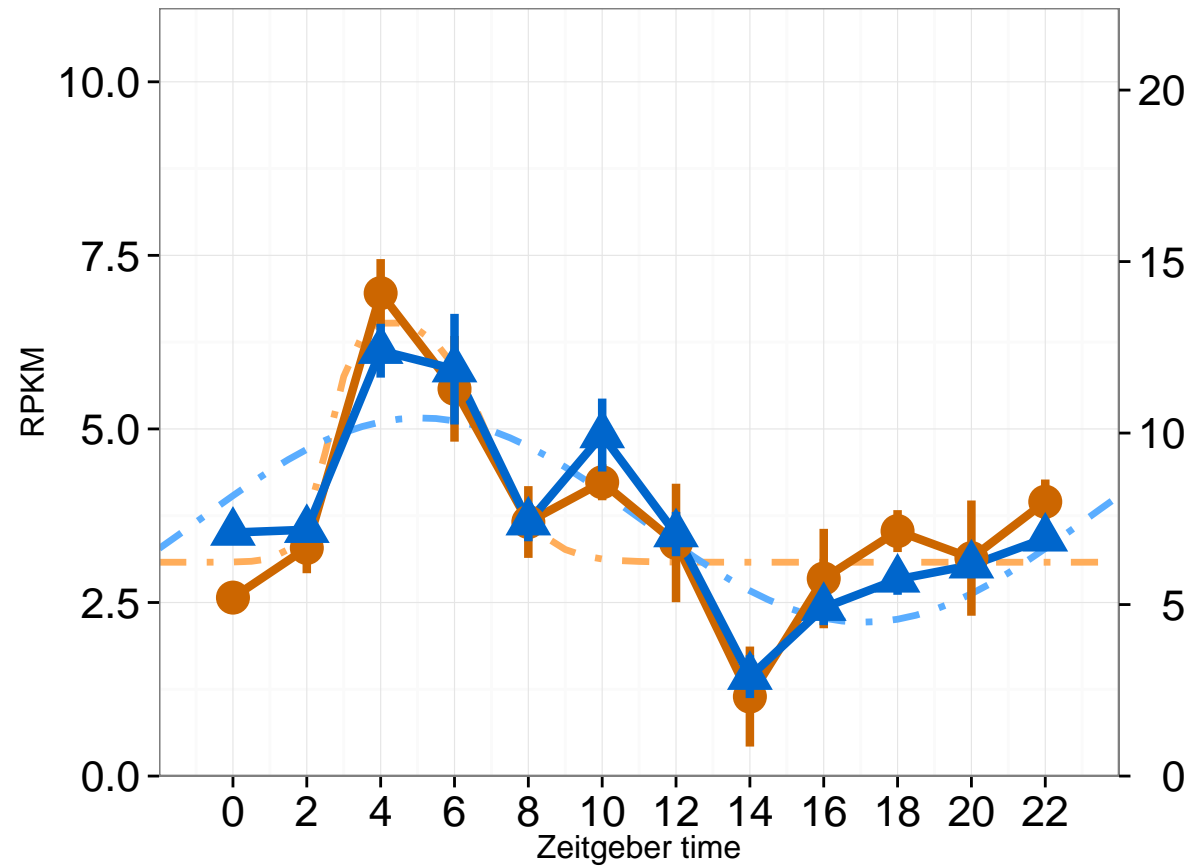

# D630039A03Rik

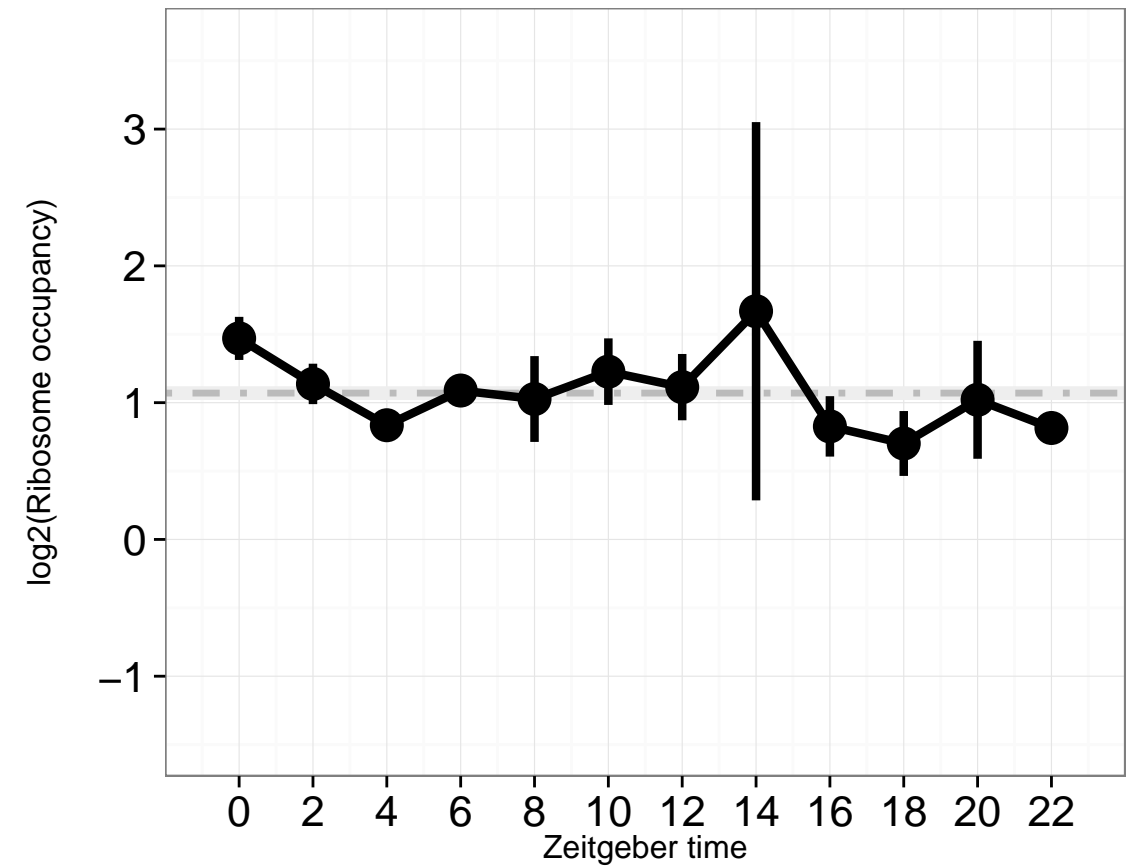

Supplement: SuppDataset_1.zip [file D630039A03Rik_set_D.pdf › Supplemental Dataset 1/D-mRNA_rhythm_translation_rhyth/D630039A03Rik_set_D.pdf]

# Dact1

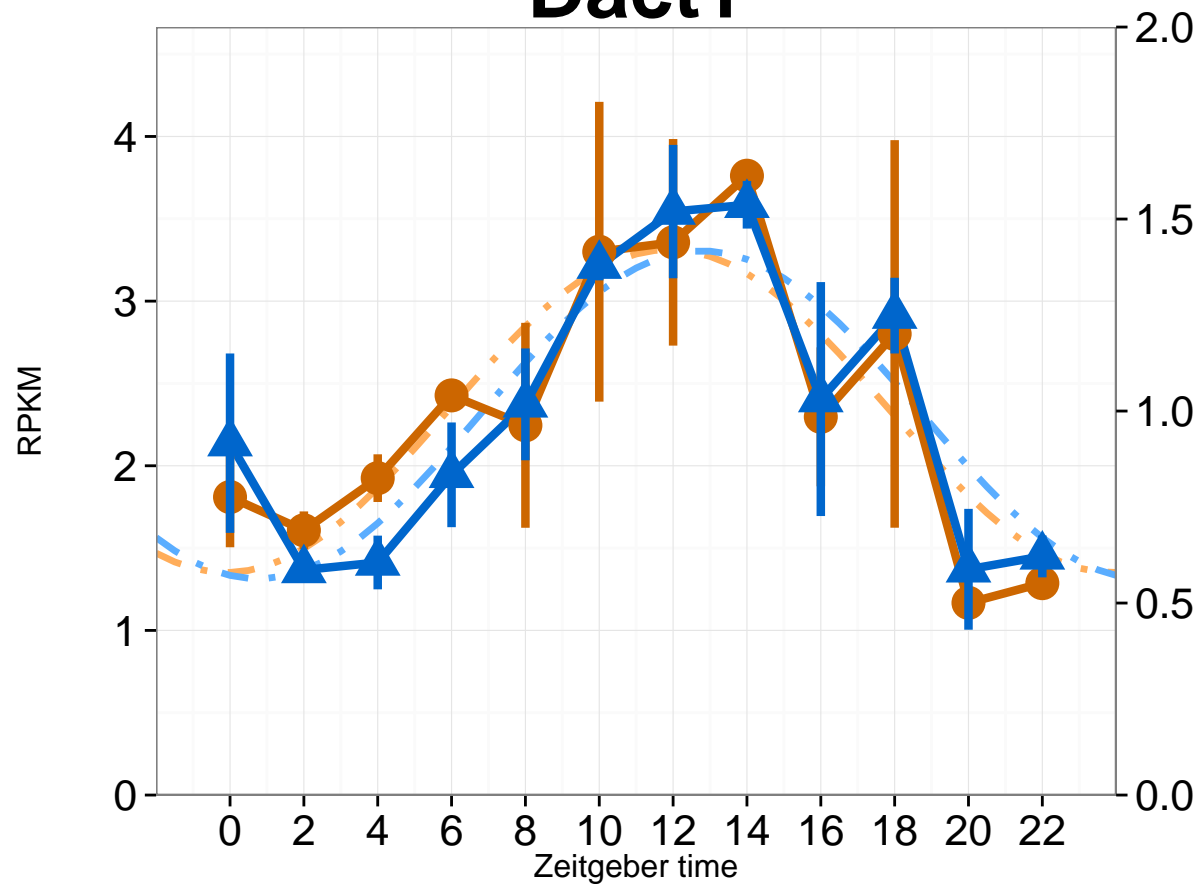

# Dact1

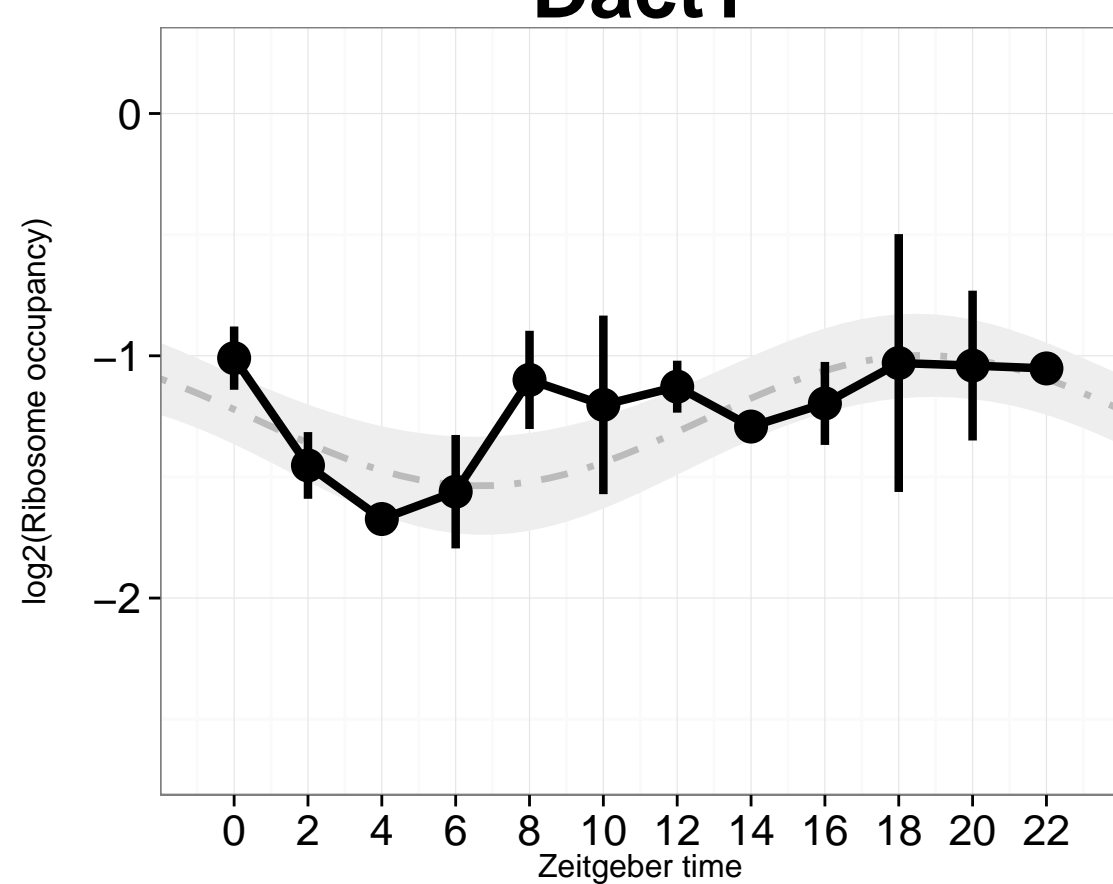

Supplement: SuppDataset_1.zip [file Dact1_set_D.pdf › Supplemental Dataset 1/D-mRNA_rhythm_translation_rhyth/Dact1_set_D.pdf]

# Dact2

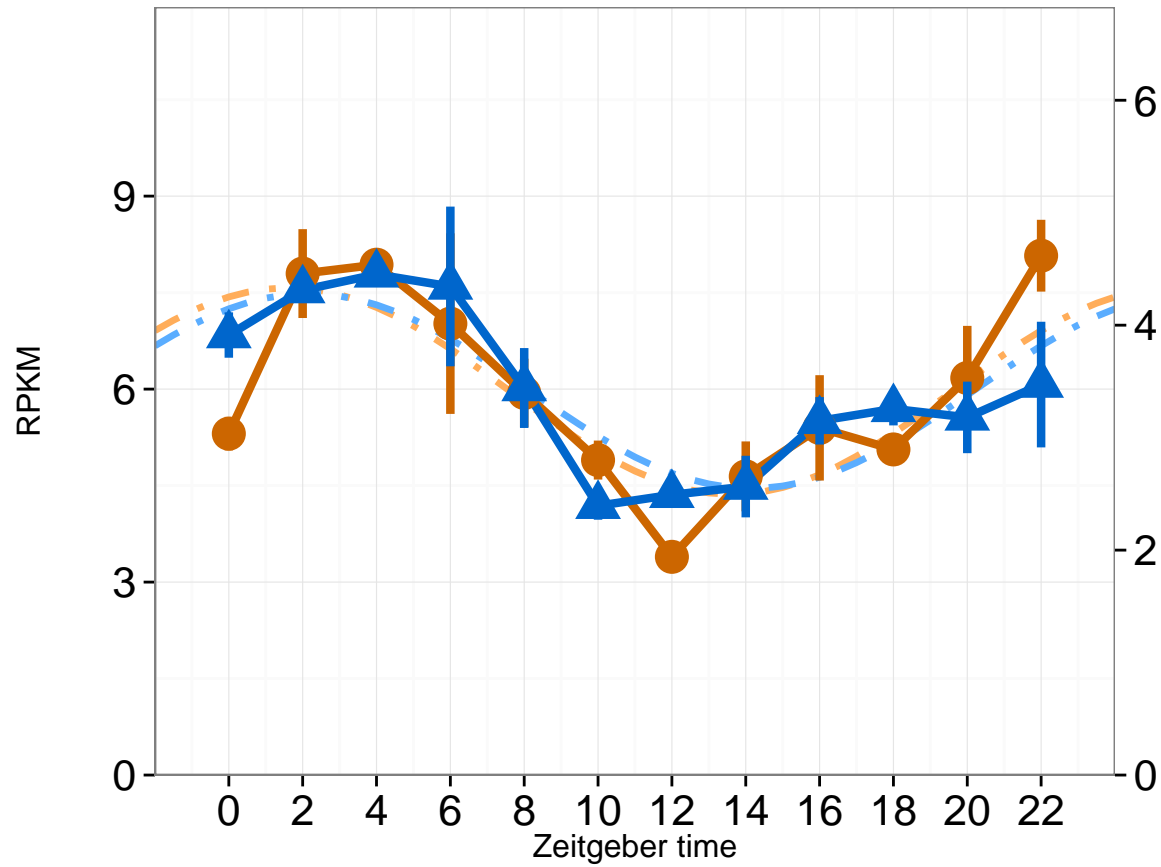

# Dact2

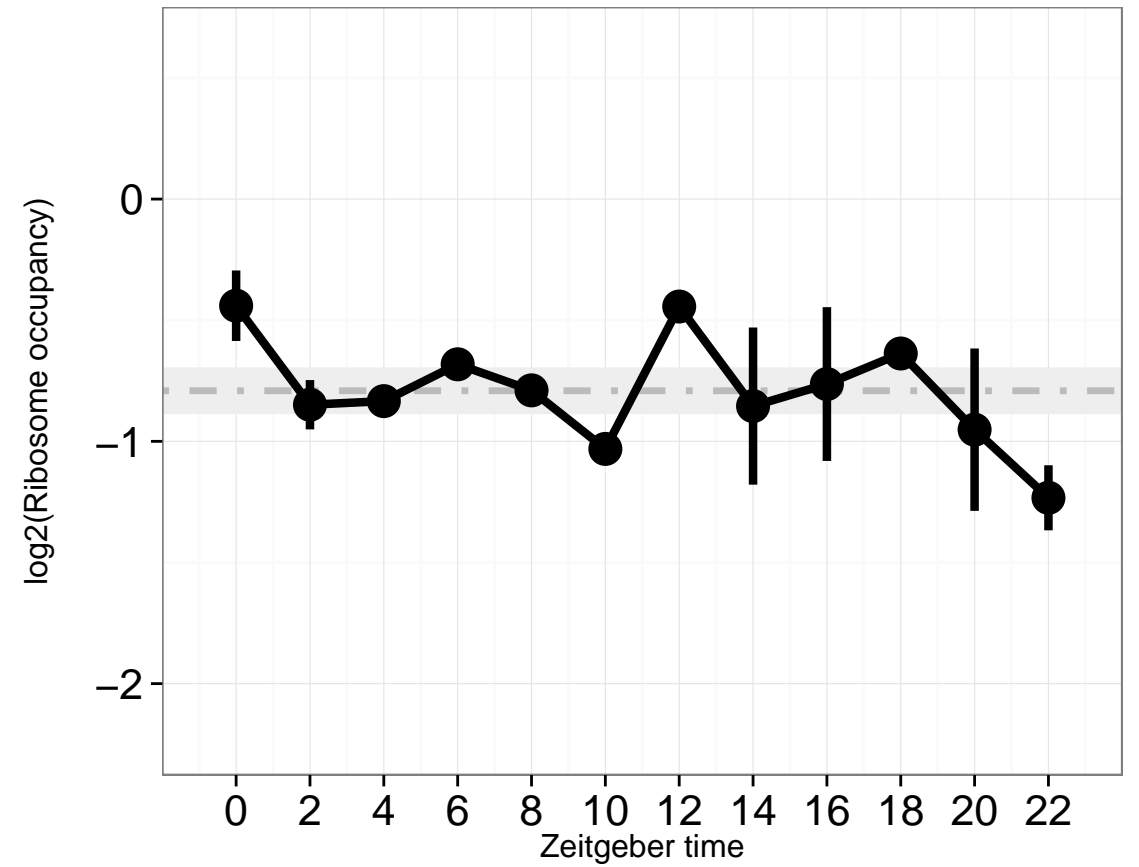

Supplement: SuppDataset_1.zip [file Dact2_set_D.pdf › Supplemental Dataset 1/D-mRNA_rhythm_translation_rhyth/Dact2_set_D.pdf]

## Dak

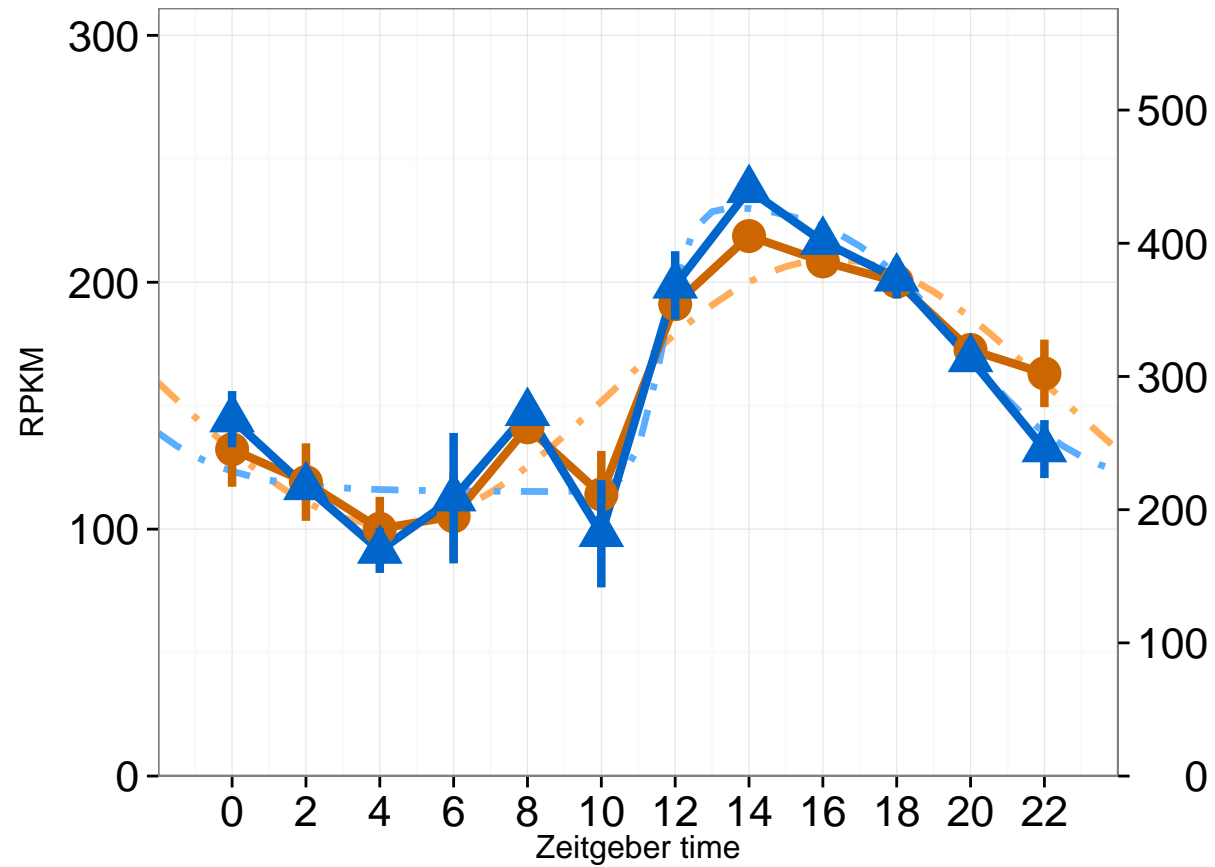

## Dak

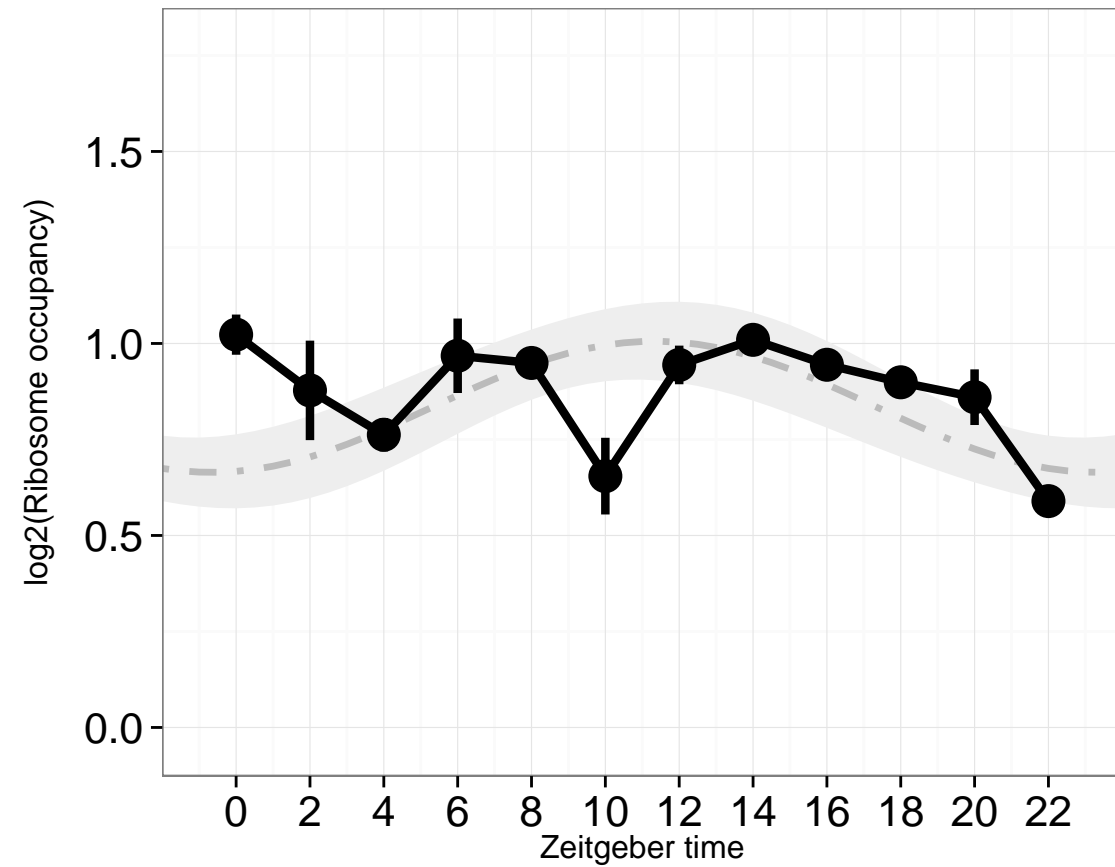

Supplement: SuppDataset_1.zip [file Dak_set_D.pdf › Supplemental Dataset 1/D-mRNA_rhythm_translation_rhyth/Dak_set_D.pdf]

## Dapk1

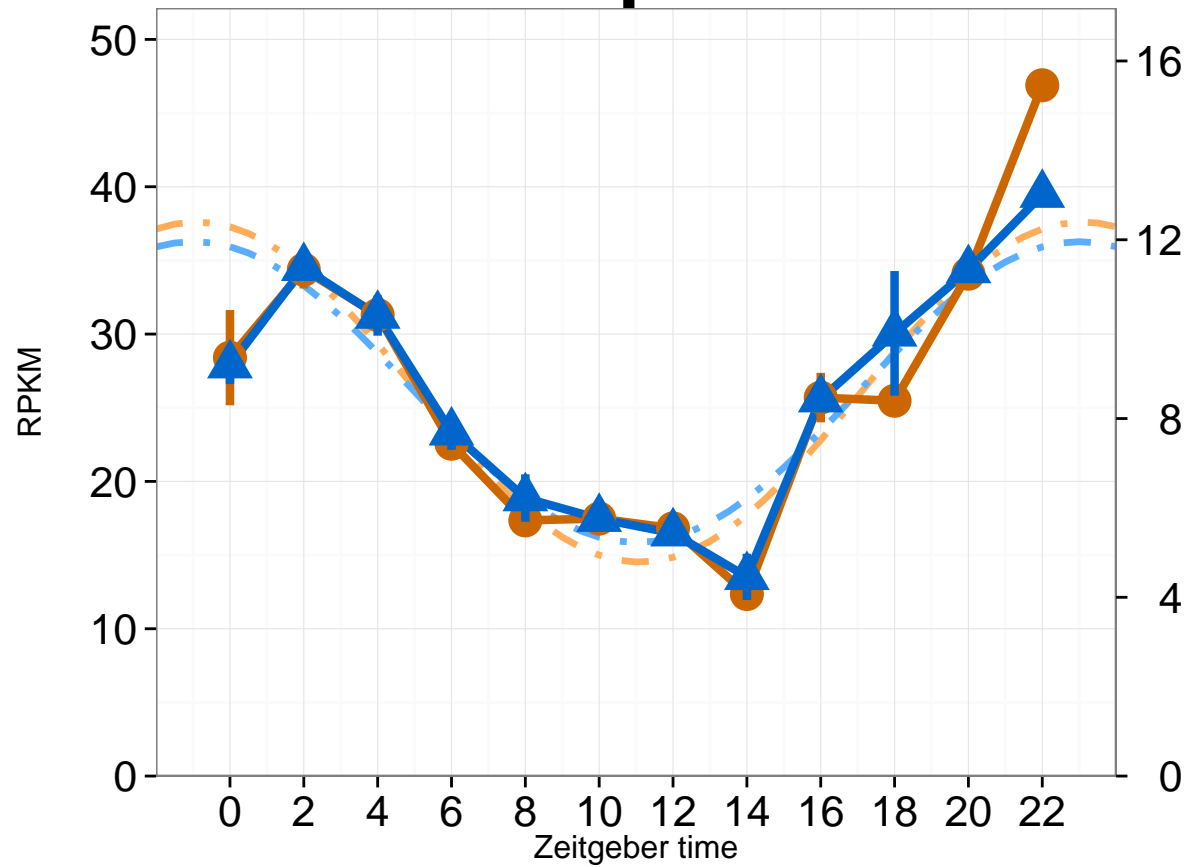

## Dapk1

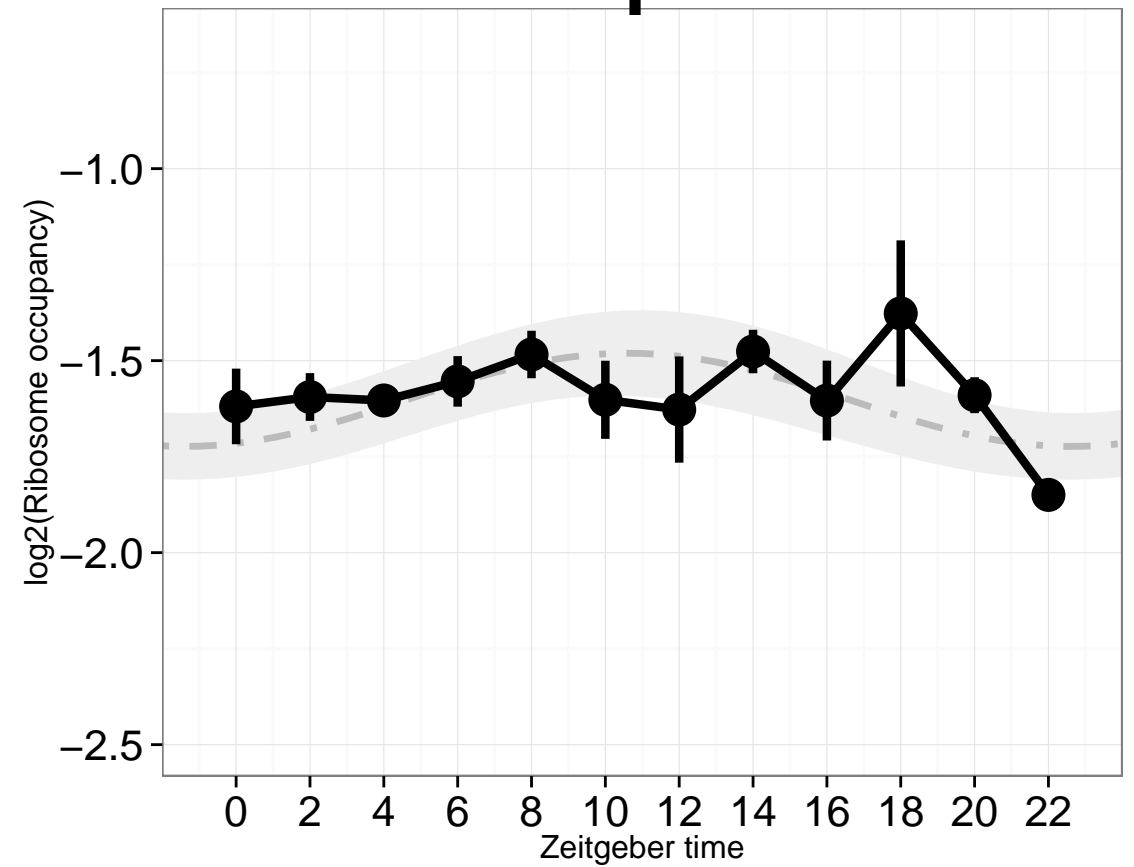

Supplement: SuppDataset_1.zip [file Dapk1_set_D.pdf › Supplemental Dataset 1/D-mRNA_rhythm_translation_rhyth/Dapk1_set_D.pdf]

## Dbf4

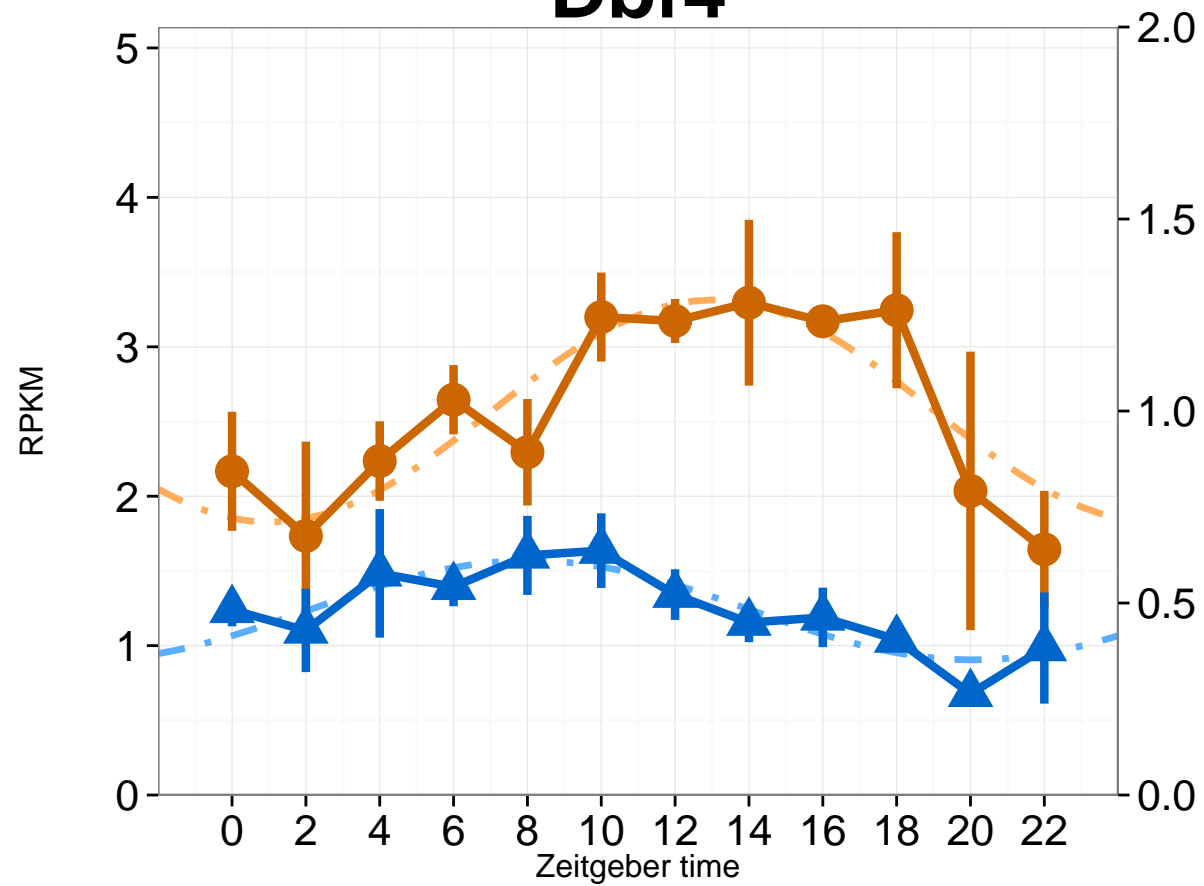

## Dbf4

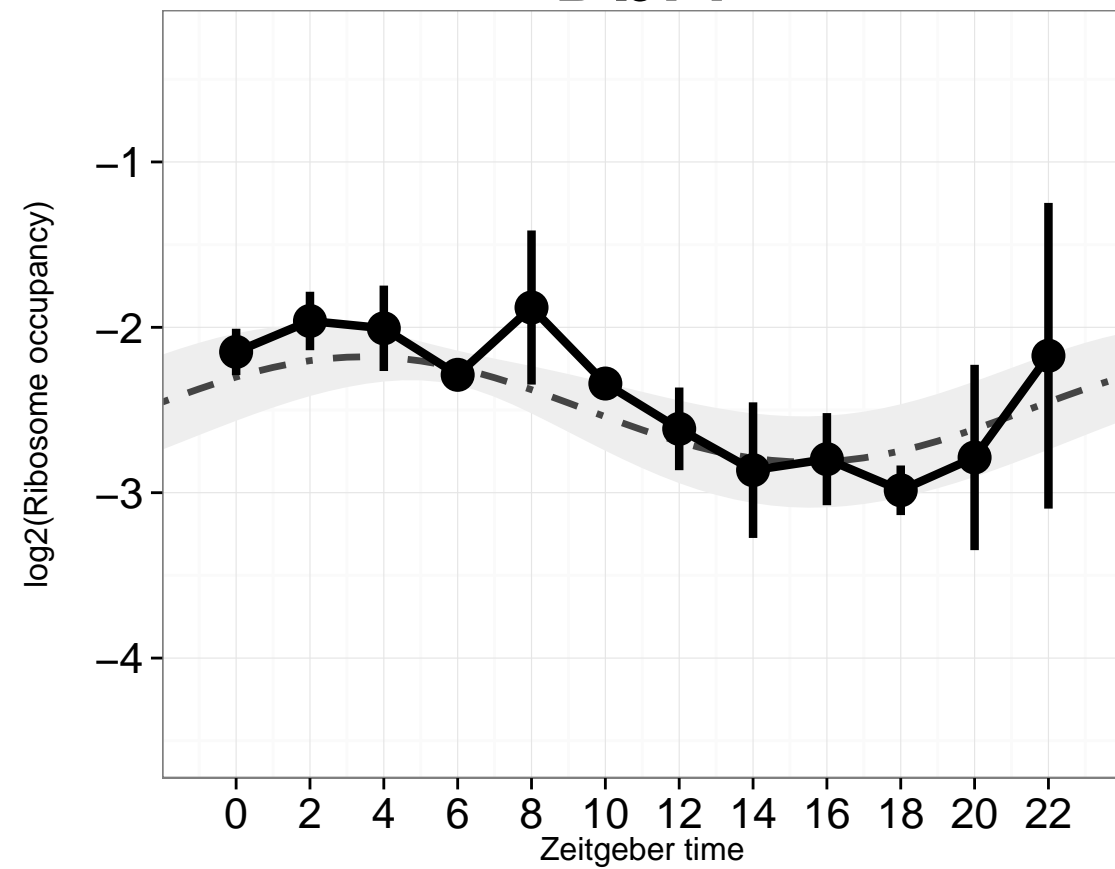

Supplement: SuppDataset_1.zip [file Dbf4_set_D.pdf › Supplemental Dataset 1/D-mRNA_rhythm_translation_rhyth/Dbf4_set_D.pdf]

## Dbp

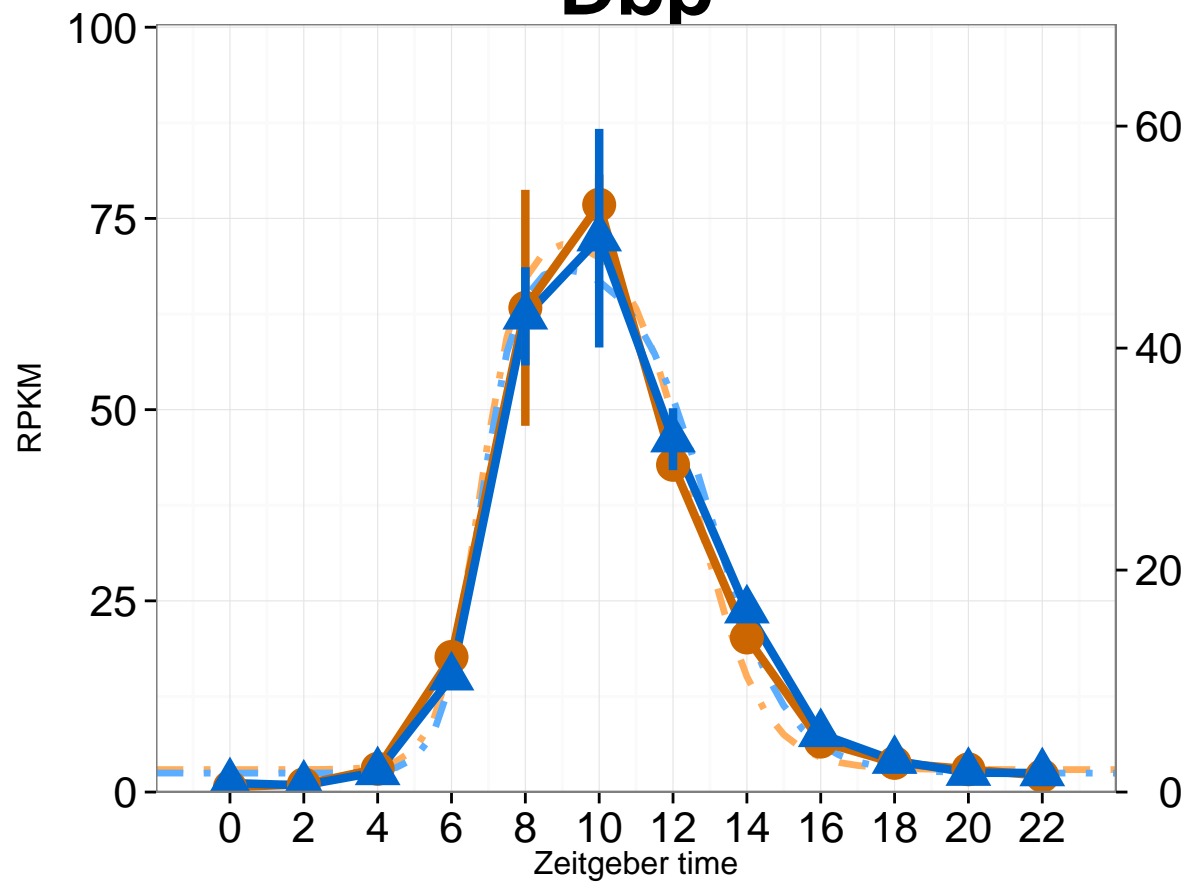

## Dbp

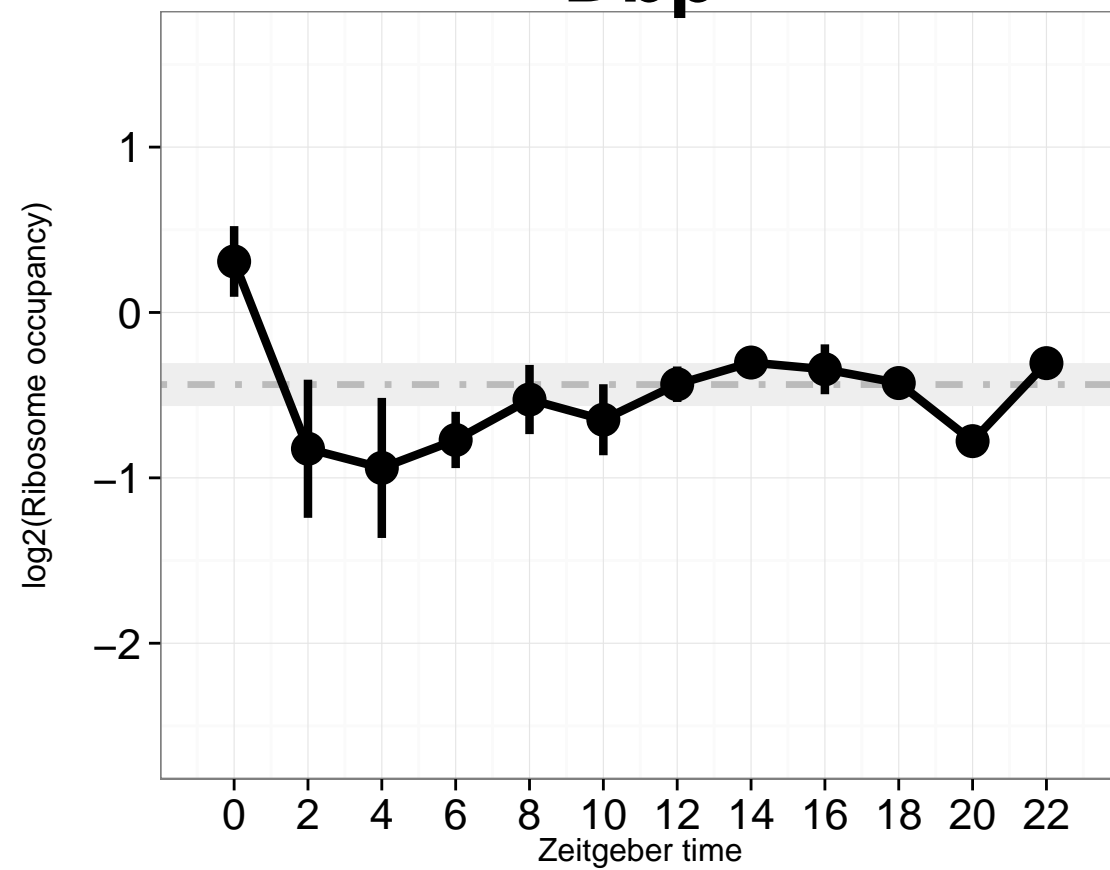

Supplement: SuppDataset_1.zip [file Dbp_set_D.pdf › Supplemental Dataset 1/D-mRNA_rhythm_translation_rhyth/Dbp_set_D.pdf]

# Dcaf6

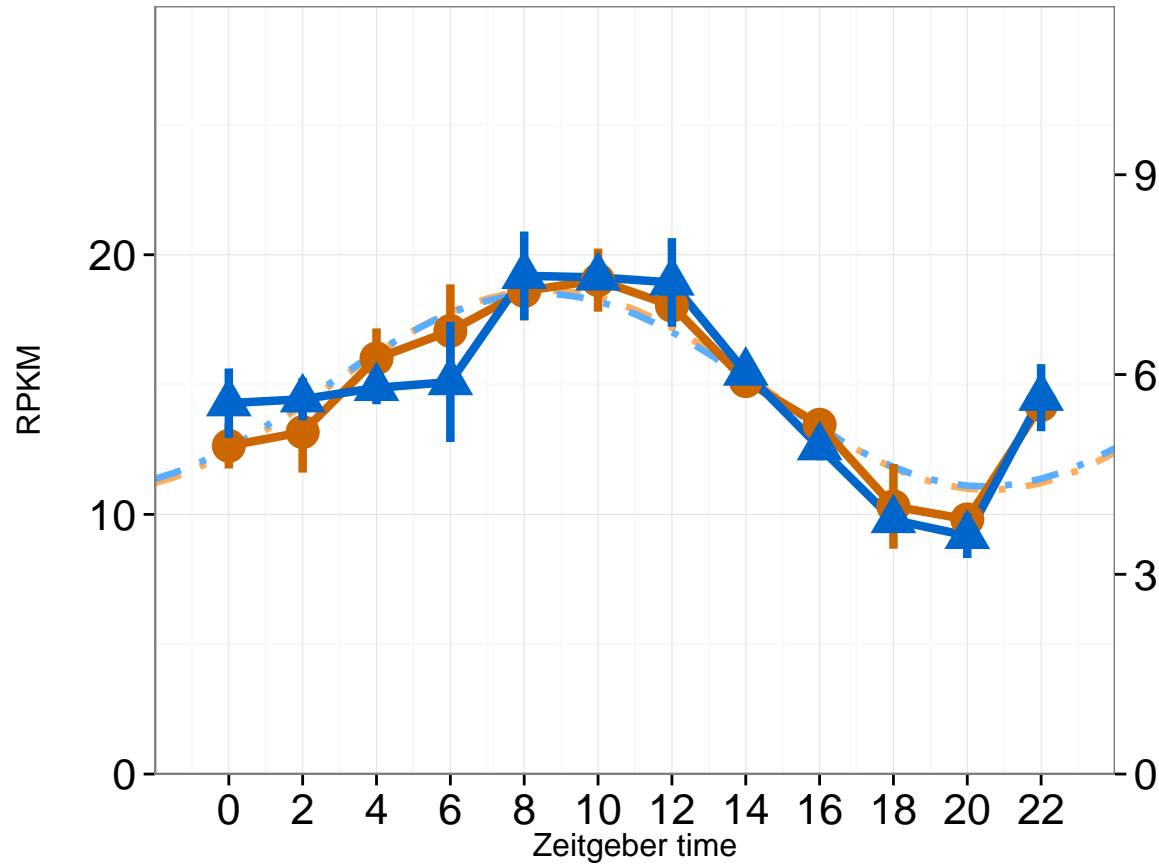

# Dcaf6

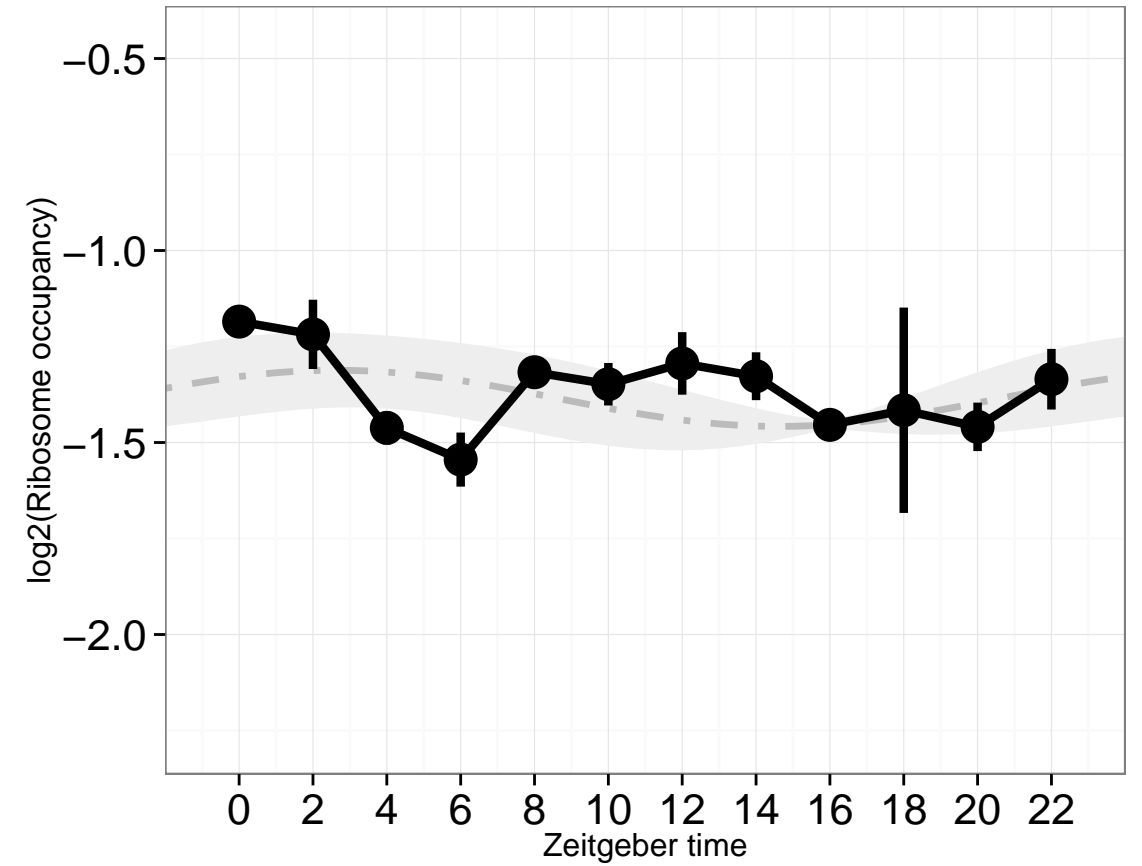

Supplement: SuppDataset_1.zip [file Dcaf6_set_D.pdf › Supplemental Dataset 1/D-mRNA_rhythm_translation_rhyth/Dcaf6_set_D.pdf]

# Dcun1d4

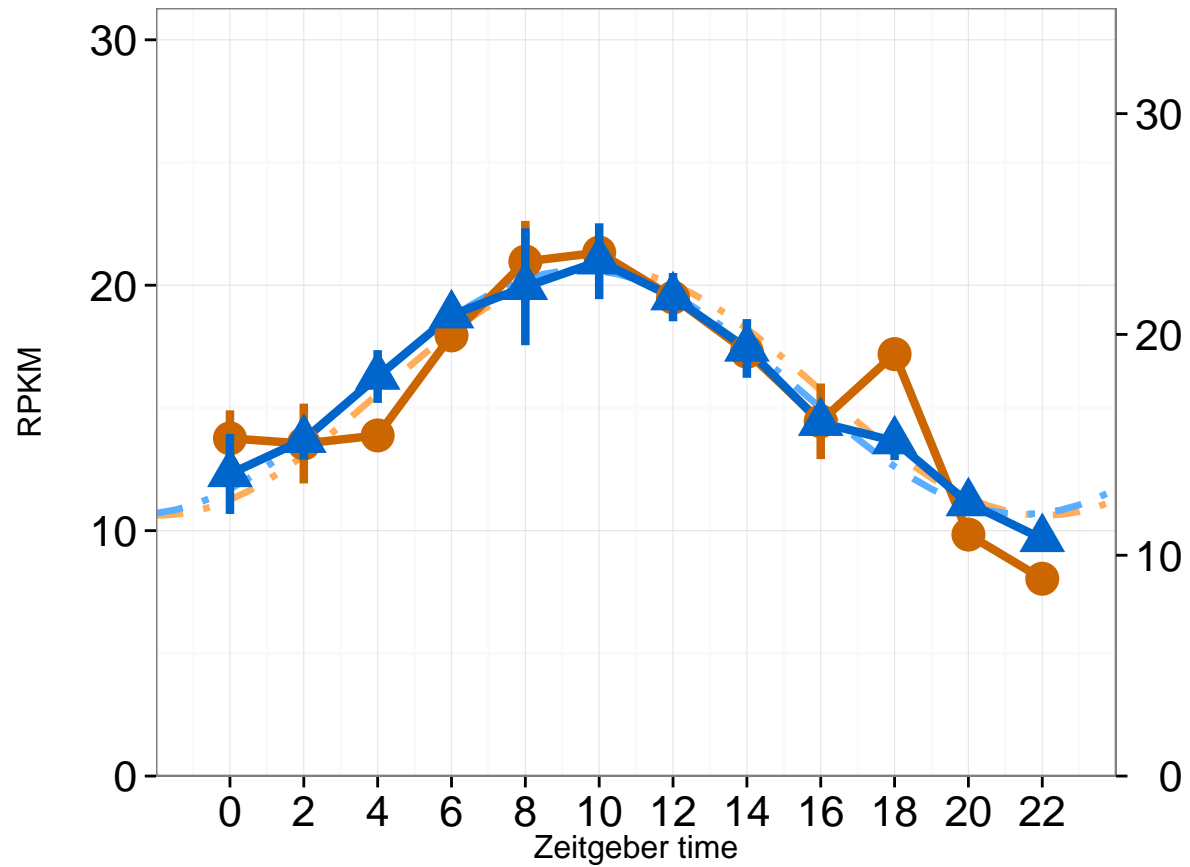

# Dcun1d4

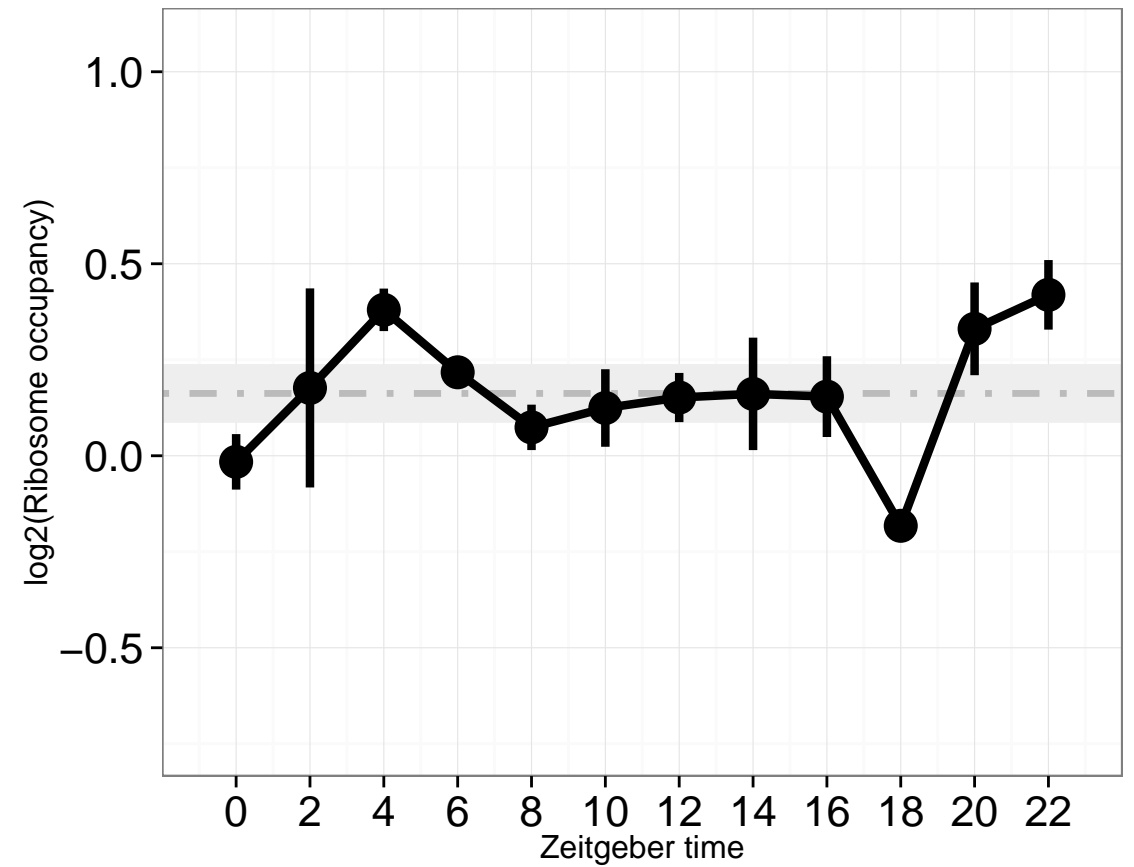

Supplement: SuppDataset_1.zip [file Dcun1d4_set_D.pdf › Supplemental Dataset 1/D-mRNA_rhythm_translation_rhyth/Dcun1d4_set_D.pdf]

# Ddah1

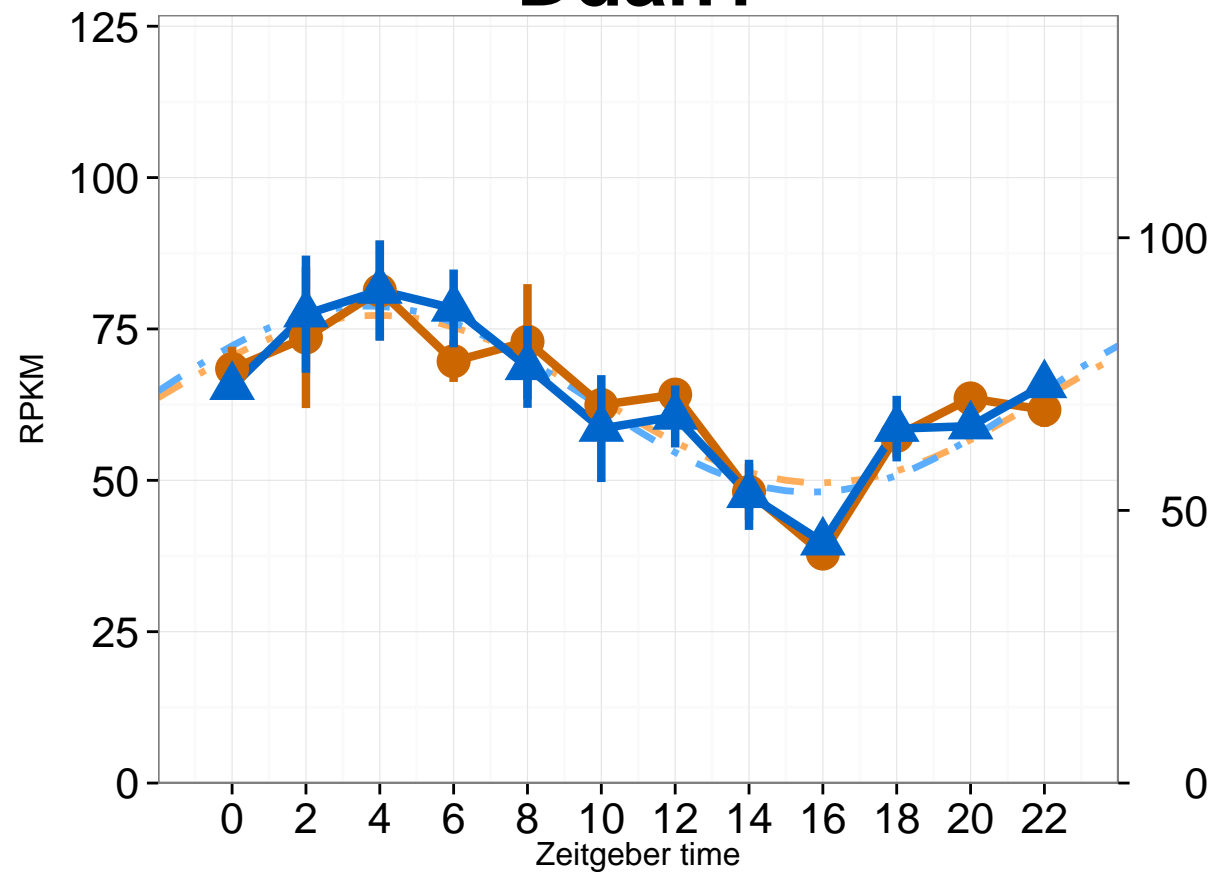

# Ddah1

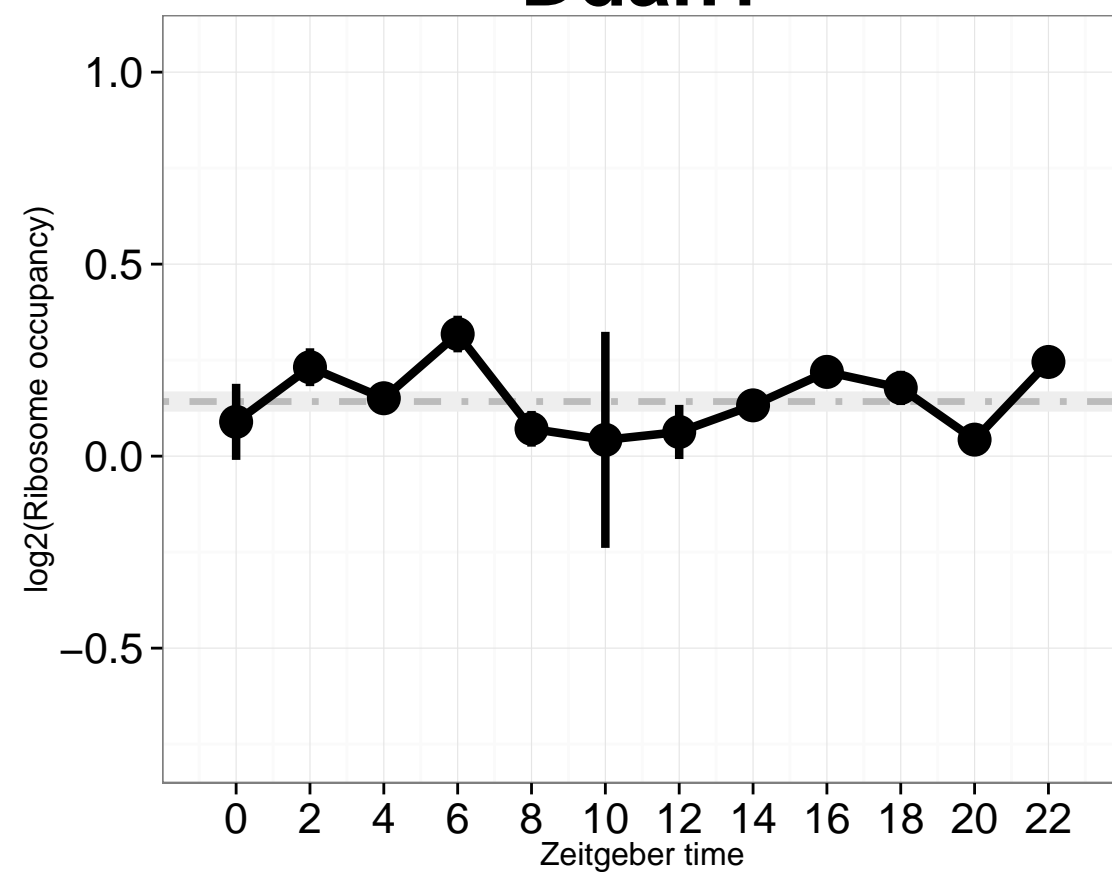

Supplement: SuppDataset_1.zip [file Ddah1_set_D.pdf › Supplemental Dataset 1/D-mRNA_rhythm_translation_rhyth/Ddah1_set_D.pdf]

## Ddc

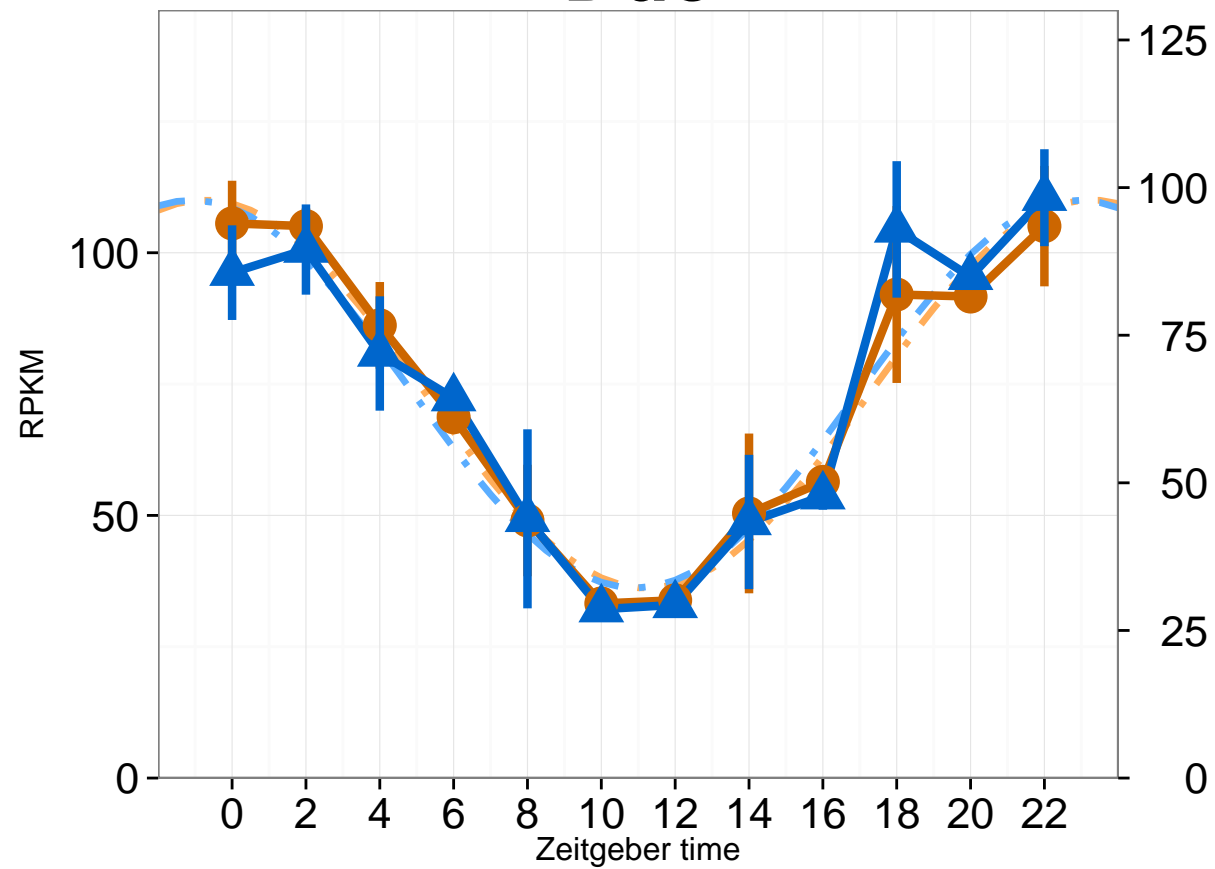

## Ddc

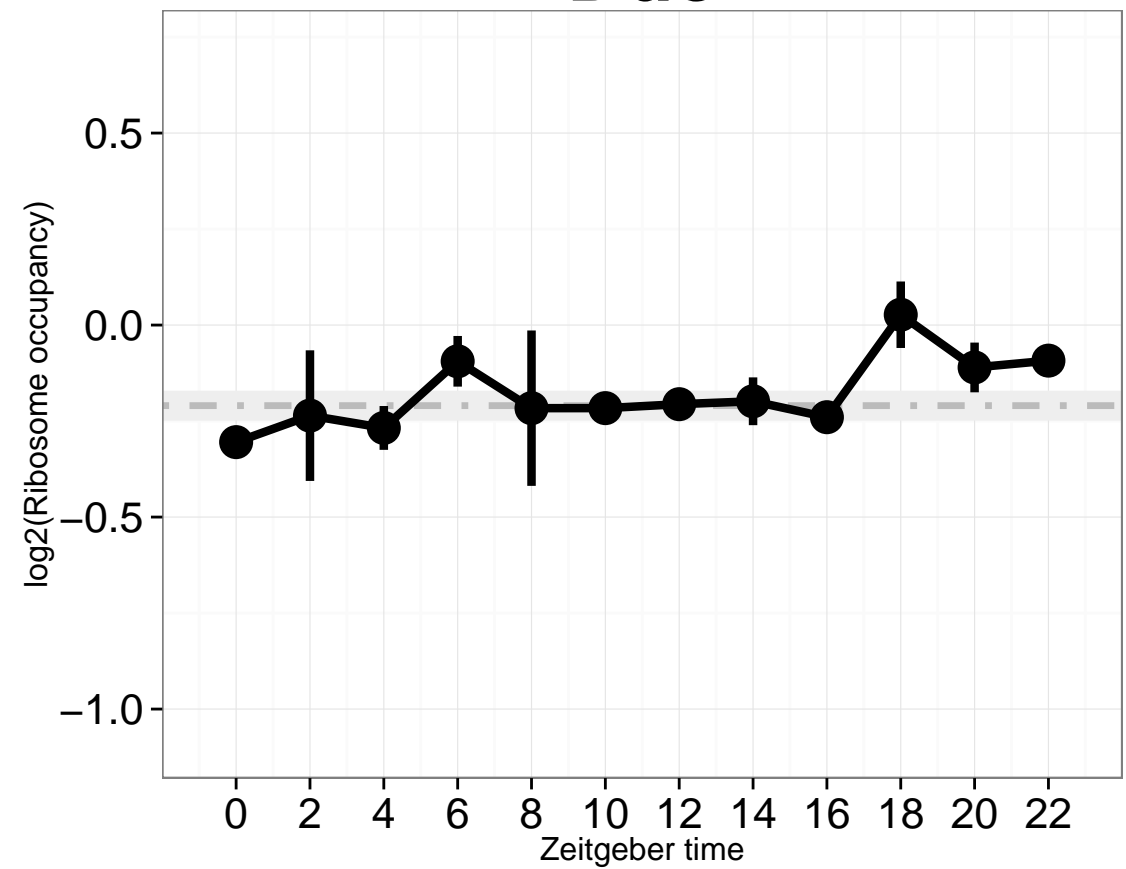

Supplement: SuppDataset_1.zip [file Ddc_set_D.pdf › Supplemental Dataset 1/D-mRNA_rhythm_translation_rhyth/Ddc_set_D.pdf]

## Ddhd1

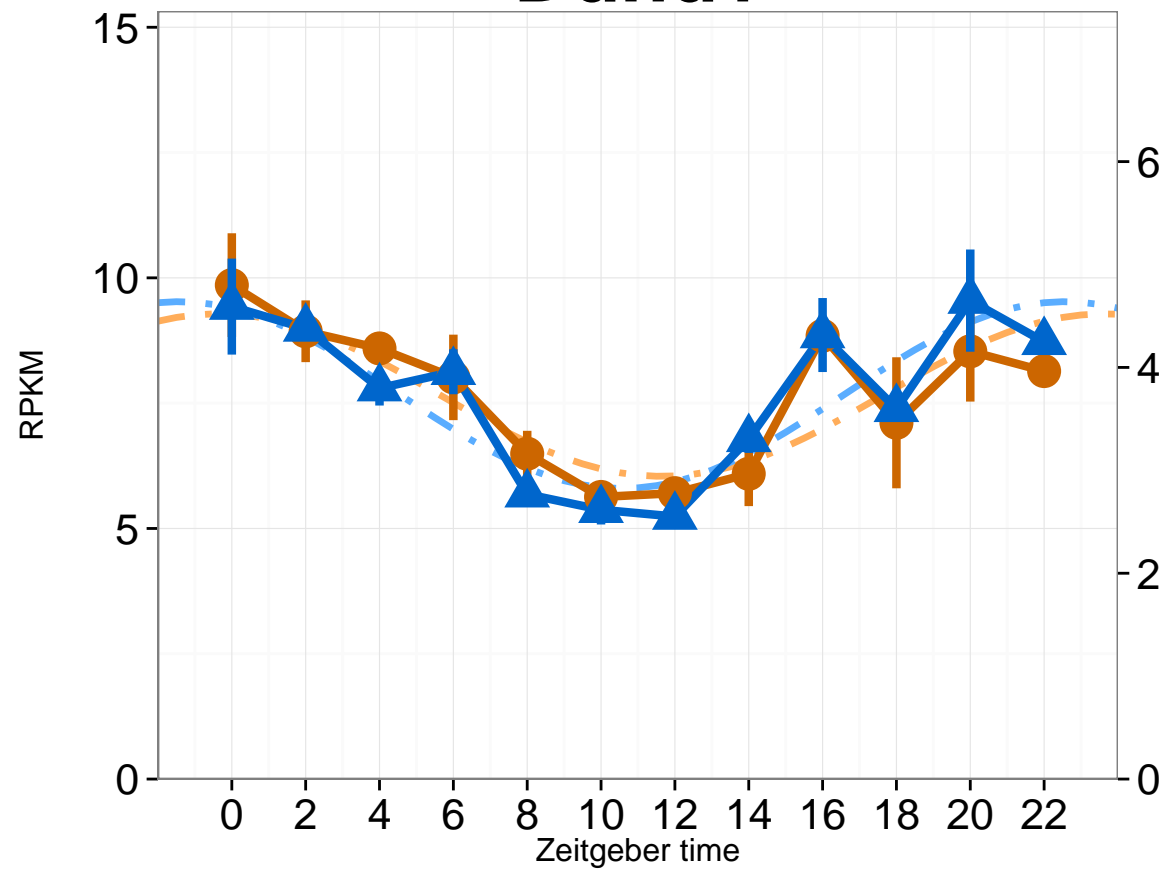

## Ddhd1

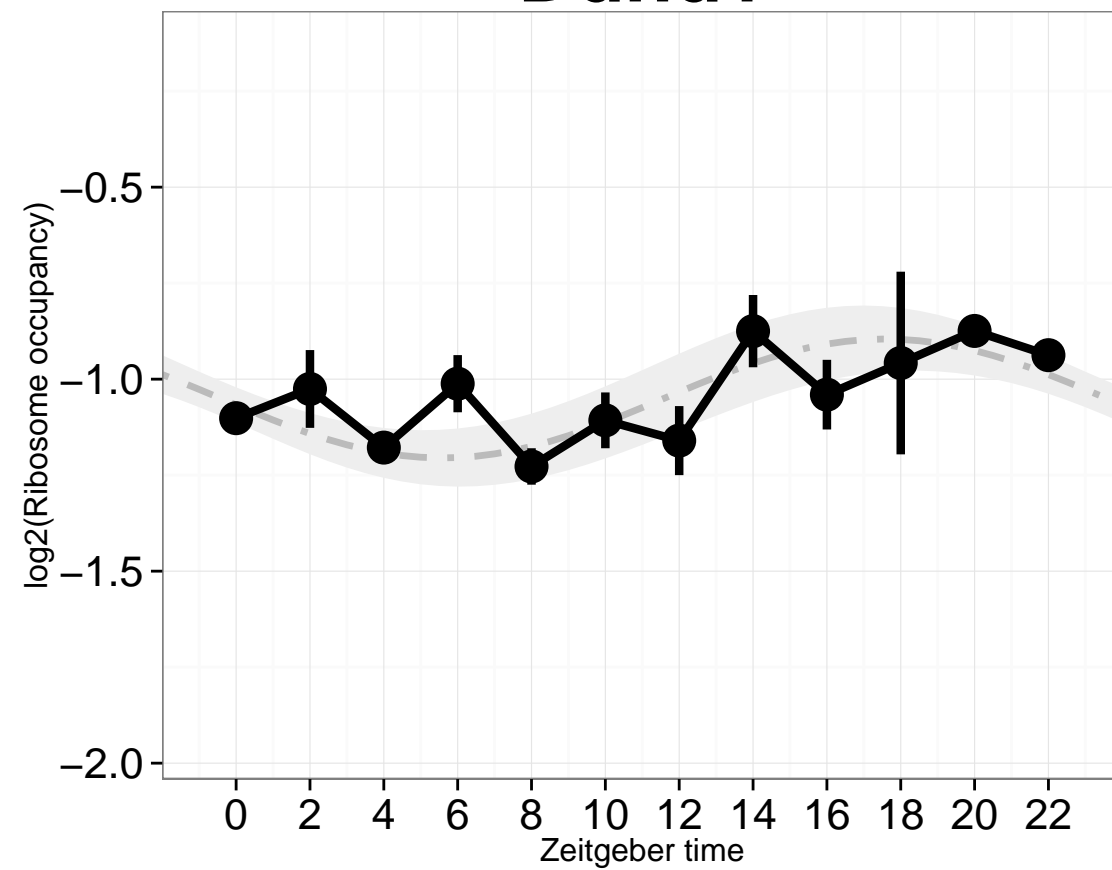

Supplement: SuppDataset_1.zip [file Ddhd1_set_D.pdf › Supplemental Dataset 1/D-mRNA_rhythm_translation_rhyth/Ddhd1_set_D.pdf]

## Ddhd2

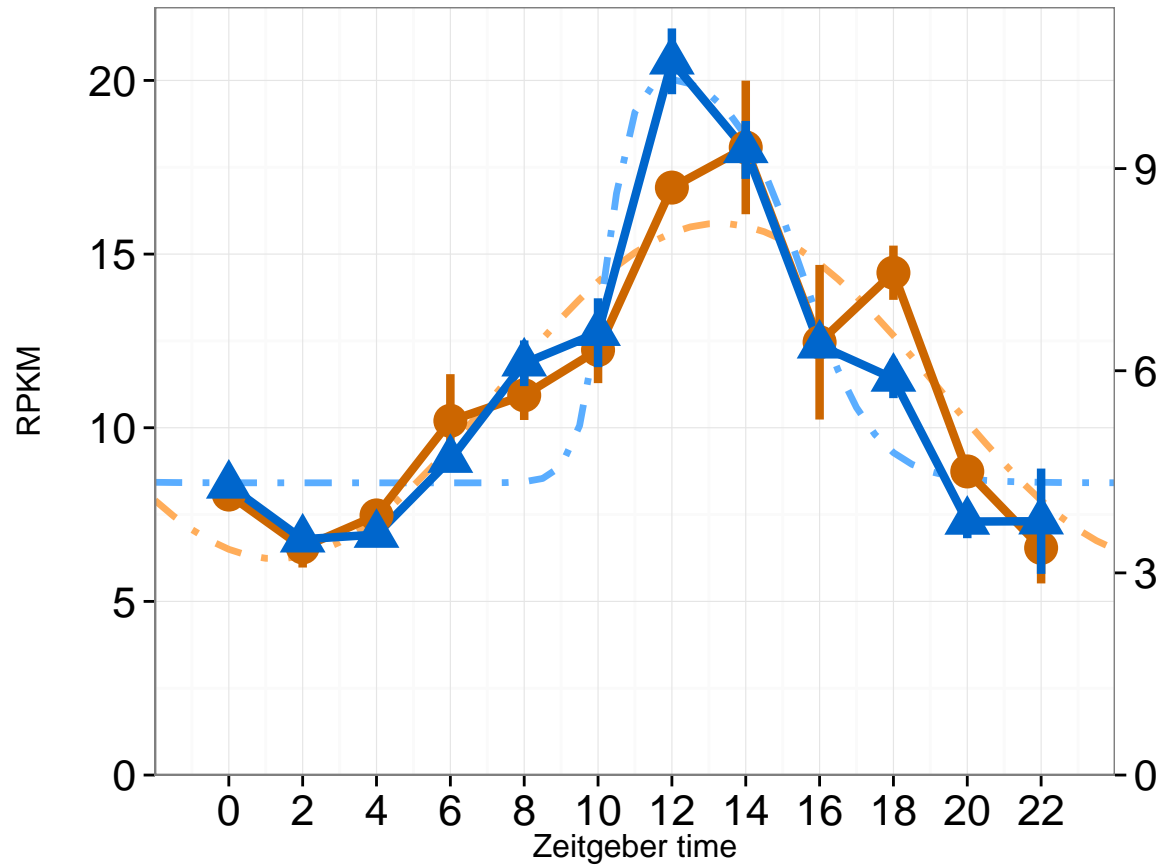

## Ddhd2

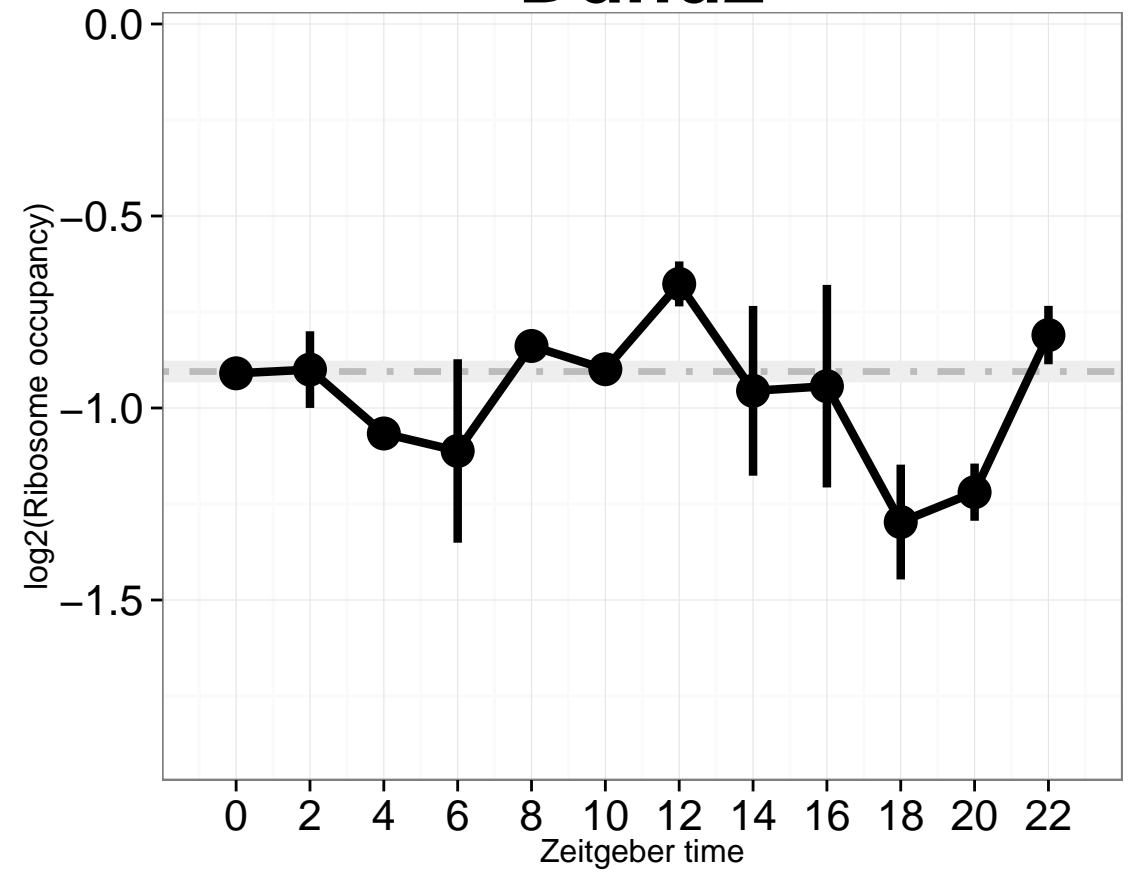

Supplement: SuppDataset_1.zip [file Ddhd2_set_D.pdf › Supplemental Dataset 1/D-mRNA_rhythm_translation_rhyth/Ddhd2_set_D.pdf]

## Ddit4

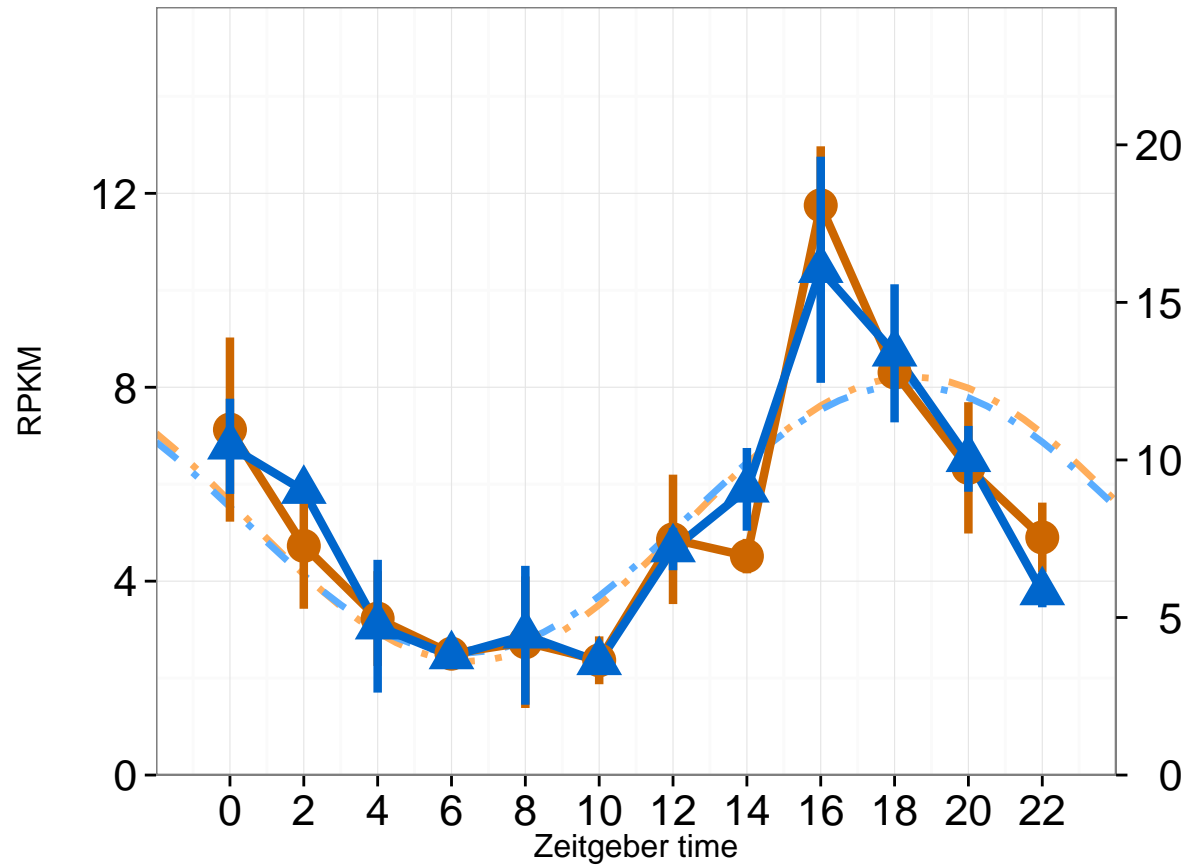

## Ddit4

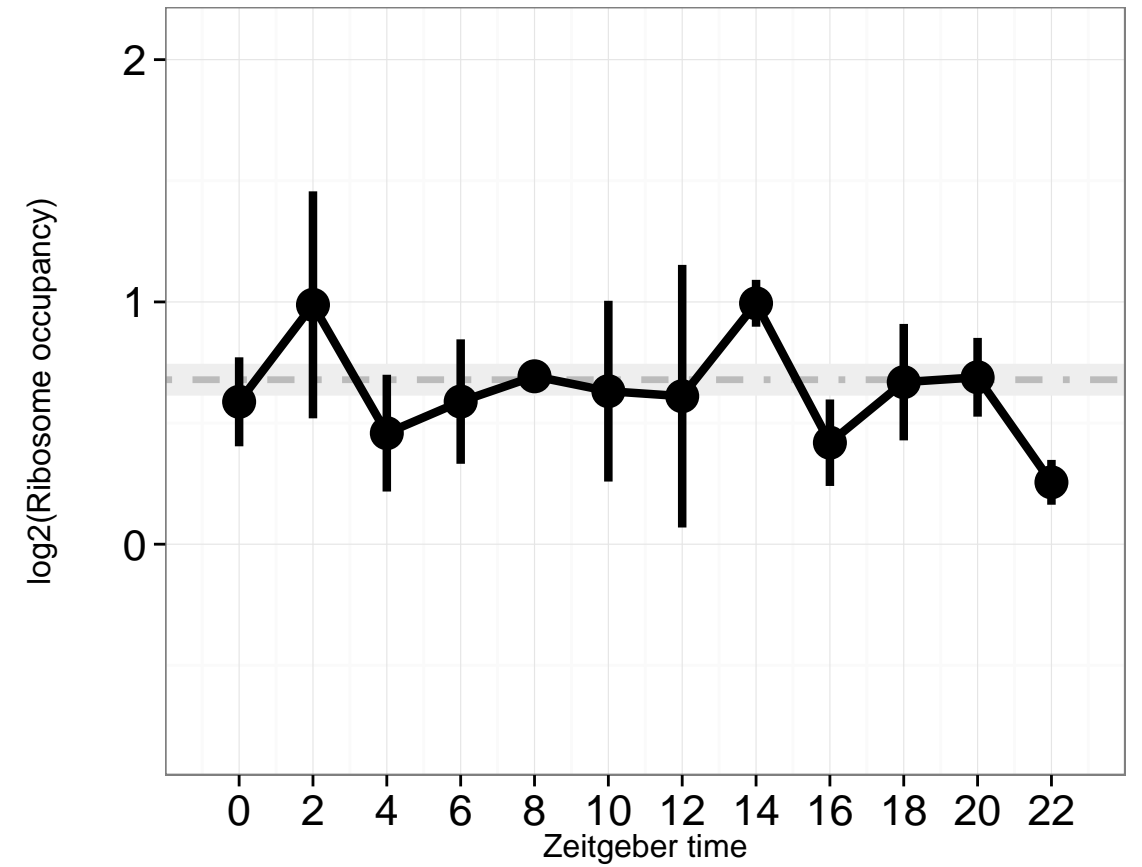

Supplement: SuppDataset_1.zip [file Ddit4_set_D.pdf › Supplemental Dataset 1/D-mRNA_rhythm_translation_rhyth/Ddit4_set_D.pdf]

## Ddo

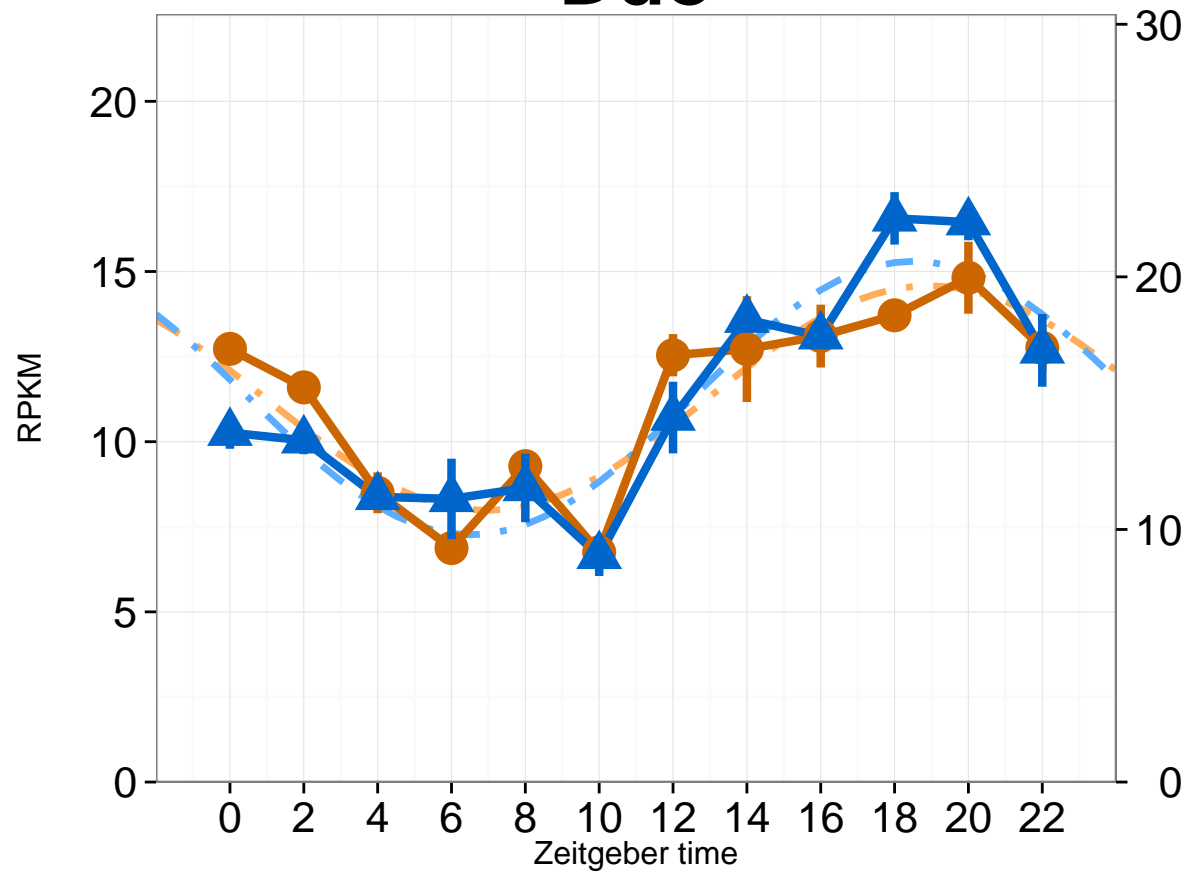

## Ddo

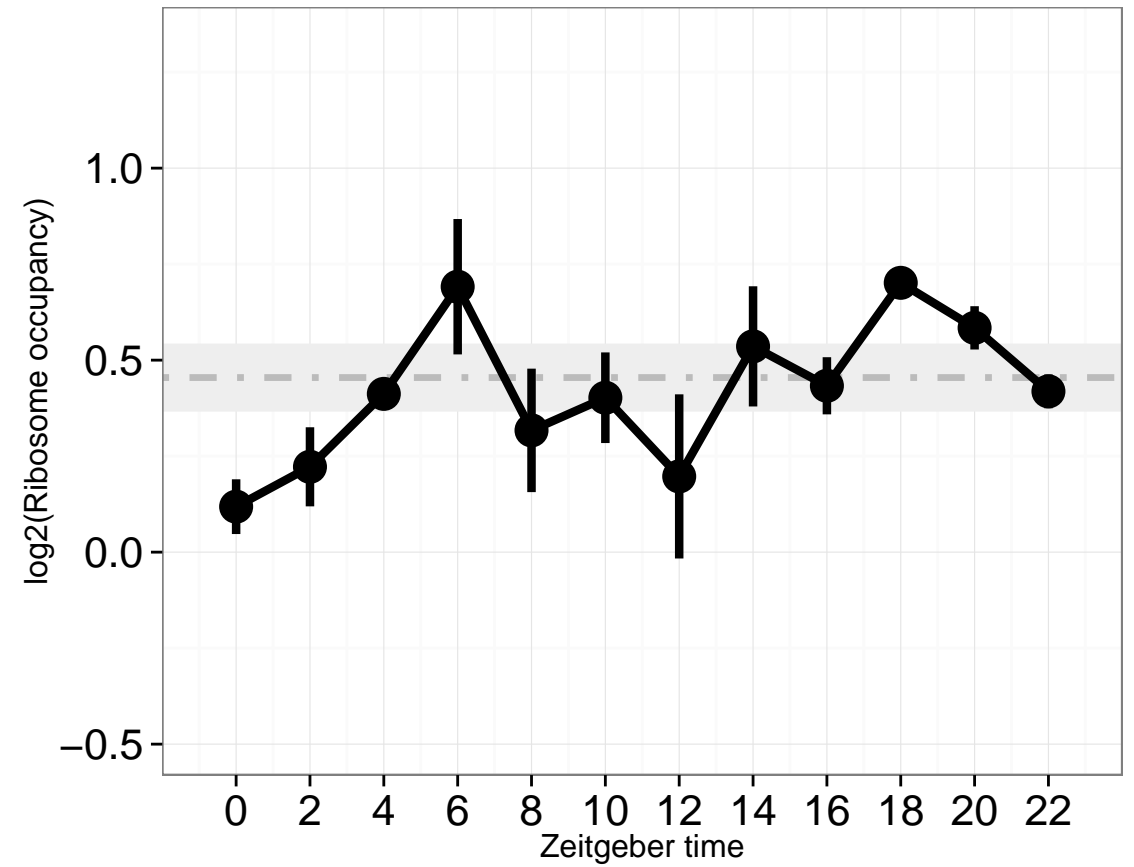

Supplement: SuppDataset_1.zip [file Ddo_set_D.pdf › Supplemental Dataset 1/D-mRNA_rhythm_translation_rhyth/Ddo_set_D.pdf]

## Ddx17

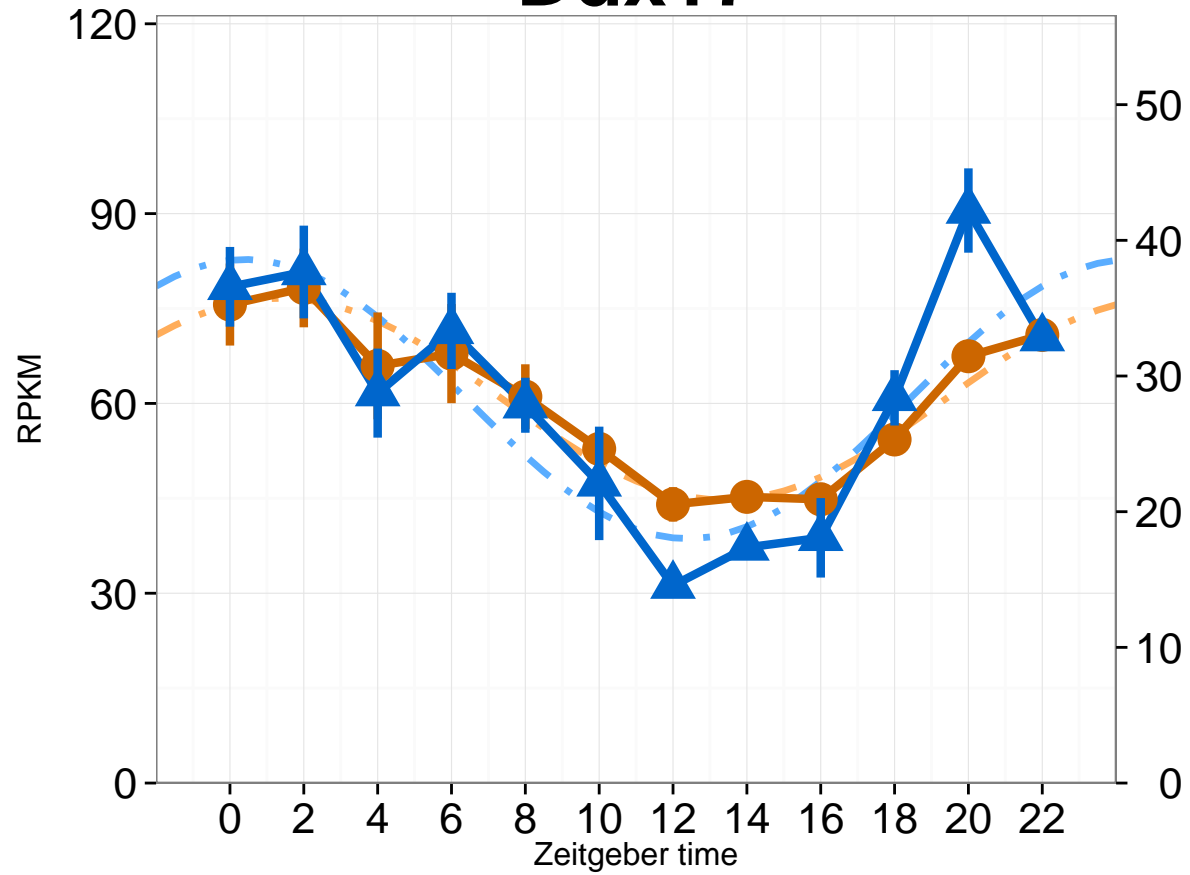

## Ddx17

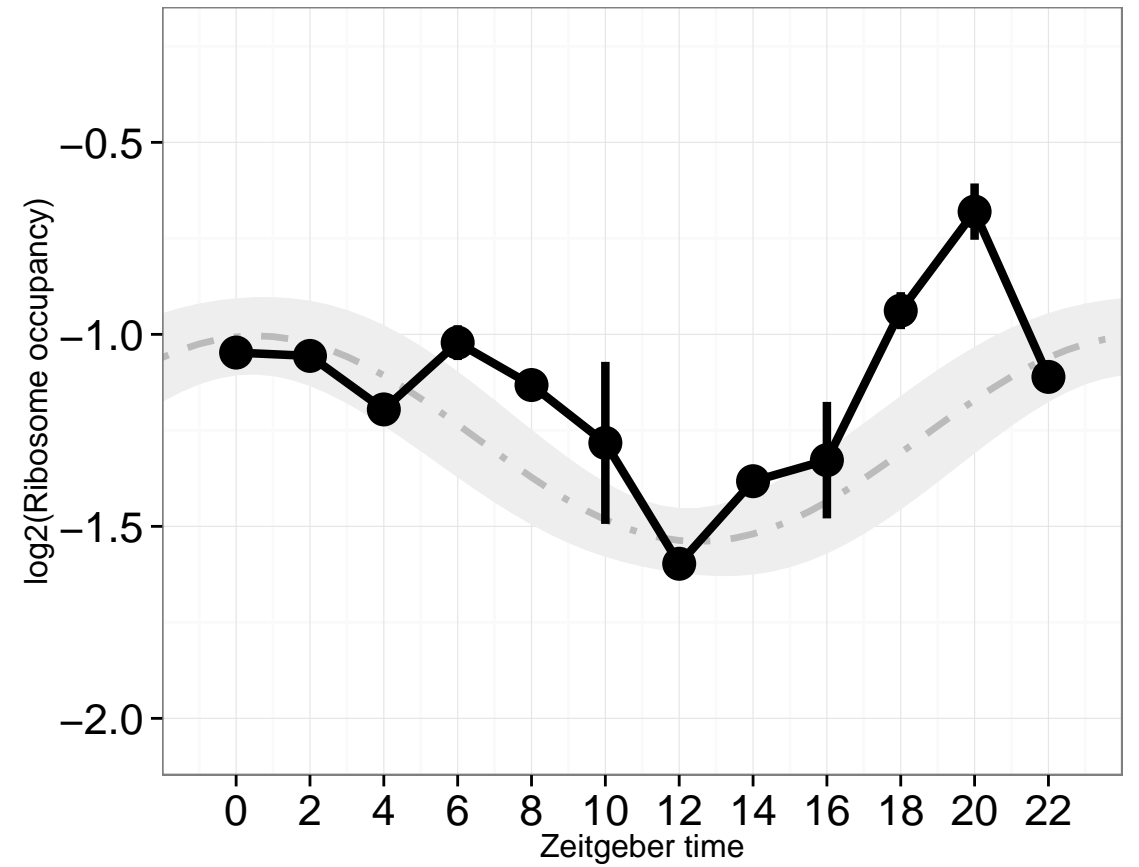

Supplement: SuppDataset_1.zip [file Ddx17_set_D.pdf › Supplemental Dataset 1/D-mRNA_rhythm_translation_rhyth/Ddx17_set_D.pdf]

## Ddx46

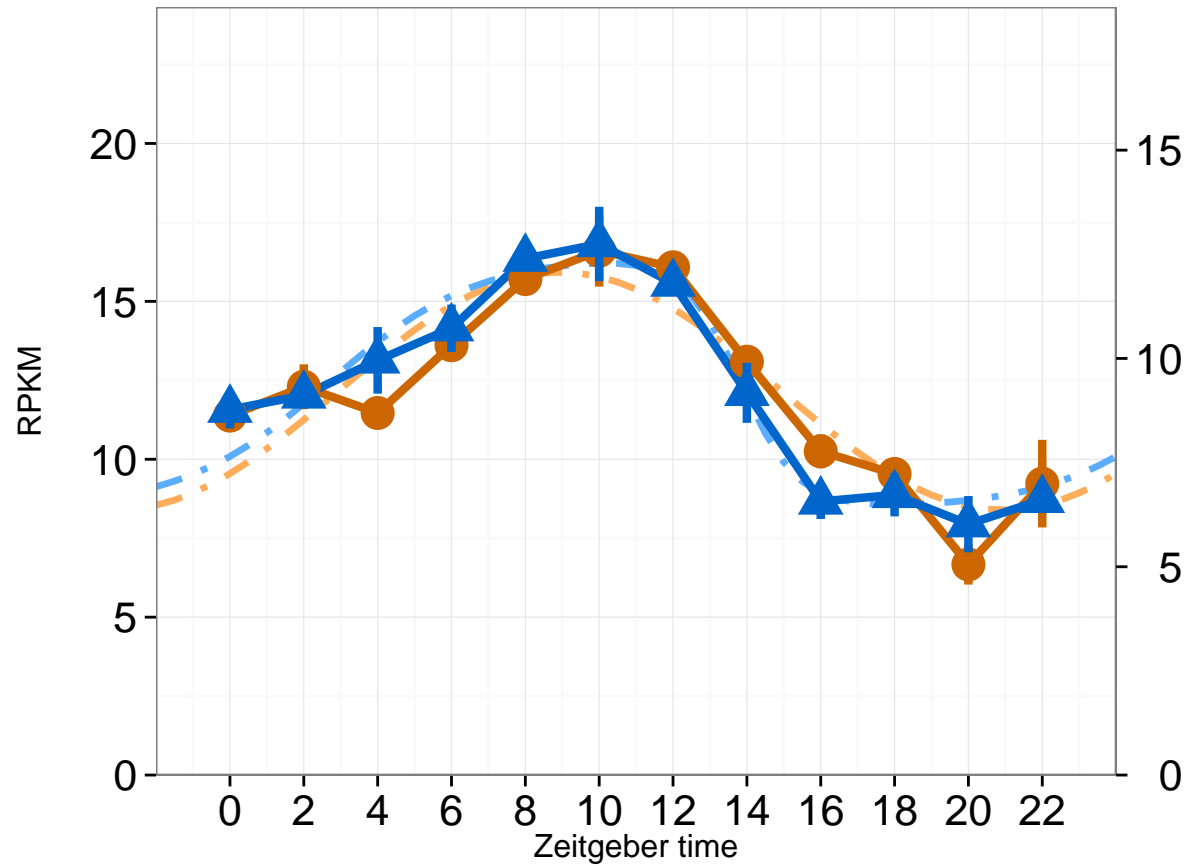

## Ddx46

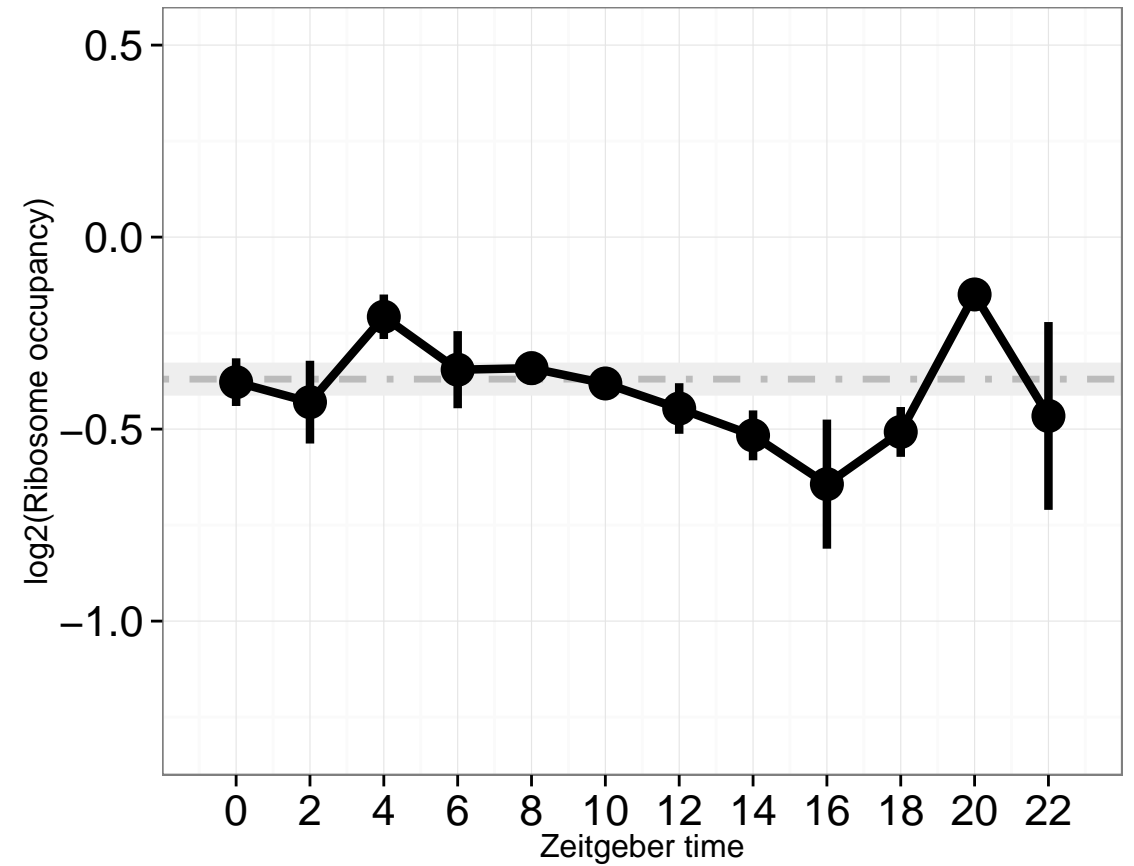

Supplement: SuppDataset_1.zip [file Ddx46_set_D.pdf › Supplemental Dataset 1/D-mRNA_rhythm_translation_rhyth/Ddx46_set_D.pdf]

## Ddx58

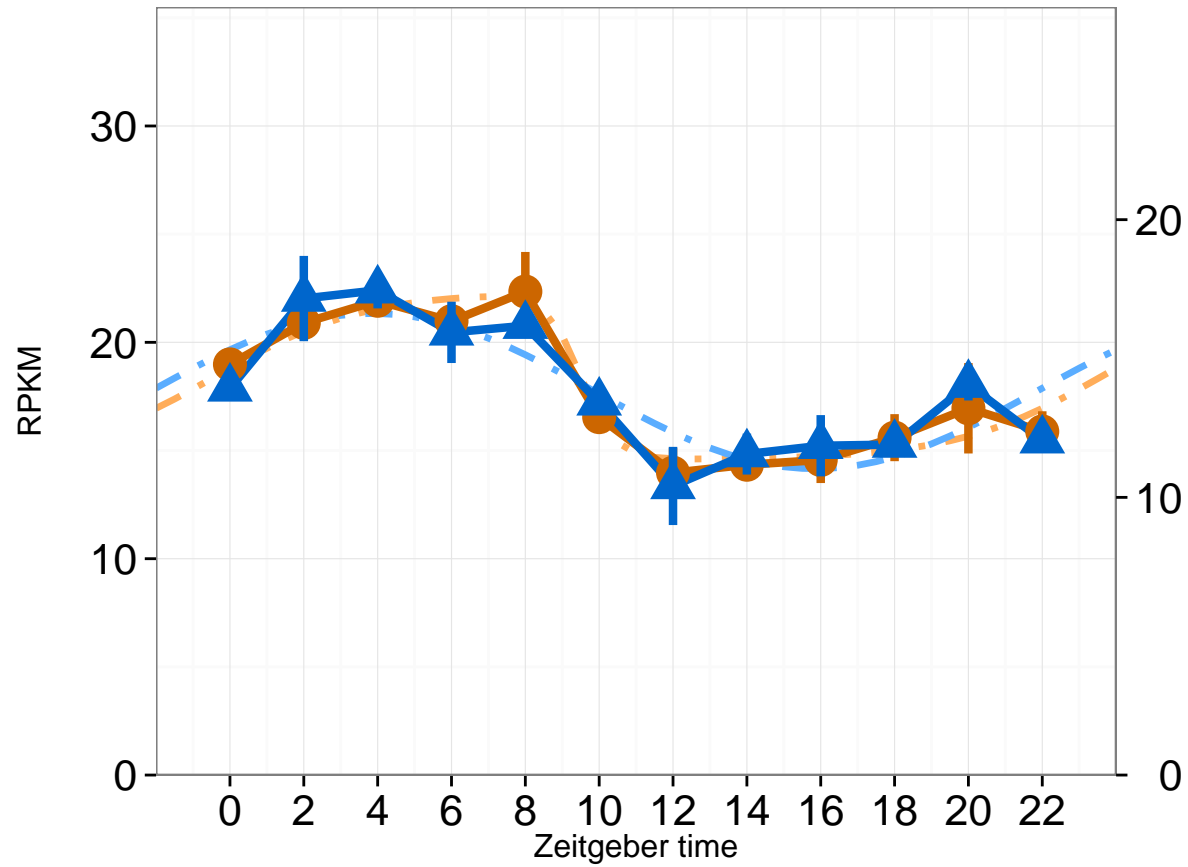

## Ddx58

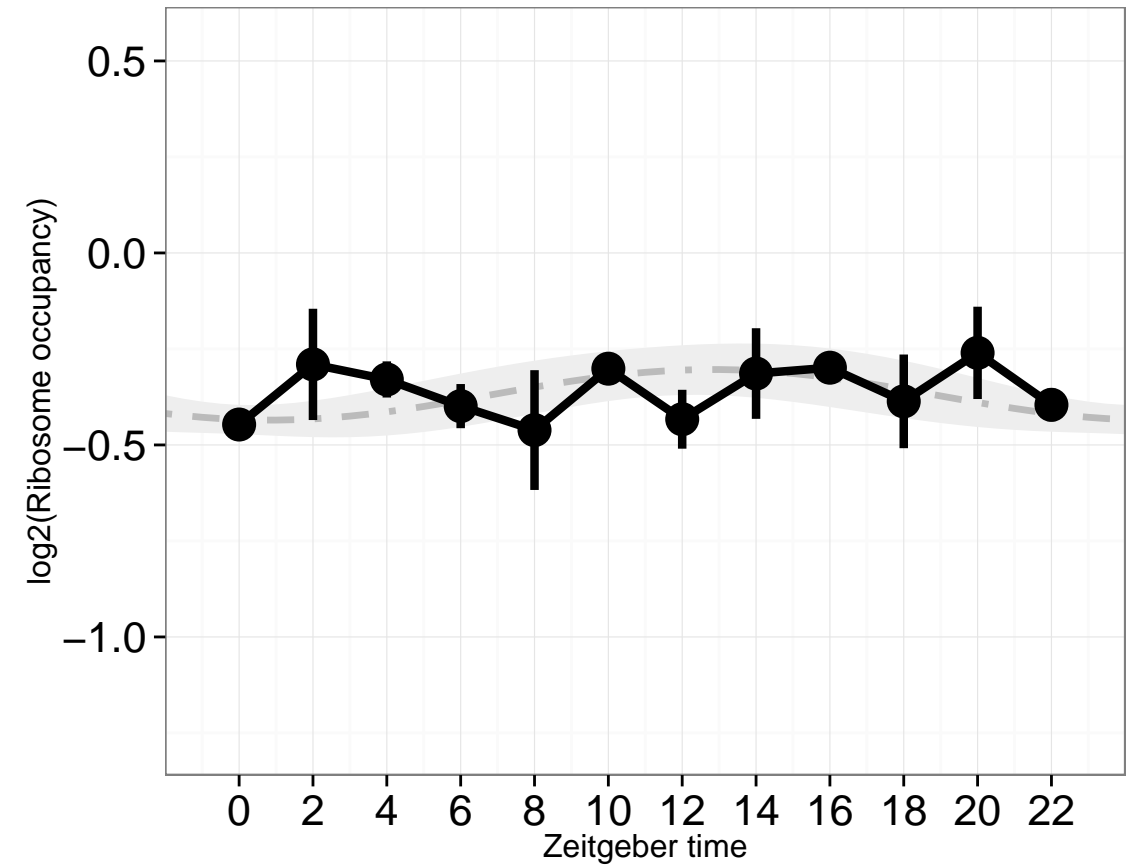

Supplement: SuppDataset_1.zip [file Ddx58_set_D.pdf › Supplemental Dataset 1/D-mRNA_rhythm_translation_rhyth/Ddx58_set_D.pdf]

## Ddx60

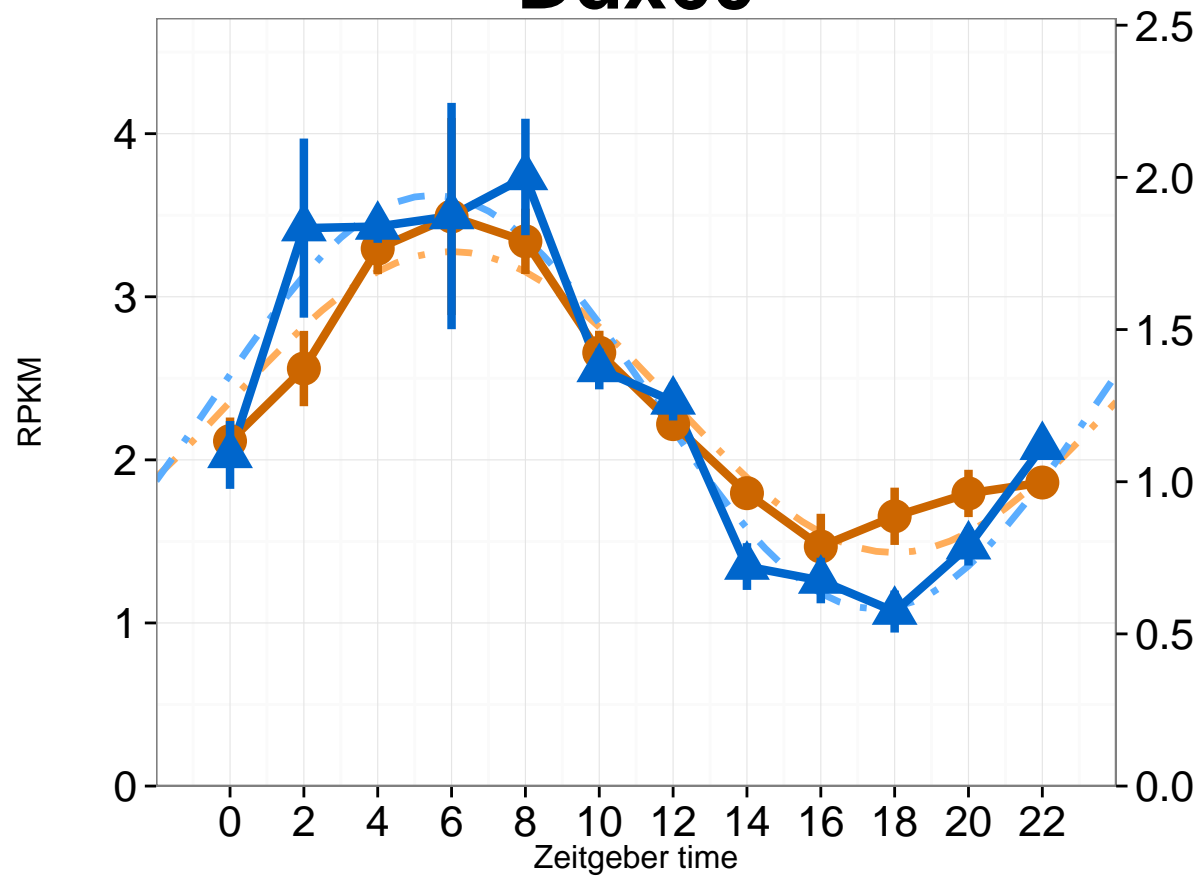

## Ddx60

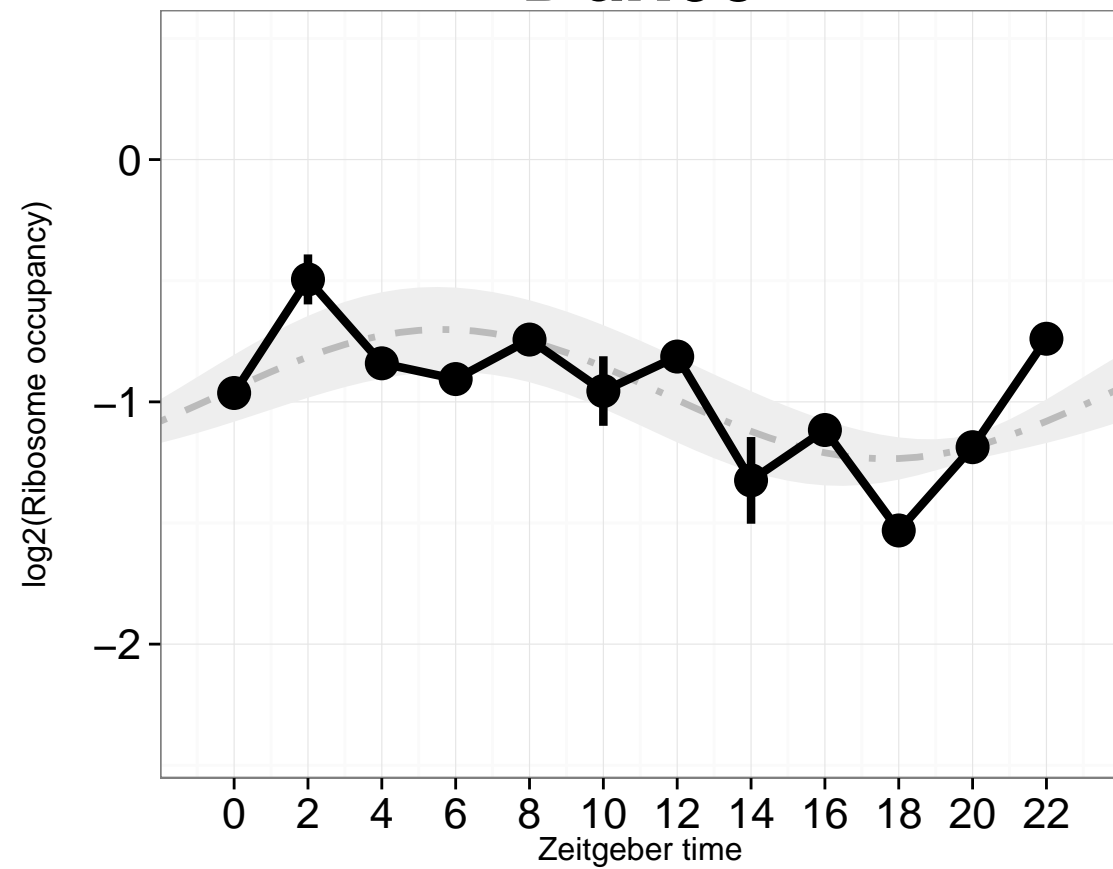

Supplement: SuppDataset_1.zip [file Ddx60_set_D.pdf › Supplemental Dataset 1/D-mRNA_rhythm_translation_rhyth/Ddx60_set_D.pdf]

## Derl3

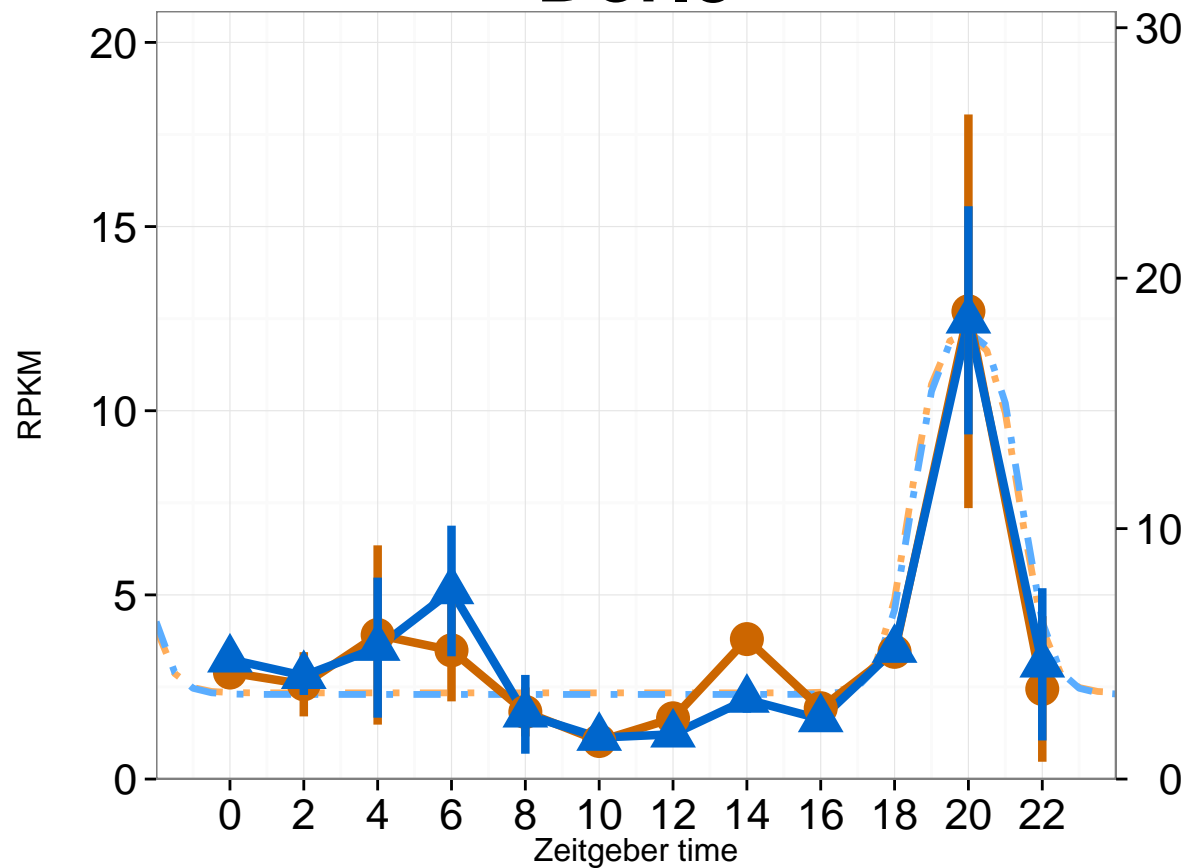

## Derl3

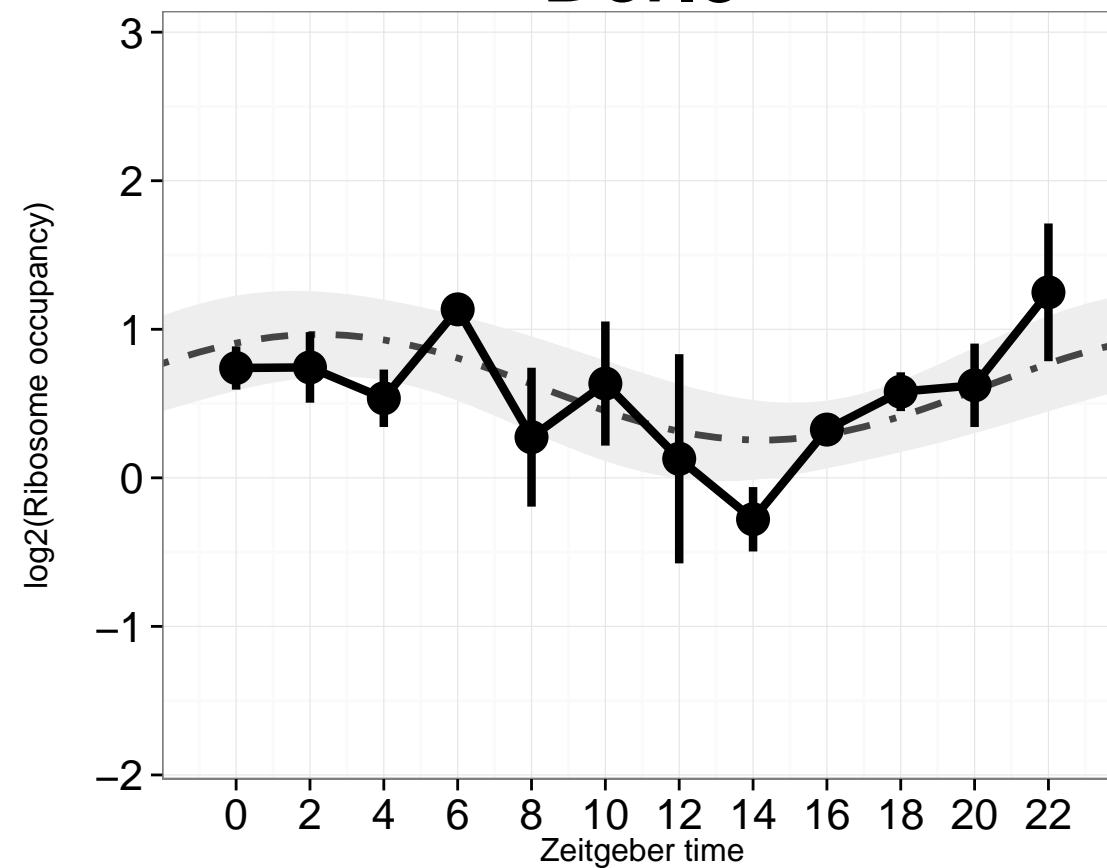

Supplement: SuppDataset_1.zip [file Derl3_set_D.pdf › Supplemental Dataset 1/D-mRNA_rhythm_translation_rhyth/Derl3_set_D.pdf]

## Desi2

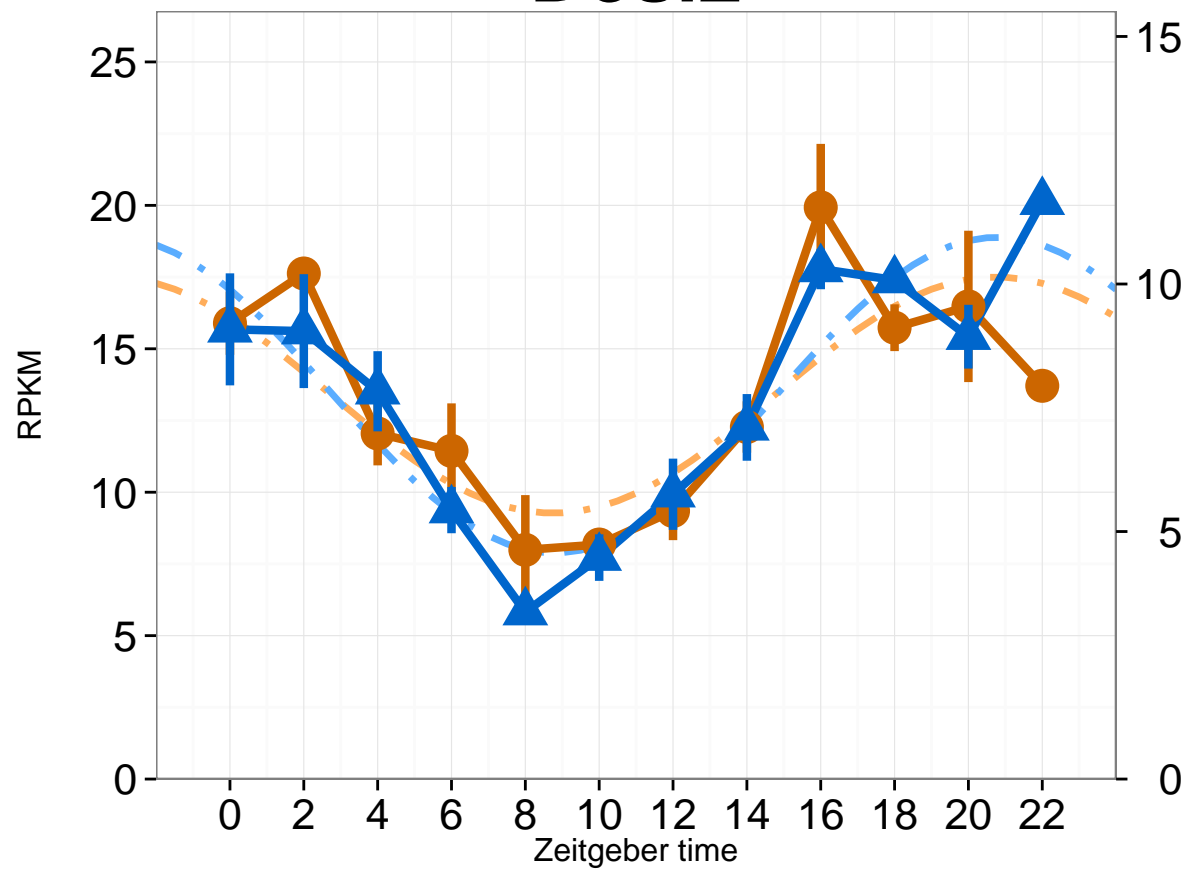

## Desi2

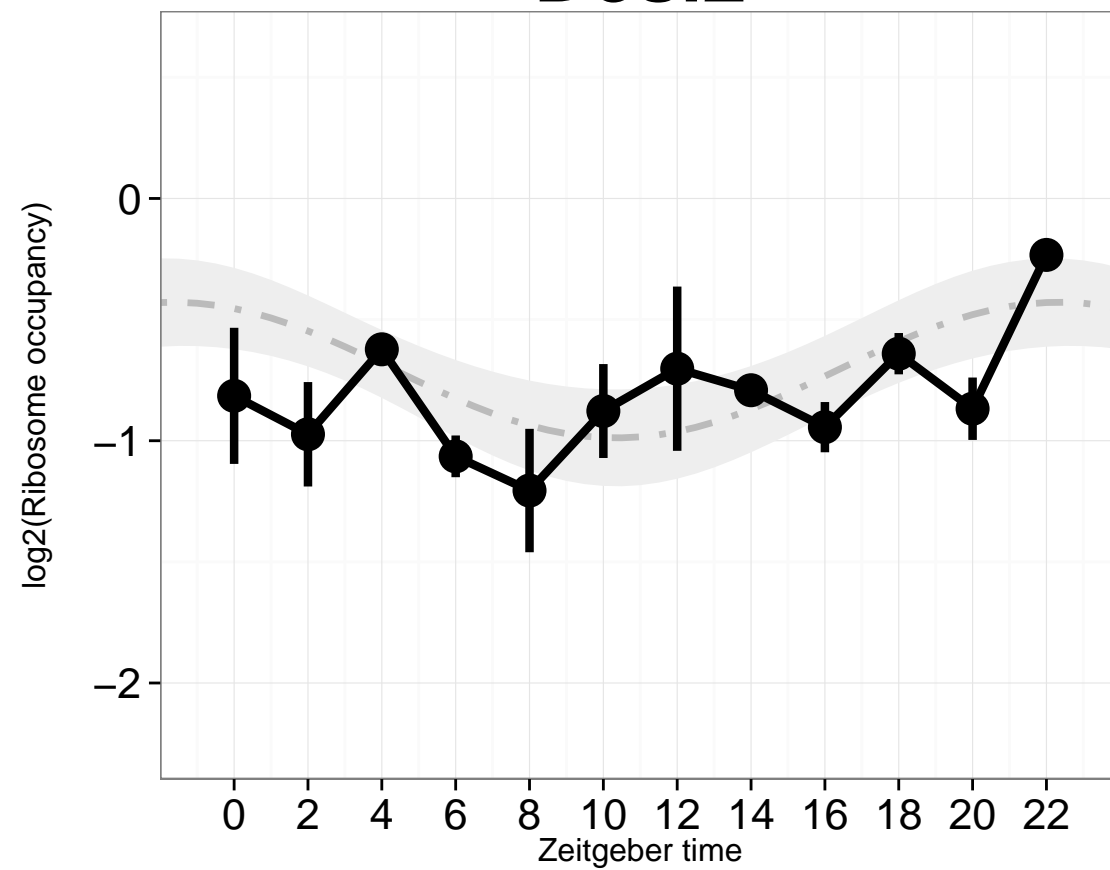

Supplement: SuppDataset_1.zip [file Desi2_set_D.pdf › Supplemental Dataset 1/D-mRNA_rhythm_translation_rhyth/Desi2_set_D.pdf]

# Det1

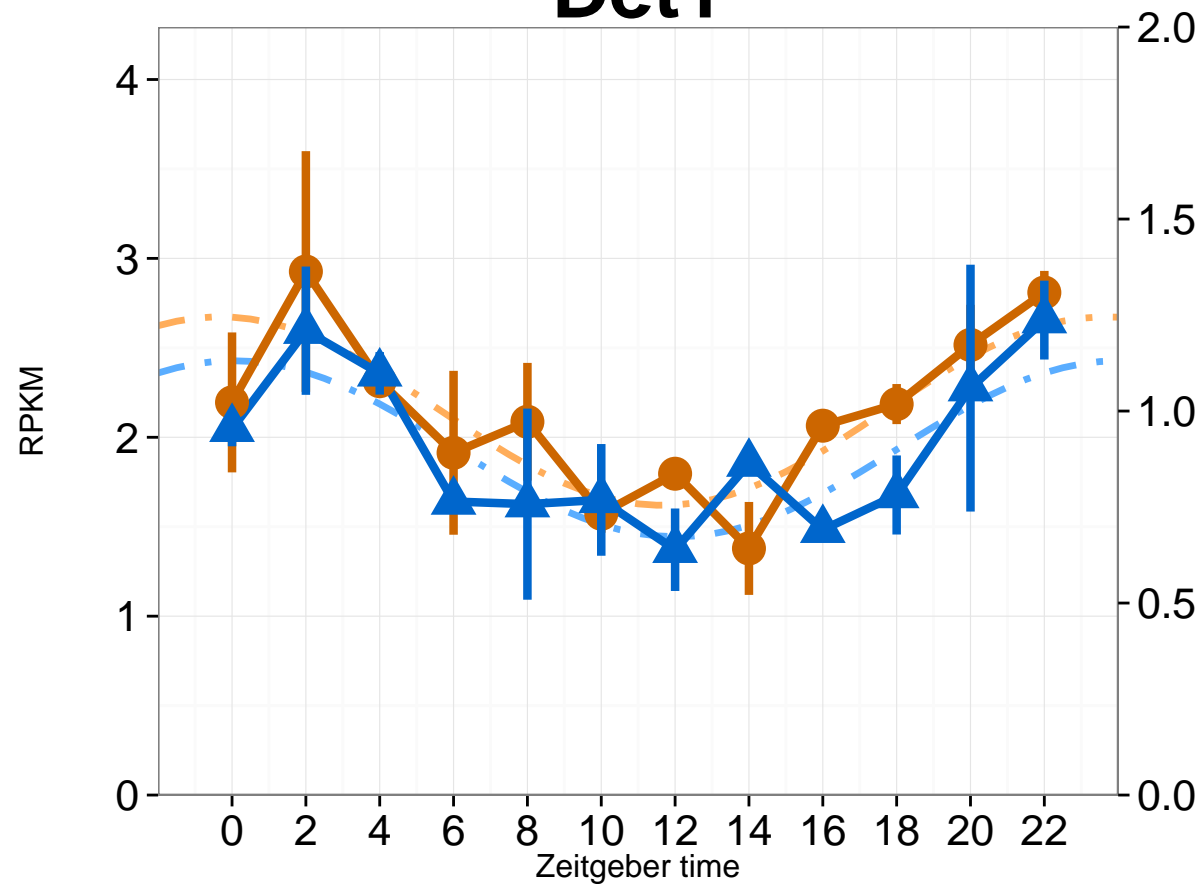

# Det1

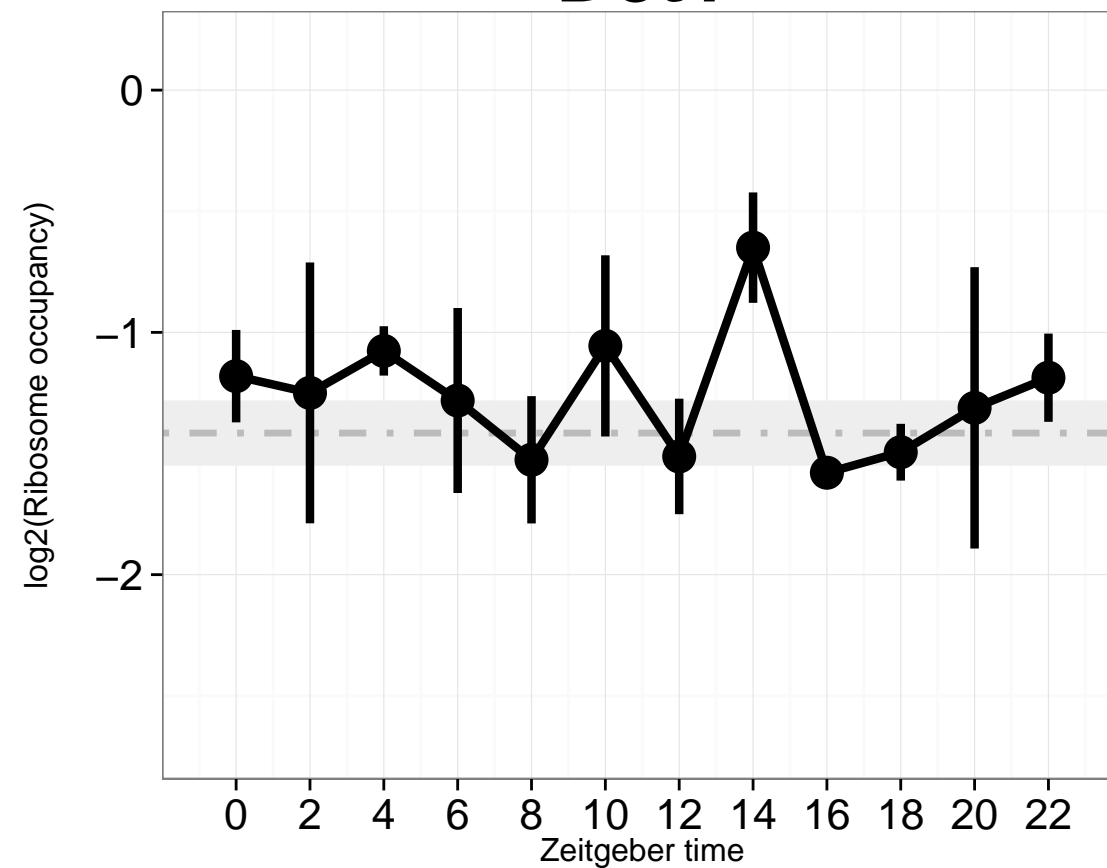

Supplement: SuppDataset_1.zip [file Det1_set_D.pdf › Supplemental Dataset 1/D-mRNA_rhythm_translation_rhyth/Det1_set_D.pdf]

## Dexi

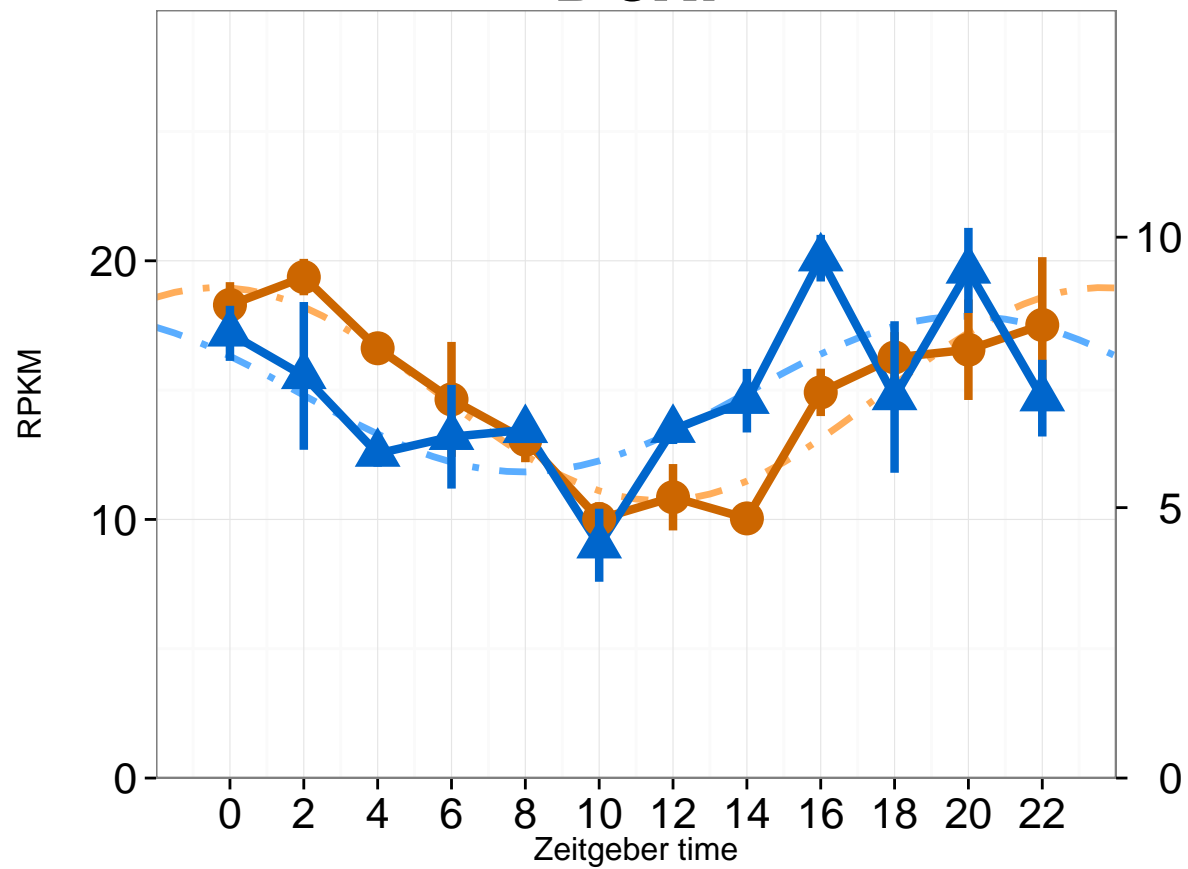

## Dexi

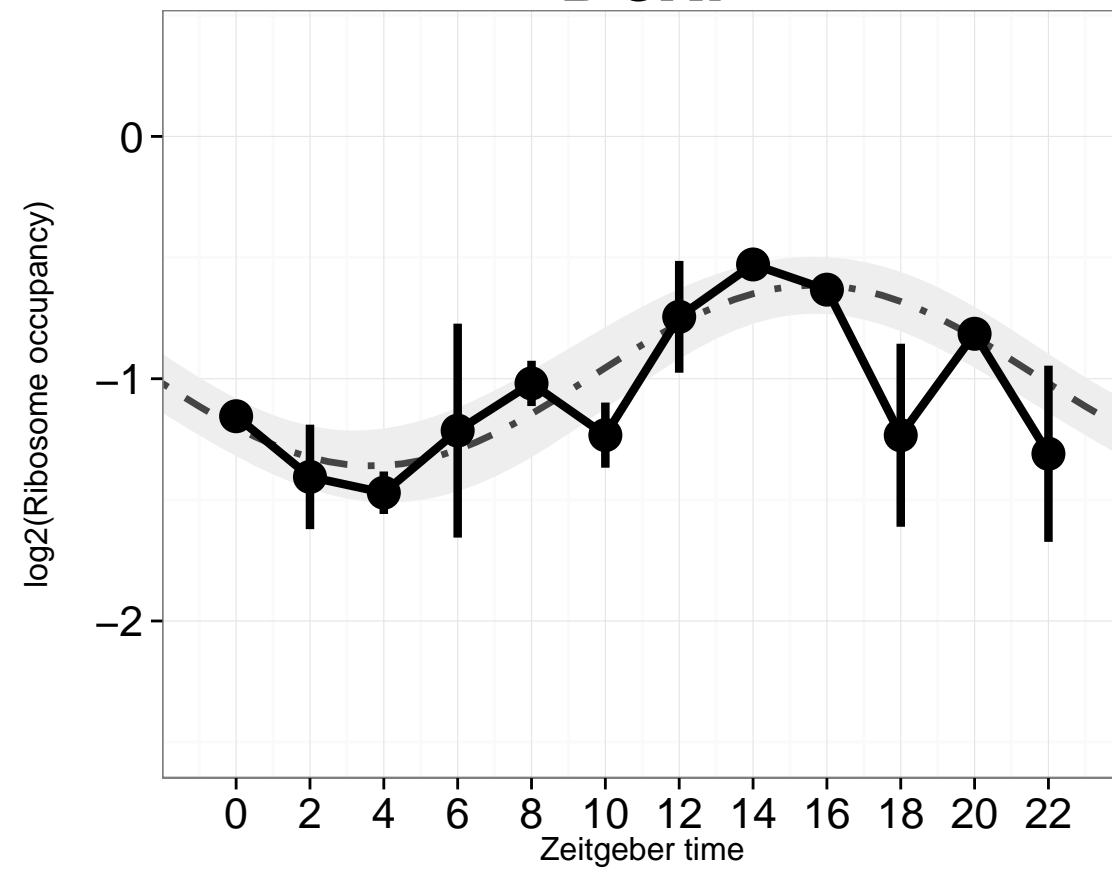

Supplement: SuppDataset_1.zip [file Dexi_set_D.pdf › Supplemental Dataset 1/D-mRNA_rhythm_translation_rhyth/Dexi_set_D.pdf]

# Dhcr24

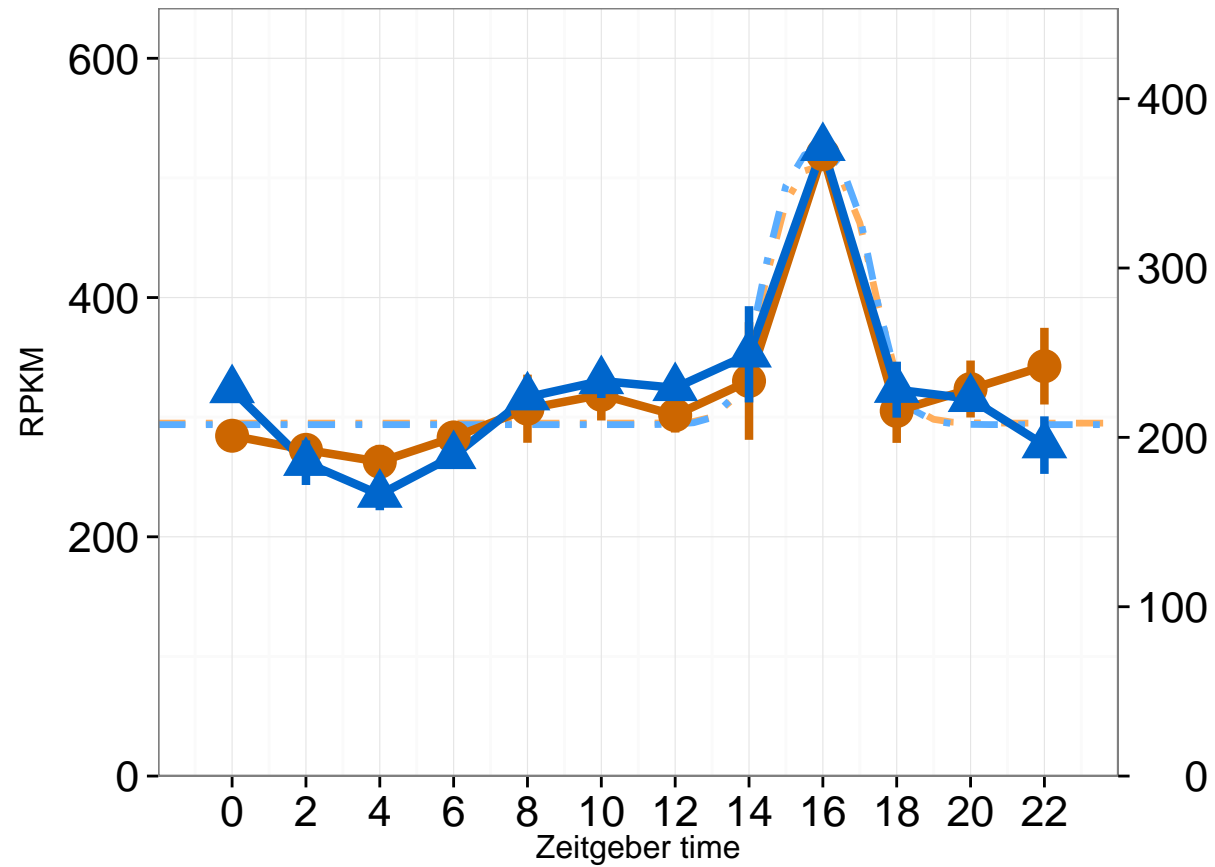

# Dhcr24

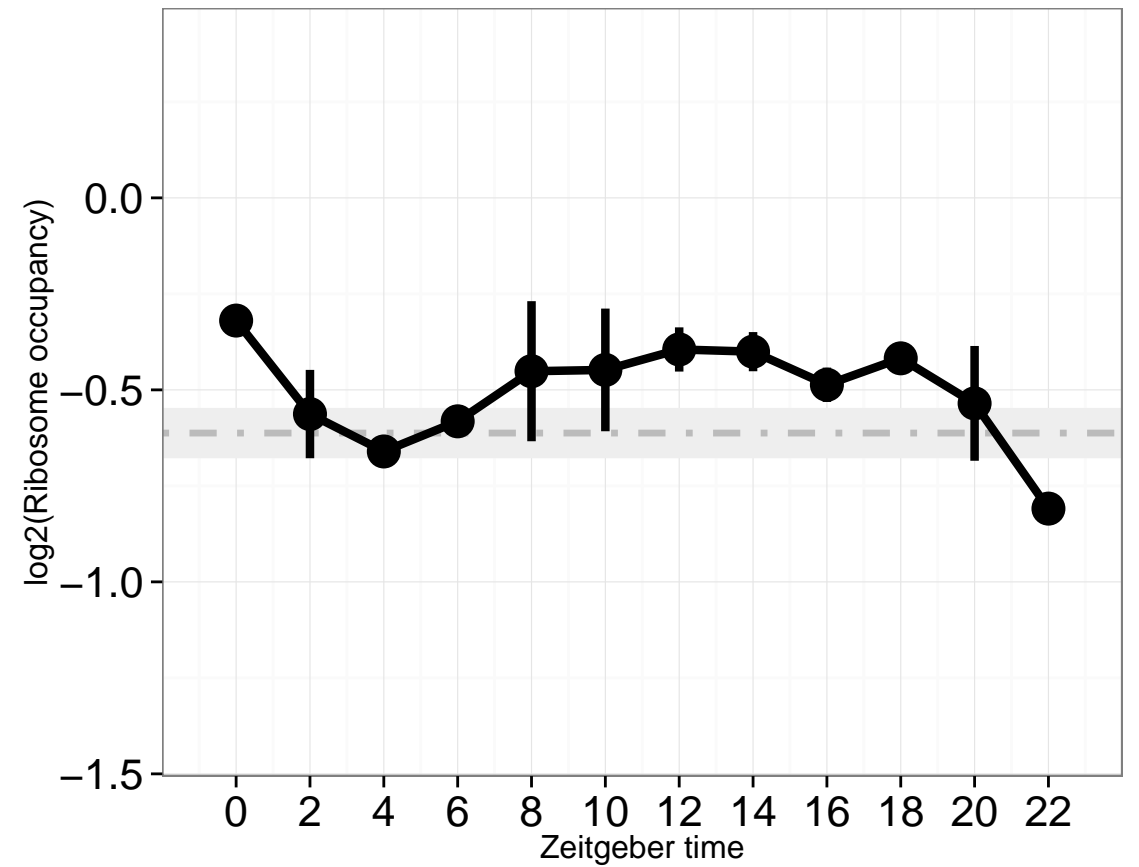

Supplement: SuppDataset_1.zip [file Dhcr24_set_D.pdf › Supplemental Dataset 1/D-mRNA_rhythm_translation_rhyth/Dhcr24_set_D.pdf]

## Dhcr7

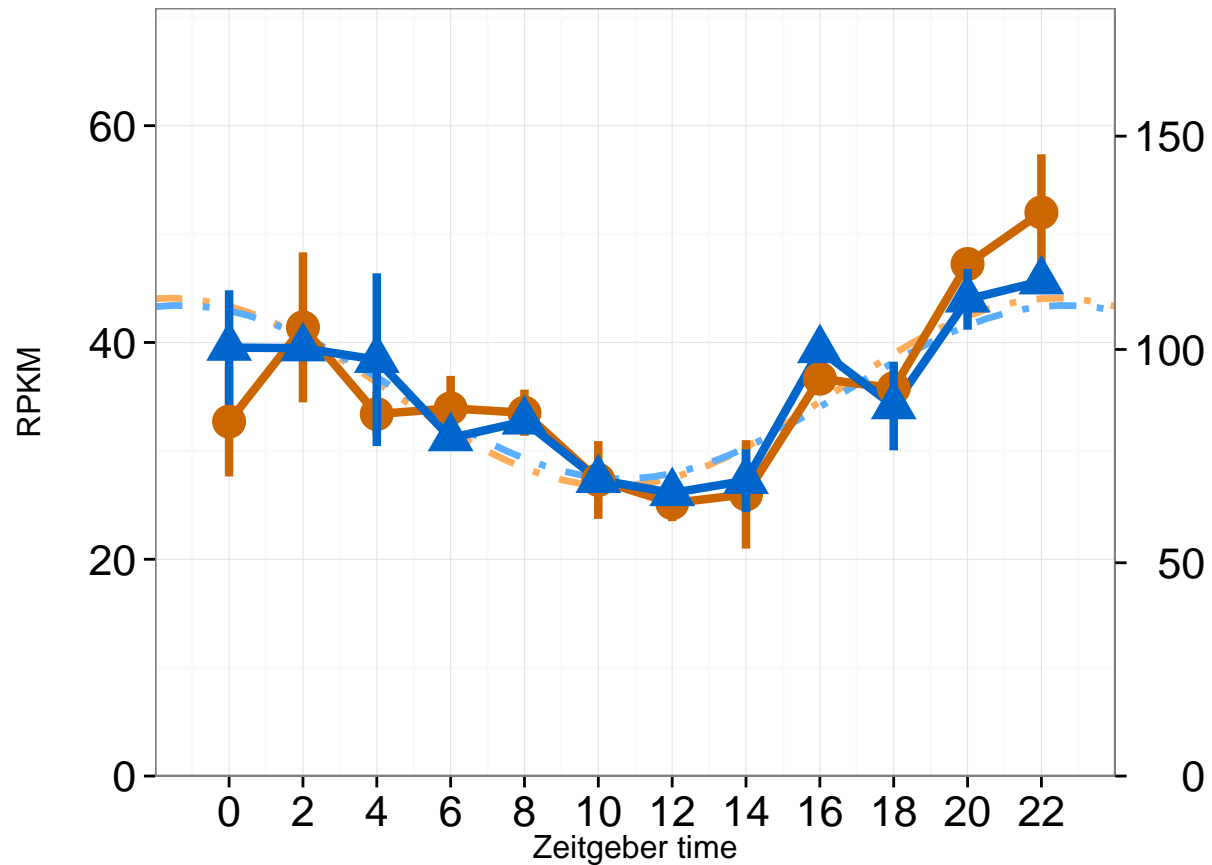

## Dhcr7

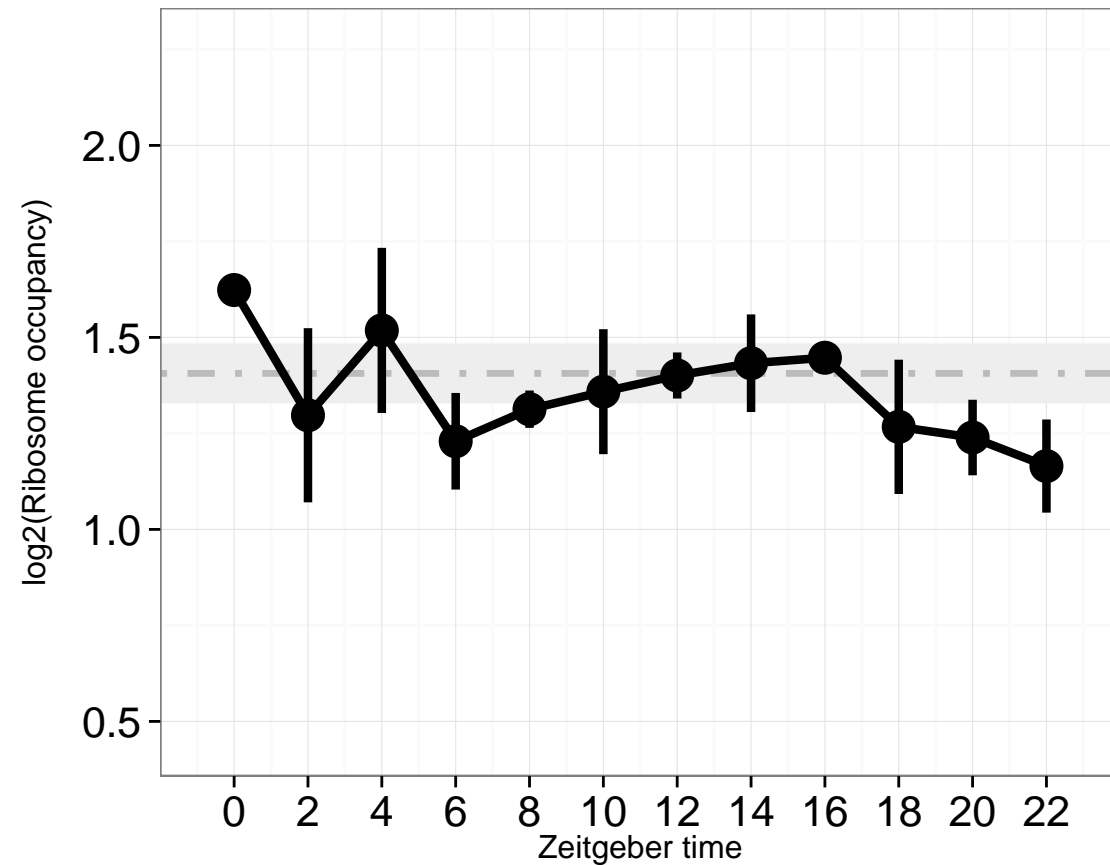

Supplement: SuppDataset_1.zip [file Dhcr7_set_D.pdf › Supplemental Dataset 1/D-mRNA_rhythm_translation_rhyth/Dhcr7_set_D.pdf]

## Dhrs3

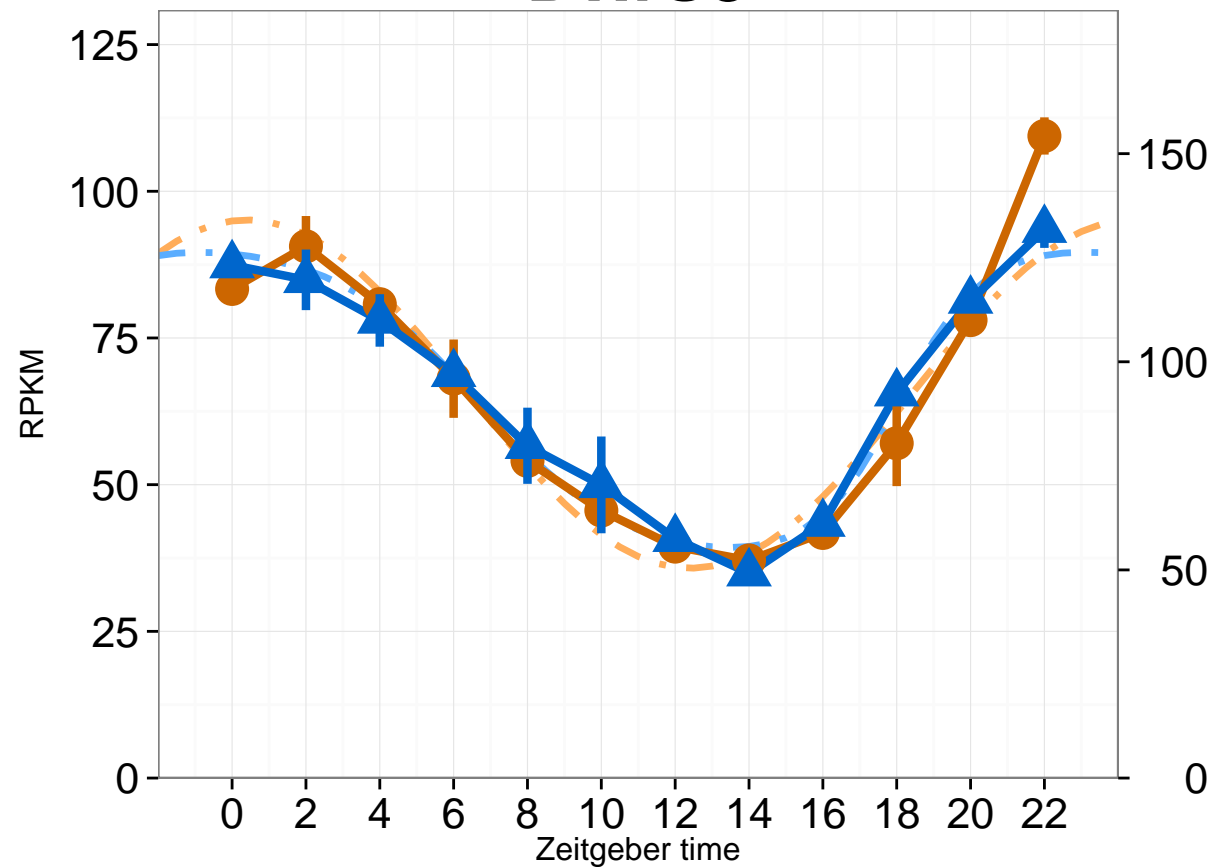

## Dhrs3

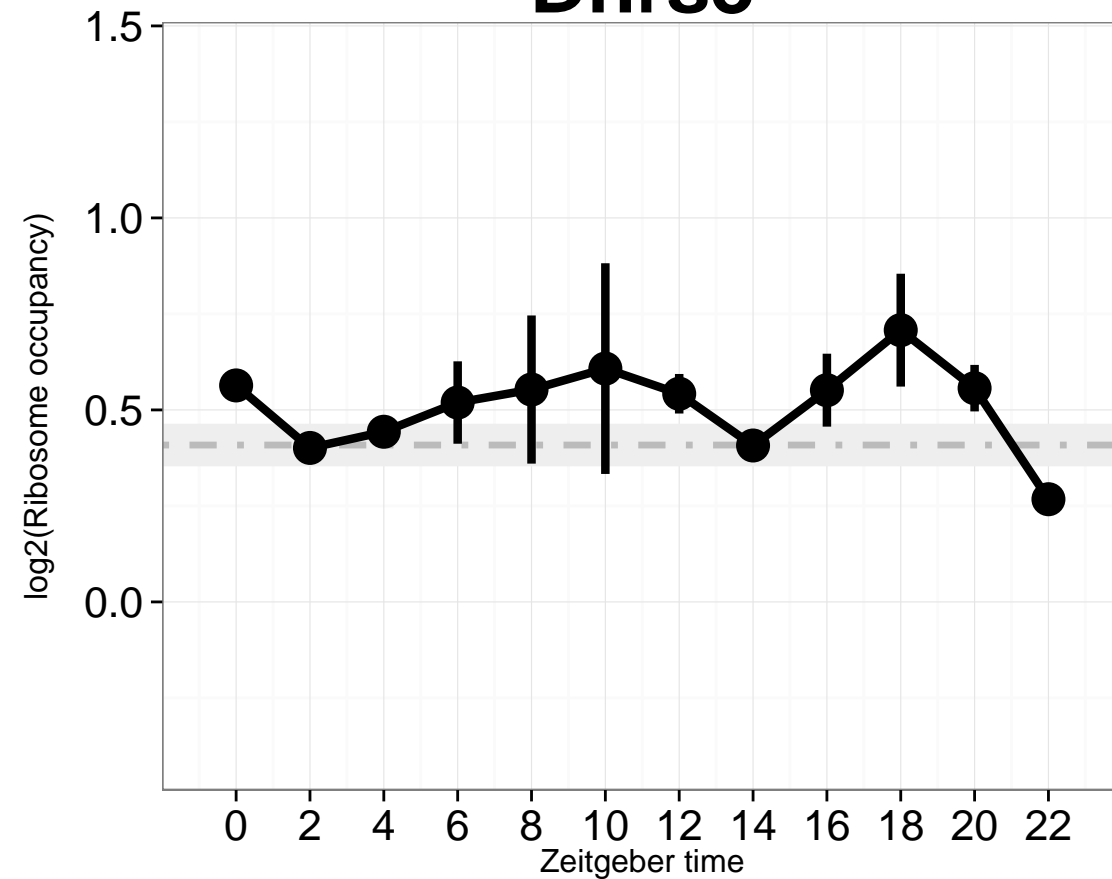

Supplement: SuppDataset_1.zip [file Dhrs3_set_D.pdf › Supplemental Dataset 1/D-mRNA_rhythm_translation_rhyth/Dhrs3_set_D.pdf]

# Dhrs9

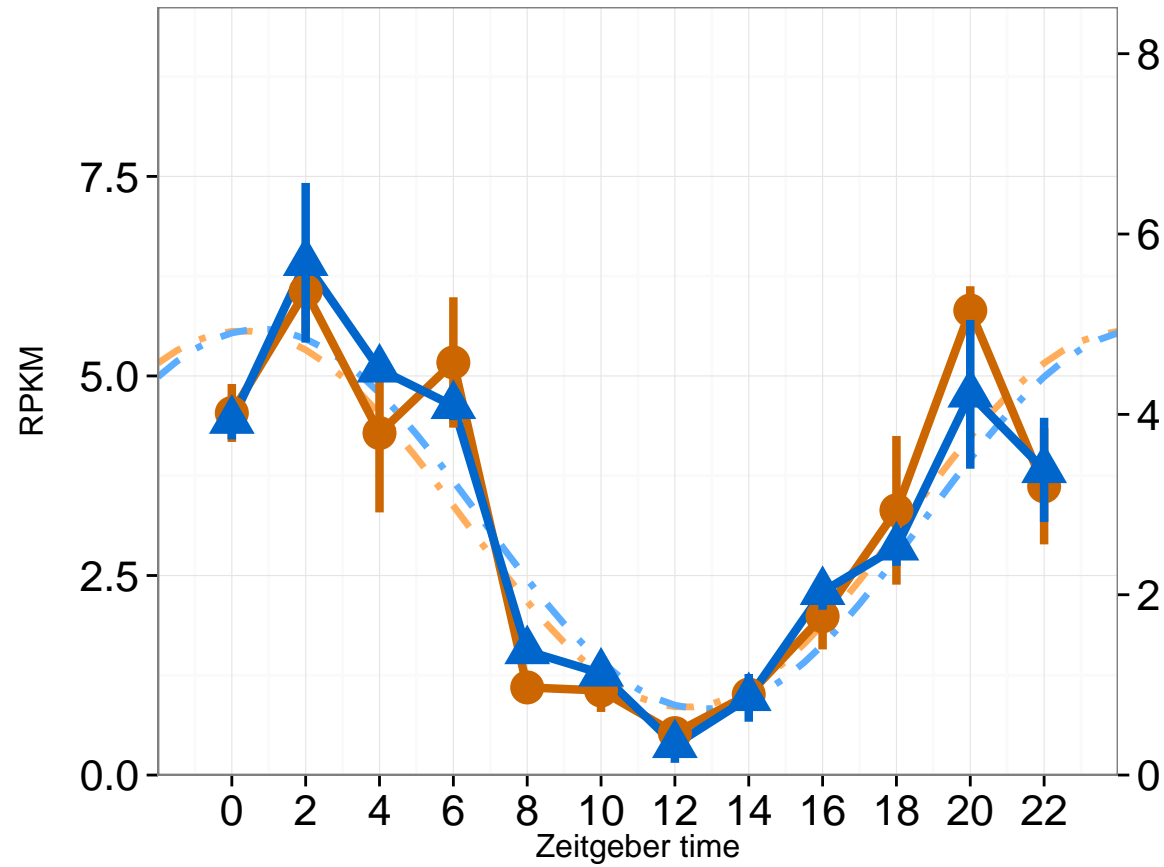

# Dhrs9

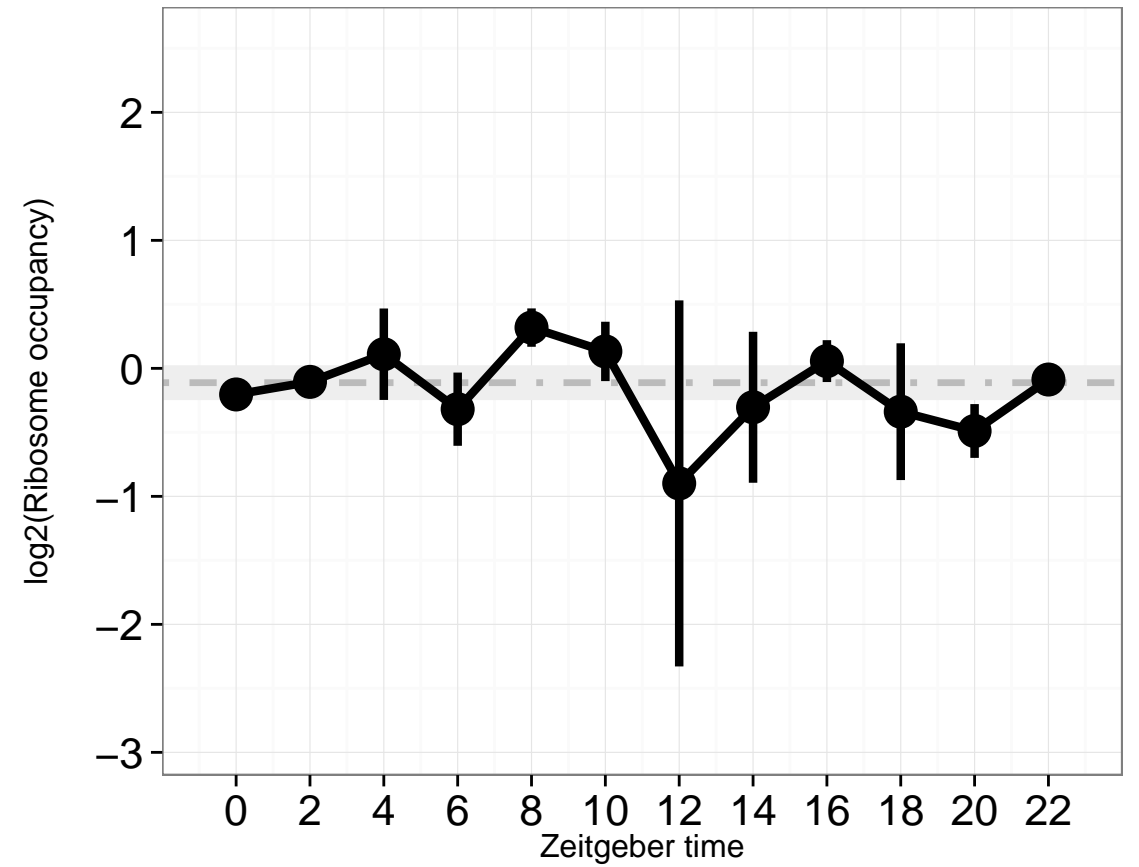

Supplement: SuppDataset_1.zip [file Dhrs9_set_D.pdf › Supplemental Dataset 1/D-mRNA_rhythm_translation_rhyth/Dhrs9_set_D.pdf]

## Dhx34

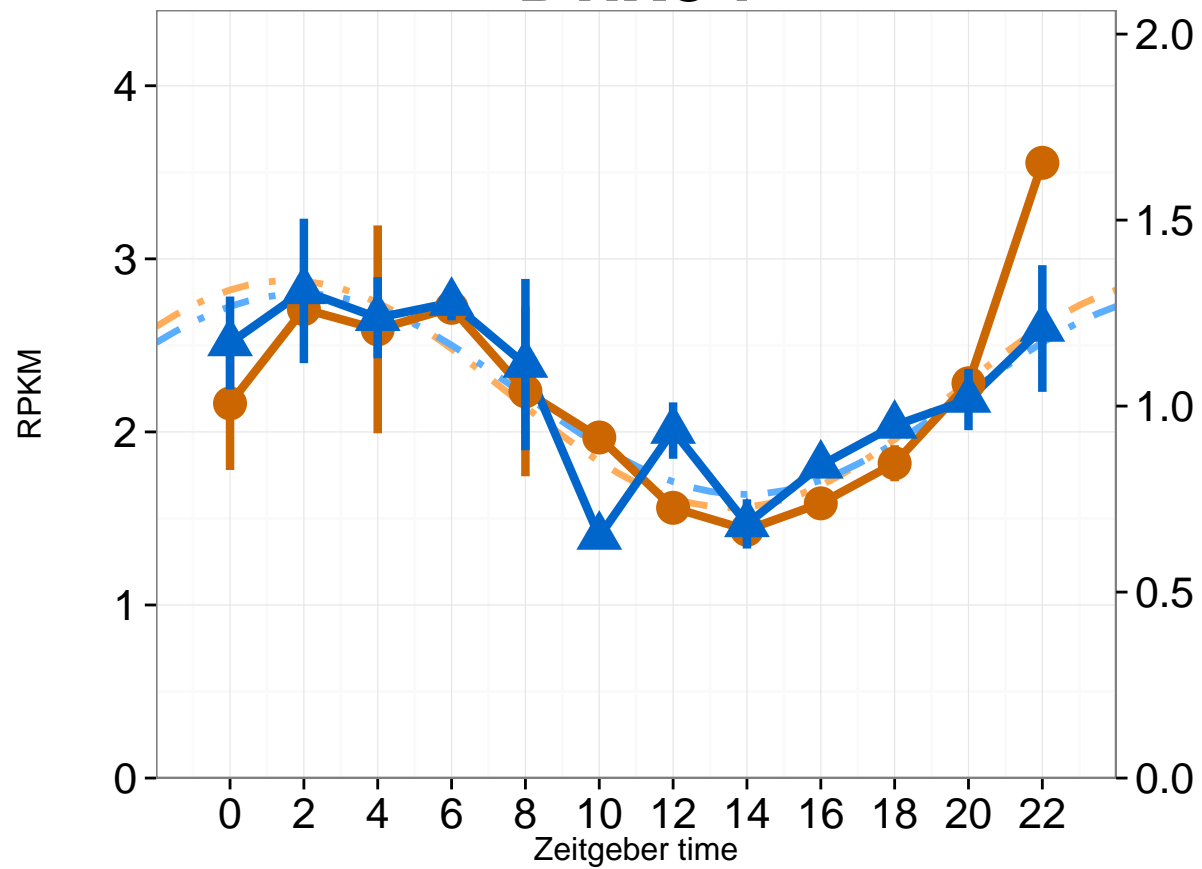

## Dhx34

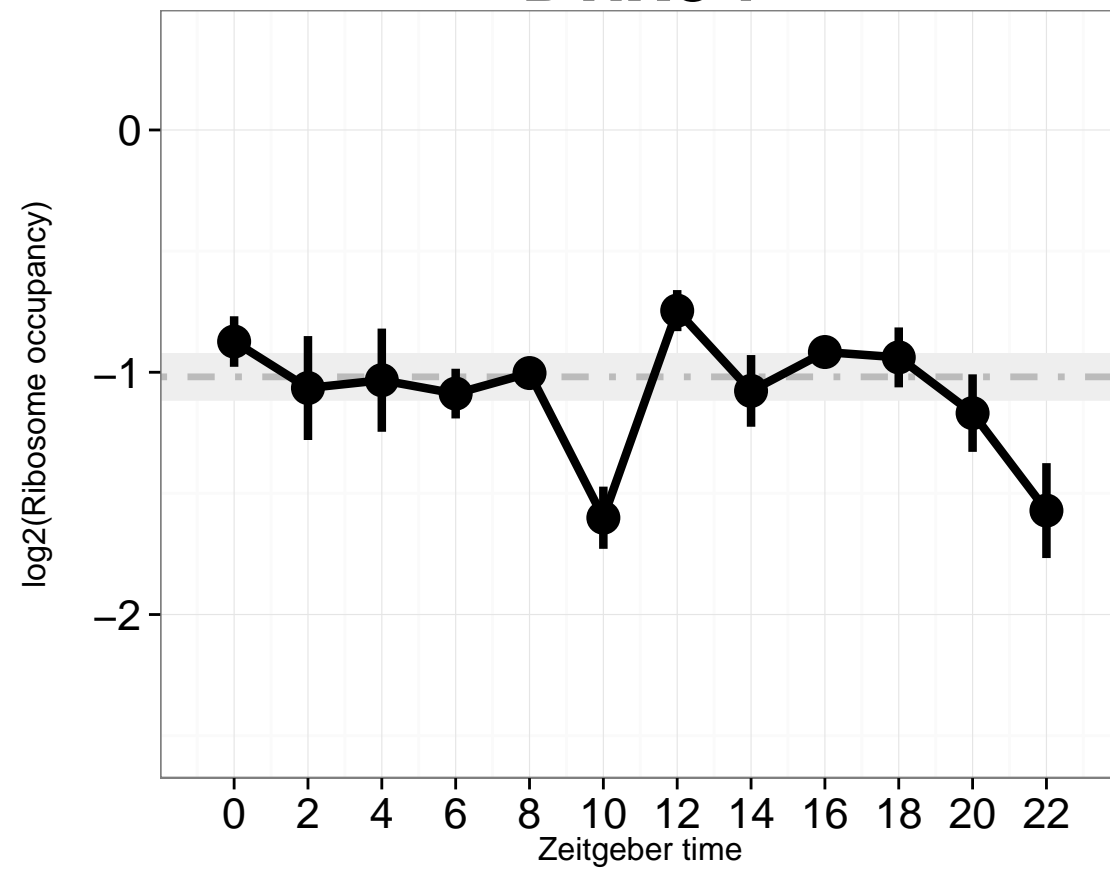

Supplement: SuppDataset_1.zip [file Dhx34_set_D.pdf › Supplemental Dataset 1/D-mRNA_rhythm_translation_rhyth/Dhx34_set_D.pdf]

## Dhx58

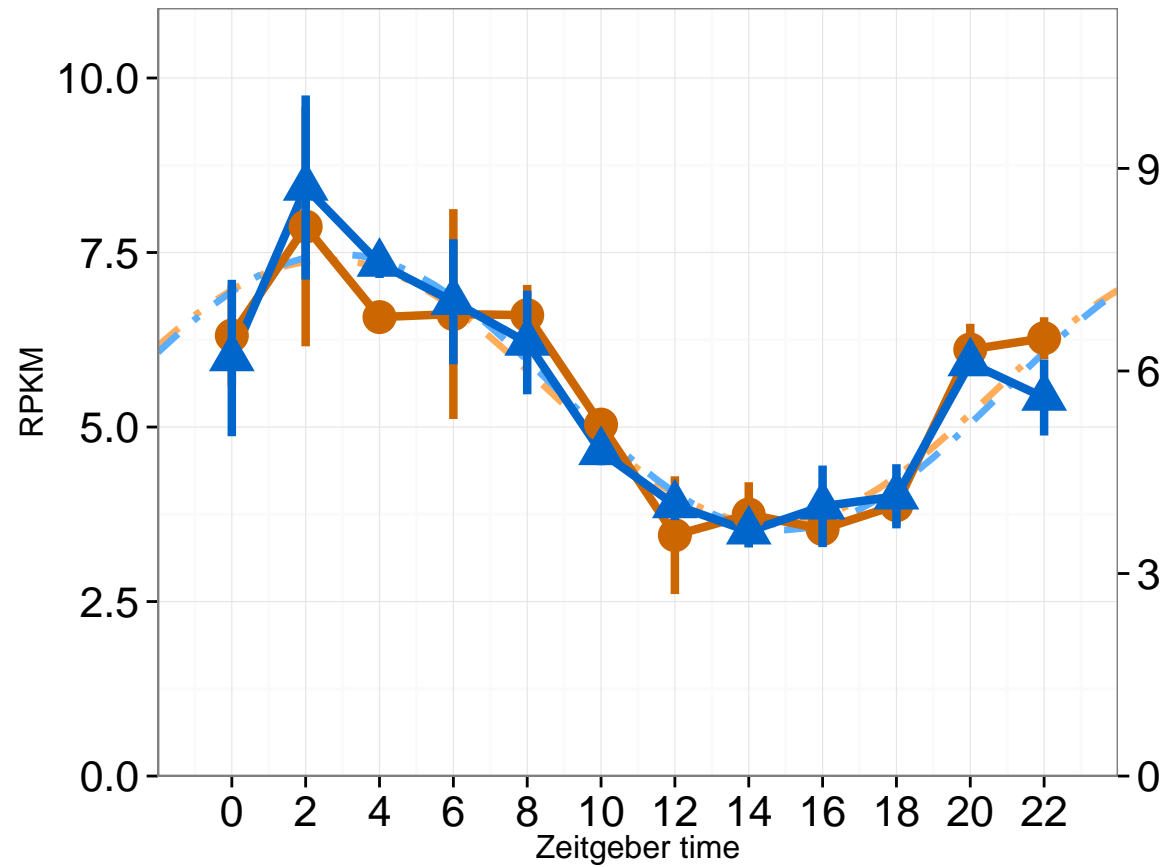

## Dhx58

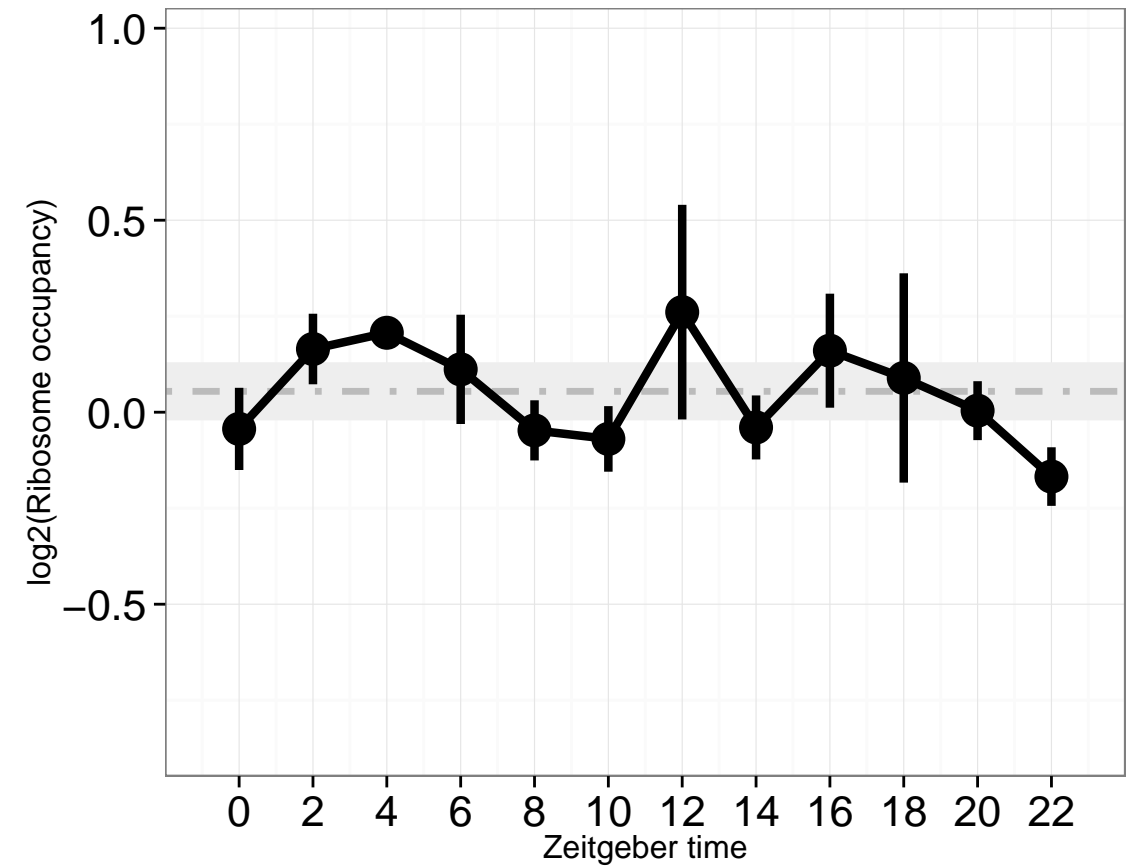

Supplement: SuppDataset_1.zip [file Dhx58_set_D.pdf › Supplemental Dataset 1/D-mRNA_rhythm_translation_rhyth/Dhx58_set_D.pdf]

## Diap2

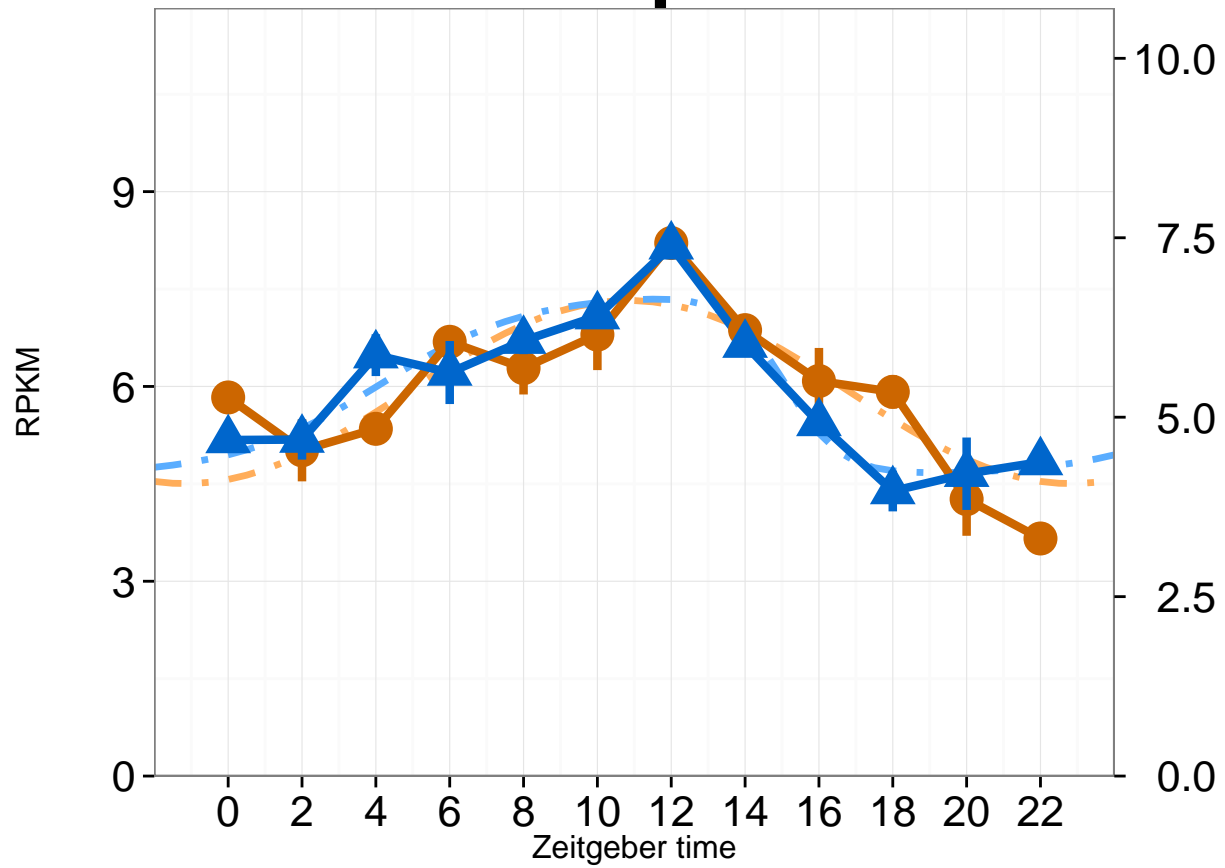

## Diap2

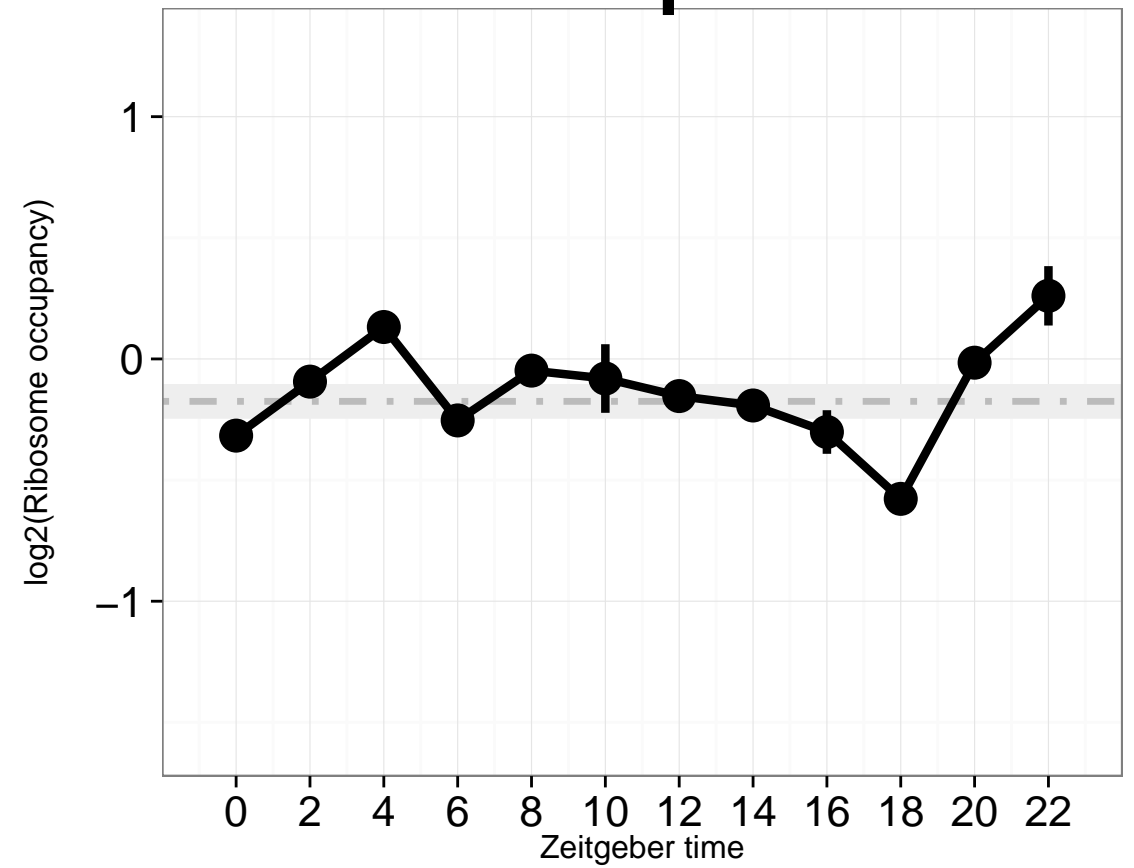

Supplement: SuppDataset_1.zip [file Diap2_set_D.pdf › Supplemental Dataset 1/D-mRNA_rhythm_translation_rhyth/Diap2_set_D.pdf]

## Dirc2

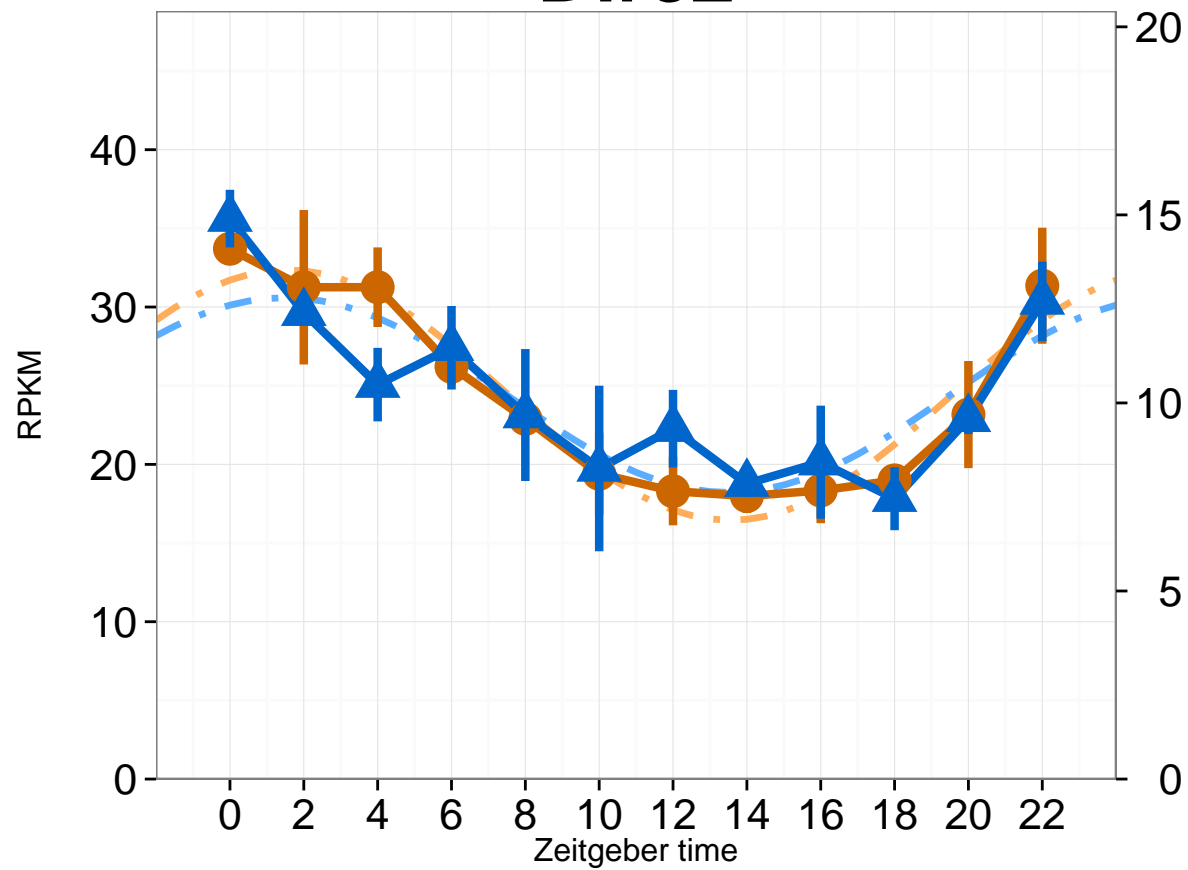

## Dirc2

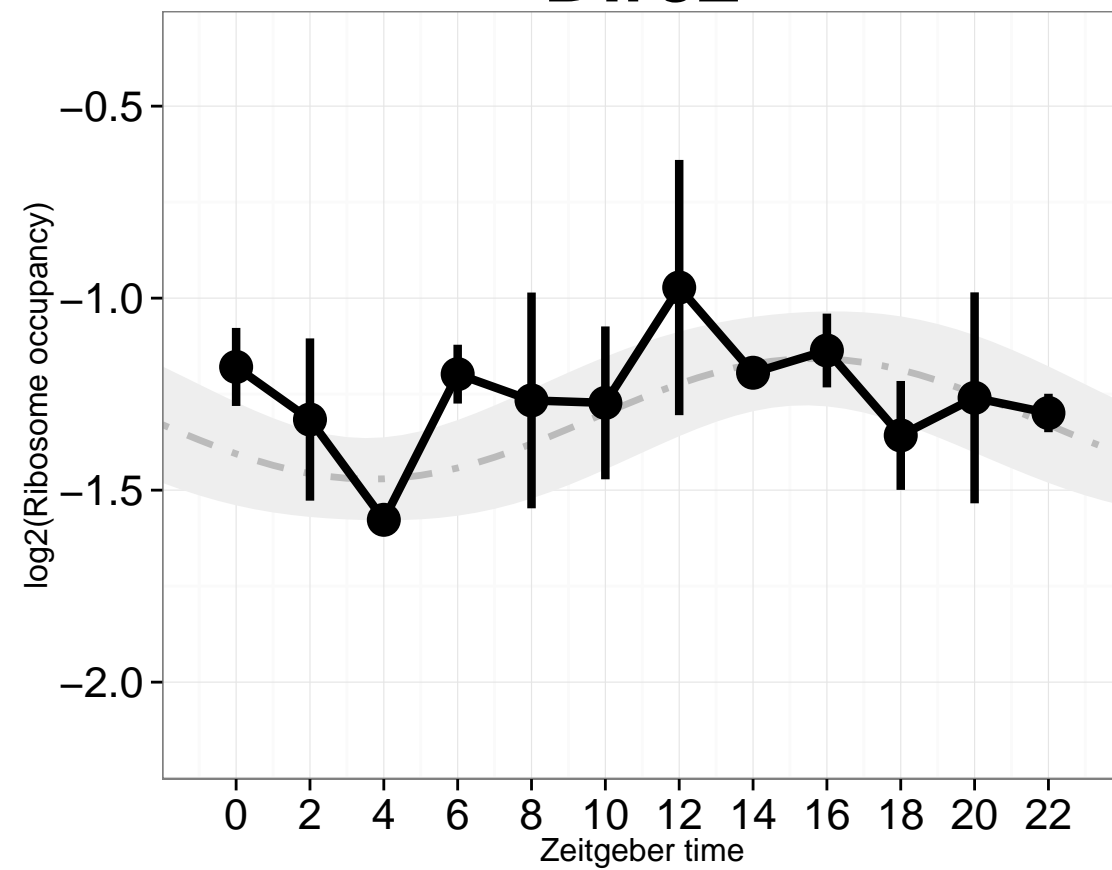

Supplement: SuppDataset_1.zip [file Dirc2_set_D.pdf › Supplemental Dataset 1/D-mRNA_rhythm_translation_rhyth/Dirc2_set_D.pdf]

# Disp1

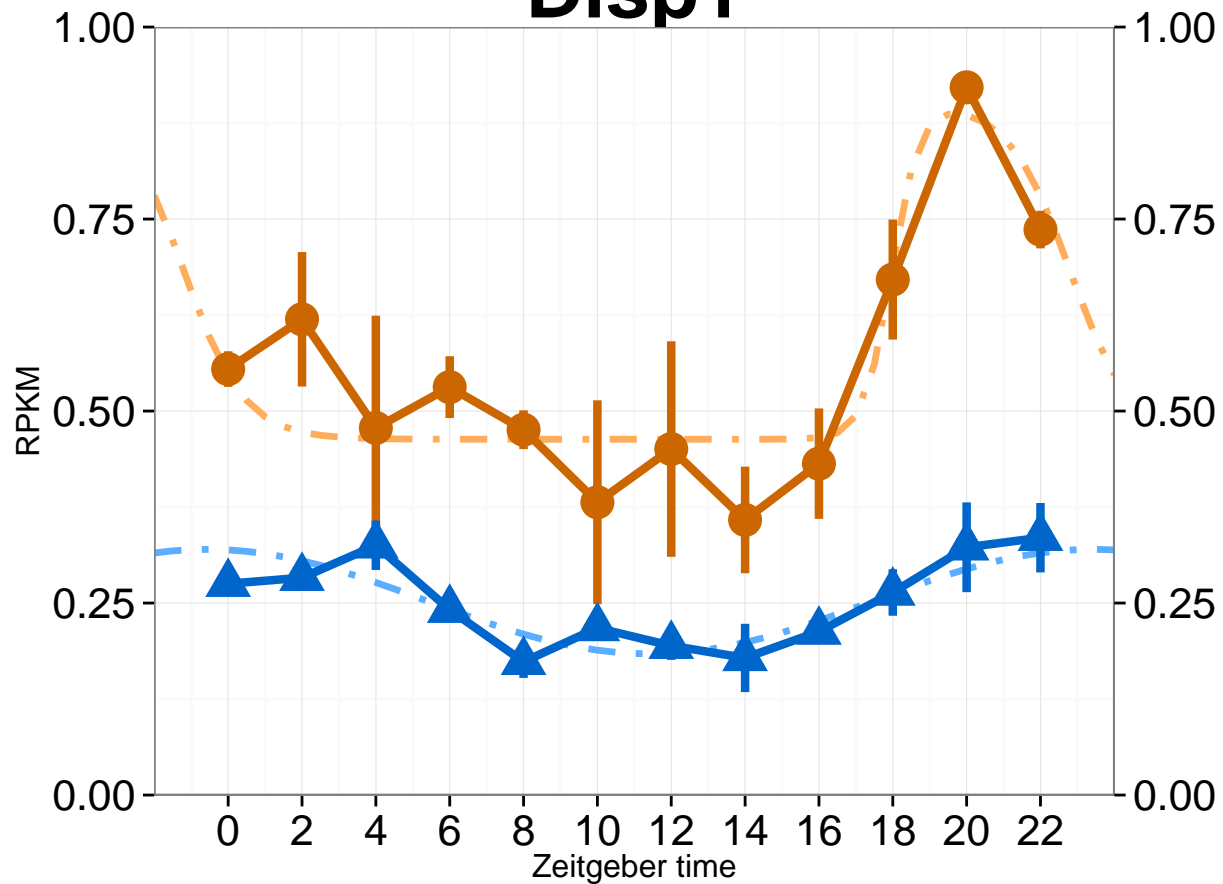

# Disp1

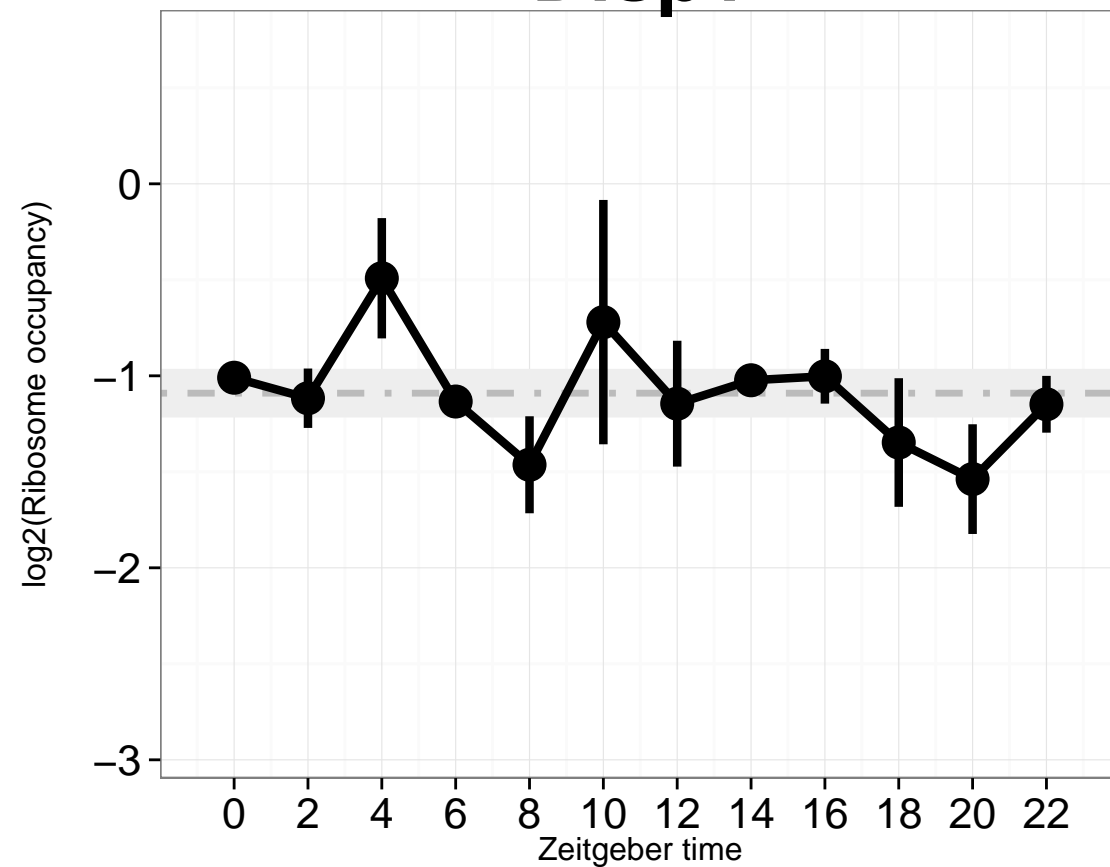

Supplement: SuppDataset_1.zip [file Disp1_set_D.pdf › Supplemental Dataset 1/D-mRNA_rhythm_translation_rhyth/Disp1_set_D.pdf]

# Dnaja1

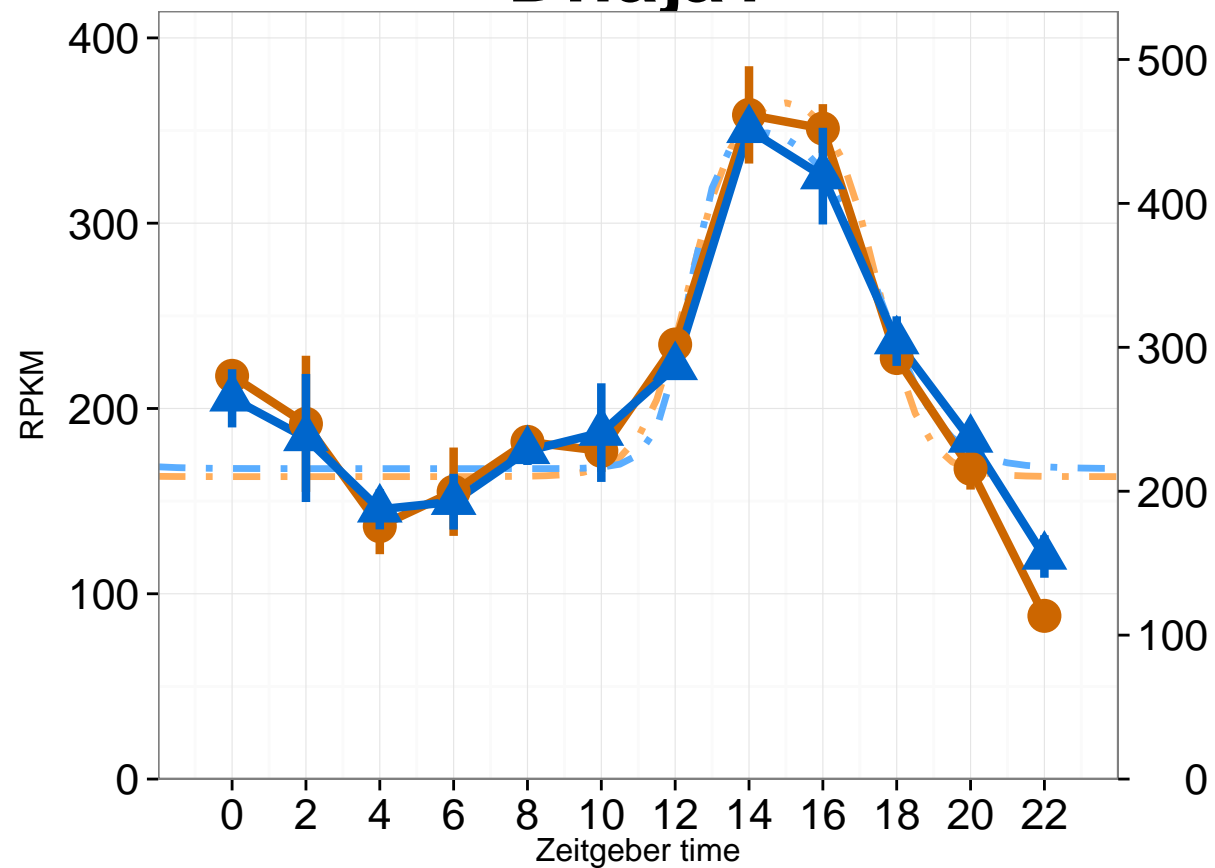

# Dnaja1

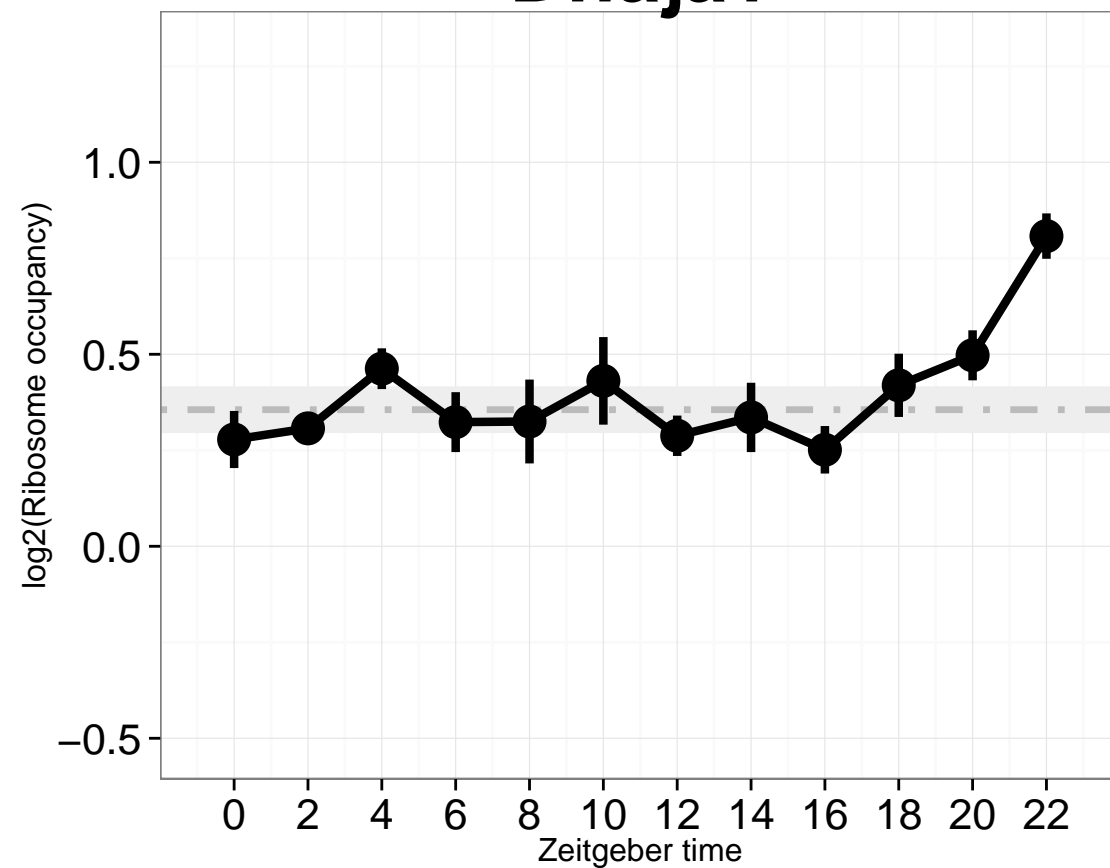

Supplement: SuppDataset_1.zip [file Dnaja1_set_D.pdf › Supplemental Dataset 1/D-mRNA_rhythm_translation_rhyth/Dnaja1_set_D.pdf]

# Dnajb1

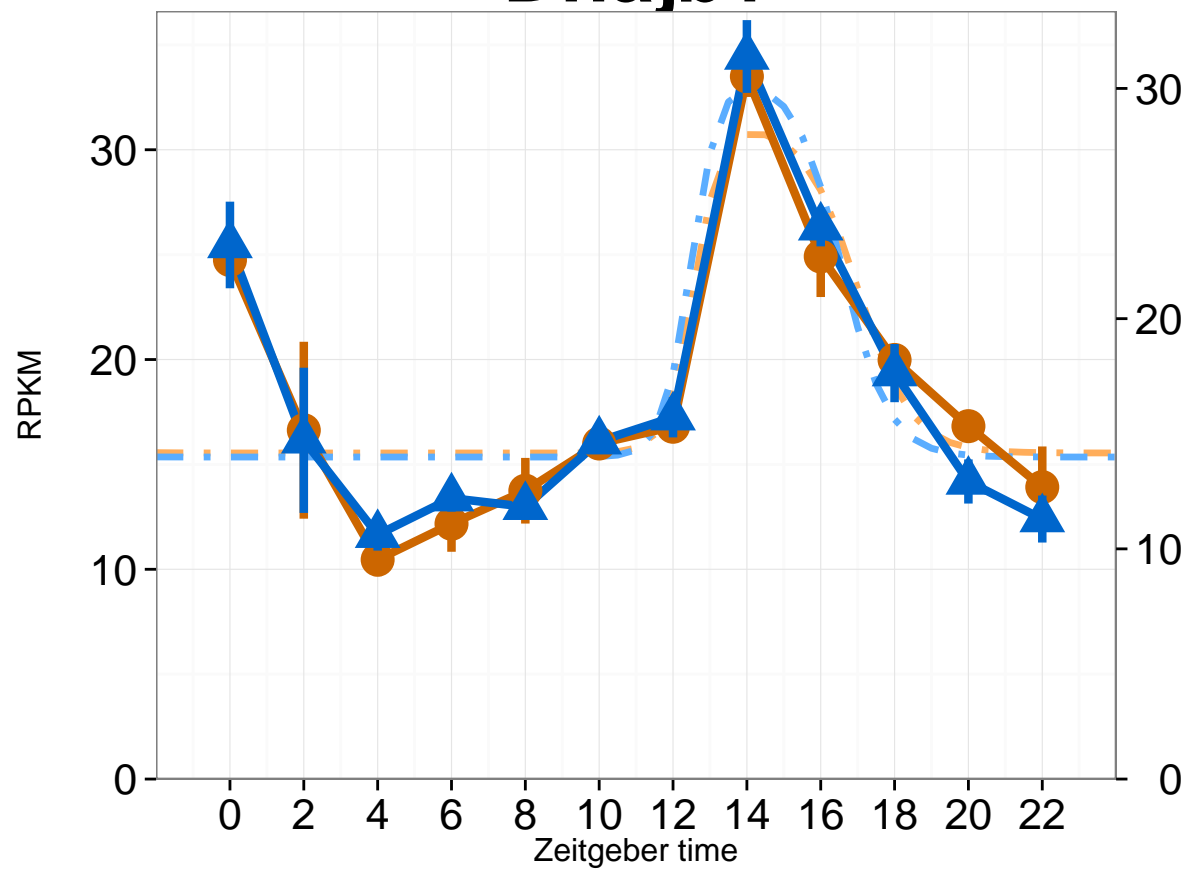

# Dnajb1

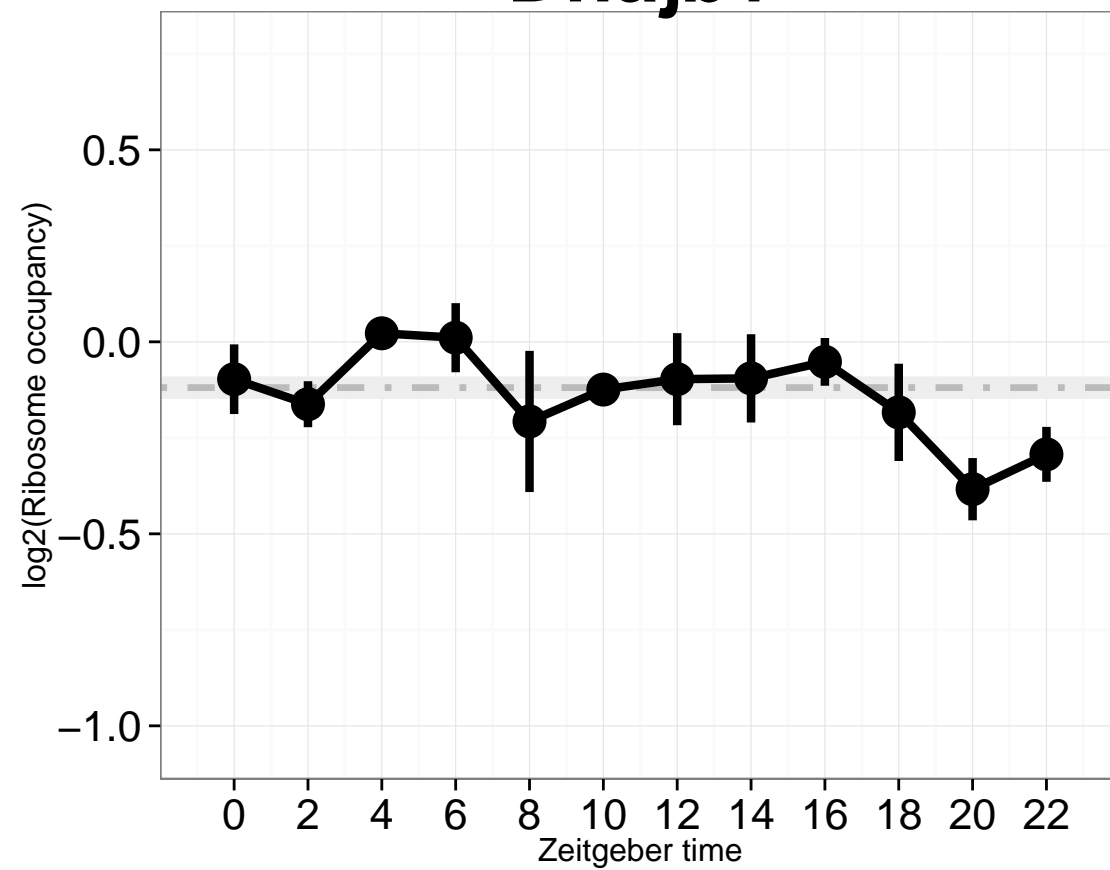

Supplement: SuppDataset_1.zip [file Dnajb1_set_D.pdf › Supplemental Dataset 1/D-mRNA_rhythm_translation_rhyth/Dnajb1_set_D.pdf]

# Dnajb4

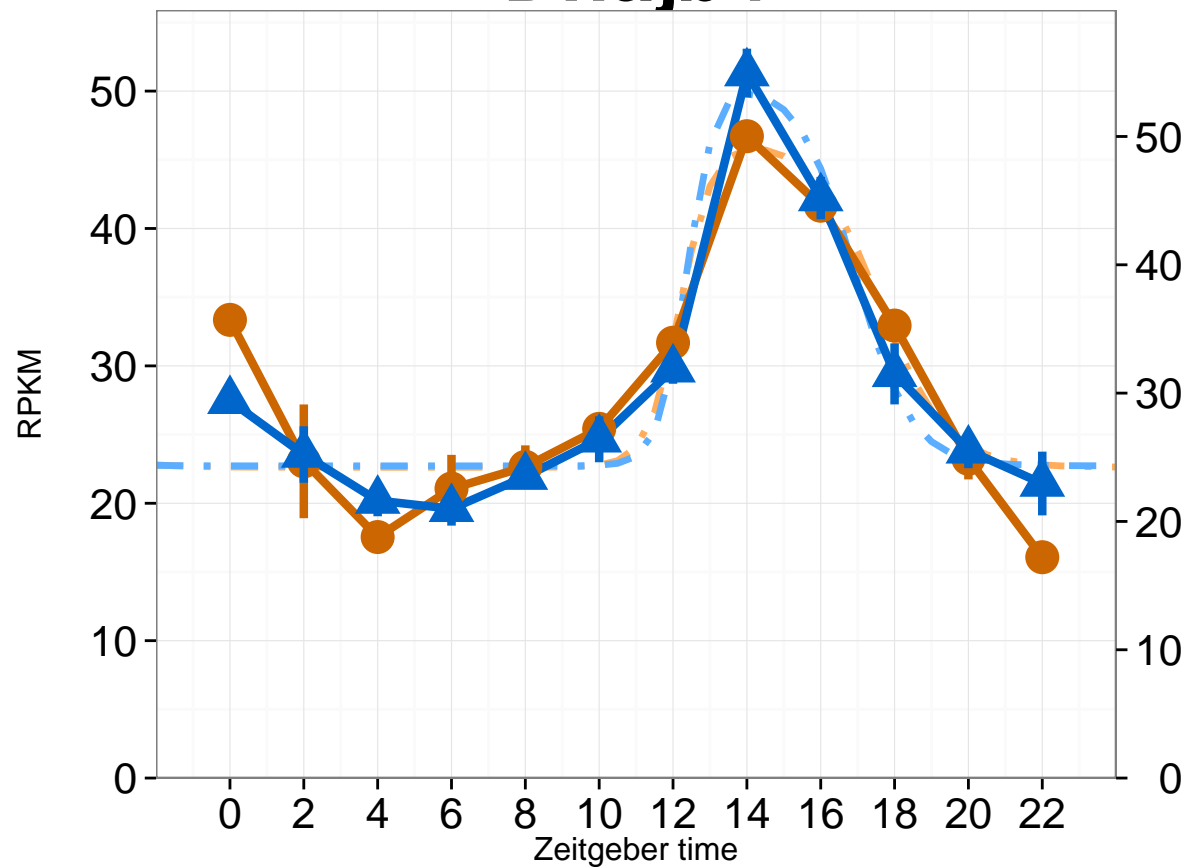

# Dnajb4

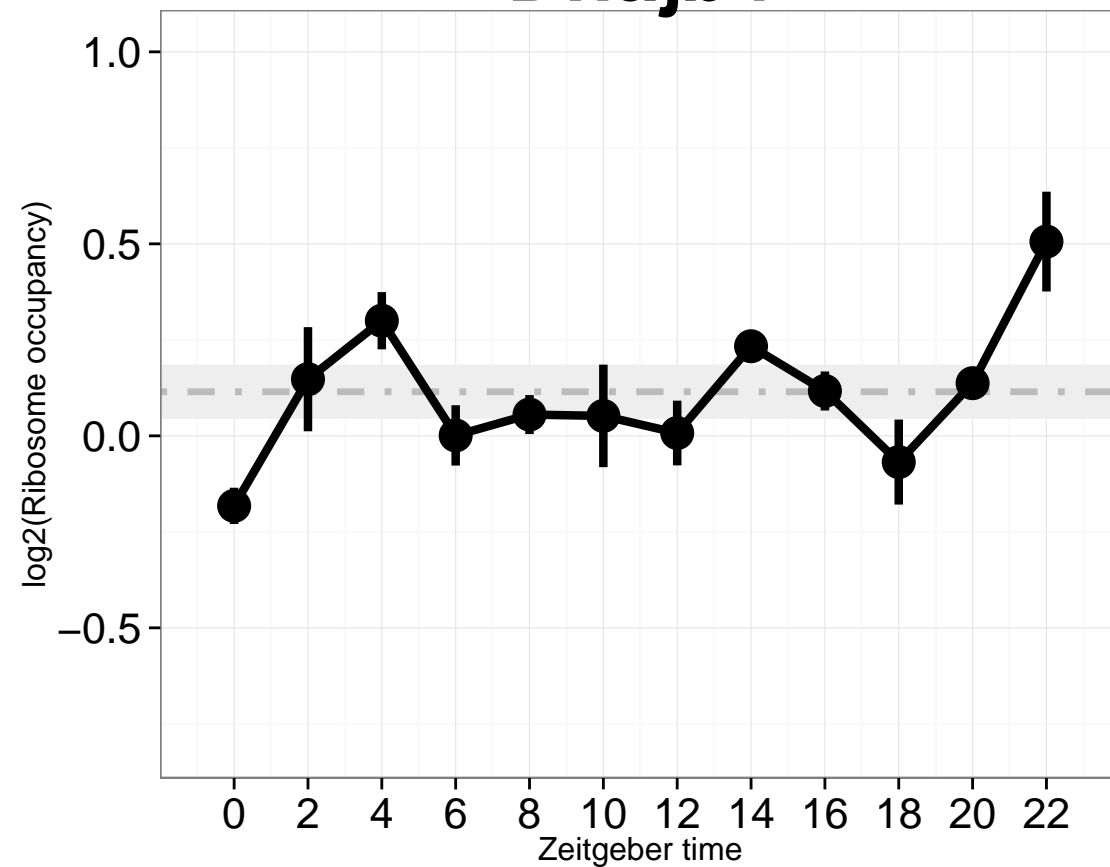

Supplement: SuppDataset_1.zip [file Dnajb4_set_D.pdf › Supplemental Dataset 1/D-mRNA_rhythm_translation_rhyth/Dnajb4_set_D.pdf]

## Dnajb6

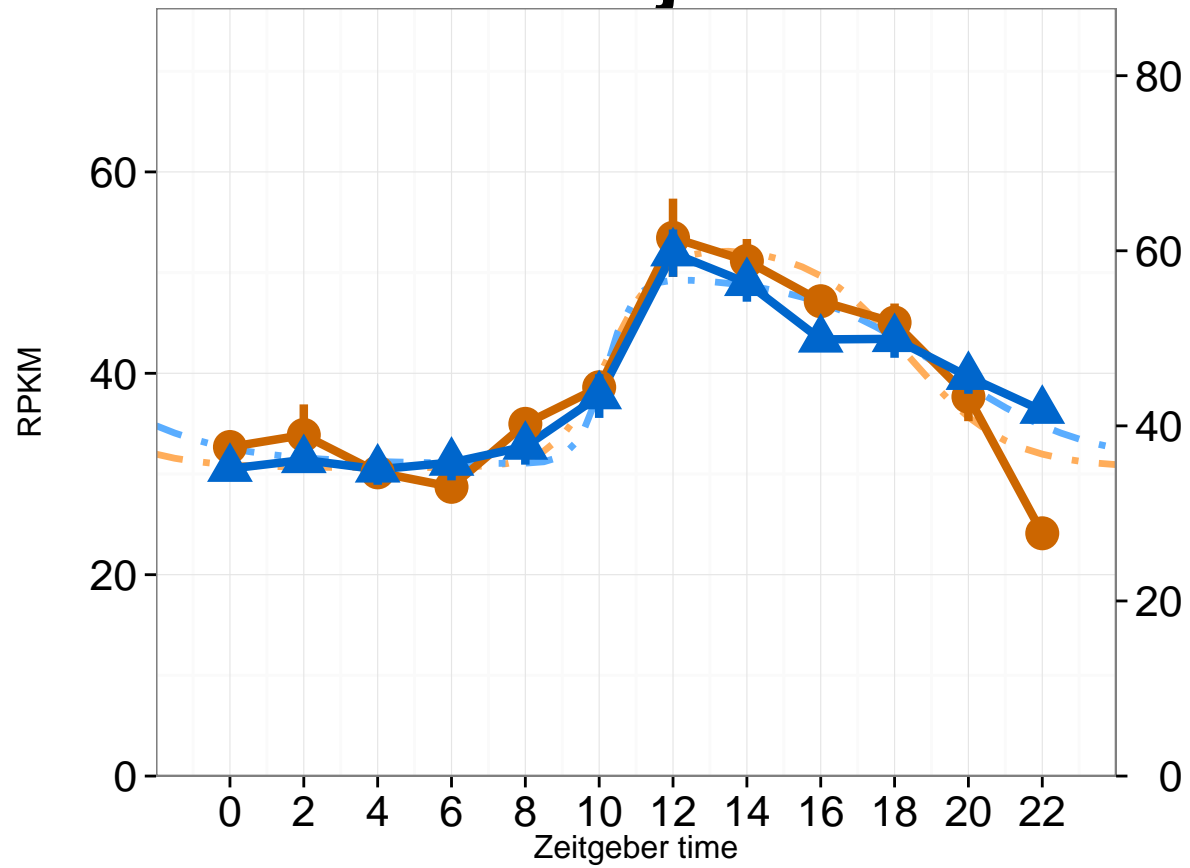

## Dnajb6

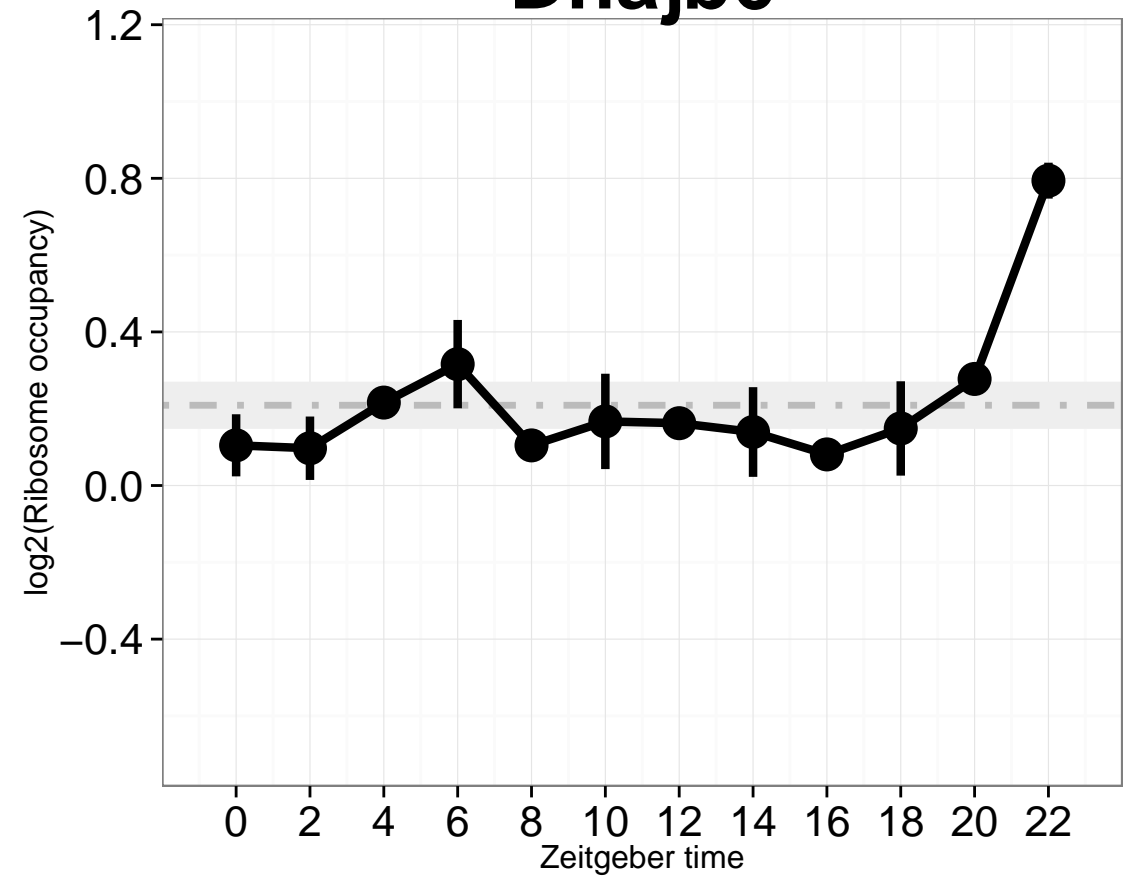

Supplement: SuppDataset_1.zip [file Dnajb6_set_D.pdf › Supplemental Dataset 1/D-mRNA_rhythm_translation_rhyth/Dnajb6_set_D.pdf]

# Dnajb9

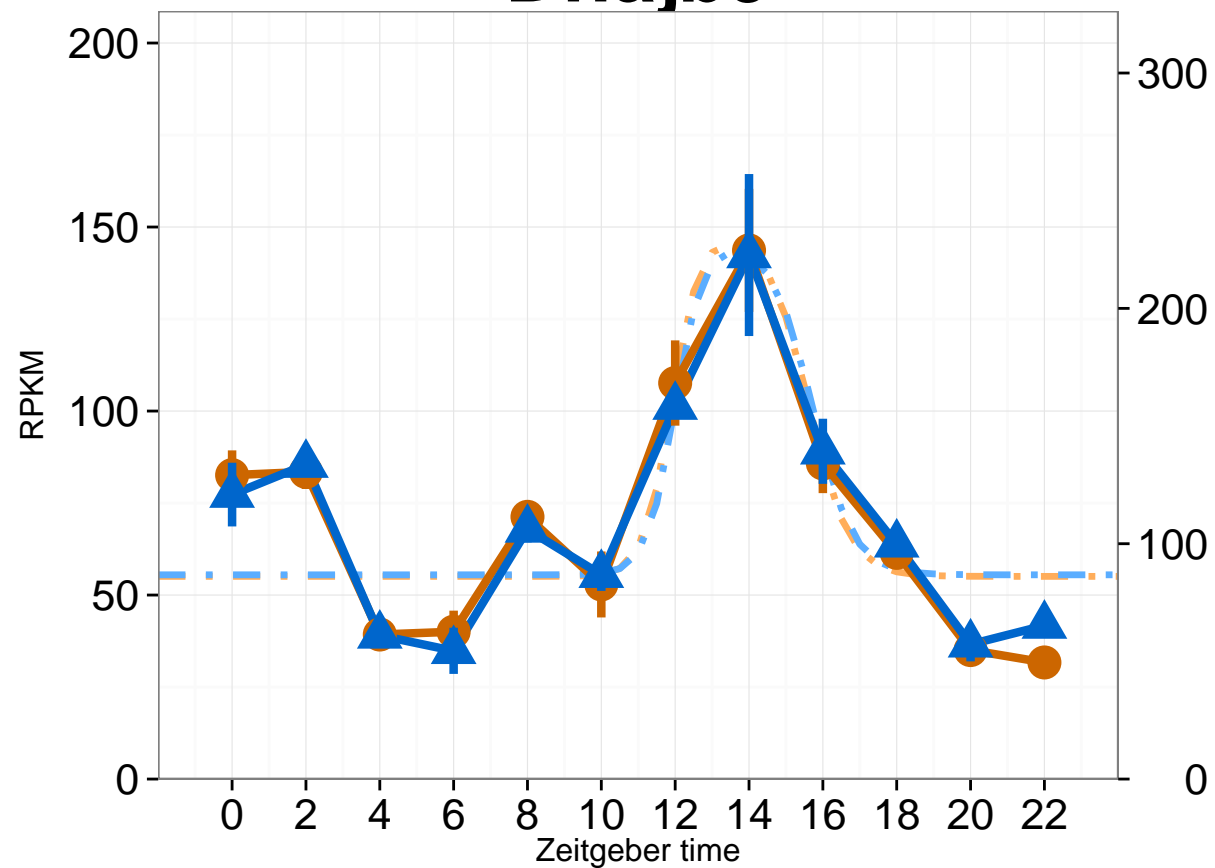

# Dnajb9

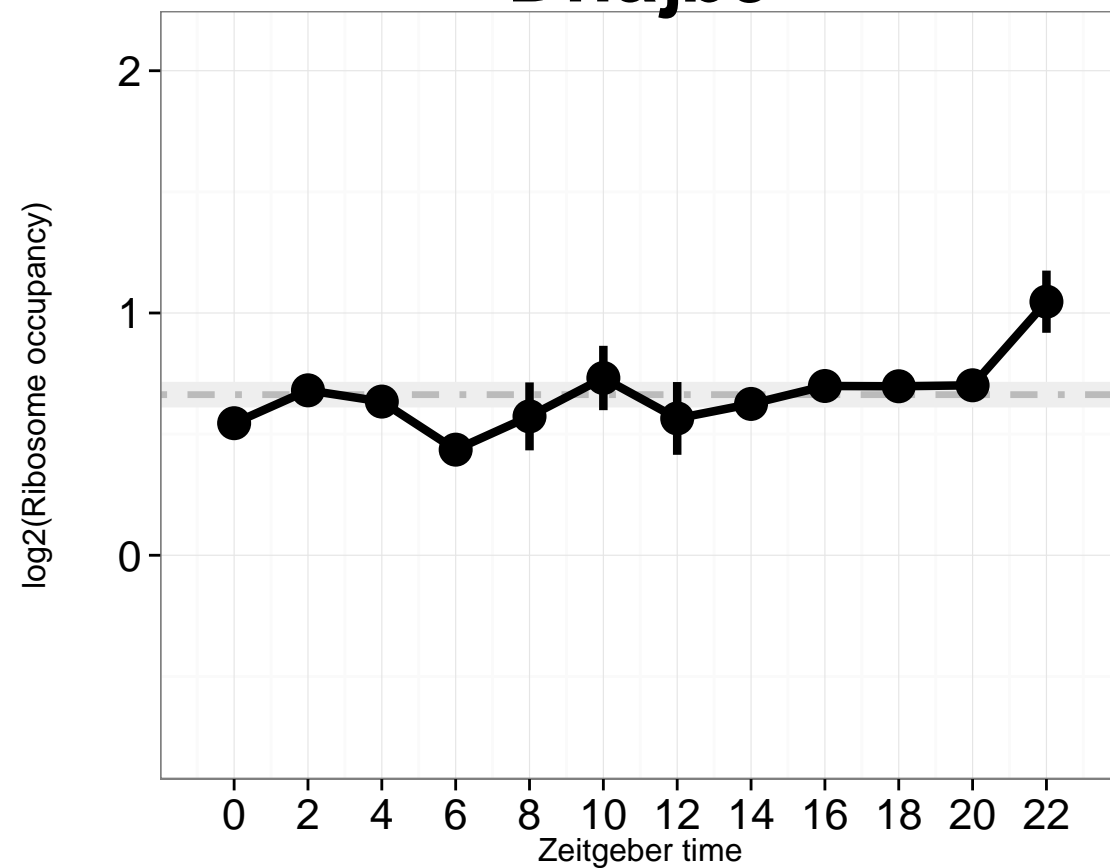

Supplement: SuppDataset_1.zip [file Dnajb9_set_D.pdf › Supplemental Dataset 1/D-mRNA_rhythm_translation_rhyth/Dnajb9_set_D.pdf]

## Dnajc12

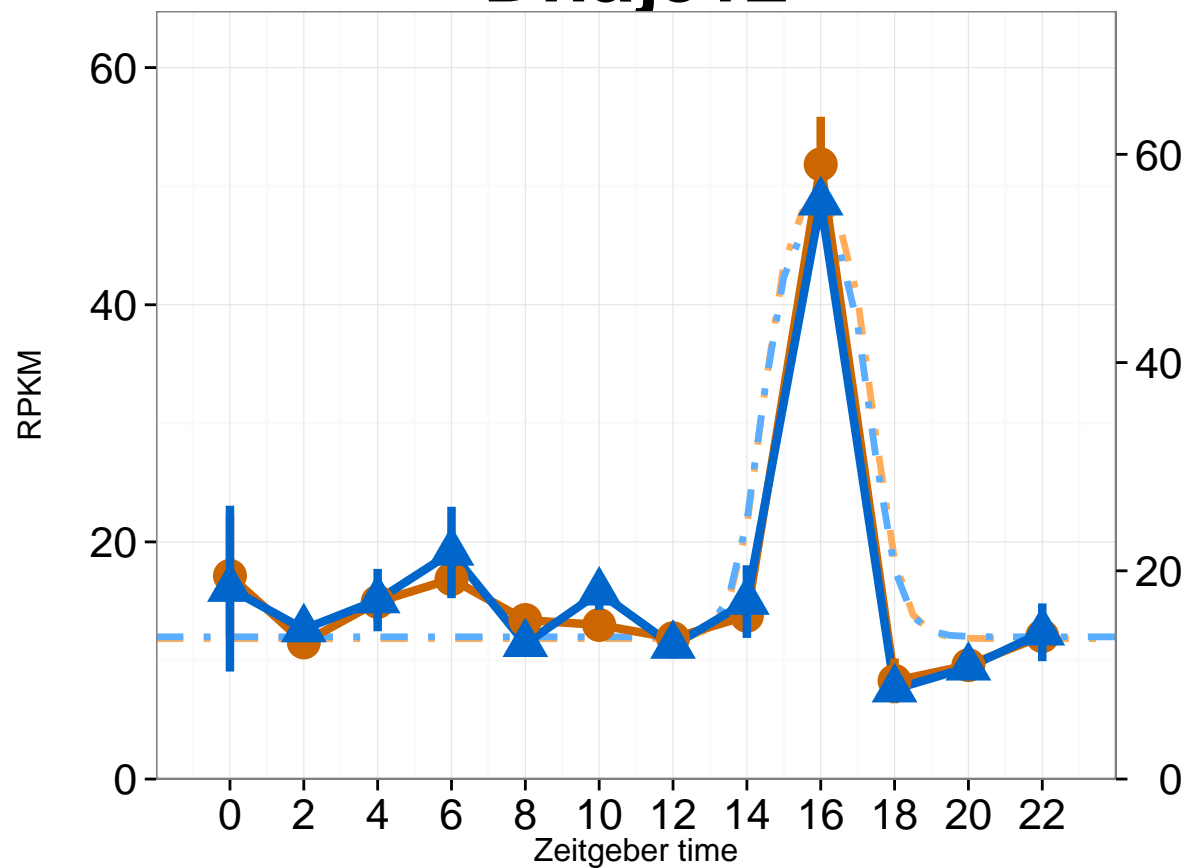

## Dnajc12

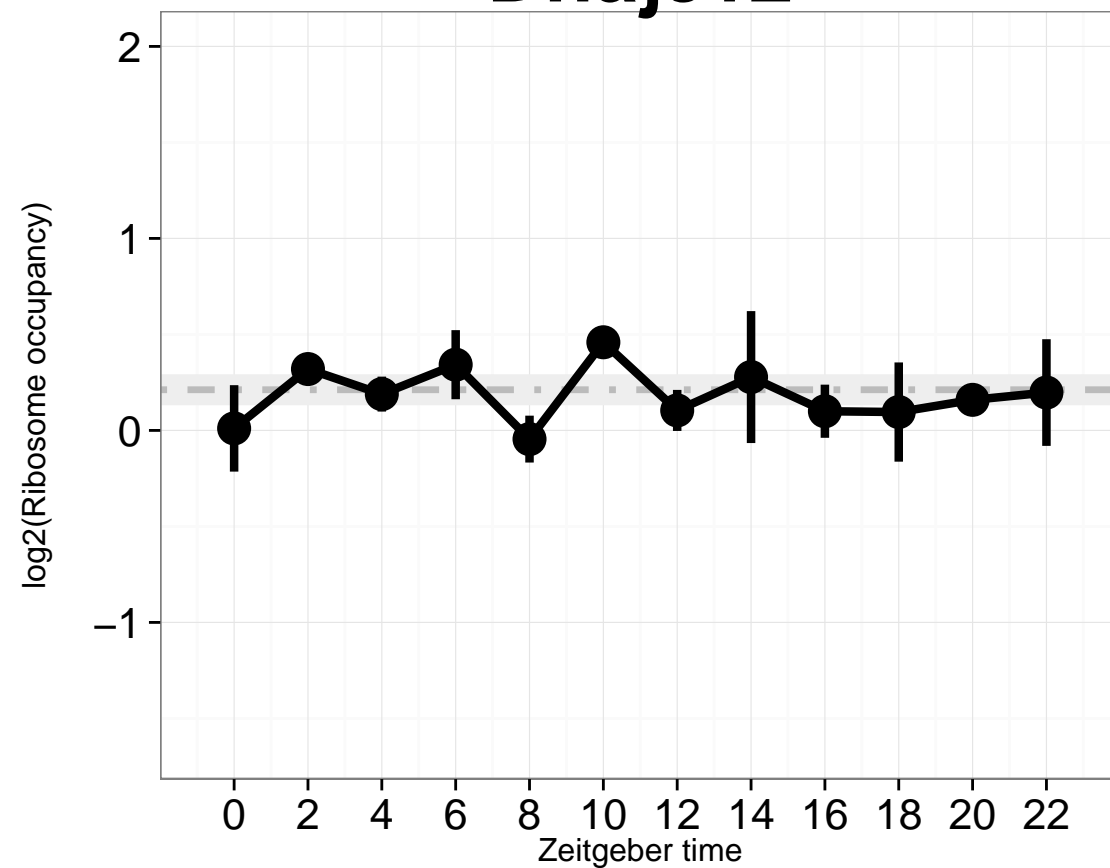

Supplement: SuppDataset_1.zip [file Dnajc12_set_D.pdf › Supplemental Dataset 1/D-mRNA_rhythm_translation_rhyth/Dnajc12_set_D.pdf]

## Dnph1

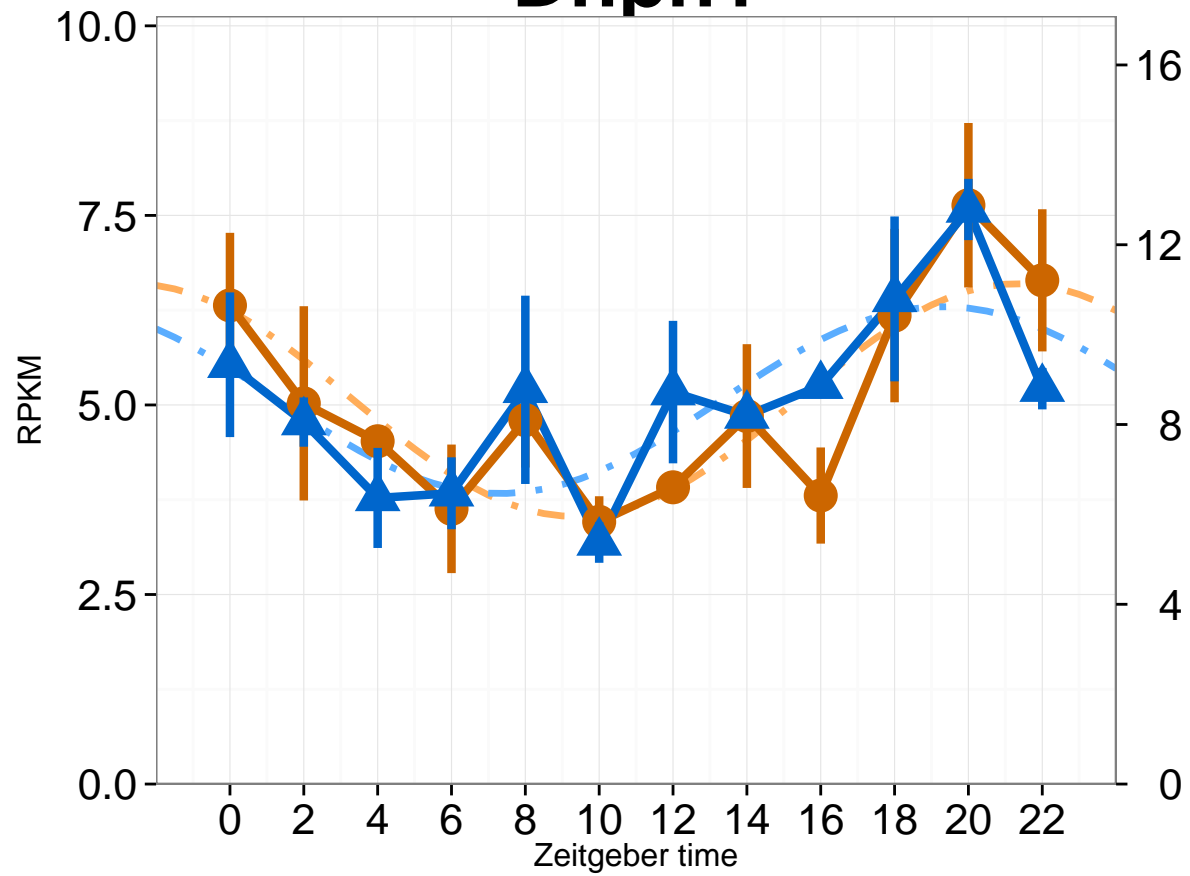

## Dnph1

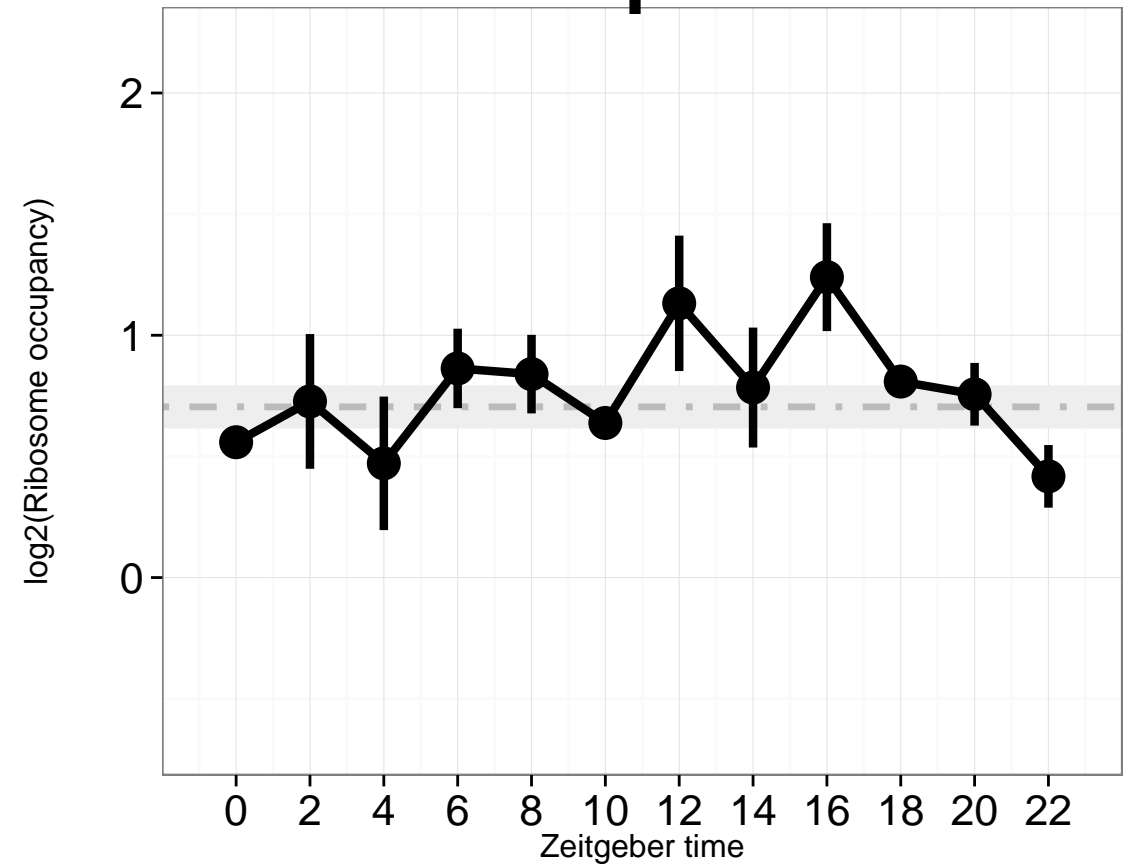

Supplement: SuppDataset_1.zip [file Dnph1_set_D.pdf › Supplemental Dataset 1/D-mRNA_rhythm_translation_rhyth/Dnph1_set_D.pdf]

# Dock6

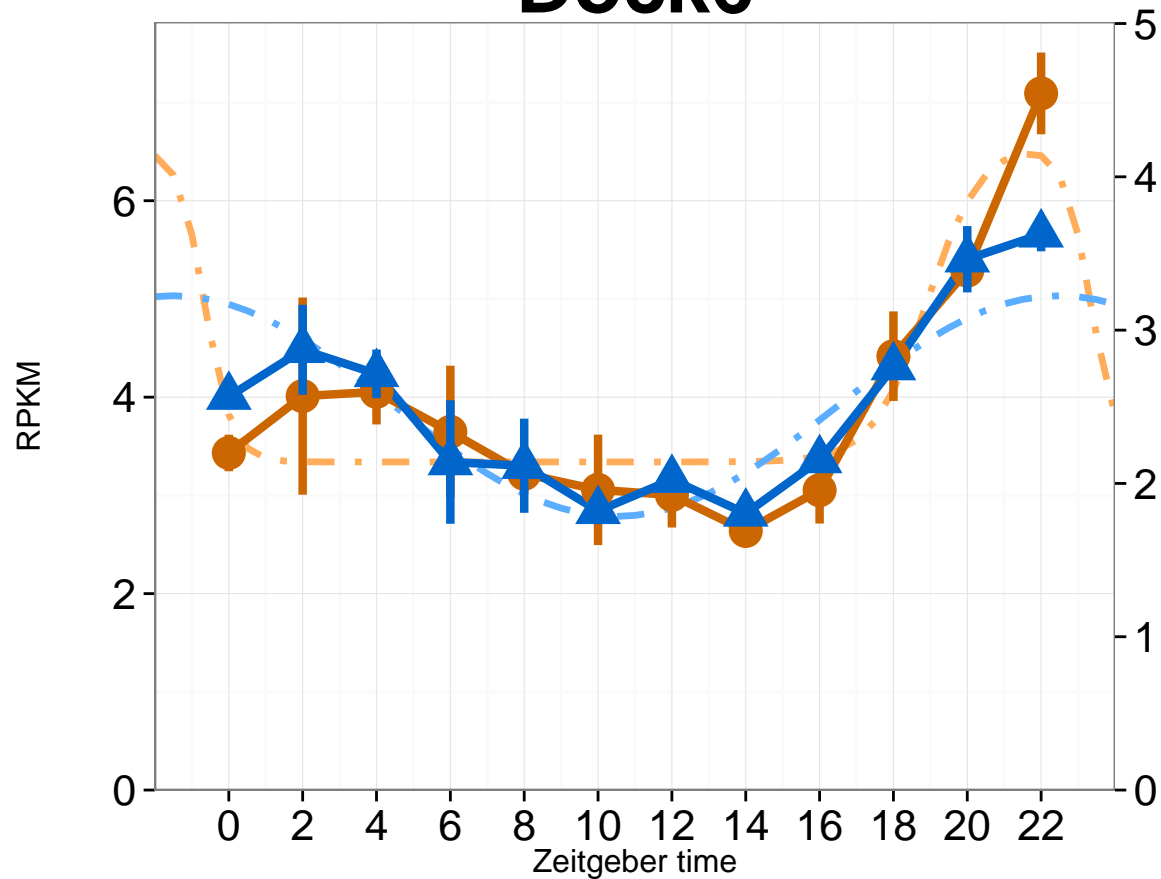

# Dock6

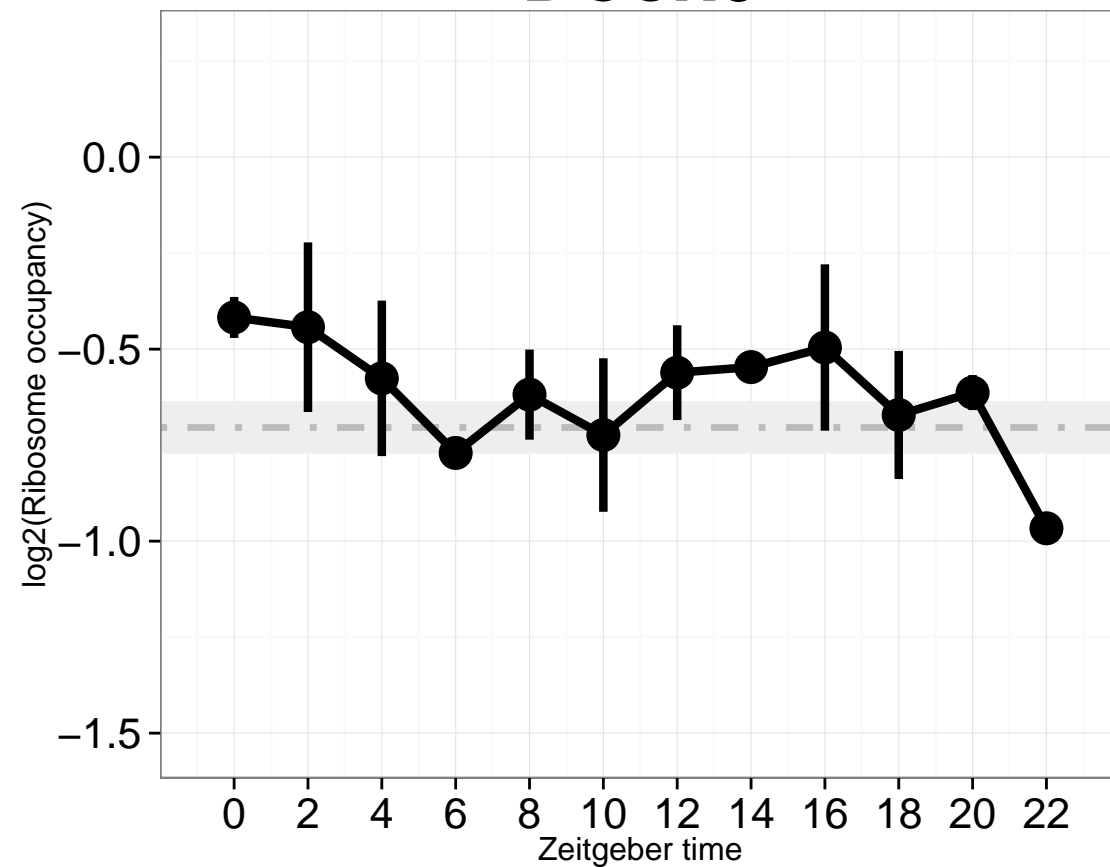

Supplement: SuppDataset_1.zip [file Dock6_set_D.pdf › Supplemental Dataset 1/D-mRNA_rhythm_translation_rhyth/Dock6_set_D.pdf]

# Dopey2

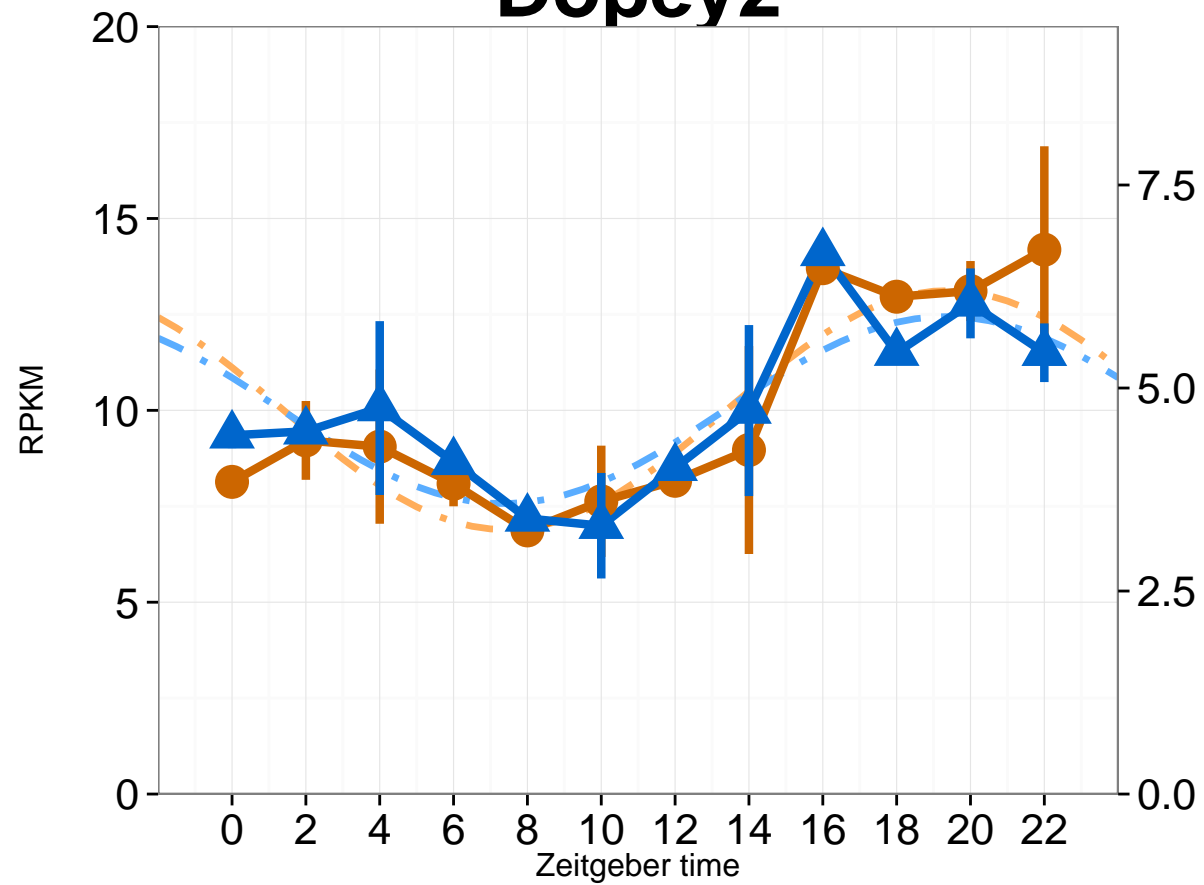

# Dopey2

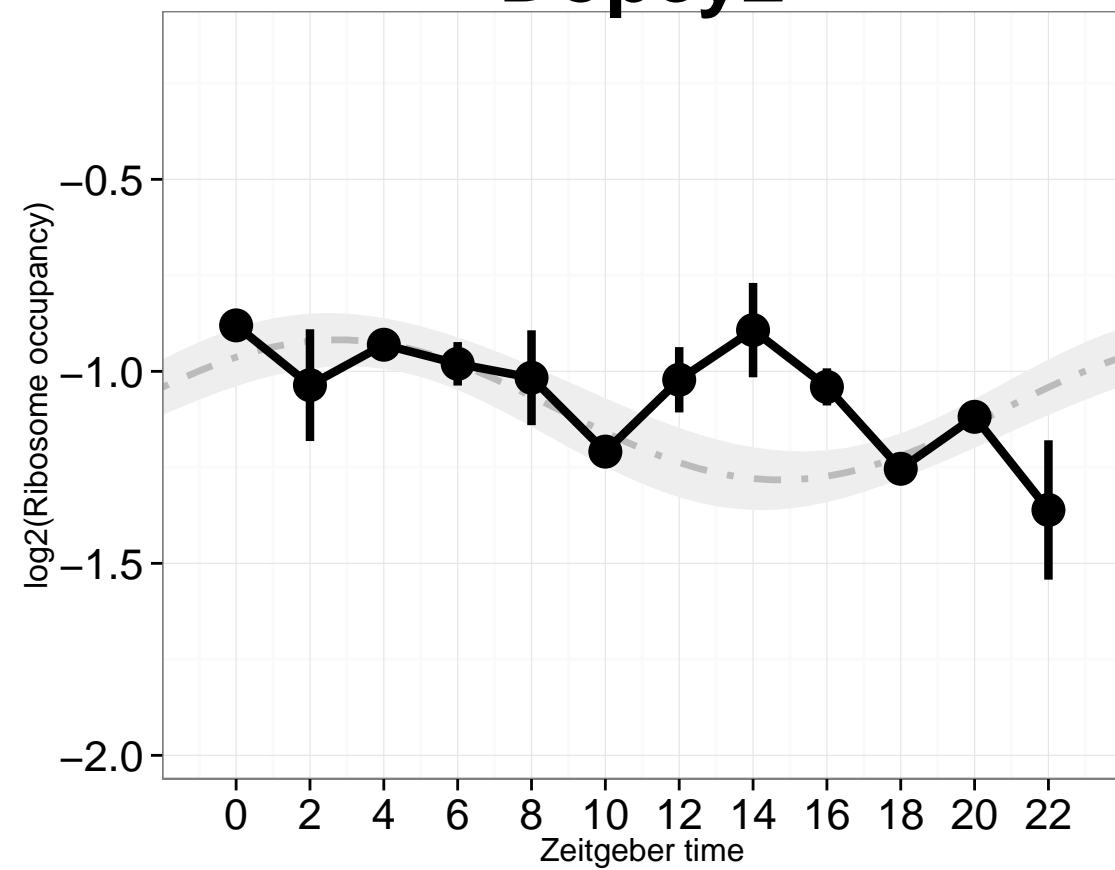

Supplement: SuppDataset_1.zip [file Dopey2_set_D.pdf › Supplemental Dataset 1/D-mRNA_rhythm_translation_rhyth/Dopey2_set_D.pdf]

## Dph6

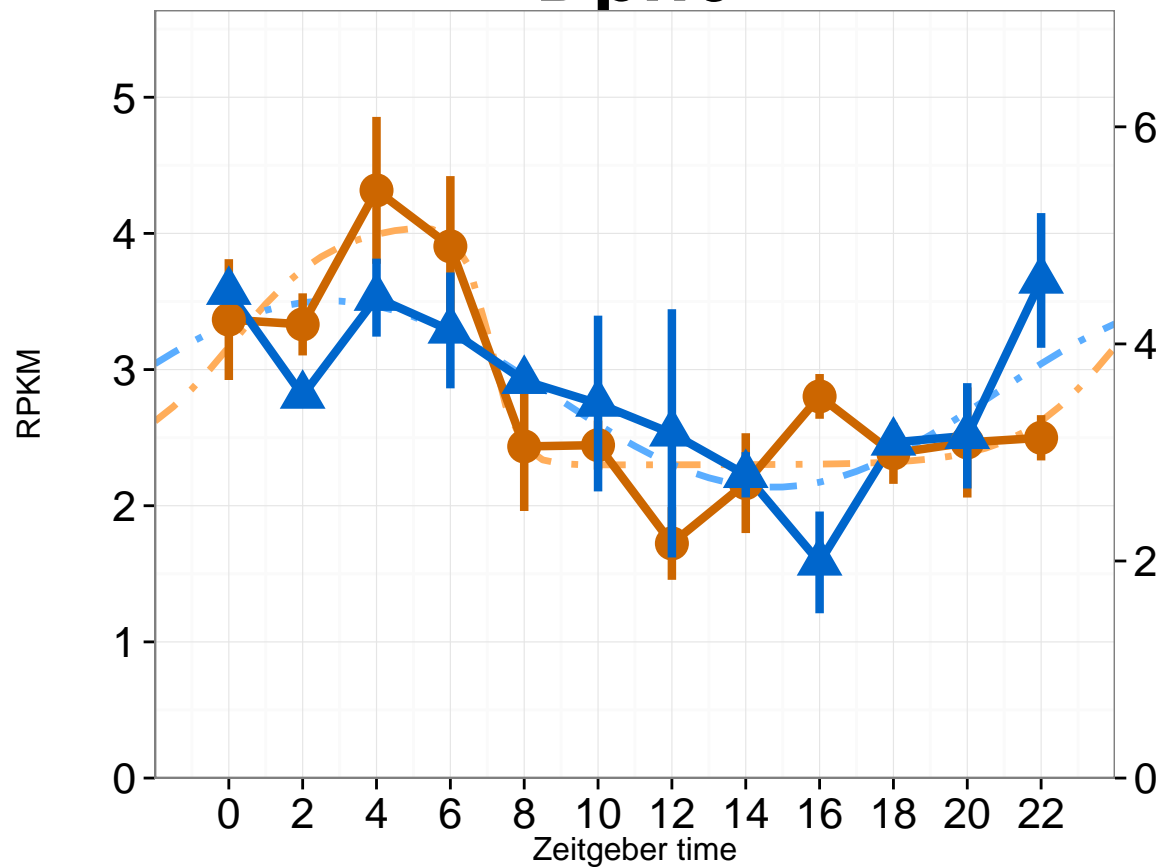

## Dph6

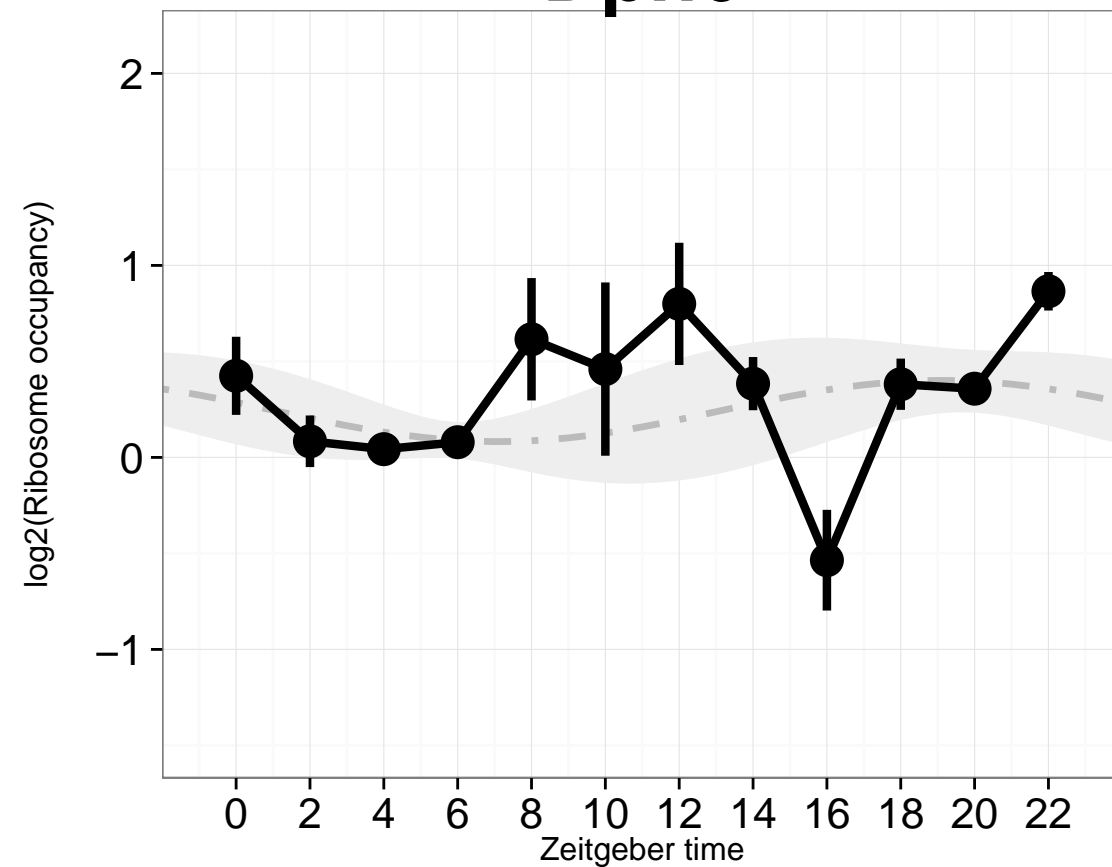

Supplement: SuppDataset_1.zip [file Dph6_set_D.pdf › Supplemental Dataset 1/D-mRNA_rhythm_translation_rhyth/Dph6_set_D.pdf]

## Dpp9

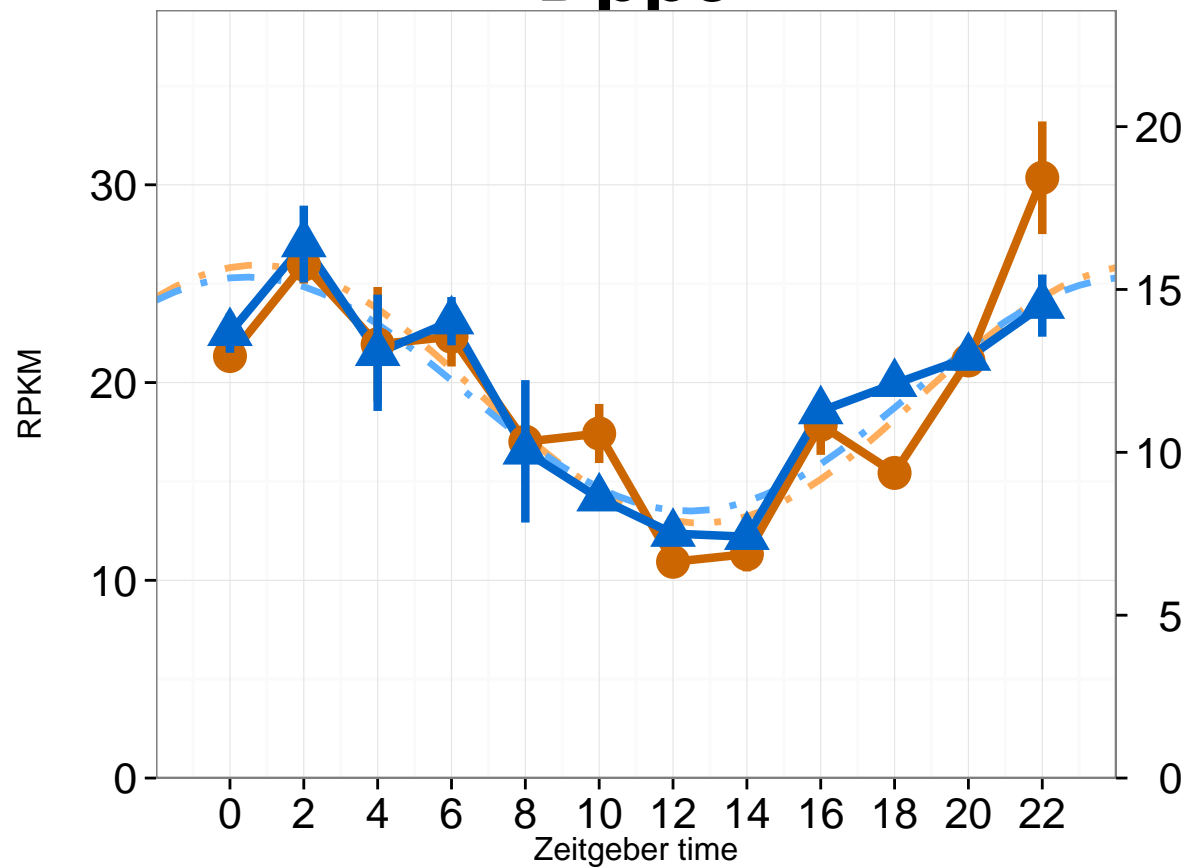

## Dpp9

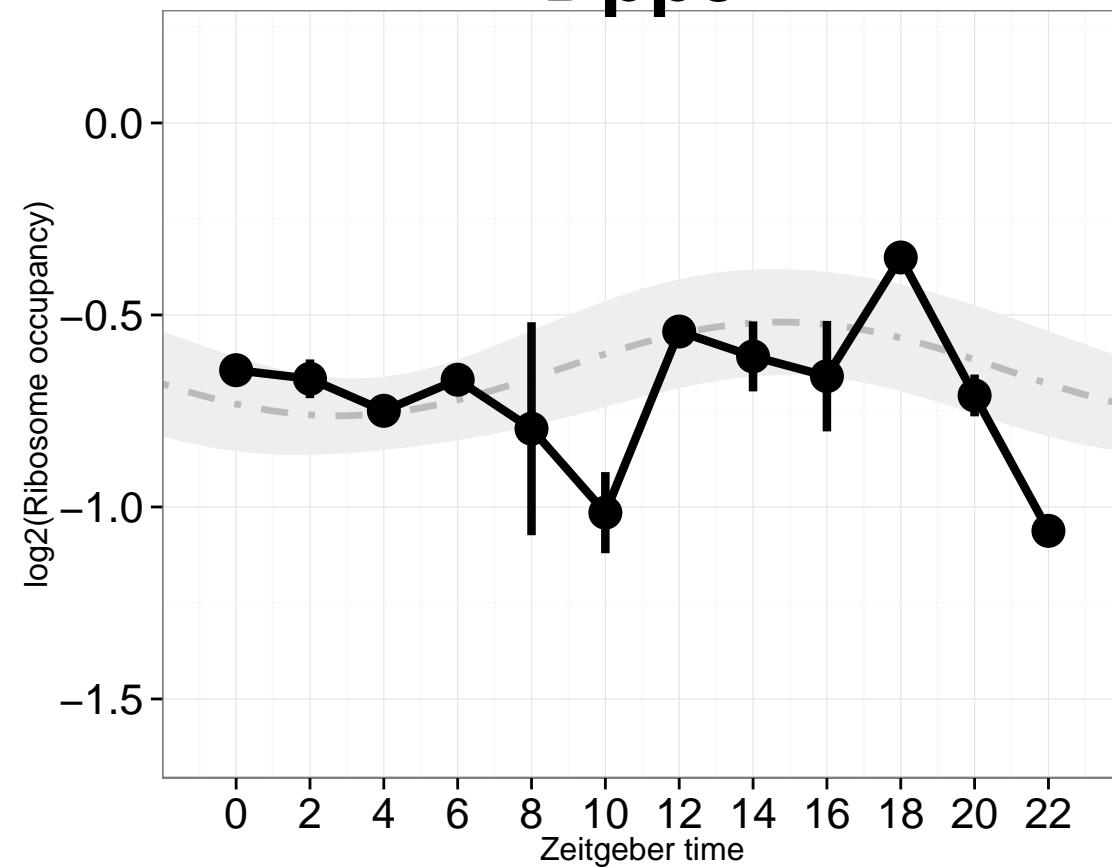

Supplement: SuppDataset_1.zip [file Dpp9_set_D.pdf › Supplemental Dataset 1/D-mRNA_rhythm_translation_rhyth/Dpp9_set_D.pdf]

## Dst

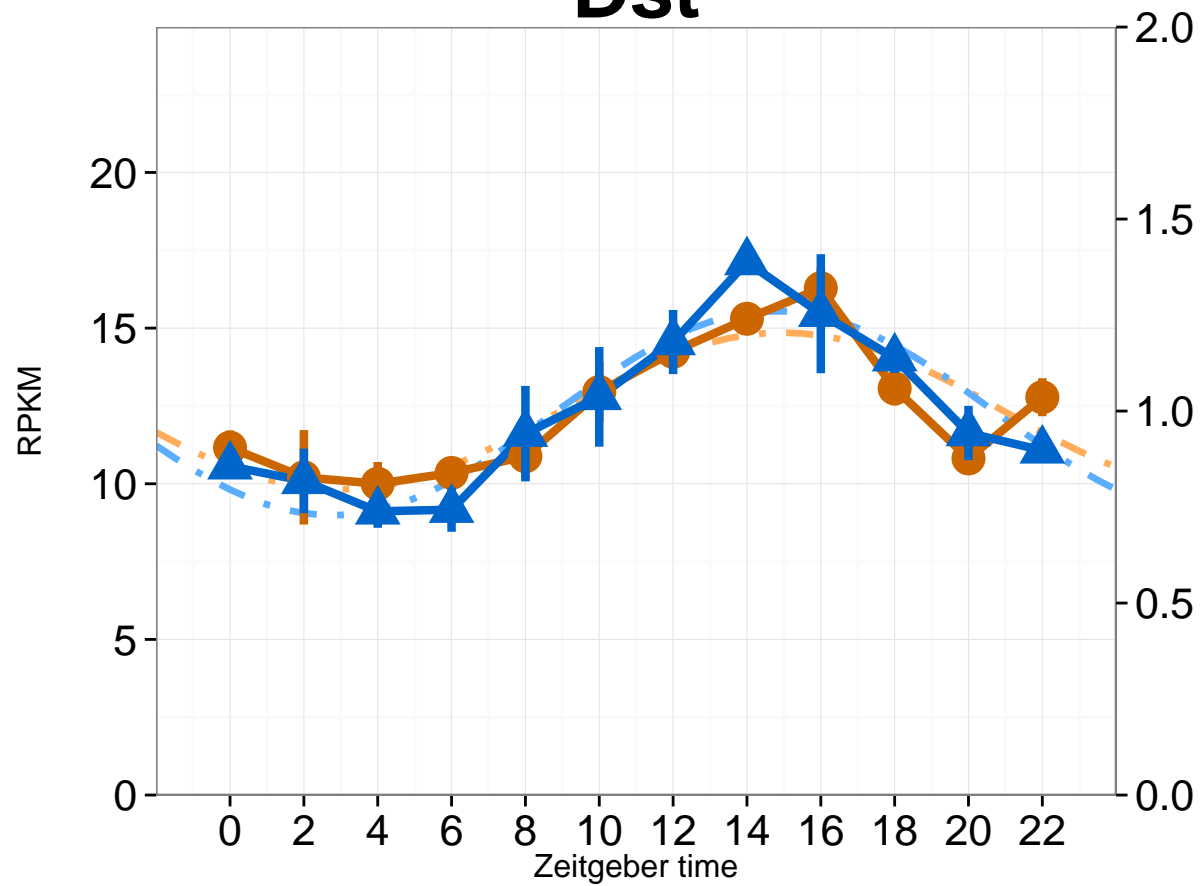

## Dst

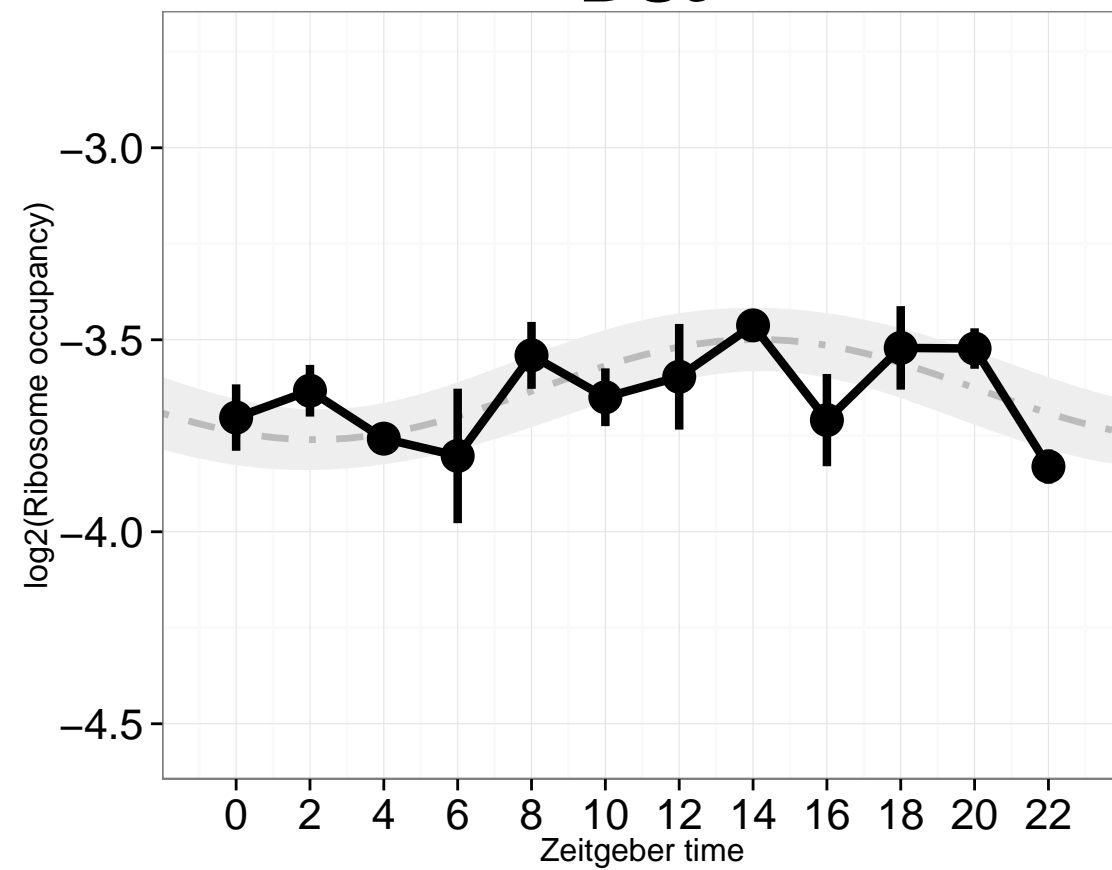

Supplement: SuppDataset_1.zip [file Dst_set_D.pdf › Supplemental Dataset 1/D-mRNA_rhythm_translation_rhyth/Dst_set_D.pdf]

# Dtx4

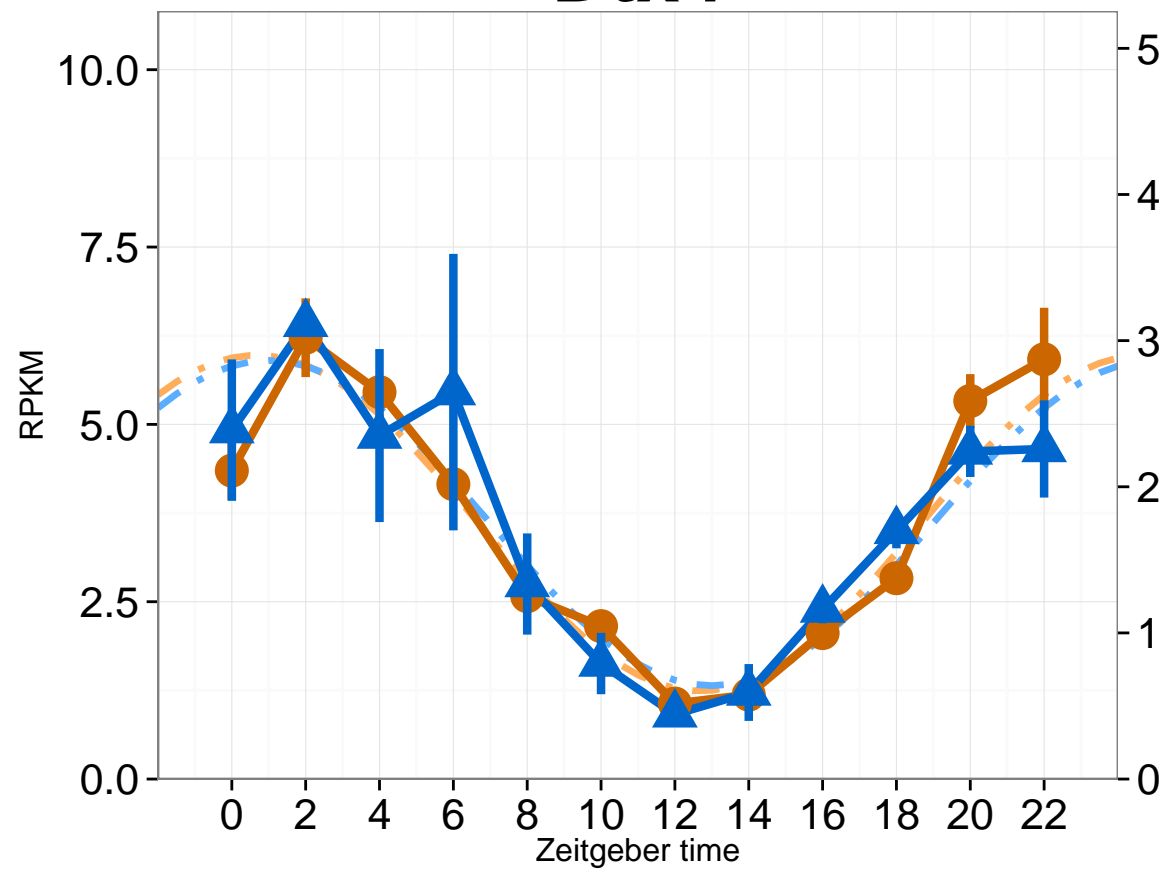

# Dtx4

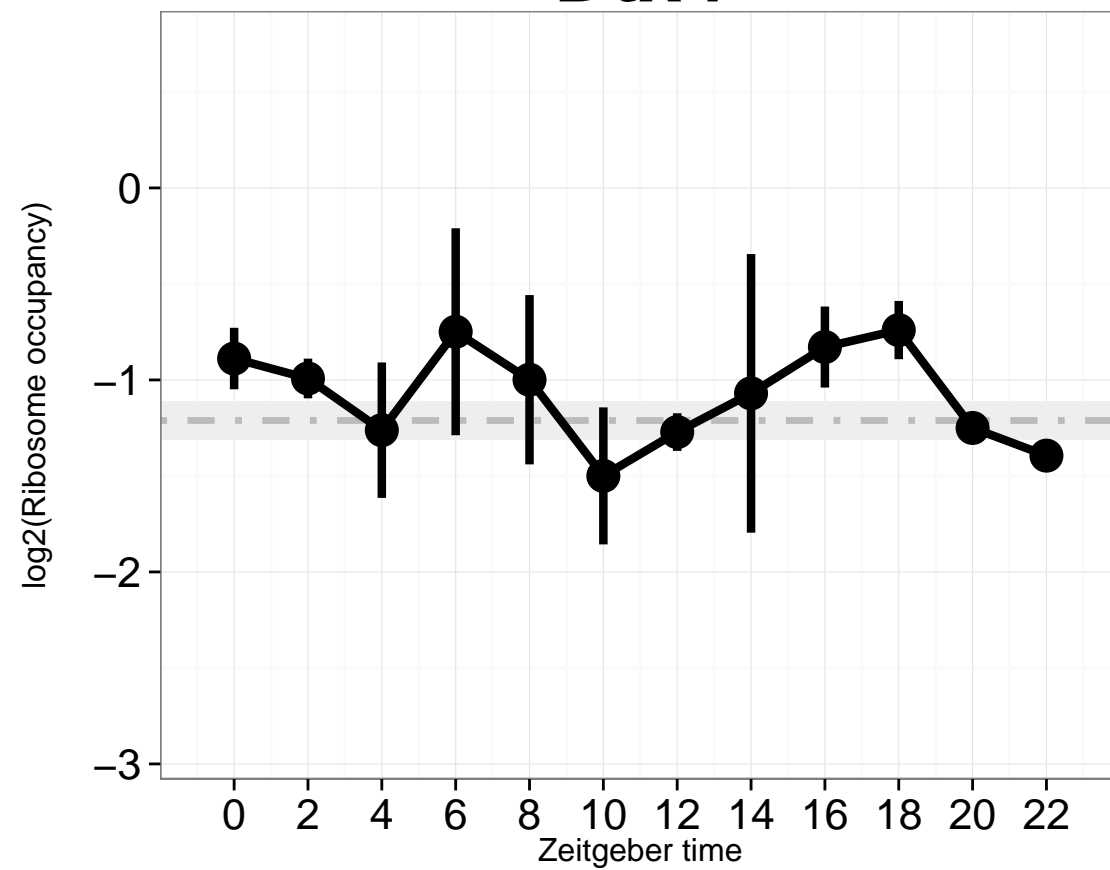

Supplement: SuppDataset_1.zip [file Dtx4_set_D.pdf › Supplemental Dataset 1/D-mRNA_rhythm_translation_rhyth/Dtx4_set_D.pdf]

## Dus2l

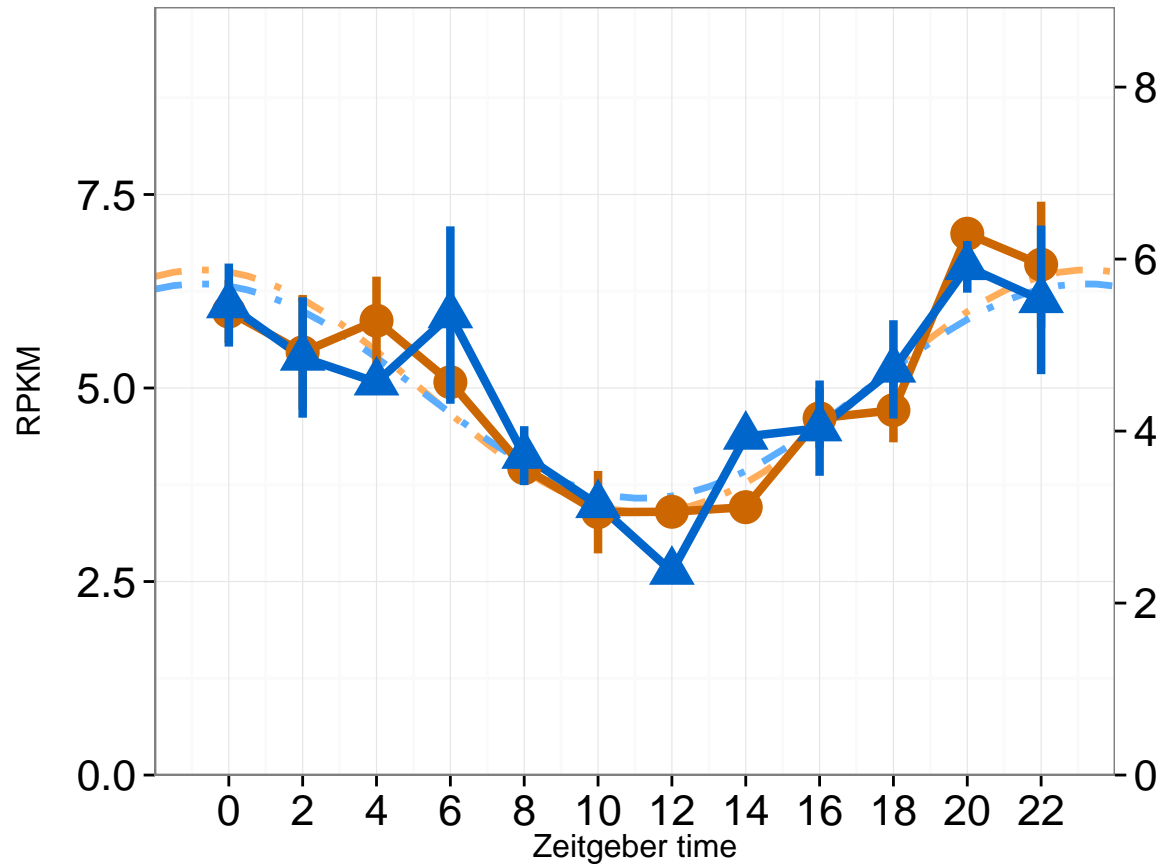

## Dus2l

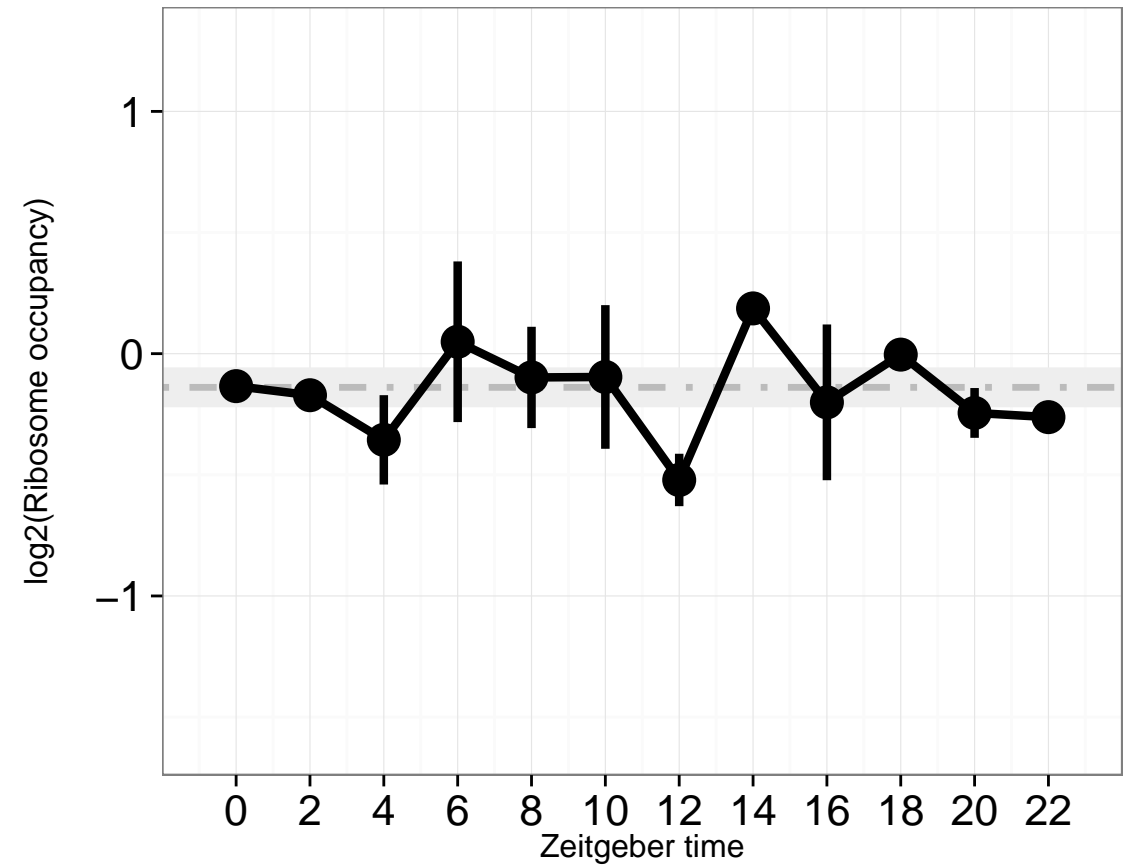

Supplement: SuppDataset_1.zip [file Dus2l_set_D.pdf › Supplemental Dataset 1/D-mRNA_rhythm_translation_rhyth/Dus2l_set_D.pdf]
