# Supplementary figures and images for: Ribosome profiling reveals the rhythmic liver translatome and circadian clock regulation by upstream open reading frames (part 96 of 113)
Source: HighWire-hosted journal article supplement (doi:10.1101/gr.195404.115), 2015-10-20

# Col6a3

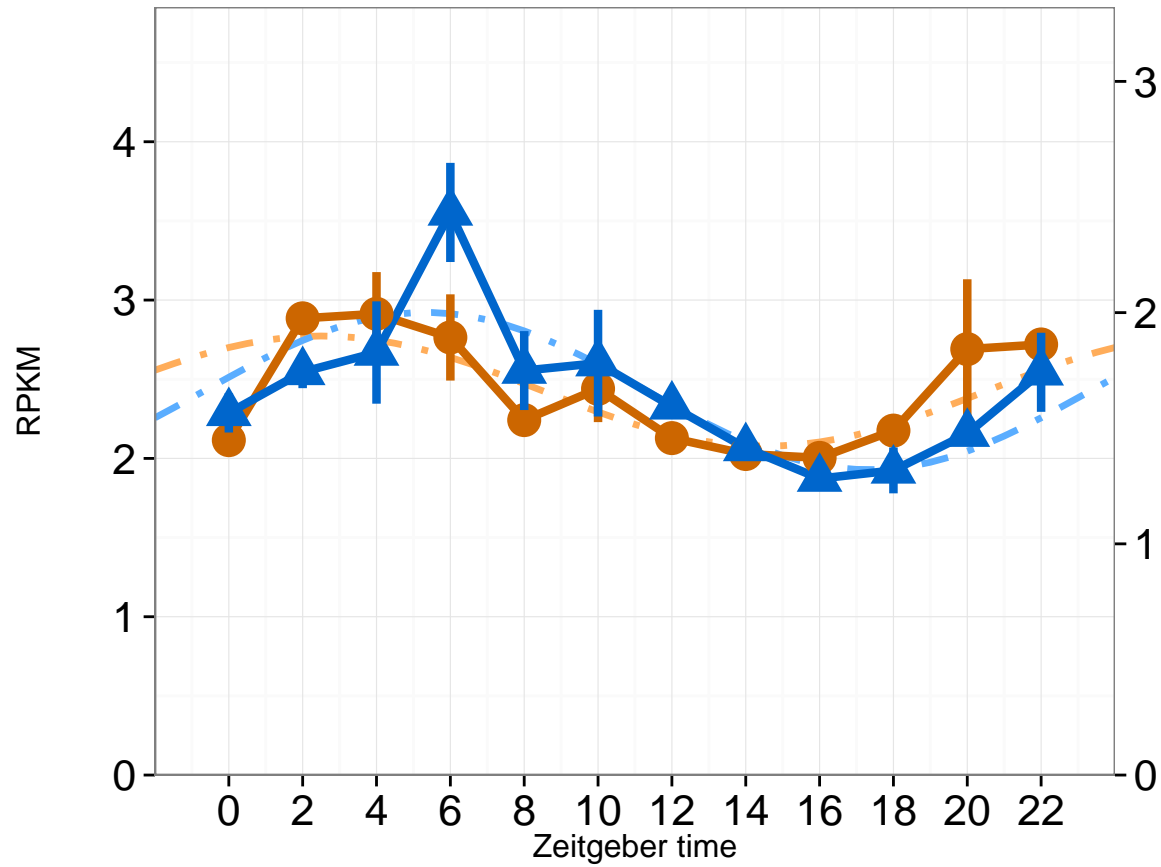

# Col6a3

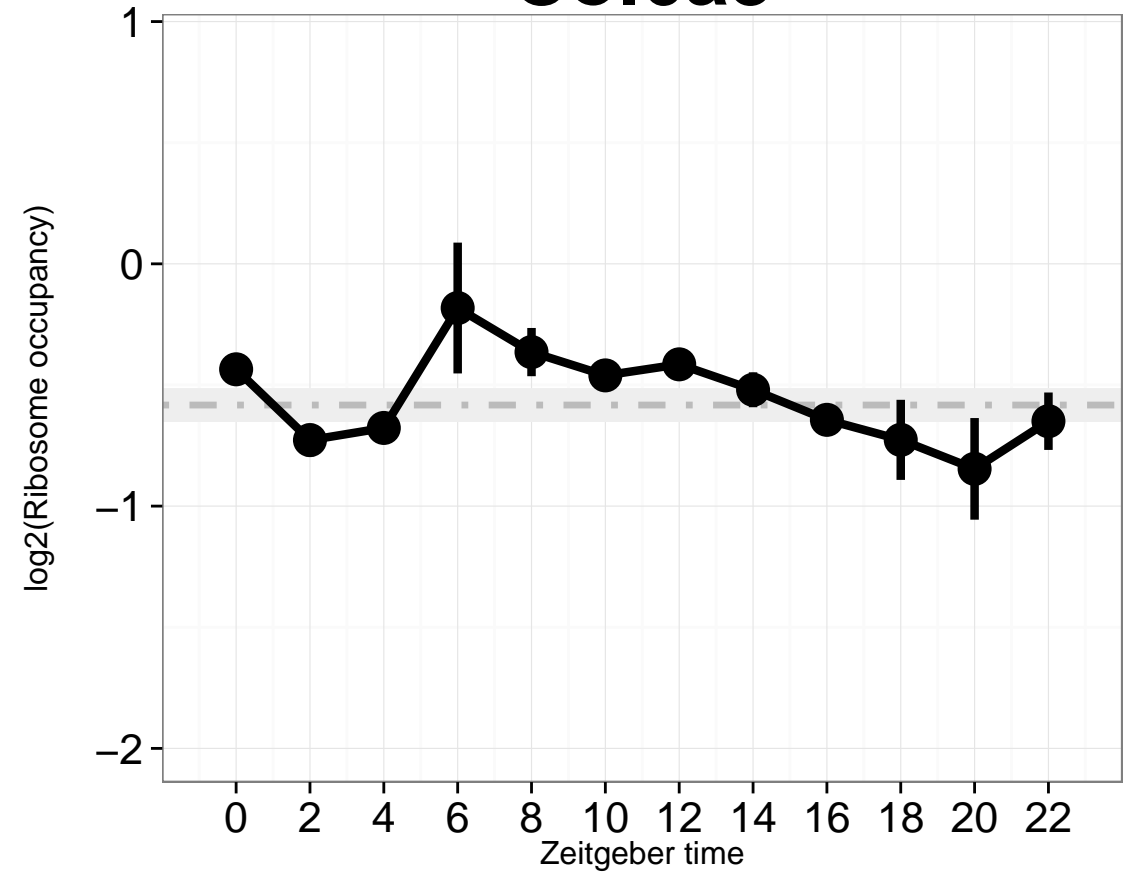

Supplement: SuppDataset_1.zip [file Col6a3_set_C.pdf › Supplemental Dataset 1/C-mRNA_nonrhythm_translation_rhyth/Col6a3_set_C.pdf]

# Cpne2

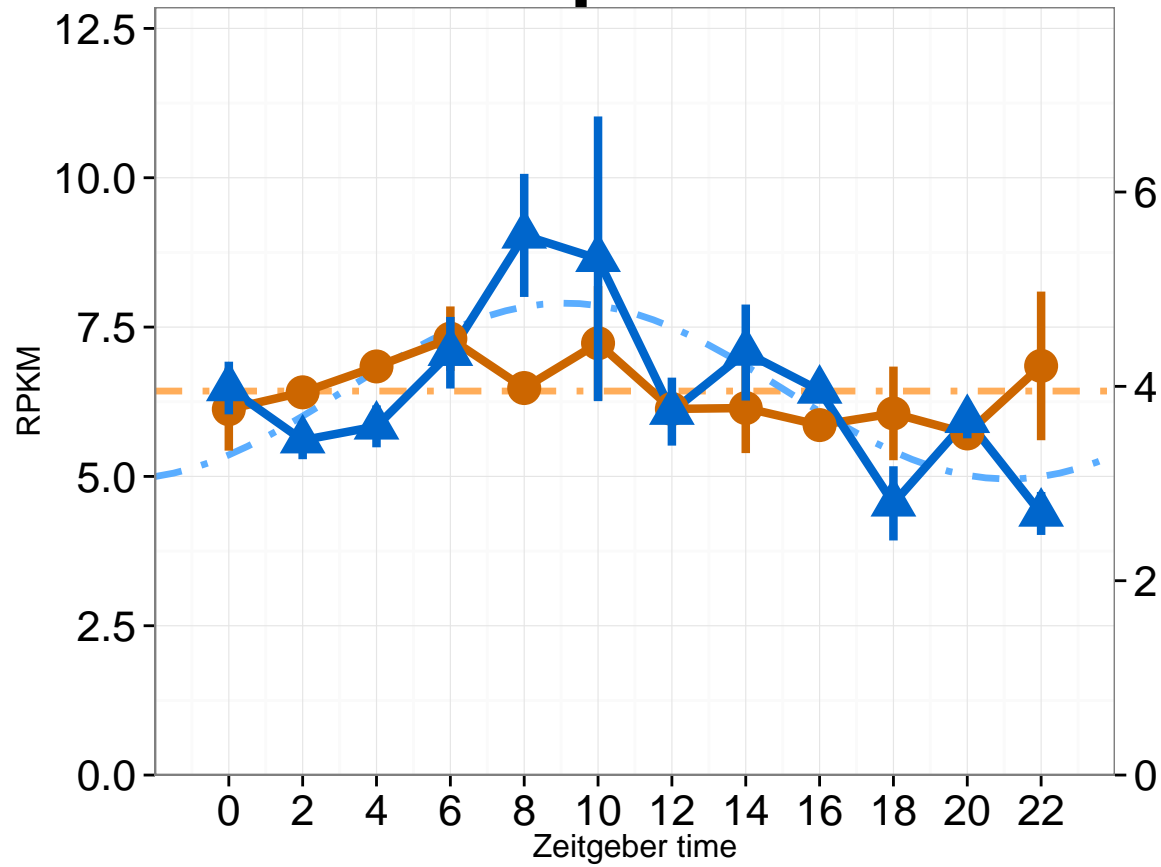

# Cpne2

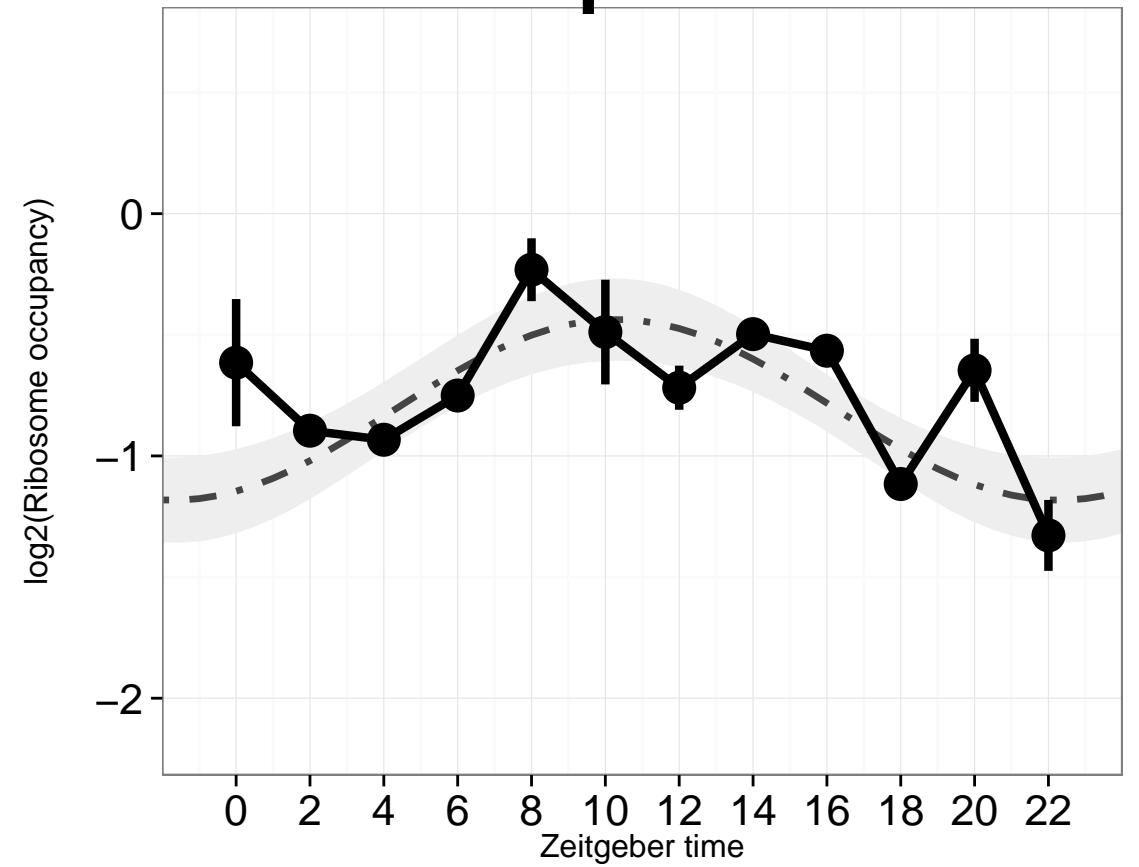

Supplement: SuppDataset_1.zip [file Cpne2_set_C.pdf › Supplemental Dataset 1/C-mRNA_nonrhythm_translation_rhyth/Cpne2_set_C.pdf]

## Cpsf6

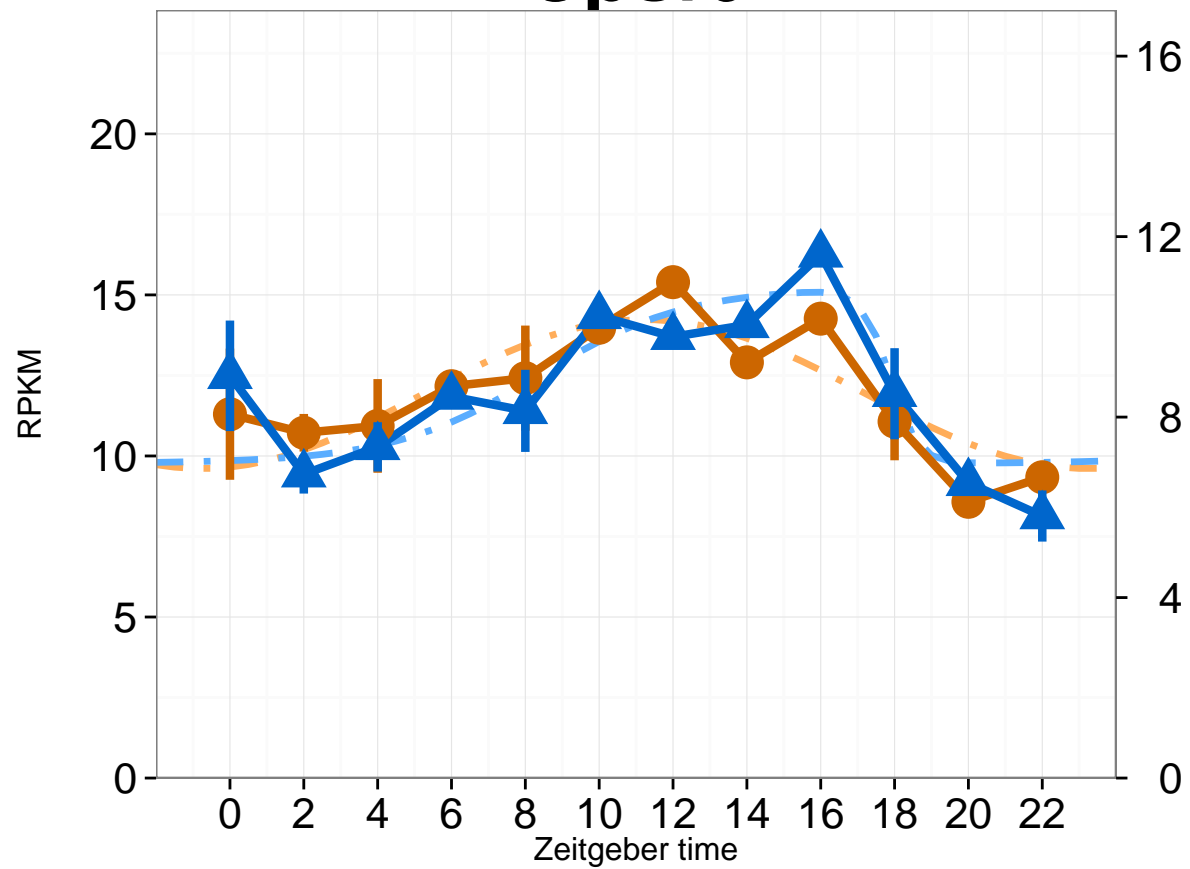

## Cpsf6

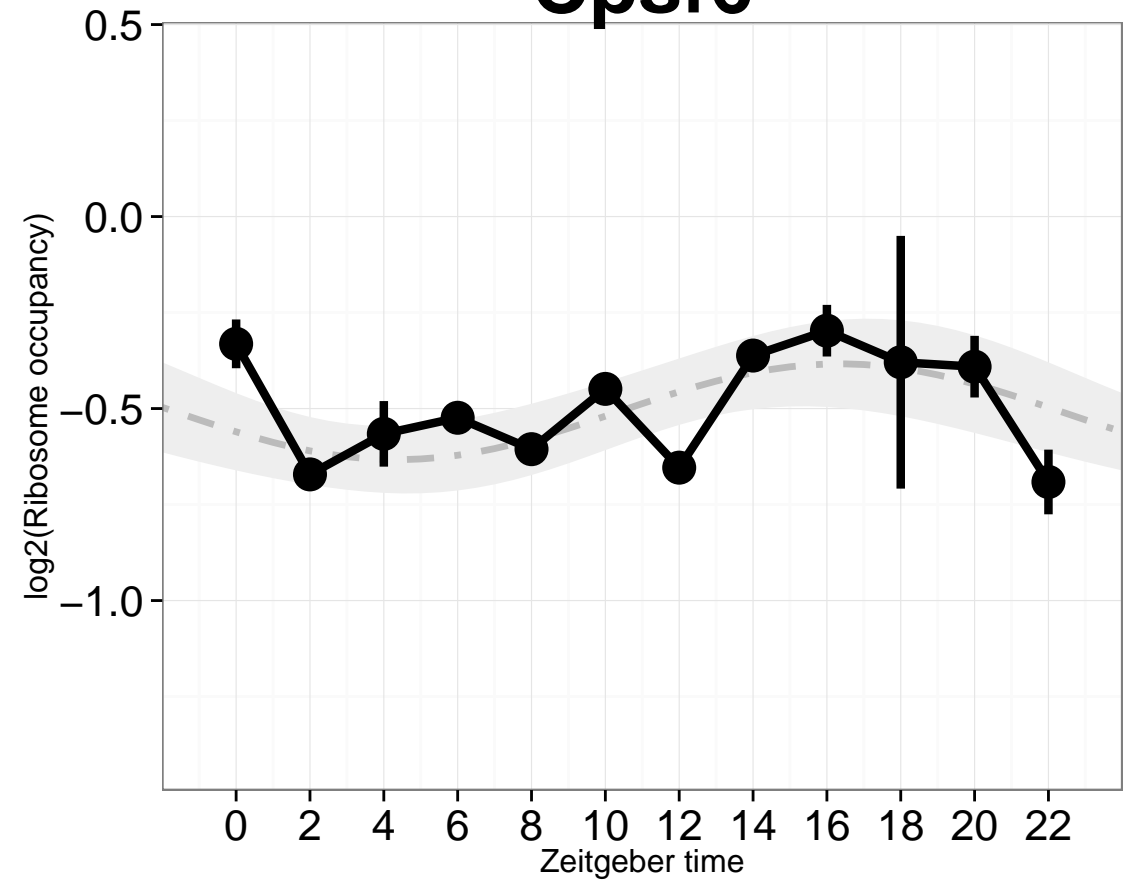

Supplement: SuppDataset_1.zip [file Cpsf6_set_C.pdf › Supplemental Dataset 1/C-mRNA_nonrhythm_translation_rhyth/Cpsf6_set_C.pdf]

## Crtc3

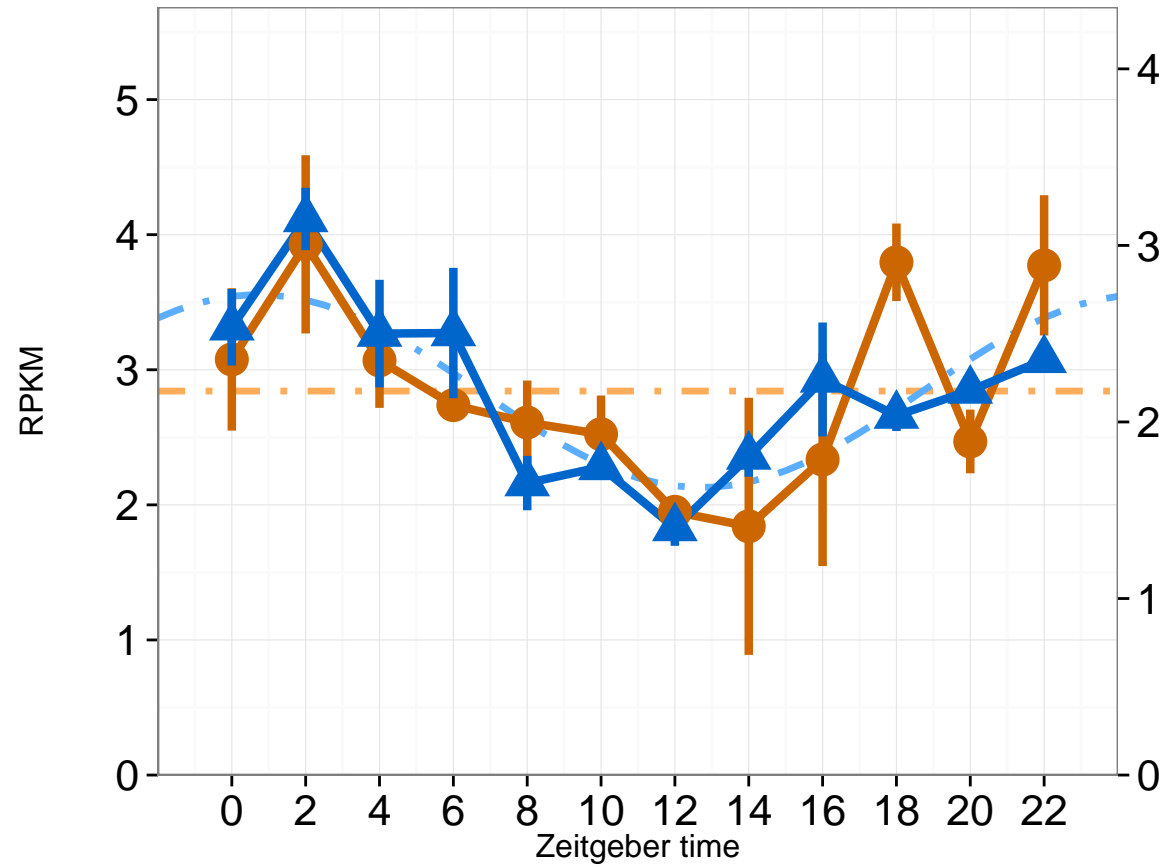

## Crtc3

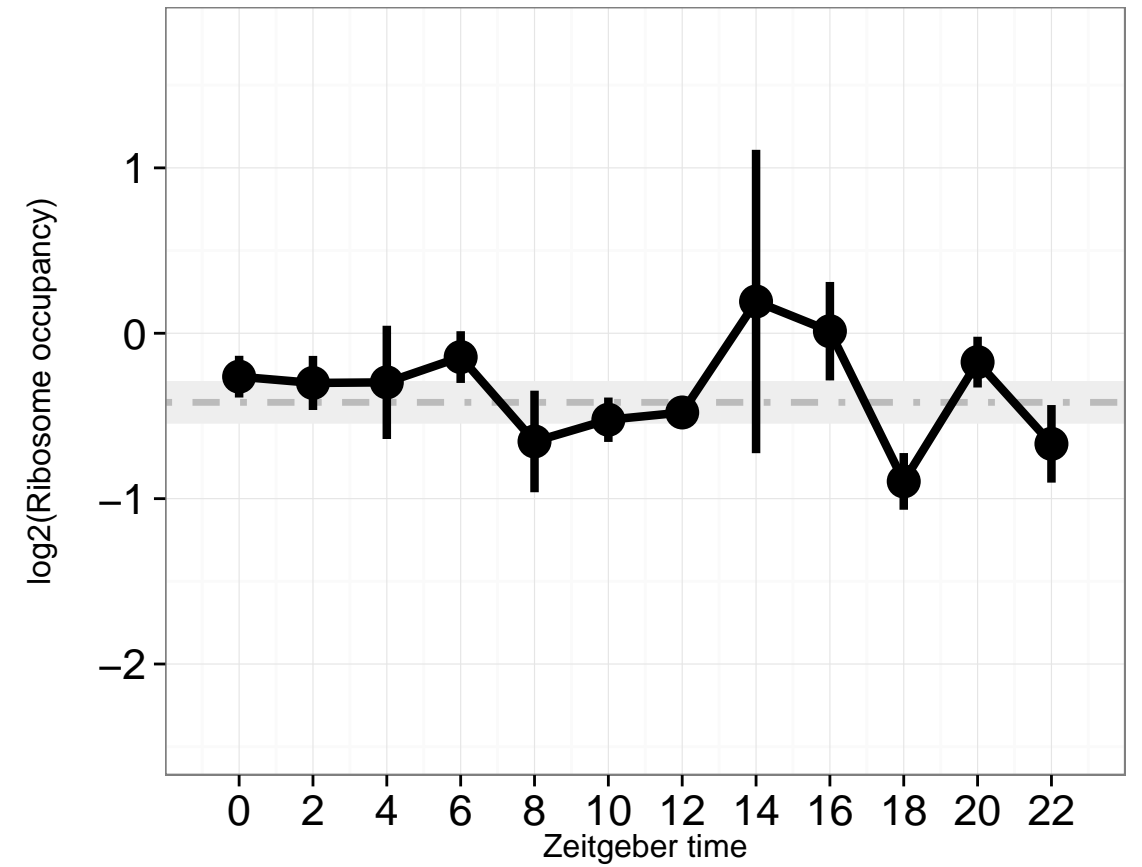

Supplement: SuppDataset_1.zip [file Crtc3_set_C.pdf › Supplemental Dataset 1/C-mRNA_nonrhythm_translation_rhyth/Crtc3_set_C.pdf]

## Crybb3

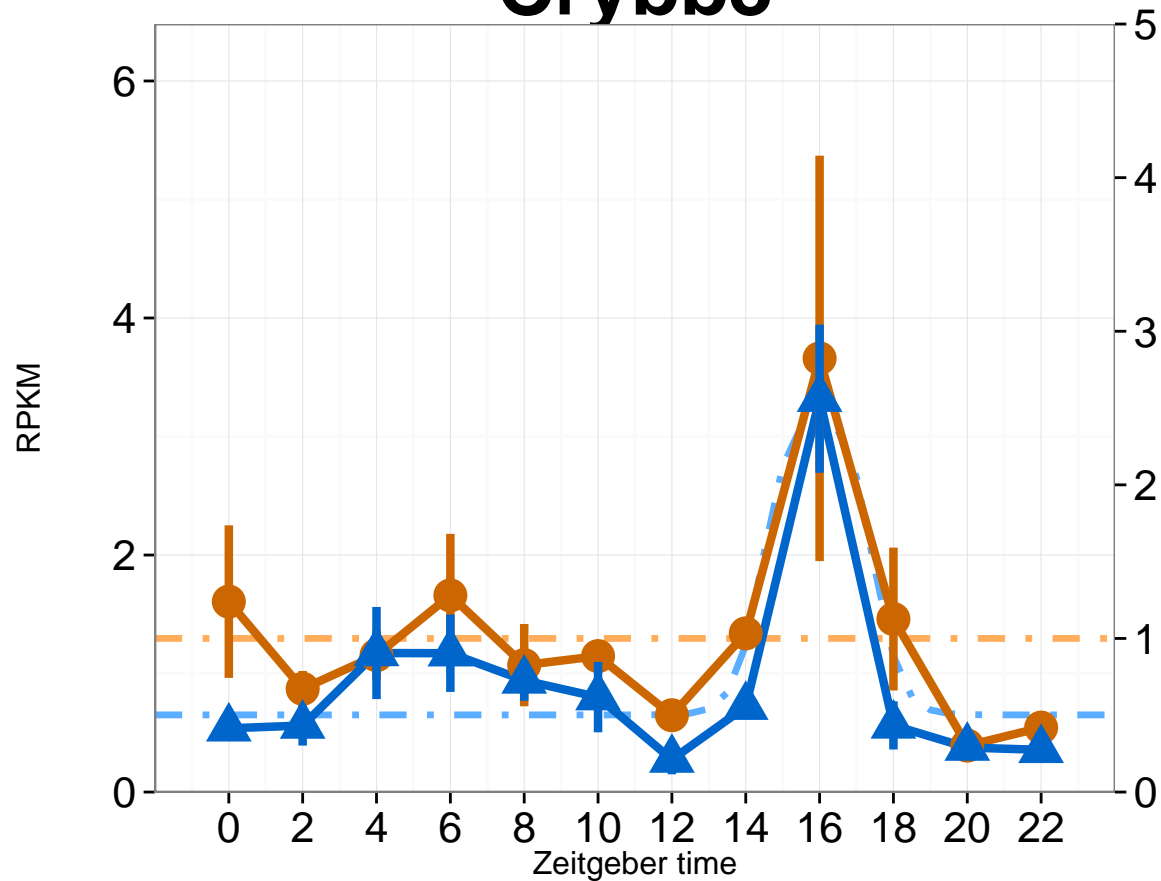

## Crybb3

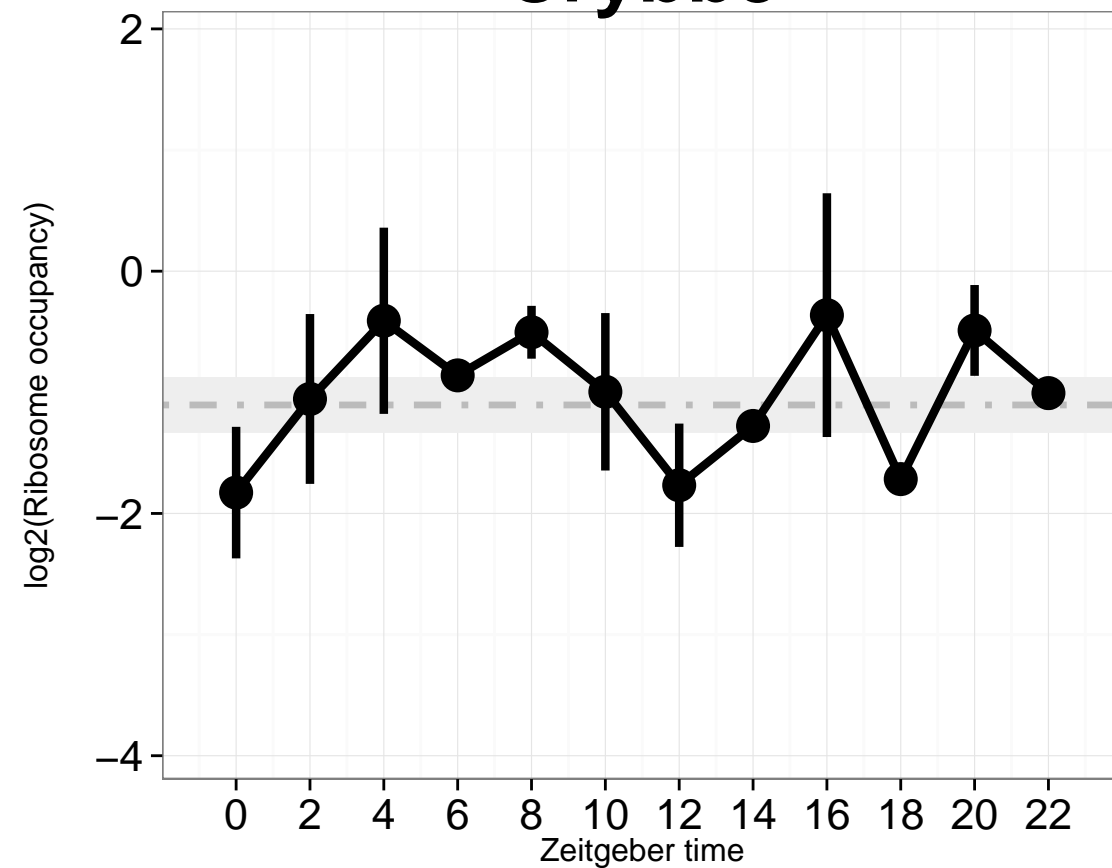

Supplement: SuppDataset_1.zip [file Crybb3_set_C.pdf › Supplemental Dataset 1/C-mRNA_nonrhythm_translation_rhyth/Crybb3_set_C.pdf]

# Csf2rb

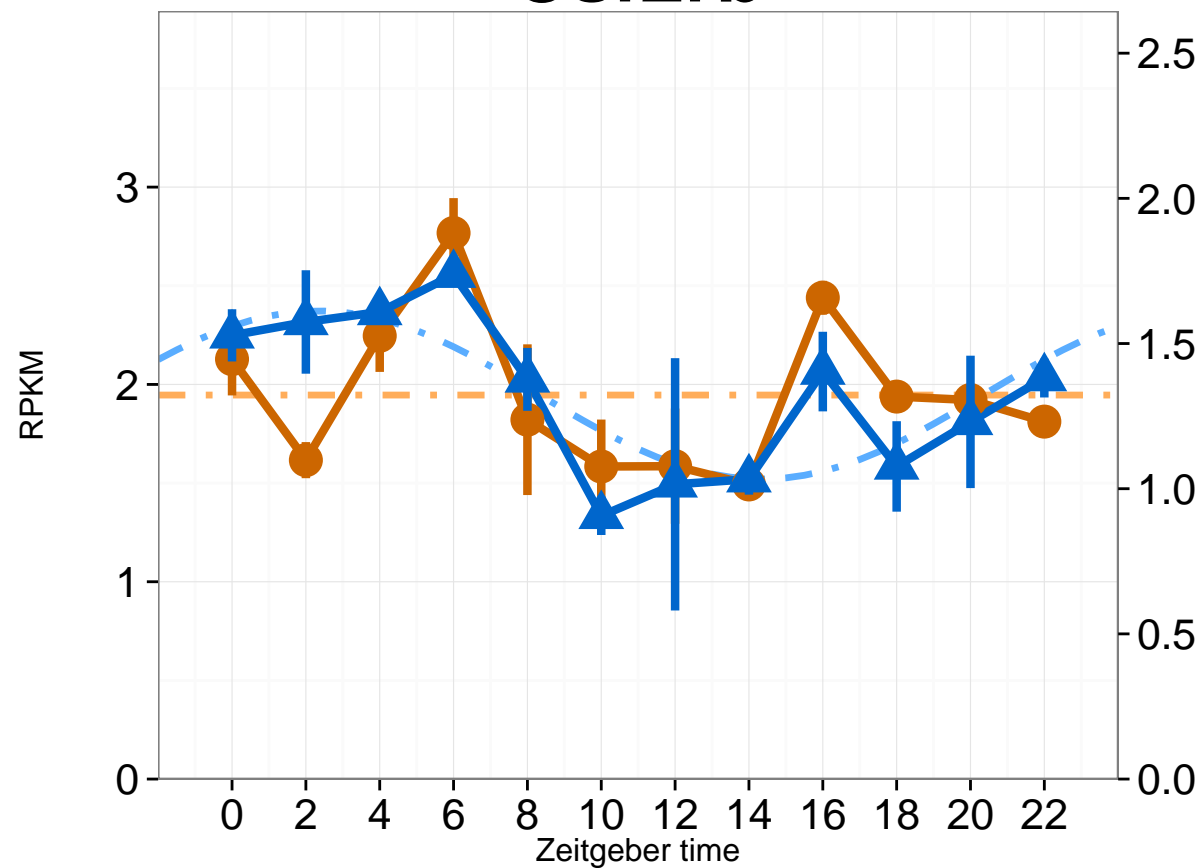

# Csf2rb

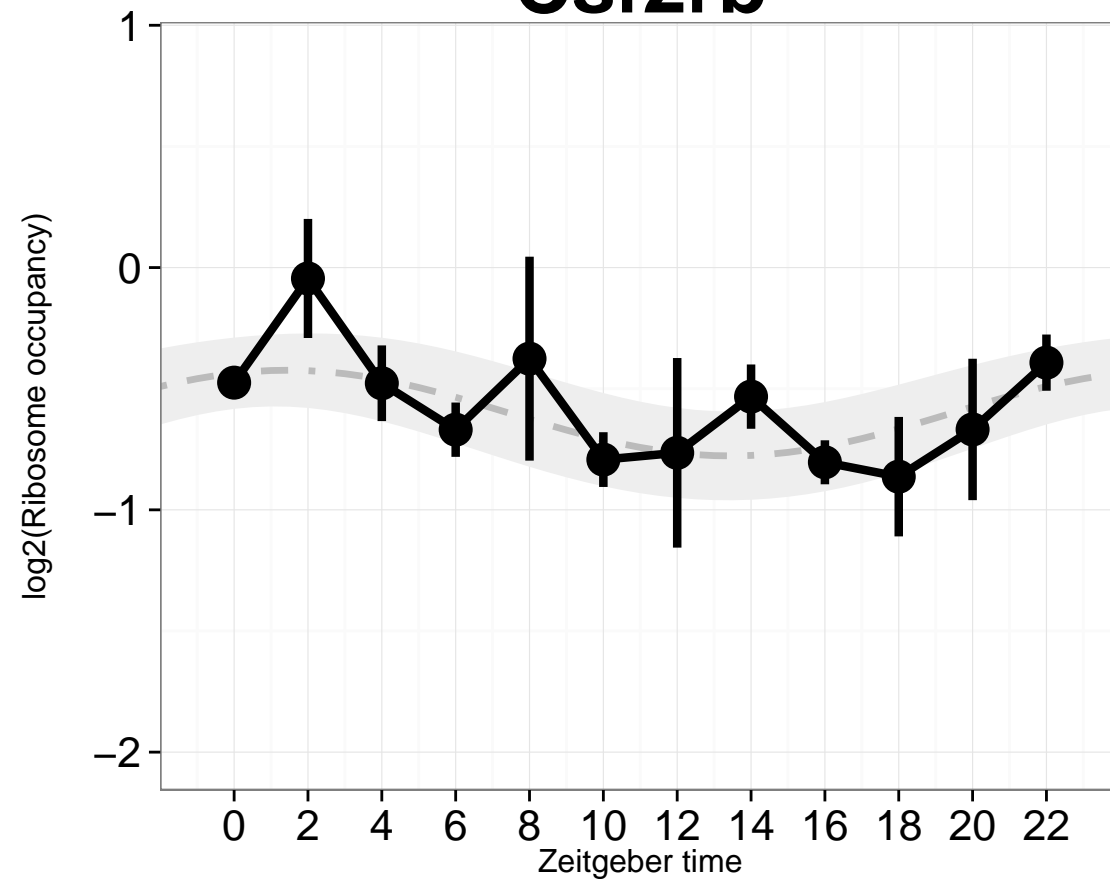

Supplement: SuppDataset_1.zip [file Csf2rb_set_C.pdf › Supplemental Dataset 1/C-mRNA_nonrhythm_translation_rhyth/Csf2rb_set_C.pdf]

## Ctf1

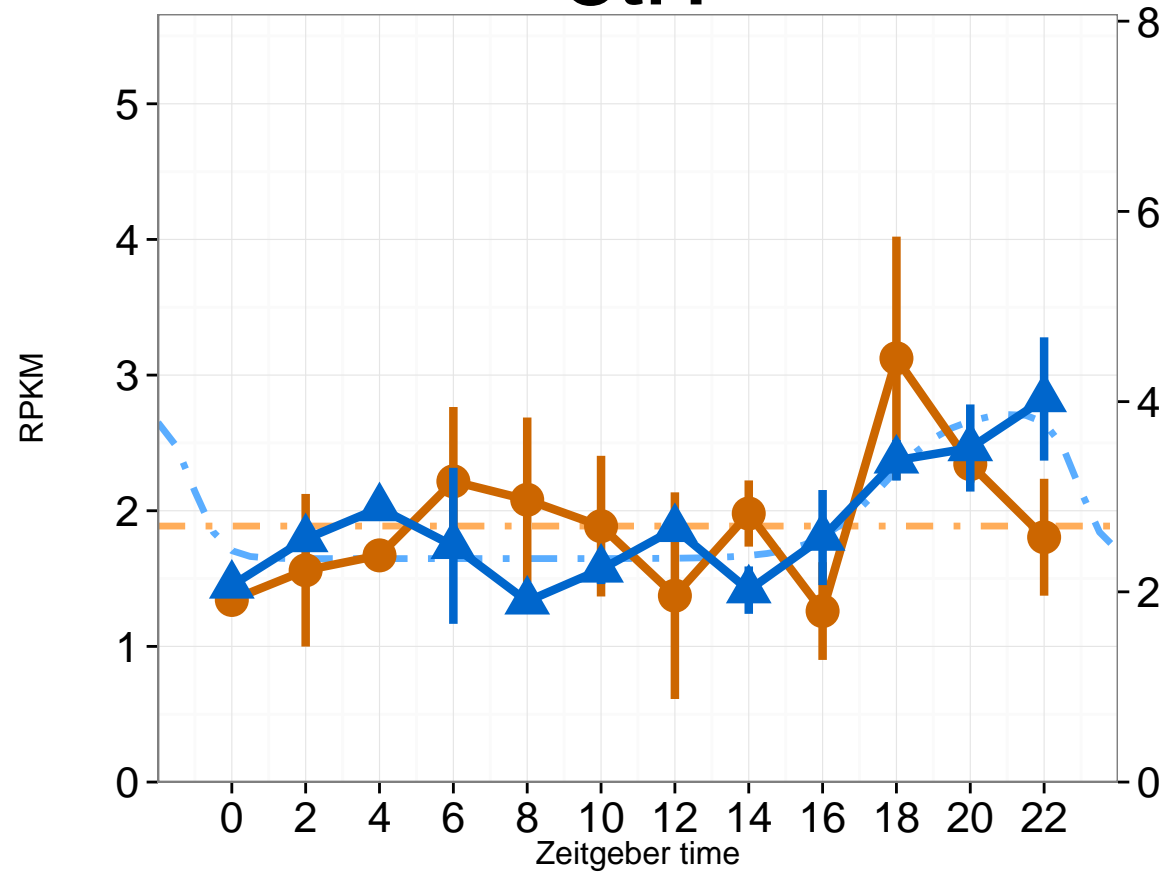

## Ctf1

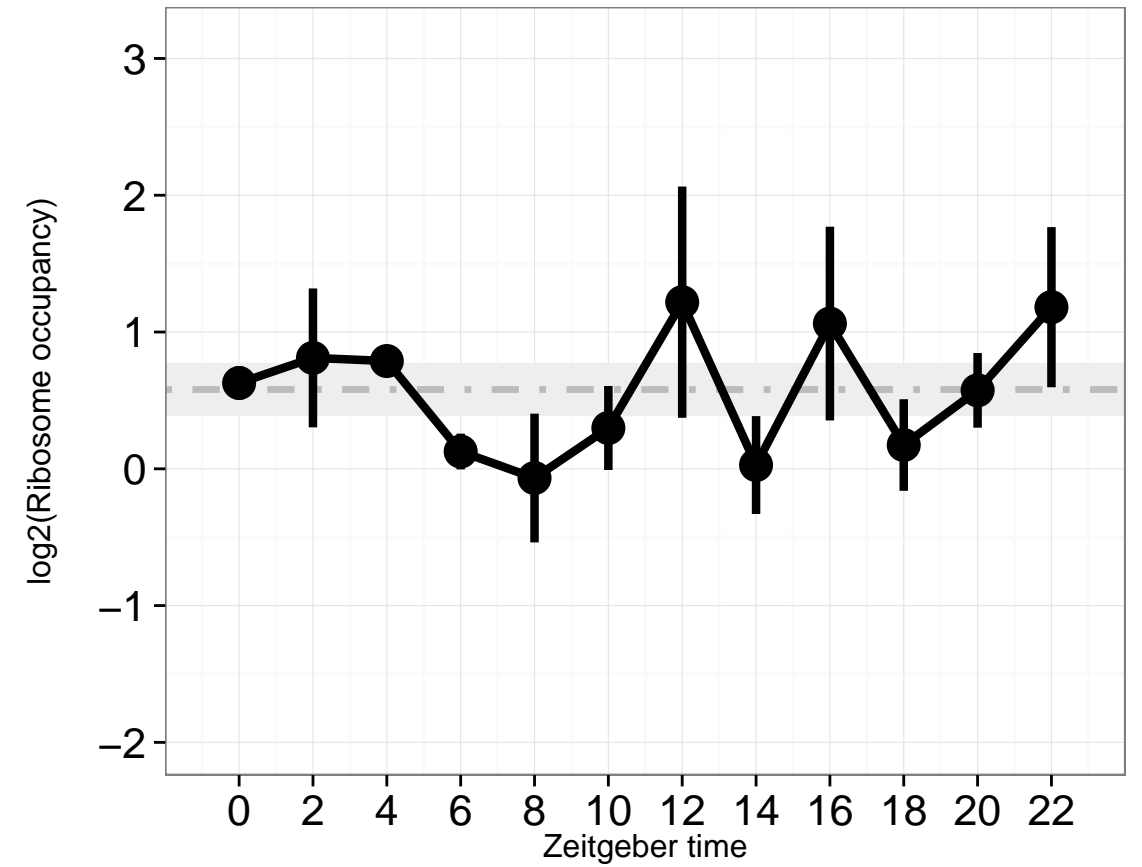

Supplement: SuppDataset_1.zip [file Ctf1_set_C.pdf › Supplemental Dataset 1/C-mRNA_nonrhythm_translation_rhyth/Ctf1_set_C.pdf]

## Cutal

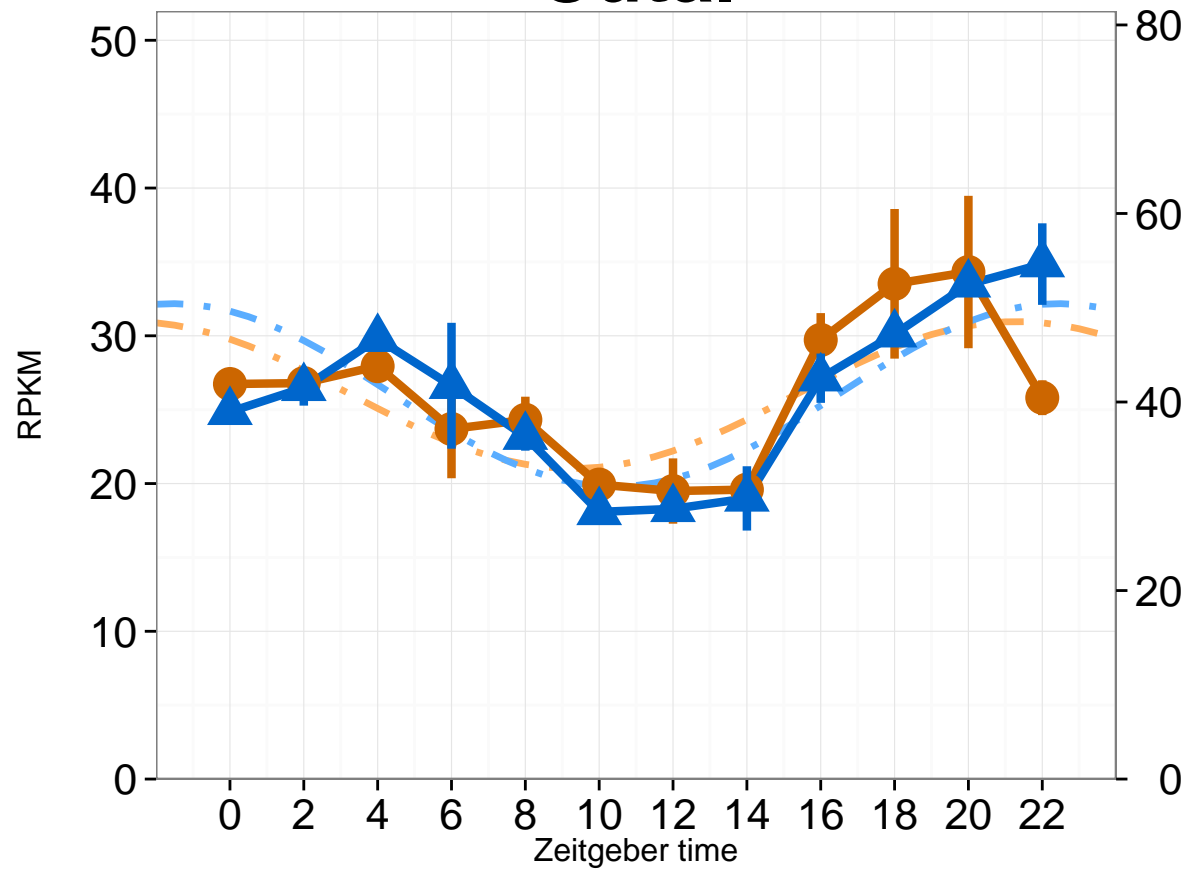

## Cutal

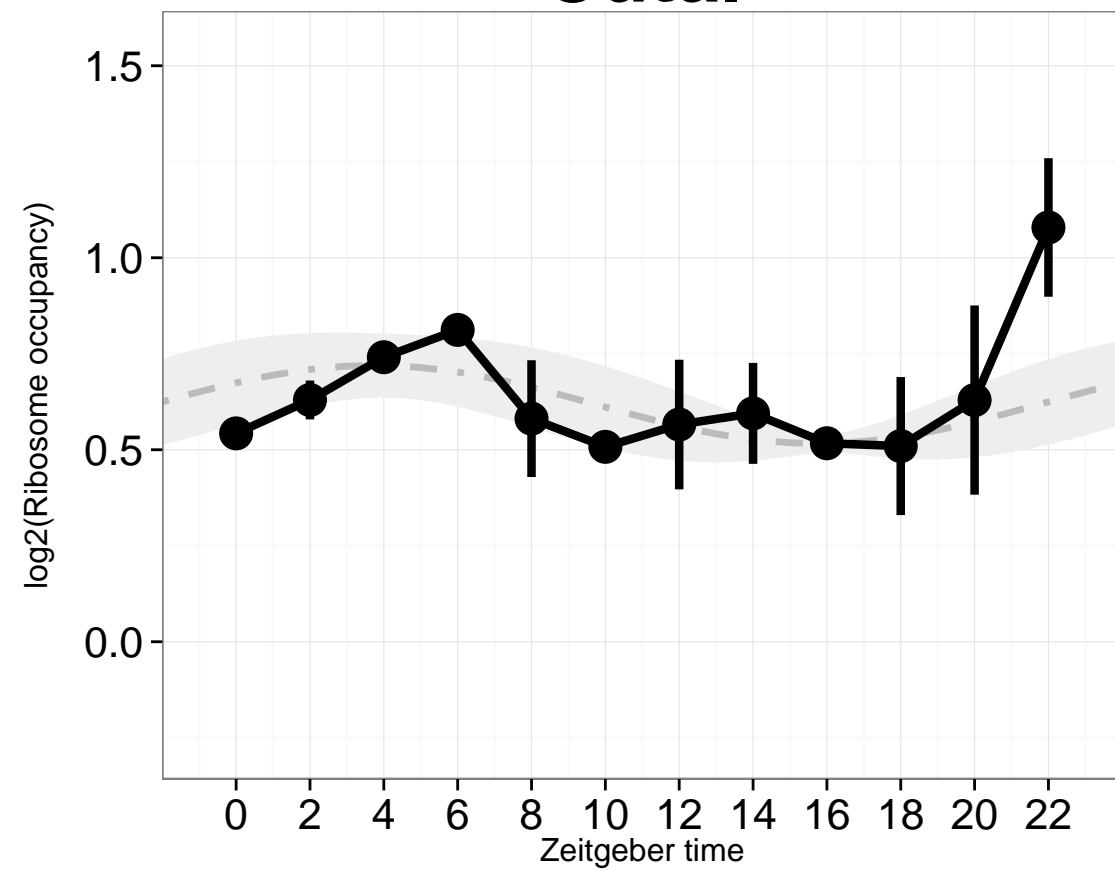

Supplement: SuppDataset_1.zip [file Cutal_set_C.pdf › Supplemental Dataset 1/C-mRNA_nonrhythm_translation_rhyth/Cutal_set_C.pdf]

## Cwc27

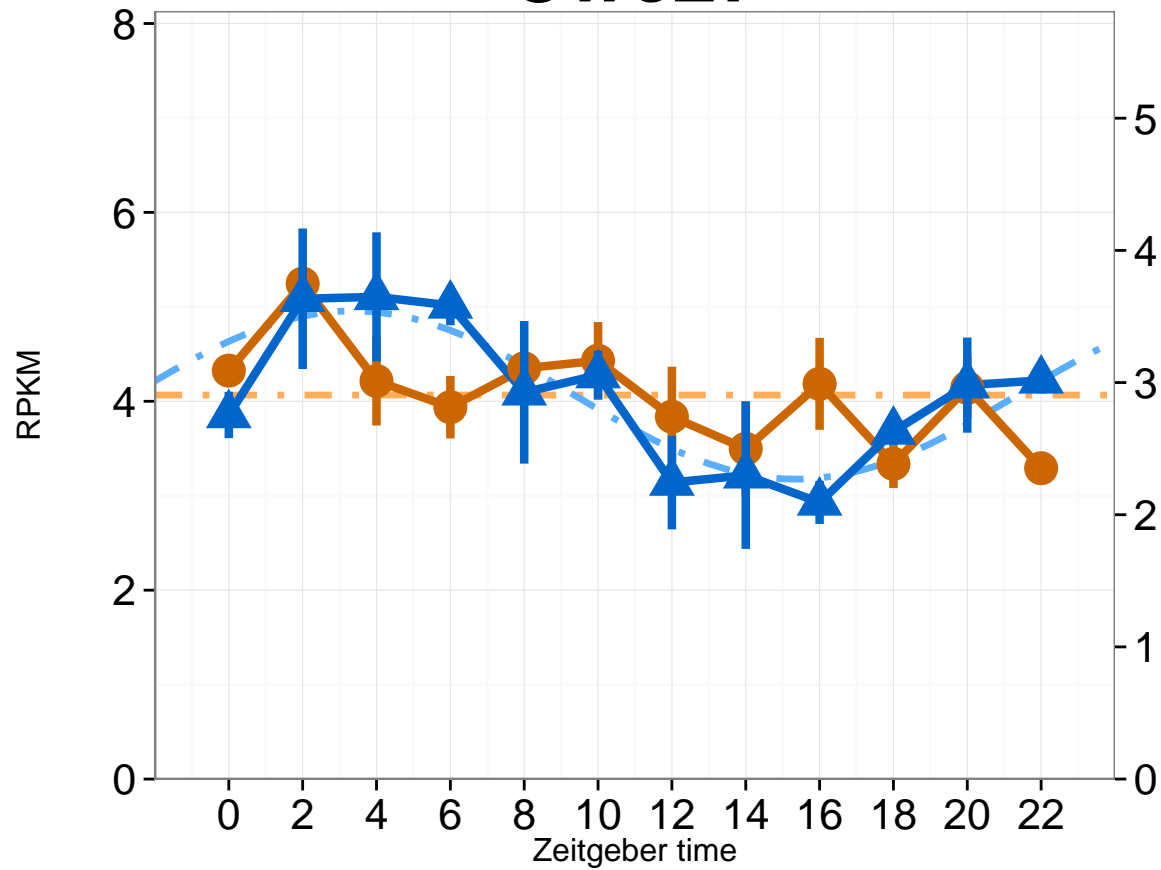

## Cwc27

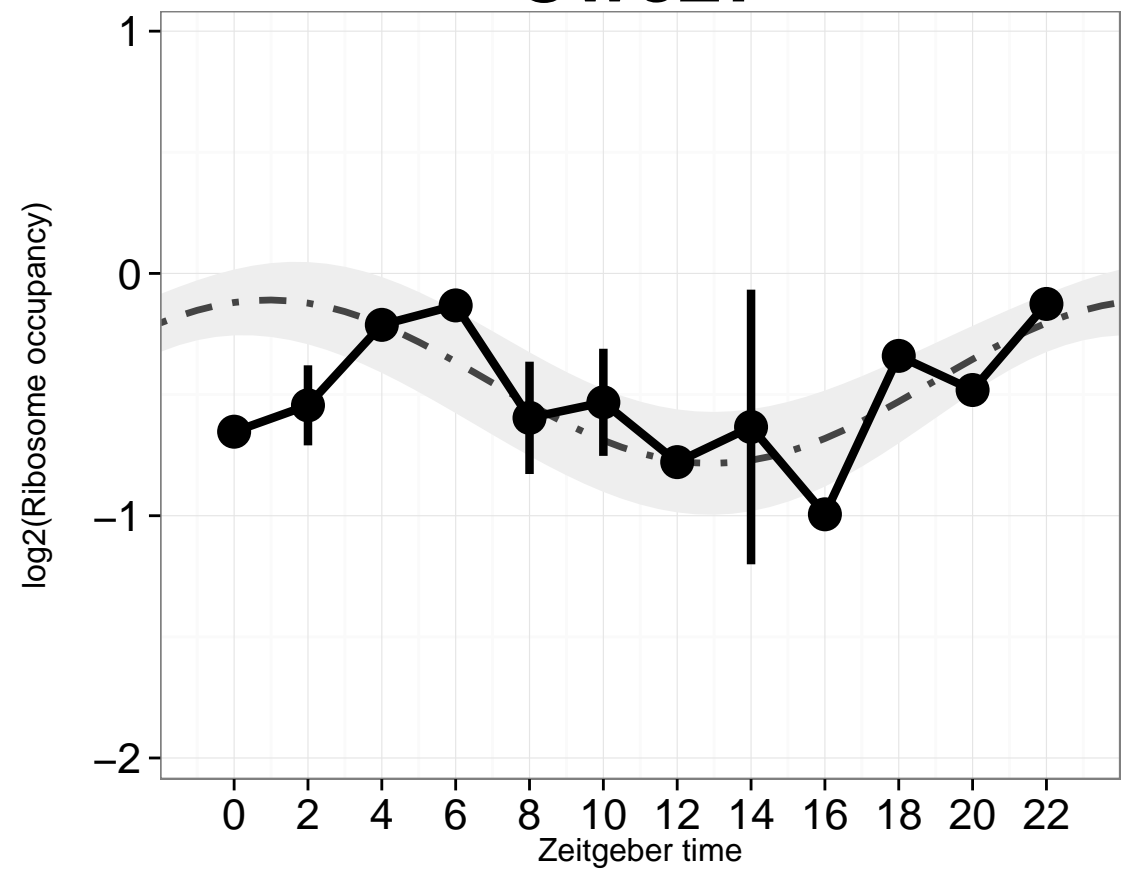

Supplement: SuppDataset_1.zip [file Cwc27_set_C.pdf › Supplemental Dataset 1/C-mRNA_nonrhythm_translation_rhyth/Cwc27_set_C.pdf]

## Cxcl10

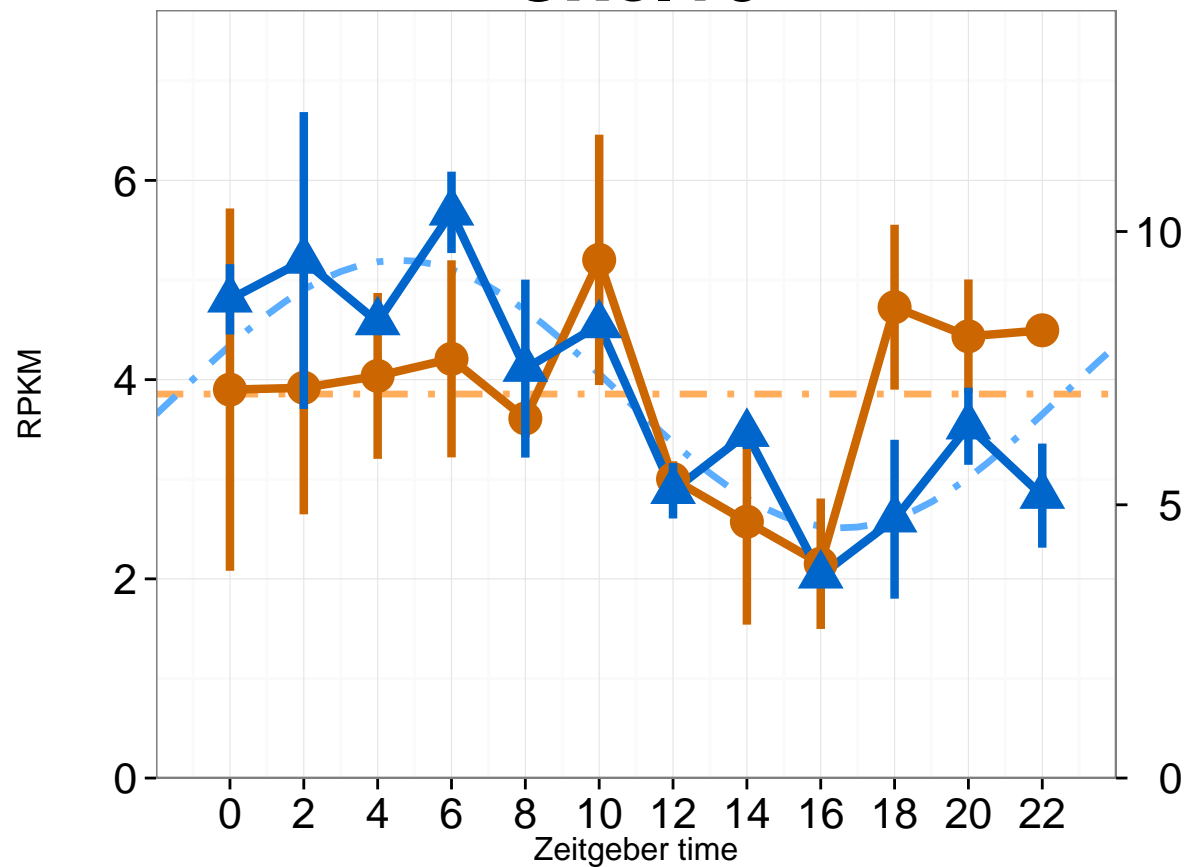

## Cxcl10

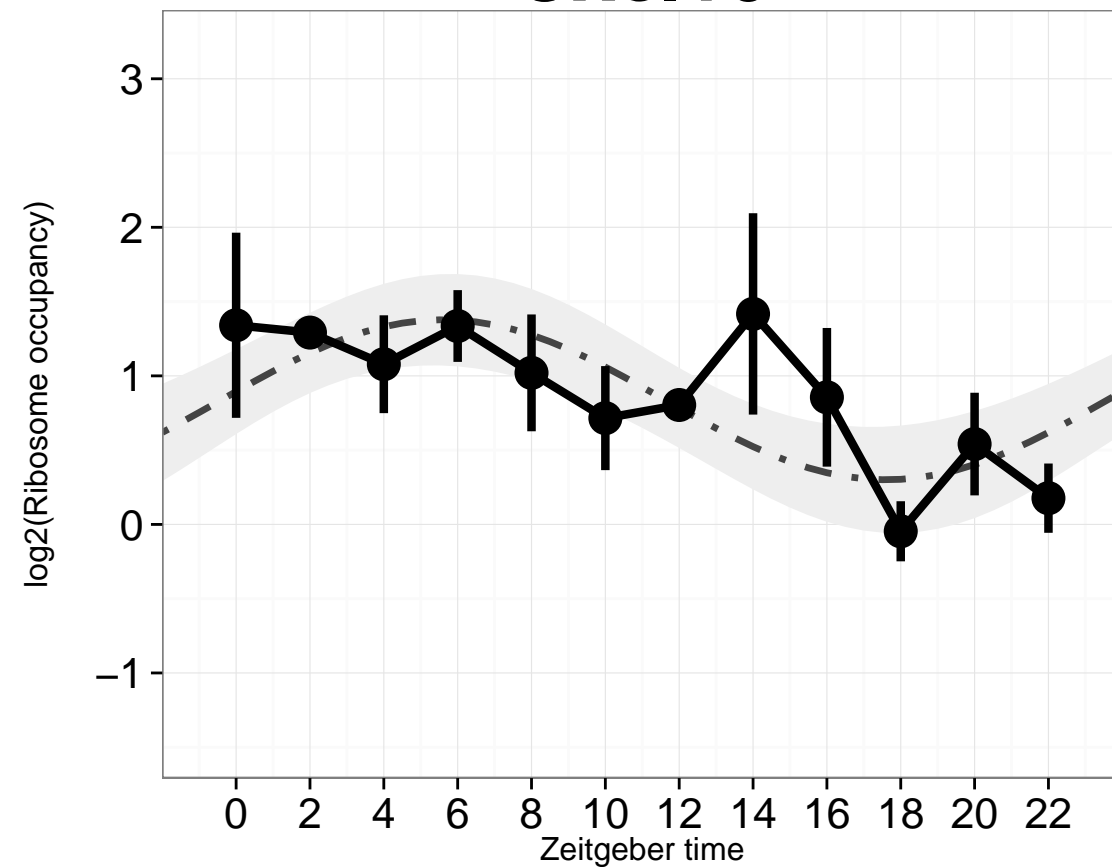

Supplement: SuppDataset_1.zip [file Cxcl10_set_C.pdf › Supplemental Dataset 1/C-mRNA_nonrhythm_translation_rhyth/Cxcl10_set_C.pdf]

## Cxcl13

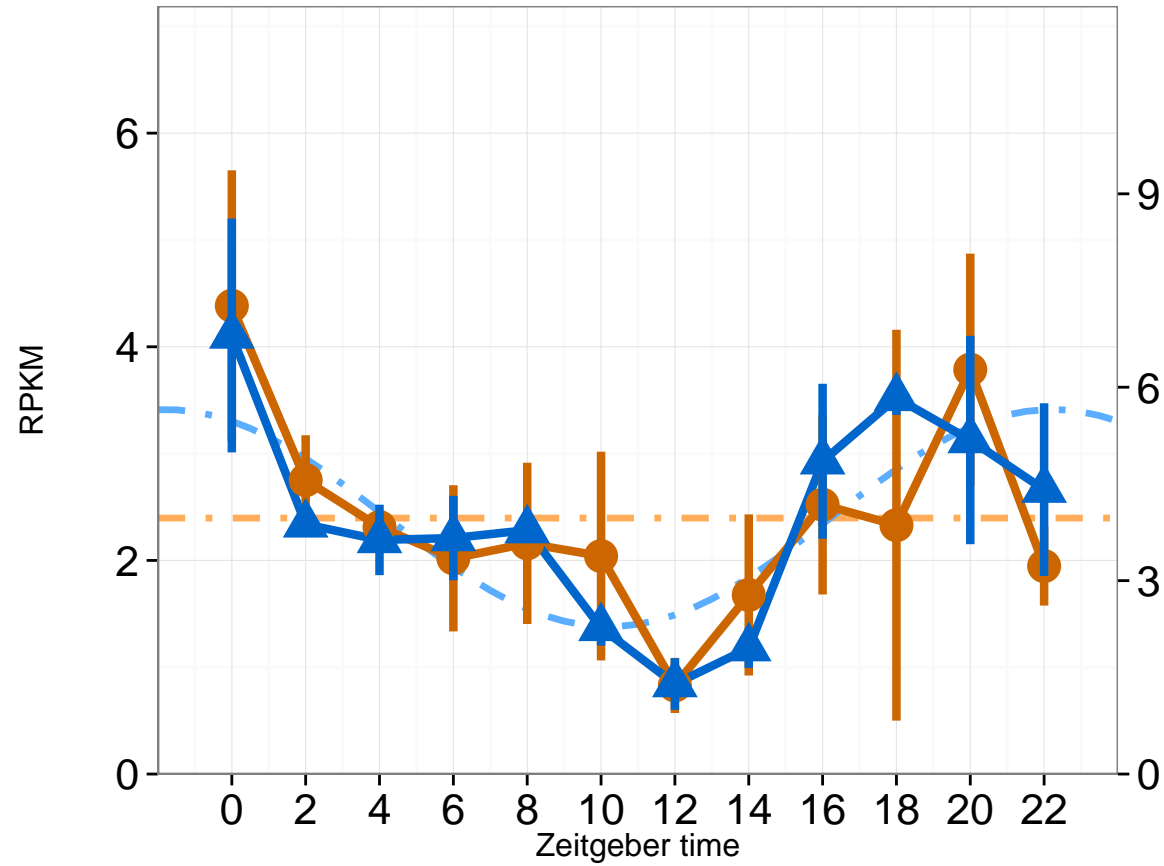

## Cxcl13

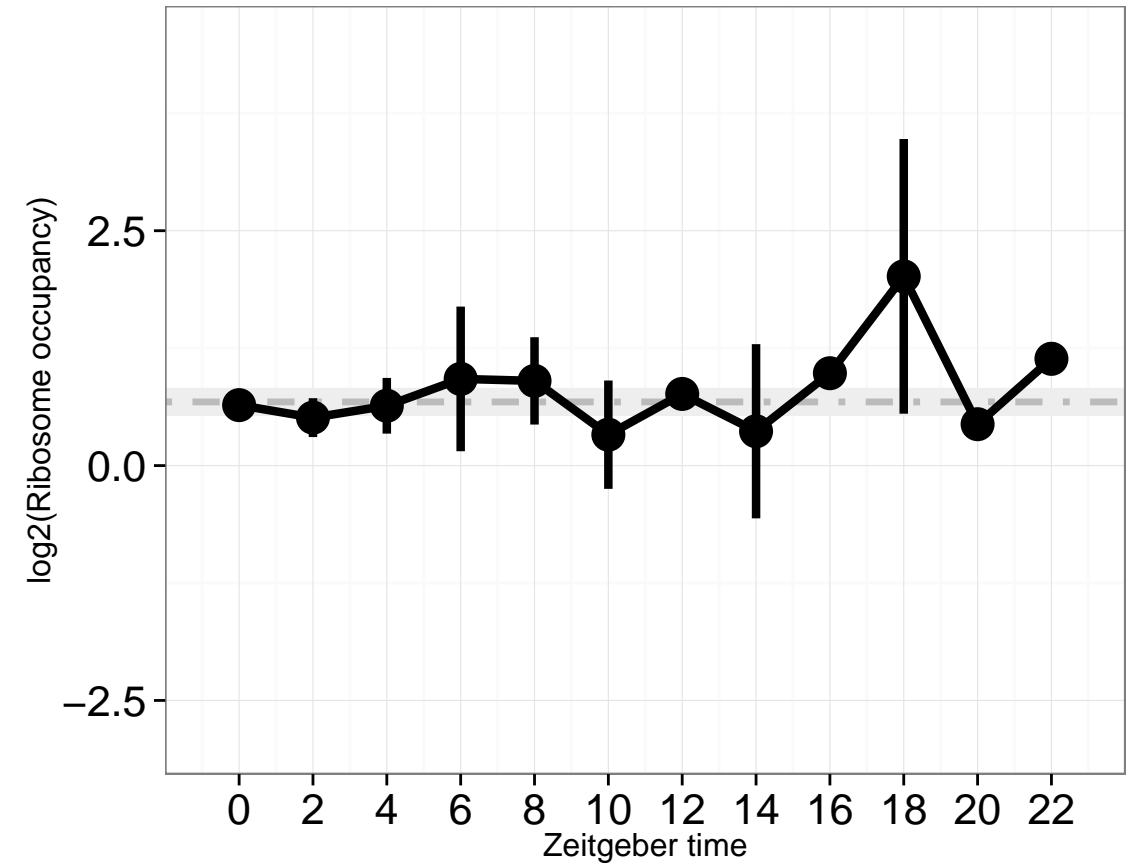

Supplement: SuppDataset_1.zip [file Cxcl13_set_C.pdf › Supplemental Dataset 1/C-mRNA_nonrhythm_translation_rhyth/Cxcl13_set_C.pdf]

# Cyp2d12

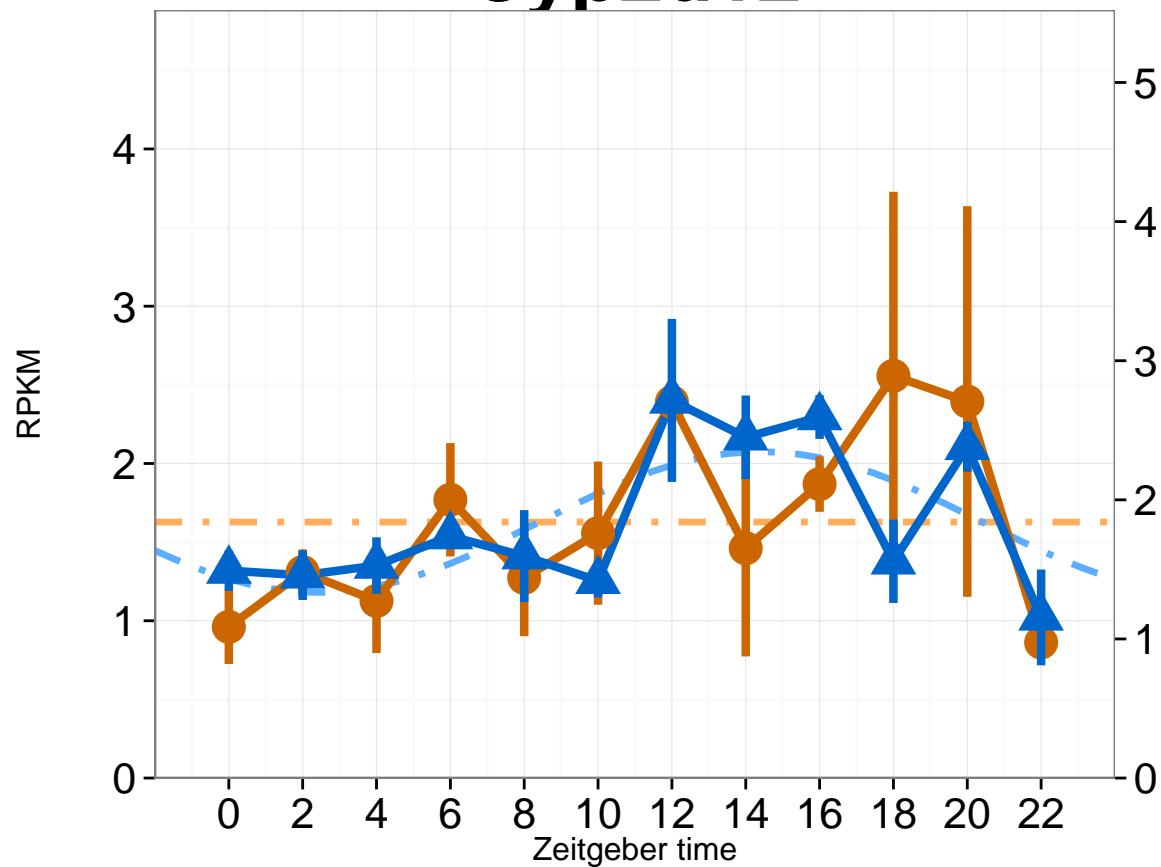

# Cyp2d12

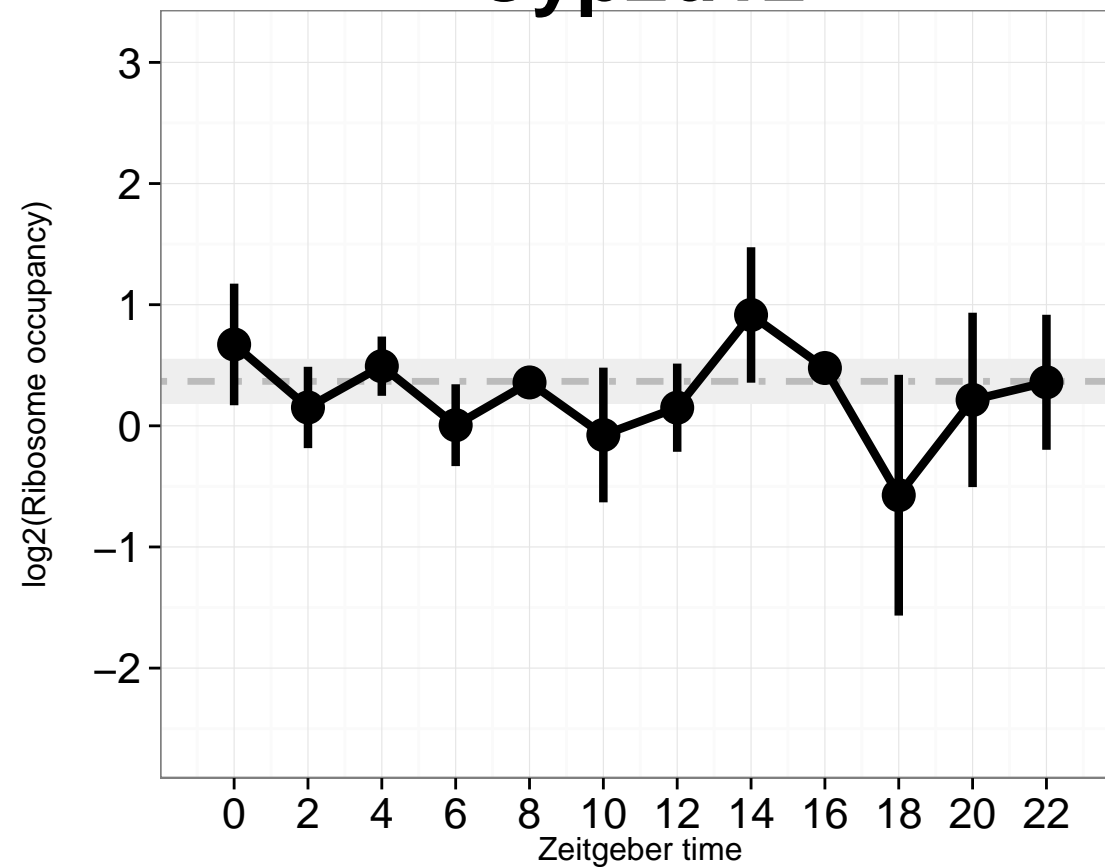

Supplement: SuppDataset_1.zip [file Cyp2d12_set_C.pdf › Supplemental Dataset 1/C-mRNA_nonrhythm_translation_rhyth/Cyp2d12_set_C.pdf]

# Cyp2u1

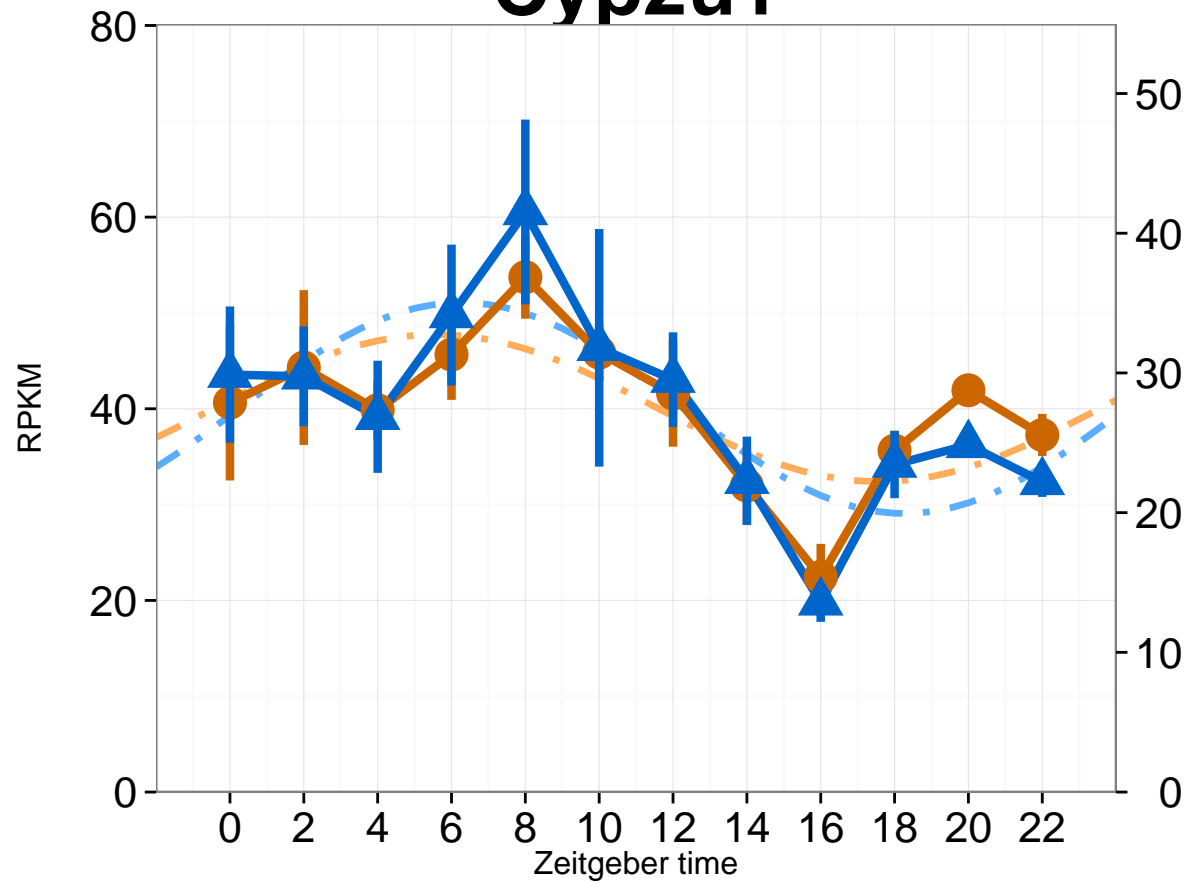

# Cyp2u1

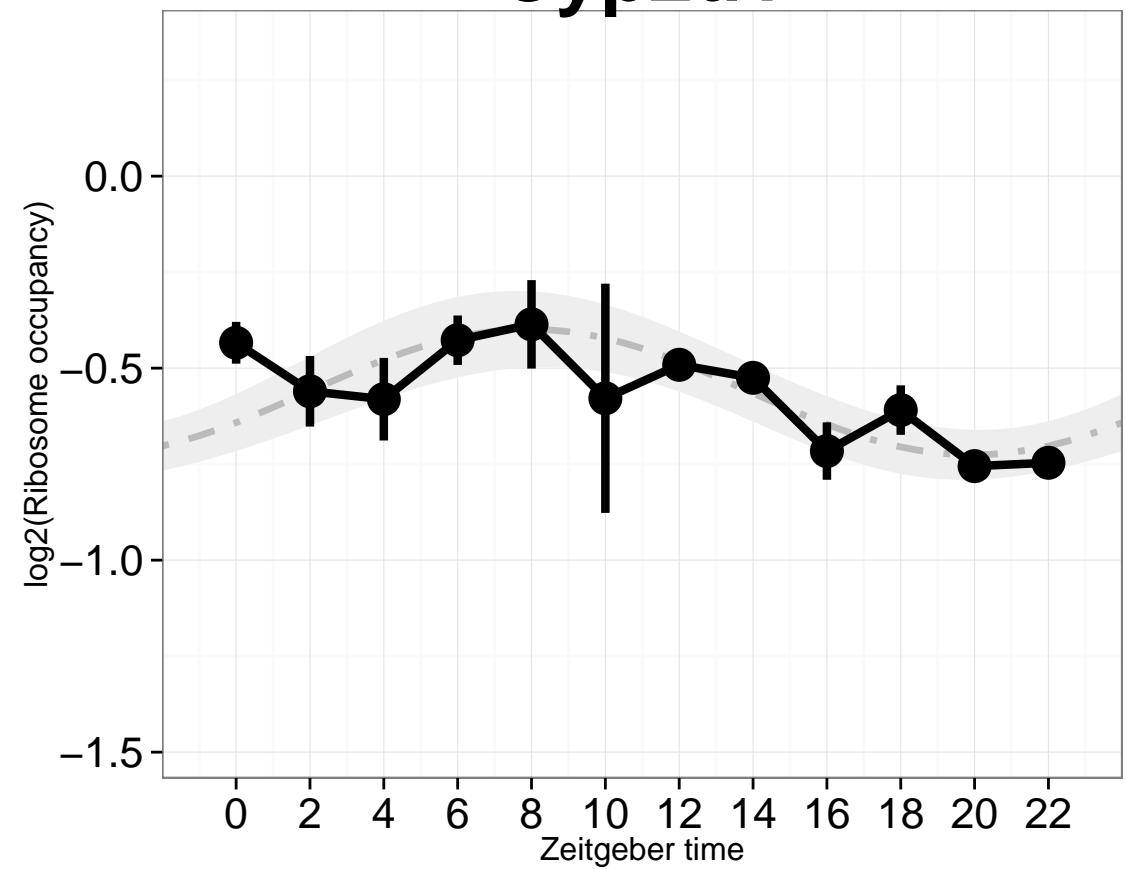

Supplement: SuppDataset_1.zip [file Cyp2u1_set_C.pdf › Supplemental Dataset 1/C-mRNA_nonrhythm_translation_rhyth/Cyp2u1_set_C.pdf]

# Cys1

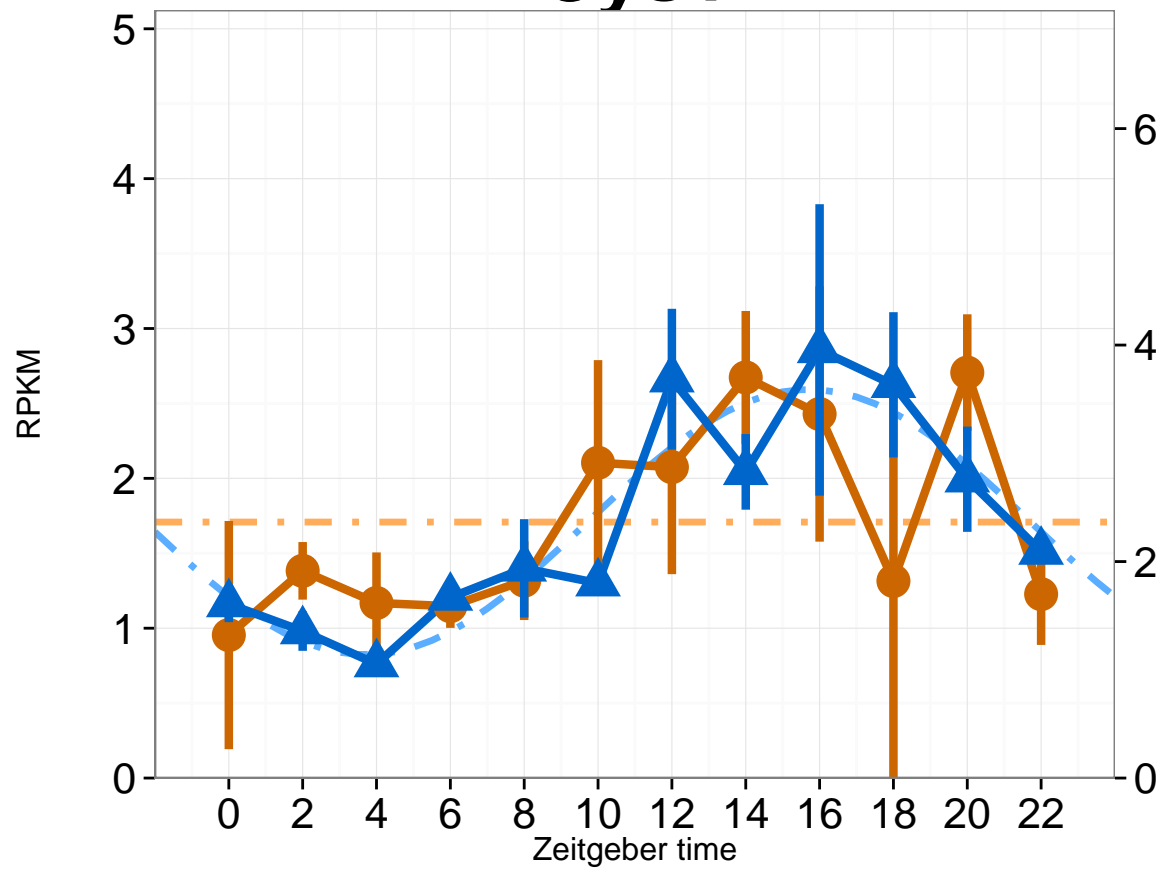

# Cys1

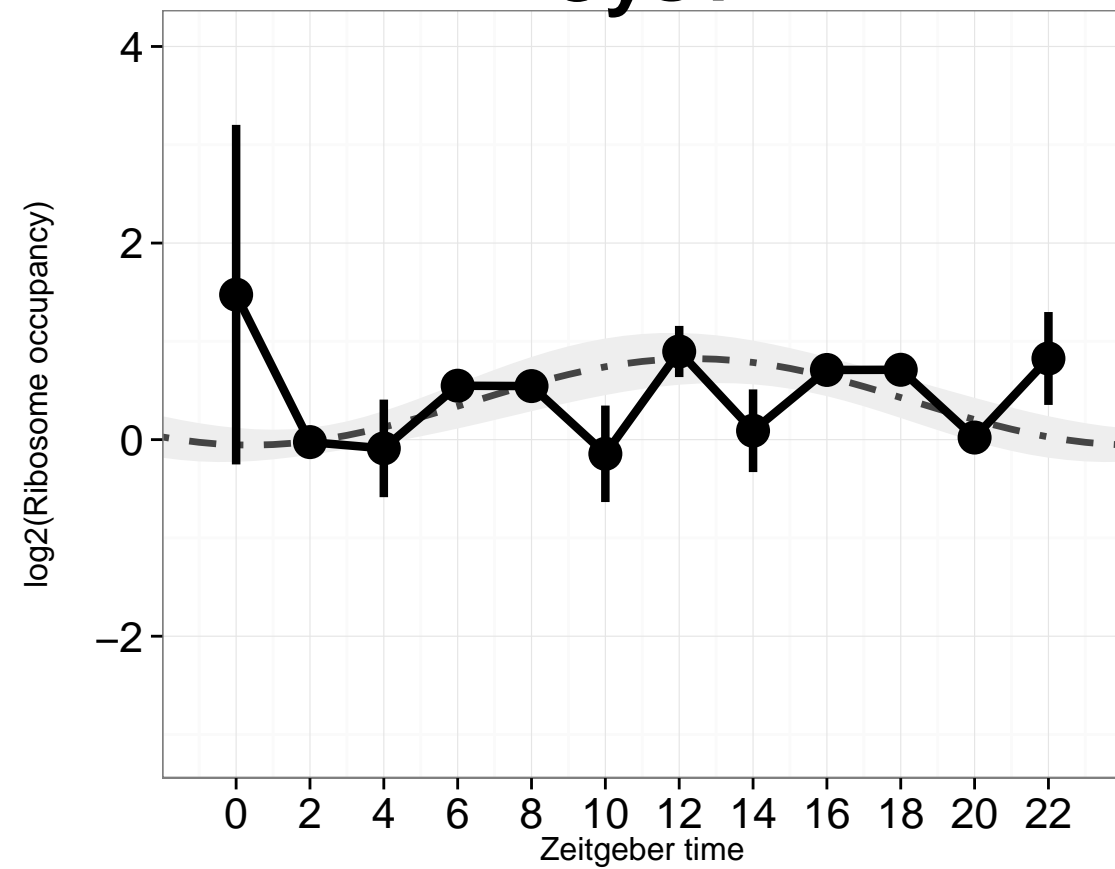

Supplement: SuppDataset_1.zip [file Cys1_set_C.pdf › Supplemental Dataset 1/C-mRNA_nonrhythm_translation_rhyth/Cys1_set_C.pdf]

# D1Ertd622e

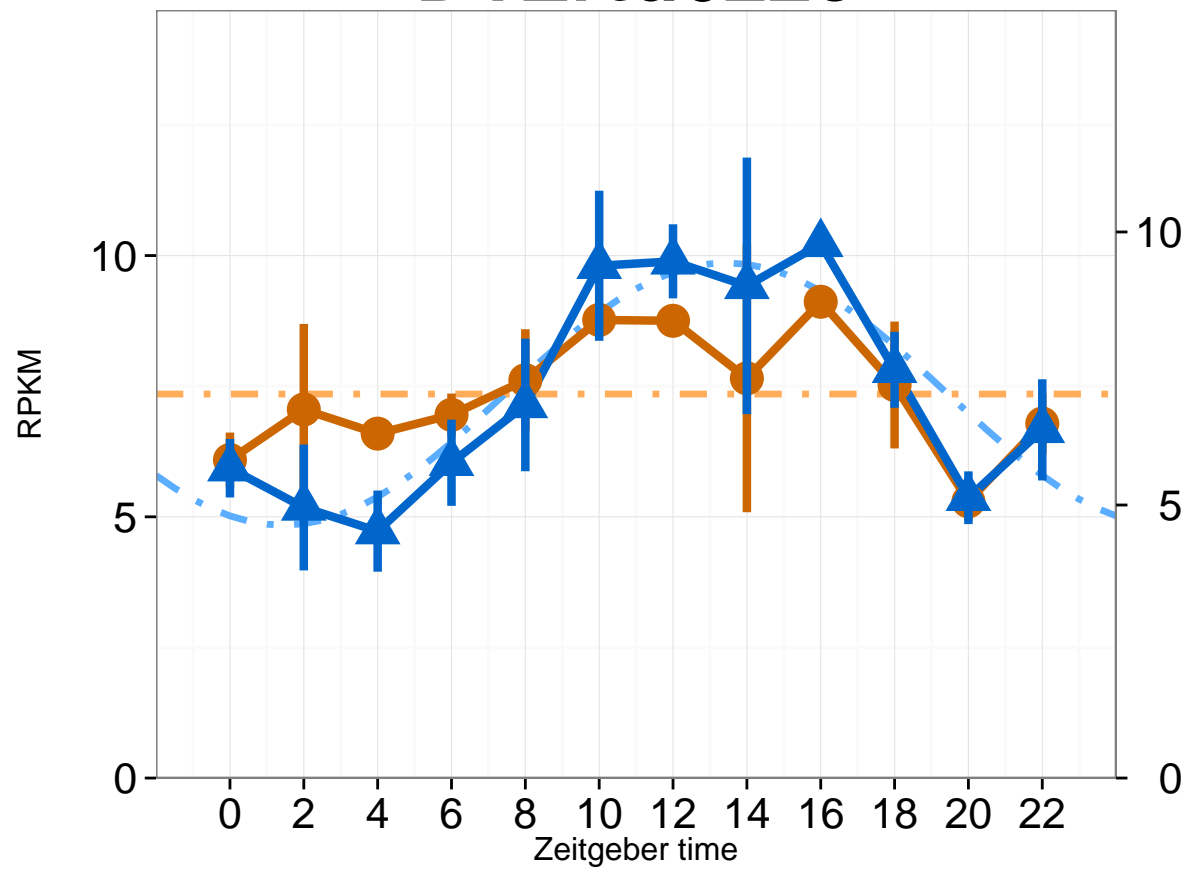

# D1Ertd622e

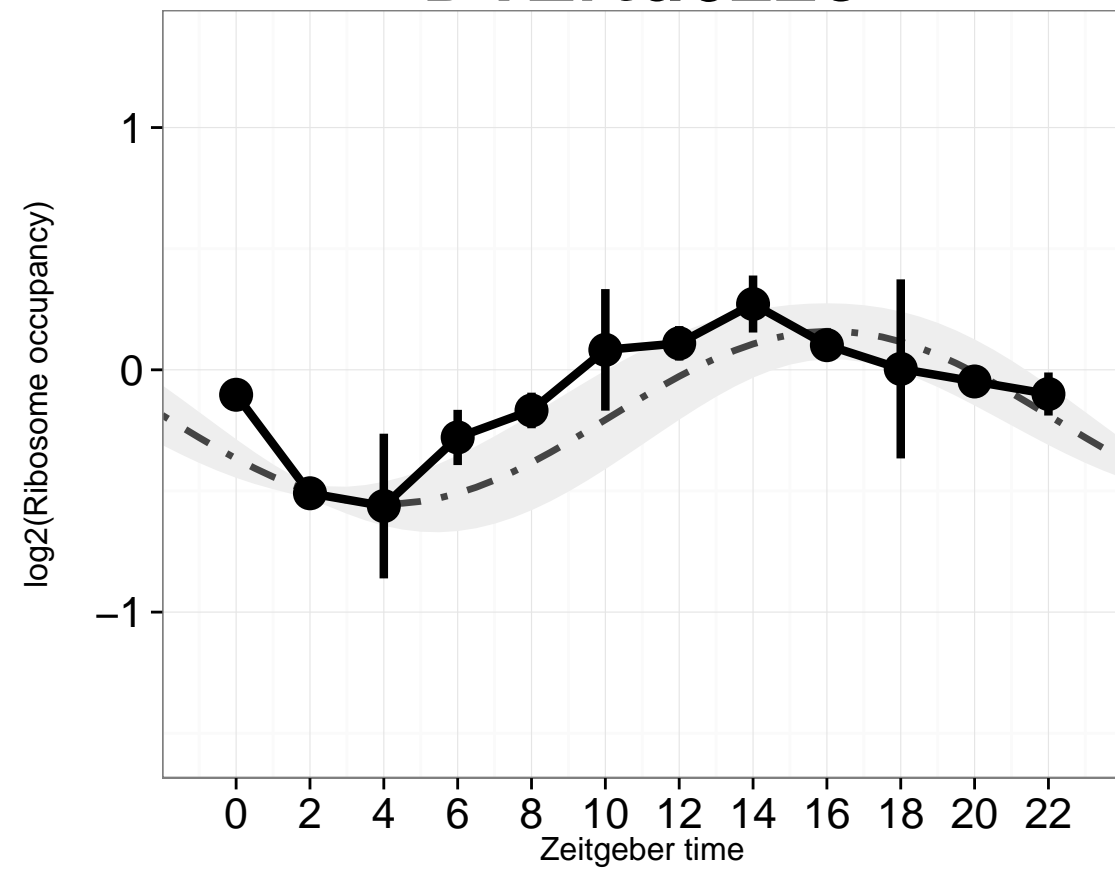

Supplement: SuppDataset_1.zip [file D1Ertd622e_set_C.pdf › Supplemental Dataset 1/C-mRNA_nonrhythm_translation_rhyth/D1Ertd622e_set_C.pdf]

## Dcaf15

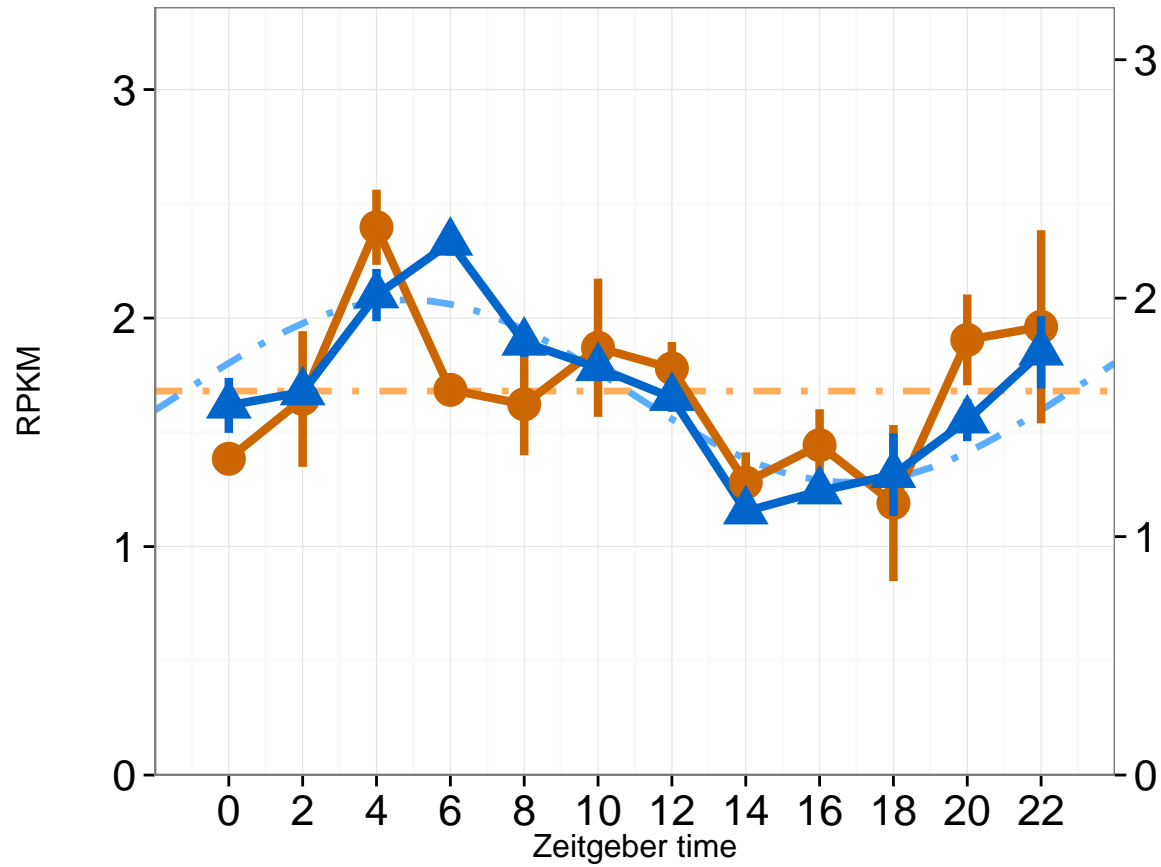

## Dcaf15

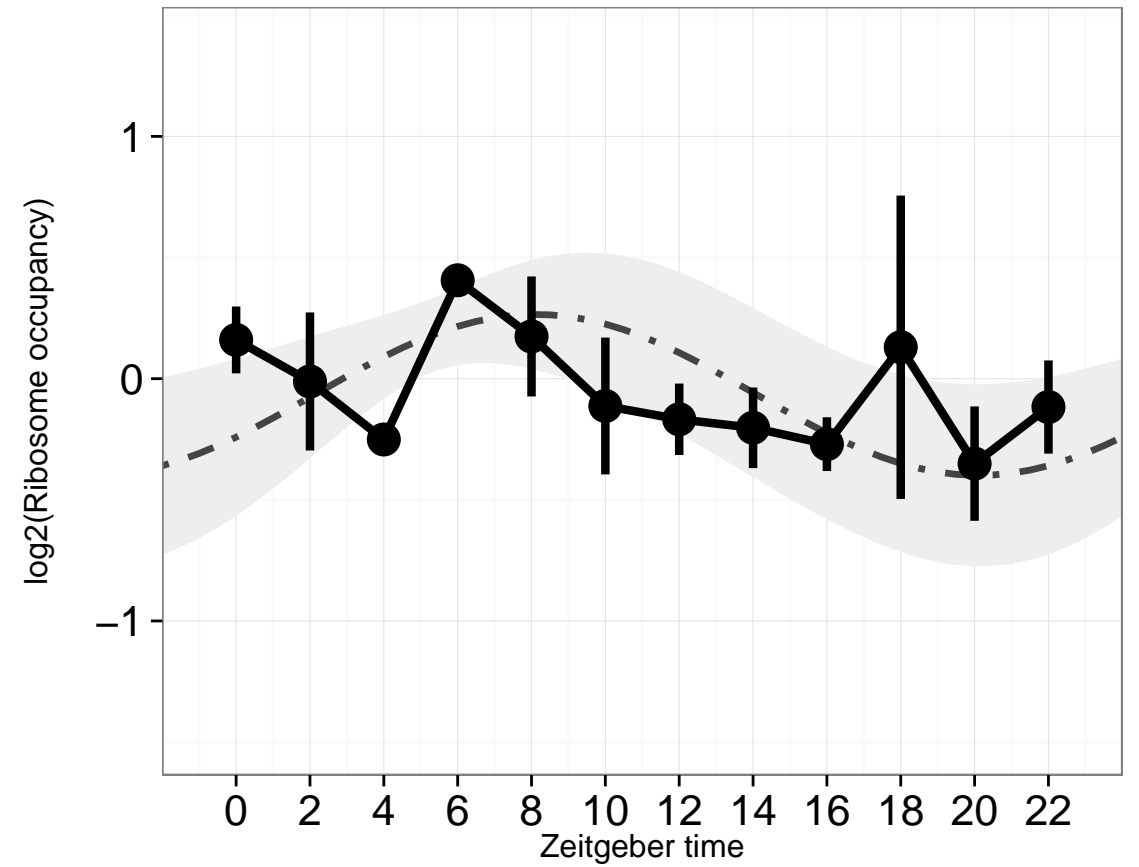

Supplement: SuppDataset_1.zip [file Dcaf15_set_C.pdf › Supplemental Dataset 1/C-mRNA_nonrhythm_translation_rhyth/Dcaf15_set_C.pdf]

# Dcbld1

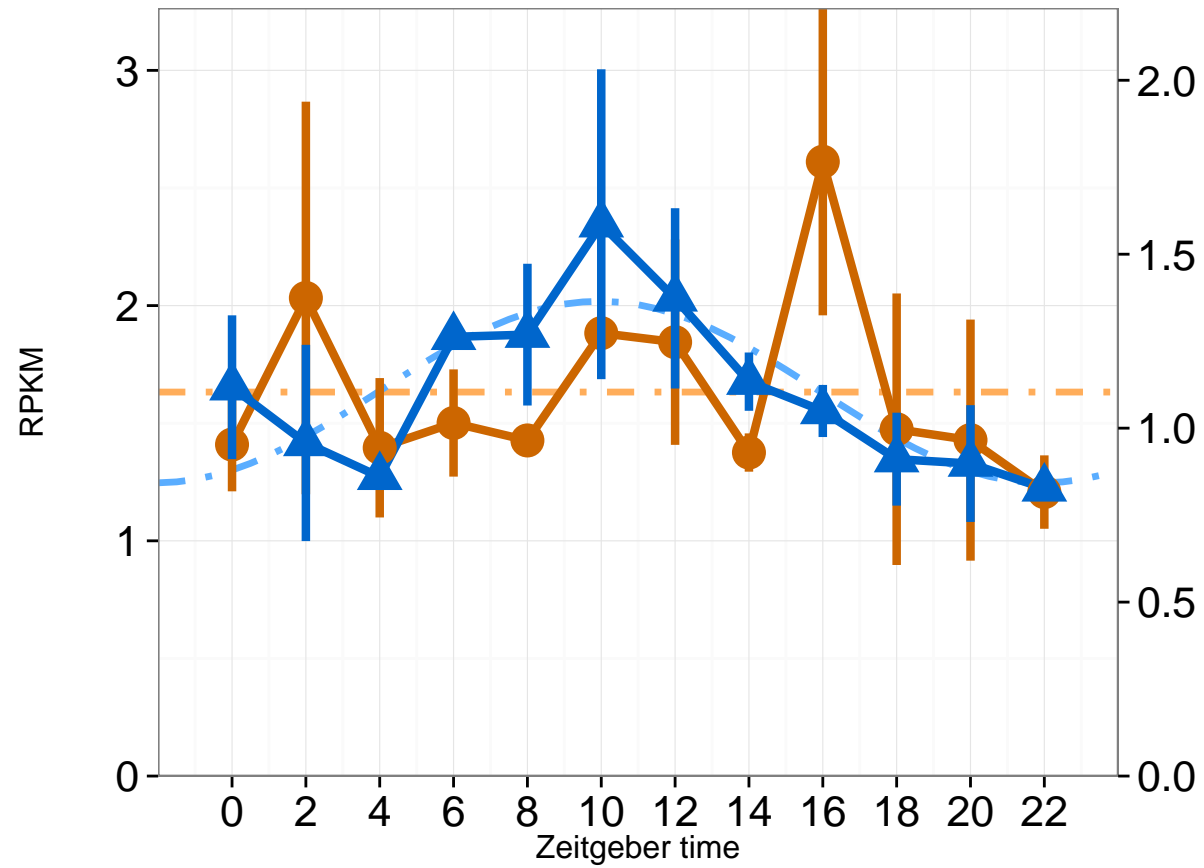

# Dcbld1

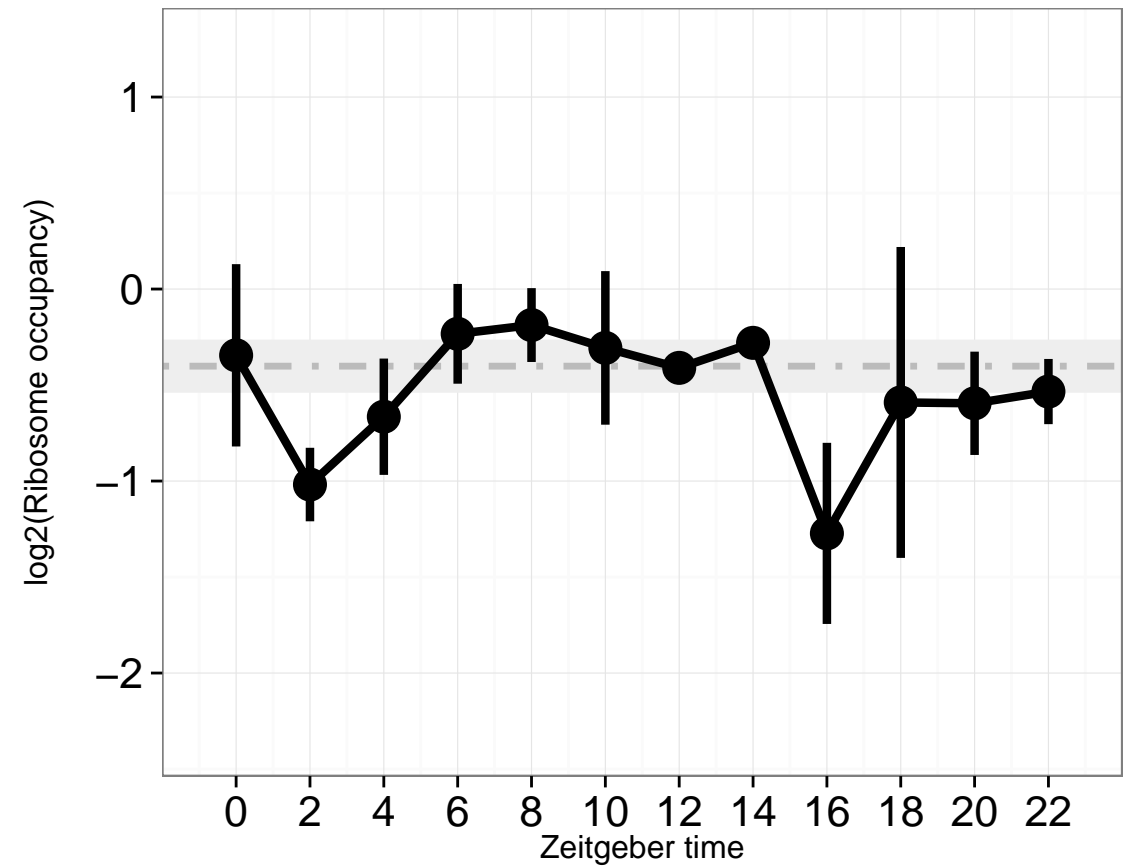

Supplement: SuppDataset_1.zip [file Dcbld1_set_C.pdf › Supplemental Dataset 1/C-mRNA_nonrhythm_translation_rhyth/Dcbld1_set_C.pdf]

# Dcdc2a

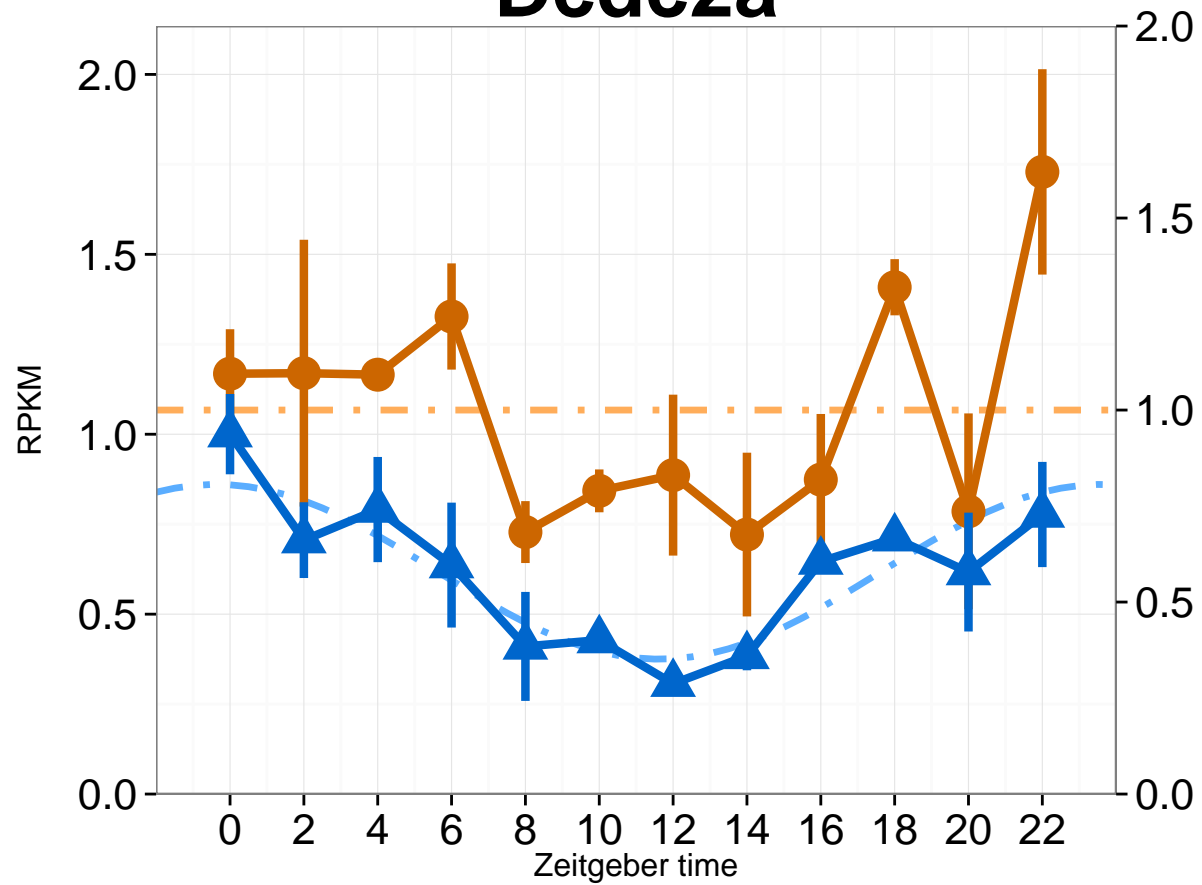

# Dcdc2a

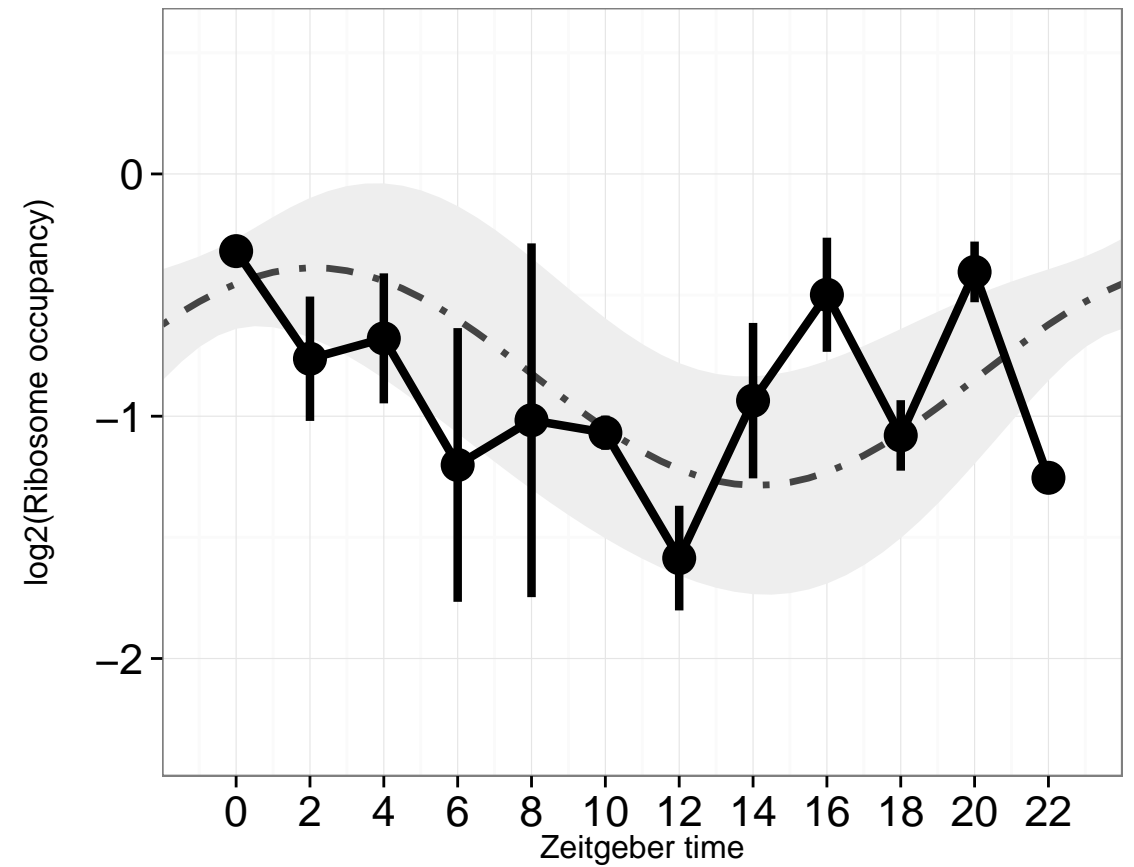

Supplement: SuppDataset_1.zip [file Dcdc2a_set_C.pdf › Supplemental Dataset 1/C-mRNA_nonrhythm_translation_rhyth/Dcdc2a_set_C.pdf]

## Dclk3

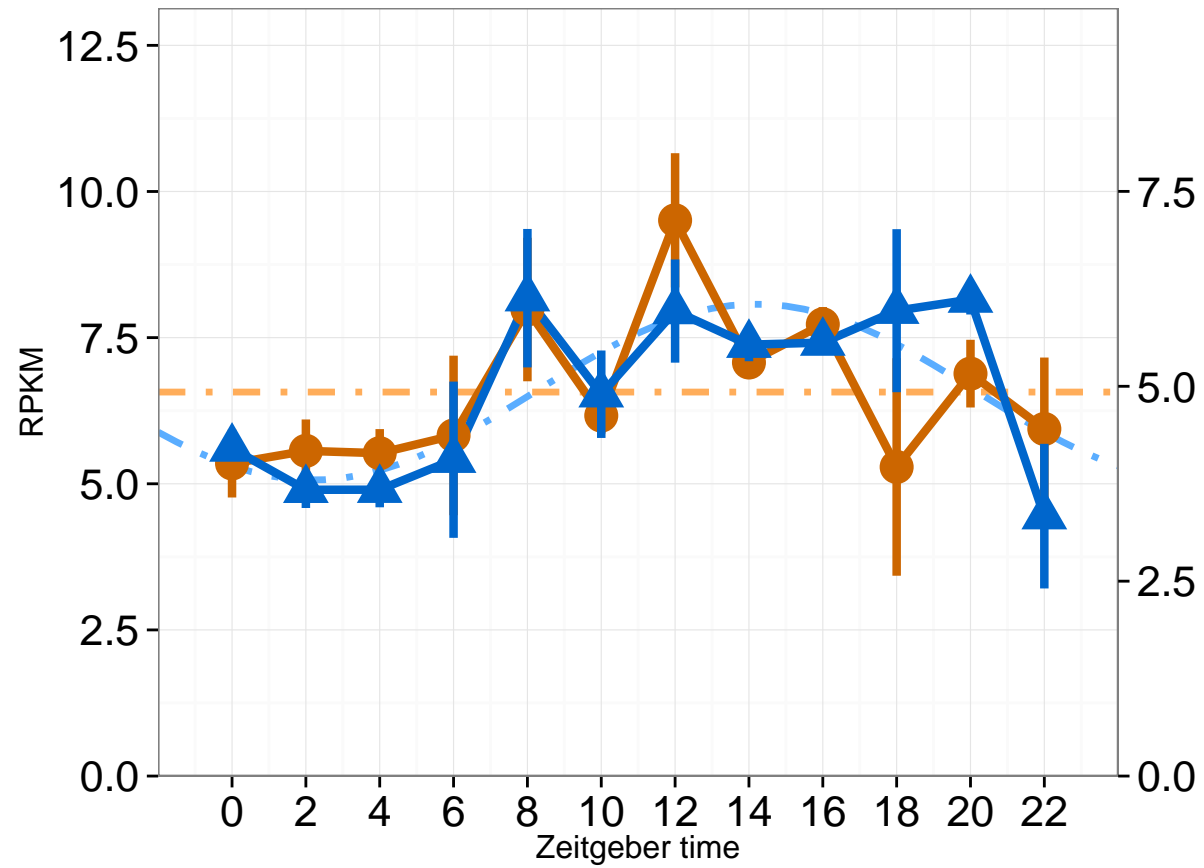

## Dclk3

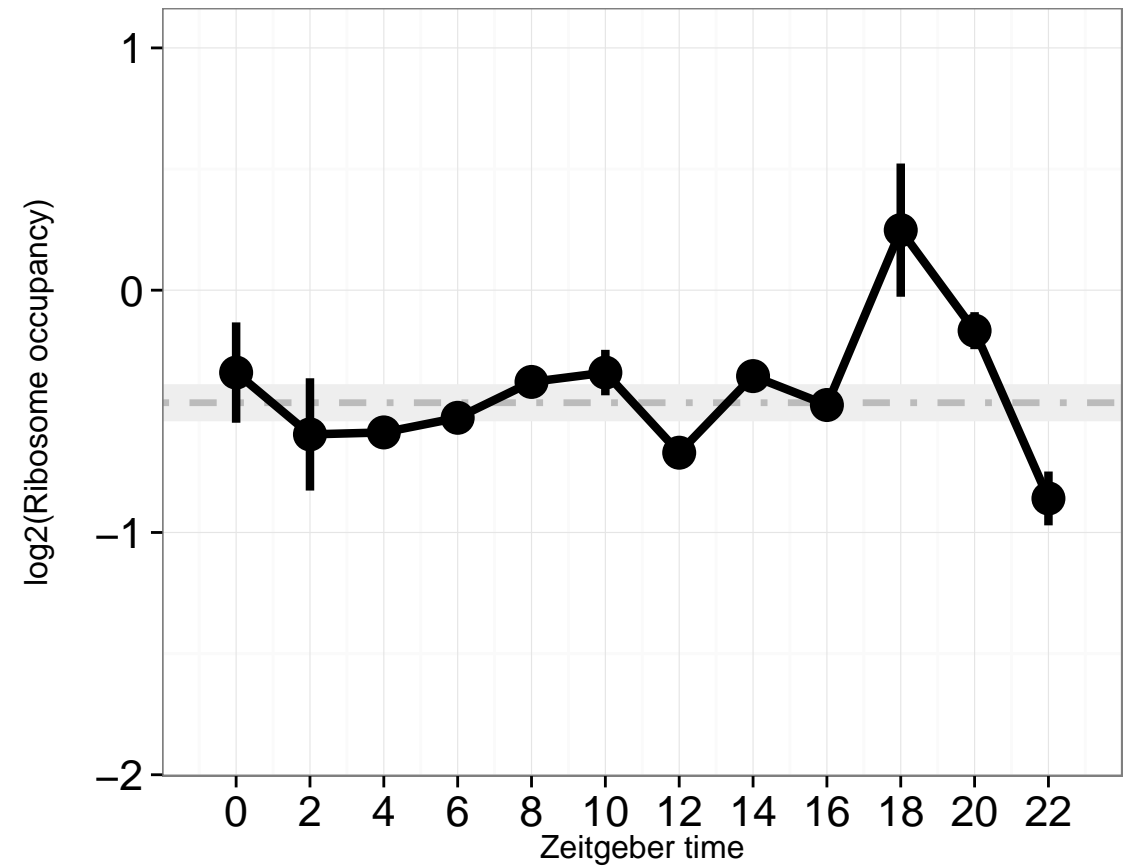

Supplement: SuppDataset_1.zip [file Dclk3_set_C.pdf › Supplemental Dataset 1/C-mRNA_nonrhythm_translation_rhyth/Dclk3_set_C.pdf]

# Dclre1a

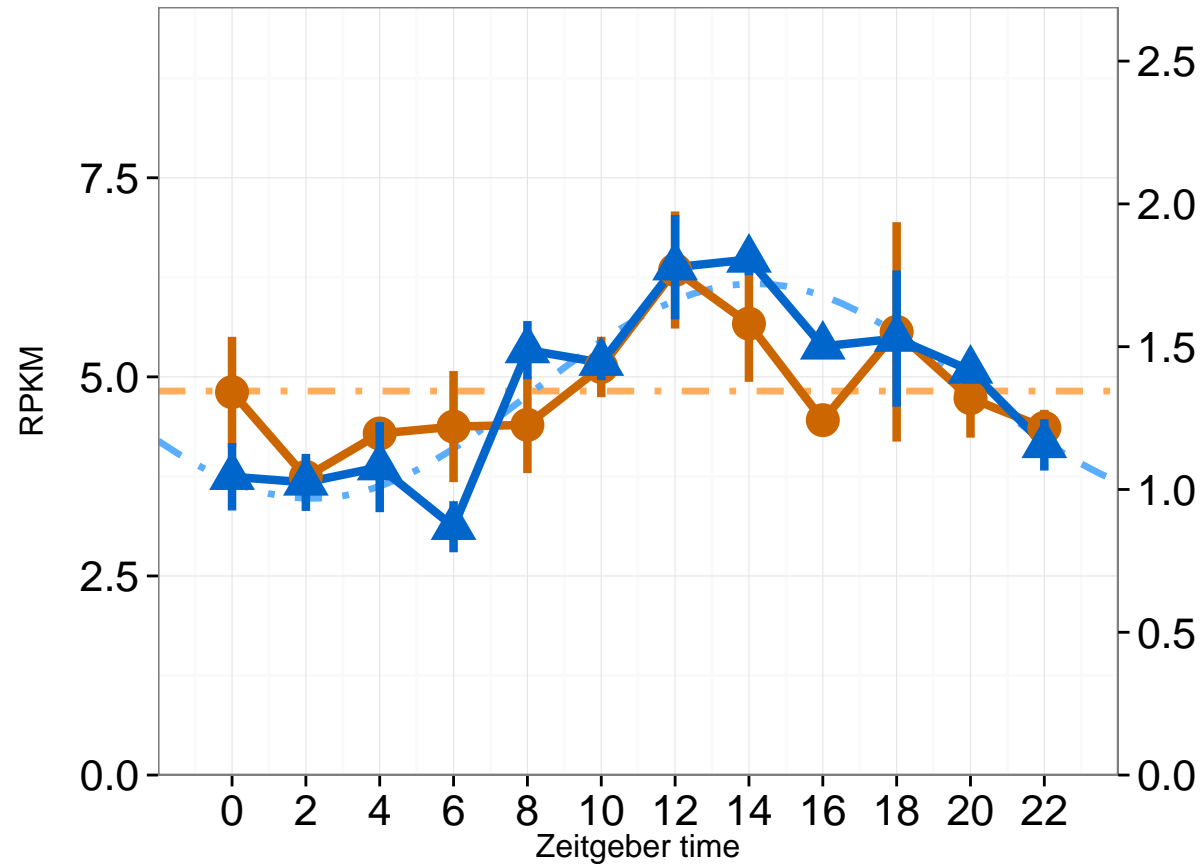

# Dclre1a

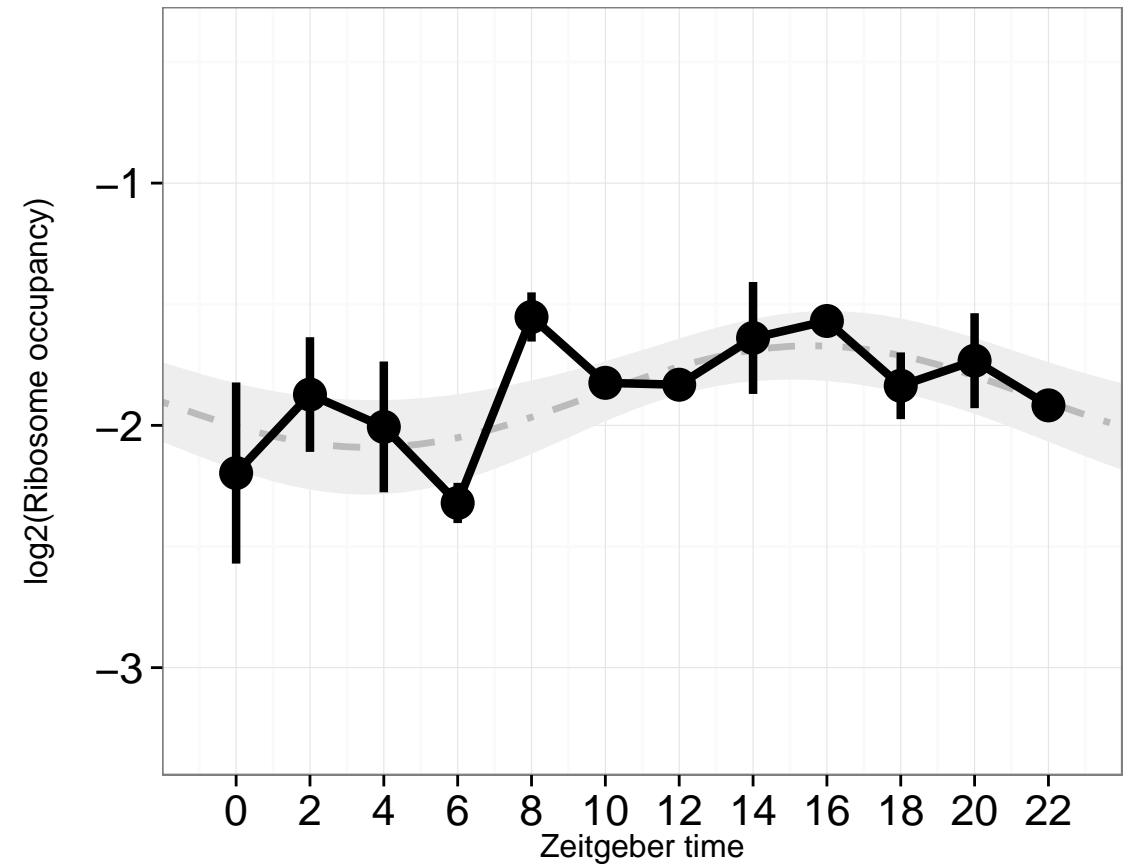

Supplement: SuppDataset_1.zip [file Dclre1a_set_C.pdf › Supplemental Dataset 1/C-mRNA_nonrhythm_translation_rhyth/Dclre1a_set_C.pdf]

# Dclre1c

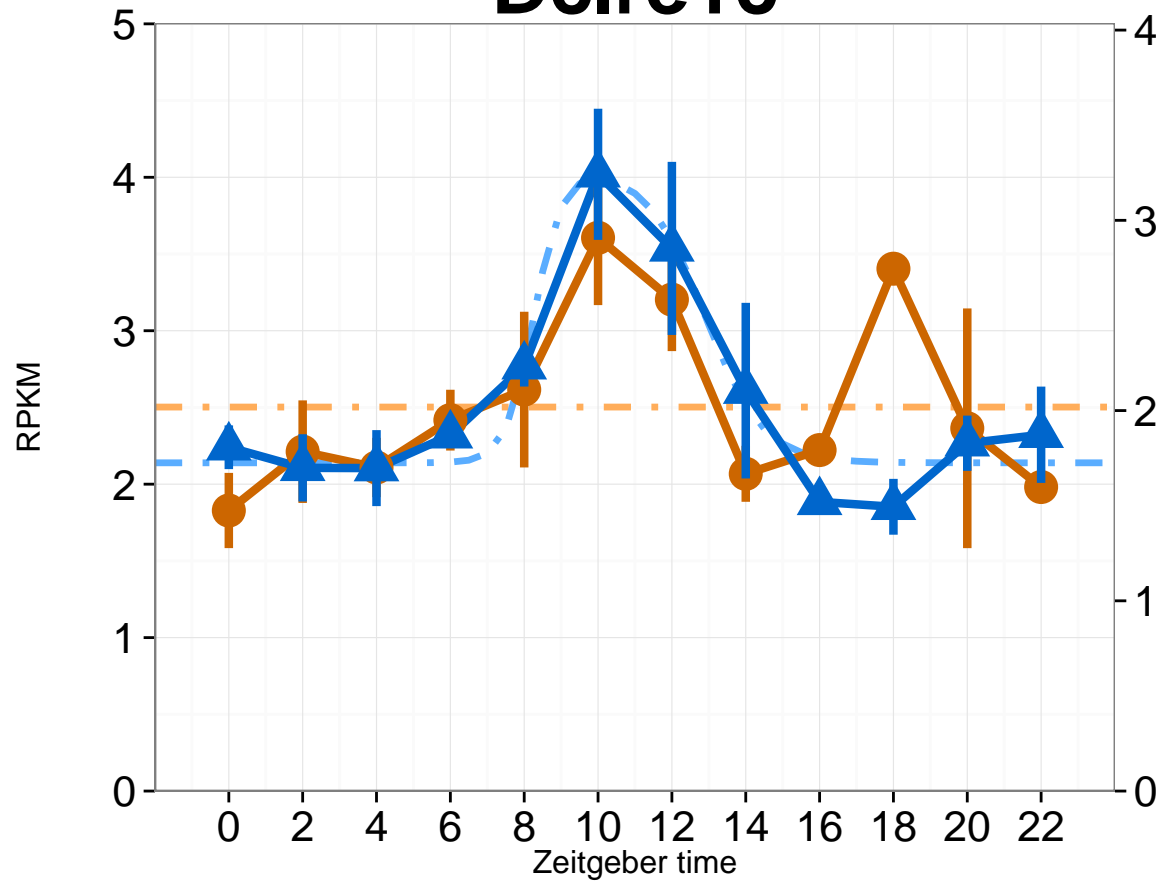

# Dclre1c

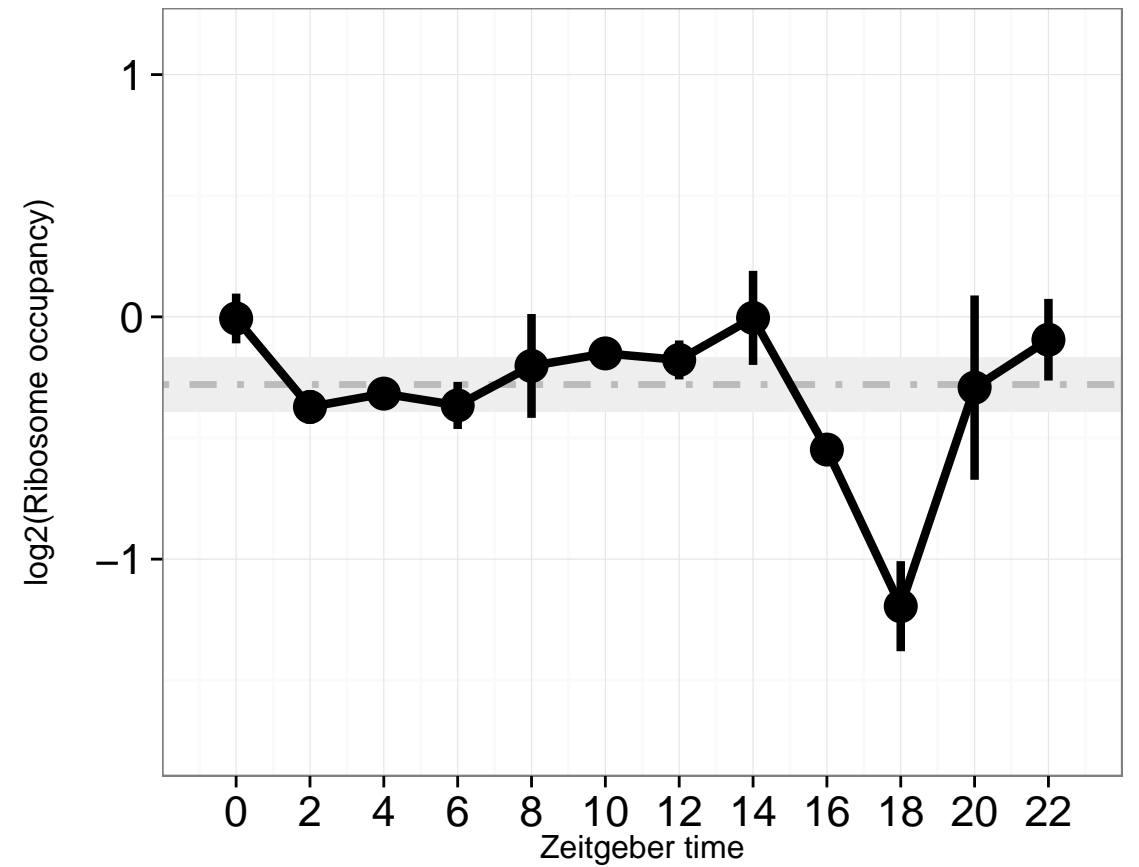

Supplement: SuppDataset_1.zip [file Dclre1c_set_C.pdf › Supplemental Dataset 1/C-mRNA_nonrhythm_translation_rhyth/Dclre1c_set_C.pdf]

# Dcp1b

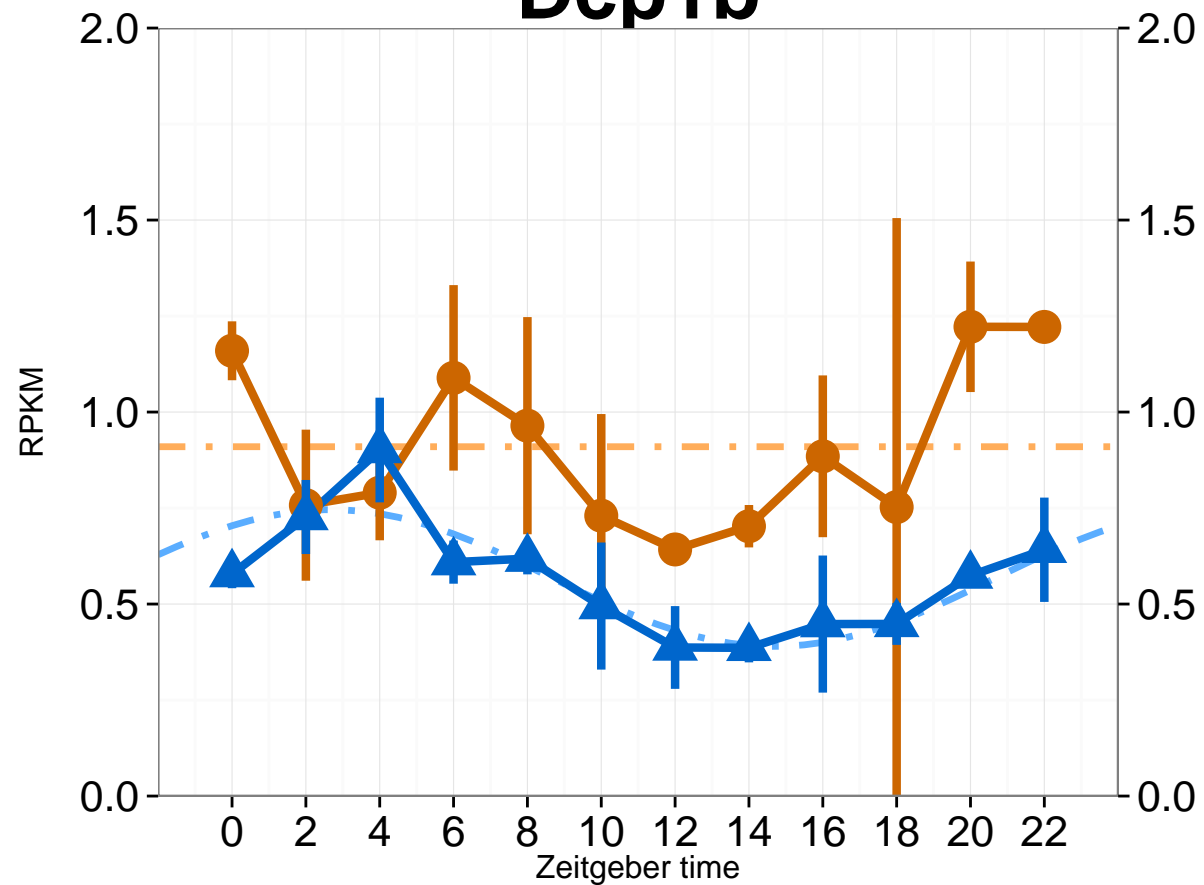

# Dcp1b

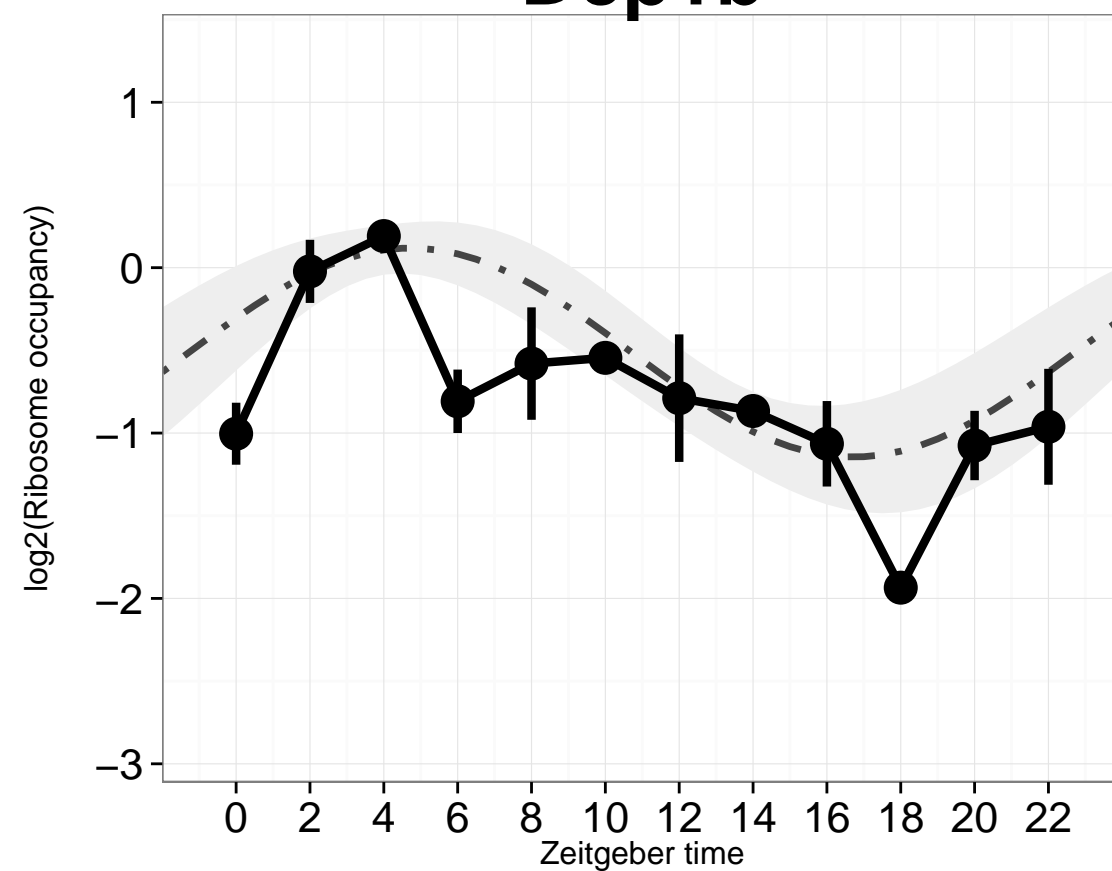

Supplement: SuppDataset_1.zip [file Dcp1b_set_C.pdf › Supplemental Dataset 1/C-mRNA_nonrhythm_translation_rhyth/Dcp1b_set_C.pdf]

# Dcun1d2

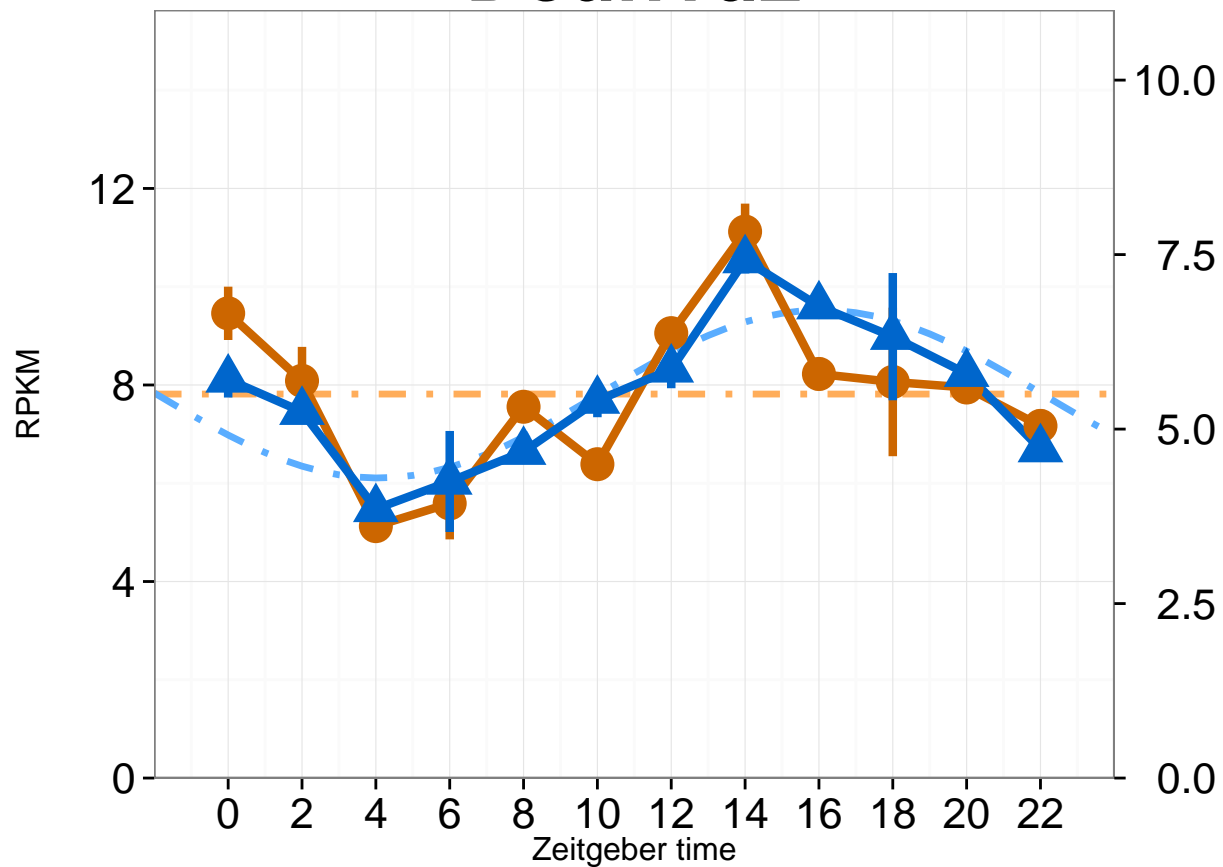

# Dcun1d2

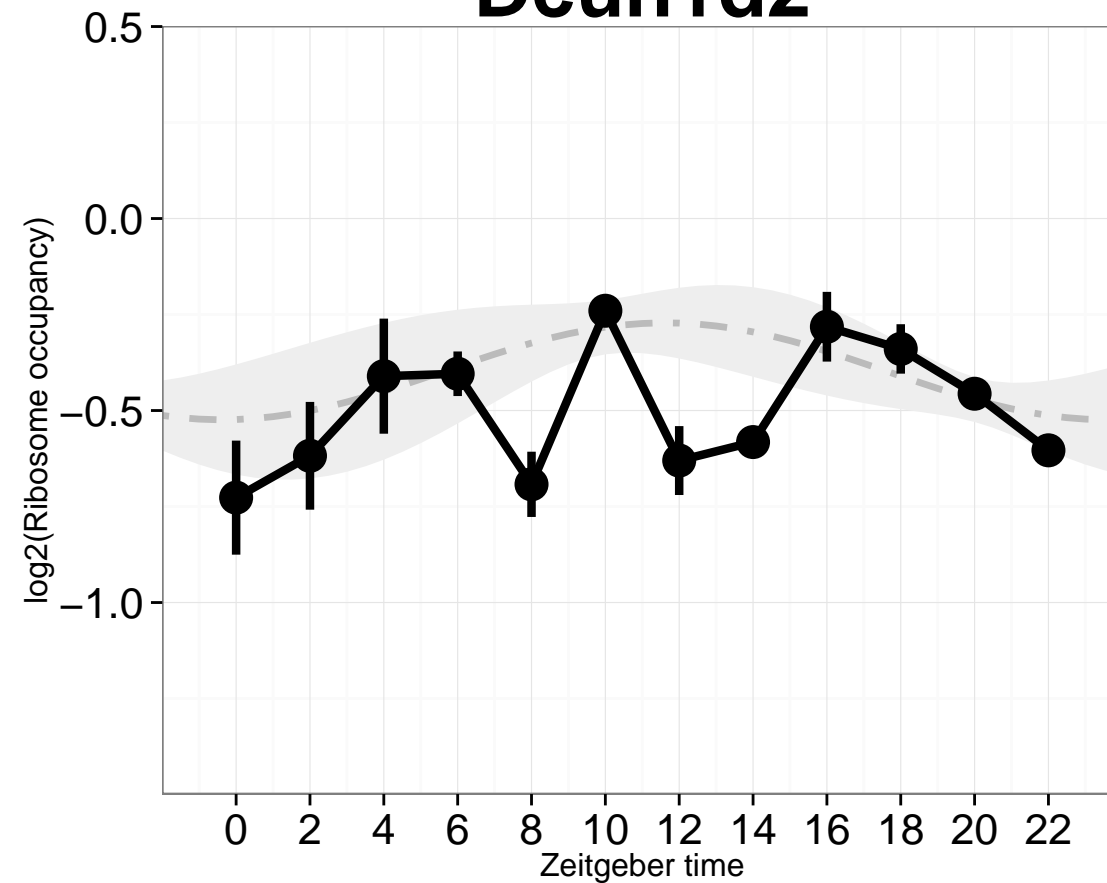

Supplement: SuppDataset_1.zip [file Dcun1d2_set_C.pdf › Supplemental Dataset 1/C-mRNA_nonrhythm_translation_rhyth/Dcun1d2_set_C.pdf]

**Ddit4I TR**

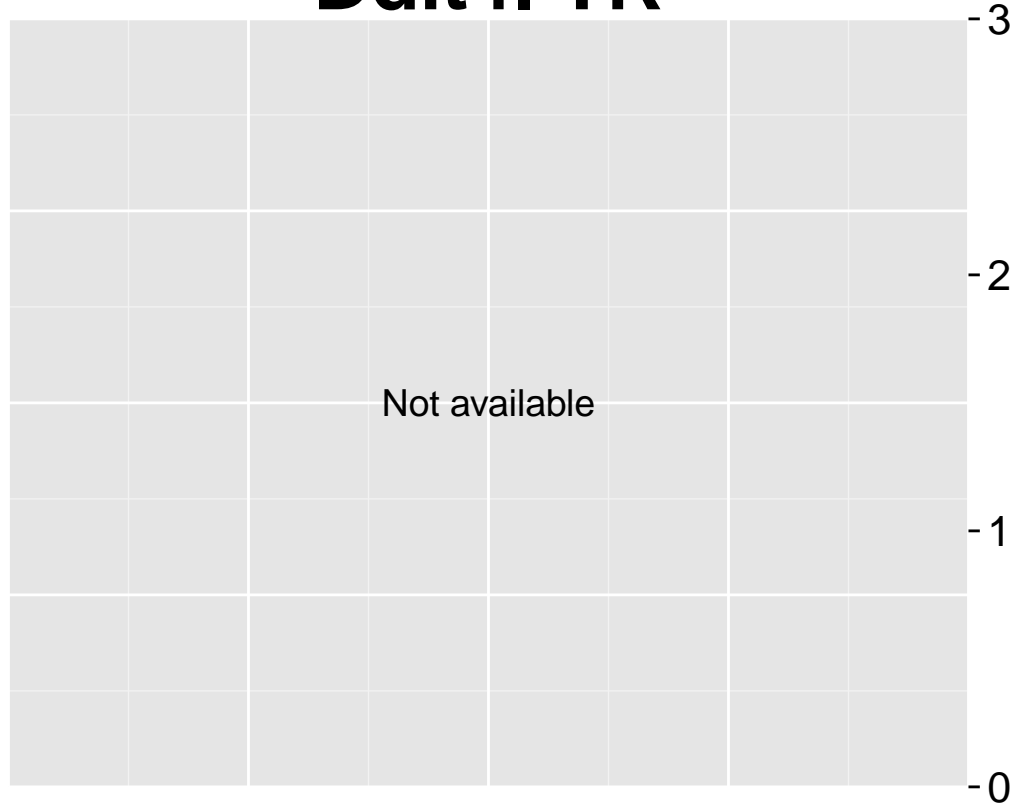

**Ddit4I log2(Ribosome occupancy**

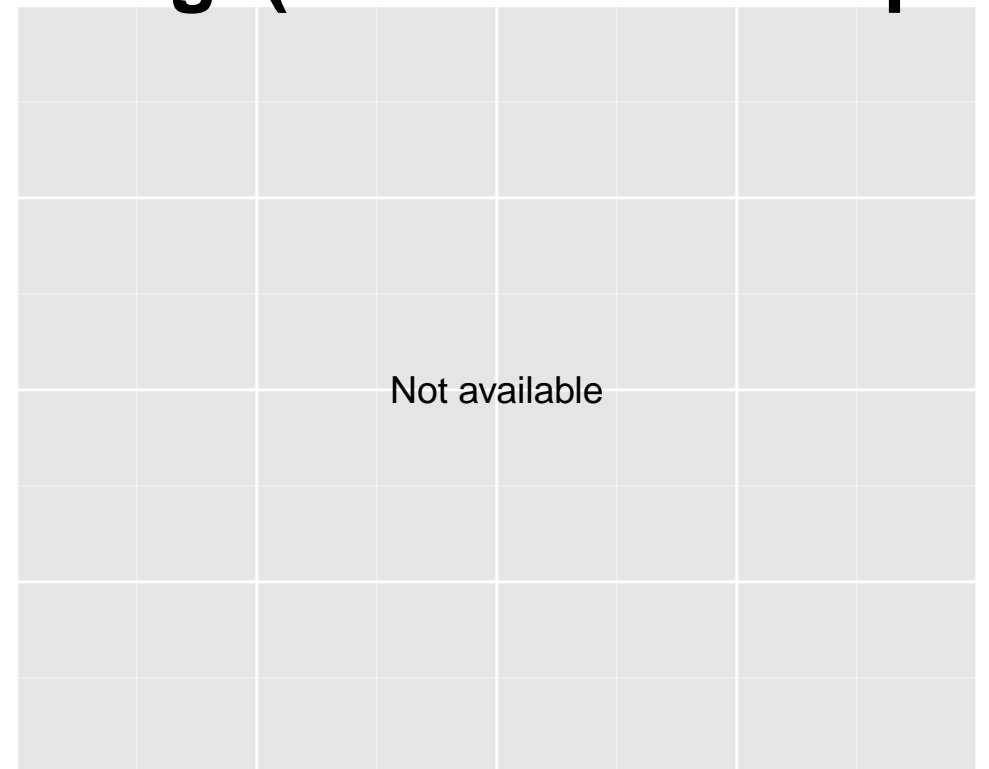

Supplement: SuppDataset_1.zip [file Ddit4l_set_C.pdf › Supplemental Dataset 1/C-mRNA_nonrhythm_translation_rhyth/Ddit4l_set_C.pdf]

# Deaf1

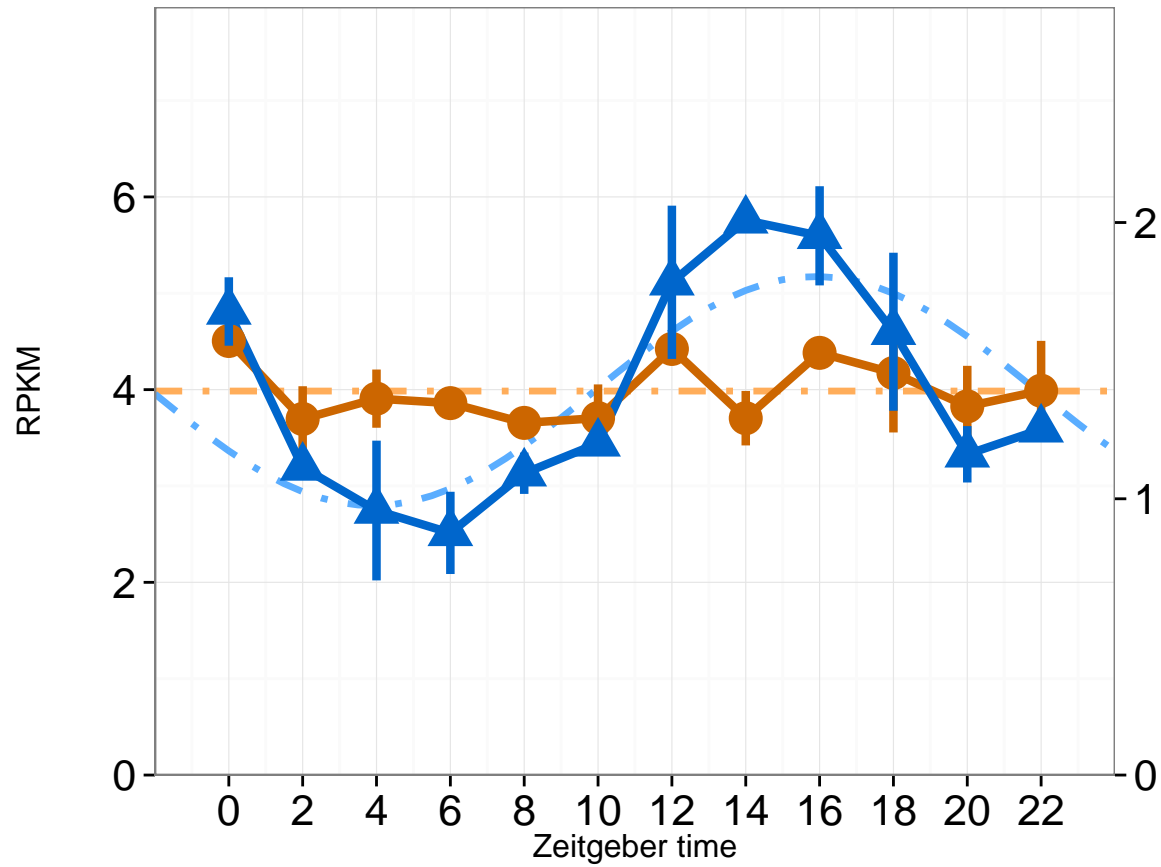

# Deaf1

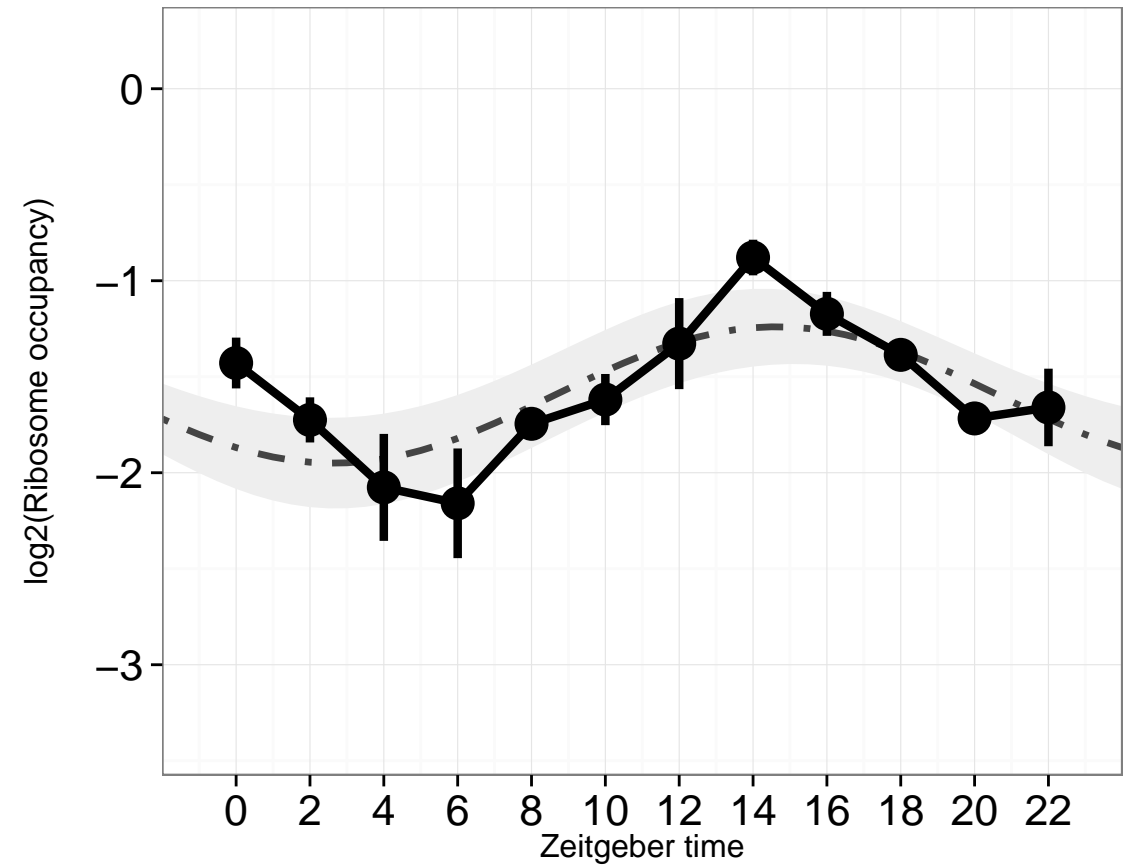

Supplement: SuppDataset_1.zip [file Deaf1_set_C.pdf › Supplemental Dataset 1/C-mRNA_nonrhythm_translation_rhyth/Deaf1_set_C.pdf]

# Decr2

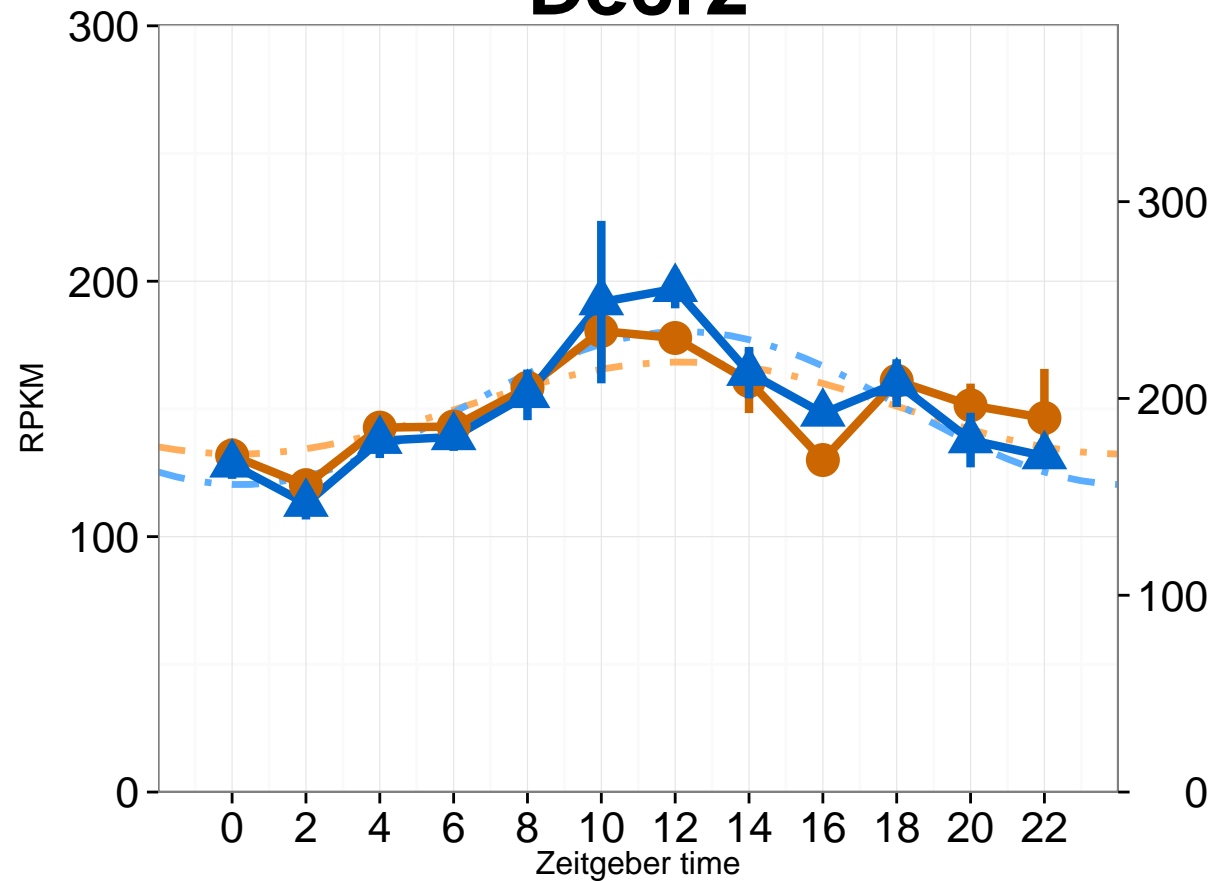

# Decr2

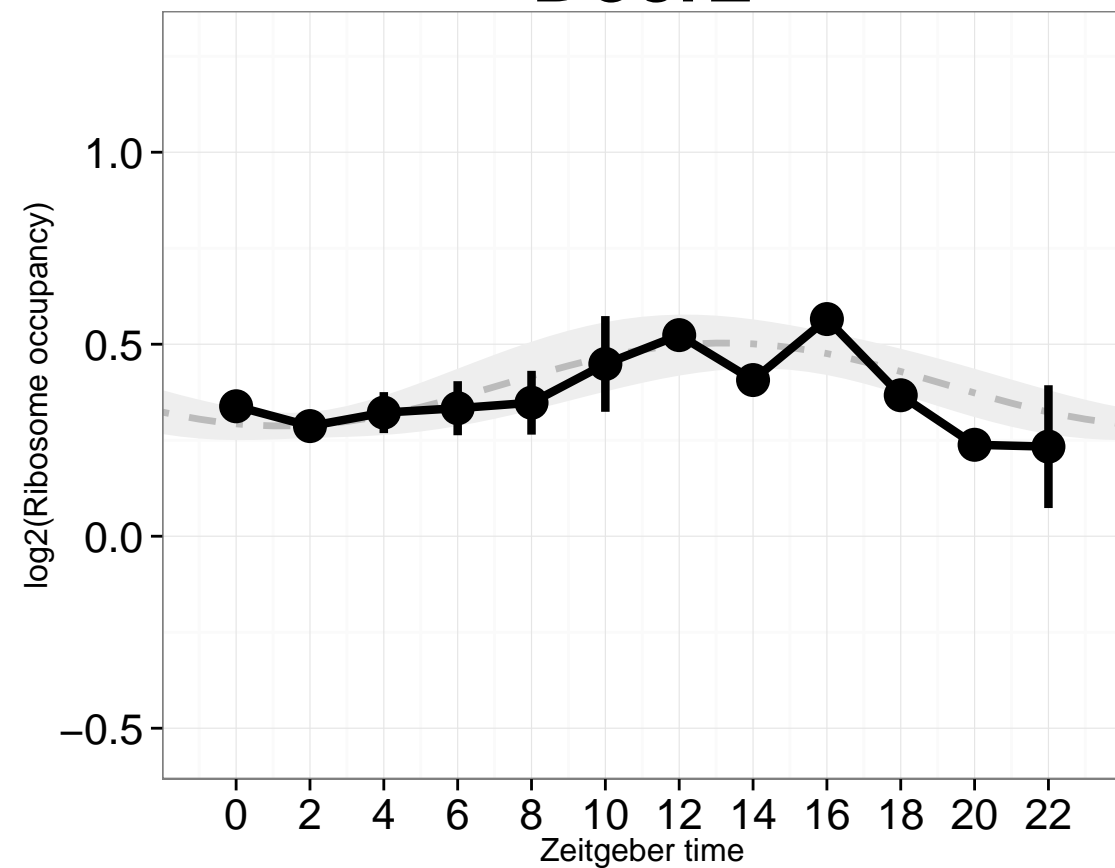

Supplement: SuppDataset_1.zip [file Decr2_set_C.pdf › Supplemental Dataset 1/C-mRNA_nonrhythm_translation_rhyth/Decr2_set_C.pdf]

# Dgkh

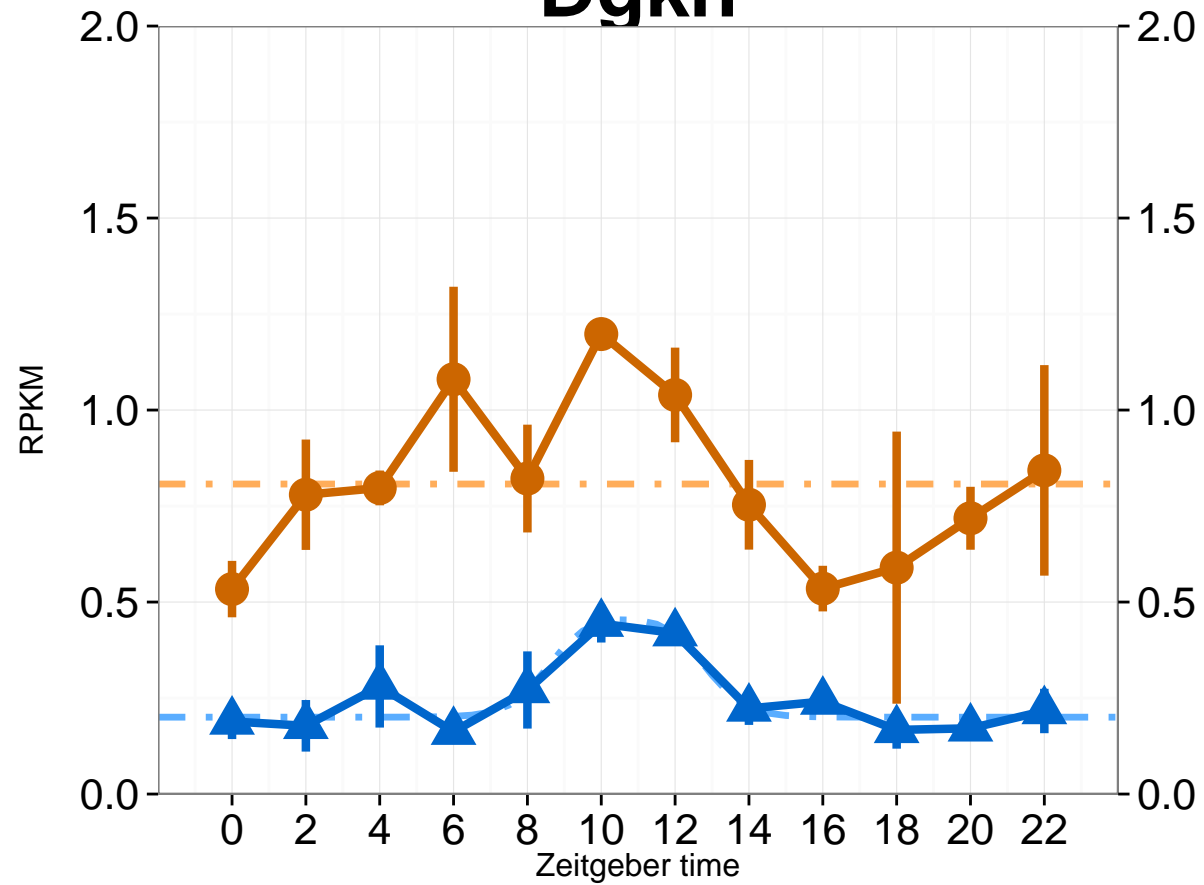

# Dgkh

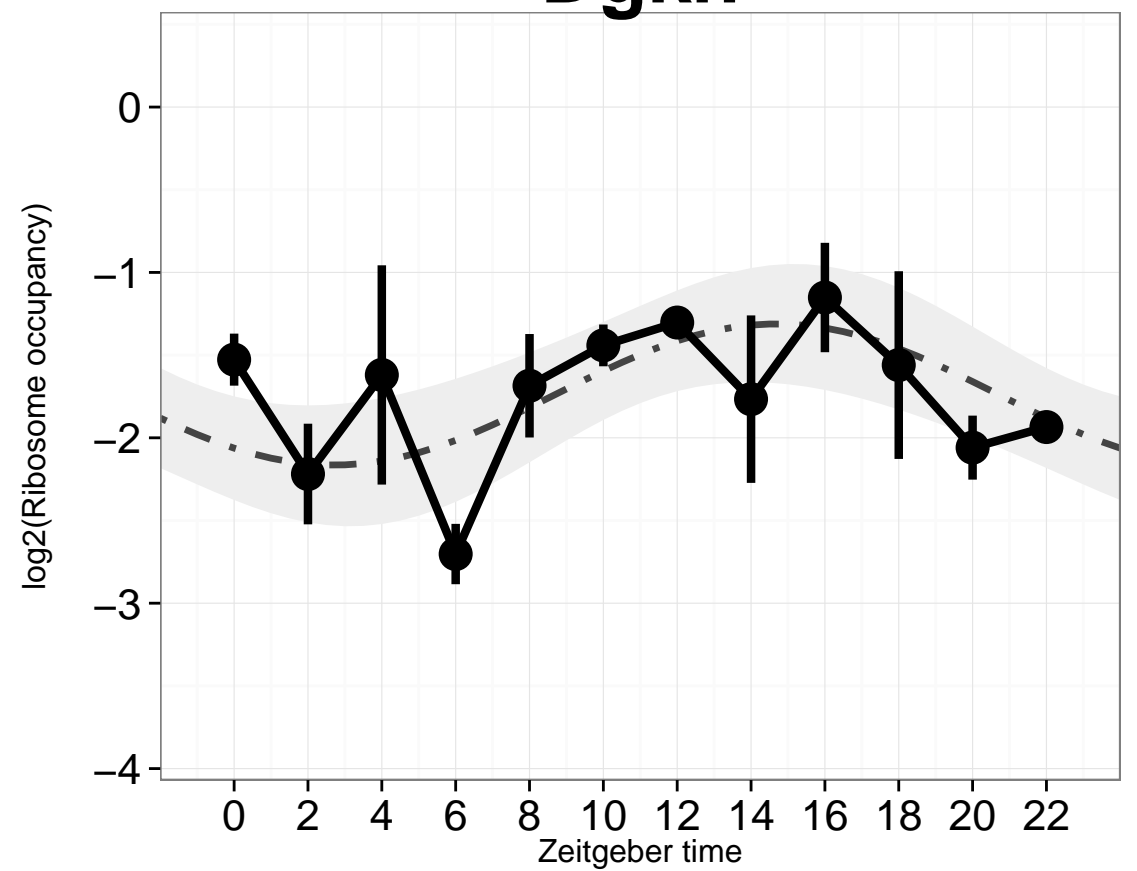

Supplement: SuppDataset_1.zip [file Dgkh_set_C.pdf › Supplemental Dataset 1/C-mRNA_nonrhythm_translation_rhyth/Dgkh_set_C.pdf]

# Dhtkd1

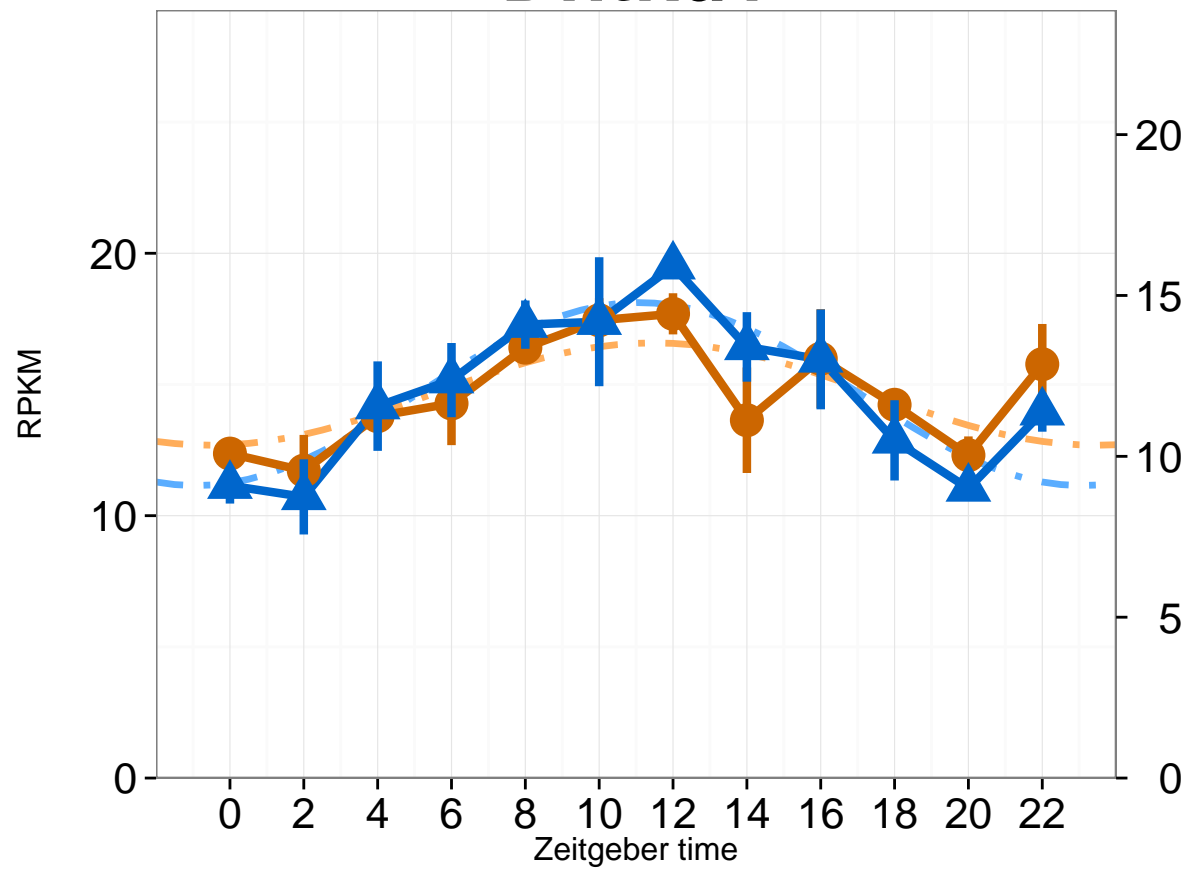

# Dhtkd1

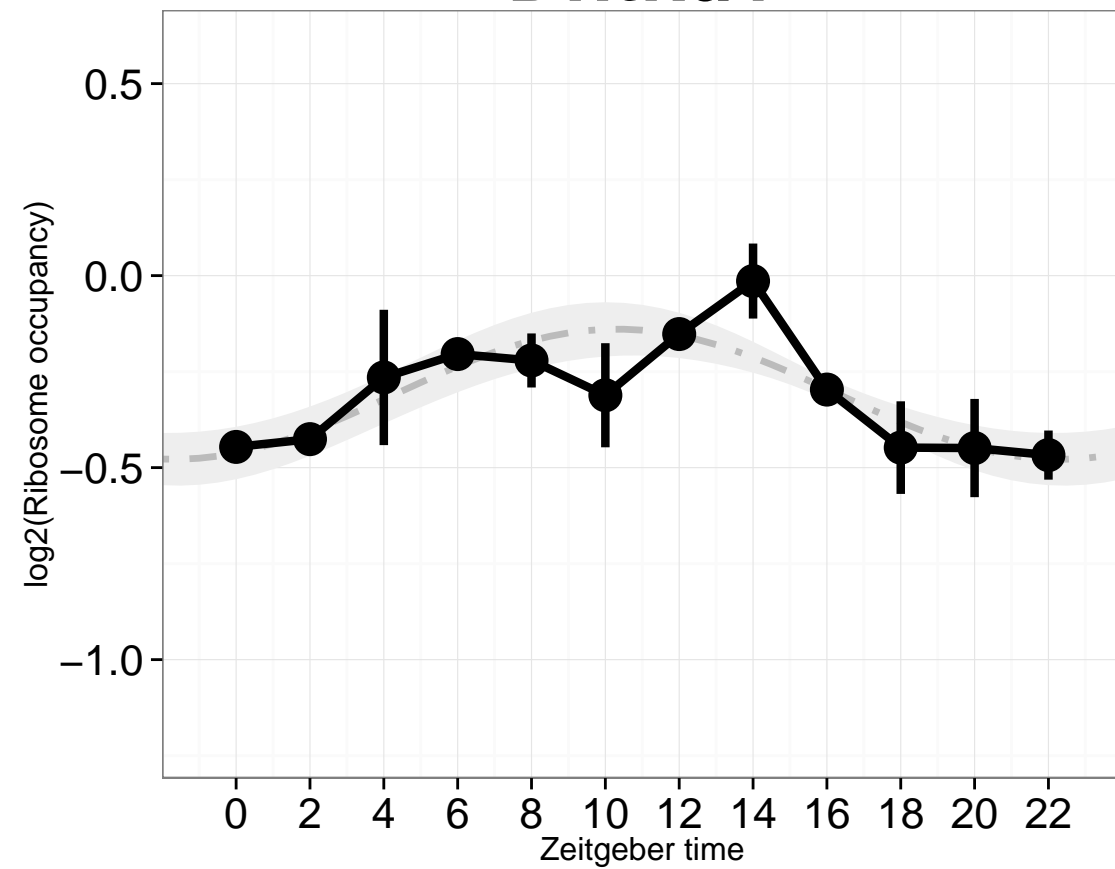

Supplement: SuppDataset_1.zip [file Dhtkd1_set_C.pdf › Supplemental Dataset 1/C-mRNA_nonrhythm_translation_rhyth/Dhtkd1_set_C.pdf]

## Dhx33

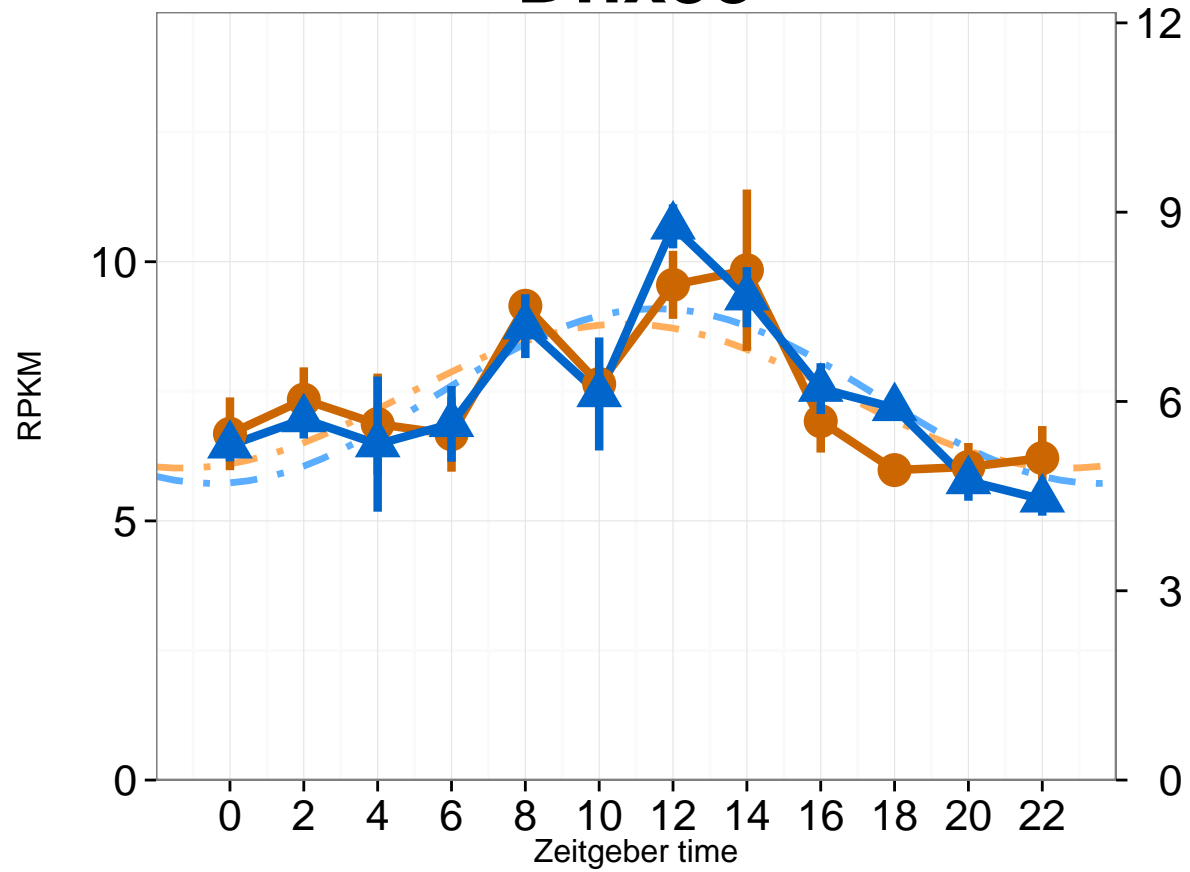

## Dhx33

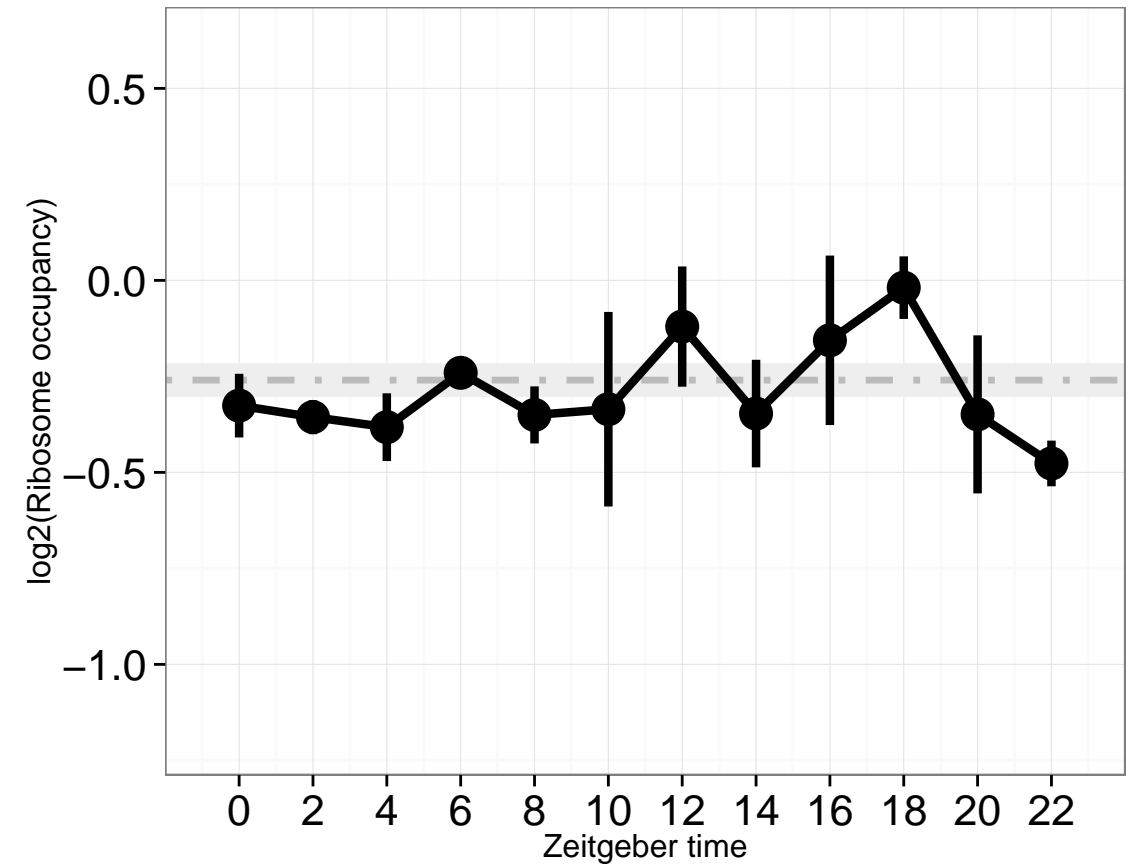

Supplement: SuppDataset_1.zip [file Dhx33_set_C.pdf › Supplemental Dataset 1/C-mRNA_nonrhythm_translation_rhyth/Dhx33_set_C.pdf]

## Dio1

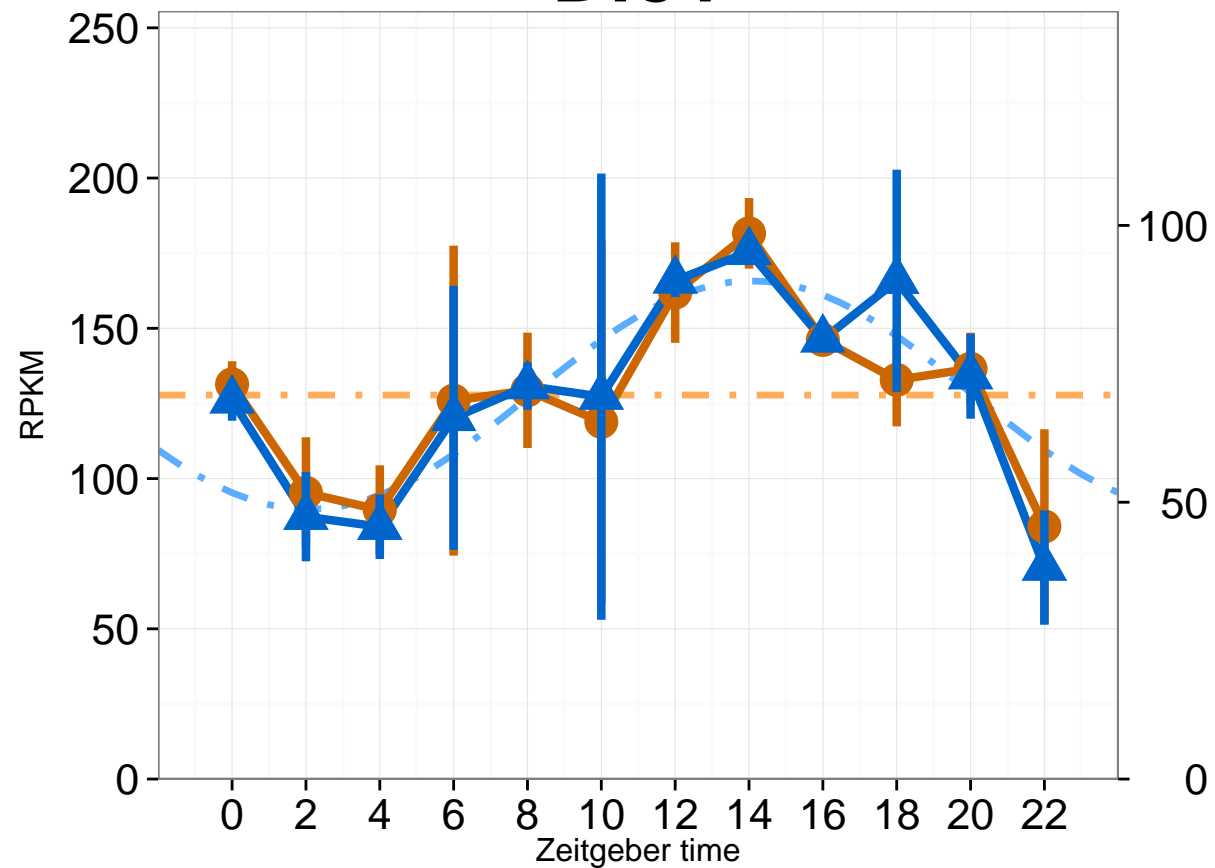

## Dio1

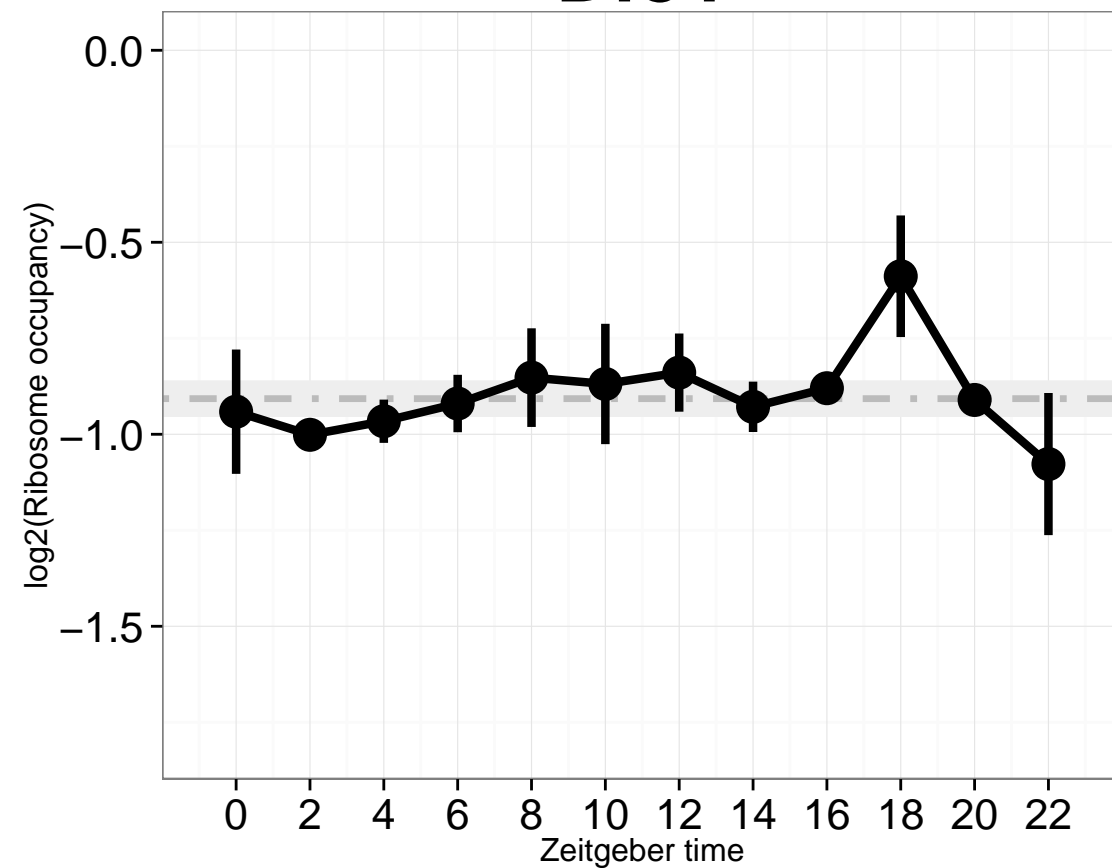

Supplement: SuppDataset_1.zip [file Dio1_set_C.pdf › Supplemental Dataset 1/C-mRNA_nonrhythm_translation_rhyth/Dio1_set_C.pdf]

## Dis3l2

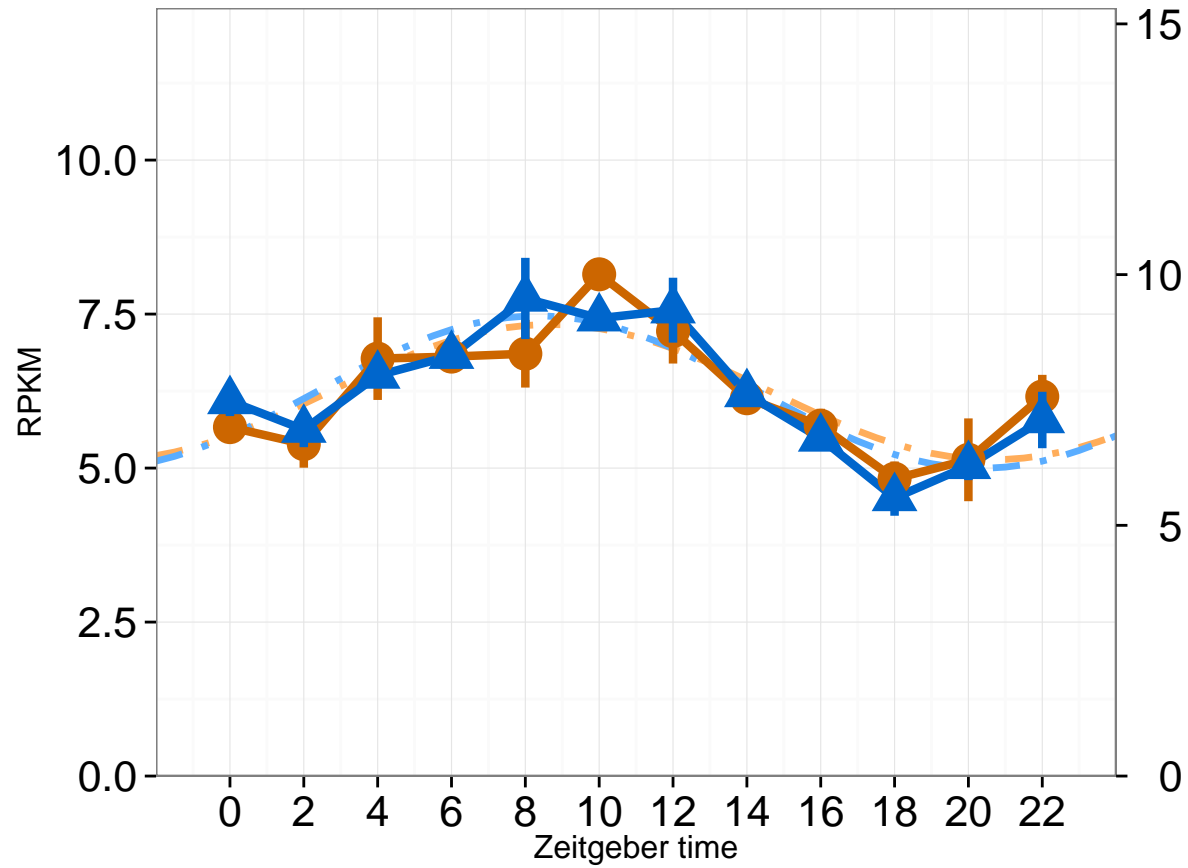

## Dis3l2

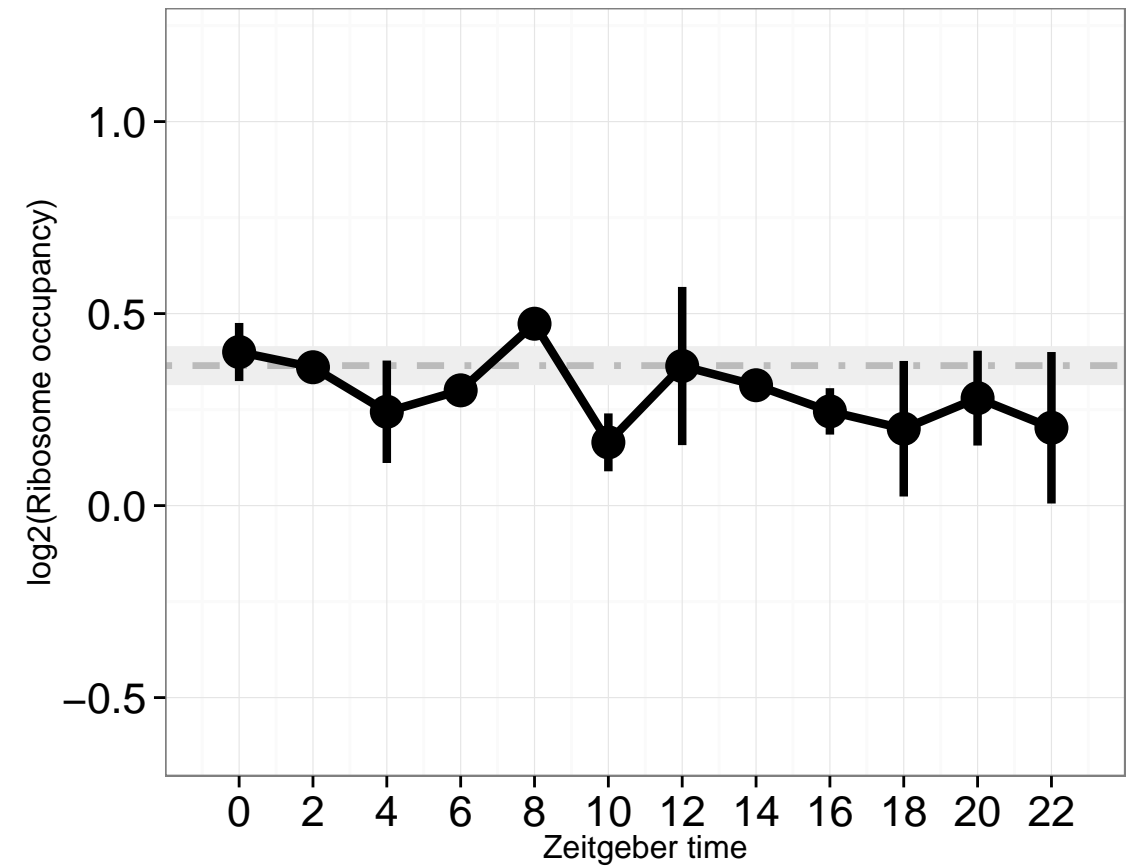

Supplement: SuppDataset_1.zip [file Dis3l2_set_C.pdf › Supplemental Dataset 1/C-mRNA_nonrhythm_translation_rhyth/Dis3l2_set_C.pdf]

## Disp2

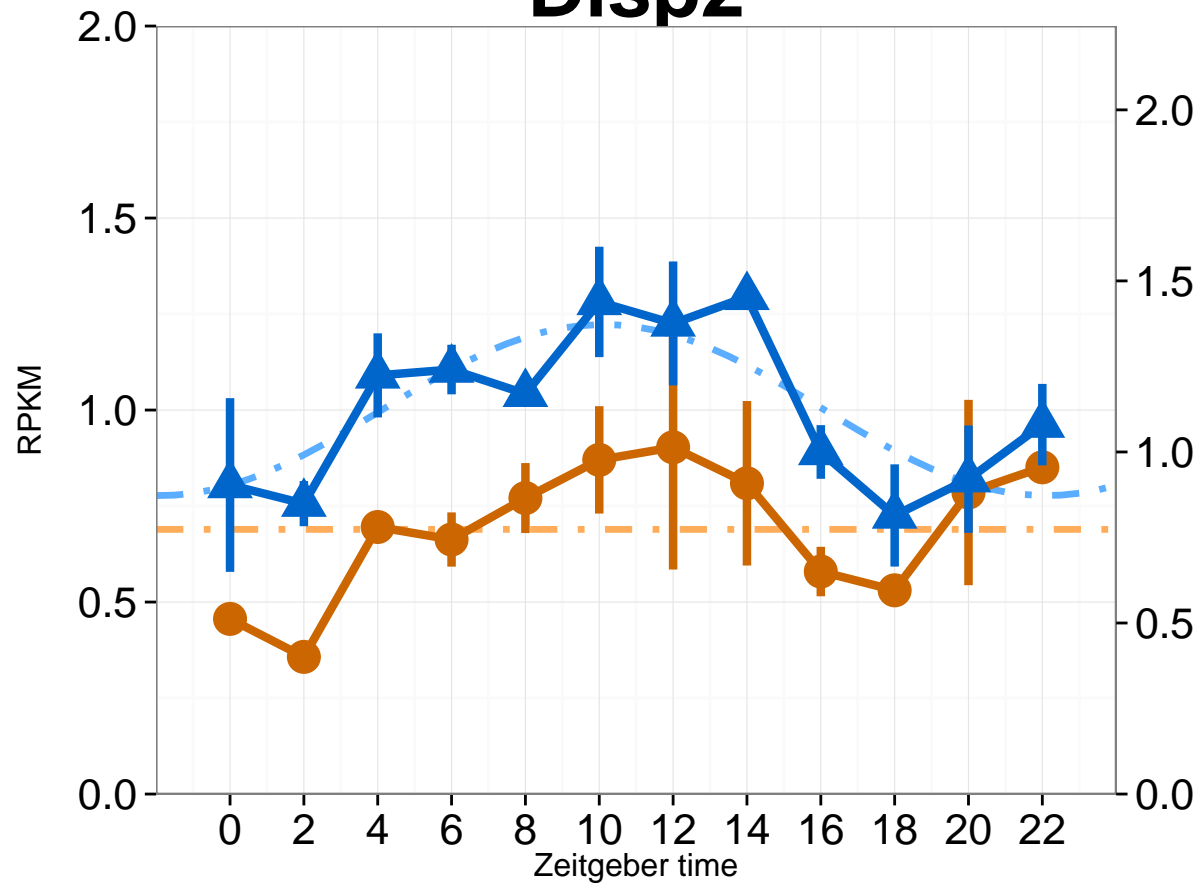

## Disp2

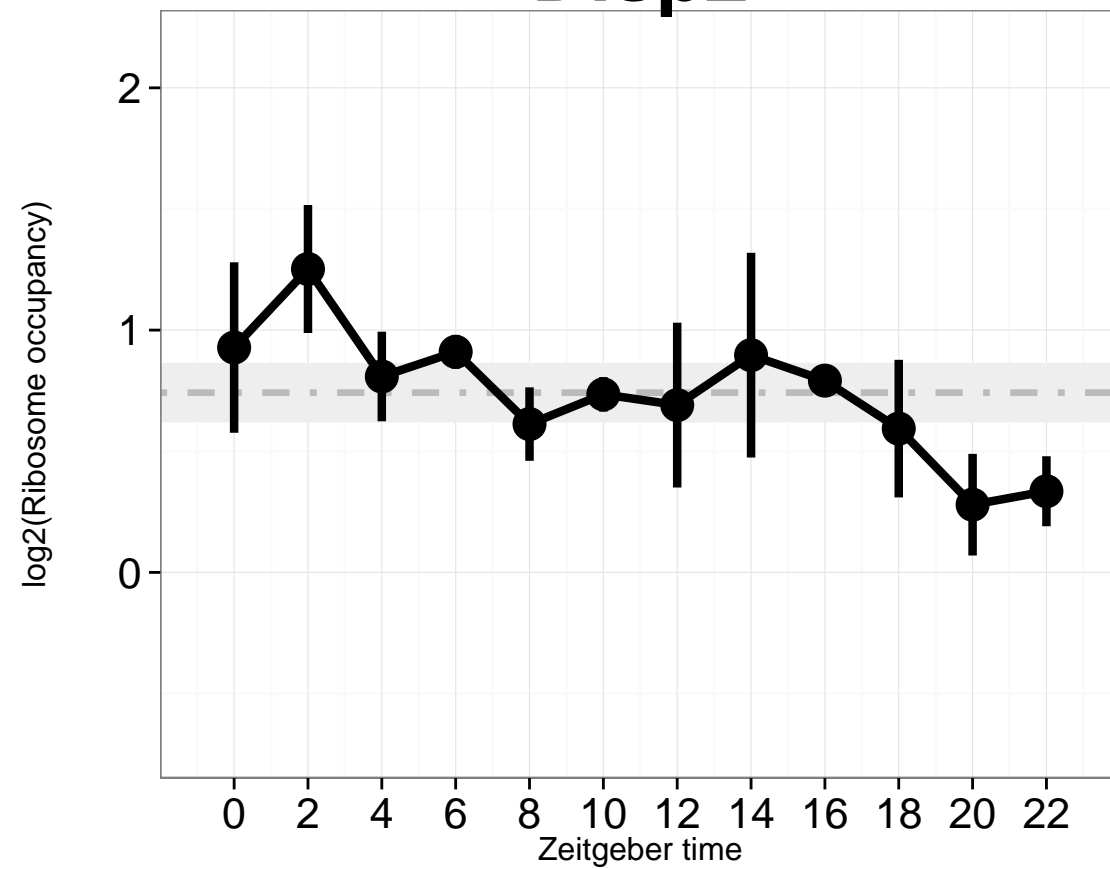

Supplement: SuppDataset_1.zip [file Disp2_set_C.pdf › Supplemental Dataset 1/C-mRNA_nonrhythm_translation_rhyth/Disp2_set_C.pdf]

# Dixdc1

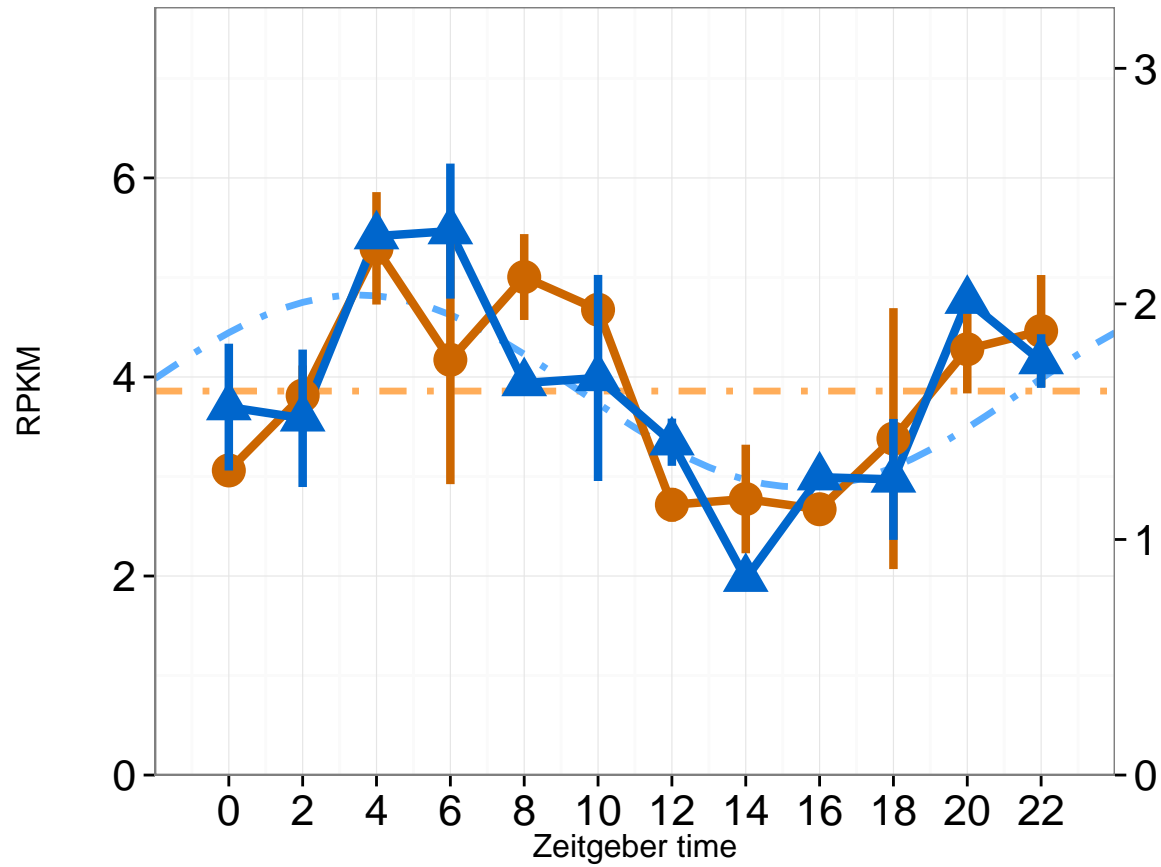

# Dixdc1

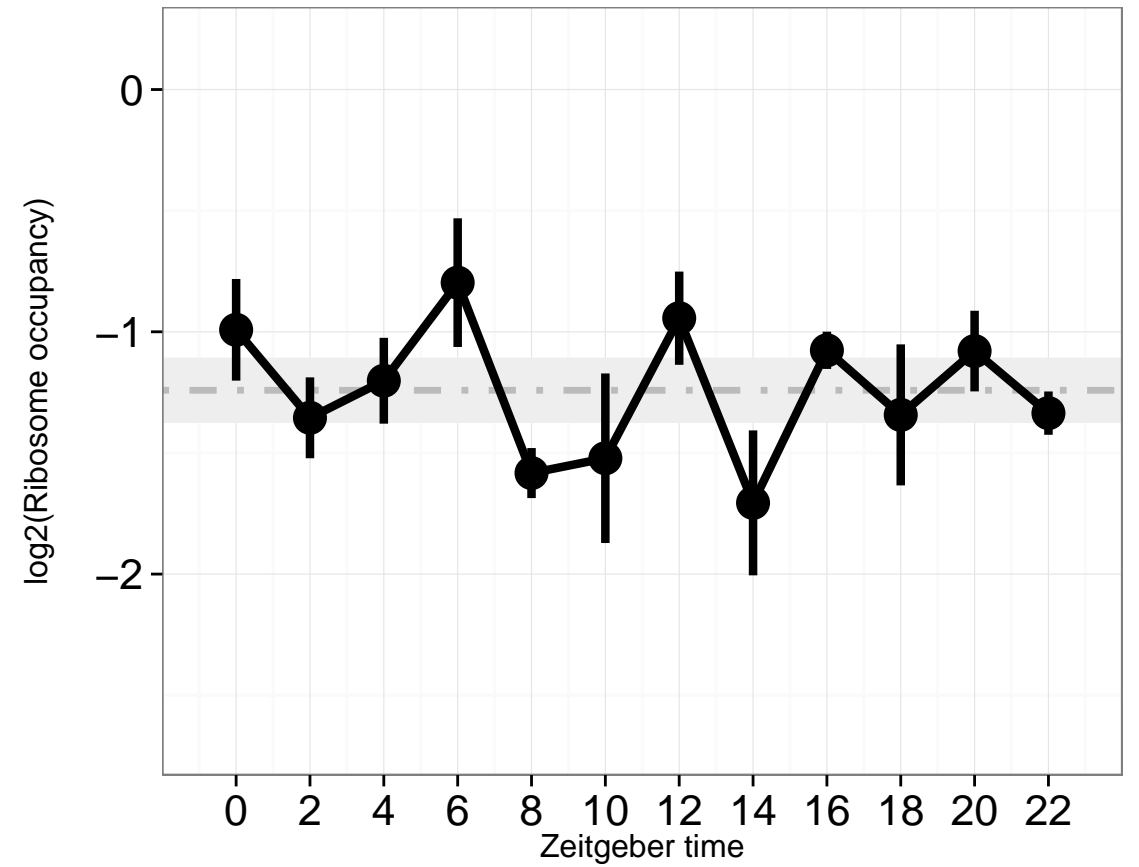

Supplement: SuppDataset_1.zip [file Dixdc1_set_C.pdf › Supplemental Dataset 1/C-mRNA_nonrhythm_translation_rhyth/Dixdc1_set_C.pdf]

# Dnaja4

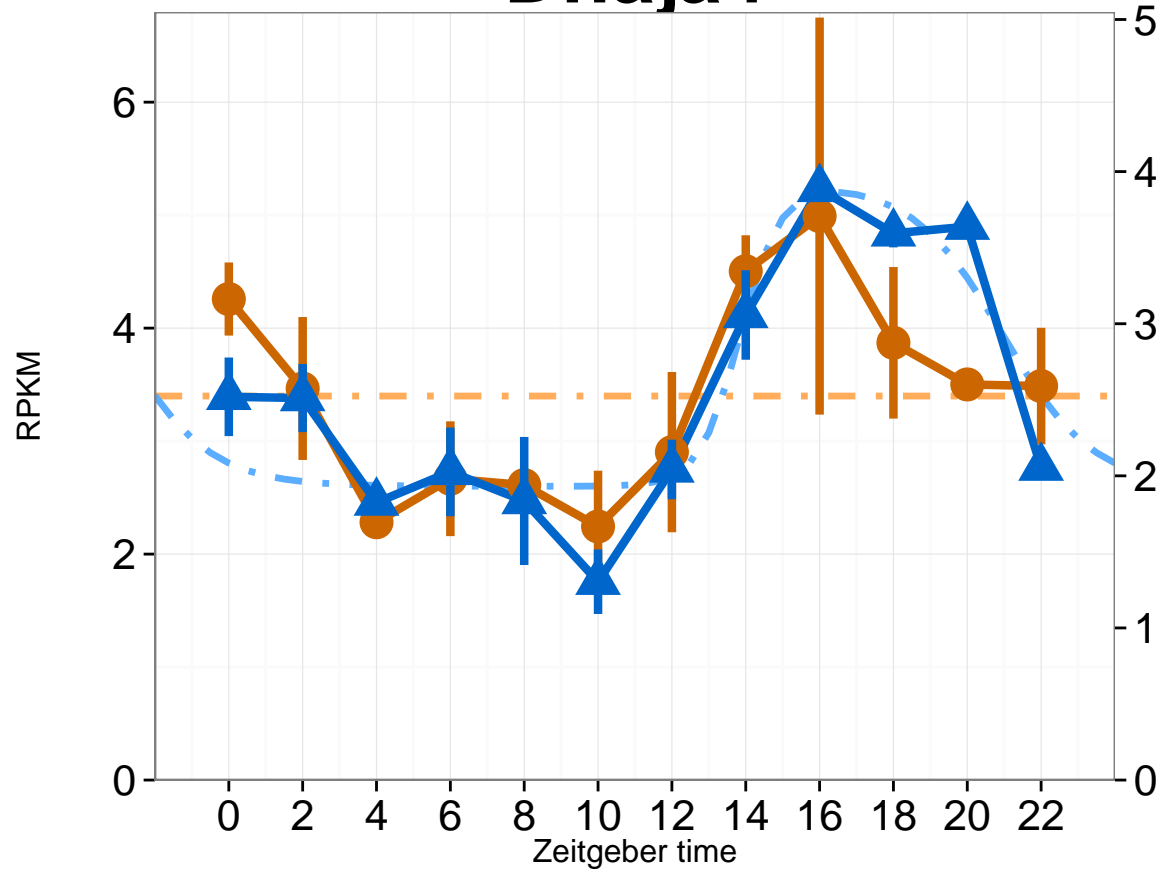

# Dnaja4

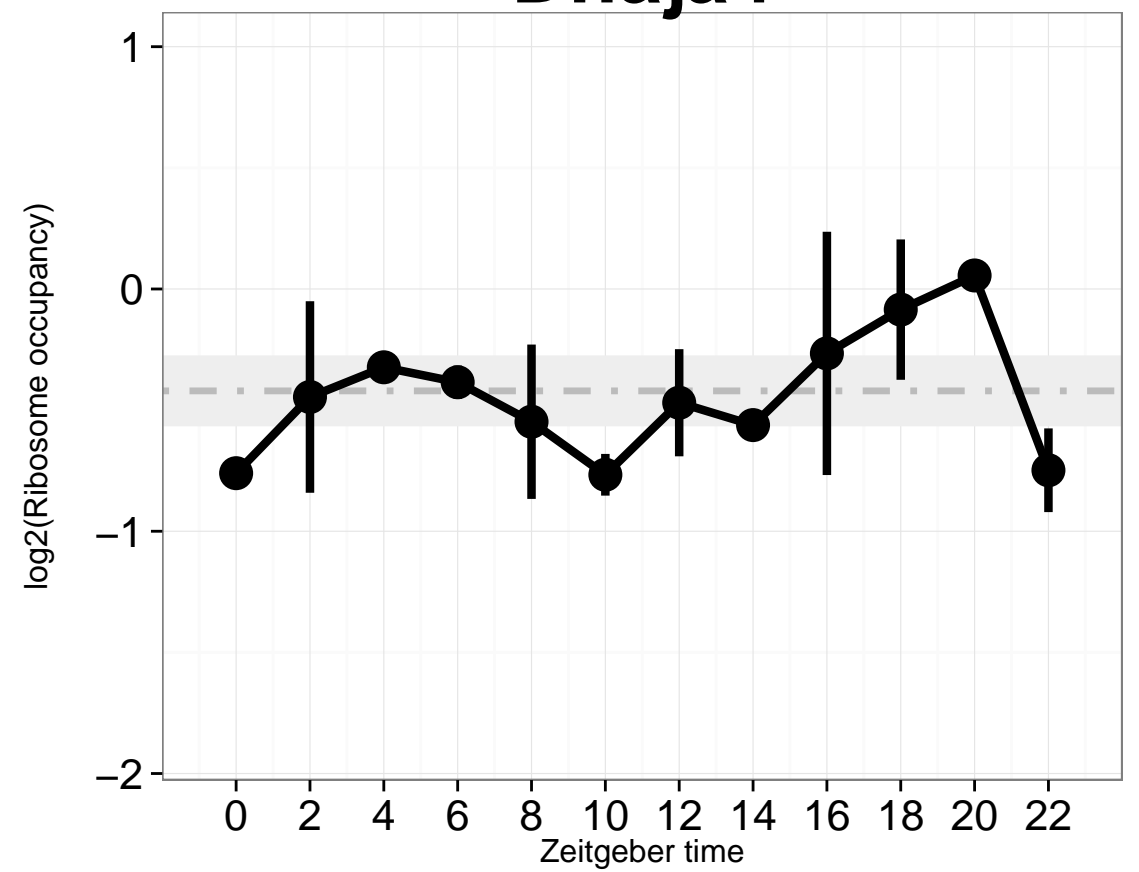

Supplement: SuppDataset_1.zip [file Dnaja4_set_C.pdf › Supplemental Dataset 1/C-mRNA_nonrhythm_translation_rhyth/Dnaja4_set_C.pdf]

## Dnajb2

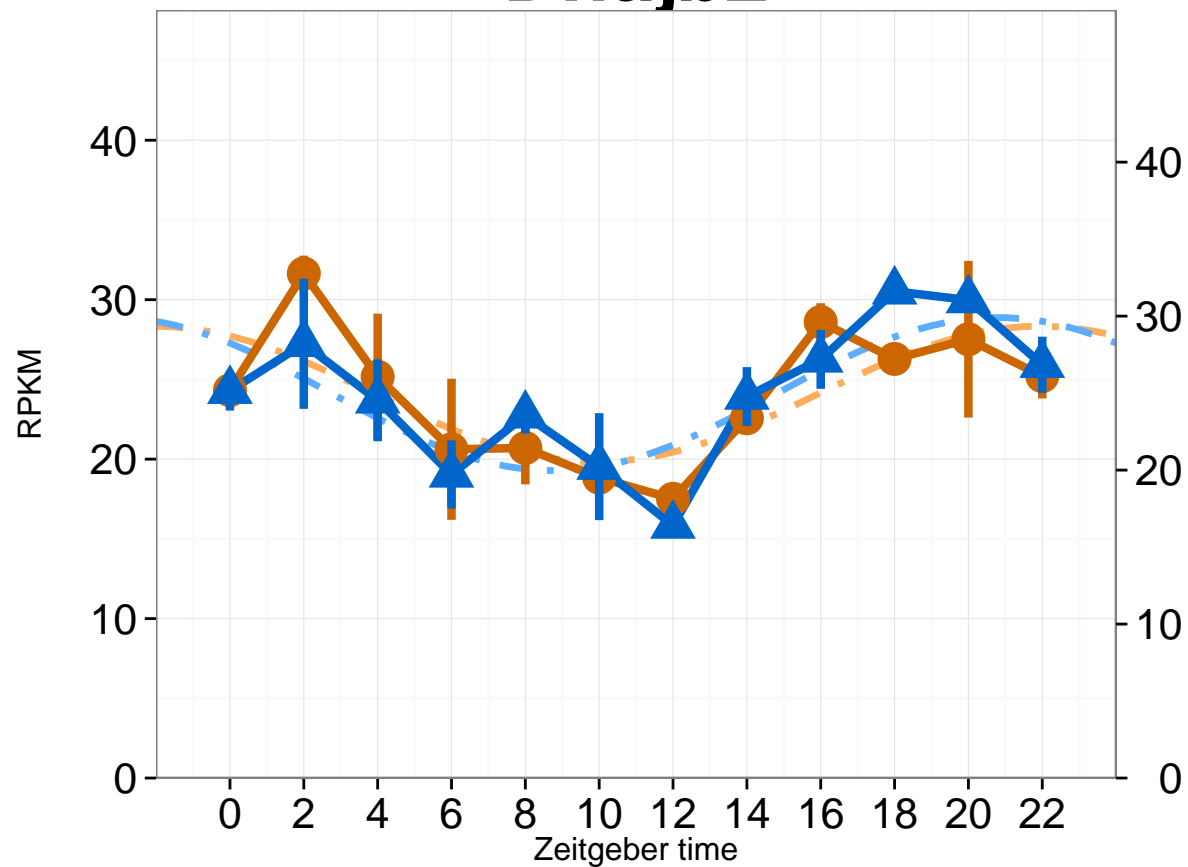

## Dnajb2

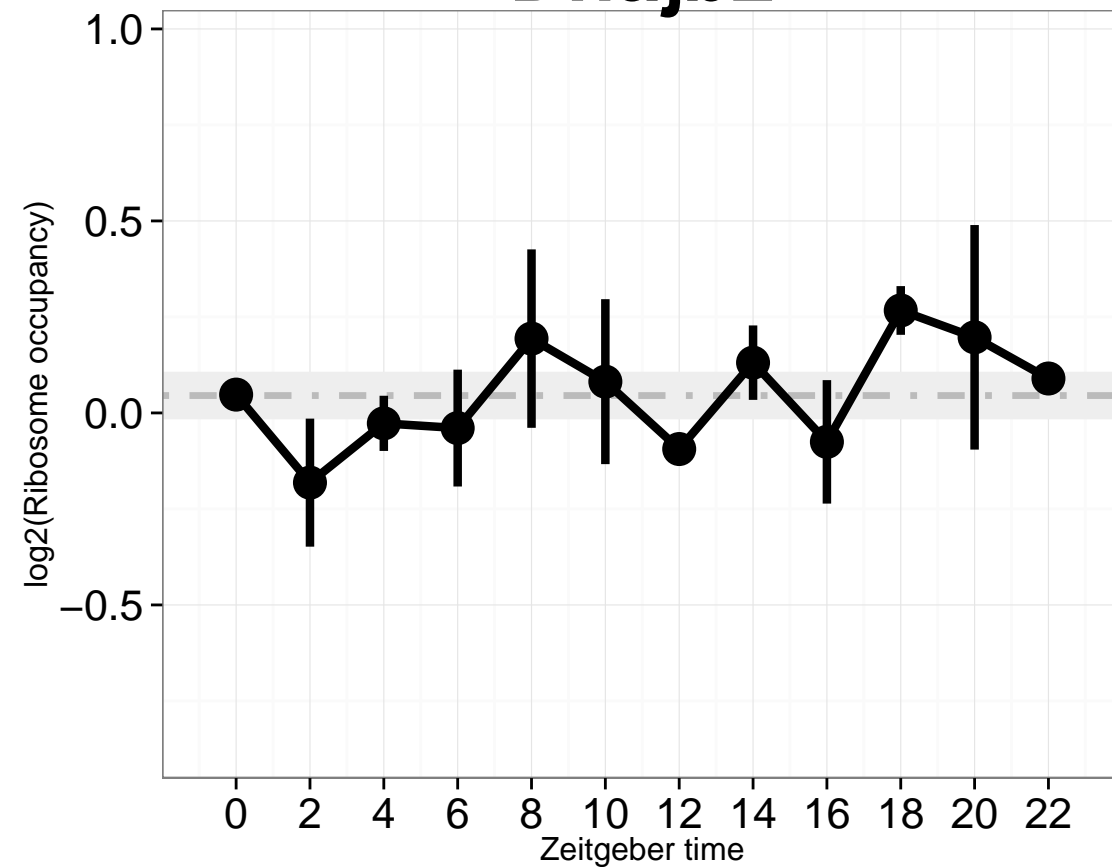

Supplement: SuppDataset_1.zip [file Dnajb2_set_C.pdf › Supplemental Dataset 1/C-mRNA_nonrhythm_translation_rhyth/Dnajb2_set_C.pdf]

# Donson

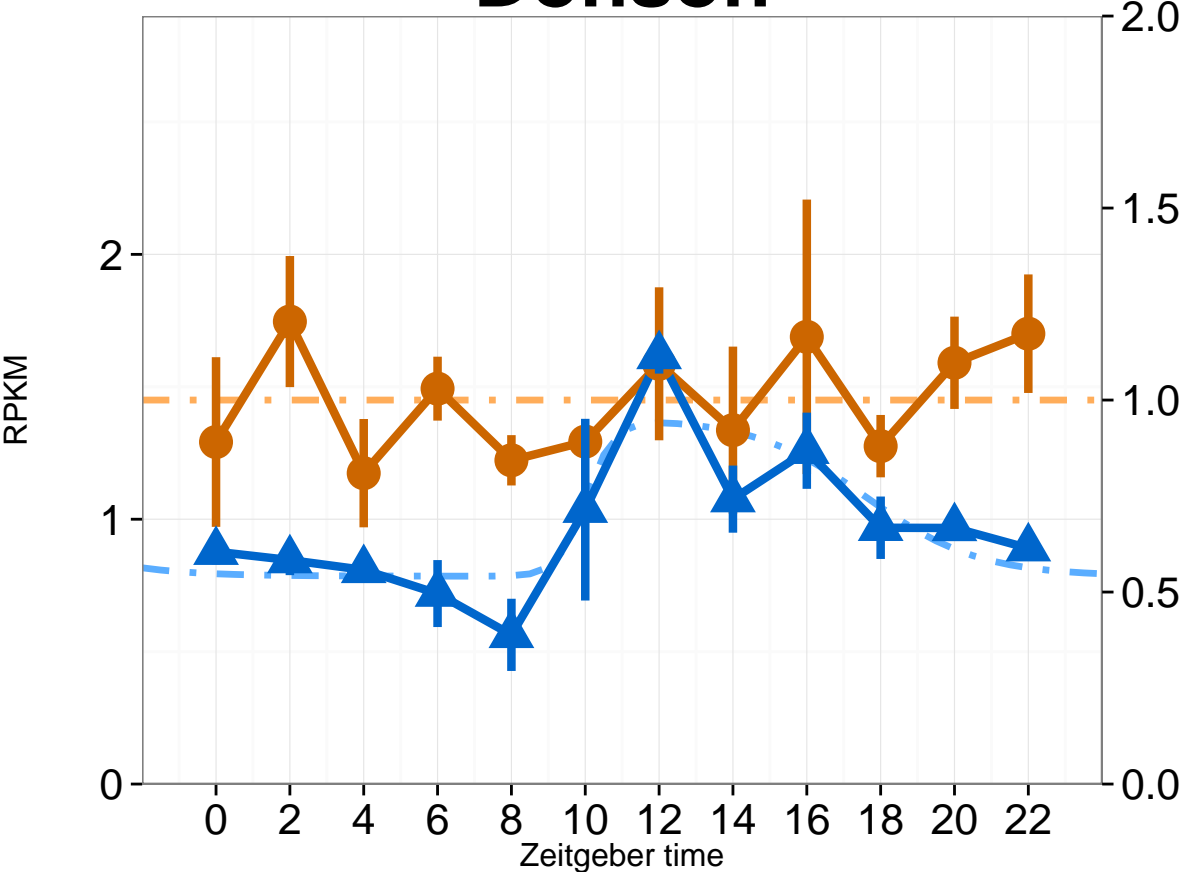

# Donson

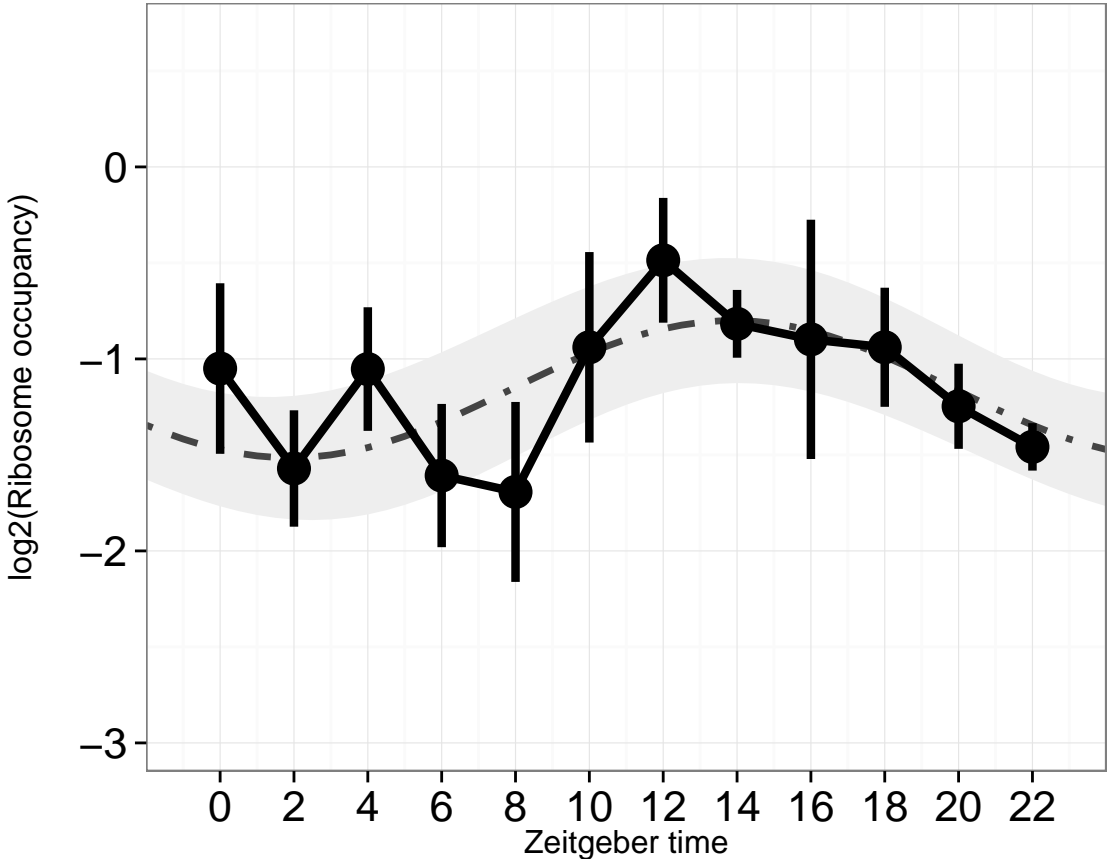

Supplement: SuppDataset_1.zip [file Donson_set_C.pdf › Supplemental Dataset 1/C-mRNA_nonrhythm_translation_rhyth/Donson_set_C.pdf]

# Dpy19l1

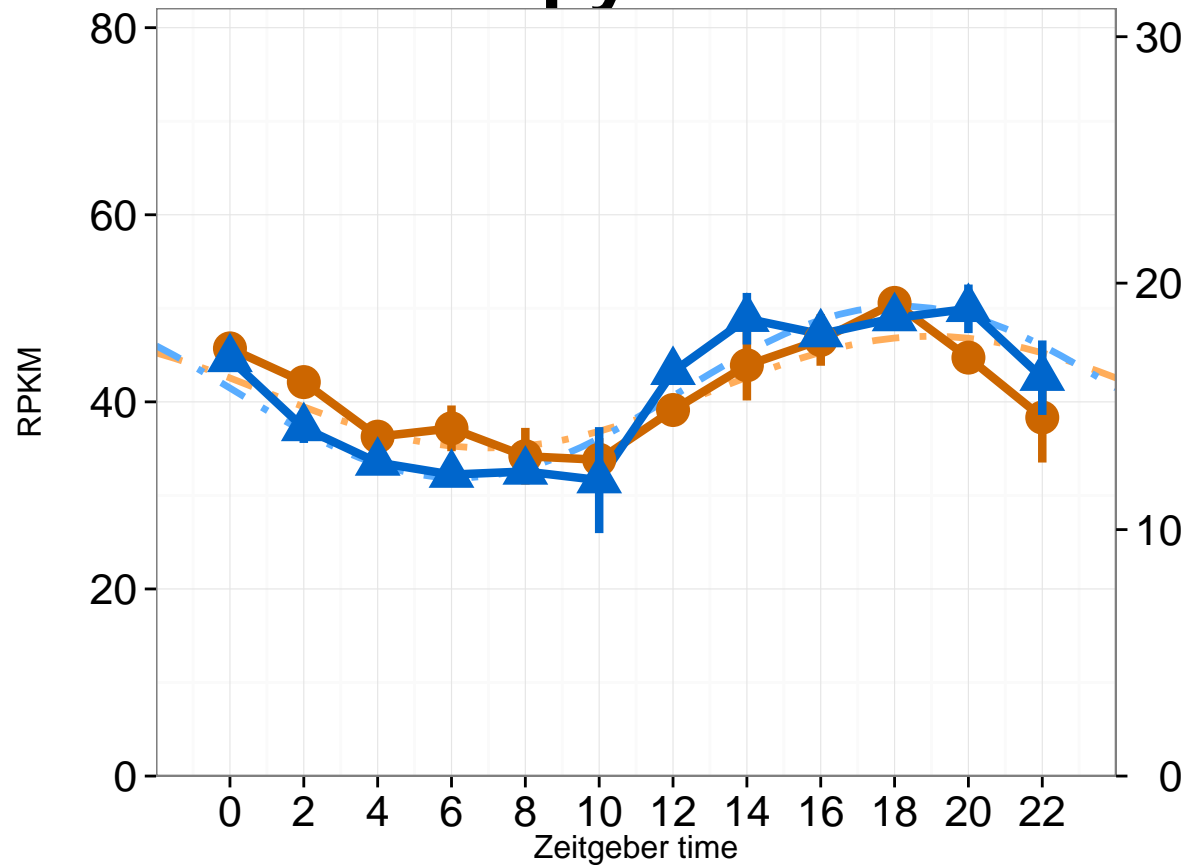

# Dpy19l1

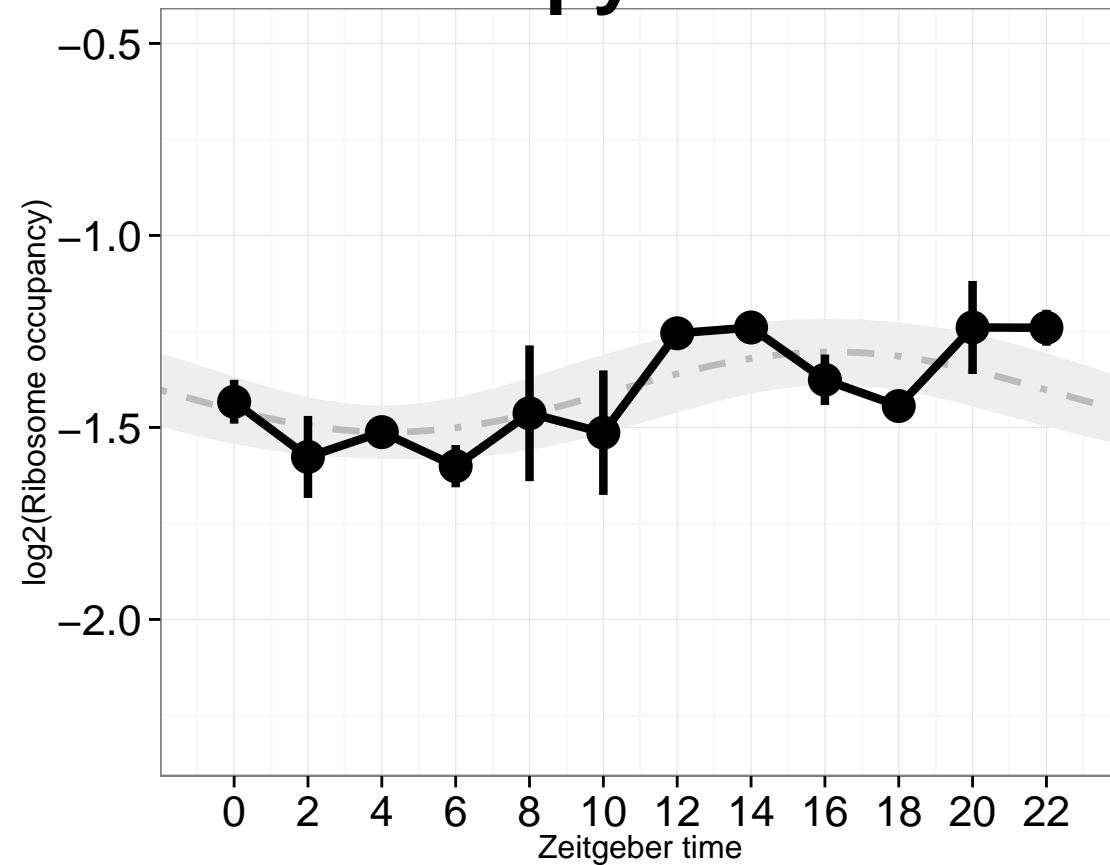

Supplement: SuppDataset_1.zip [file Dpy19l1_set_C.pdf › Supplemental Dataset 1/C-mRNA_nonrhythm_translation_rhyth/Dpy19l1_set_C.pdf]

## Dvl2

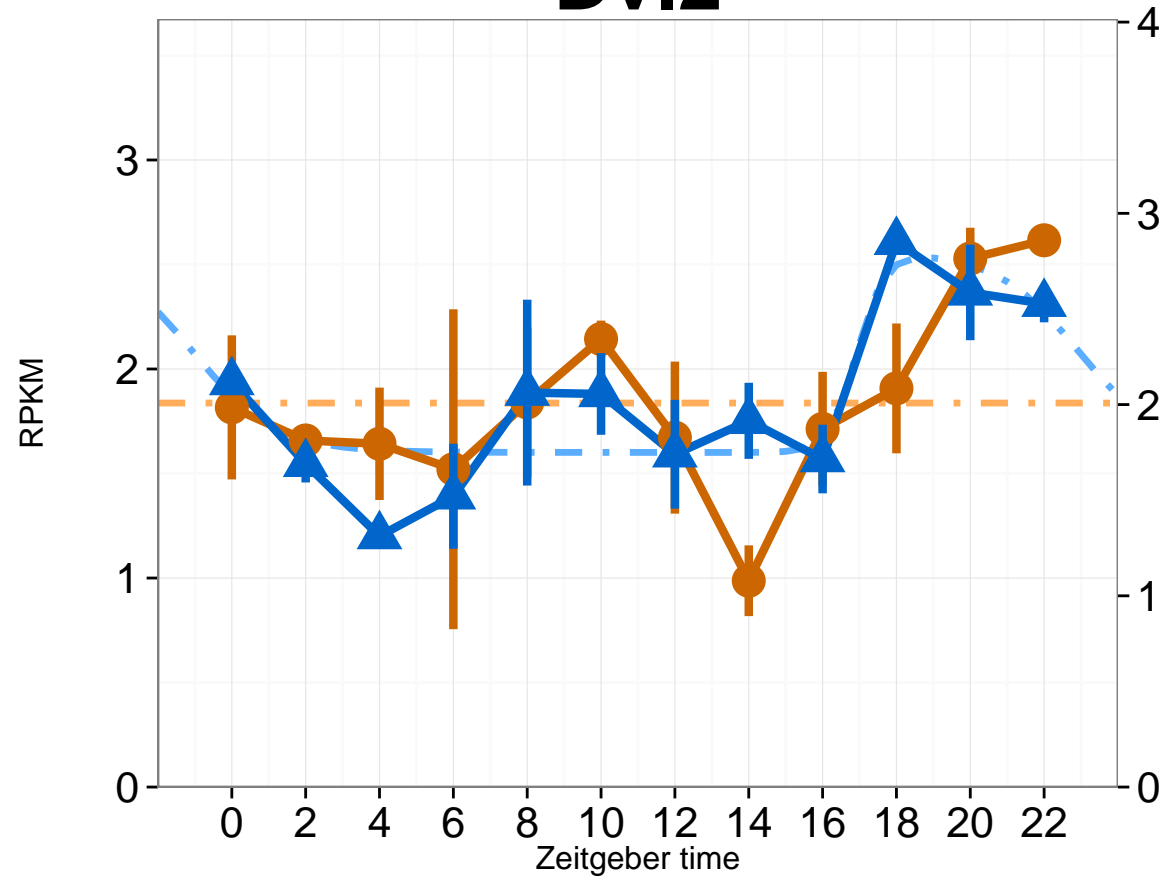

## Dvl2

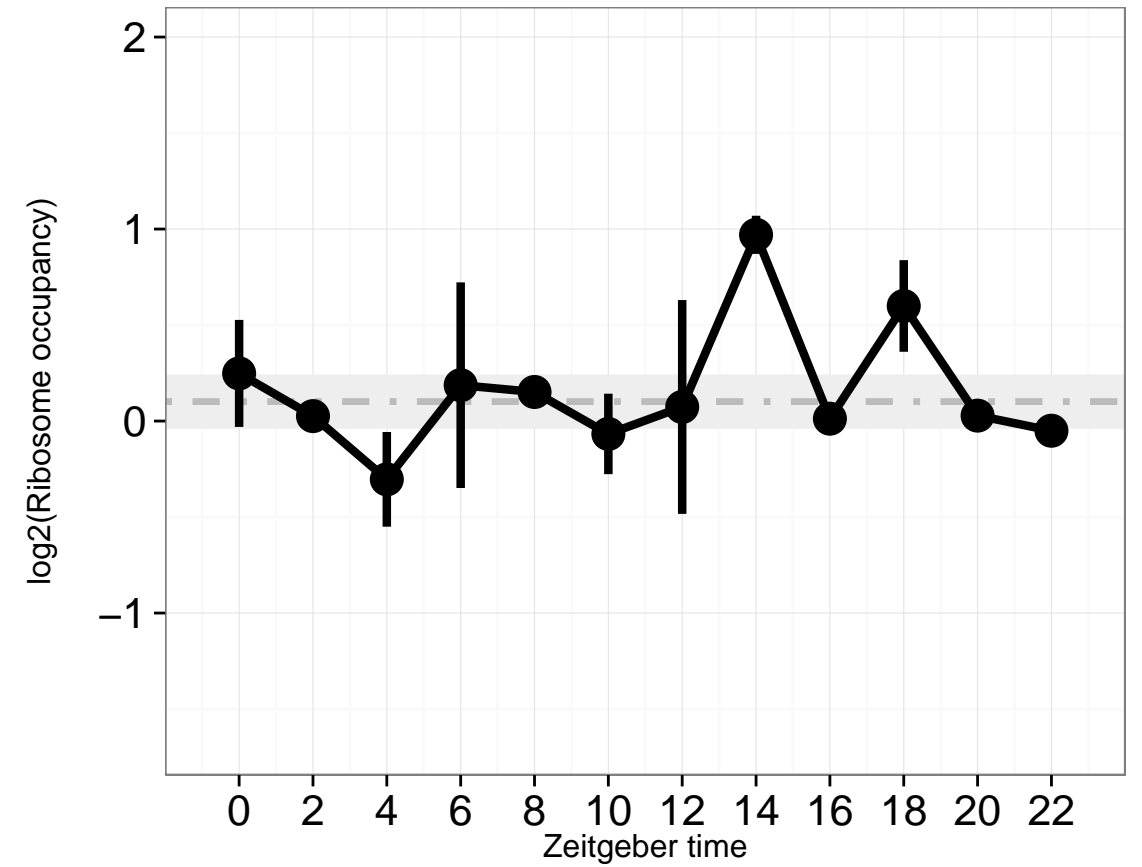

Supplement: SuppDataset_1.zip [file Dvl2_set_C.pdf › Supplemental Dataset 1/C-mRNA_nonrhythm_translation_rhyth/Dvl2_set_C.pdf]

# E130311K13Rik

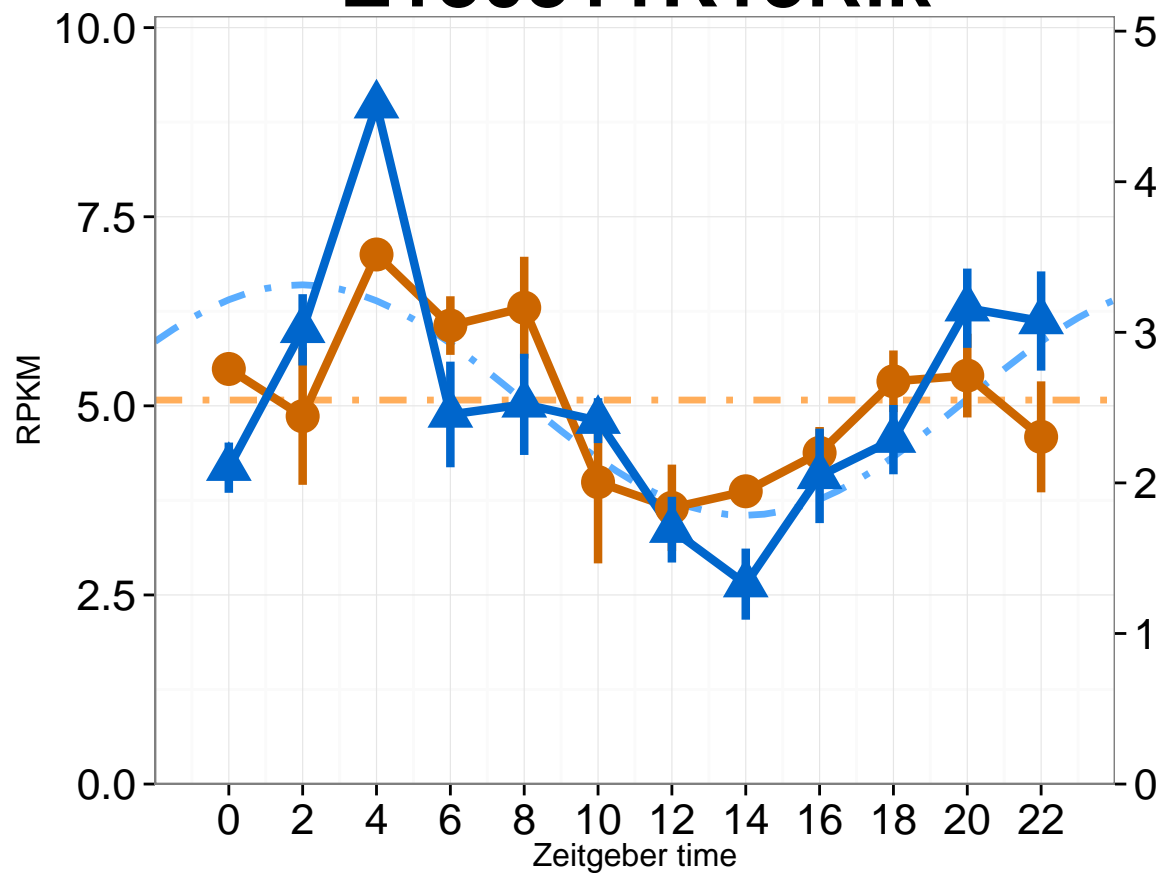

# E130311K13Rik

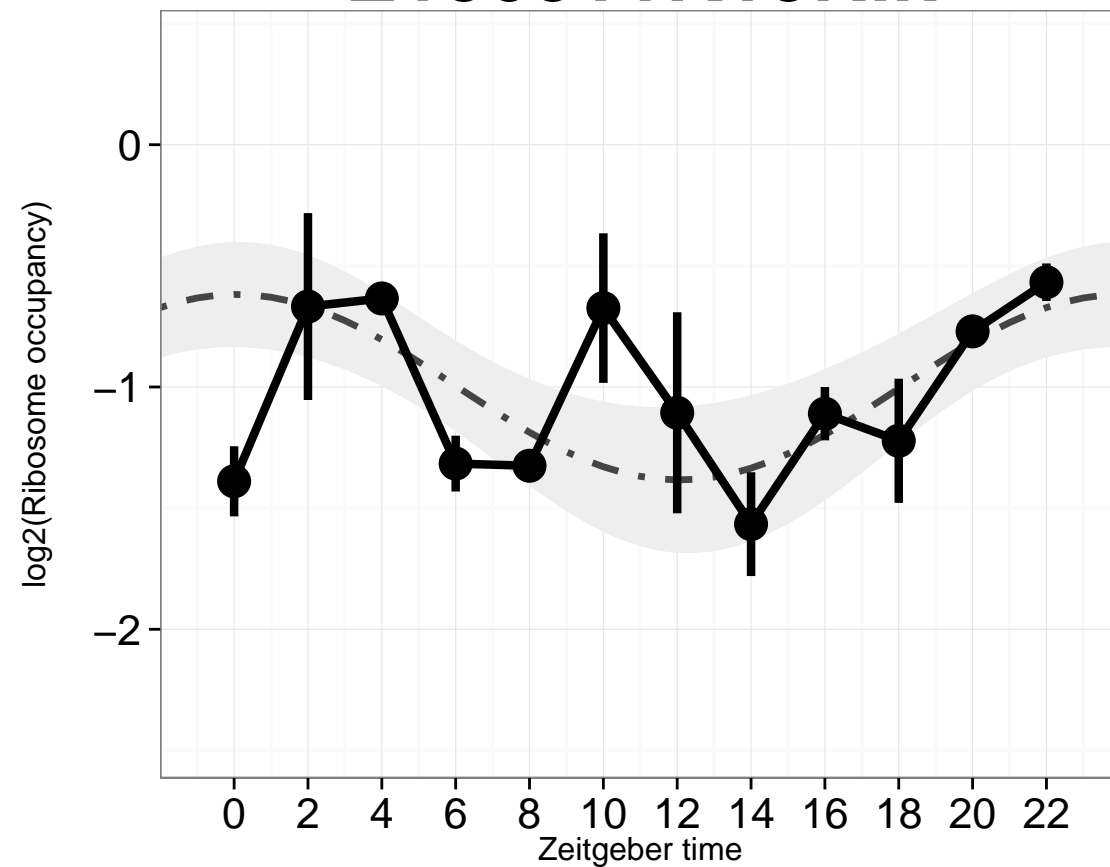

Supplement: SuppDataset_1.zip [file E130311K13Rik_set_C.pdf › Supplemental Dataset 1/C-mRNA_nonrhythm_translation_rhyth/E130311K13Rik_set_C.pdf]

## Ece2

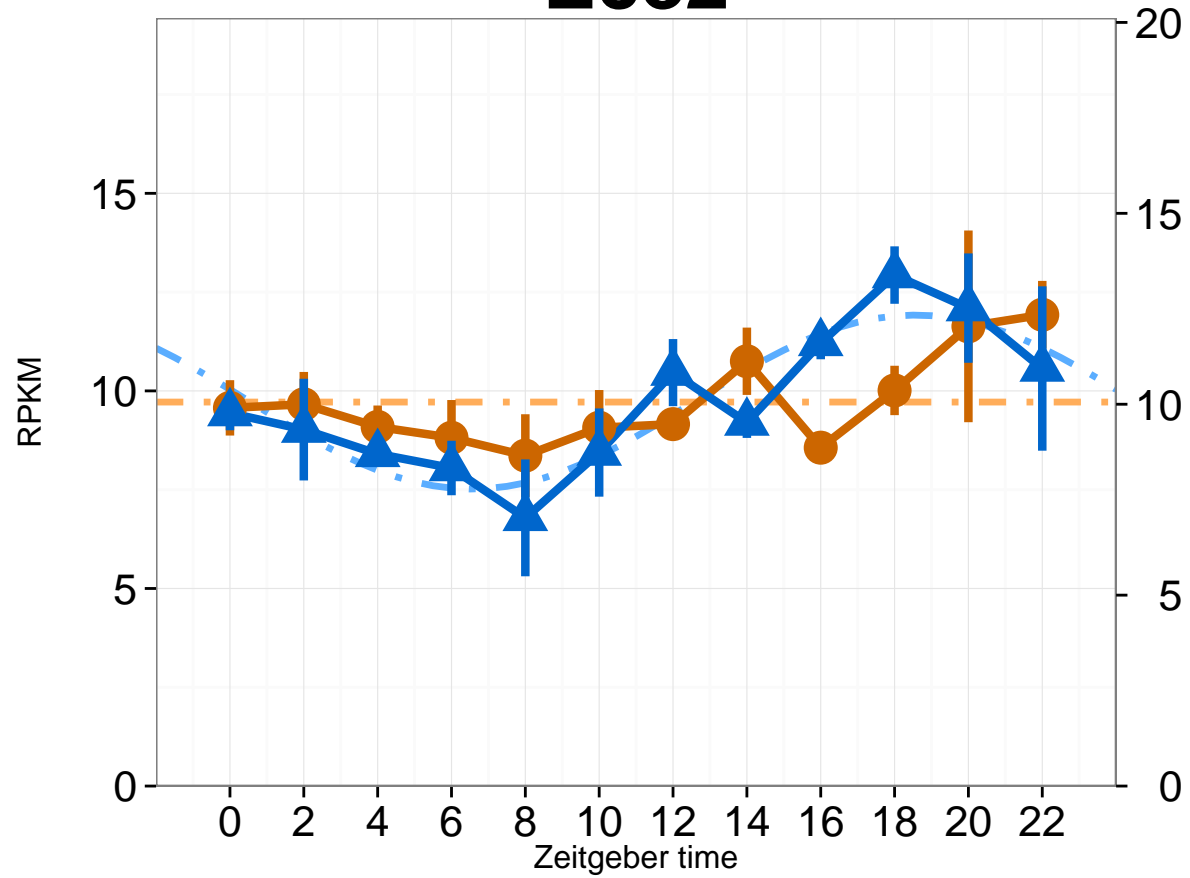

## Ece2

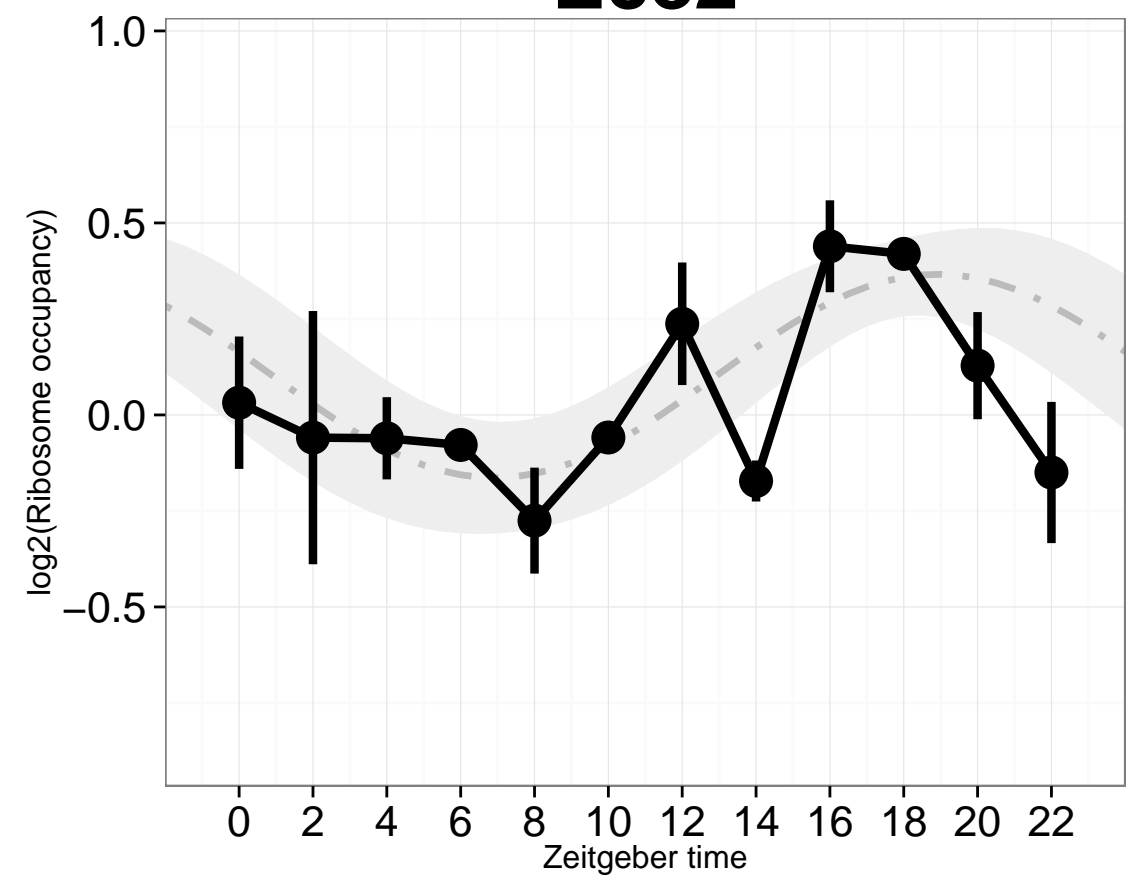

Supplement: SuppDataset_1.zip [file Ece2_set_C.pdf › Supplemental Dataset 1/C-mRNA_nonrhythm_translation_rhyth/Ece2_set_C.pdf]

## Edem3

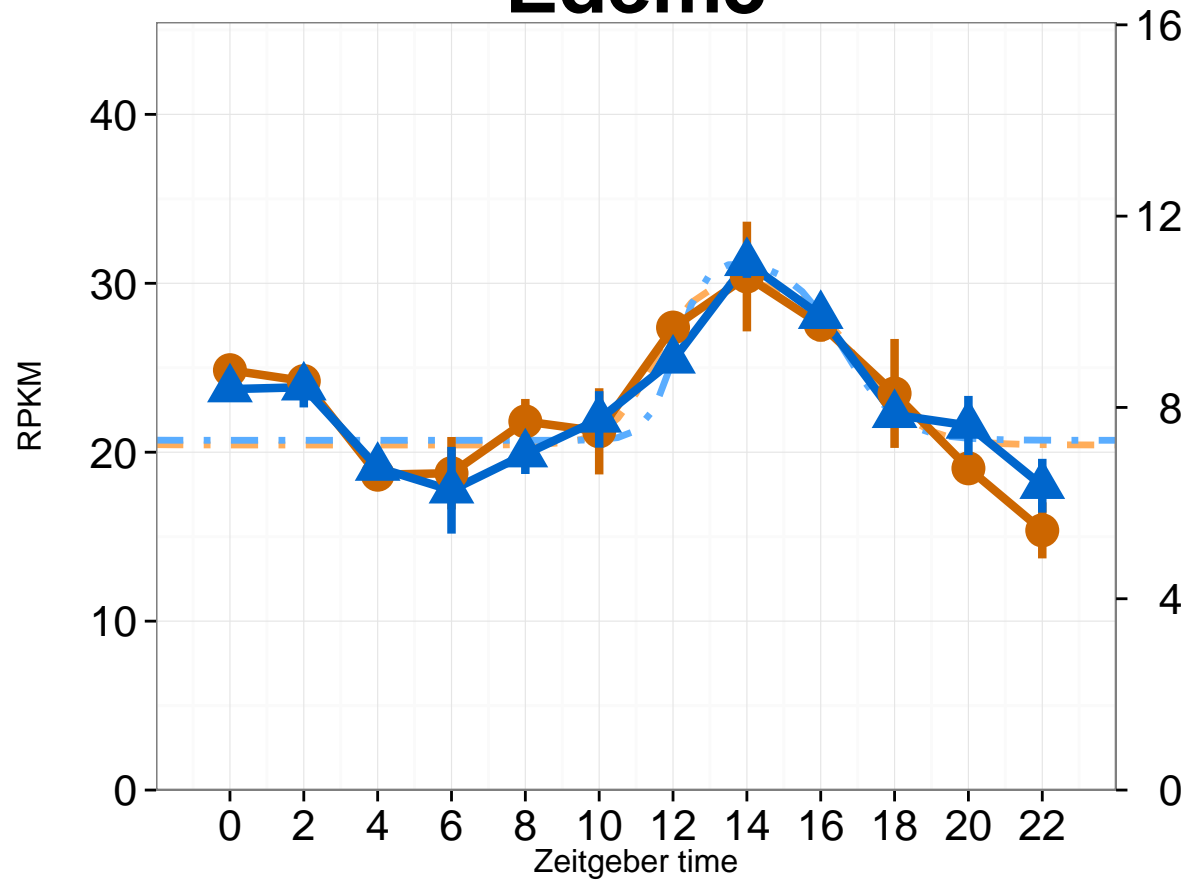

## Edem3

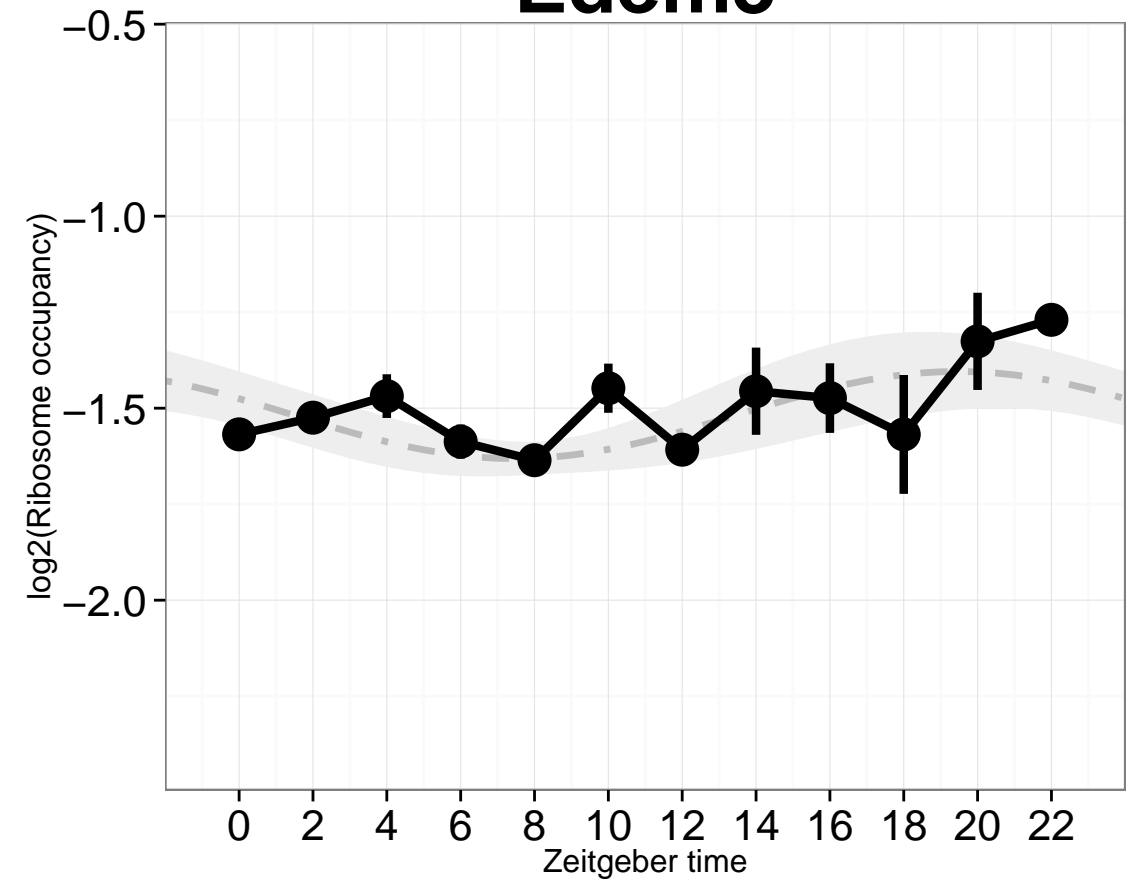

Supplement: SuppDataset_1.zip [file Edem3_set_C.pdf › Supplemental Dataset 1/C-mRNA_nonrhythm_translation_rhyth/Edem3_set_C.pdf]

# Eef1a1

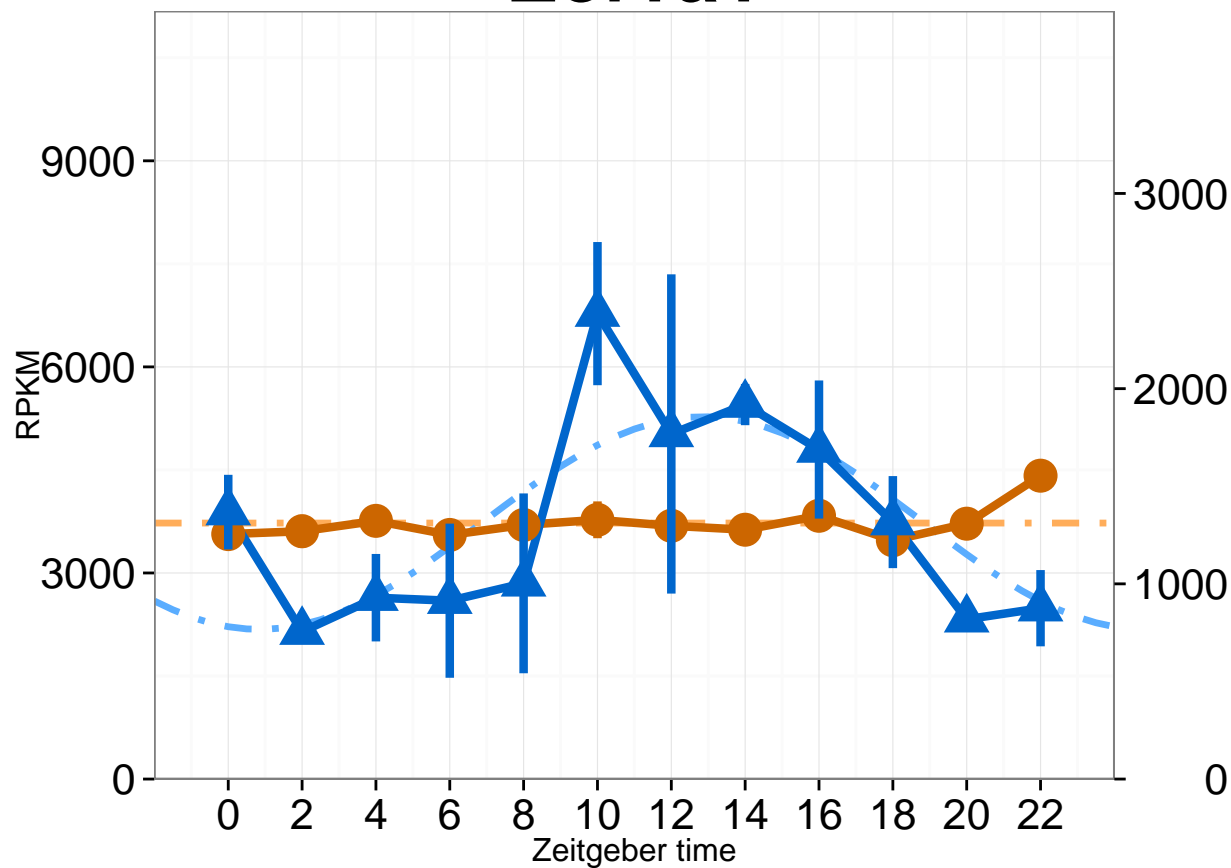

# Eef1a1

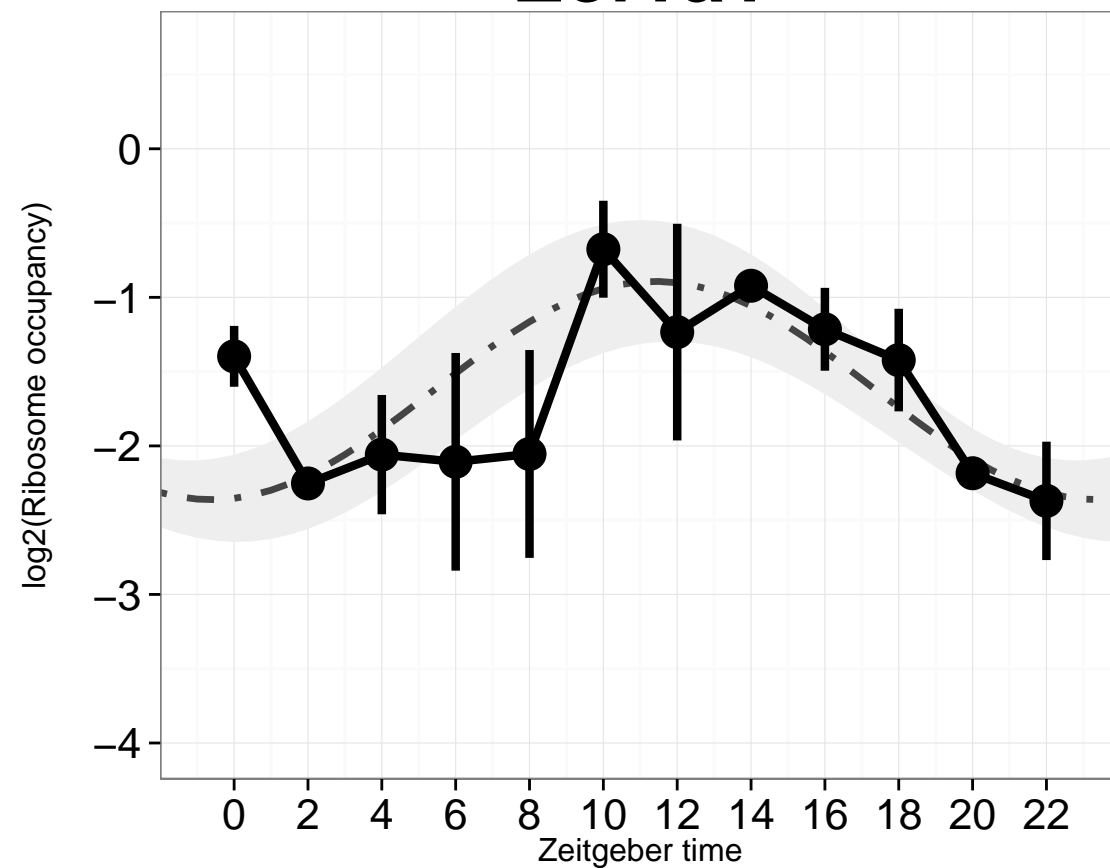

Supplement: SuppDataset_1.zip [file Eef1a1_set_C.pdf › Supplemental Dataset 1/C-mRNA_nonrhythm_translation_rhyth/Eef1a1_set_C.pdf]

# Eef1b2

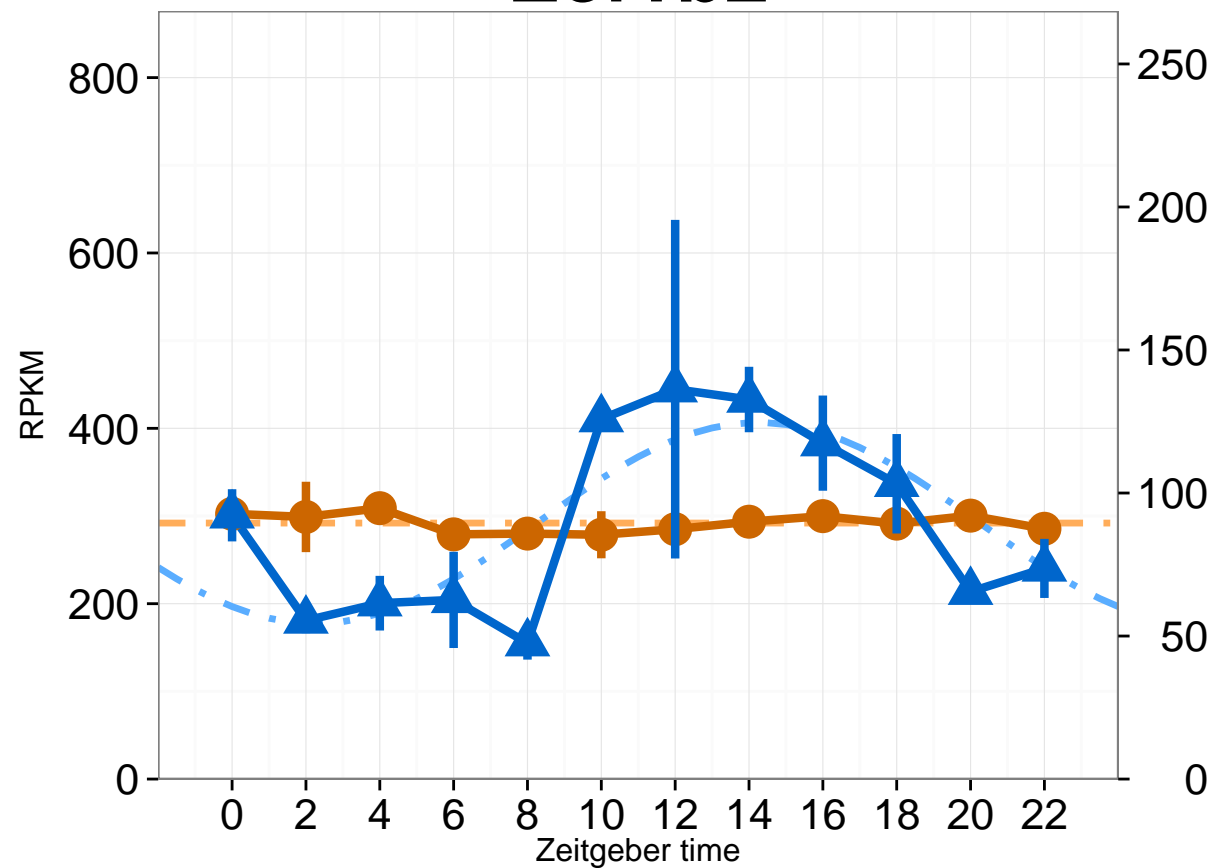

# Eef1b2

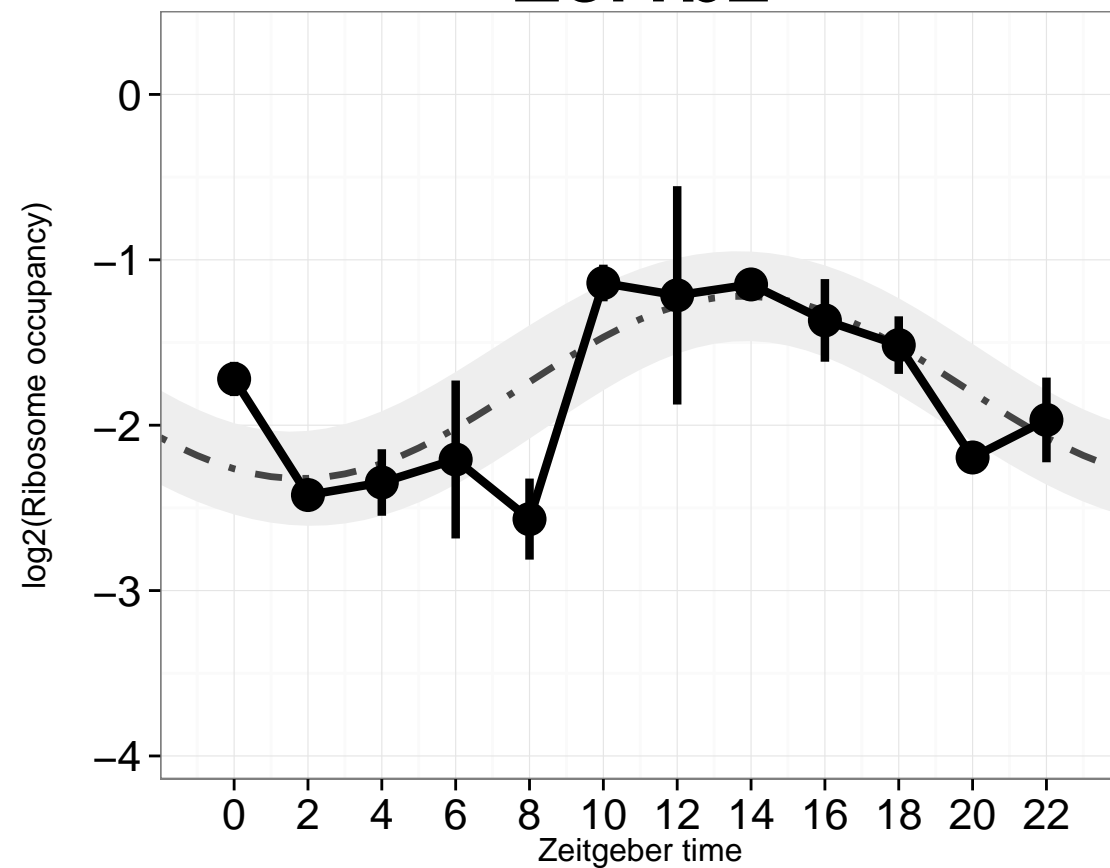

Supplement: SuppDataset_1.zip [file Eef1b2_set_C.pdf › Supplemental Dataset 1/C-mRNA_nonrhythm_translation_rhyth/Eef1b2_set_C.pdf]

## Eef1d

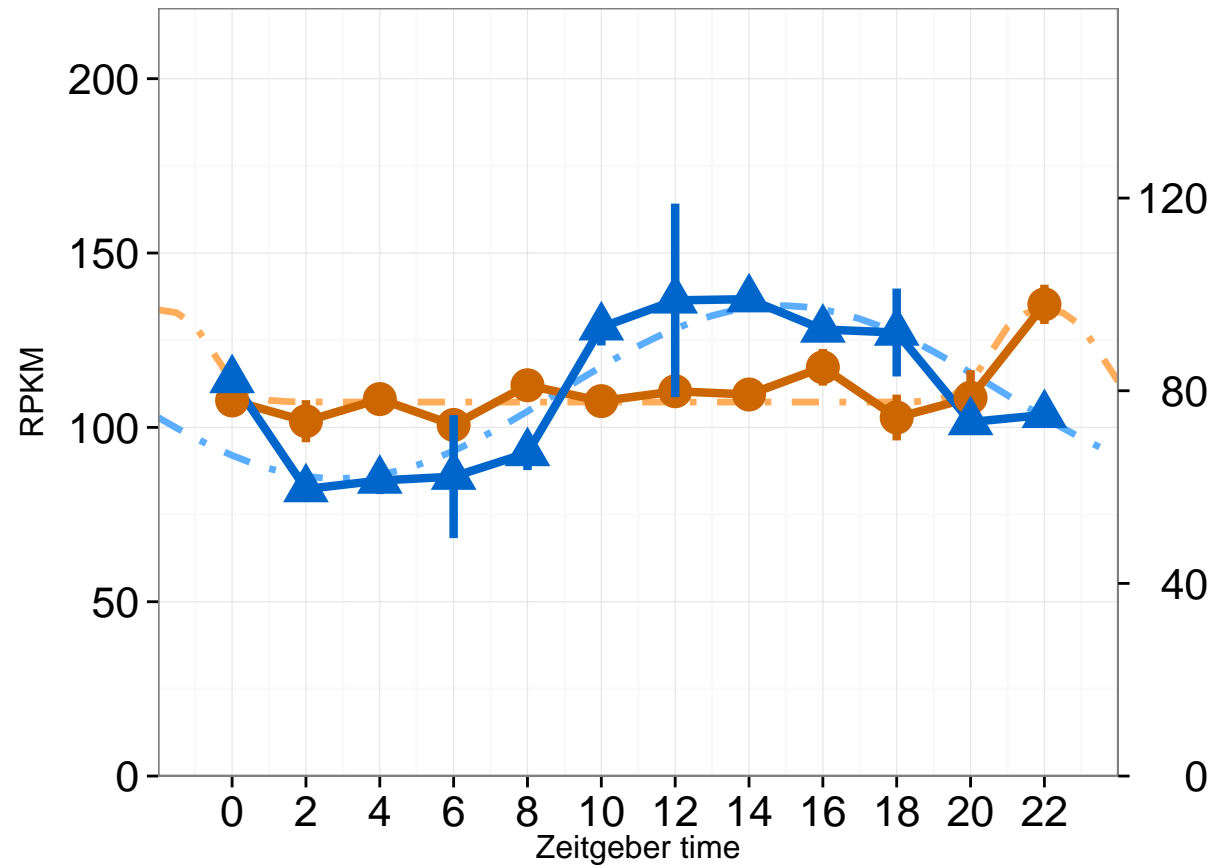

## Eef1d

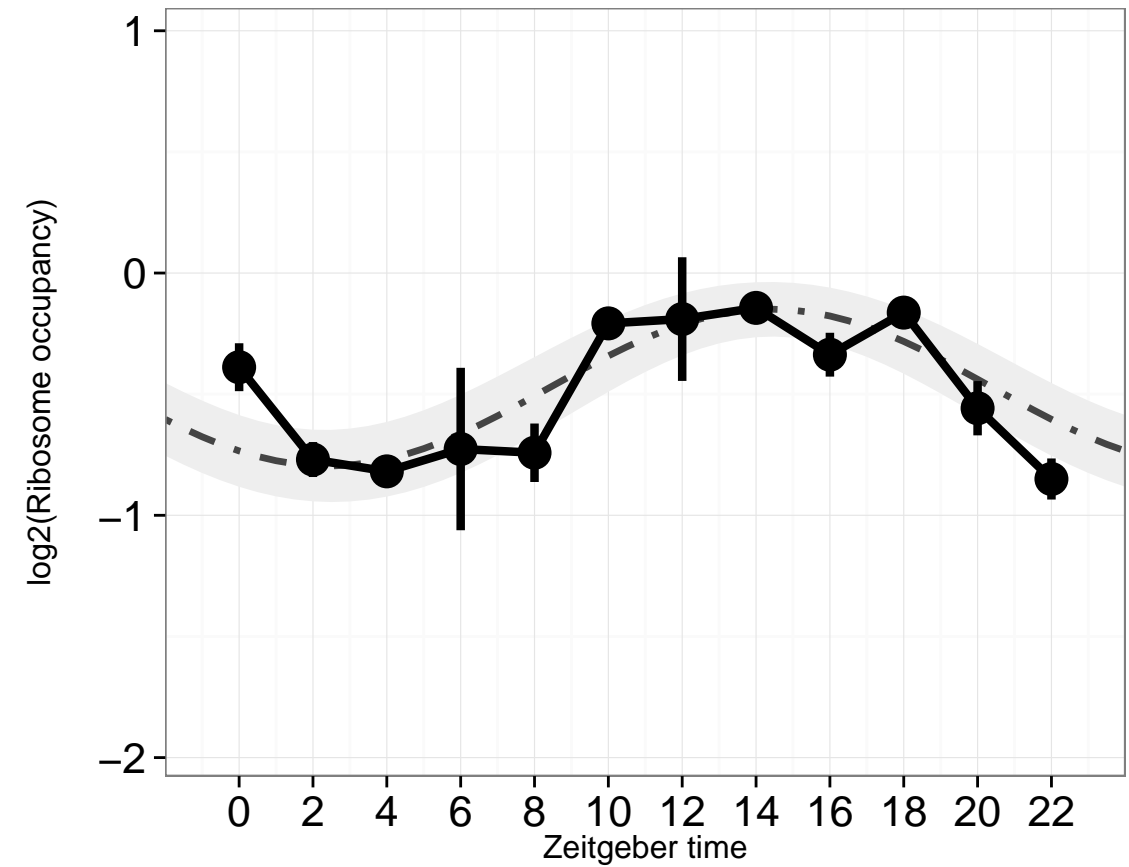

Supplement: SuppDataset_1.zip [file Eef1d_set_C.pdf › Supplemental Dataset 1/C-mRNA_nonrhythm_translation_rhyth/Eef1d_set_C.pdf]

## Eef1g

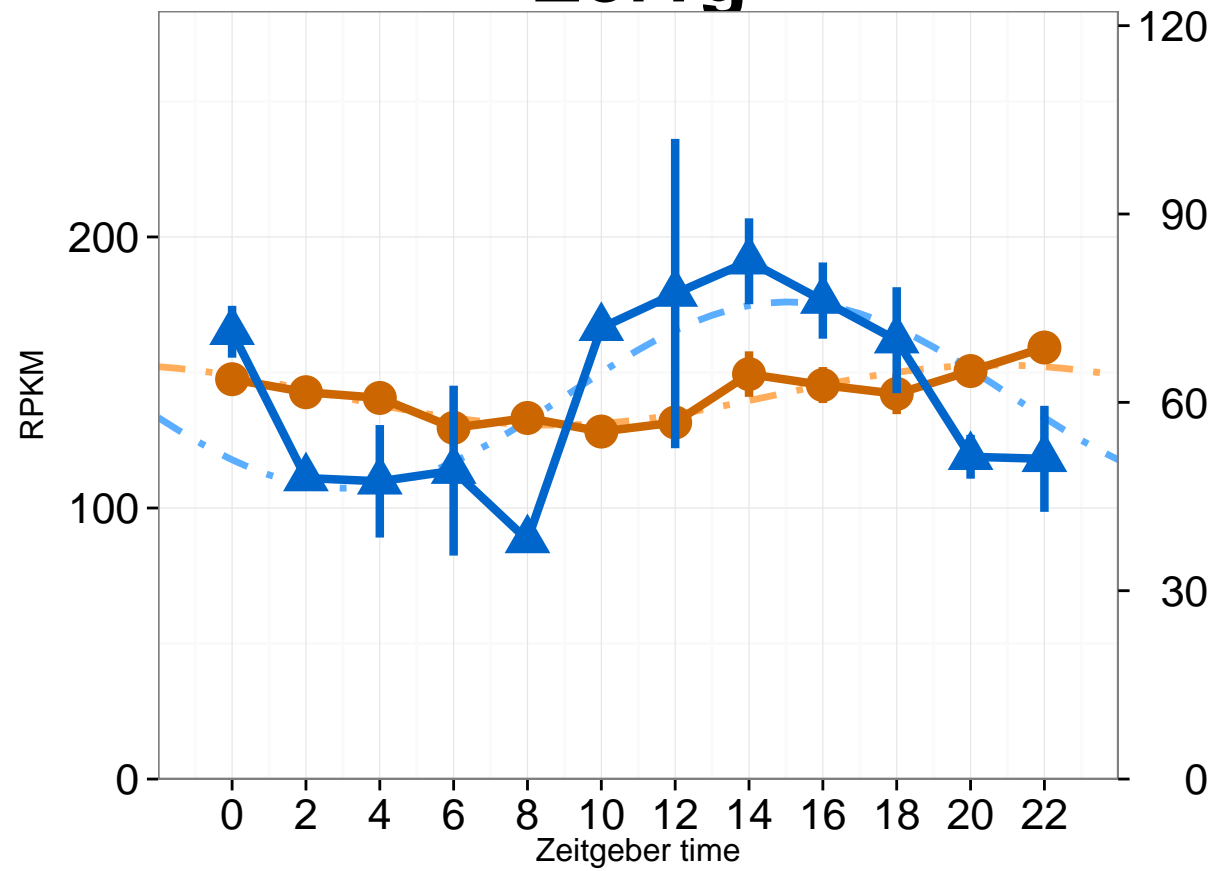

## Eef1g

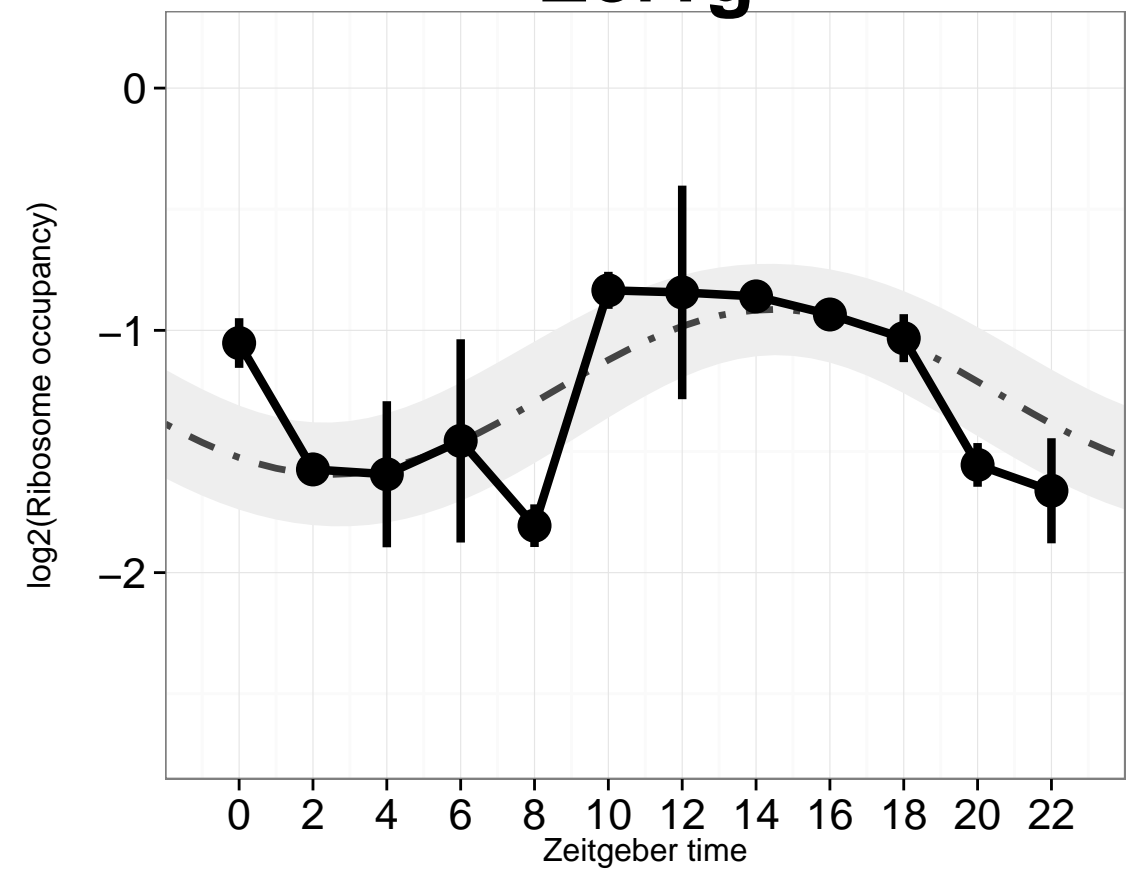

Supplement: SuppDataset_1.zip [file Eef1g_set_C.pdf › Supplemental Dataset 1/C-mRNA_nonrhythm_translation_rhyth/Eef1g_set_C.pdf]

## Eef2

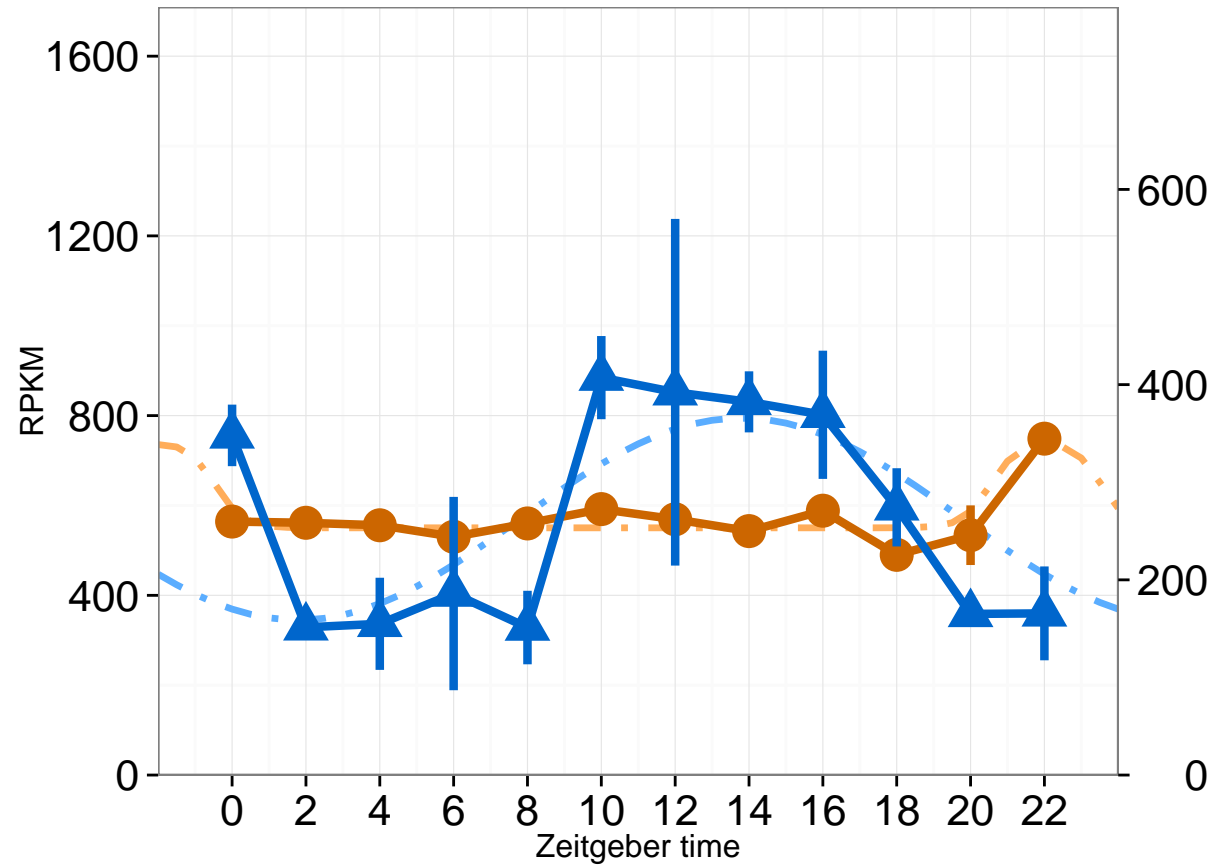

## Eef2

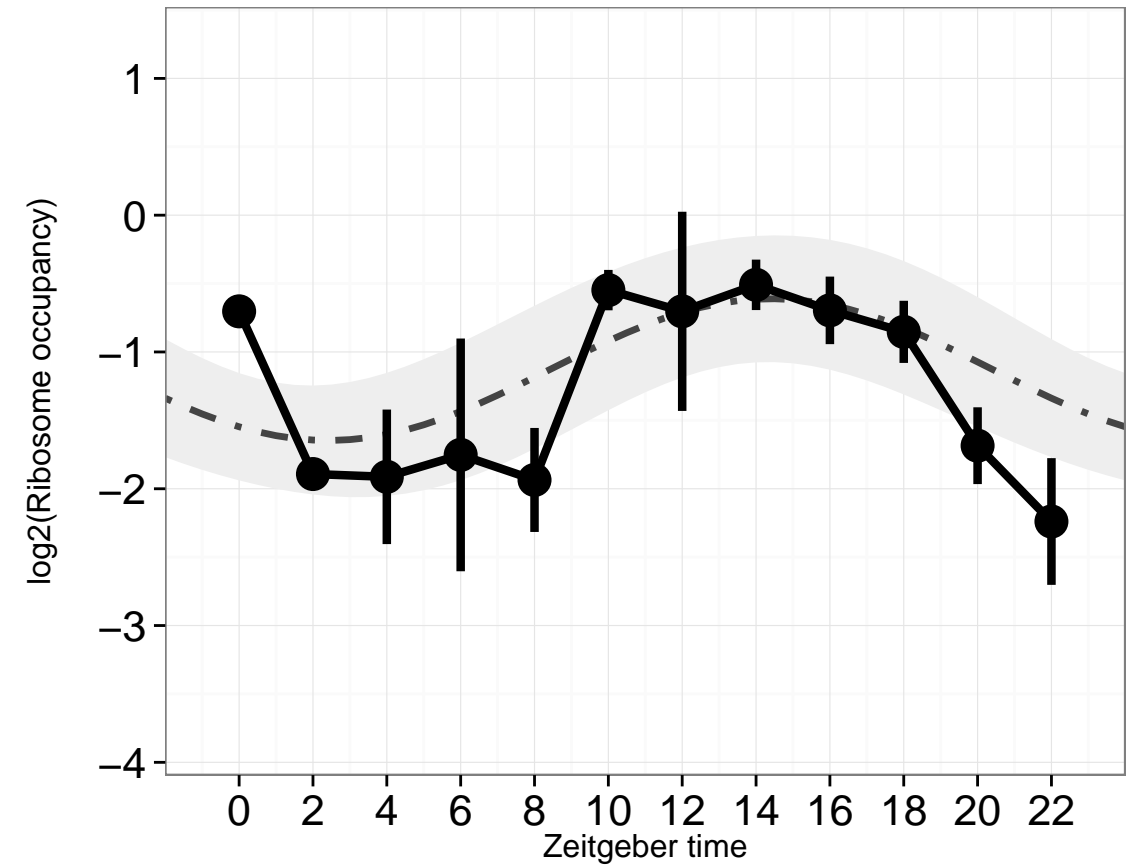

Supplement: SuppDataset_1.zip [file Eef2_set_C.pdf › Supplemental Dataset 1/C-mRNA_nonrhythm_translation_rhyth/Eef2_set_C.pdf]

## Eef2k

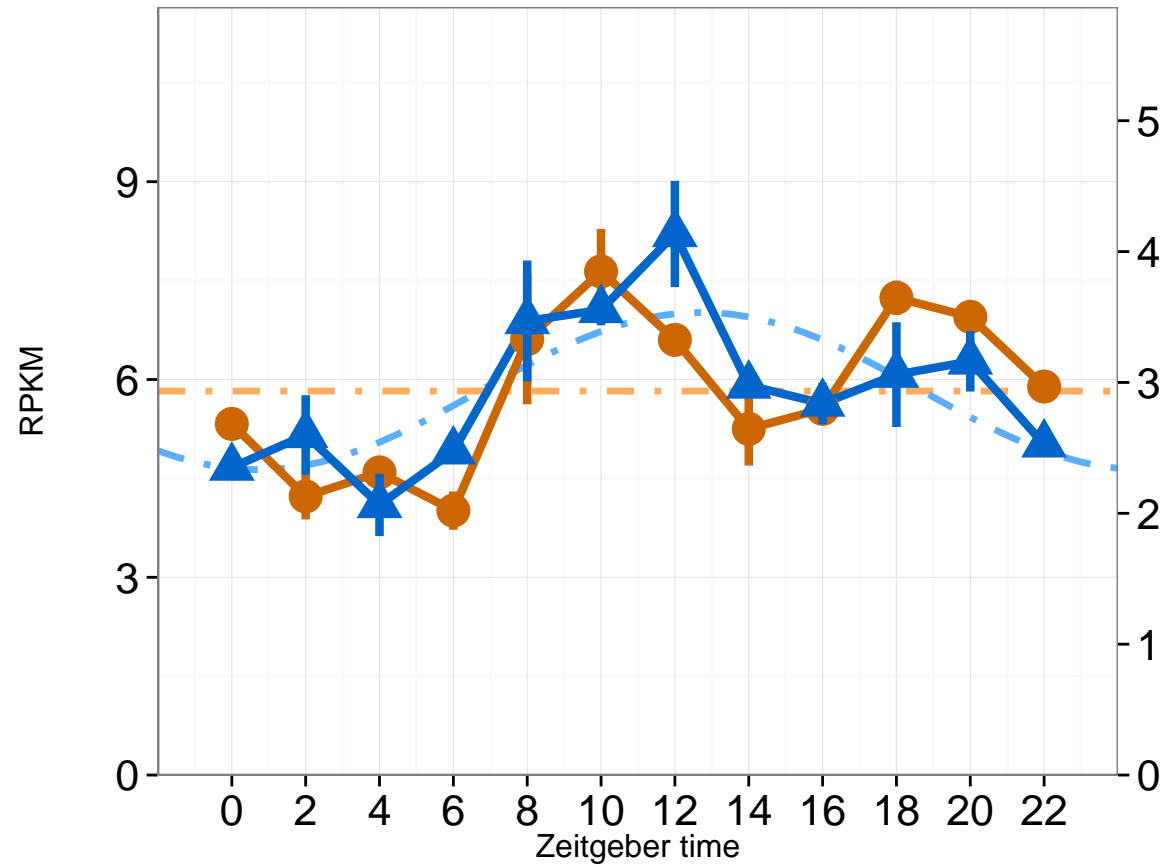

## Eef2k

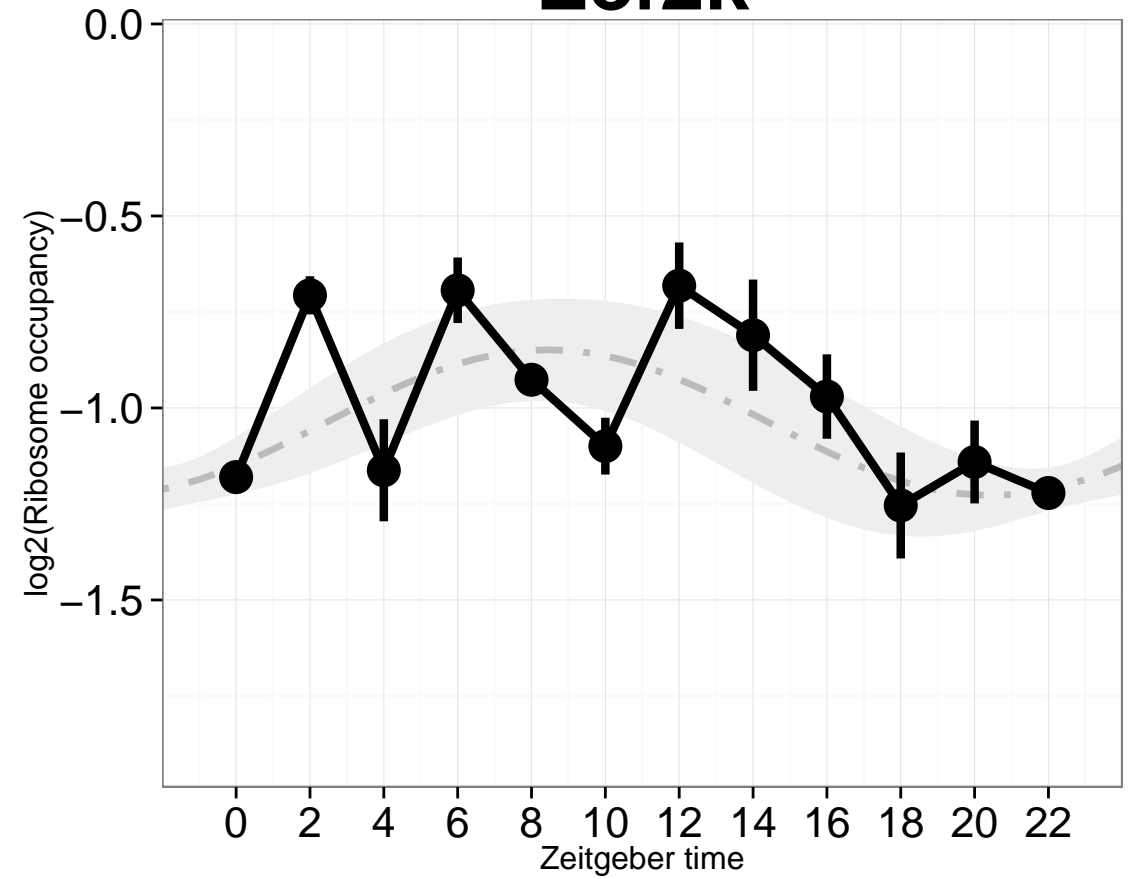

Supplement: SuppDataset_1.zip [file Eef2k_set_C.pdf › Supplemental Dataset 1/C-mRNA_nonrhythm_translation_rhyth/Eef2k_set_C.pdf]

## Efr3b TR

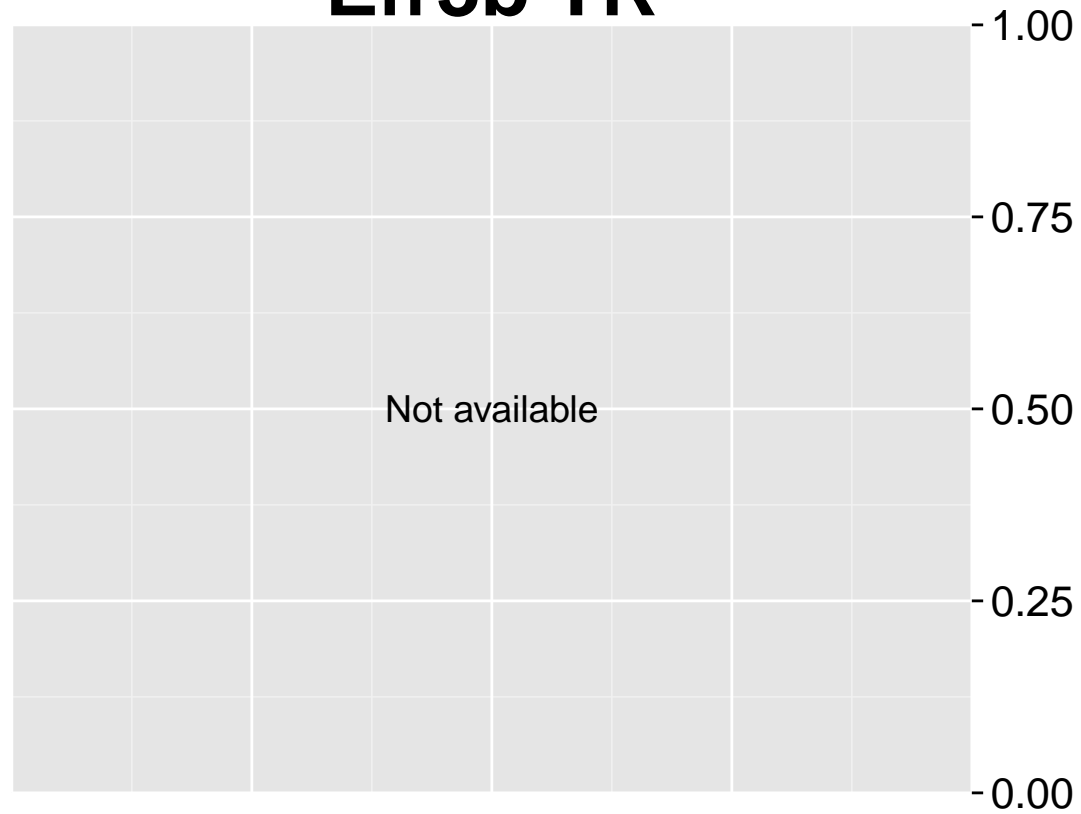

## Efr3b log2(Ribosome occupancy)

Supplement: SuppDataset_1.zip [file Efr3b_set_C.pdf › Supplemental Dataset 1/C-mRNA_nonrhythm_translation_rhyth/Efr3b_set_C.pdf]

# Eif2b3

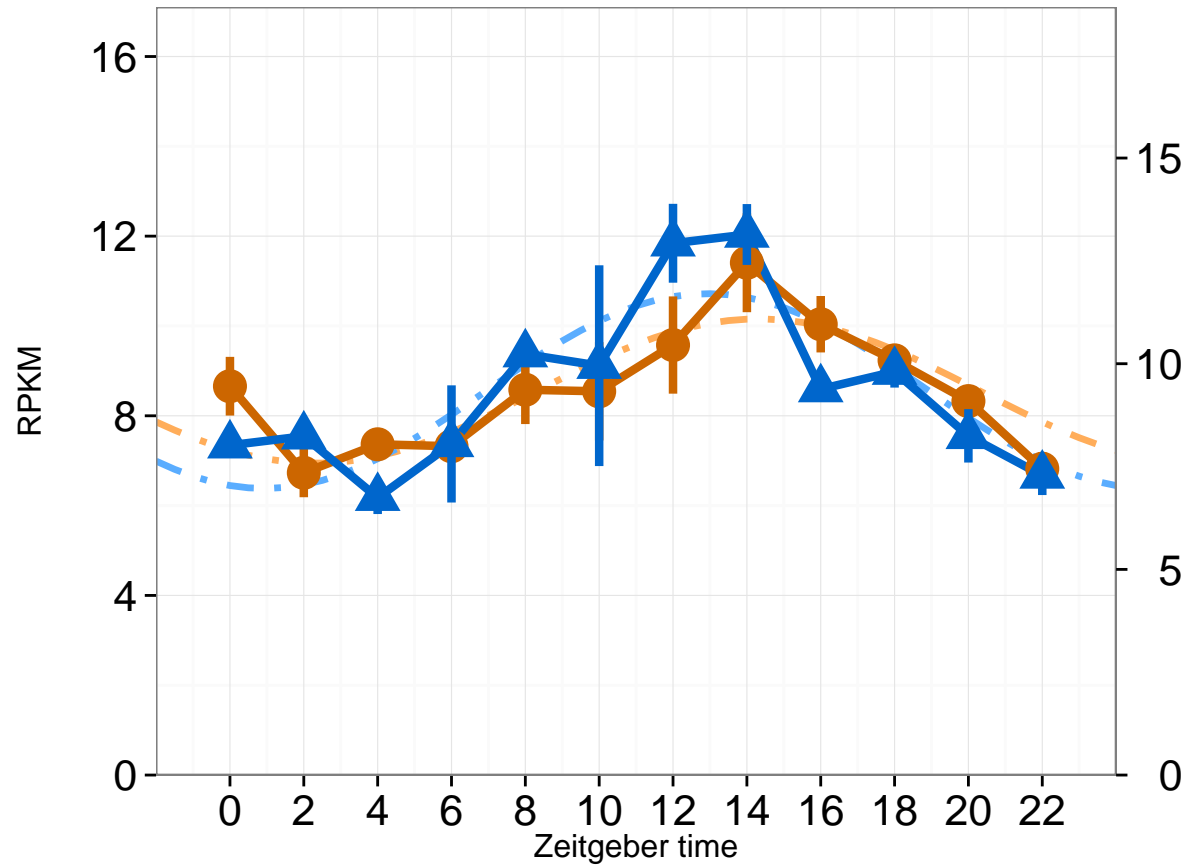

# Eif2b3

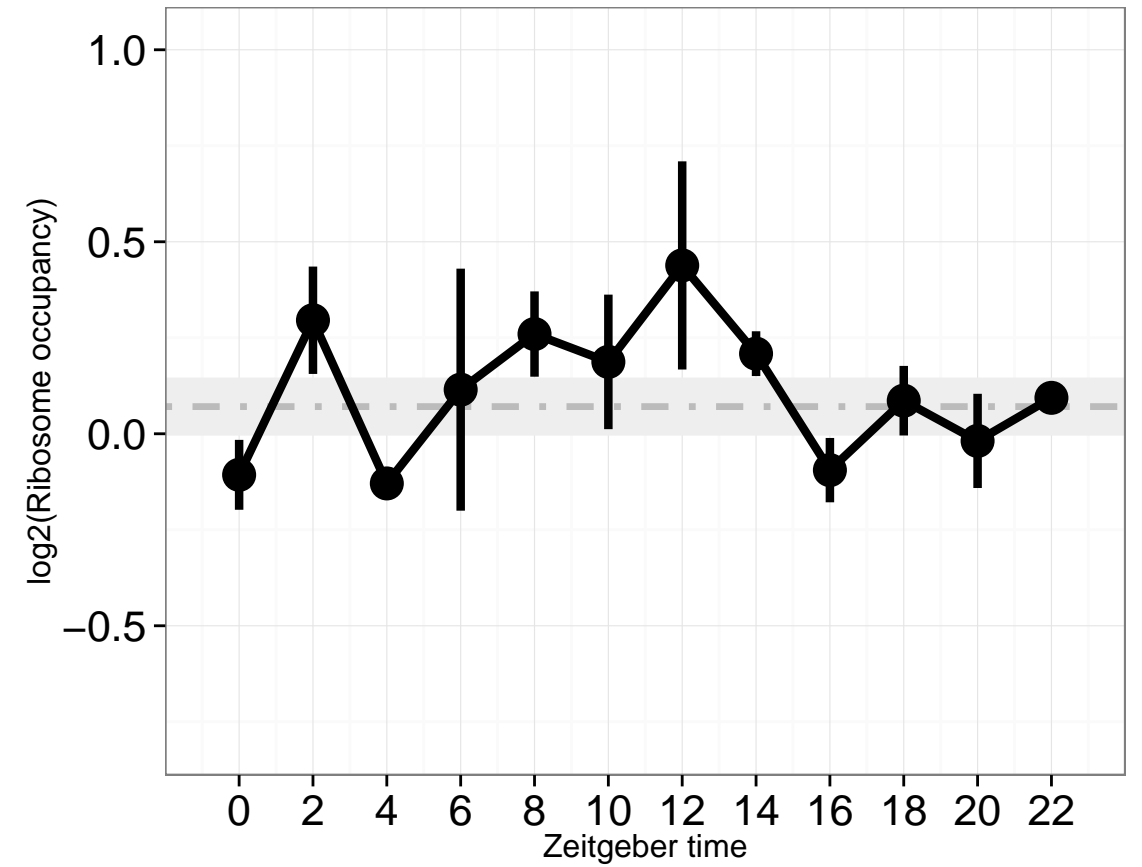

Supplement: SuppDataset_1.zip [file Eif2b3_set_C.pdf › Supplemental Dataset 1/C-mRNA_nonrhythm_translation_rhyth/Eif2b3_set_C.pdf]

## Eif3f

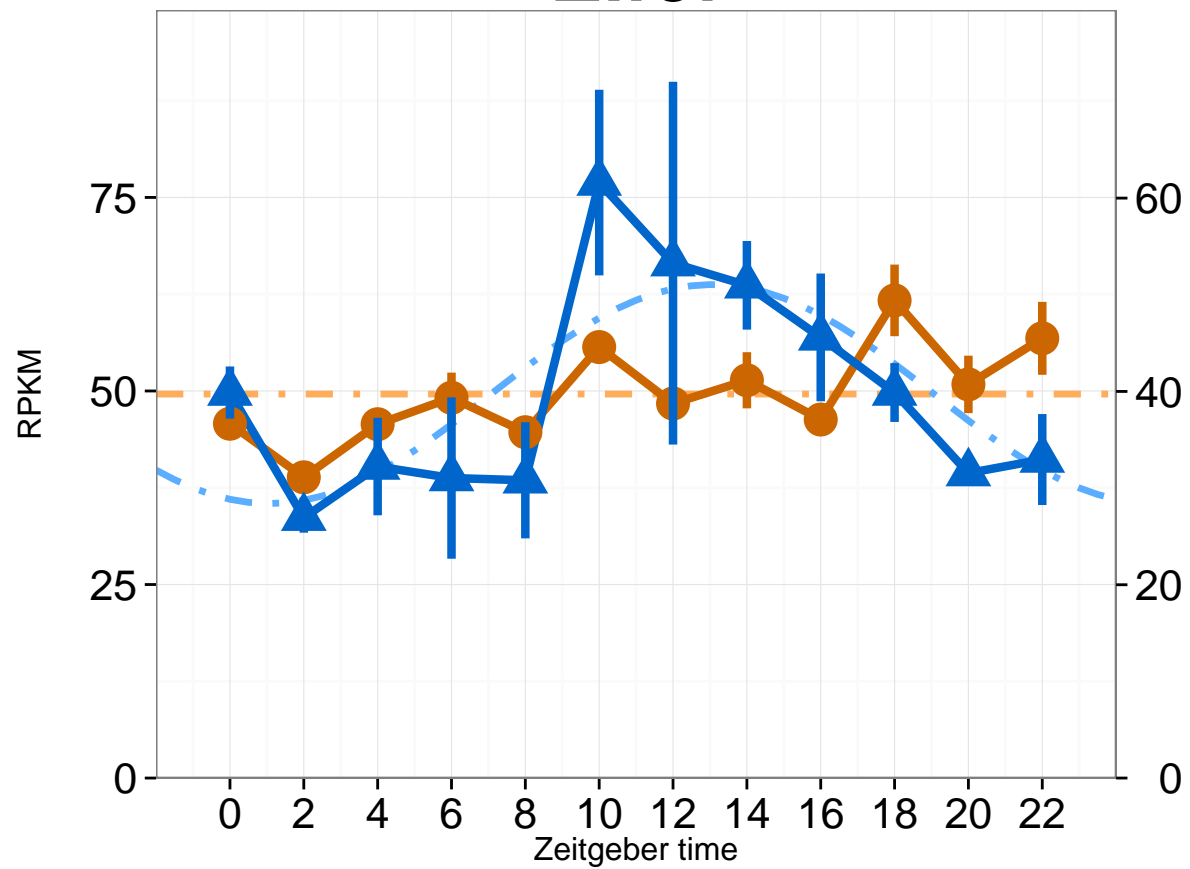

## Eif3f

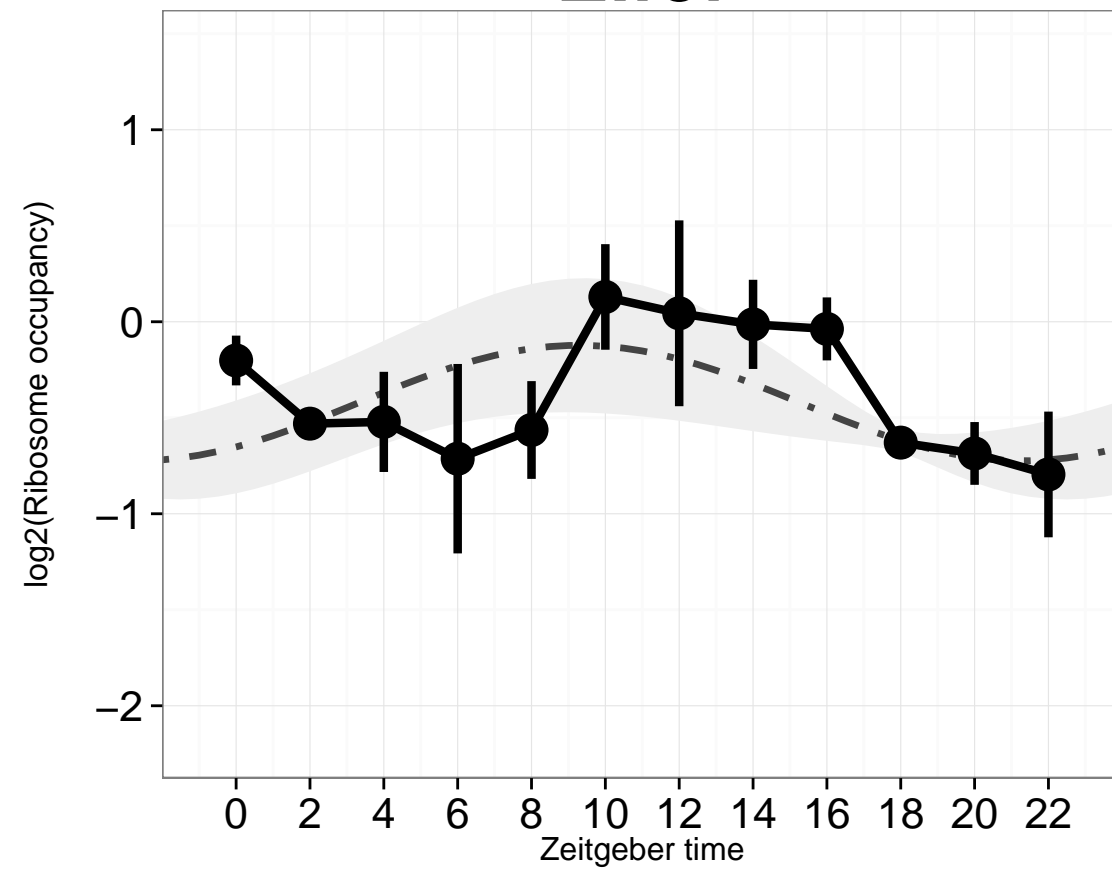

Supplement: SuppDataset_1.zip [file Eif3f_set_C.pdf › Supplemental Dataset 1/C-mRNA_nonrhythm_translation_rhyth/Eif3f_set_C.pdf]

## Eif3h

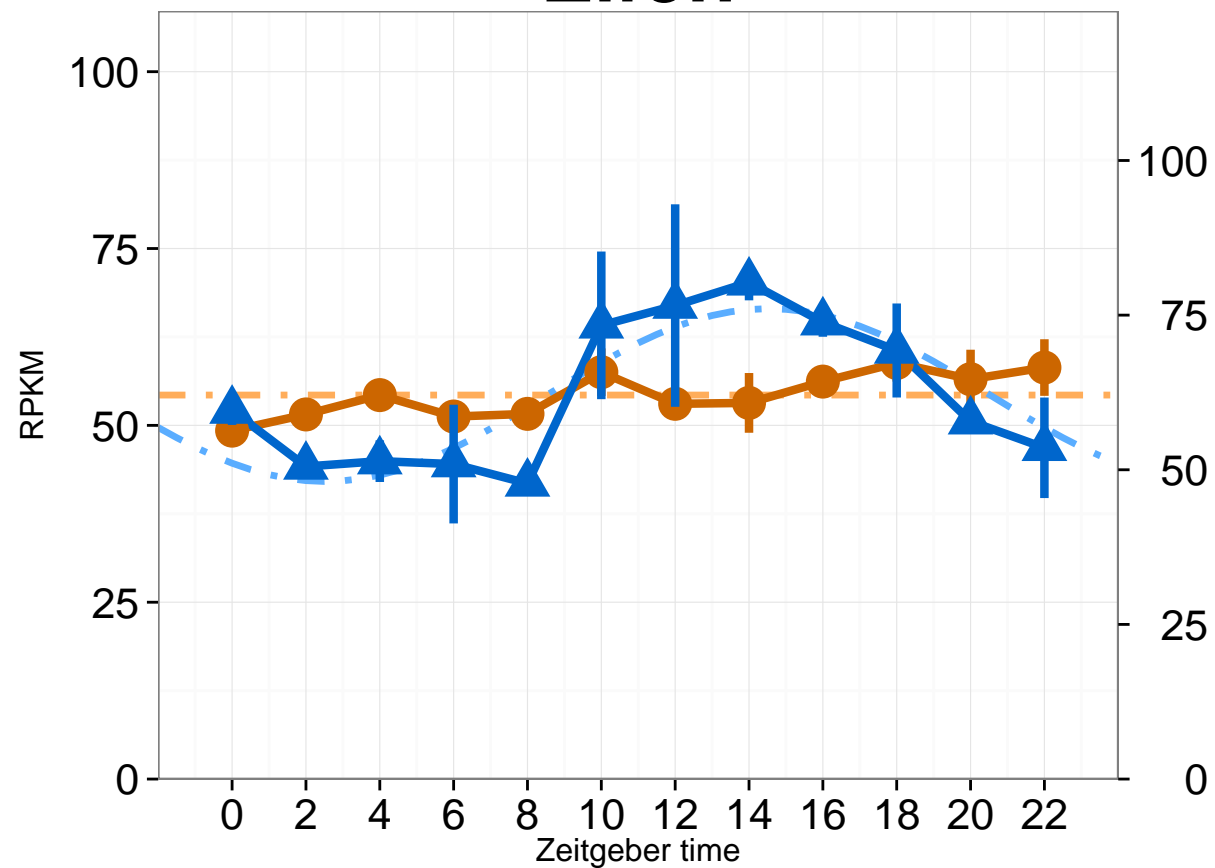

## Eif3h

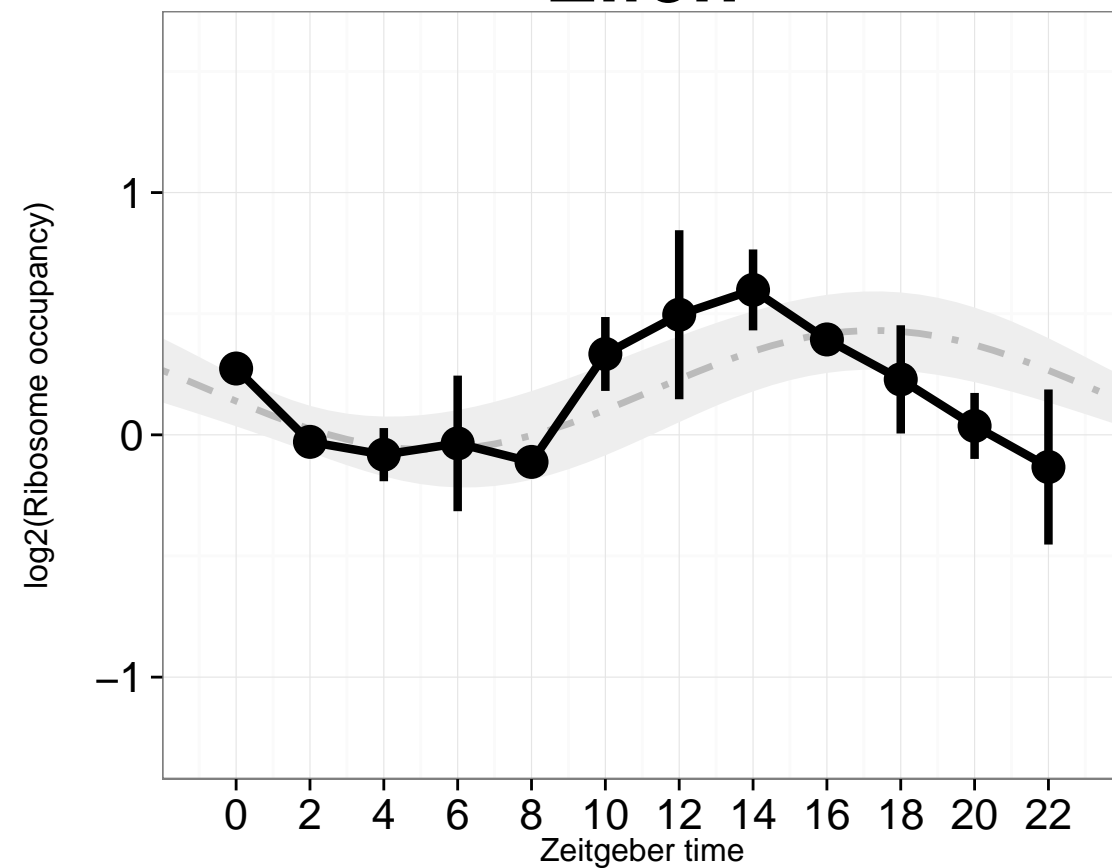

Supplement: SuppDataset_1.zip [file Eif3h_set_C.pdf › Supplemental Dataset 1/C-mRNA_nonrhythm_translation_rhyth/Eif3h_set_C.pdf]

## Elmo3

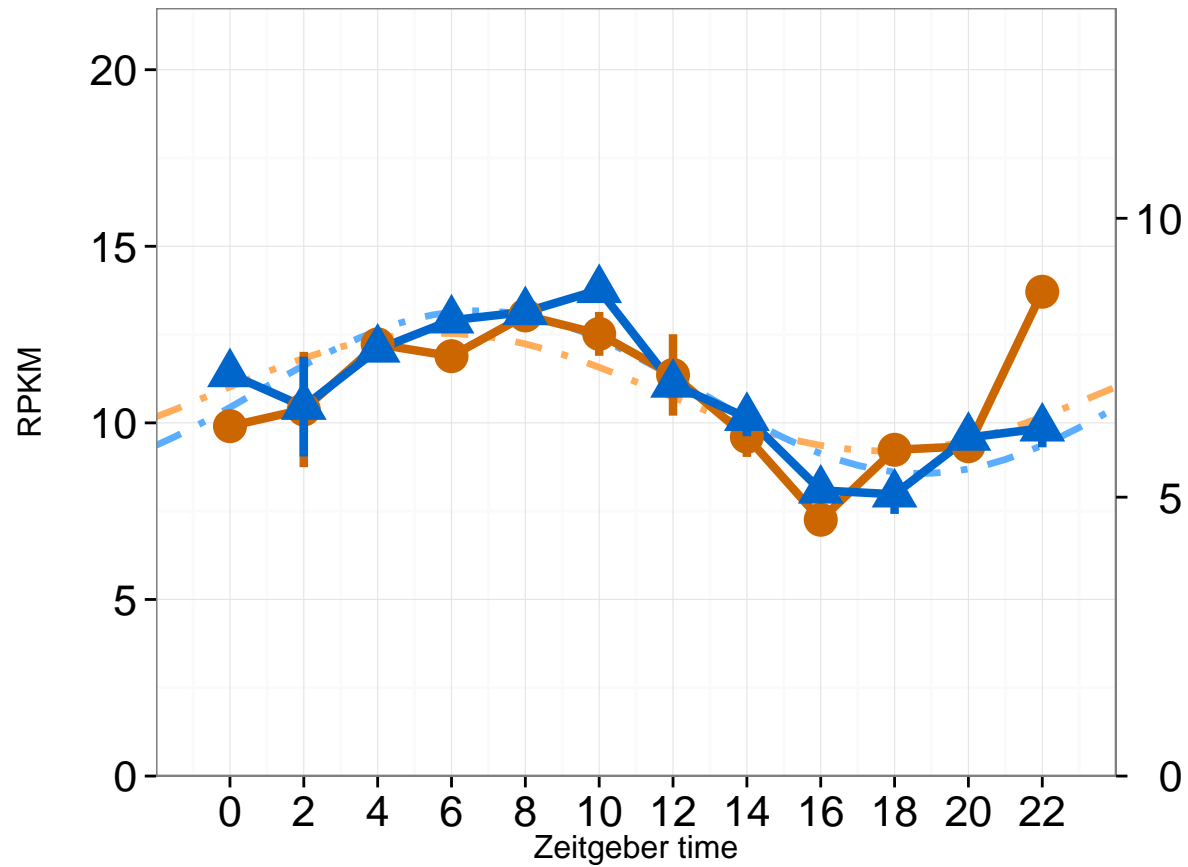

## Elmo3

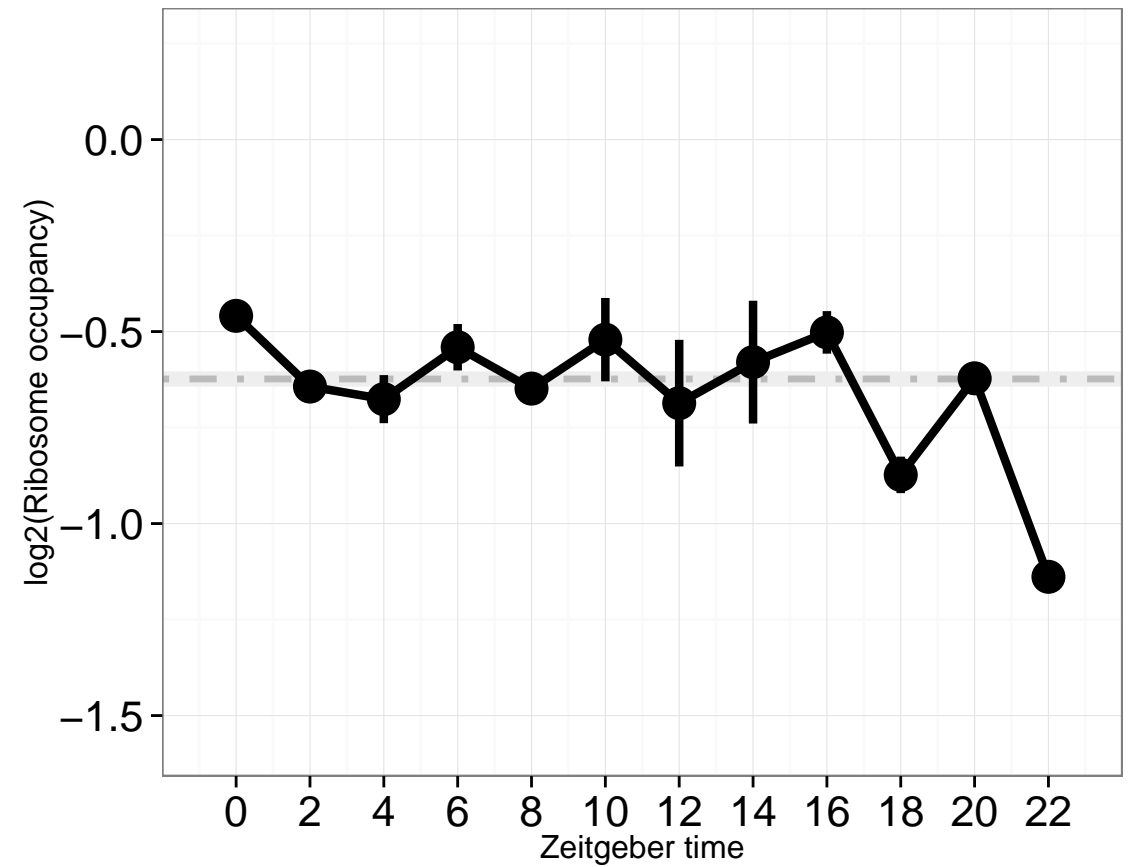

Supplement: SuppDataset_1.zip [file Elmo3_set_C.pdf › Supplemental Dataset 1/C-mRNA_nonrhythm_translation_rhyth/Elmo3_set_C.pdf]

# Eln

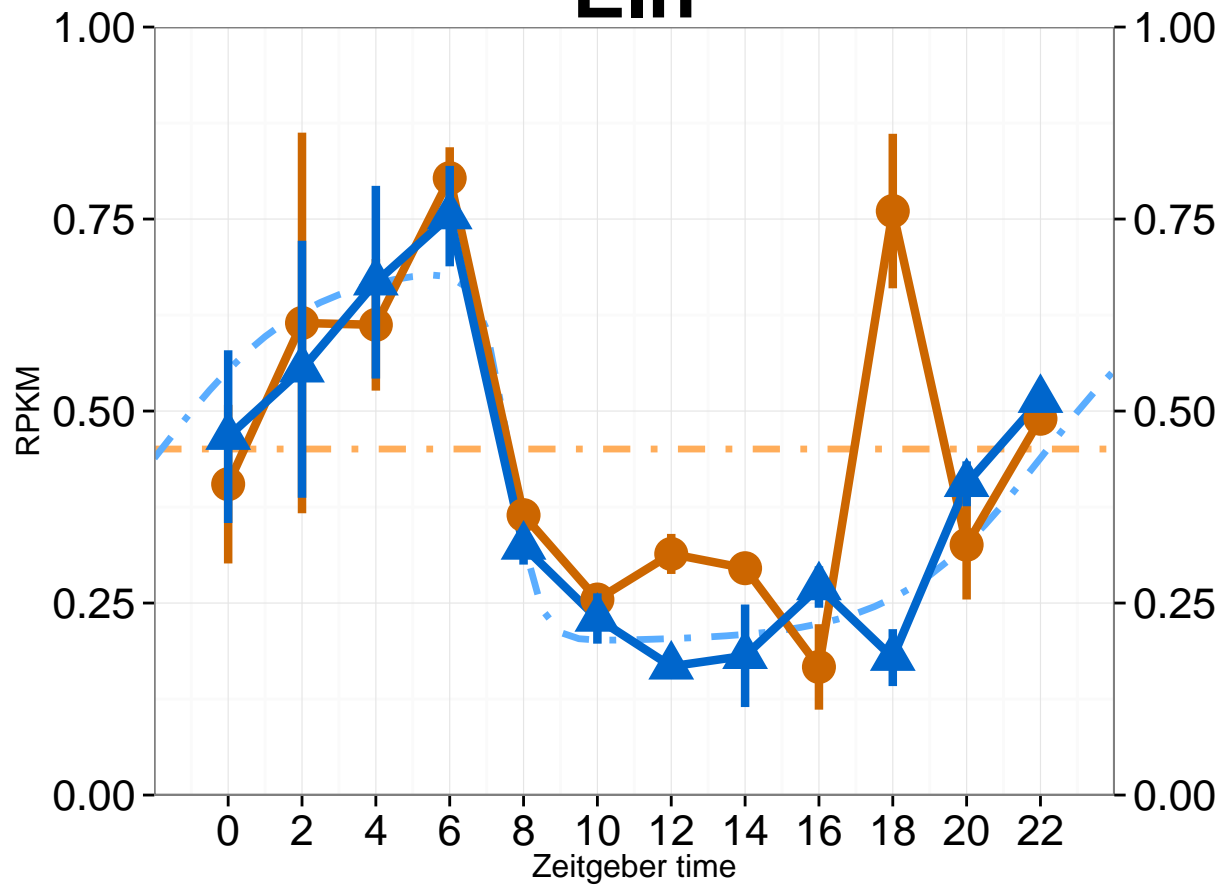

# Eln

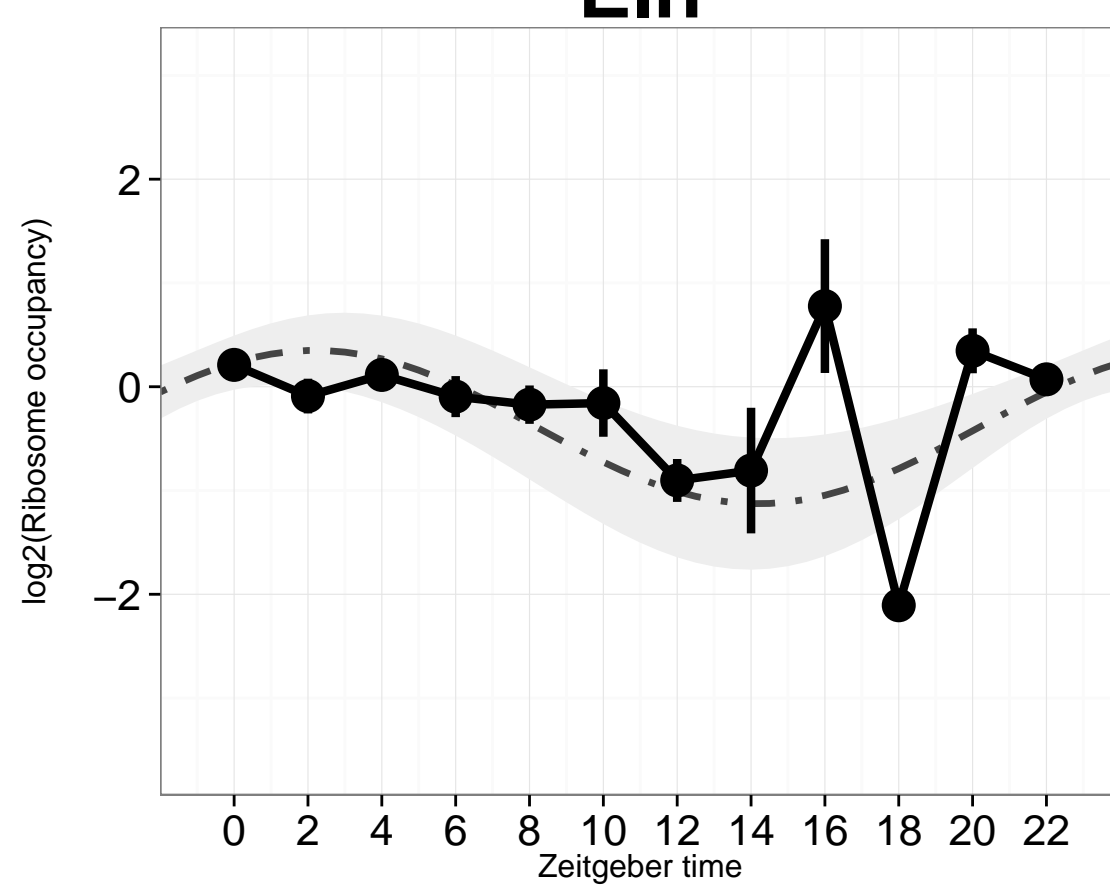

Supplement: SuppDataset_1.zip [file Eln_set_C.pdf › Supplemental Dataset 1/C-mRNA_nonrhythm_translation_rhyth/Eln_set_C.pdf]

## Elp6

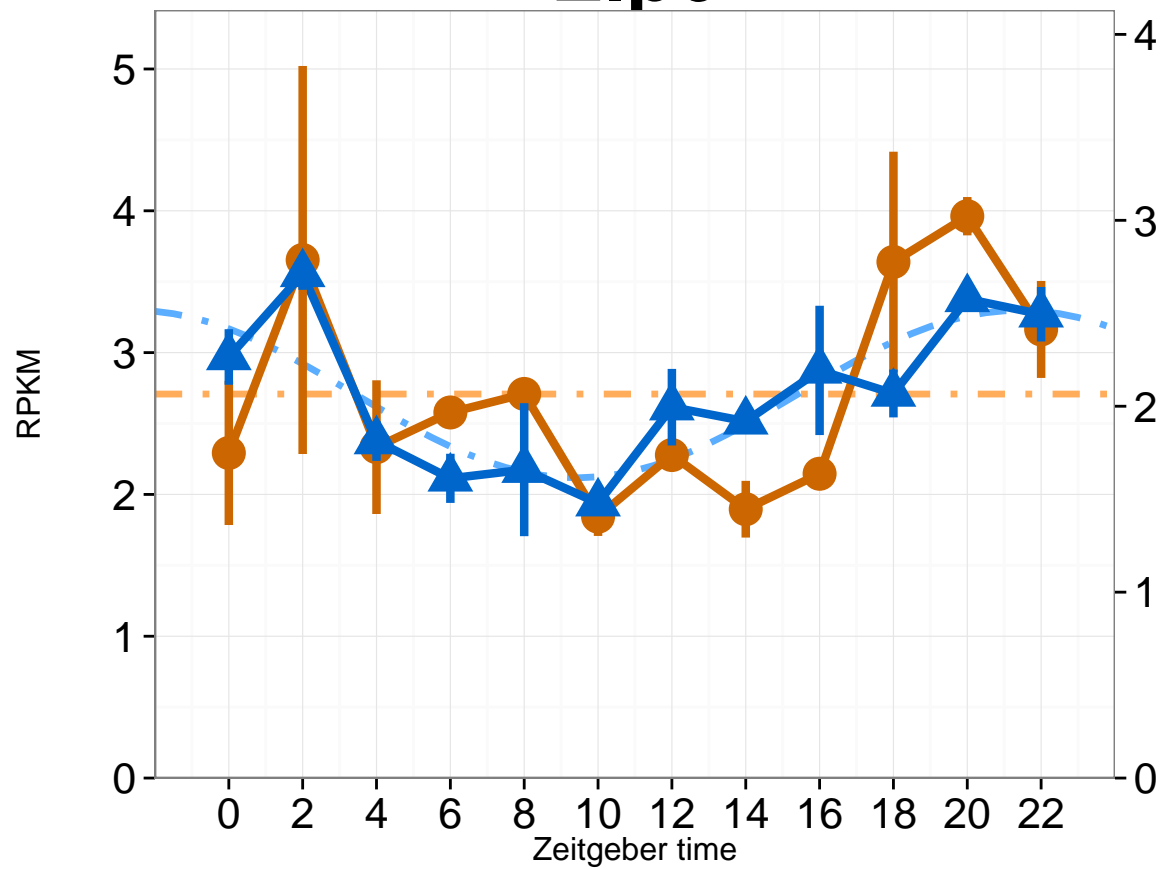

## Elp6

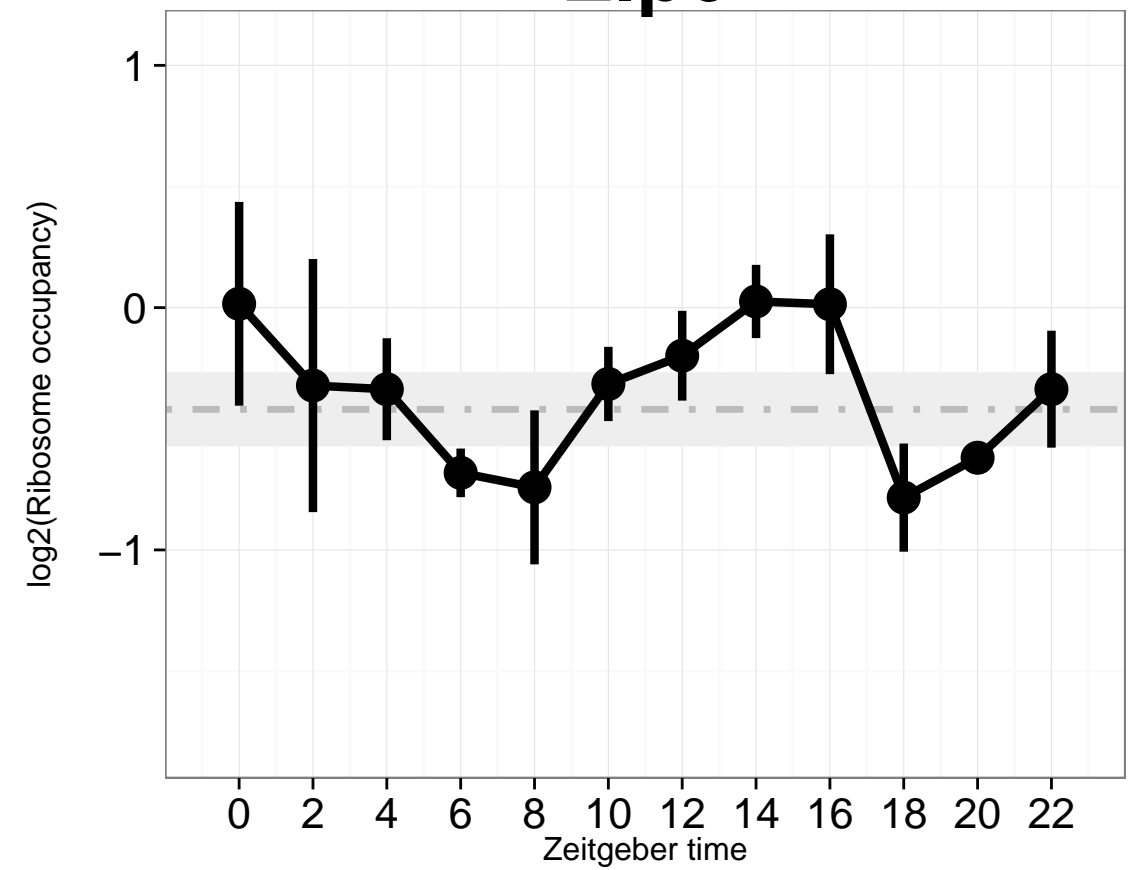

Supplement: SuppDataset_1.zip [file Elp6_set_C.pdf › Supplemental Dataset 1/C-mRNA_nonrhythm_translation_rhyth/Elp6_set_C.pdf]

## Eml2

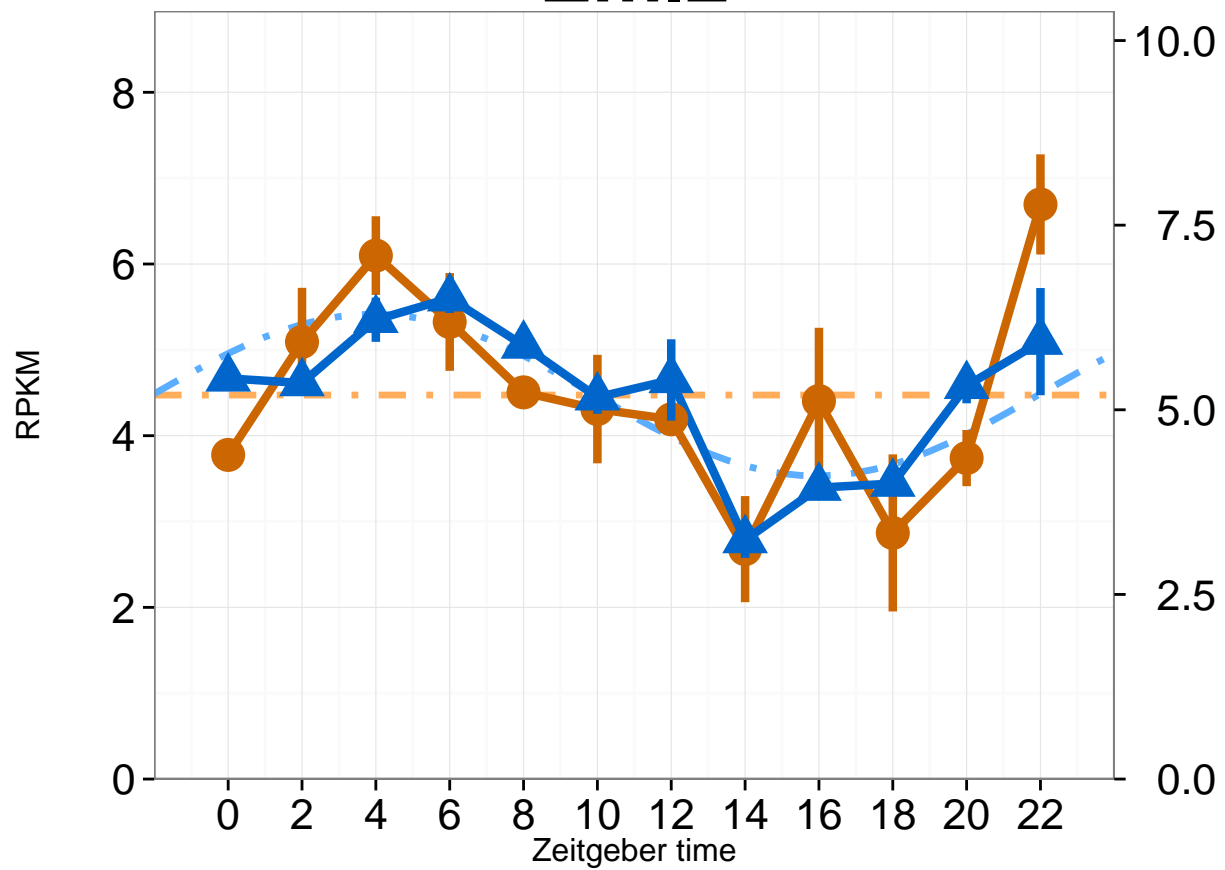

## Eml2

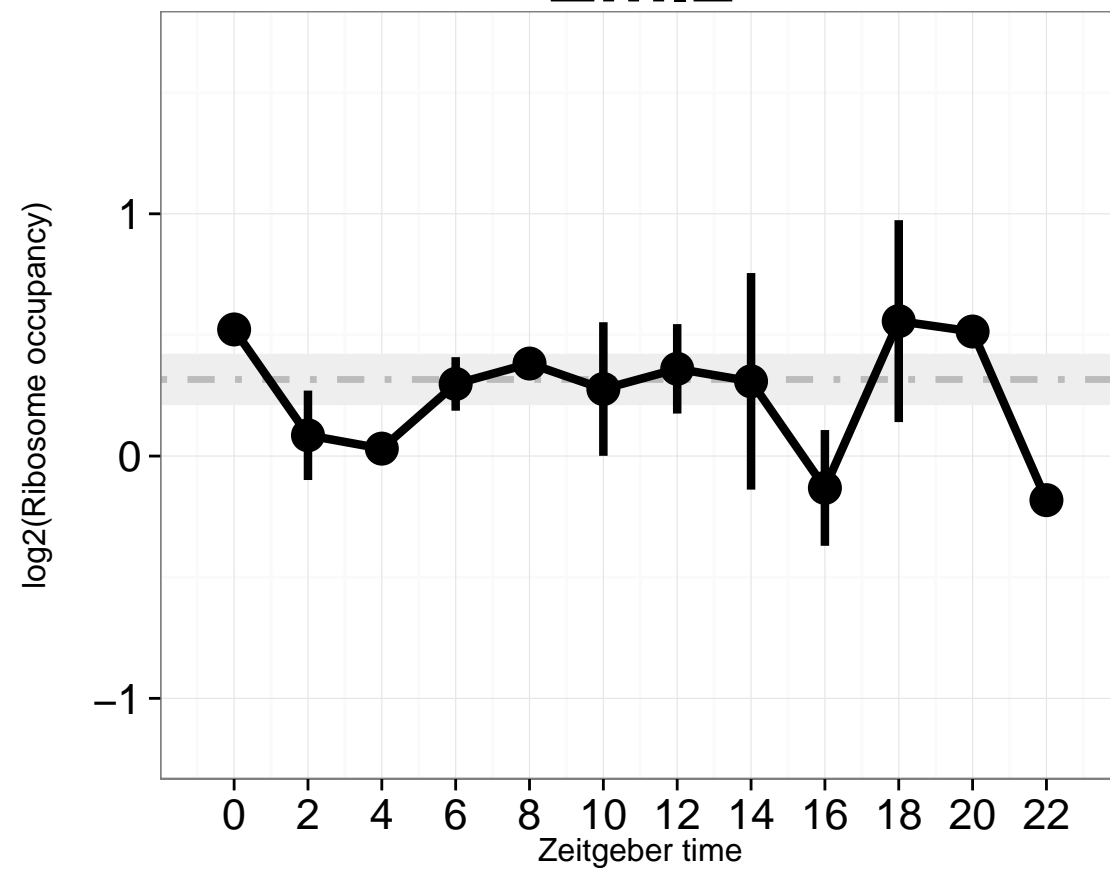

Supplement: SuppDataset_1.zip [file Eml2_set_C.pdf › Supplemental Dataset 1/C-mRNA_nonrhythm_translation_rhyth/Eml2_set_C.pdf]

**Emp1 TR**

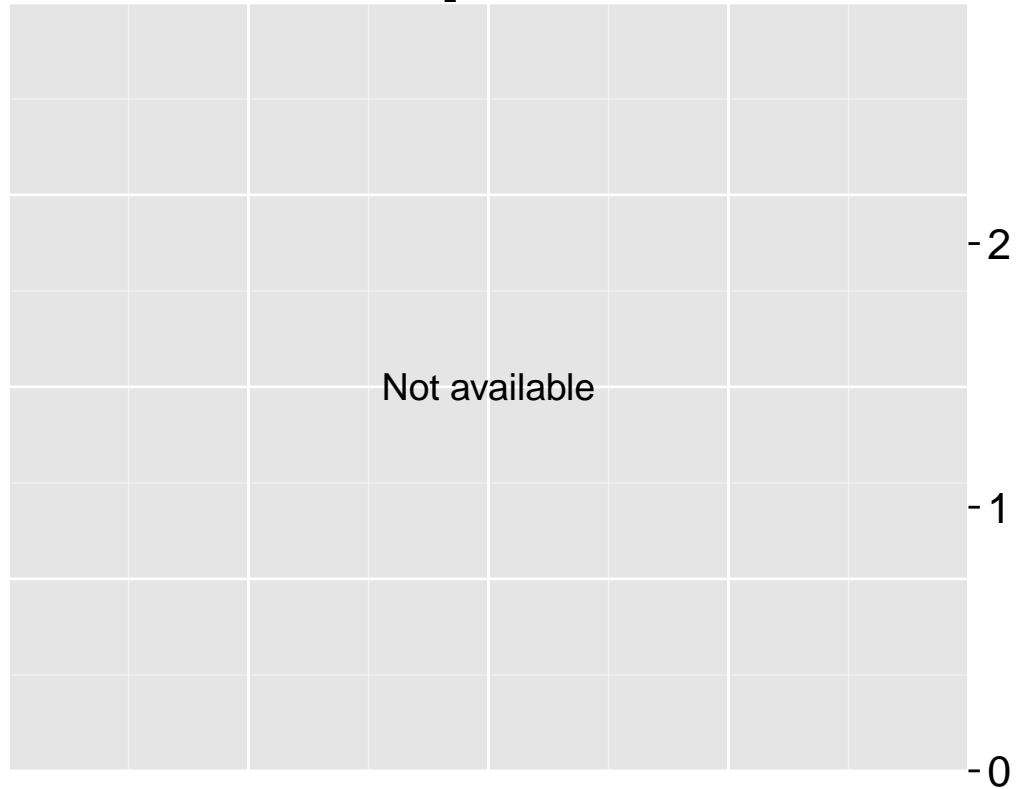

**Emp1 log2(Ribosome occupancy)**

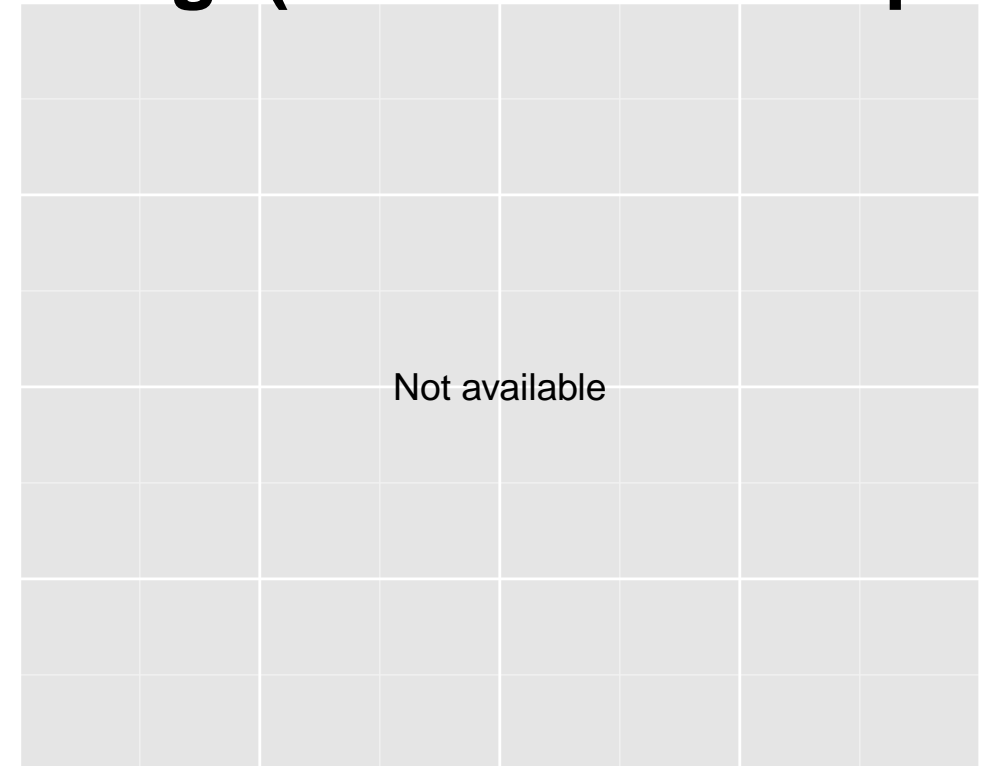

Supplement: SuppDataset_1.zip [file Emp1_set_C.pdf › Supplemental Dataset 1/C-mRNA_nonrhythm_translation_rhyth/Emp1_set_C.pdf]

# Enc1

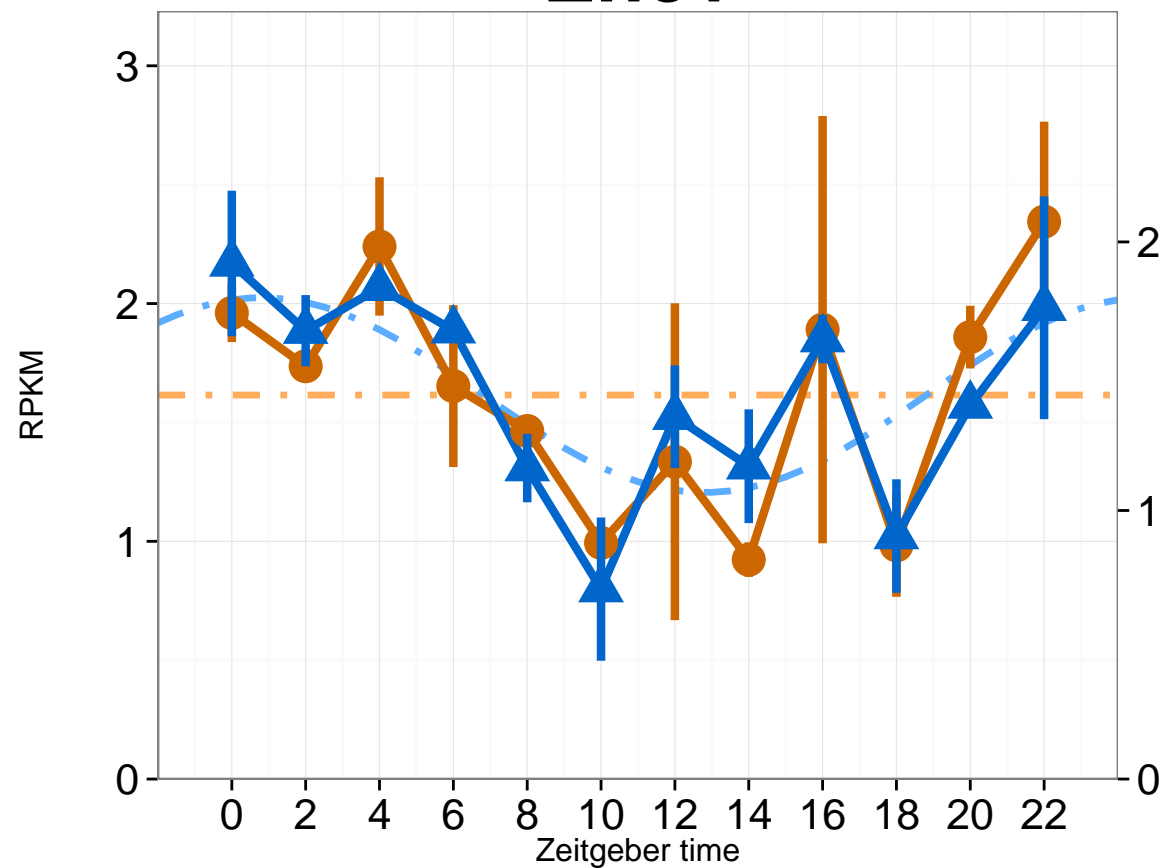

# Enc1

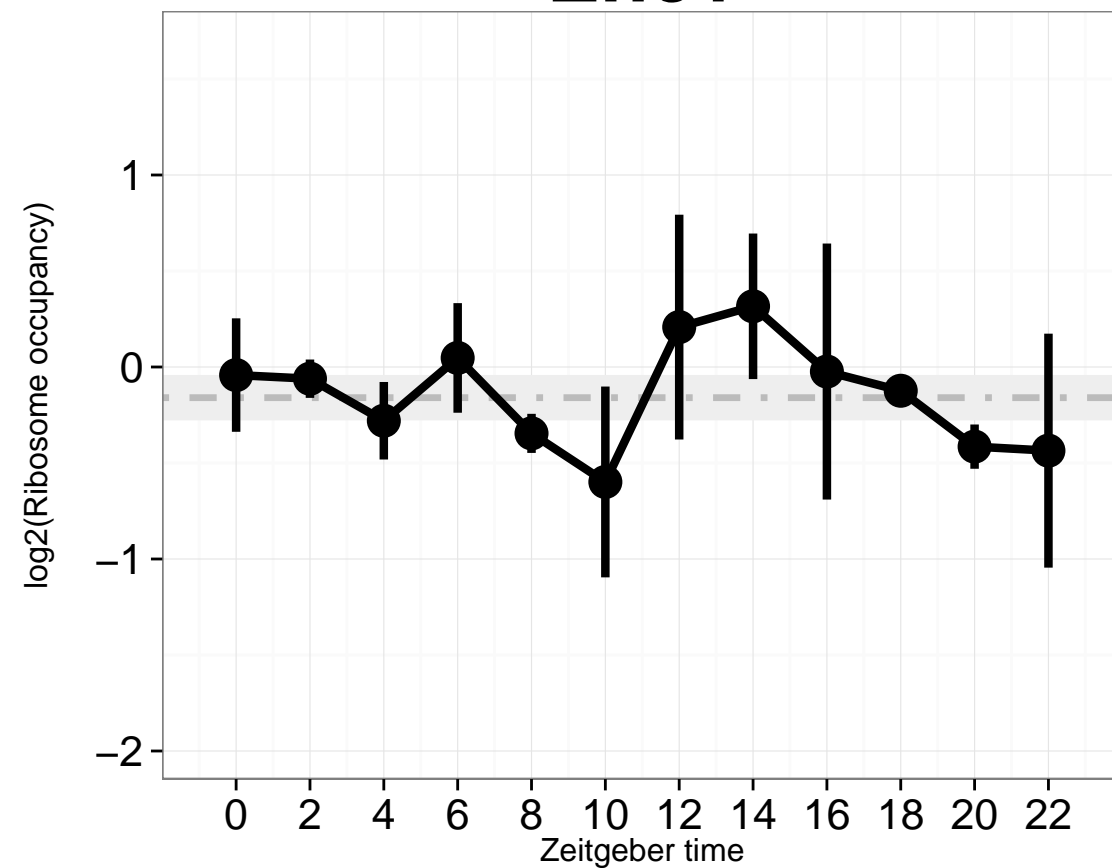

Supplement: SuppDataset_1.zip [file Enc1_set_C.pdf › Supplemental Dataset 1/C-mRNA_nonrhythm_translation_rhyth/Enc1_set_C.pdf]

## Endog

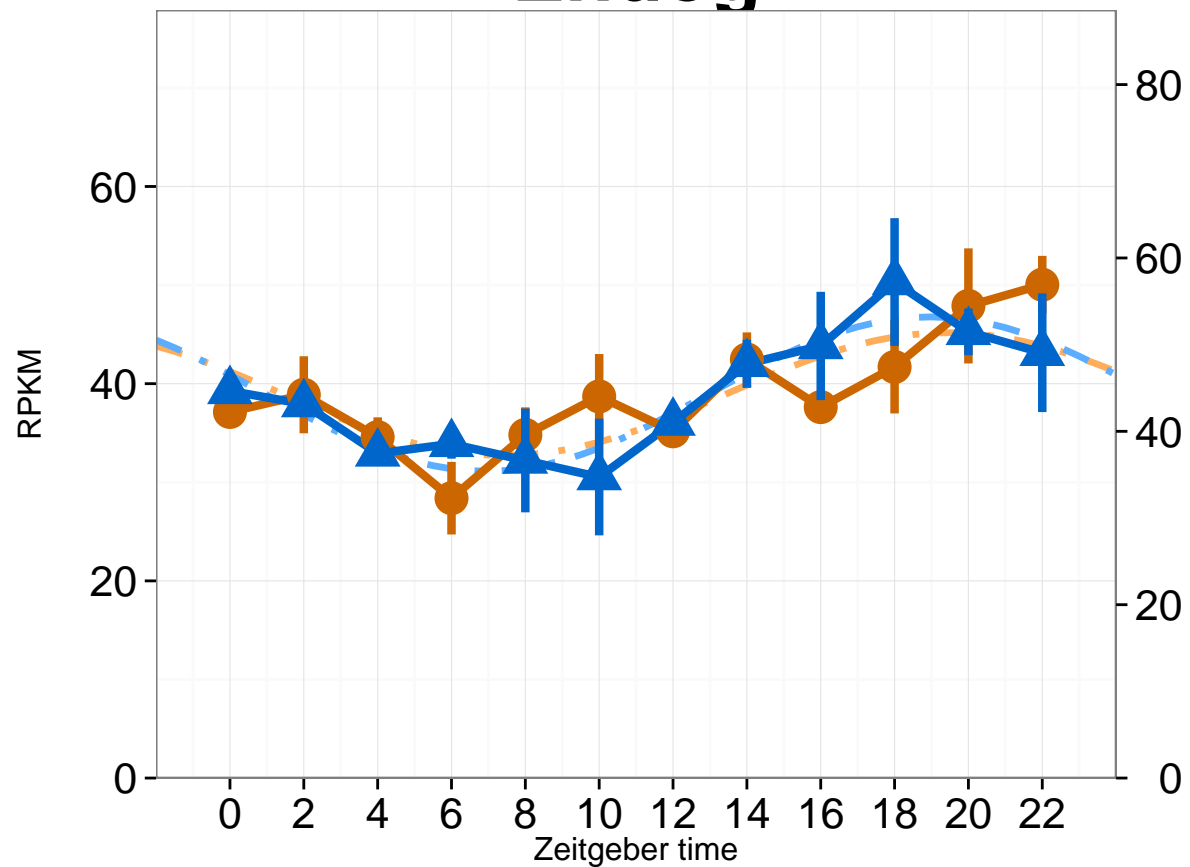

## Endog

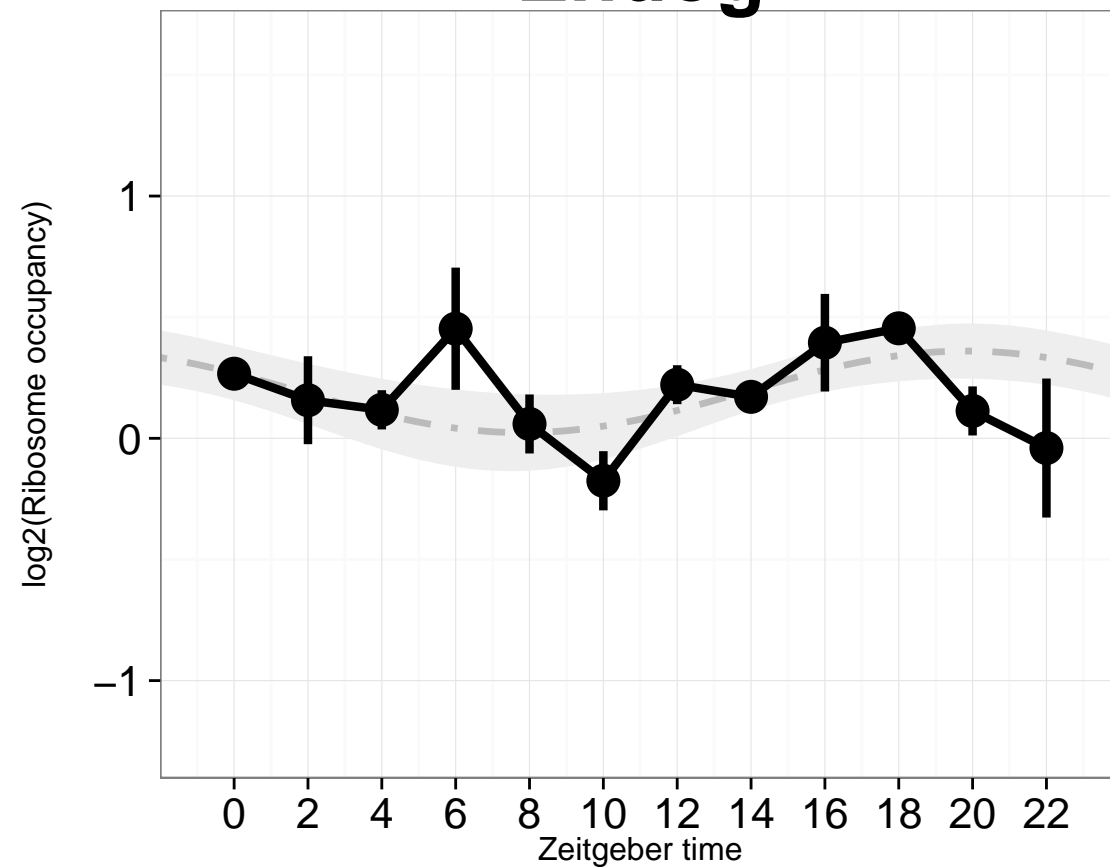

Supplement: SuppDataset_1.zip [file Endog_set_C.pdf › Supplemental Dataset 1/C-mRNA_nonrhythm_translation_rhyth/Endog_set_C.pdf]

## Enho

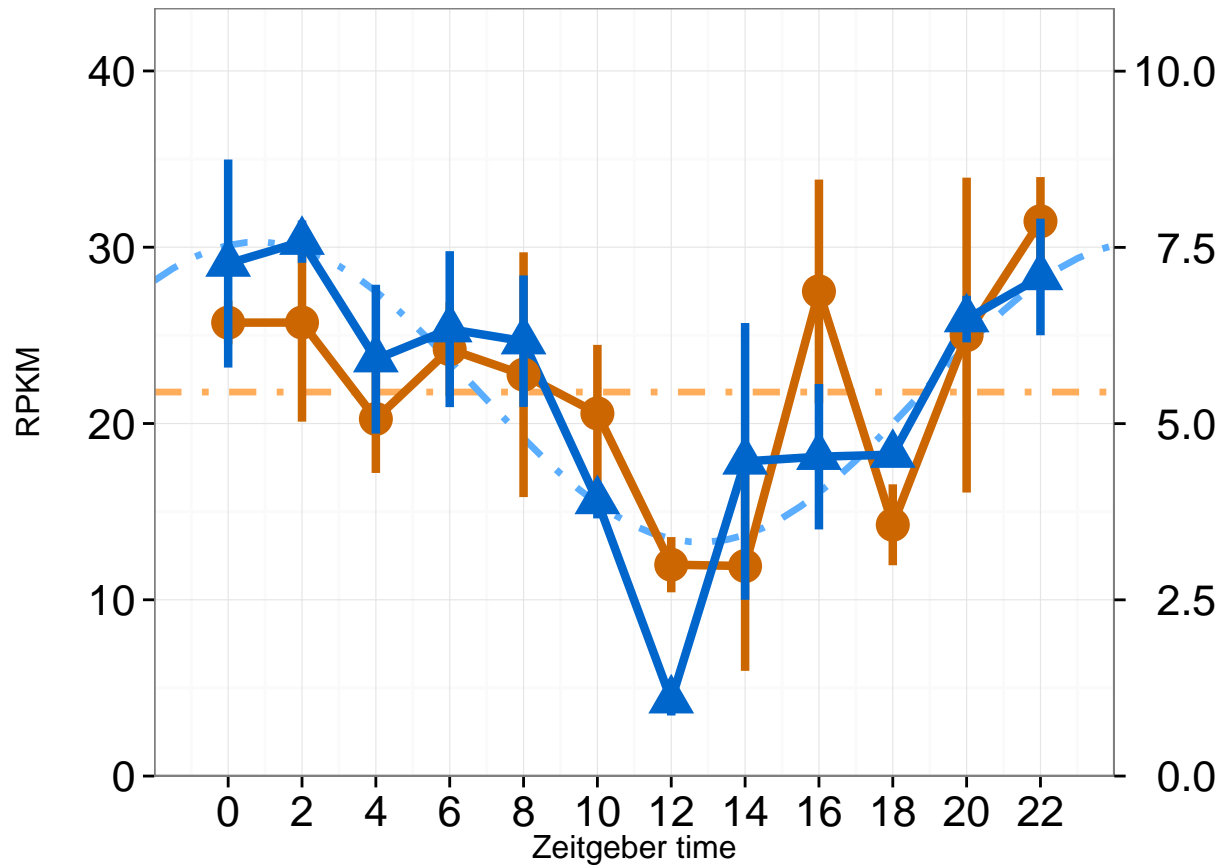

## Enho

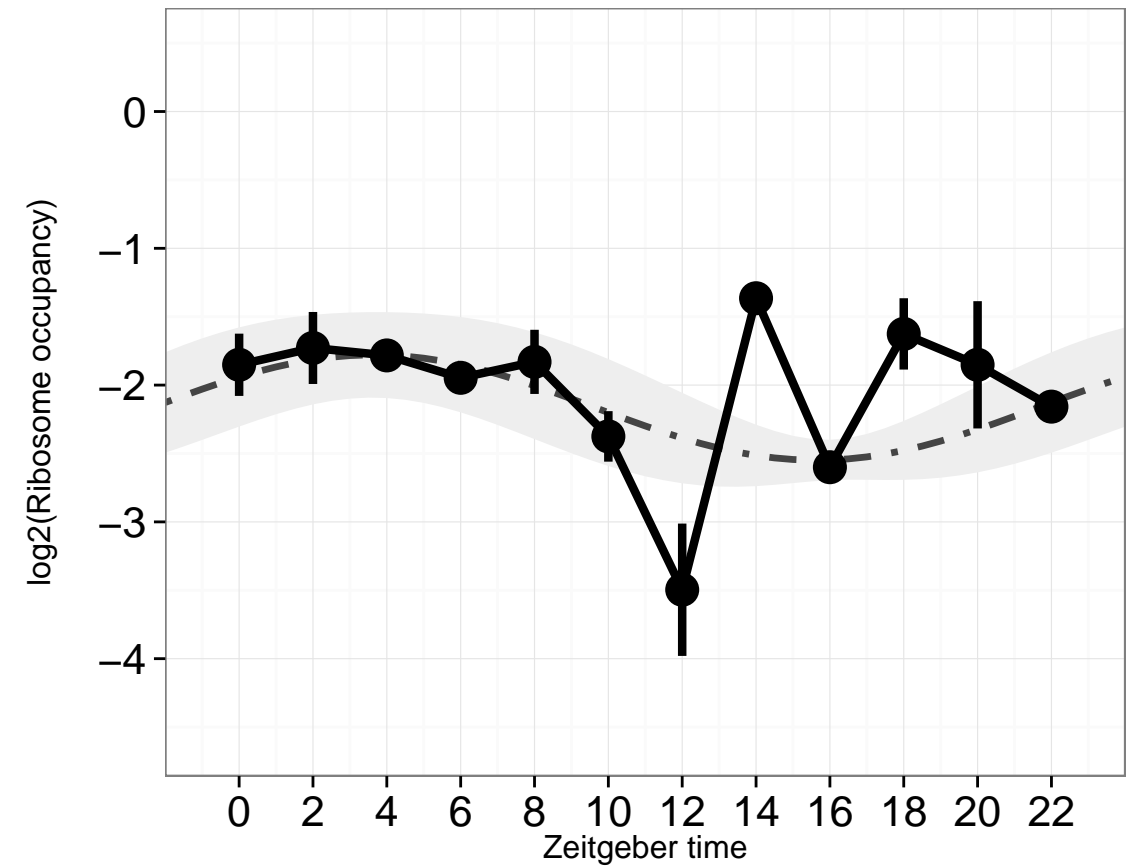

Supplement: SuppDataset_1.zip [file Enho_set_C.pdf › Supplemental Dataset 1/C-mRNA_nonrhythm_translation_rhyth/Enho_set_C.pdf]

## Eno3

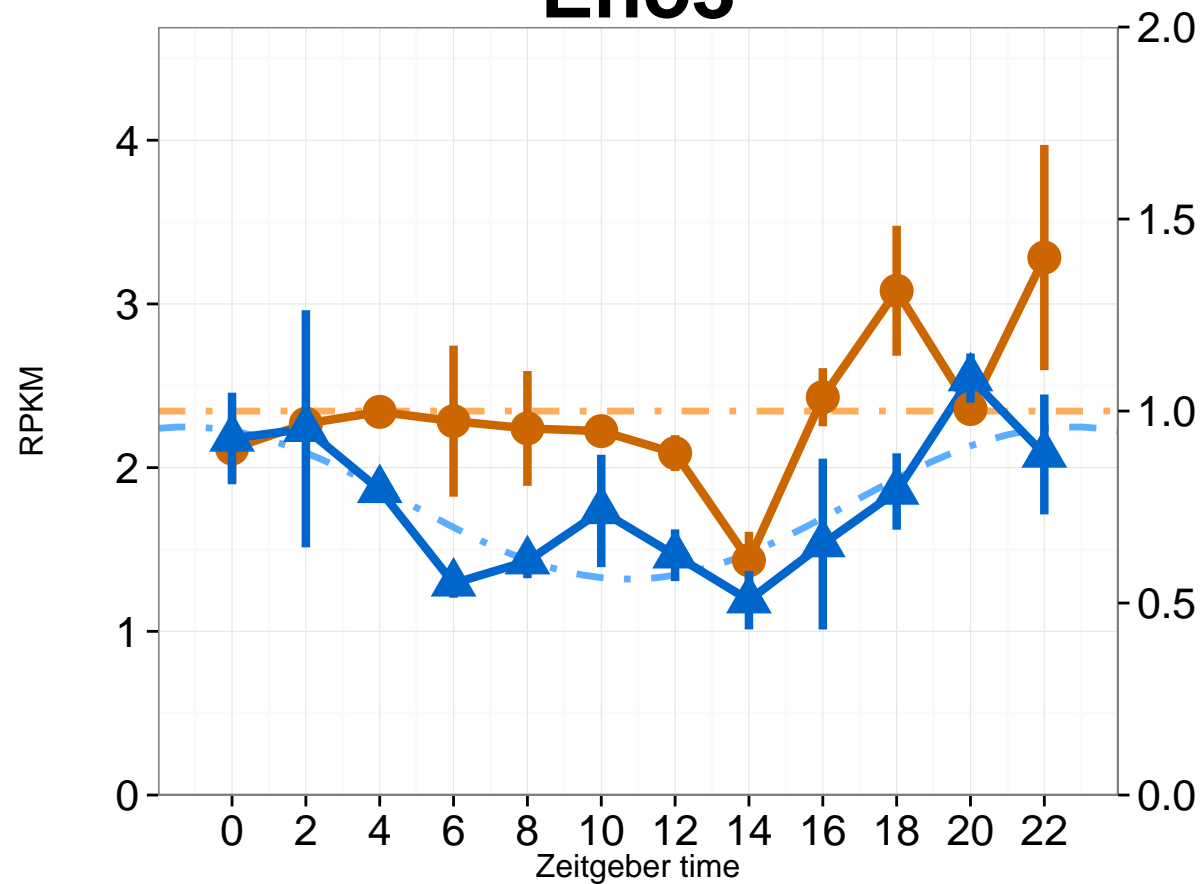

## Eno3

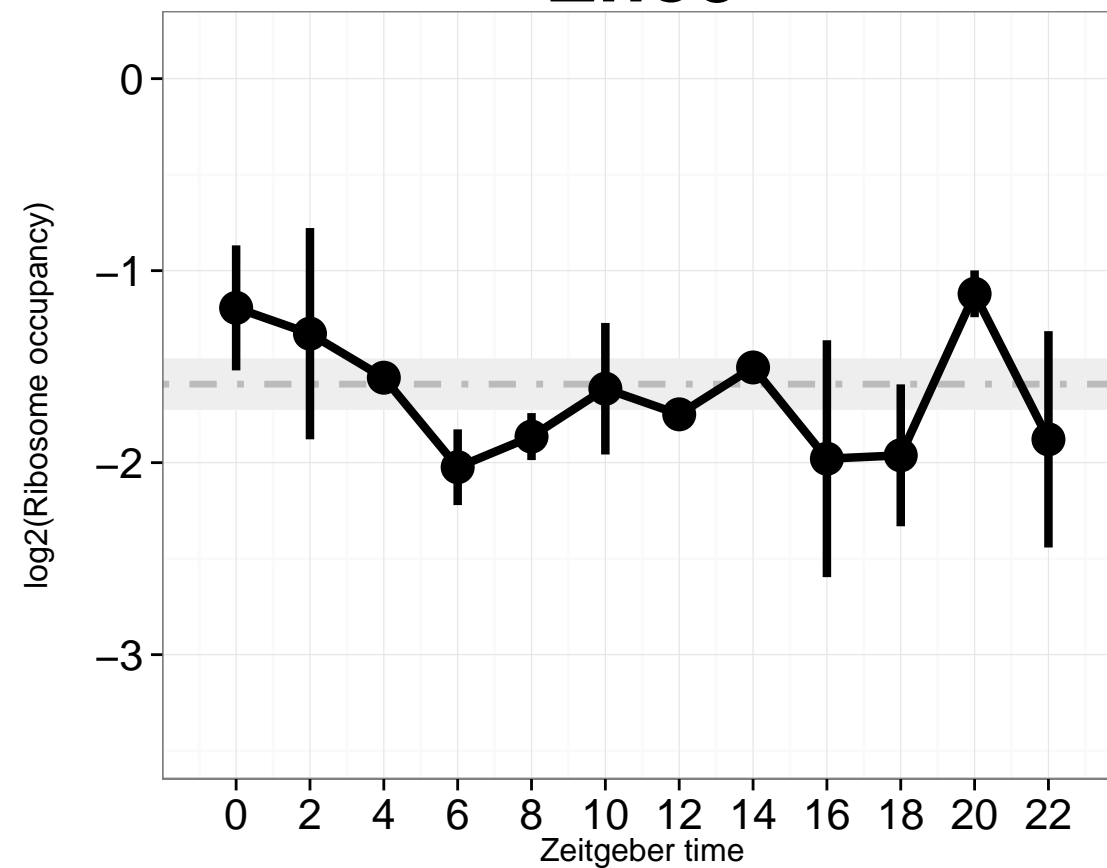

Supplement: SuppDataset_1.zip [file Eno3_set_C.pdf › Supplemental Dataset 1/C-mRNA_nonrhythm_translation_rhyth/Eno3_set_C.pdf]

## Enpp1

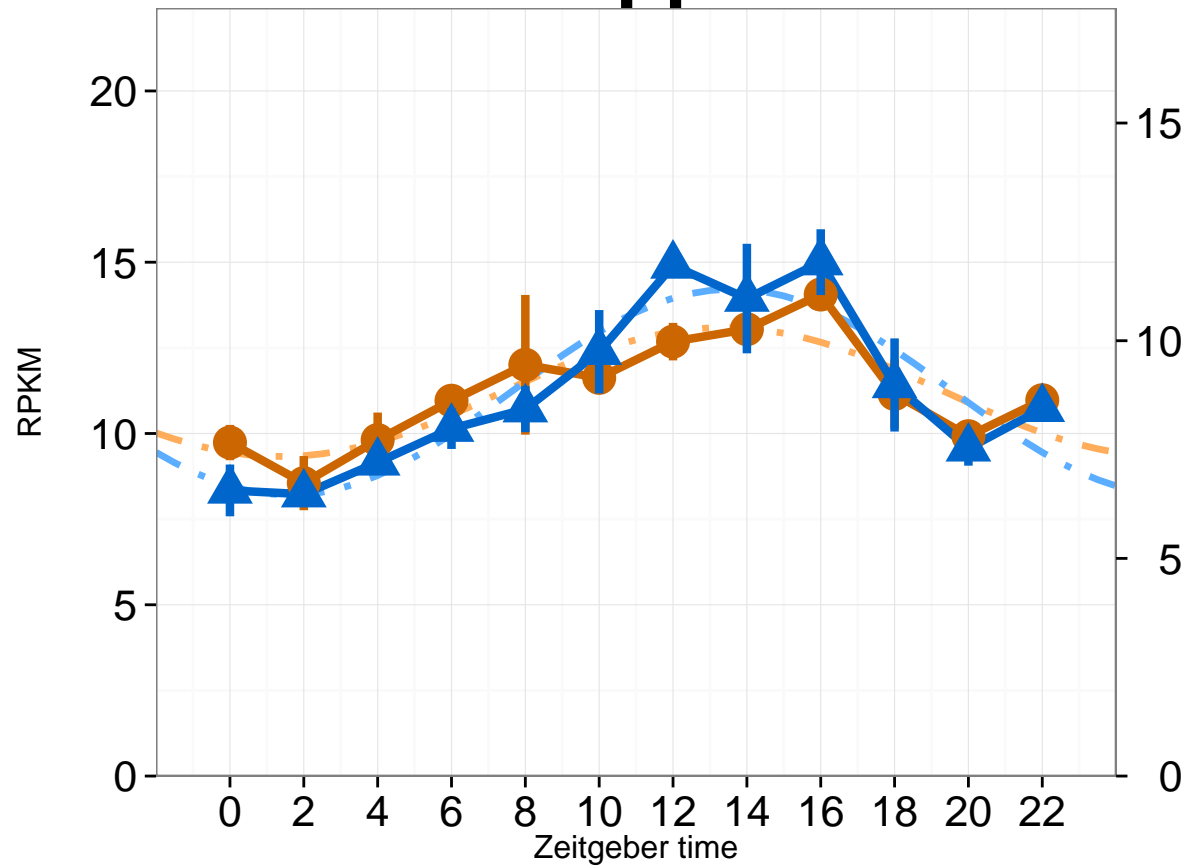

## Enpp1

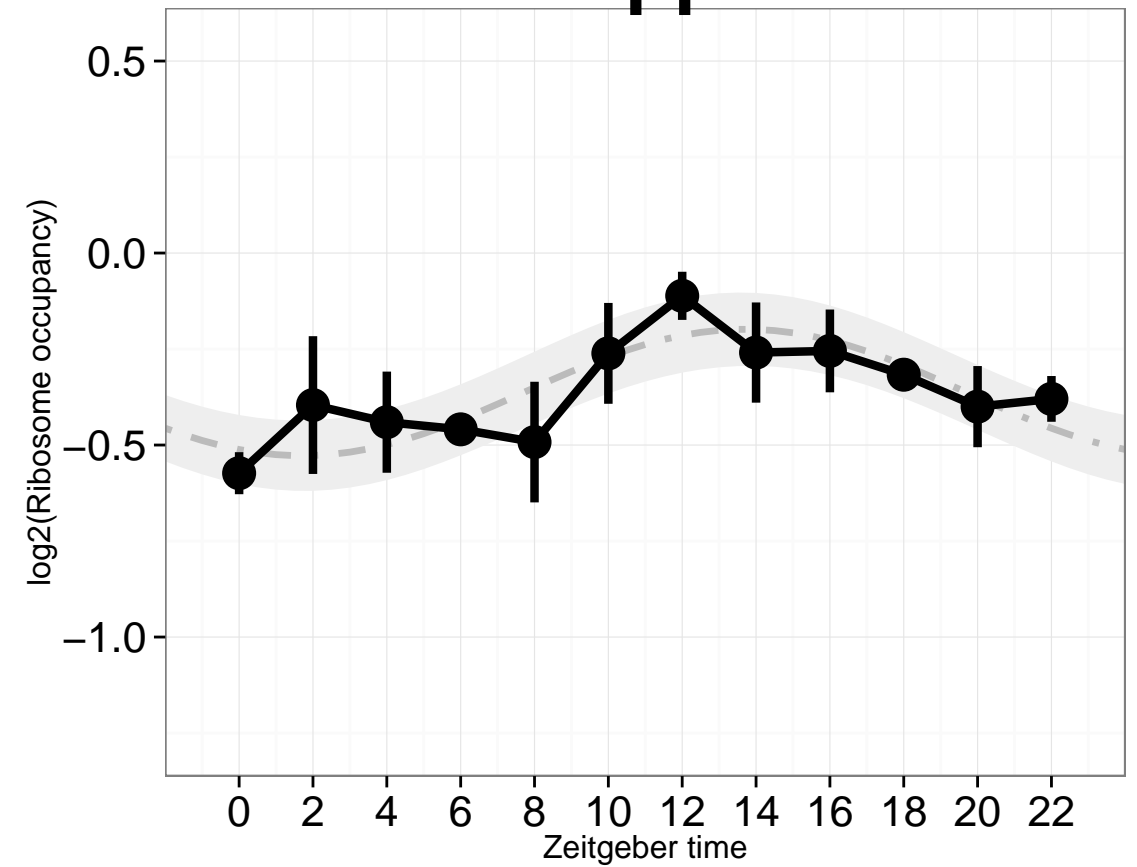

Supplement: SuppDataset_1.zip [file Enpp1_set_C.pdf › Supplemental Dataset 1/C-mRNA_nonrhythm_translation_rhyth/Enpp1_set_C.pdf]

# Entpd7

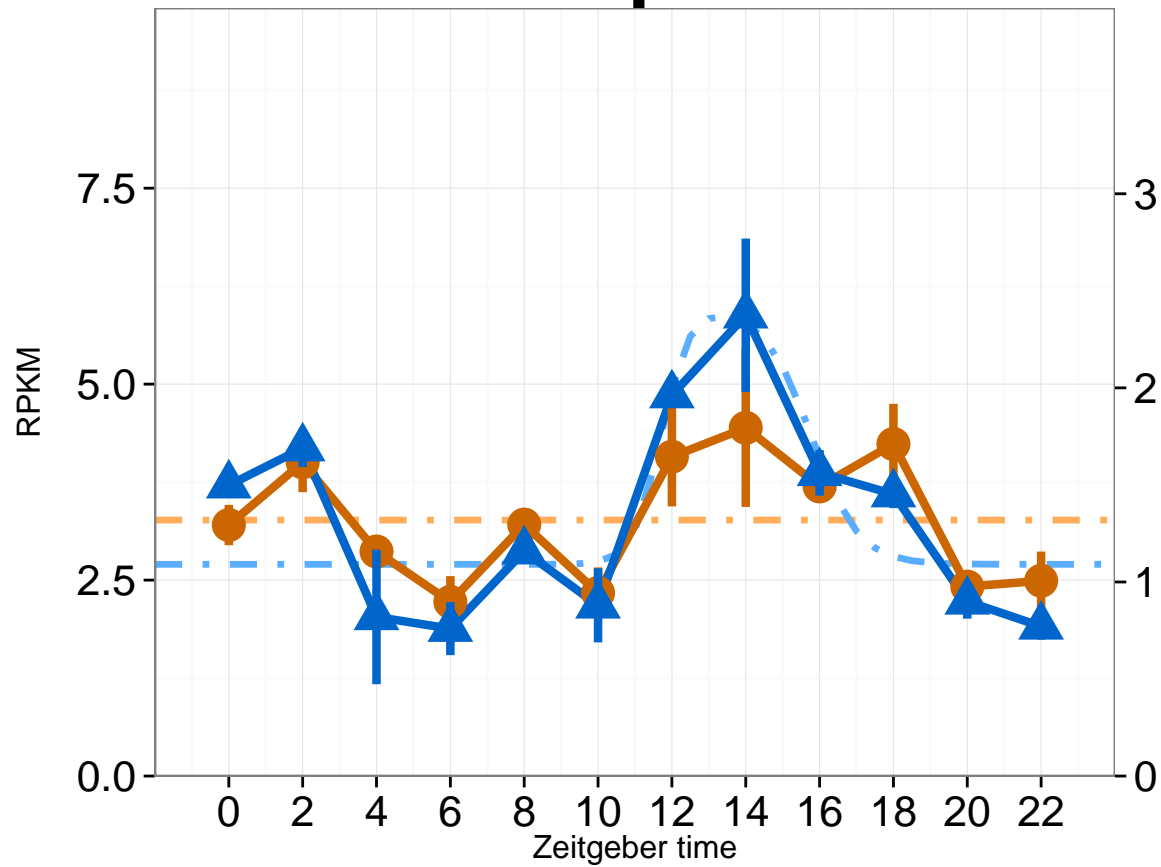

# Entpd7

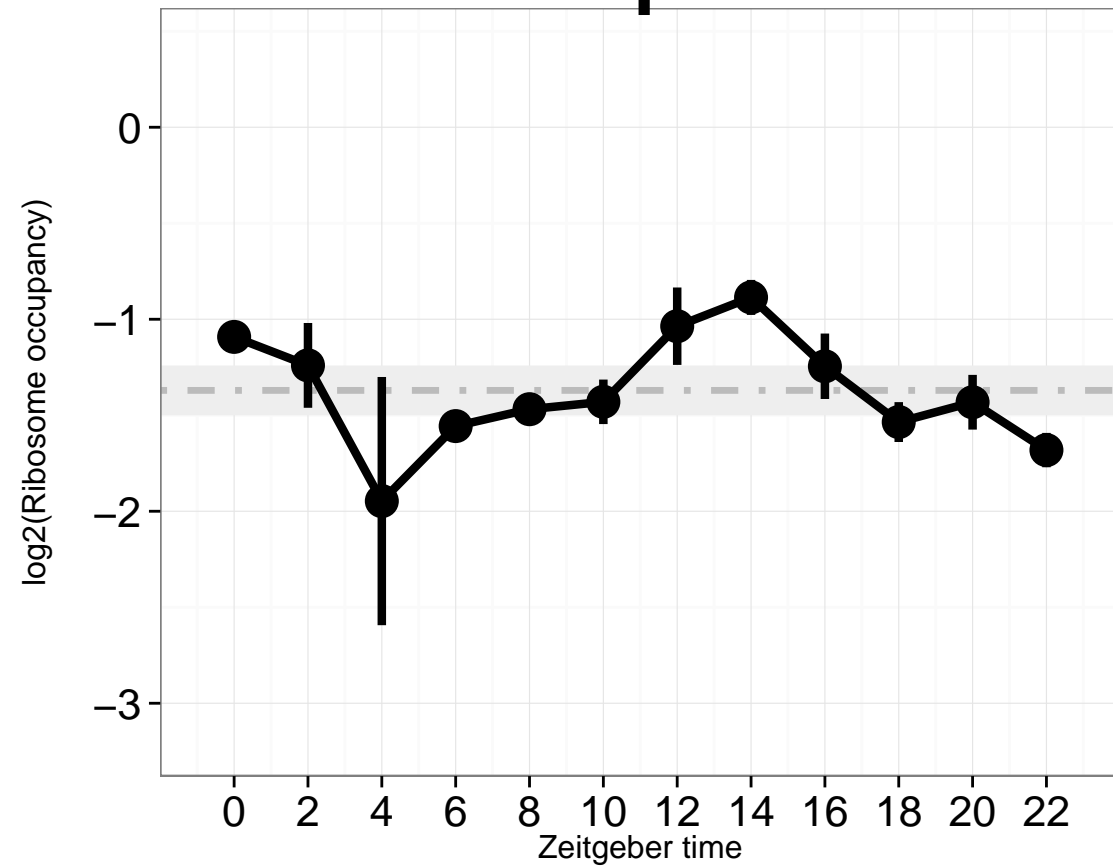

Supplement: SuppDataset_1.zip [file Entpd7_set_C.pdf › Supplemental Dataset 1/C-mRNA_nonrhythm_translation_rhyth/Entpd7_set_C.pdf]

# Epb4.111

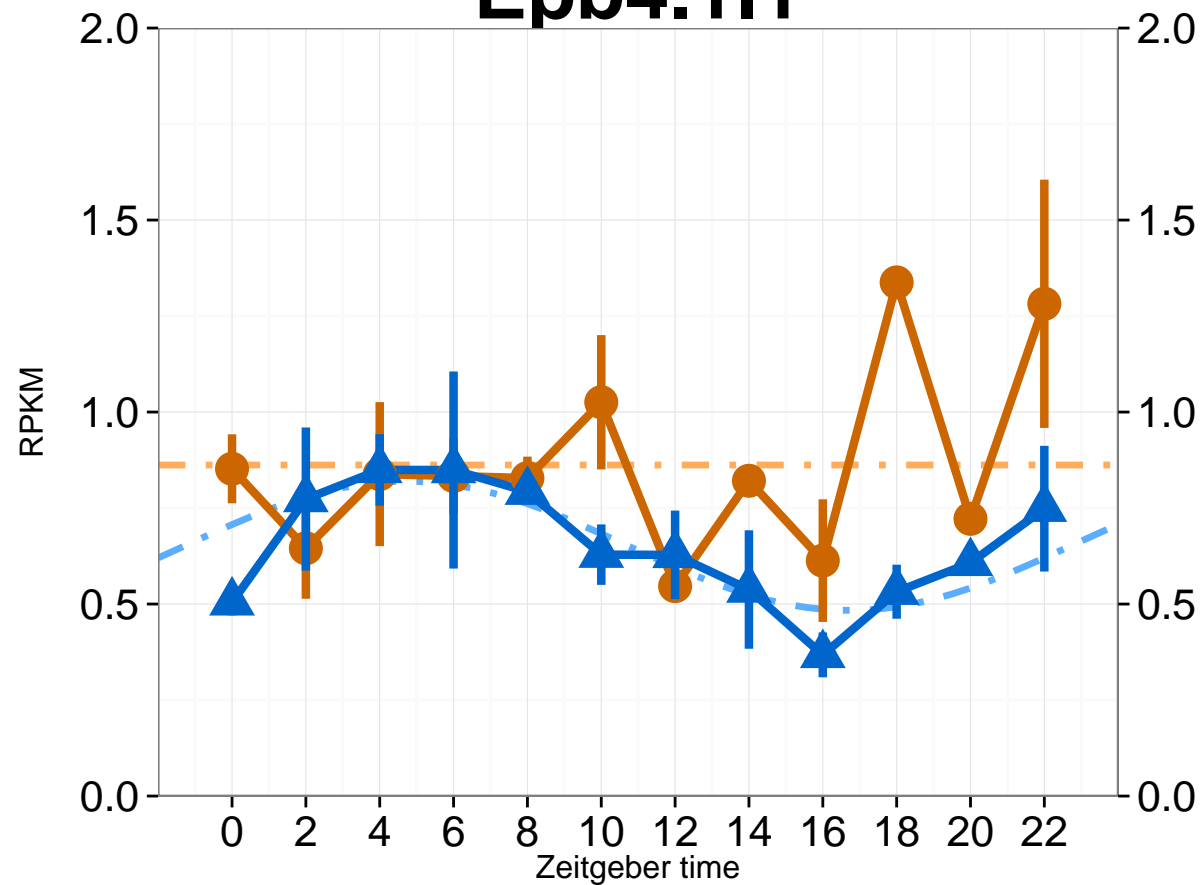

# Epb4.111

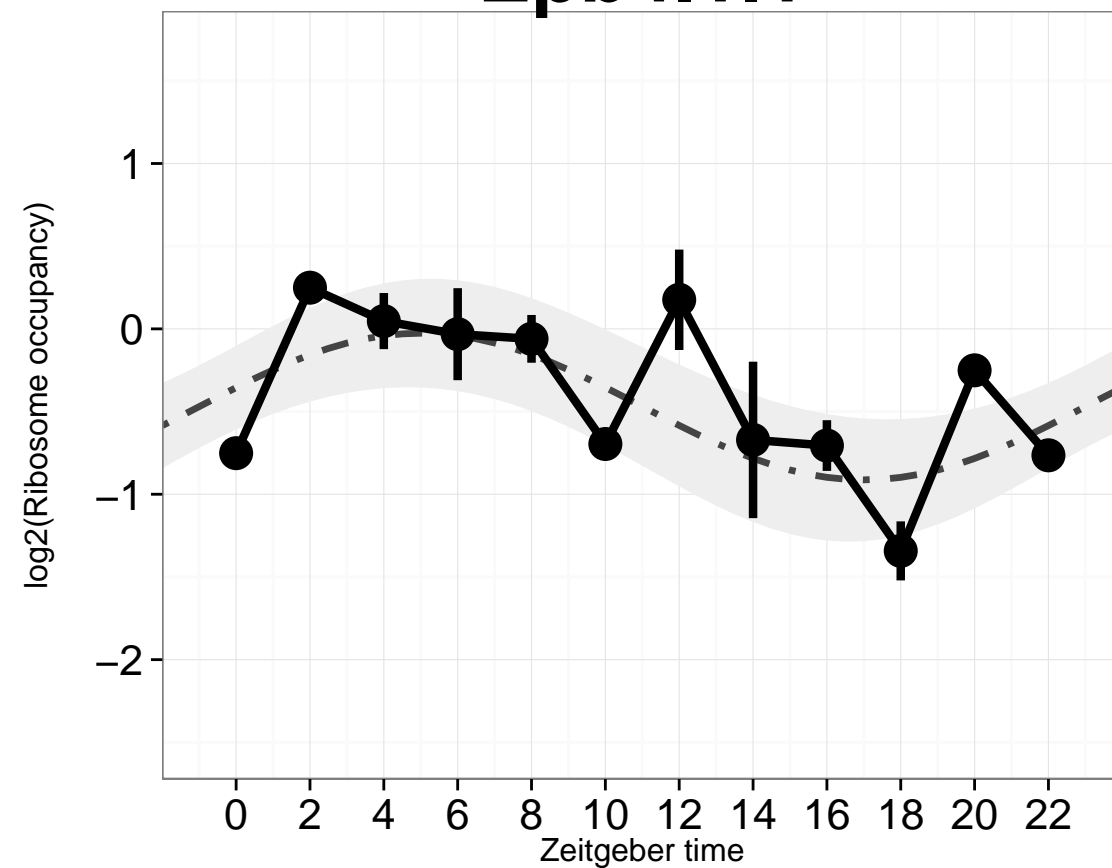

Supplement: SuppDataset_1.zip [file Epb4.1l1_set_C.pdf › Supplemental Dataset 1/C-mRNA_nonrhythm_translation_rhyth/Epb4.1l1_set_C.pdf]

# Ercc1

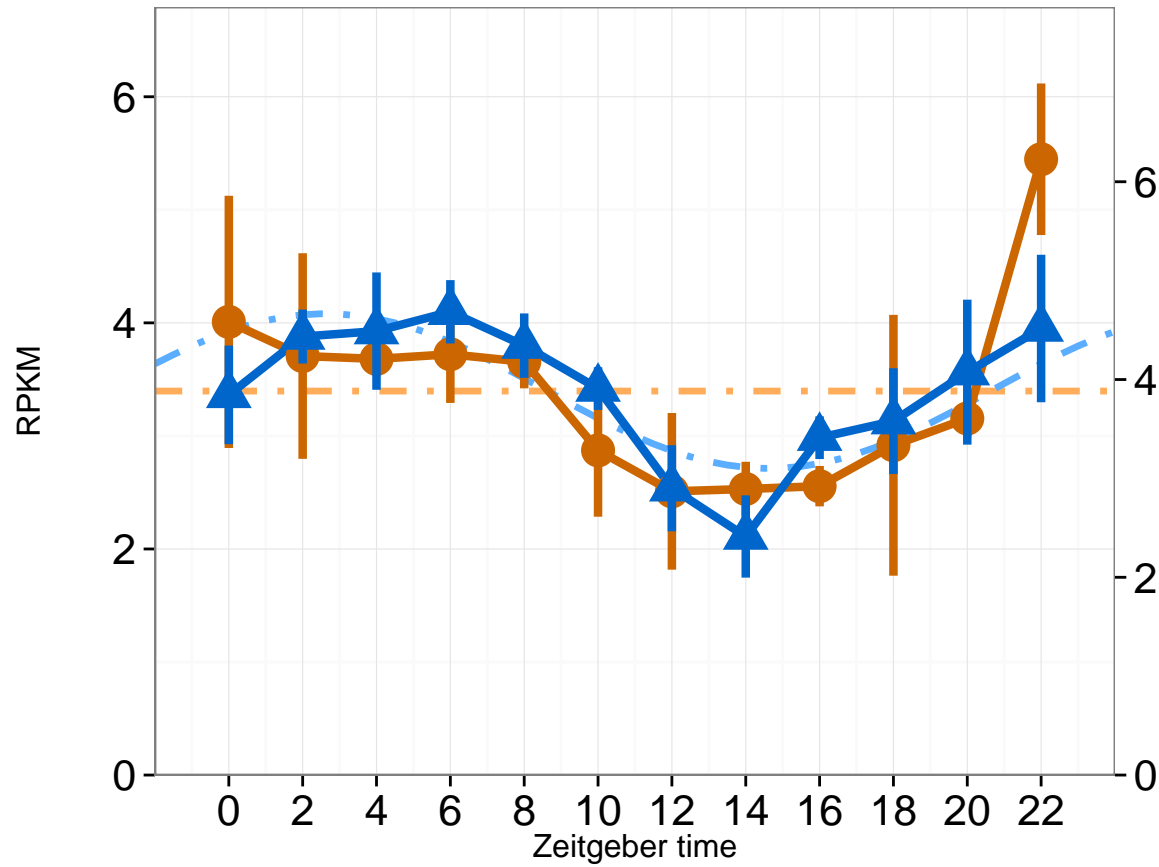

# Ercc1

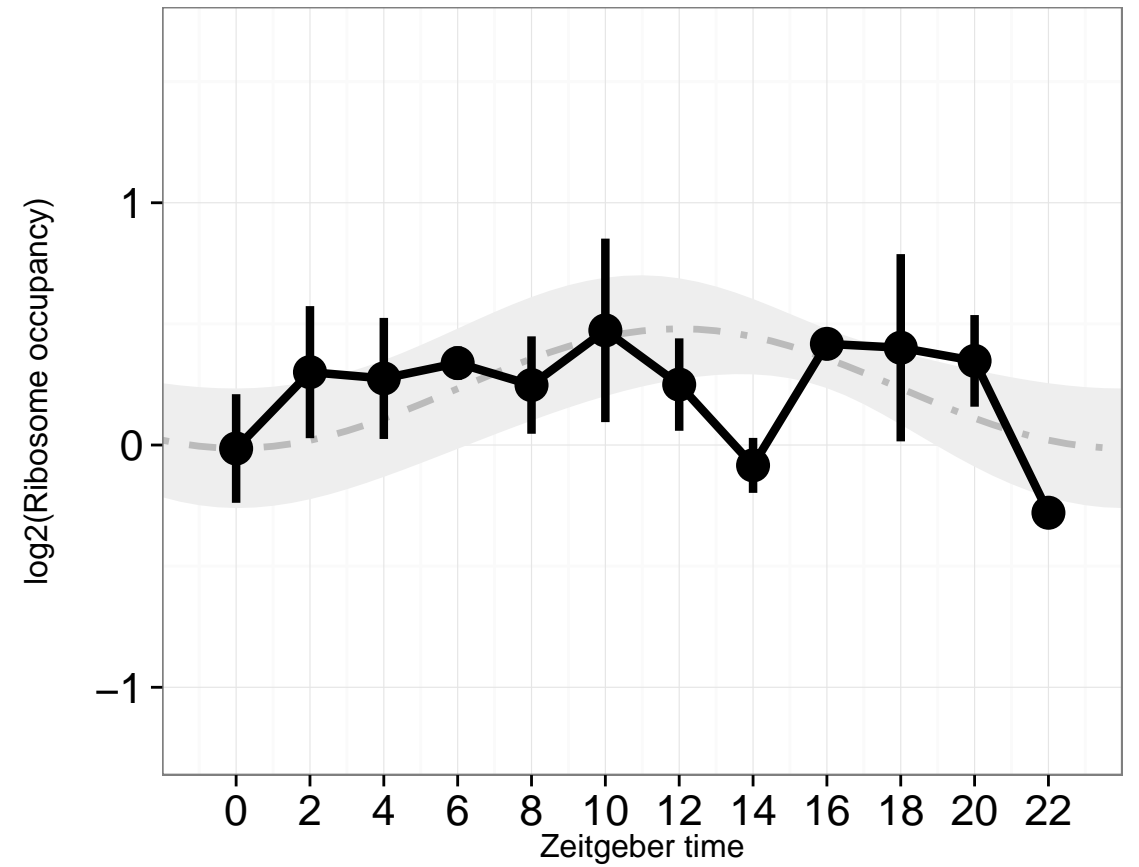

Supplement: SuppDataset_1.zip [file Ercc1_set_C.pdf › Supplemental Dataset 1/C-mRNA_nonrhythm_translation_rhyth/Ercc1_set_C.pdf]

# Erp44

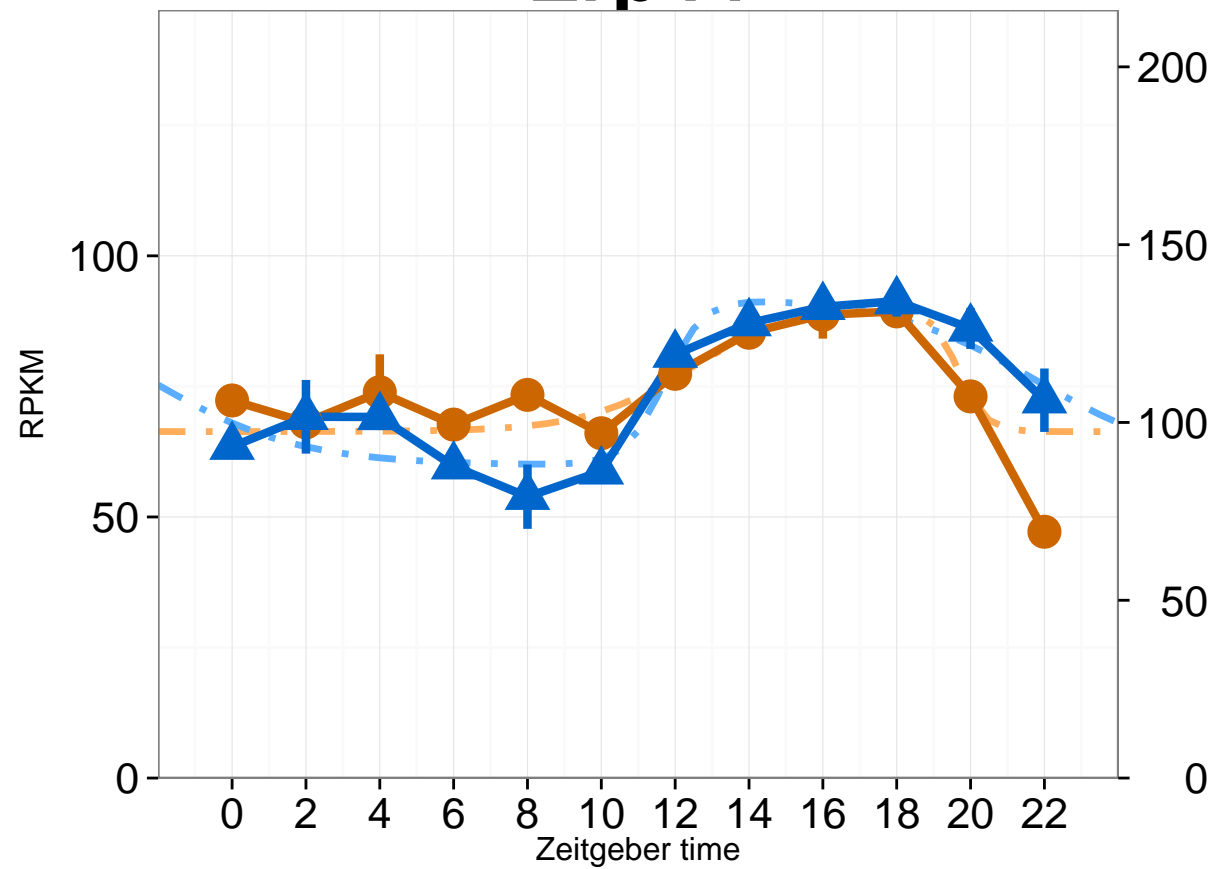

# Erp44

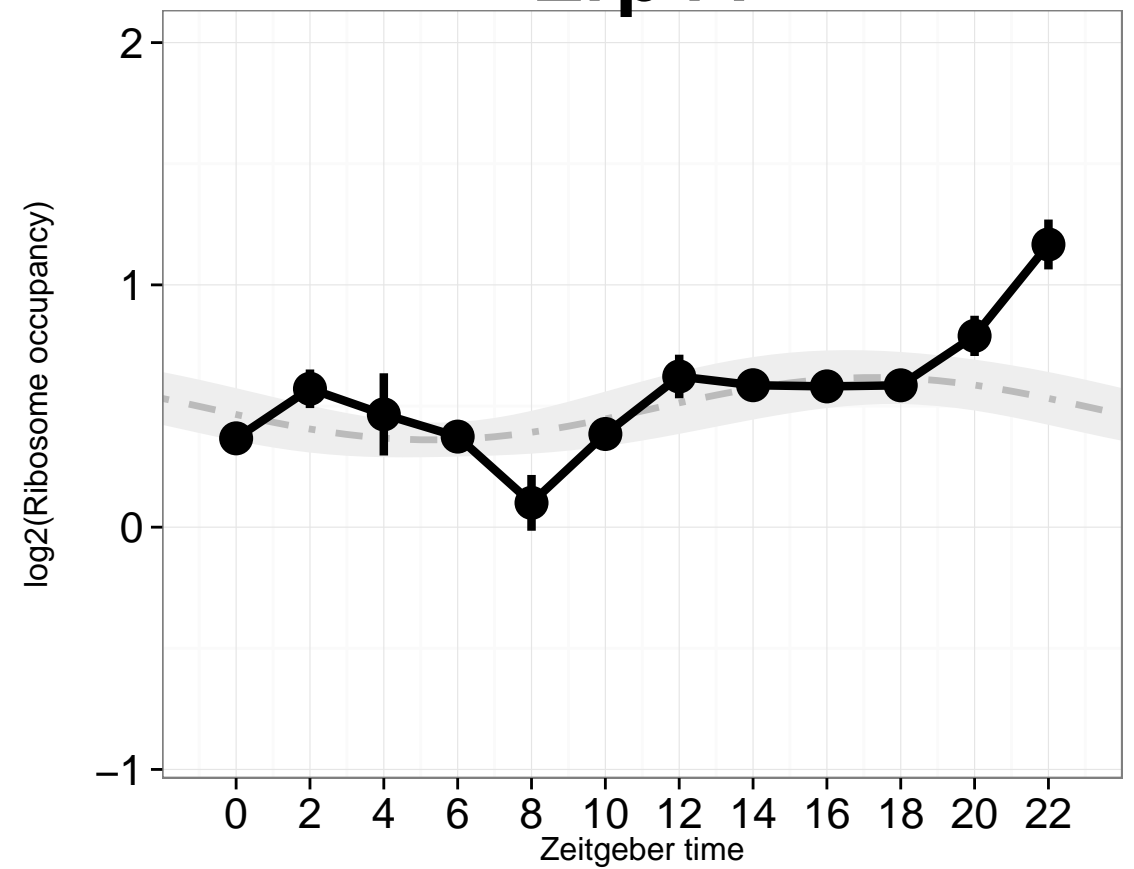

Supplement: SuppDataset_1.zip [file Erp44_set_C.pdf › Supplemental Dataset 1/C-mRNA_nonrhythm_translation_rhyth/Erp44_set_C.pdf]

## Esco2

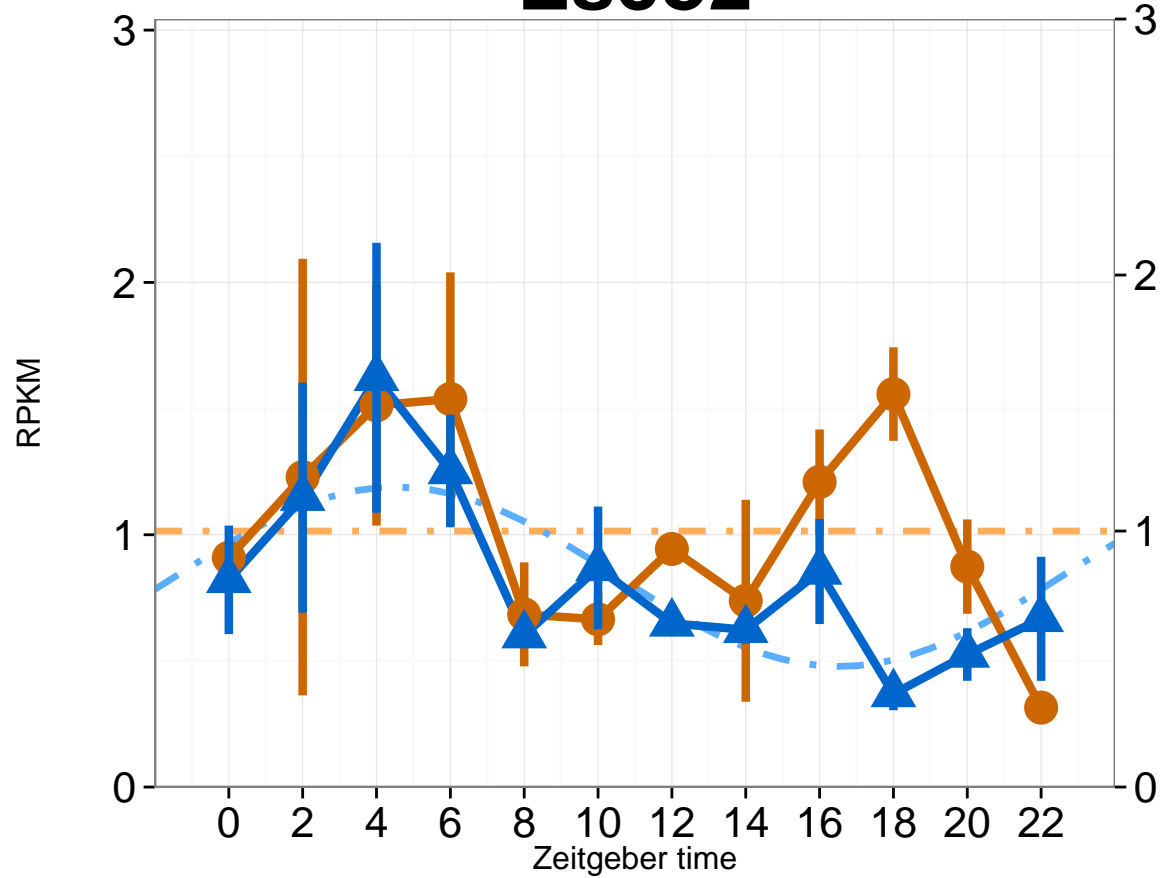

## Esco2

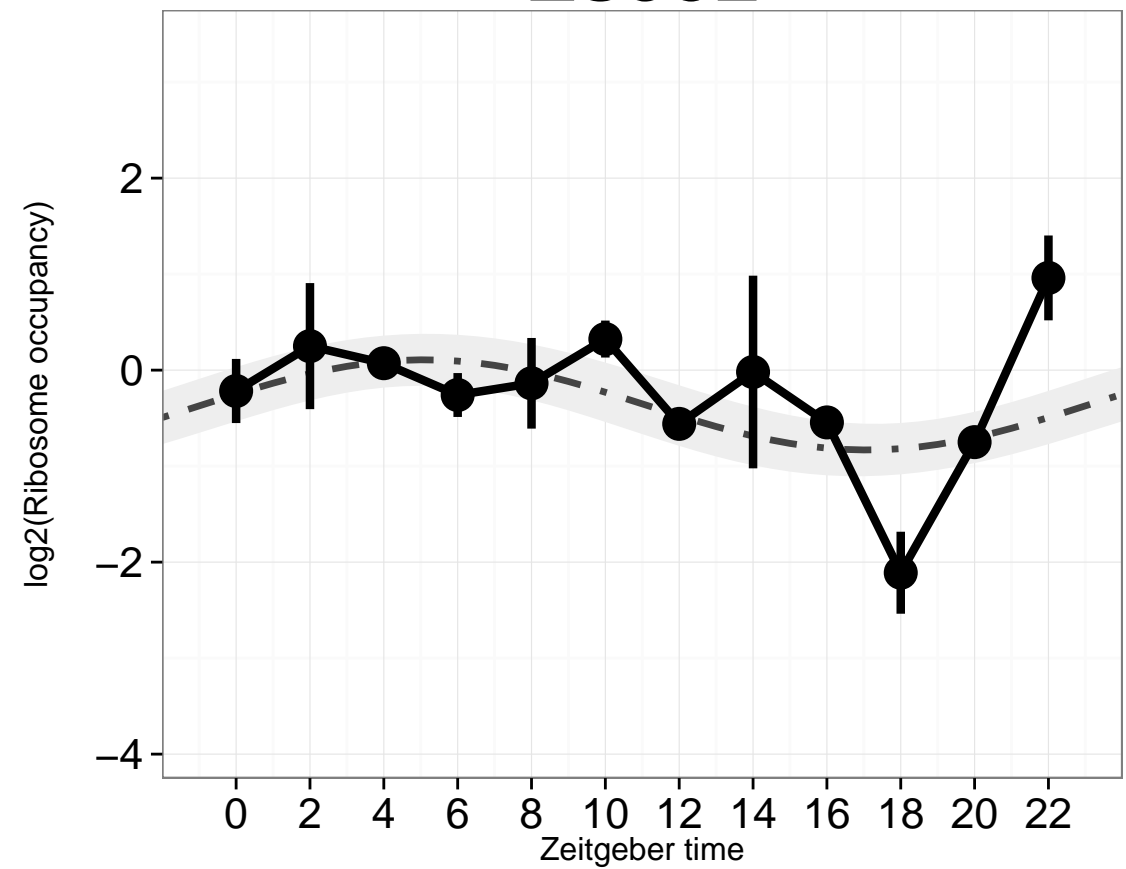

Supplement: SuppDataset_1.zip [file Esco2_set_C.pdf › Supplemental Dataset 1/C-mRNA_nonrhythm_translation_rhyth/Esco2_set_C.pdf]

## Esrra

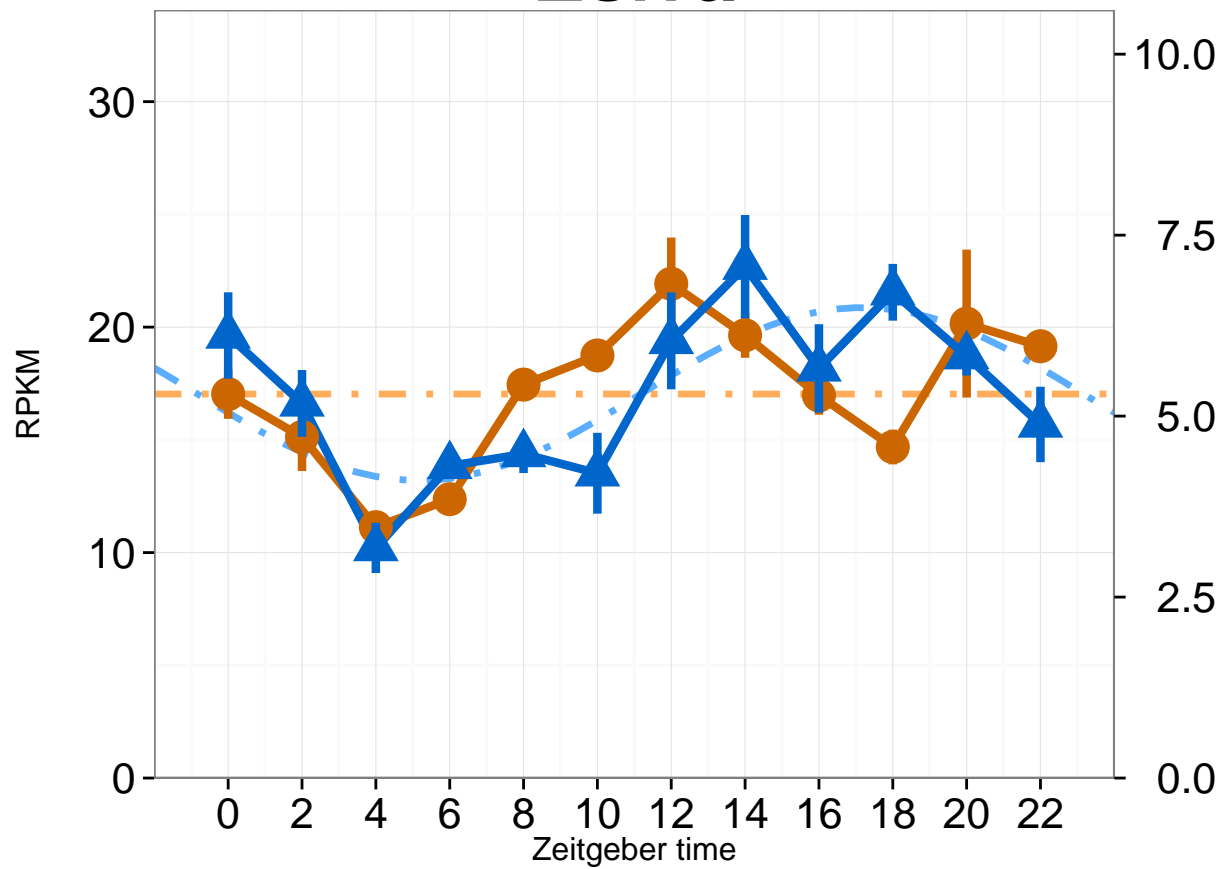

## Esrra

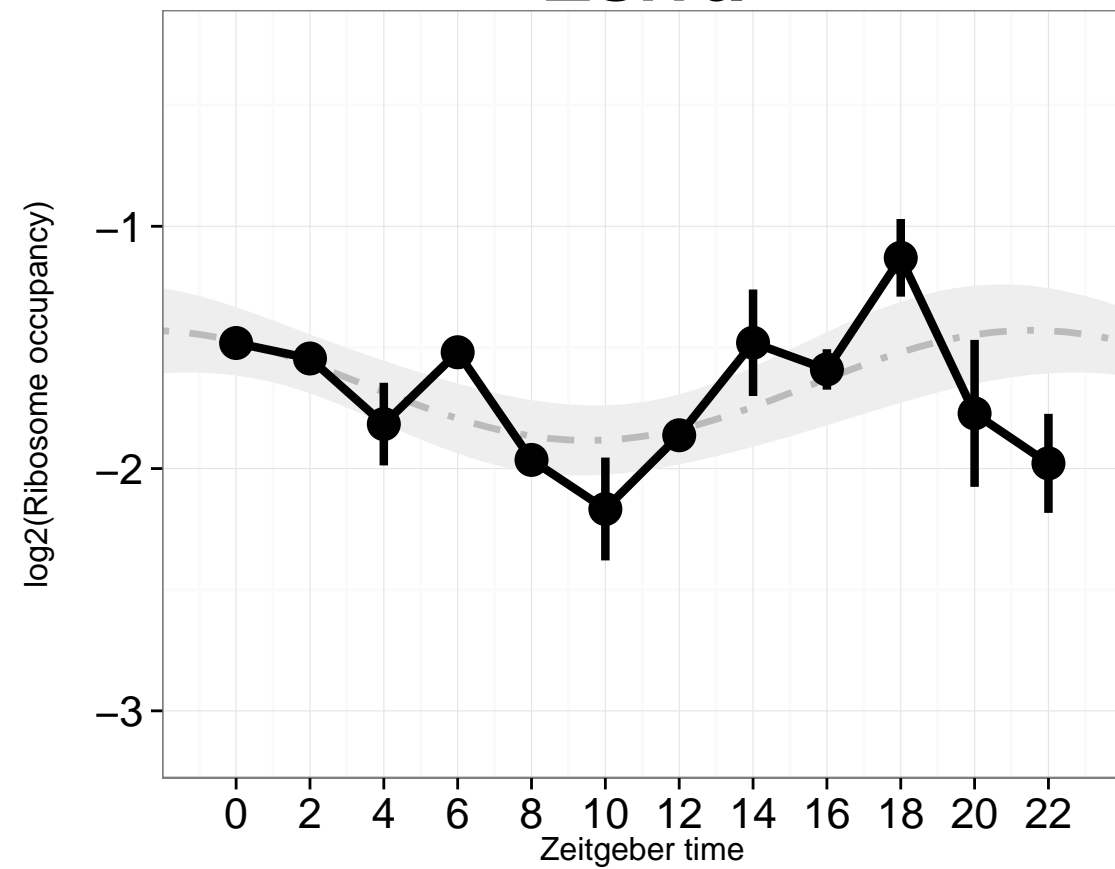

Supplement: SuppDataset_1.zip [file Esrra_set_C.pdf › Supplemental Dataset 1/C-mRNA_nonrhythm_translation_rhyth/Esrra_set_C.pdf]

## Evi2a

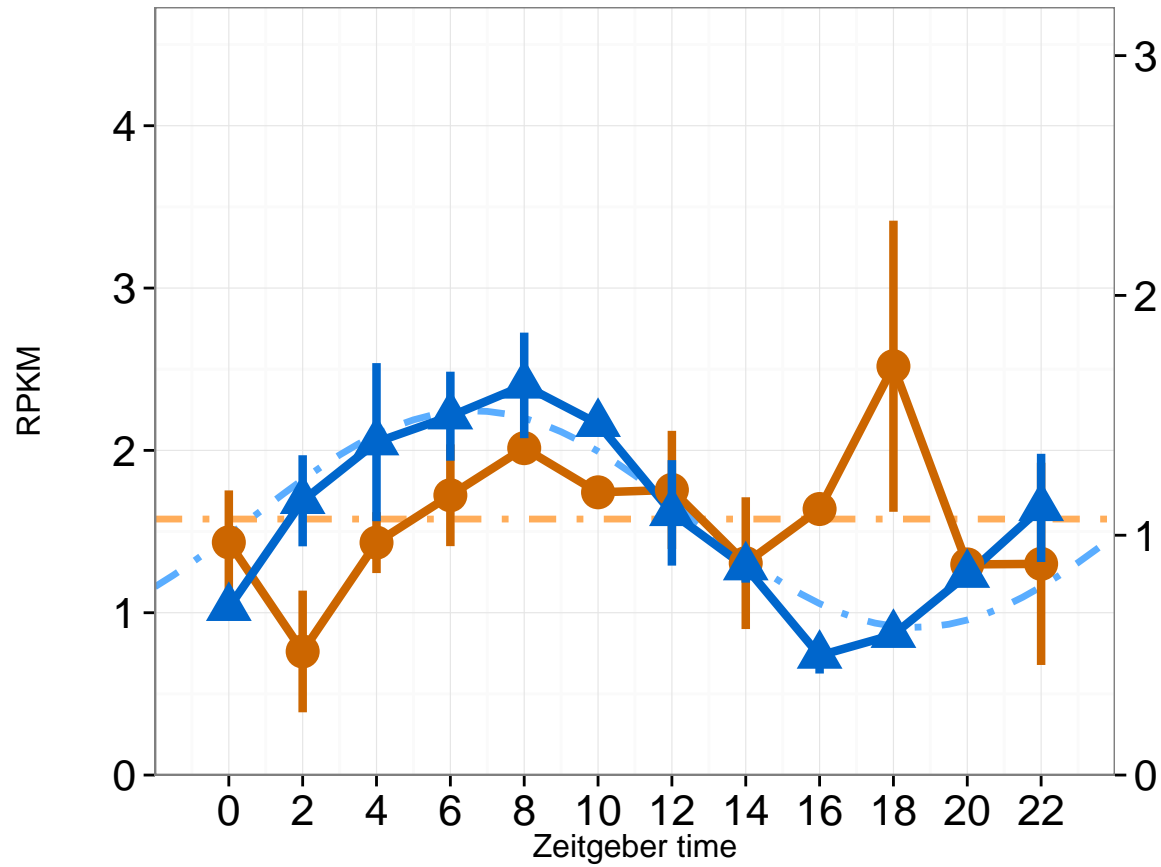

## Evi2a

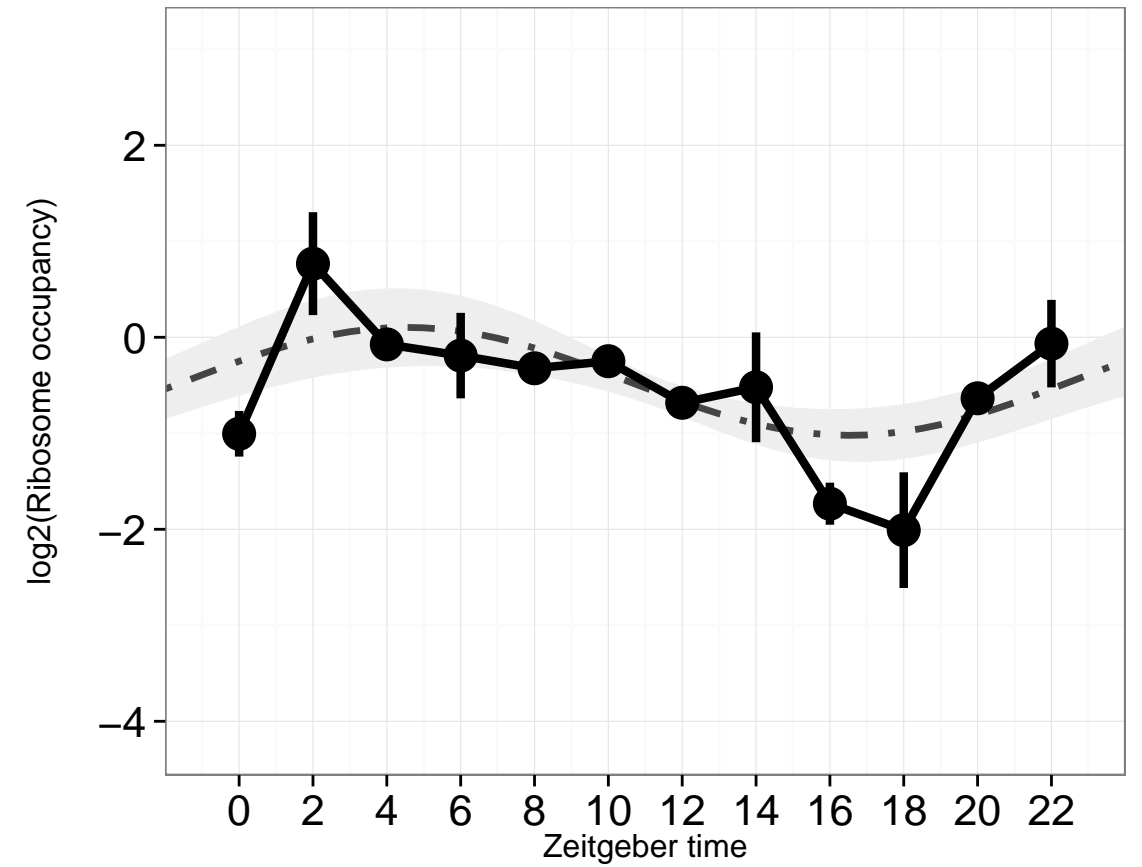

Supplement: SuppDataset_1.zip [file Evi2a_set_C.pdf › Supplemental Dataset 1/C-mRNA_nonrhythm_translation_rhyth/Evi2a_set_C.pdf]

# Evi5

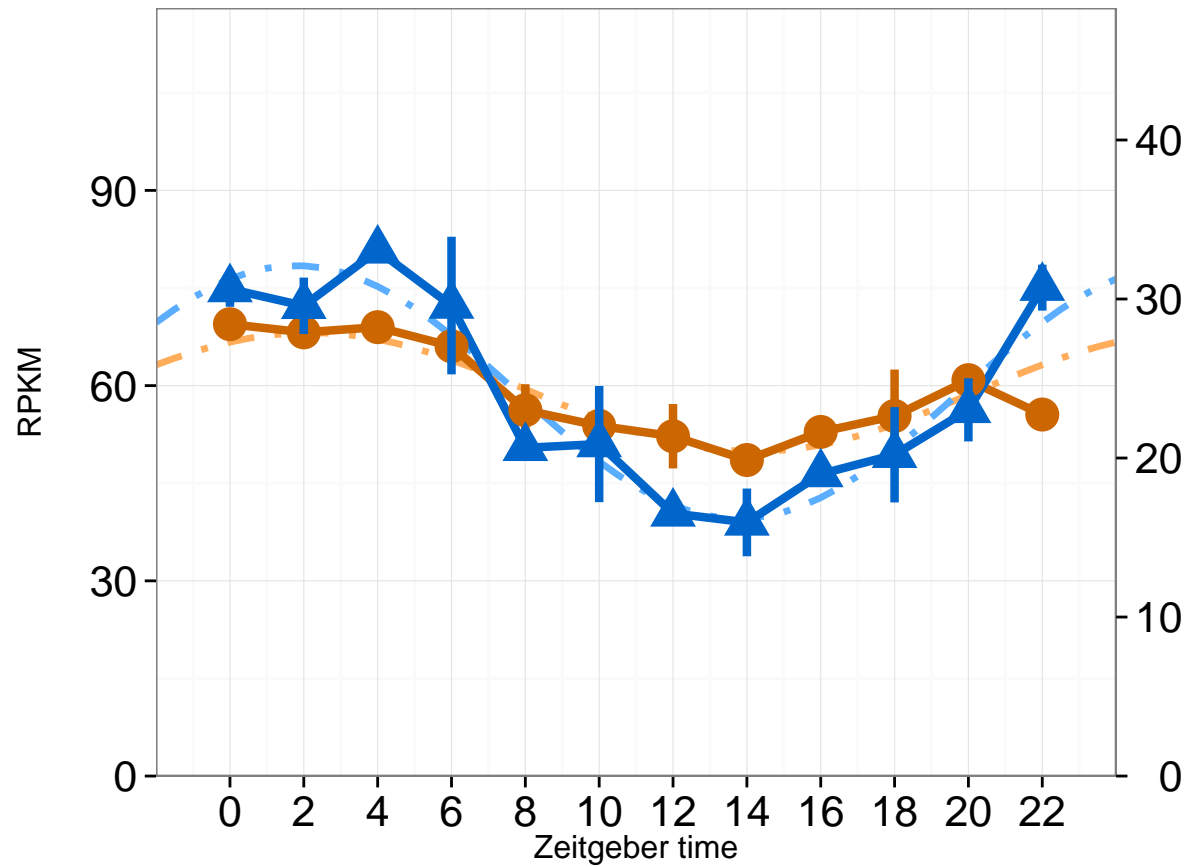

# Evi5

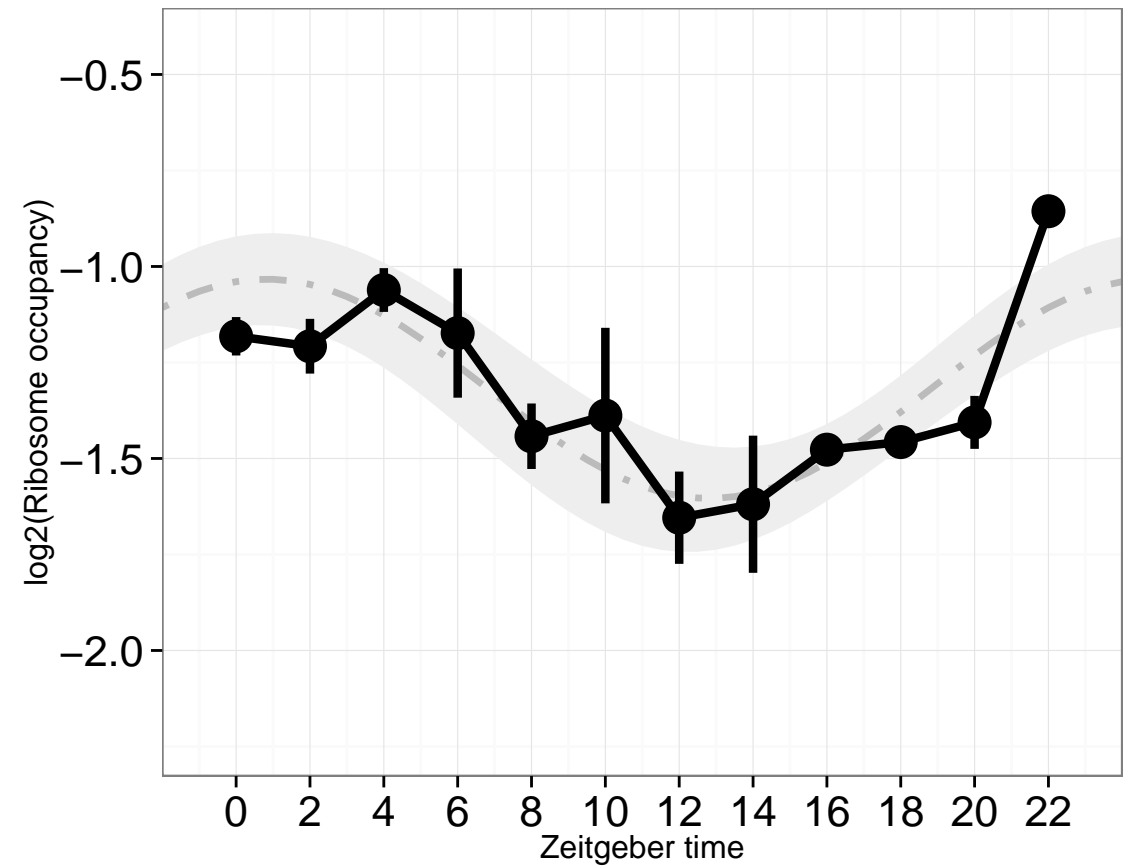

Supplement: SuppDataset_1.zip [file Evi5_set_C.pdf › Supplemental Dataset 1/C-mRNA_nonrhythm_translation_rhyth/Evi5_set_C.pdf]

## Exoc3l4

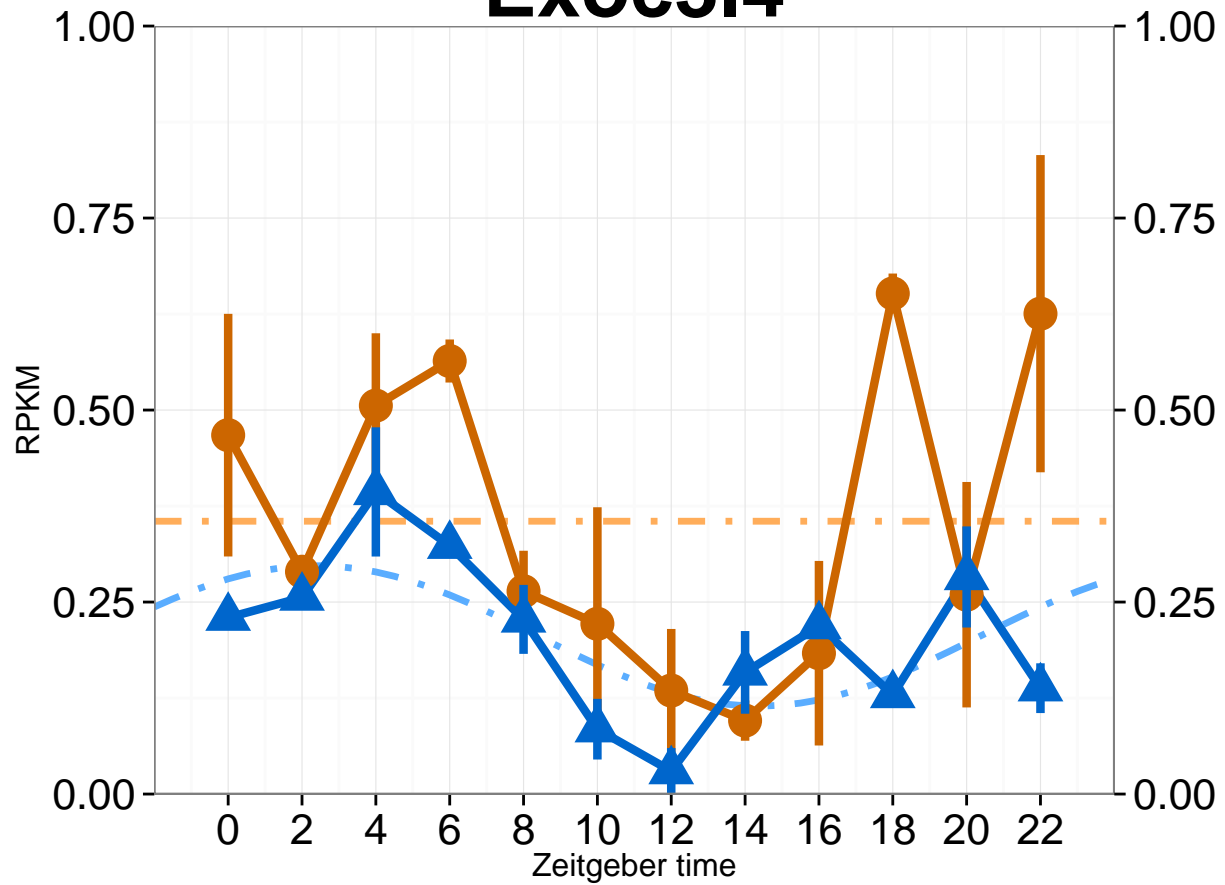

## Exoc3l4

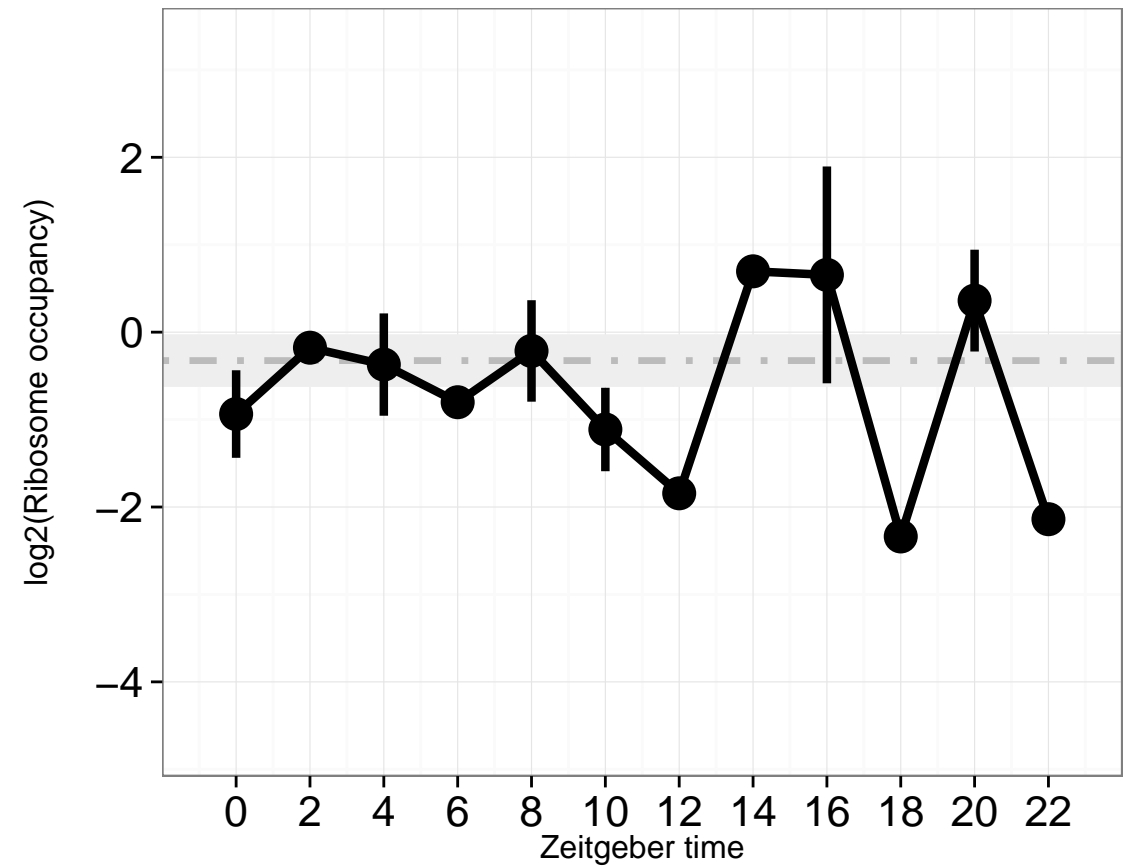

Supplement: SuppDataset_1.zip [file Exoc3l4_set_C.pdf › Supplemental Dataset 1/C-mRNA_nonrhythm_translation_rhyth/Exoc3l4_set_C.pdf]

## Exosc8

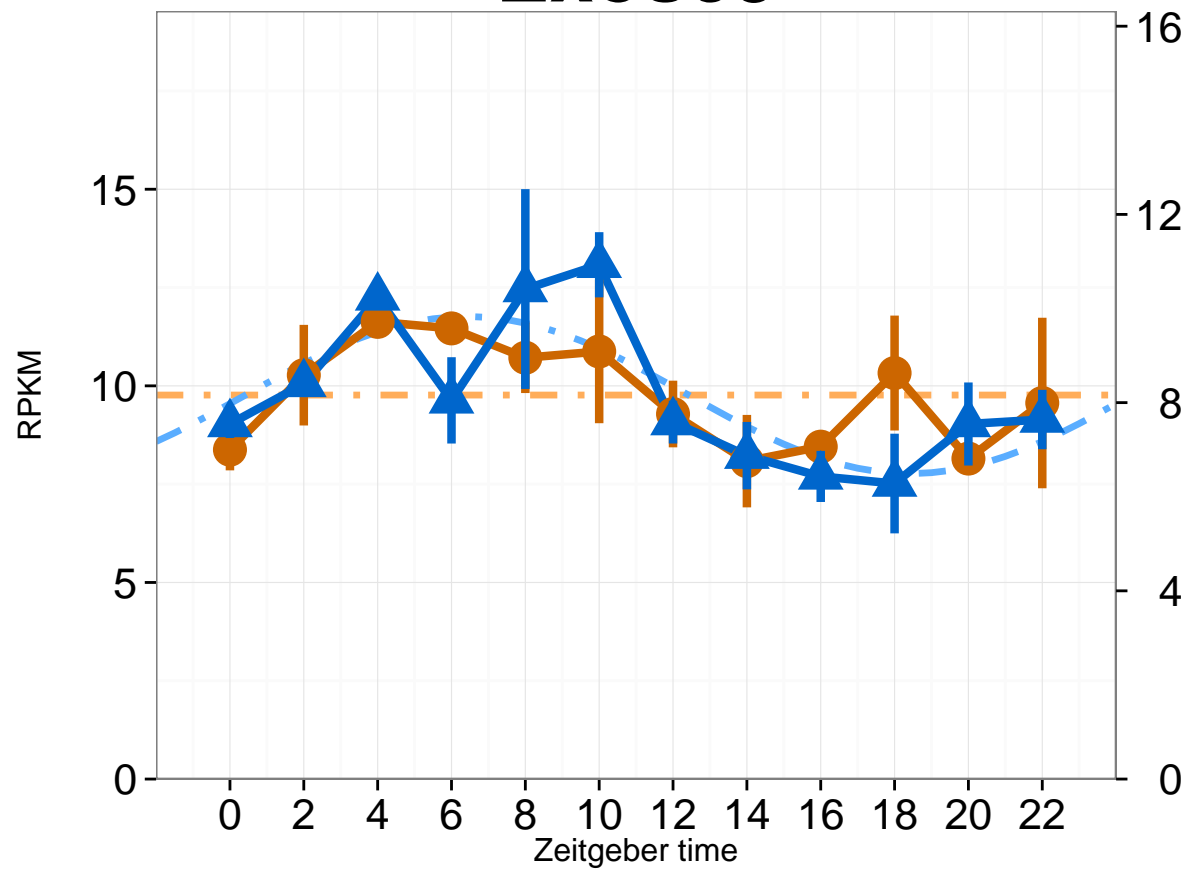

## Exosc8

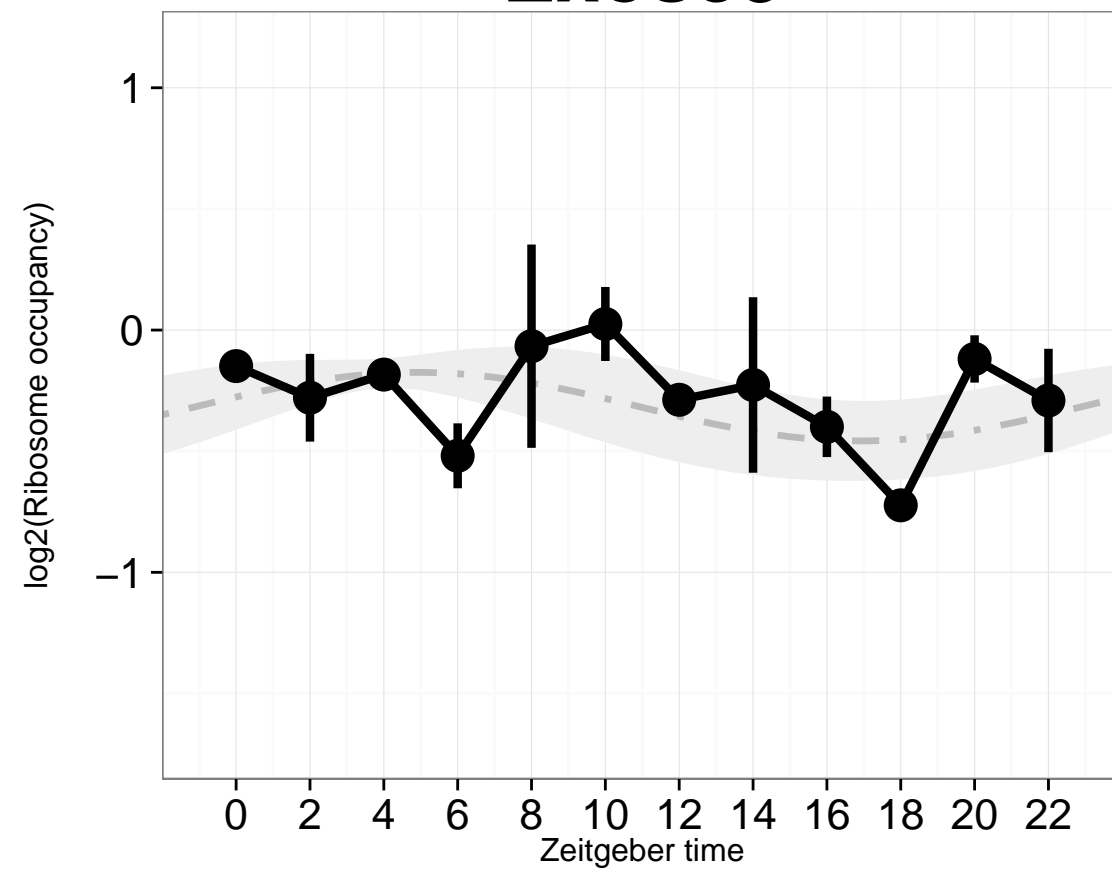

Supplement: SuppDataset_1.zip [file Exosc8_set_C.pdf › Supplemental Dataset 1/C-mRNA_nonrhythm_translation_rhyth/Exosc8_set_C.pdf]

# Fam151b

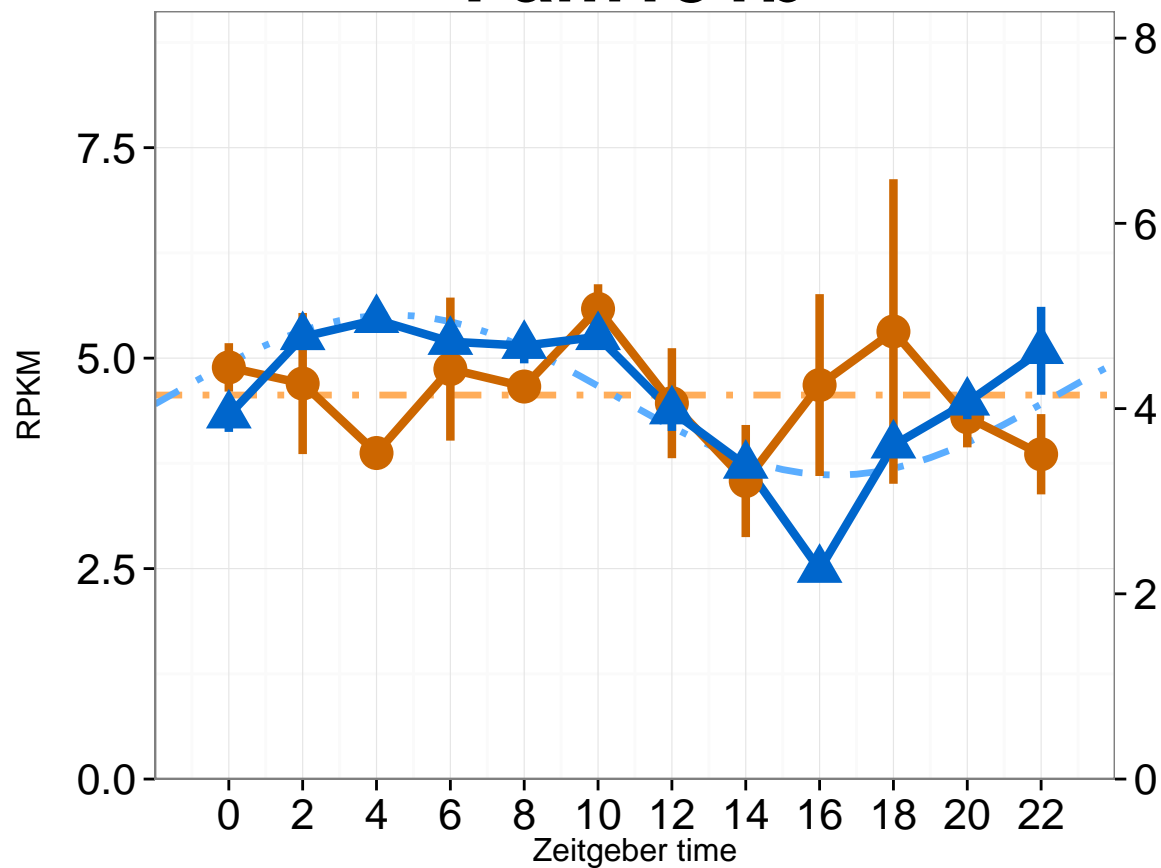

# Fam151b

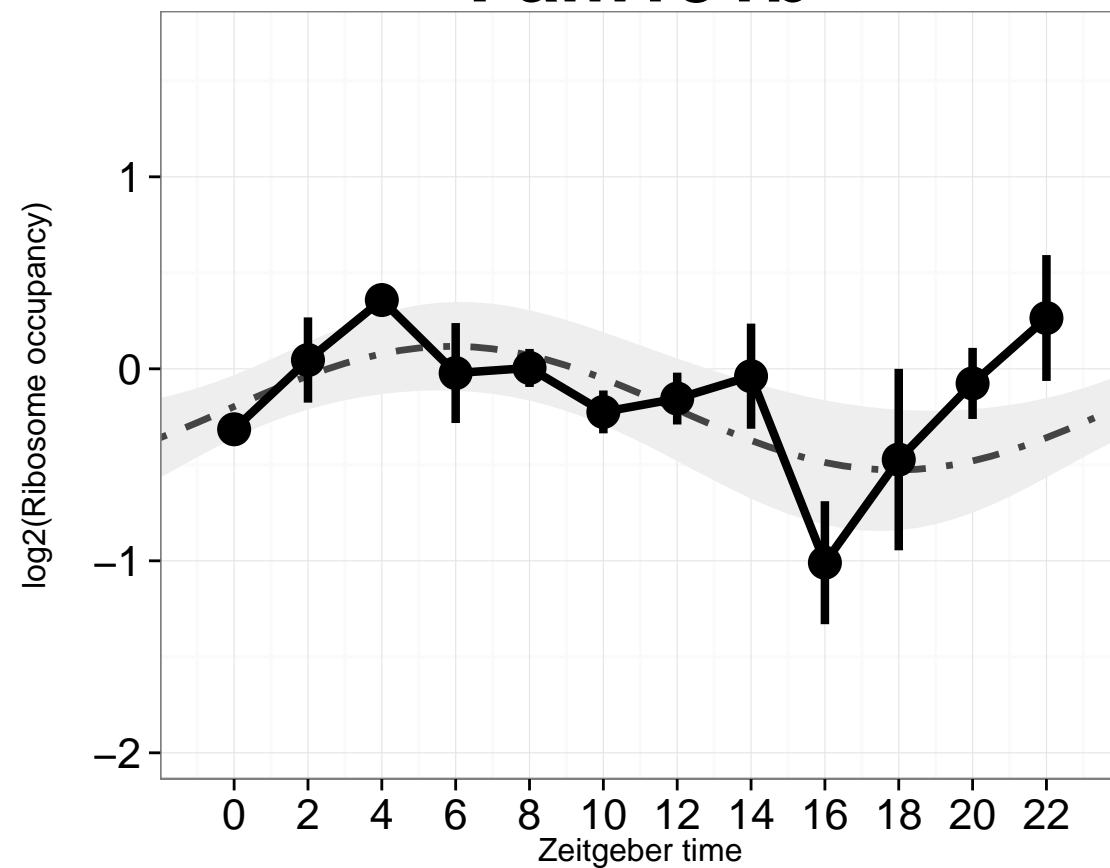

Supplement: SuppDataset_1.zip [file Fam151b_set_C.pdf › Supplemental Dataset 1/C-mRNA_nonrhythm_translation_rhyth/Fam151b_set_C.pdf]

# Fam195b

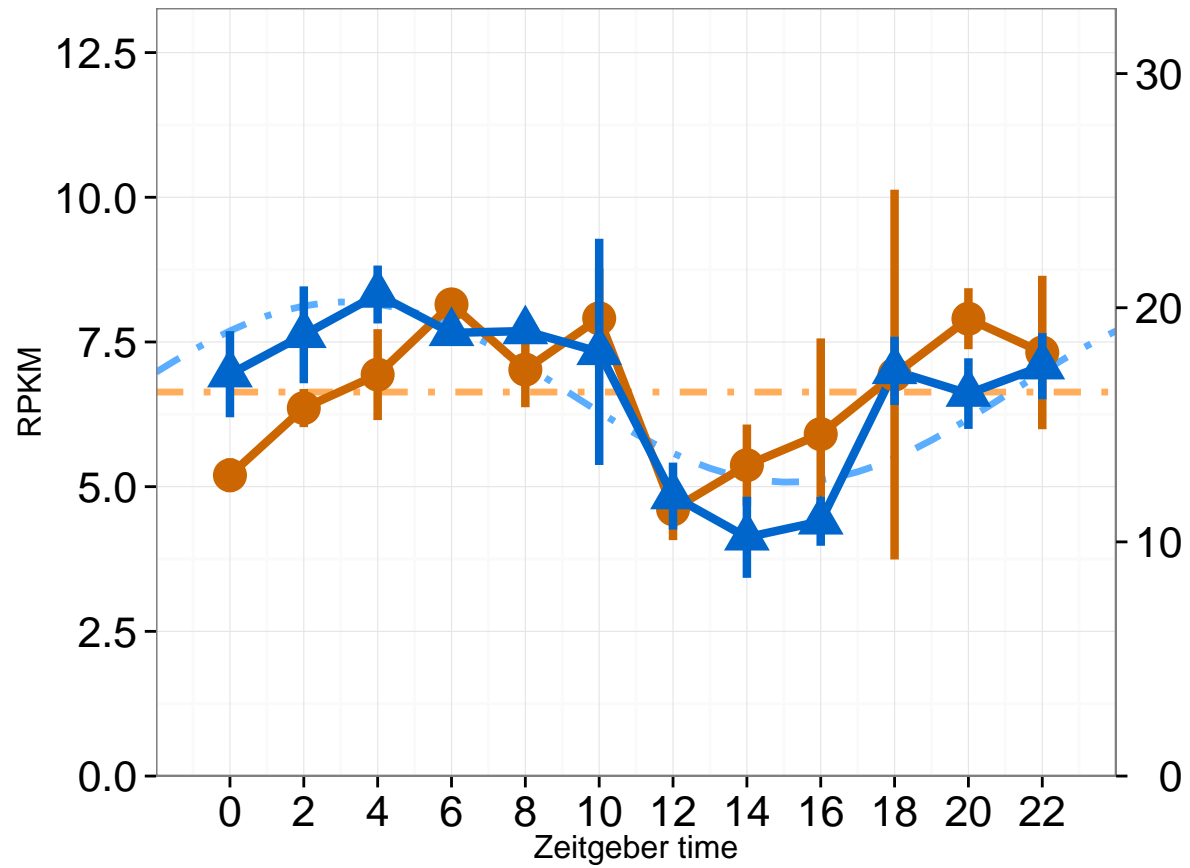

# Fam195b

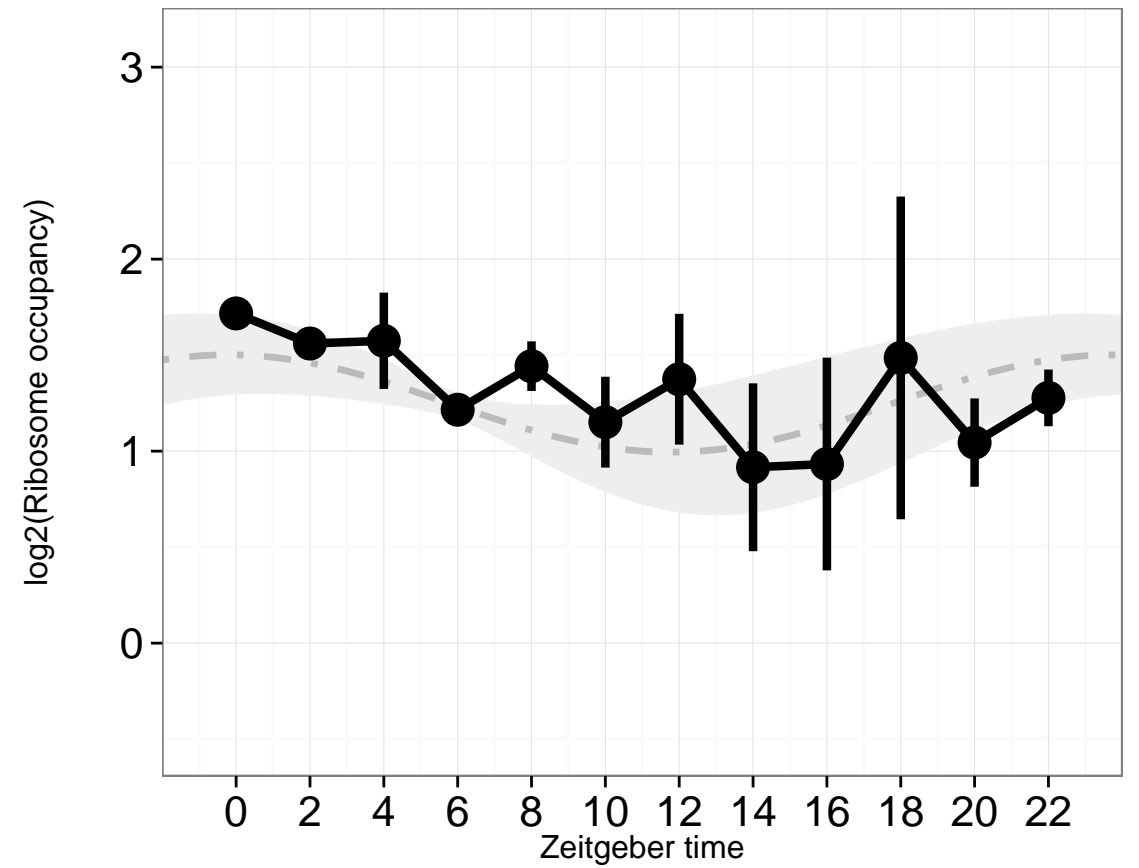

Supplement: SuppDataset_1.zip [file Fam195b_set_C.pdf › Supplemental Dataset 1/C-mRNA_nonrhythm_translation_rhyth/Fam195b_set_C.pdf]

# Fam26f

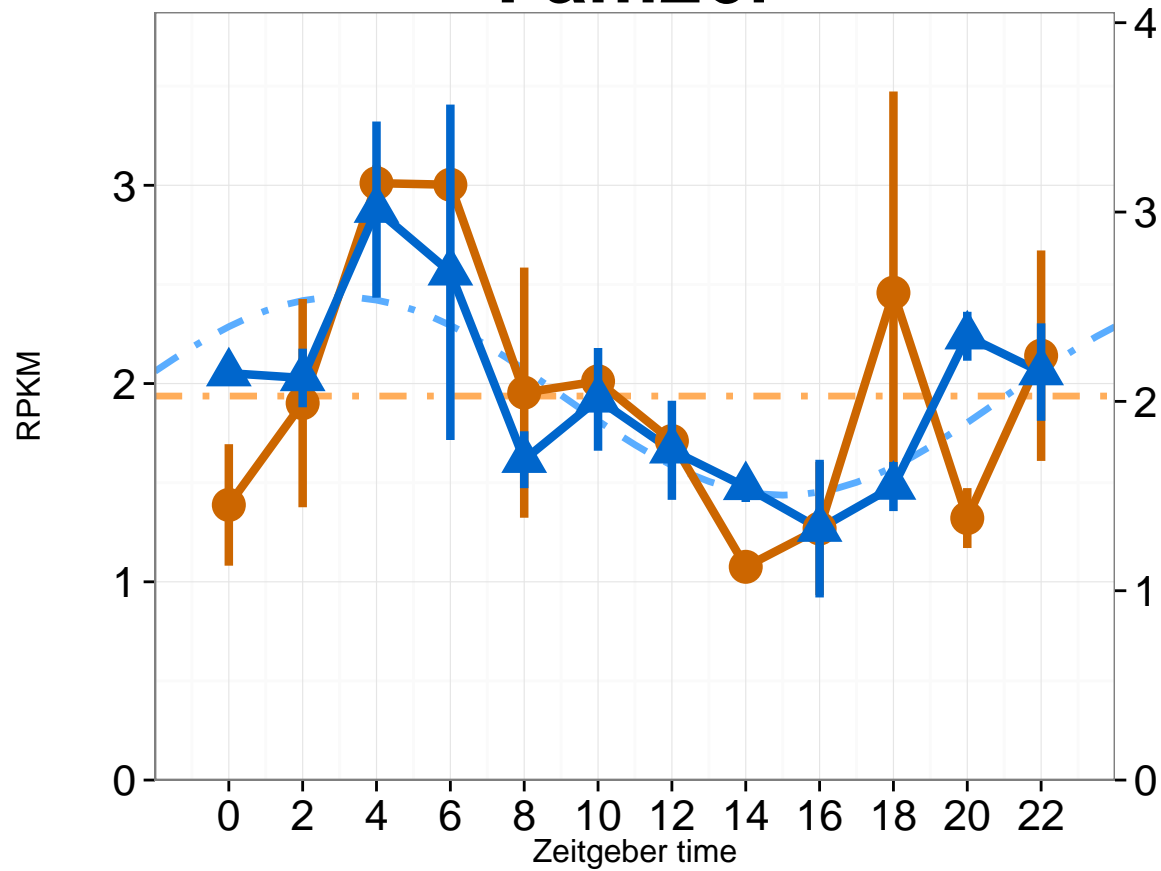

# Fam26f

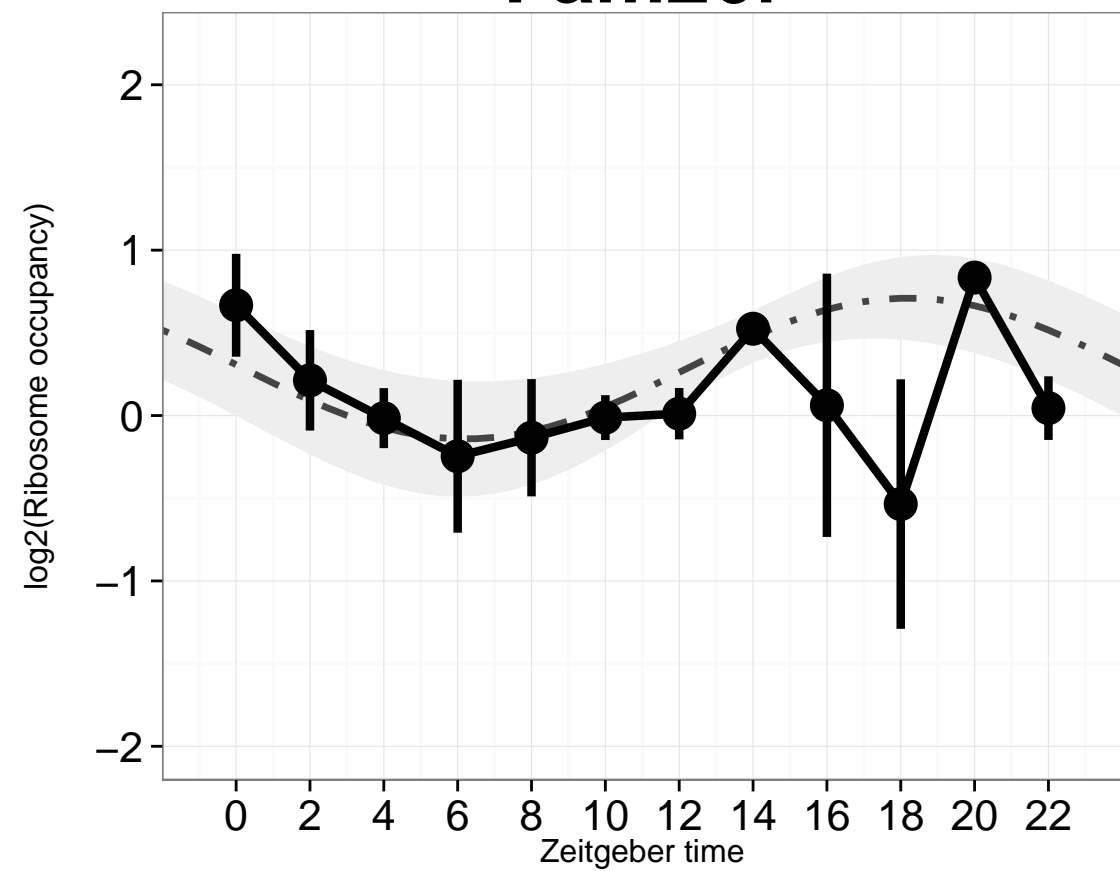

Supplement: SuppDataset_1.zip [file Fam26f_set_C.pdf › Supplemental Dataset 1/C-mRNA_nonrhythm_translation_rhyth/Fam26f_set_C.pdf]

# Fam65b

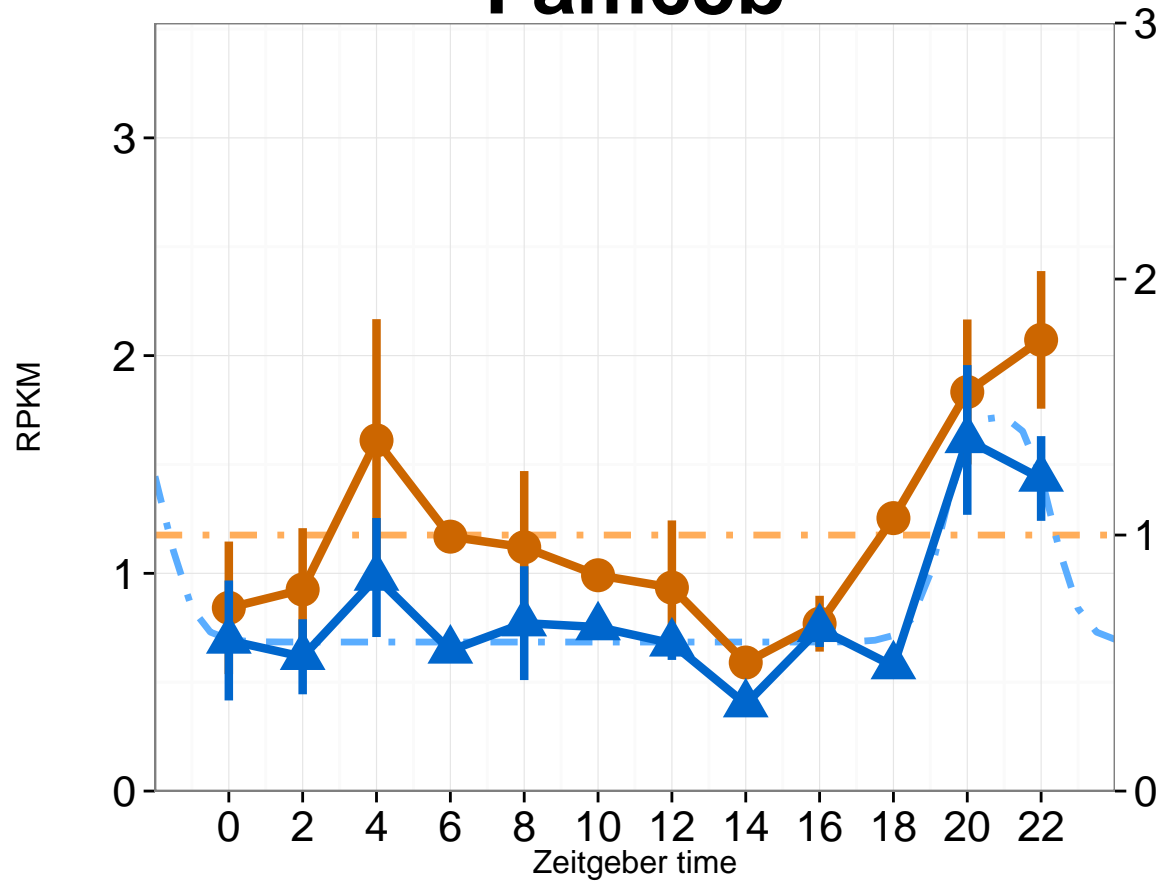

# Fam65b

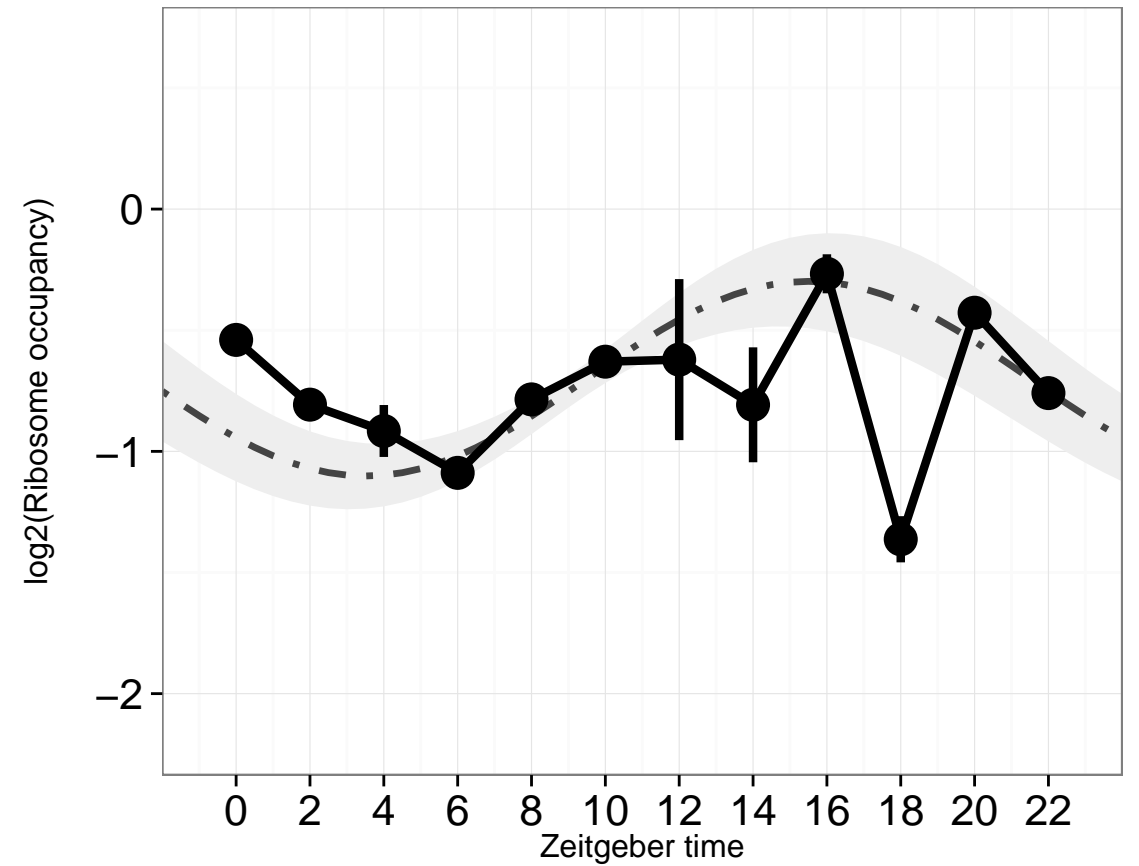

Supplement: SuppDataset_1.zip [file Fam65b_set_C.pdf › Supplemental Dataset 1/C-mRNA_nonrhythm_translation_rhyth/Fam65b_set_C.pdf]

# Fam76b

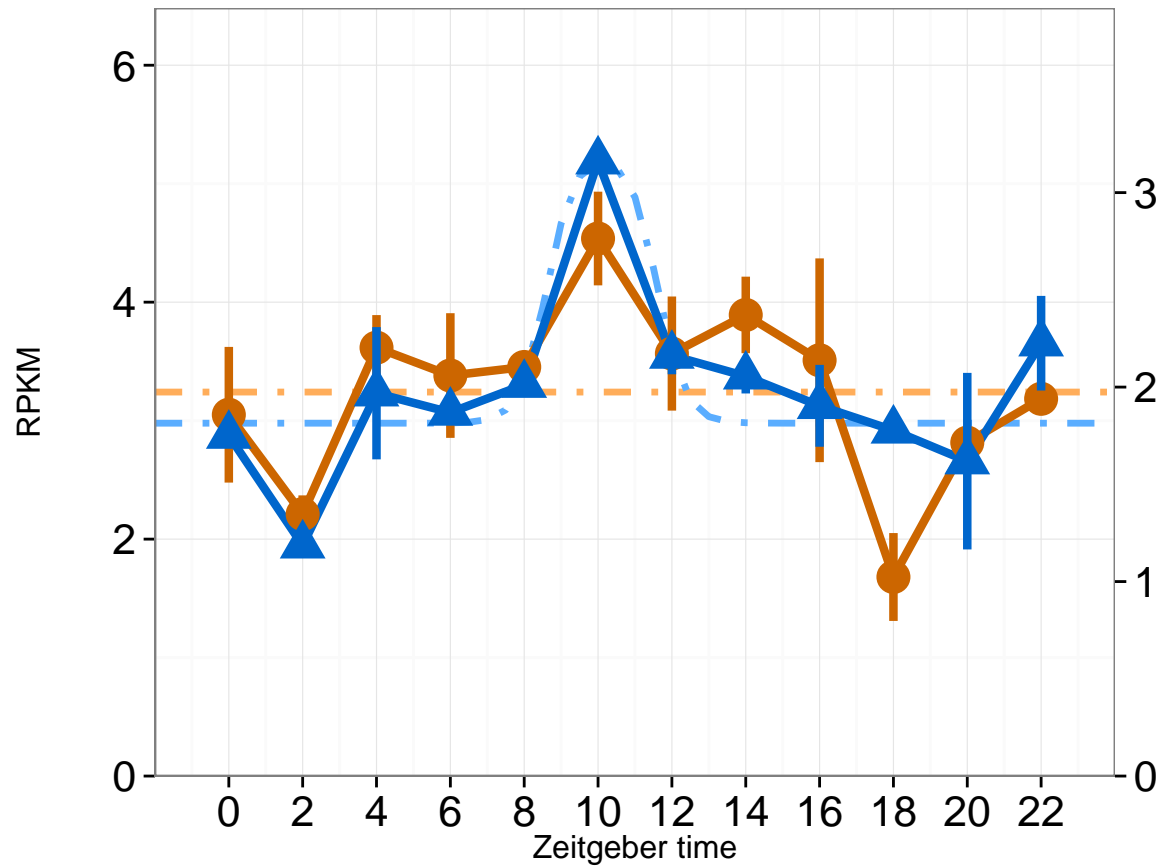

# Fam76b

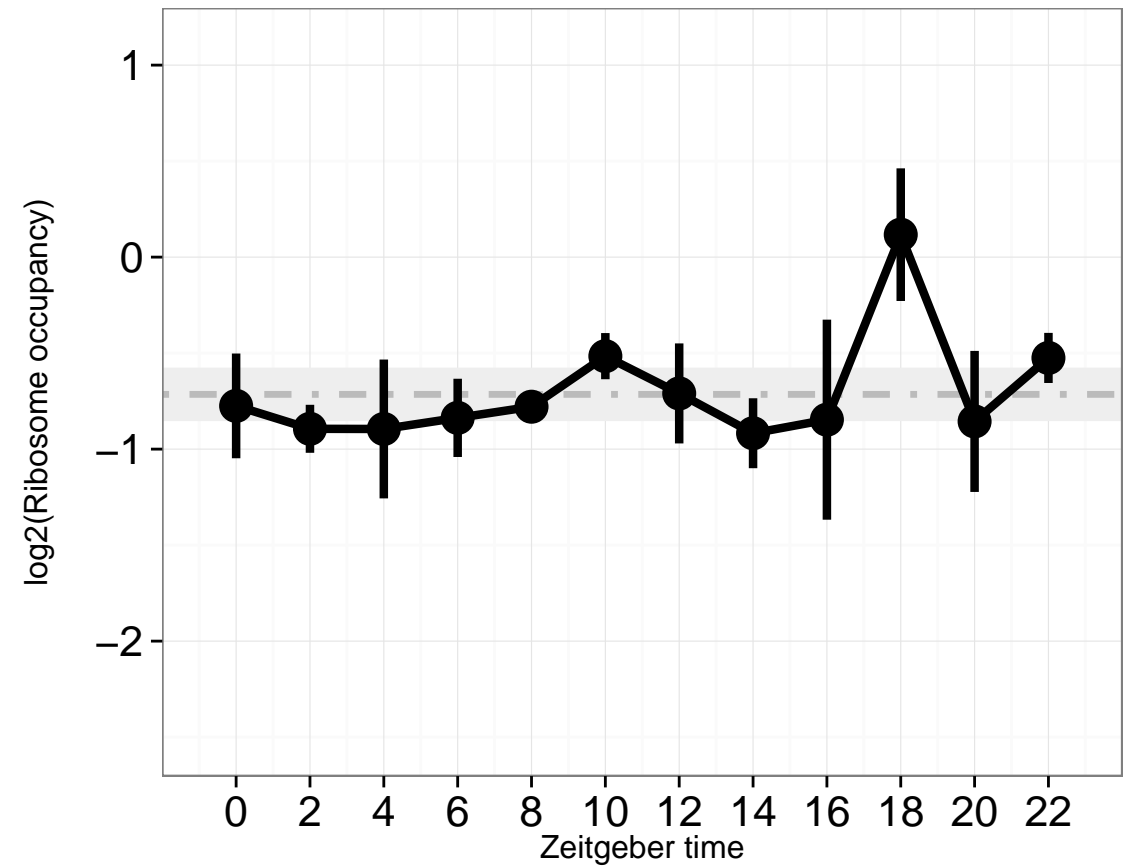

Supplement: SuppDataset_1.zip [file Fam76b_set_C.pdf › Supplemental Dataset 1/C-mRNA_nonrhythm_translation_rhyth/Fam76b_set_C.pdf]

## Far1

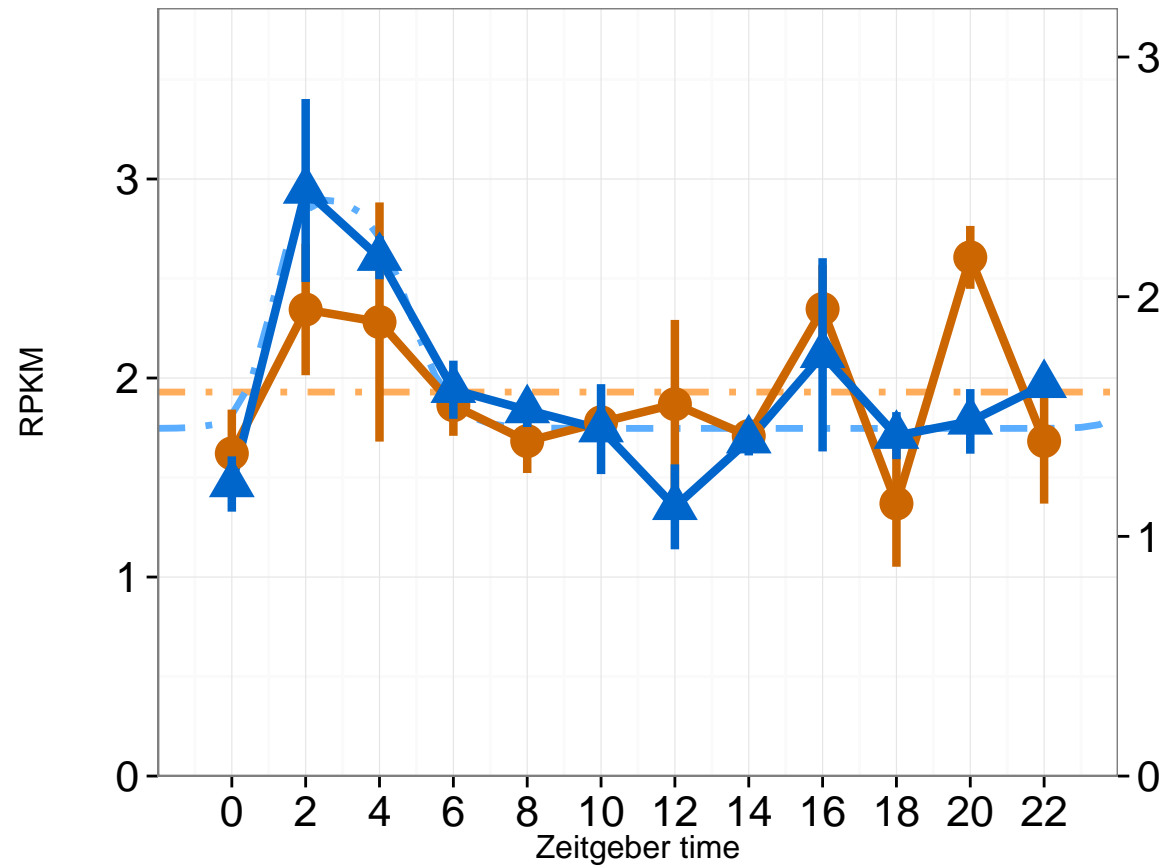

## Far1

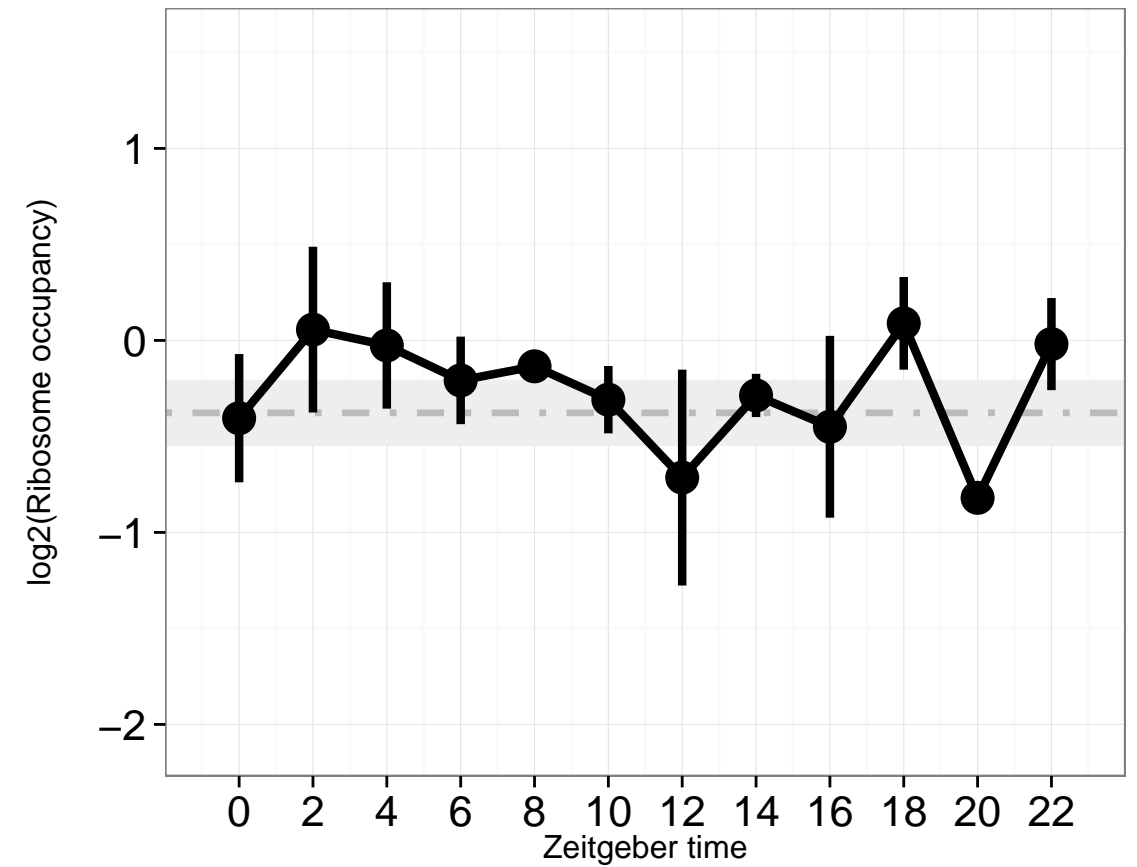

Supplement: SuppDataset_1.zip [file Far1_set_C.pdf › Supplemental Dataset 1/C-mRNA_nonrhythm_translation_rhyth/Far1_set_C.pdf]

## Fbn1

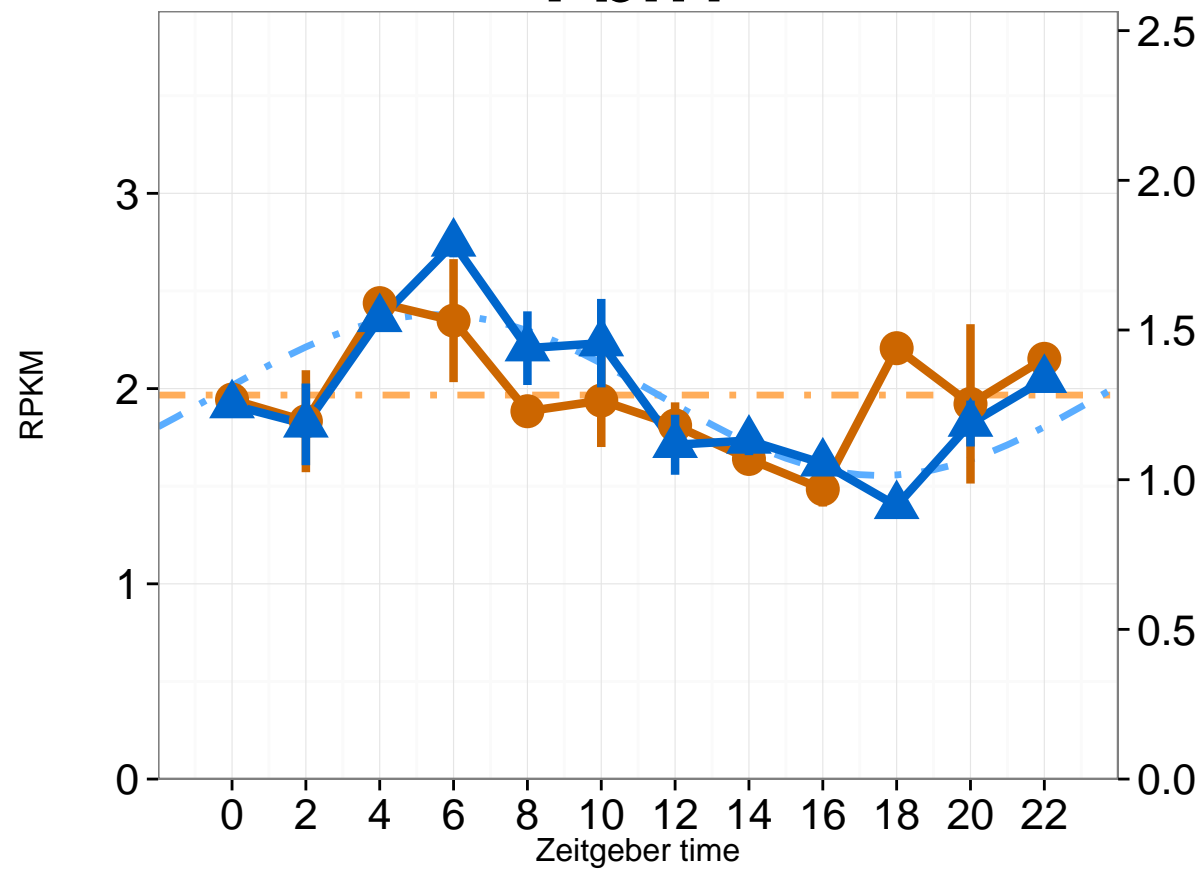

## Fbn1

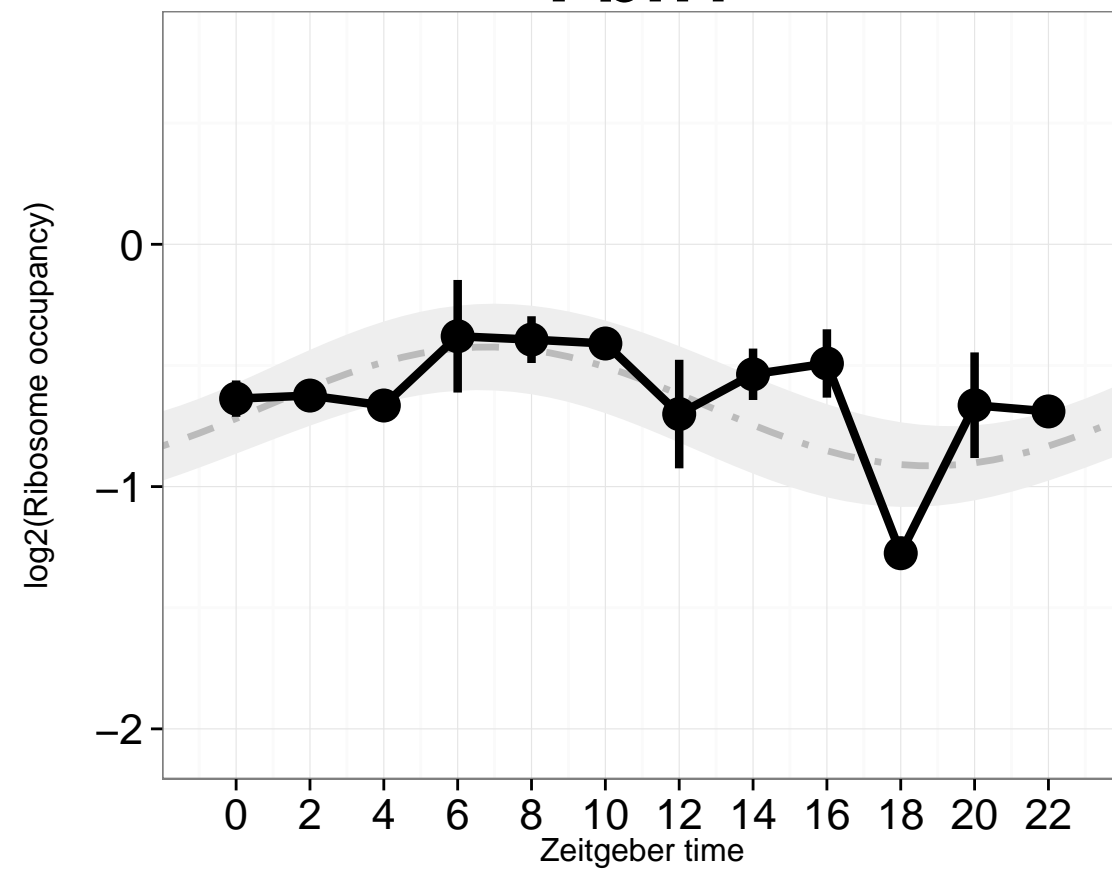

Supplement: SuppDataset_1.zip [file Fbn1_set_C.pdf › Supplemental Dataset 1/C-mRNA_nonrhythm_translation_rhyth/Fbn1_set_C.pdf]

## Fbxl15

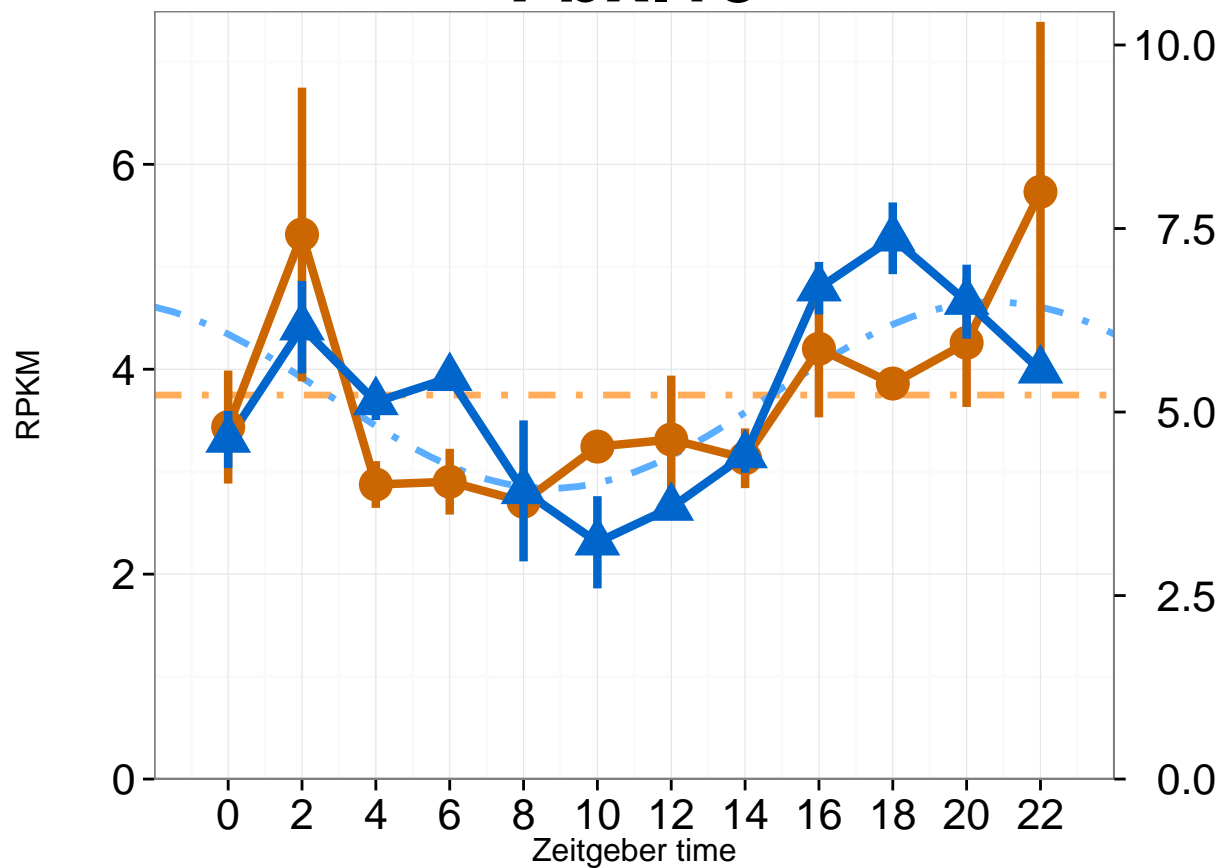

## Fbxl15

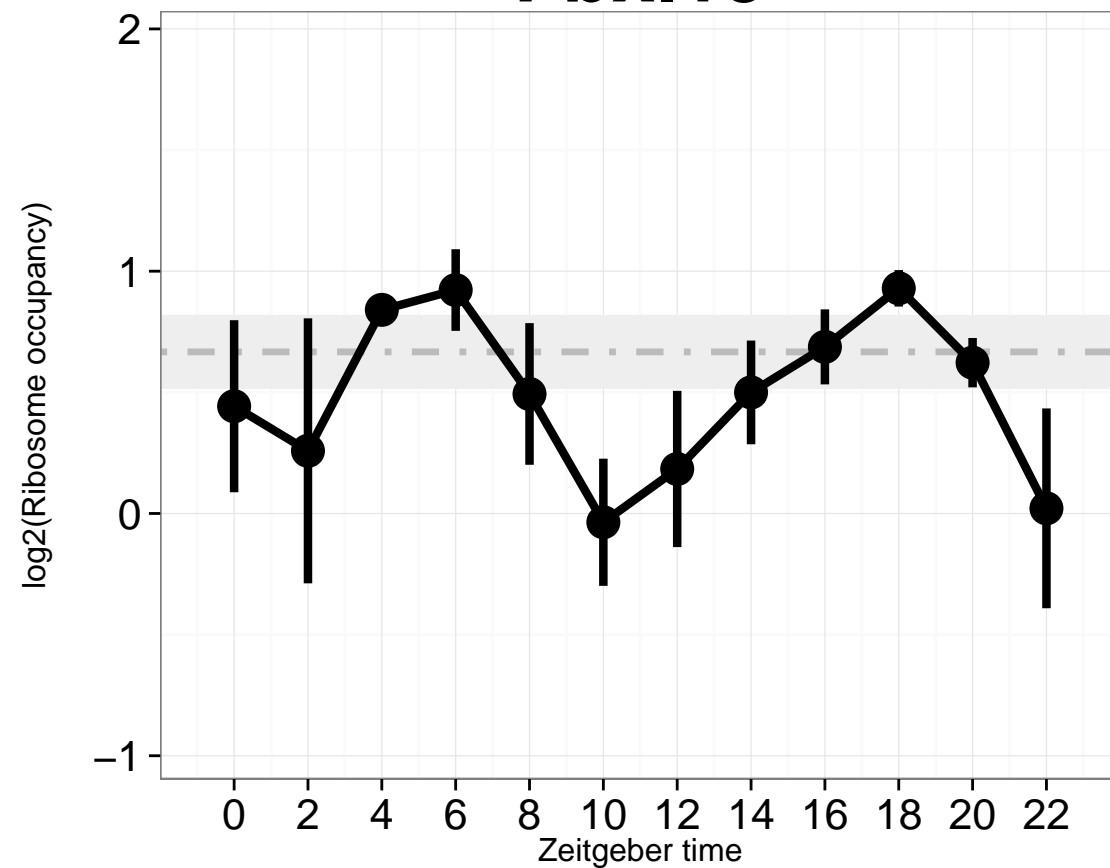

Supplement: SuppDataset_1.zip [file Fbxl15_set_C.pdf › Supplemental Dataset 1/C-mRNA_nonrhythm_translation_rhyth/Fbxl15_set_C.pdf]

## Fetub

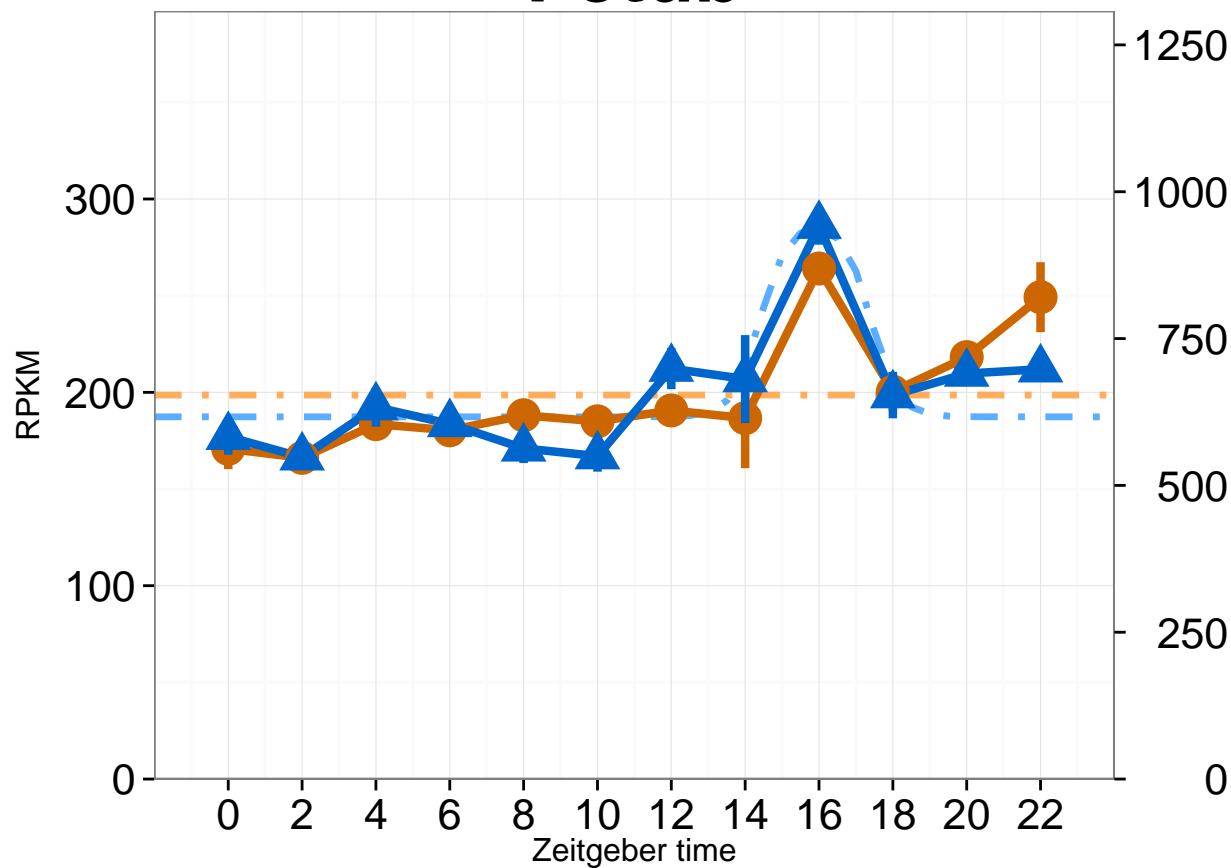

## Fetub

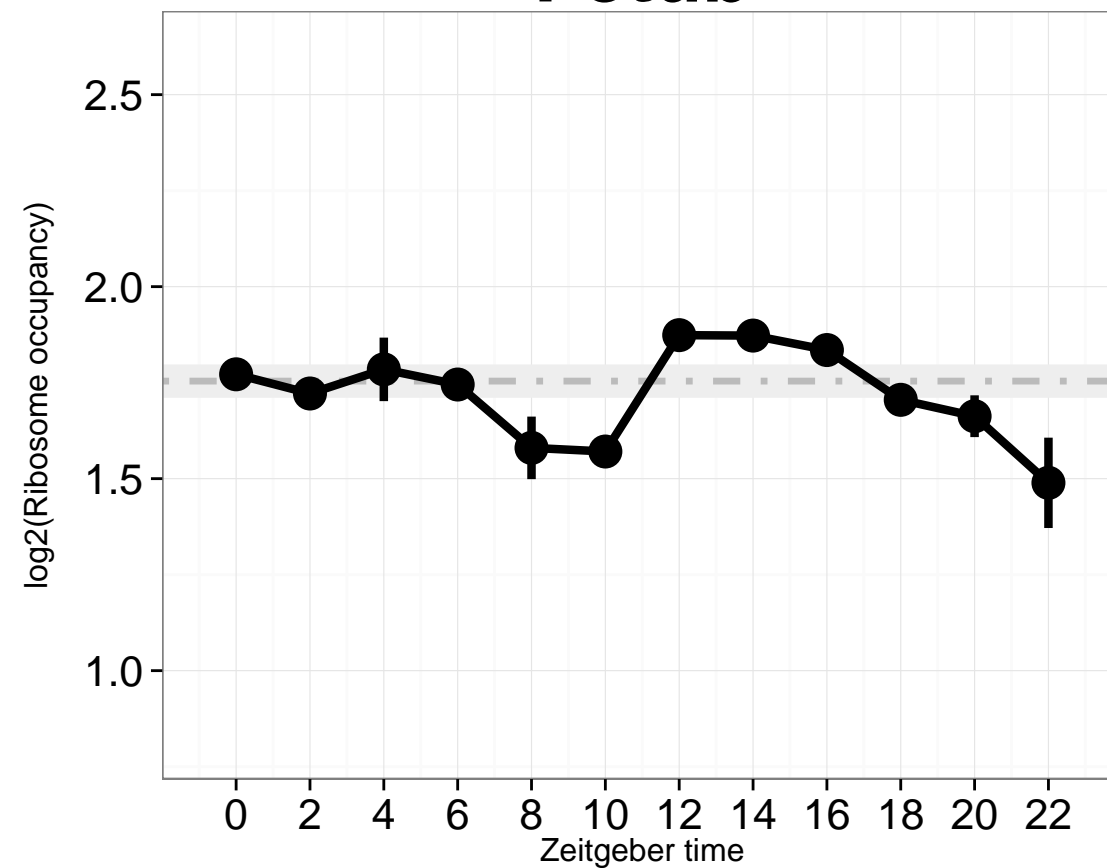

Supplement: SuppDataset_1.zip [file Fetub_set_C.pdf › Supplemental Dataset 1/C-mRNA_nonrhythm_translation_rhyth/Fetub_set_C.pdf]

## Fibp

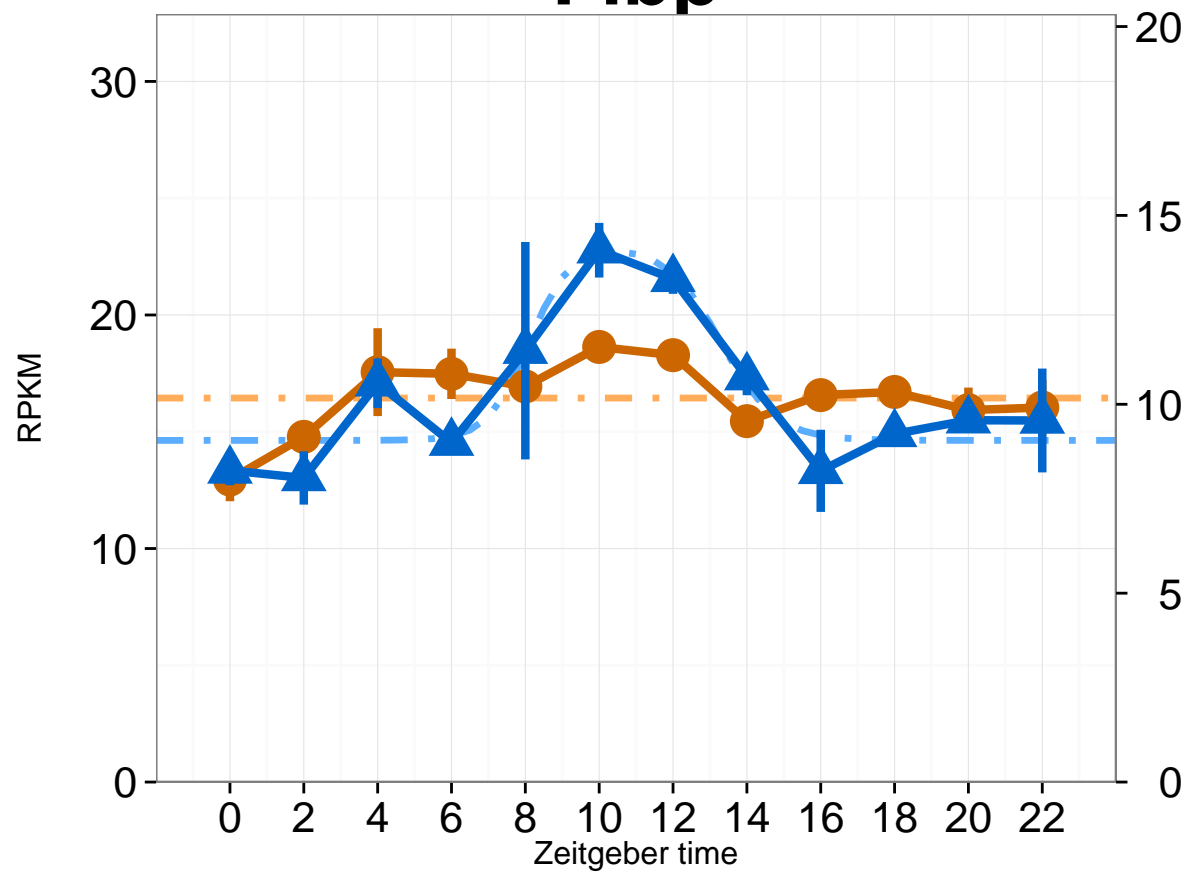

## Fibp

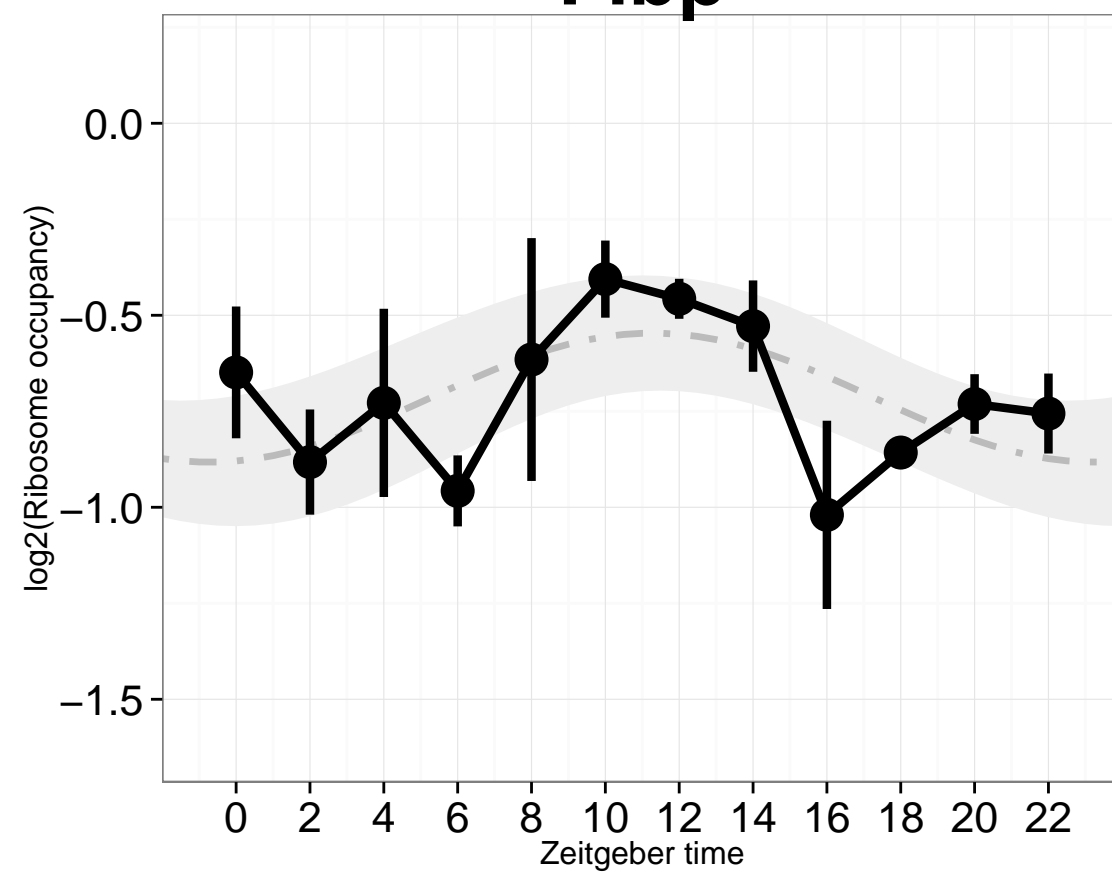

Supplement: SuppDataset_1.zip [file Fibp_set_C.pdf › Supplemental Dataset 1/C-mRNA_nonrhythm_translation_rhyth/Fibp_set_C.pdf]

# Fkbp14

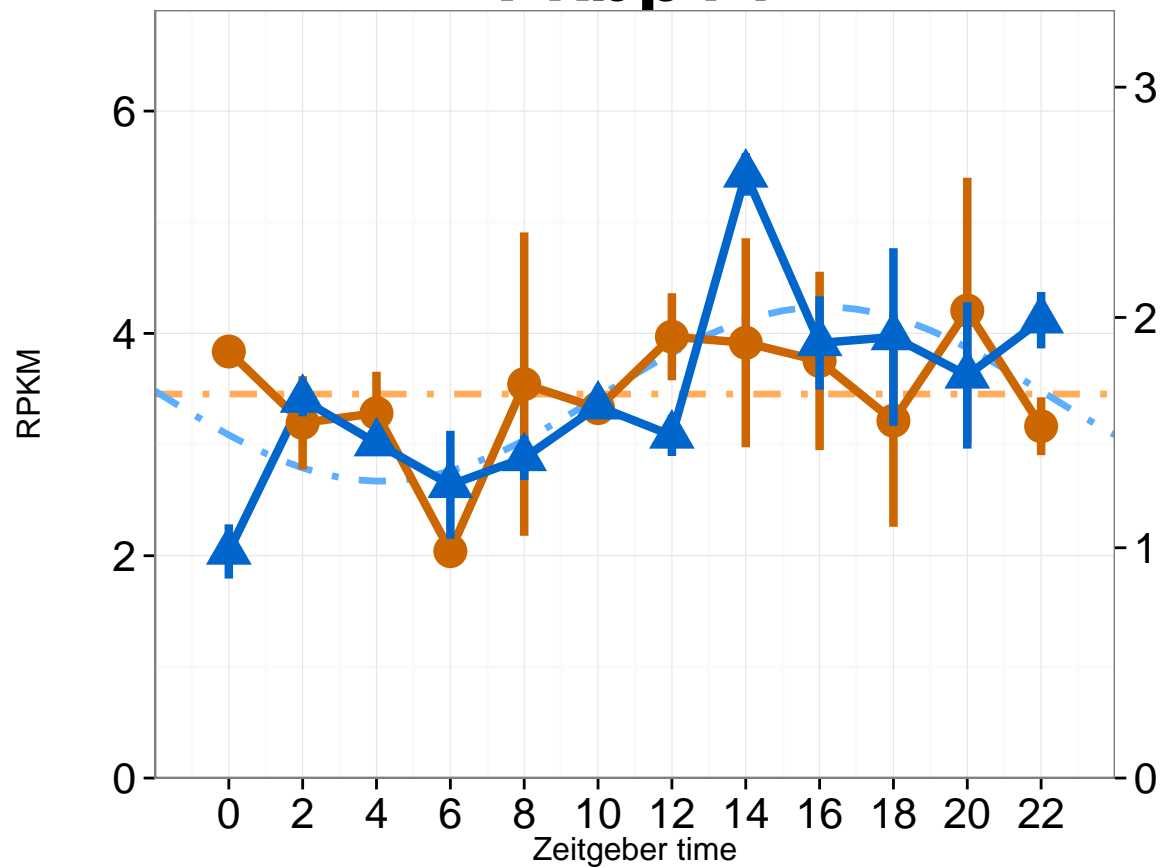

# Fkbp14

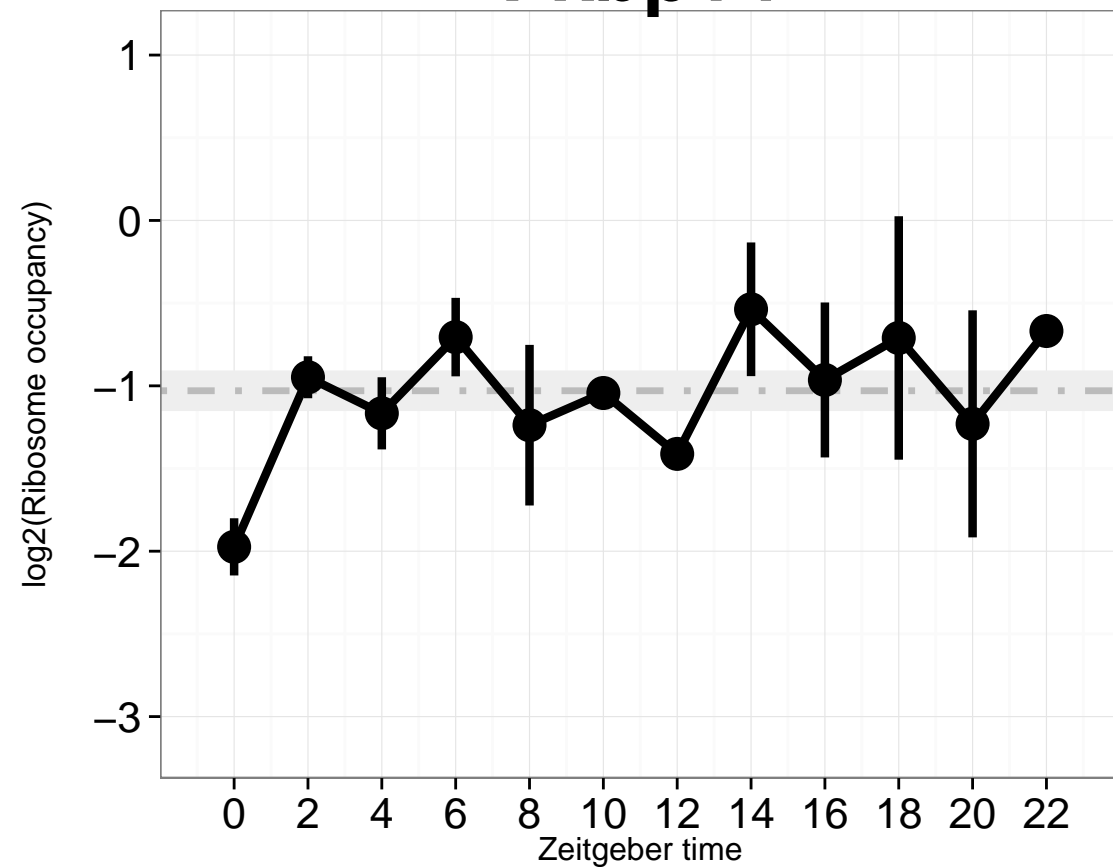

Supplement: SuppDataset_1.zip [file Fkbp14_set_C.pdf › Supplemental Dataset 1/C-mRNA_nonrhythm_translation_rhyth/Fkbp14_set_C.pdf]

## Fntb

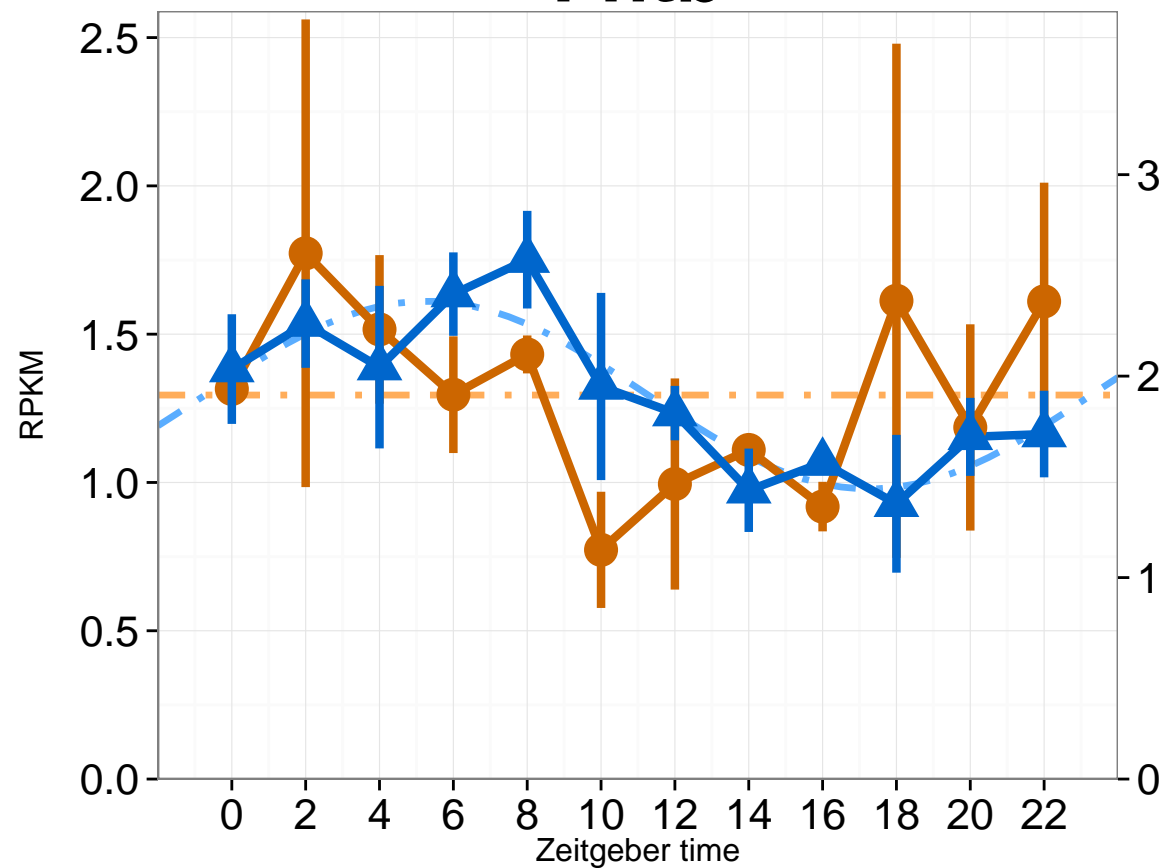

## Fntb

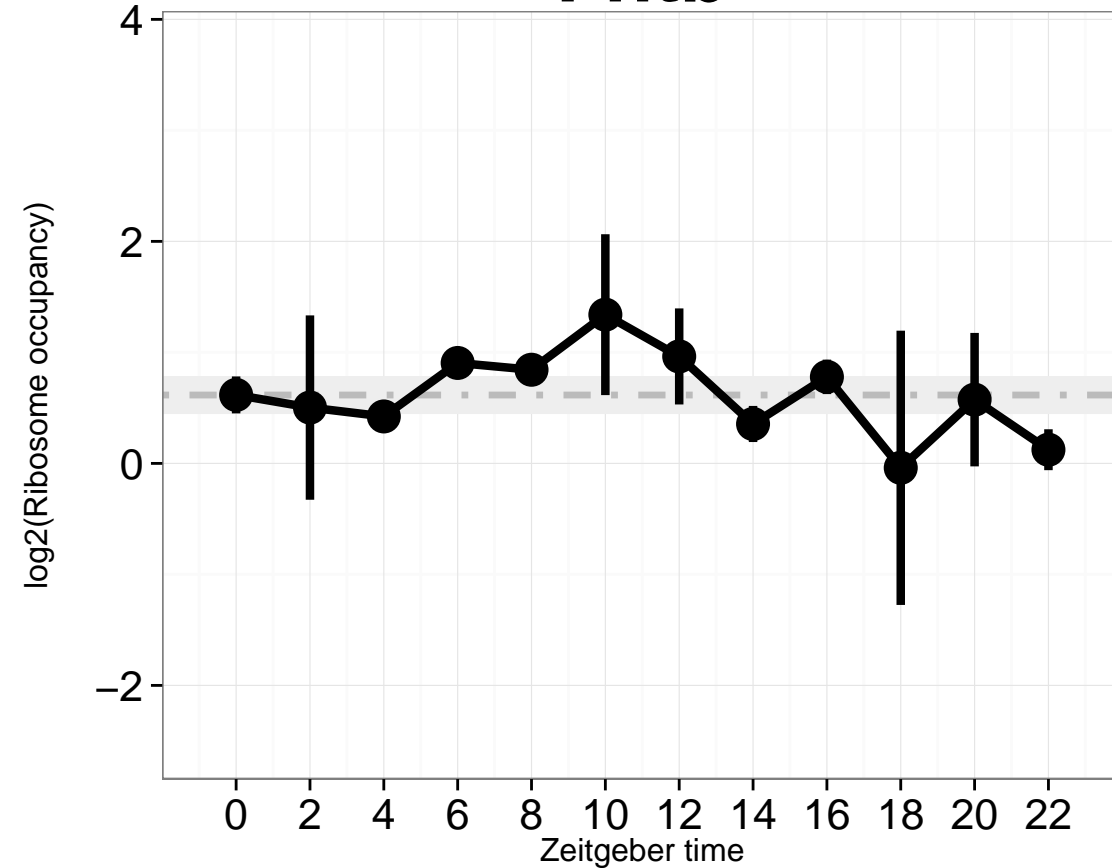

Supplement: SuppDataset_1.zip [file Fntb_set_C.pdf › Supplemental Dataset 1/C-mRNA_nonrhythm_translation_rhyth/Fntb_set_C.pdf]

## Frzb

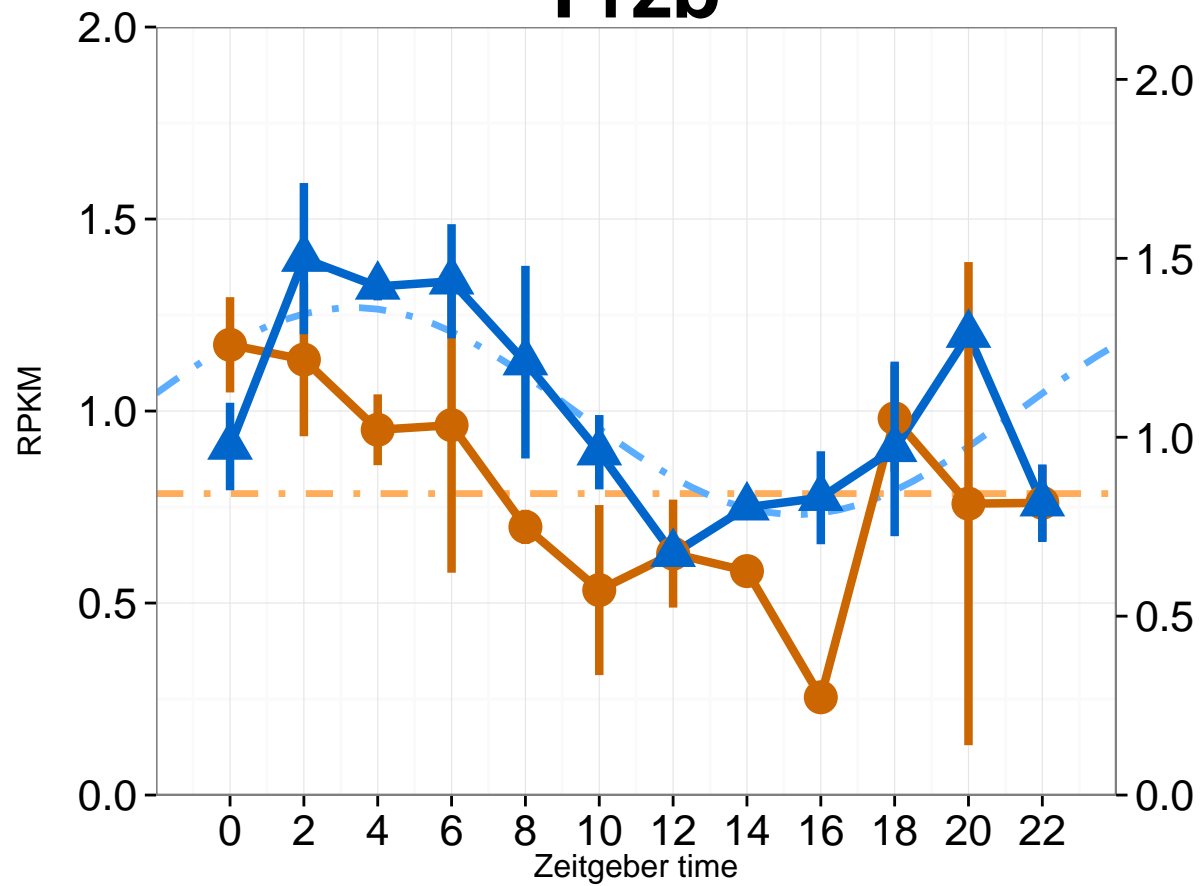

## Frzb

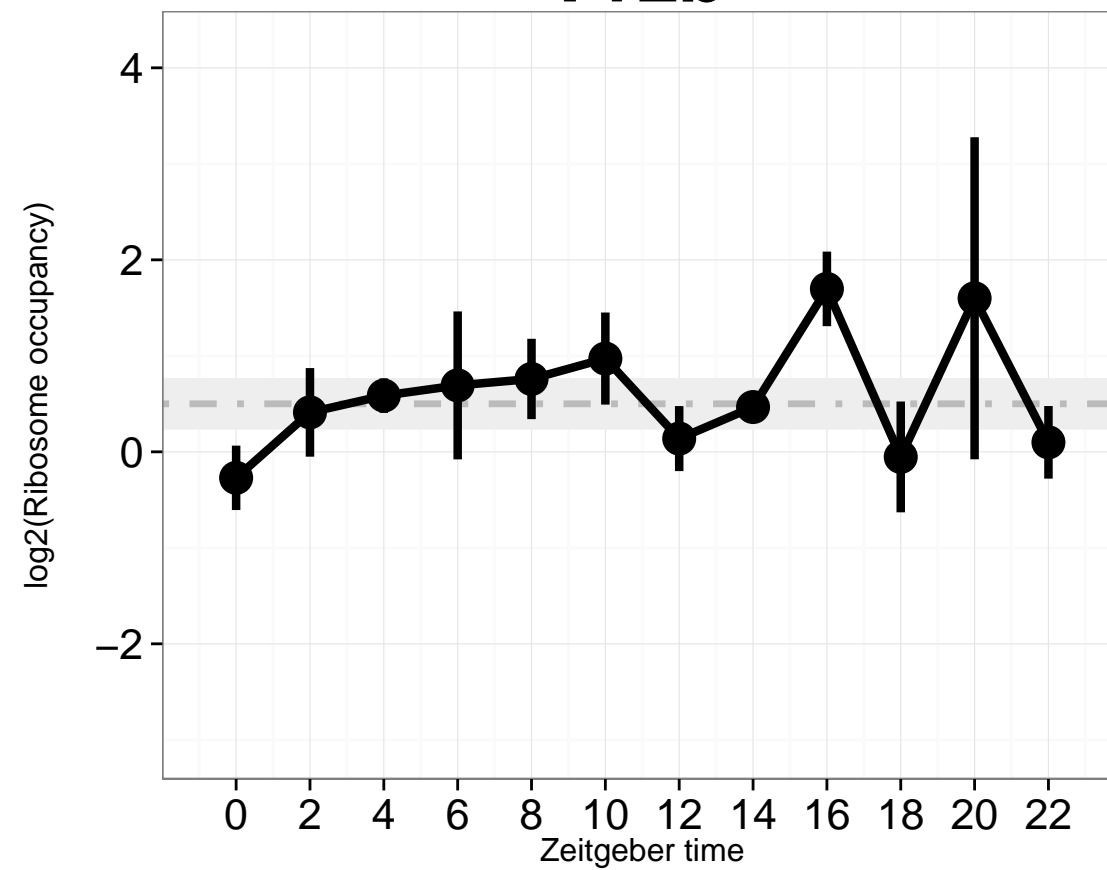

Supplement: SuppDataset_1.zip [file Frzb_set_C.pdf › Supplemental Dataset 1/C-mRNA_nonrhythm_translation_rhyth/Frzb_set_C.pdf]

**Fsbp TR**

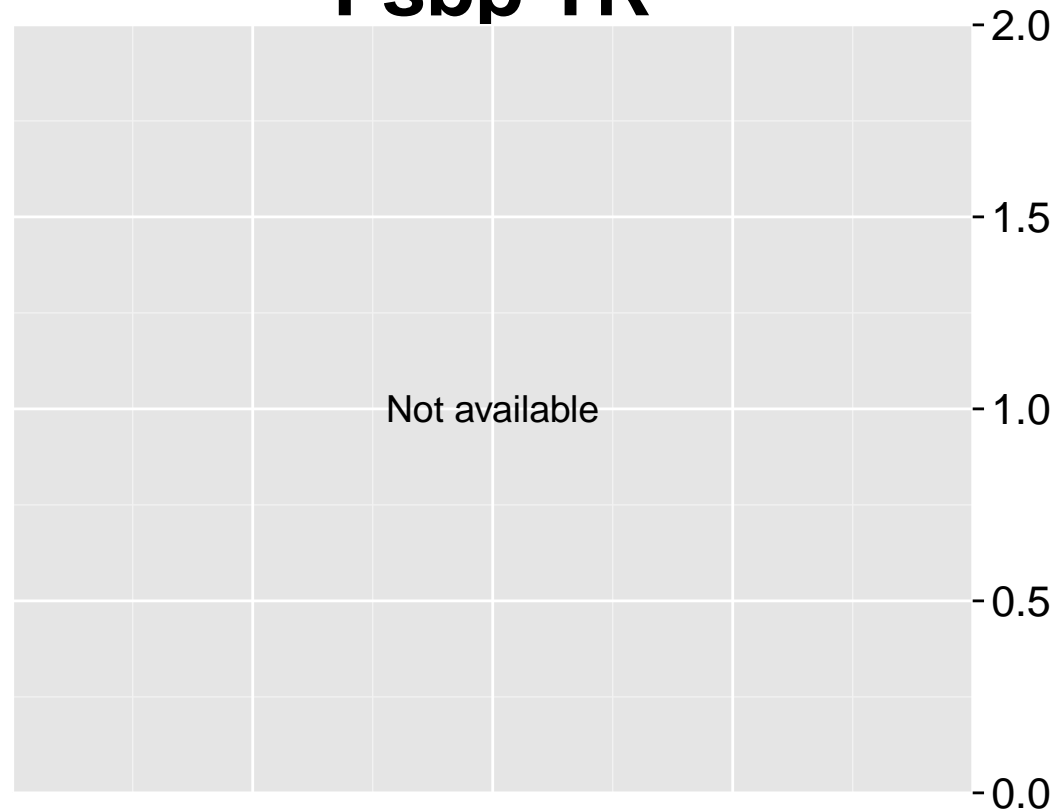

**Fsbp log2(Ribosome occupancy)**

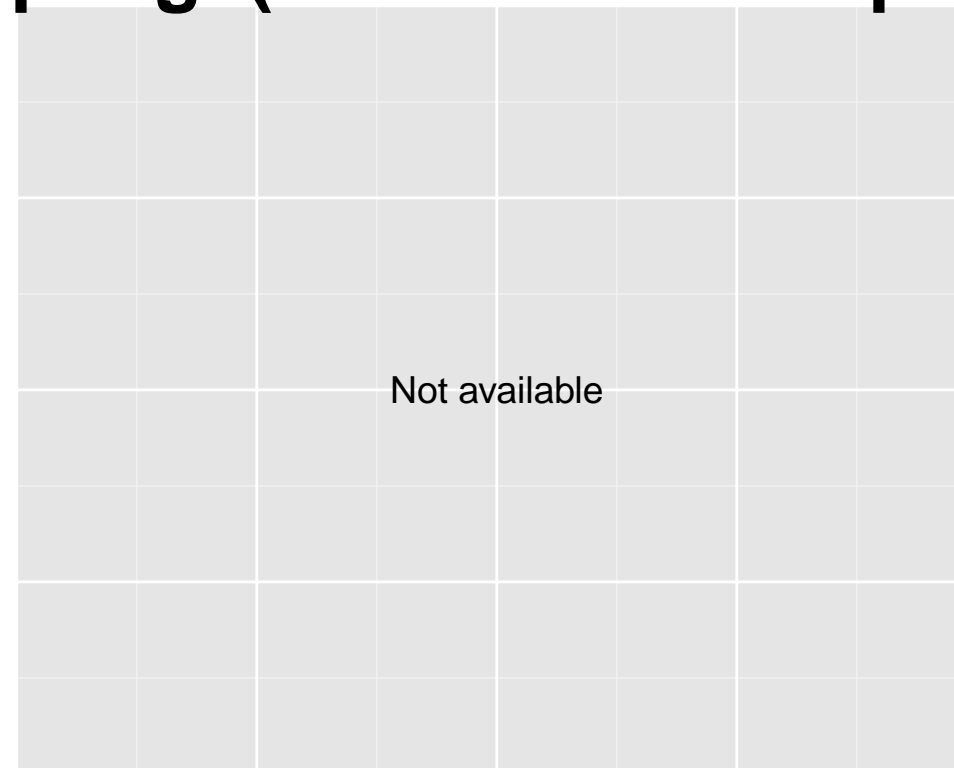

Supplement: SuppDataset_1.zip [file Fsbp_set_C.pdf › Supplemental Dataset 1/C-mRNA_nonrhythm_translation_rhyth/Fsbp_set_C.pdf]

# Fth1

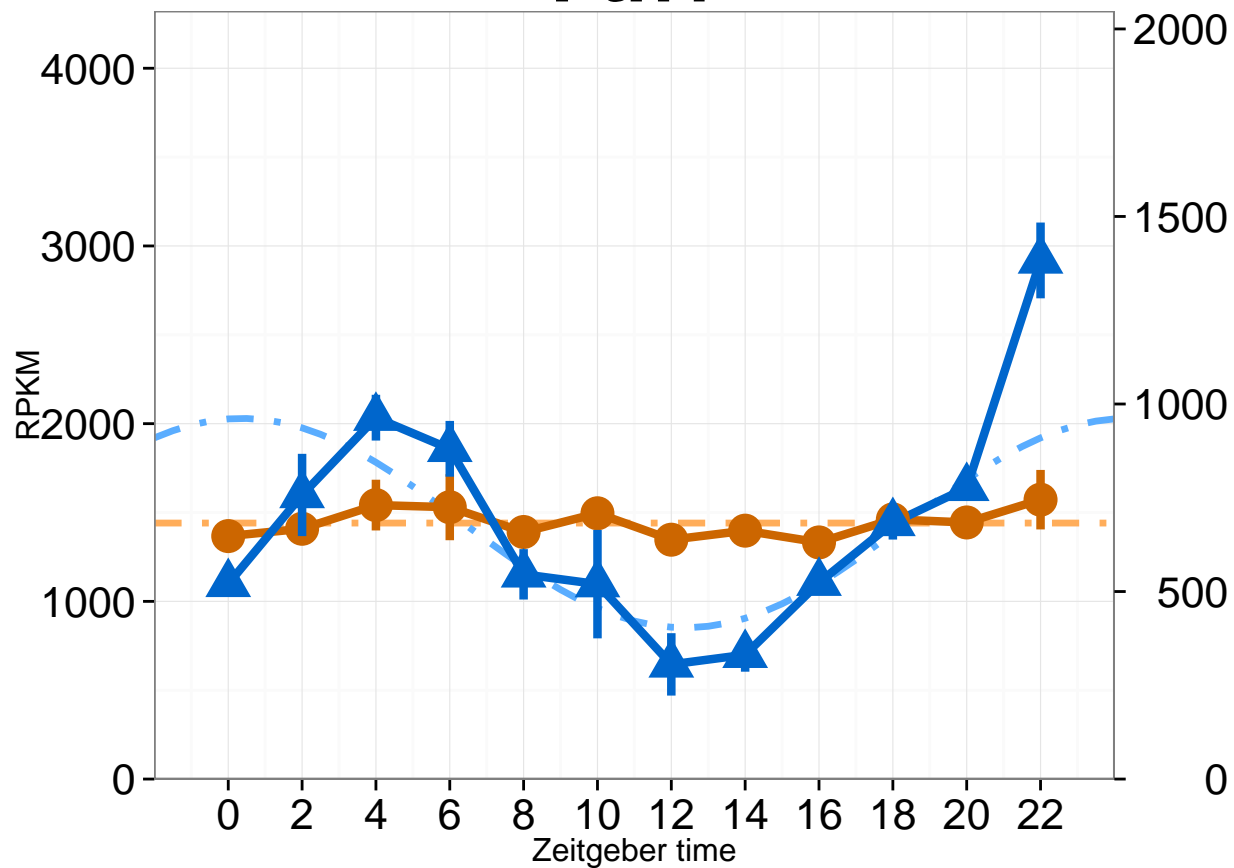

# Fth1

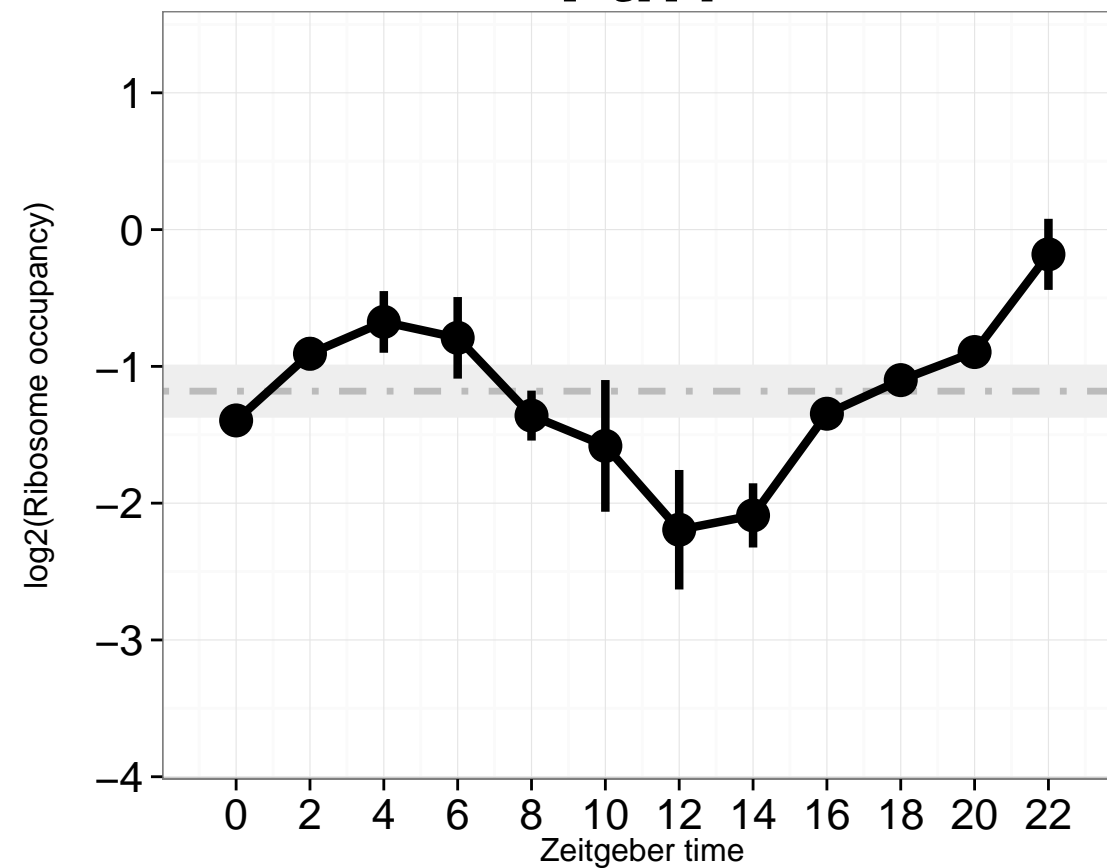

Supplement: SuppDataset_1.zip [file Fth1_set_C.pdf › Supplemental Dataset 1/C-mRNA_nonrhythm_translation_rhyth/Fth1_set_C.pdf]

# Ftl1

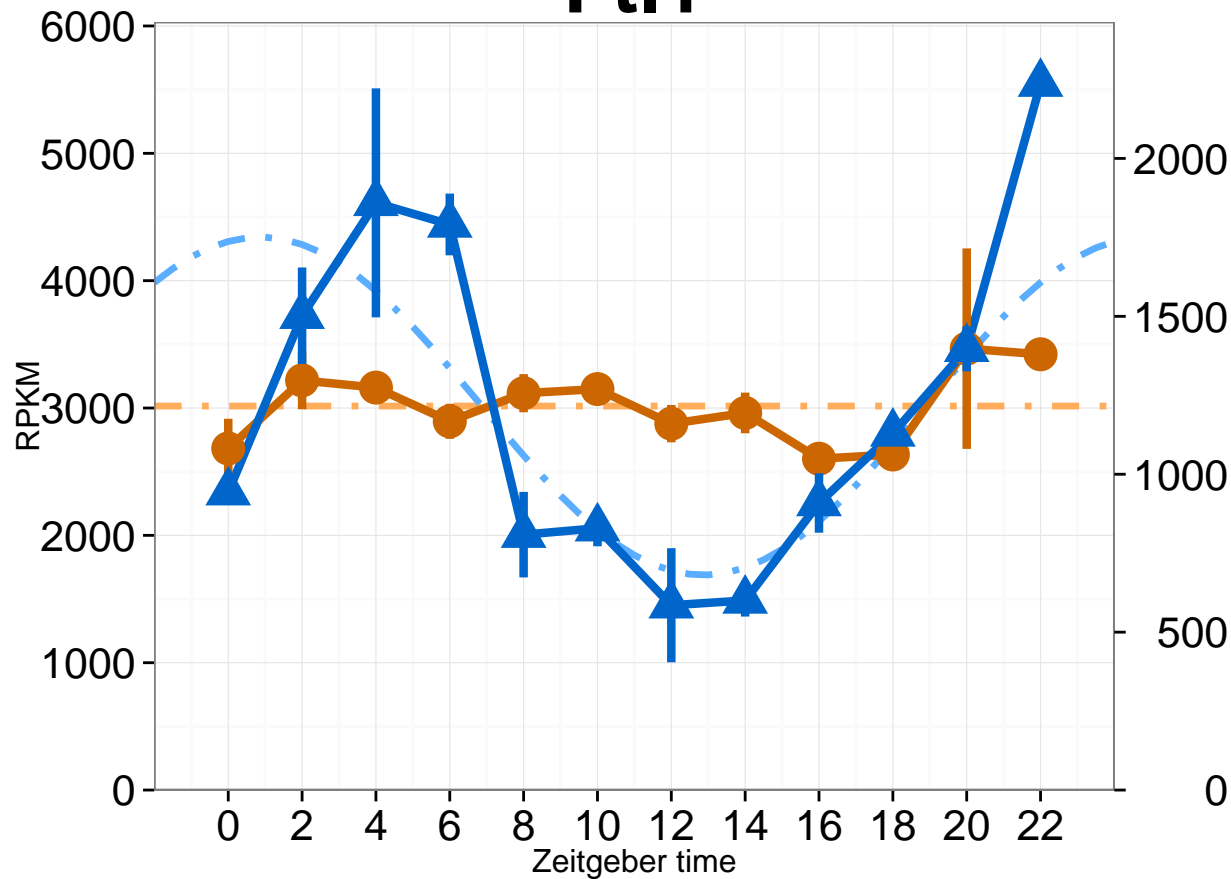

# Ftl1

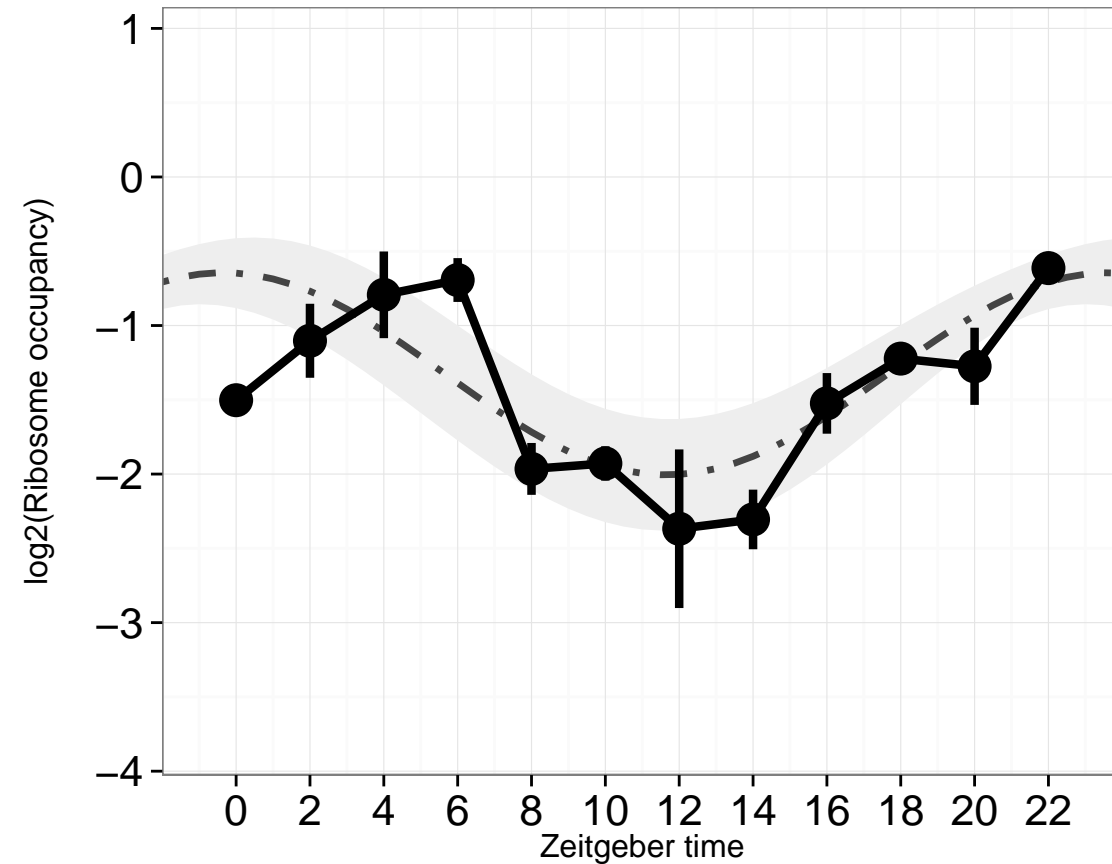

Supplement: SuppDataset_1.zip [file Ftl1_set_C.pdf › Supplemental Dataset 1/C-mRNA_nonrhythm_translation_rhyth/Ftl1_set_C.pdf]

## Fv1

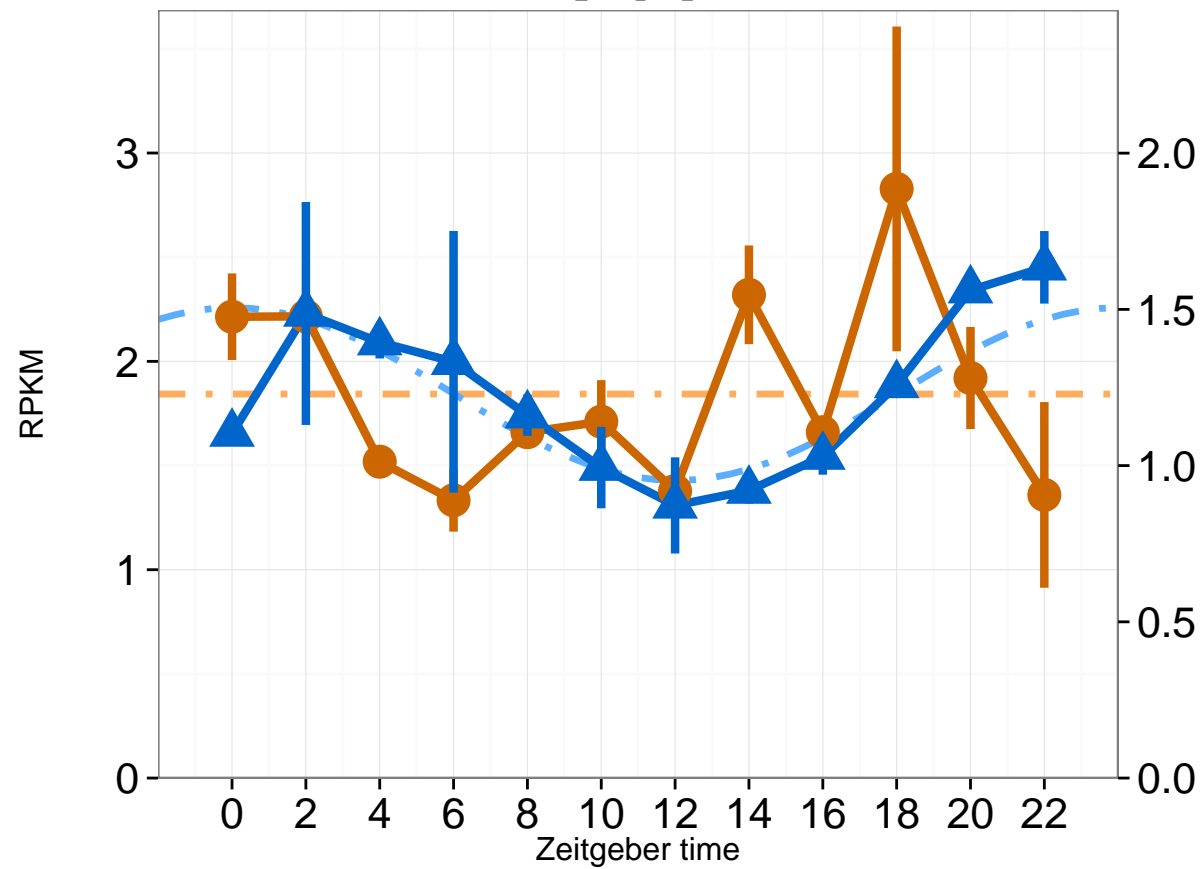

## Fv1

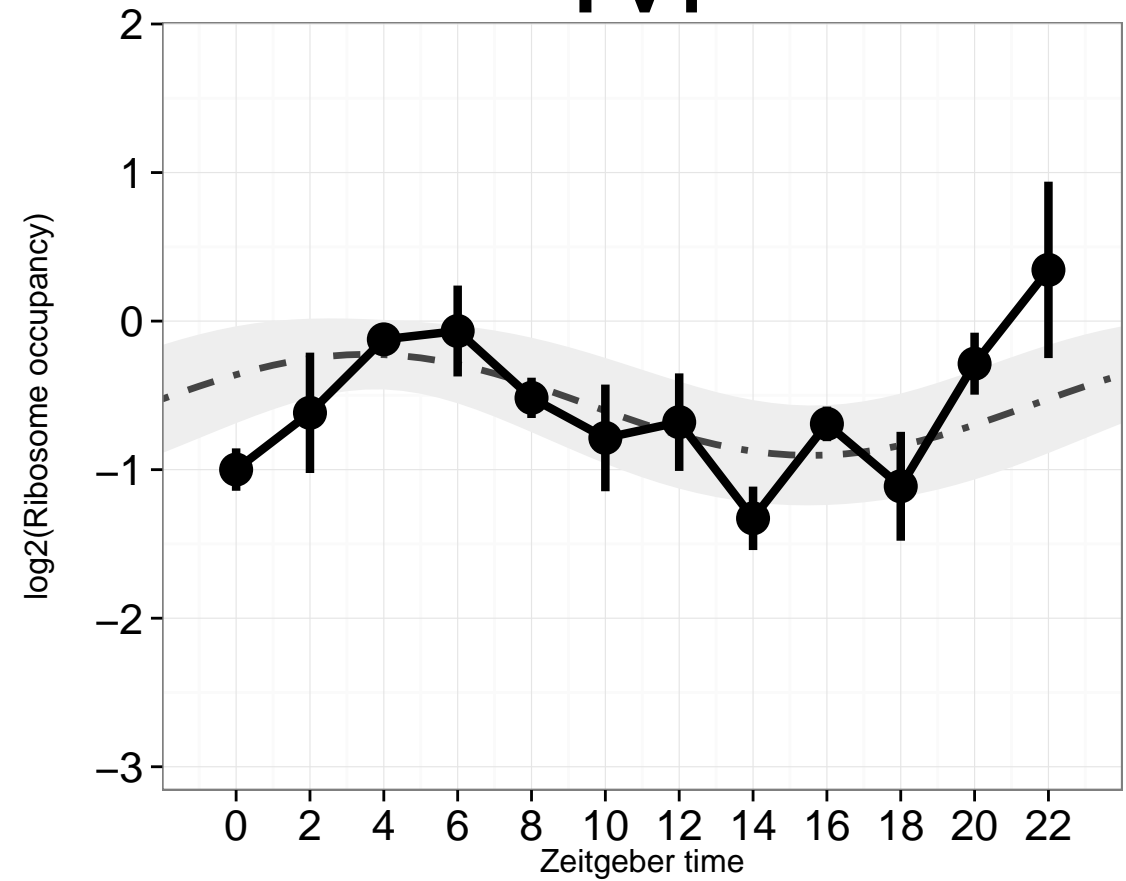

Supplement: SuppDataset_1.zip [file Fv1_set_C.pdf › Supplemental Dataset 1/C-mRNA_nonrhythm_translation_rhyth/Fv1_set_C.pdf]

## G2e3

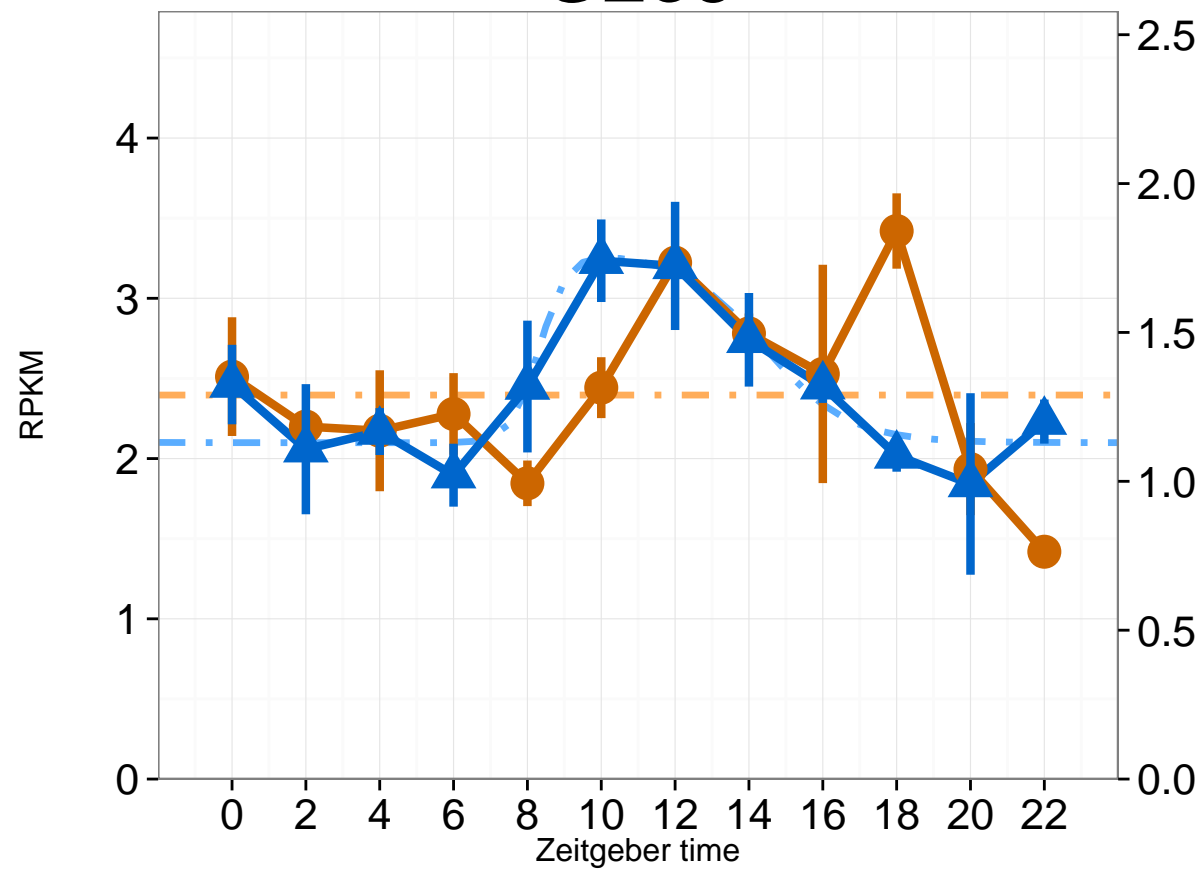

## G2e3

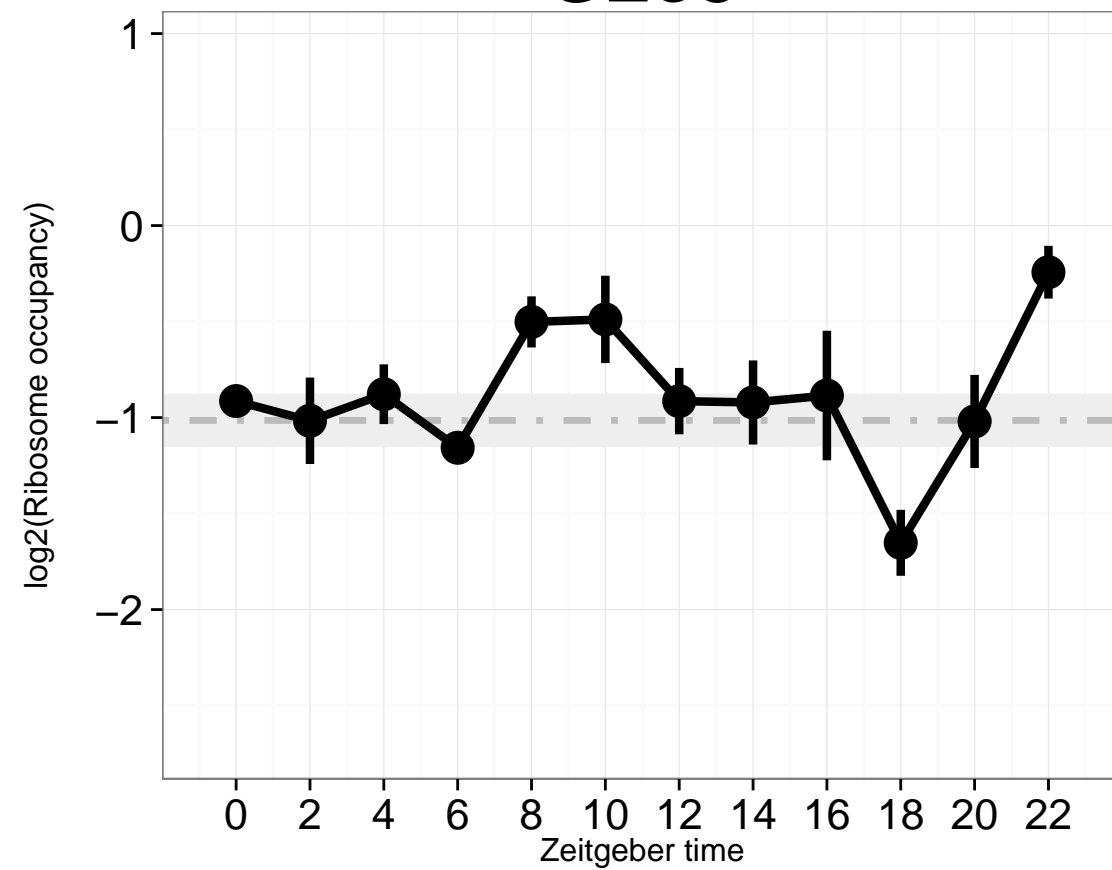

Supplement: SuppDataset_1.zip [file G2e3_set_C.pdf › Supplemental Dataset 1/C-mRNA_nonrhythm_translation_rhyth/G2e3_set_C.pdf]

# Gabpb1

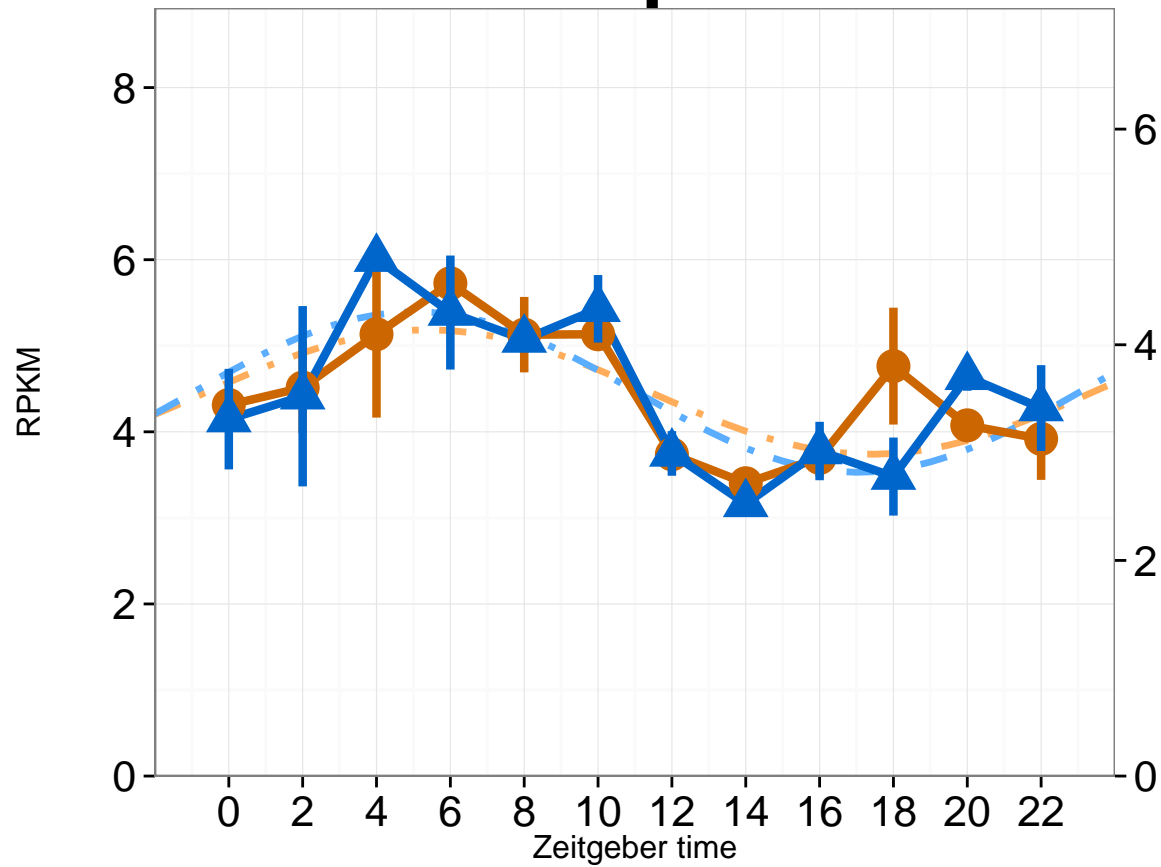

# Gabpb1

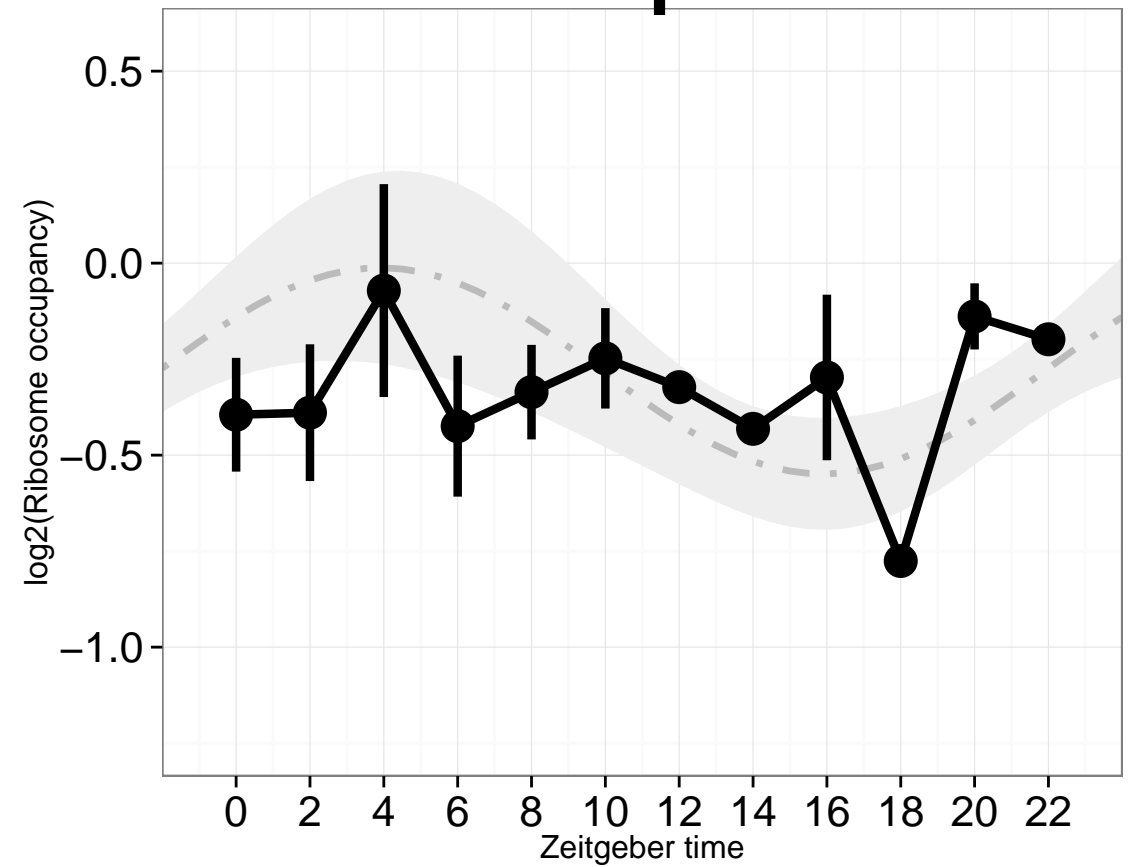

Supplement: SuppDataset_1.zip [file Gabpb1_set_C.pdf › Supplemental Dataset 1/C-mRNA_nonrhythm_translation_rhyth/Gabpb1_set_C.pdf]

# Galnt11

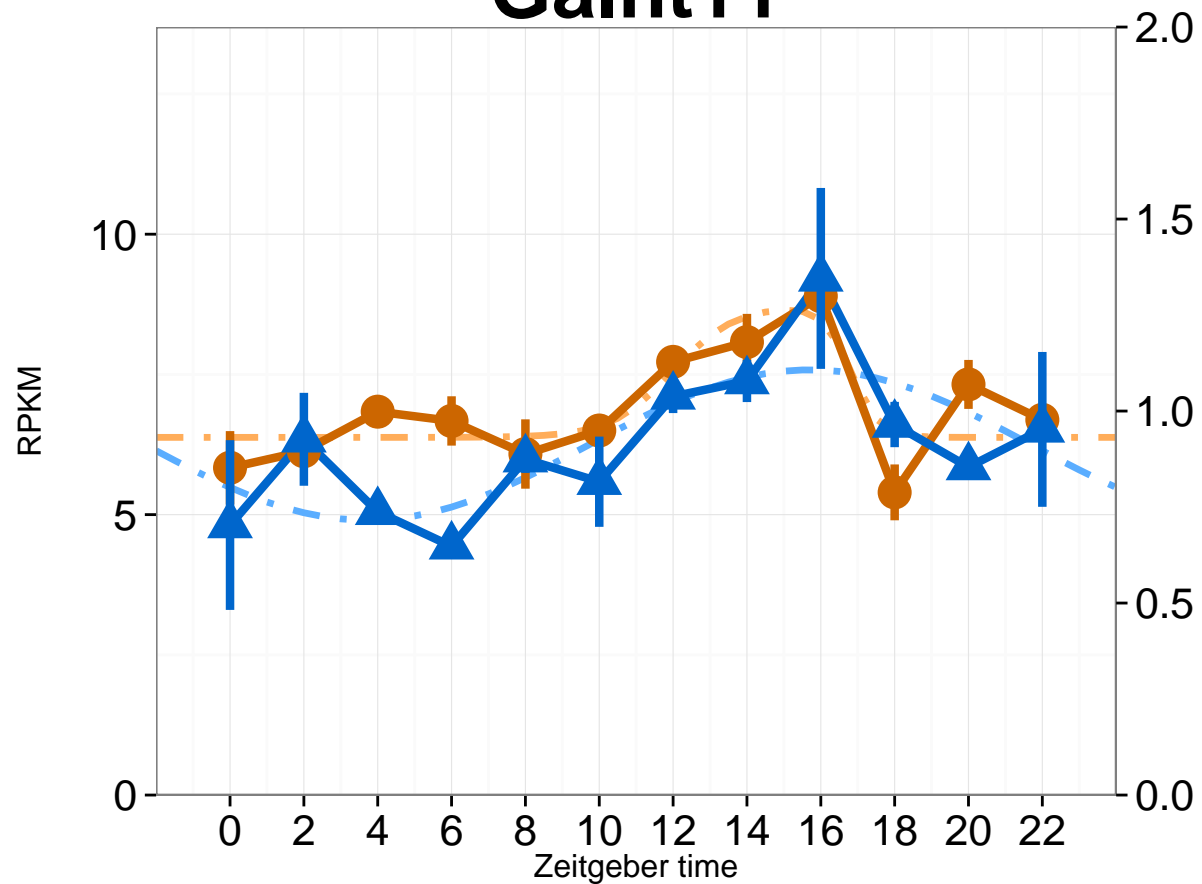

# Galnt11

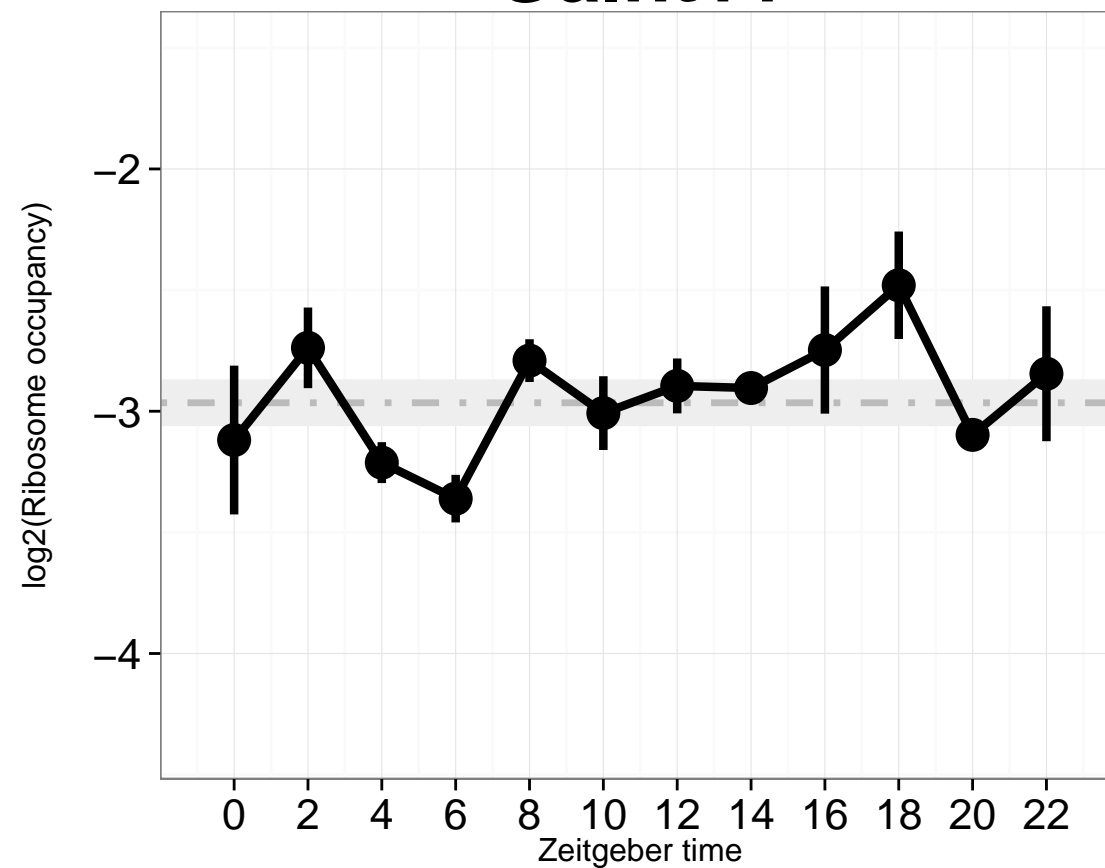

Supplement: SuppDataset_1.zip [file Galnt11_set_C.pdf › Supplemental Dataset 1/C-mRNA_nonrhythm_translation_rhyth/Galnt11_set_C.pdf]

## Galnt6

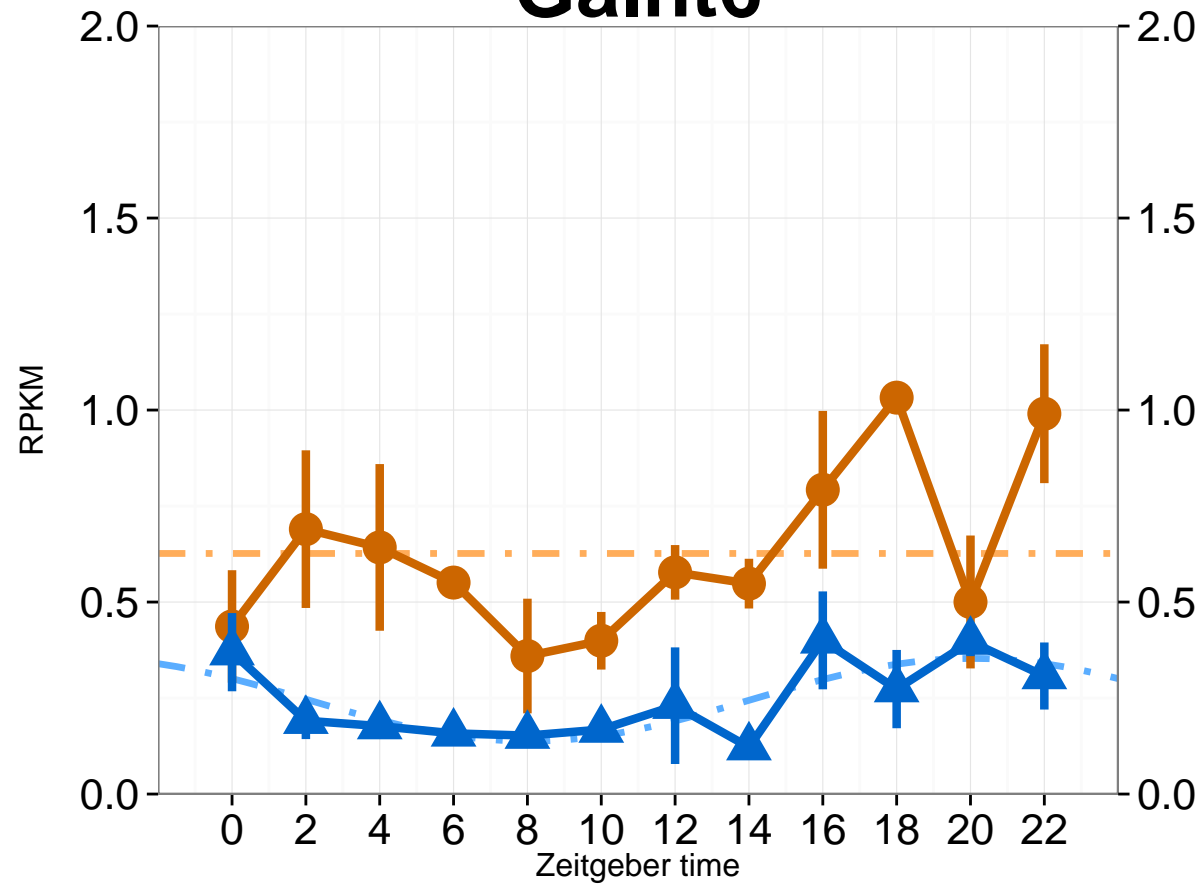

## Galnt6

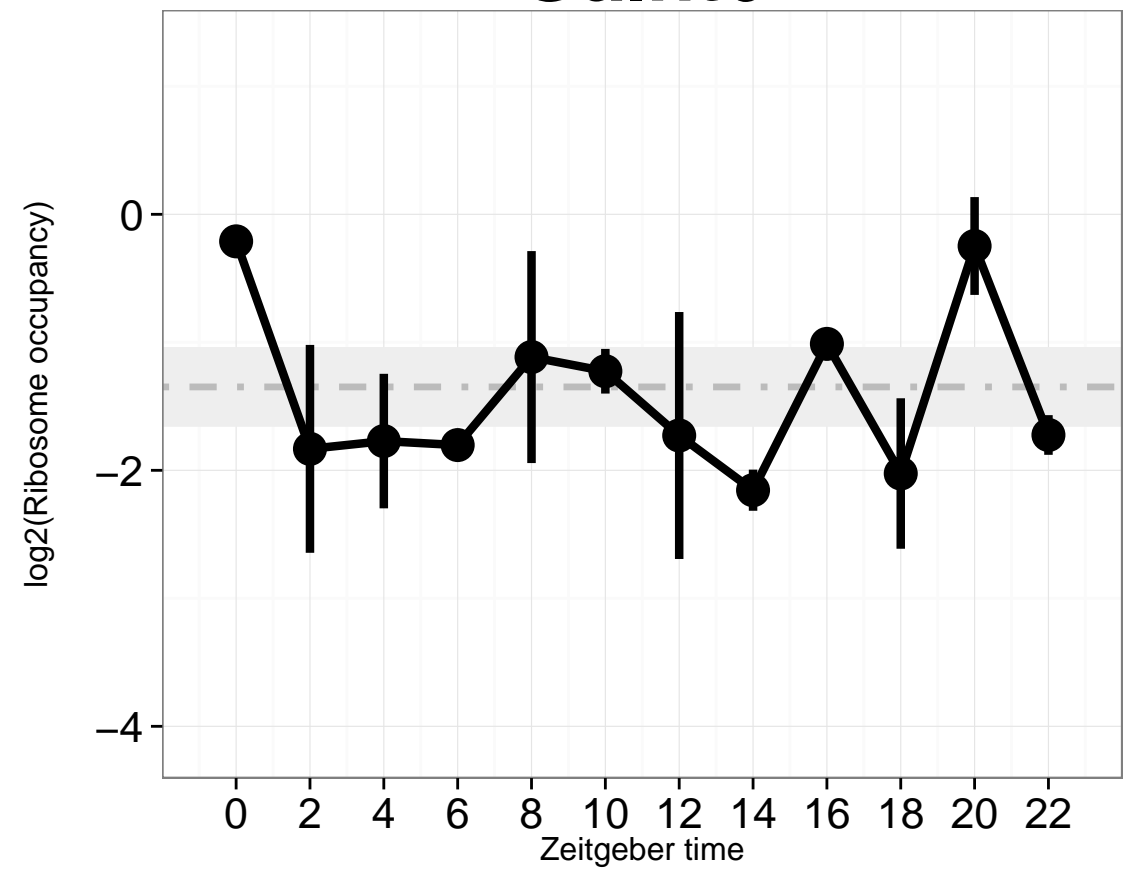

Supplement: SuppDataset_1.zip [file Galnt6_set_C.pdf › Supplemental Dataset 1/C-mRNA_nonrhythm_translation_rhyth/Galnt6_set_C.pdf]

## Gas1

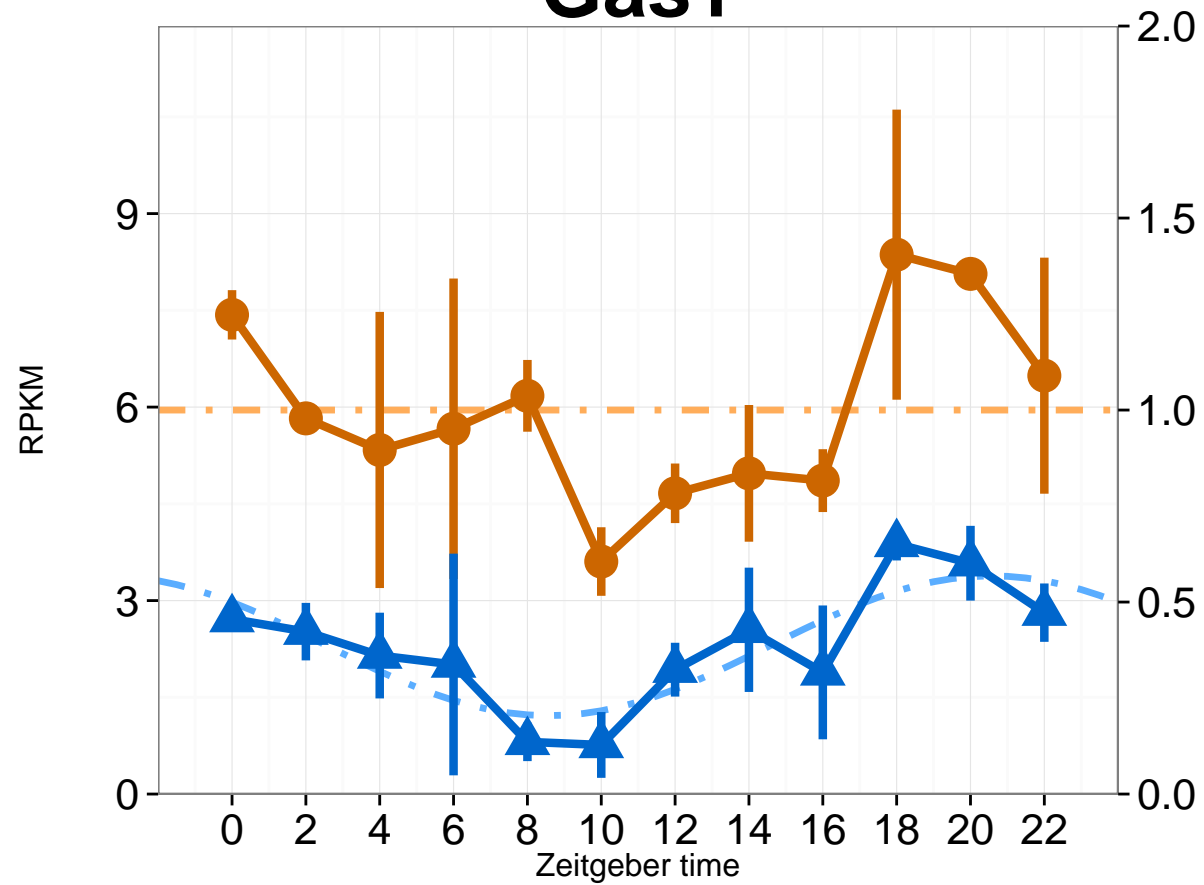

## Gas1

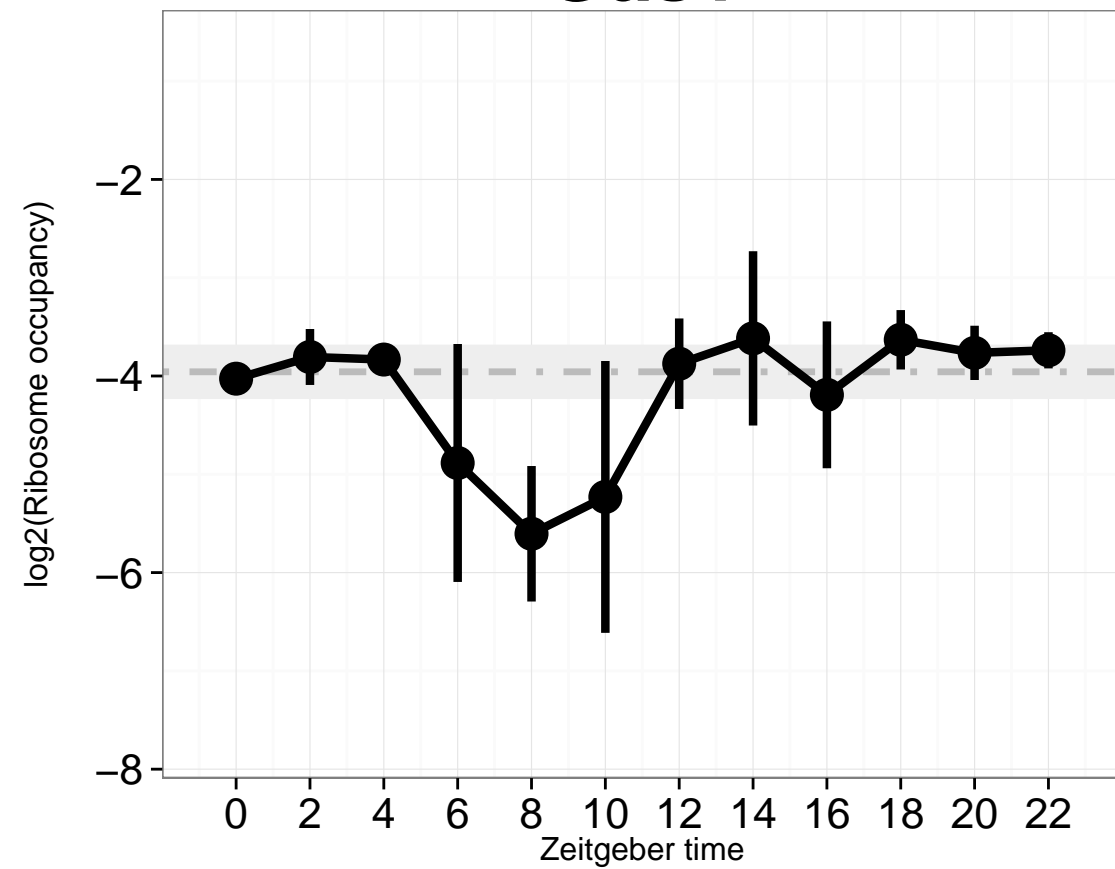

Supplement: SuppDataset_1.zip [file Gas1_set_C.pdf › Supplemental Dataset 1/C-mRNA_nonrhythm_translation_rhyth/Gas1_set_C.pdf]

# Gbp8

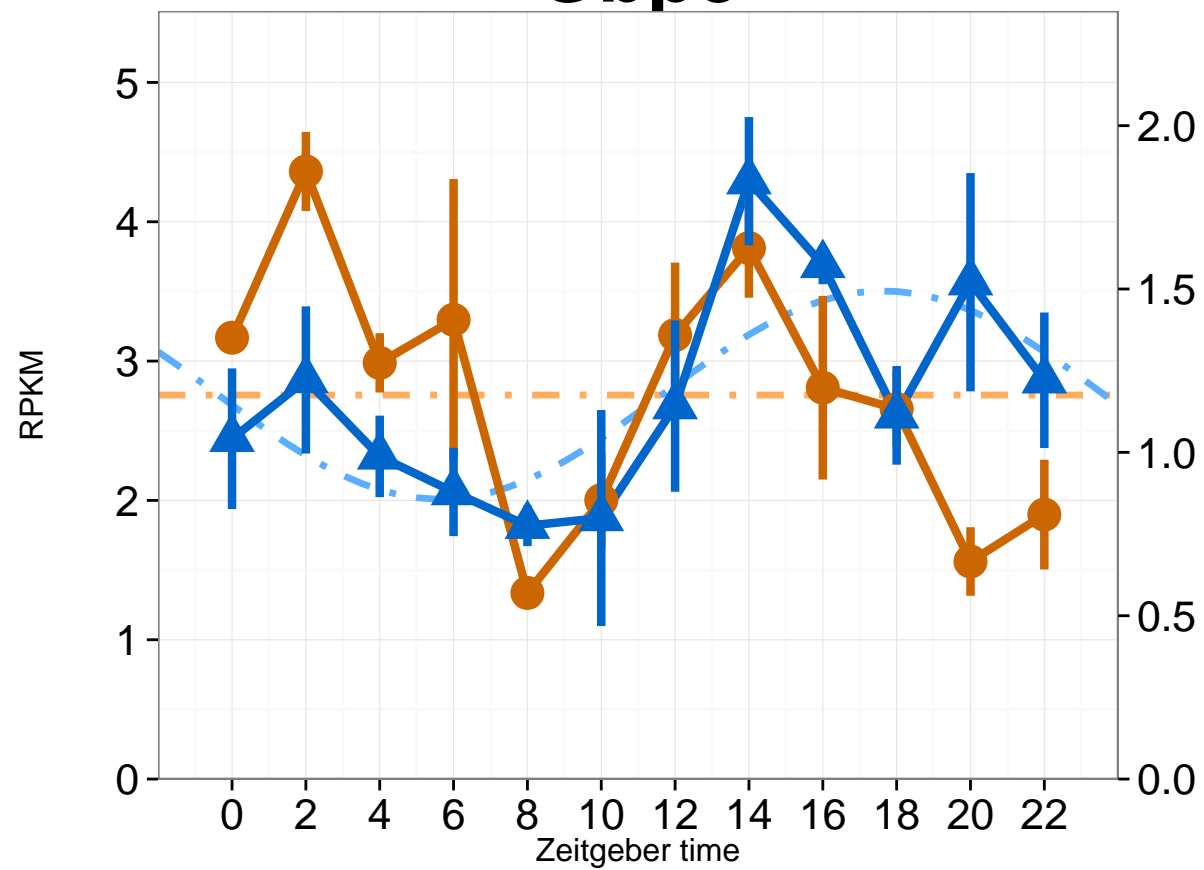

# Gbp8

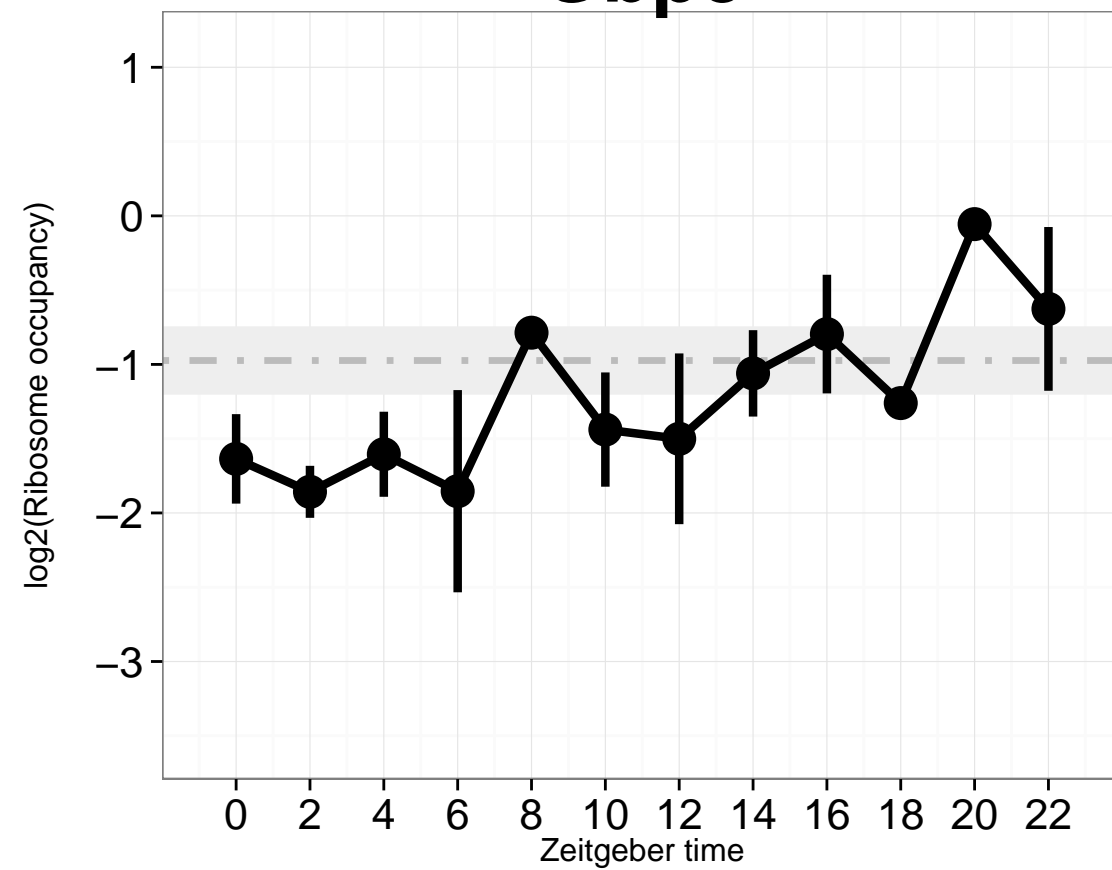

Supplement: SuppDataset_1.zip [file Gbp8_set_C.pdf › Supplemental Dataset 1/C-mRNA_nonrhythm_translation_rhyth/Gbp8_set_C.pdf]

# Gcc1

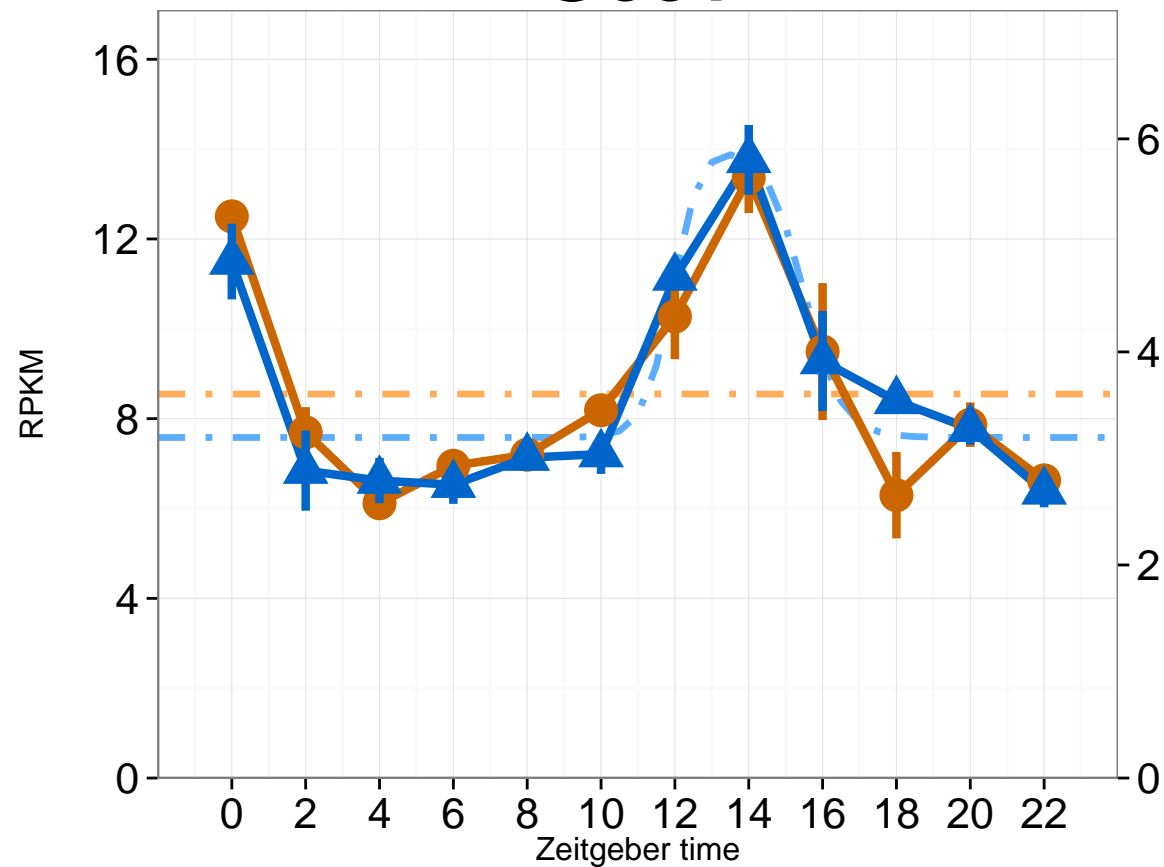

# Gcc1

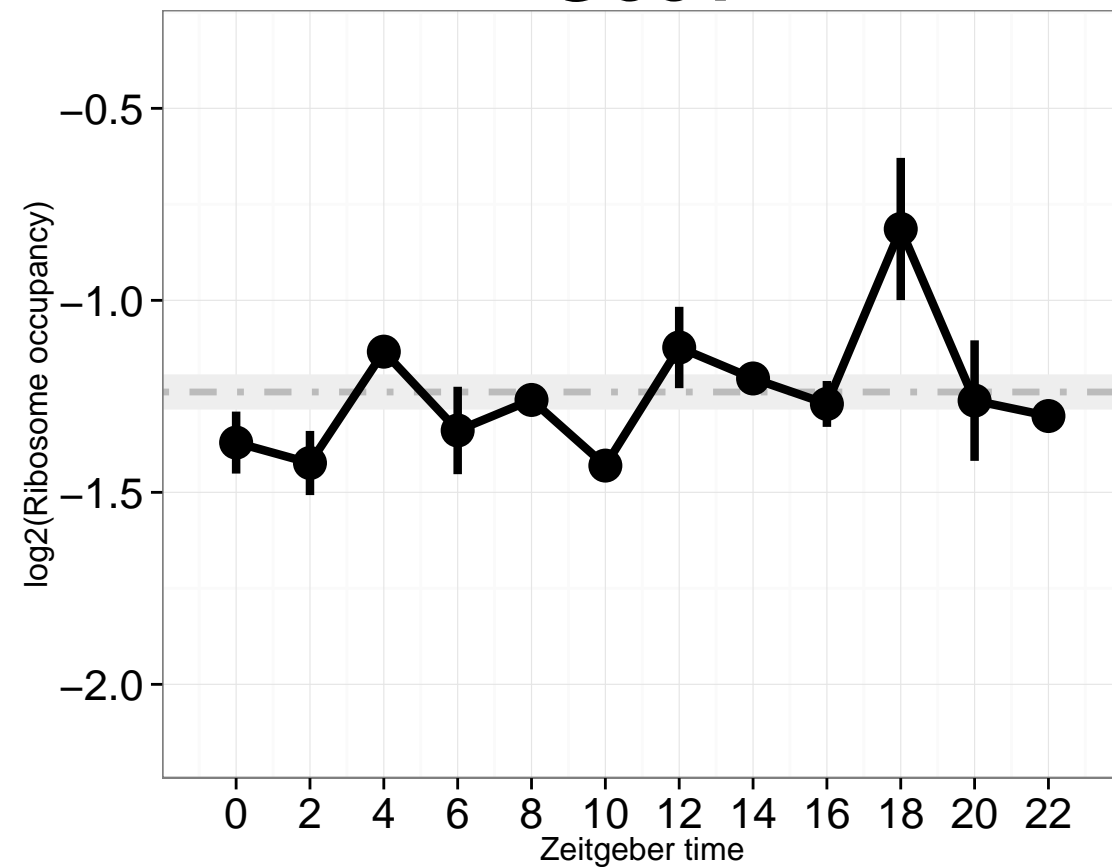

Supplement: SuppDataset_1.zip [file Gcc1_set_C.pdf › Supplemental Dataset 1/C-mRNA_nonrhythm_translation_rhyth/Gcc1_set_C.pdf]

## Gcnt2

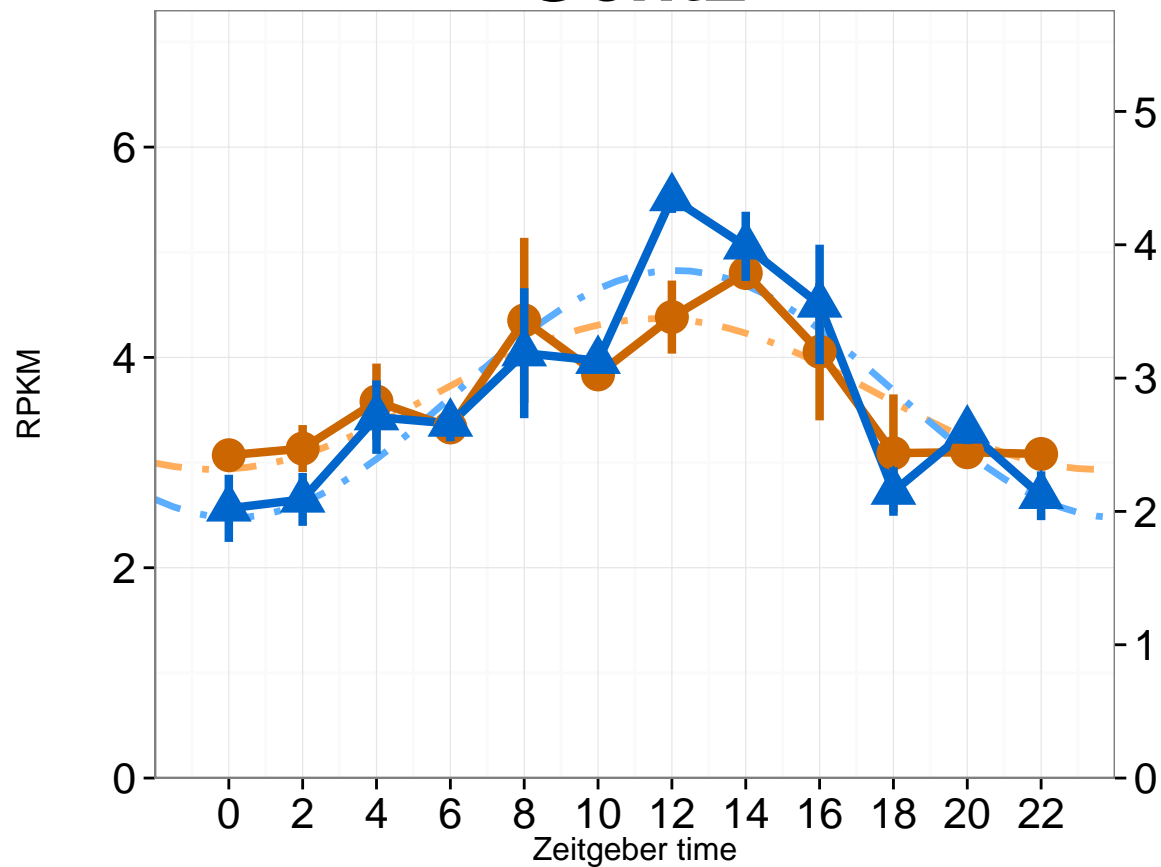

## Gcnt2

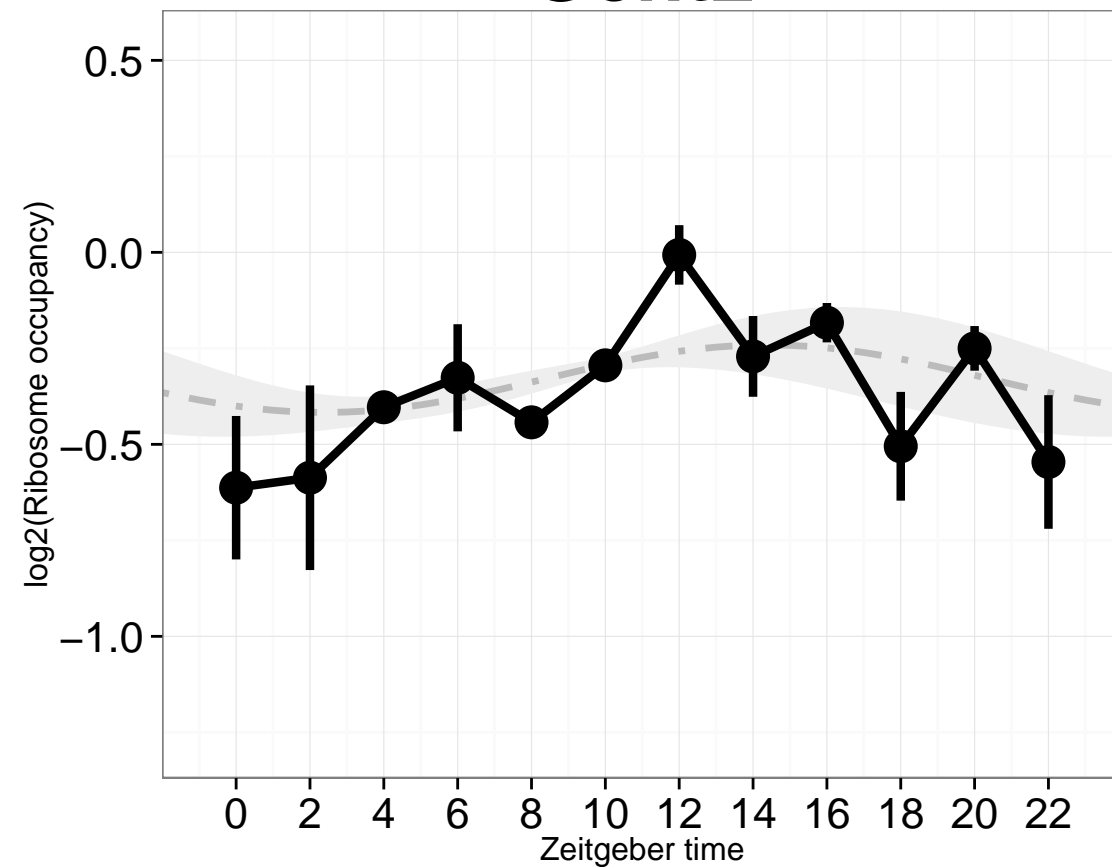

Supplement: SuppDataset_1.zip [file Gcnt2_set_C.pdf › Supplemental Dataset 1/C-mRNA_nonrhythm_translation_rhyth/Gcnt2_set_C.pdf]

## Gemin6

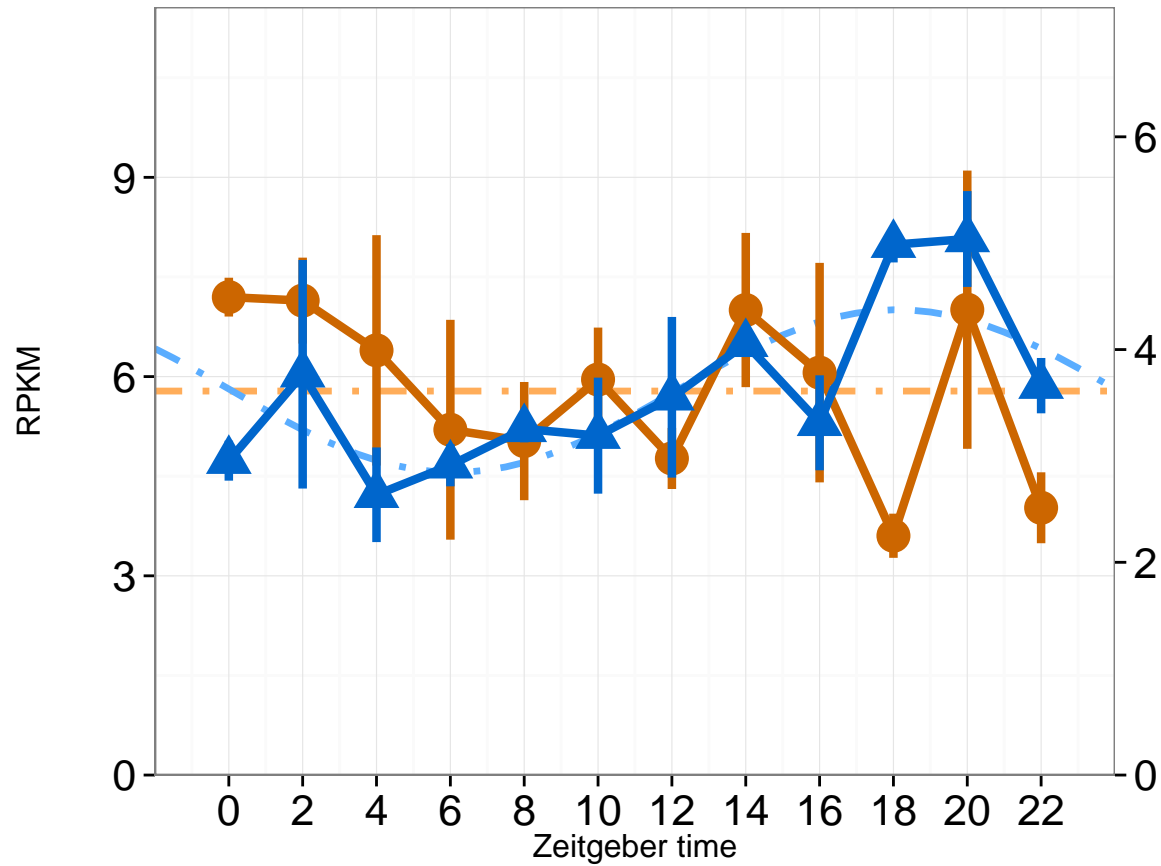

## Gemin6

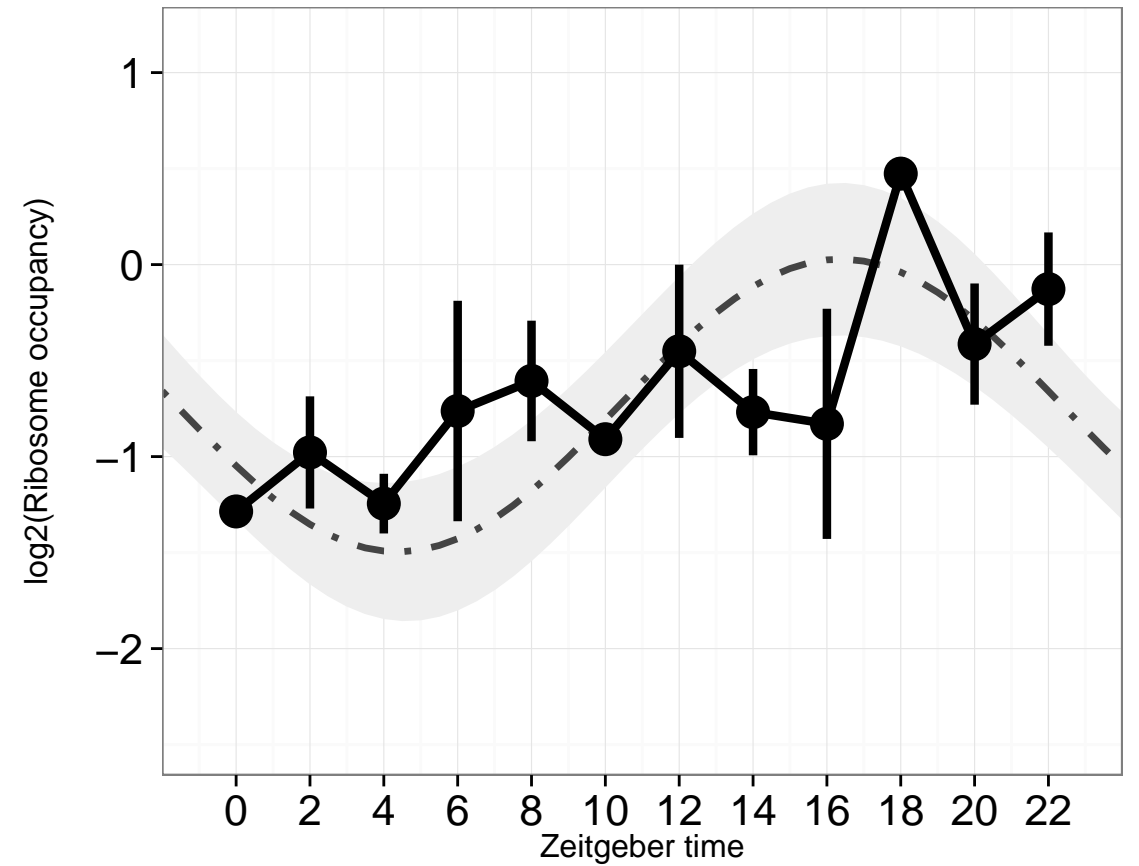

Supplement: SuppDataset_1.zip [file Gemin6_set_C.pdf › Supplemental Dataset 1/C-mRNA_nonrhythm_translation_rhyth/Gemin6_set_C.pdf]

# Ggps1

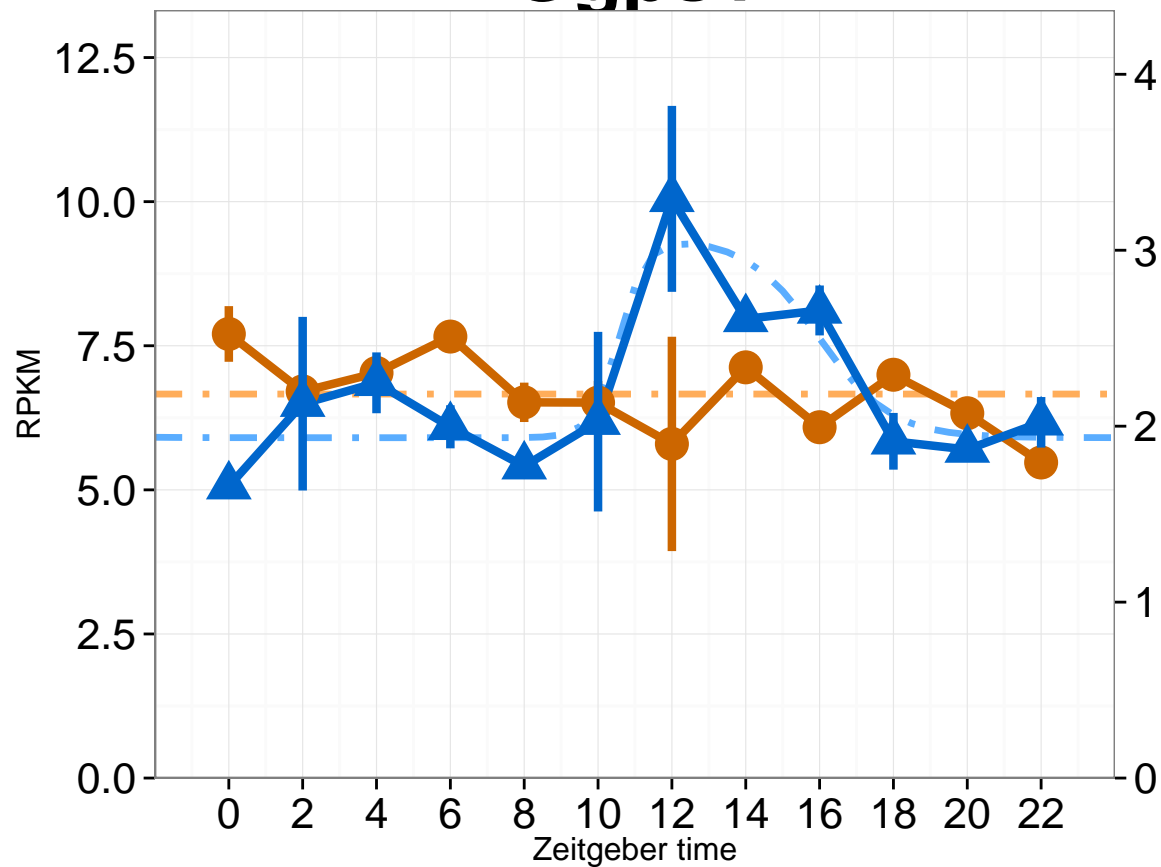

# Ggps1

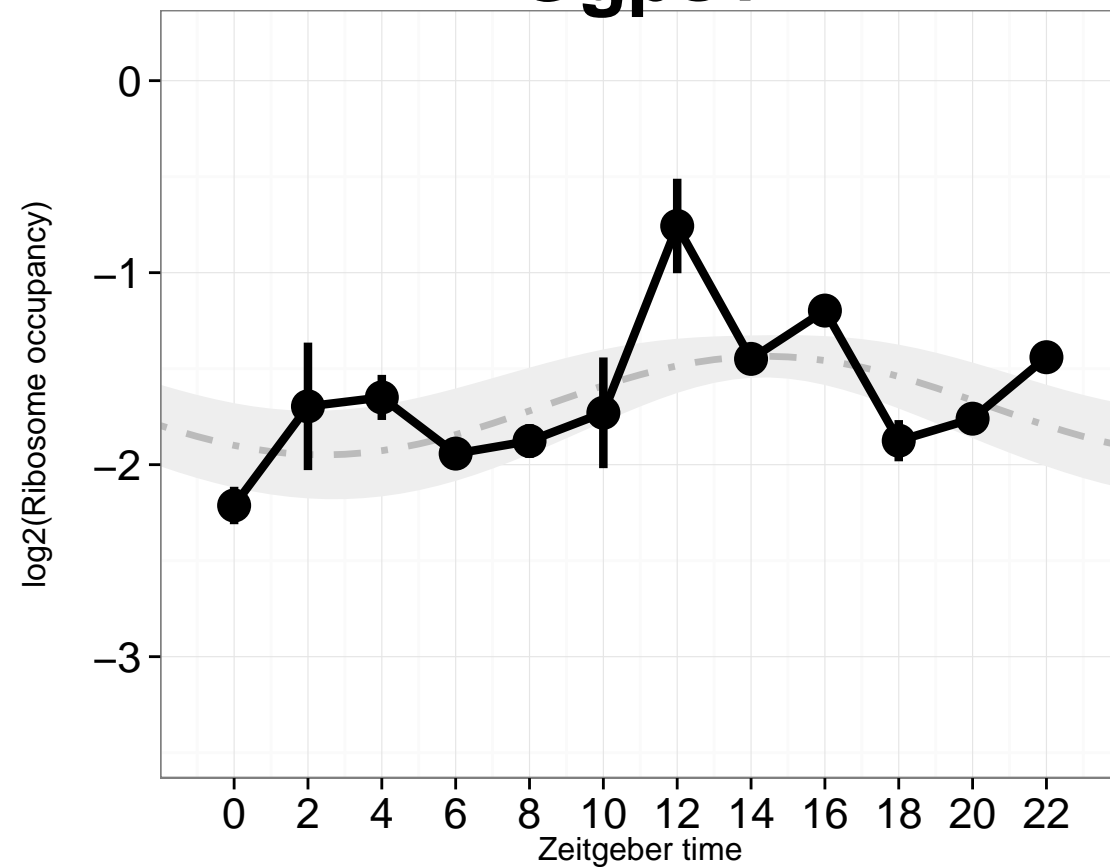

Supplement: SuppDataset_1.zip [file Ggps1_set_C.pdf › Supplemental Dataset 1/C-mRNA_nonrhythm_translation_rhyth/Ggps1_set_C.pdf]

# Gimap1

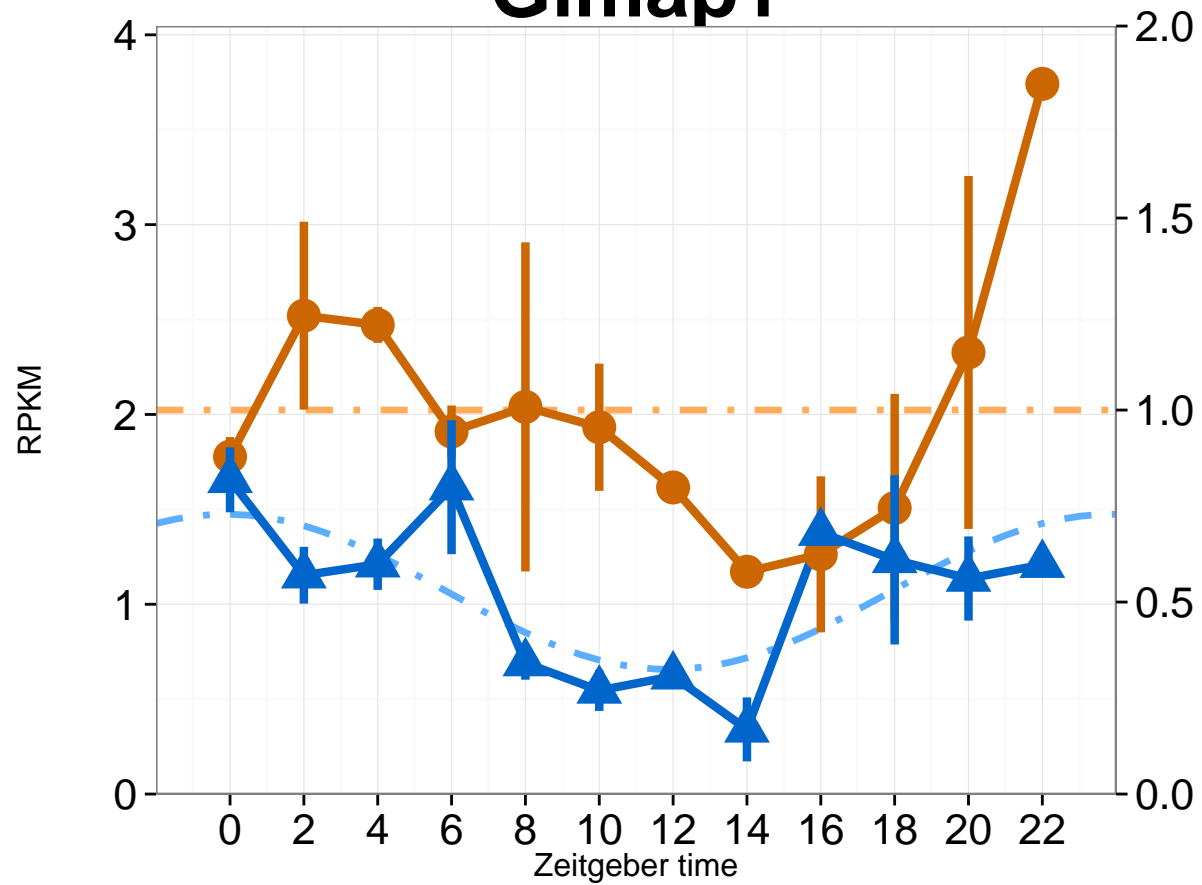

# Gimap1

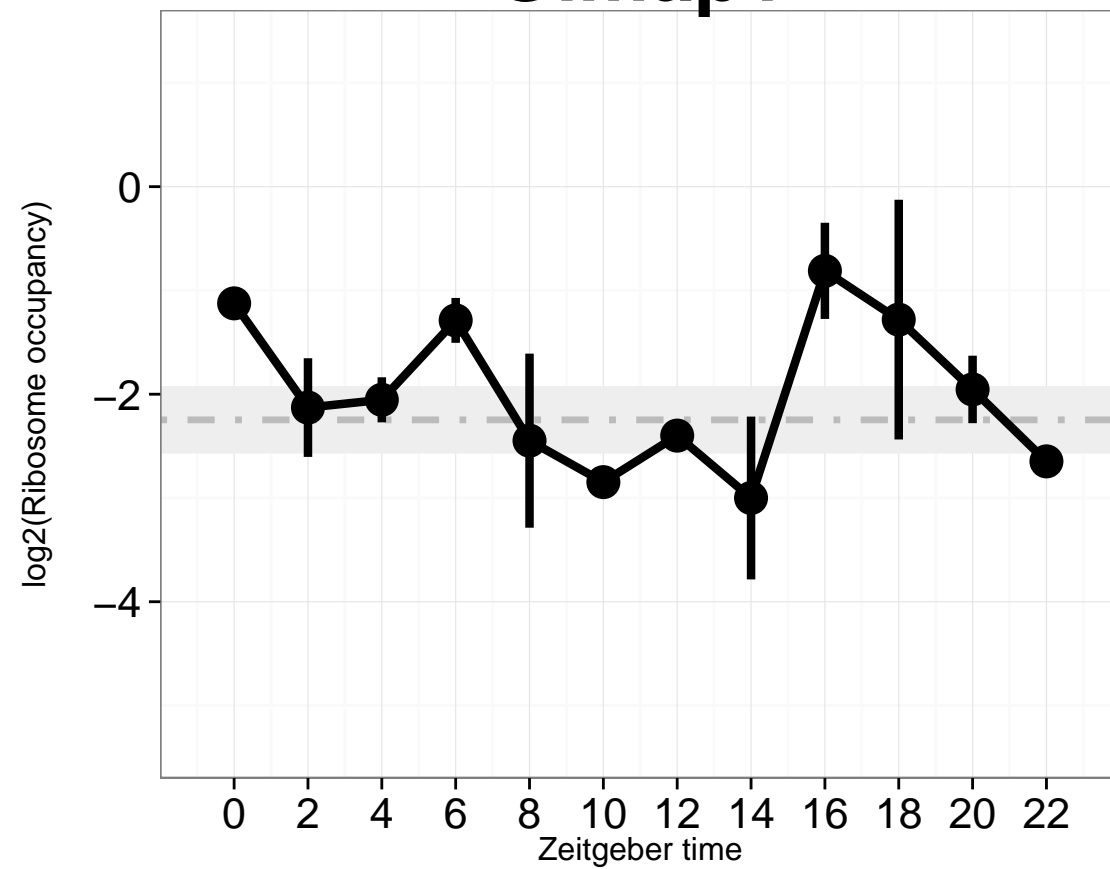

Supplement: SuppDataset_1.zip [file Gimap1_set_C.pdf › Supplemental Dataset 1/C-mRNA_nonrhythm_translation_rhyth/Gimap1_set_C.pdf]

## Gimap8

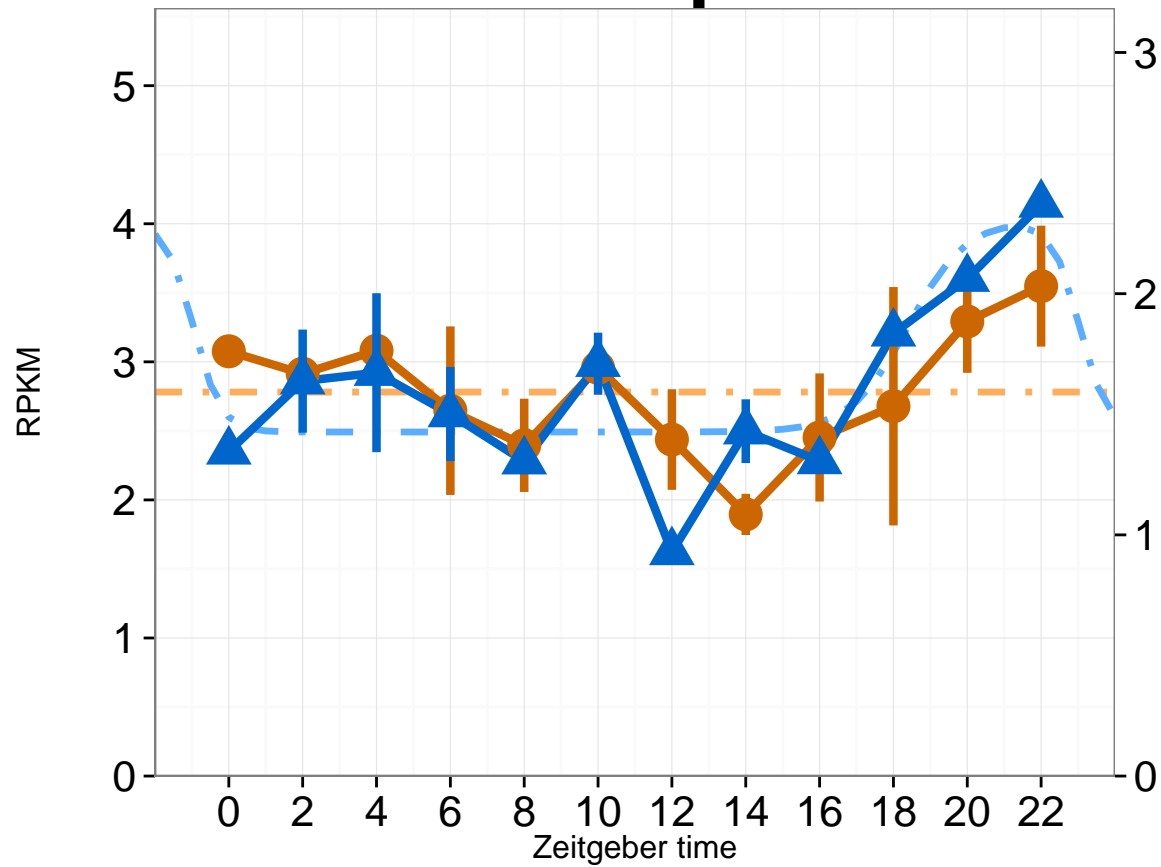

## Gimap8

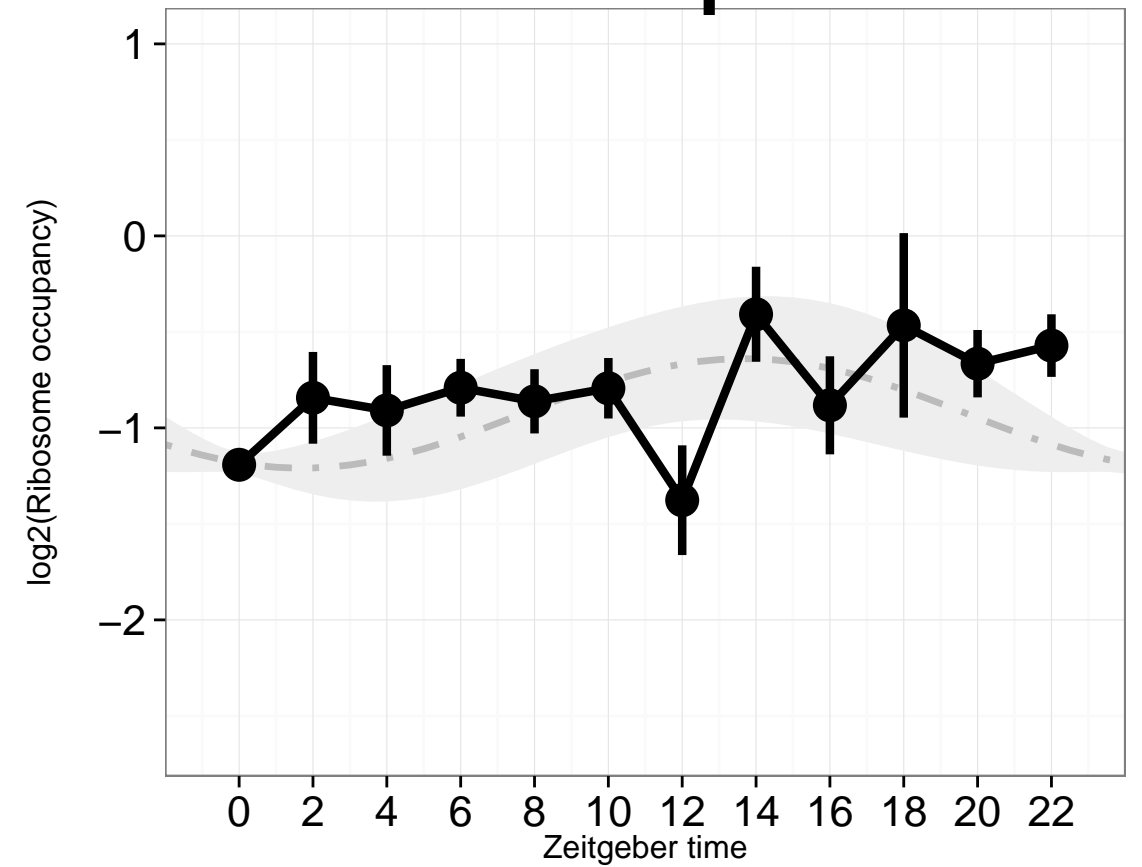

Supplement: SuppDataset_1.zip [file Gimap8_set_C.pdf › Supplemental Dataset 1/C-mRNA_nonrhythm_translation_rhyth/Gimap8_set_C.pdf]
