# Supplementary figures and images for: Ribosome profiling reveals the rhythmic liver translatome and circadian clock regulation by upstream open reading frames (part 18 of 113)
Source: HighWire-hosted journal article supplement (doi:10.1101/gr.195404.115), 2015-10-20

# Cox7c

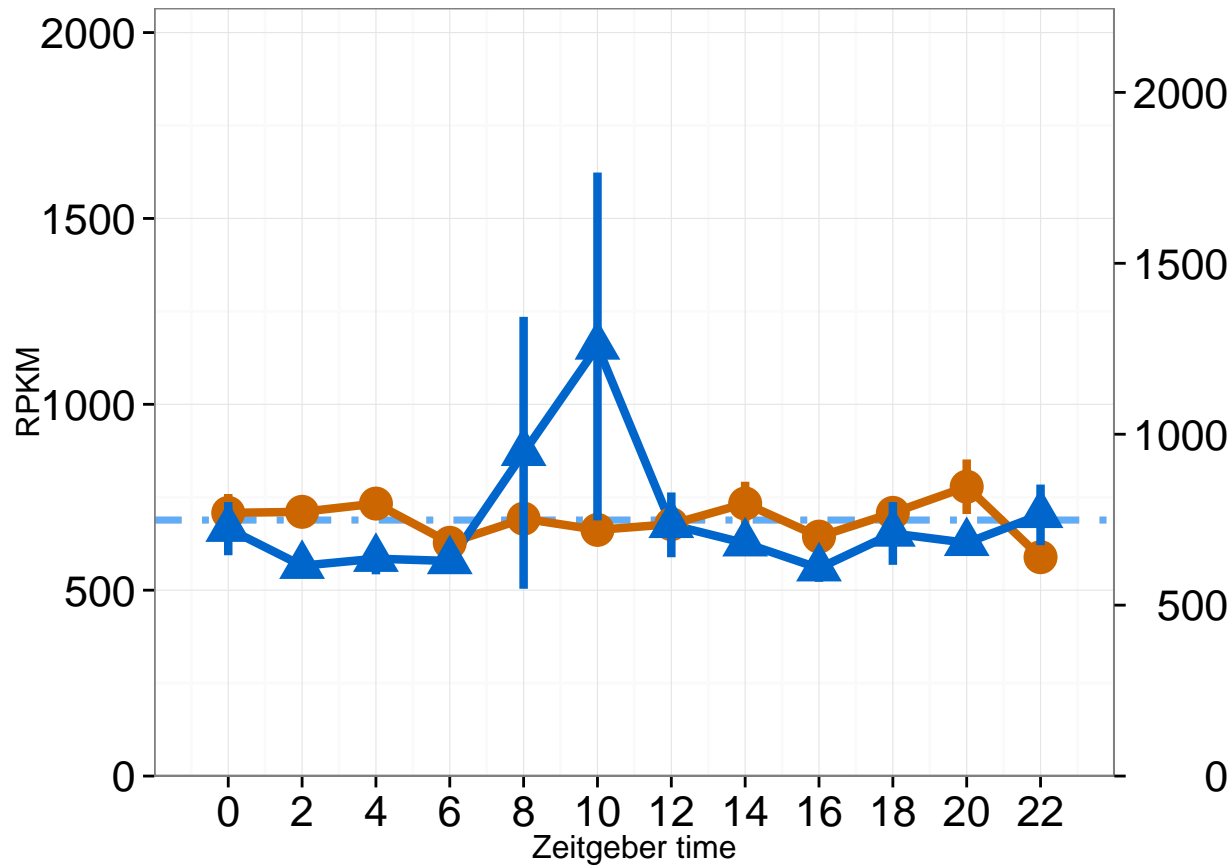

# Cox7c

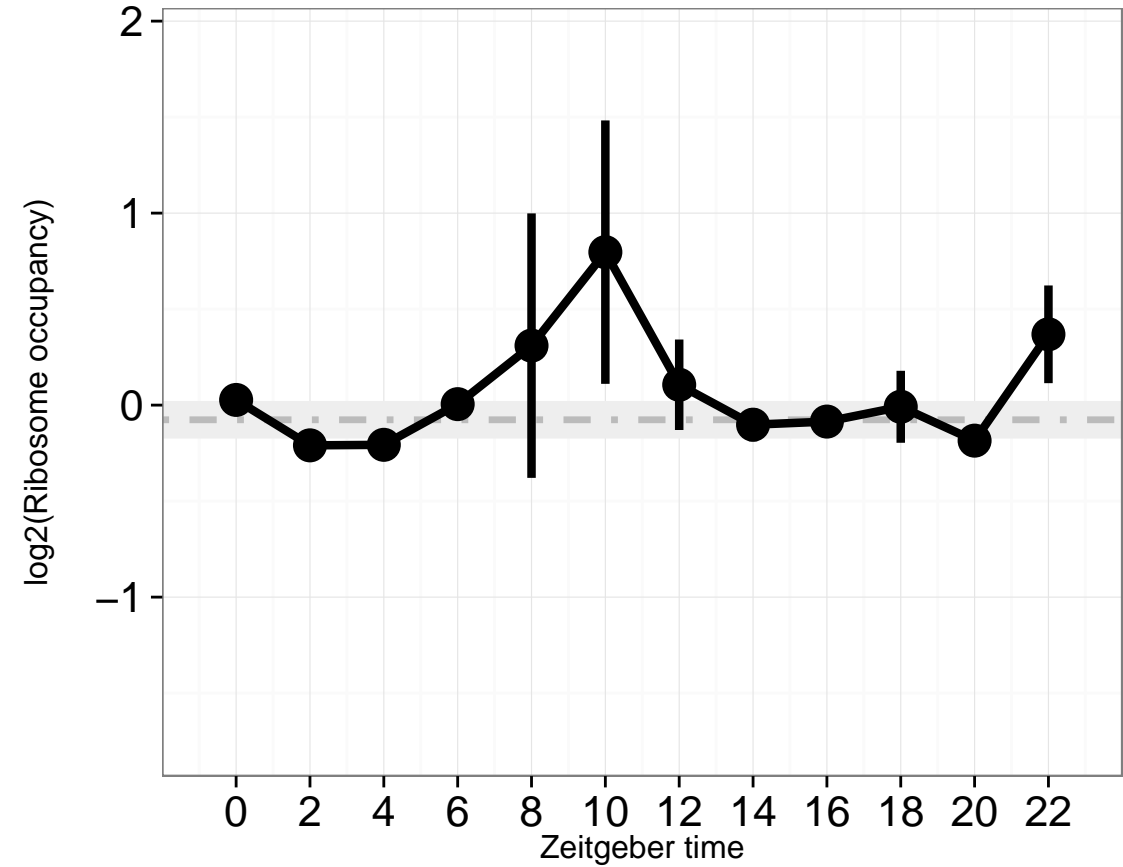

Supplement: SuppDataset_1.zip [file Cox7c_set_A.pdf › Supplemental Dataset 1/A-mRNA_nonrhyth_translation_nonrhyth/Cox7c_set_A.pdf]

# Cox8a

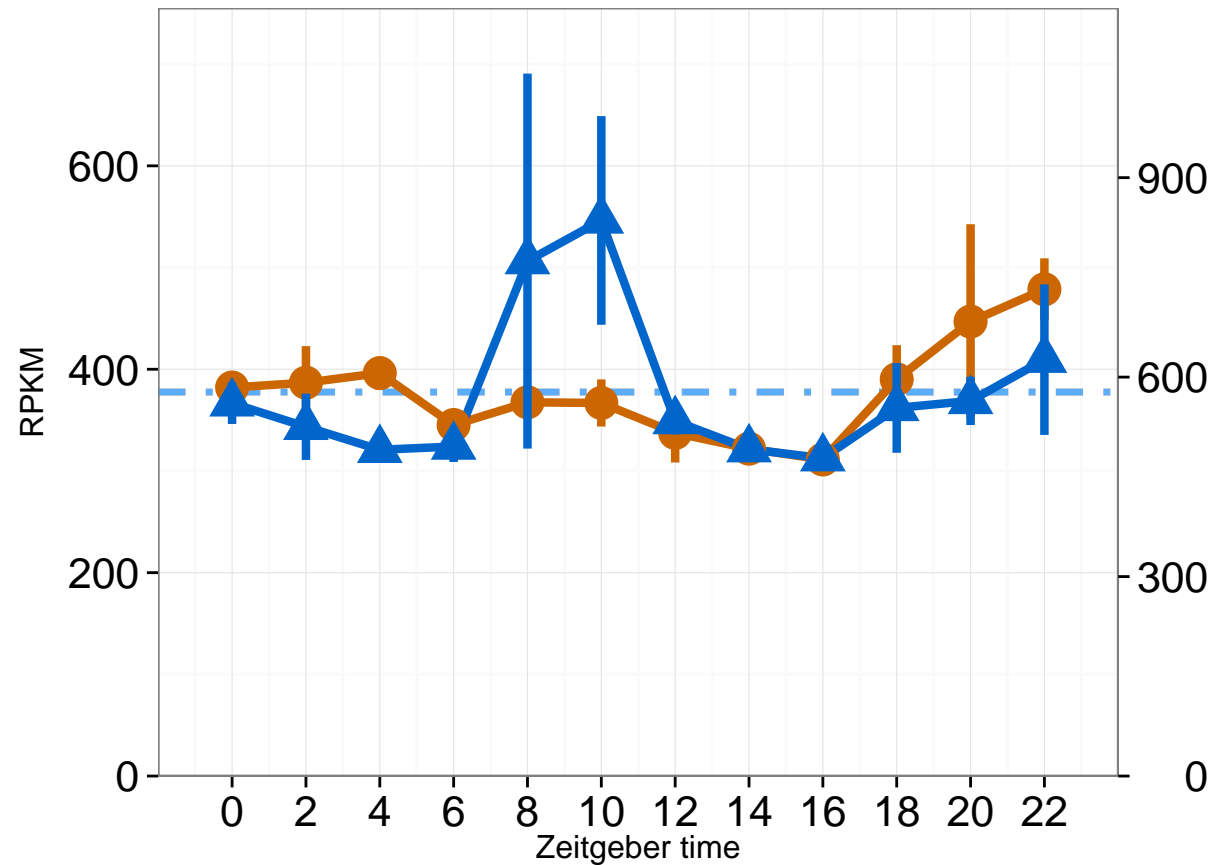

# Cox8a

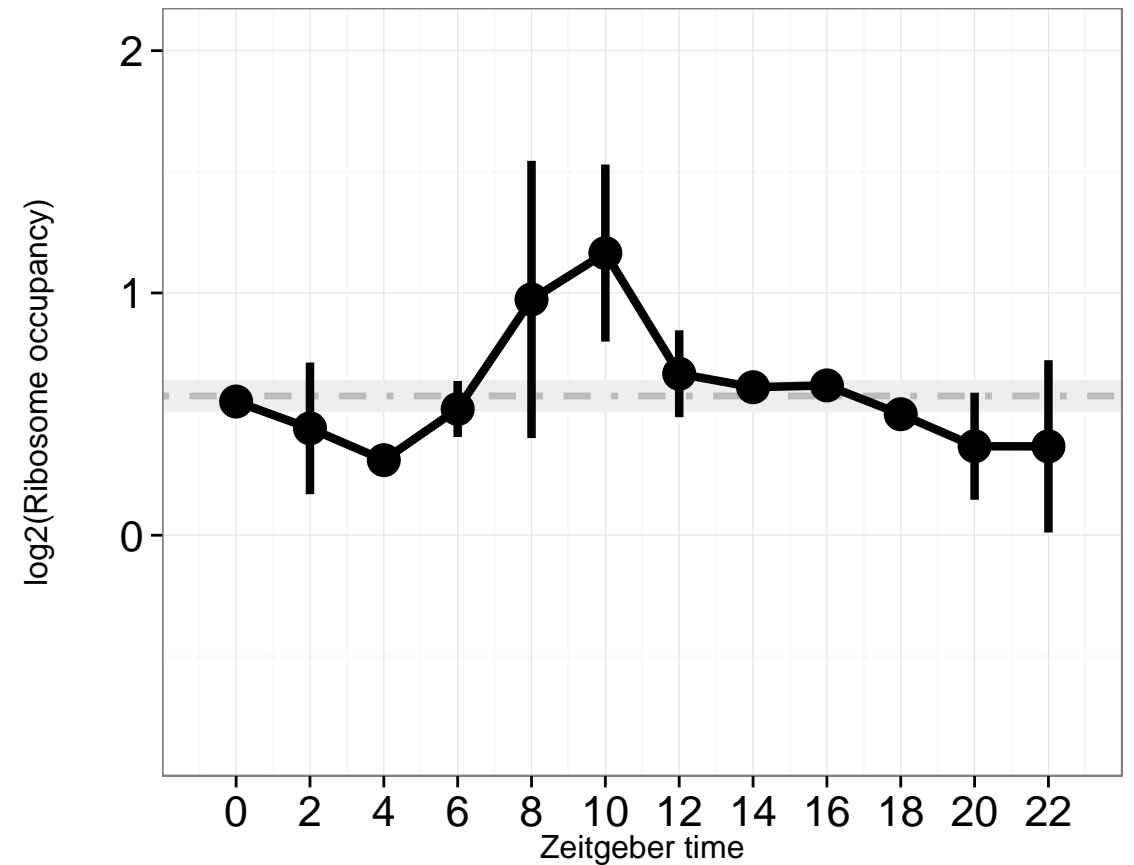

Supplement: SuppDataset_1.zip [file Cox8a_set_A.pdf › Supplemental Dataset 1/A-mRNA_nonrhyth_translation_nonrhyth/Cox8a_set_A.pdf]

# Cpa1

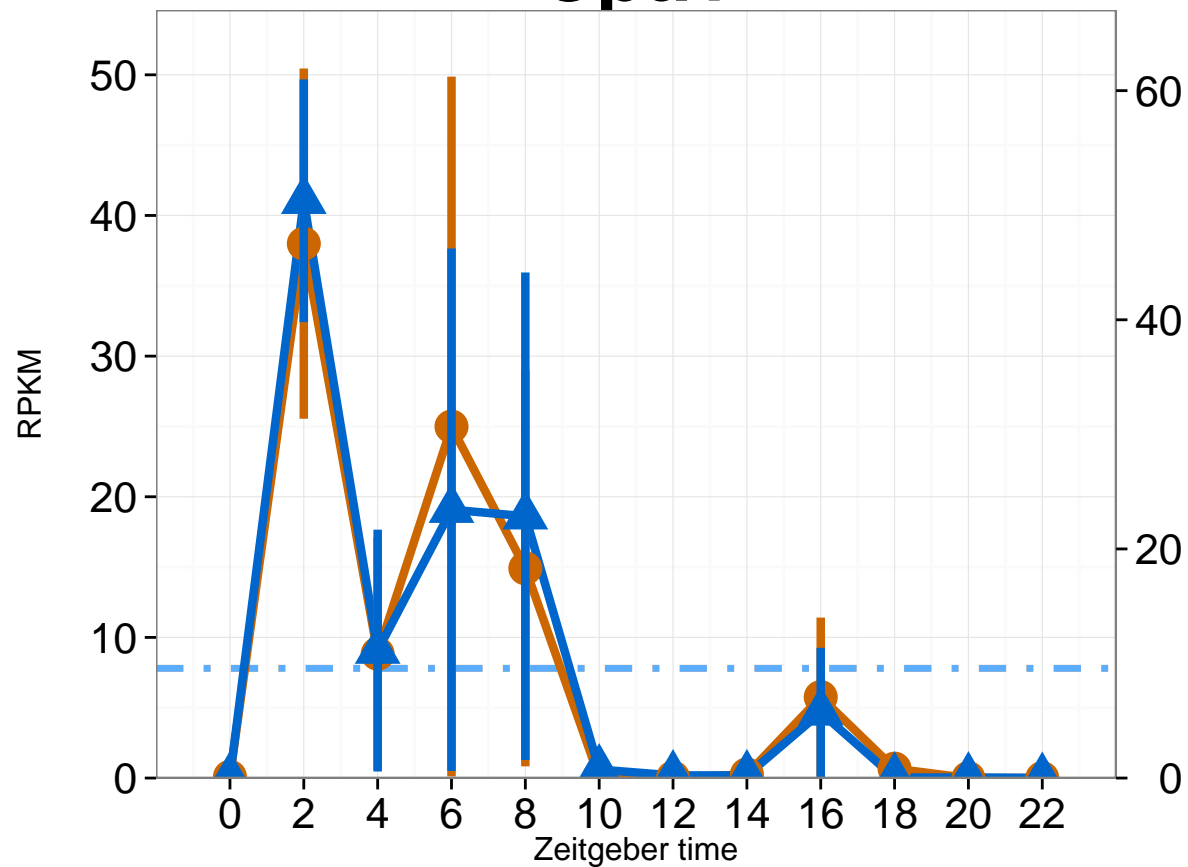

# Cpa1

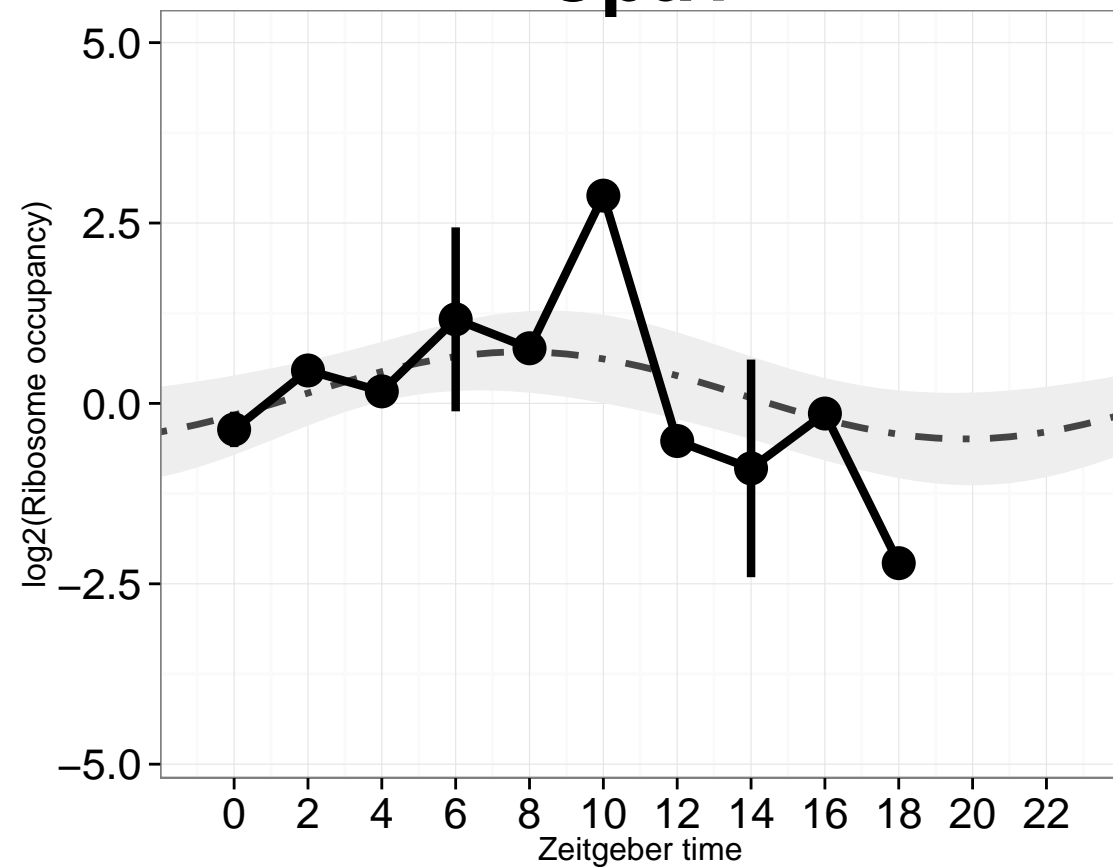

Supplement: SuppDataset_1.zip [file Cpa1_set_A.pdf › Supplemental Dataset 1/A-mRNA_nonrhyth_translation_nonrhyth/Cpa1_set_A.pdf]

# Cpa2

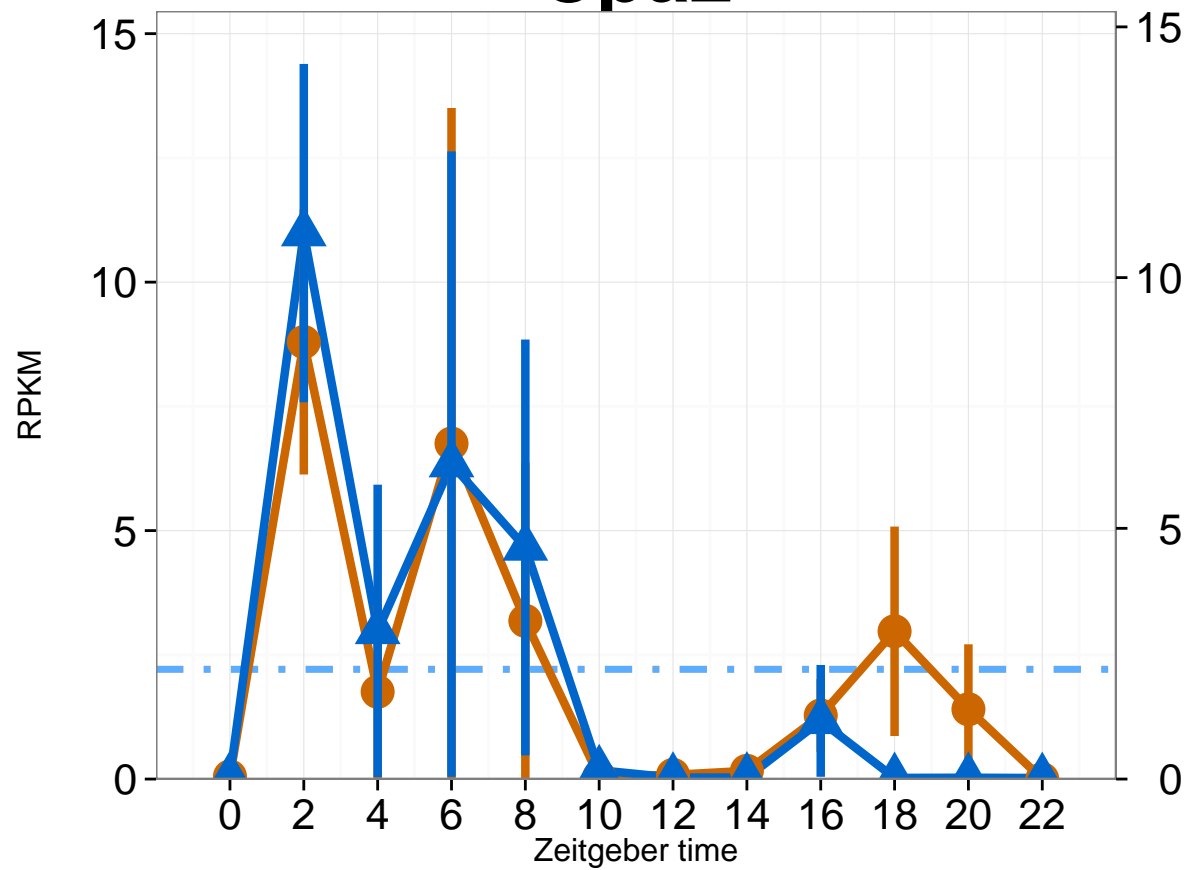

# Cpa2

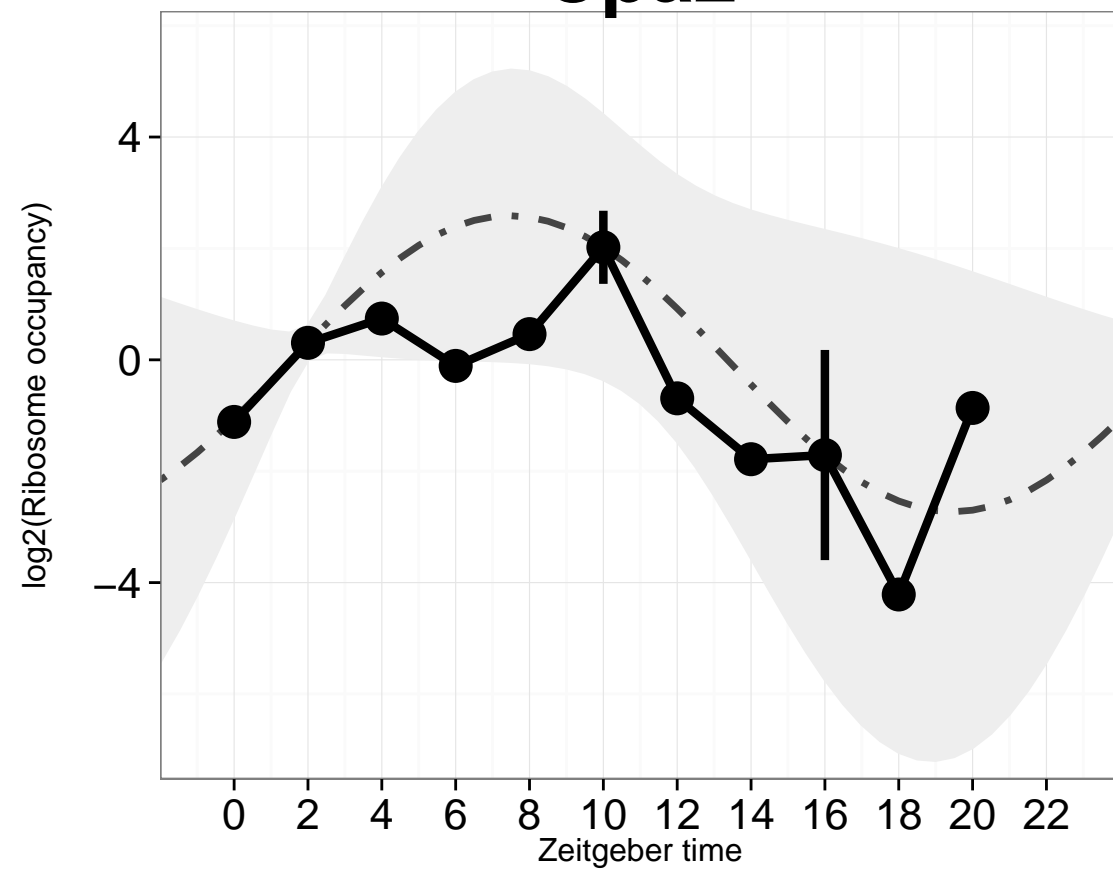

Supplement: SuppDataset_1.zip [file Cpa2_set_A.pdf › Supplemental Dataset 1/A-mRNA_nonrhyth_translation_nonrhyth/Cpa2_set_A.pdf]

# Cpb1

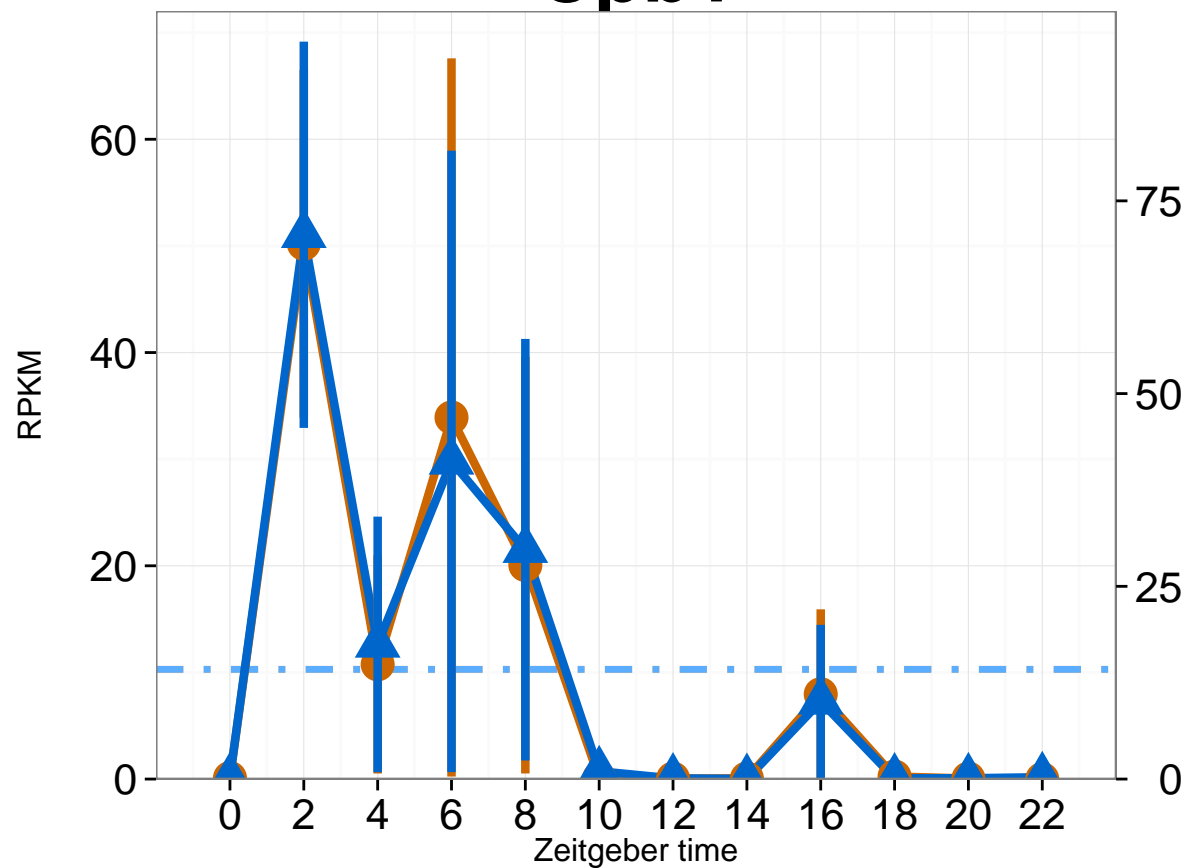

# Cpb1

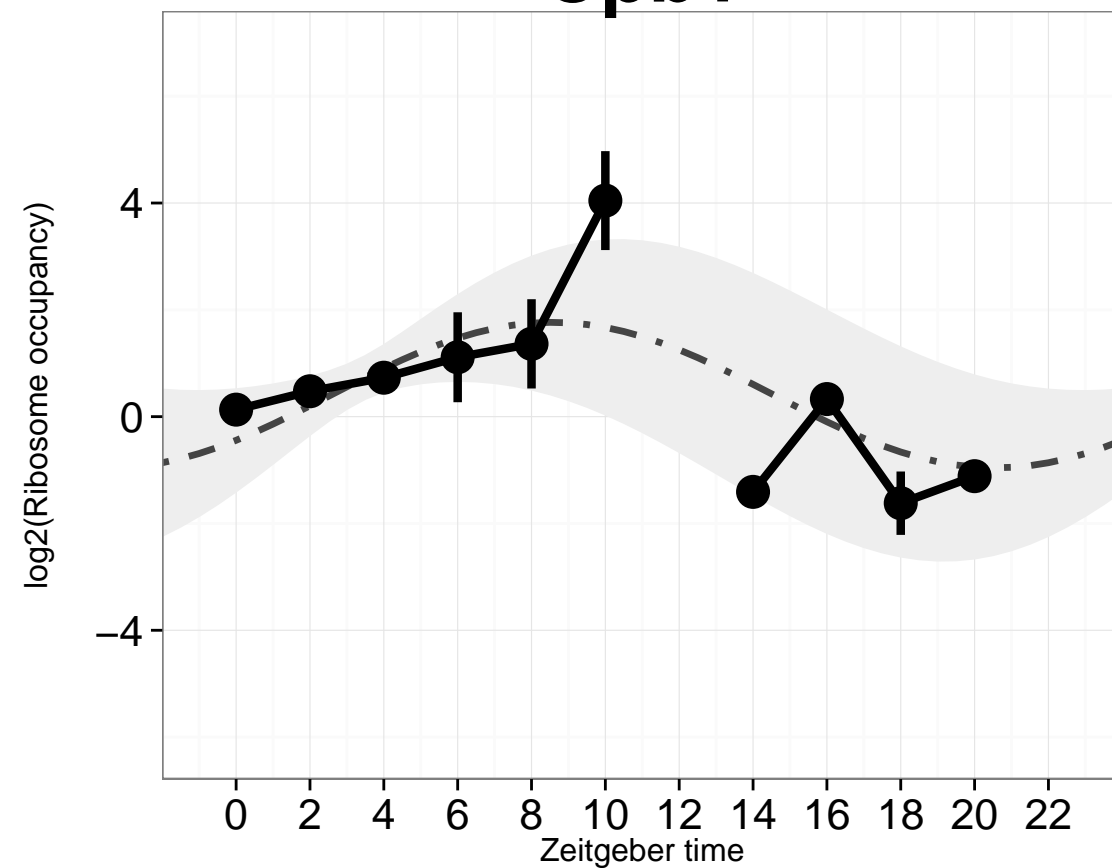

Supplement: SuppDataset_1.zip [file Cpb1_set_A.pdf › Supplemental Dataset 1/A-mRNA_nonrhyth_translation_nonrhyth/Cpb1_set_A.pdf]

## Cpd

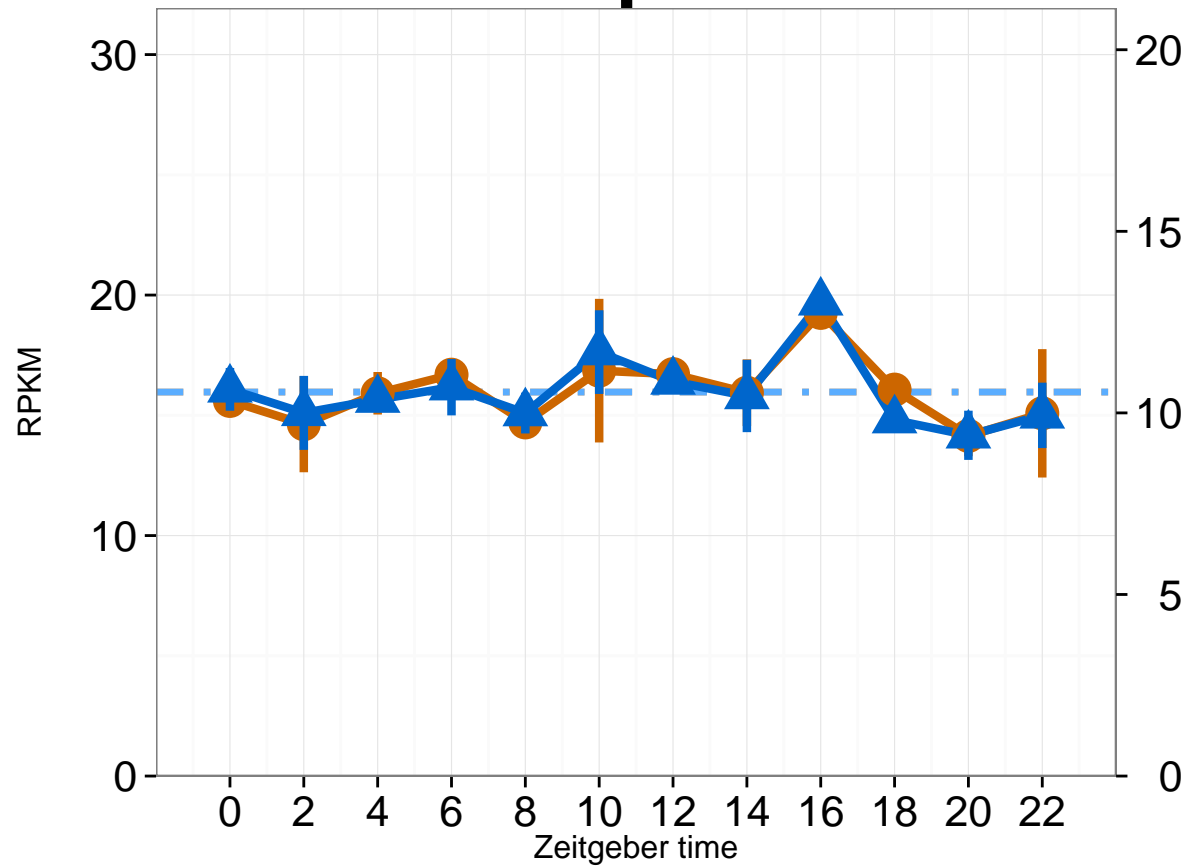

## Cpd

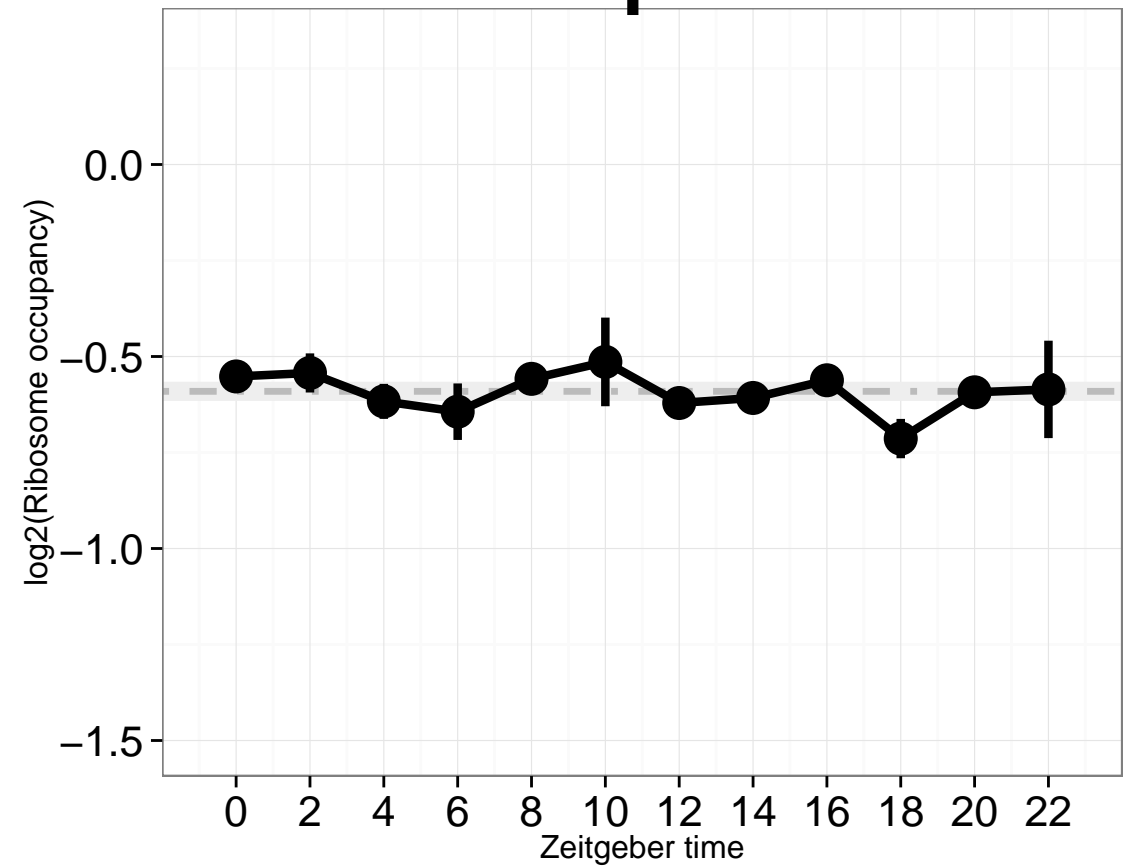

Supplement: SuppDataset_1.zip [file Cpd_set_A.pdf › Supplemental Dataset 1/A-mRNA_nonrhyth_translation_nonrhyth/Cpd_set_A.pdf]

**Cpe TR**

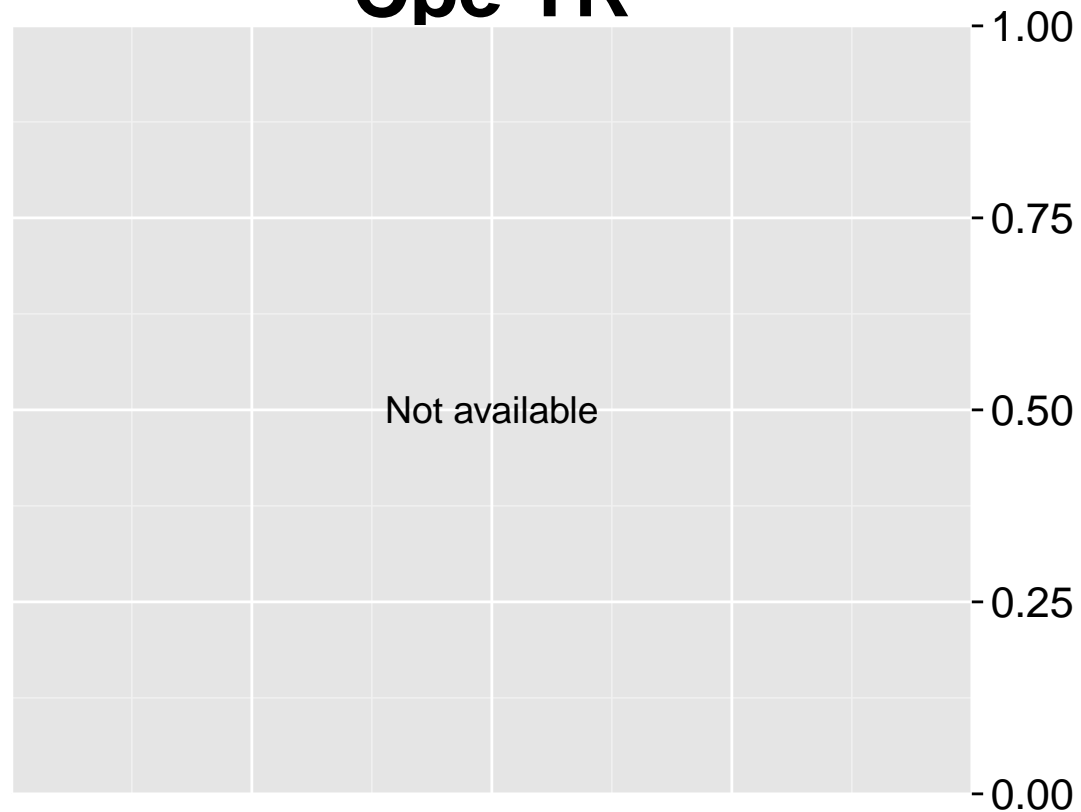

**Cpe log2(Ribosome occupancy)**

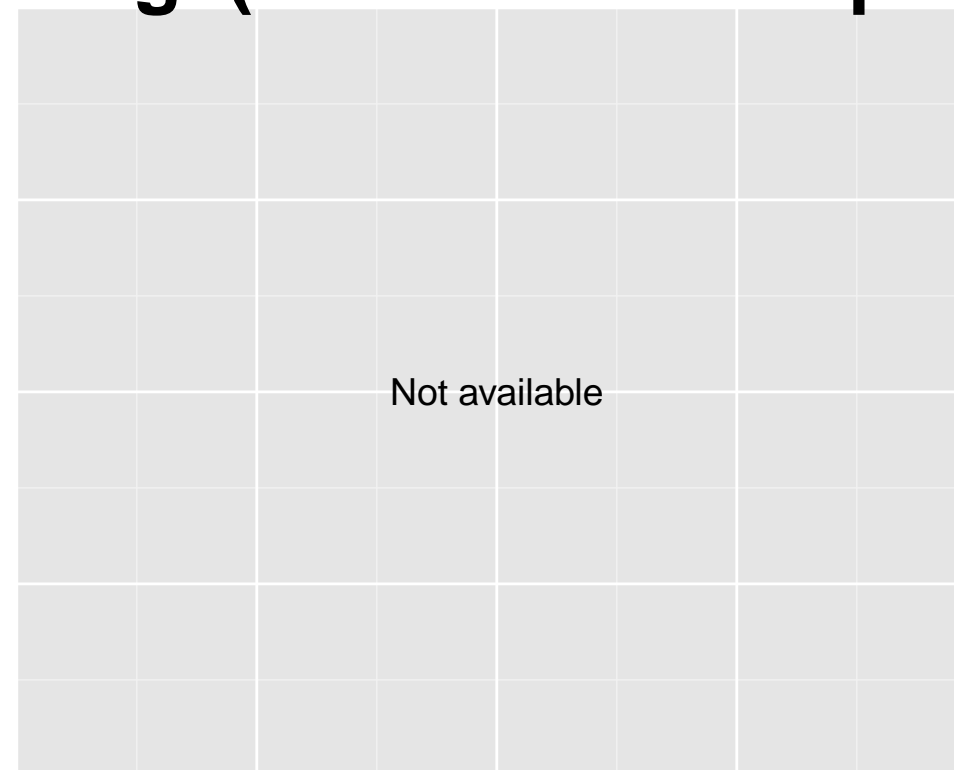

Supplement: SuppDataset_1.zip [file Cpe_set_A.pdf › Supplemental Dataset 1/A-mRNA_nonrhyth_translation_nonrhyth/Cpe_set_A.pdf]

# Cpeb2

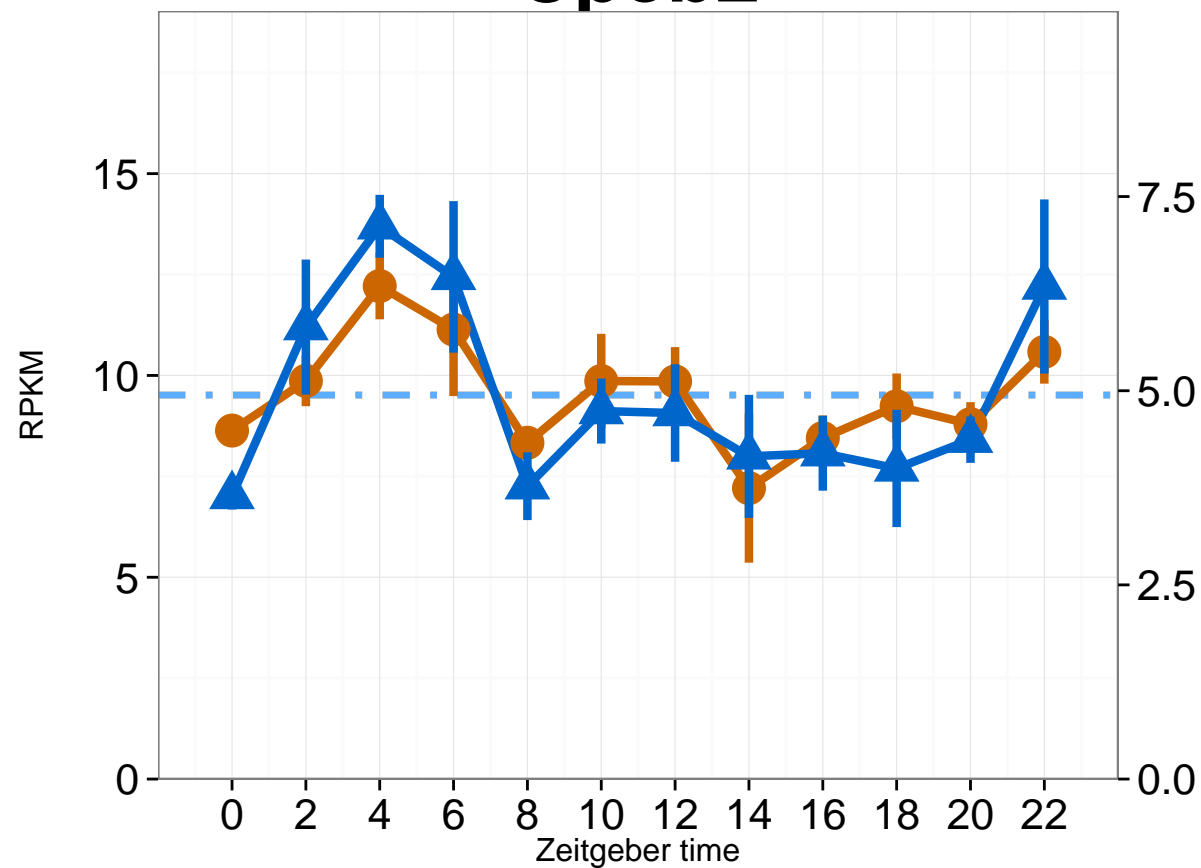

# Cpeb2

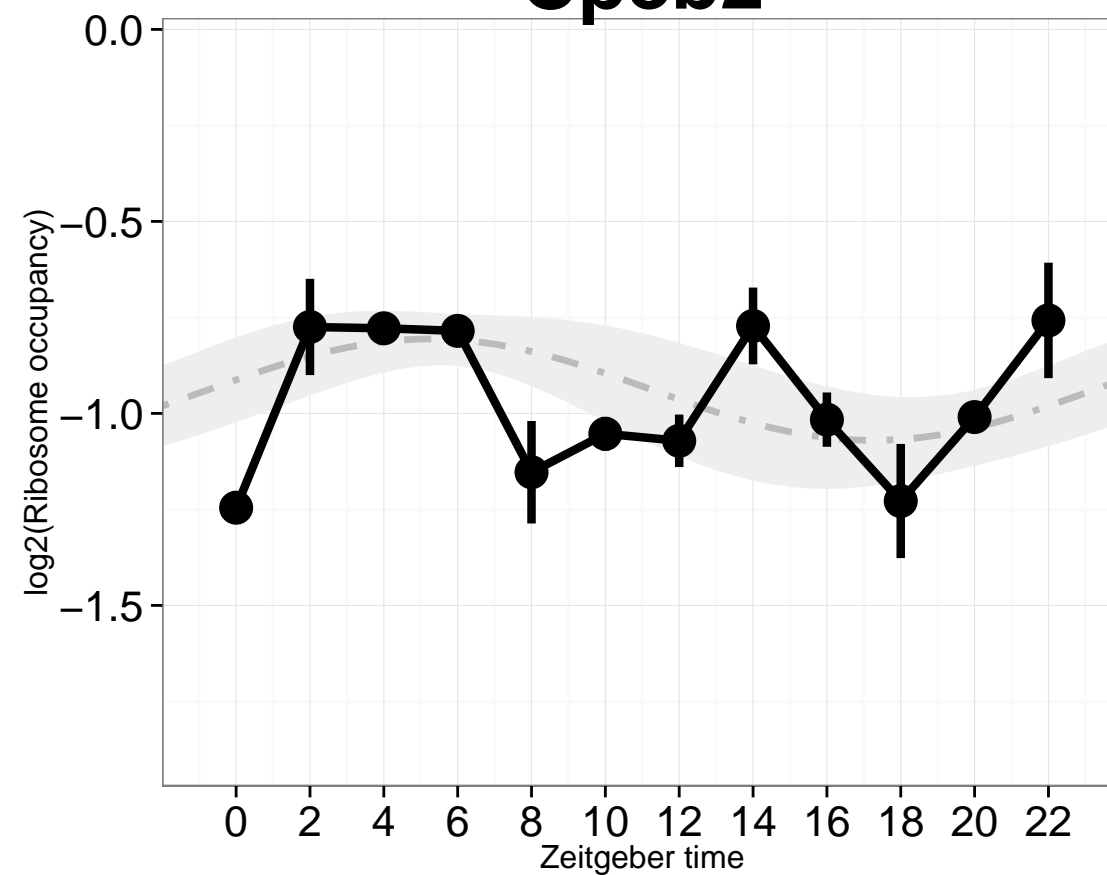

Supplement: SuppDataset_1.zip [file Cpeb2_set_A.pdf › Supplemental Dataset 1/A-mRNA_nonrhyth_translation_nonrhyth/Cpeb2_set_A.pdf]

## Cpeb3

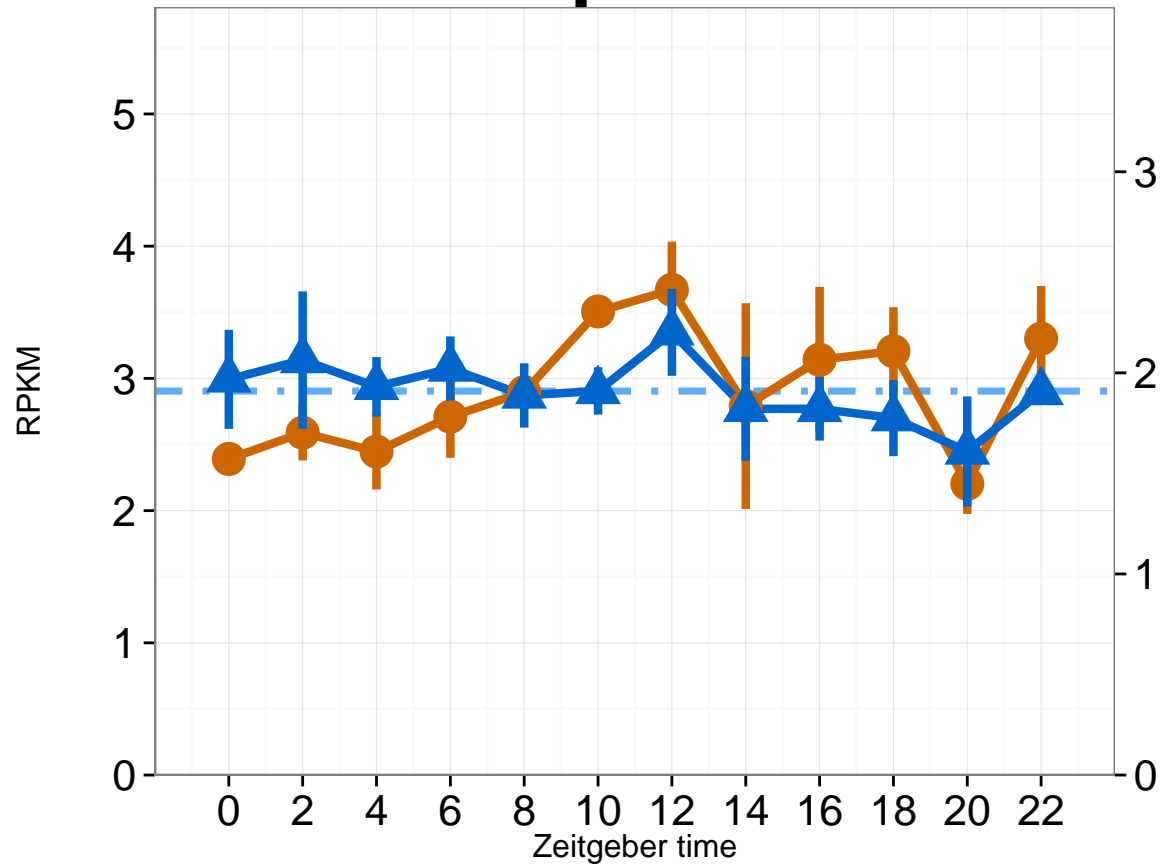

## Cpeb3

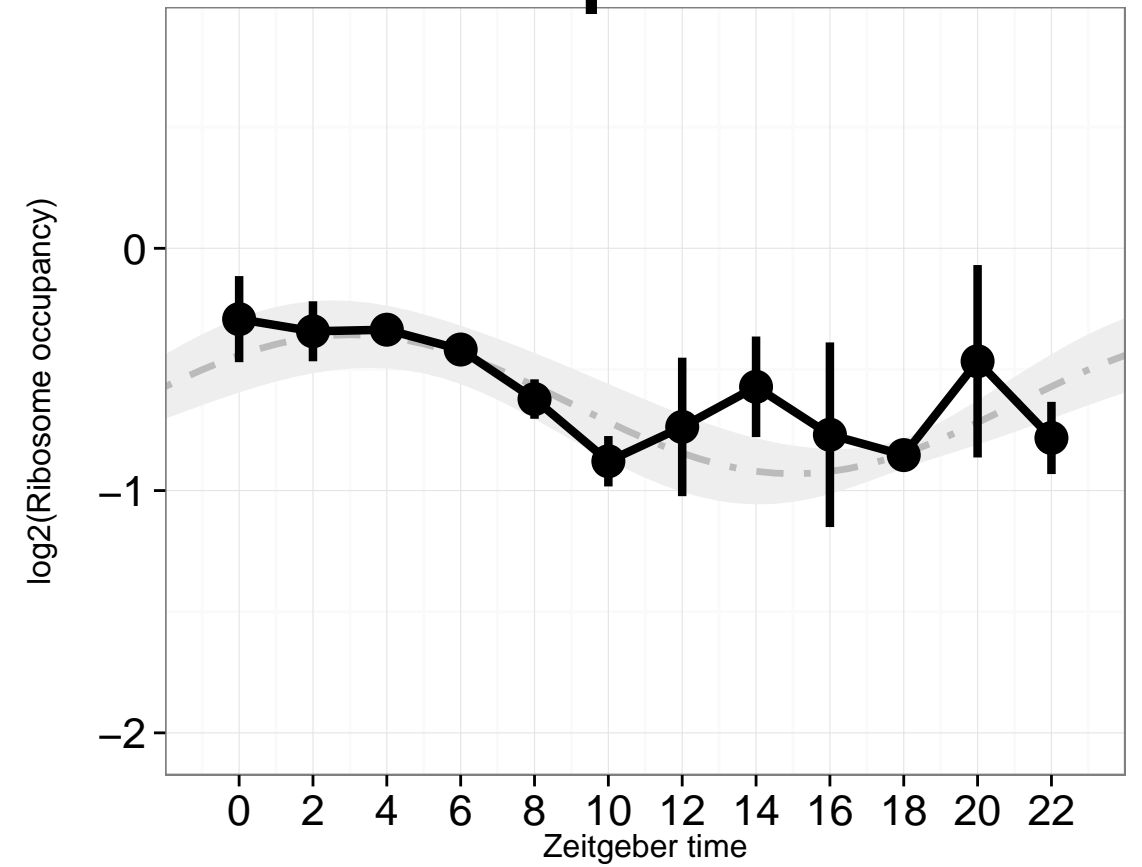

Supplement: SuppDataset_1.zip [file Cpeb3_set_A.pdf › Supplemental Dataset 1/A-mRNA_nonrhyth_translation_nonrhyth/Cpeb3_set_A.pdf]

# Cpn1

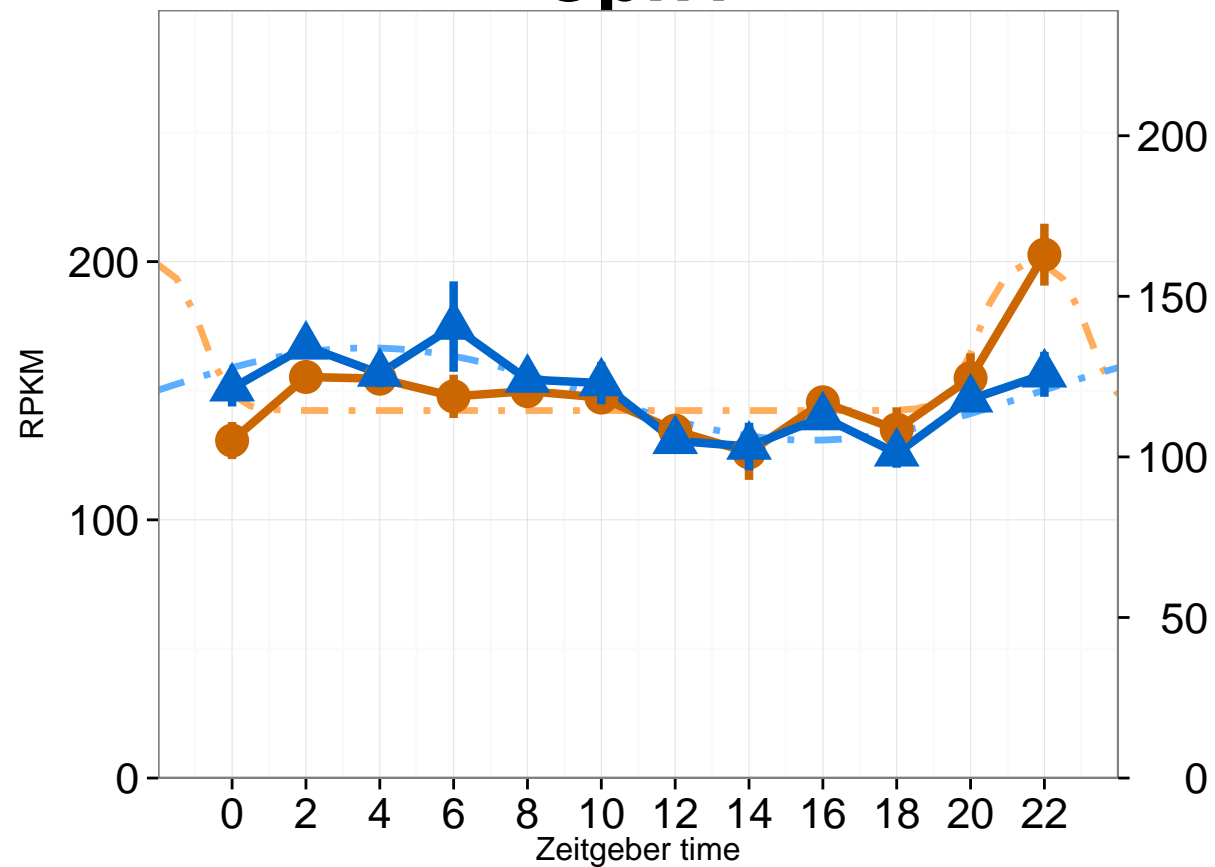

# Cpn1

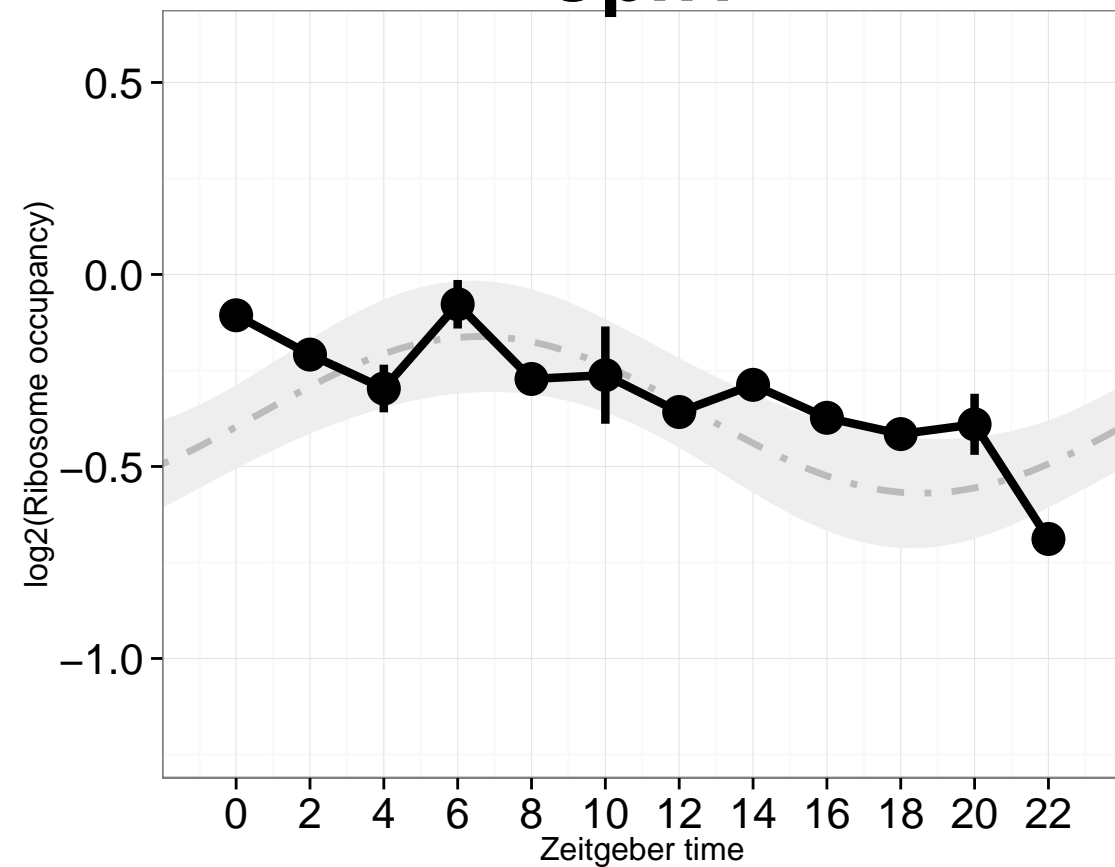

Supplement: SuppDataset_1.zip [file Cpn1_set_A.pdf › Supplemental Dataset 1/A-mRNA_nonrhyth_translation_nonrhyth/Cpn1_set_A.pdf]

# Cpn2

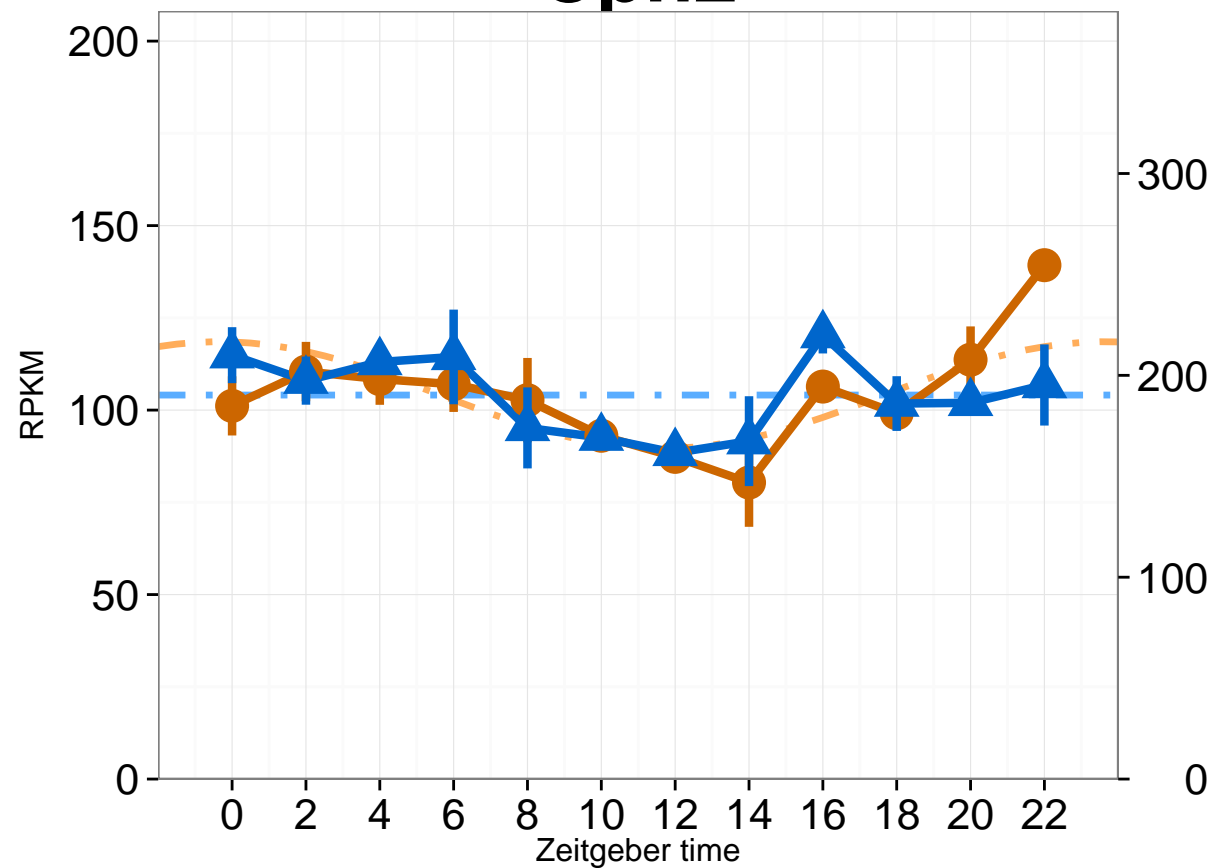

# Cpn2

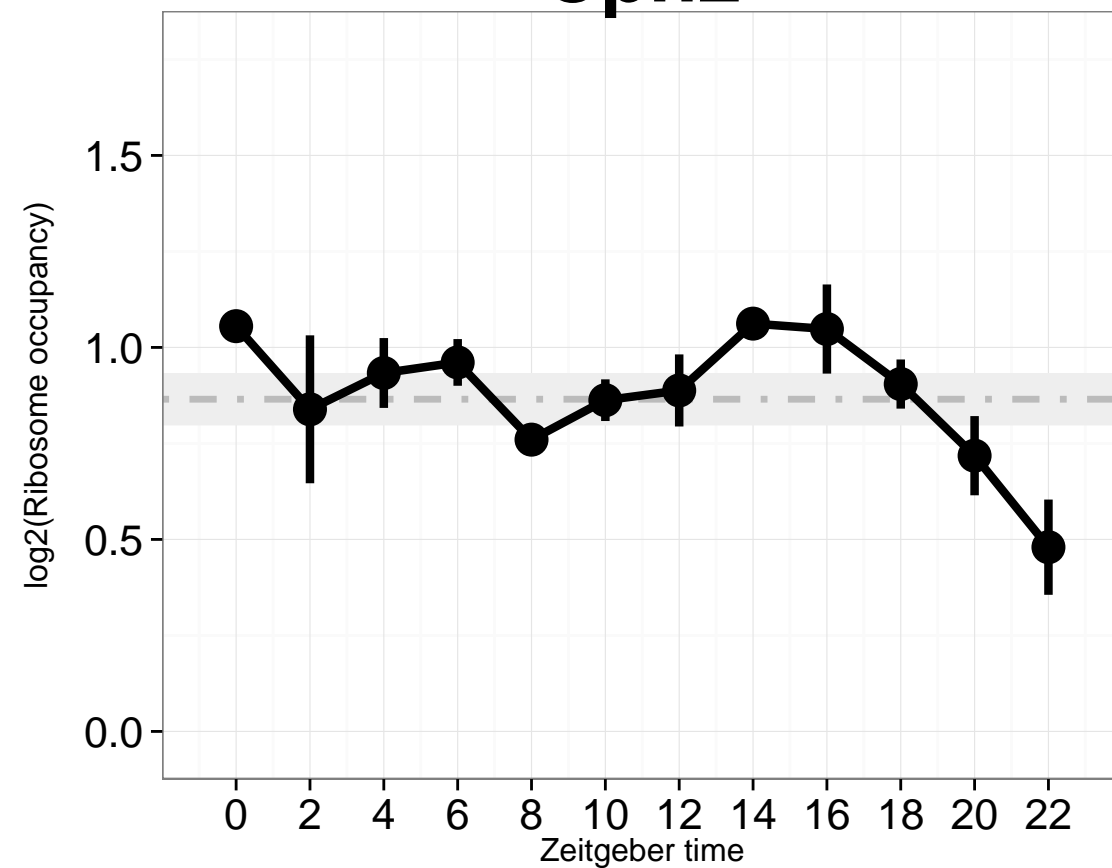

Supplement: SuppDataset_1.zip [file Cpn2_set_A.pdf › Supplemental Dataset 1/A-mRNA_nonrhyth_translation_nonrhyth/Cpn2_set_A.pdf]

# Cpne1

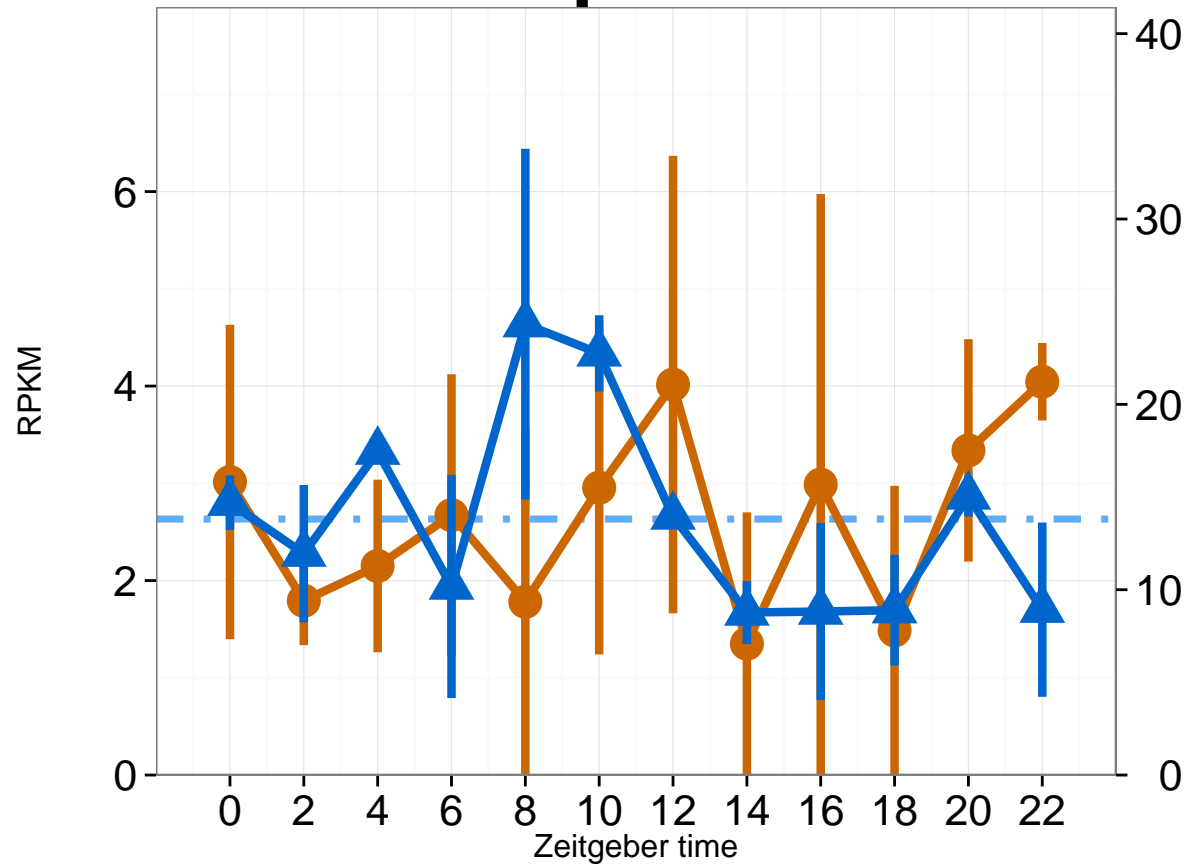

# Cpne1

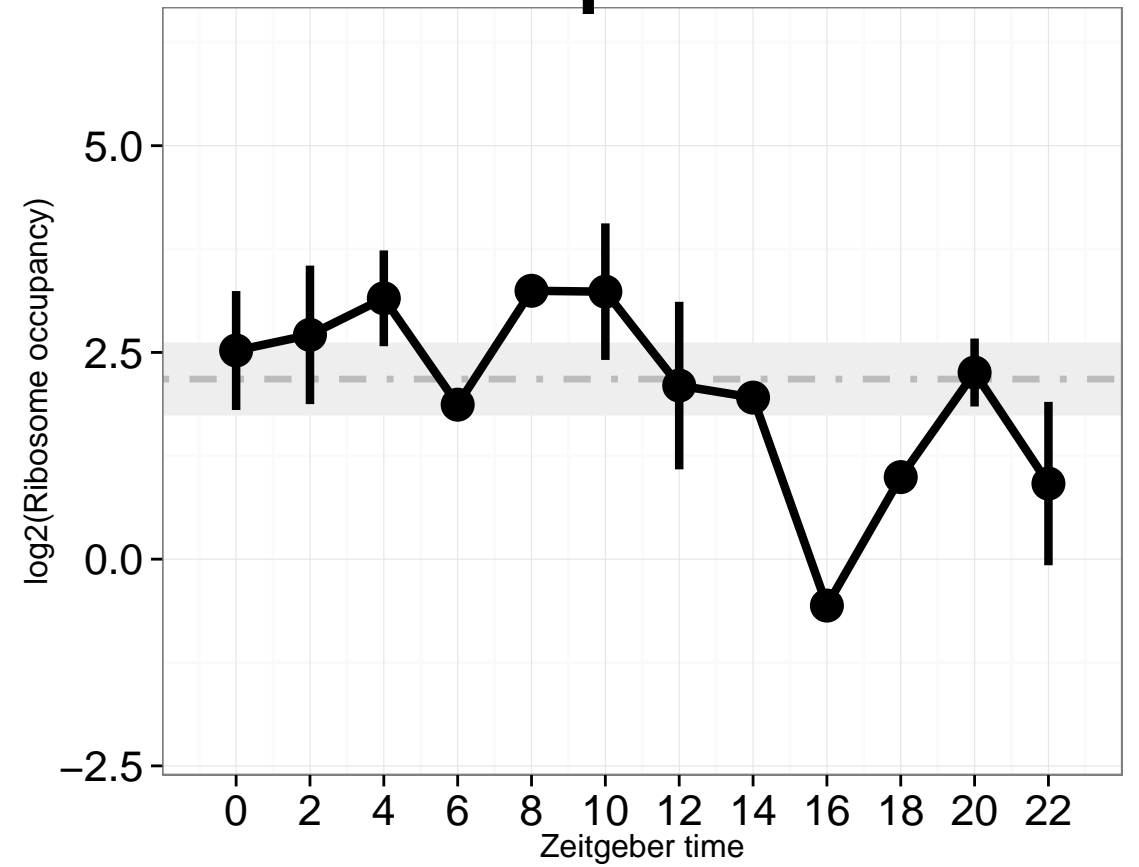

Supplement: SuppDataset_1.zip [file Cpne1_set_A.pdf › Supplemental Dataset 1/A-mRNA_nonrhyth_translation_nonrhyth/Cpne1_set_A.pdf]

# Cpne3

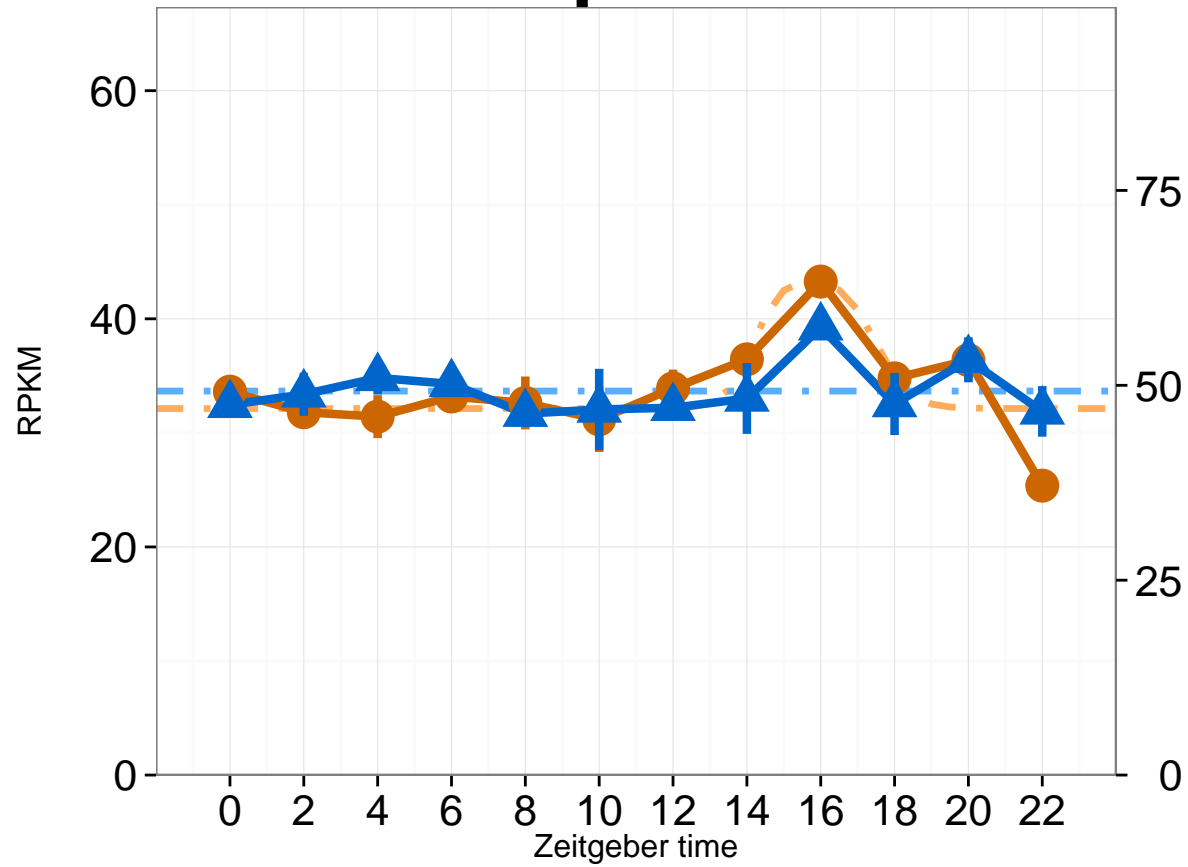

# Cpne3

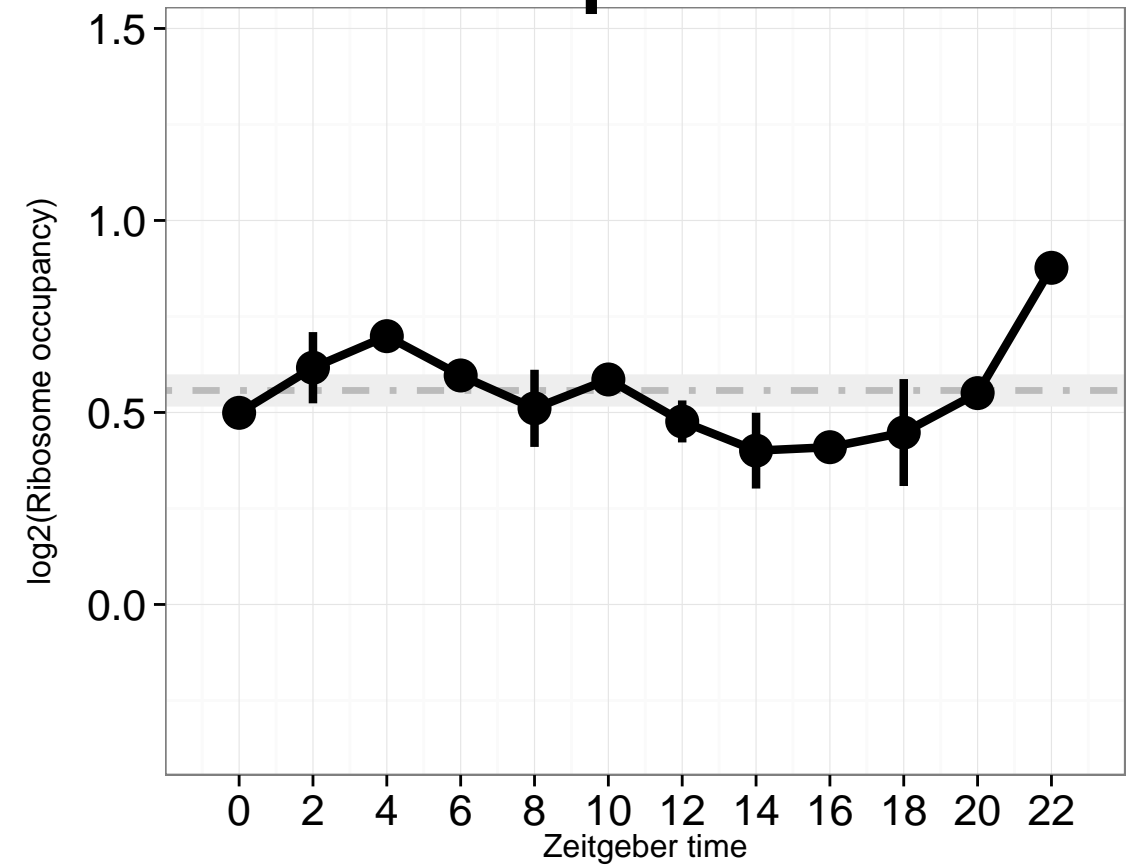

Supplement: SuppDataset_1.zip [file Cpne3_set_A.pdf › Supplemental Dataset 1/A-mRNA_nonrhyth_translation_nonrhyth/Cpne3_set_A.pdf]

## Cpox

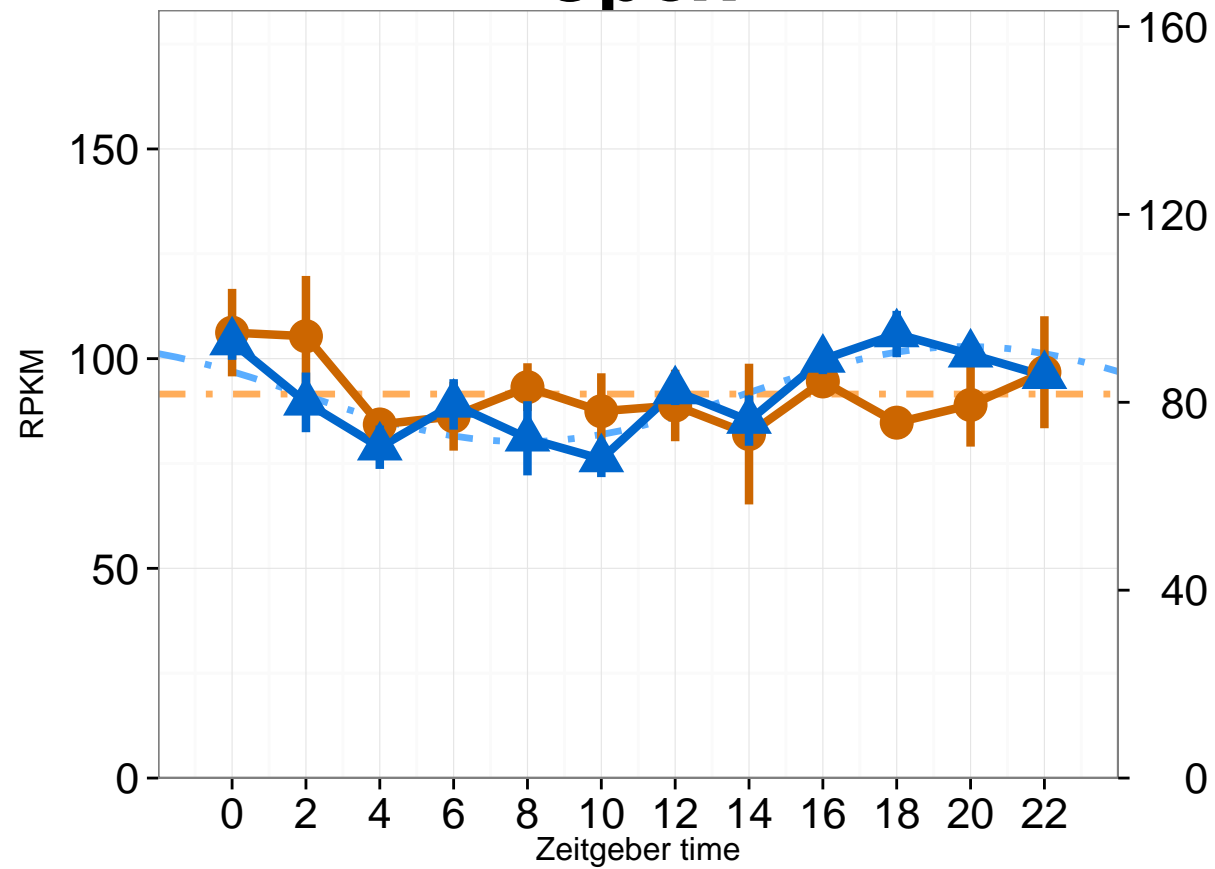

## Cpox

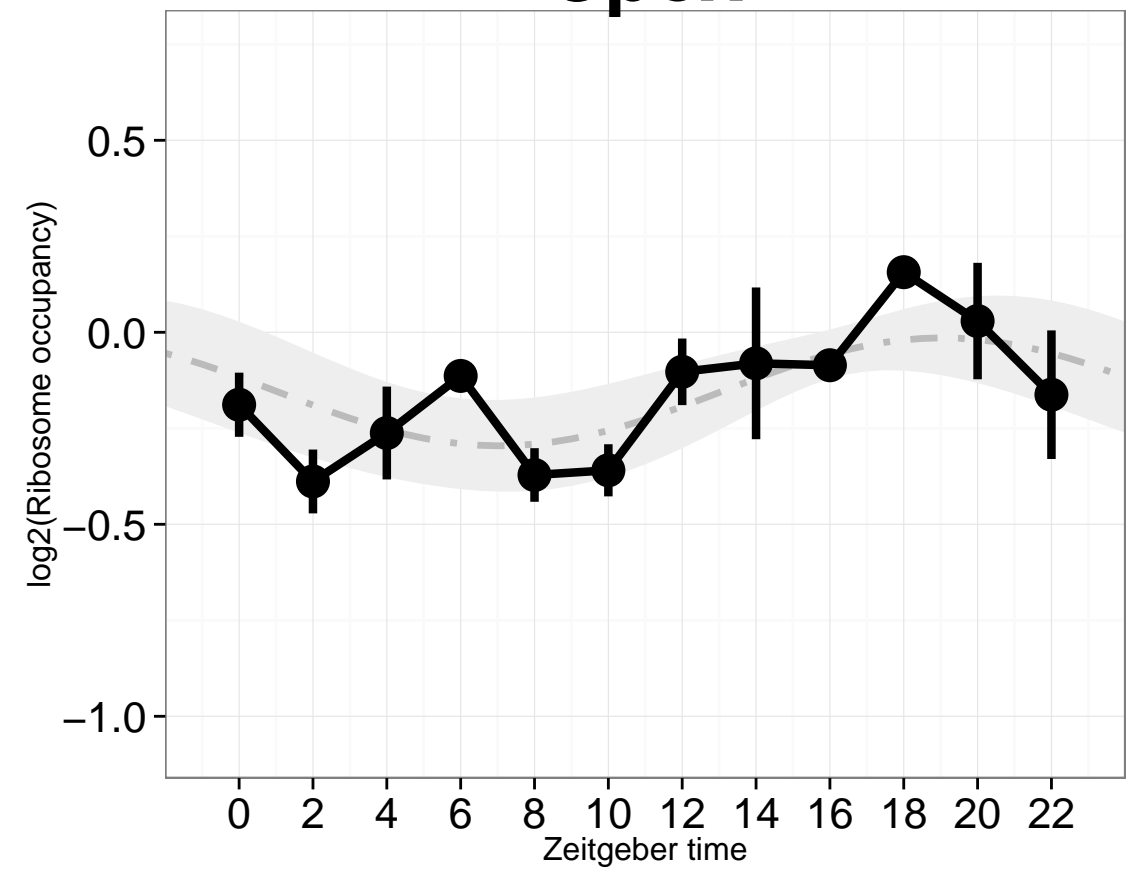

Supplement: SuppDataset_1.zip [file Cpox_set_A.pdf › Supplemental Dataset 1/A-mRNA_nonrhyth_translation_nonrhyth/Cpox_set_A.pdf]

# Cpped1

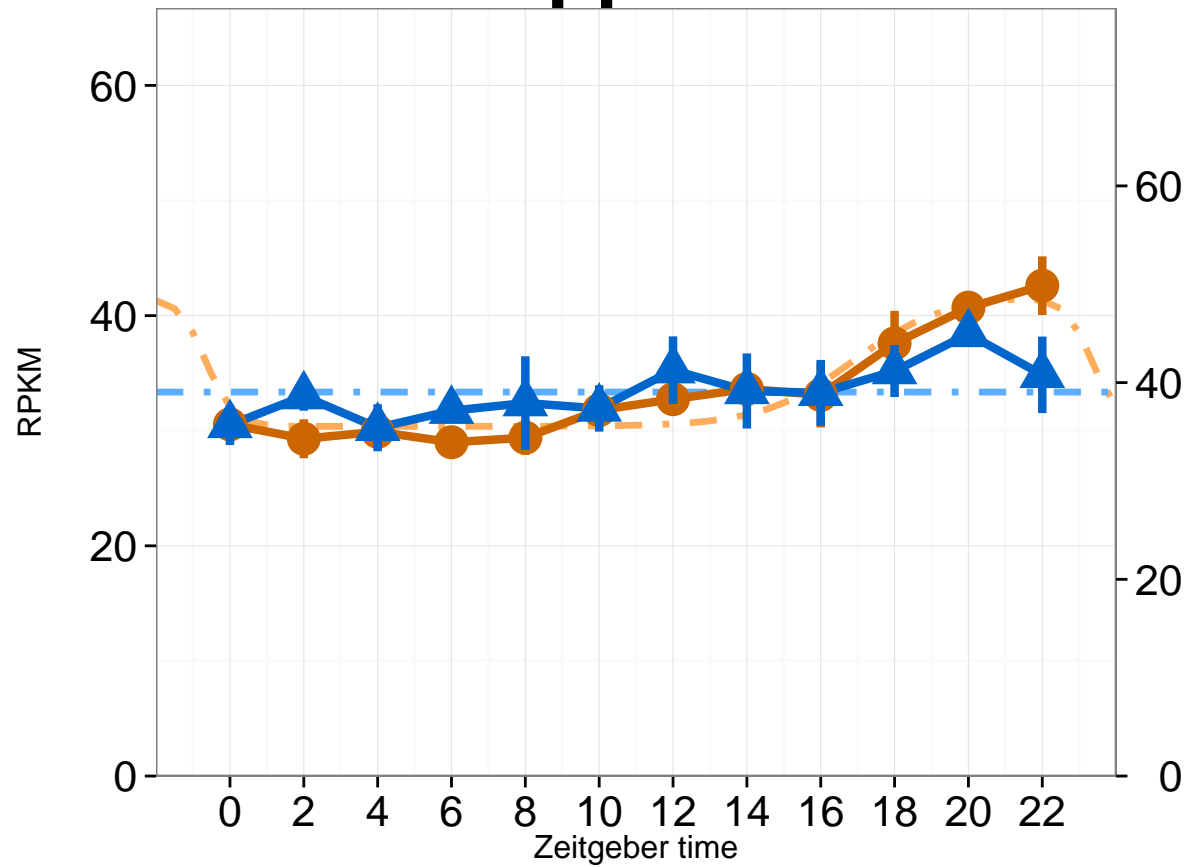

# Cpped1

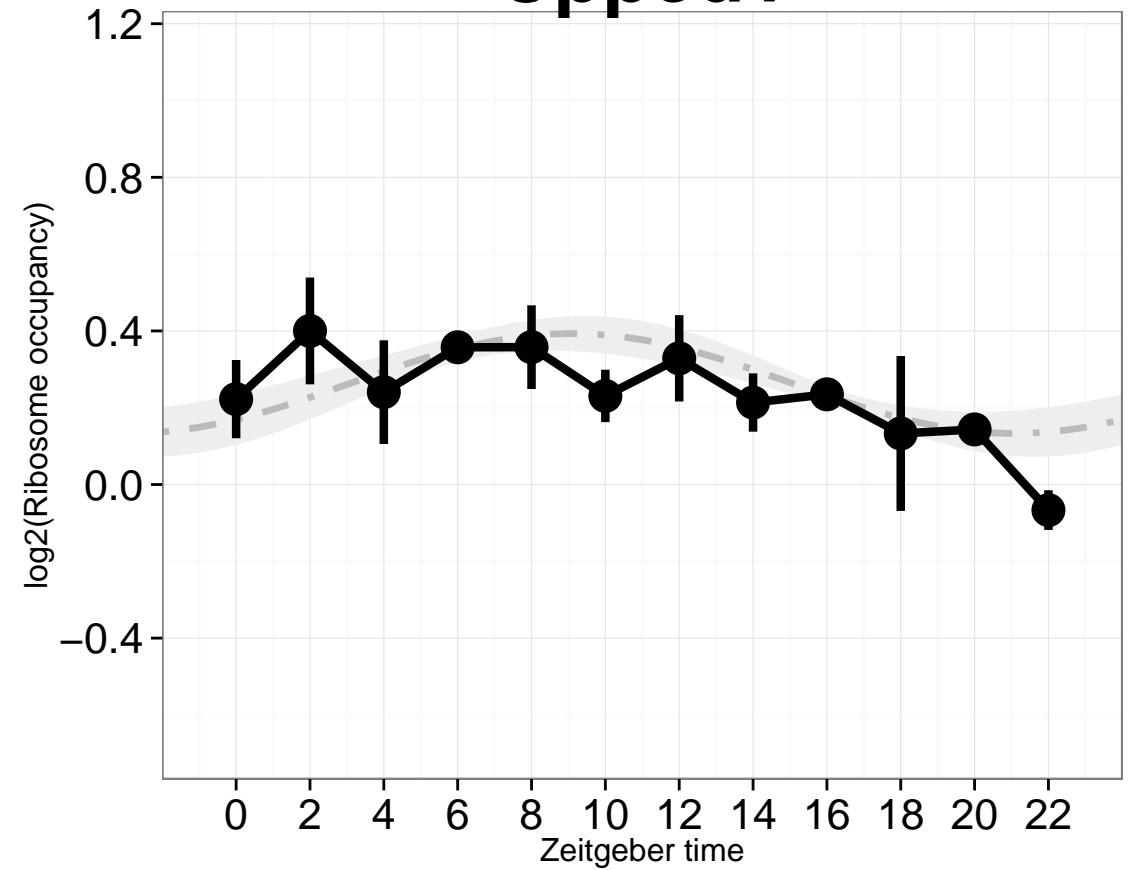

Supplement: SuppDataset_1.zip [file Cpped1_set_A.pdf › Supplemental Dataset 1/A-mRNA_nonrhyth_translation_nonrhyth/Cpped1_set_A.pdf]

## Cpq

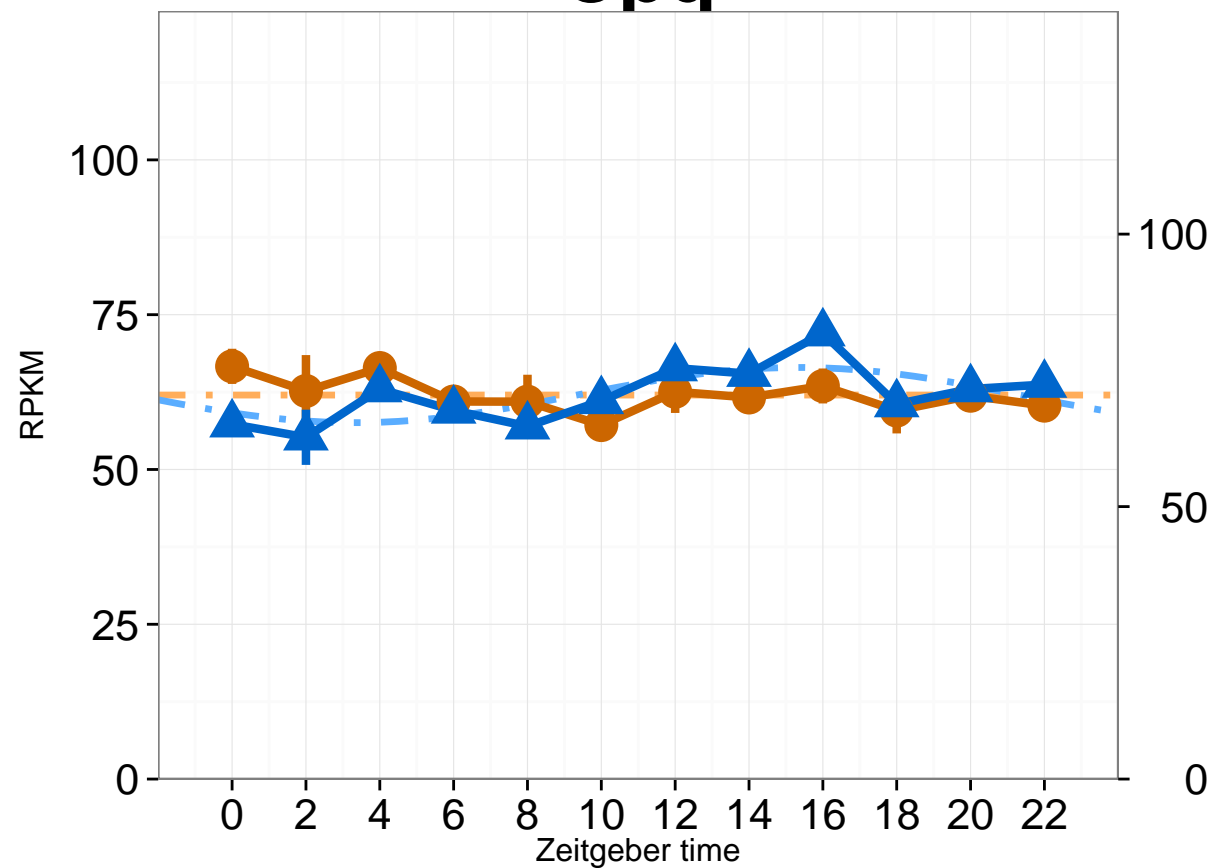

## Cpq

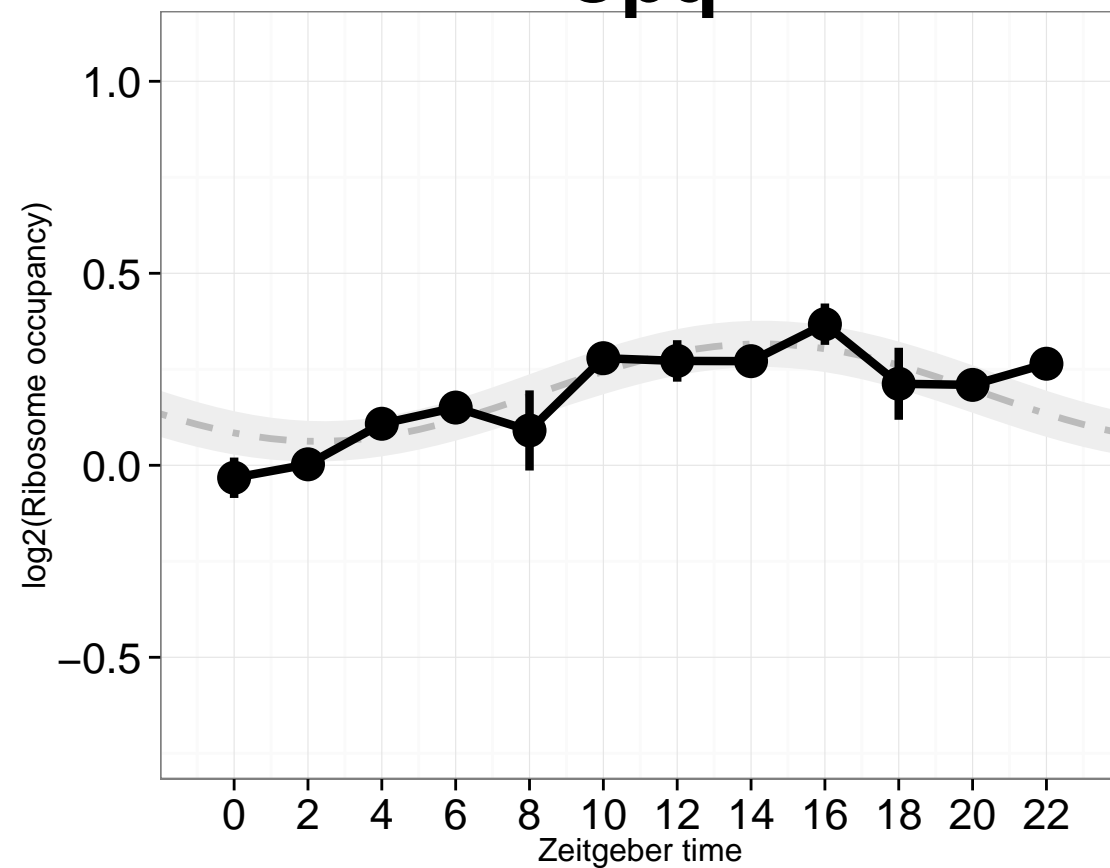

Supplement: SuppDataset_1.zip [file Cpq_set_A.pdf › Supplemental Dataset 1/A-mRNA_nonrhyth_translation_nonrhyth/Cpq_set_A.pdf]

# Cps1

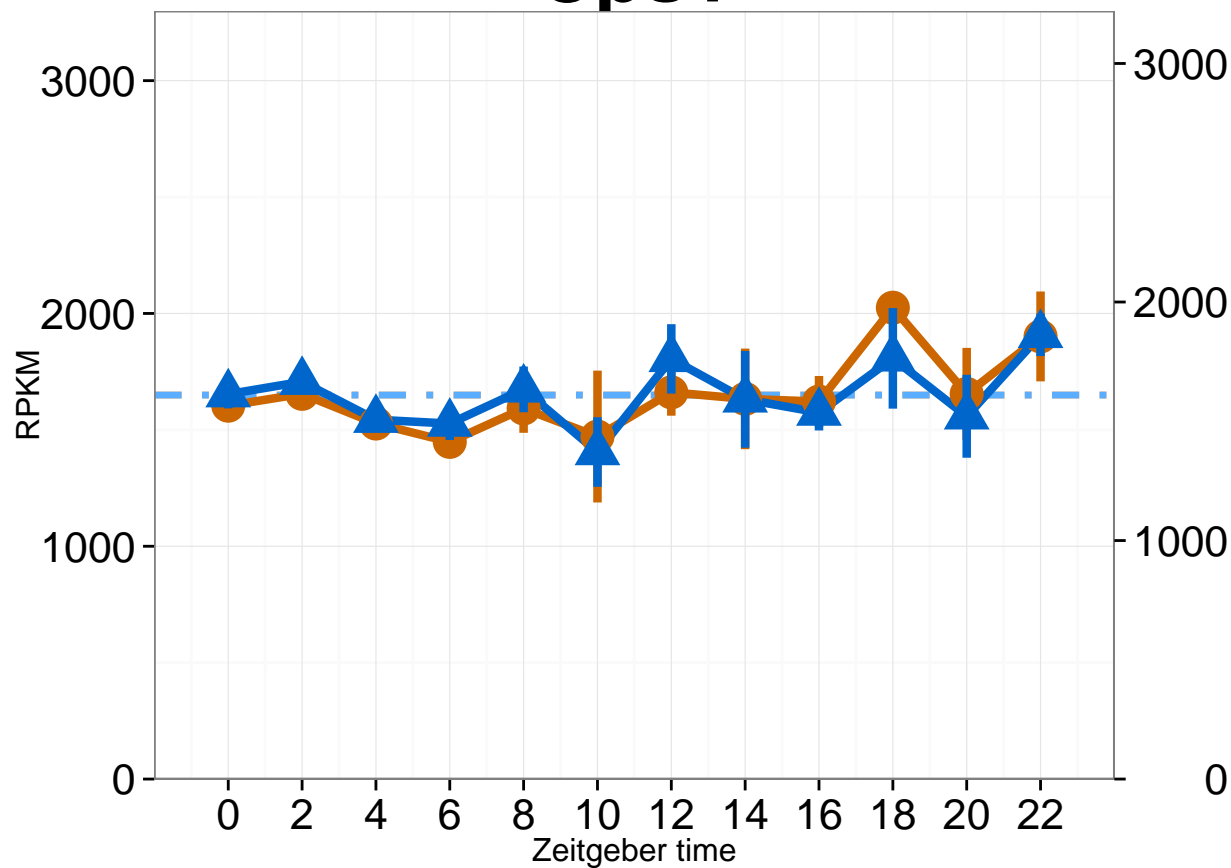

# Cps1

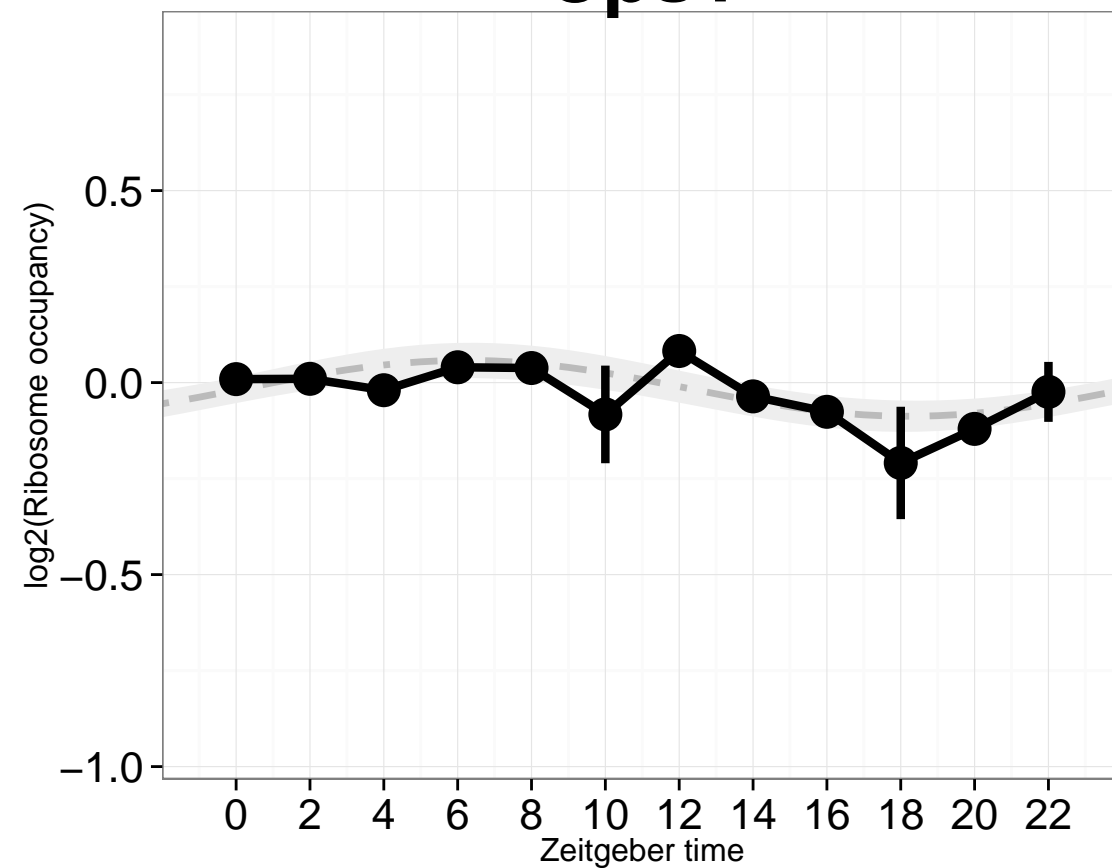

Supplement: SuppDataset_1.zip [file Cps1_set_A.pdf › Supplemental Dataset 1/A-mRNA_nonrhyth_translation_nonrhyth/Cps1_set_A.pdf]

# Cpsf1

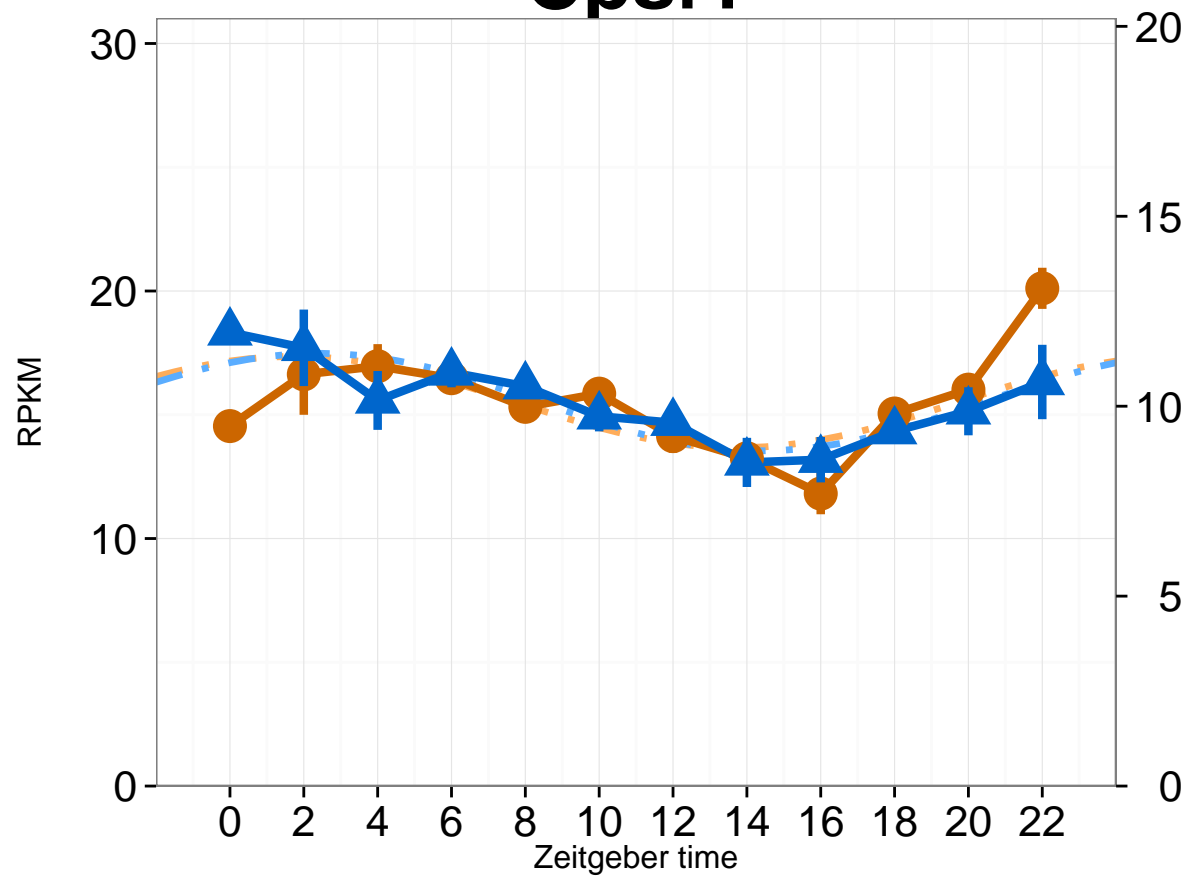

# Cpsf1

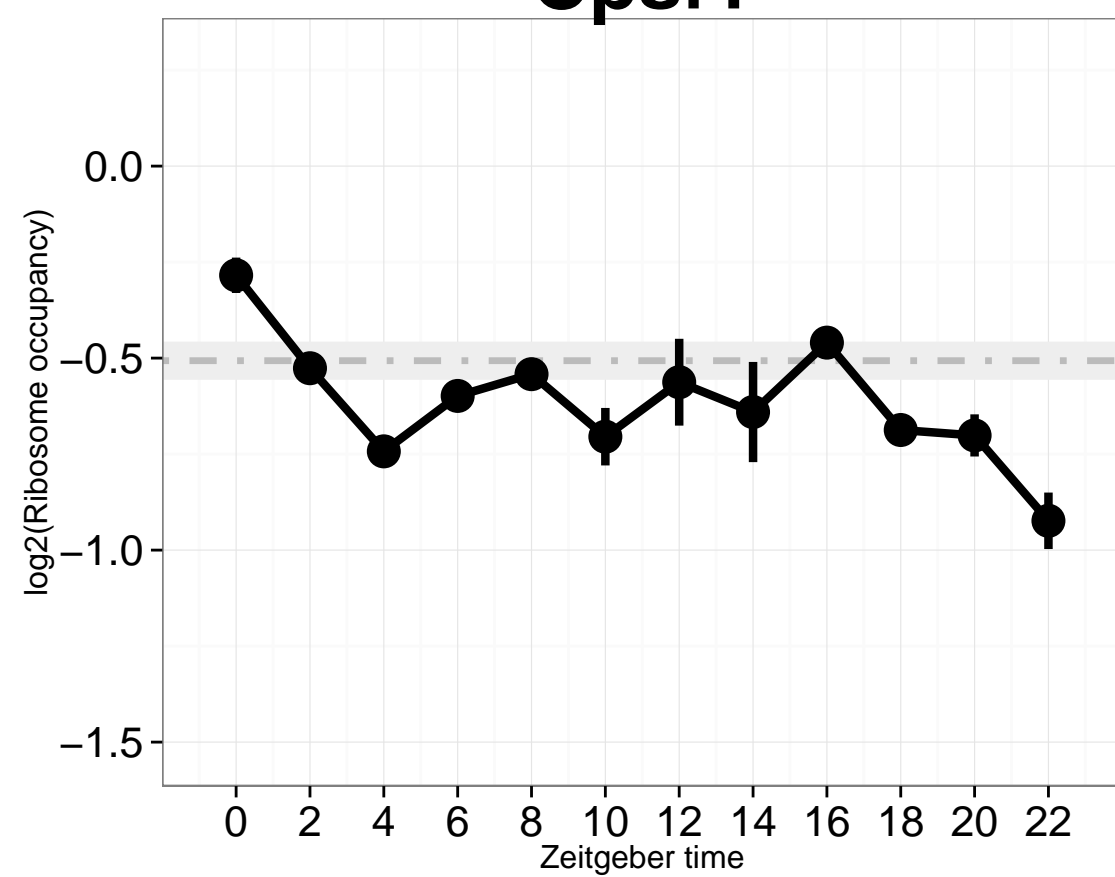

Supplement: SuppDataset_1.zip [file Cpsf1_set_A.pdf › Supplemental Dataset 1/A-mRNA_nonrhyth_translation_nonrhyth/Cpsf1_set_A.pdf]

## Cpsf2

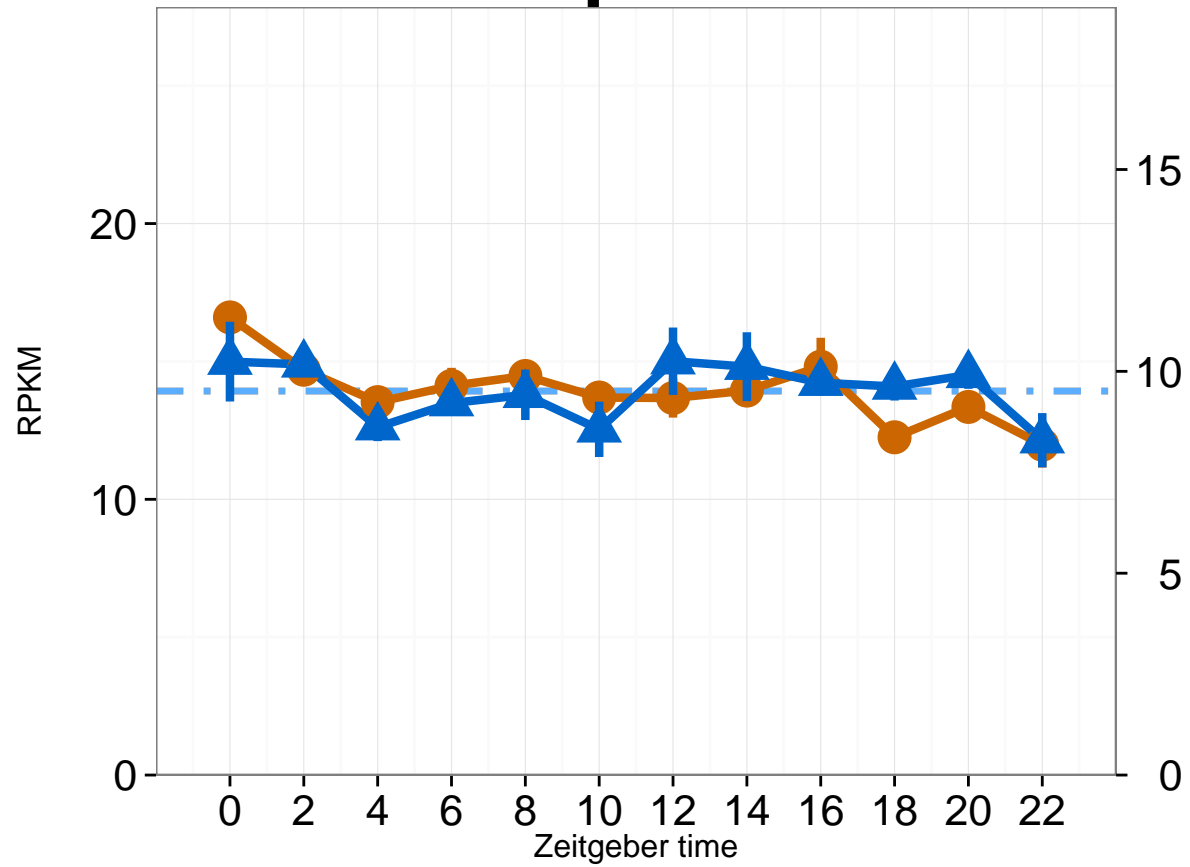

## Cpsf2

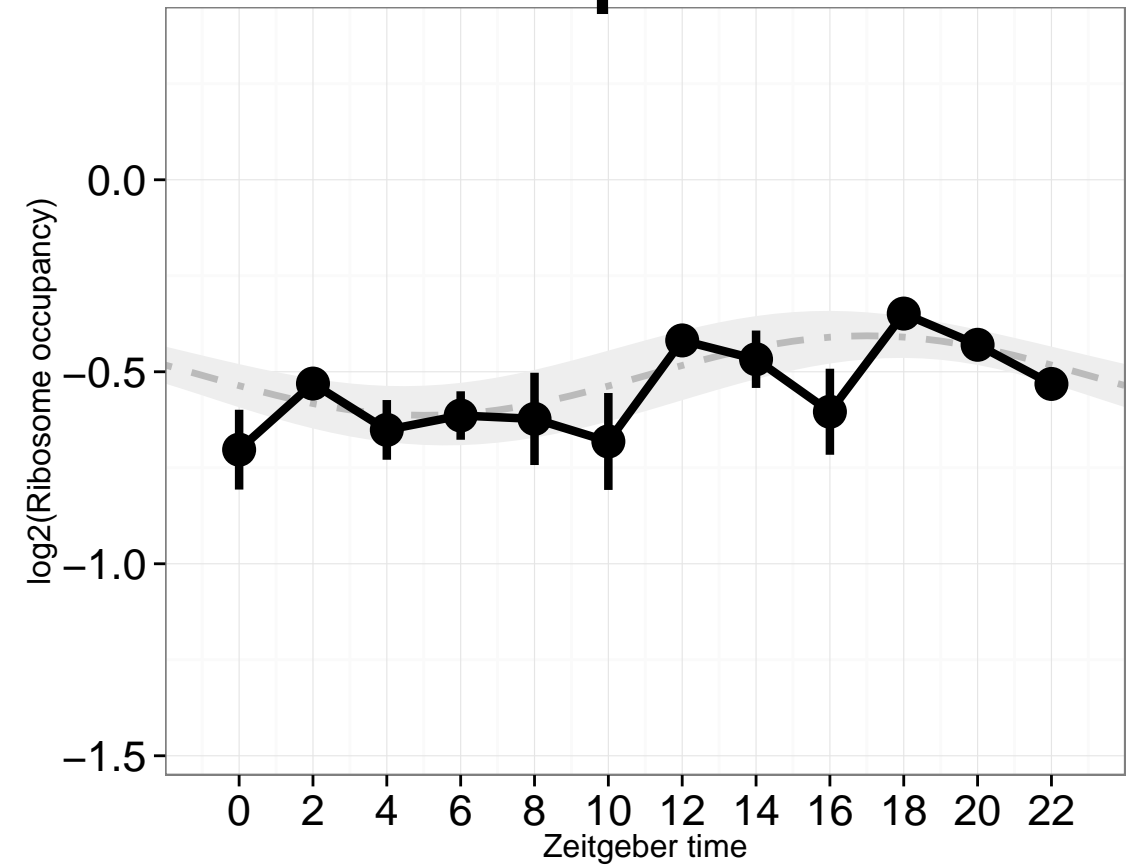

Supplement: SuppDataset_1.zip [file Cpsf2_set_A.pdf › Supplemental Dataset 1/A-mRNA_nonrhyth_translation_nonrhyth/Cpsf2_set_A.pdf]

## Cpsf3

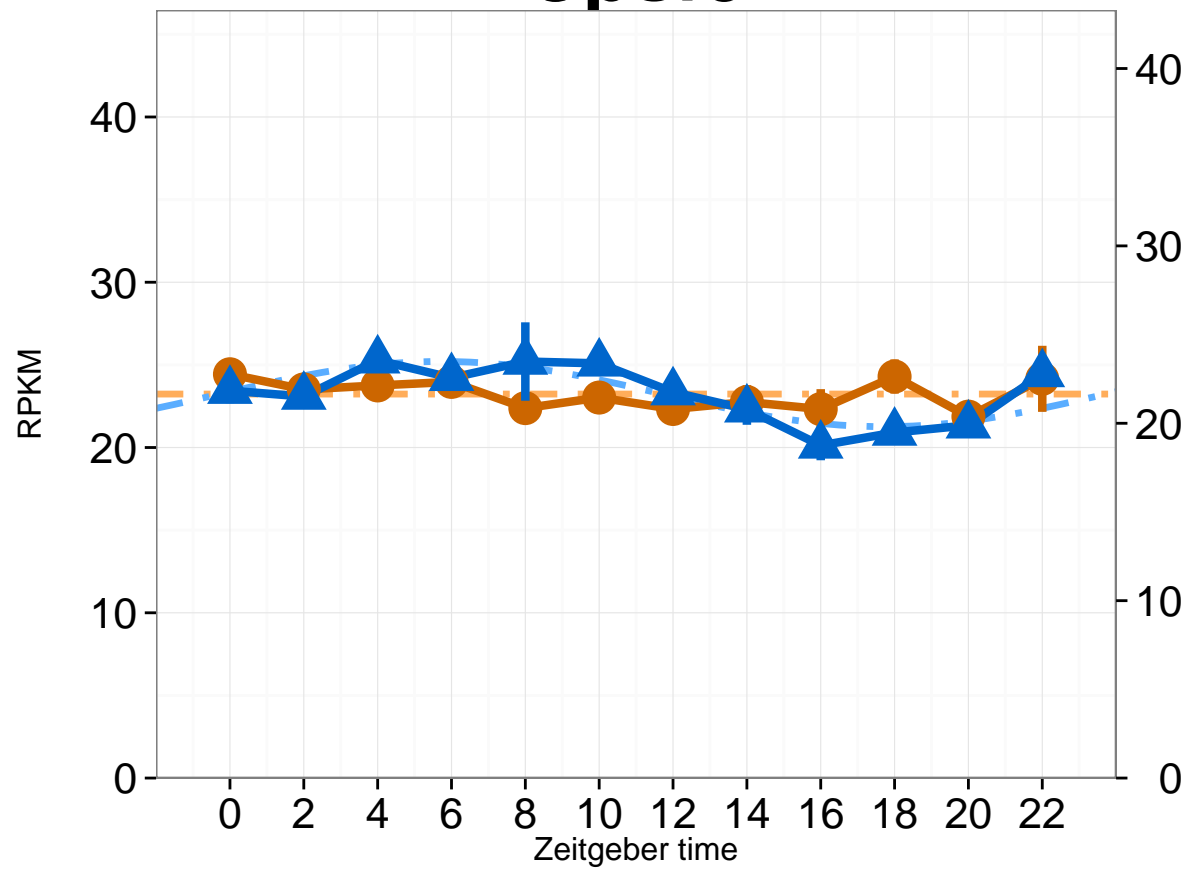

## Cpsf3

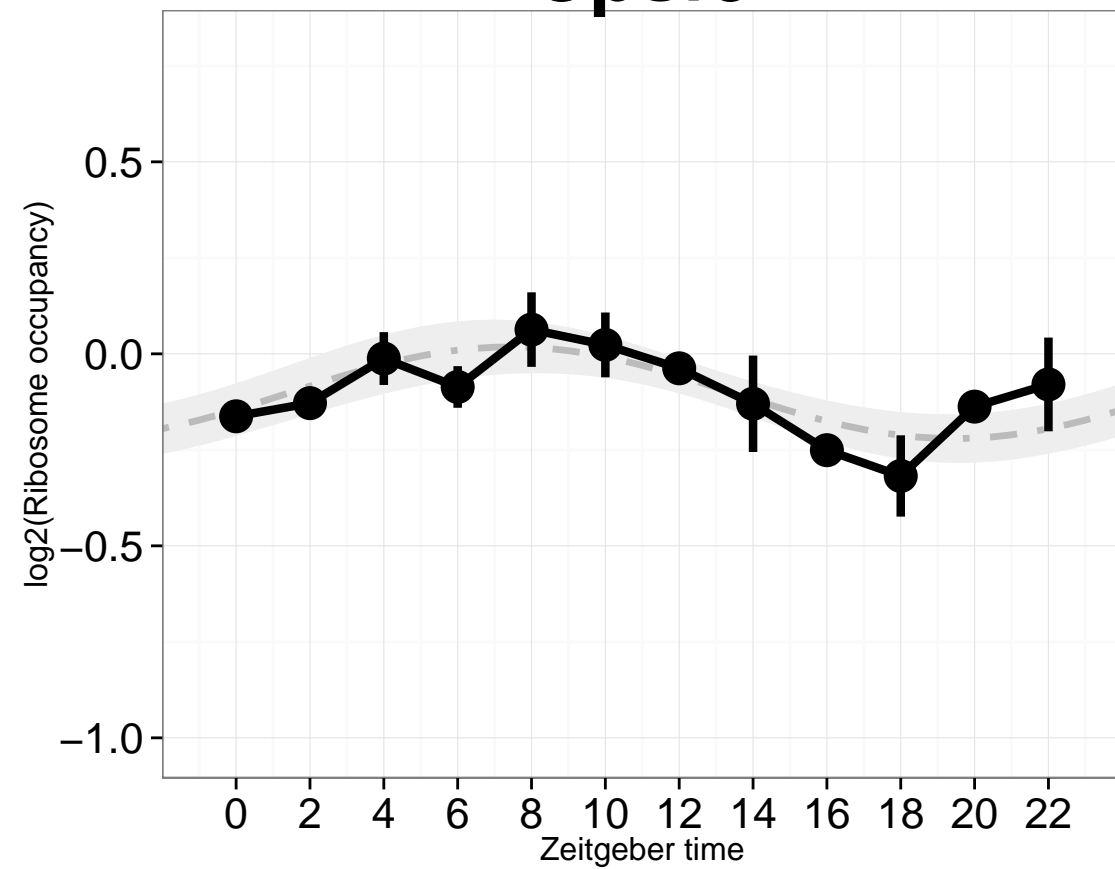

Supplement: SuppDataset_1.zip [file Cpsf3_set_A.pdf › Supplemental Dataset 1/A-mRNA_nonrhyth_translation_nonrhyth/Cpsf3_set_A.pdf]

## Cpsf3l

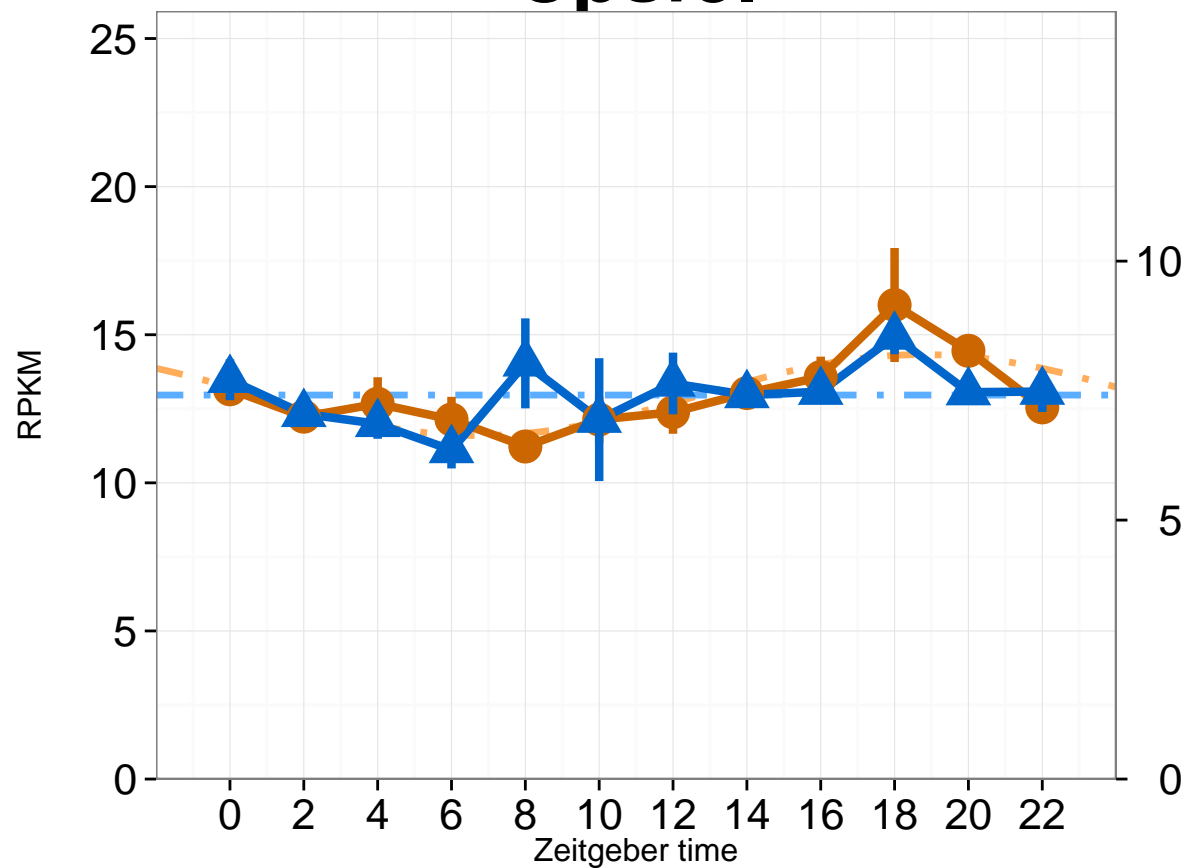

## Cpsf3l

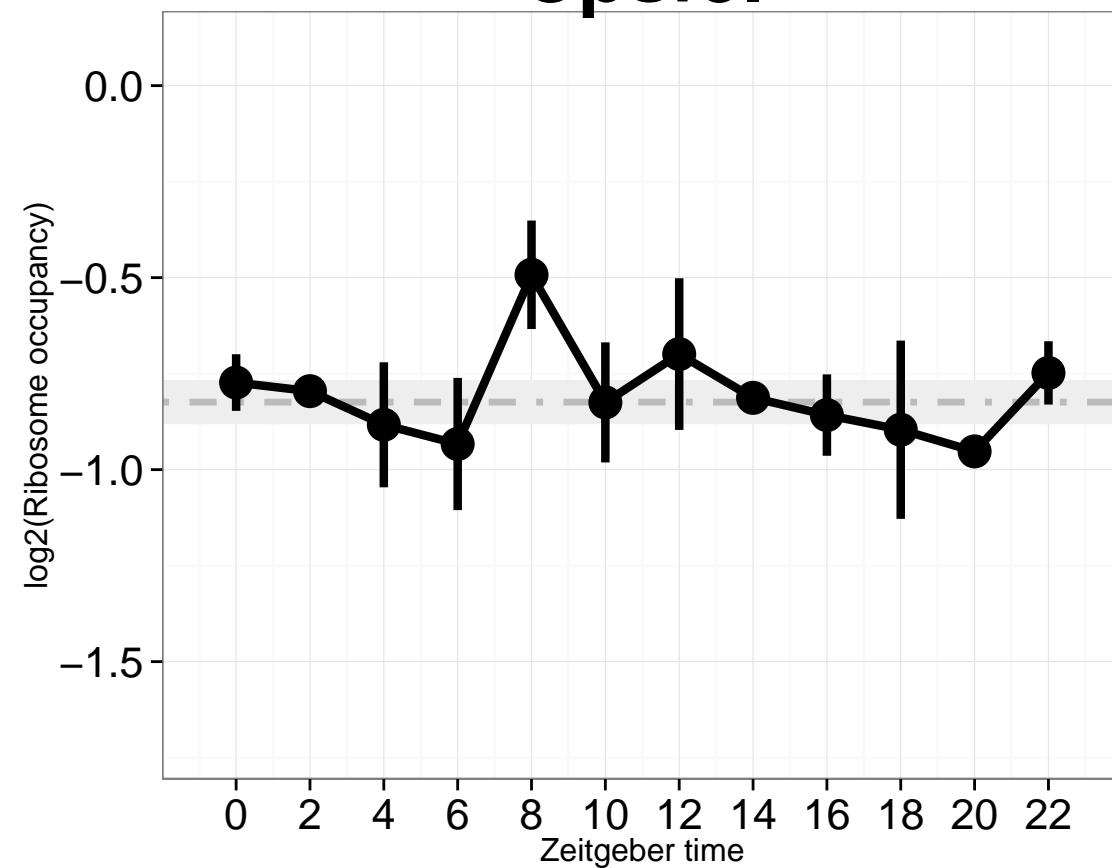

Supplement: SuppDataset_1.zip [file Cpsf3l_set_A.pdf › Supplemental Dataset 1/A-mRNA_nonrhyth_translation_nonrhyth/Cpsf3l_set_A.pdf]

## Cpsf4

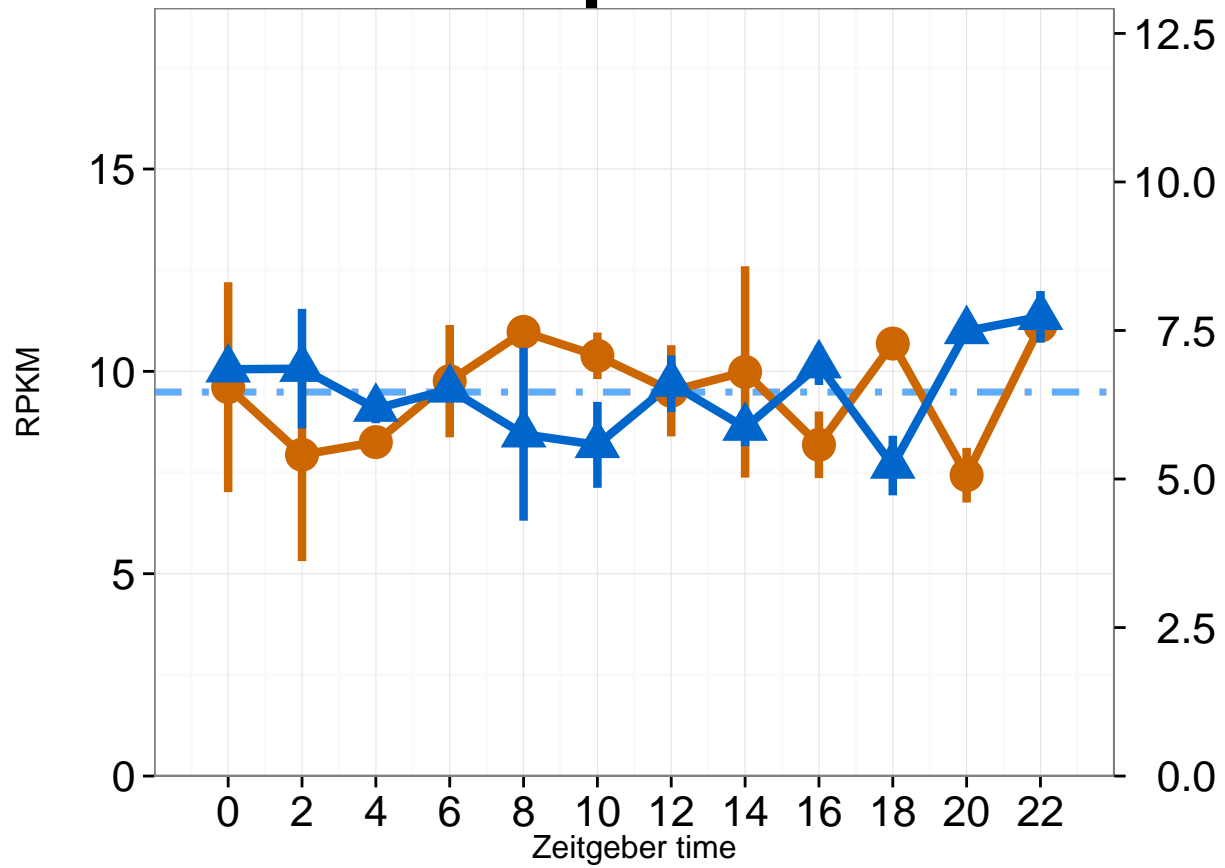

## Cpsf4

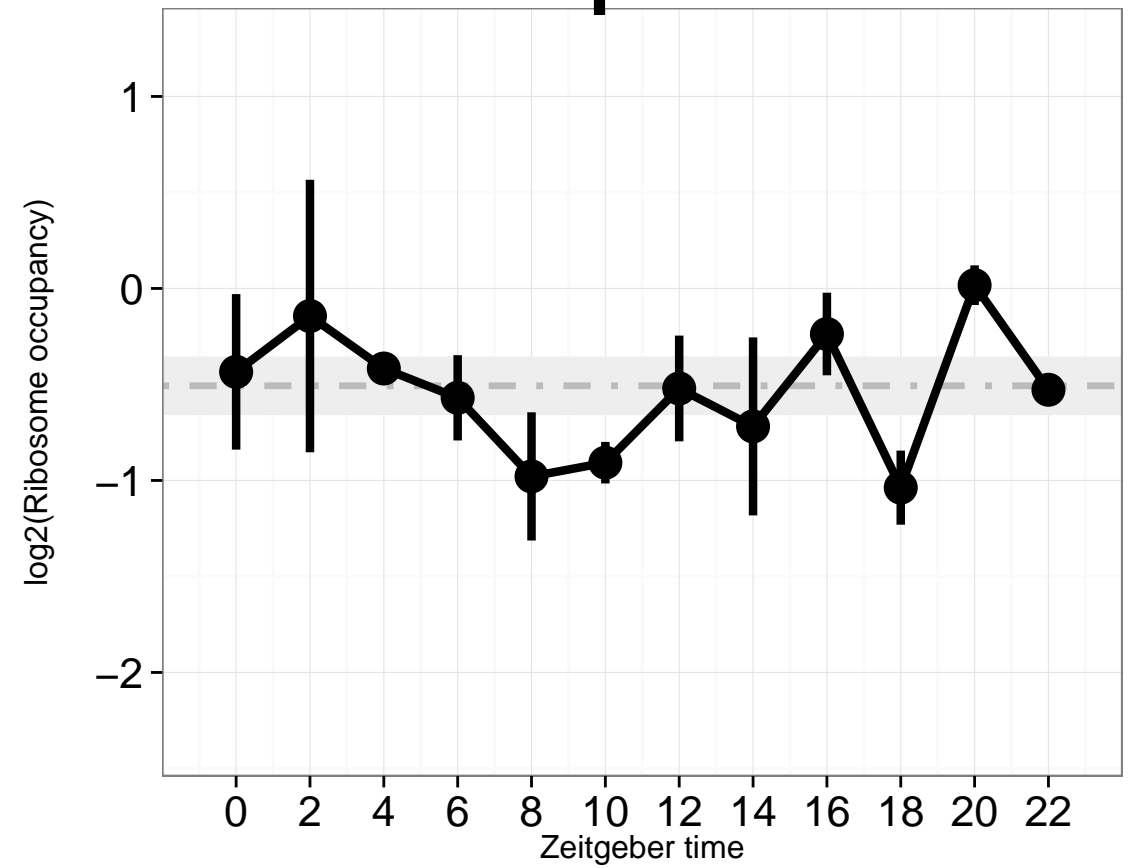

Supplement: SuppDataset_1.zip [file Cpsf4_set_A.pdf › Supplemental Dataset 1/A-mRNA_nonrhyth_translation_nonrhyth/Cpsf4_set_A.pdf]

## Cpsf4l

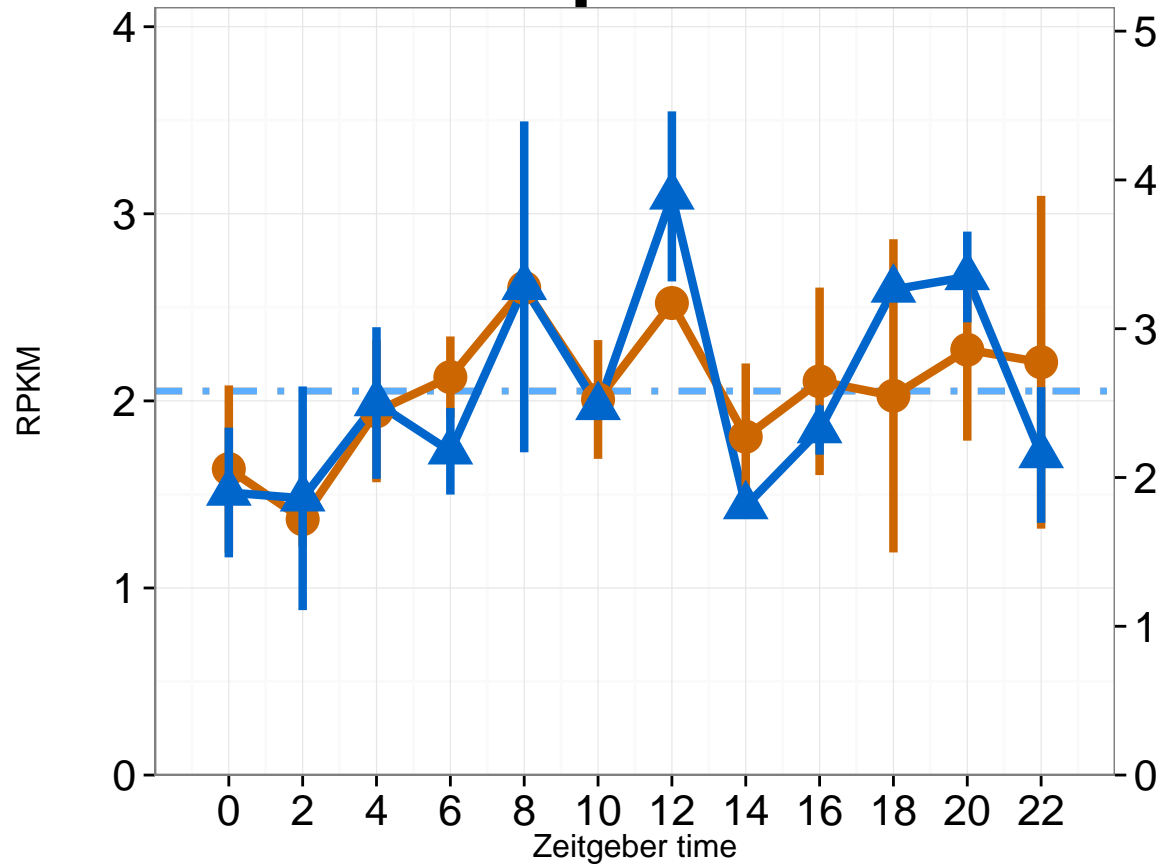

## Cpsf4l

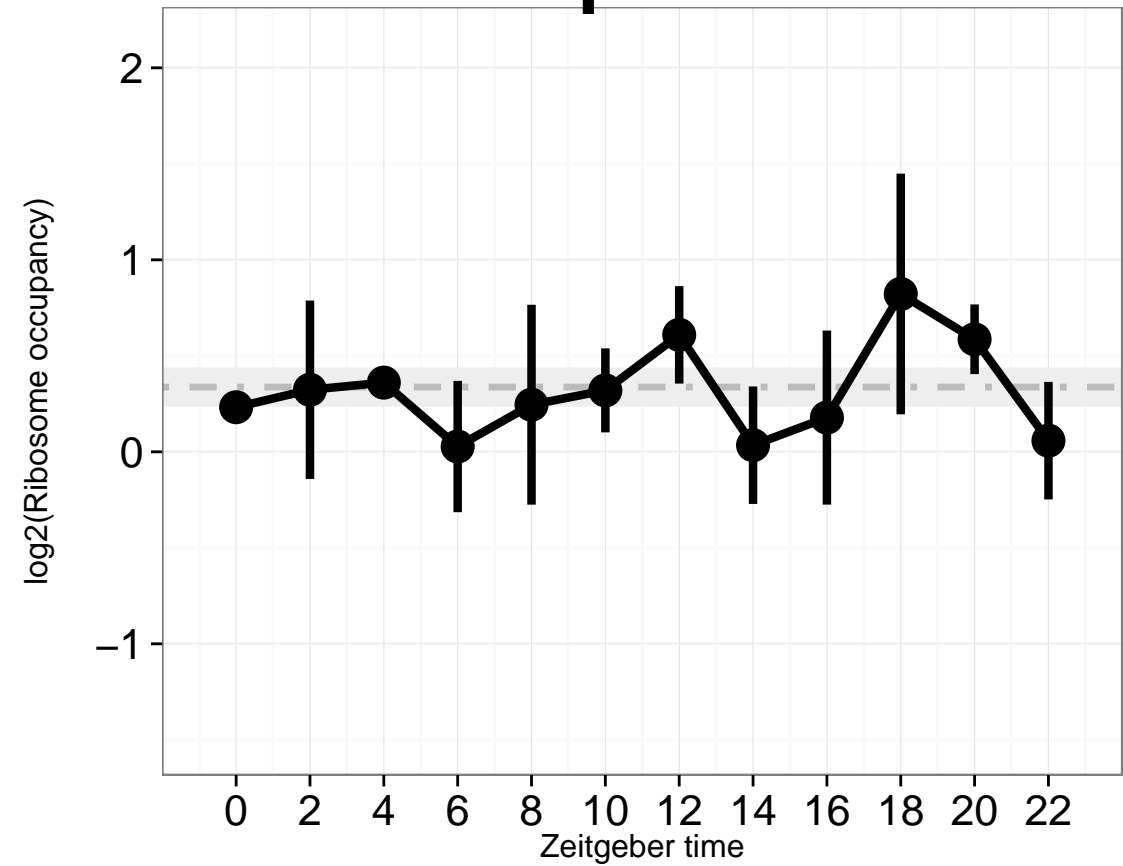

Supplement: SuppDataset_1.zip [file Cpsf4l_set_A.pdf › Supplemental Dataset 1/A-mRNA_nonrhyth_translation_nonrhyth/Cpsf4l_set_A.pdf]

## Cpsf7

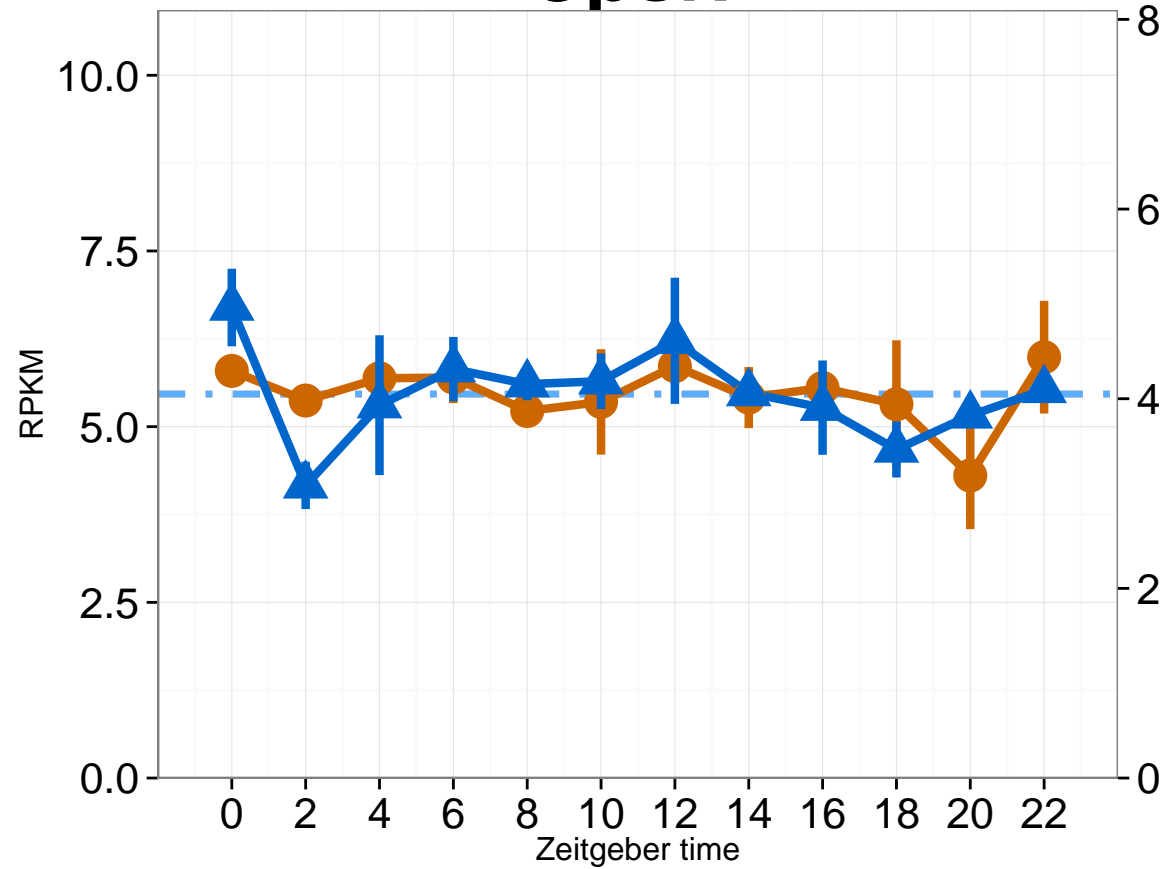

## Cpsf7

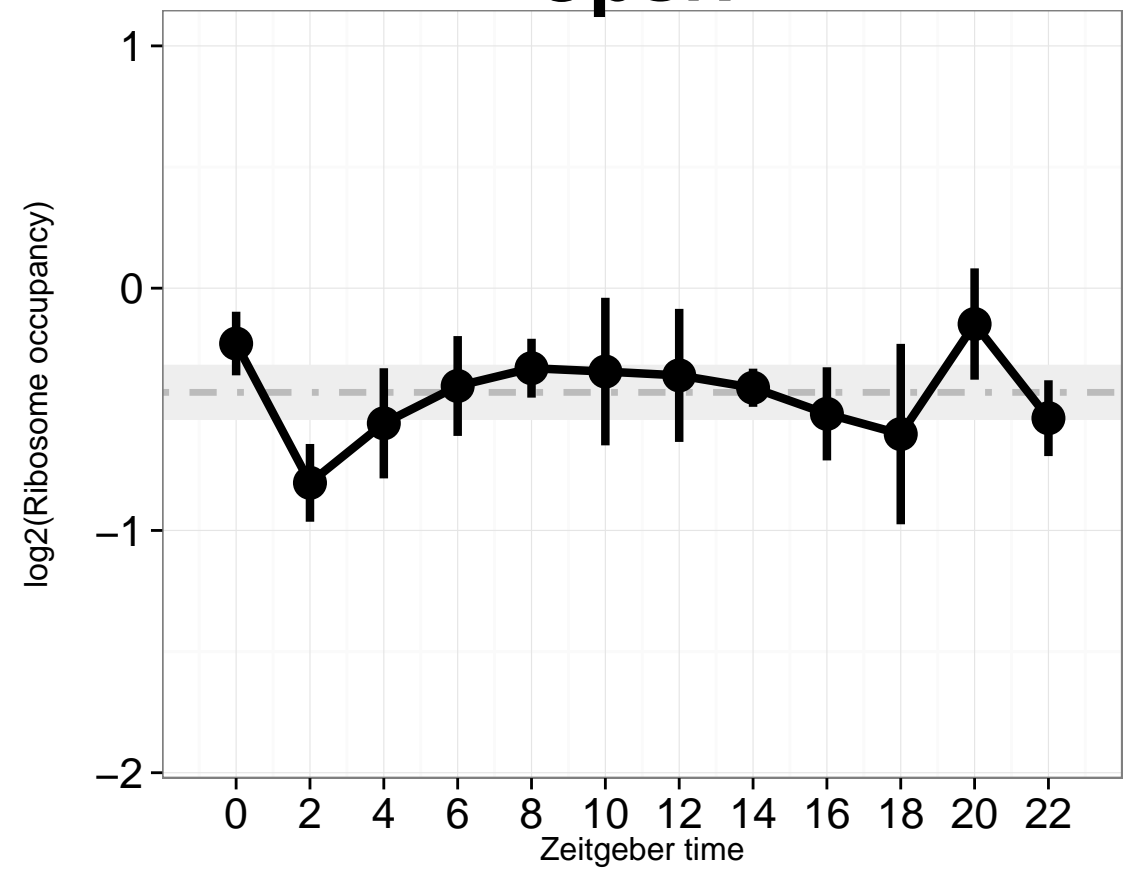

Supplement: SuppDataset_1.zip [file Cpsf7_set_A.pdf › Supplemental Dataset 1/A-mRNA_nonrhyth_translation_nonrhyth/Cpsf7_set_A.pdf]

## Cpt2

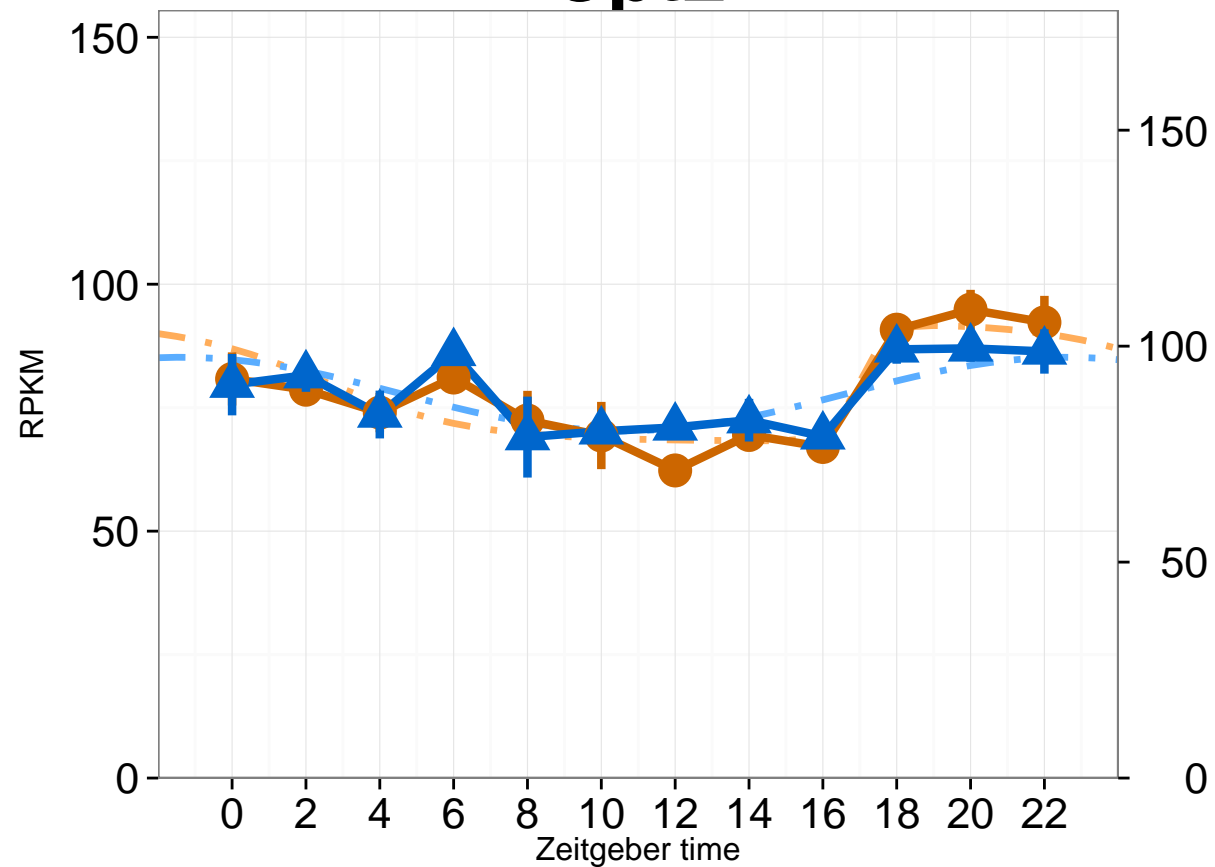

## Cpt2

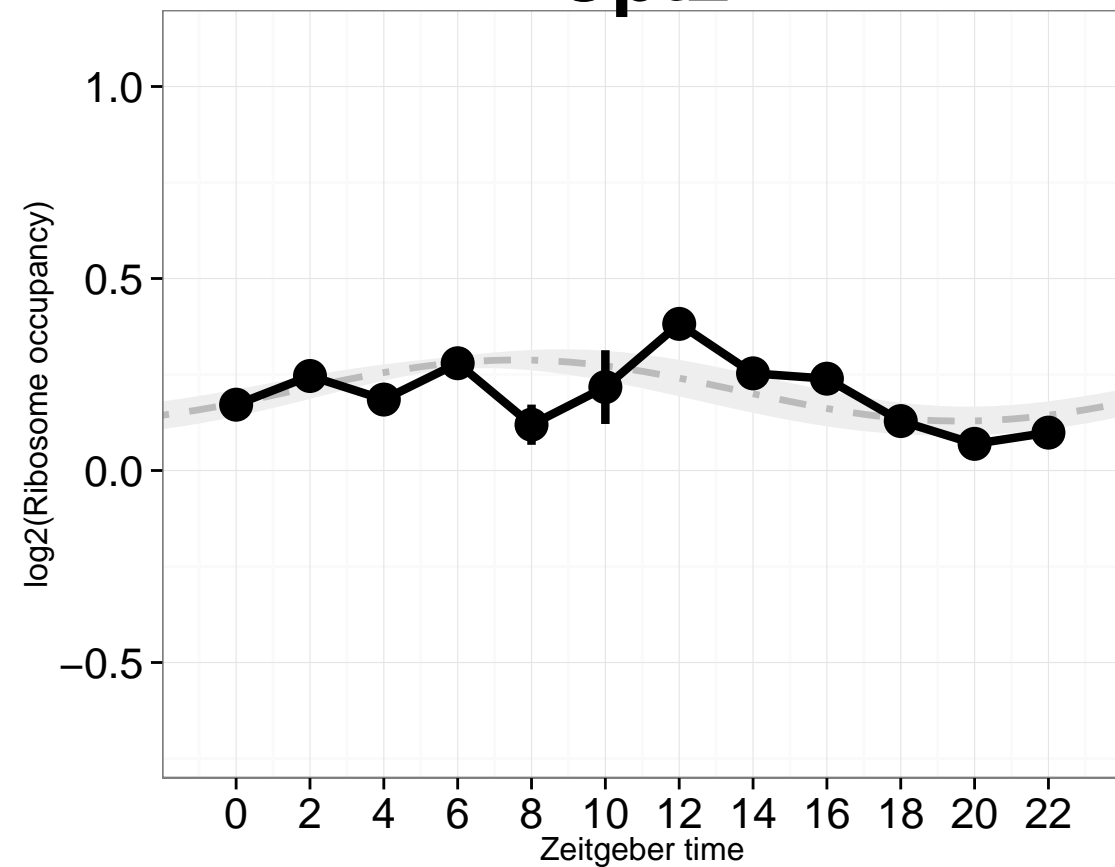

Supplement: SuppDataset_1.zip [file Cpt2_set_A.pdf › Supplemental Dataset 1/A-mRNA_nonrhyth_translation_nonrhyth/Cpt2_set_A.pdf]

## Cpz

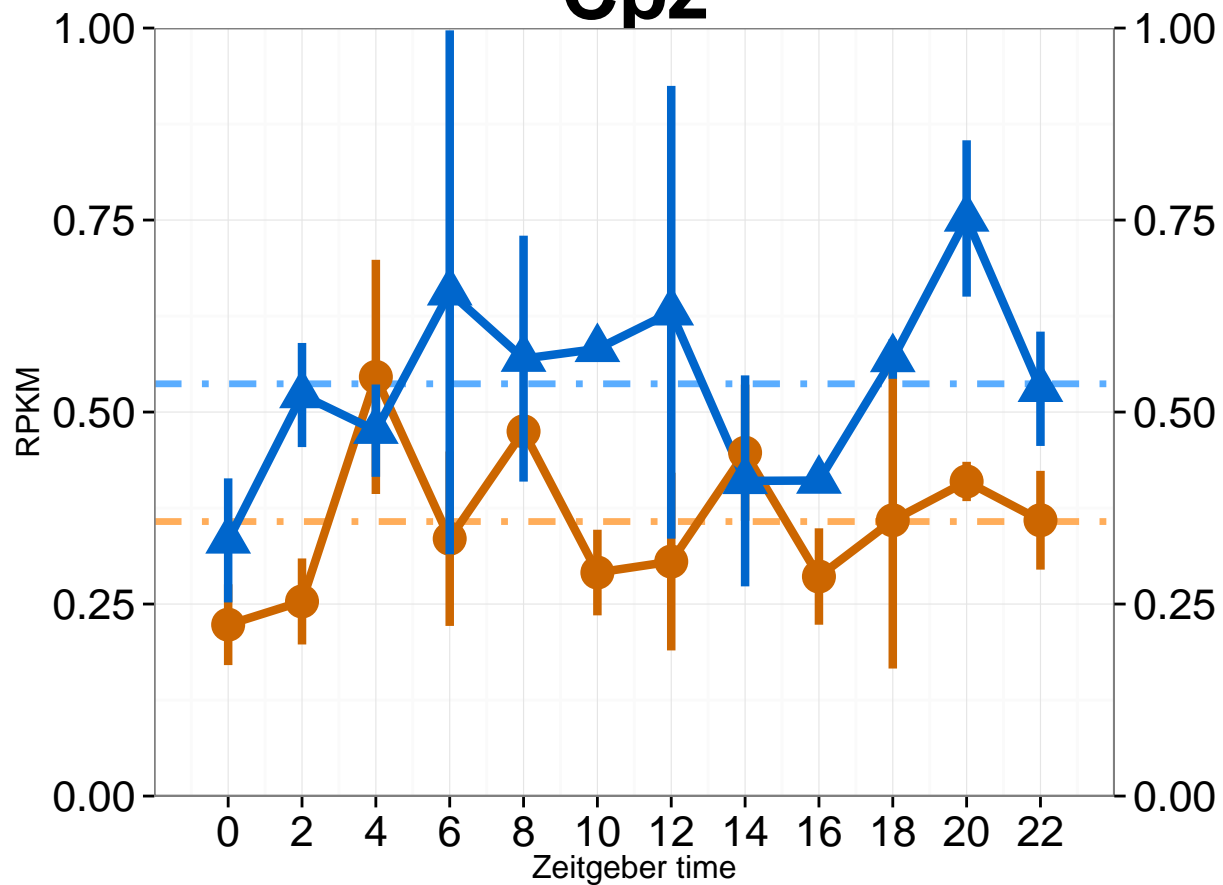

## Cpz

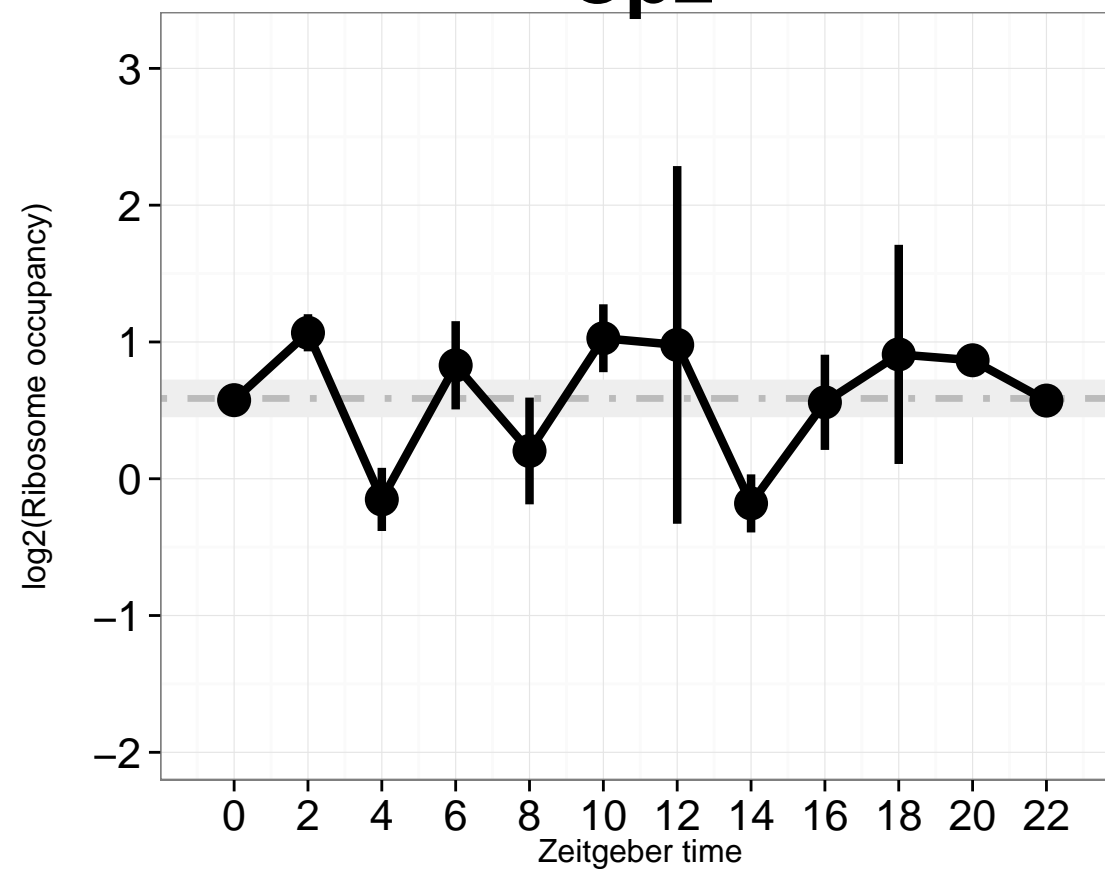

Supplement: SuppDataset_1.zip [file Cpz_set_A.pdf › Supplemental Dataset 1/A-mRNA_nonrhyth_translation_nonrhyth/Cpz_set_A.pdf]

## Cr1l

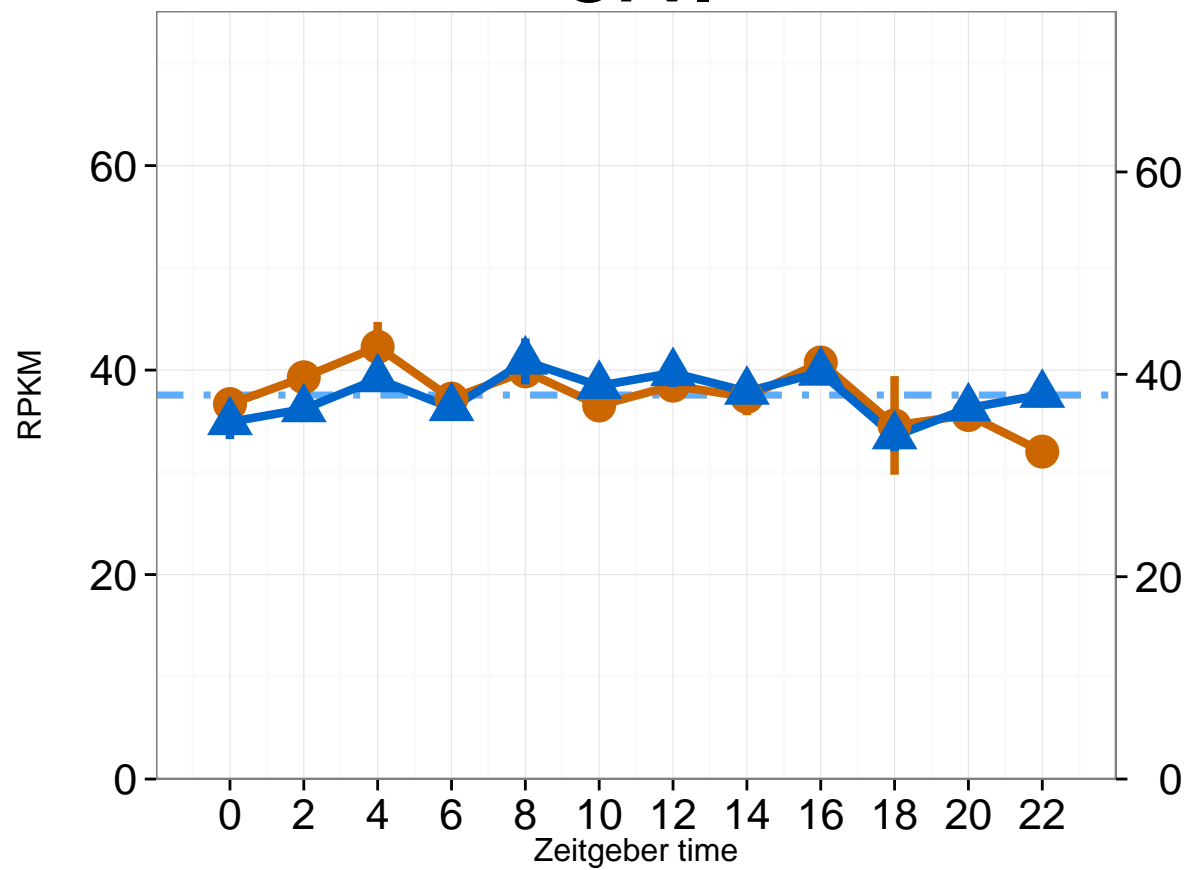

## Cr1l

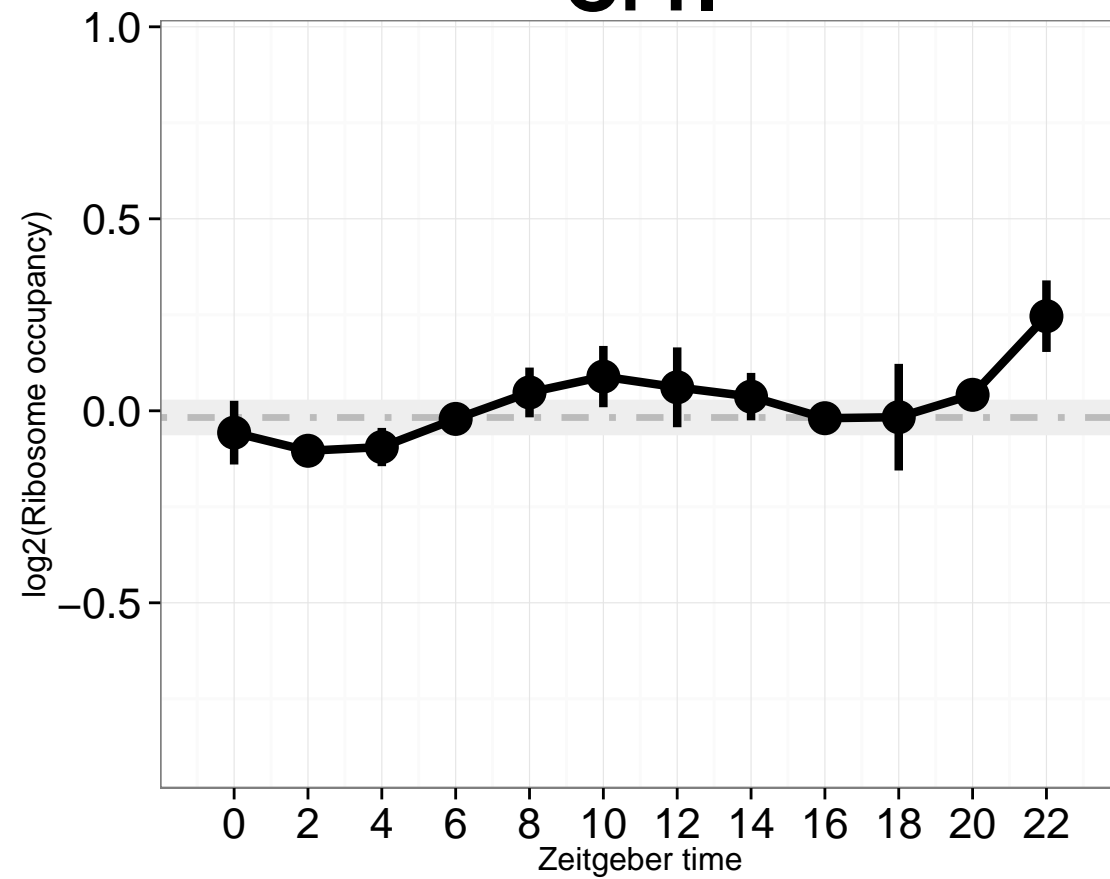

Supplement: SuppDataset_1.zip [file Cr1l_set_A.pdf › Supplemental Dataset 1/A-mRNA_nonrhyth_translation_nonrhyth/Cr1l_set_A.pdf]

## Cramp1l

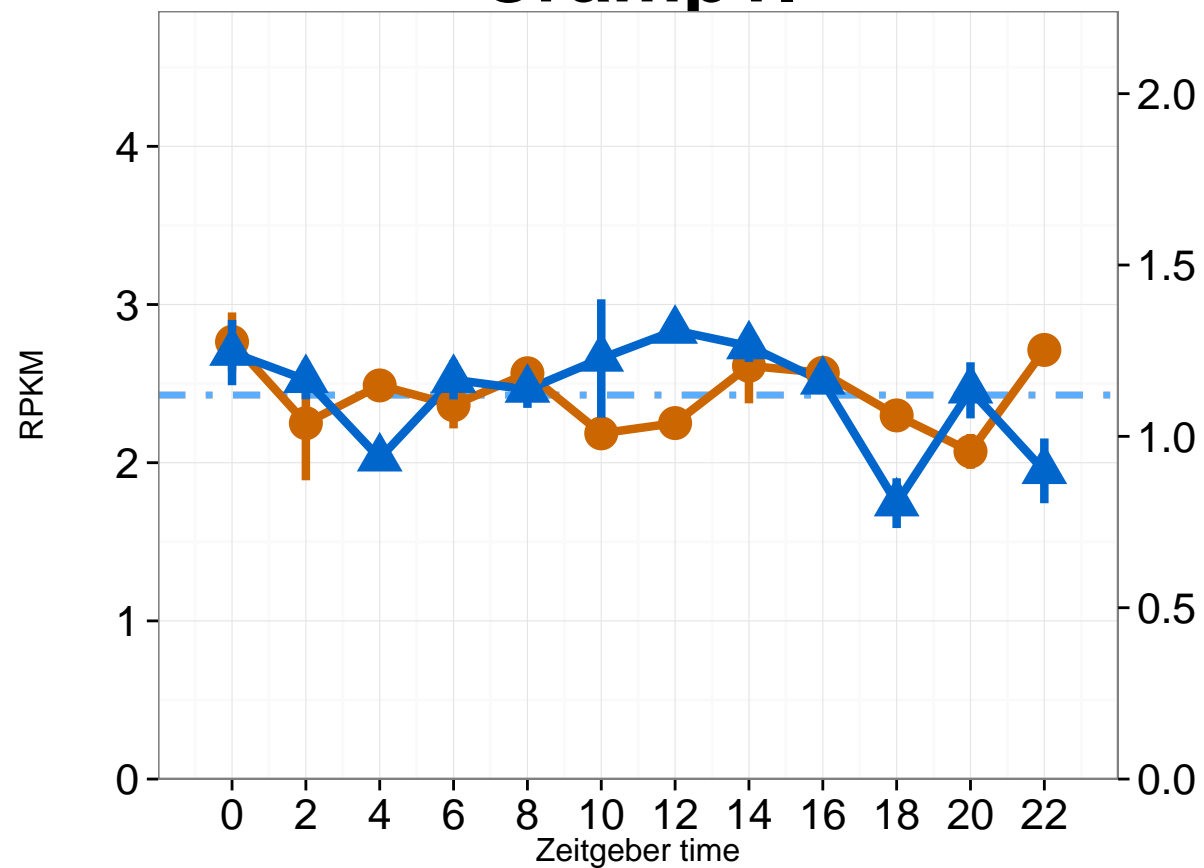

## Cramp1l

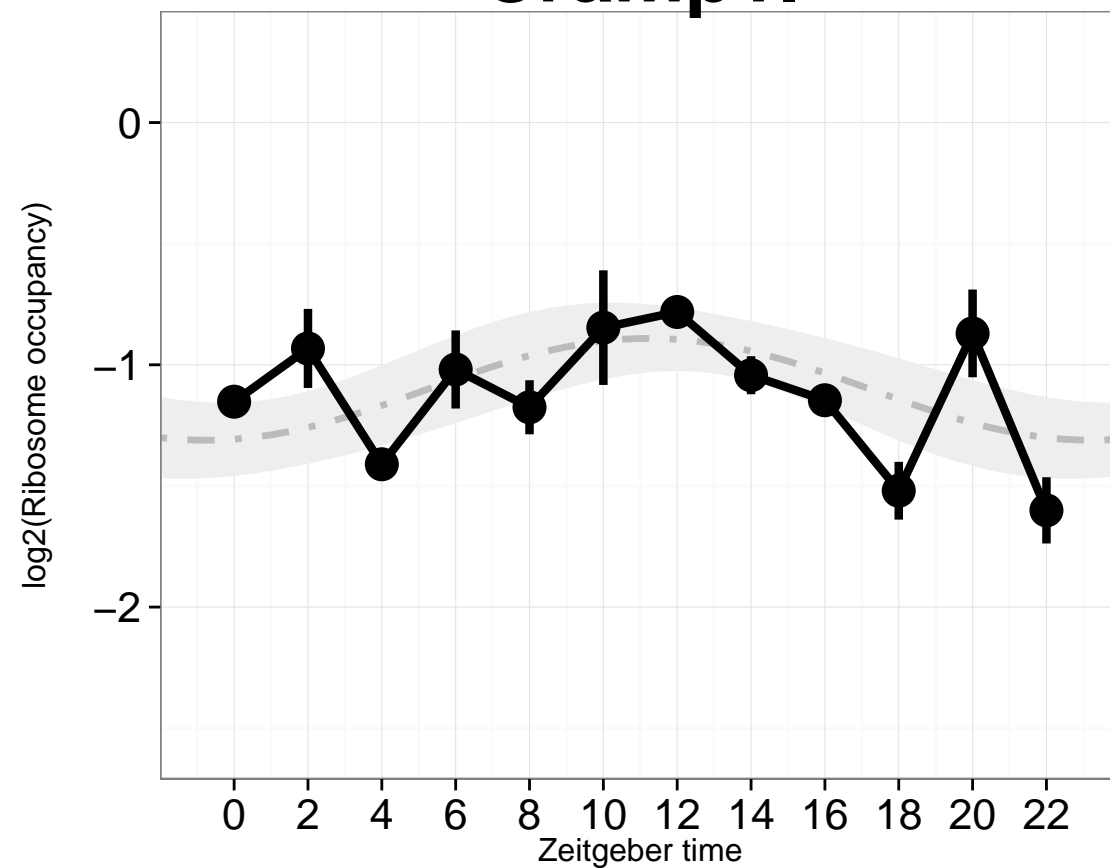

Supplement: SuppDataset_1.zip [file Cramp1l_set_A.pdf › Supplemental Dataset 1/A-mRNA_nonrhyth_translation_nonrhyth/Cramp1l_set_A.pdf]

## Crbn

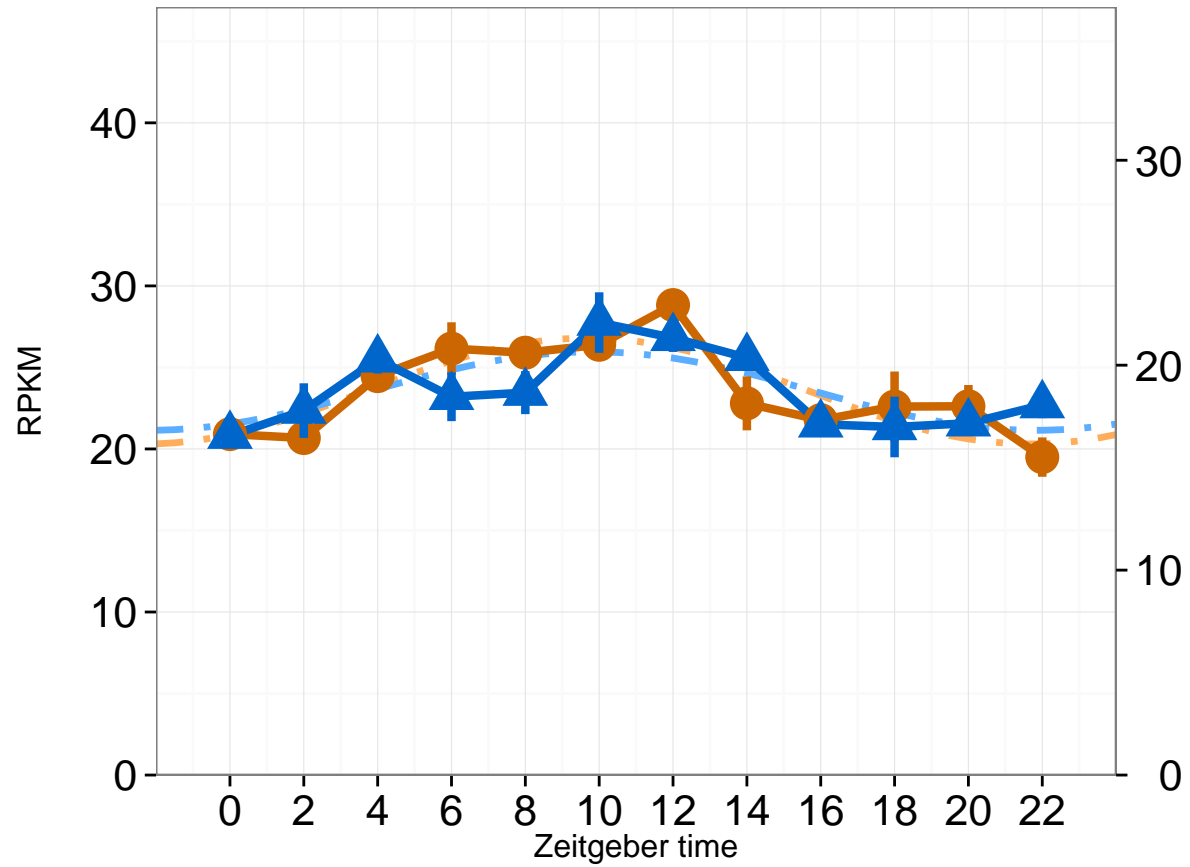

## Crbn

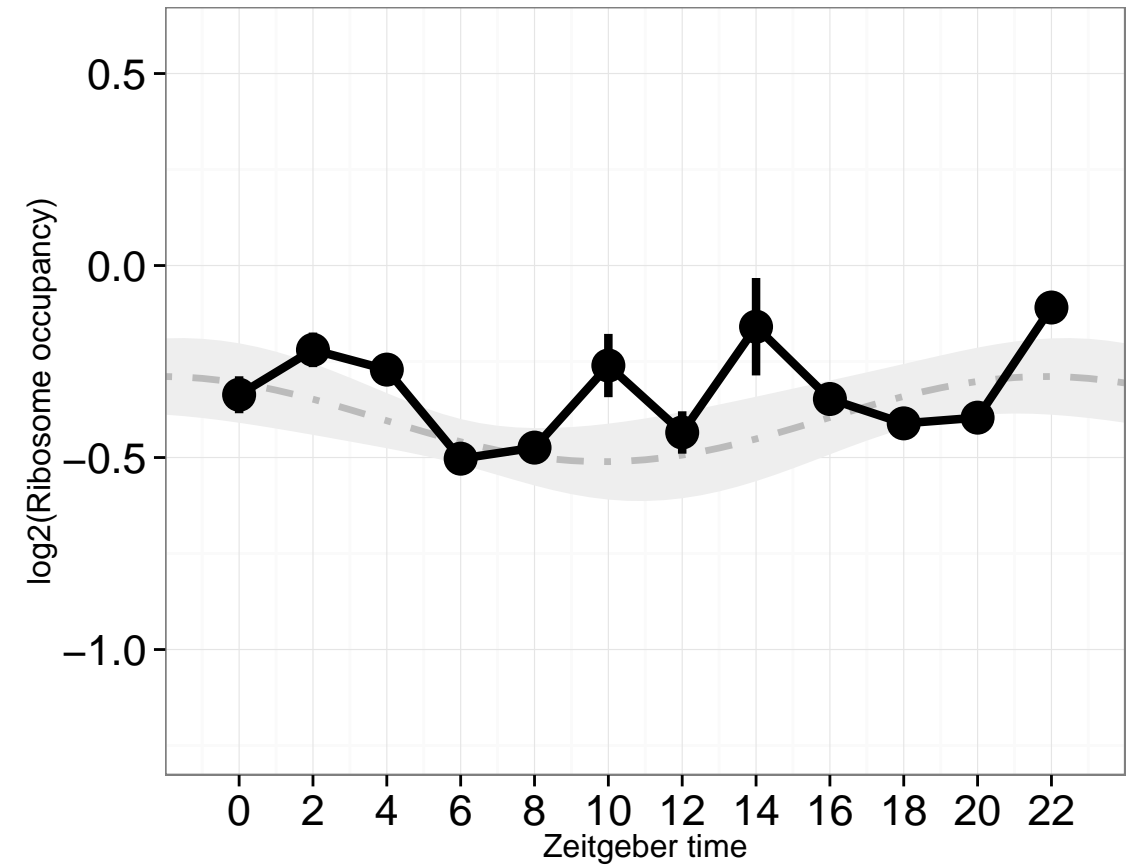

Supplement: SuppDataset_1.zip [file Crbn_set_A.pdf › Supplemental Dataset 1/A-mRNA_nonrhyth_translation_nonrhyth/Crbn_set_A.pdf]

## Creb1

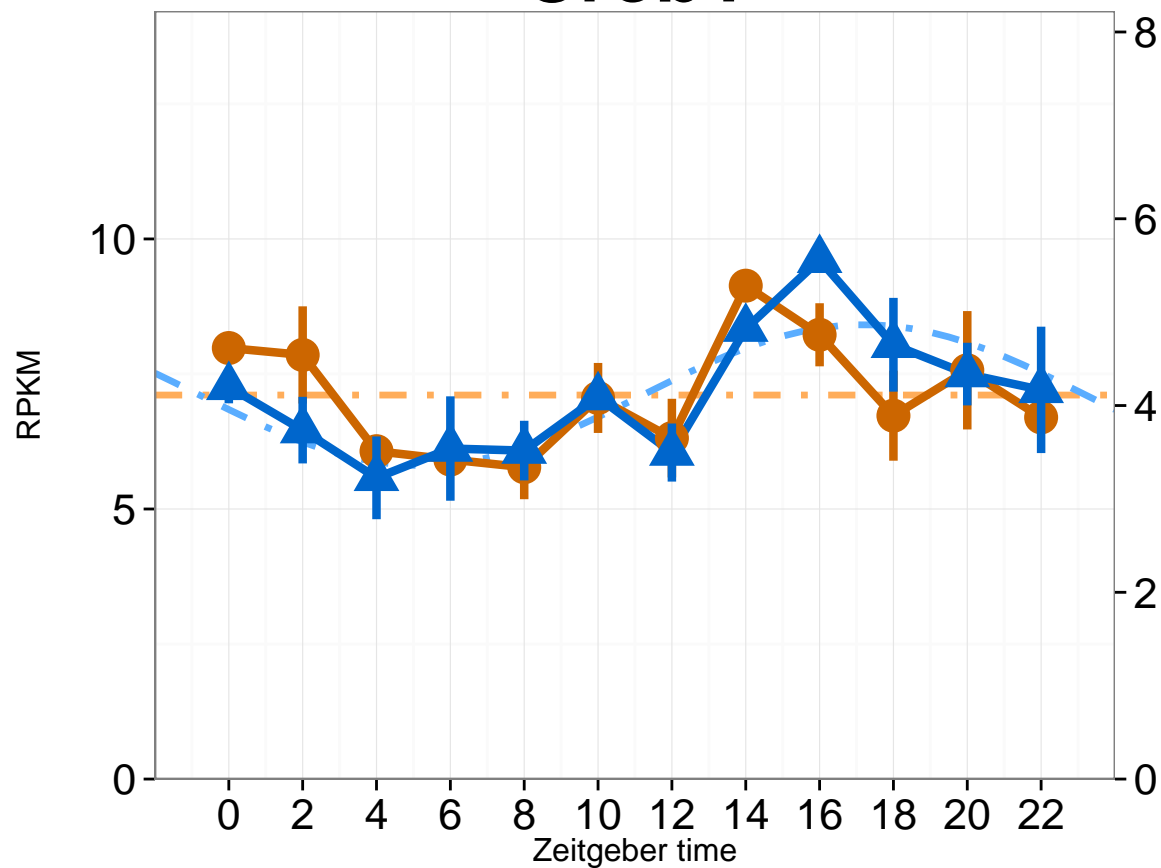

## Creb1

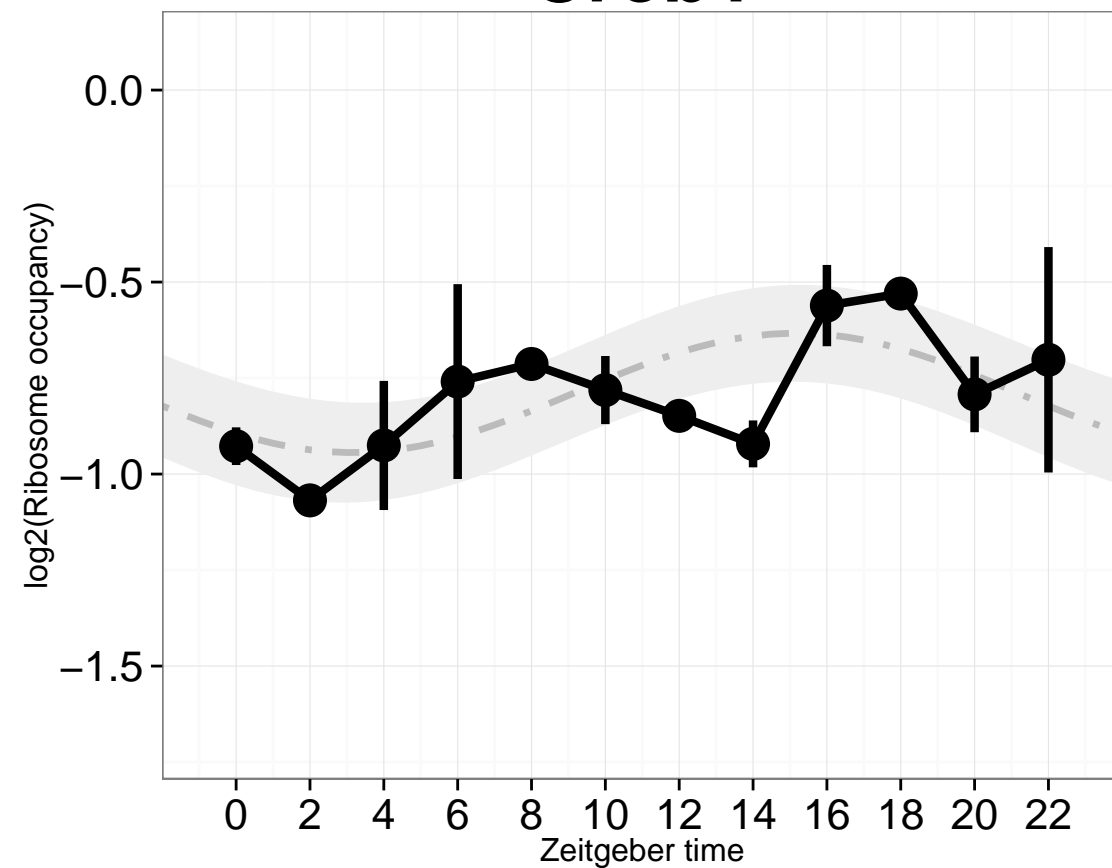

Supplement: SuppDataset_1.zip [file Creb1_set_A.pdf › Supplemental Dataset 1/A-mRNA_nonrhyth_translation_nonrhyth/Creb1_set_A.pdf]

## Creb3

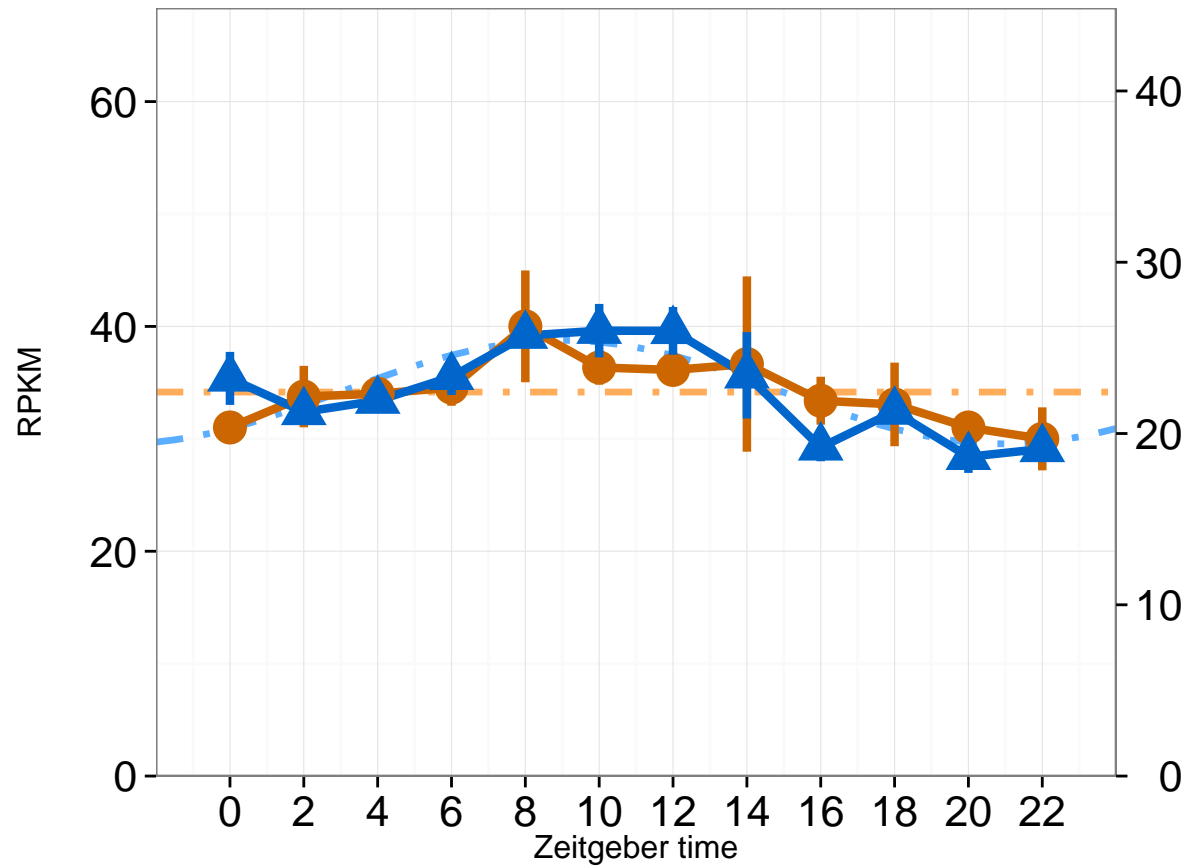

## Creb3

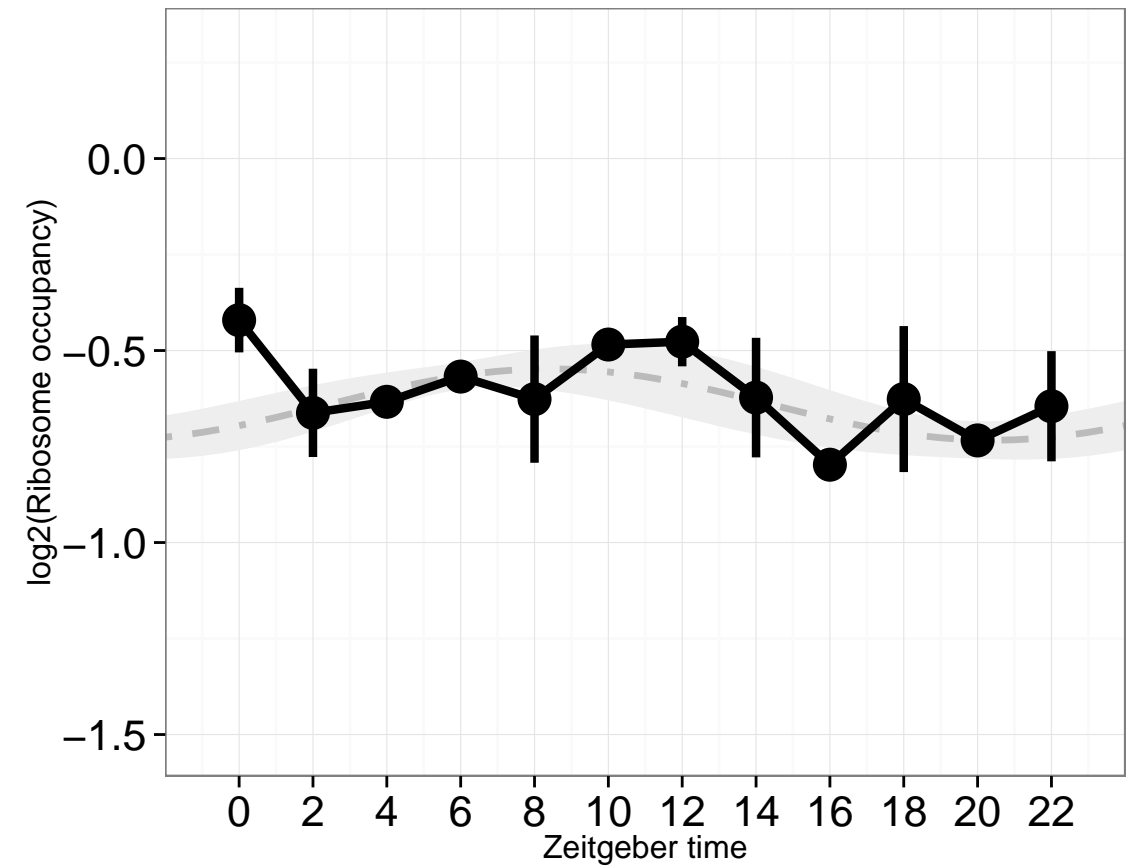

Supplement: SuppDataset_1.zip [file Creb3_set_A.pdf › Supplemental Dataset 1/A-mRNA_nonrhyth_translation_nonrhyth/Creb3_set_A.pdf]

# Creb3l2

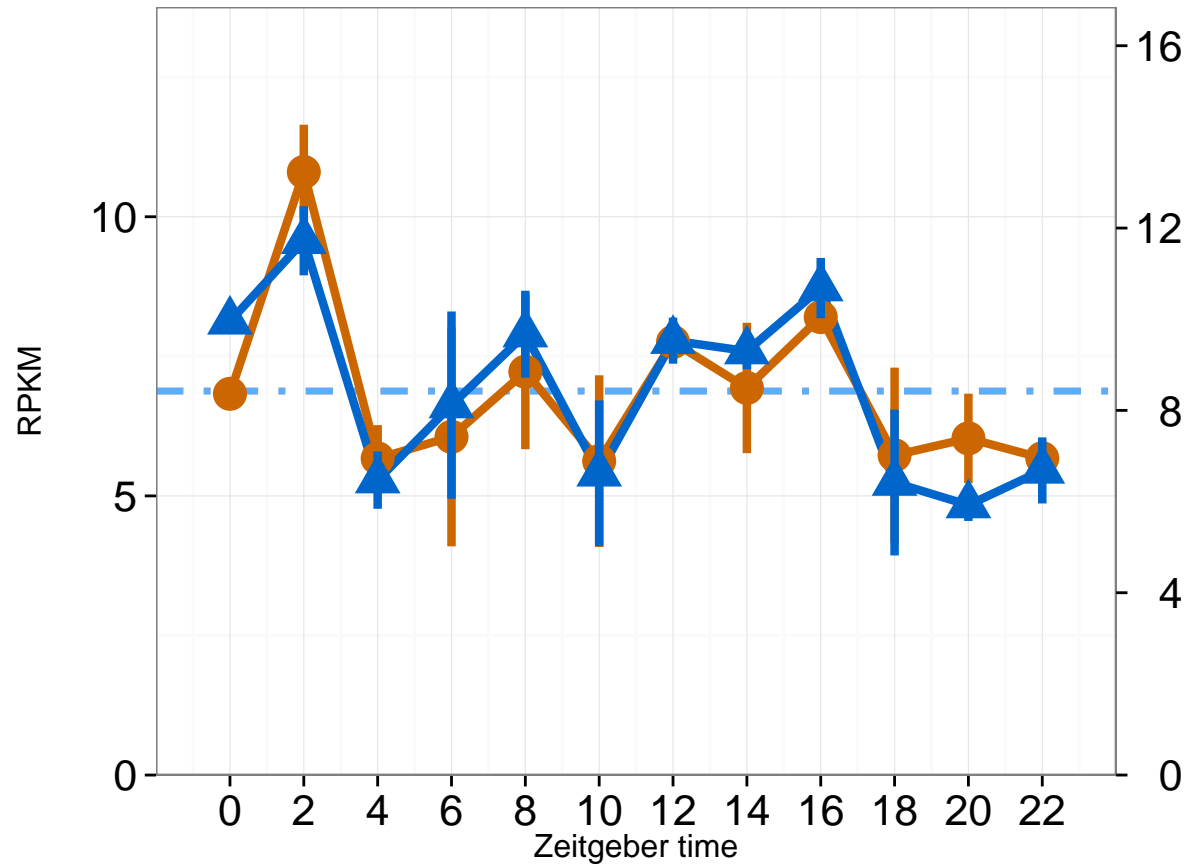

# Creb3l2

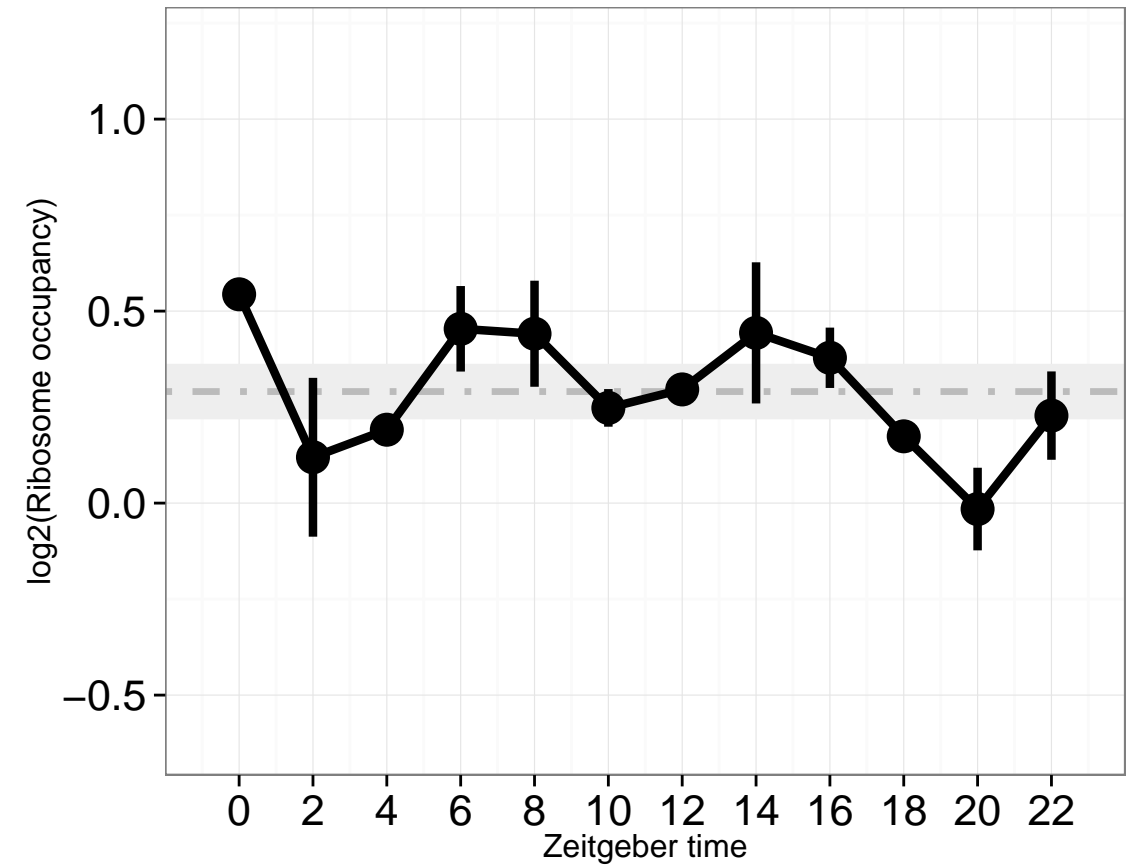

Supplement: SuppDataset_1.zip [file Creb3l2_set_A.pdf › Supplemental Dataset 1/A-mRNA_nonrhyth_translation_nonrhyth/Creb3l2_set_A.pdf]

## Creb3l3

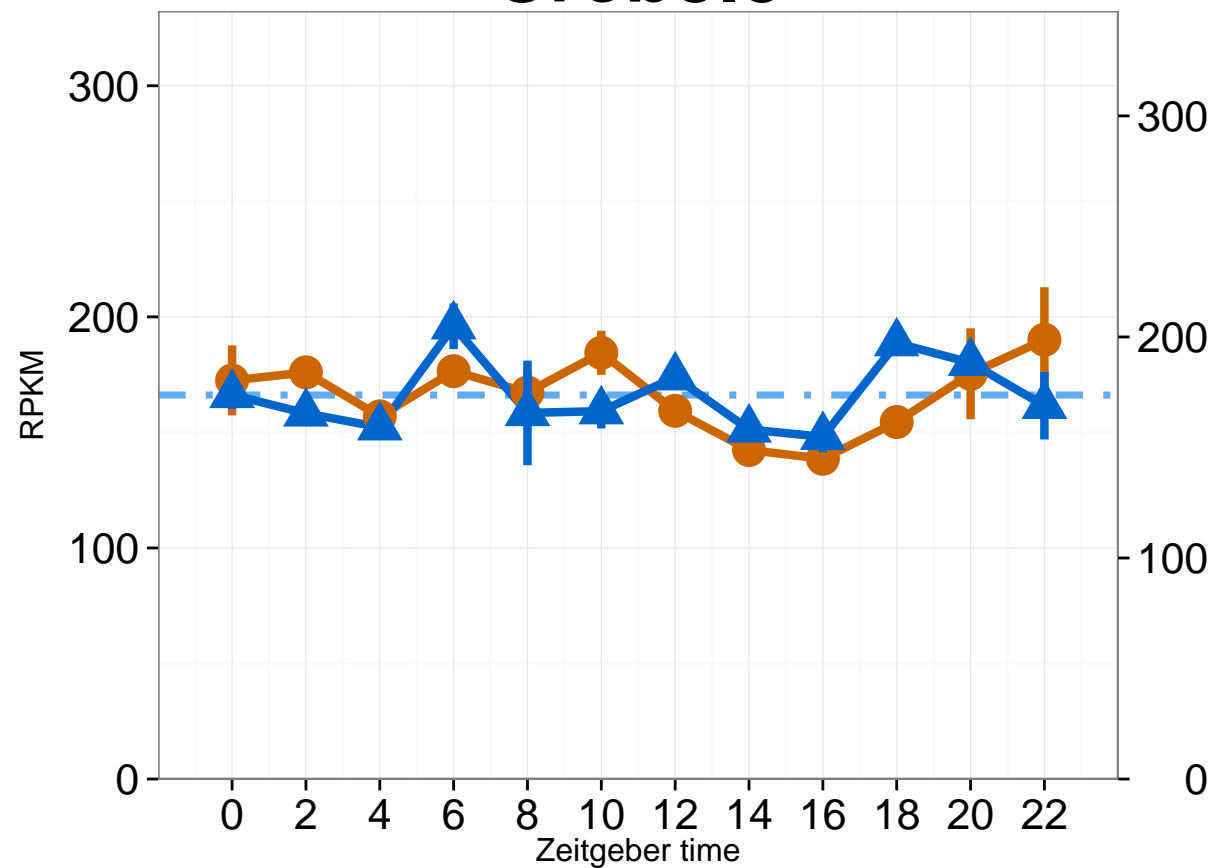

## Creb3l3

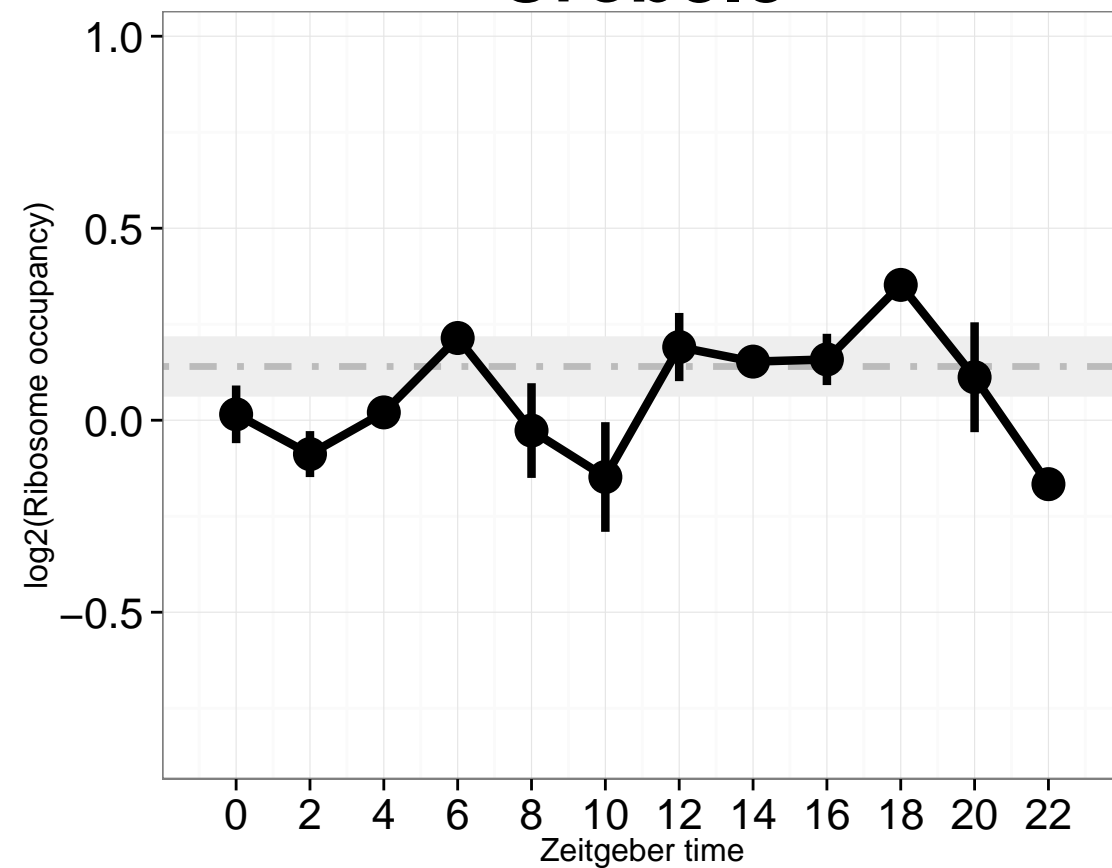

Supplement: SuppDataset_1.zip [file Creb3l3_set_A.pdf › Supplemental Dataset 1/A-mRNA_nonrhyth_translation_nonrhyth/Creb3l3_set_A.pdf]

## Crebbp

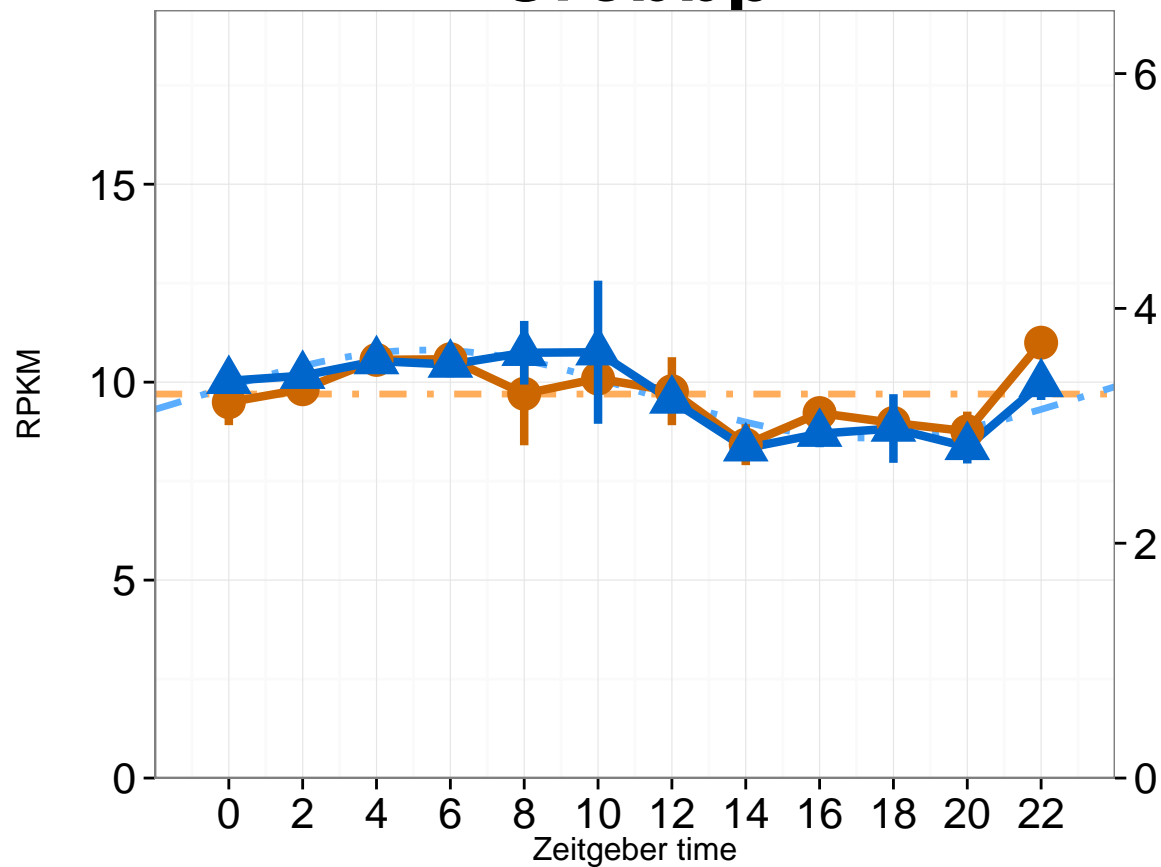

## Crebbp

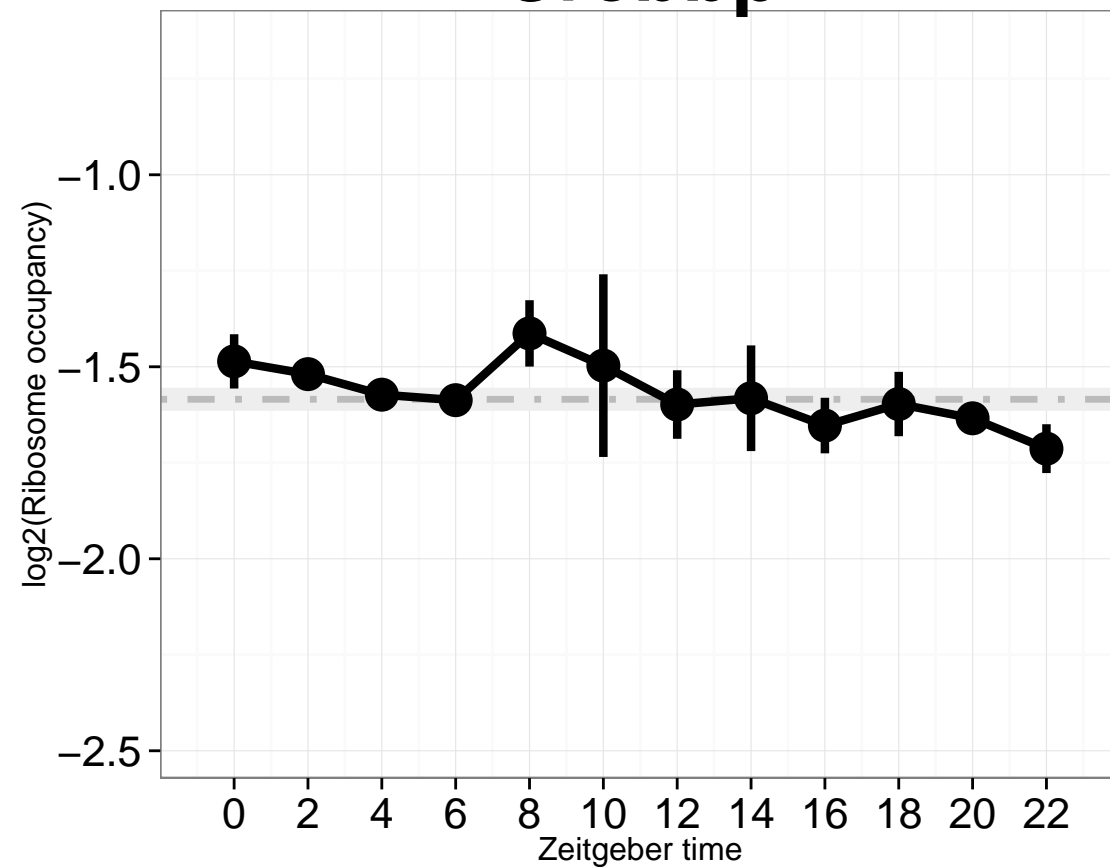

Supplement: SuppDataset_1.zip [file Crebbp_set_A.pdf › Supplemental Dataset 1/A-mRNA_nonrhyth_translation_nonrhyth/Crebbp_set_A.pdf]

## Crebl2

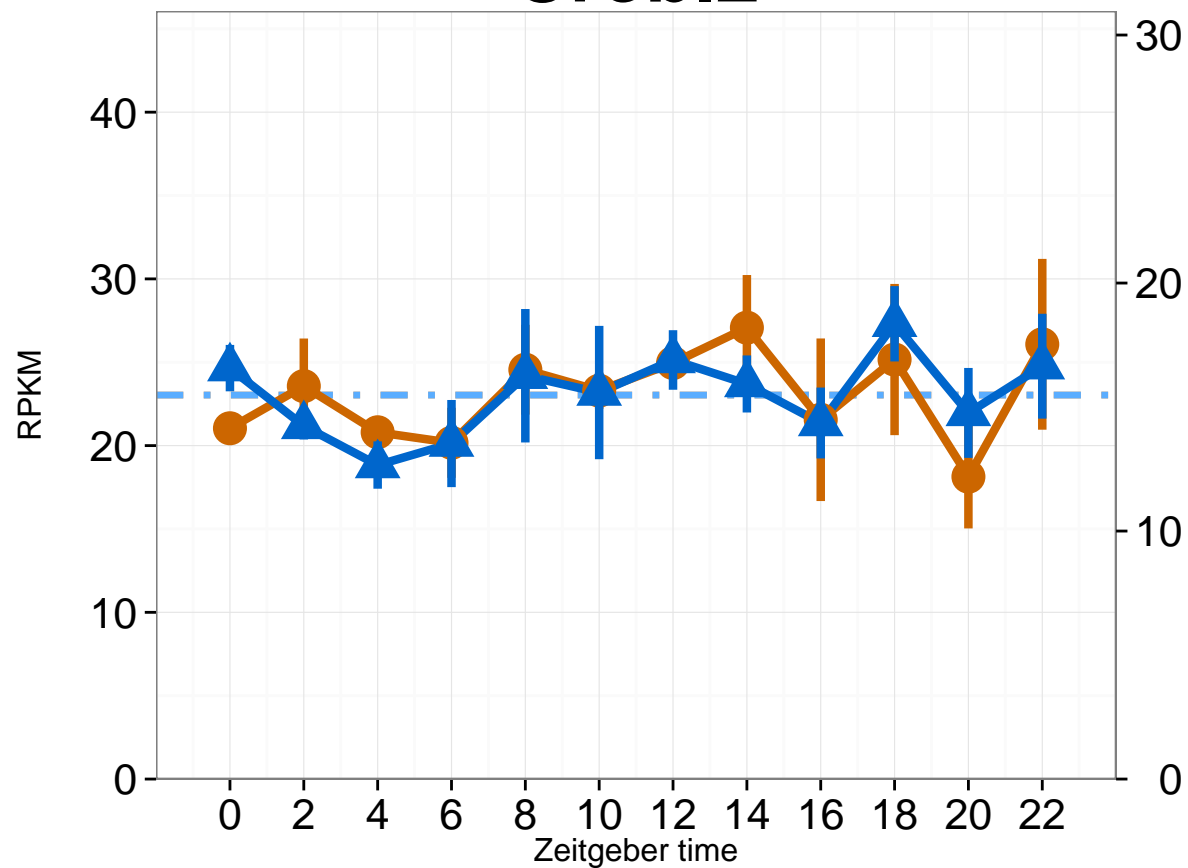

## Crebl2

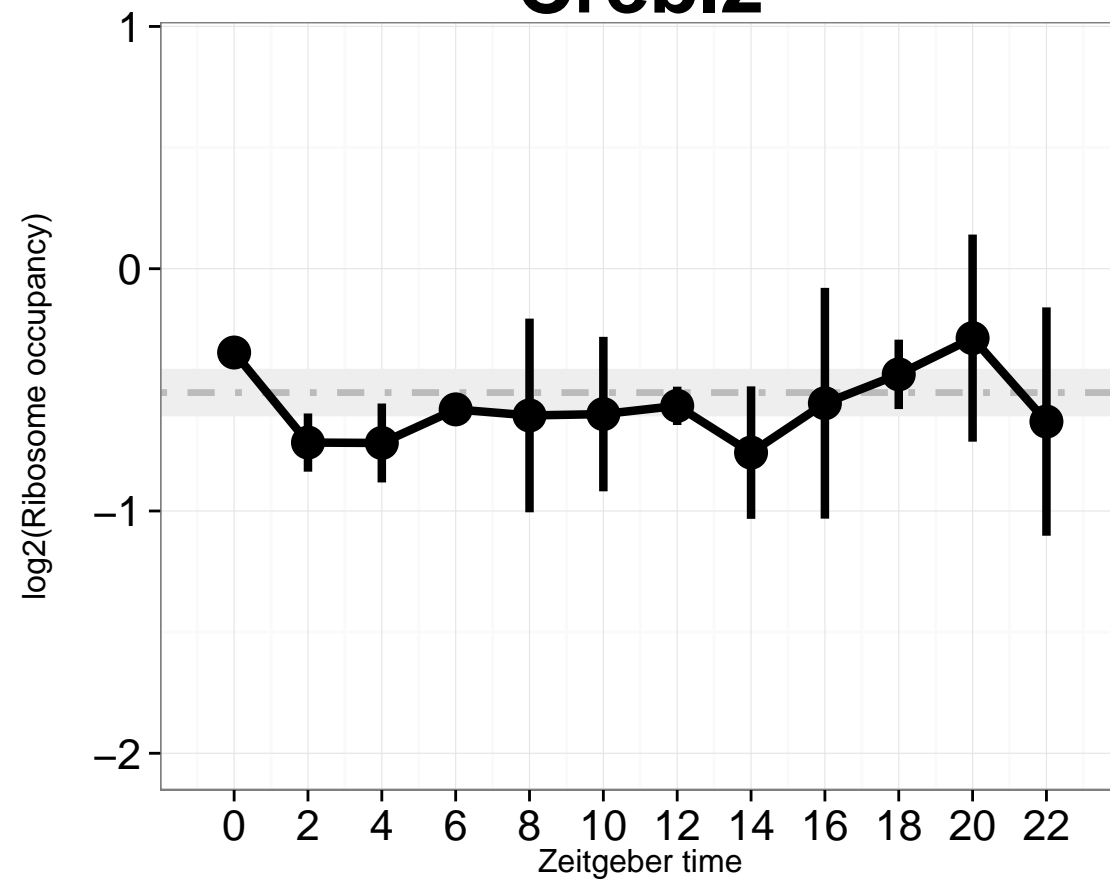

Supplement: SuppDataset_1.zip [file Crebl2_set_A.pdf › Supplemental Dataset 1/A-mRNA_nonrhyth_translation_nonrhyth/Crebl2_set_A.pdf]

# Crebrf

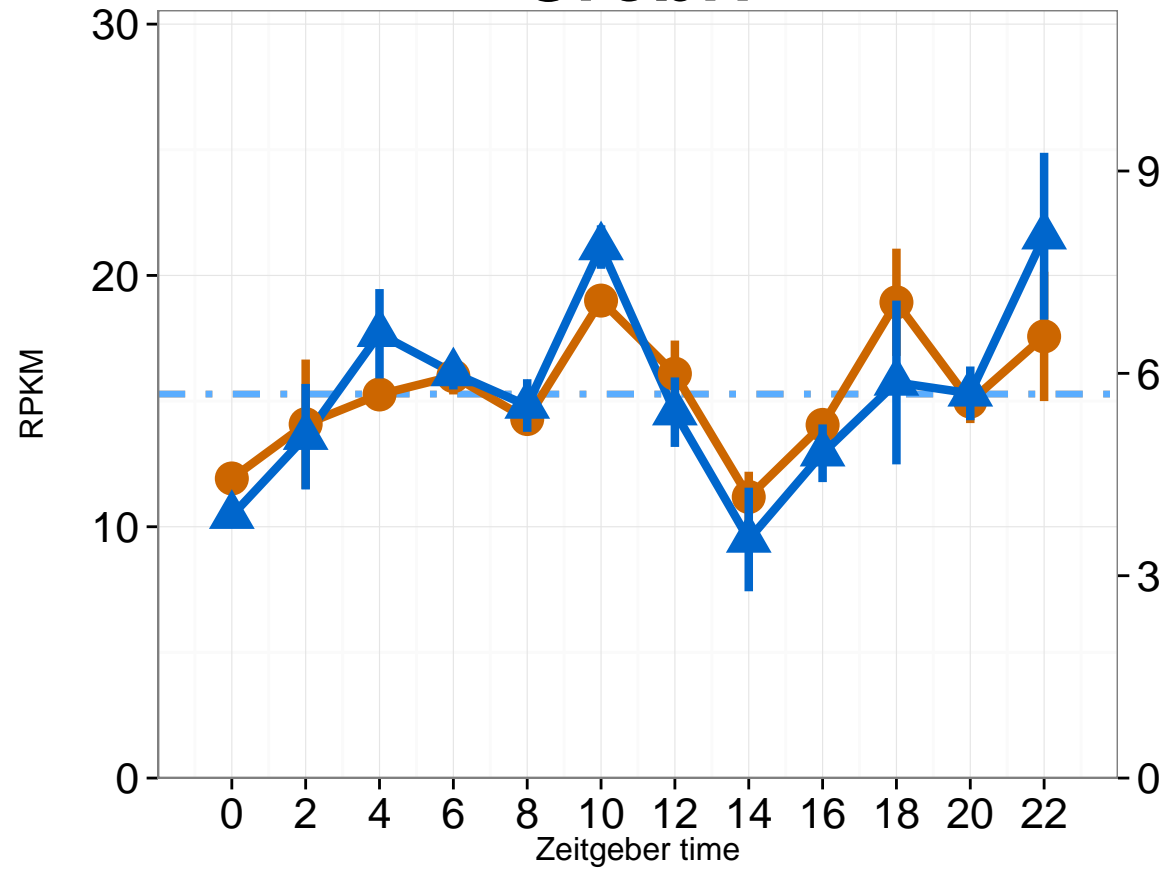

# Crebrf

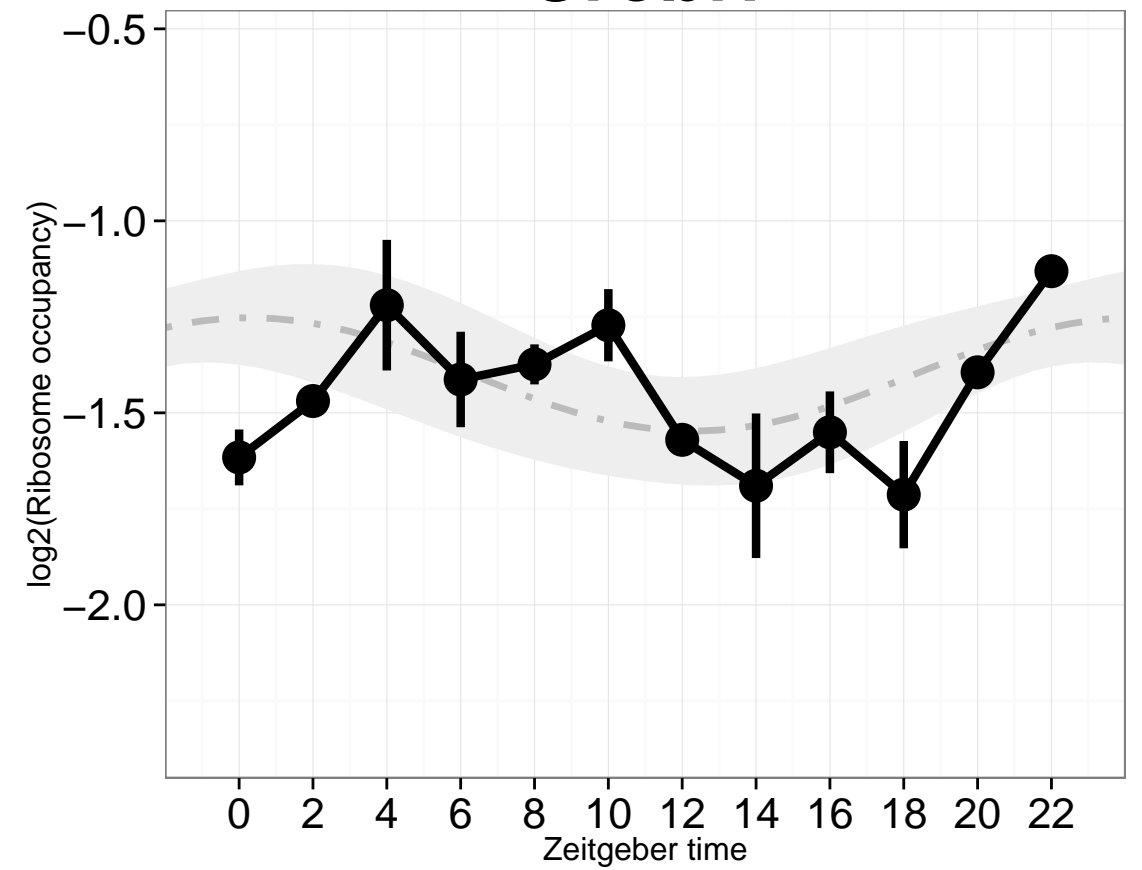

Supplement: SuppDataset_1.zip [file Crebrf_set_A.pdf › Supplemental Dataset 1/A-mRNA_nonrhyth_translation_nonrhyth/Crebrf_set_A.pdf]

# Creg1

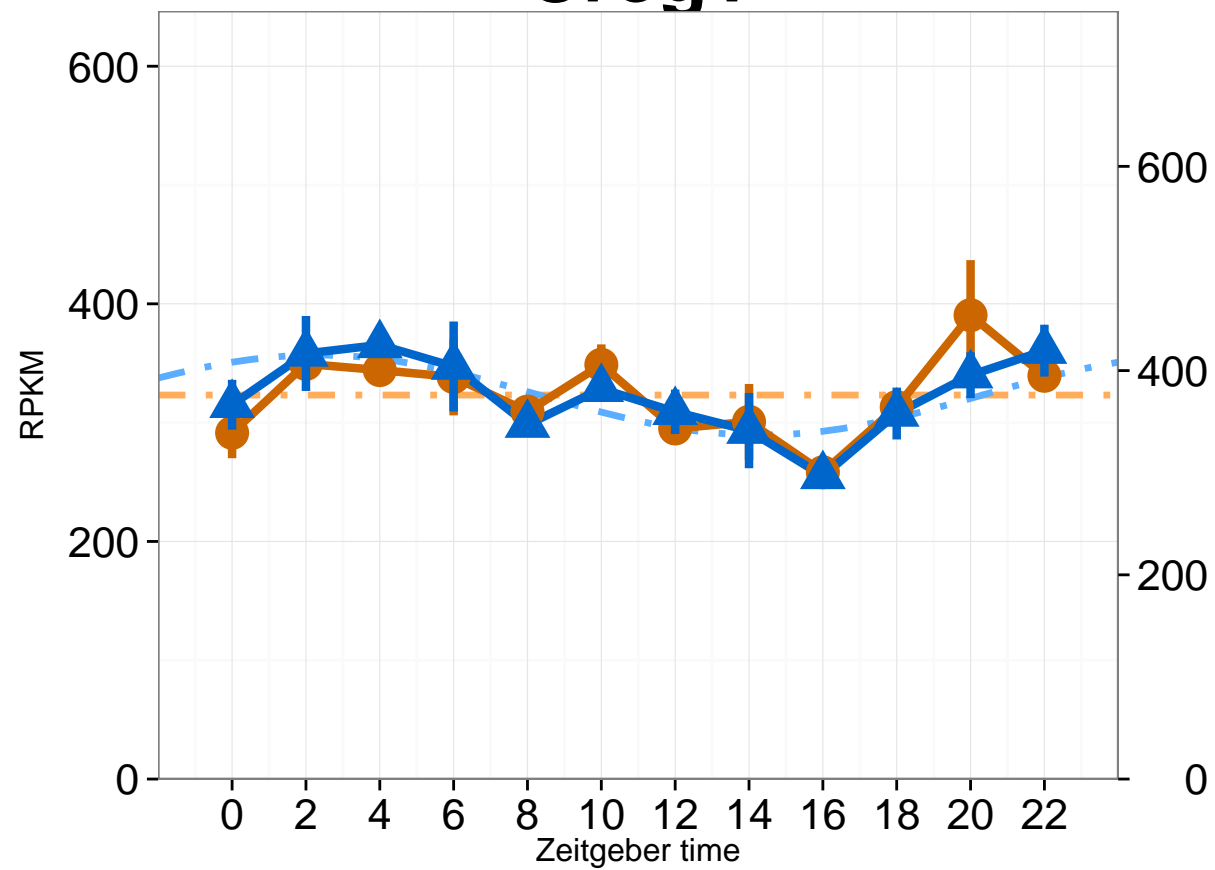

# Creg1

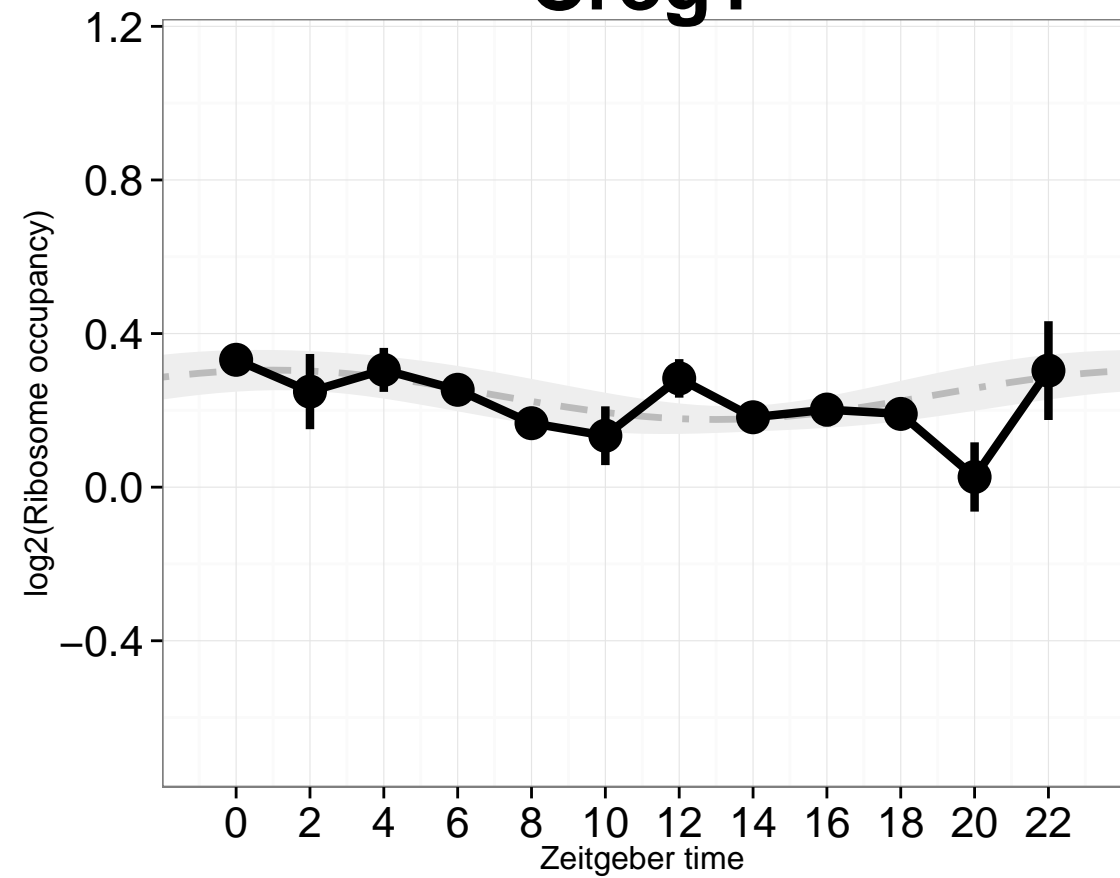

Supplement: SuppDataset_1.zip [file Creg1_set_A.pdf › Supplemental Dataset 1/A-mRNA_nonrhyth_translation_nonrhyth/Creg1_set_A.pdf]

## Creld1

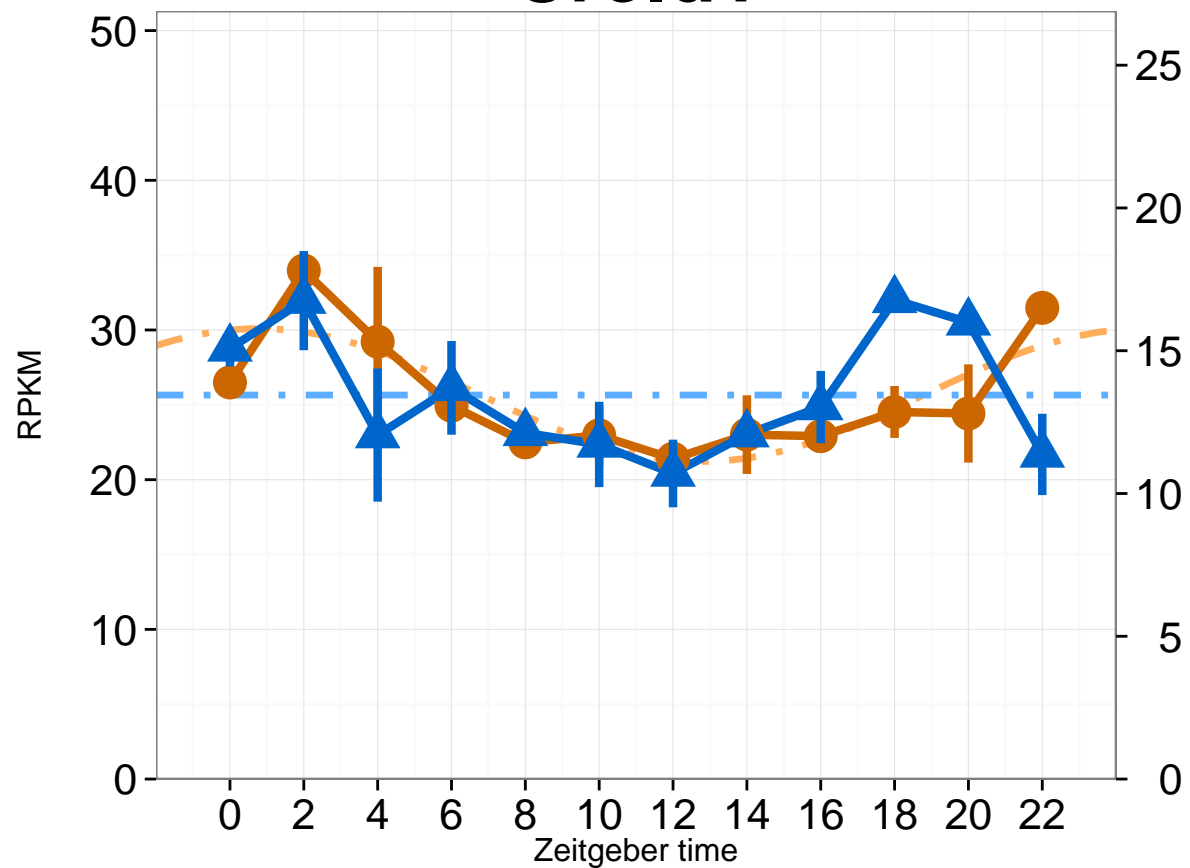

## Creld1

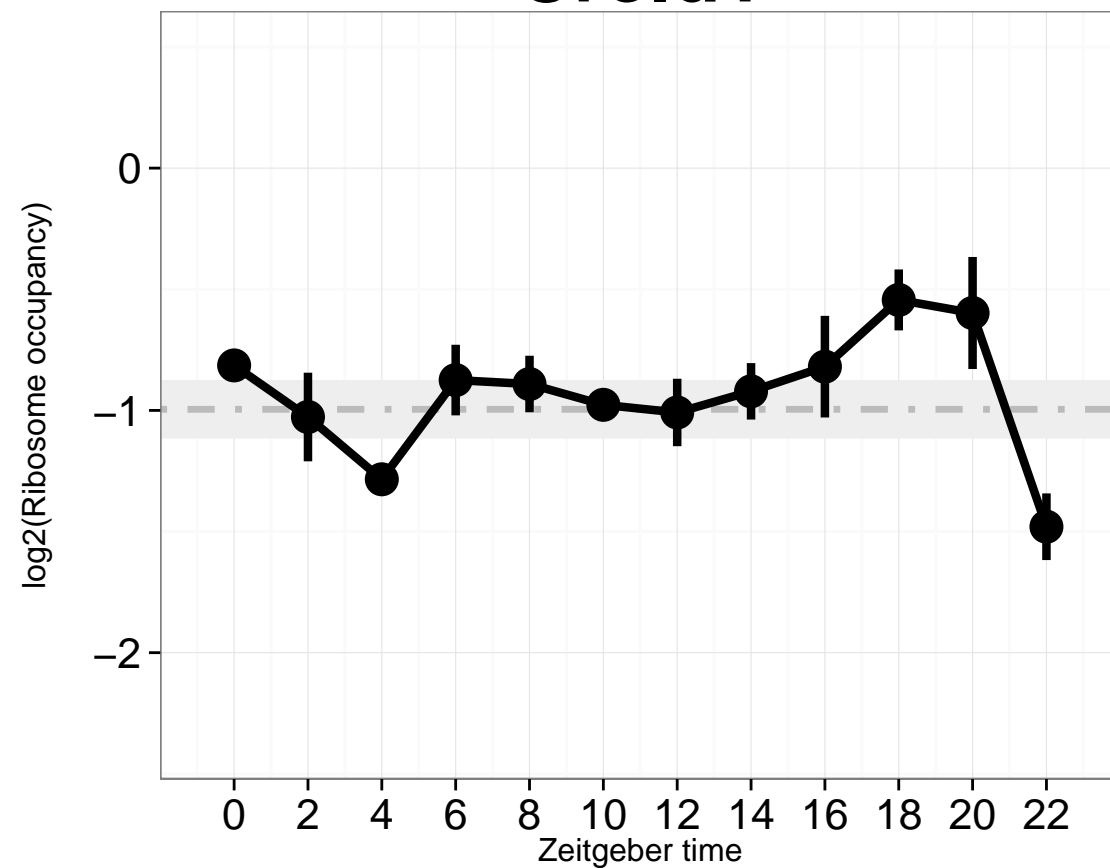

Supplement: SuppDataset_1.zip [file Creld1_set_A.pdf › Supplemental Dataset 1/A-mRNA_nonrhyth_translation_nonrhyth/Creld1_set_A.pdf]

# Creld2

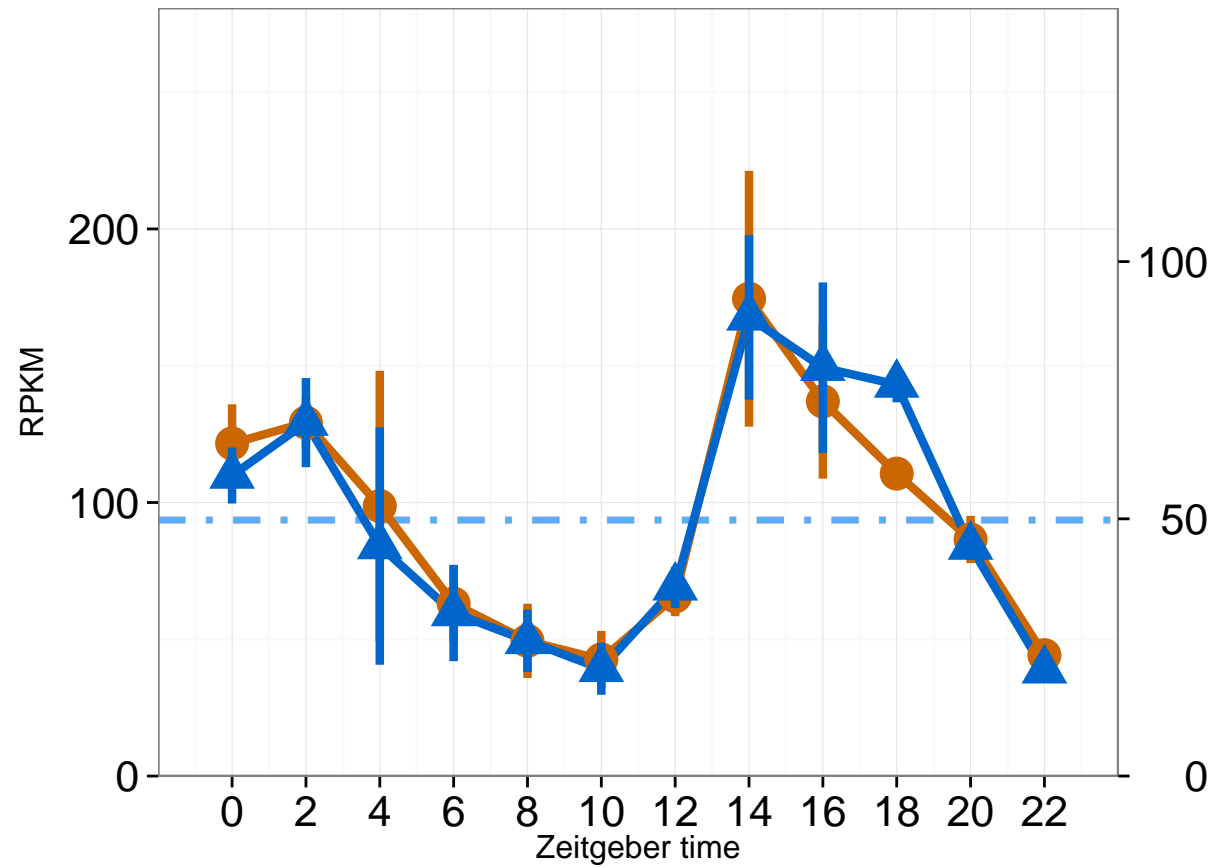

# Creld2

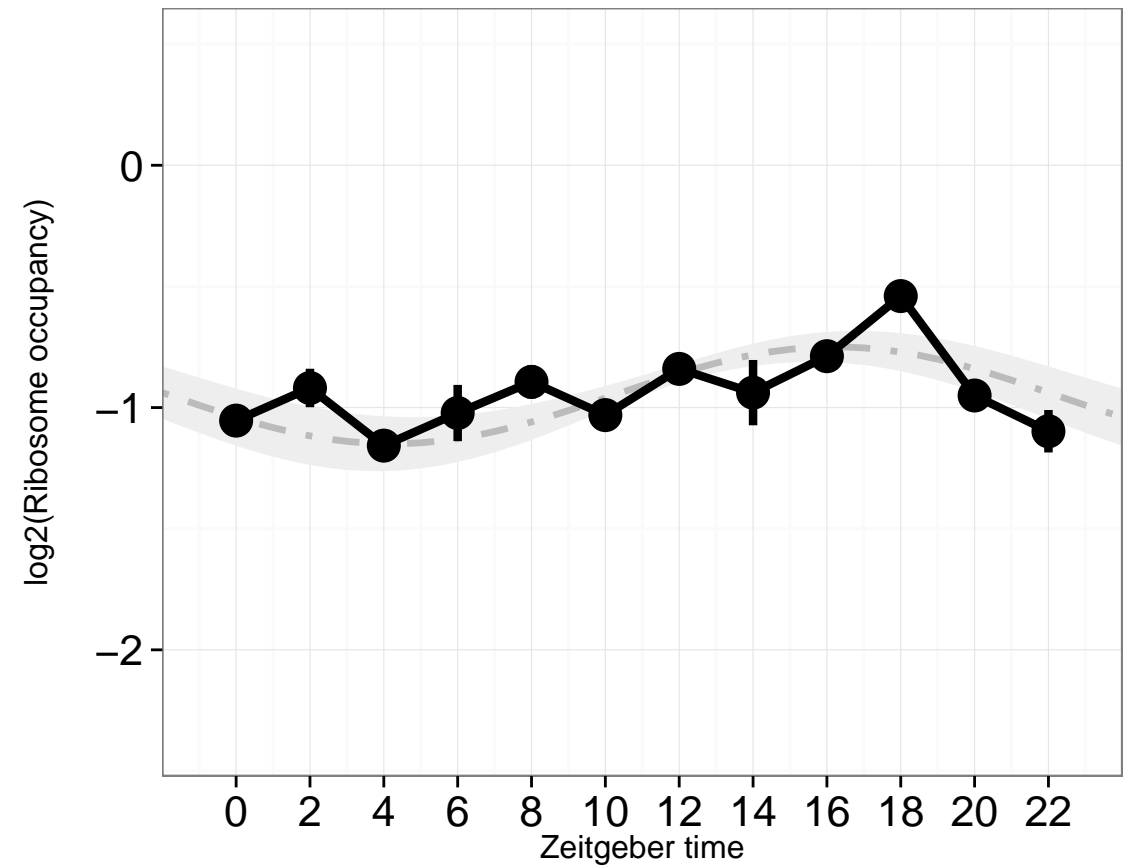

Supplement: SuppDataset_1.zip [file Creld2_set_A.pdf › Supplemental Dataset 1/A-mRNA_nonrhyth_translation_nonrhyth/Creld2_set_A.pdf]

# Crim1

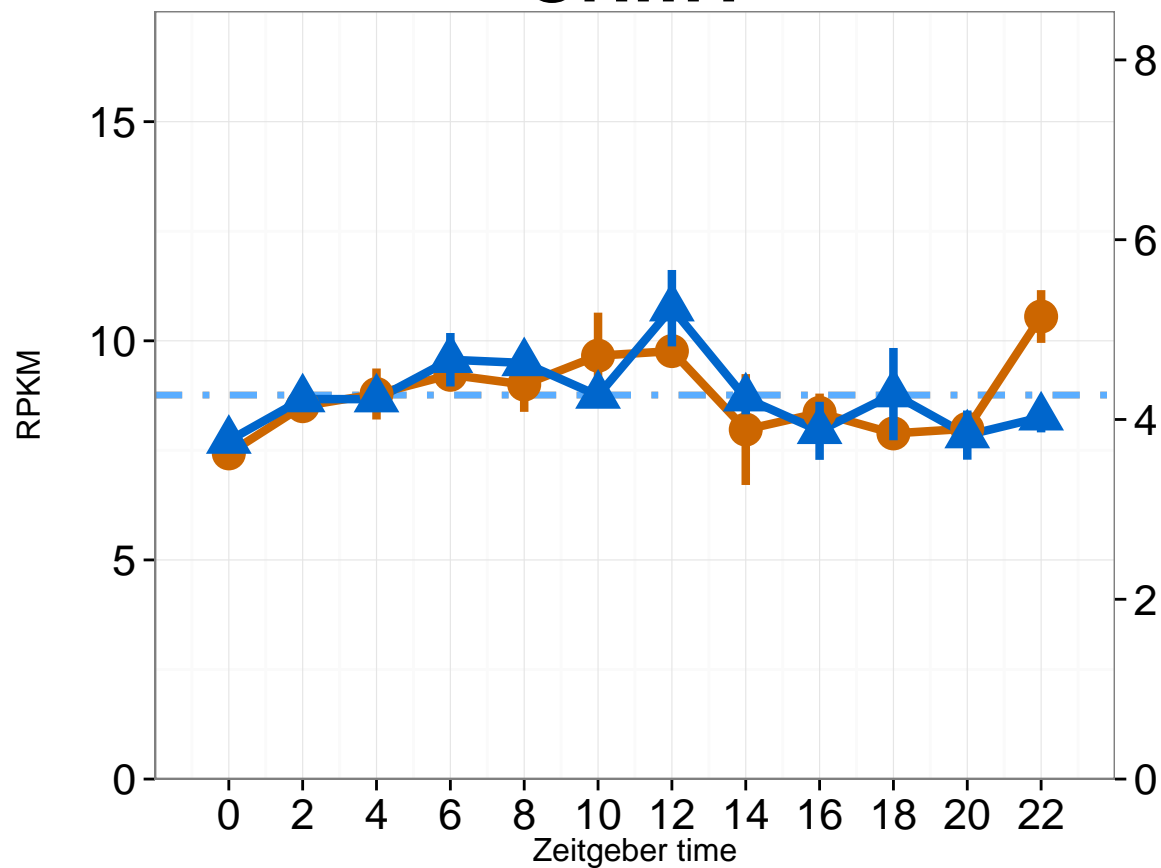

# Crim1

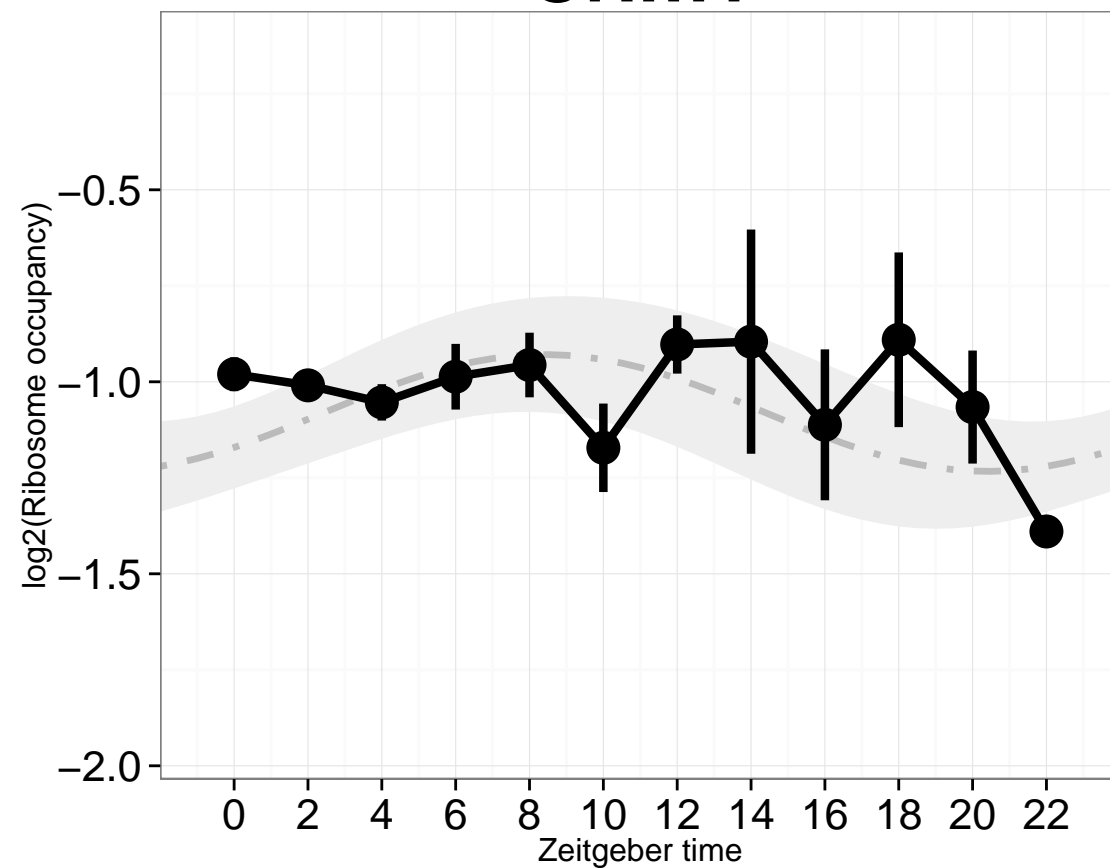

Supplement: SuppDataset_1.zip [file Crim1_set_A.pdf › Supplemental Dataset 1/A-mRNA_nonrhyth_translation_nonrhyth/Crim1_set_A.pdf]

## Crip1

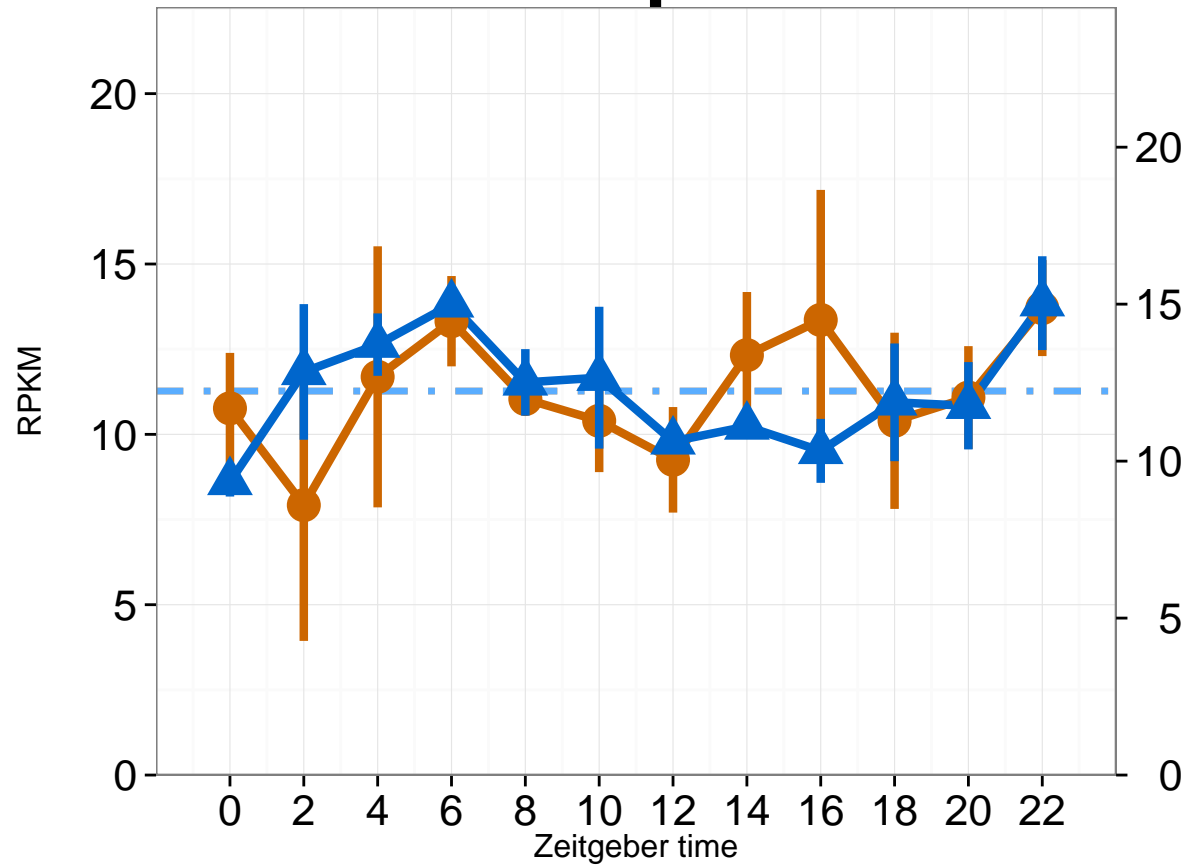

## Crip1

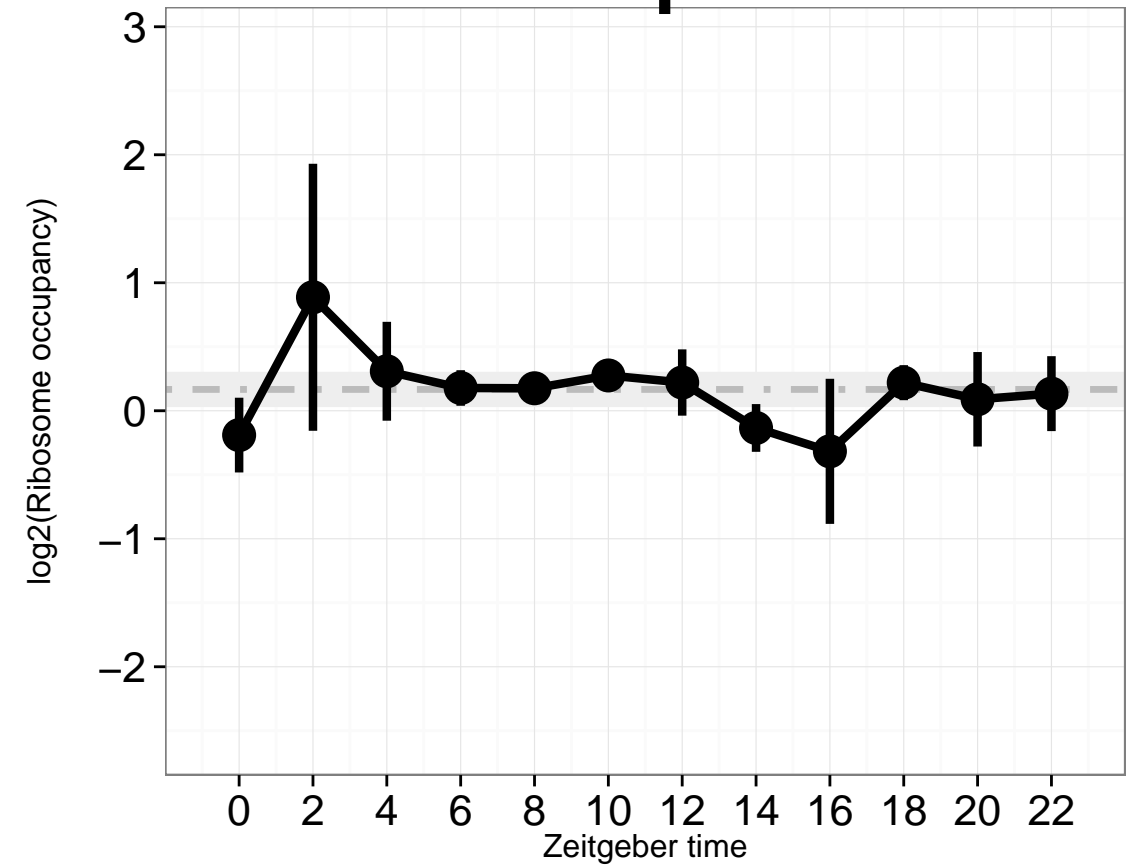

Supplement: SuppDataset_1.zip [file Crip1_set_A.pdf › Supplemental Dataset 1/A-mRNA_nonrhyth_translation_nonrhyth/Crip1_set_A.pdf]

## Cript

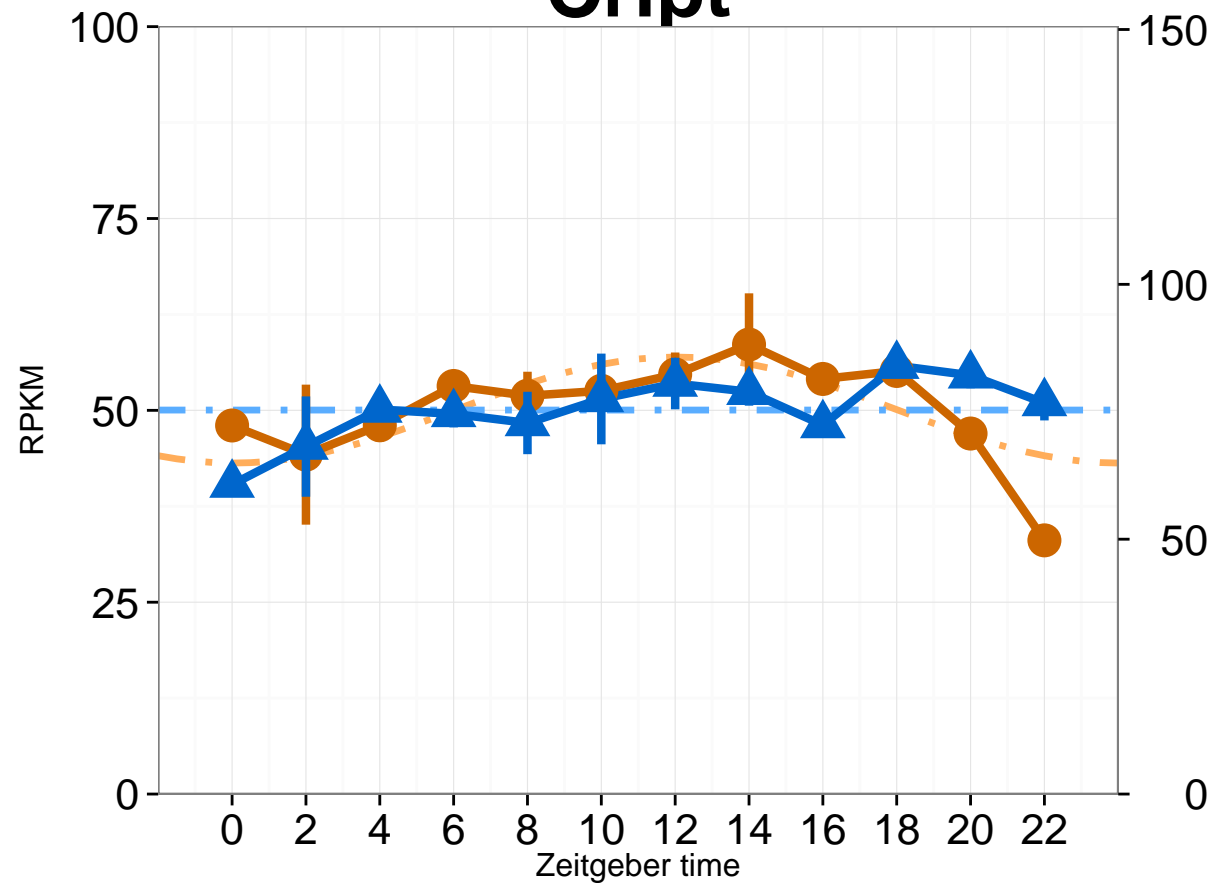

## Cript

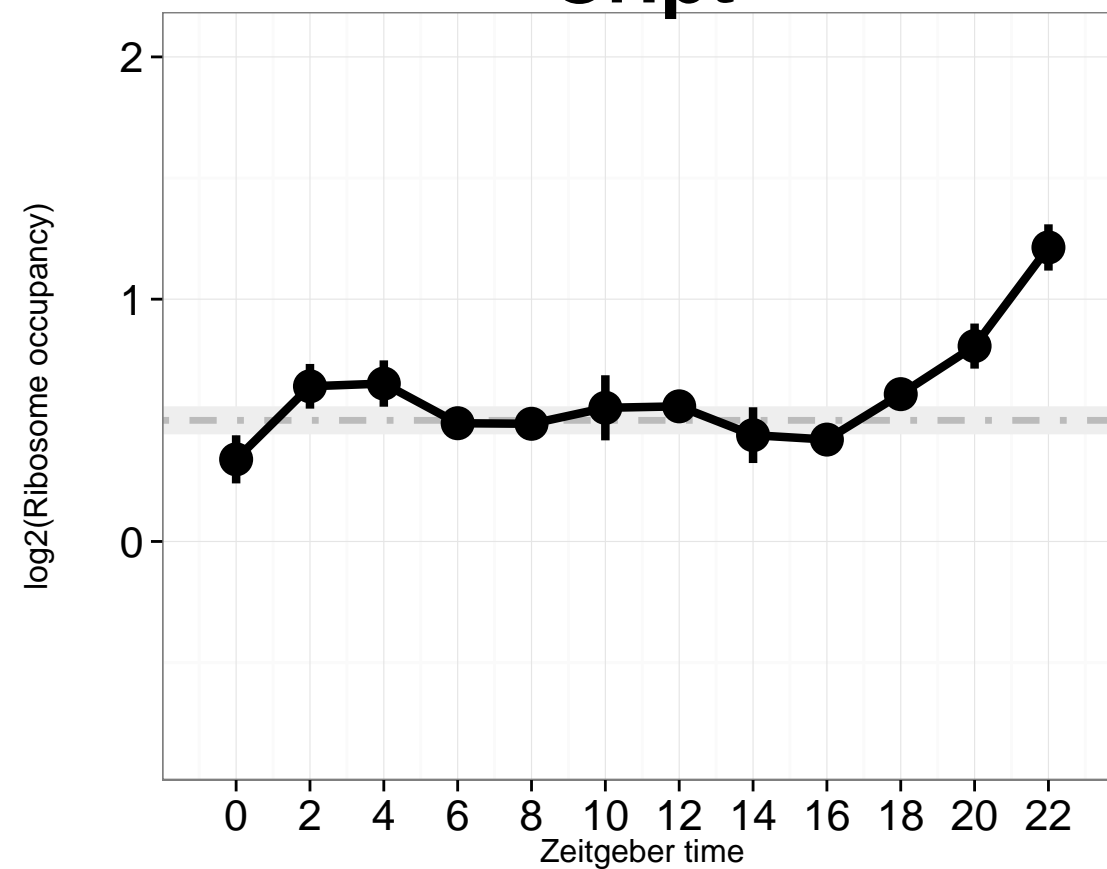

Supplement: SuppDataset_1.zip [file Cript_set_A.pdf › Supplemental Dataset 1/A-mRNA_nonrhyth_translation_nonrhyth/Cript_set_A.pdf]

## Crk

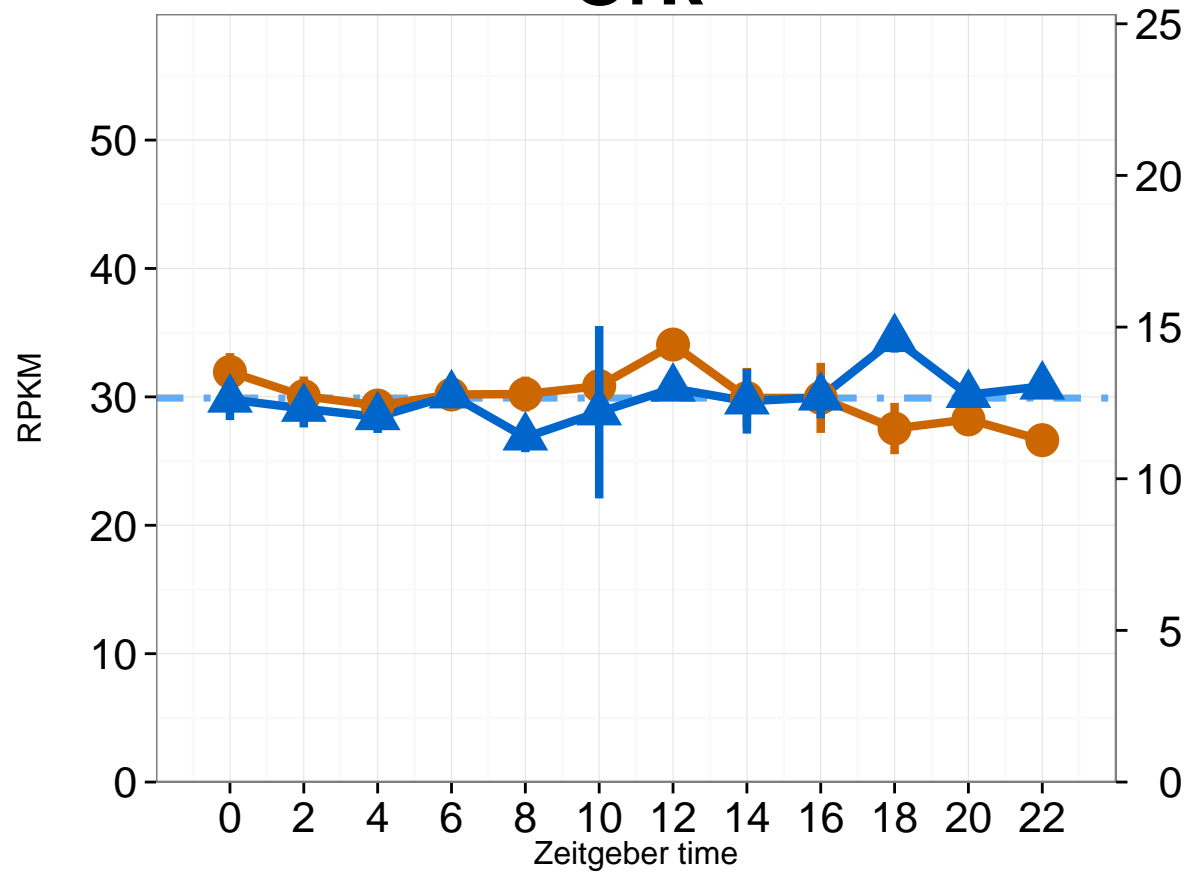

## Crk

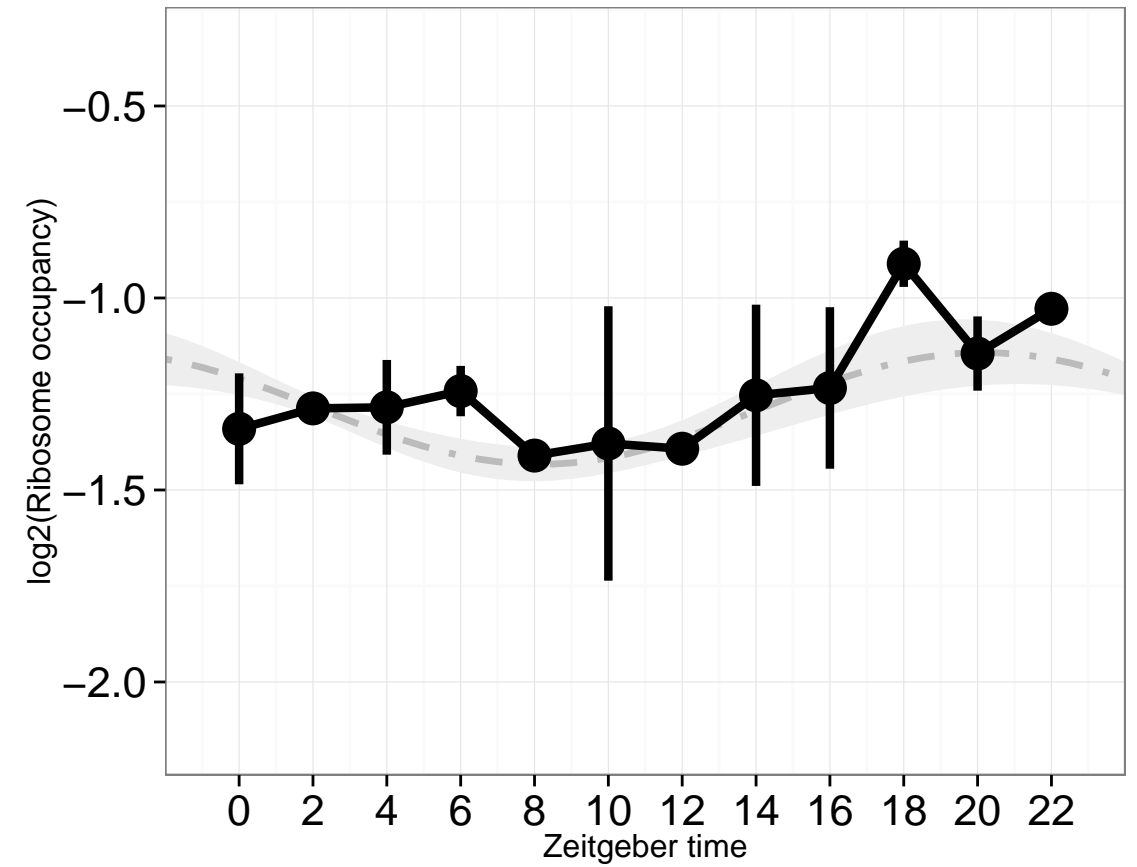

Supplement: SuppDataset_1.zip [file Crk_set_A.pdf › Supplemental Dataset 1/A-mRNA_nonrhyth_translation_nonrhyth/Crk_set_A.pdf]

## Crif2

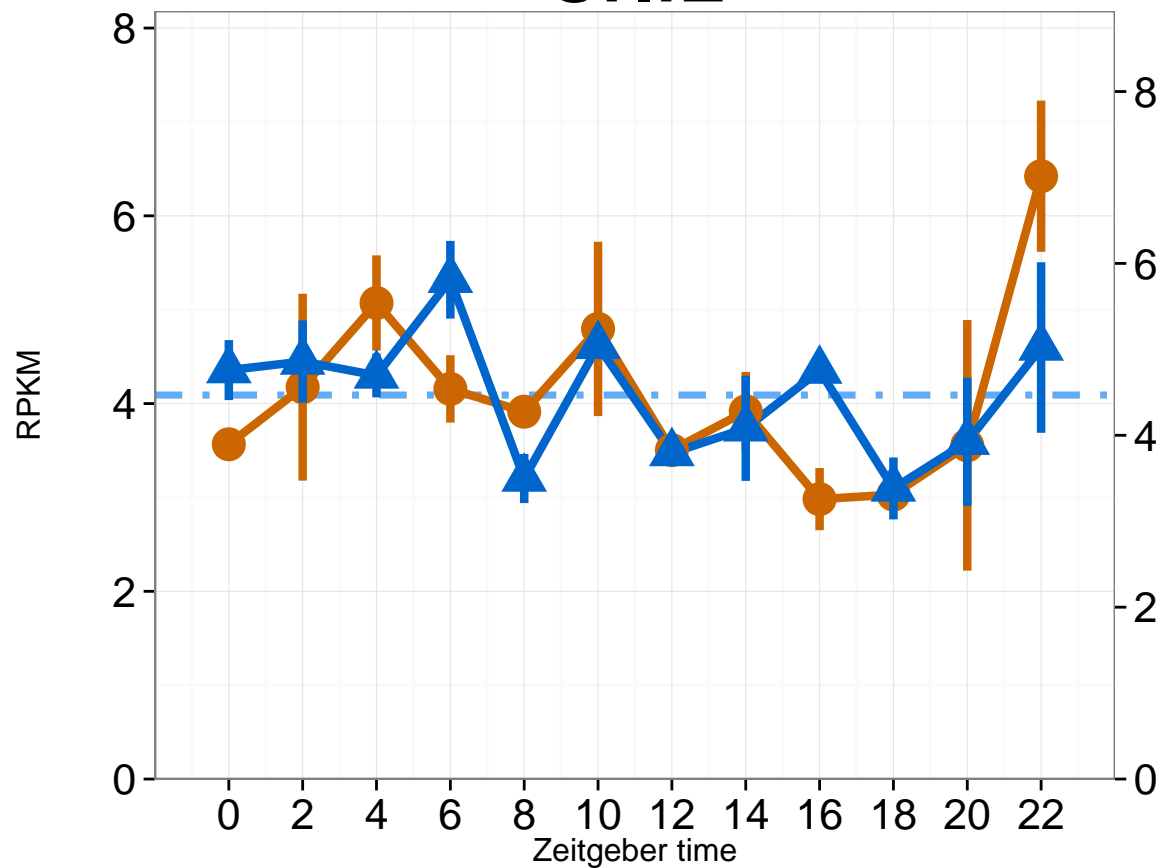

## Crif2

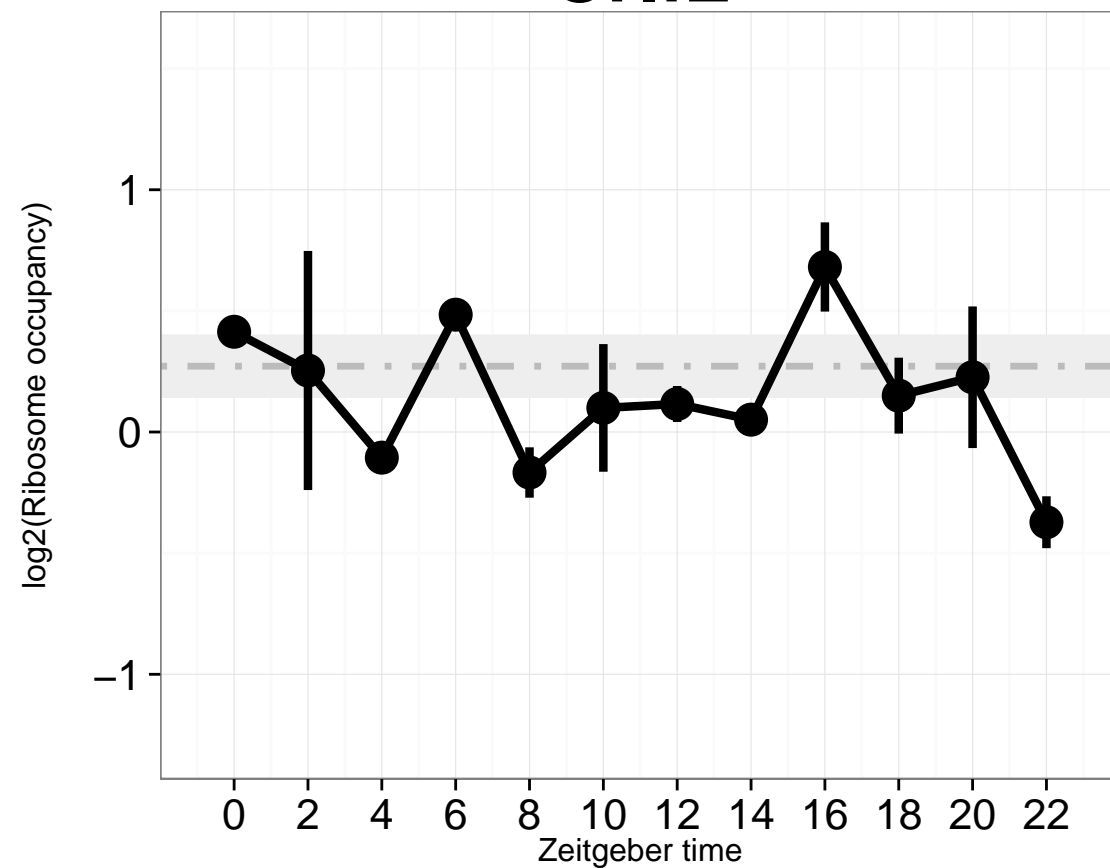

Supplement: SuppDataset_1.zip [file Crlf2_set_A.pdf › Supplemental Dataset 1/A-mRNA_nonrhyth_translation_nonrhyth/Crlf2_set_A.pdf]

## Crif3

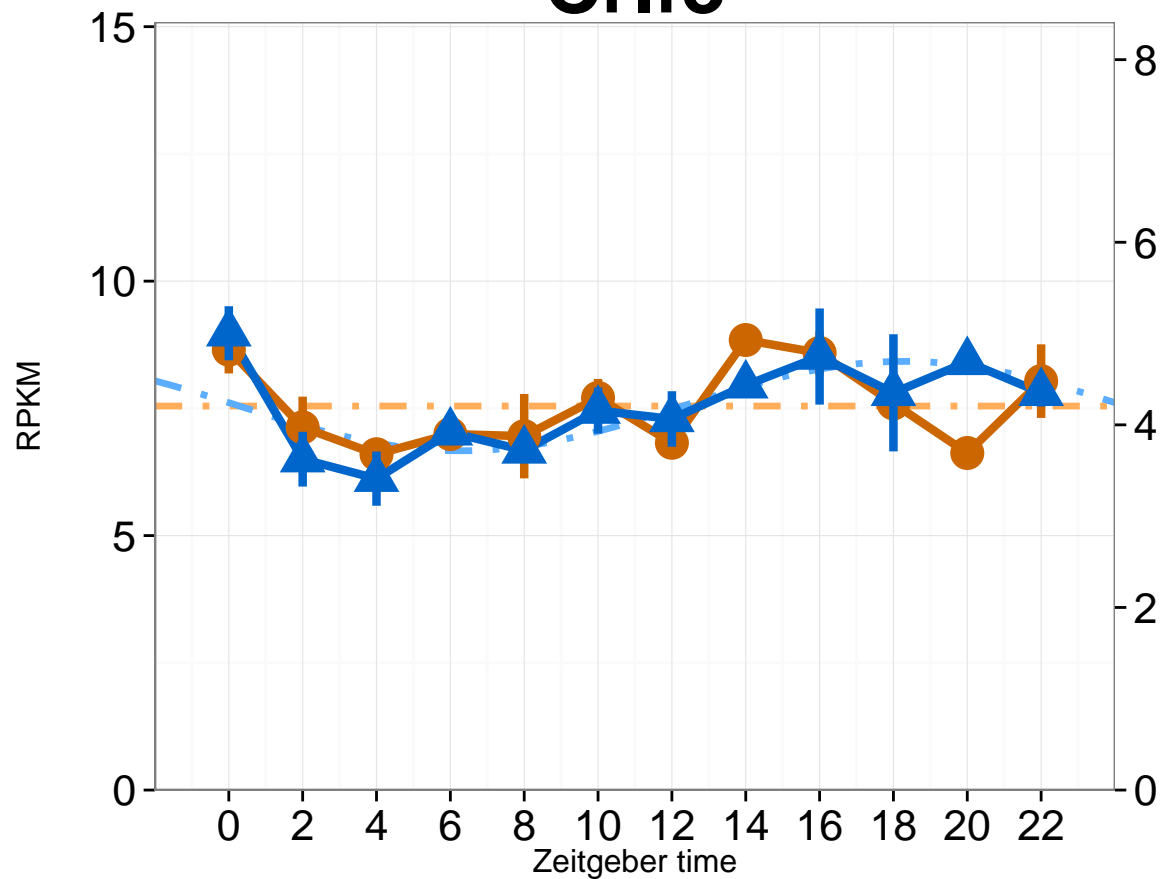

## Crif3

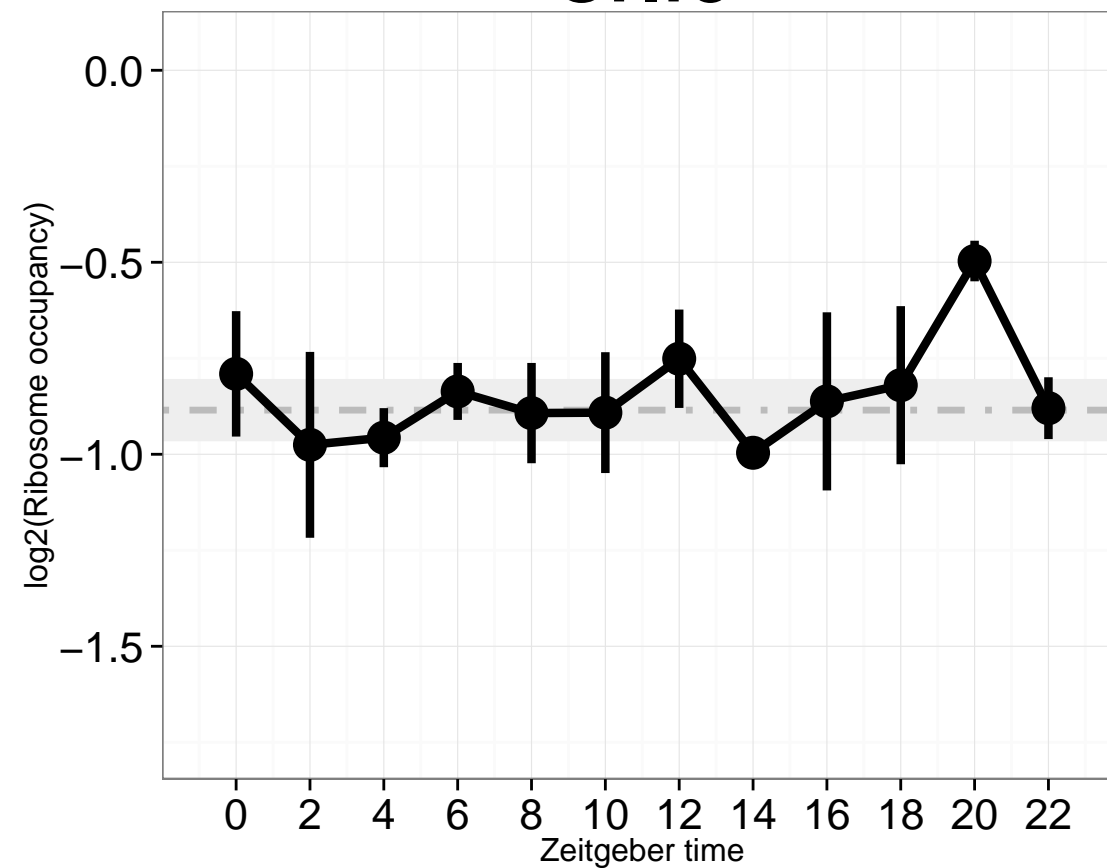

Supplement: SuppDataset_1.zip [file Crlf3_set_A.pdf › Supplemental Dataset 1/A-mRNA_nonrhyth_translation_nonrhyth/Crlf3_set_A.pdf]

## CrIs1

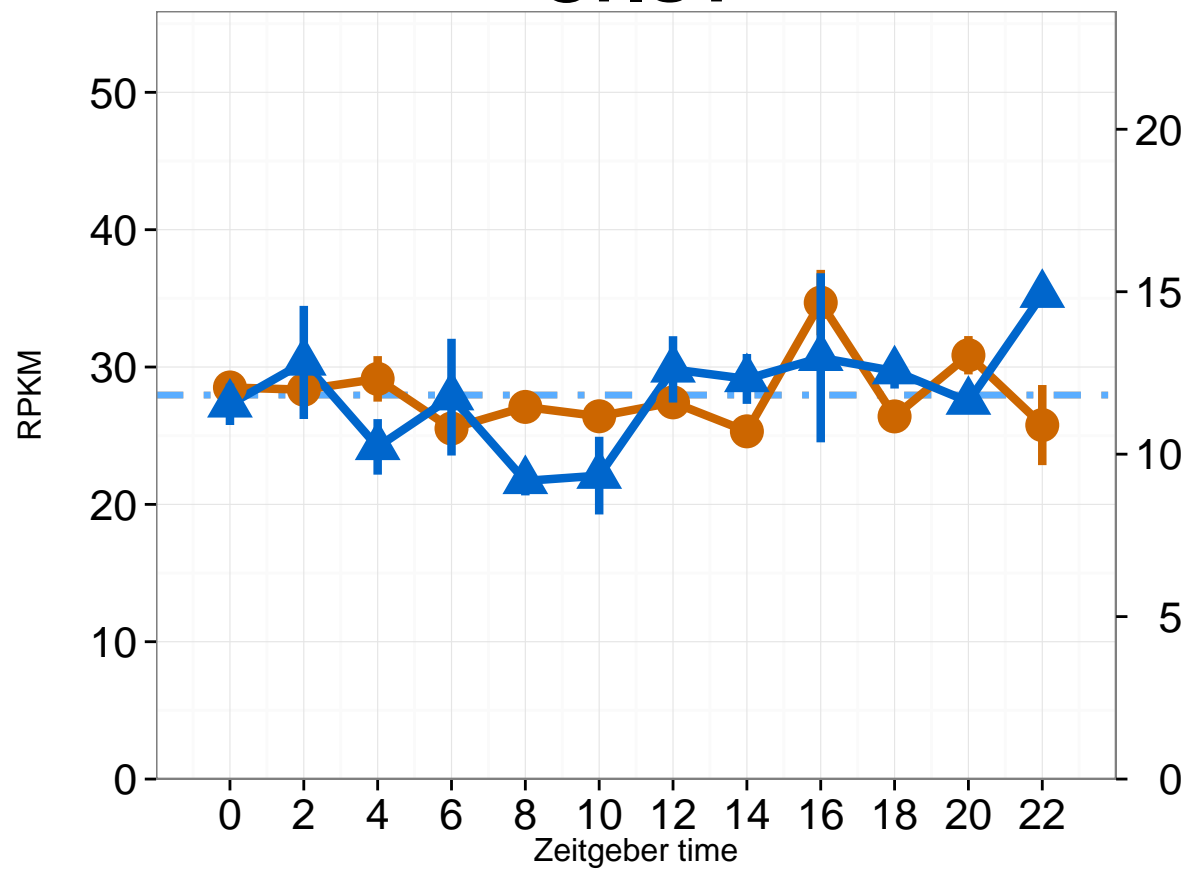

## CrIs1

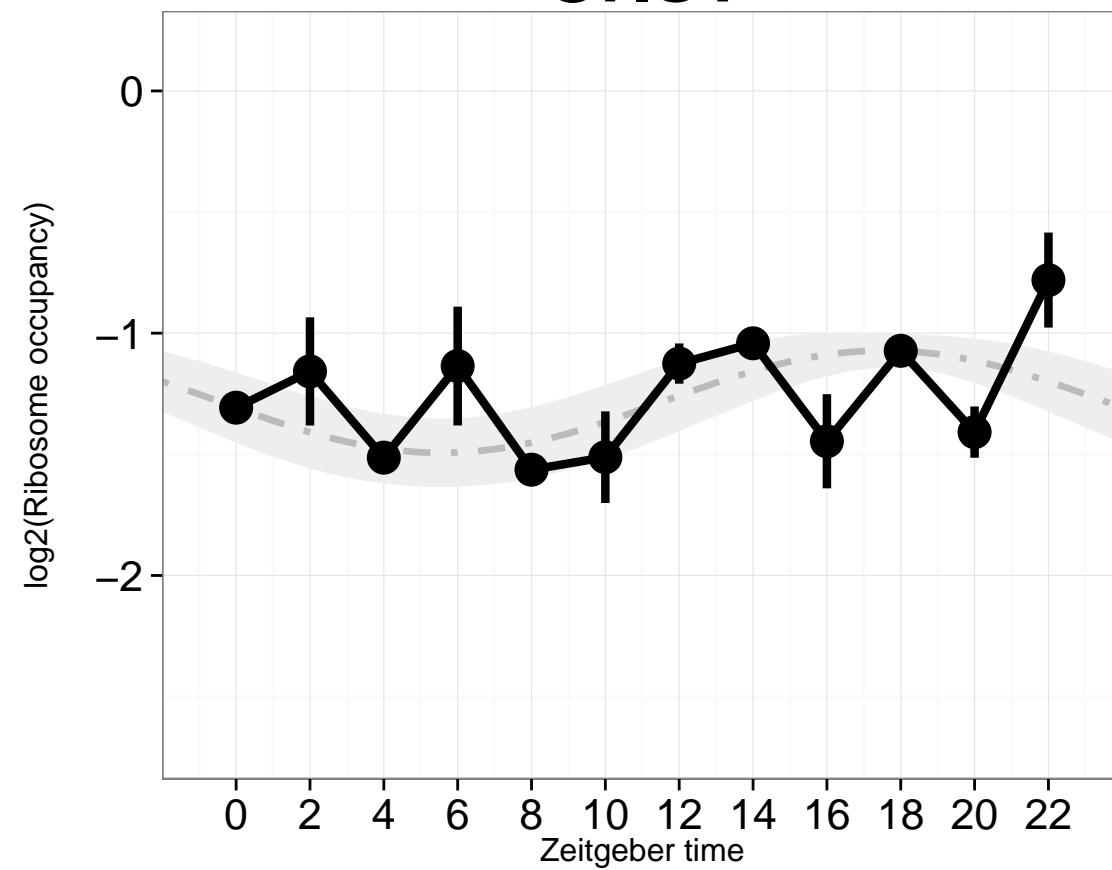

Supplement: SuppDataset_1.zip [file Crls1_set_A.pdf › Supplemental Dataset 1/A-mRNA_nonrhyth_translation_nonrhyth/Crls1_set_A.pdf]

# Crnkl1

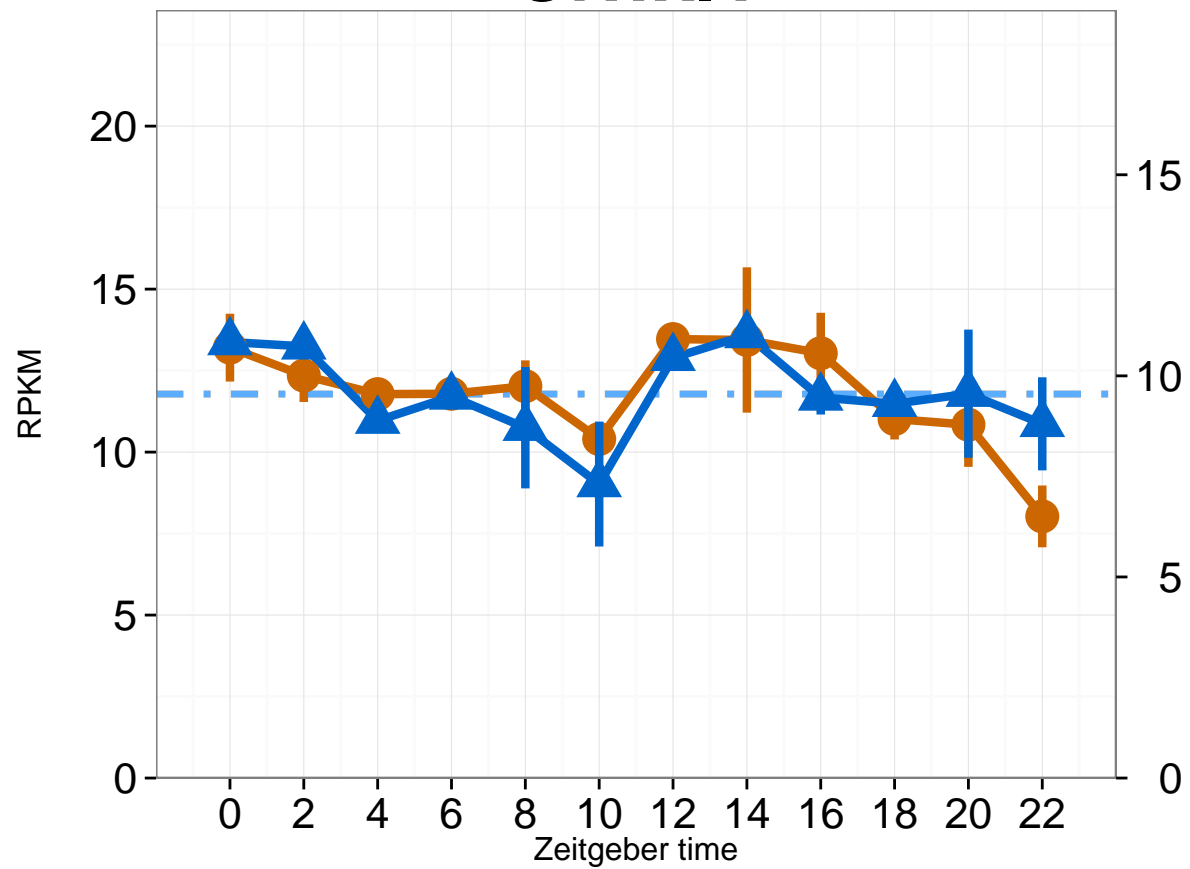

# Crnkl1

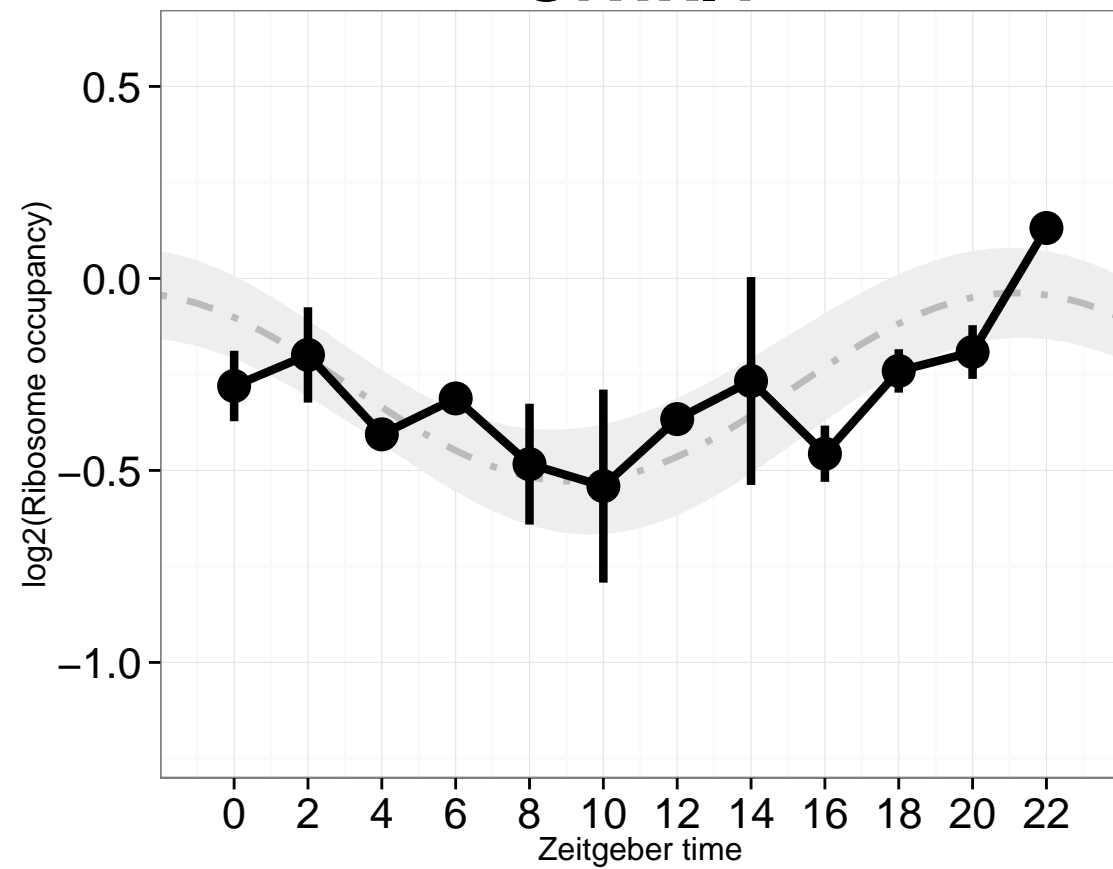

Supplement: SuppDataset_1.zip [file Crnkl1_set_A.pdf › Supplemental Dataset 1/A-mRNA_nonrhyth_translation_nonrhyth/Crnkl1_set_A.pdf]

# Crtap

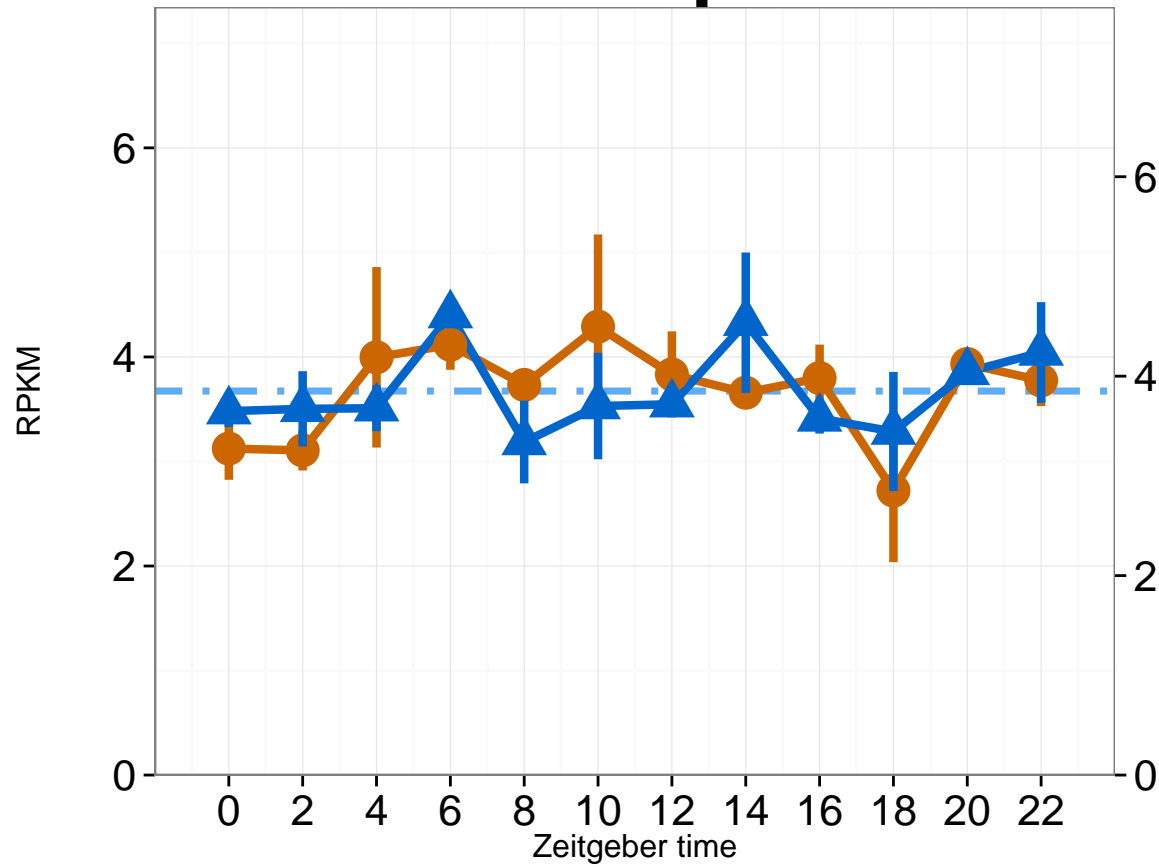

# Crtap

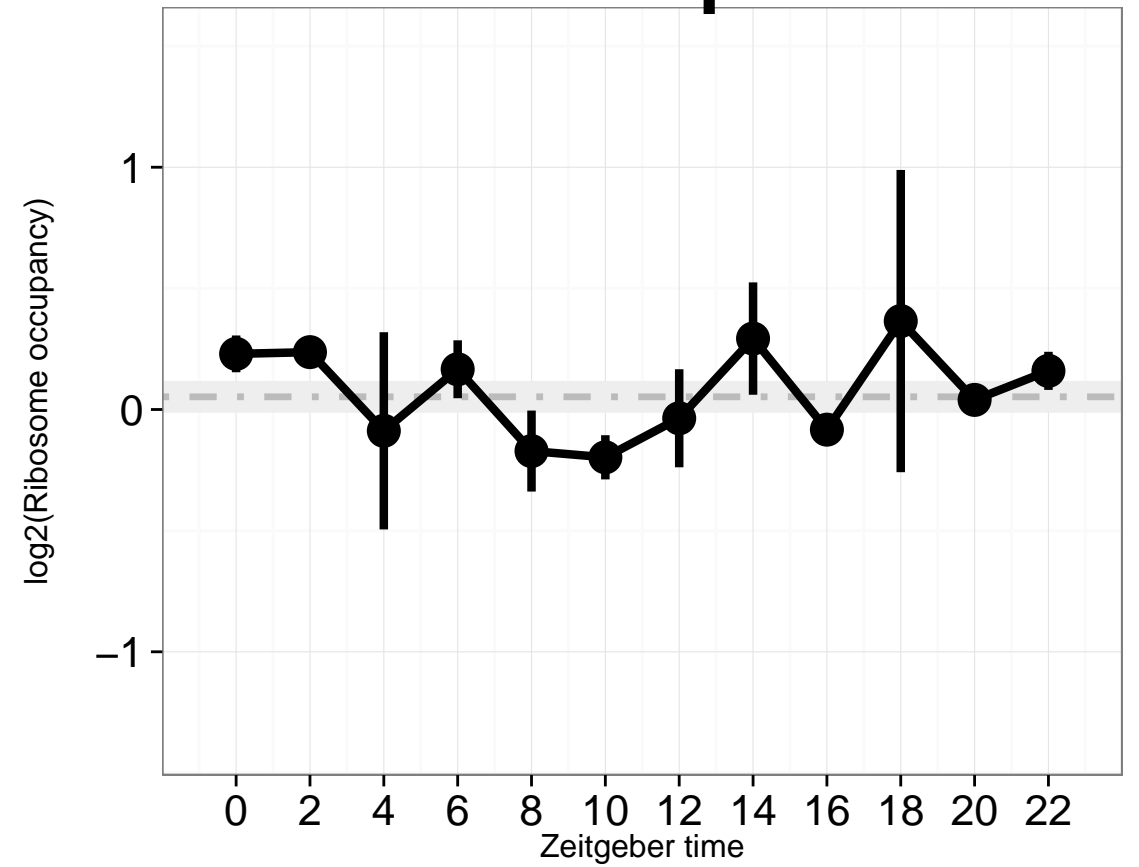

Supplement: SuppDataset_1.zip [file Crtap_set_A.pdf › Supplemental Dataset 1/A-mRNA_nonrhyth_translation_nonrhyth/Crtap_set_A.pdf]

# Crtc1

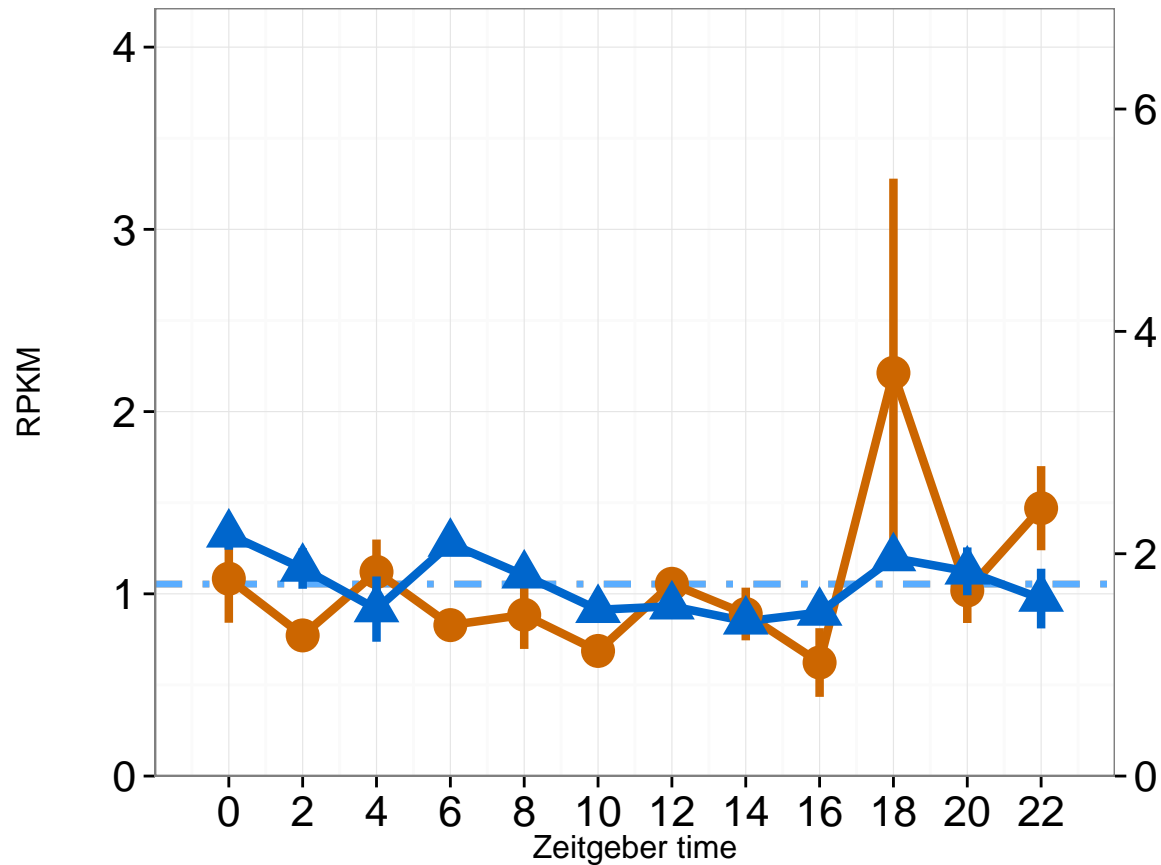

# Crtc1

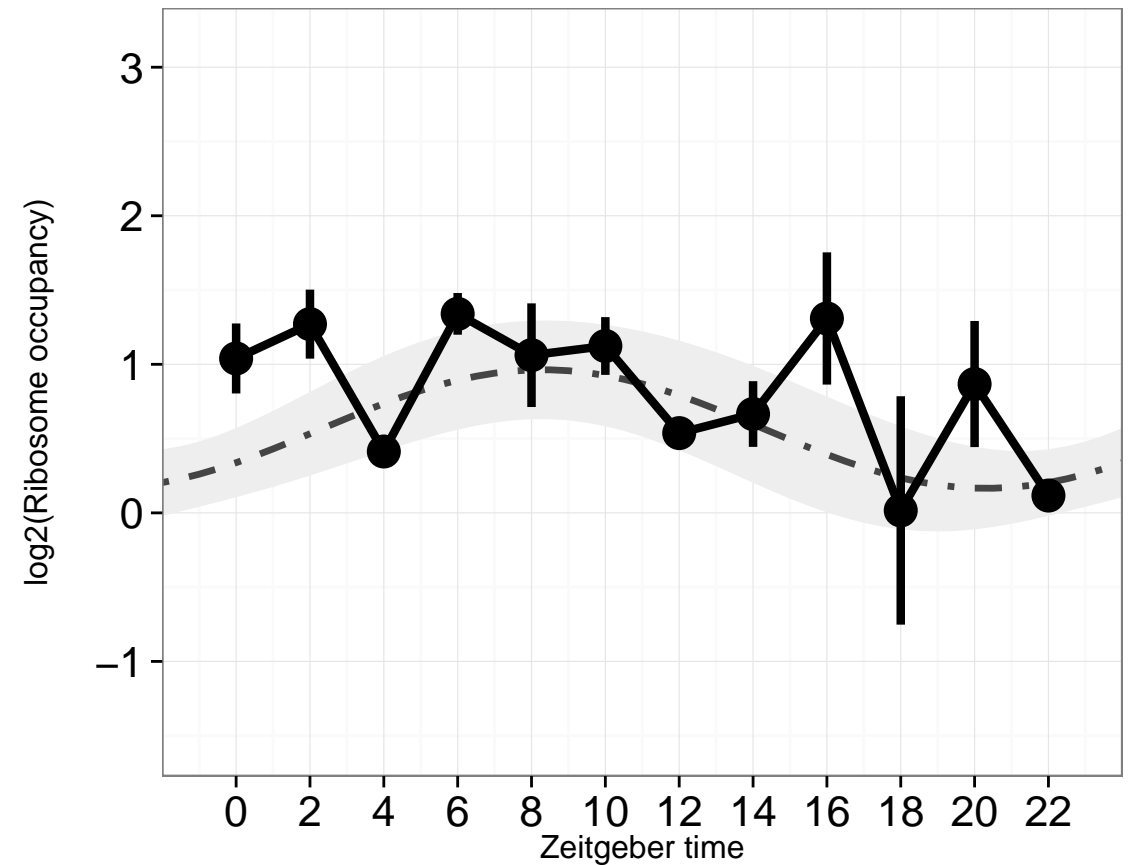

Supplement: SuppDataset_1.zip [file Crtc1_set_A.pdf › Supplemental Dataset 1/A-mRNA_nonrhyth_translation_nonrhyth/Crtc1_set_A.pdf]

## Crtc2

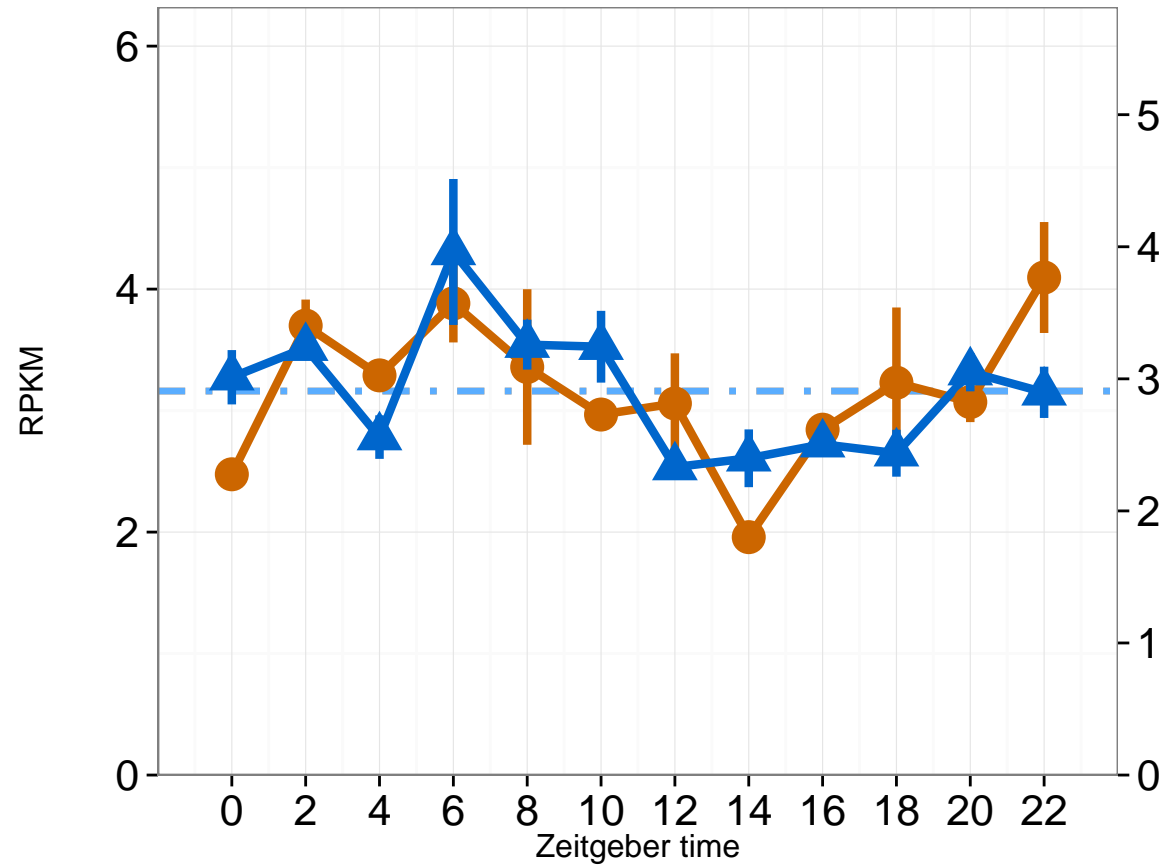

## Crtc2

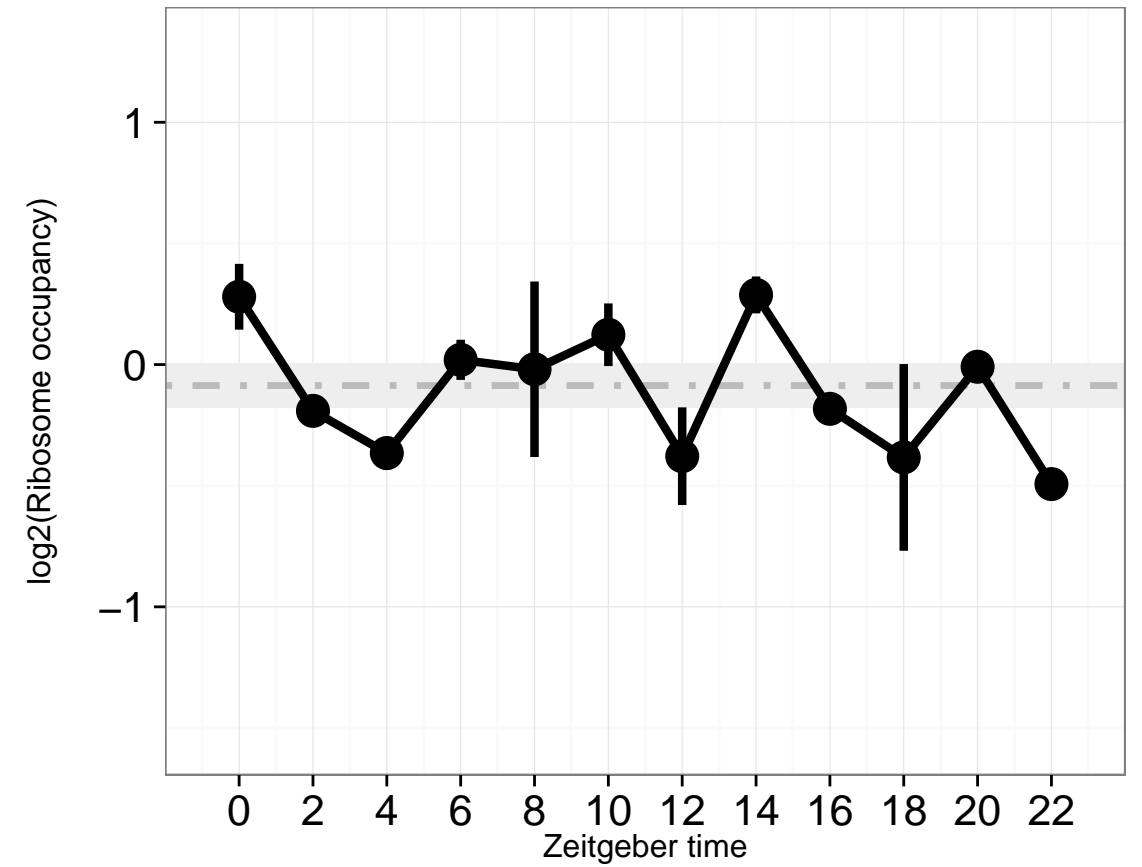

Supplement: SuppDataset_1.zip [file Crtc2_set_A.pdf › Supplemental Dataset 1/A-mRNA_nonrhyth_translation_nonrhyth/Crtc2_set_A.pdf]

## Cryab

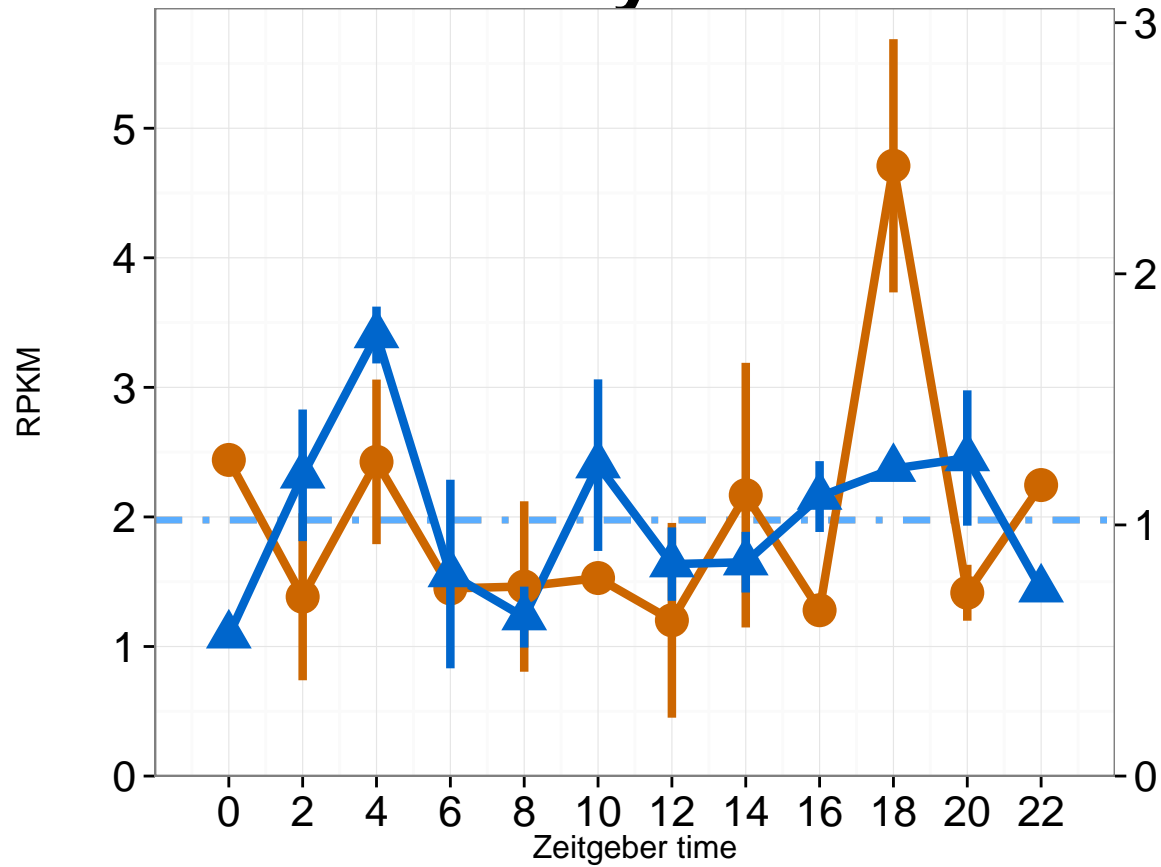

## Cryab

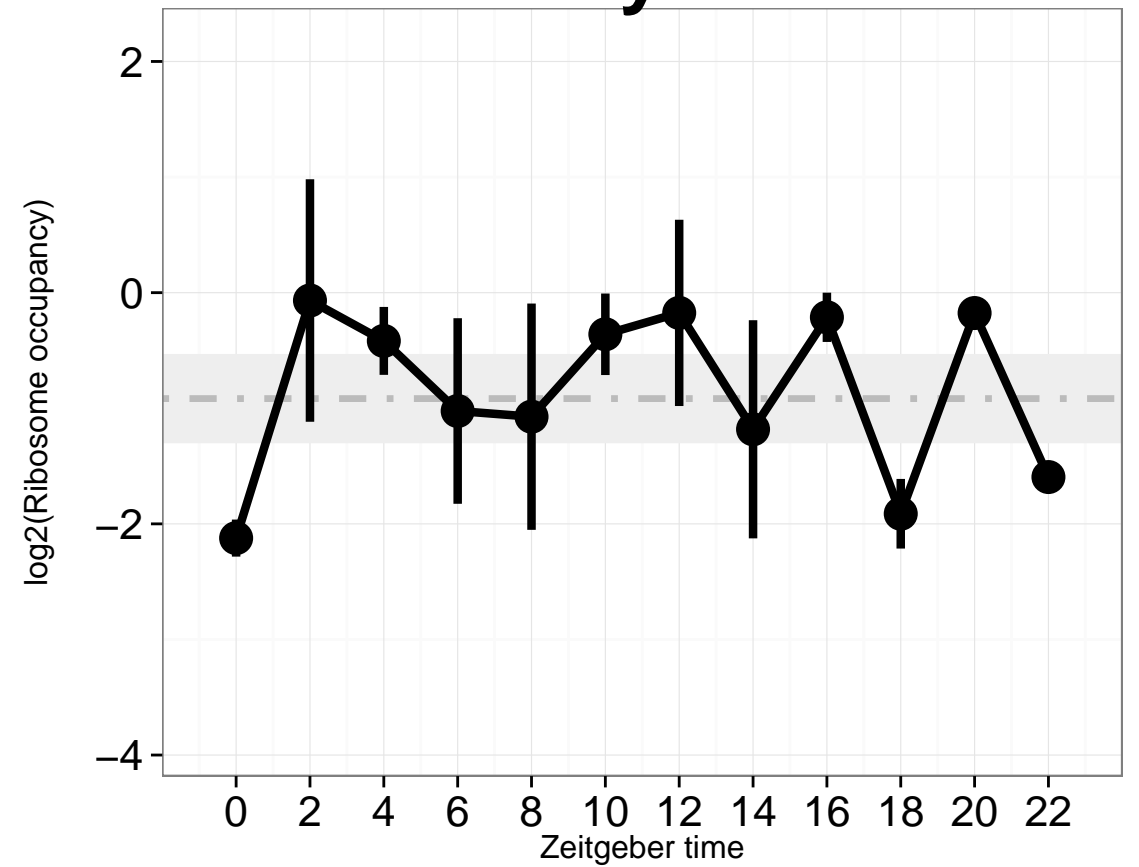

Supplement: SuppDataset_1.zip [file Cryab_set_A.pdf › Supplemental Dataset 1/A-mRNA_nonrhyth_translation_nonrhyth/Cryab_set_A.pdf]

# Crygn

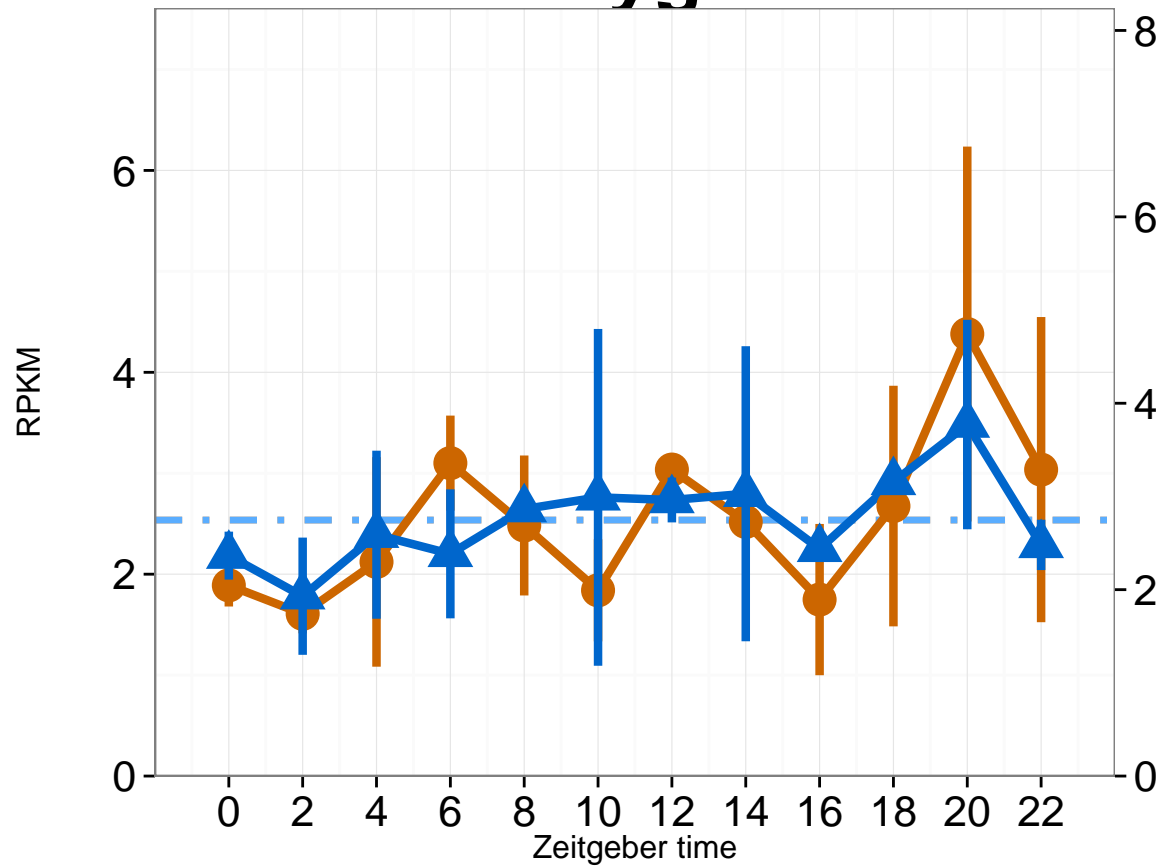

# Crygn

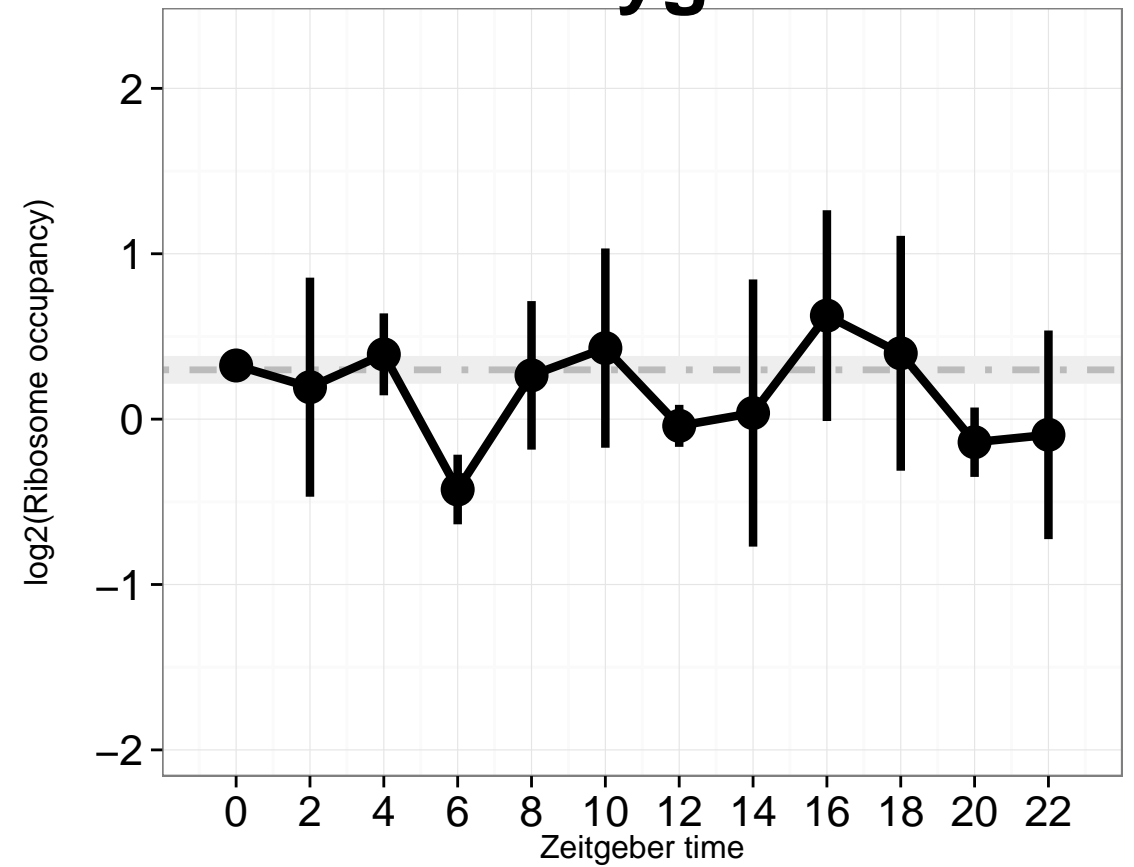

Supplement: SuppDataset_1.zip [file Crygn_set_A.pdf › Supplemental Dataset 1/A-mRNA_nonrhyth_translation_nonrhyth/Crygn_set_A.pdf]

# CryI1

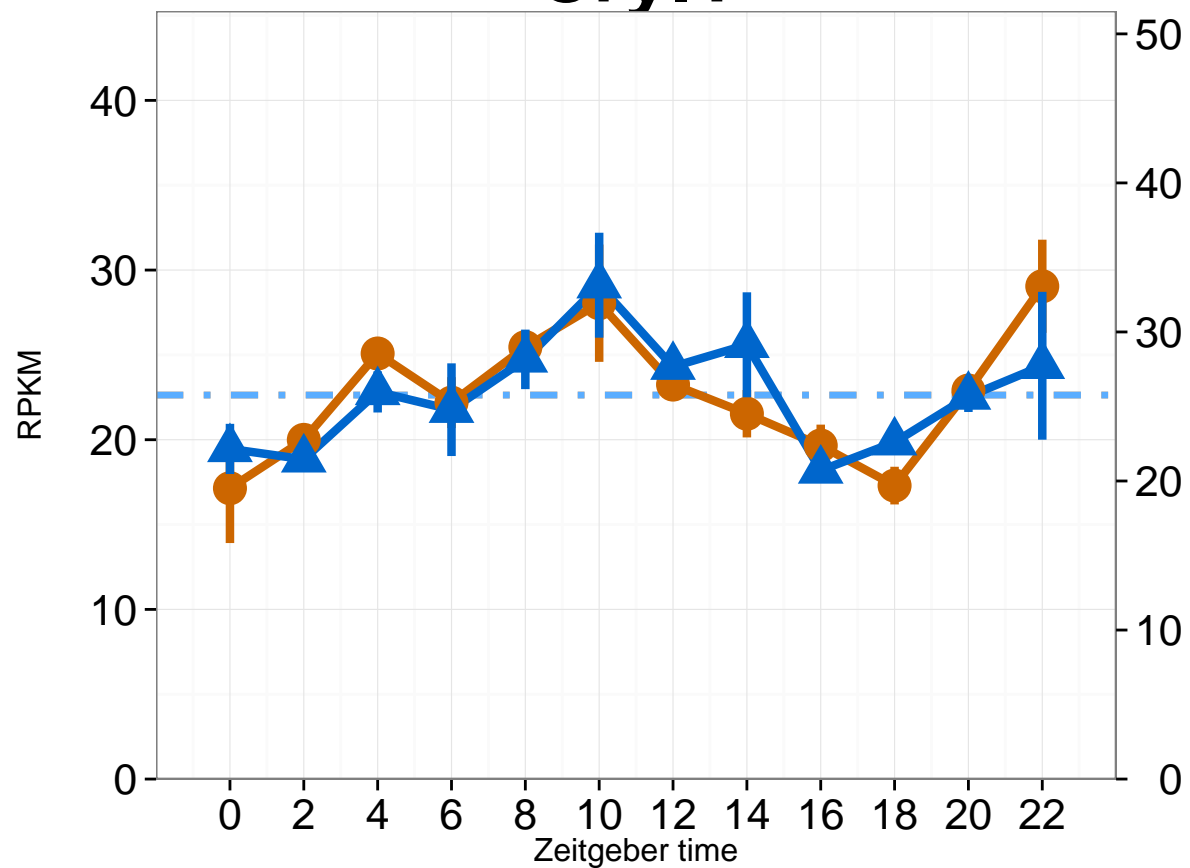

# CryI1

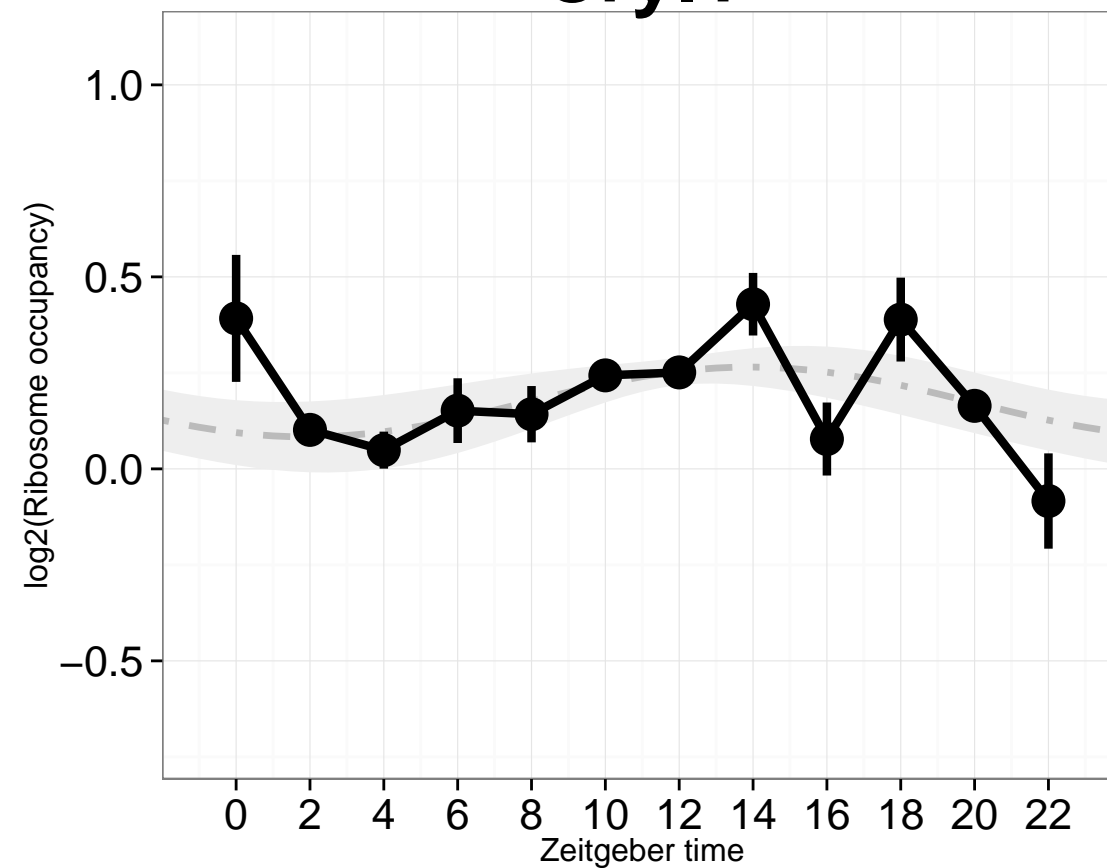

Supplement: SuppDataset_1.zip [file Cryl1_set_A.pdf › Supplemental Dataset 1/A-mRNA_nonrhyth_translation_nonrhyth/Cryl1_set_A.pdf]

## Crym

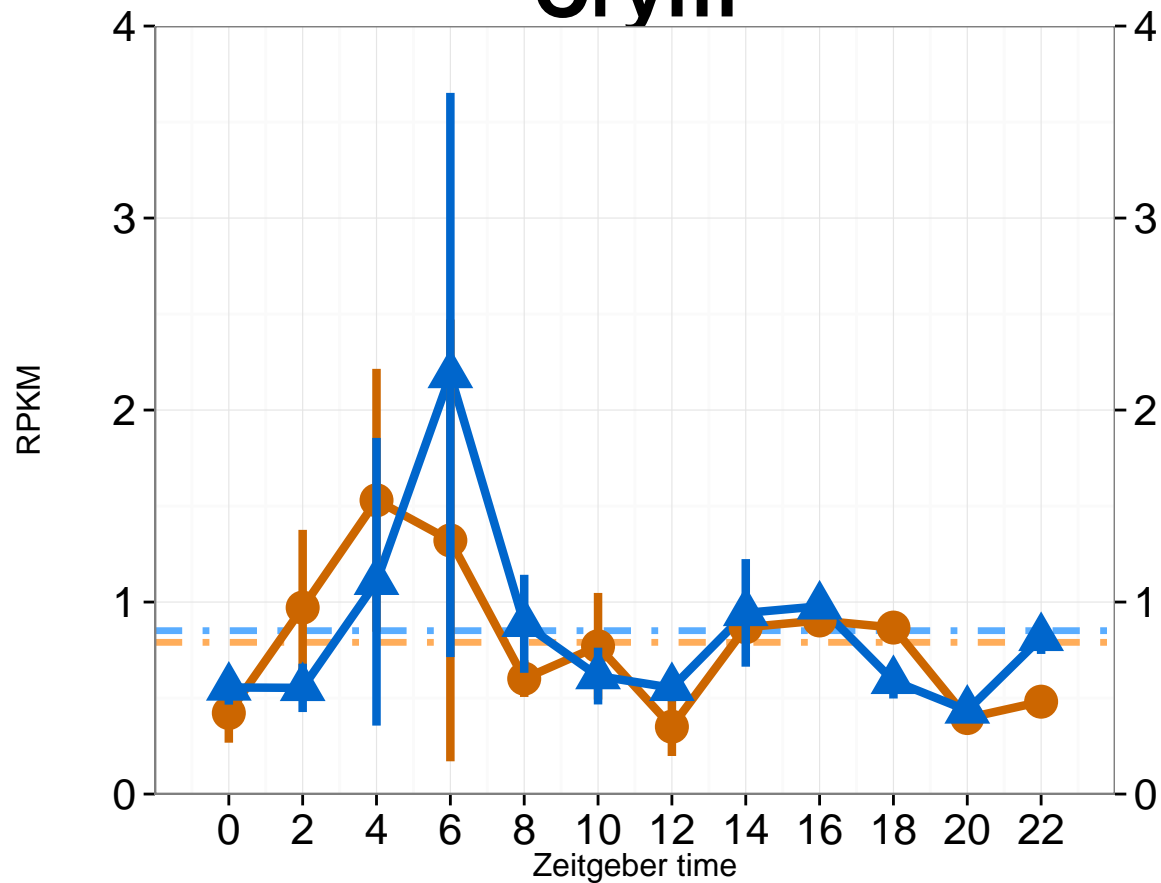

## Crym

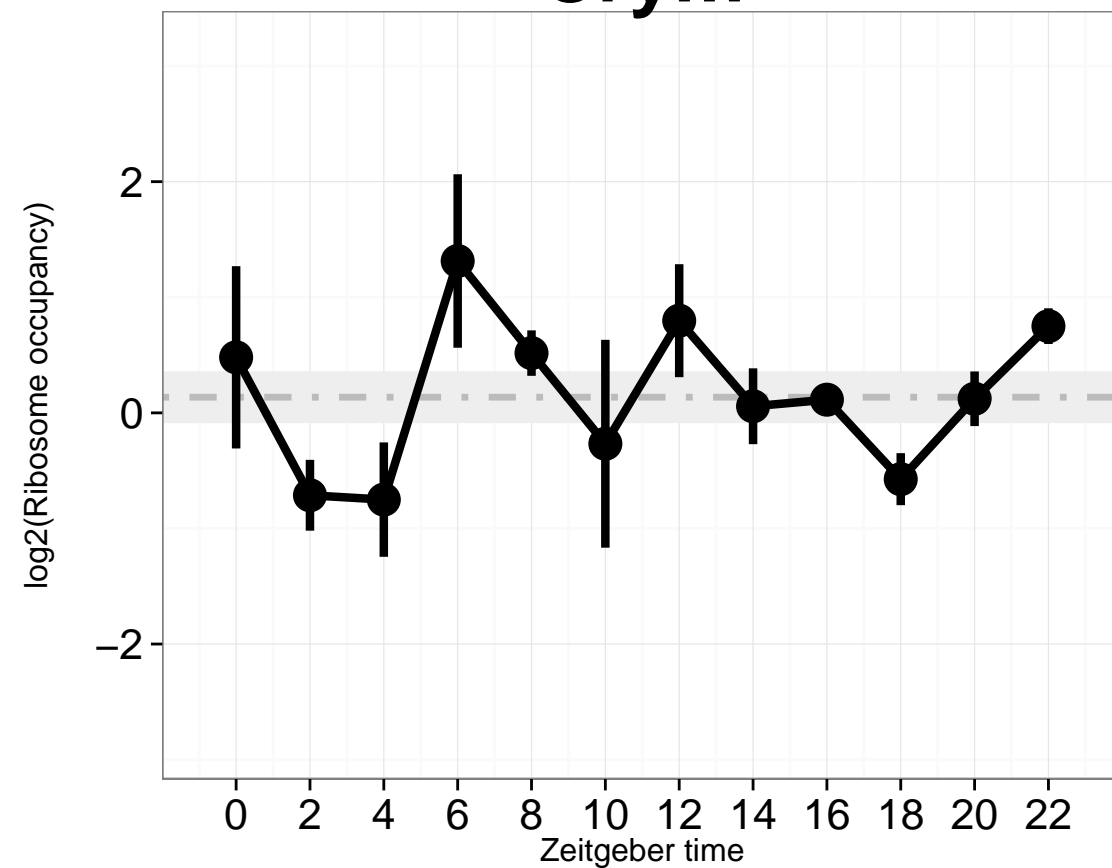

Supplement: SuppDataset_1.zip [file Crym_set_A.pdf › Supplemental Dataset 1/A-mRNA_nonrhyth_translation_nonrhyth/Crym_set_A.pdf]

## Cryz

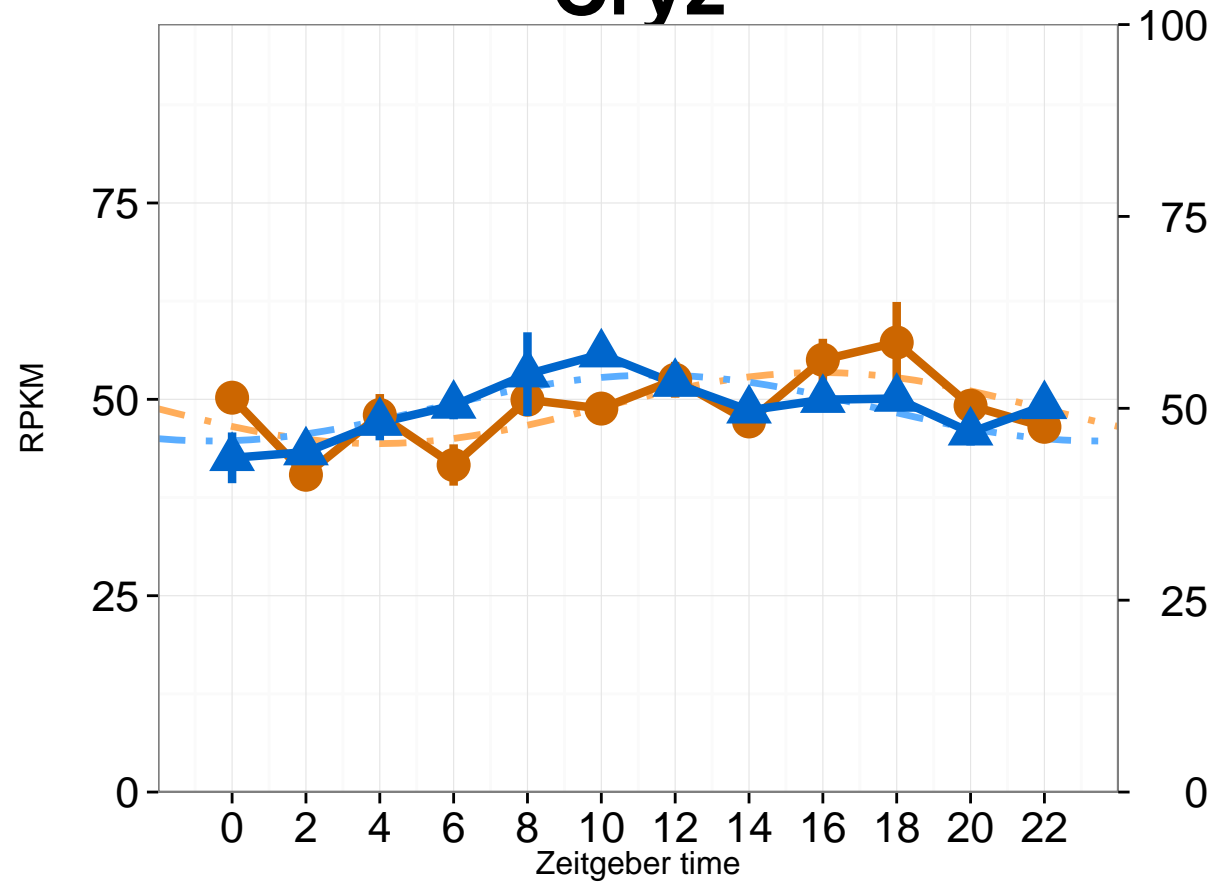

## Cryz

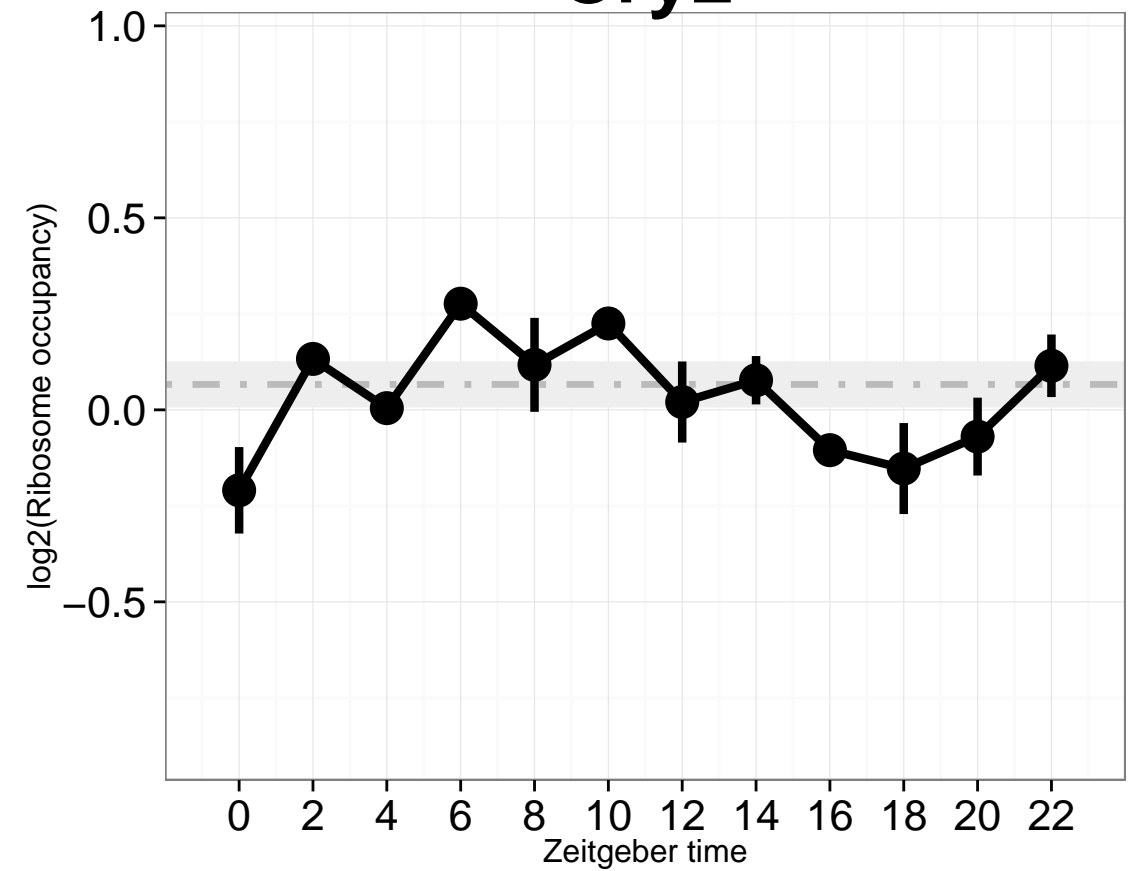

Supplement: SuppDataset_1.zip [file Cryz_set_A.pdf › Supplemental Dataset 1/A-mRNA_nonrhyth_translation_nonrhyth/Cryz_set_A.pdf]

# Cryz1

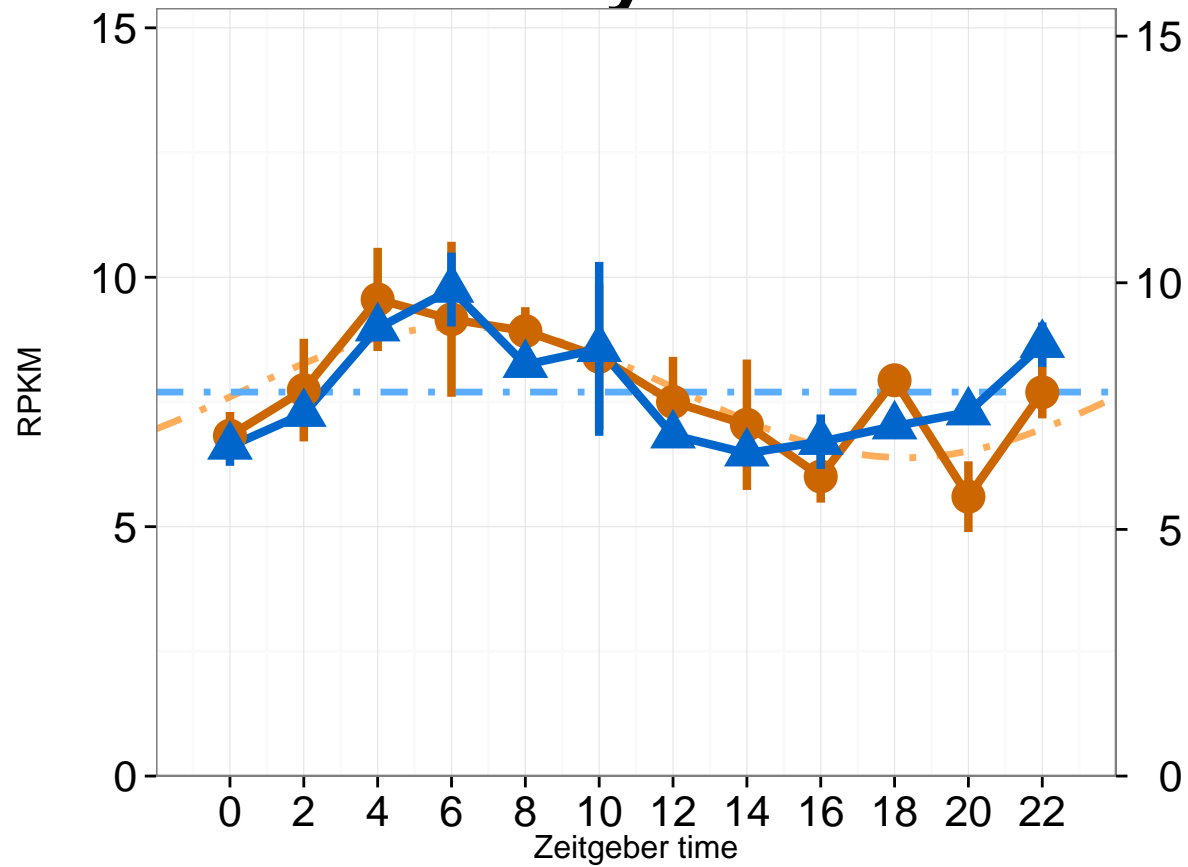

# Cryz1

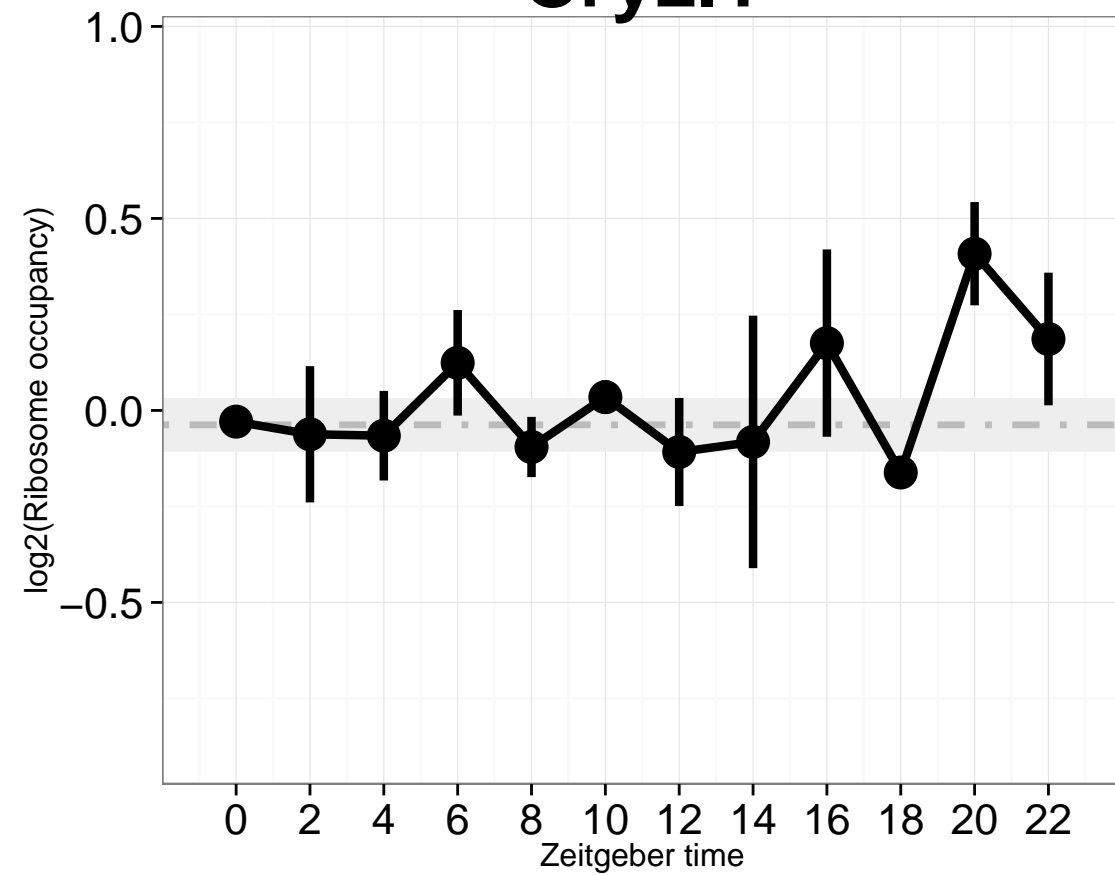

Supplement: SuppDataset_1.zip [file Cryzl1_set_A.pdf › Supplemental Dataset 1/A-mRNA_nonrhyth_translation_nonrhyth/Cryzl1_set_A.pdf]

**Cs**

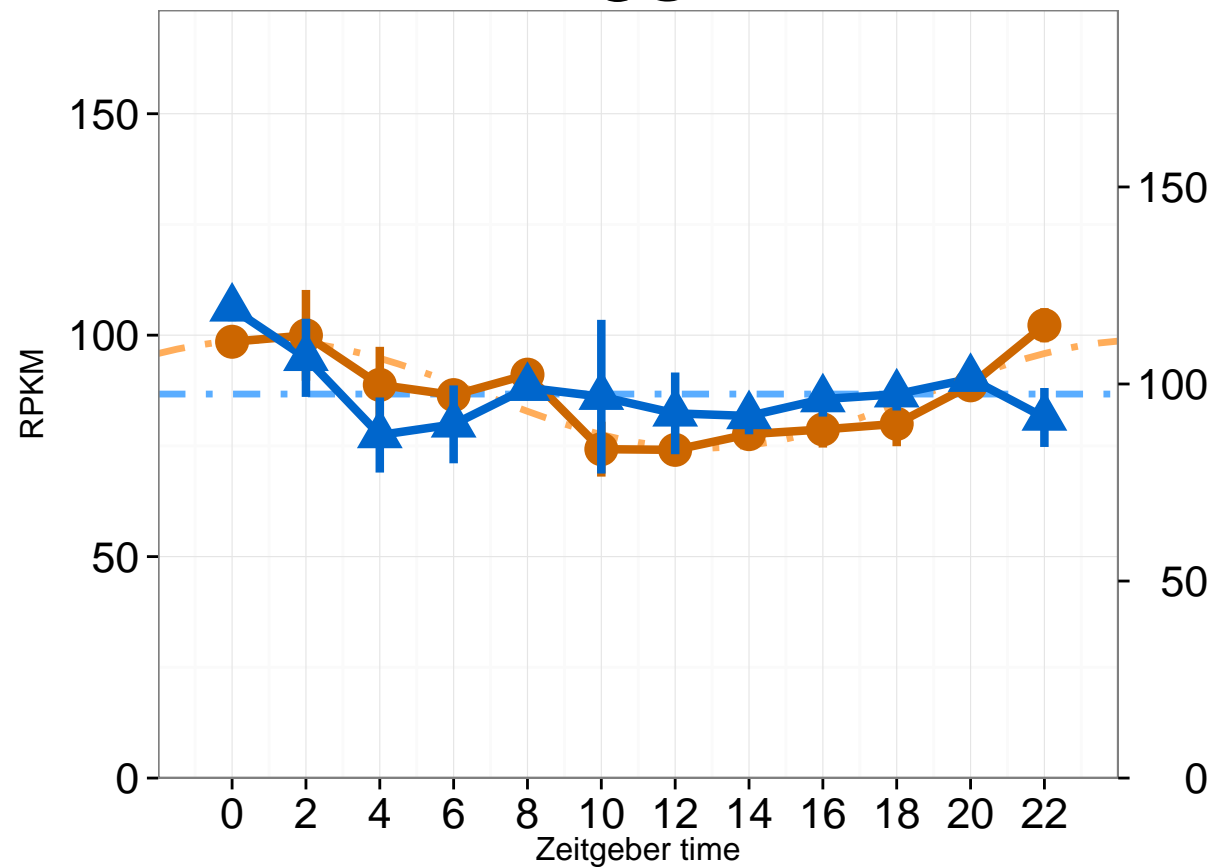

**Cs**

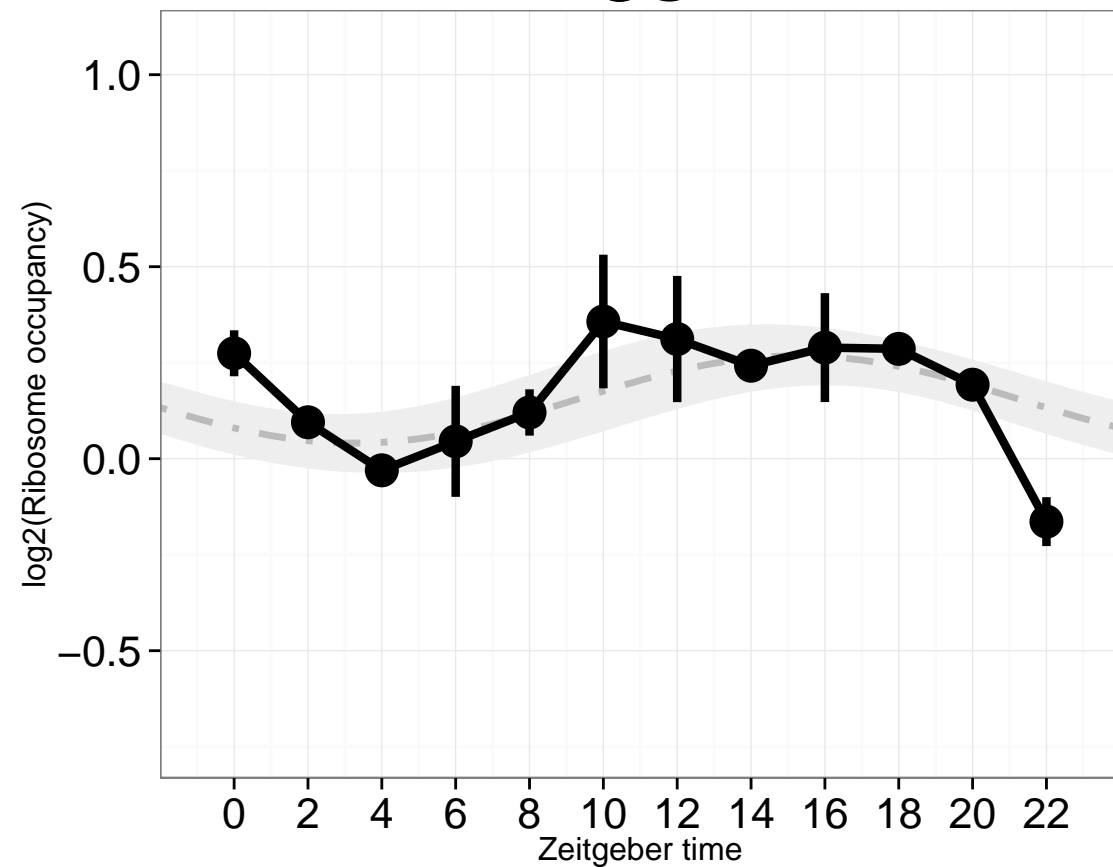

Supplement: SuppDataset_1.zip [file Cs_set_A.pdf › Supplemental Dataset 1/A-mRNA_nonrhyth_translation_nonrhyth/Cs_set_A.pdf]

# Csde1

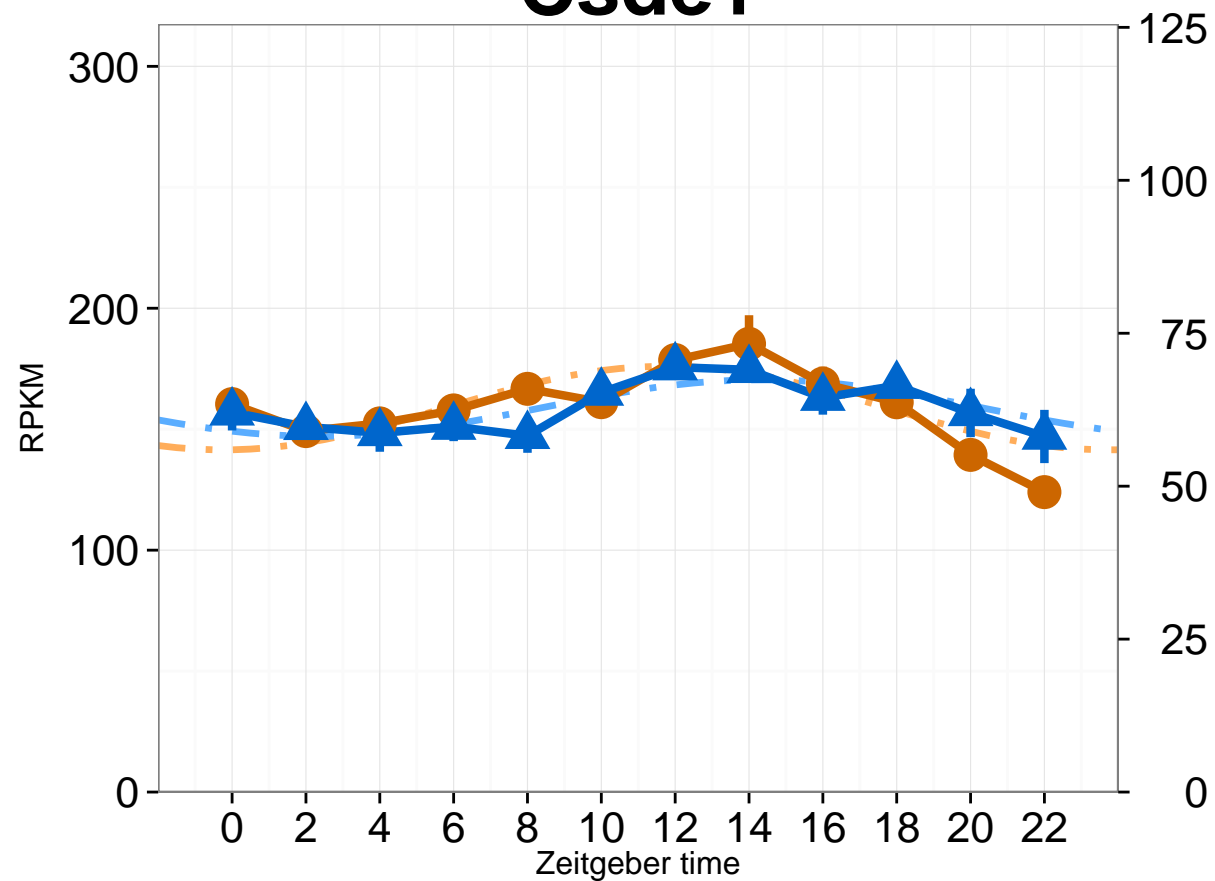

# Csde1

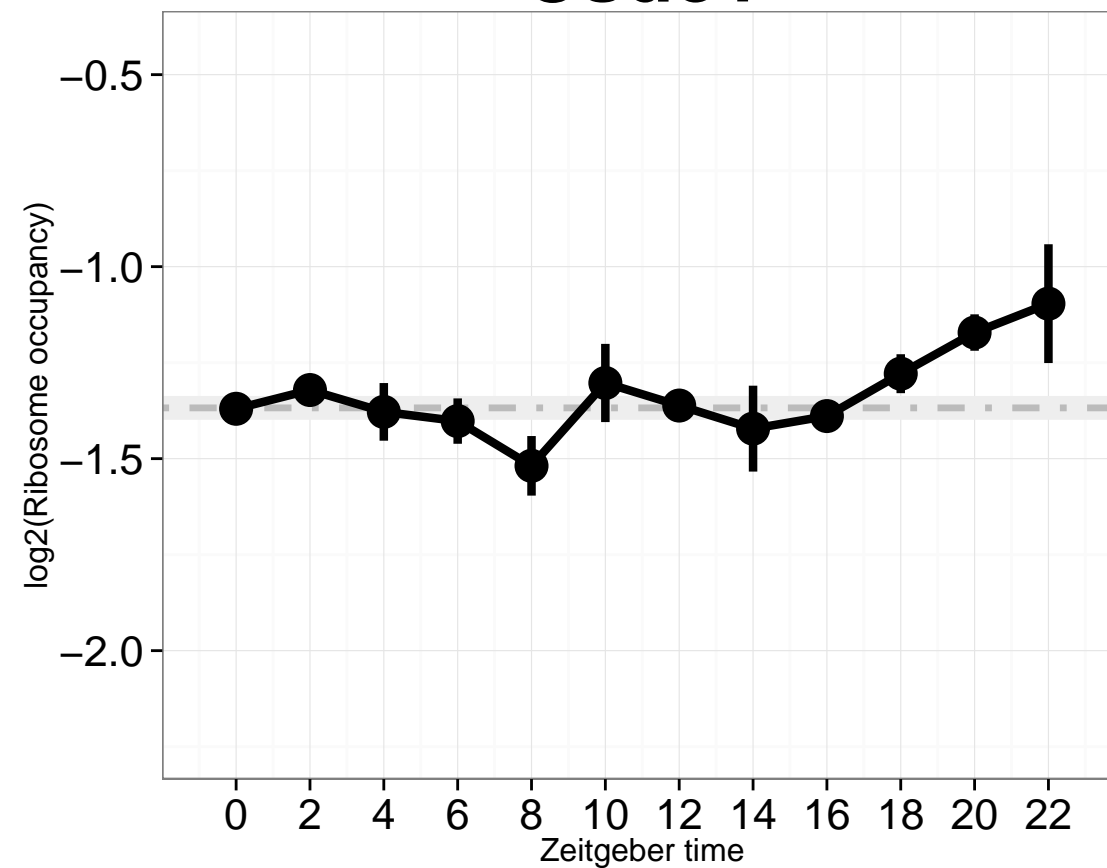

Supplement: SuppDataset_1.zip [file Csde1_set_A.pdf › Supplemental Dataset 1/A-mRNA_nonrhyth_translation_nonrhyth/Csde1_set_A.pdf]

## Cse1l

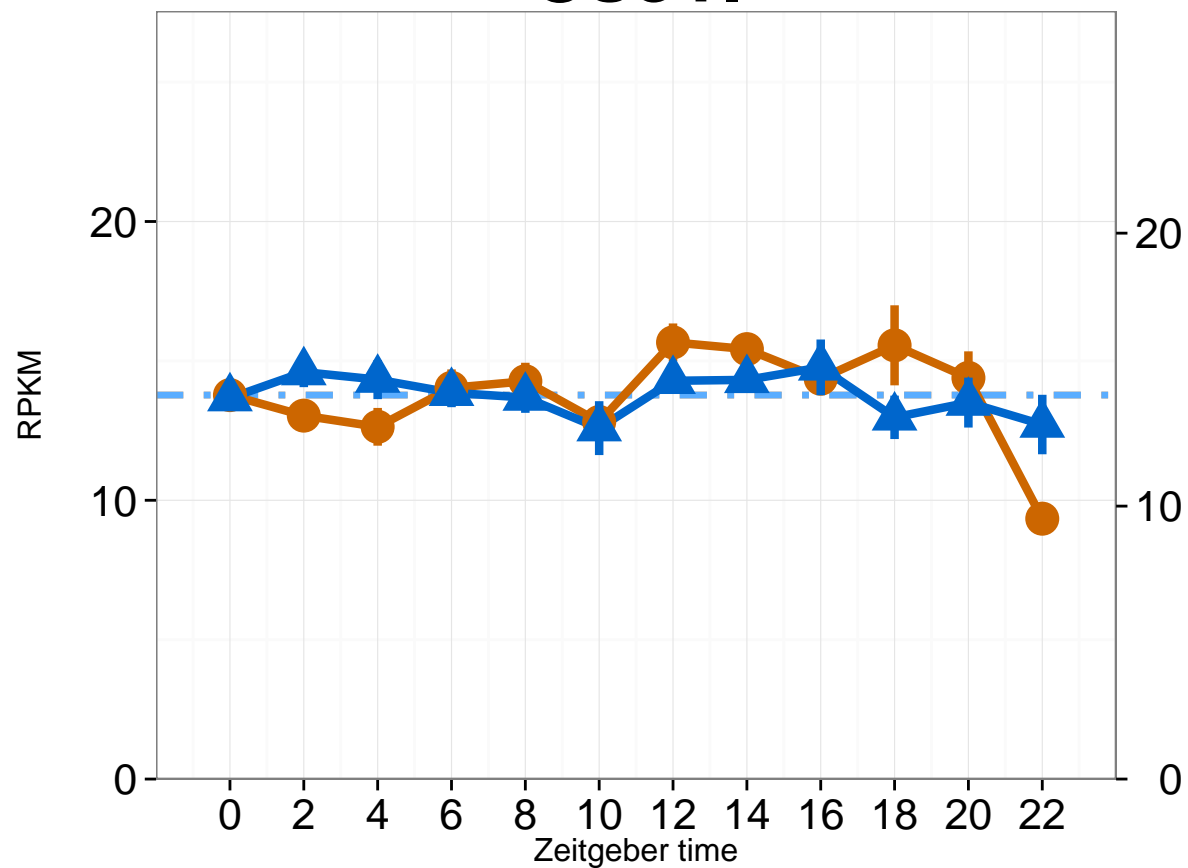

## Cse1l

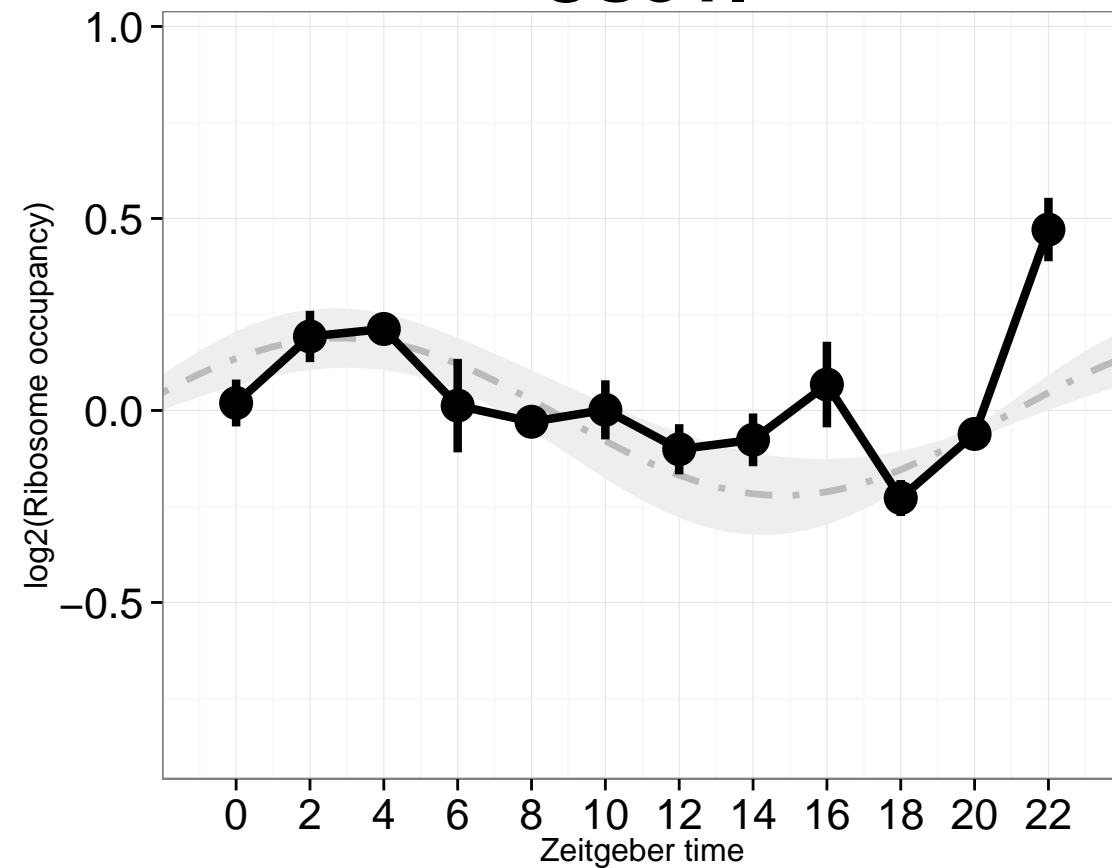

Supplement: SuppDataset_1.zip [file Cse1l_set_A.pdf › Supplemental Dataset 1/A-mRNA_nonrhyth_translation_nonrhyth/Cse1l_set_A.pdf]

# Csf1r

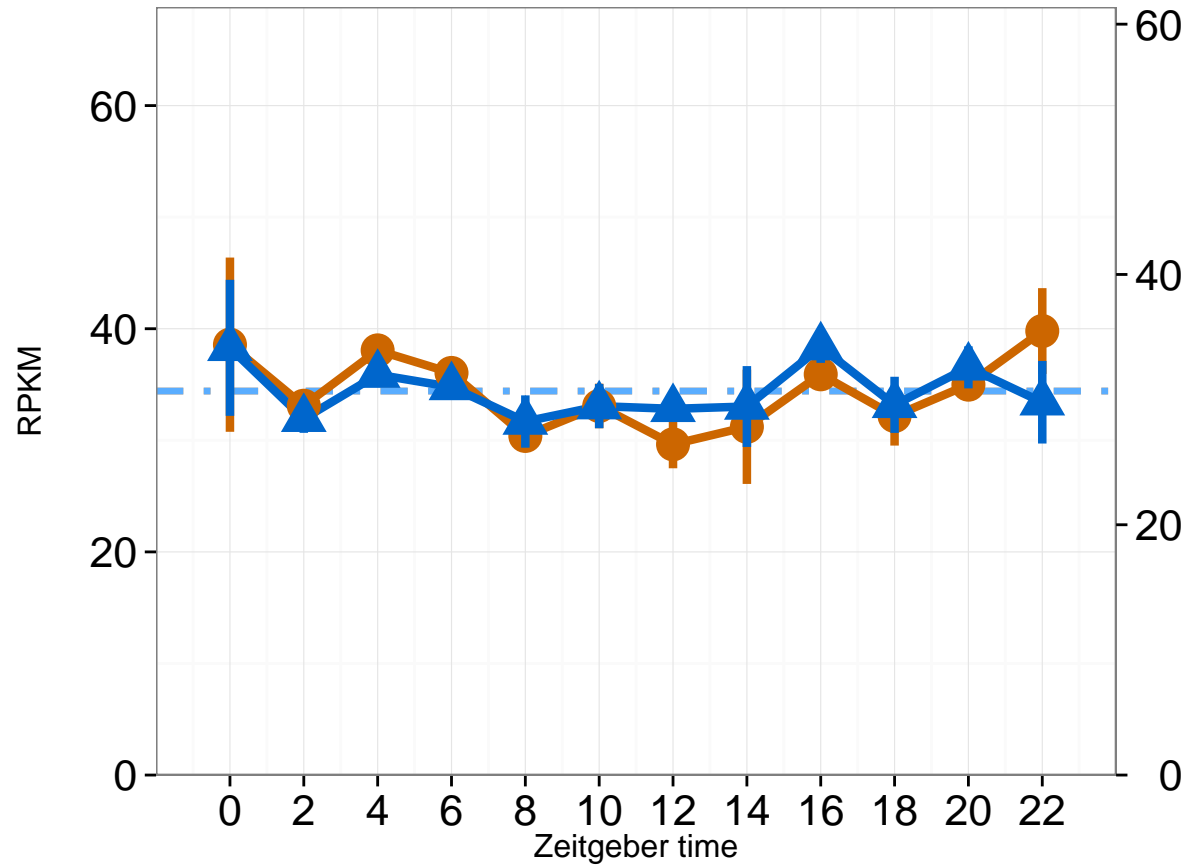

# Csf1r

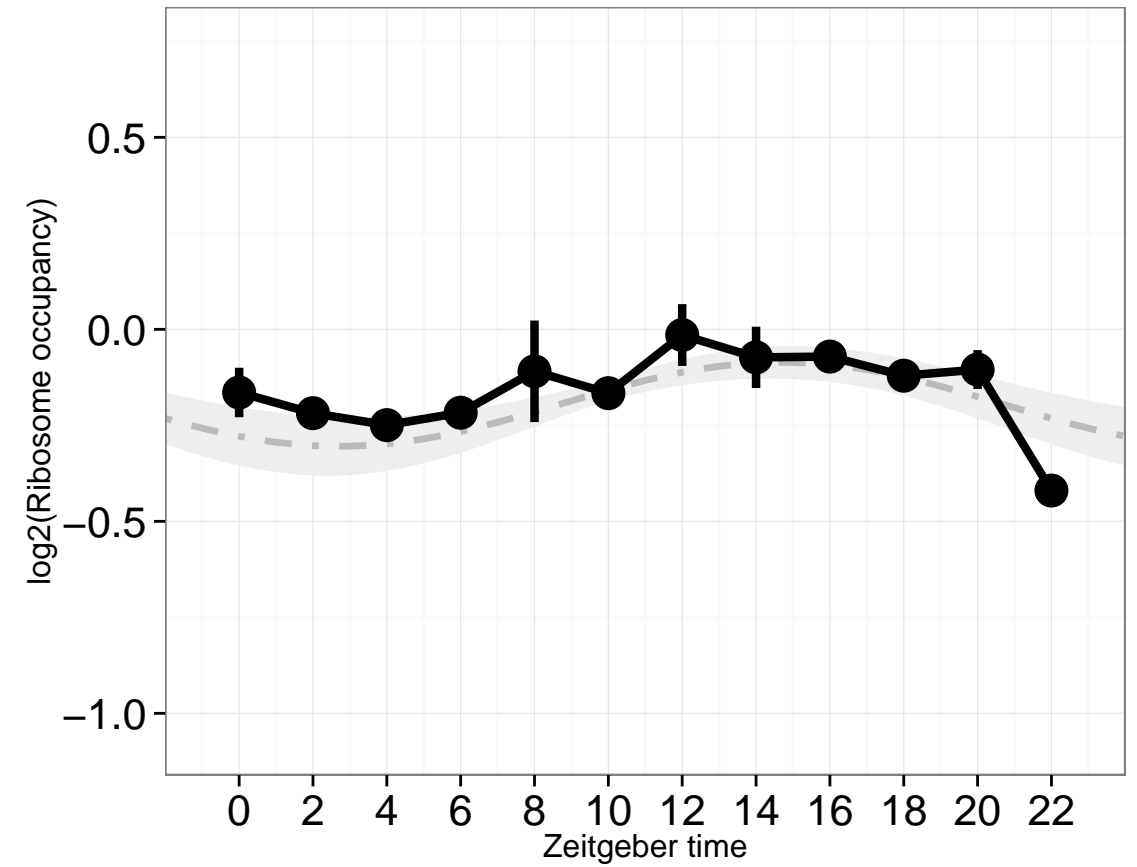

Supplement: SuppDataset_1.zip [file Csf1r_set_A.pdf › Supplemental Dataset 1/A-mRNA_nonrhyth_translation_nonrhyth/Csf1r_set_A.pdf]

# Csf2ra

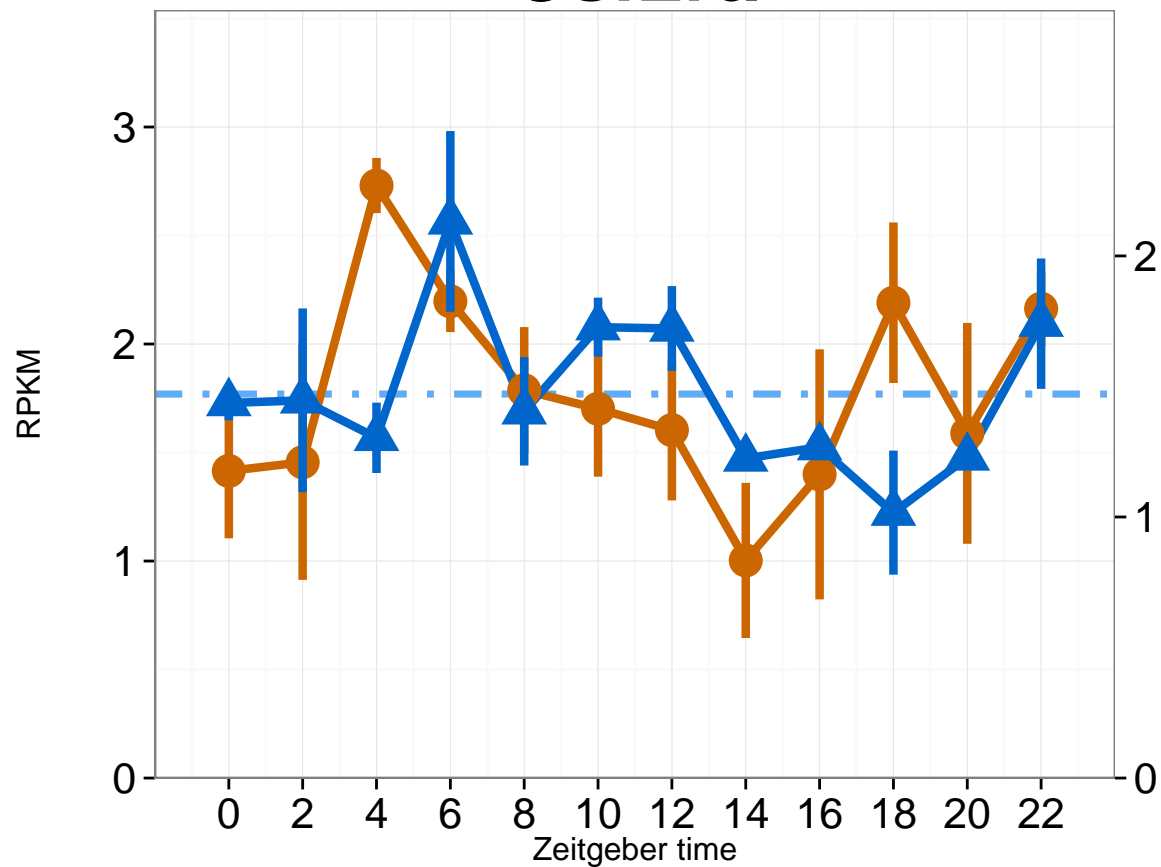

# Csf2ra

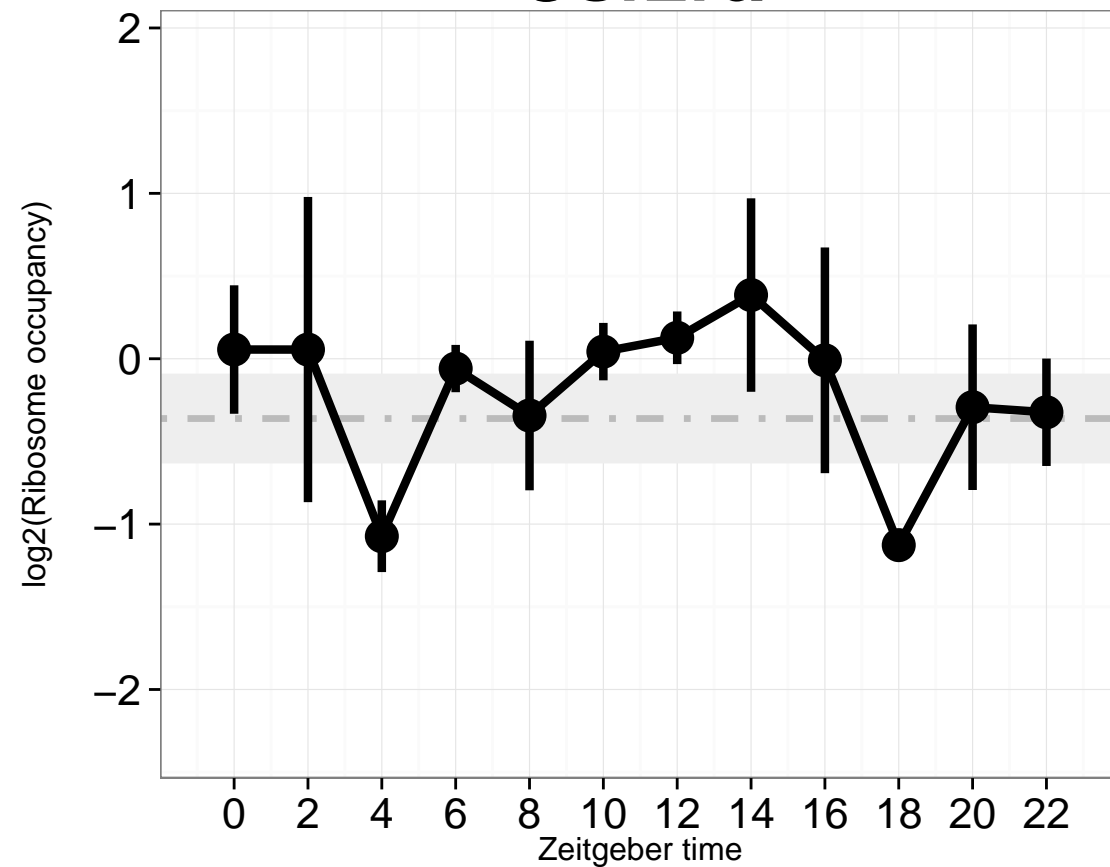

Supplement: SuppDataset_1.zip [file Csf2ra_set_A.pdf › Supplemental Dataset 1/A-mRNA_nonrhyth_translation_nonrhyth/Csf2ra_set_A.pdf]

Csf2rb2

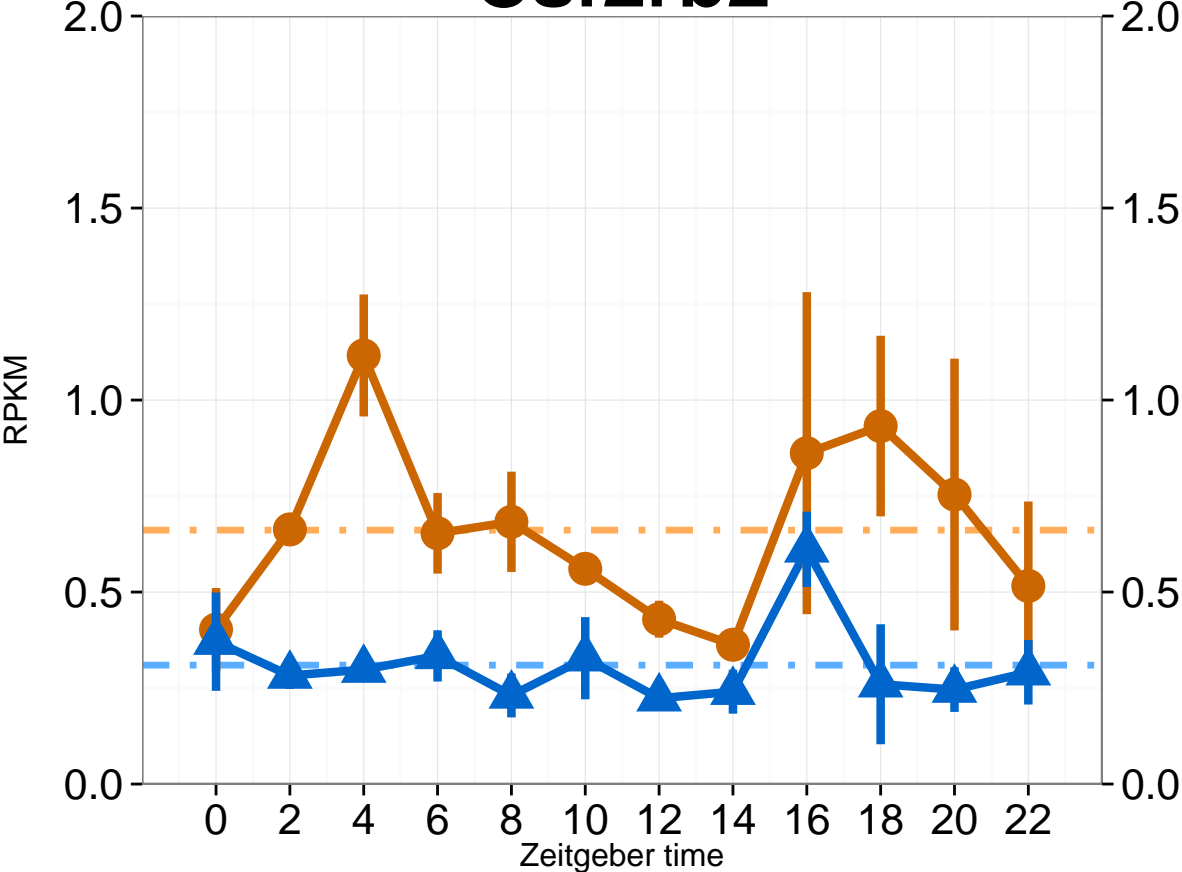

Csf2rb2

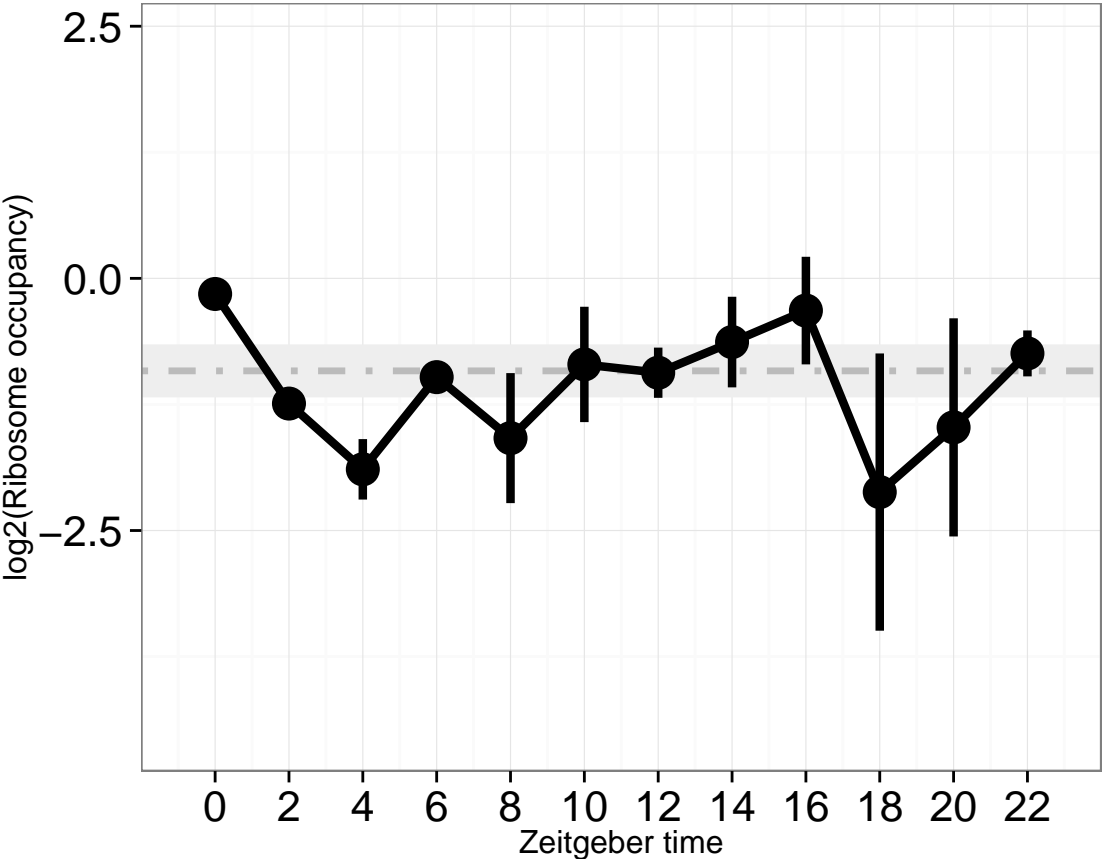

Supplement: SuppDataset_1.zip [file Csf2rb2_set_A.pdf › Supplemental Dataset 1/A-mRNA_nonrhyth_translation_nonrhyth/Csf2rb2_set_A.pdf]

# Csf3r

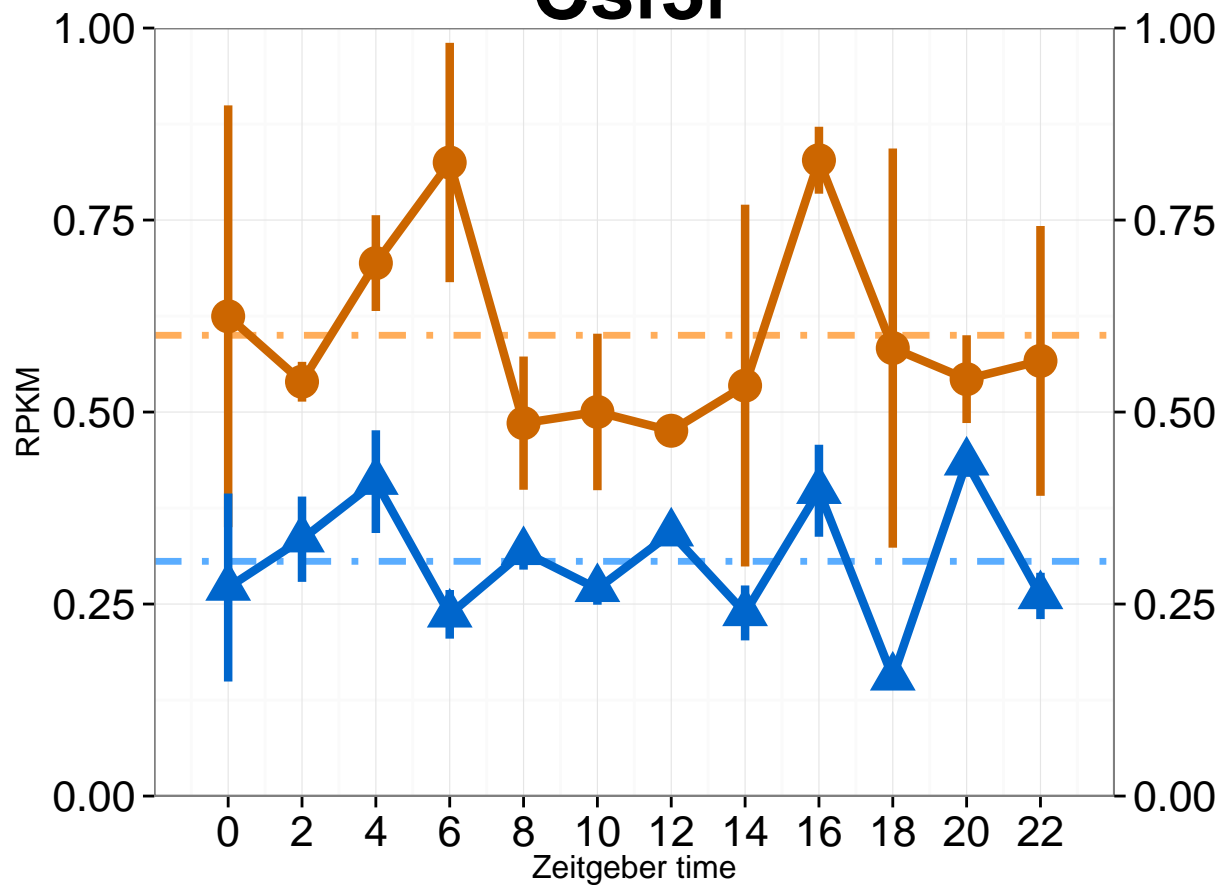

# Csf3r

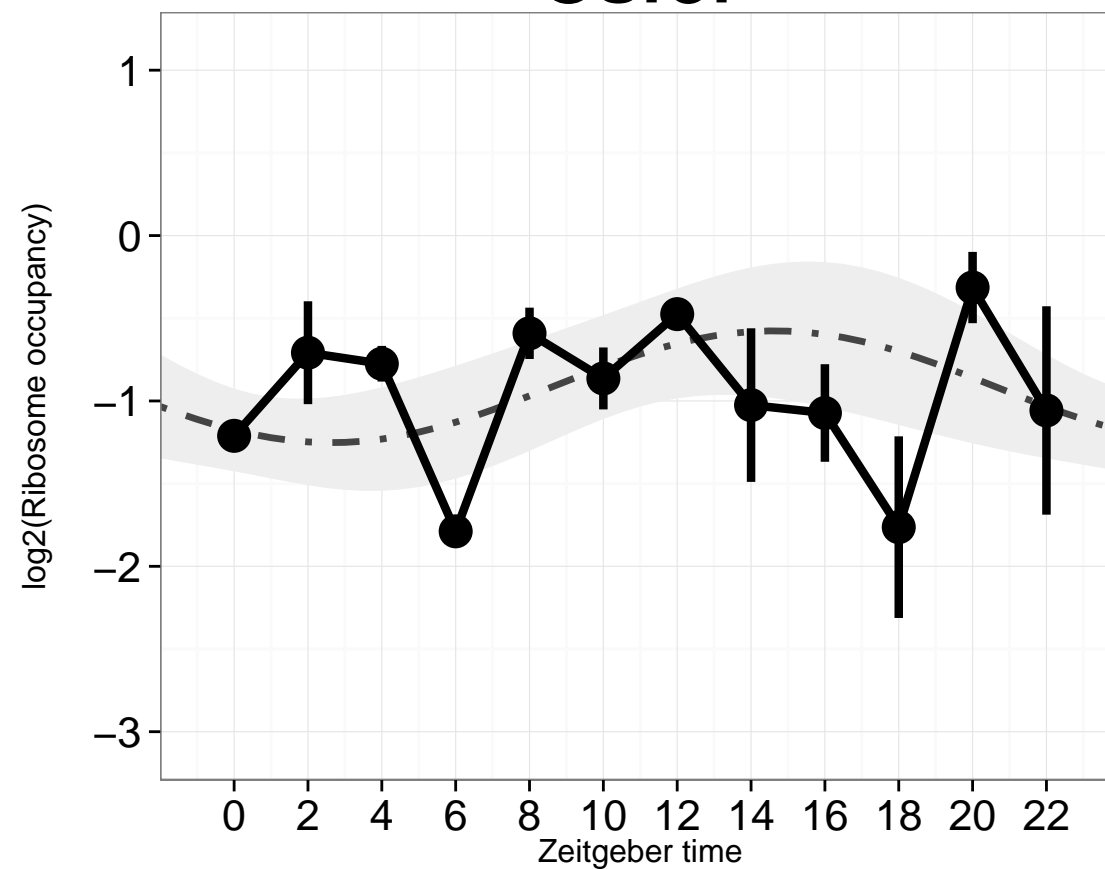

Supplement: SuppDataset_1.zip [file Csf3r_set_A.pdf › Supplemental Dataset 1/A-mRNA_nonrhyth_translation_nonrhyth/Csf3r_set_A.pdf]

## Csgalnact2

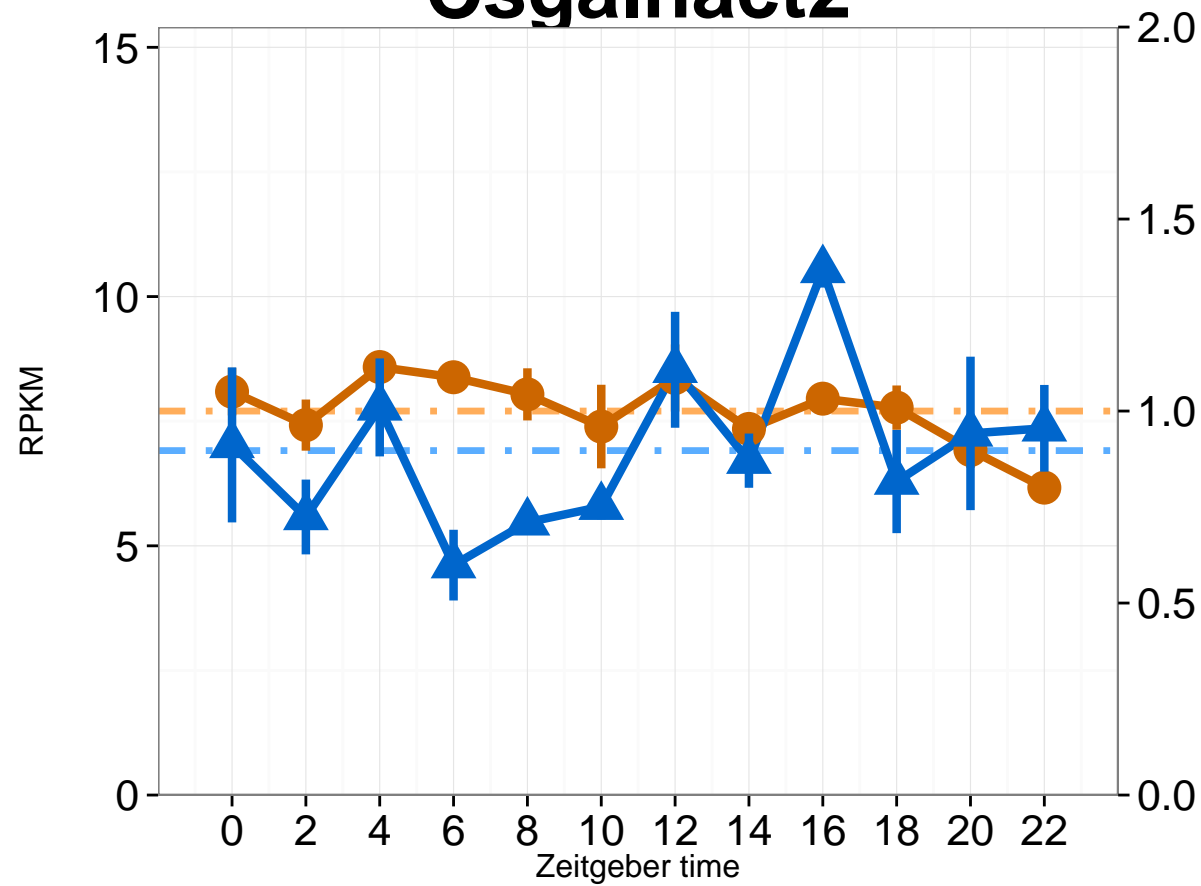

## Csgalnact2

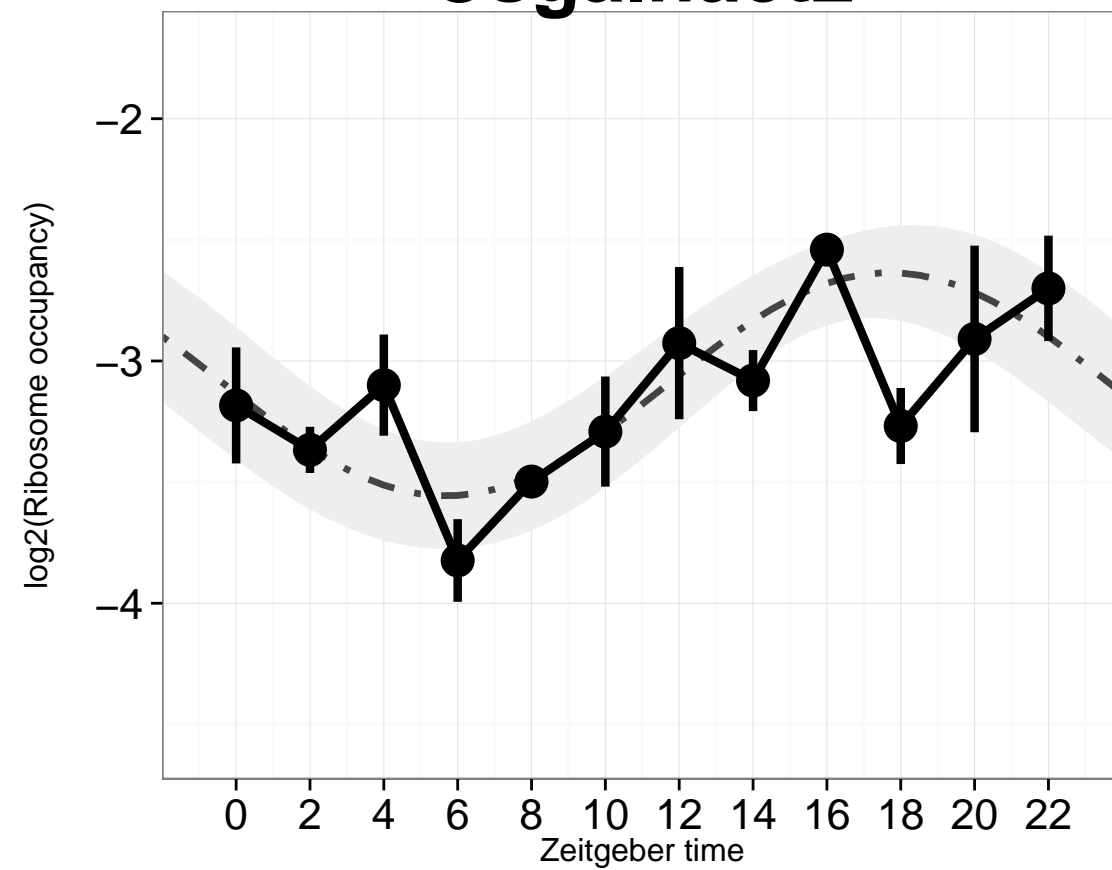

Supplement: SuppDataset_1.zip [file Csgalnact2_set_A.pdf › Supplemental Dataset 1/A-mRNA_nonrhyth_translation_nonrhyth/Csgalnact2_set_A.pdf]

## Csk

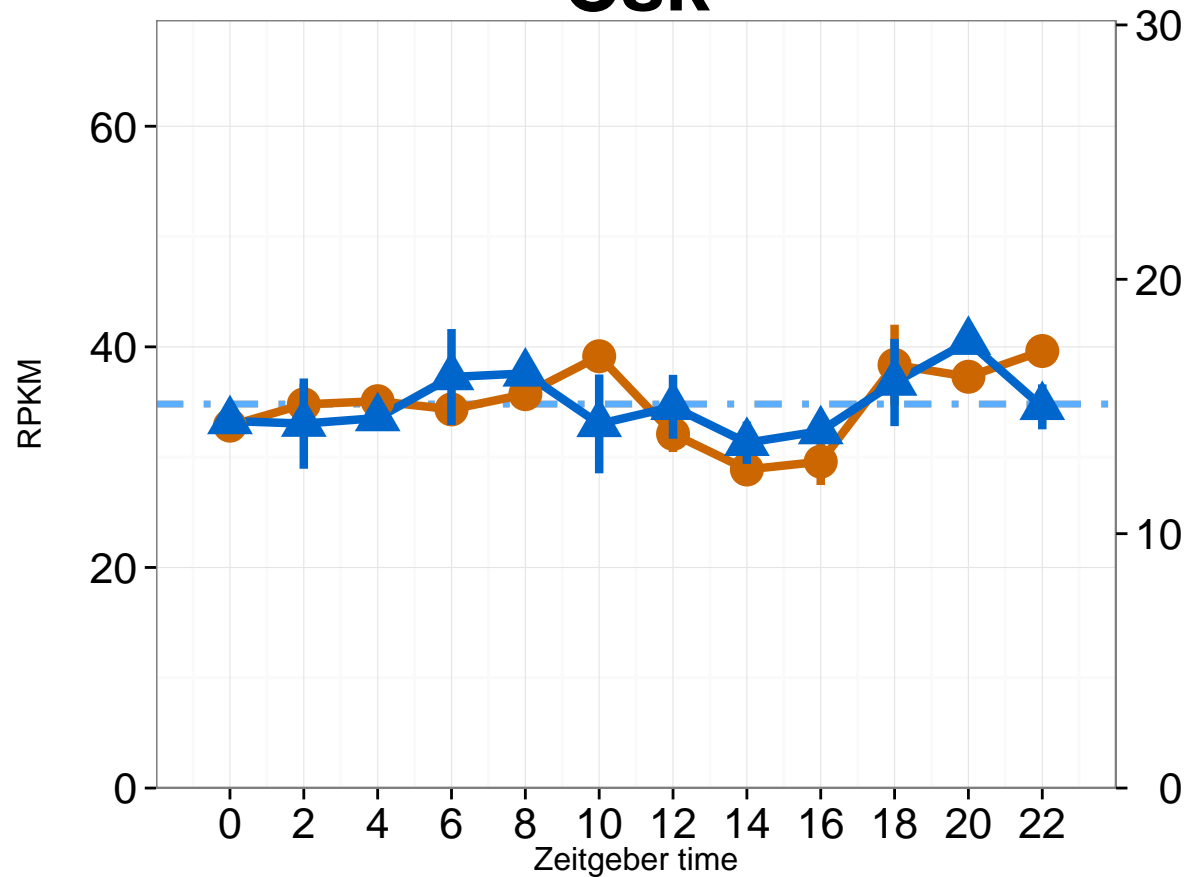

## Csk

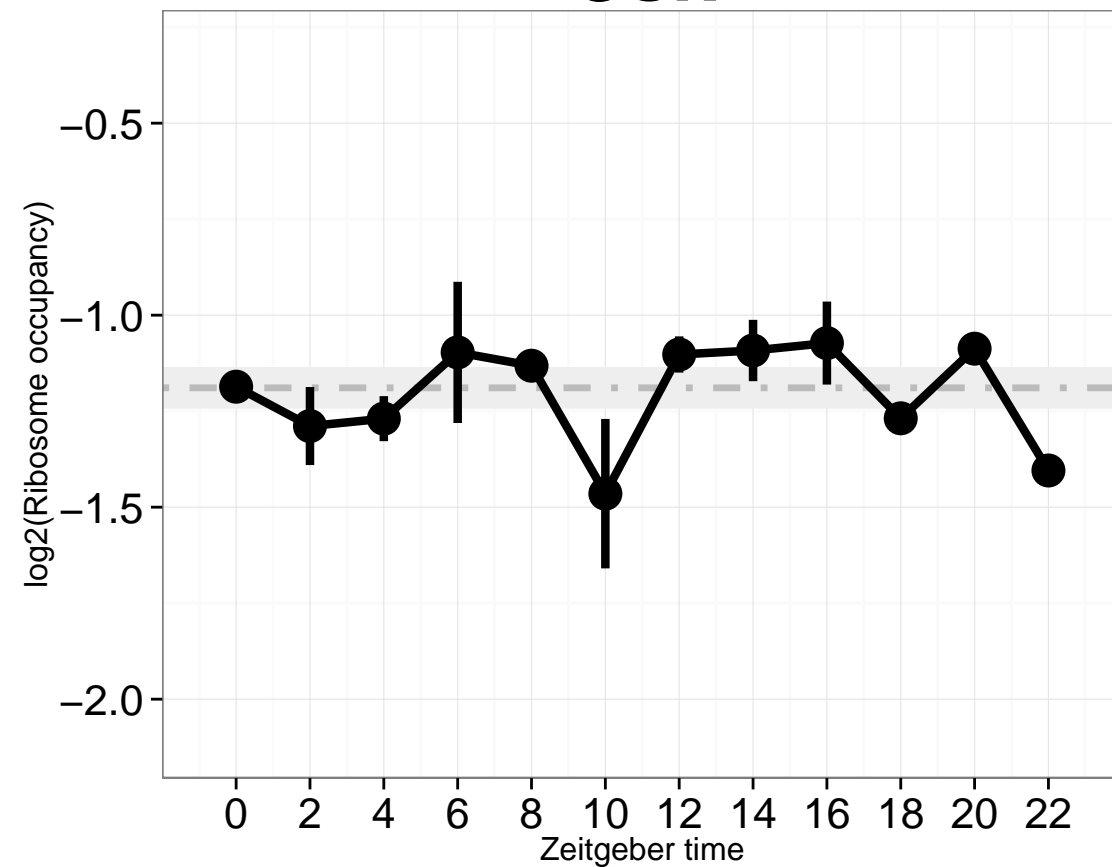

Supplement: SuppDataset_1.zip [file Csk_set_A.pdf › Supplemental Dataset 1/A-mRNA_nonrhyth_translation_nonrhyth/Csk_set_A.pdf]

# Csnk1a1

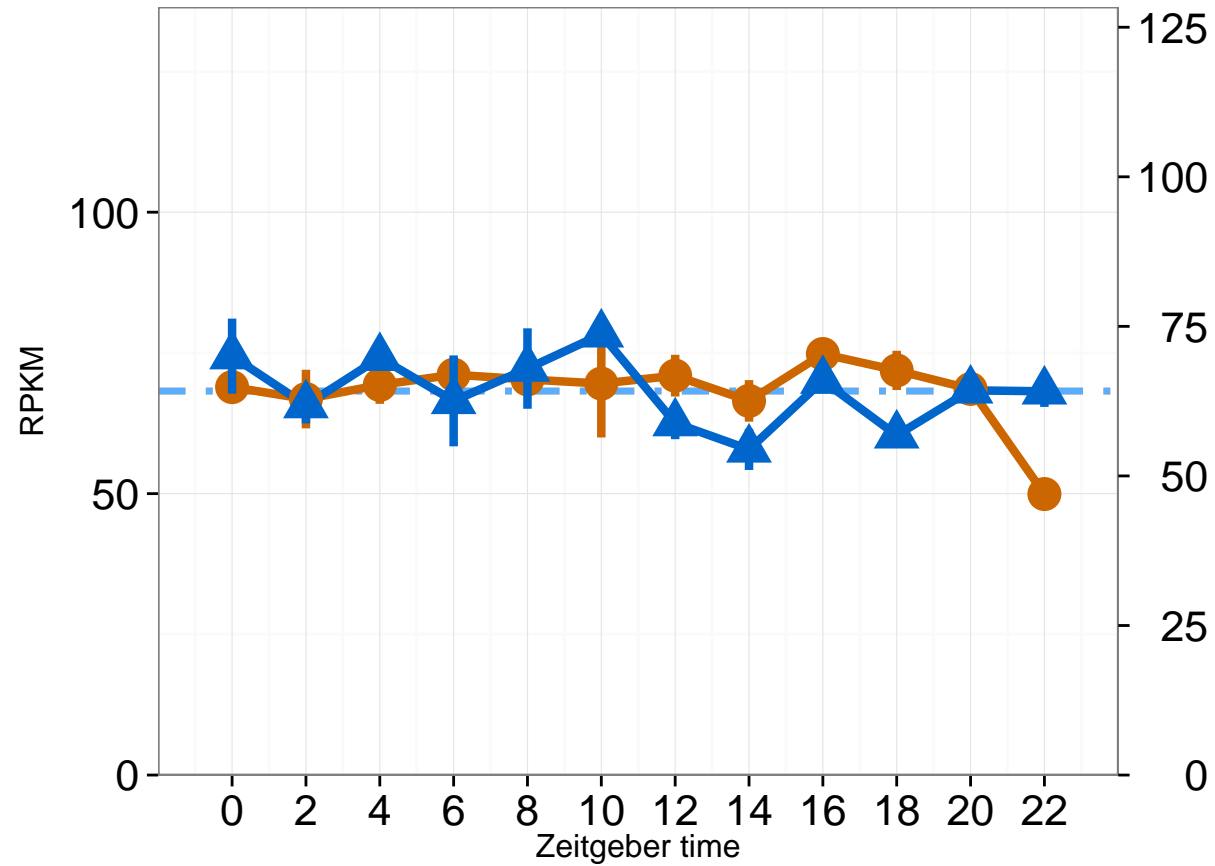

# Csnk1a1

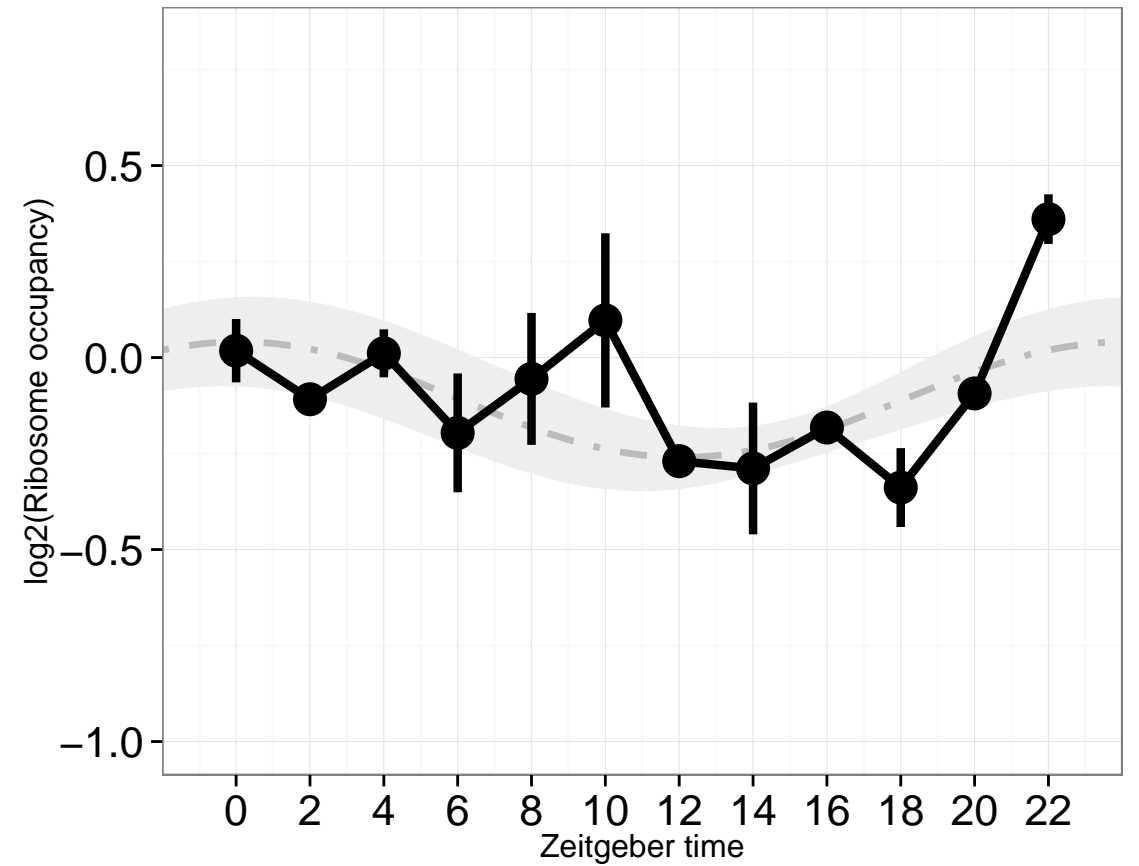

Supplement: SuppDataset_1.zip [file Csnk1a1_set_A.pdf › Supplemental Dataset 1/A-mRNA_nonrhyth_translation_nonrhyth/Csnk1a1_set_A.pdf]

# Csnk1d

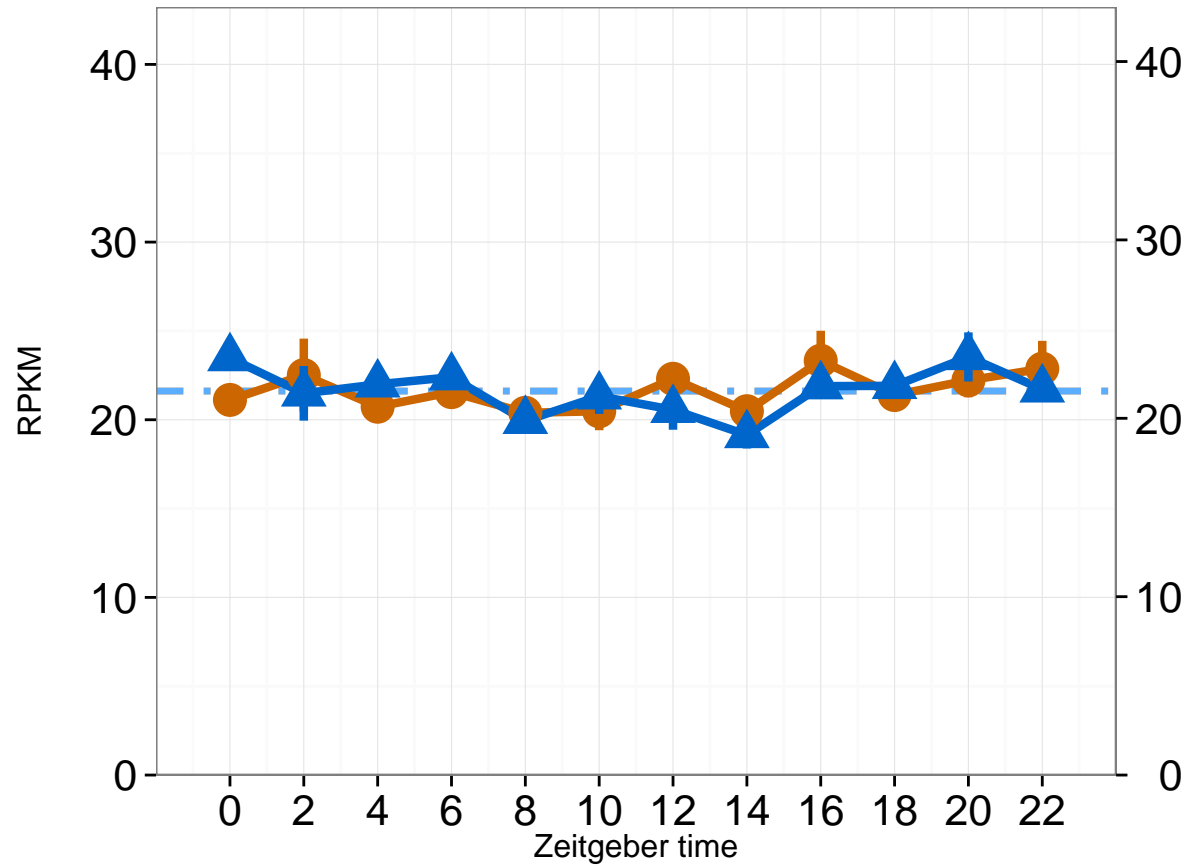

# Csnk1d

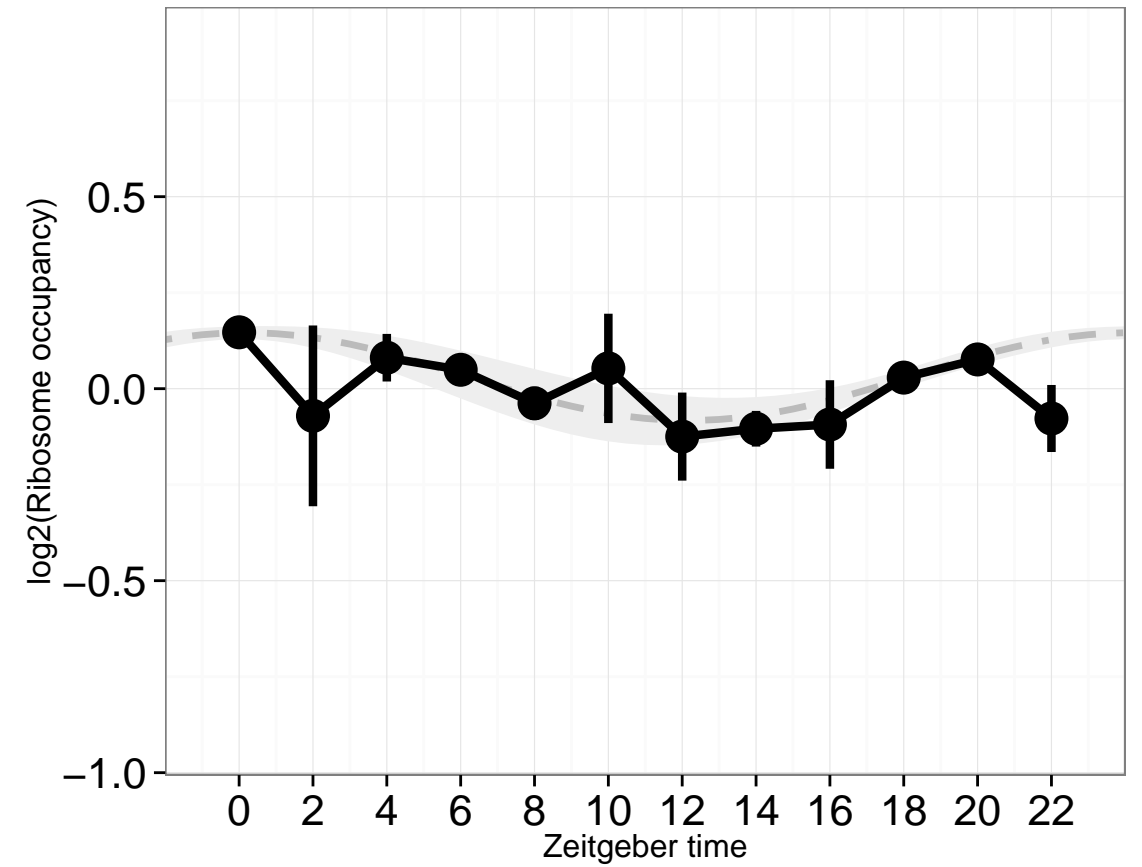

Supplement: SuppDataset_1.zip [file Csnk1d_set_A.pdf › Supplemental Dataset 1/A-mRNA_nonrhyth_translation_nonrhyth/Csnk1d_set_A.pdf]

# Csnk1e

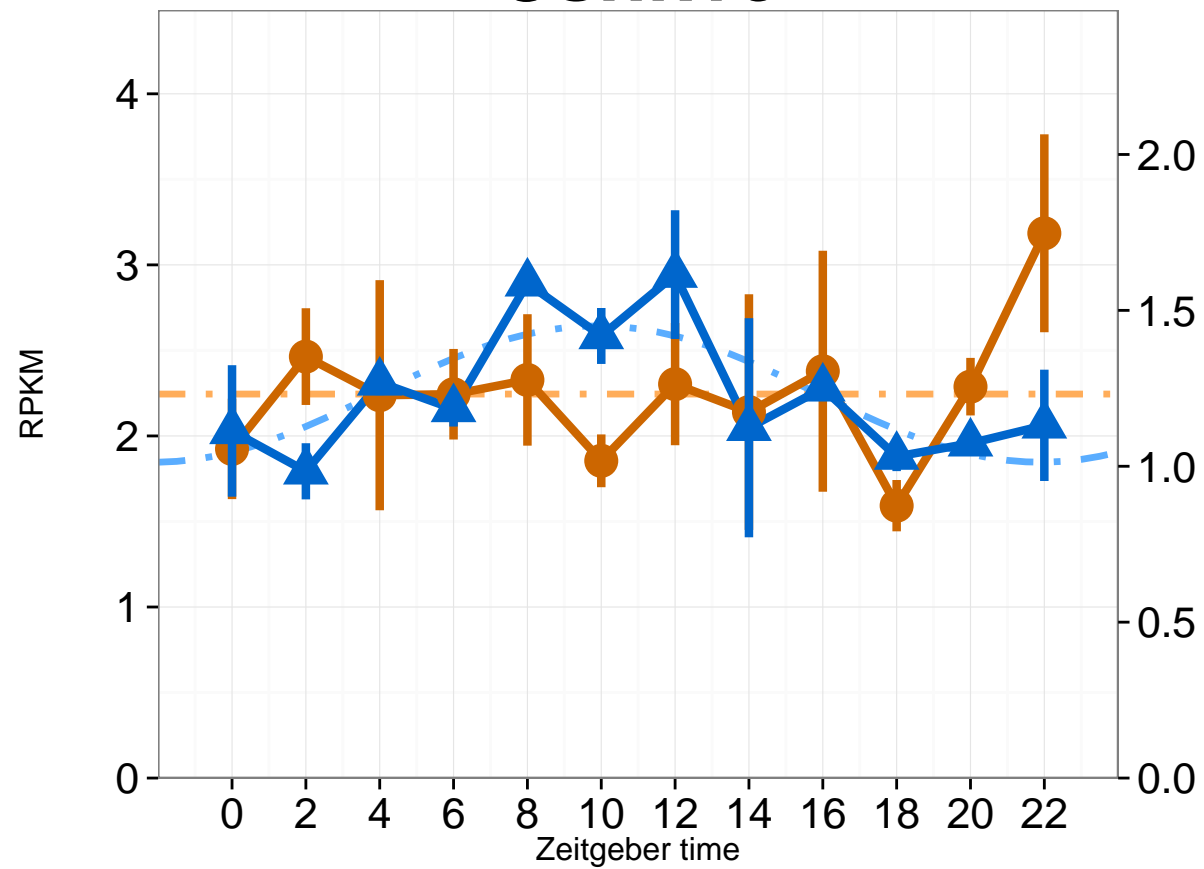

# Csnk1e

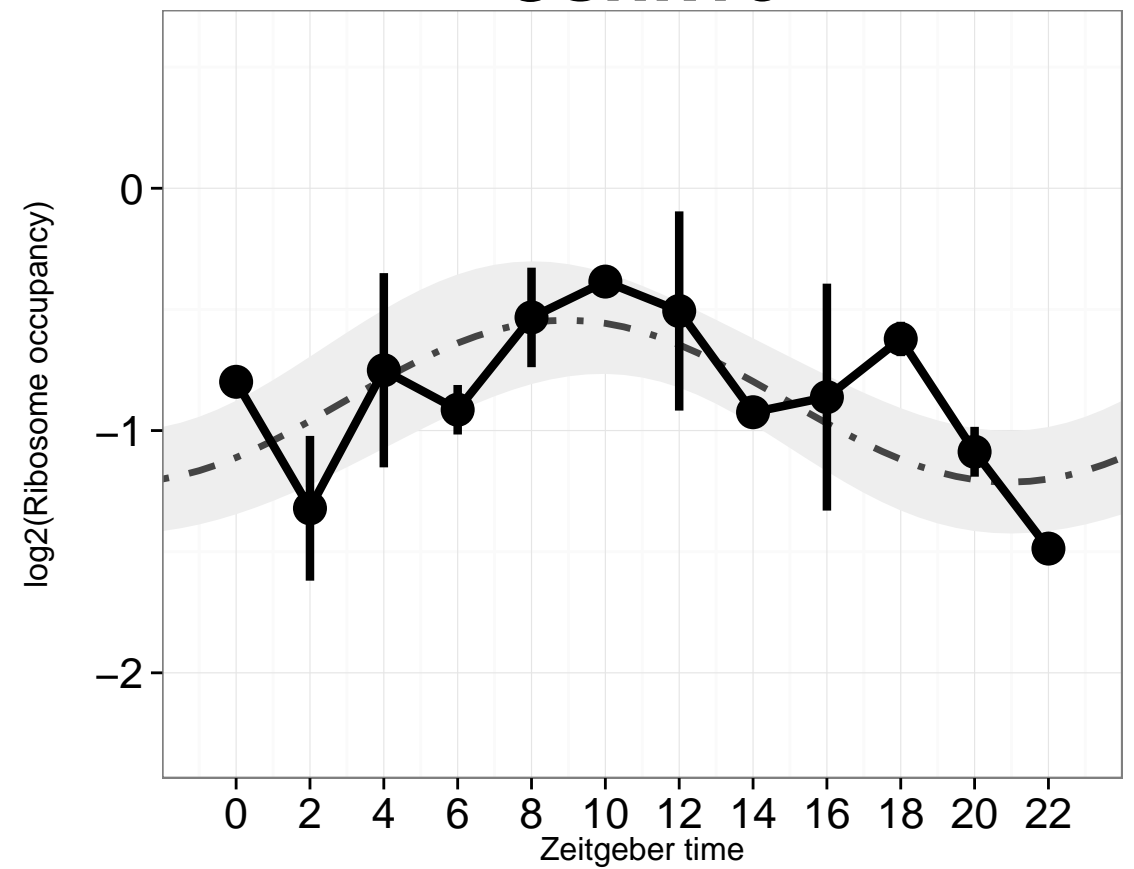

Supplement: SuppDataset_1.zip [file Csnk1e_set_A.pdf › Supplemental Dataset 1/A-mRNA_nonrhyth_translation_nonrhyth/Csnk1e_set_A.pdf]

# Csnk1g1

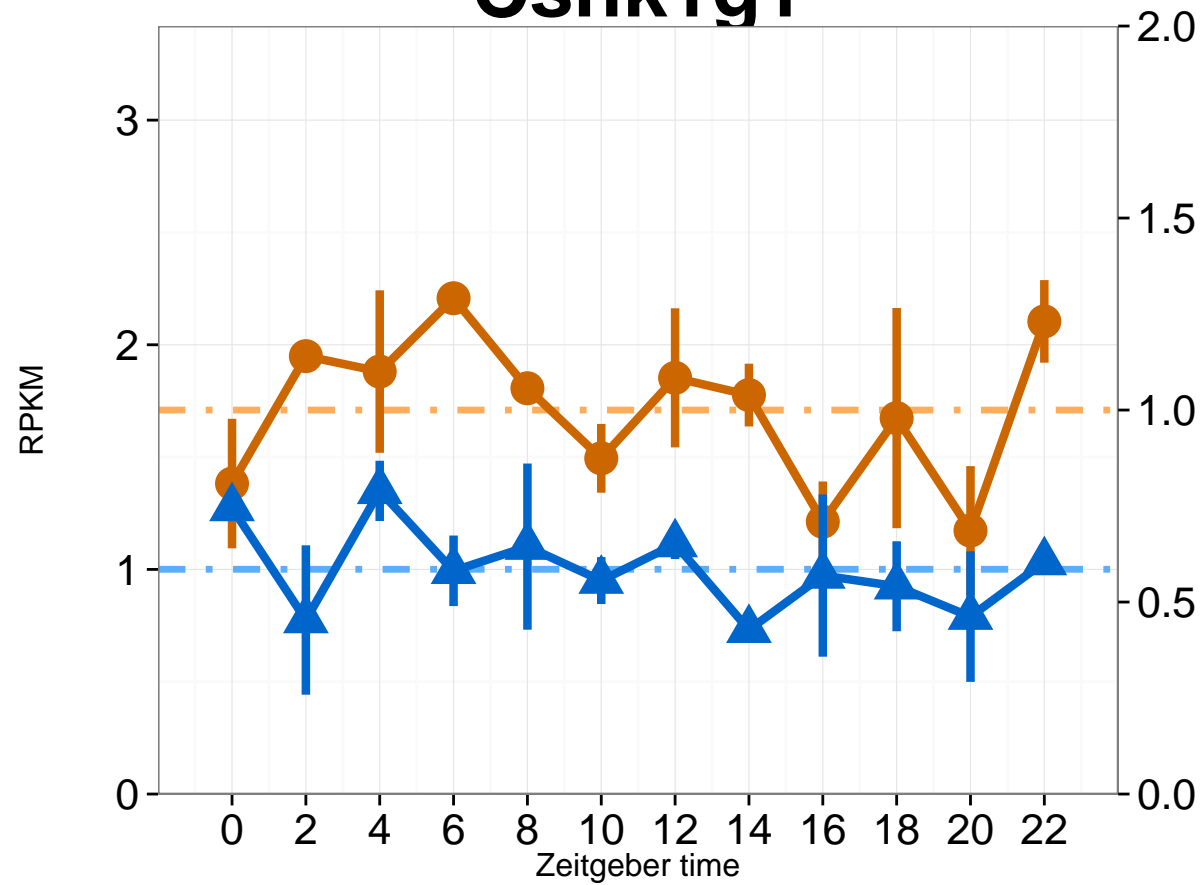

# Csnk1g1

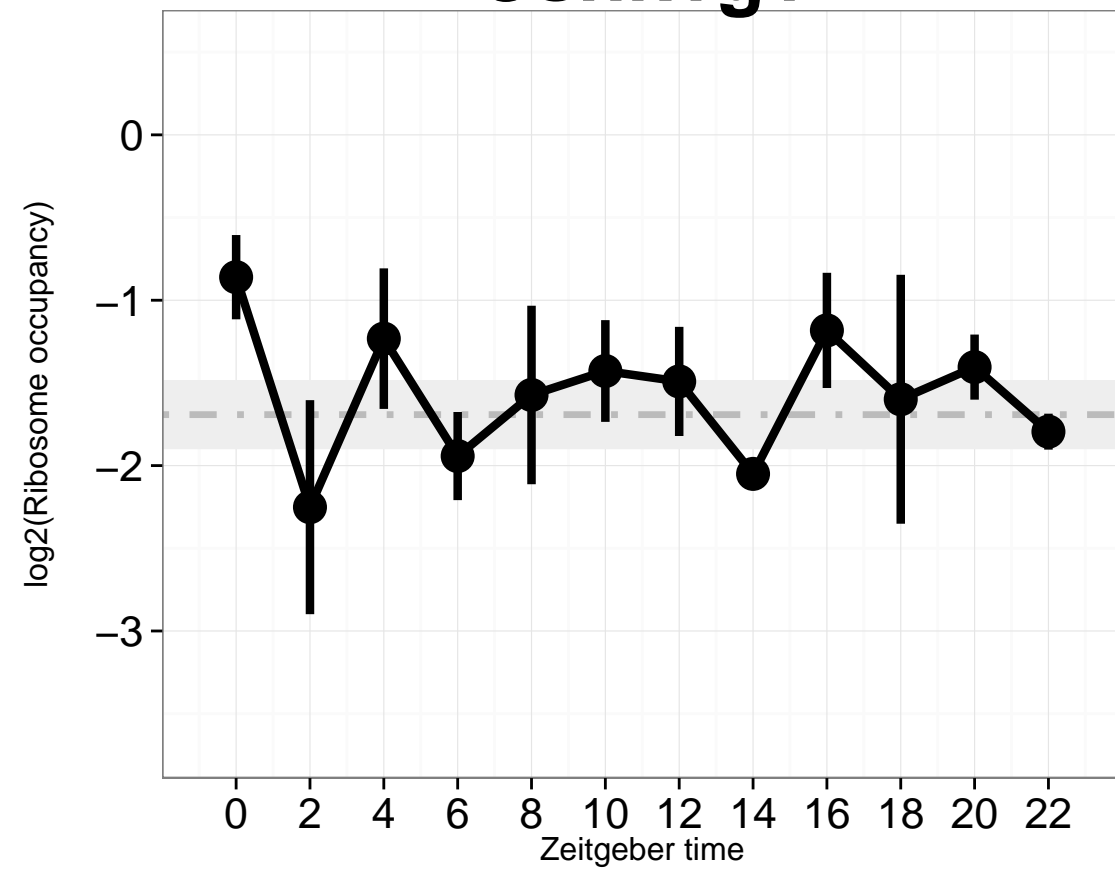

Supplement: SuppDataset_1.zip [file Csnk1g1_set_A.pdf › Supplemental Dataset 1/A-mRNA_nonrhyth_translation_nonrhyth/Csnk1g1_set_A.pdf]

# Csnk1g2

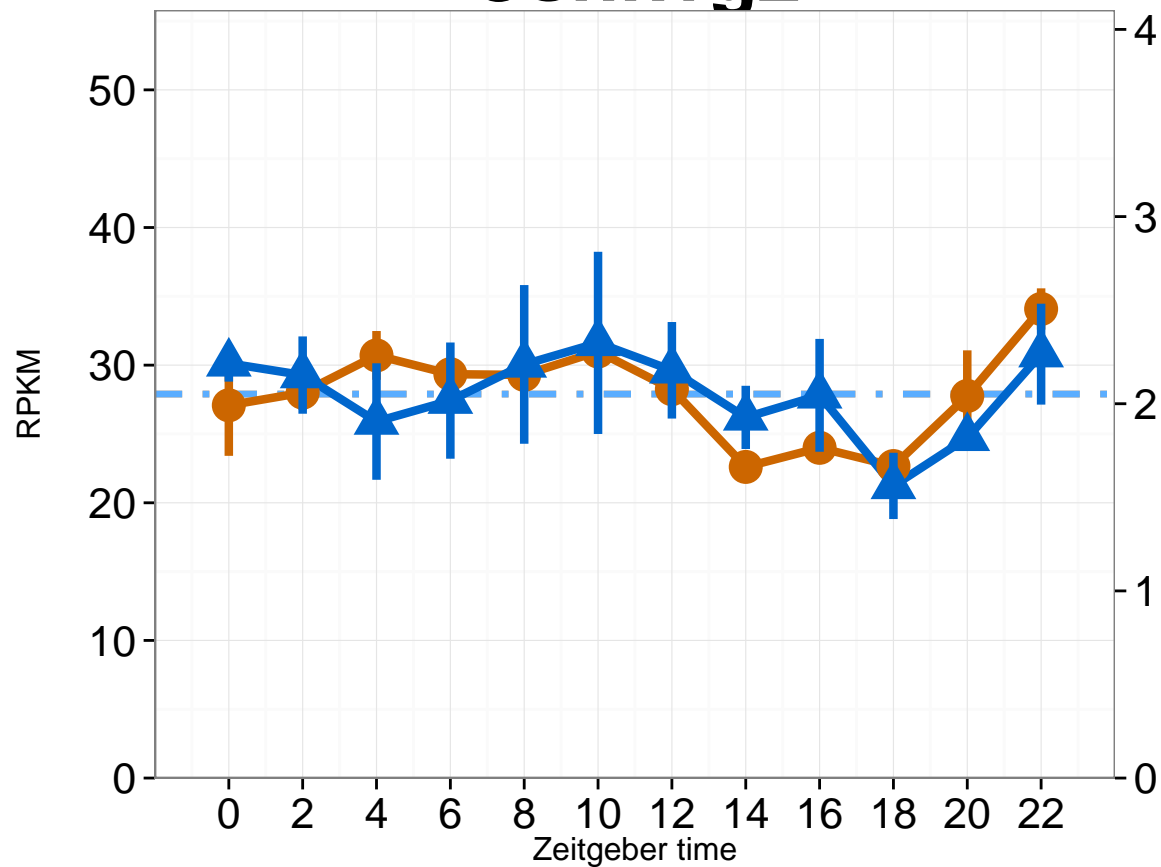

# Csnk1g2

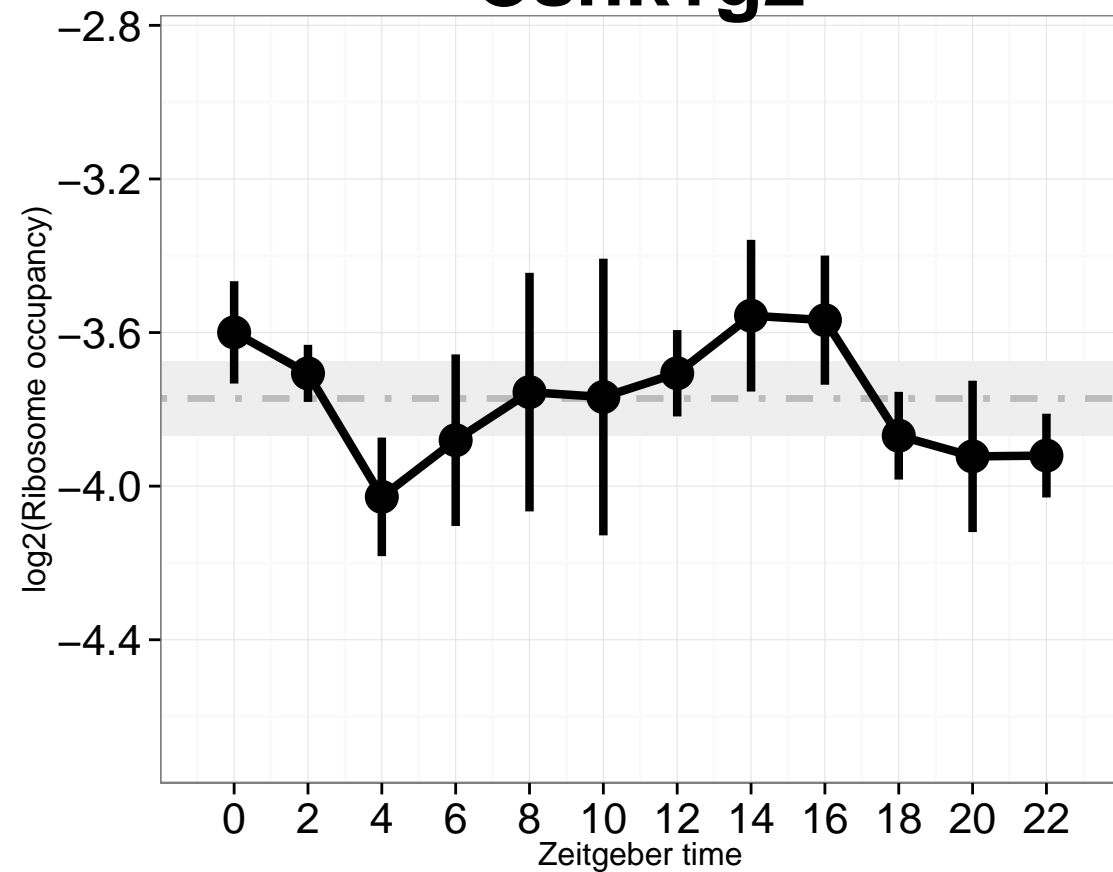

Supplement: SuppDataset_1.zip [file Csnk1g2_set_A.pdf › Supplemental Dataset 1/A-mRNA_nonrhyth_translation_nonrhyth/Csnk1g2_set_A.pdf]

# Csnk2a1

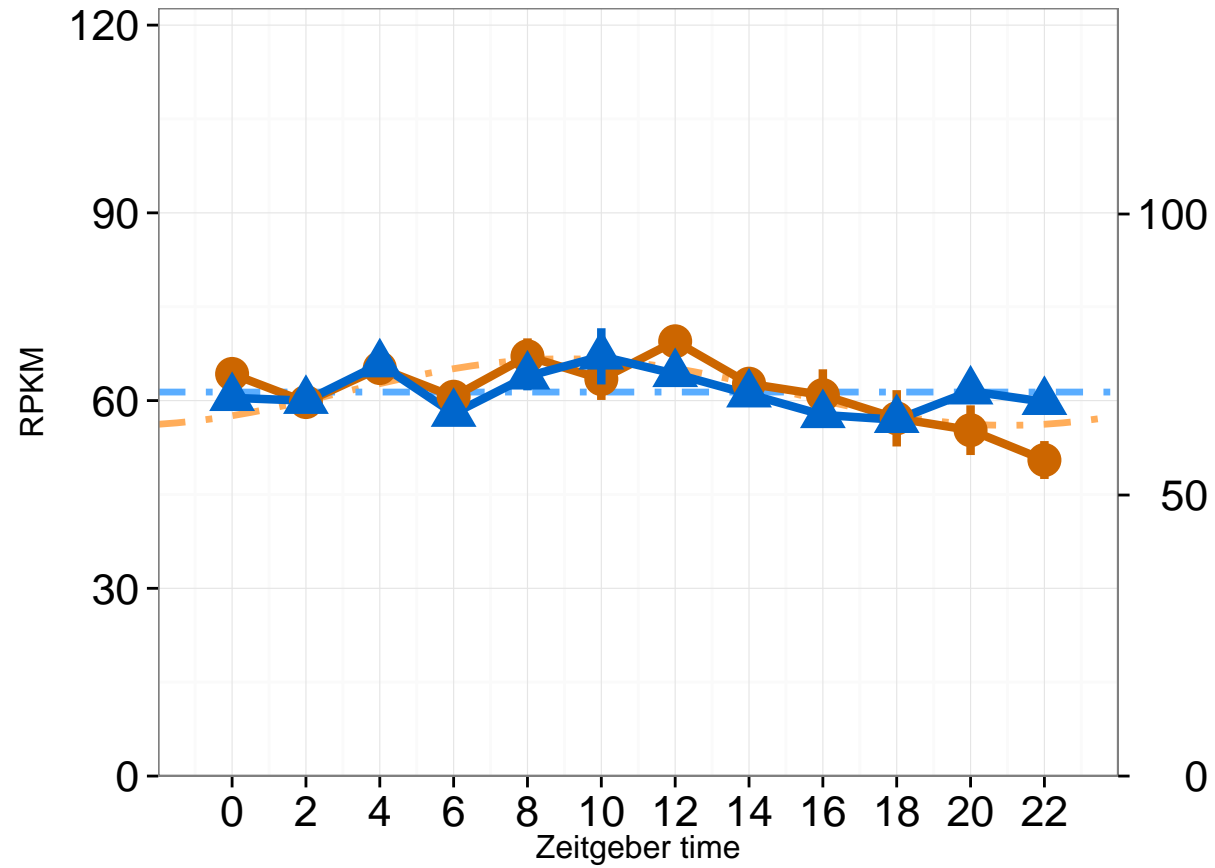

# Csnk2a1

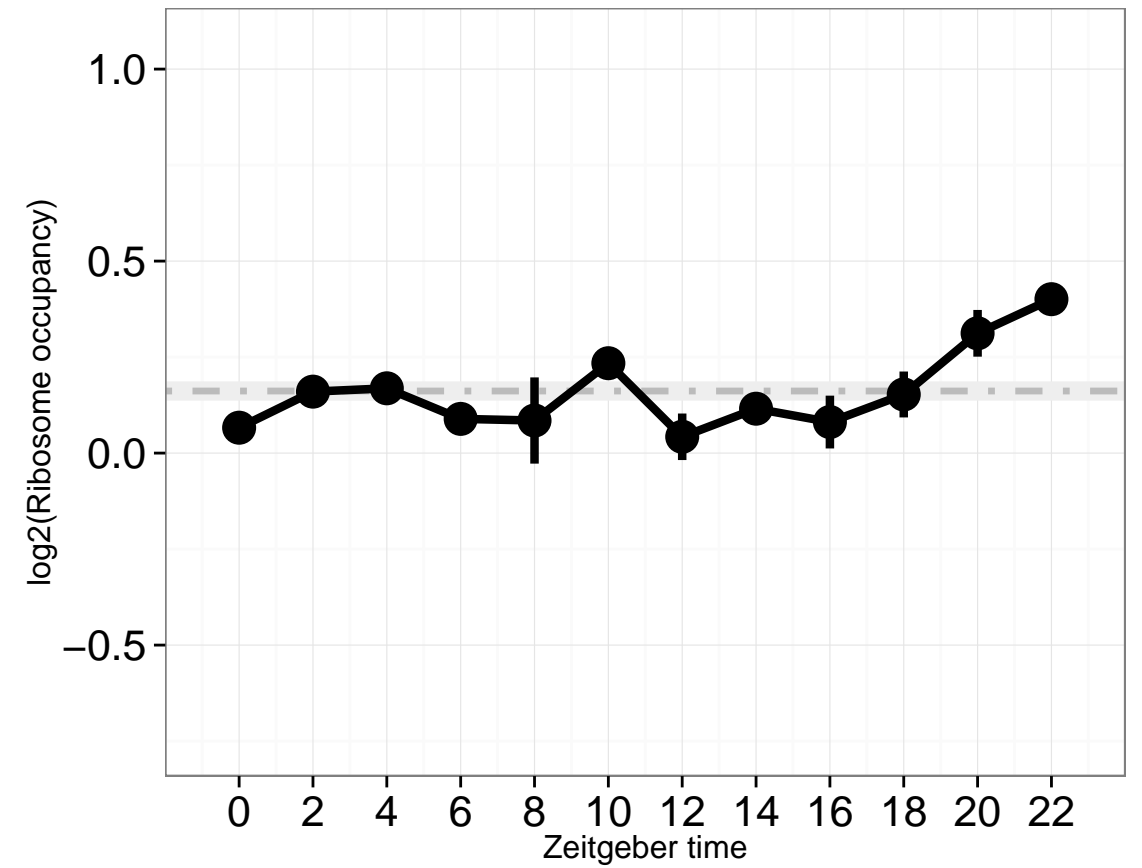

Supplement: SuppDataset_1.zip [file Csnk2a1_set_A.pdf › Supplemental Dataset 1/A-mRNA_nonrhyth_translation_nonrhyth/Csnk2a1_set_A.pdf]

## Csnk2a2

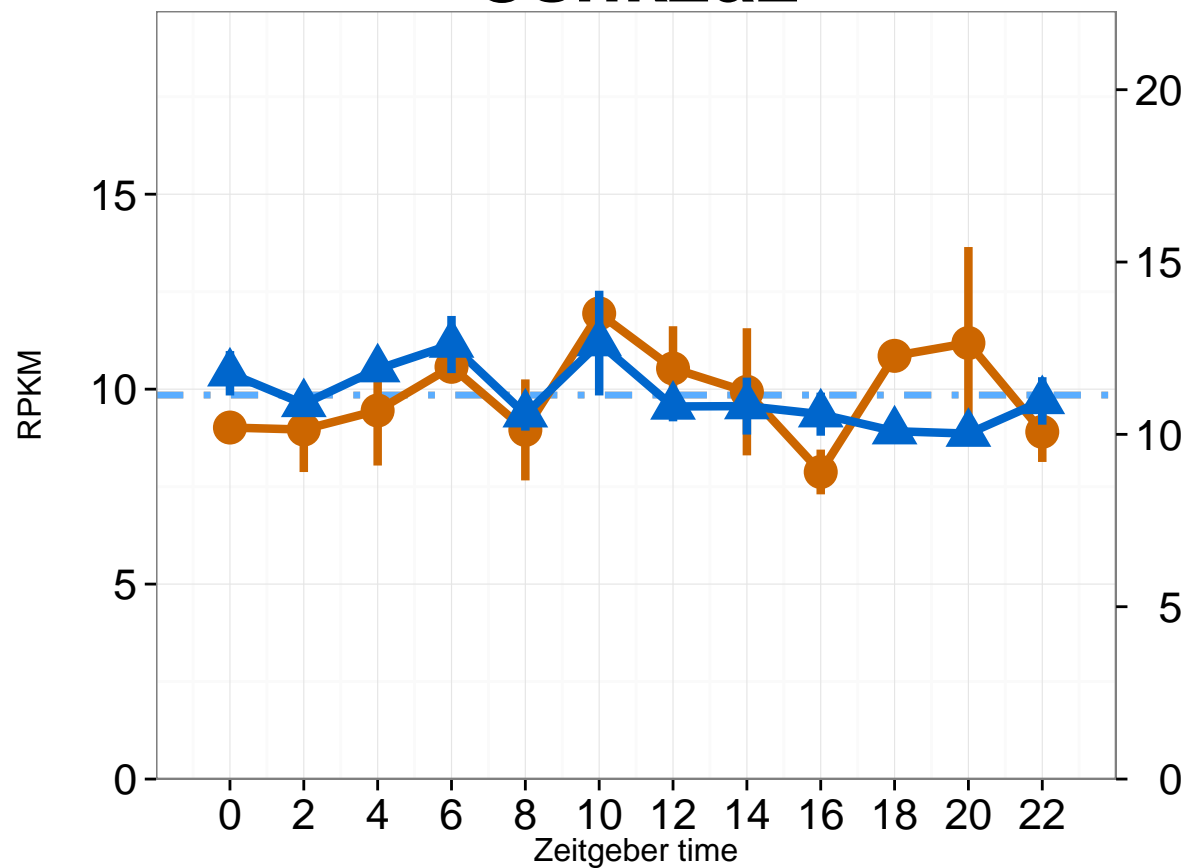

## Csnk2a2

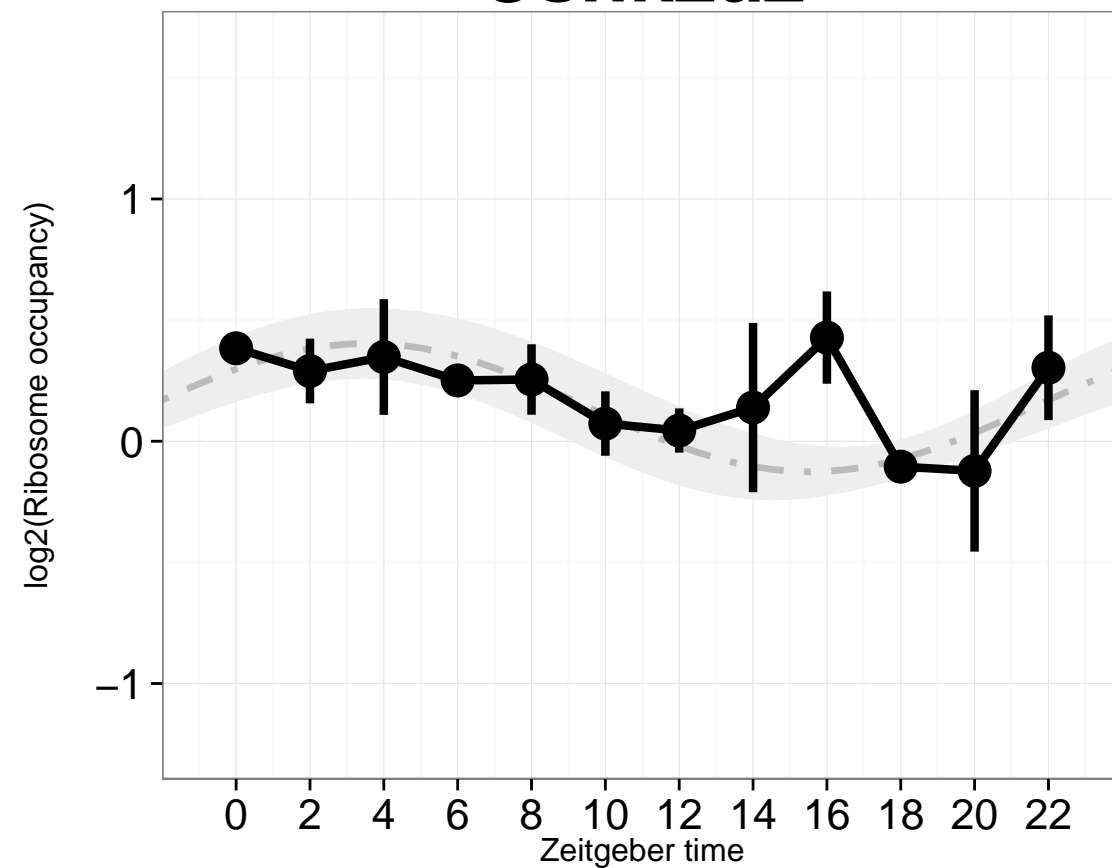

Supplement: SuppDataset_1.zip [file Csnk2a2_set_A.pdf › Supplemental Dataset 1/A-mRNA_nonrhyth_translation_nonrhyth/Csnk2a2_set_A.pdf]

# Csnk2b

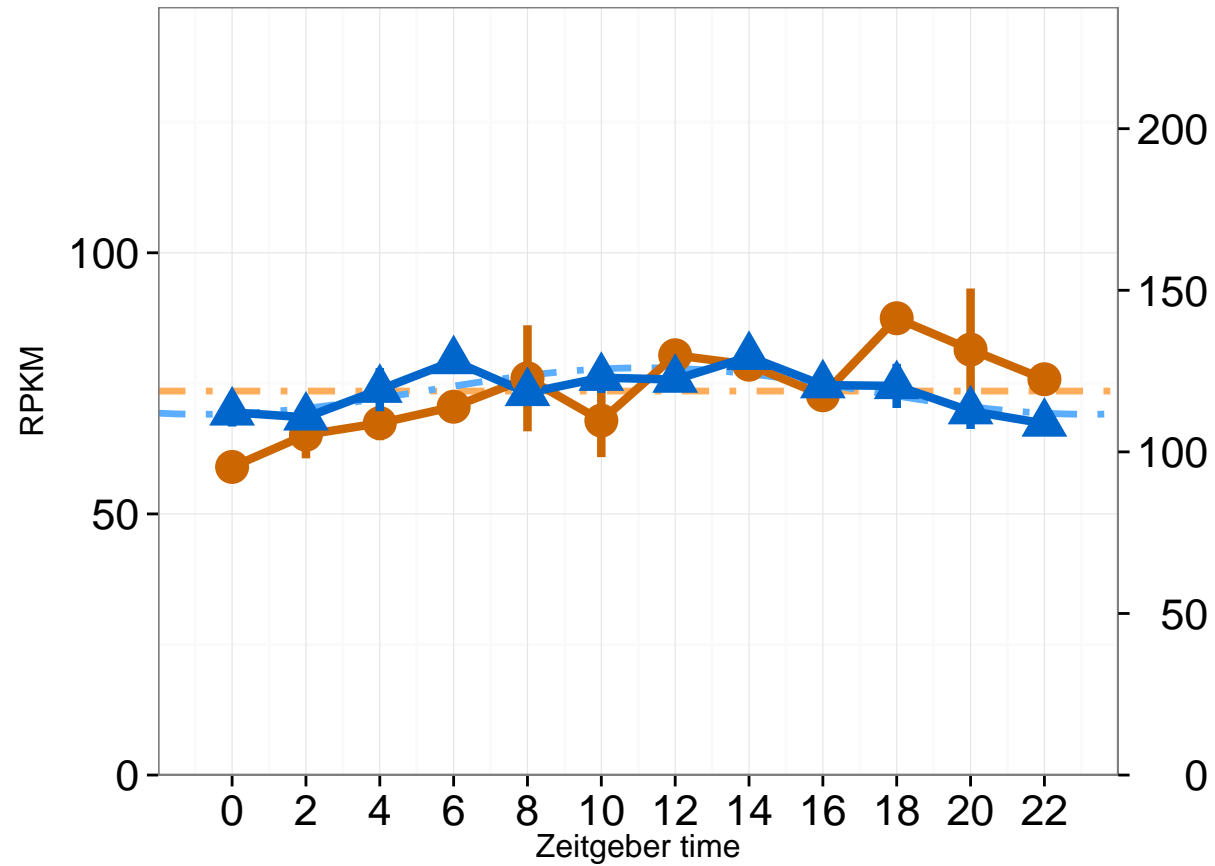

# Csnk2b

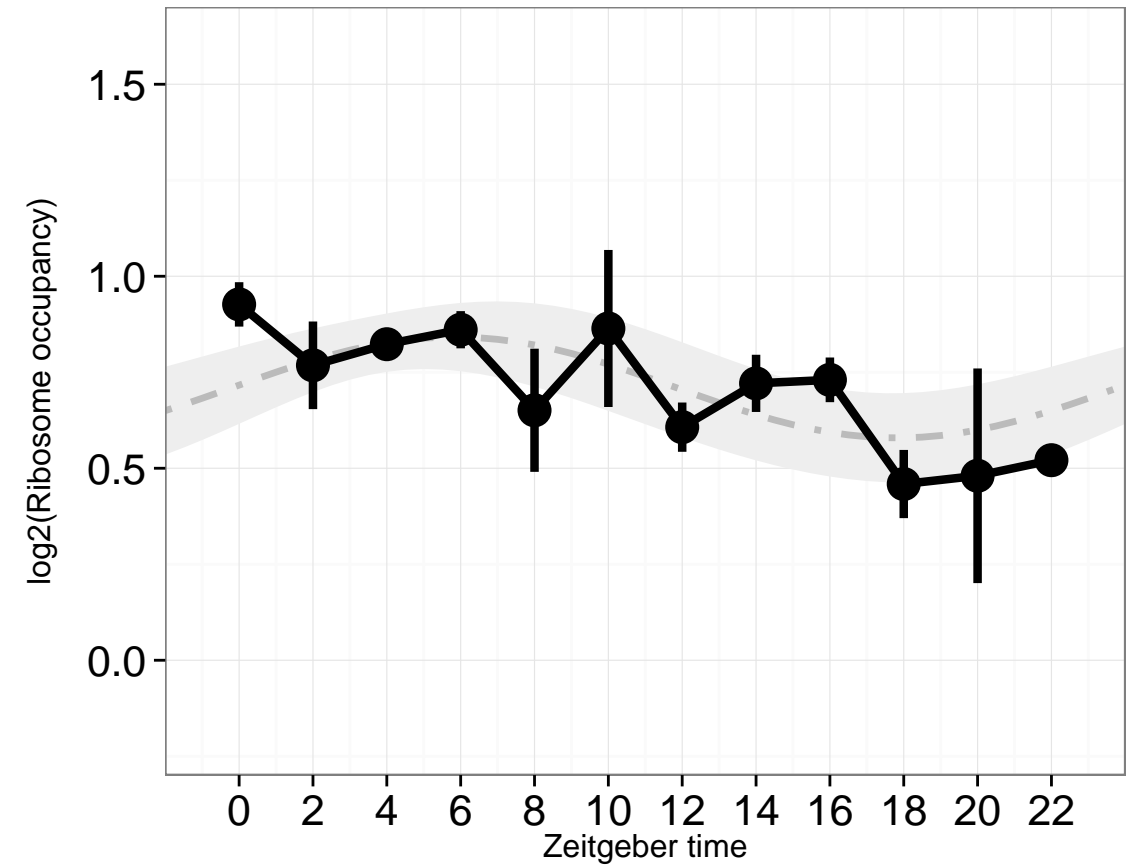

Supplement: SuppDataset_1.zip [file Csnk2b_set_A.pdf › Supplemental Dataset 1/A-mRNA_nonrhyth_translation_nonrhyth/Csnk2b_set_A.pdf]

# Cspg5

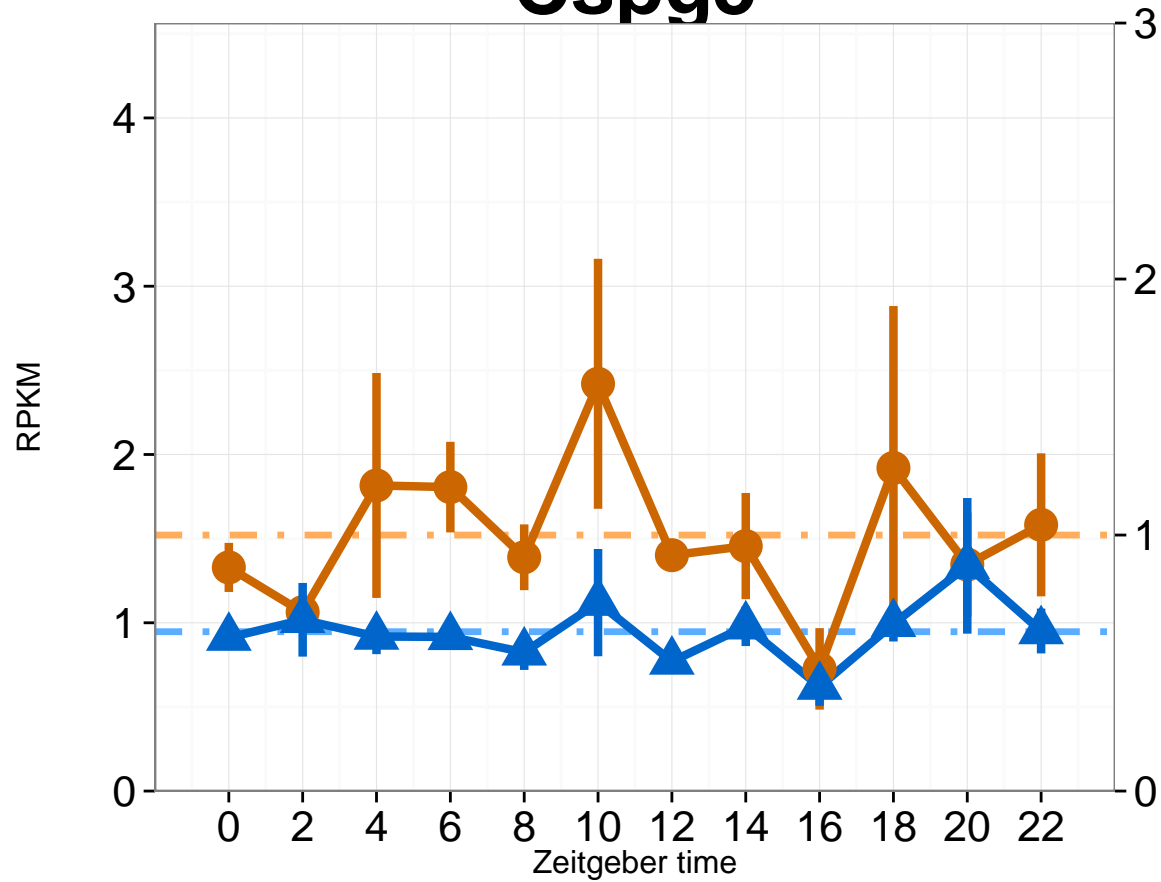

# Cspg5

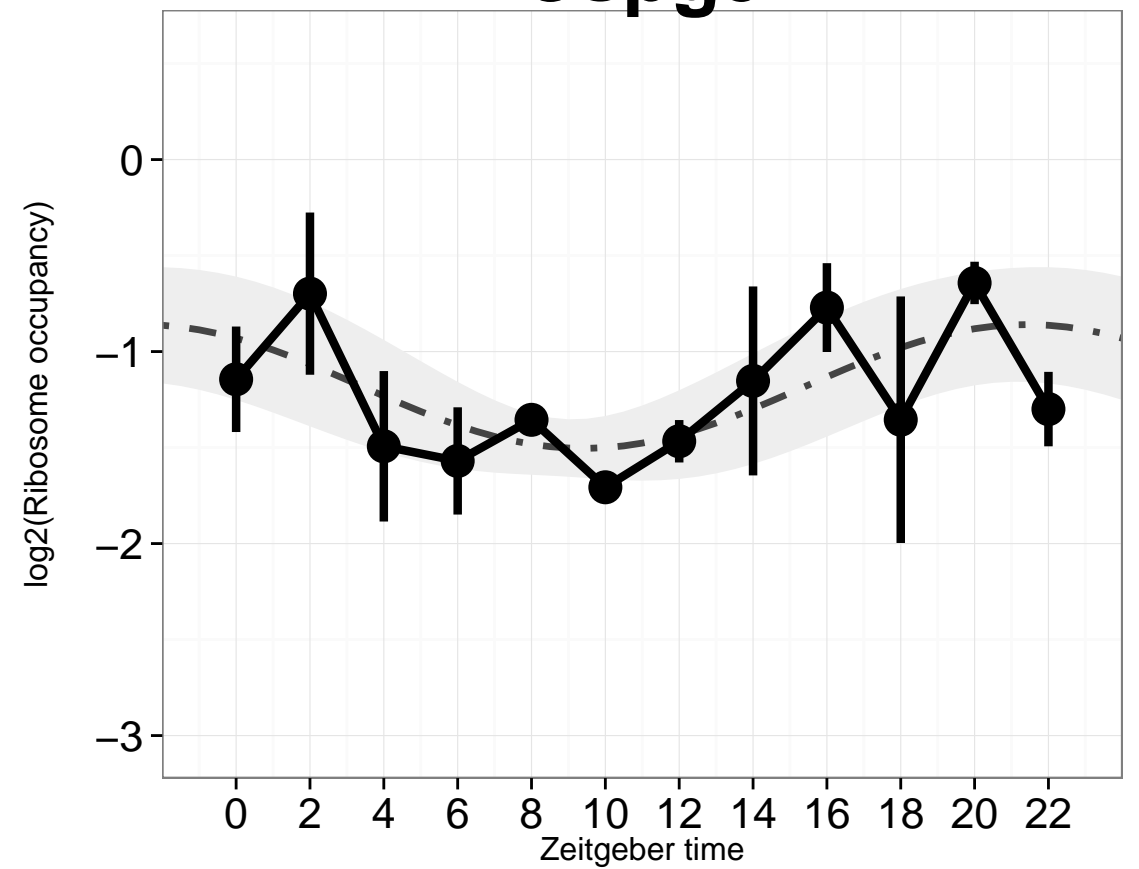

Supplement: SuppDataset_1.zip [file Cspg5_set_A.pdf › Supplemental Dataset 1/A-mRNA_nonrhyth_translation_nonrhyth/Cspg5_set_A.pdf]

# Cspp1

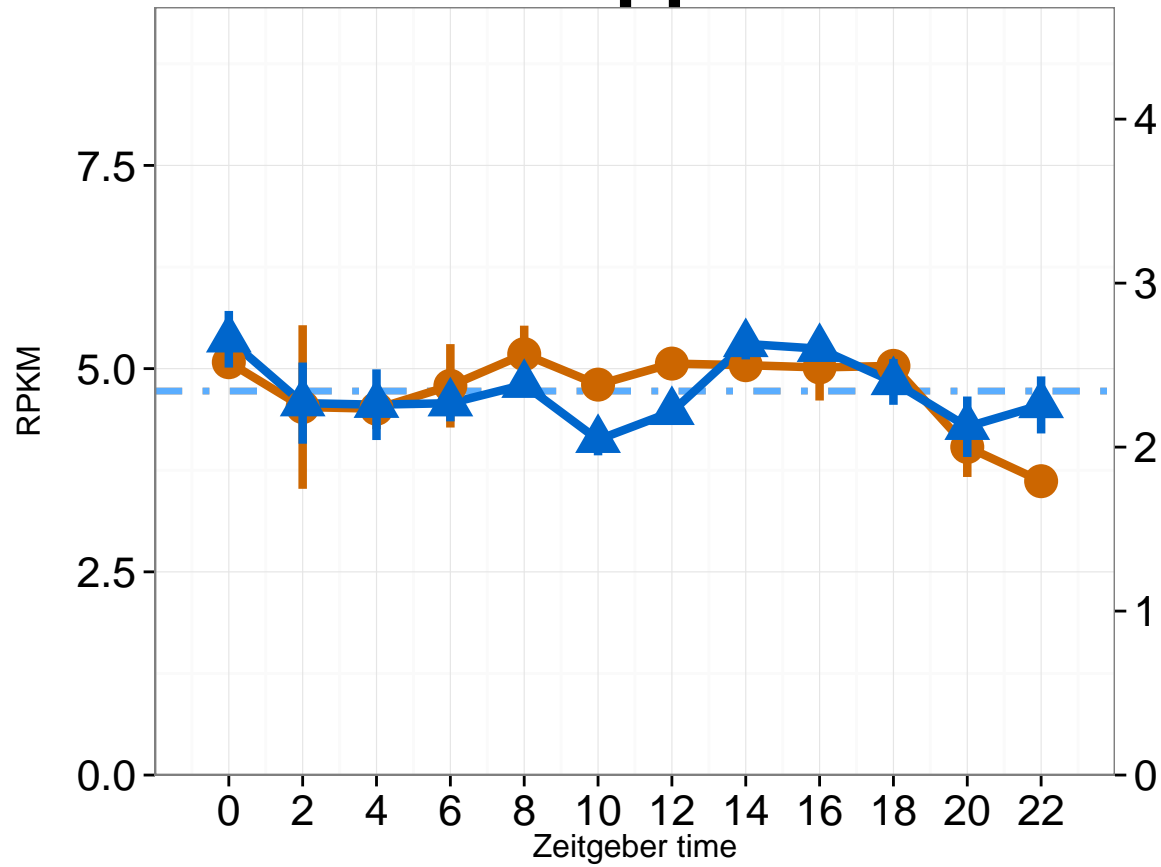

# Cspp1

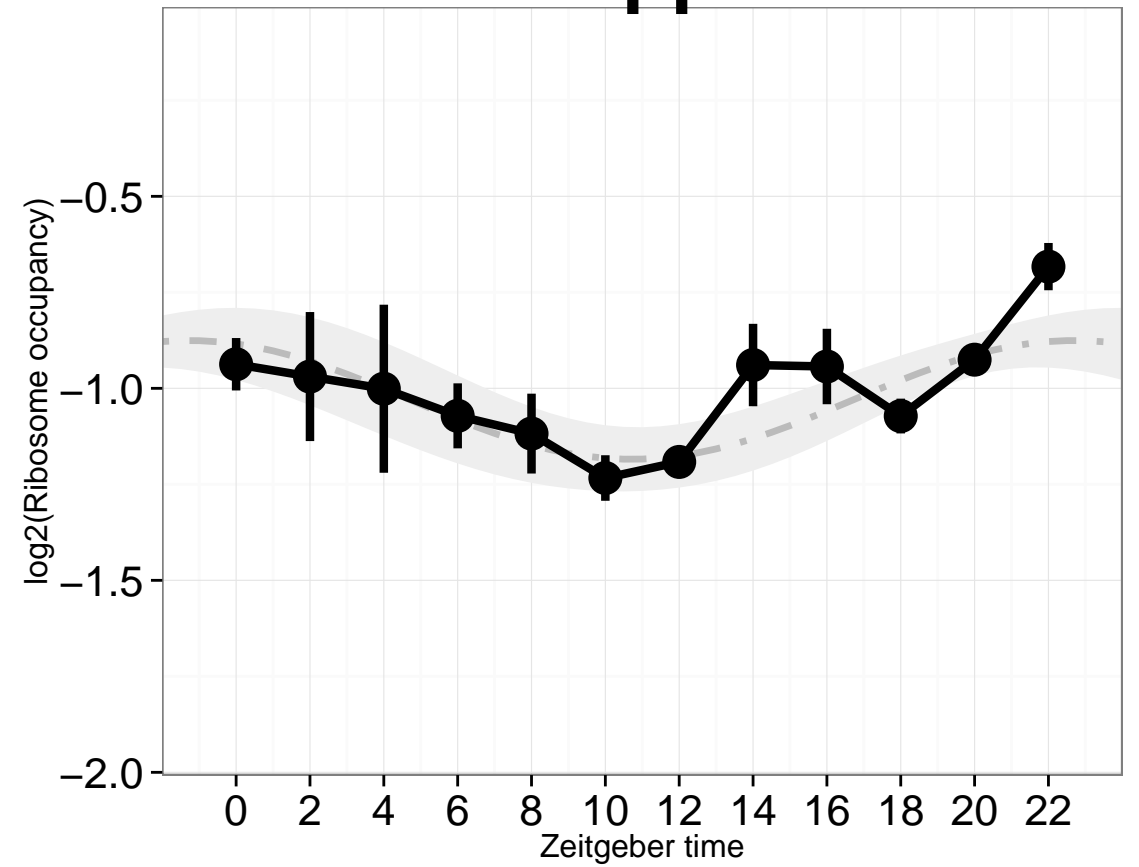

Supplement: SuppDataset_1.zip [file Cspp1_set_A.pdf › Supplemental Dataset 1/A-mRNA_nonrhyth_translation_nonrhyth/Cspp1_set_A.pdf]

# Csrnp2

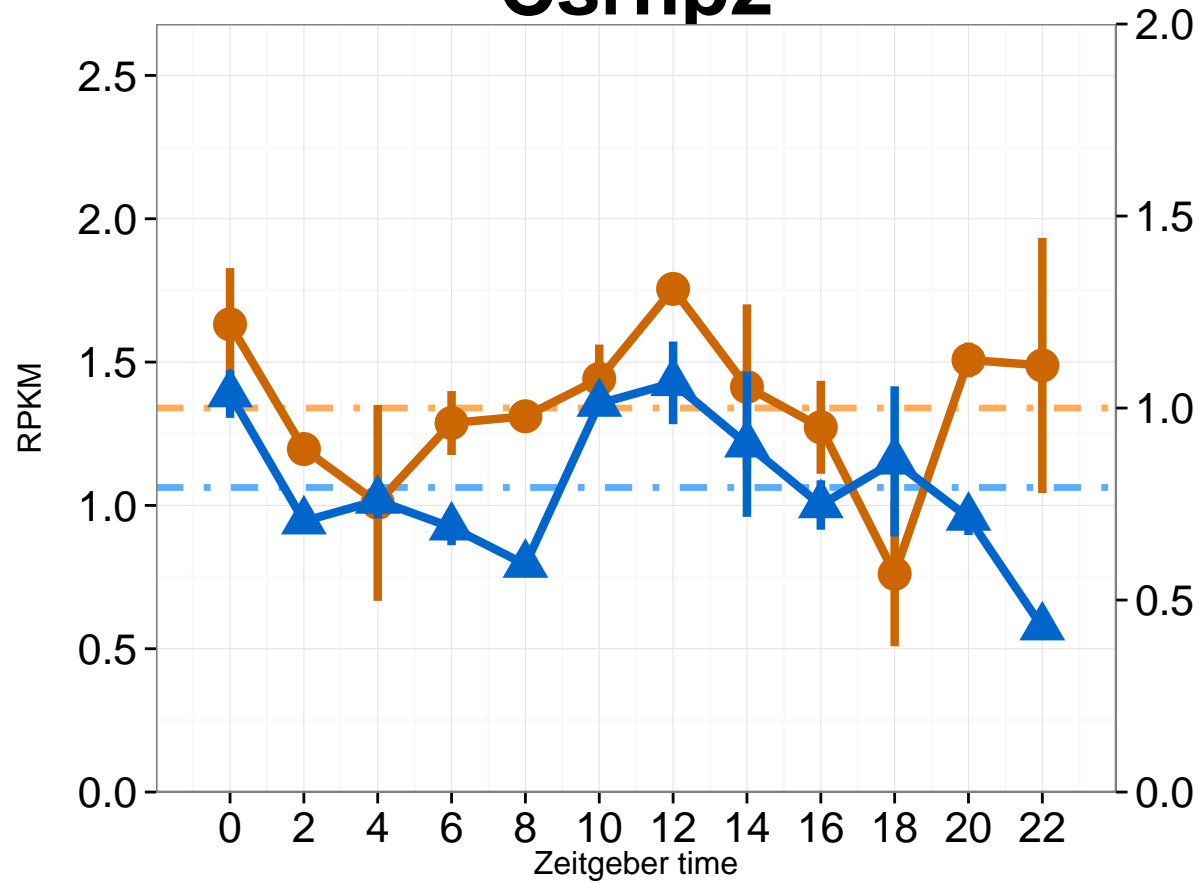

# Csrnp2

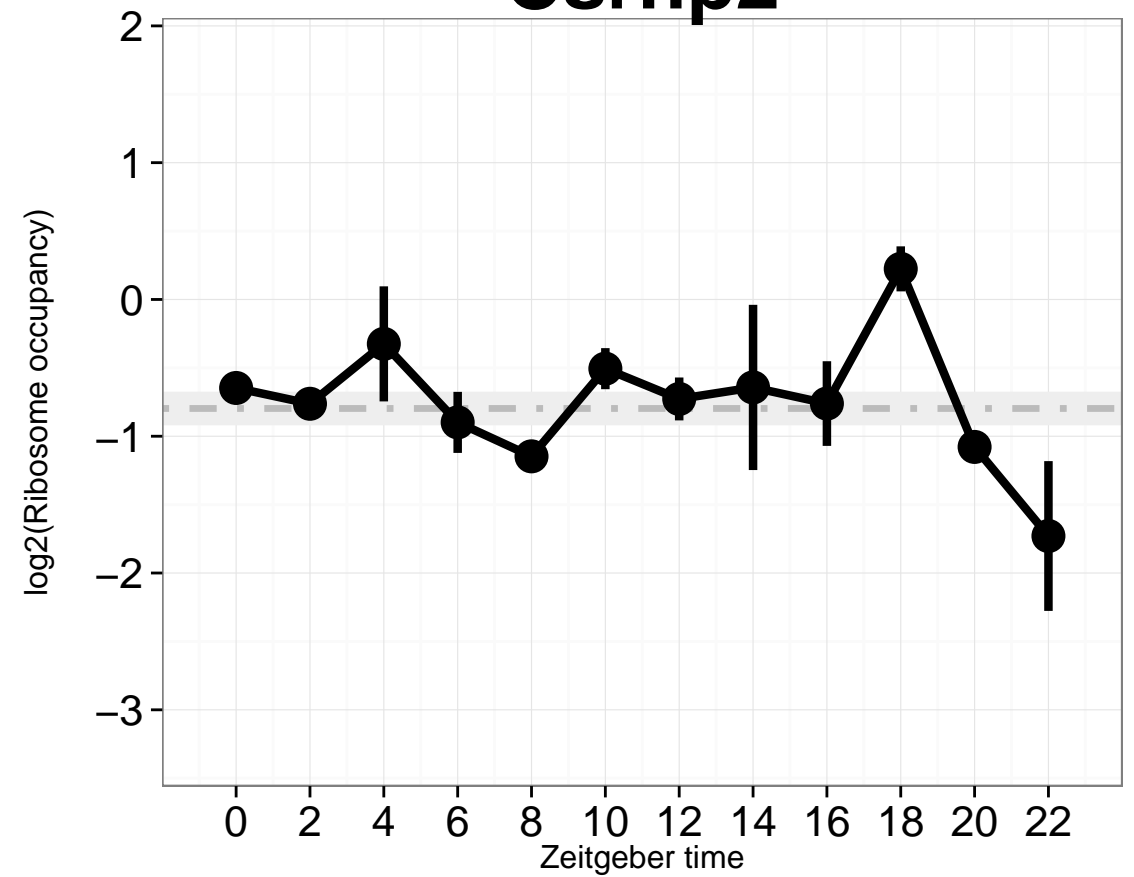

Supplement: SuppDataset_1.zip [file Csrnp2_set_A.pdf › Supplemental Dataset 1/A-mRNA_nonrhyth_translation_nonrhyth/Csrnp2_set_A.pdf]

# Csrp1

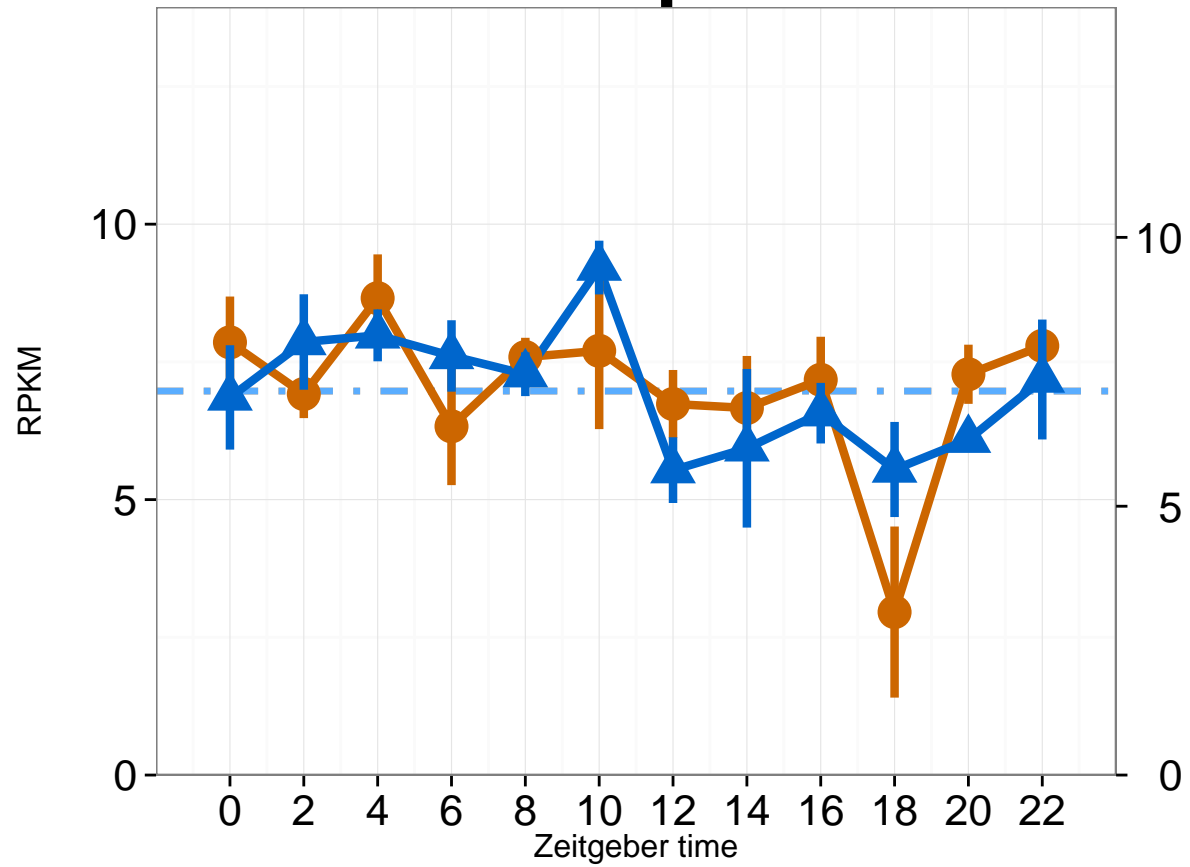

# Csrp1

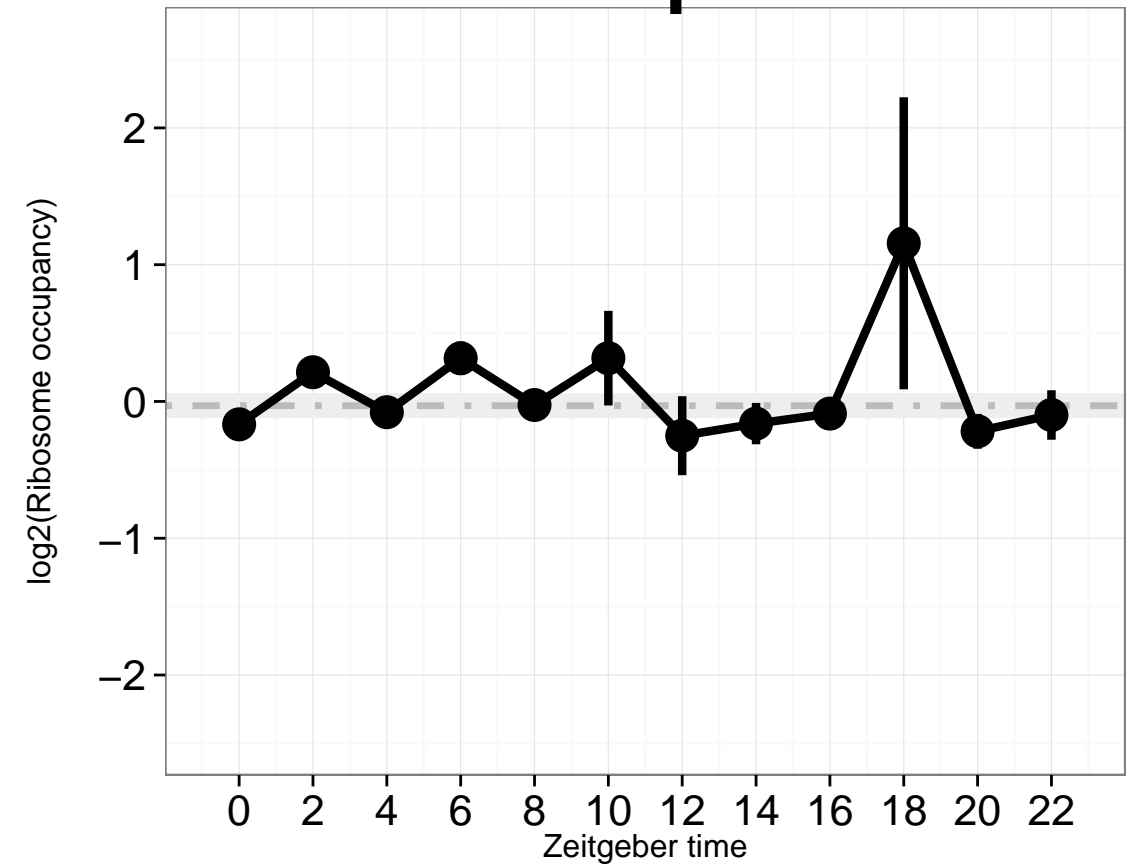

Supplement: SuppDataset_1.zip [file Csrp1_set_A.pdf › Supplemental Dataset 1/A-mRNA_nonrhyth_translation_nonrhyth/Csrp1_set_A.pdf]

# Csrp2

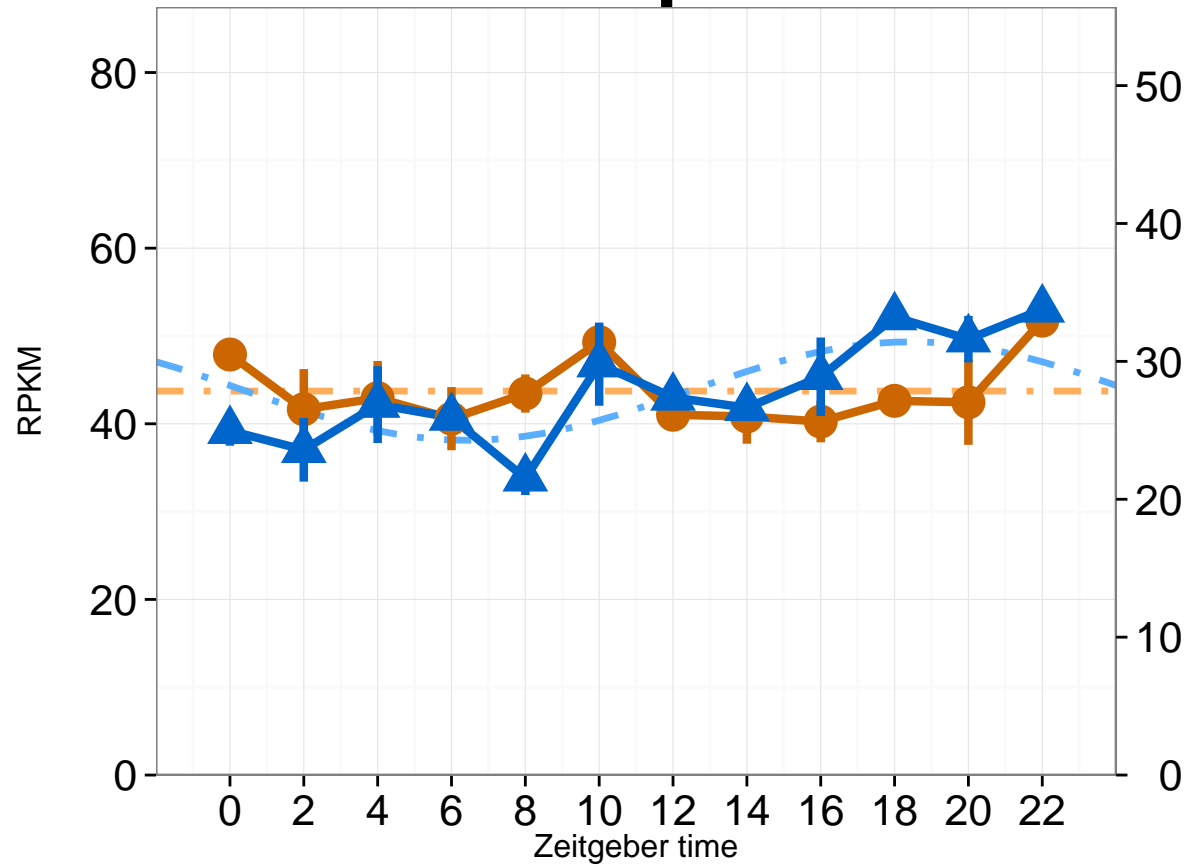

# Csrp2

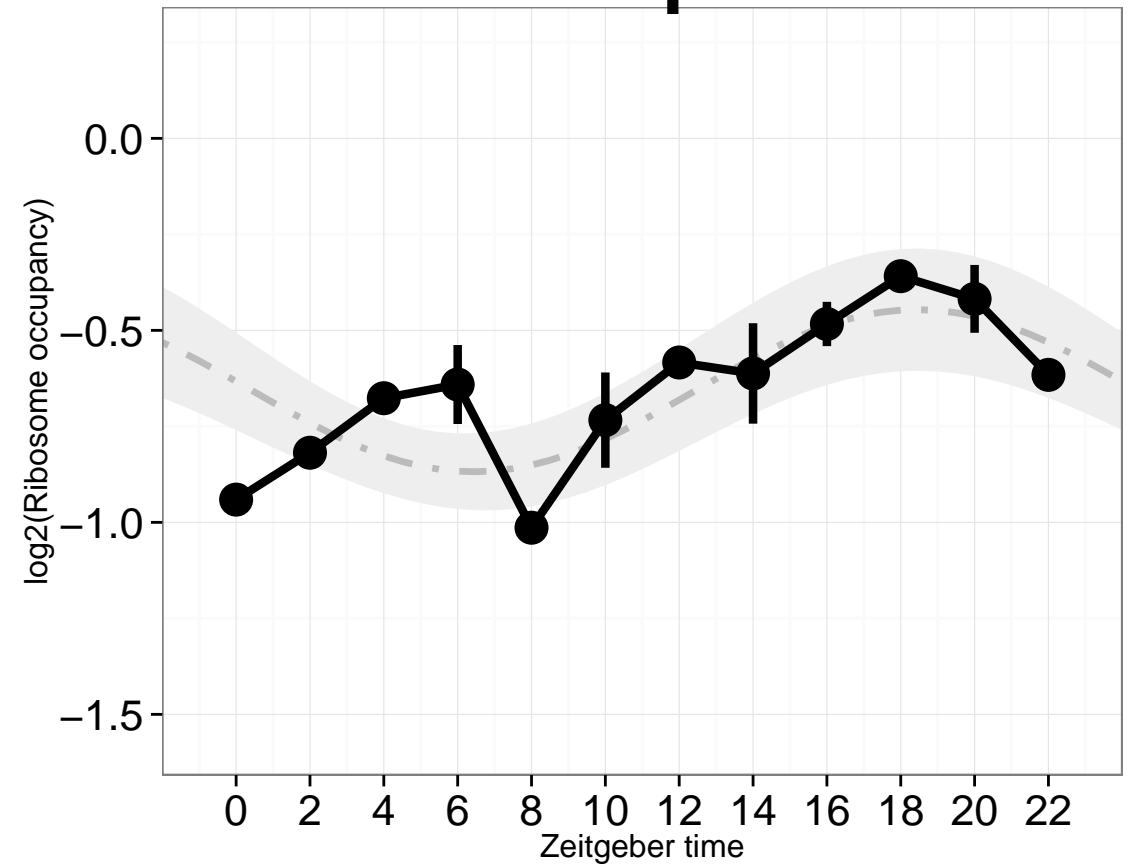

Supplement: SuppDataset_1.zip [file Csrp2_set_A.pdf › Supplemental Dataset 1/A-mRNA_nonrhyth_translation_nonrhyth/Csrp2_set_A.pdf]

# Csrp2bp

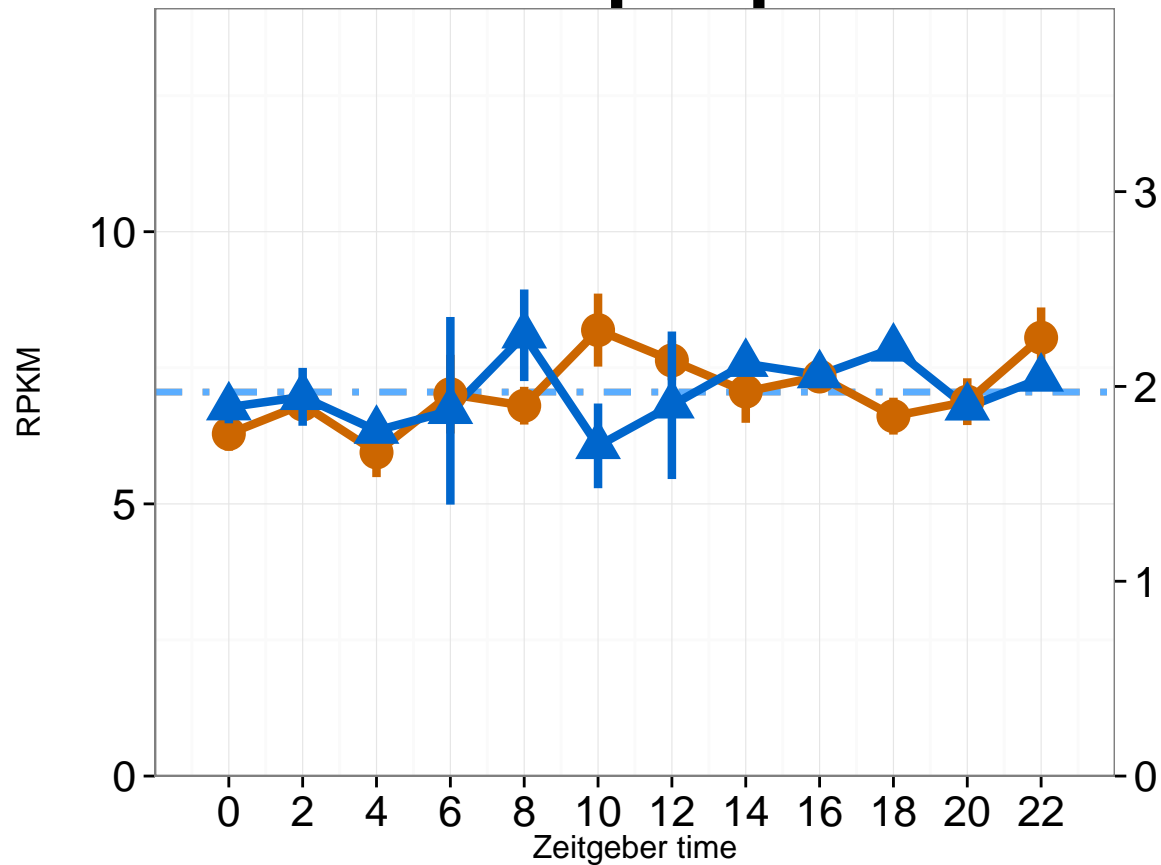

# Csrp2bp

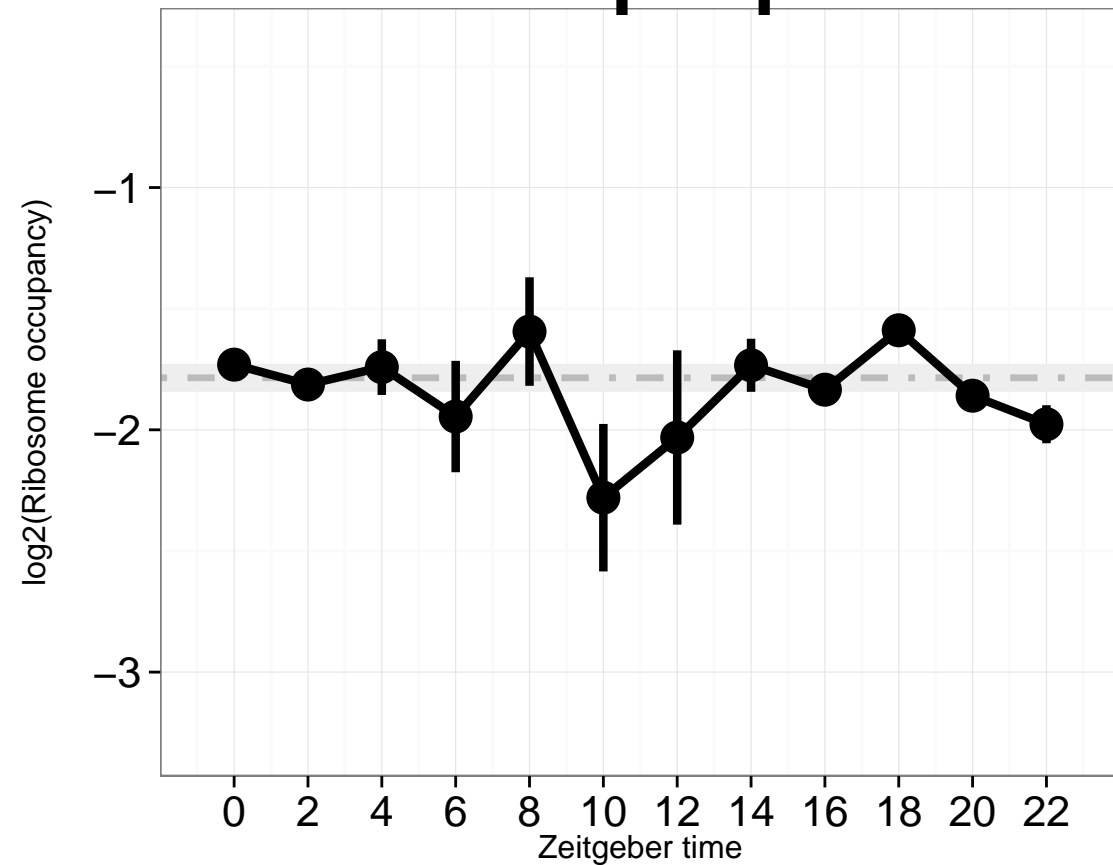

Supplement: SuppDataset_1.zip [file Csrp2bp_set_A.pdf › Supplemental Dataset 1/A-mRNA_nonrhyth_translation_nonrhyth/Csrp2bp_set_A.pdf]

## Cst3

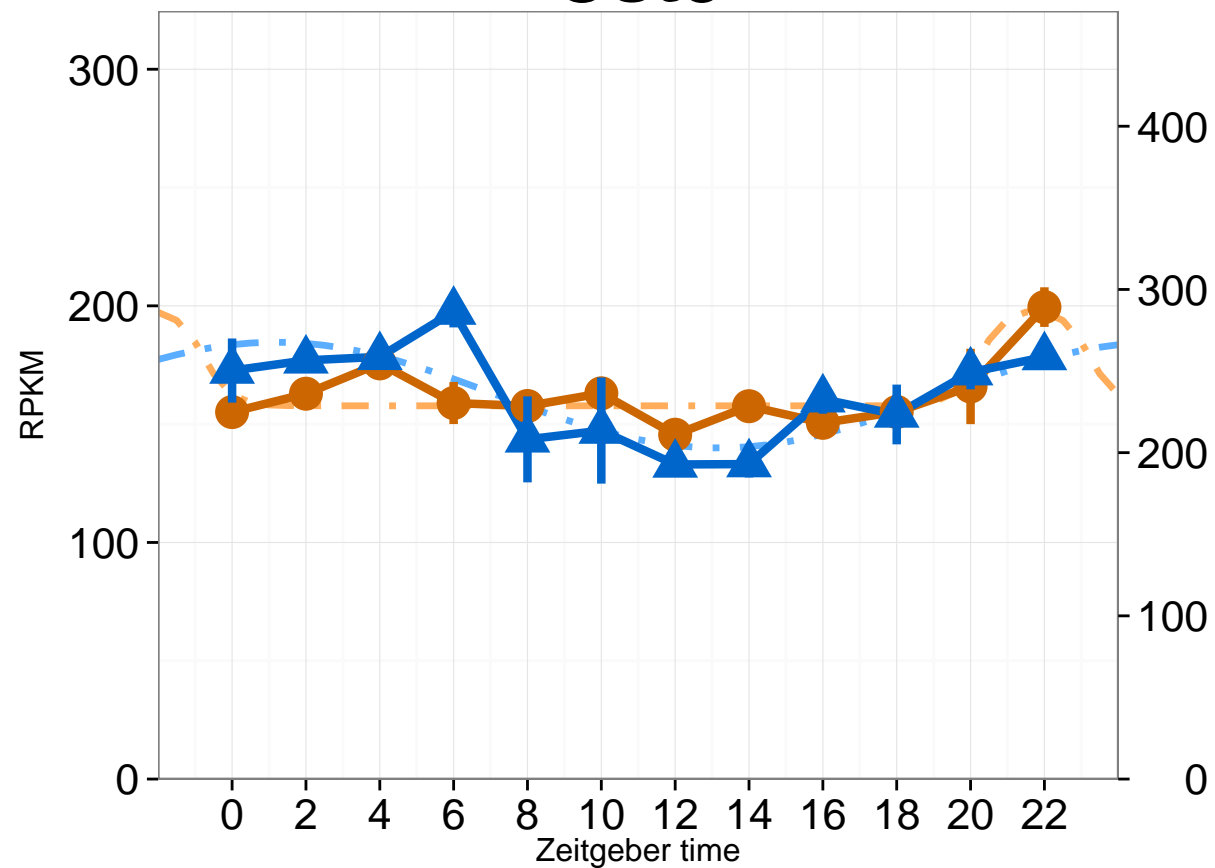

## Cst3

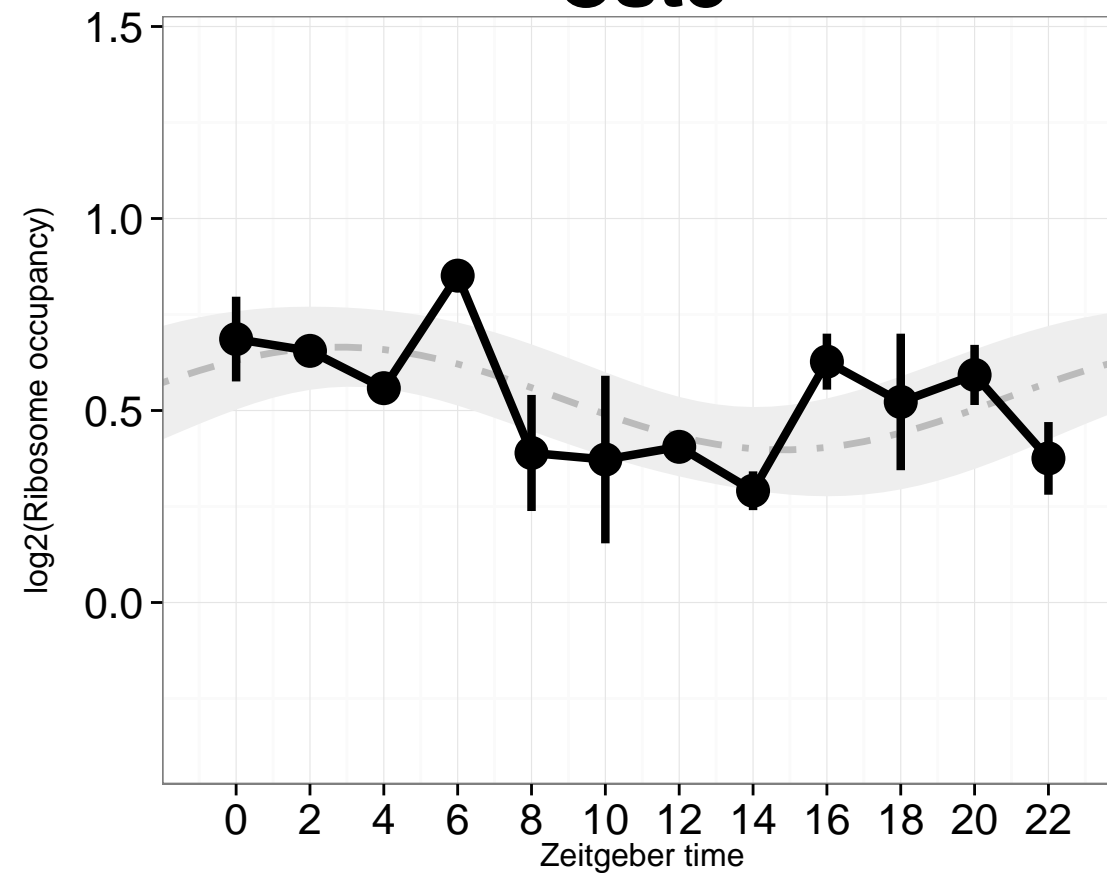

Supplement: SuppDataset_1.zip [file Cst3_set_A.pdf › Supplemental Dataset 1/A-mRNA_nonrhyth_translation_nonrhyth/Cst3_set_A.pdf]

## Cstb

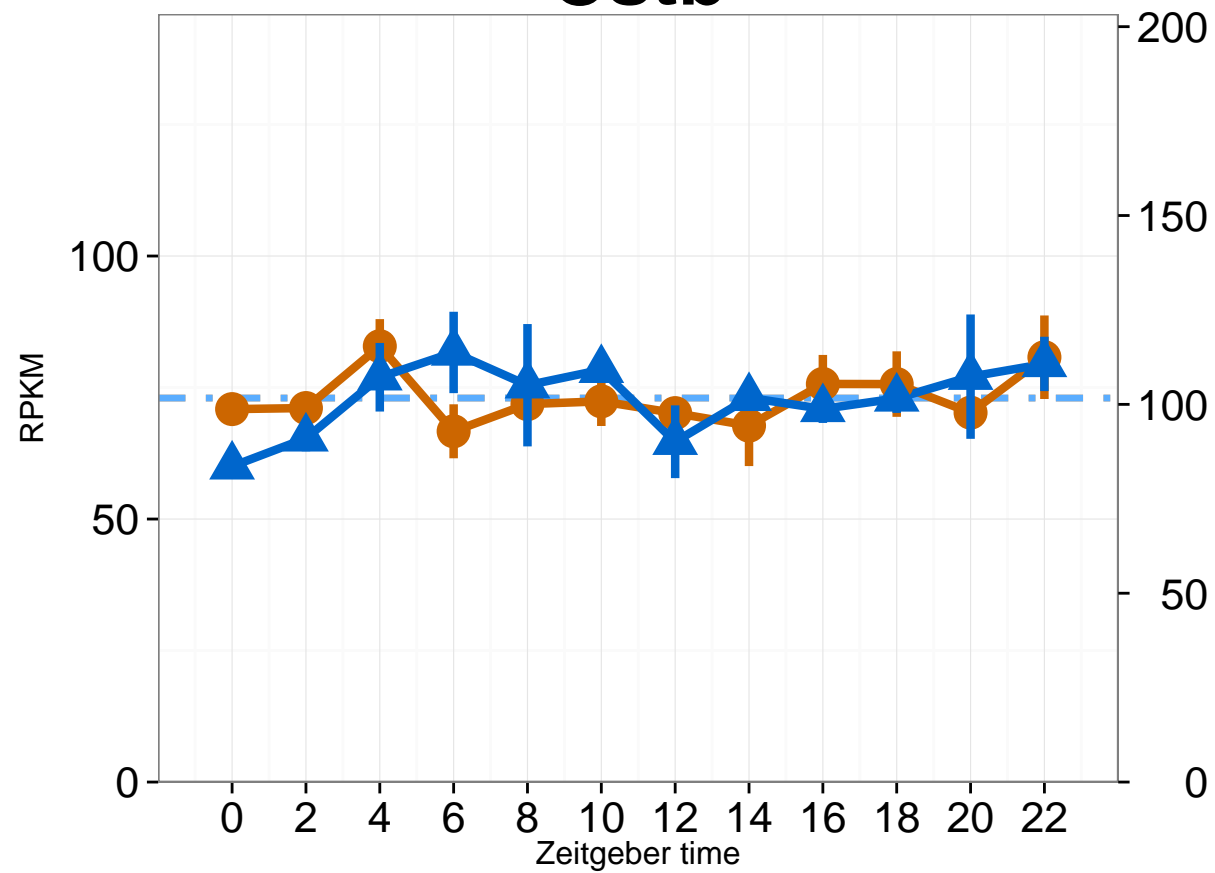

## Cstb

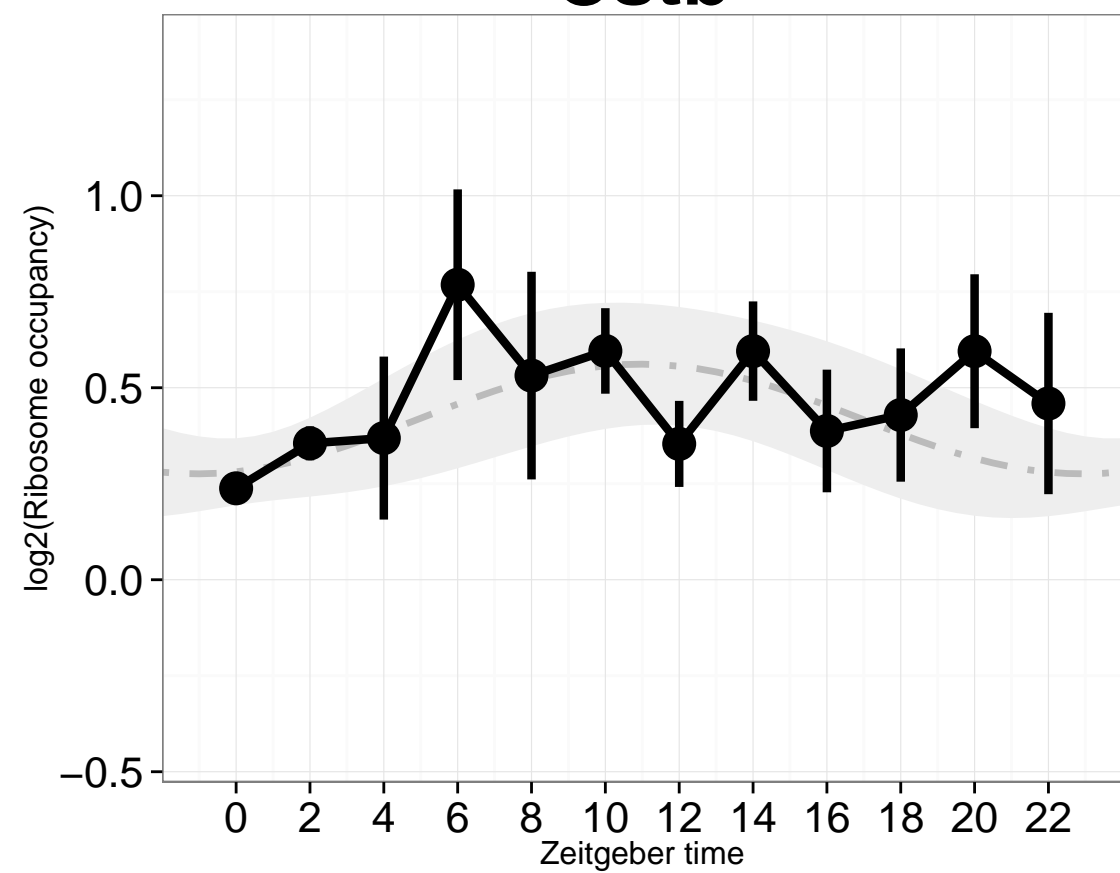

Supplement: SuppDataset_1.zip [file Cstb_set_A.pdf › Supplemental Dataset 1/A-mRNA_nonrhyth_translation_nonrhyth/Cstb_set_A.pdf]

# Cstf1

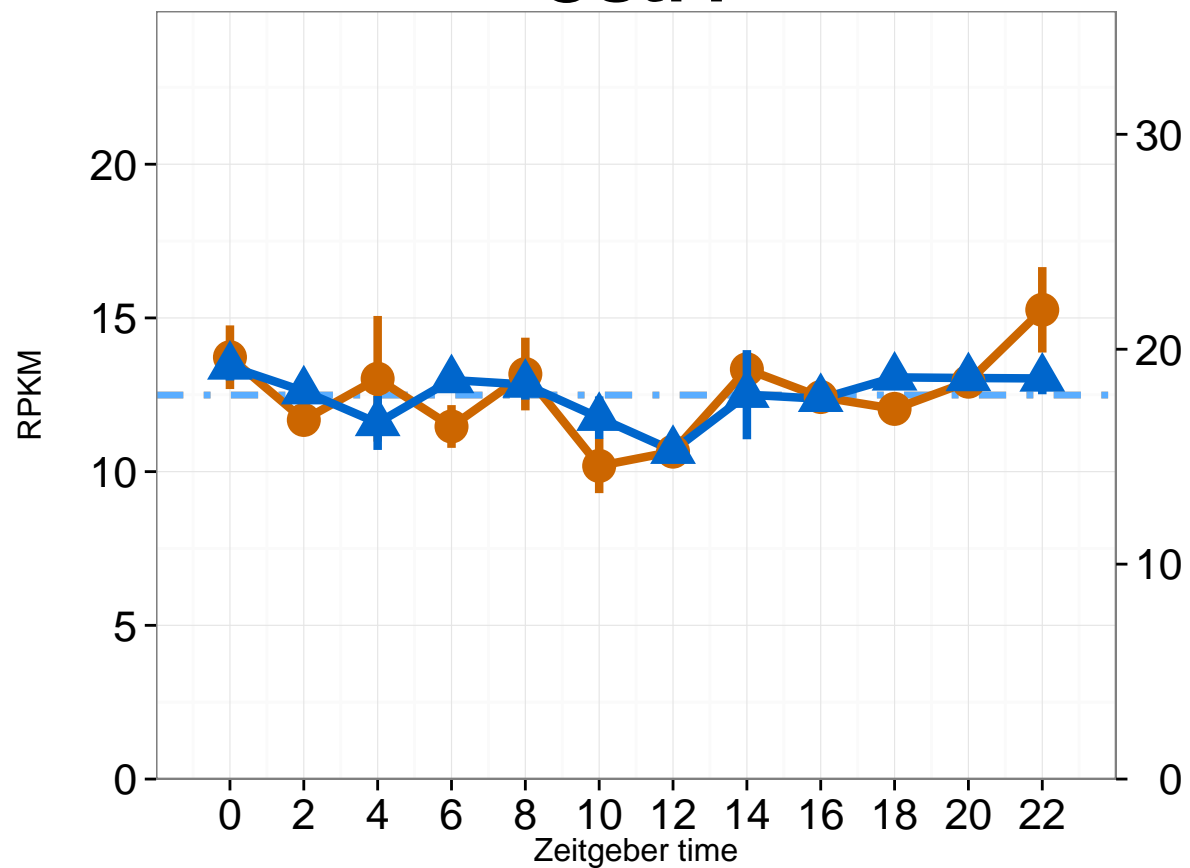

# Cstf1

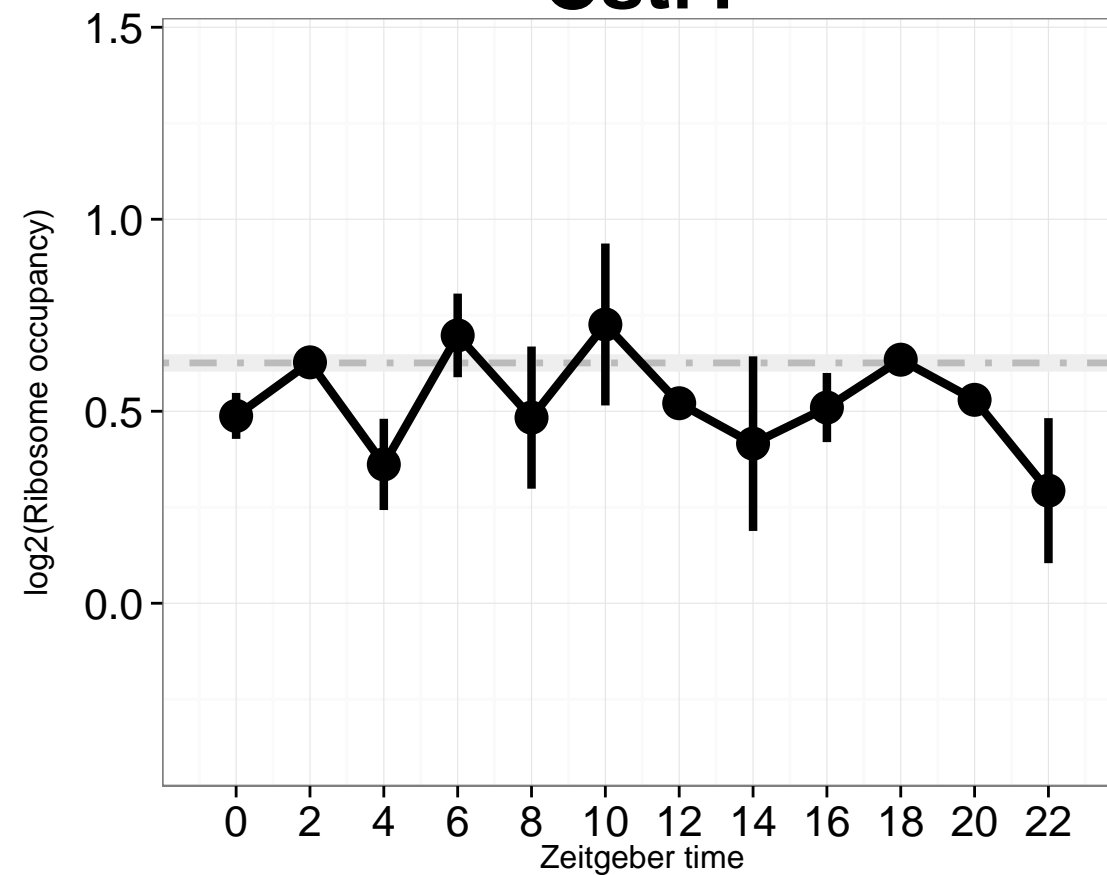

Supplement: SuppDataset_1.zip [file Cstf1_set_A.pdf › Supplemental Dataset 1/A-mRNA_nonrhyth_translation_nonrhyth/Cstf1_set_A.pdf]

# Cstf2

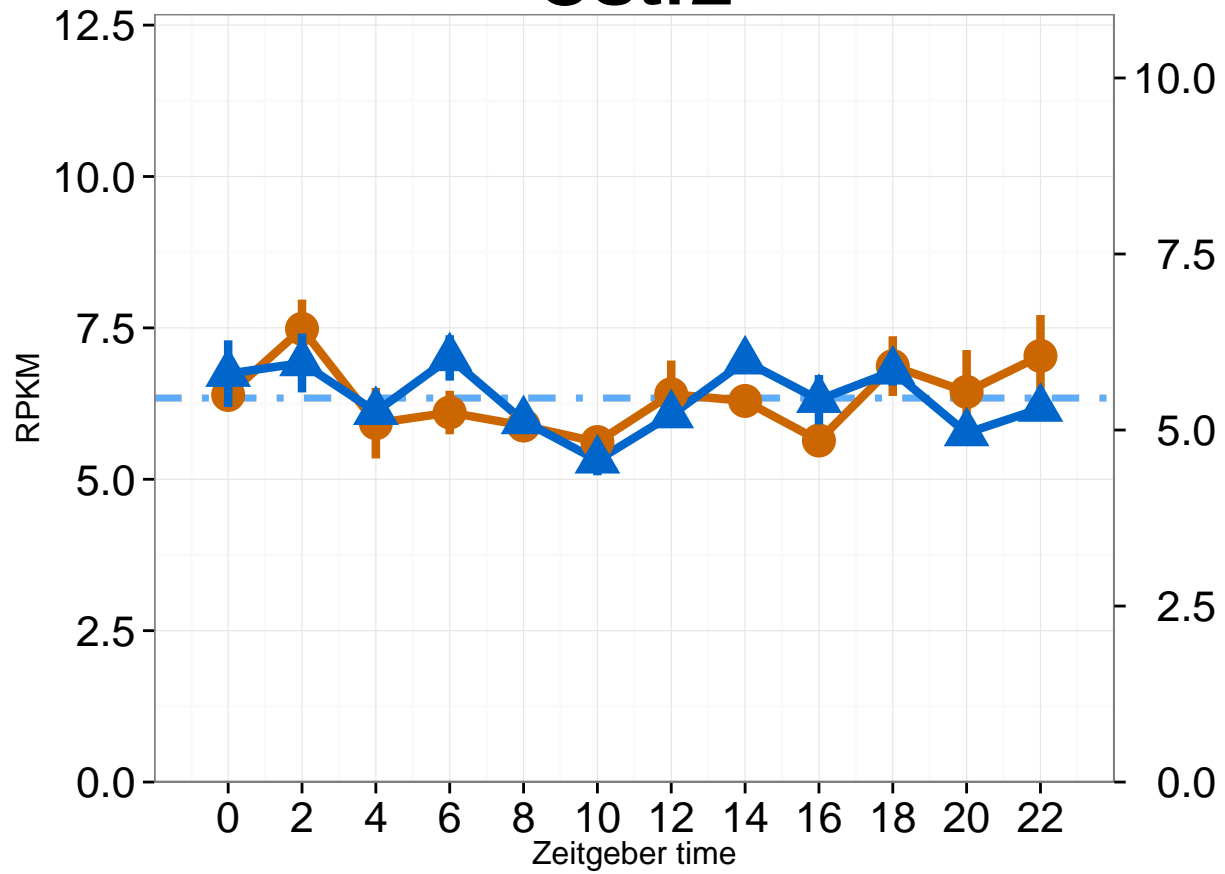

# Cstf2

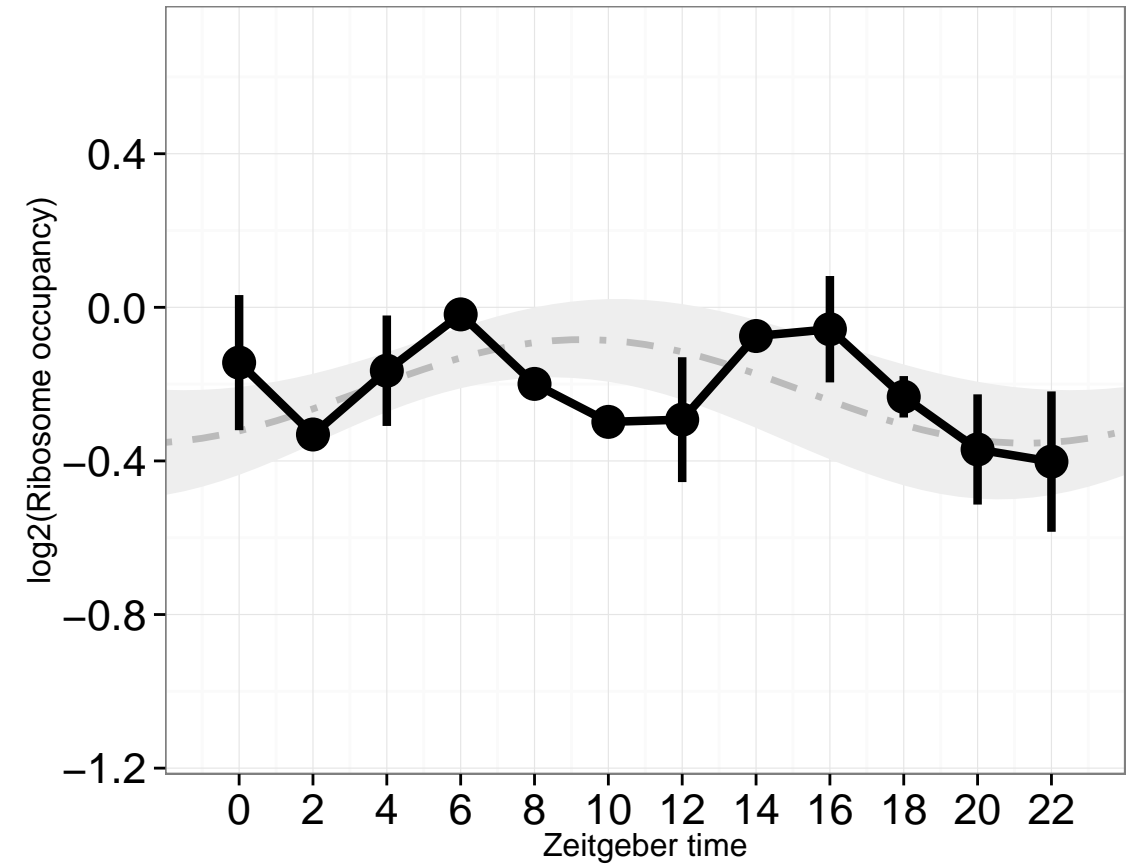

Supplement: SuppDataset_1.zip [file Cstf2_set_A.pdf › Supplemental Dataset 1/A-mRNA_nonrhyth_translation_nonrhyth/Cstf2_set_A.pdf]

## Cstf2t

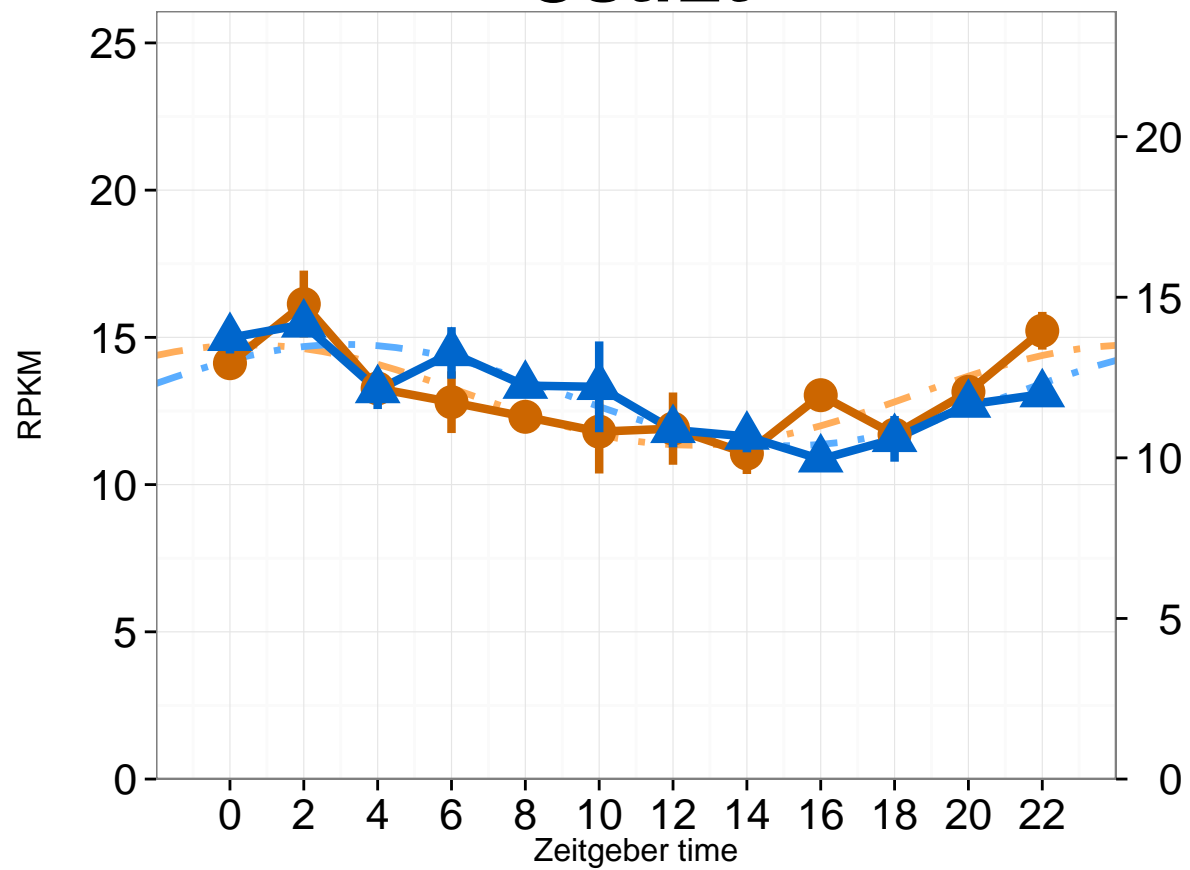

## Cstf2t

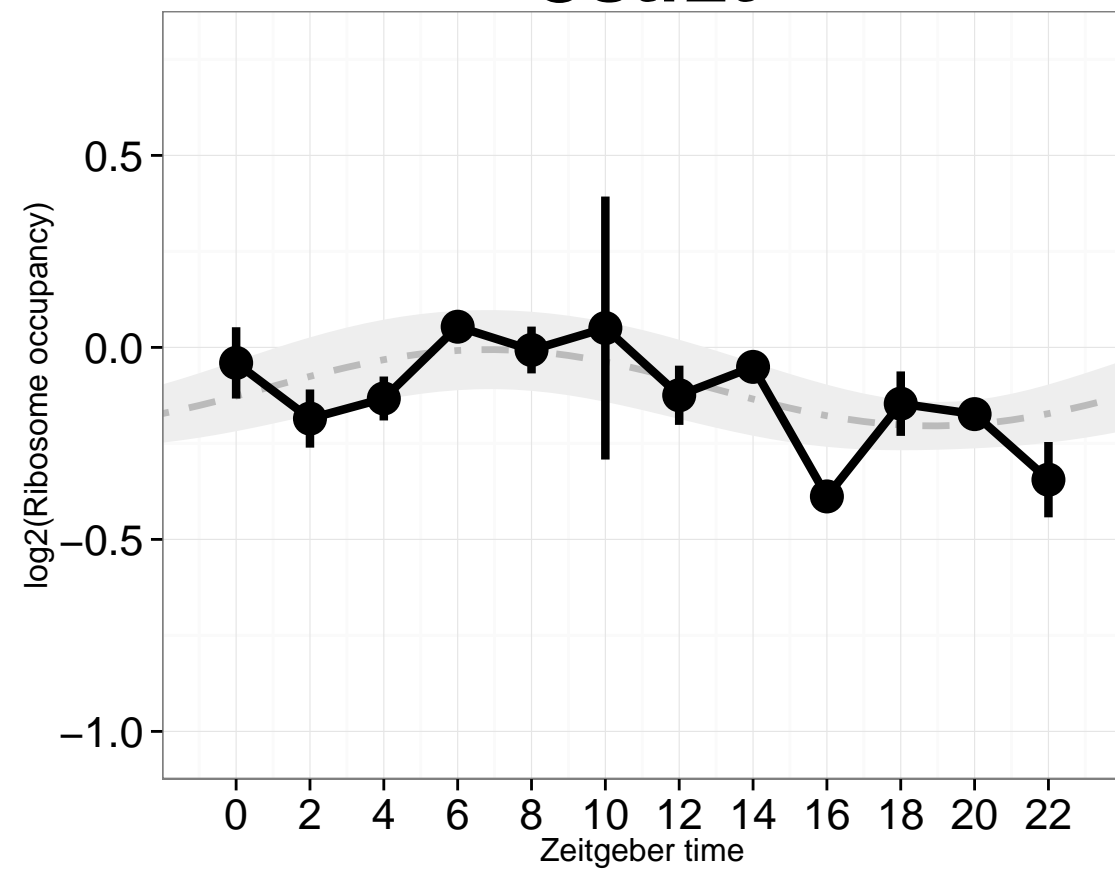

Supplement: SuppDataset_1.zip [file Cstf2t_set_A.pdf › Supplemental Dataset 1/A-mRNA_nonrhyth_translation_nonrhyth/Cstf2t_set_A.pdf]

# Ctage5

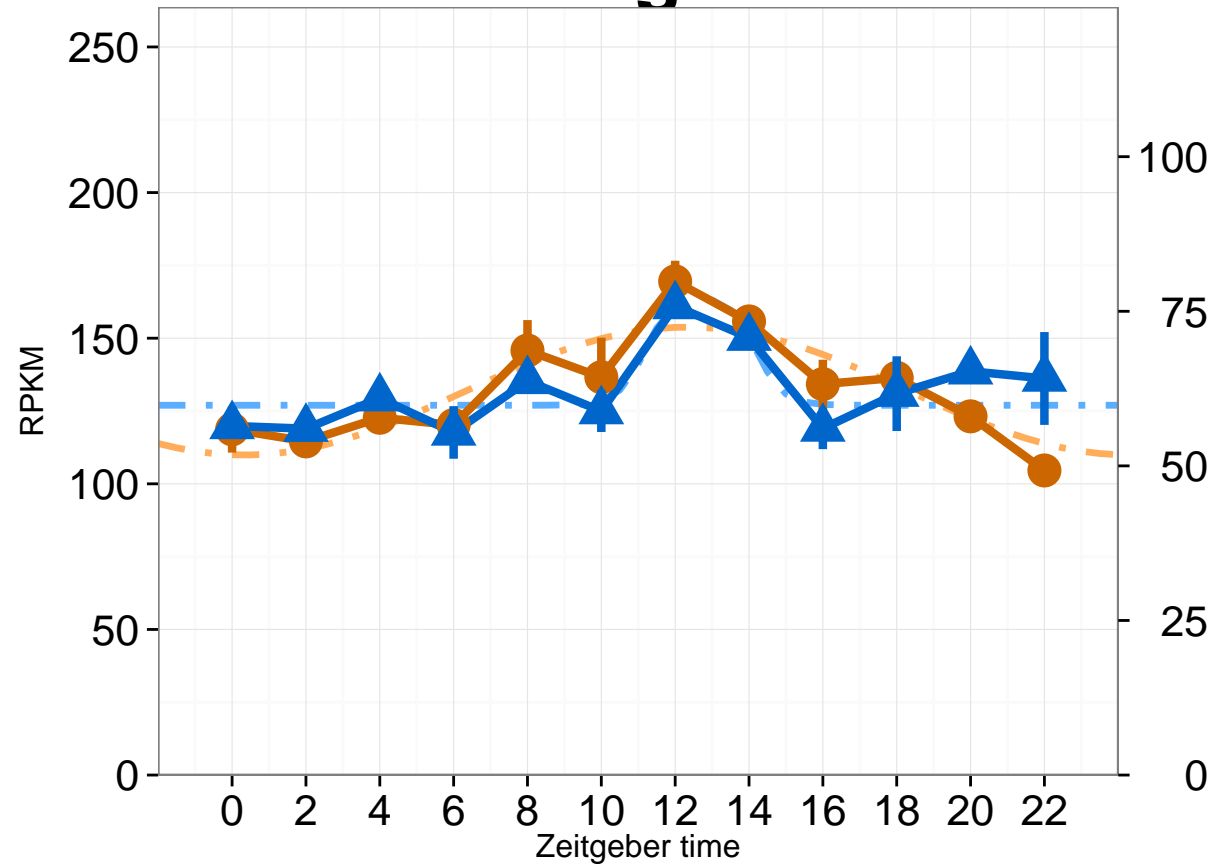

# Ctage5

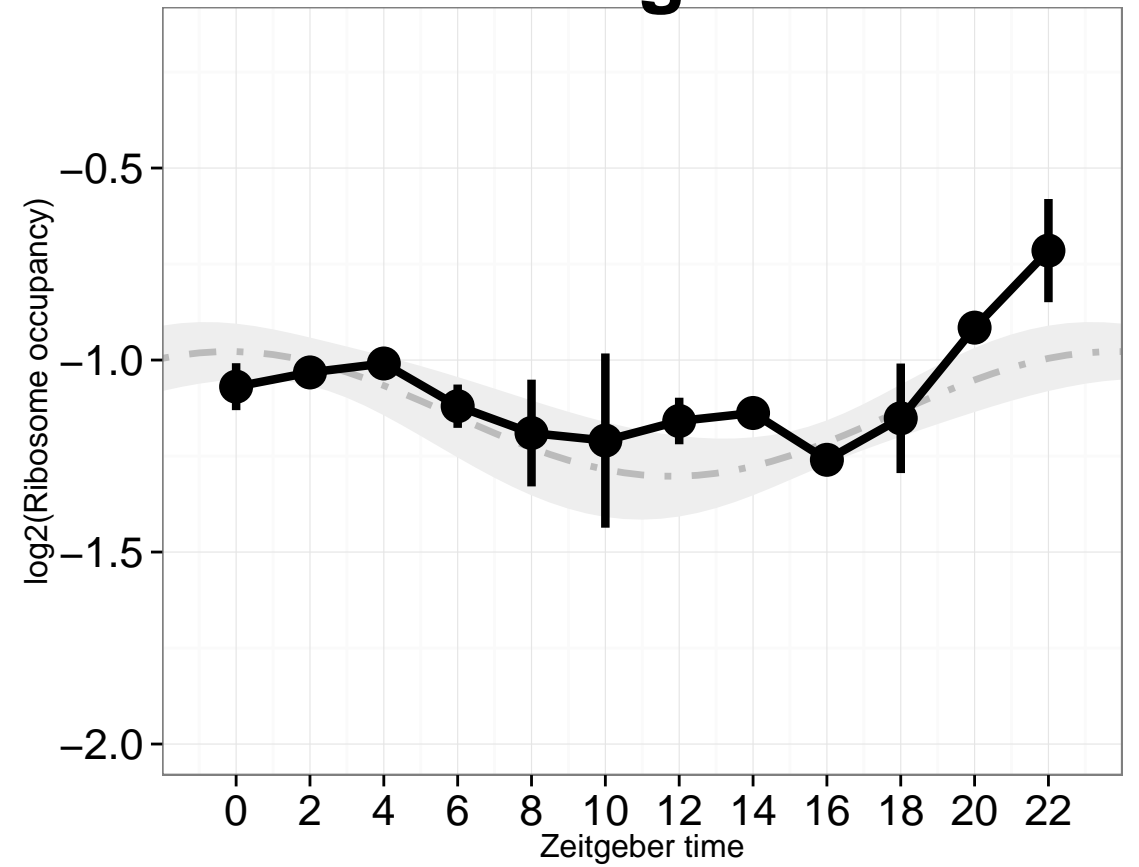

Supplement: SuppDataset_1.zip [file Ctage5_set_A.pdf › Supplemental Dataset 1/A-mRNA_nonrhyth_translation_nonrhyth/Ctage5_set_A.pdf]

# Ctbp1

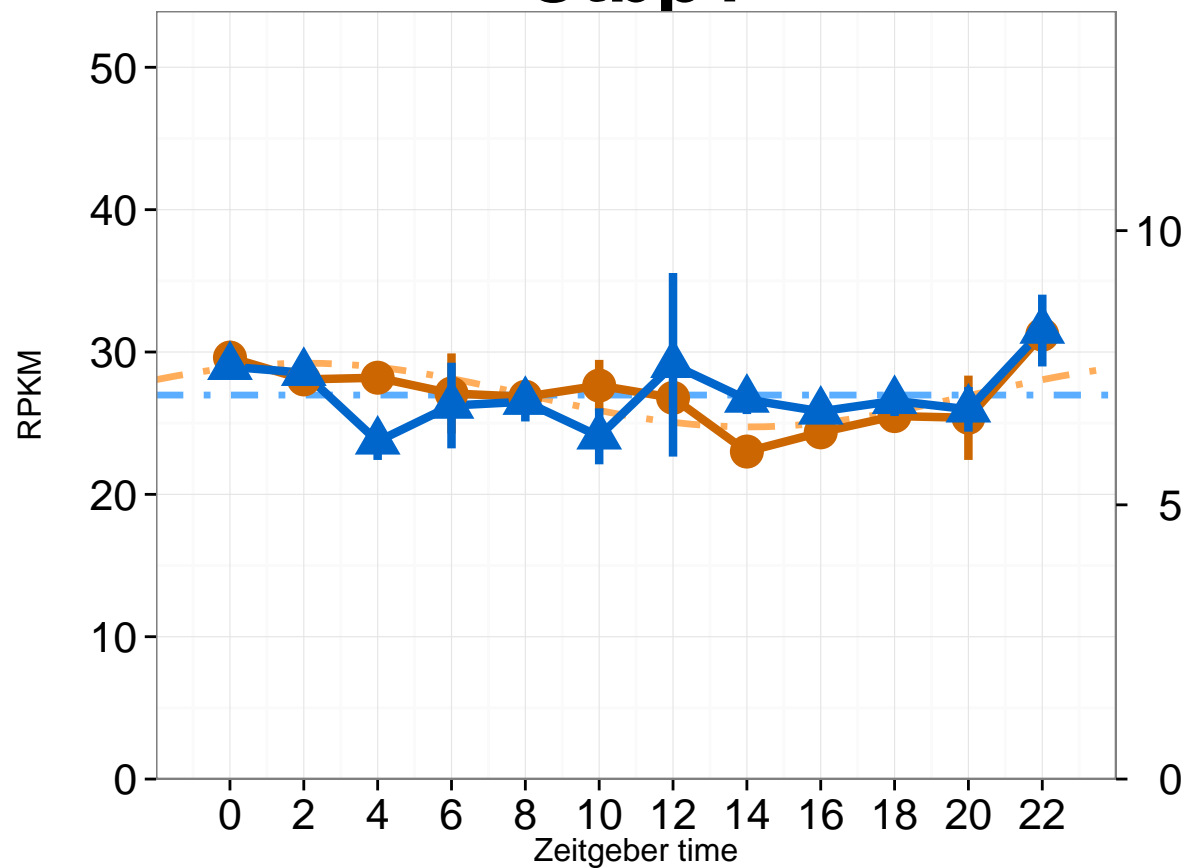

# Ctbp1

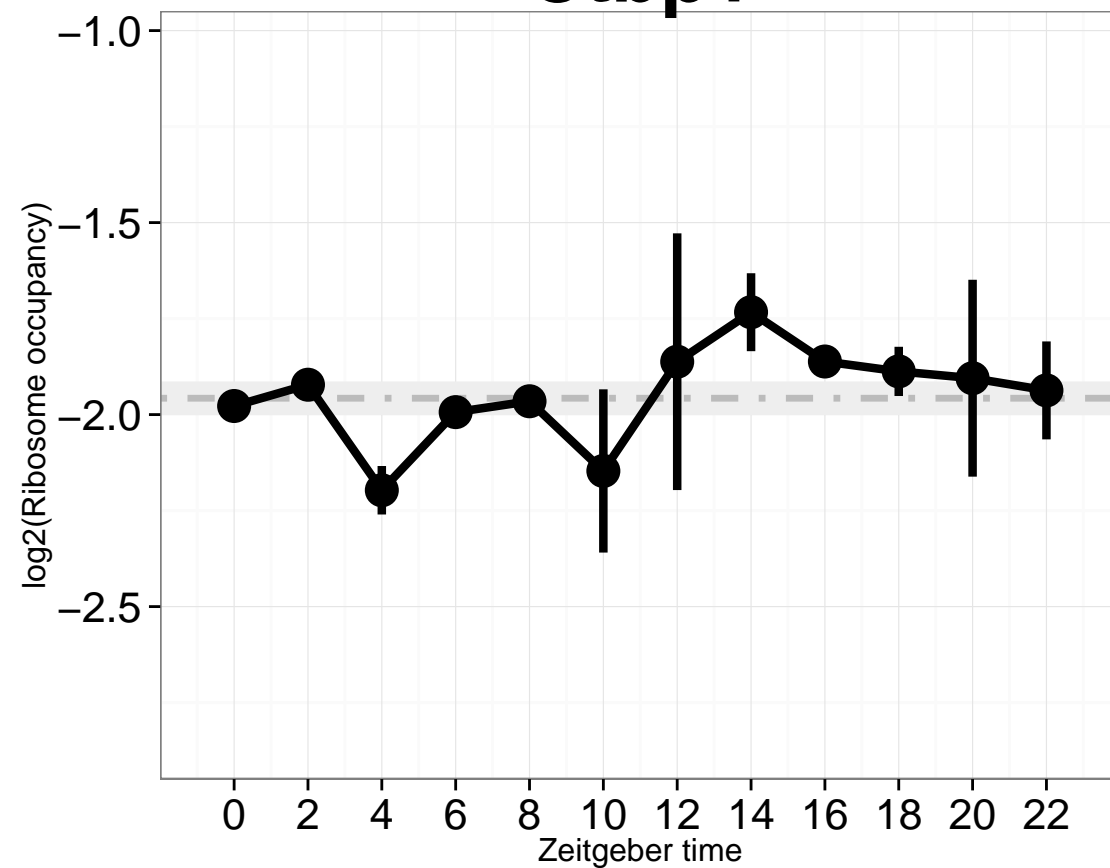

Supplement: SuppDataset_1.zip [file Ctbp1_set_A.pdf › Supplemental Dataset 1/A-mRNA_nonrhyth_translation_nonrhyth/Ctbp1_set_A.pdf]

## Ctbs

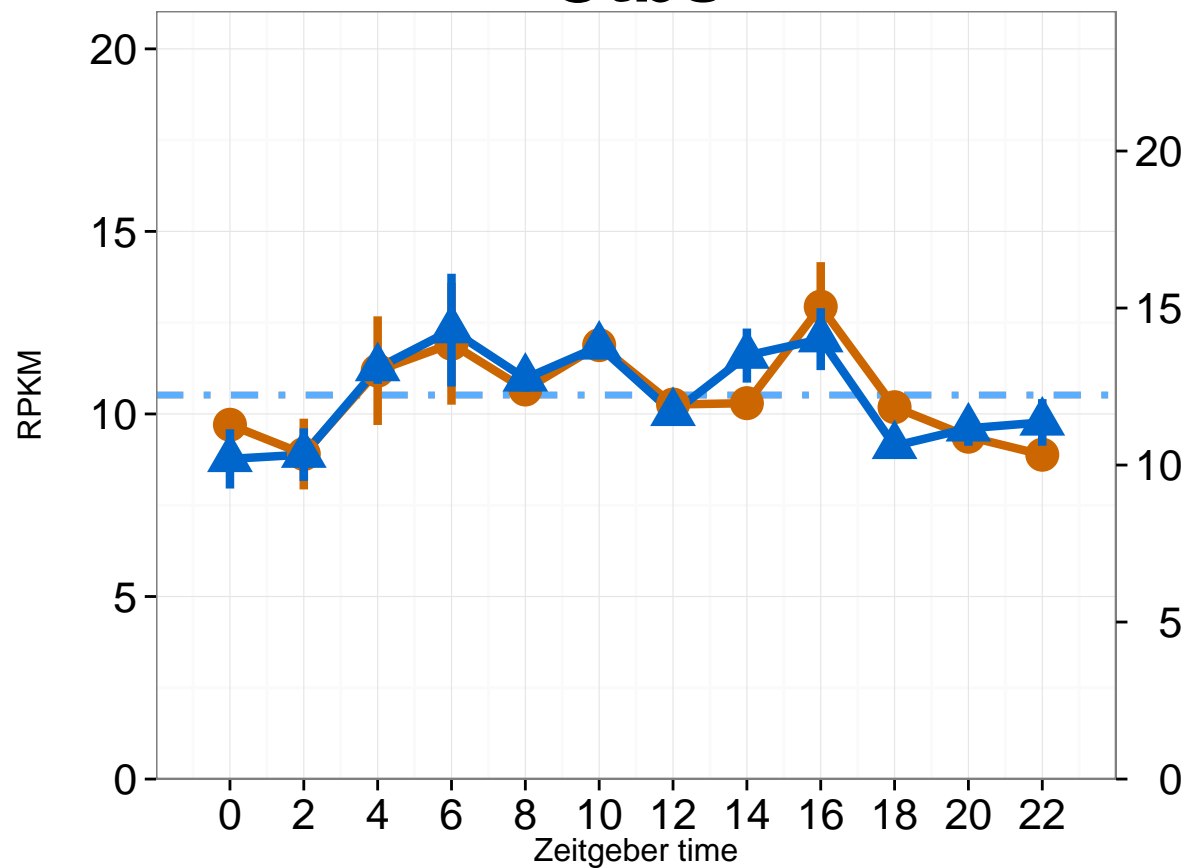

## Ctbs

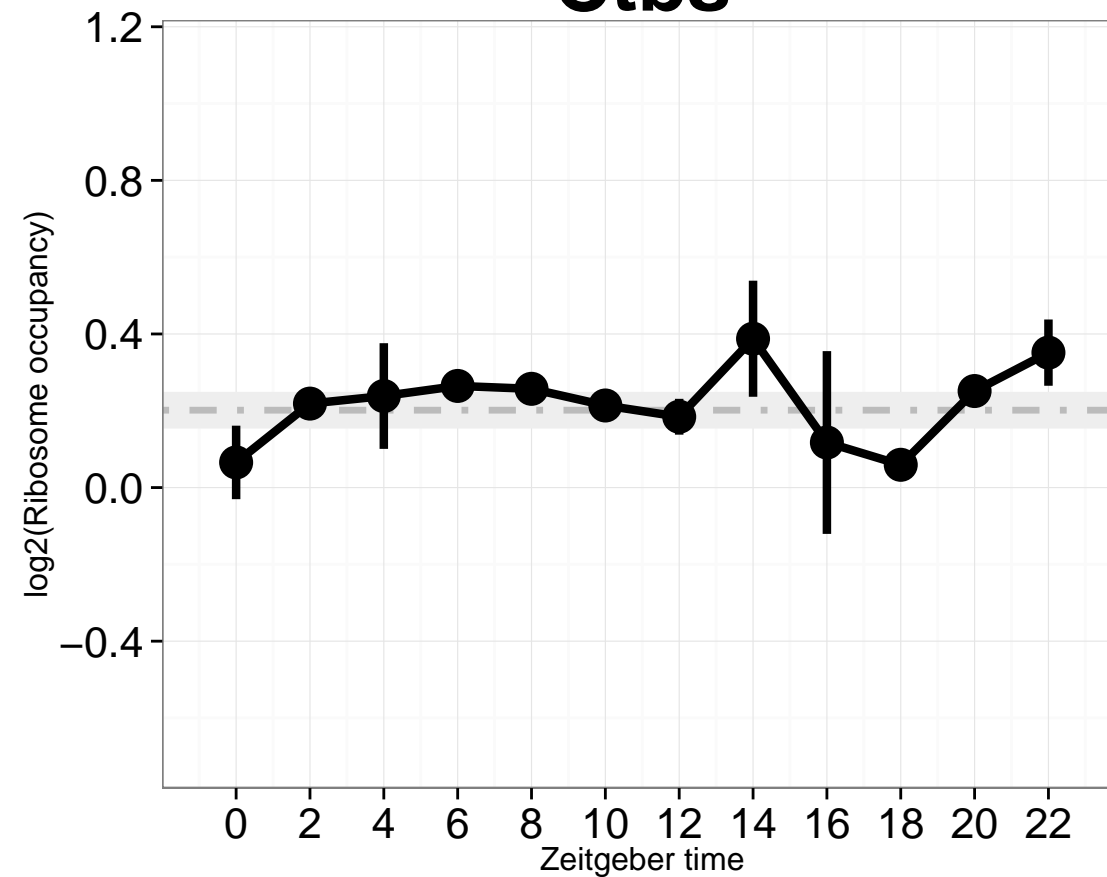

Supplement: SuppDataset_1.zip [file Ctbs_set_A.pdf › Supplemental Dataset 1/A-mRNA_nonrhyth_translation_nonrhyth/Ctbs_set_A.pdf]

## Ctcf

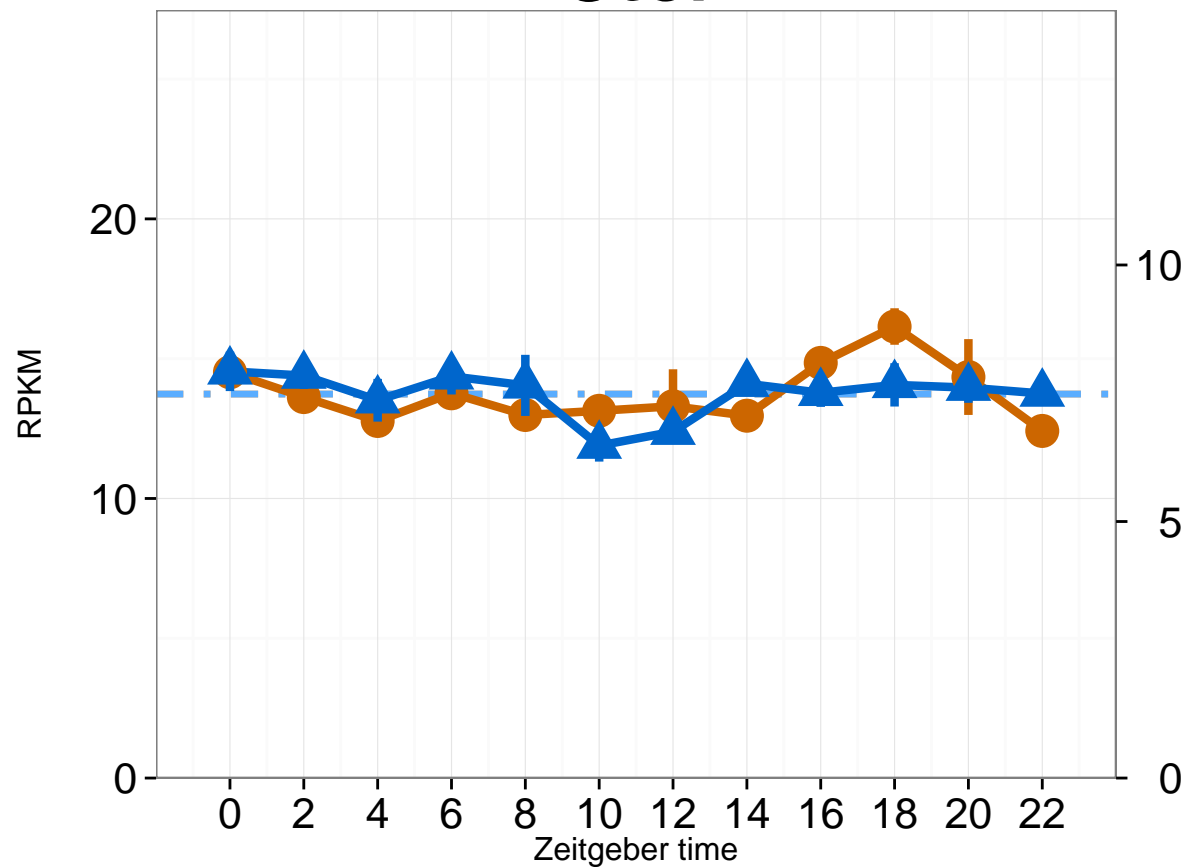

## Ctcf

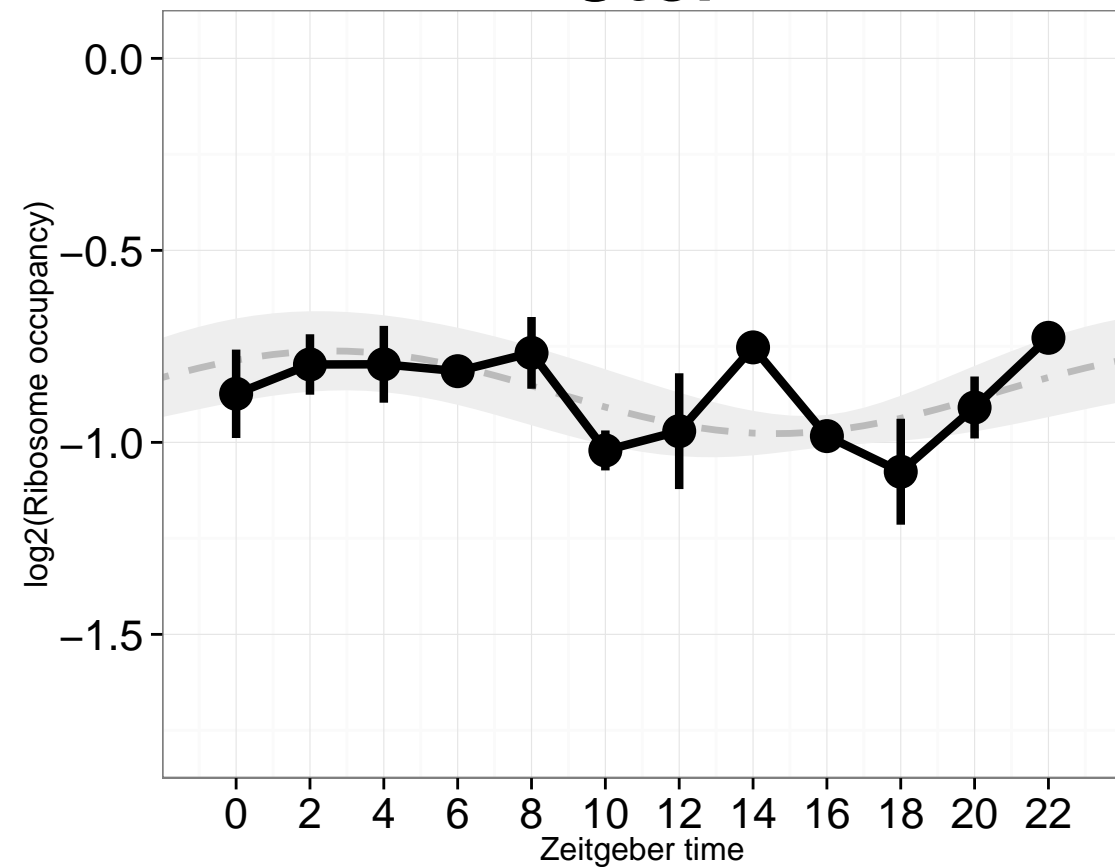

Supplement: SuppDataset_1.zip [file Ctcf_set_A.pdf › Supplemental Dataset 1/A-mRNA_nonrhyth_translation_nonrhyth/Ctcf_set_A.pdf]

# Ctdnep1

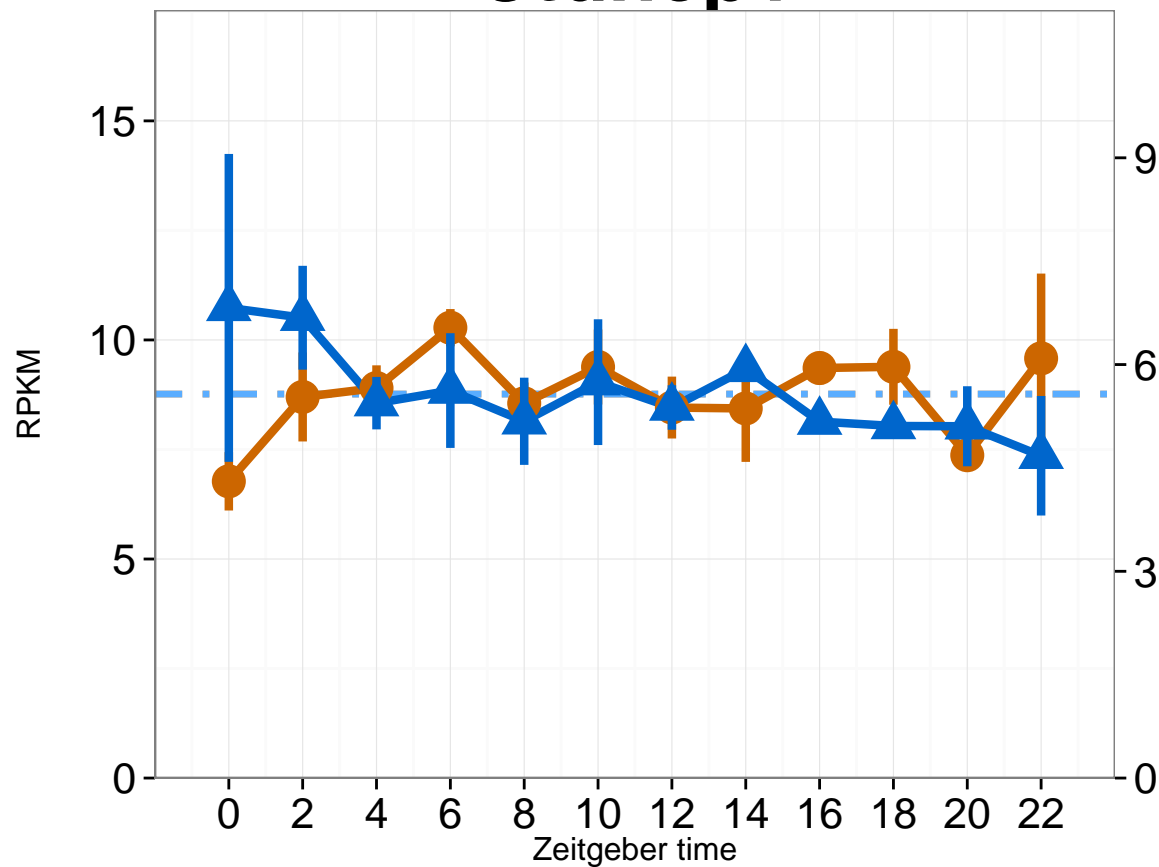

# Ctdnep1

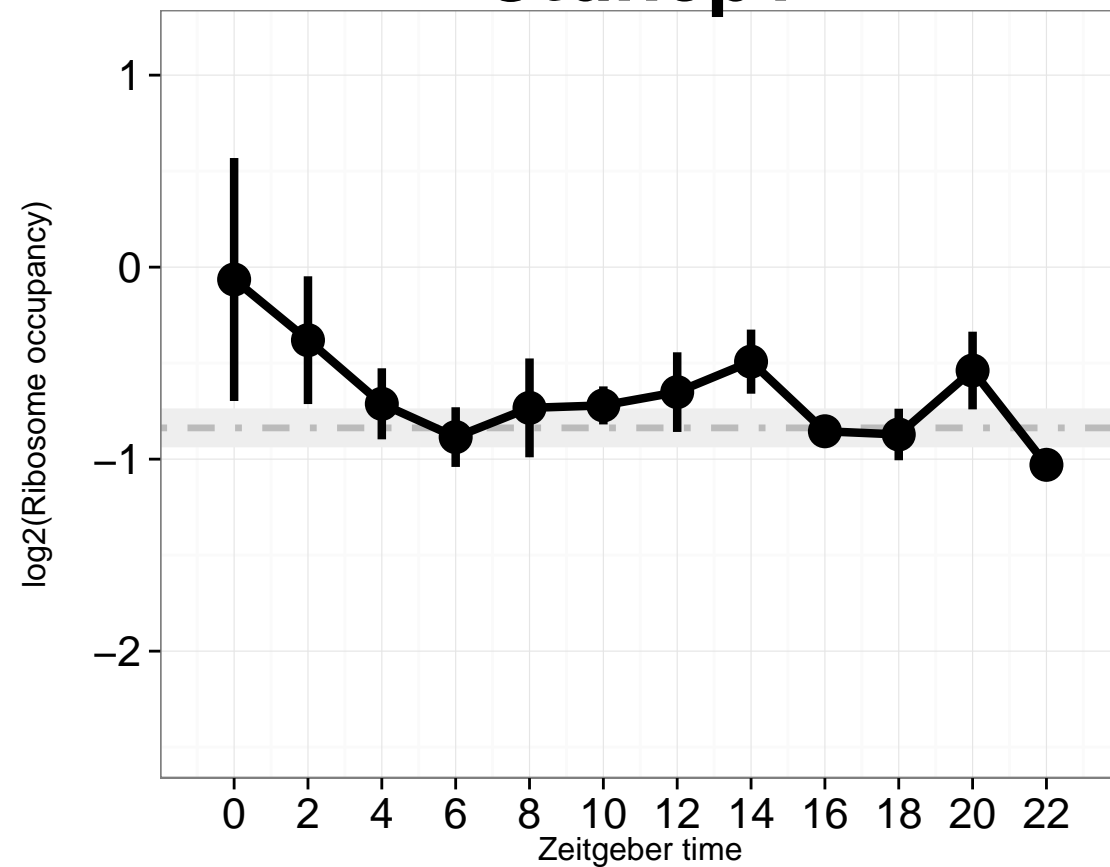

Supplement: SuppDataset_1.zip [file Ctdnep1_set_A.pdf › Supplemental Dataset 1/A-mRNA_nonrhyth_translation_nonrhyth/Ctdnep1_set_A.pdf]

# Ctdp1

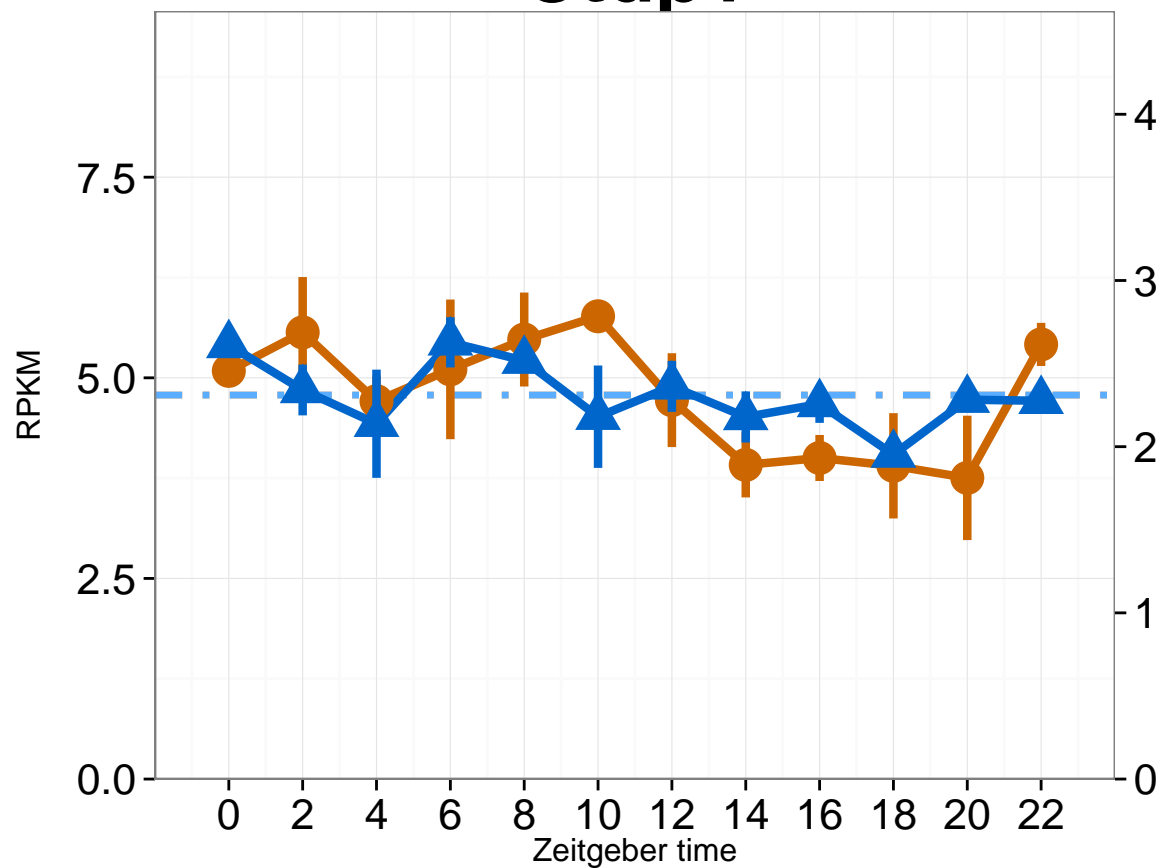

# Ctdp1

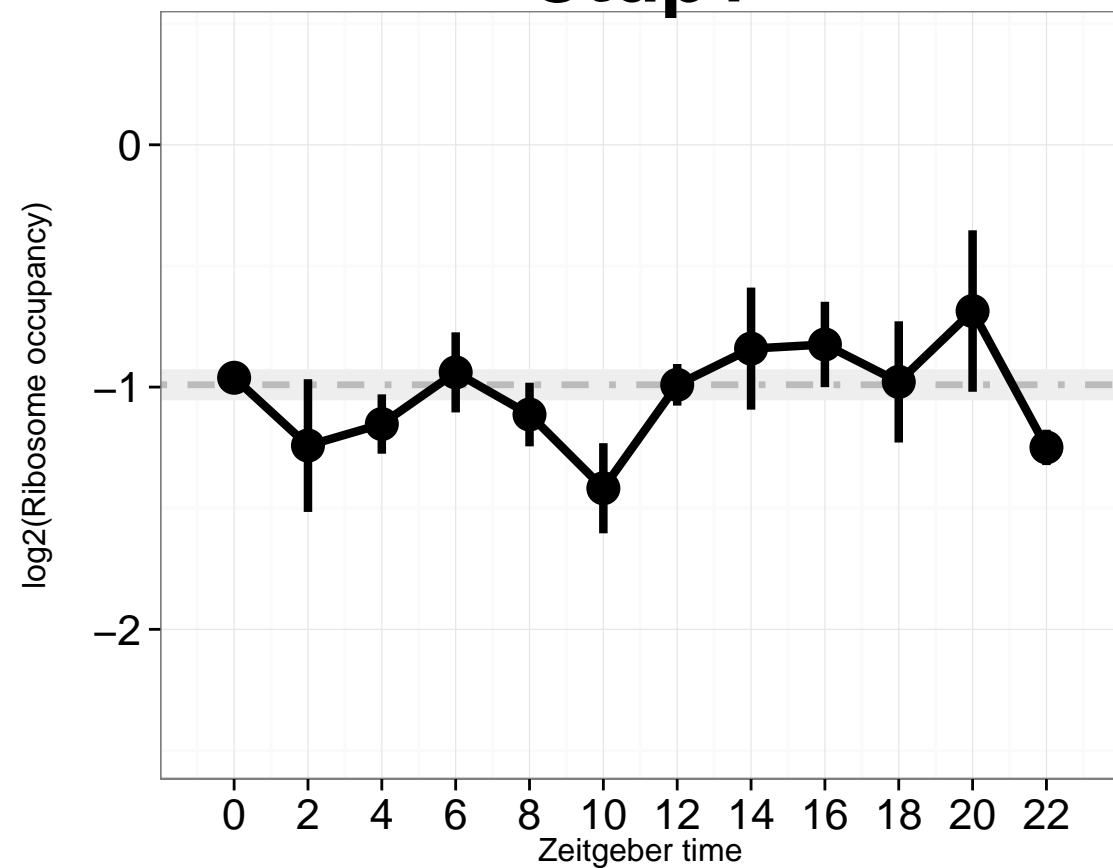

Supplement: SuppDataset_1.zip [file Ctdp1_set_A.pdf › Supplemental Dataset 1/A-mRNA_nonrhyth_translation_nonrhyth/Ctdp1_set_A.pdf]

# Ctdspl2

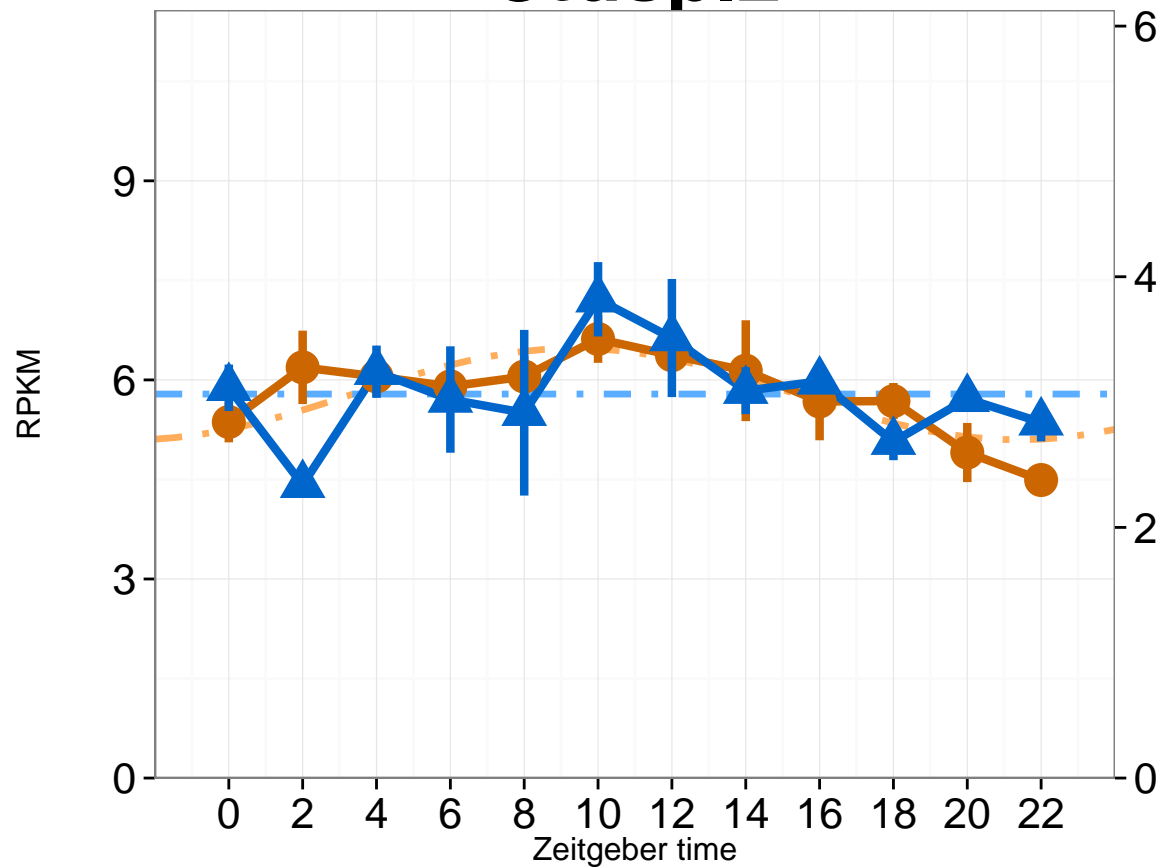

# Ctdspl2

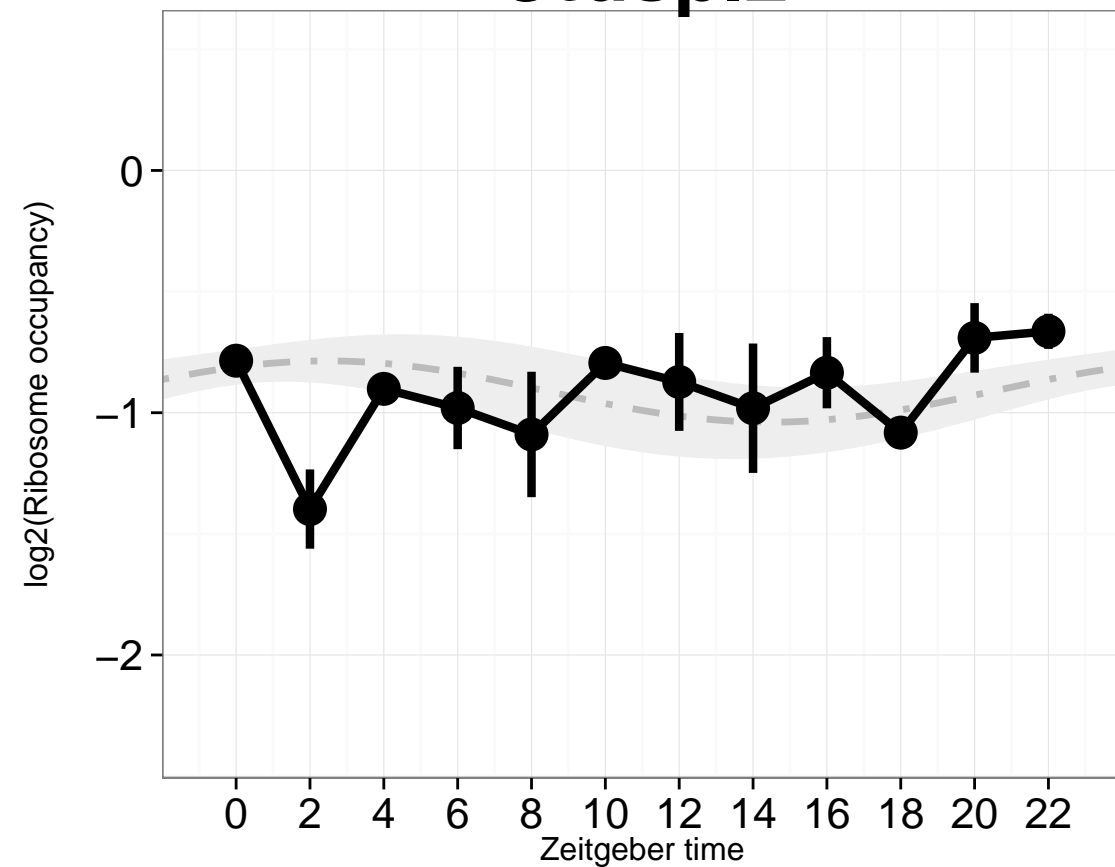

Supplement: SuppDataset_1.zip [file Ctdspl2_set_A.pdf › Supplemental Dataset 1/A-mRNA_nonrhyth_translation_nonrhyth/Ctdspl2_set_A.pdf]

## Ctdspl

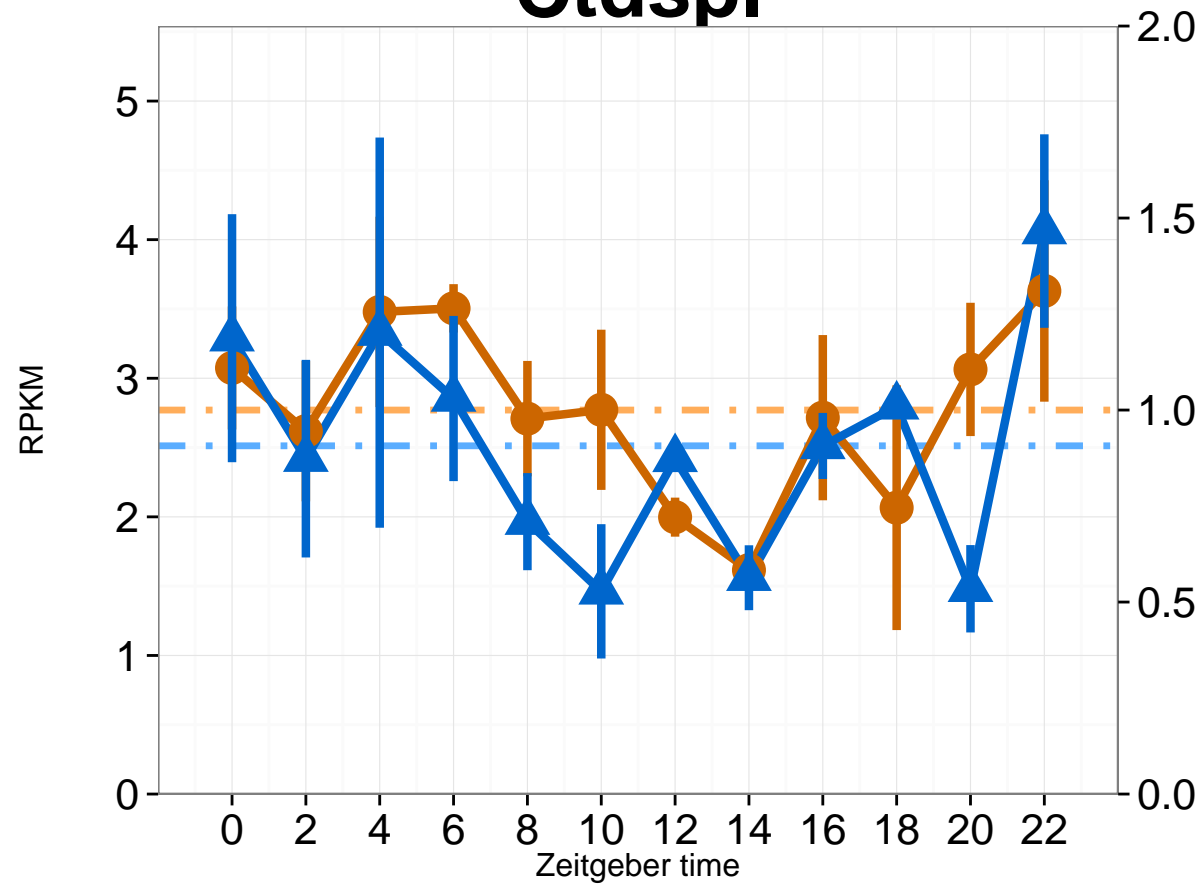

## Ctdspl

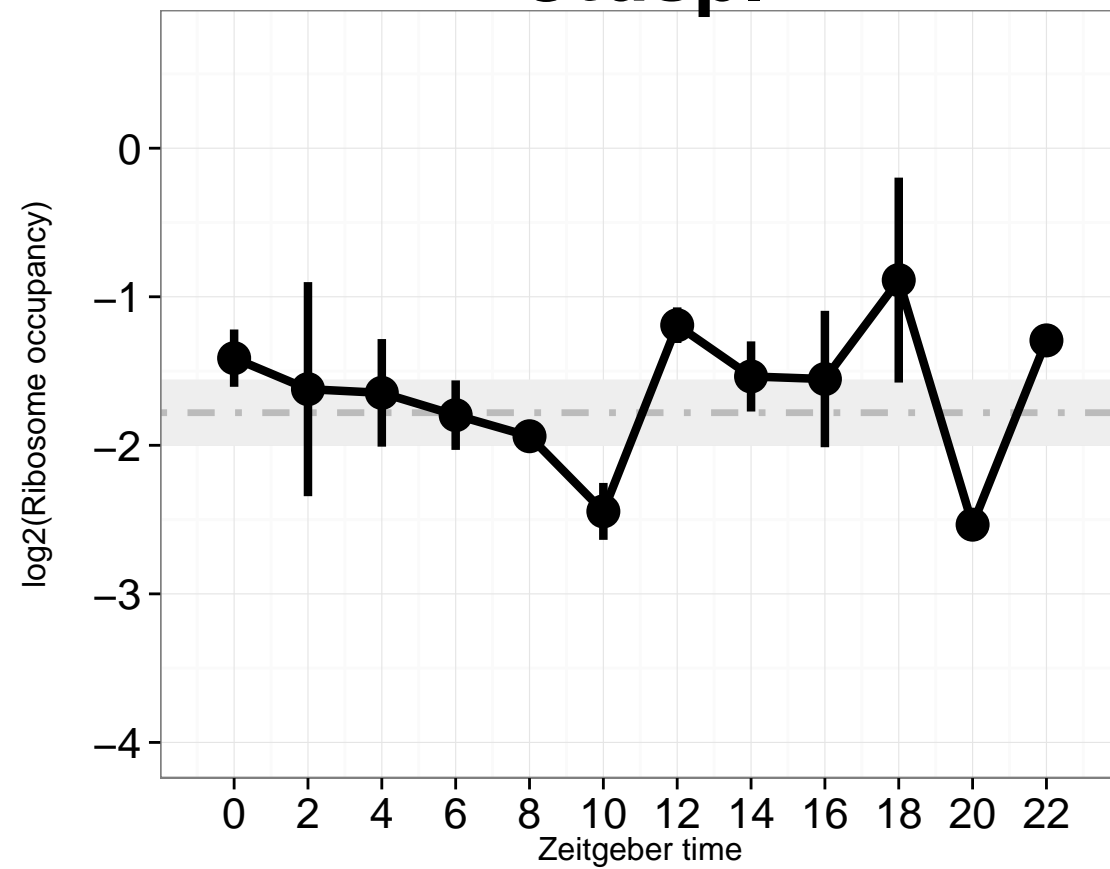

Supplement: SuppDataset_1.zip [file Ctdspl_set_A.pdf › Supplemental Dataset 1/A-mRNA_nonrhyth_translation_nonrhyth/Ctdspl_set_A.pdf]

## Ctgf

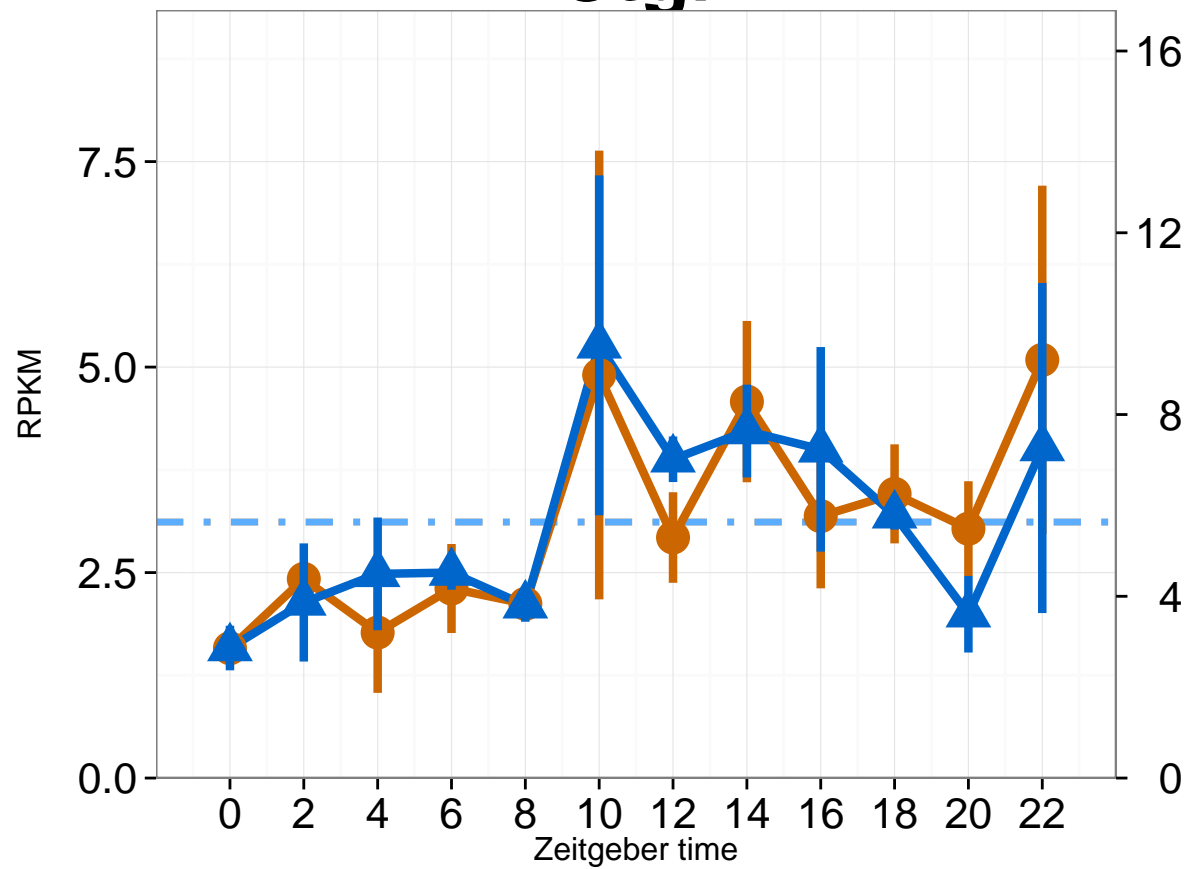

## Ctgf

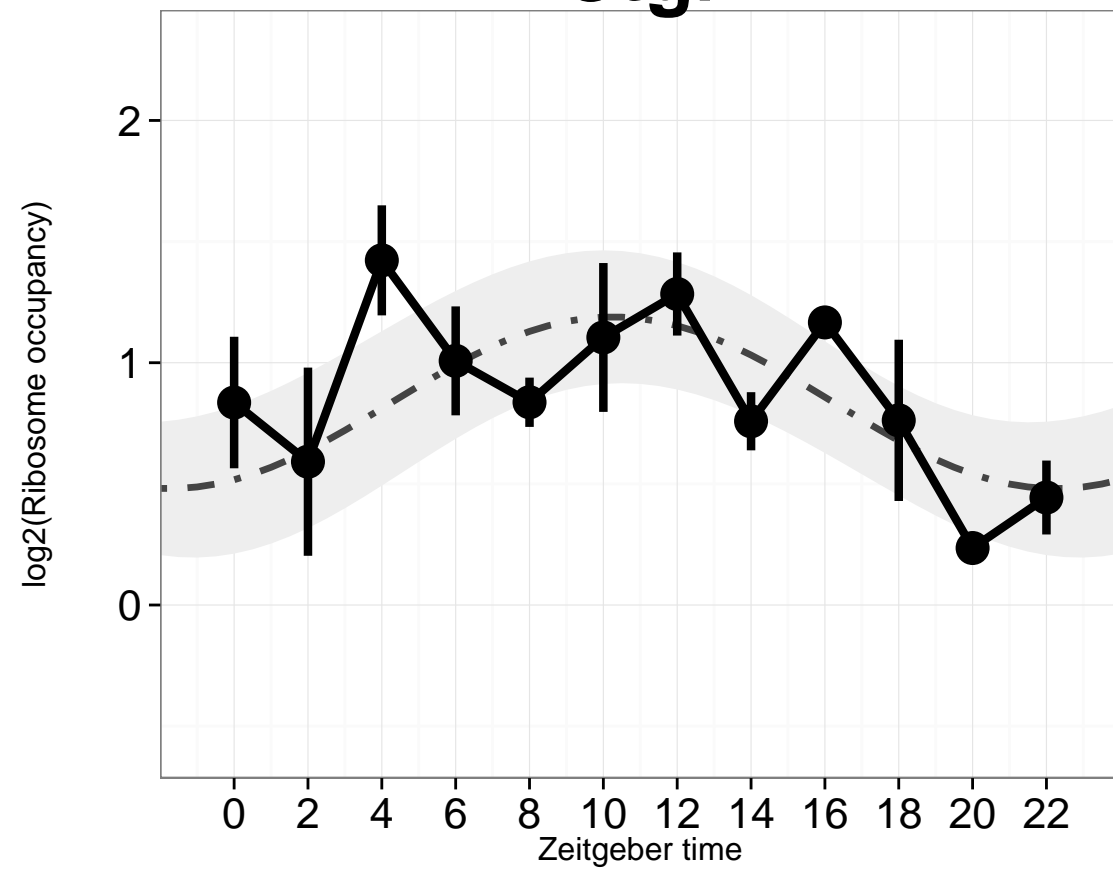

Supplement: SuppDataset_1.zip [file Ctgf_set_A.pdf › Supplemental Dataset 1/A-mRNA_nonrhyth_translation_nonrhyth/Ctgf_set_A.pdf]

# Ctif

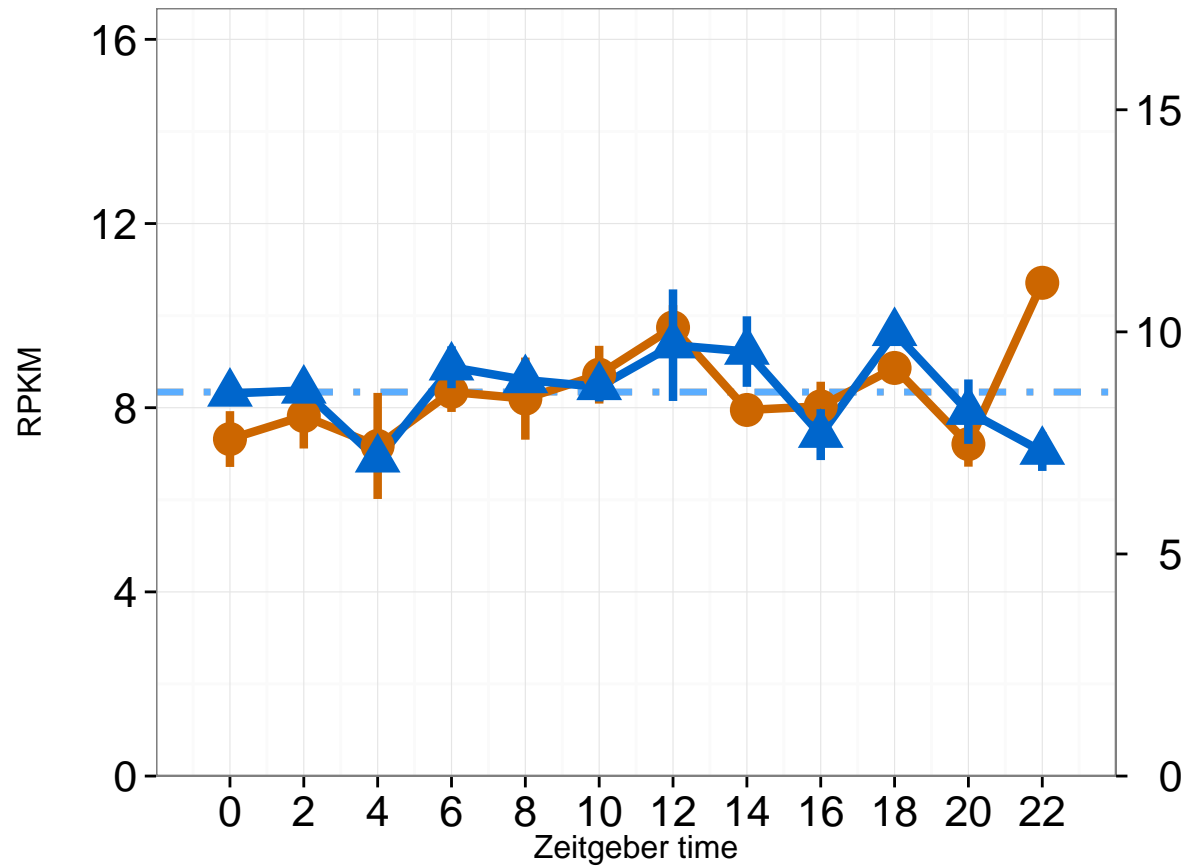

# Ctif

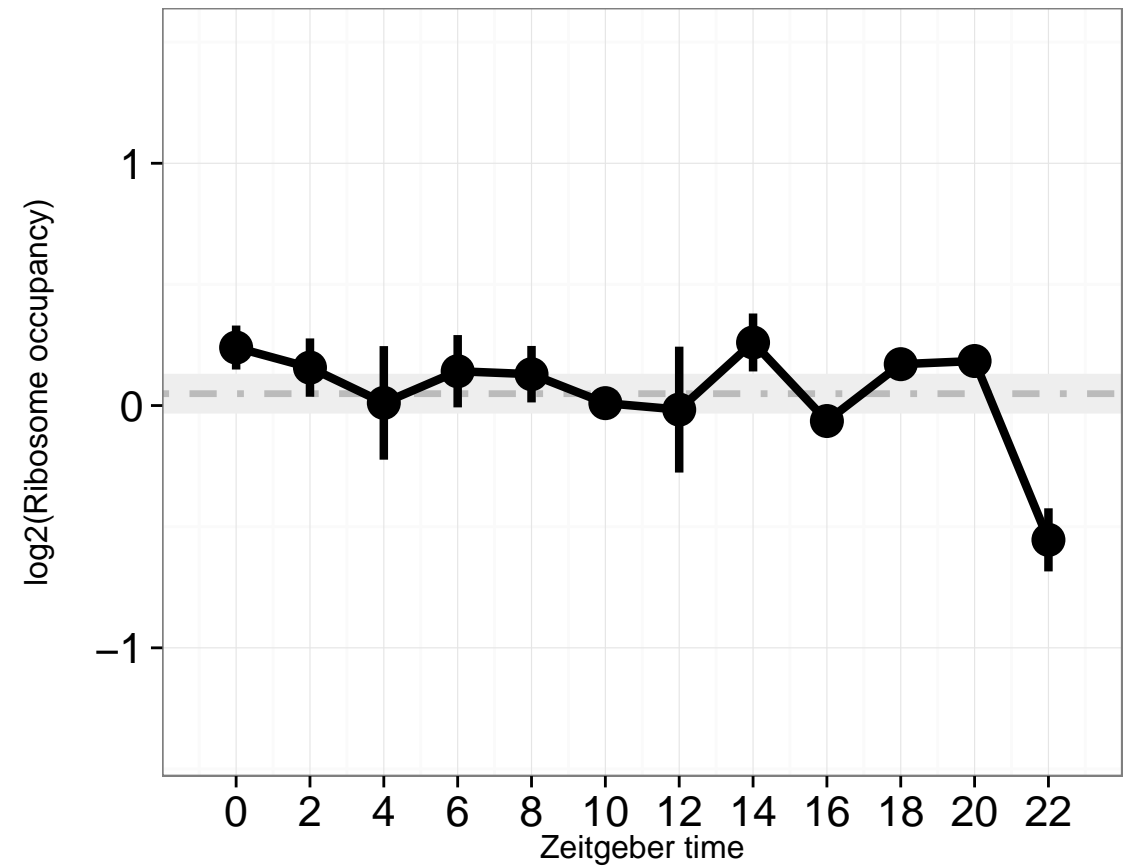

Supplement: SuppDataset_1.zip [file Ctif_set_A.pdf › Supplemental Dataset 1/A-mRNA_nonrhyth_translation_nonrhyth/Ctif_set_A.pdf]

# Ctla2a

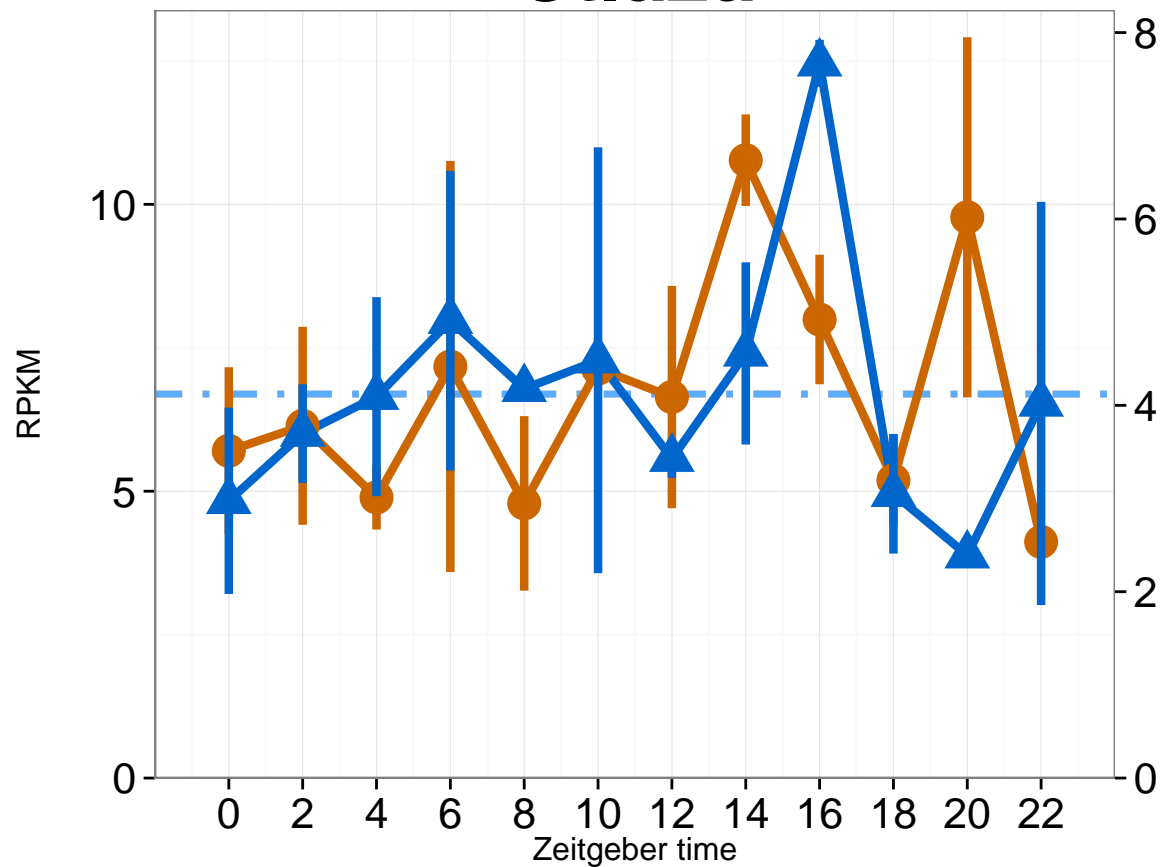

# Ctla2a

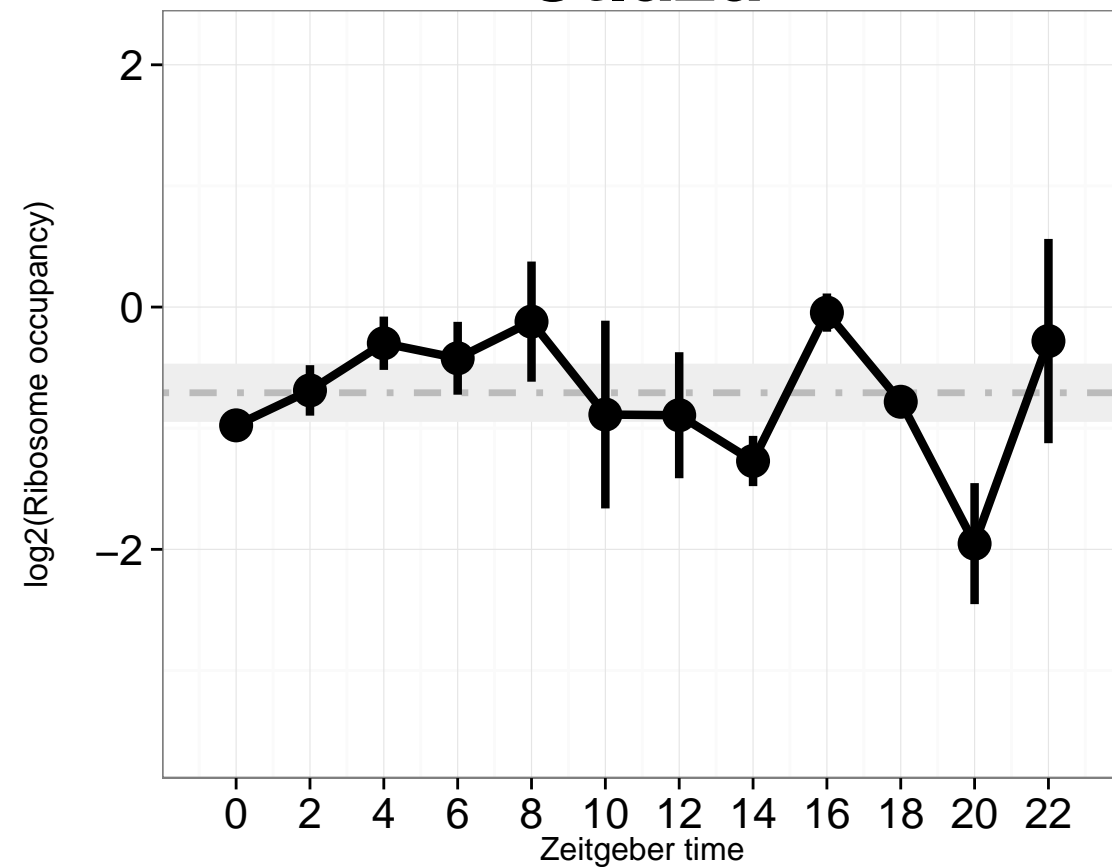

Supplement: SuppDataset_1.zip [file Ctla2a_set_A.pdf › Supplemental Dataset 1/A-mRNA_nonrhyth_translation_nonrhyth/Ctla2a_set_A.pdf]

# Ctla2b

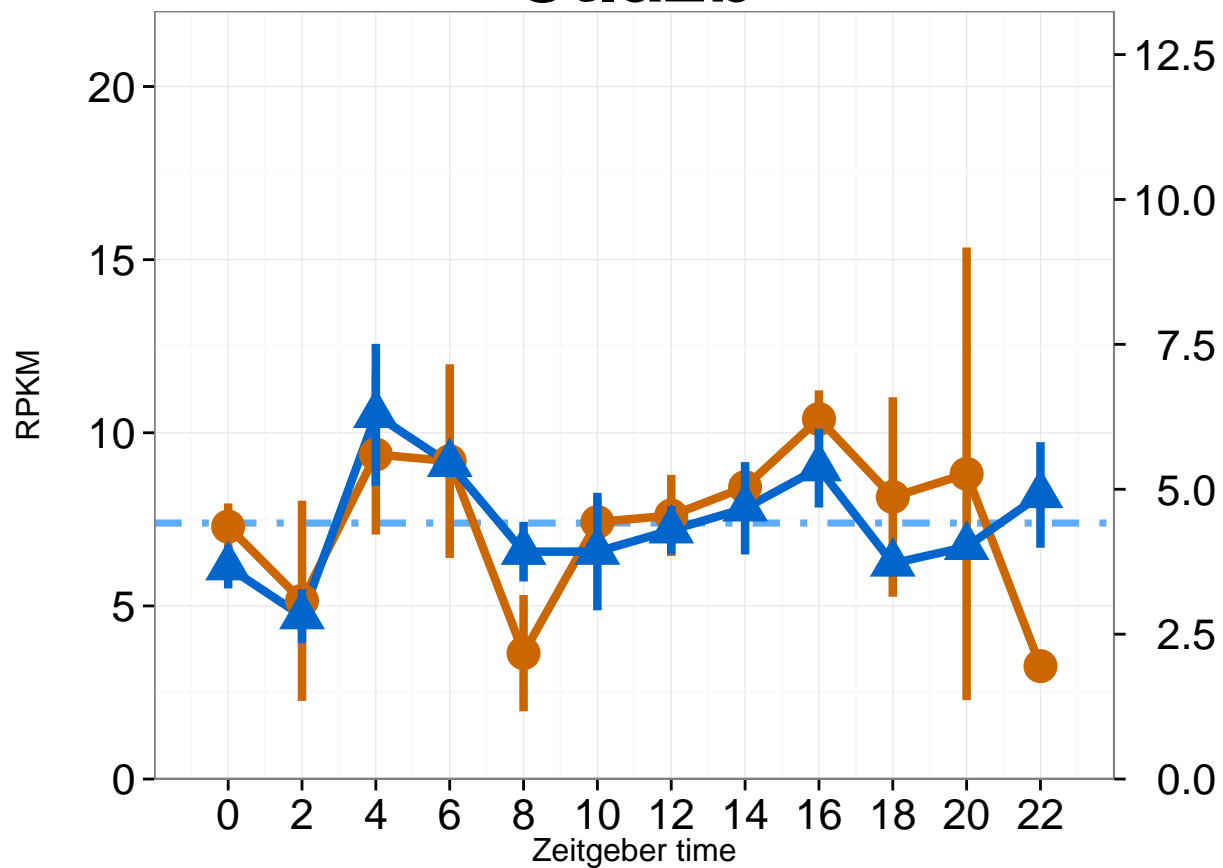

# Ctla2b

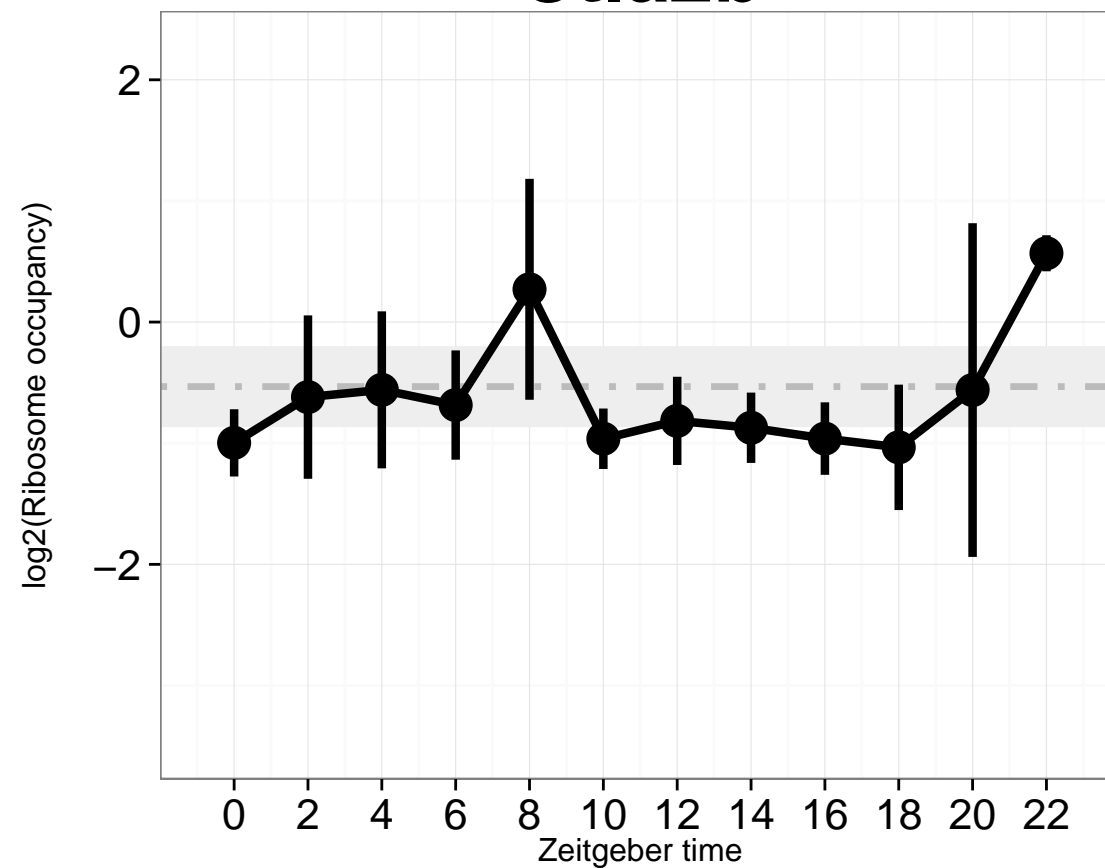

Supplement: SuppDataset_1.zip [file Ctla2b_set_A.pdf › Supplemental Dataset 1/A-mRNA_nonrhyth_translation_nonrhyth/Ctla2b_set_A.pdf]

## Ctnna1

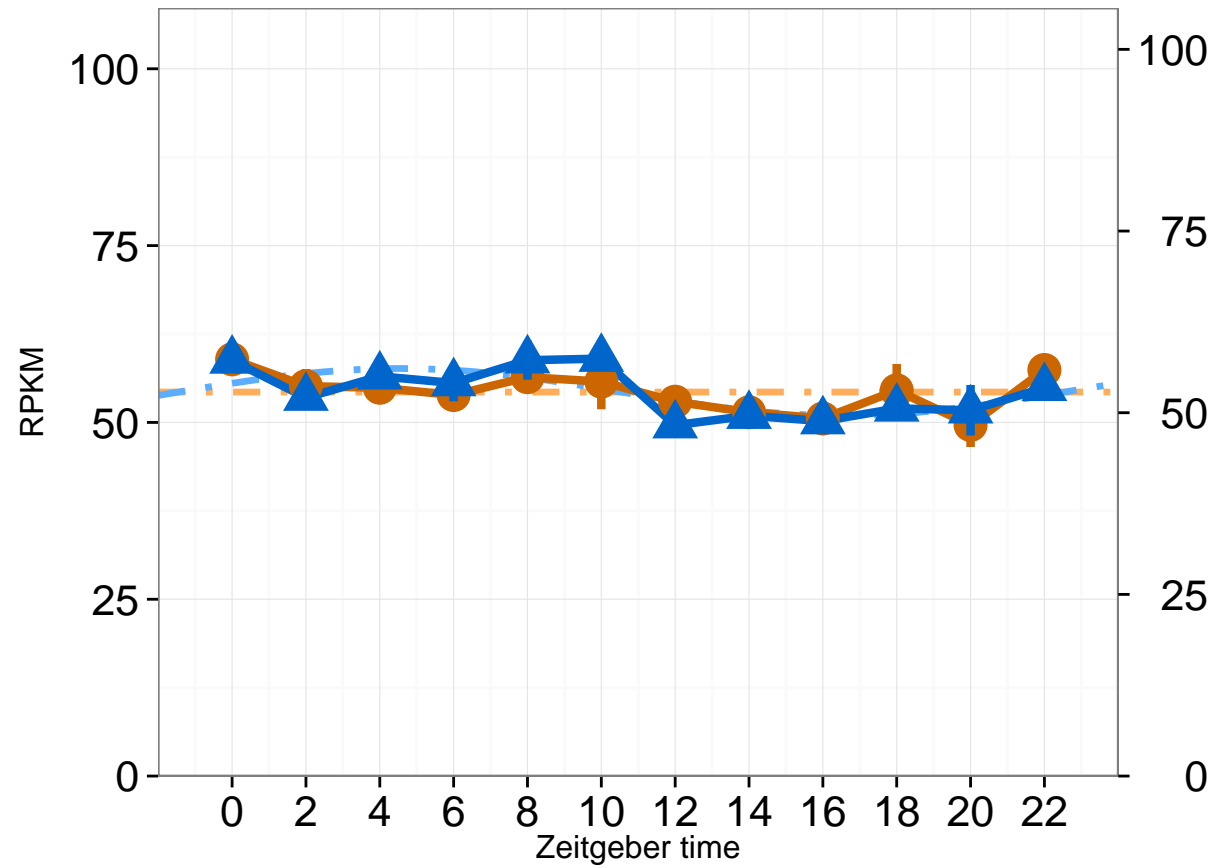

## Ctnna1

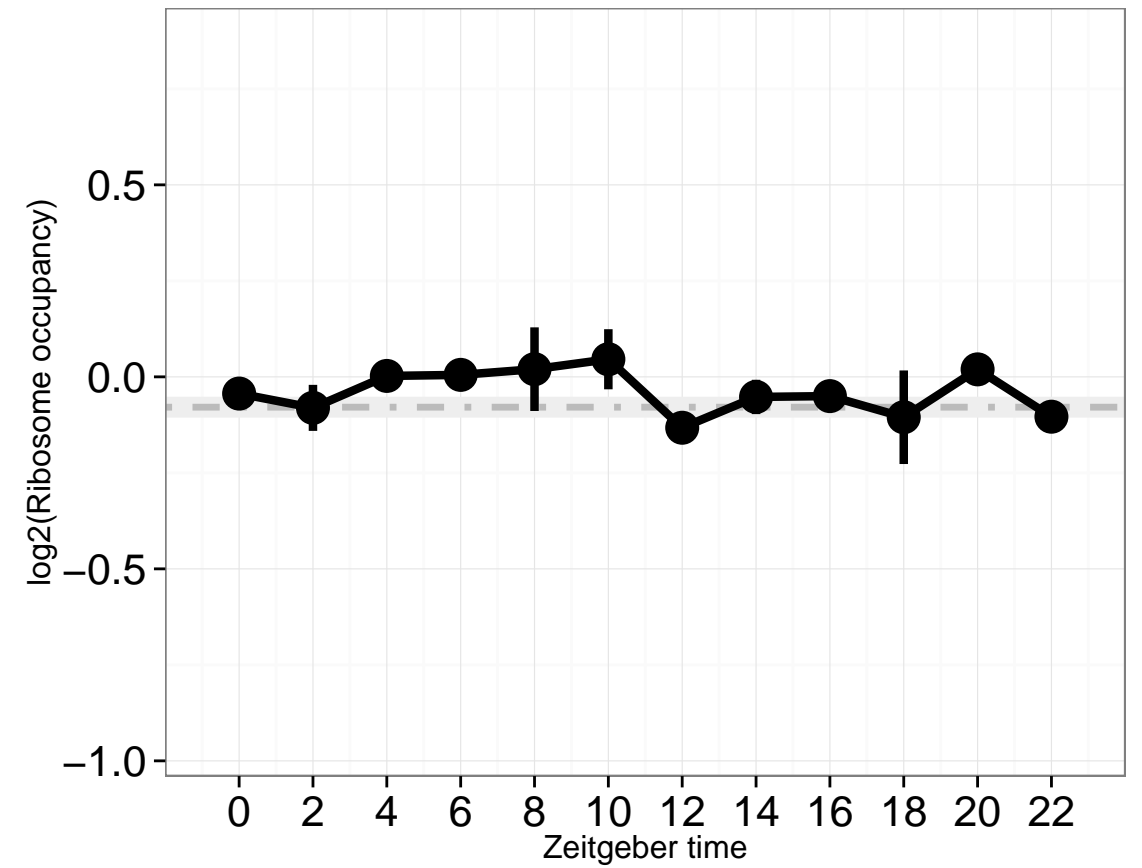

Supplement: SuppDataset_1.zip [file Ctnna1_set_A.pdf › Supplemental Dataset 1/A-mRNA_nonrhyth_translation_nonrhyth/Ctnna1_set_A.pdf]

## Ctnna1

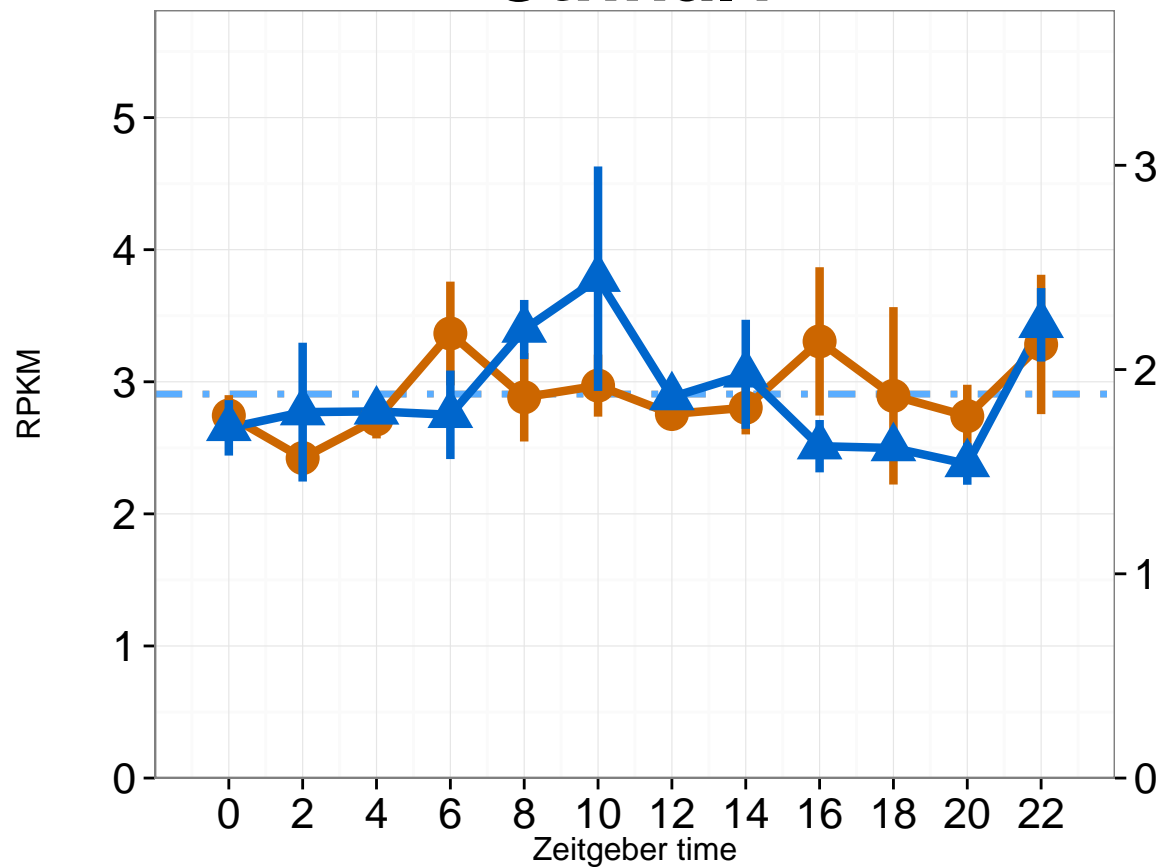

## Ctnna1

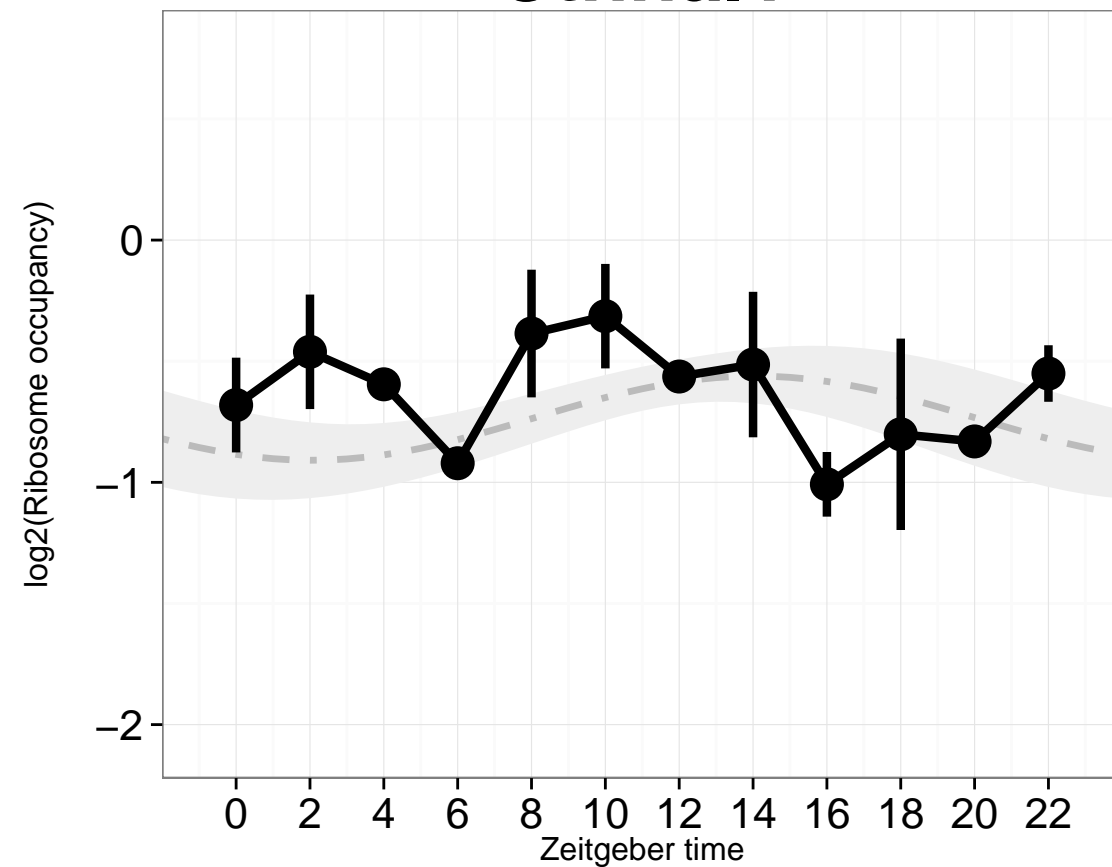

Supplement: SuppDataset_1.zip [file Ctnnal1_set_A.pdf › Supplemental Dataset 1/A-mRNA_nonrhyth_translation_nonrhyth/Ctnnal1_set_A.pdf]

## Ctnnb1

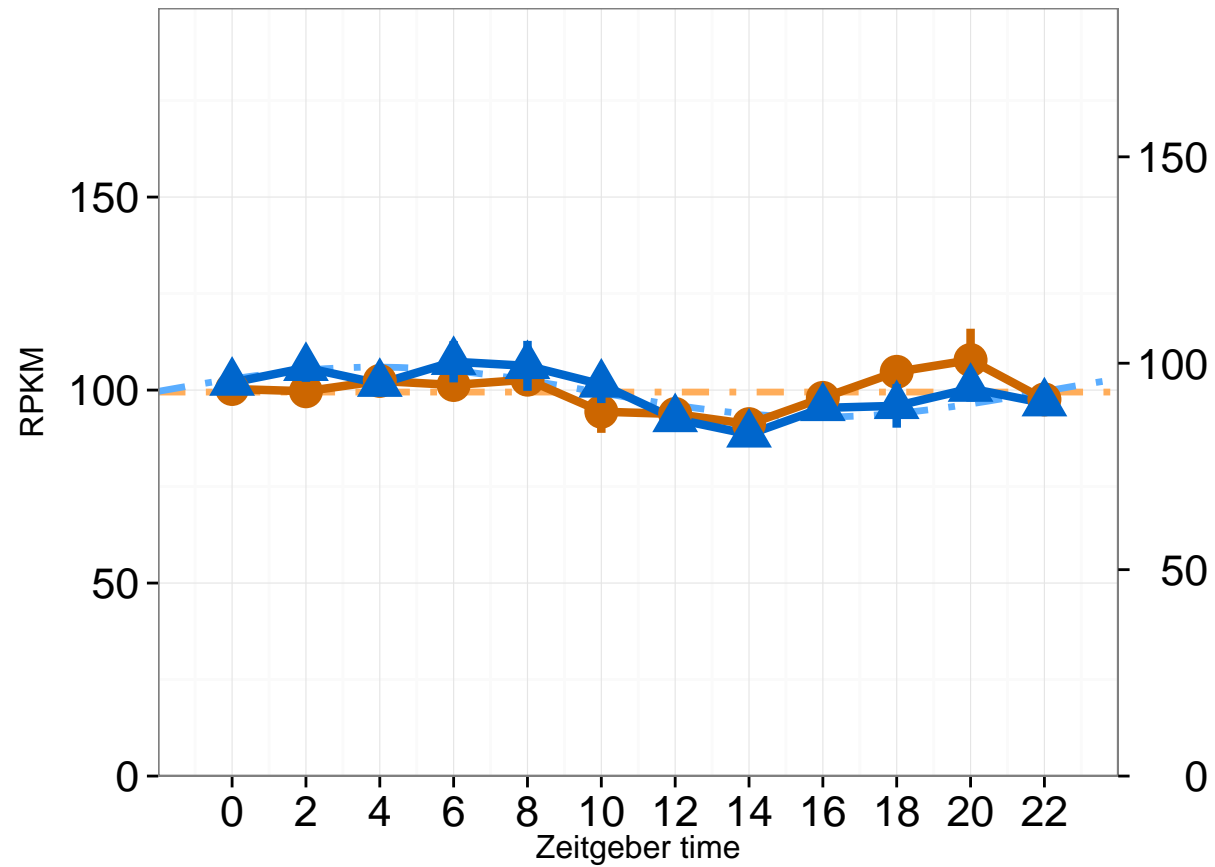

## Ctnnb1

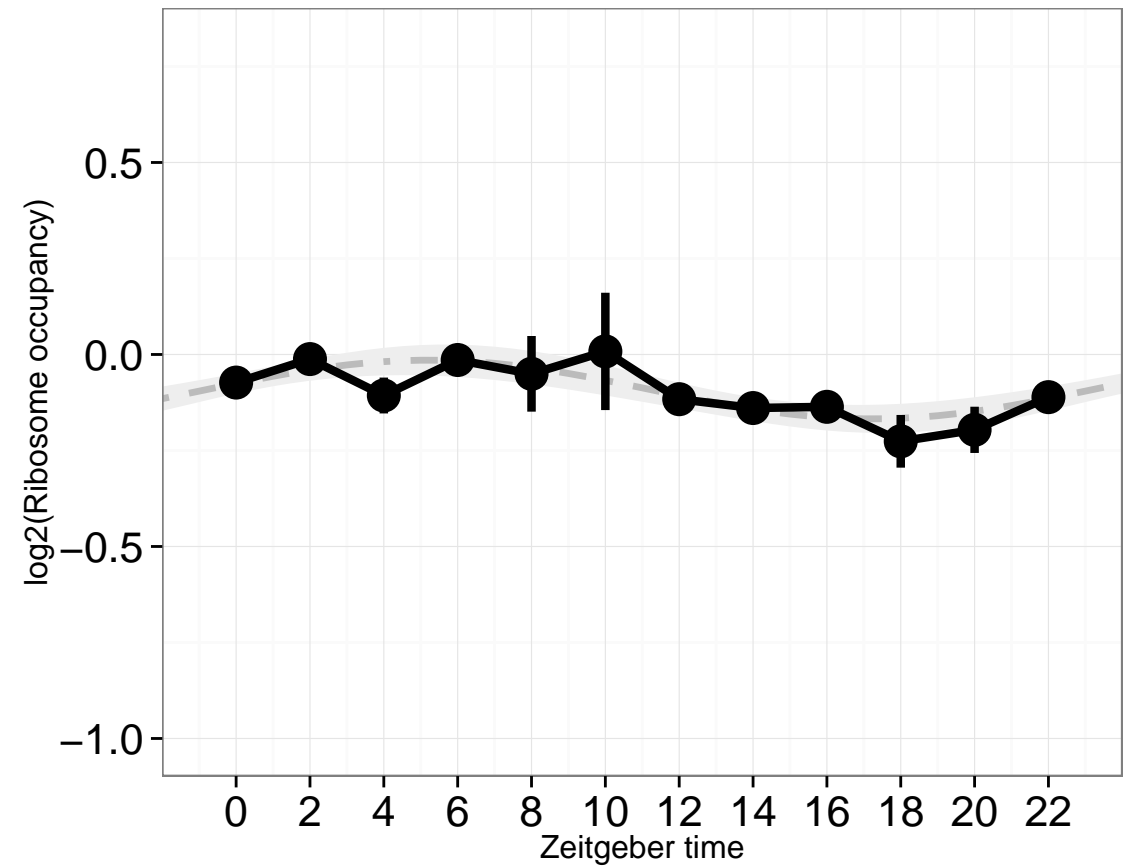

Supplement: SuppDataset_1.zip [file Ctnnb1_set_A.pdf › Supplemental Dataset 1/A-mRNA_nonrhyth_translation_nonrhyth/Ctnnb1_set_A.pdf]

# Ctnnbip1

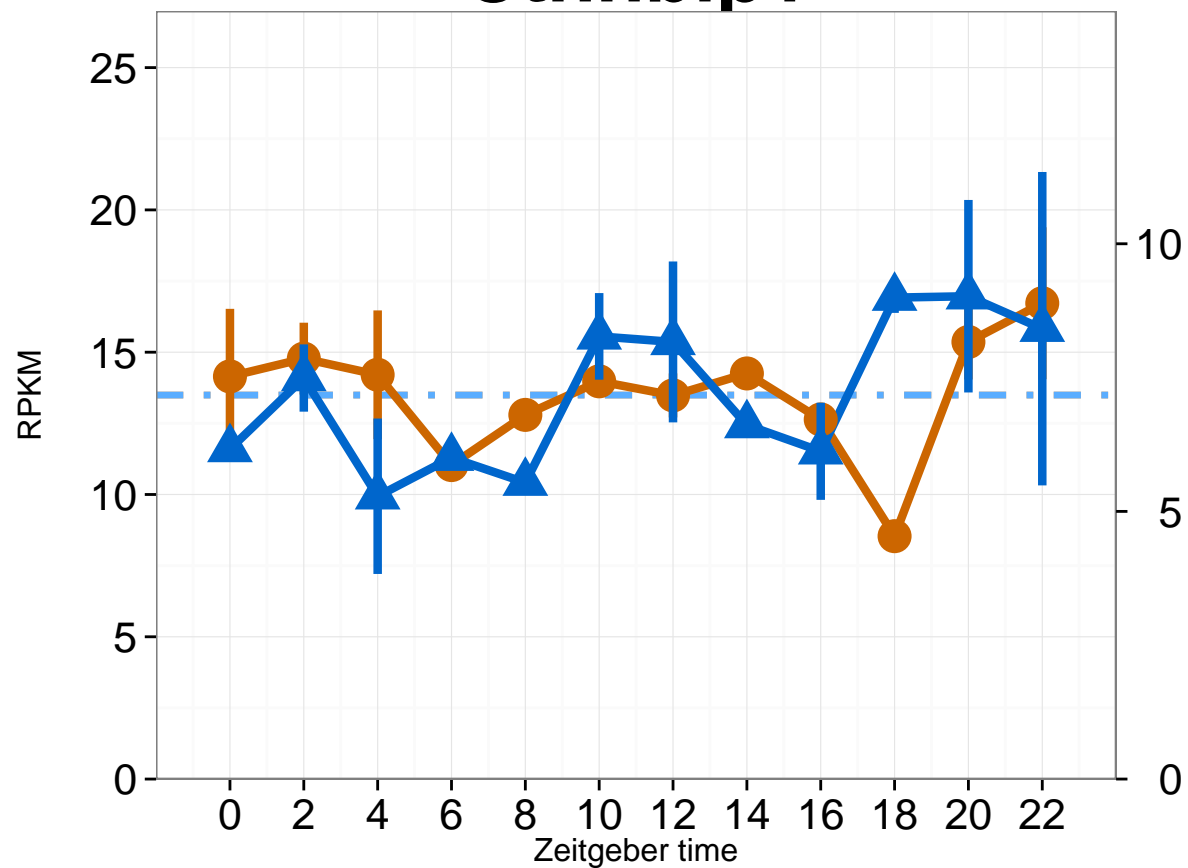

# Ctnnbip1

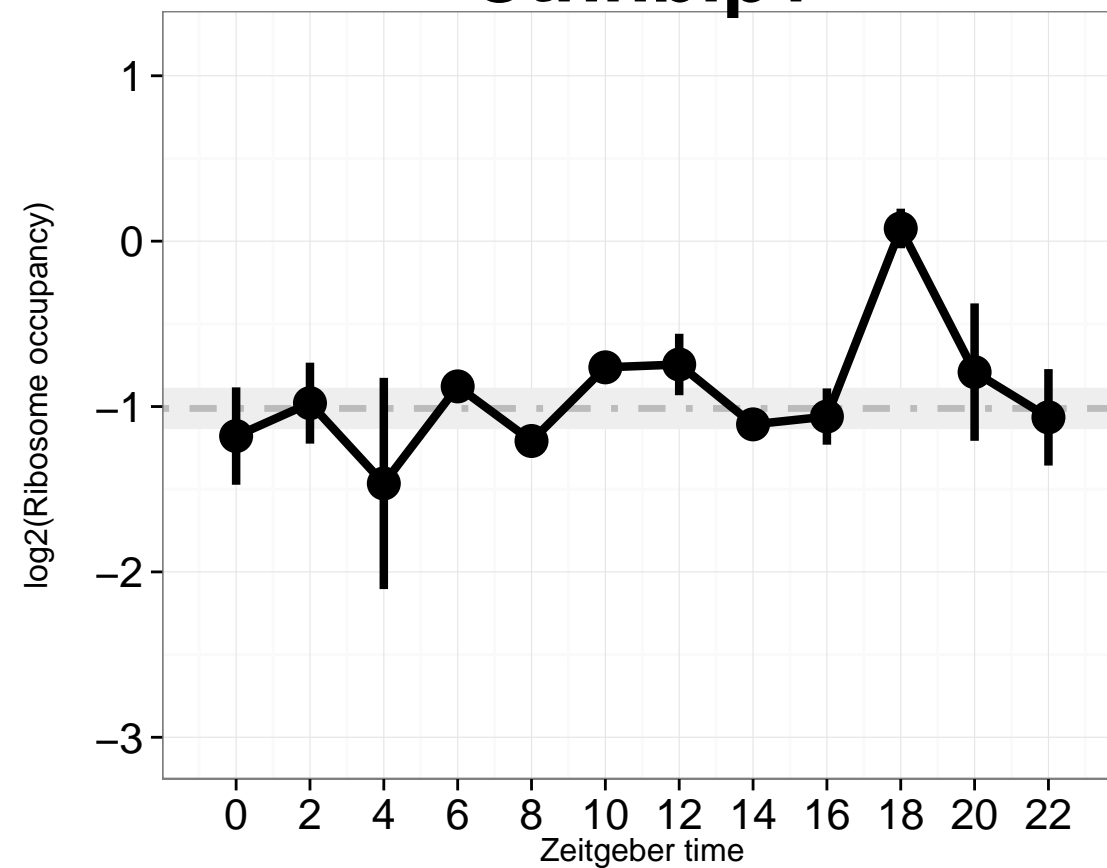

Supplement: SuppDataset_1.zip [file Ctnnbip1_set_A.pdf › Supplemental Dataset 1/A-mRNA_nonrhyth_translation_nonrhyth/Ctnnbip1_set_A.pdf]
