# Supplementary figures and images for: Ribosome profiling reveals the rhythmic liver translatome and circadian clock regulation by upstream open reading frames (part 19 of 113)
Source: HighWire-hosted journal article supplement (doi:10.1101/gr.195404.115), 2015-10-20

## Ctnnbl1

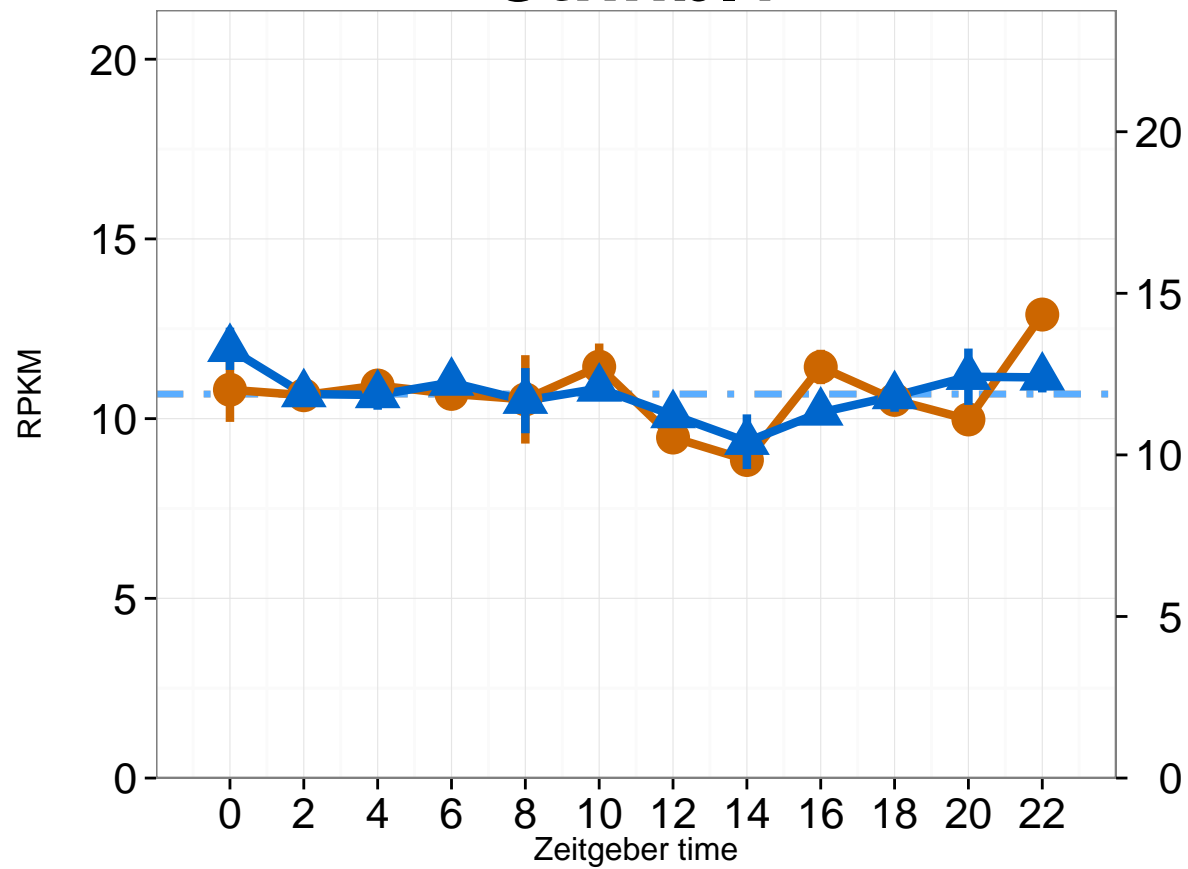

## Ctnnbl1

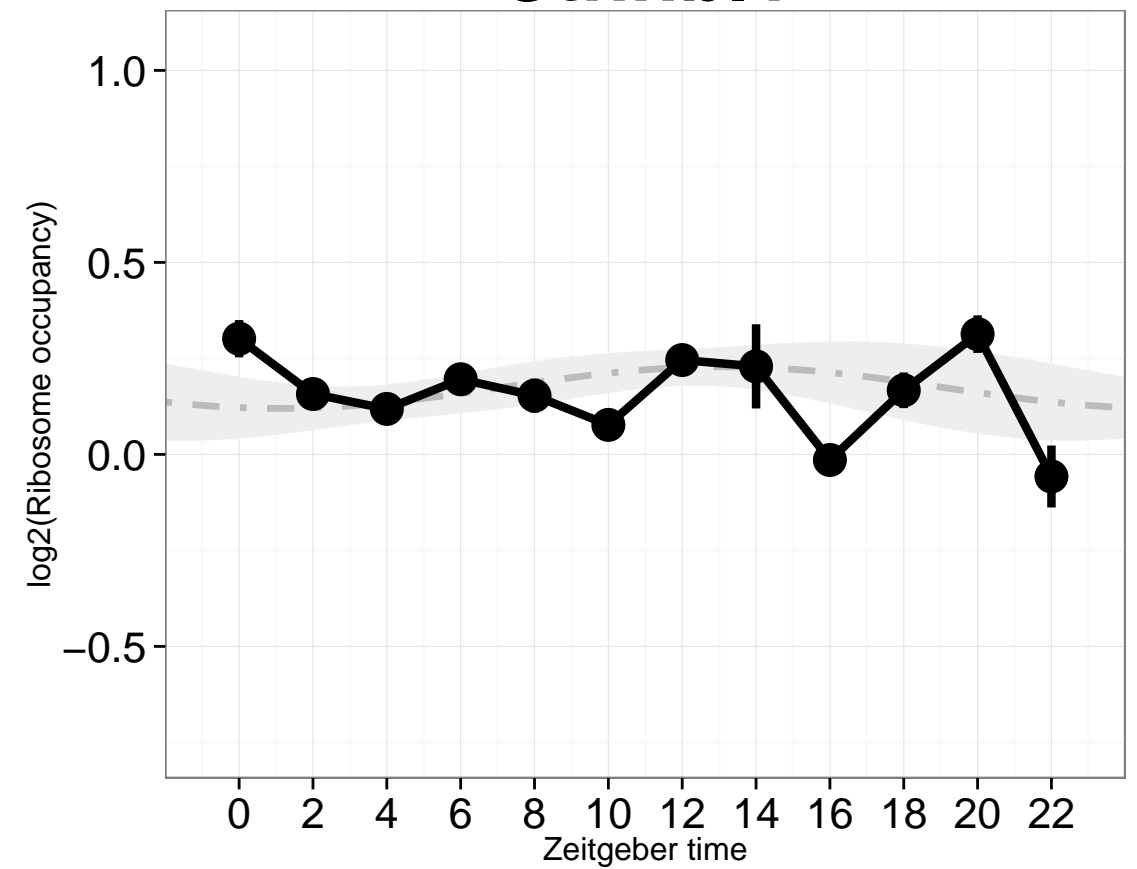

Supplement: SuppDataset_1.zip [file Ctnnbl1_set_A.pdf › Supplemental Dataset 1/A-mRNA_nonrhyth_translation_nonrhyth/Ctnnbl1_set_A.pdf]

## Ctnnd1

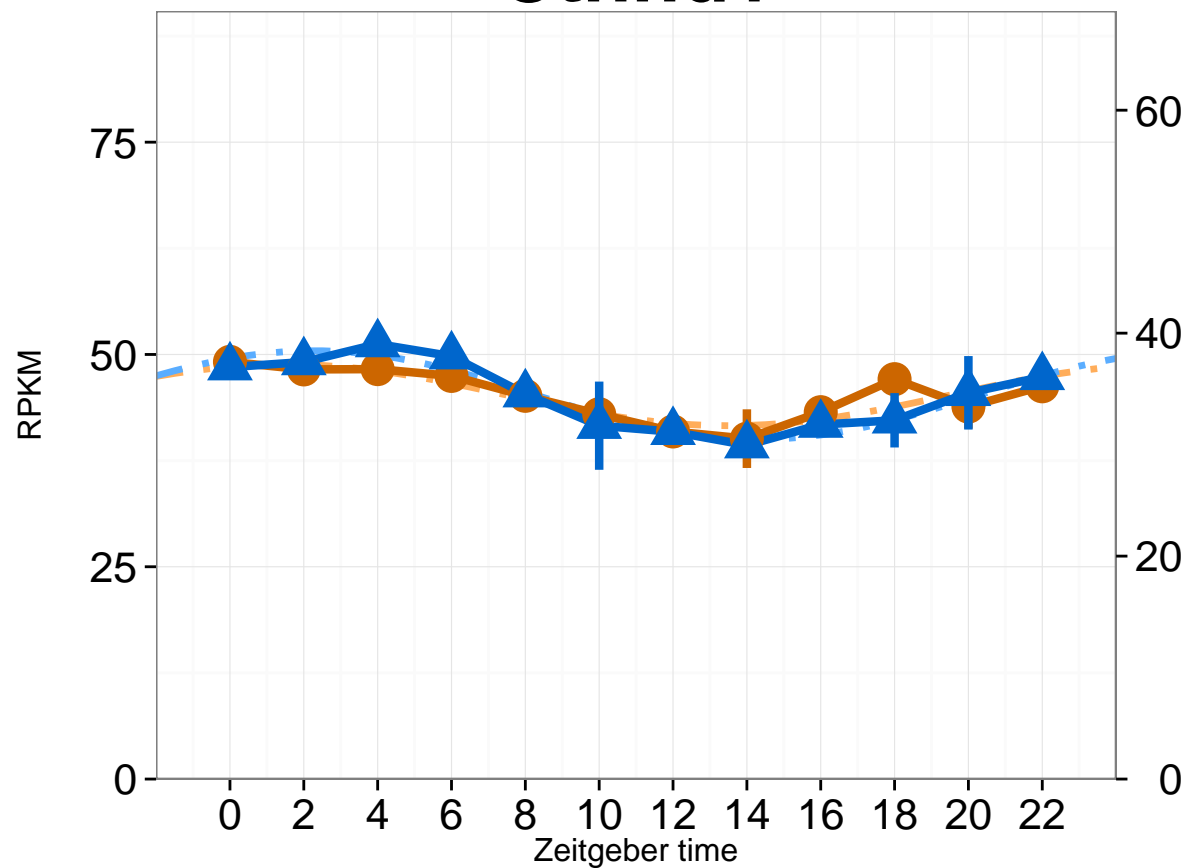

## Ctnnd1

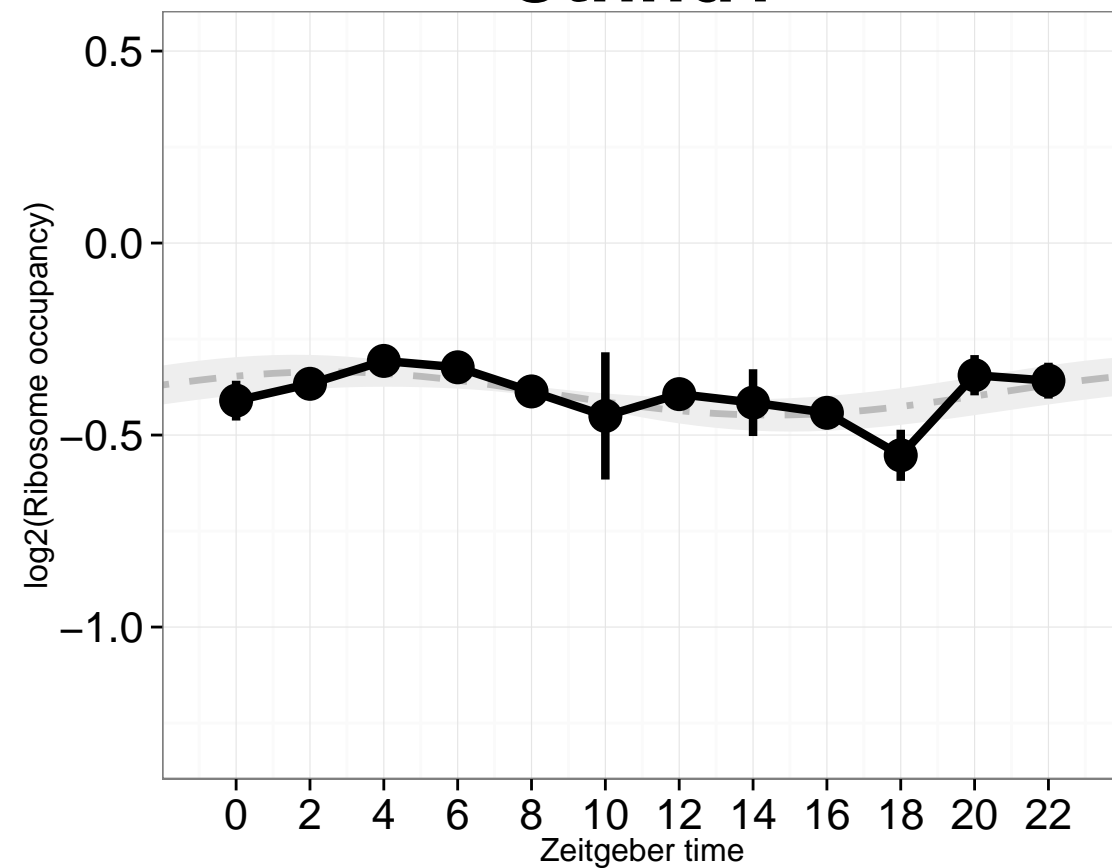

Supplement: SuppDataset_1.zip [file Ctnnd1_set_A.pdf › Supplemental Dataset 1/A-mRNA_nonrhyth_translation_nonrhyth/Ctnnd1_set_A.pdf]

# Ctns

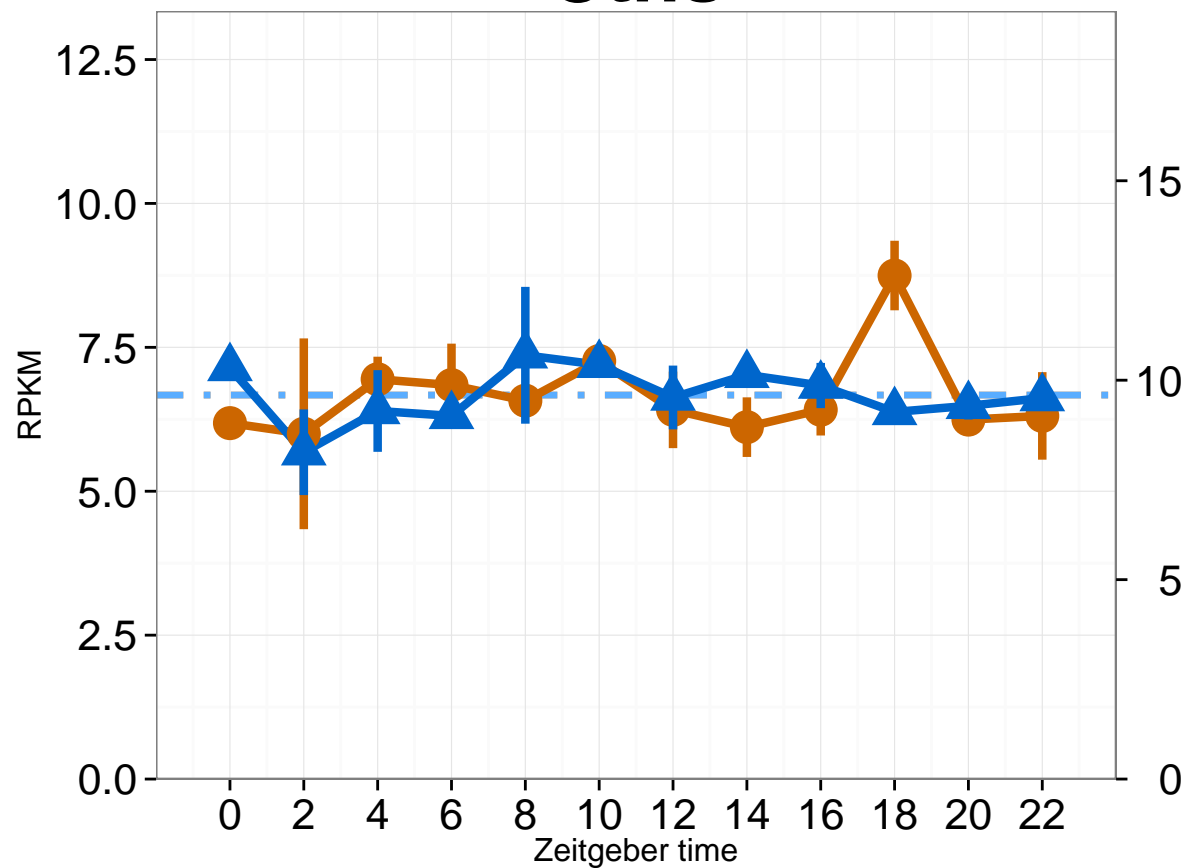

# Ctns

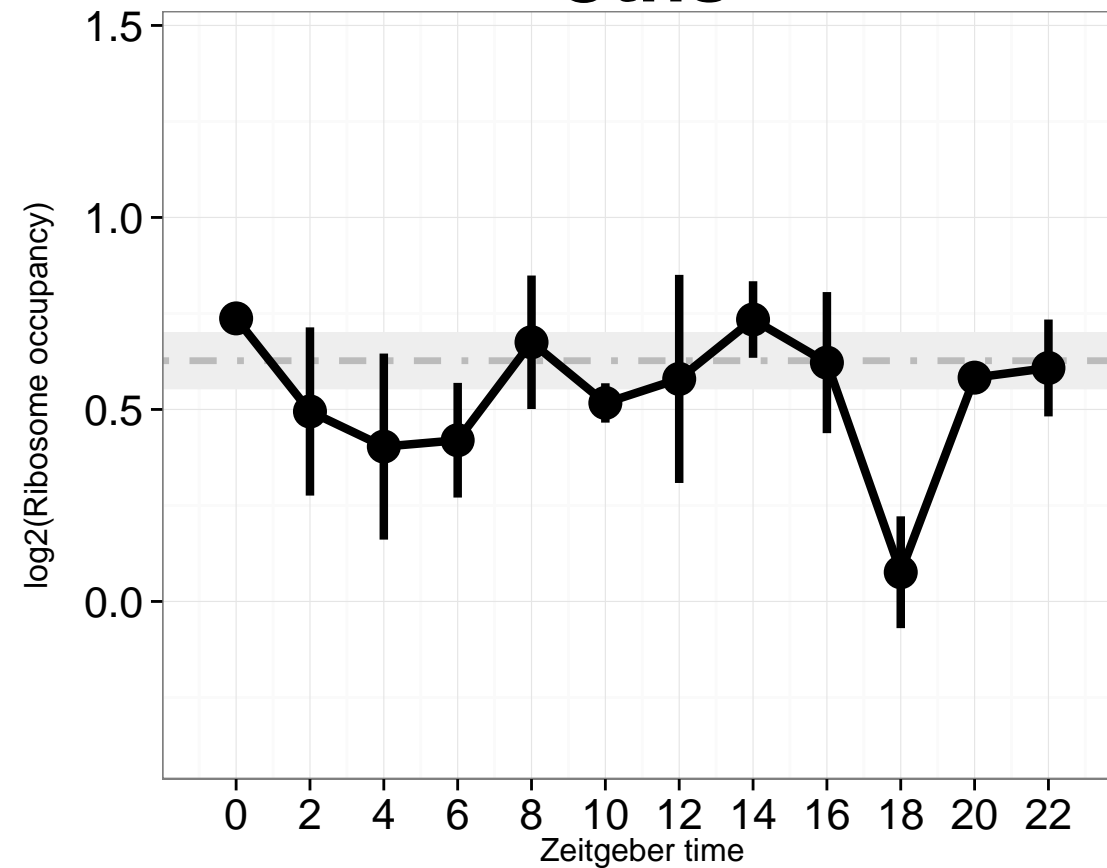

Supplement: SuppDataset_1.zip [file Ctns_set_A.pdf › Supplemental Dataset 1/A-mRNA_nonrhyth_translation_nonrhyth/Ctns_set_A.pdf]

# Ctr9

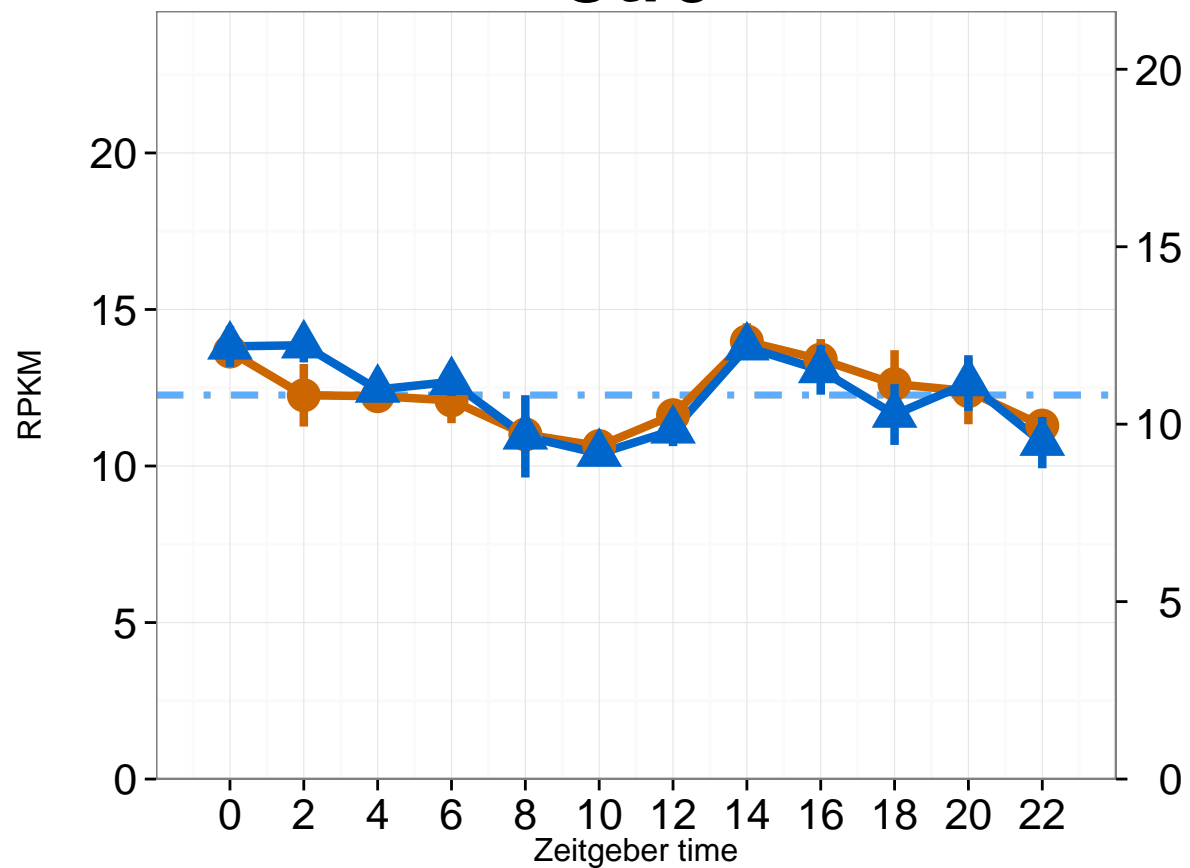

# Ctr9

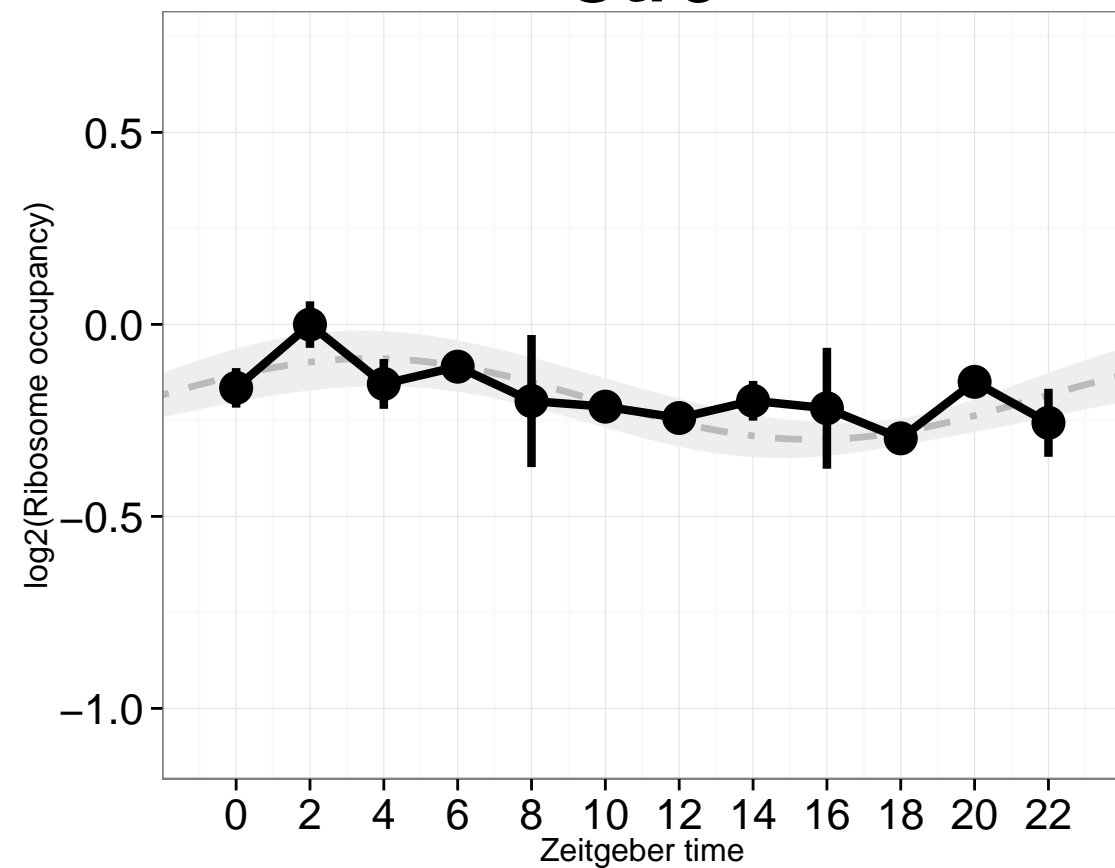

Supplement: SuppDataset_1.zip [file Ctr9_set_A.pdf › Supplemental Dataset 1/A-mRNA_nonrhyth_translation_nonrhyth/Ctr9_set_A.pdf]

# Ctrb1

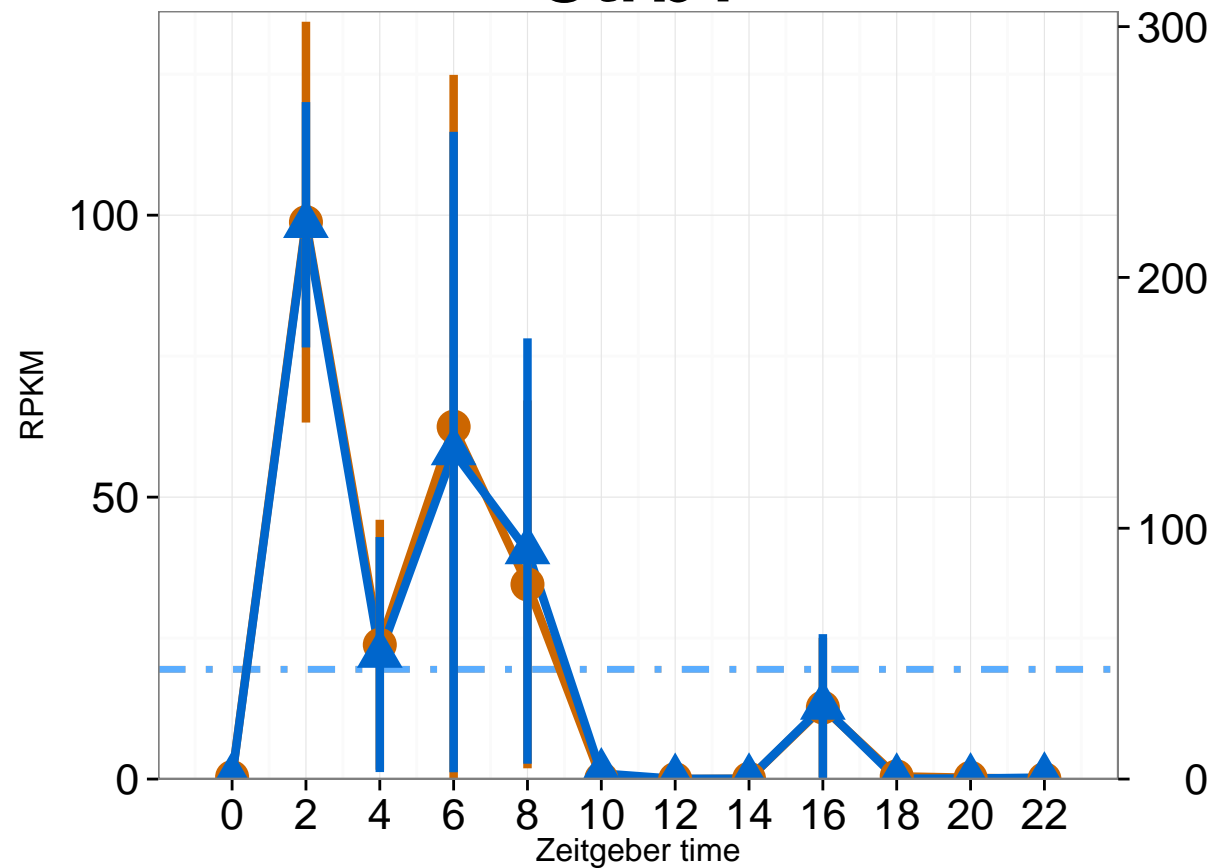

# Ctrb1

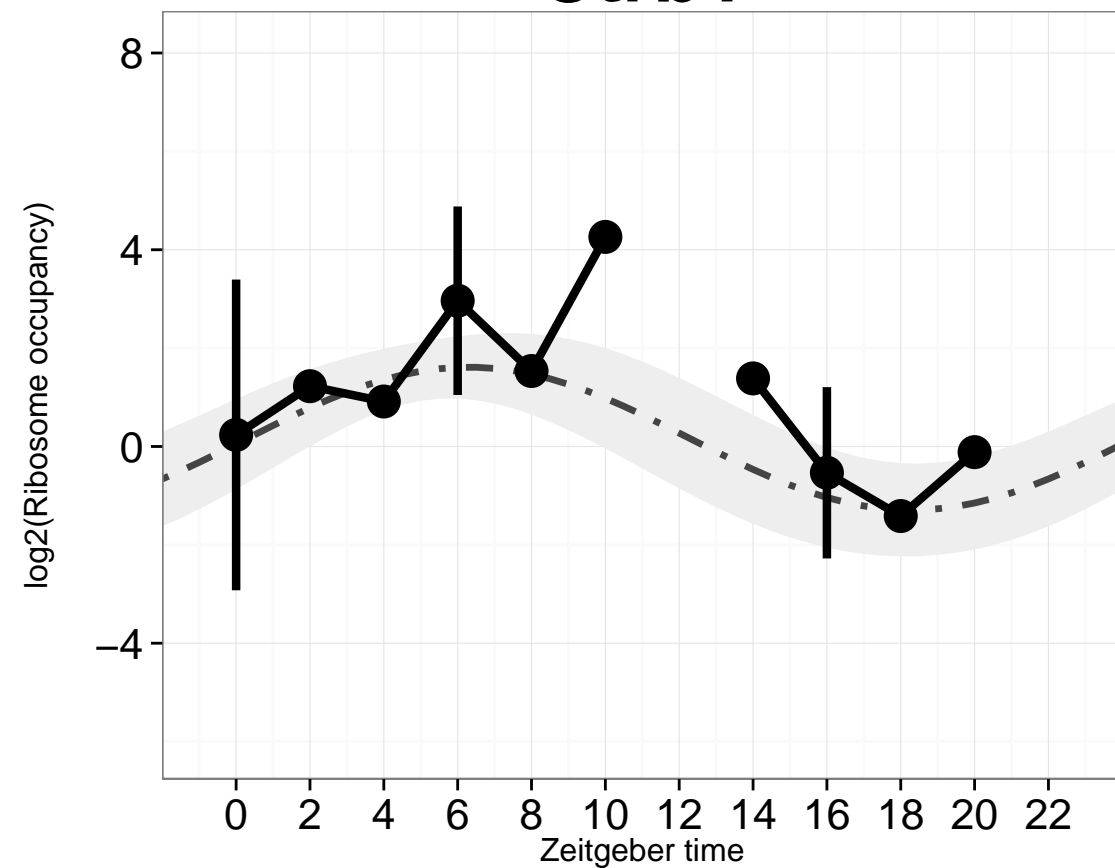

Supplement: SuppDataset_1.zip [file Ctrb1_set_A.pdf › Supplemental Dataset 1/A-mRNA_nonrhyth_translation_nonrhyth/Ctrb1_set_A.pdf]

**Ctrl TR**

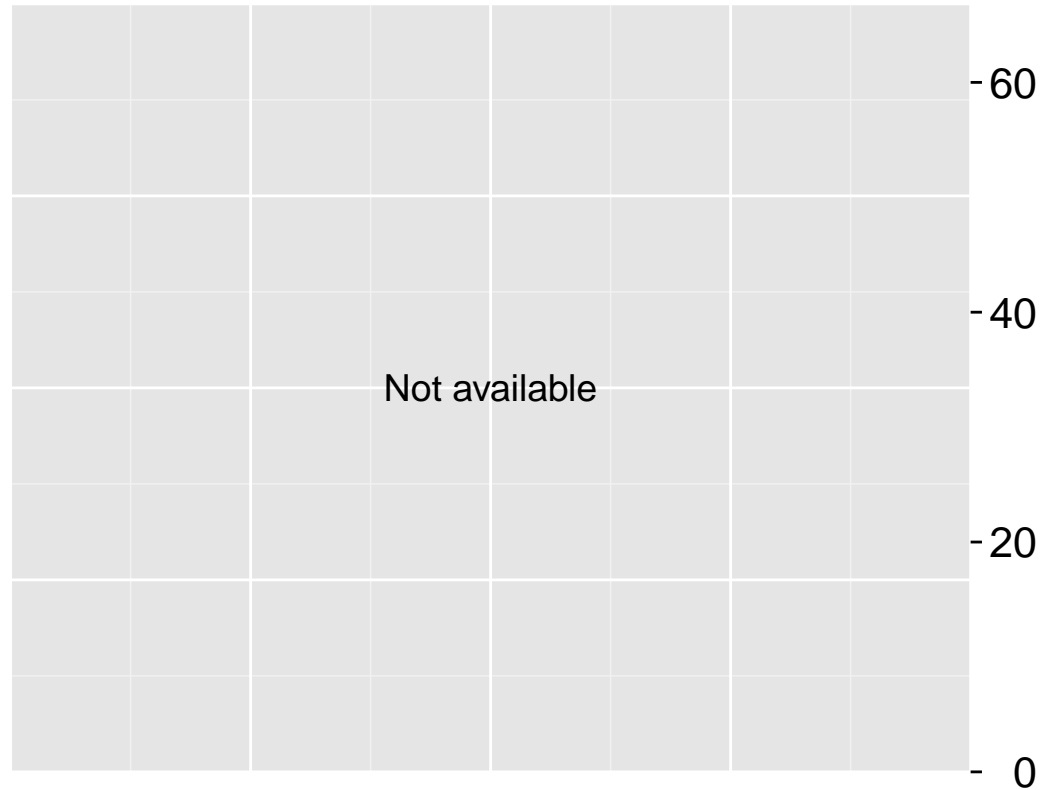

**Ctrl log2(Ribosome occupancy)**

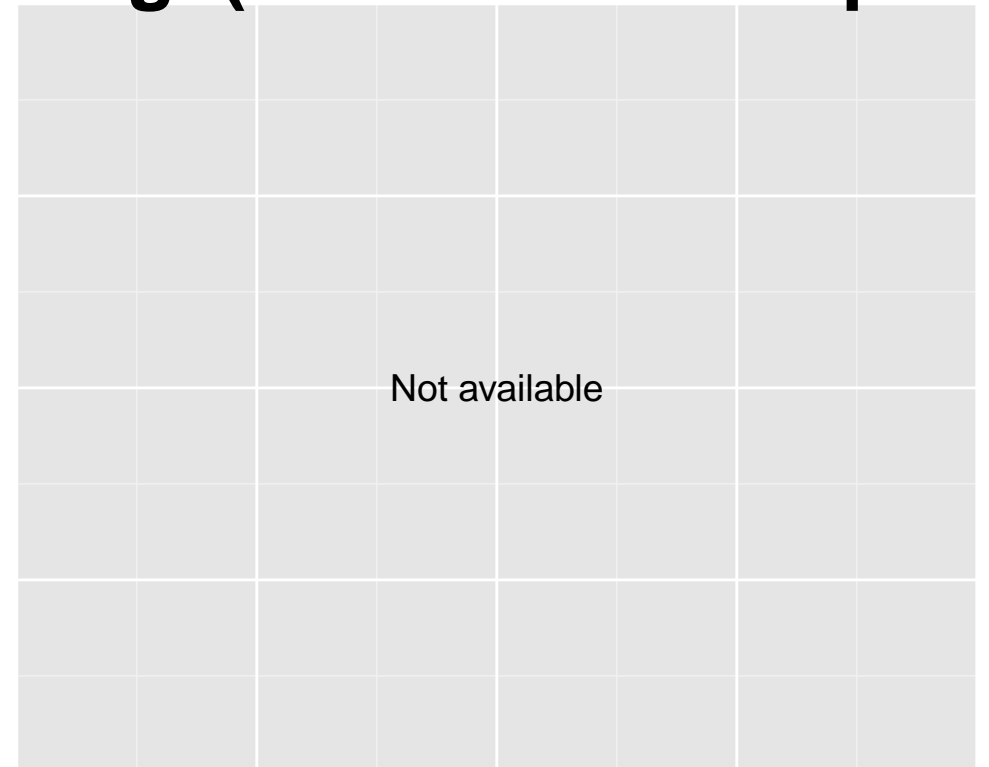

Supplement: SuppDataset_1.zip [file Ctrl_set_A.pdf › Supplemental Dataset 1/A-mRNA_nonrhyth_translation_nonrhyth/Ctrl_set_A.pdf]

## Ctsa

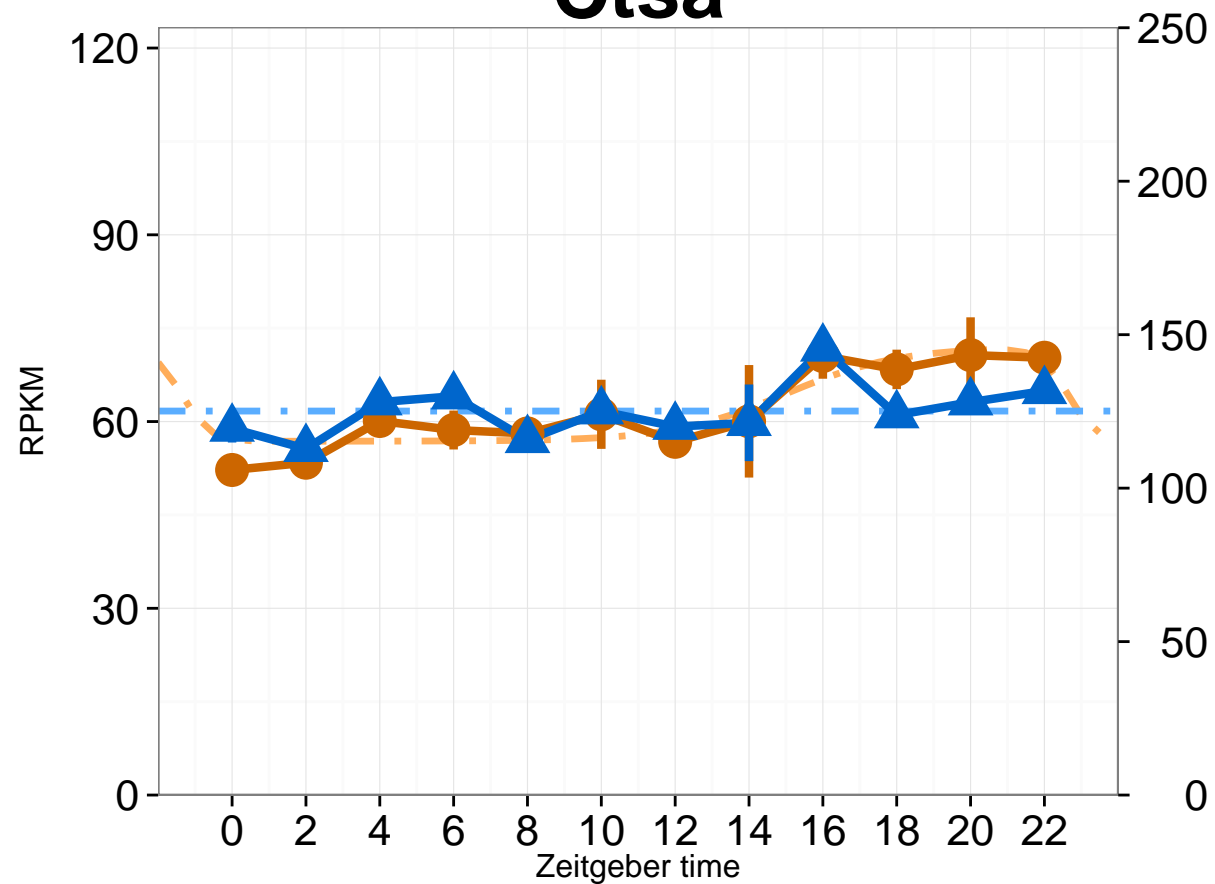

## Ctsa

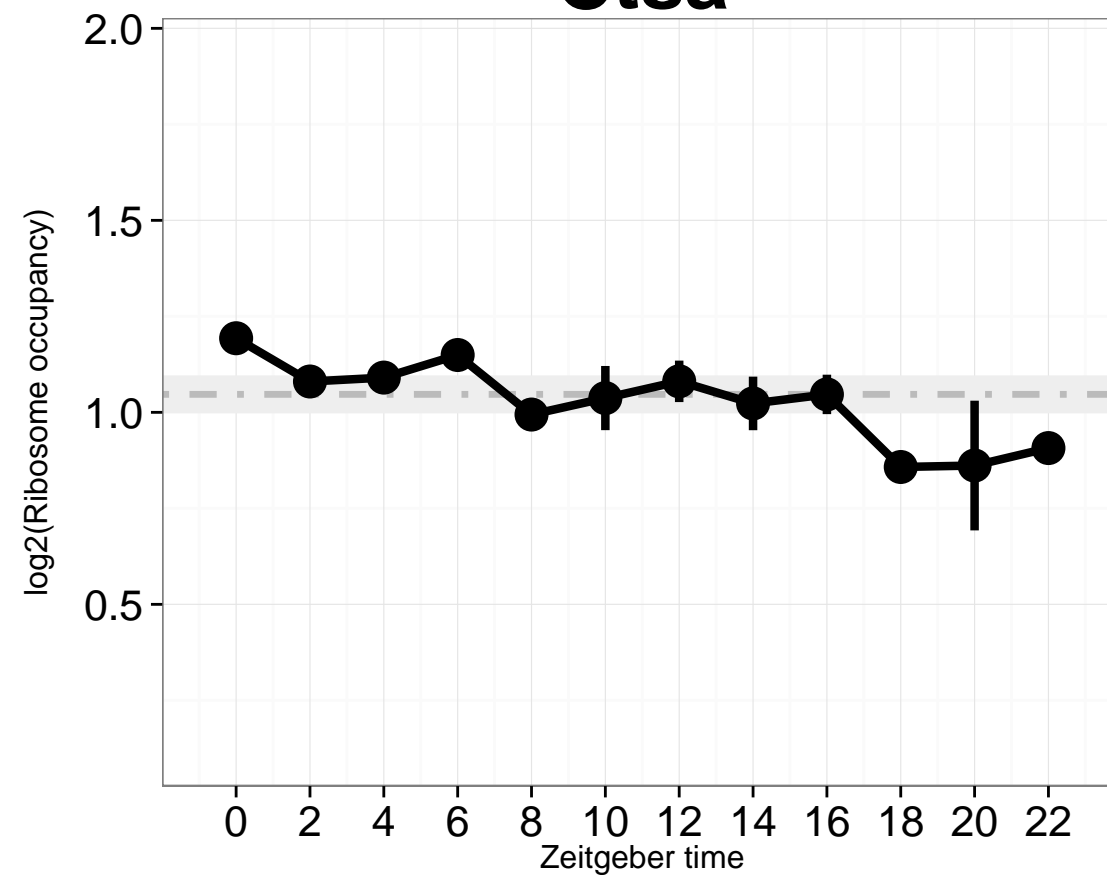

Supplement: SuppDataset_1.zip [file Ctsa_set_A.pdf › Supplemental Dataset 1/A-mRNA_nonrhyth_translation_nonrhyth/Ctsa_set_A.pdf]

## Ctsb

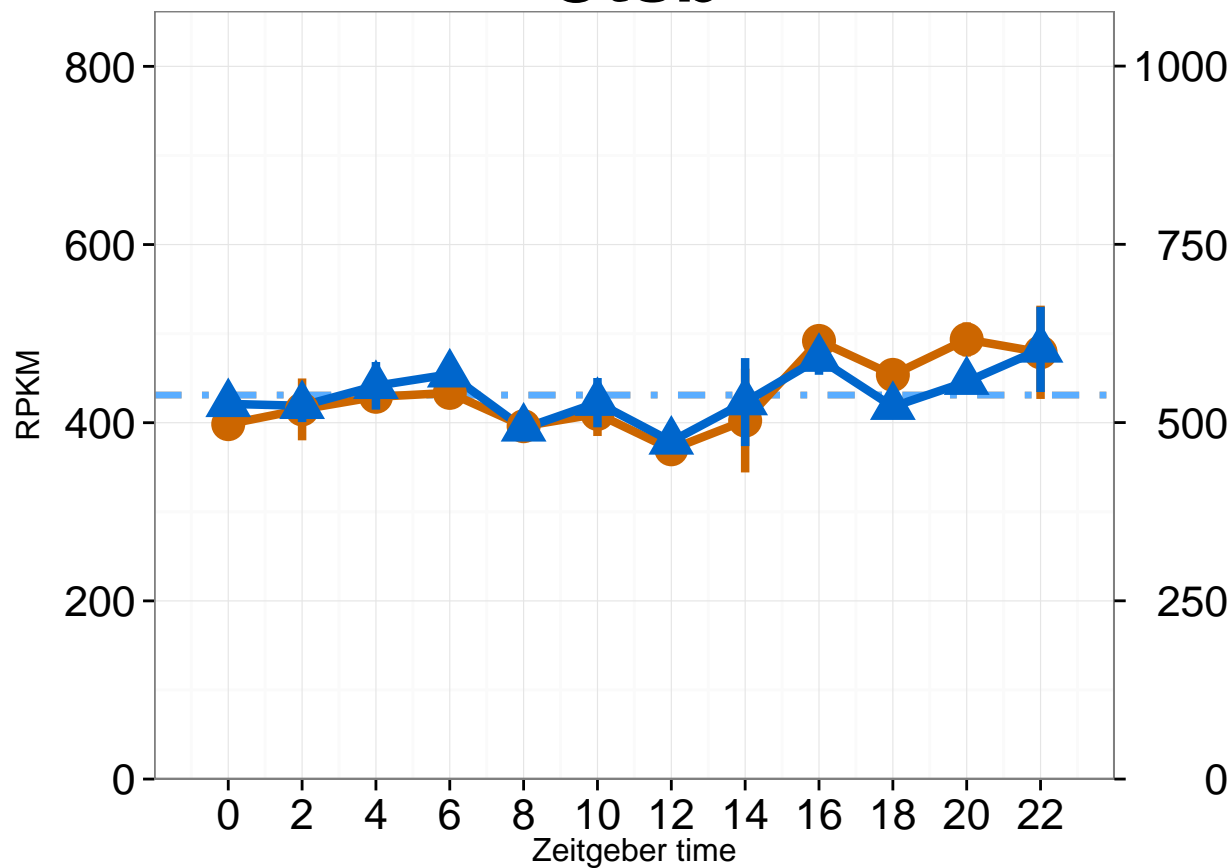

## Ctsb

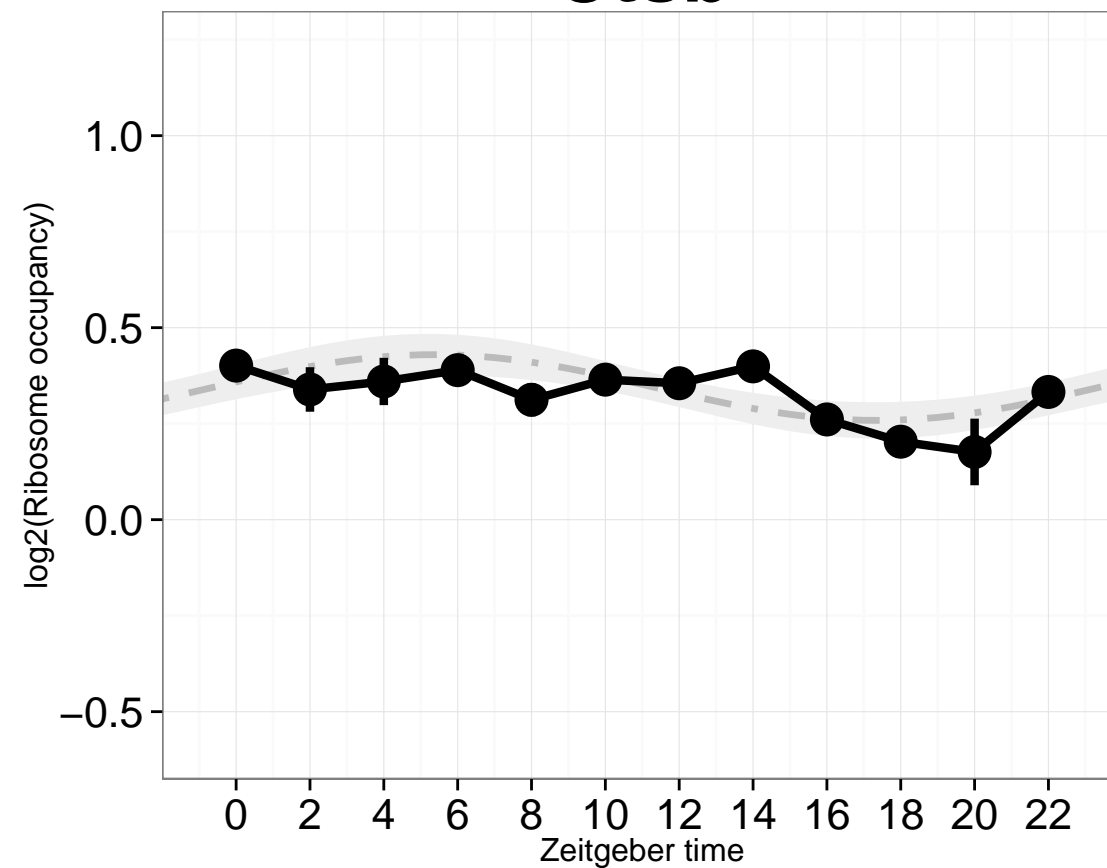

Supplement: SuppDataset_1.zip [file Ctsb_set_A.pdf › Supplemental Dataset 1/A-mRNA_nonrhyth_translation_nonrhyth/Ctsb_set_A.pdf]

## Ctsc

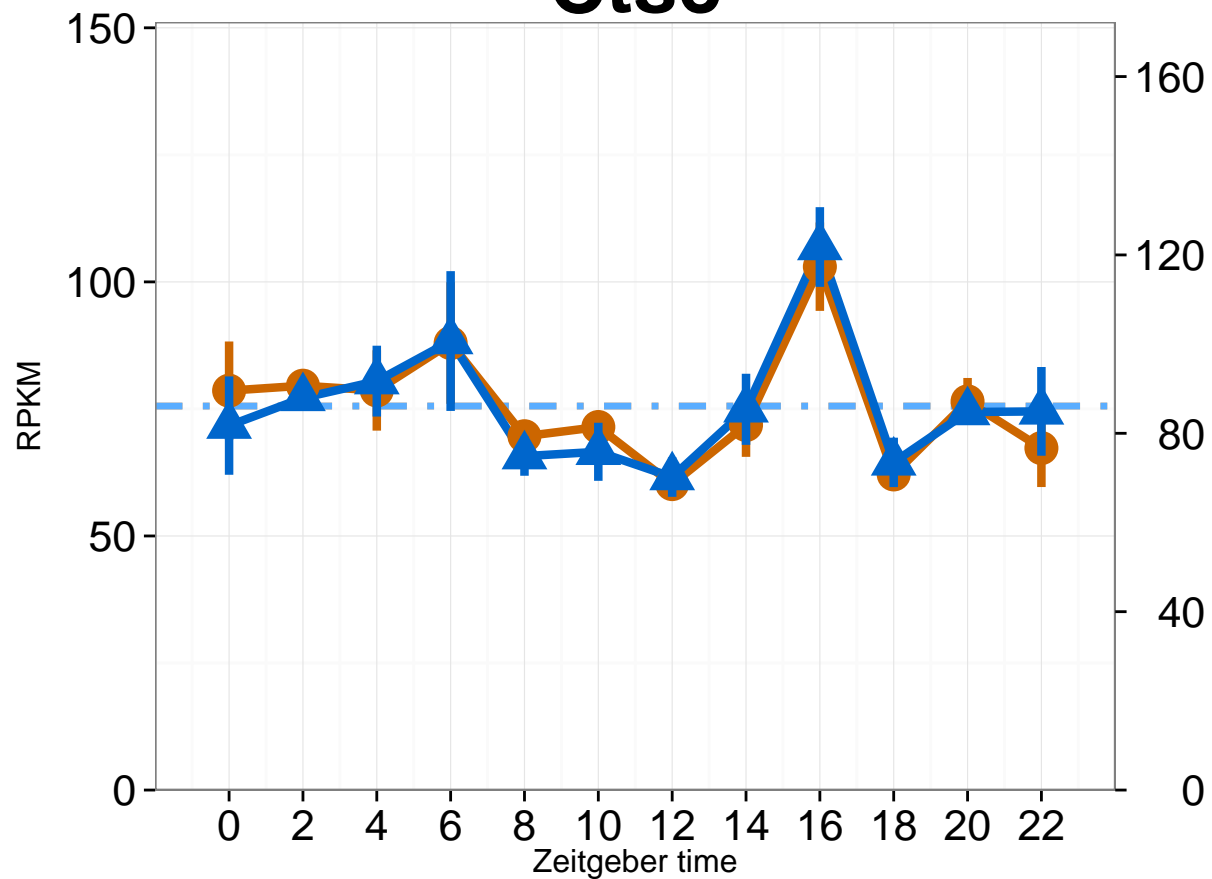

## Ctsc

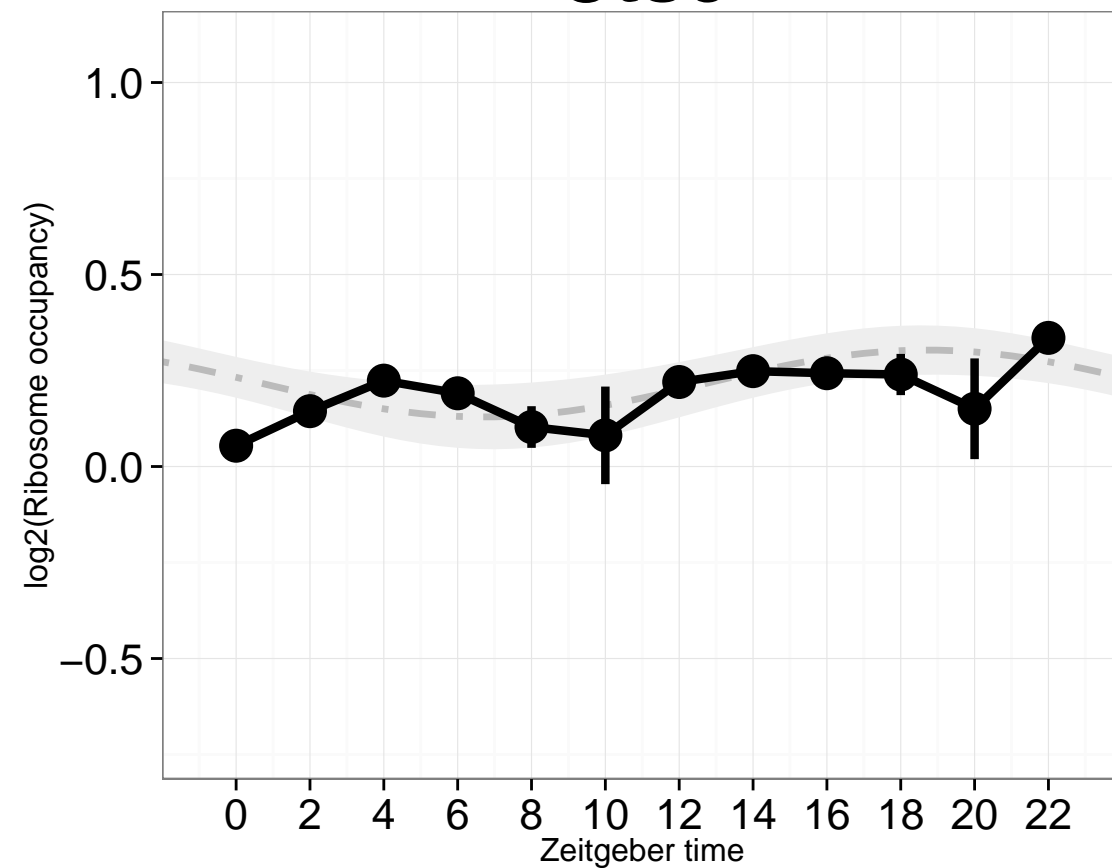

Supplement: SuppDataset_1.zip [file Ctsc_set_A.pdf › Supplemental Dataset 1/A-mRNA_nonrhyth_translation_nonrhyth/Ctsc_set_A.pdf]

## Ctsd

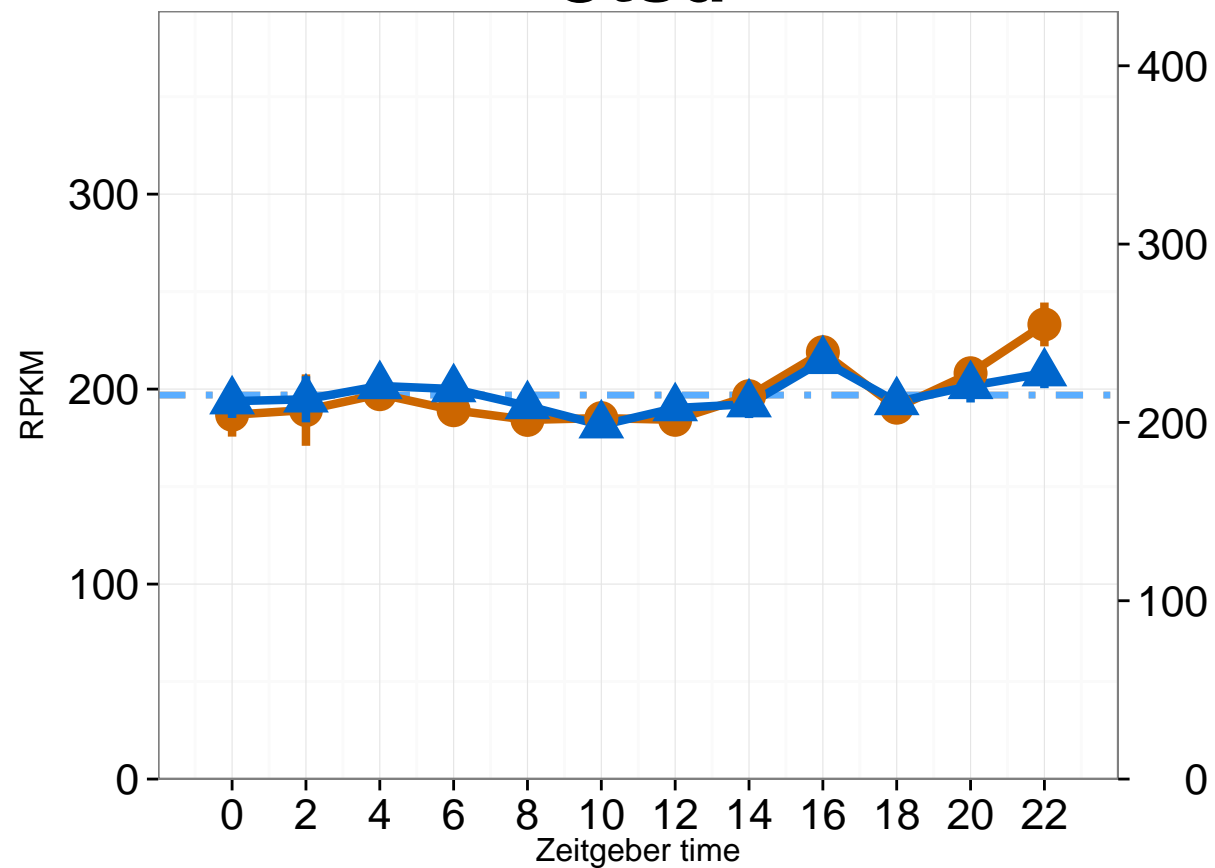

## Ctsd

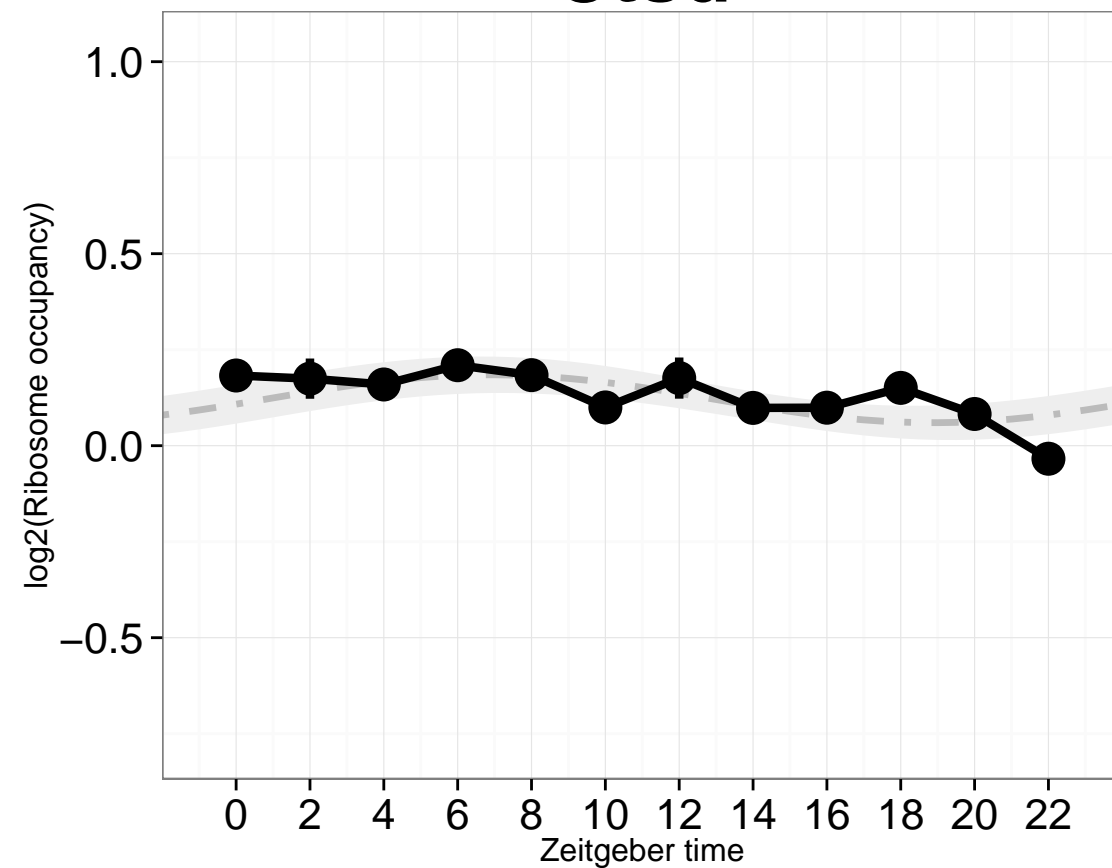

Supplement: SuppDataset_1.zip [file Ctsd_set_A.pdf › Supplemental Dataset 1/A-mRNA_nonrhyth_translation_nonrhyth/Ctsd_set_A.pdf]

## Ctsf

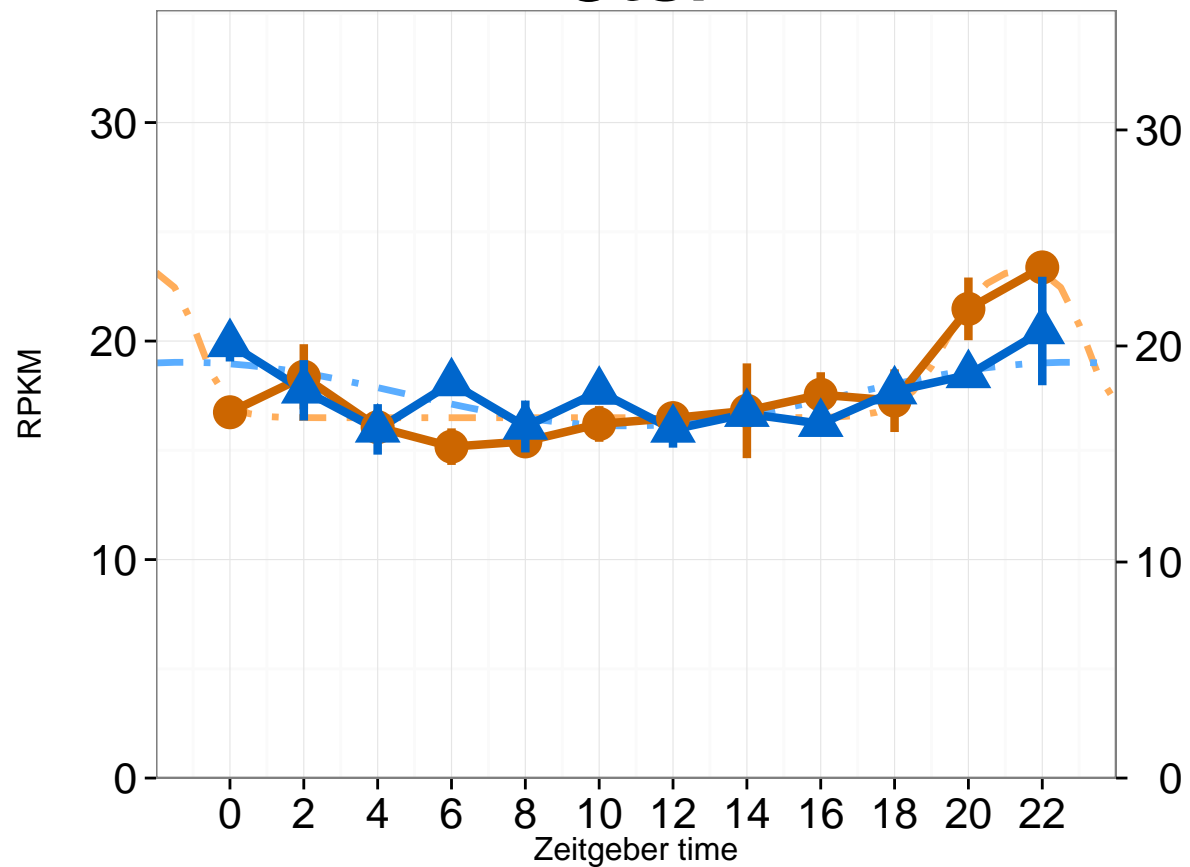

## Ctsf

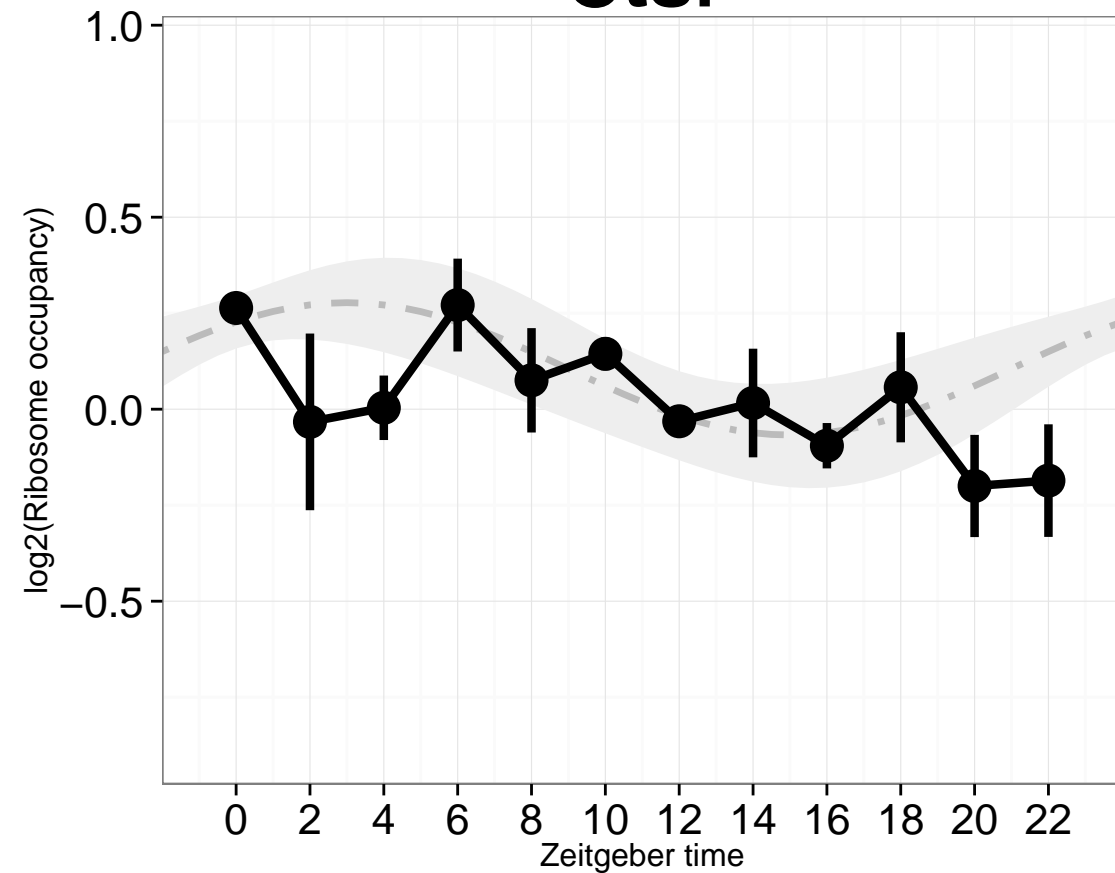

Supplement: SuppDataset_1.zip [file Ctsf_set_A.pdf › Supplemental Dataset 1/A-mRNA_nonrhyth_translation_nonrhyth/Ctsf_set_A.pdf]

## Ctsh

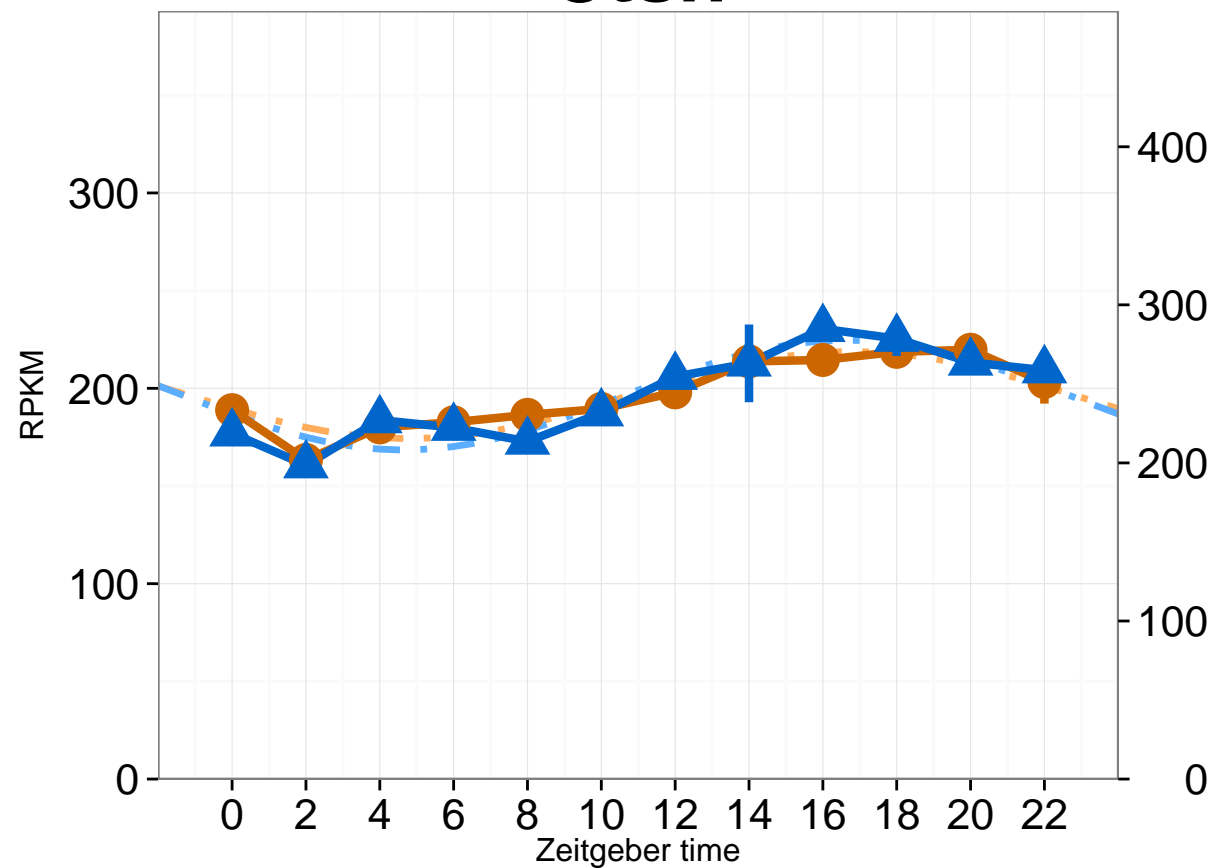

## Ctsh

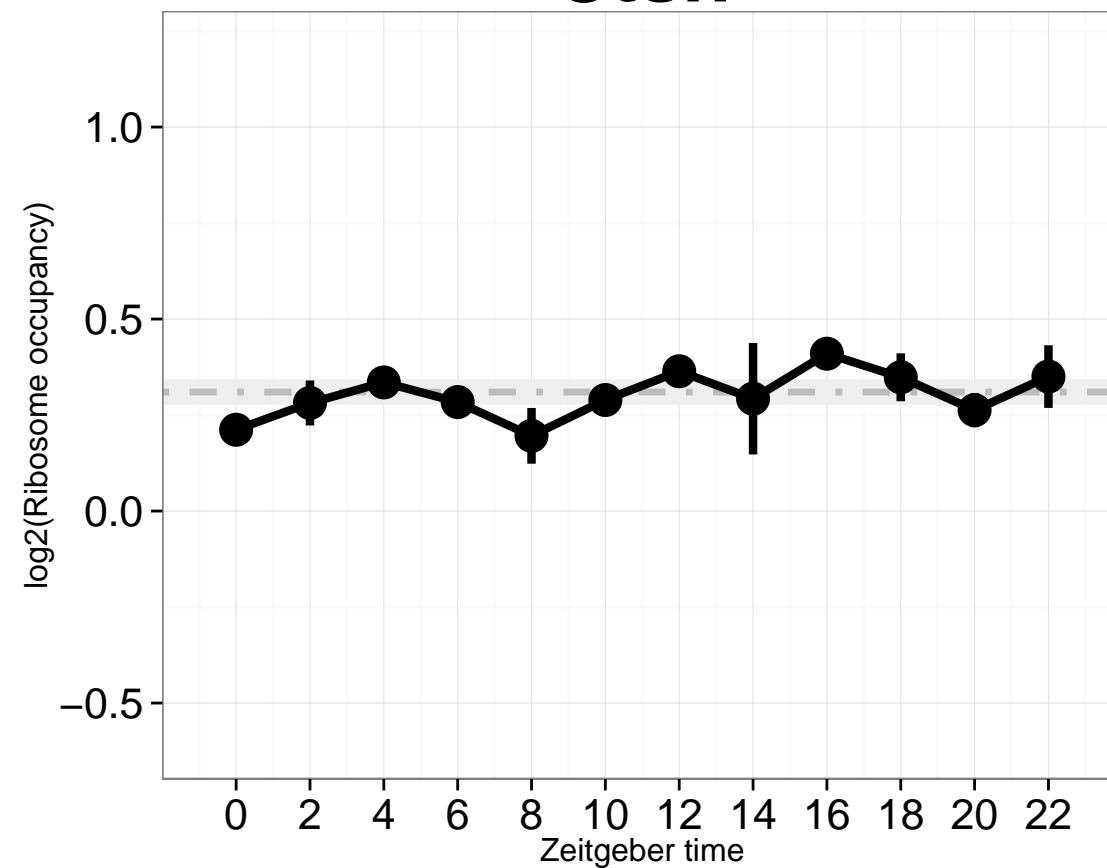

Supplement: SuppDataset_1.zip [file Ctsh_set_A.pdf › Supplemental Dataset 1/A-mRNA_nonrhyth_translation_nonrhyth/Ctsh_set_A.pdf]

## Ctsk

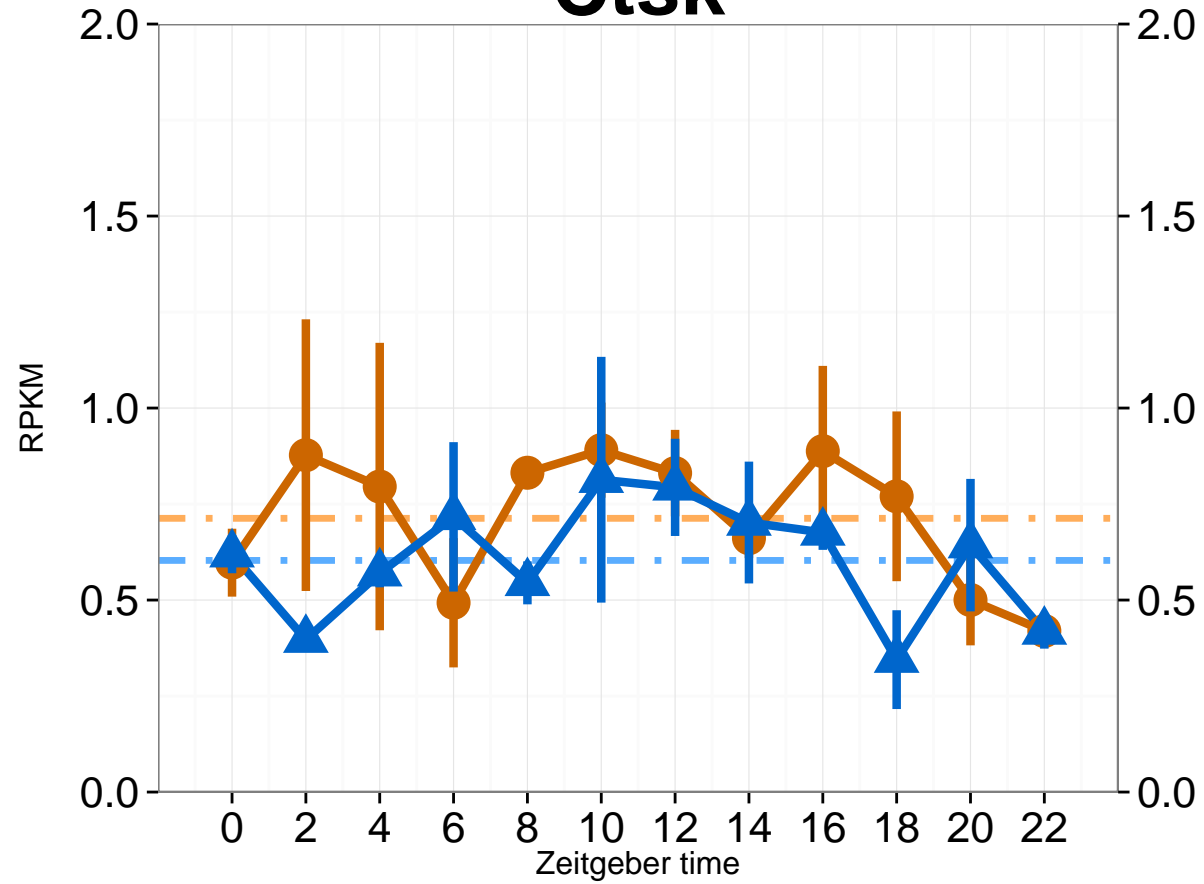

## Ctsk

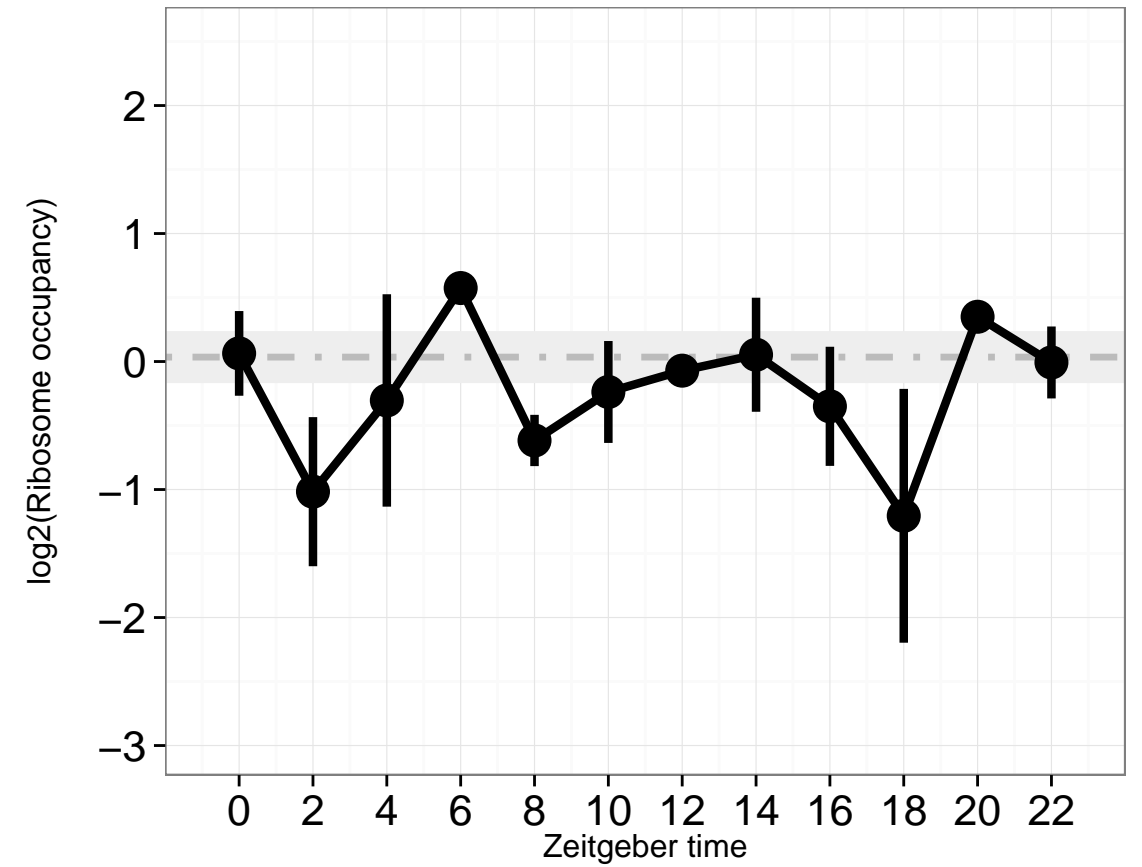

Supplement: SuppDataset_1.zip [file Ctsk_set_A.pdf › Supplemental Dataset 1/A-mRNA_nonrhyth_translation_nonrhyth/Ctsk_set_A.pdf]

## CtsI

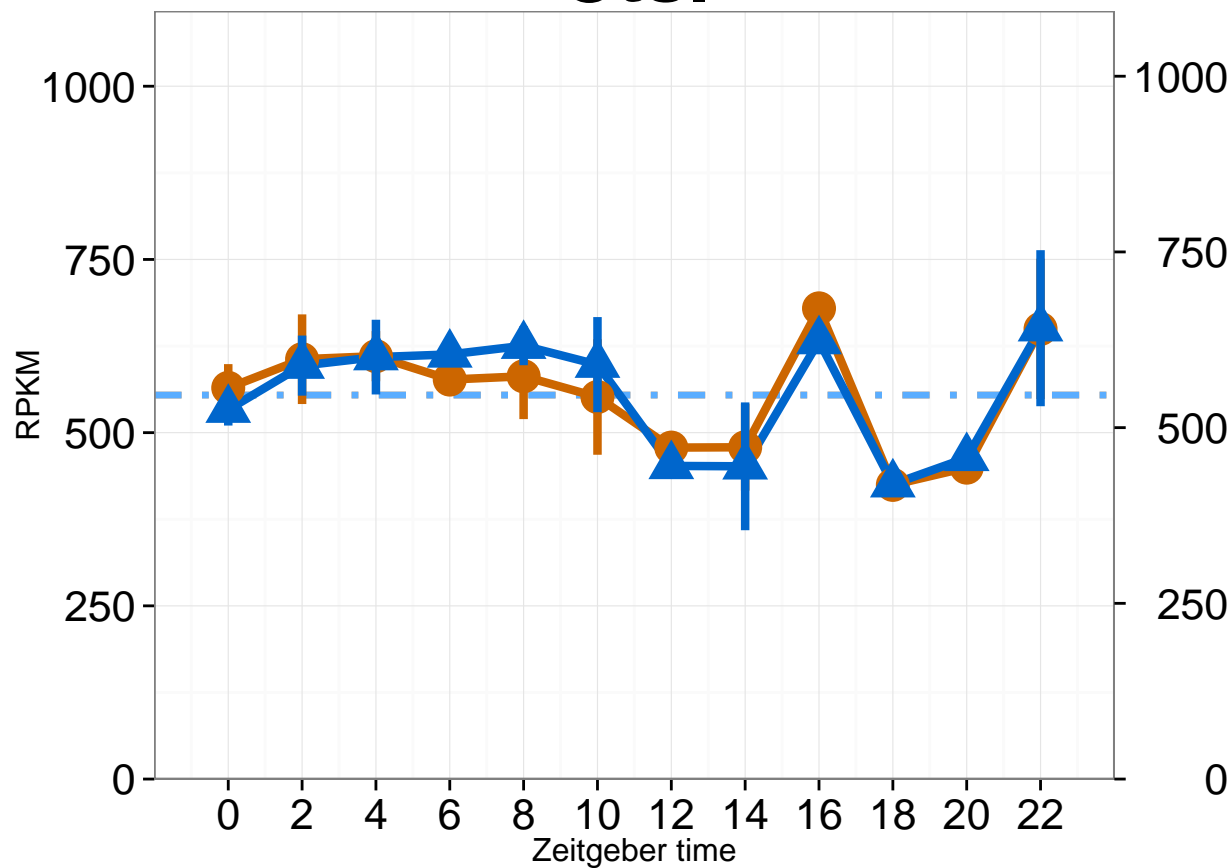

## CtsI

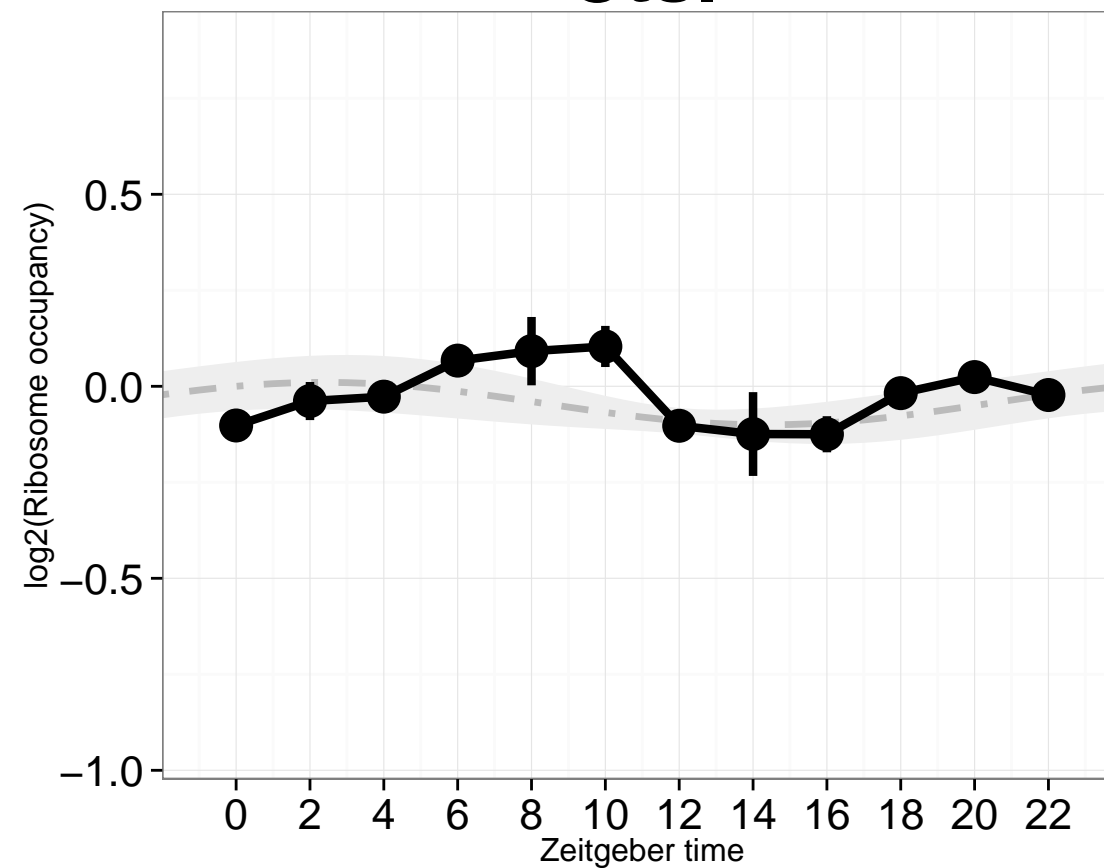

Supplement: SuppDataset_1.zip [file Ctsl_set_A.pdf › Supplemental Dataset 1/A-mRNA_nonrhyth_translation_nonrhyth/Ctsl_set_A.pdf]

## Ctso

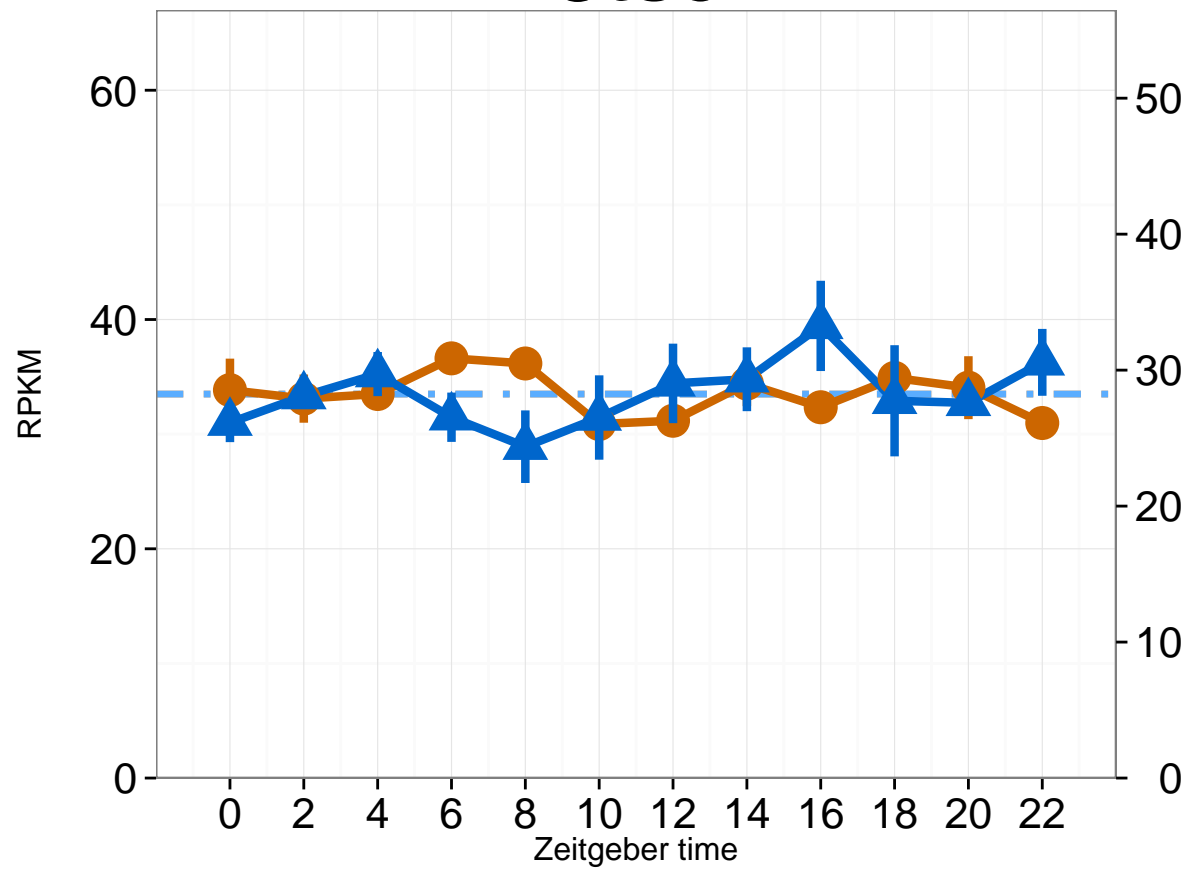

## Ctso

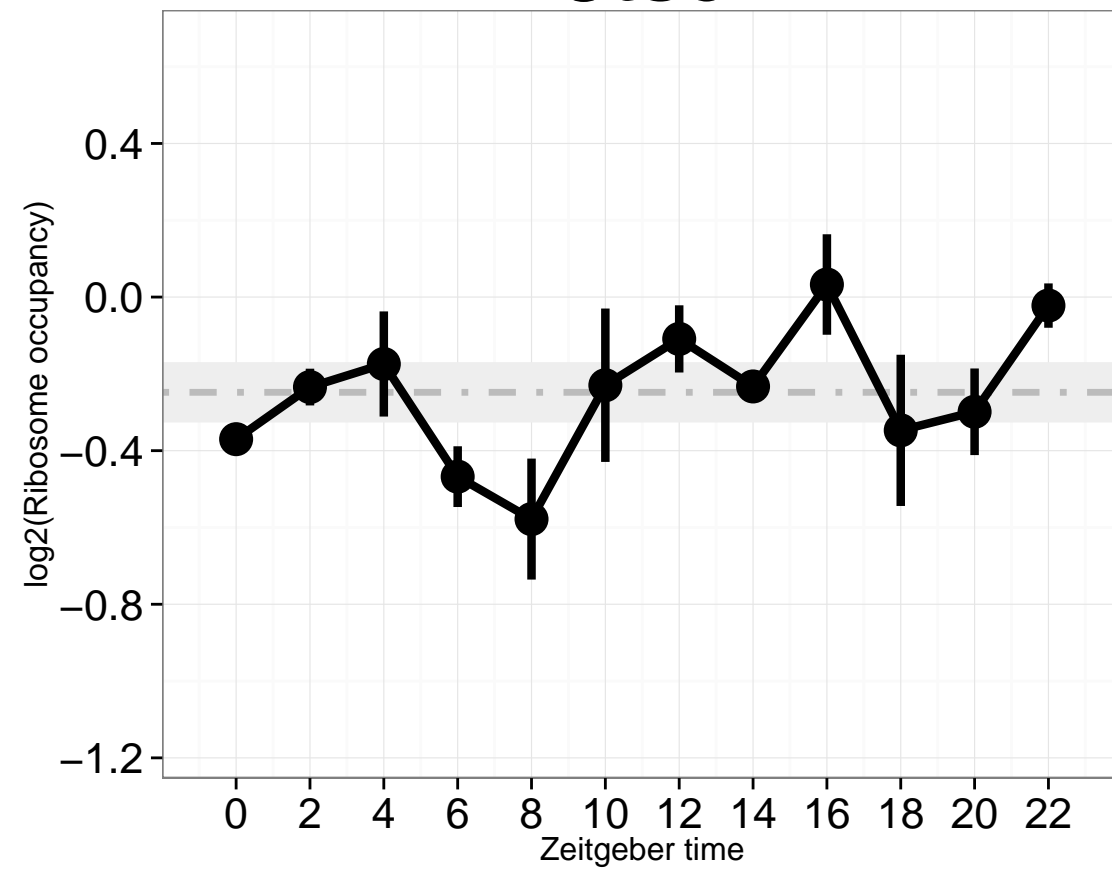

Supplement: SuppDataset_1.zip [file Ctso_set_A.pdf › Supplemental Dataset 1/A-mRNA_nonrhyth_translation_nonrhyth/Ctso_set_A.pdf]

## Ctss

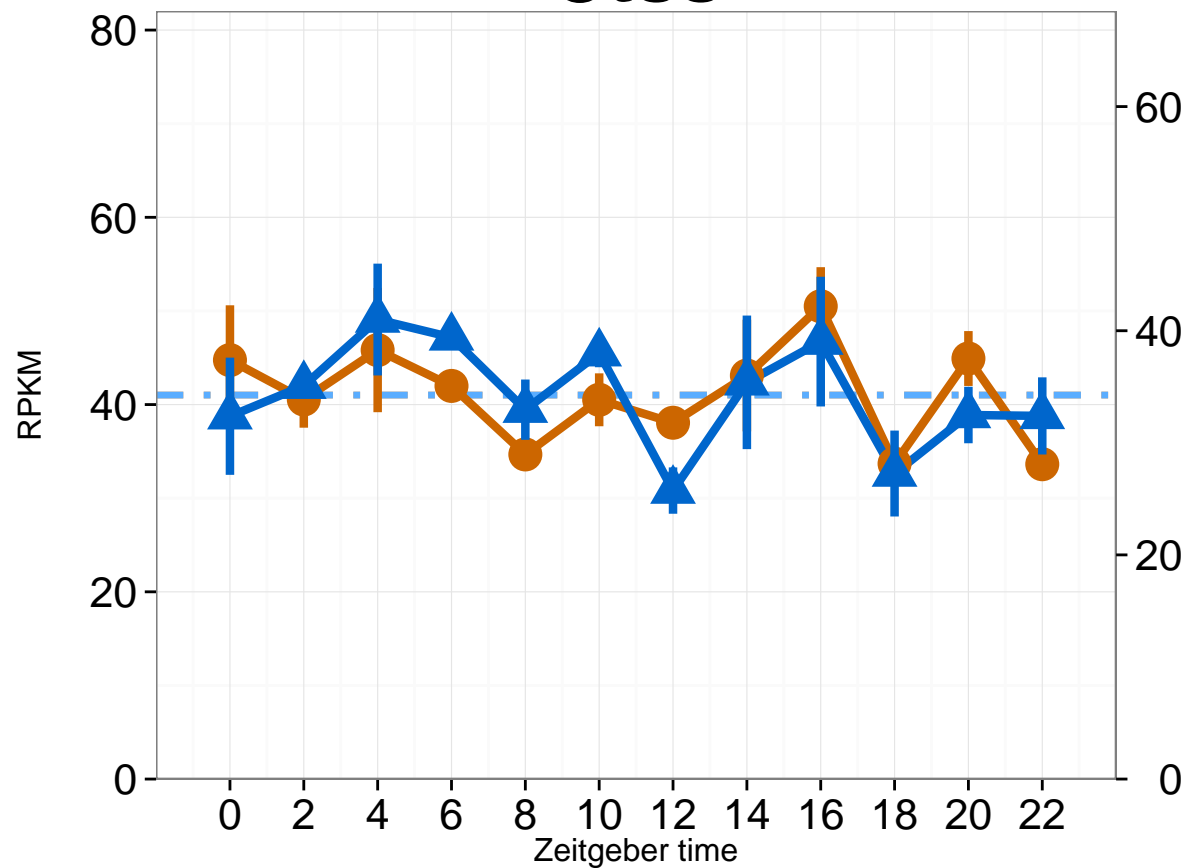

## Ctss

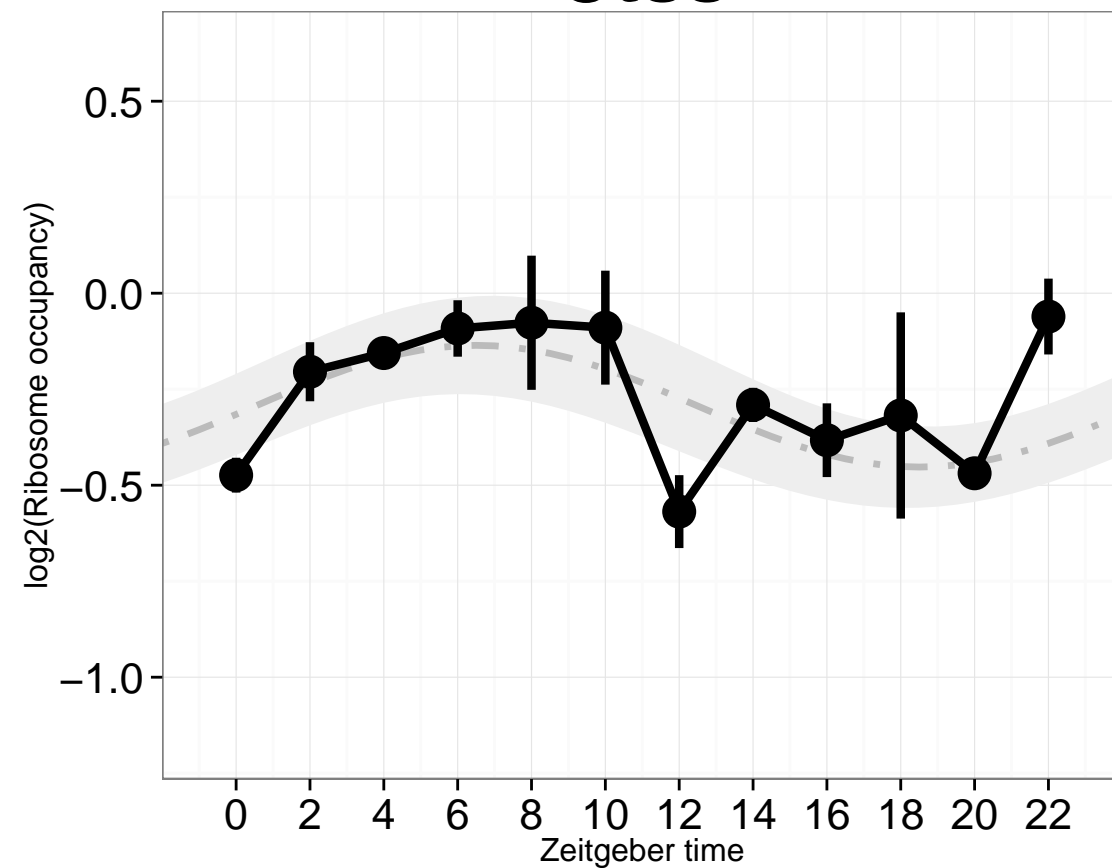

Supplement: SuppDataset_1.zip [file Ctss_set_A.pdf › Supplemental Dataset 1/A-mRNA_nonrhyth_translation_nonrhyth/Ctss_set_A.pdf]

## Ctsz

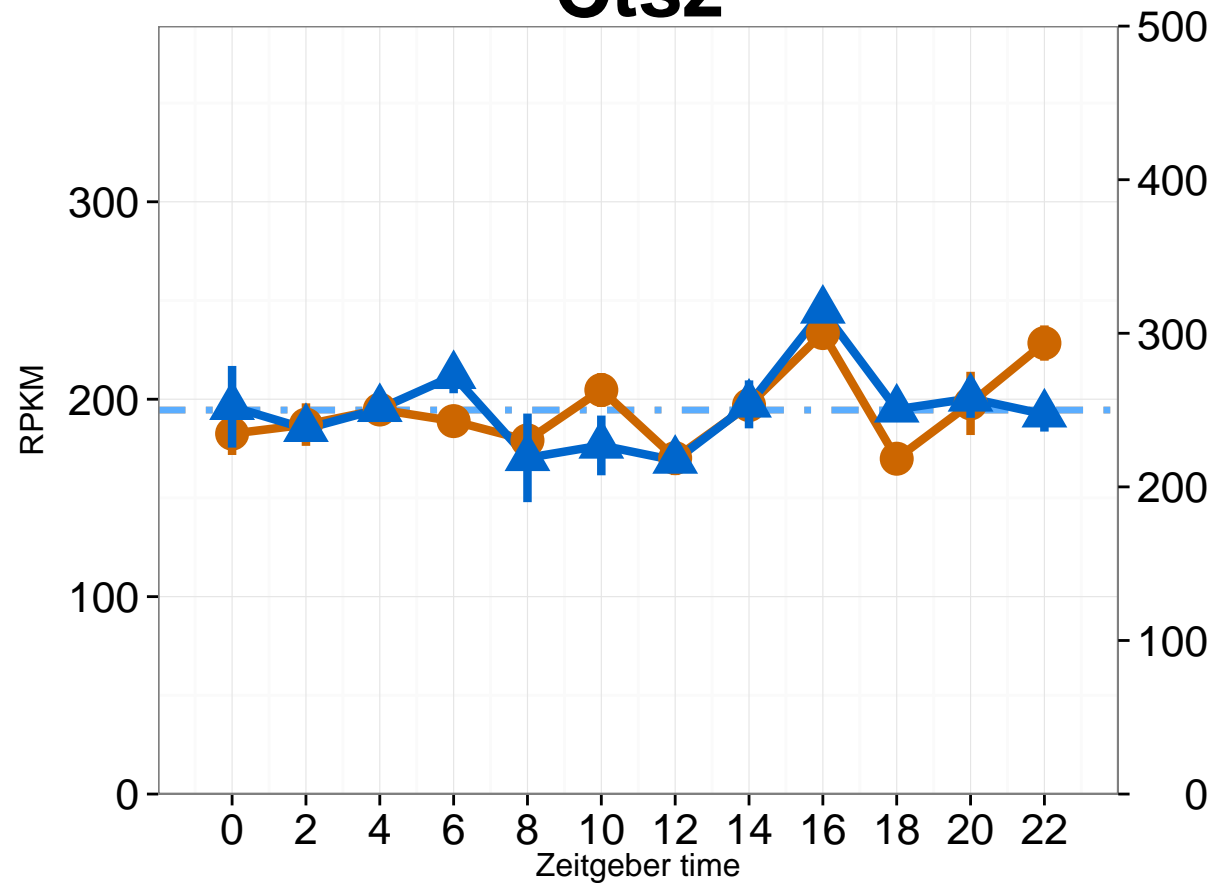

## Ctsz

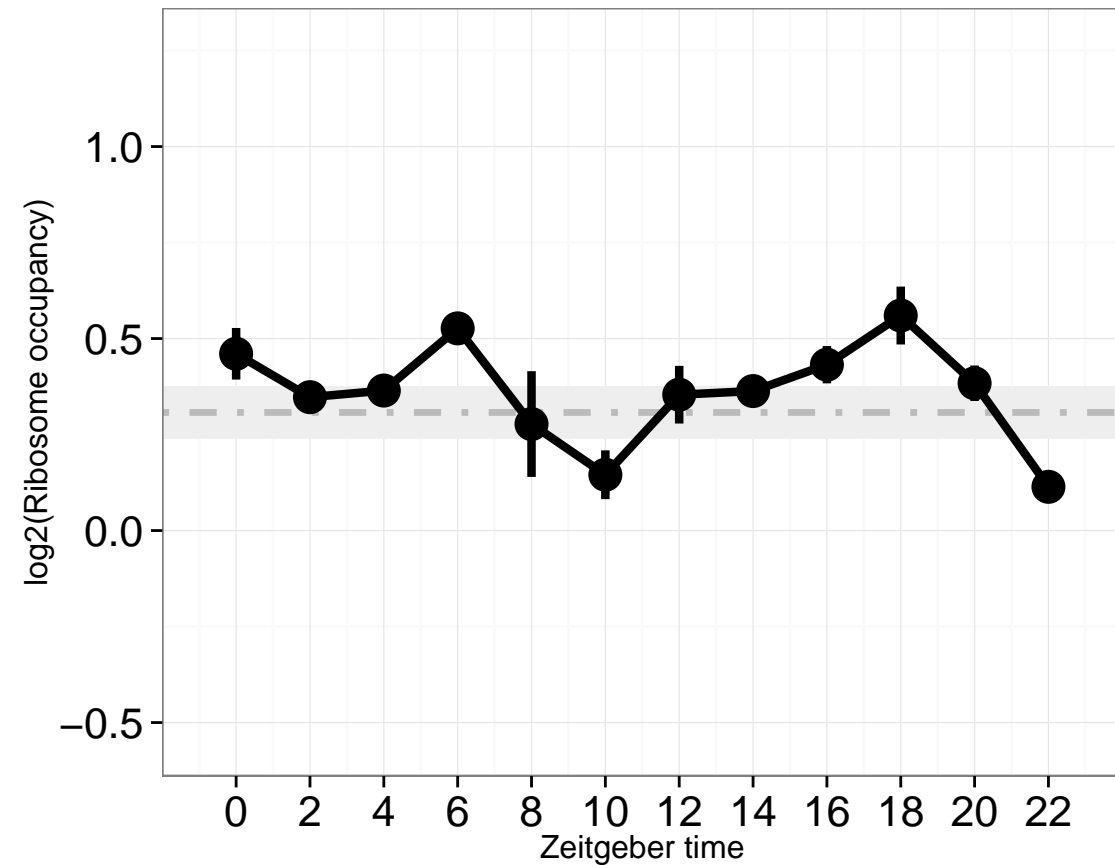

Supplement: SuppDataset_1.zip [file Ctsz_set_A.pdf › Supplemental Dataset 1/A-mRNA_nonrhyth_translation_nonrhyth/Ctsz_set_A.pdf]

## Cttn

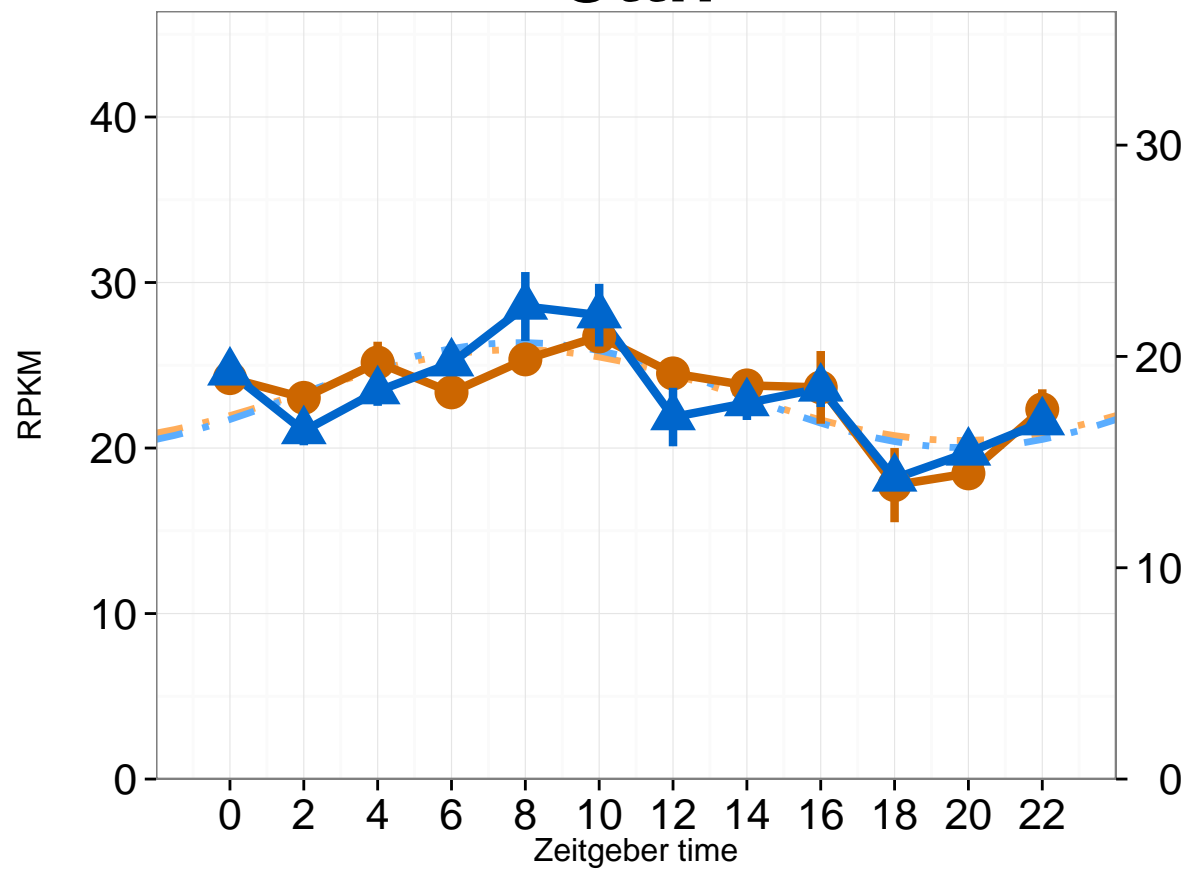

## Cttn

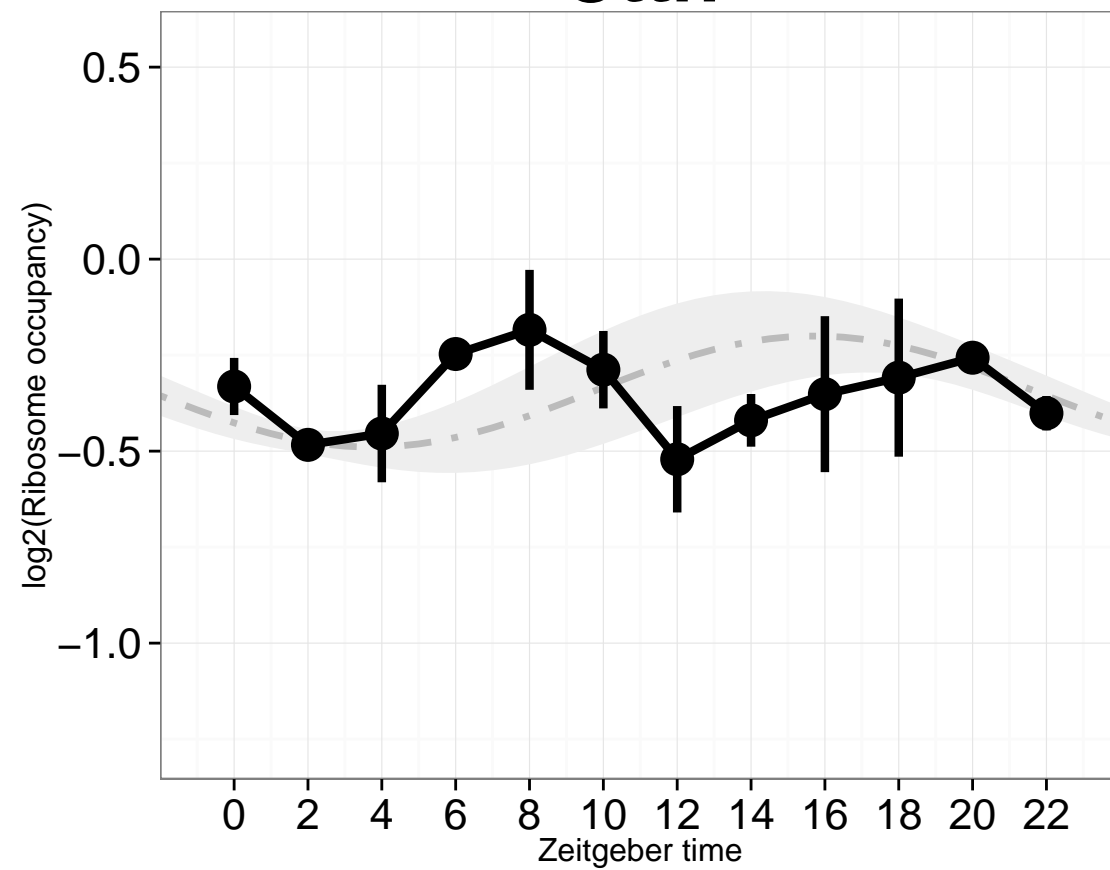

Supplement: SuppDataset_1.zip [file Cttn_set_A.pdf › Supplemental Dataset 1/A-mRNA_nonrhyth_translation_nonrhyth/Cttn_set_A.pdf]

# Cttnbp2nl

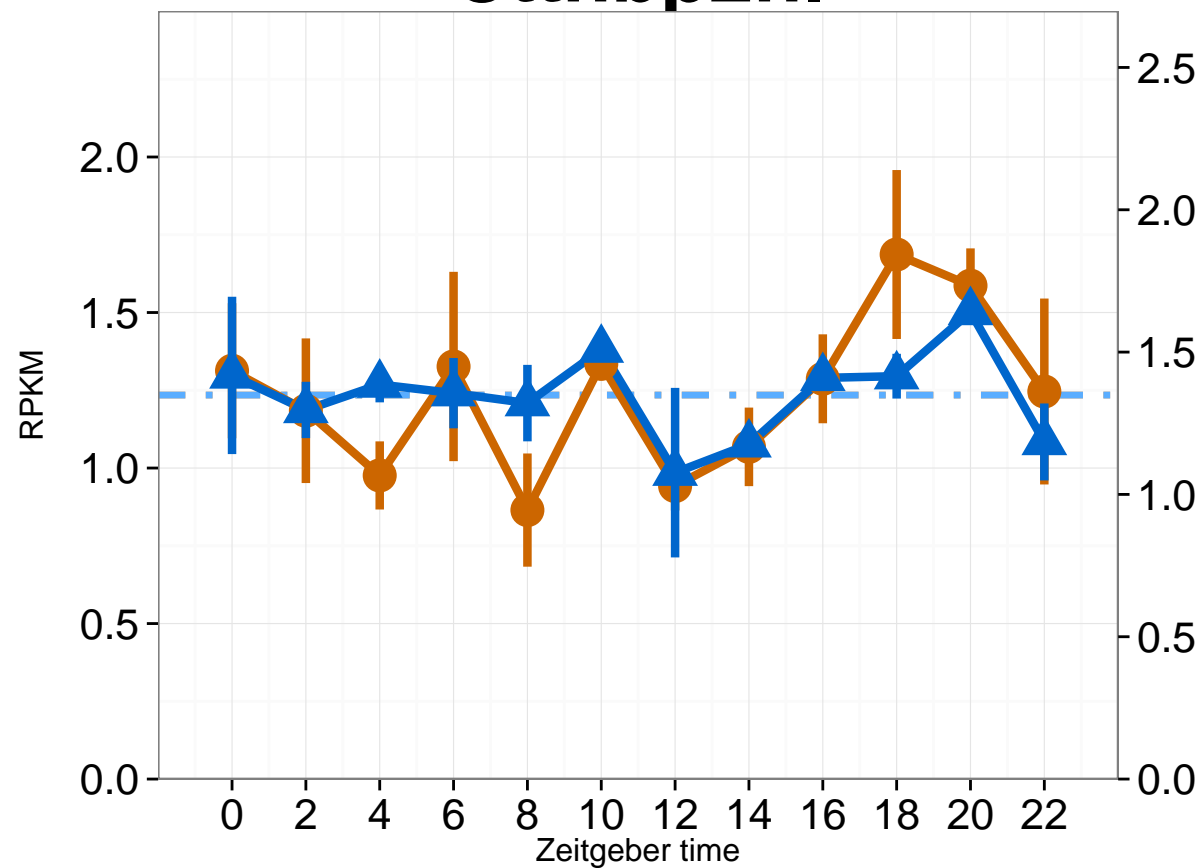

# Cttnbp2nl

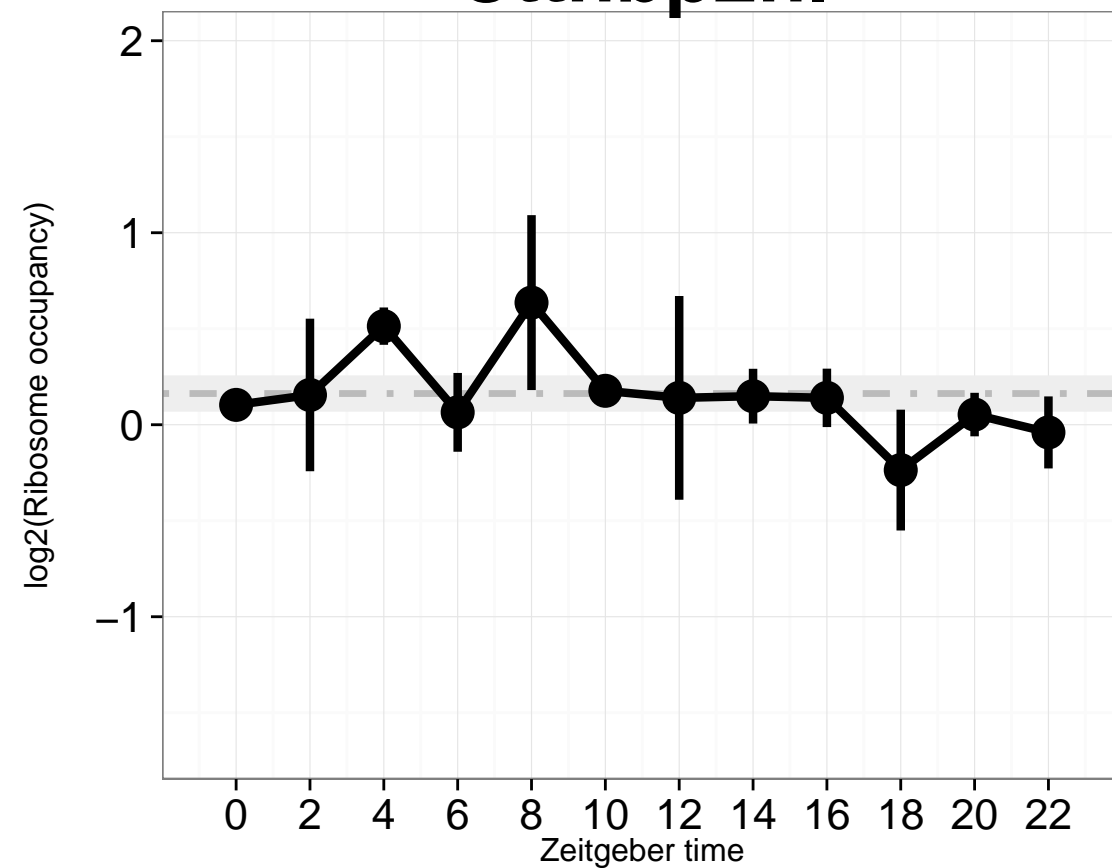

Supplement: SuppDataset_1.zip [file Cttnbp2nl_set_A.pdf › Supplemental Dataset 1/A-mRNA_nonrhyth_translation_nonrhyth/Cttnbp2nl_set_A.pdf]

# Ctu1

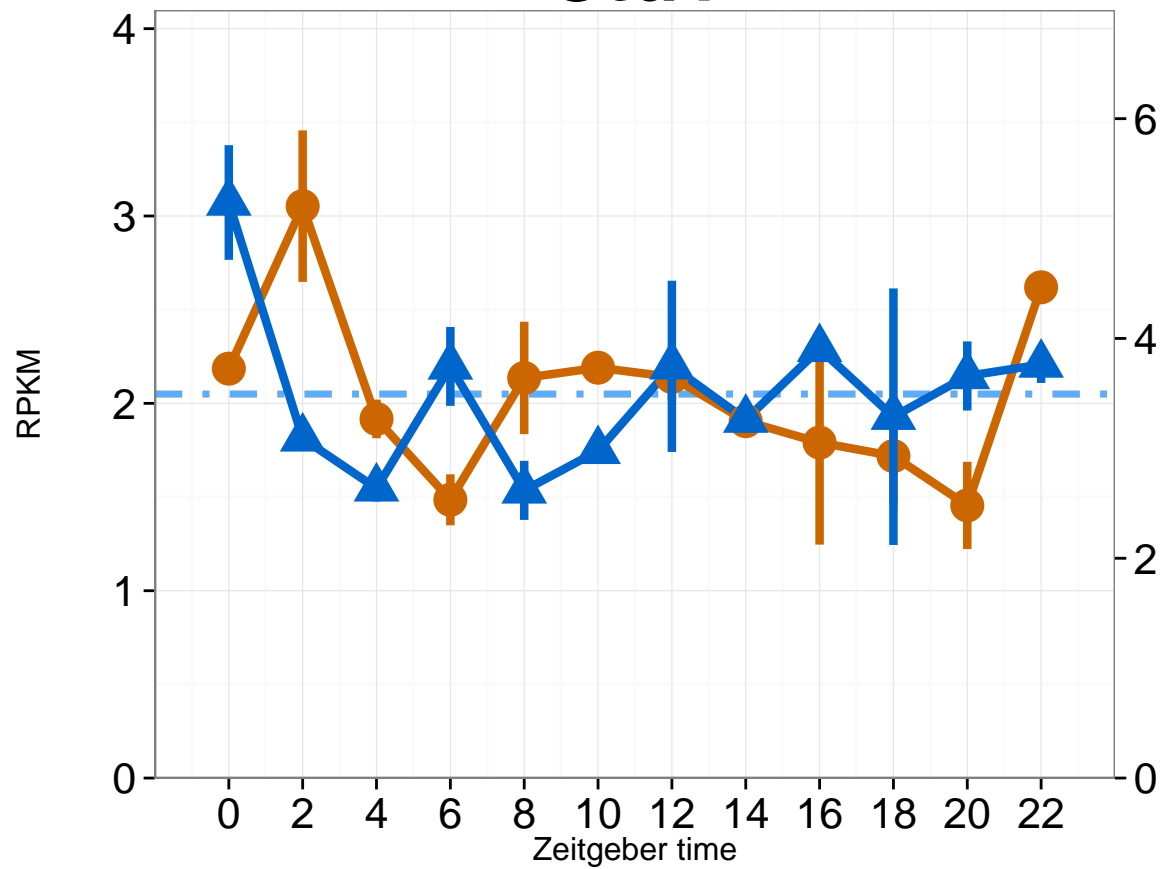

# Ctu1

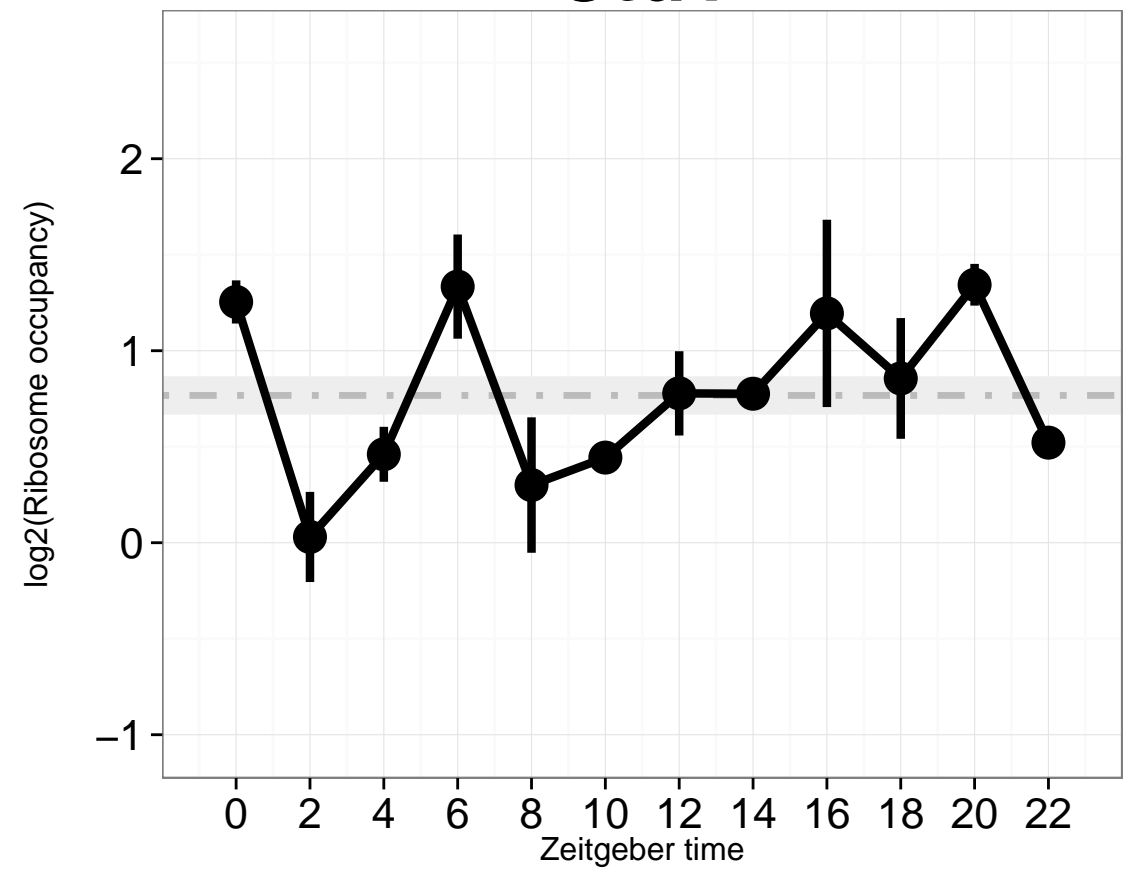

Supplement: SuppDataset_1.zip [file Ctu1_set_A.pdf › Supplemental Dataset 1/A-mRNA_nonrhyth_translation_nonrhyth/Ctu1_set_A.pdf]

## Cuedc2

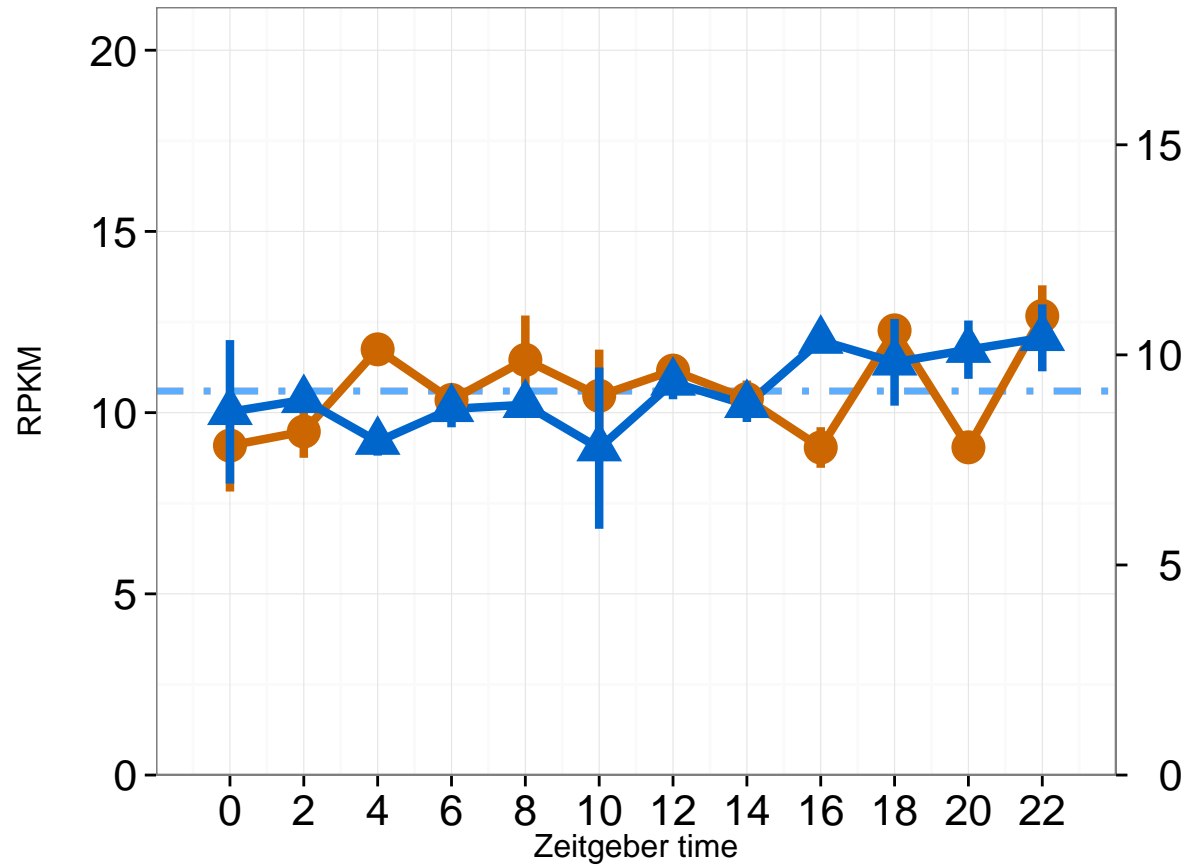

## Cuedc2

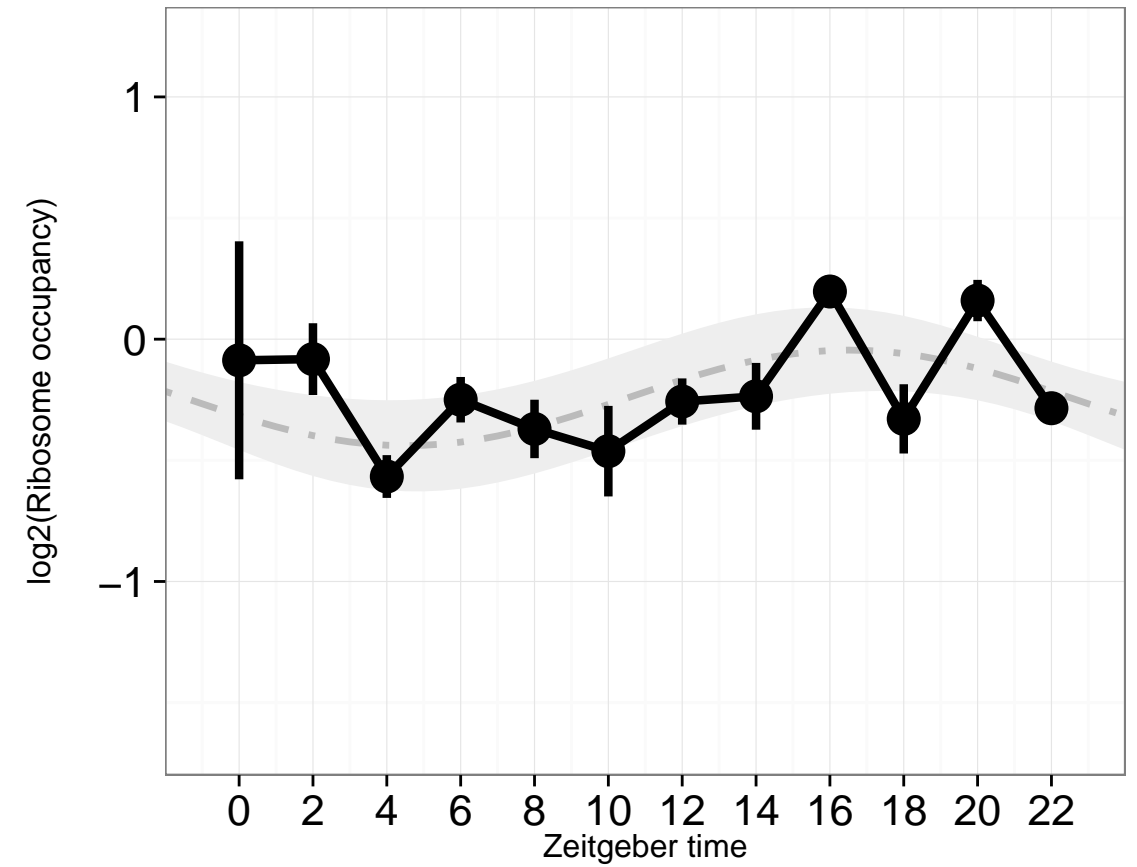

Supplement: SuppDataset_1.zip [file Cuedc2_set_A.pdf › Supplemental Dataset 1/A-mRNA_nonrhyth_translation_nonrhyth/Cuedc2_set_A.pdf]

## Cul1

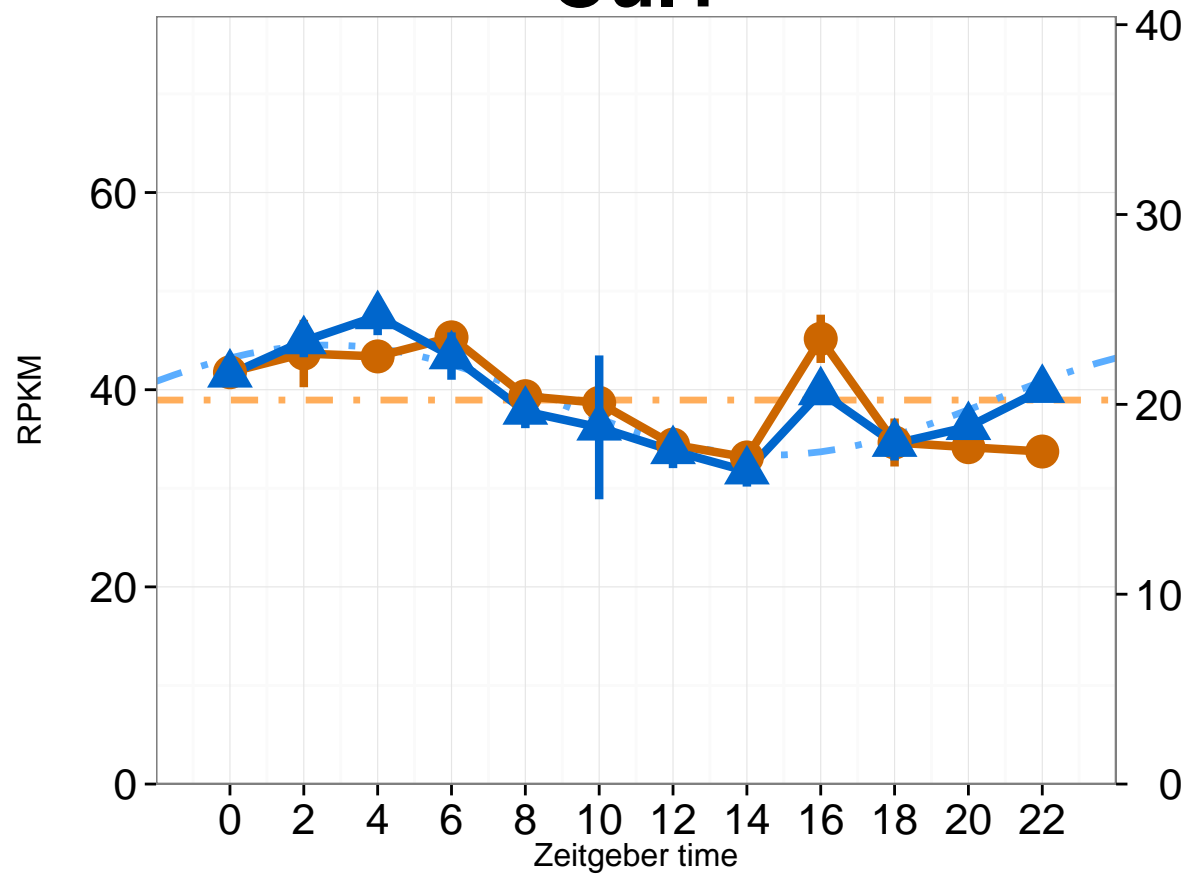

## Cul1

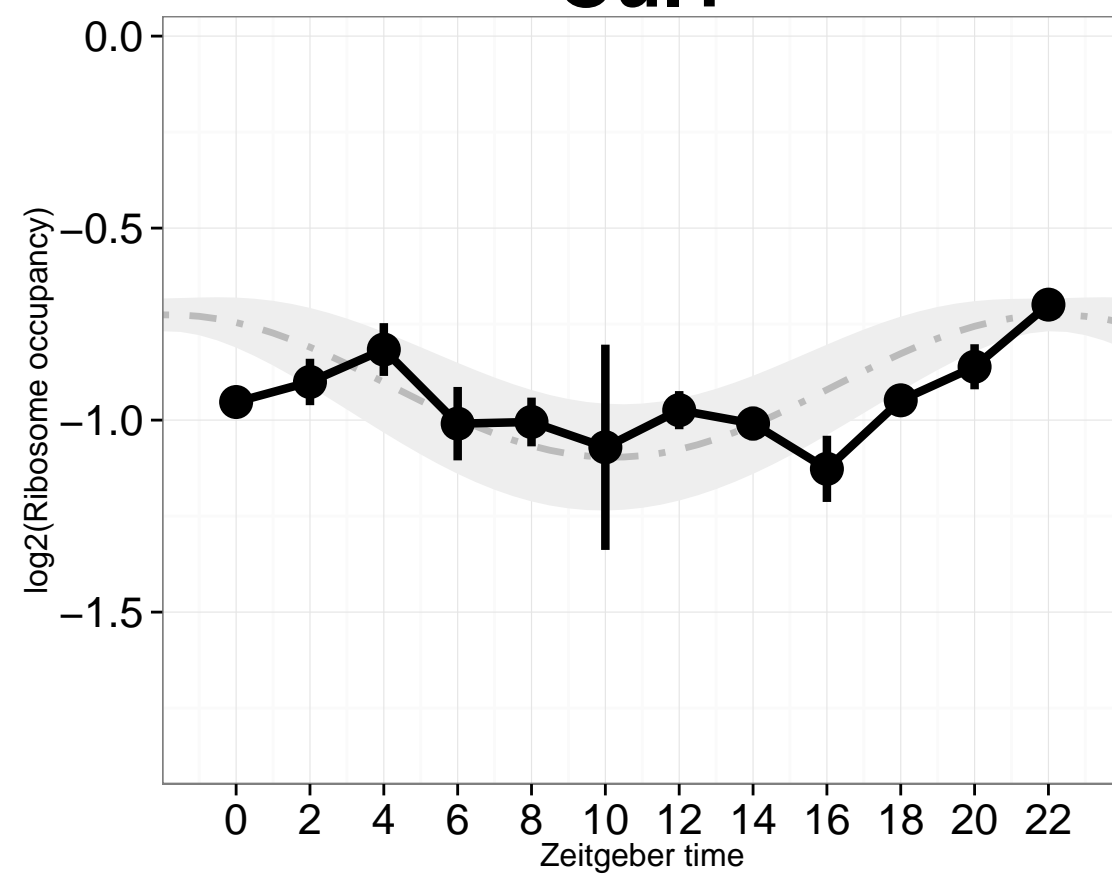

Supplement: SuppDataset_1.zip [file Cul1_set_A.pdf › Supplemental Dataset 1/A-mRNA_nonrhyth_translation_nonrhyth/Cul1_set_A.pdf]

## Cul2

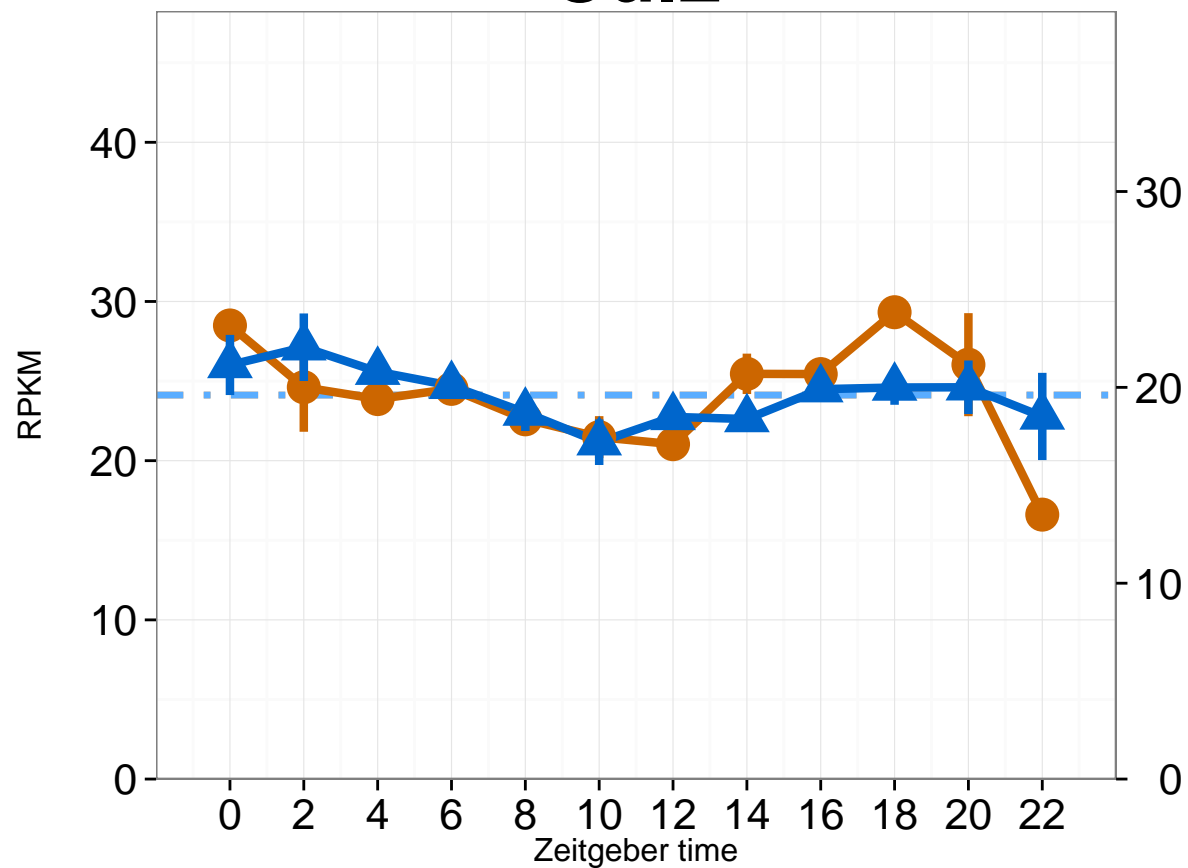

## Cul2

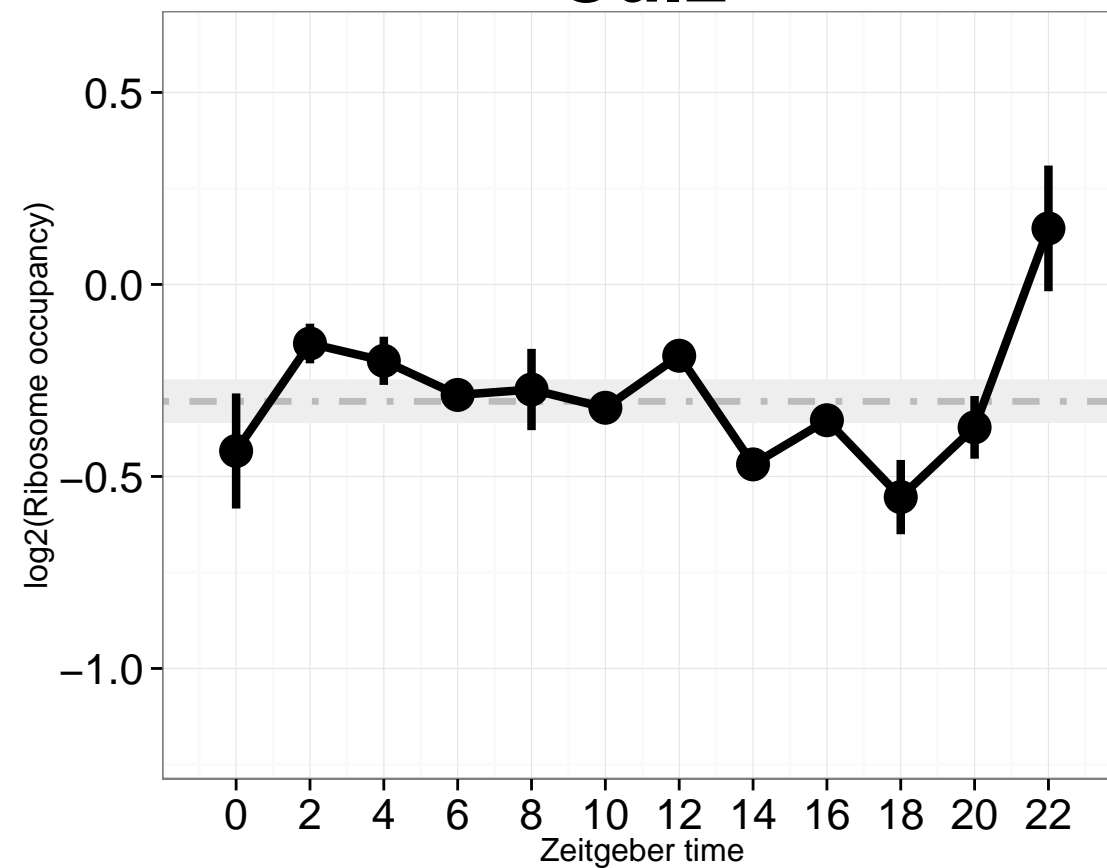

Supplement: SuppDataset_1.zip [file Cul2_set_A.pdf › Supplemental Dataset 1/A-mRNA_nonrhyth_translation_nonrhyth/Cul2_set_A.pdf]

## Cul3

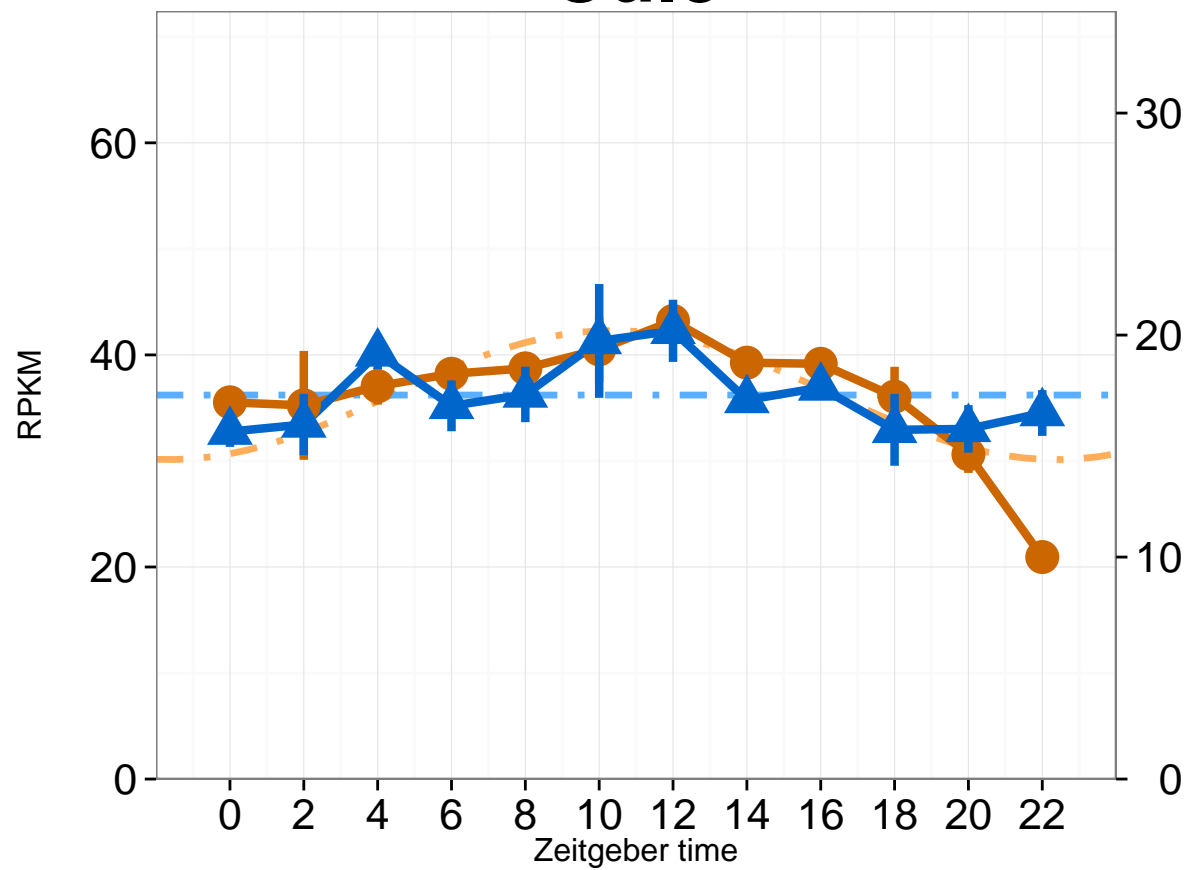

## Cul3

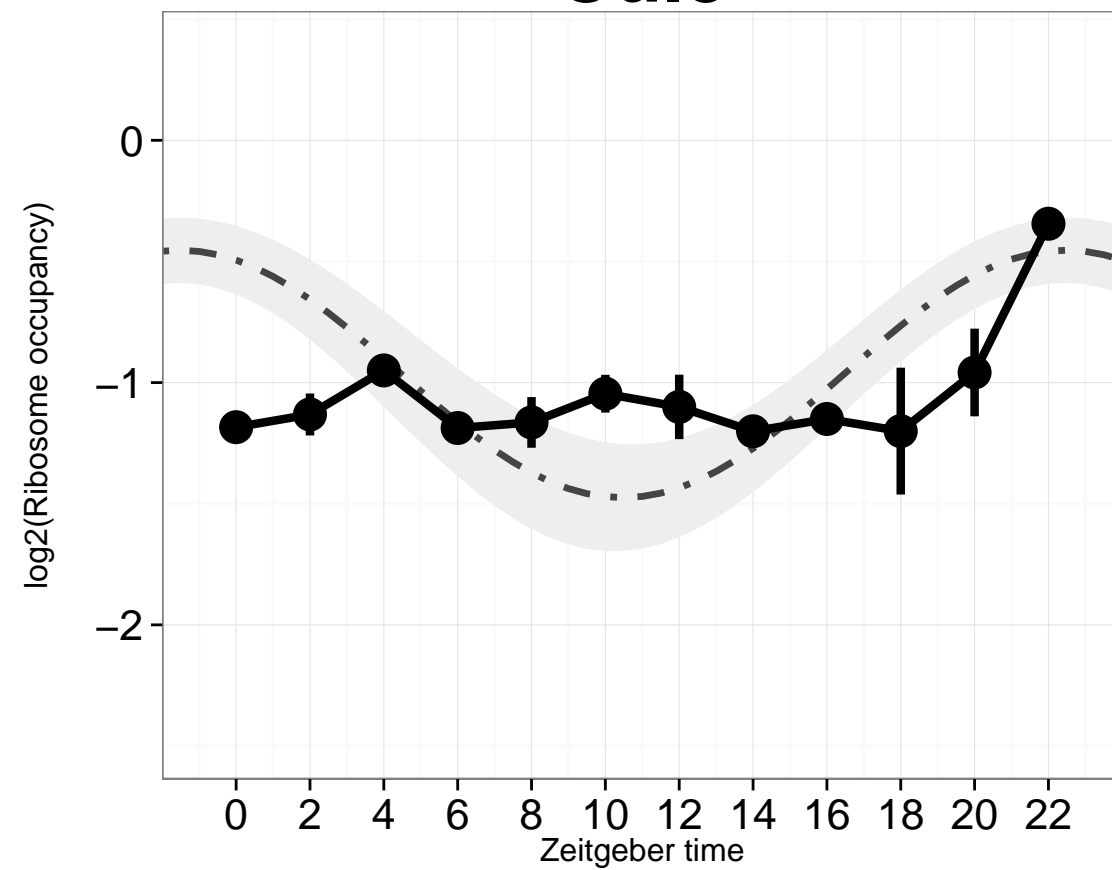

Supplement: SuppDataset_1.zip [file Cul3_set_A.pdf › Supplemental Dataset 1/A-mRNA_nonrhyth_translation_nonrhyth/Cul3_set_A.pdf]

## Cul4a

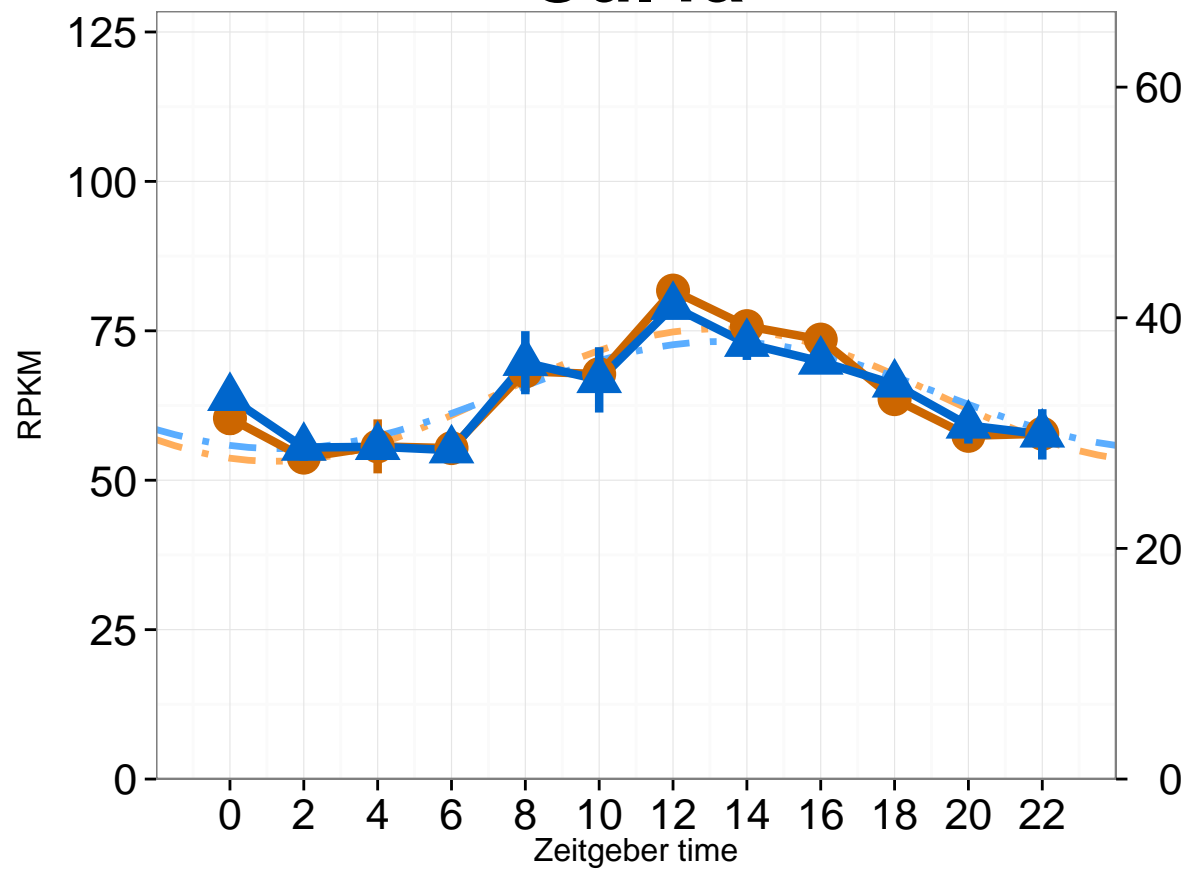

## Cul4a

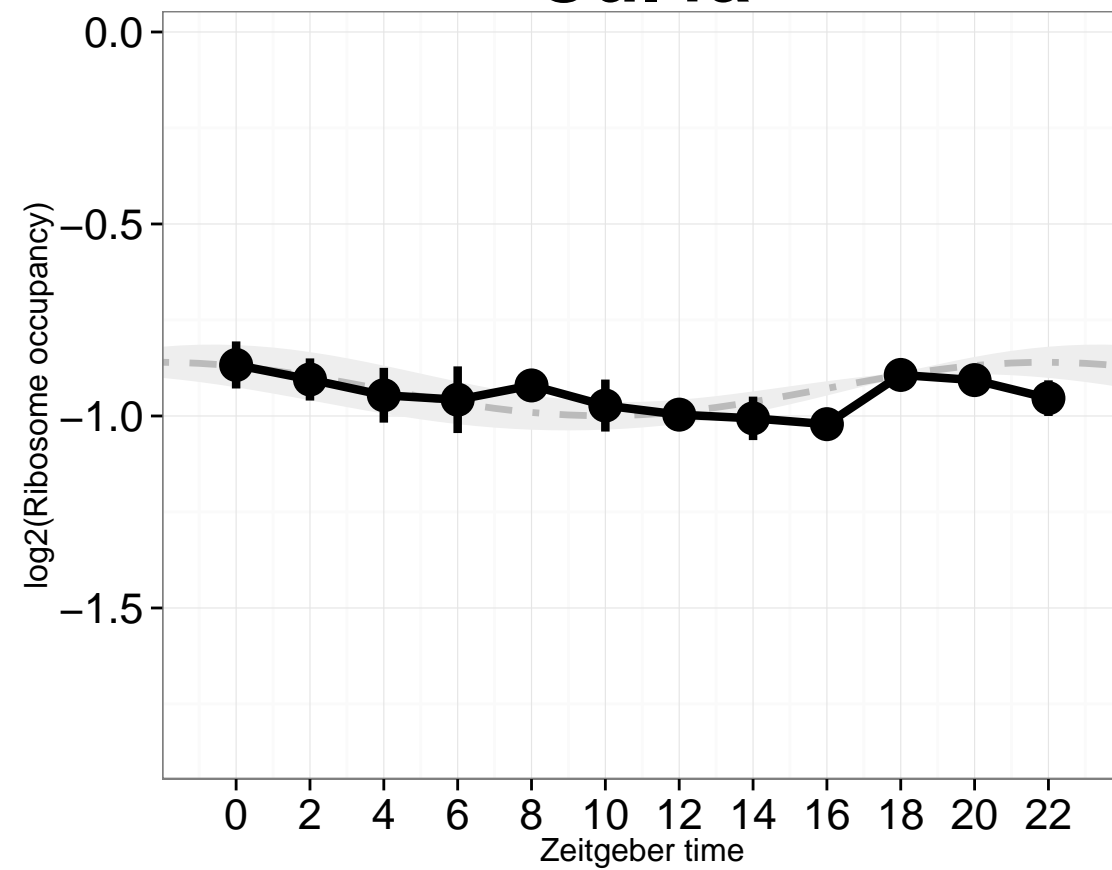

Supplement: SuppDataset_1.zip [file Cul4a_set_A.pdf › Supplemental Dataset 1/A-mRNA_nonrhyth_translation_nonrhyth/Cul4a_set_A.pdf]

## Cul4b

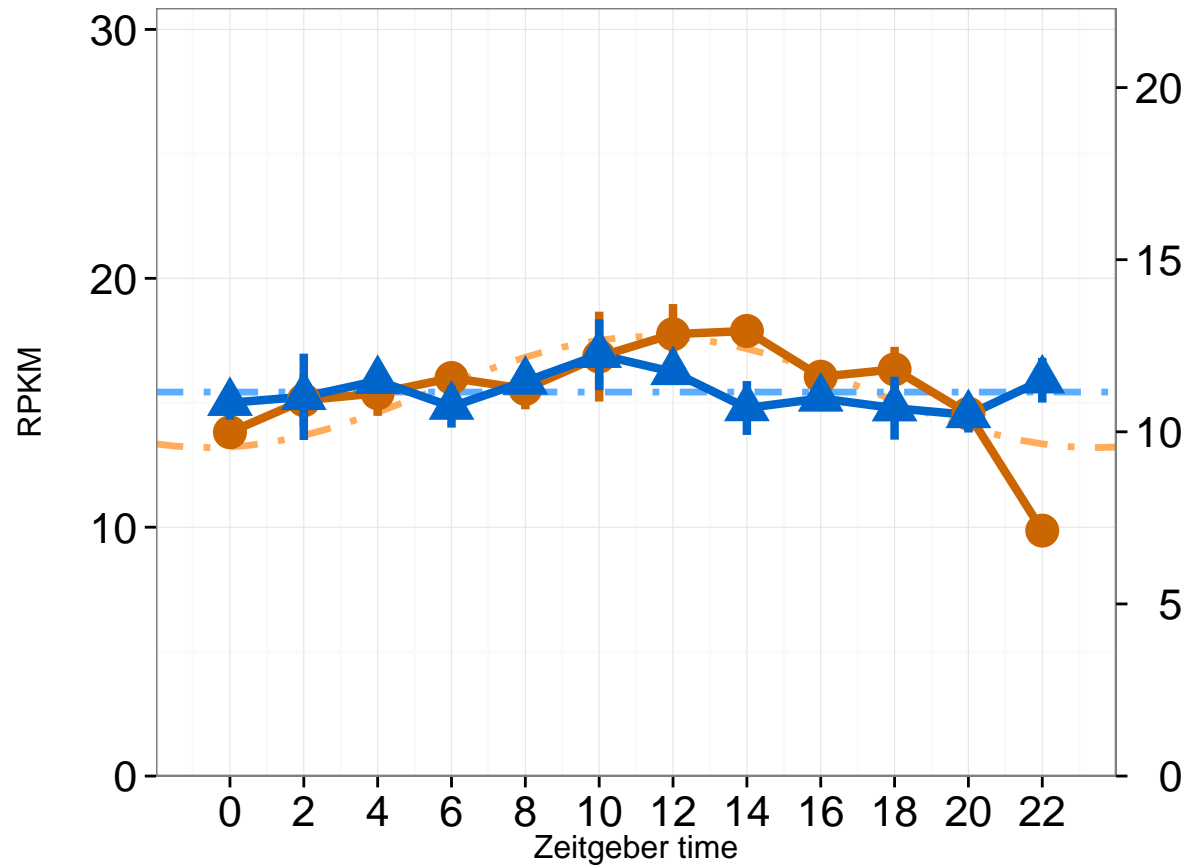

## Cul4b

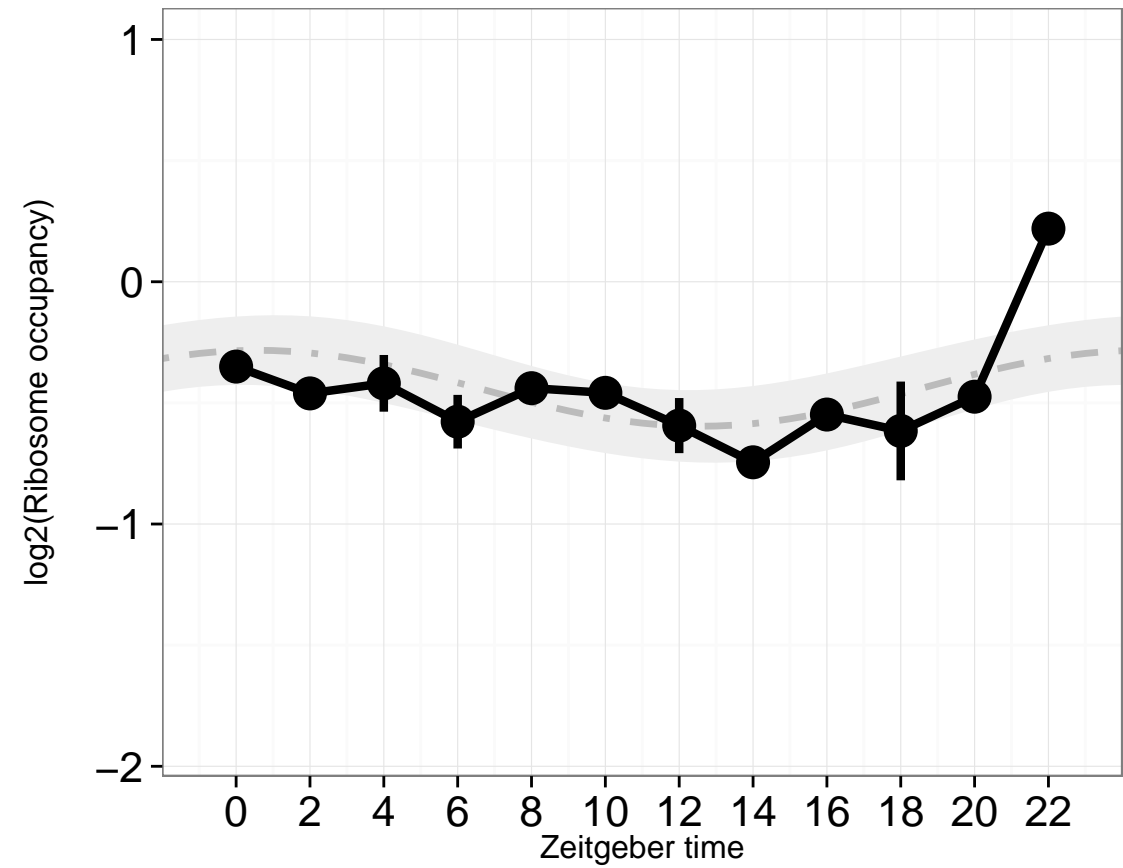

Supplement: SuppDataset_1.zip [file Cul4b_set_A.pdf › Supplemental Dataset 1/A-mRNA_nonrhyth_translation_nonrhyth/Cul4b_set_A.pdf]

## Cul5

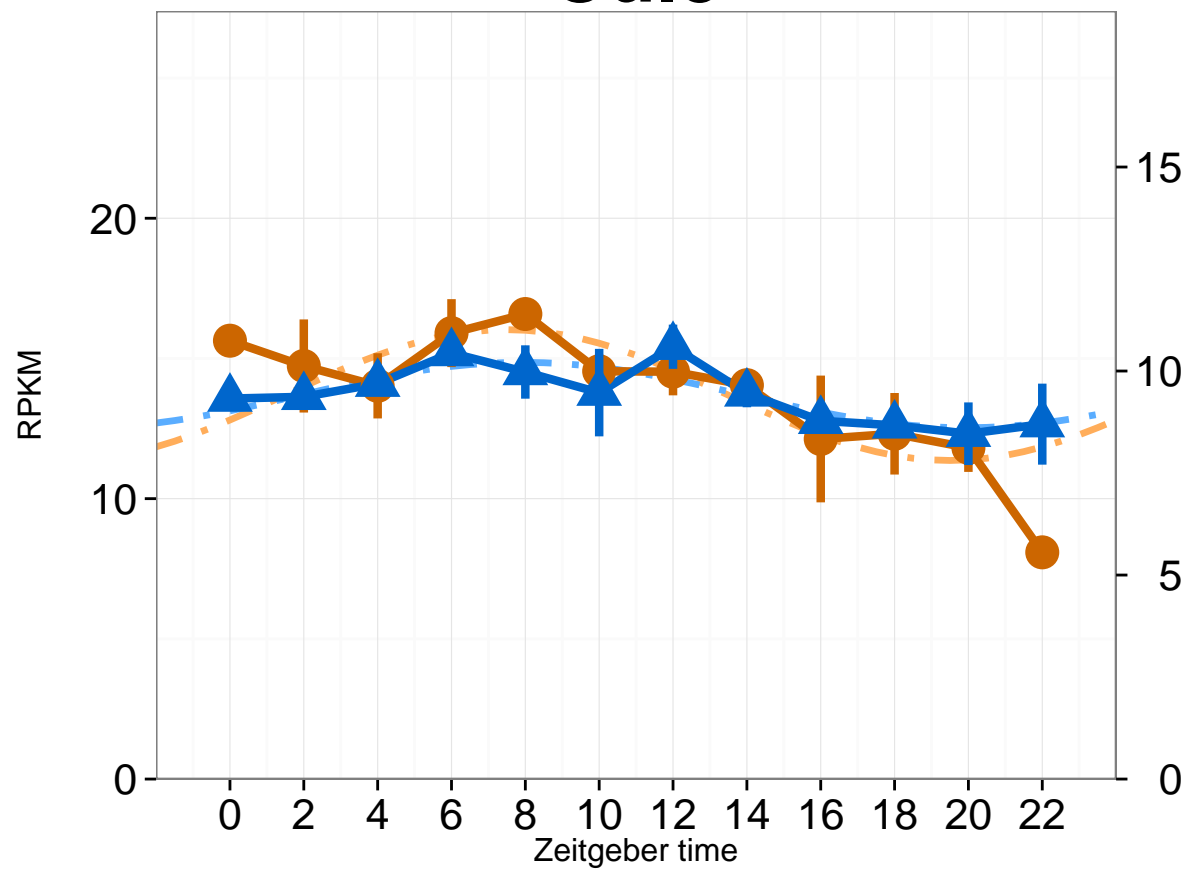

## Cul5

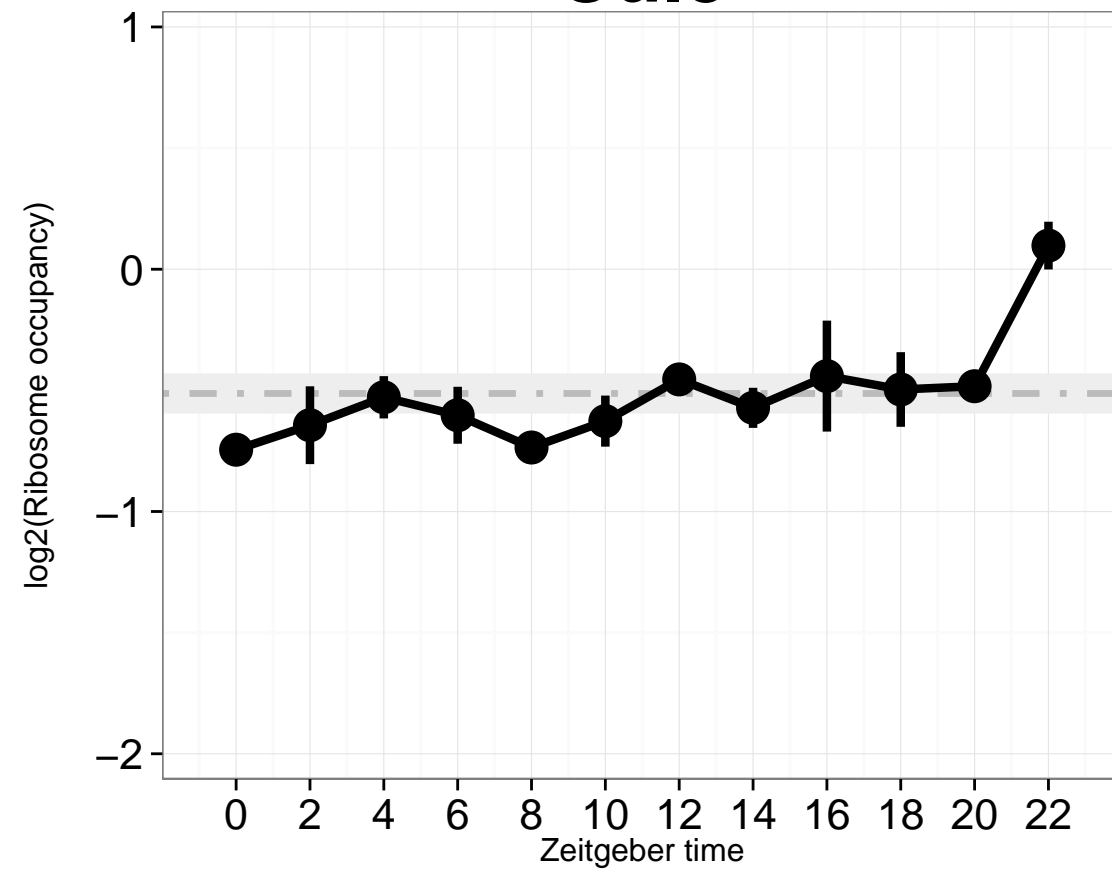

Supplement: SuppDataset_1.zip [file Cul5_set_A.pdf › Supplemental Dataset 1/A-mRNA_nonrhyth_translation_nonrhyth/Cul5_set_A.pdf]

## Cul7

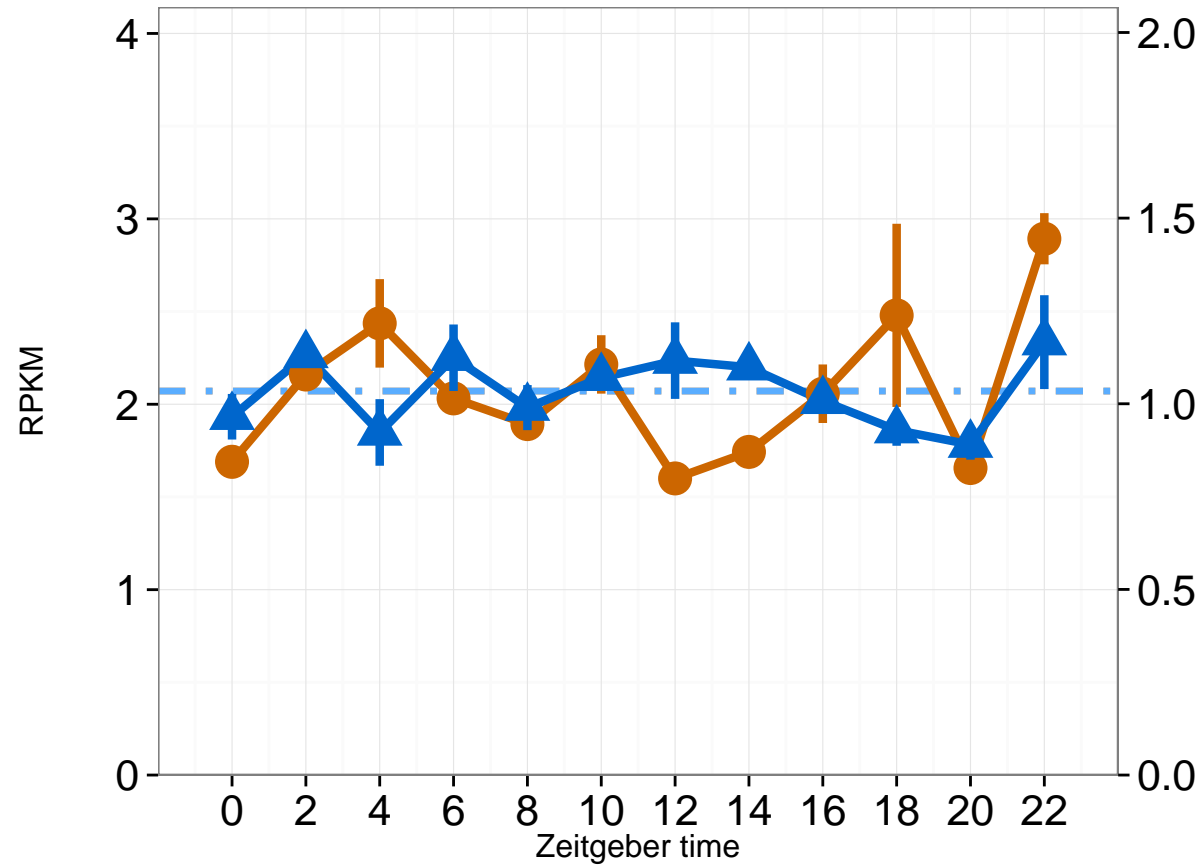

## Cul7

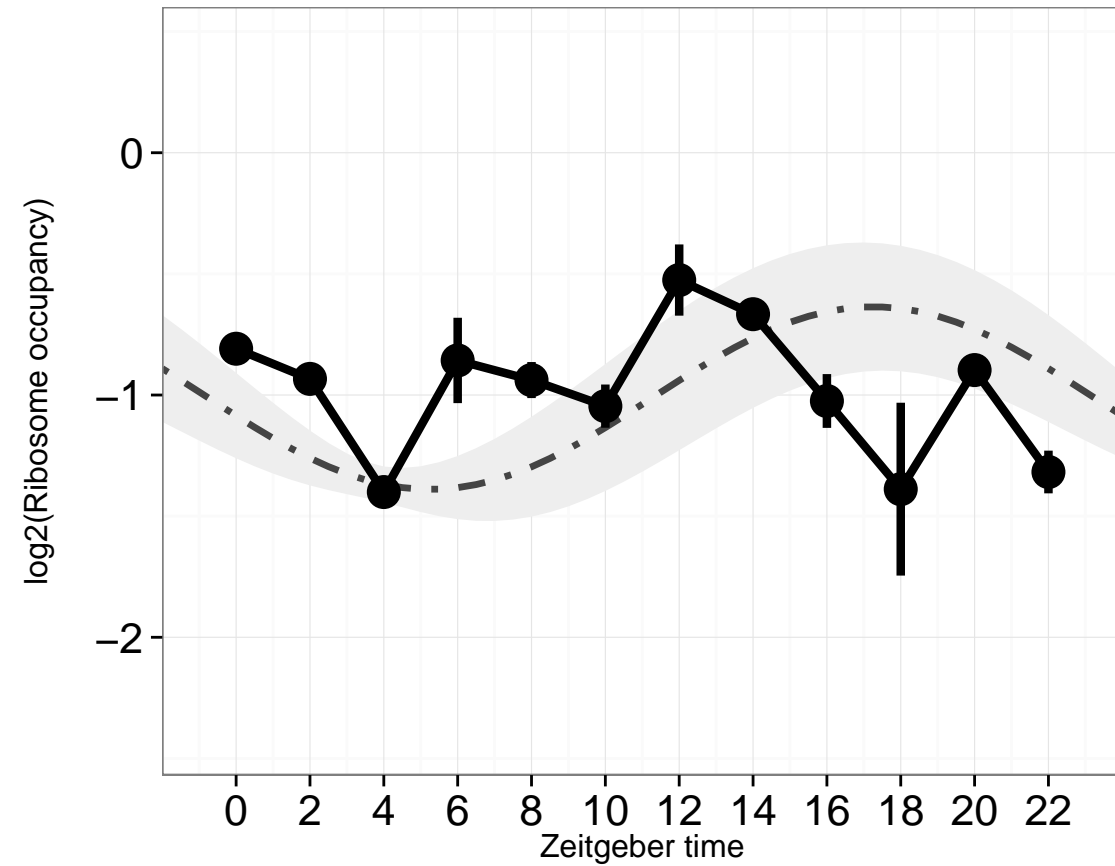

Supplement: SuppDataset_1.zip [file Cul7_set_A.pdf › Supplemental Dataset 1/A-mRNA_nonrhyth_translation_nonrhyth/Cul7_set_A.pdf]

## Cul9

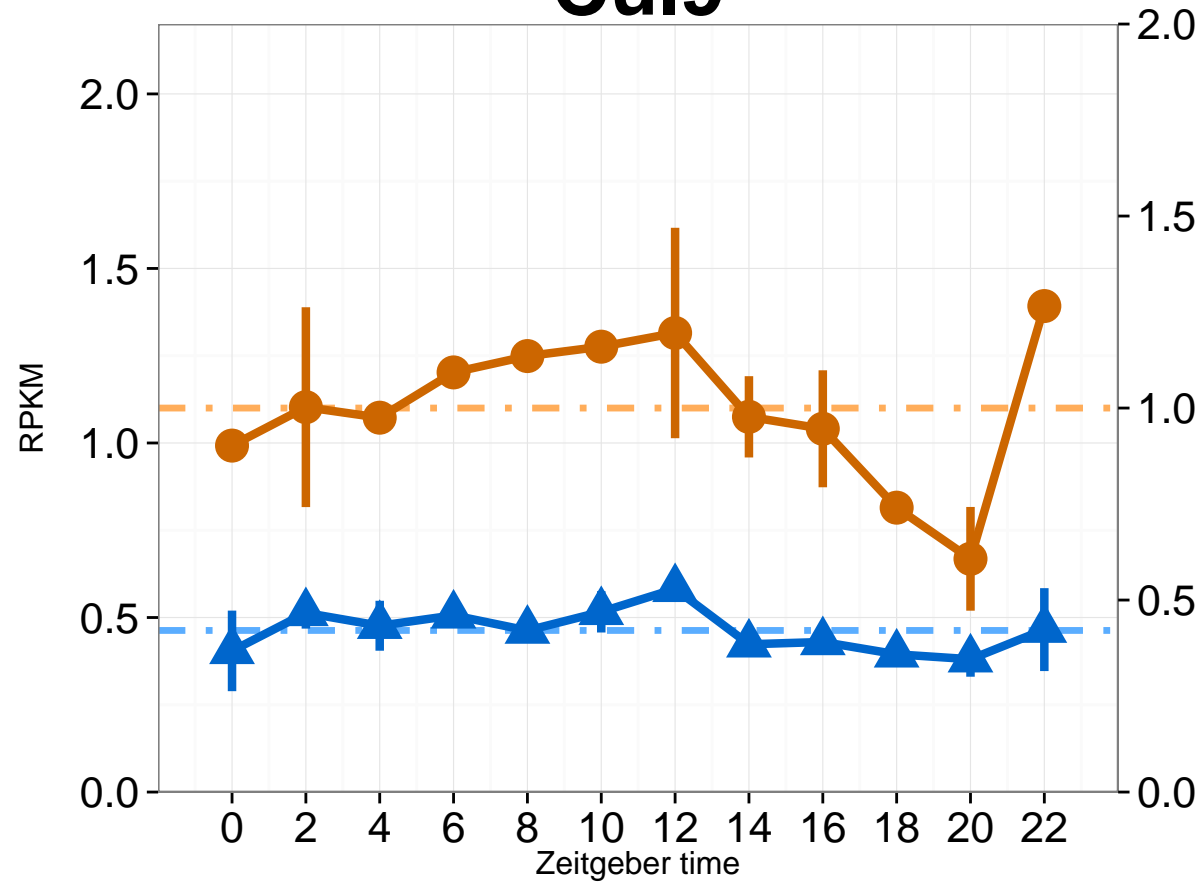

## Cul9

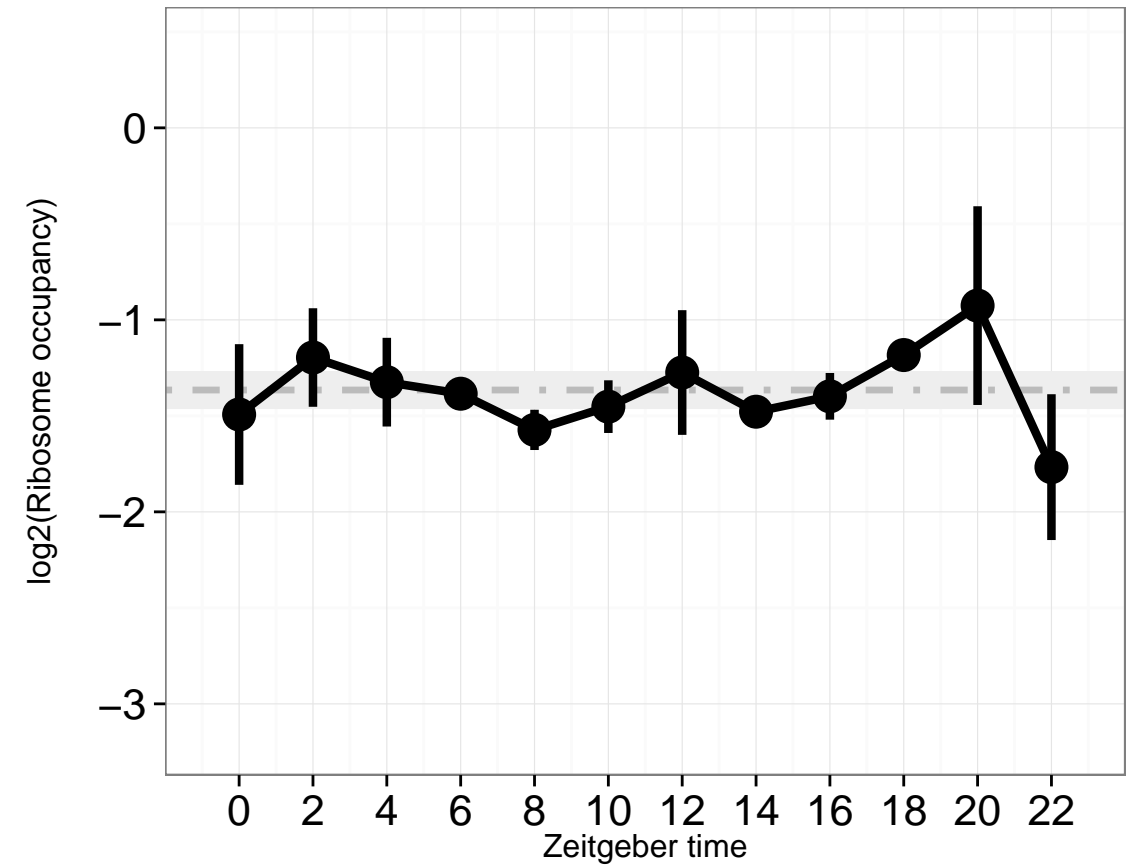

Supplement: SuppDataset_1.zip [file Cul9_set_A.pdf › Supplemental Dataset 1/A-mRNA_nonrhyth_translation_nonrhyth/Cul9_set_A.pdf]

## Cuta

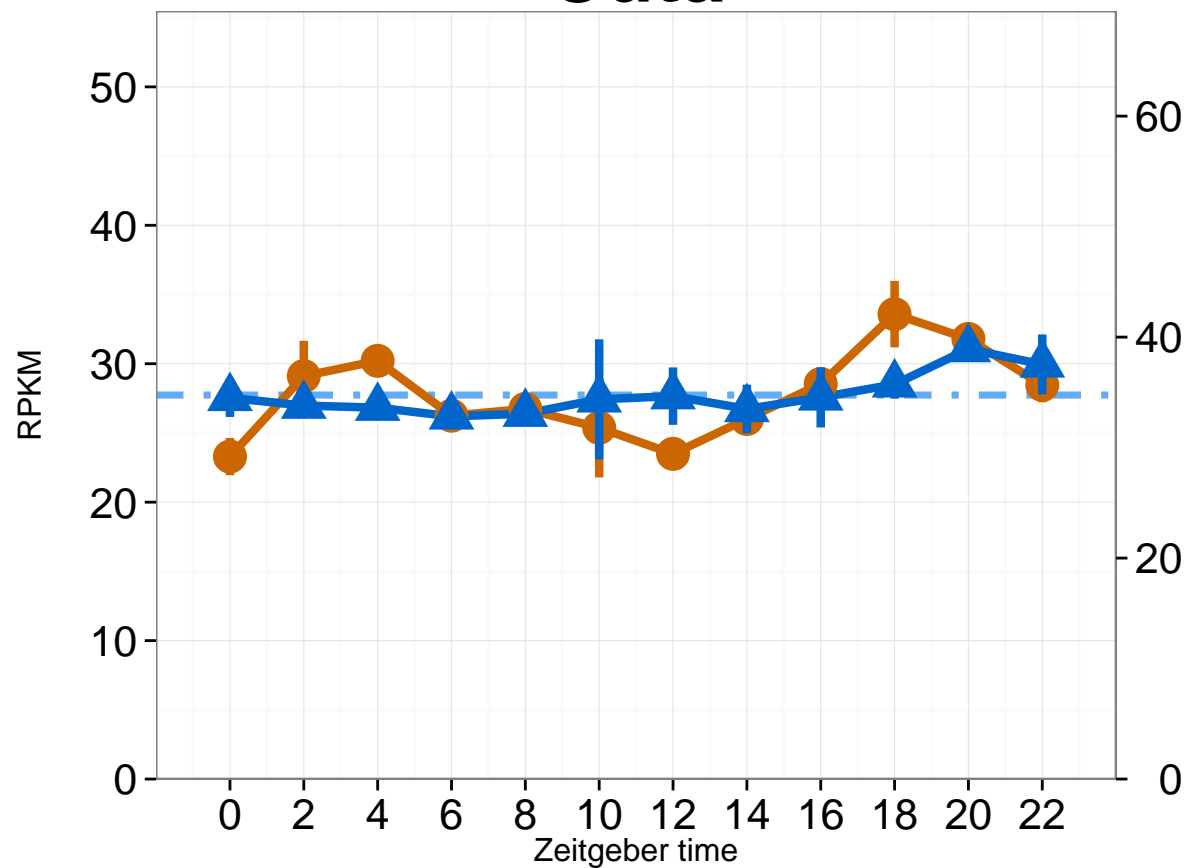

## Cuta

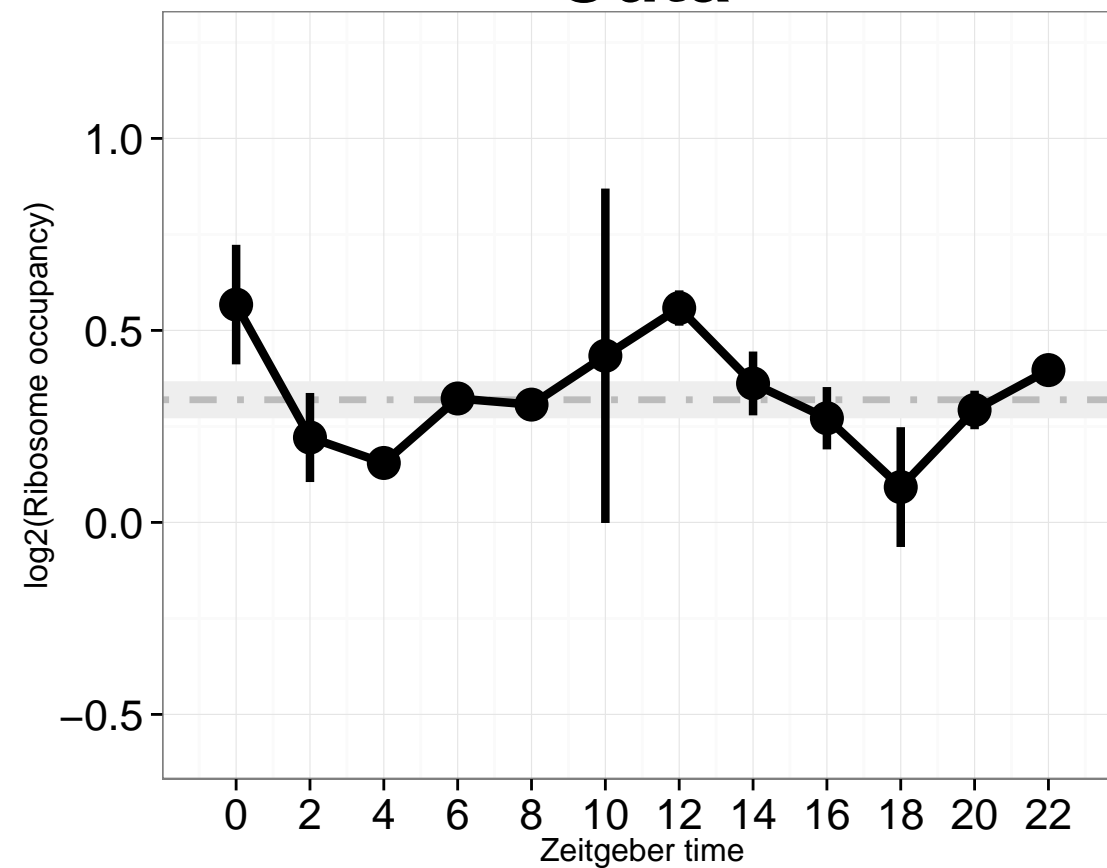

Supplement: SuppDataset_1.zip [file Cuta_set_A.pdf › Supplemental Dataset 1/A-mRNA_nonrhyth_translation_nonrhyth/Cuta_set_A.pdf]

## Cutc

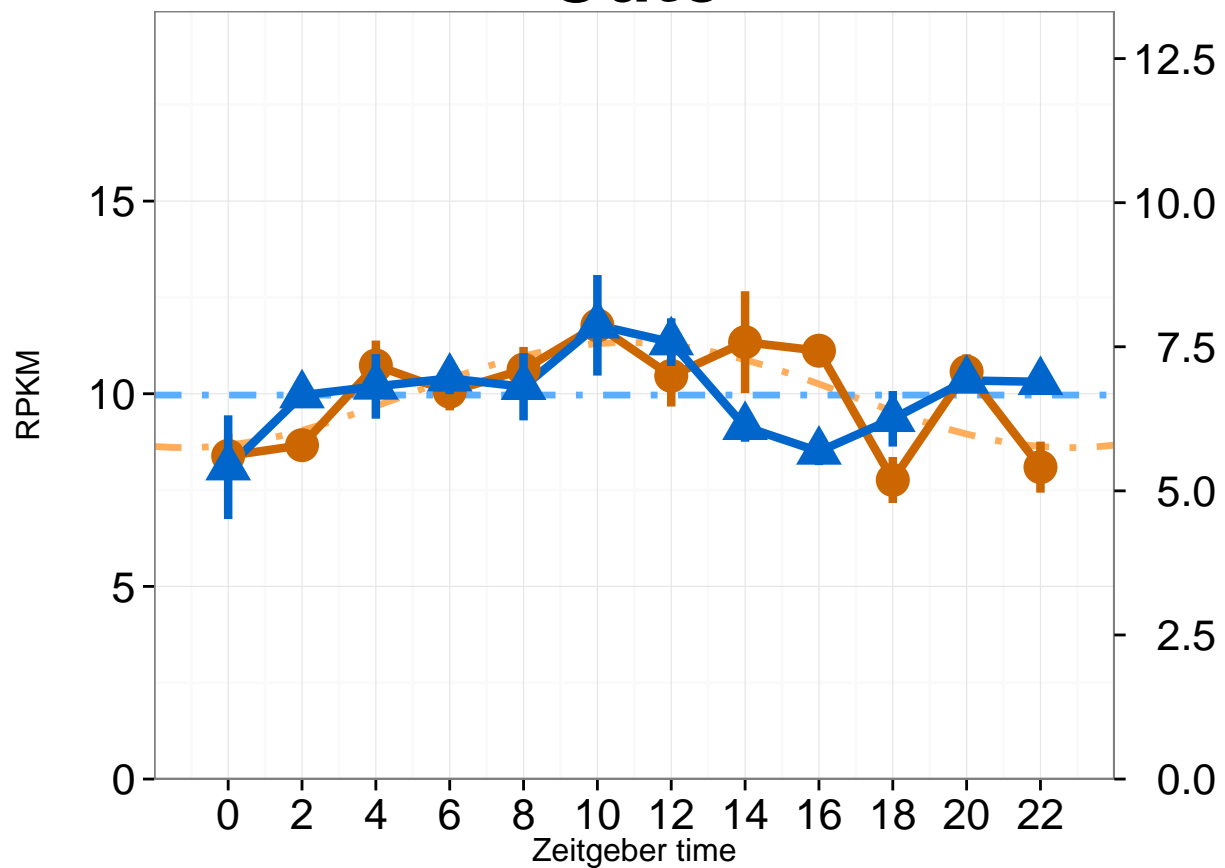

## Cutc

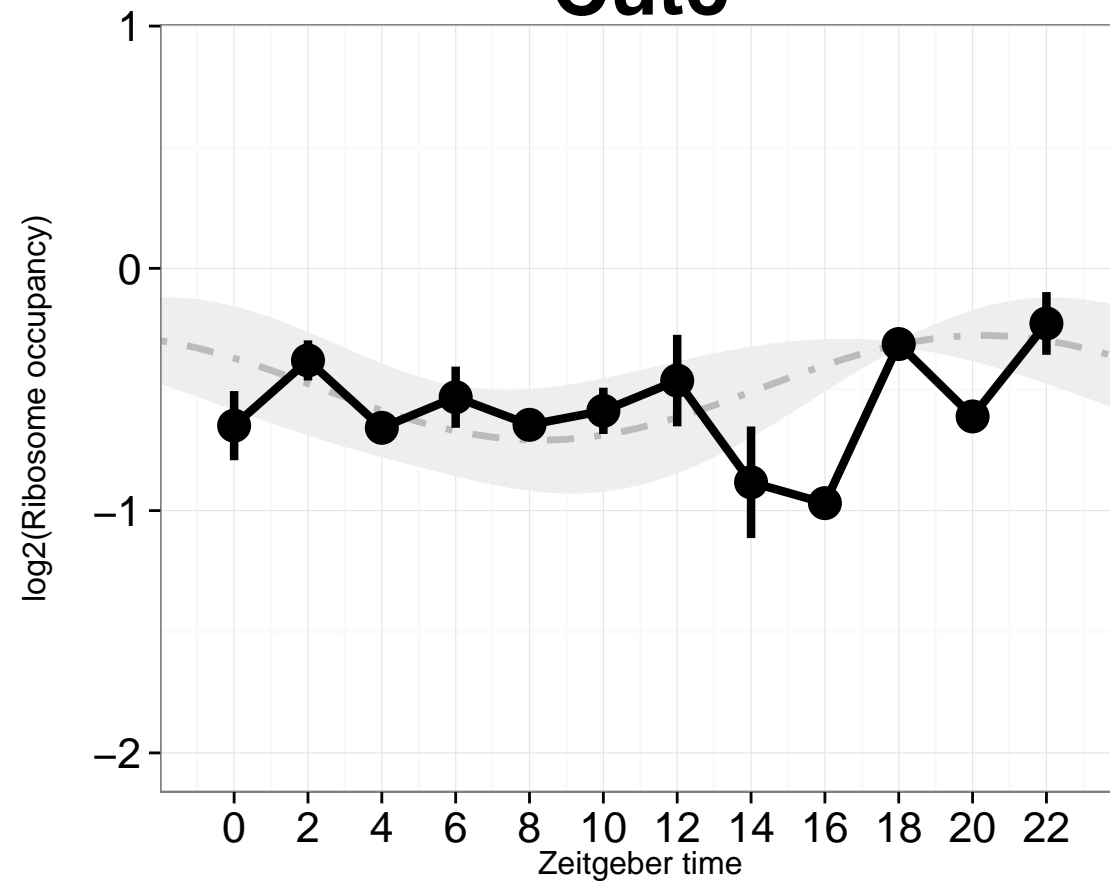

Supplement: SuppDataset_1.zip [file Cutc_set_A.pdf › Supplemental Dataset 1/A-mRNA_nonrhyth_translation_nonrhyth/Cutc_set_A.pdf]

## Cux1

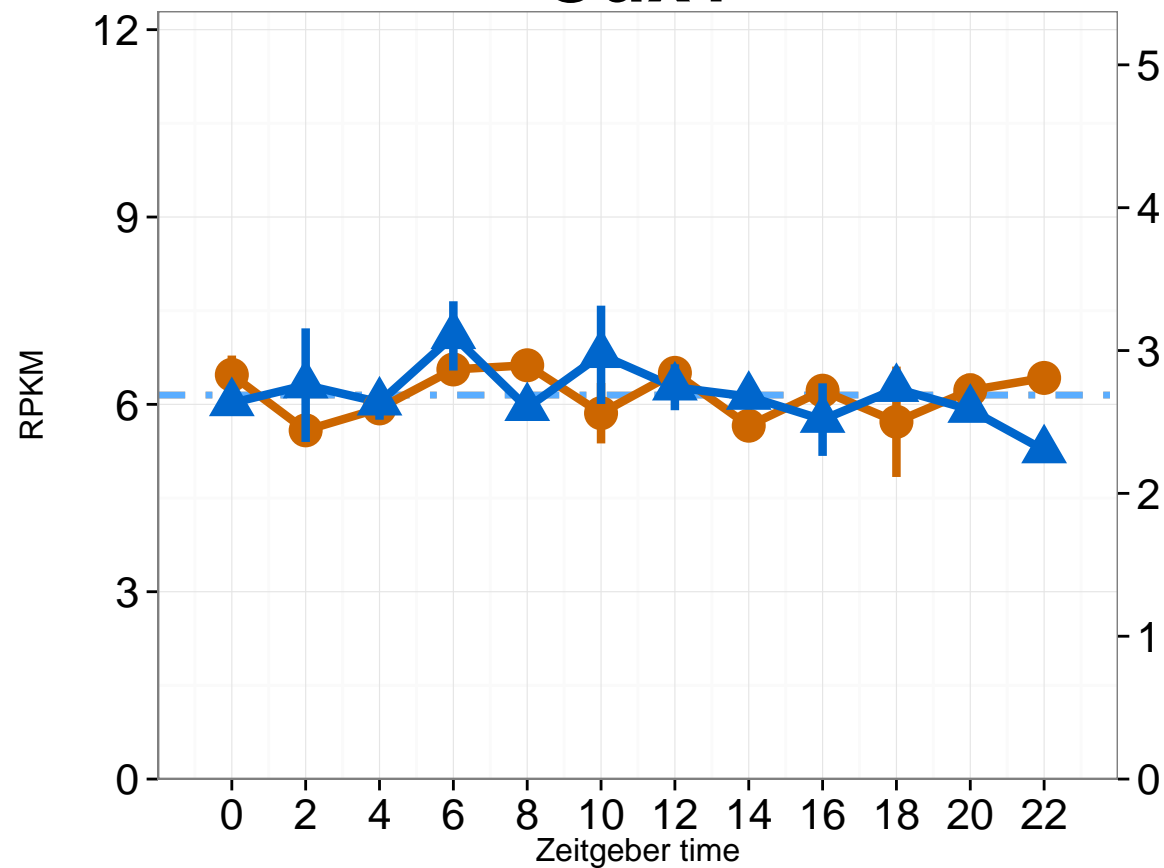

## Cux1

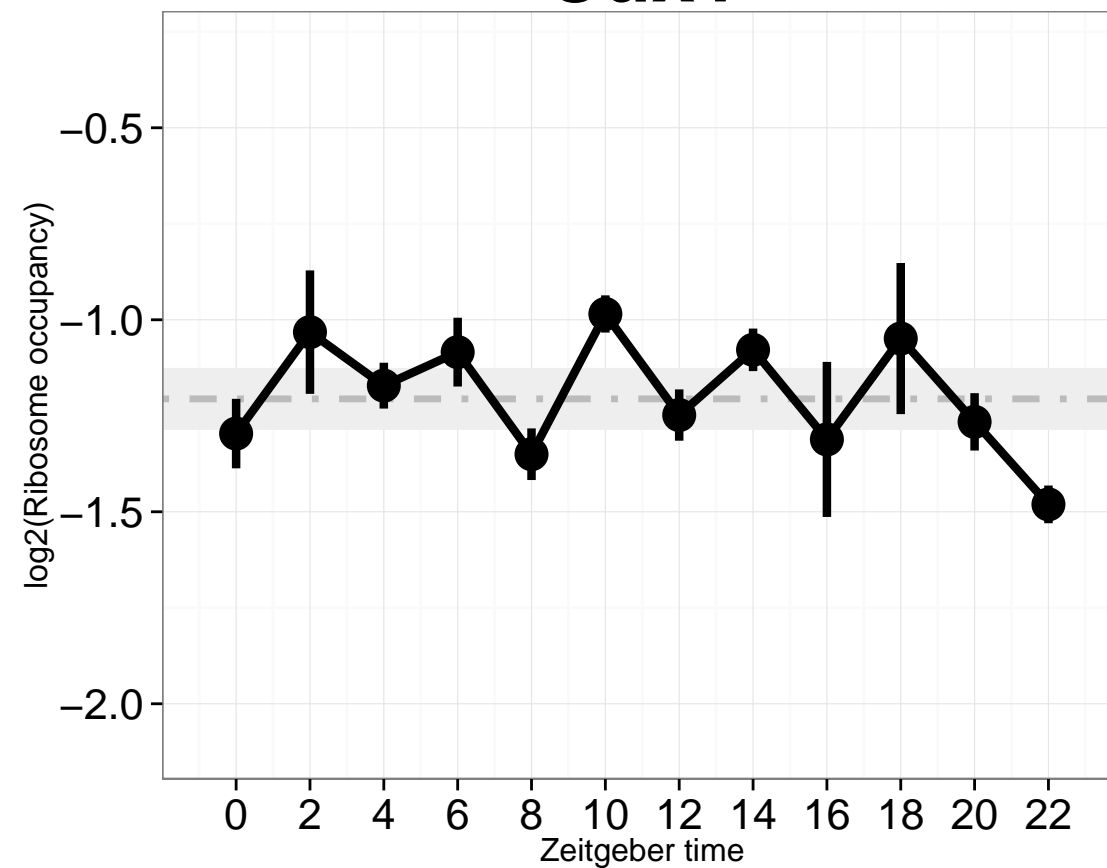

Supplement: SuppDataset_1.zip [file Cux1_set_A.pdf › Supplemental Dataset 1/A-mRNA_nonrhyth_translation_nonrhyth/Cux1_set_A.pdf]

## Cwc15

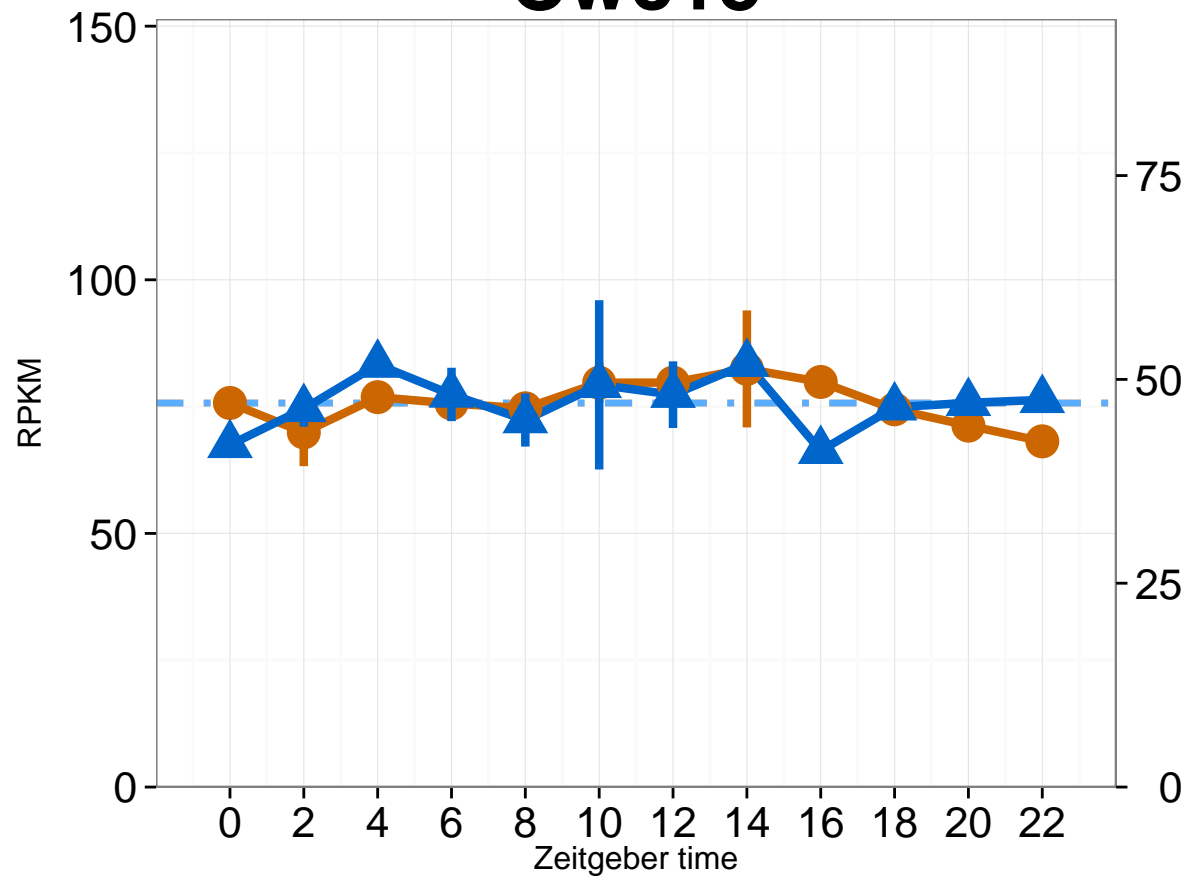

## Cwc15

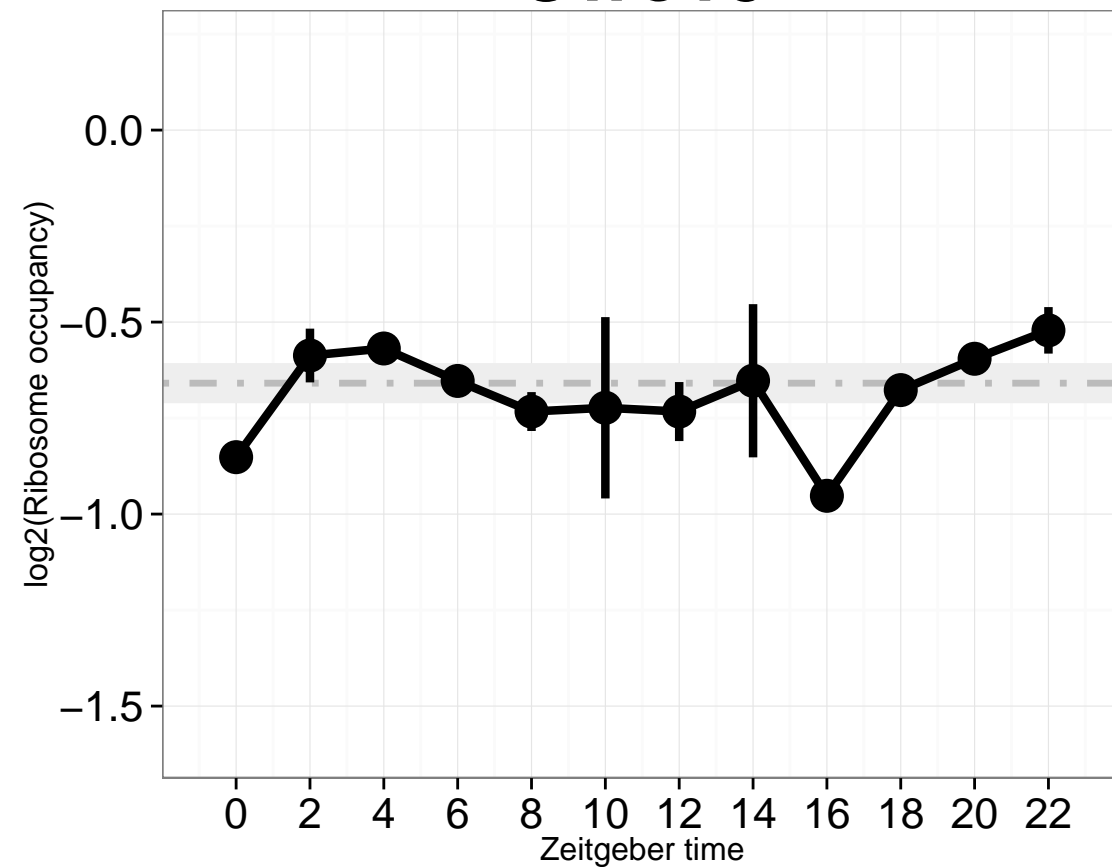

Supplement: SuppDataset_1.zip [file Cwc15_set_A.pdf › Supplemental Dataset 1/A-mRNA_nonrhyth_translation_nonrhyth/Cwc15_set_A.pdf]

# Cwc22

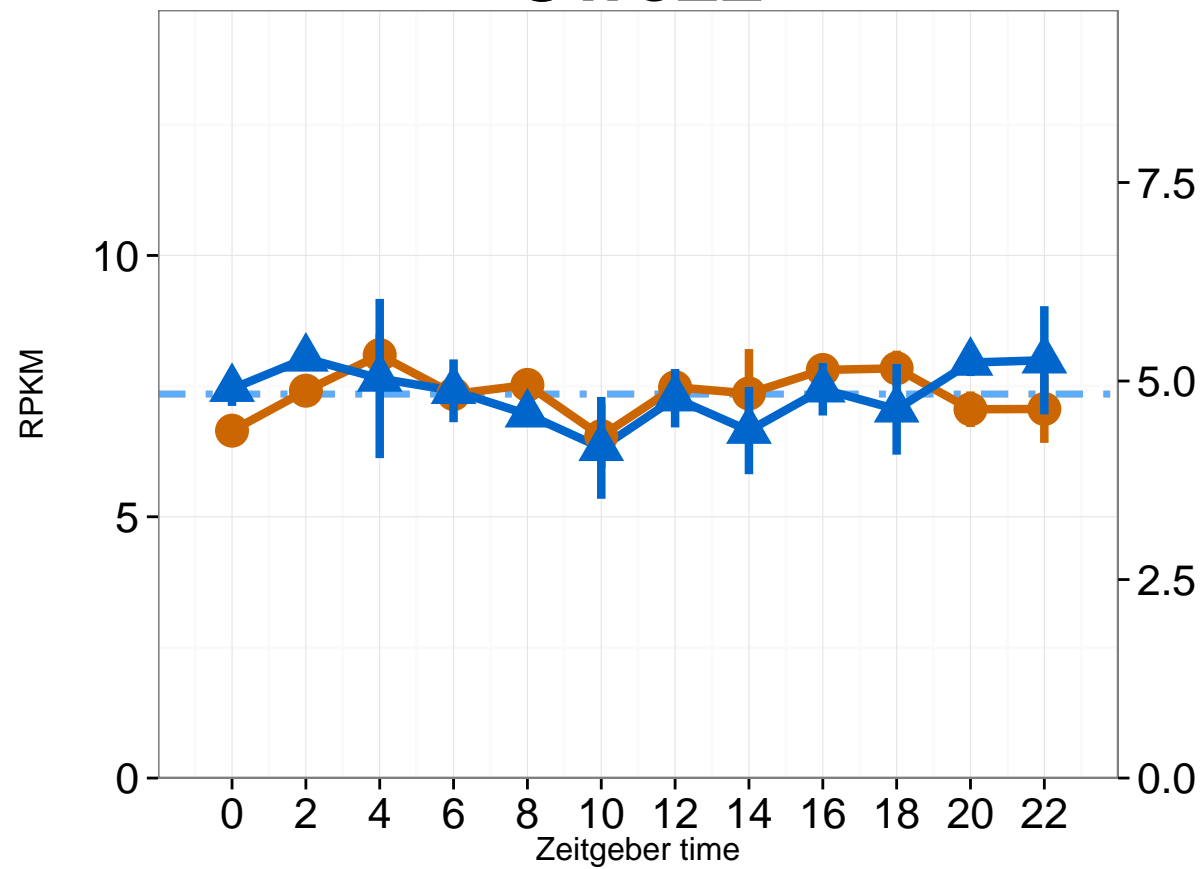

# Cwc22

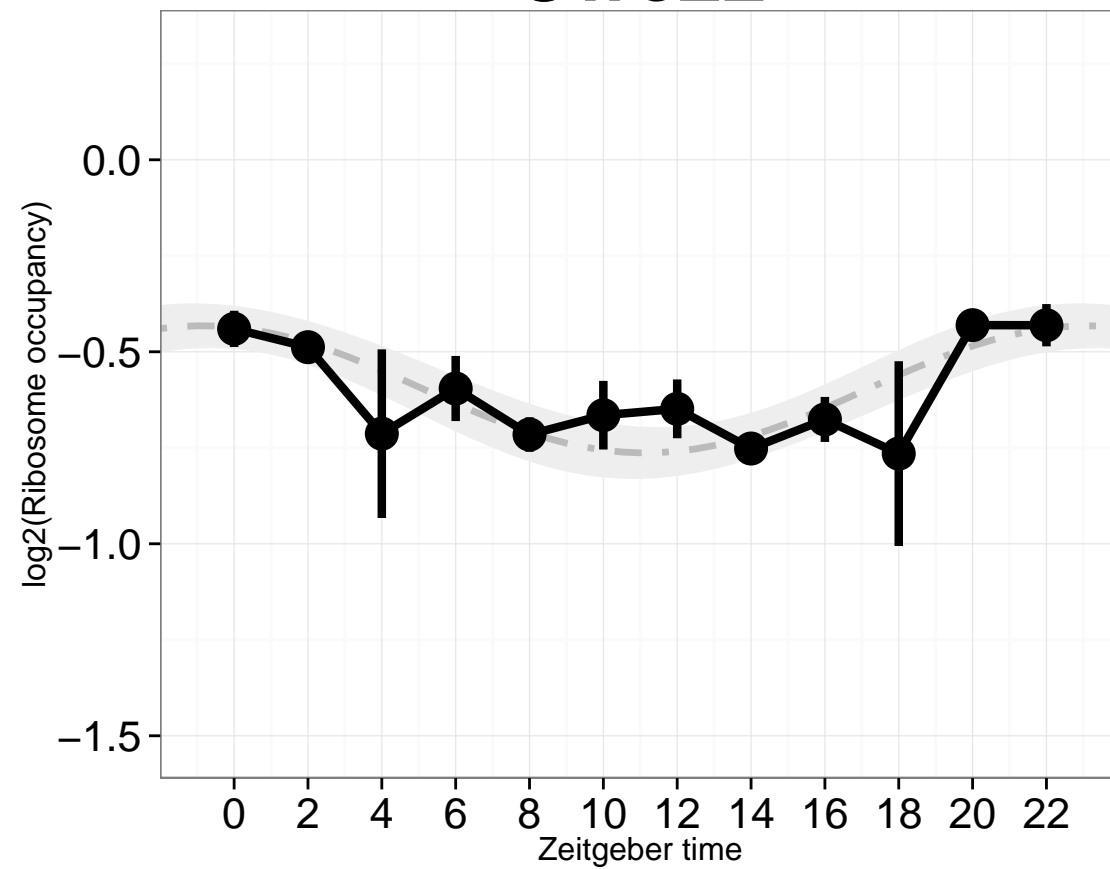

Supplement: SuppDataset_1.zip [file Cwc22_set_A.pdf › Supplemental Dataset 1/A-mRNA_nonrhyth_translation_nonrhyth/Cwc22_set_A.pdf]

# Cwc25

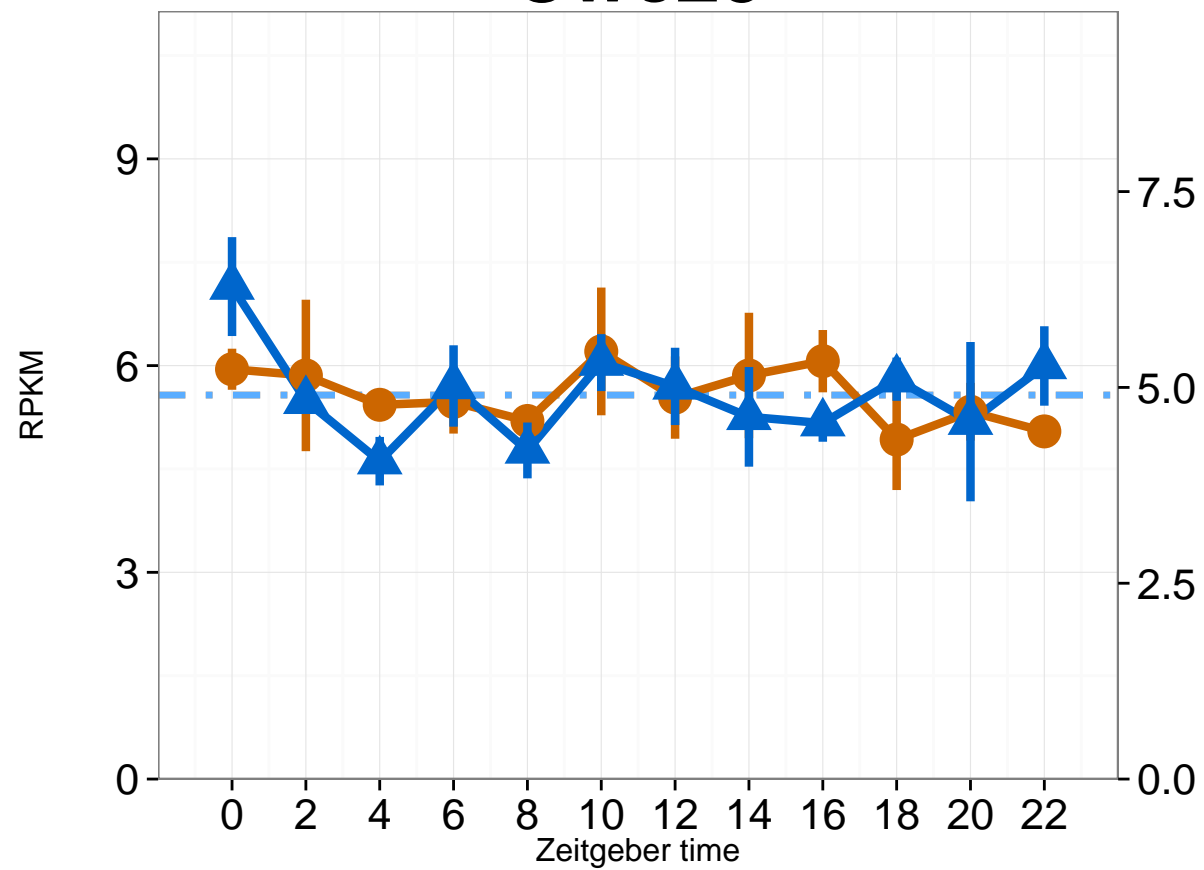

# Cwc25

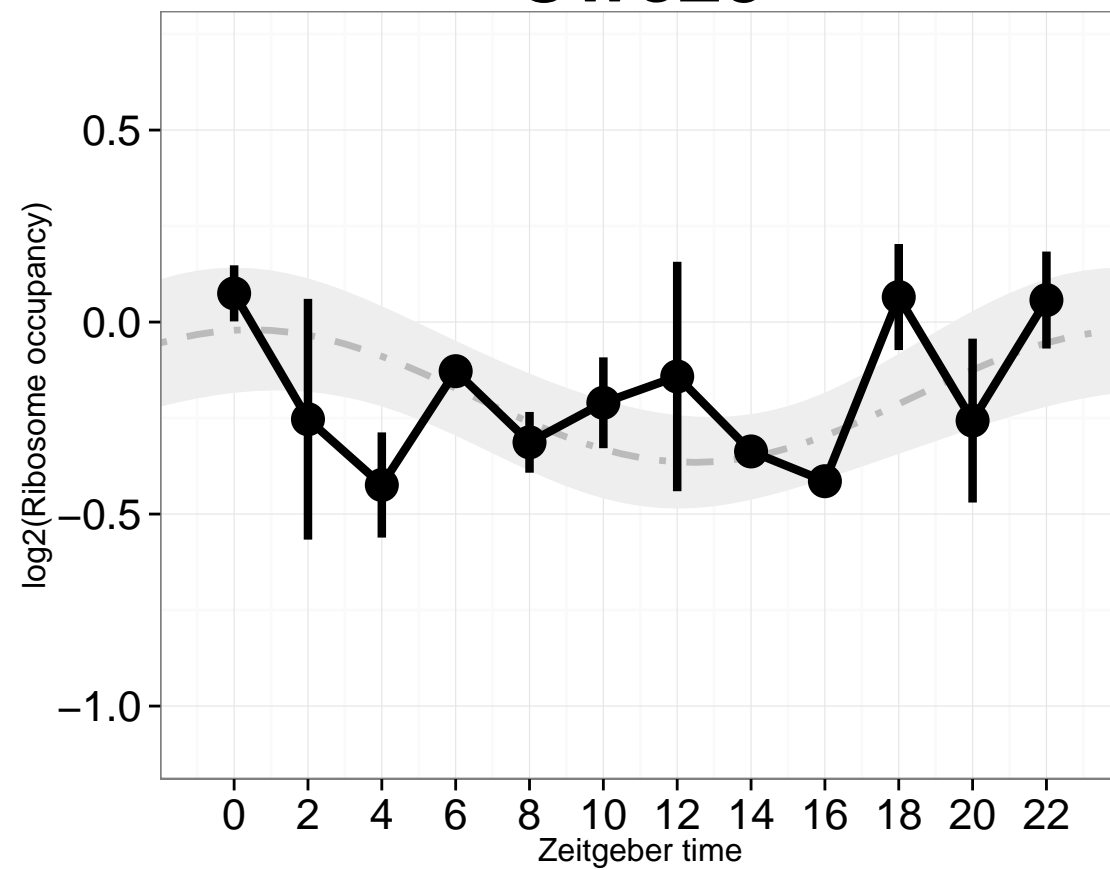

Supplement: SuppDataset_1.zip [file Cwc25_set_A.pdf › Supplemental Dataset 1/A-mRNA_nonrhyth_translation_nonrhyth/Cwc25_set_A.pdf]

# Cwf19l1

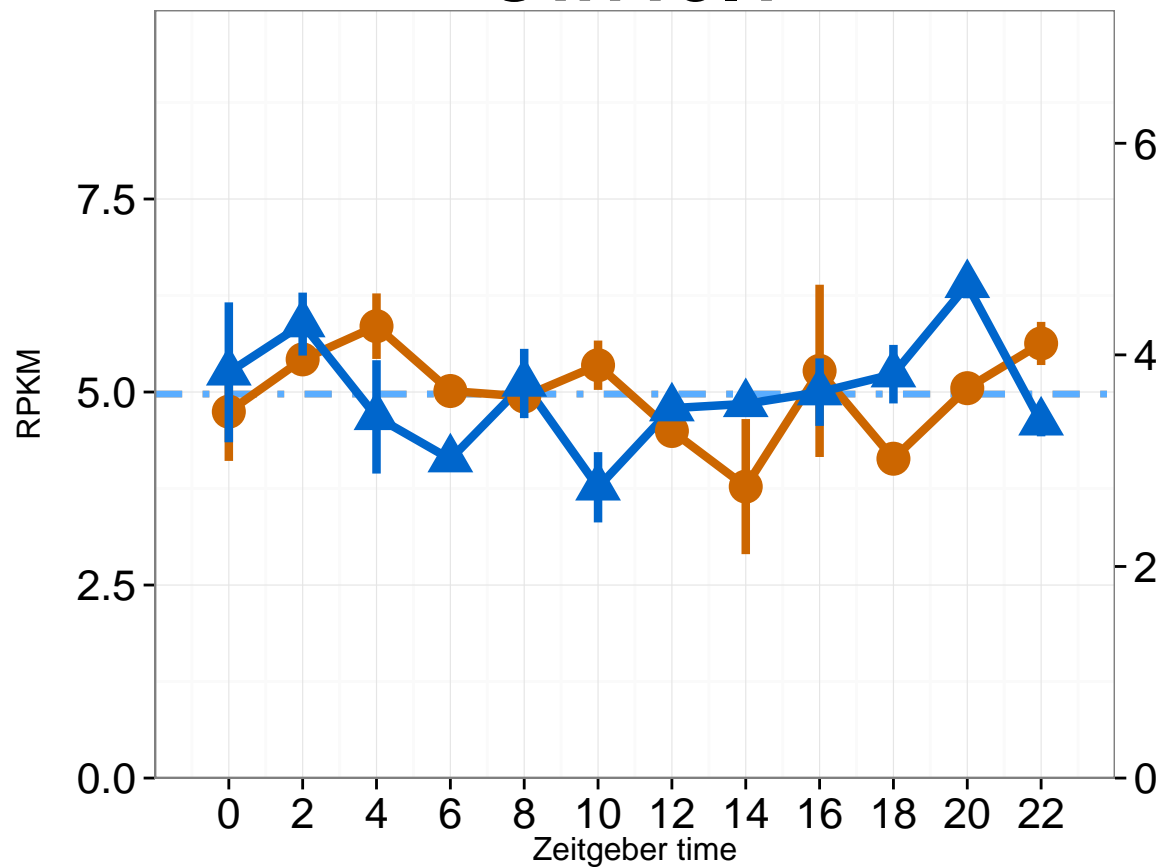

# Cwf19l1

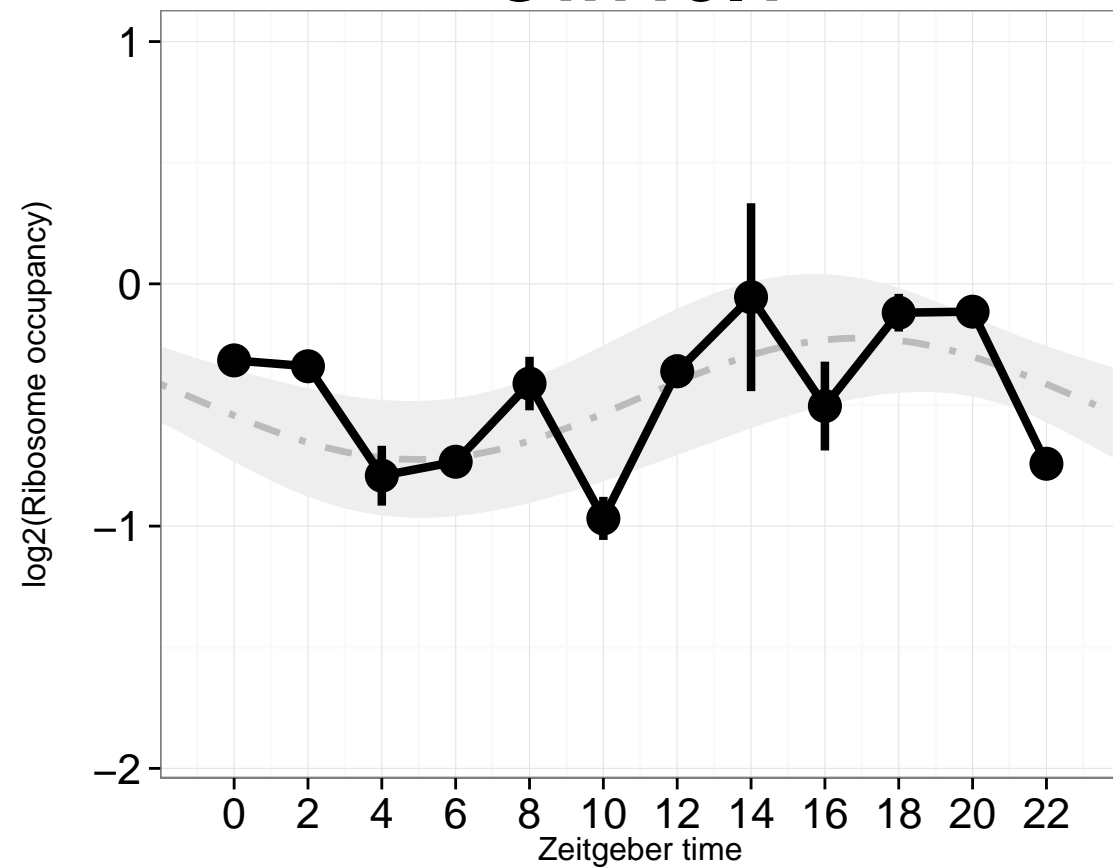

Supplement: SuppDataset_1.zip [file Cwf19l1_set_A.pdf › Supplemental Dataset 1/A-mRNA_nonrhyth_translation_nonrhyth/Cwf19l1_set_A.pdf]

# Cwf19l2

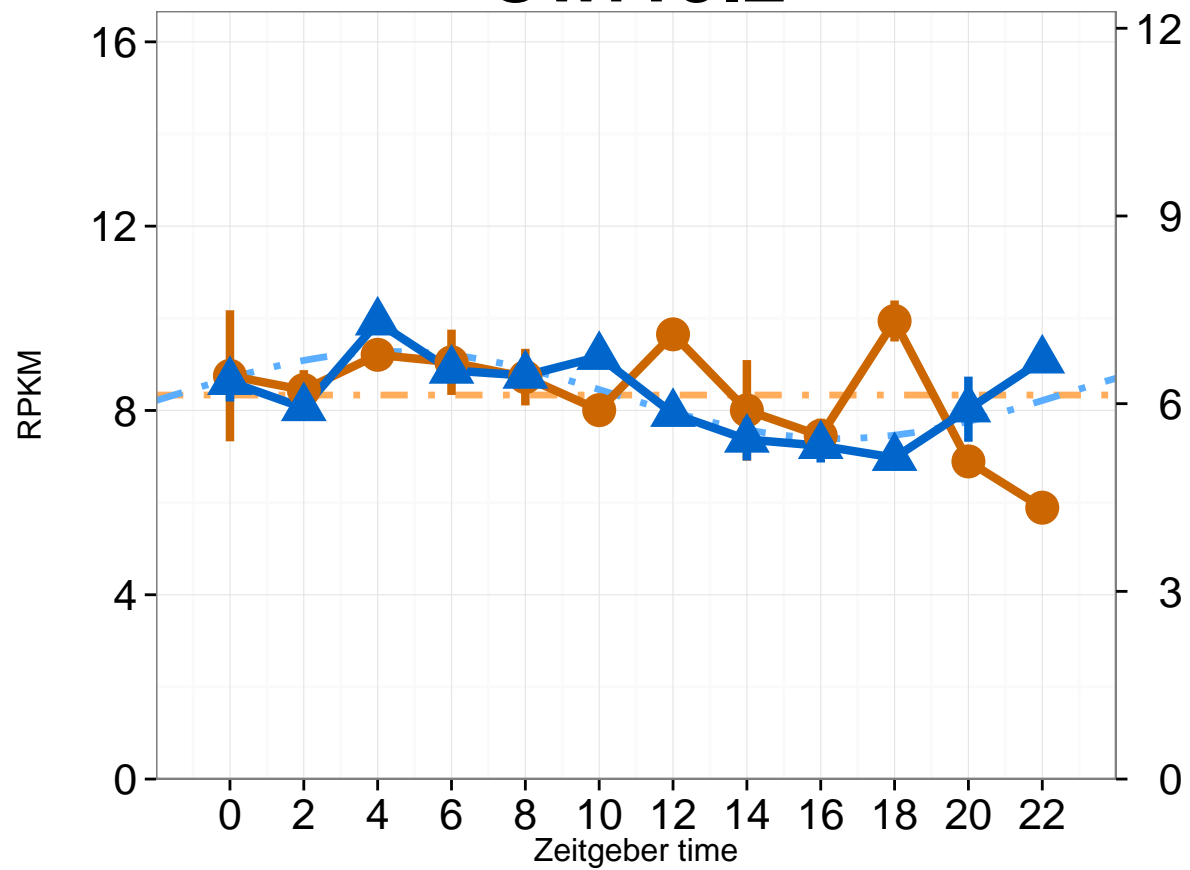

# Cwf19l2

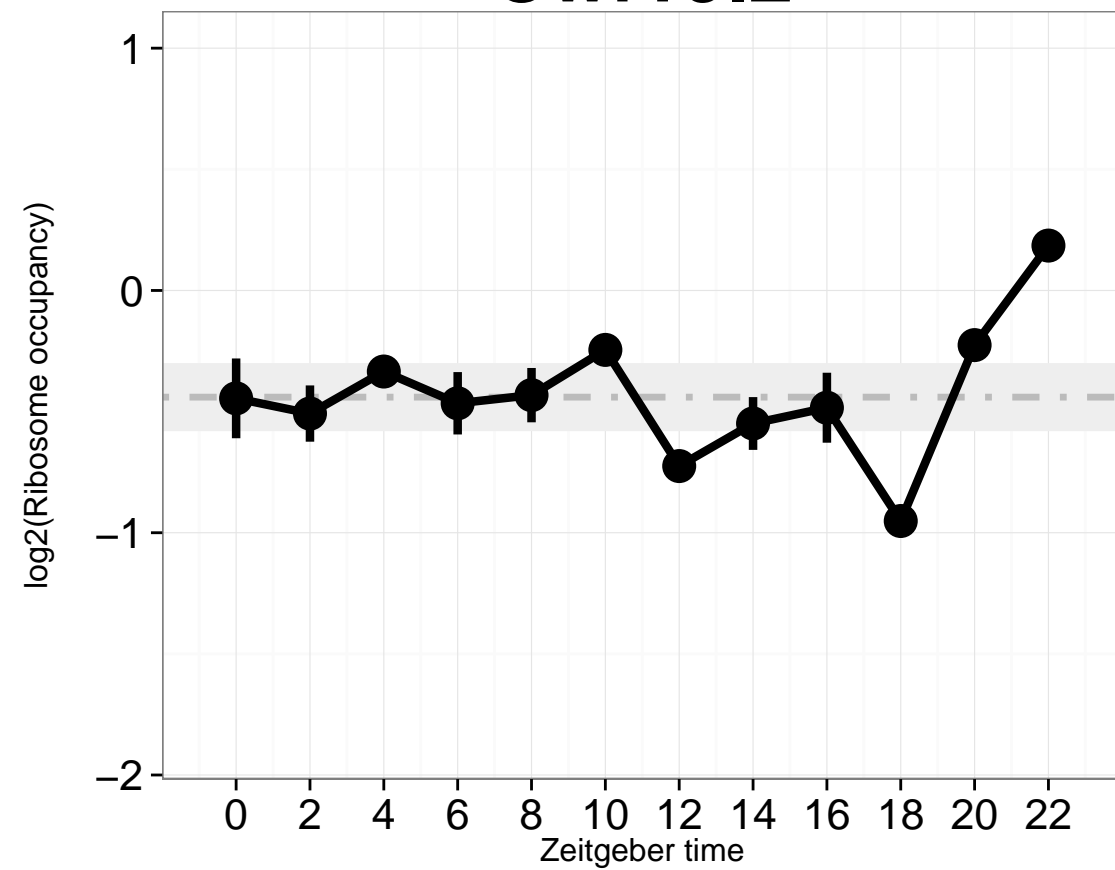

Supplement: SuppDataset_1.zip [file Cwf19l2_set_A.pdf › Supplemental Dataset 1/A-mRNA_nonrhyth_translation_nonrhyth/Cwf19l2_set_A.pdf]

# Cx3cl1 TR

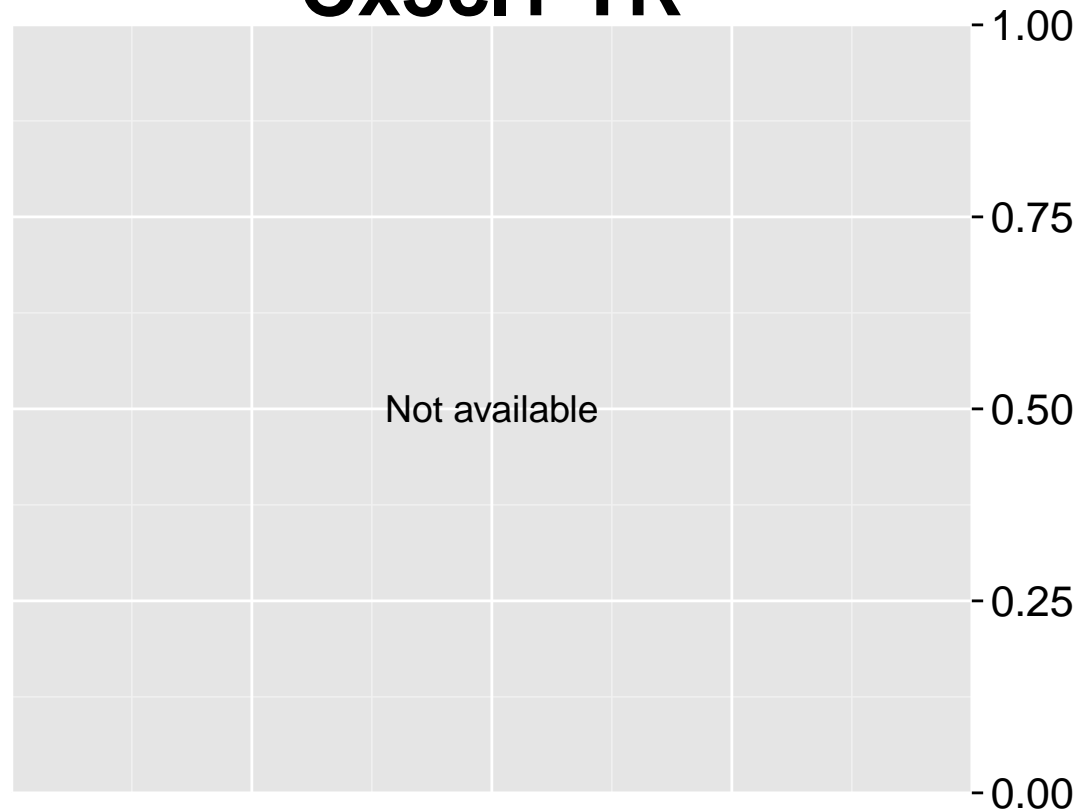

# Cx3cl1 log2(Ribosome occupancy)

Supplement: SuppDataset_1.zip [file Cx3cl1_set_A.pdf › Supplemental Dataset 1/A-mRNA_nonrhyth_translation_nonrhyth/Cx3cl1_set_A.pdf]

**Cx3cr1 TR**

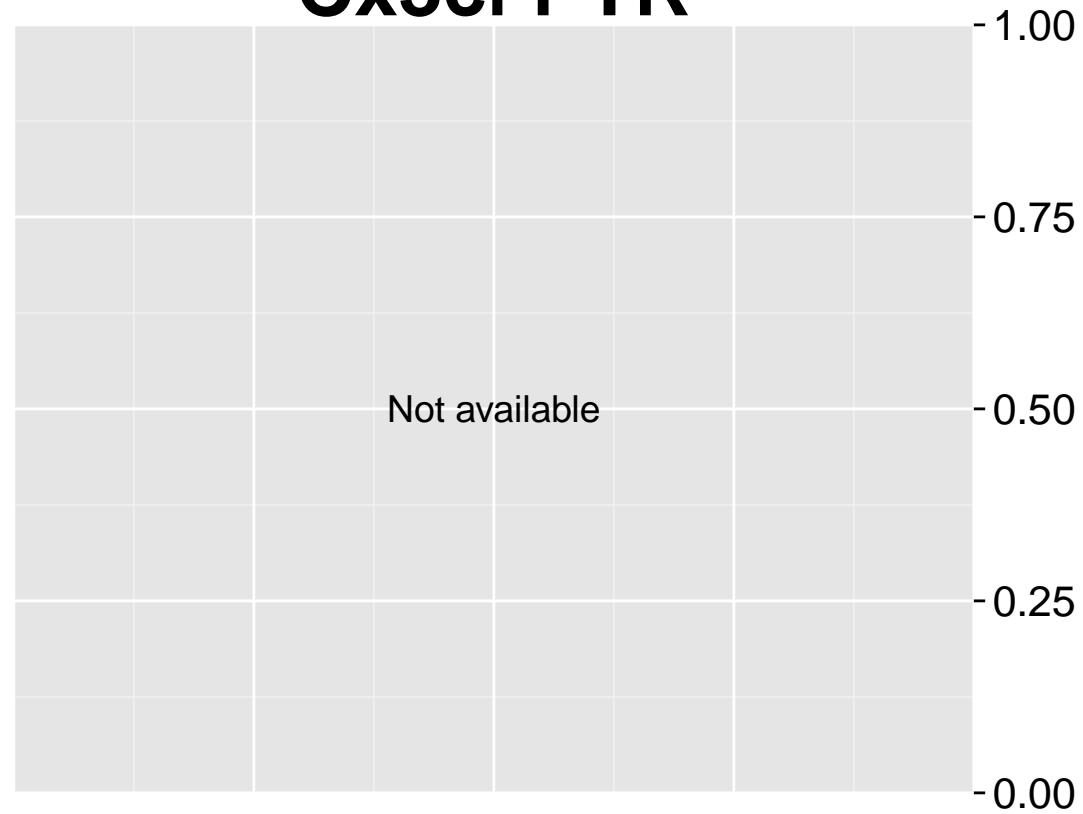

**Cx3cr1 log2(Ribosome occupancy**

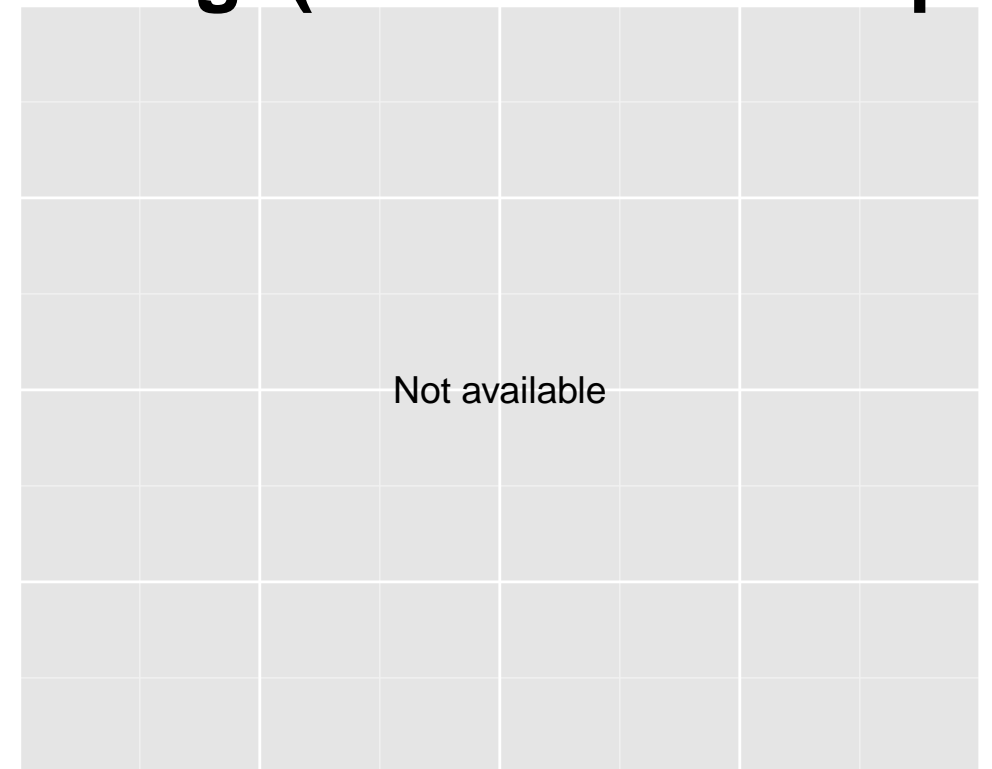

Supplement: SuppDataset_1.zip [file Cx3cr1_set_A.pdf › Supplemental Dataset 1/A-mRNA_nonrhyth_translation_nonrhyth/Cx3cr1_set_A.pdf]

## Cxcl16

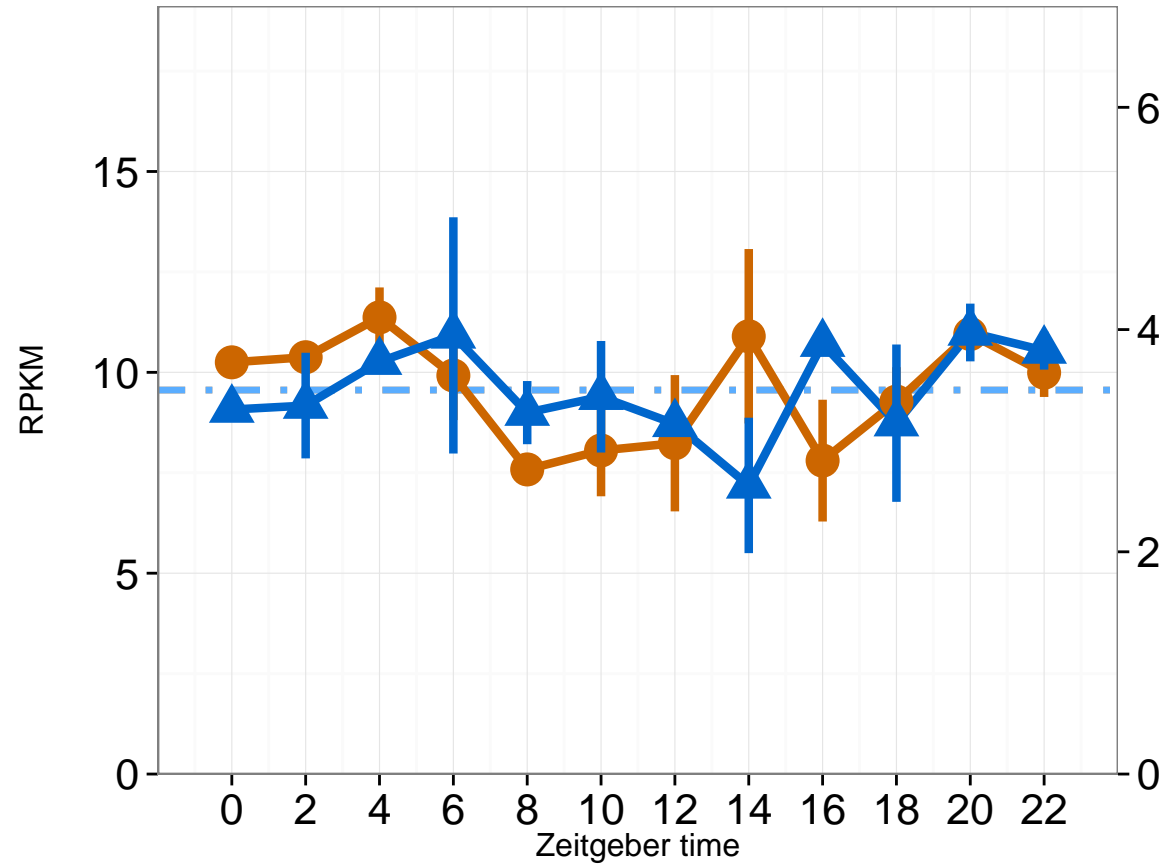

## Cxcl16

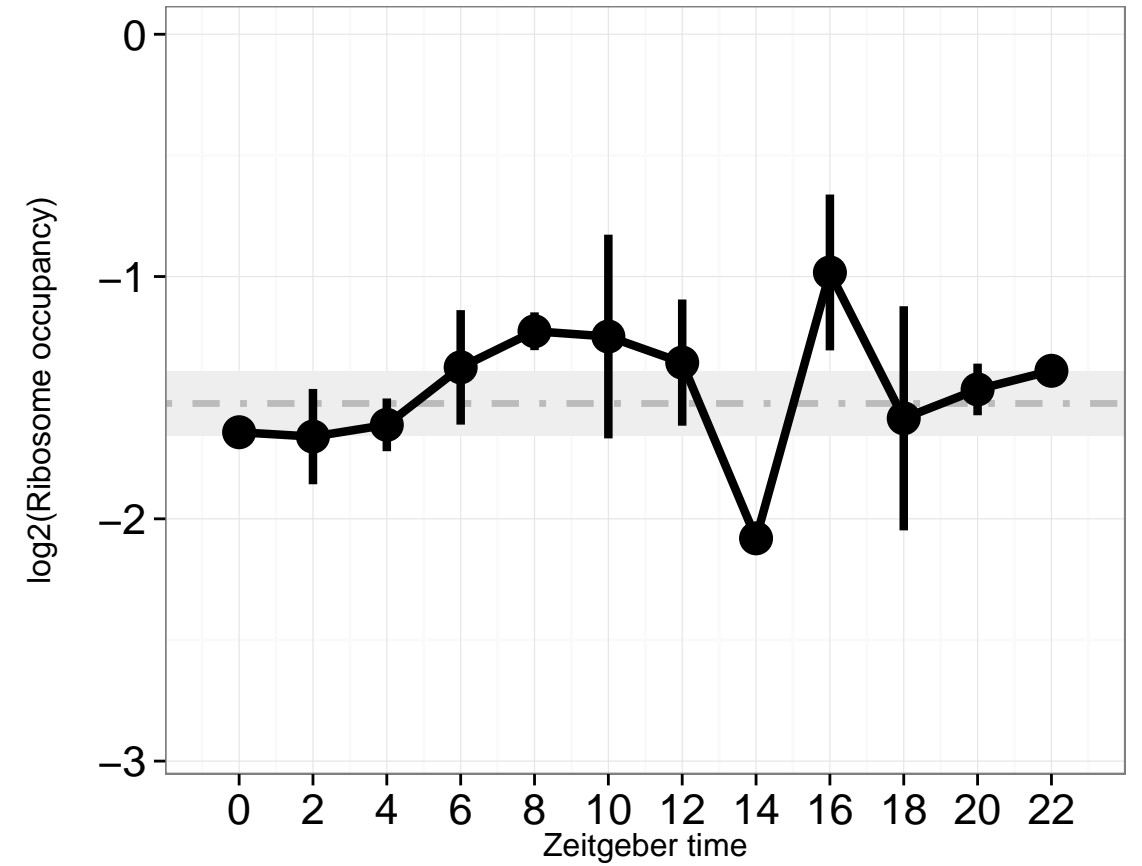

Supplement: SuppDataset_1.zip [file Cxcl16_set_A.pdf › Supplemental Dataset 1/A-mRNA_nonrhyth_translation_nonrhyth/Cxcl16_set_A.pdf]

## Cxcl1

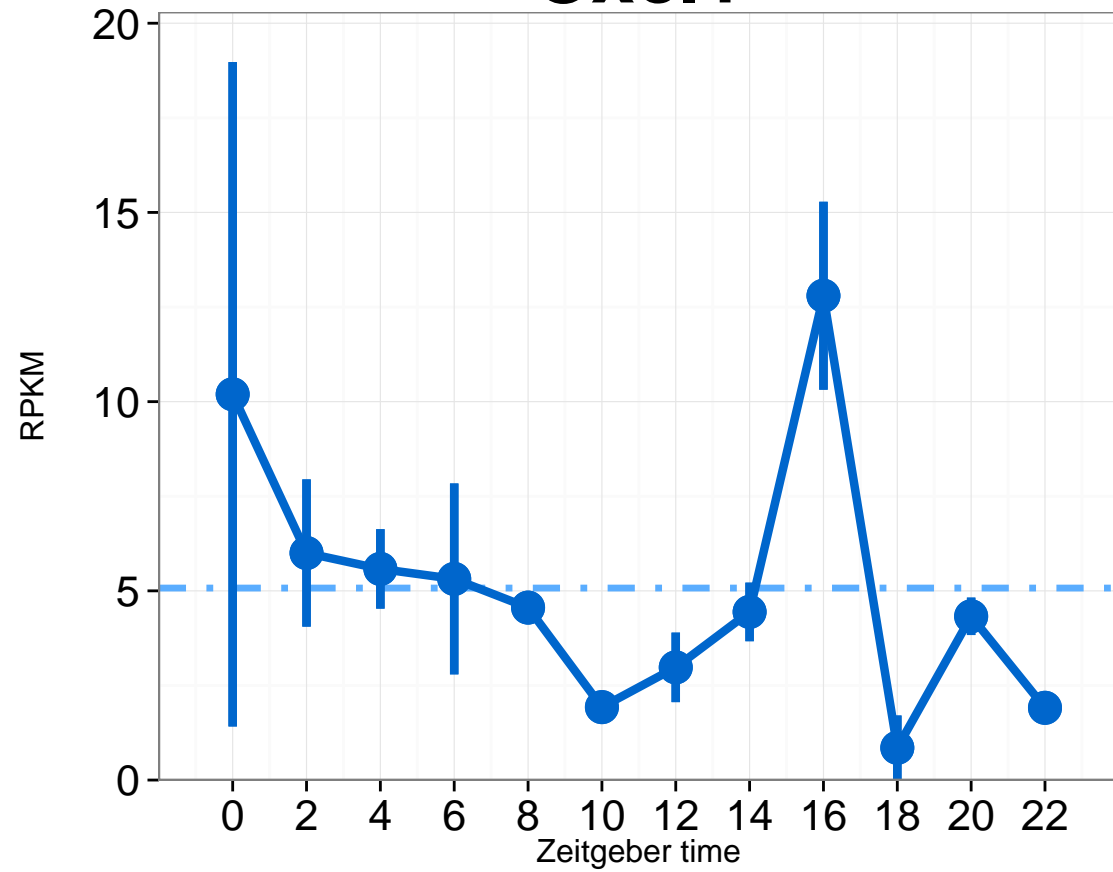

## Cxcl1 log2(Ribosome occupancy)

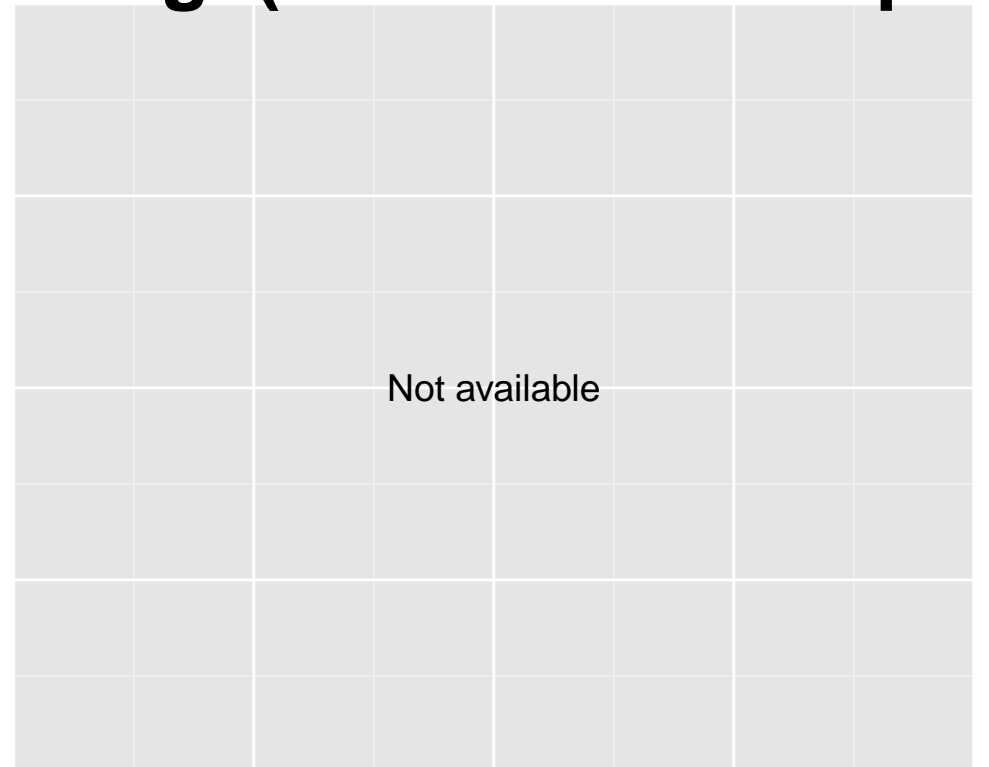

Supplement: SuppDataset_1.zip [file Cxcl1_set_A.pdf › Supplemental Dataset 1/A-mRNA_nonrhyth_translation_nonrhyth/Cxcl1_set_A.pdf]

## Cxcl9

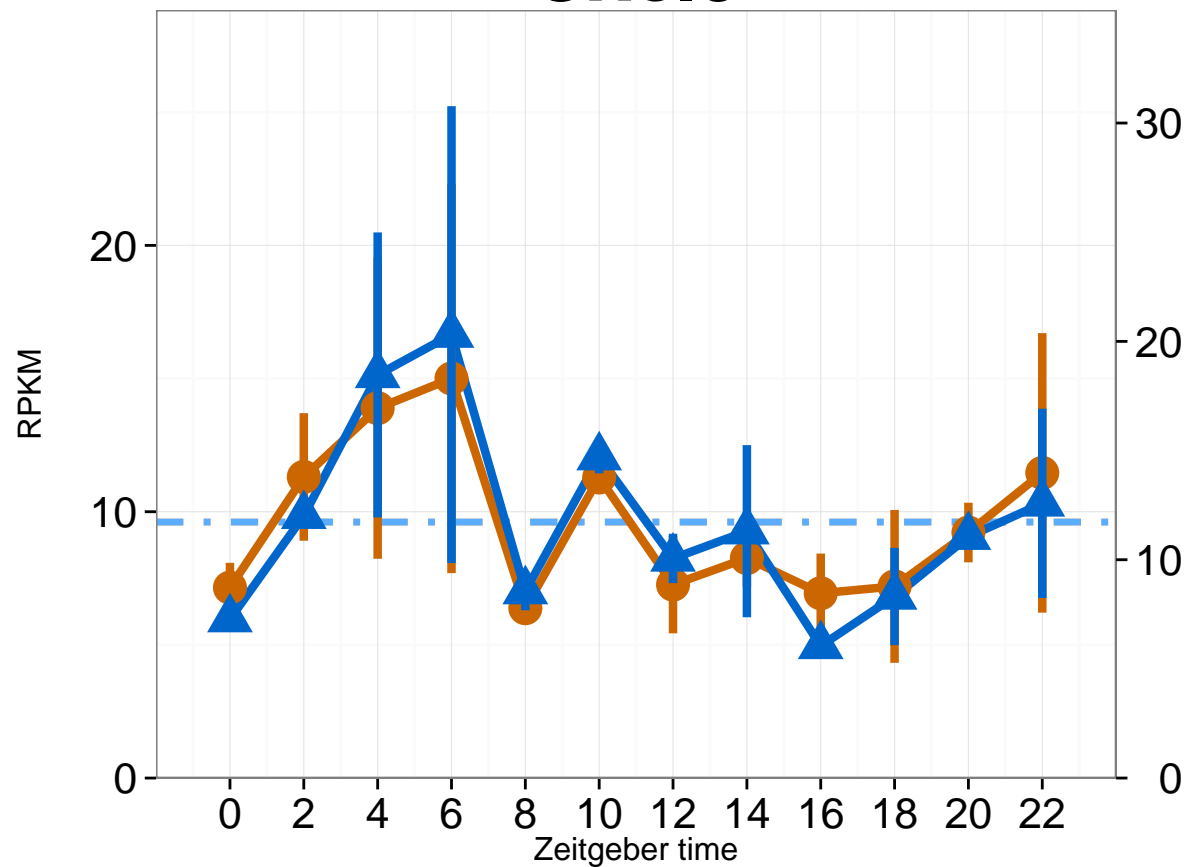

## Cxcl9

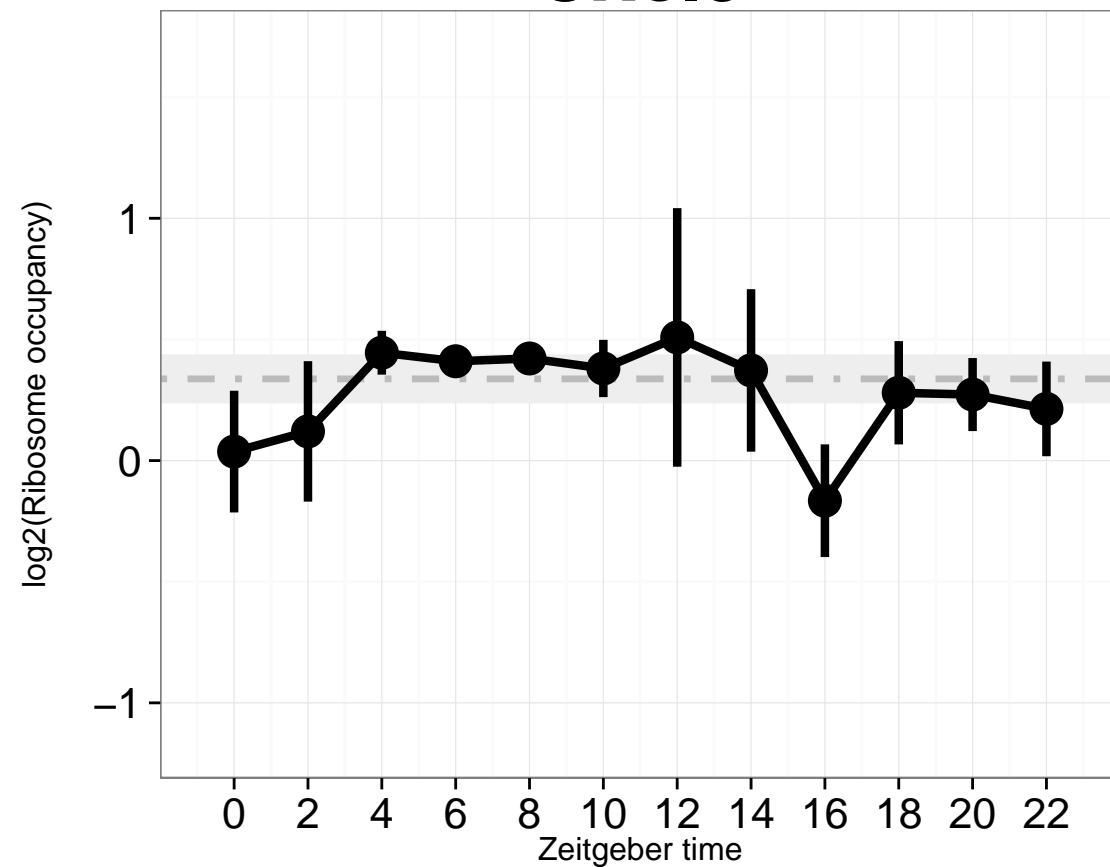

Supplement: SuppDataset_1.zip [file Cxcl9_set_A.pdf › Supplemental Dataset 1/A-mRNA_nonrhyth_translation_nonrhyth/Cxcl9_set_A.pdf]

## Cxcr4 TR

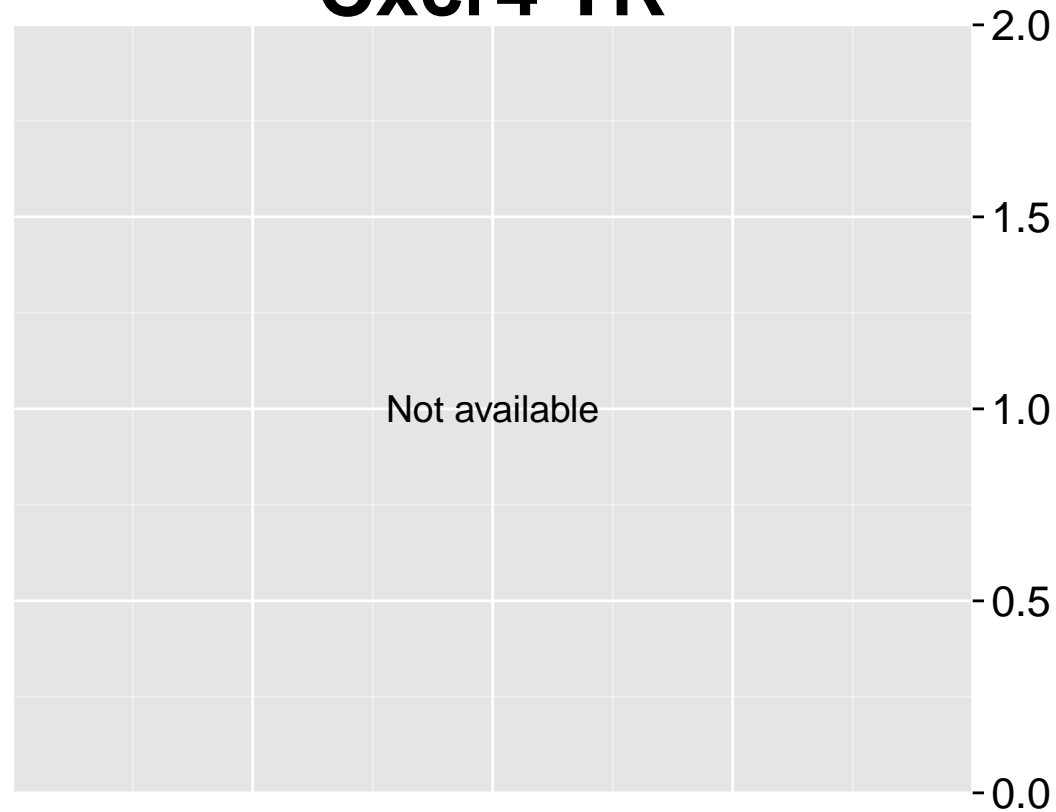

## Cxcr4 log2(Ribosome occupancy

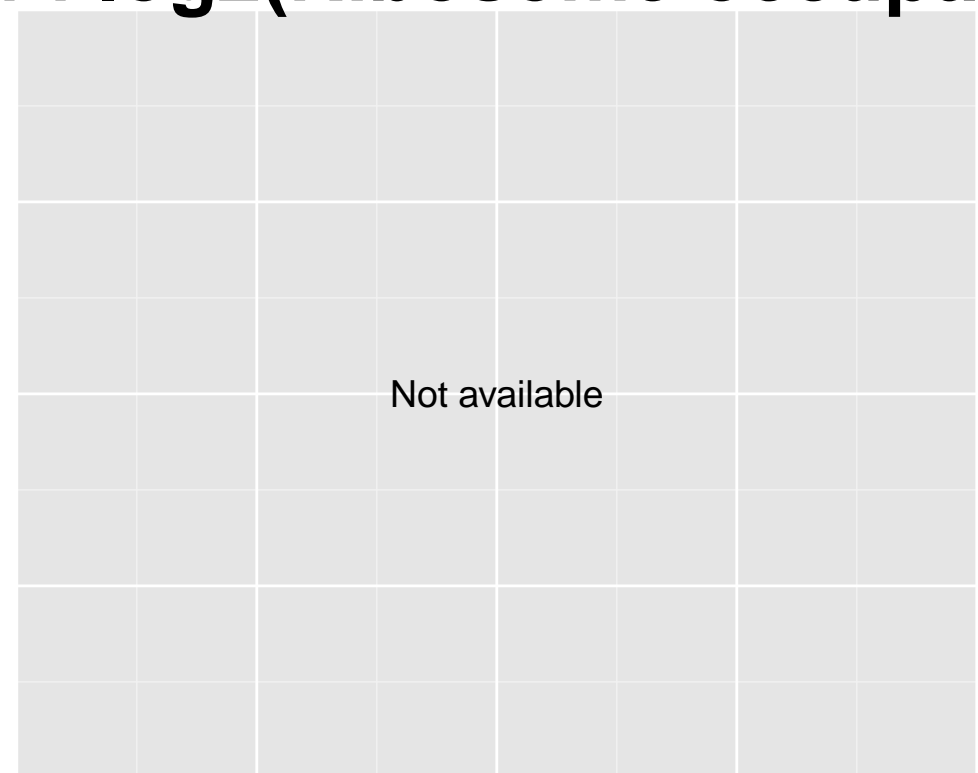

Supplement: SuppDataset_1.zip [file Cxcr4_set_A.pdf › Supplemental Dataset 1/A-mRNA_nonrhyth_translation_nonrhyth/Cxcr4_set_A.pdf]

## Cxcr6

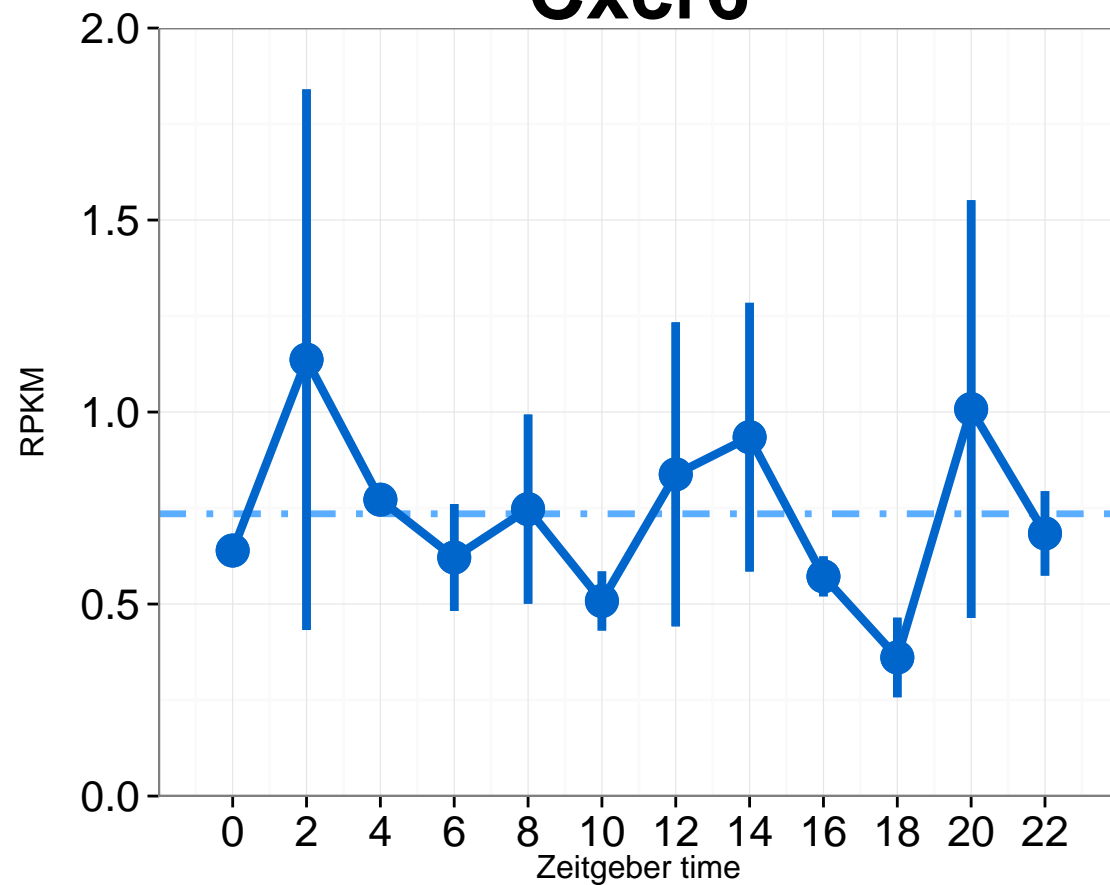

## Cxcr6 log2(Ribosome occupancy

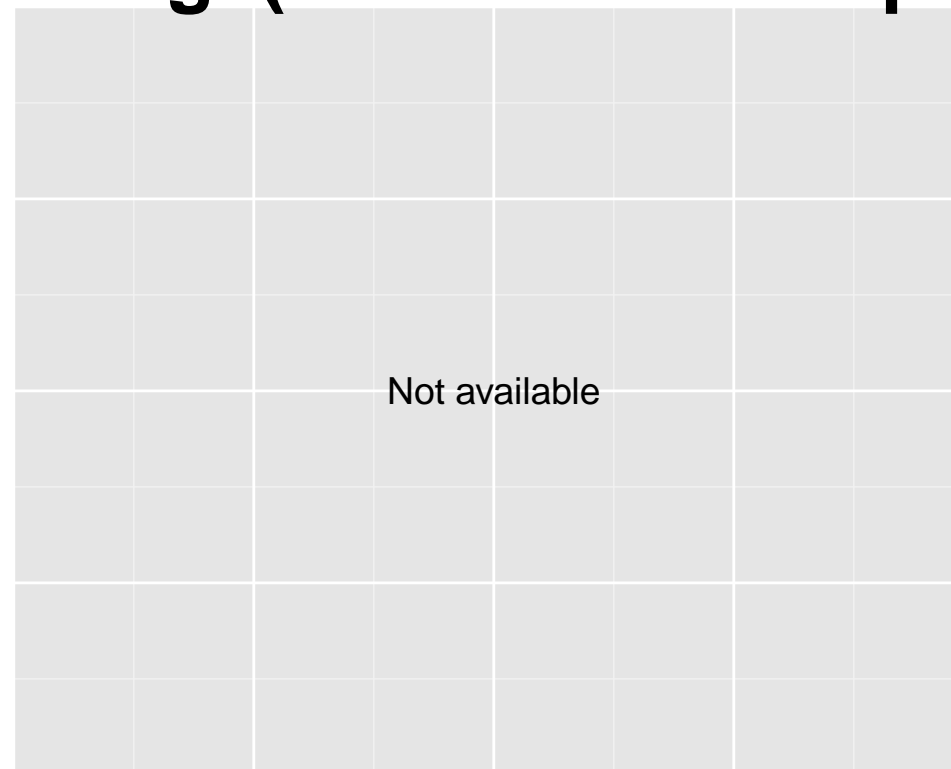

Supplement: SuppDataset_1.zip [file Cxcr6_set_A.pdf › Supplemental Dataset 1/A-mRNA_nonrhyth_translation_nonrhyth/Cxcr6_set_A.pdf]

## Cxx1a

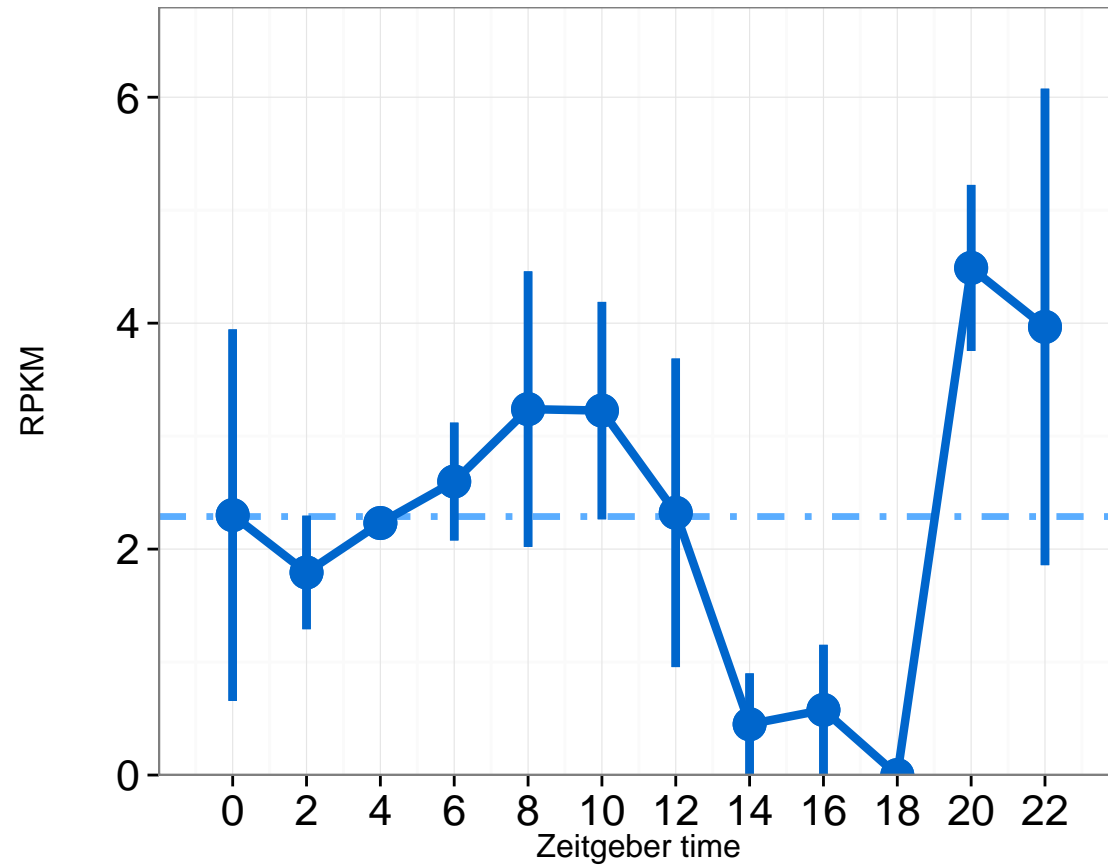

## Cxx1a log2(Ribosome occupancy

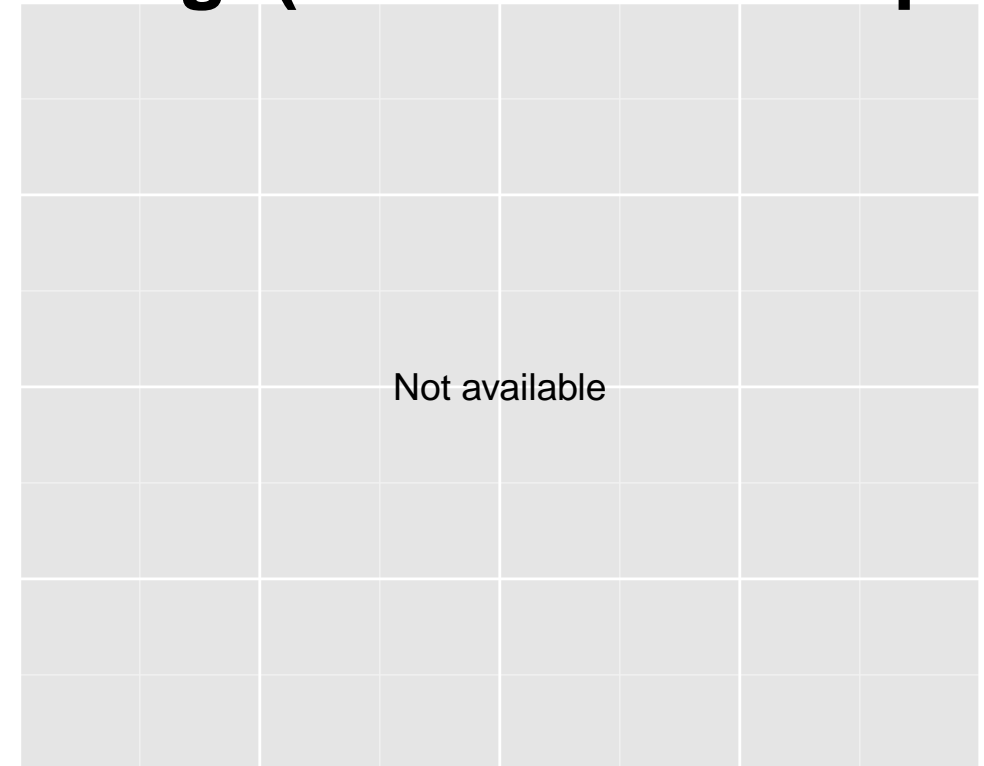

Supplement: SuppDataset_1.zip [file Cxx1a_set_A.pdf › Supplemental Dataset 1/A-mRNA_nonrhyth_translation_nonrhyth/Cxx1a_set_A.pdf]

## Cxx1b

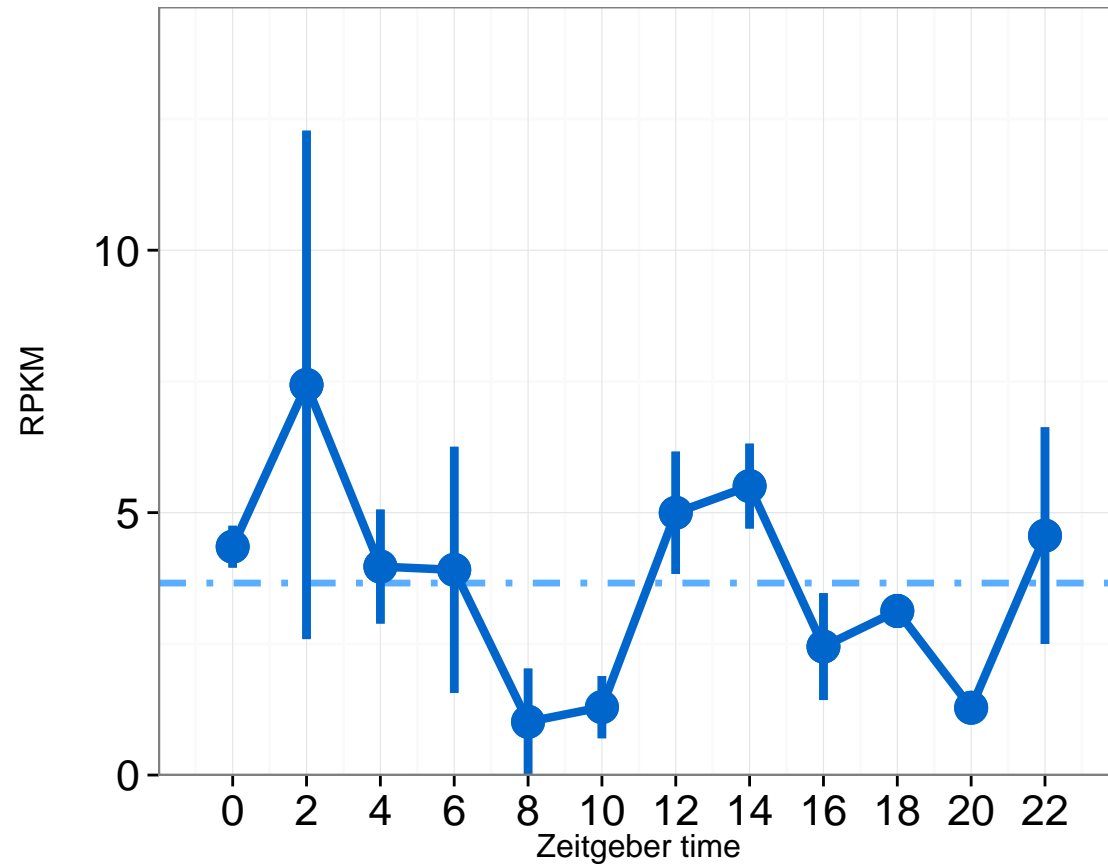

## Cxx1b log2(Ribosome occupancy

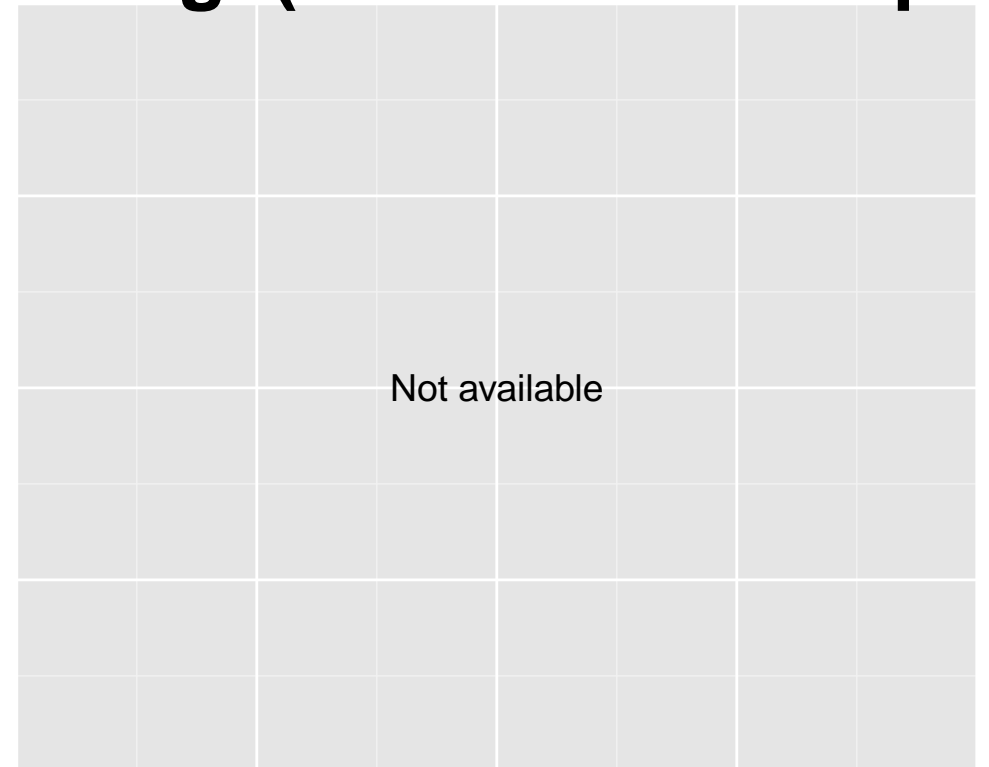

Supplement: SuppDataset_1.zip [file Cxx1b_set_A.pdf › Supplemental Dataset 1/A-mRNA_nonrhyth_translation_nonrhyth/Cxx1b_set_A.pdf]

## Cxxc1

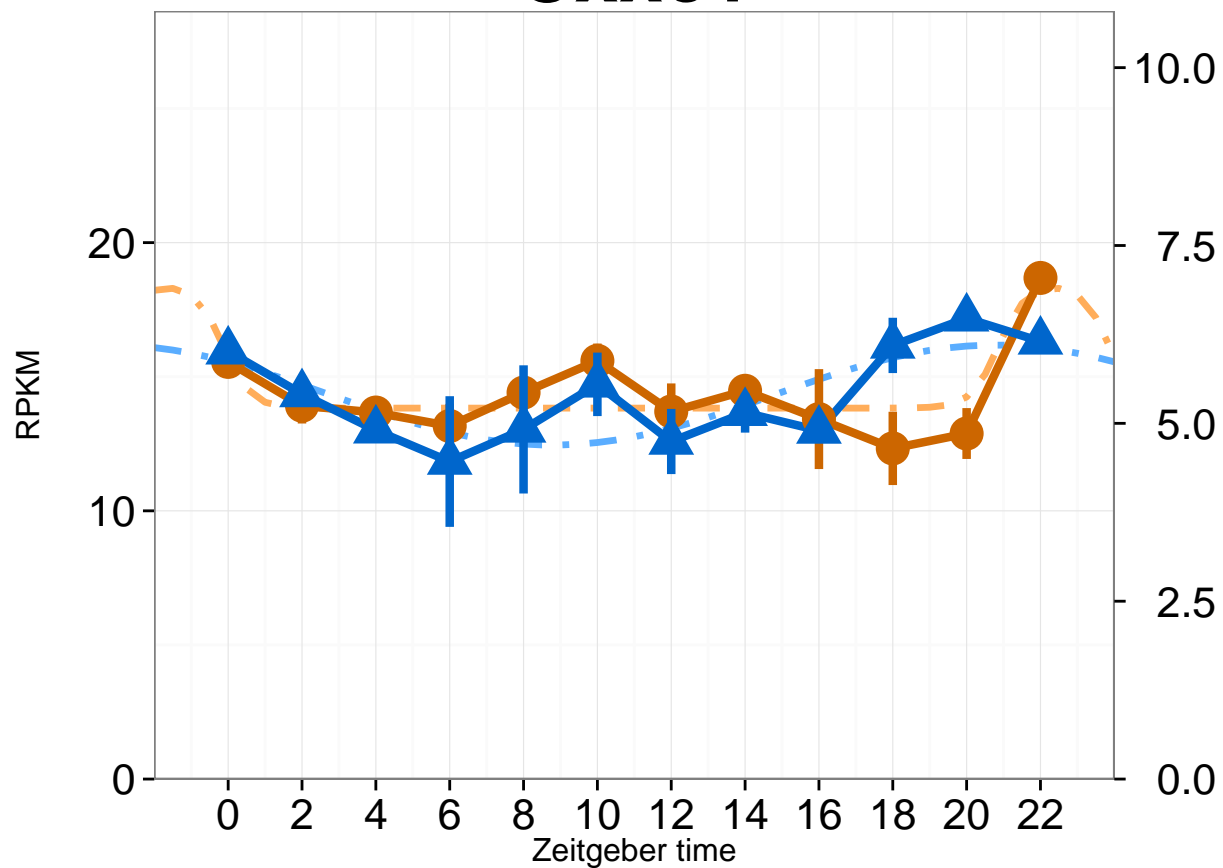

## Cxxc1

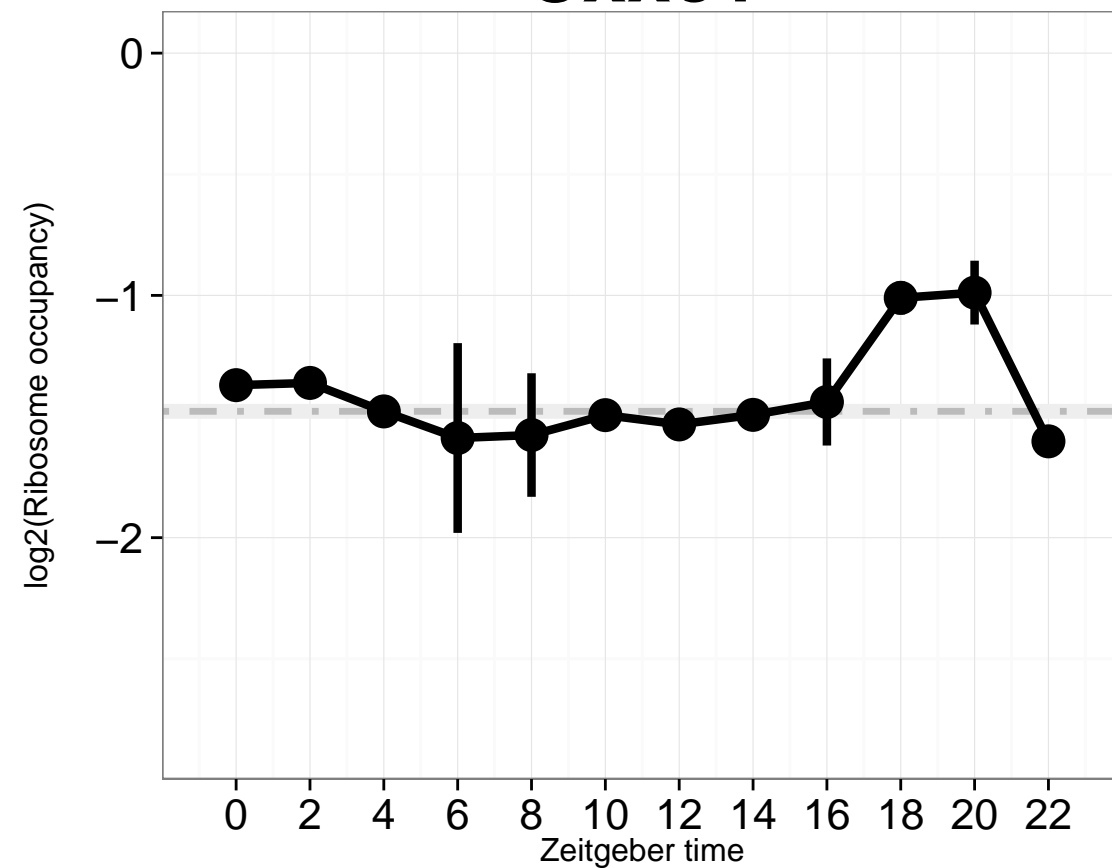

Supplement: SuppDataset_1.zip [file Cxxc1_set_A.pdf › Supplemental Dataset 1/A-mRNA_nonrhyth_translation_nonrhyth/Cxxc1_set_A.pdf]

# Cyb561d2

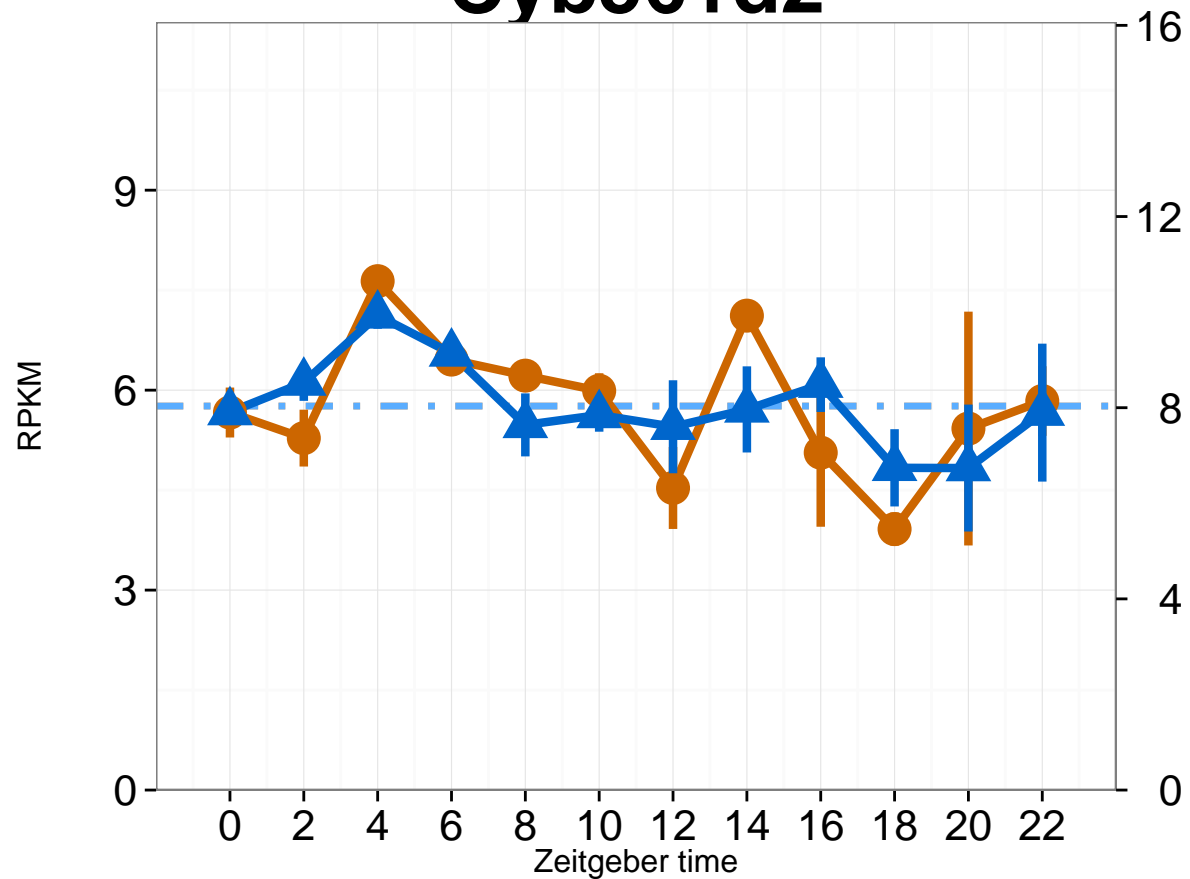

# Cyb561d2

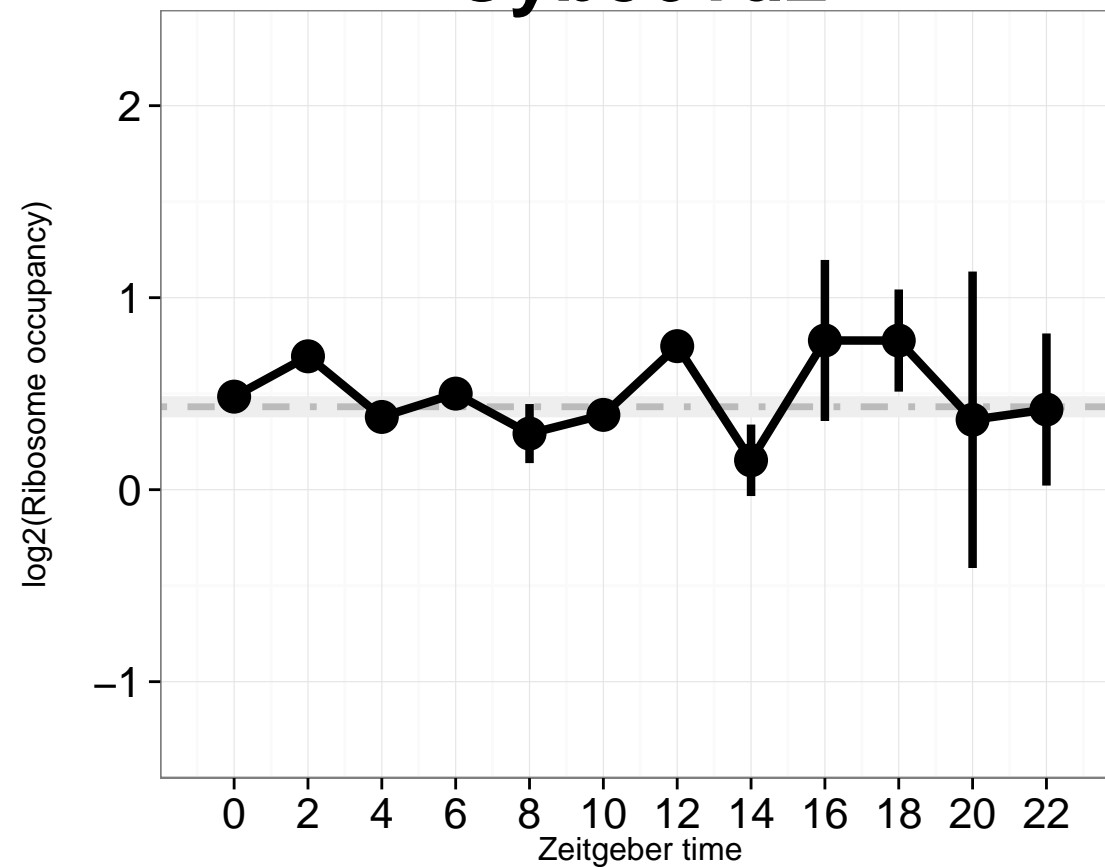

Supplement: SuppDataset_1.zip [file Cyb561d2_set_A.pdf › Supplemental Dataset 1/A-mRNA_nonrhyth_translation_nonrhyth/Cyb561d2_set_A.pdf]

# Cyb5

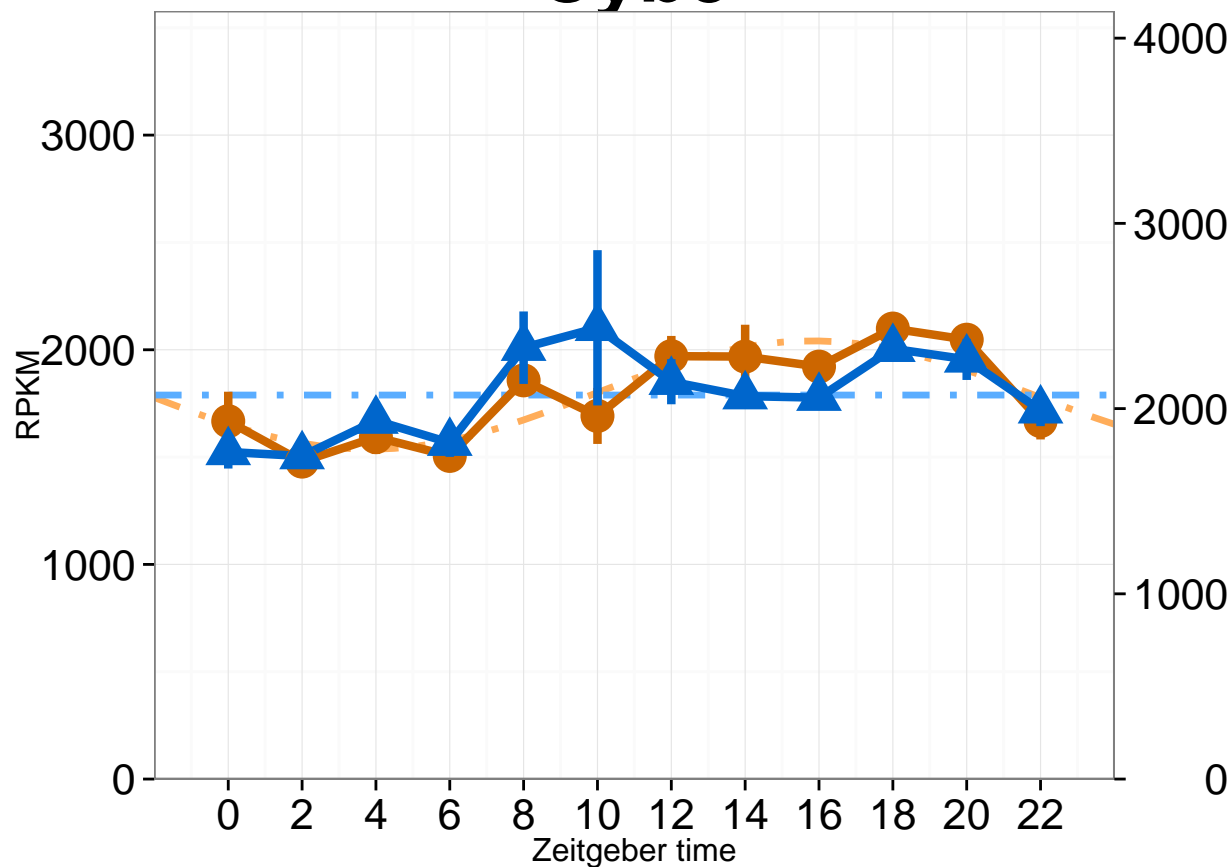

# Cyb5

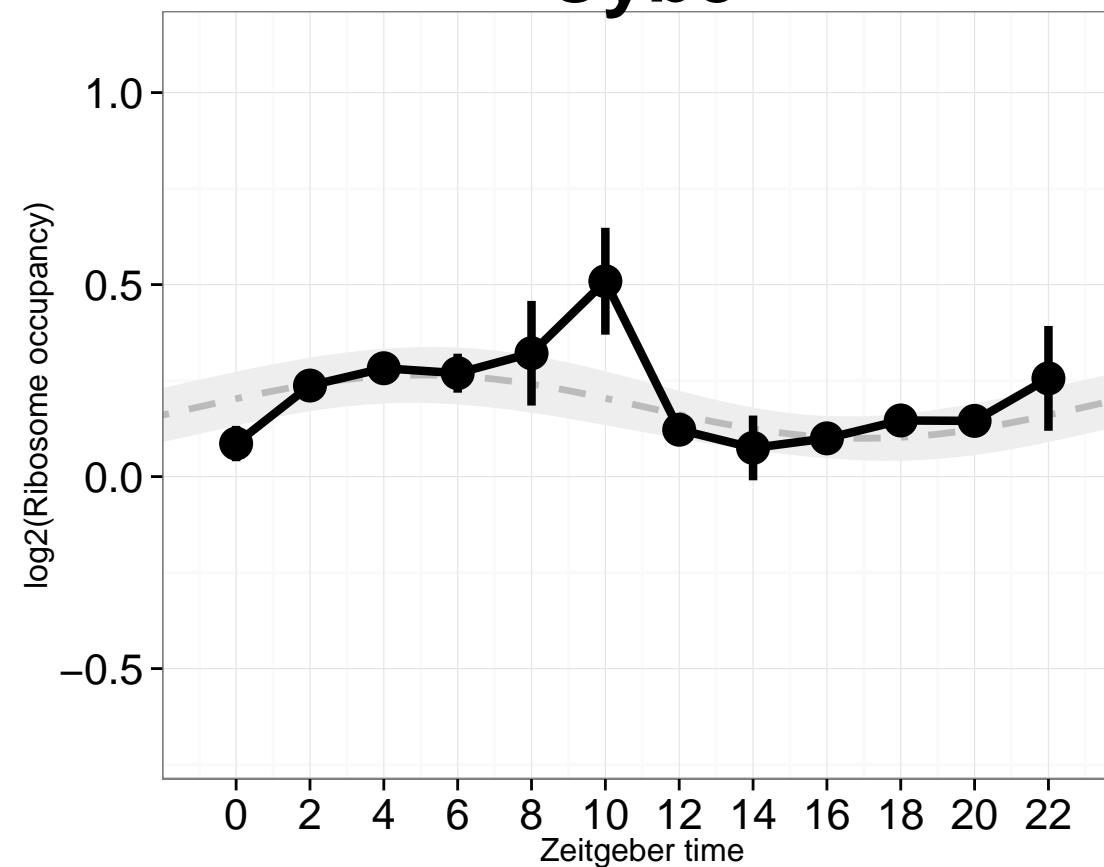

Supplement: SuppDataset_1.zip [file Cyb5_set_A.pdf › Supplemental Dataset 1/A-mRNA_nonrhyth_translation_nonrhyth/Cyb5_set_A.pdf]

# Cyb5d1

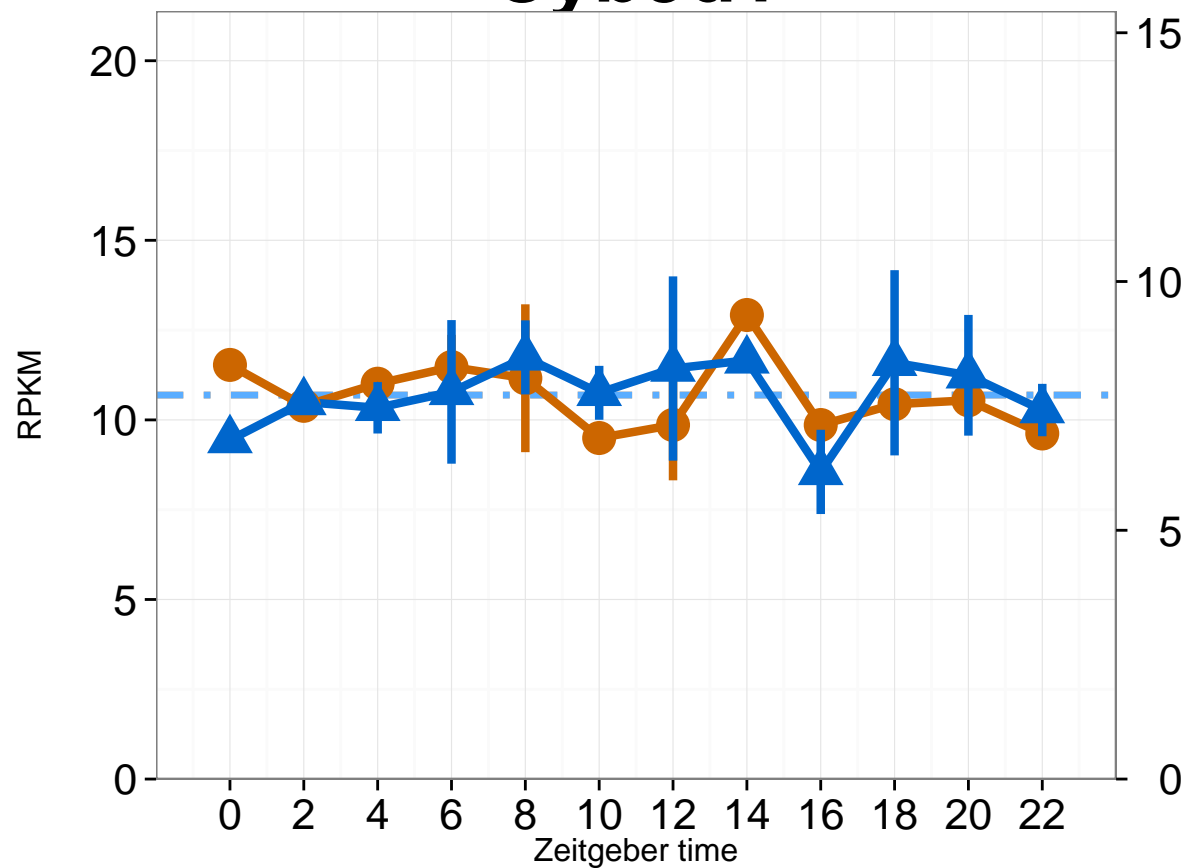

# Cyb5d1

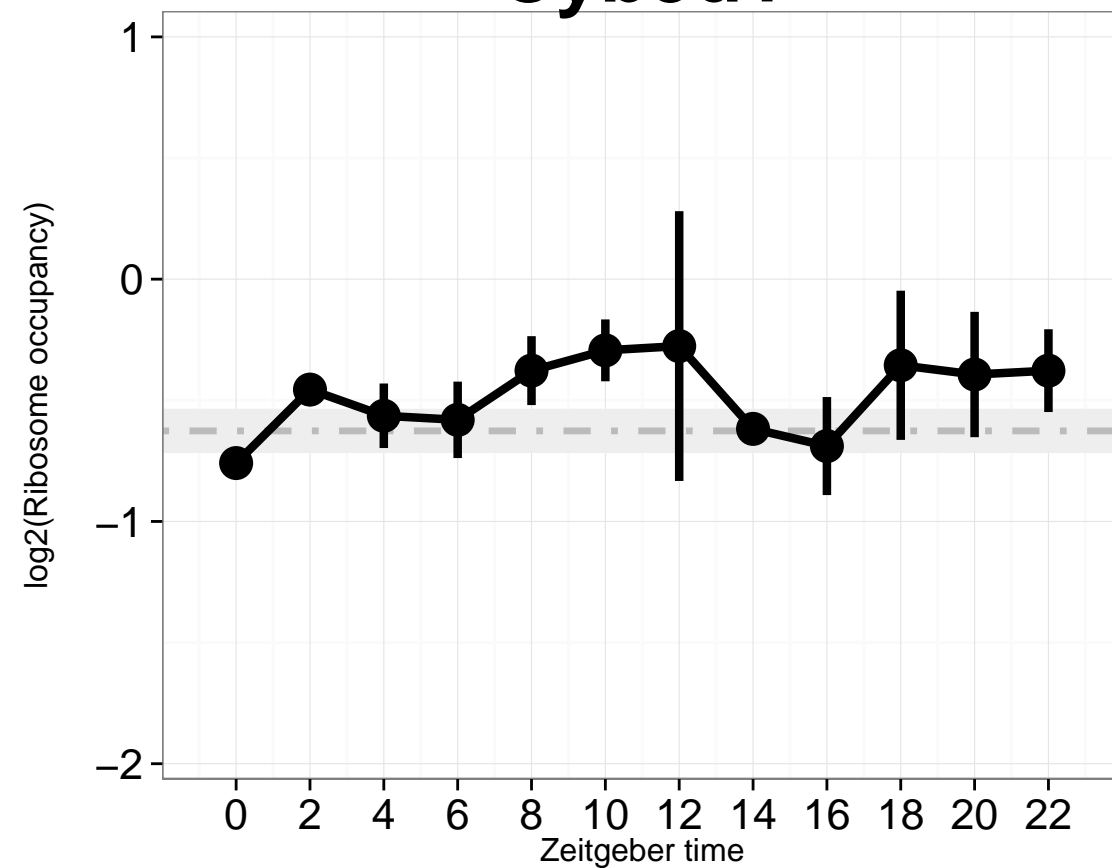

Supplement: SuppDataset_1.zip [file Cyb5d1_set_A.pdf › Supplemental Dataset 1/A-mRNA_nonrhyth_translation_nonrhyth/Cyb5d1_set_A.pdf]

# Cyb5d2

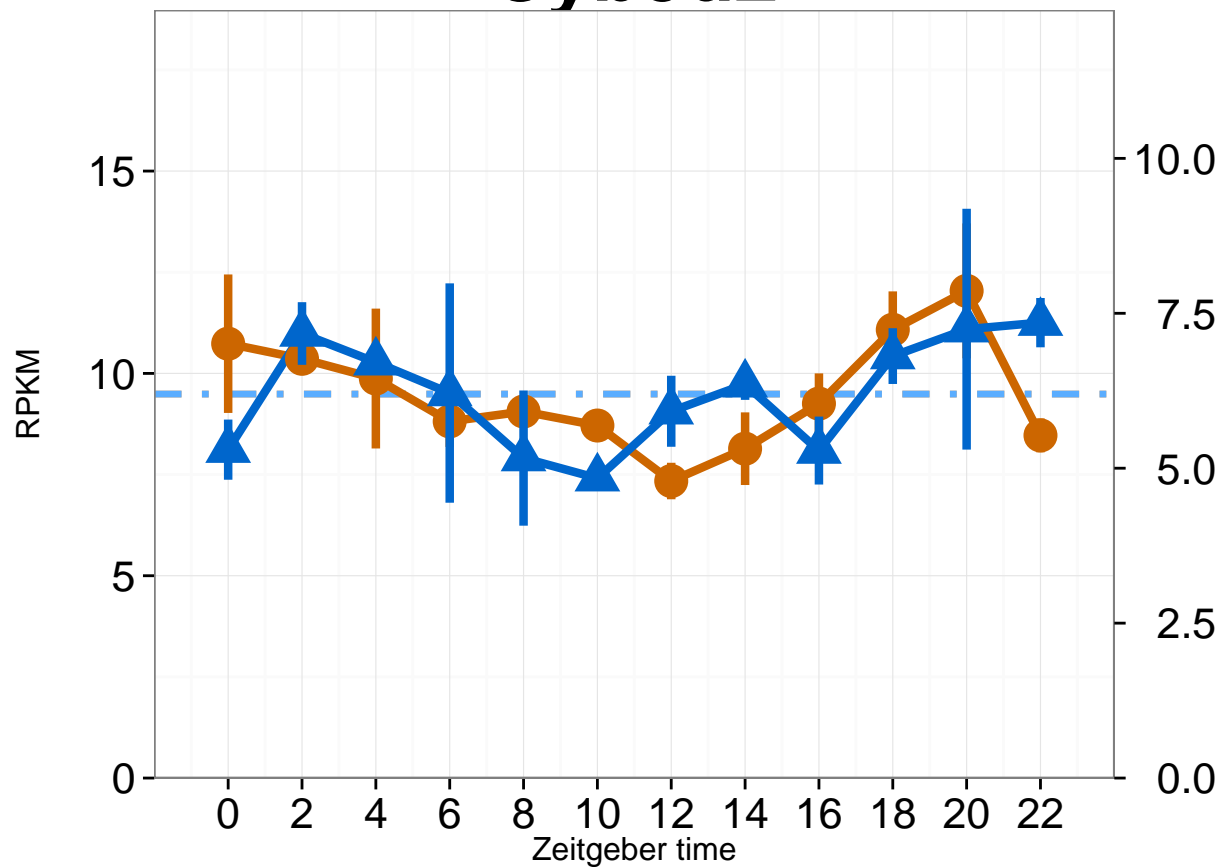

# Cyb5d2

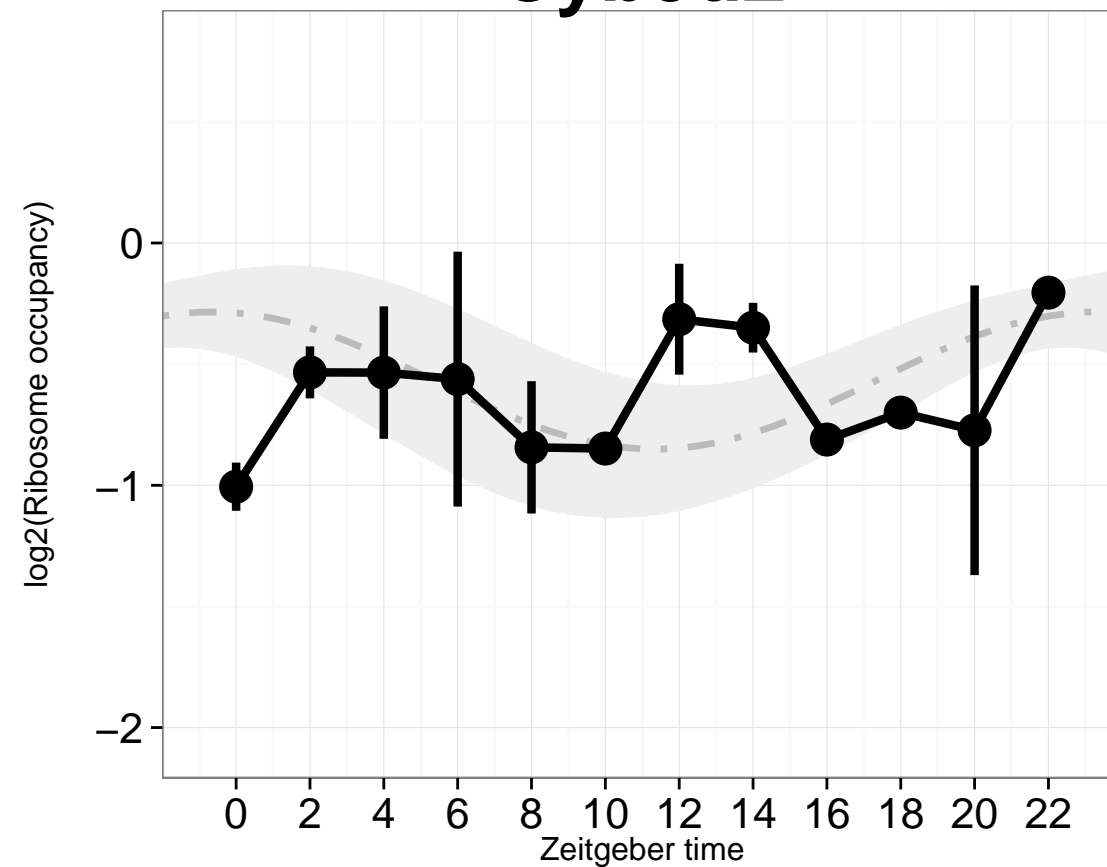

Supplement: SuppDataset_1.zip [file Cyb5d2_set_A.pdf › Supplemental Dataset 1/A-mRNA_nonrhyth_translation_nonrhyth/Cyb5d2_set_A.pdf]

# Cyb5r3

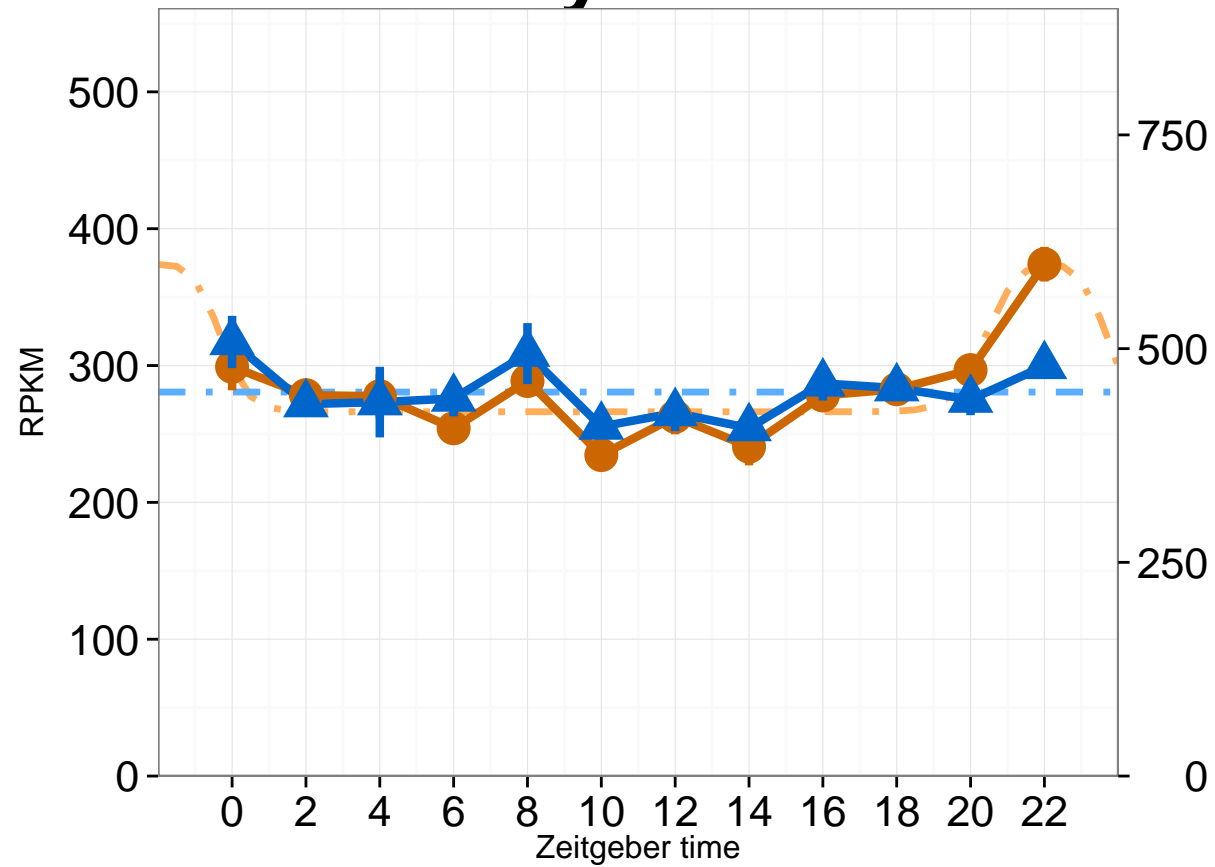

# Cyb5r3

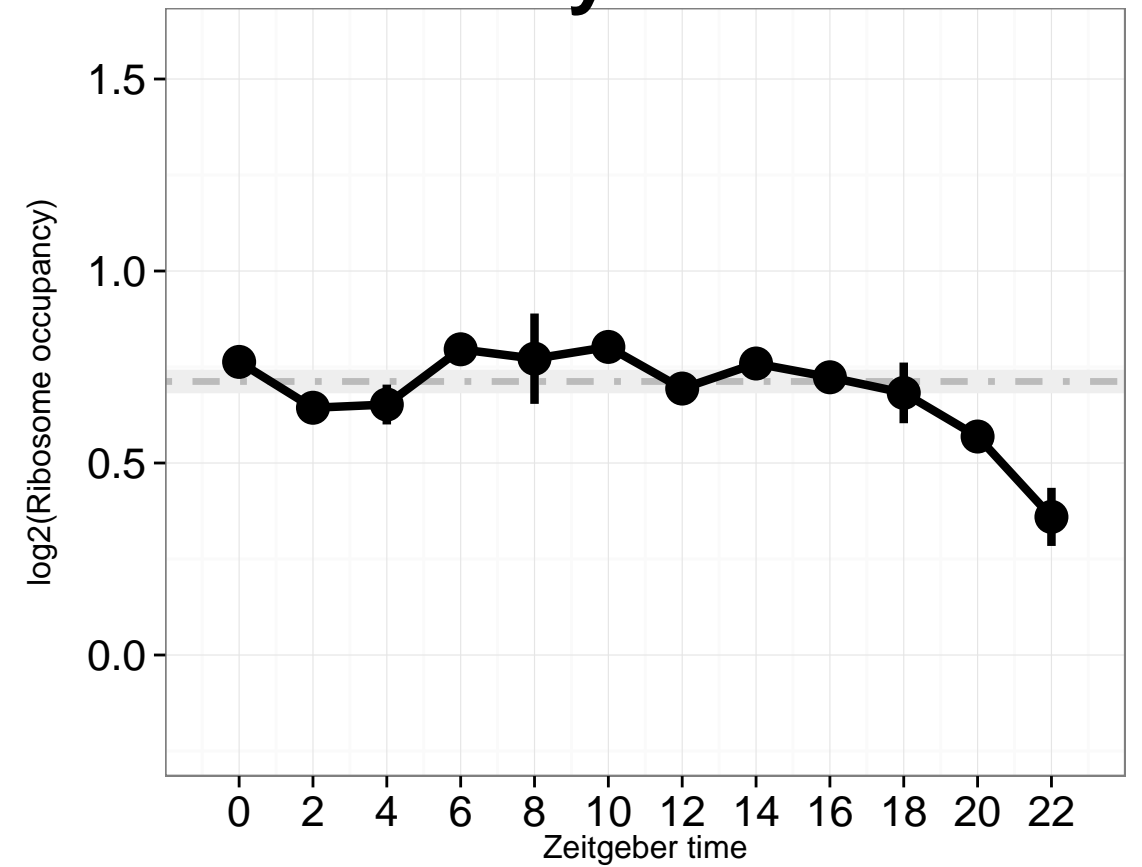

Supplement: SuppDataset_1.zip [file Cyb5r3_set_A.pdf › Supplemental Dataset 1/A-mRNA_nonrhyth_translation_nonrhyth/Cyb5r3_set_A.pdf]

# Cyb5r4

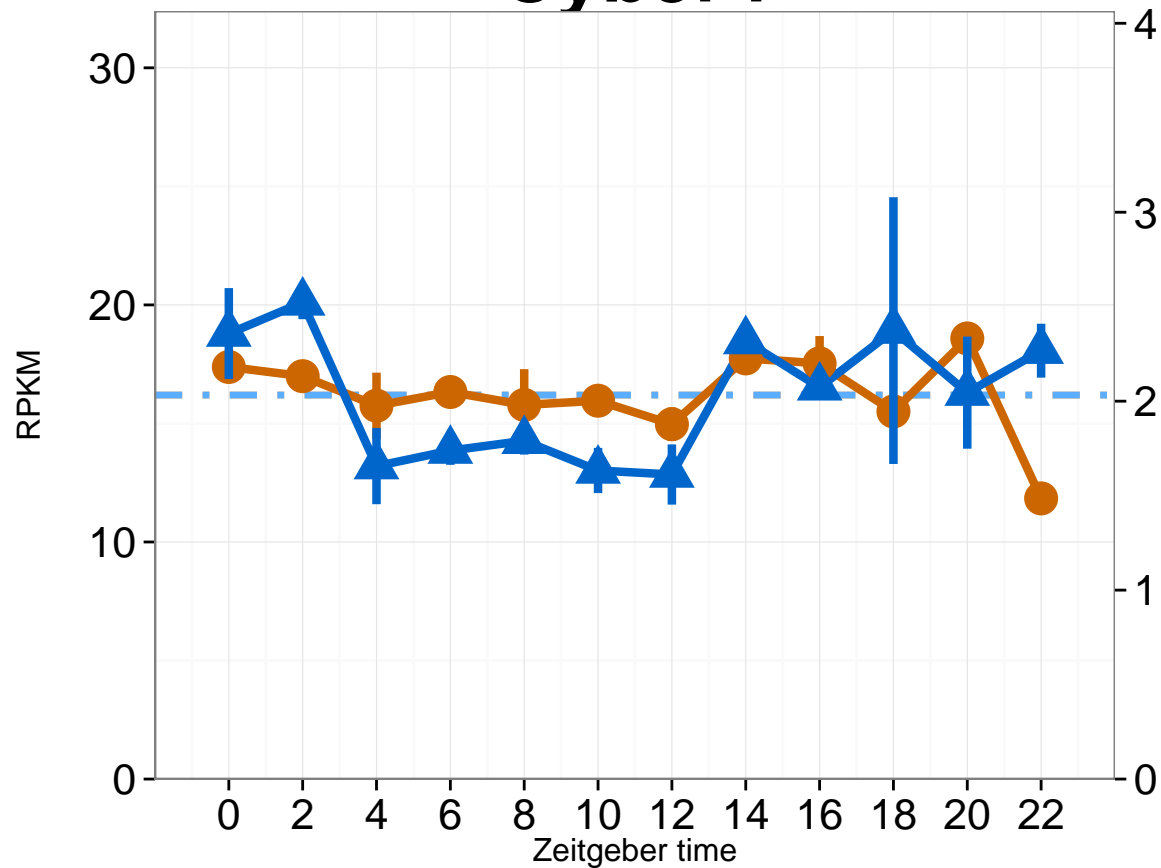

# Cyb5r4

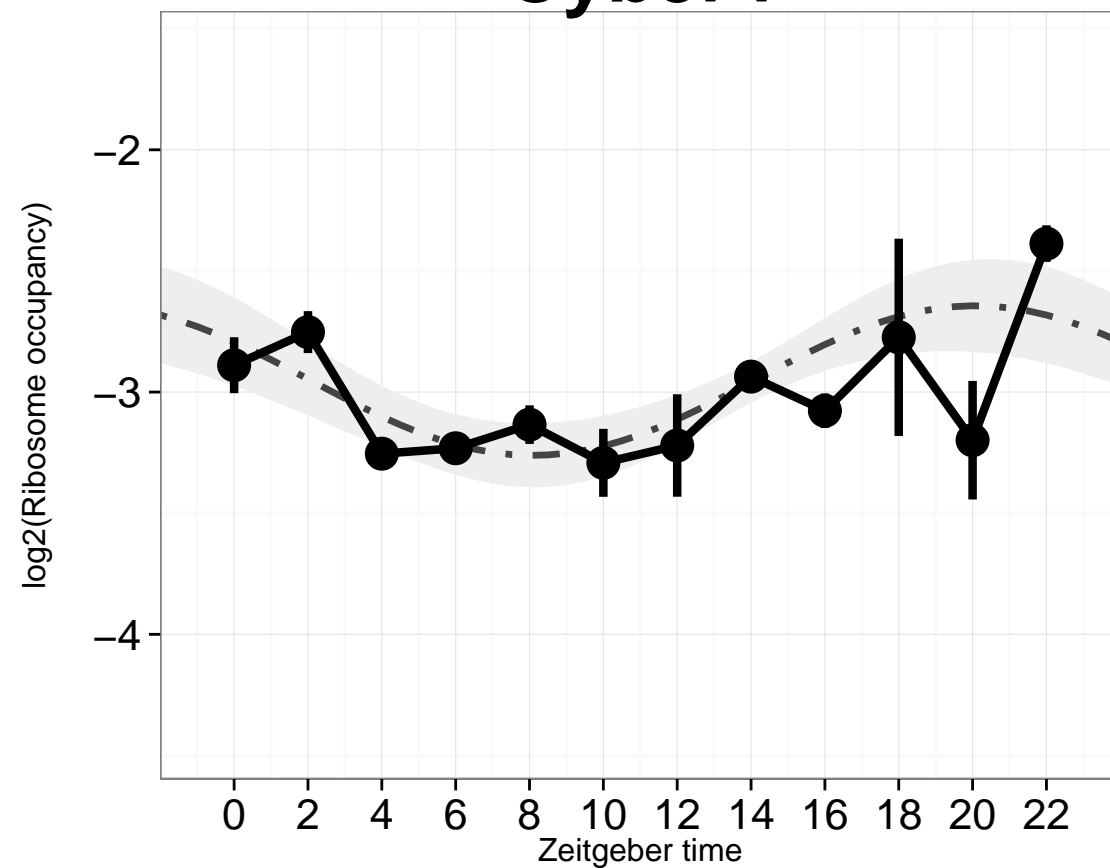

Supplement: SuppDataset_1.zip [file Cyb5r4_set_A.pdf › Supplemental Dataset 1/A-mRNA_nonrhyth_translation_nonrhyth/Cyb5r4_set_A.pdf]

# Cyb5rl

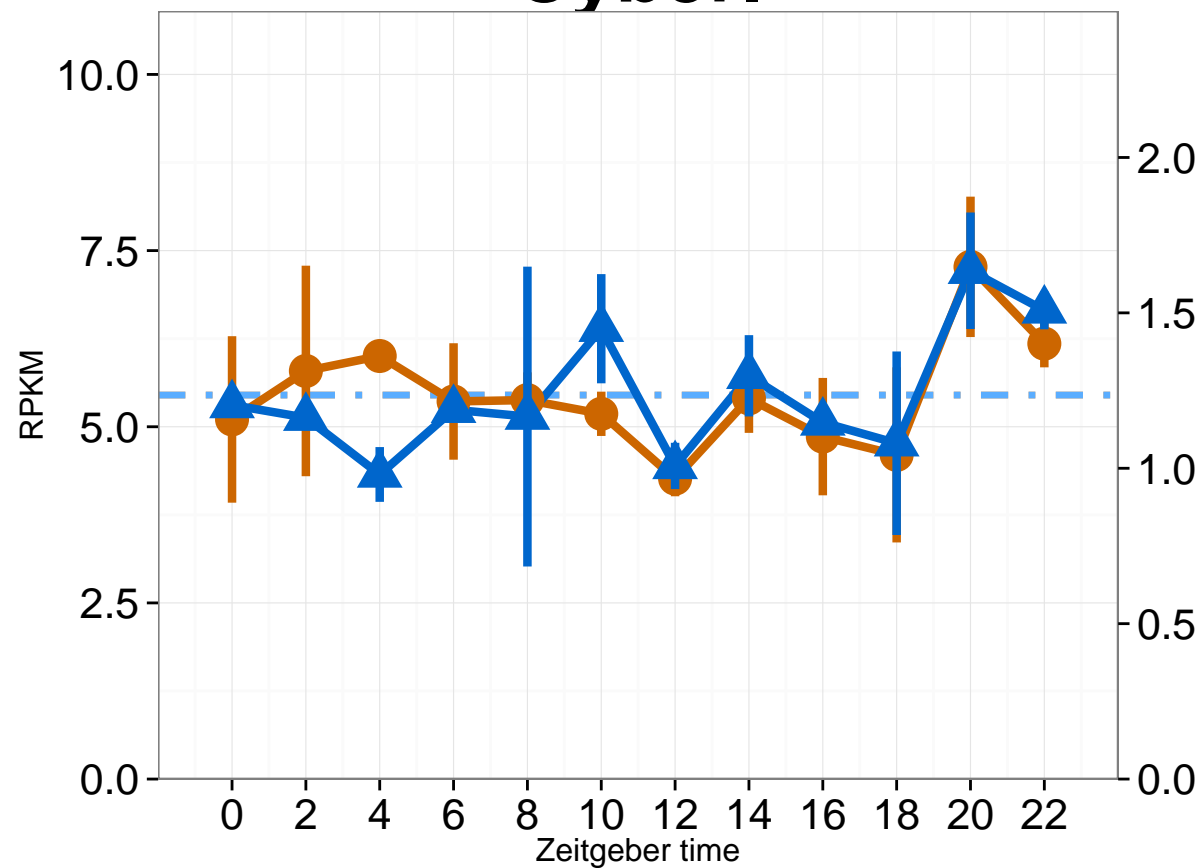

# Cyb5rl

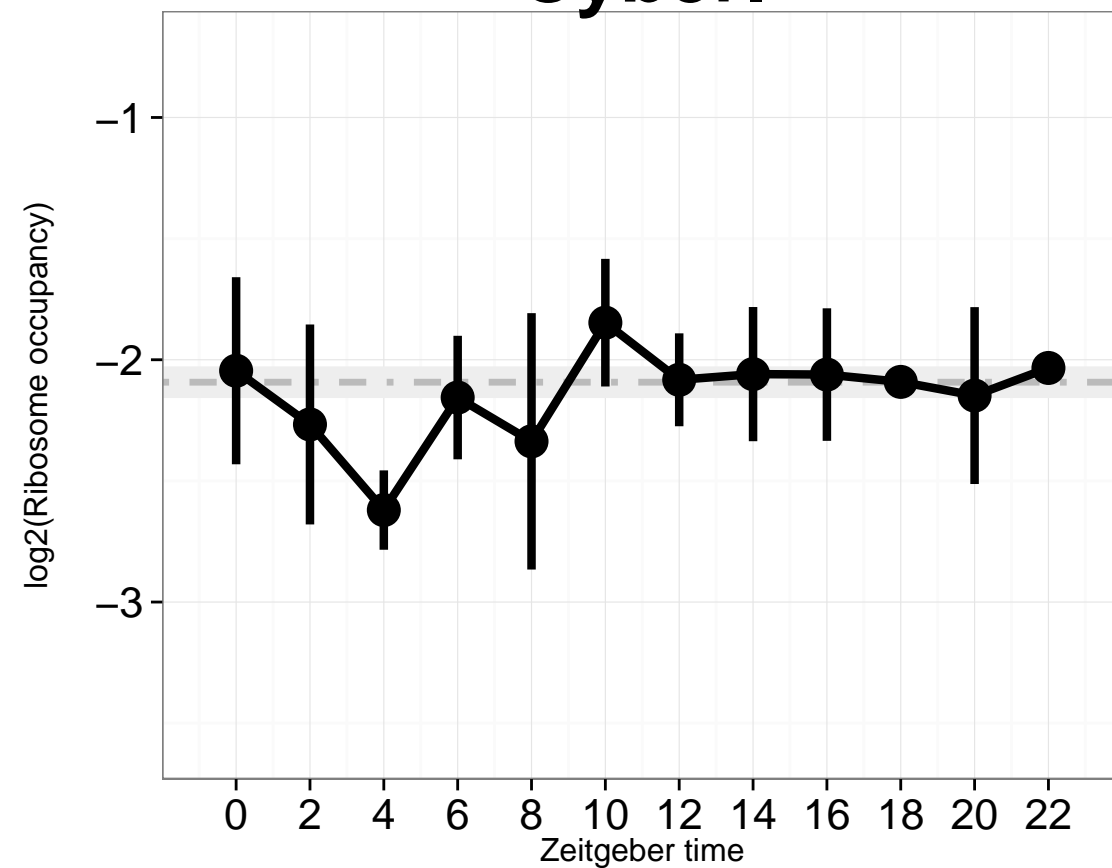

Supplement: SuppDataset_1.zip [file Cyb5rl_set_A.pdf › Supplemental Dataset 1/A-mRNA_nonrhyth_translation_nonrhyth/Cyb5rl_set_A.pdf]

## Cybb

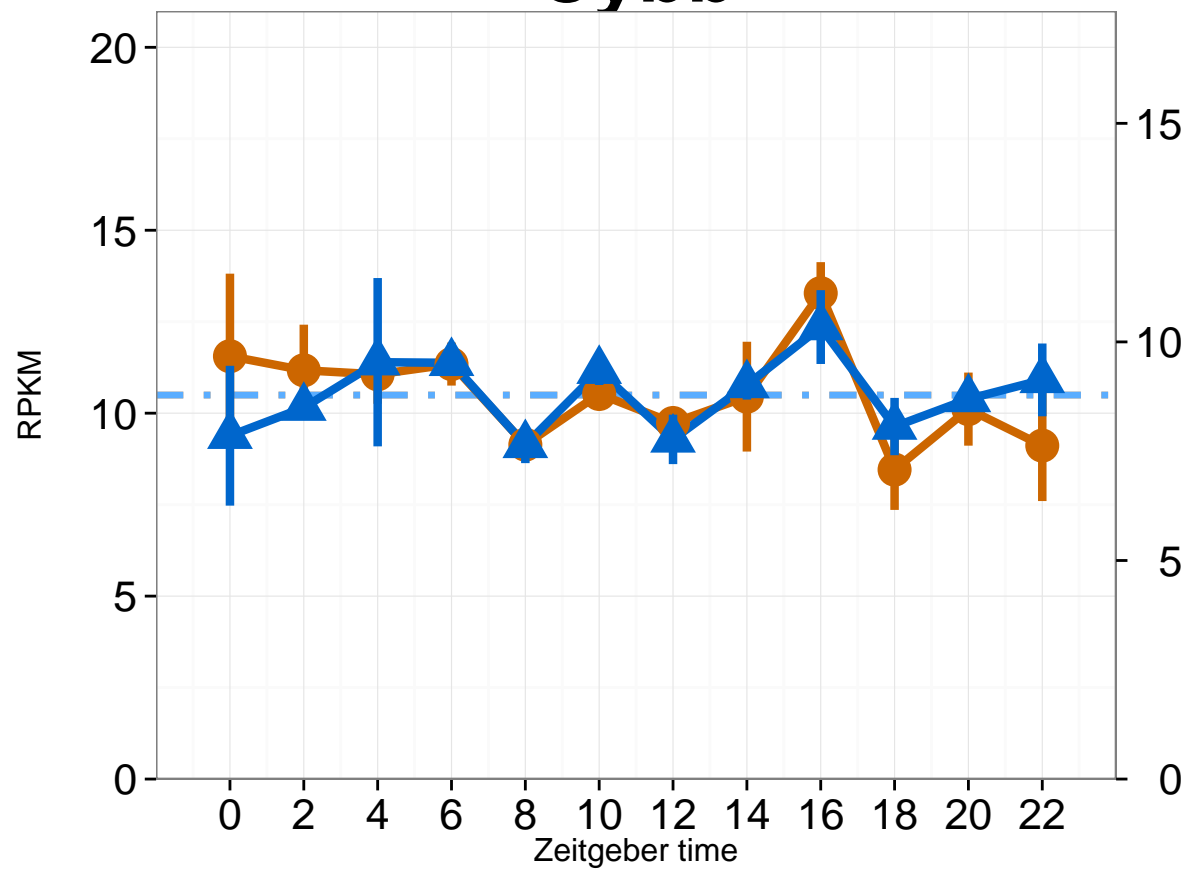

## Cybb

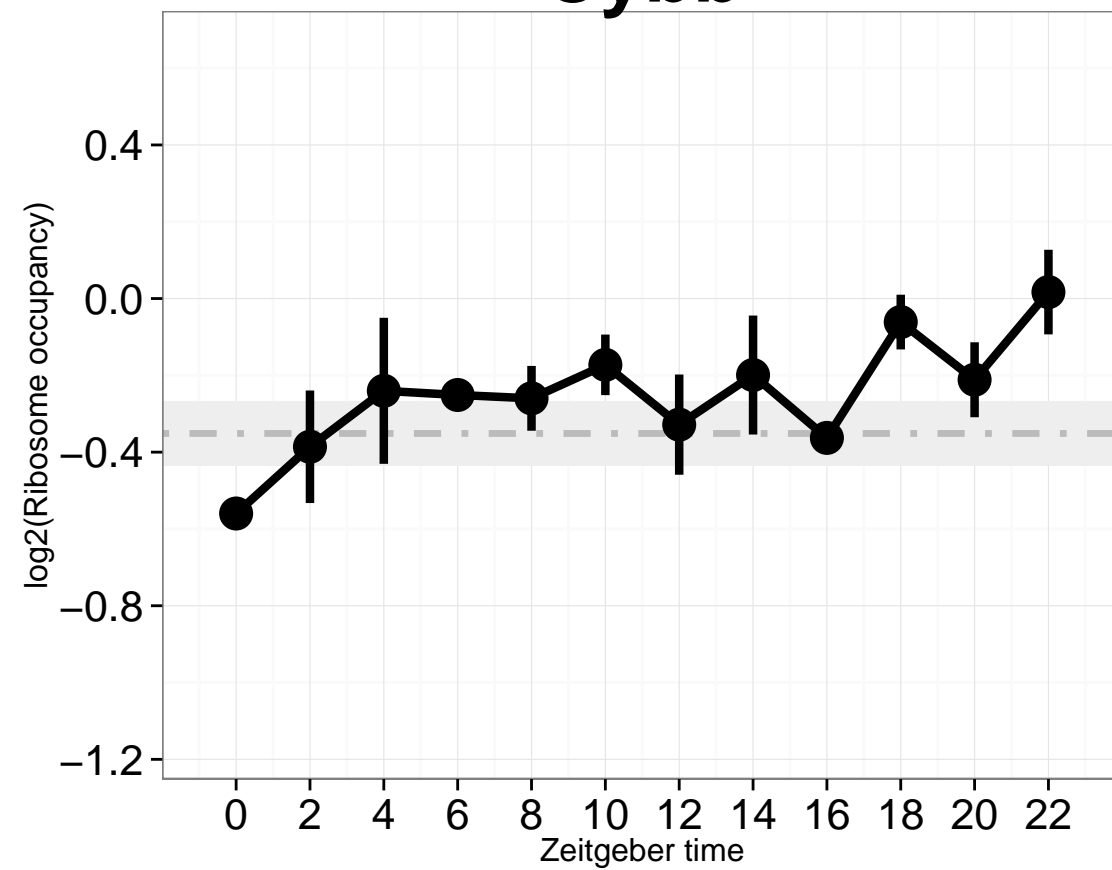

Supplement: SuppDataset_1.zip [file Cybb_set_A.pdf › Supplemental Dataset 1/A-mRNA_nonrhyth_translation_nonrhyth/Cybb_set_A.pdf]

# Cyc1

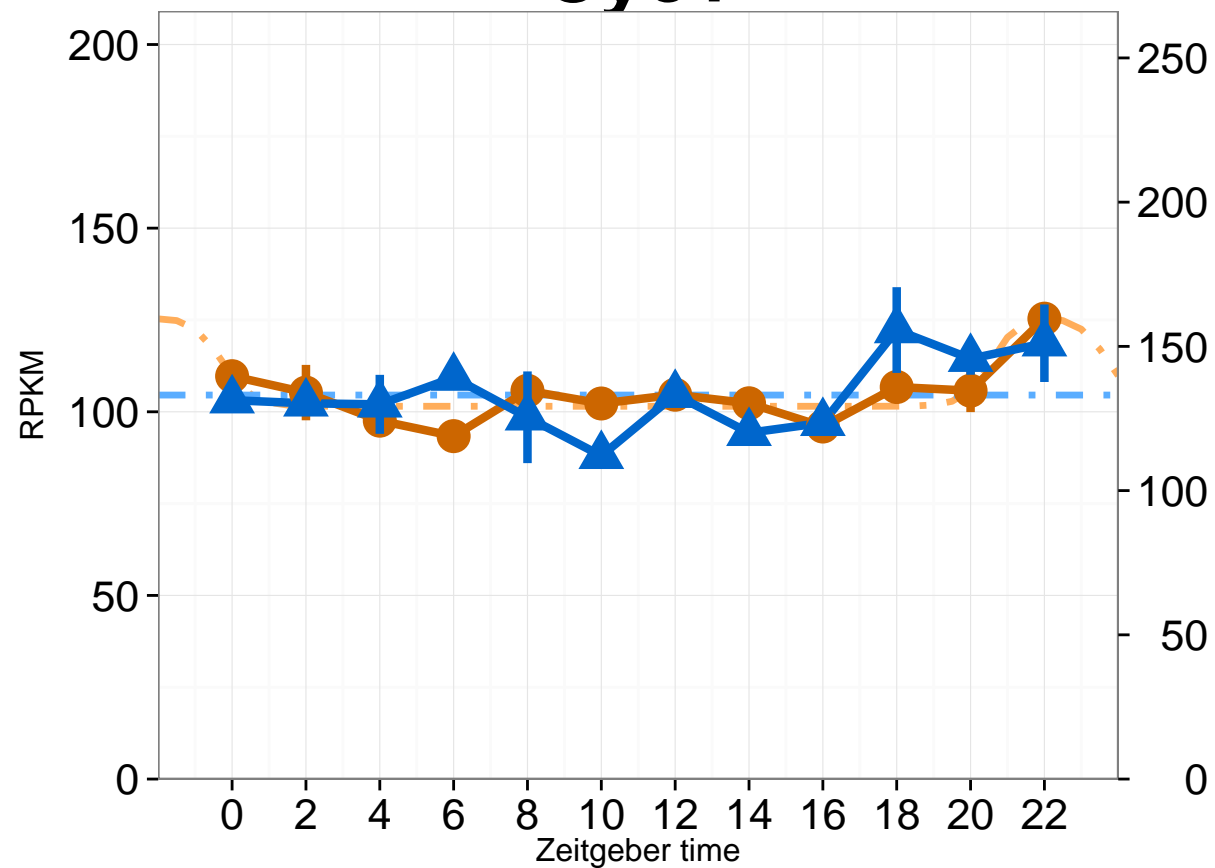

# Cyc1

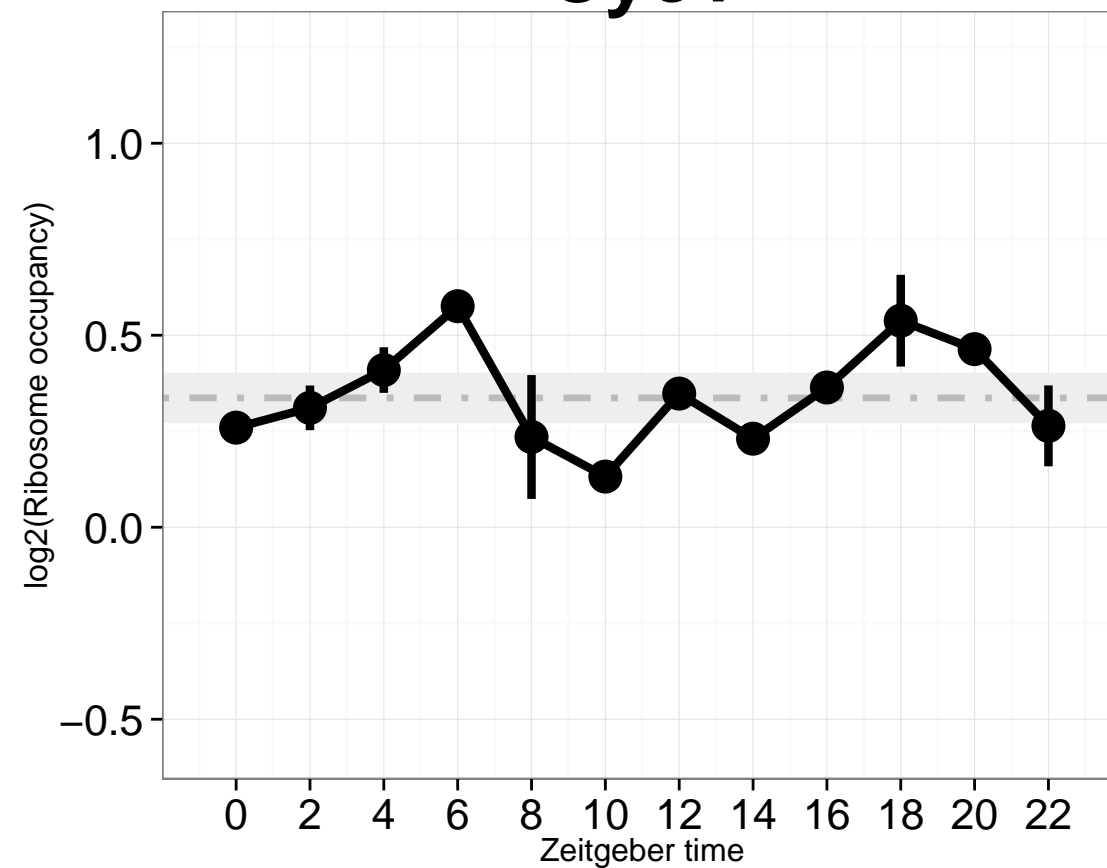

Supplement: SuppDataset_1.zip [file Cyc1_set_A.pdf › Supplemental Dataset 1/A-mRNA_nonrhyth_translation_nonrhyth/Cyc1_set_A.pdf]

## Cyts

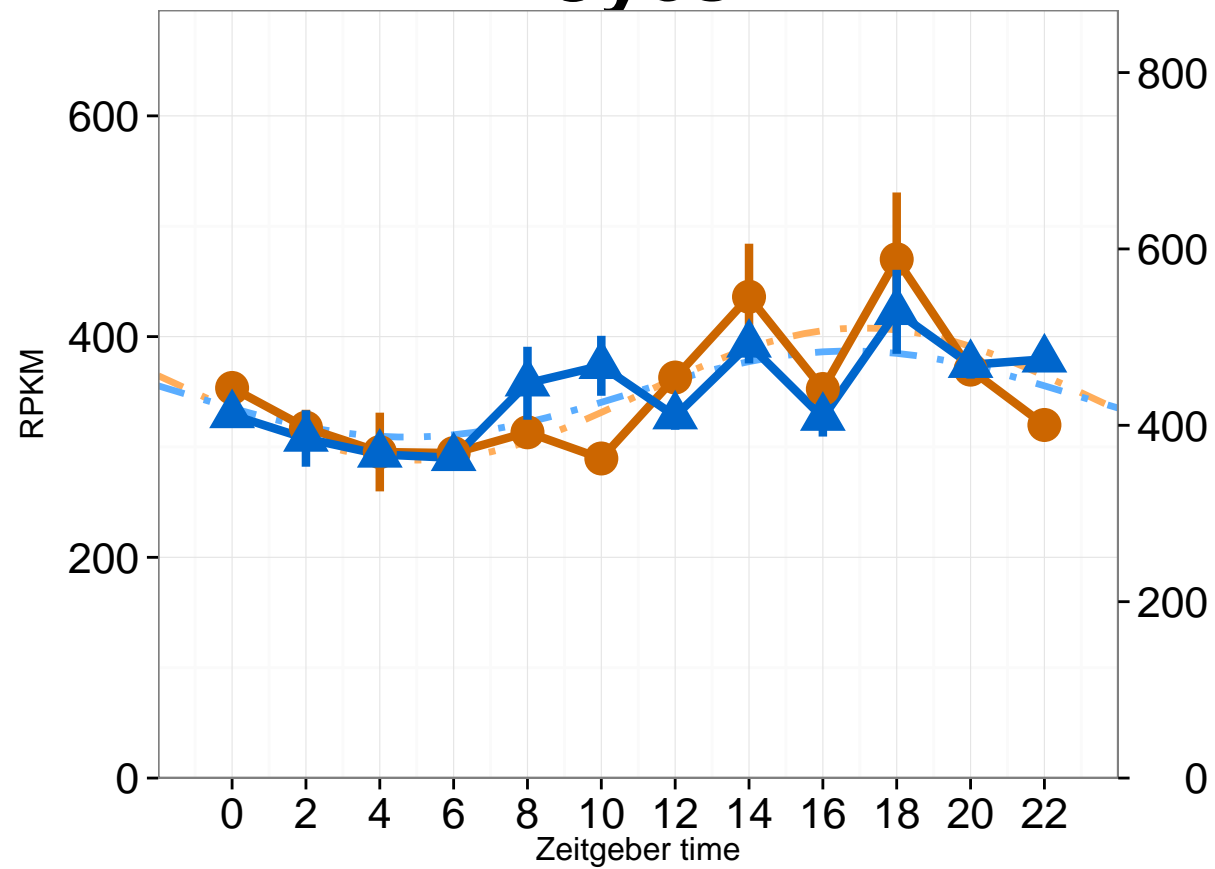

## Cyts

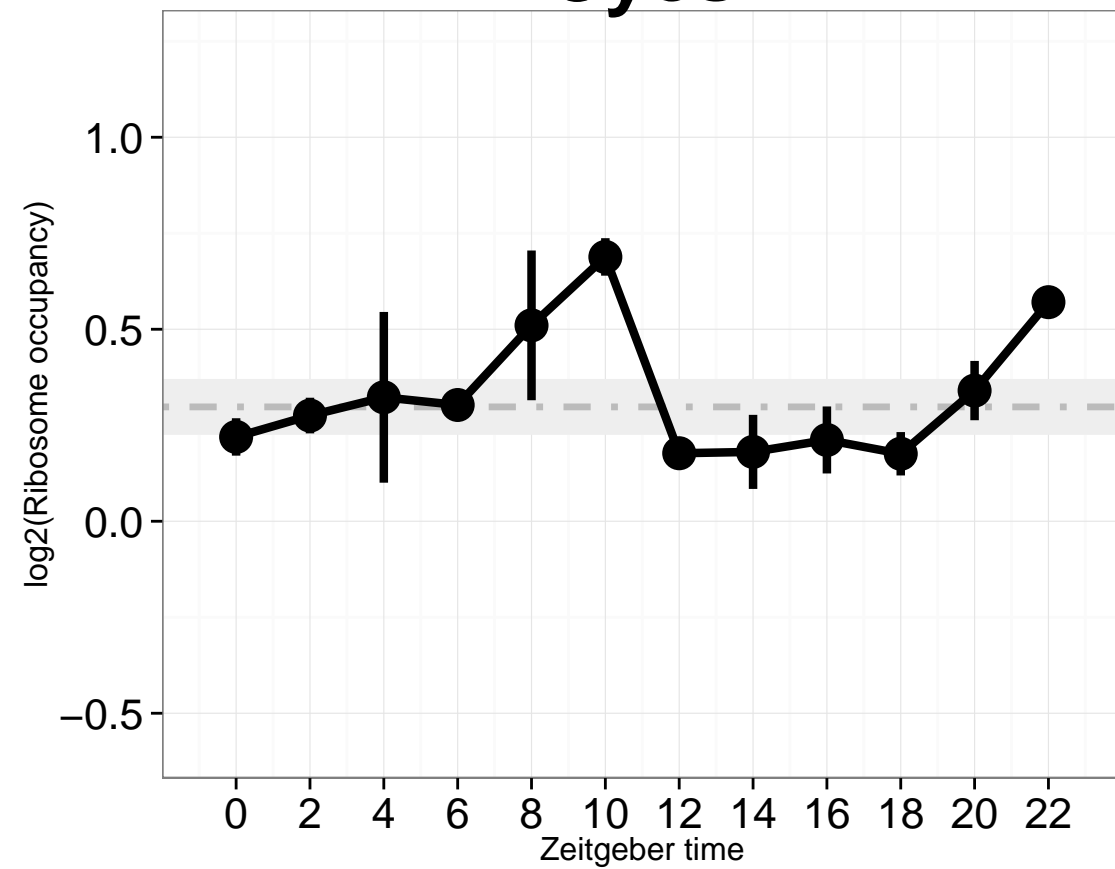

Supplement: SuppDataset_1.zip [file Cycs_set_A.pdf › Supplemental Dataset 1/A-mRNA_nonrhyth_translation_nonrhyth/Cycs_set_A.pdf]

## Cyfip1

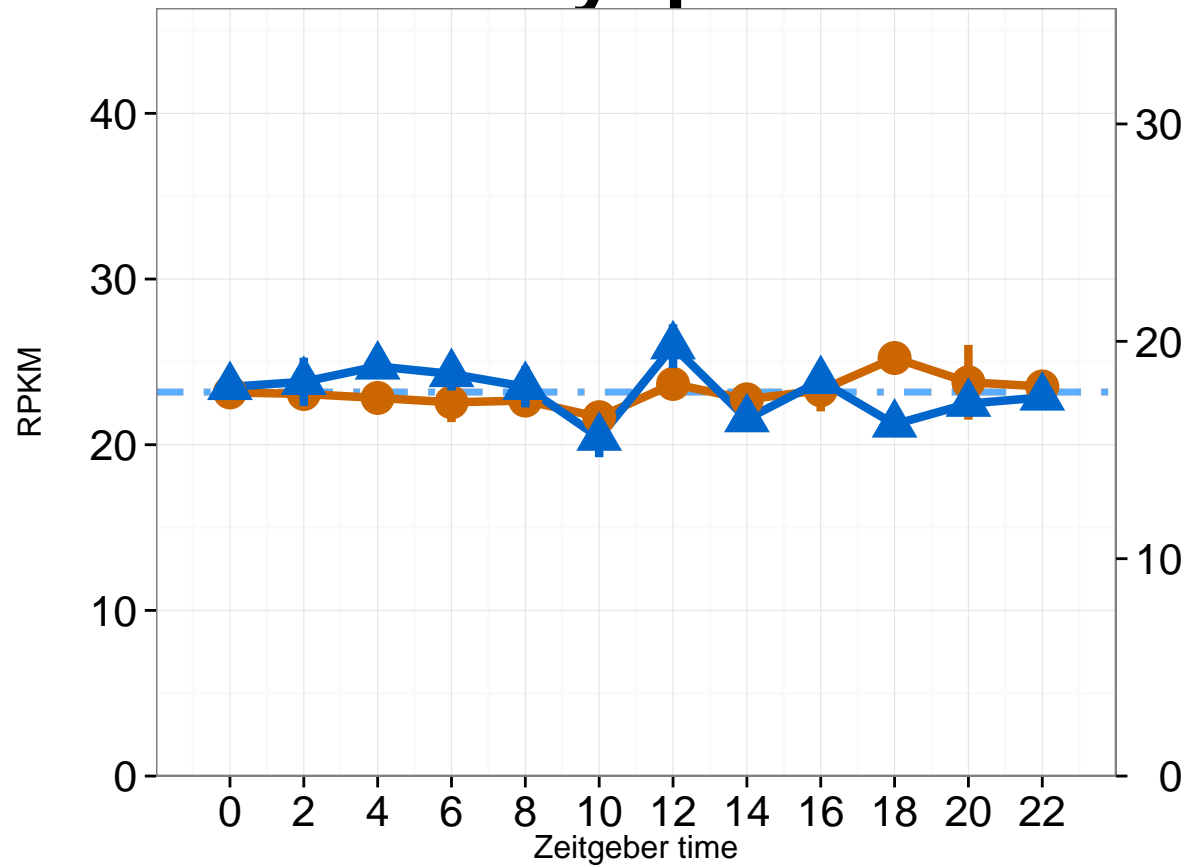

## Cyfip1

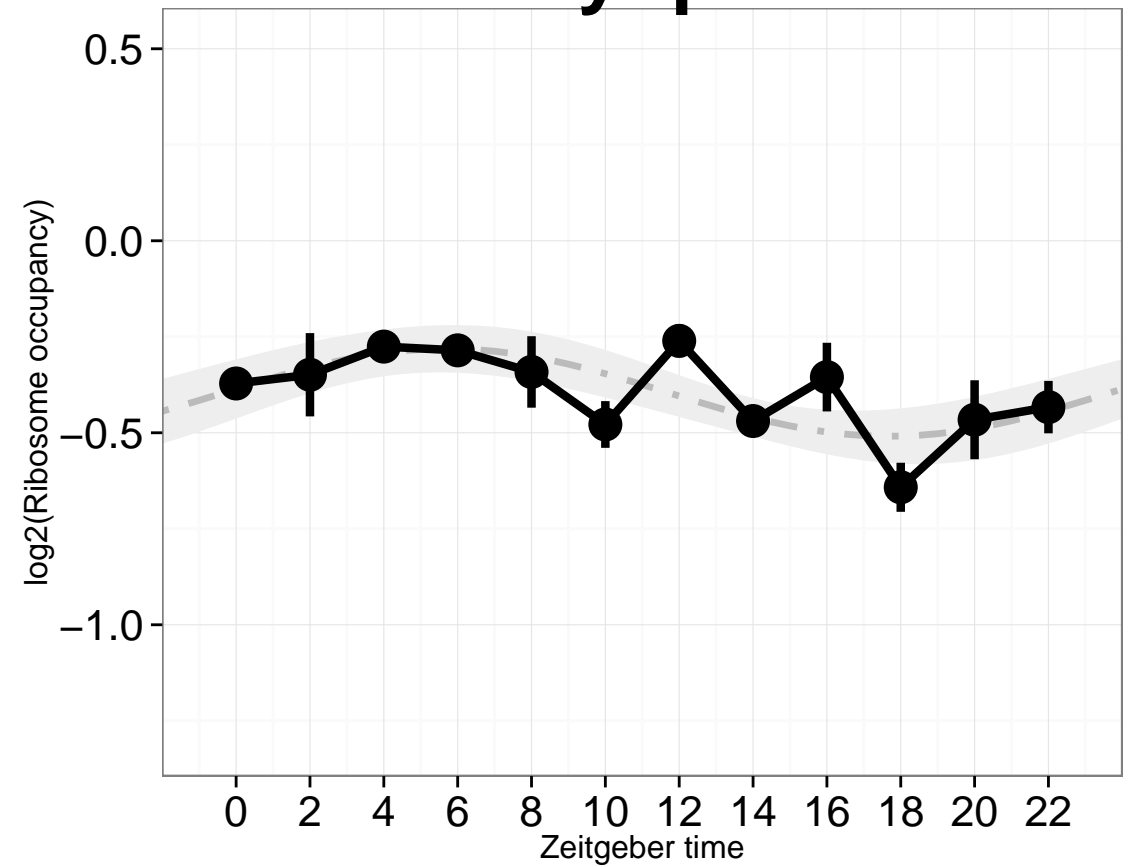

Supplement: SuppDataset_1.zip [file Cyfip1_set_A.pdf › Supplemental Dataset 1/A-mRNA_nonrhyth_translation_nonrhyth/Cyfip1_set_A.pdf]

## Cyfip2

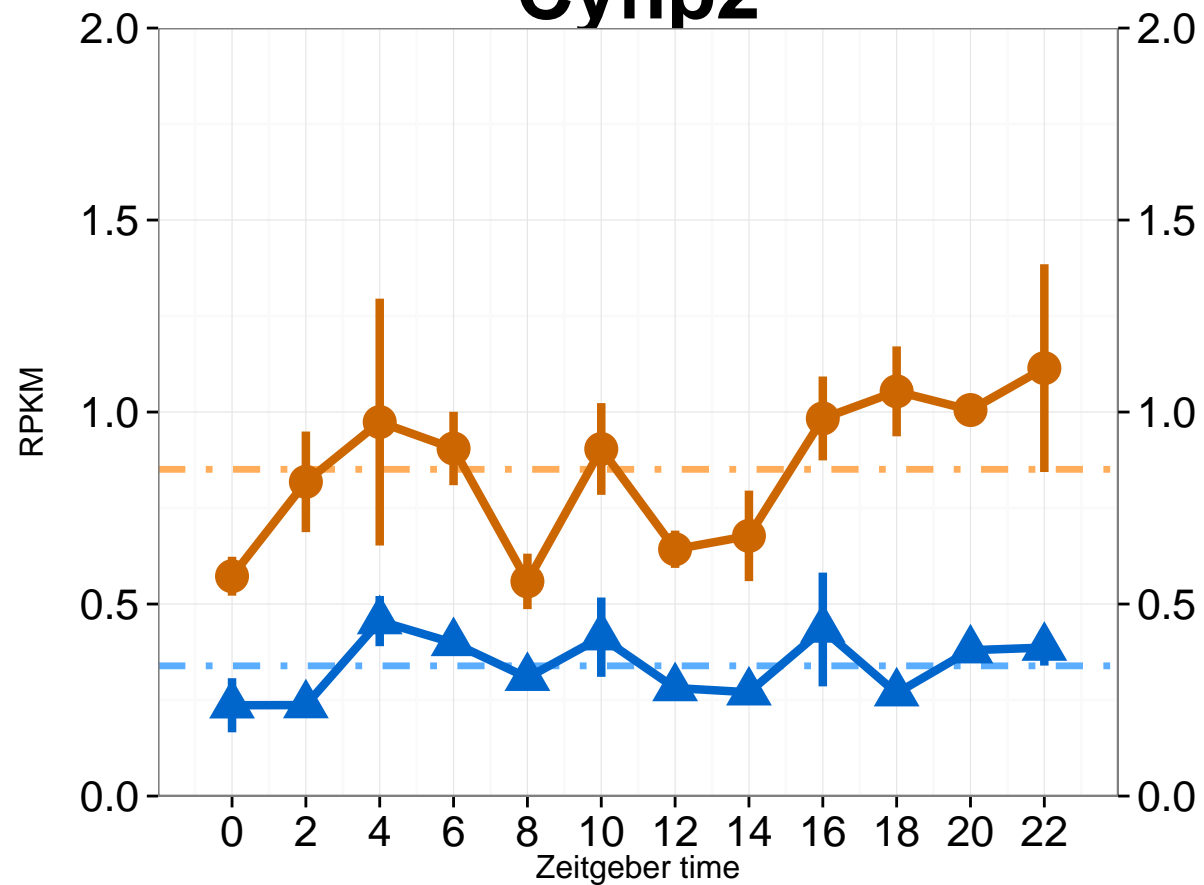

## Cyfip2

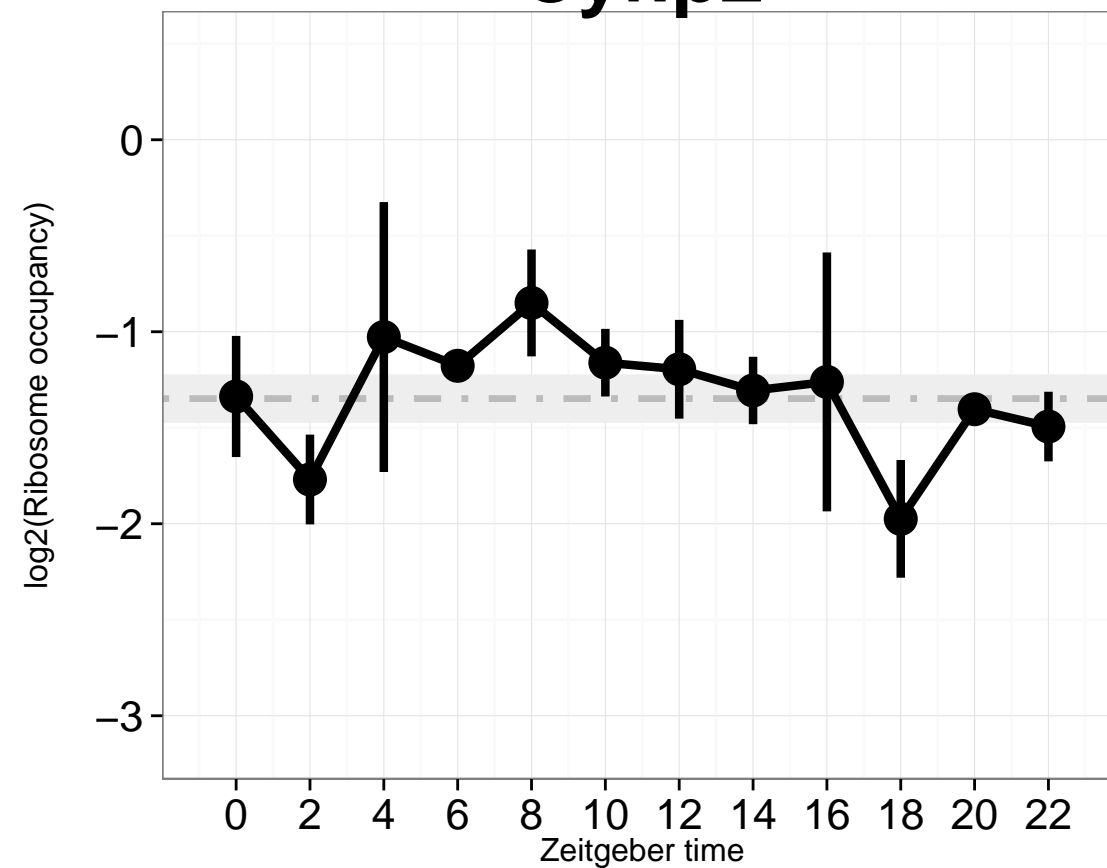

Supplement: SuppDataset_1.zip [file Cyfip2_set_A.pdf › Supplemental Dataset 1/A-mRNA_nonrhyth_translation_nonrhyth/Cyfip2_set_A.pdf]

# Cygb

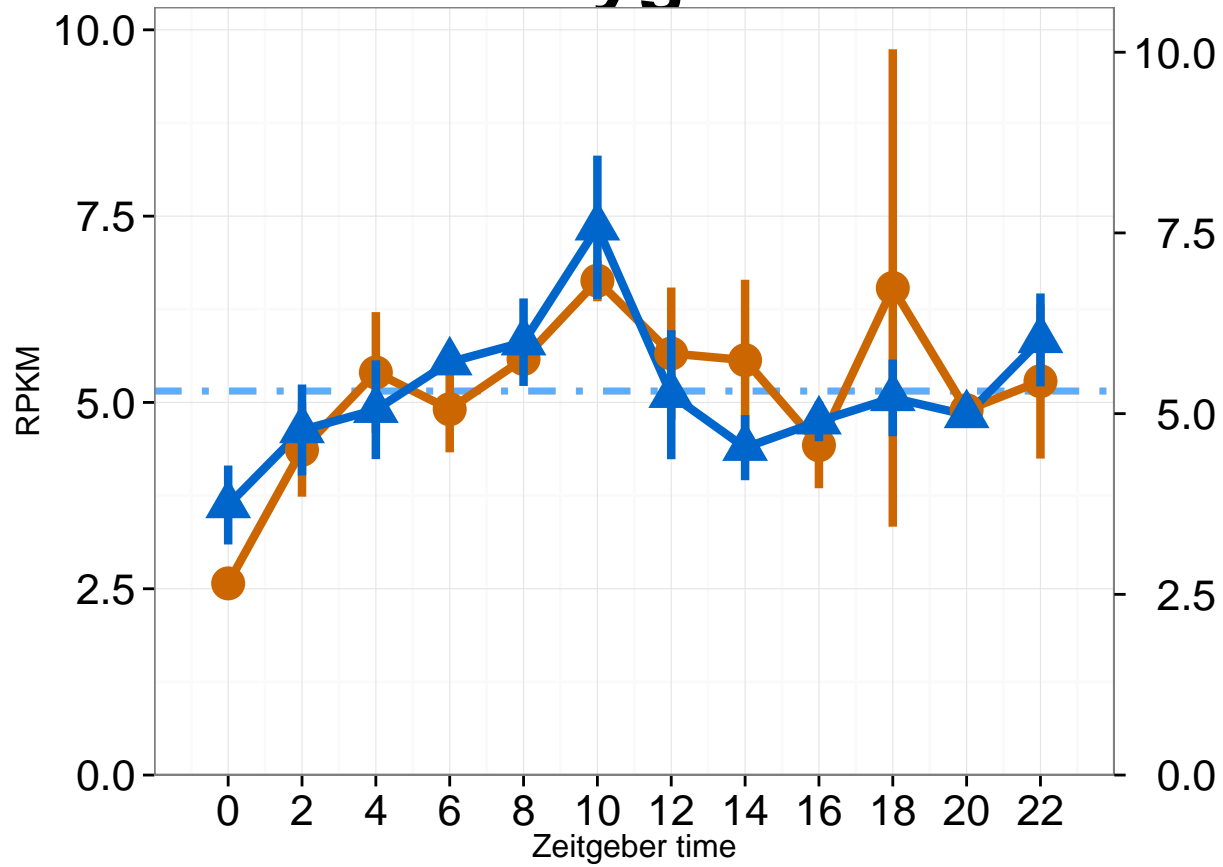

# Cygb

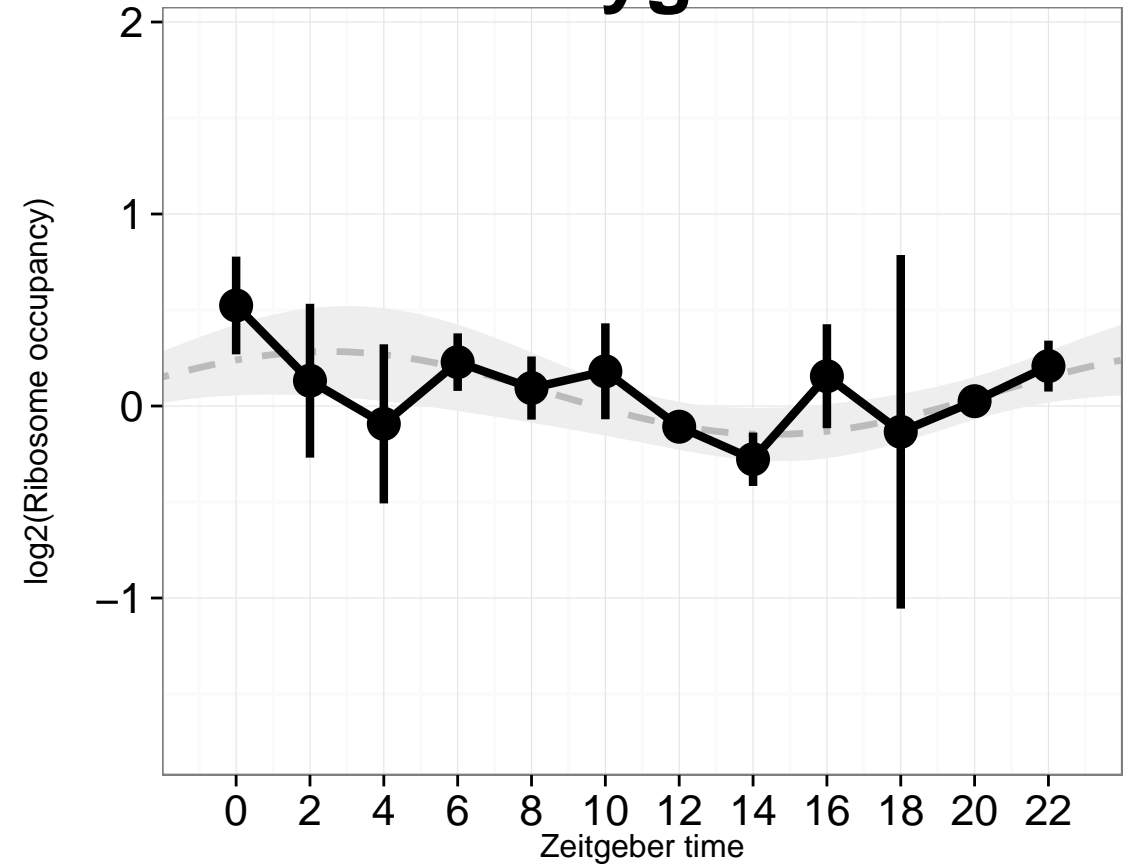

Supplement: SuppDataset_1.zip [file Cygb_set_A.pdf › Supplemental Dataset 1/A-mRNA_nonrhyth_translation_nonrhyth/Cygb_set_A.pdf]

# Cyhr1

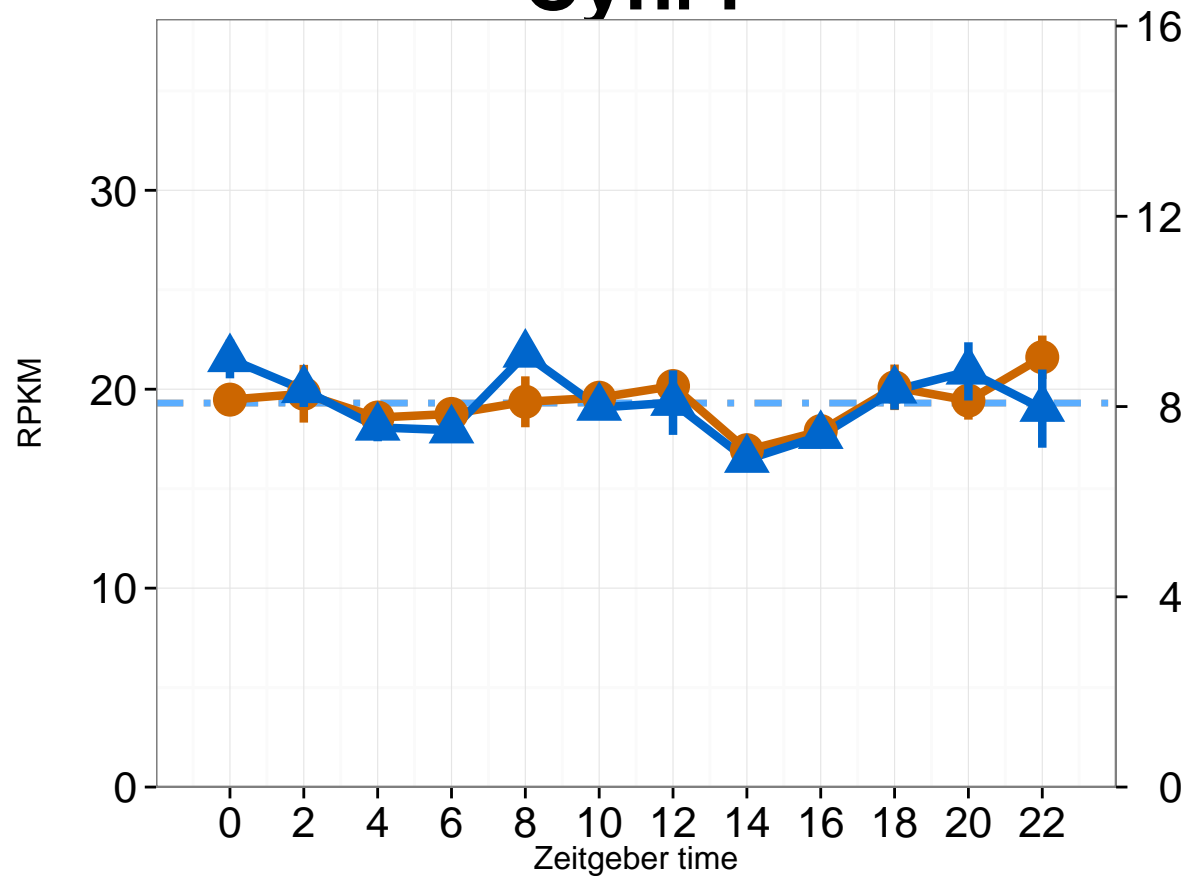

# Cyhr1

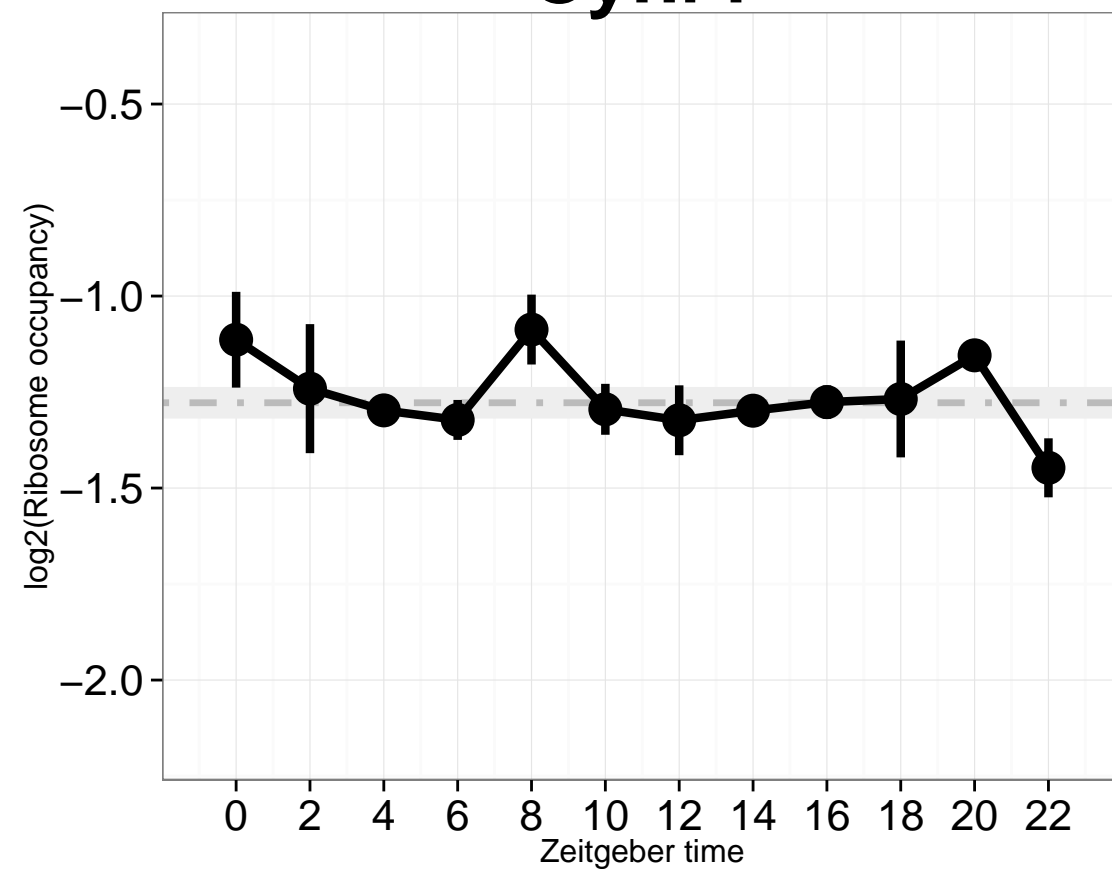

Supplement: SuppDataset_1.zip [file Cyhr1_set_A.pdf › Supplemental Dataset 1/A-mRNA_nonrhyth_translation_nonrhyth/Cyhr1_set_A.pdf]

## Cyld

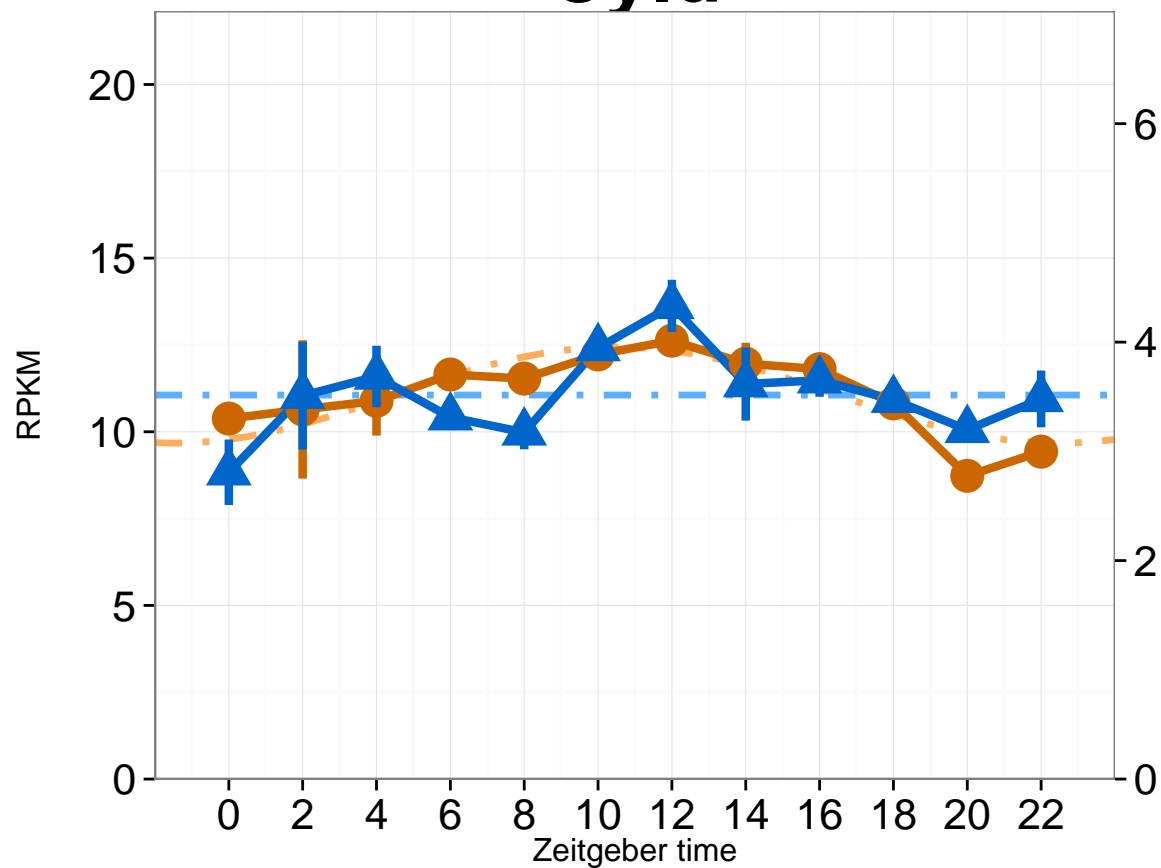

## Cyld

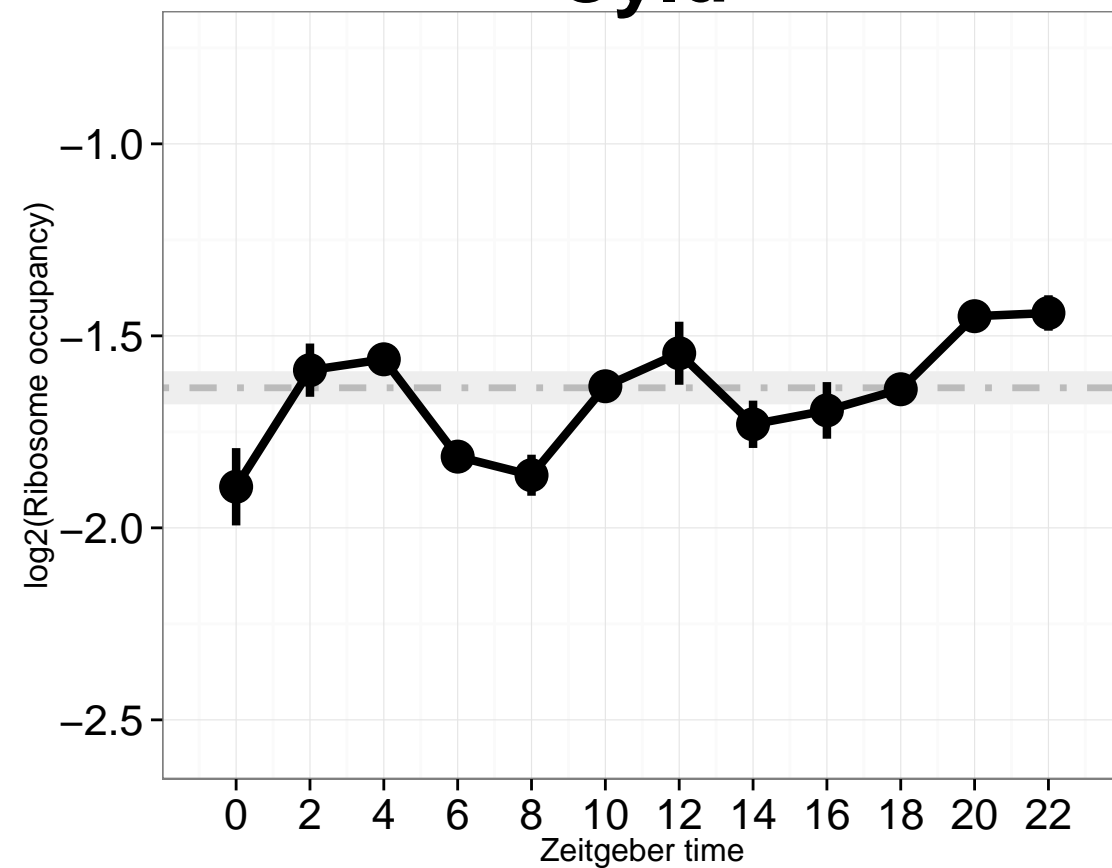

Supplement: SuppDataset_1.zip [file Cyld_set_A.pdf › Supplemental Dataset 1/A-mRNA_nonrhyth_translation_nonrhyth/Cyld_set_A.pdf]

# Cyp1a1

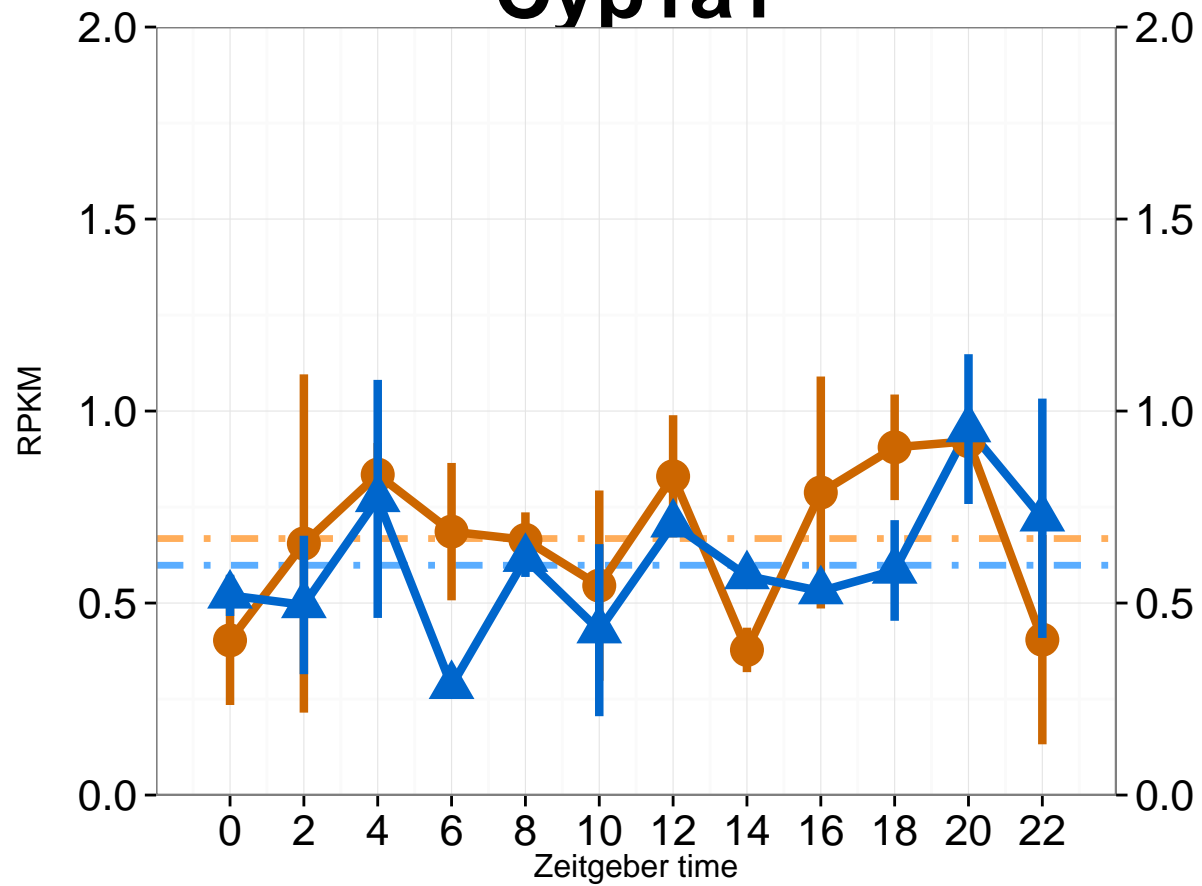

# Cyp1a1

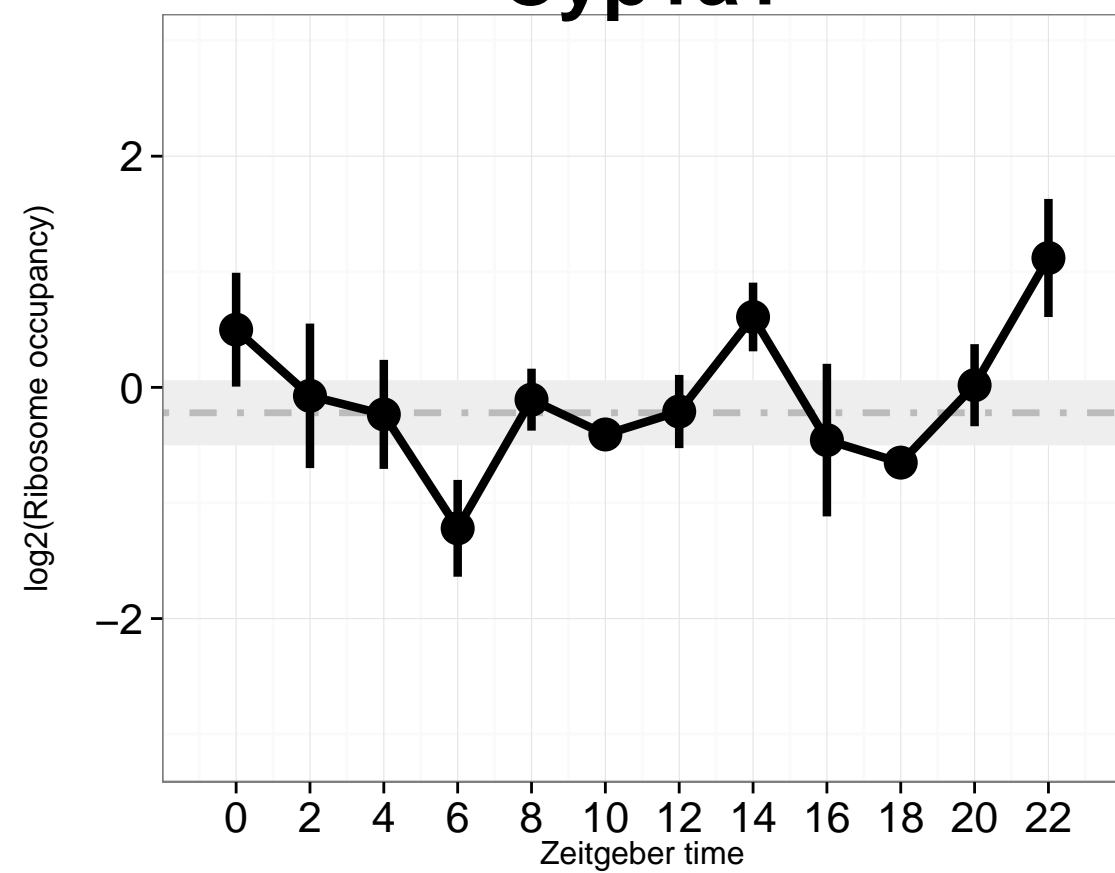

Supplement: SuppDataset_1.zip [file Cyp1a1_set_A.pdf › Supplemental Dataset 1/A-mRNA_nonrhyth_translation_nonrhyth/Cyp1a1_set_A.pdf]

# Cyp1a2

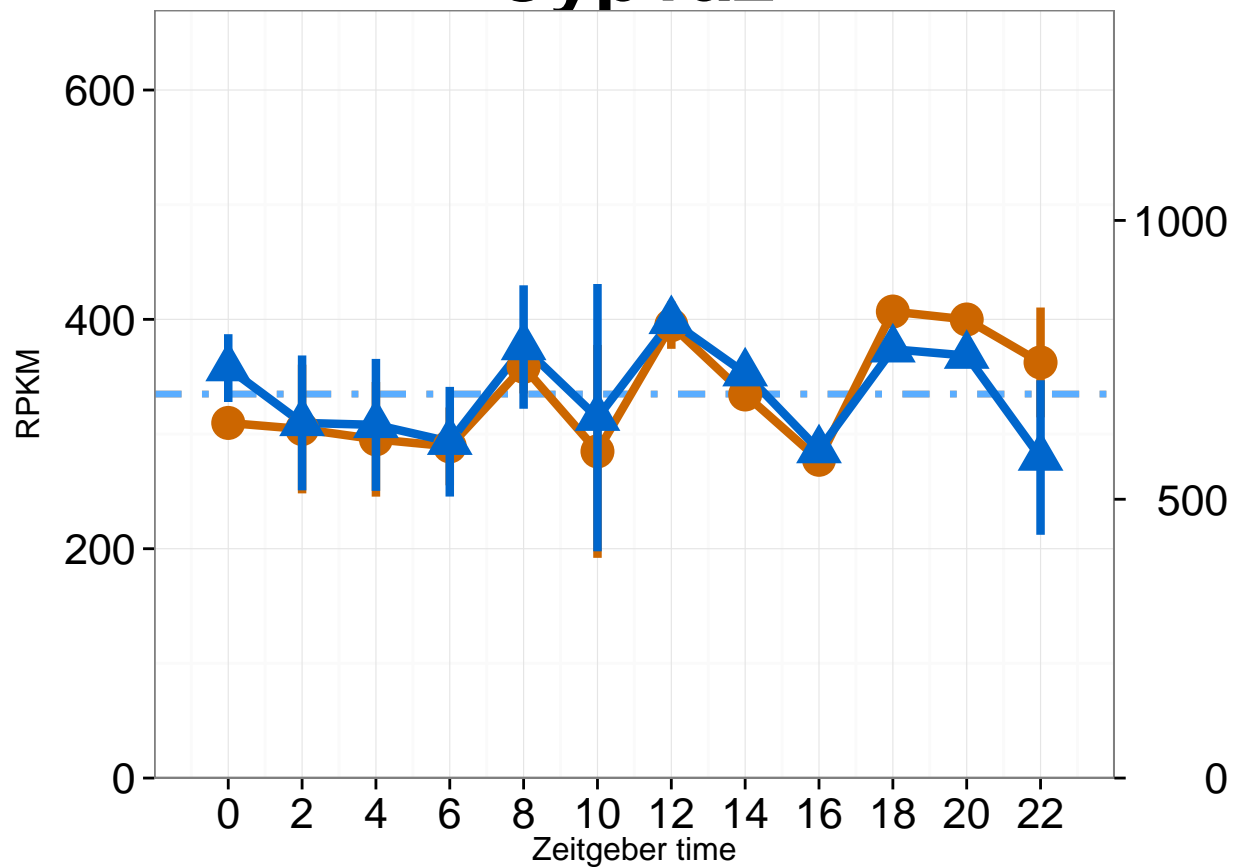

# Cyp1a2

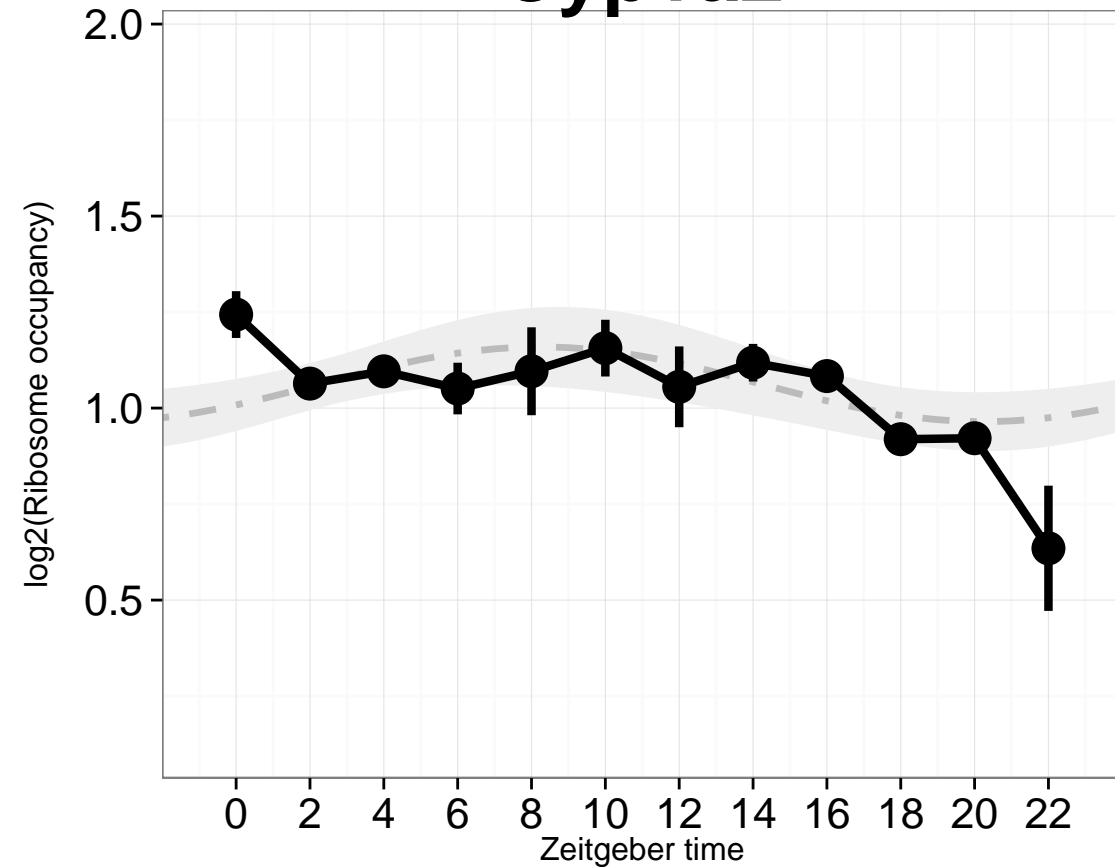

Supplement: SuppDataset_1.zip [file Cyp1a2_set_A.pdf › Supplemental Dataset 1/A-mRNA_nonrhyth_translation_nonrhyth/Cyp1a2_set_A.pdf]

# Cyp20a1

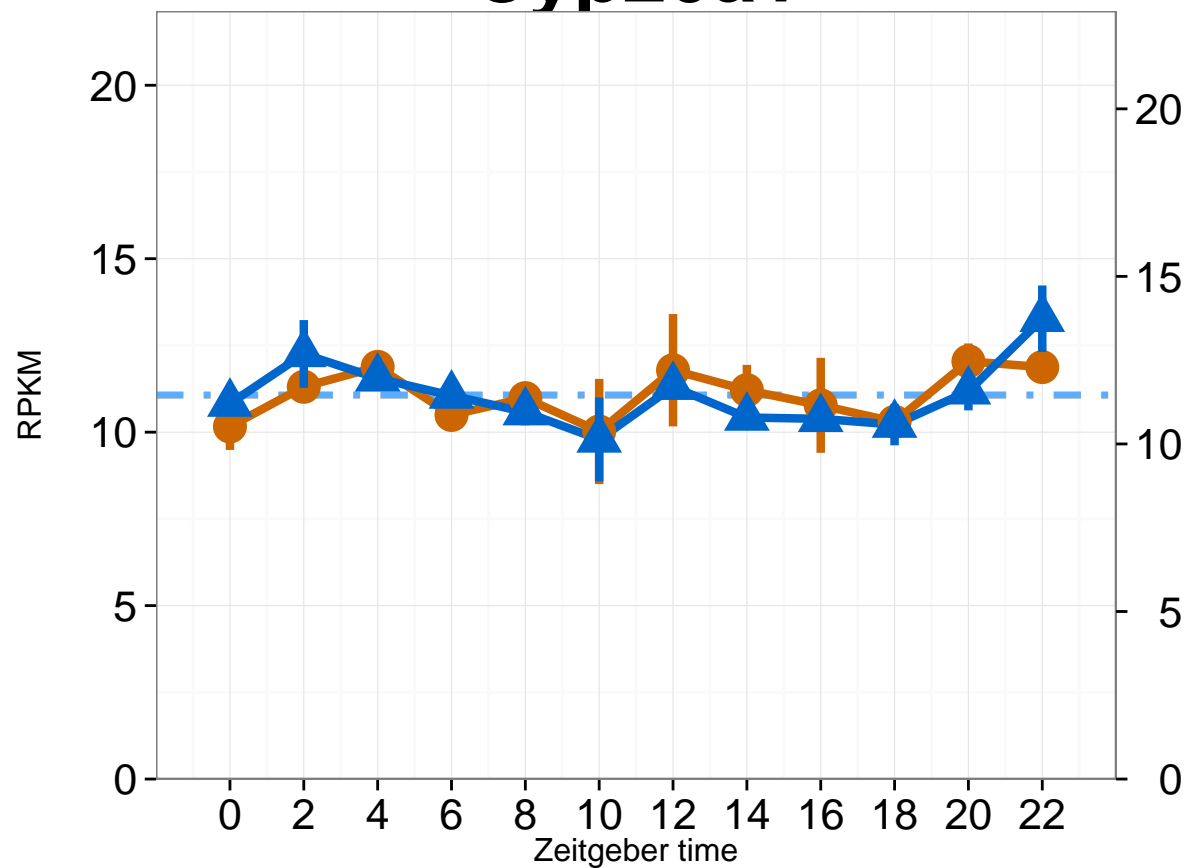

# Cyp20a1

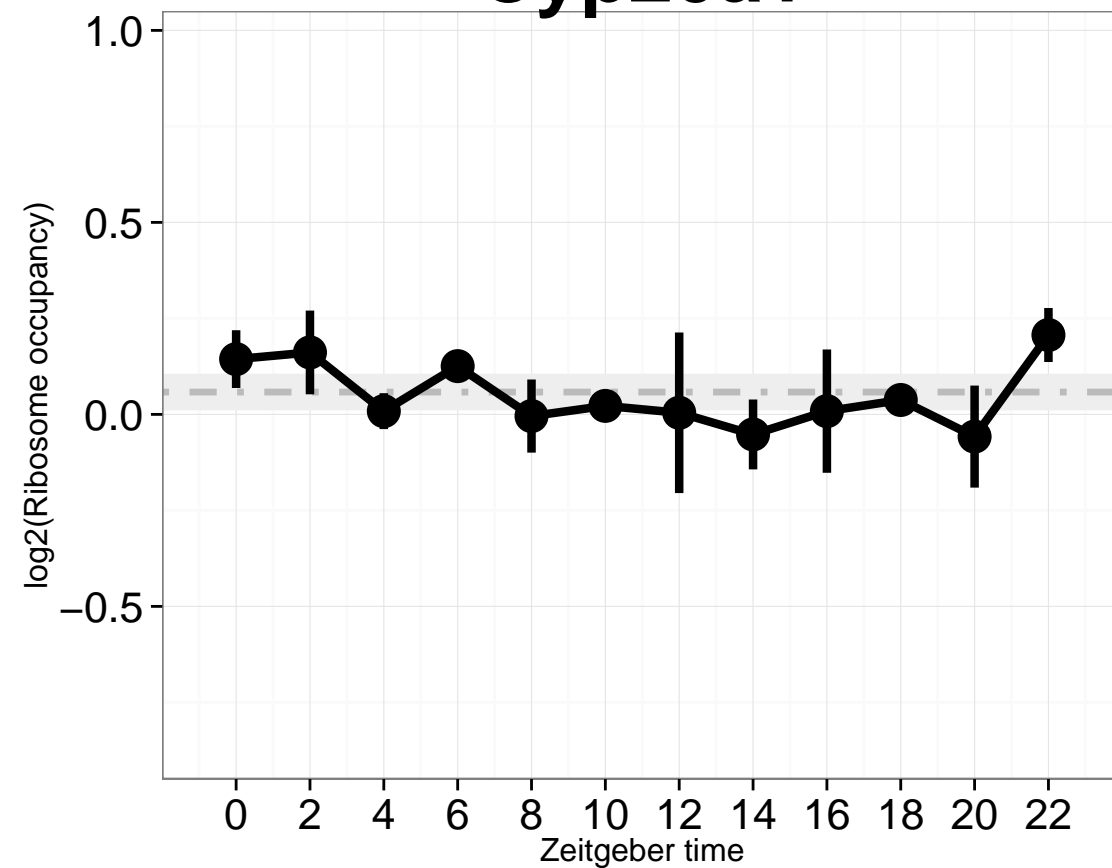

Supplement: SuppDataset_1.zip [file Cyp20a1_set_A.pdf › Supplemental Dataset 1/A-mRNA_nonrhyth_translation_nonrhyth/Cyp20a1_set_A.pdf]

# Cyp26b1

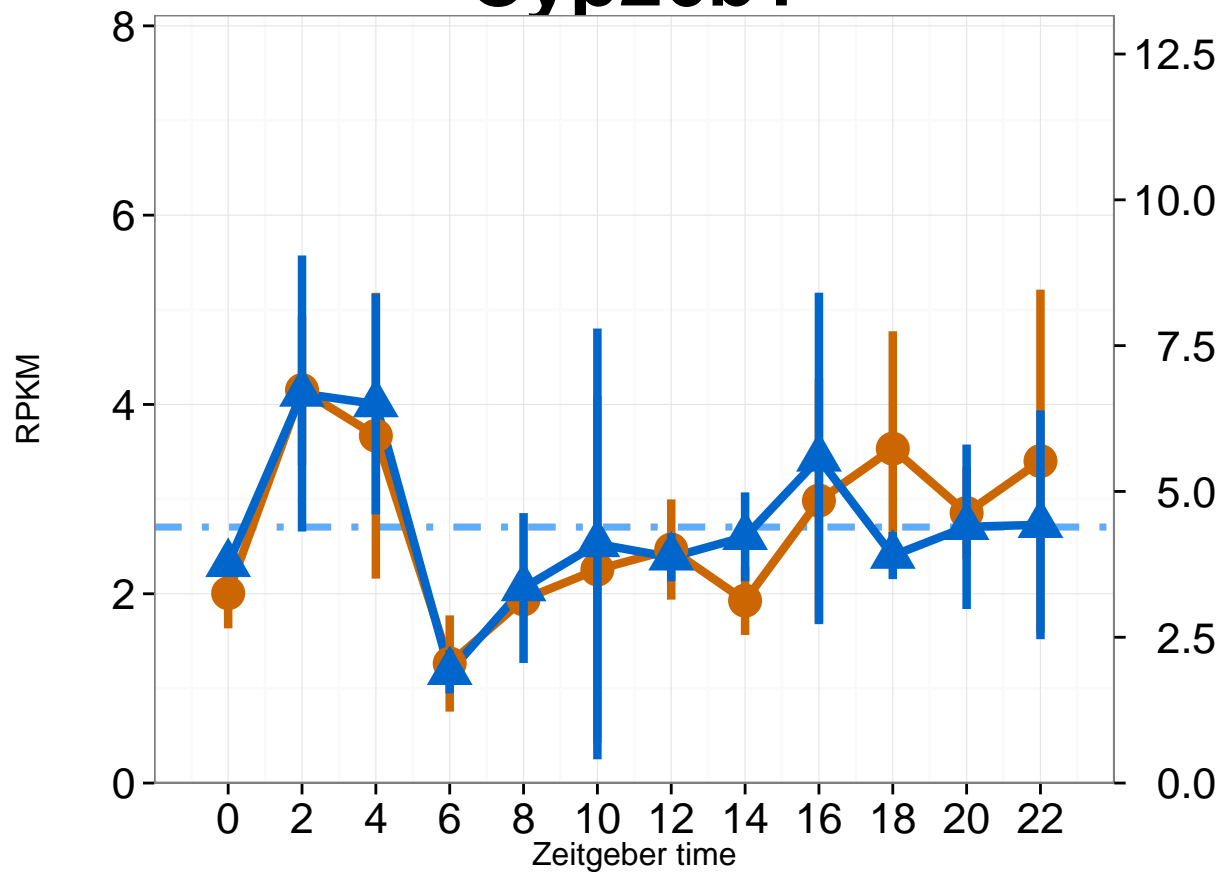

# Cyp26b1

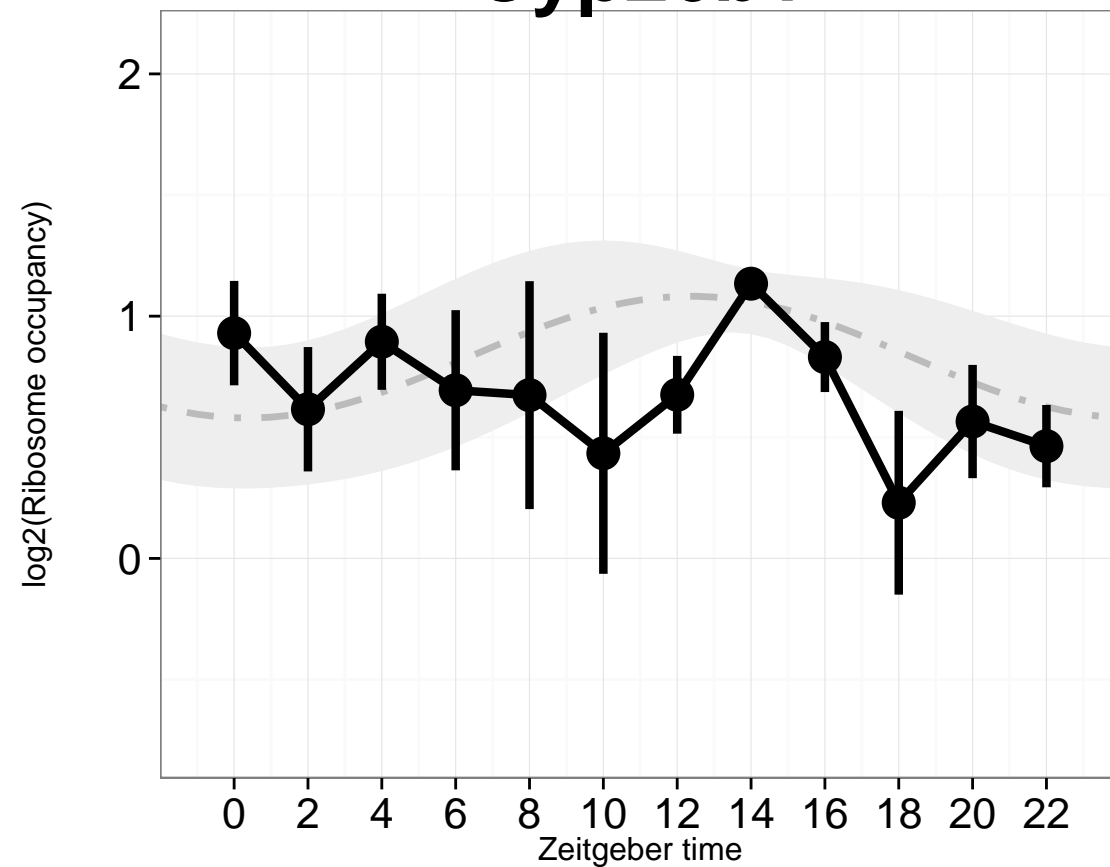

Supplement: SuppDataset_1.zip [file Cyp26b1_set_A.pdf › Supplemental Dataset 1/A-mRNA_nonrhyth_translation_nonrhyth/Cyp26b1_set_A.pdf]

# Cyp27a1

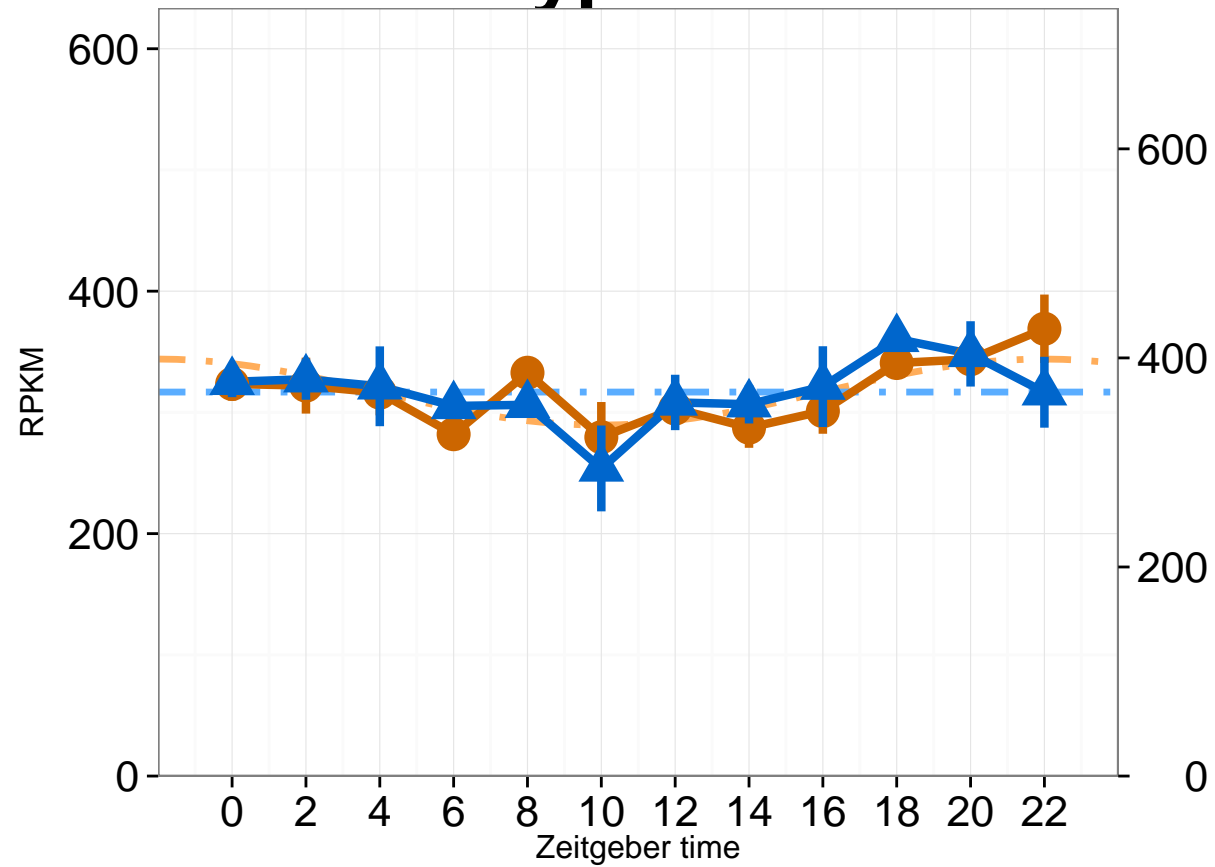

# Cyp27a1

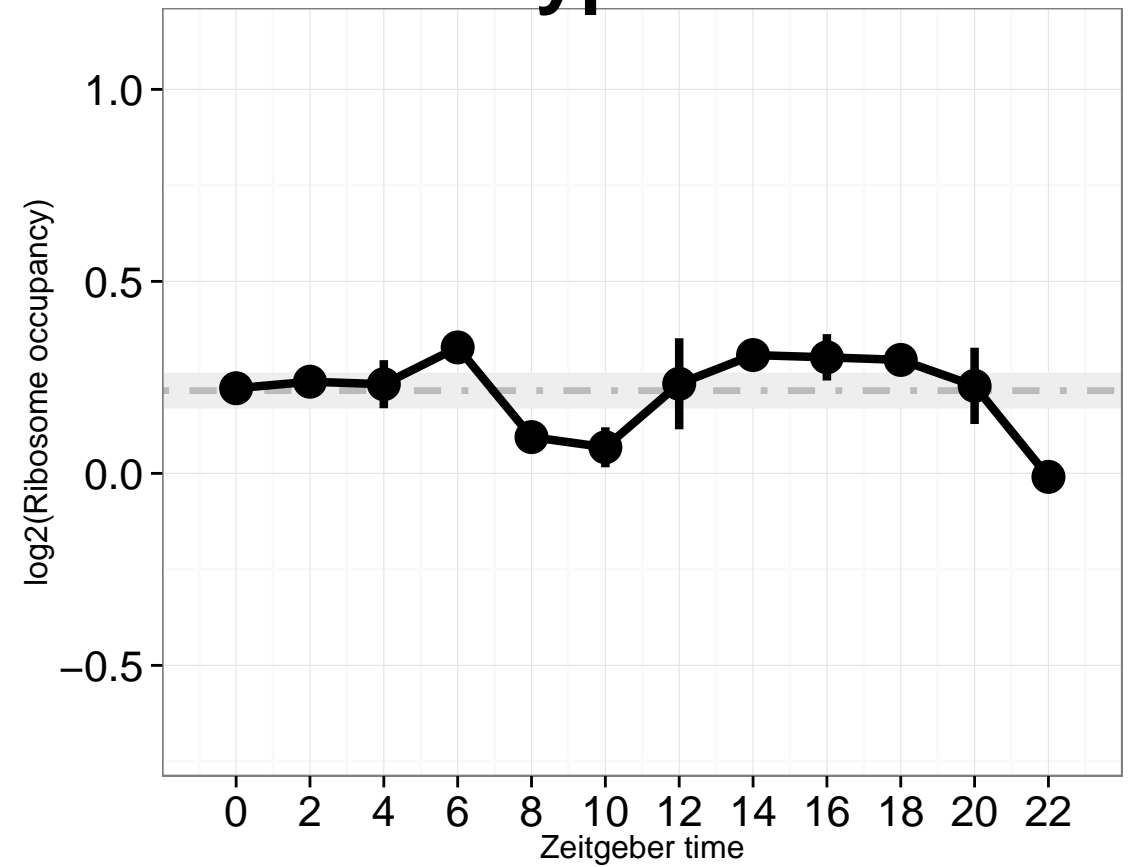

Supplement: SuppDataset_1.zip [file Cyp27a1_set_A.pdf › Supplemental Dataset 1/A-mRNA_nonrhyth_translation_nonrhyth/Cyp27a1_set_A.pdf]

# Cyp2a12

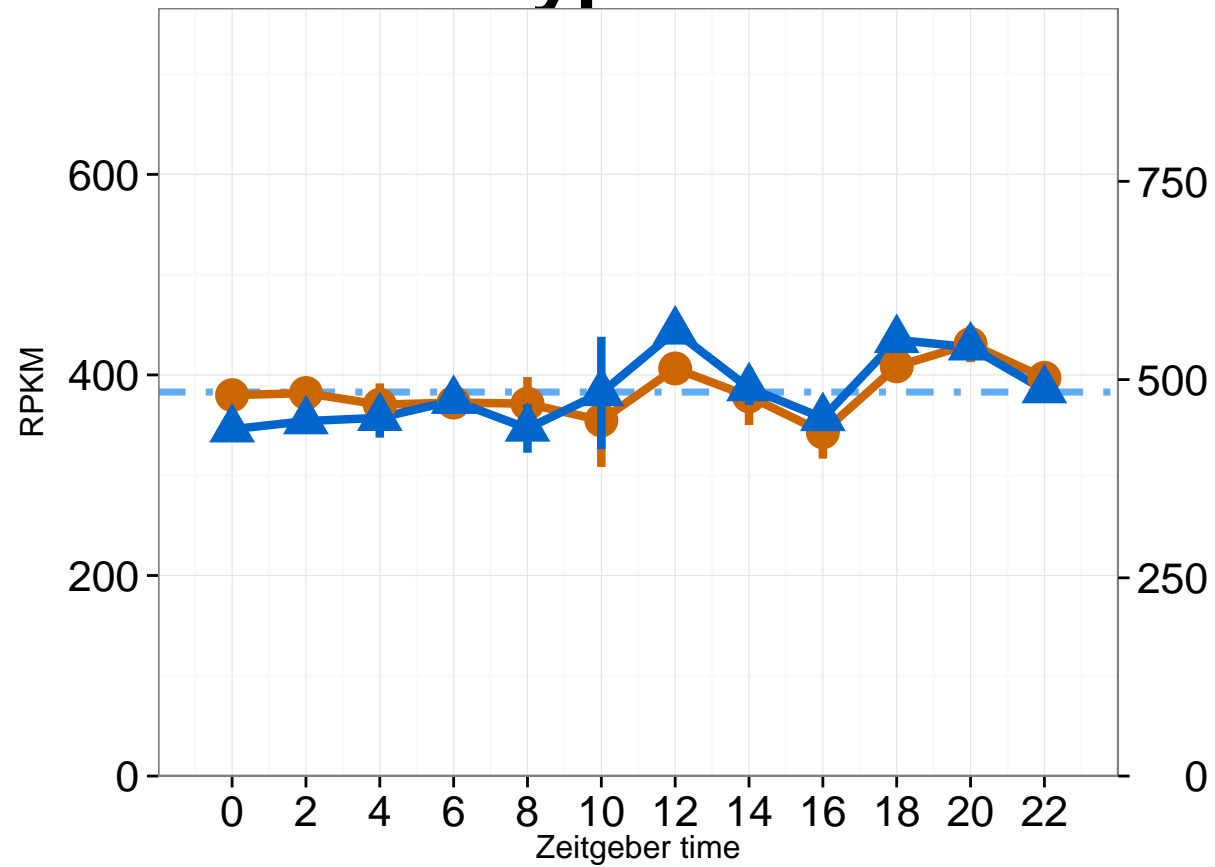

# Cyp2a12

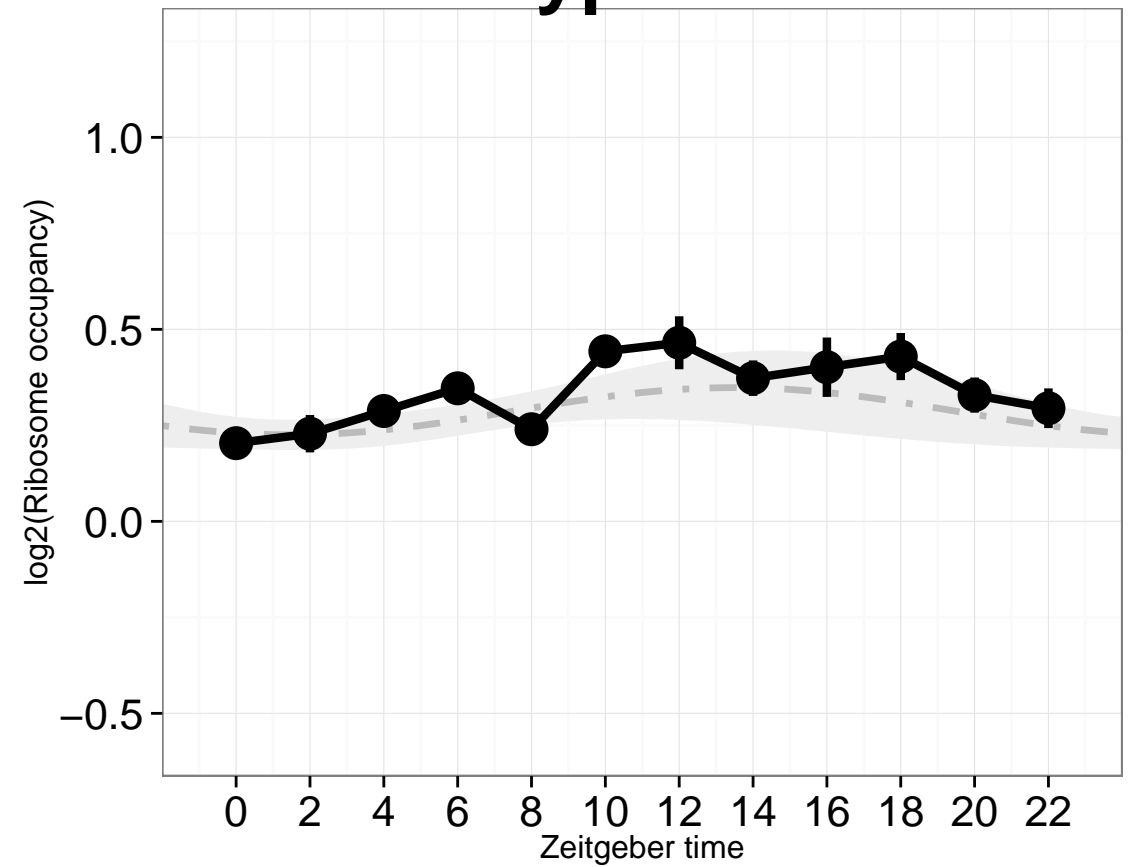

Supplement: SuppDataset_1.zip [file Cyp2a12_set_A.pdf › Supplemental Dataset 1/A-mRNA_nonrhyth_translation_nonrhyth/Cyp2a12_set_A.pdf]

# Cyp2a22

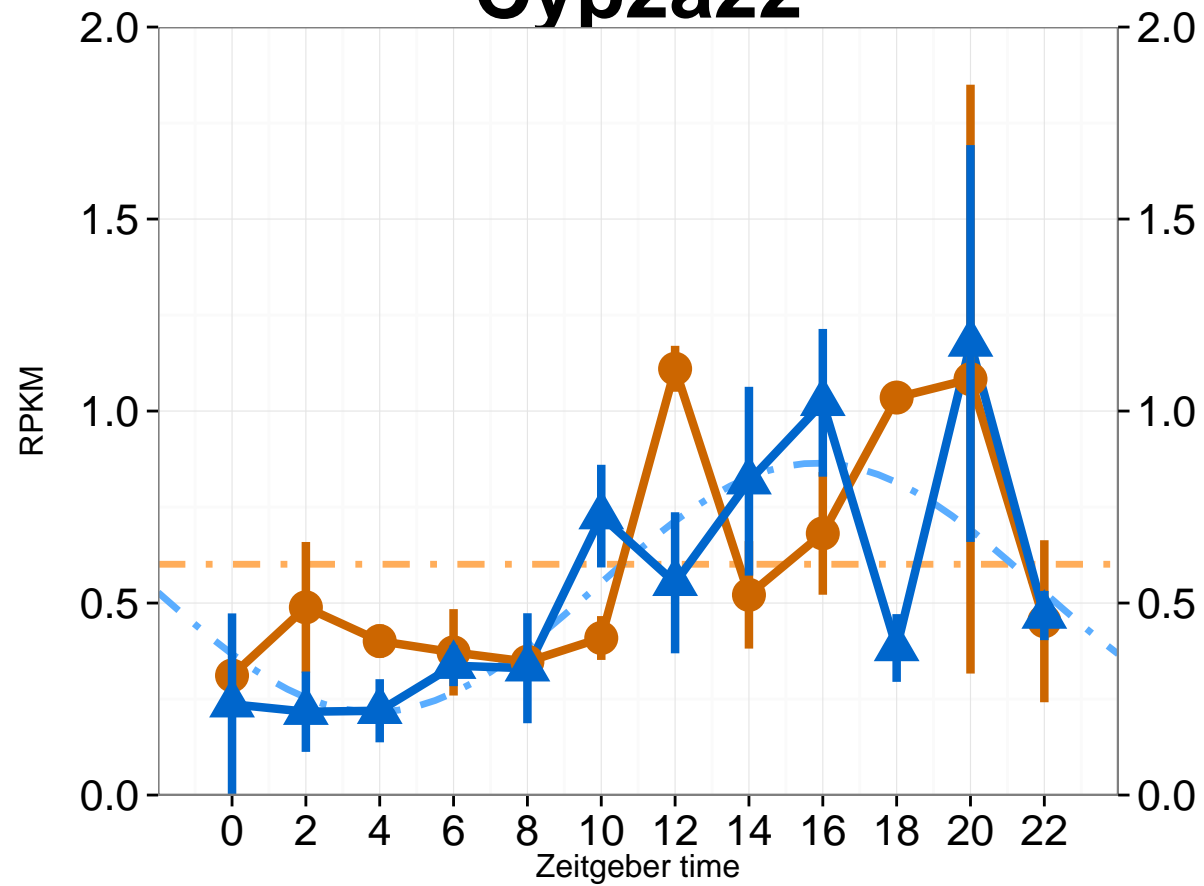

# Cyp2a22

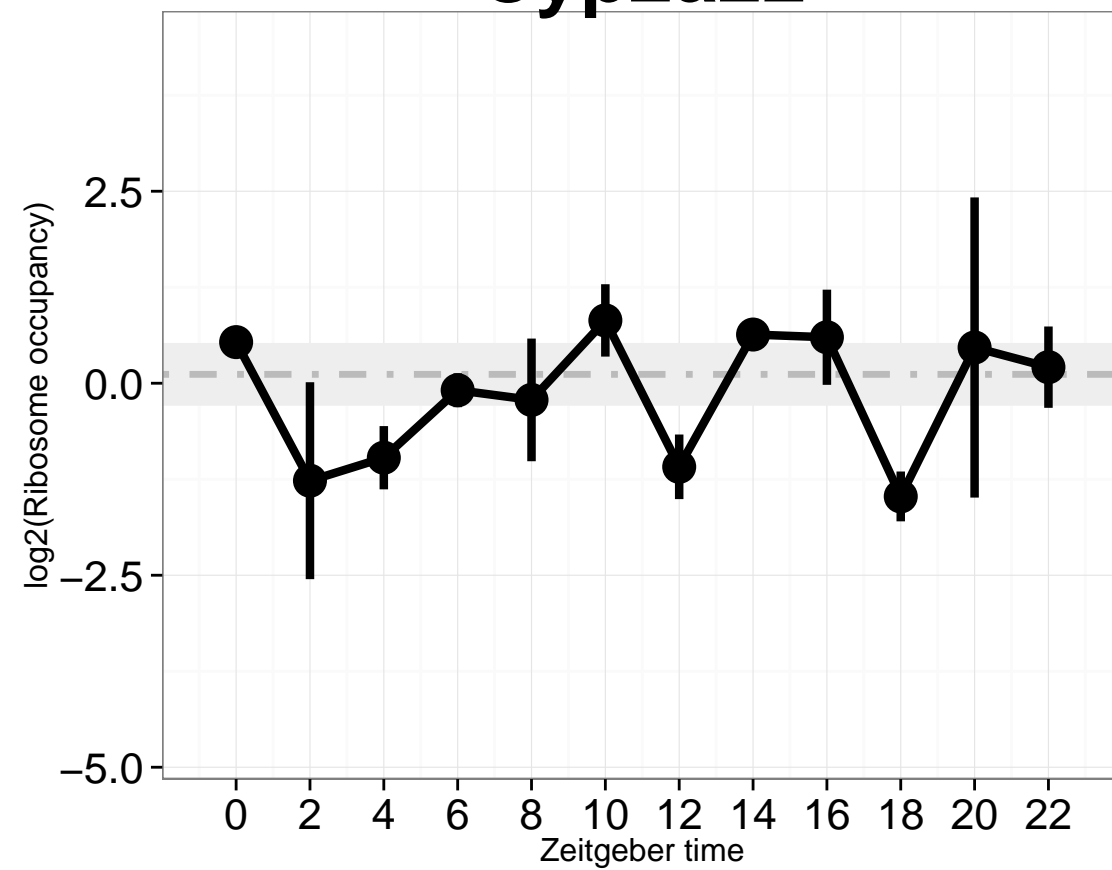

Supplement: SuppDataset_1.zip [file Cyp2a22_set_A.pdf › Supplemental Dataset 1/A-mRNA_nonrhyth_translation_nonrhyth/Cyp2a22_set_A.pdf]

# Cyp2a4

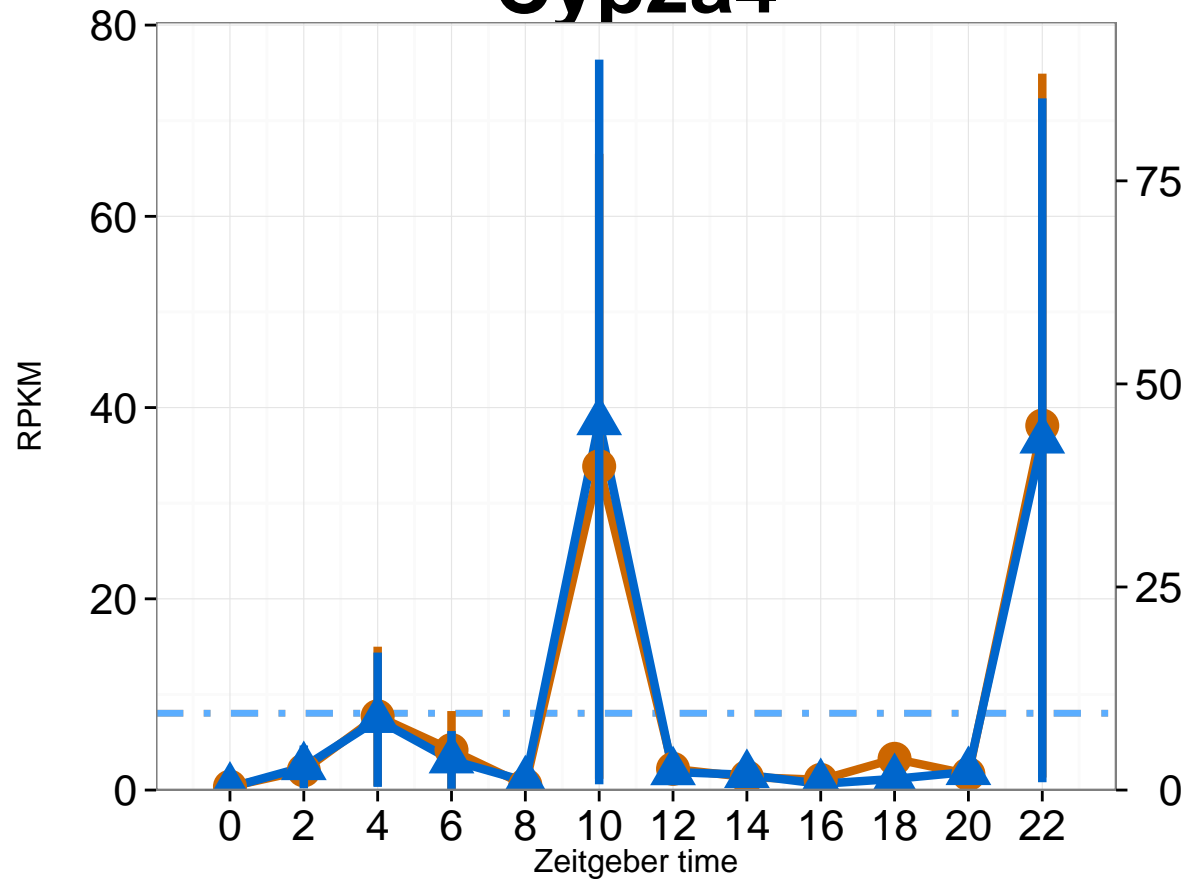

# Cyp2a4

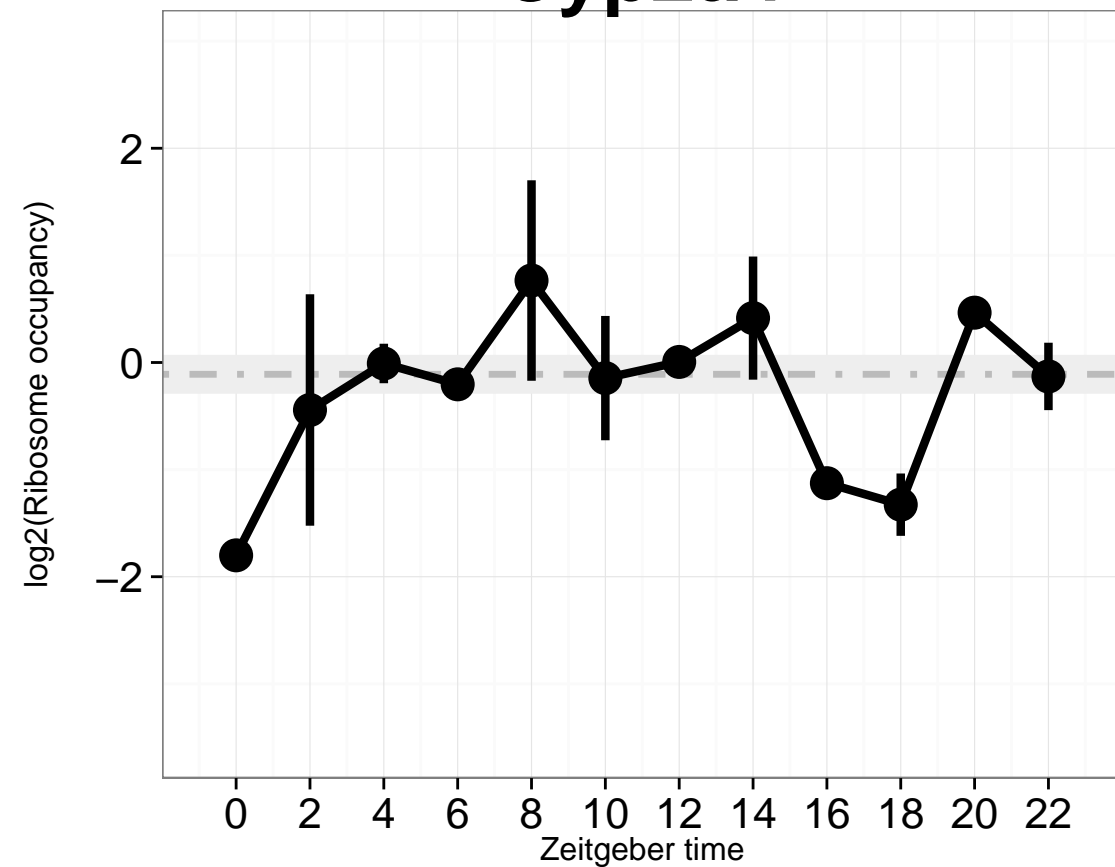

Supplement: SuppDataset_1.zip [file Cyp2a4_set_A.pdf › Supplemental Dataset 1/A-mRNA_nonrhyth_translation_nonrhyth/Cyp2a4_set_A.pdf]

# Cyp2c29

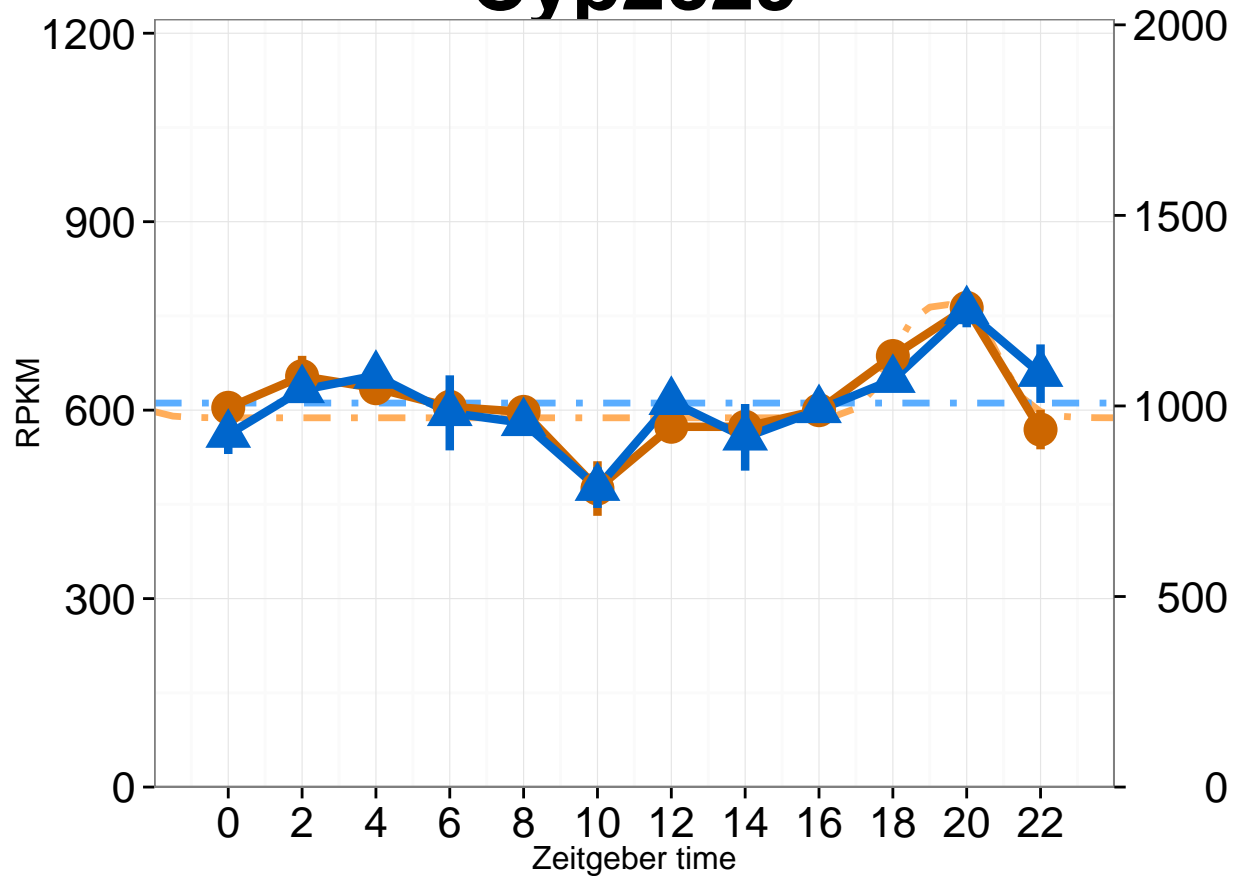

# Cyp2c29

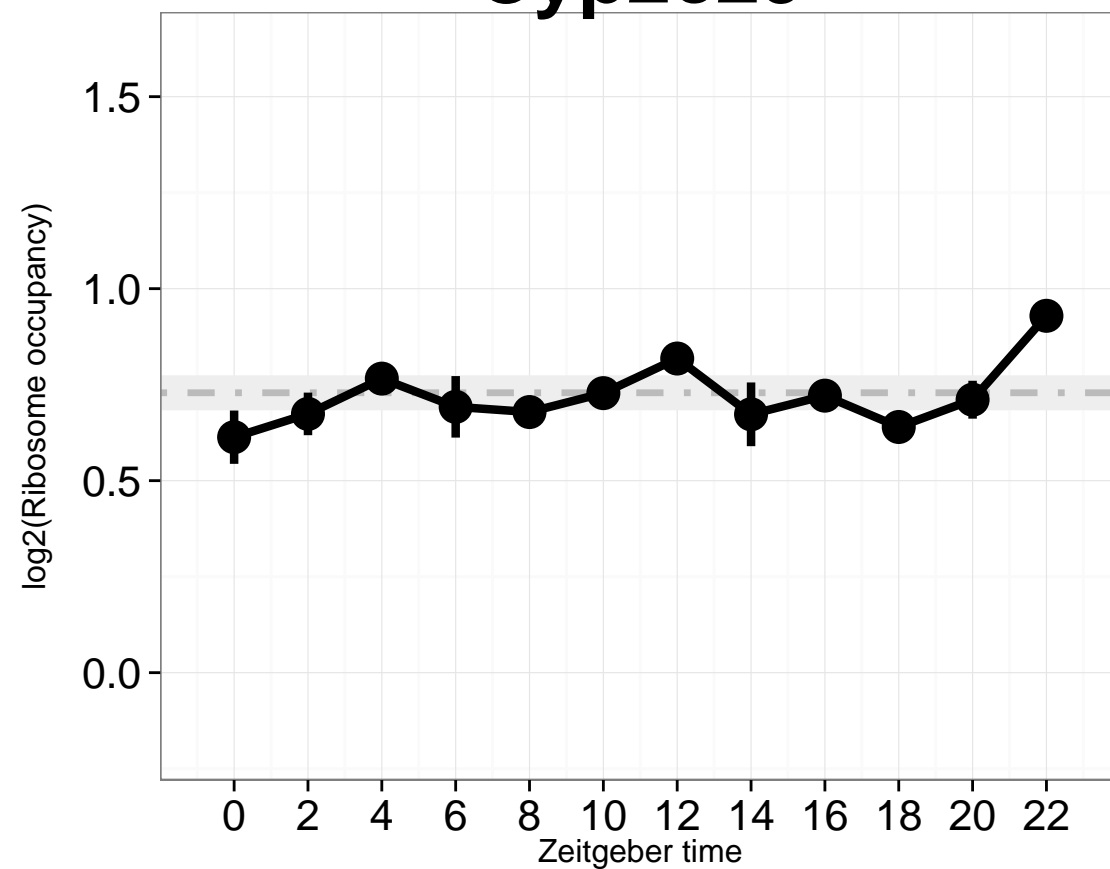

Supplement: SuppDataset_1.zip [file Cyp2c29_set_A.pdf › Supplemental Dataset 1/A-mRNA_nonrhyth_translation_nonrhyth/Cyp2c29_set_A.pdf]

# Cyp2c38

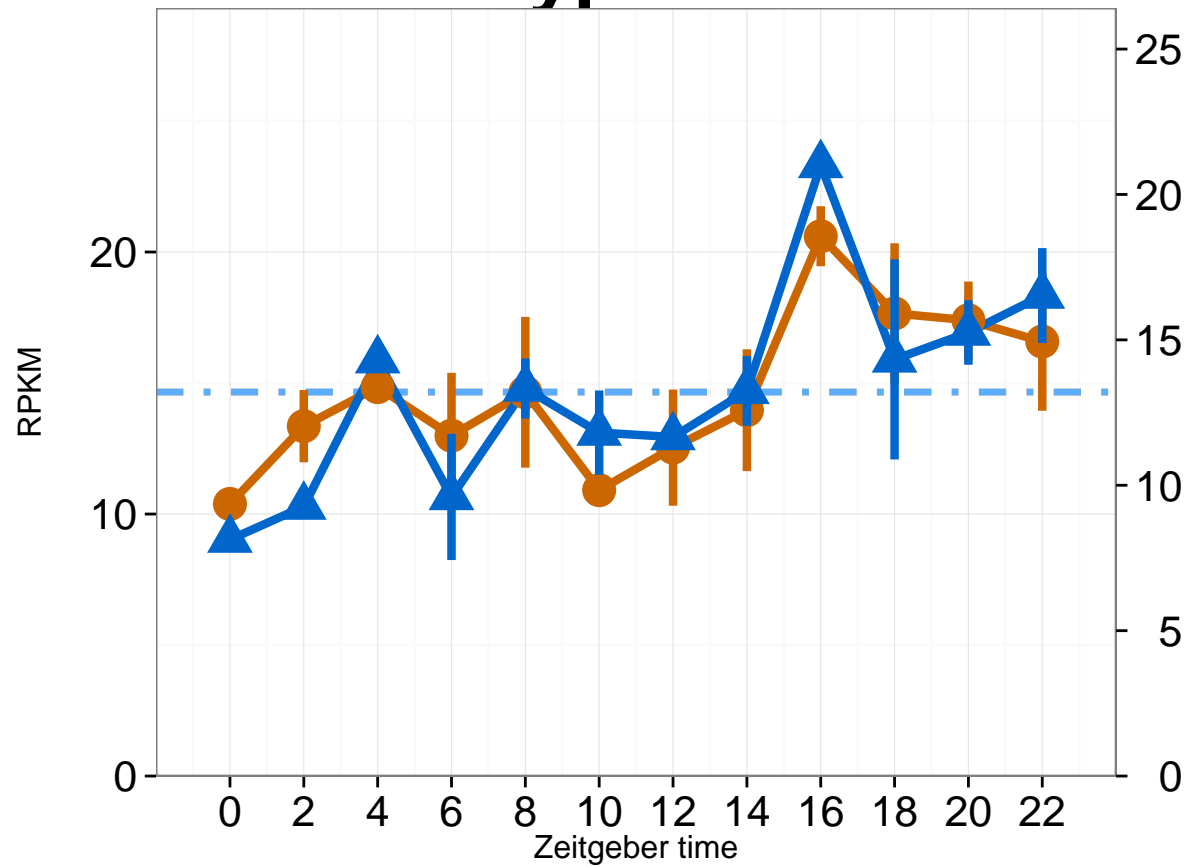

# Cyp2c38

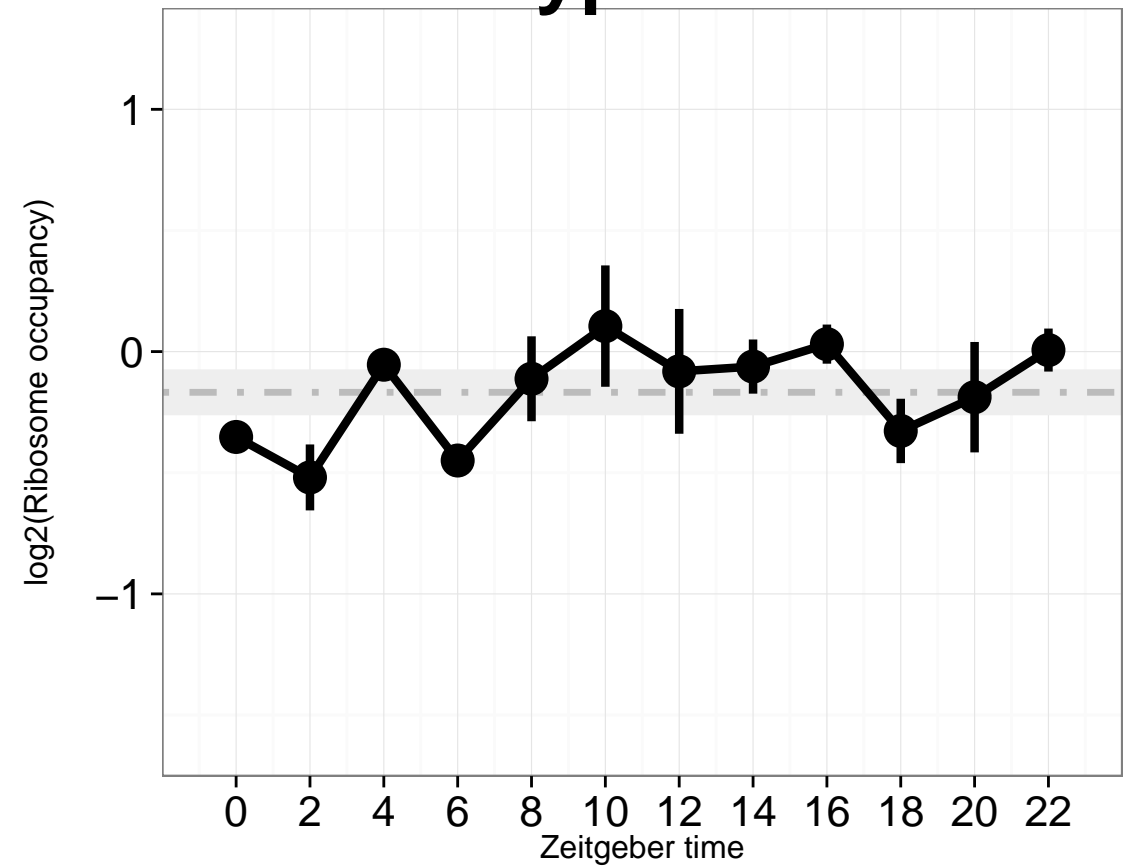

Supplement: SuppDataset_1.zip [file Cyp2c38_set_A.pdf › Supplemental Dataset 1/A-mRNA_nonrhyth_translation_nonrhyth/Cyp2c38_set_A.pdf]

# Cyp2c40

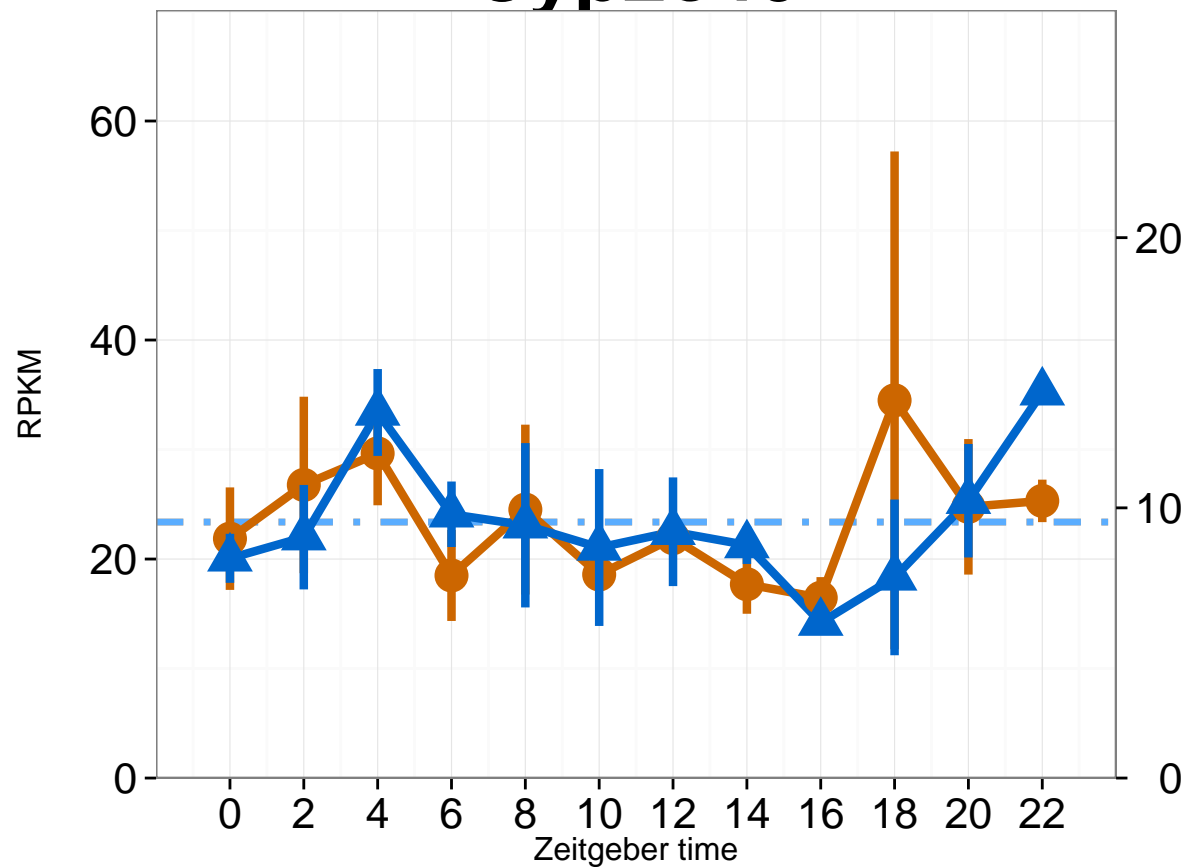

# Cyp2c40

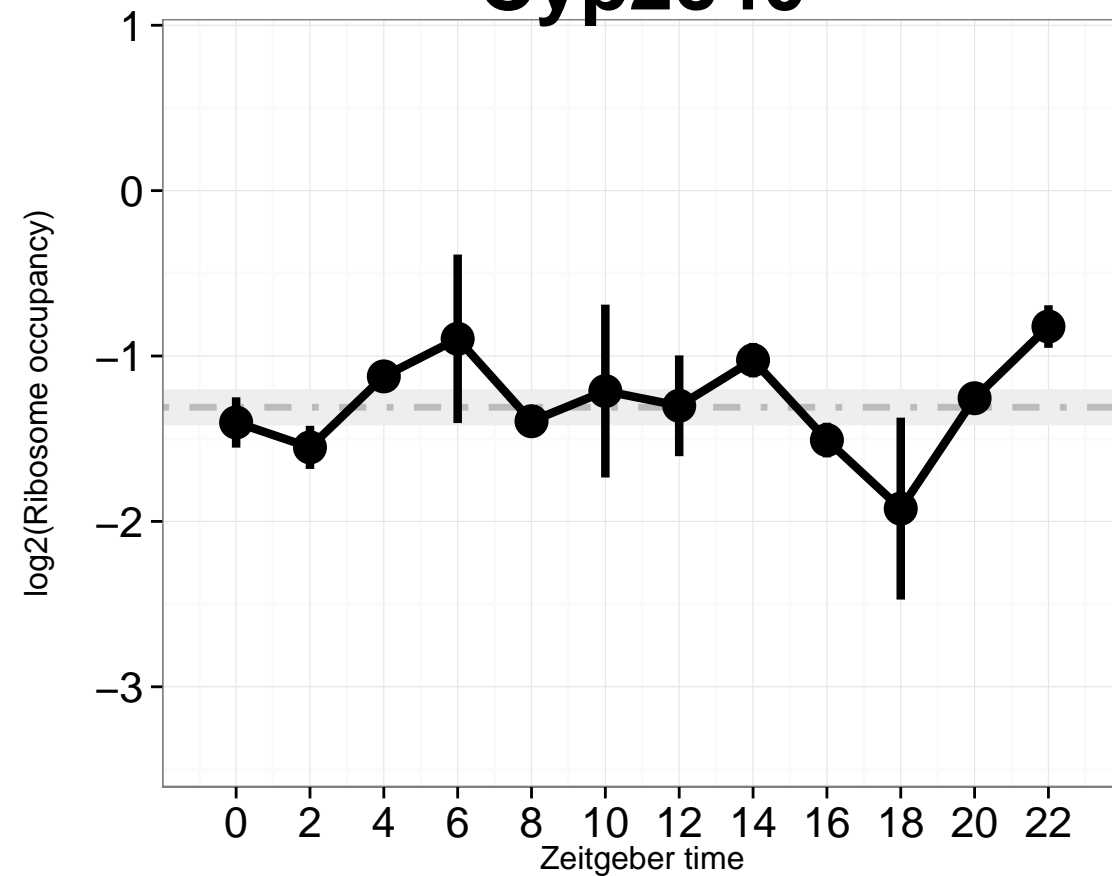

Supplement: SuppDataset_1.zip [file Cyp2c40_set_A.pdf › Supplemental Dataset 1/A-mRNA_nonrhyth_translation_nonrhyth/Cyp2c40_set_A.pdf]

# Cyp2c44

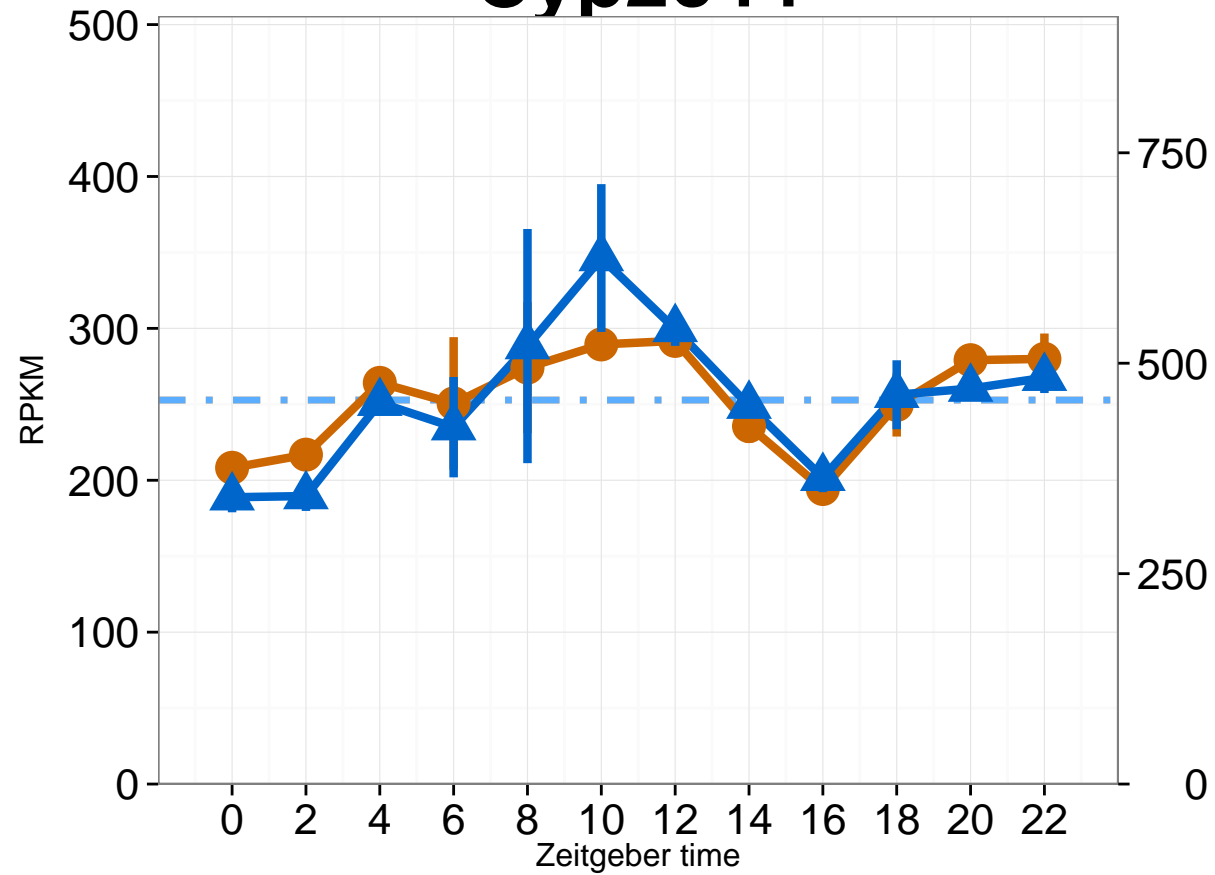

# Cyp2c44

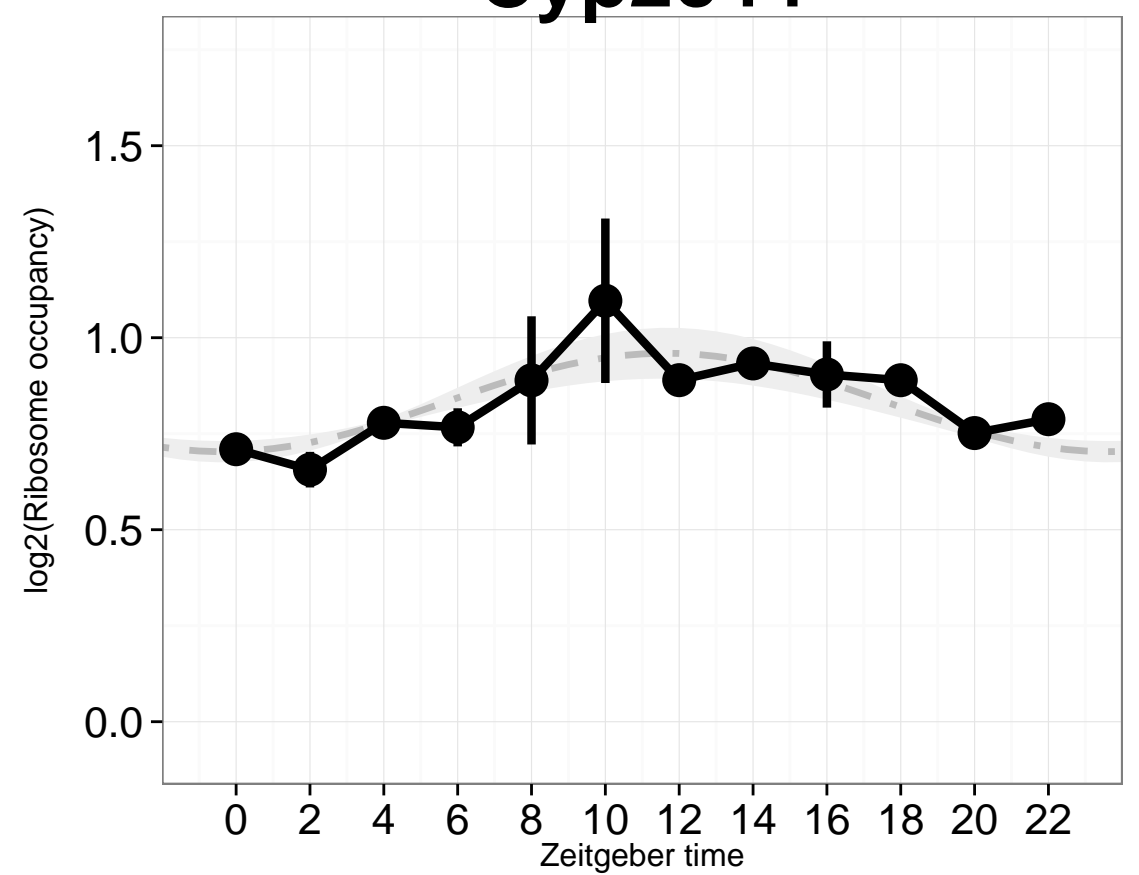

Supplement: SuppDataset_1.zip [file Cyp2c44_set_A.pdf › Supplemental Dataset 1/A-mRNA_nonrhyth_translation_nonrhyth/Cyp2c44_set_A.pdf]

# Cyp2c50

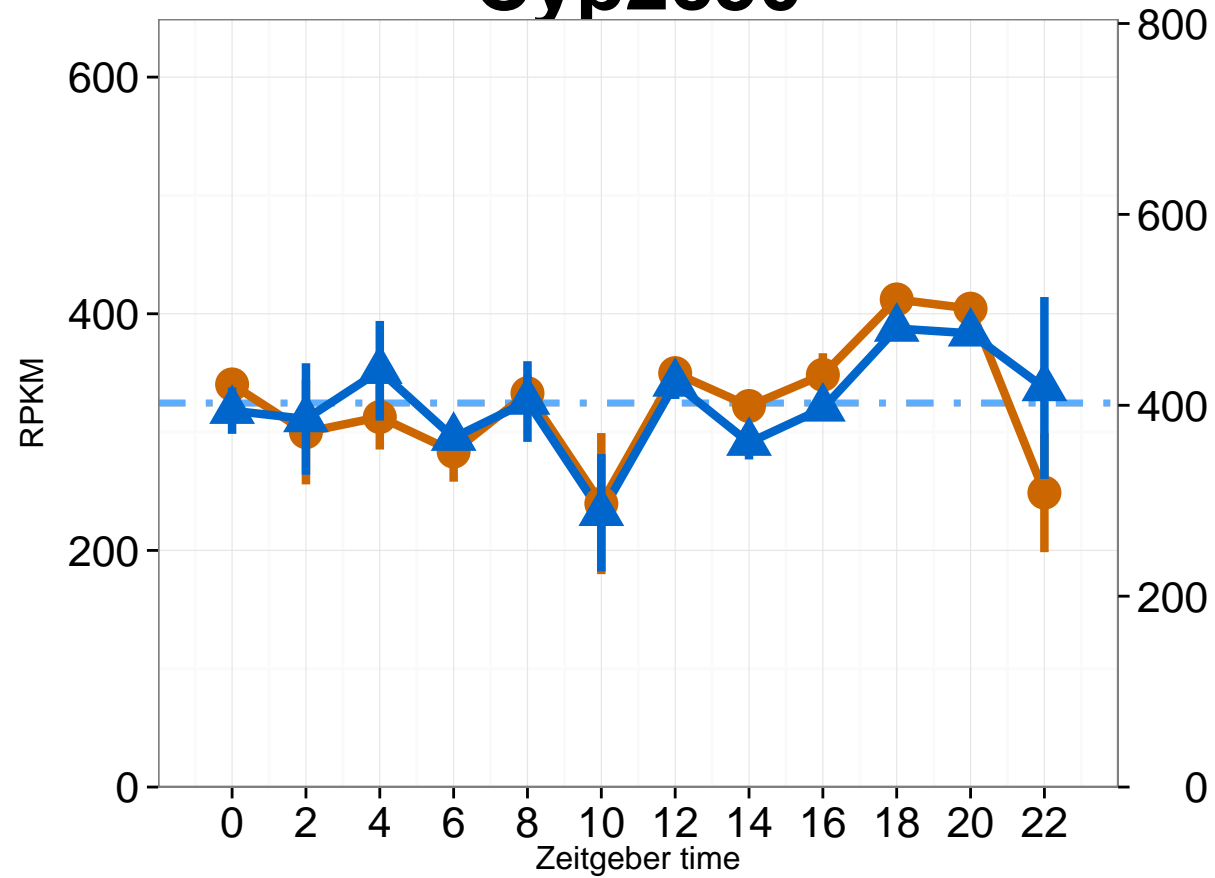

# Cyp2c50

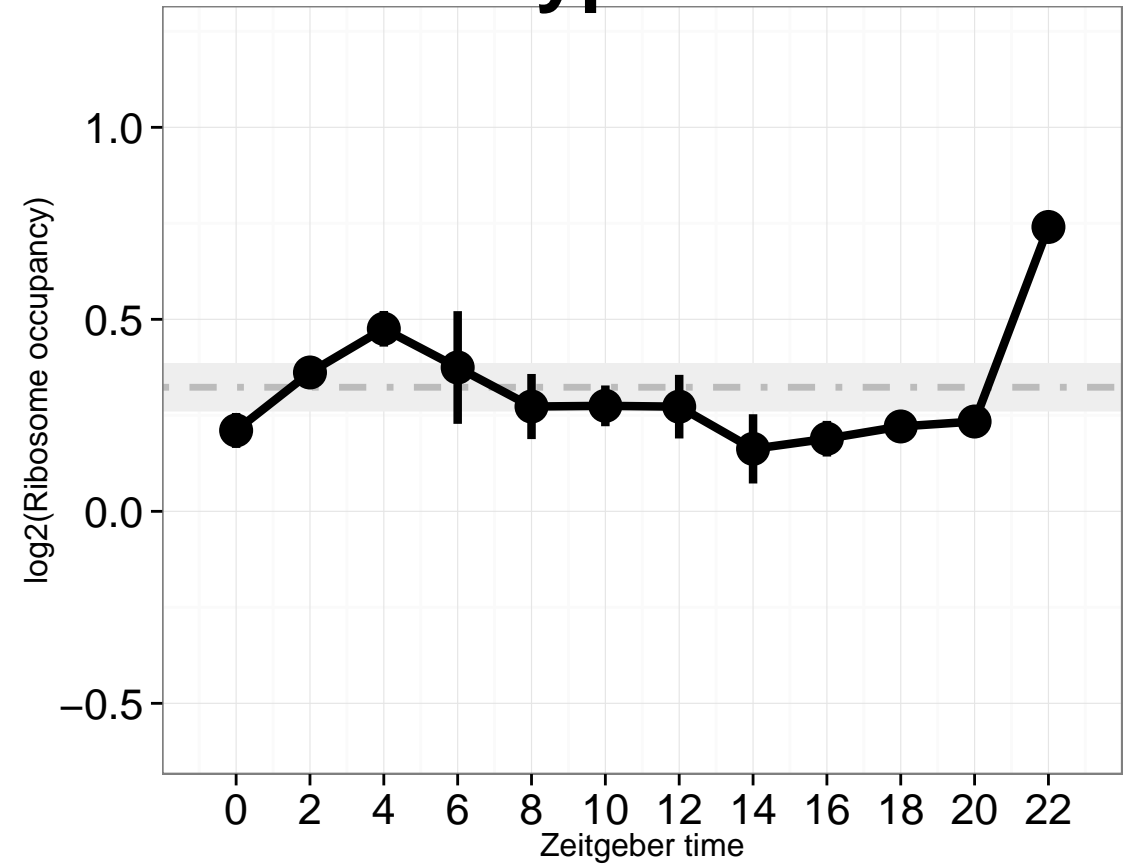

Supplement: SuppDataset_1.zip [file Cyp2c50_set_A.pdf › Supplemental Dataset 1/A-mRNA_nonrhyth_translation_nonrhyth/Cyp2c50_set_A.pdf]

# Cyp2c55

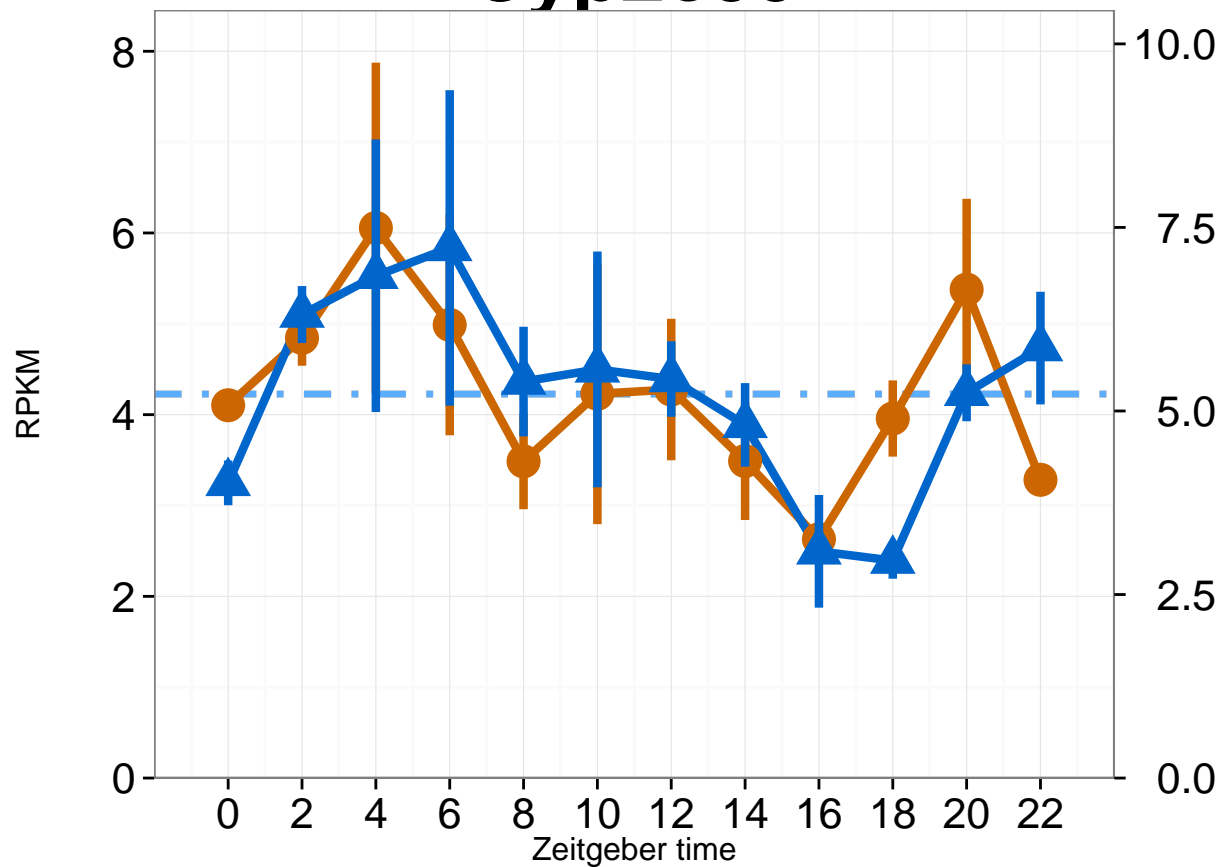

# Cyp2c55

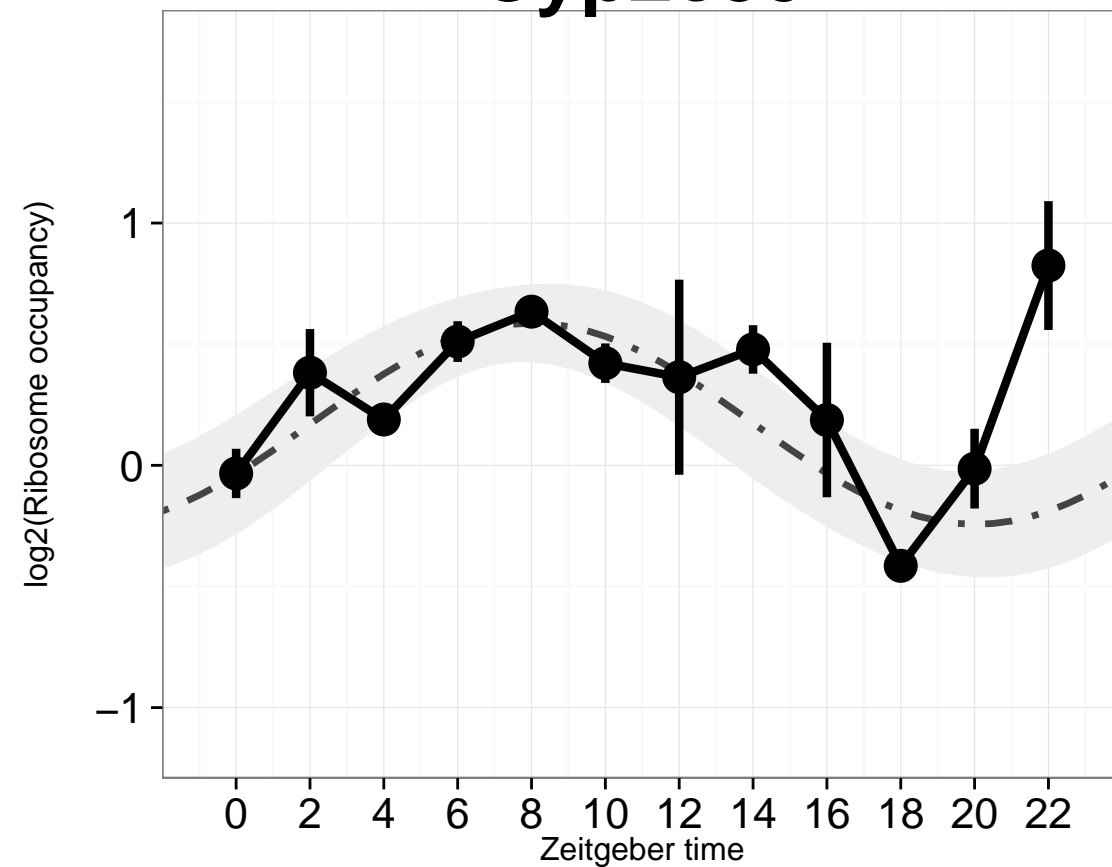

Supplement: SuppDataset_1.zip [file Cyp2c55_set_A.pdf › Supplemental Dataset 1/A-mRNA_nonrhyth_translation_nonrhyth/Cyp2c55_set_A.pdf]

# Cyp2c67

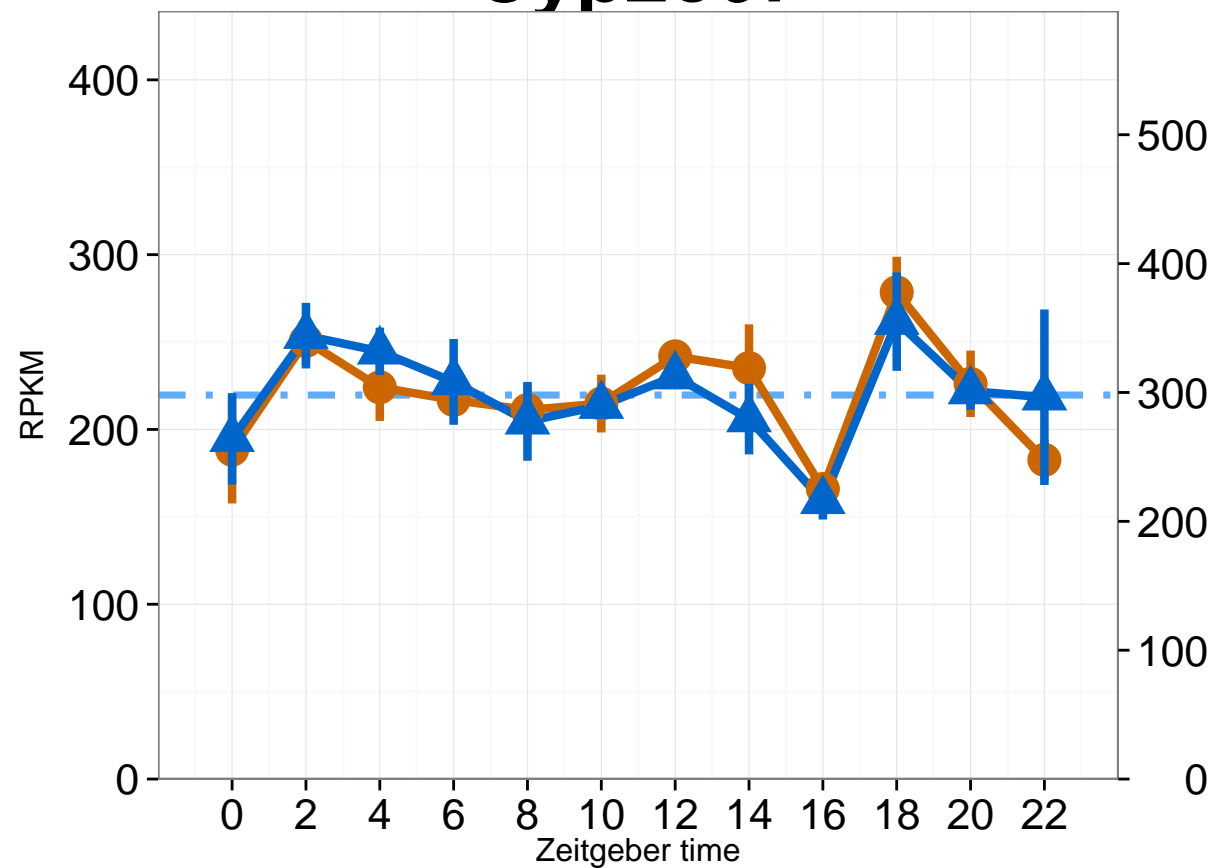

# Cyp2c67

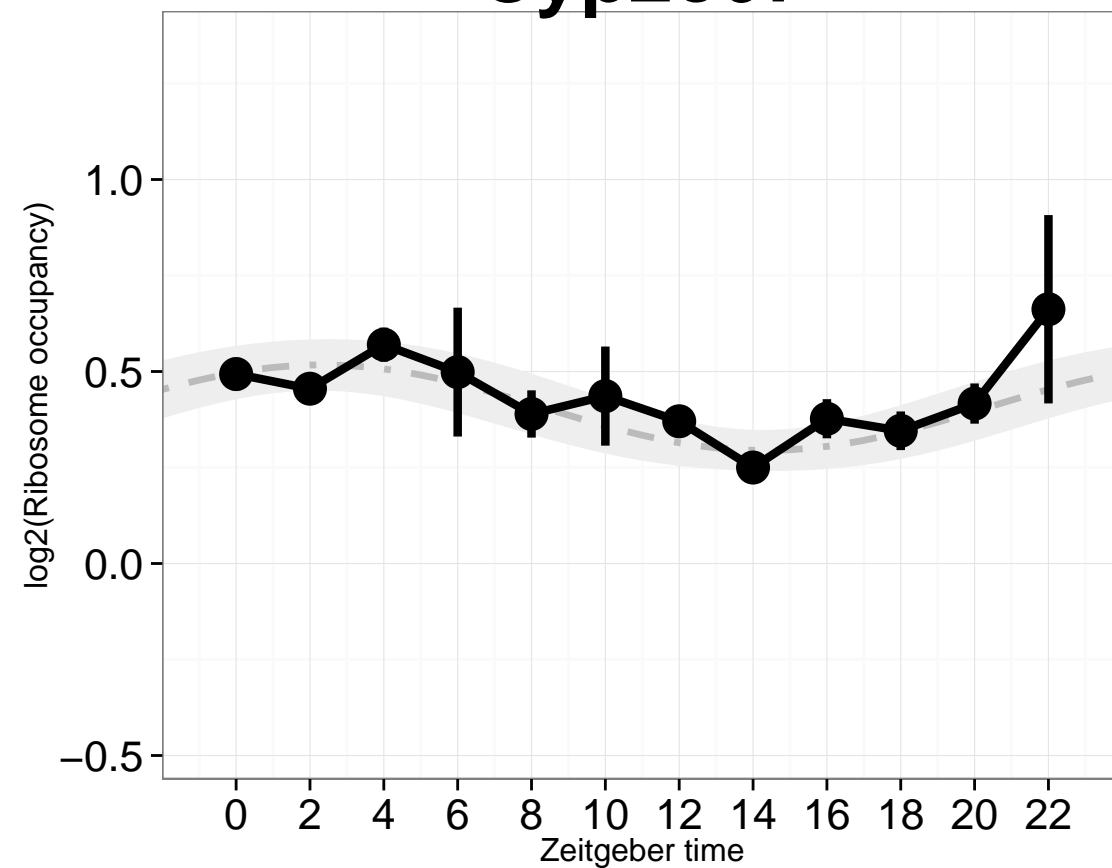

Supplement: SuppDataset_1.zip [file Cyp2c67_set_A.pdf › Supplemental Dataset 1/A-mRNA_nonrhyth_translation_nonrhyth/Cyp2c67_set_A.pdf]

# Cyp2c68

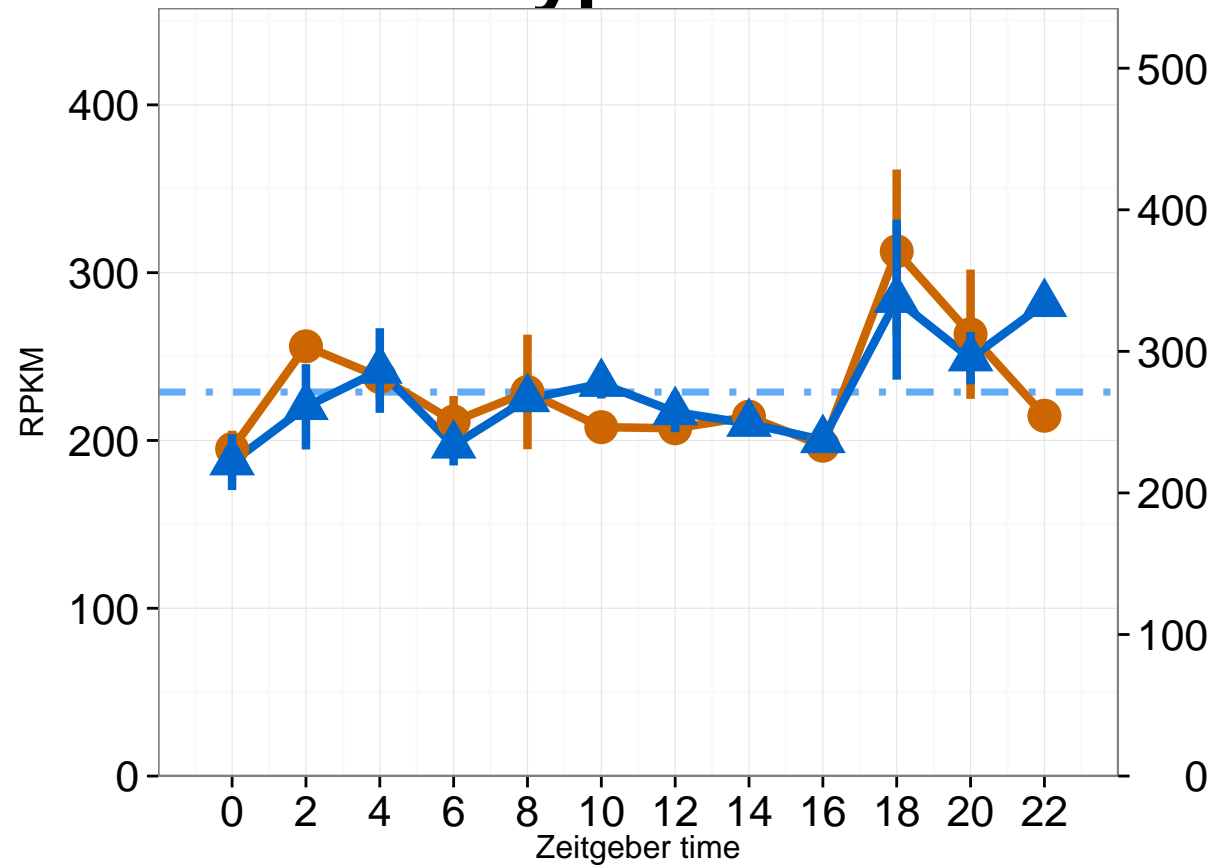

# Cyp2c68

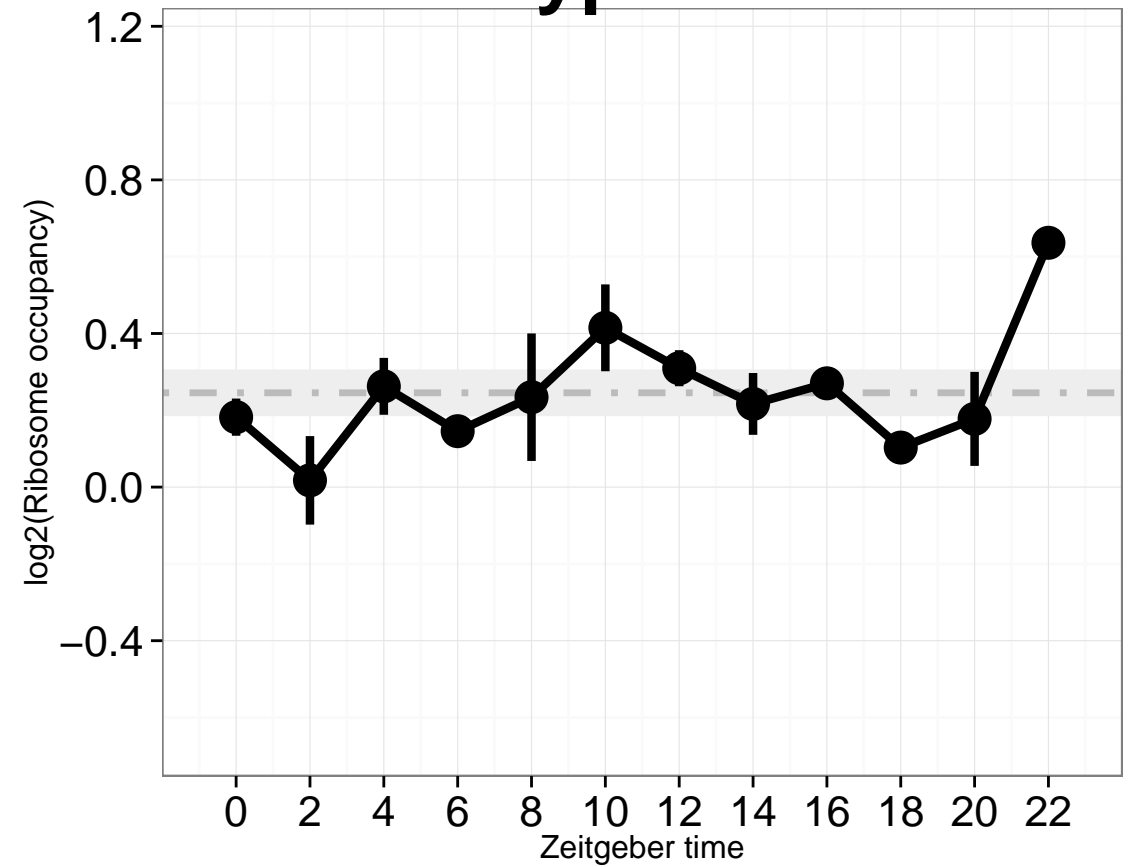

Supplement: SuppDataset_1.zip [file Cyp2c68_set_A.pdf › Supplemental Dataset 1/A-mRNA_nonrhyth_translation_nonrhyth/Cyp2c68_set_A.pdf]

# Cyp2c69

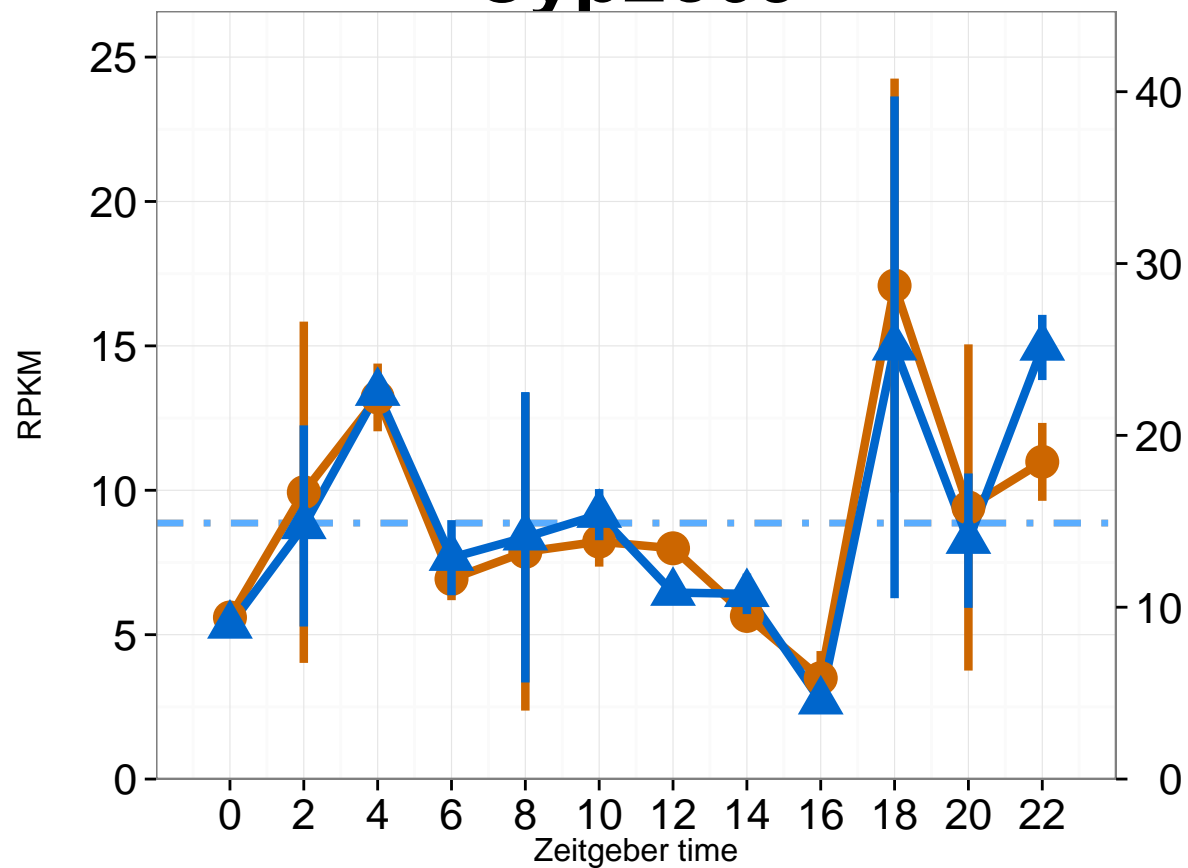

# Cyp2c69

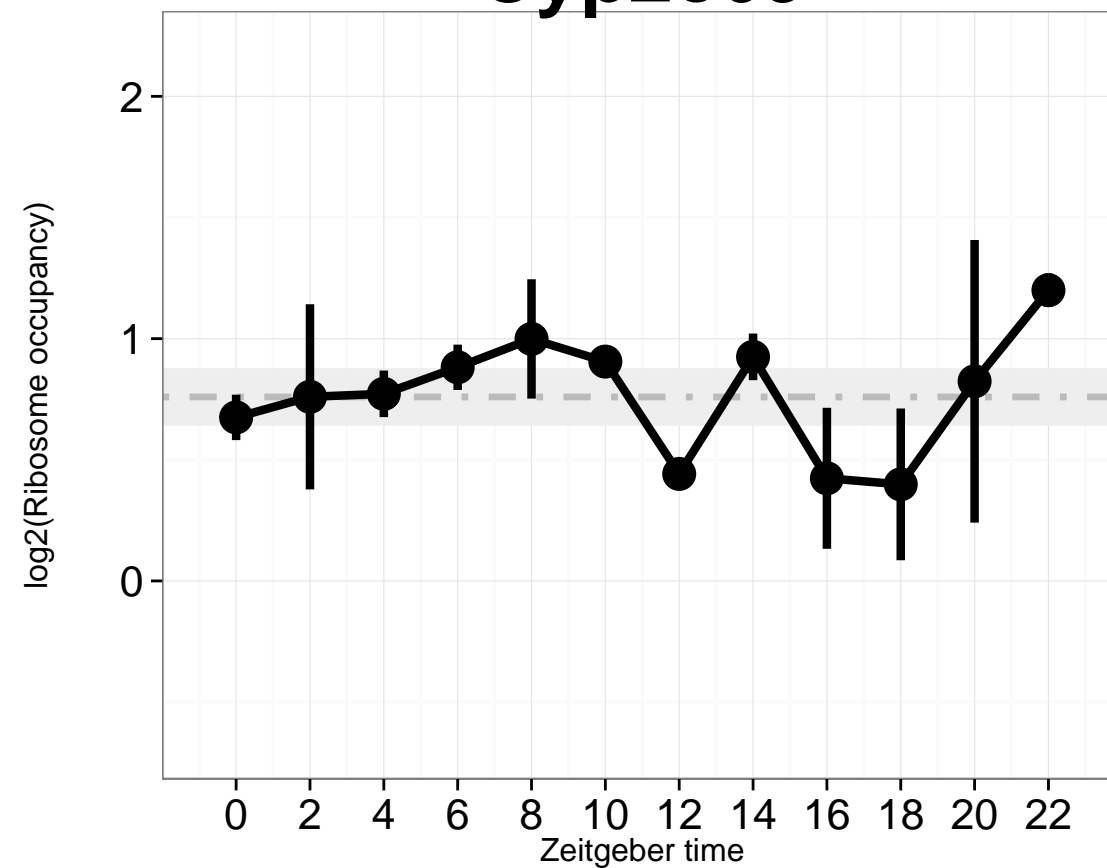

Supplement: SuppDataset_1.zip [file Cyp2c69_set_A.pdf › Supplemental Dataset 1/A-mRNA_nonrhyth_translation_nonrhyth/Cyp2c69_set_A.pdf]

# Cyp2d10

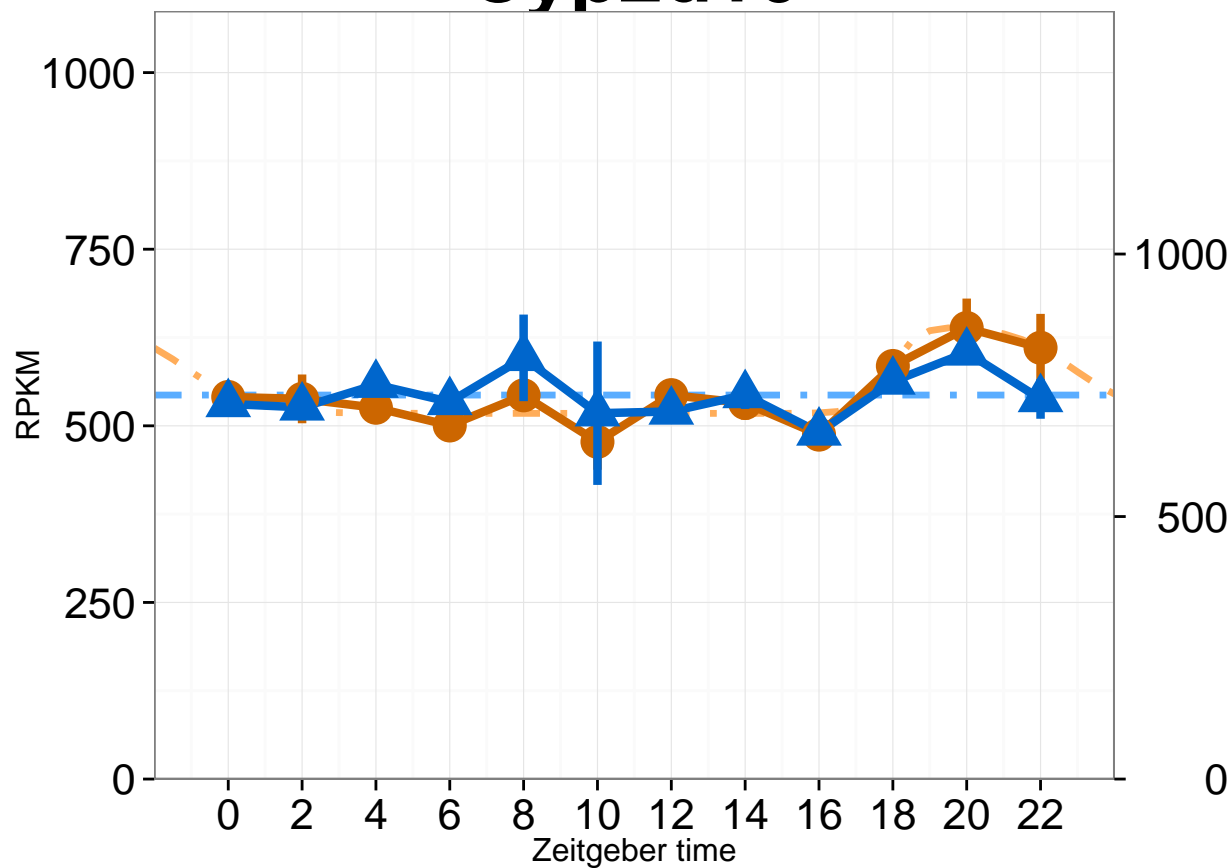

# Cyp2d10

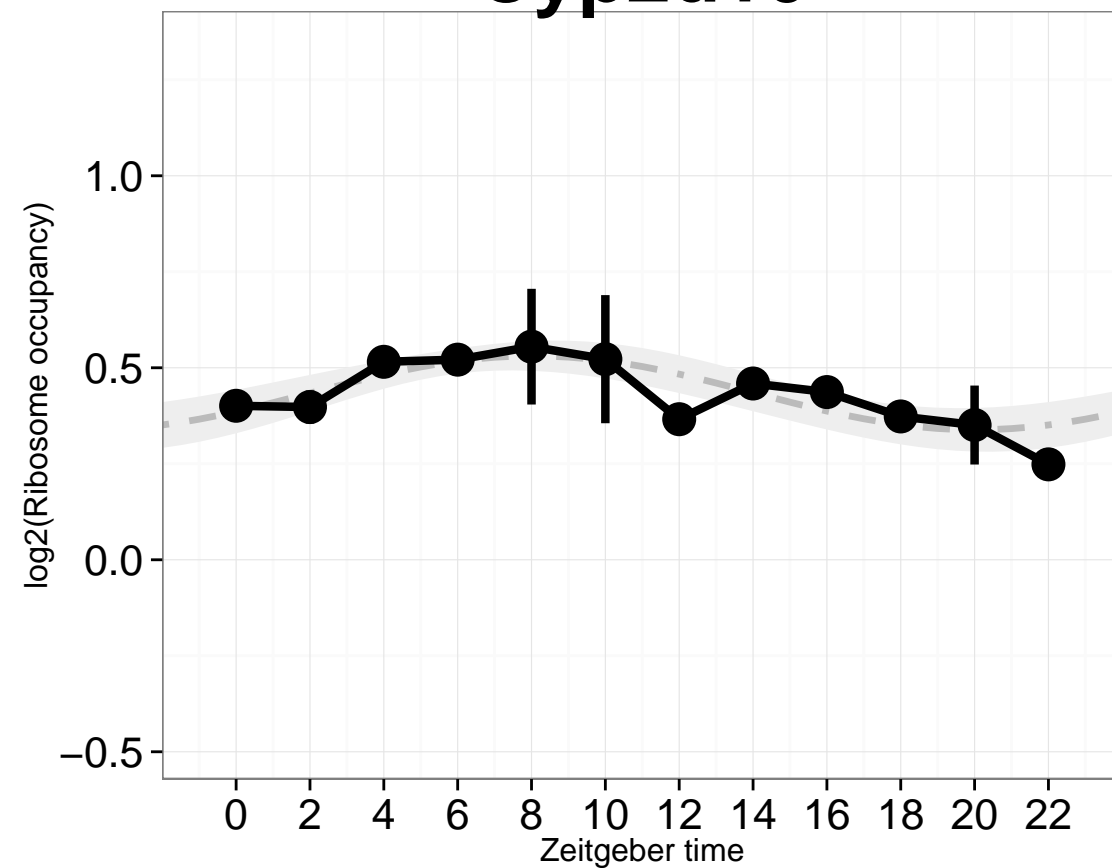

Supplement: SuppDataset_1.zip [file Cyp2d10_set_A.pdf › Supplemental Dataset 1/A-mRNA_nonrhyth_translation_nonrhyth/Cyp2d10_set_A.pdf]

# Cyp2d22

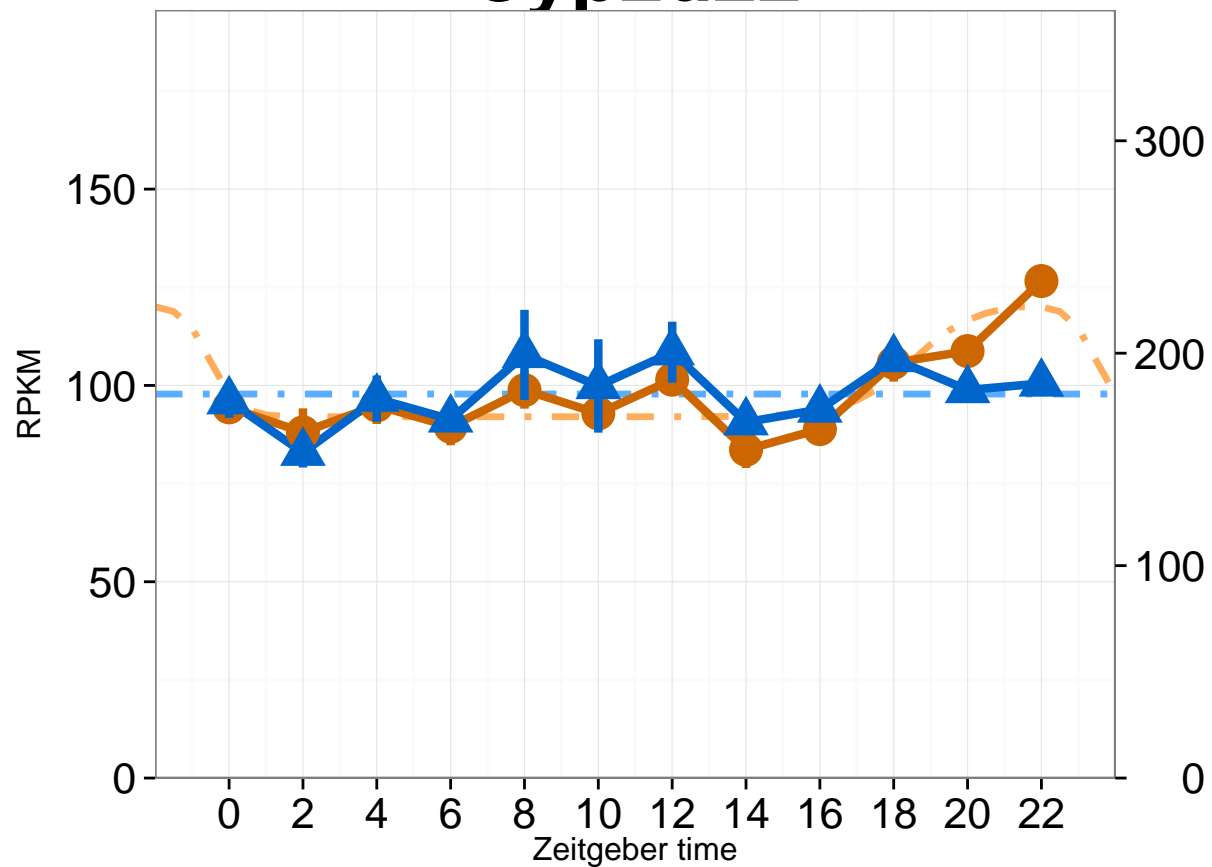

# Cyp2d22

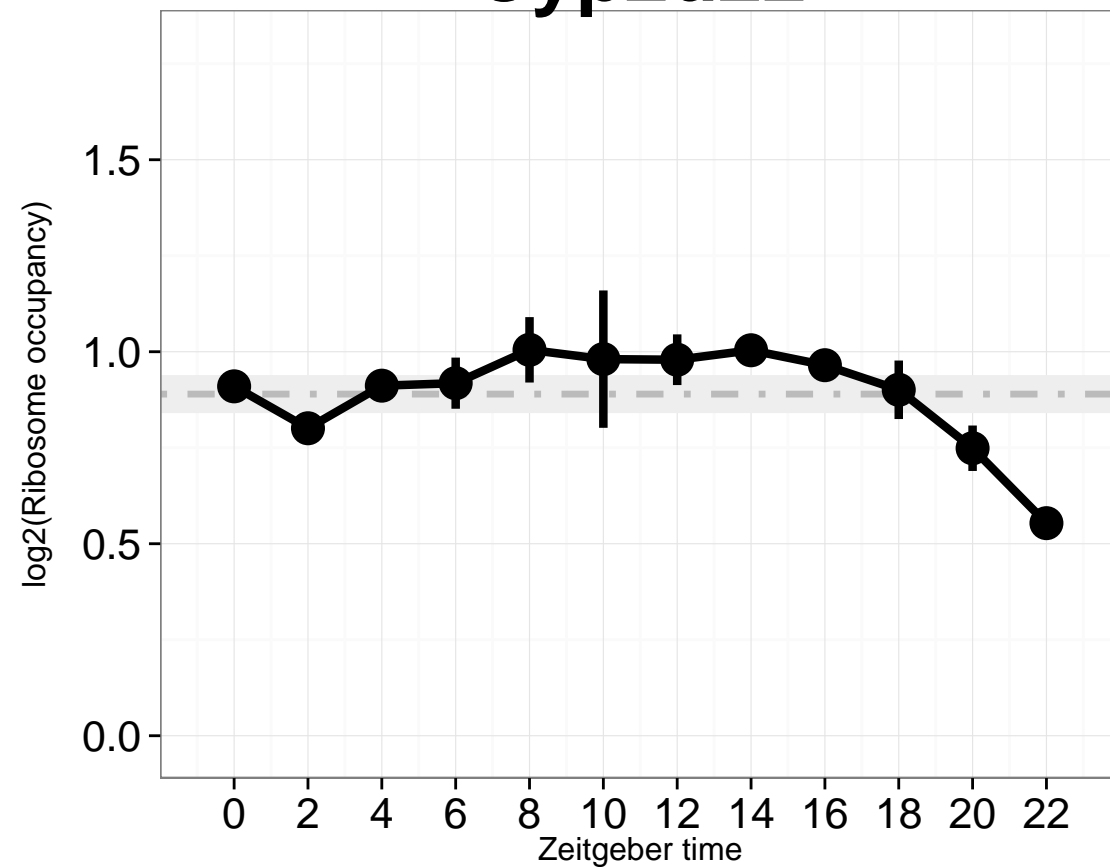

Supplement: SuppDataset_1.zip [file Cyp2d22_set_A.pdf › Supplemental Dataset 1/A-mRNA_nonrhyth_translation_nonrhyth/Cyp2d22_set_A.pdf]

# Cyp2d26

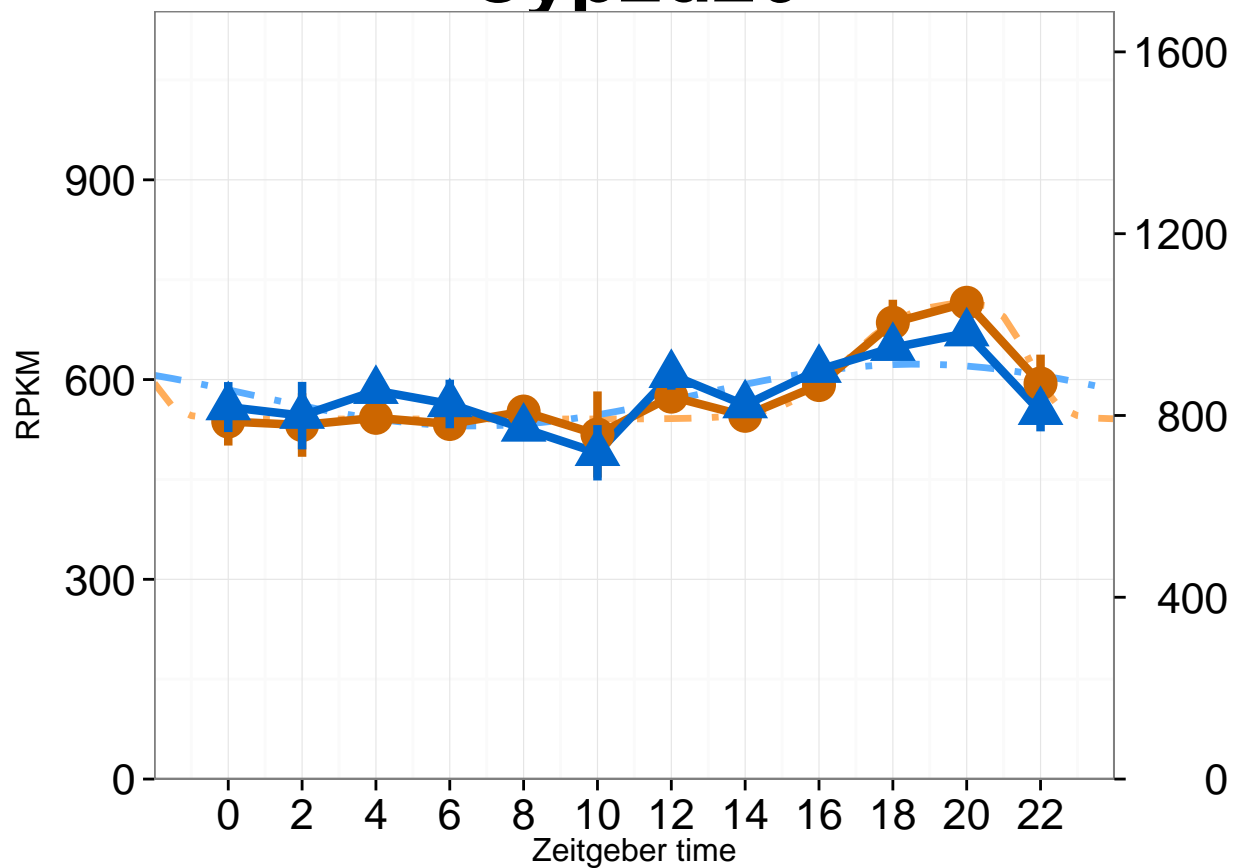

# Cyp2d26

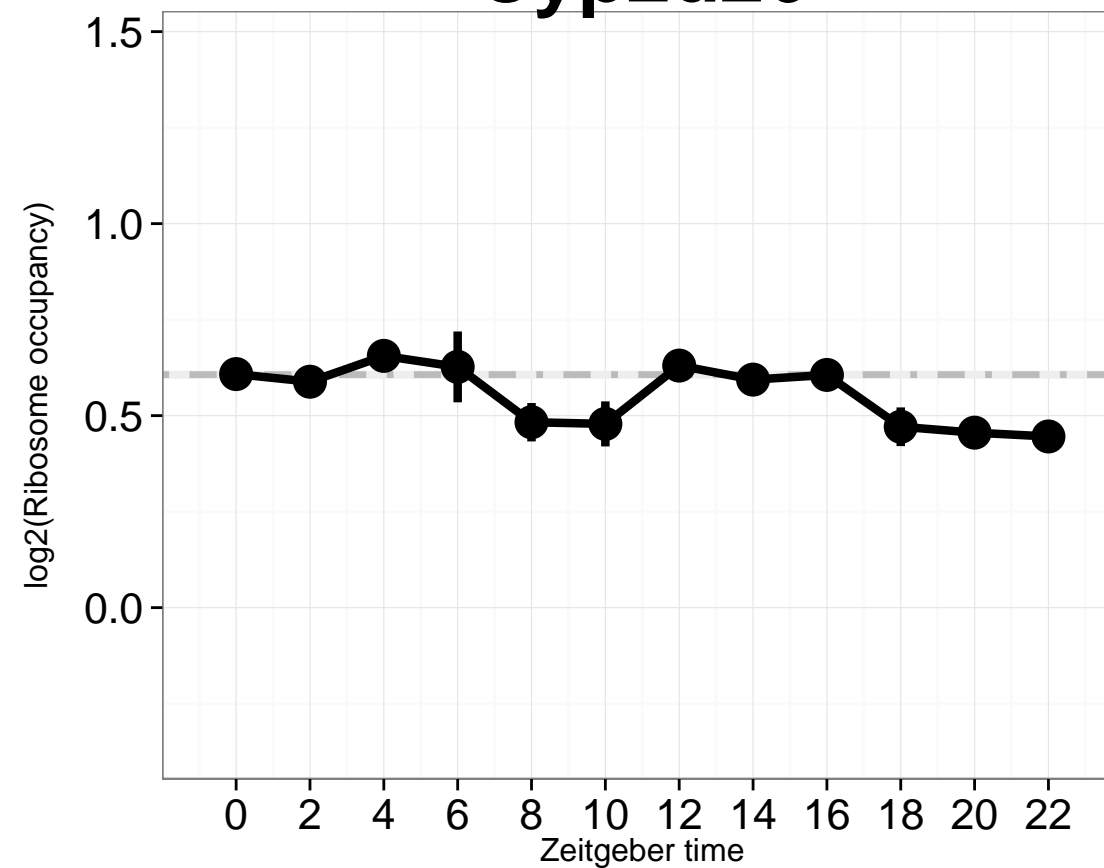

Supplement: SuppDataset_1.zip [file Cyp2d26_set_A.pdf › Supplemental Dataset 1/A-mRNA_nonrhyth_translation_nonrhyth/Cyp2d26_set_A.pdf]

# Cyp2d34

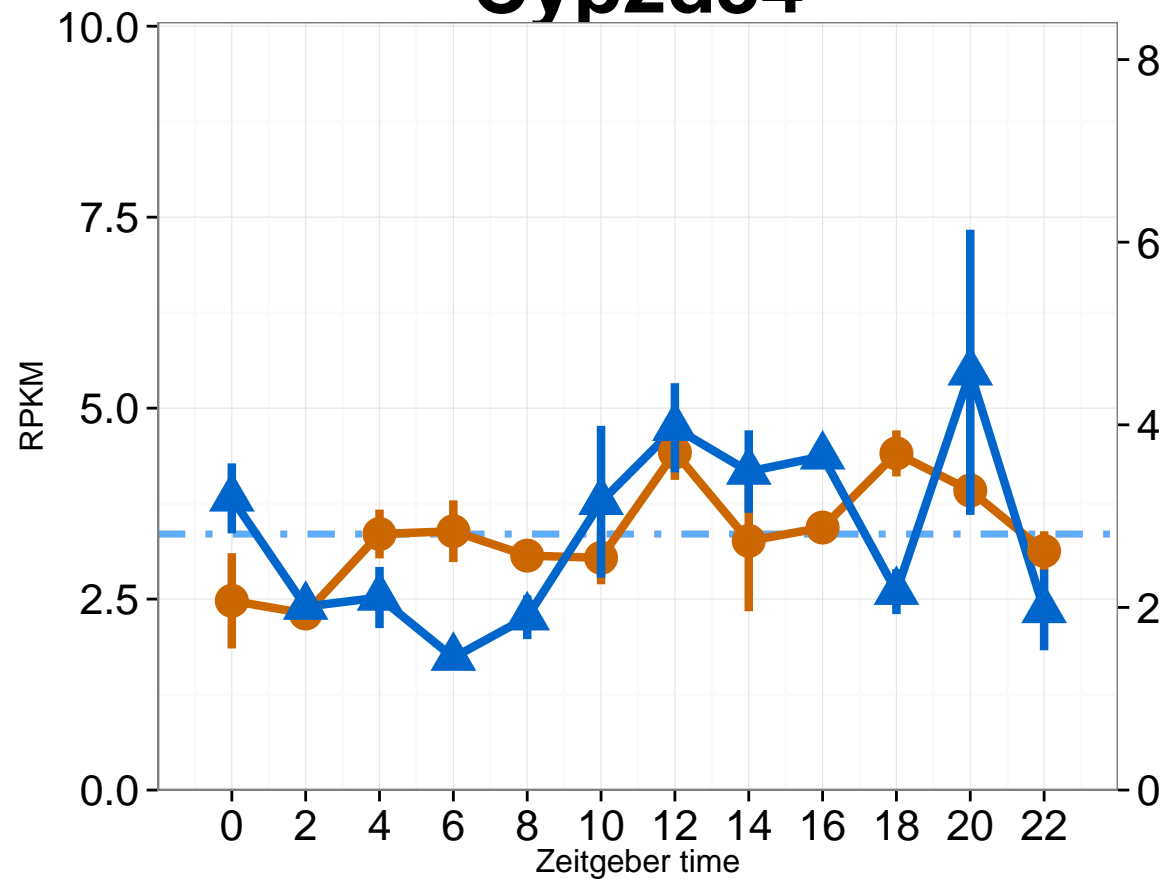

# Cyp2d34

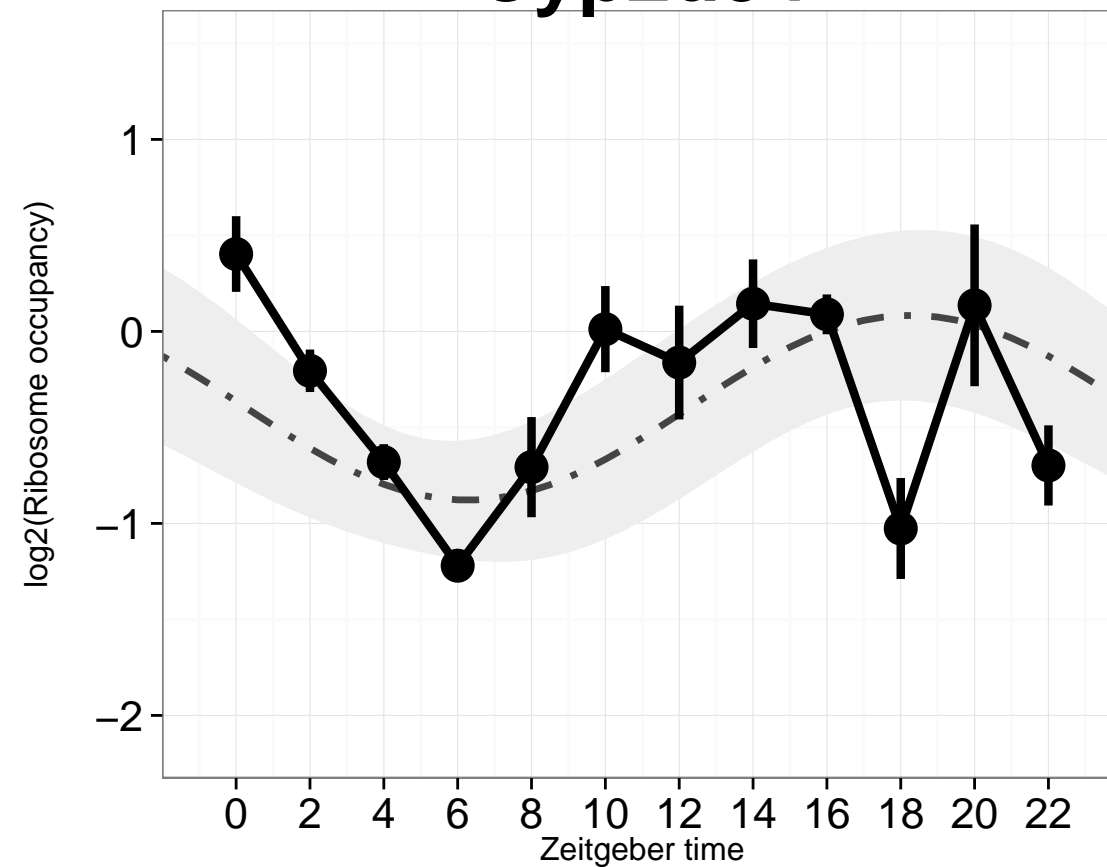

Supplement: SuppDataset_1.zip [file Cyp2d34_set_A.pdf › Supplemental Dataset 1/A-mRNA_nonrhyth_translation_nonrhyth/Cyp2d34_set_A.pdf]

## Cyp2d37-ps

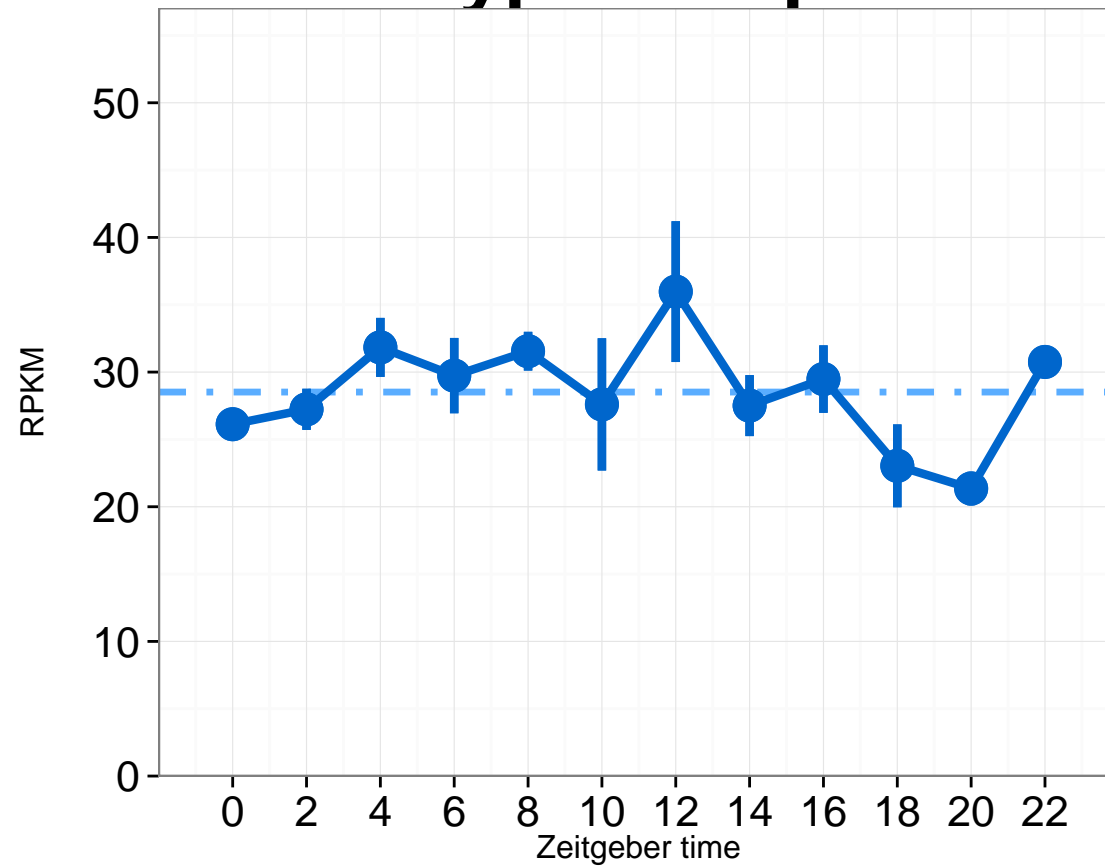

## Cyp2d37-ps log2(Ribosome occupancy)

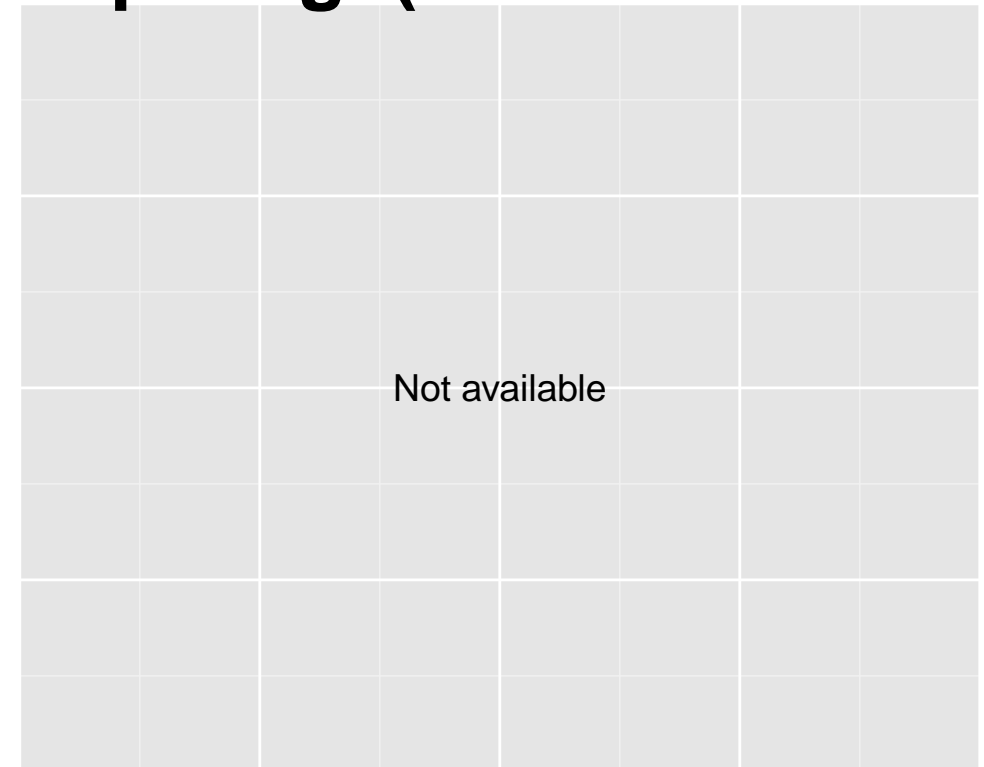

Supplement: SuppDataset_1.zip [file Cyp2d37-ps_set_A.pdf › Supplemental Dataset 1/A-mRNA_nonrhyth_translation_nonrhyth/Cyp2d37-ps_set_A.pdf]

# Cyp2d40

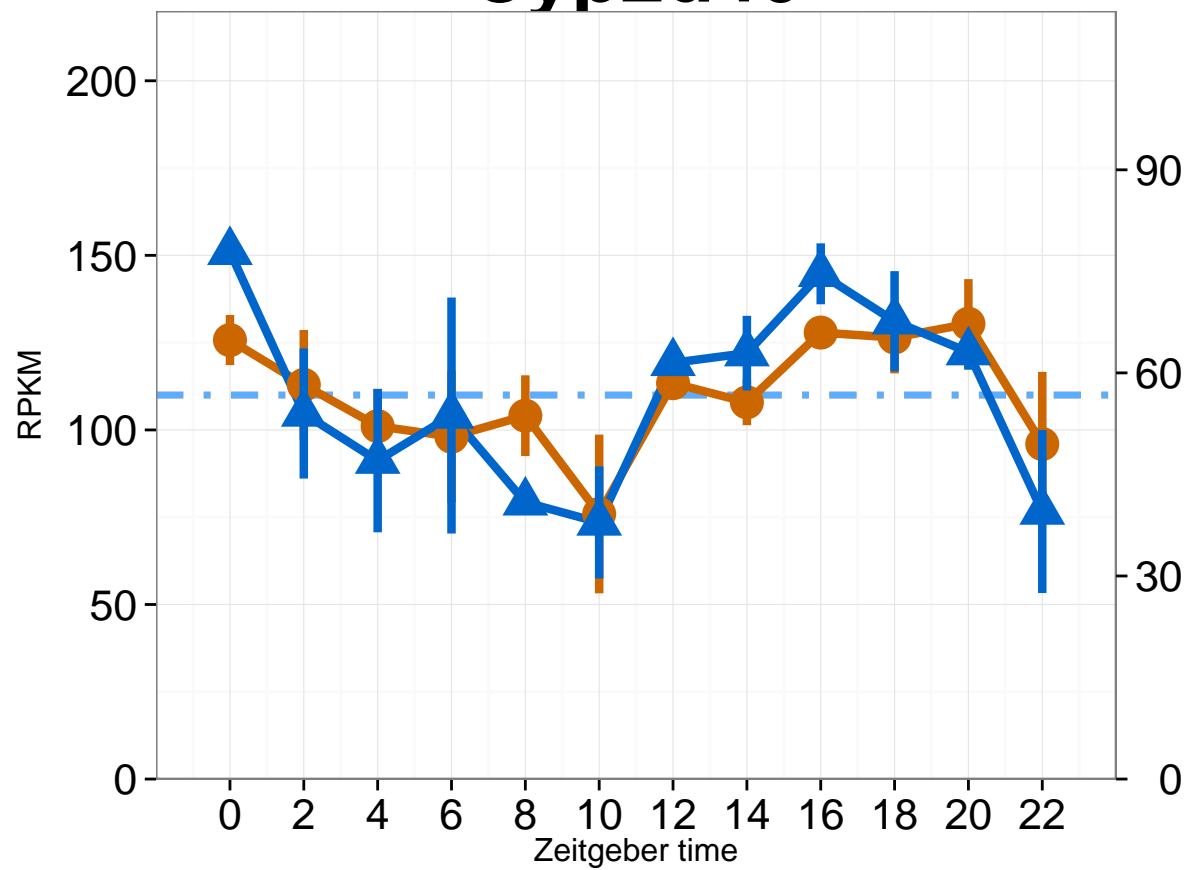

# Cyp2d40

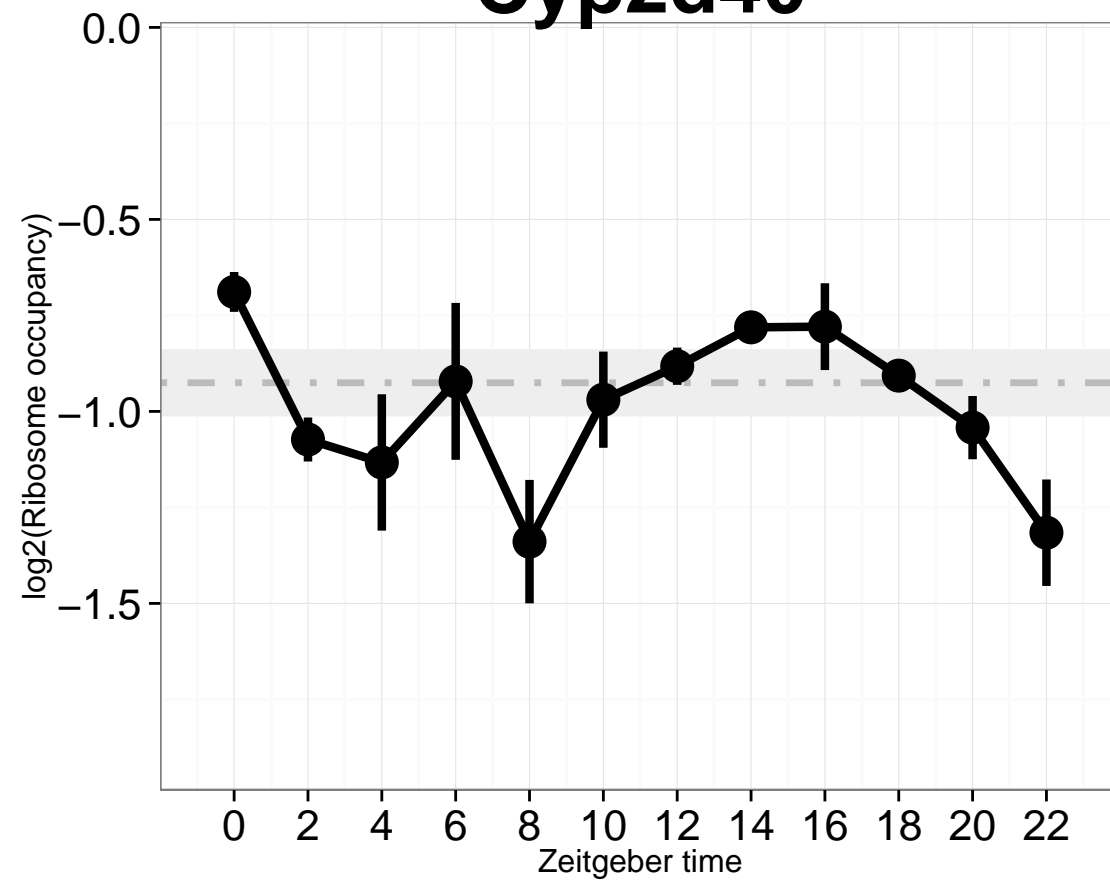

Supplement: SuppDataset_1.zip [file Cyp2d40_set_A.pdf › Supplemental Dataset 1/A-mRNA_nonrhyth_translation_nonrhyth/Cyp2d40_set_A.pdf]

# Cyp2d9

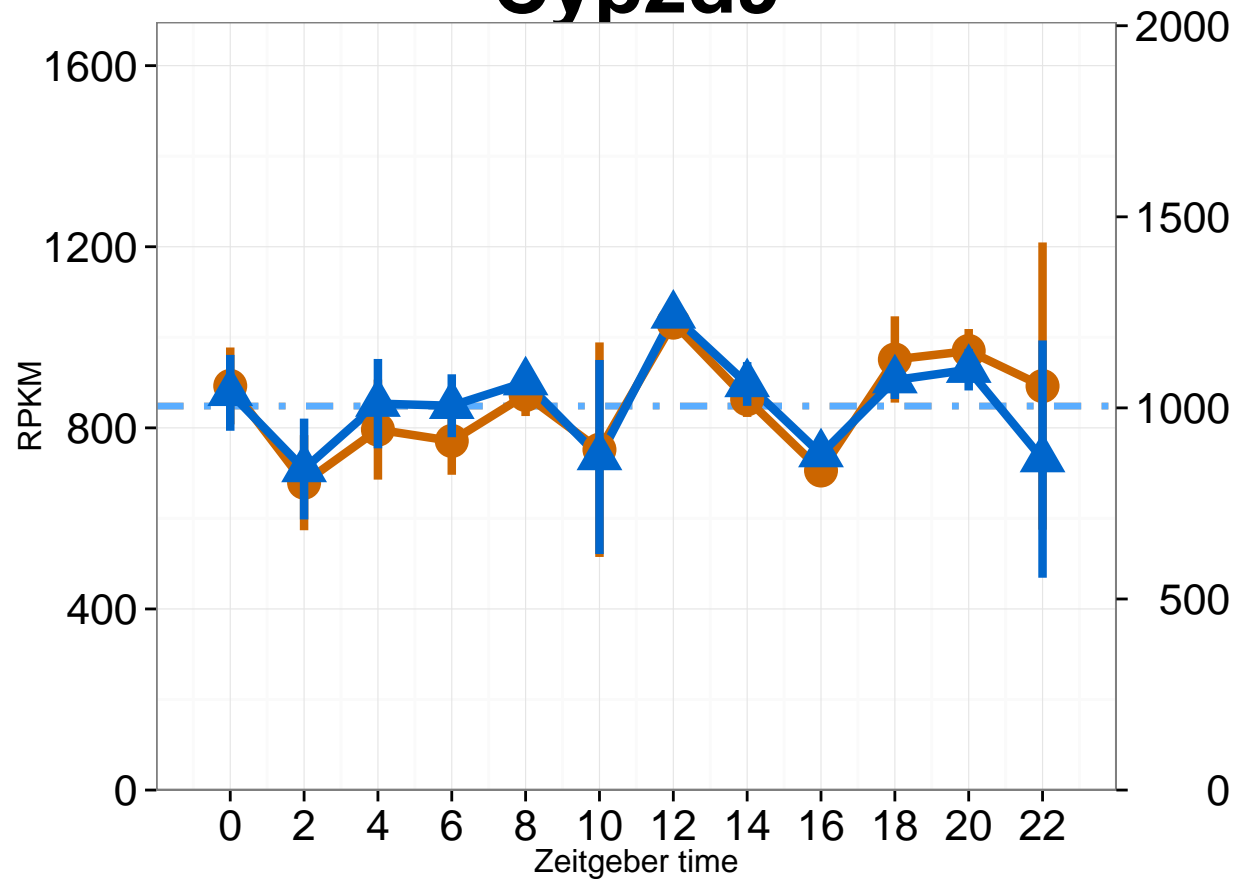

# Cyp2d9

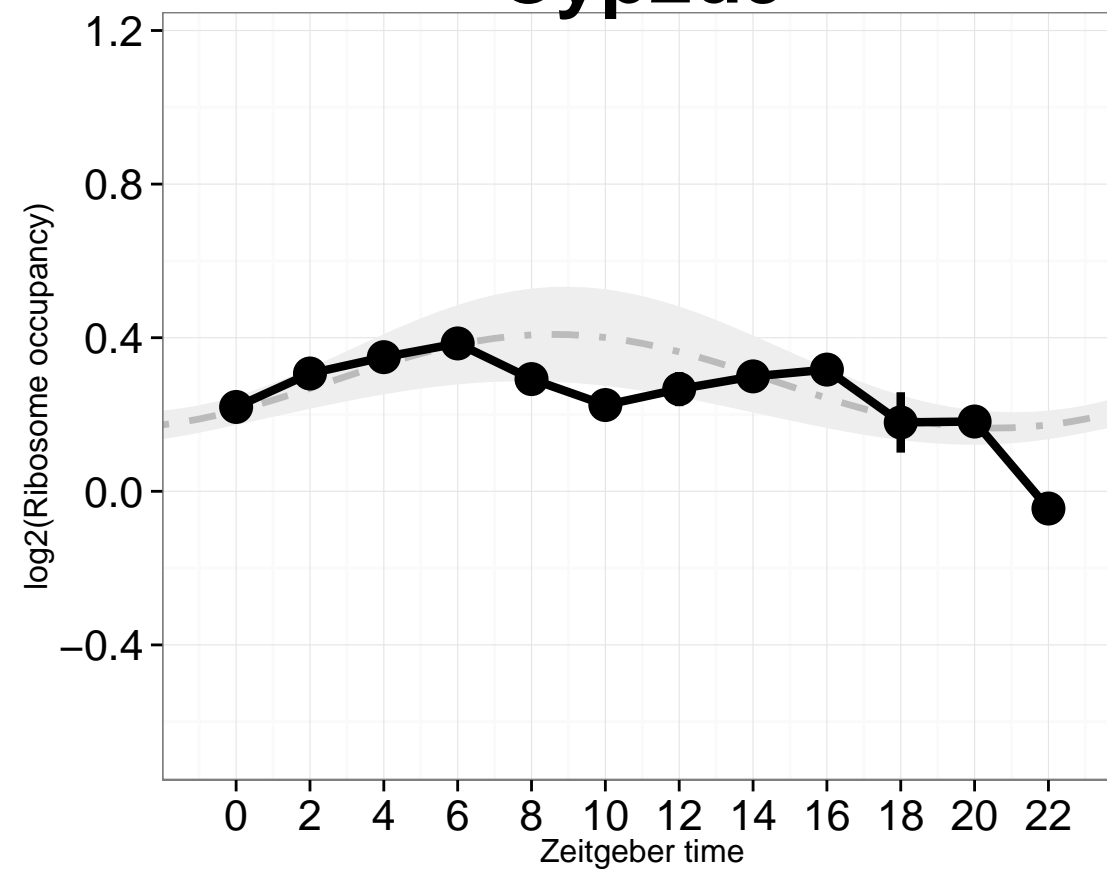

Supplement: SuppDataset_1.zip [file Cyp2d9_set_A.pdf › Supplemental Dataset 1/A-mRNA_nonrhyth_translation_nonrhyth/Cyp2d9_set_A.pdf]

# Cyp2f2

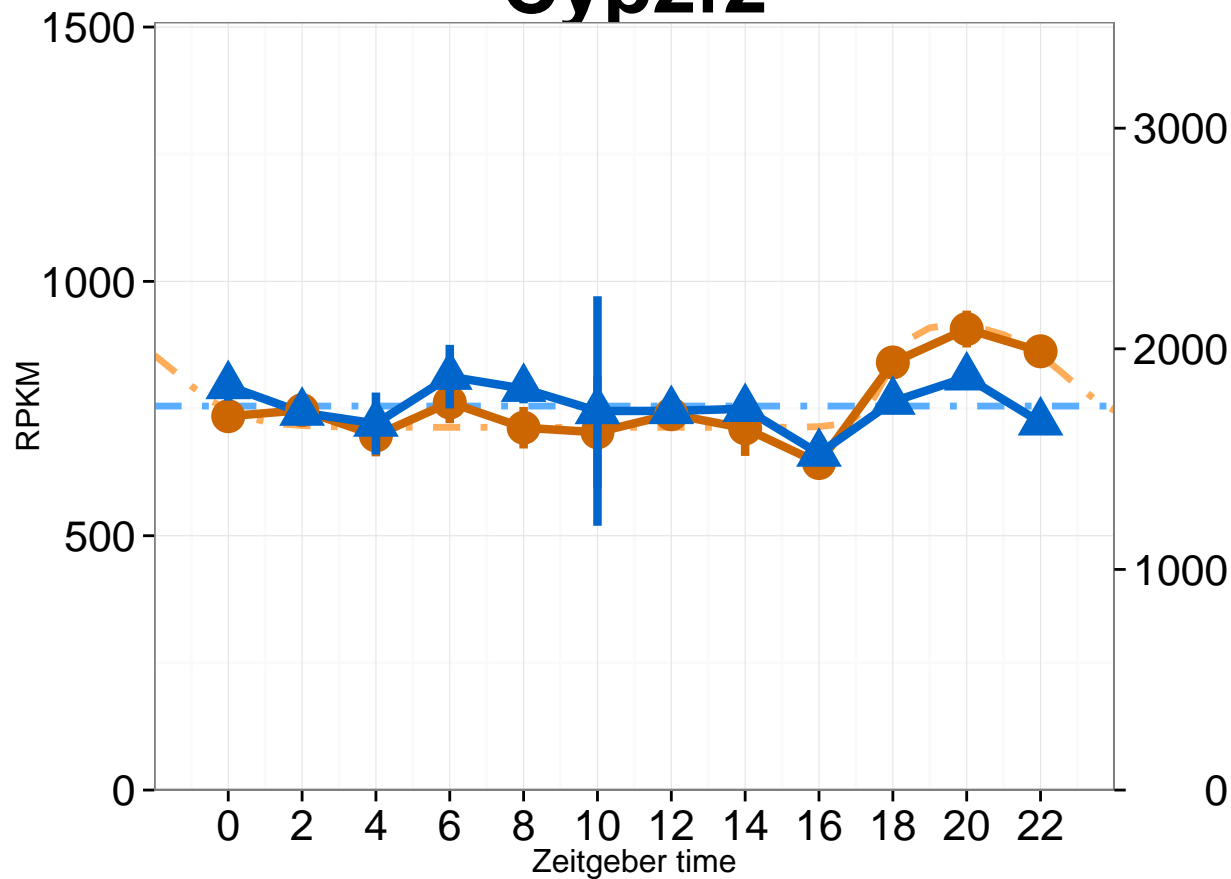

# Cyp2f2

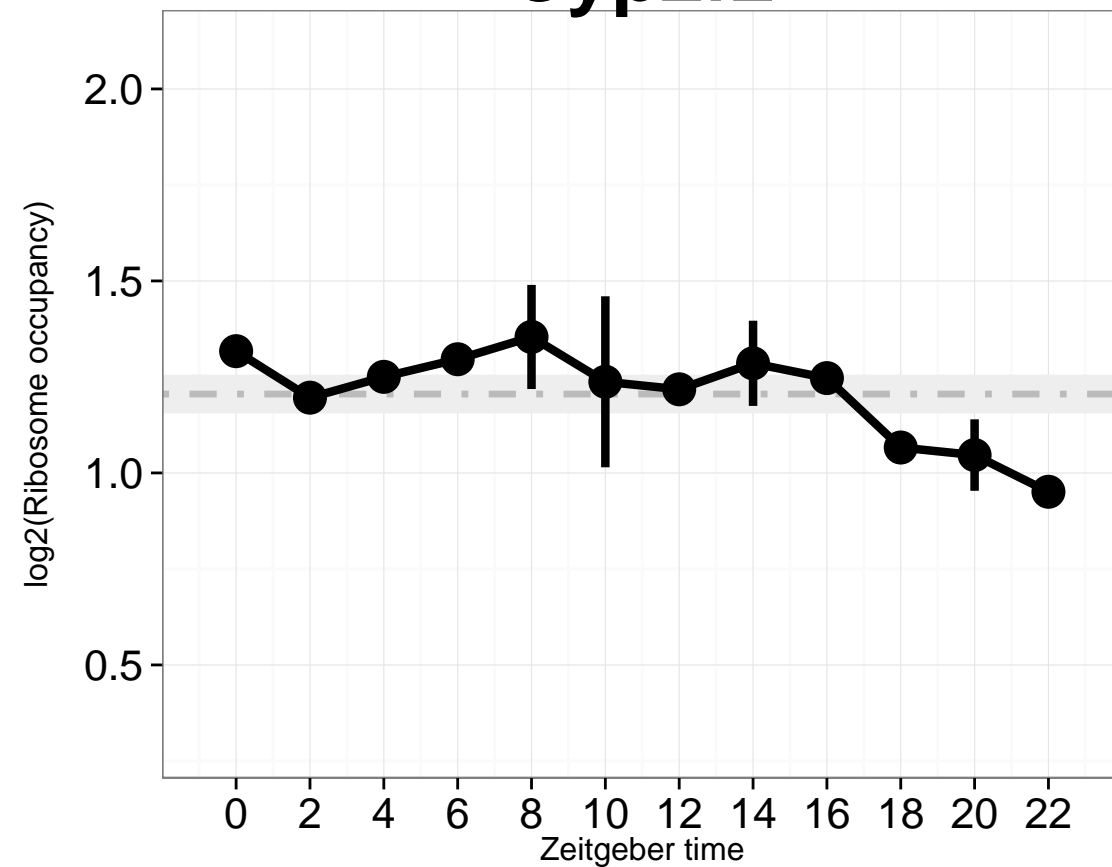

Supplement: SuppDataset_1.zip [file Cyp2f2_set_A.pdf › Supplemental Dataset 1/A-mRNA_nonrhyth_translation_nonrhyth/Cyp2f2_set_A.pdf]

## Cyp2j5

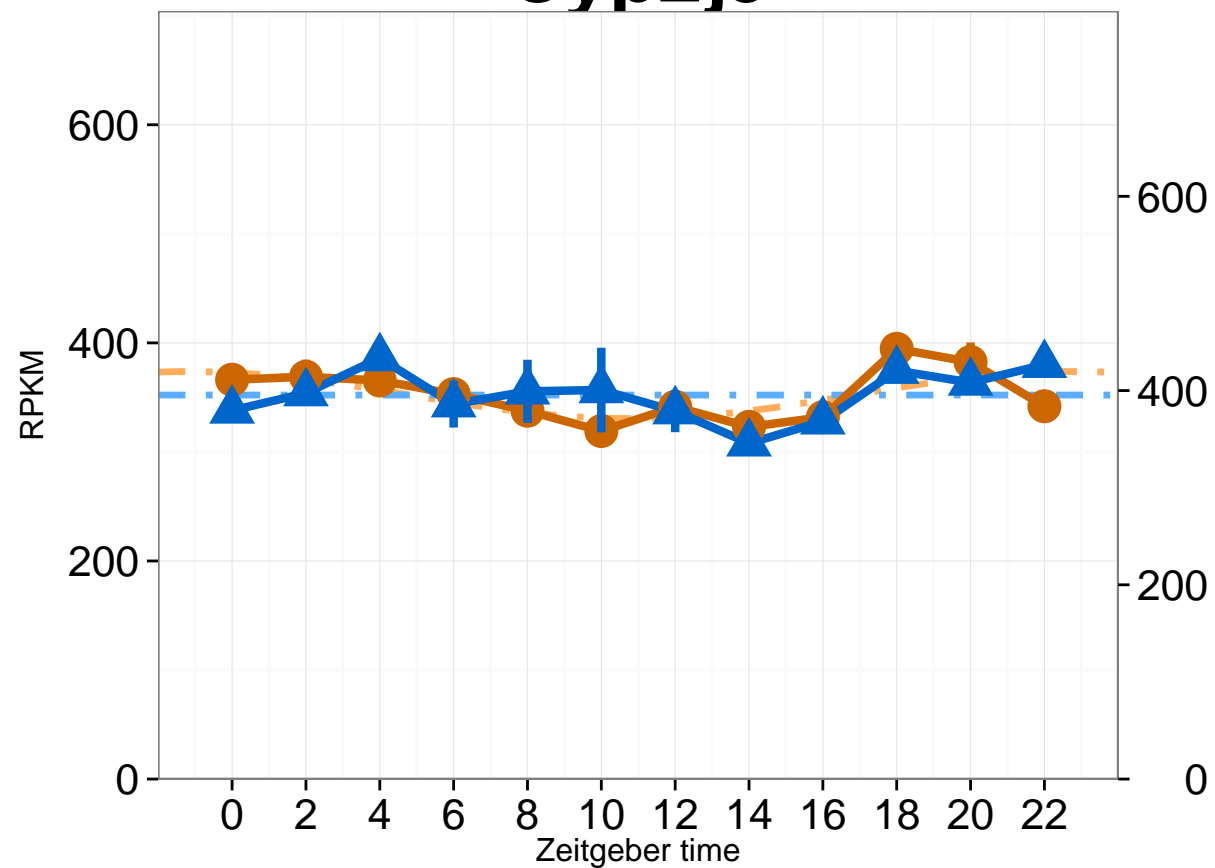

## Cyp2j5

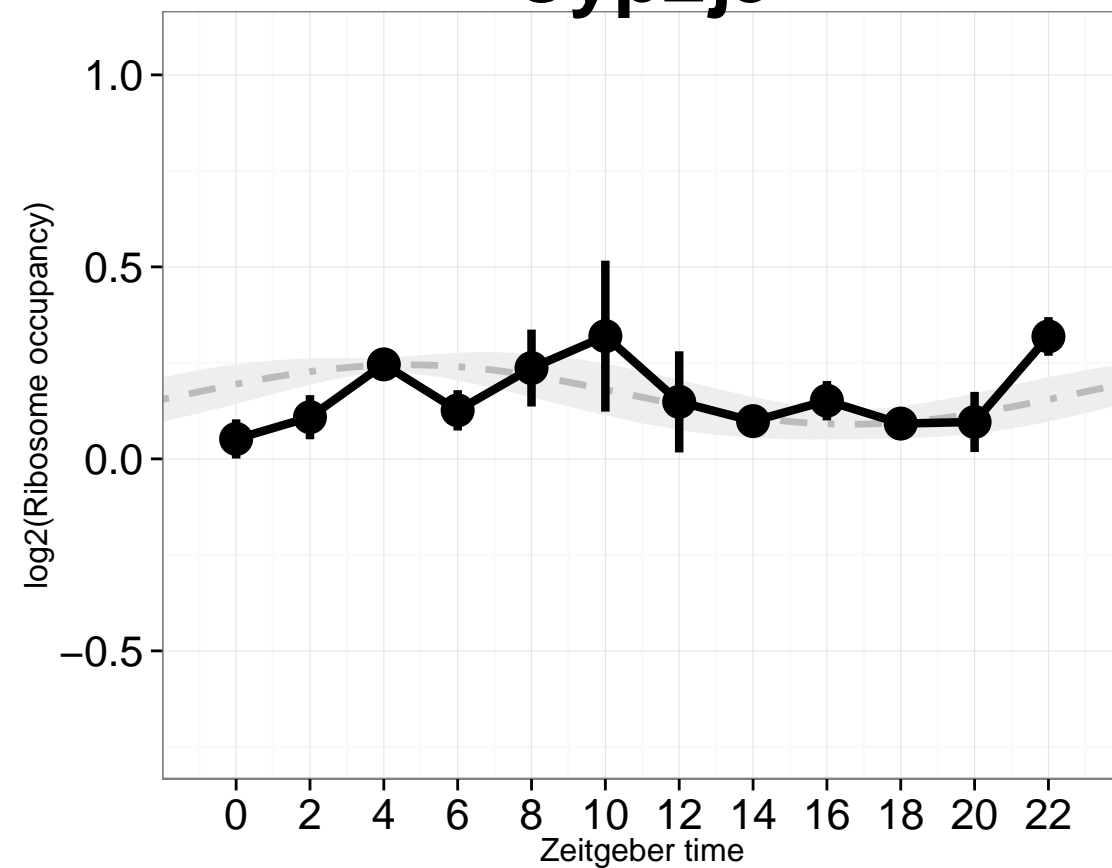

Supplement: SuppDataset_1.zip [file Cyp2j5_set_A.pdf › Supplemental Dataset 1/A-mRNA_nonrhyth_translation_nonrhyth/Cyp2j5_set_A.pdf]

# Cyp2j6

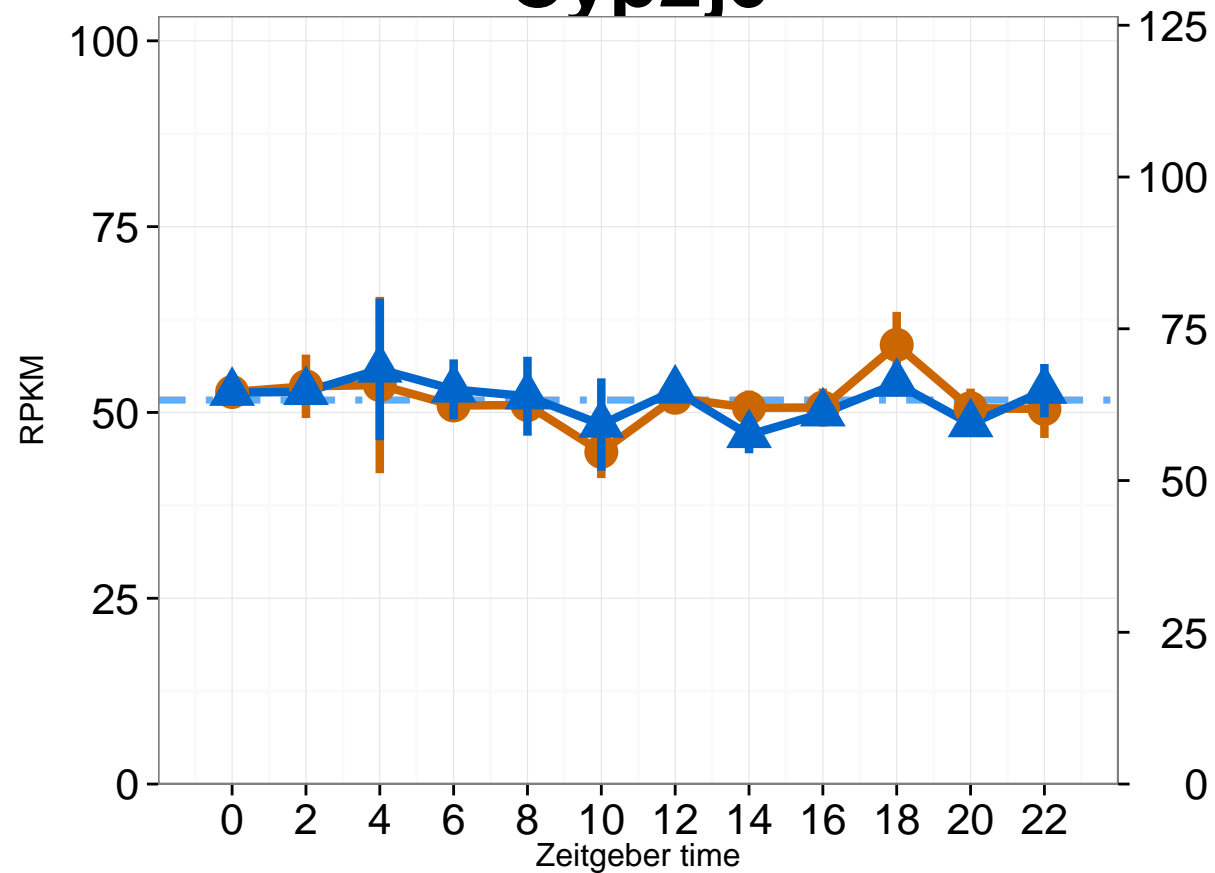

# Cyp2j6

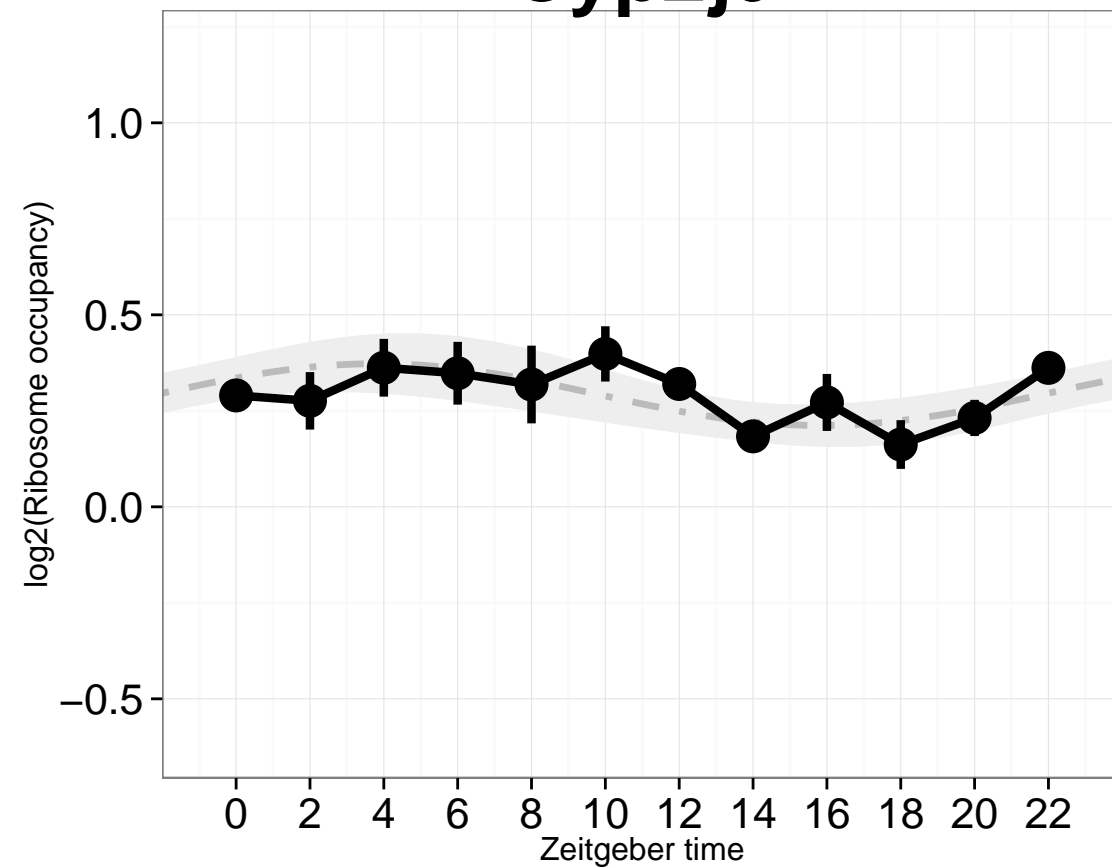

Supplement: SuppDataset_1.zip [file Cyp2j6_set_A.pdf › Supplemental Dataset 1/A-mRNA_nonrhyth_translation_nonrhyth/Cyp2j6_set_A.pdf]

# Cyp2j9

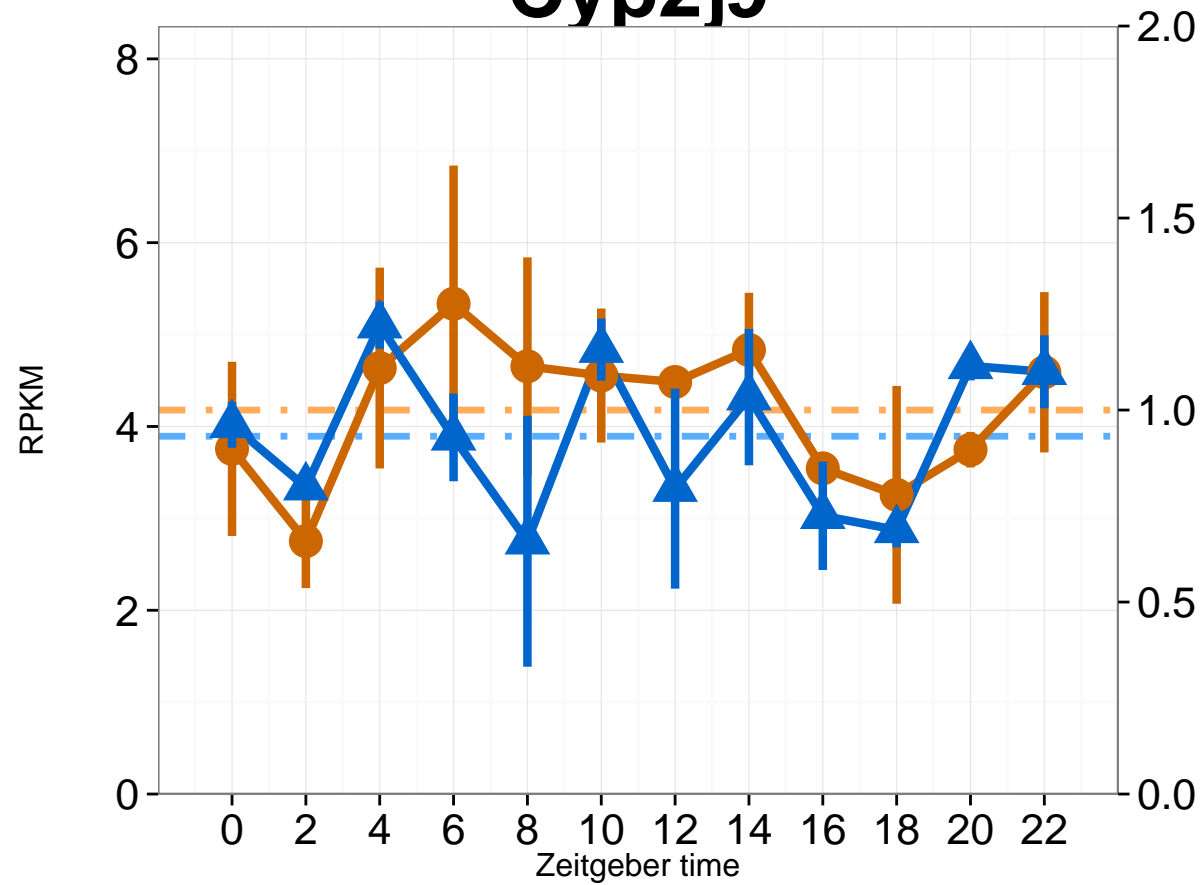

# Cyp2j9

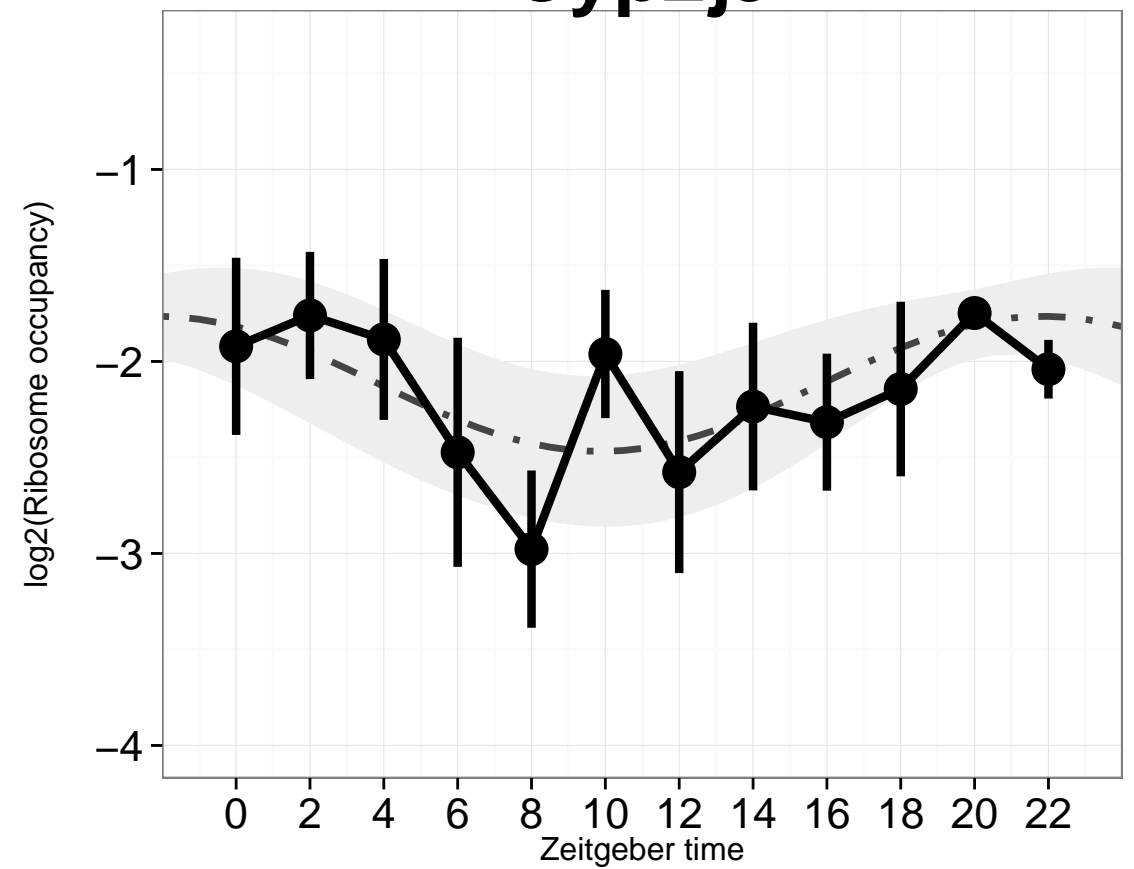

Supplement: SuppDataset_1.zip [file Cyp2j9_set_A.pdf › Supplemental Dataset 1/A-mRNA_nonrhyth_translation_nonrhyth/Cyp2j9_set_A.pdf]

# Cyp2r1

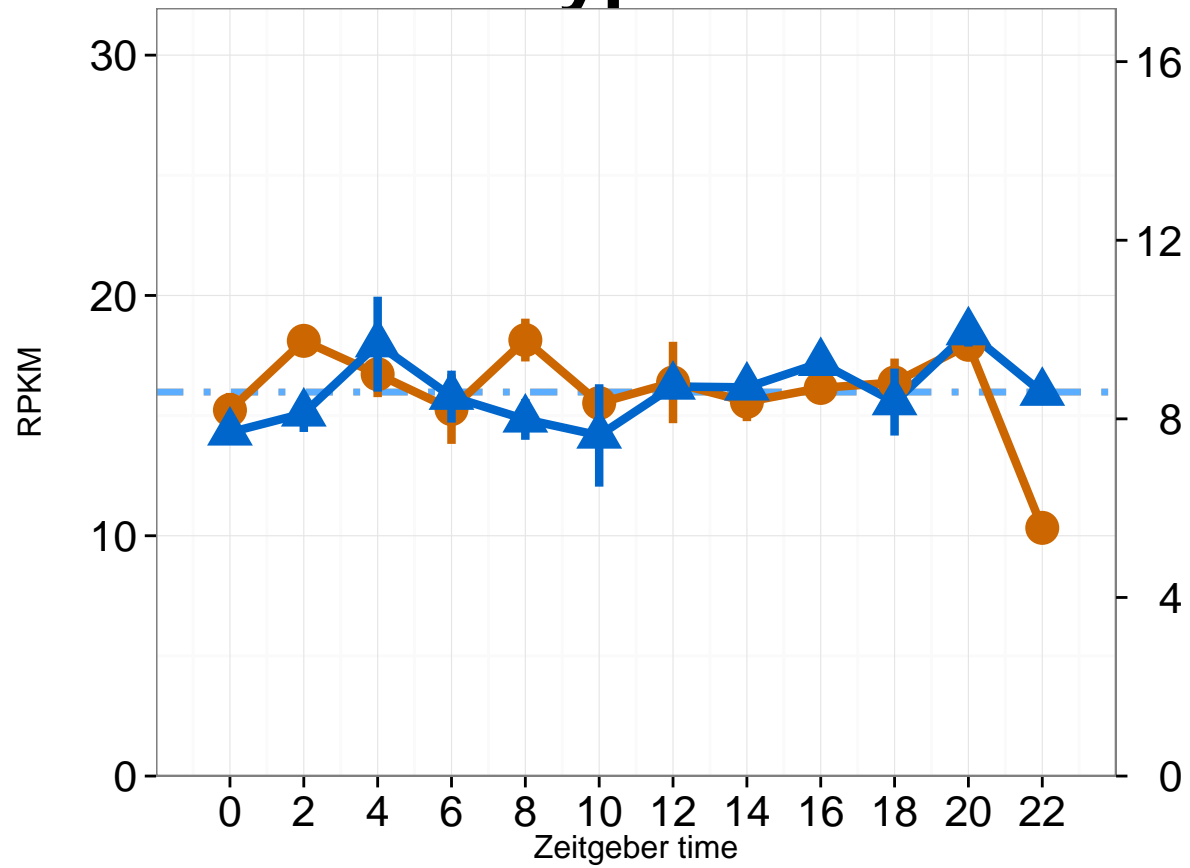

# Cyp2r1

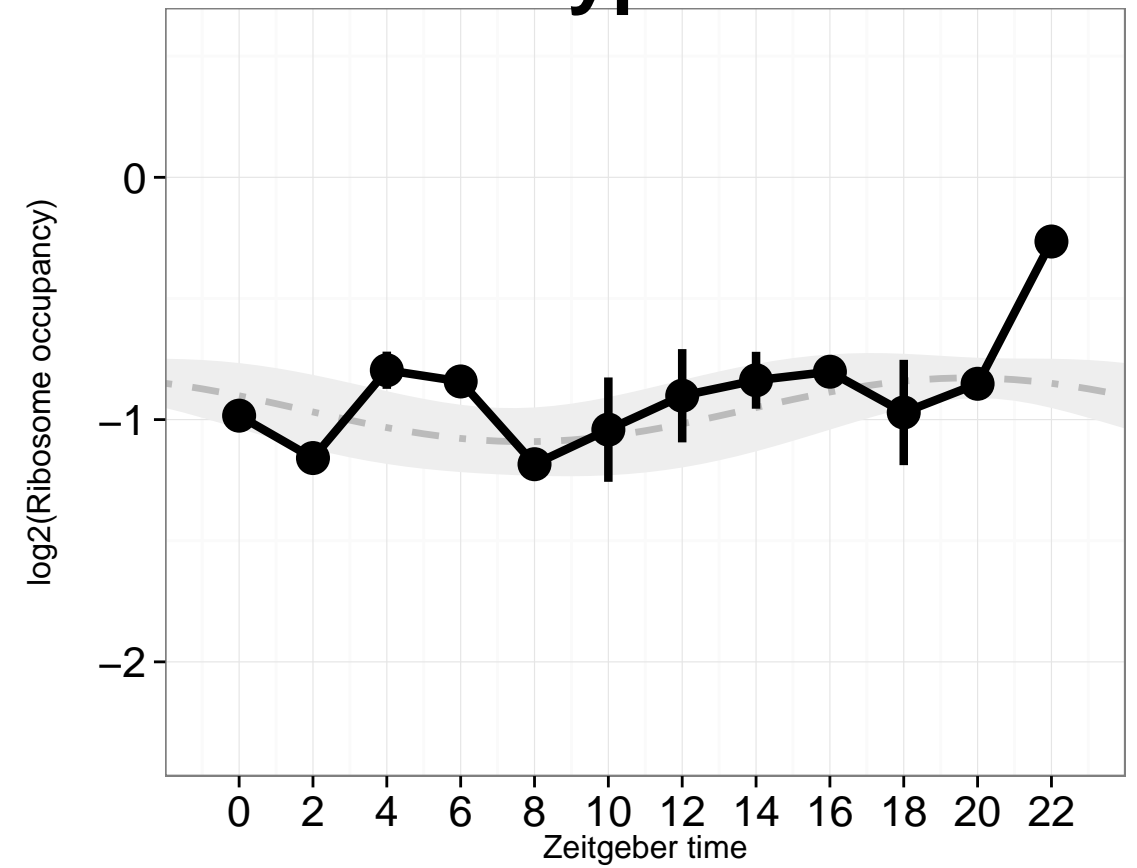

Supplement: SuppDataset_1.zip [file Cyp2r1_set_A.pdf › Supplemental Dataset 1/A-mRNA_nonrhyth_translation_nonrhyth/Cyp2r1_set_A.pdf]

# Cyp3a11

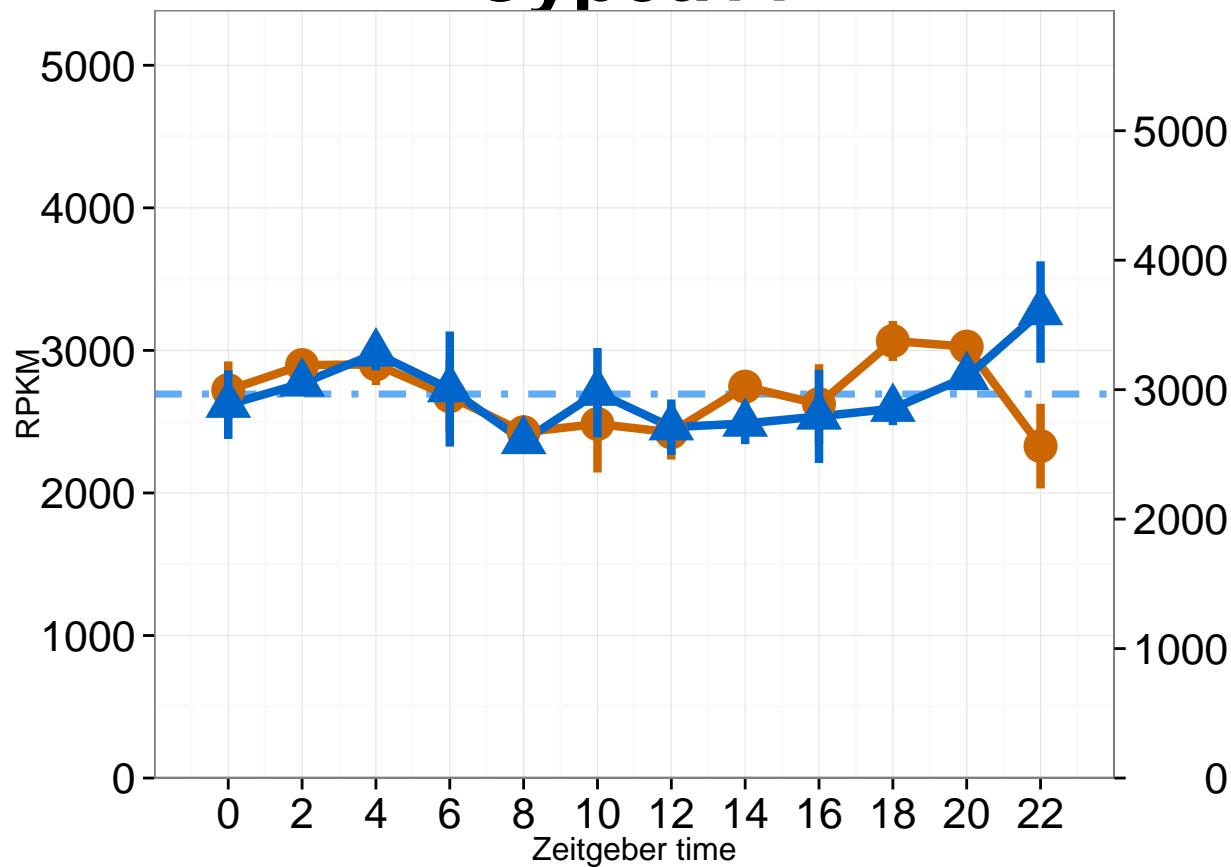

# Cyp3a11

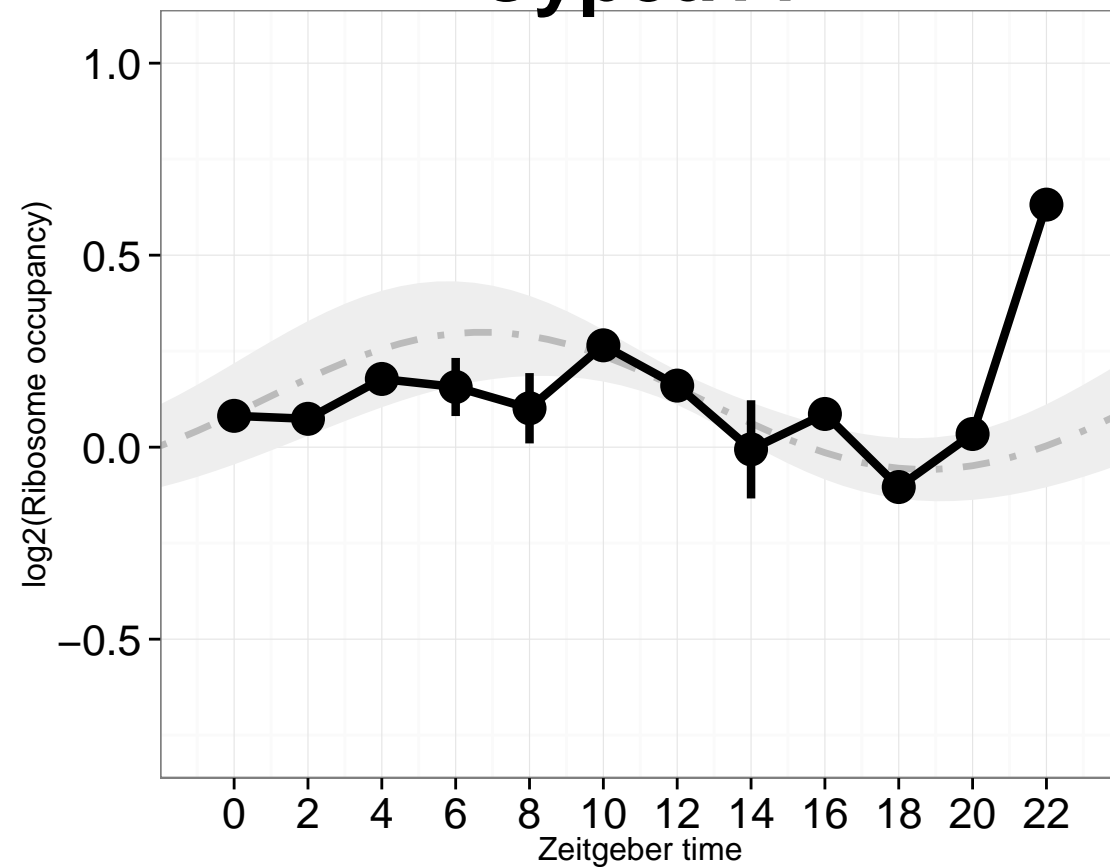

Supplement: SuppDataset_1.zip [file Cyp3a11_set_A.pdf › Supplemental Dataset 1/A-mRNA_nonrhyth_translation_nonrhyth/Cyp3a11_set_A.pdf]

# Cyp3a25

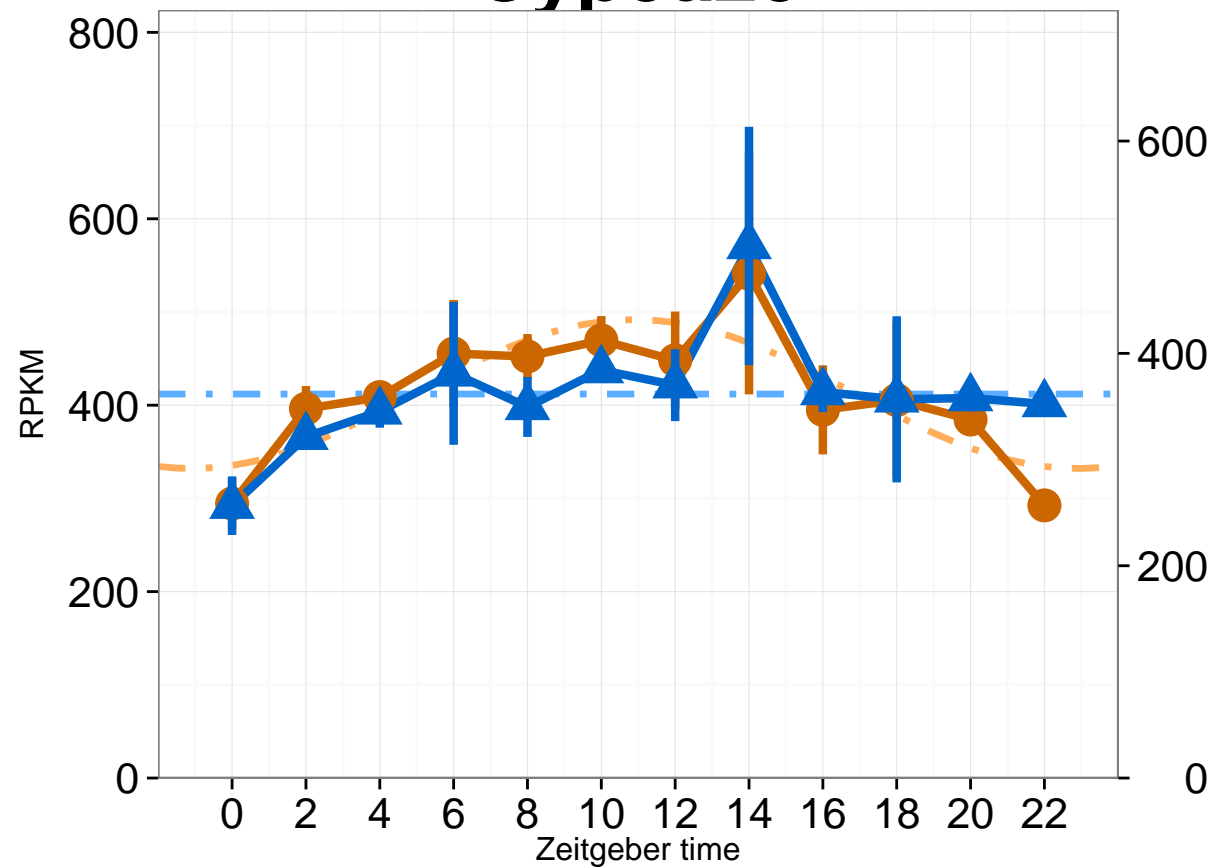

# Cyp3a25

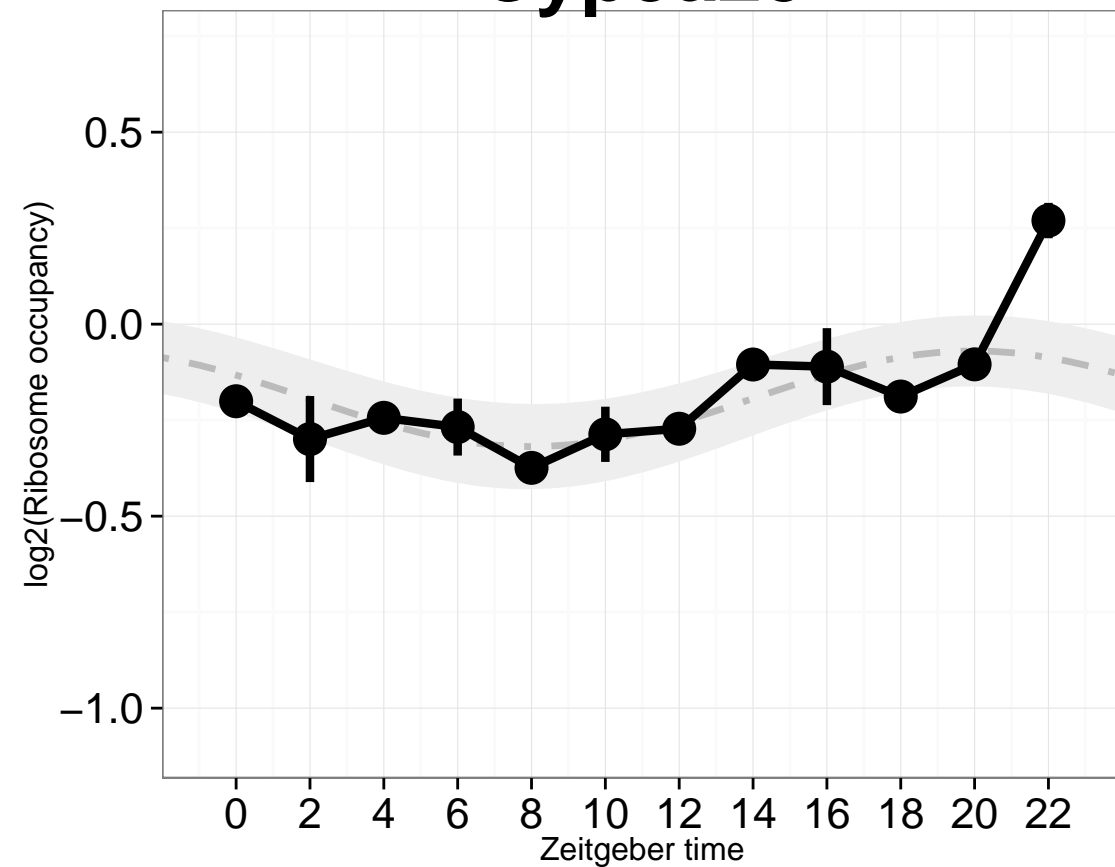

Supplement: SuppDataset_1.zip [file Cyp3a25_set_A.pdf › Supplemental Dataset 1/A-mRNA_nonrhyth_translation_nonrhyth/Cyp3a25_set_A.pdf]

# Cyp3a59

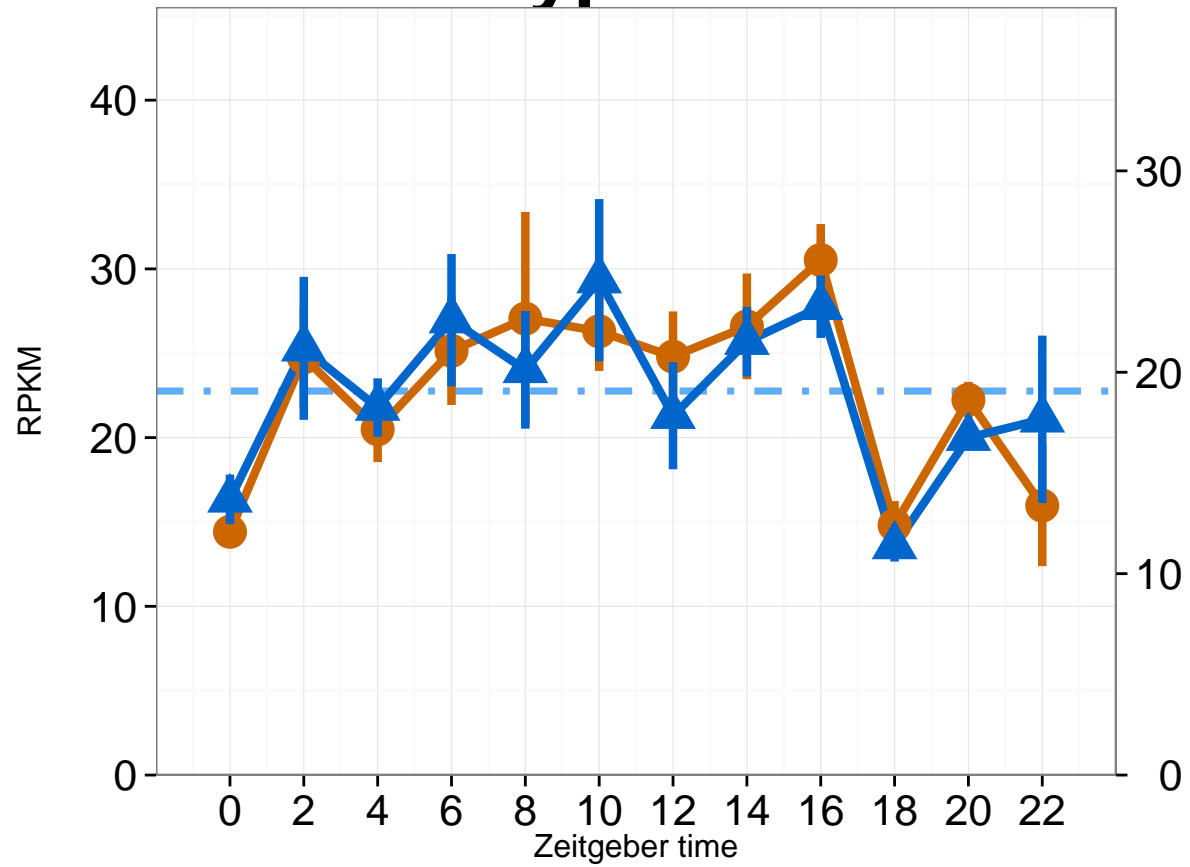

# Cyp3a59

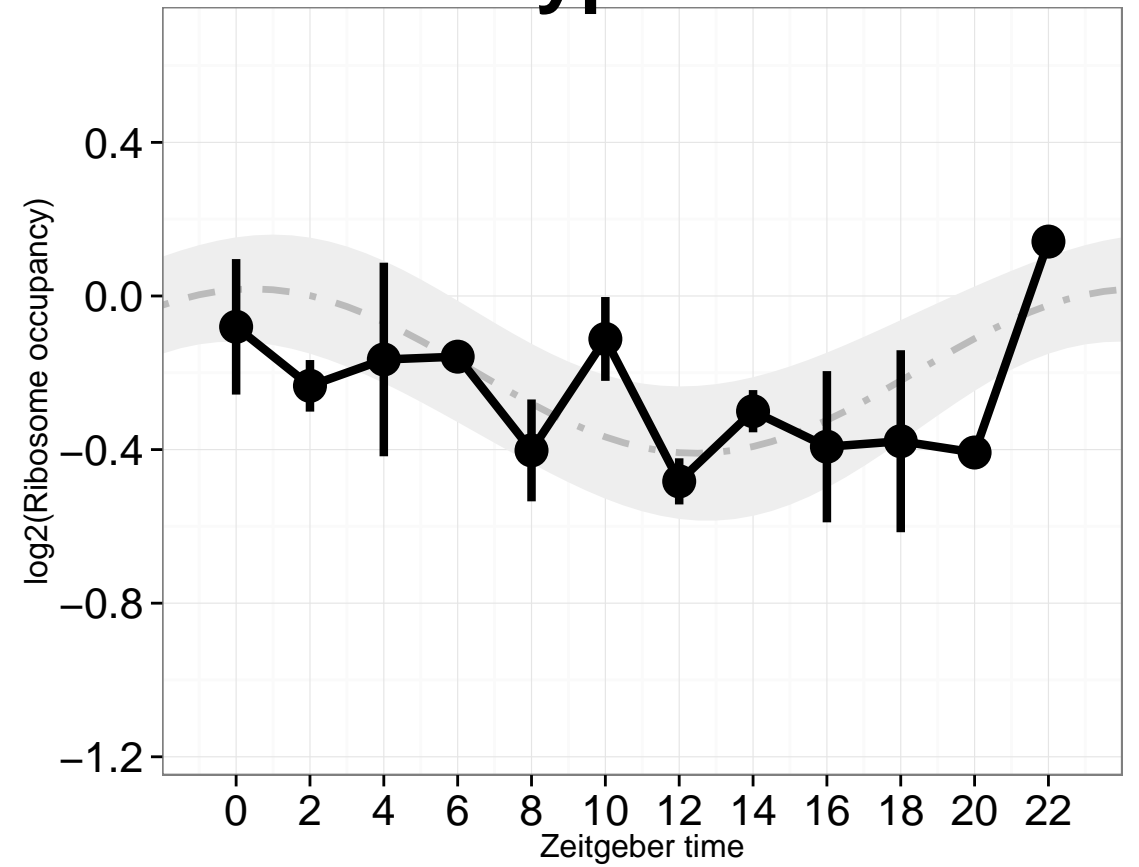

Supplement: SuppDataset_1.zip [file Cyp3a59_set_A.pdf › Supplemental Dataset 1/A-mRNA_nonrhyth_translation_nonrhyth/Cyp3a59_set_A.pdf]

# Cyp46a1

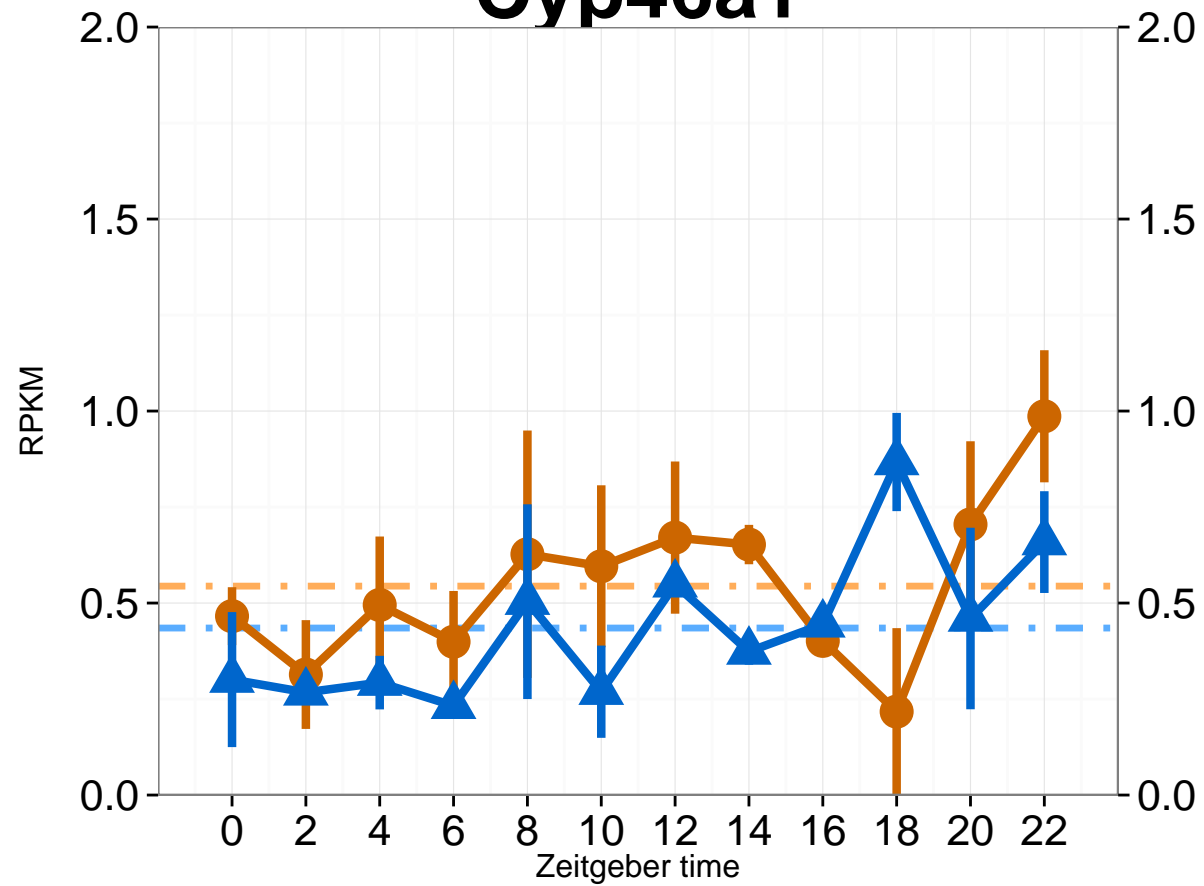

# Cyp46a1

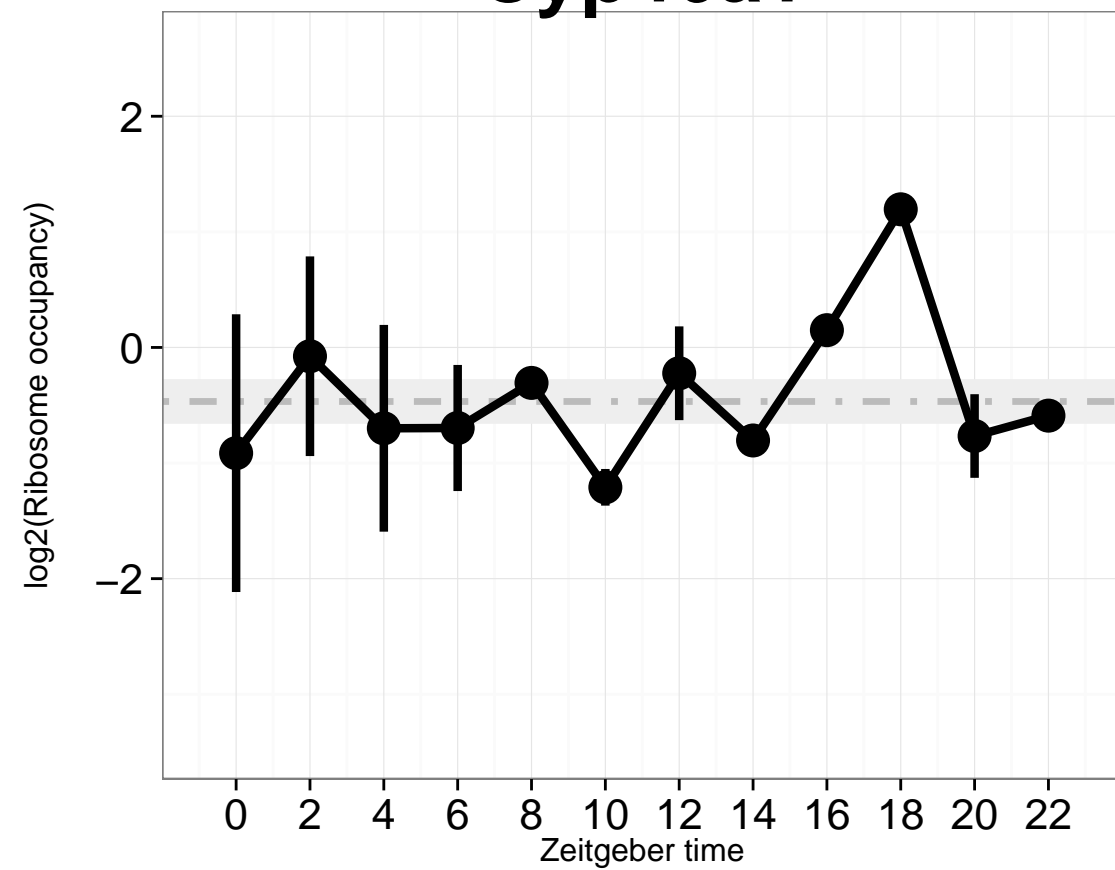

Supplement: SuppDataset_1.zip [file Cyp46a1_set_A.pdf › Supplemental Dataset 1/A-mRNA_nonrhyth_translation_nonrhyth/Cyp46a1_set_A.pdf]

# Cyp4a10

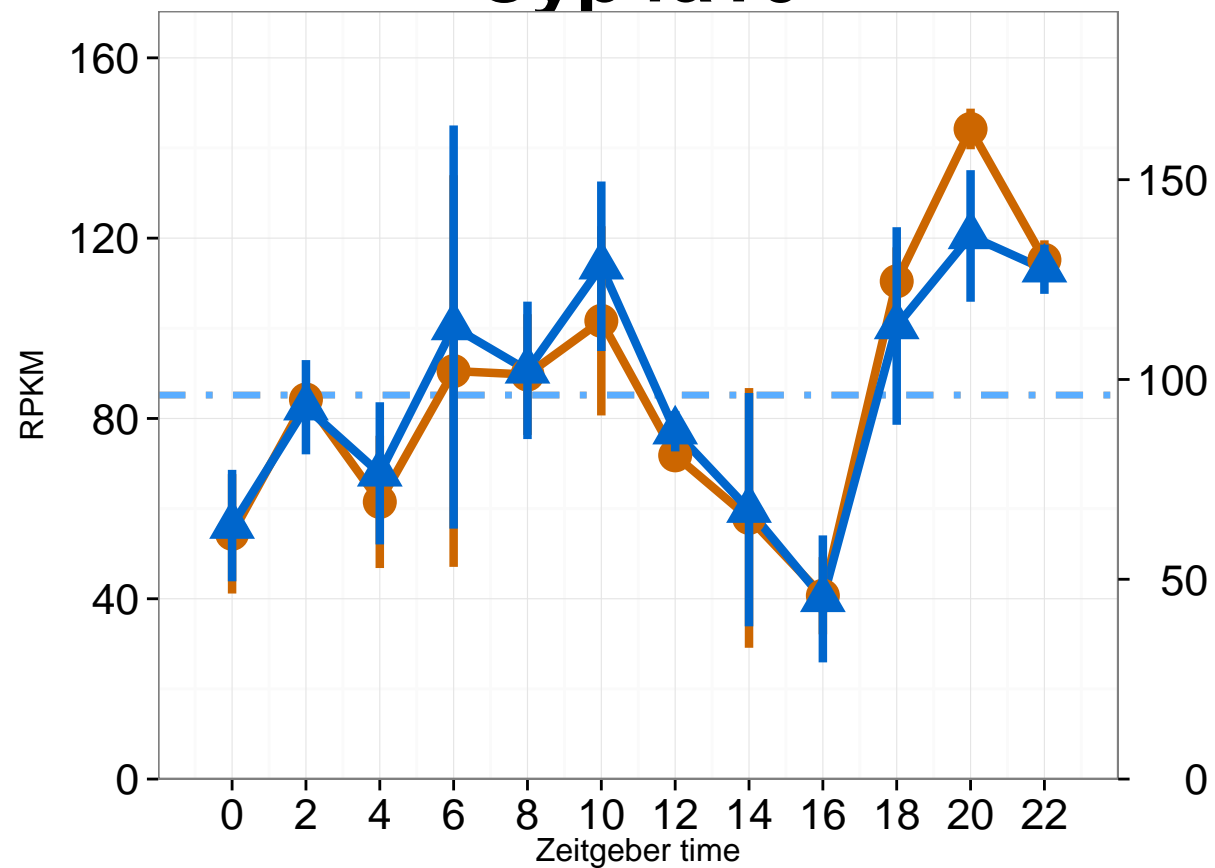

# Cyp4a10

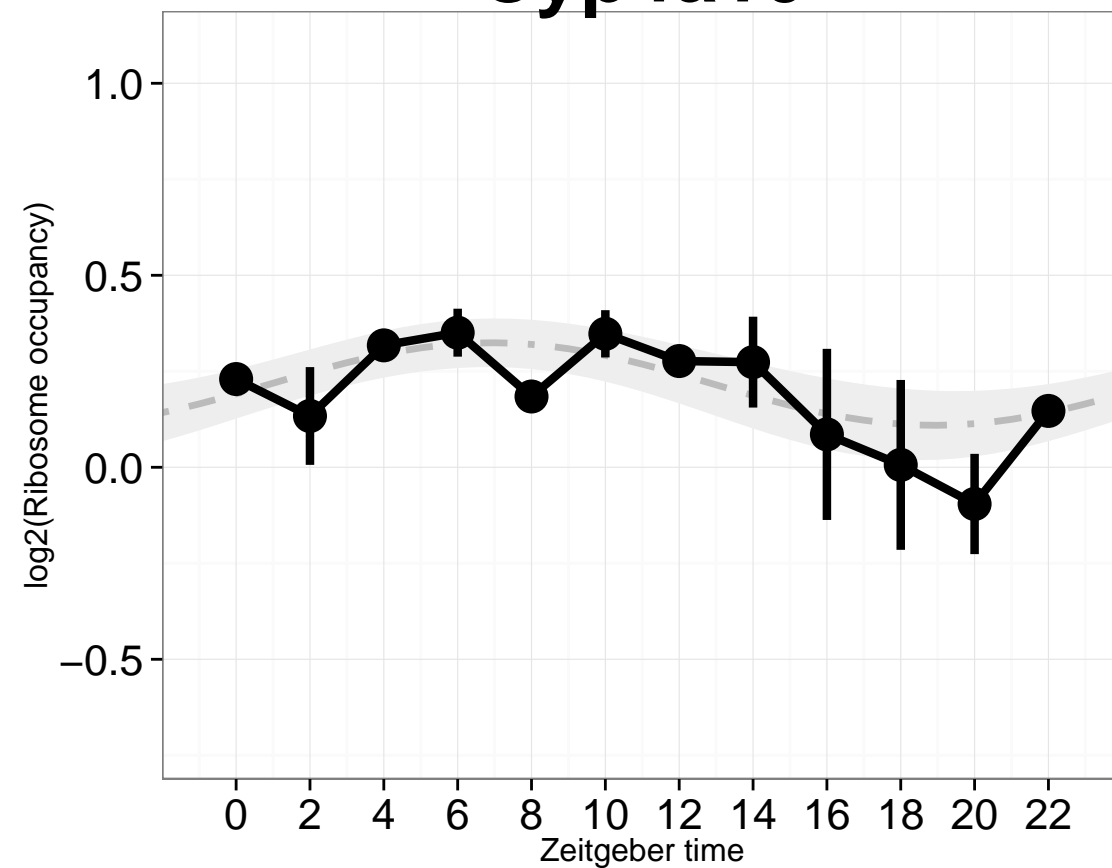

Supplement: SuppDataset_1.zip [file Cyp4a10_set_A.pdf › Supplemental Dataset 1/A-mRNA_nonrhyth_translation_nonrhyth/Cyp4a10_set_A.pdf]

# Cyp4a12a

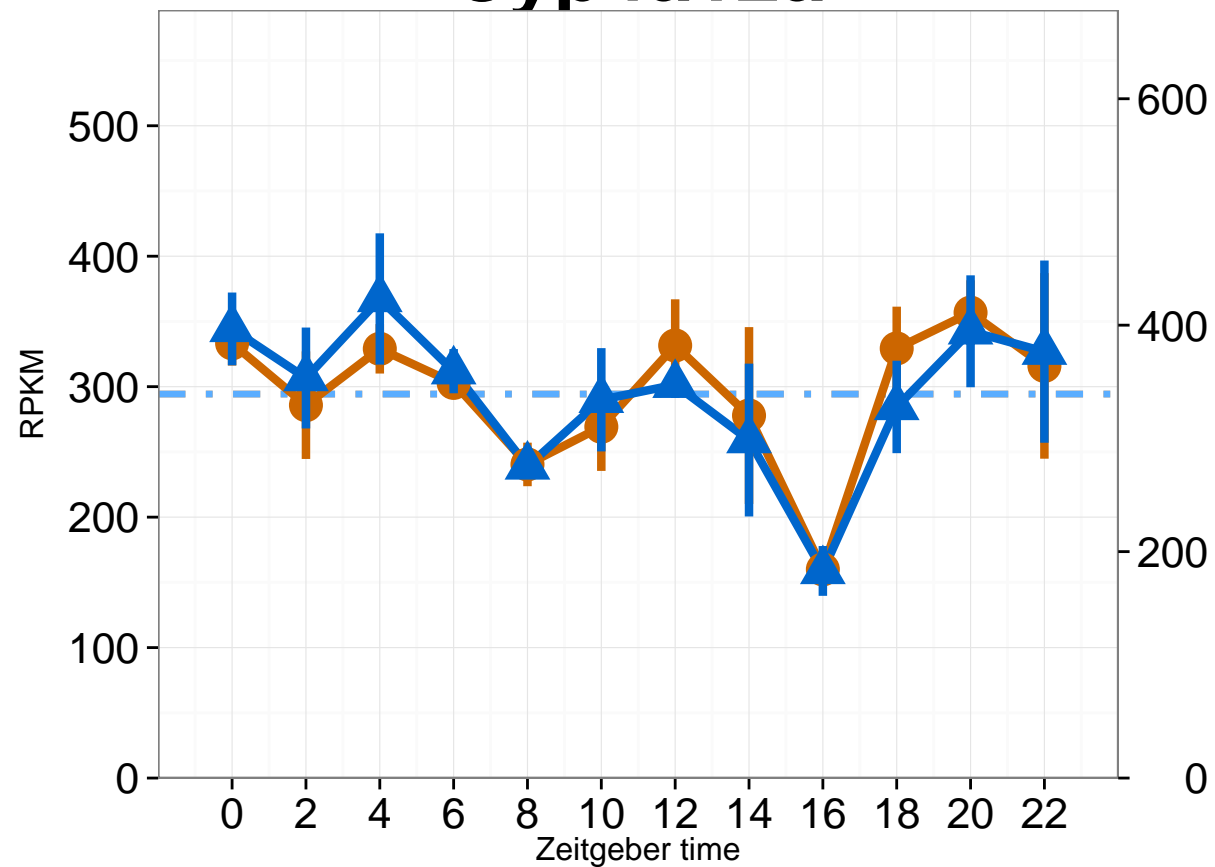

# Cyp4a12a

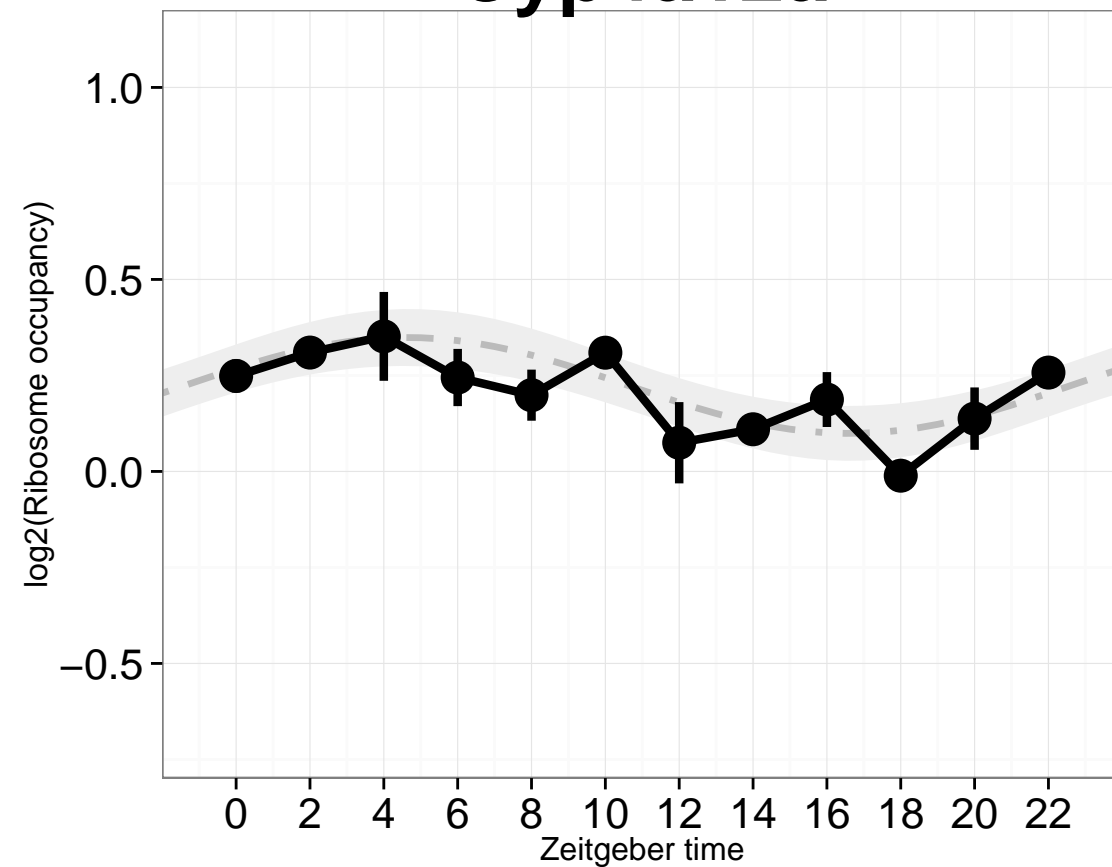

Supplement: SuppDataset_1.zip [file Cyp4a12a_set_A.pdf › Supplemental Dataset 1/A-mRNA_nonrhyth_translation_nonrhyth/Cyp4a12a_set_A.pdf]

# Cyp4a12b

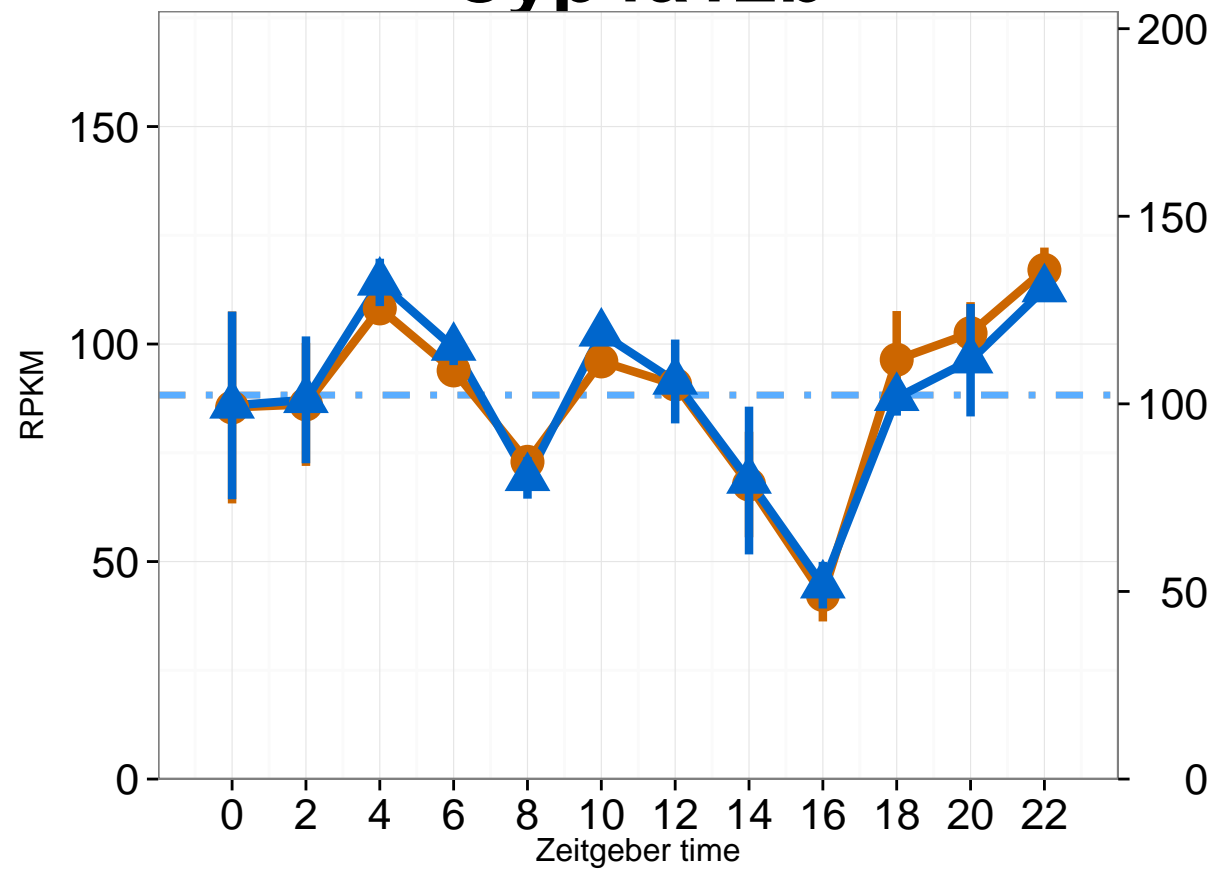

# Cyp4a12b

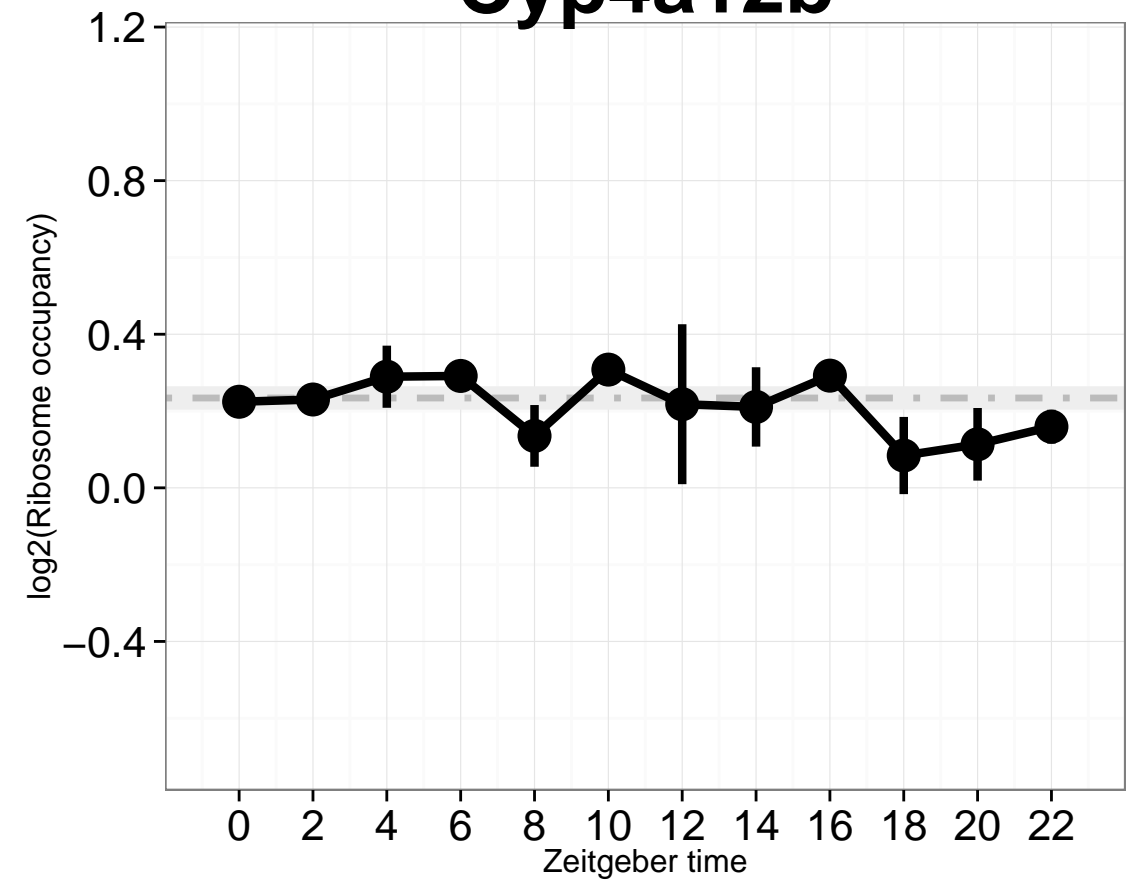

Supplement: SuppDataset_1.zip [file Cyp4a12b_set_A.pdf › Supplemental Dataset 1/A-mRNA_nonrhyth_translation_nonrhyth/Cyp4a12b_set_A.pdf]

# Cyp4a14

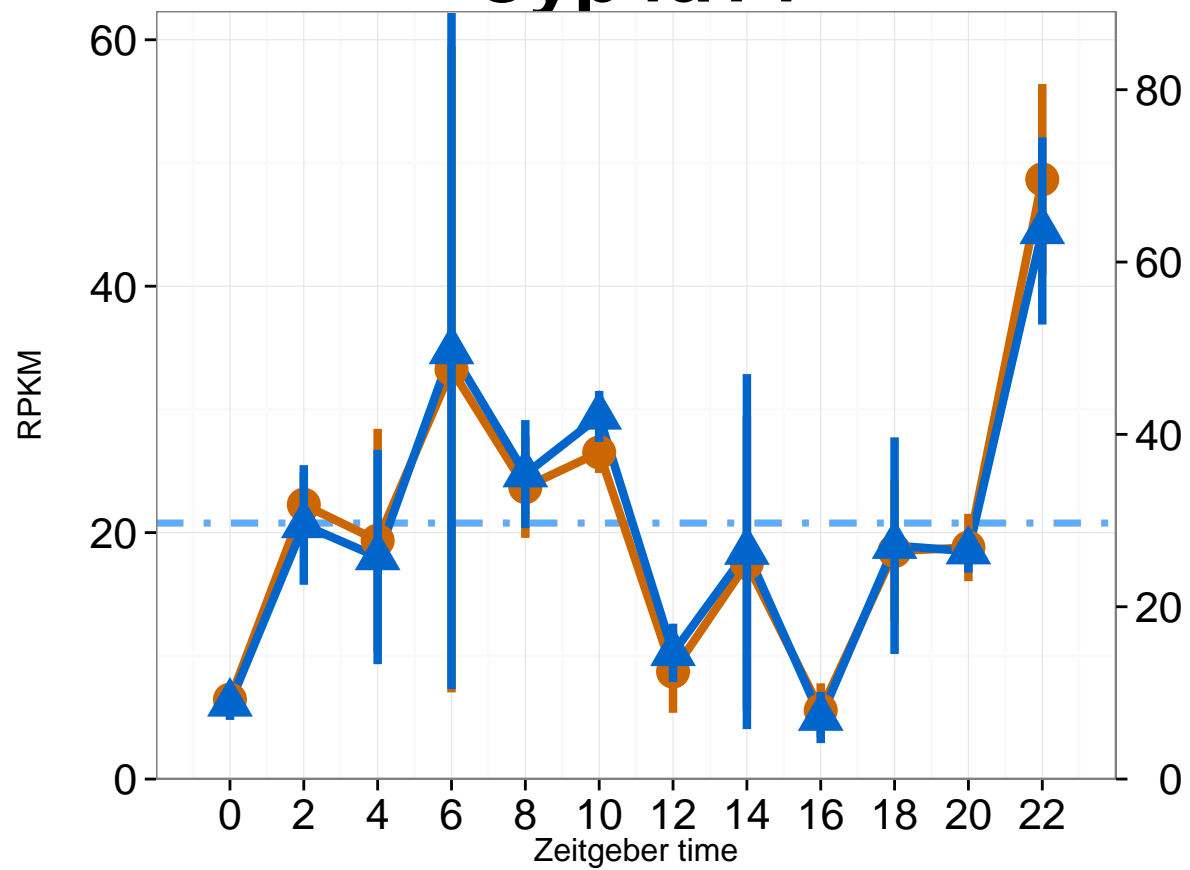

# Cyp4a14

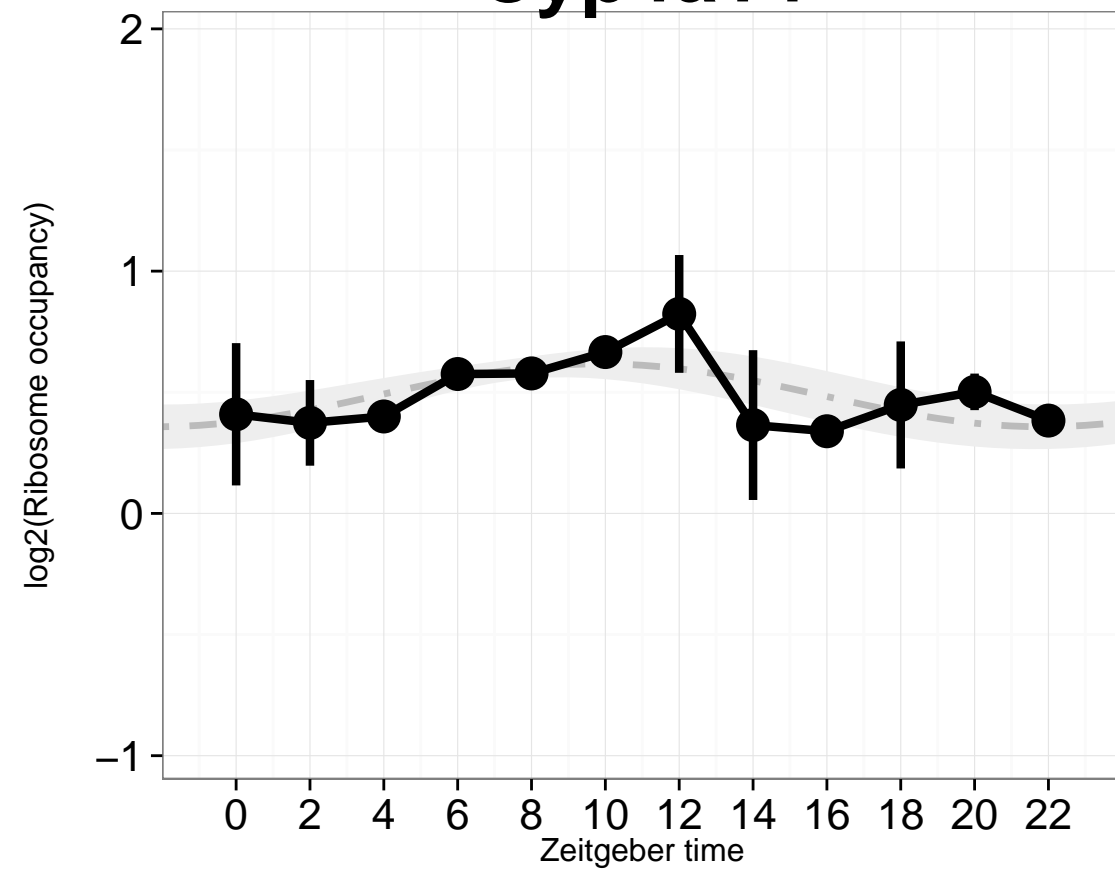

Supplement: SuppDataset_1.zip [file Cyp4a14_set_A.pdf › Supplemental Dataset 1/A-mRNA_nonrhyth_translation_nonrhyth/Cyp4a14_set_A.pdf]

# Cyp4a31

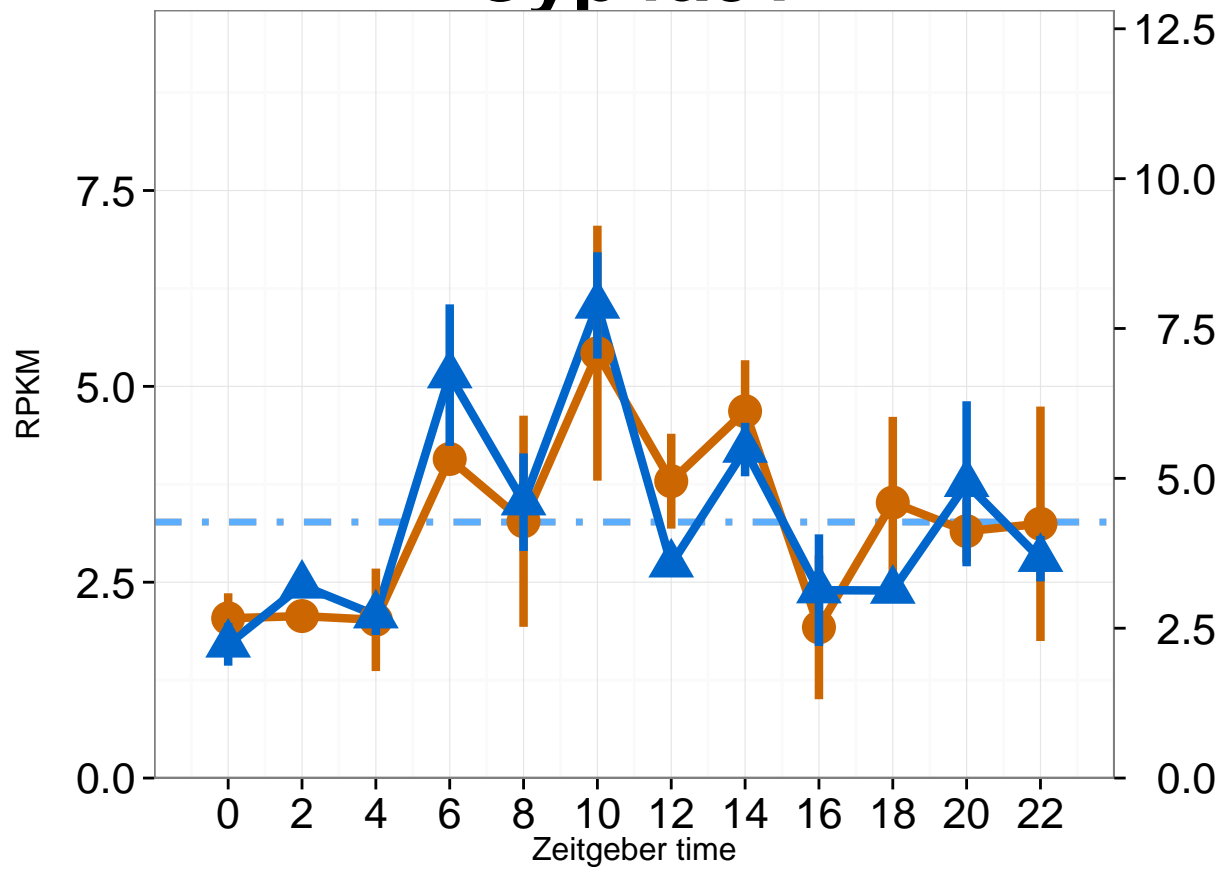

# Cyp4a31

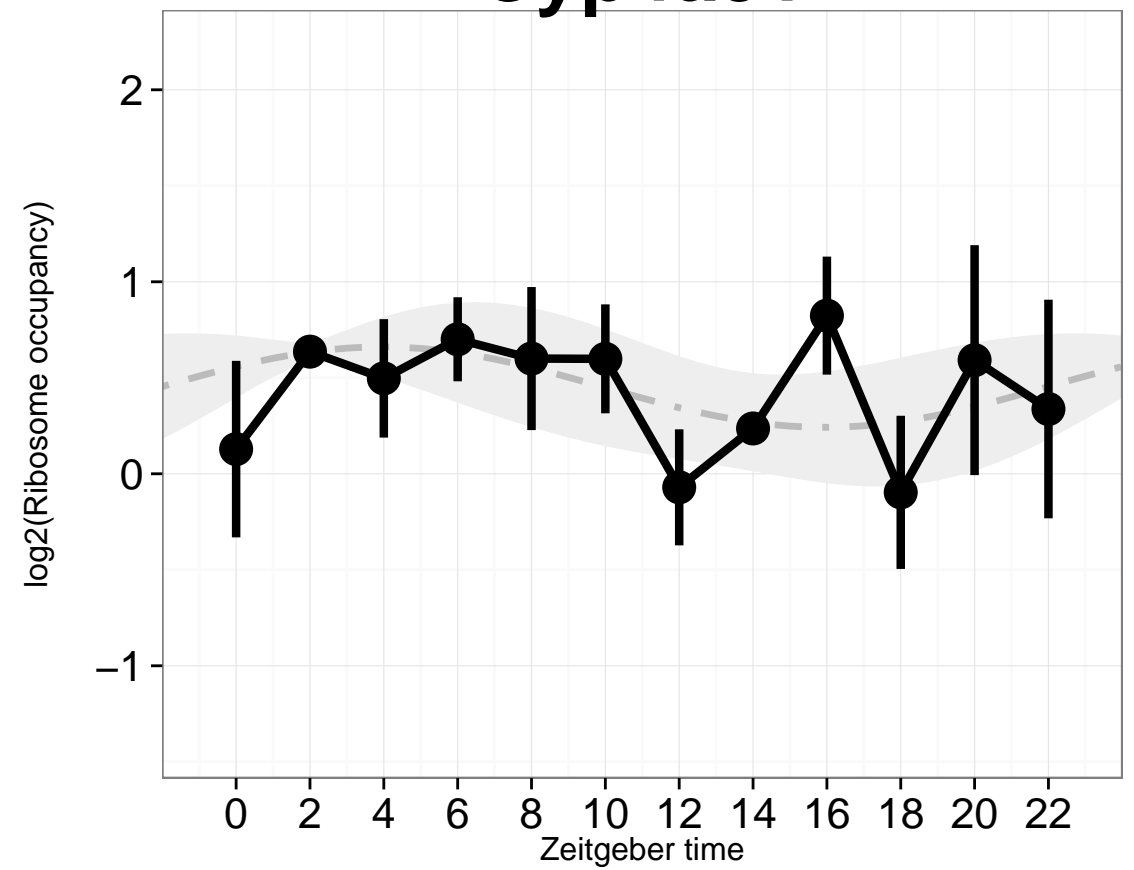

Supplement: SuppDataset_1.zip [file Cyp4a31_set_A.pdf › Supplemental Dataset 1/A-mRNA_nonrhyth_translation_nonrhyth/Cyp4a31_set_A.pdf]
