# Supplementary figures and images for: Ribosome profiling reveals the rhythmic liver translatome and circadian clock regulation by upstream open reading frames (part 20 of 113)
Source: HighWire-hosted journal article supplement (doi:10.1101/gr.195404.115), 2015-10-20

# Cyp4b1

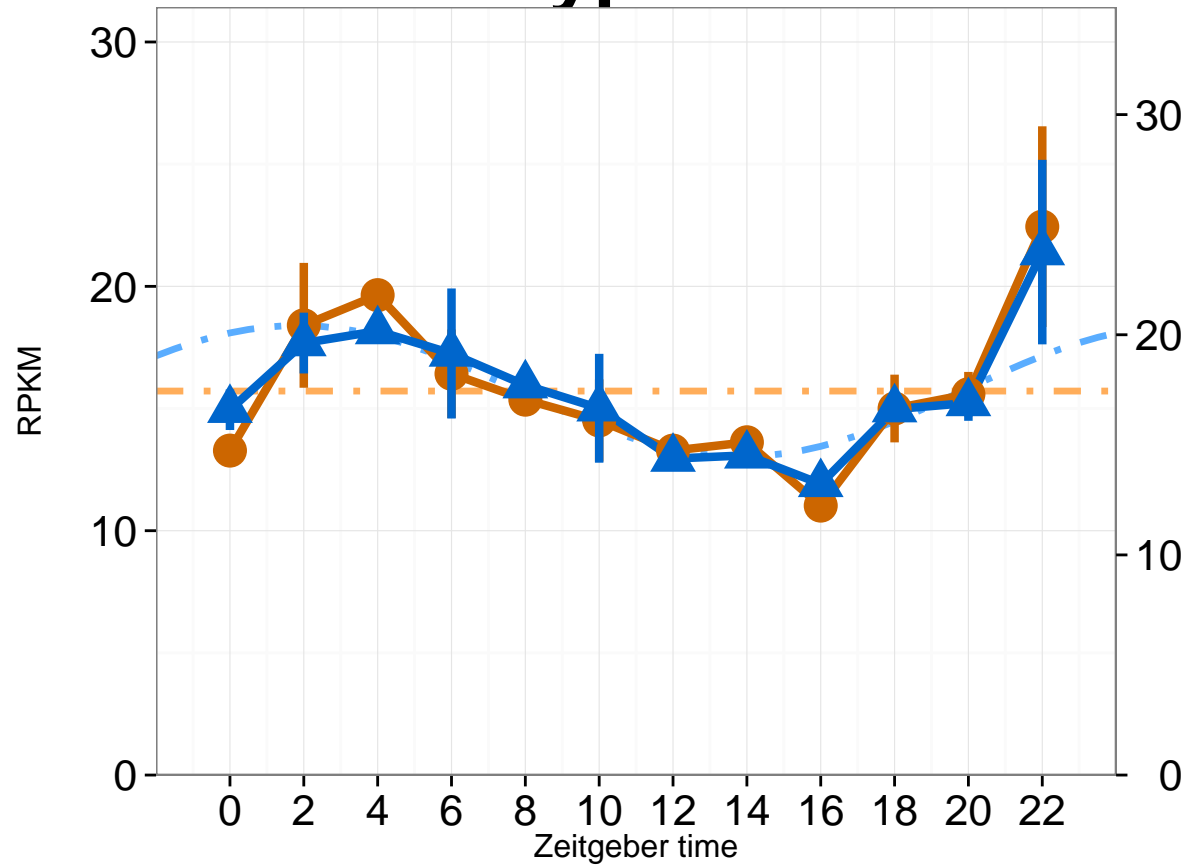

# Cyp4b1

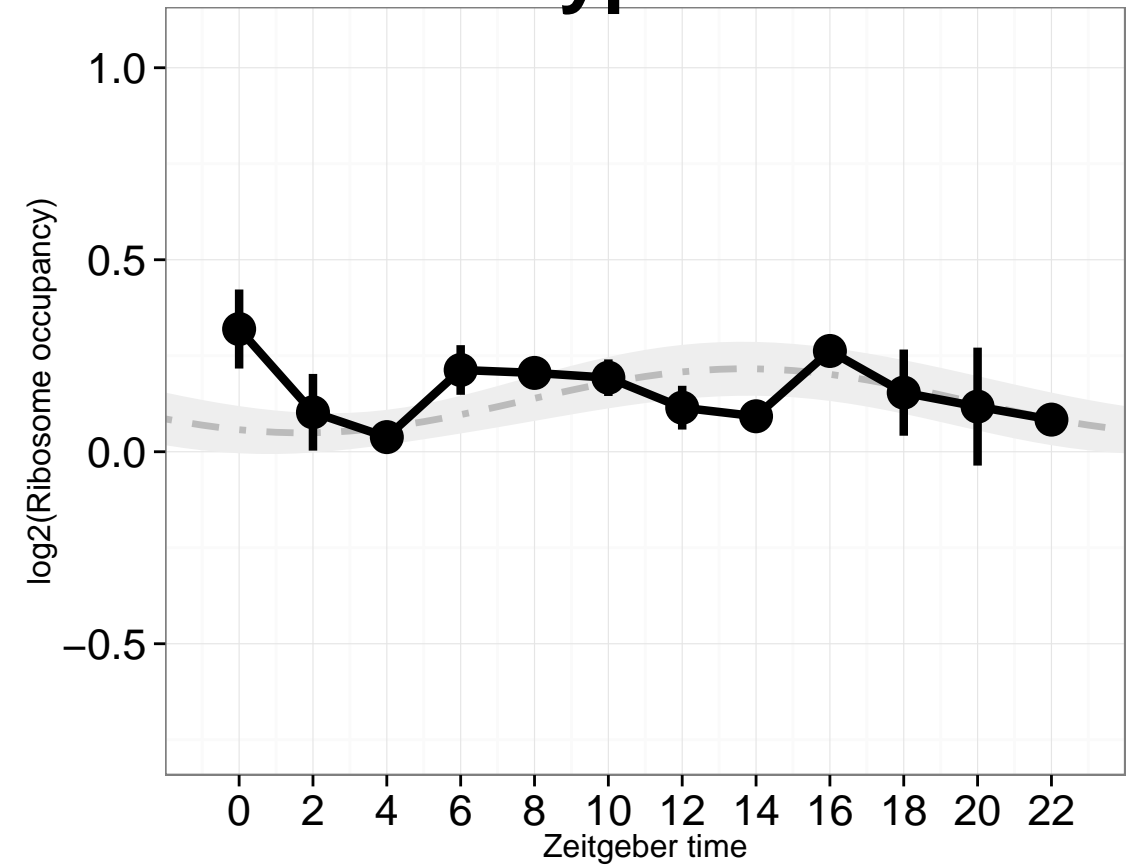

Supplement: SuppDataset_1.zip [file Cyp4b1_set_A.pdf › Supplemental Dataset 1/A-mRNA_nonrhyth_translation_nonrhyth/Cyp4b1_set_A.pdf]

# Cyp4f13

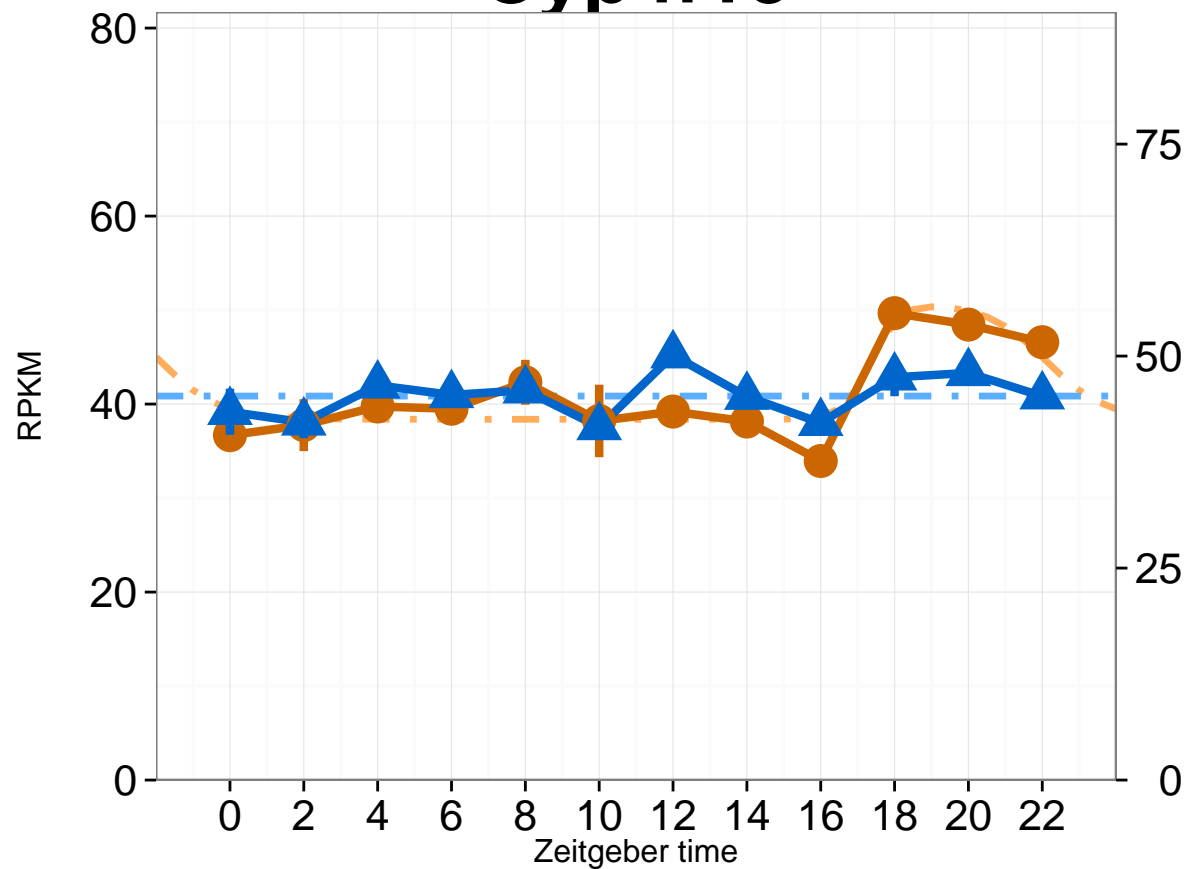

# Cyp4f13

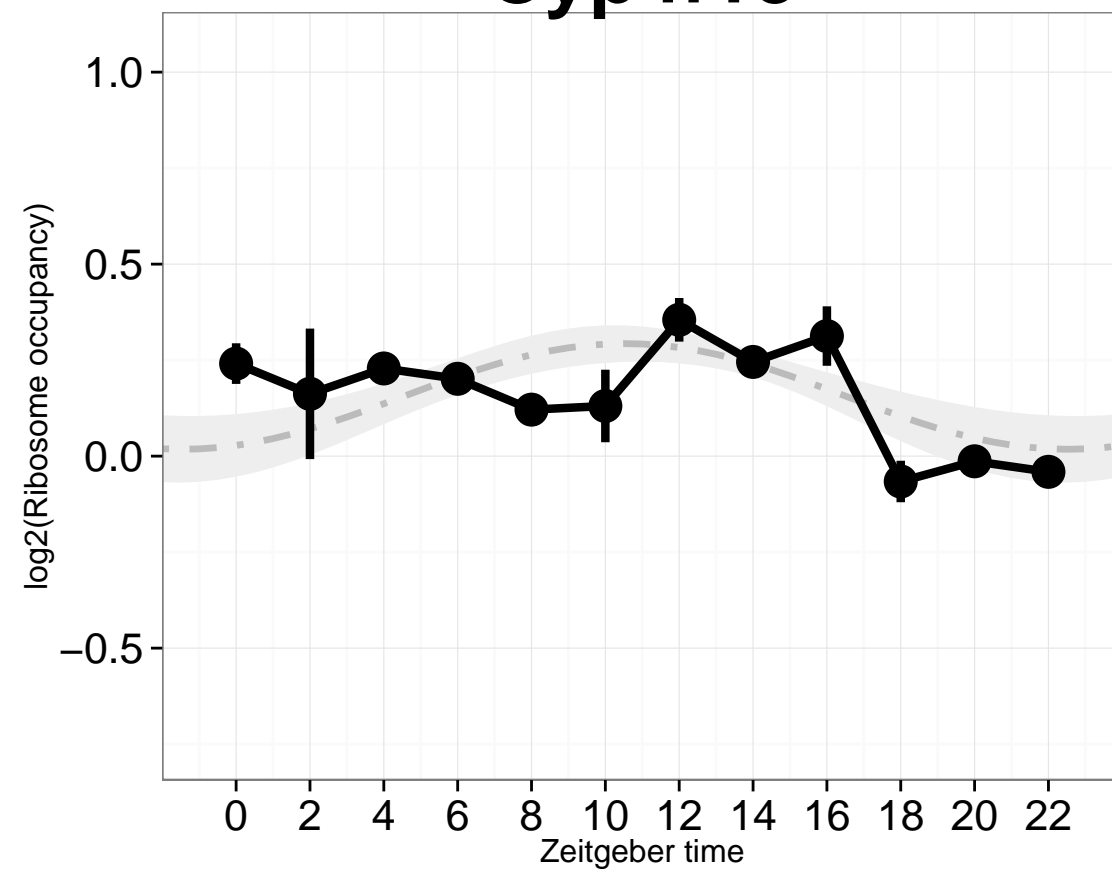

Supplement: SuppDataset_1.zip [file Cyp4f13_set_A.pdf › Supplemental Dataset 1/A-mRNA_nonrhyth_translation_nonrhyth/Cyp4f13_set_A.pdf]

# Cyp4f14

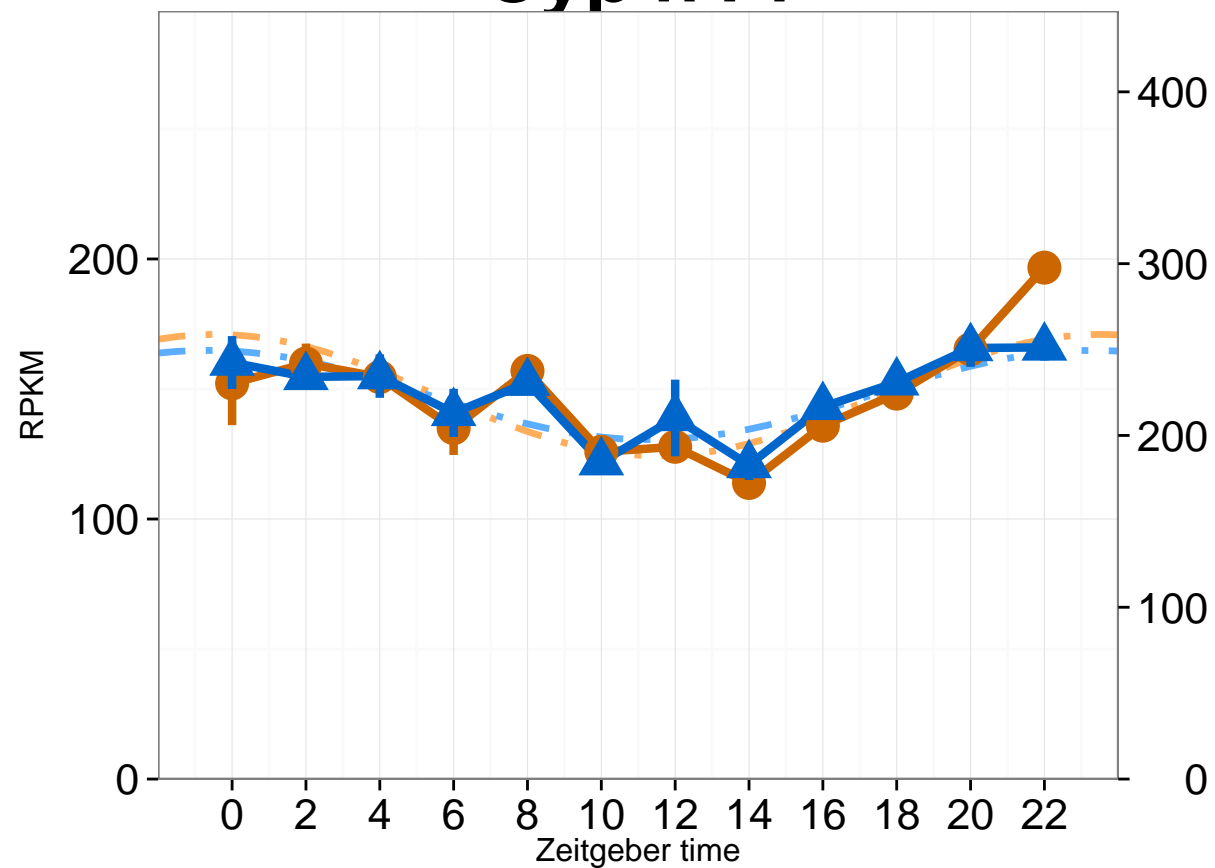

# Cyp4f14

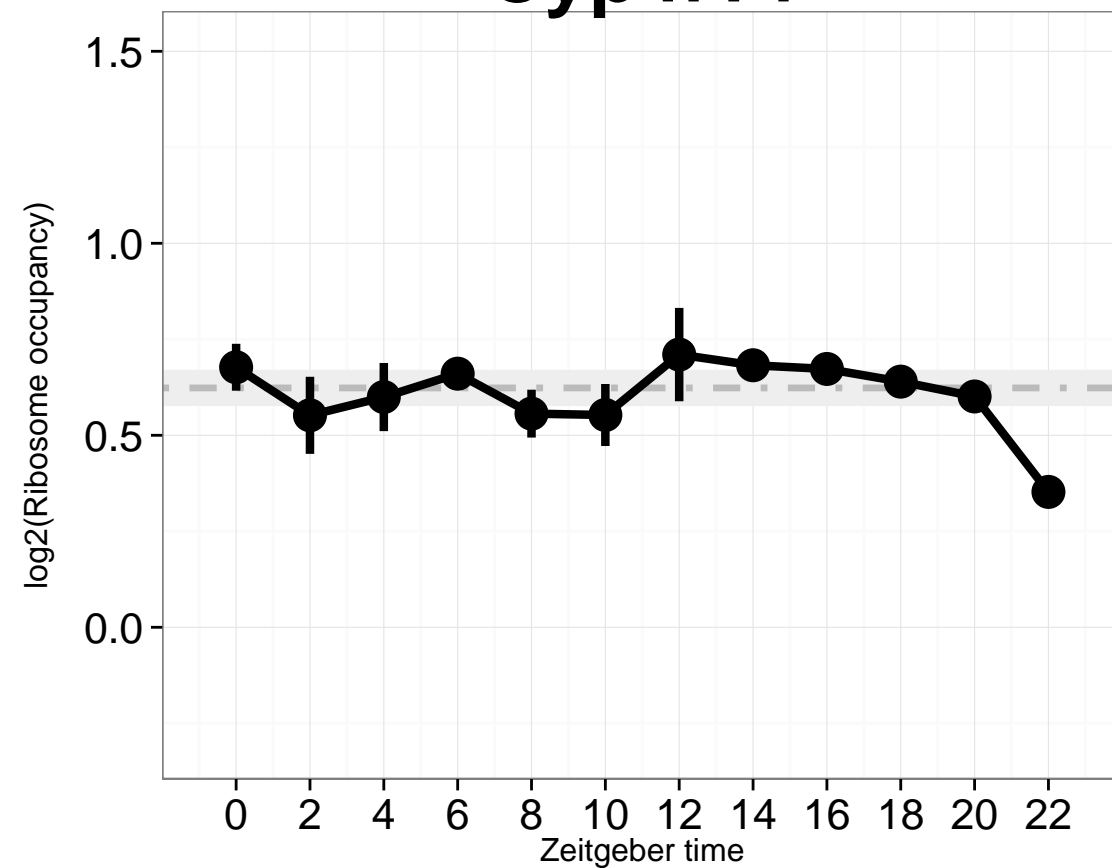

Supplement: SuppDataset_1.zip [file Cyp4f14_set_A.pdf › Supplemental Dataset 1/A-mRNA_nonrhyth_translation_nonrhyth/Cyp4f14_set_A.pdf]

## Cyp4f15

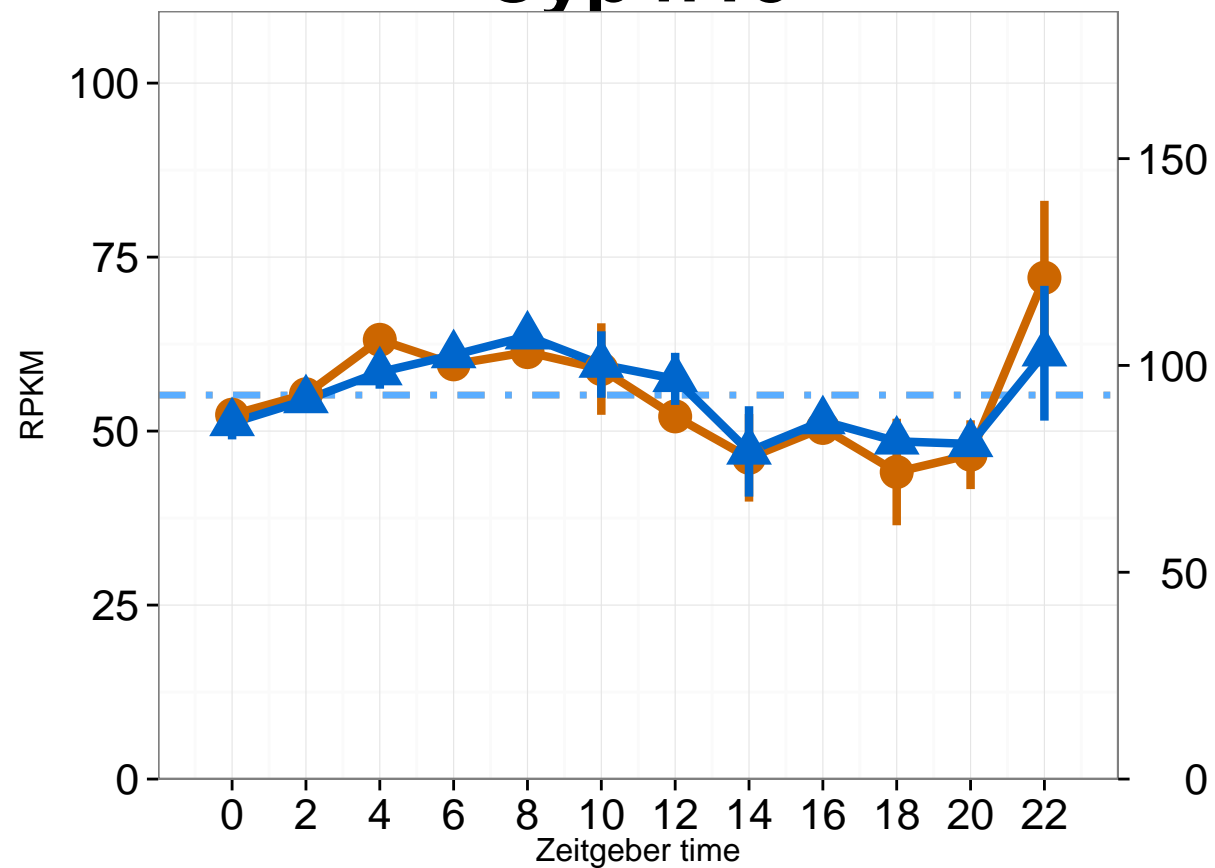

## Cyp4f15

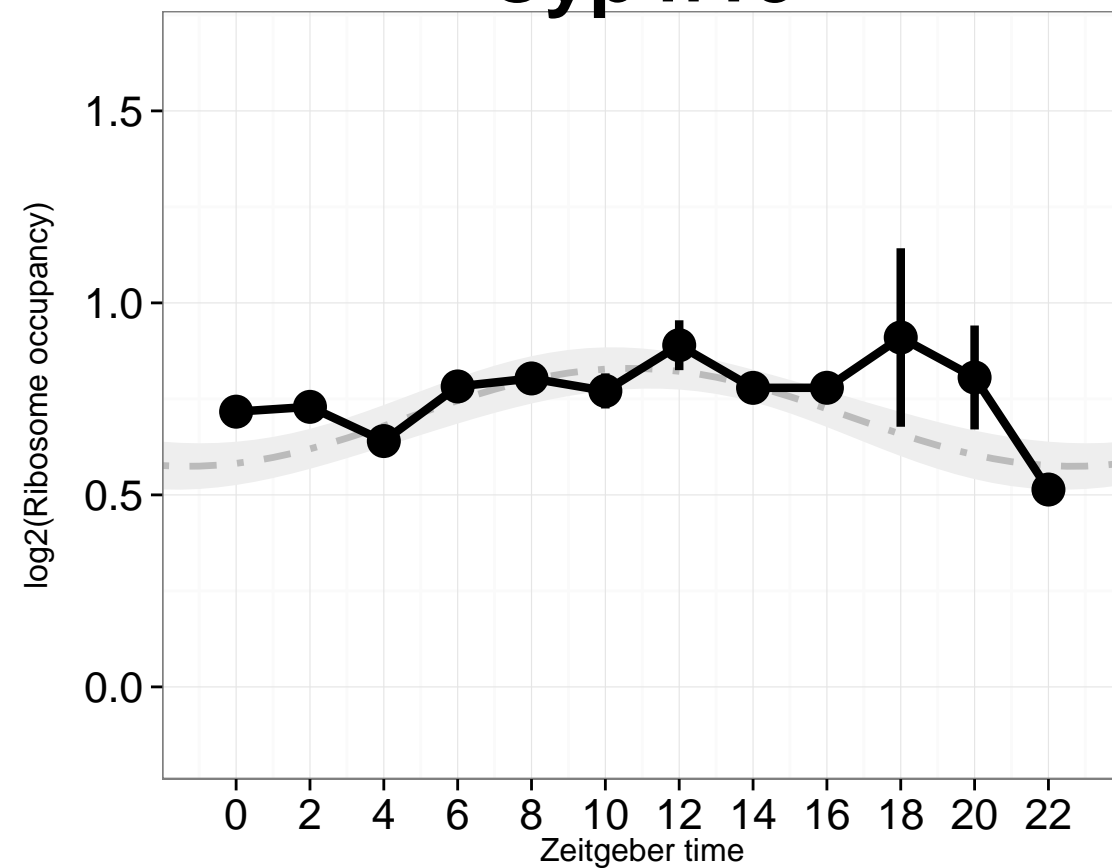

Supplement: SuppDataset_1.zip [file Cyp4f15_set_A.pdf › Supplemental Dataset 1/A-mRNA_nonrhyth_translation_nonrhyth/Cyp4f15_set_A.pdf]

# Cyp4f16

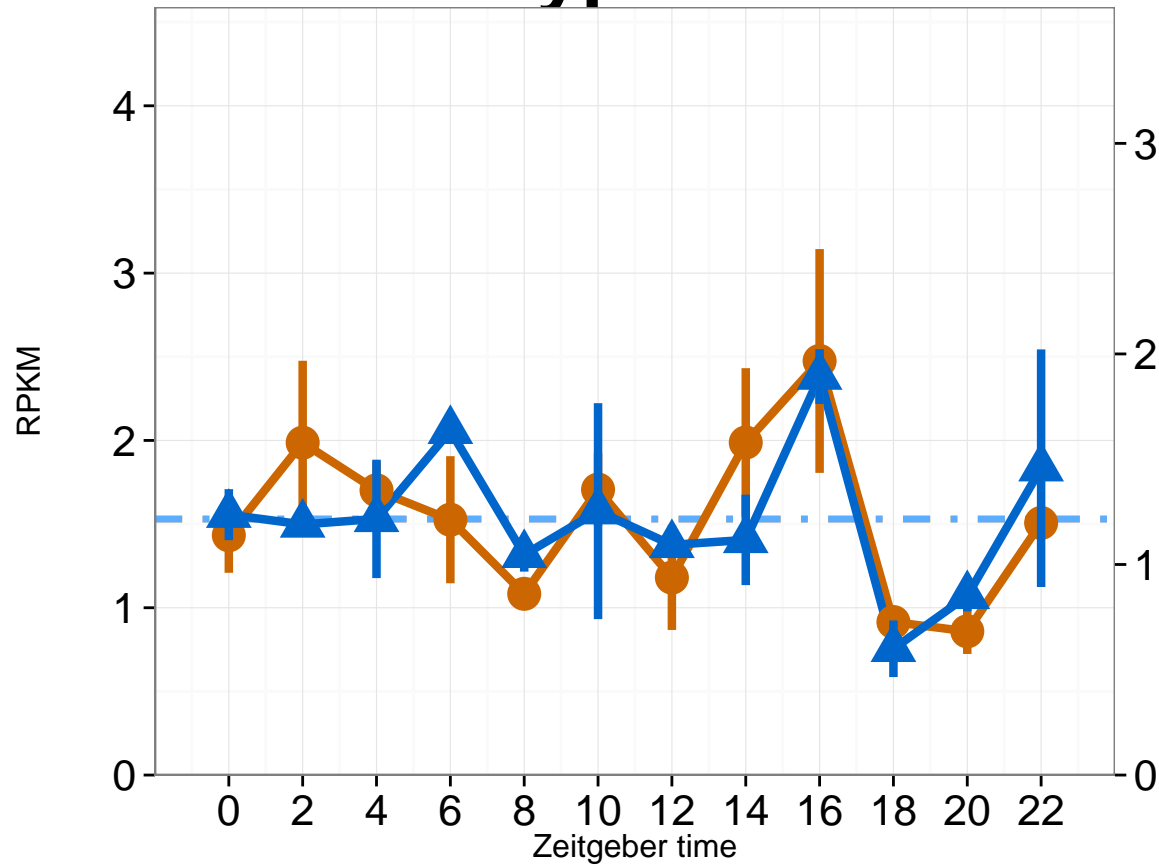

# Cyp4f16

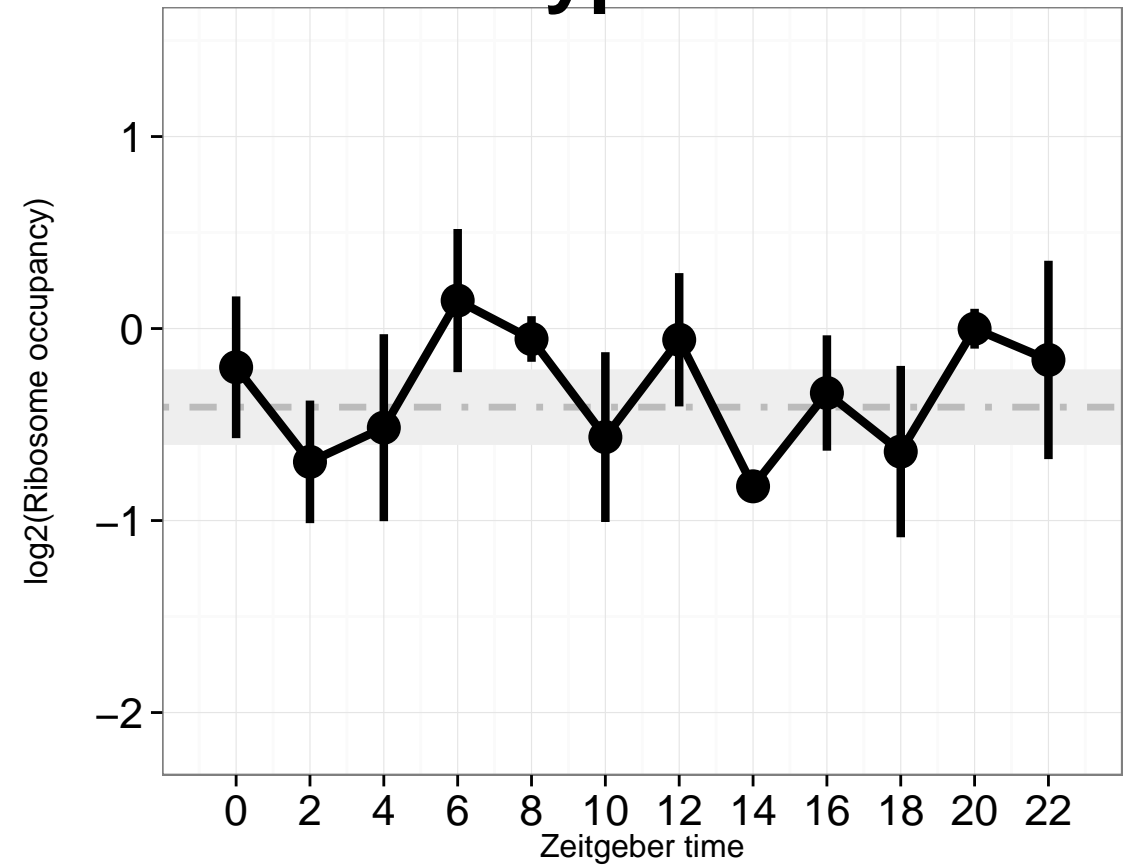

Supplement: SuppDataset_1.zip [file Cyp4f16_set_A.pdf › Supplemental Dataset 1/A-mRNA_nonrhyth_translation_nonrhyth/Cyp4f16_set_A.pdf]

# Cyp4f18

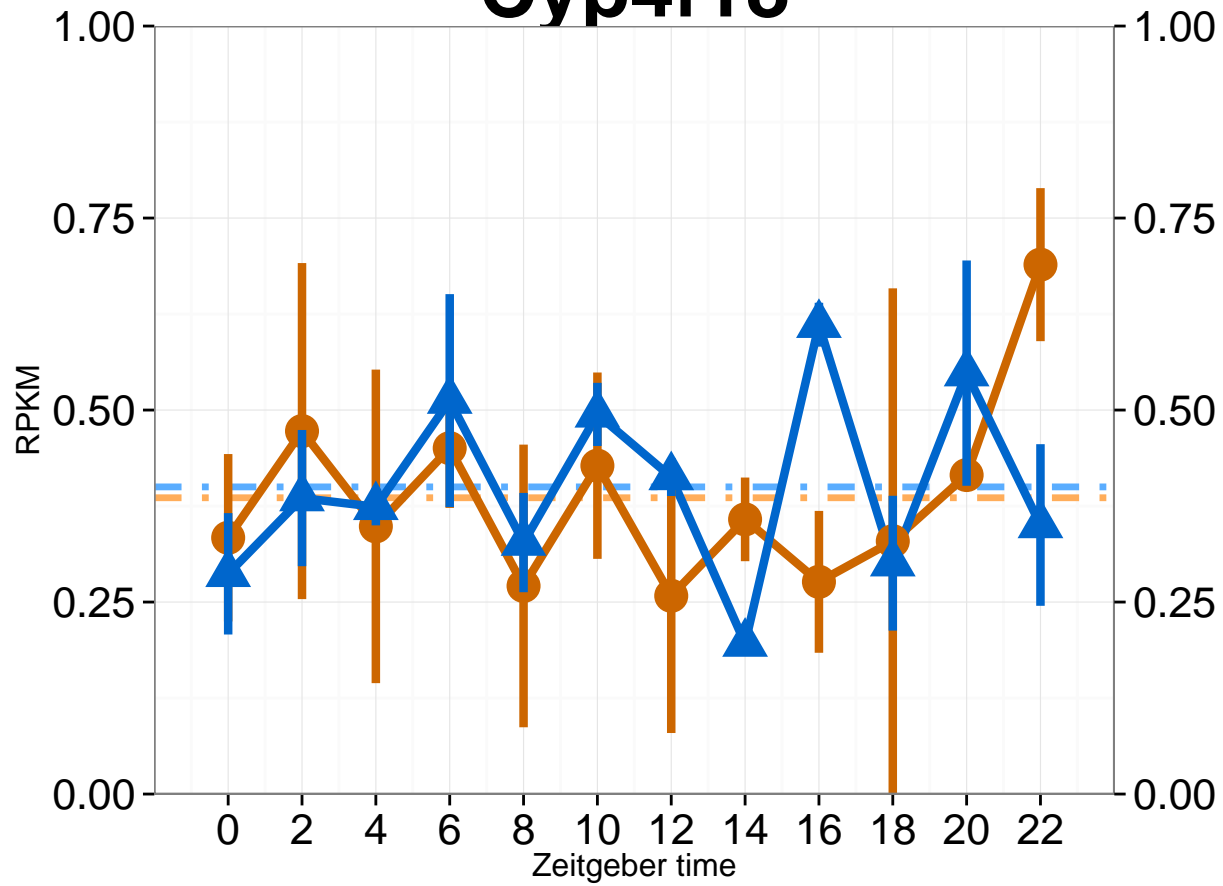

# Cyp4f18

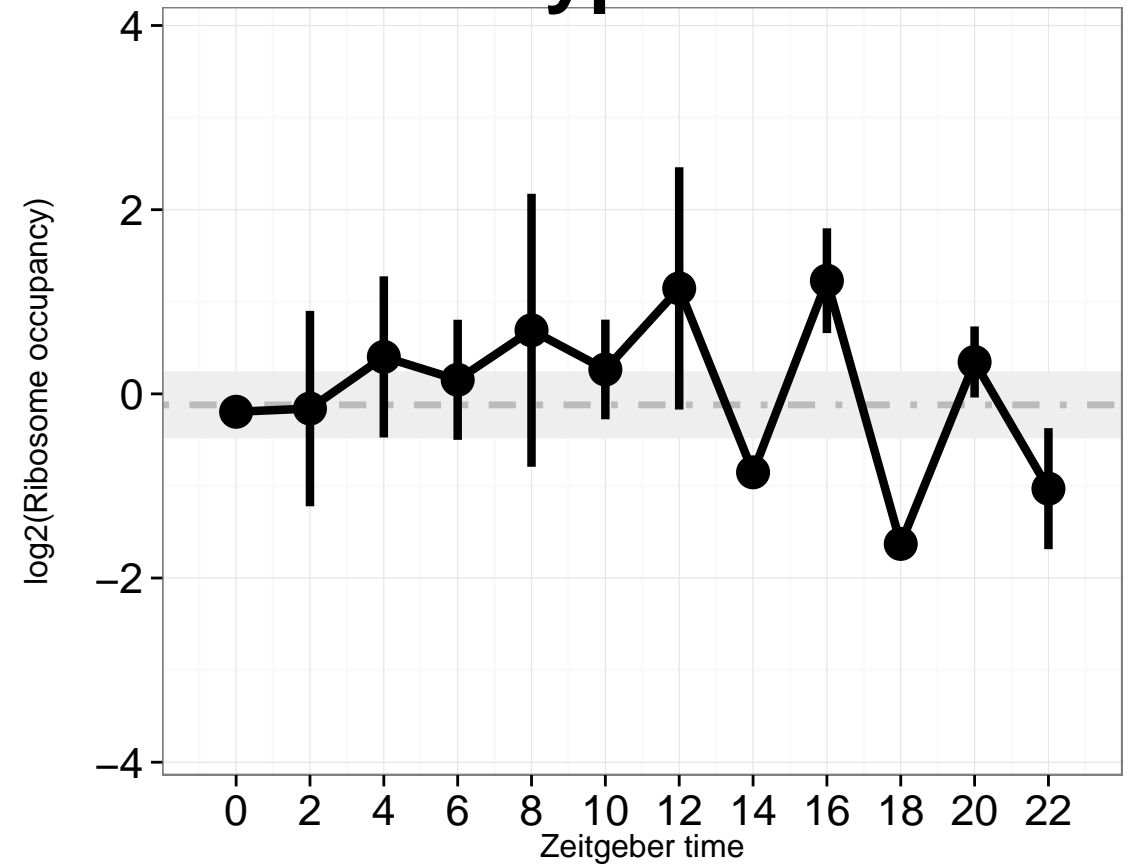

Supplement: SuppDataset_1.zip [file Cyp4f18_set_A.pdf › Supplemental Dataset 1/A-mRNA_nonrhyth_translation_nonrhyth/Cyp4f18_set_A.pdf]

# Cyp4v3

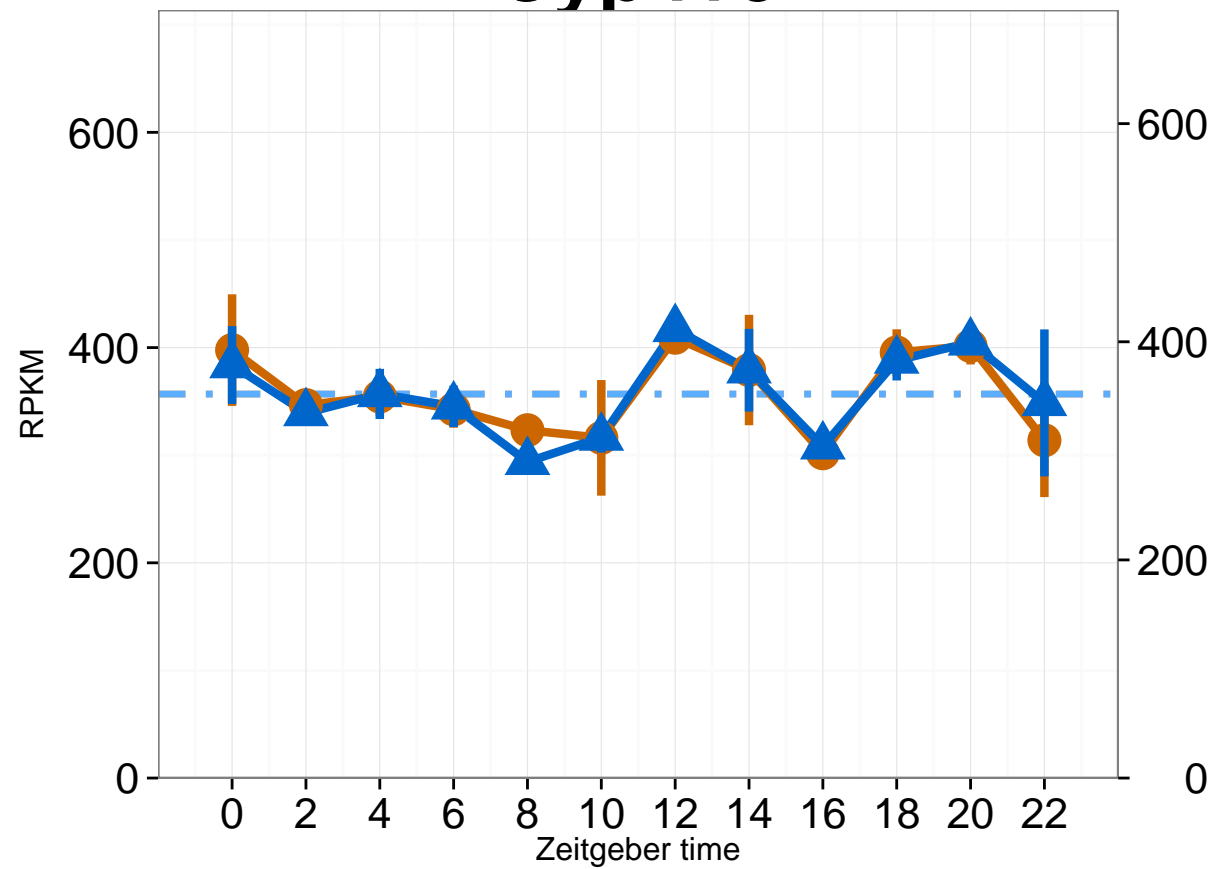

# Cyp4v3

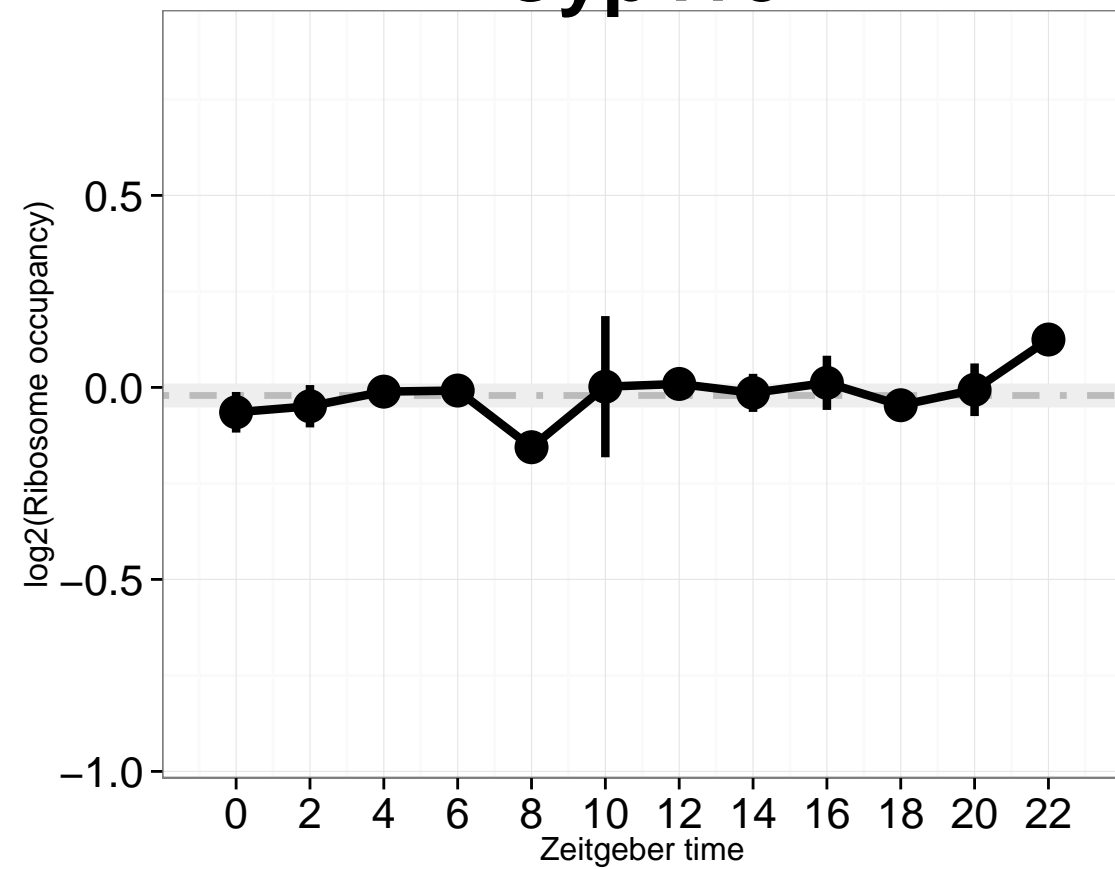

Supplement: SuppDataset_1.zip [file Cyp4v3_set_A.pdf › Supplemental Dataset 1/A-mRNA_nonrhyth_translation_nonrhyth/Cyp4v3_set_A.pdf]

# Cyp51

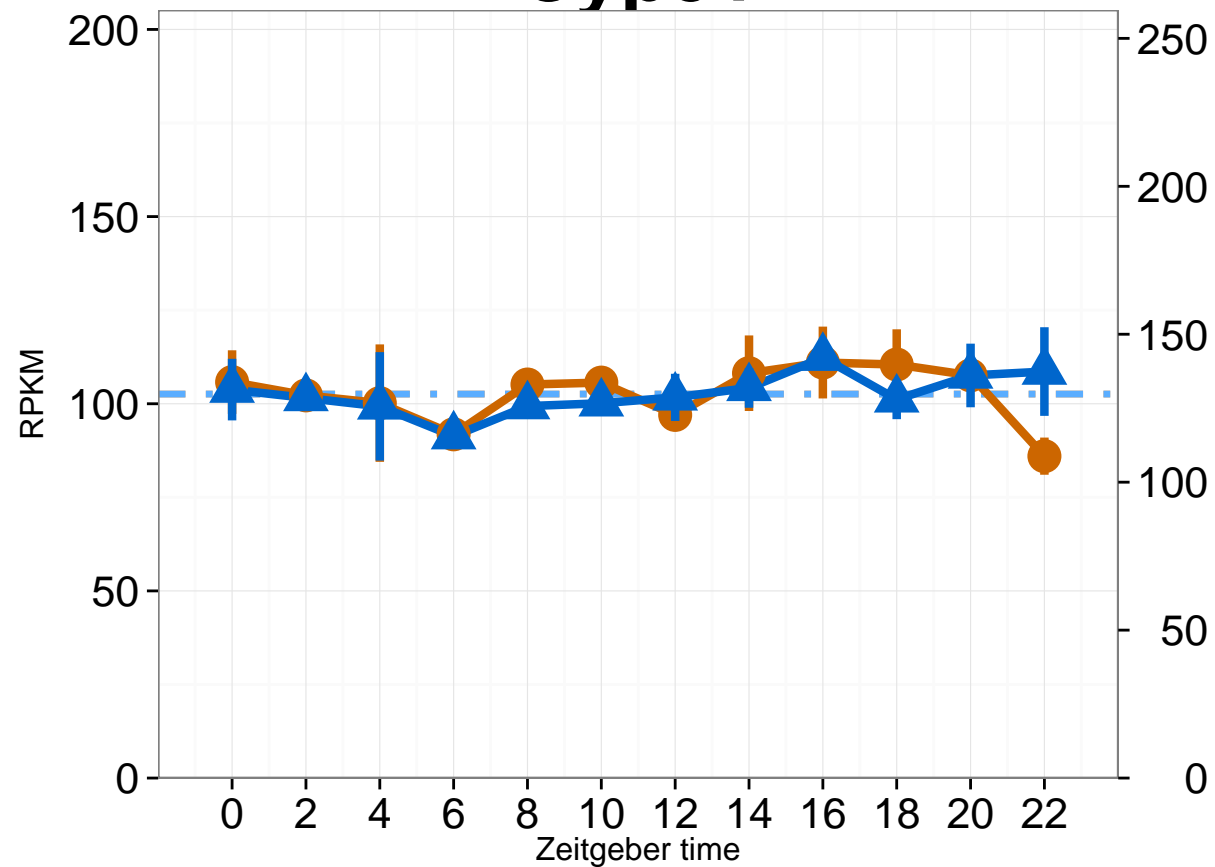

# Cyp51

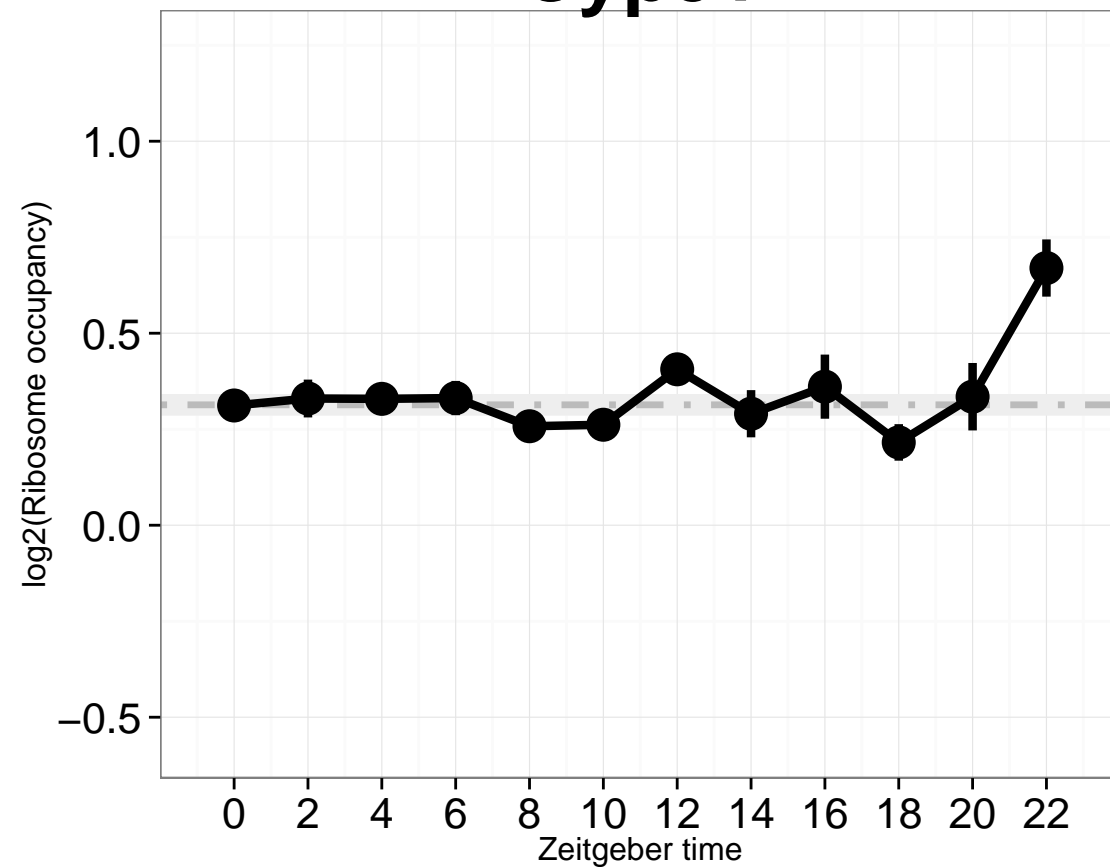

Supplement: SuppDataset_1.zip [file Cyp51_set_A.pdf › Supplemental Dataset 1/A-mRNA_nonrhyth_translation_nonrhyth/Cyp51_set_A.pdf]

# Cyp7b1

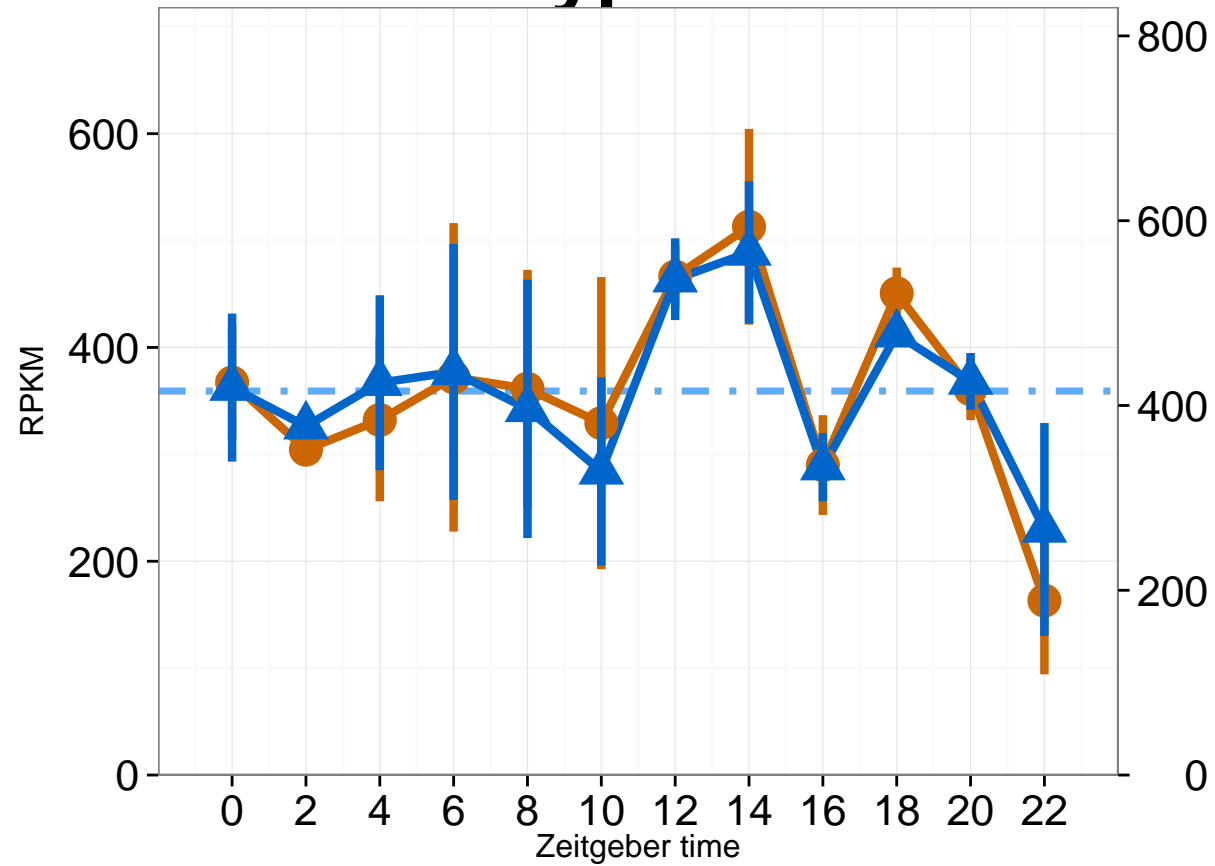

# Cyp7b1

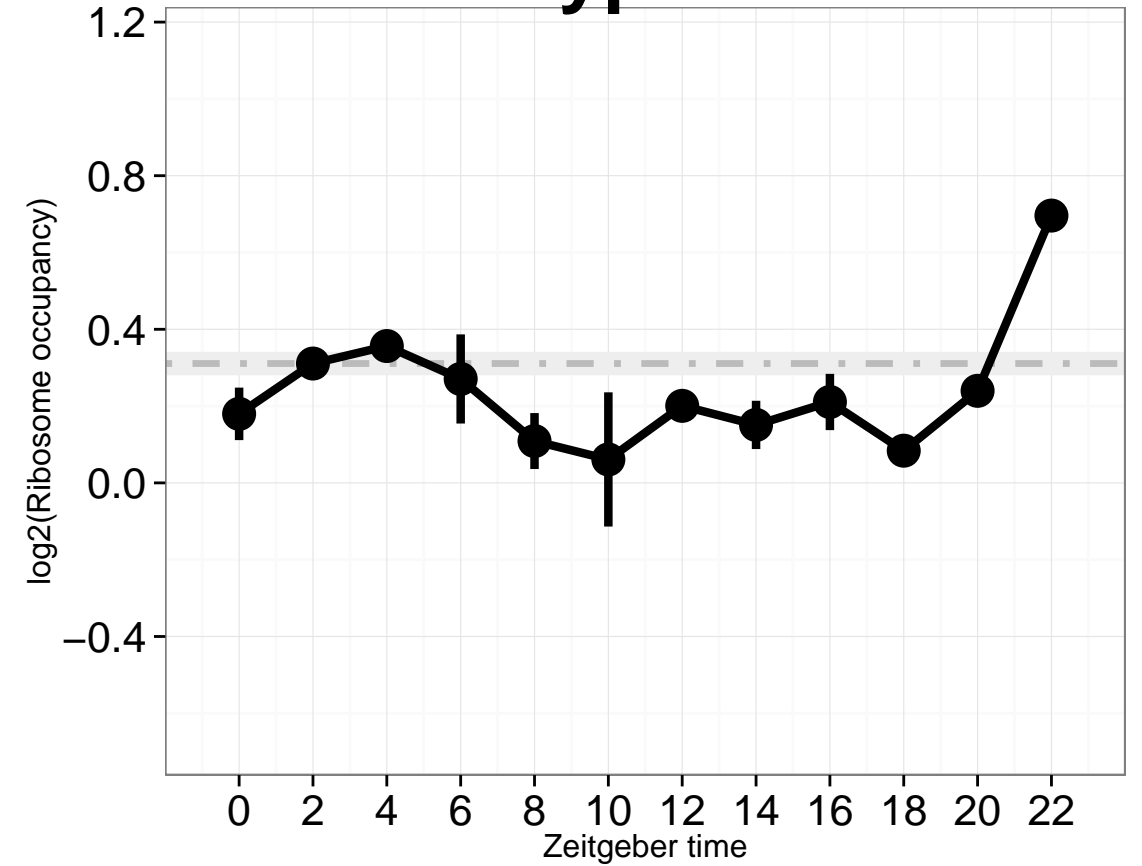

Supplement: SuppDataset_1.zip [file Cyp7b1_set_A.pdf › Supplemental Dataset 1/A-mRNA_nonrhyth_translation_nonrhyth/Cyp7b1_set_A.pdf]

# Cyr61

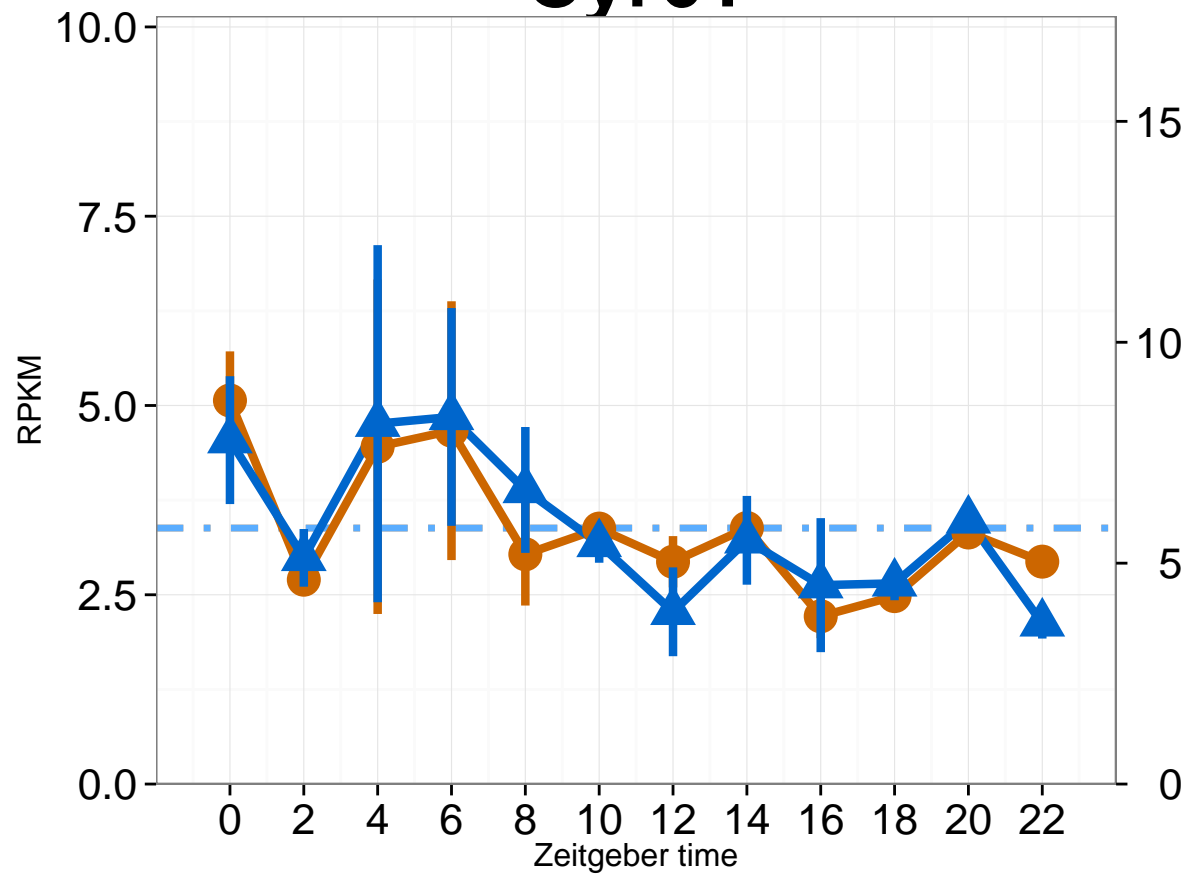

# Cyr61

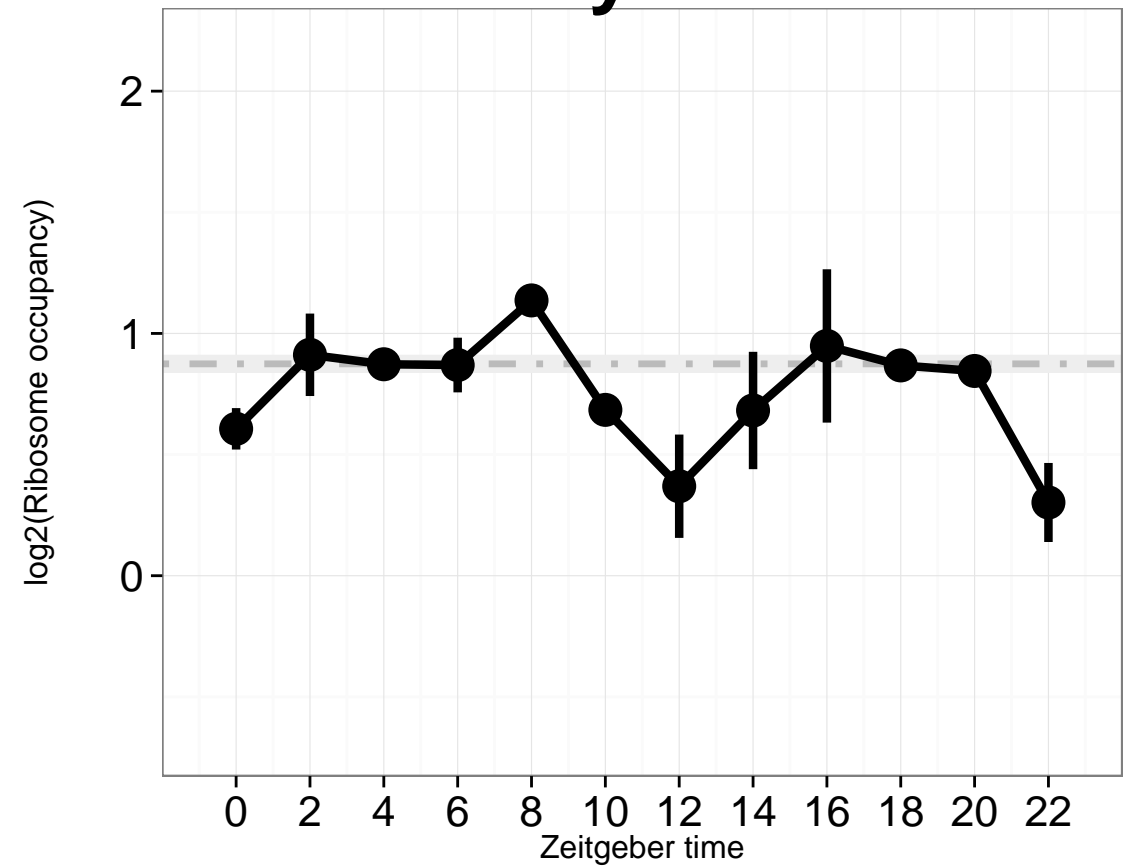

Supplement: SuppDataset_1.zip [file Cyr61_set_A.pdf › Supplemental Dataset 1/A-mRNA_nonrhyth_translation_nonrhyth/Cyr61_set_A.pdf]

# Cysltr1

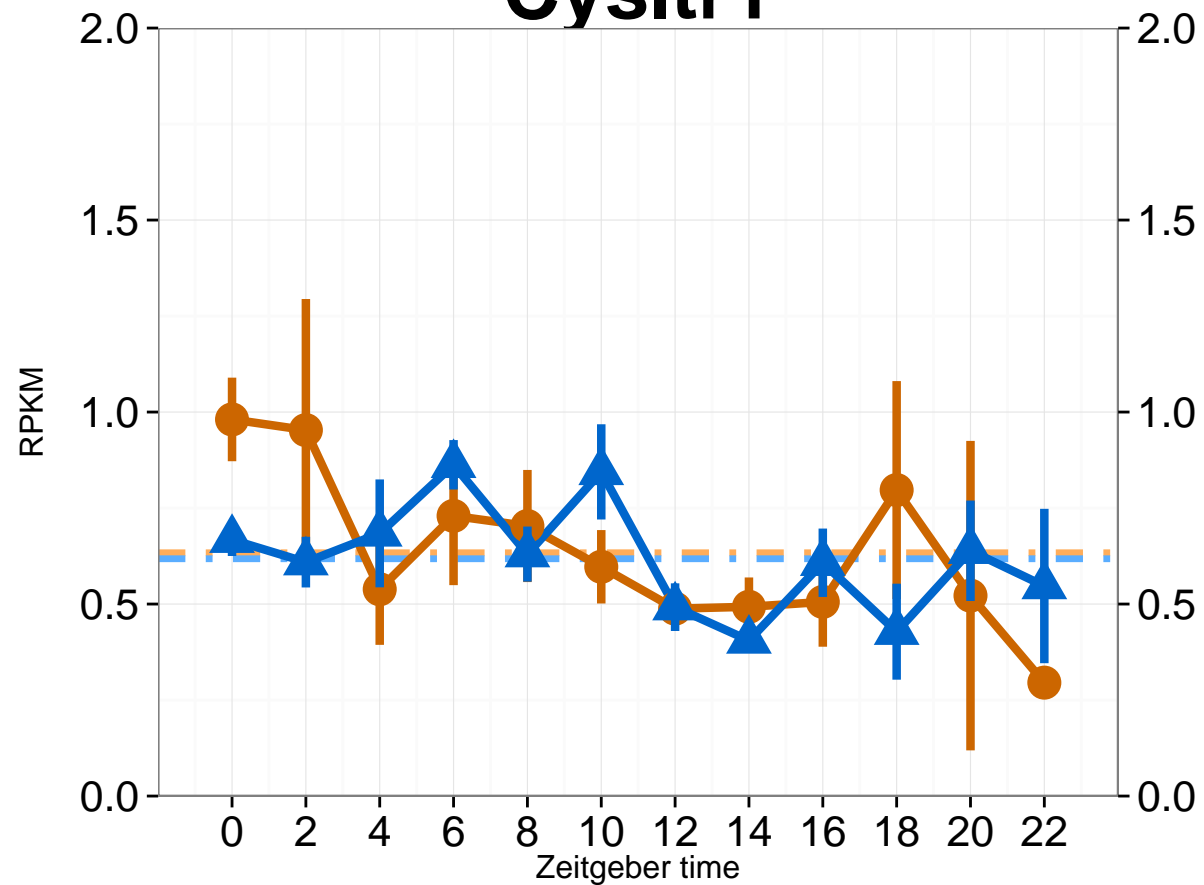

# Cysltr1

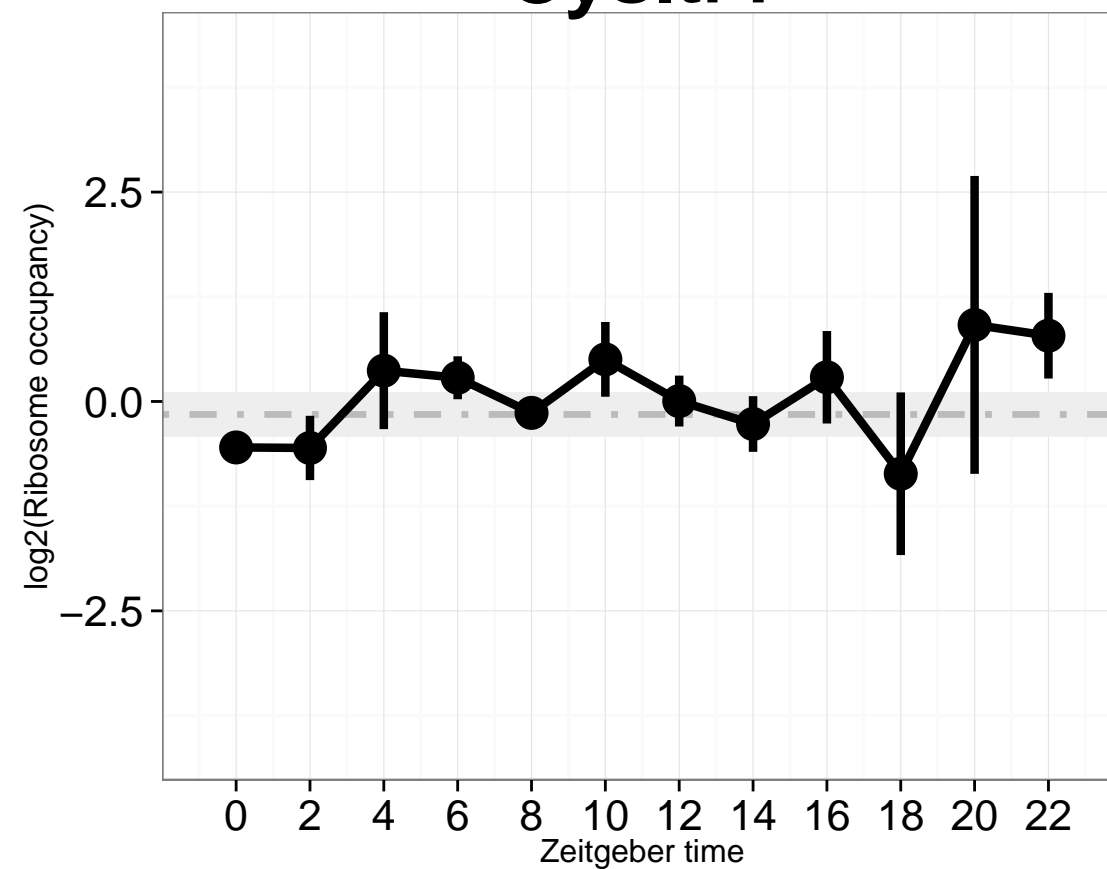

Supplement: SuppDataset_1.zip [file Cysltr1_set_A.pdf › Supplemental Dataset 1/A-mRNA_nonrhyth_translation_nonrhyth/Cysltr1_set_A.pdf]

# Cystm1

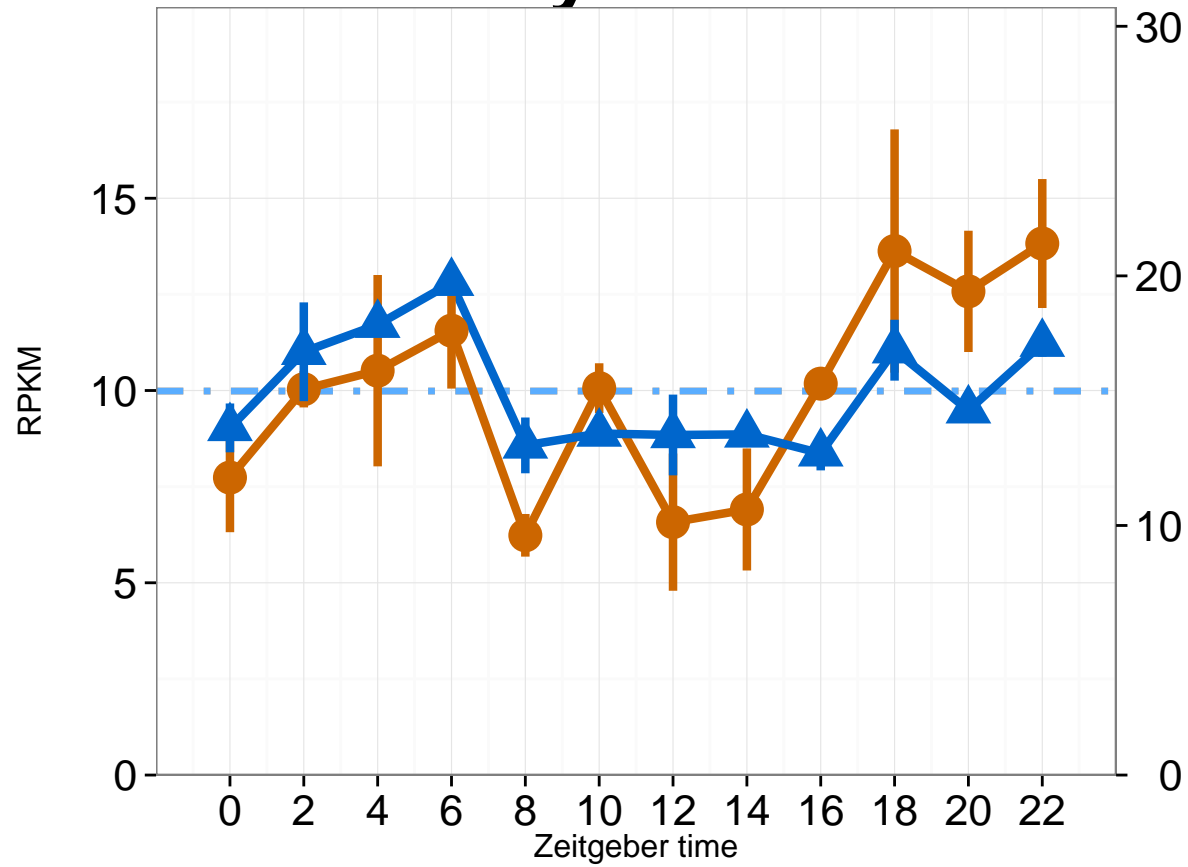

# Cystm1

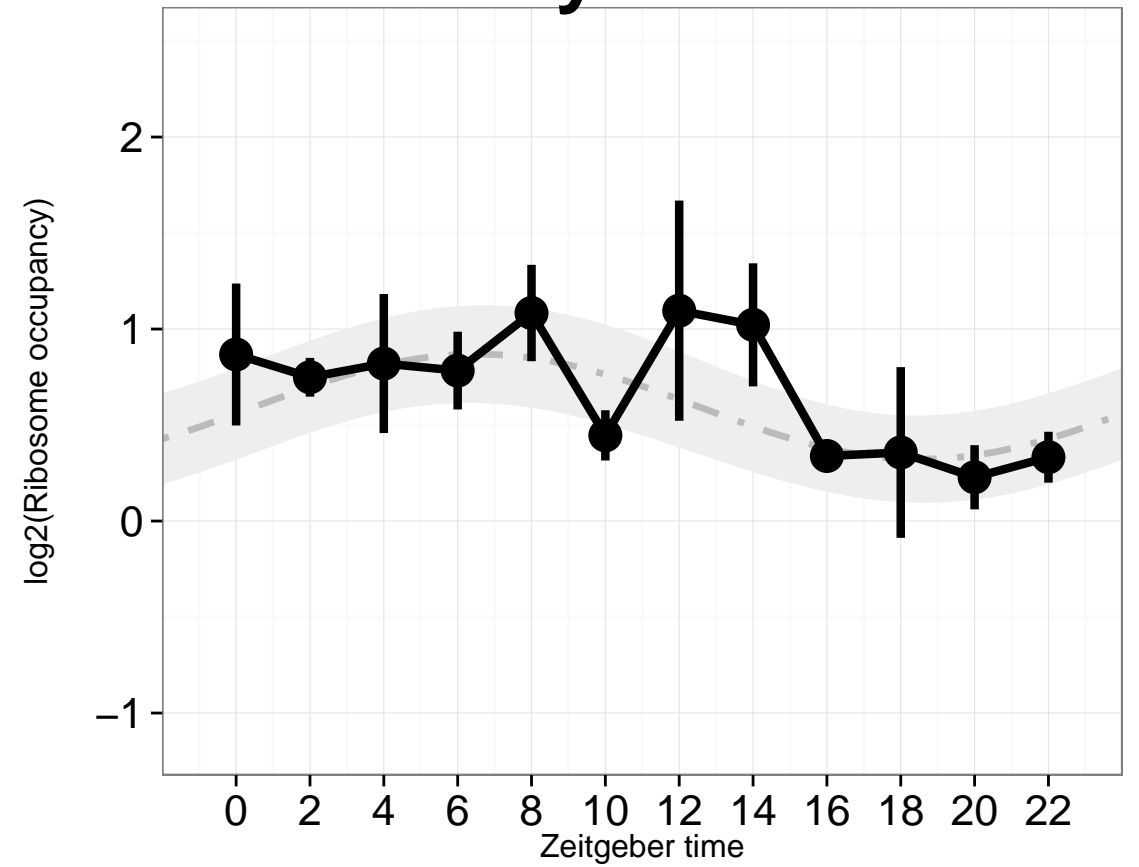

Supplement: SuppDataset_1.zip [file Cystm1_set_A.pdf › Supplemental Dataset 1/A-mRNA_nonrhyth_translation_nonrhyth/Cystm1_set_A.pdf]

## Cyth2

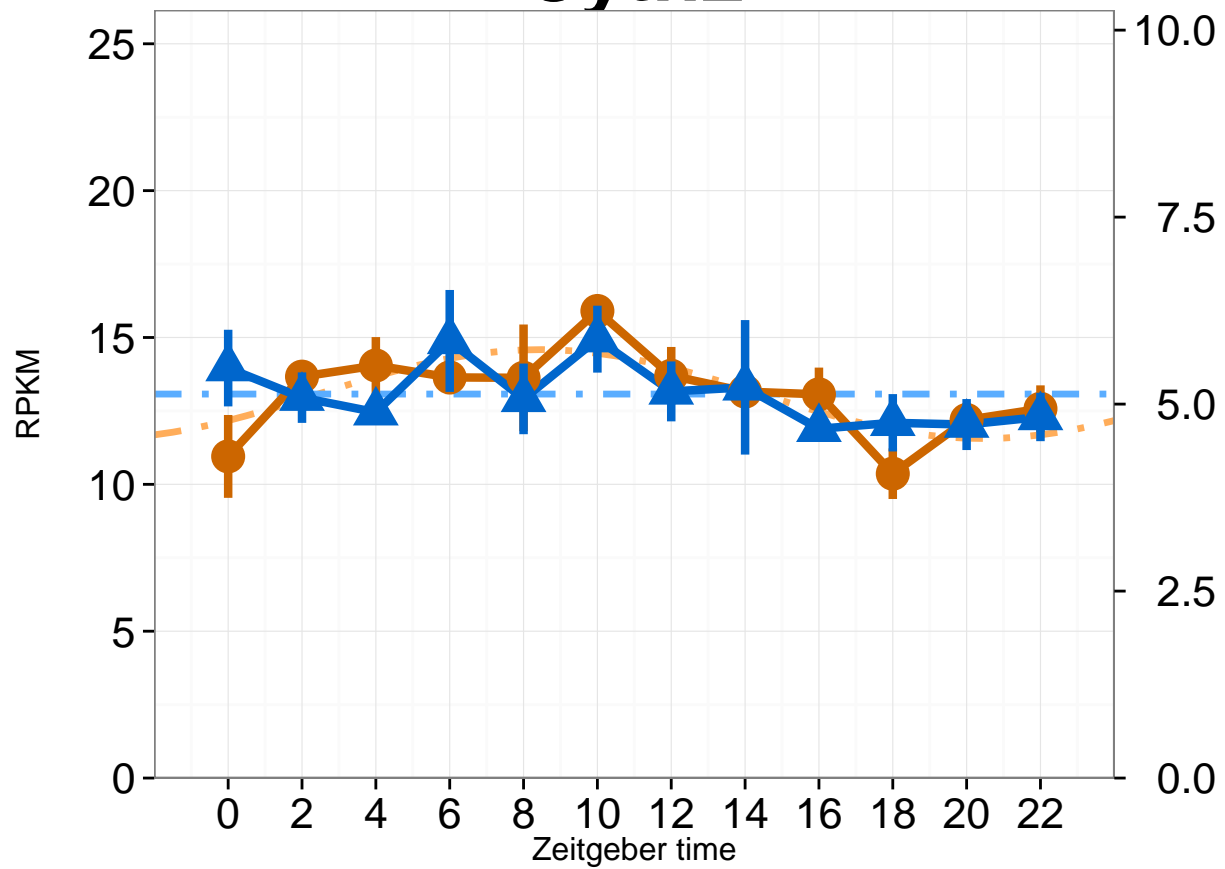

## Cyth2

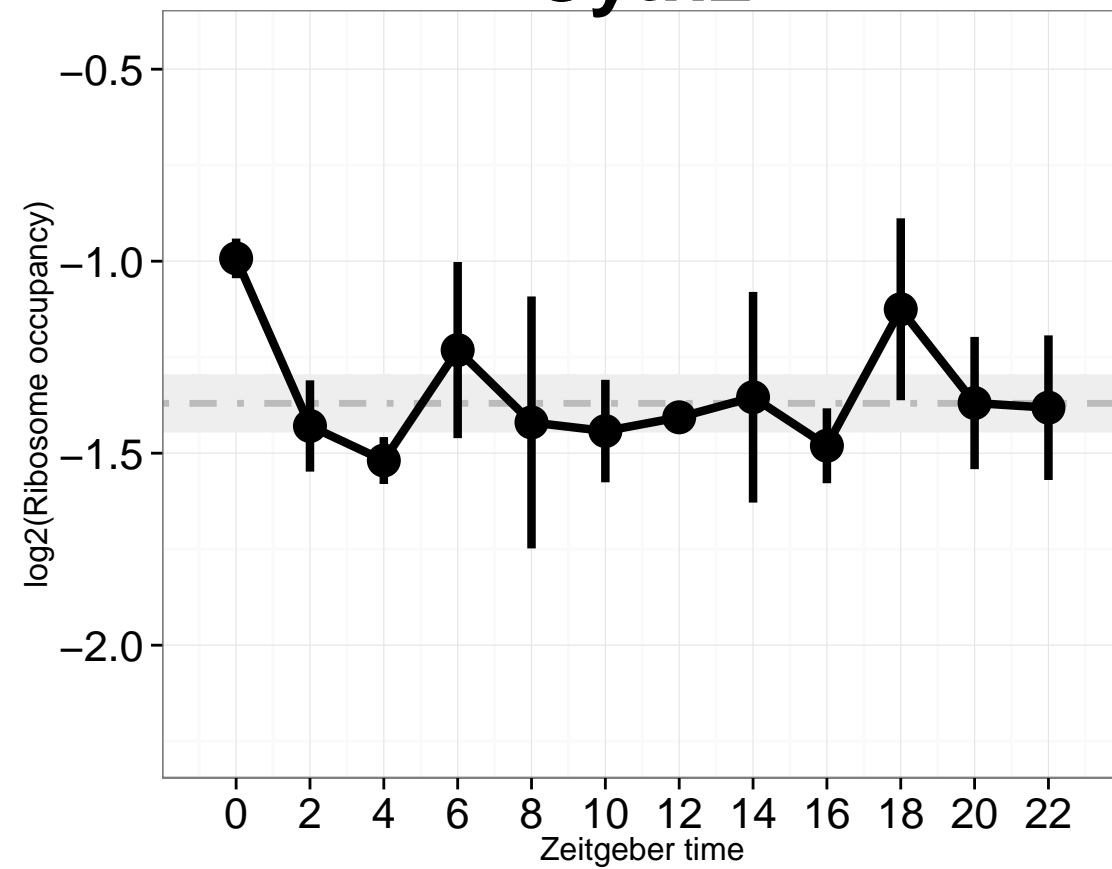

Supplement: SuppDataset_1.zip [file Cyth2_set_A.pdf › Supplemental Dataset 1/A-mRNA_nonrhyth_translation_nonrhyth/Cyth2_set_A.pdf]

## Cyth3

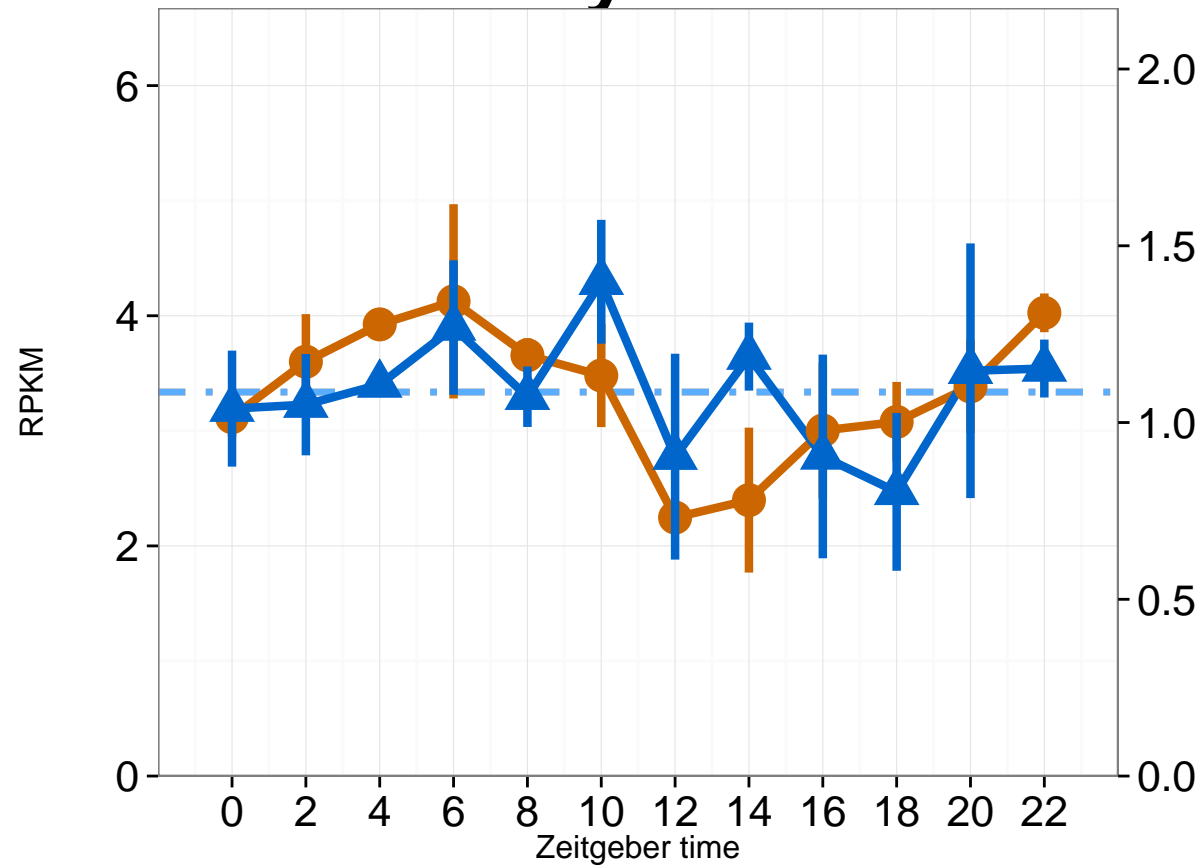

## Cyth3

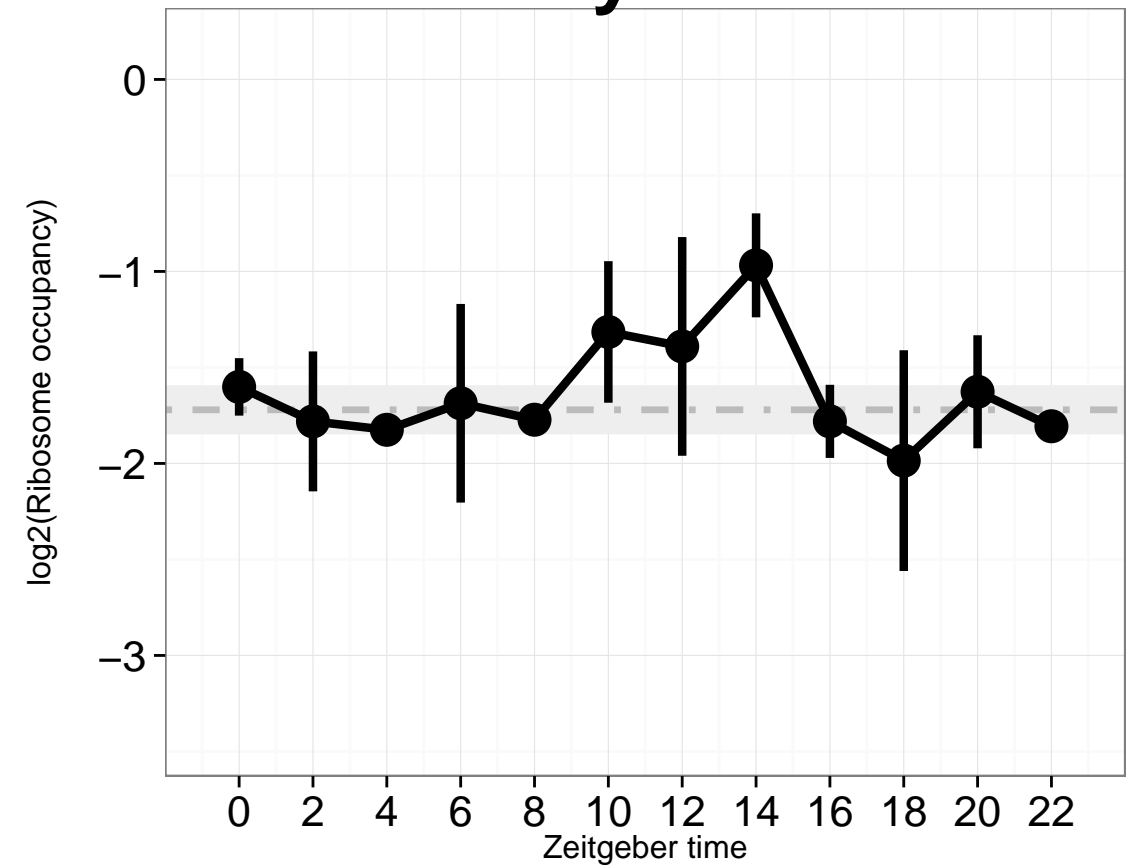

Supplement: SuppDataset_1.zip [file Cyth3_set_A.pdf › Supplemental Dataset 1/A-mRNA_nonrhyth_translation_nonrhyth/Cyth3_set_A.pdf]

# Cyth4

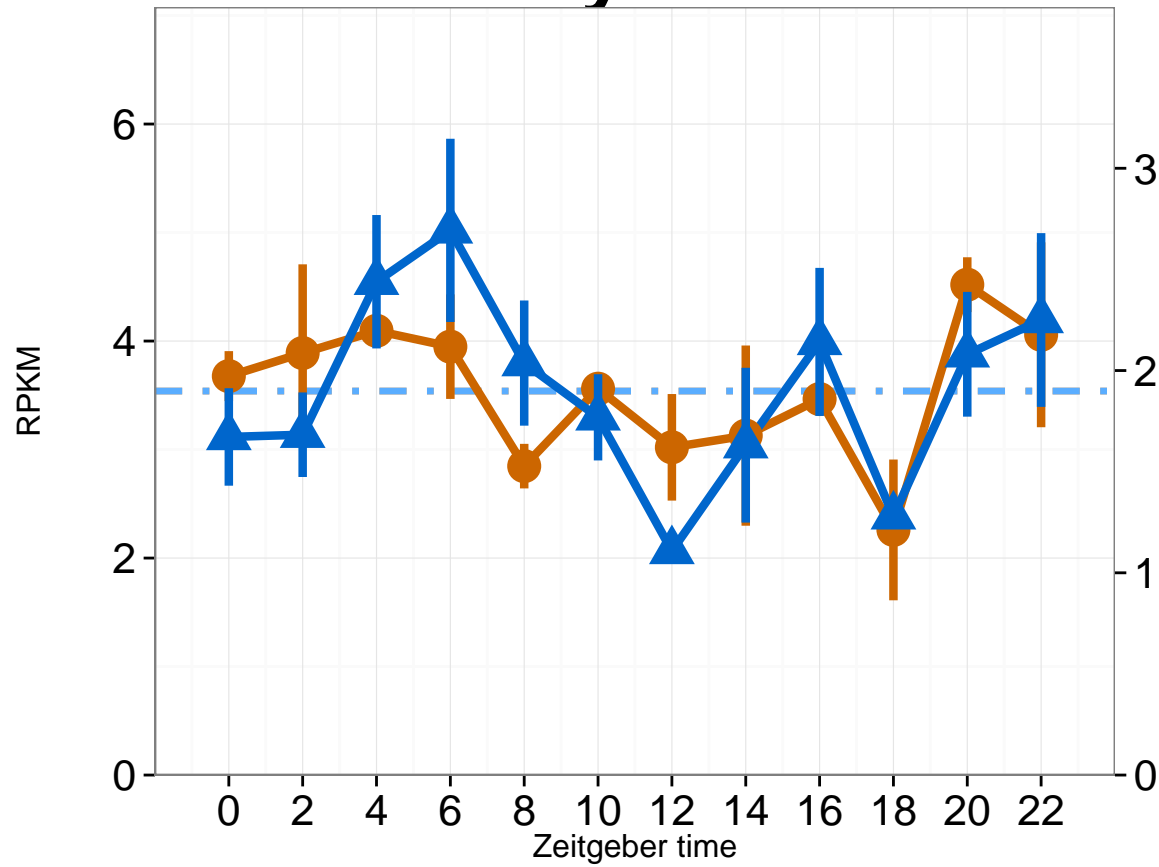

# Cyth4

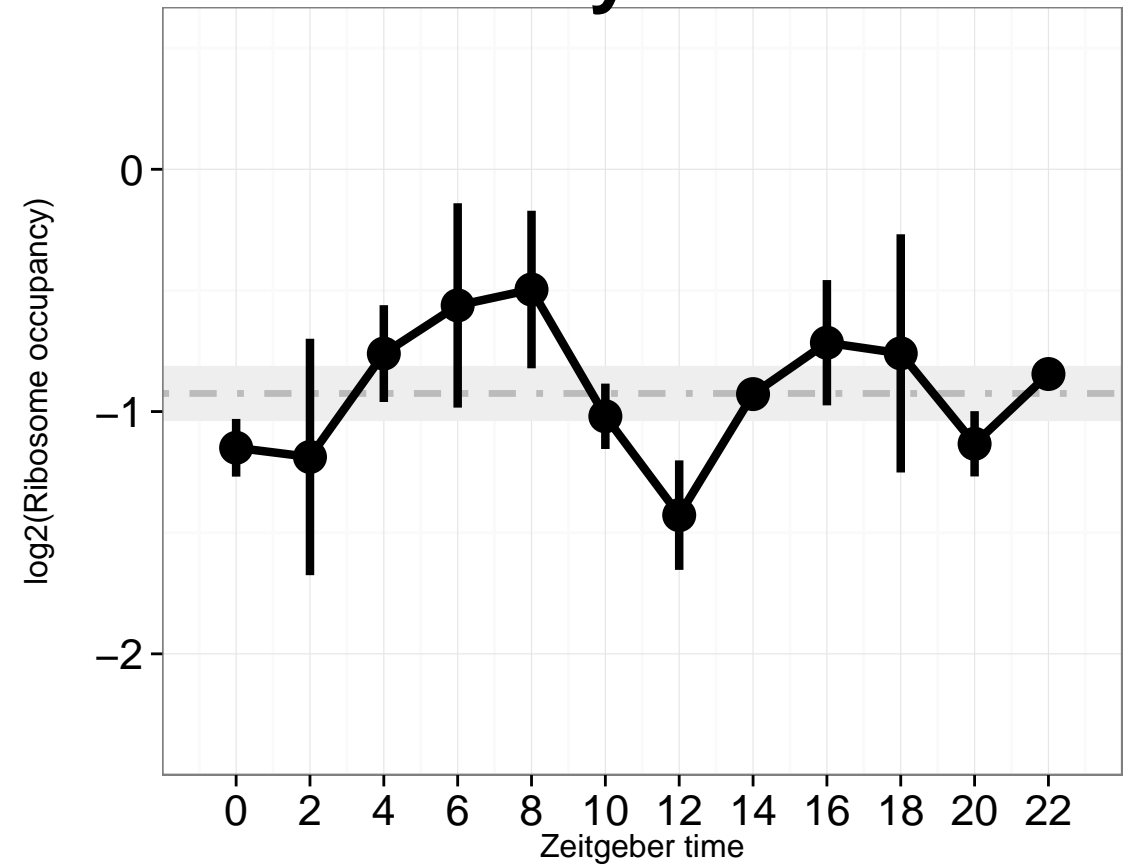

Supplement: SuppDataset_1.zip [file Cyth4_set_A.pdf › Supplemental Dataset 1/A-mRNA_nonrhyth_translation_nonrhyth/Cyth4_set_A.pdf]

## Cytip

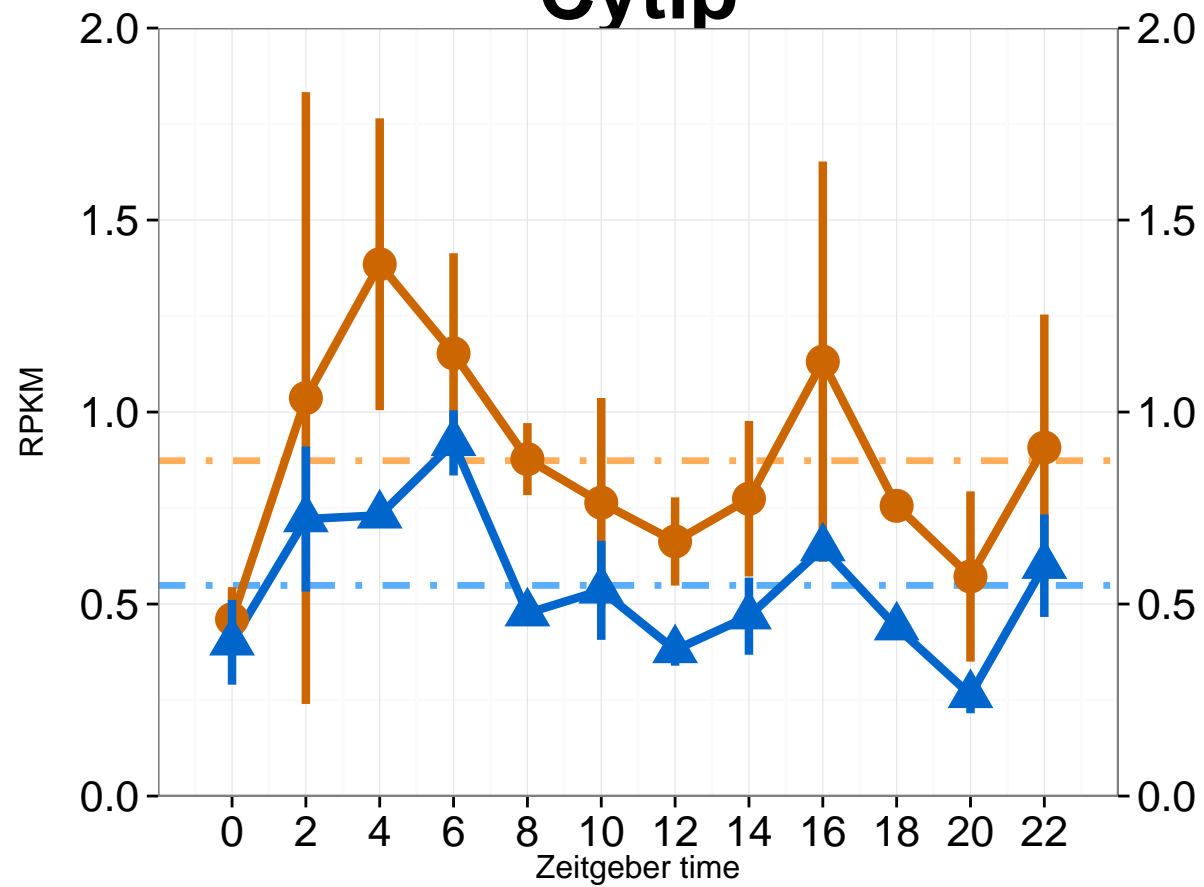

## Cytip

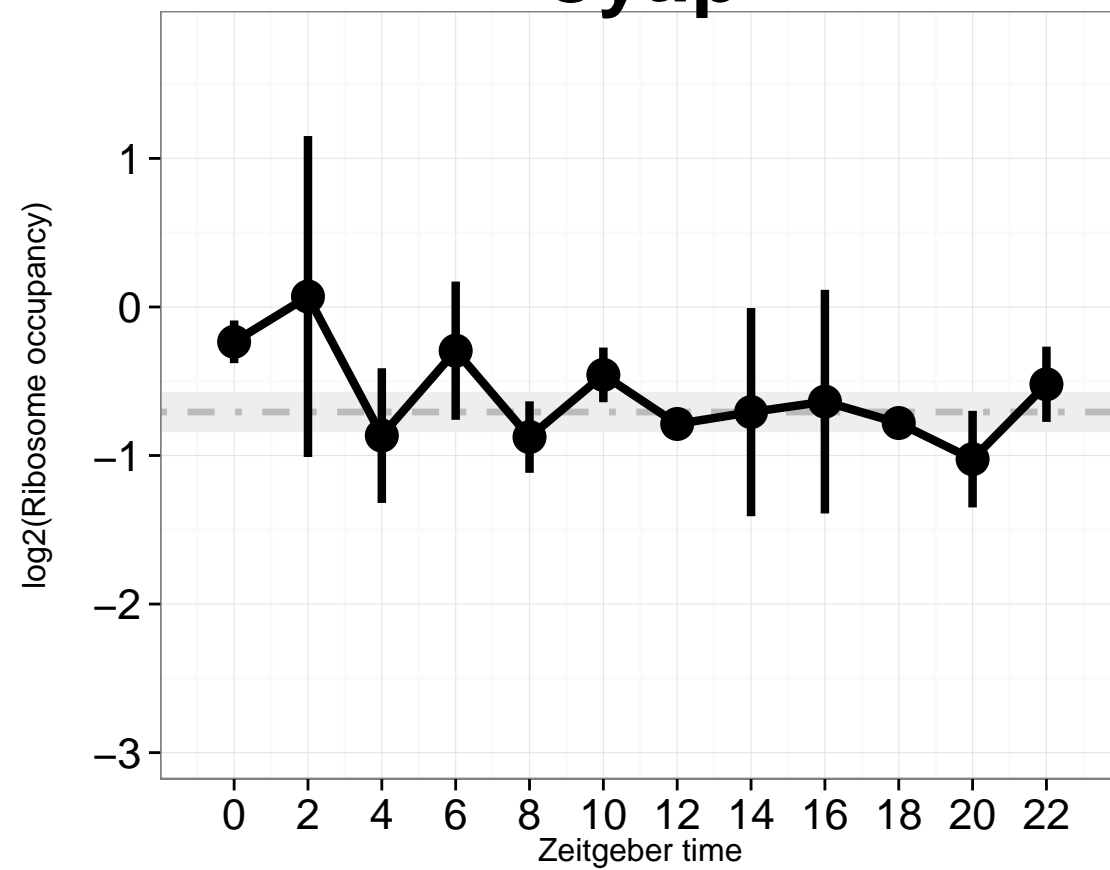

Supplement: SuppDataset_1.zip [file Cytip_set_A.pdf › Supplemental Dataset 1/A-mRNA_nonrhyth_translation_nonrhyth/Cytip_set_A.pdf]

# Cyyr1

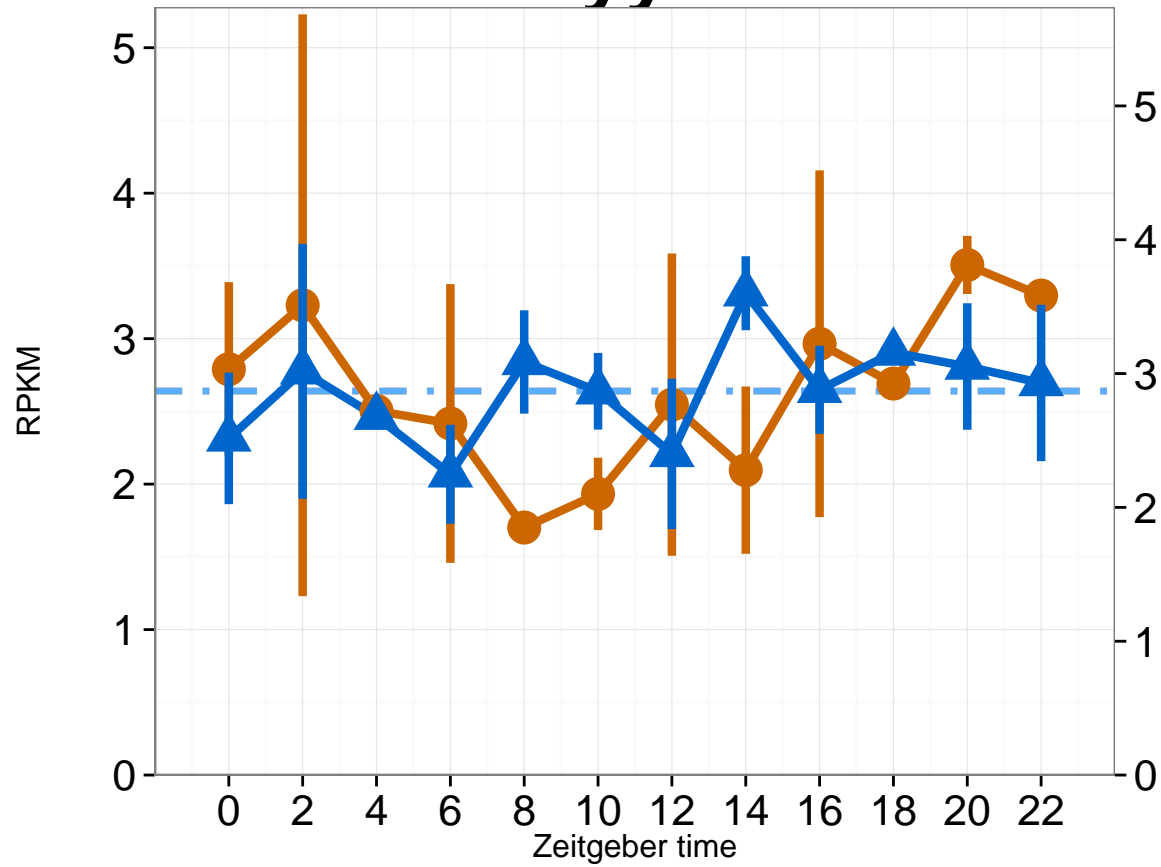

# Cyyr1

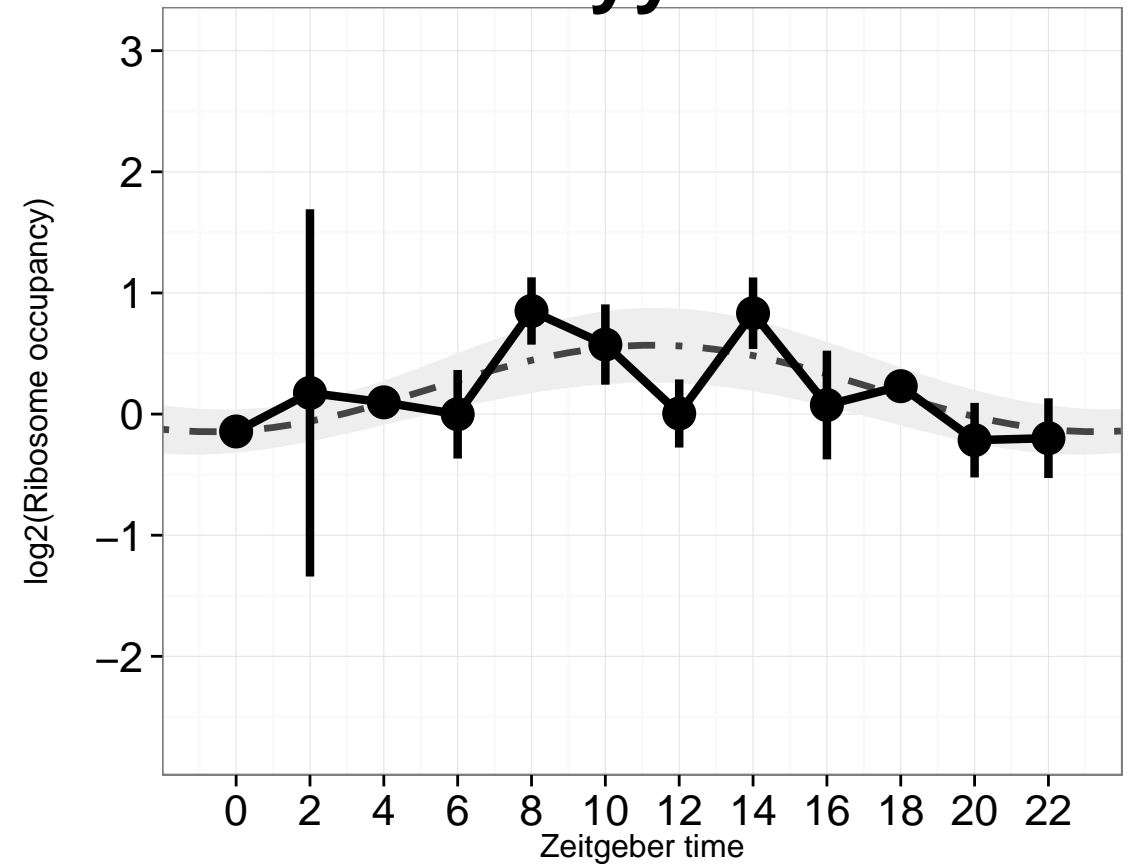

Supplement: SuppDataset_1.zip [file Cyyr1_set_A.pdf › Supplemental Dataset 1/A-mRNA_nonrhyth_translation_nonrhyth/Cyyr1_set_A.pdf]

# D030056L22Rik

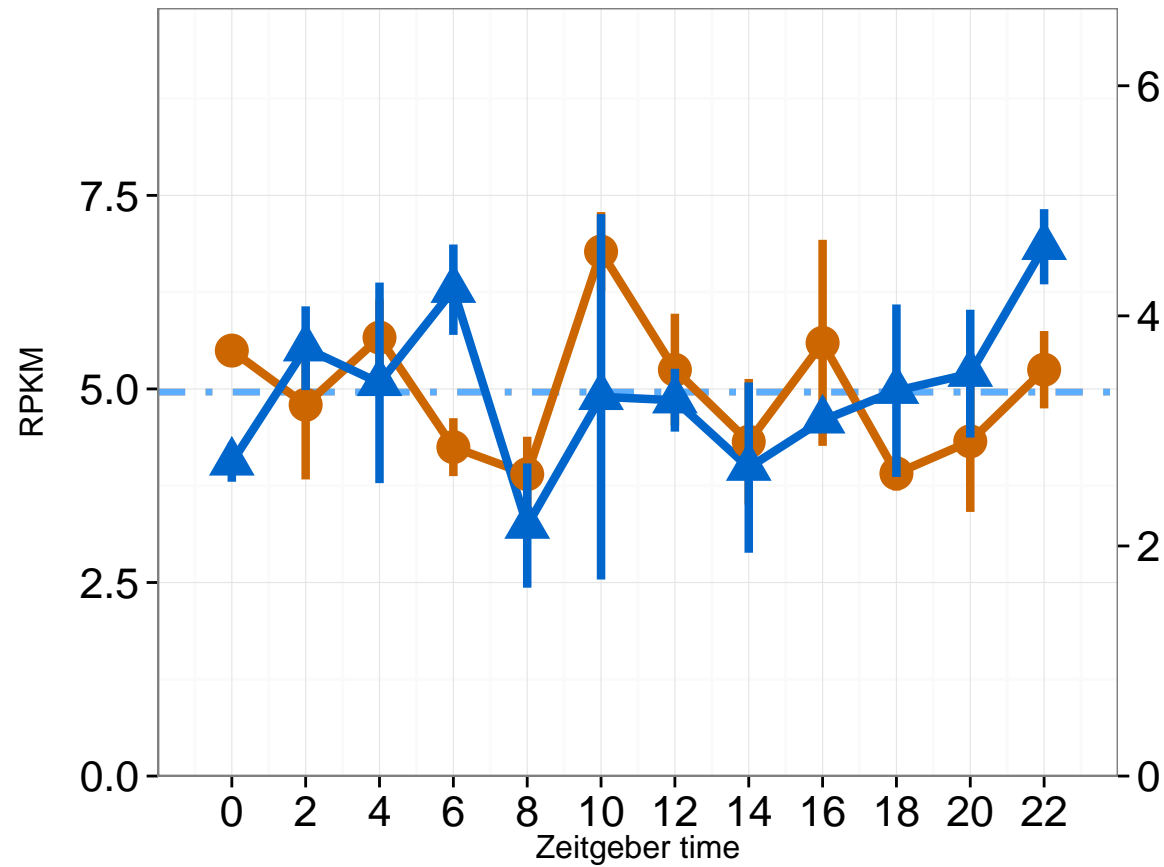

# D030056L22Rik

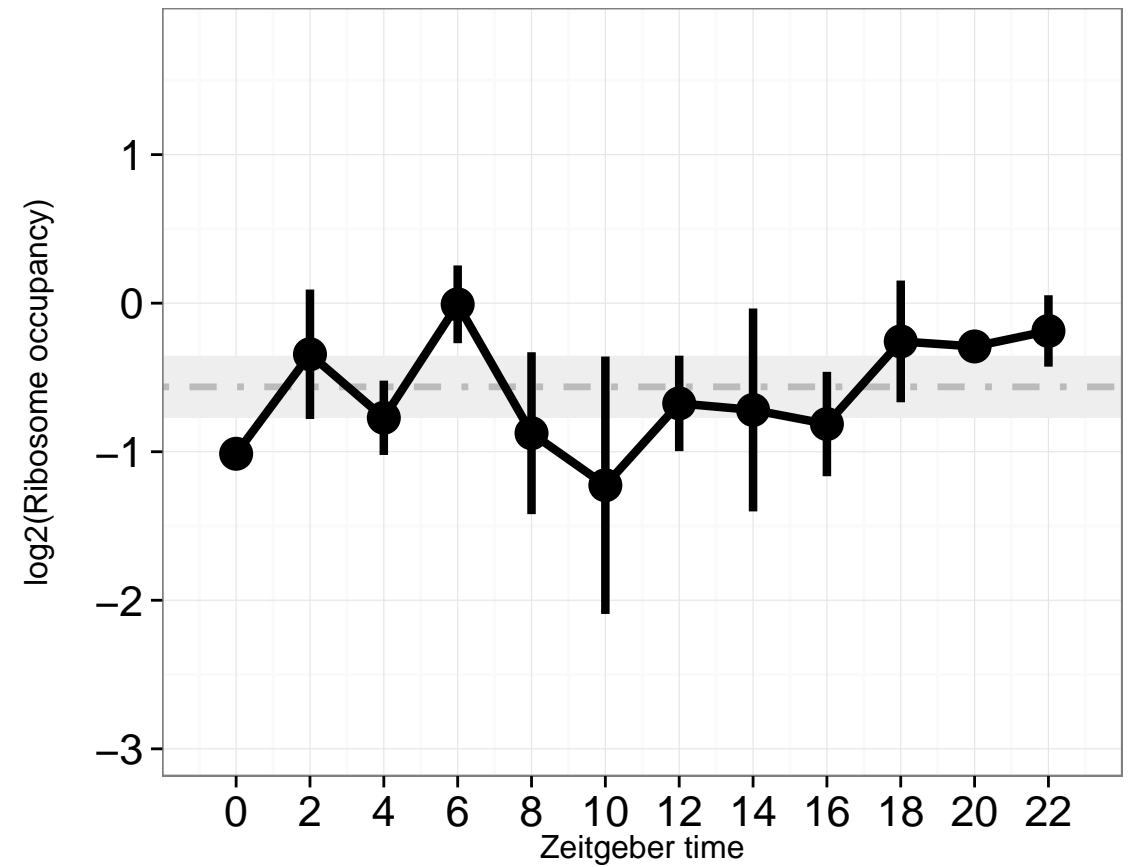

Supplement: SuppDataset_1.zip [file D030056L22Rik_set_A.pdf › Supplemental Dataset 1/A-mRNA_nonrhyth_translation_nonrhyth/D030056L22Rik_set_A.pdf]

# D10Jhu81e

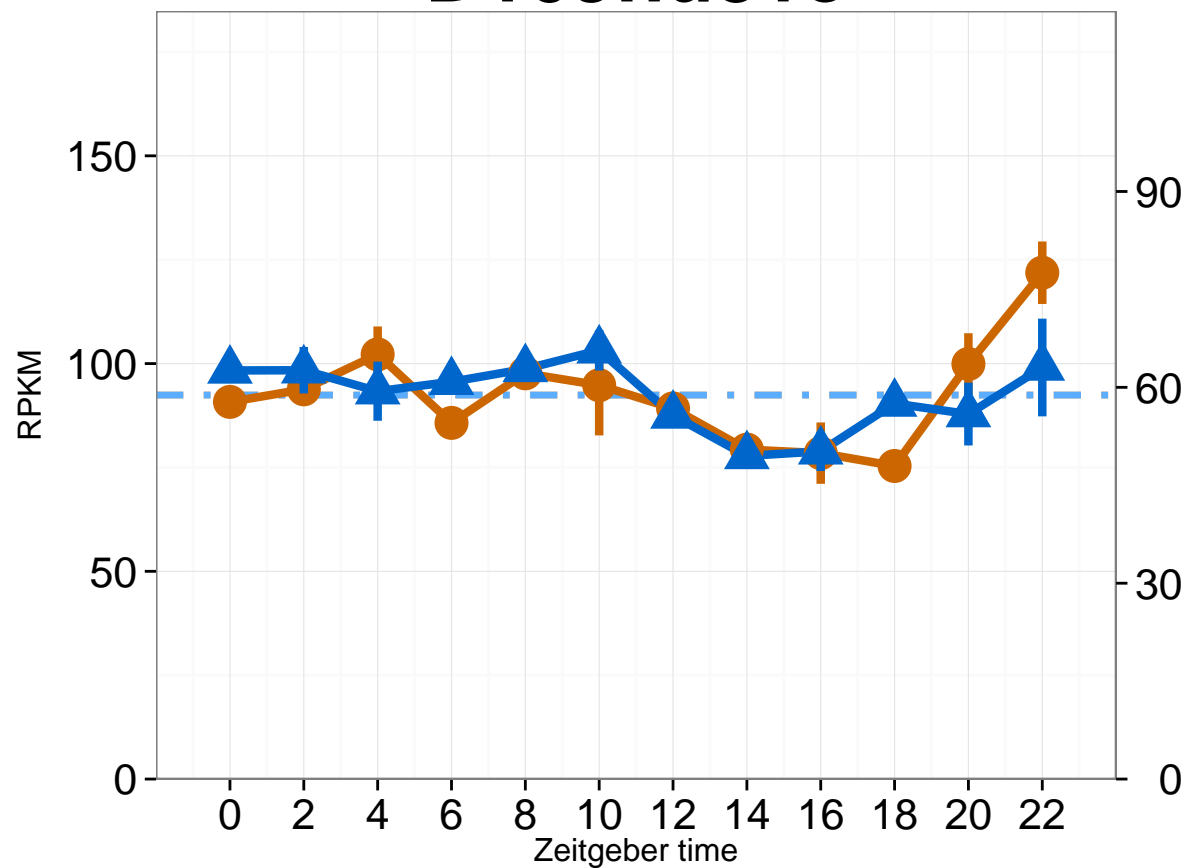

# D10Jhu81e

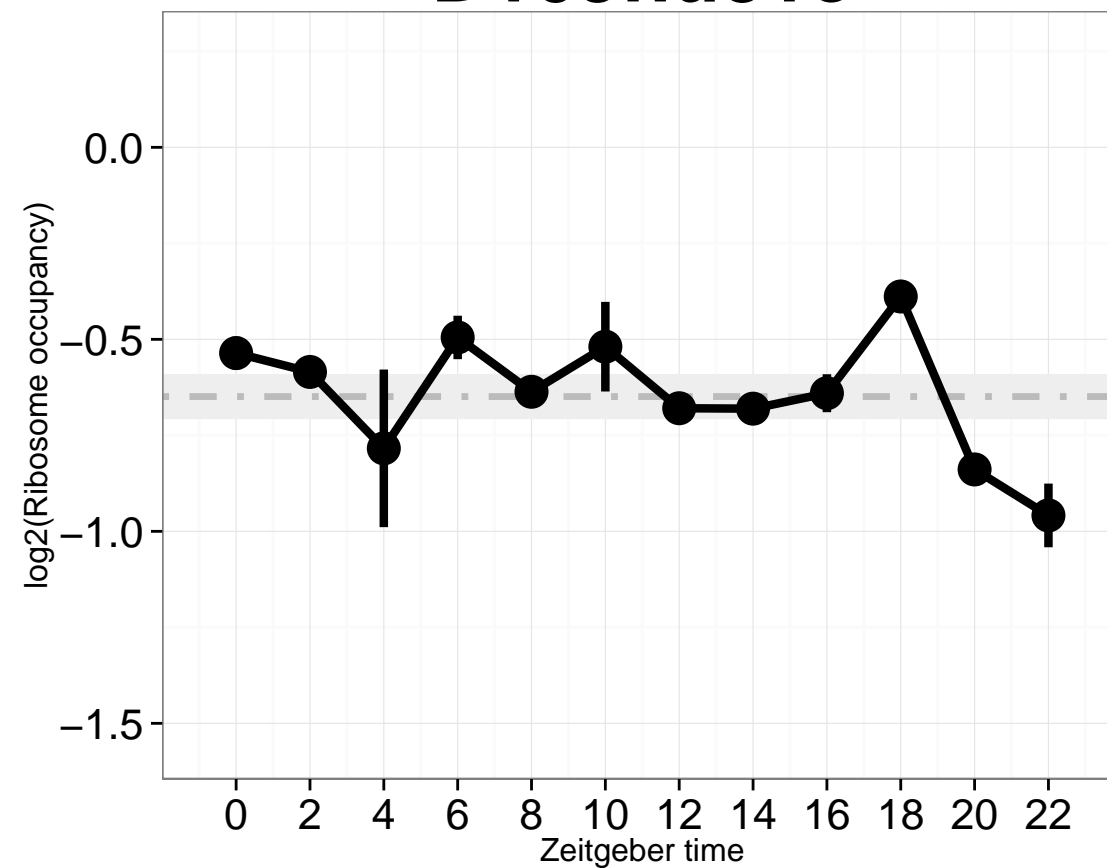

Supplement: SuppDataset_1.zip [file D10Jhu81e_set_A.pdf › Supplemental Dataset 1/A-mRNA_nonrhyth_translation_nonrhyth/D10Jhu81e_set_A.pdf]

# D10Wsu102e

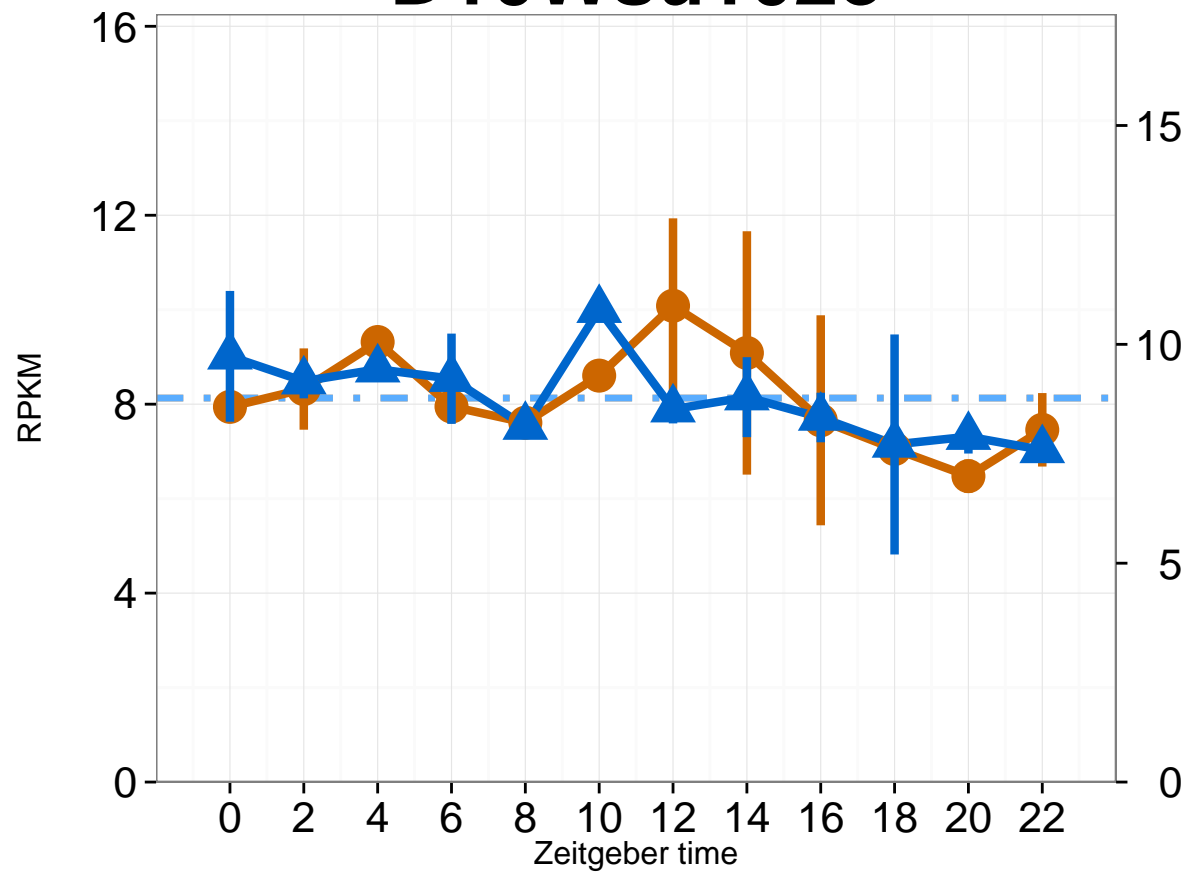

# D10Wsu102e

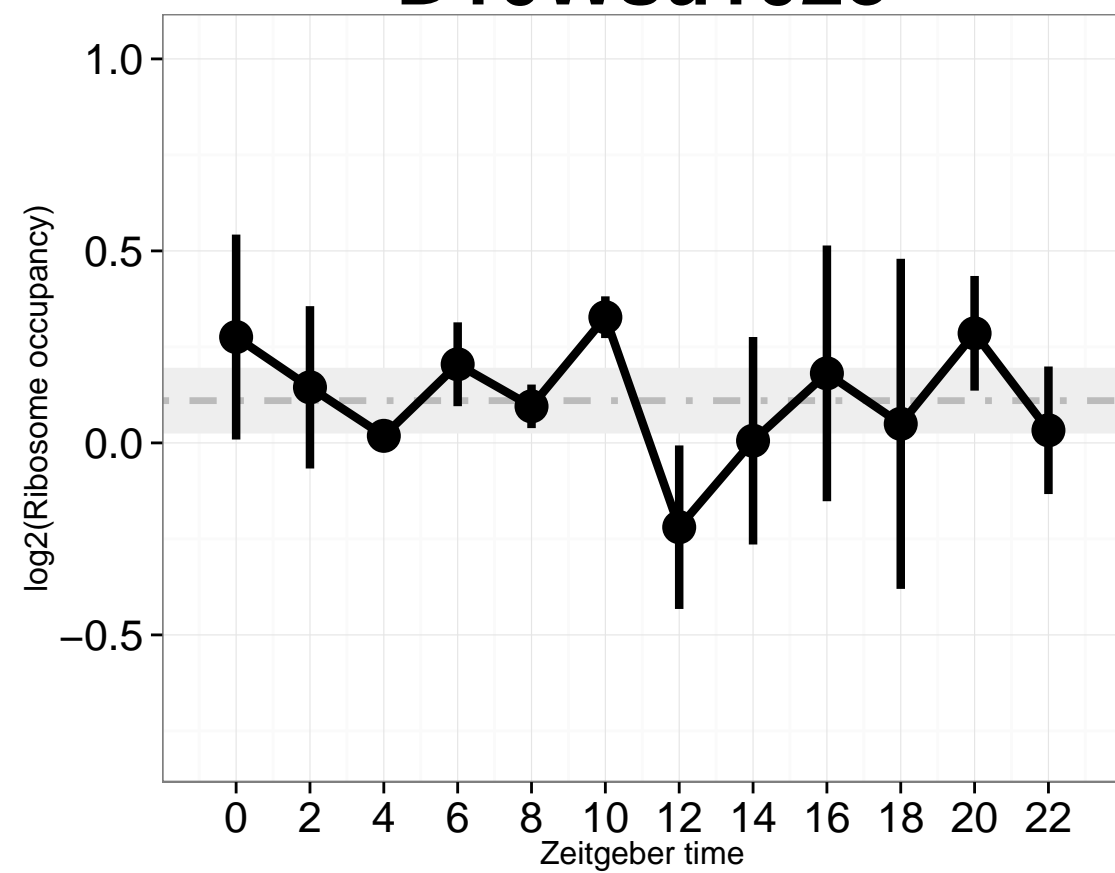

Supplement: SuppDataset_1.zip [file D10Wsu102e_set_A.pdf › Supplemental Dataset 1/A-mRNA_nonrhyth_translation_nonrhyth/D10Wsu102e_set_A.pdf]

# D11Wsu47e

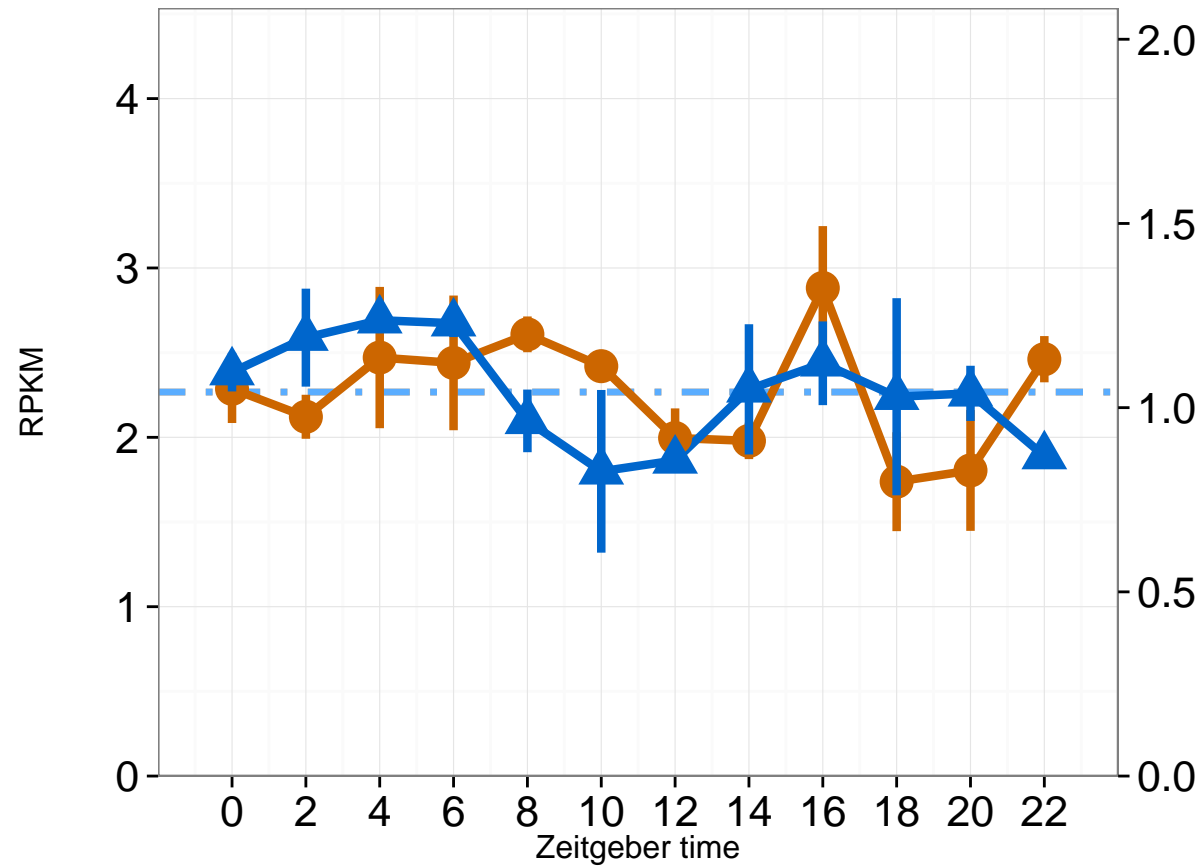

# D11Wsu47e

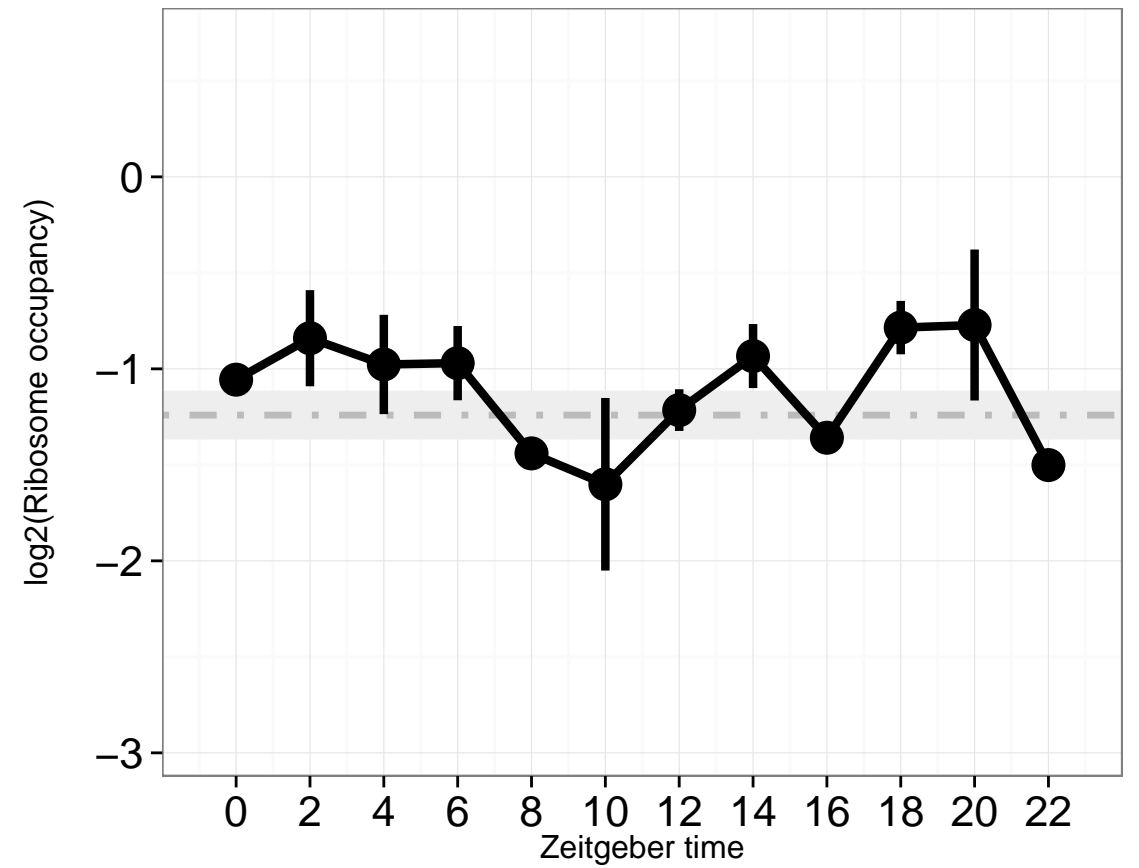

Supplement: SuppDataset_1.zip [file D11Wsu47e_set_A.pdf › Supplemental Dataset 1/A-mRNA_nonrhyth_translation_nonrhyth/D11Wsu47e_set_A.pdf]

## D130040H23Rik

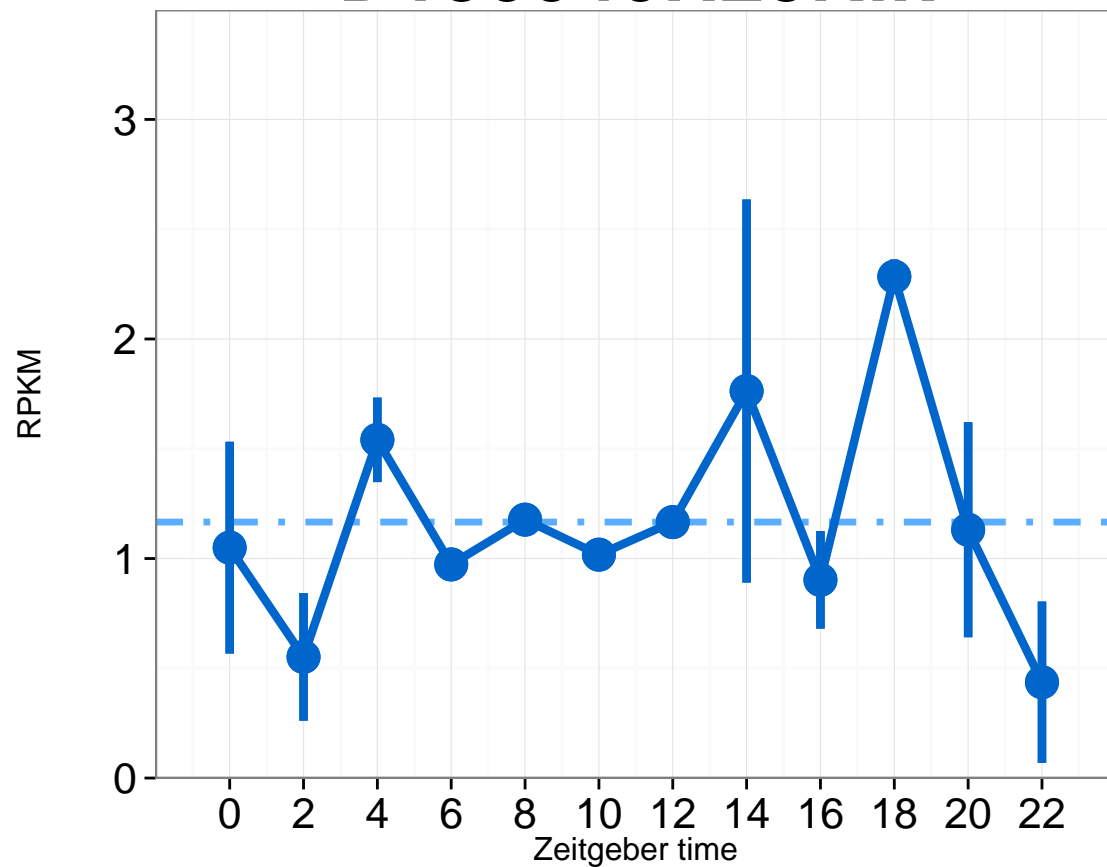

## D130040H23Rik log<sub>2</sub>(Ribosome occup

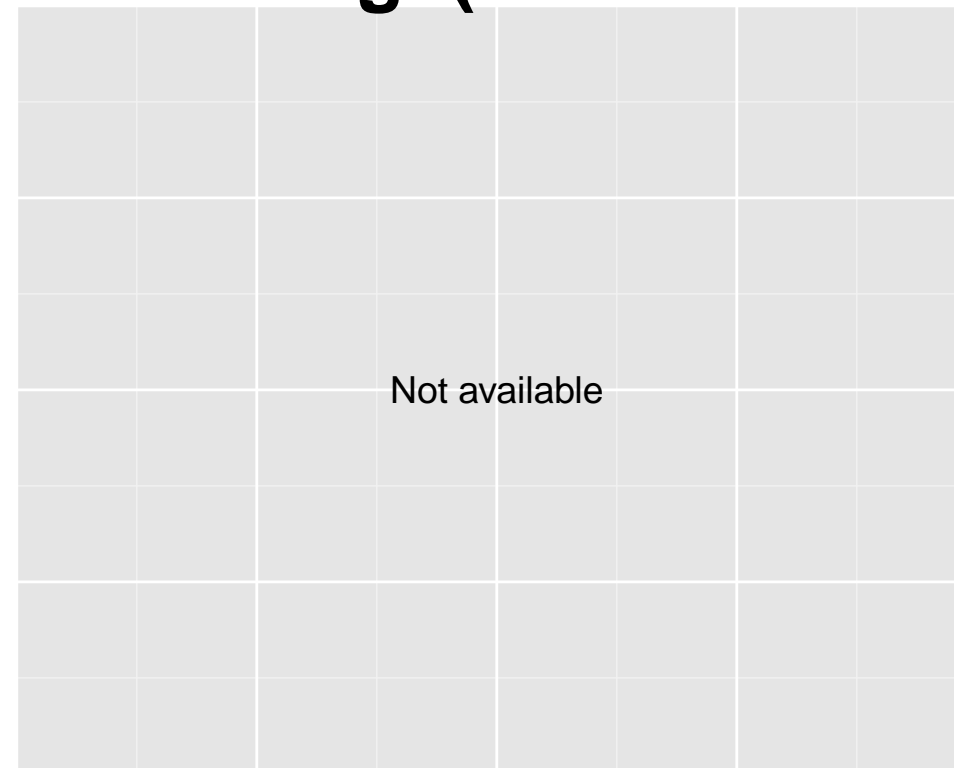

Supplement: SuppDataset_1.zip [file D130040H23Rik_set_A.pdf › Supplemental Dataset 1/A-mRNA_nonrhyth_translation_nonrhyth/D130040H23Rik_set_A.pdf]

# D130043K22Rik

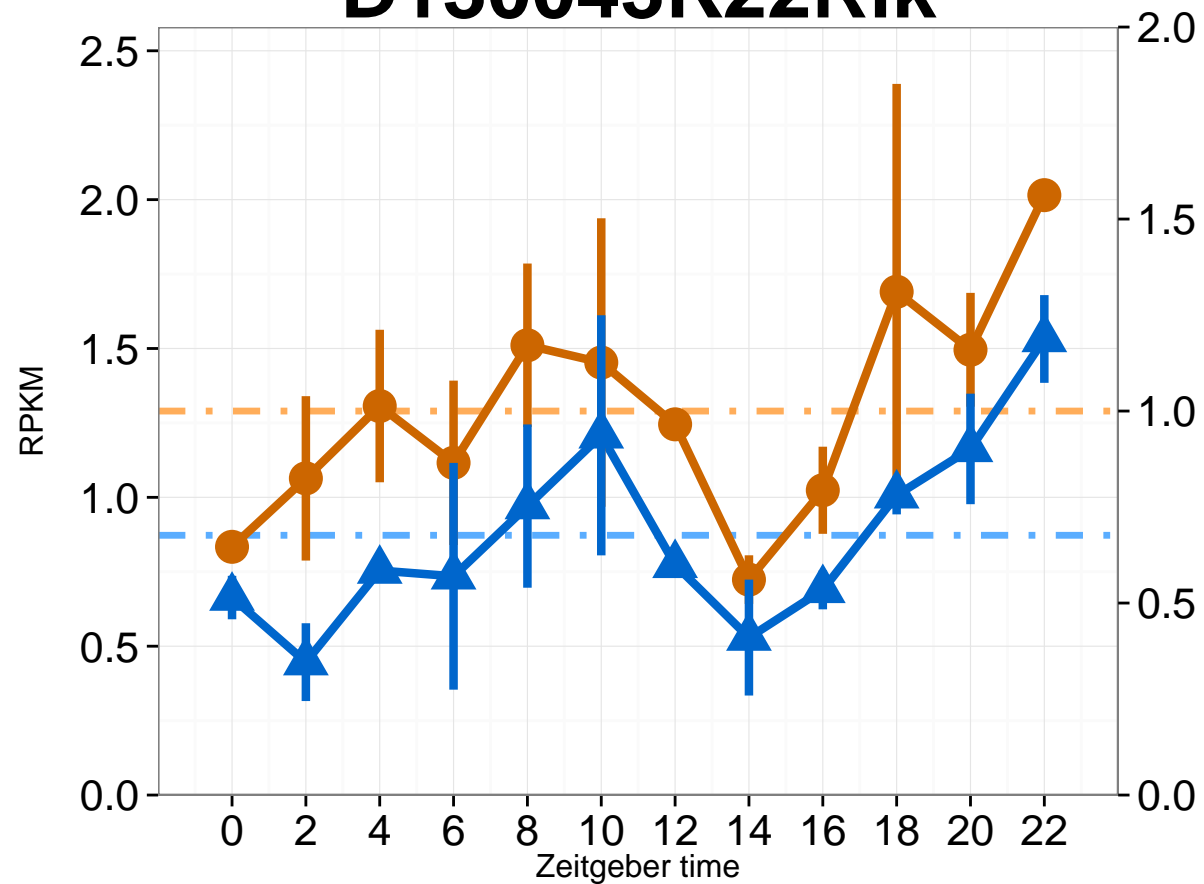

# D130043K22Rik

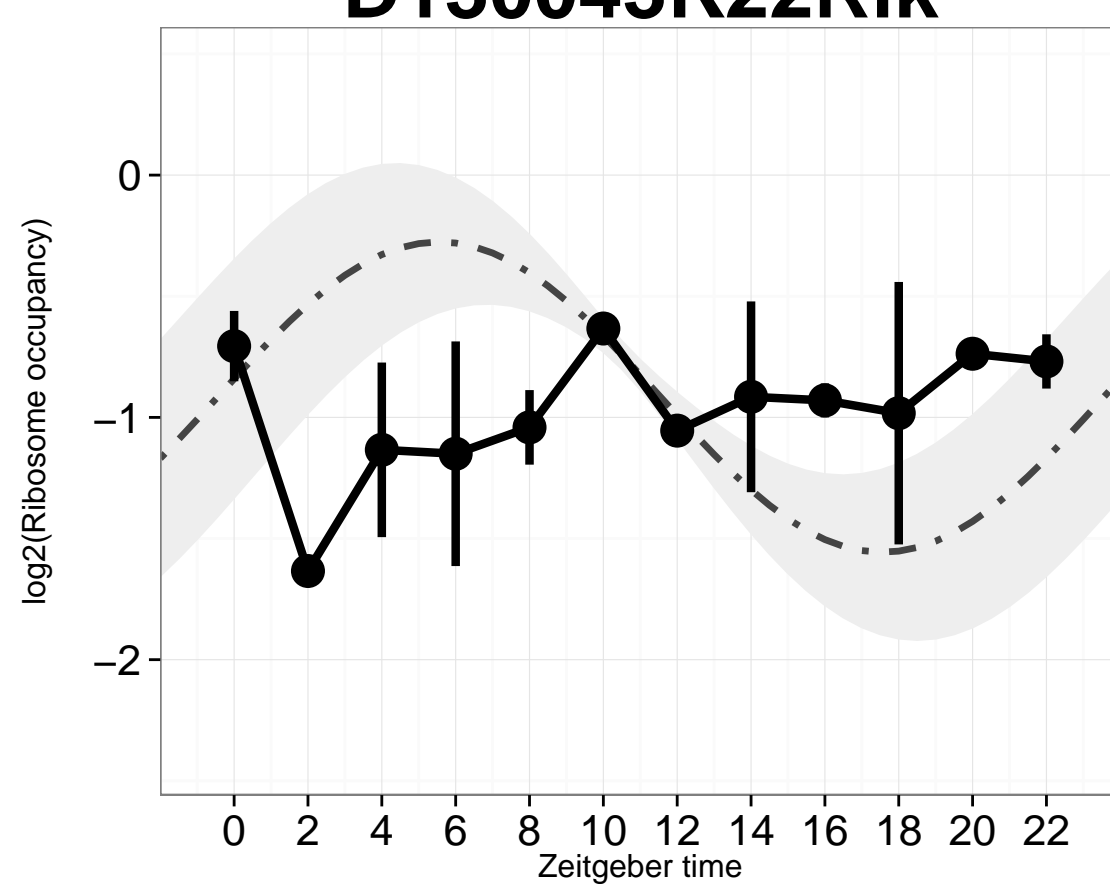

Supplement: SuppDataset_1.zip [file D130043K22Rik_set_A.pdf › Supplemental Dataset 1/A-mRNA_nonrhyth_translation_nonrhyth/D130043K22Rik_set_A.pdf]

# D14Abb1e

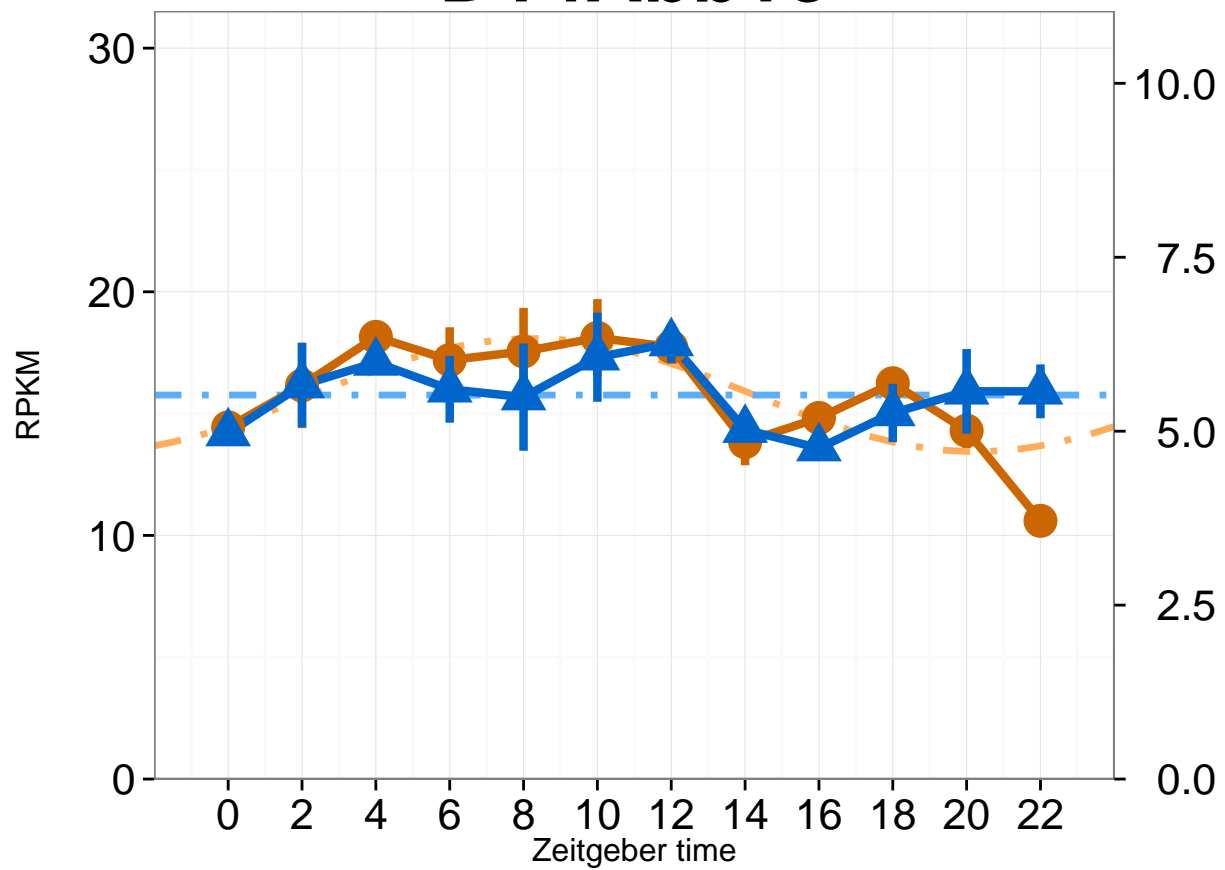

# D14Abb1e

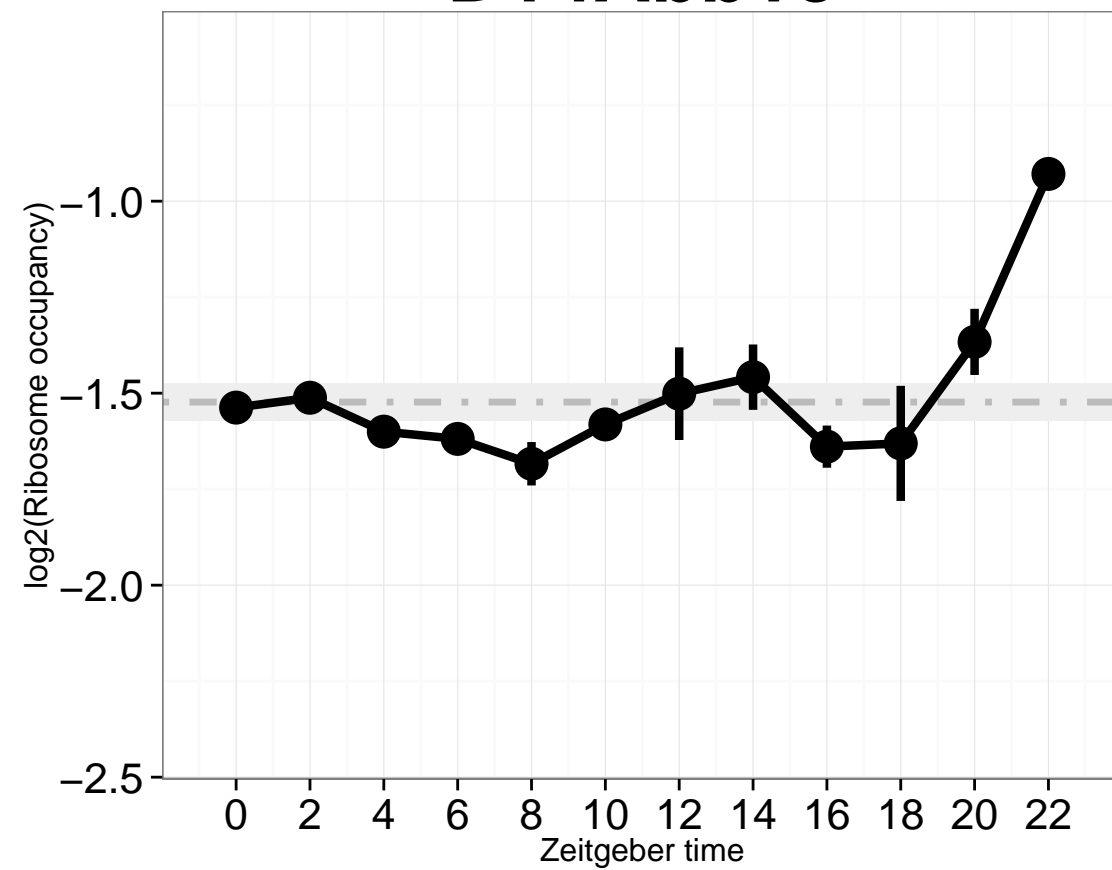

Supplement: SuppDataset_1.zip [file D14Abb1e_set_A.pdf › Supplemental Dataset 1/A-mRNA_nonrhyth_translation_nonrhyth/D14Abb1e_set_A.pdf]

# D15Ertd621e

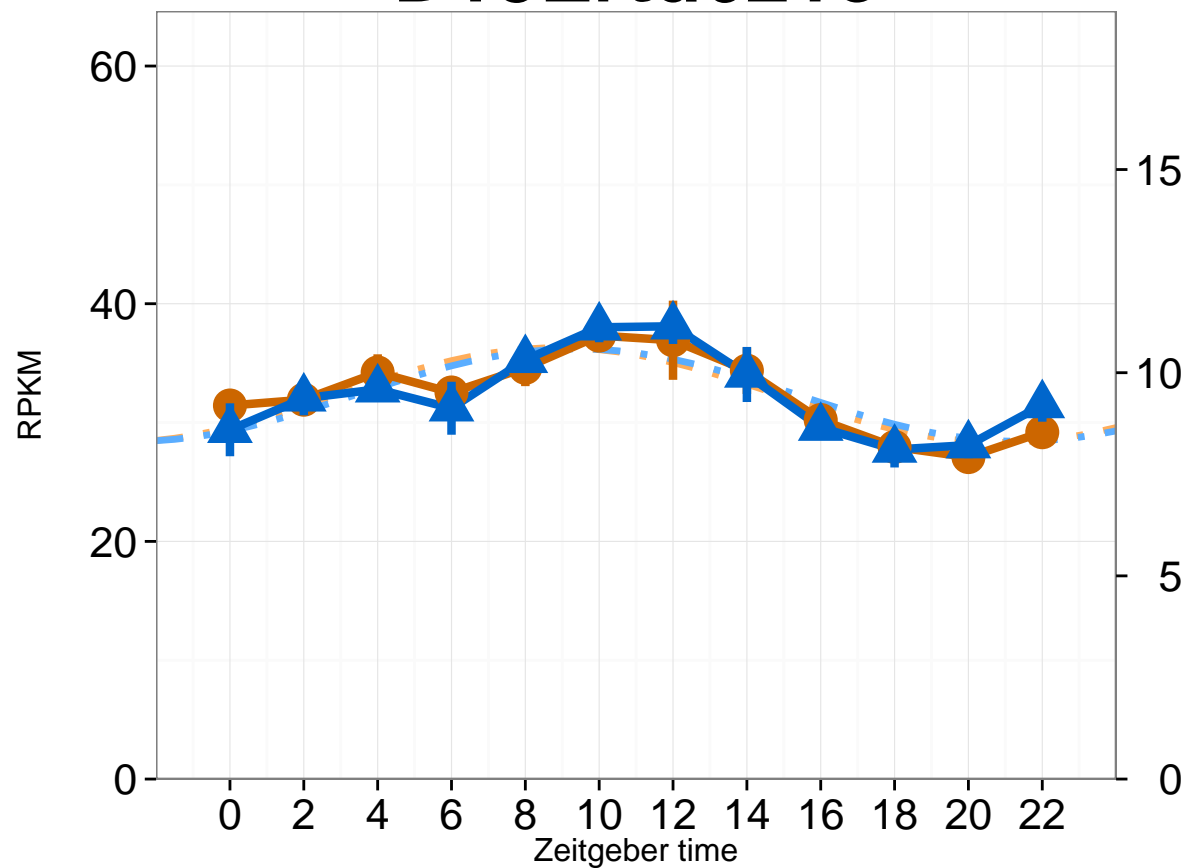

# D15Ertd621e

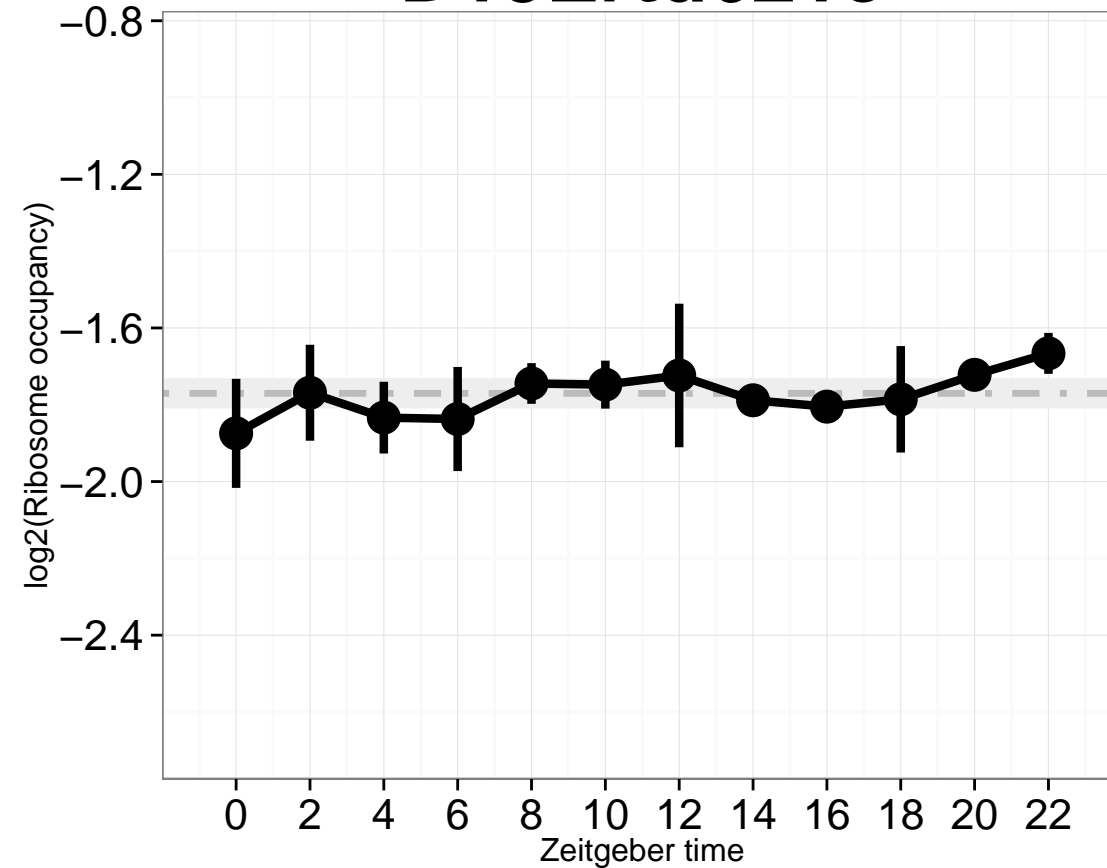

Supplement: SuppDataset_1.zip [file D15Ertd621e_set_A.pdf › Supplemental Dataset 1/A-mRNA_nonrhyth_translation_nonrhyth/D15Ertd621e_set_A.pdf]

# D16Ertd472e

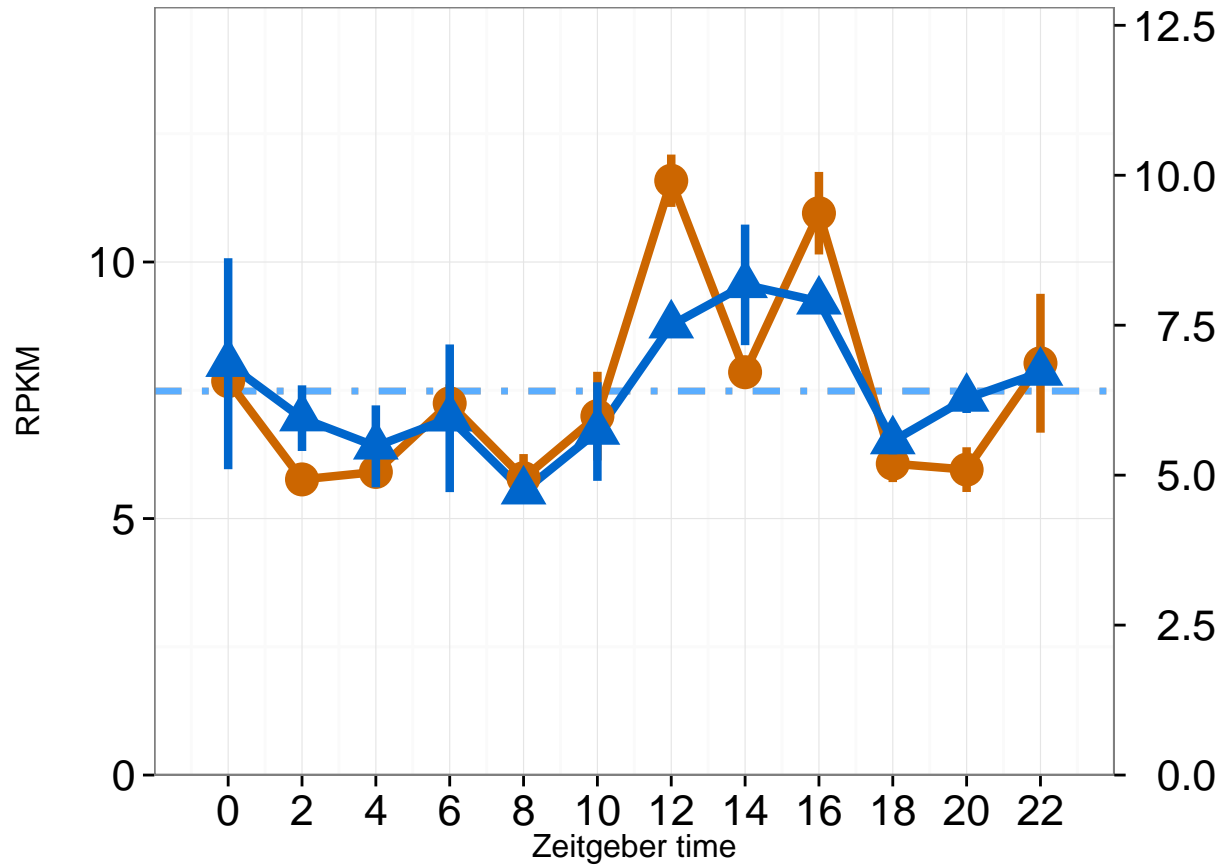

# D16Ertd472e

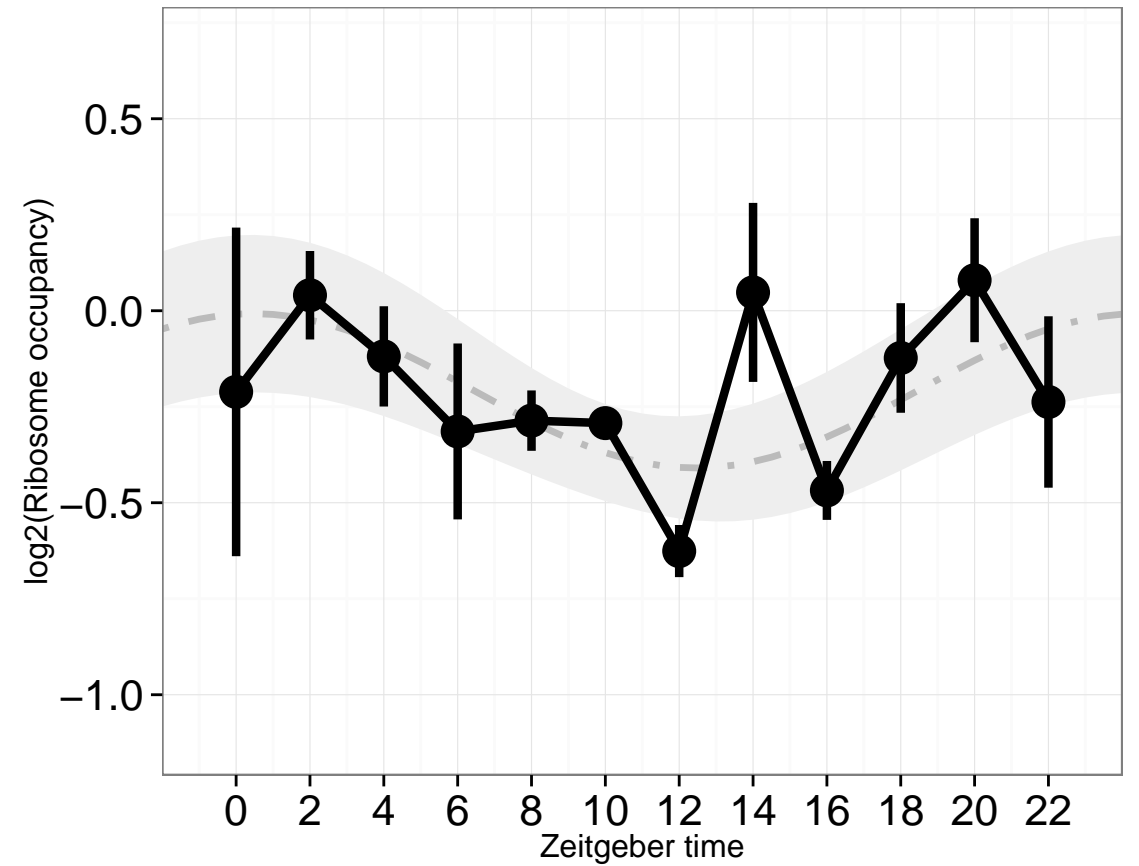

Supplement: SuppDataset_1.zip [file D16Ertd472e_set_A.pdf › Supplemental Dataset 1/A-mRNA_nonrhyth_translation_nonrhyth/D16Ertd472e_set_A.pdf]

# D17H6S53E

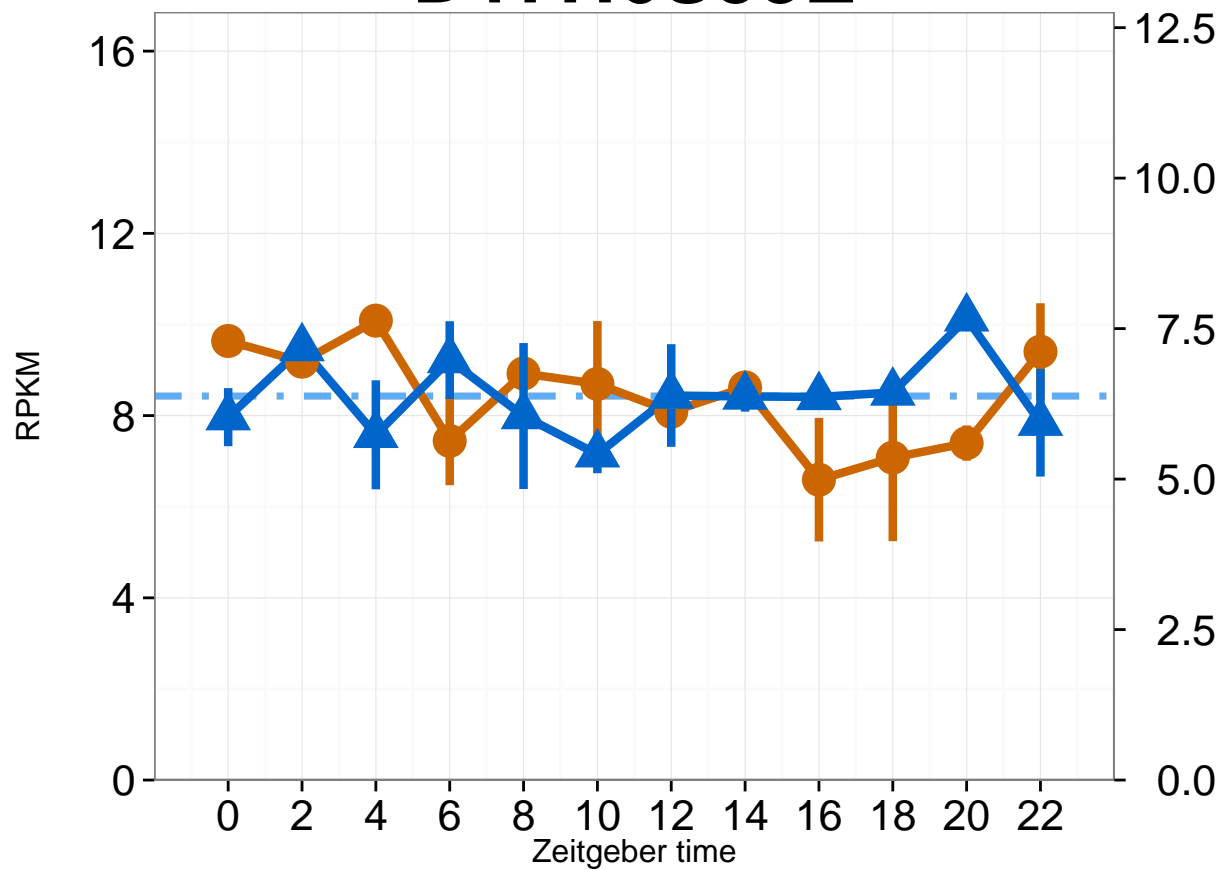

# D17H6S53E

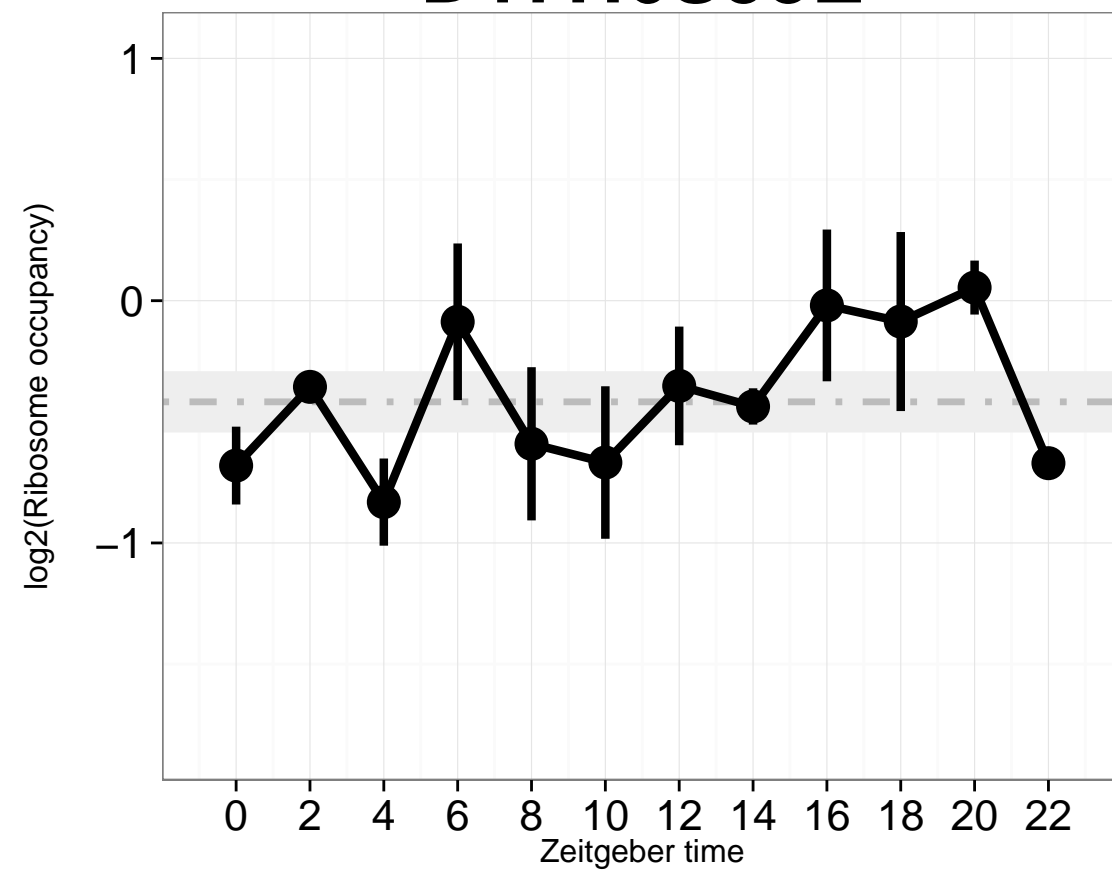

Supplement: SuppDataset_1.zip [file D17H6S53E_set_A.pdf › Supplemental Dataset 1/A-mRNA_nonrhyth_translation_nonrhyth/D17H6S53E_set_A.pdf]

# D17H6S56E-5

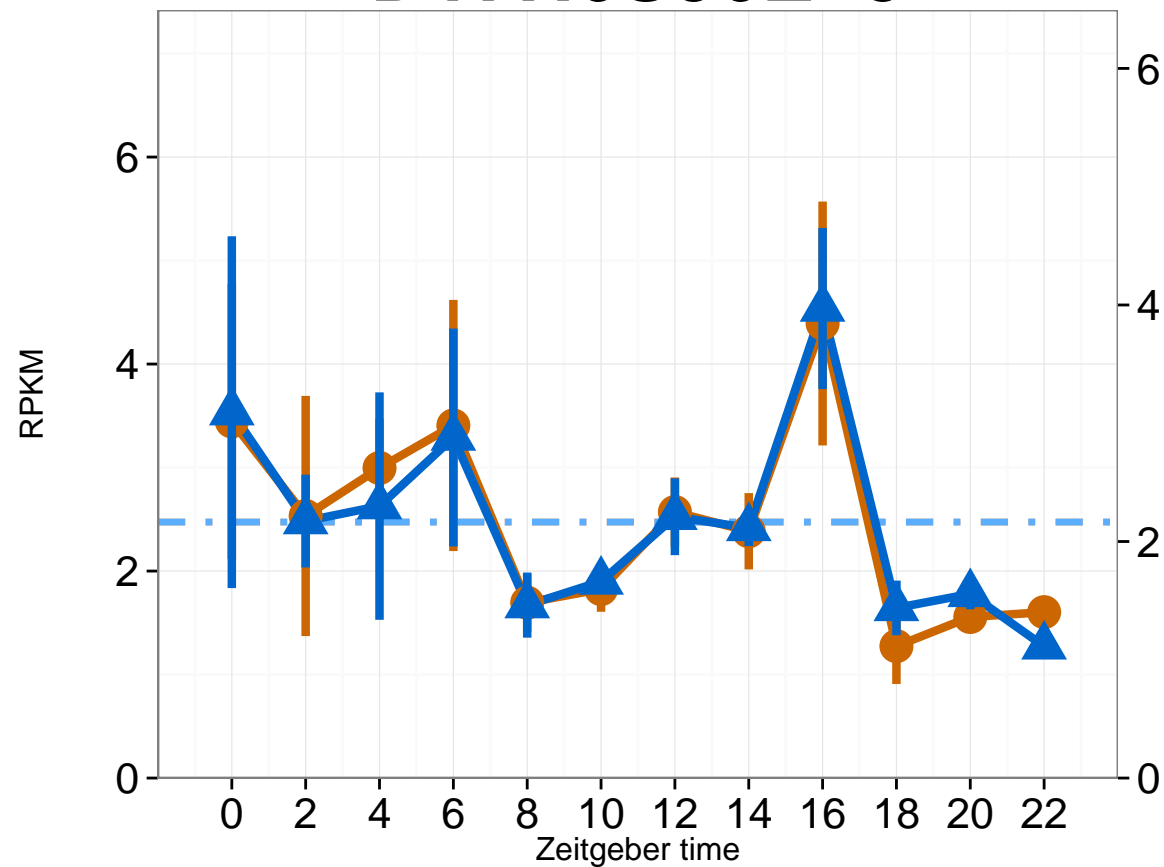

# D17H6S56E-5

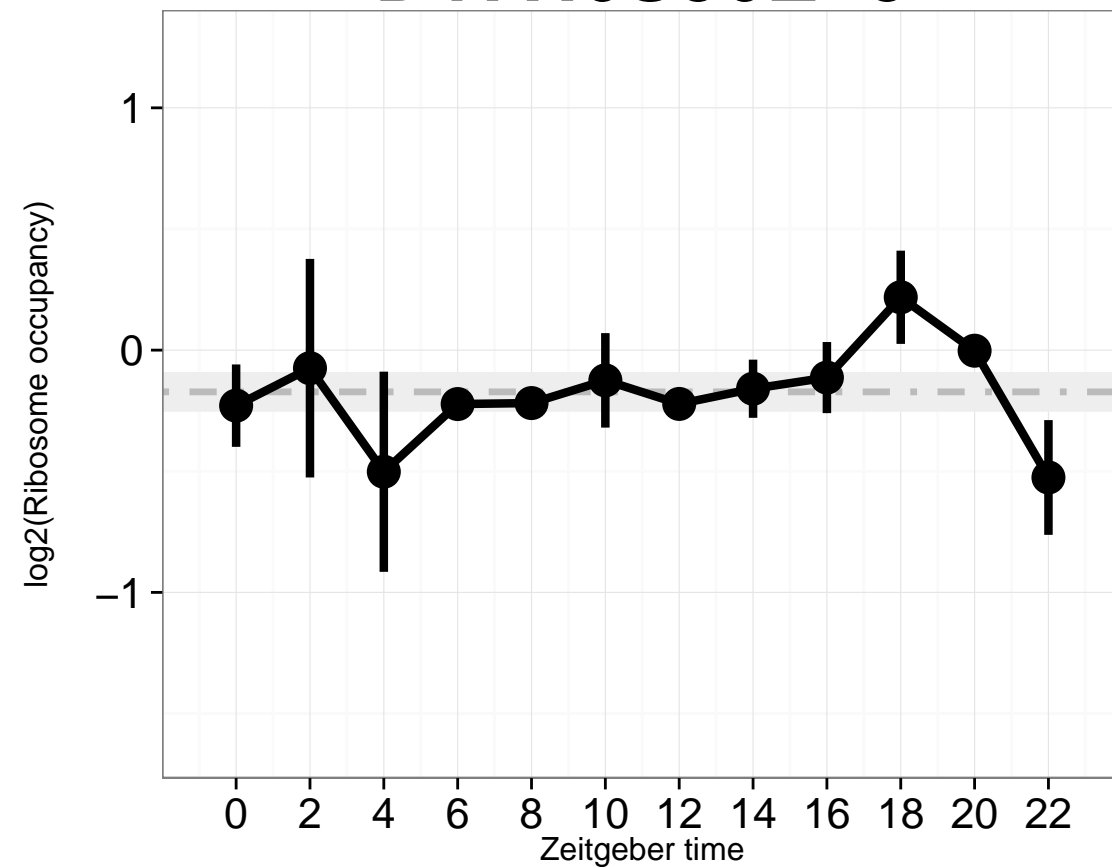

Supplement: SuppDataset_1.zip [file D17H6S56E-5_set_A.pdf › Supplemental Dataset 1/A-mRNA_nonrhyth_translation_nonrhyth/D17H6S56E-5_set_A.pdf]

# D17Wsu104e

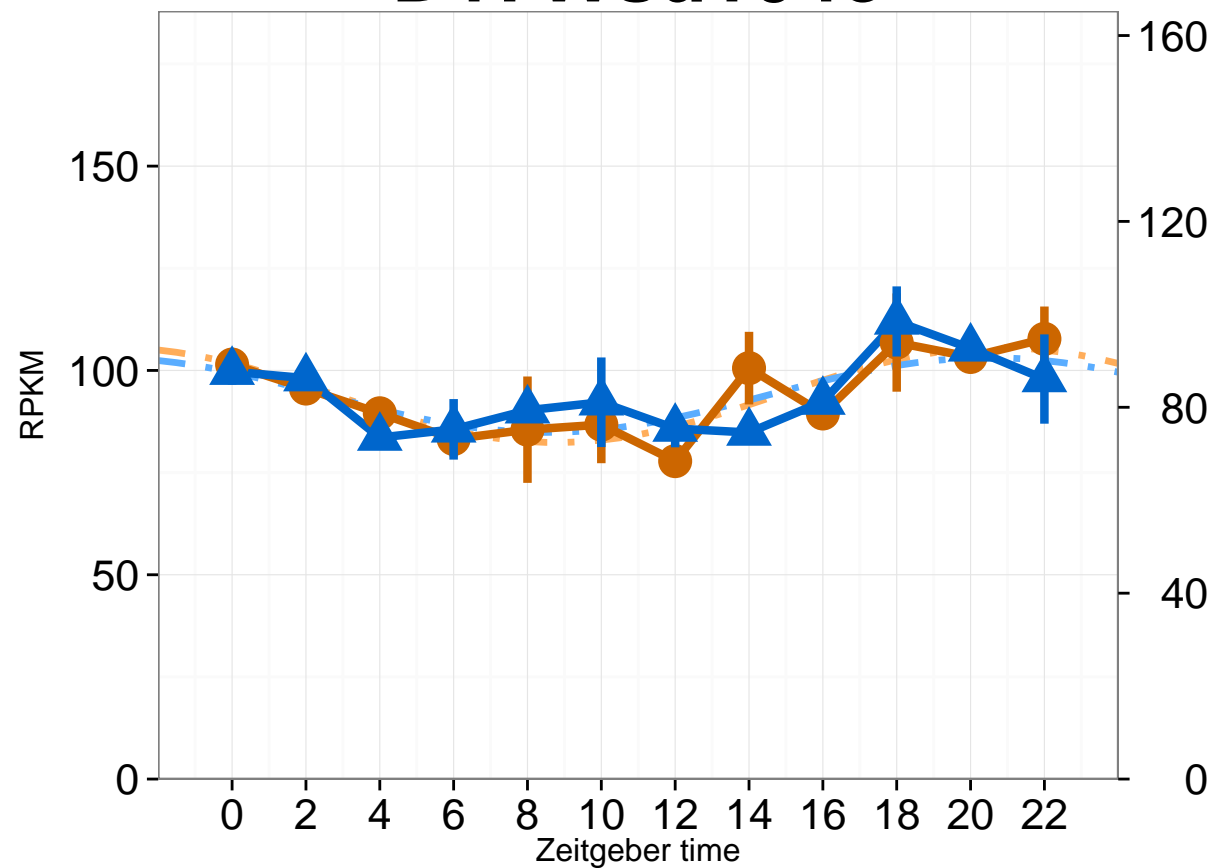

# D17Wsu104e

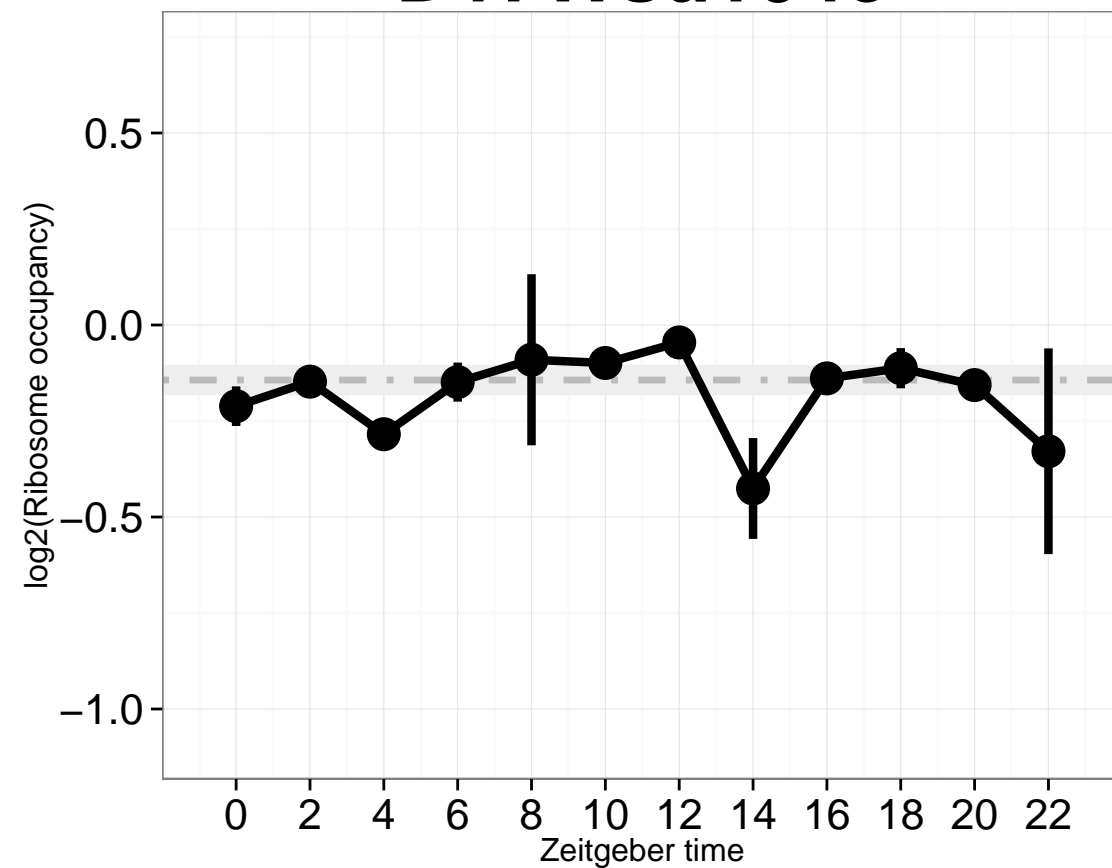

Supplement: SuppDataset_1.zip [file D17Wsu104e_set_A.pdf › Supplemental Dataset 1/A-mRNA_nonrhyth_translation_nonrhyth/D17Wsu104e_set_A.pdf]

# D17Wsu92e

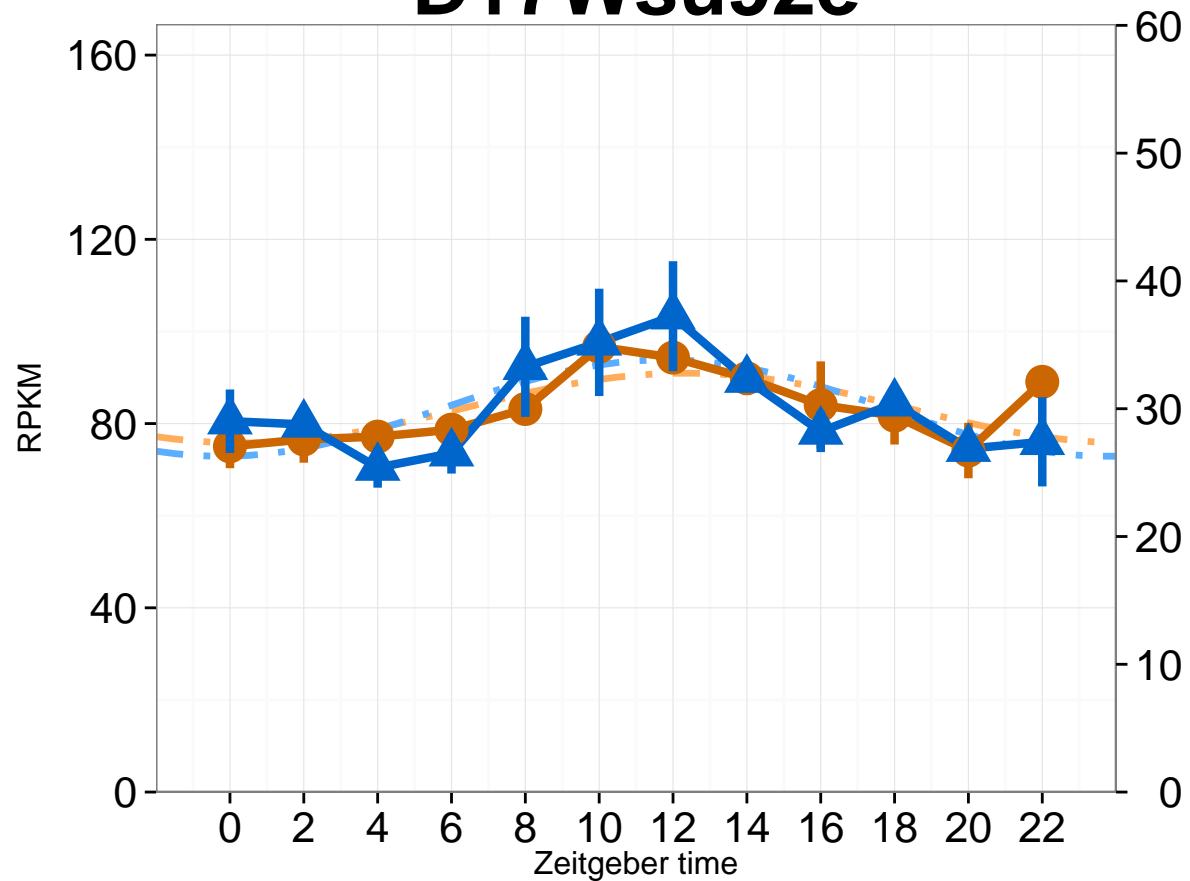

# D17Wsu92e

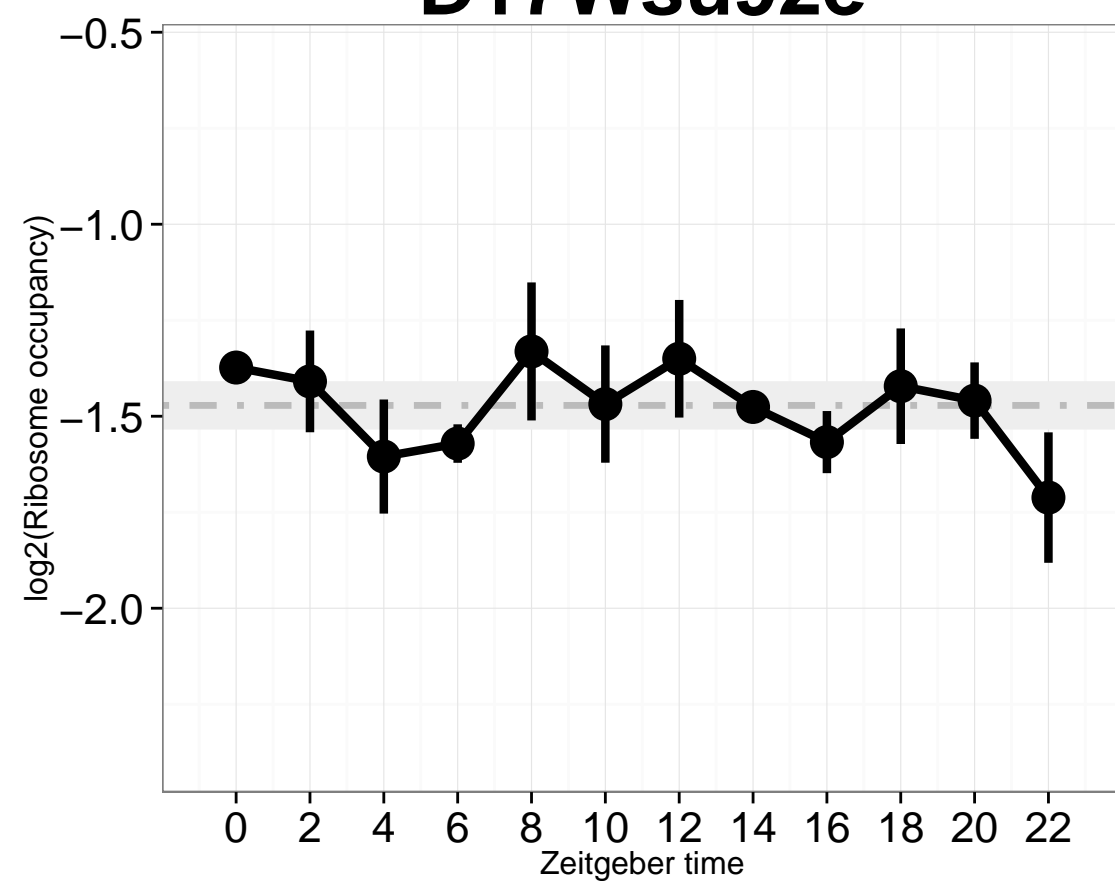

Supplement: SuppDataset_1.zip [file D17Wsu92e_set_A.pdf › Supplemental Dataset 1/A-mRNA_nonrhyth_translation_nonrhyth/D17Wsu92e_set_A.pdf]

# D19Bwg1357e

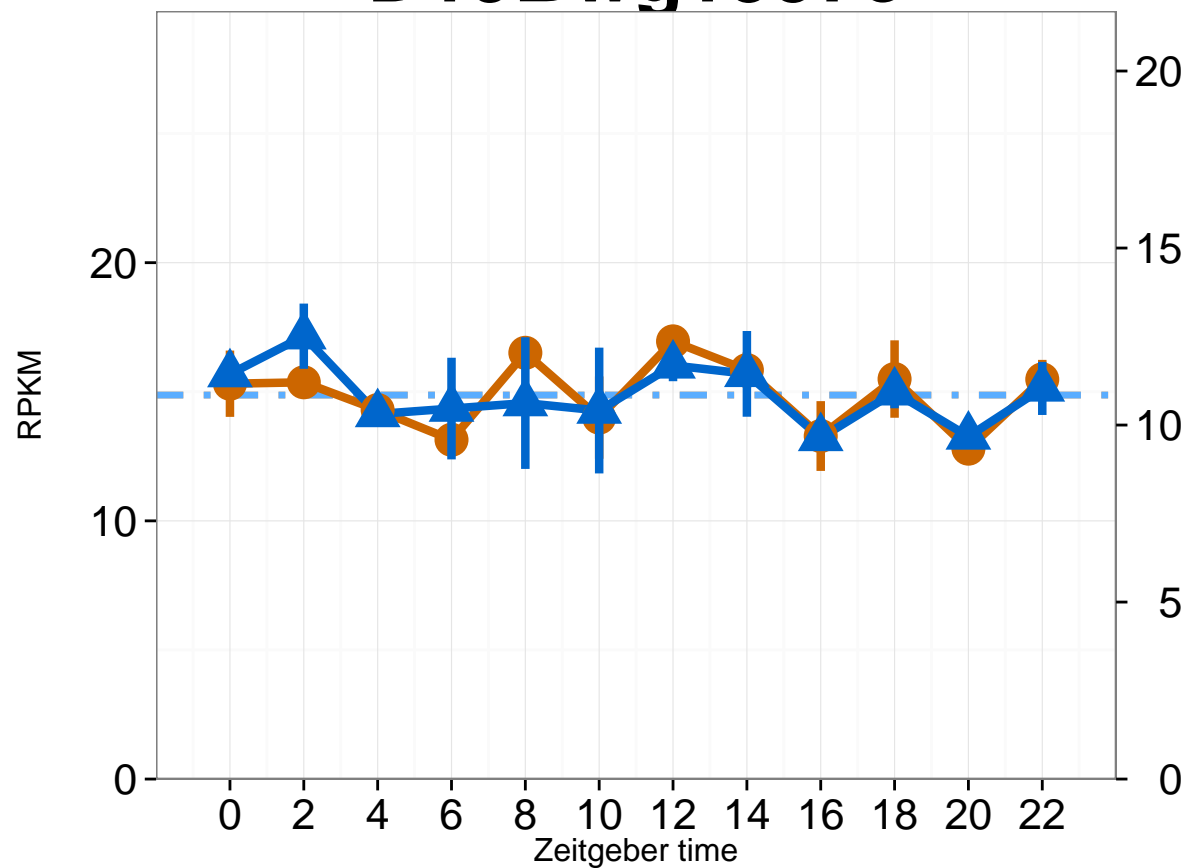

# D19Bwg1357e

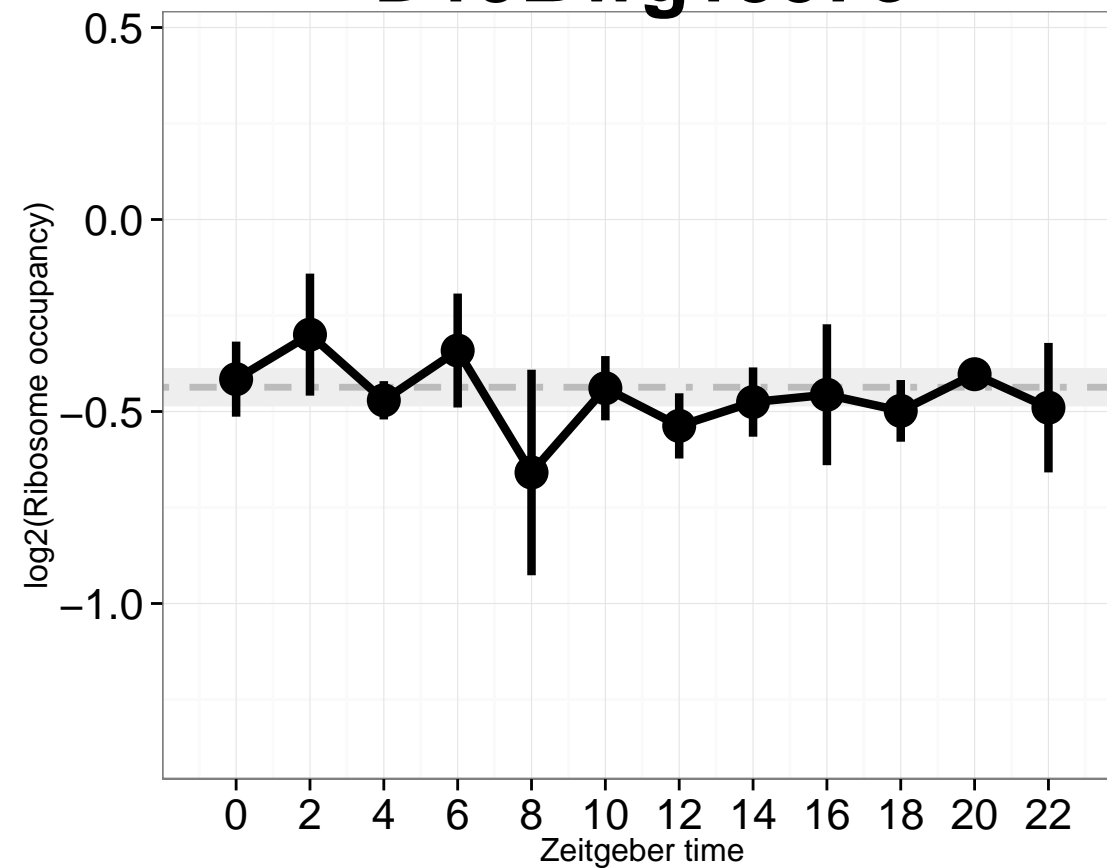

Supplement: SuppDataset_1.zip [file D19Bwg1357e_set_A.pdf › Supplemental Dataset 1/A-mRNA_nonrhyth_translation_nonrhyth/D19Bwg1357e_set_A.pdf]

# D230025D16Rik

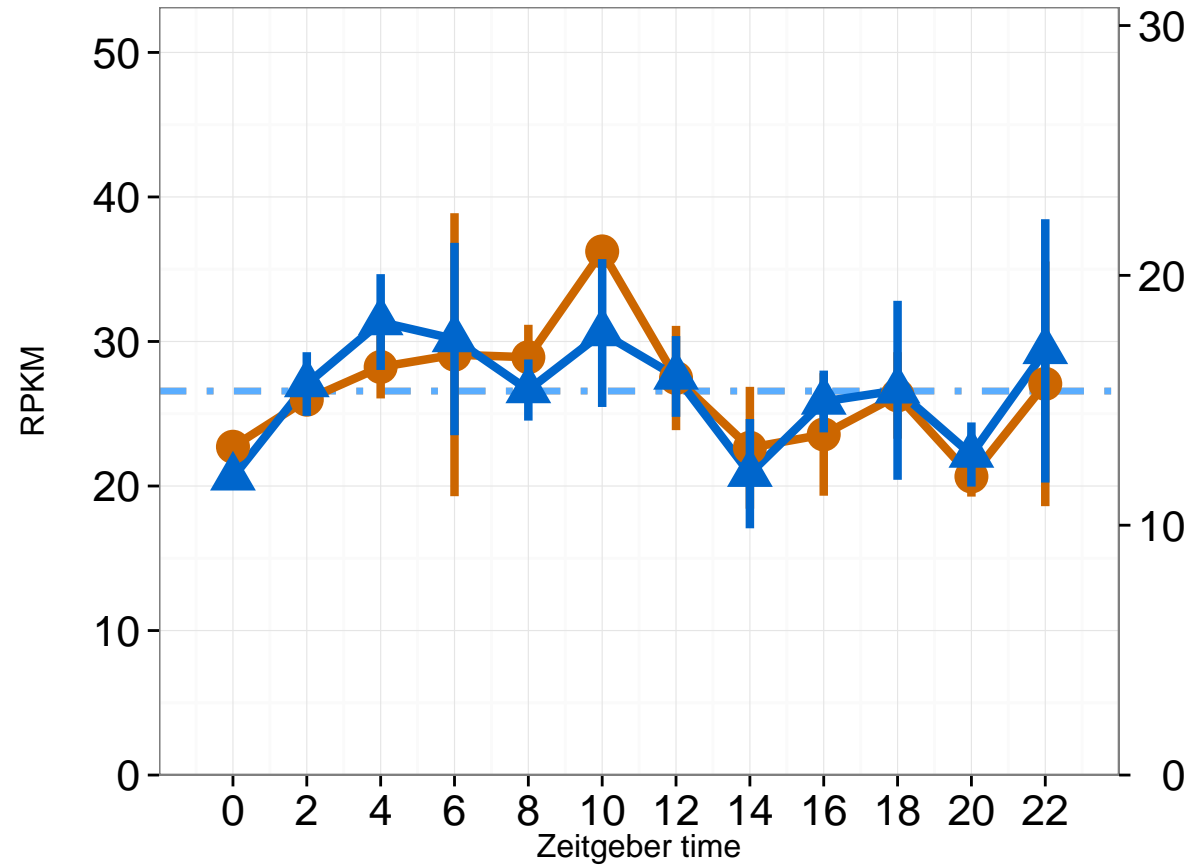

# D230025D16Rik

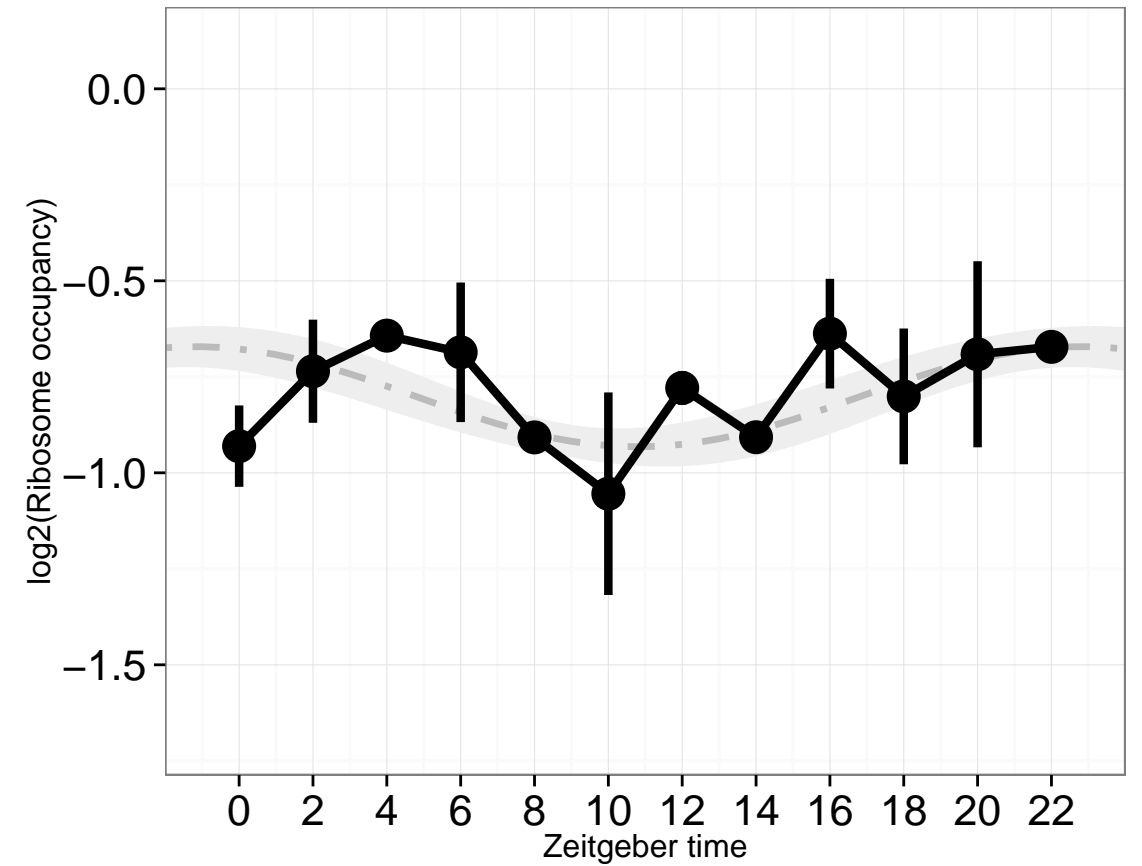

Supplement: SuppDataset_1.zip [file D230025D16Rik_set_A.pdf › Supplemental Dataset 1/A-mRNA_nonrhyth_translation_nonrhyth/D230025D16Rik_set_A.pdf]

# D2Wsu81e

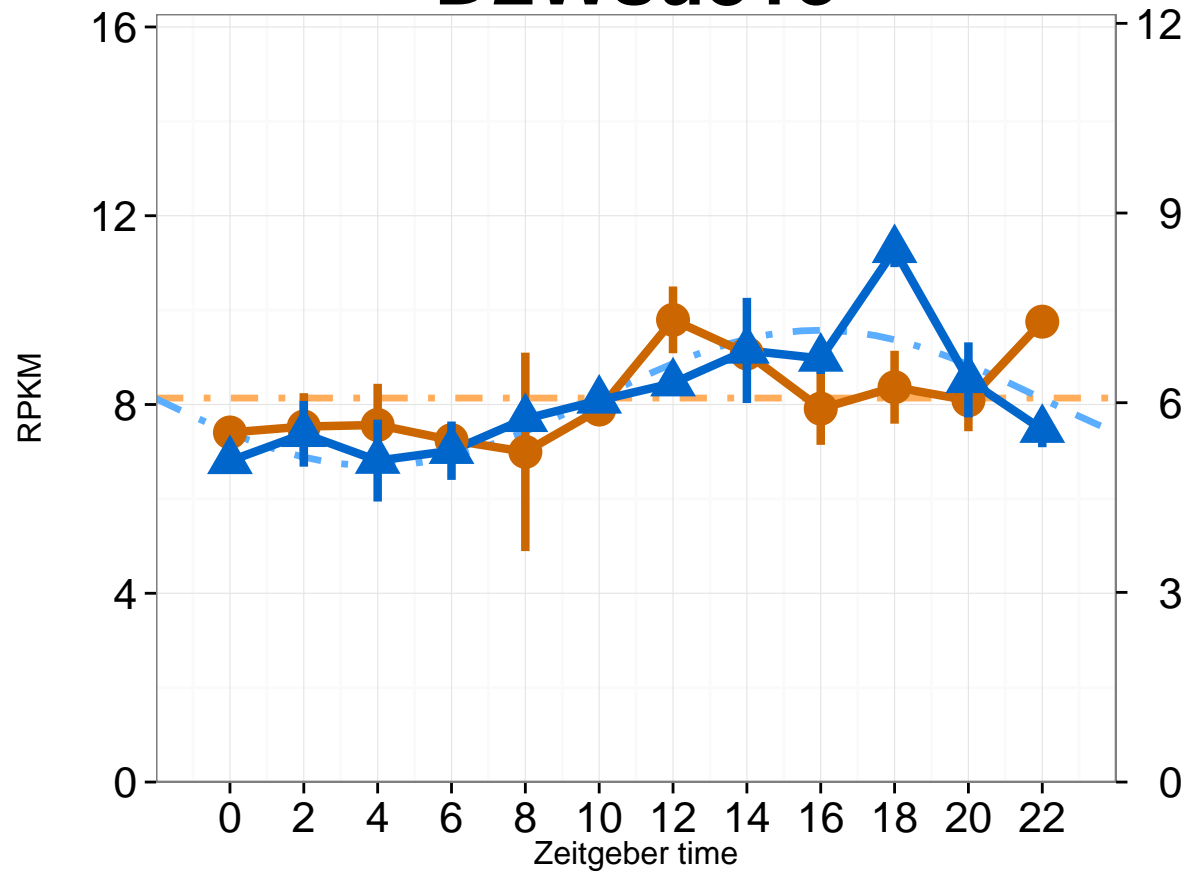

# D2Wsu81e

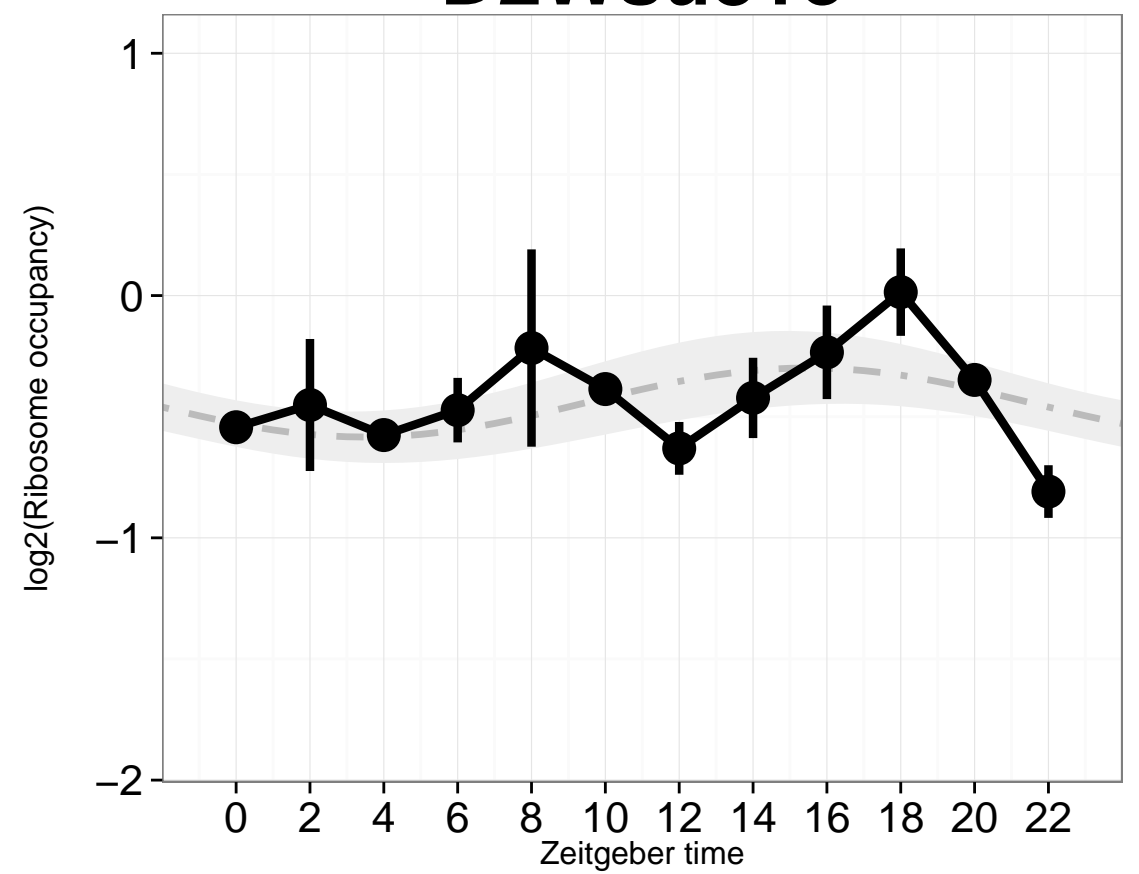

Supplement: SuppDataset_1.zip [file D2Wsu81e_set_A.pdf › Supplemental Dataset 1/A-mRNA_nonrhyth_translation_nonrhyth/D2Wsu81e_set_A.pdf]

# D2hgdh

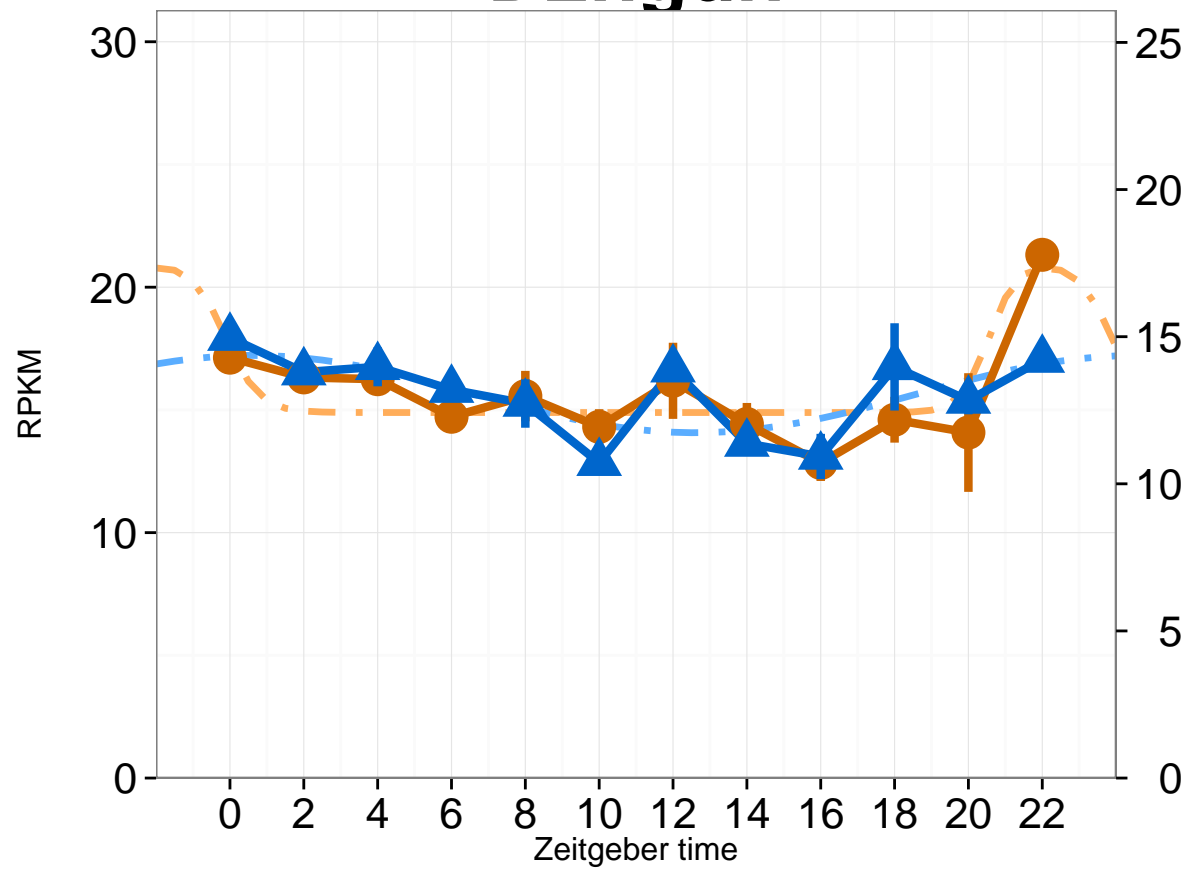

# D2hgdh

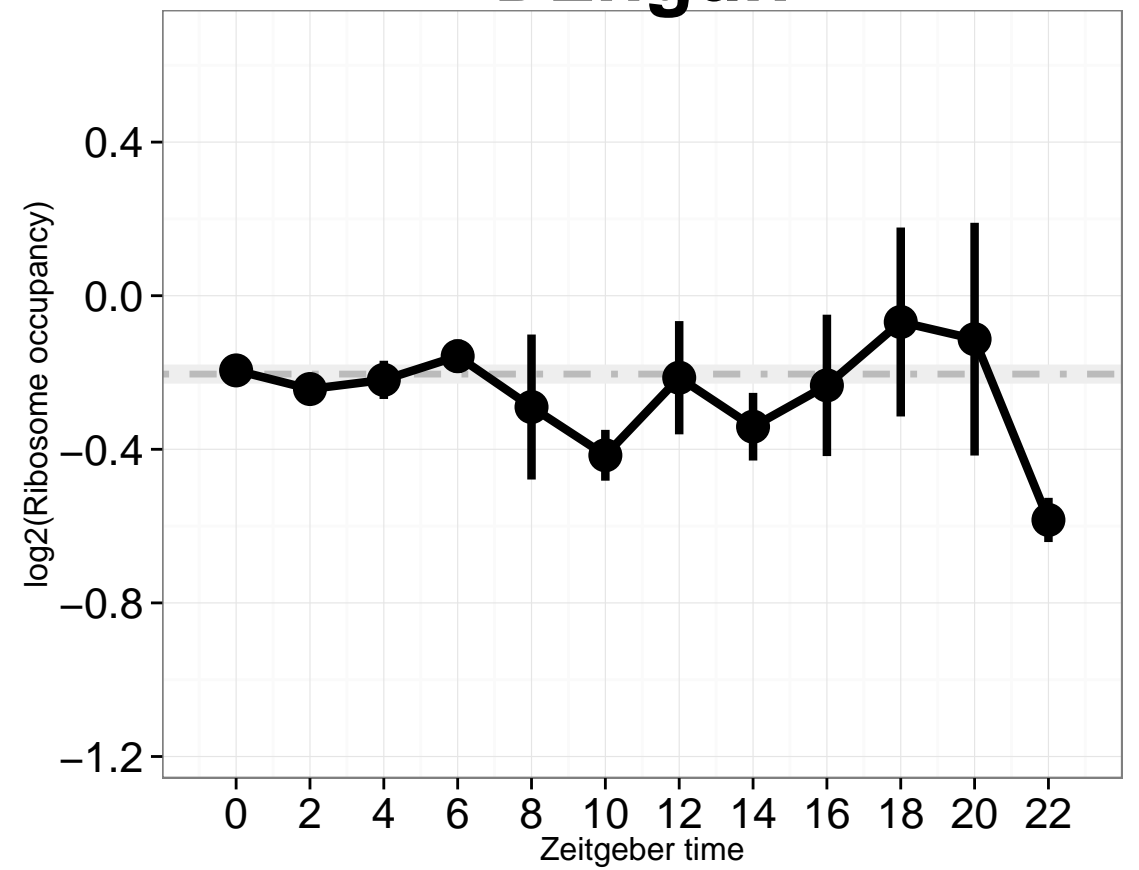

Supplement: SuppDataset_1.zip [file D2hgdh_set_A.pdf › Supplemental Dataset 1/A-mRNA_nonrhyth_translation_nonrhyth/D2hgdh_set_A.pdf]

# D3Ertd254e

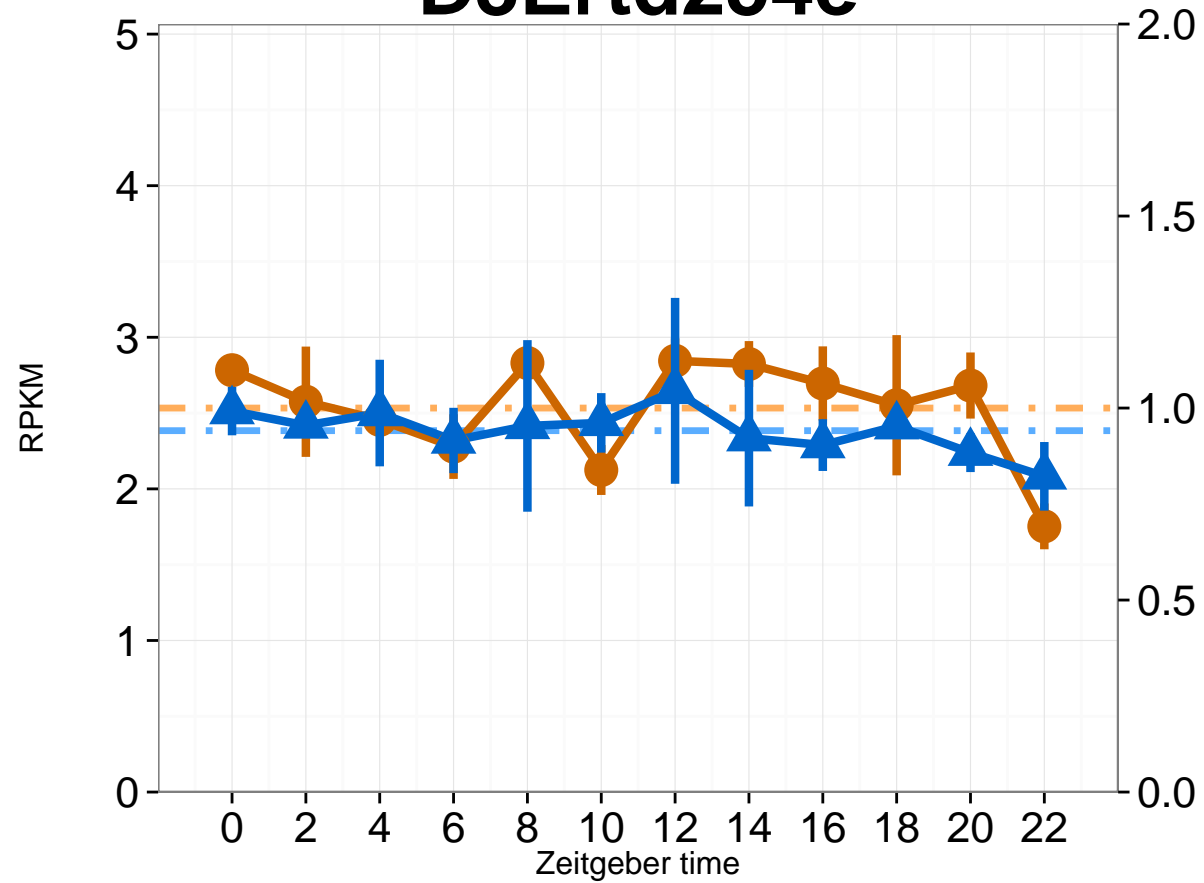

# D3Ertd254e

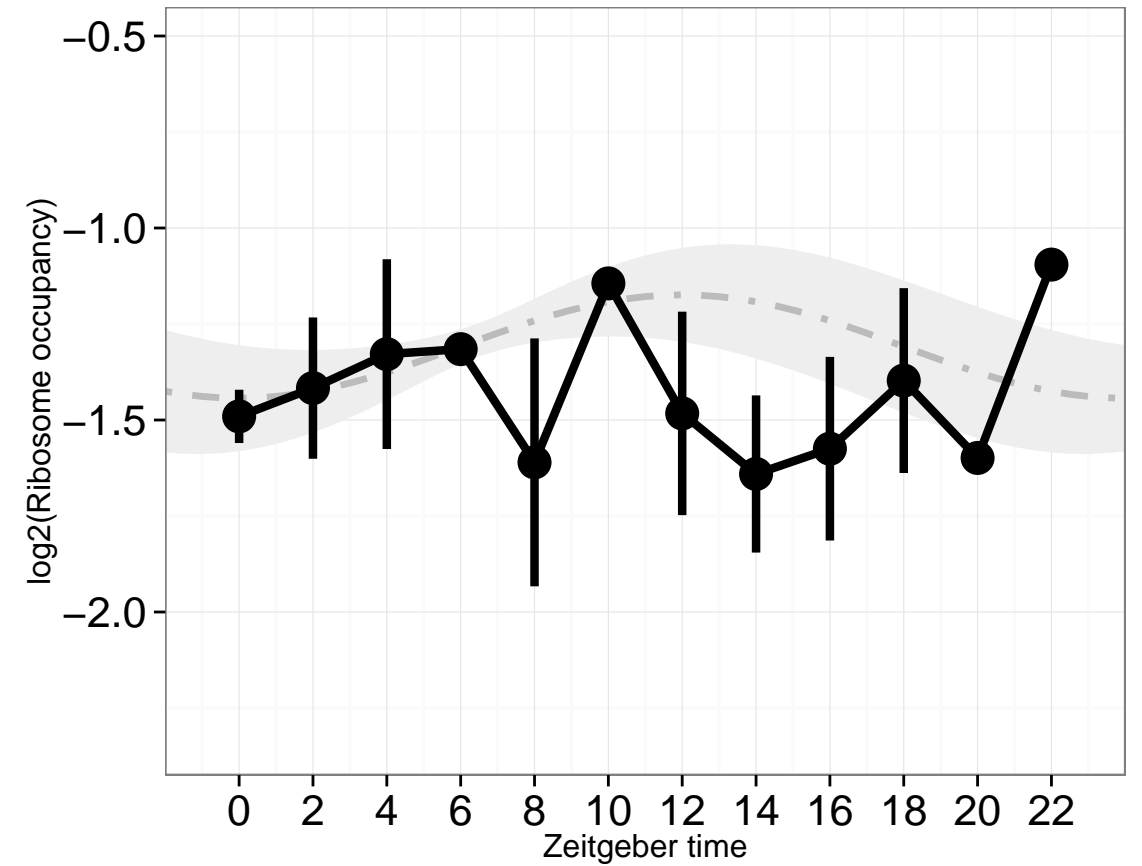

Supplement: SuppDataset_1.zip [file D3Ertd254e_set_A.pdf › Supplemental Dataset 1/A-mRNA_nonrhyth_translation_nonrhyth/D3Ertd254e_set_A.pdf]

# D3Ertd751e

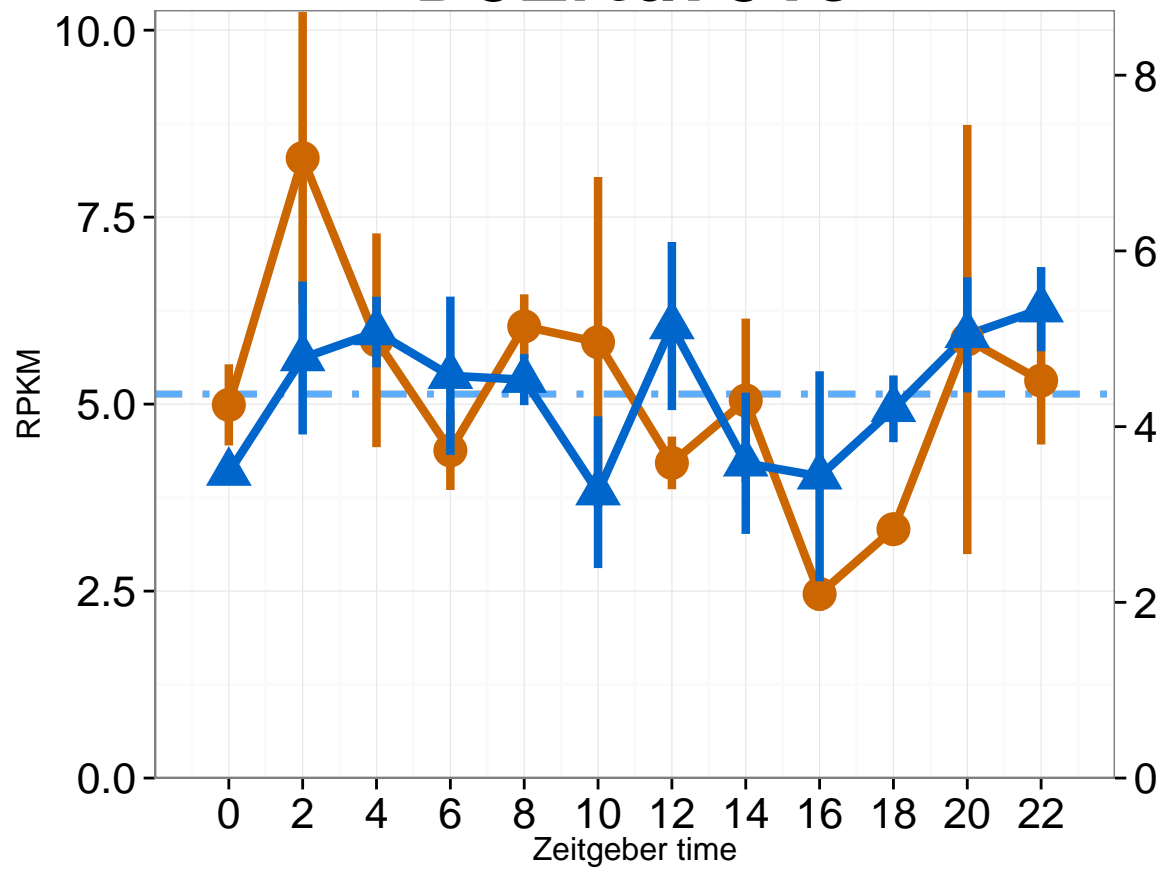

# D3Ertd751e

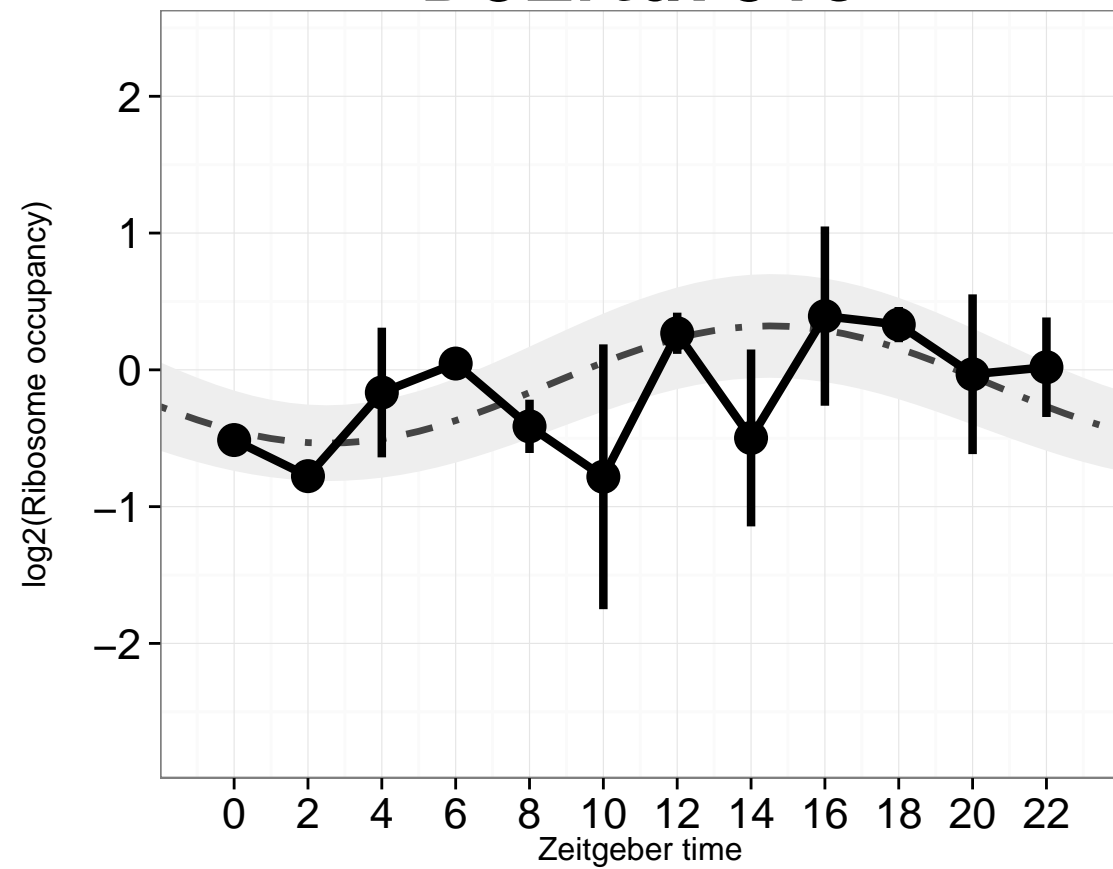

Supplement: SuppDataset_1.zip [file D3Ertd751e_set_A.pdf › Supplemental Dataset 1/A-mRNA_nonrhyth_translation_nonrhyth/D3Ertd751e_set_A.pdf]

# D630045J12Rik

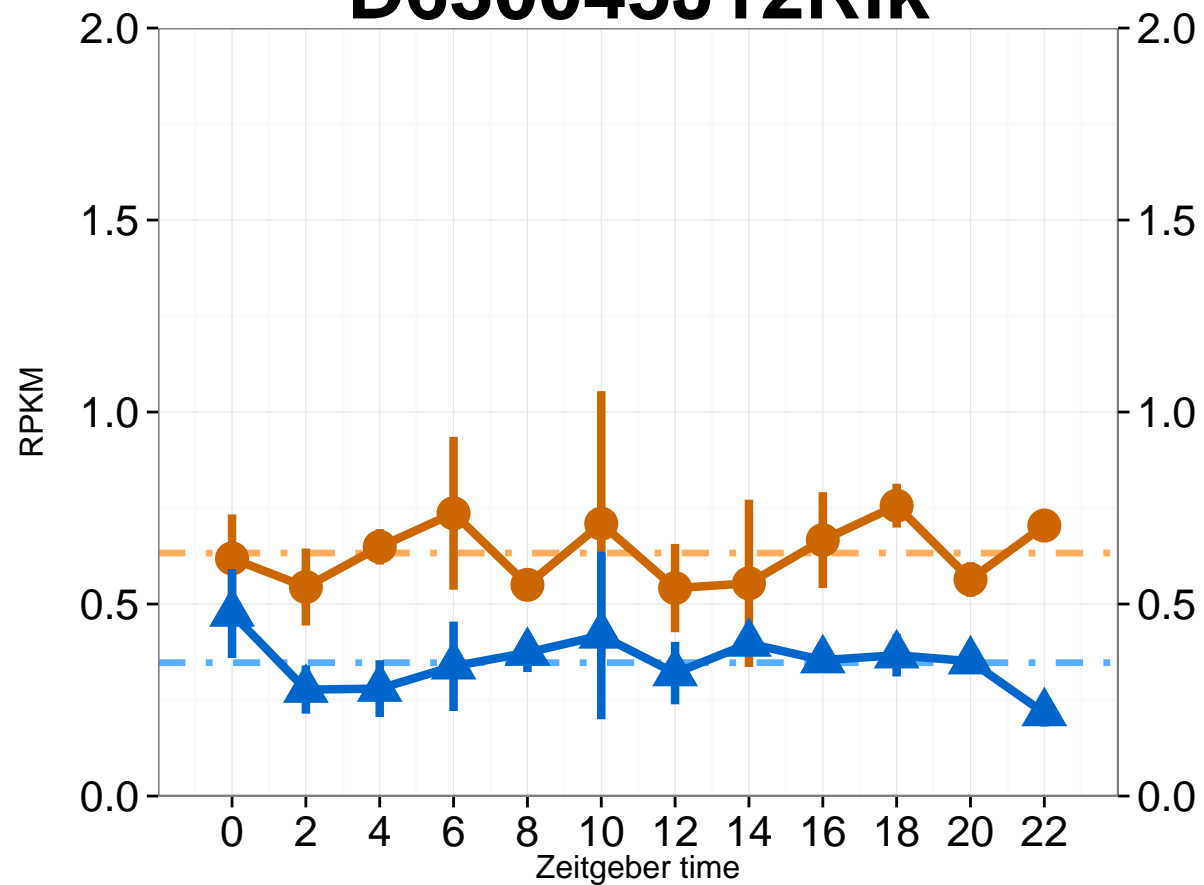

# D630045J12Rik

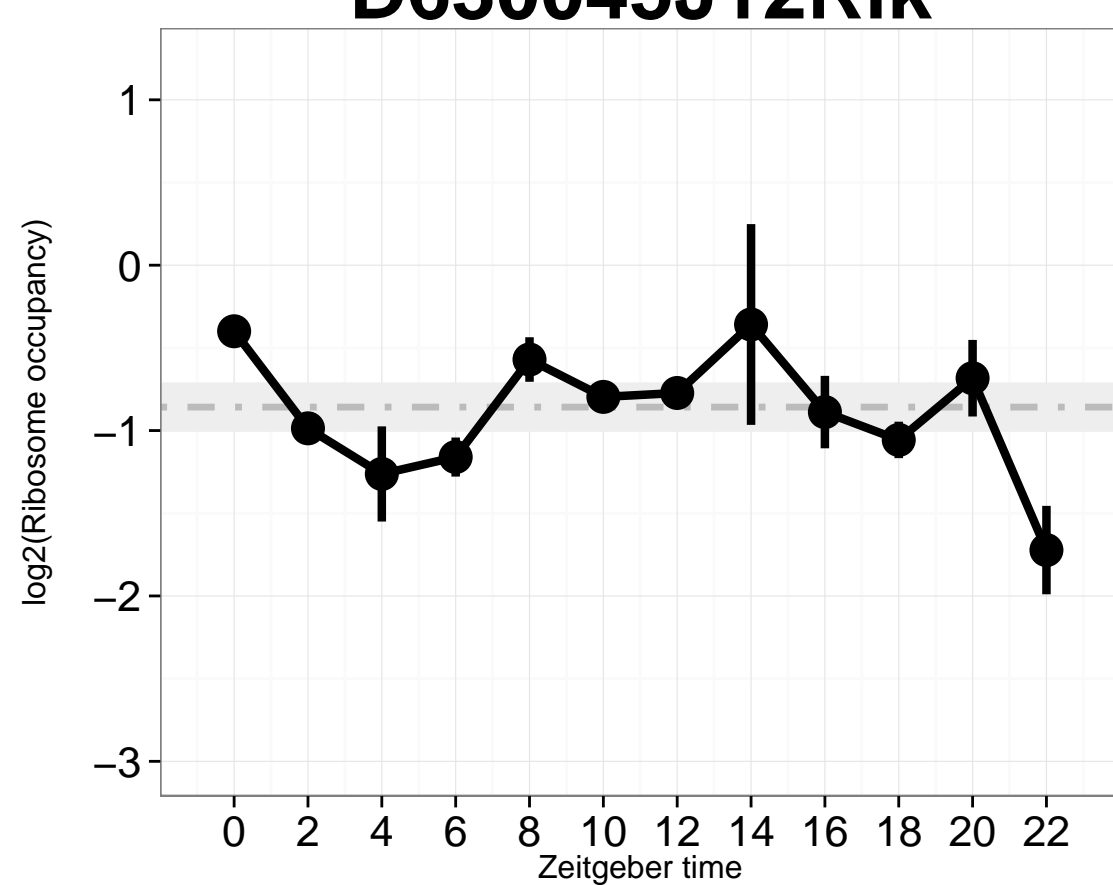

Supplement: SuppDataset_1.zip [file D630045J12Rik_set_A.pdf › Supplemental Dataset 1/A-mRNA_nonrhyth_translation_nonrhyth/D630045J12Rik_set_A.pdf]

# D6Wsu163e

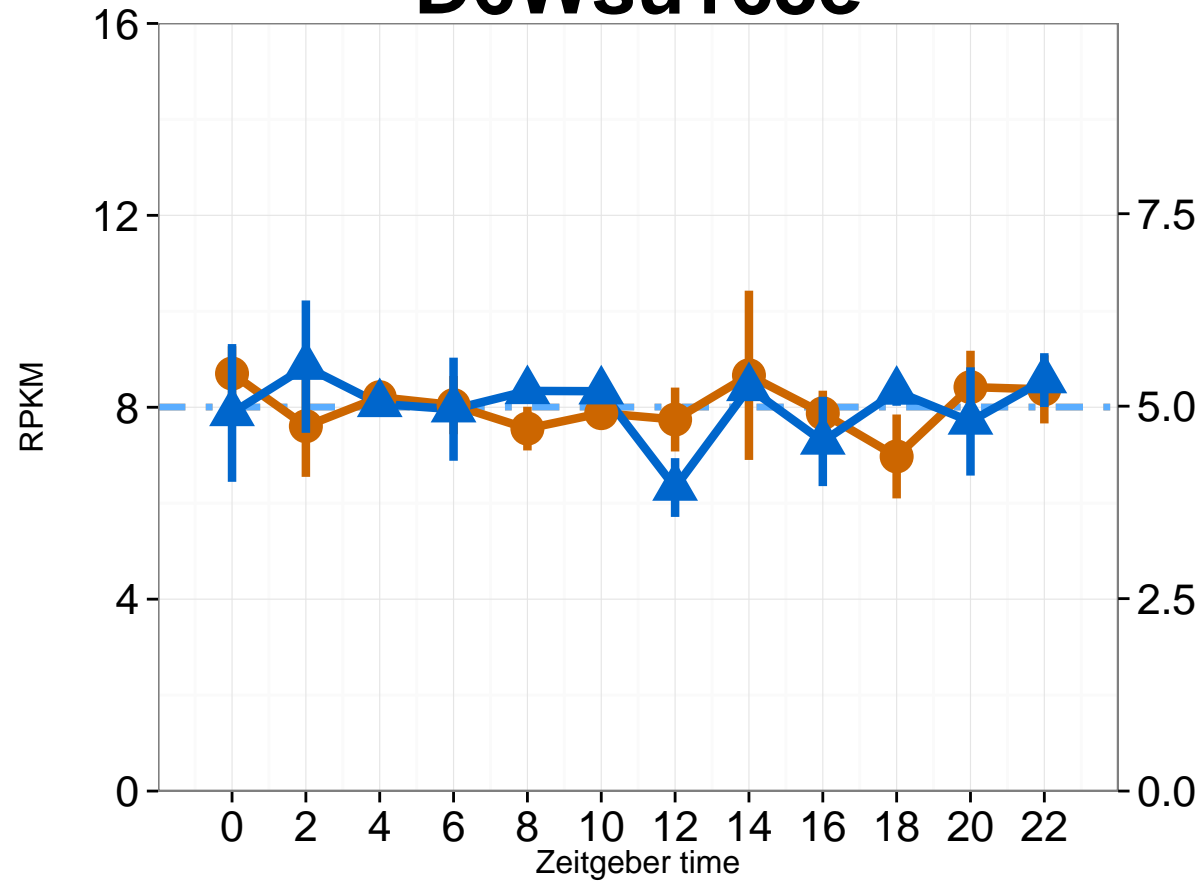

# D6Wsu163e

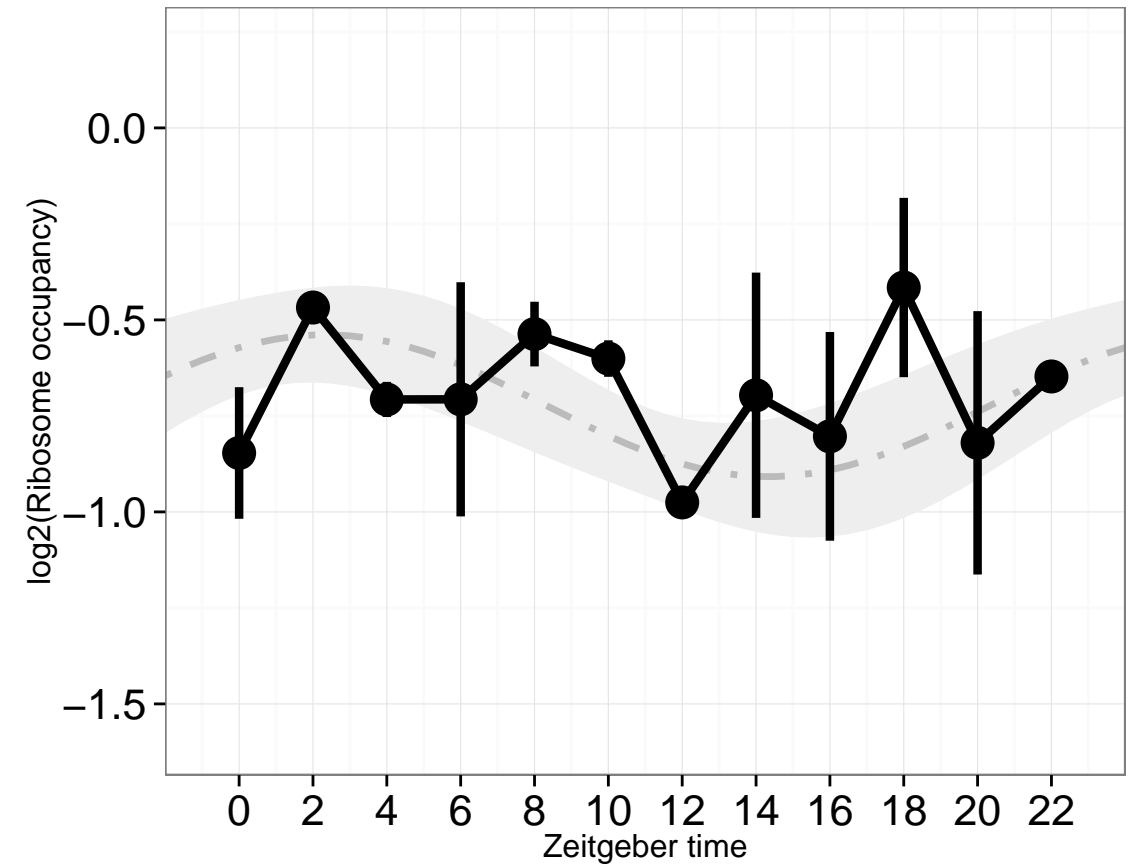

Supplement: SuppDataset_1.zip [file D6Wsu163e_set_A.pdf › Supplemental Dataset 1/A-mRNA_nonrhyth_translation_nonrhyth/D6Wsu163e_set_A.pdf]

## D830050J10Rik

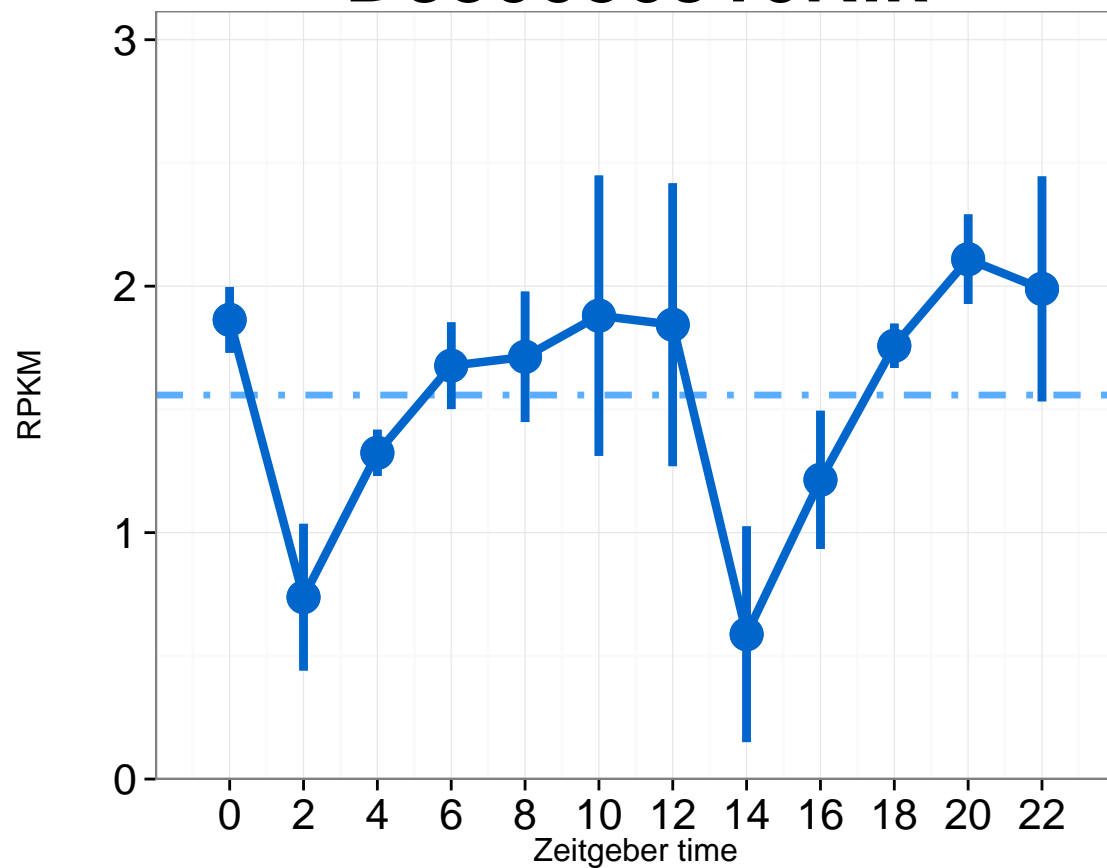

## D830050J10Rik log2(Ribosome occup

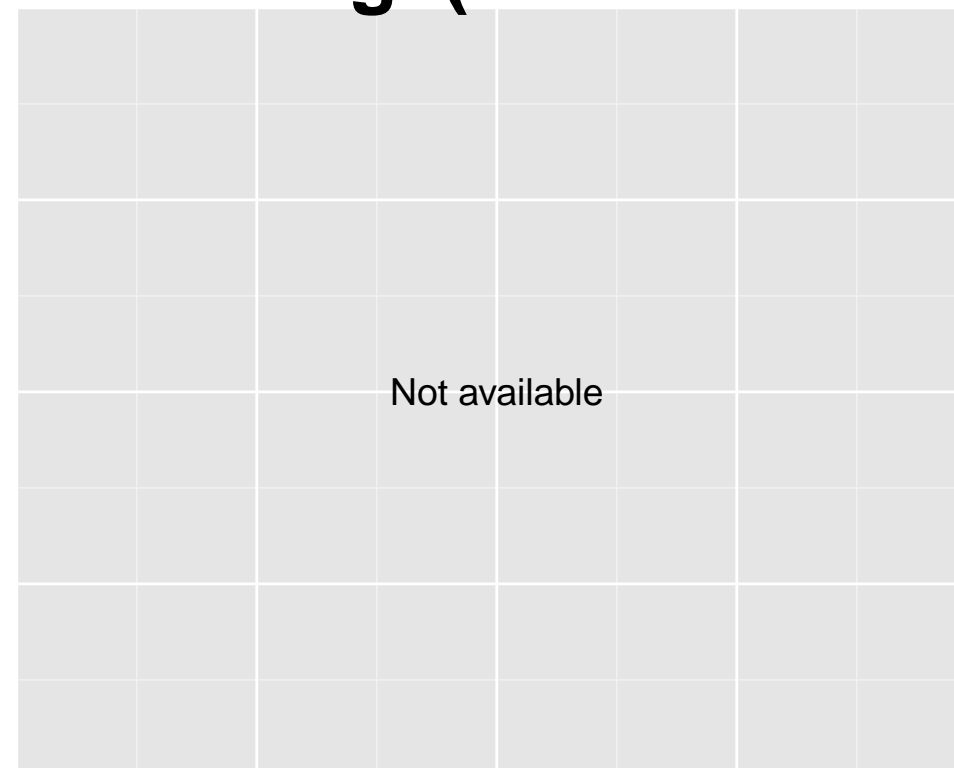

Supplement: SuppDataset_1.zip [file D830050J10Rik_set_A.pdf › Supplemental Dataset 1/A-mRNA_nonrhyth_translation_nonrhyth/D830050J10Rik_set_A.pdf]

# D8Ertd738e

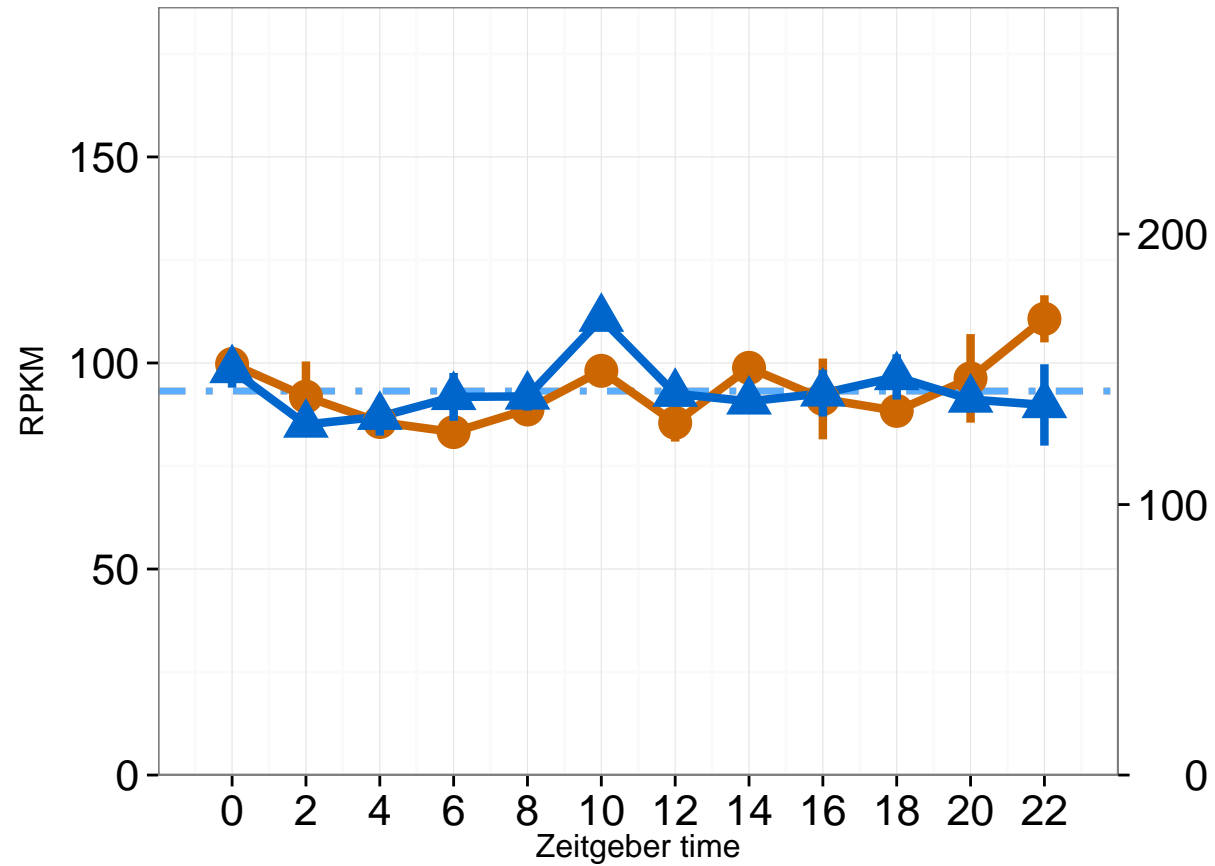

# D8Ertd738e

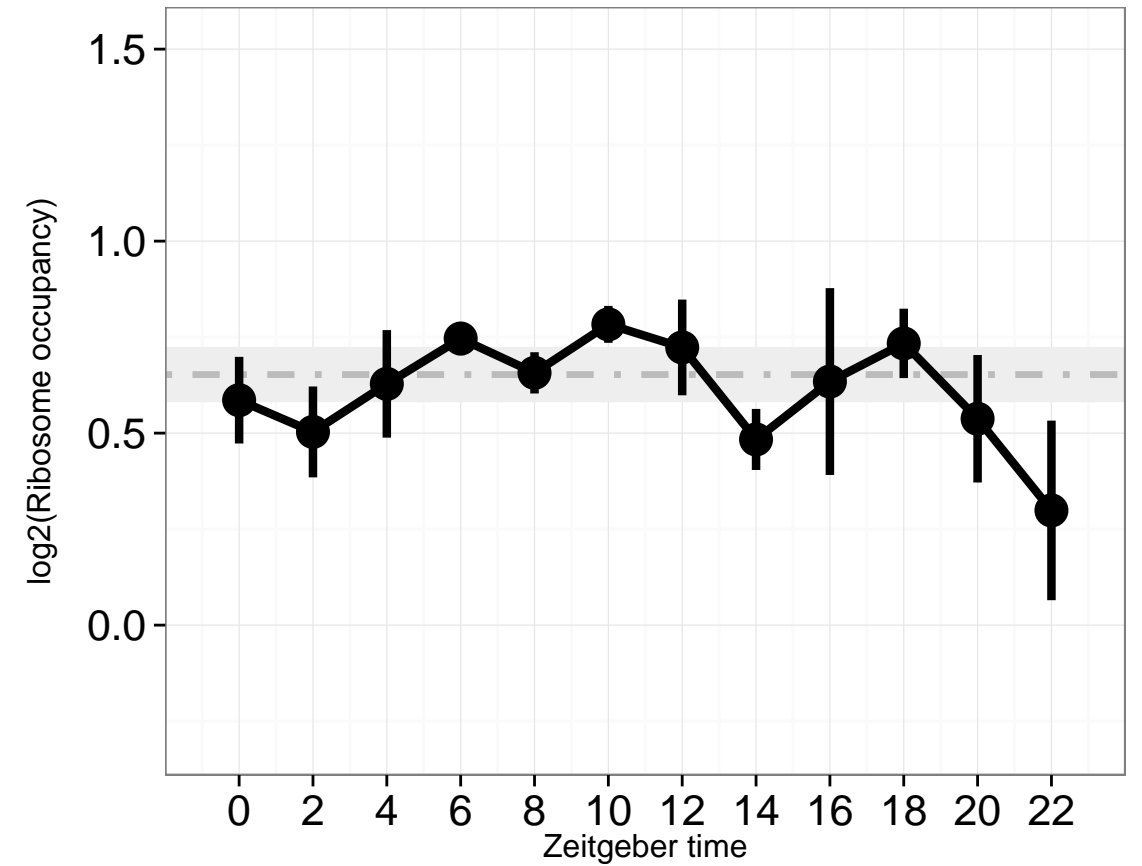

Supplement: SuppDataset_1.zip [file D8Ertd738e_set_A.pdf › Supplemental Dataset 1/A-mRNA_nonrhyth_translation_nonrhyth/D8Ertd738e_set_A.pdf]

# D930015E06Rik

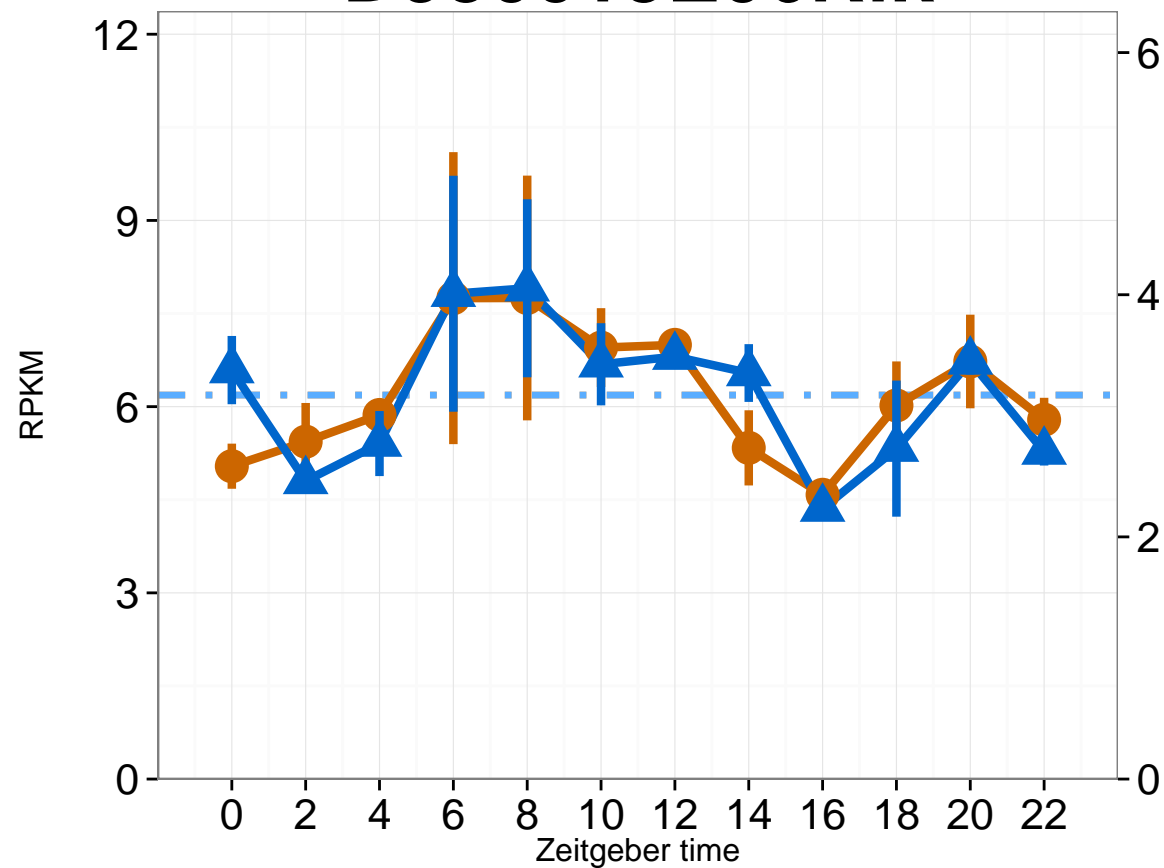

# D930015E06Rik

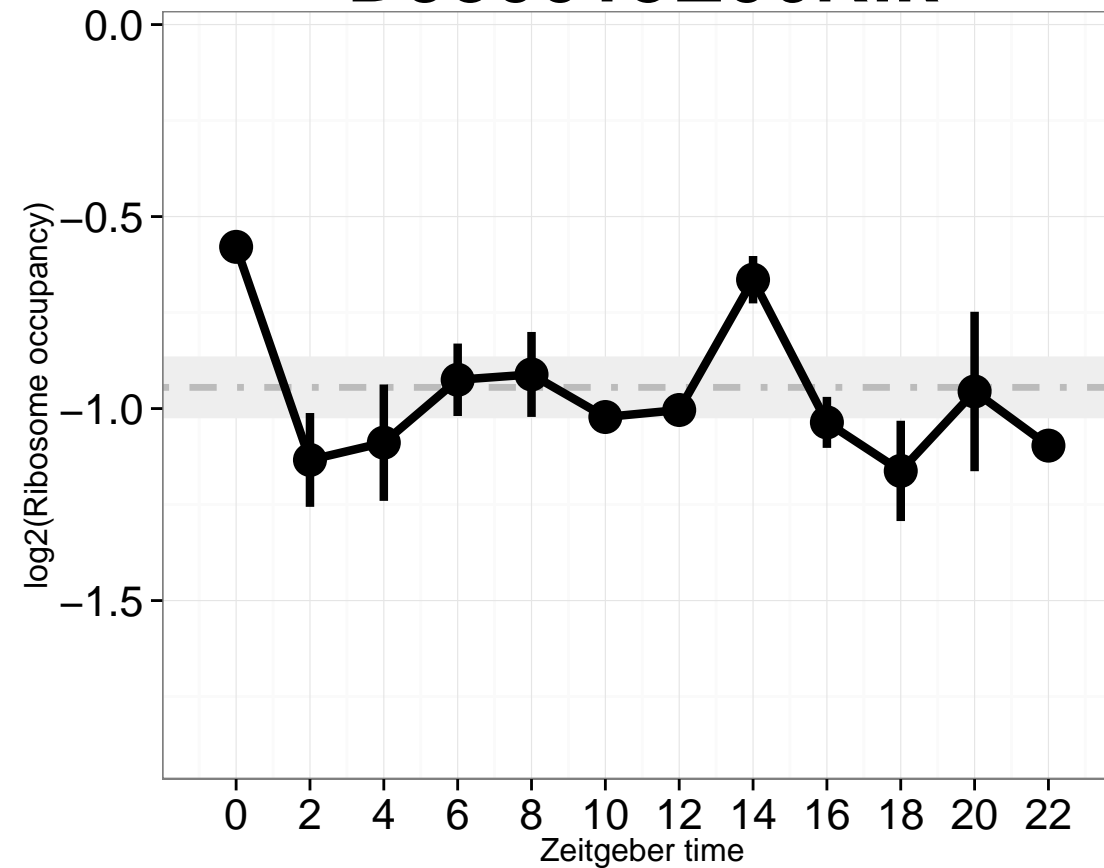

Supplement: SuppDataset_1.zip [file D930015E06Rik_set_A.pdf › Supplemental Dataset 1/A-mRNA_nonrhyth_translation_nonrhyth/D930015E06Rik_set_A.pdf]

## Daam1

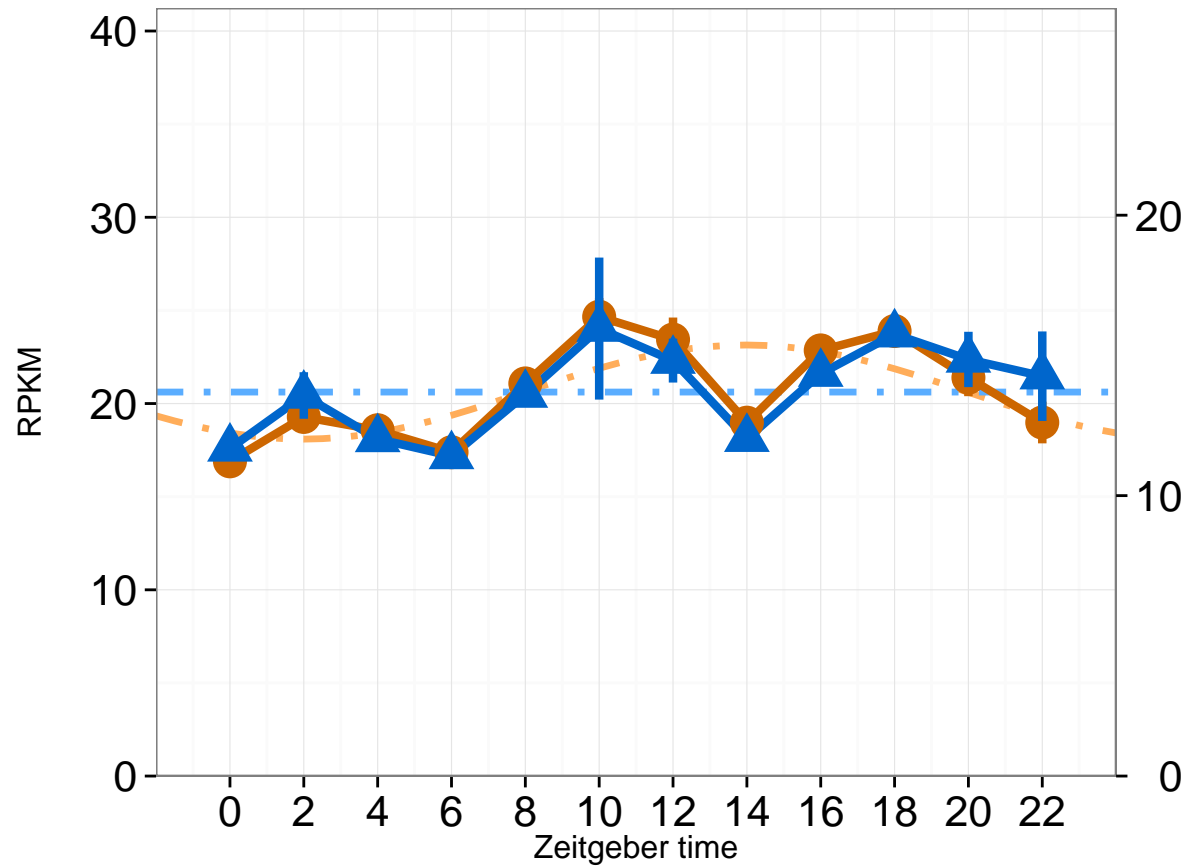

## Daam1

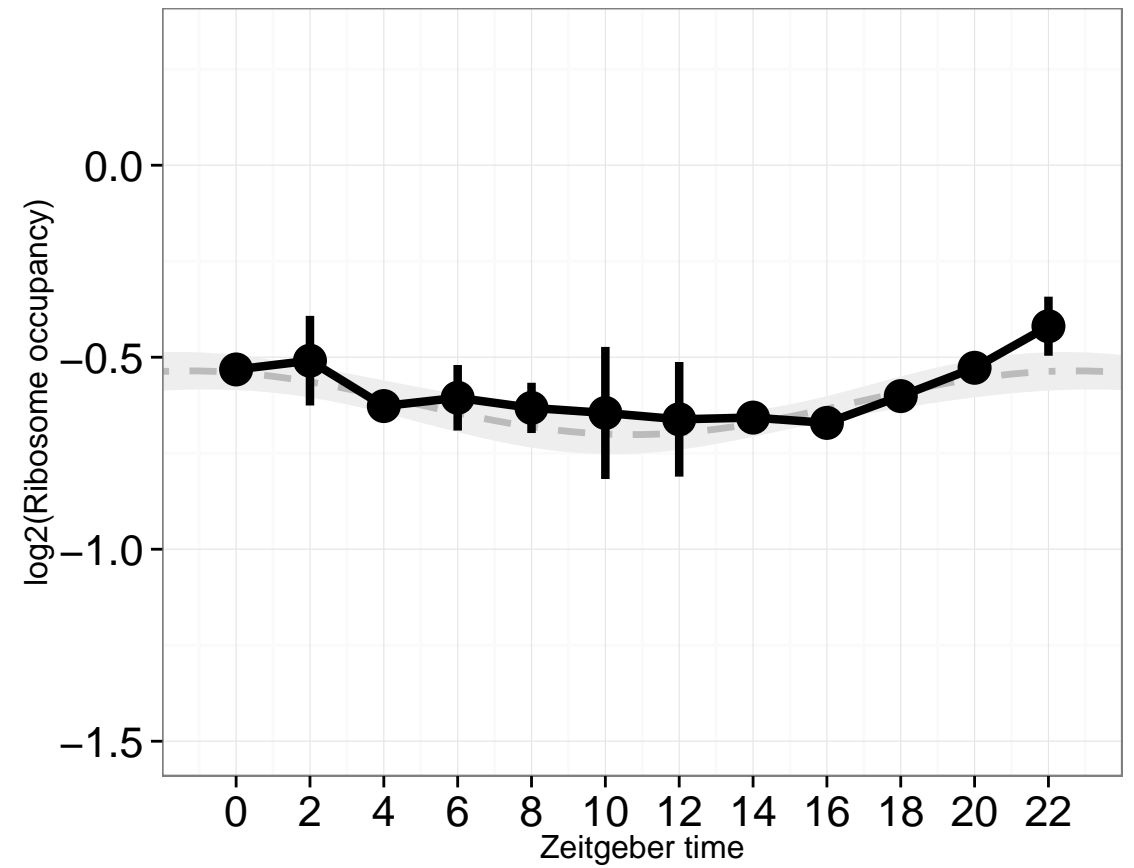

Supplement: SuppDataset_1.zip [file Daam1_set_A.pdf › Supplemental Dataset 1/A-mRNA_nonrhyth_translation_nonrhyth/Daam1_set_A.pdf]

# Daam2

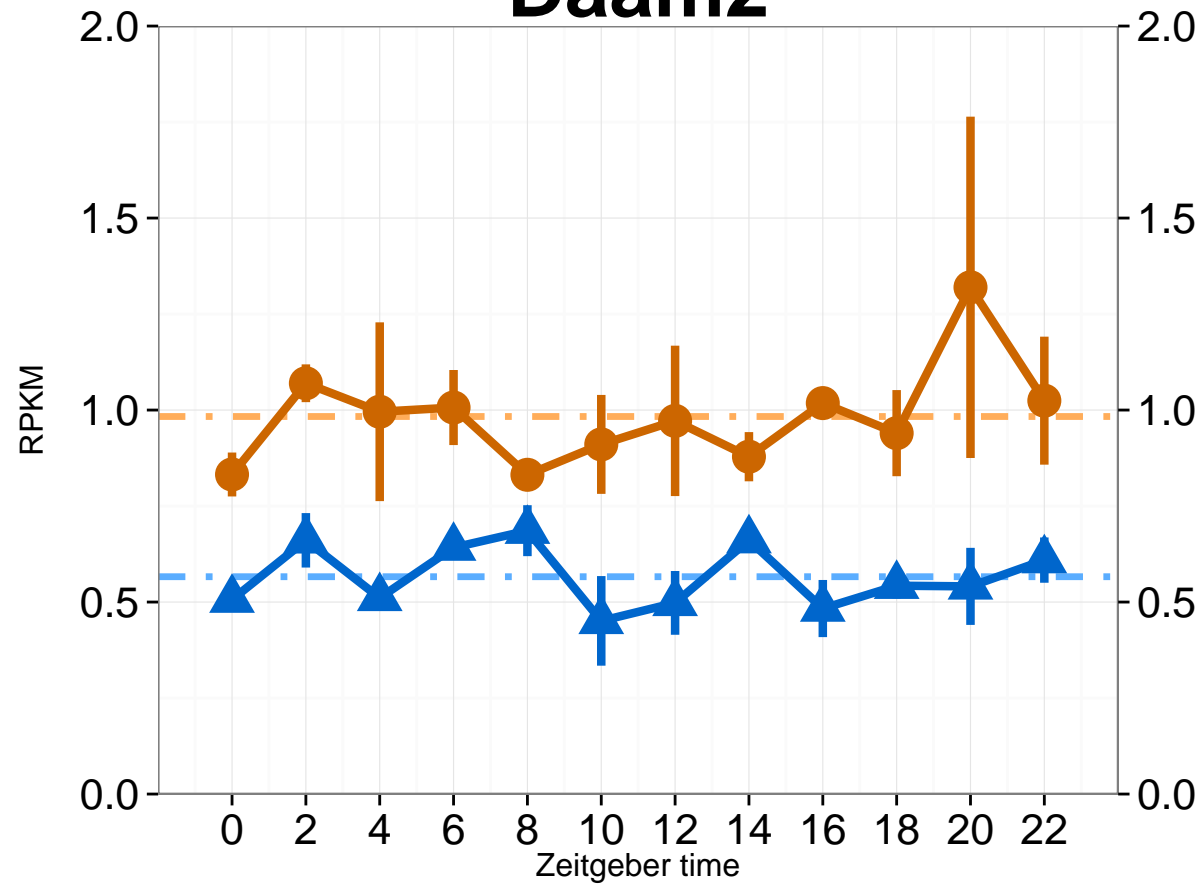

# Daam2

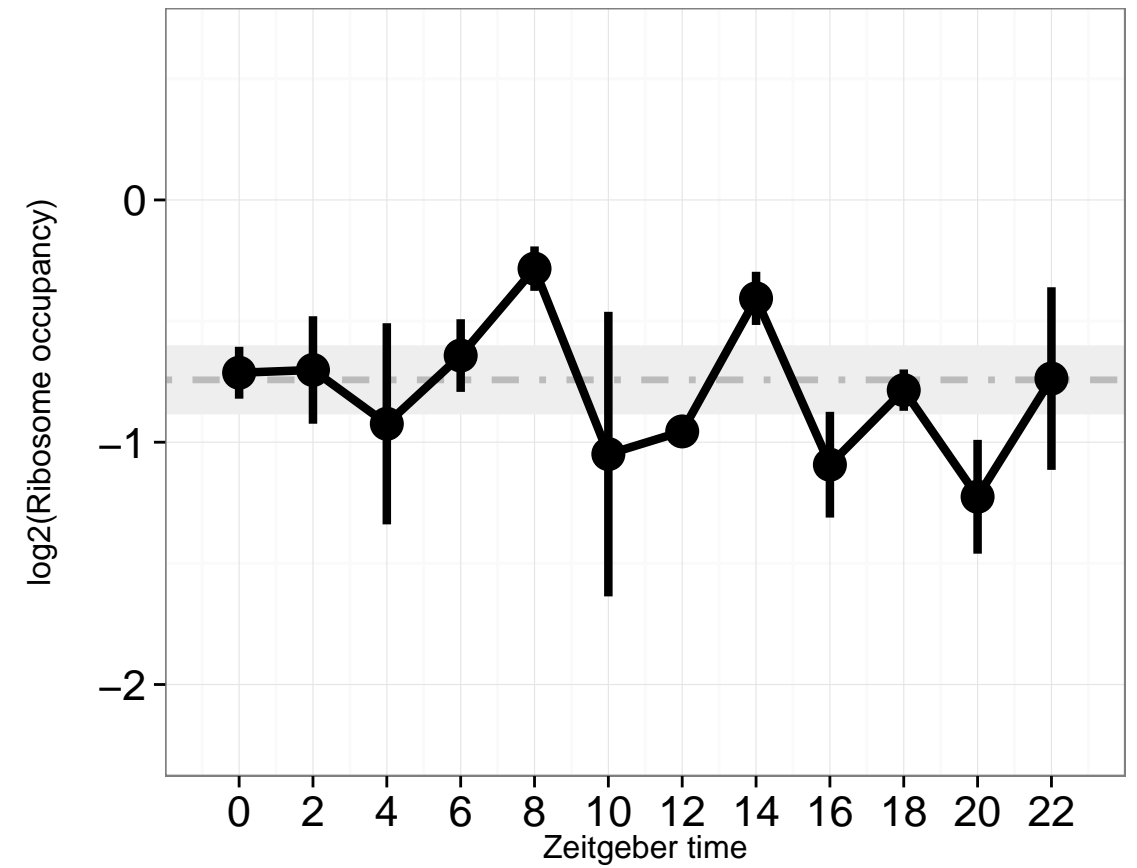

Supplement: SuppDataset_1.zip [file Daam2_set_A.pdf › Supplemental Dataset 1/A-mRNA_nonrhyth_translation_nonrhyth/Daam2_set_A.pdf]

## Dab2

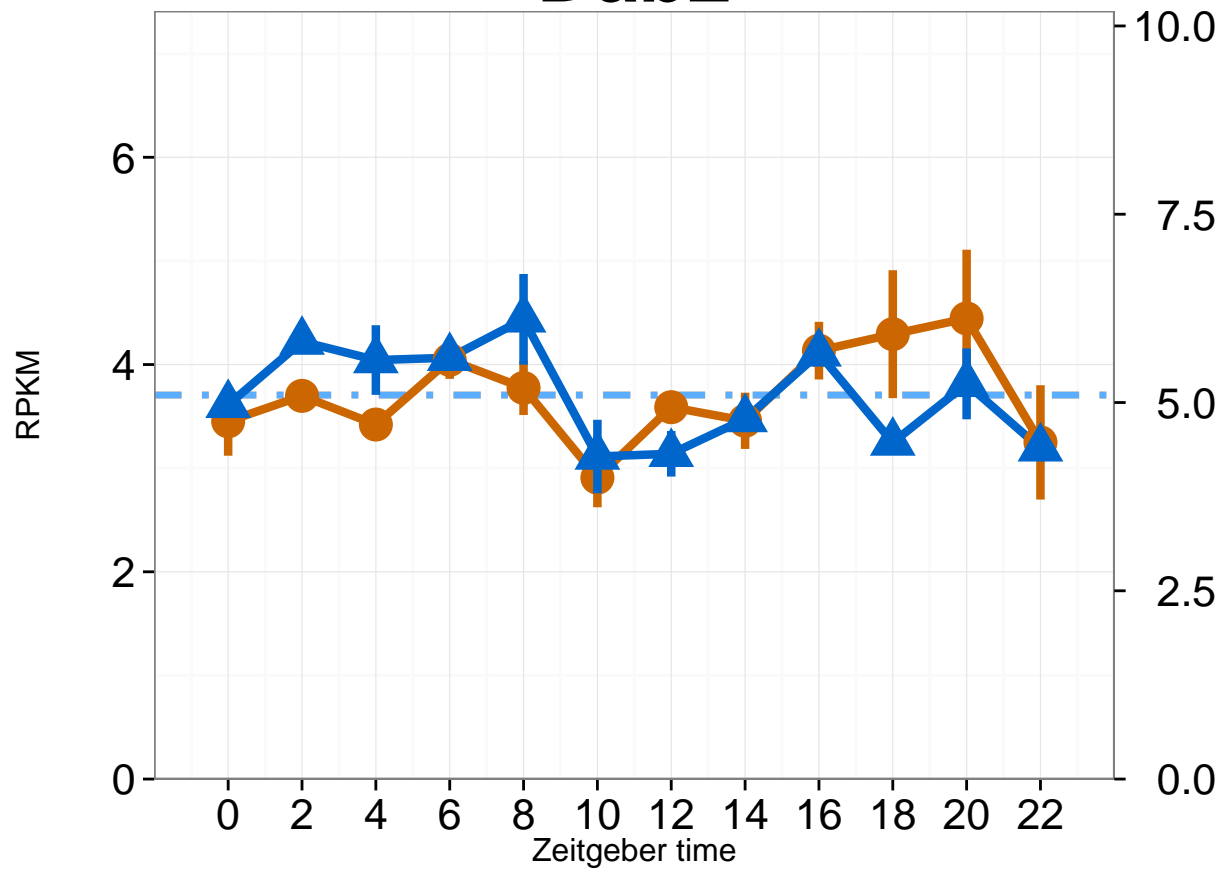

## Dab2

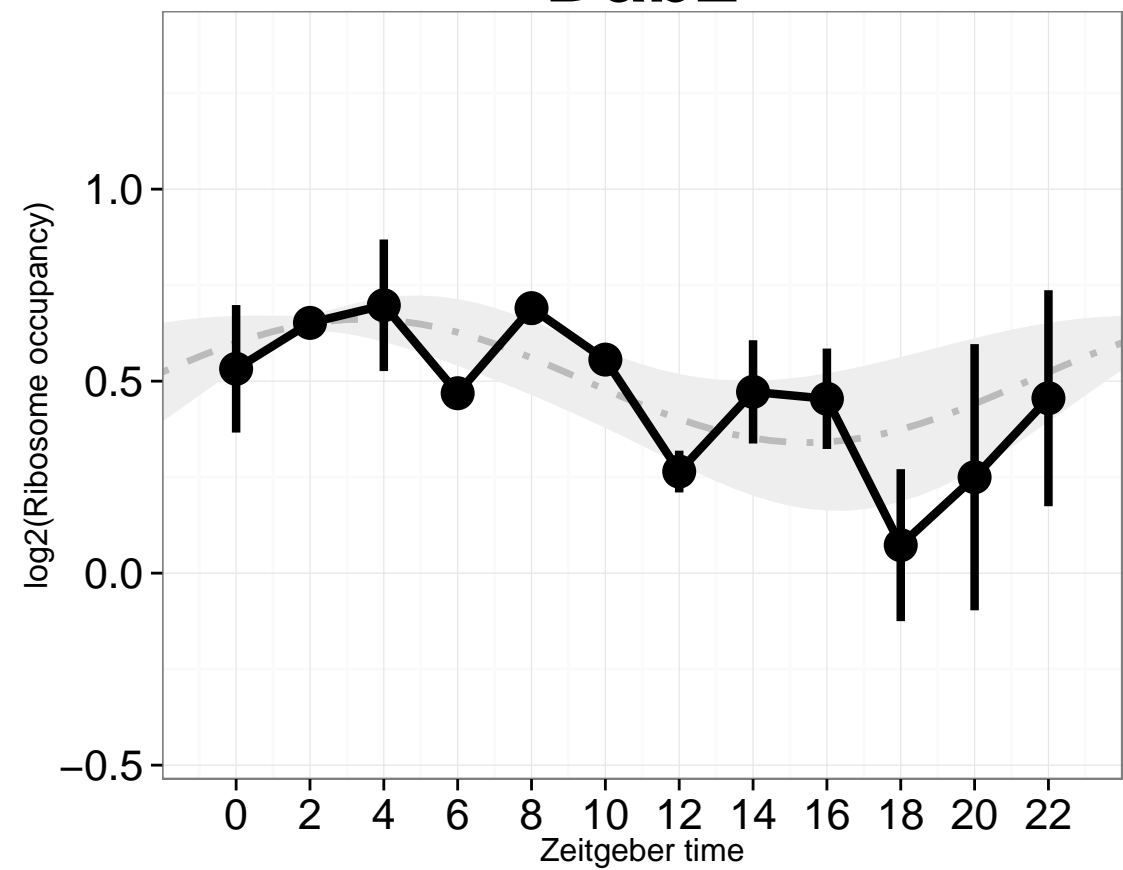

Supplement: SuppDataset_1.zip [file Dab2_set_A.pdf › Supplemental Dataset 1/A-mRNA_nonrhyth_translation_nonrhyth/Dab2_set_A.pdf]

# Dab2ip

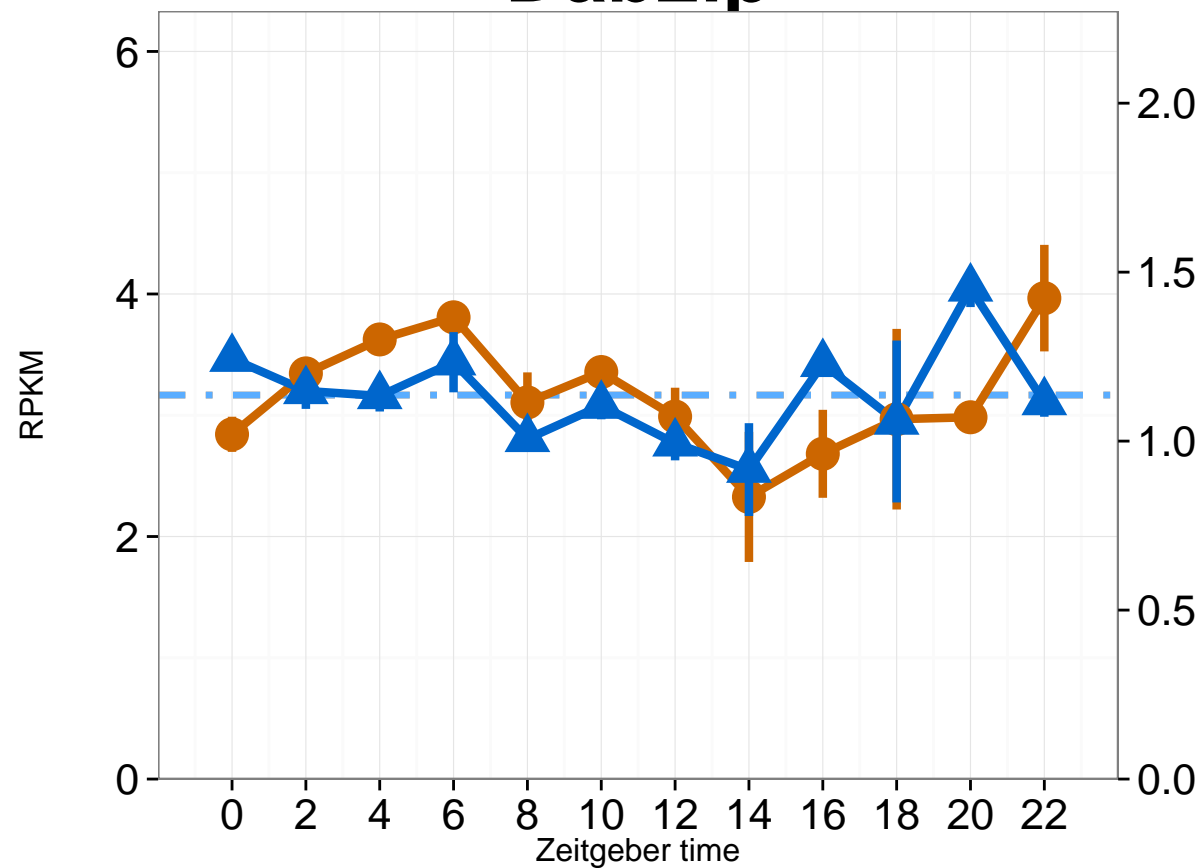

# Dab2ip

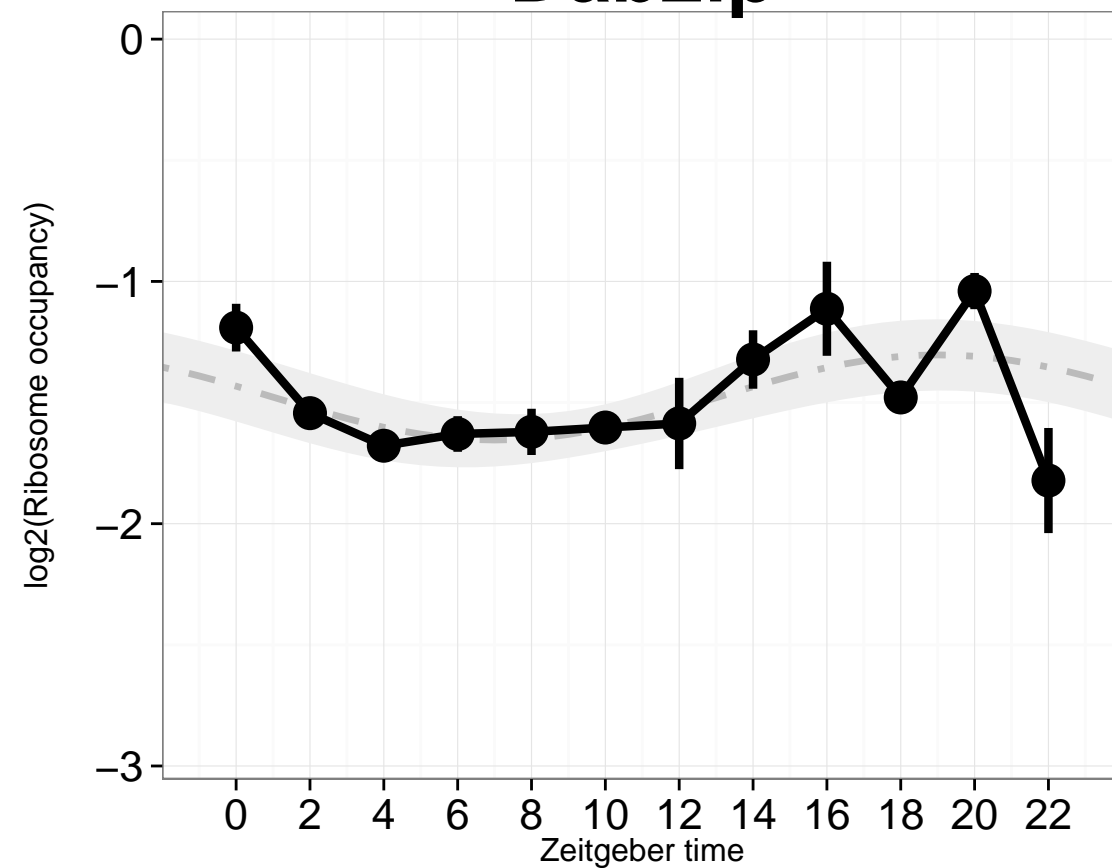

Supplement: SuppDataset_1.zip [file Dab2ip_set_A.pdf › Supplemental Dataset 1/A-mRNA_nonrhyth_translation_nonrhyth/Dab2ip_set_A.pdf]

## Dad1

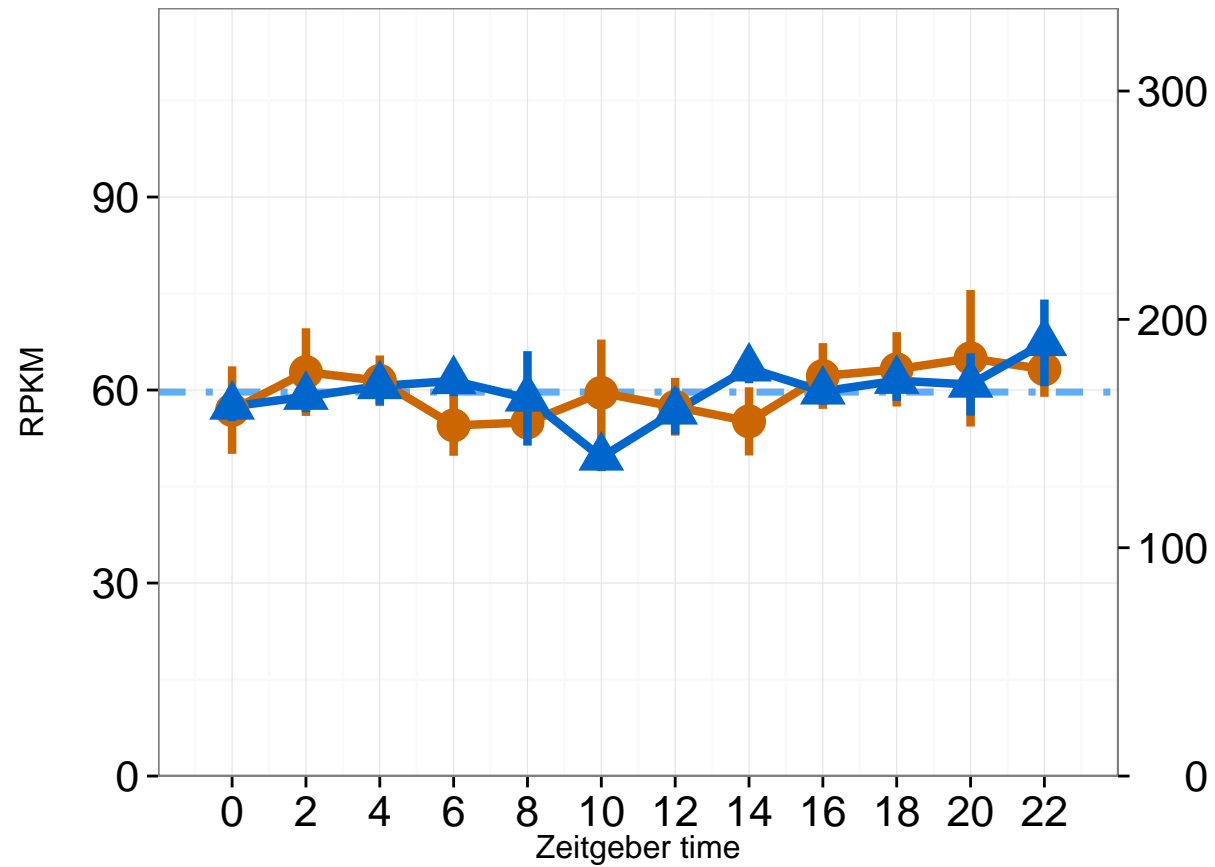

## Dad1

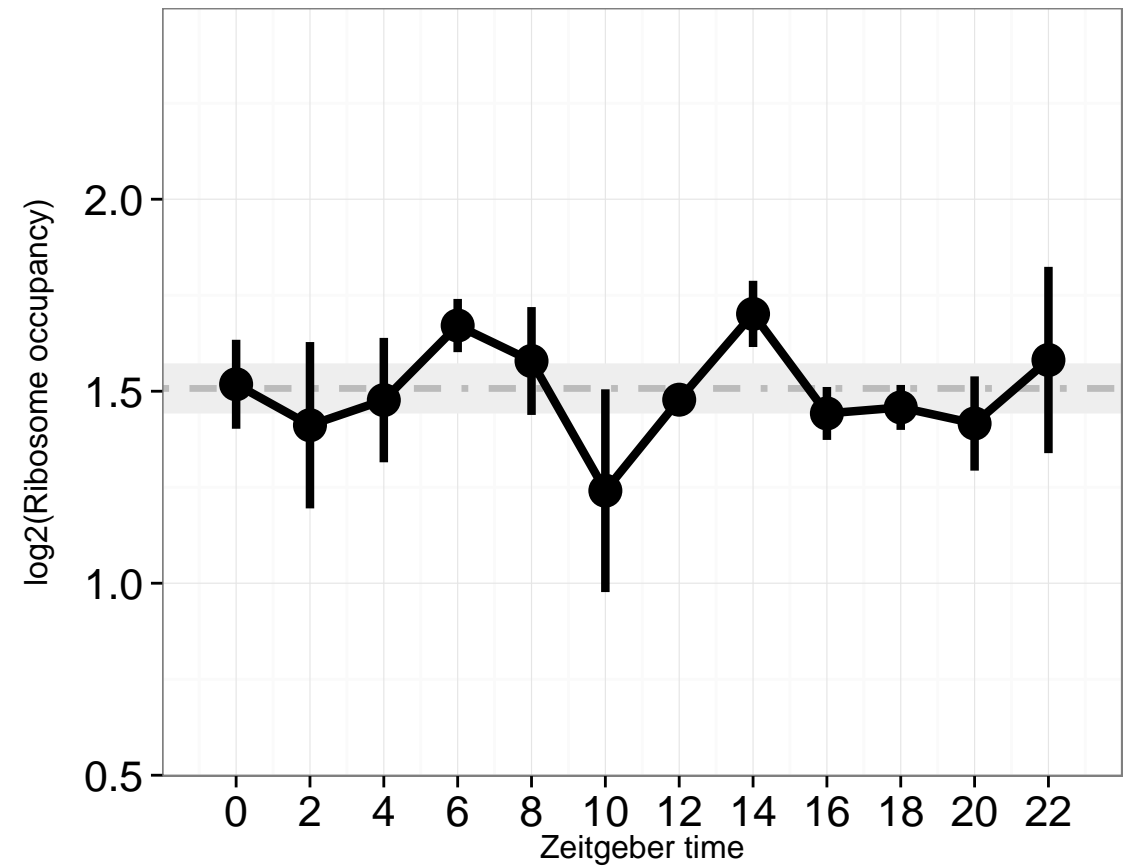

Supplement: SuppDataset_1.zip [file Dad1_set_A.pdf › Supplemental Dataset 1/A-mRNA_nonrhyth_translation_nonrhyth/Dad1_set_A.pdf]

# Dag1

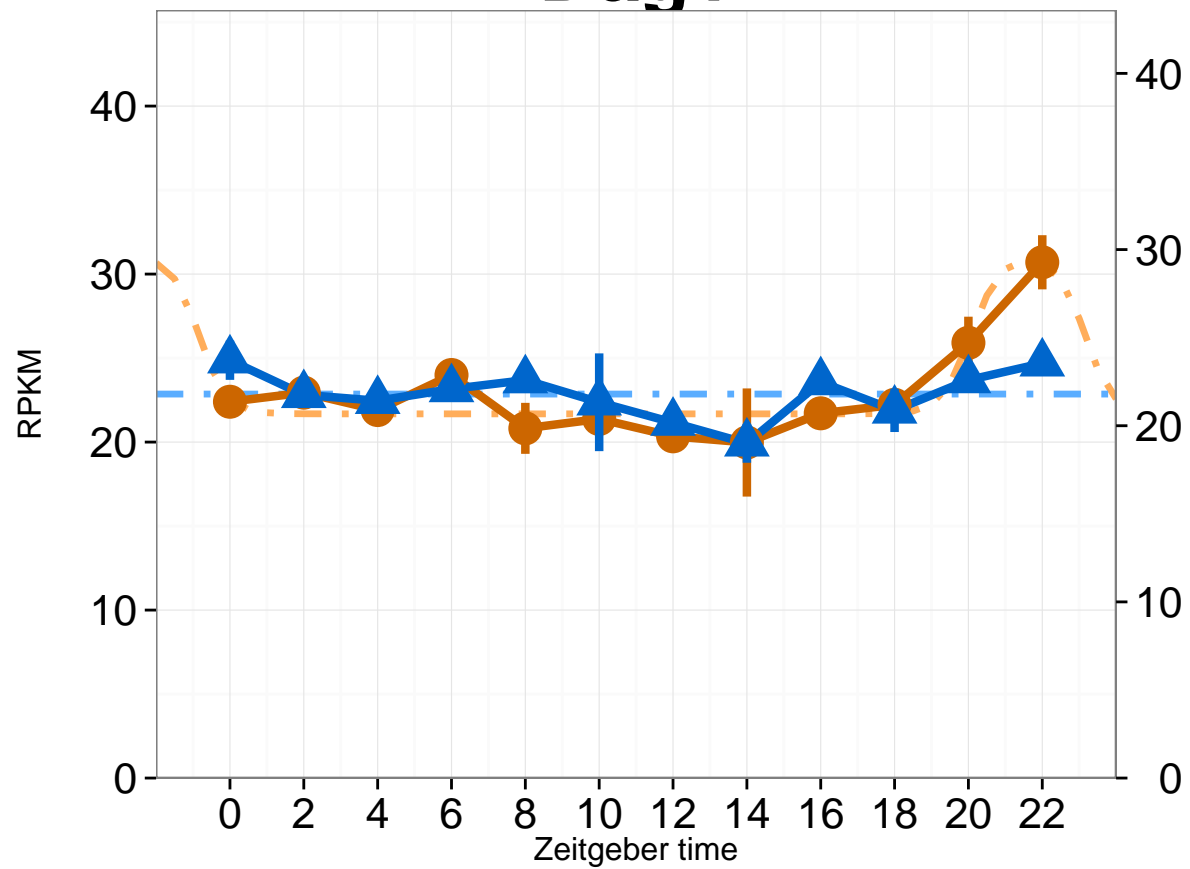

# Dag1

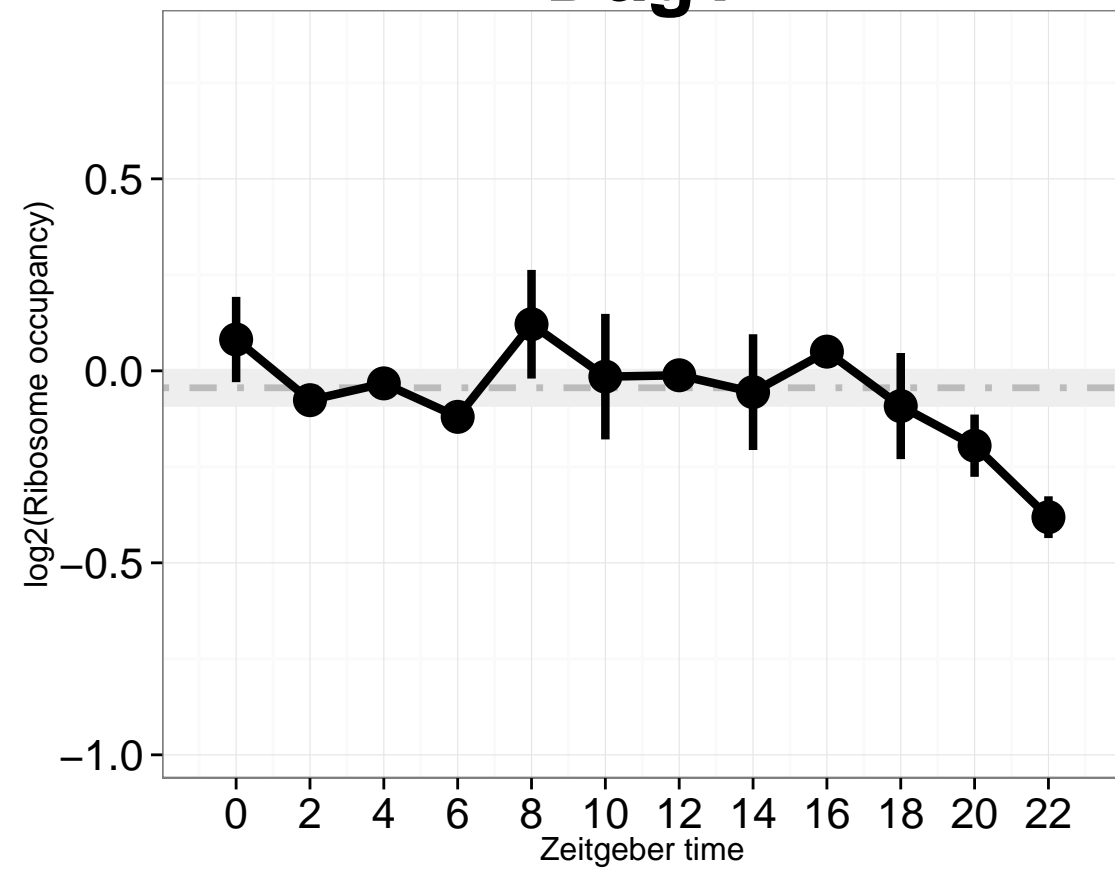

Supplement: SuppDataset_1.zip [file Dag1_set_A.pdf › Supplemental Dataset 1/A-mRNA_nonrhyth_translation_nonrhyth/Dag1_set_A.pdf]

# Daglb

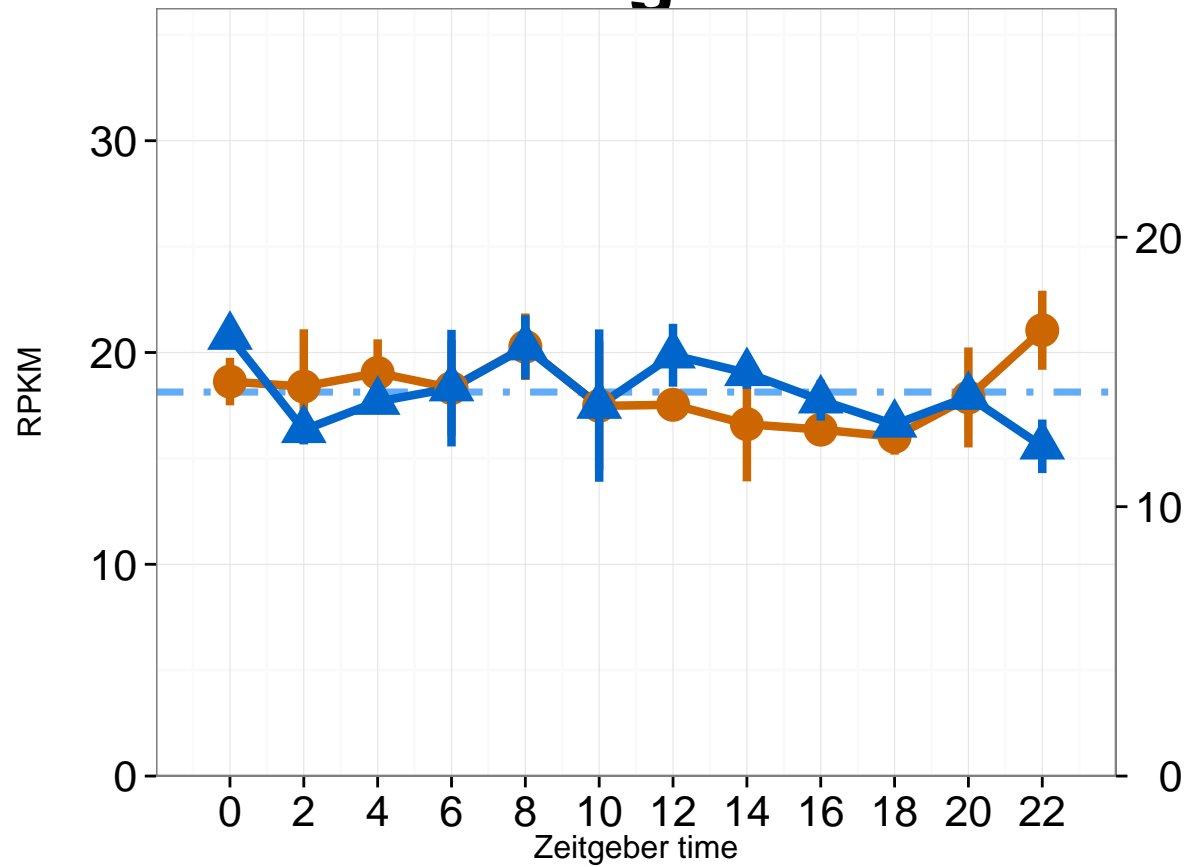

# Daglb

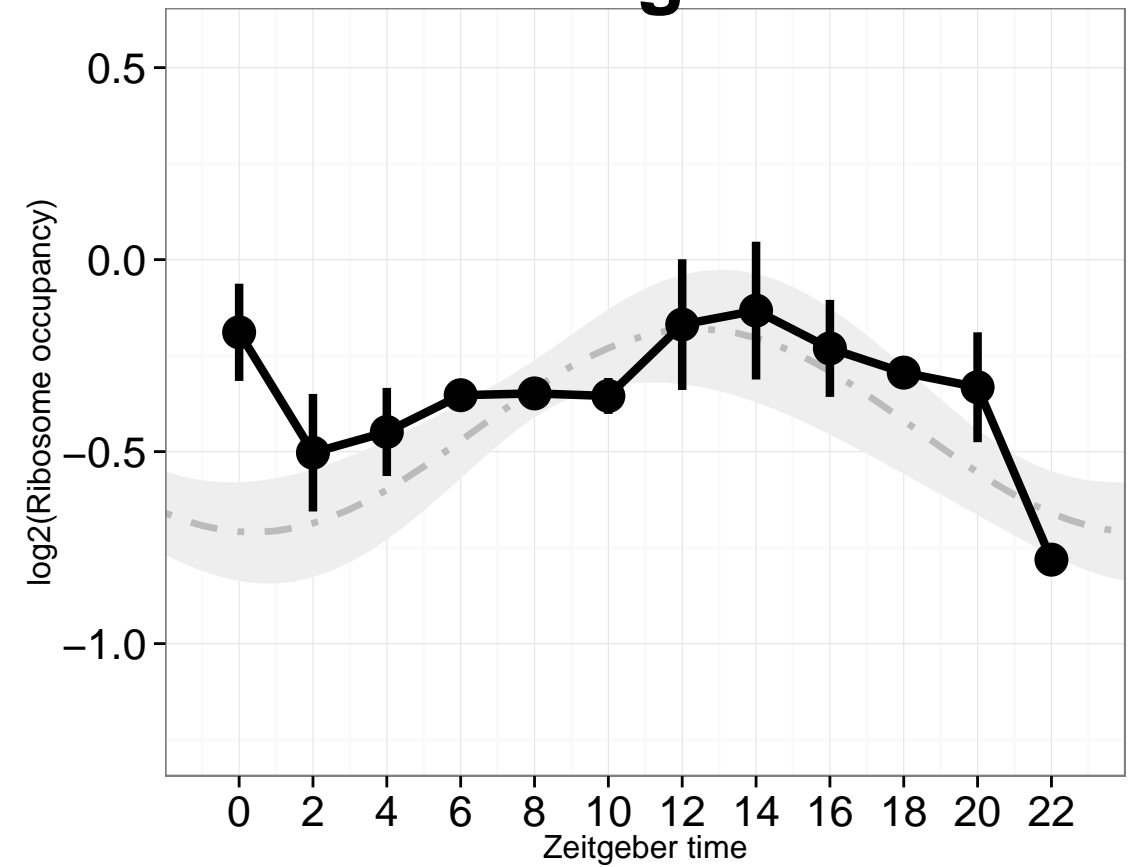

Supplement: SuppDataset_1.zip [file Daglb_set_A.pdf › Supplemental Dataset 1/A-mRNA_nonrhyth_translation_nonrhyth/Daglb_set_A.pdf]

# Dalrd3

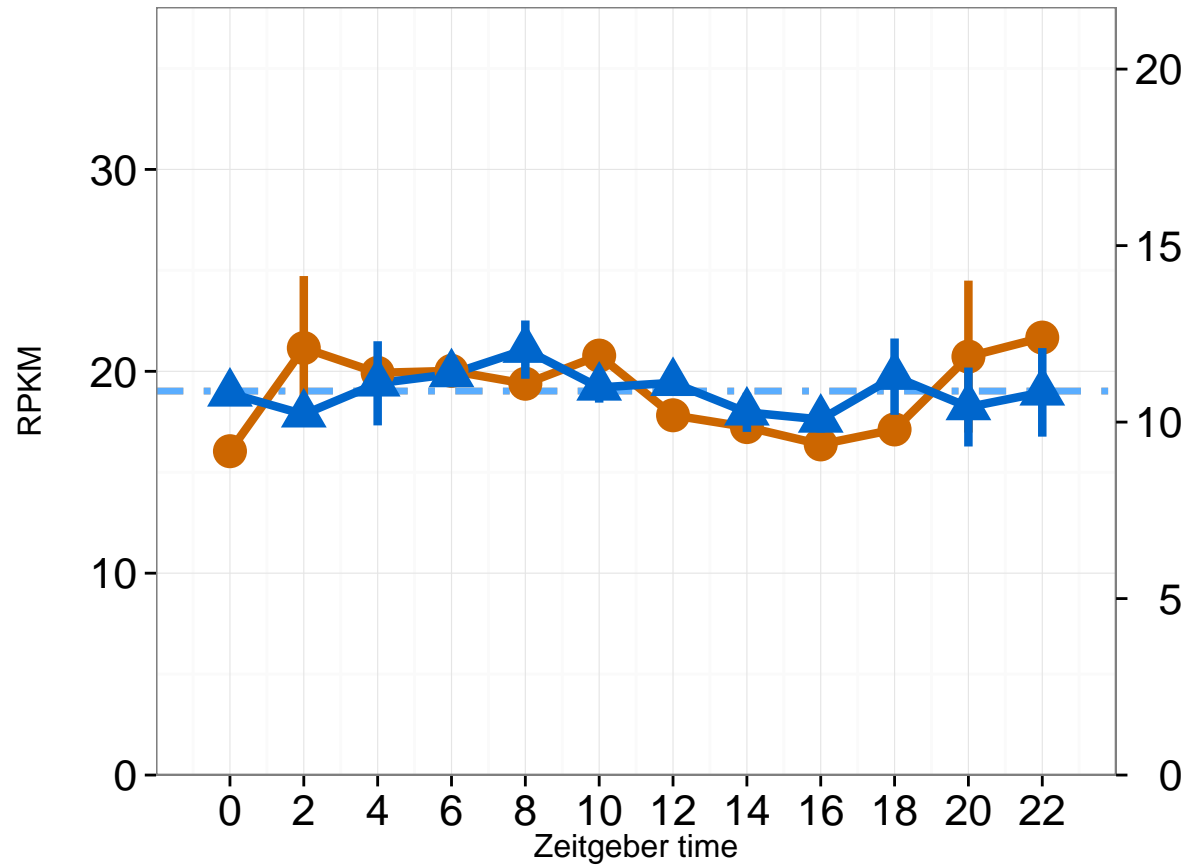

# Dalrd3

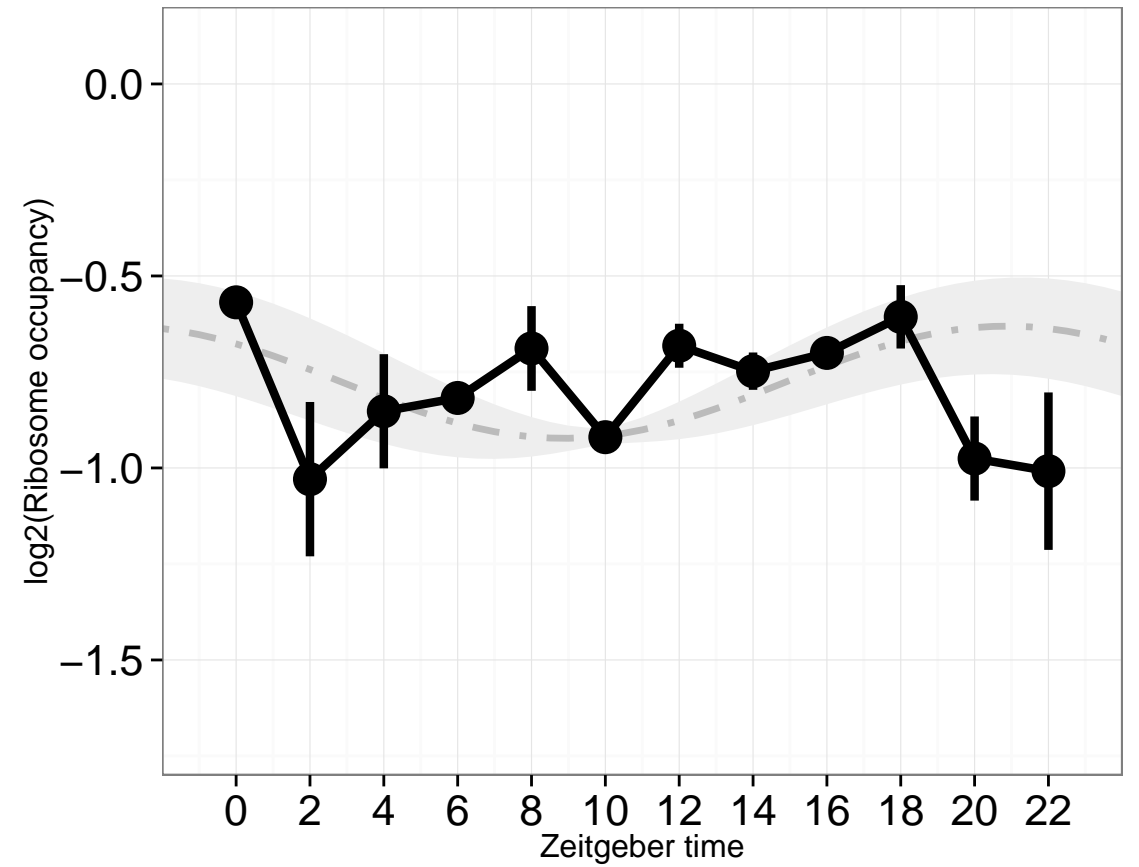

Supplement: SuppDataset_1.zip [file Dalrd3_set_A.pdf › Supplemental Dataset 1/A-mRNA_nonrhyth_translation_nonrhyth/Dalrd3_set_A.pdf]

# Dap3

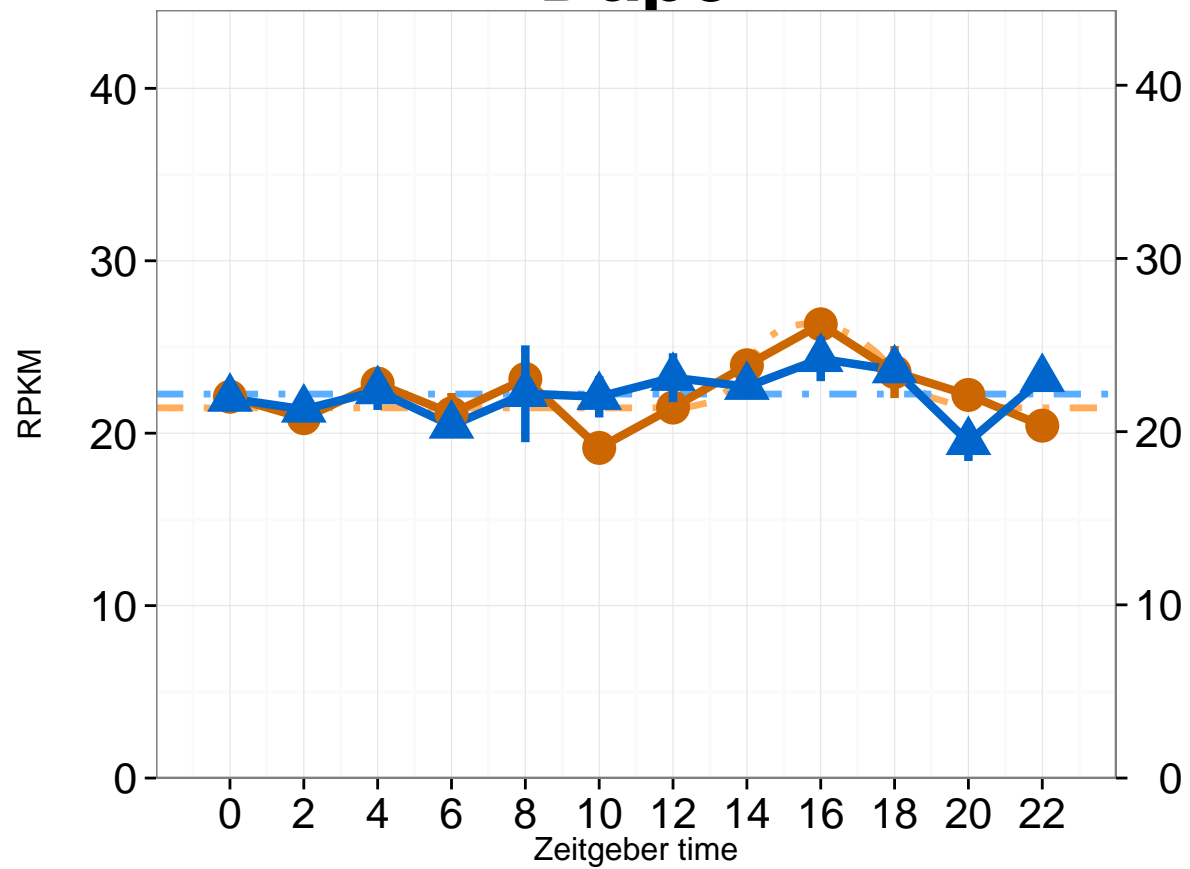

# Dap3

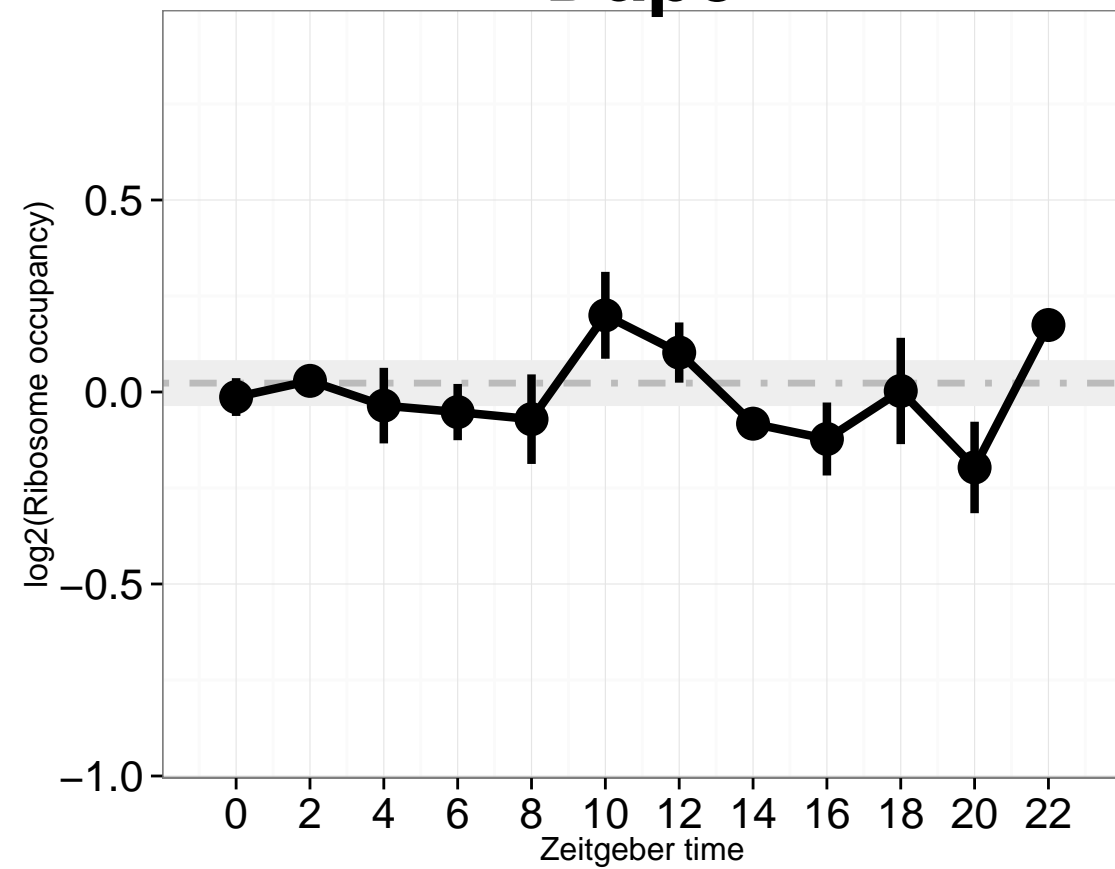

Supplement: SuppDataset_1.zip [file Dap3_set_A.pdf › Supplemental Dataset 1/A-mRNA_nonrhyth_translation_nonrhyth/Dap3_set_A.pdf]

## Dapk2

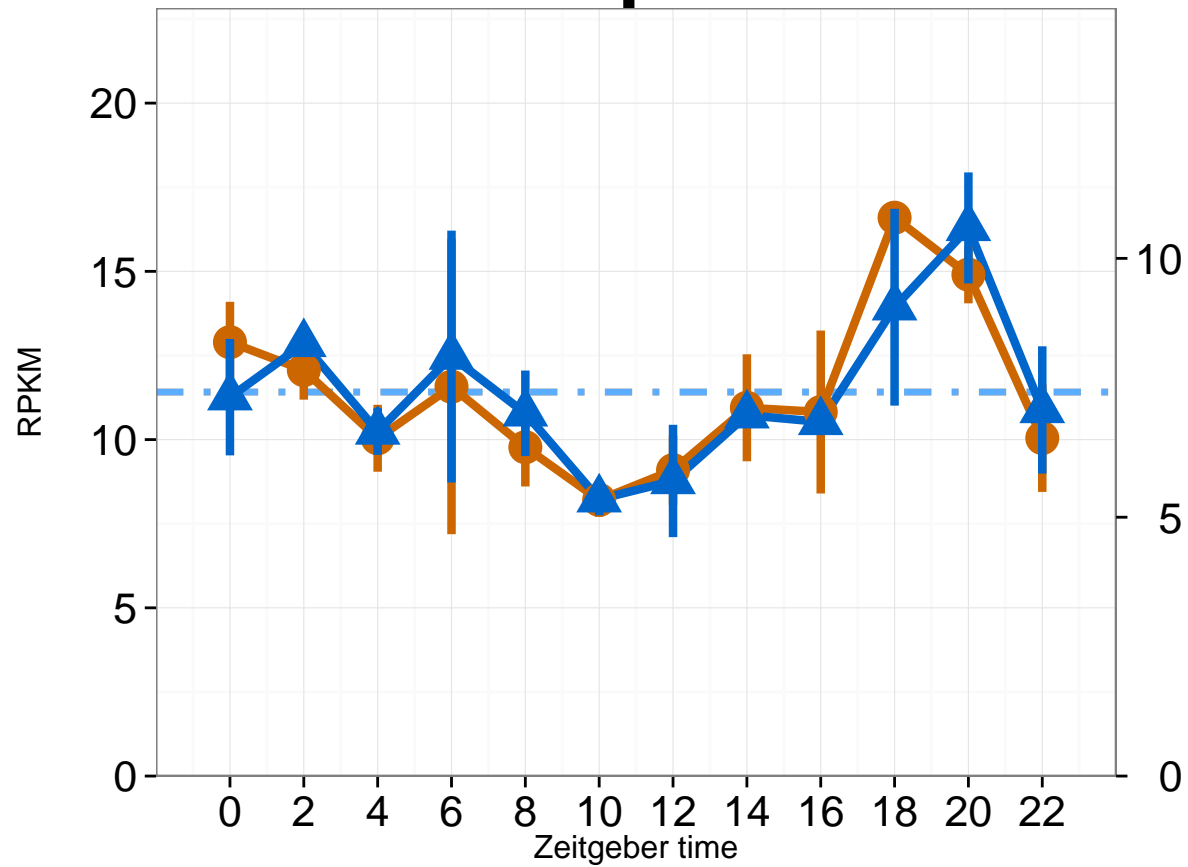

## Dapk2

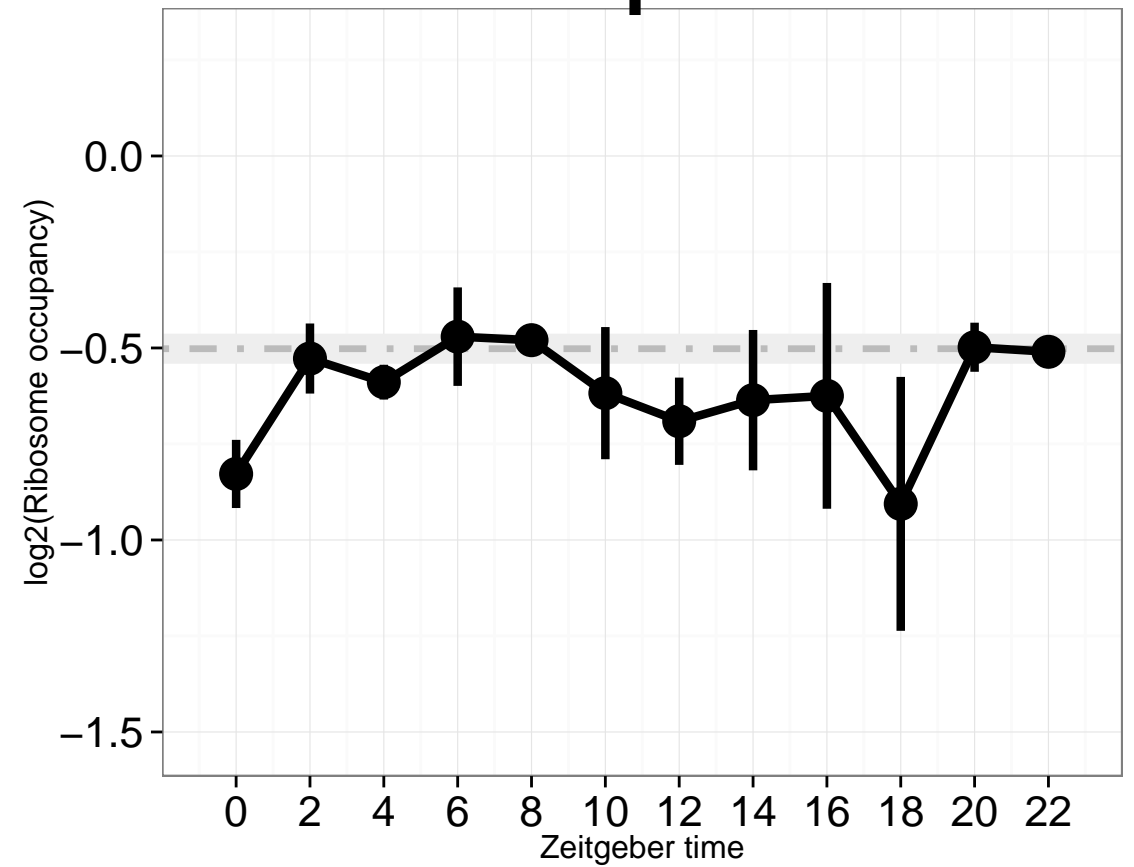

Supplement: SuppDataset_1.zip [file Dapk2_set_A.pdf › Supplemental Dataset 1/A-mRNA_nonrhyth_translation_nonrhyth/Dapk2_set_A.pdf]

## Dapk3

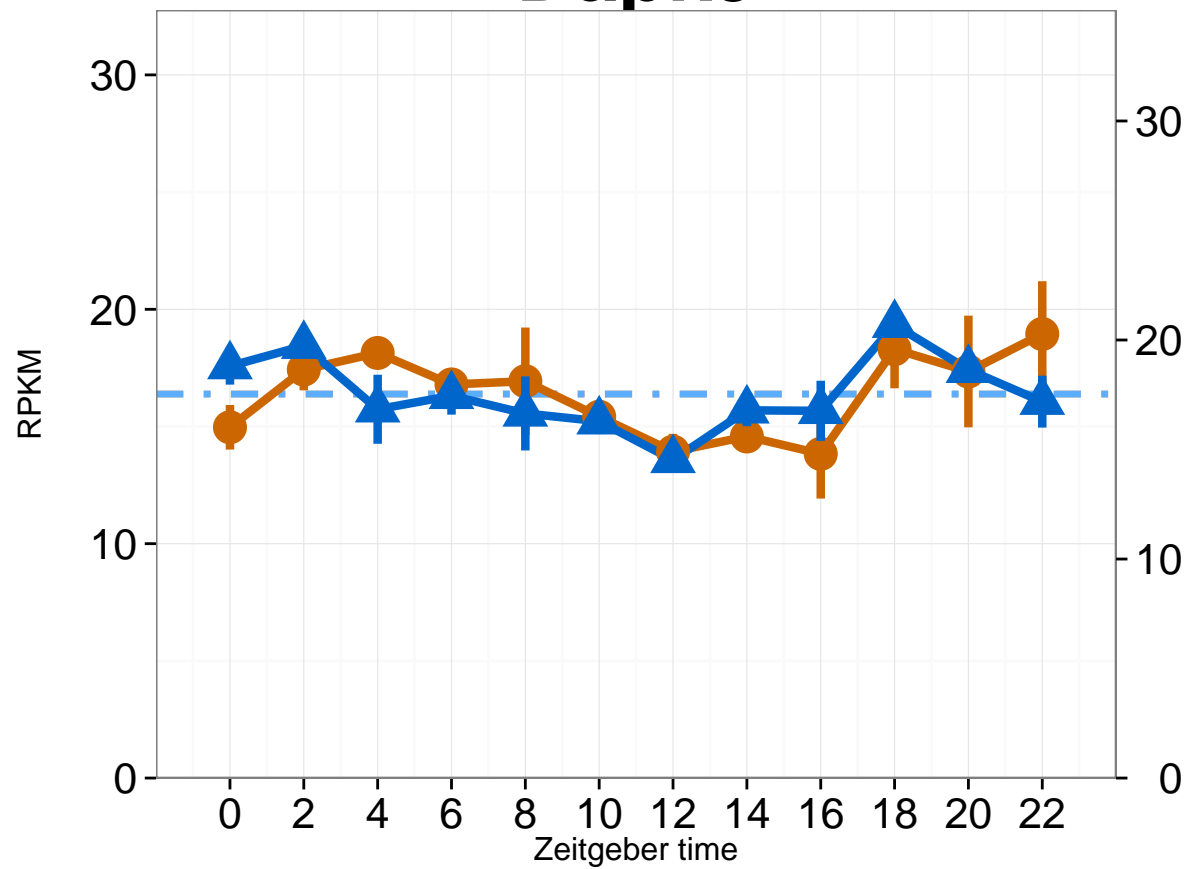

## Dapk3

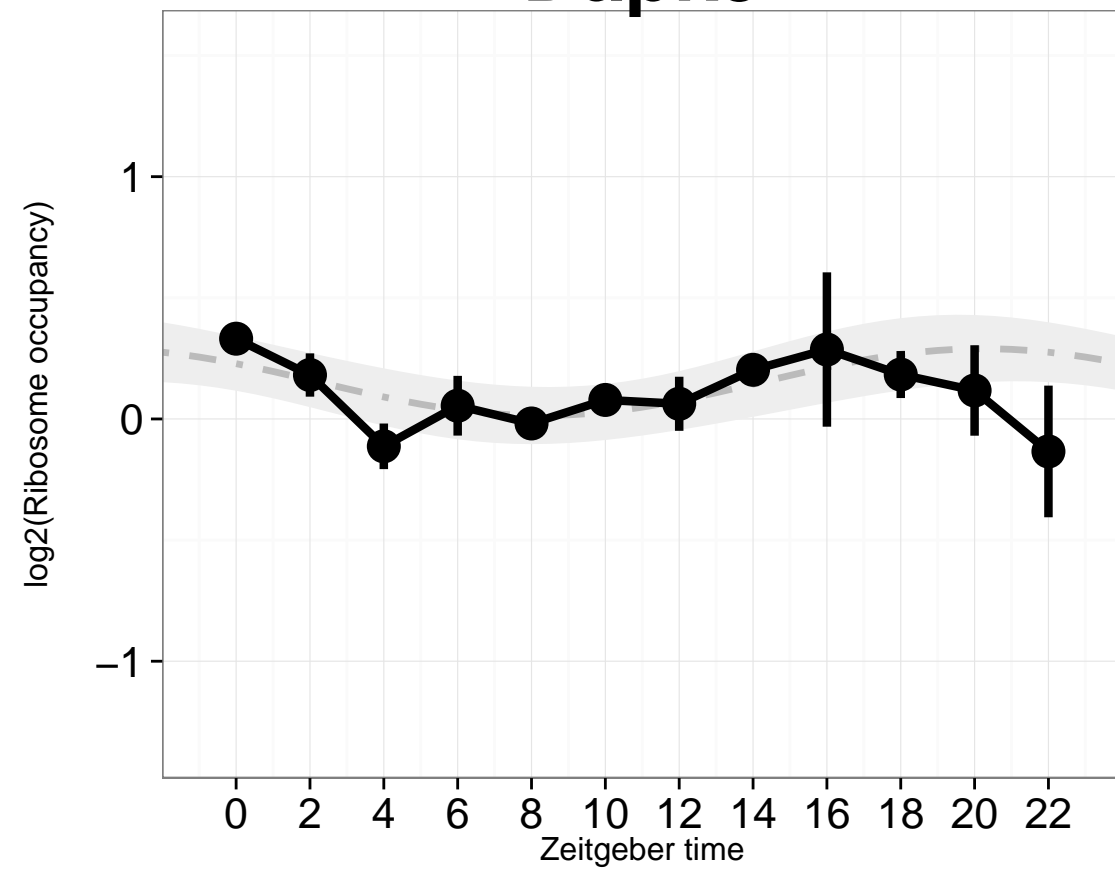

Supplement: SuppDataset_1.zip [file Dapk3_set_A.pdf › Supplemental Dataset 1/A-mRNA_nonrhyth_translation_nonrhyth/Dapk3_set_A.pdf]

# Dapp1

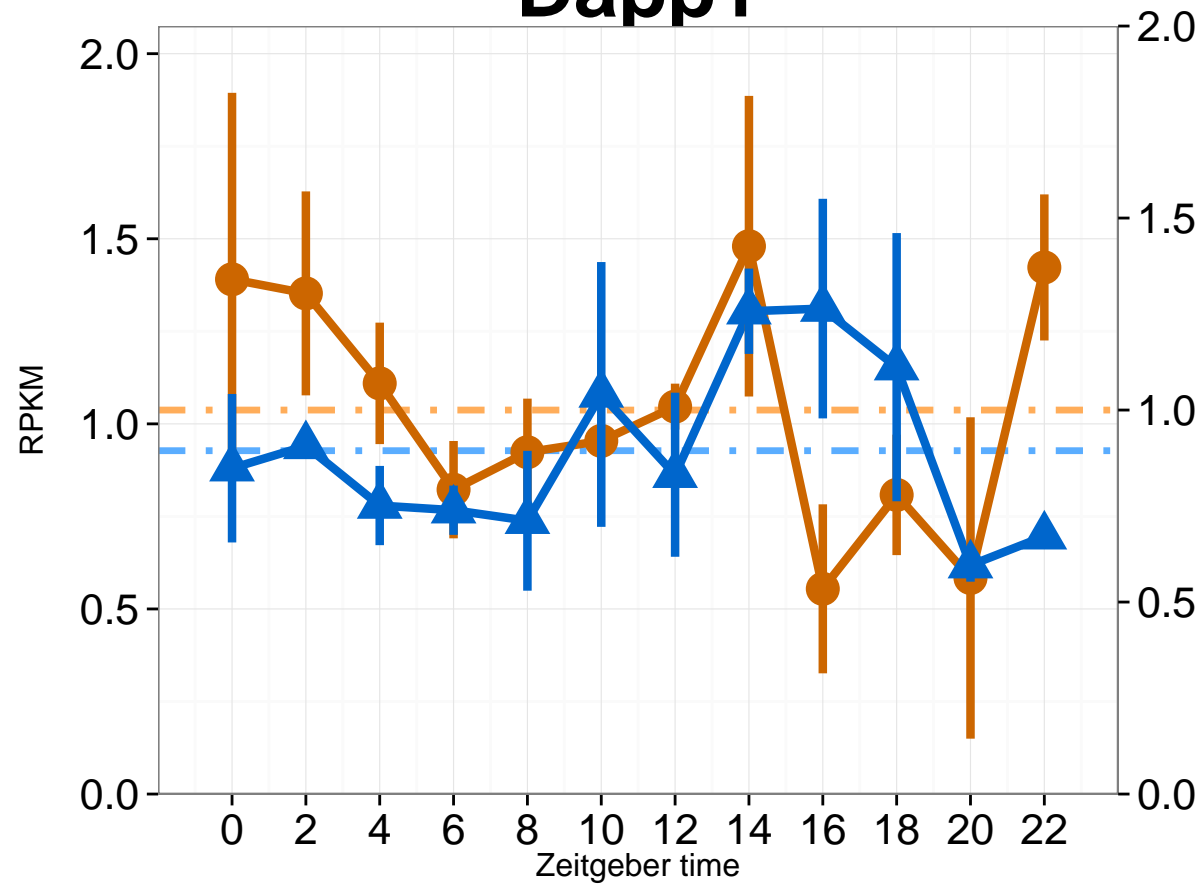

# Dapp1

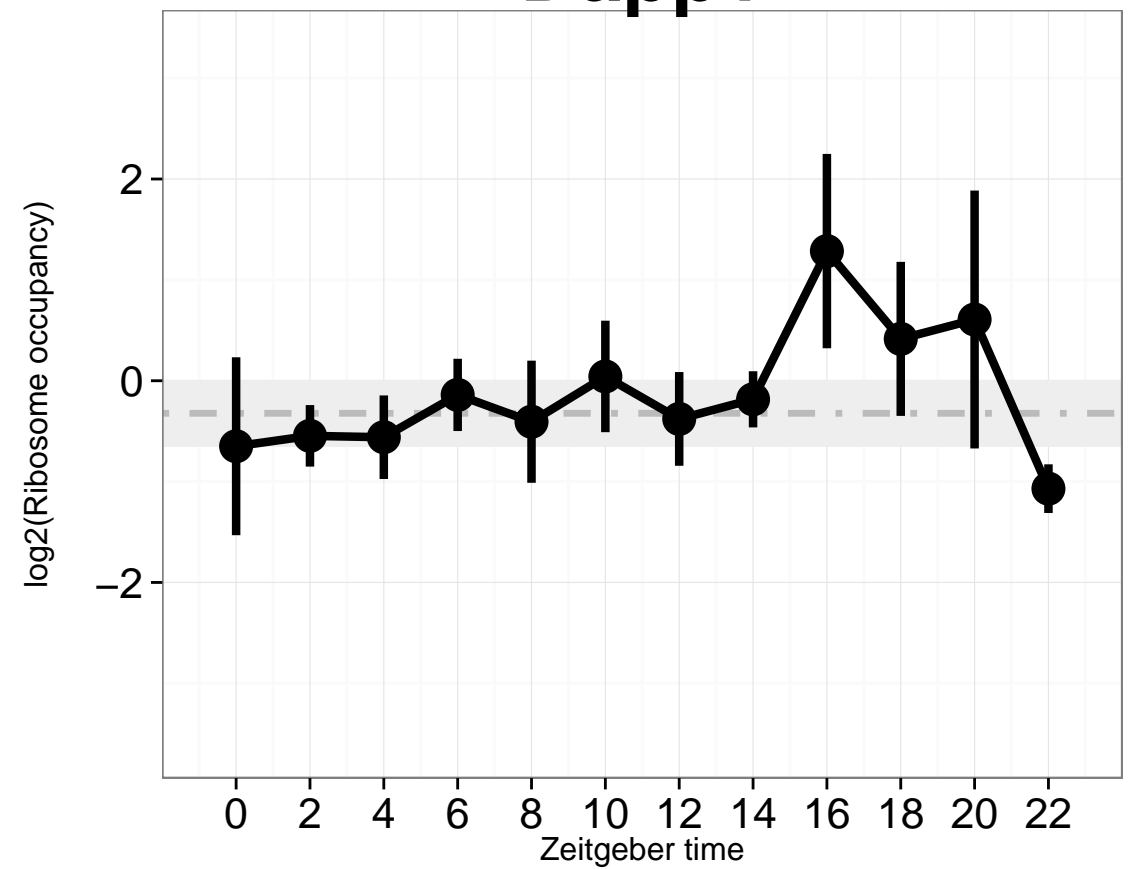

Supplement: SuppDataset_1.zip [file Dapp1_set_A.pdf › Supplemental Dataset 1/A-mRNA_nonrhyth_translation_nonrhyth/Dapp1_set_A.pdf]

## Darc

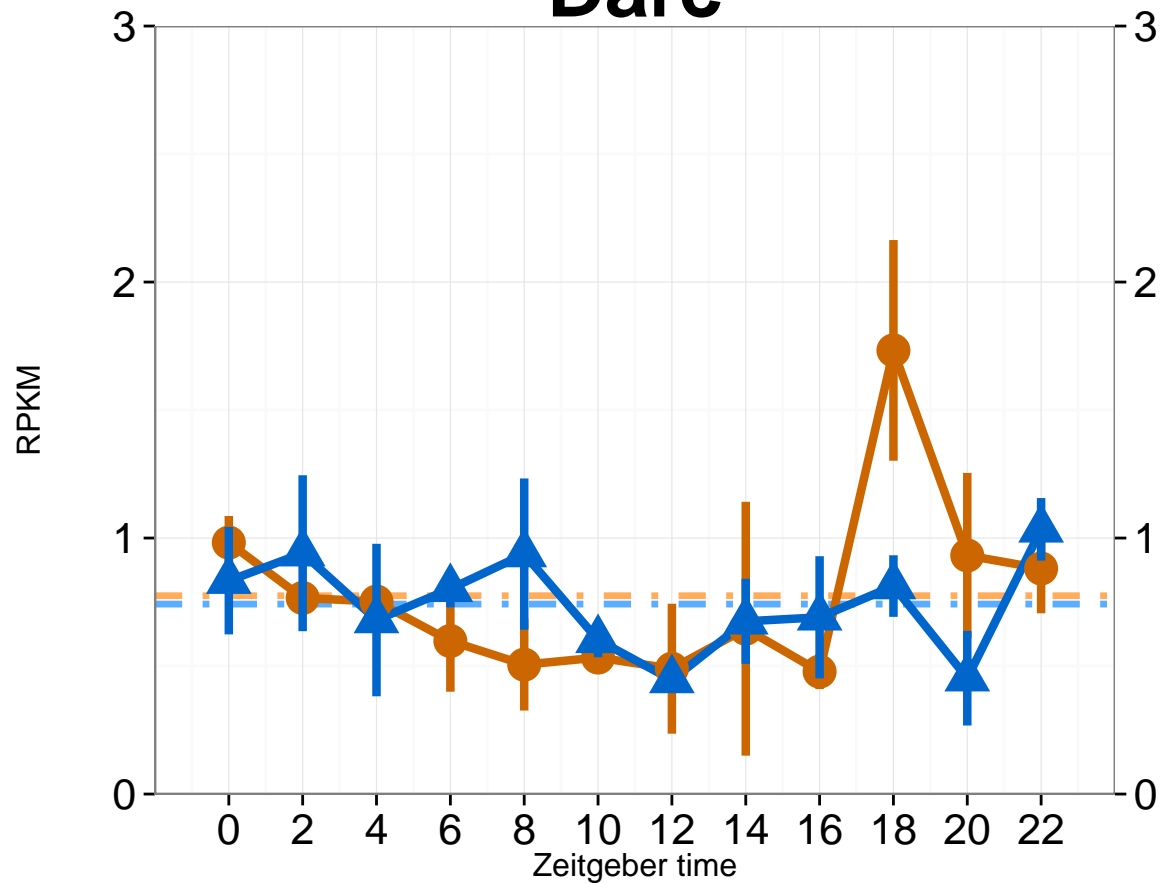

## Darc

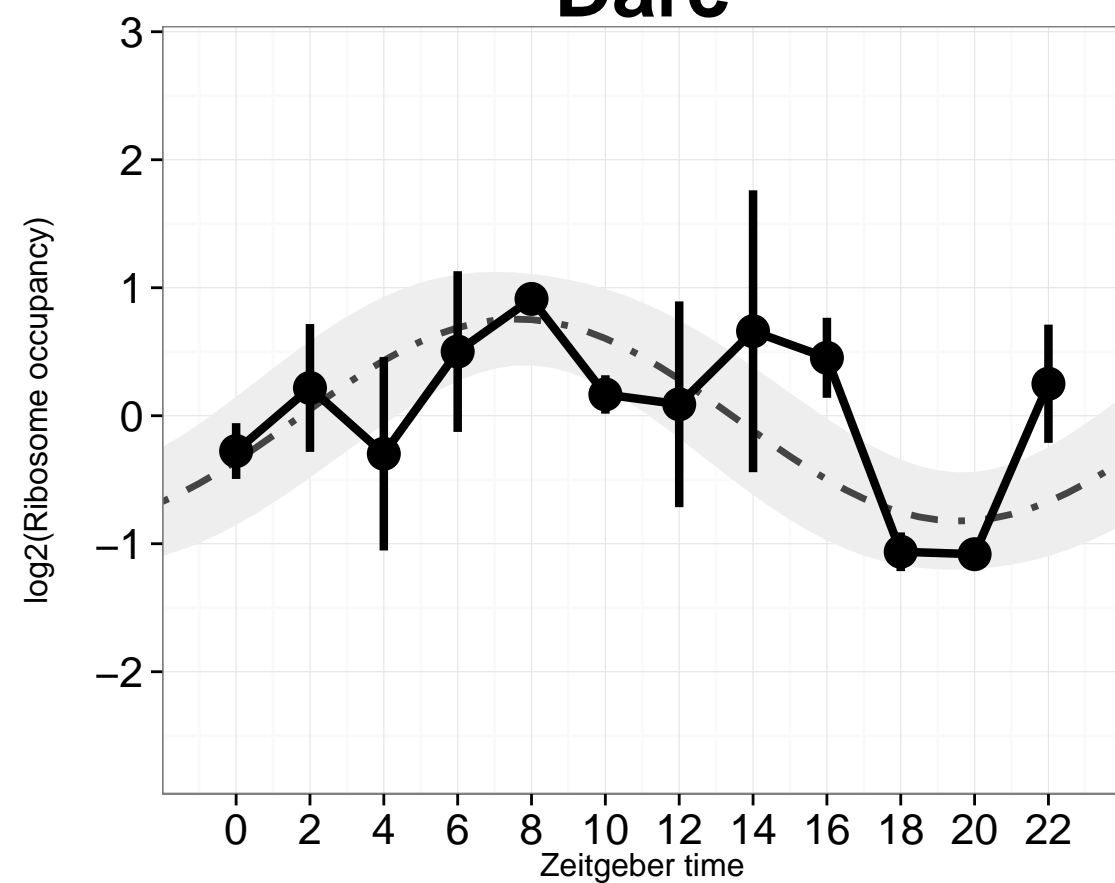

Supplement: SuppDataset_1.zip [file Darc_set_A.pdf › Supplemental Dataset 1/A-mRNA_nonrhyth_translation_nonrhyth/Darc_set_A.pdf]

## Dars2

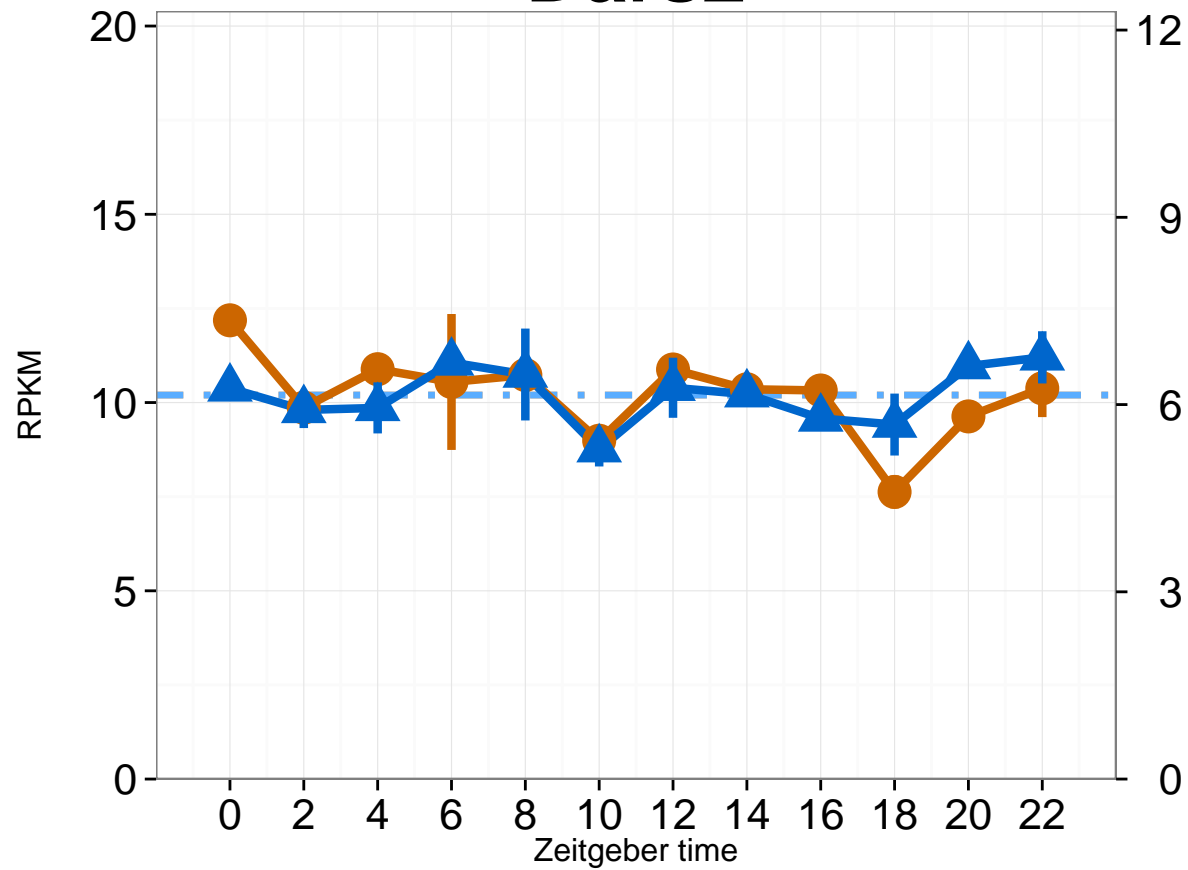

## Dars2

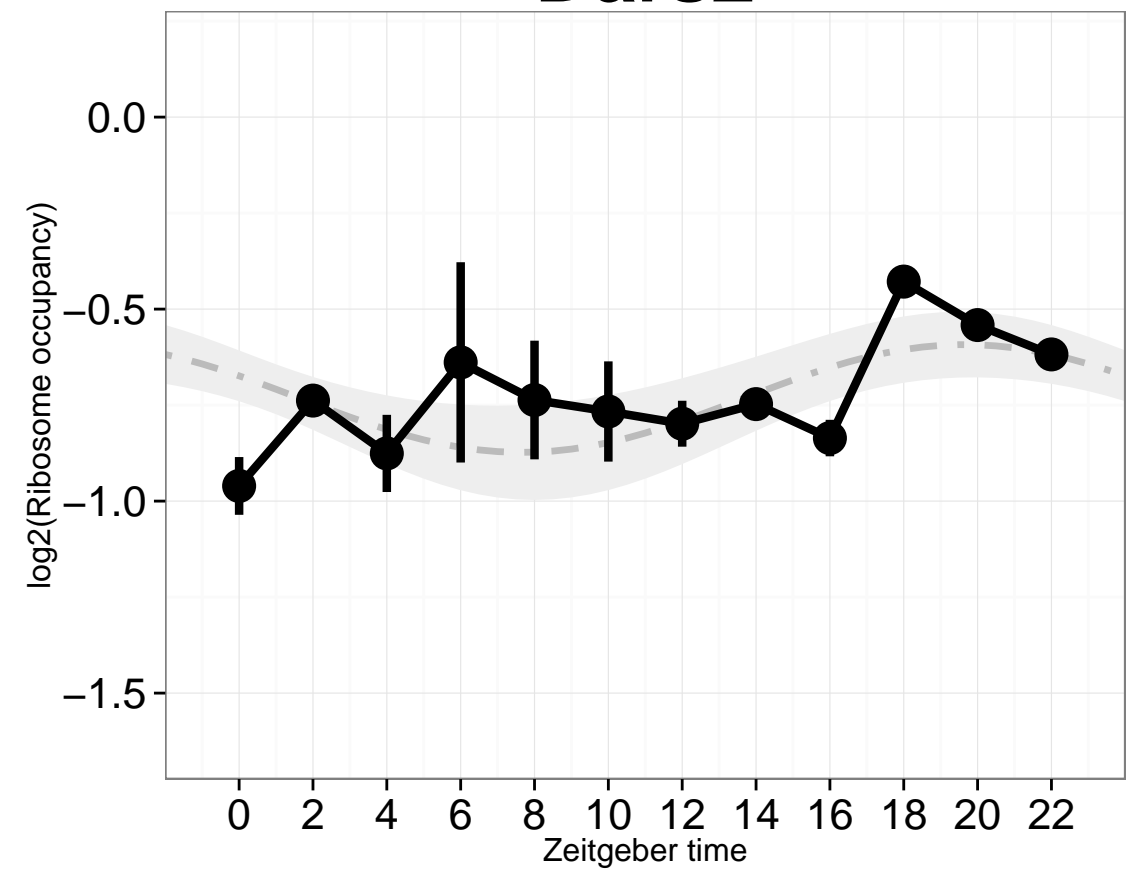

Supplement: SuppDataset_1.zip [file Dars2_set_A.pdf › Supplemental Dataset 1/A-mRNA_nonrhyth_translation_nonrhyth/Dars2_set_A.pdf]

## Dars

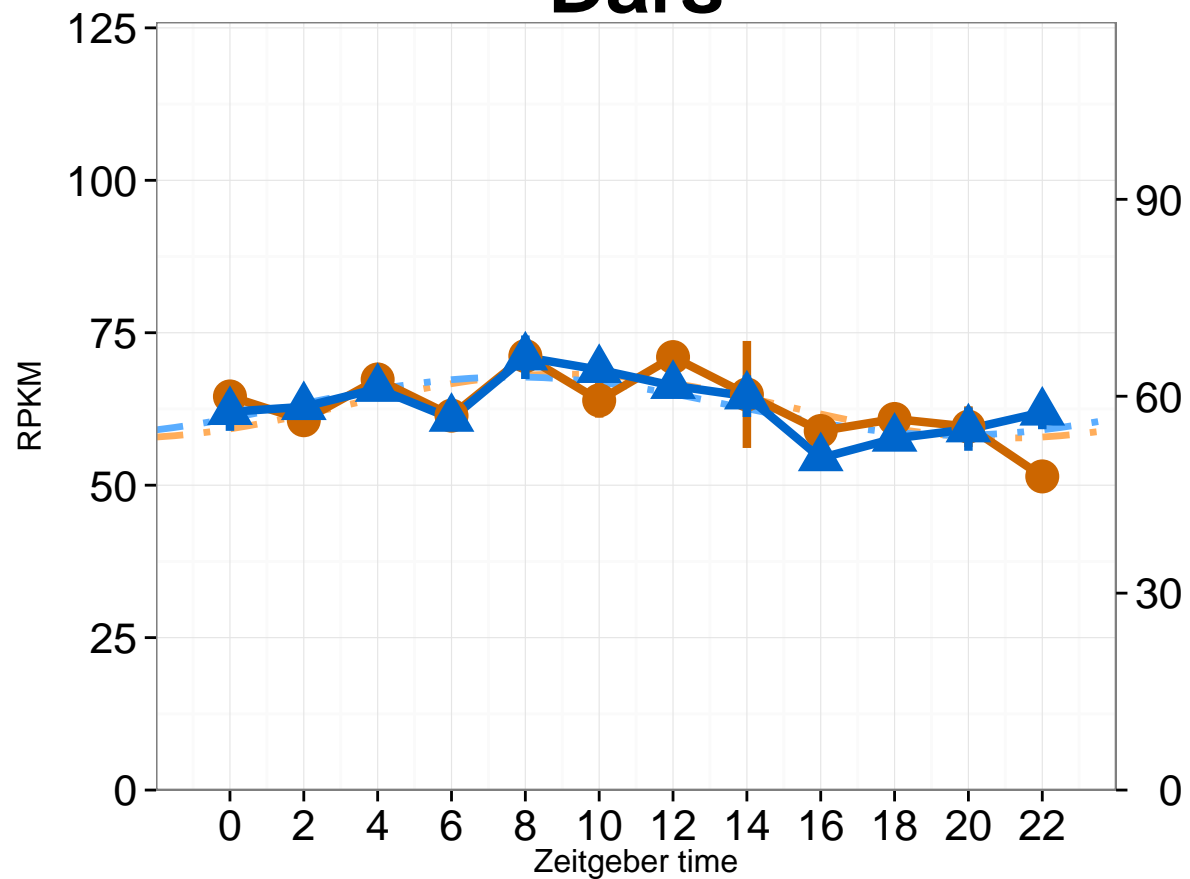

## Dars

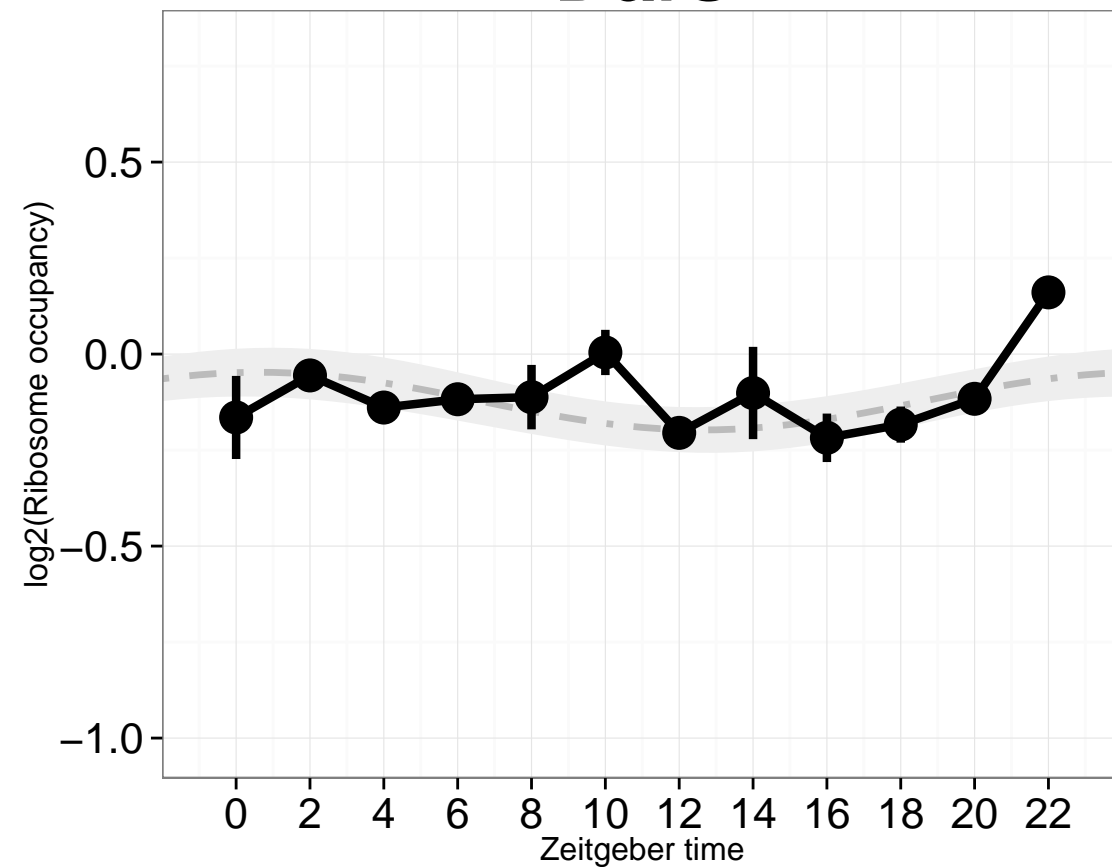

Supplement: SuppDataset_1.zip [file Dars_set_A.pdf › Supplemental Dataset 1/A-mRNA_nonrhyth_translation_nonrhyth/Dars_set_A.pdf]

## Daxx

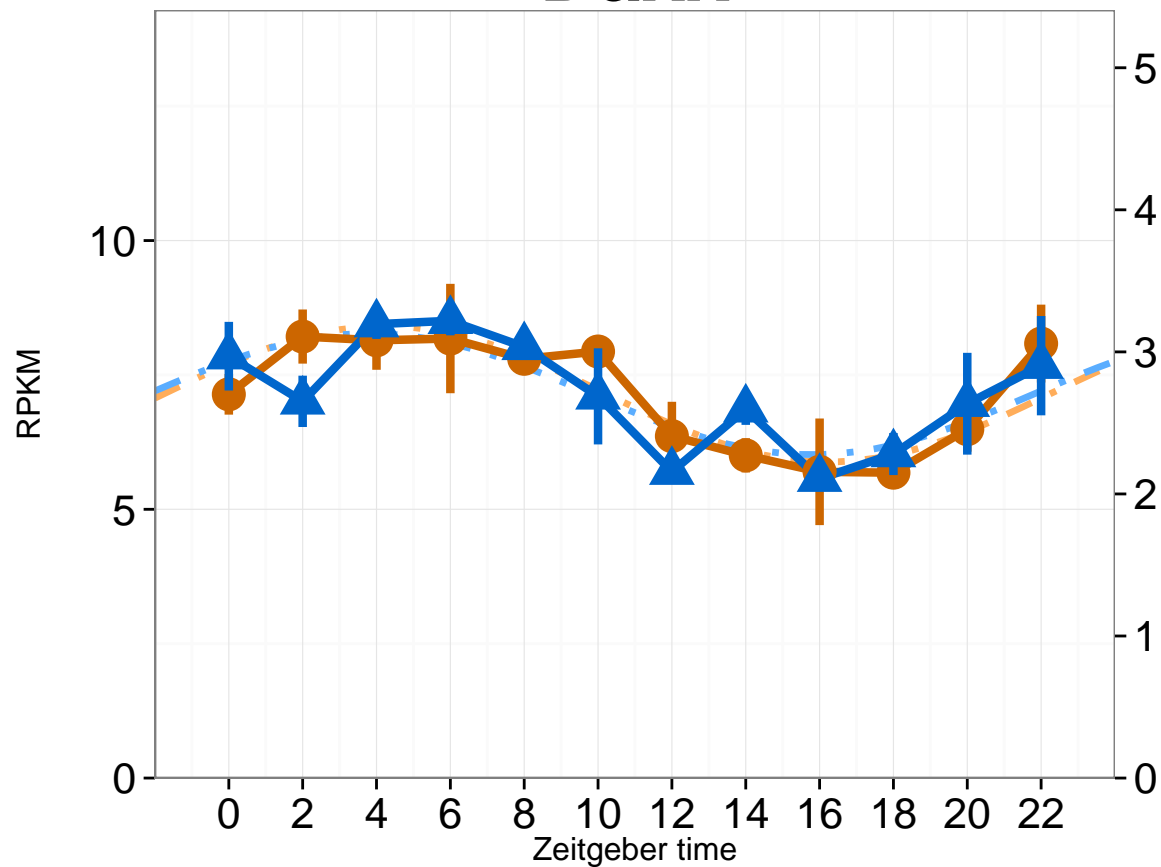

## Daxx

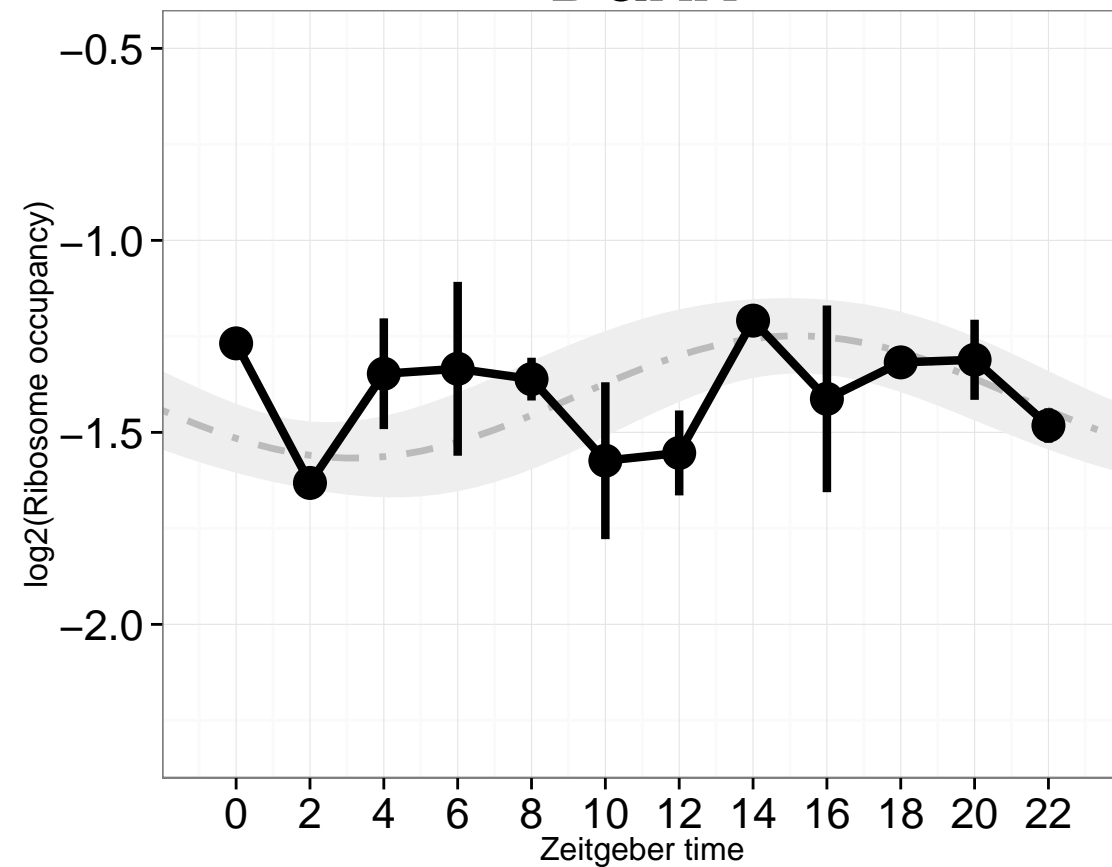

Supplement: SuppDataset_1.zip [file Daxx_set_A.pdf › Supplemental Dataset 1/A-mRNA_nonrhyth_translation_nonrhyth/Daxx_set_A.pdf]

## Dazap1

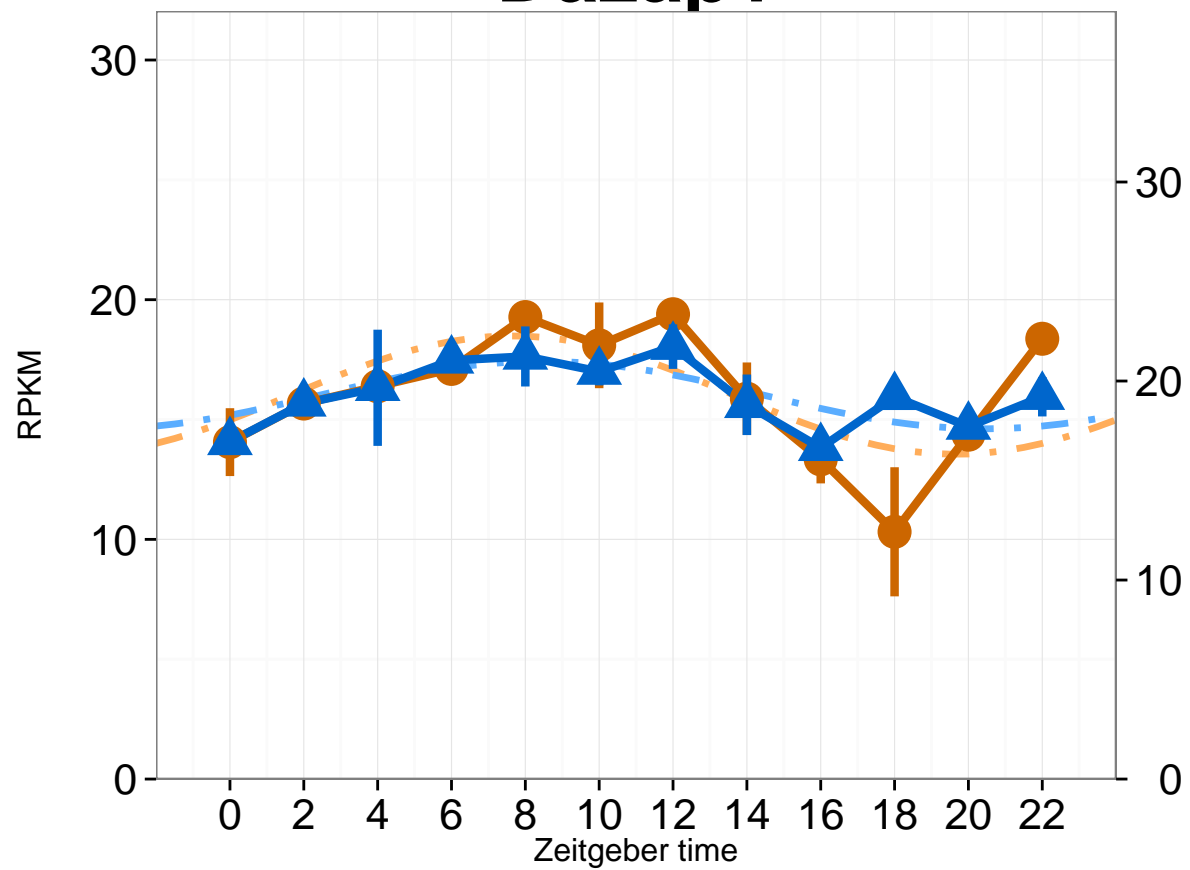

## Dazap1

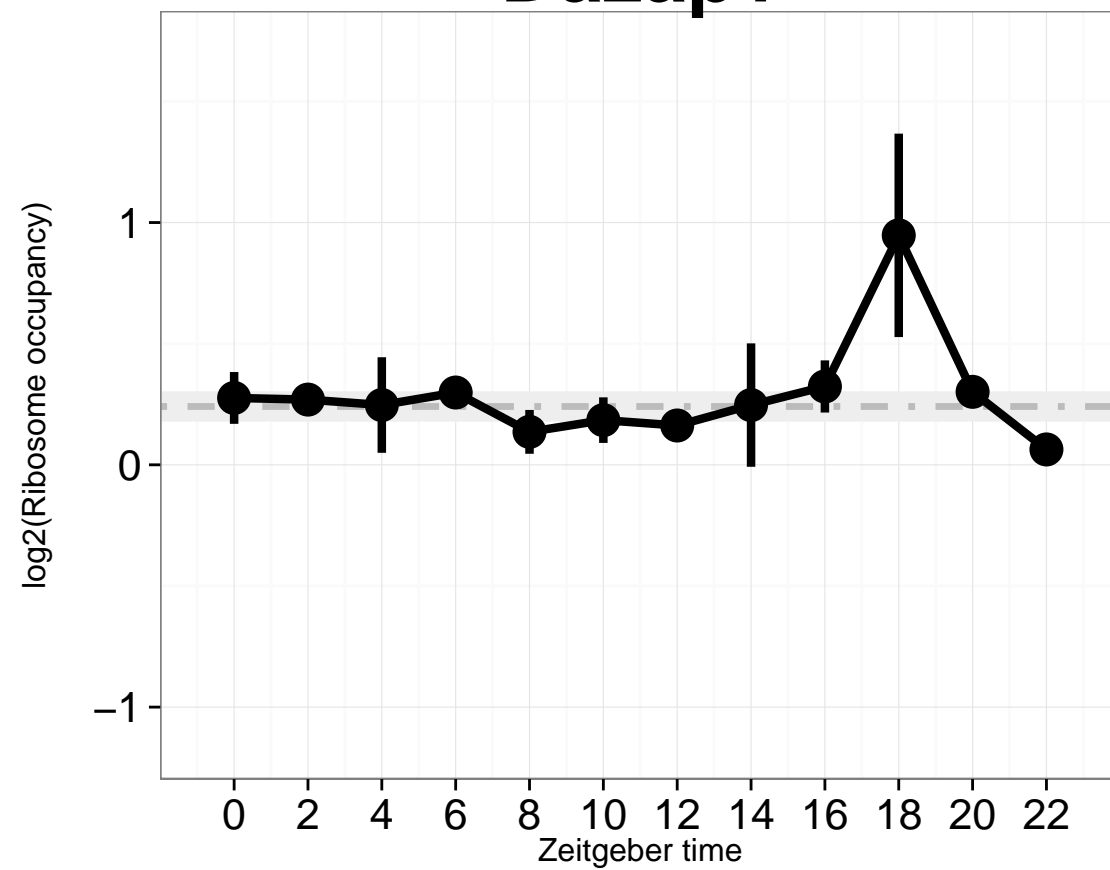

Supplement: SuppDataset_1.zip [file Dazap1_set_A.pdf › Supplemental Dataset 1/A-mRNA_nonrhyth_translation_nonrhyth/Dazap1_set_A.pdf]

## Dazap2

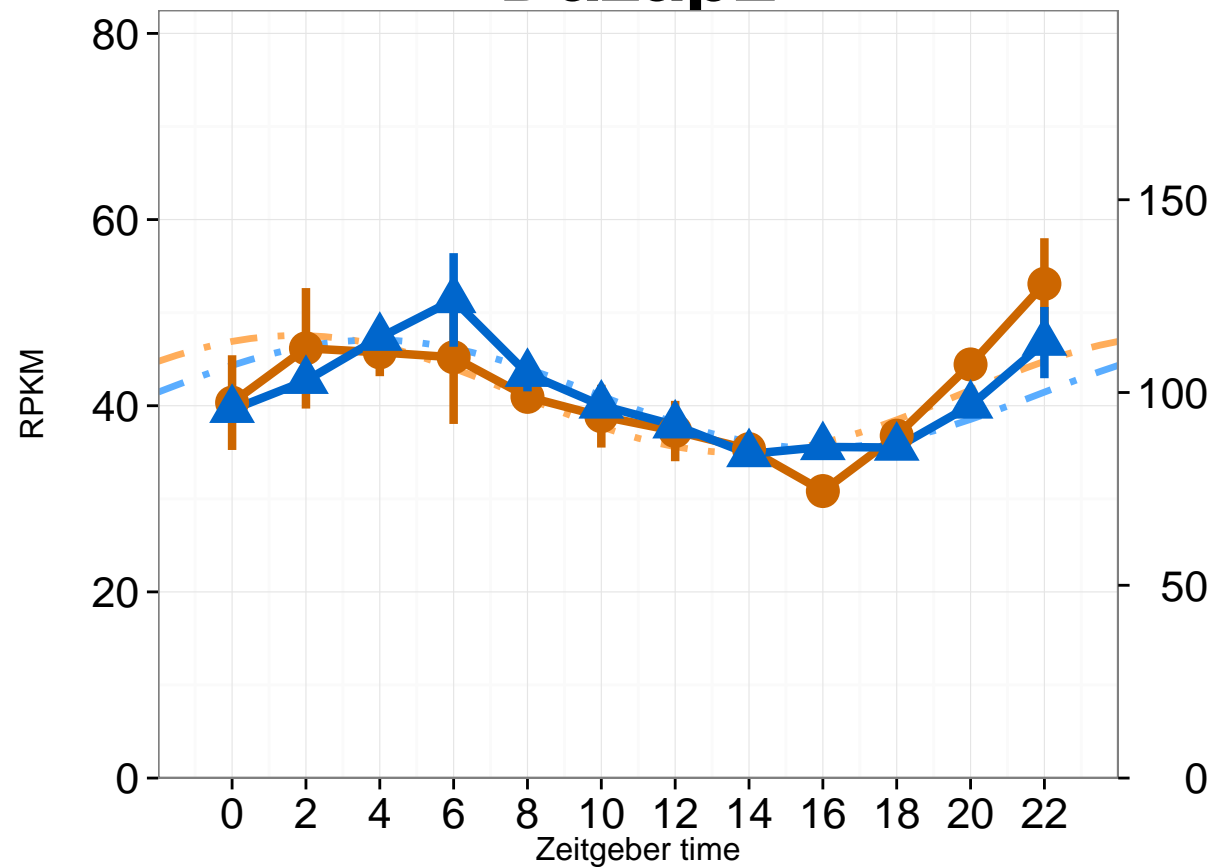

## Dazap2

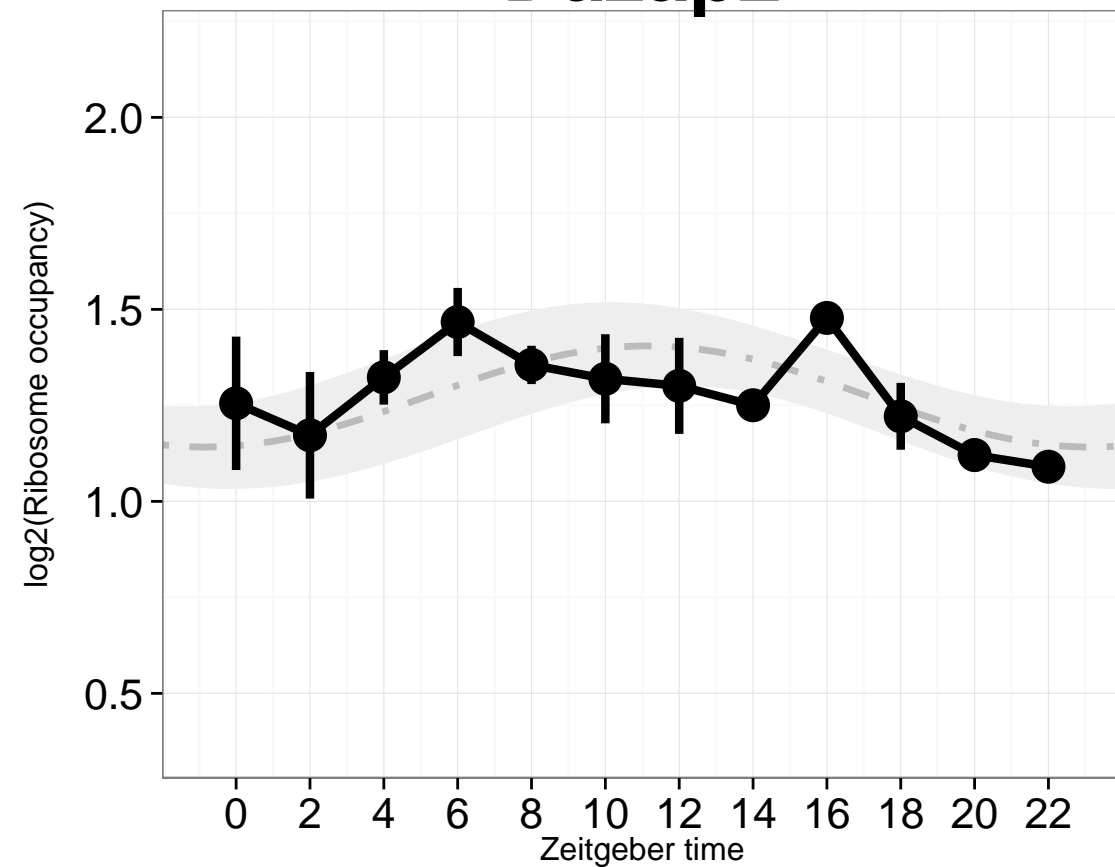

Supplement: SuppDataset_1.zip [file Dazap2_set_A.pdf › Supplemental Dataset 1/A-mRNA_nonrhyth_translation_nonrhyth/Dazap2_set_A.pdf]

## Dbi

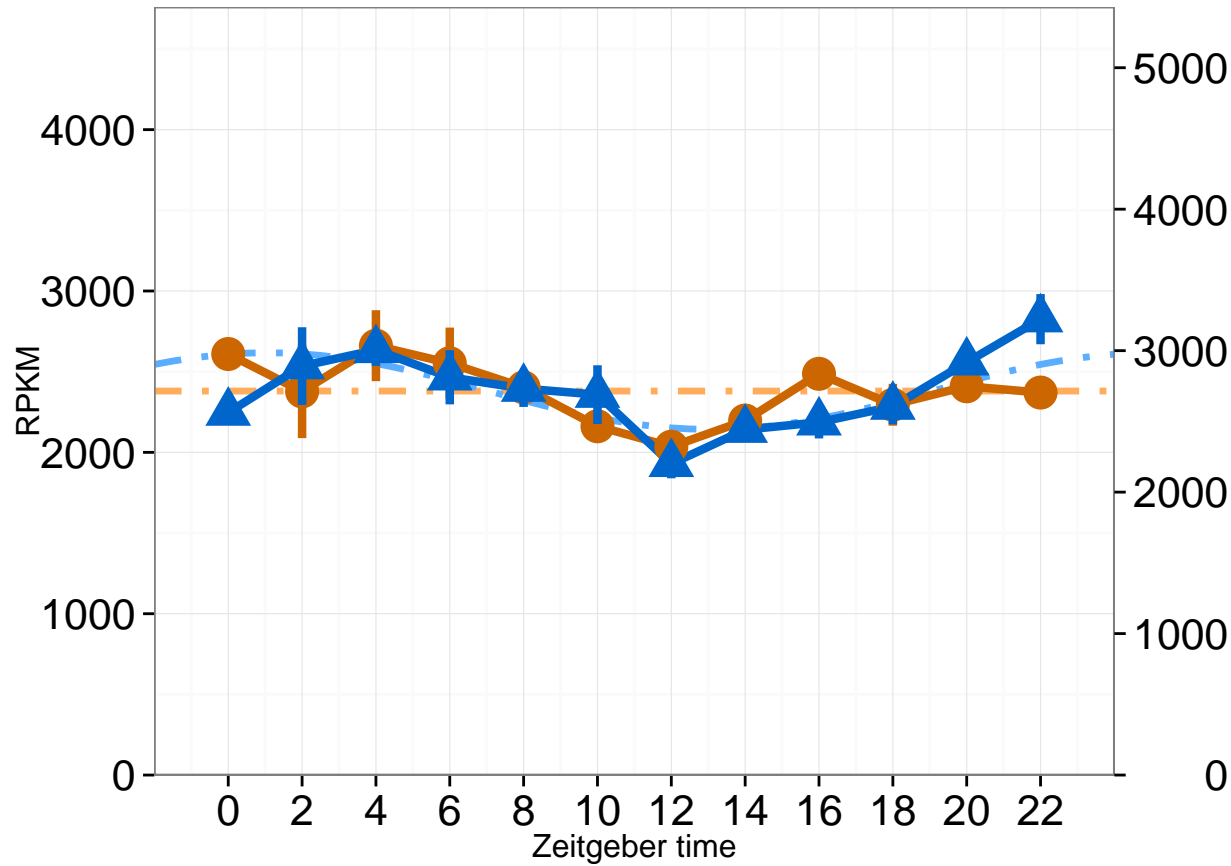

## Dbi

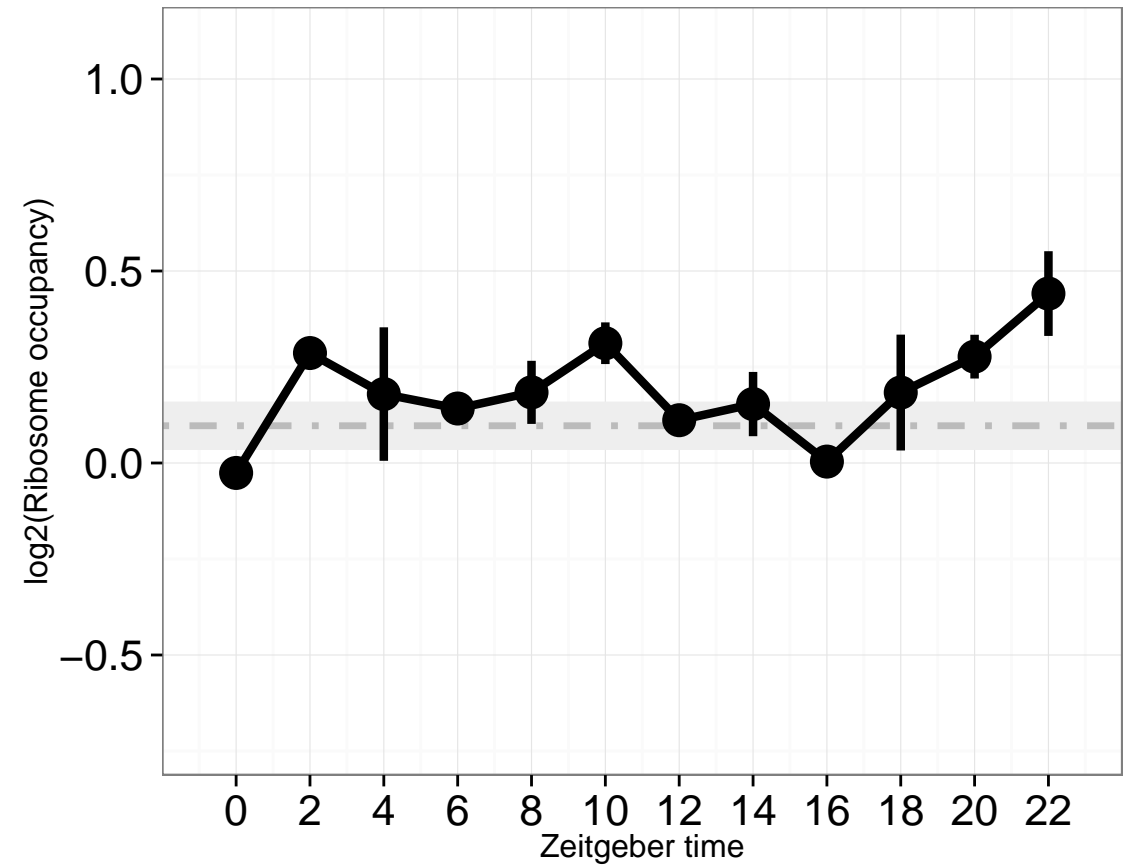

Supplement: SuppDataset_1.zip [file Dbi_set_A.pdf › Supplemental Dataset 1/A-mRNA_nonrhyth_translation_nonrhyth/Dbi_set_A.pdf]

# Dbn1

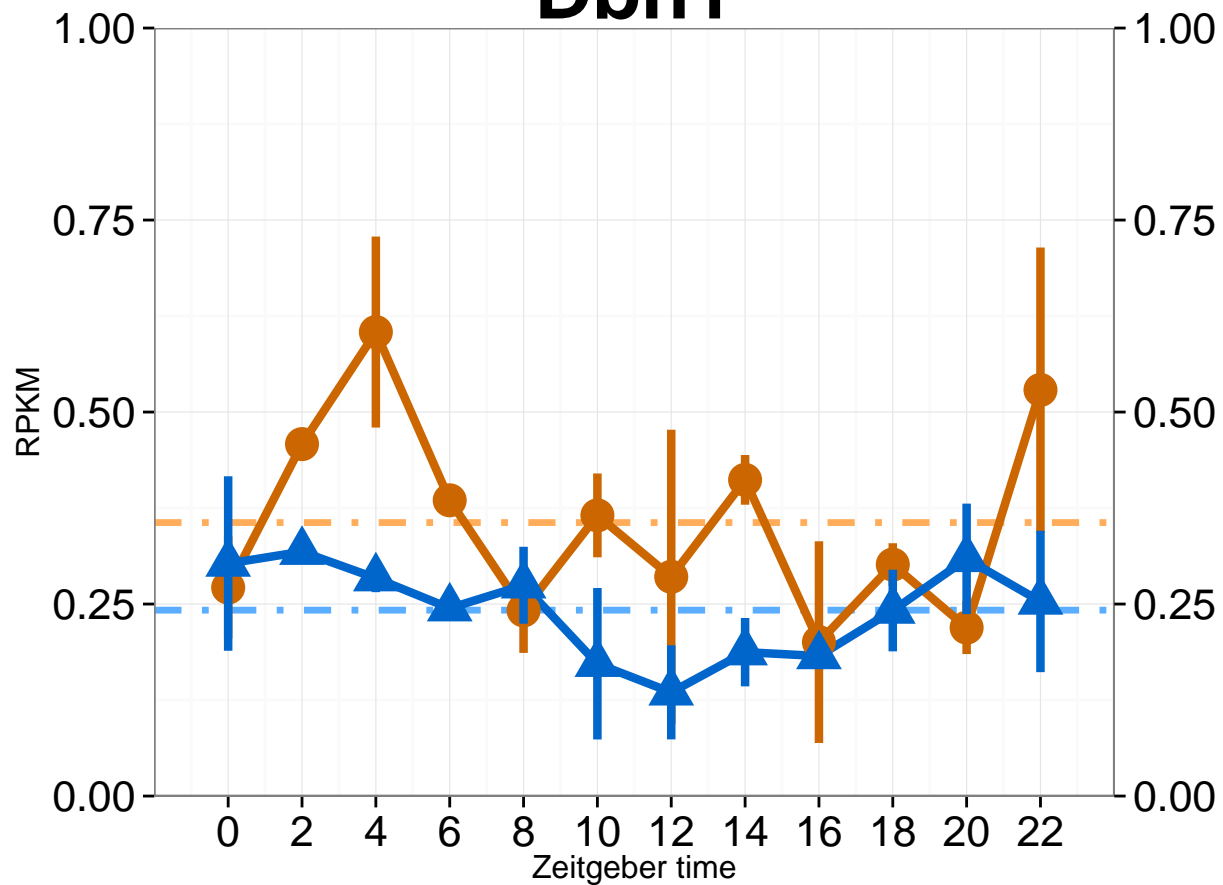

# Dbn1

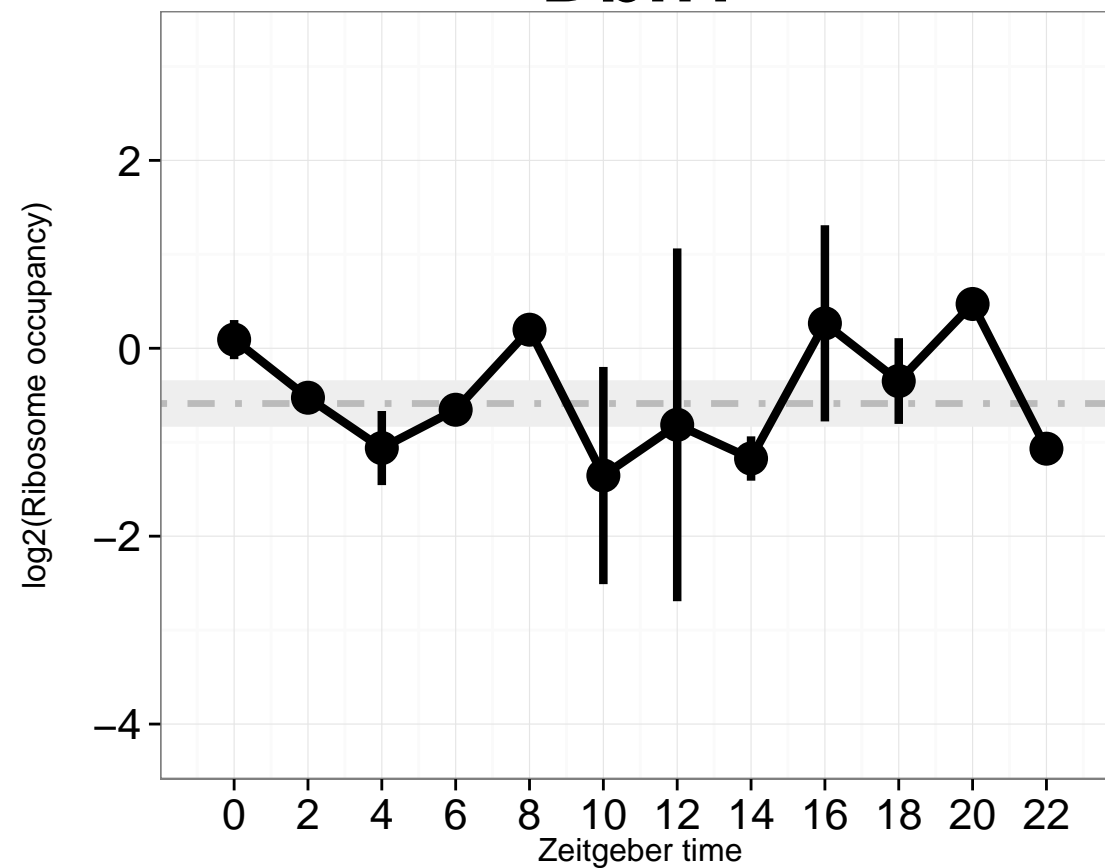

Supplement: SuppDataset_1.zip [file Dbn1_set_A.pdf › Supplemental Dataset 1/A-mRNA_nonrhyth_translation_nonrhyth/Dbn1_set_A.pdf]

## Dbndd2

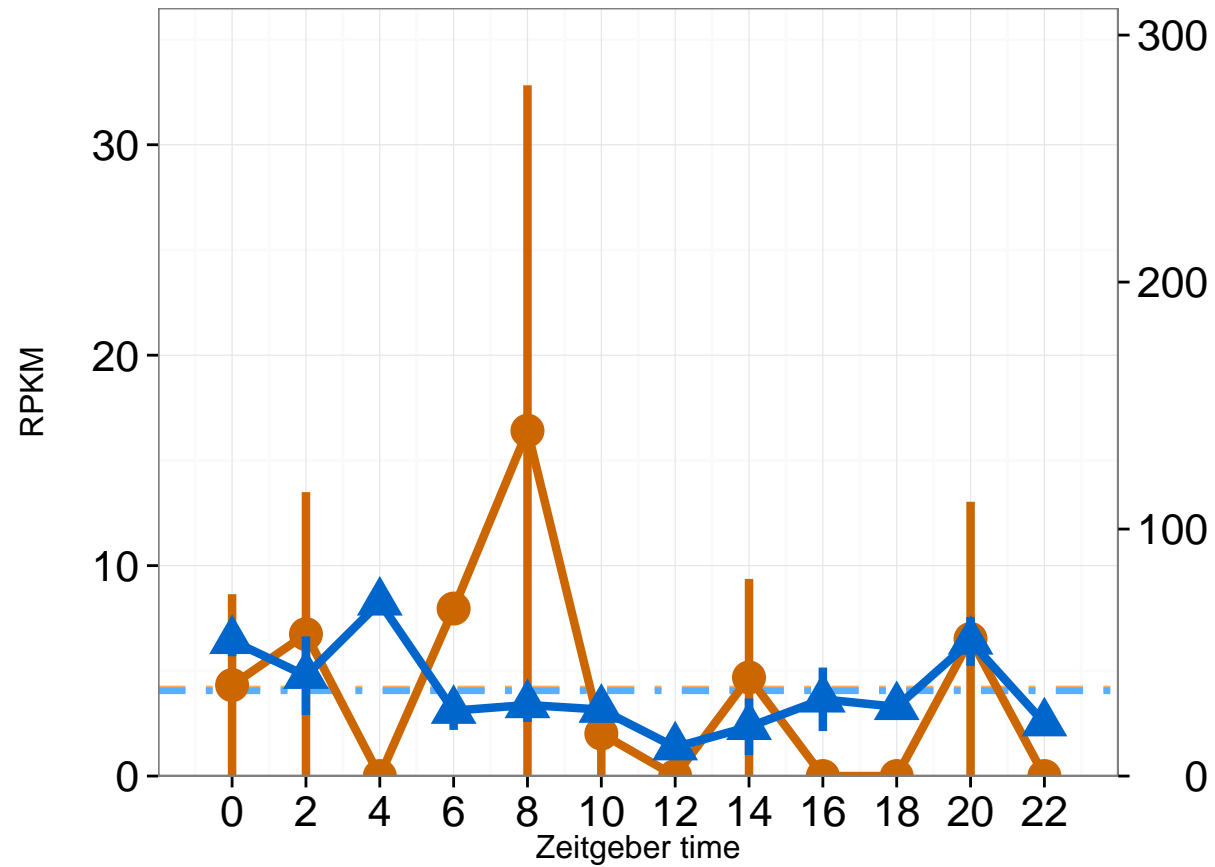

## Dbndd2

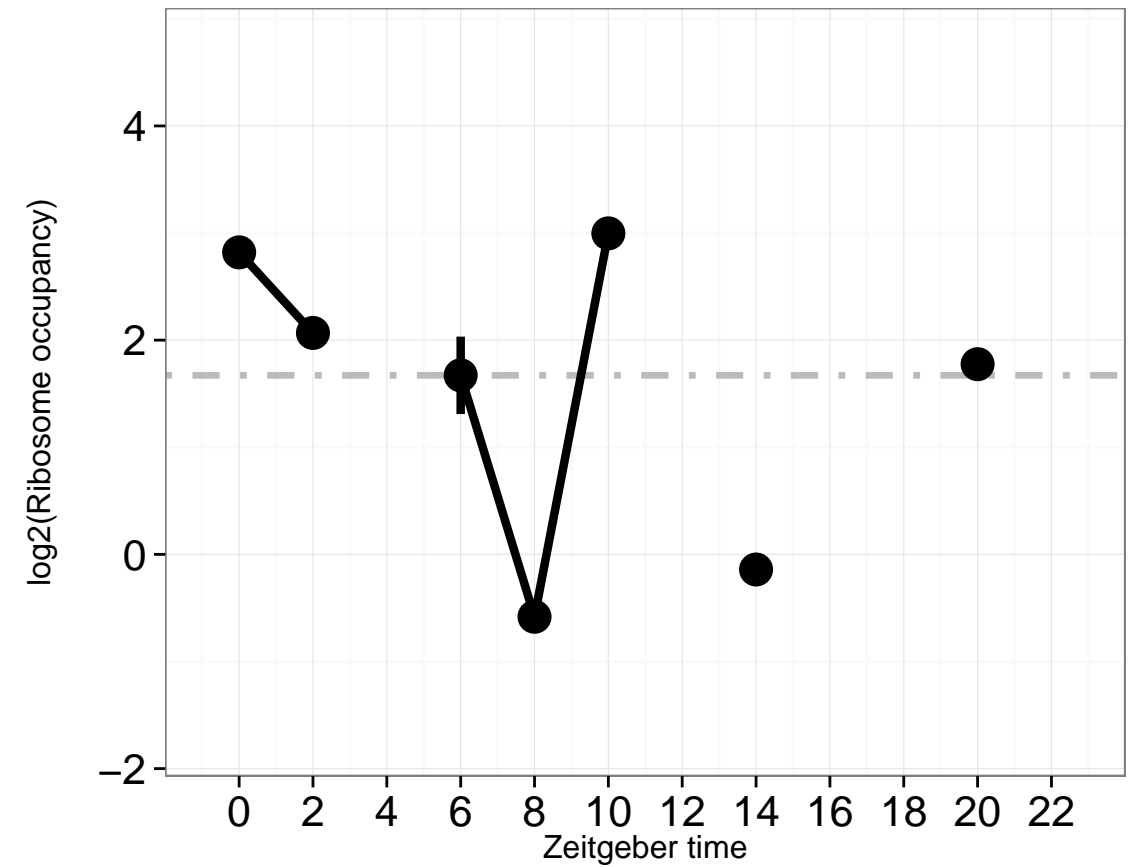

Supplement: SuppDataset_1.zip [file Dbndd2_set_A.pdf › Supplemental Dataset 1/A-mRNA_nonrhyth_translation_nonrhyth/Dbndd2_set_A.pdf]

## Dbnl

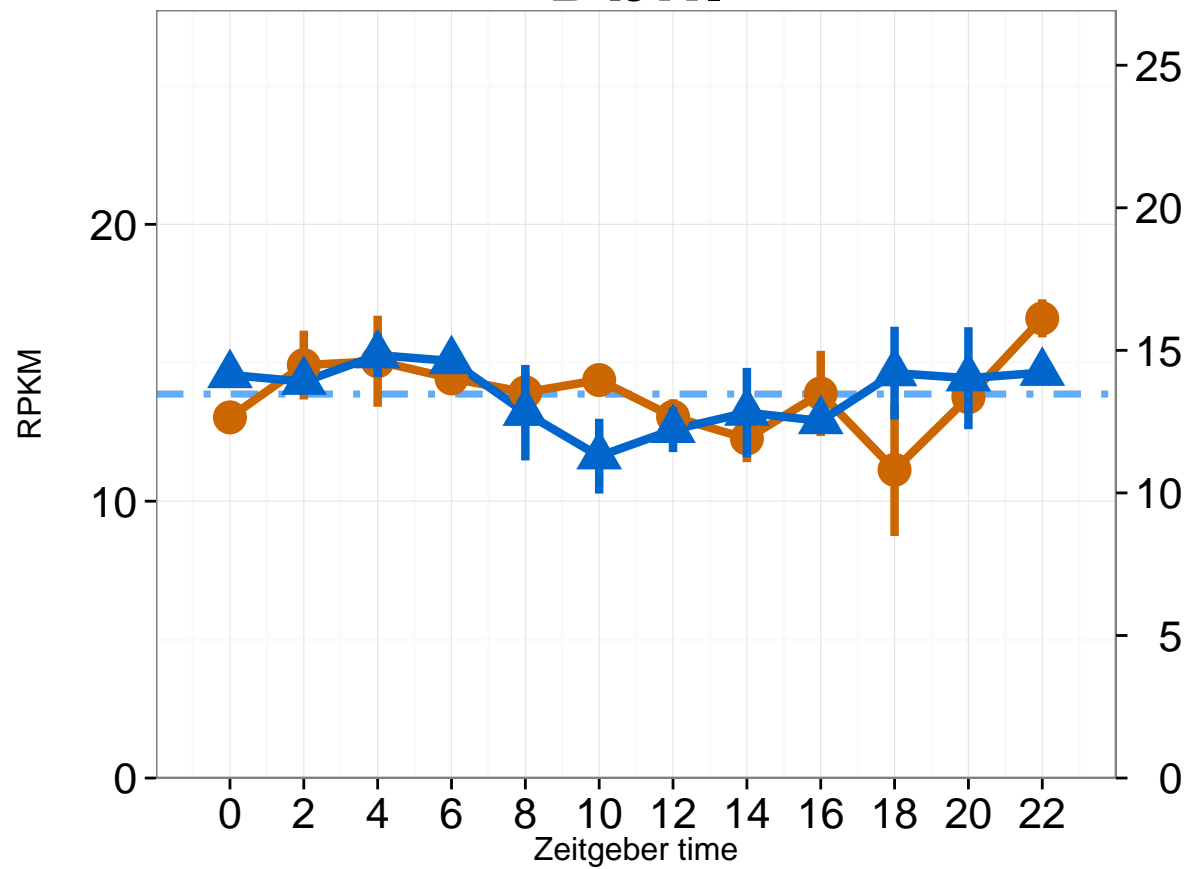

## Dbnl

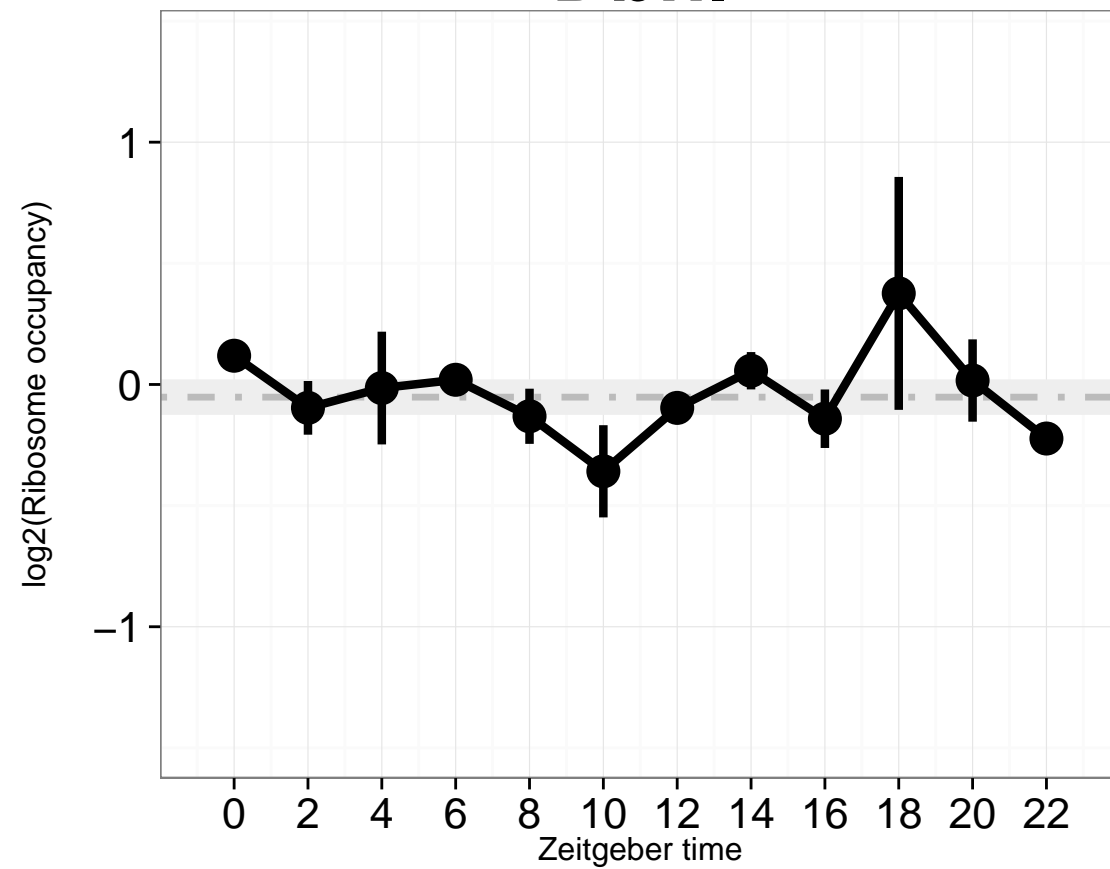

Supplement: SuppDataset_1.zip [file Dbnl_set_A.pdf › Supplemental Dataset 1/A-mRNA_nonrhyth_translation_nonrhyth/Dbnl_set_A.pdf]

# Dbr1

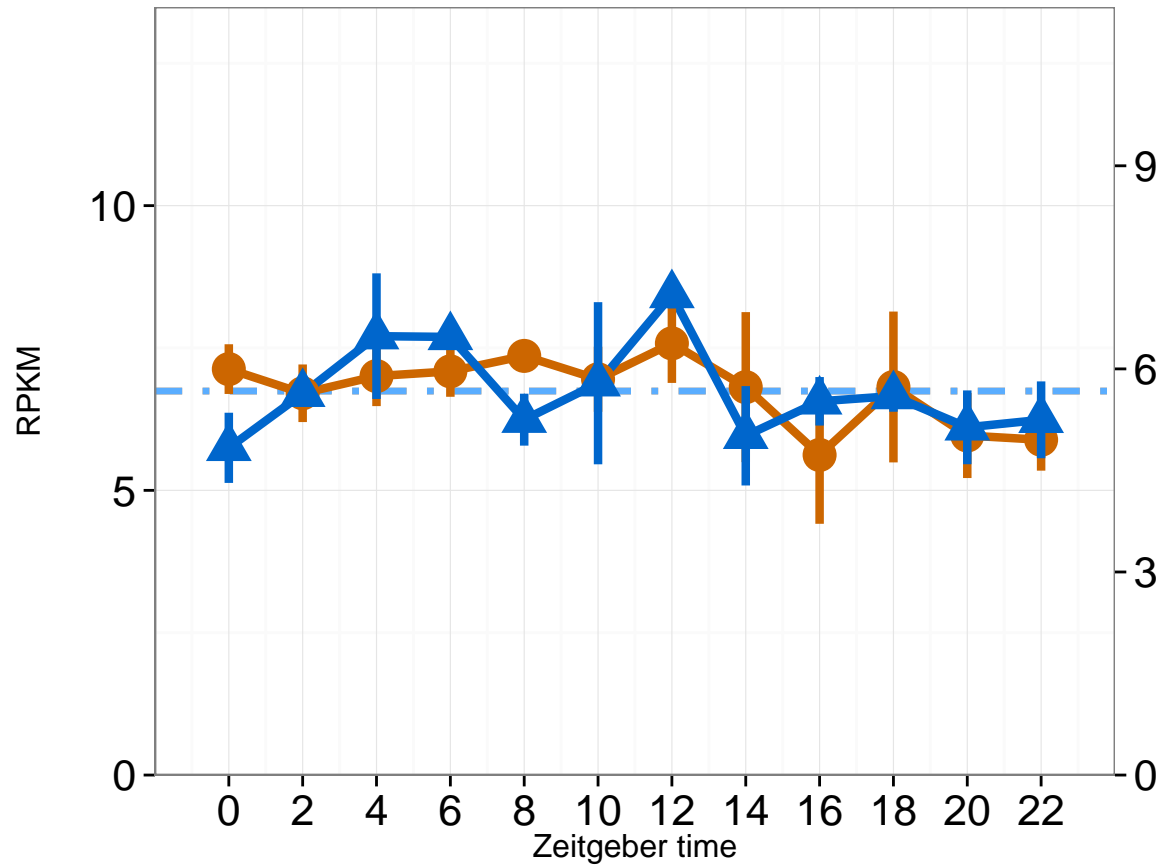

# Dbr1

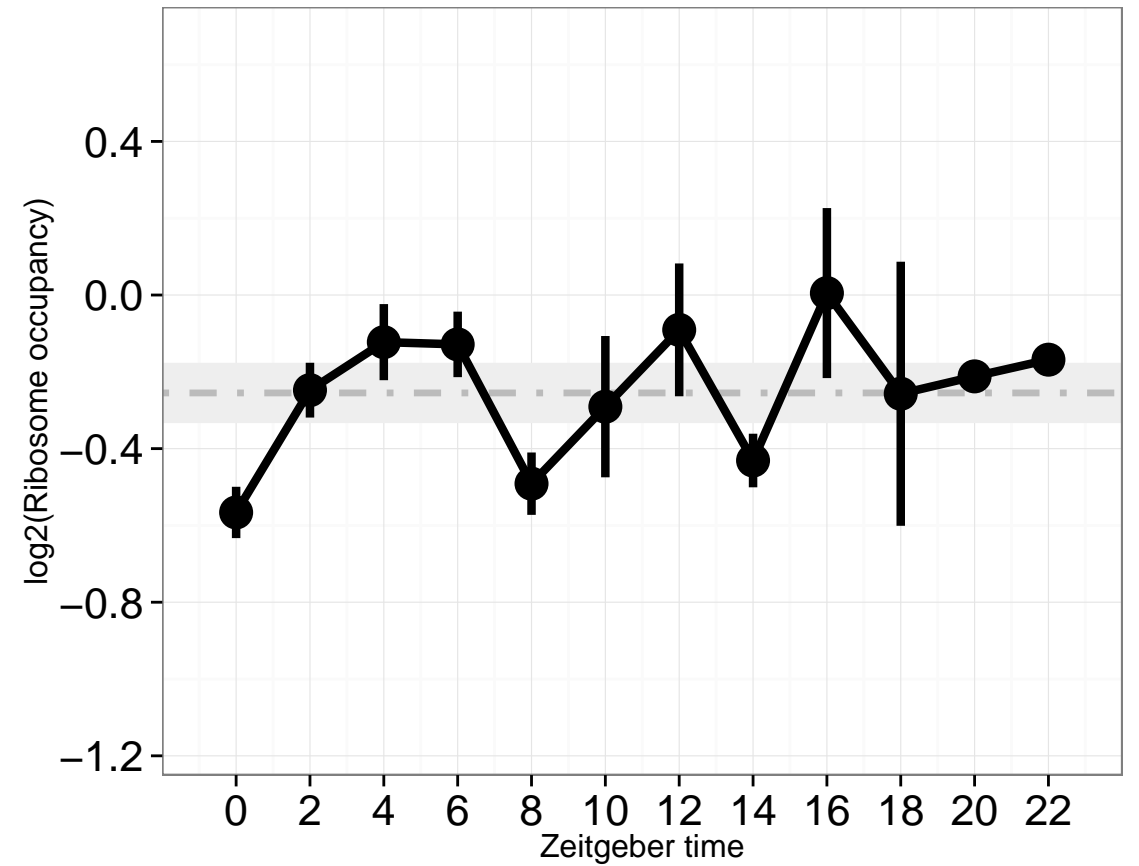

Supplement: SuppDataset_1.zip [file Dbr1_set_A.pdf › Supplemental Dataset 1/A-mRNA_nonrhyth_translation_nonrhyth/Dbr1_set_A.pdf]

## Dbt

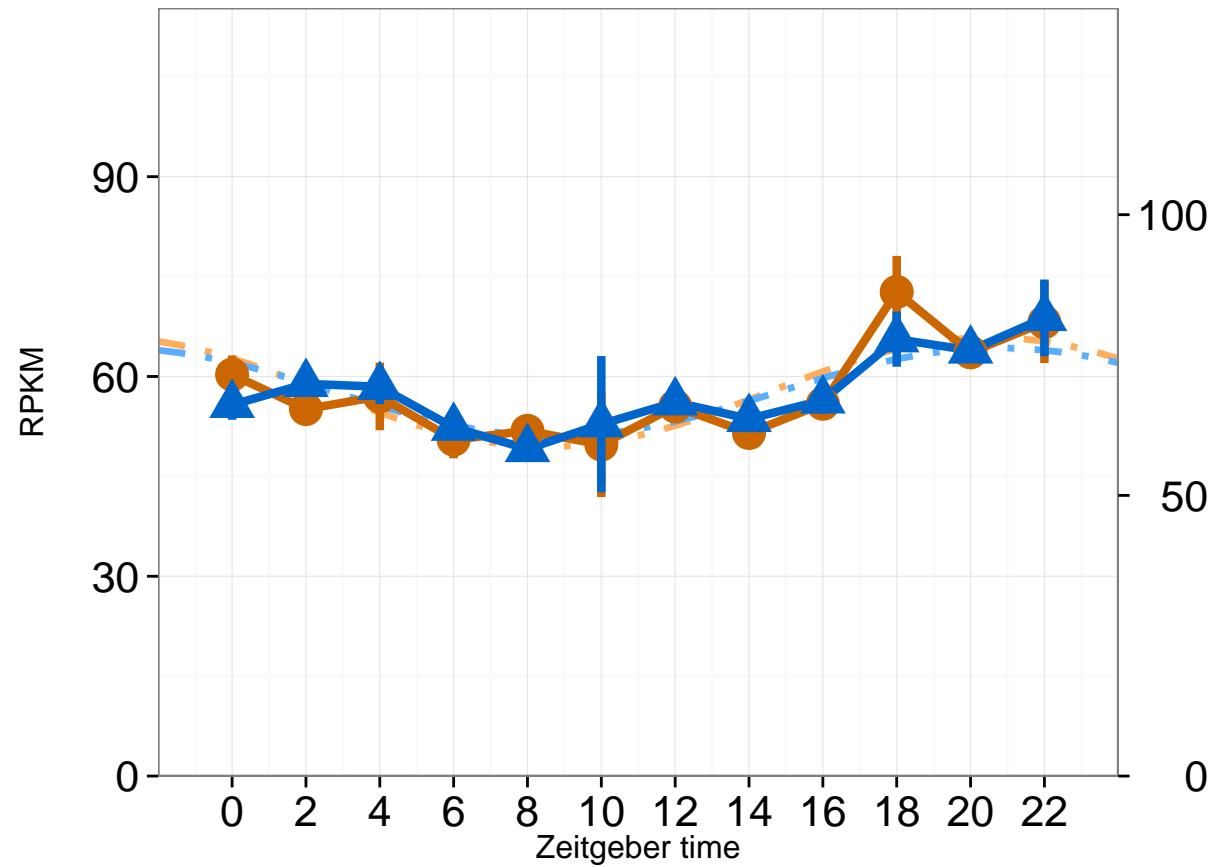

## Dbt

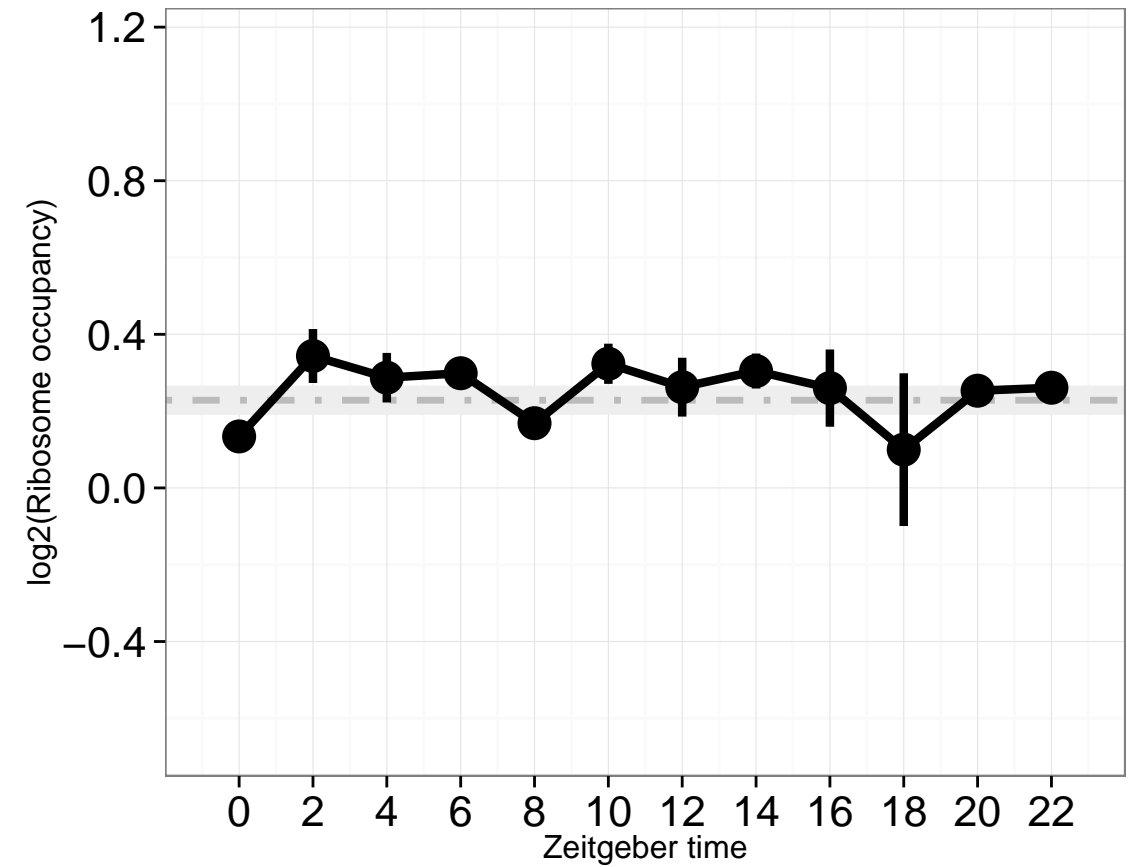

Supplement: SuppDataset_1.zip [file Dbt_set_A.pdf › Supplemental Dataset 1/A-mRNA_nonrhyth_translation_nonrhyth/Dbt_set_A.pdf]

## Dcaf10

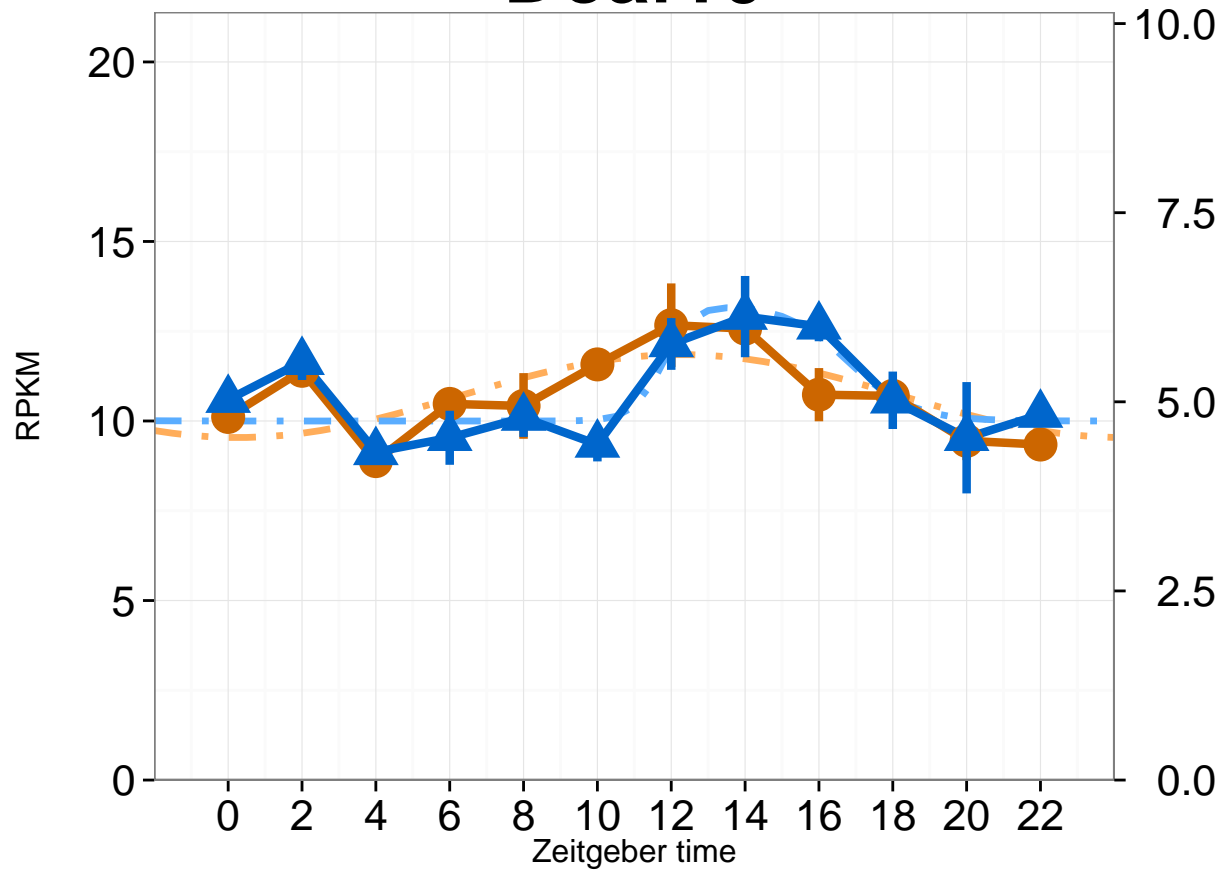

## Dcaf10

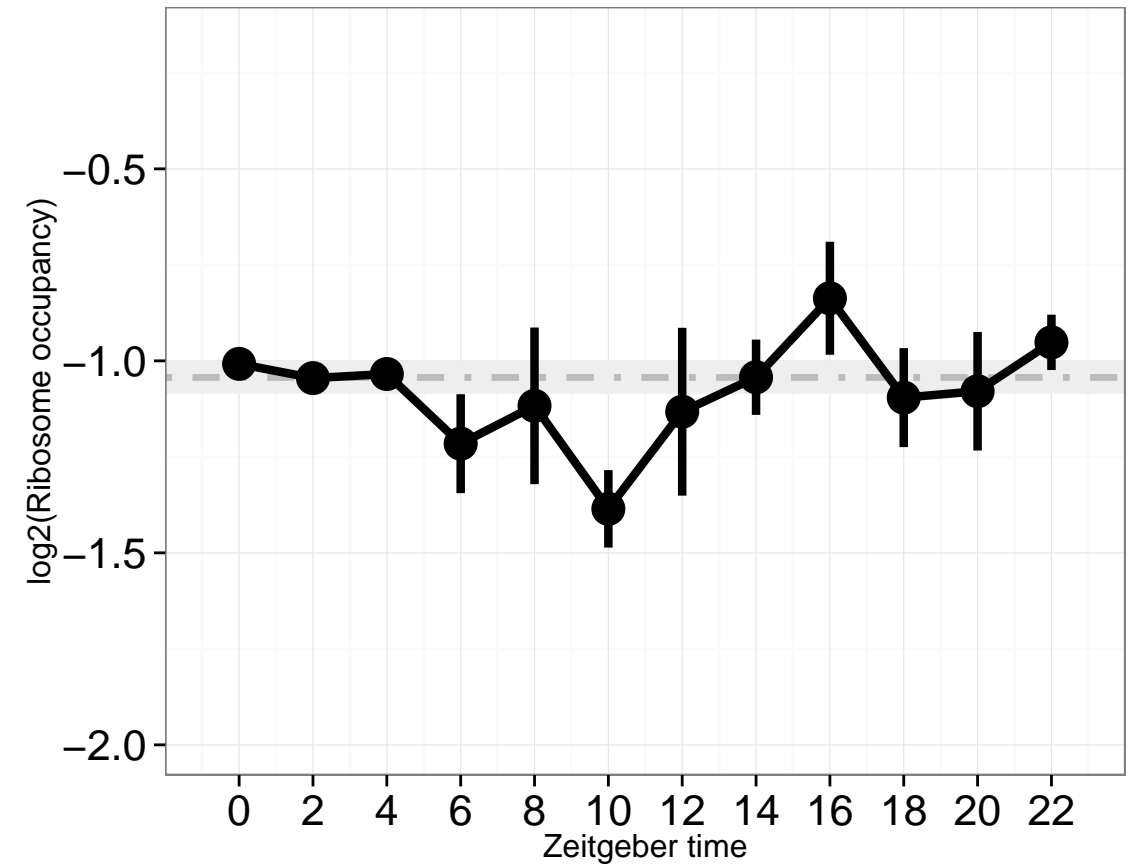

Supplement: SuppDataset_1.zip [file Dcaf10_set_A.pdf › Supplemental Dataset 1/A-mRNA_nonrhyth_translation_nonrhyth/Dcaf10_set_A.pdf]

## Dcaf11

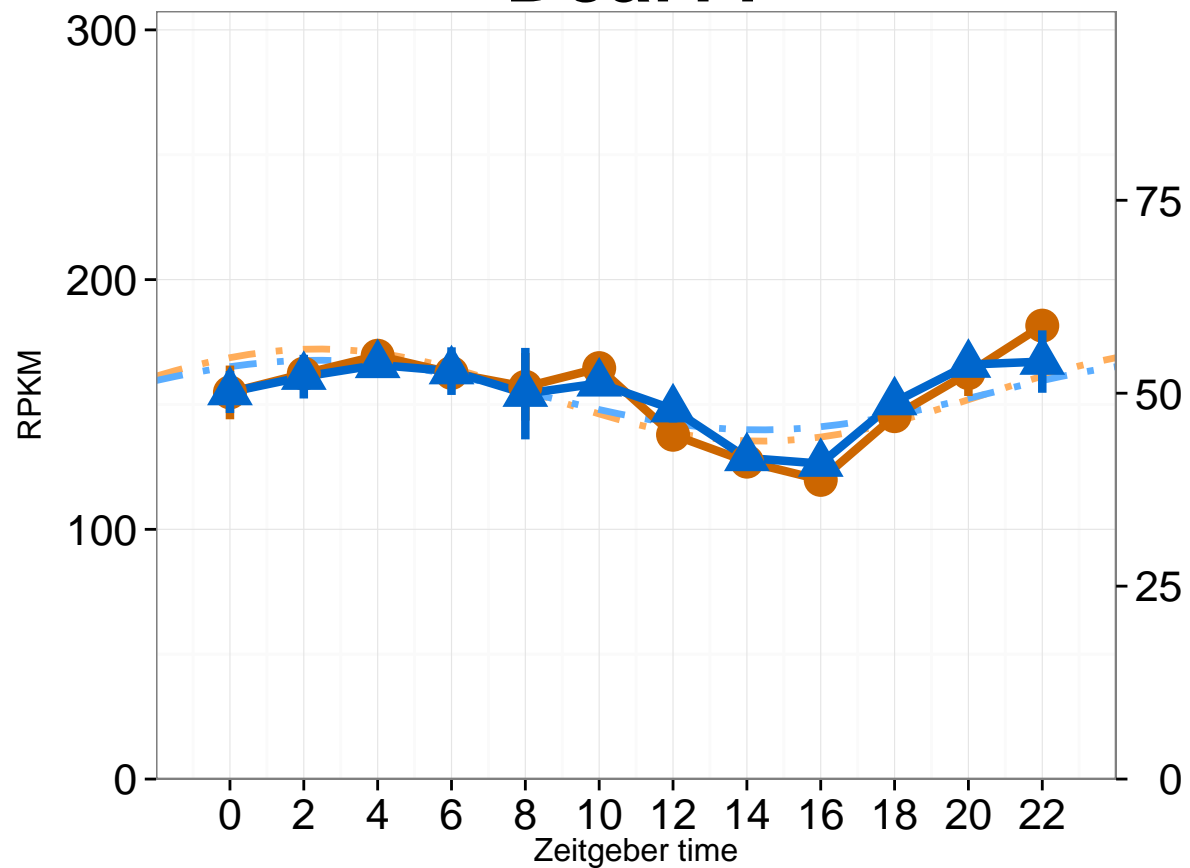

## Dcaf11

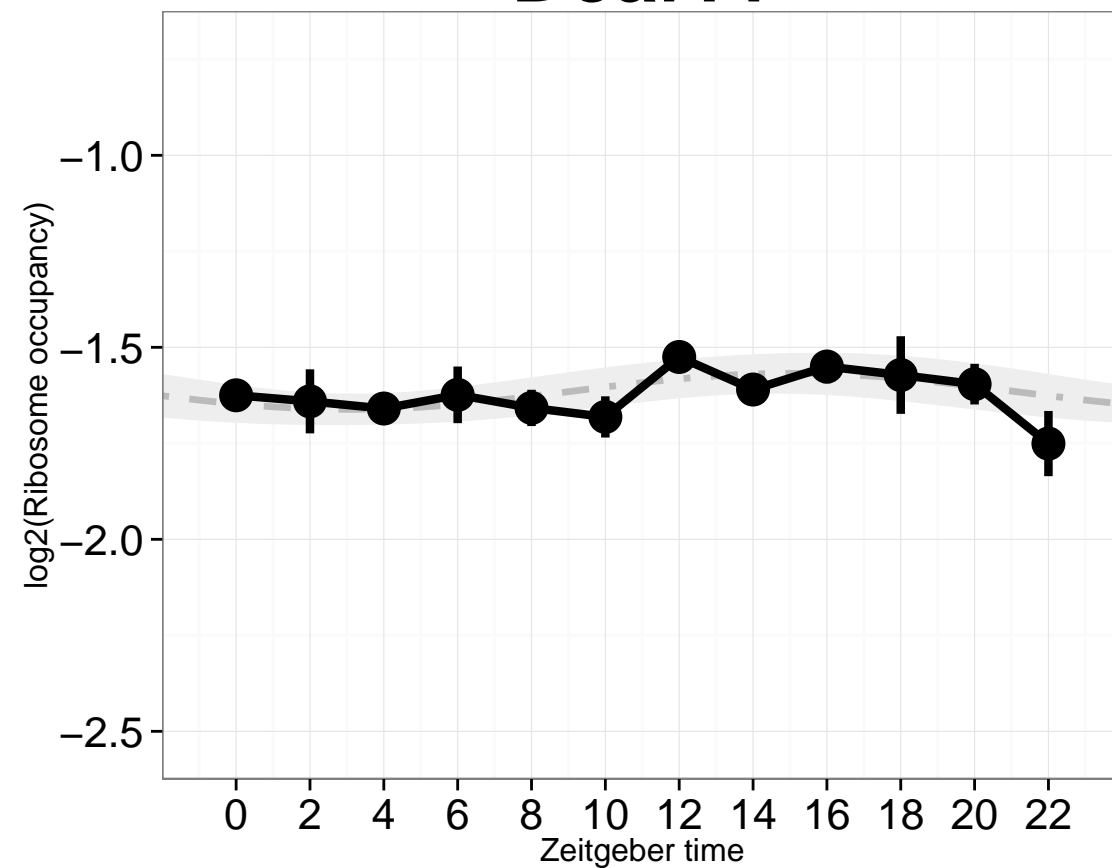

Supplement: SuppDataset_1.zip [file Dcaf11_set_A.pdf › Supplemental Dataset 1/A-mRNA_nonrhyth_translation_nonrhyth/Dcaf11_set_A.pdf]

# Dcaf12

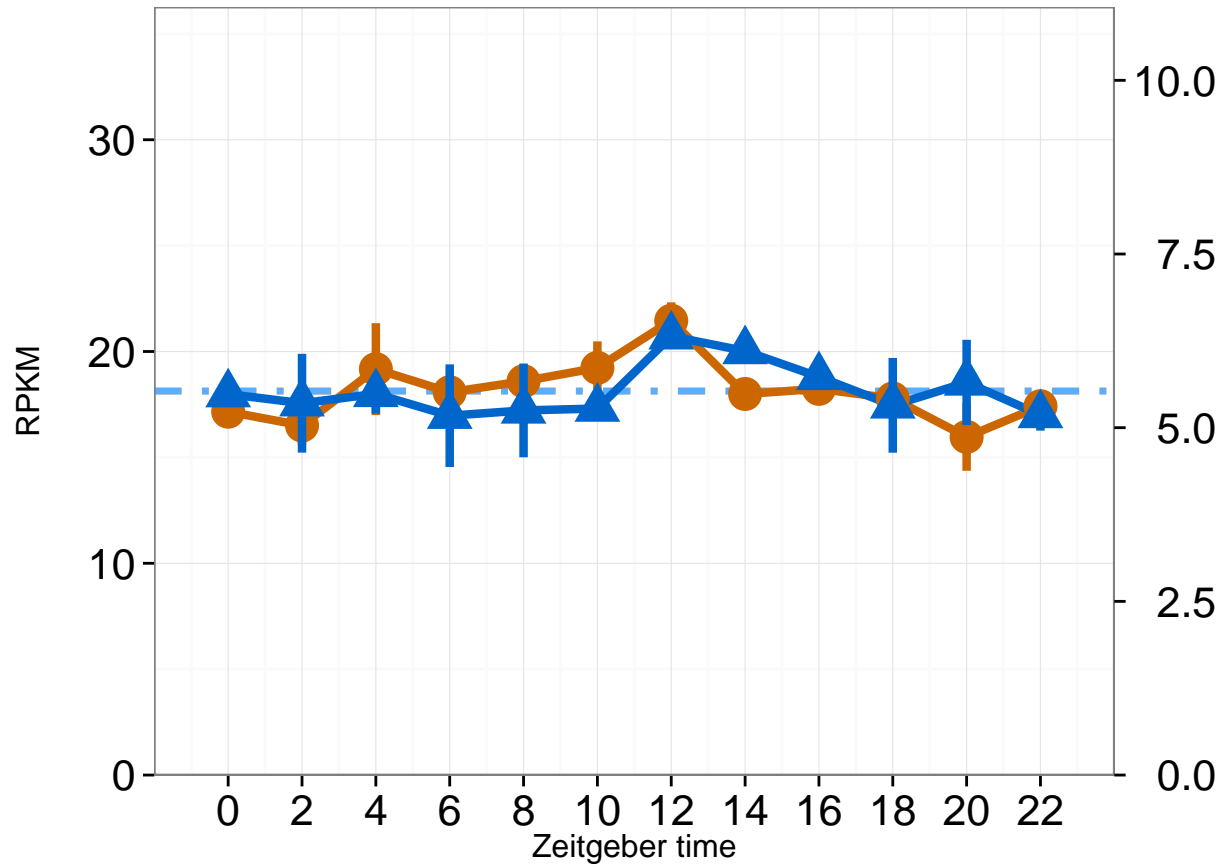

# Dcaf12

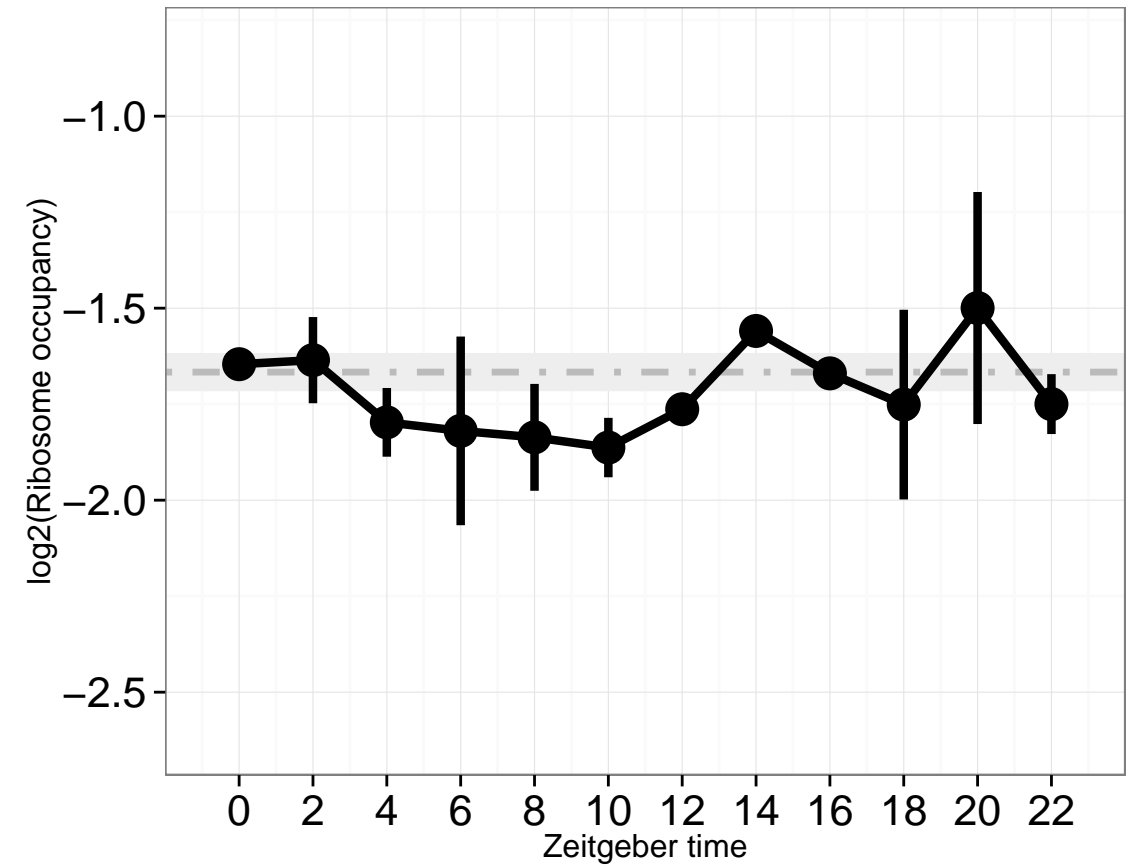

Supplement: SuppDataset_1.zip [file Dcaf12_set_A.pdf › Supplemental Dataset 1/A-mRNA_nonrhyth_translation_nonrhyth/Dcaf12_set_A.pdf]

## Dcaf12l1

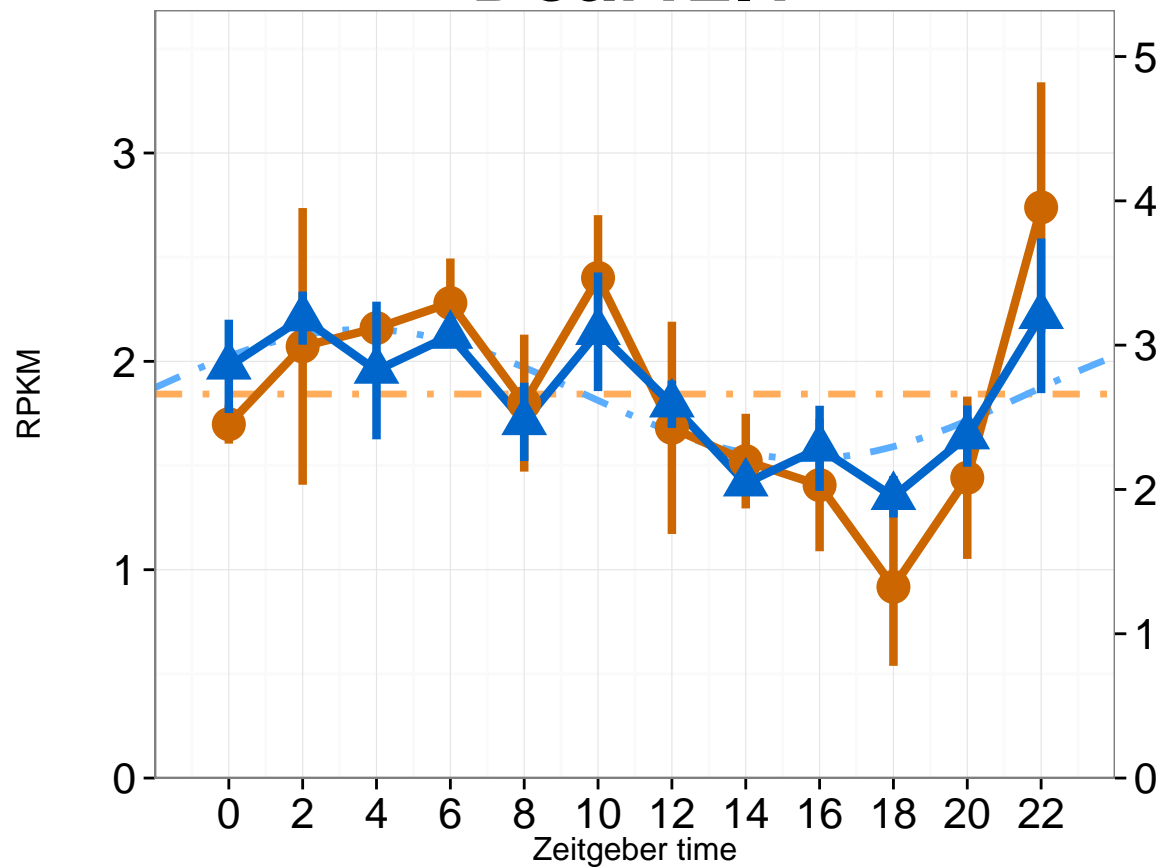

## Dcaf12l1

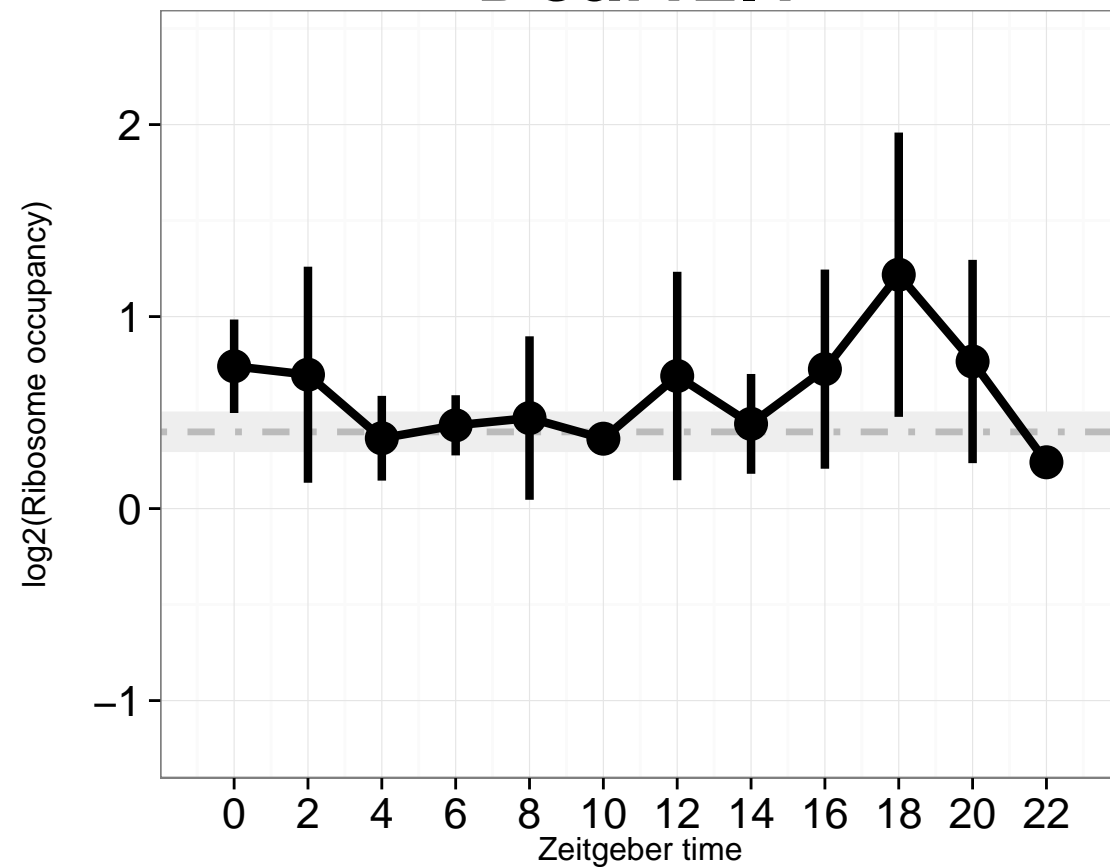

Supplement: SuppDataset_1.zip [file Dcaf12l1_set_A.pdf › Supplemental Dataset 1/A-mRNA_nonrhyth_translation_nonrhyth/Dcaf12l1_set_A.pdf]

## Dcaf13

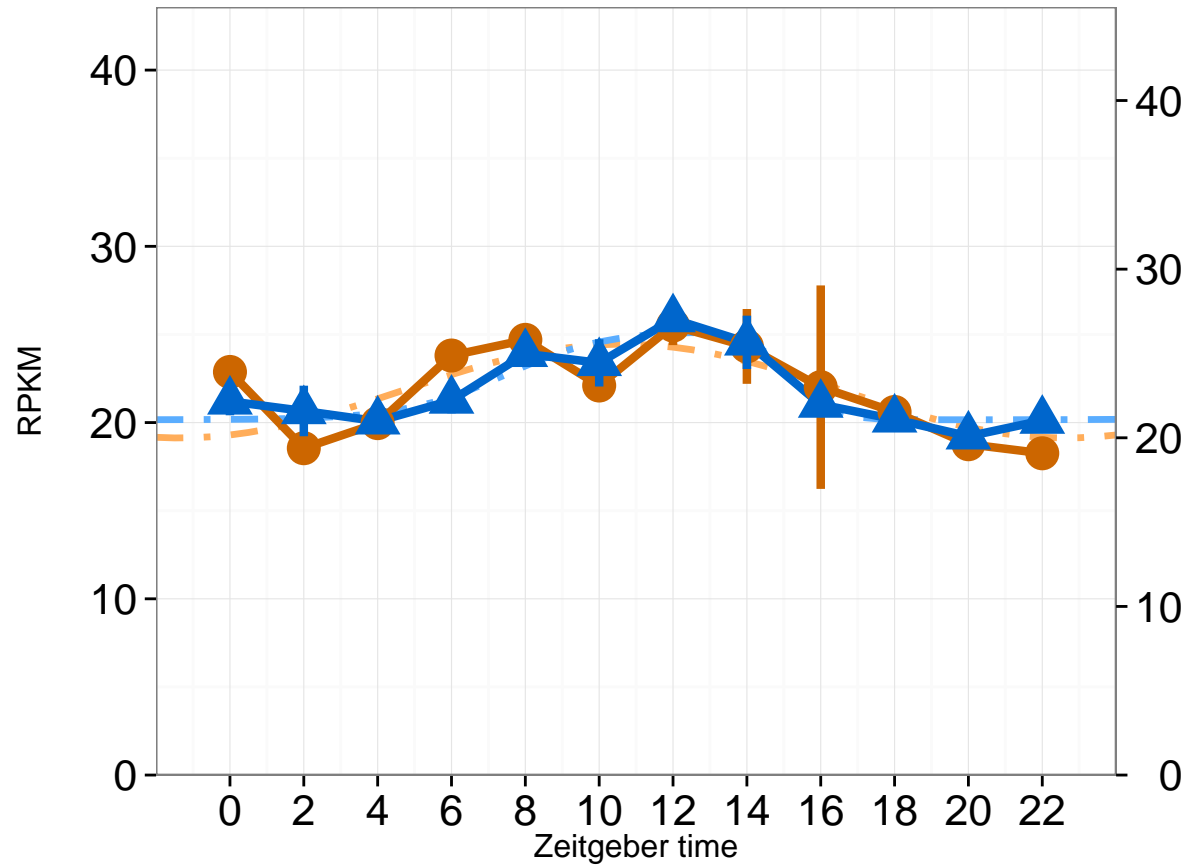

## Dcaf13

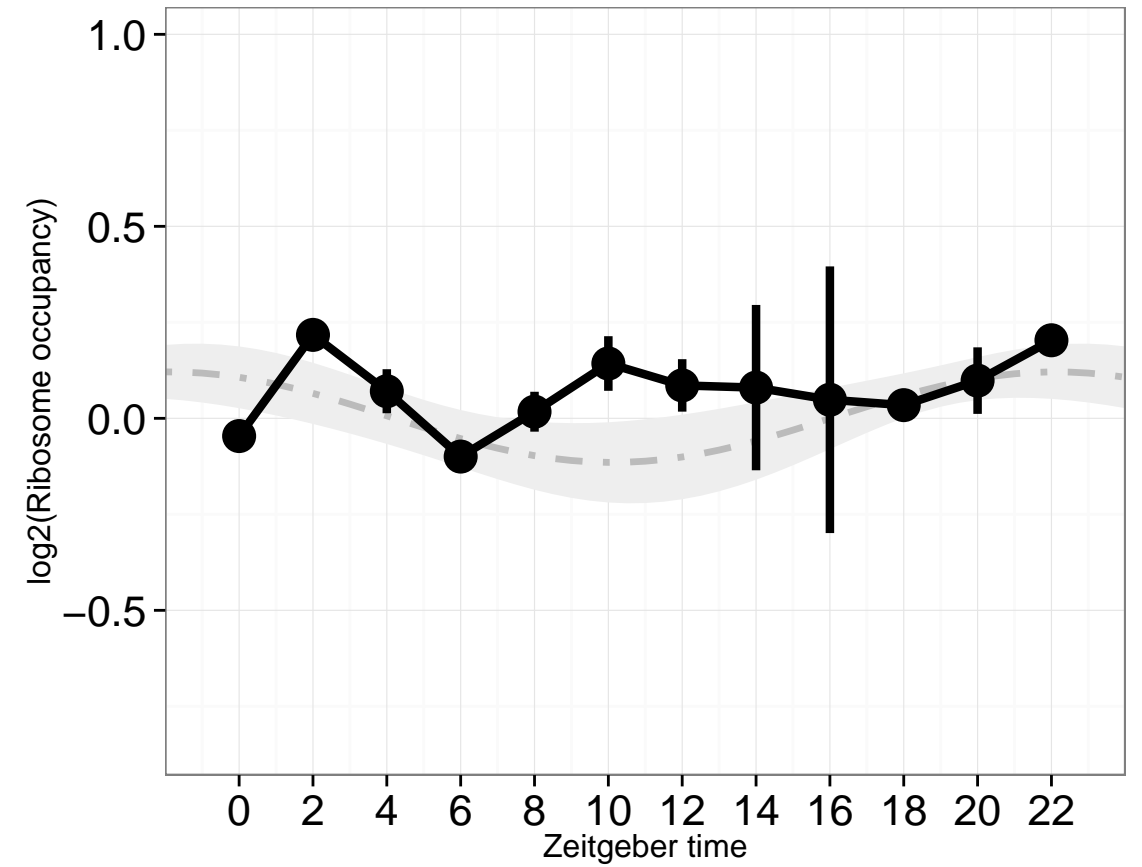

Supplement: SuppDataset_1.zip [file Dcaf13_set_A.pdf › Supplemental Dataset 1/A-mRNA_nonrhyth_translation_nonrhyth/Dcaf13_set_A.pdf]

## Dcaf17

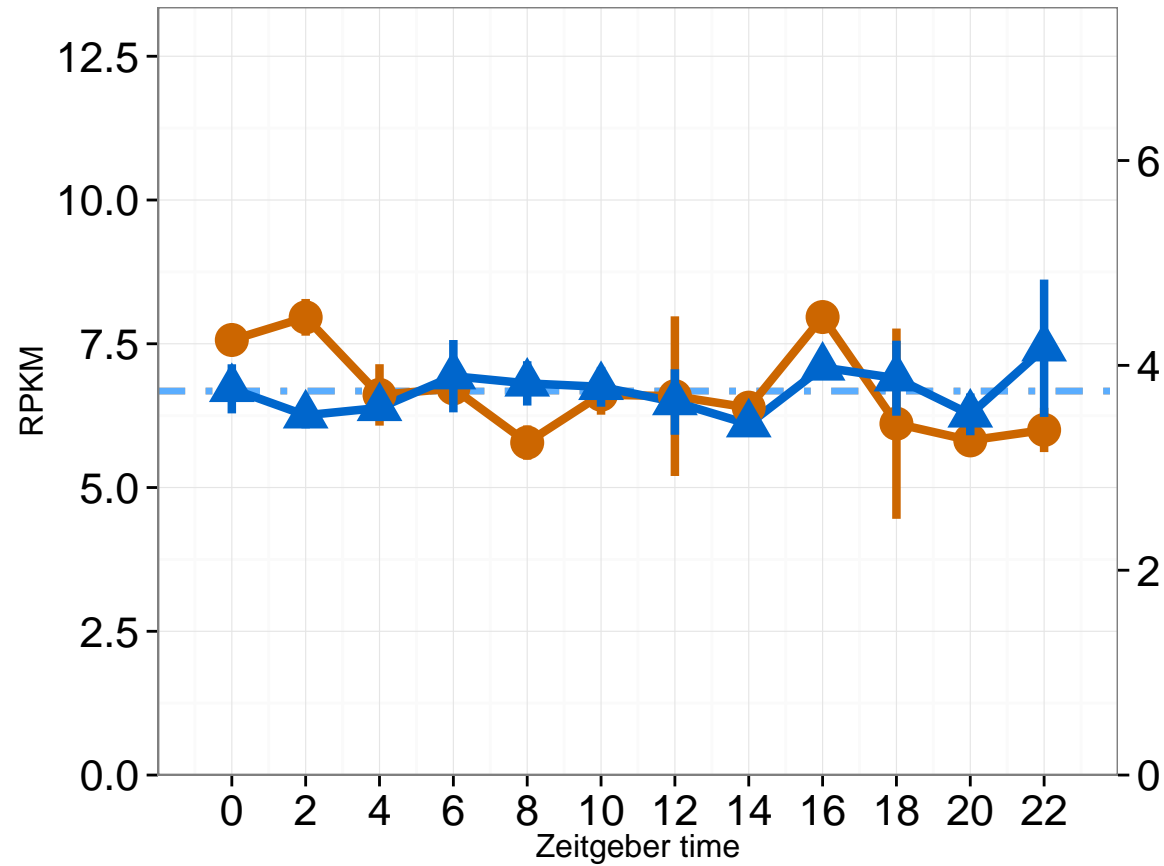

## Dcaf17

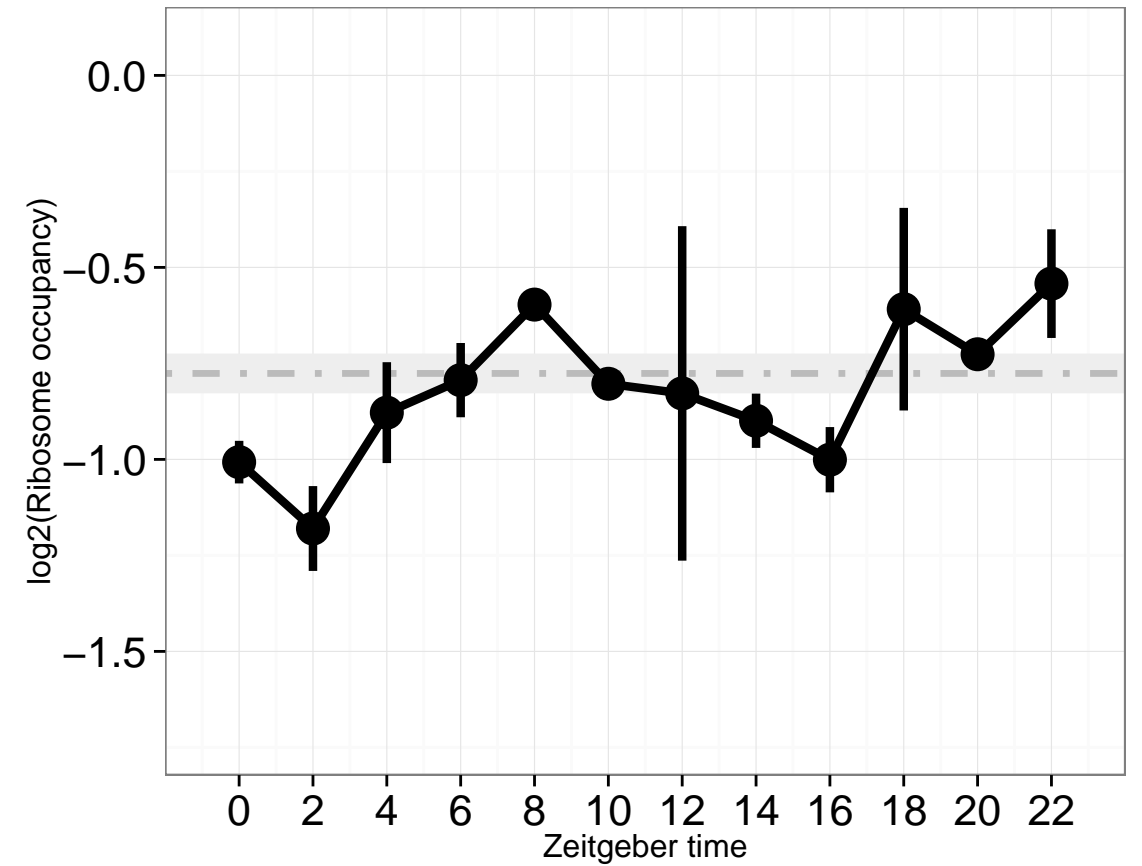

Supplement: SuppDataset_1.zip [file Dcaf17_set_A.pdf › Supplemental Dataset 1/A-mRNA_nonrhyth_translation_nonrhyth/Dcaf17_set_A.pdf]

# Dcaf4

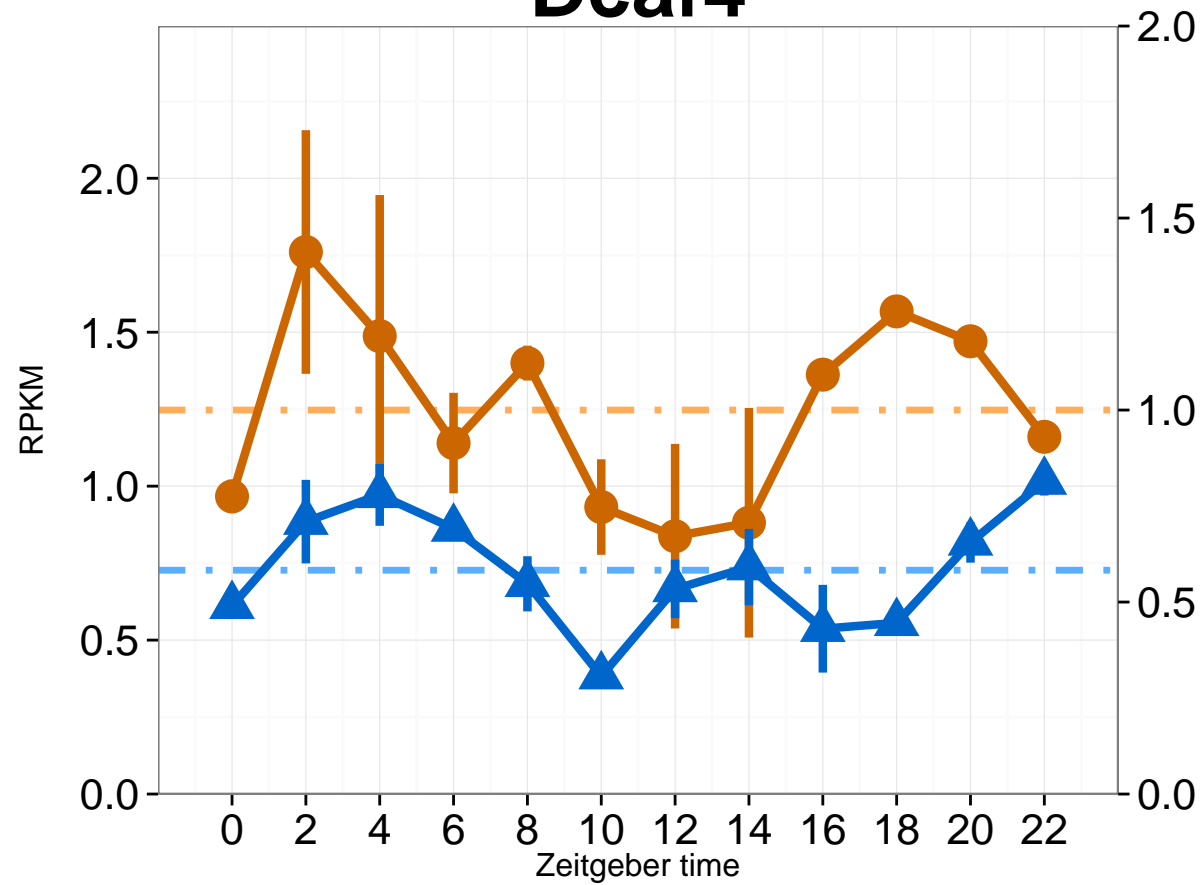

# Dcaf4

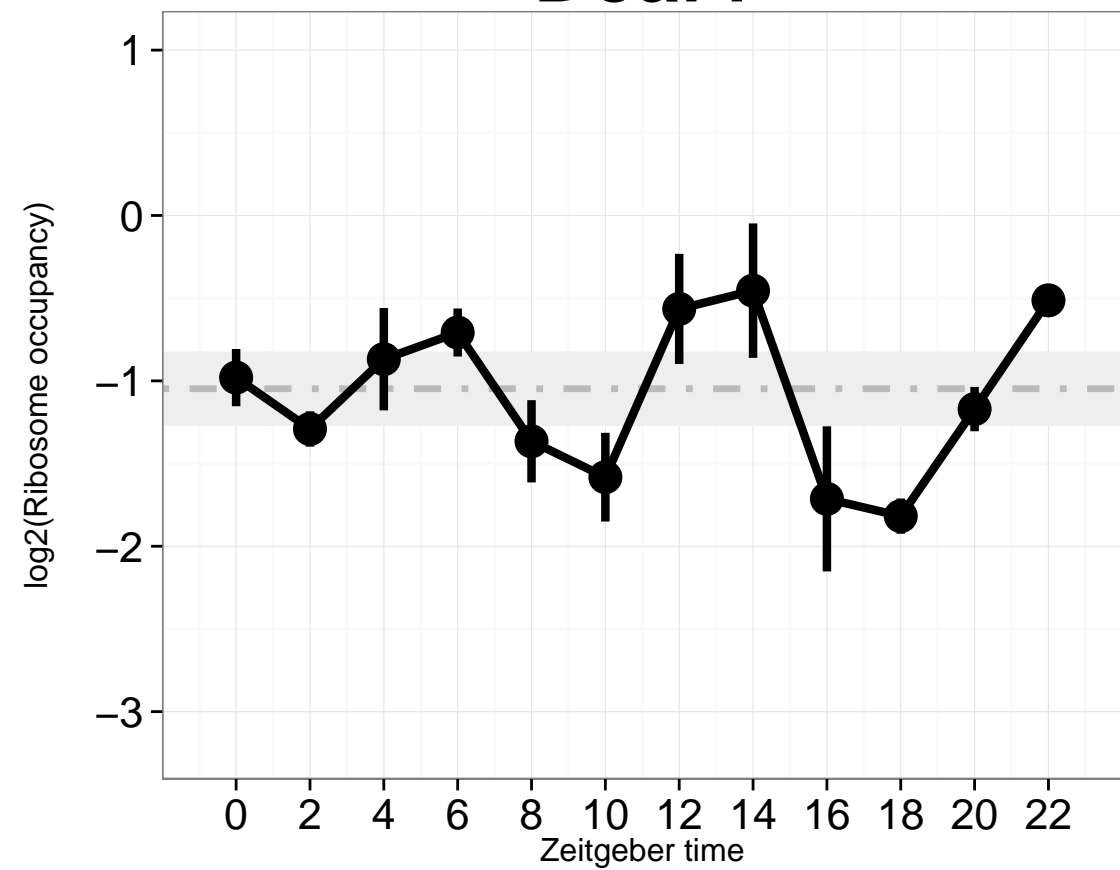

Supplement: SuppDataset_1.zip [file Dcaf4_set_A.pdf › Supplemental Dataset 1/A-mRNA_nonrhyth_translation_nonrhyth/Dcaf4_set_A.pdf]

## Dcaf5

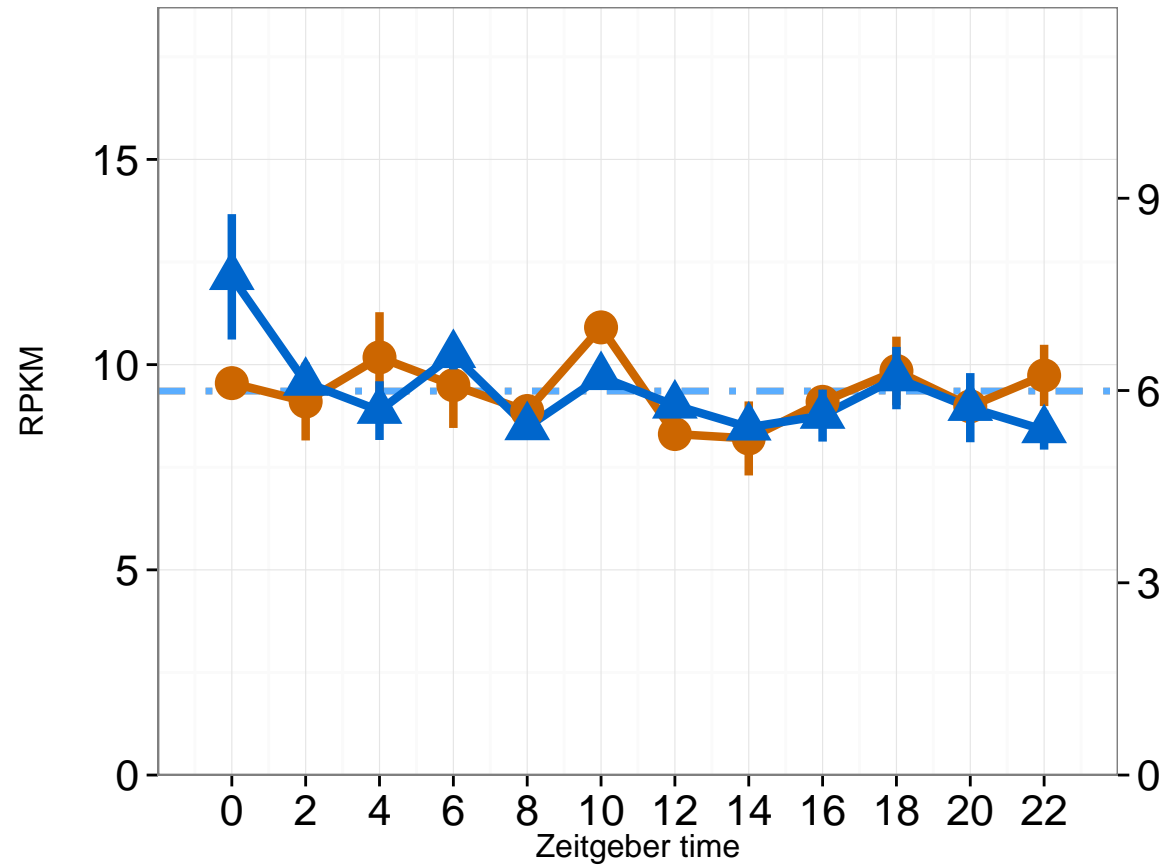

## Dcaf5

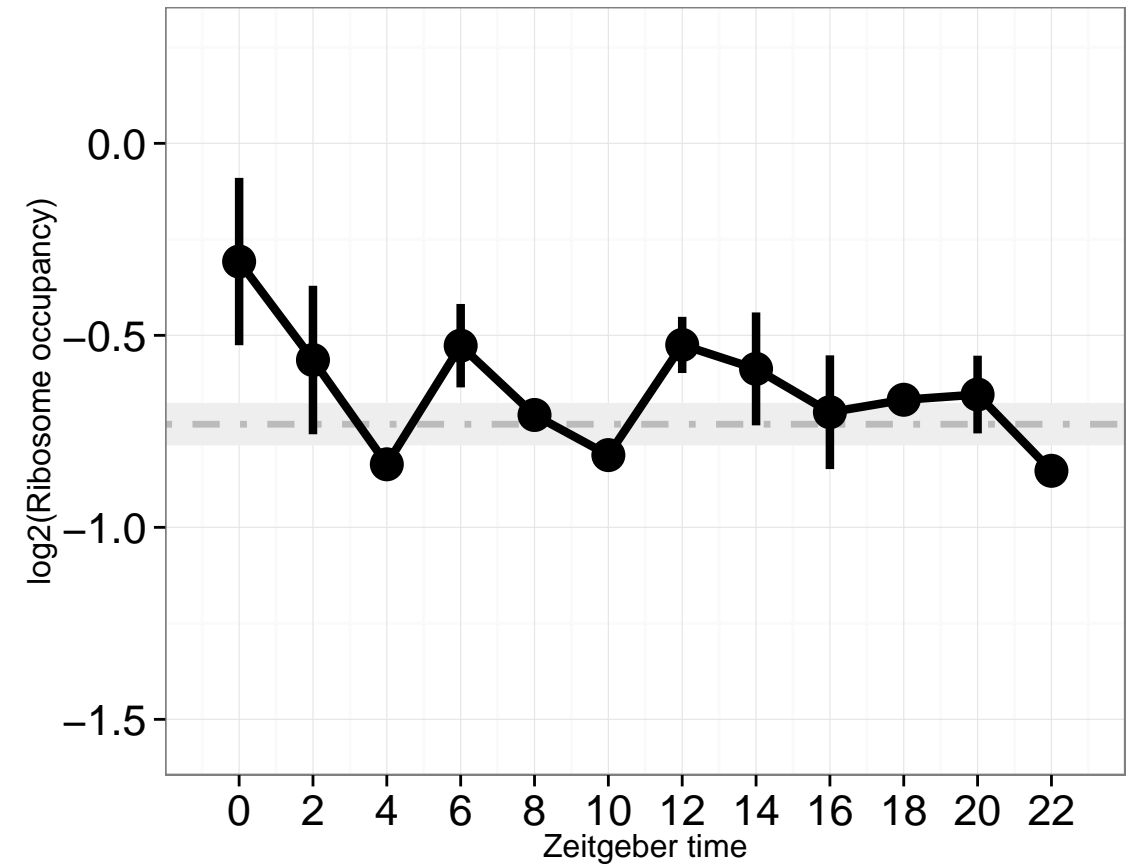

Supplement: SuppDataset_1.zip [file Dcaf5_set_A.pdf › Supplemental Dataset 1/A-mRNA_nonrhyth_translation_nonrhyth/Dcaf5_set_A.pdf]

## Dcaf7

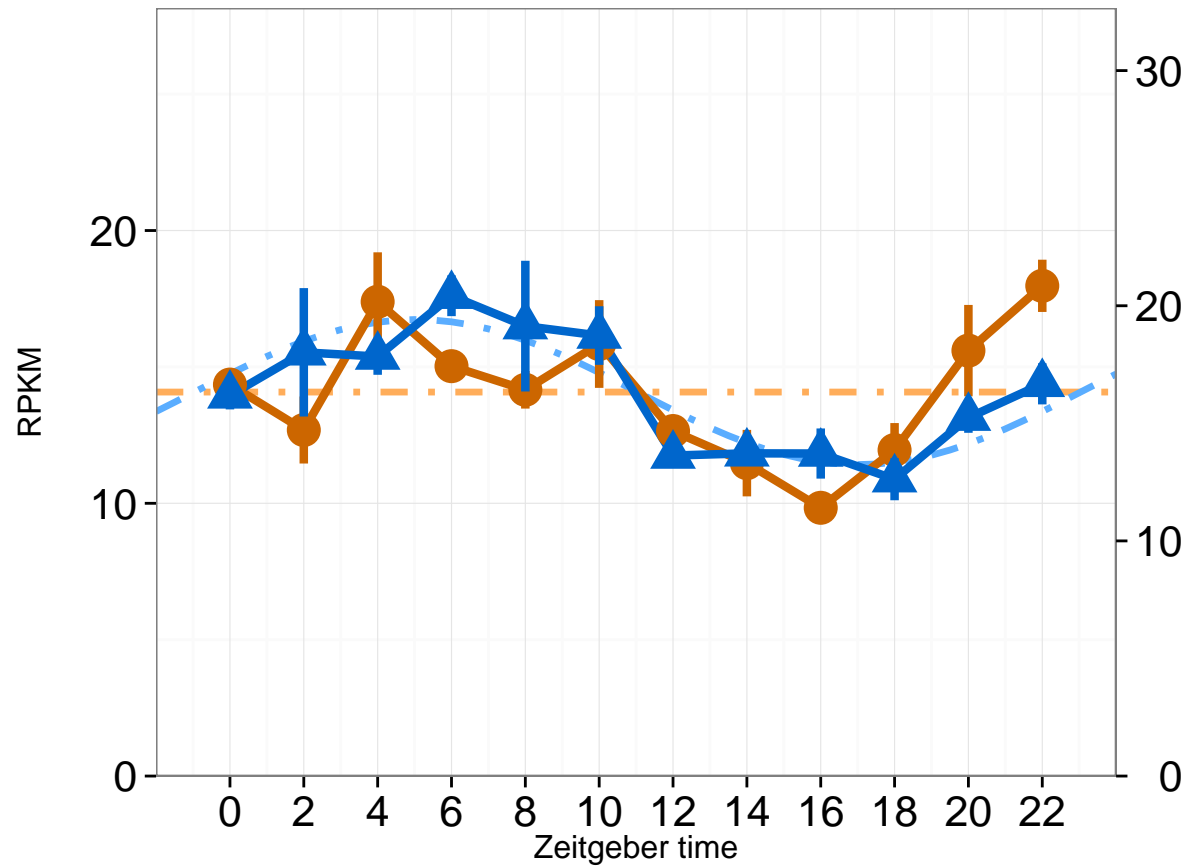

## Dcaf7

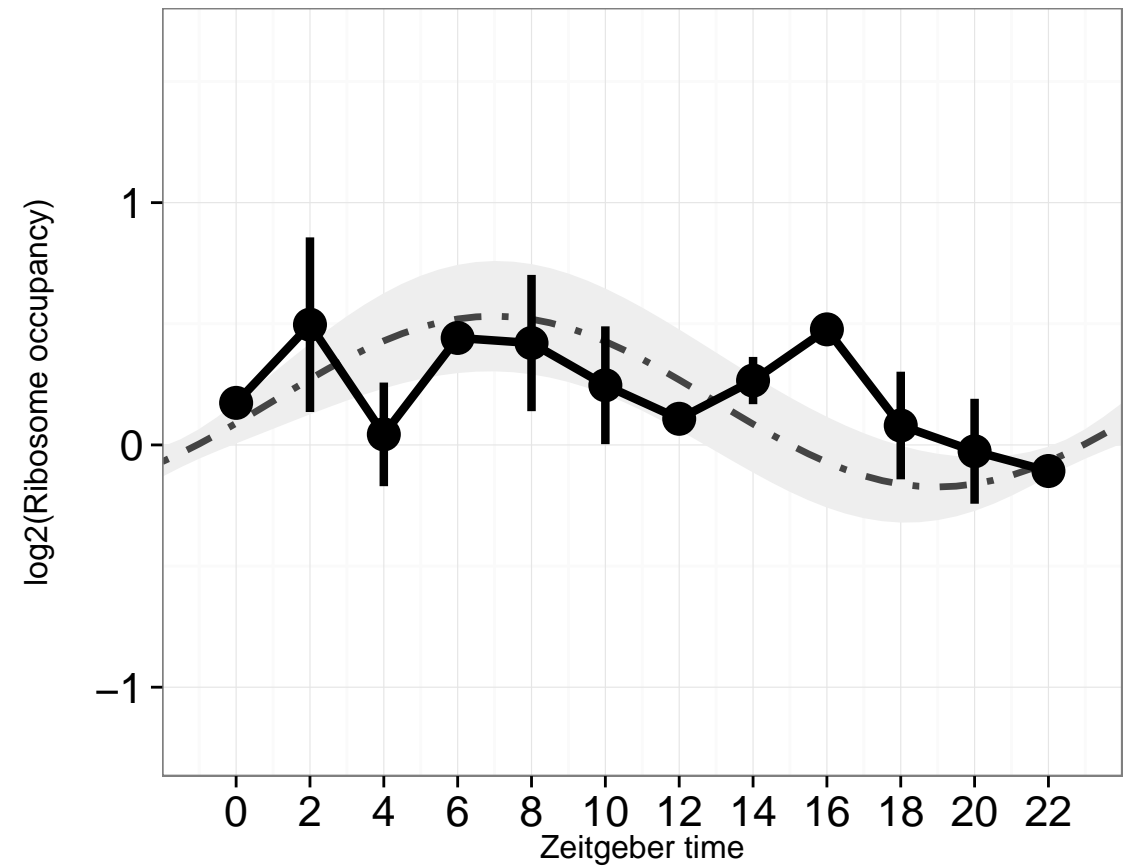

Supplement: SuppDataset_1.zip [file Dcaf7_set_A.pdf › Supplemental Dataset 1/A-mRNA_nonrhyth_translation_nonrhyth/Dcaf7_set_A.pdf]

## Dcaf8

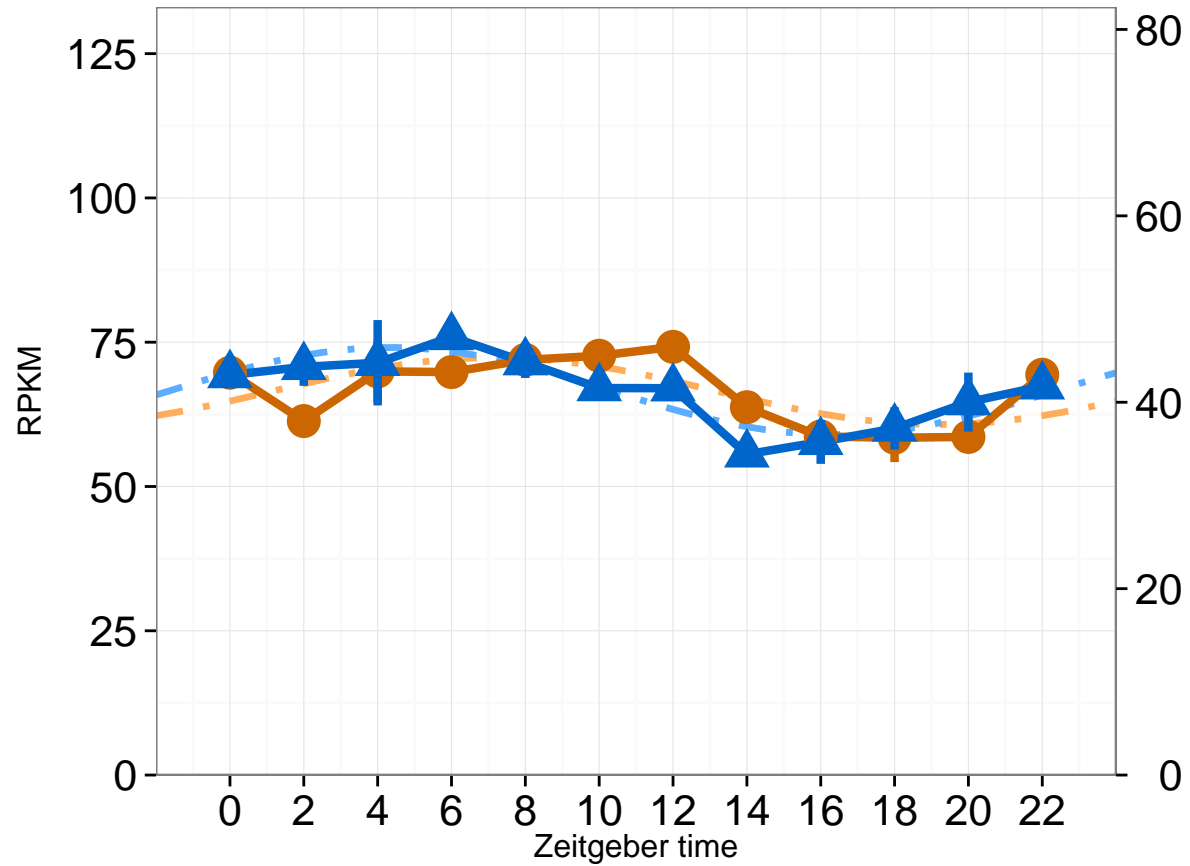

## Dcaf8

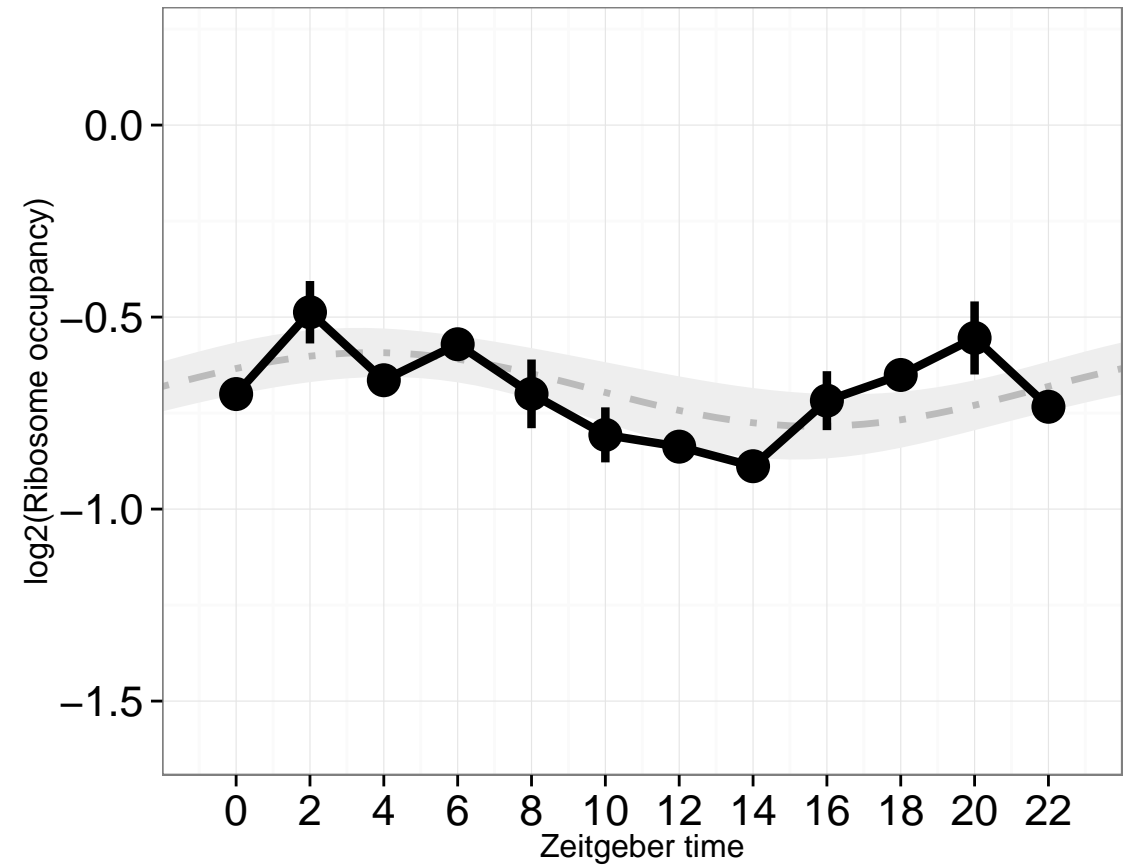

Supplement: SuppDataset_1.zip [file Dcaf8_set_A.pdf › Supplemental Dataset 1/A-mRNA_nonrhyth_translation_nonrhyth/Dcaf8_set_A.pdf]

# Dcbld2

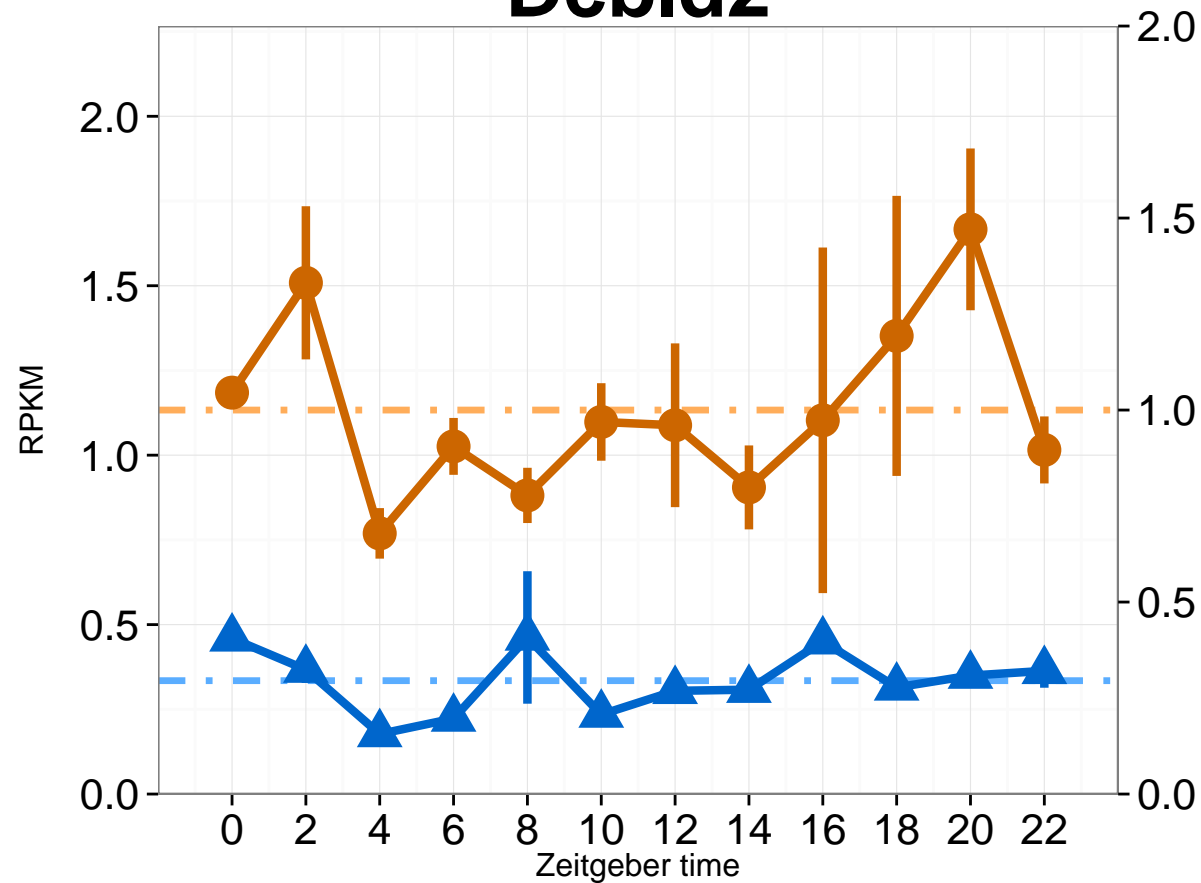

# Dcbld2

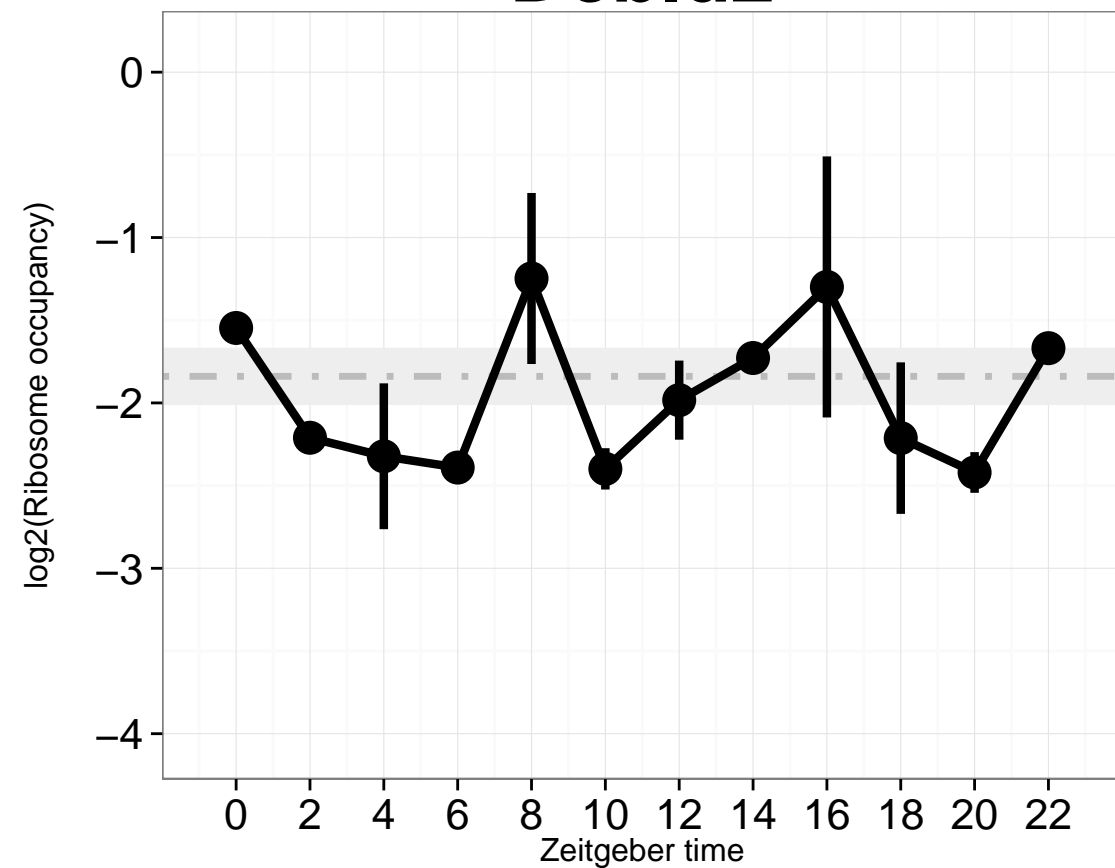

Supplement: SuppDataset_1.zip [file Dcbld2_set_A.pdf › Supplemental Dataset 1/A-mRNA_nonrhyth_translation_nonrhyth/Dcbld2_set_A.pdf]

# Dchs1

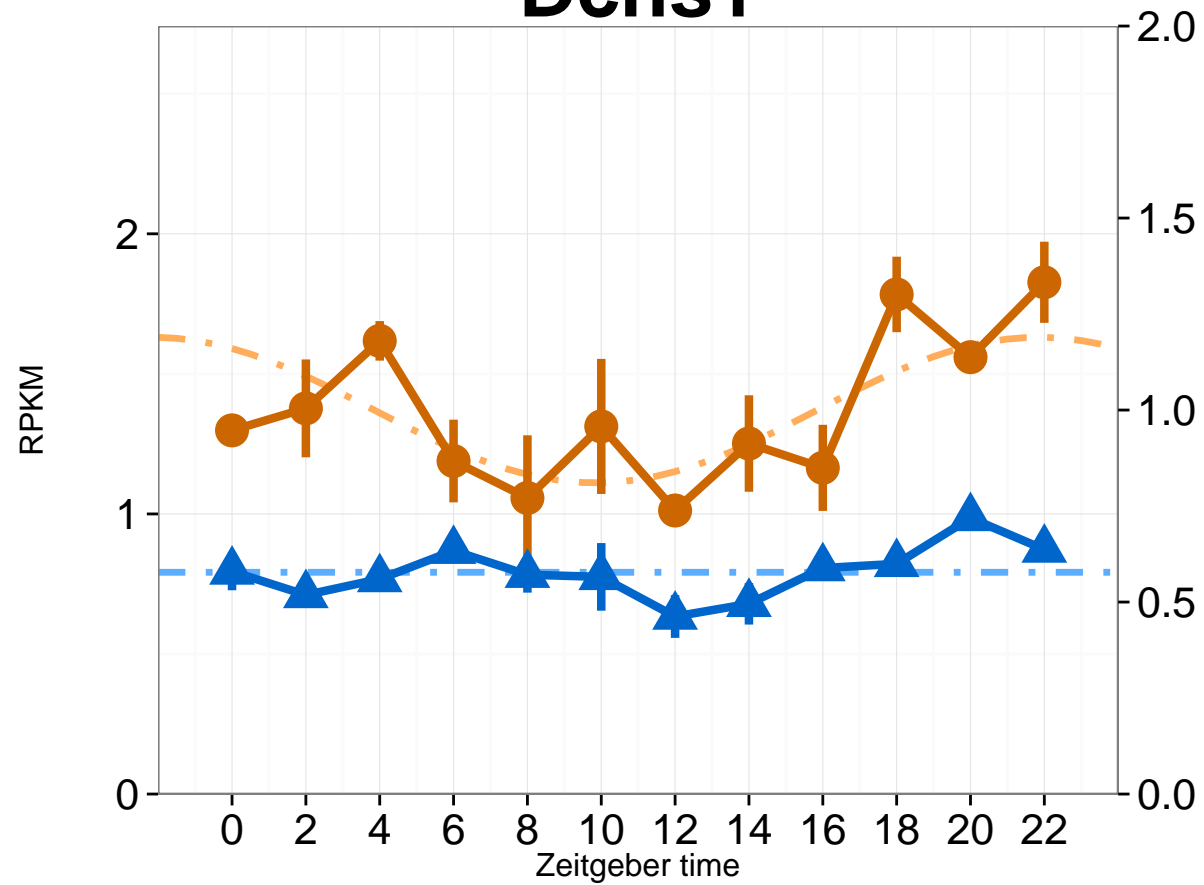

# Dchs1

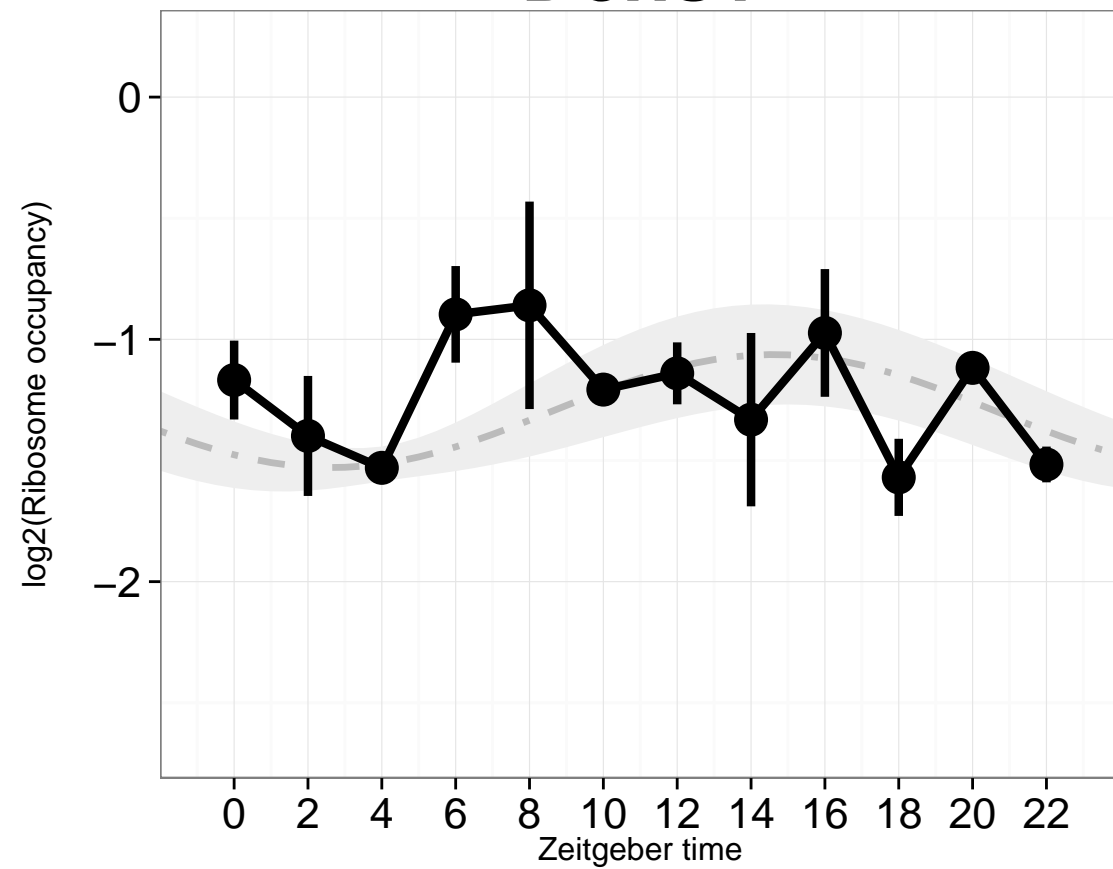

Supplement: SuppDataset_1.zip [file Dchs1_set_A.pdf › Supplemental Dataset 1/A-mRNA_nonrhyth_translation_nonrhyth/Dchs1_set_A.pdf]

## Dck

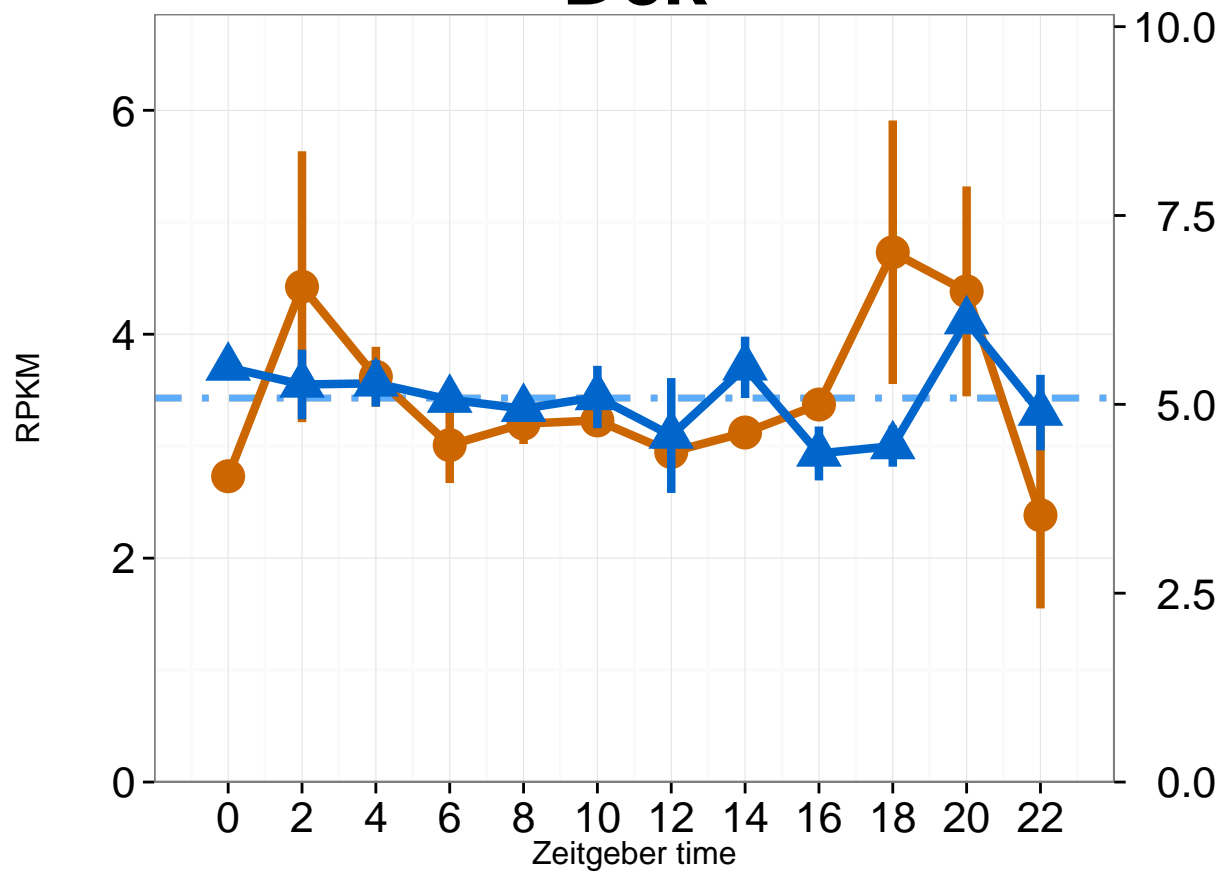

## Dck

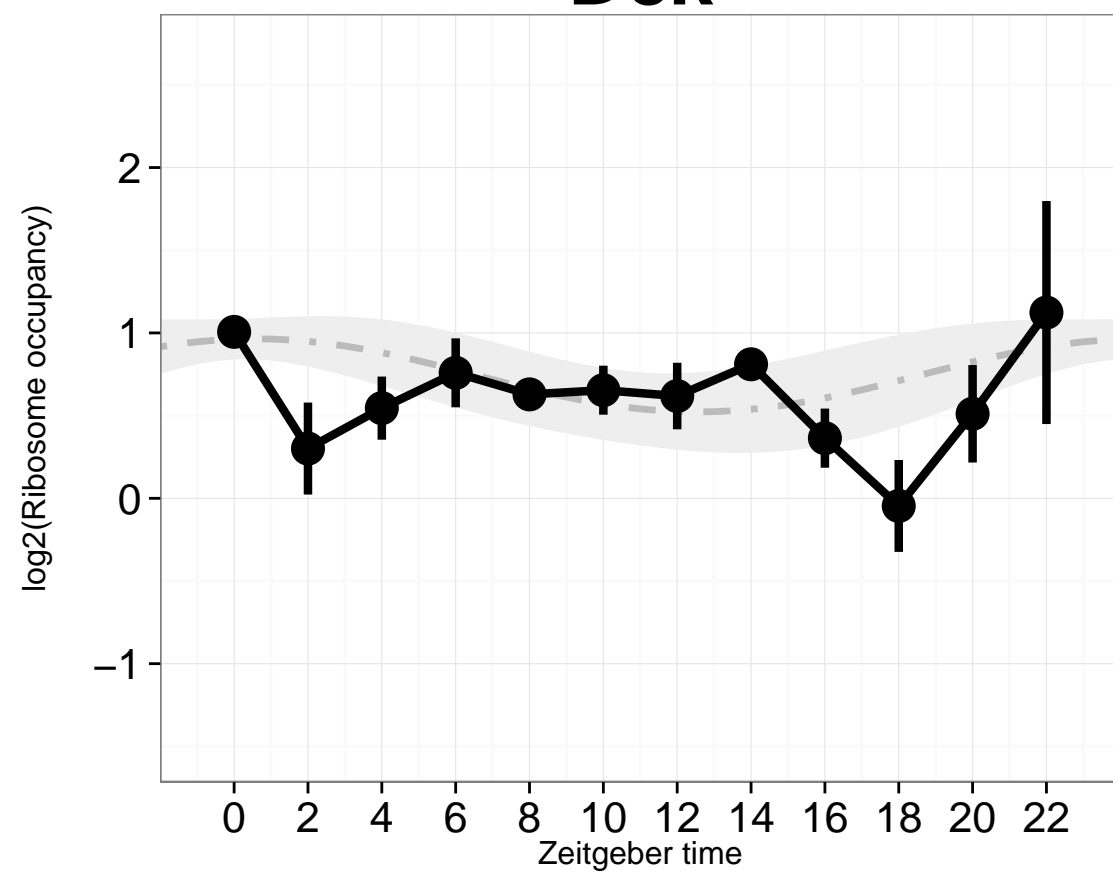

Supplement: SuppDataset_1.zip [file Dck_set_A.pdf › Supplemental Dataset 1/A-mRNA_nonrhyth_translation_nonrhyth/Dck_set_A.pdf]

# Dclre1b

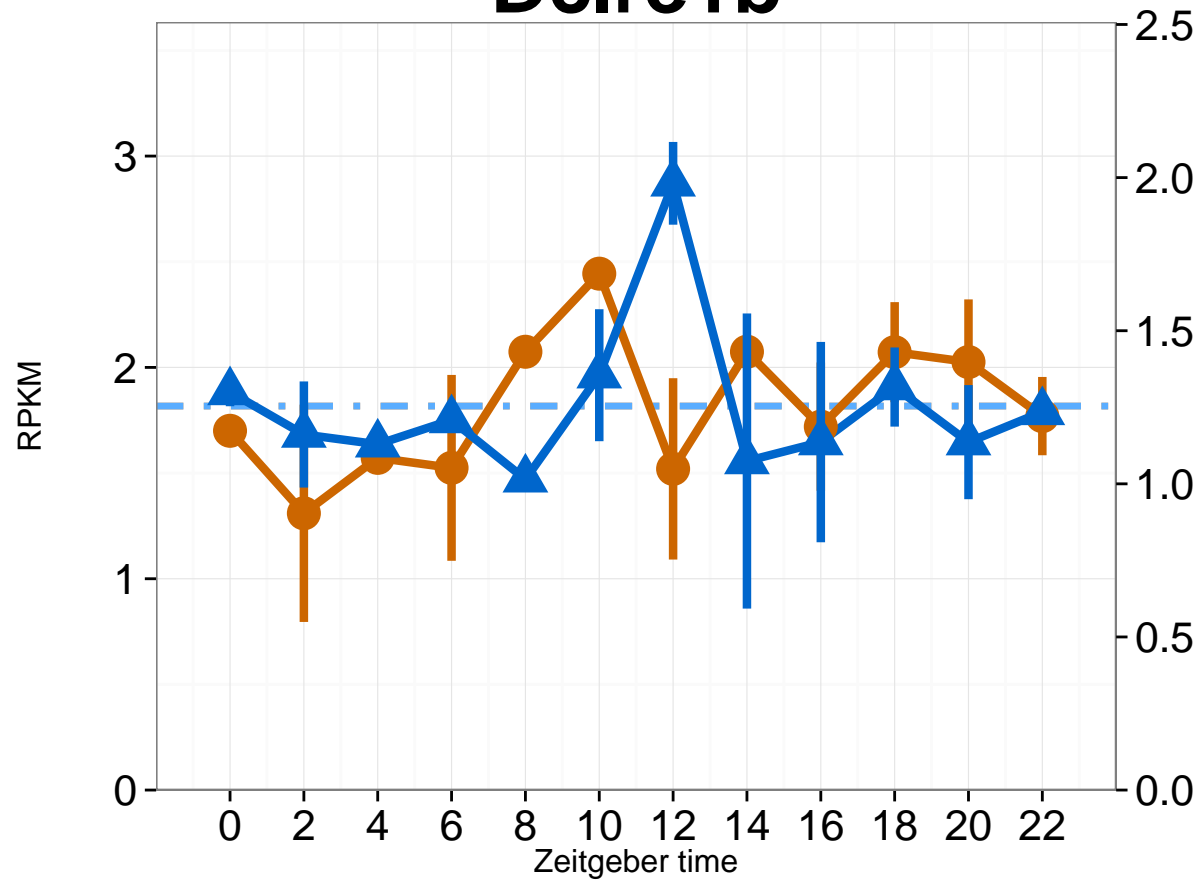

# Dclre1b

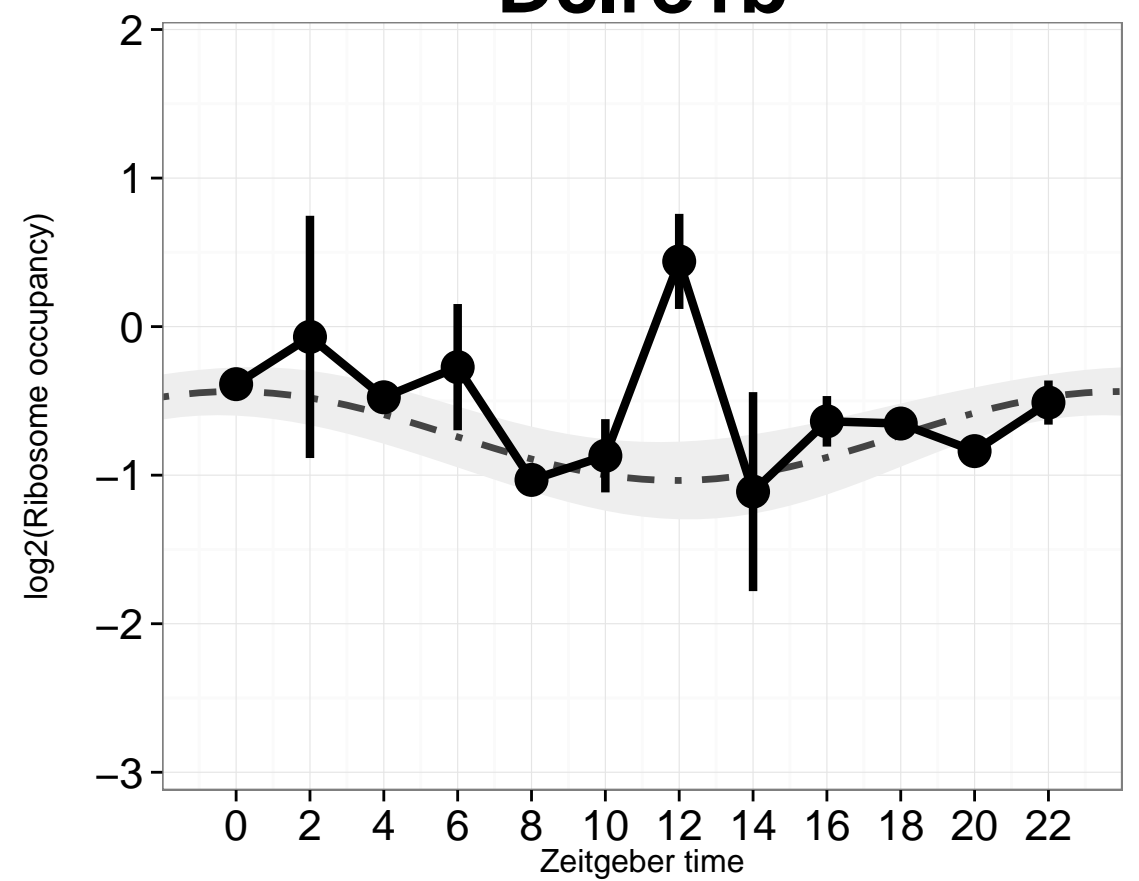

Supplement: SuppDataset_1.zip [file Dclre1b_set_A.pdf › Supplemental Dataset 1/A-mRNA_nonrhyth_translation_nonrhyth/Dclre1b_set_A.pdf]

# Dcp1a

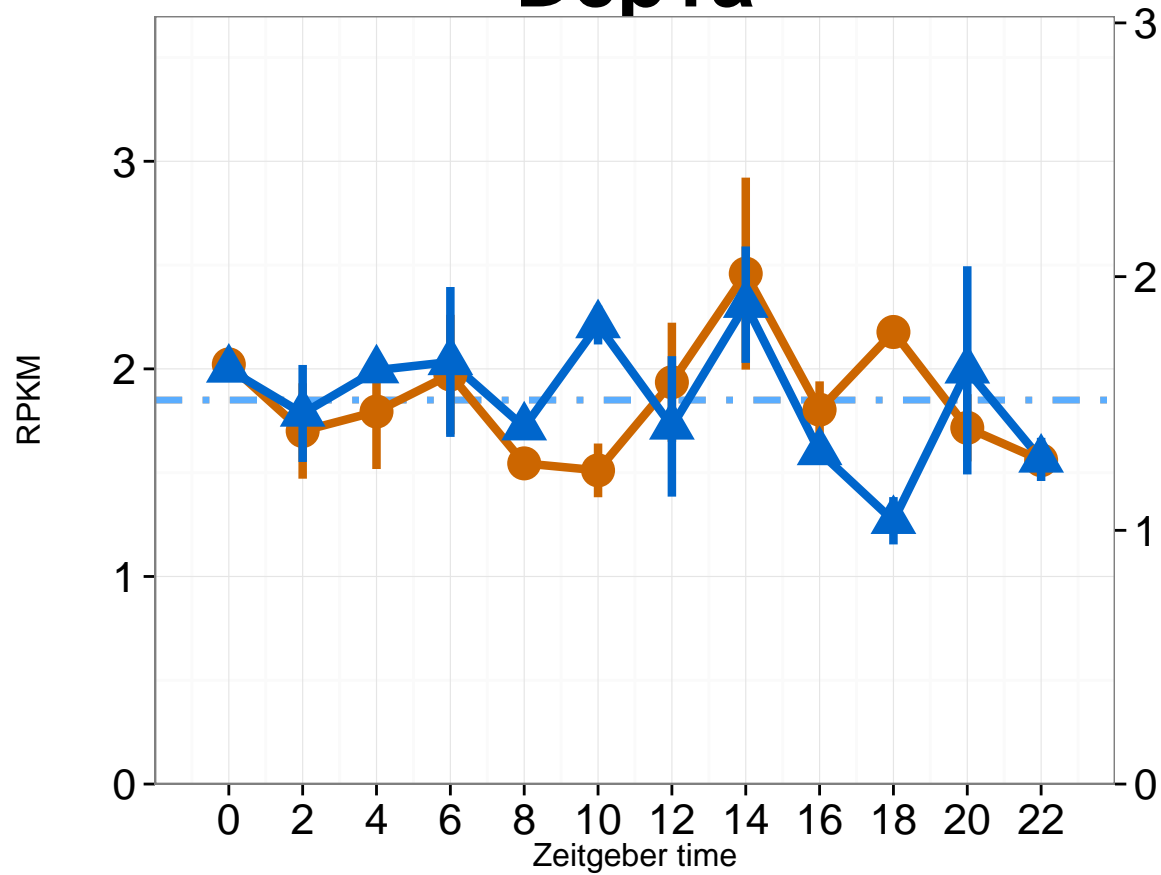

# Dcp1a

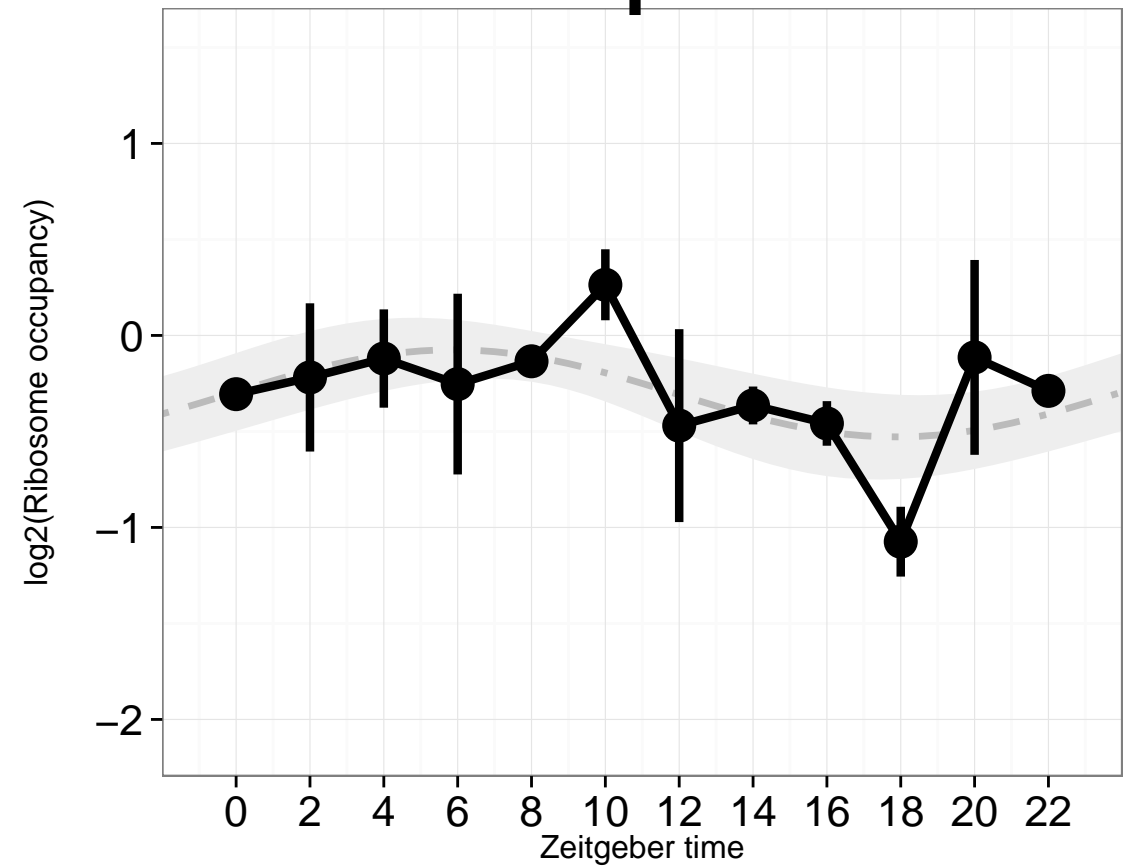

Supplement: SuppDataset_1.zip [file Dcp1a_set_A.pdf › Supplemental Dataset 1/A-mRNA_nonrhyth_translation_nonrhyth/Dcp1a_set_A.pdf]

# Dcp2

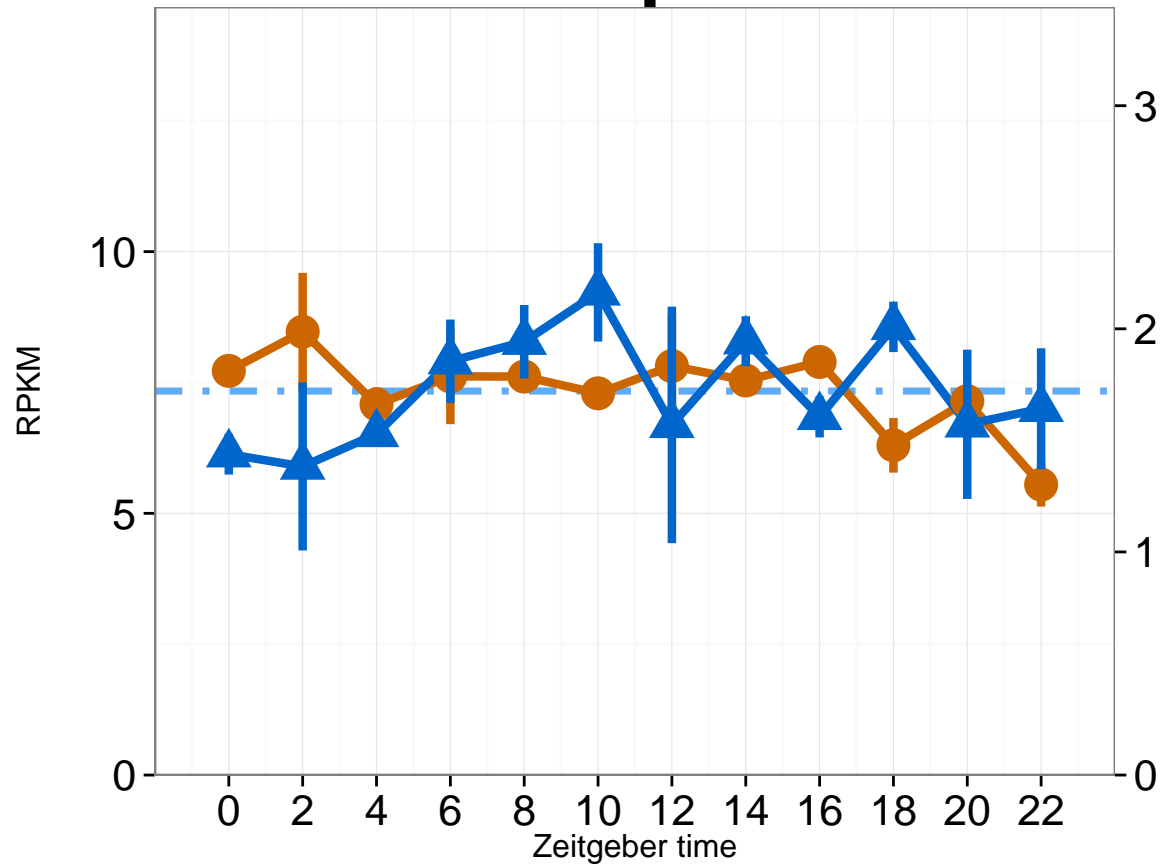

# Dcp2

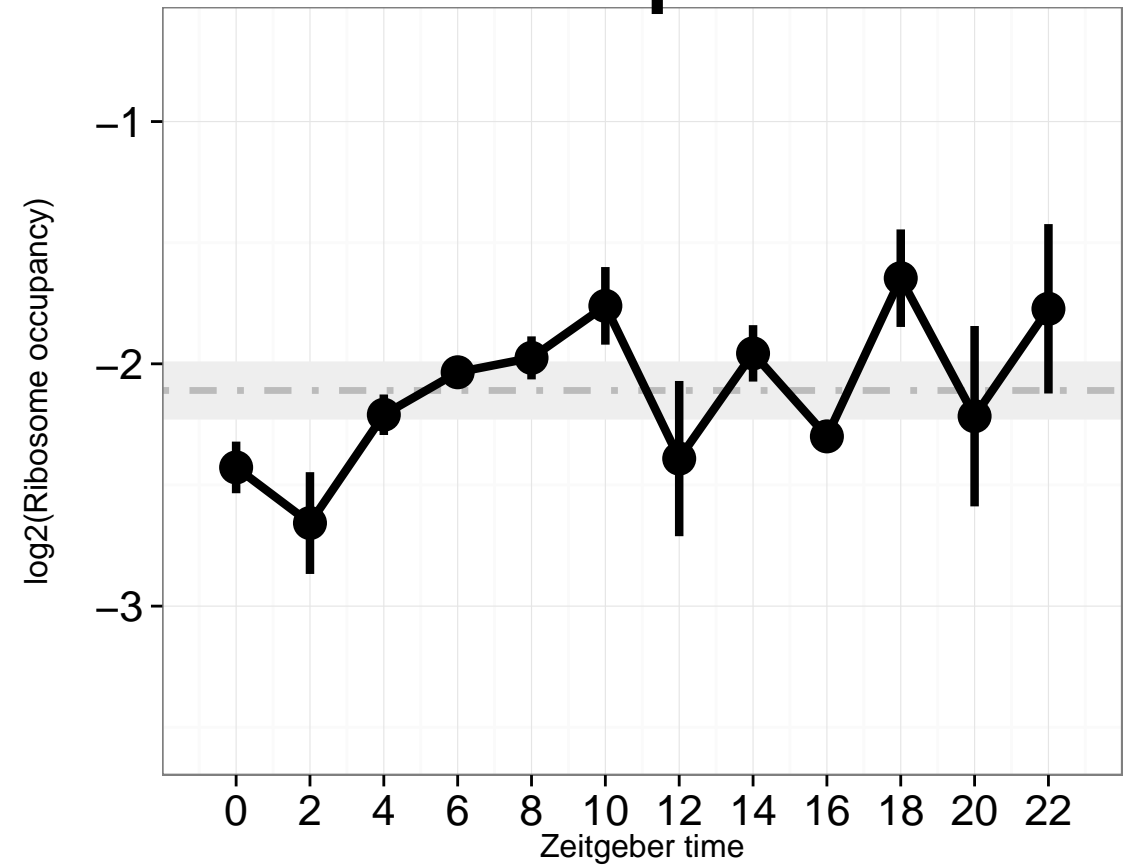

Supplement: SuppDataset_1.zip [file Dcp2_set_A.pdf › Supplemental Dataset 1/A-mRNA_nonrhyth_translation_nonrhyth/Dcp2_set_A.pdf]

## Dcps

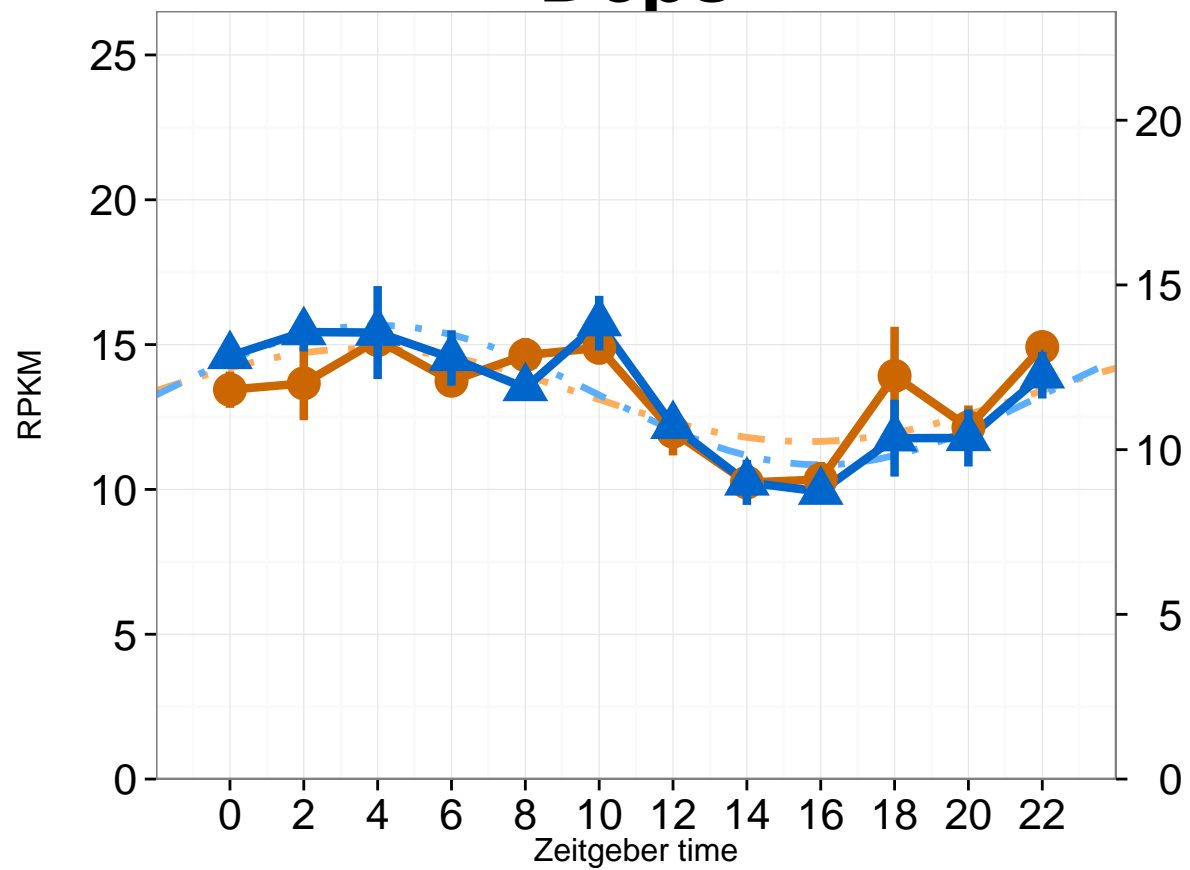

## Dcps

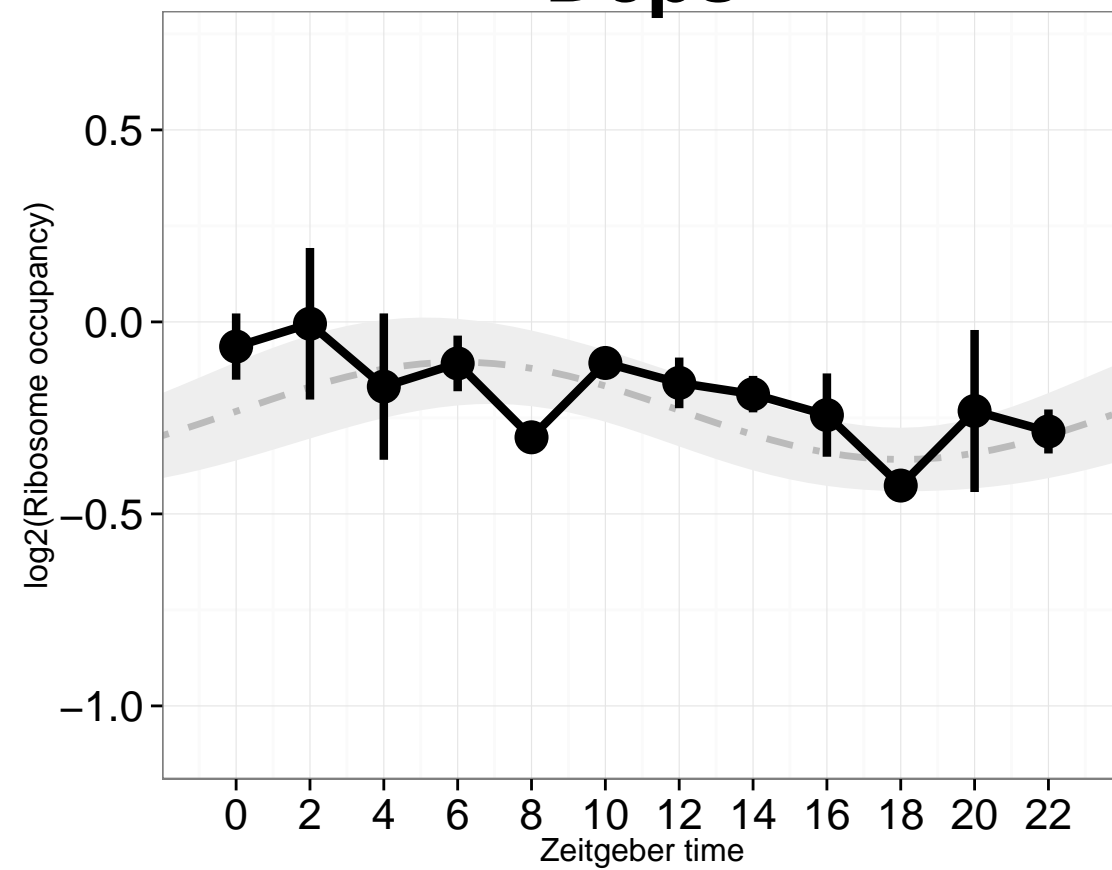

Supplement: SuppDataset_1.zip [file Dcps_set_A.pdf › Supplemental Dataset 1/A-mRNA_nonrhyth_translation_nonrhyth/Dcps_set_A.pdf]

## Dct

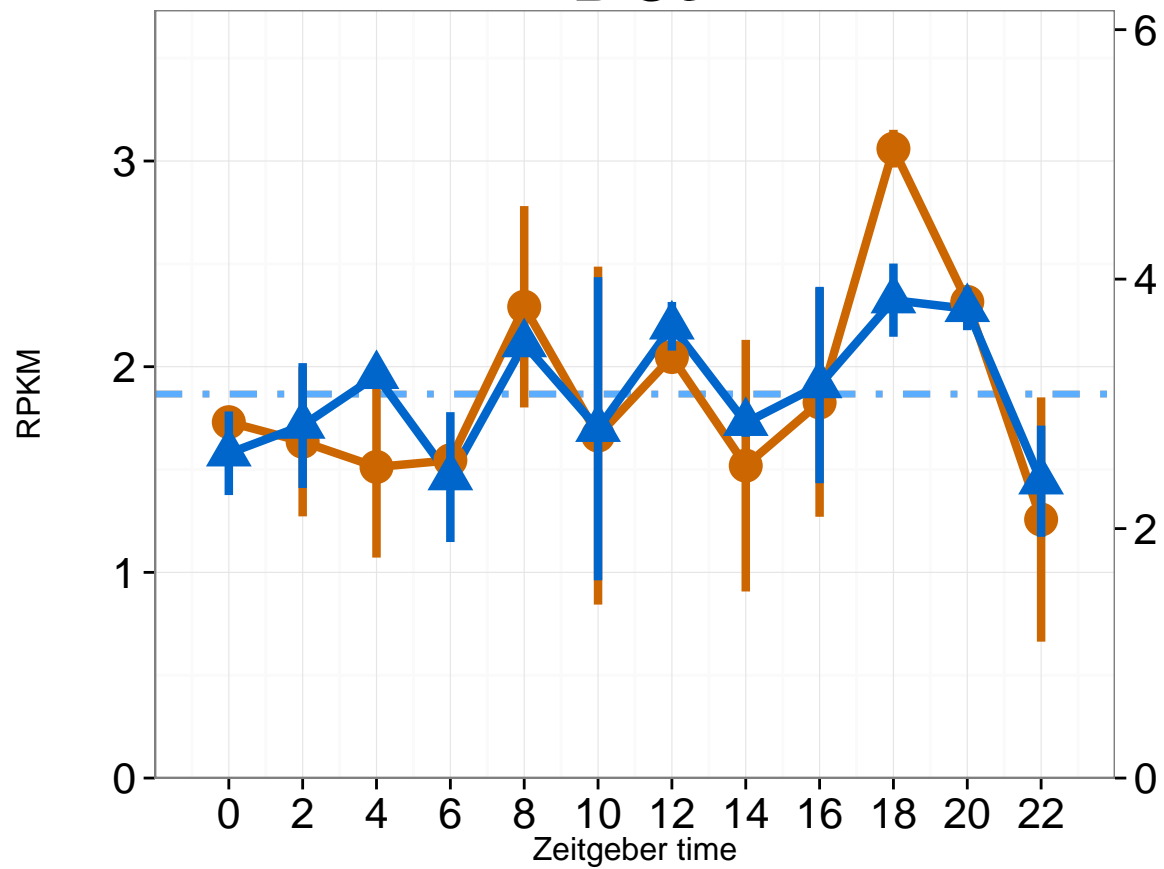

## Dct

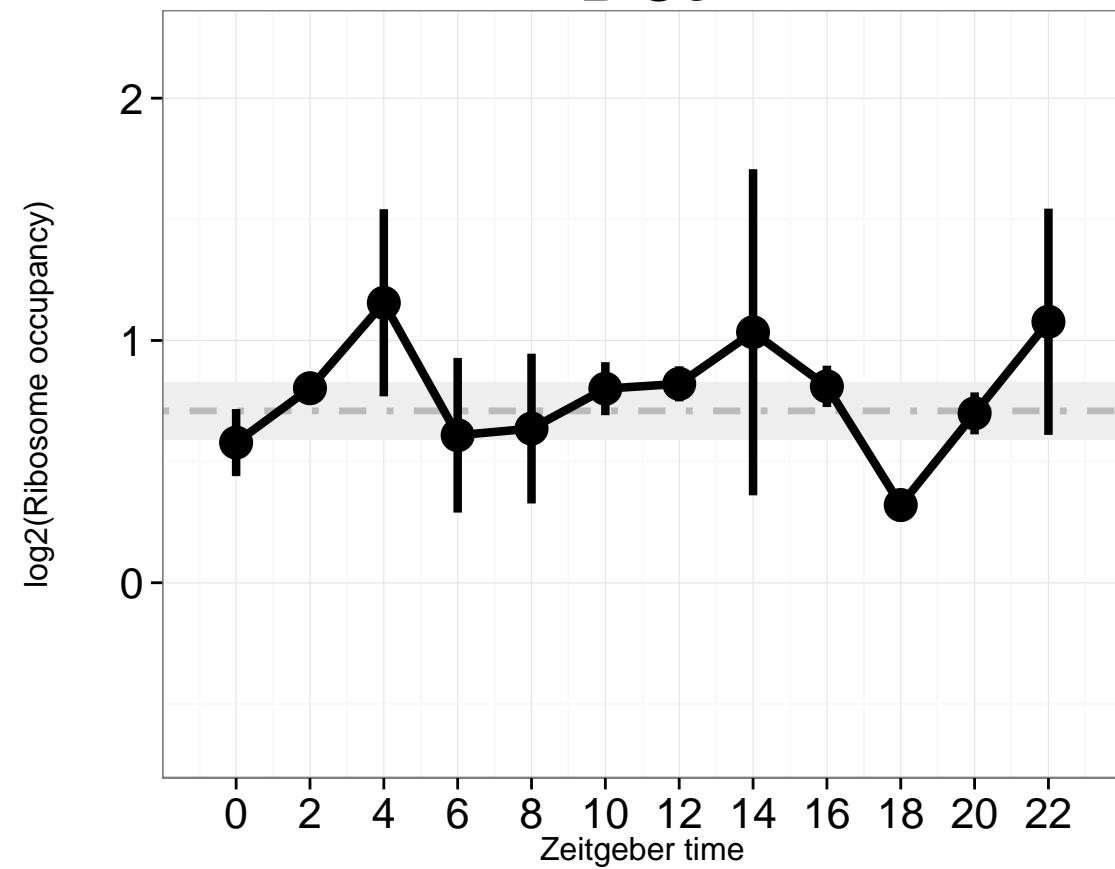

Supplement: SuppDataset_1.zip [file Dct_set_A.pdf › Supplemental Dataset 1/A-mRNA_nonrhyth_translation_nonrhyth/Dct_set_A.pdf]

# Dctn2

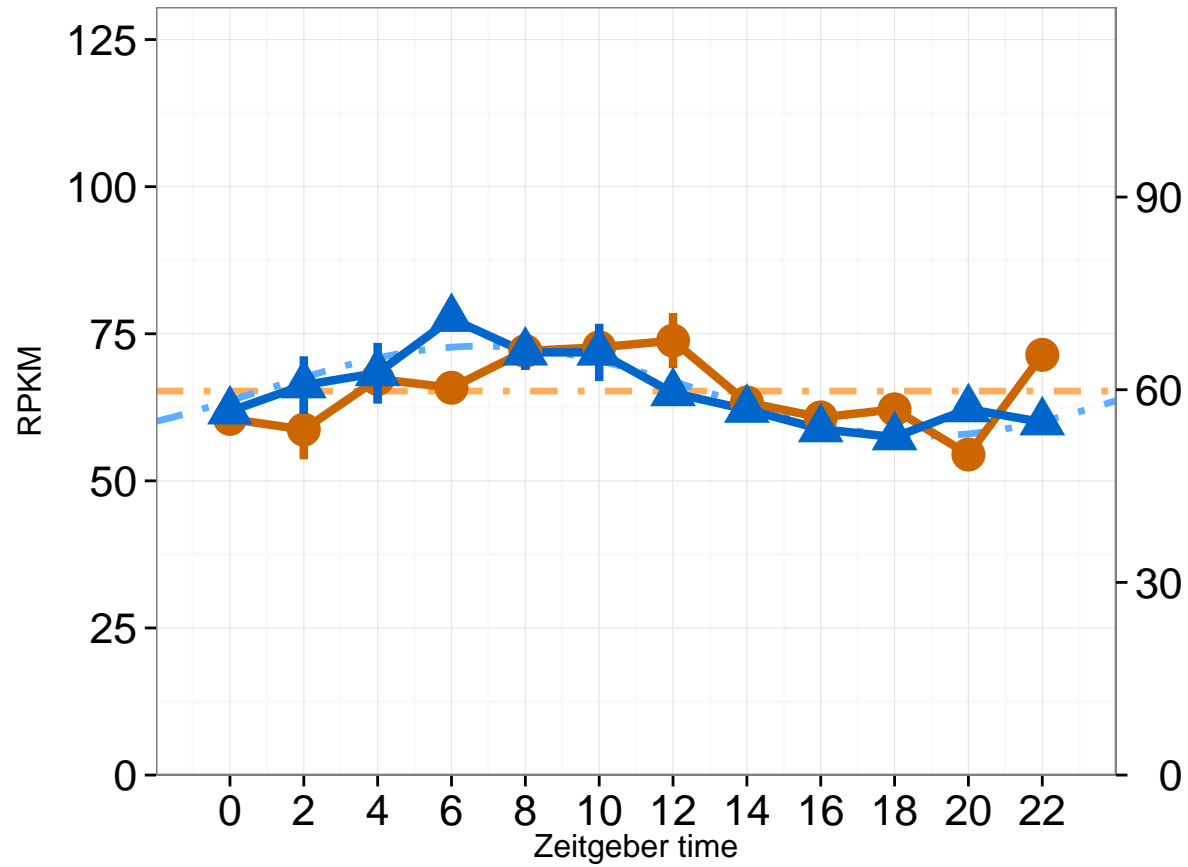

# Dctn2

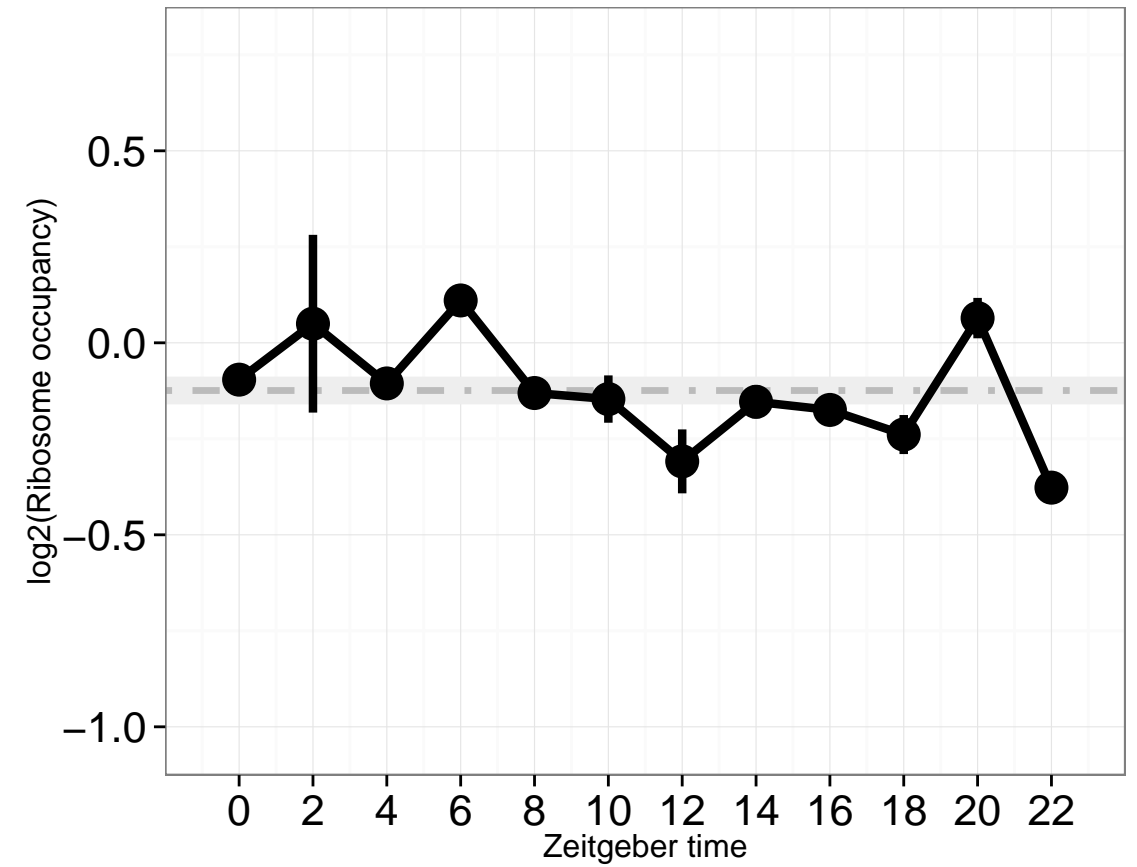

Supplement: SuppDataset_1.zip [file Dctn2_set_A.pdf › Supplemental Dataset 1/A-mRNA_nonrhyth_translation_nonrhyth/Dctn2_set_A.pdf]

# Dctn3

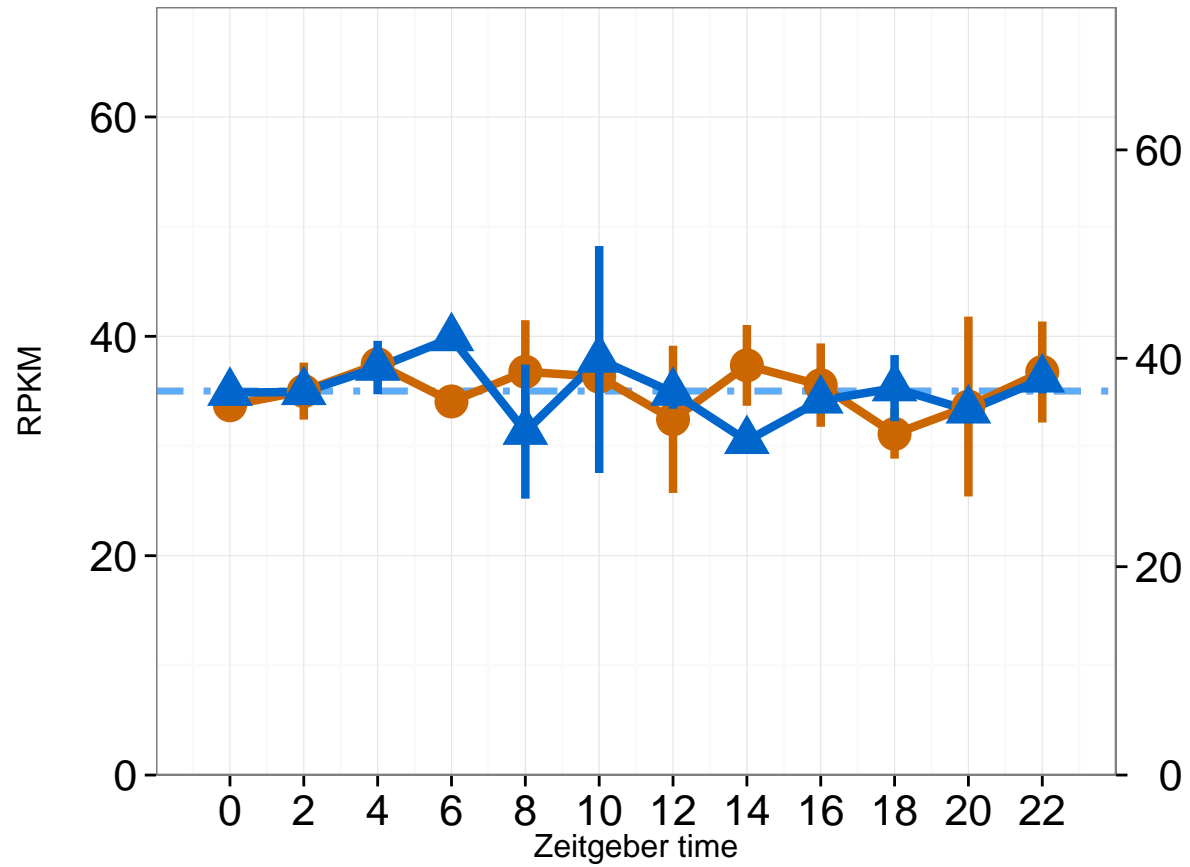

# Dctn3

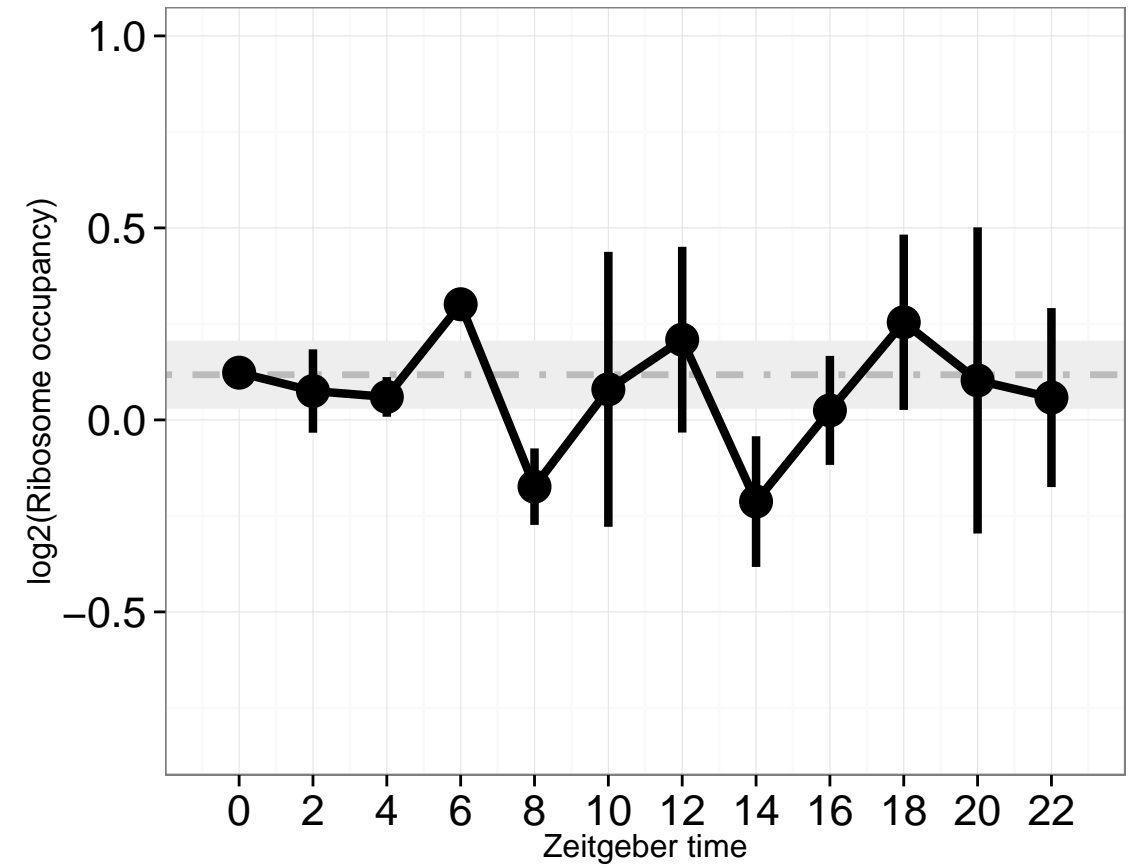

Supplement: SuppDataset_1.zip [file Dctn3_set_A.pdf › Supplemental Dataset 1/A-mRNA_nonrhyth_translation_nonrhyth/Dctn3_set_A.pdf]

# Dctn4

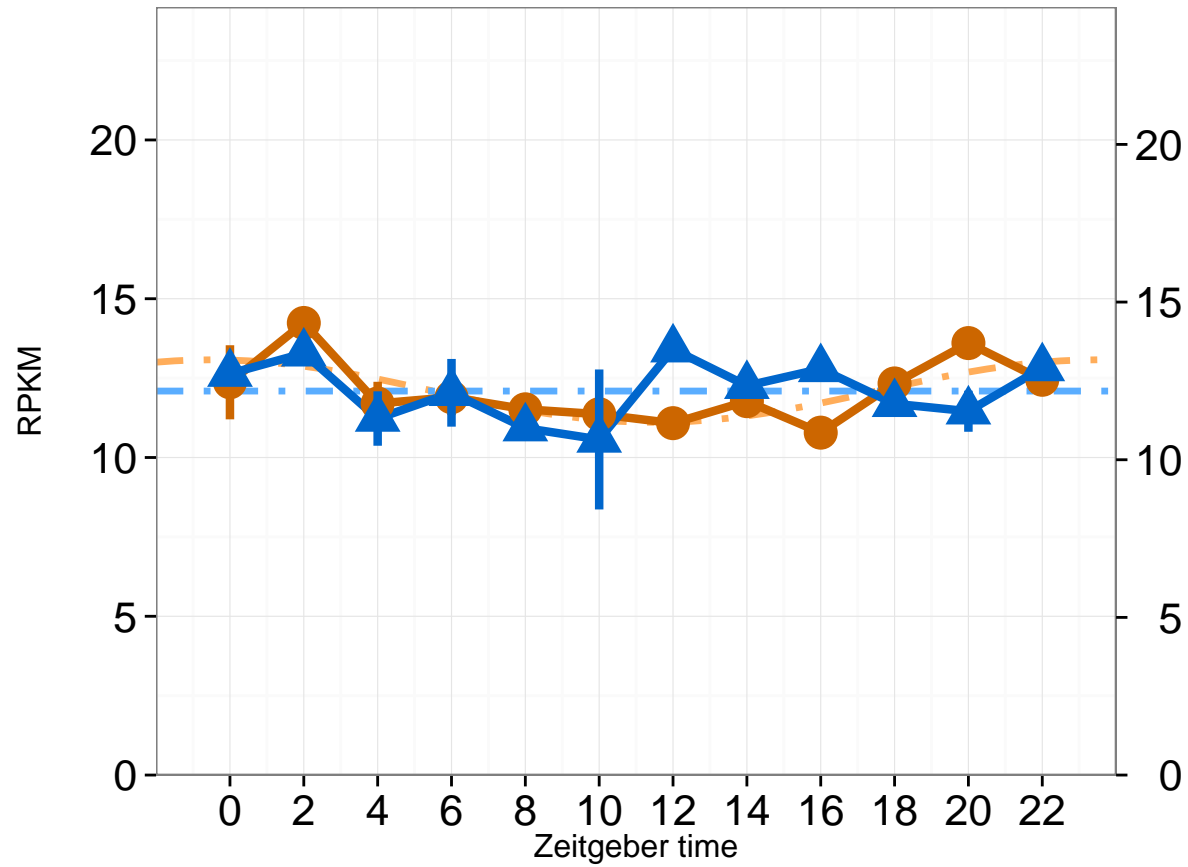

# Dctn4

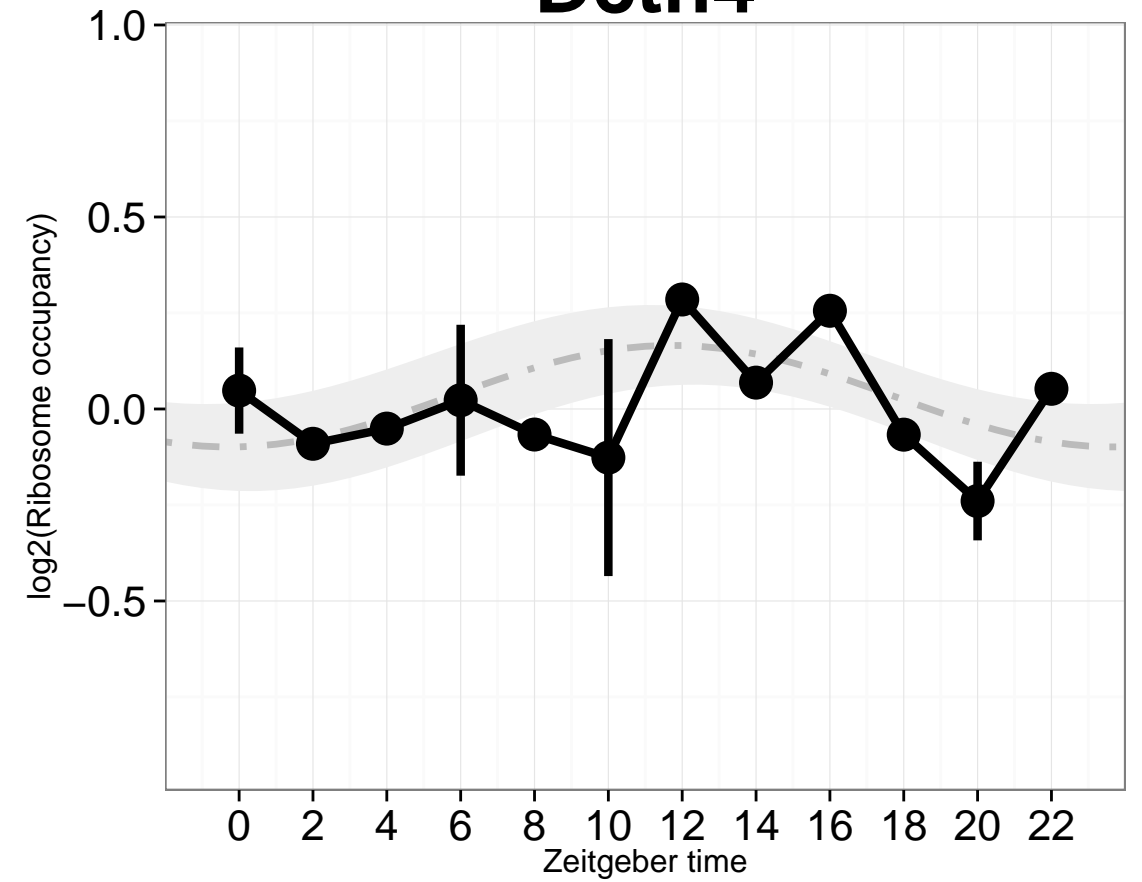

Supplement: SuppDataset_1.zip [file Dctn4_set_A.pdf › Supplemental Dataset 1/A-mRNA_nonrhyth_translation_nonrhyth/Dctn4_set_A.pdf]

# Dctn5

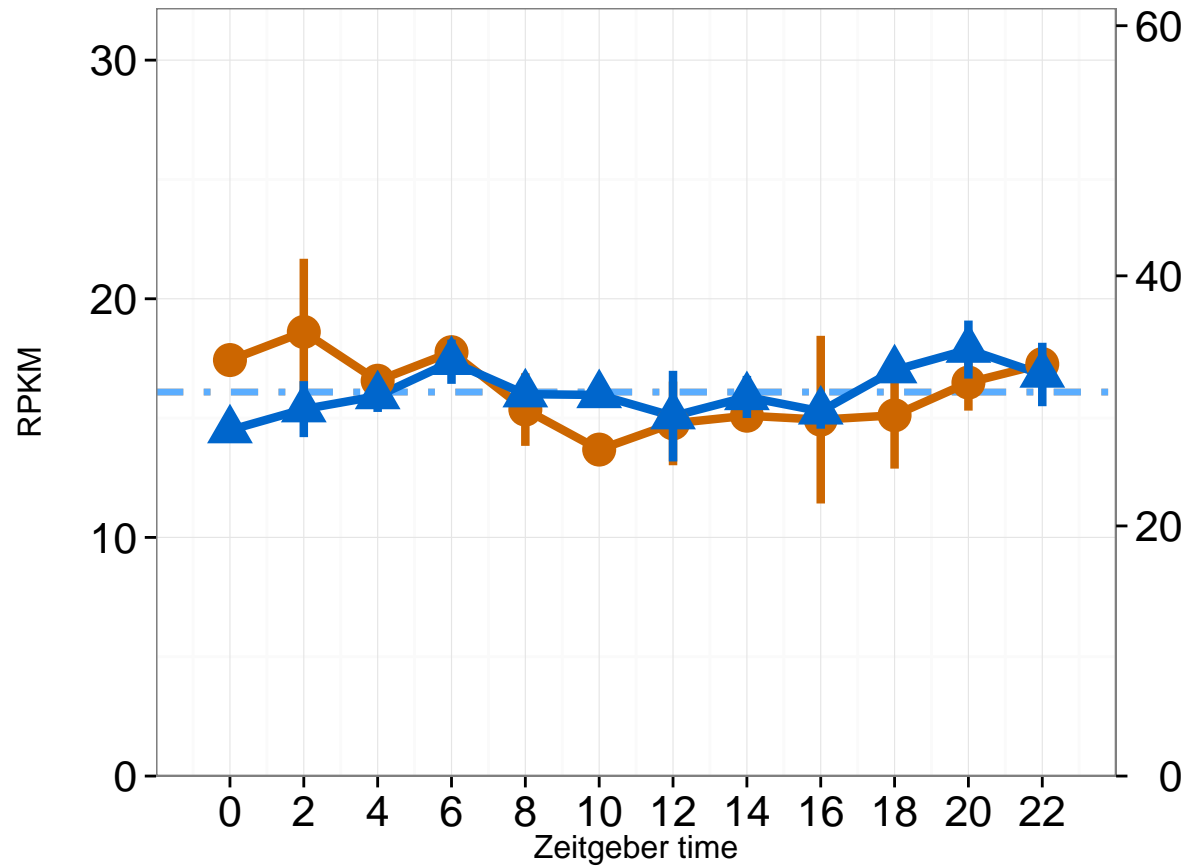

# Dctn5

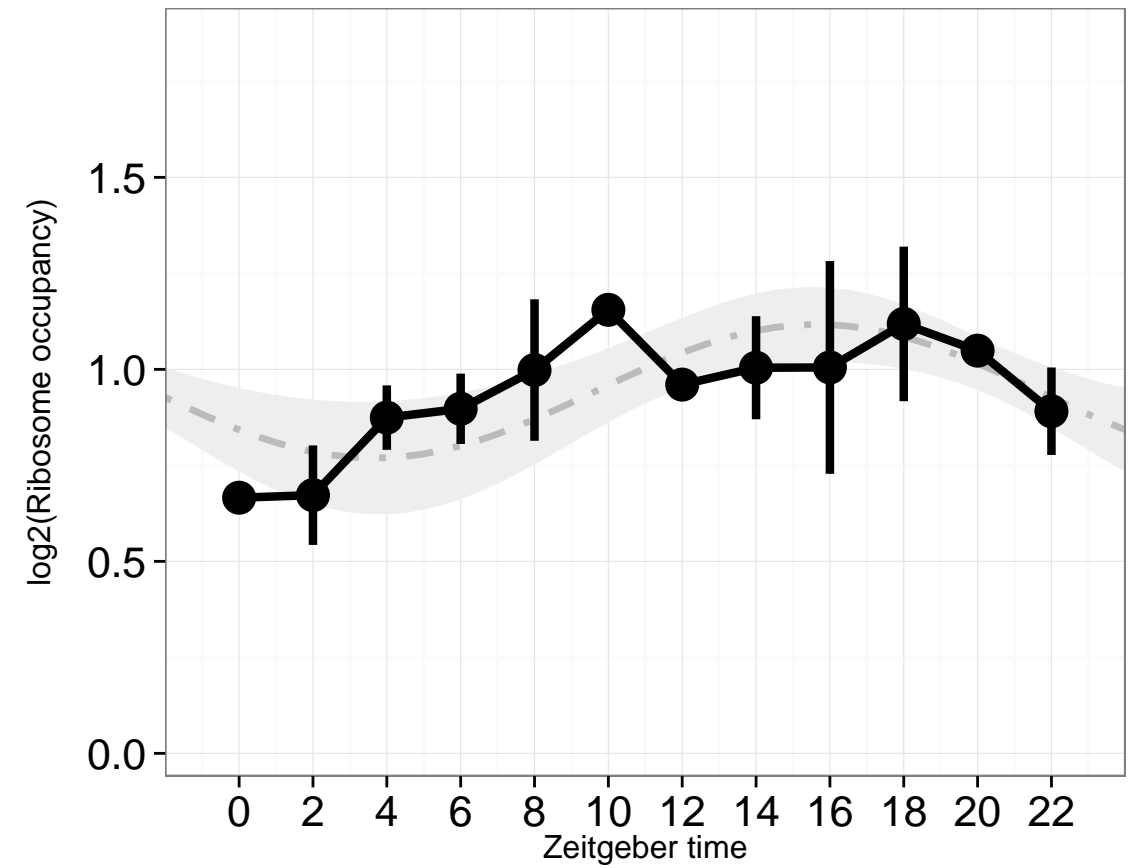

Supplement: SuppDataset_1.zip [file Dctn5_set_A.pdf › Supplemental Dataset 1/A-mRNA_nonrhyth_translation_nonrhyth/Dctn5_set_A.pdf]

# Dctn6

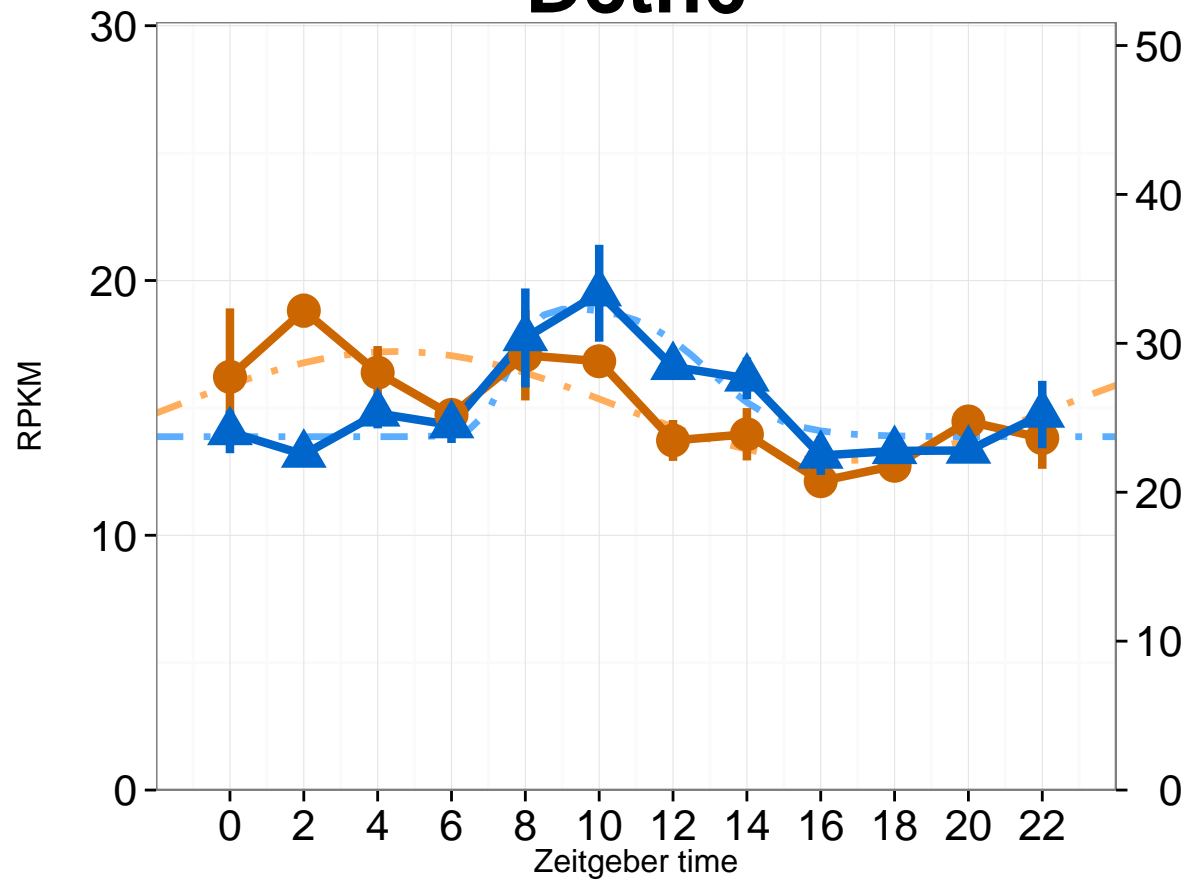

# Dctn6

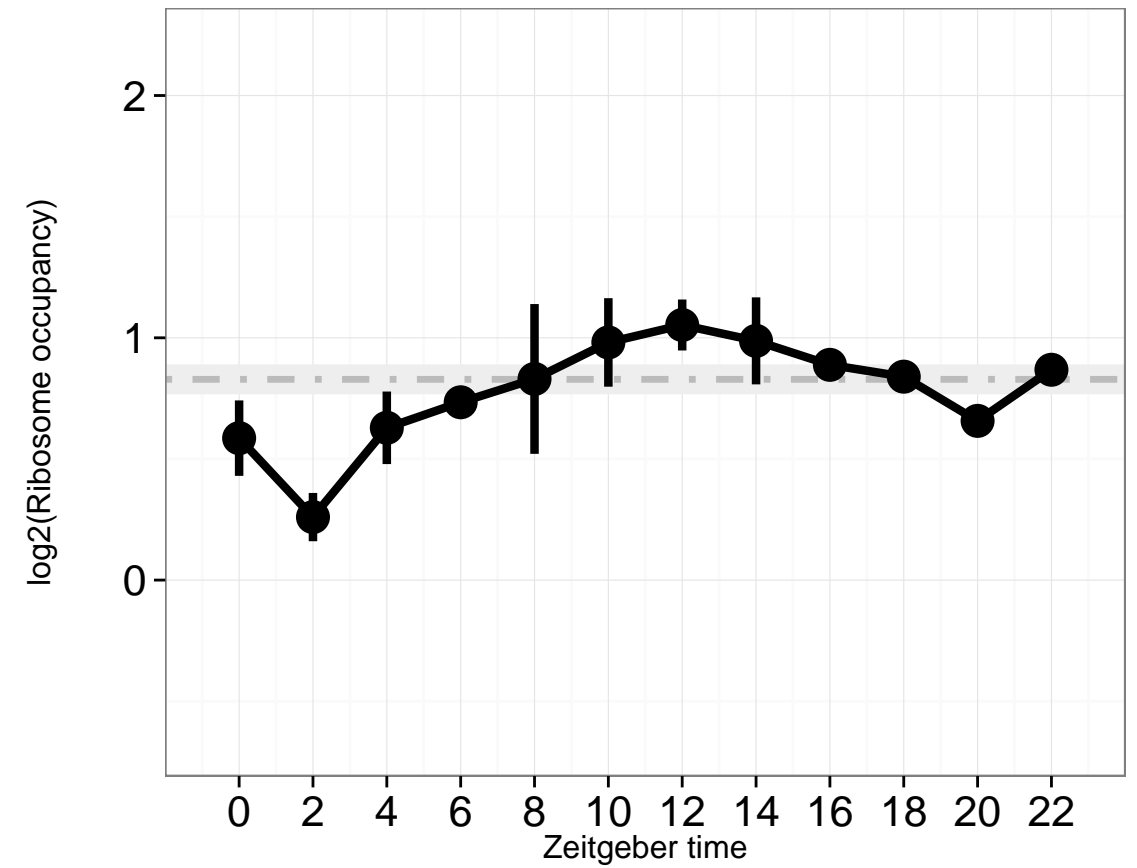

Supplement: SuppDataset_1.zip [file Dctn6_set_A.pdf › Supplemental Dataset 1/A-mRNA_nonrhyth_translation_nonrhyth/Dctn6_set_A.pdf]

# Dctpp1

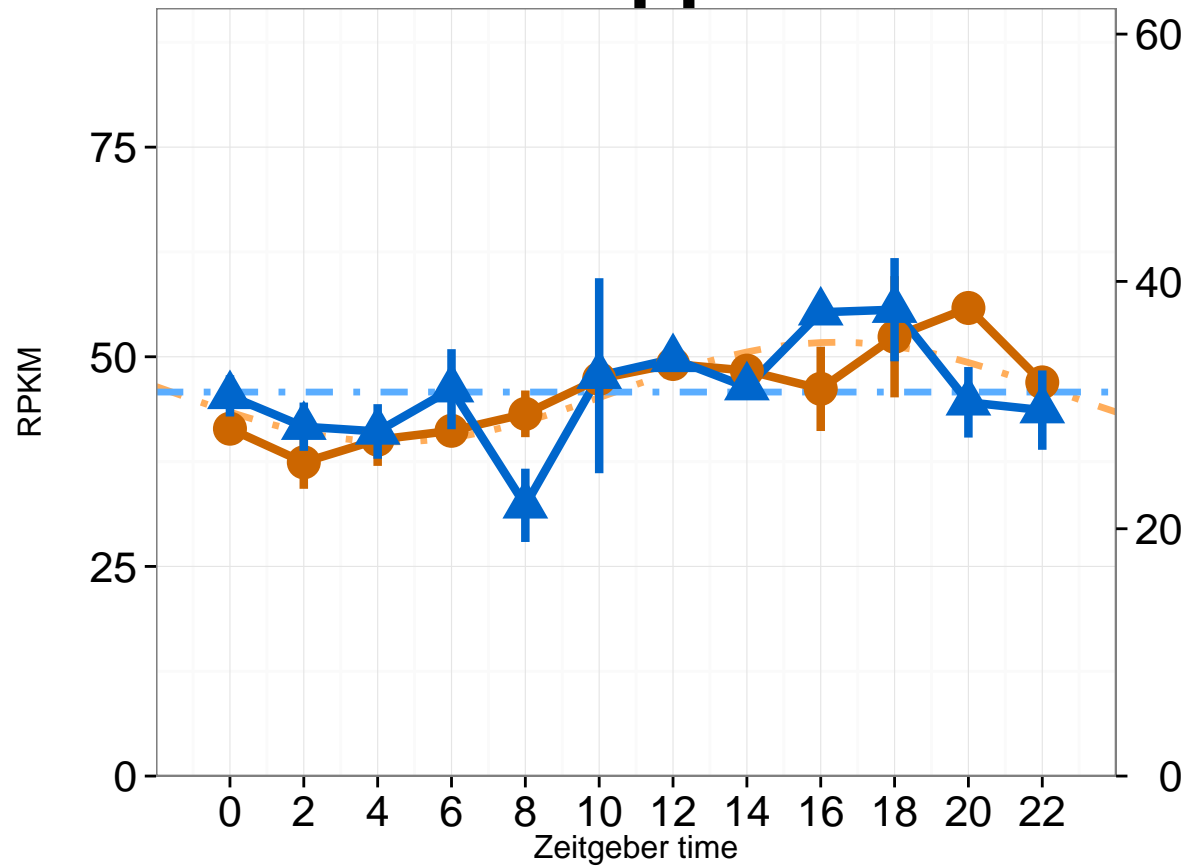

# Dctpp1

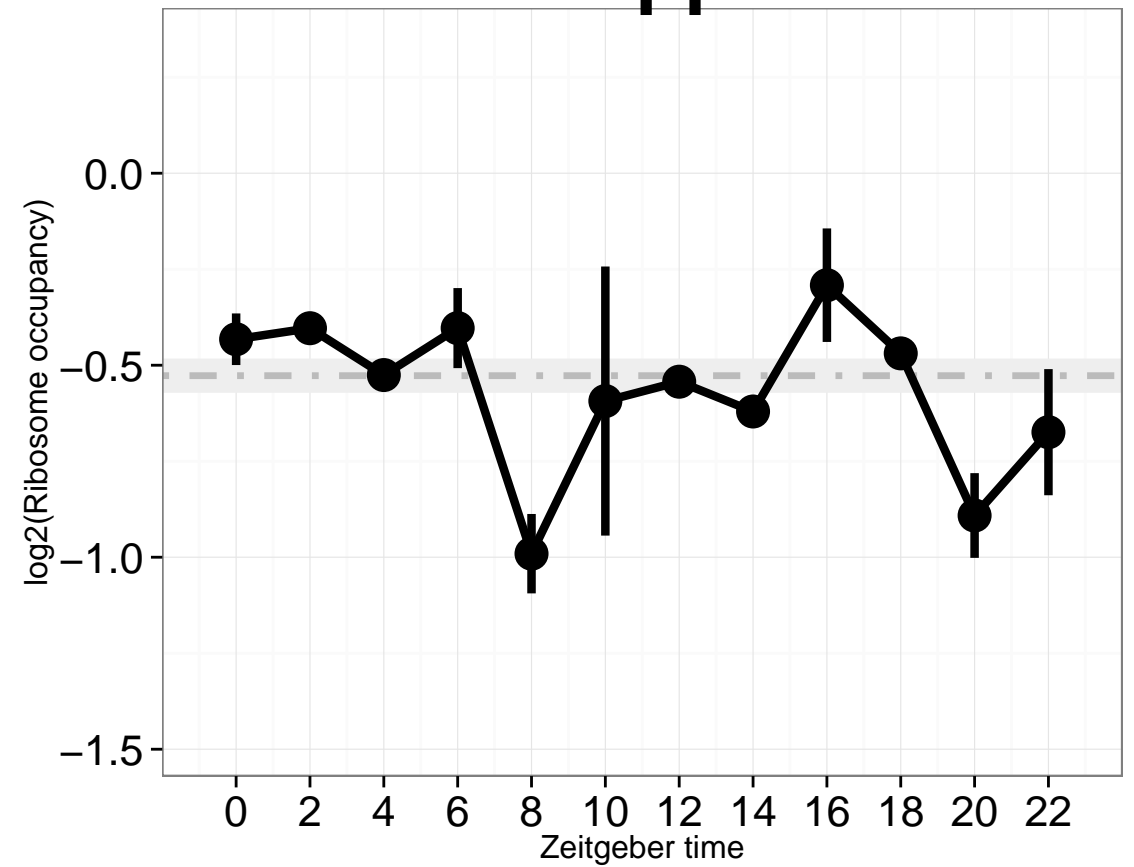

Supplement: SuppDataset_1.zip [file Dctpp1_set_A.pdf › Supplemental Dataset 1/A-mRNA_nonrhyth_translation_nonrhyth/Dctpp1_set_A.pdf]

# Dcun1d1

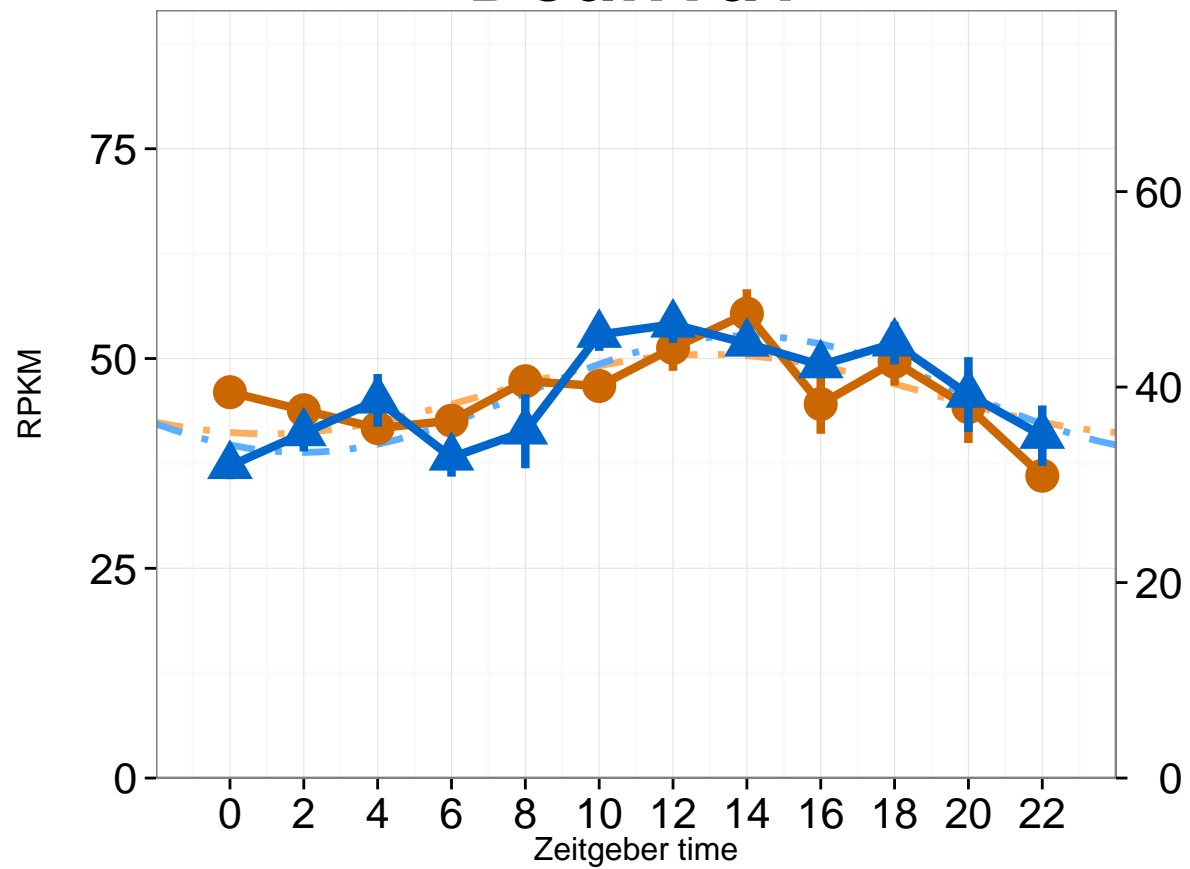

# Dcun1d1

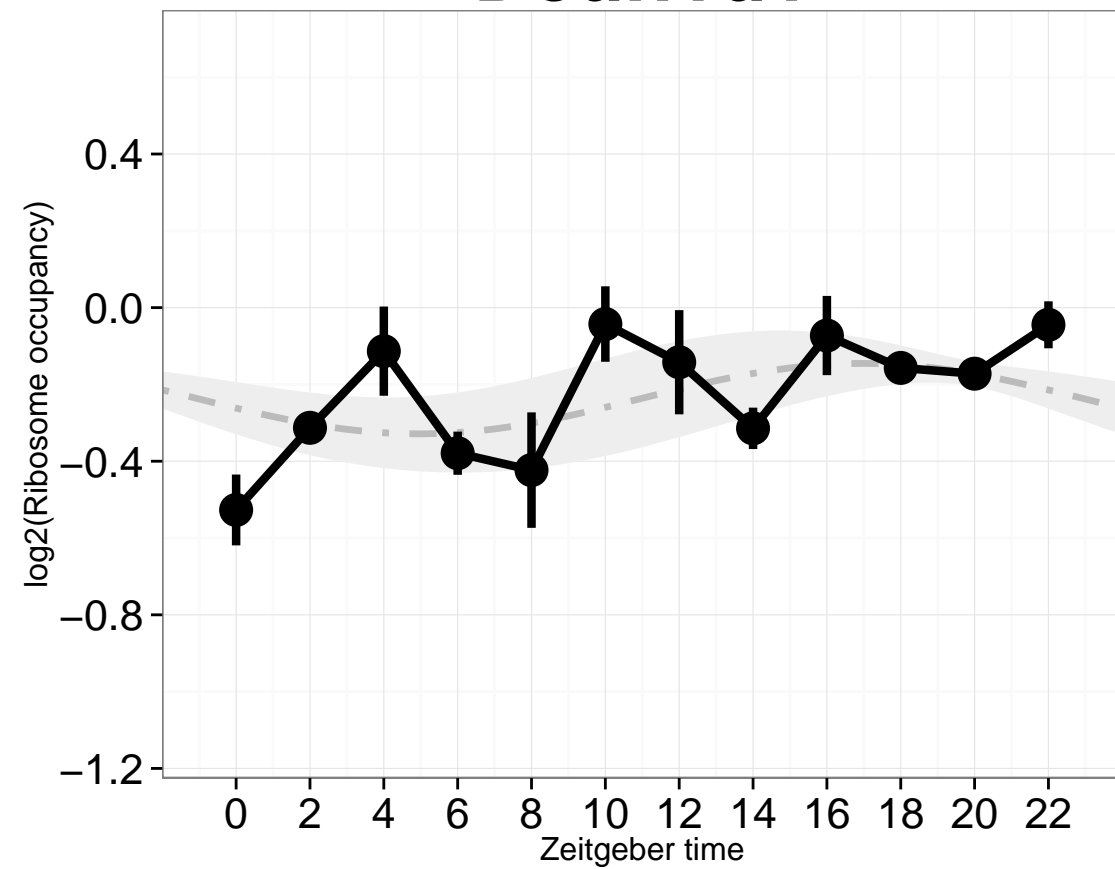

Supplement: SuppDataset_1.zip [file Dcun1d1_set_A.pdf › Supplemental Dataset 1/A-mRNA_nonrhyth_translation_nonrhyth/Dcun1d1_set_A.pdf]

# Dcun1d5

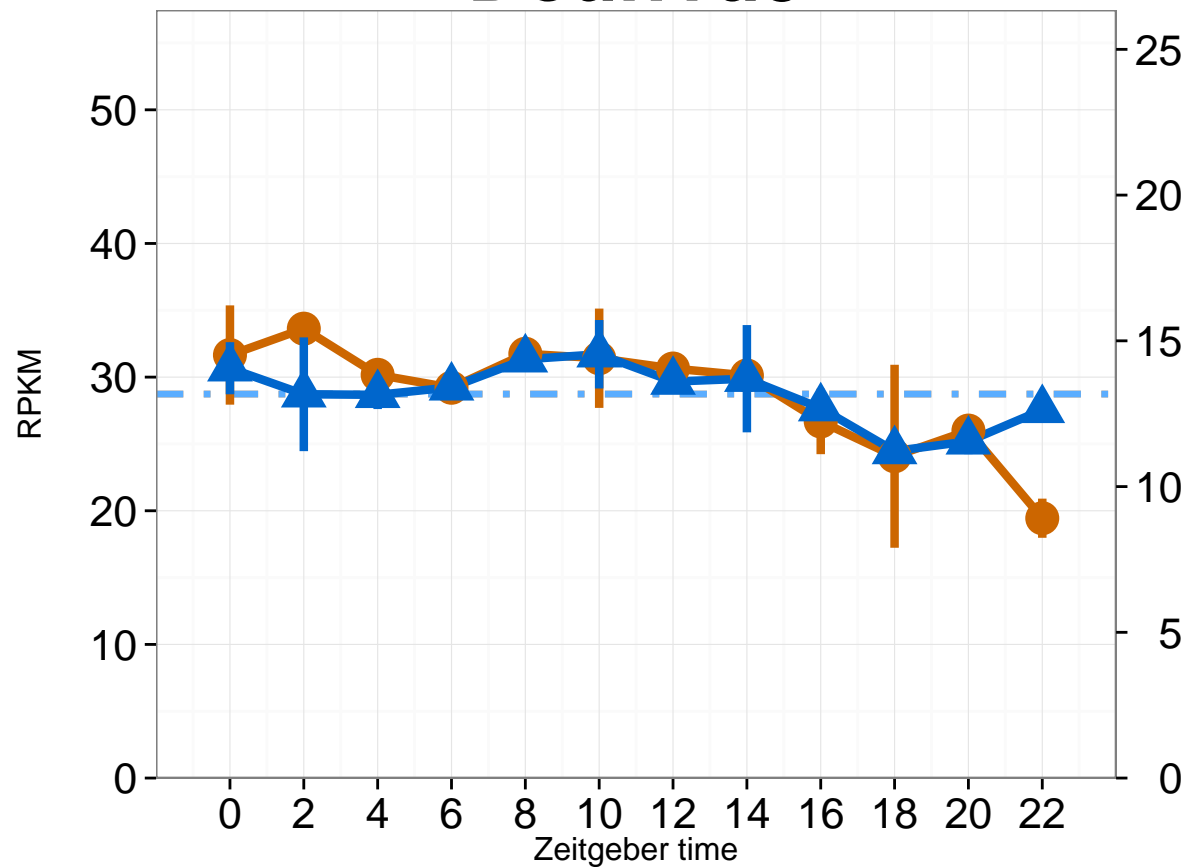

# Dcun1d5

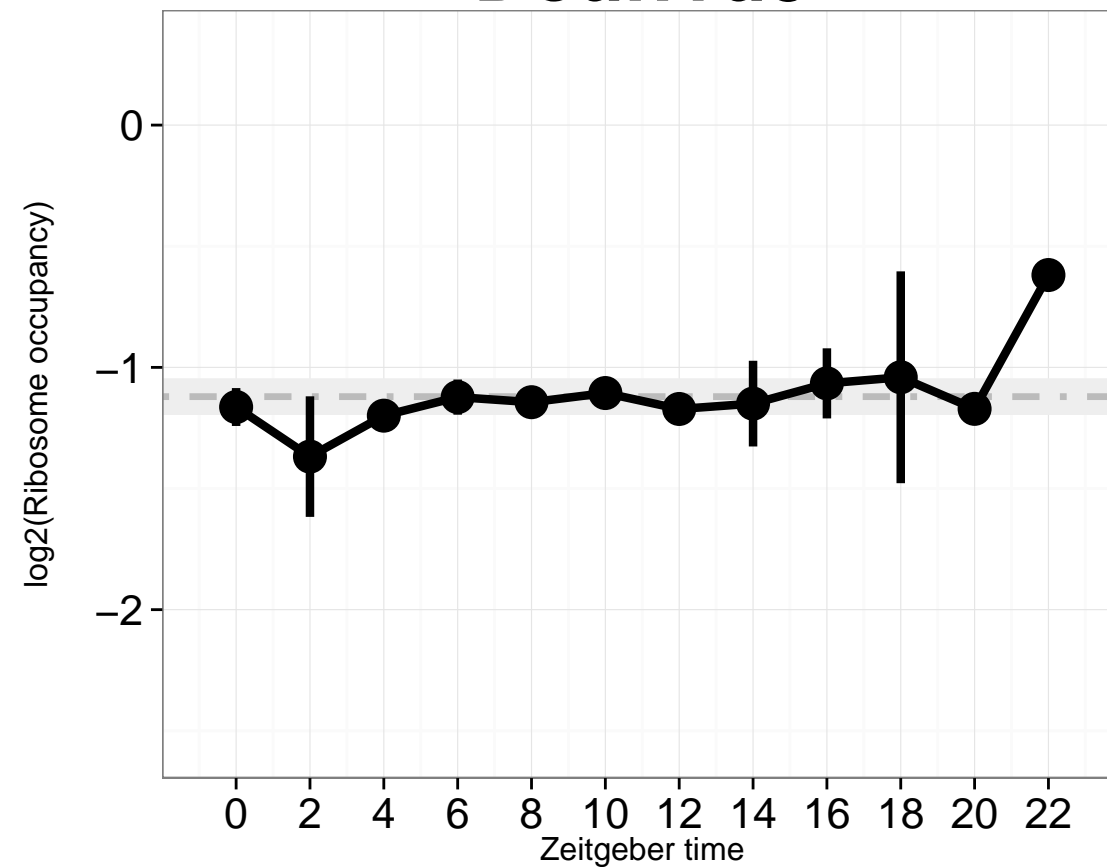

Supplement: SuppDataset_1.zip [file Dcun1d5_set_A.pdf › Supplemental Dataset 1/A-mRNA_nonrhyth_translation_nonrhyth/Dcun1d5_set_A.pdf]

# Dcxr

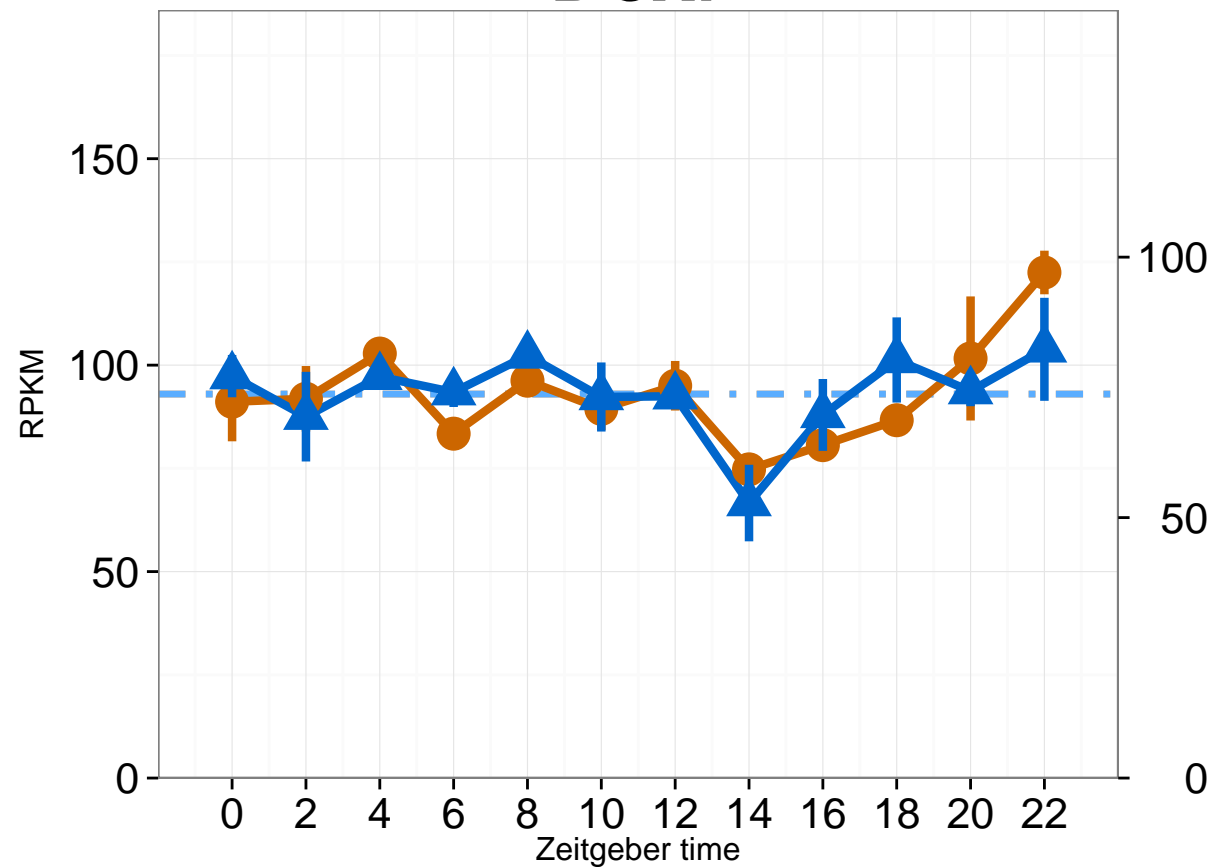

# Dcxr

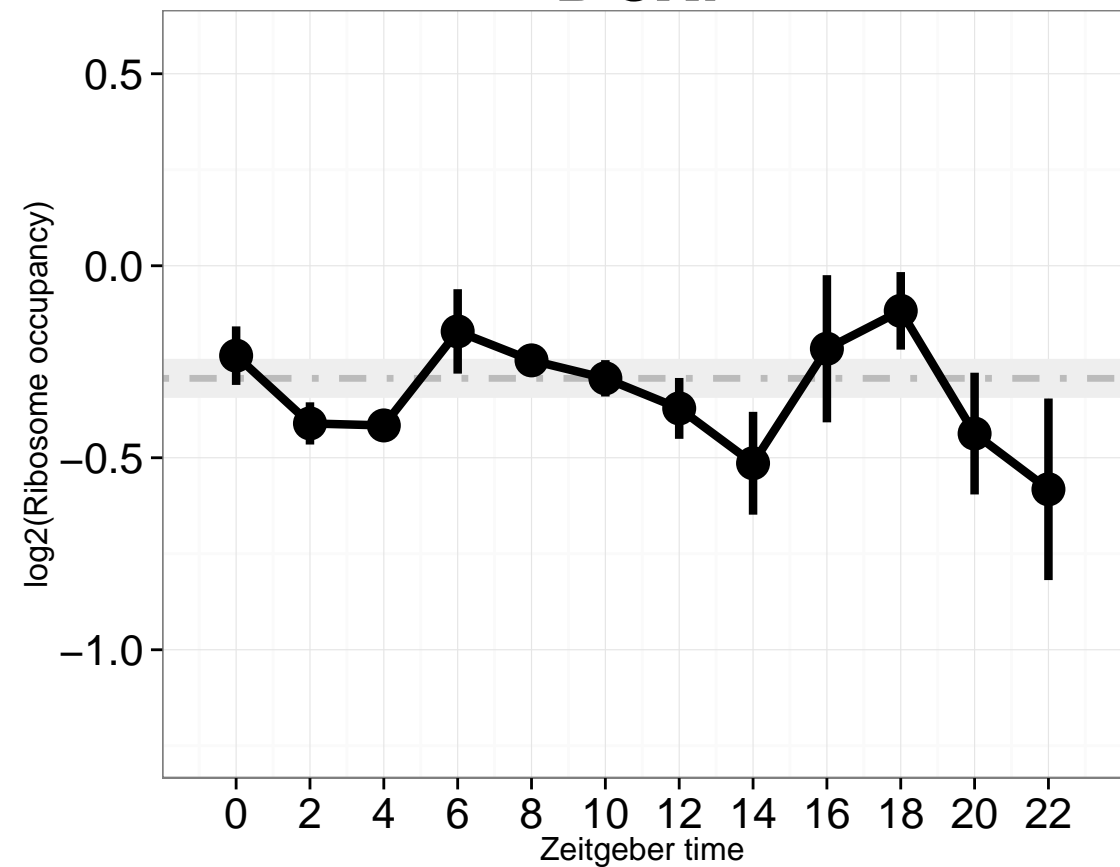

Supplement: SuppDataset_1.zip [file Dcxr_set_A.pdf › Supplemental Dataset 1/A-mRNA_nonrhyth_translation_nonrhyth/Dcxr_set_A.pdf]

## Dda1

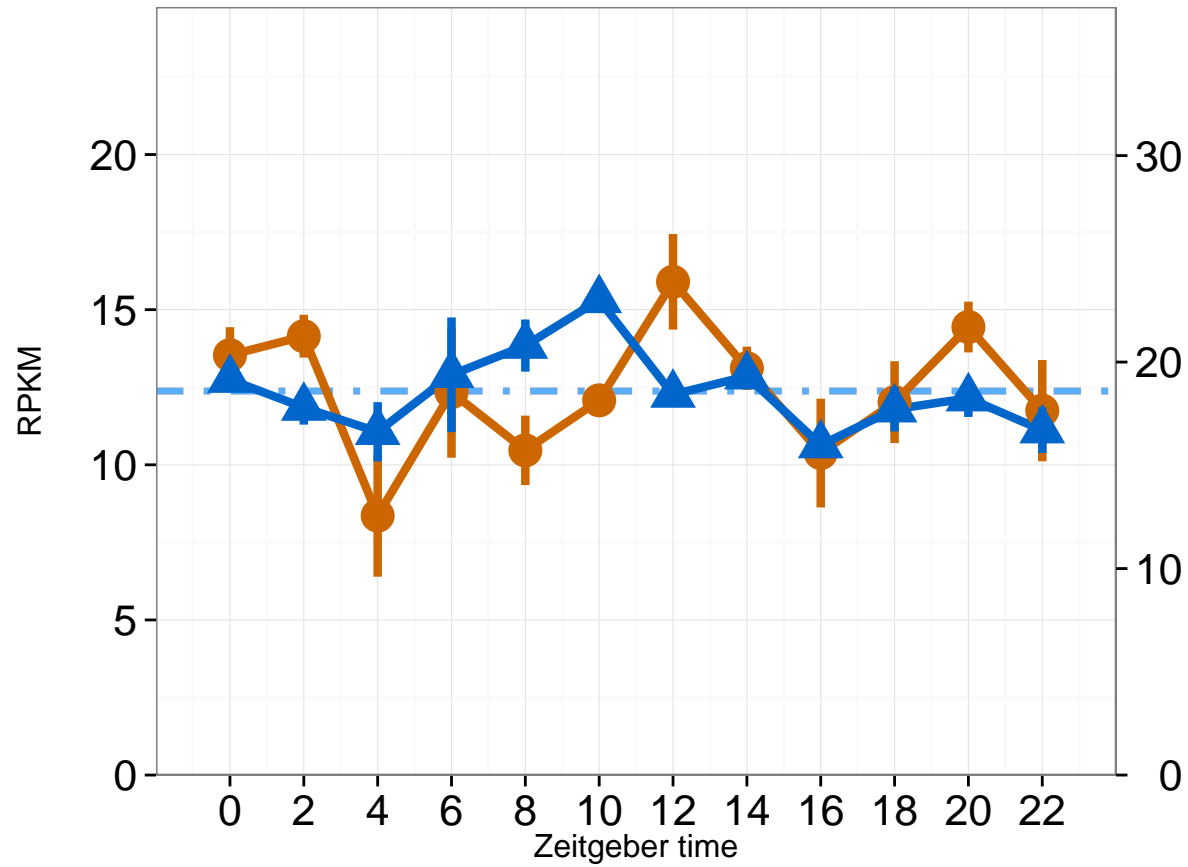

## Dda1

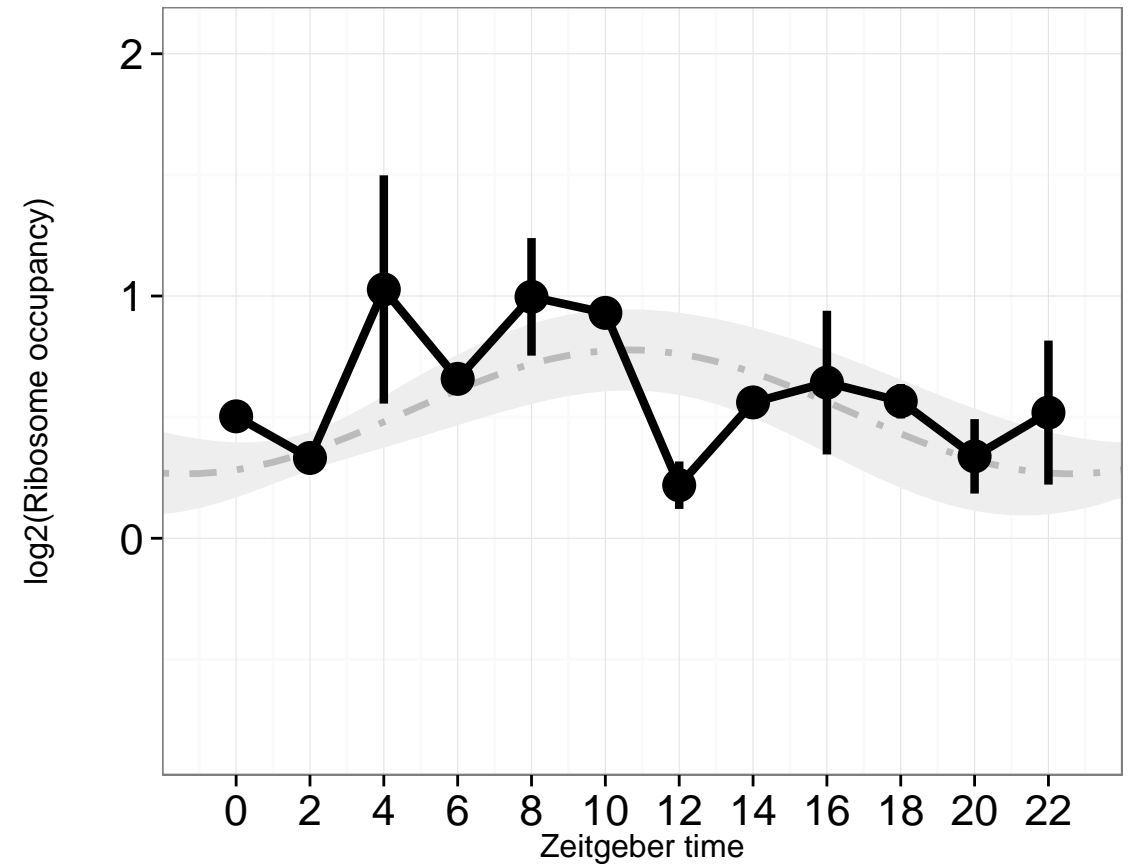

Supplement: SuppDataset_1.zip [file Dda1_set_A.pdf › Supplemental Dataset 1/A-mRNA_nonrhyth_translation_nonrhyth/Dda1_set_A.pdf]

## Ddah2

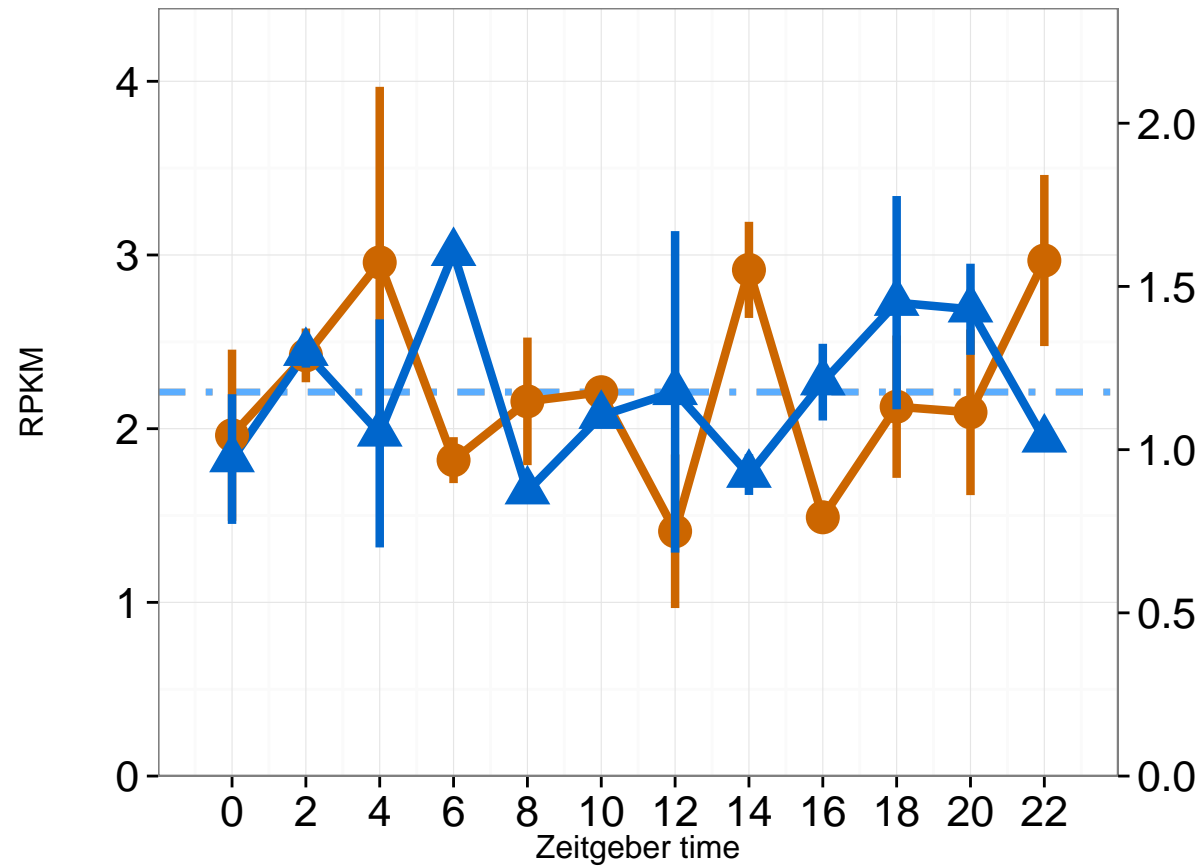

## Ddah2

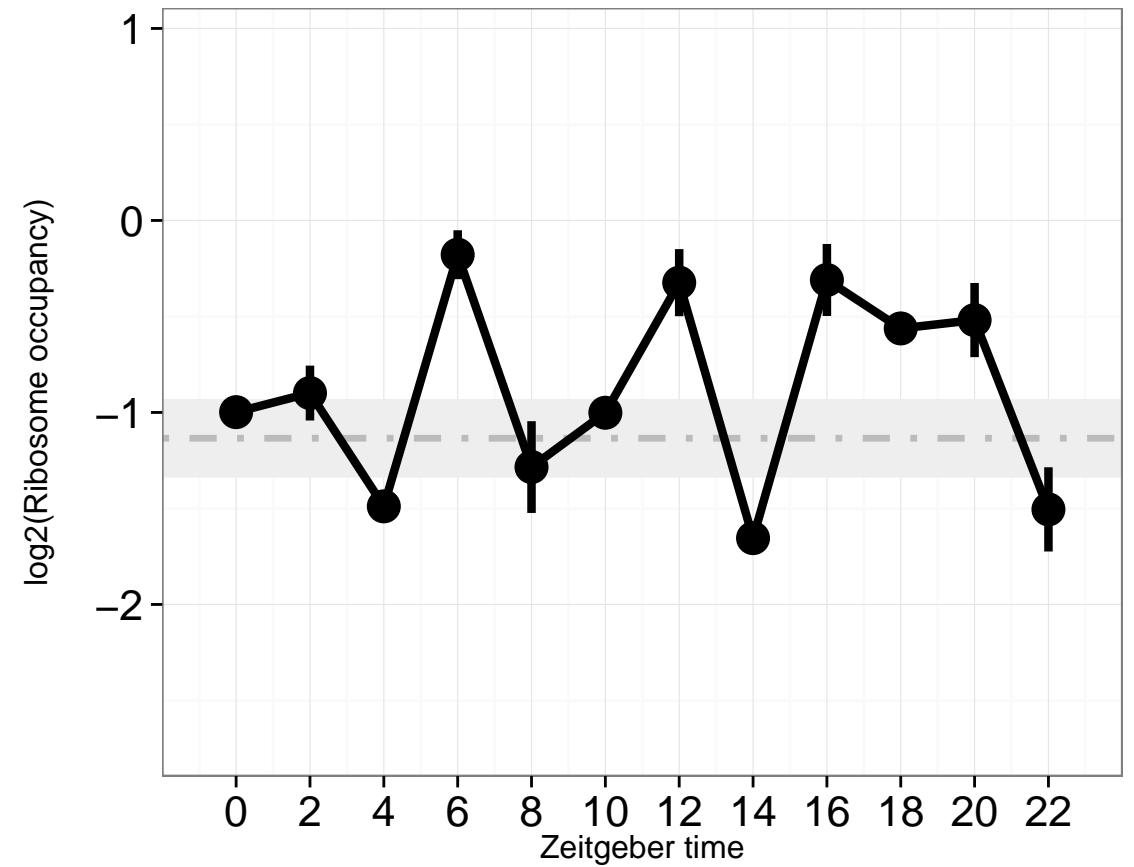

Supplement: SuppDataset_1.zip [file Ddah2_set_A.pdf › Supplemental Dataset 1/A-mRNA_nonrhyth_translation_nonrhyth/Ddah2_set_A.pdf]

## Ddb1

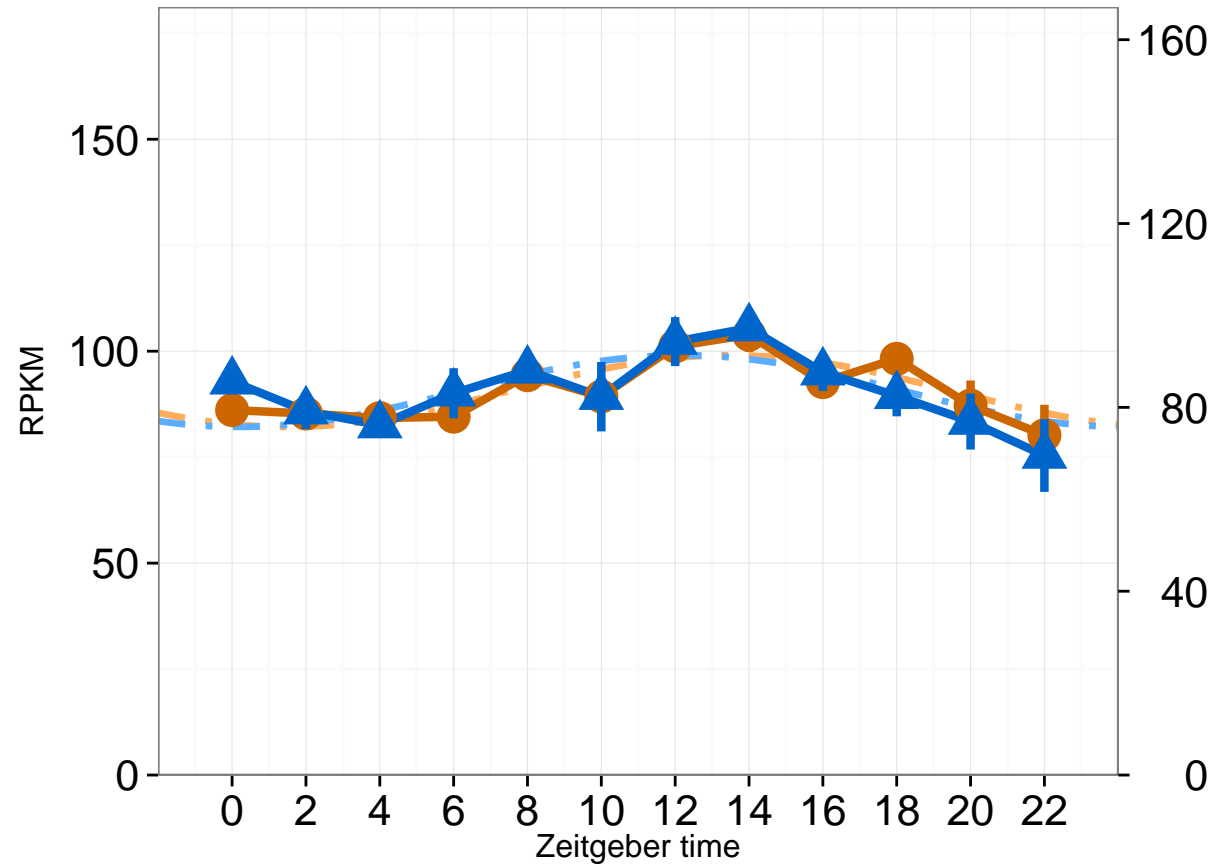

## Ddb1

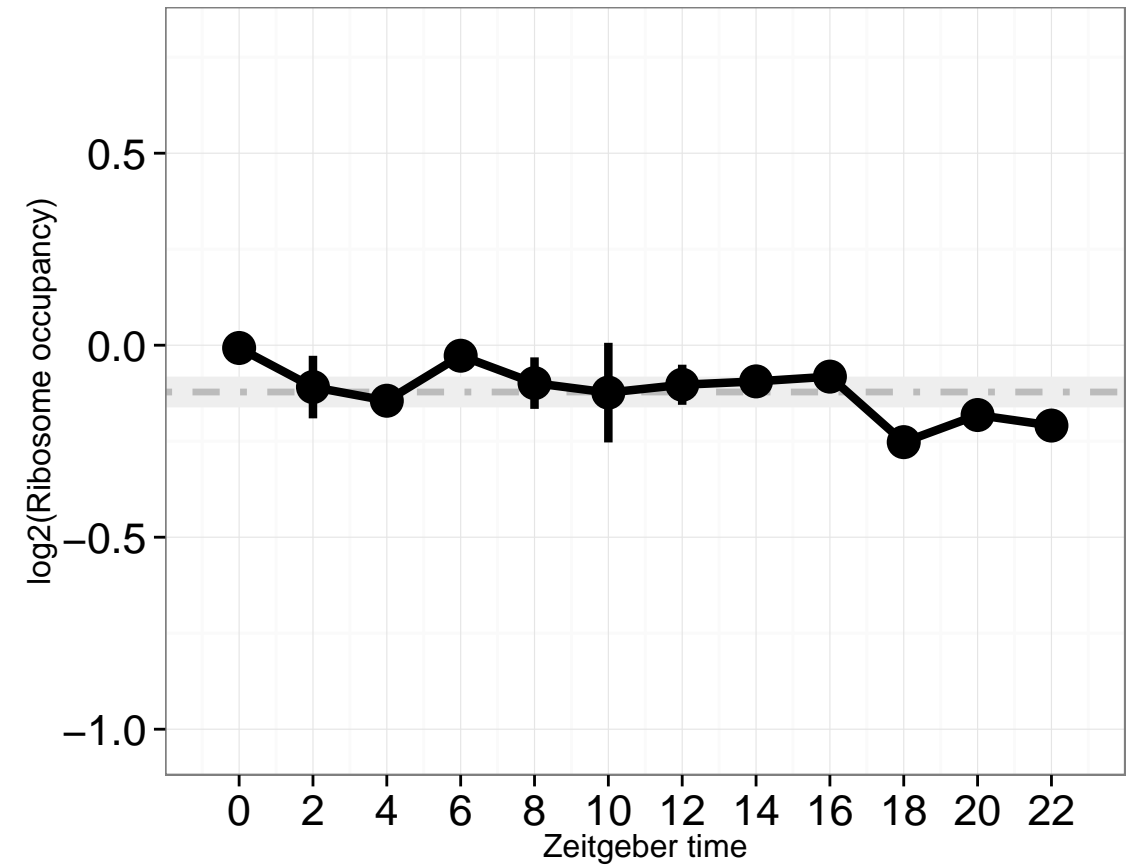

Supplement: SuppDataset_1.zip [file Ddb1_set_A.pdf › Supplemental Dataset 1/A-mRNA_nonrhyth_translation_nonrhyth/Ddb1_set_A.pdf]

## Ddi2

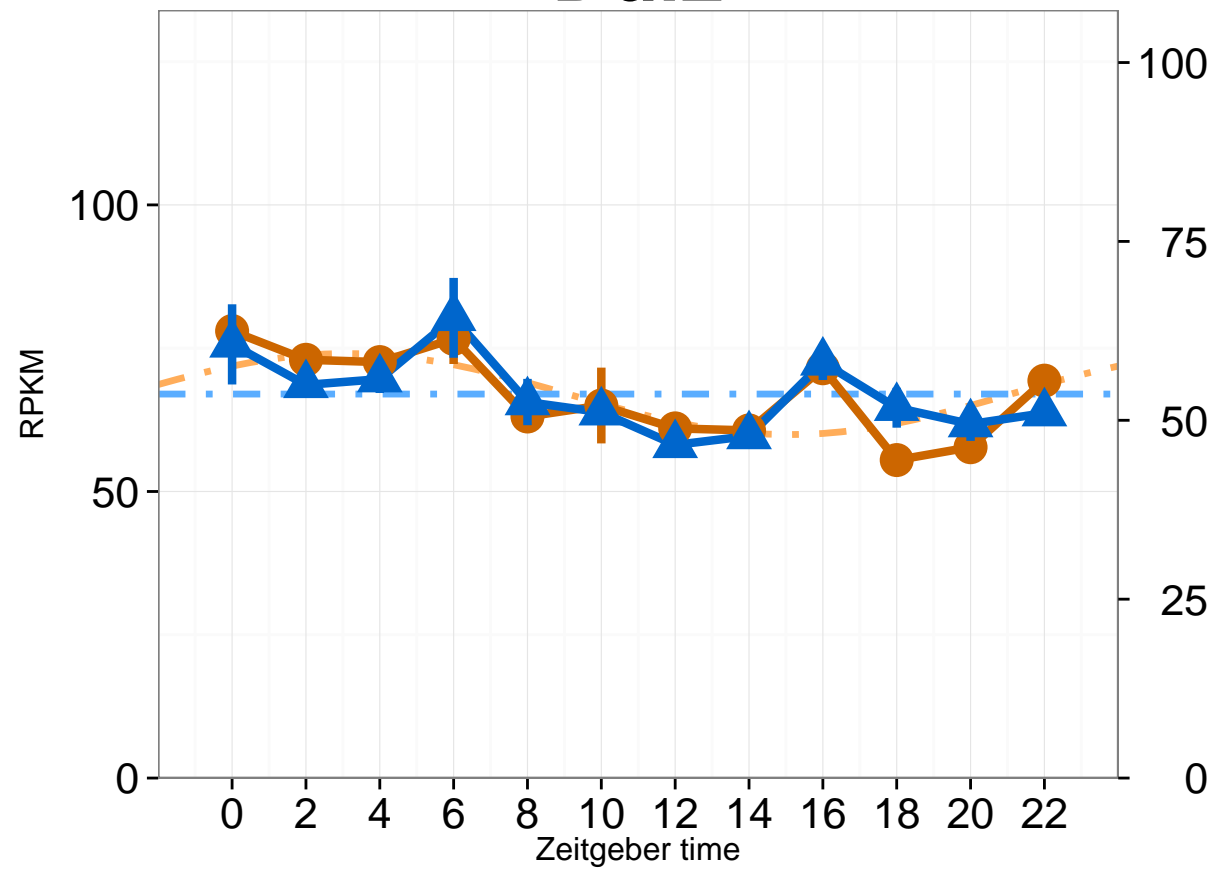

## Ddi2

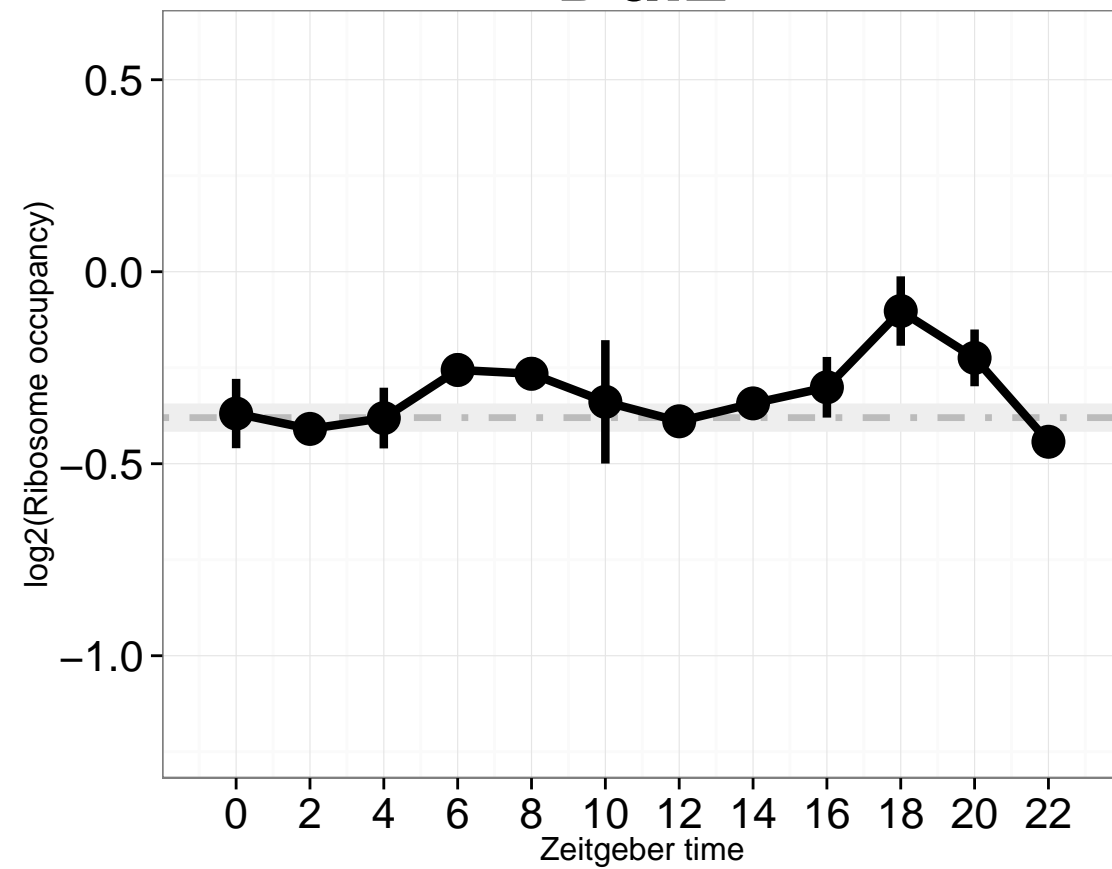

Supplement: SuppDataset_1.zip [file Ddi2_set_A.pdf › Supplemental Dataset 1/A-mRNA_nonrhyth_translation_nonrhyth/Ddi2_set_A.pdf]

## Ddit3

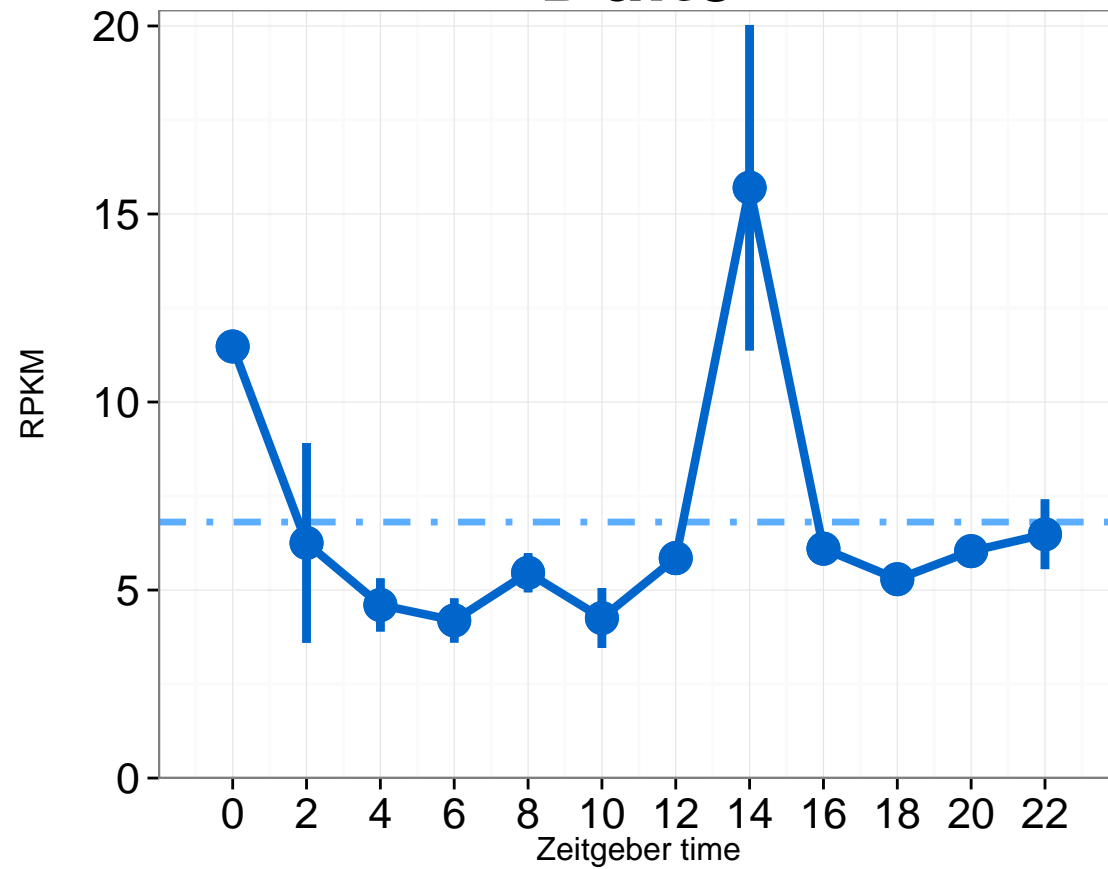

## Ddit3 log2(Ribosome occupancy)

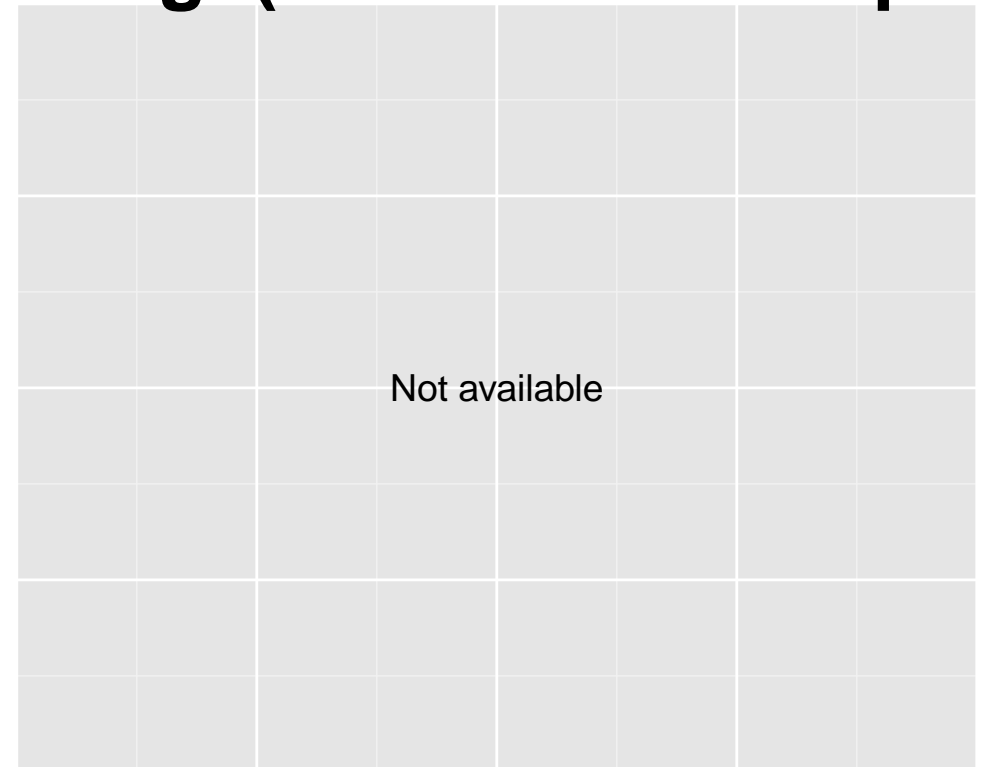

Supplement: SuppDataset_1.zip [file Ddit3_set_A.pdf › Supplemental Dataset 1/A-mRNA_nonrhyth_translation_nonrhyth/Ddit3_set_A.pdf]

## Ddost

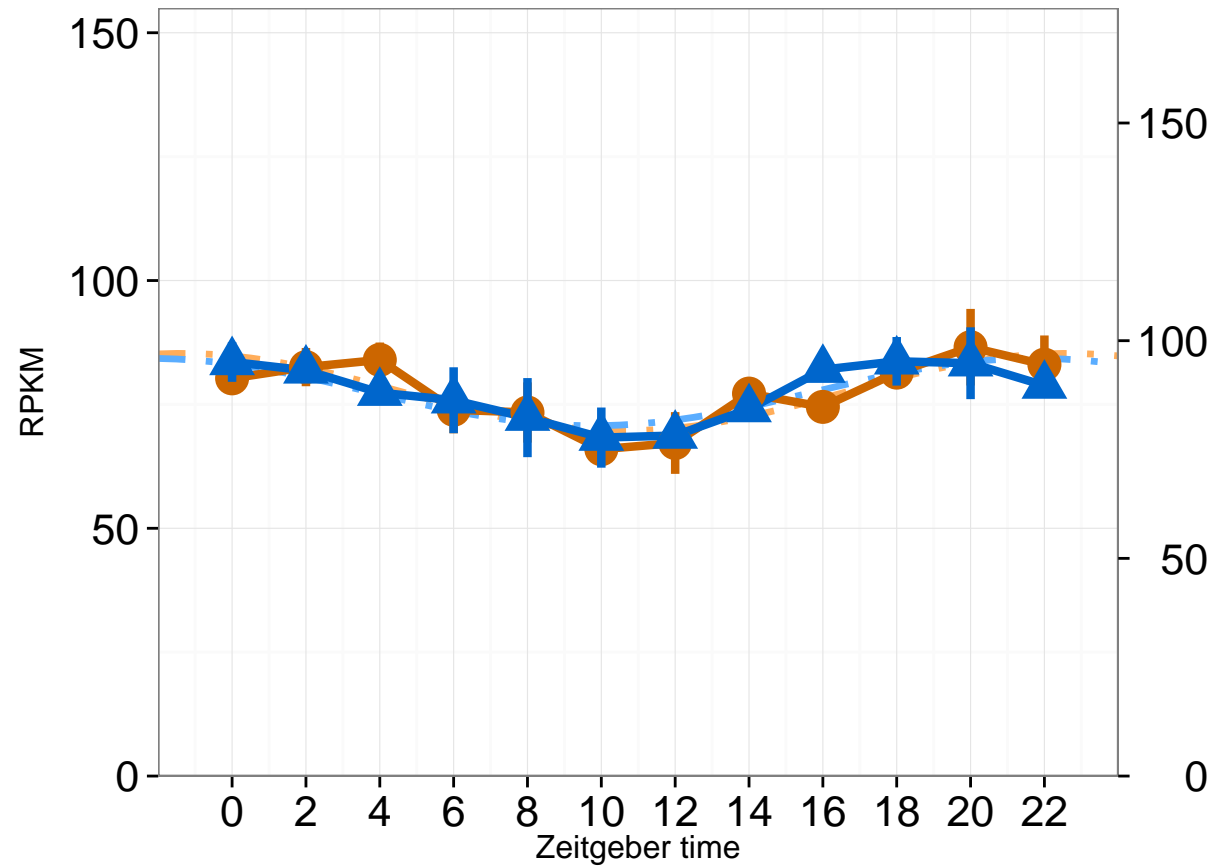

## Ddost

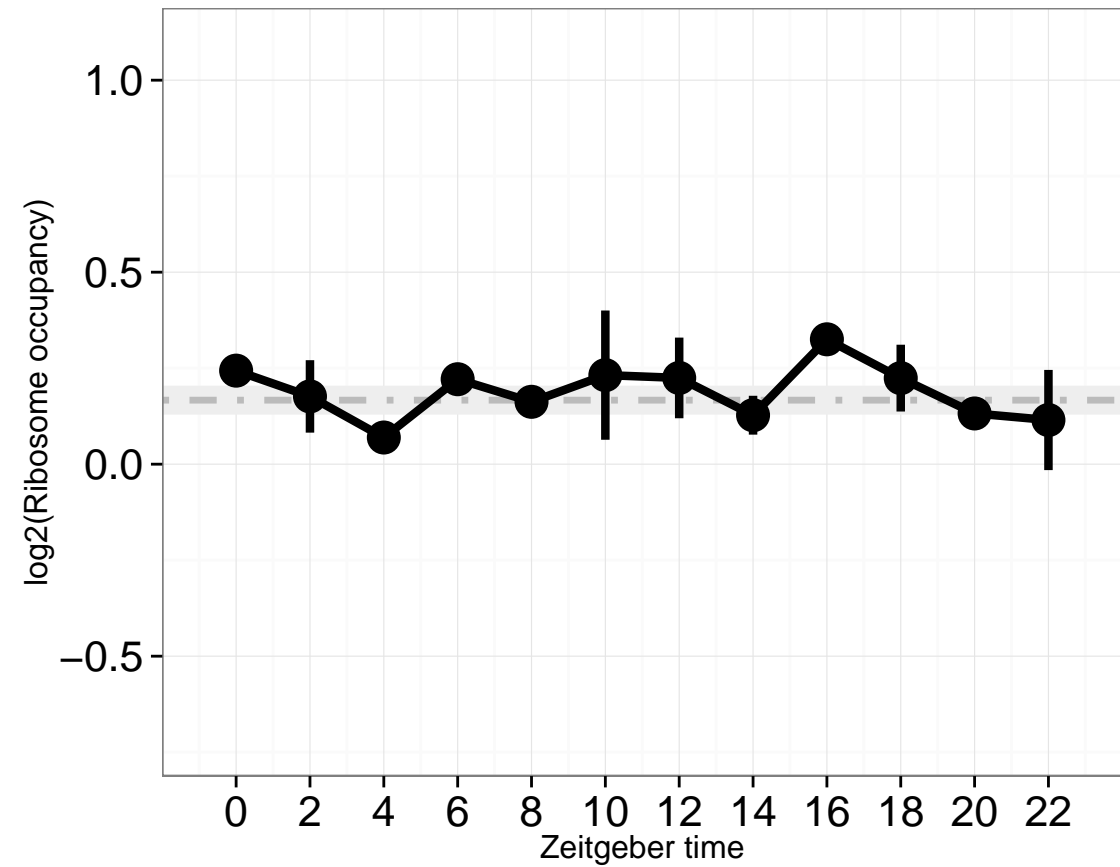

Supplement: SuppDataset_1.zip [file Ddost_set_A.pdf › Supplemental Dataset 1/A-mRNA_nonrhyth_translation_nonrhyth/Ddost_set_A.pdf]

# Ddr1

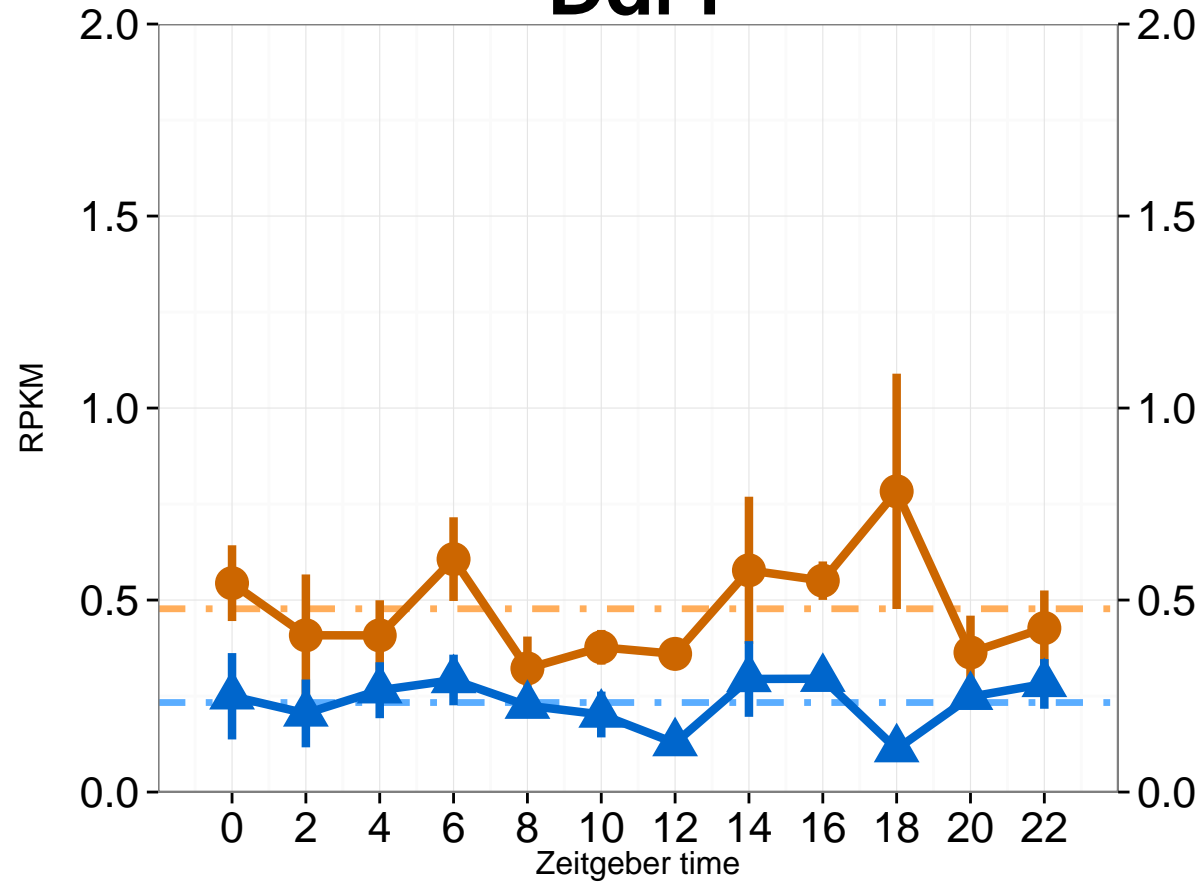

# Ddr1

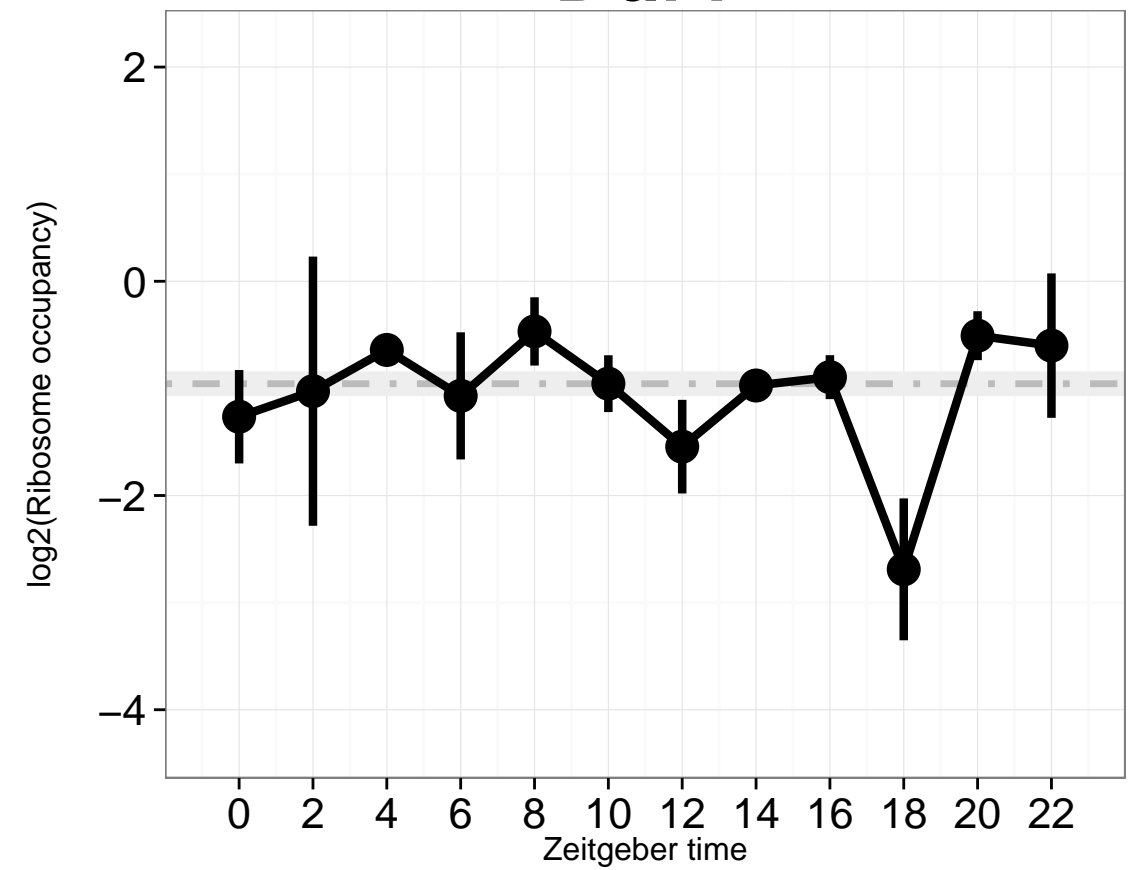

Supplement: SuppDataset_1.zip [file Ddr1_set_A.pdf › Supplemental Dataset 1/A-mRNA_nonrhyth_translation_nonrhyth/Ddr1_set_A.pdf]

# Ddrgk1

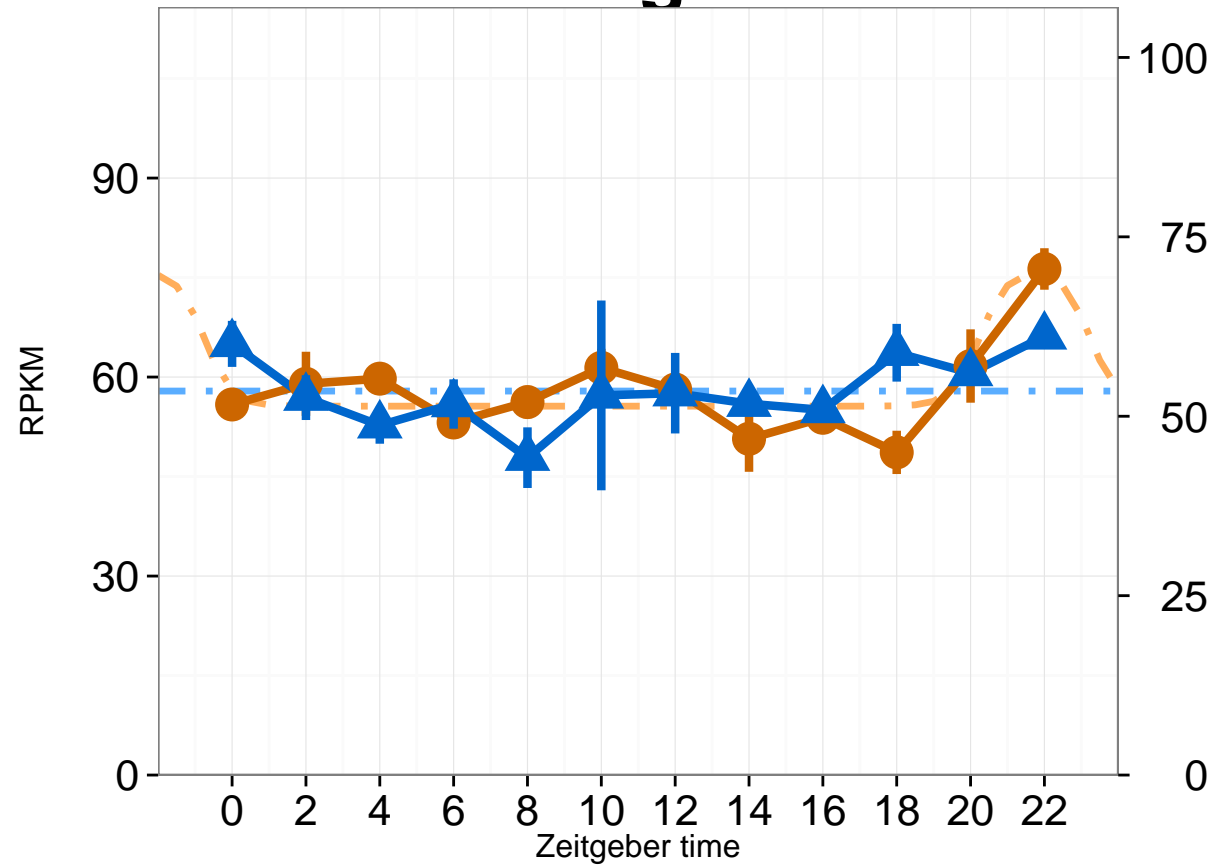

# Ddrgk1

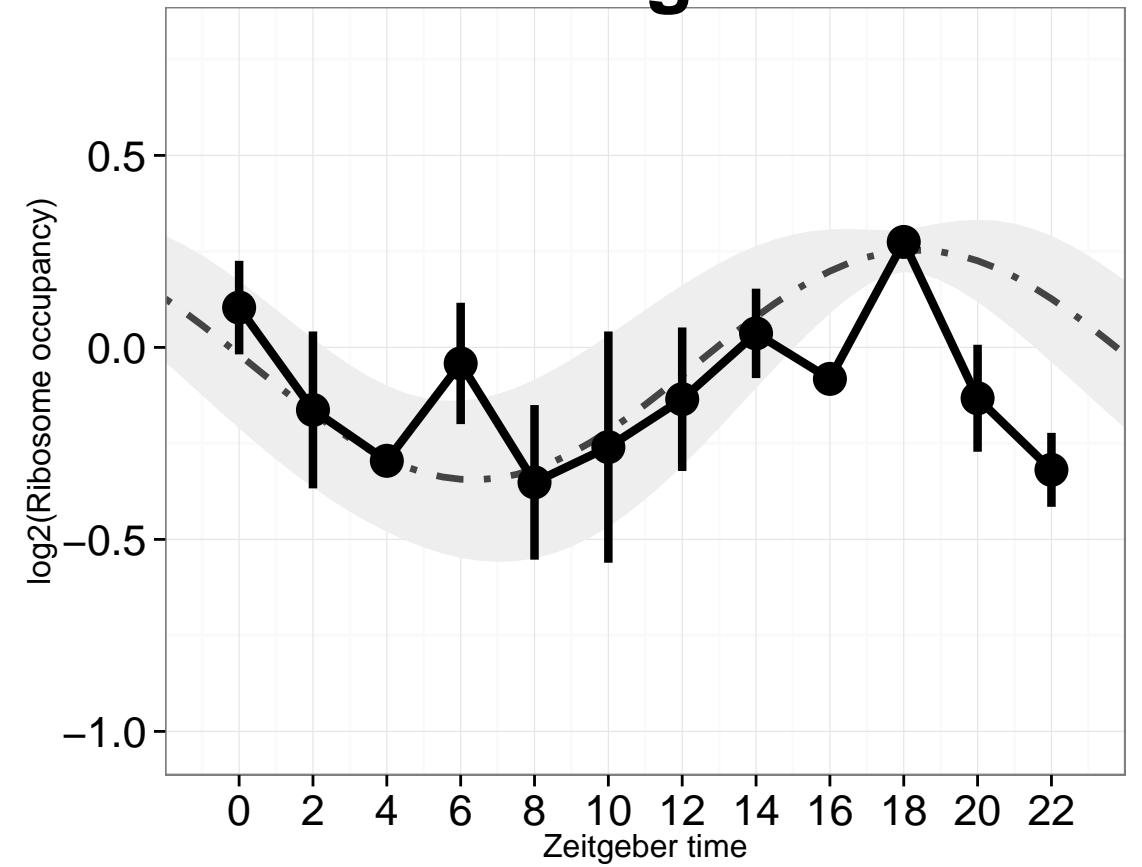

Supplement: SuppDataset_1.zip [file Ddrgk1_set_A.pdf › Supplemental Dataset 1/A-mRNA_nonrhyth_translation_nonrhyth/Ddrgk1_set_A.pdf]
