# Supplementary figures and images for: Ribosome profiling reveals the rhythmic liver translatome and circadian clock regulation by upstream open reading frames (part 21 of 113)
Source: HighWire-hosted journal article supplement (doi:10.1101/gr.195404.115), 2015-10-20

# Ddx10

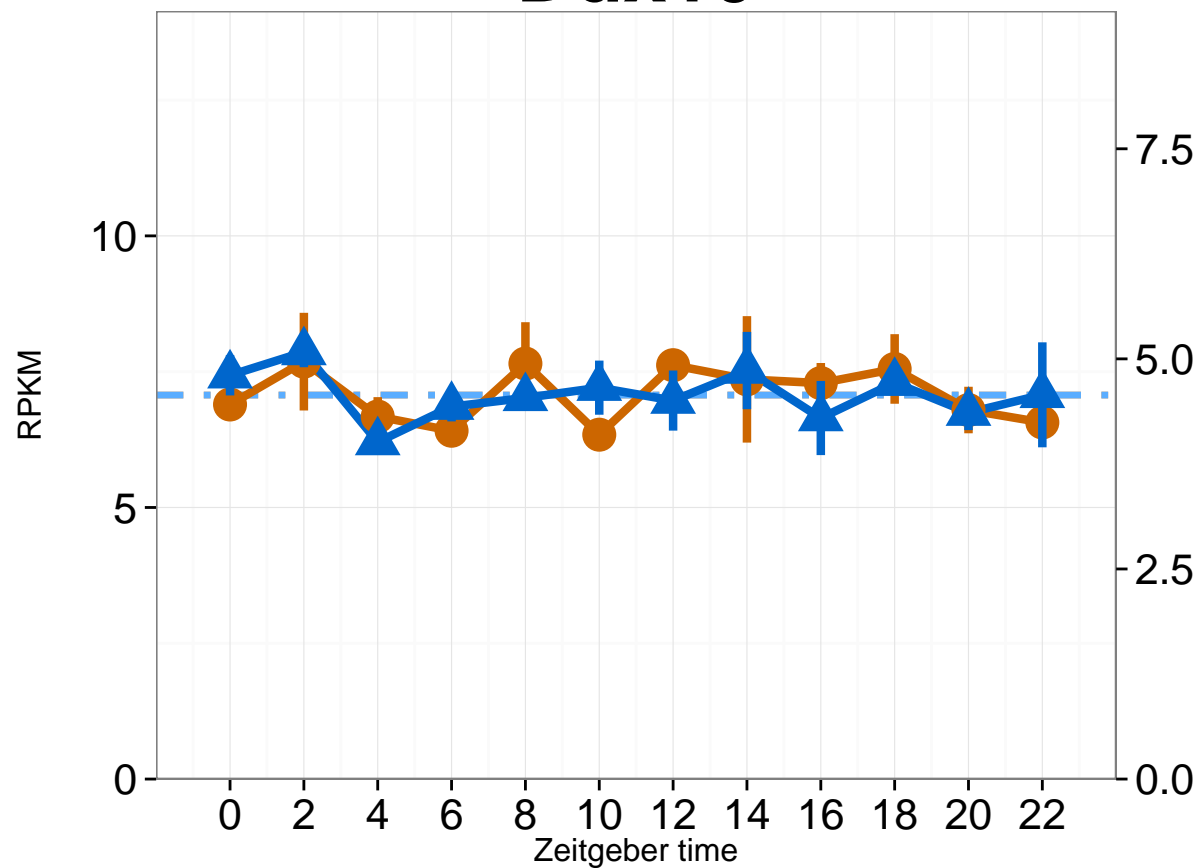

# Ddx10

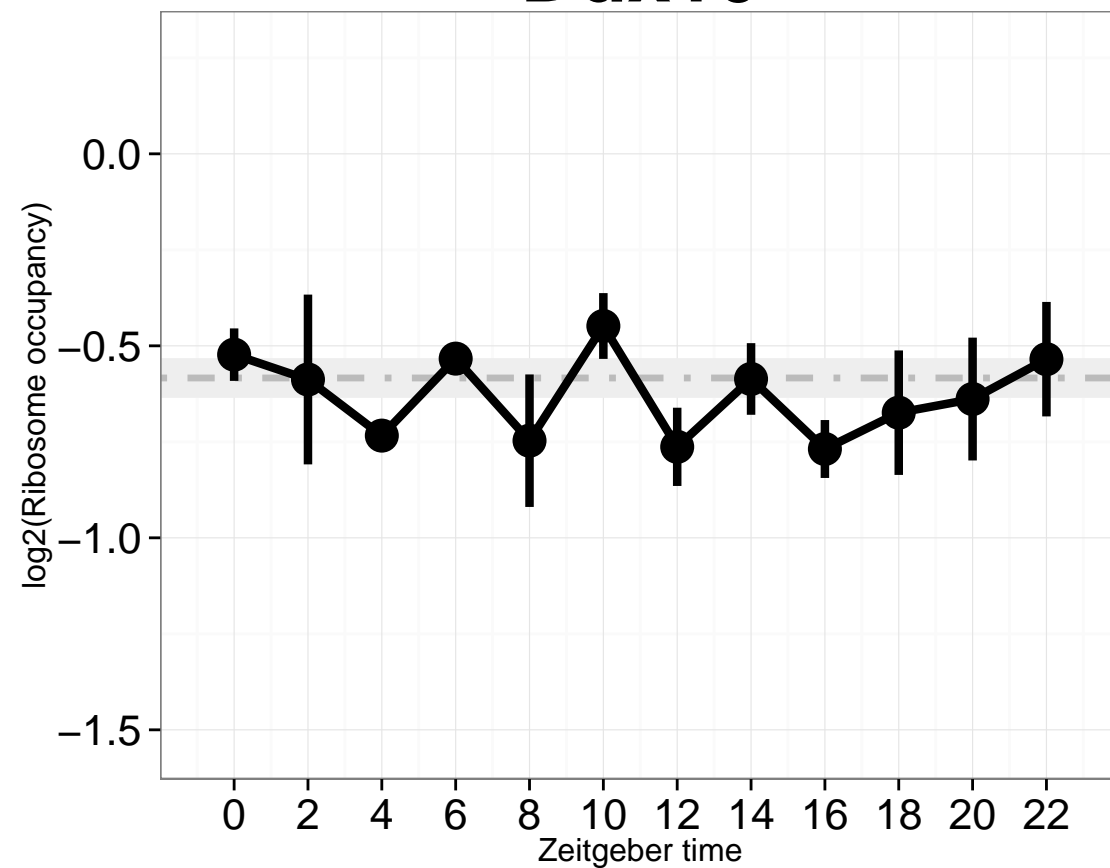

Supplement: SuppDataset_1.zip [file Ddx10_set_A.pdf › Supplemental Dataset 1/A-mRNA_nonrhyth_translation_nonrhyth/Ddx10_set_A.pdf]

# Ddx11

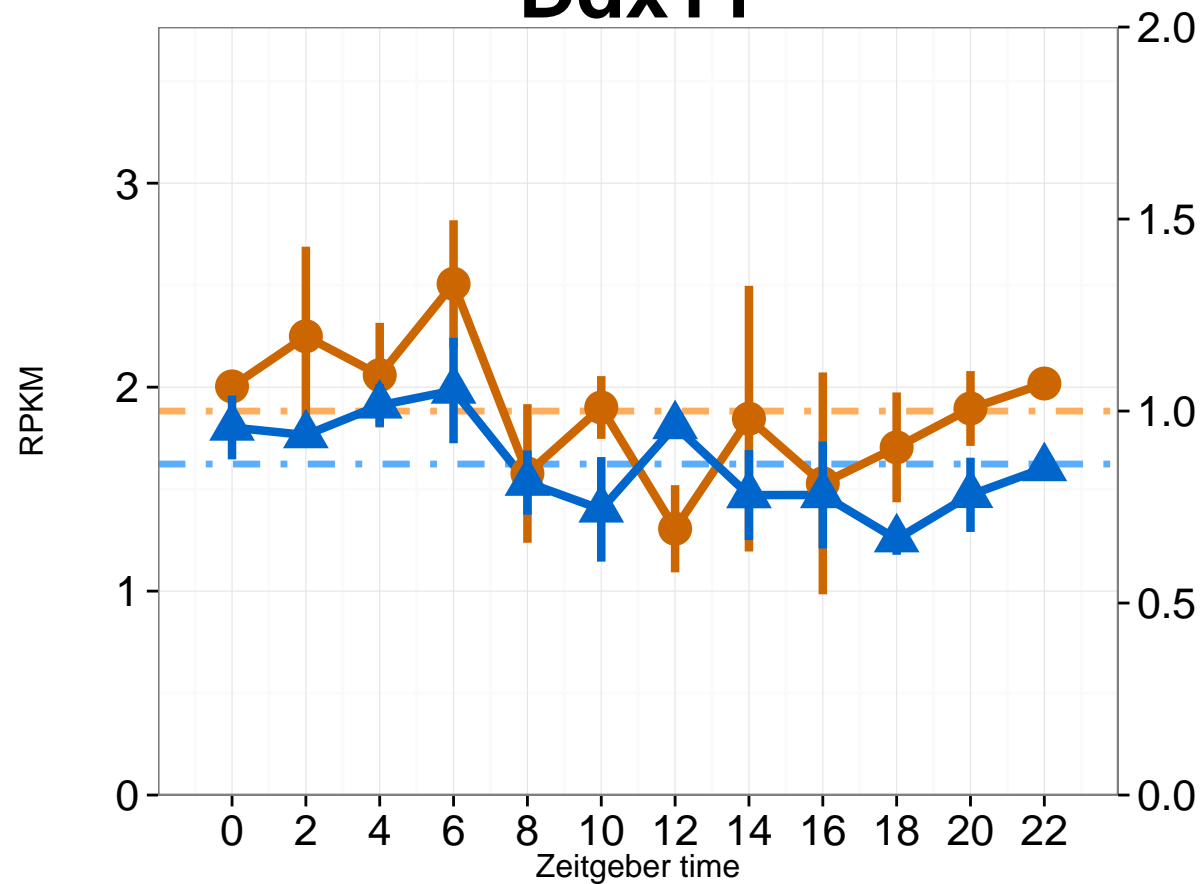

# Ddx11

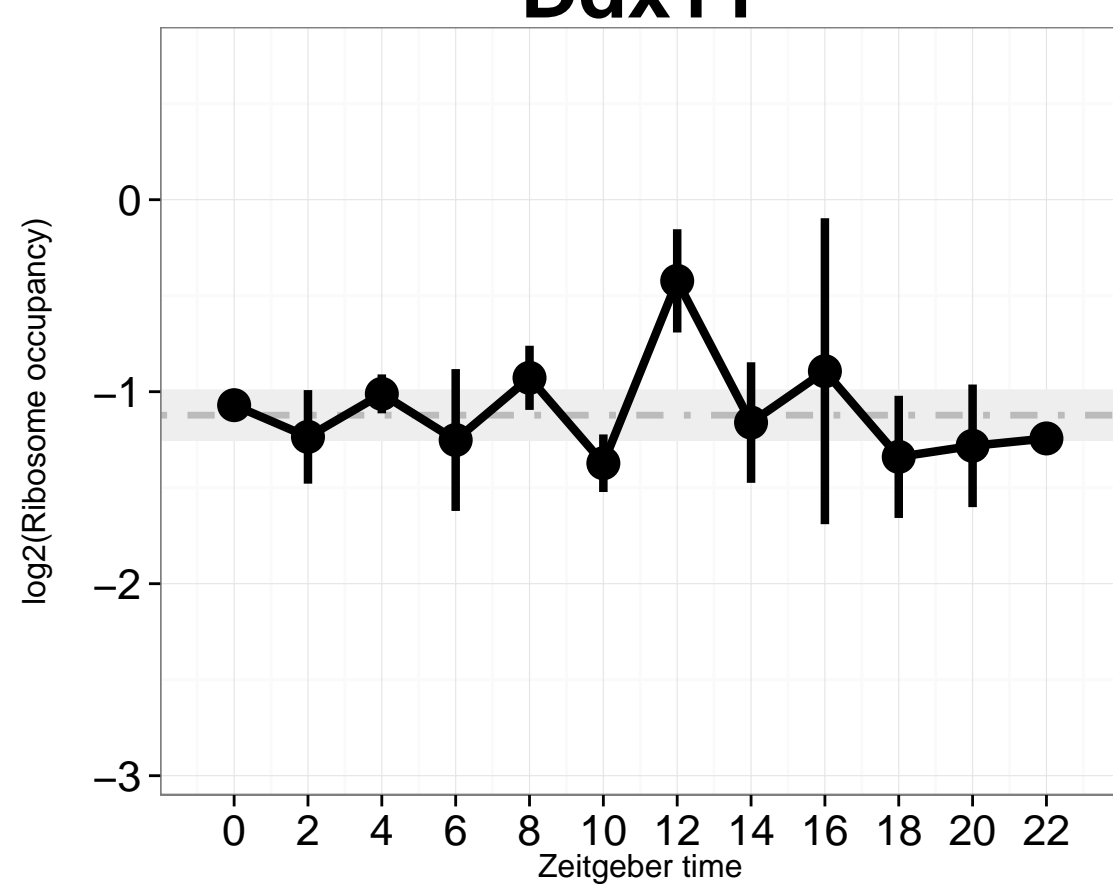

Supplement: SuppDataset_1.zip [file Ddx11_set_A.pdf › Supplemental Dataset 1/A-mRNA_nonrhyth_translation_nonrhyth/Ddx11_set_A.pdf]

## Ddx18

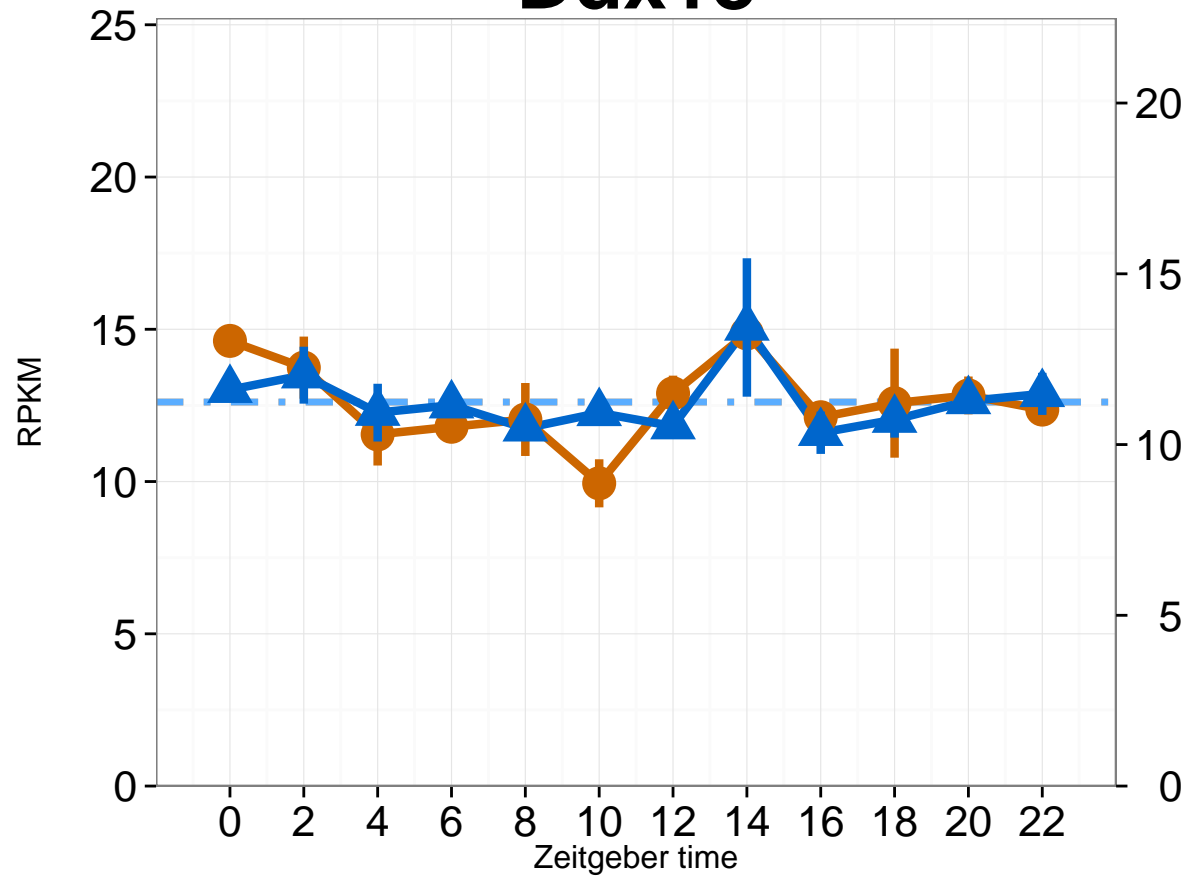

## Ddx18

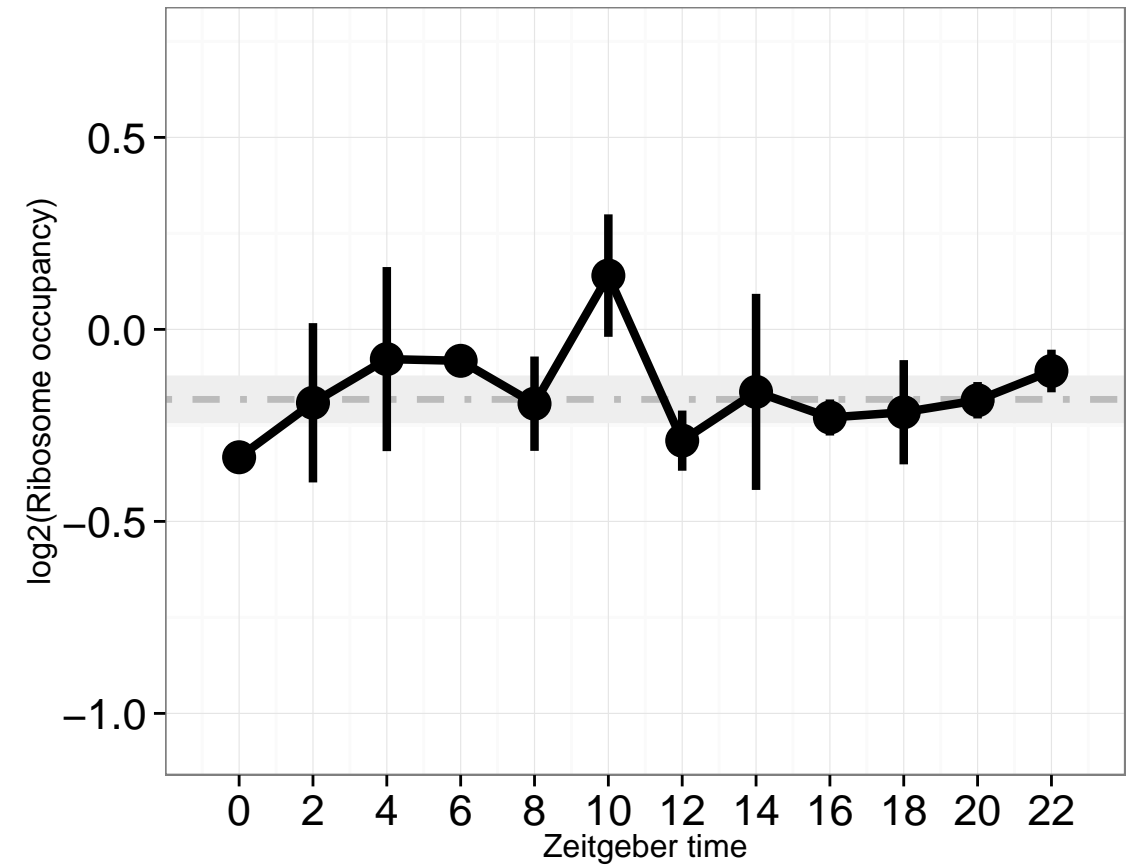

Supplement: SuppDataset_1.zip [file Ddx18_set_A.pdf › Supplemental Dataset 1/A-mRNA_nonrhyth_translation_nonrhyth/Ddx18_set_A.pdf]

# Ddx19a

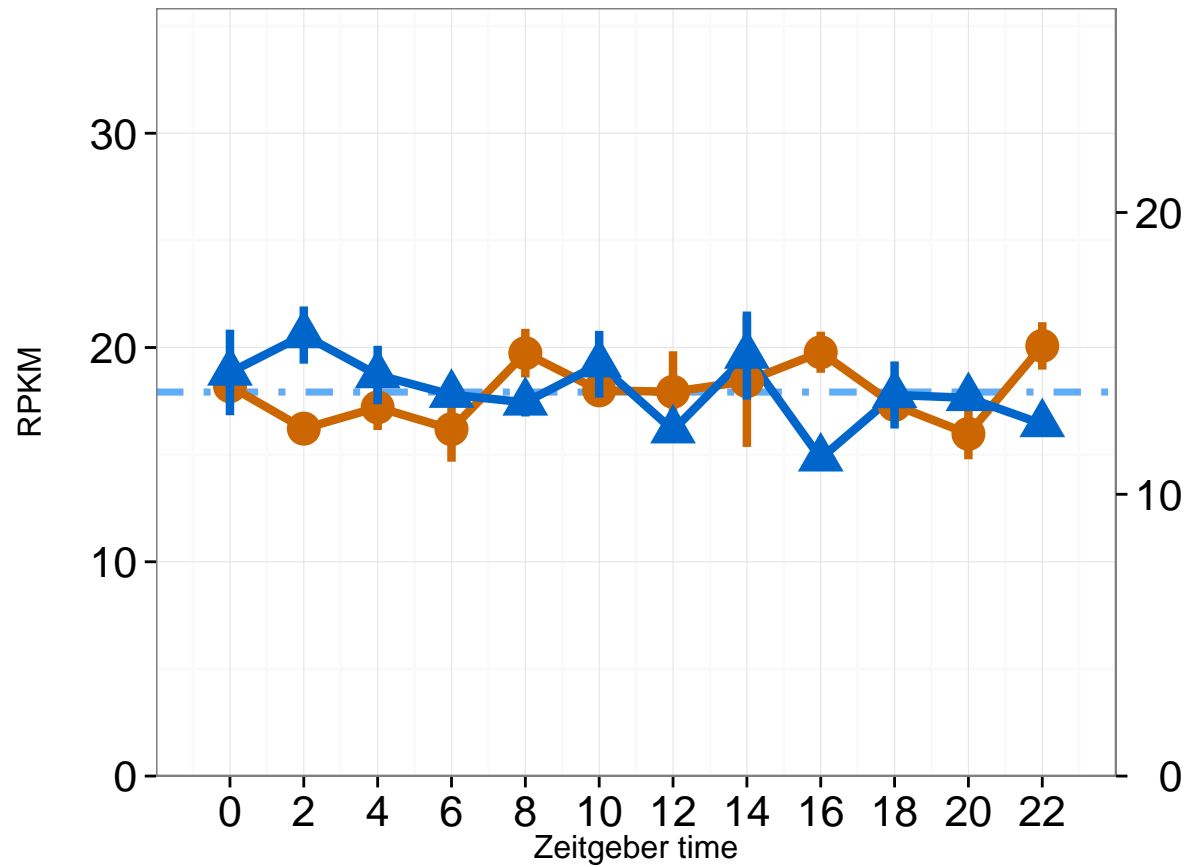

# Ddx19a

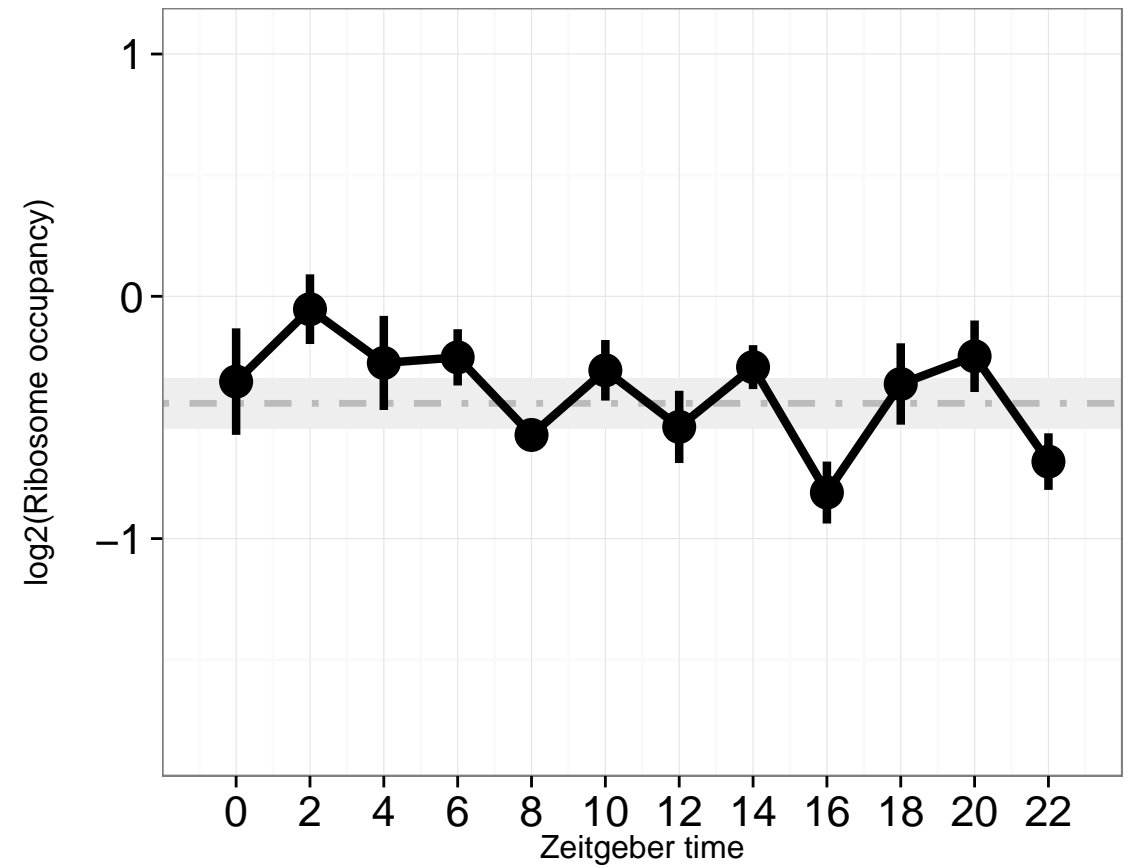

Supplement: SuppDataset_1.zip [file Ddx19a_set_A.pdf › Supplemental Dataset 1/A-mRNA_nonrhyth_translation_nonrhyth/Ddx19a_set_A.pdf]

# Ddx19b

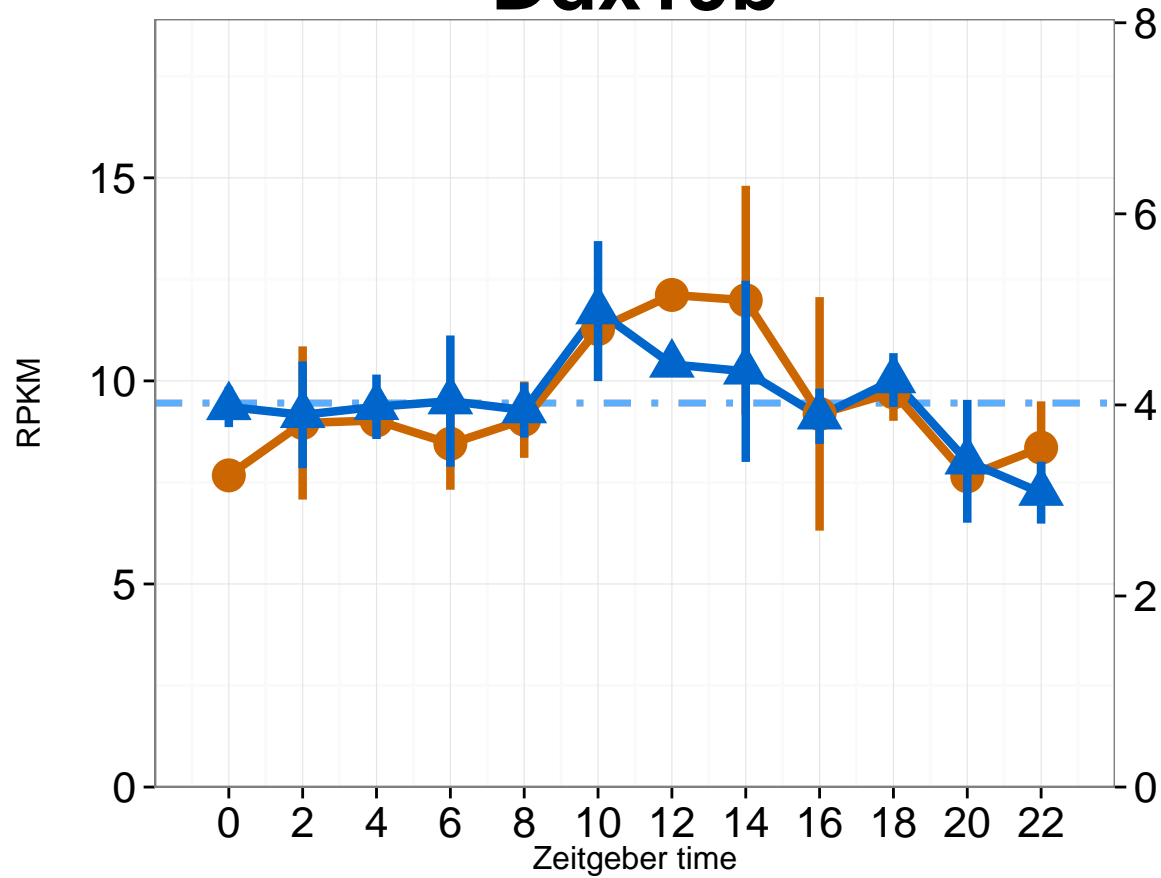

# Ddx19b

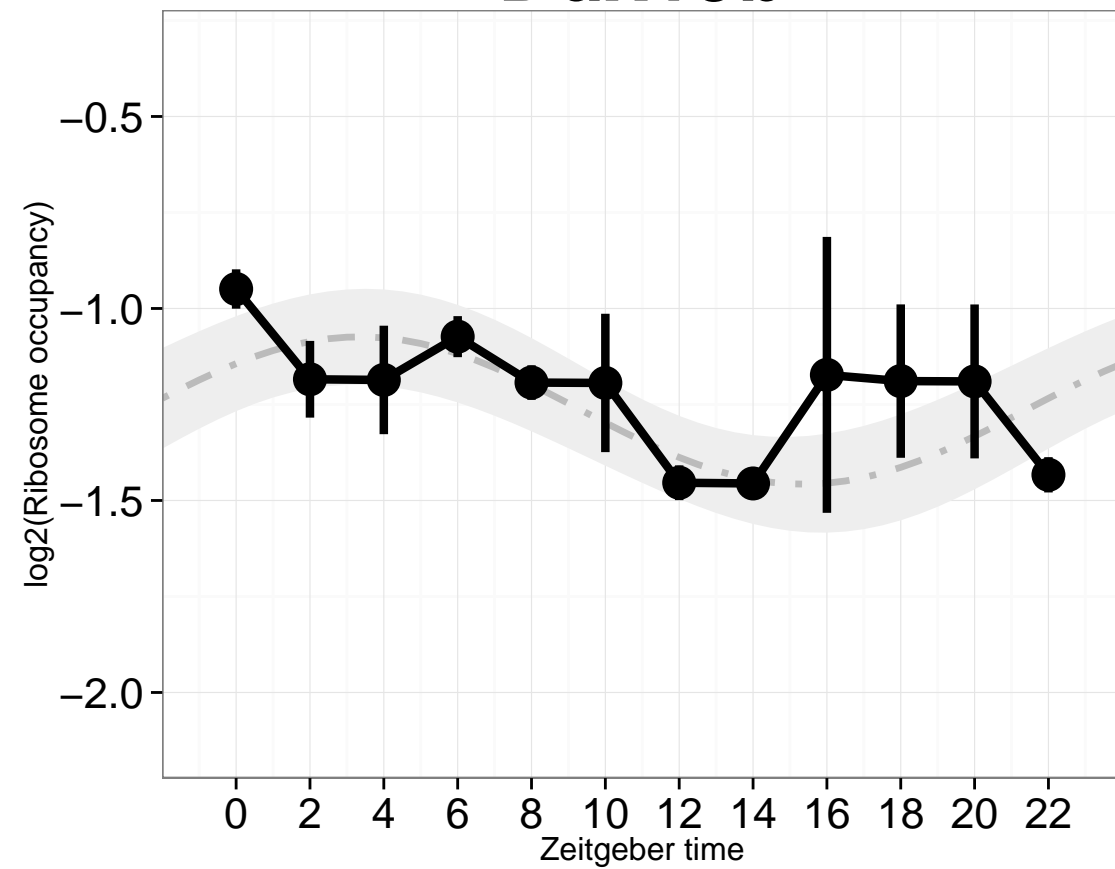

Supplement: SuppDataset_1.zip [file Ddx19b_set_A.pdf › Supplemental Dataset 1/A-mRNA_nonrhyth_translation_nonrhyth/Ddx19b_set_A.pdf]

## Ddx1

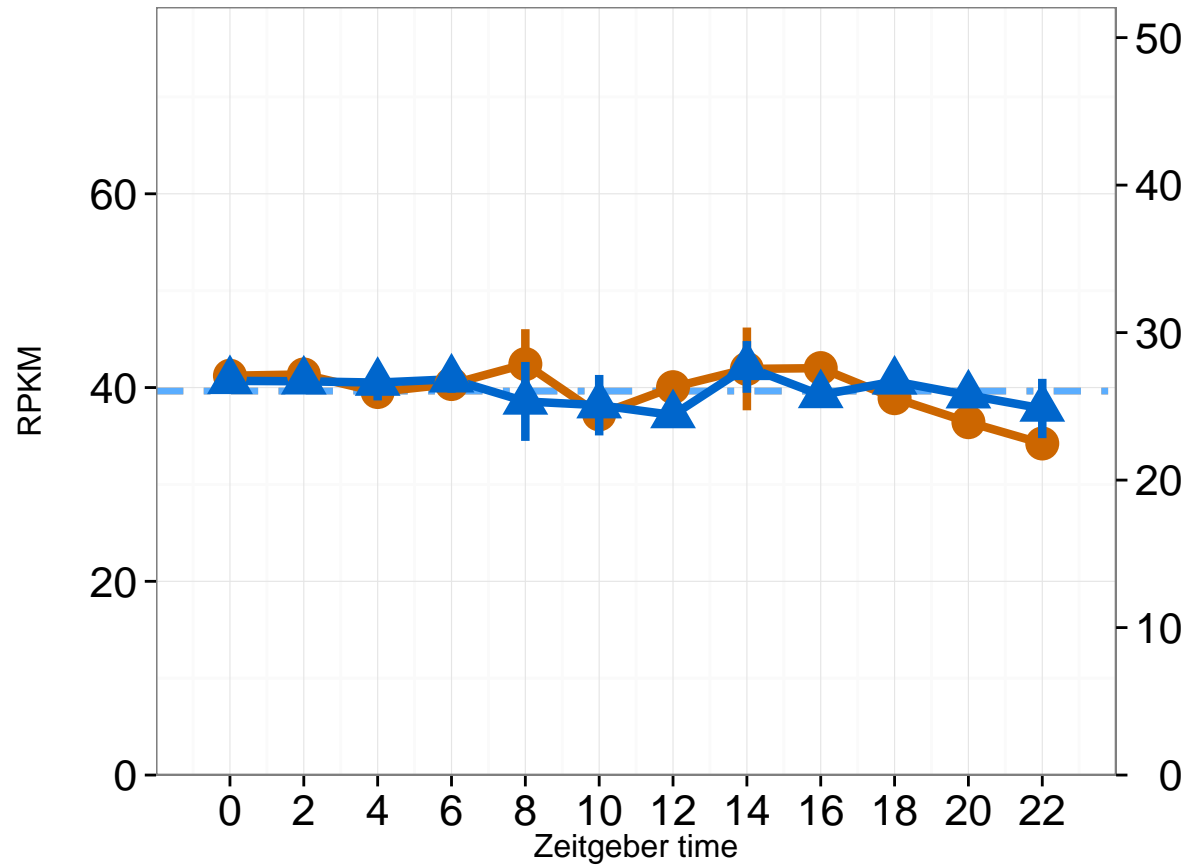

## Ddx1

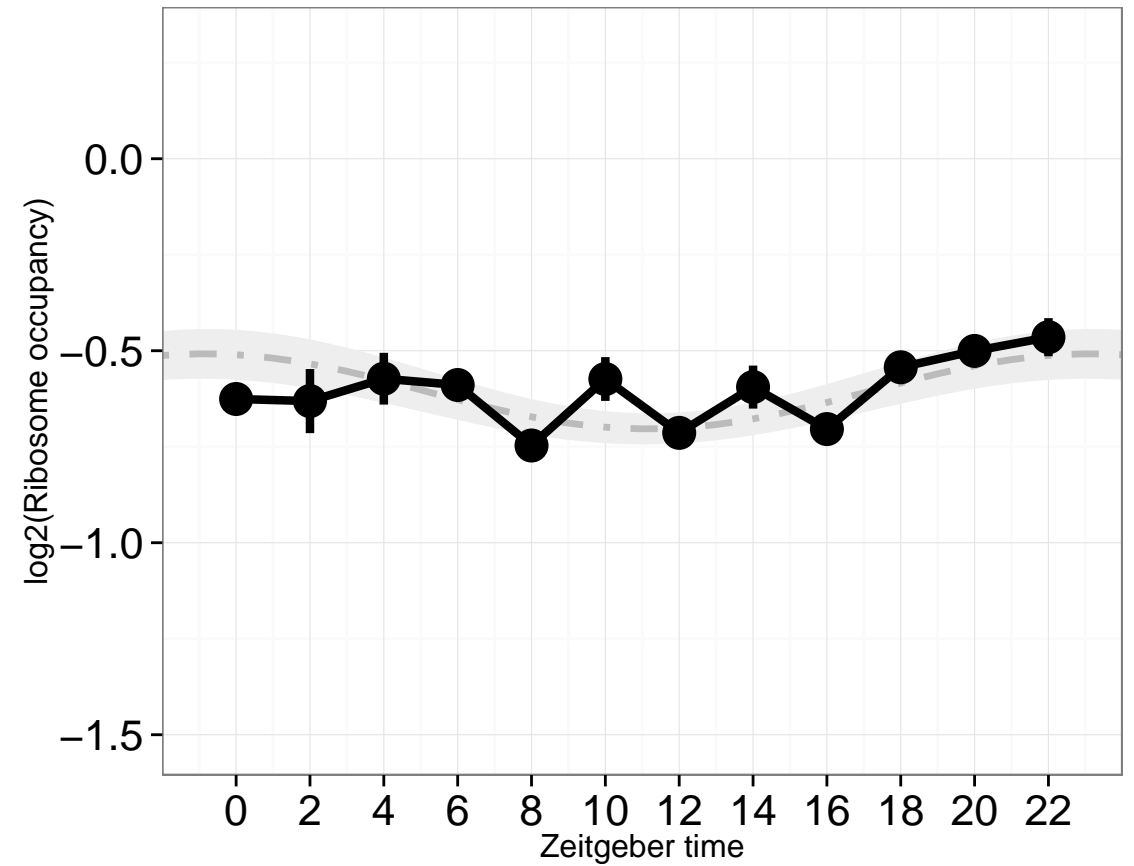

Supplement: SuppDataset_1.zip [file Ddx1_set_A.pdf › Supplemental Dataset 1/A-mRNA_nonrhyth_translation_nonrhyth/Ddx1_set_A.pdf]

## Ddx20

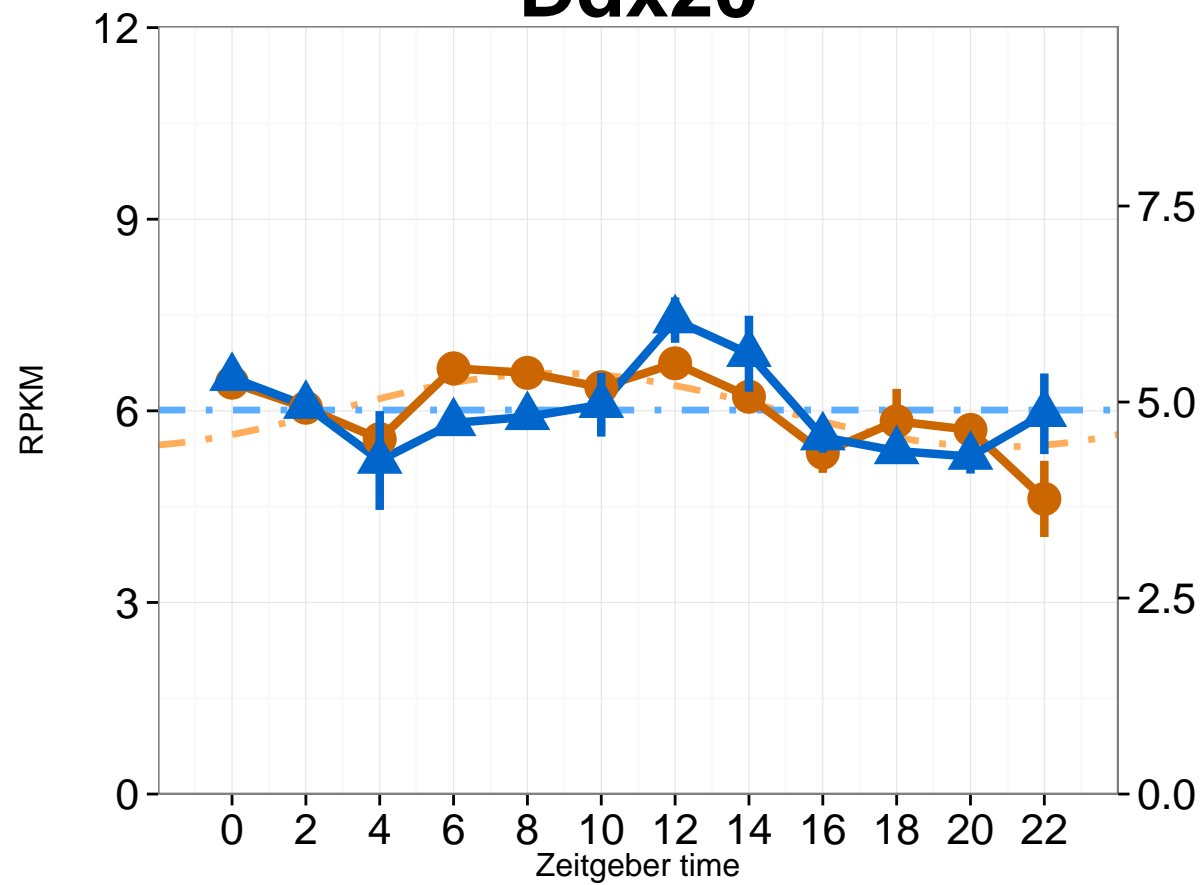

## Ddx20

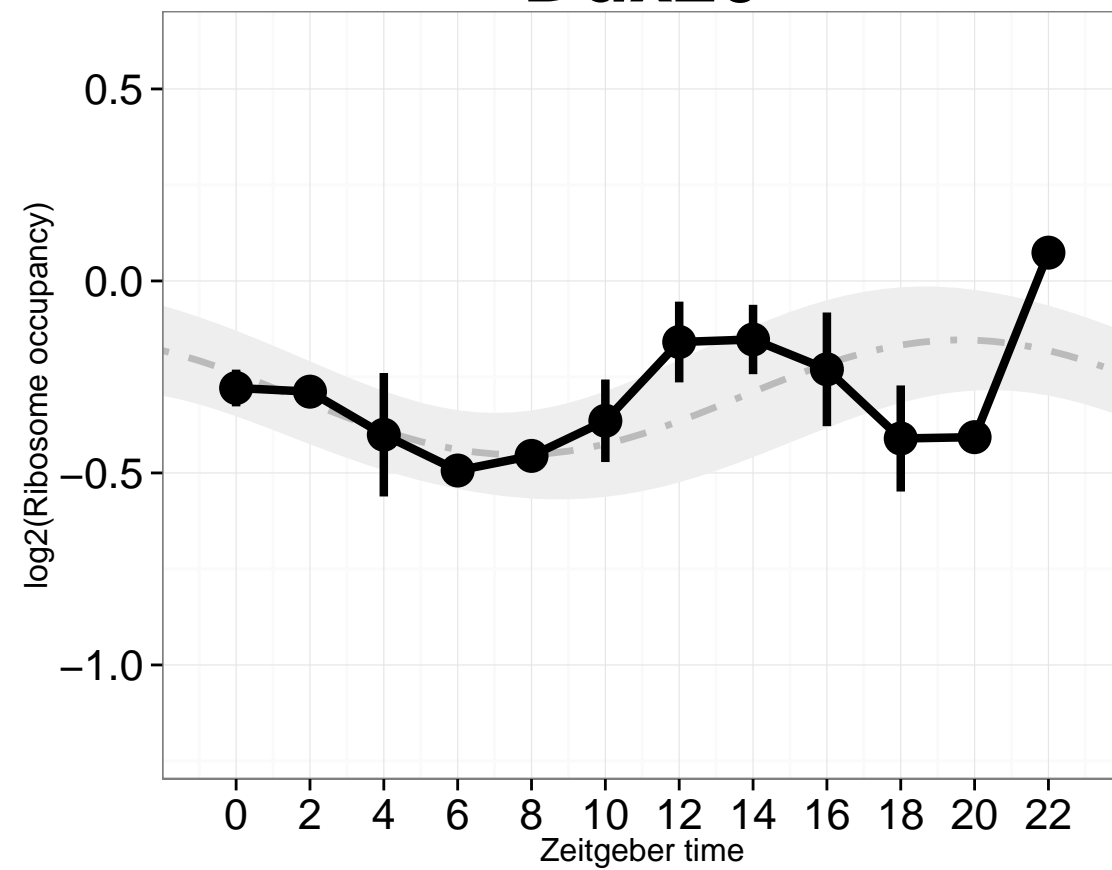

Supplement: SuppDataset_1.zip [file Ddx20_set_A.pdf › Supplemental Dataset 1/A-mRNA_nonrhyth_translation_nonrhyth/Ddx20_set_A.pdf]

# Ddx21

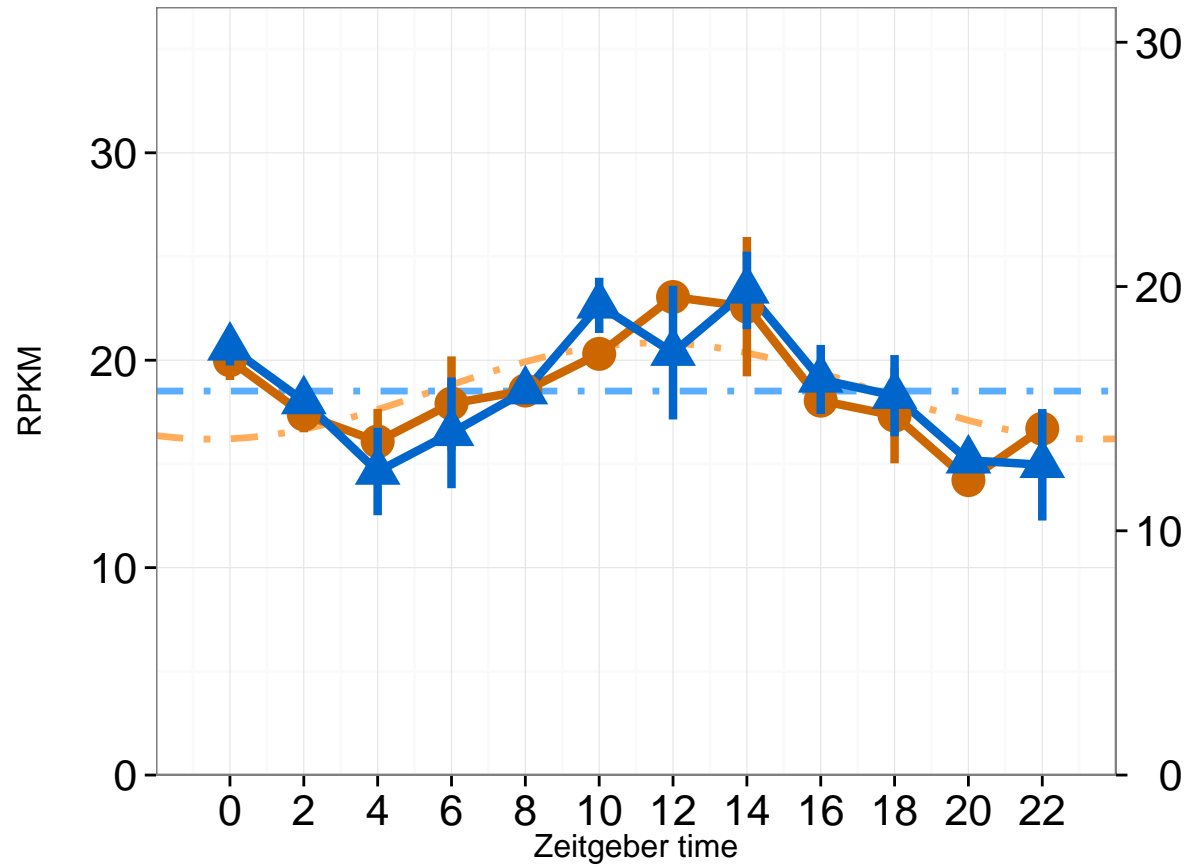

# Ddx21

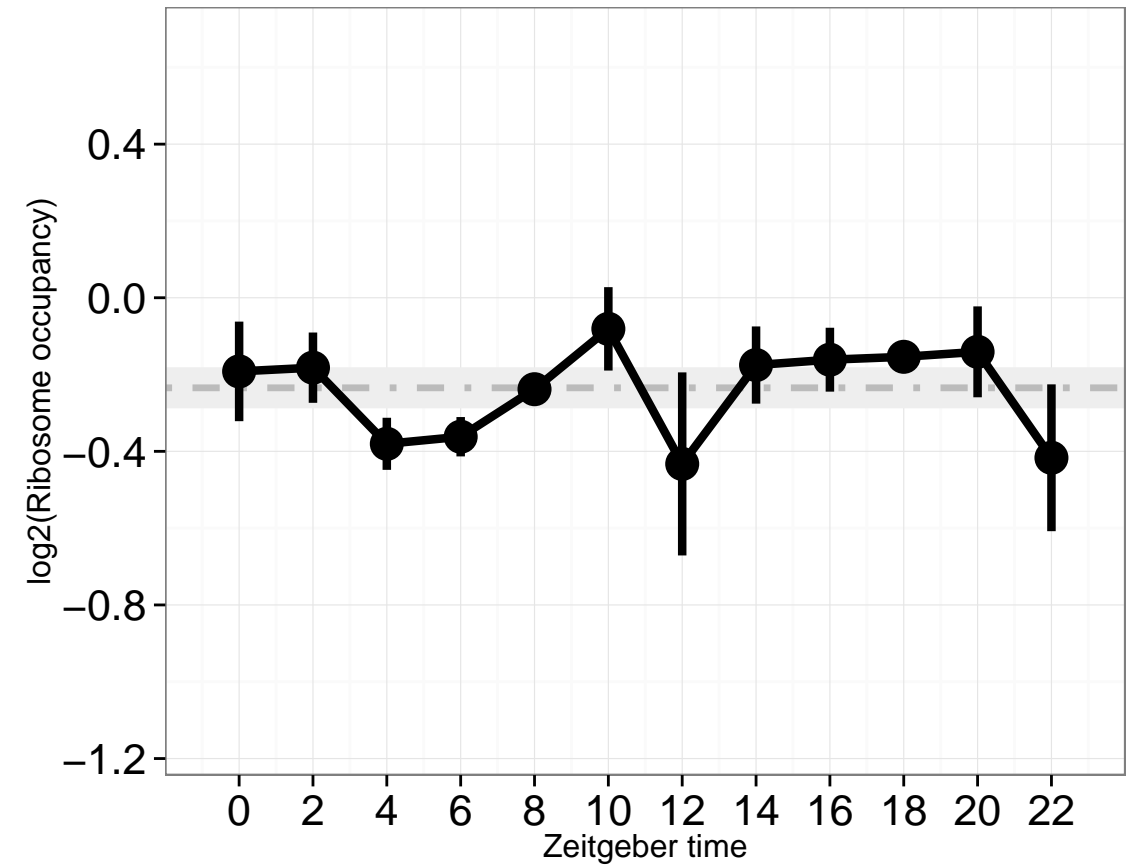

Supplement: SuppDataset_1.zip [file Ddx21_set_A.pdf › Supplemental Dataset 1/A-mRNA_nonrhyth_translation_nonrhyth/Ddx21_set_A.pdf]

## Ddx23

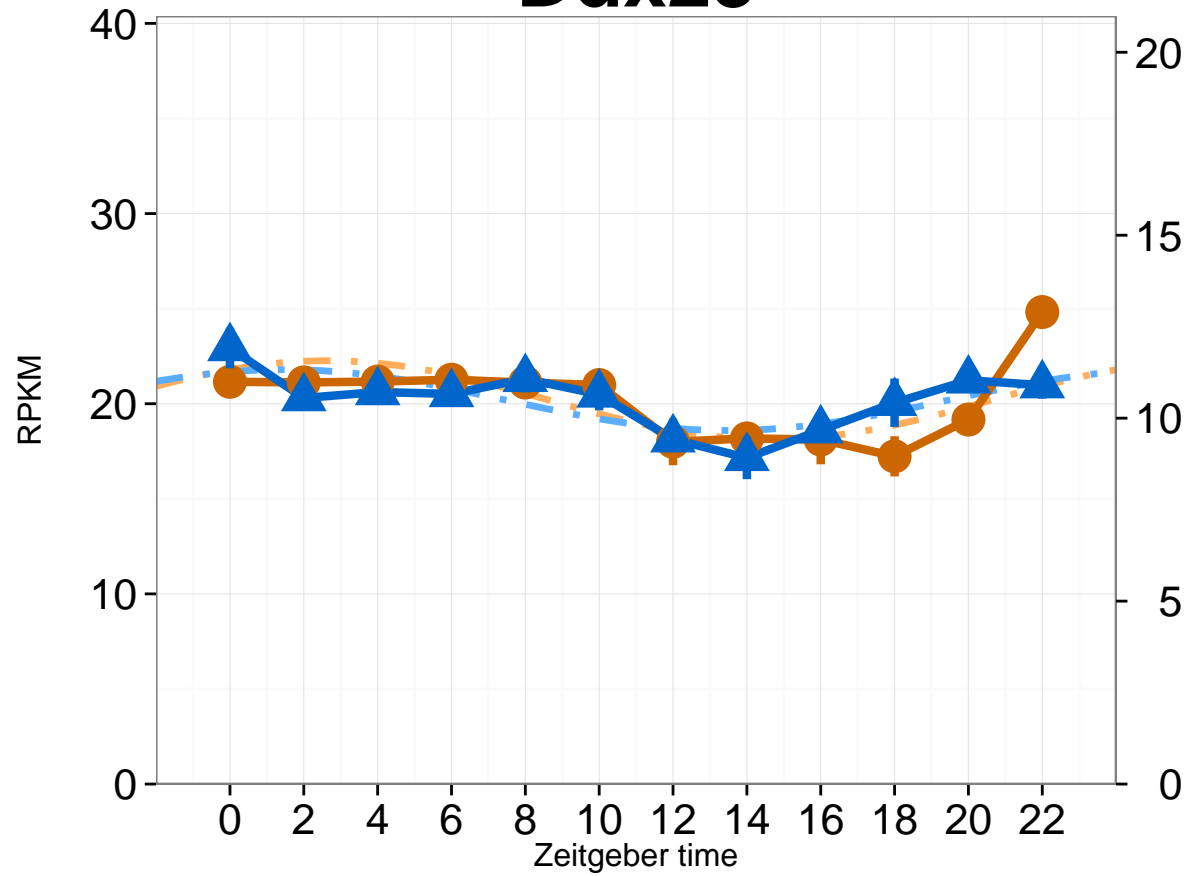

## Ddx23

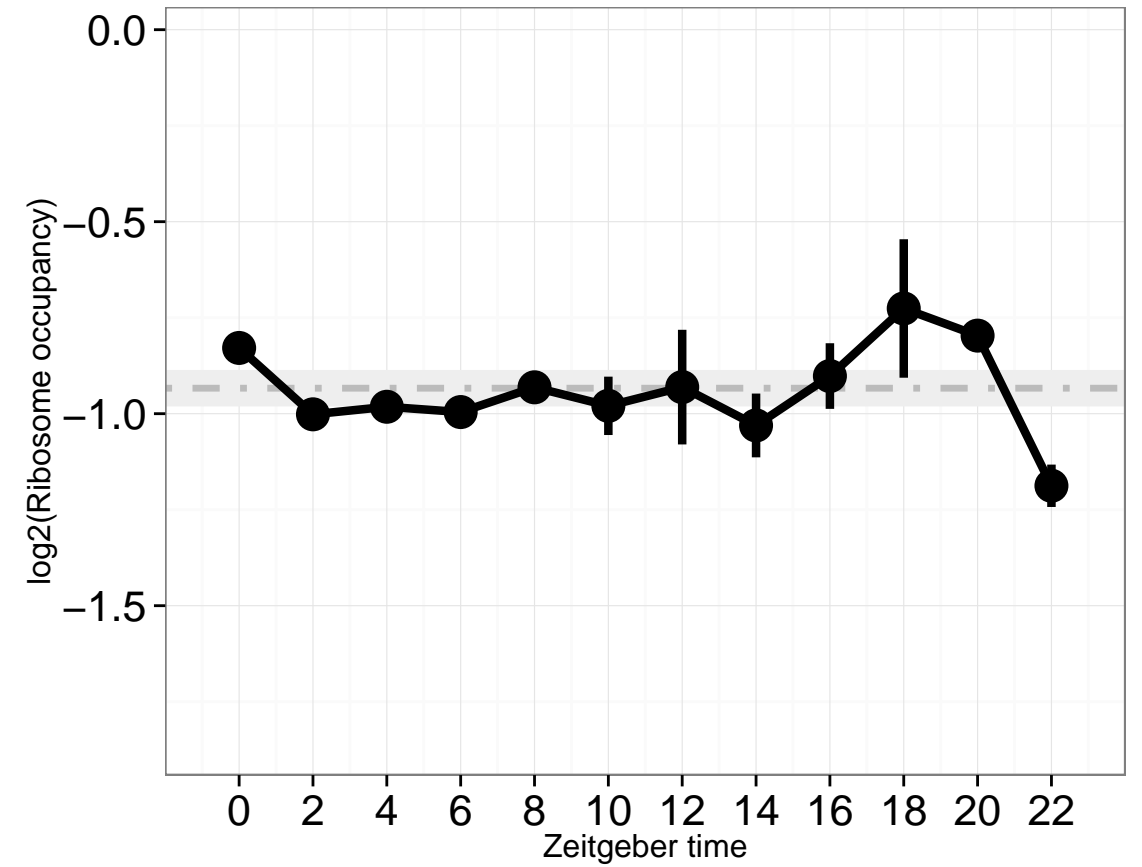

Supplement: SuppDataset_1.zip [file Ddx23_set_A.pdf › Supplemental Dataset 1/A-mRNA_nonrhyth_translation_nonrhyth/Ddx23_set_A.pdf]

## Ddx24

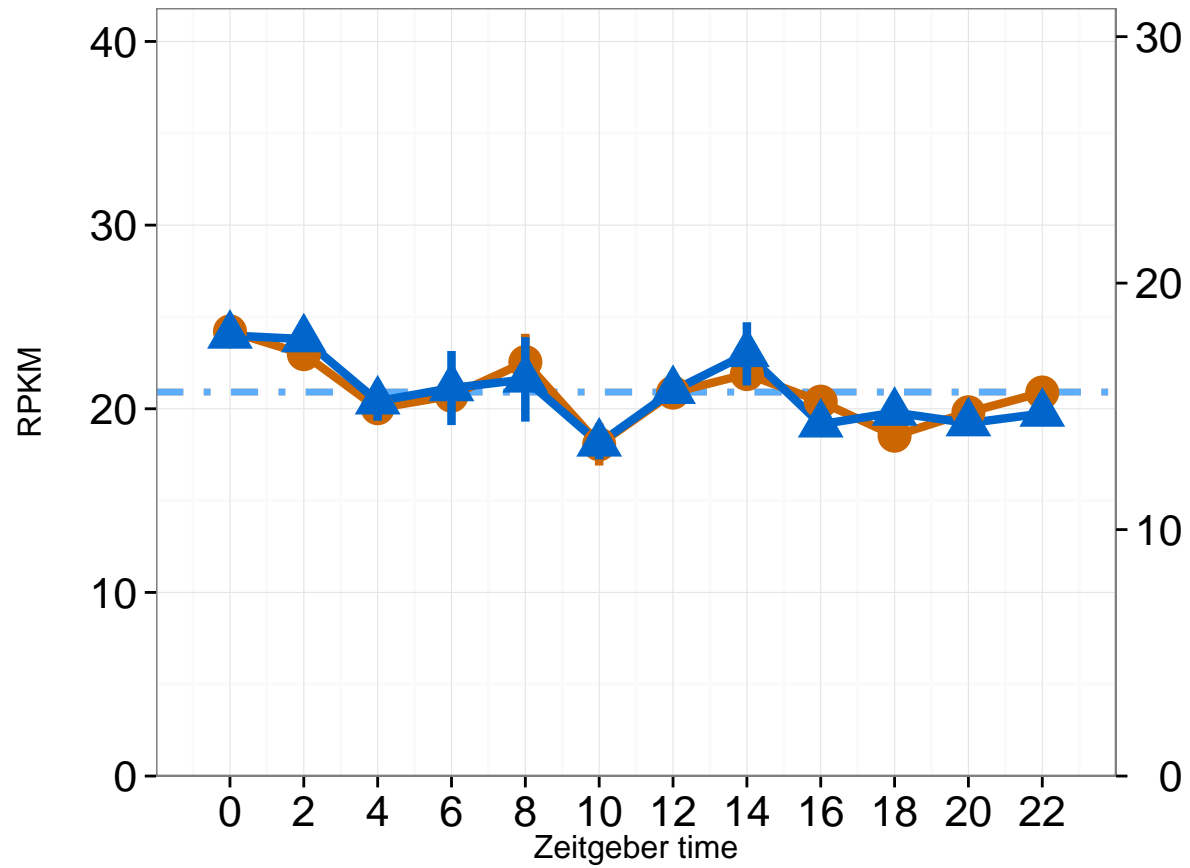

## Ddx24

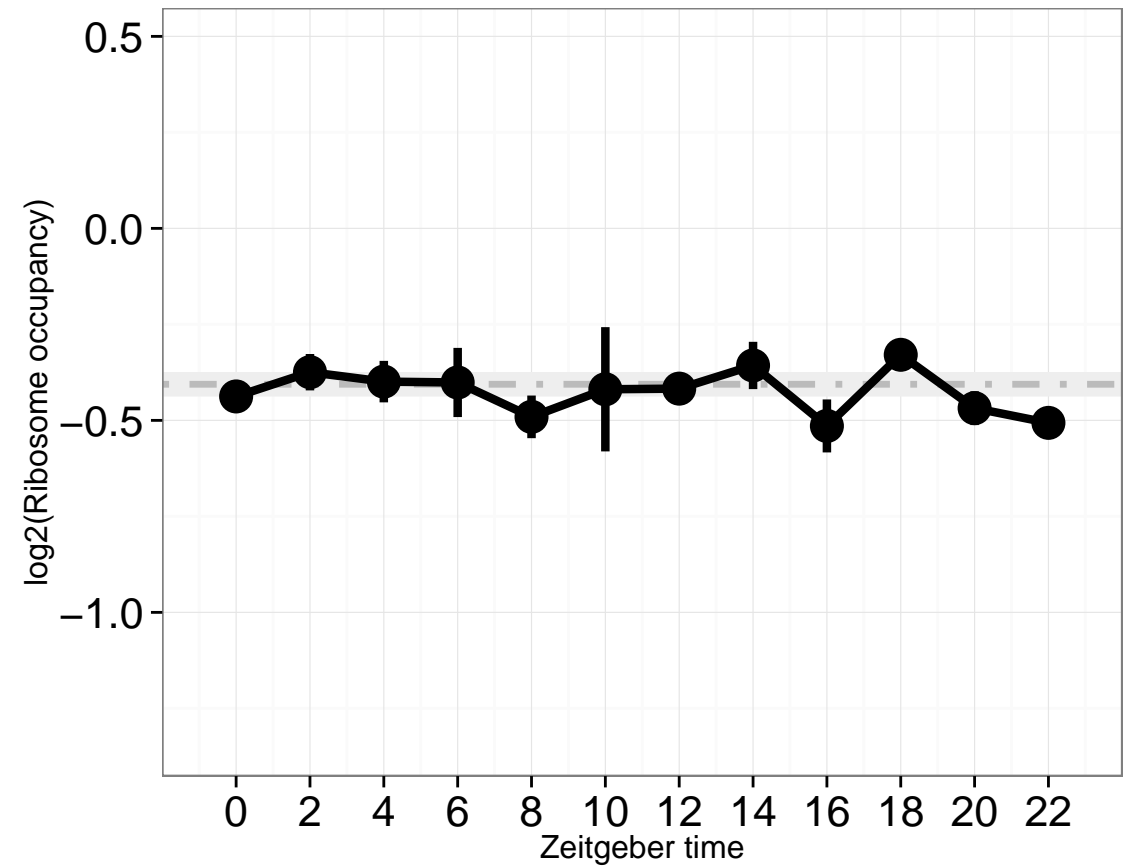

Supplement: SuppDataset_1.zip [file Ddx24_set_A.pdf › Supplemental Dataset 1/A-mRNA_nonrhyth_translation_nonrhyth/Ddx24_set_A.pdf]

# Ddx26b

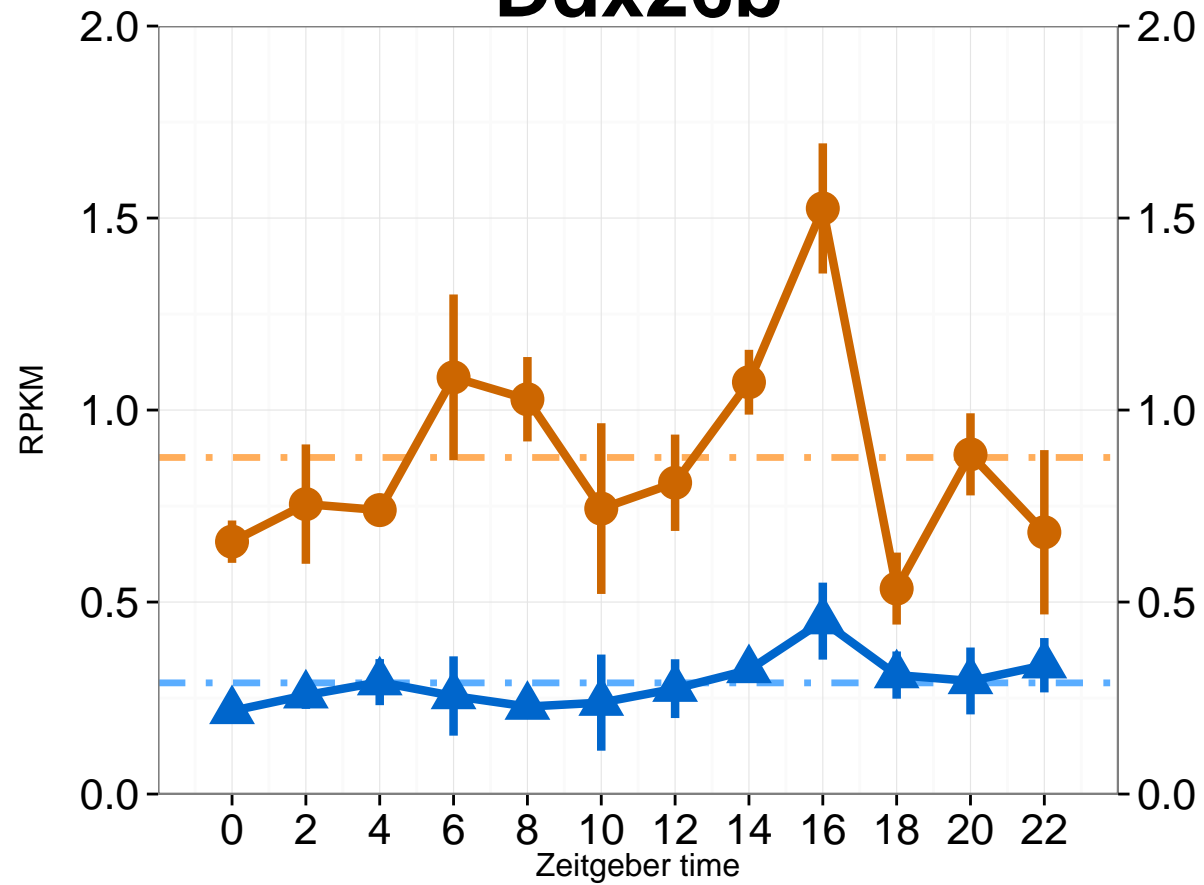

# Ddx26b

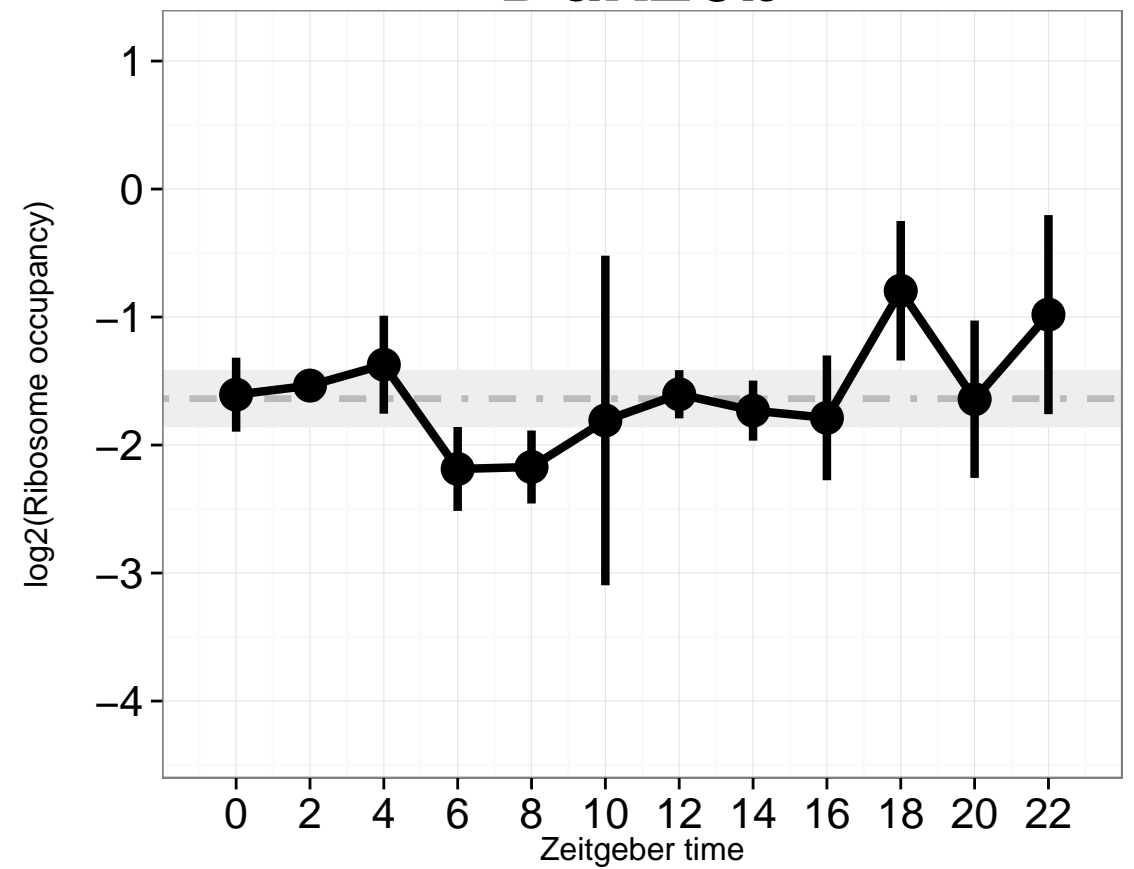

Supplement: SuppDataset_1.zip [file Ddx26b_set_A.pdf › Supplemental Dataset 1/A-mRNA_nonrhyth_translation_nonrhyth/Ddx26b_set_A.pdf]

## Ddx27

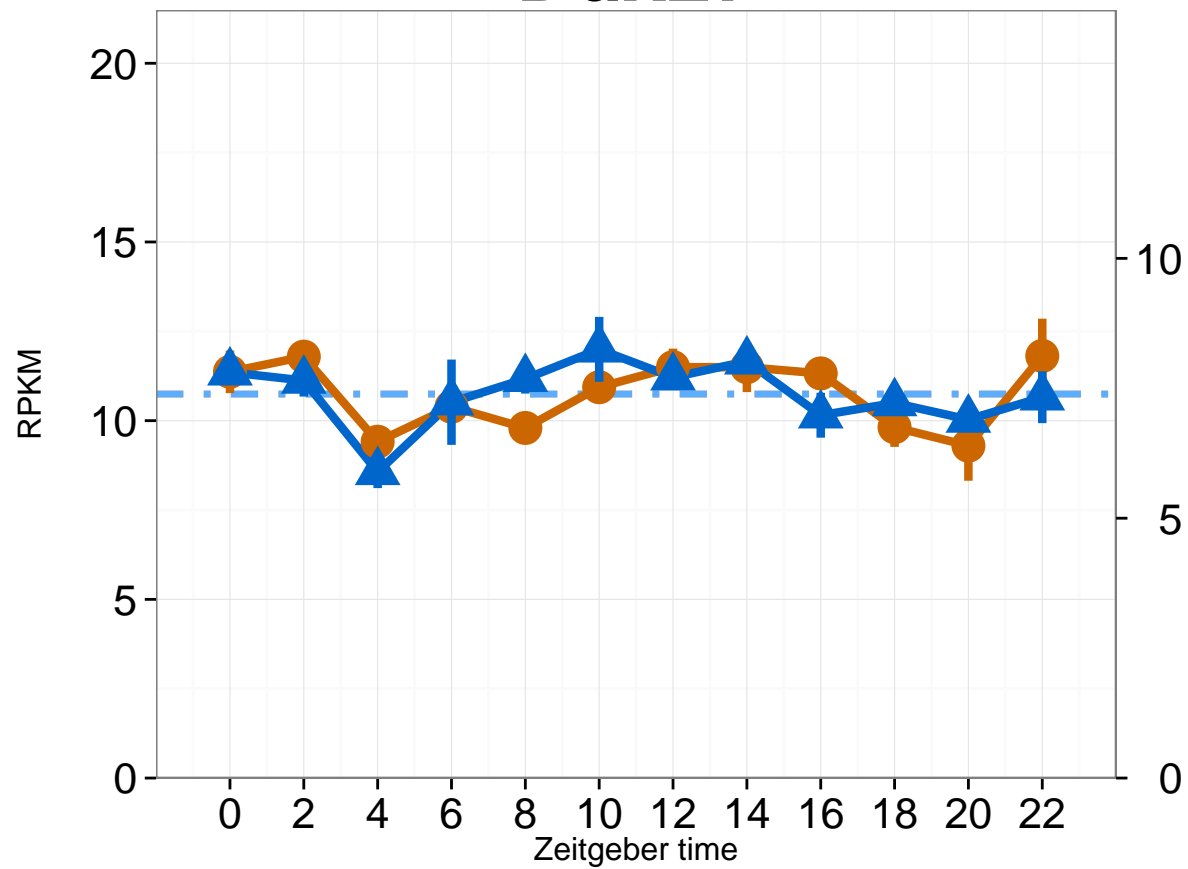

## Ddx27

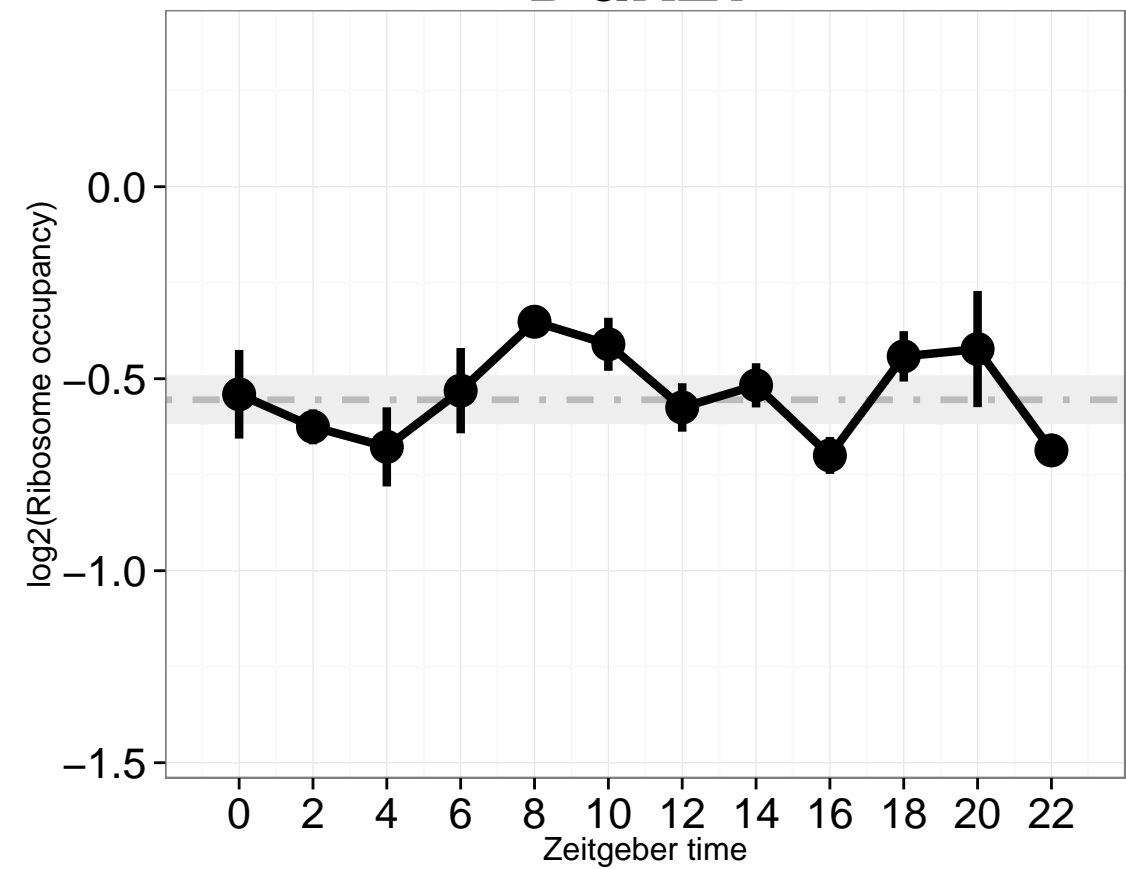

Supplement: SuppDataset_1.zip [file Ddx27_set_A.pdf › Supplemental Dataset 1/A-mRNA_nonrhyth_translation_nonrhyth/Ddx27_set_A.pdf]

## Ddx28

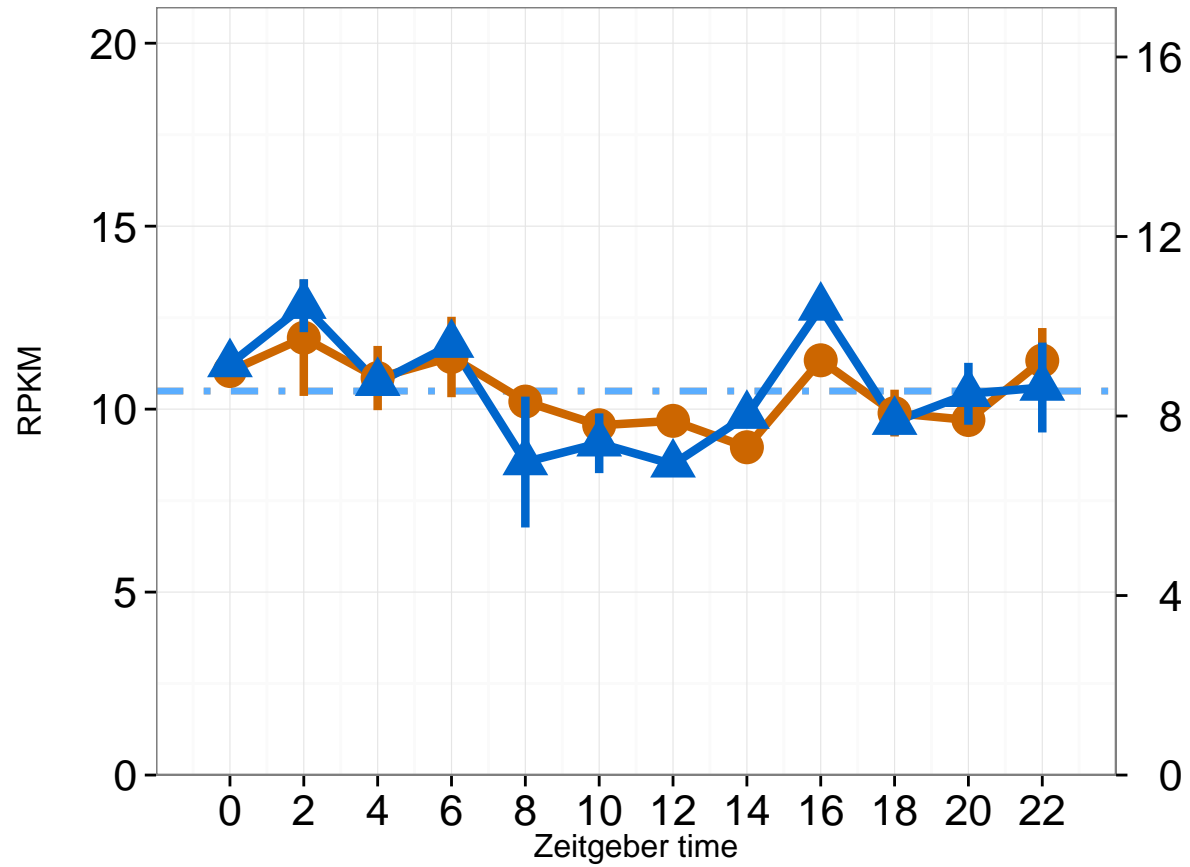

## Ddx28

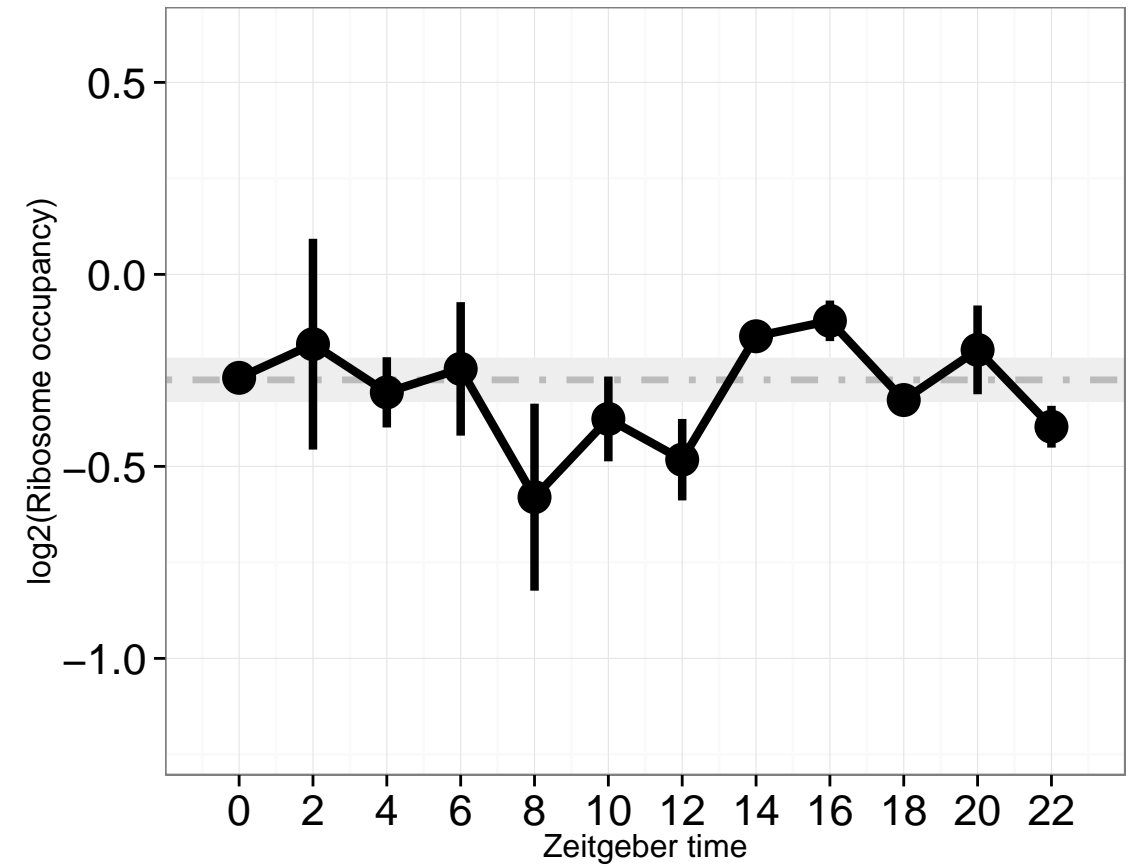

Supplement: SuppDataset_1.zip [file Ddx28_set_A.pdf › Supplemental Dataset 1/A-mRNA_nonrhyth_translation_nonrhyth/Ddx28_set_A.pdf]

# Ddx31

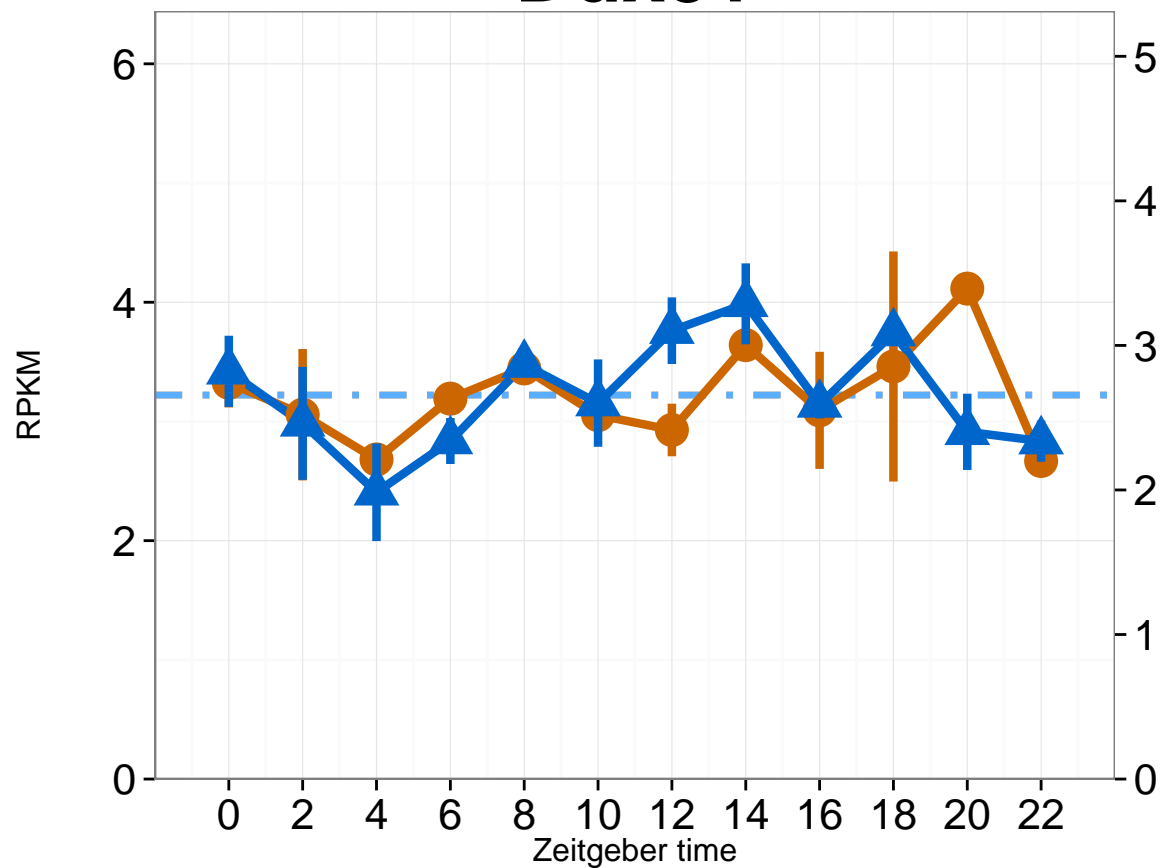

# Ddx31

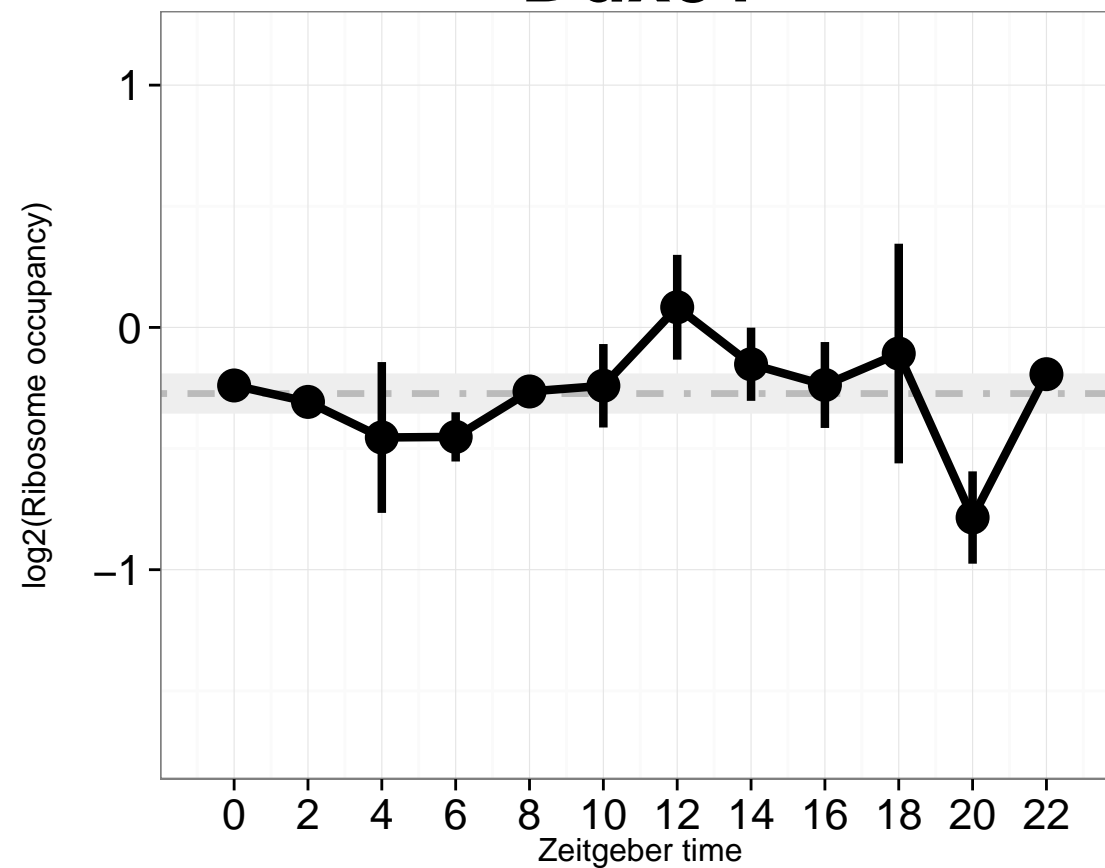

Supplement: SuppDataset_1.zip [file Ddx31_set_A.pdf › Supplemental Dataset 1/A-mRNA_nonrhyth_translation_nonrhyth/Ddx31_set_A.pdf]

# Ddx39

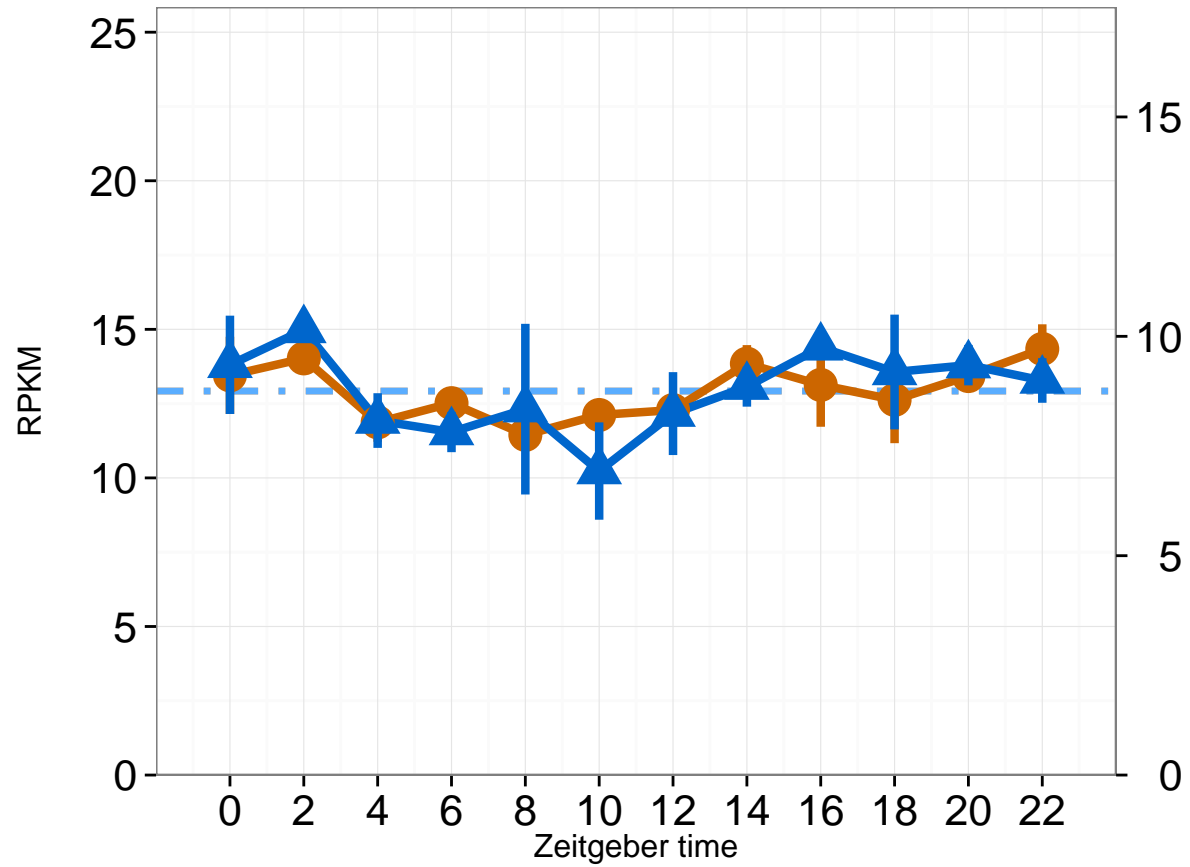

# Ddx39

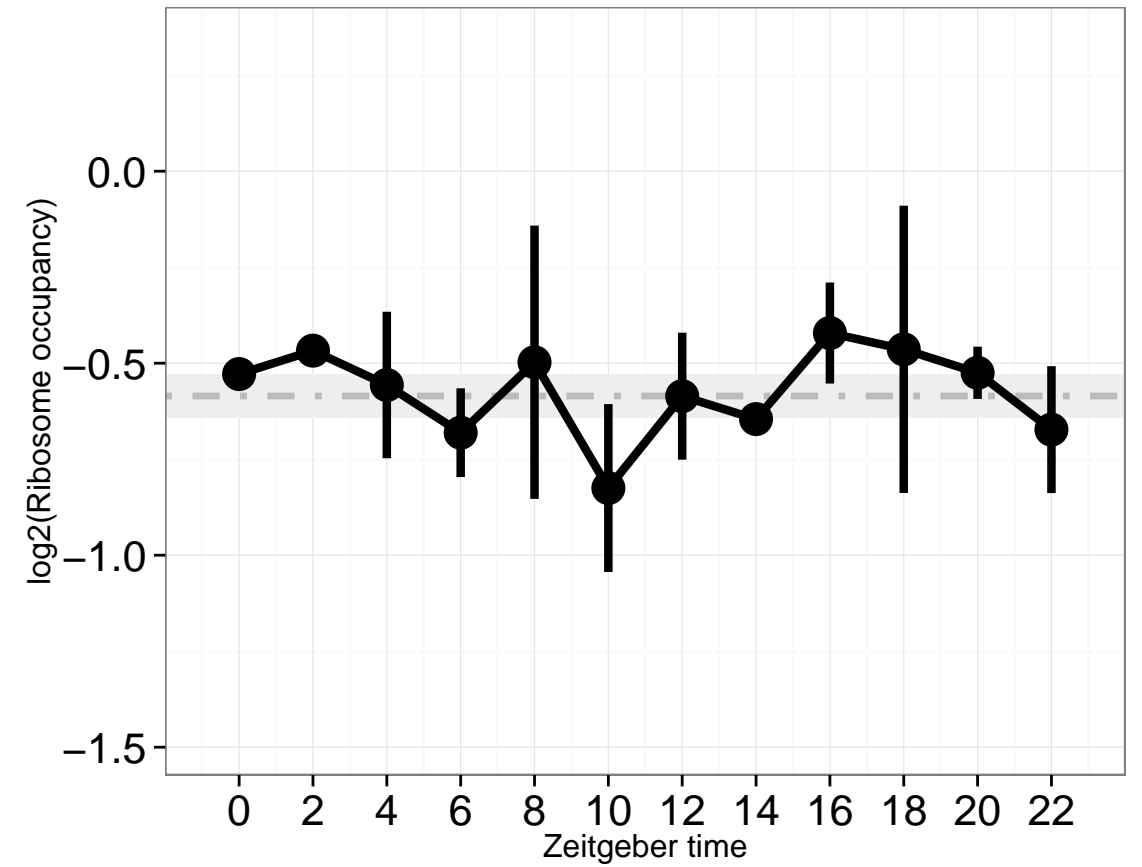

Supplement: SuppDataset_1.zip [file Ddx39_set_A.pdf › Supplemental Dataset 1/A-mRNA_nonrhyth_translation_nonrhyth/Ddx39_set_A.pdf]

## Ddx39b

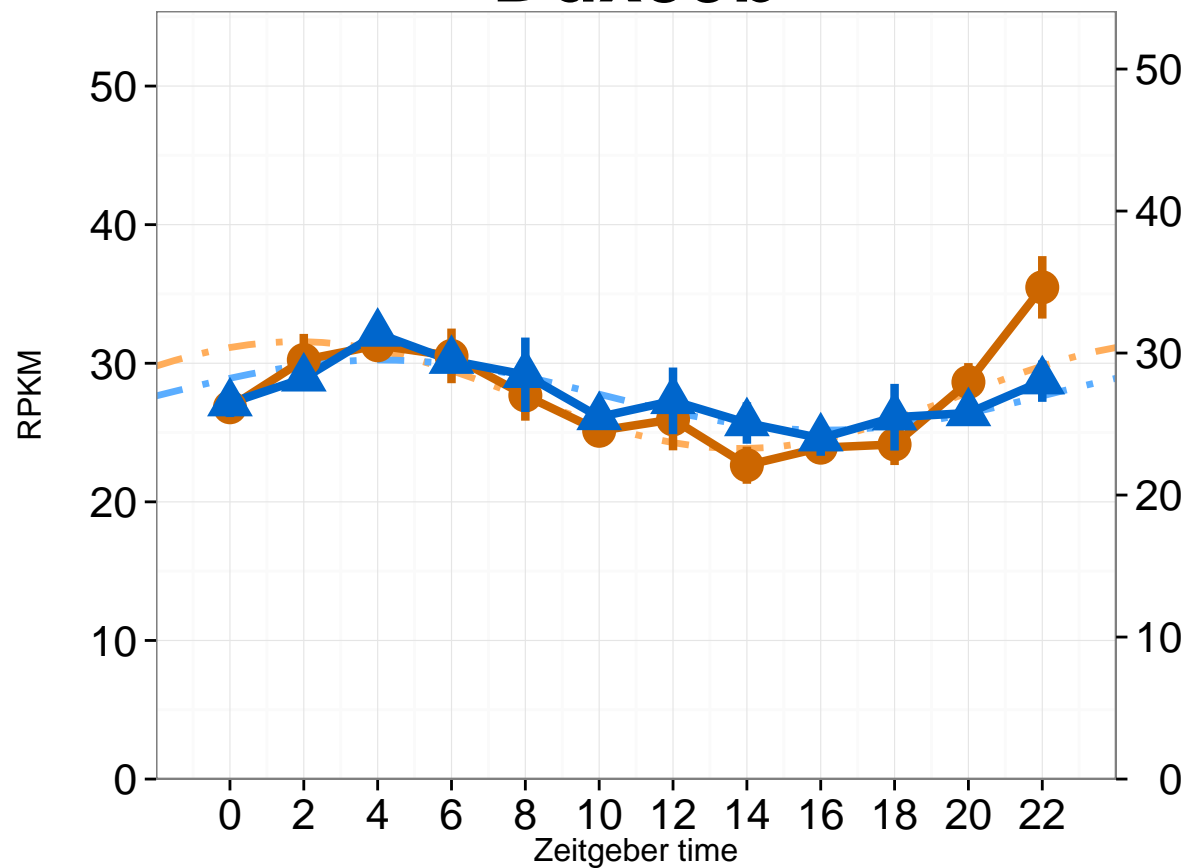

## Ddx39b

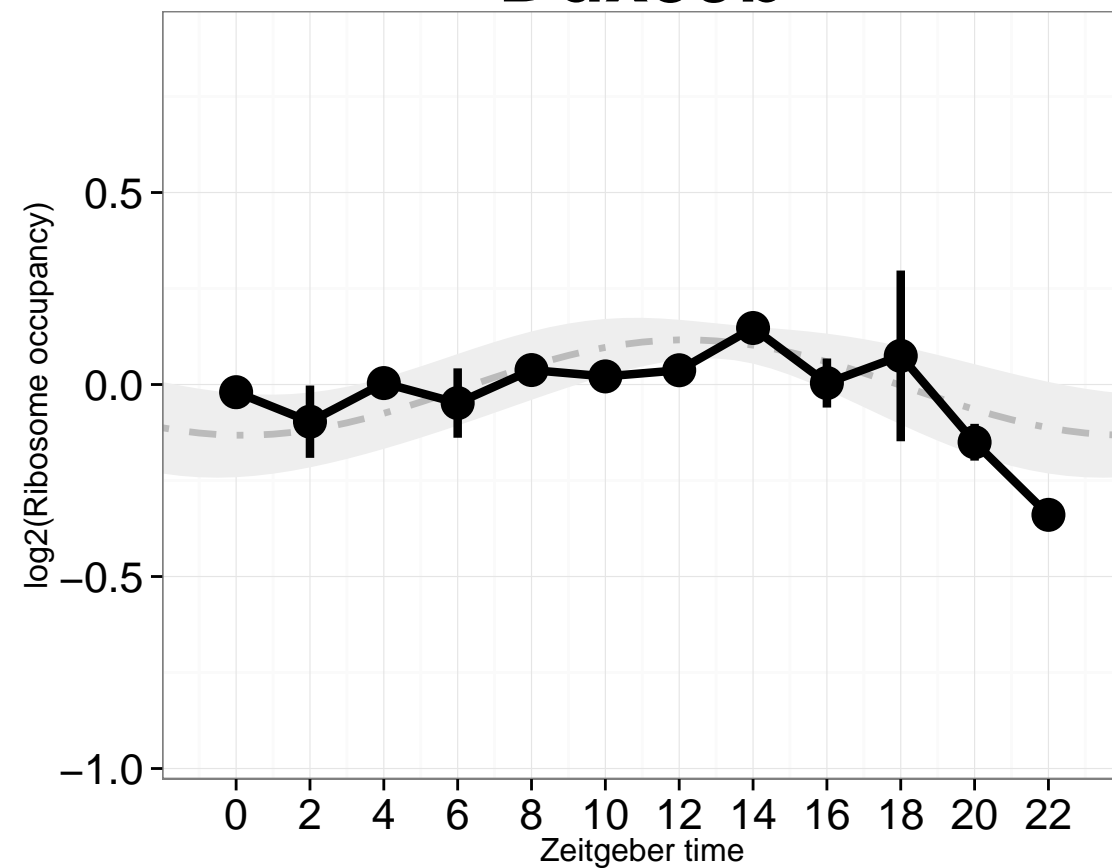

Supplement: SuppDataset_1.zip [file Ddx39b_set_A.pdf › Supplemental Dataset 1/A-mRNA_nonrhyth_translation_nonrhyth/Ddx39b_set_A.pdf]

# Ddx3x

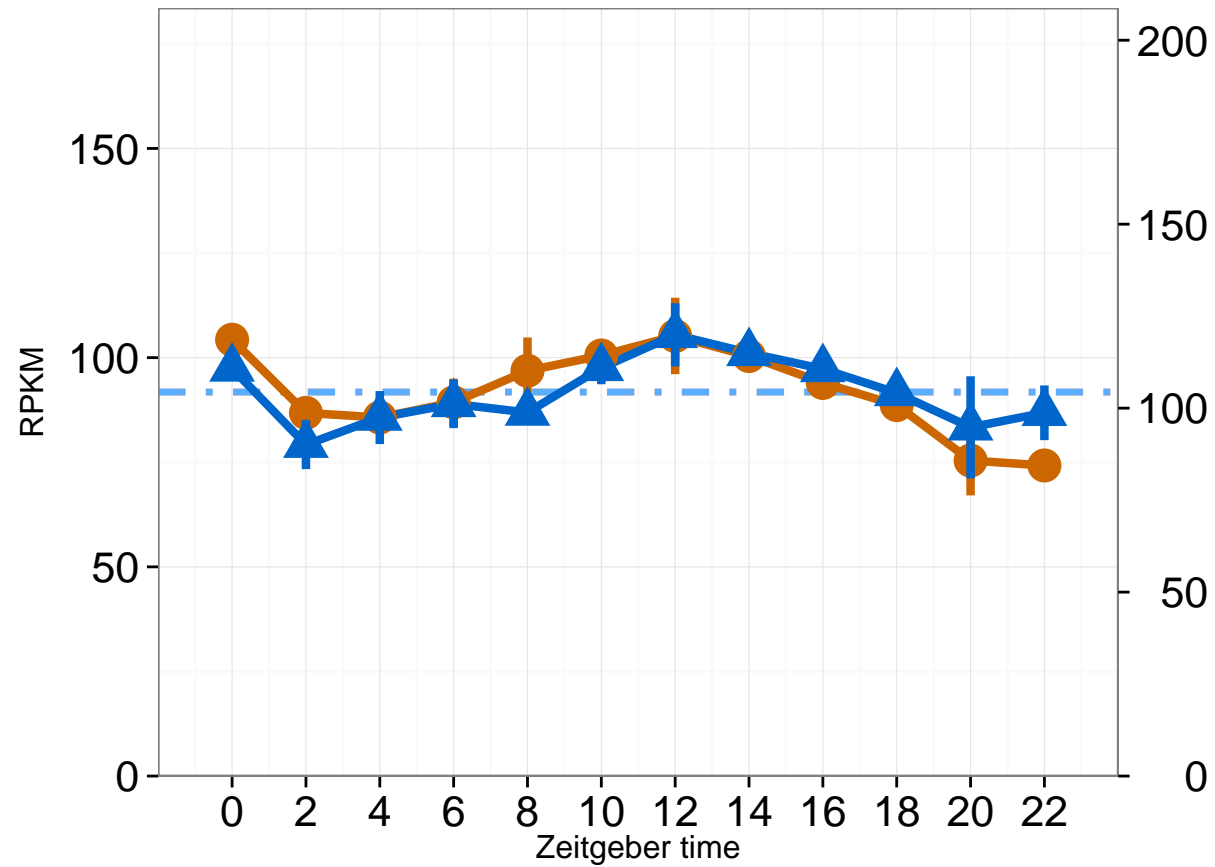

# Ddx3x

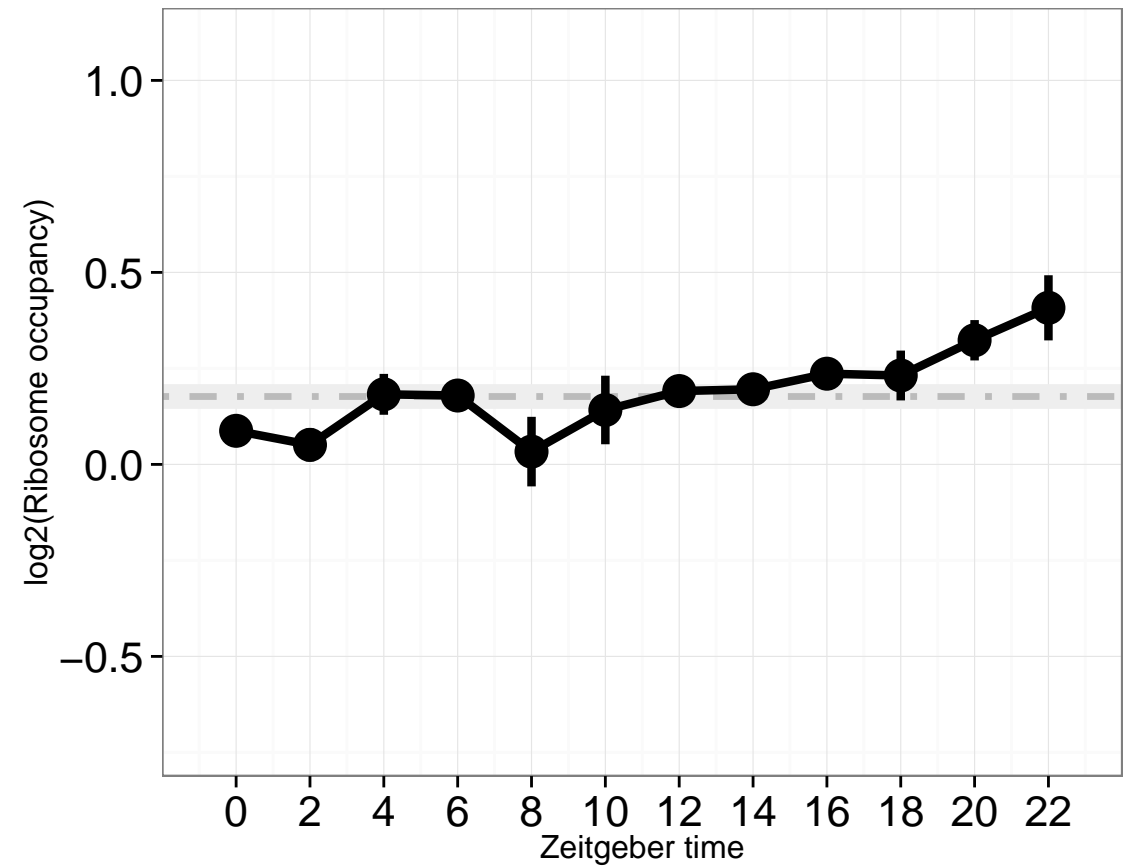

Supplement: SuppDataset_1.zip [file Ddx3x_set_A.pdf › Supplemental Dataset 1/A-mRNA_nonrhyth_translation_nonrhyth/Ddx3x_set_A.pdf]

# Ddx3y

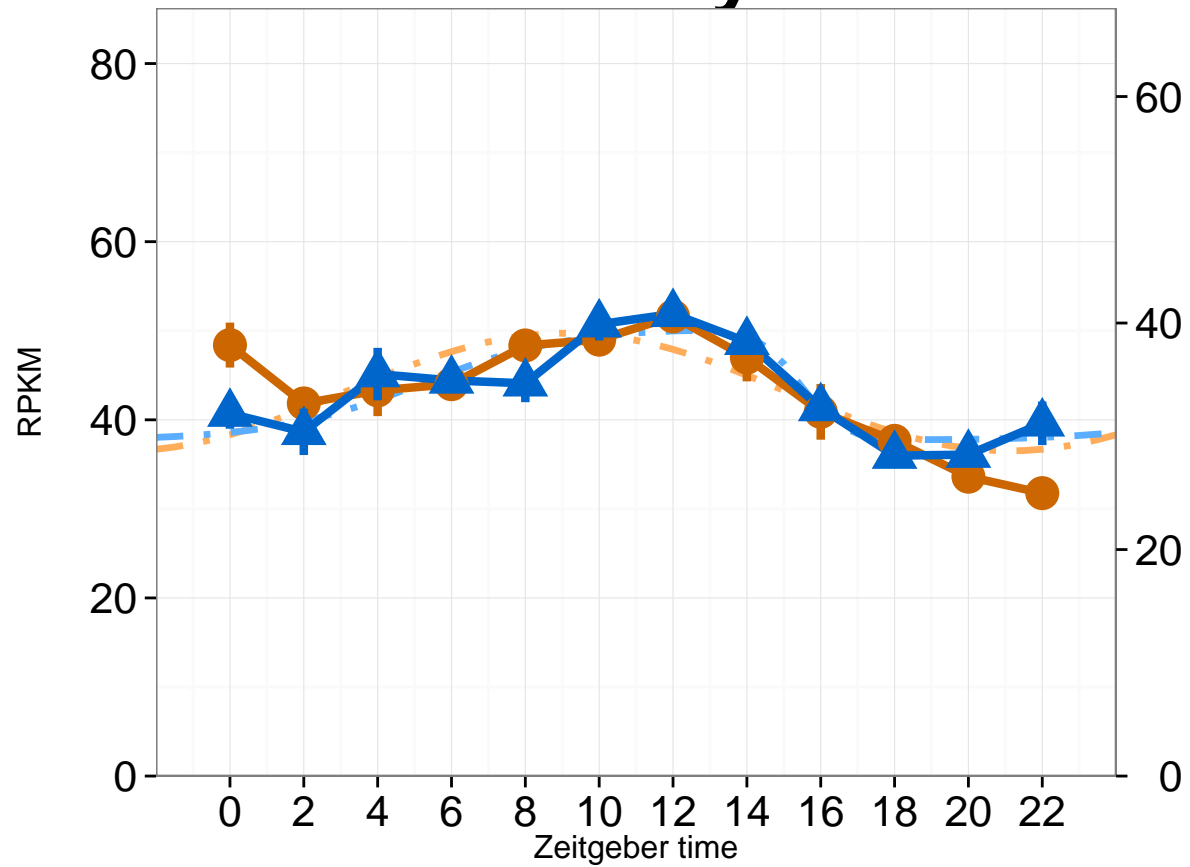

# Ddx3y

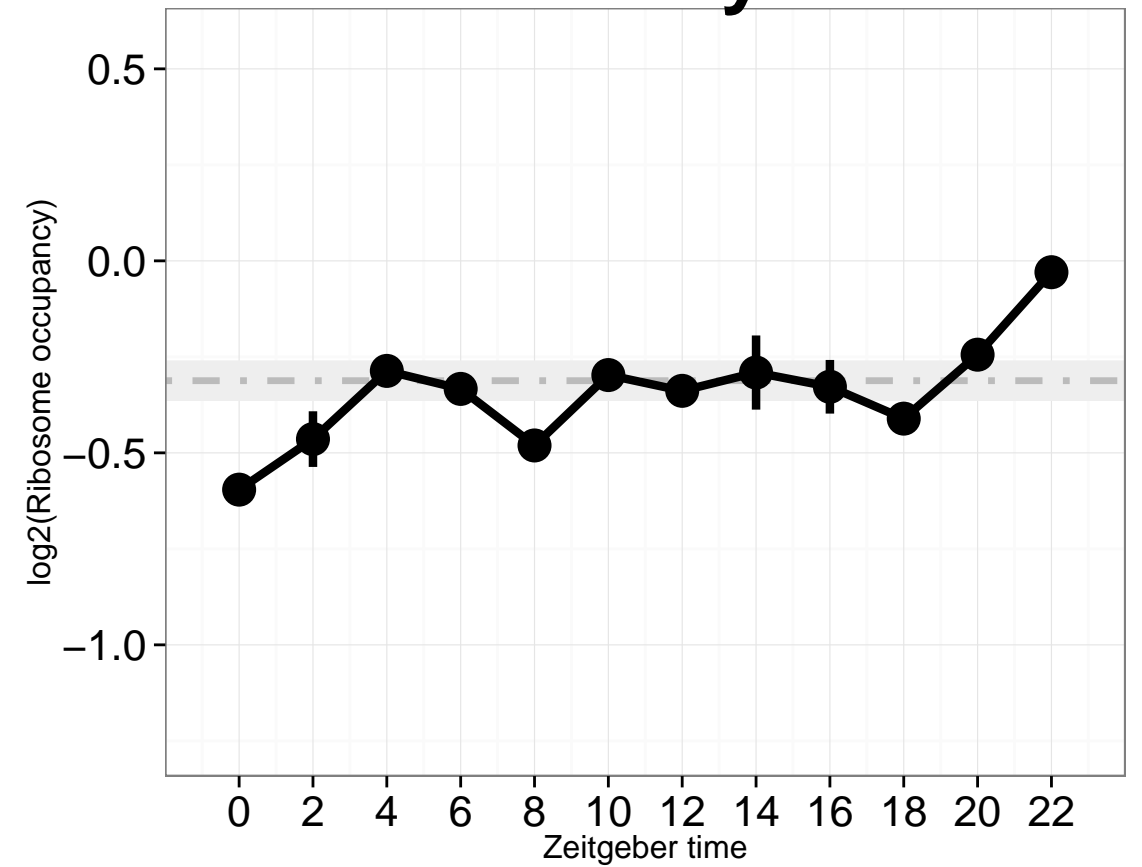

Supplement: SuppDataset_1.zip [file Ddx3y_set_A.pdf › Supplemental Dataset 1/A-mRNA_nonrhyth_translation_nonrhyth/Ddx3y_set_A.pdf]

## Ddx41

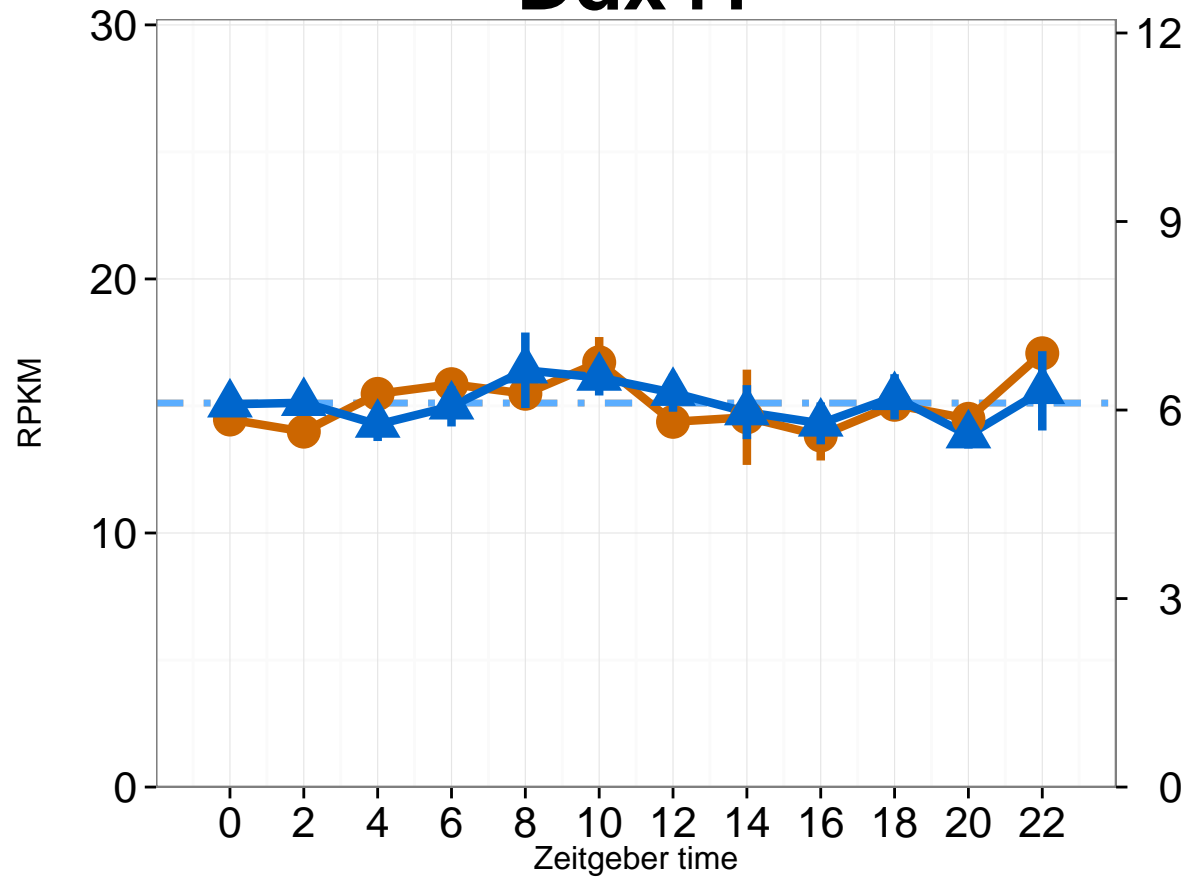

## Ddx41

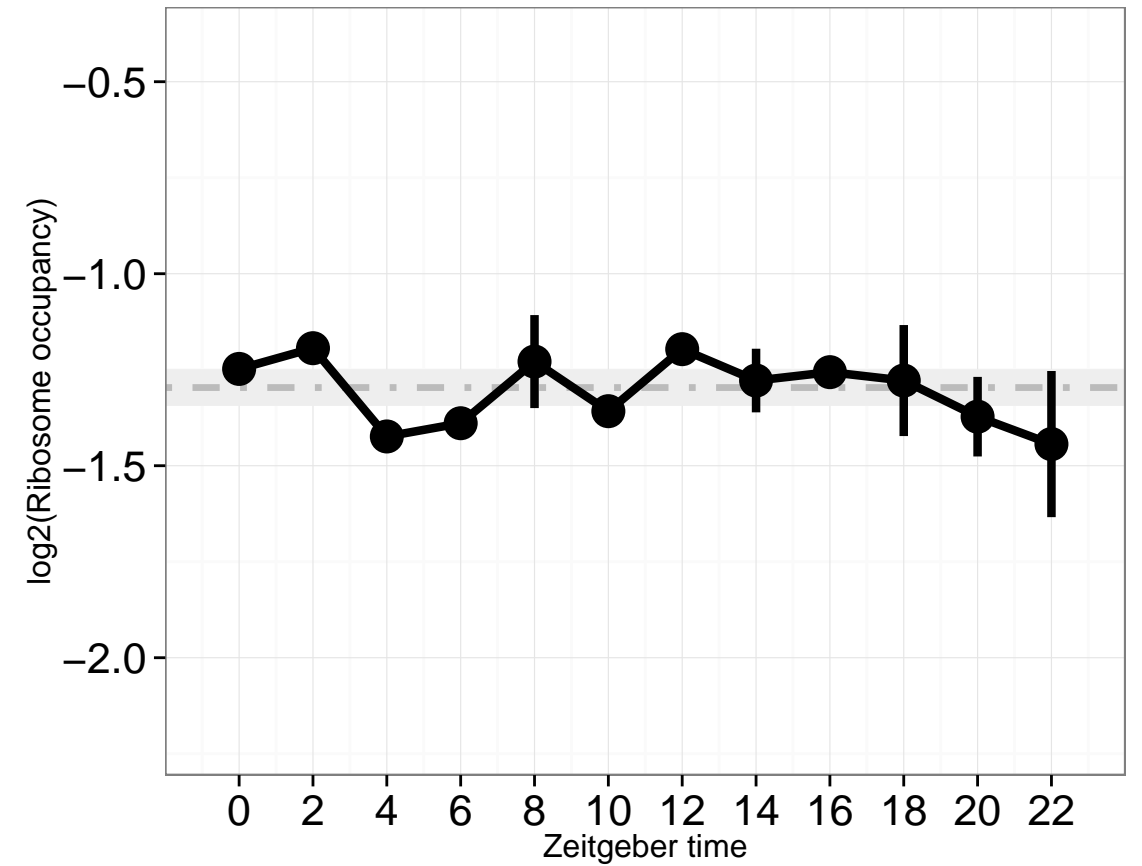

Supplement: SuppDataset_1.zip [file Ddx41_set_A.pdf › Supplemental Dataset 1/A-mRNA_nonrhyth_translation_nonrhyth/Ddx41_set_A.pdf]

## Ddx42

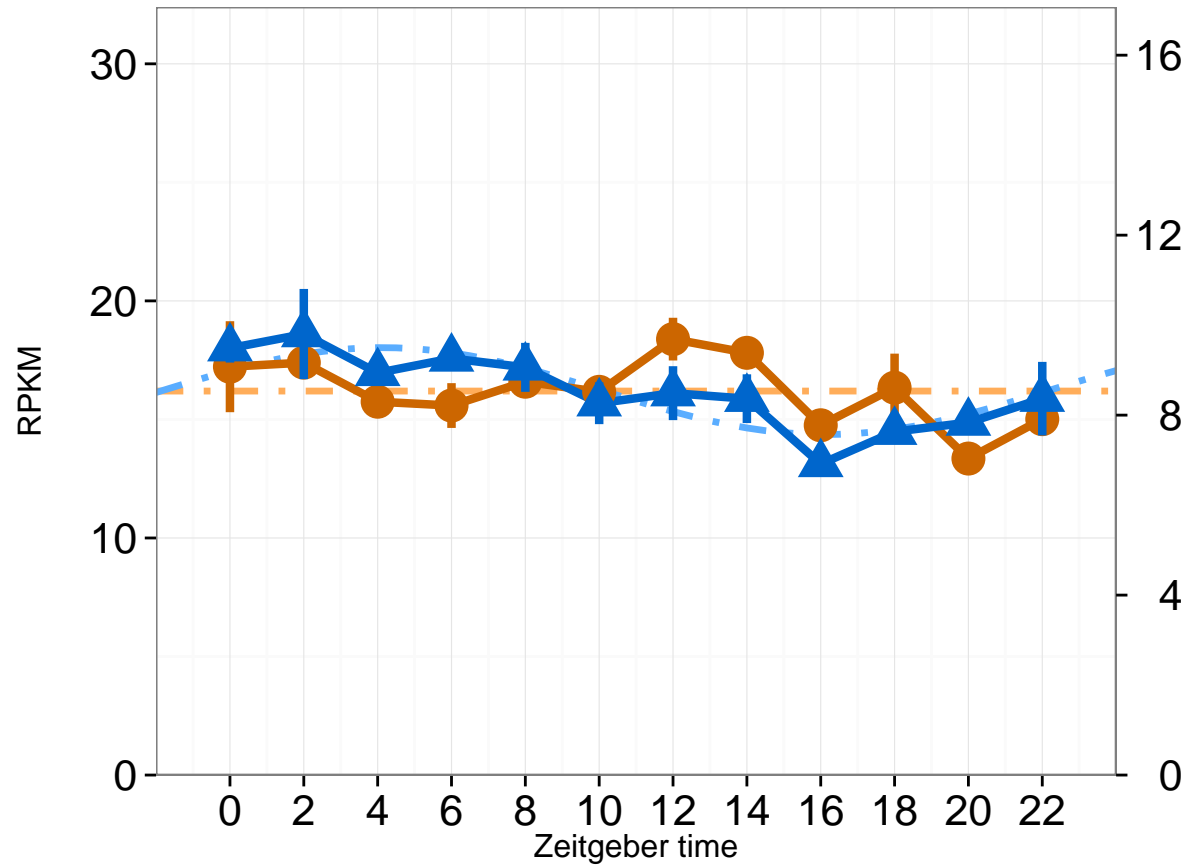

## Ddx42

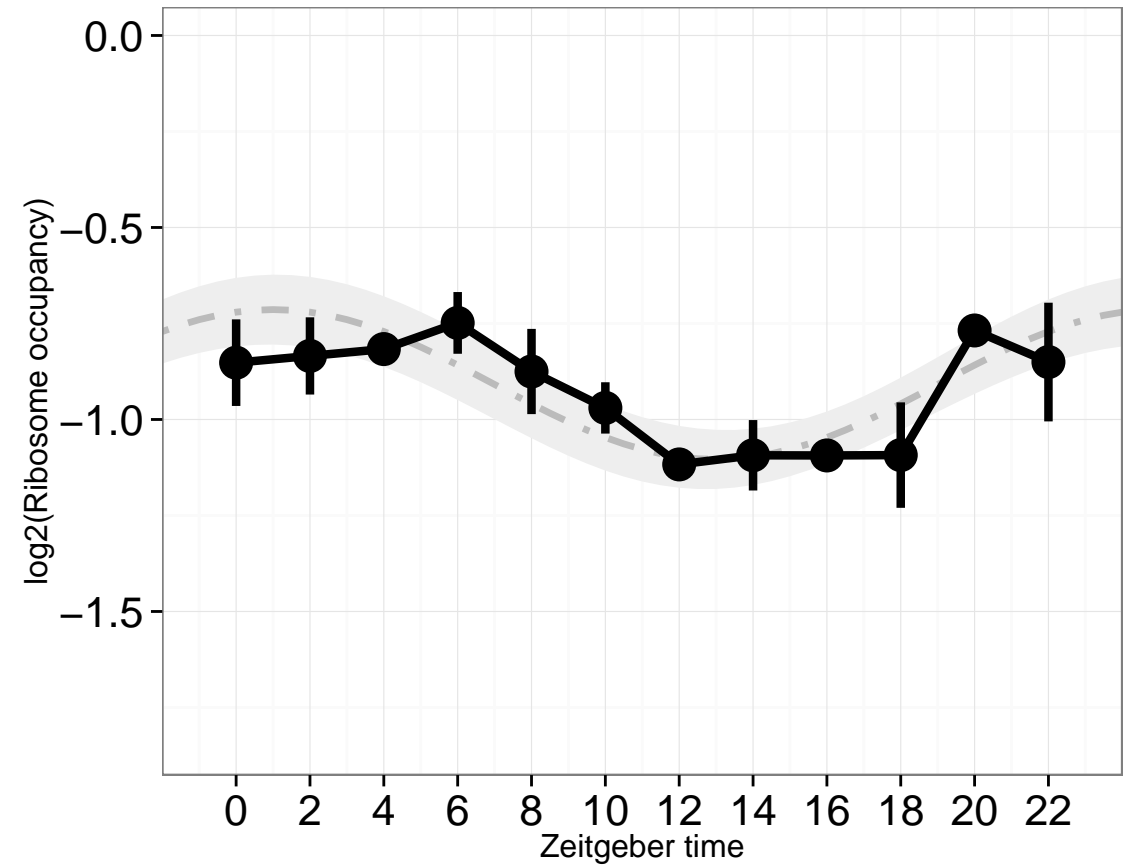

Supplement: SuppDataset_1.zip [file Ddx42_set_A.pdf › Supplemental Dataset 1/A-mRNA_nonrhyth_translation_nonrhyth/Ddx42_set_A.pdf]

## Ddx47

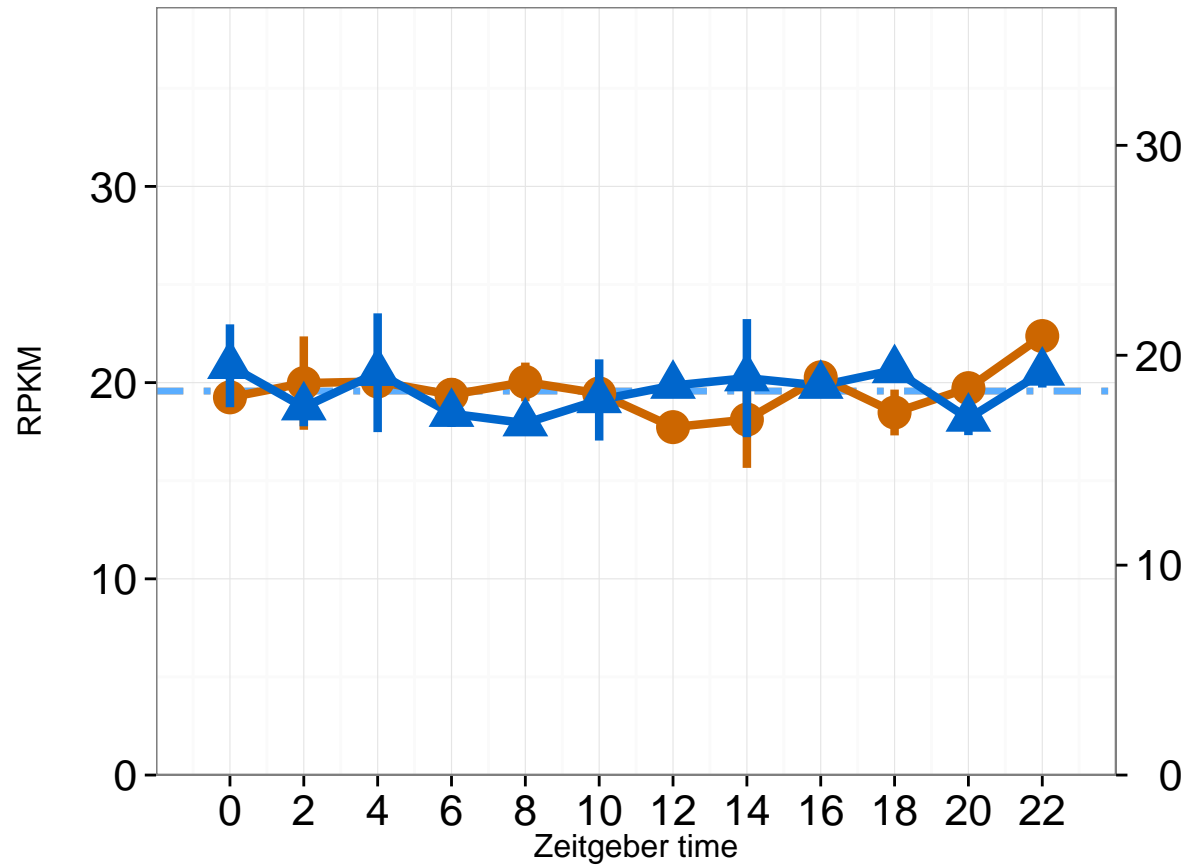

## Ddx47

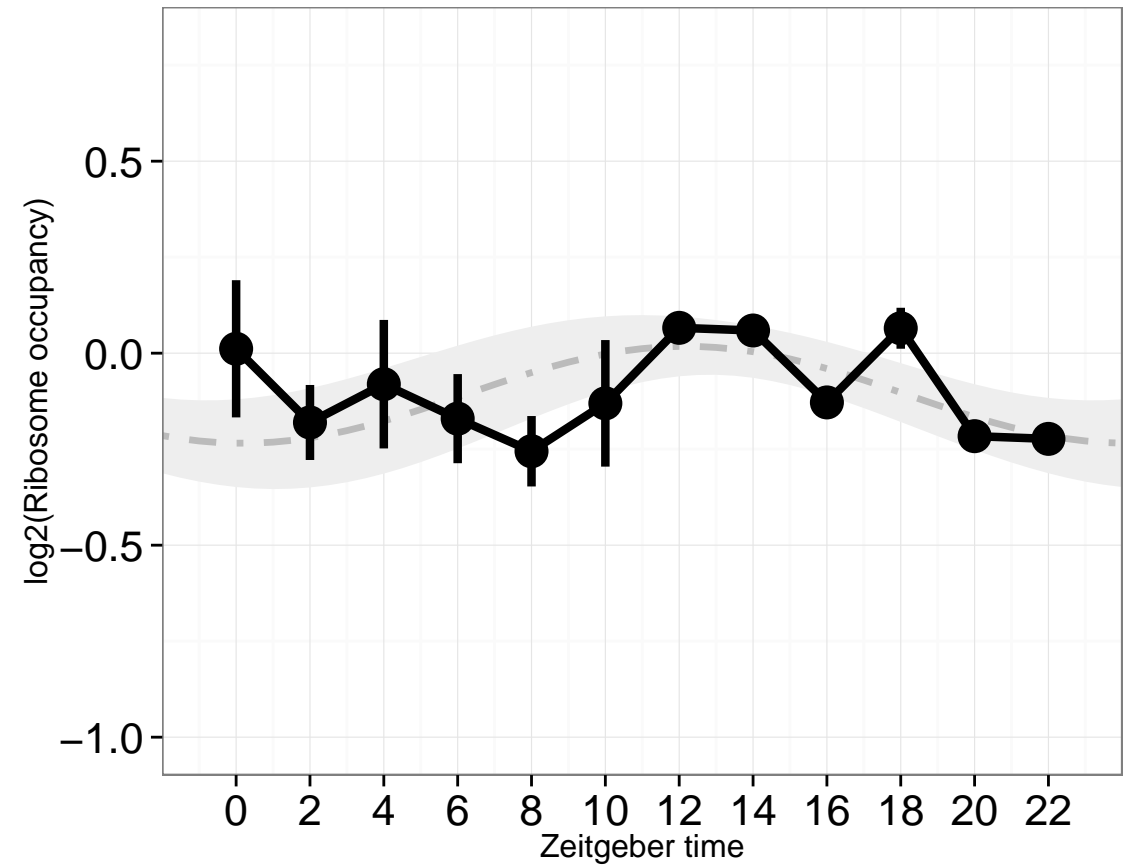

Supplement: SuppDataset_1.zip [file Ddx47_set_A.pdf › Supplemental Dataset 1/A-mRNA_nonrhyth_translation_nonrhyth/Ddx47_set_A.pdf]

## Ddx49

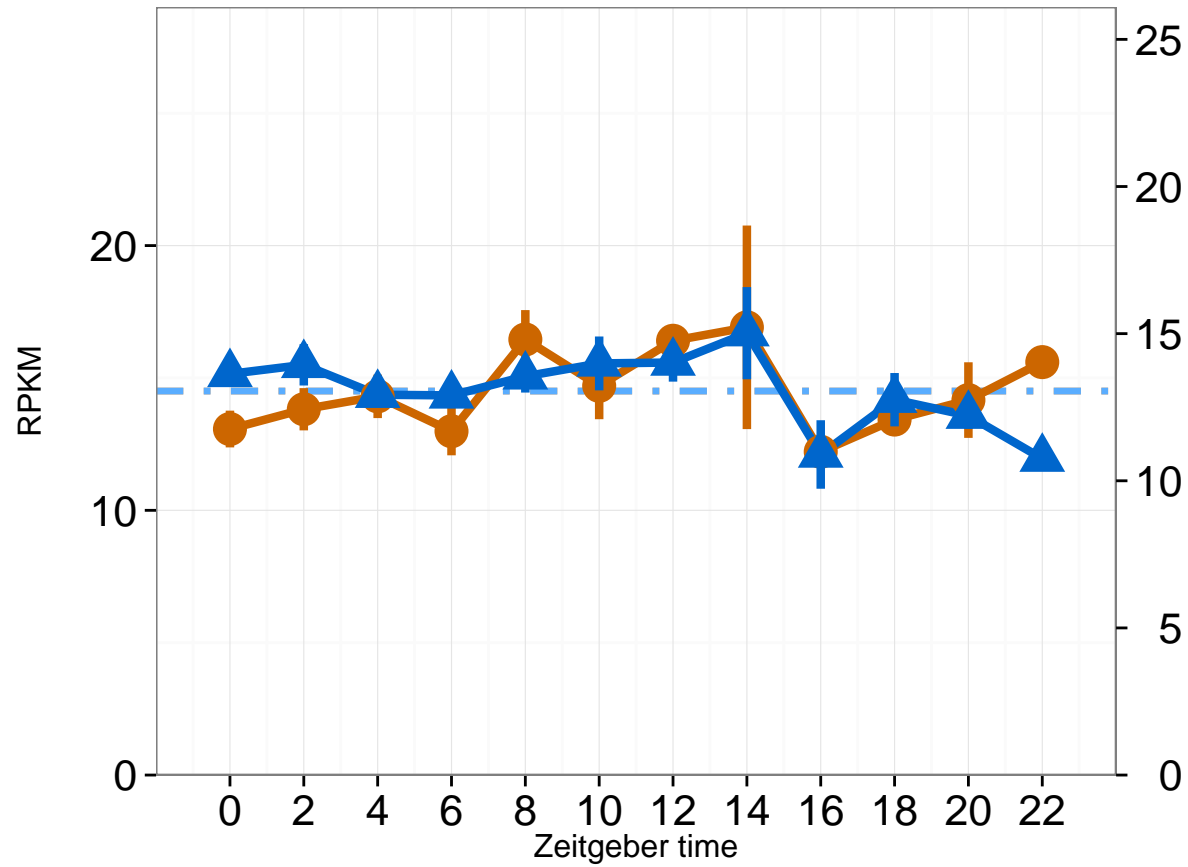

## Ddx49

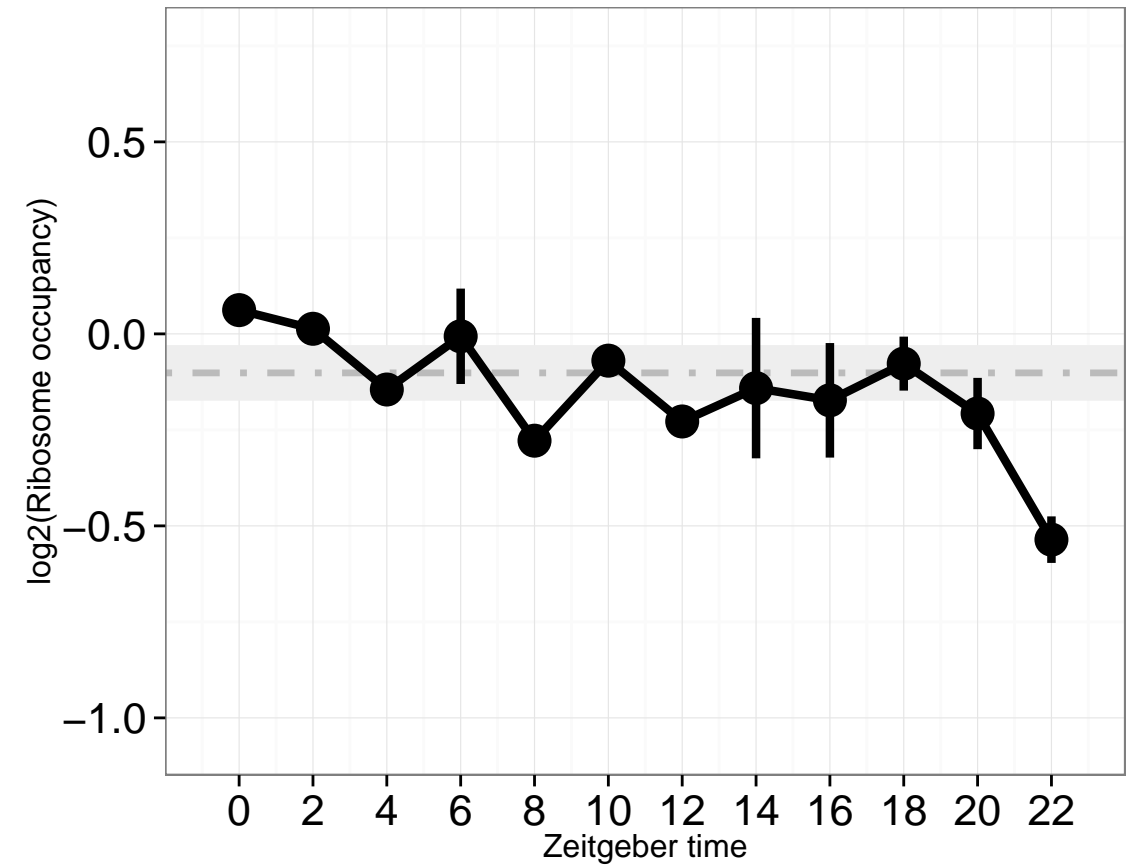

Supplement: SuppDataset_1.zip [file Ddx49_set_A.pdf › Supplemental Dataset 1/A-mRNA_nonrhyth_translation_nonrhyth/Ddx49_set_A.pdf]

# Ddx50

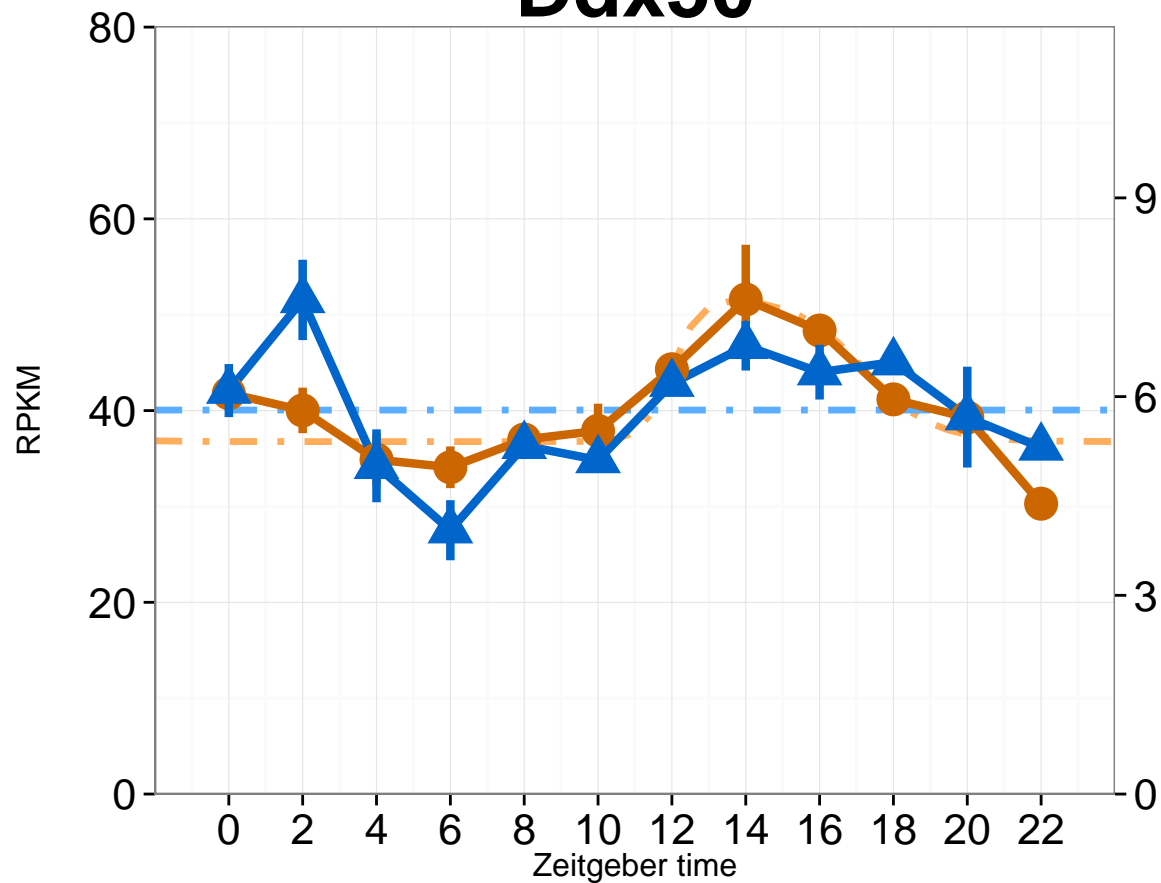

# Ddx50

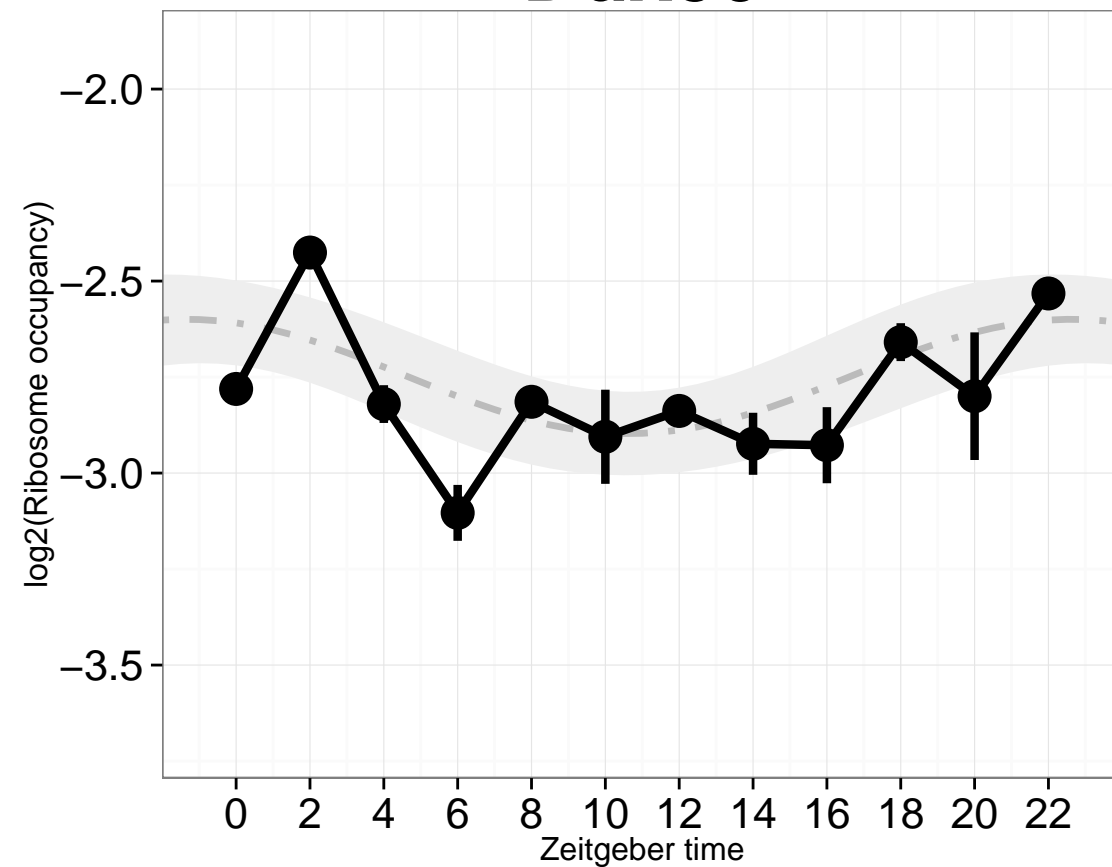

Supplement: SuppDataset_1.zip [file Ddx50_set_A.pdf › Supplemental Dataset 1/A-mRNA_nonrhyth_translation_nonrhyth/Ddx50_set_A.pdf]

## Ddx51

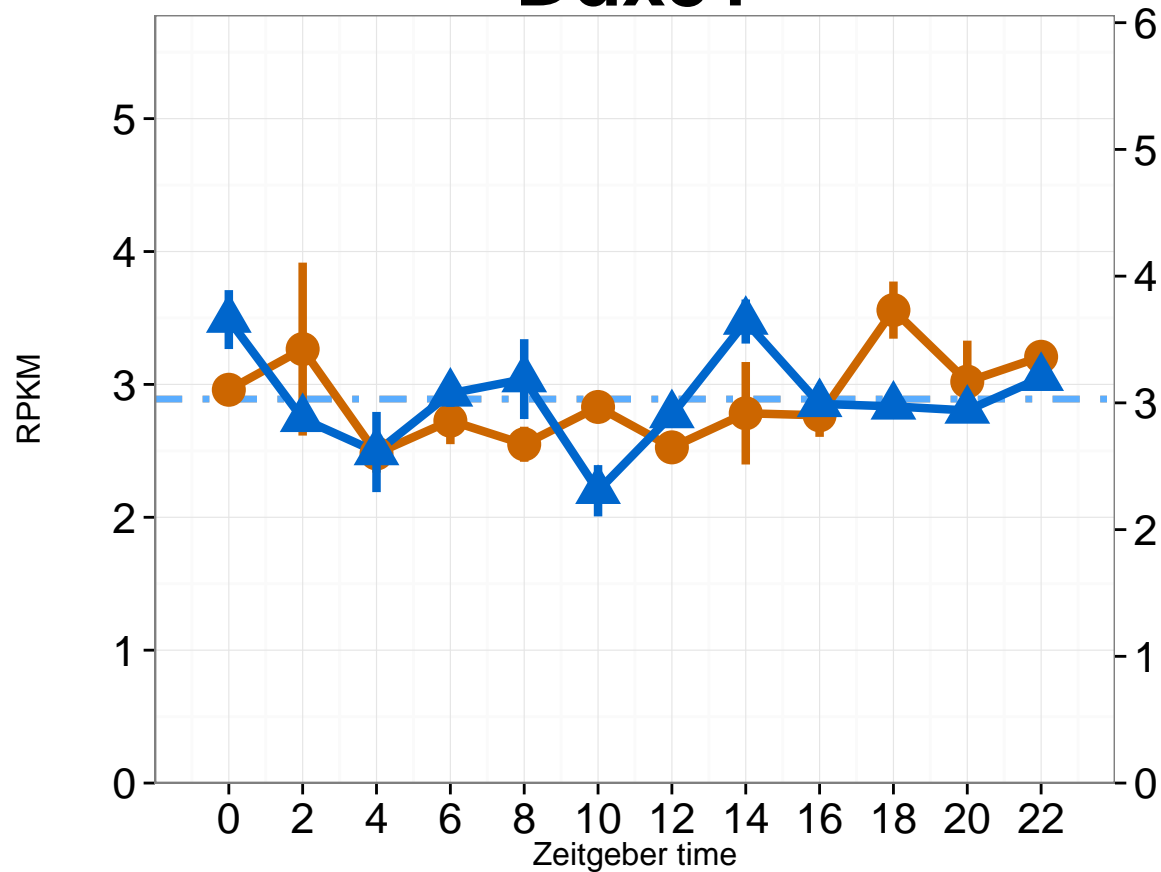

## Ddx51

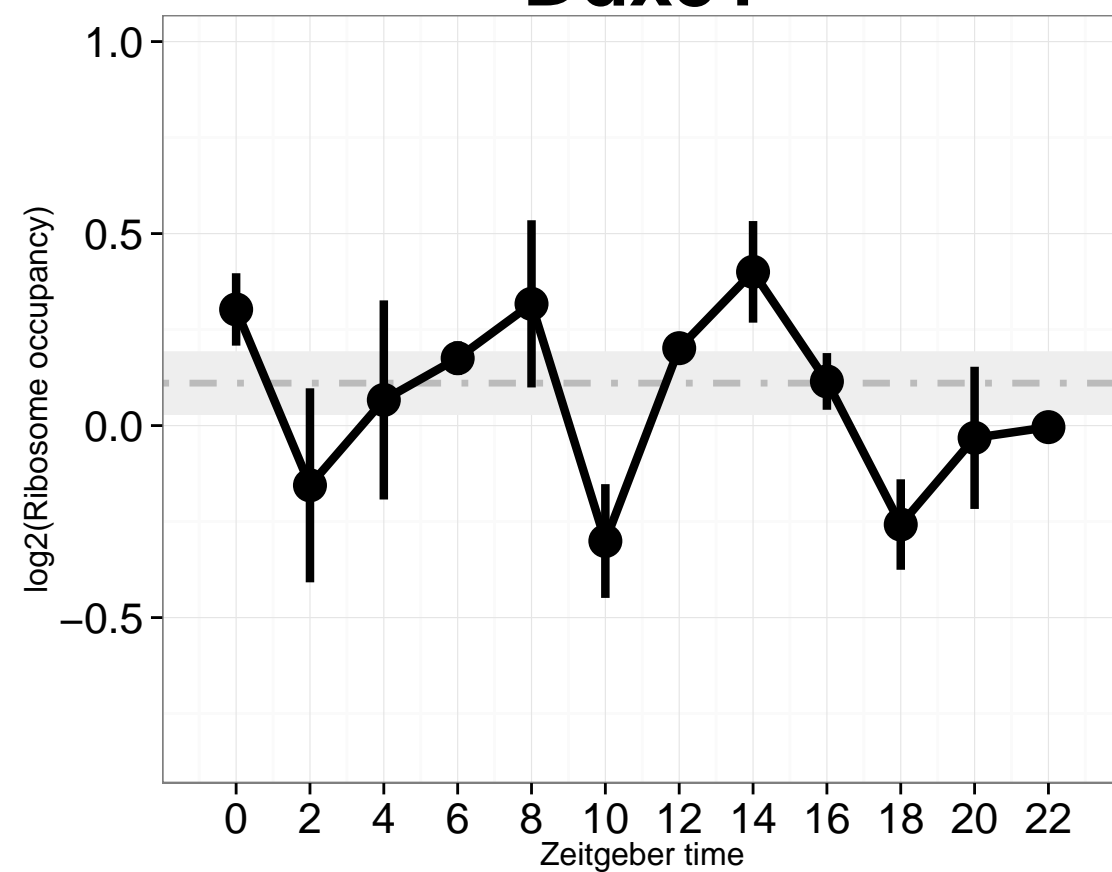

Supplement: SuppDataset_1.zip [file Ddx51_set_A.pdf › Supplemental Dataset 1/A-mRNA_nonrhyth_translation_nonrhyth/Ddx51_set_A.pdf]

## Ddx52

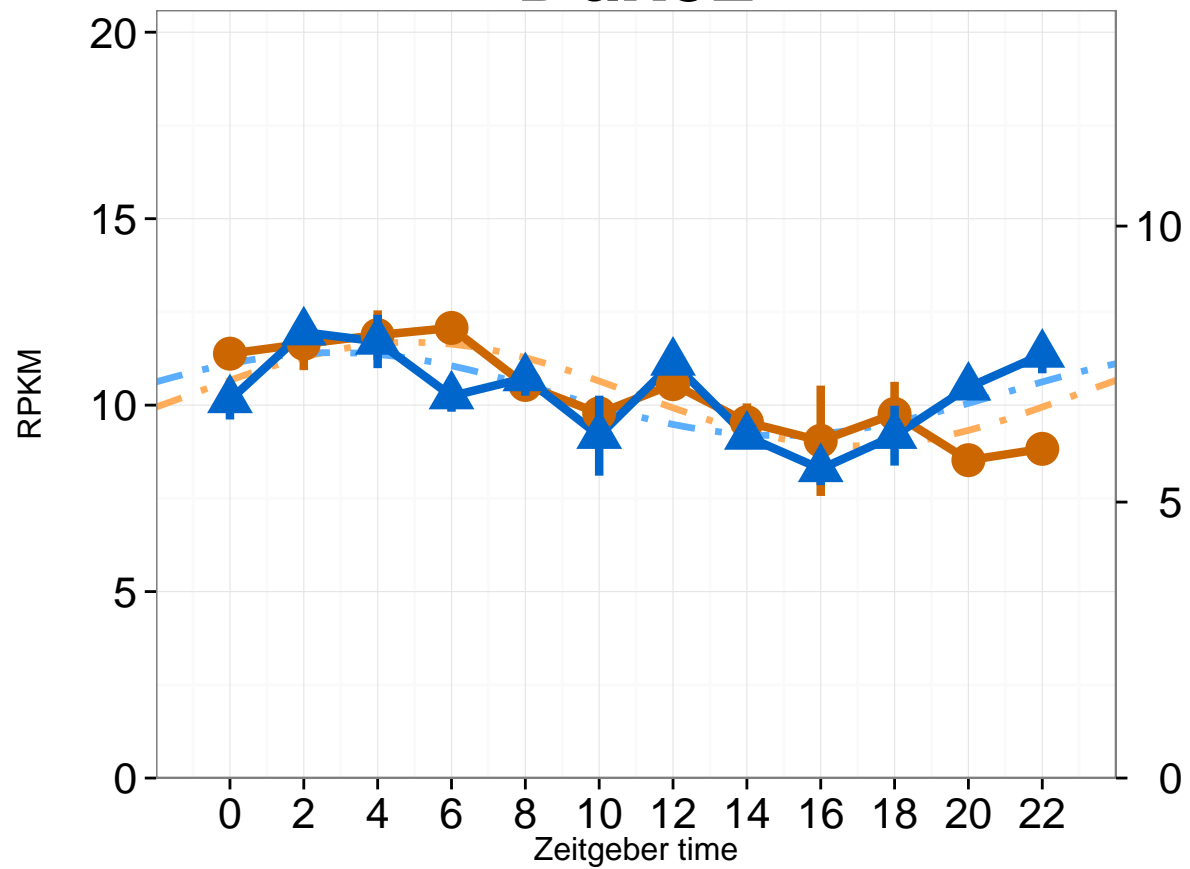

## Ddx52

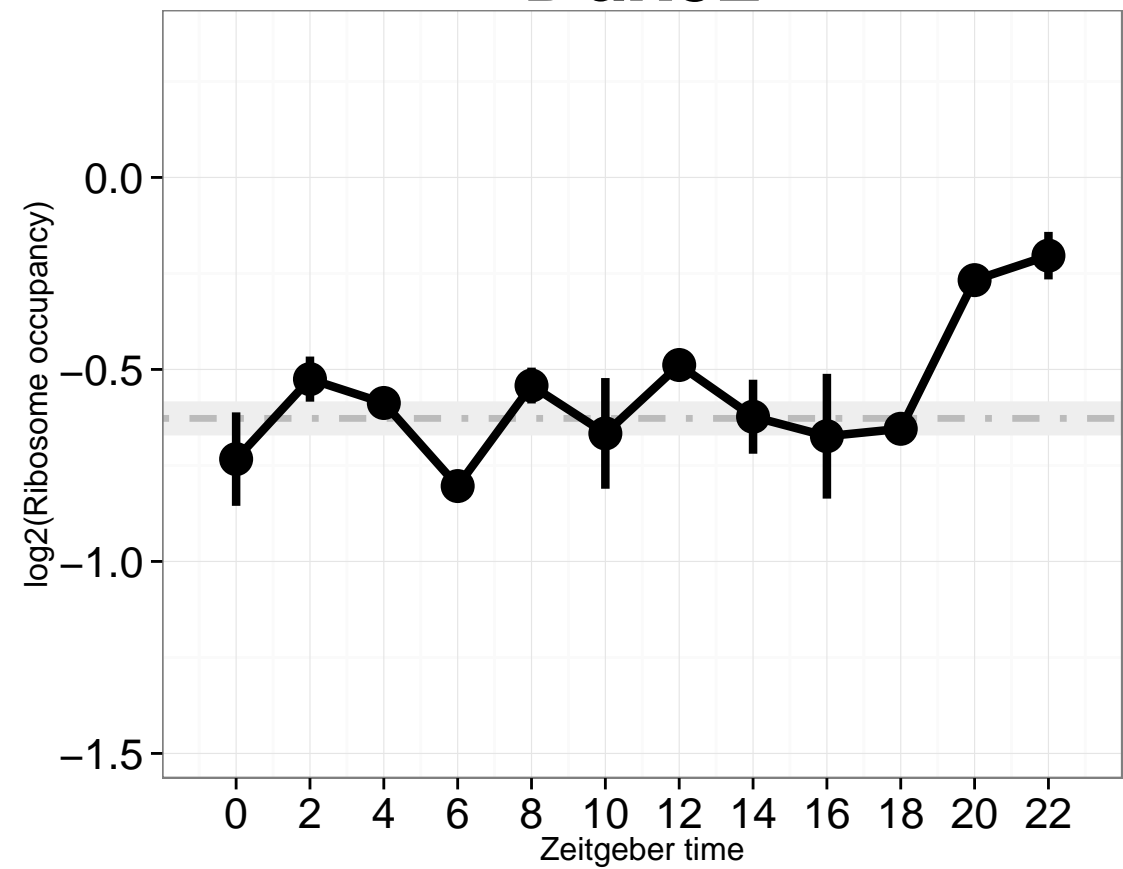

Supplement: SuppDataset_1.zip [file Ddx52_set_A.pdf › Supplemental Dataset 1/A-mRNA_nonrhyth_translation_nonrhyth/Ddx52_set_A.pdf]

## Ddx54

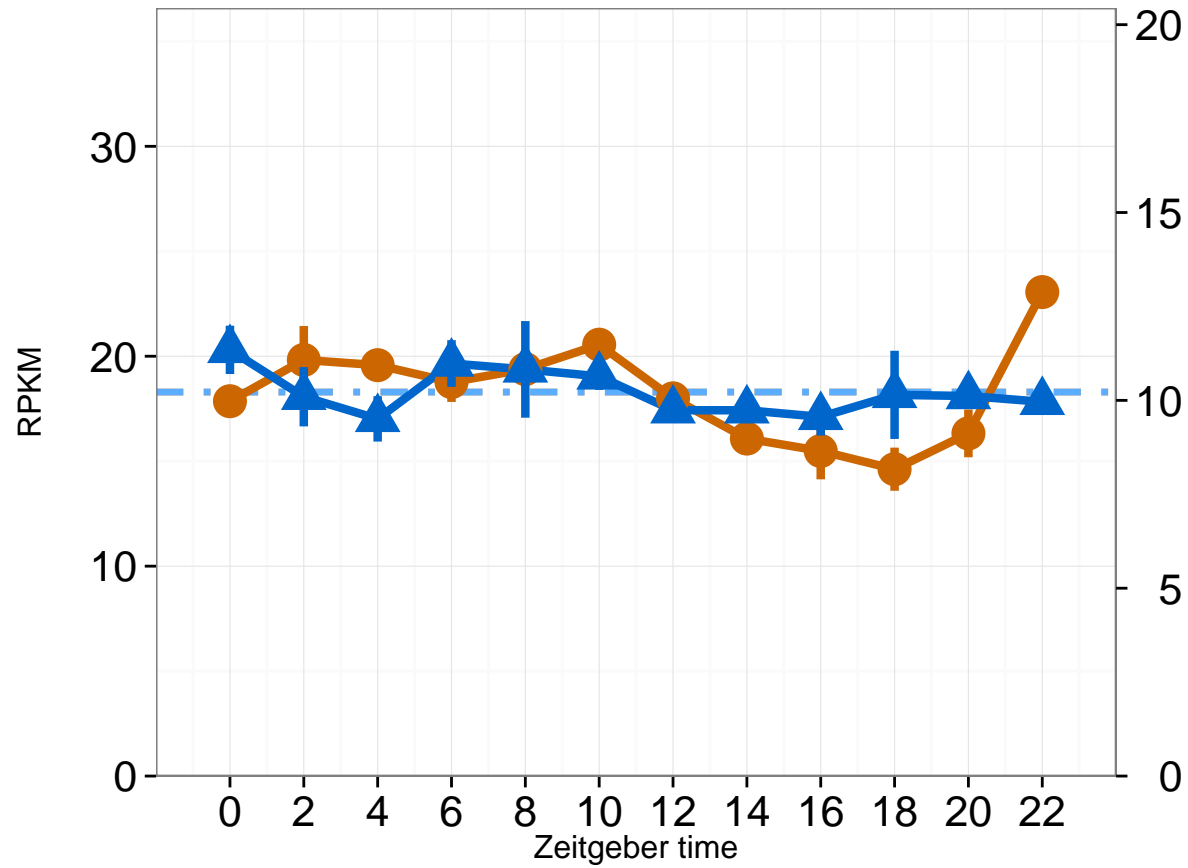

## Ddx54

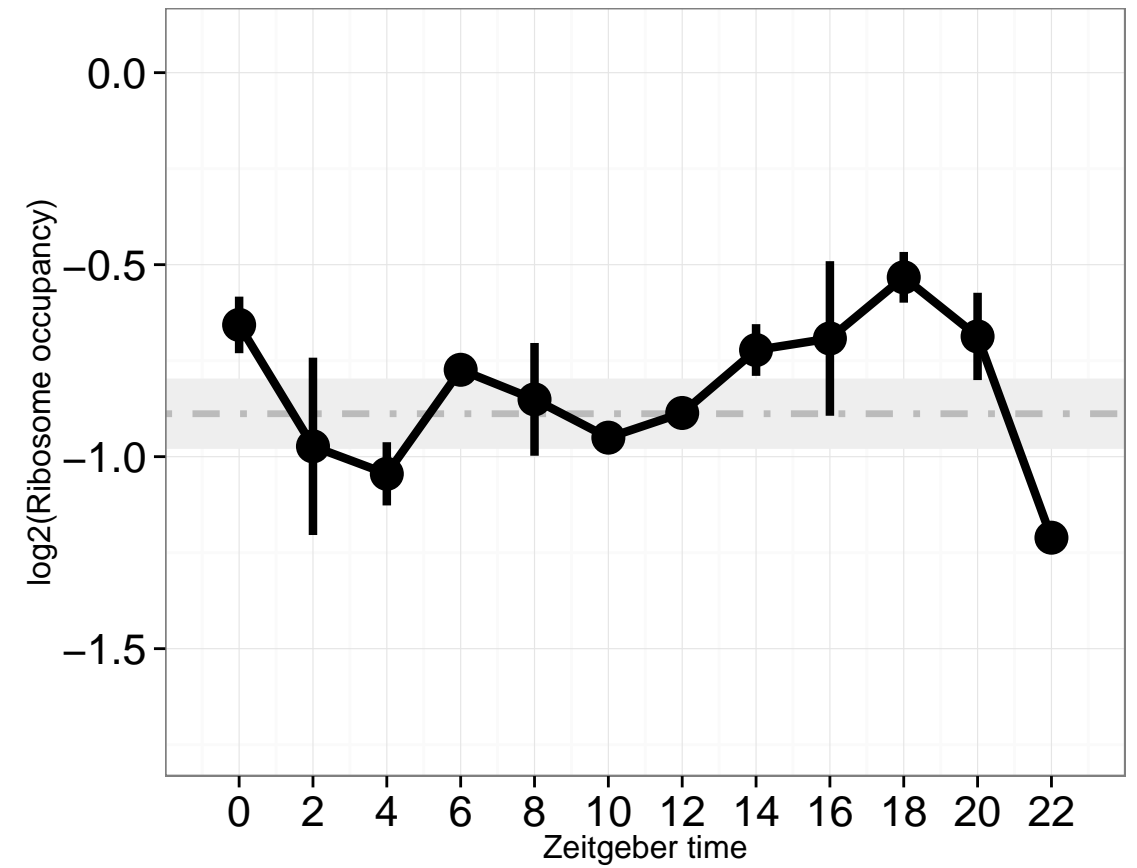

Supplement: SuppDataset_1.zip [file Ddx54_set_A.pdf › Supplemental Dataset 1/A-mRNA_nonrhyth_translation_nonrhyth/Ddx54_set_A.pdf]

# Ddx55

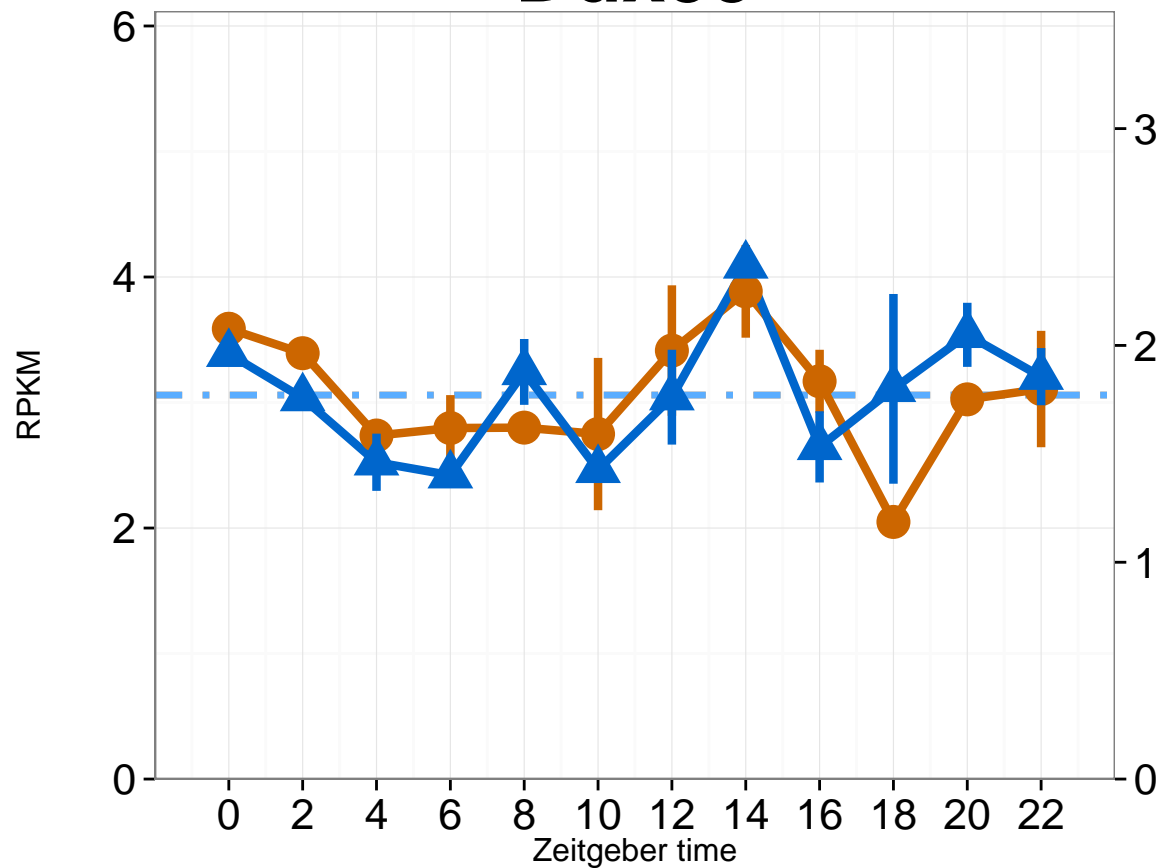

# Ddx55

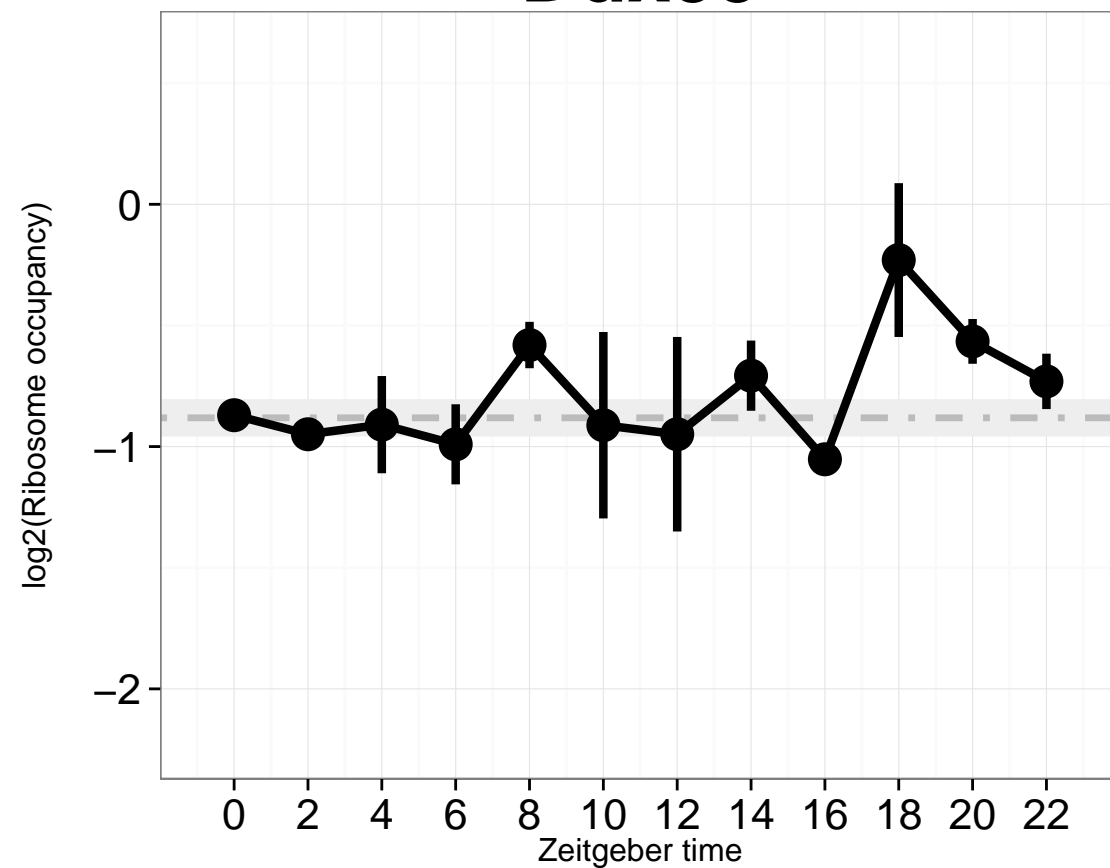

Supplement: SuppDataset_1.zip [file Ddx55_set_A.pdf › Supplemental Dataset 1/A-mRNA_nonrhyth_translation_nonrhyth/Ddx55_set_A.pdf]

## Ddx56

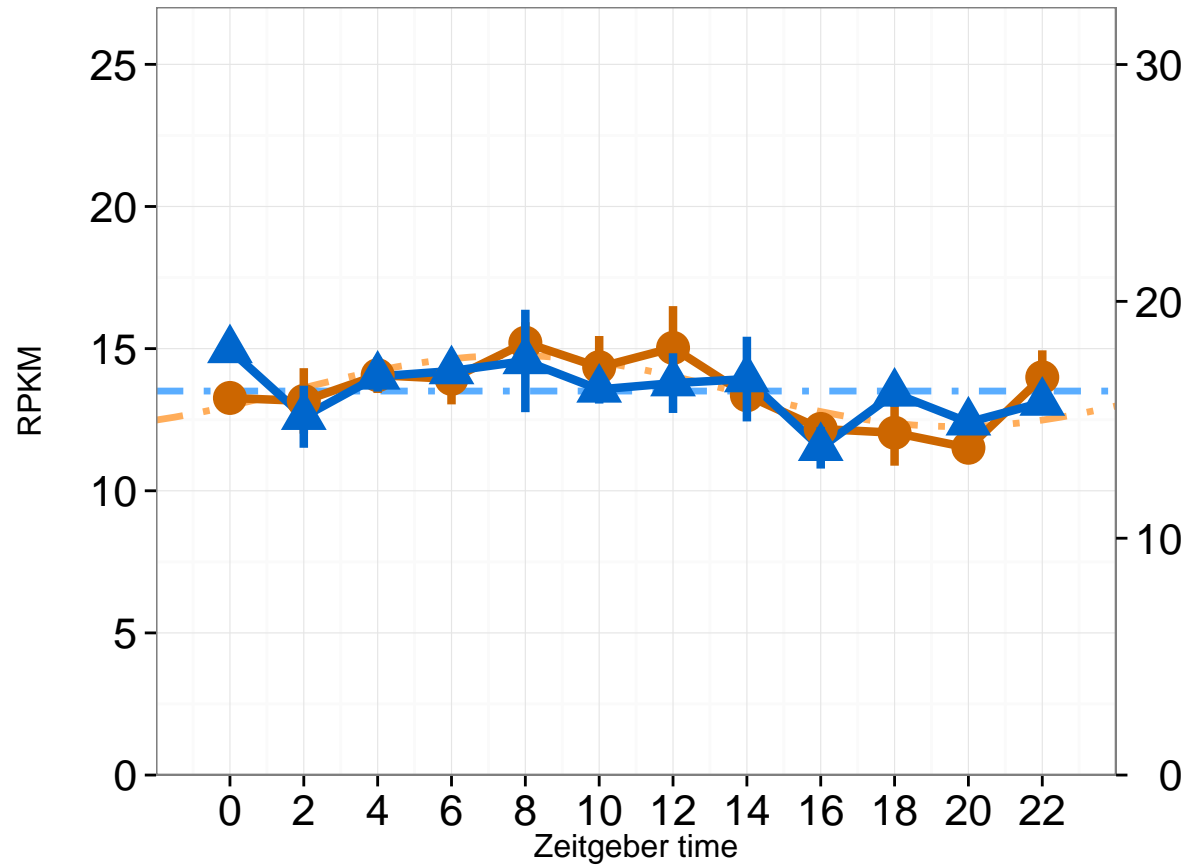

## Ddx56

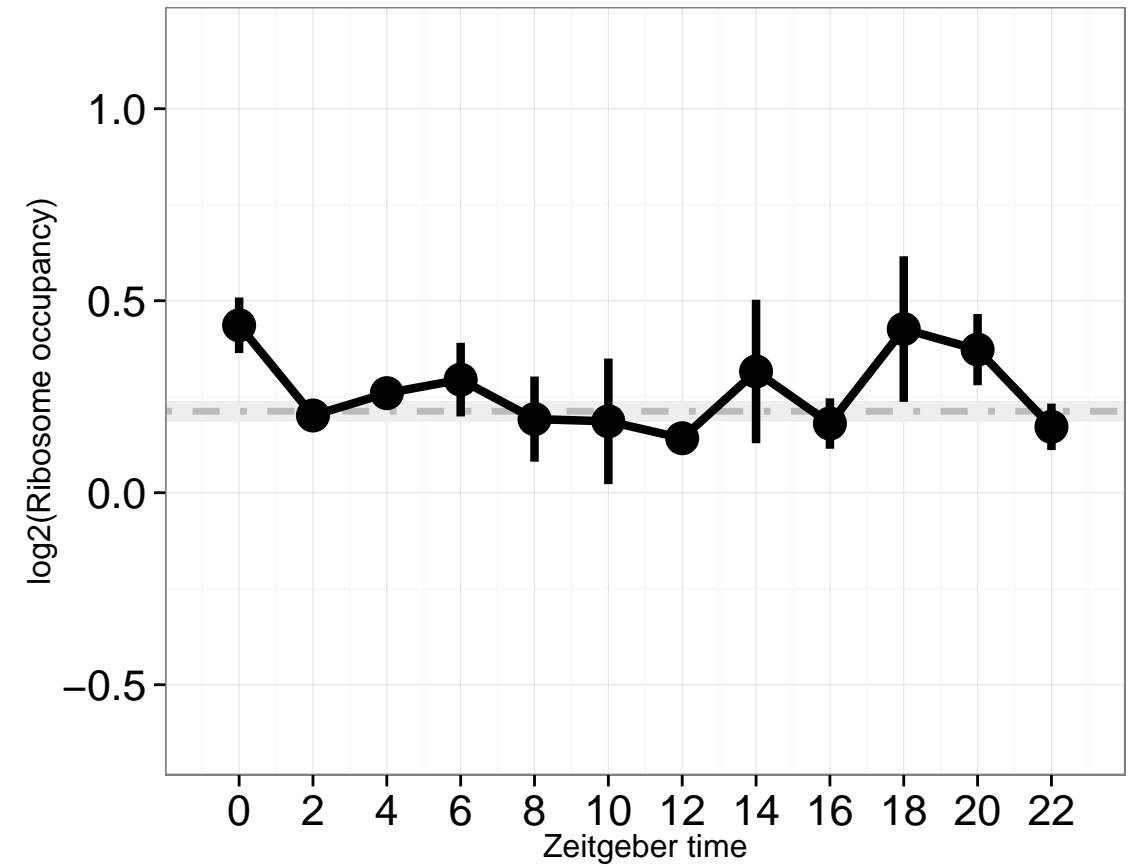

Supplement: SuppDataset_1.zip [file Ddx56_set_A.pdf › Supplemental Dataset 1/A-mRNA_nonrhyth_translation_nonrhyth/Ddx56_set_A.pdf]

# Ddx59

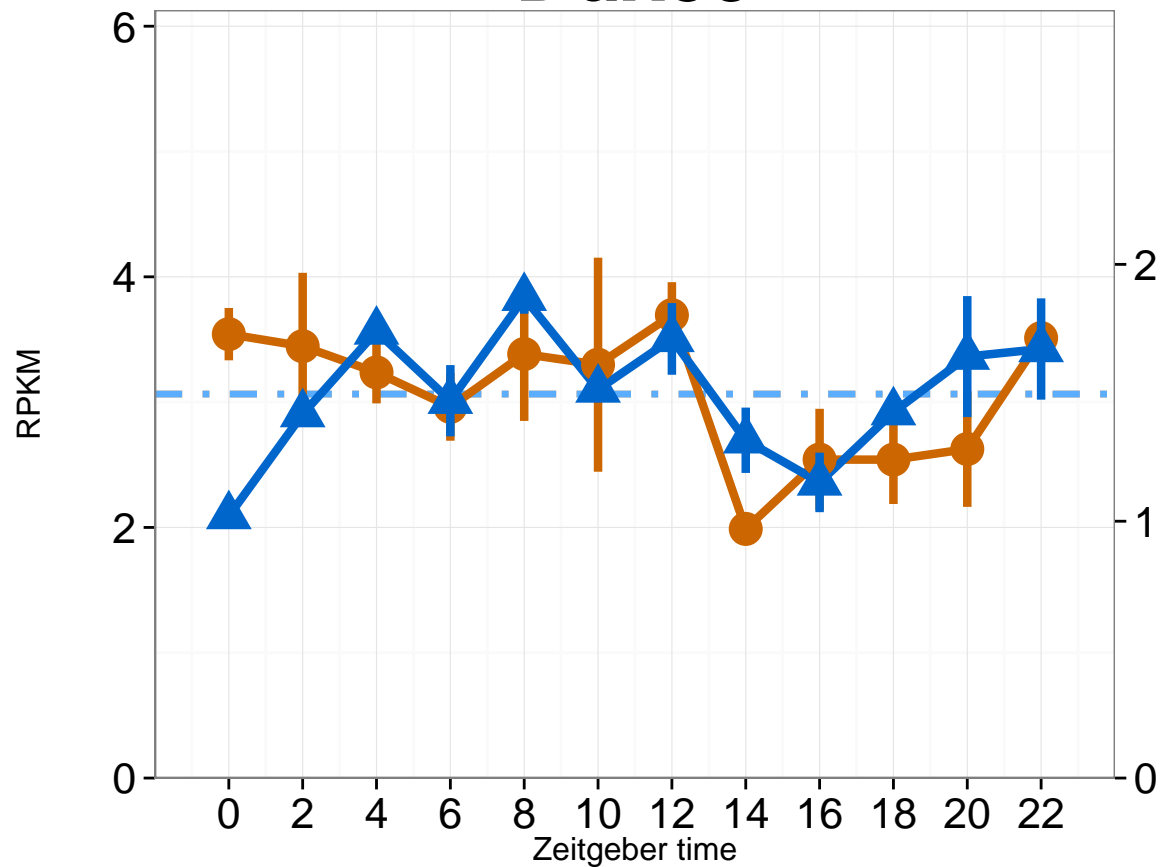

# Ddx59

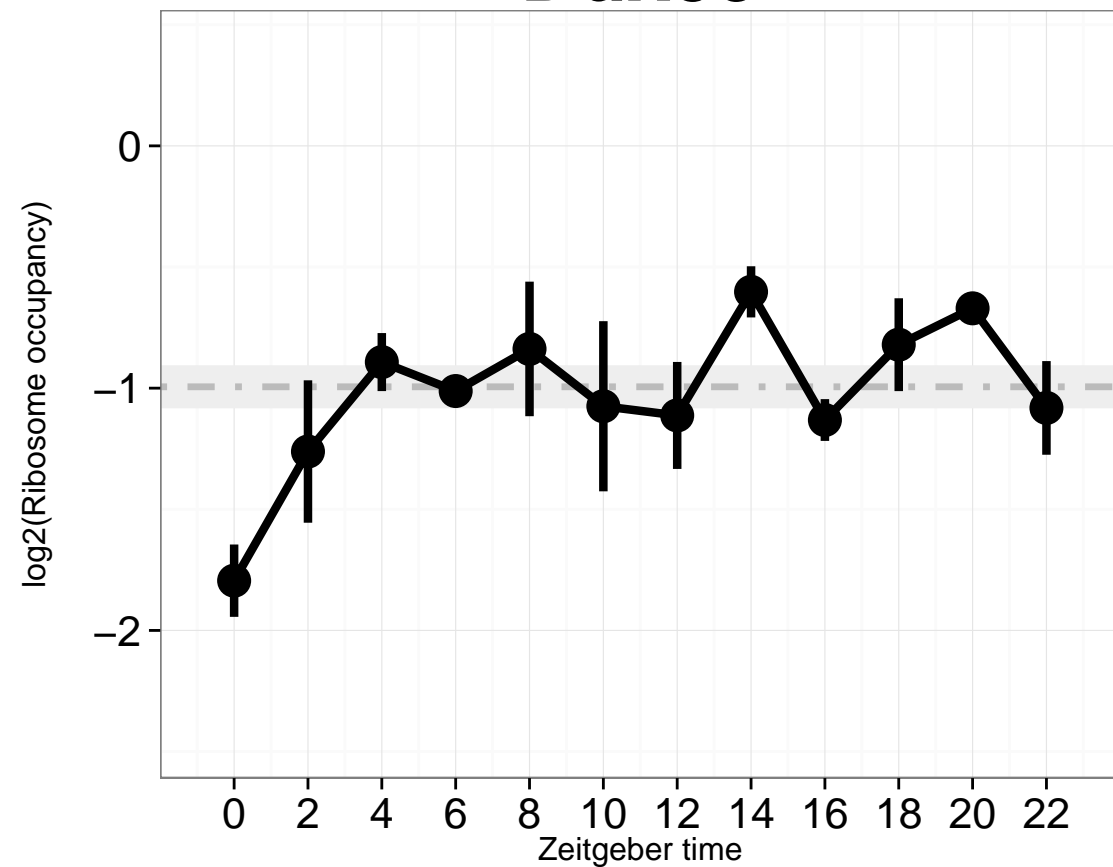

Supplement: SuppDataset_1.zip [file Ddx59_set_A.pdf › Supplemental Dataset 1/A-mRNA_nonrhyth_translation_nonrhyth/Ddx59_set_A.pdf]

## Ddx5

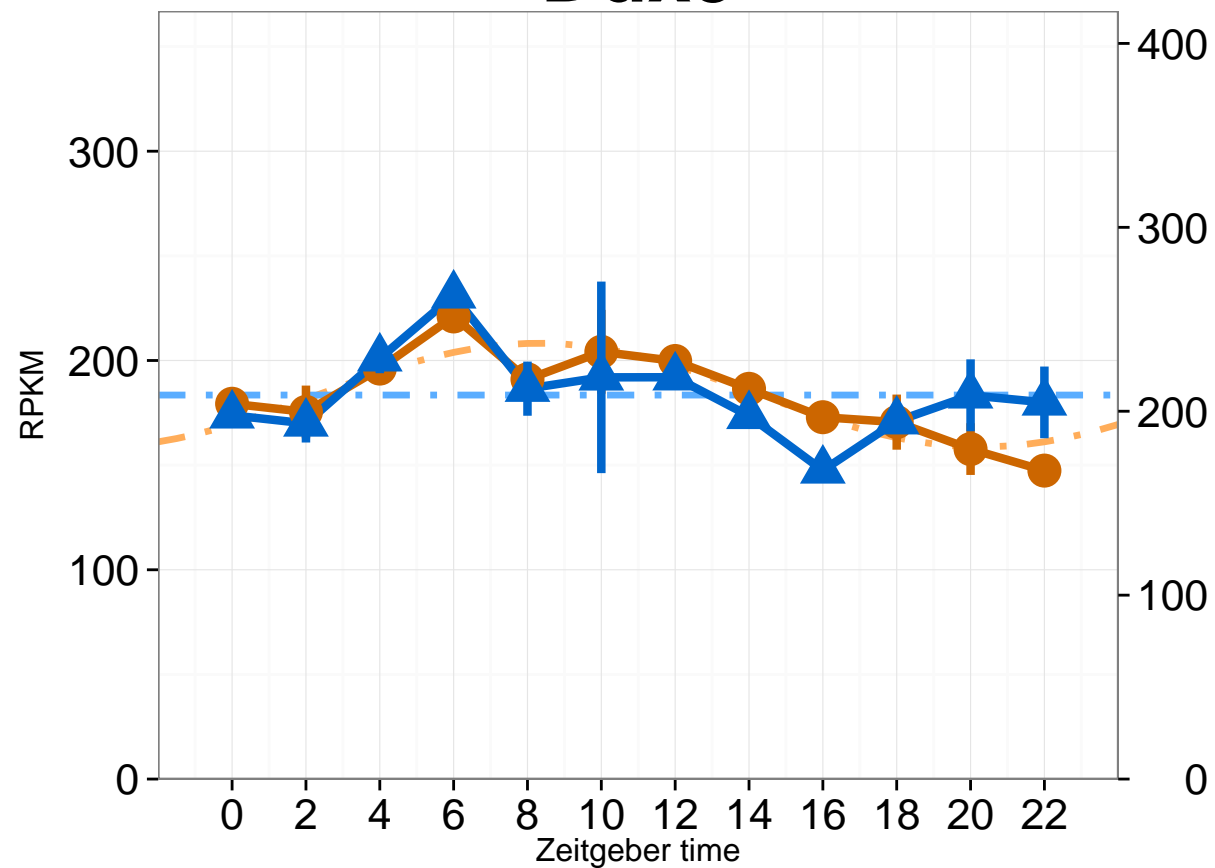

## Ddx5

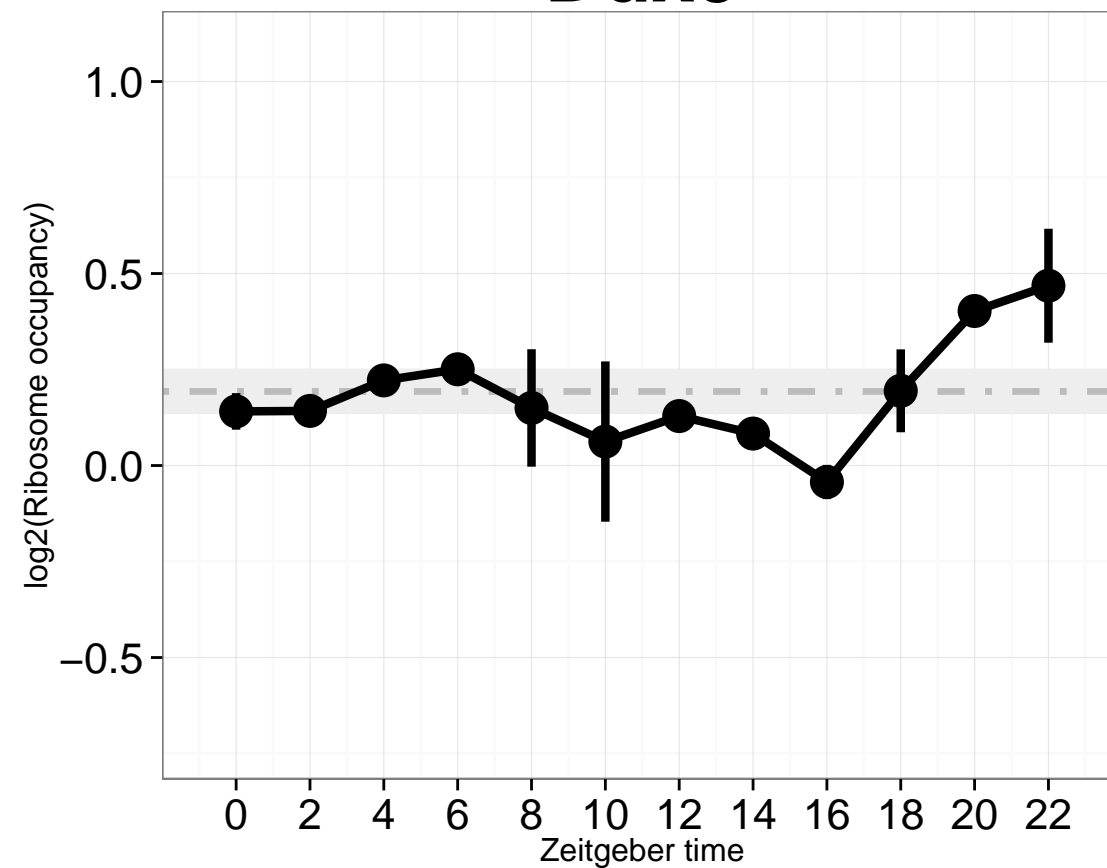

Supplement: SuppDataset_1.zip [file Ddx5_set_A.pdf › Supplemental Dataset 1/A-mRNA_nonrhyth_translation_nonrhyth/Ddx5_set_A.pdf]

## Ddx6

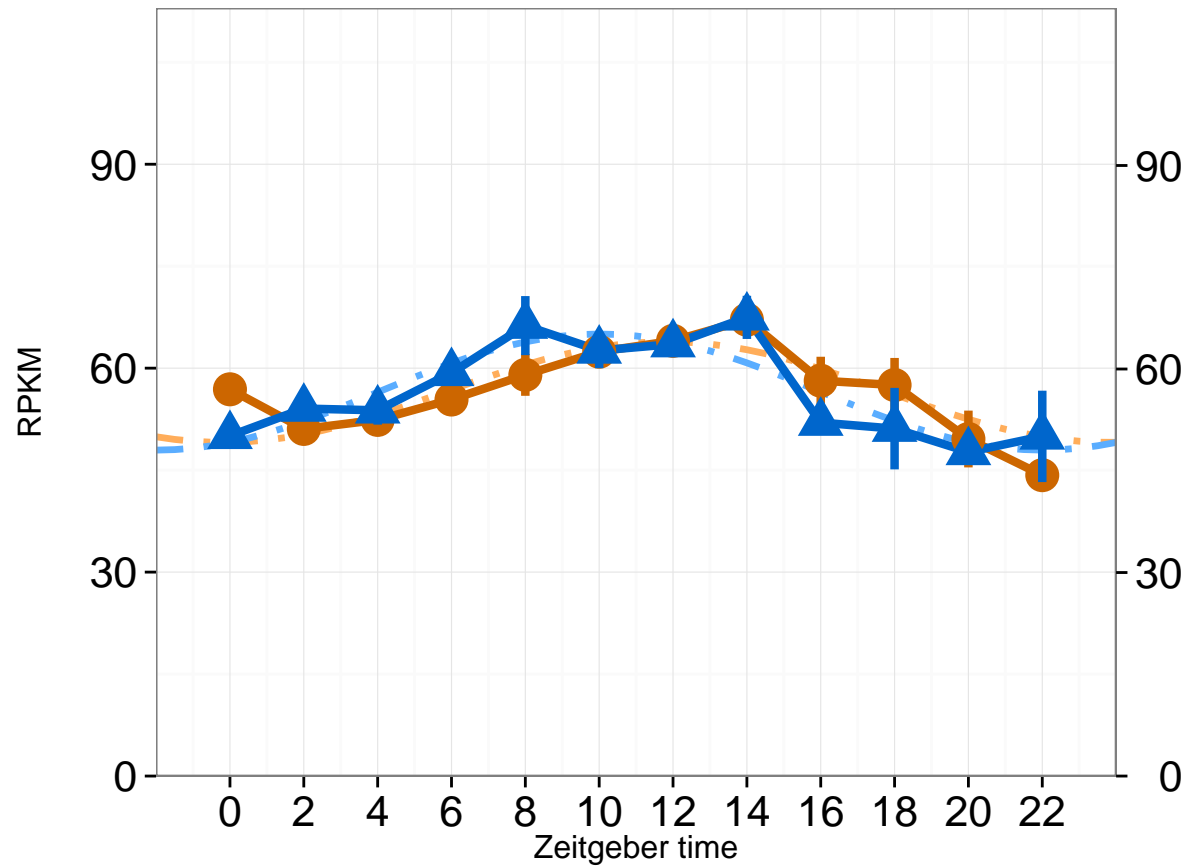

## Ddx6

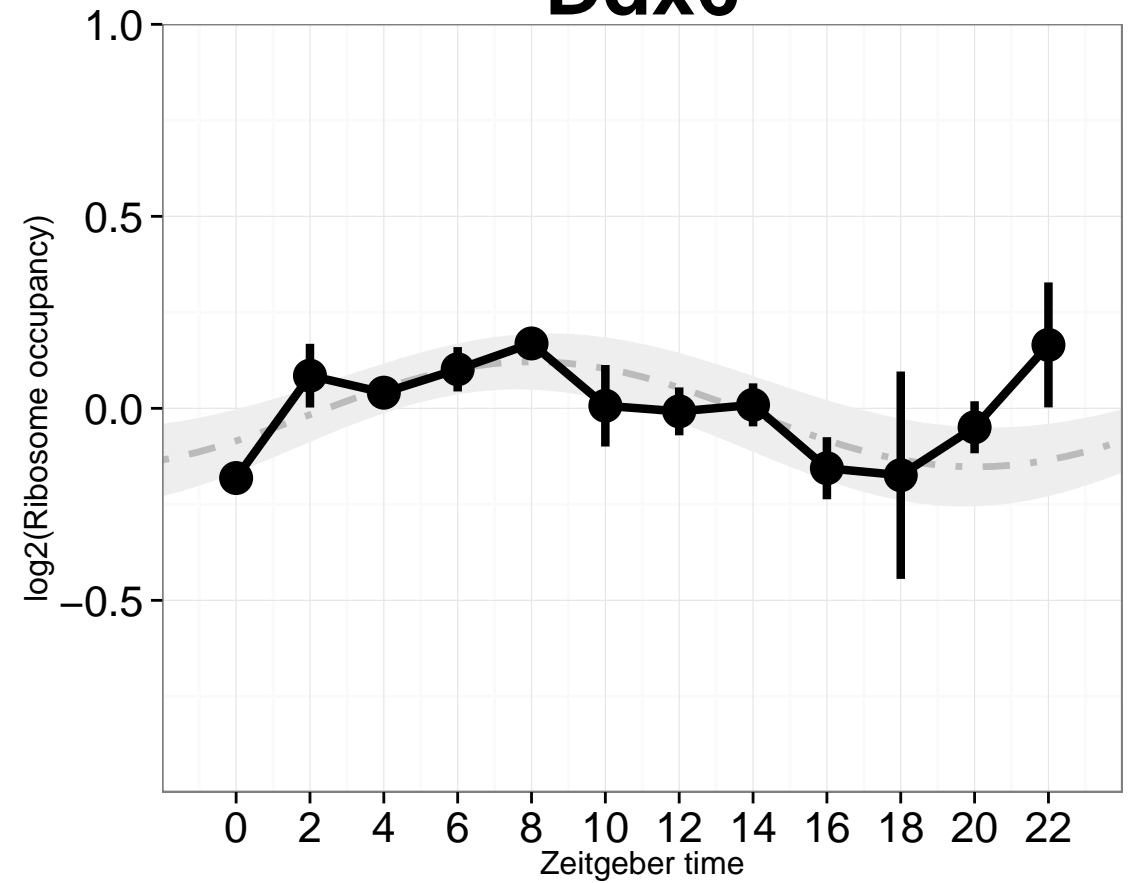

Supplement: SuppDataset_1.zip [file Ddx6_set_A.pdf › Supplemental Dataset 1/A-mRNA_nonrhyth_translation_nonrhyth/Ddx6_set_A.pdf]

# Deb1

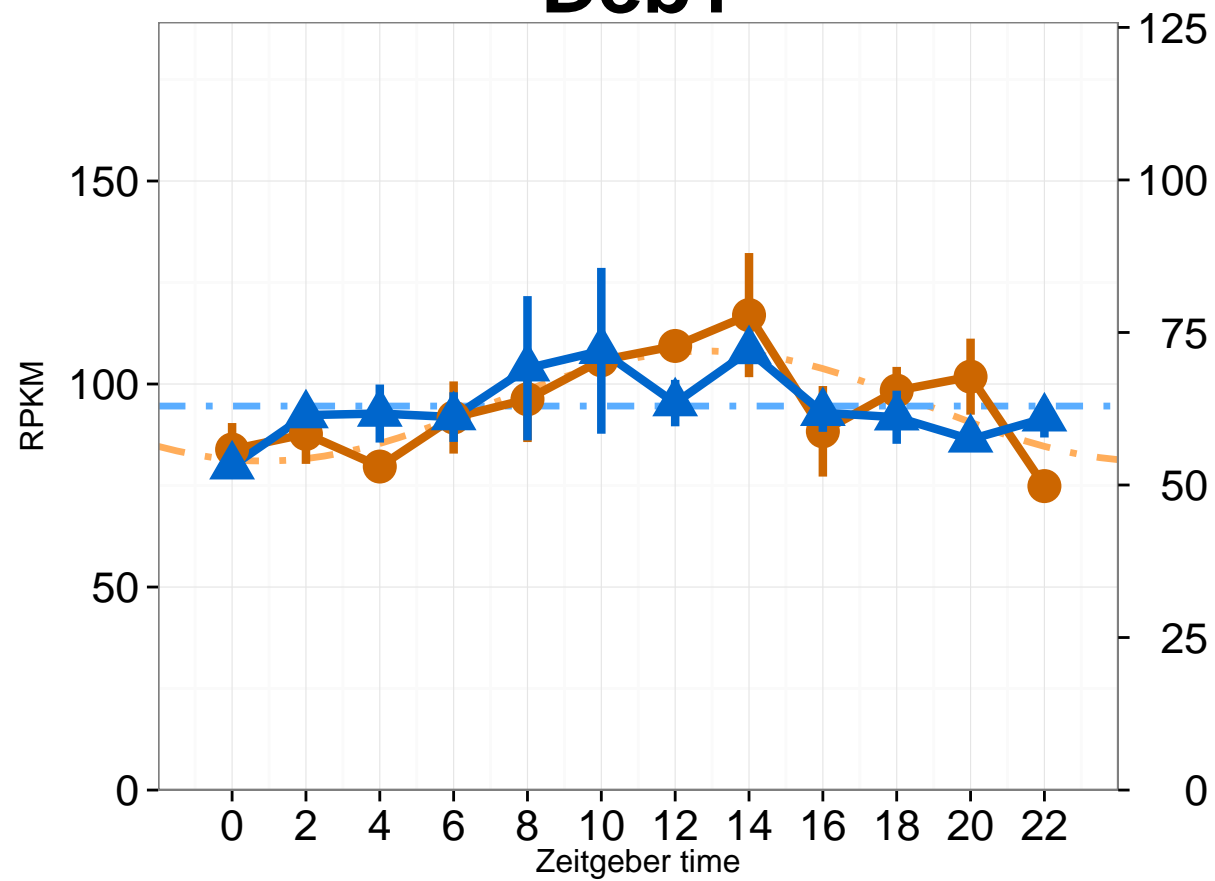

# Deb1

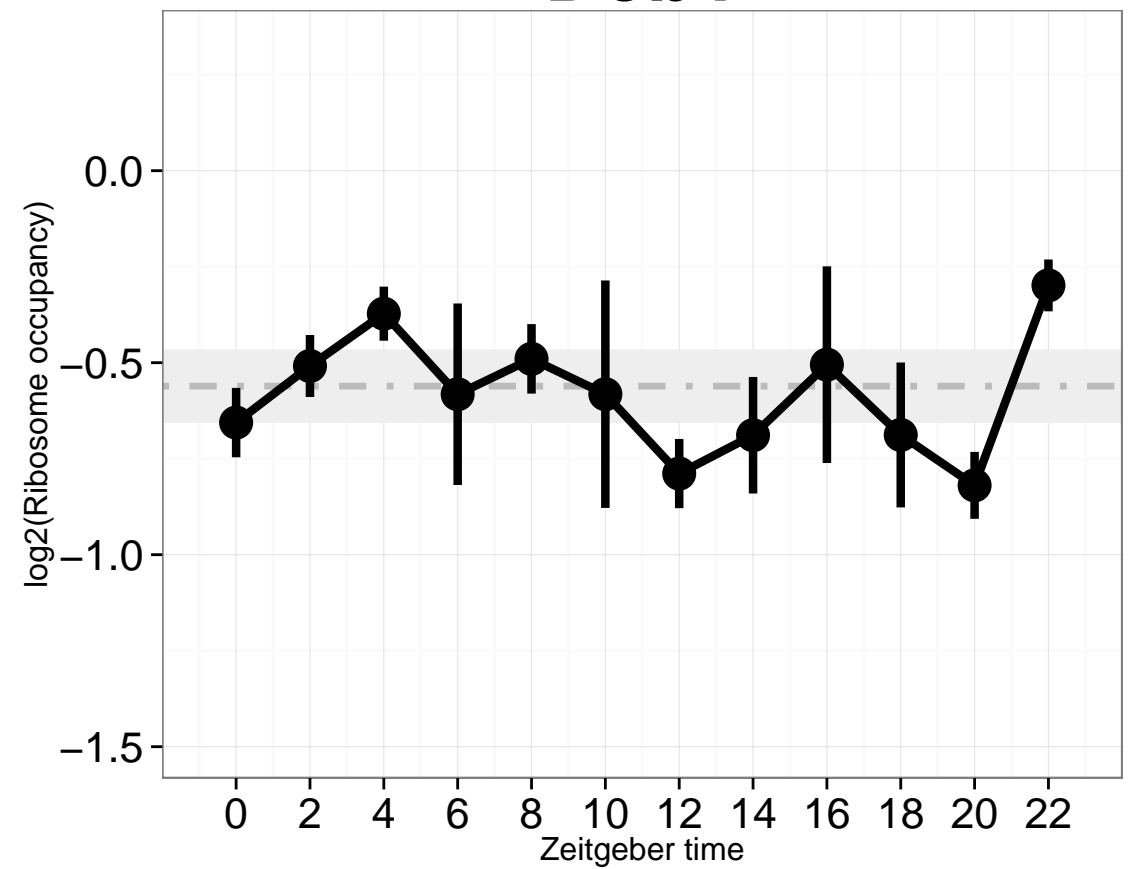

Supplement: SuppDataset_1.zip [file Deb1_set_A.pdf › Supplemental Dataset 1/A-mRNA_nonrhyth_translation_nonrhyth/Deb1_set_A.pdf]

# Decr1

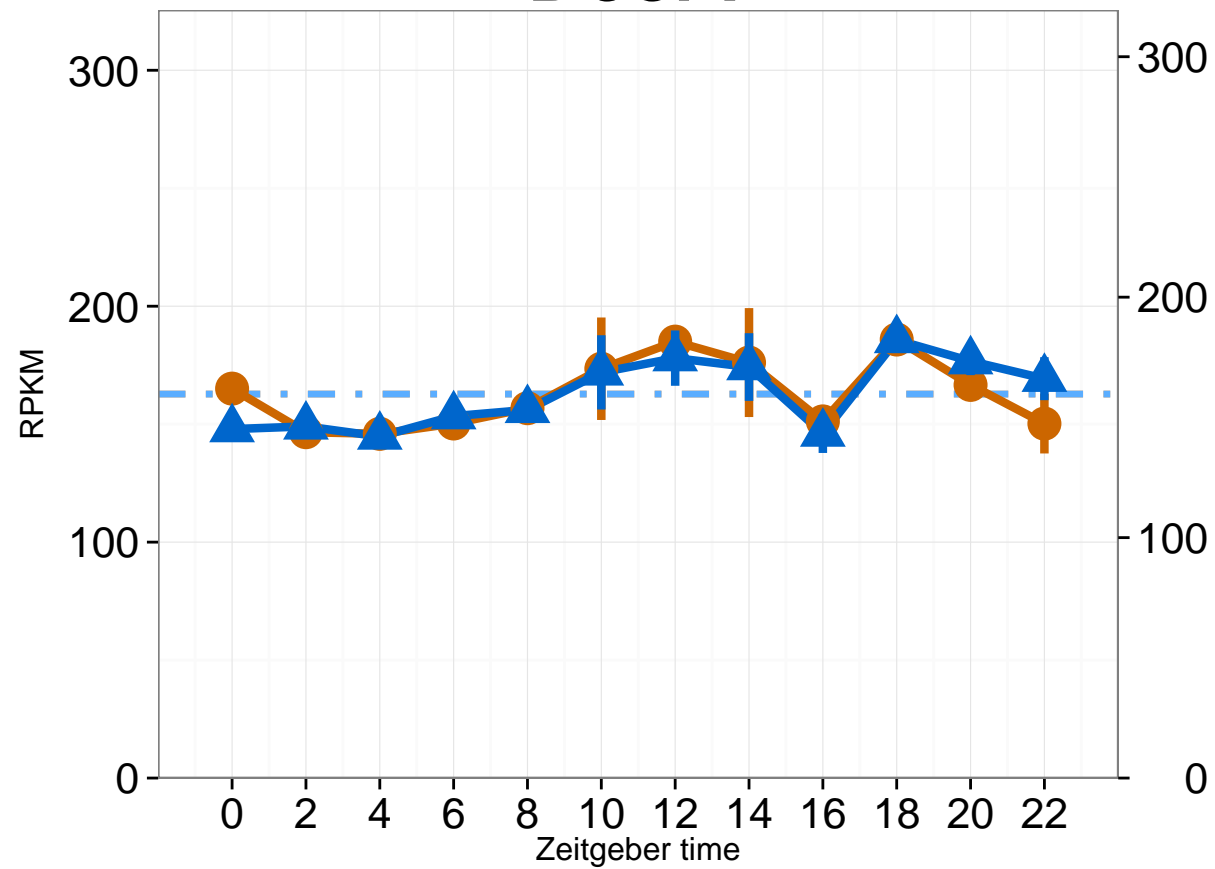

# Decr1

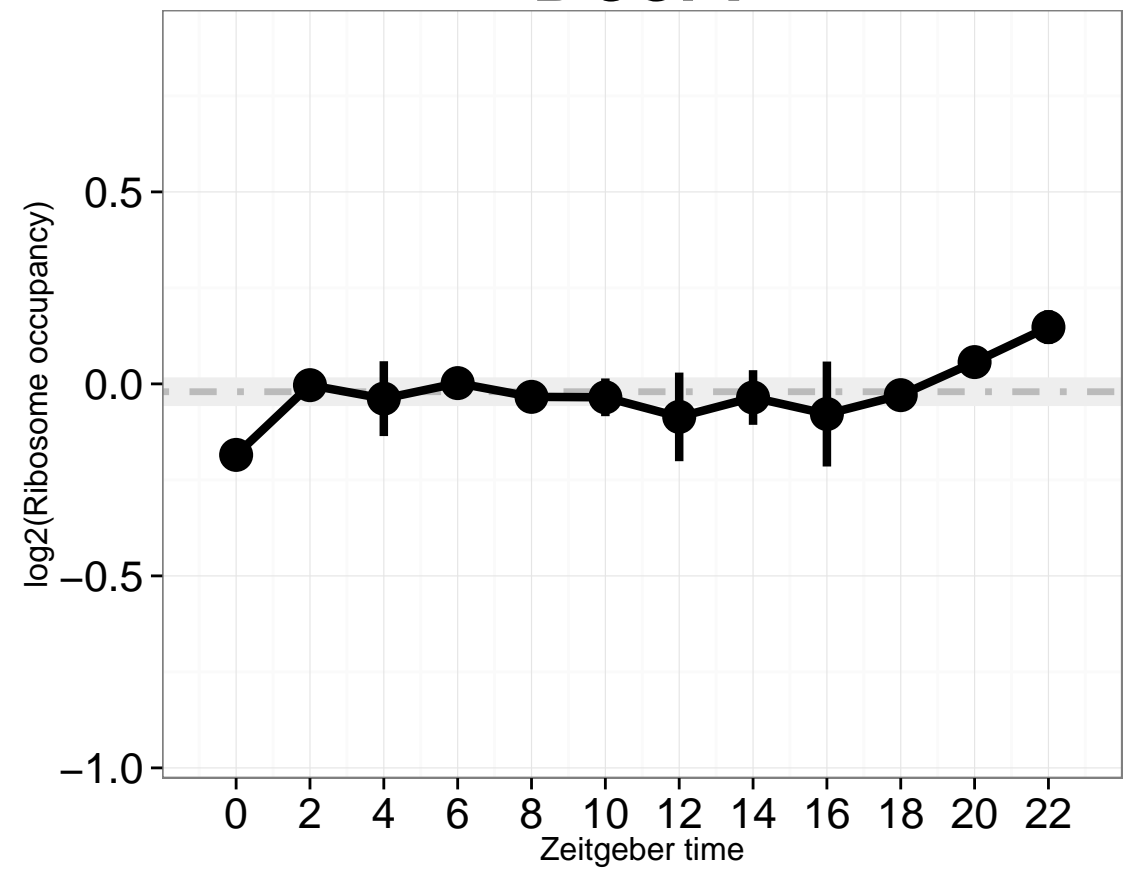

Supplement: SuppDataset_1.zip [file Decr1_set_A.pdf › Supplemental Dataset 1/A-mRNA_nonrhyth_translation_nonrhyth/Decr1_set_A.pdf]

## Dedd

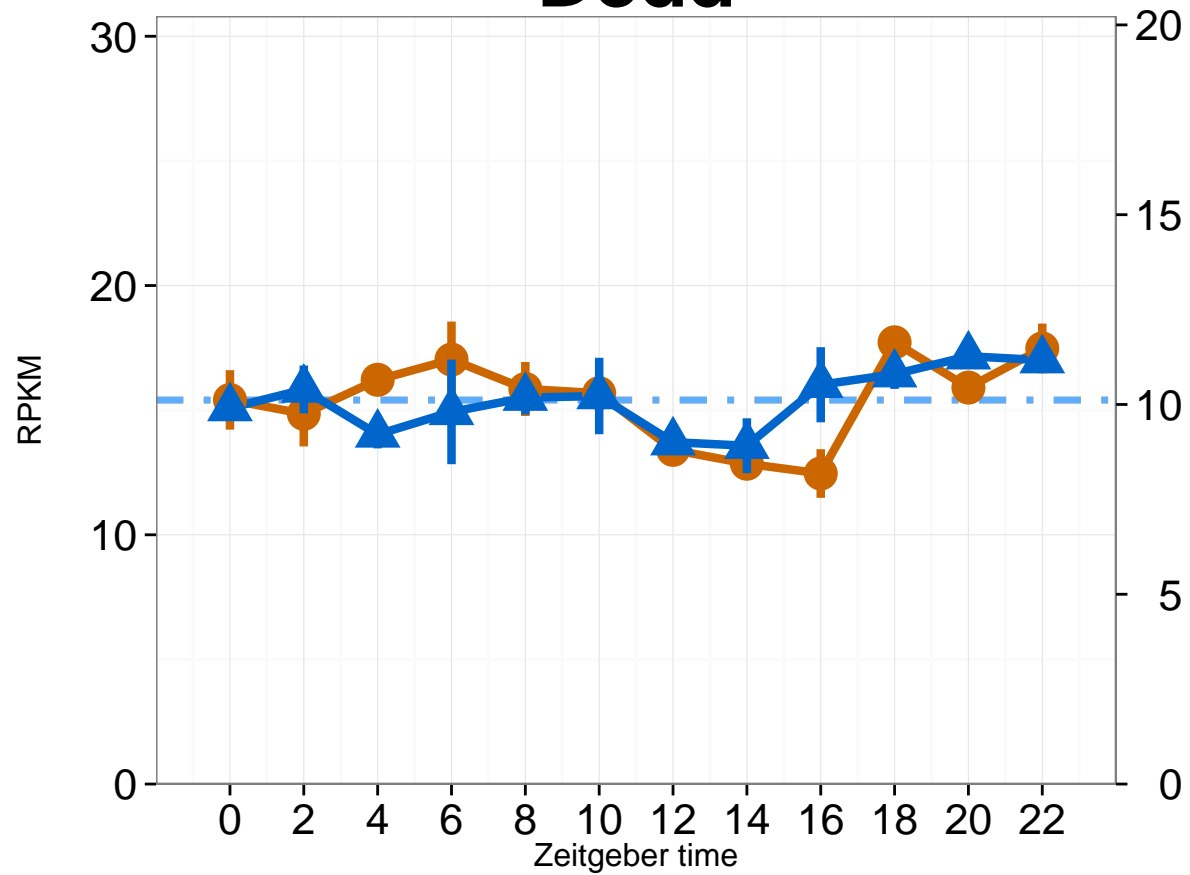

## Dedd

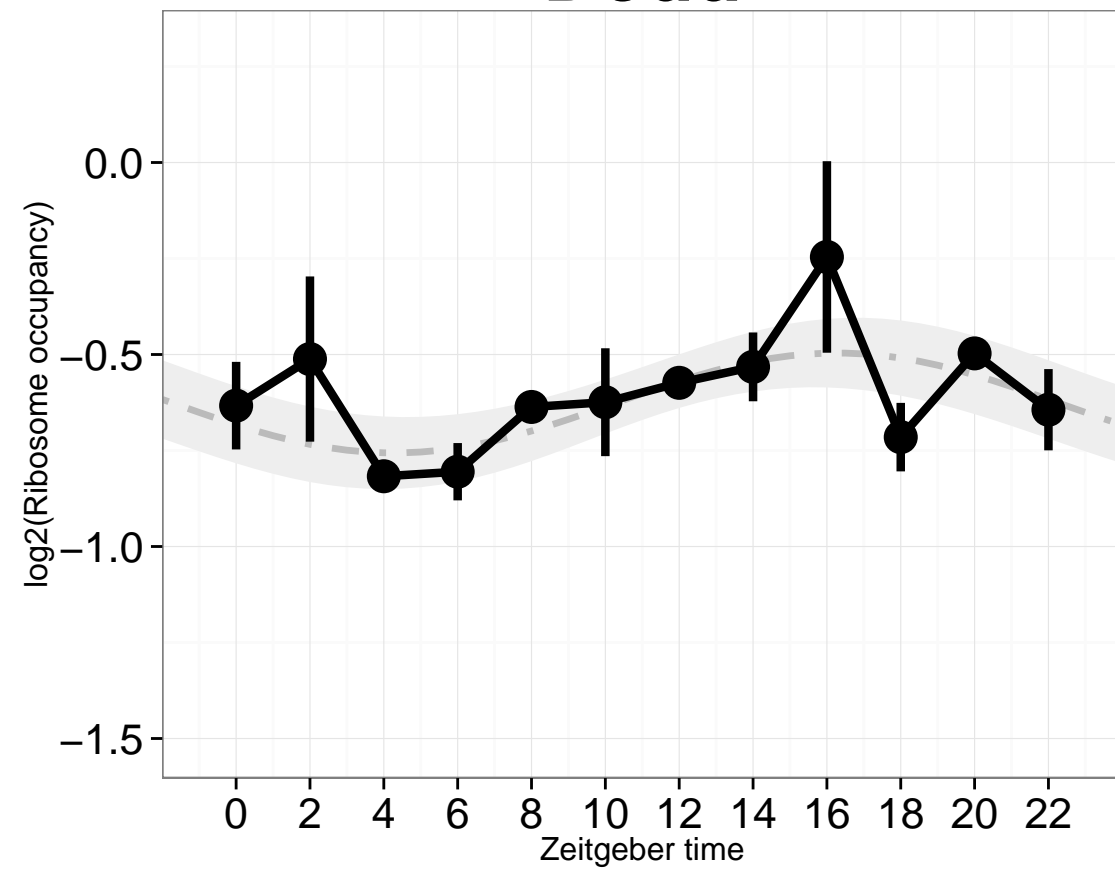

Supplement: SuppDataset_1.zip [file Dedd_set_A.pdf › Supplemental Dataset 1/A-mRNA_nonrhyth_translation_nonrhyth/Dedd_set_A.pdf]

# Degs1

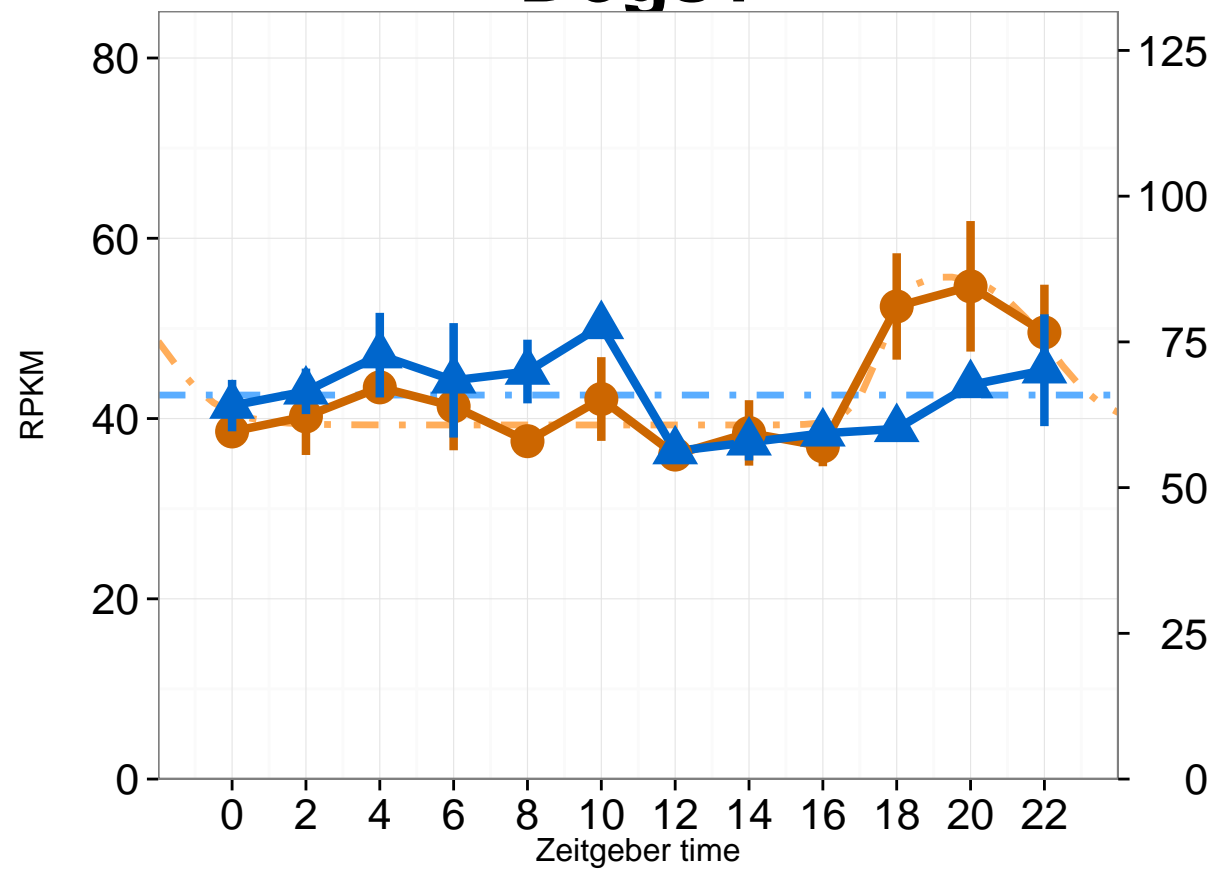

# Degs1

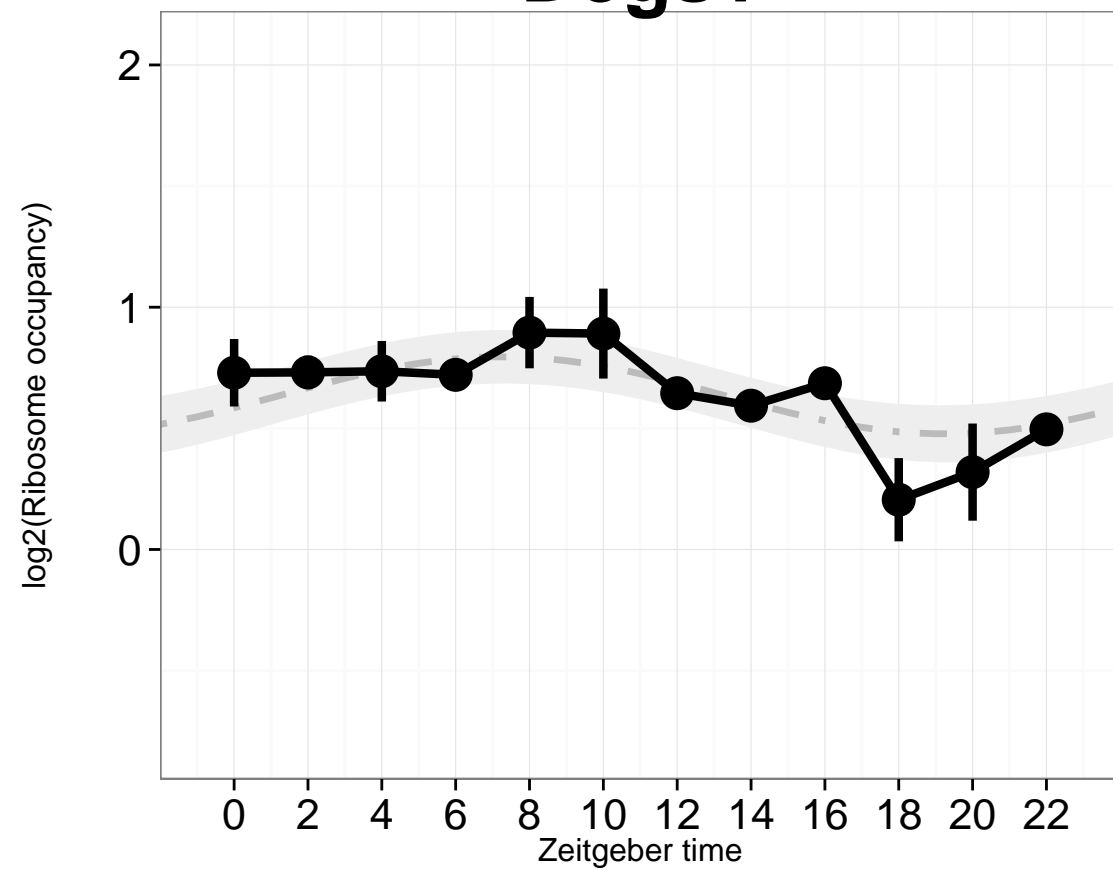

Supplement: SuppDataset_1.zip [file Degs1_set_A.pdf › Supplemental Dataset 1/A-mRNA_nonrhyth_translation_nonrhyth/Degs1_set_A.pdf]

## Dek

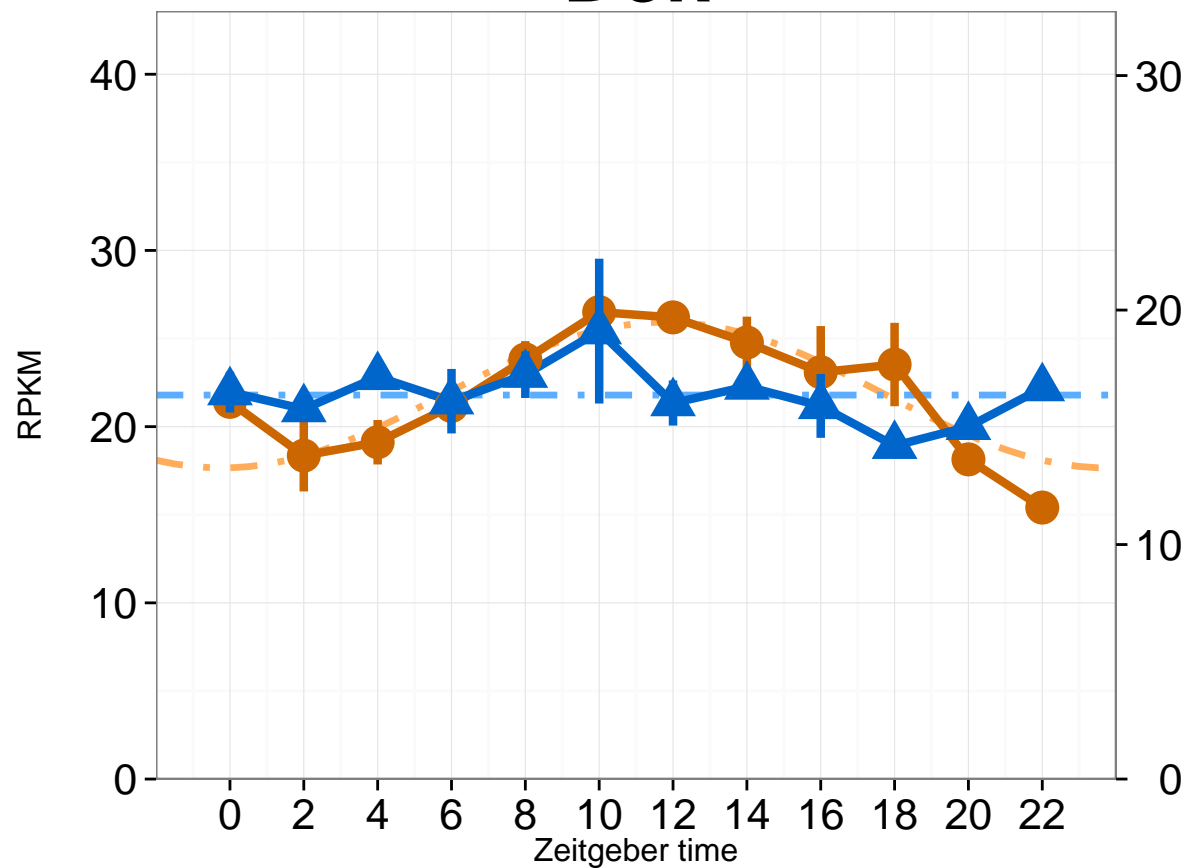

## Dek

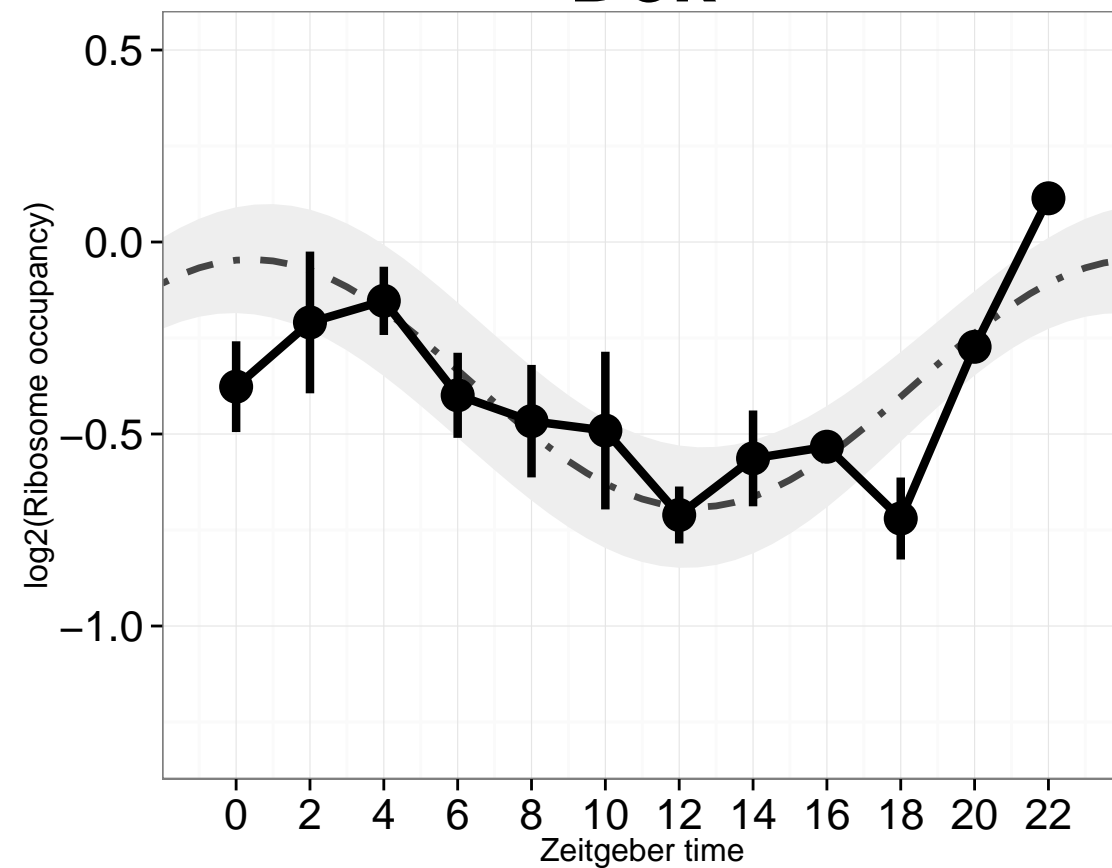

Supplement: SuppDataset_1.zip [file Dek_set_A.pdf › Supplemental Dataset 1/A-mRNA_nonrhyth_translation_nonrhyth/Dek_set_A.pdf]

# Dennd1a

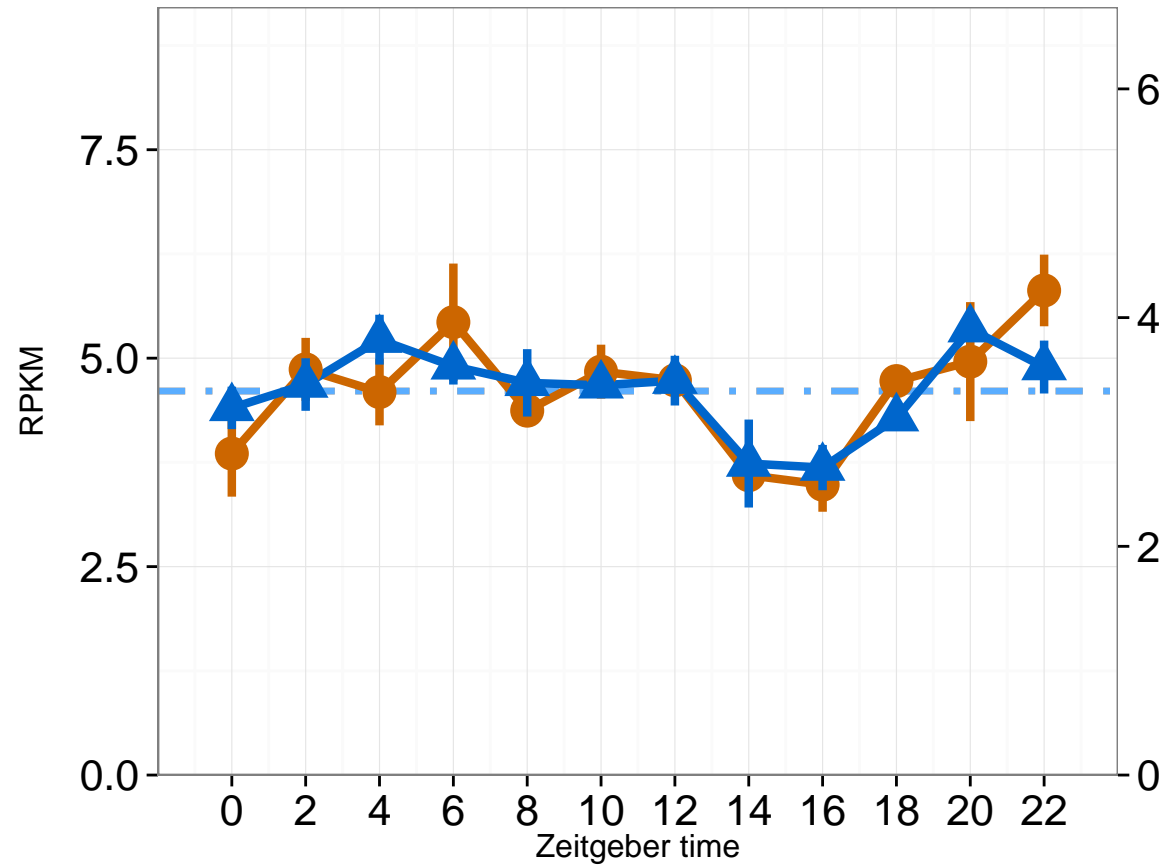

# Dennd1a

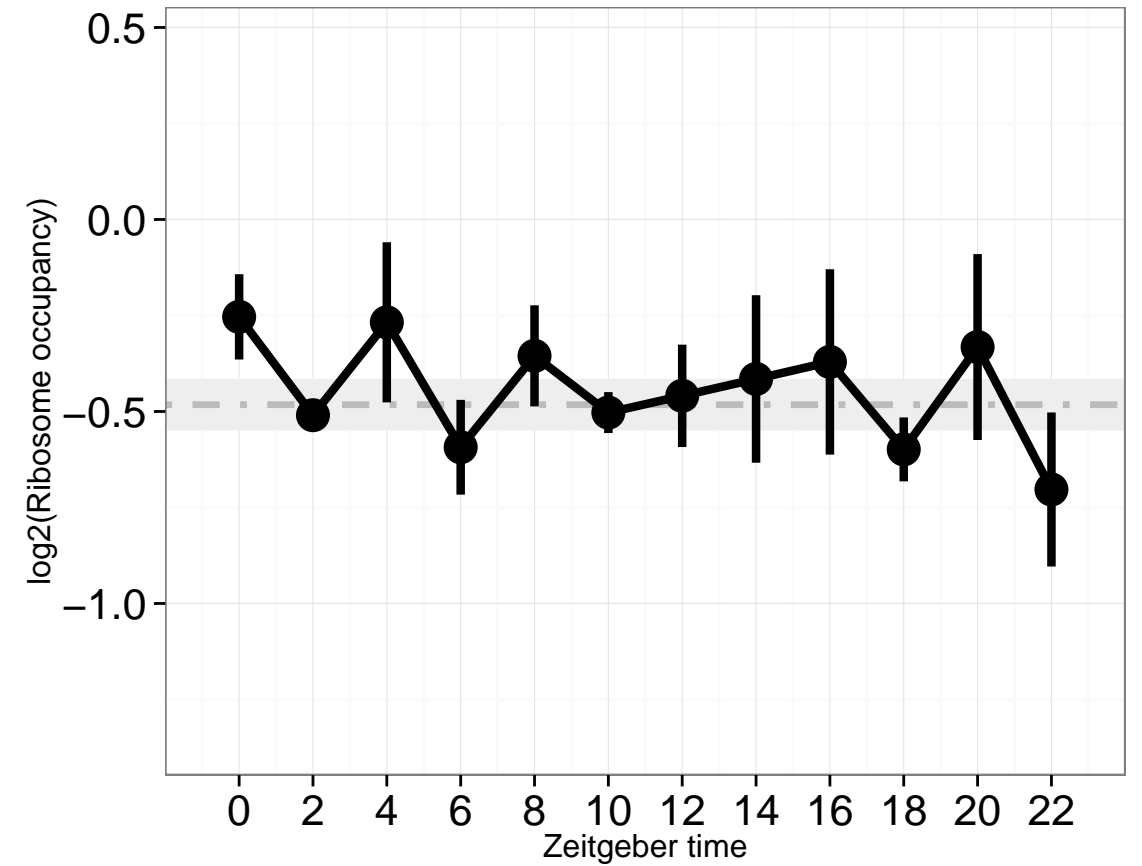

Supplement: SuppDataset_1.zip [file Dennd1a_set_A.pdf › Supplemental Dataset 1/A-mRNA_nonrhyth_translation_nonrhyth/Dennd1a_set_A.pdf]

# Dennd1b

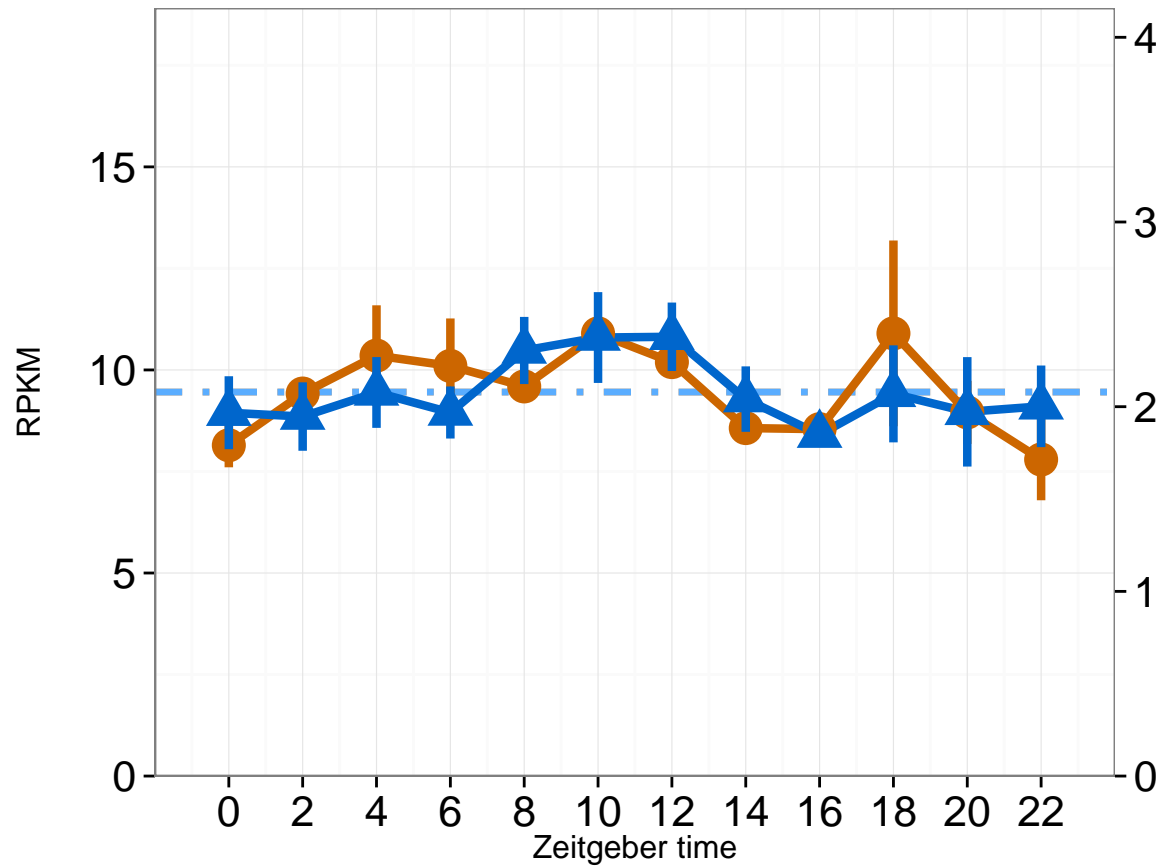

# Dennd1b

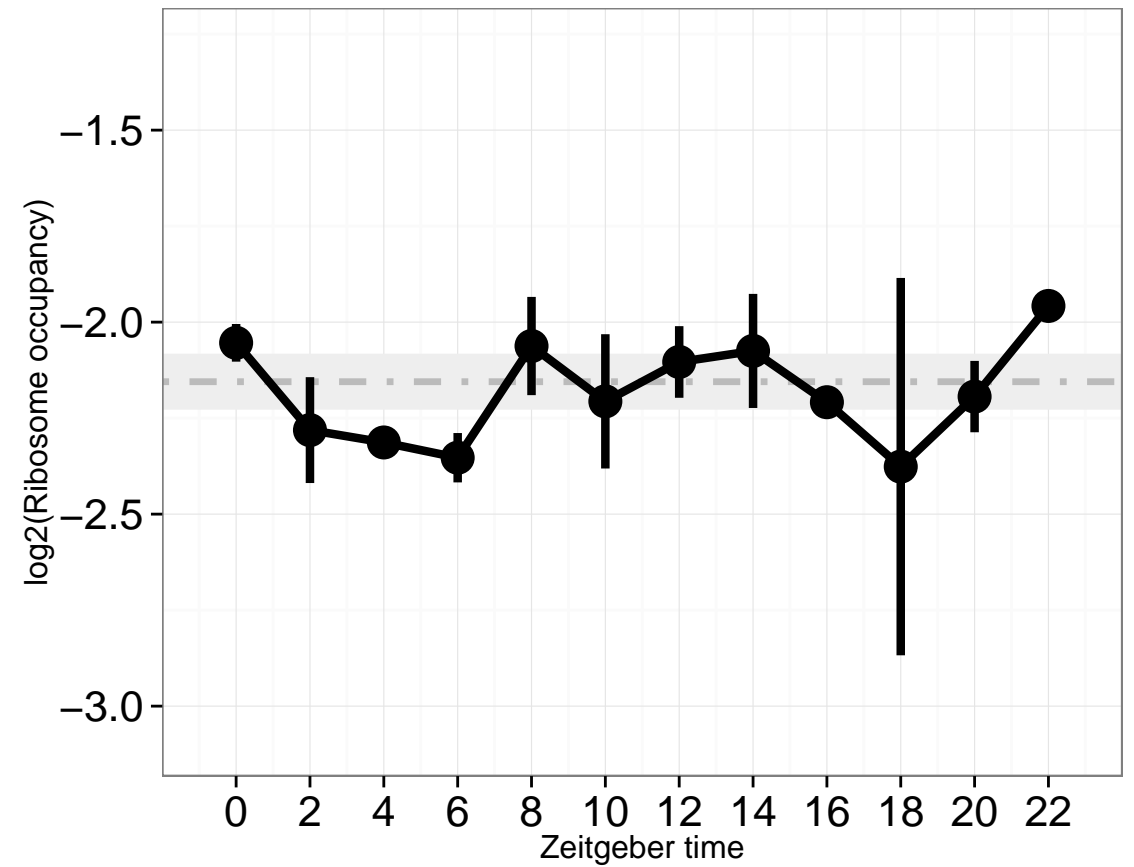

Supplement: SuppDataset_1.zip [file Dennd1b_set_A.pdf › Supplemental Dataset 1/A-mRNA_nonrhyth_translation_nonrhyth/Dennd1b_set_A.pdf]

## Dennd1c

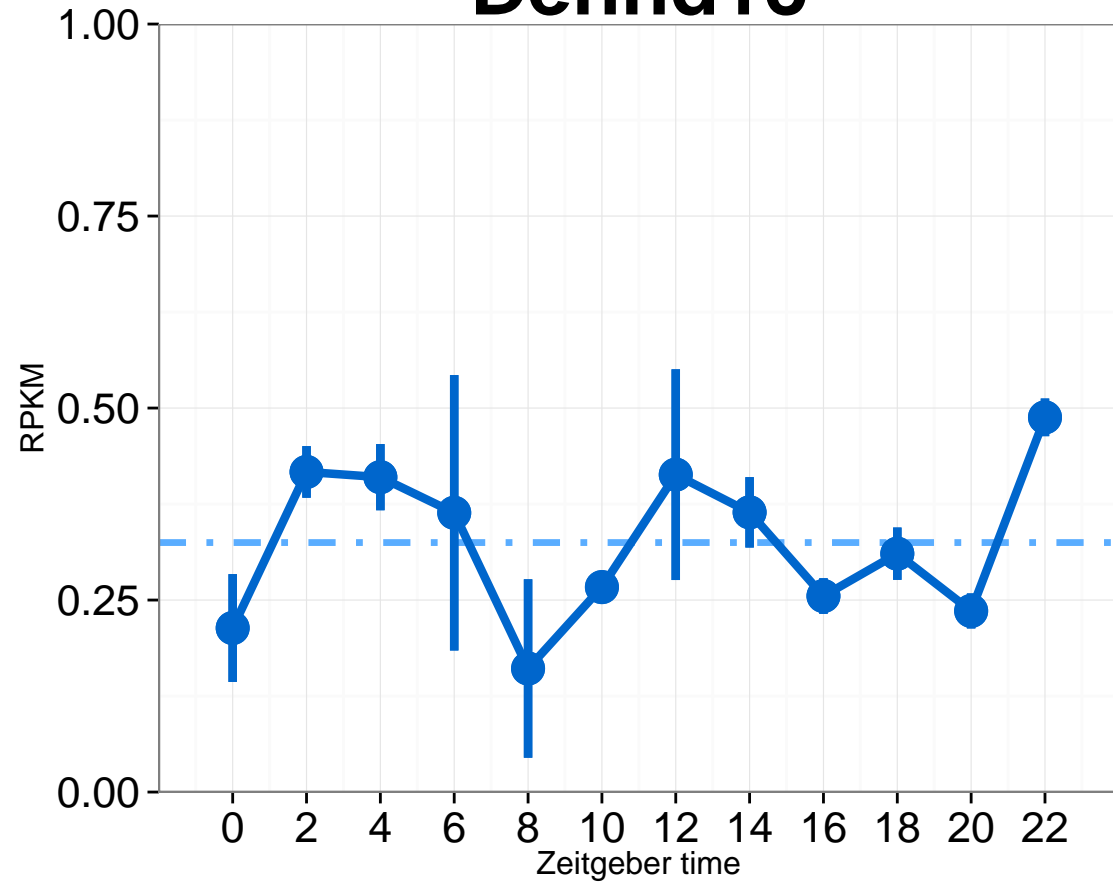

## Dennd1c log2(Ribosome occupanc

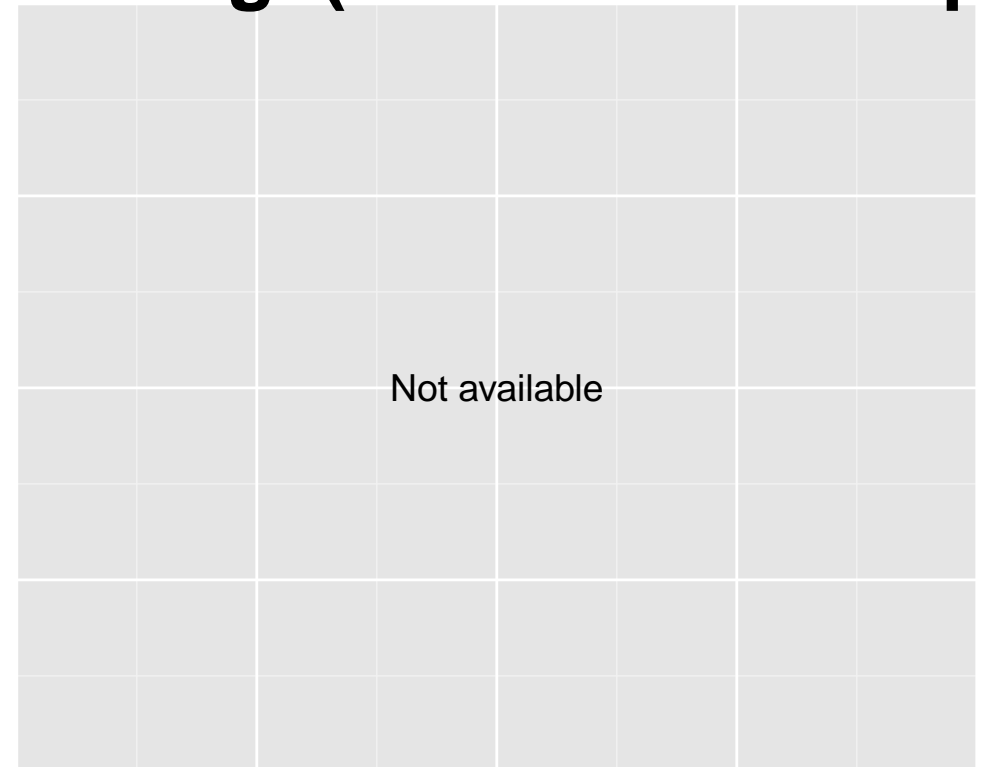

Supplement: SuppDataset_1.zip [file Dennd1c_set_A.pdf › Supplemental Dataset 1/A-mRNA_nonrhyth_translation_nonrhyth/Dennd1c_set_A.pdf]

# Dennd2a

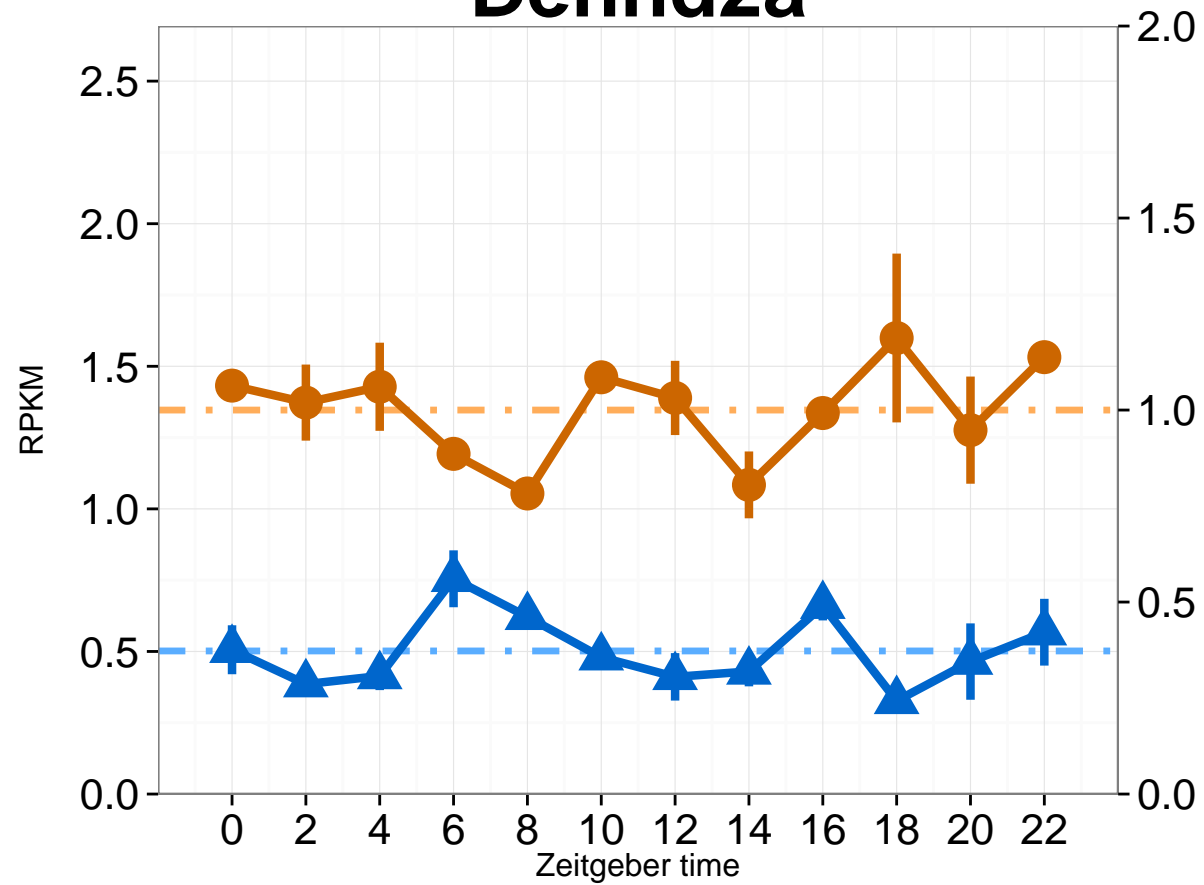

# Dennd2a

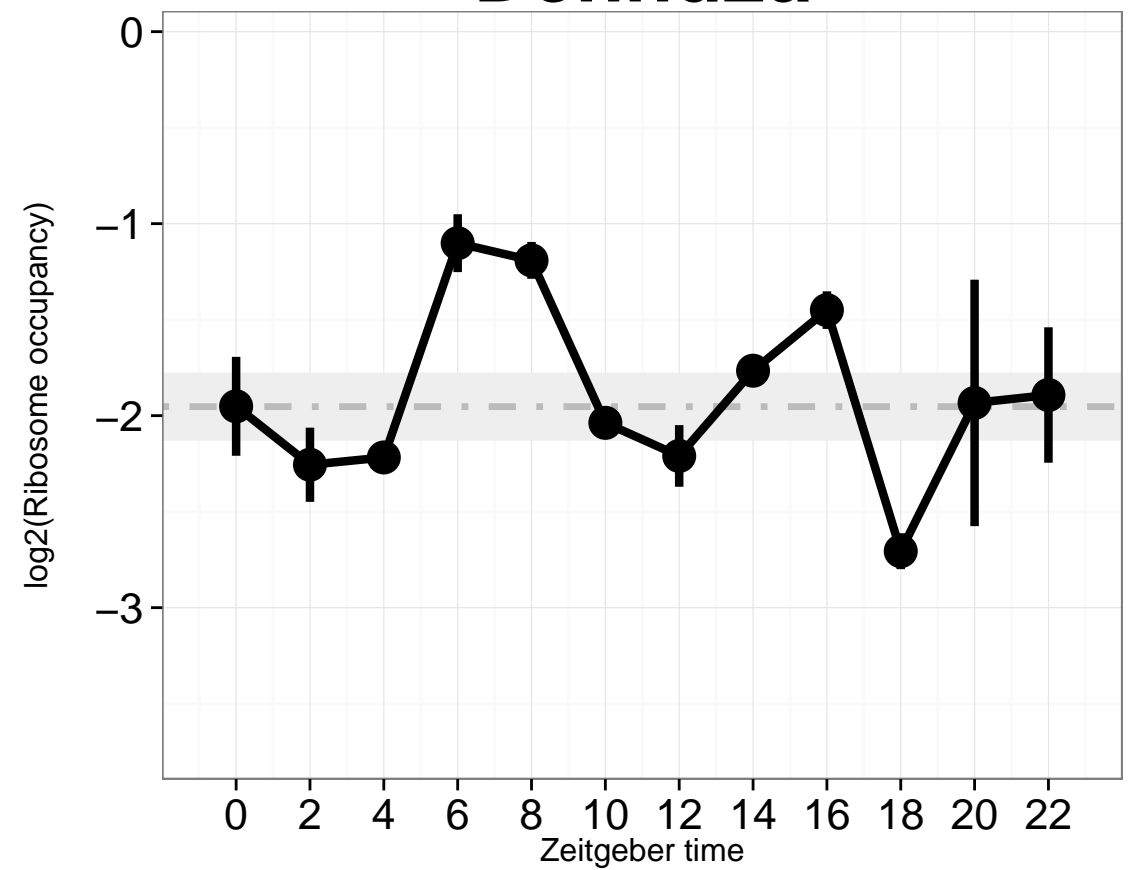

Supplement: SuppDataset_1.zip [file Dennd2a_set_A.pdf › Supplemental Dataset 1/A-mRNA_nonrhyth_translation_nonrhyth/Dennd2a_set_A.pdf]

## Dennd2c

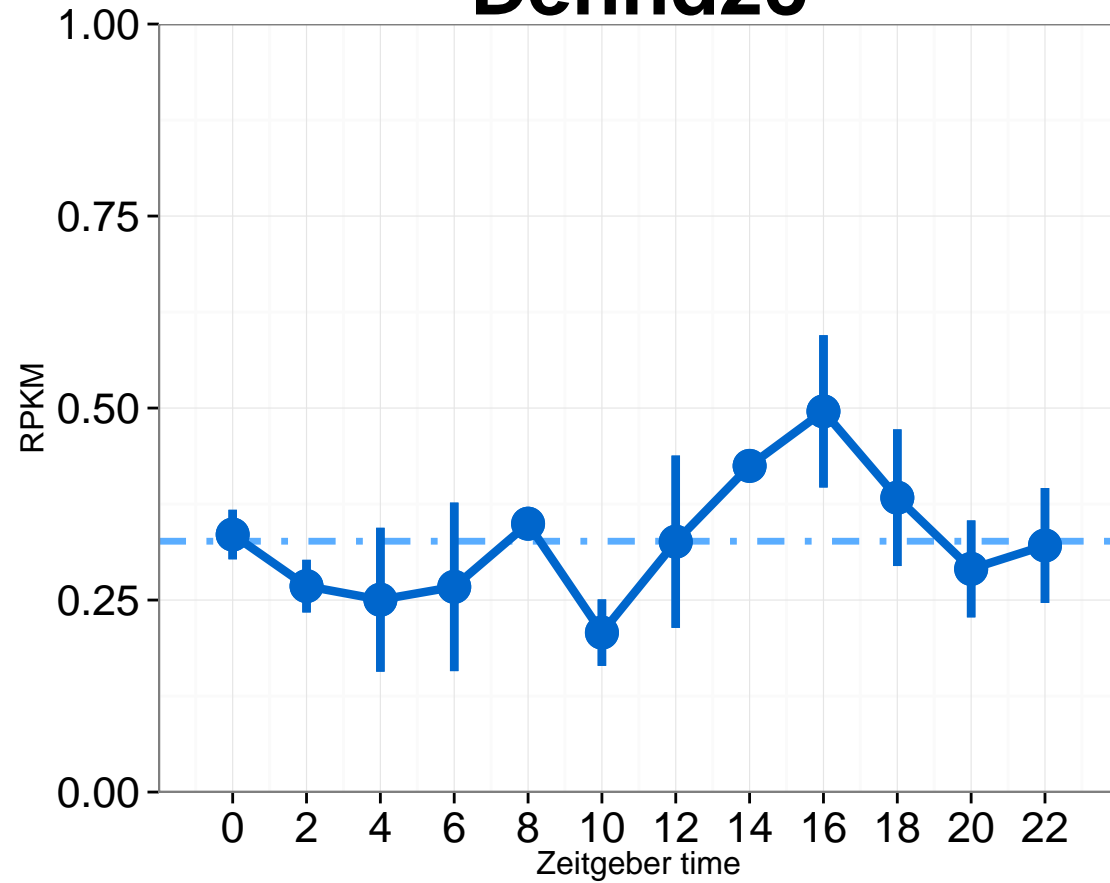

## Dennd2c log2(Ribosome occupanc

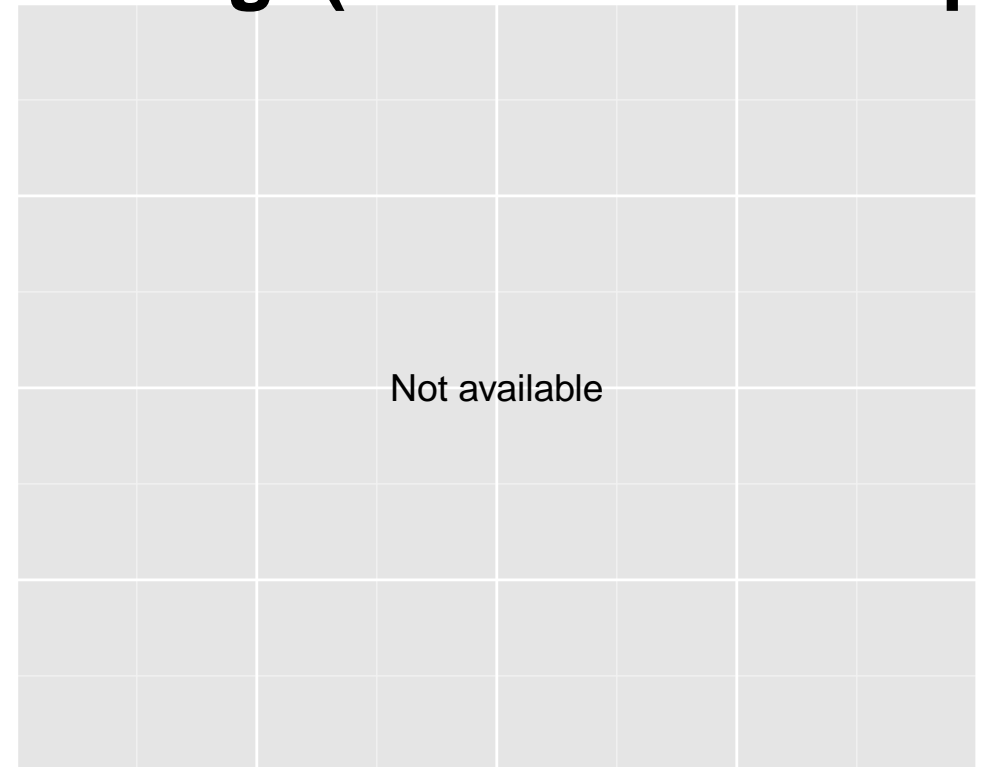

Supplement: SuppDataset_1.zip [file Dennd2c_set_A.pdf › Supplemental Dataset 1/A-mRNA_nonrhyth_translation_nonrhyth/Dennd2c_set_A.pdf]

## Dennd2d

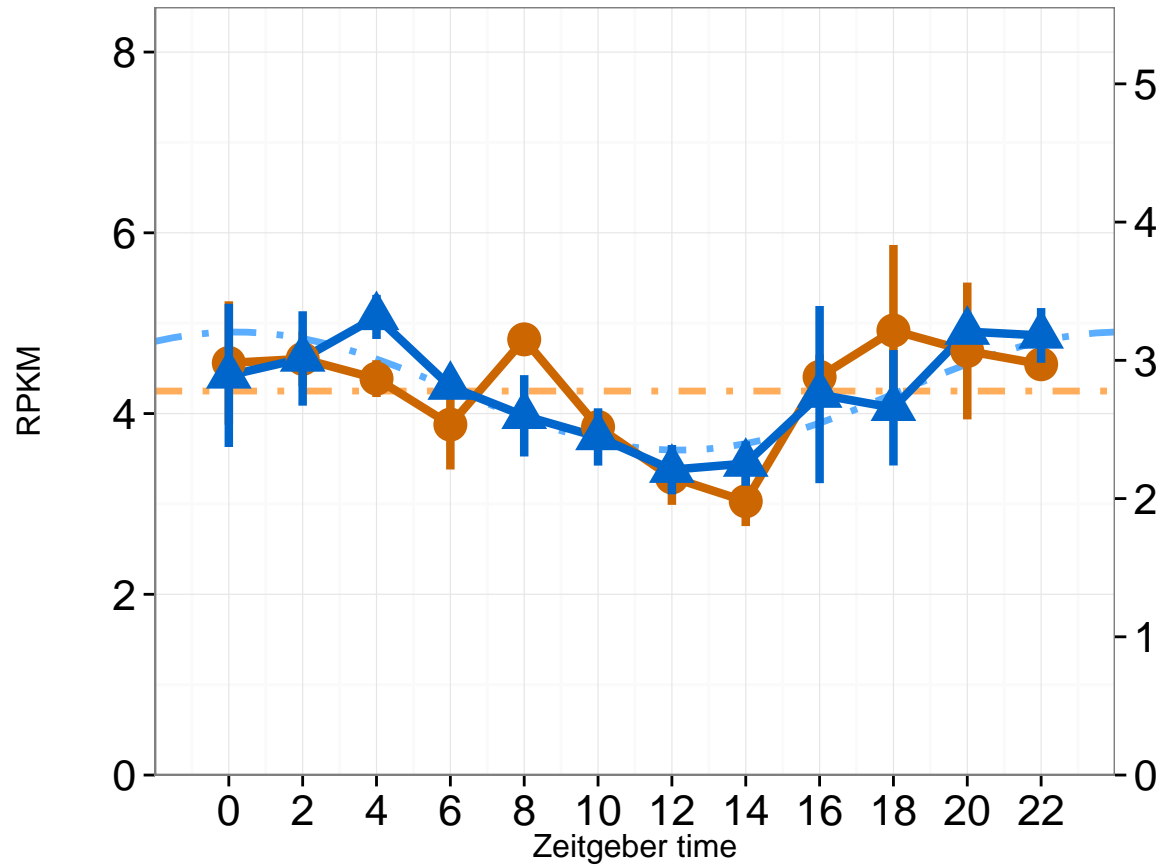

## Dennd2d

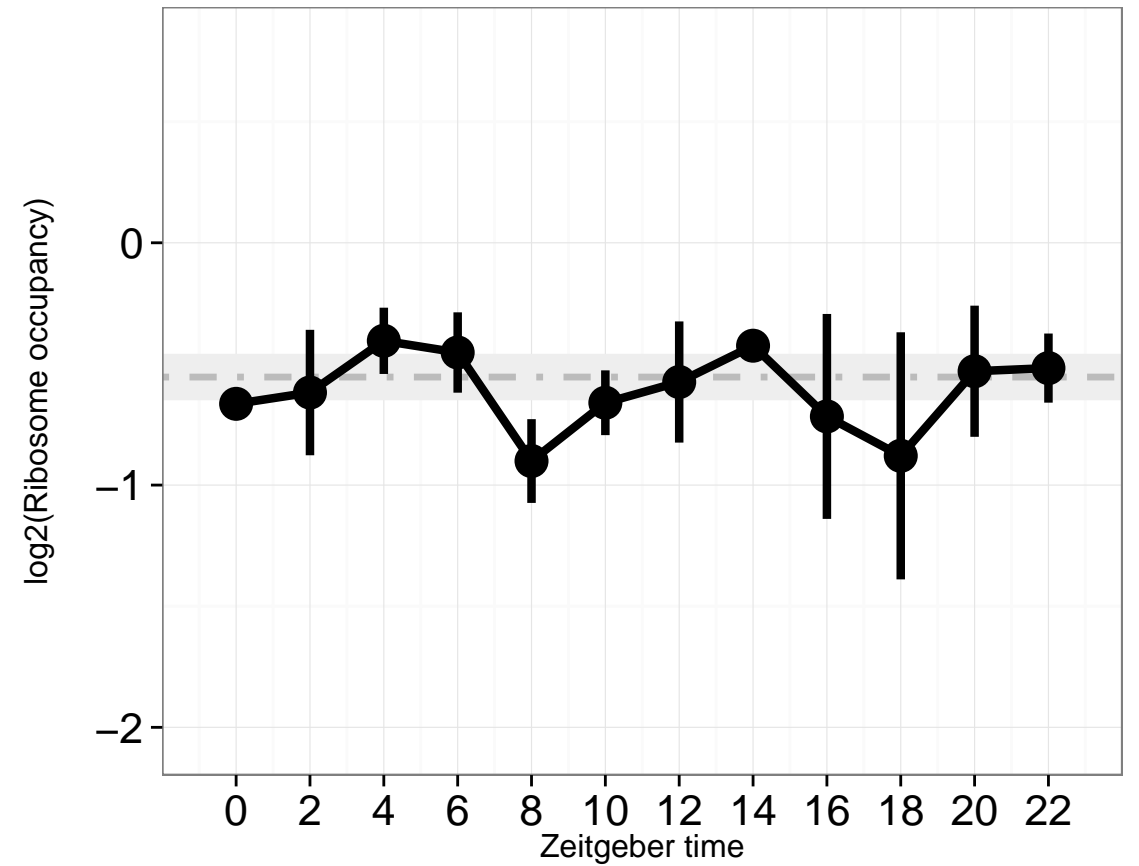

Supplement: SuppDataset_1.zip [file Dennd2d_set_A.pdf › Supplemental Dataset 1/A-mRNA_nonrhyth_translation_nonrhyth/Dennd2d_set_A.pdf]

## Dennd3

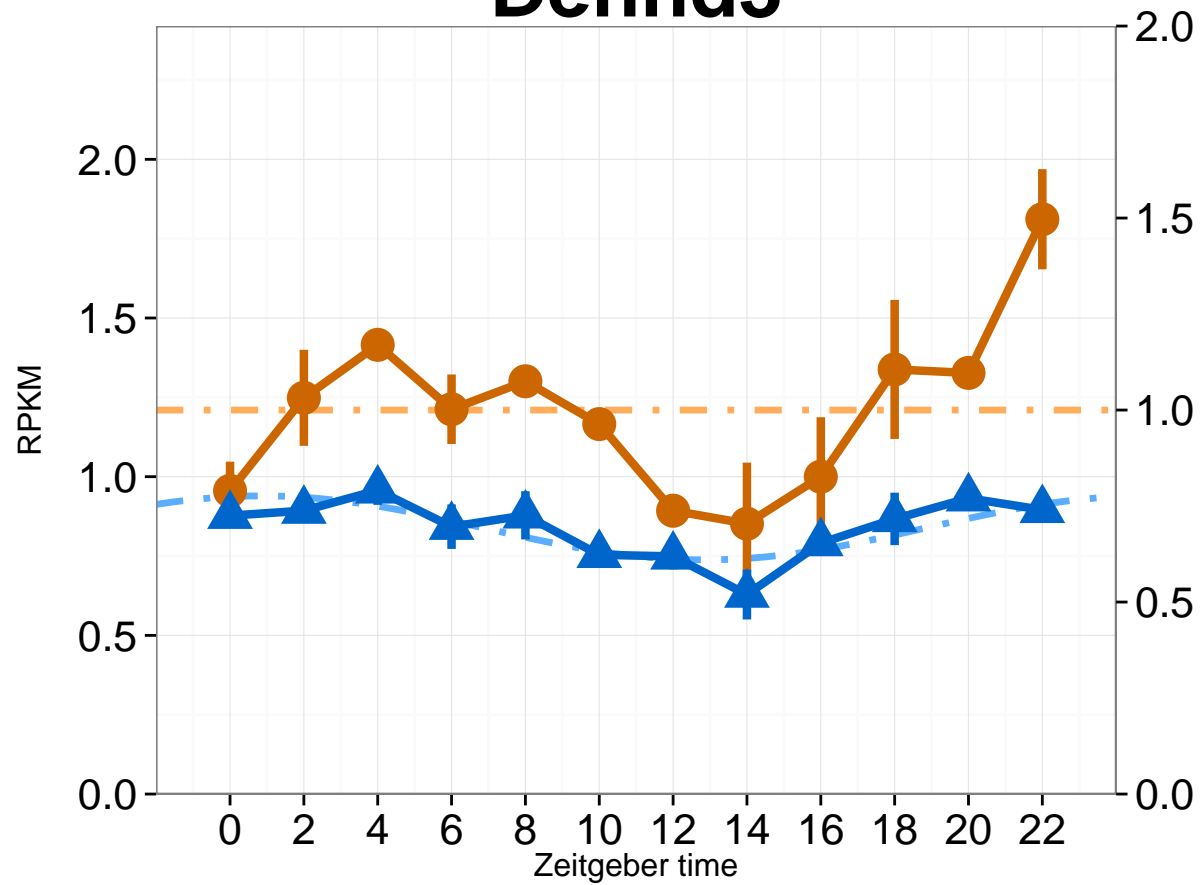

## Dennd3

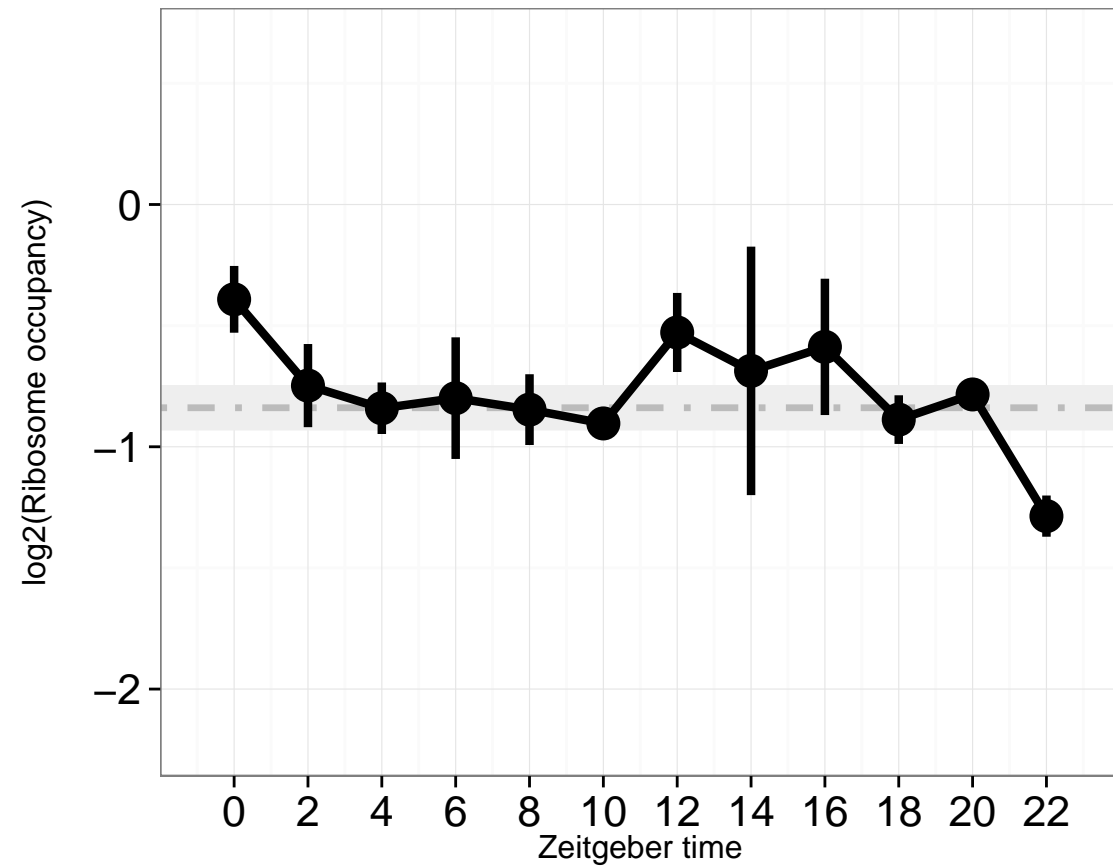

Supplement: SuppDataset_1.zip [file Dennd3_set_A.pdf › Supplemental Dataset 1/A-mRNA_nonrhyth_translation_nonrhyth/Dennd3_set_A.pdf]

# Dennd4a

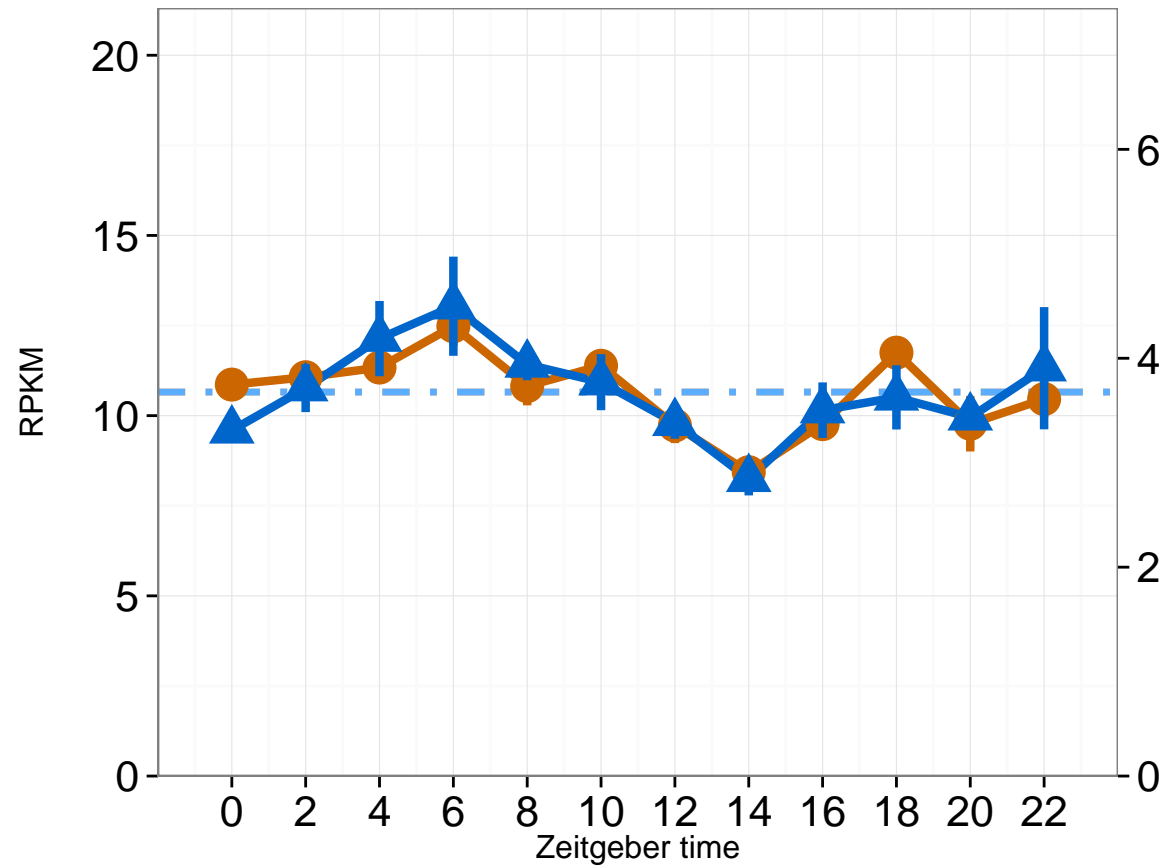

# Dennd4a

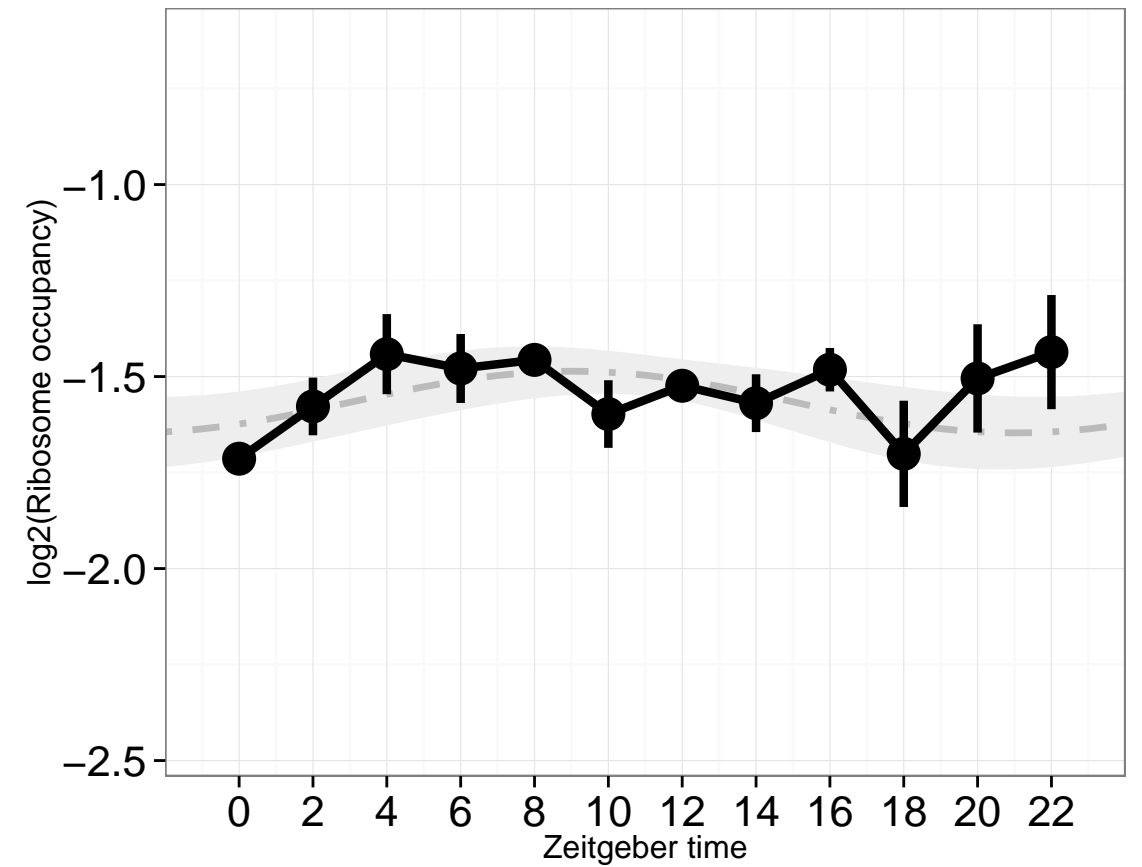

Supplement: SuppDataset_1.zip [file Dennd4a_set_A.pdf › Supplemental Dataset 1/A-mRNA_nonrhyth_translation_nonrhyth/Dennd4a_set_A.pdf]

# Dennd4b

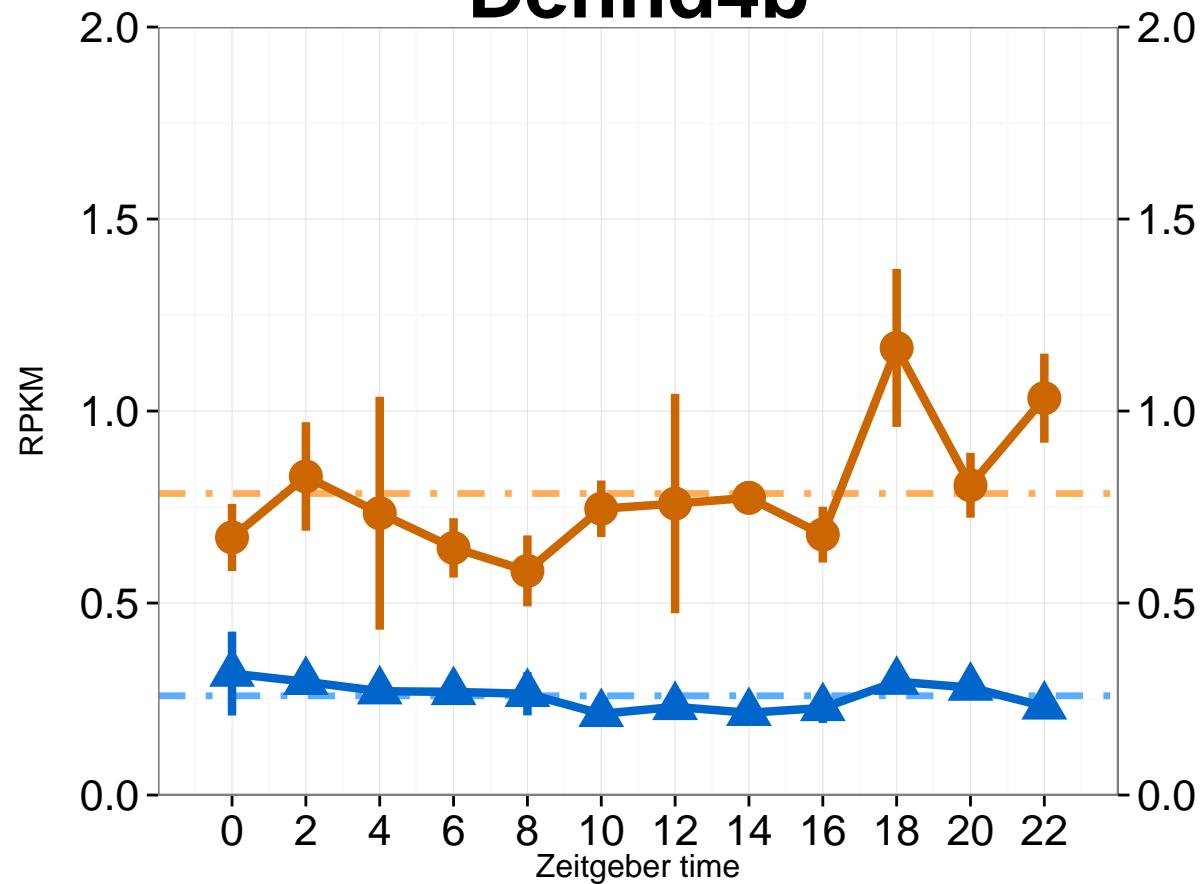

# Dennd4b

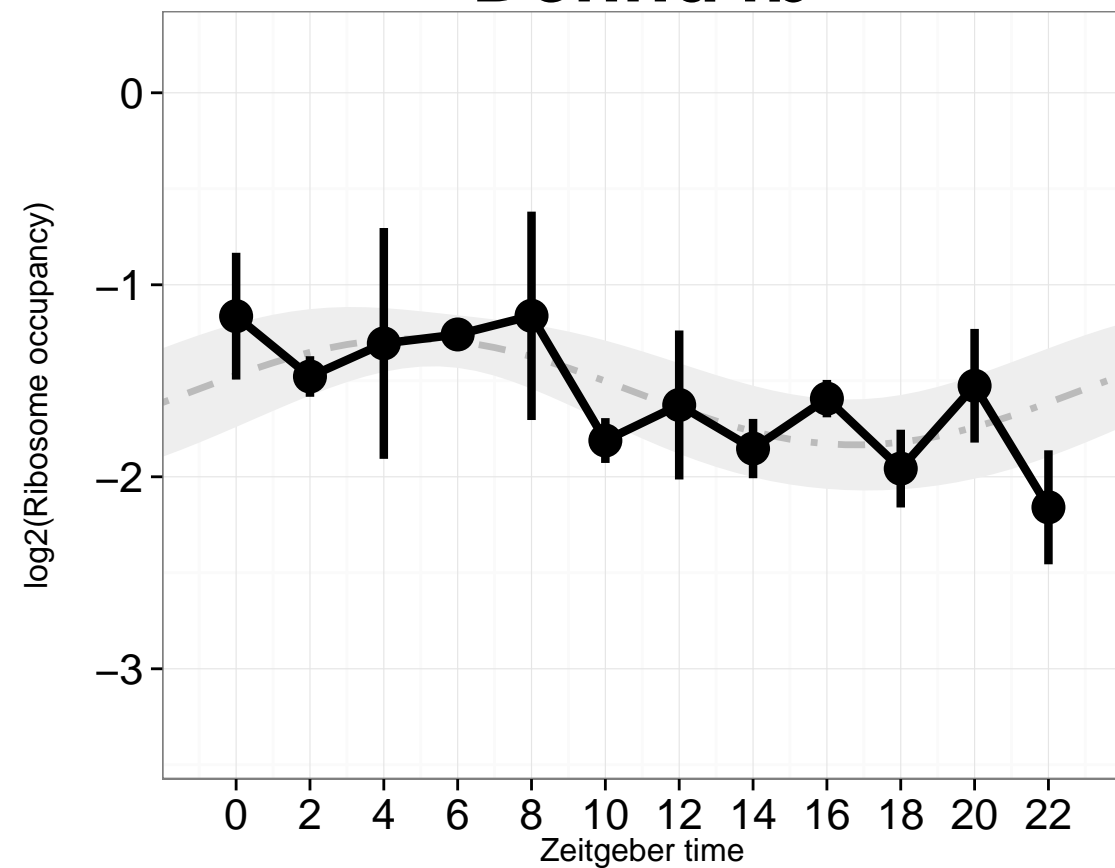

Supplement: SuppDataset_1.zip [file Dennd4b_set_A.pdf › Supplemental Dataset 1/A-mRNA_nonrhyth_translation_nonrhyth/Dennd4b_set_A.pdf]

## Dennd4c

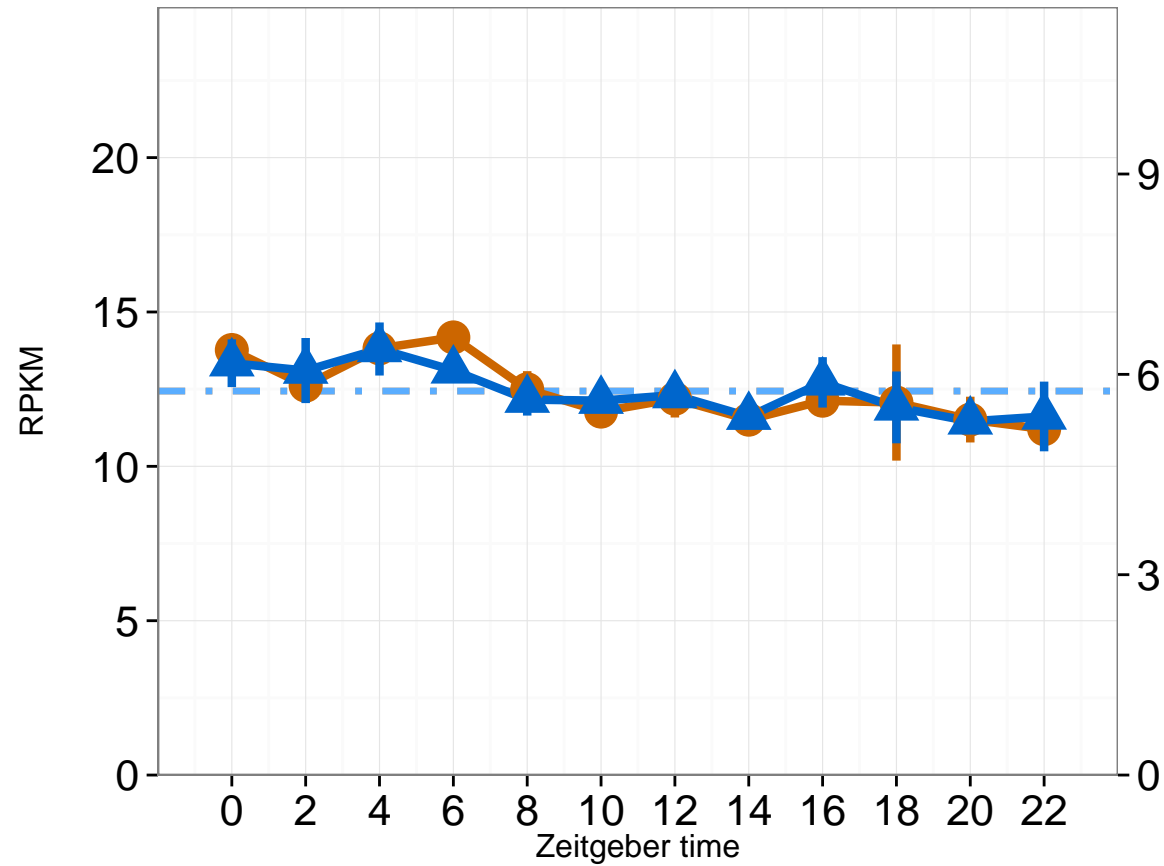

## Dennd4c

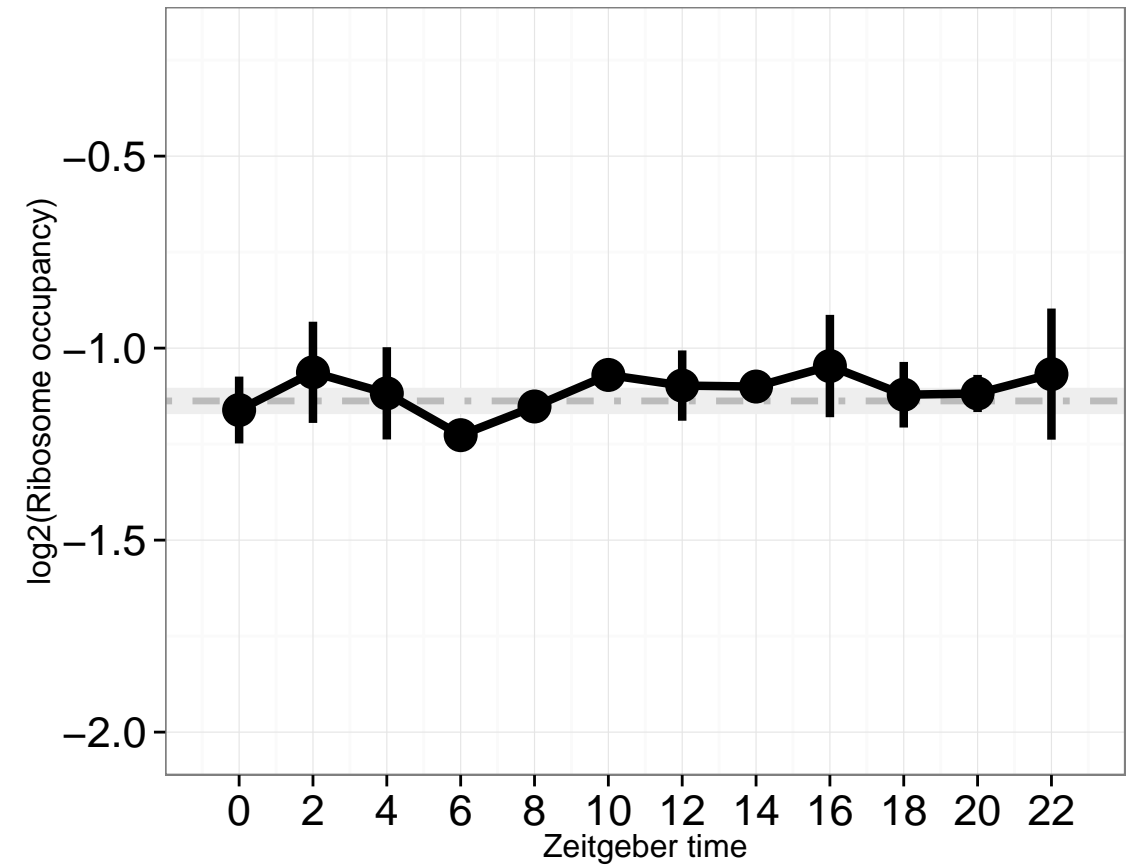

Supplement: SuppDataset_1.zip [file Dennd4c_set_A.pdf › Supplemental Dataset 1/A-mRNA_nonrhyth_translation_nonrhyth/Dennd4c_set_A.pdf]

# Dennd5a

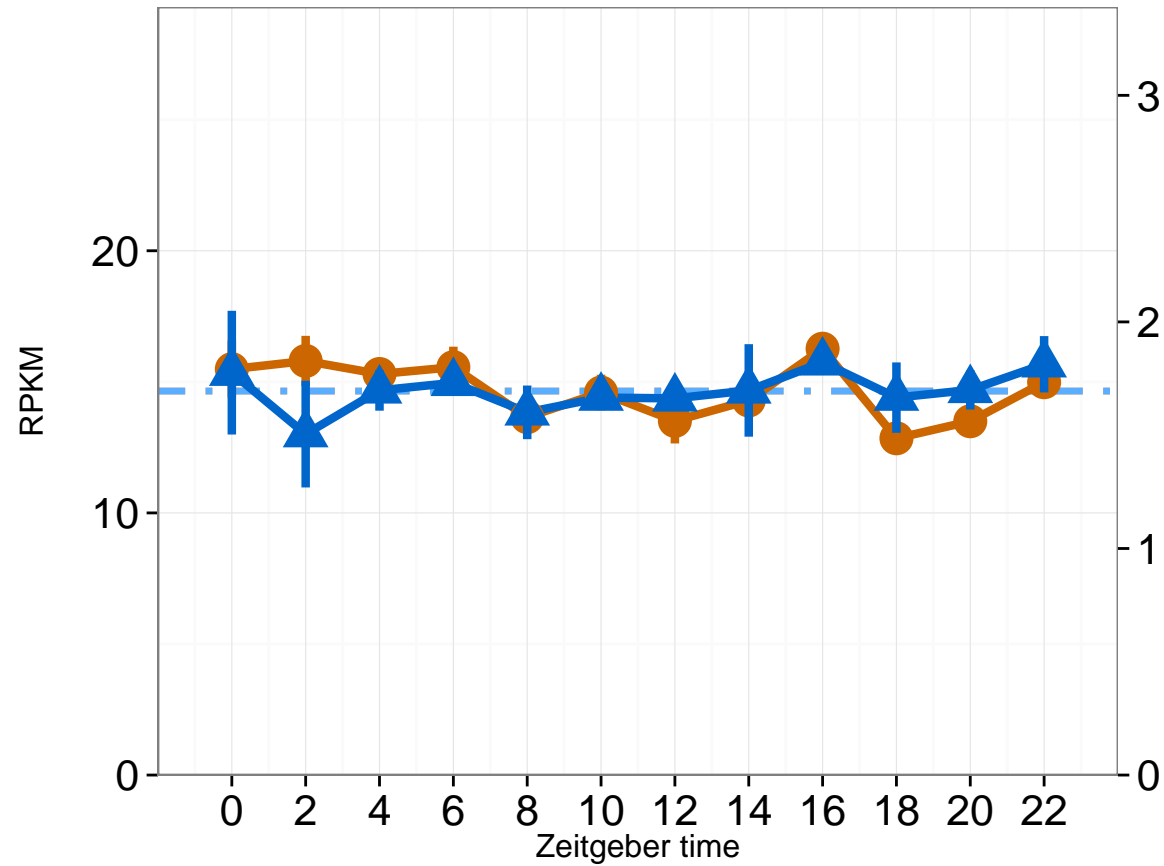

# Dennd5a

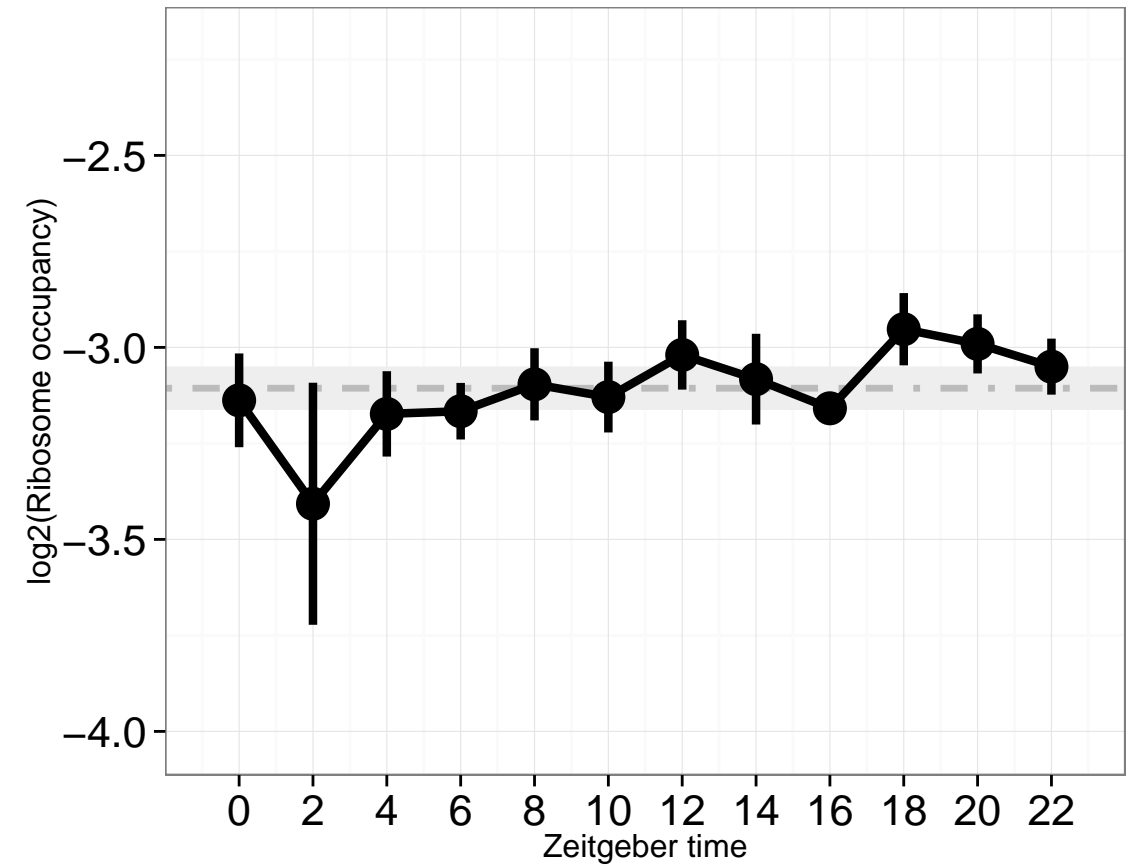

Supplement: SuppDataset_1.zip [file Dennd5a_set_A.pdf › Supplemental Dataset 1/A-mRNA_nonrhyth_translation_nonrhyth/Dennd5a_set_A.pdf]

# Dennd5b

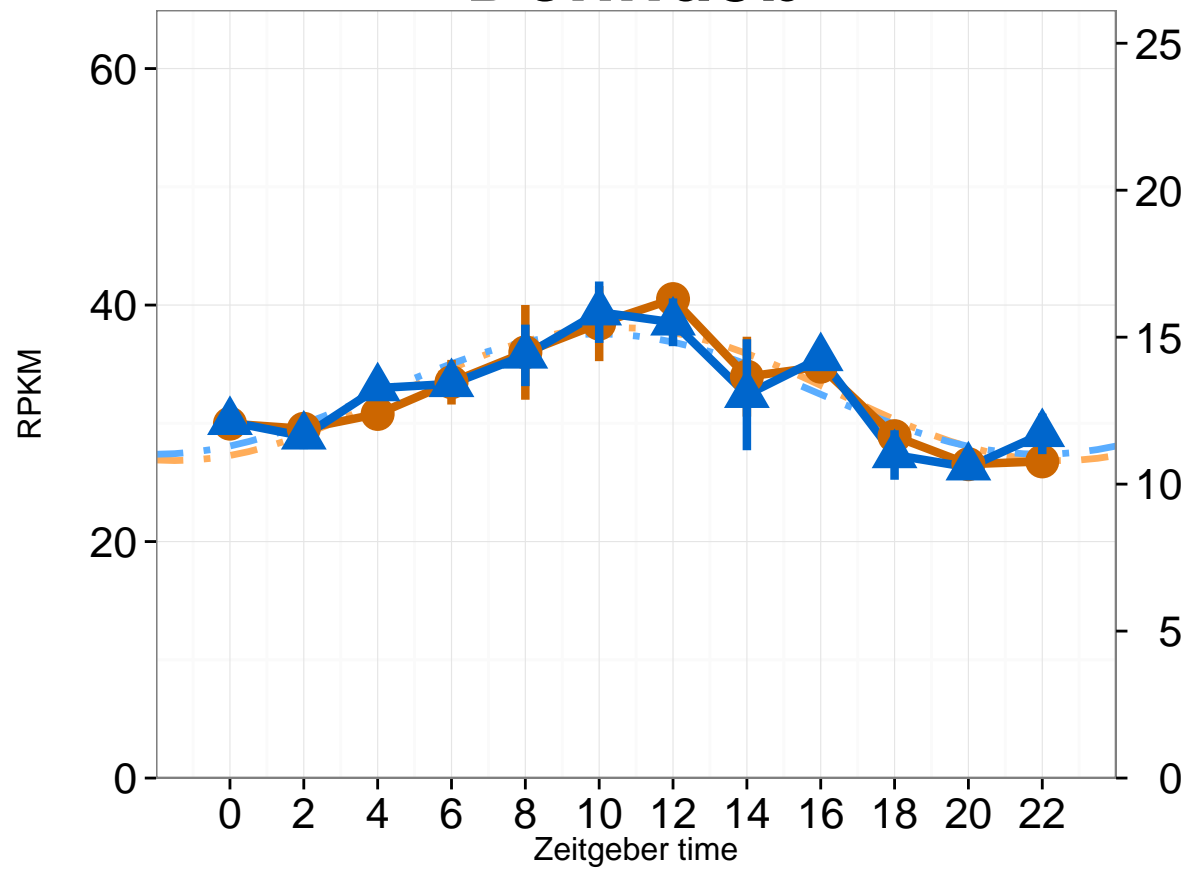

# Dennd5b

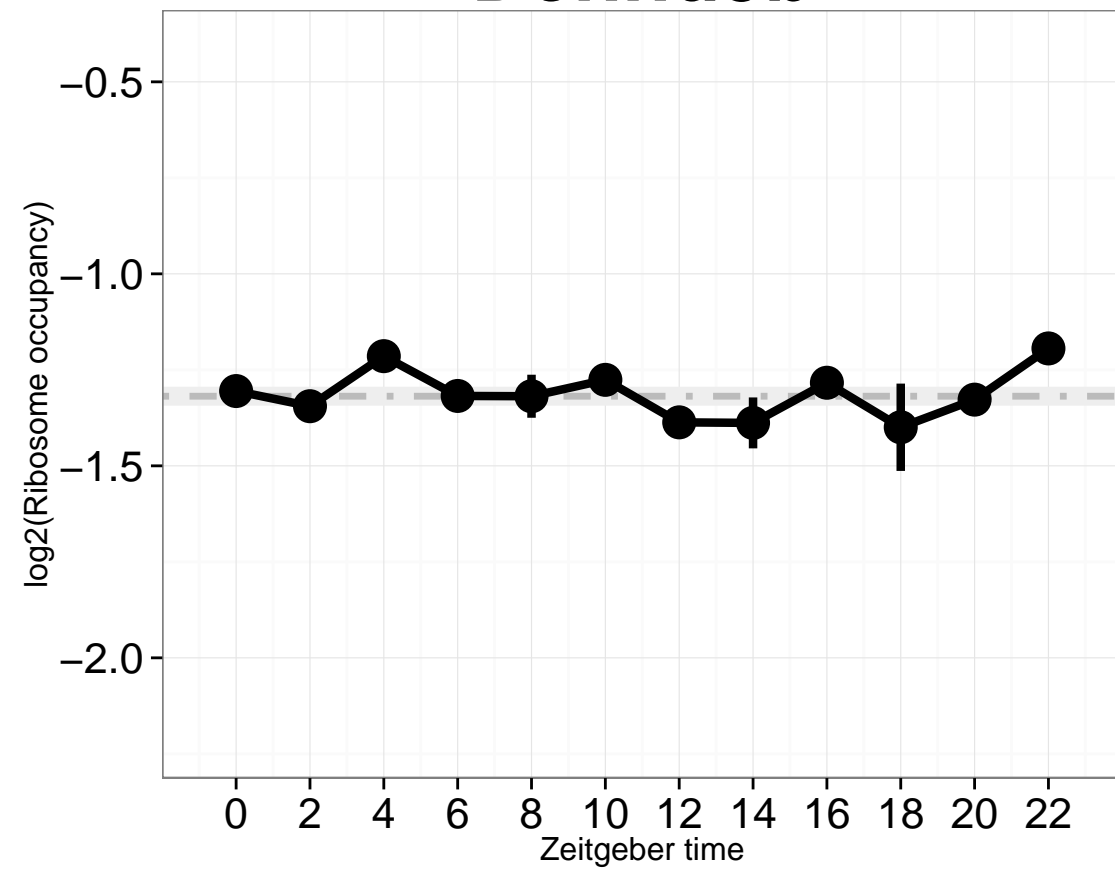

Supplement: SuppDataset_1.zip [file Dennd5b_set_A.pdf › Supplemental Dataset 1/A-mRNA_nonrhyth_translation_nonrhyth/Dennd5b_set_A.pdf]

# Dennd6a

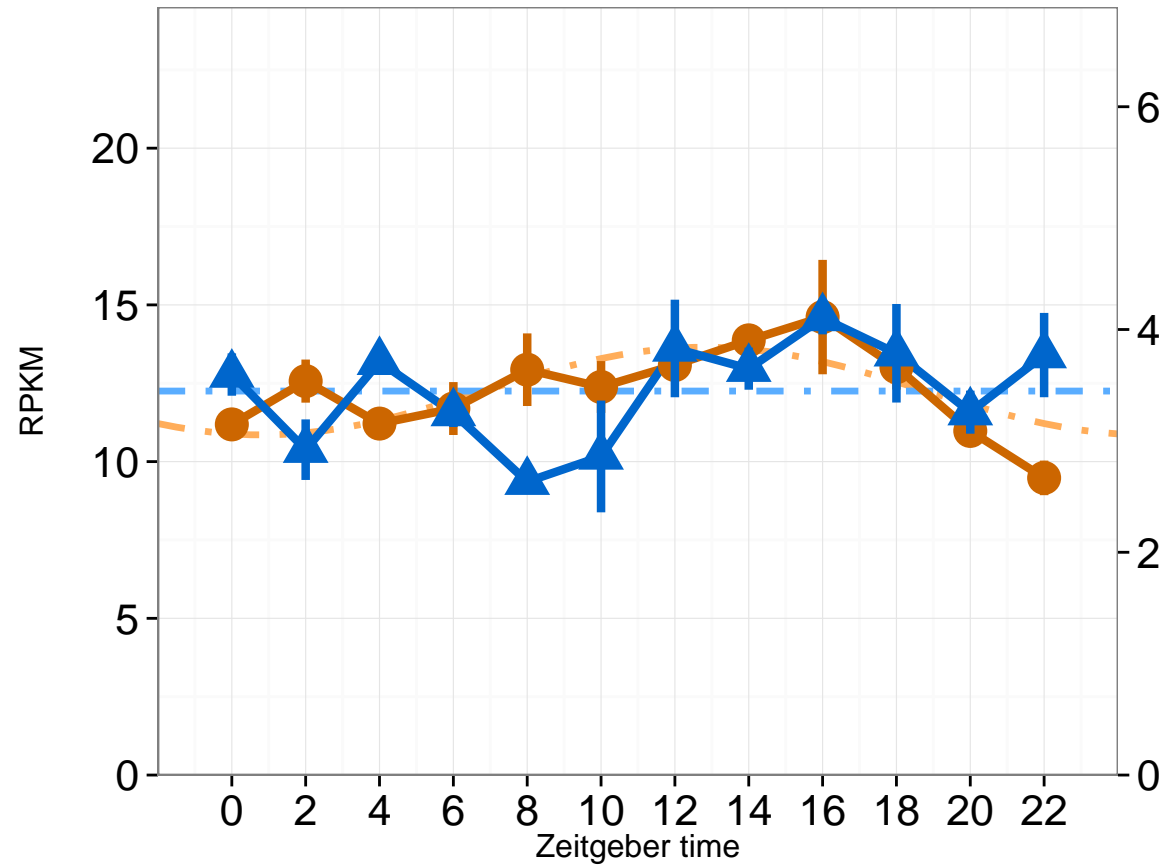

# Dennd6a

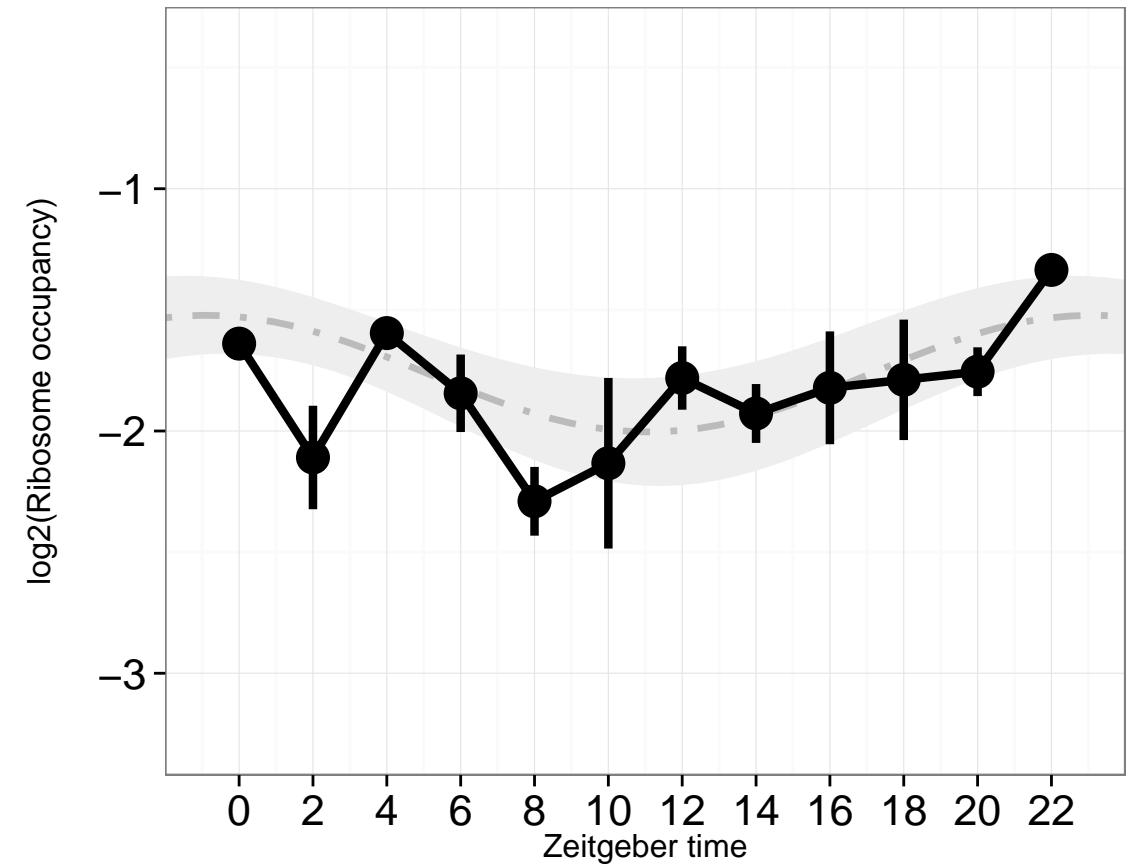

Supplement: SuppDataset_1.zip [file Dennd6a_set_A.pdf › Supplemental Dataset 1/A-mRNA_nonrhyth_translation_nonrhyth/Dennd6a_set_A.pdf]

# Dennd6b

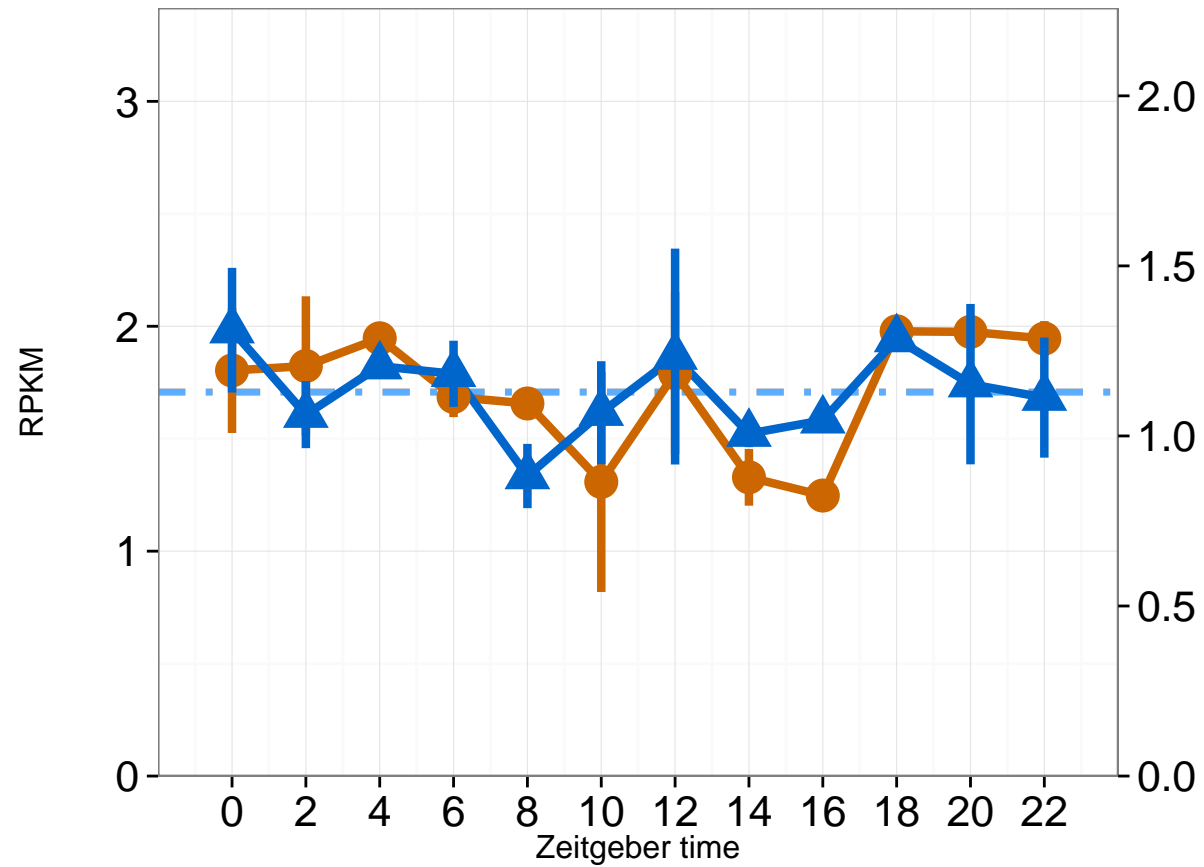

# Dennd6b

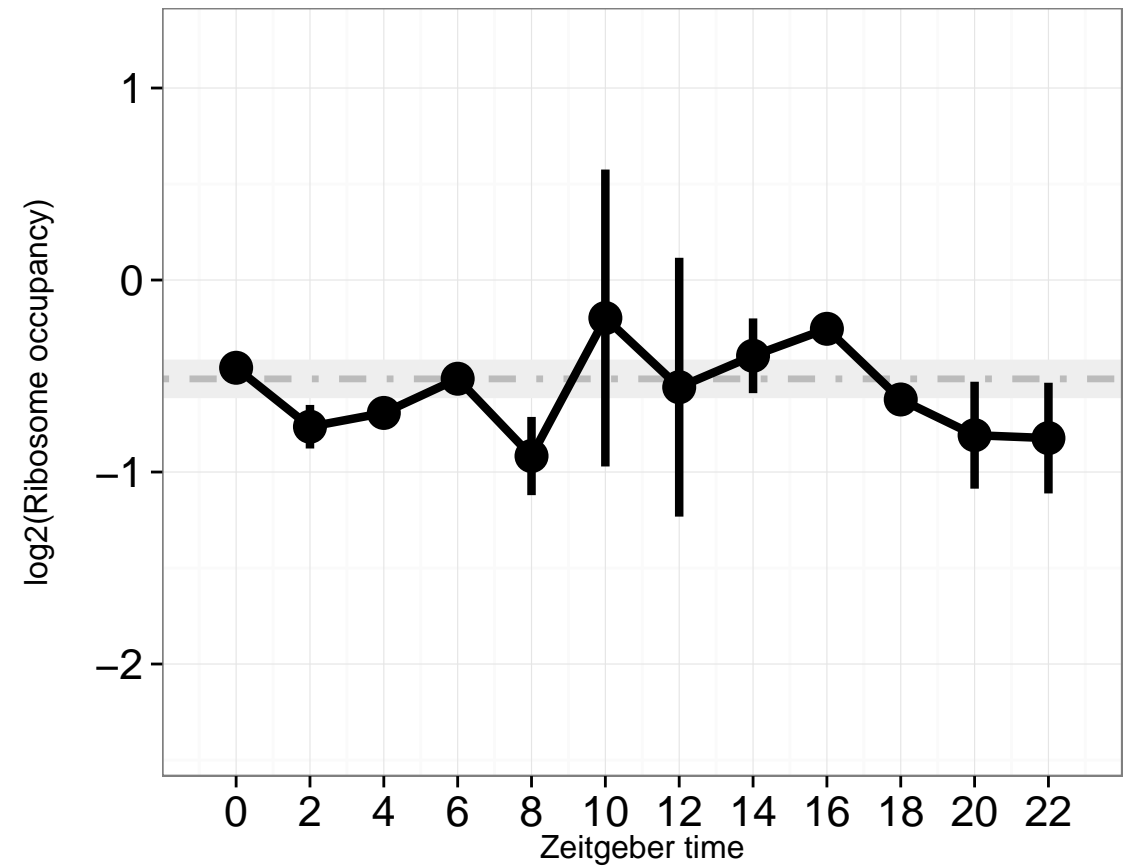

Supplement: SuppDataset_1.zip [file Dennd6b_set_A.pdf › Supplemental Dataset 1/A-mRNA_nonrhyth_translation_nonrhyth/Dennd6b_set_A.pdf]

## Denr

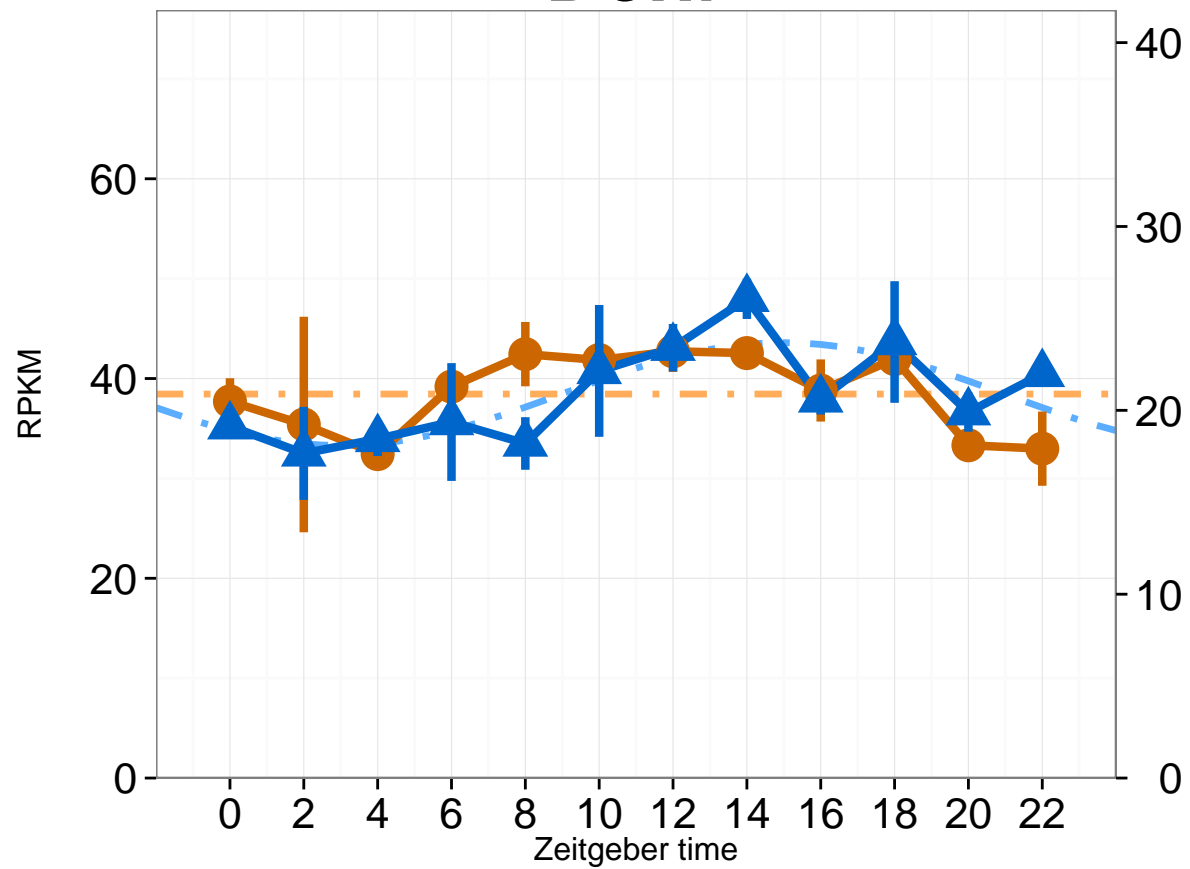

## Denr

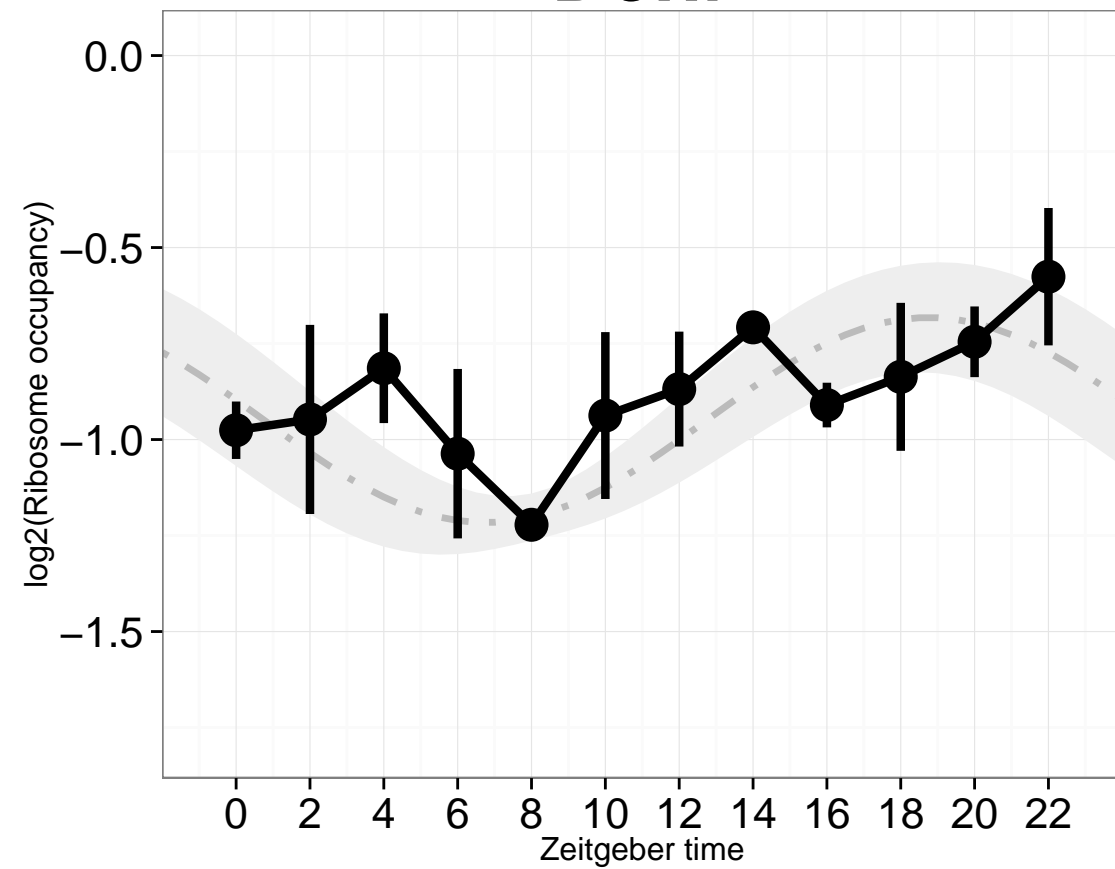

Supplement: SuppDataset_1.zip [file Denr_set_A.pdf › Supplemental Dataset 1/A-mRNA_nonrhyth_translation_nonrhyth/Denr_set_A.pdf]

# Depdc5

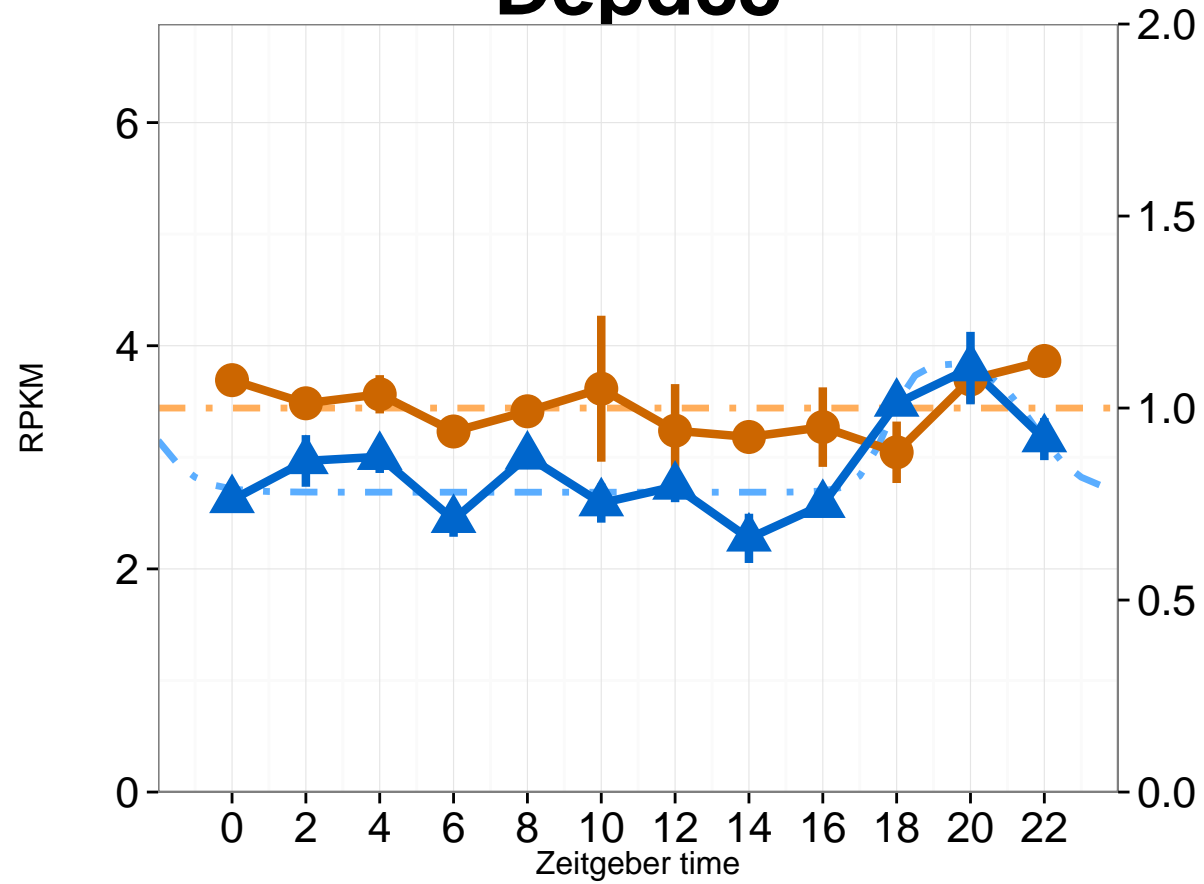

# Depdc5

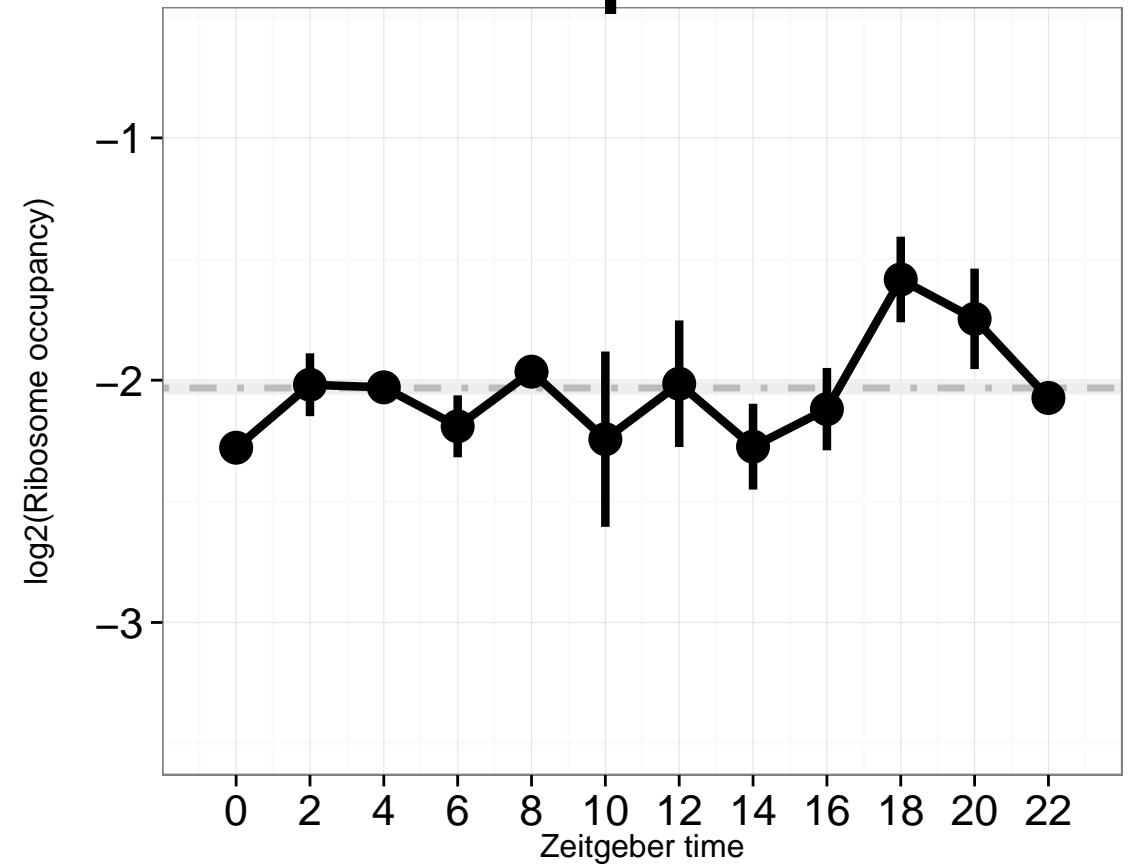

Supplement: SuppDataset_1.zip [file Depdc5_set_A.pdf › Supplemental Dataset 1/A-mRNA_nonrhyth_translation_nonrhyth/Depdc5_set_A.pdf]

# Depdc7

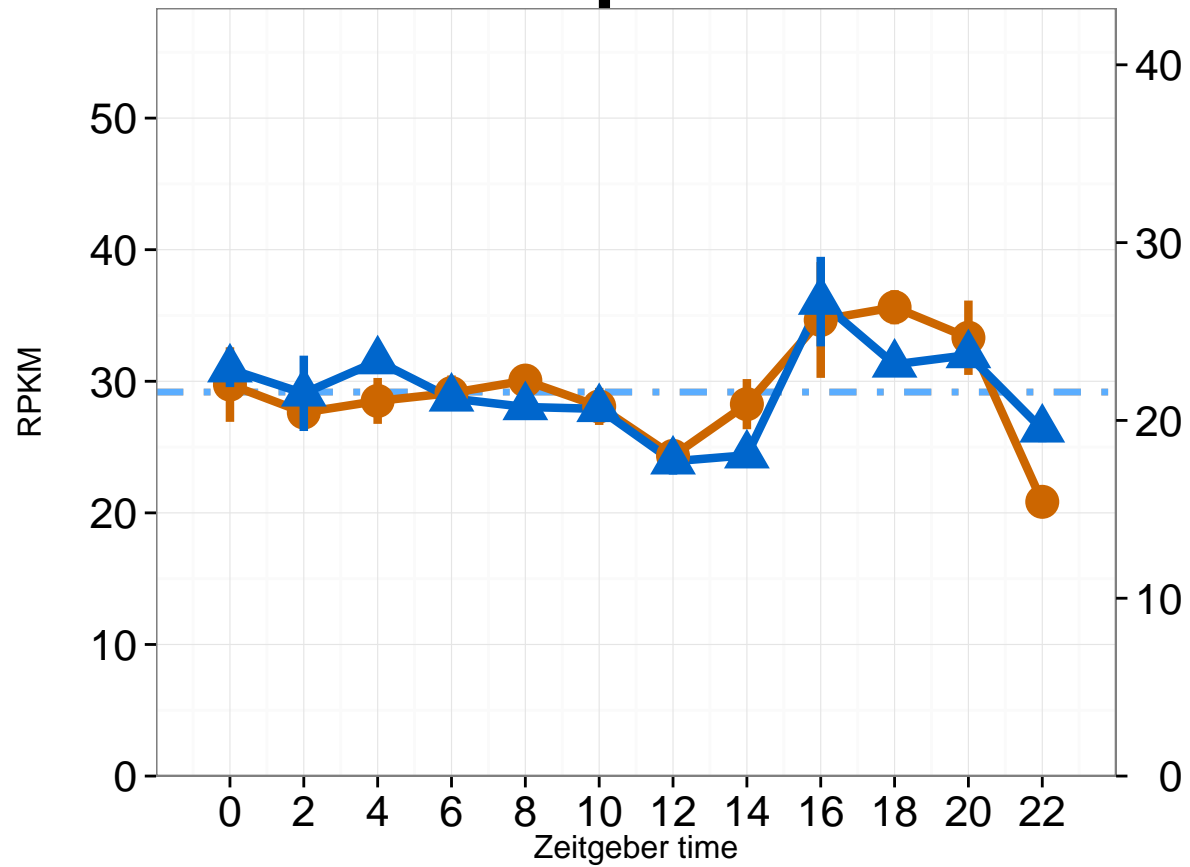

# Depdc7

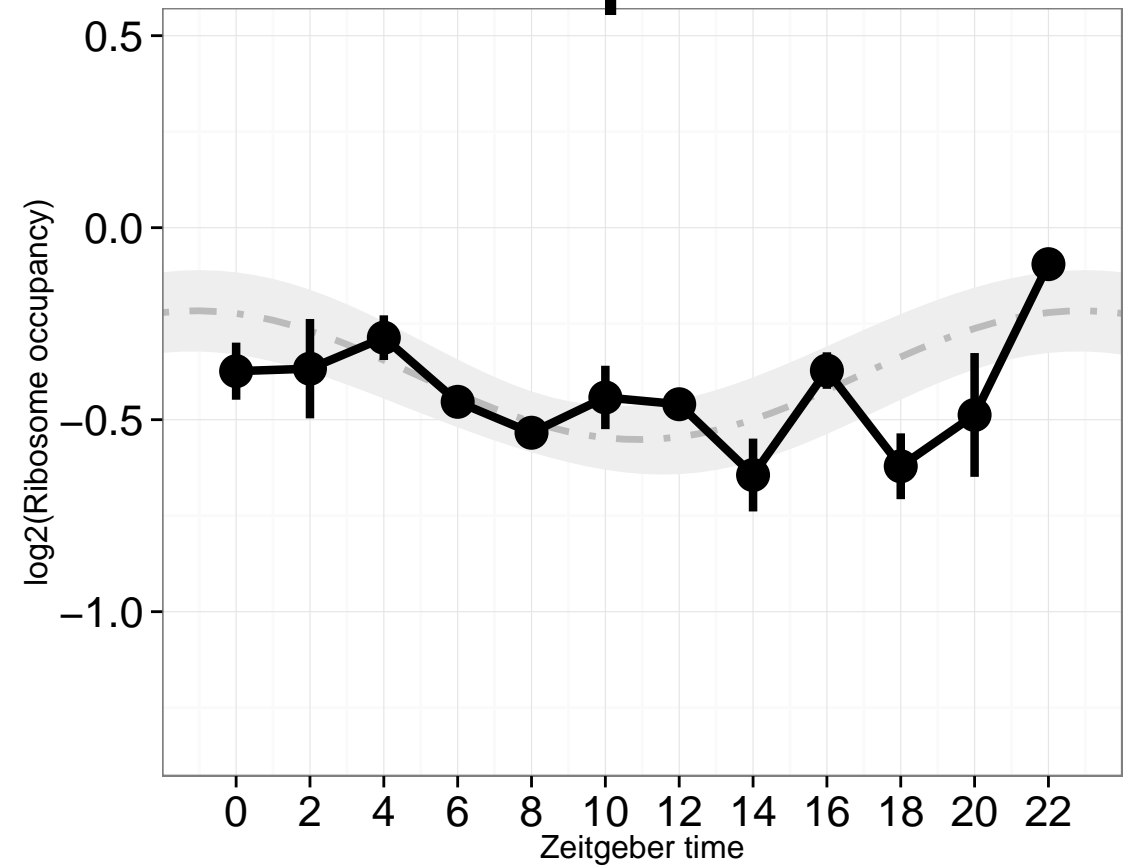

Supplement: SuppDataset_1.zip [file Depdc7_set_A.pdf › Supplemental Dataset 1/A-mRNA_nonrhyth_translation_nonrhyth/Depdc7_set_A.pdf]

## Deptor

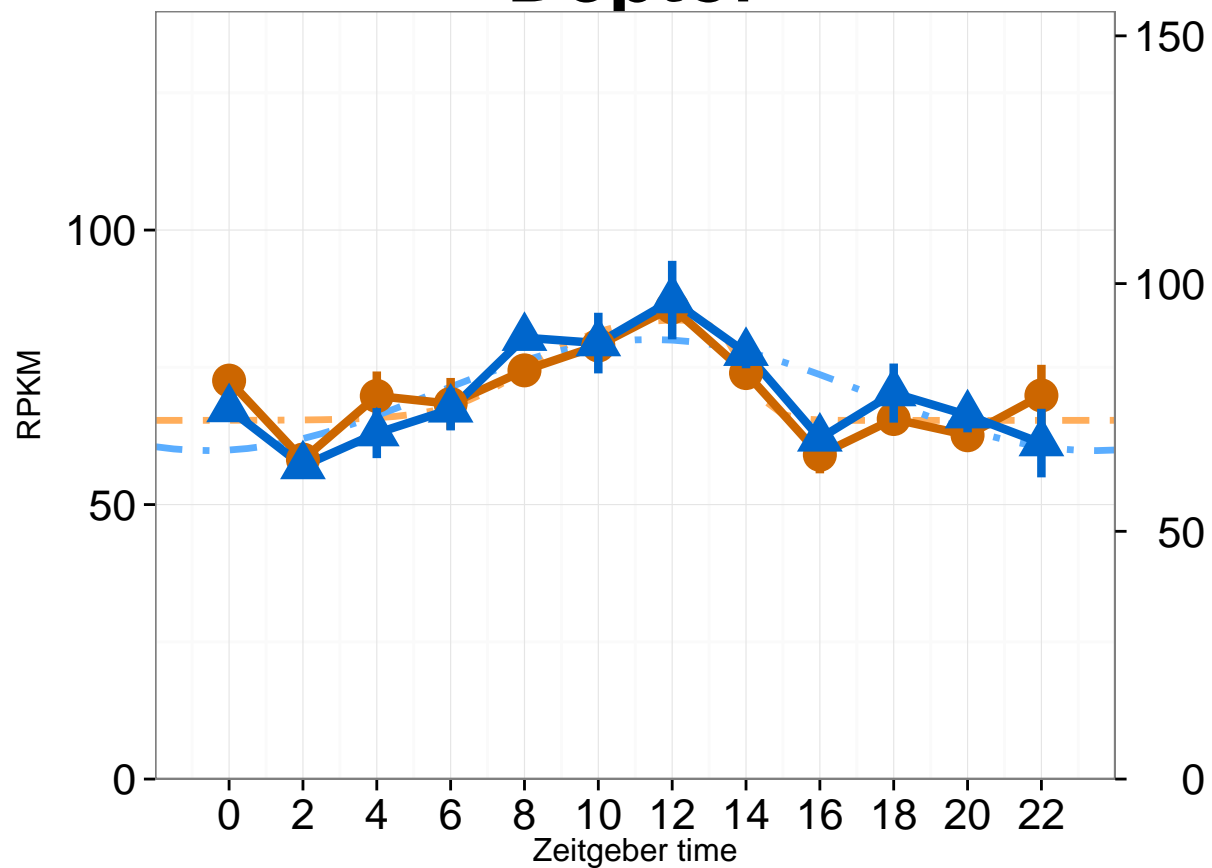

## Deptor

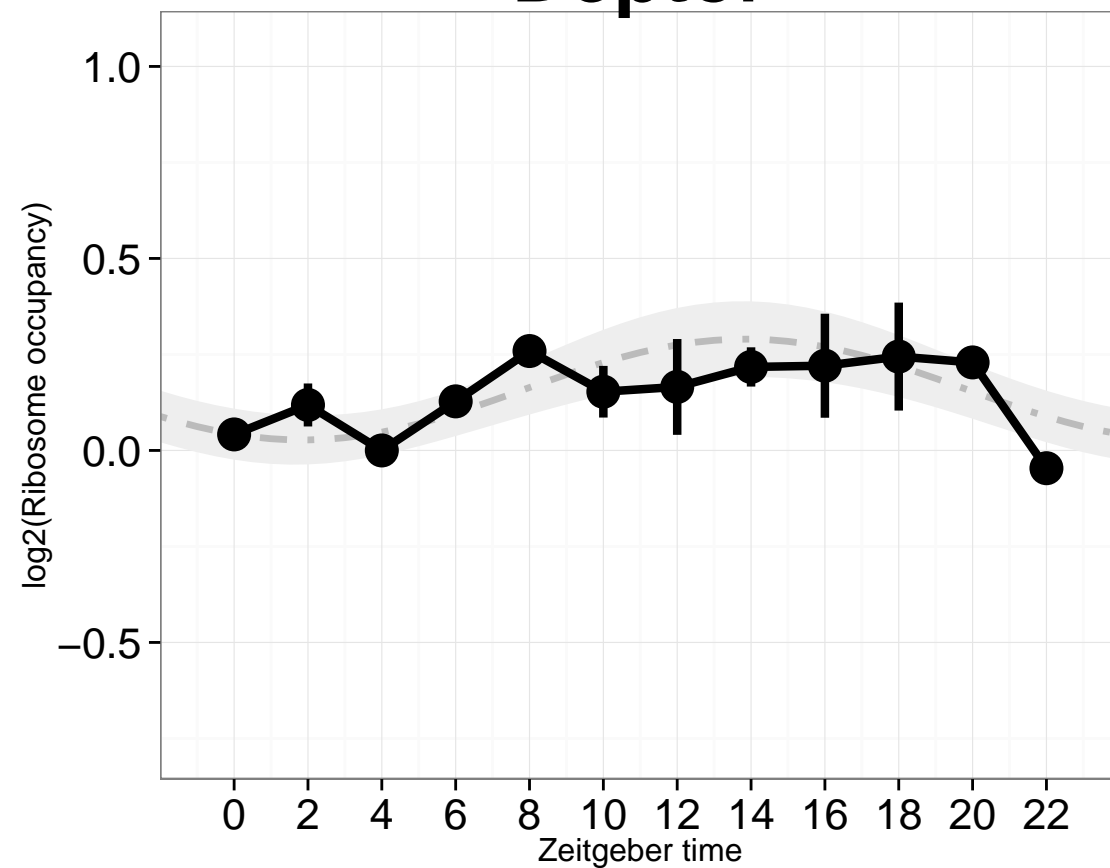

Supplement: SuppDataset_1.zip [file Deptor_set_A.pdf › Supplemental Dataset 1/A-mRNA_nonrhyth_translation_nonrhyth/Deptor_set_A.pdf]

## Dera

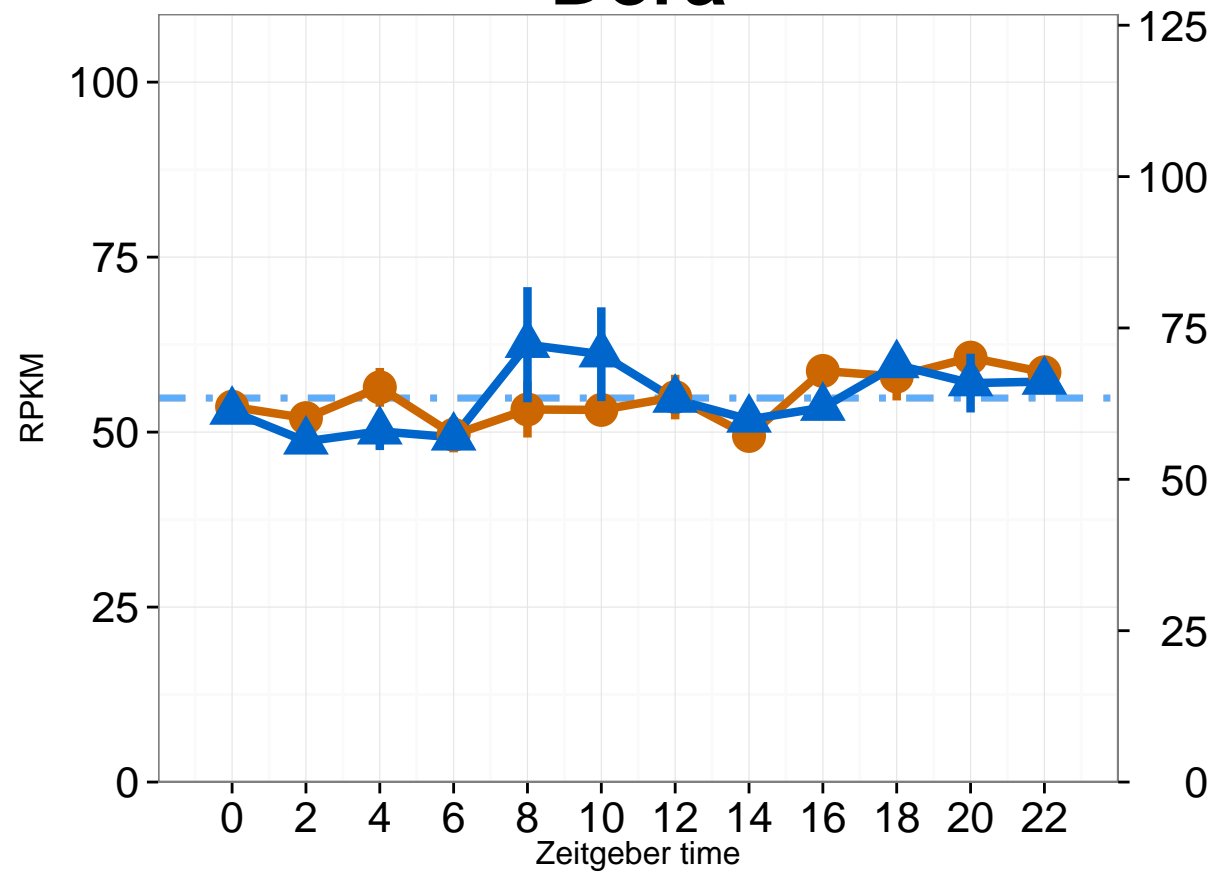

## Dera

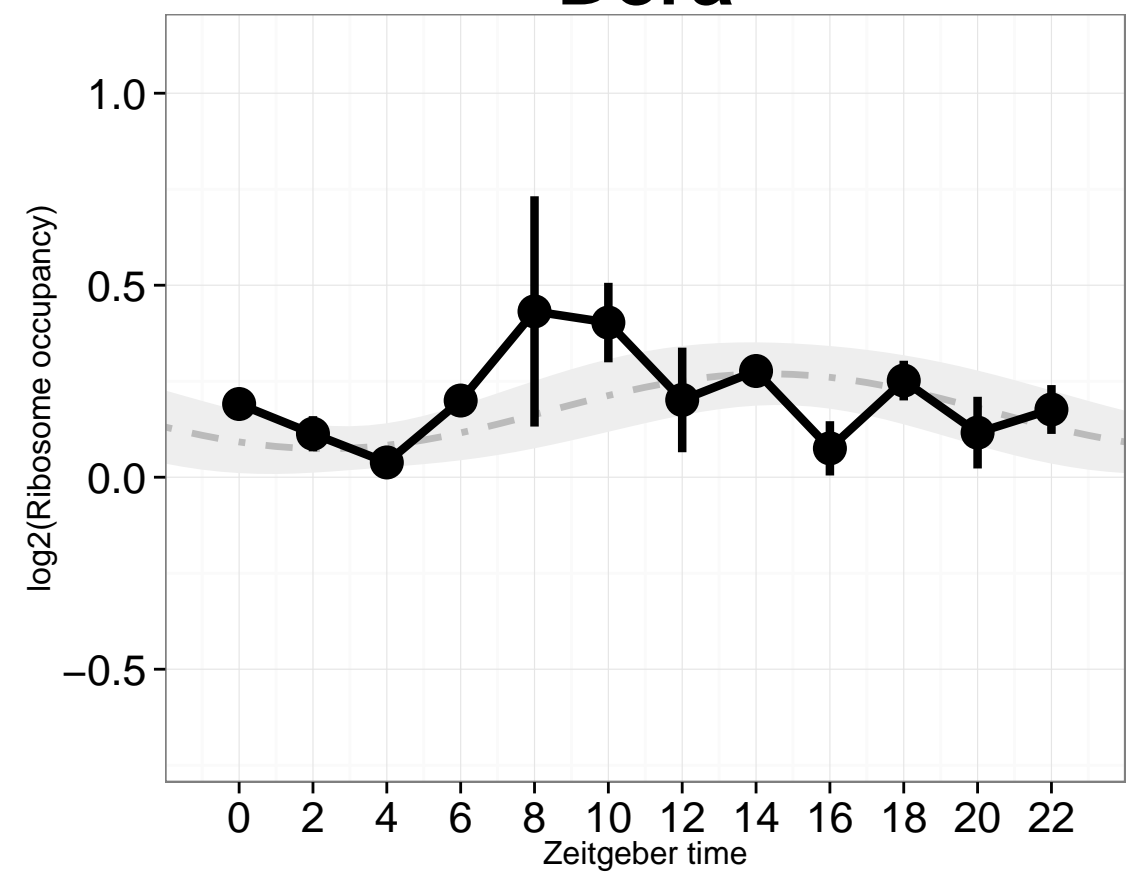

Supplement: SuppDataset_1.zip [file Dera_set_A.pdf › Supplemental Dataset 1/A-mRNA_nonrhyth_translation_nonrhyth/Dera_set_A.pdf]

## Derl1

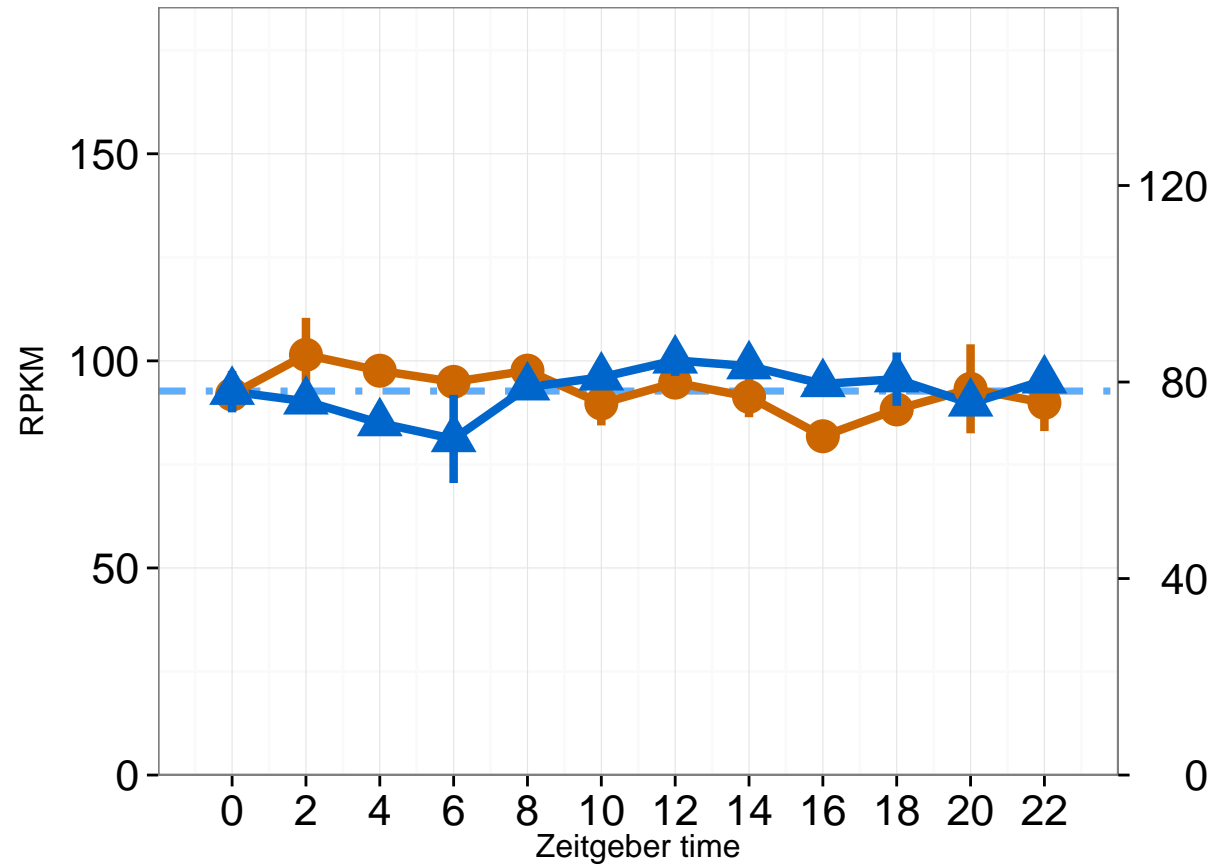

## Derl1

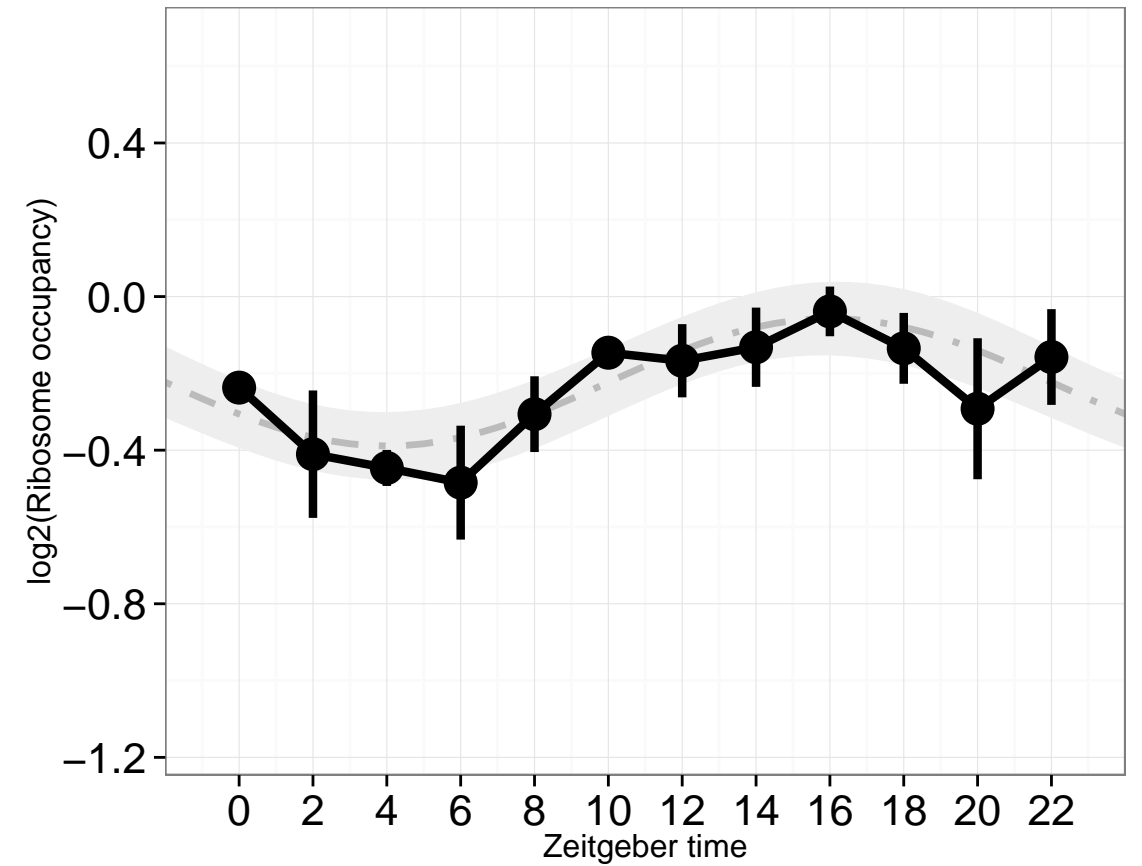

Supplement: SuppDataset_1.zip [file Derl1_set_A.pdf › Supplemental Dataset 1/A-mRNA_nonrhyth_translation_nonrhyth/Derl1_set_A.pdf]

## Derl2

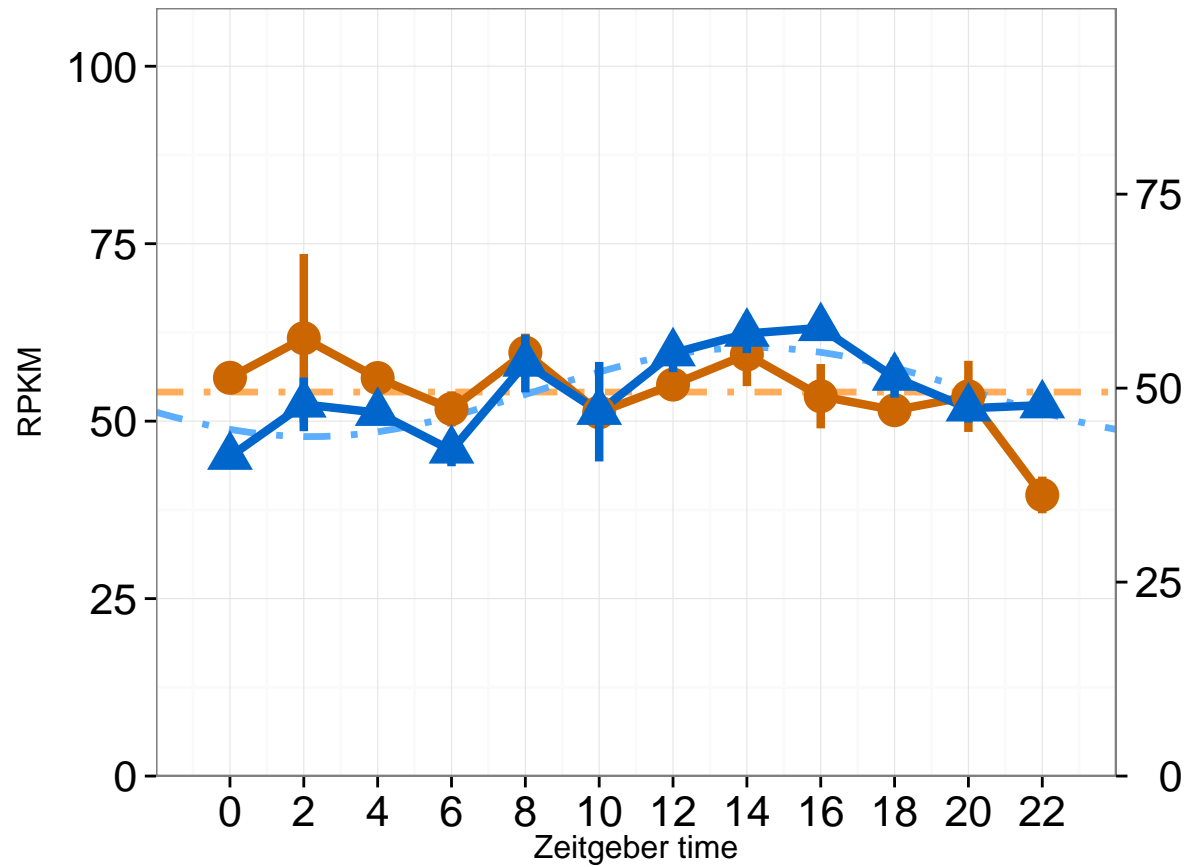

## Derl2

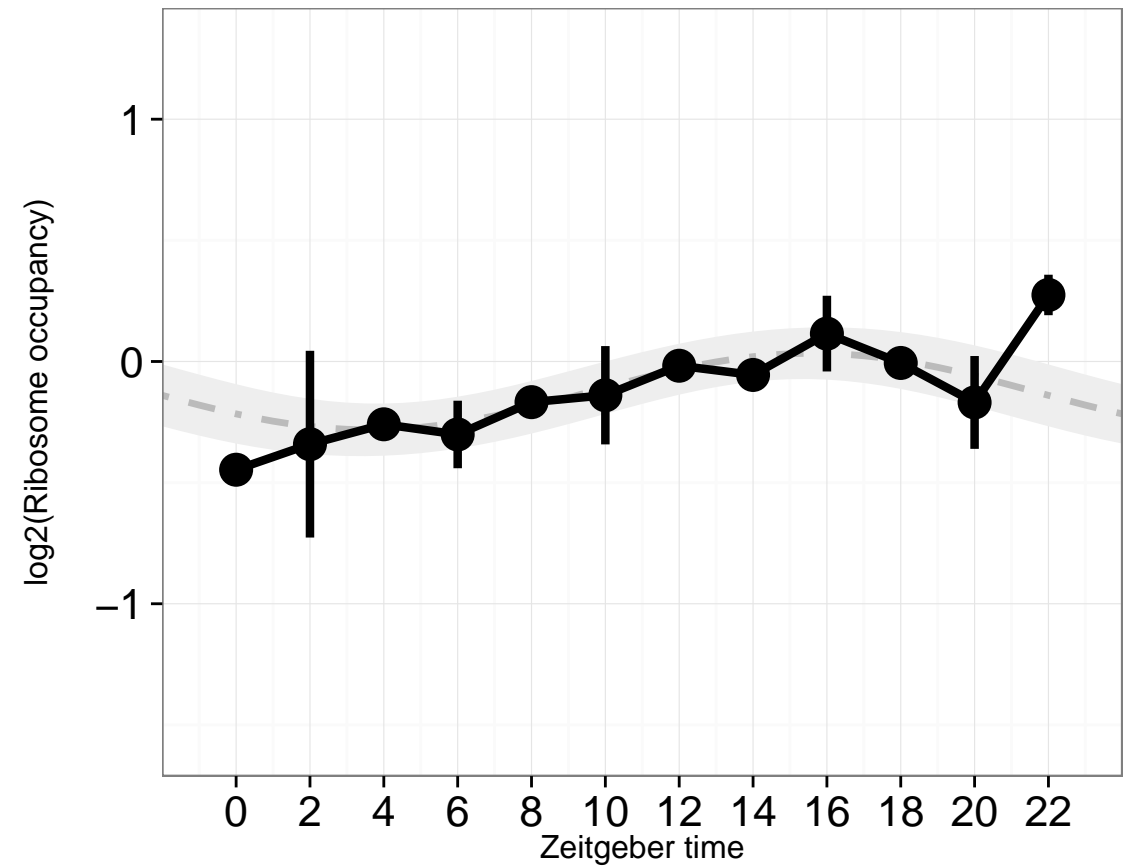

Supplement: SuppDataset_1.zip [file Derl2_set_A.pdf › Supplemental Dataset 1/A-mRNA_nonrhyth_translation_nonrhyth/Derl2_set_A.pdf]

## Des

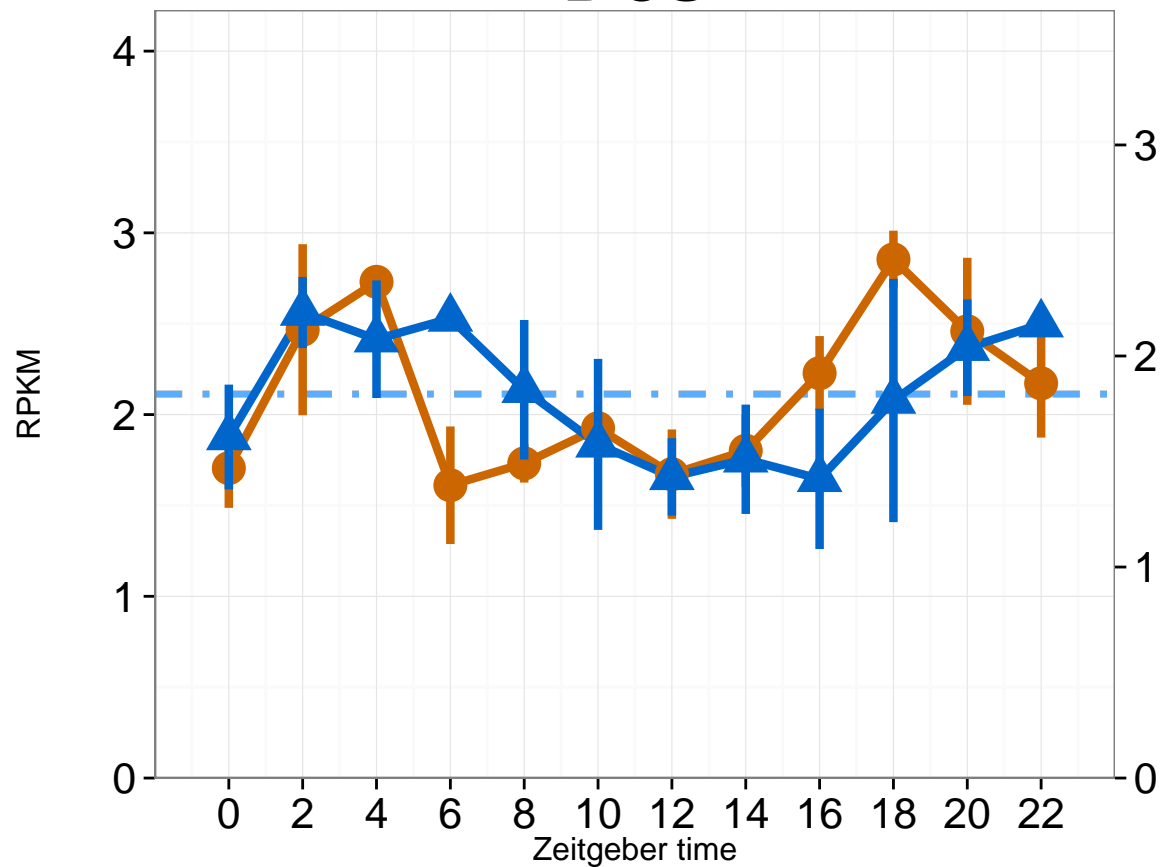

## Des

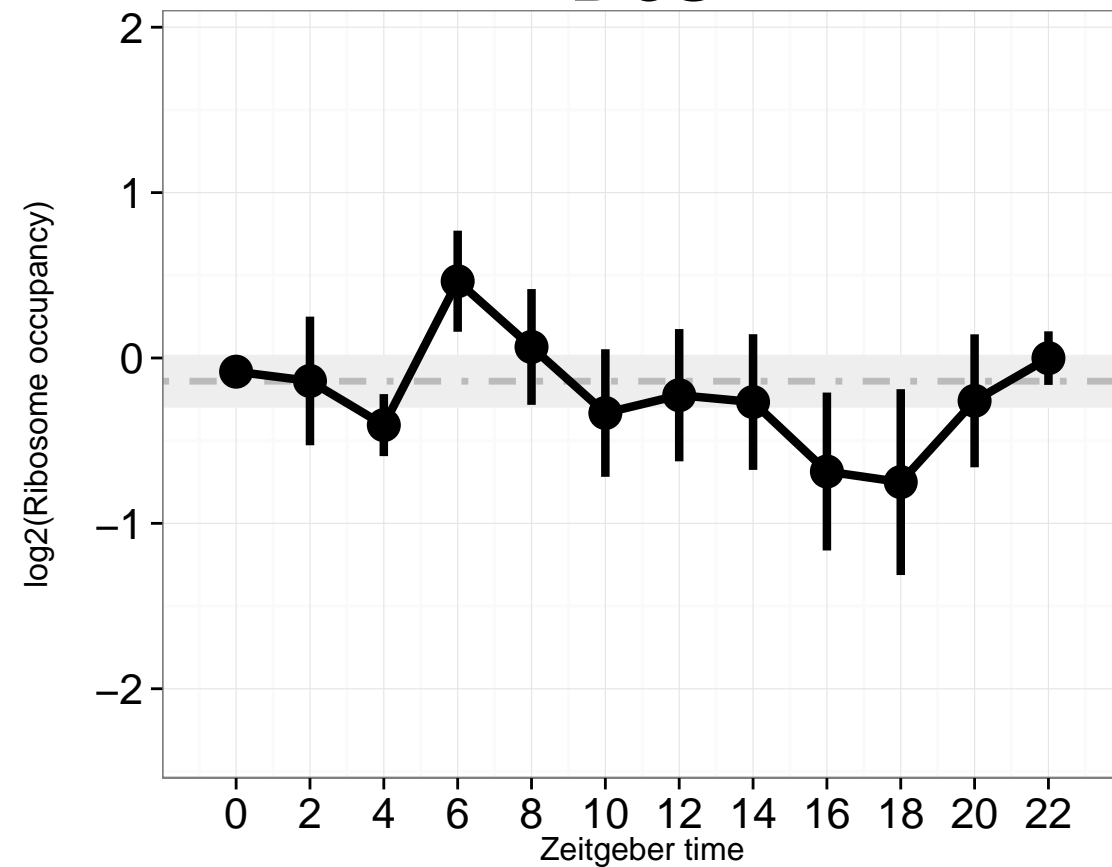

Supplement: SuppDataset_1.zip [file Des_set_A.pdf › Supplemental Dataset 1/A-mRNA_nonrhyth_translation_nonrhyth/Des_set_A.pdf]

# Desi1

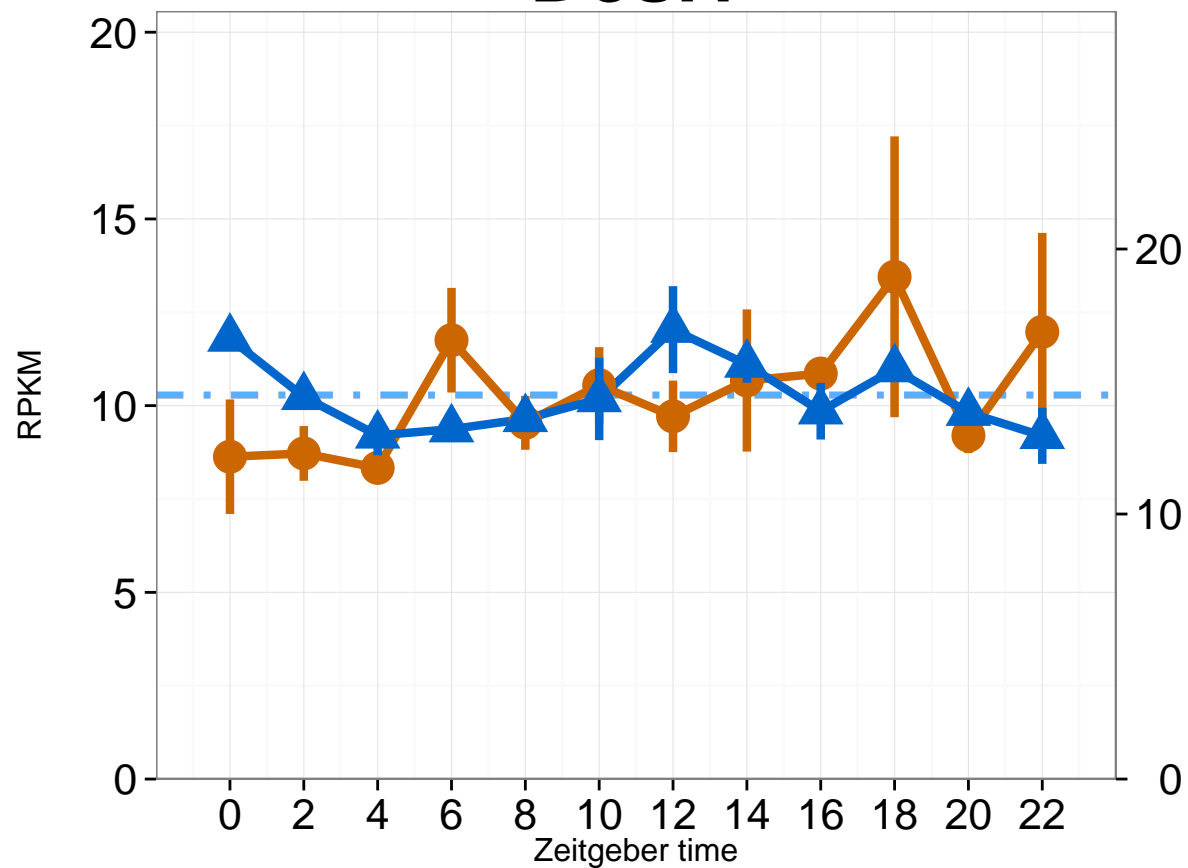

# Desi1

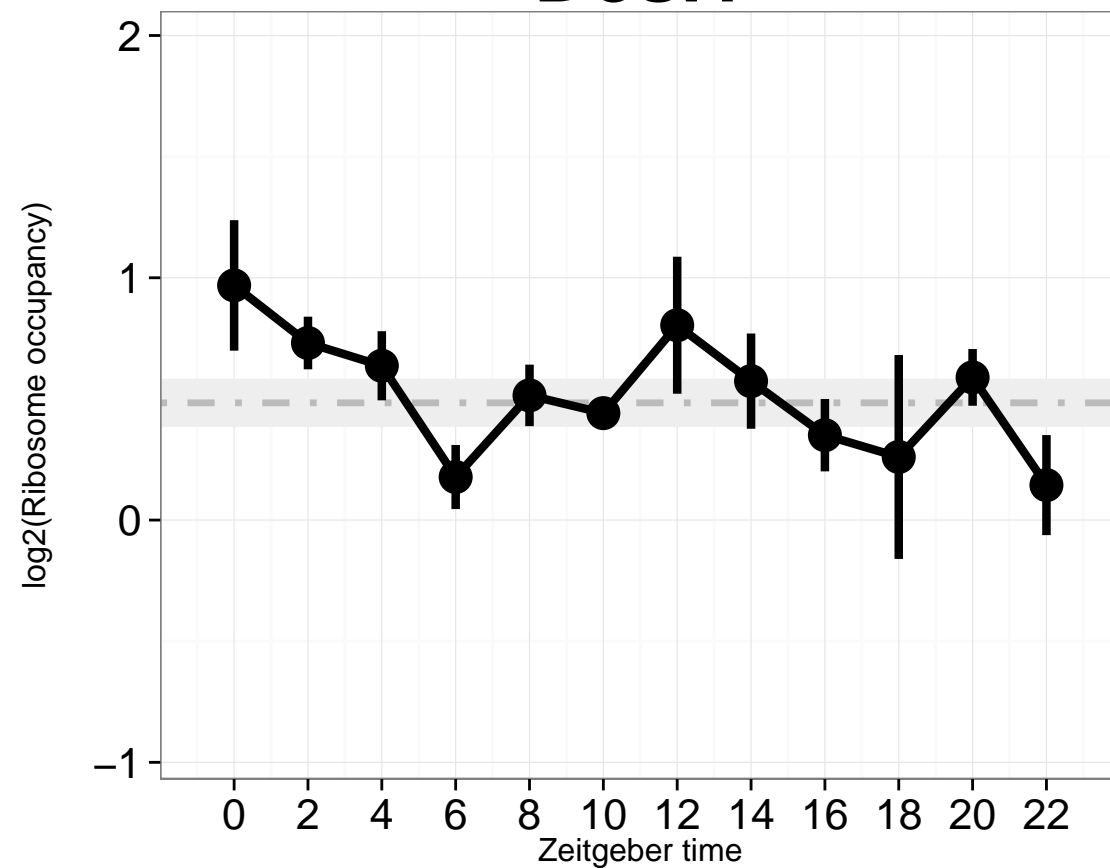

Supplement: SuppDataset_1.zip [file Desi1_set_A.pdf › Supplemental Dataset 1/A-mRNA_nonrhyth_translation_nonrhyth/Desi1_set_A.pdf]

# Dffa

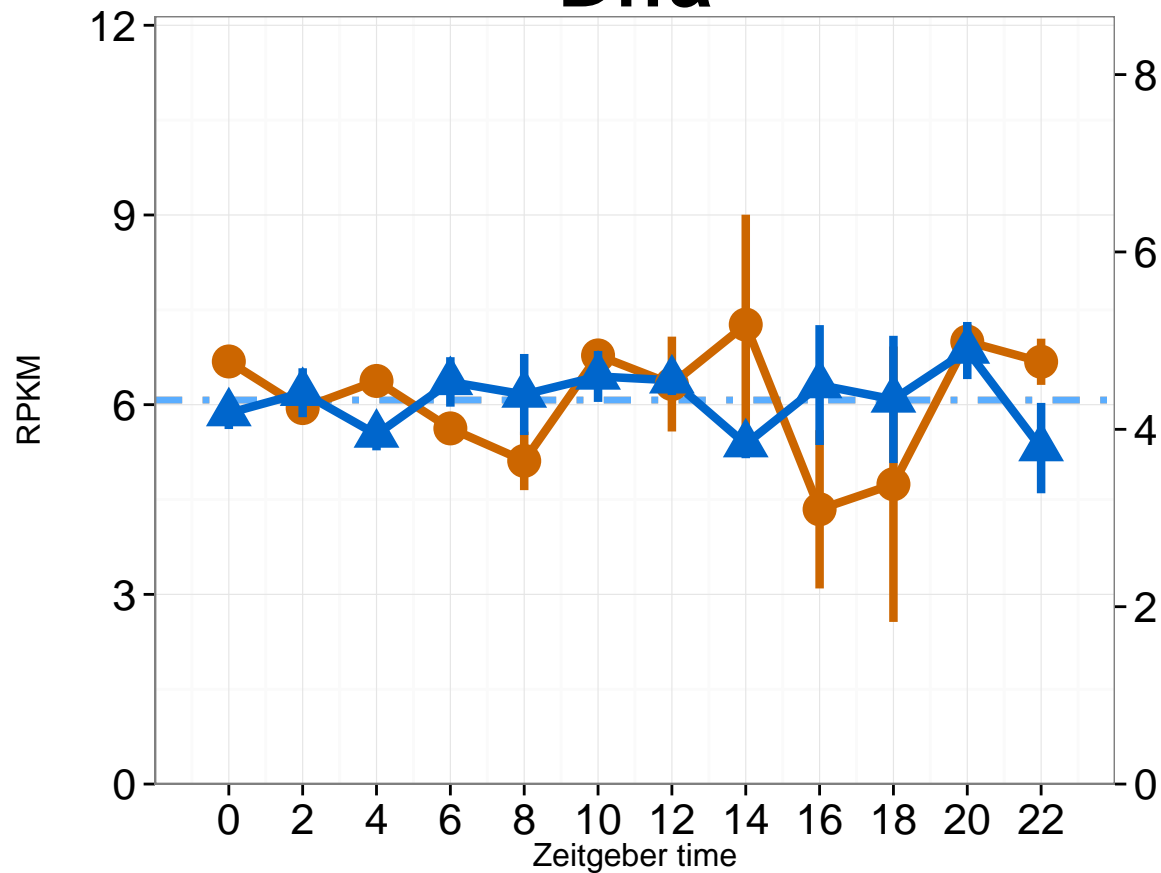

# Dffa

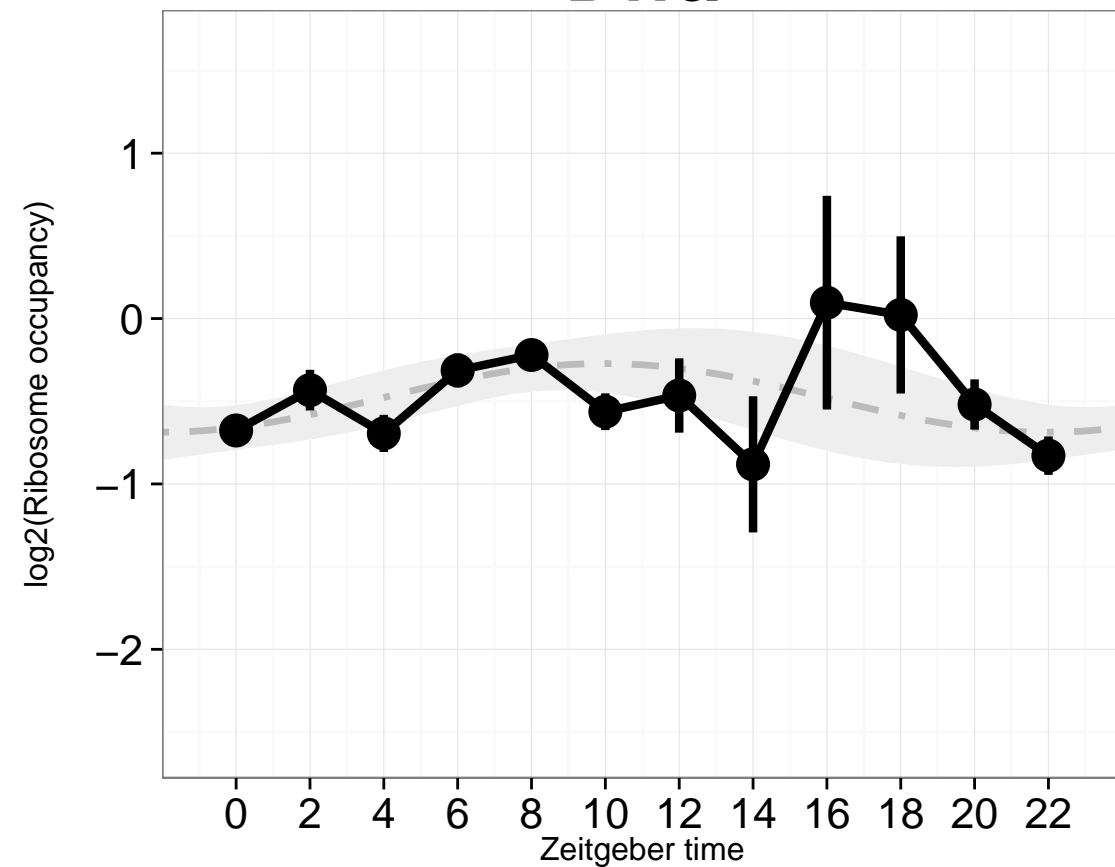

Supplement: SuppDataset_1.zip [file Dffa_set_A.pdf › Supplemental Dataset 1/A-mRNA_nonrhyth_translation_nonrhyth/Dffa_set_A.pdf]

## Dffb

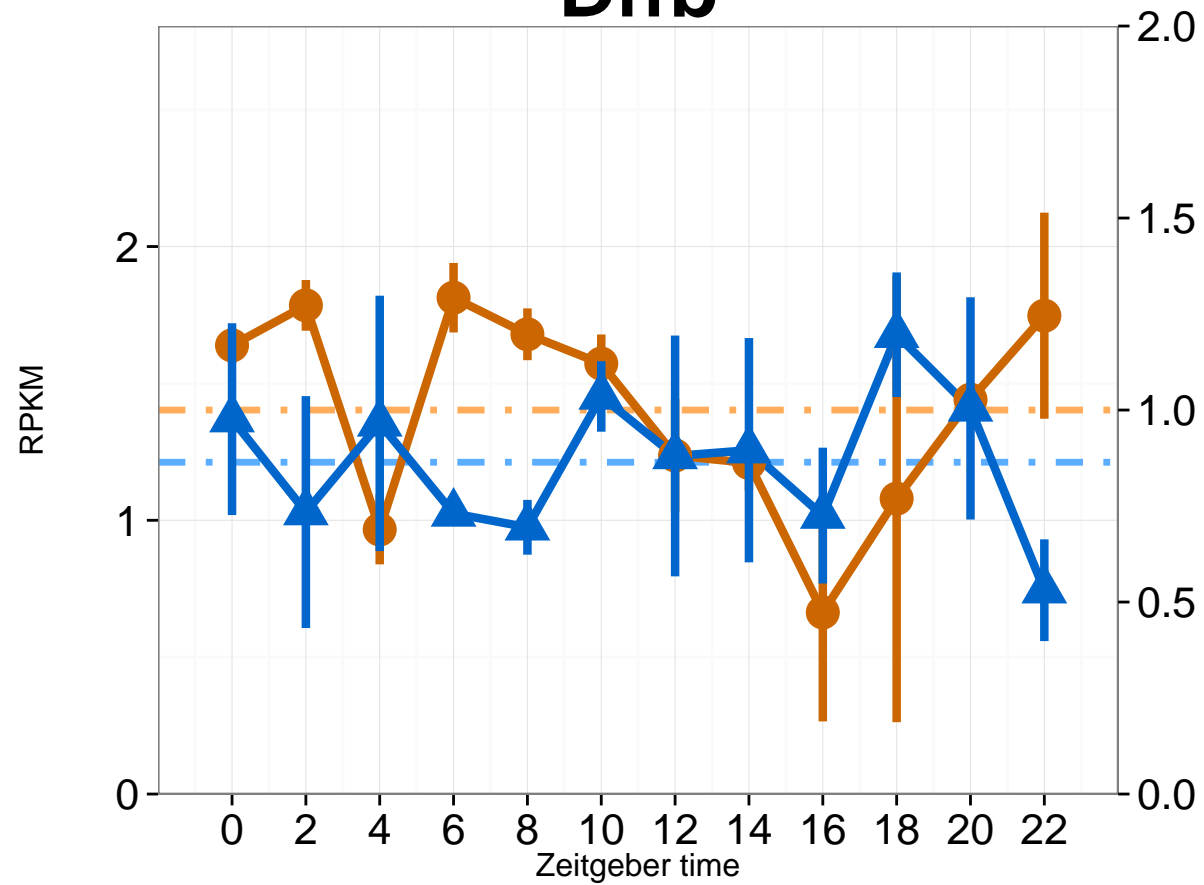

## Dffb

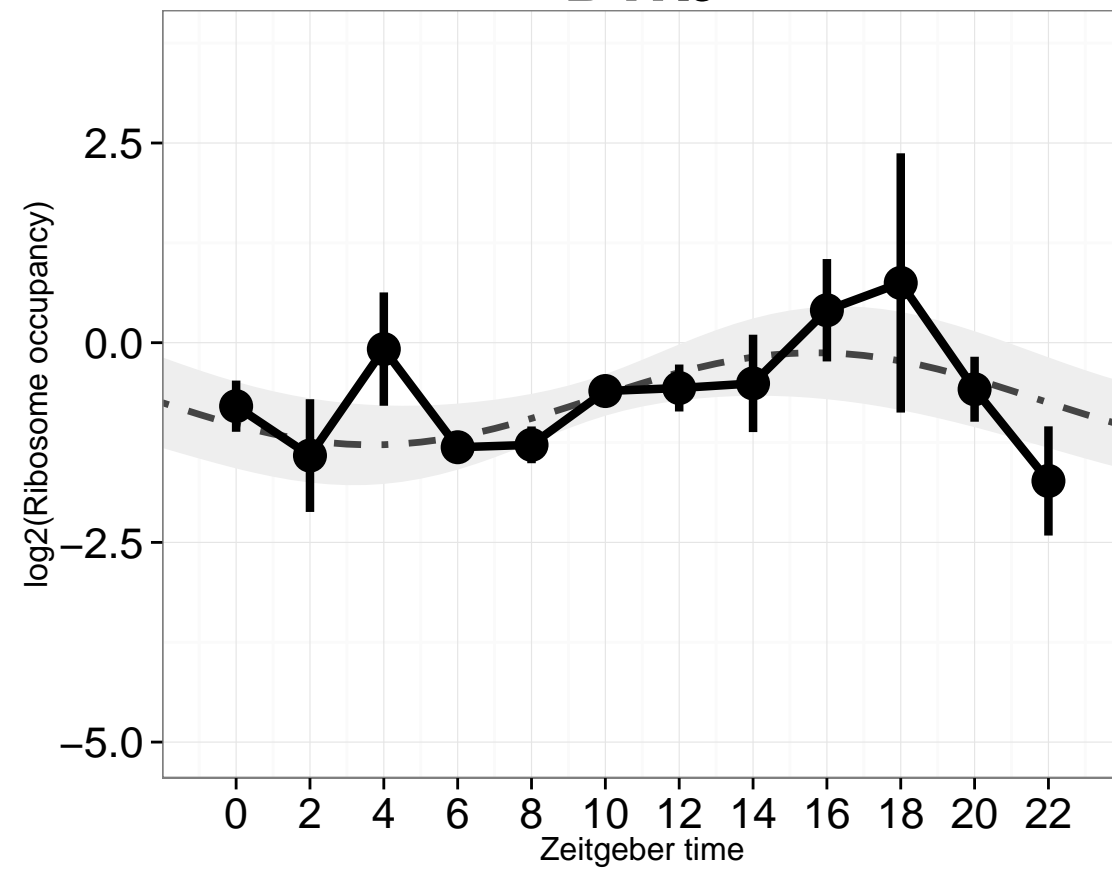

Supplement: SuppDataset_1.zip [file Dffb_set_A.pdf › Supplemental Dataset 1/A-mRNA_nonrhyth_translation_nonrhyth/Dffb_set_A.pdf]

# Dgat1

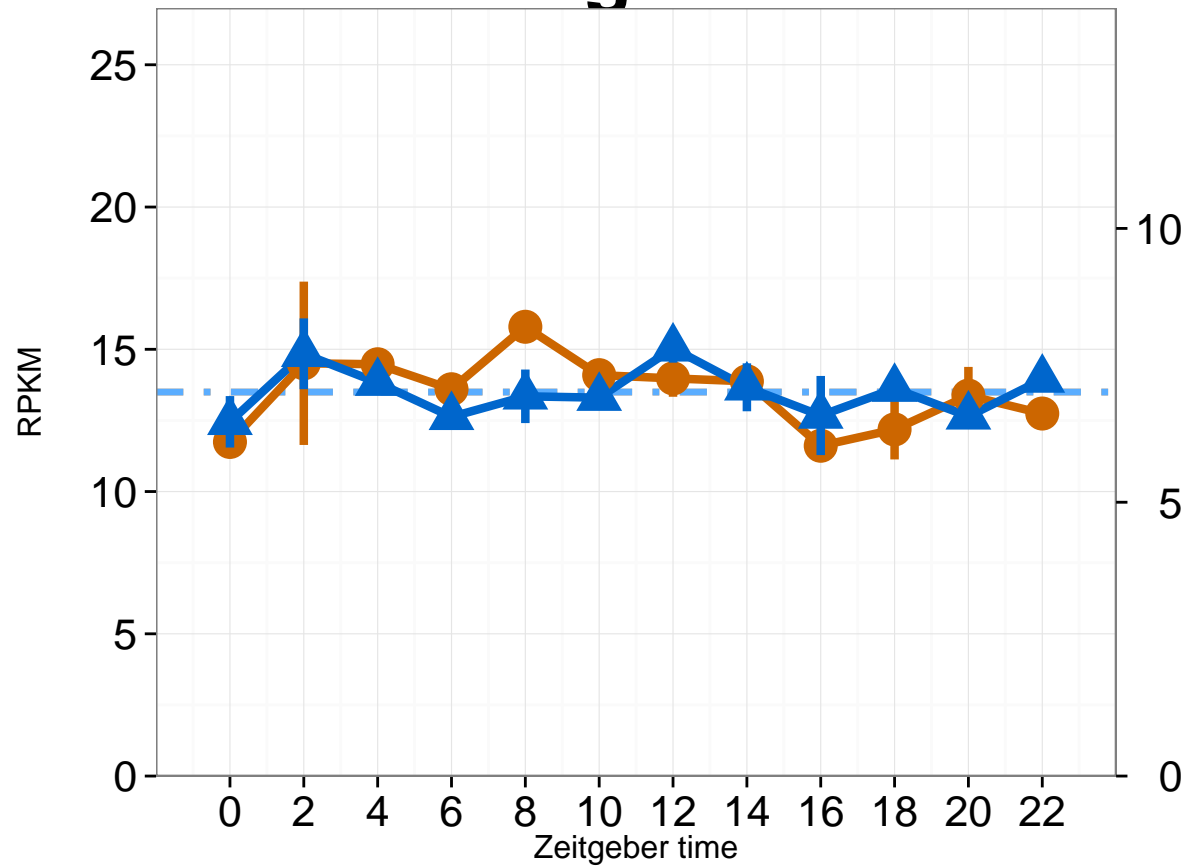

# Dgat1

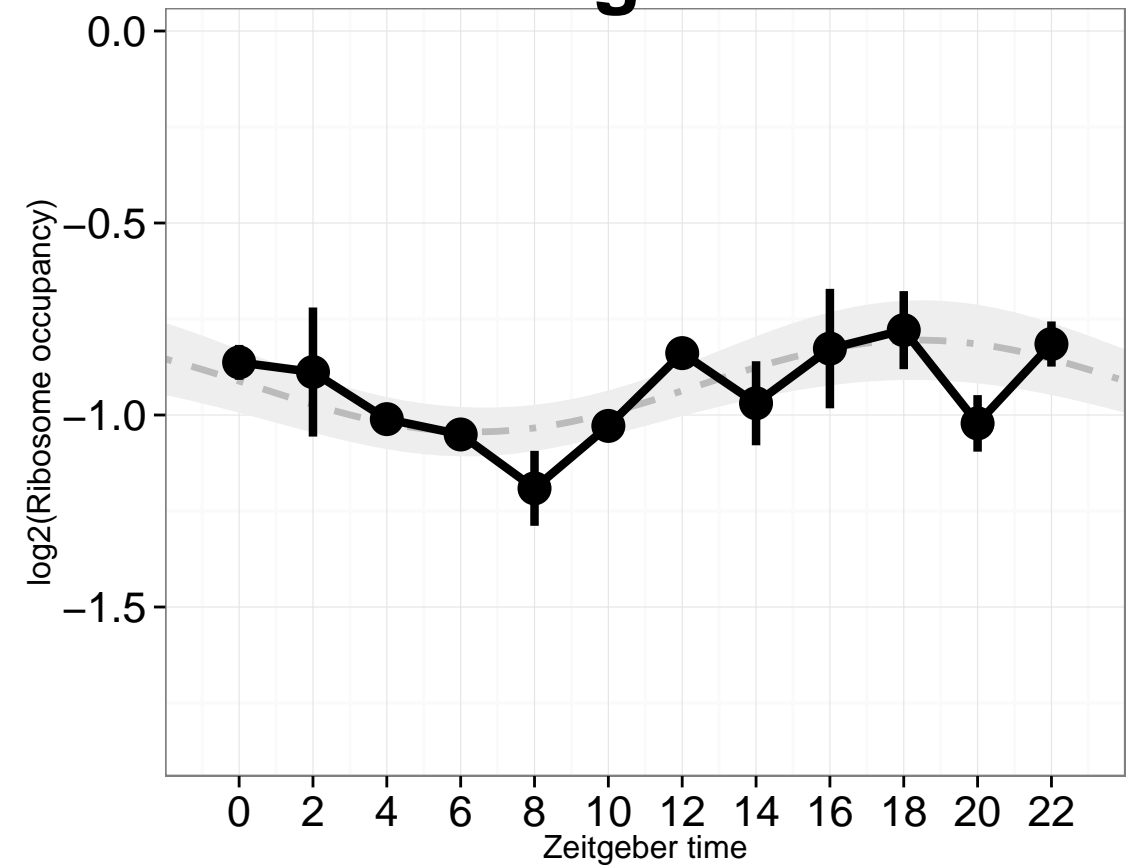

Supplement: SuppDataset_1.zip [file Dgat1_set_A.pdf › Supplemental Dataset 1/A-mRNA_nonrhyth_translation_nonrhyth/Dgat1_set_A.pdf]

# Dgat2

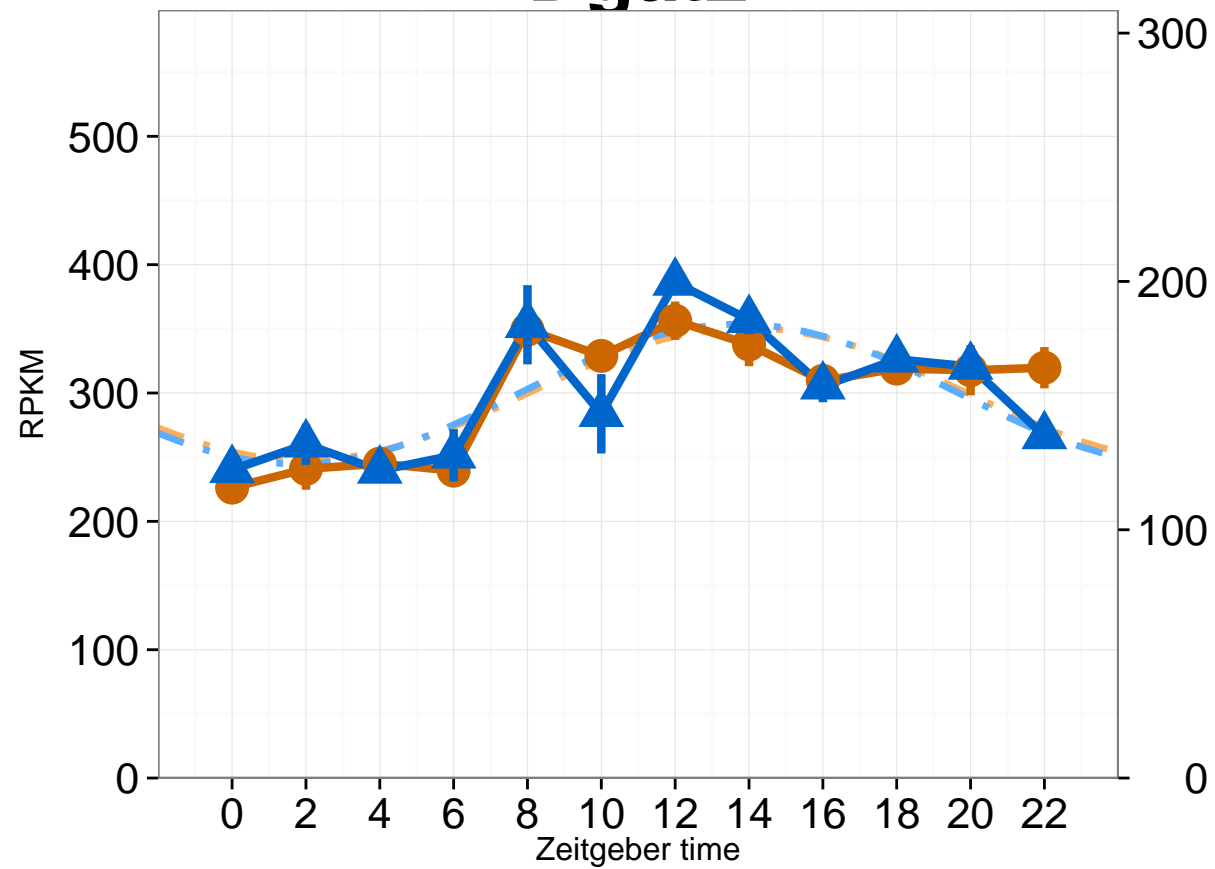

# Dgat2

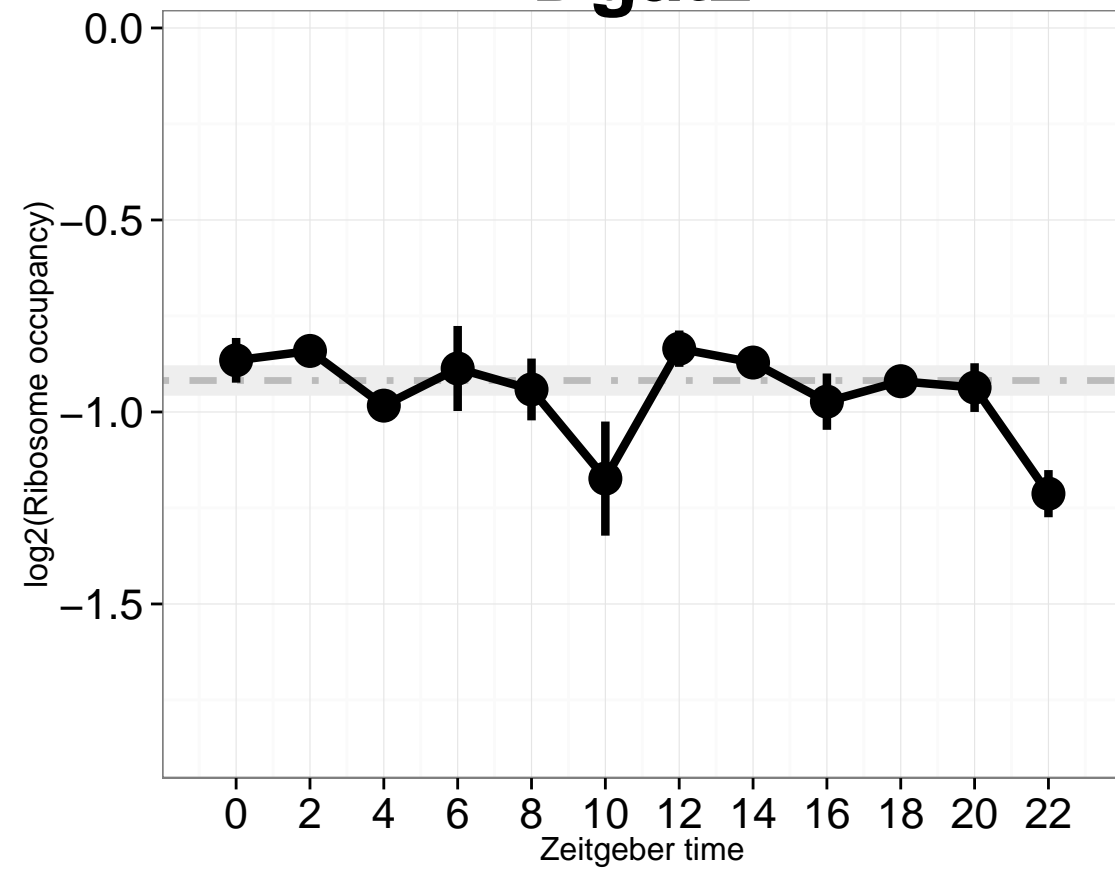

Supplement: SuppDataset_1.zip [file Dgat2_set_A.pdf › Supplemental Dataset 1/A-mRNA_nonrhyth_translation_nonrhyth/Dgat2_set_A.pdf]

# Dgcr14

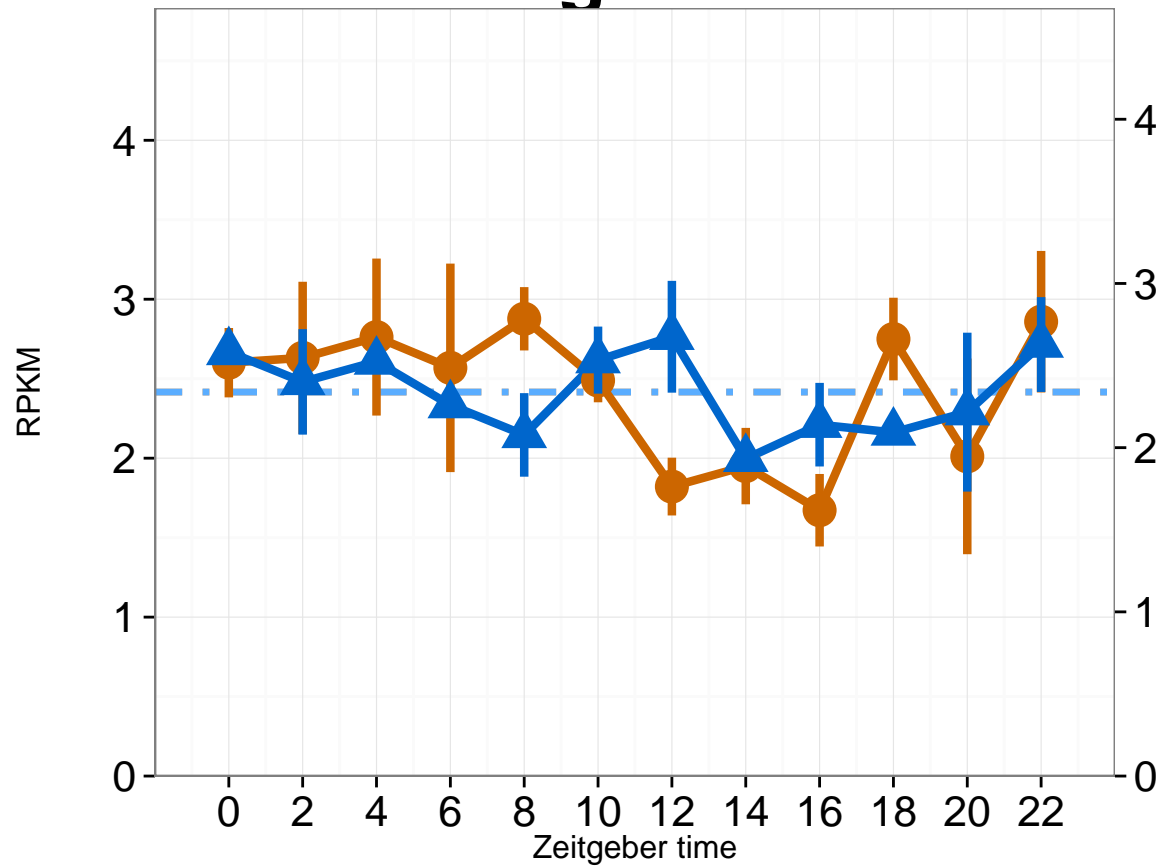

# Dgcr14

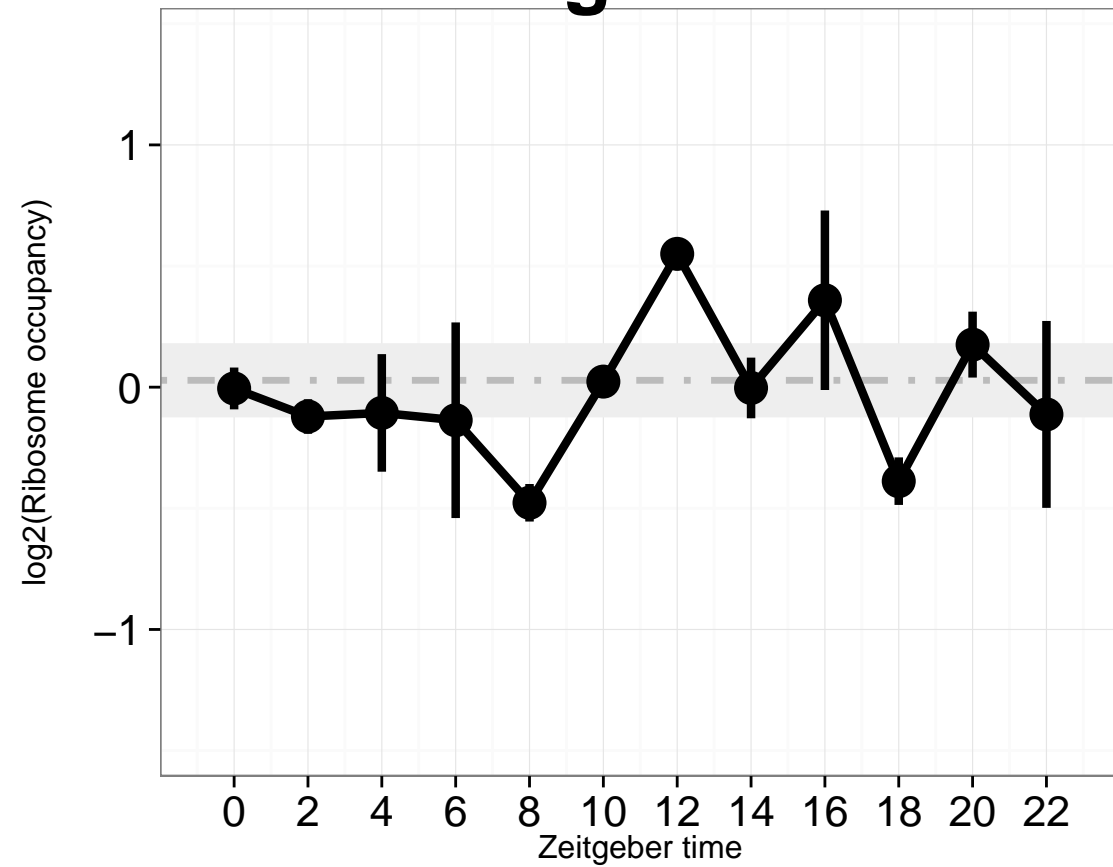

Supplement: SuppDataset_1.zip [file Dgcr14_set_A.pdf › Supplemental Dataset 1/A-mRNA_nonrhyth_translation_nonrhyth/Dgcr14_set_A.pdf]

# Dgcr2

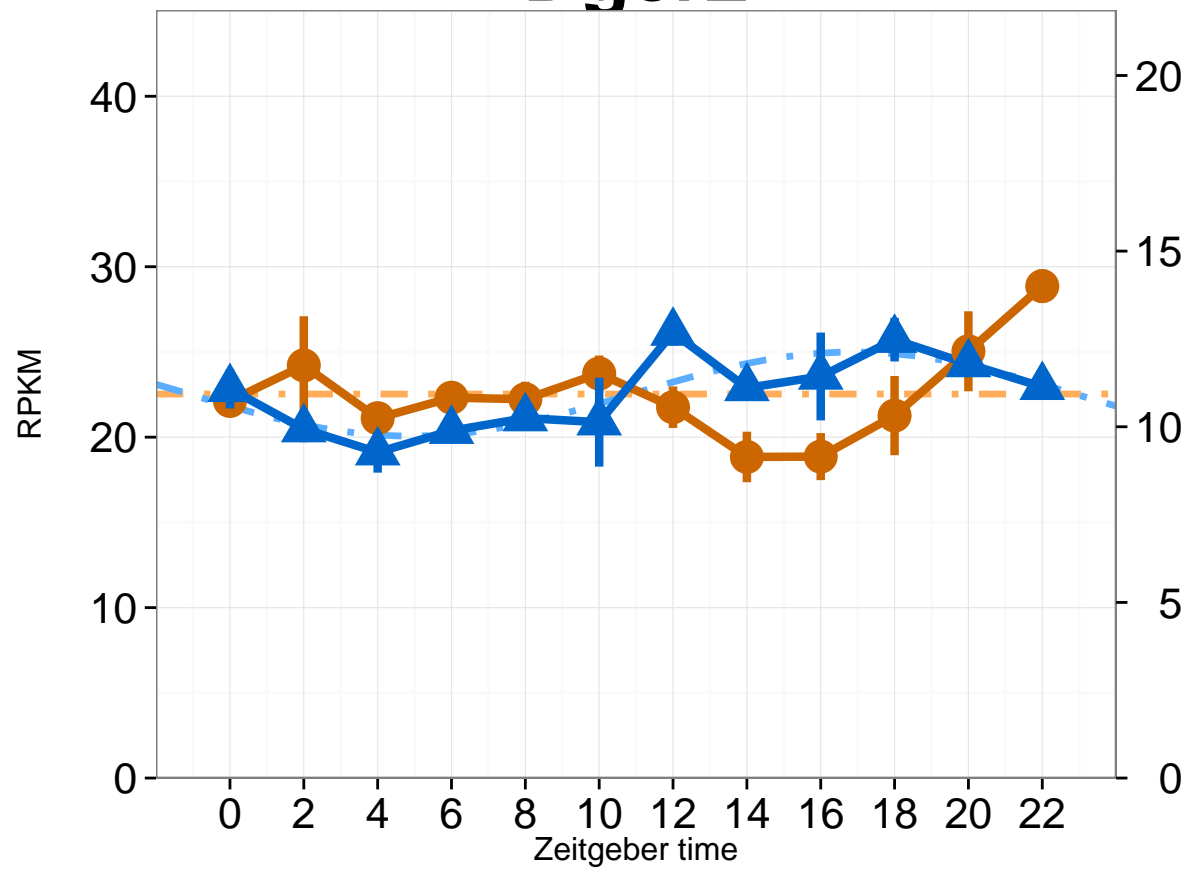

# Dgcr2

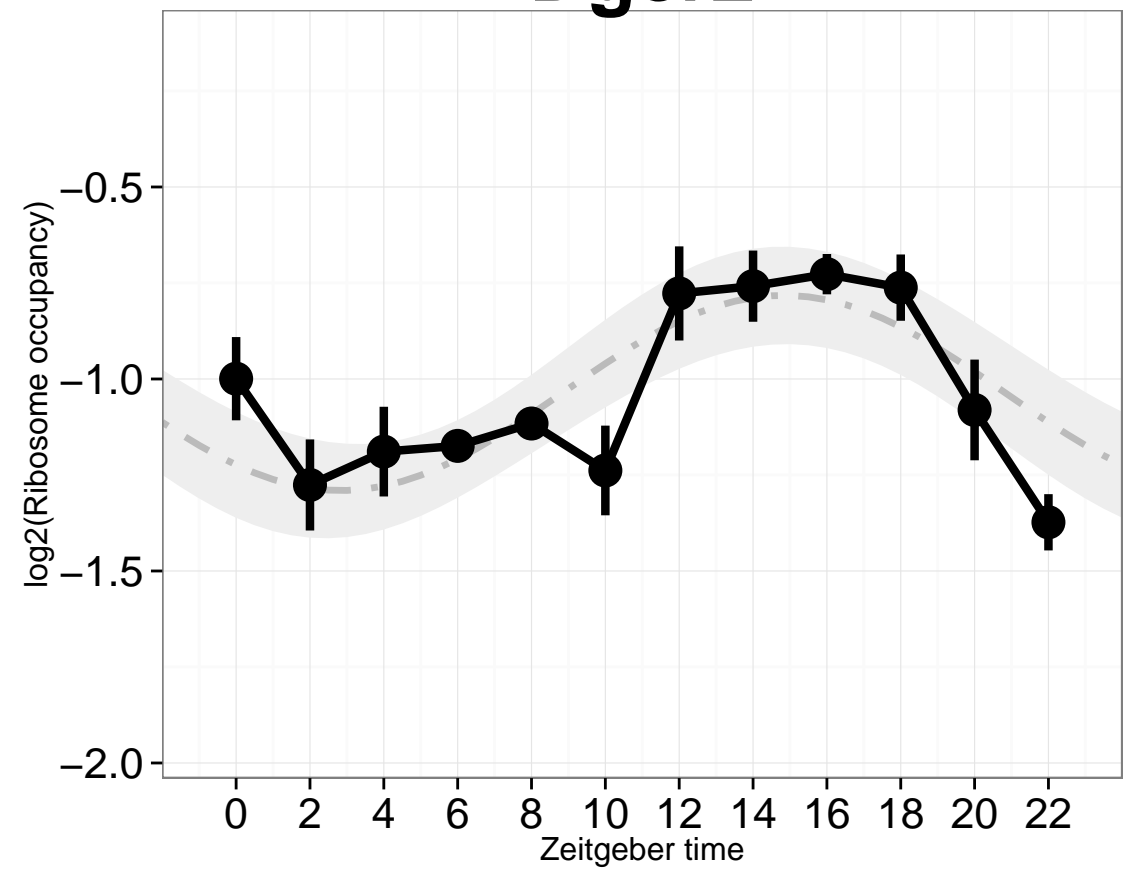

Supplement: SuppDataset_1.zip [file Dgcr2_set_A.pdf › Supplemental Dataset 1/A-mRNA_nonrhyth_translation_nonrhyth/Dgcr2_set_A.pdf]

# Dgka

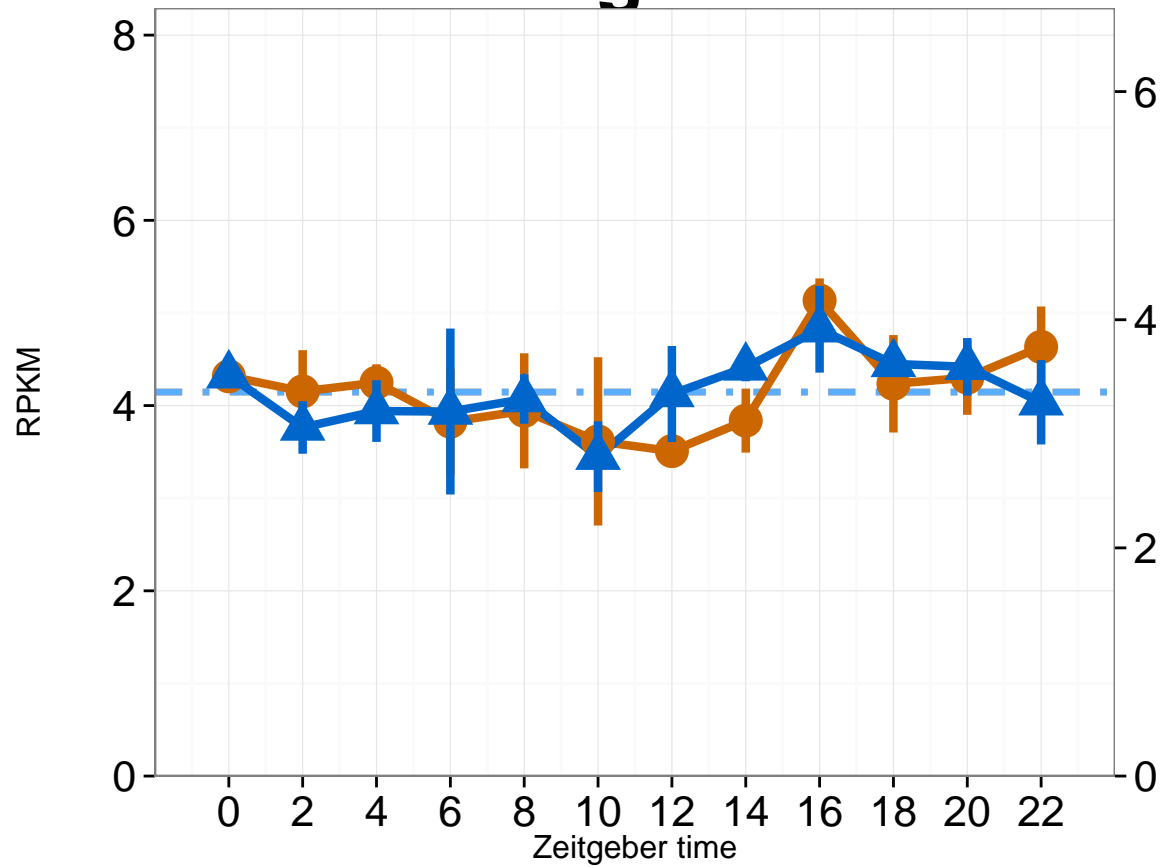

# Dgka

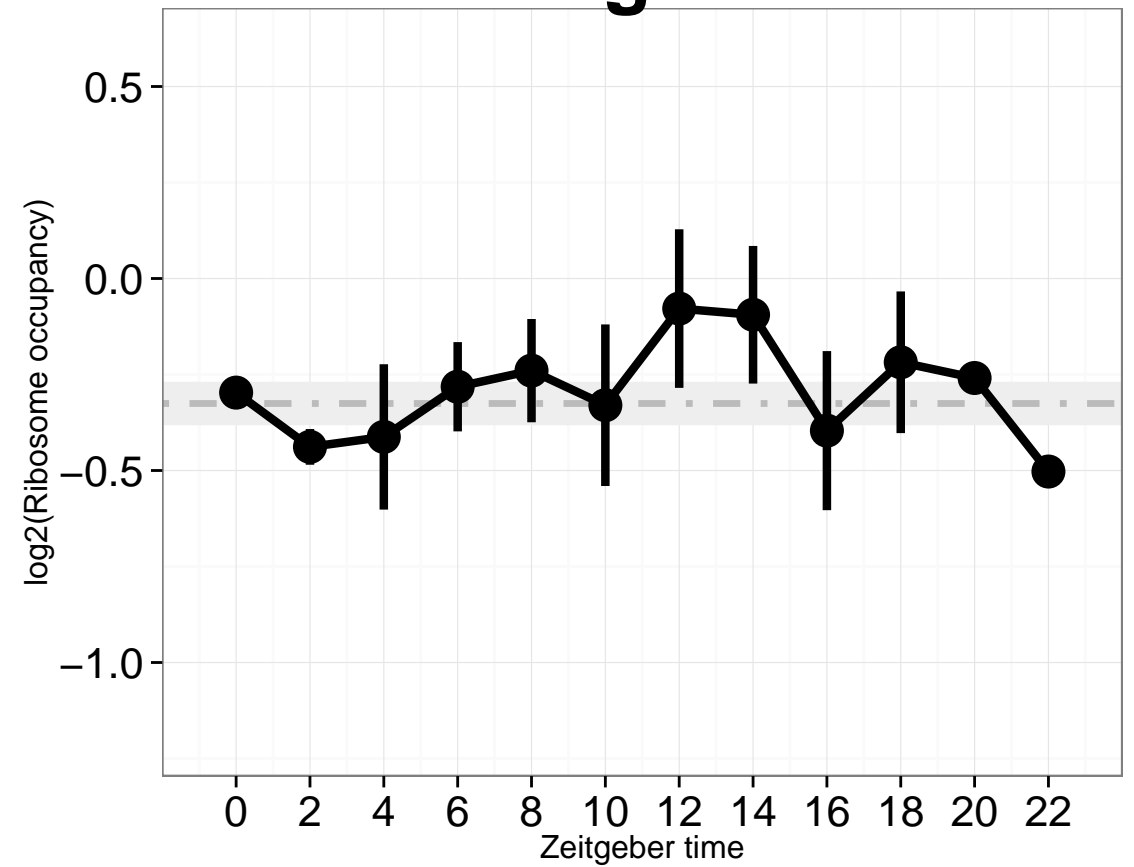

Supplement: SuppDataset_1.zip [file Dgka_set_A.pdf › Supplemental Dataset 1/A-mRNA_nonrhyth_translation_nonrhyth/Dgka_set_A.pdf]

# Dgkd

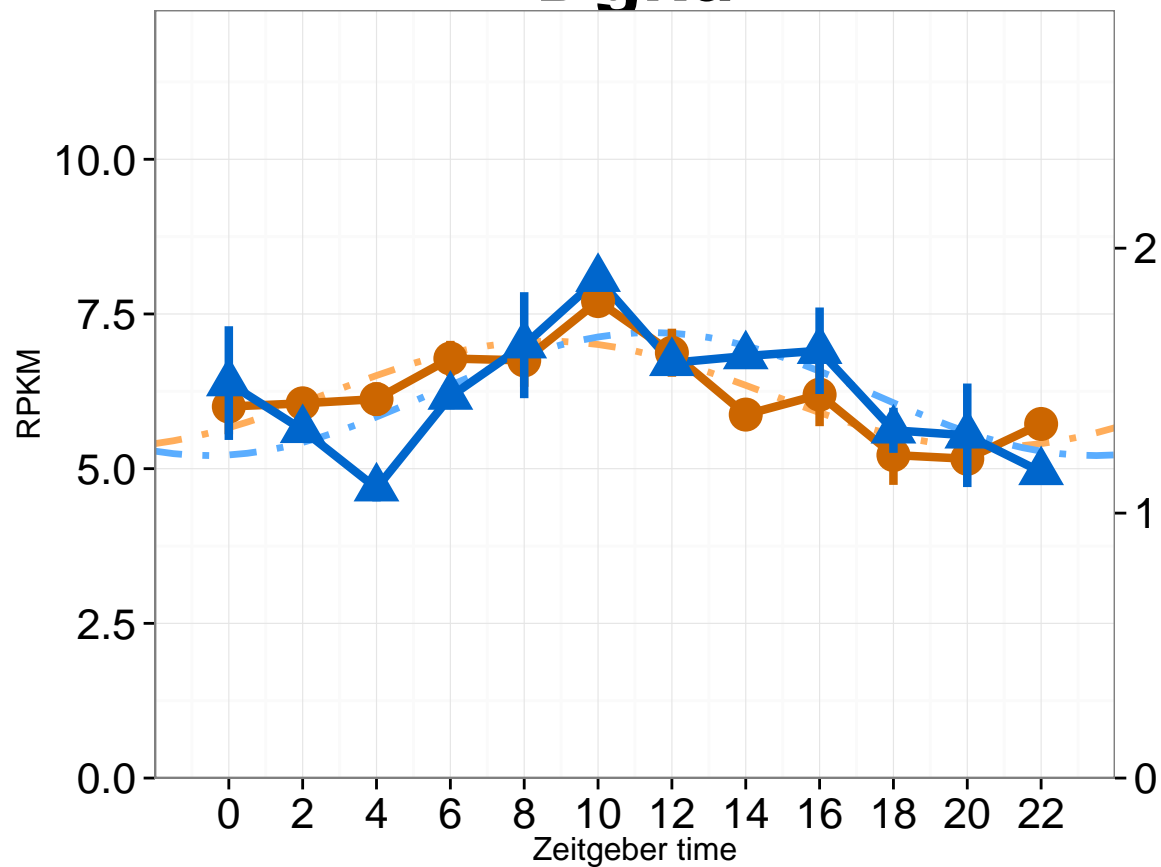

# Dgkd

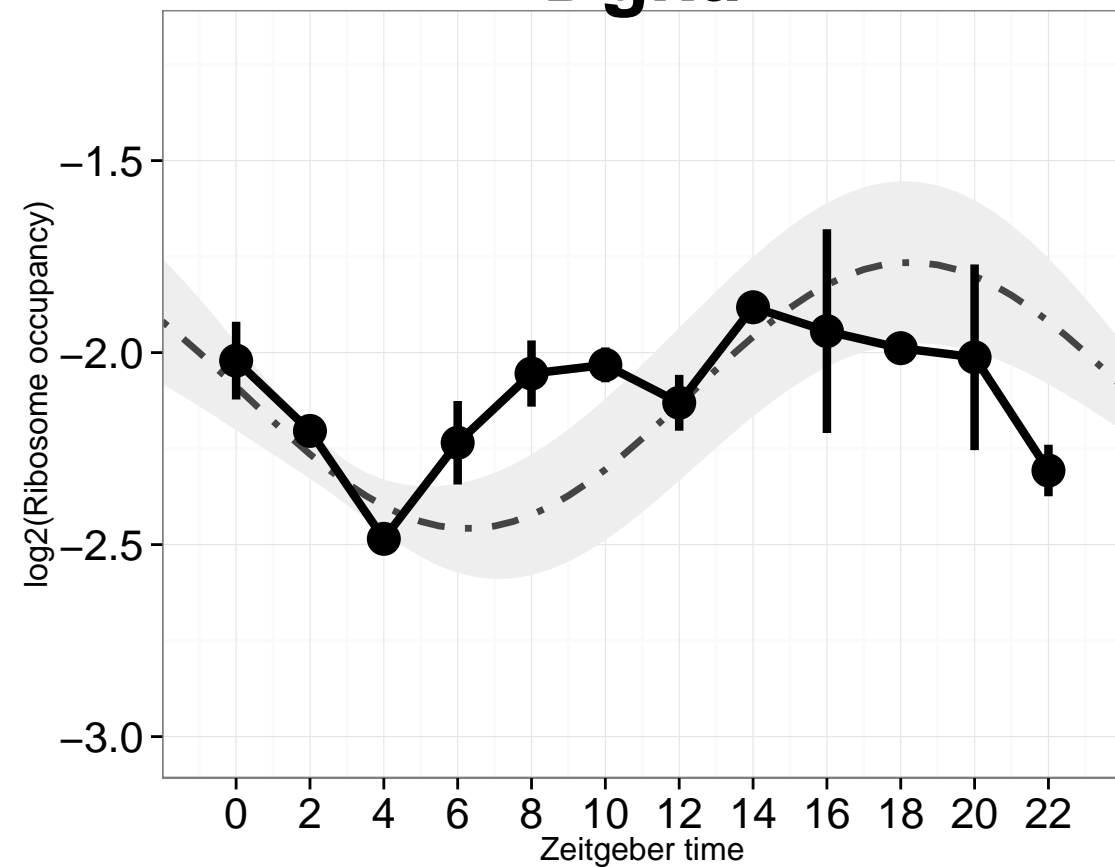

Supplement: SuppDataset_1.zip [file Dgkd_set_A.pdf › Supplemental Dataset 1/A-mRNA_nonrhyth_translation_nonrhyth/Dgkd_set_A.pdf]

# Dgke

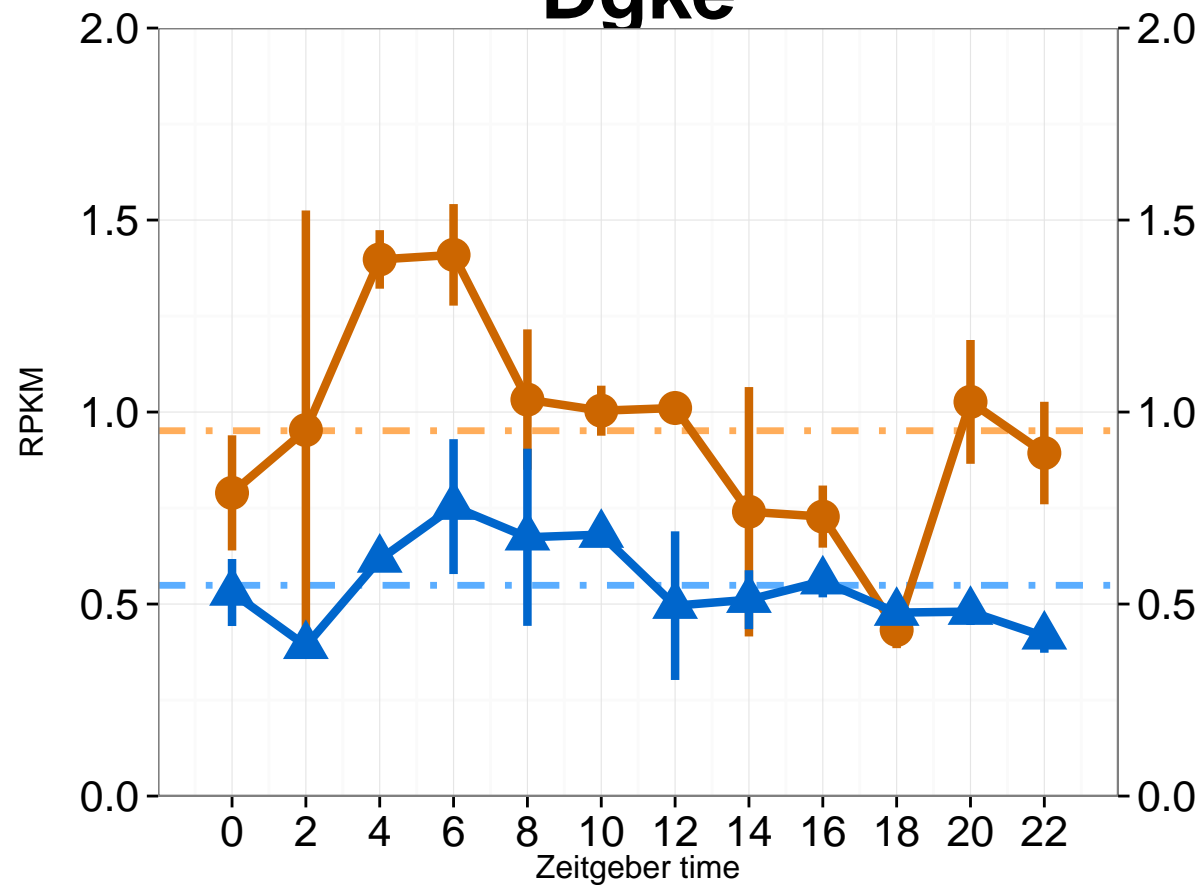

# Dgke

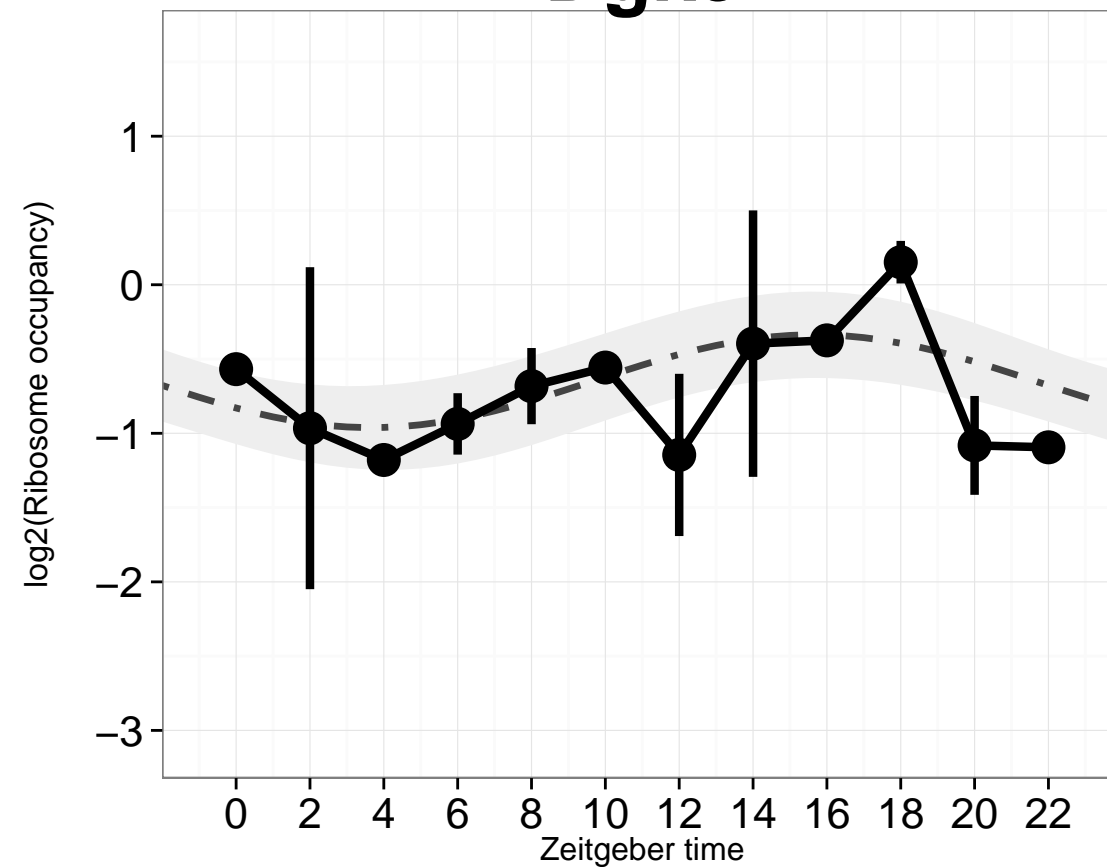

Supplement: SuppDataset_1.zip [file Dgke_set_A.pdf › Supplemental Dataset 1/A-mRNA_nonrhyth_translation_nonrhyth/Dgke_set_A.pdf]

## Dgkq

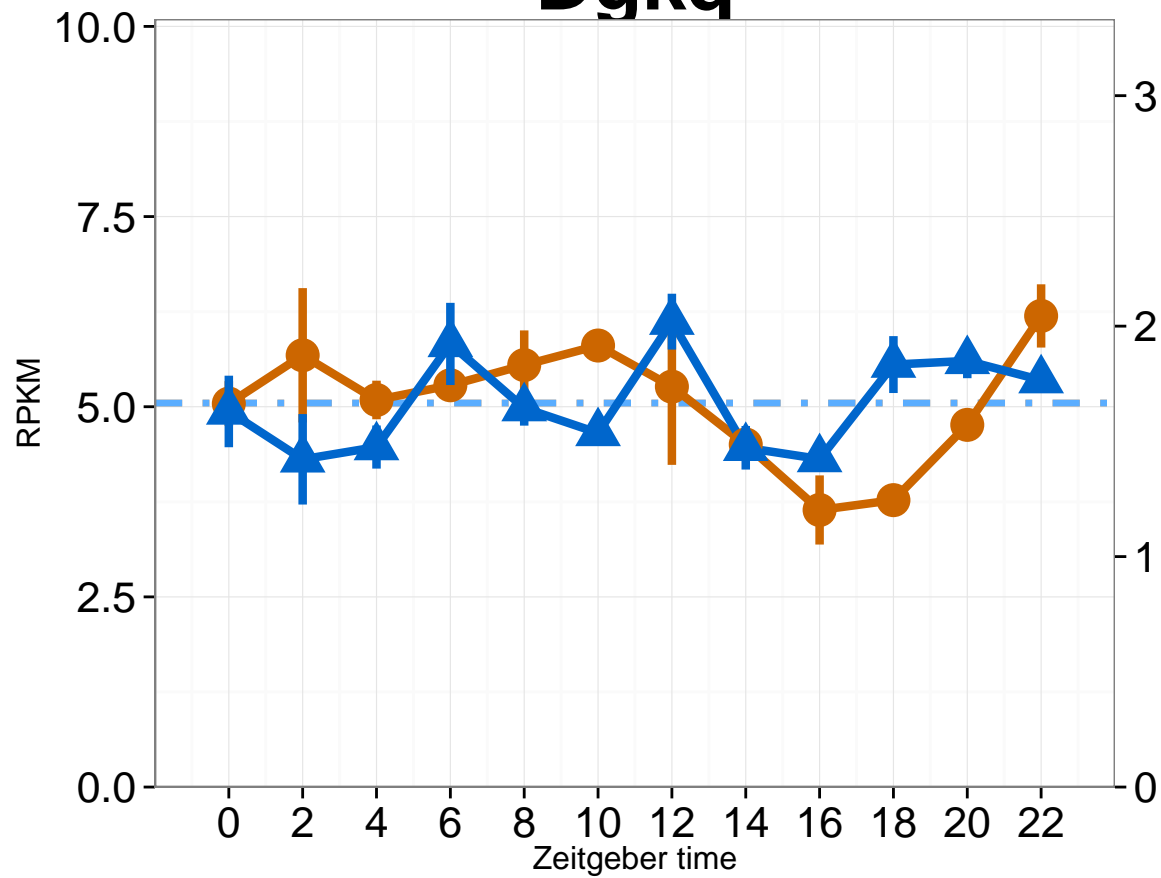

## Dgkq

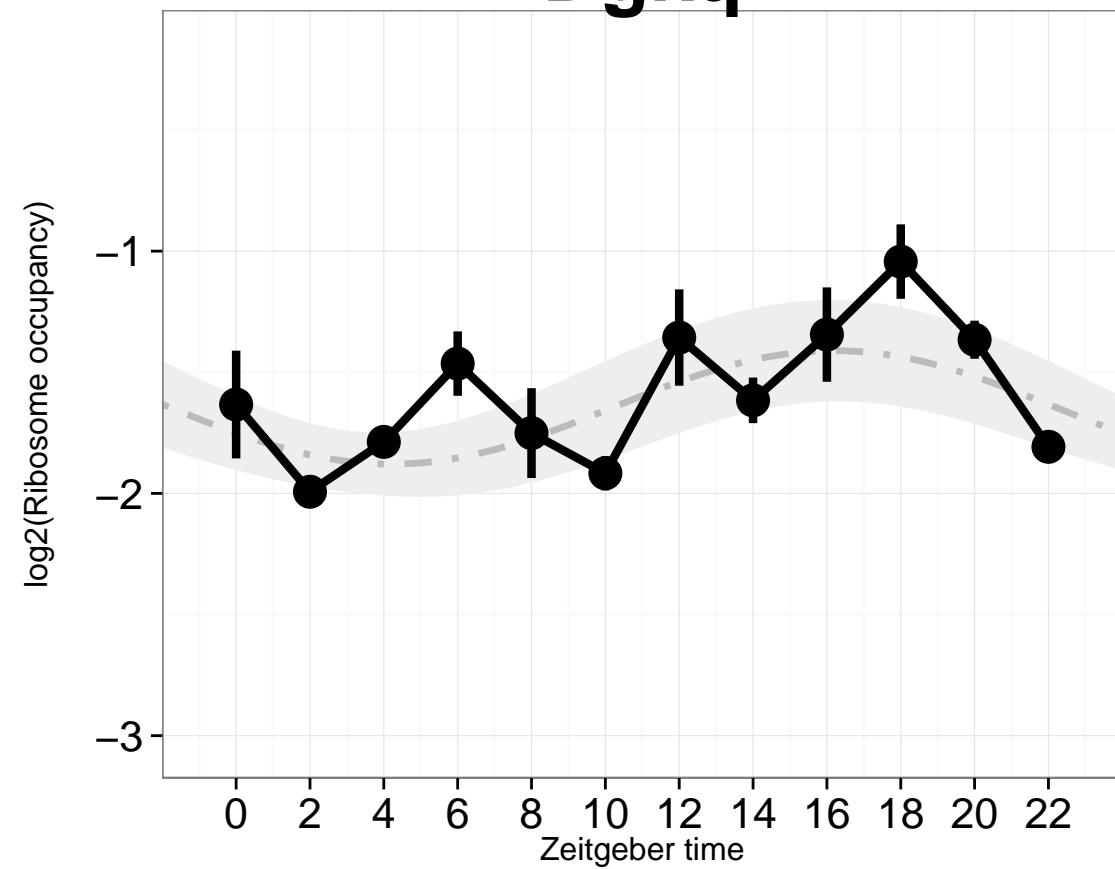

Supplement: SuppDataset_1.zip [file Dgkq_set_A.pdf › Supplemental Dataset 1/A-mRNA_nonrhyth_translation_nonrhyth/Dgkq_set_A.pdf]

## Dgkz

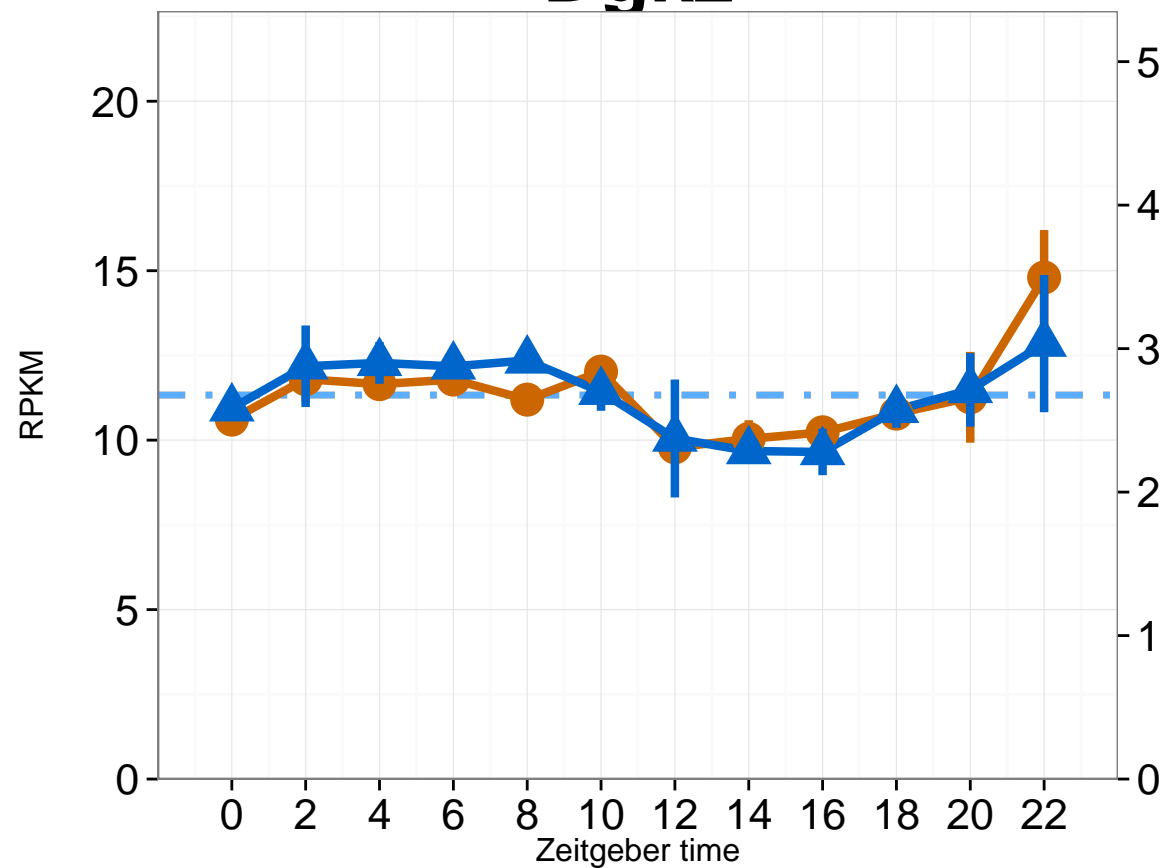

## Dgkz

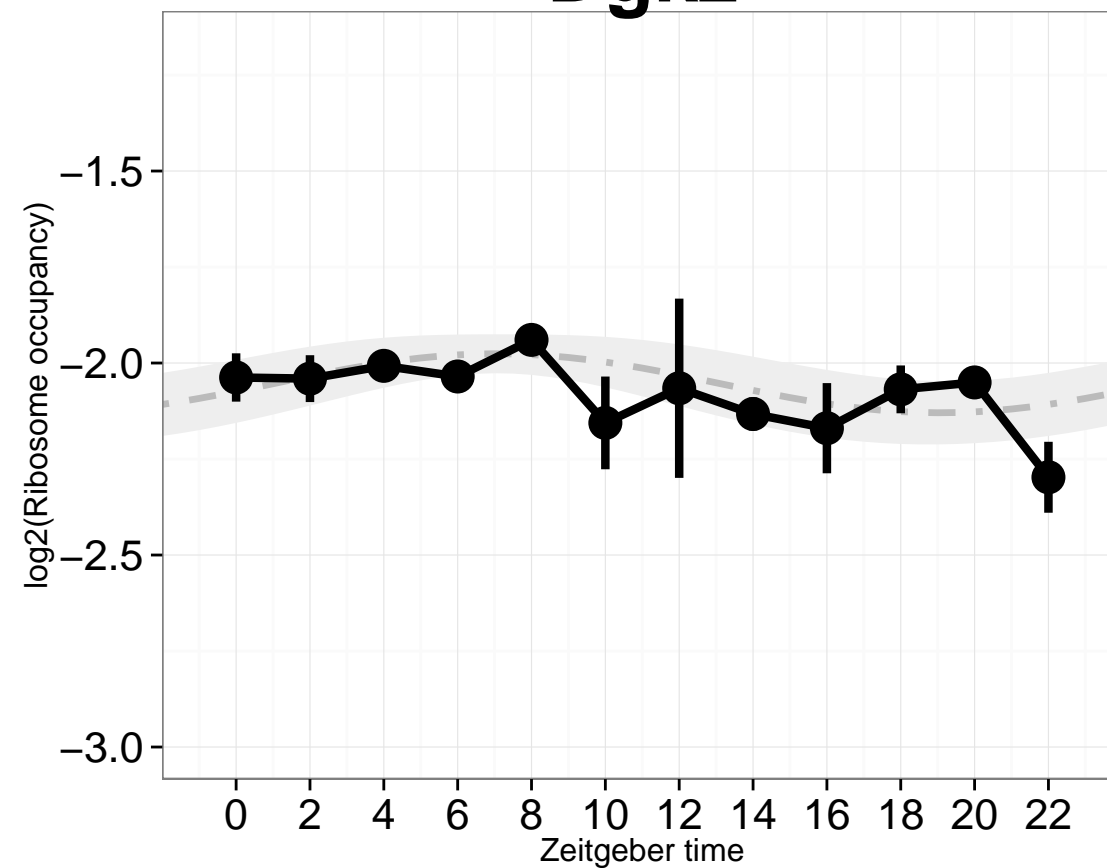

Supplement: SuppDataset_1.zip [file Dgkz_set_A.pdf › Supplemental Dataset 1/A-mRNA_nonrhyth_translation_nonrhyth/Dgkz_set_A.pdf]

## Dguok

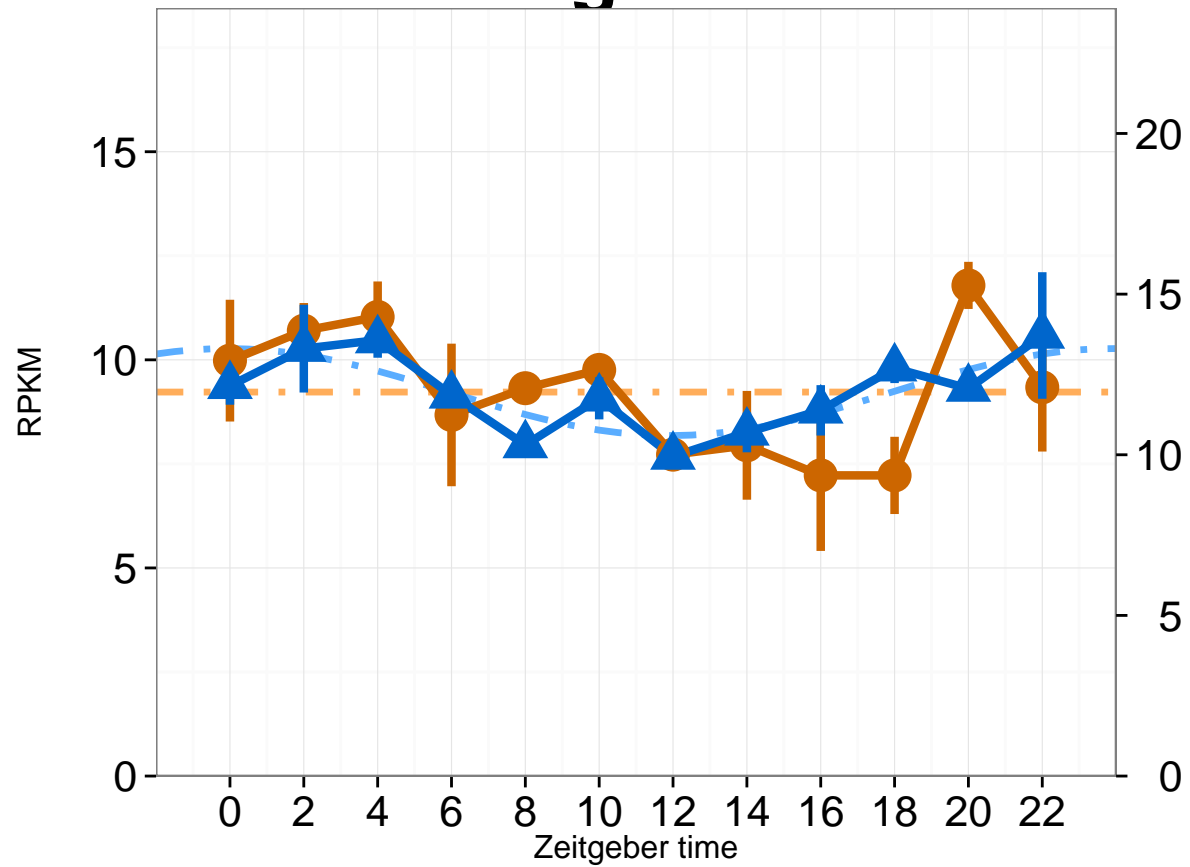

## Dguok

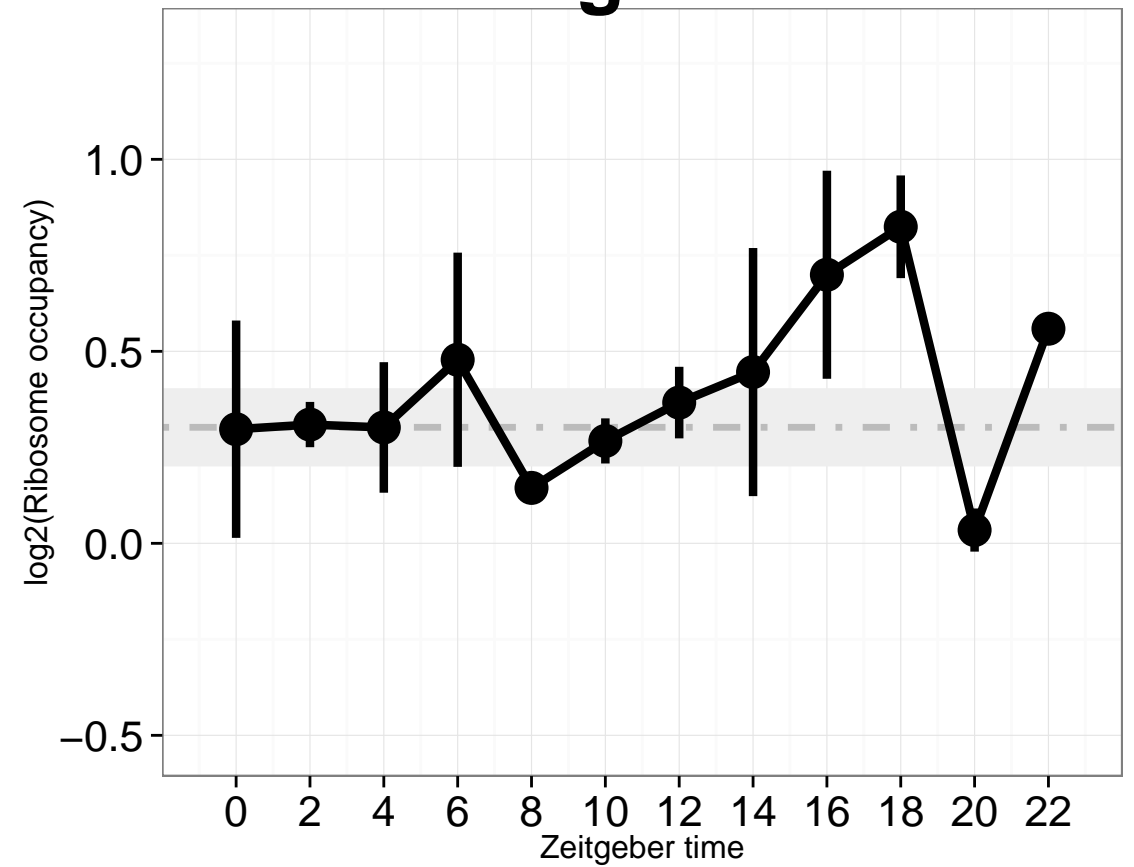

Supplement: SuppDataset_1.zip [file Dguok_set_A.pdf › Supplemental Dataset 1/A-mRNA_nonrhyth_translation_nonrhyth/Dguok_set_A.pdf]

## Dhdds

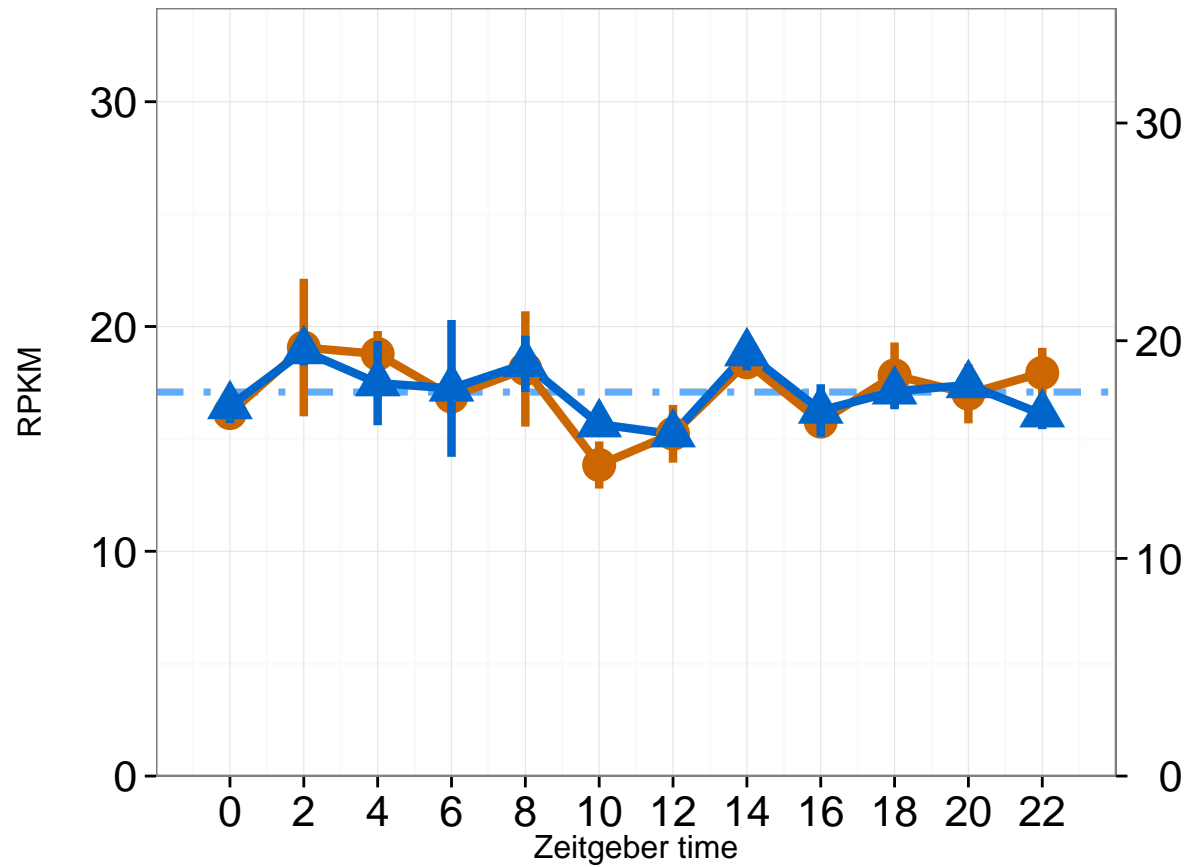

## Dhdds

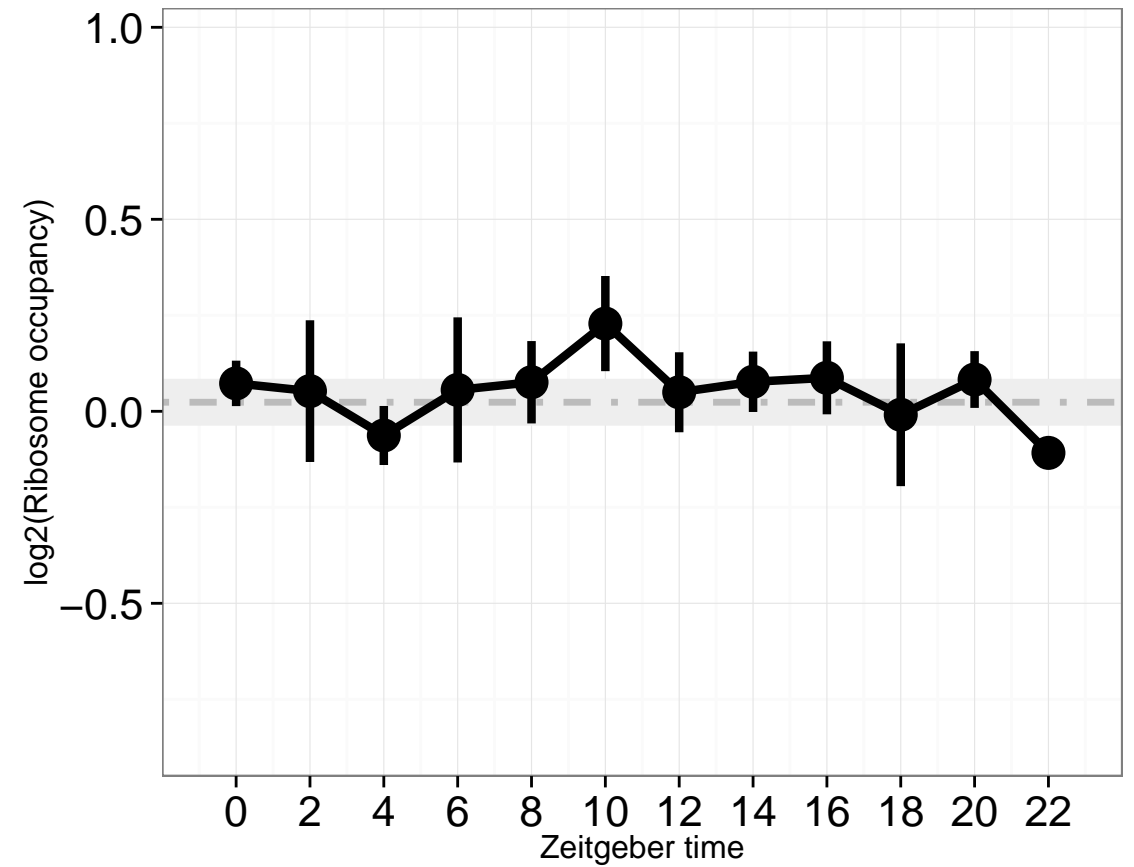

Supplement: SuppDataset_1.zip [file Dhdds_set_A.pdf › Supplemental Dataset 1/A-mRNA_nonrhyth_translation_nonrhyth/Dhdds_set_A.pdf]

## Dhdh

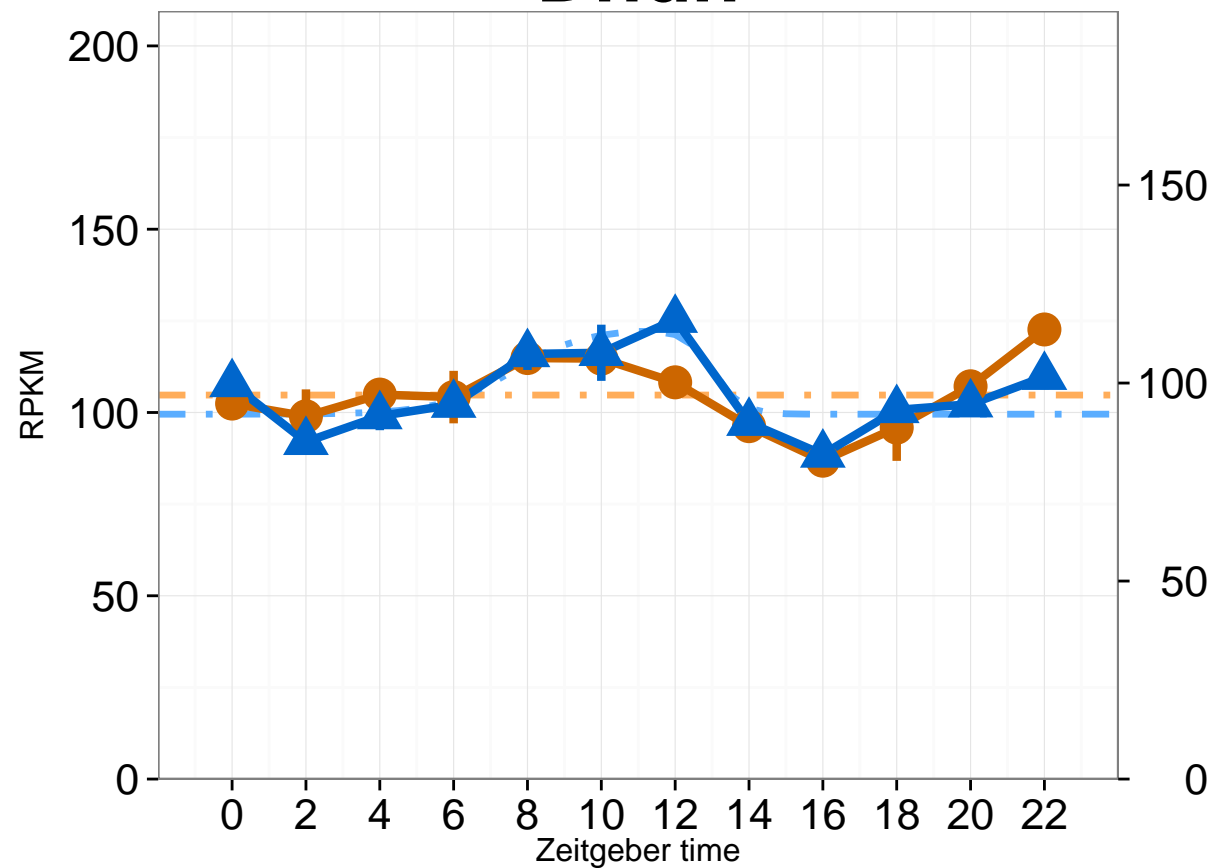

## Dhdh

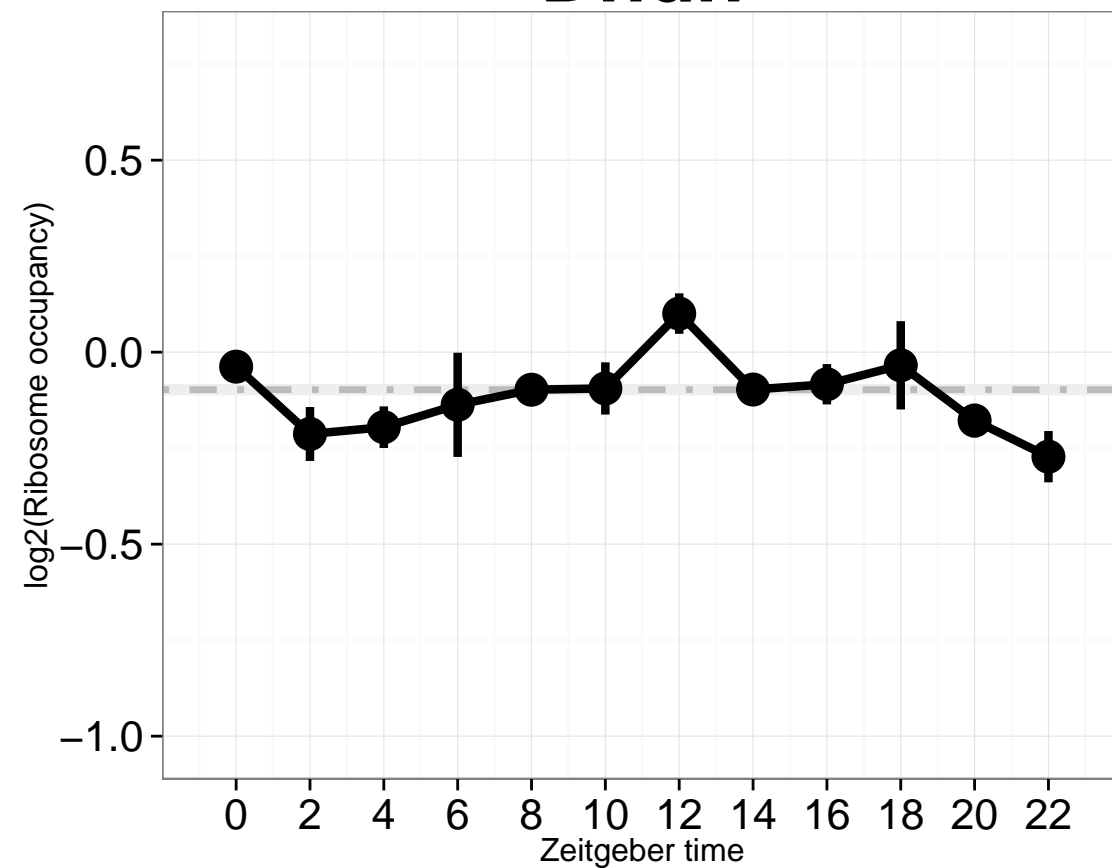

Supplement: SuppDataset_1.zip [file Dhdh_set_A.pdf › Supplemental Dataset 1/A-mRNA_nonrhyth_translation_nonrhyth/Dhdh_set_A.pdf]

## Dhodh

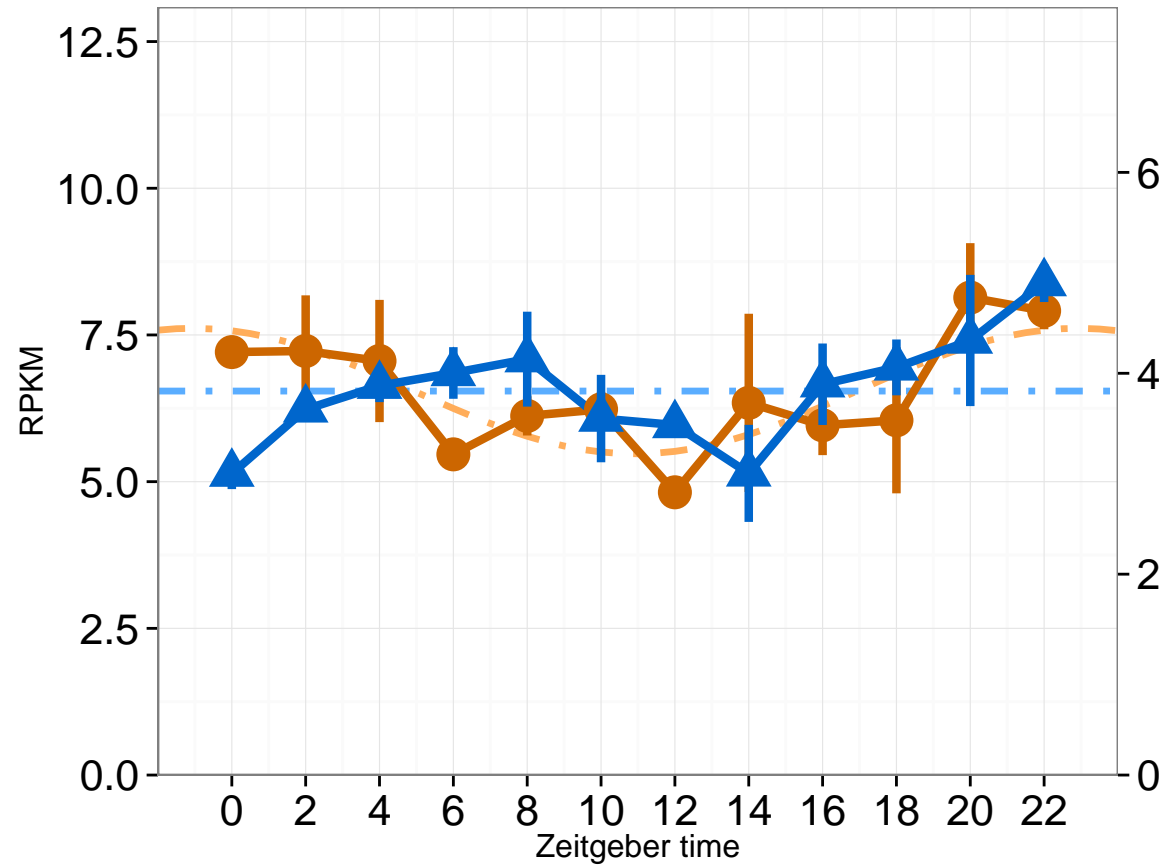

## Dhodh

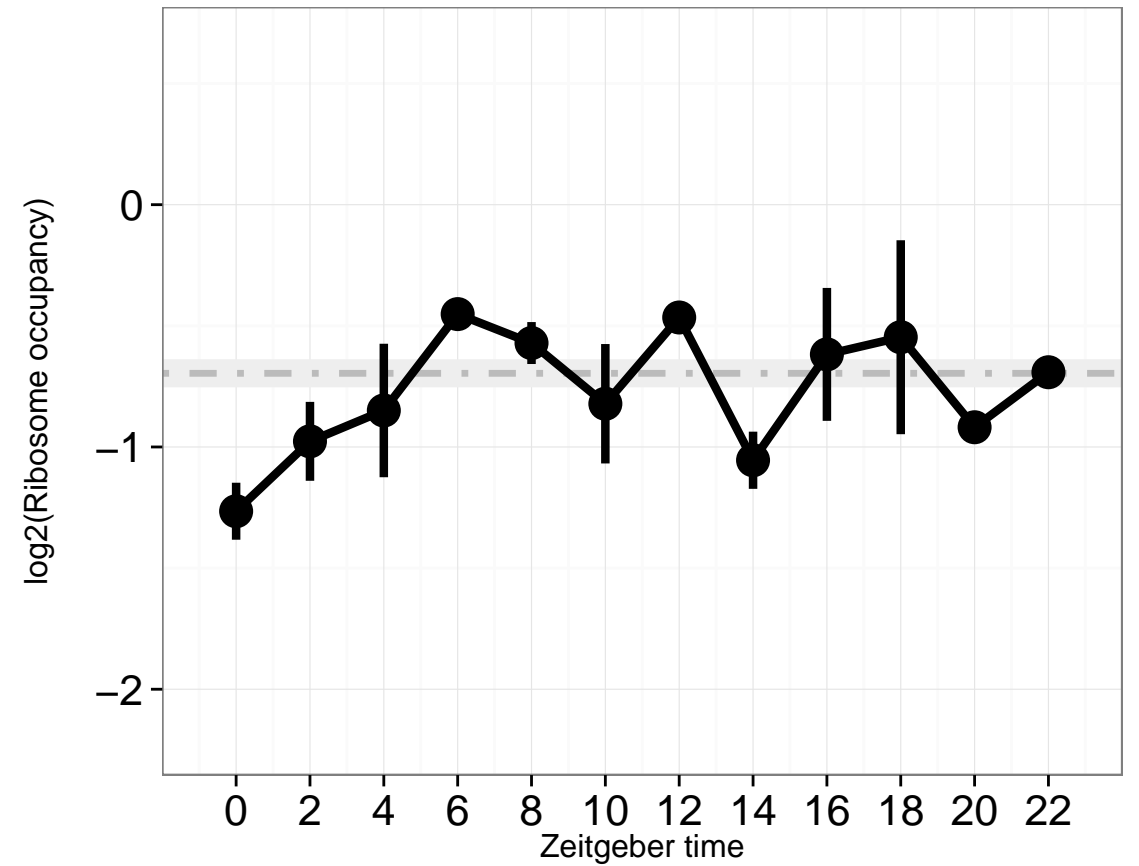

Supplement: SuppDataset_1.zip [file Dhodh_set_A.pdf › Supplemental Dataset 1/A-mRNA_nonrhyth_translation_nonrhyth/Dhodh_set_A.pdf]

## Dhps

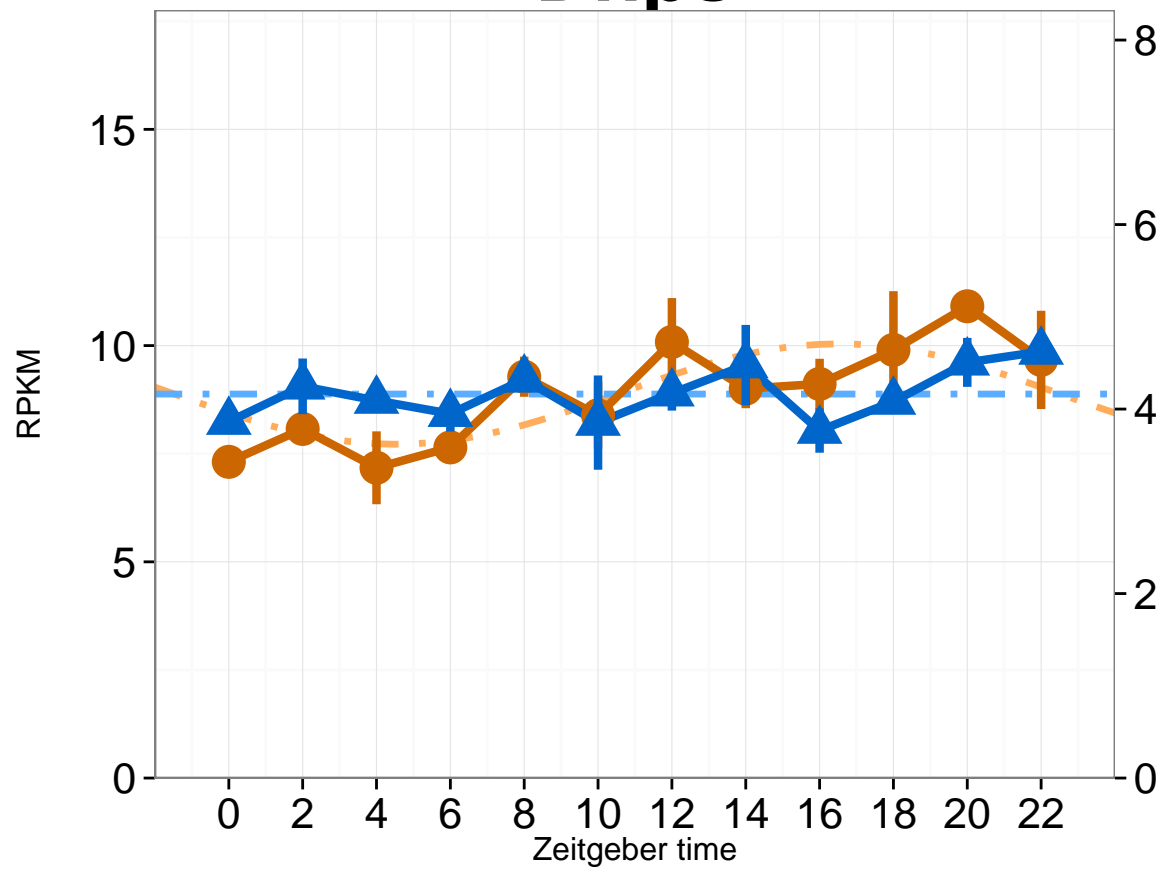

## Dhps

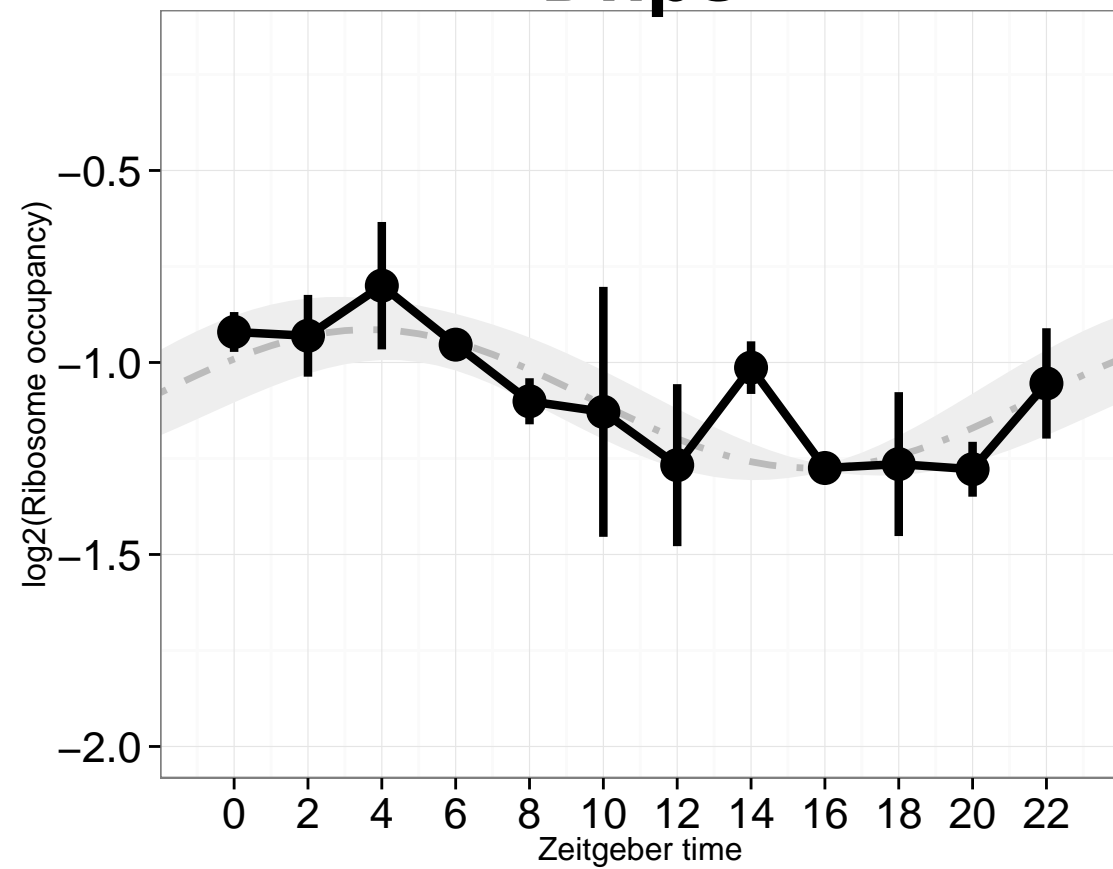

Supplement: SuppDataset_1.zip [file Dhps_set_A.pdf › Supplemental Dataset 1/A-mRNA_nonrhyth_translation_nonrhyth/Dhps_set_A.pdf]

## Dhrs11

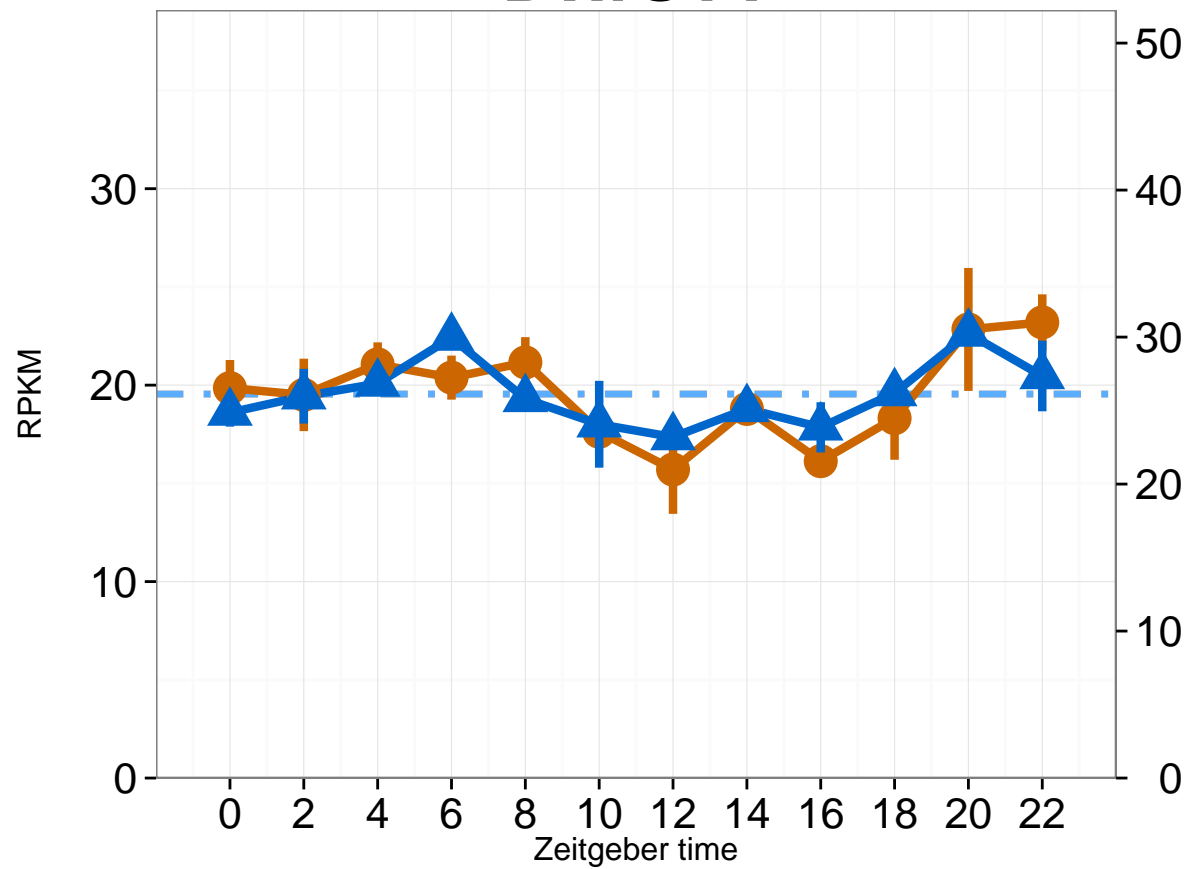

## Dhrs11

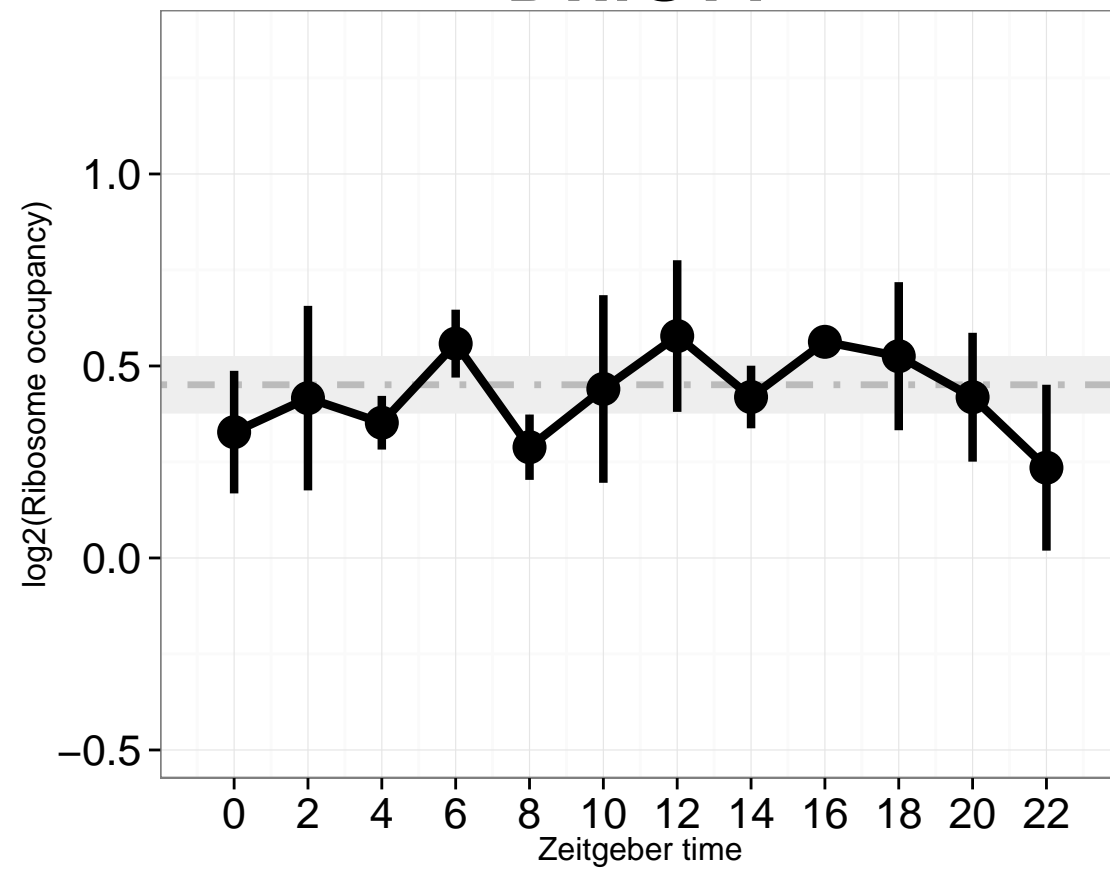

Supplement: SuppDataset_1.zip [file Dhrs11_set_A.pdf › Supplemental Dataset 1/A-mRNA_nonrhyth_translation_nonrhyth/Dhrs11_set_A.pdf]

## Dhrs13

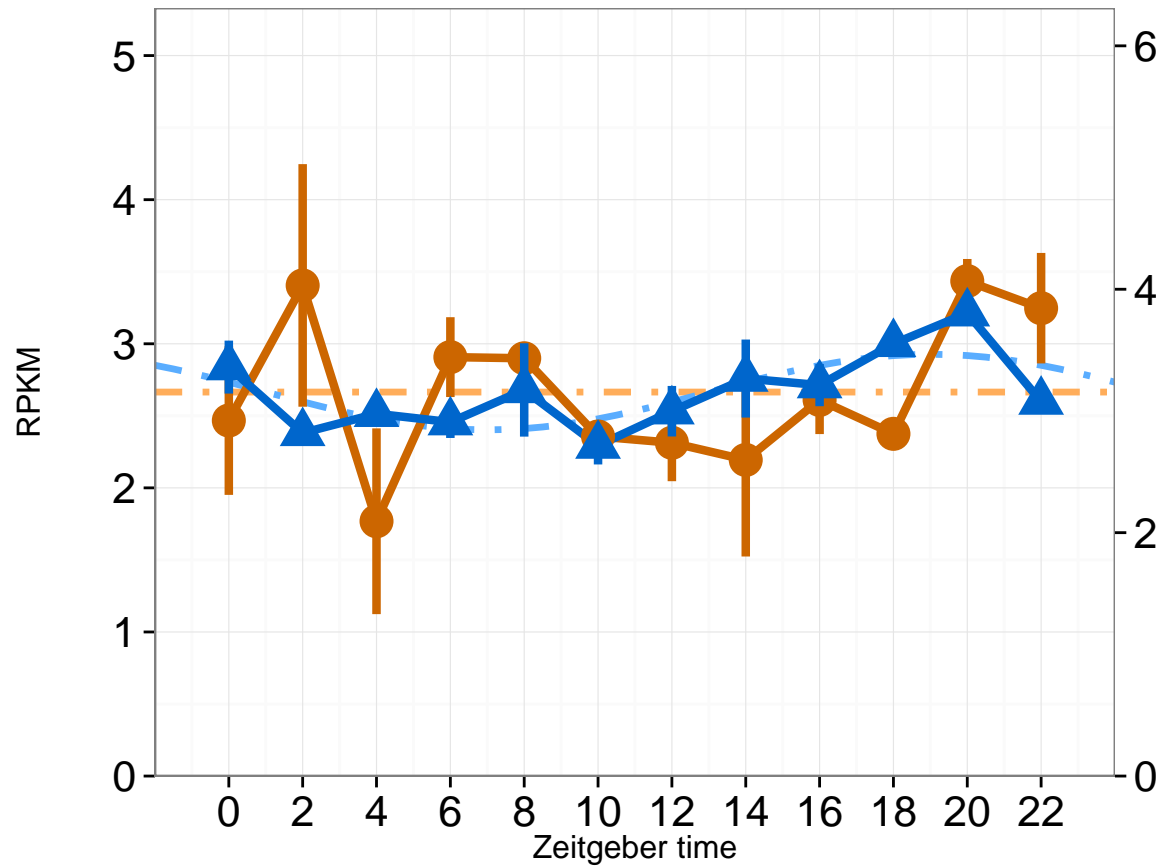

## Dhrs13

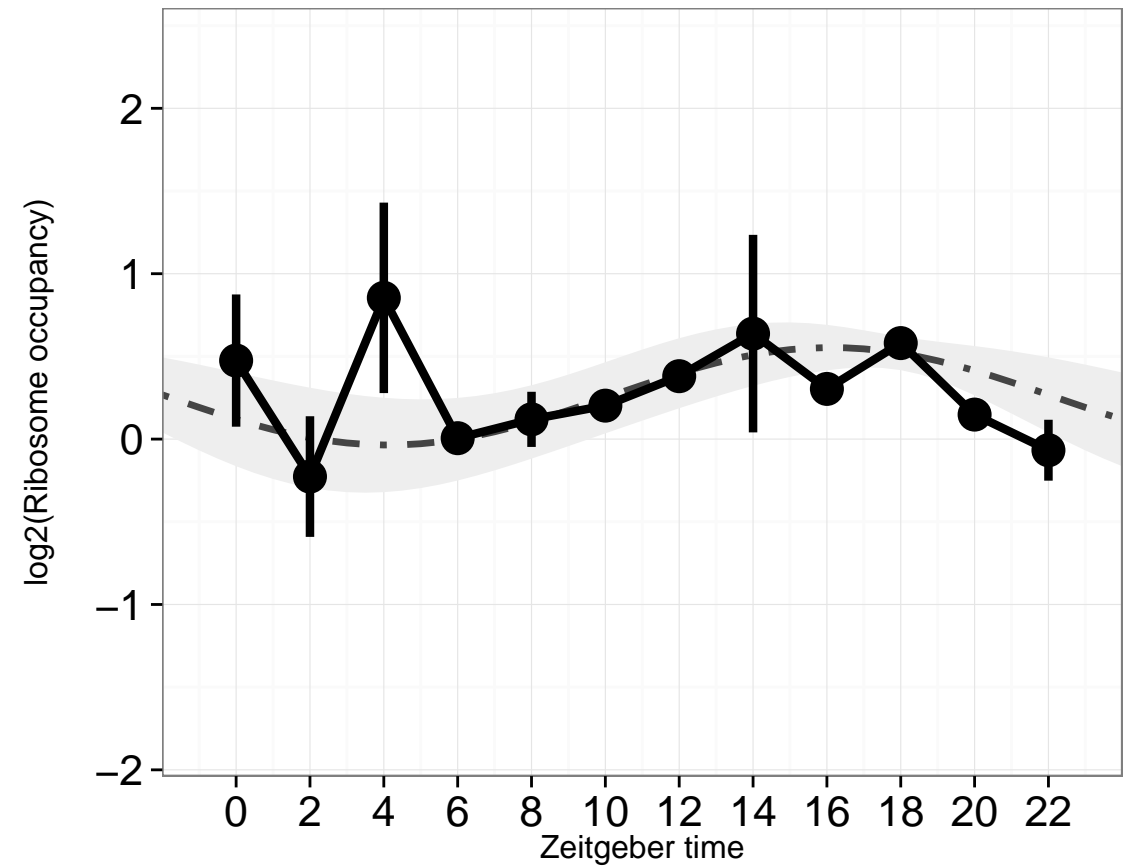

Supplement: SuppDataset_1.zip [file Dhrs13_set_A.pdf › Supplemental Dataset 1/A-mRNA_nonrhyth_translation_nonrhyth/Dhrs13_set_A.pdf]

## Dhrs1

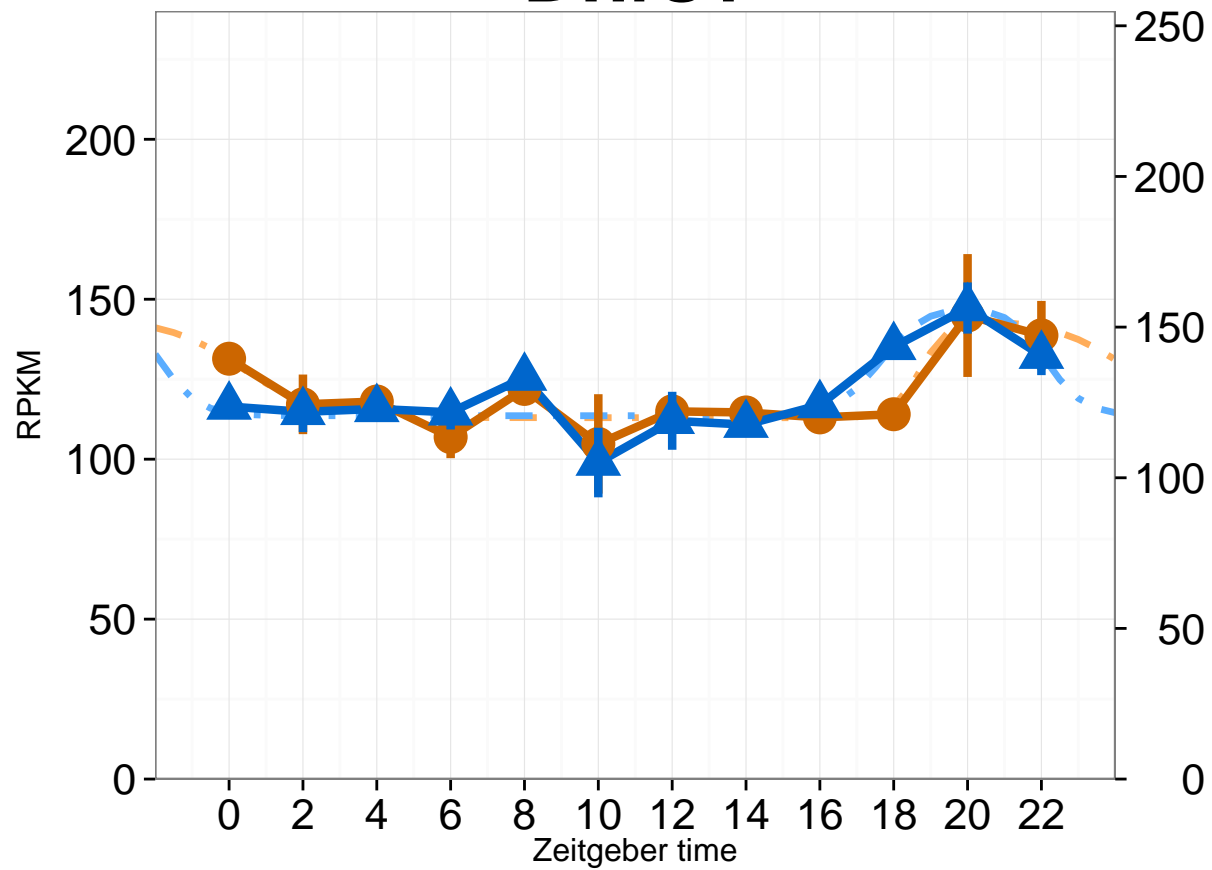

## Dhrs1

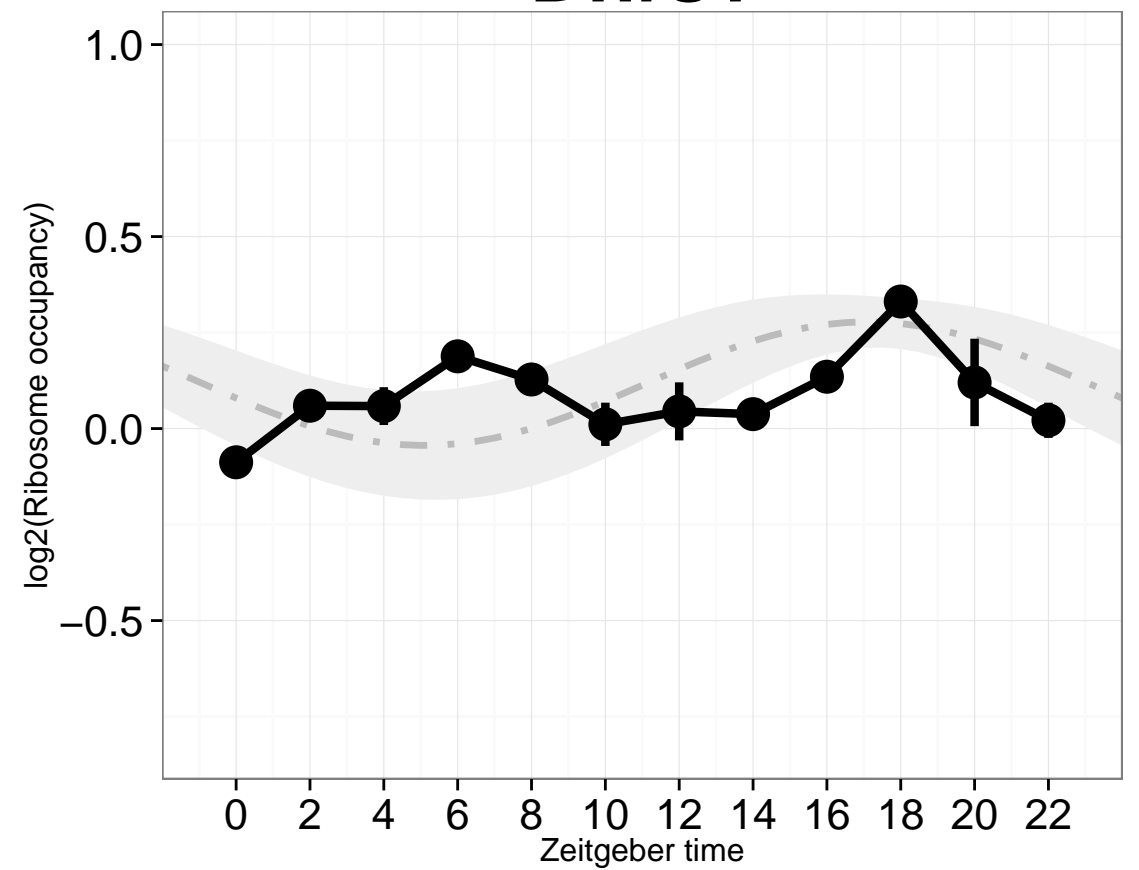

Supplement: SuppDataset_1.zip [file Dhrs1_set_A.pdf › Supplemental Dataset 1/A-mRNA_nonrhyth_translation_nonrhyth/Dhrs1_set_A.pdf]

## Dhrs4

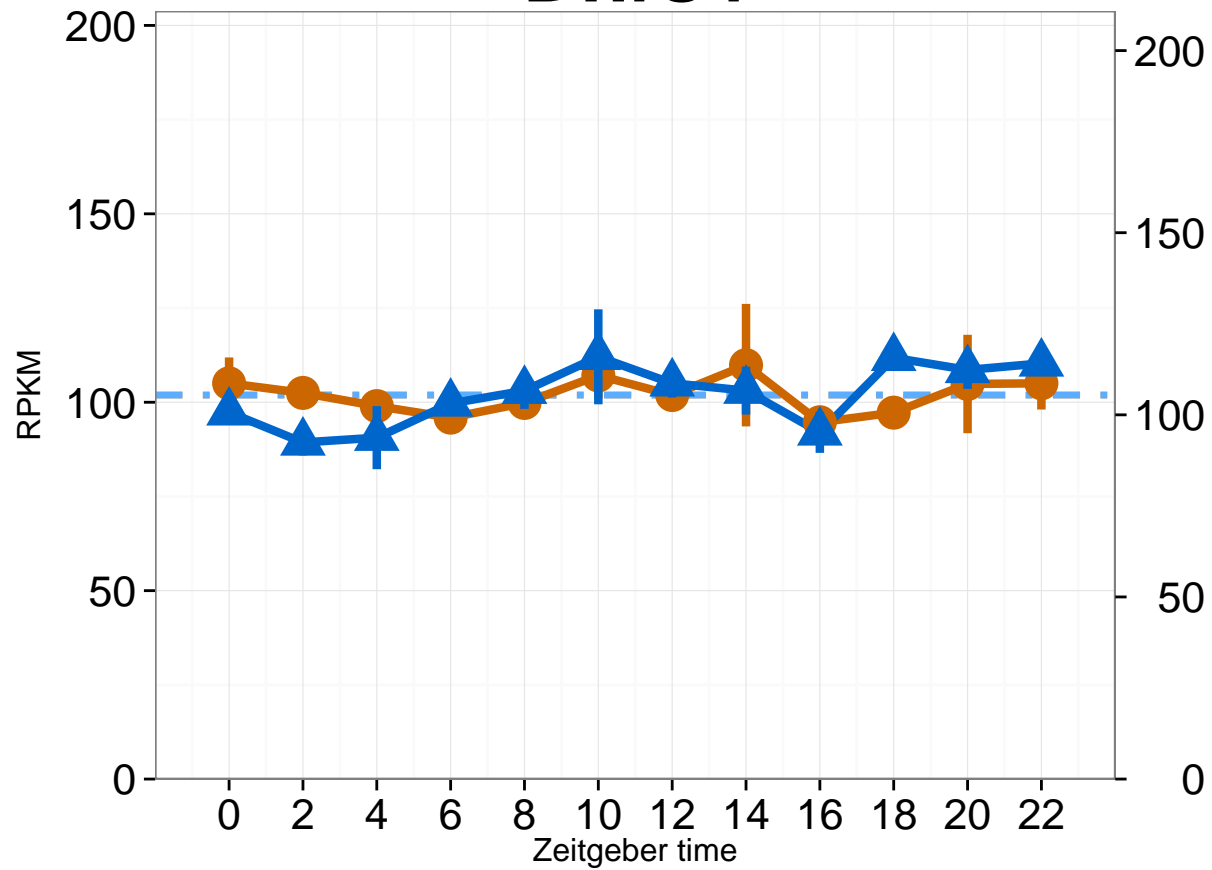

## Dhrs4

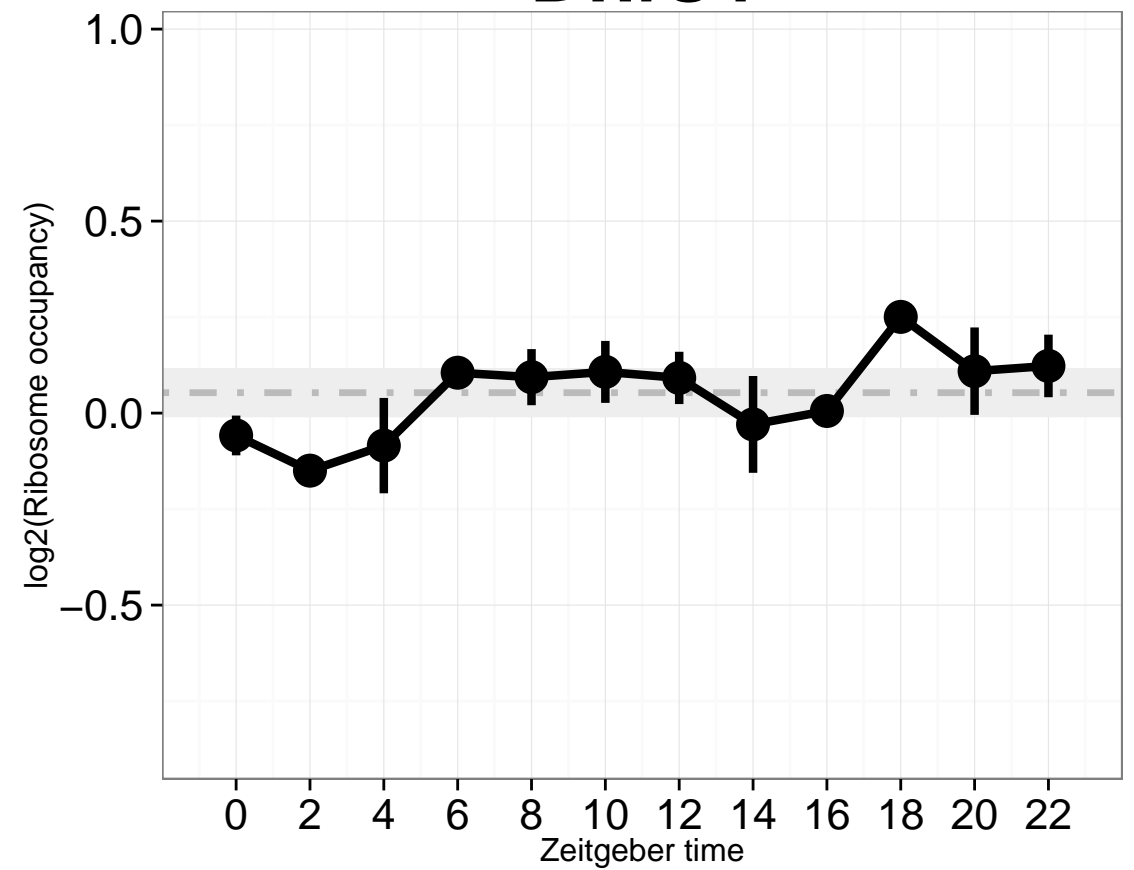

Supplement: SuppDataset_1.zip [file Dhrs4_set_A.pdf › Supplemental Dataset 1/A-mRNA_nonrhyth_translation_nonrhyth/Dhrs4_set_A.pdf]

## Dhrs7

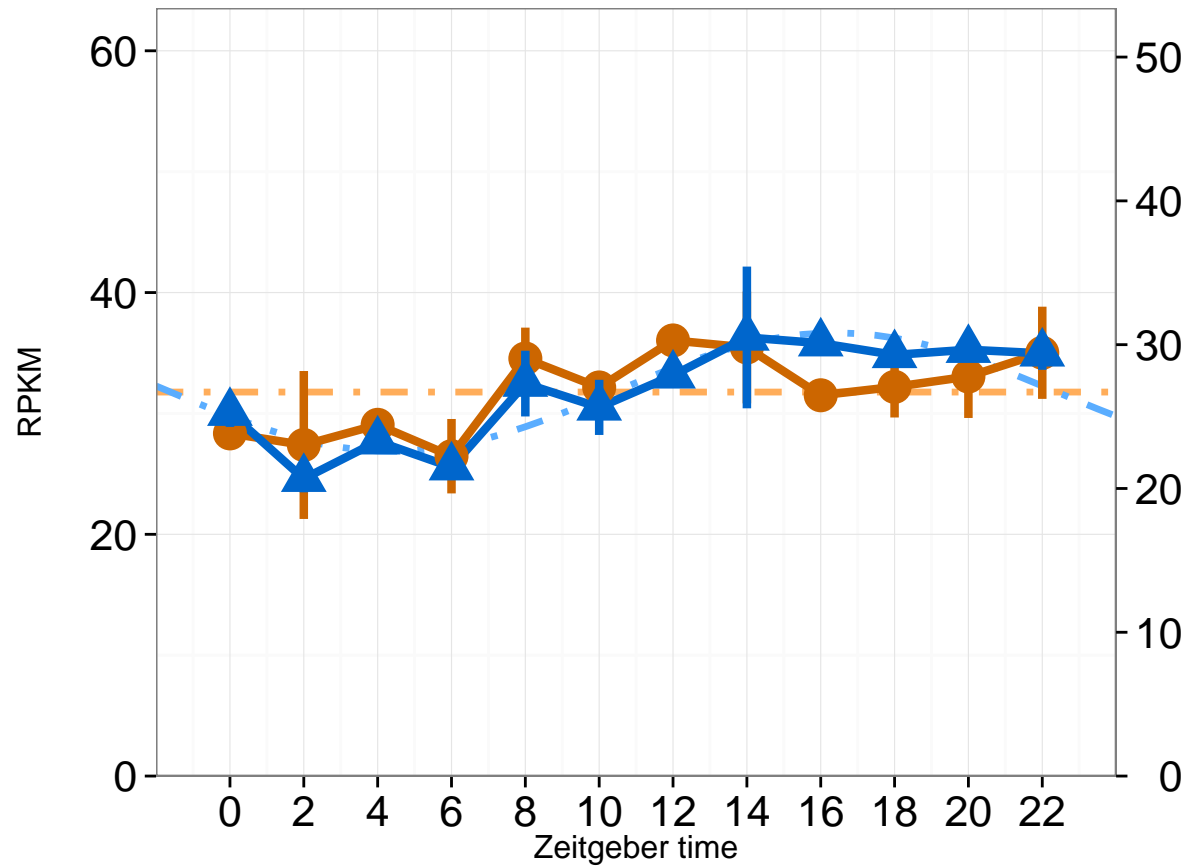

## Dhrs7

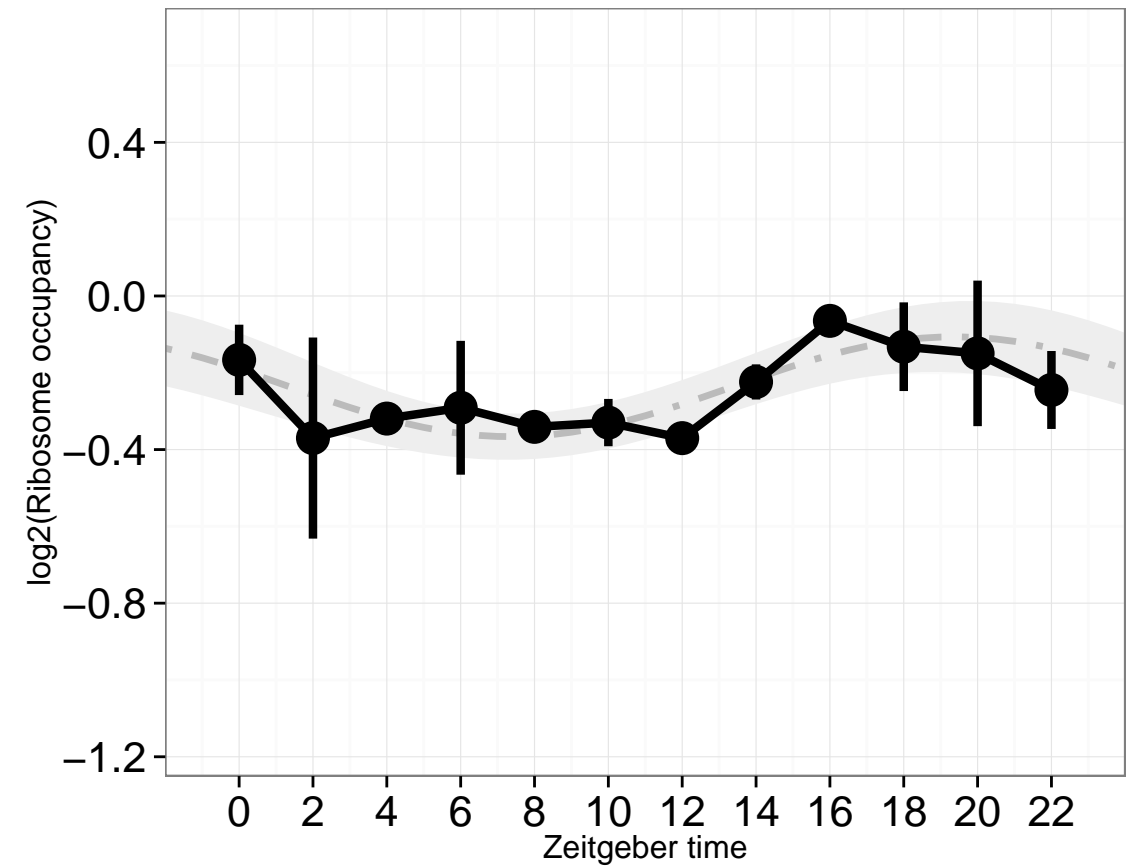

Supplement: SuppDataset_1.zip [file Dhrs7_set_A.pdf › Supplemental Dataset 1/A-mRNA_nonrhyth_translation_nonrhyth/Dhrs7_set_A.pdf]

# Dhrs7b

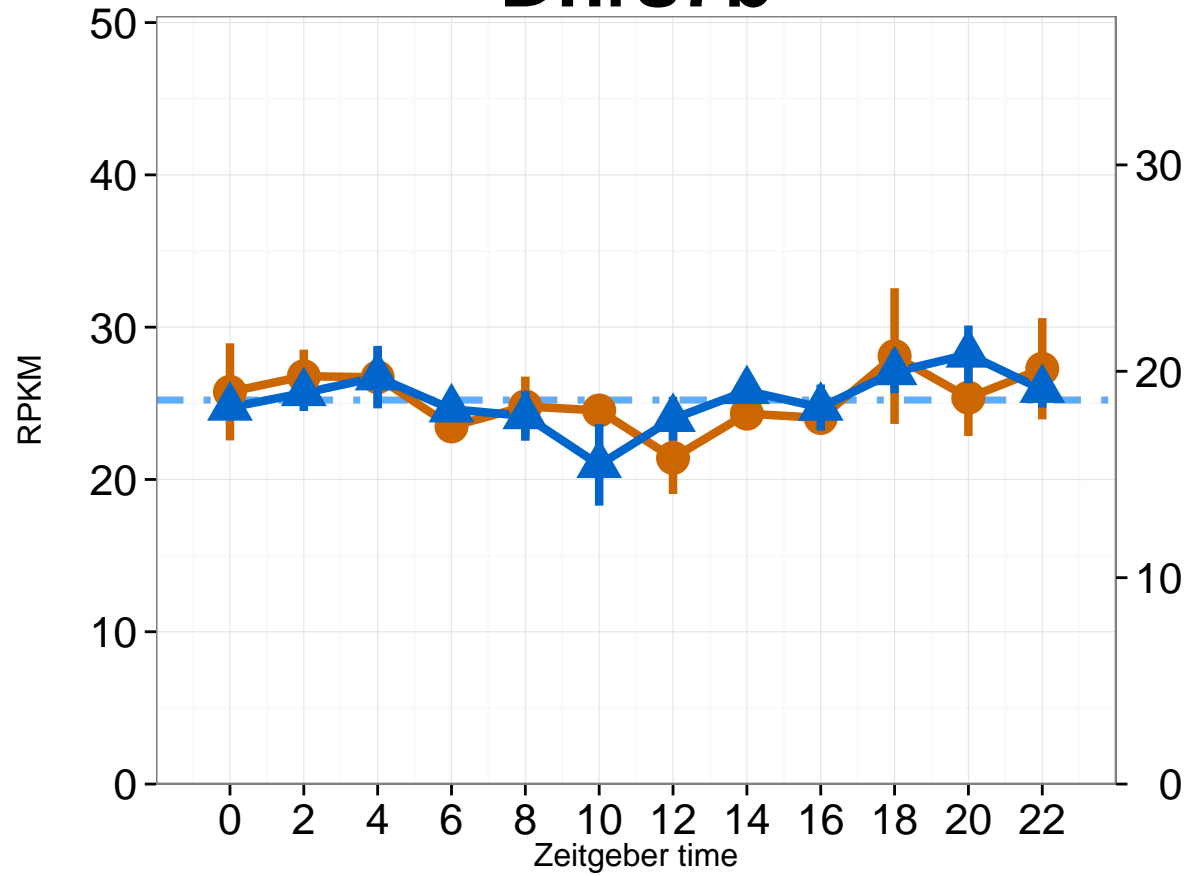

# Dhrs7b

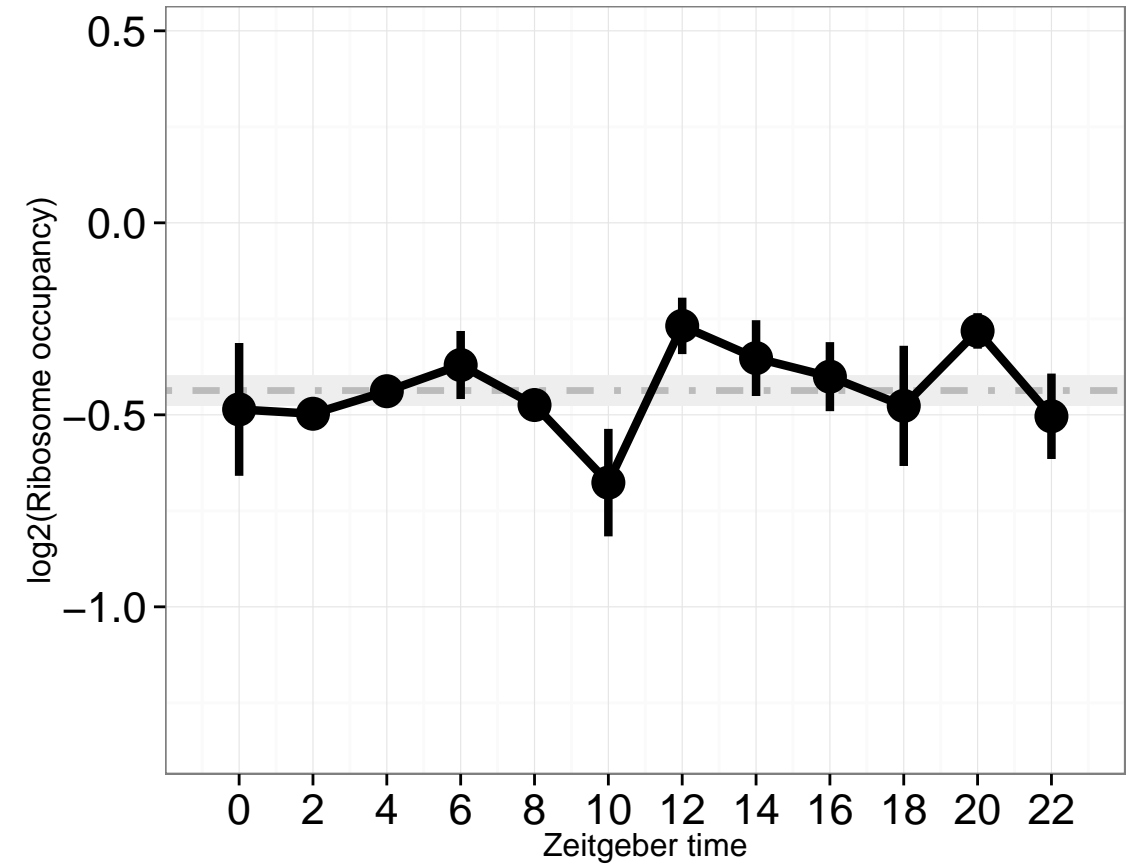

Supplement: SuppDataset_1.zip [file Dhrs7b_set_A.pdf › Supplemental Dataset 1/A-mRNA_nonrhyth_translation_nonrhyth/Dhrs7b_set_A.pdf]

## Dhx15

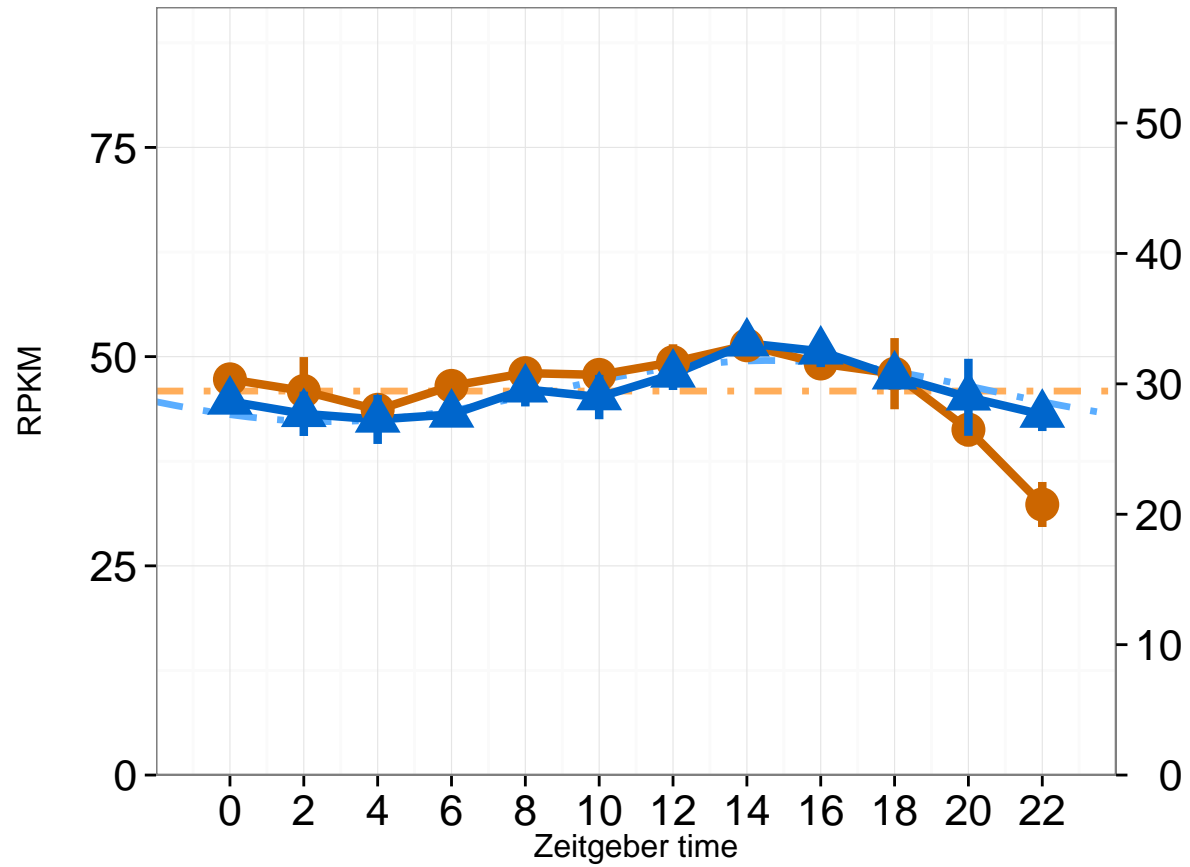

## Dhx15

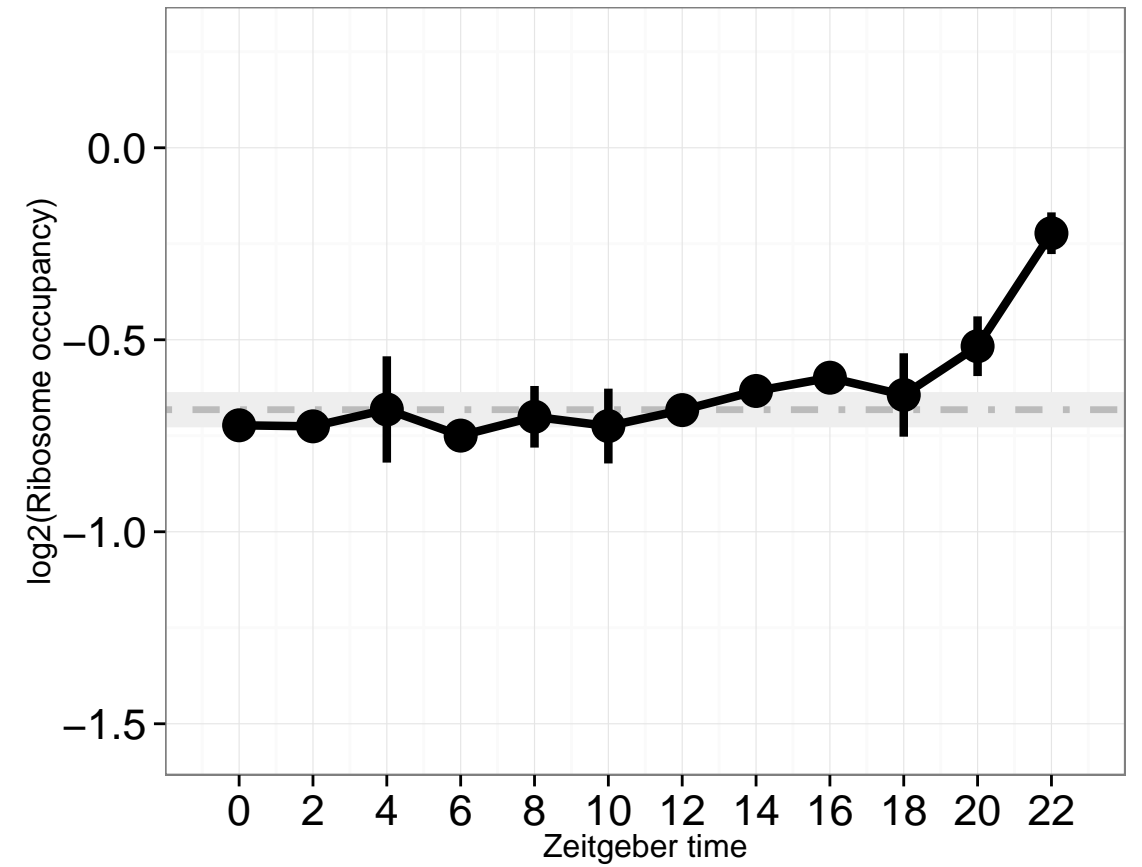

Supplement: SuppDataset_1.zip [file Dhx15_set_A.pdf › Supplemental Dataset 1/A-mRNA_nonrhyth_translation_nonrhyth/Dhx15_set_A.pdf]

# Dhx16

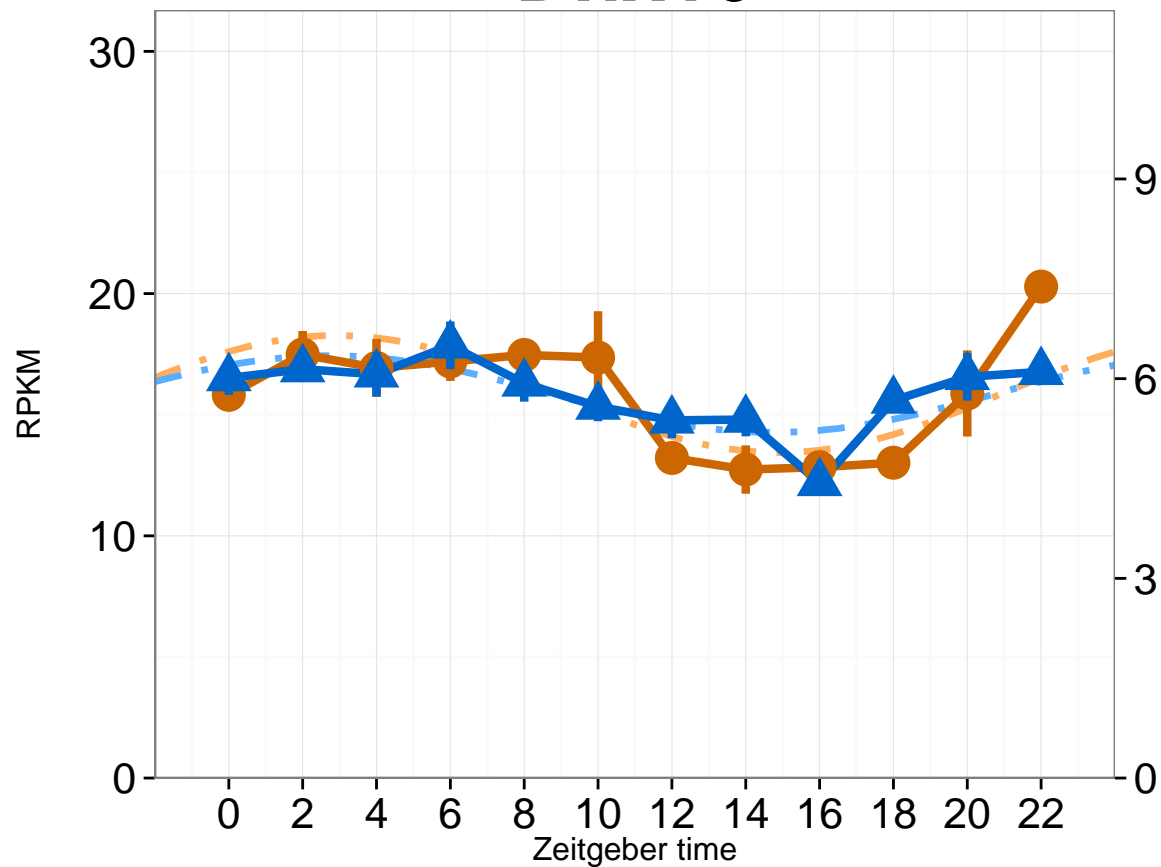

# Dhx16

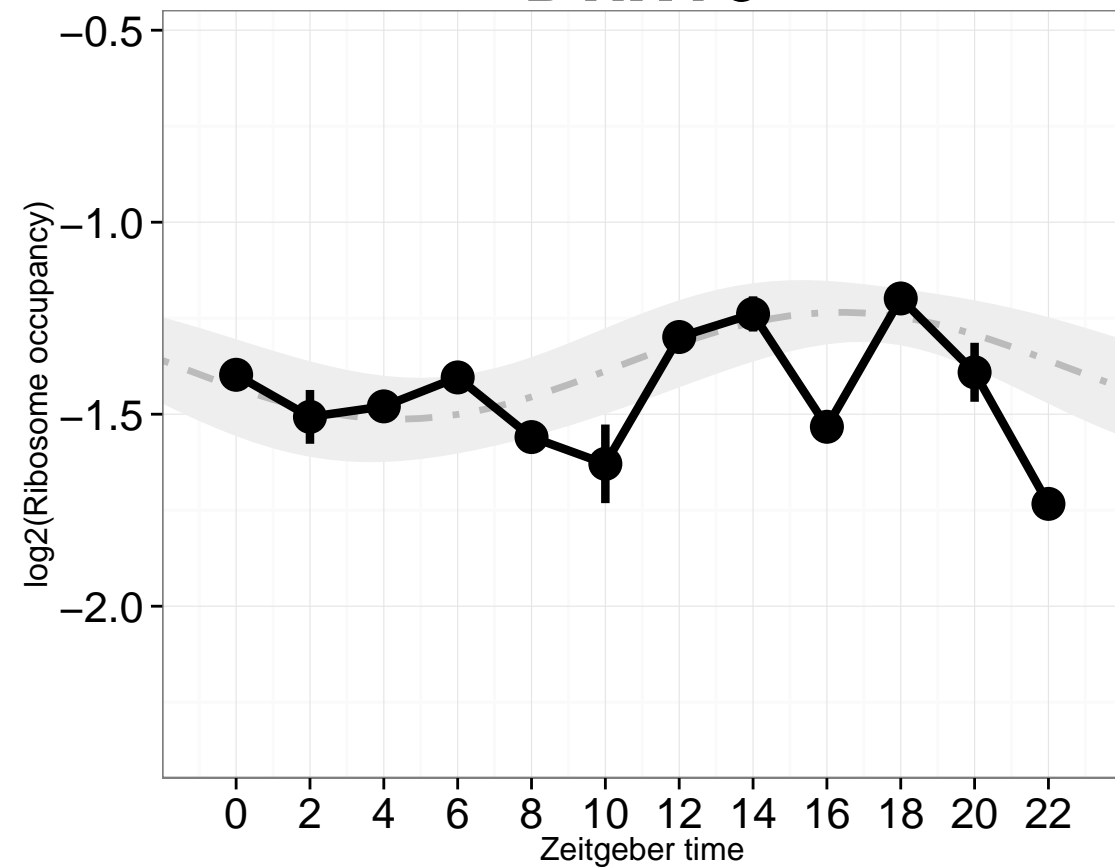

Supplement: SuppDataset_1.zip [file Dhx16_set_A.pdf › Supplemental Dataset 1/A-mRNA_nonrhyth_translation_nonrhyth/Dhx16_set_A.pdf]

## Dhx29

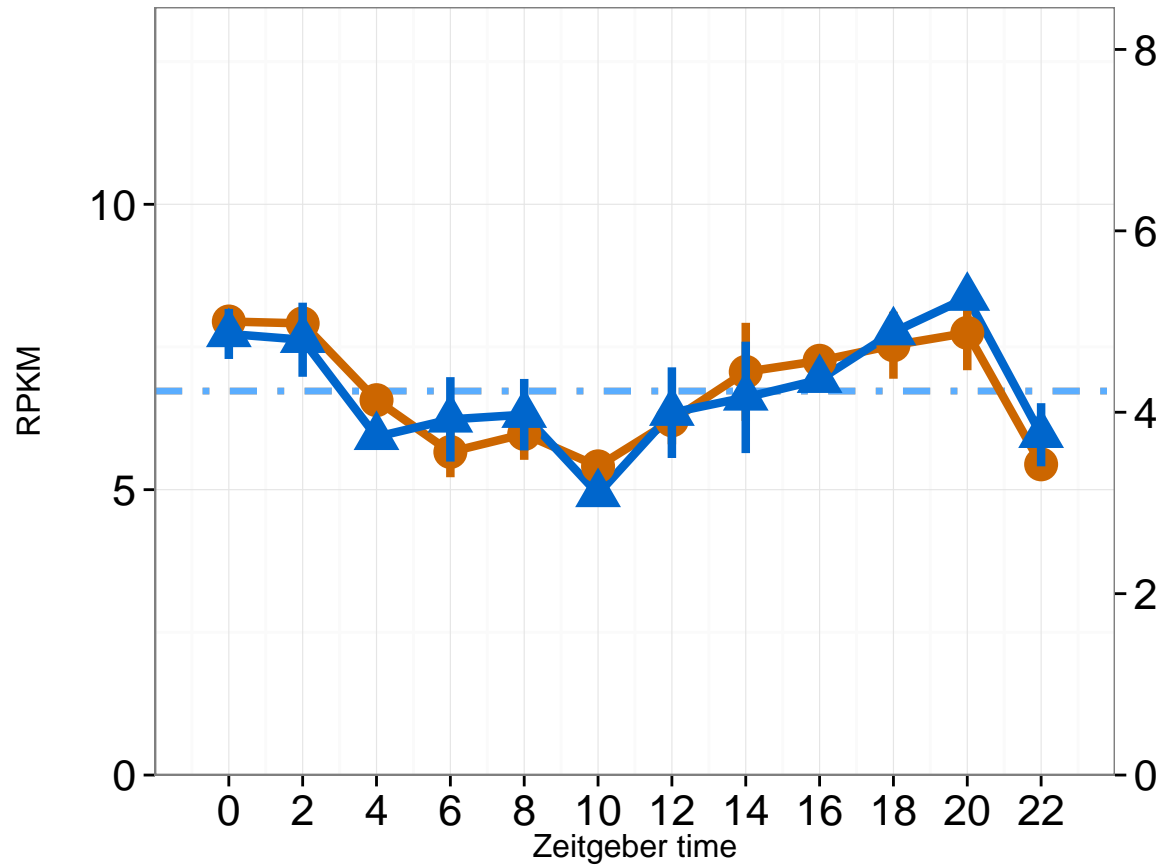

## Dhx29

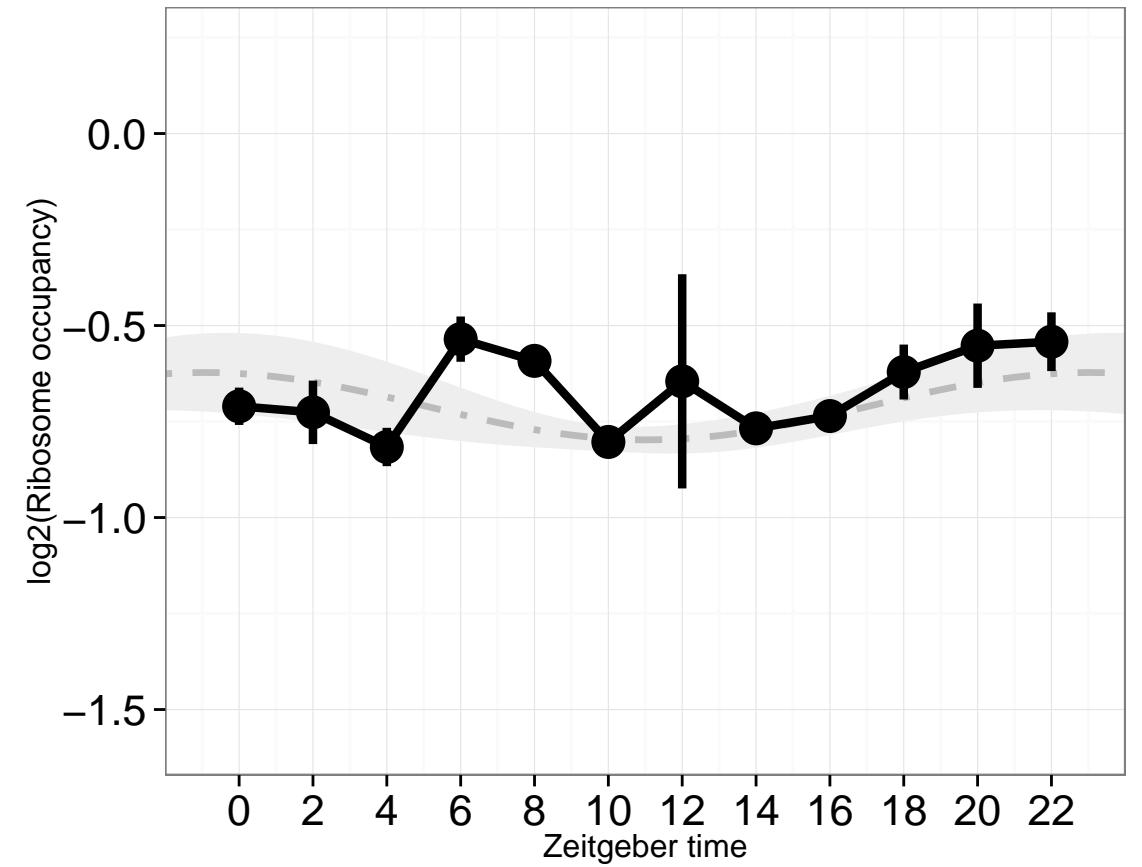

Supplement: SuppDataset_1.zip [file Dhx29_set_A.pdf › Supplemental Dataset 1/A-mRNA_nonrhyth_translation_nonrhyth/Dhx29_set_A.pdf]

## Dhx30

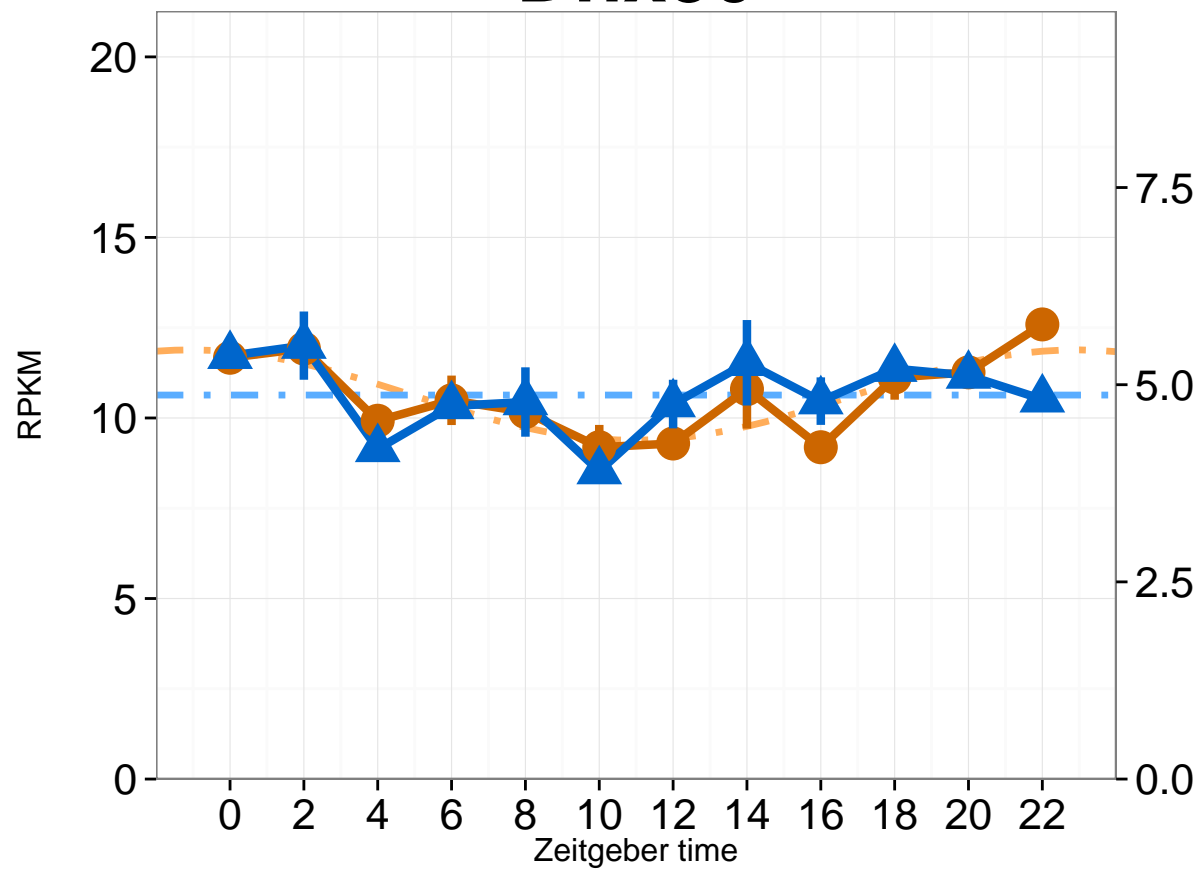

## Dhx30

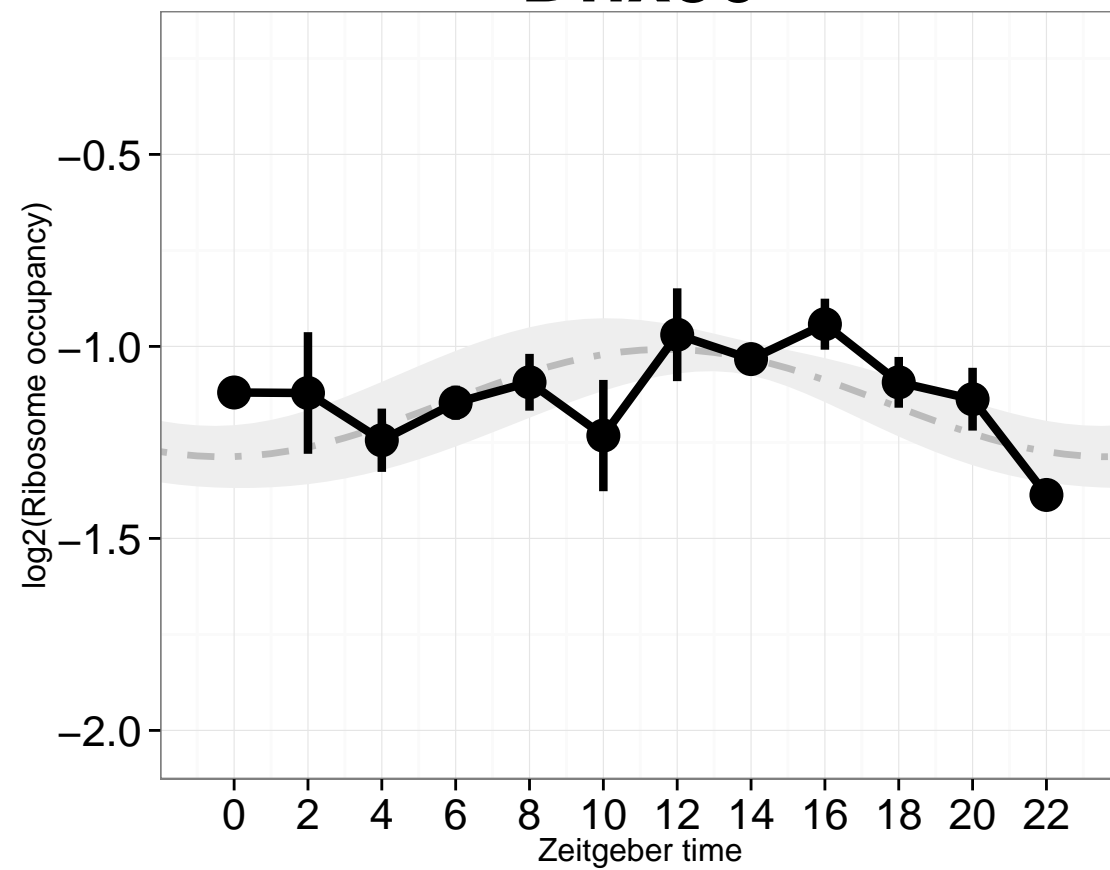

Supplement: SuppDataset_1.zip [file Dhx30_set_A.pdf › Supplemental Dataset 1/A-mRNA_nonrhyth_translation_nonrhyth/Dhx30_set_A.pdf]

## Dhx32

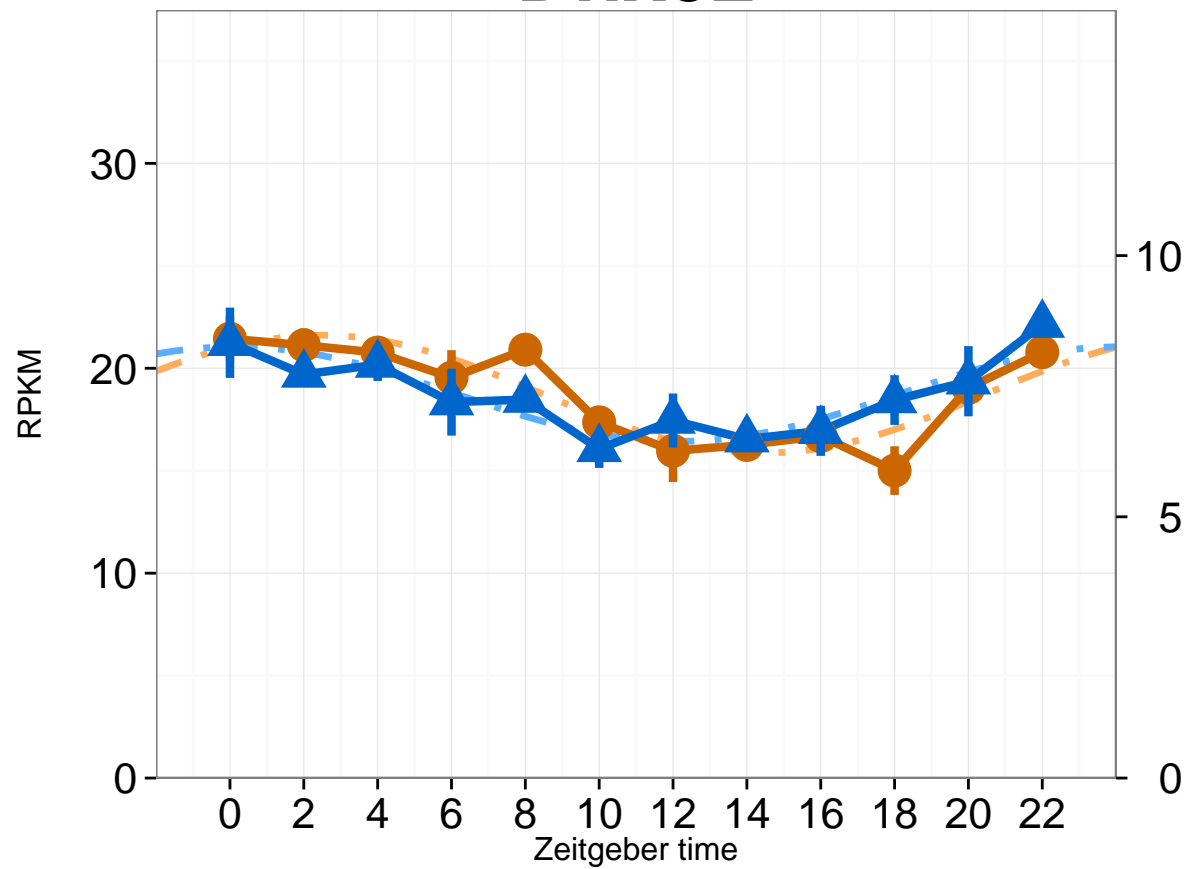

## Dhx32

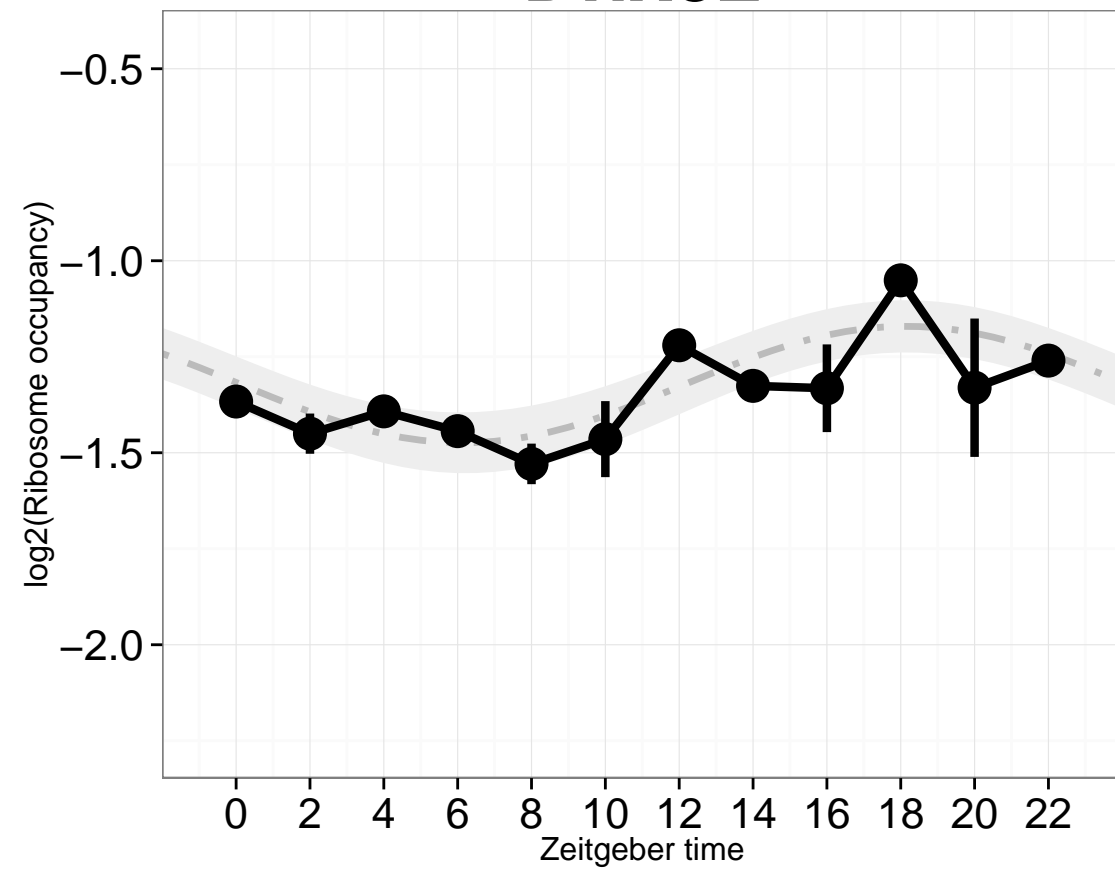

Supplement: SuppDataset_1.zip [file Dhx32_set_A.pdf › Supplemental Dataset 1/A-mRNA_nonrhyth_translation_nonrhyth/Dhx32_set_A.pdf]

# Dhx35

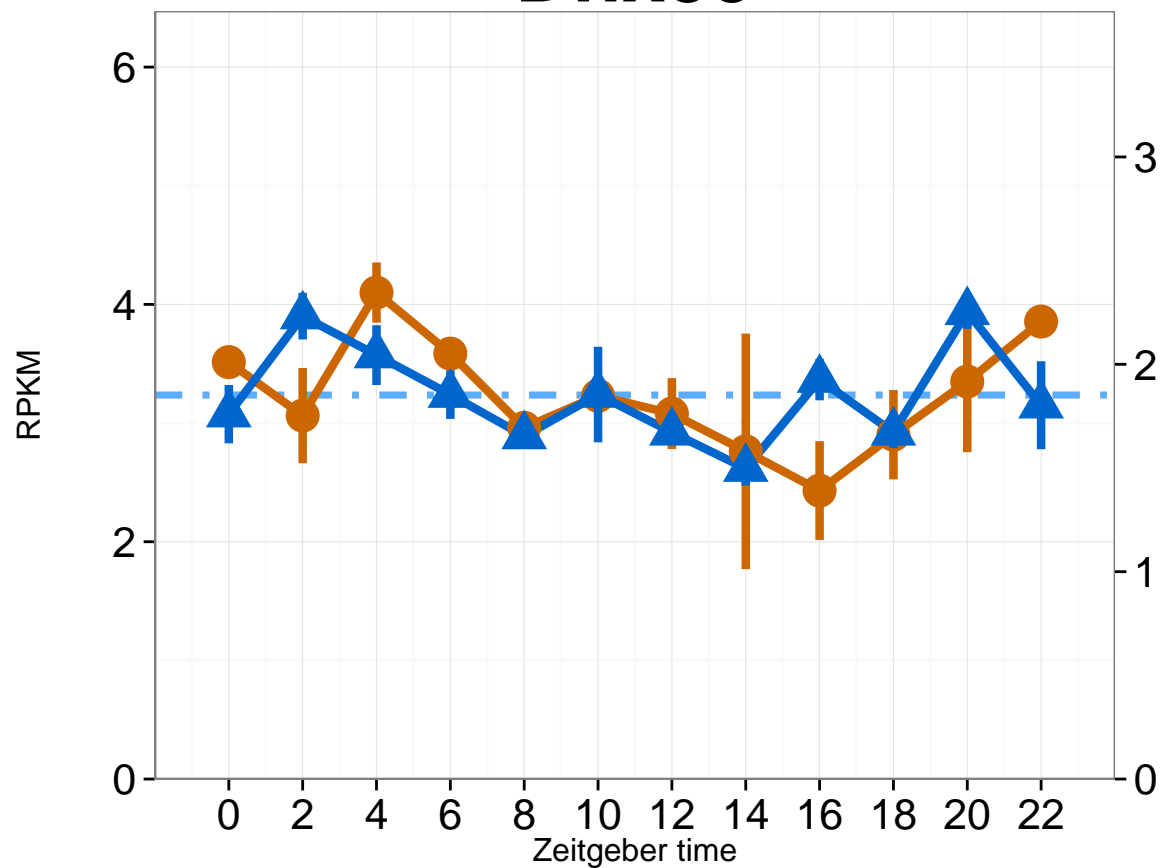

# Dhx35

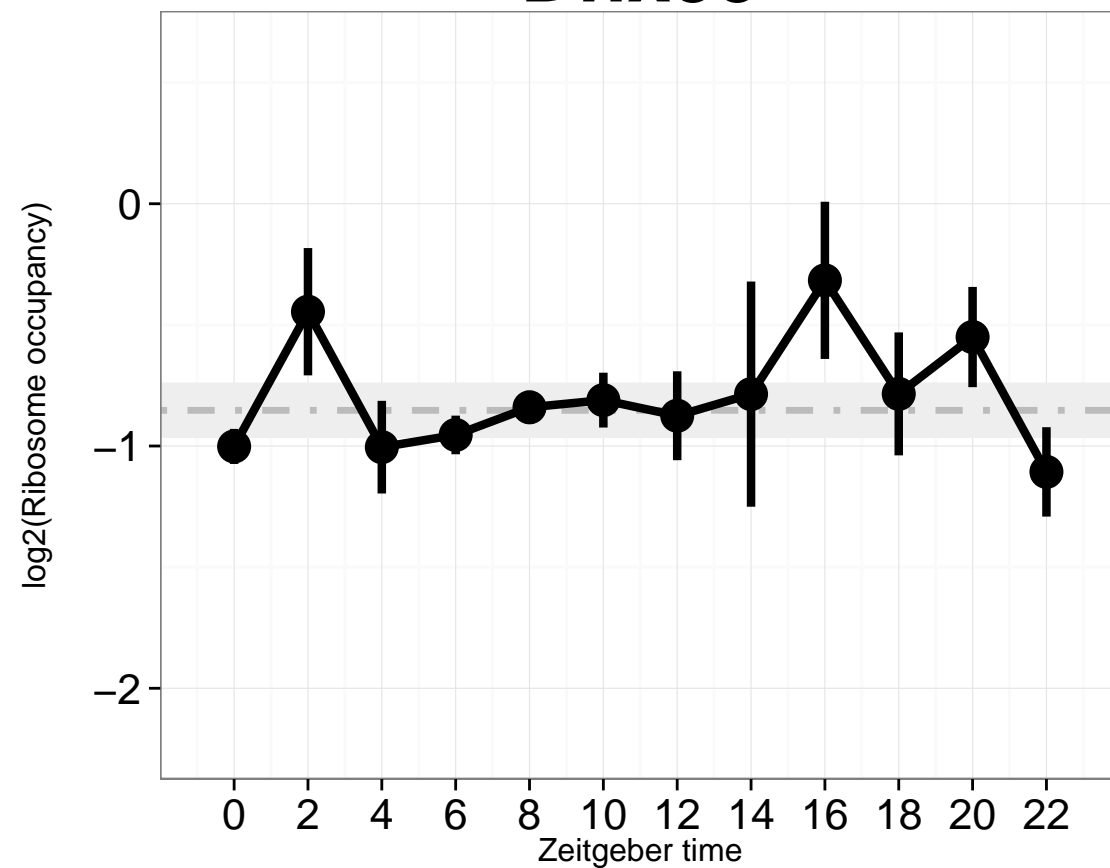

Supplement: SuppDataset_1.zip [file Dhx35_set_A.pdf › Supplemental Dataset 1/A-mRNA_nonrhyth_translation_nonrhyth/Dhx35_set_A.pdf]

## Dhx36

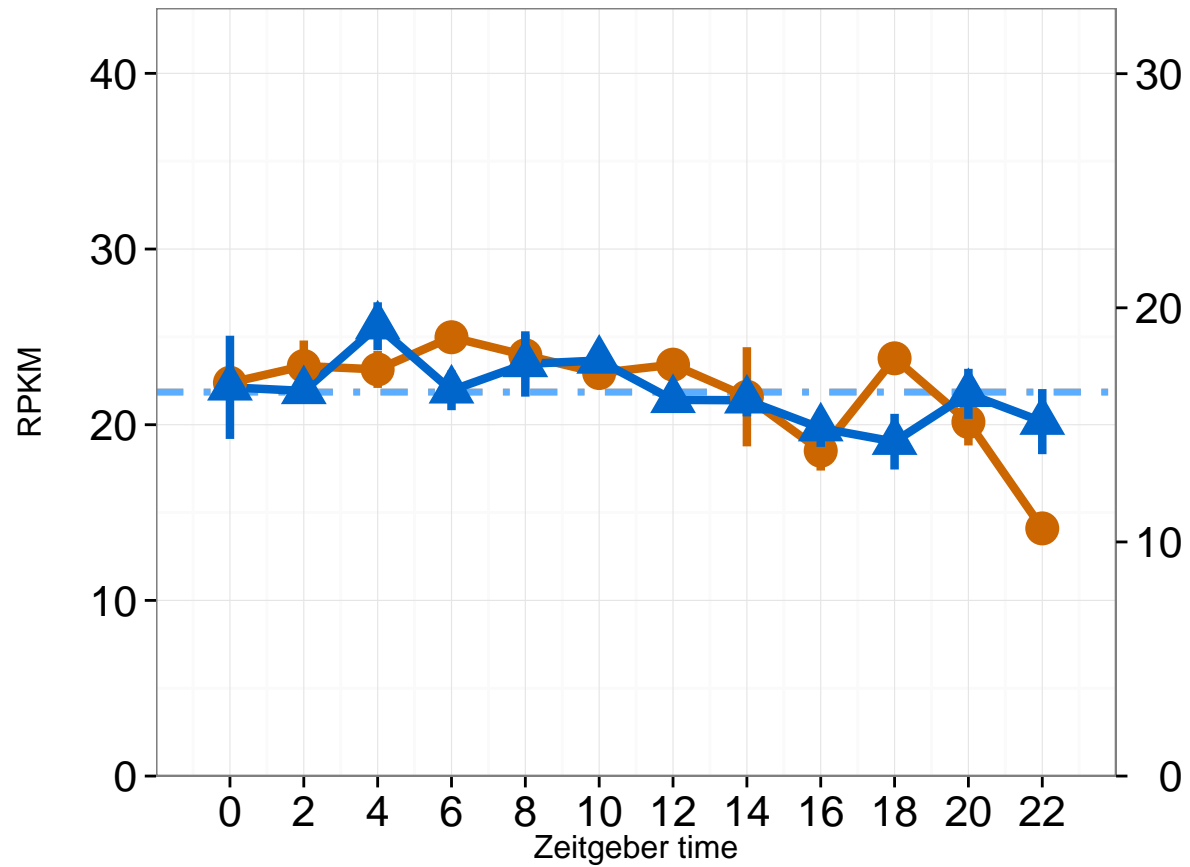

## Dhx36

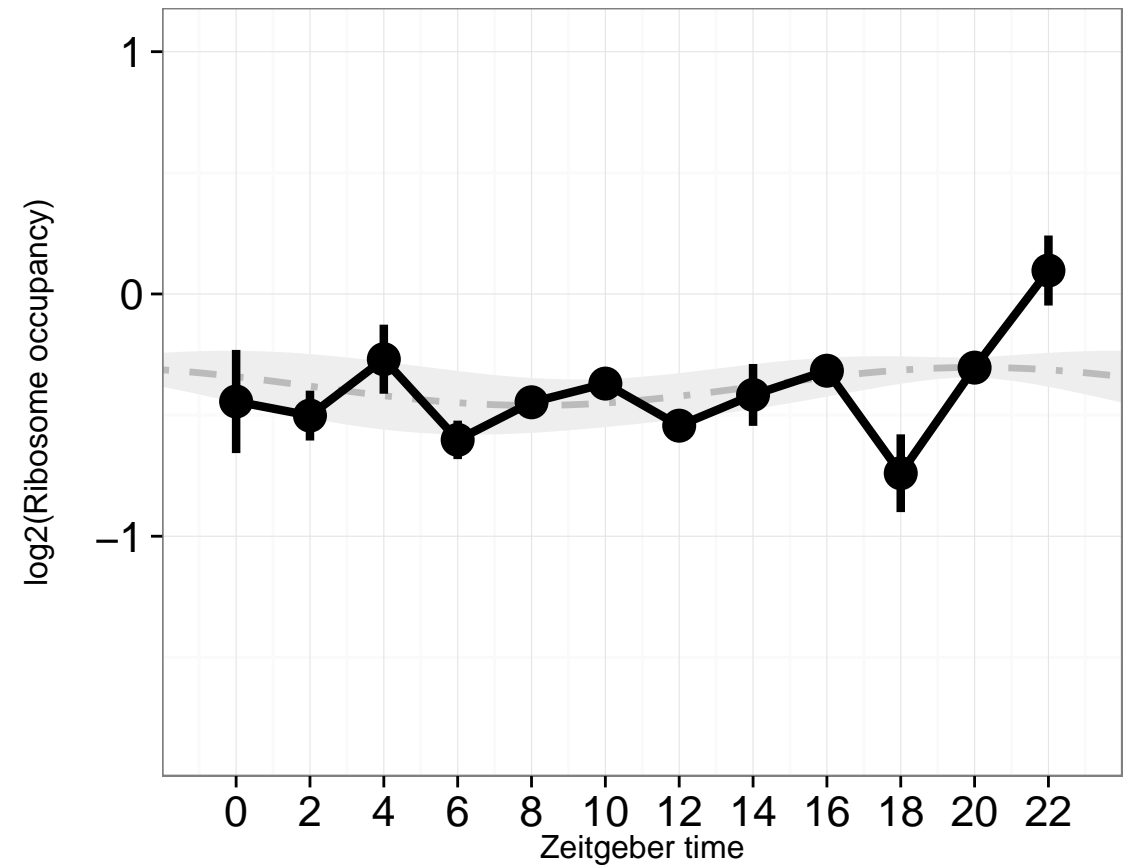

Supplement: SuppDataset_1.zip [file Dhx36_set_A.pdf › Supplemental Dataset 1/A-mRNA_nonrhyth_translation_nonrhyth/Dhx36_set_A.pdf]

# Dhx37

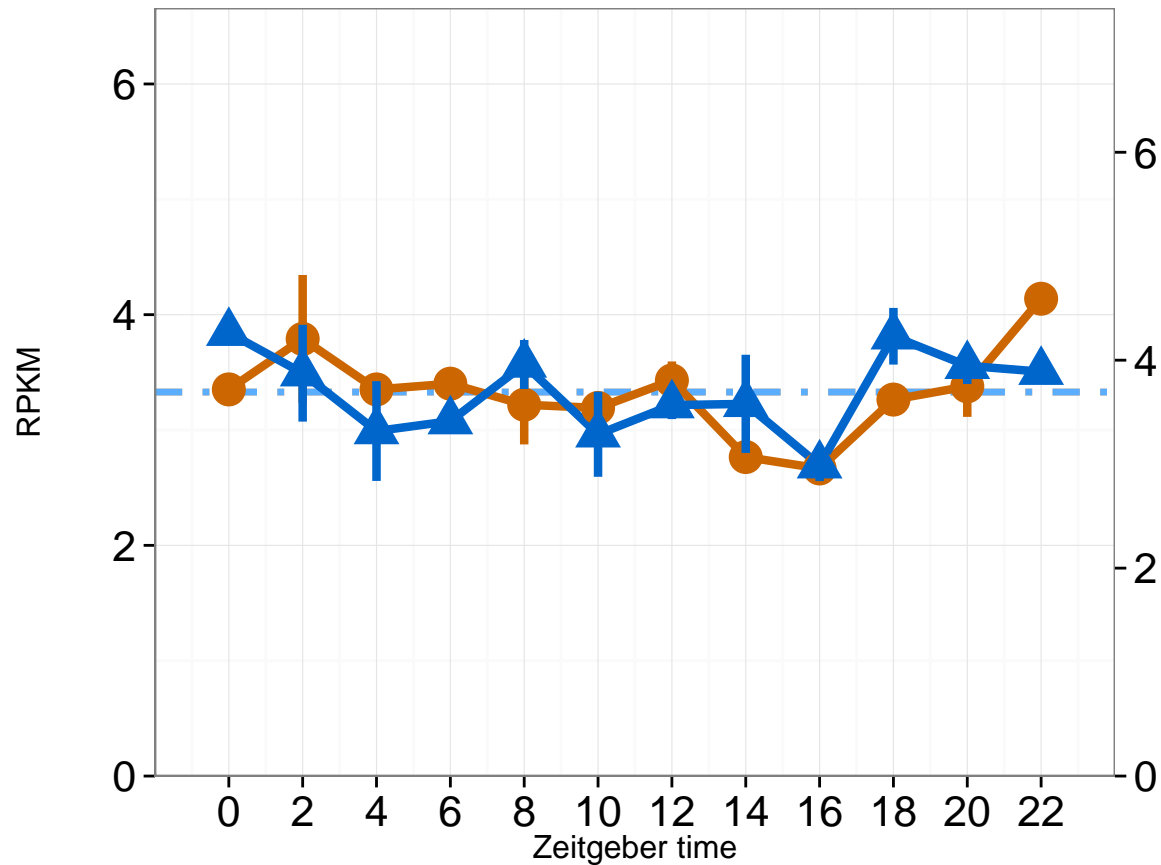

# Dhx37

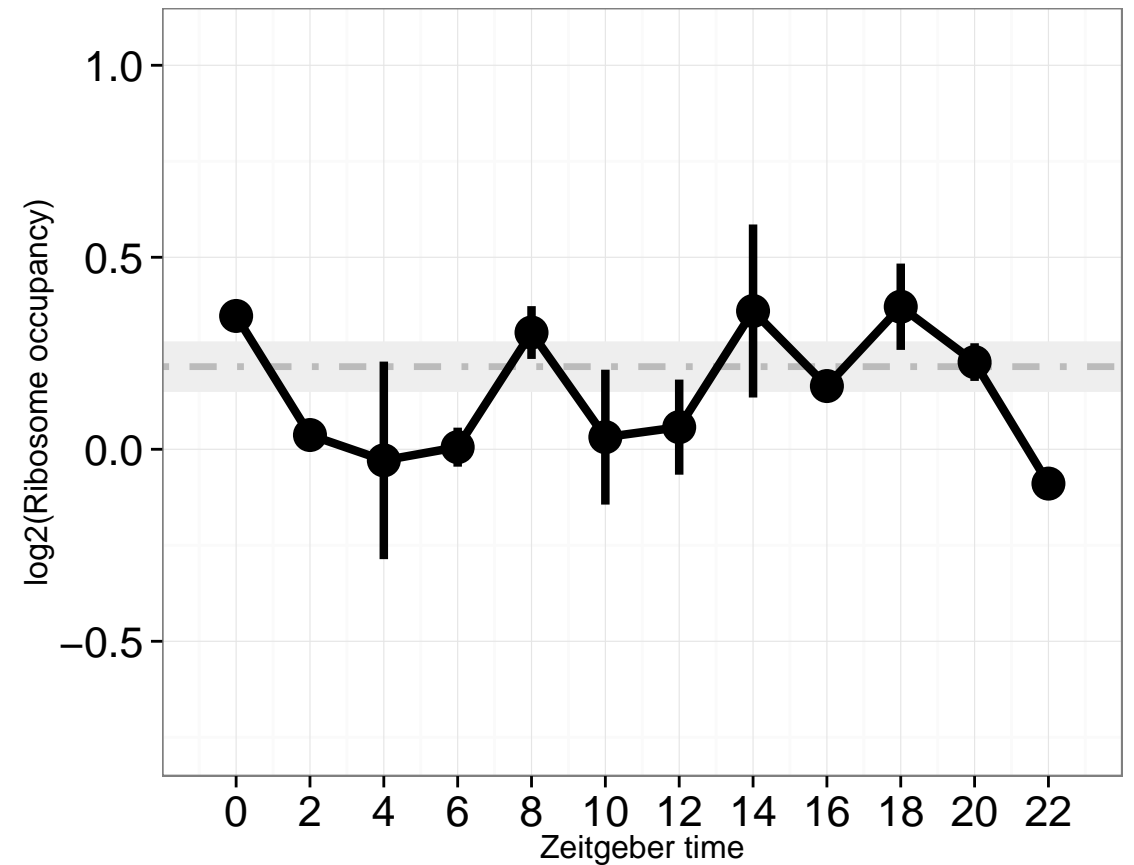

Supplement: SuppDataset_1.zip [file Dhx37_set_A.pdf › Supplemental Dataset 1/A-mRNA_nonrhyth_translation_nonrhyth/Dhx37_set_A.pdf]

## Dhx38

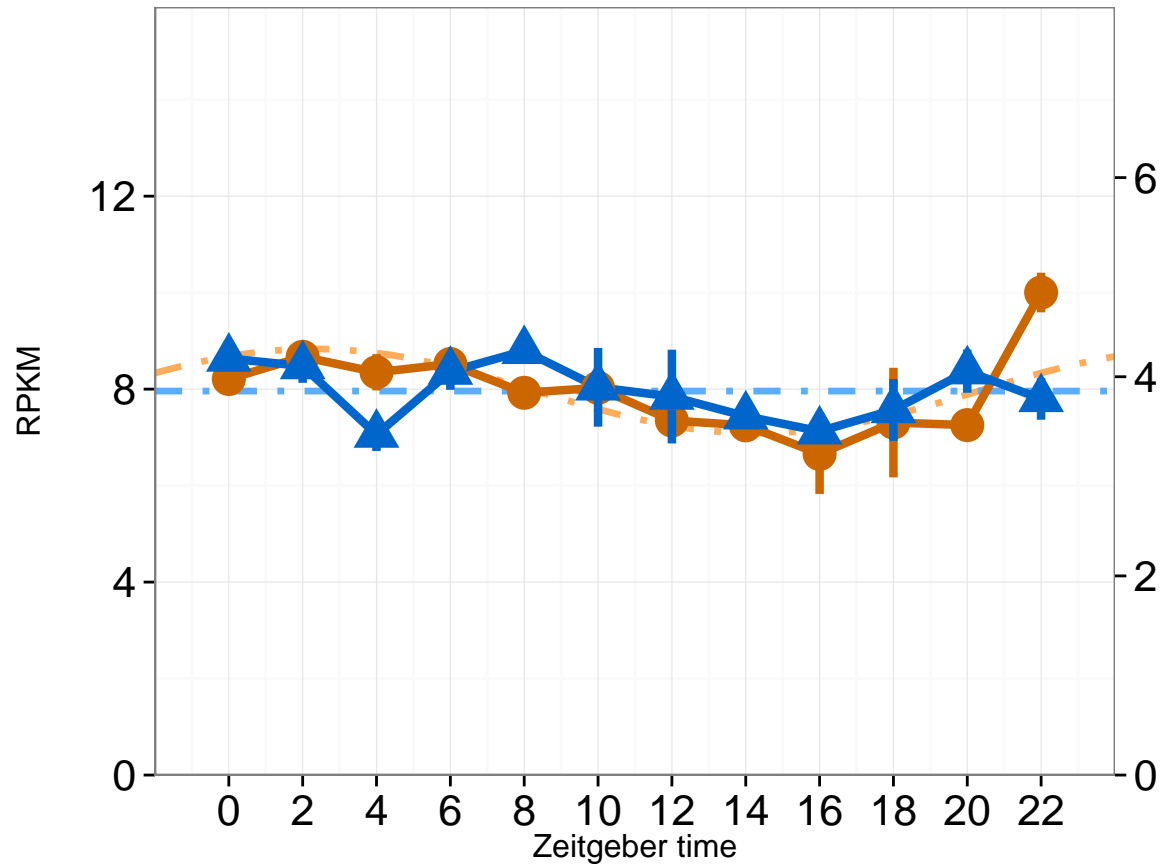

## Dhx38

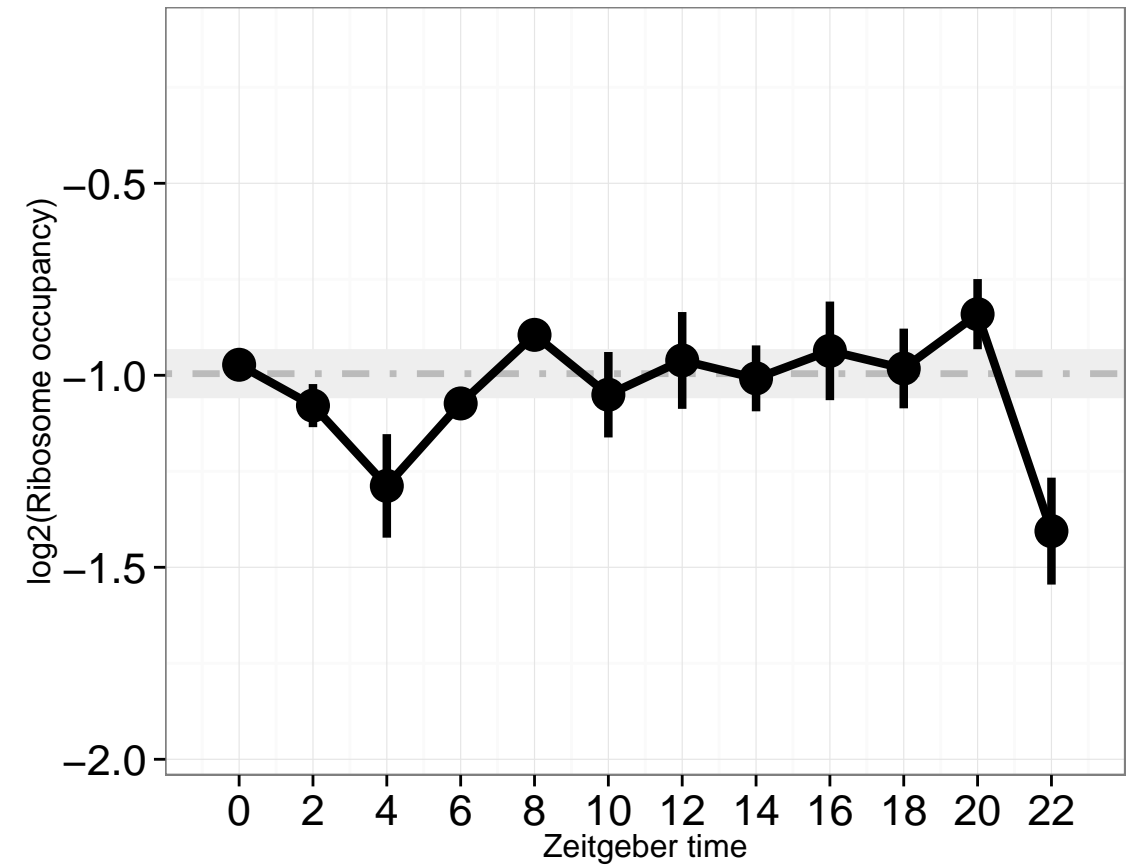

Supplement: SuppDataset_1.zip [file Dhx38_set_A.pdf › Supplemental Dataset 1/A-mRNA_nonrhyth_translation_nonrhyth/Dhx38_set_A.pdf]

## Dhx40

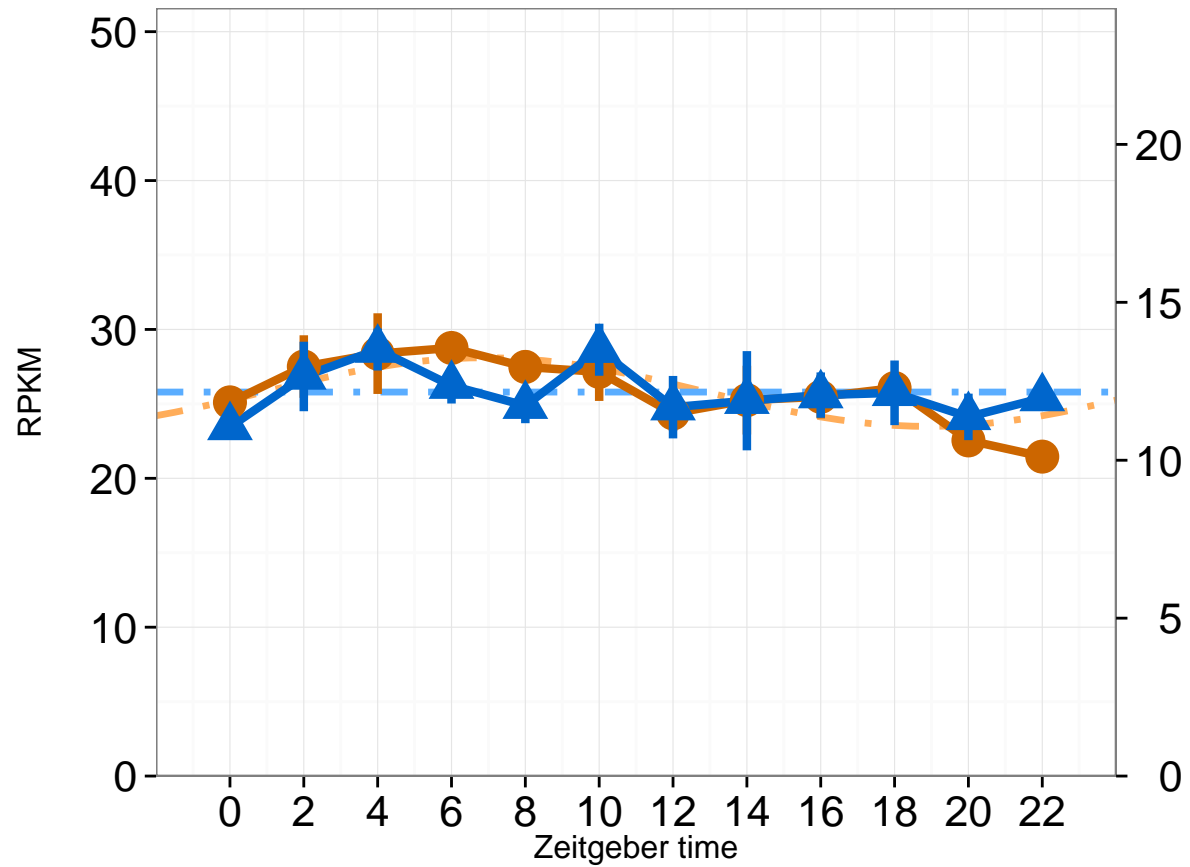

## Dhx40

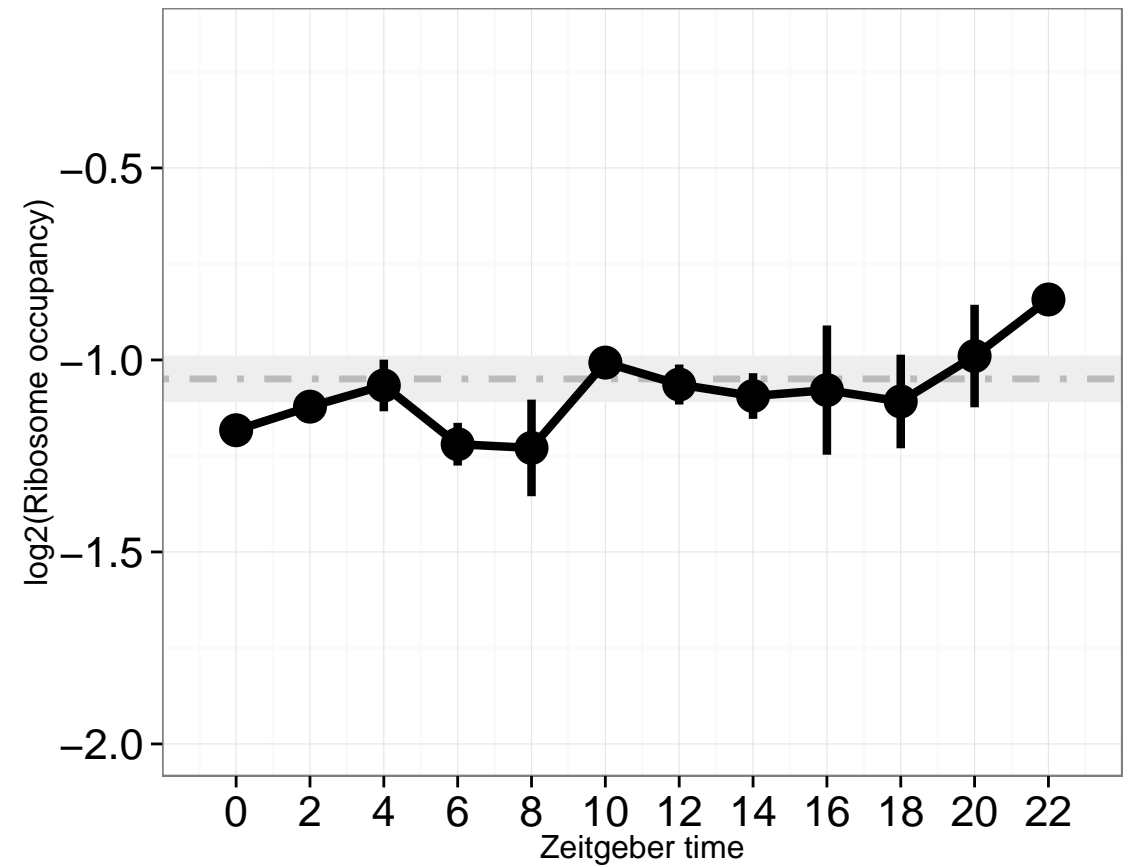

Supplement: SuppDataset_1.zip [file Dhx40_set_A.pdf › Supplemental Dataset 1/A-mRNA_nonrhyth_translation_nonrhyth/Dhx40_set_A.pdf]

## Dhx57

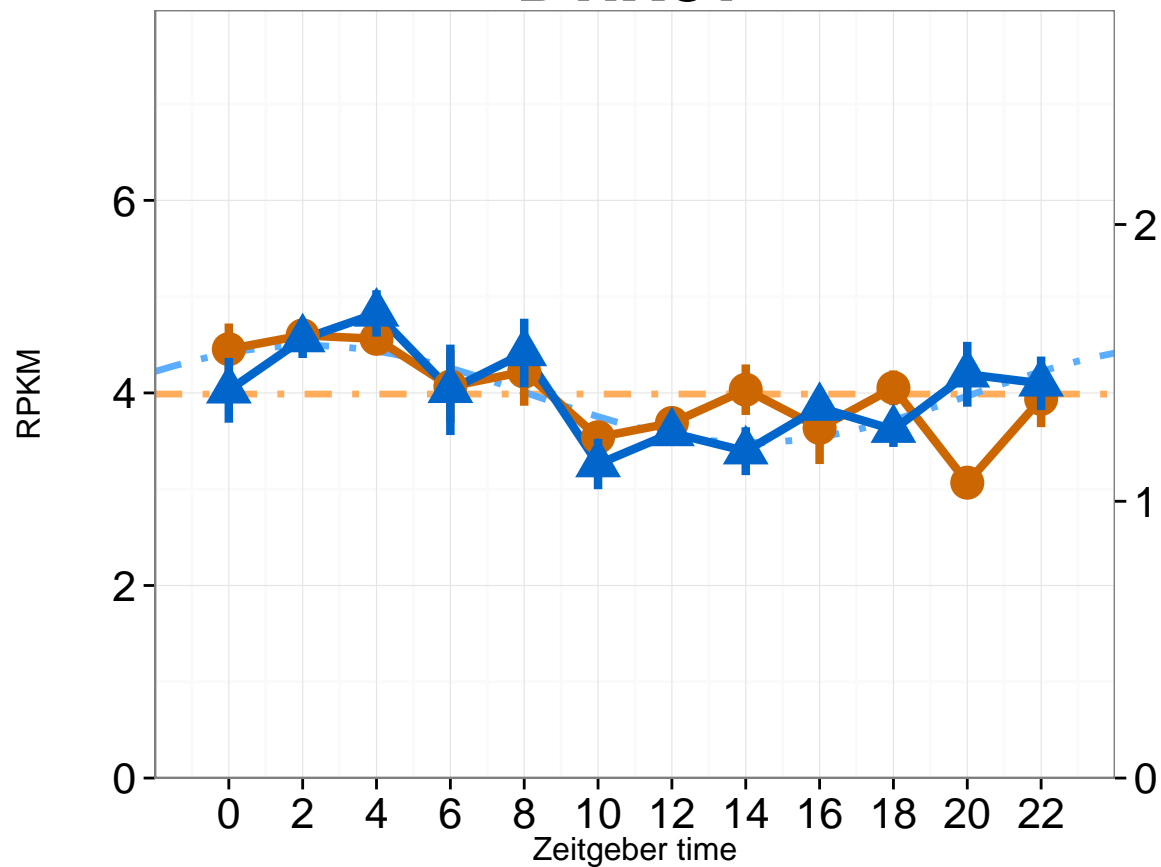

## Dhx57

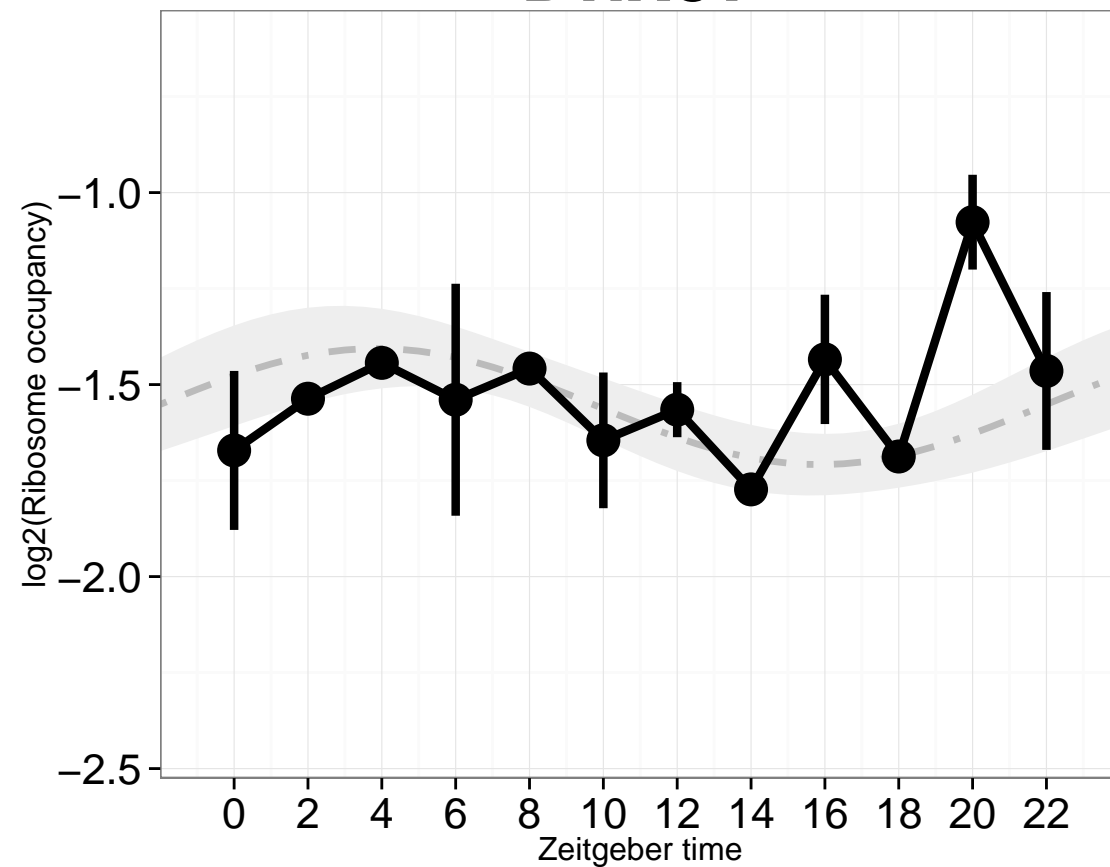

Supplement: SuppDataset_1.zip [file Dhx57_set_A.pdf › Supplemental Dataset 1/A-mRNA_nonrhyth_translation_nonrhyth/Dhx57_set_A.pdf]

## Dhx8

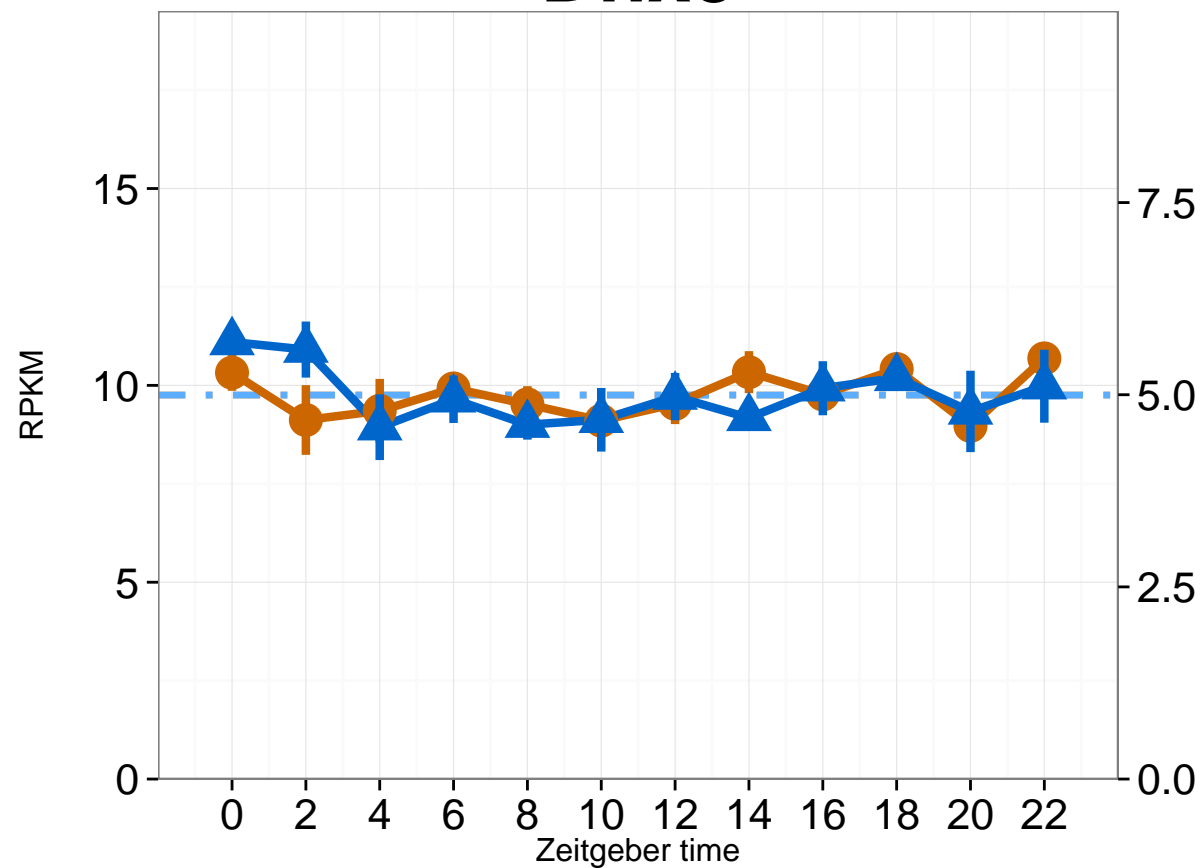

## Dhx8

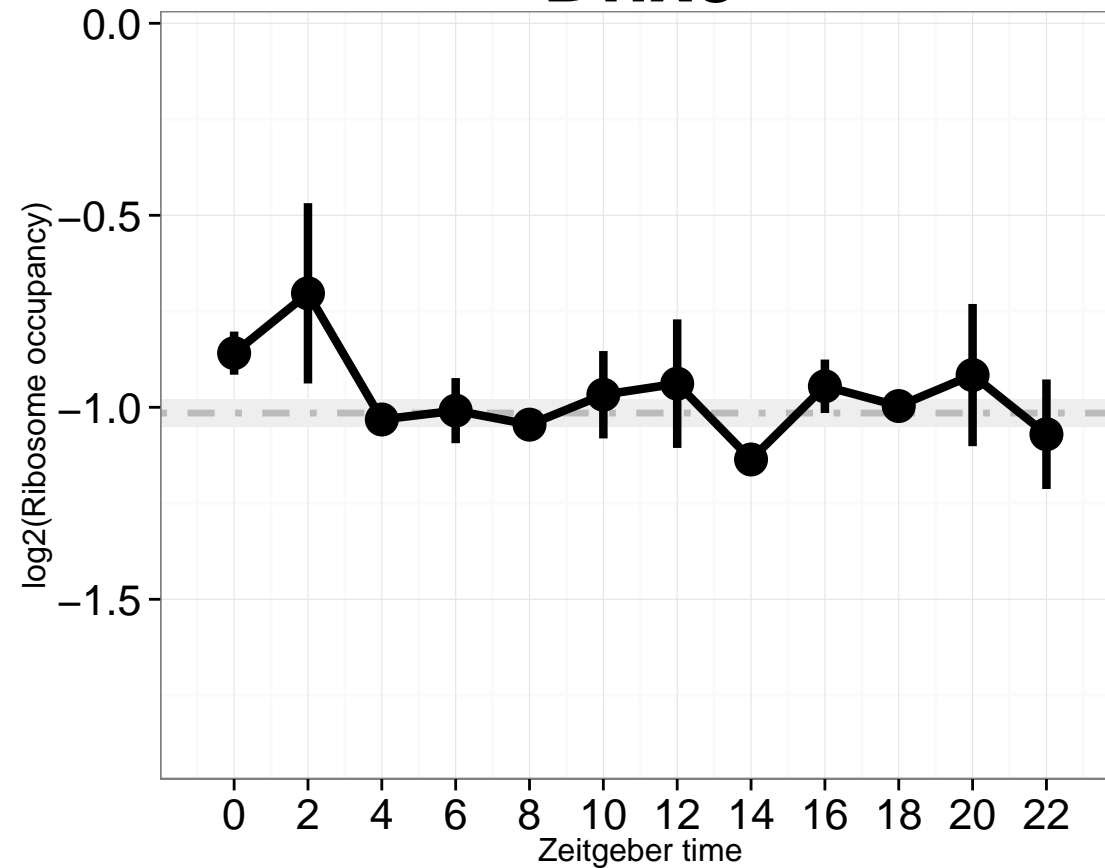

Supplement: SuppDataset_1.zip [file Dhx8_set_A.pdf › Supplemental Dataset 1/A-mRNA_nonrhyth_translation_nonrhyth/Dhx8_set_A.pdf]

## Diap1

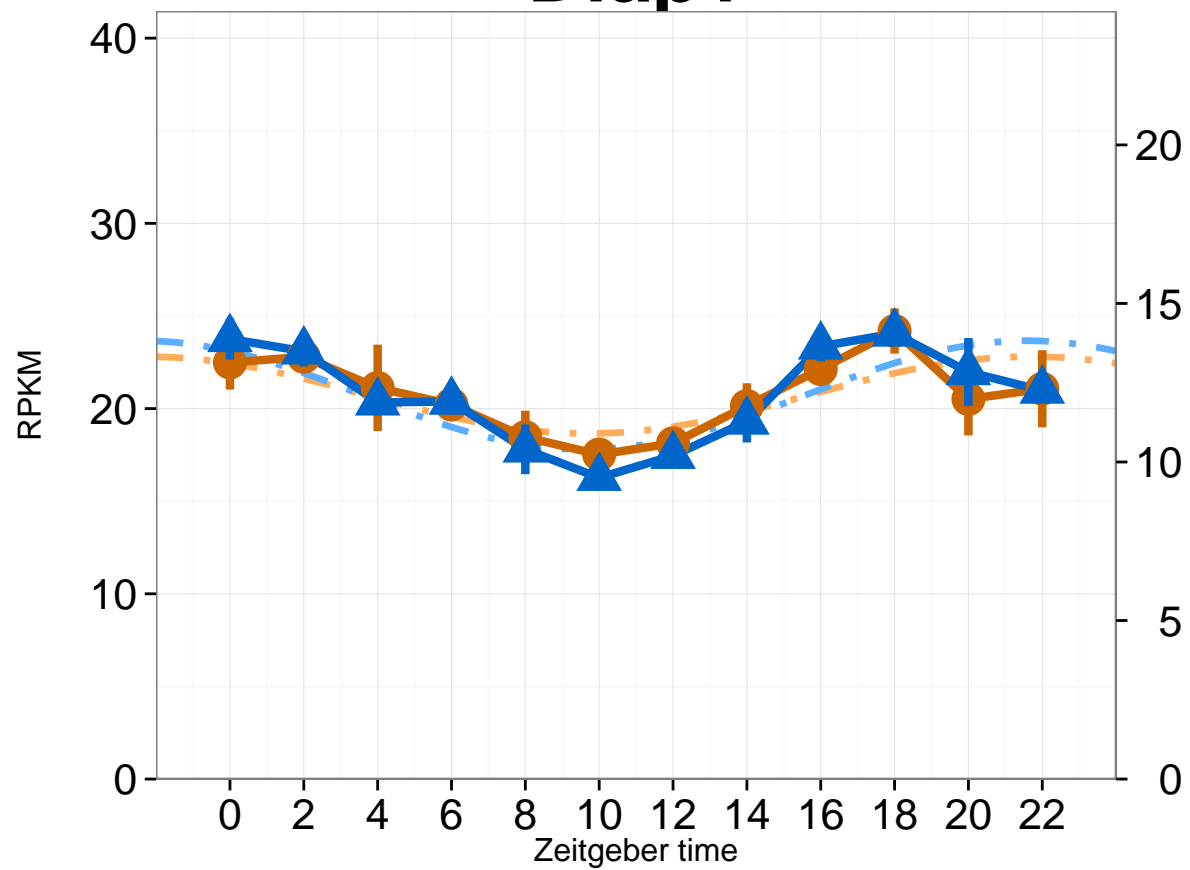

## Diap1

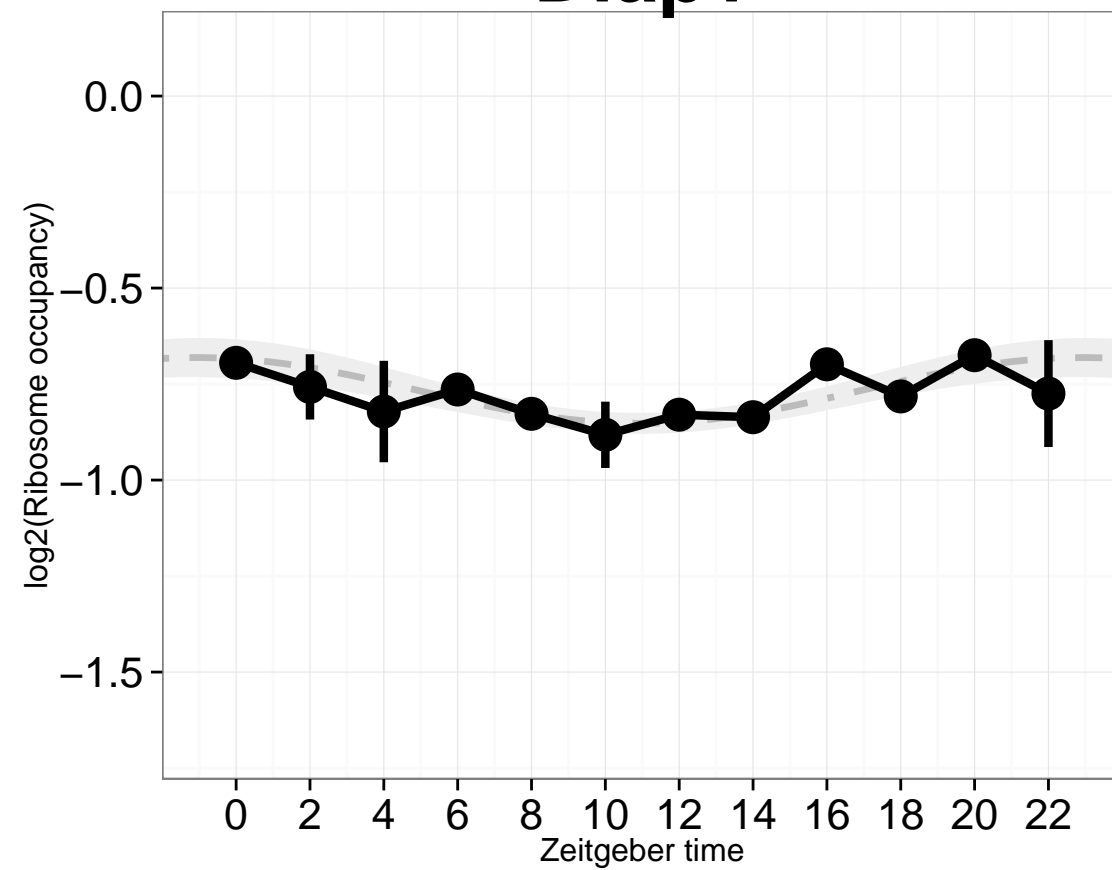

Supplement: SuppDataset_1.zip [file Diap1_set_A.pdf › Supplemental Dataset 1/A-mRNA_nonrhyth_translation_nonrhyth/Diap1_set_A.pdf]

## Dicer1

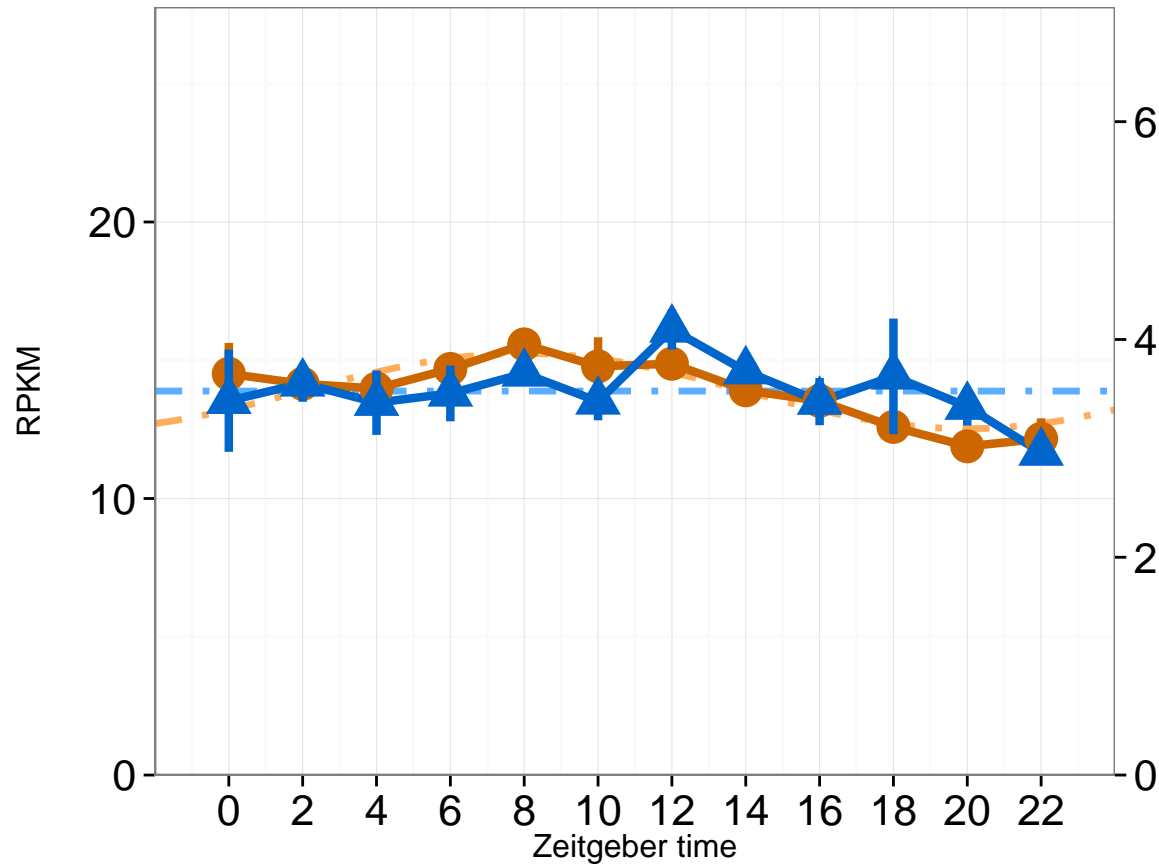

## Dicer1

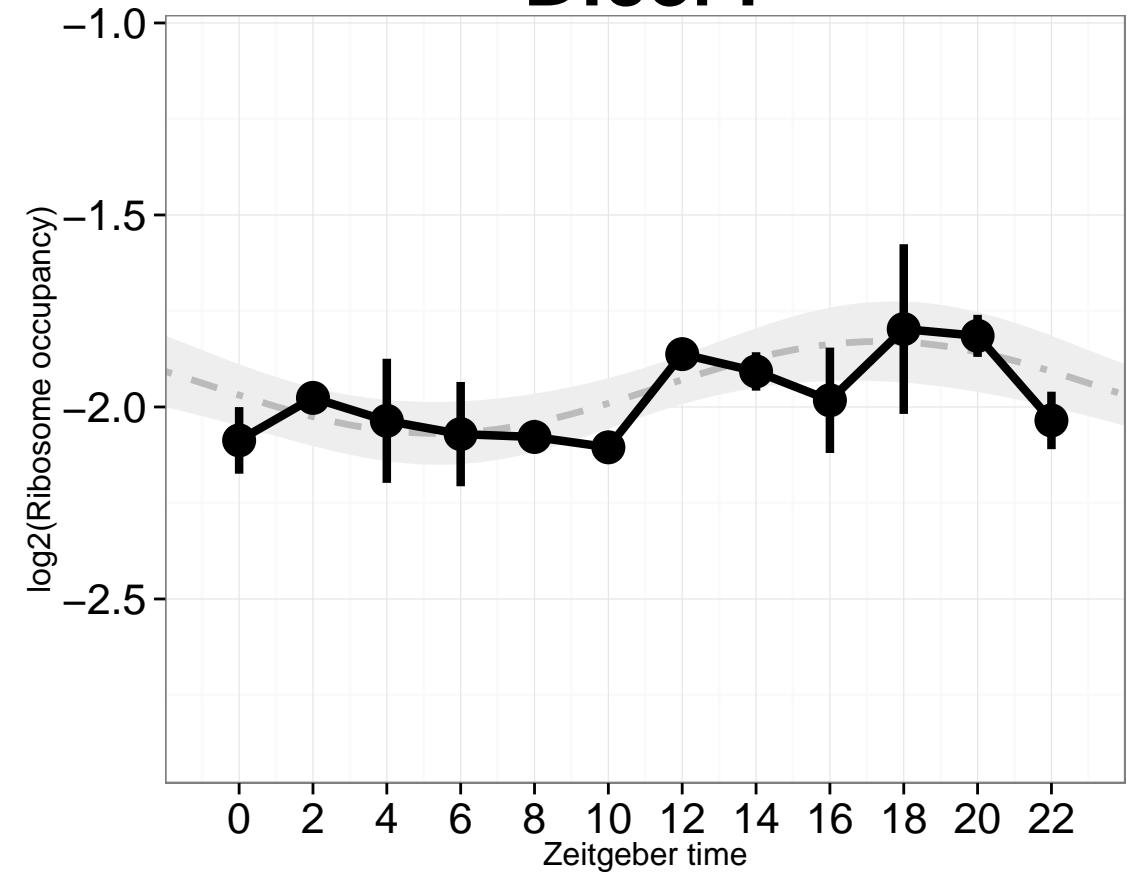

Supplement: SuppDataset_1.zip [file Dicer1_set_A.pdf › Supplemental Dataset 1/A-mRNA_nonrhyth_translation_nonrhyth/Dicer1_set_A.pdf]

# Dido1

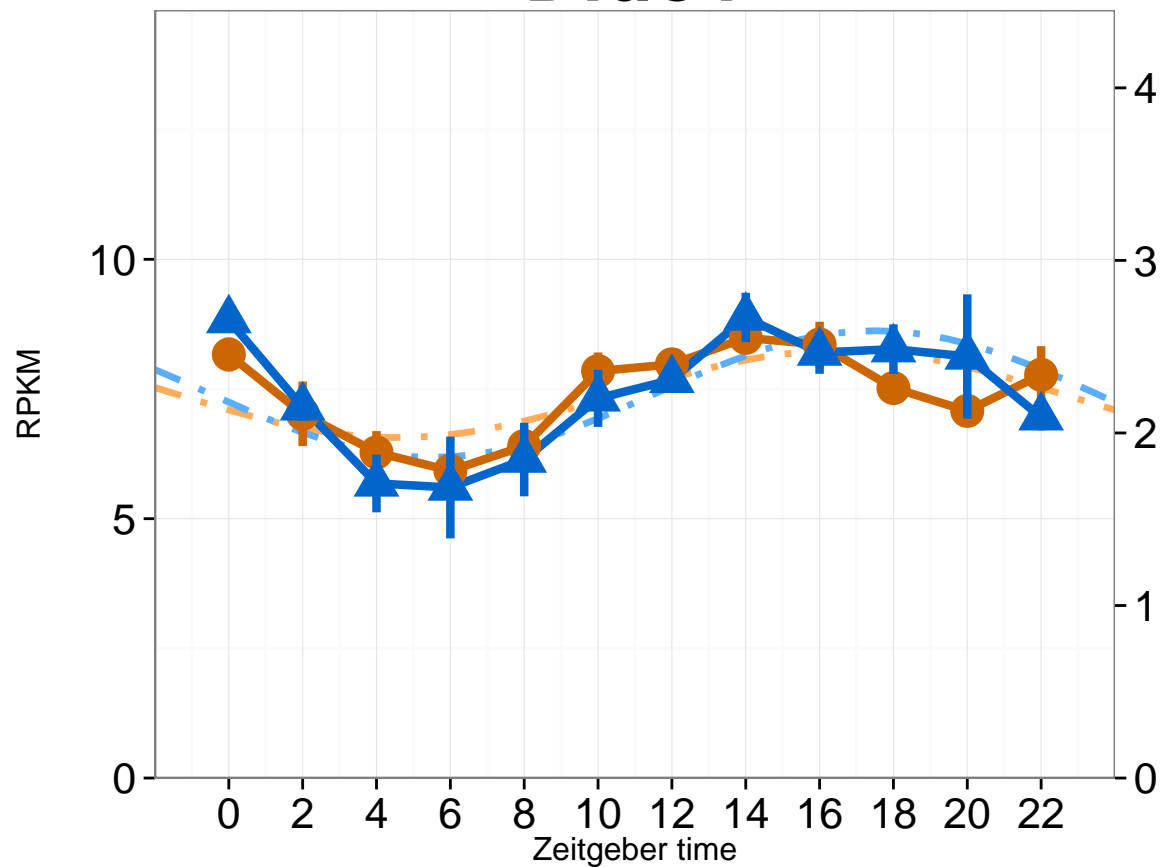

# Dido1

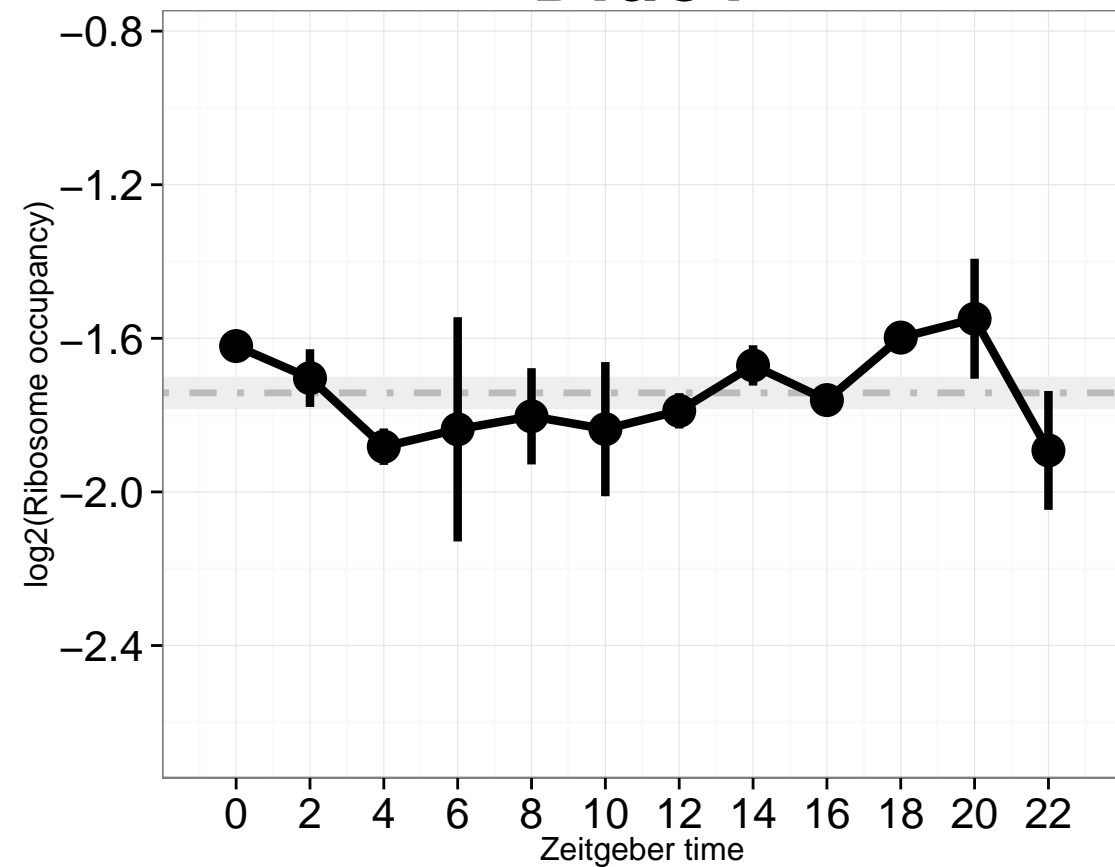

Supplement: SuppDataset_1.zip [file Dido1_set_A.pdf › Supplemental Dataset 1/A-mRNA_nonrhyth_translation_nonrhyth/Dido1_set_A.pdf]

# Diexf

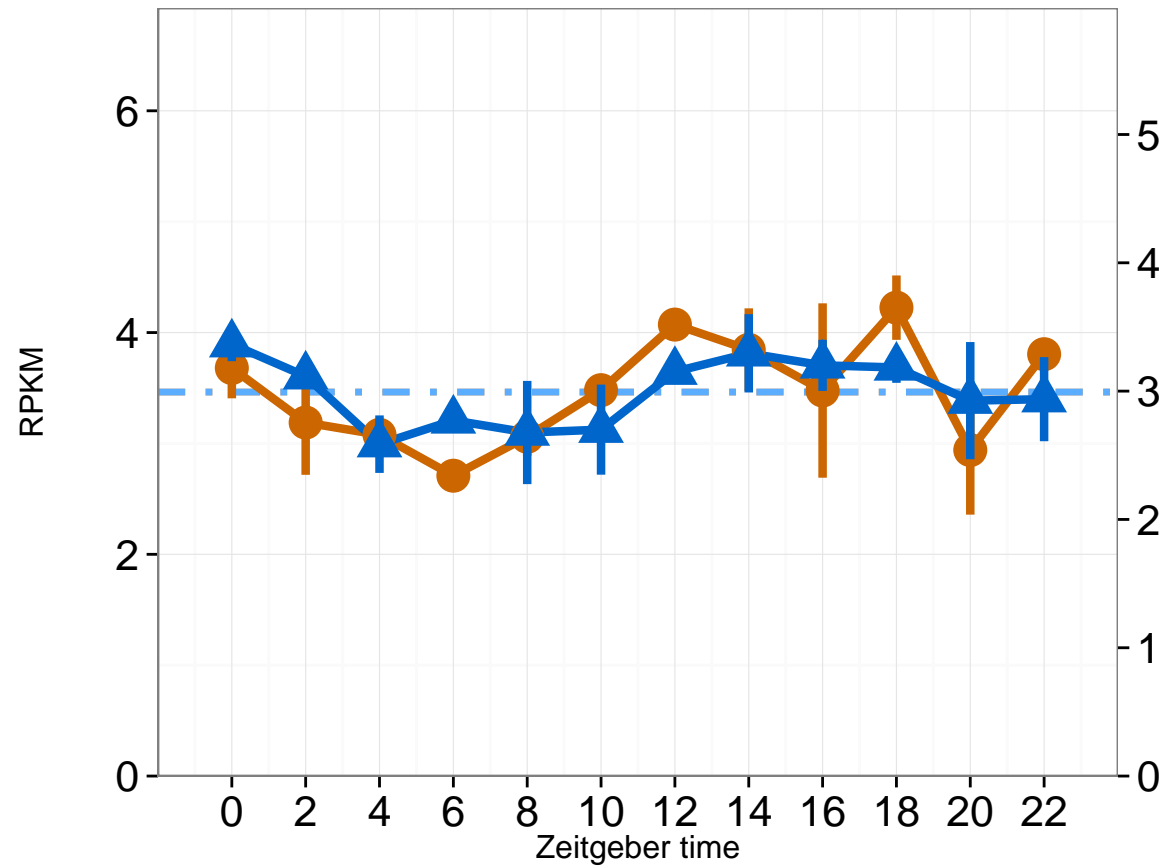

# Diexf

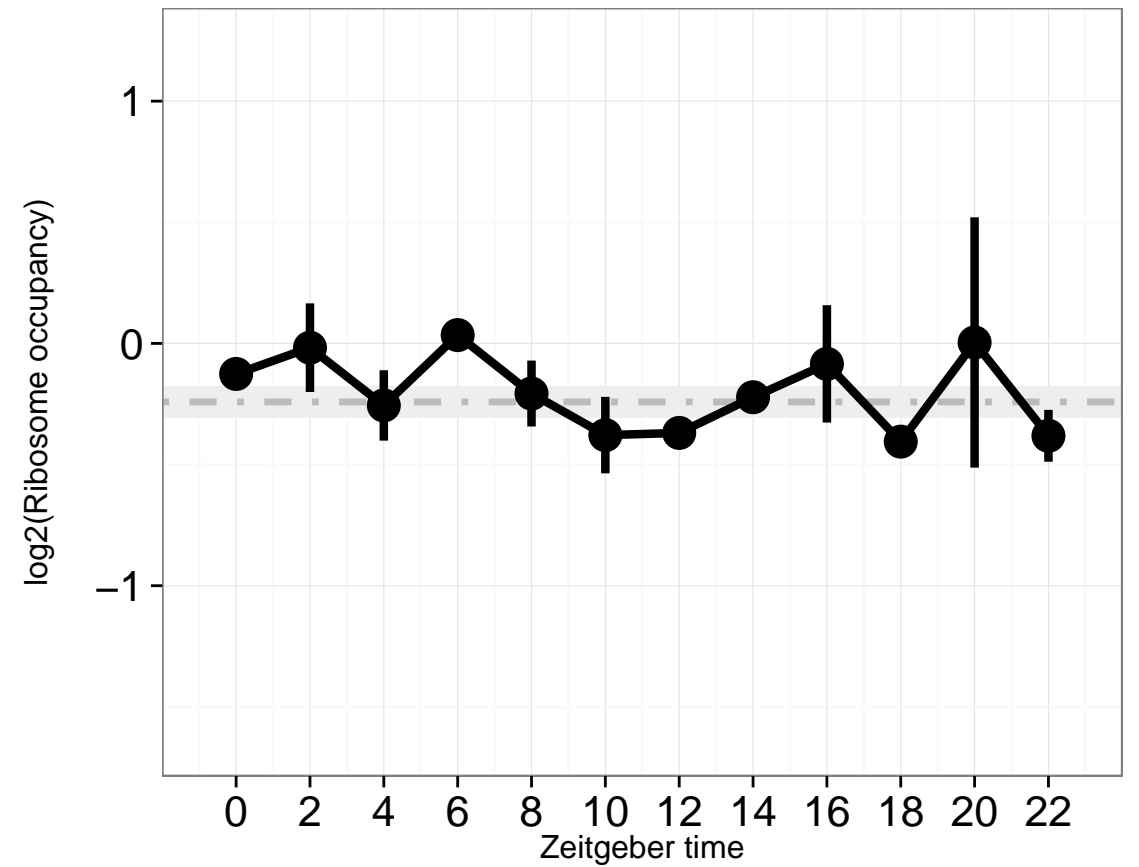

Supplement: SuppDataset_1.zip [file Diexf_set_A.pdf › Supplemental Dataset 1/A-mRNA_nonrhyth_translation_nonrhyth/Diexf_set_A.pdf]

# Dimt1

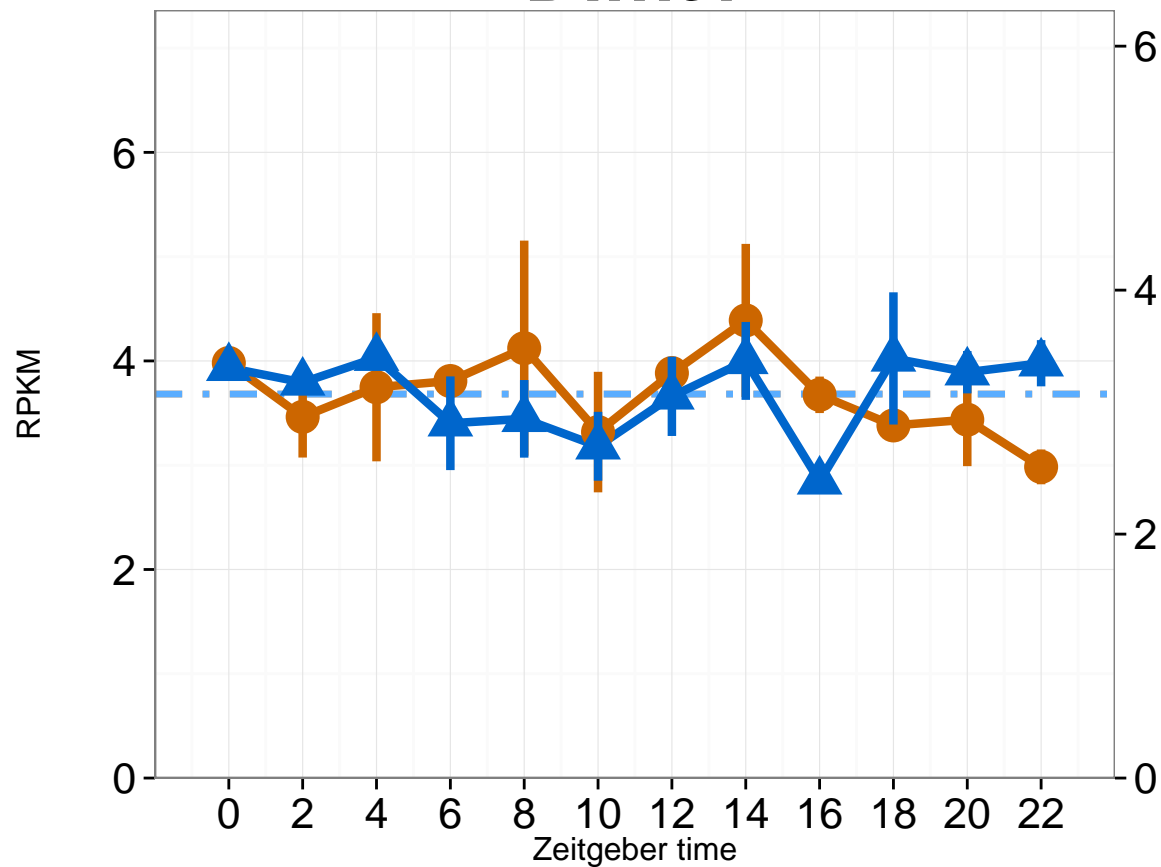

# Dimt1

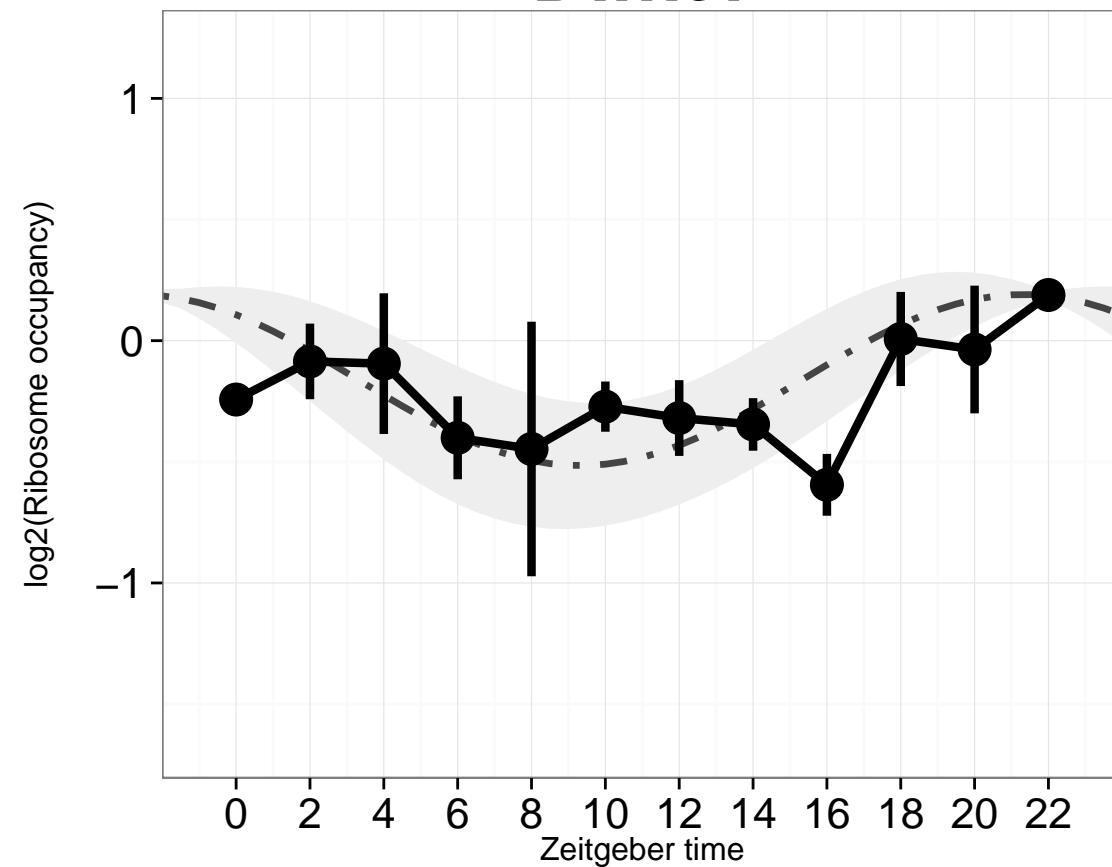

Supplement: SuppDataset_1.zip [file Dimt1_set_A.pdf › Supplemental Dataset 1/A-mRNA_nonrhyth_translation_nonrhyth/Dimt1_set_A.pdf]

# Dip2a

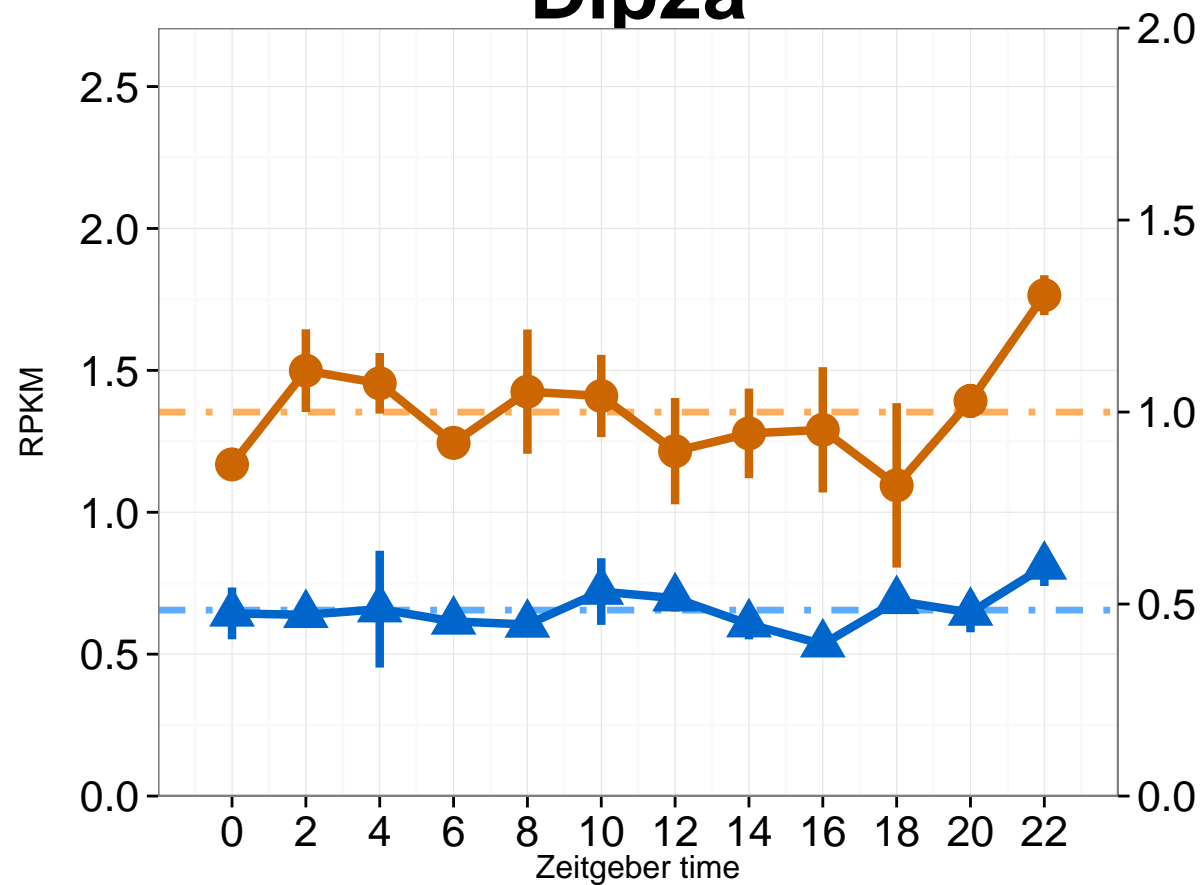

# Dip2a

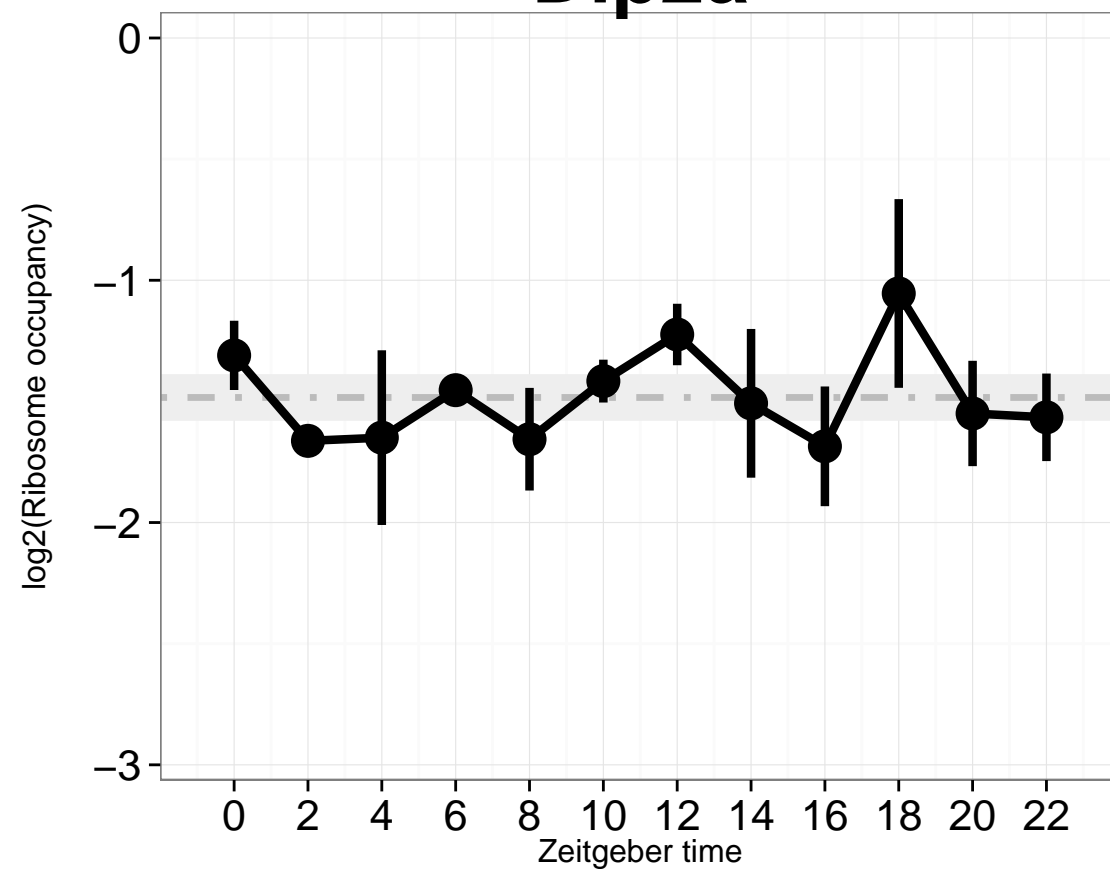

Supplement: SuppDataset_1.zip [file Dip2a_set_A.pdf › Supplemental Dataset 1/A-mRNA_nonrhyth_translation_nonrhyth/Dip2a_set_A.pdf]

# Dip2b

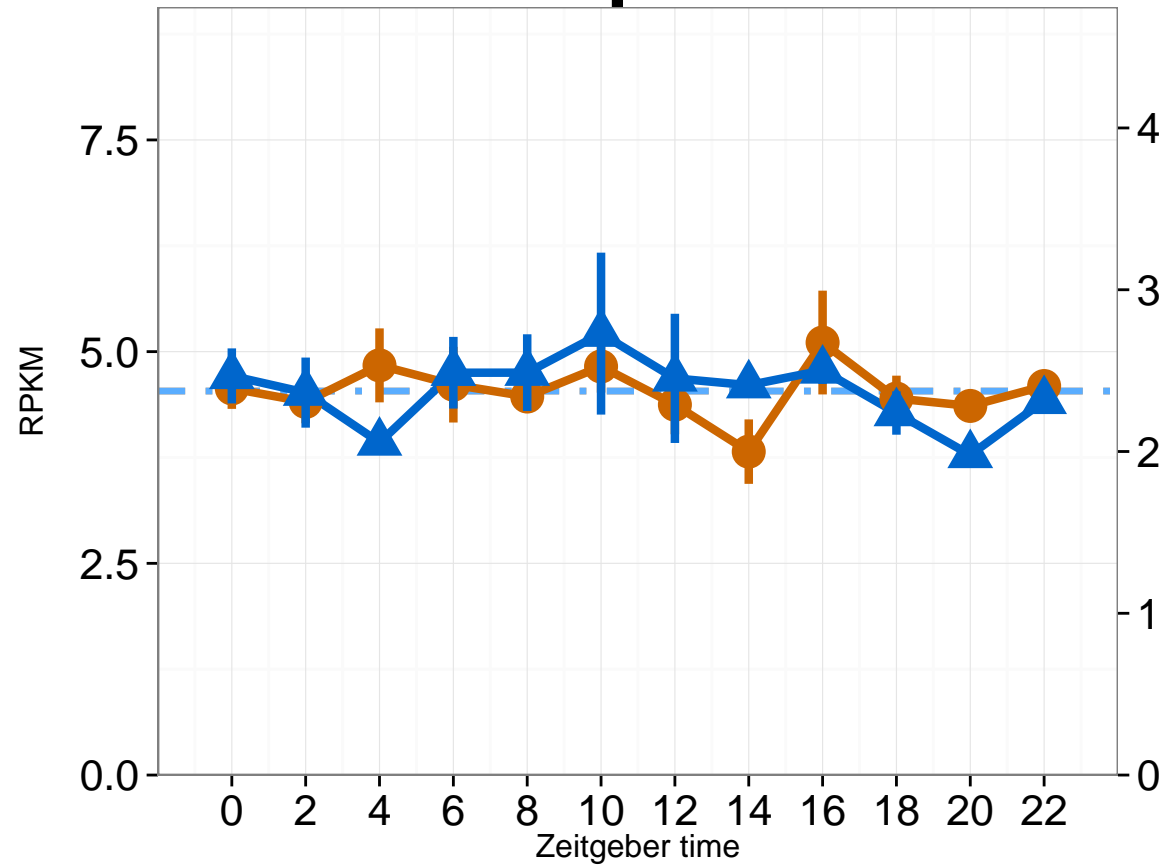

# Dip2b

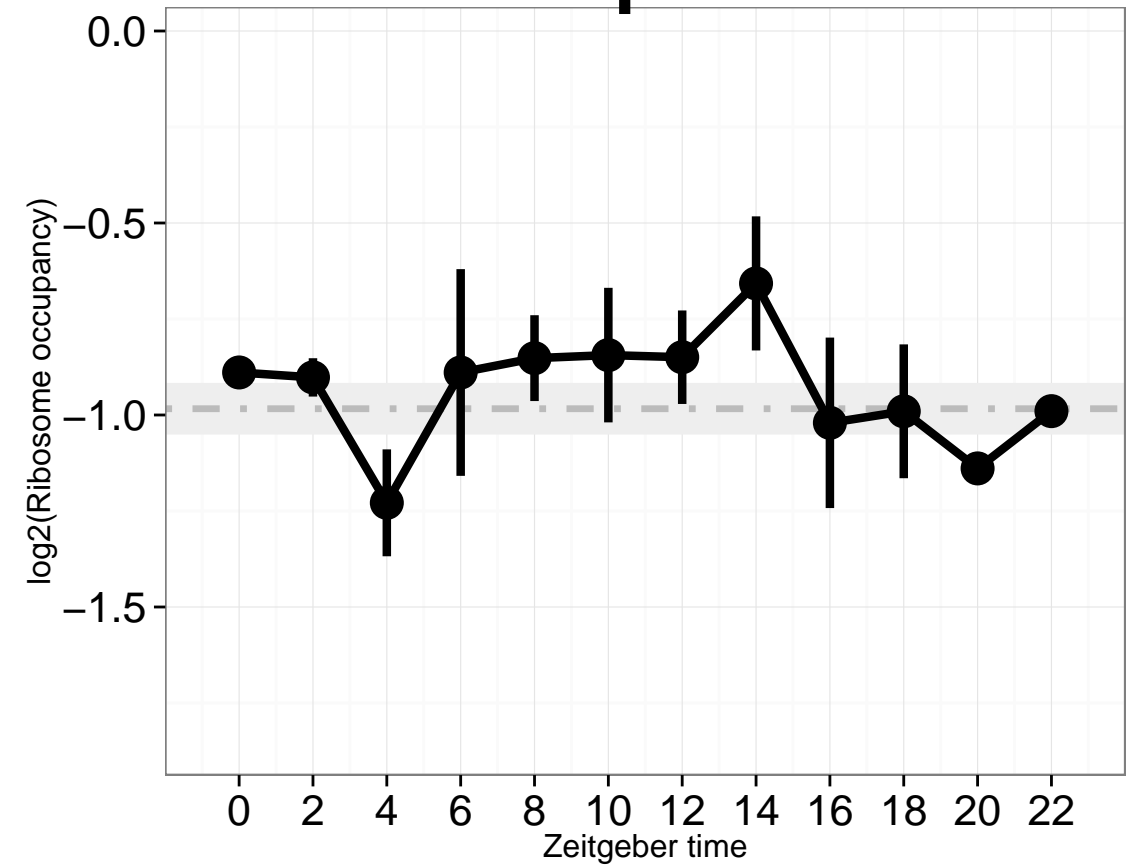

Supplement: SuppDataset_1.zip [file Dip2b_set_A.pdf › Supplemental Dataset 1/A-mRNA_nonrhyth_translation_nonrhyth/Dip2b_set_A.pdf]
