# Supplementary figures and images for: Ribosome profiling reveals the rhythmic liver translatome and circadian clock regulation by upstream open reading frames (part 22 of 113)
Source: HighWire-hosted journal article supplement (doi:10.1101/gr.195404.115), 2015-10-20

# Dip2c

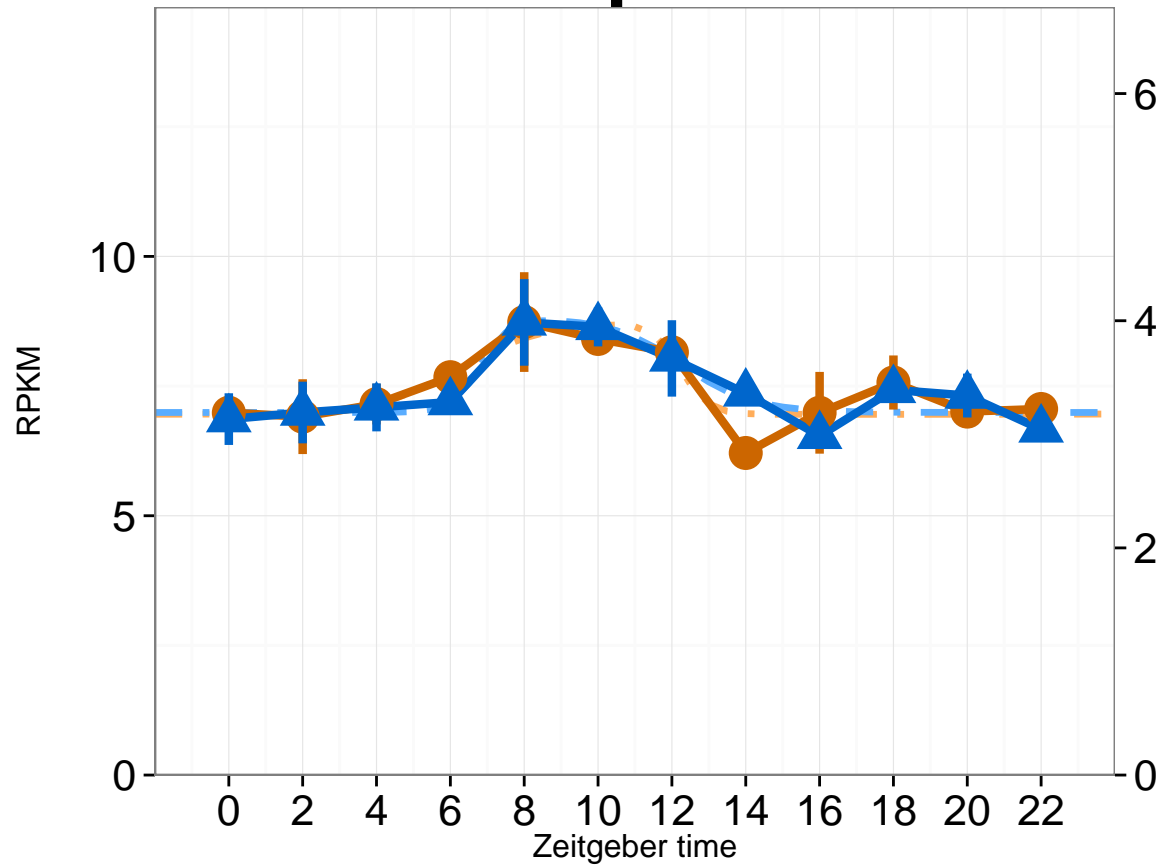

# Dip2c

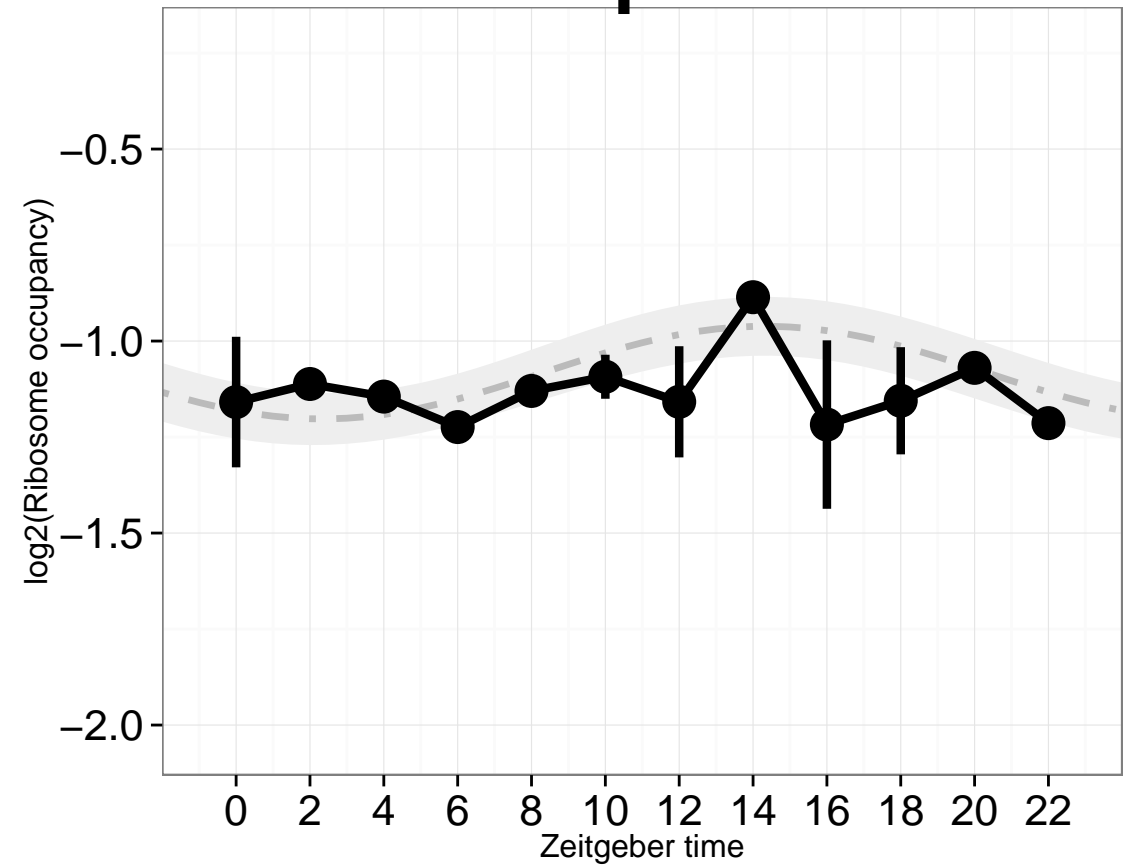

Supplement: SuppDataset_1.zip [file Dip2c_set_A.pdf › Supplemental Dataset 1/A-mRNA_nonrhyth_translation_nonrhyth/Dip2c_set_A.pdf]

## Dis3

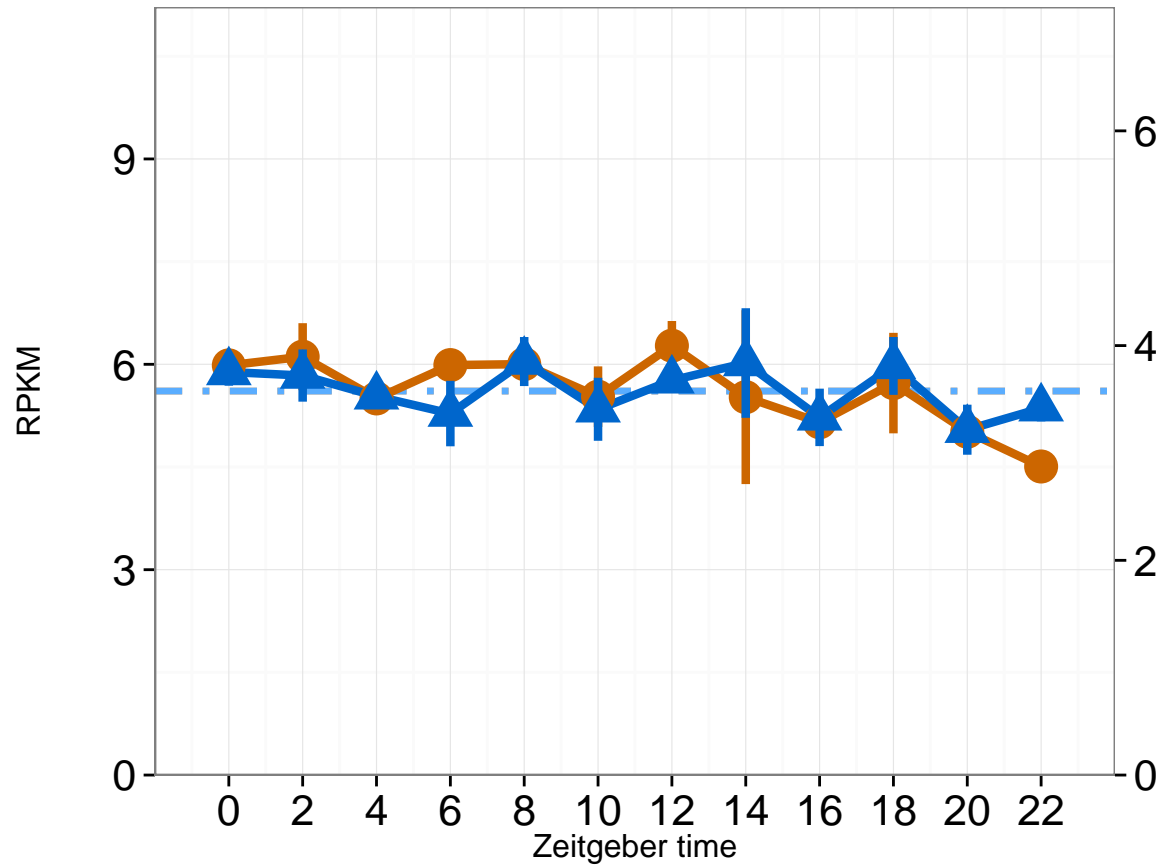

## Dis3

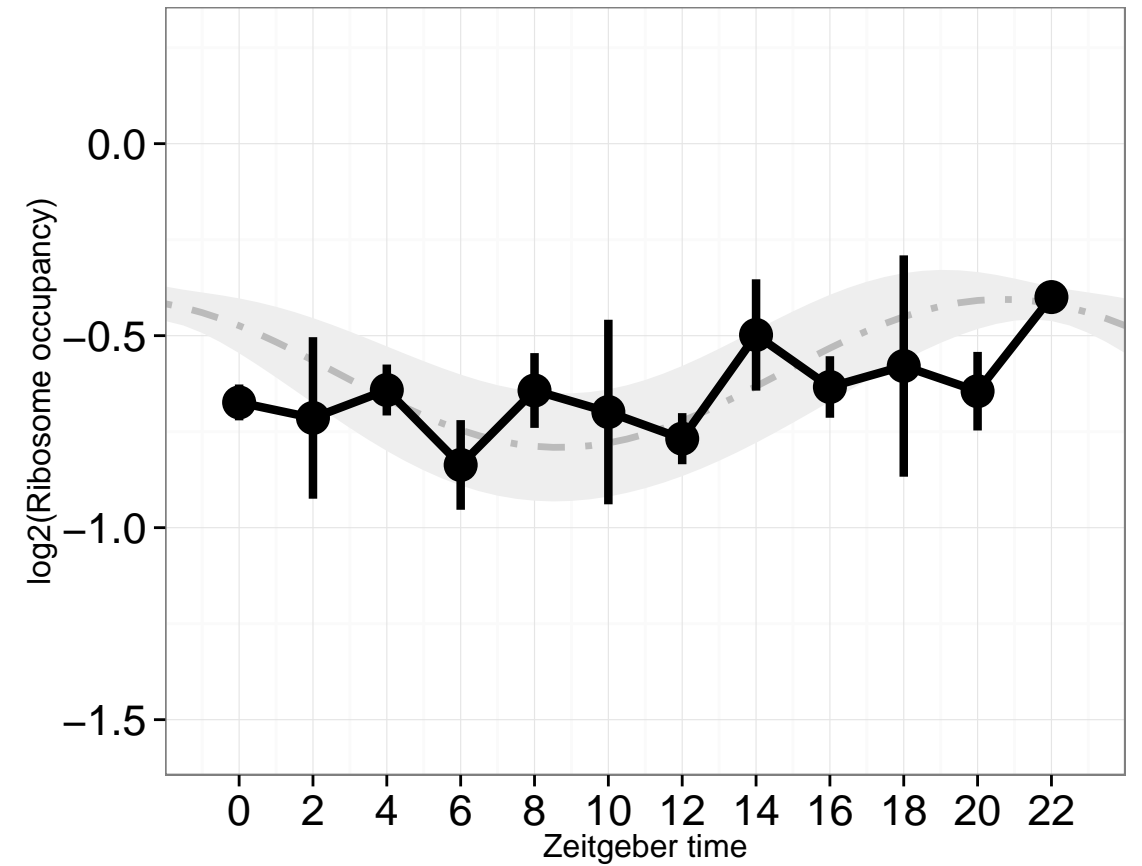

Supplement: SuppDataset_1.zip [file Dis3_set_A.pdf › Supplemental Dataset 1/A-mRNA_nonrhyth_translation_nonrhyth/Dis3_set_A.pdf]

## Dis3l

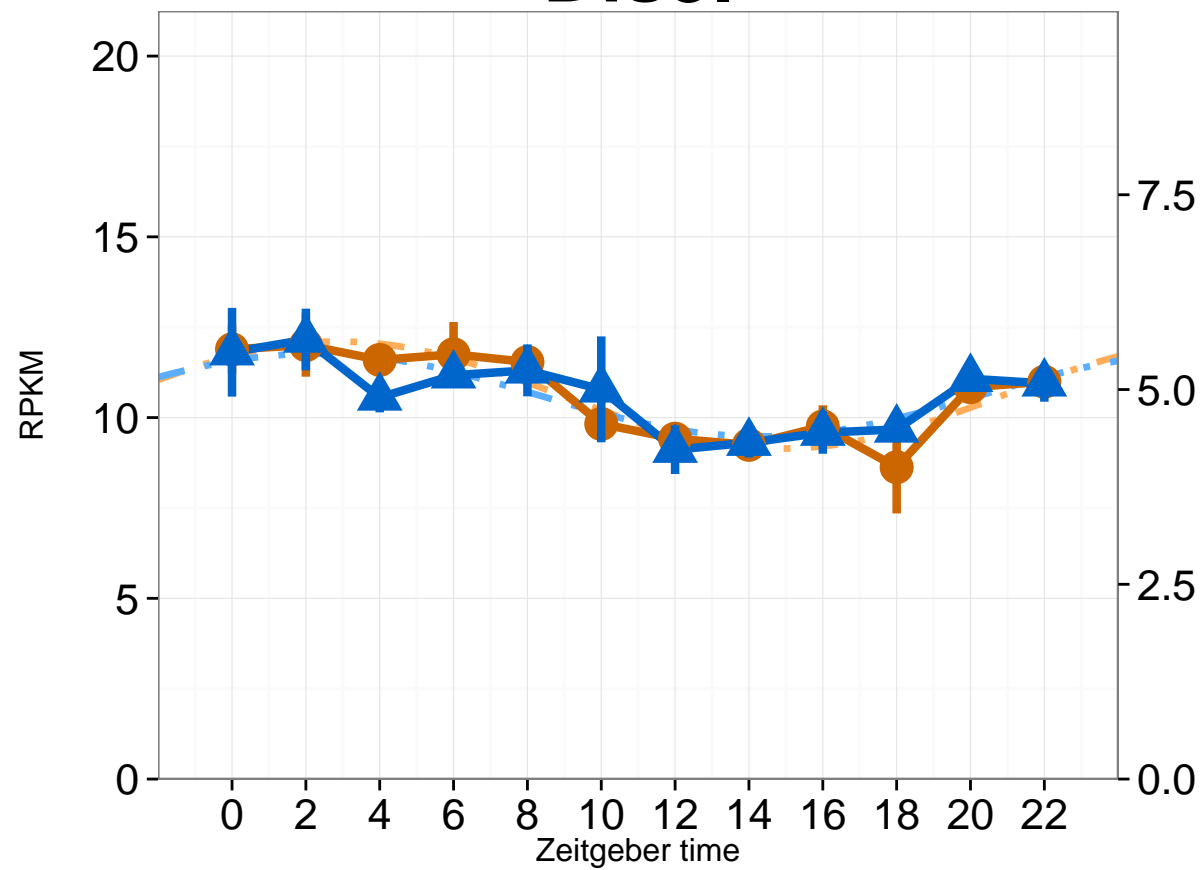

## Dis3l

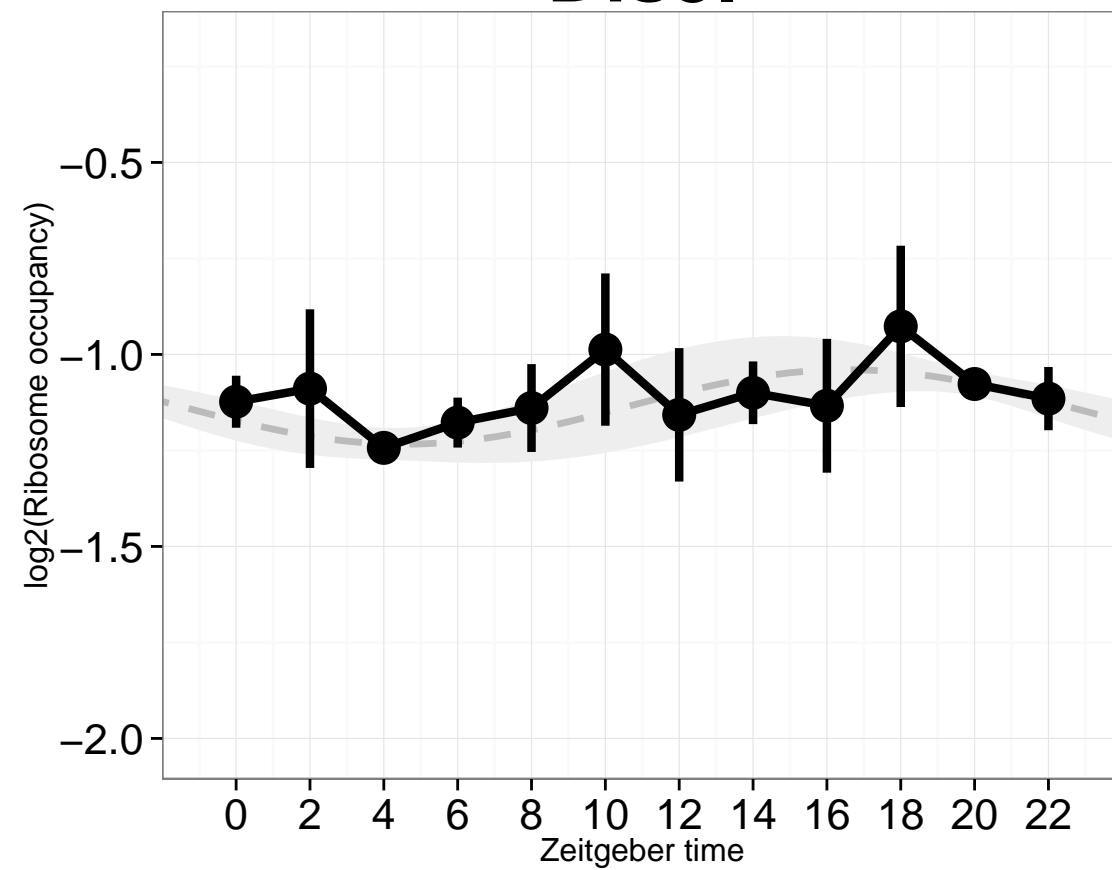

Supplement: SuppDataset_1.zip [file Dis3l_set_A.pdf › Supplemental Dataset 1/A-mRNA_nonrhyth_translation_nonrhyth/Dis3l_set_A.pdf]

# Dkc1

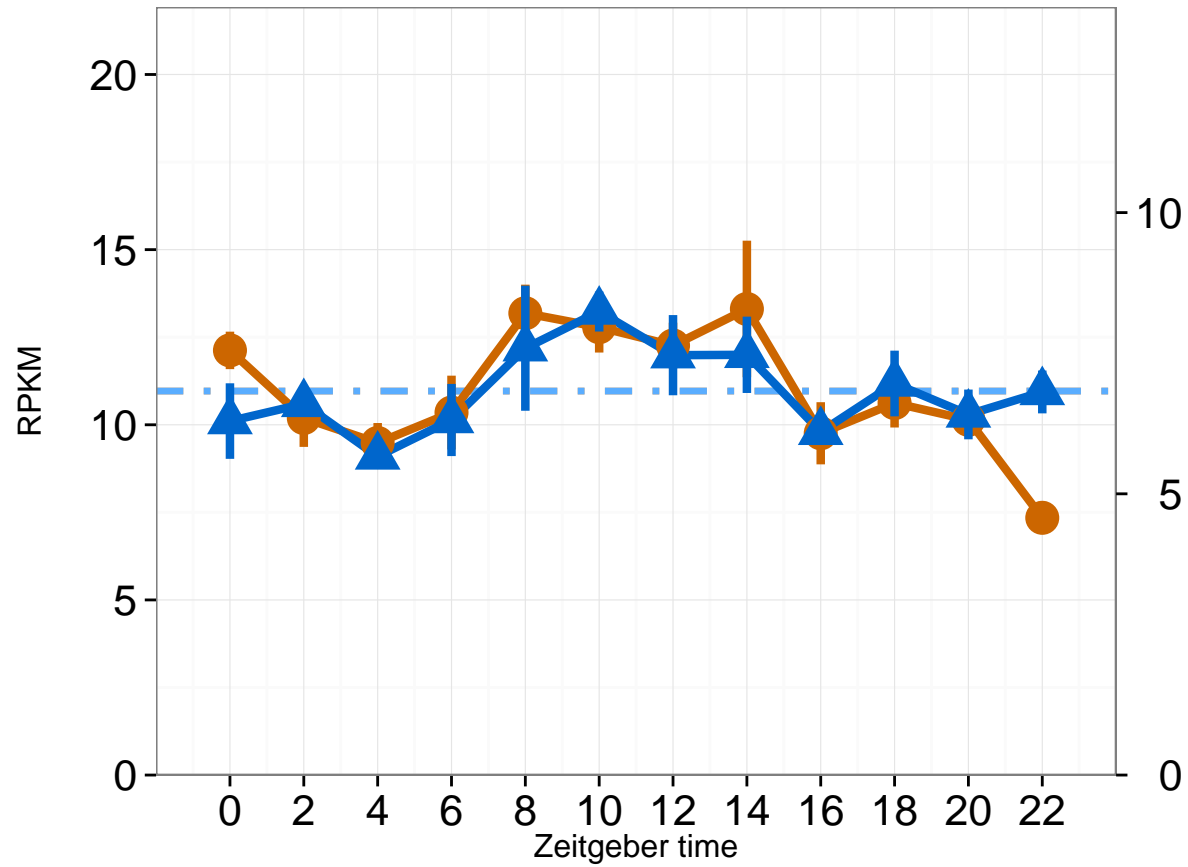

# Dkc1

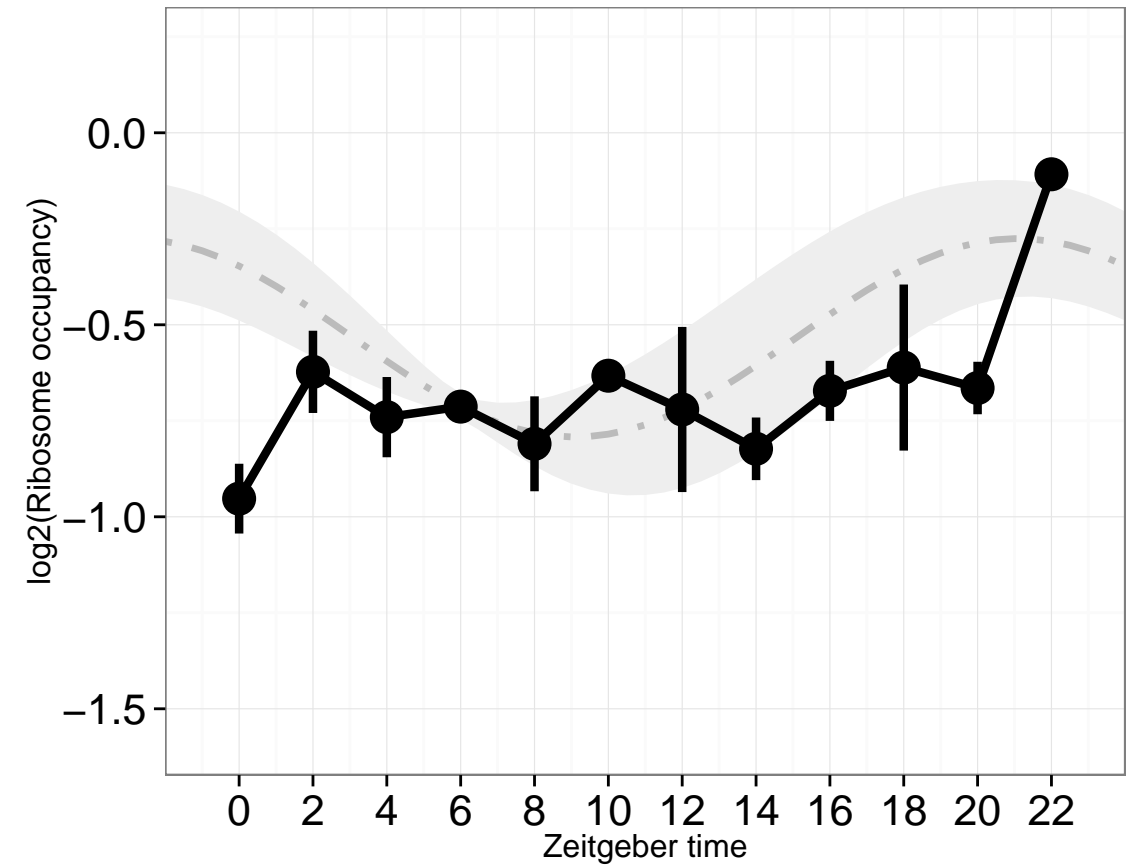

Supplement: SuppDataset_1.zip [file Dkc1_set_A.pdf › Supplemental Dataset 1/A-mRNA_nonrhyth_translation_nonrhyth/Dkc1_set_A.pdf]

# Dkk3

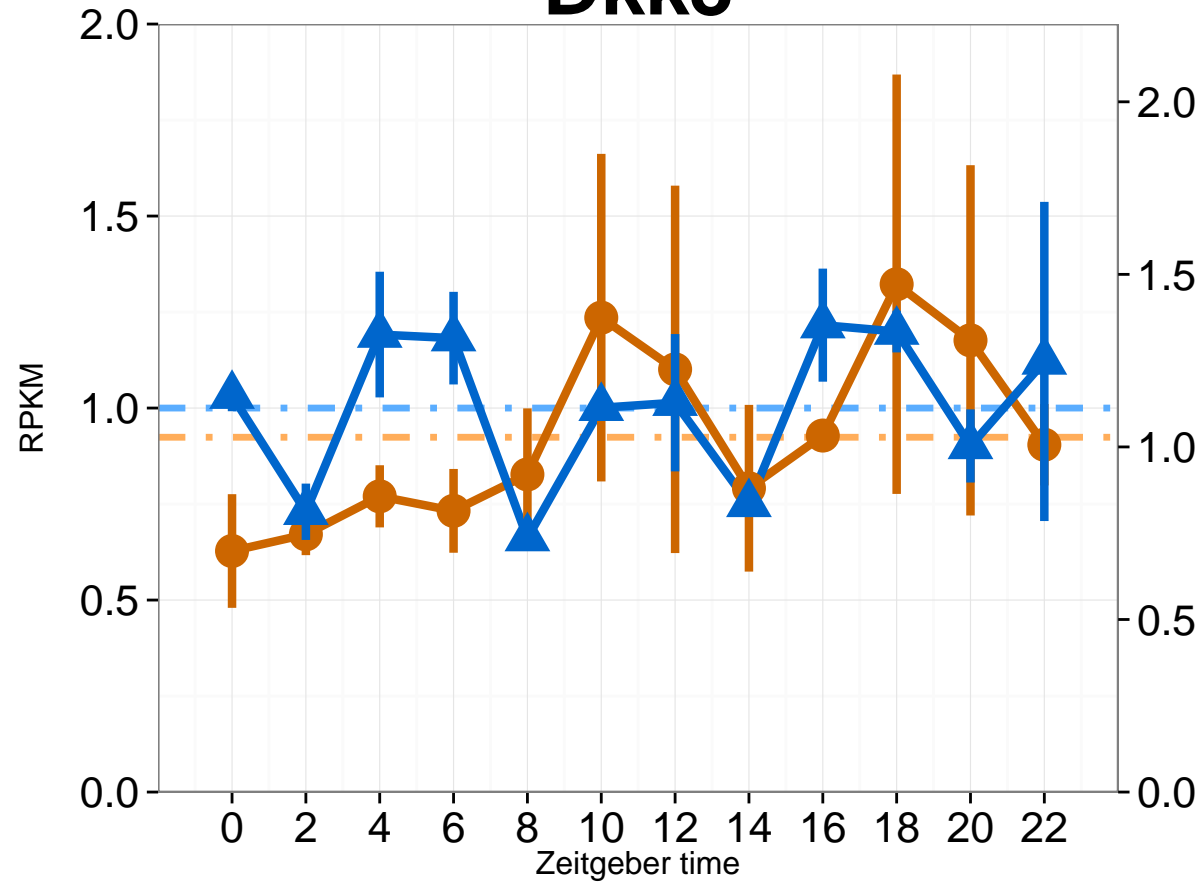

# Dkk3

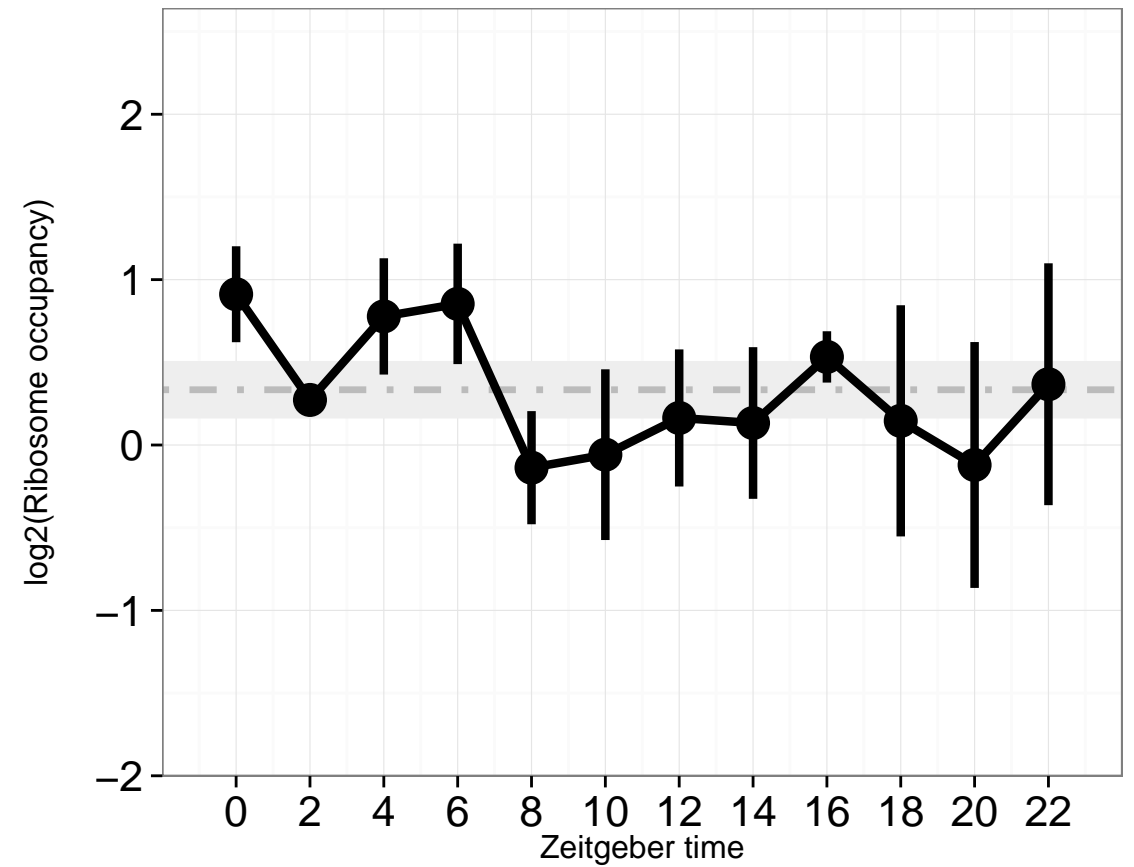

Supplement: SuppDataset_1.zip [file Dkk3_set_A.pdf › Supplemental Dataset 1/A-mRNA_nonrhyth_translation_nonrhyth/Dkk3_set_A.pdf]

## Dlat

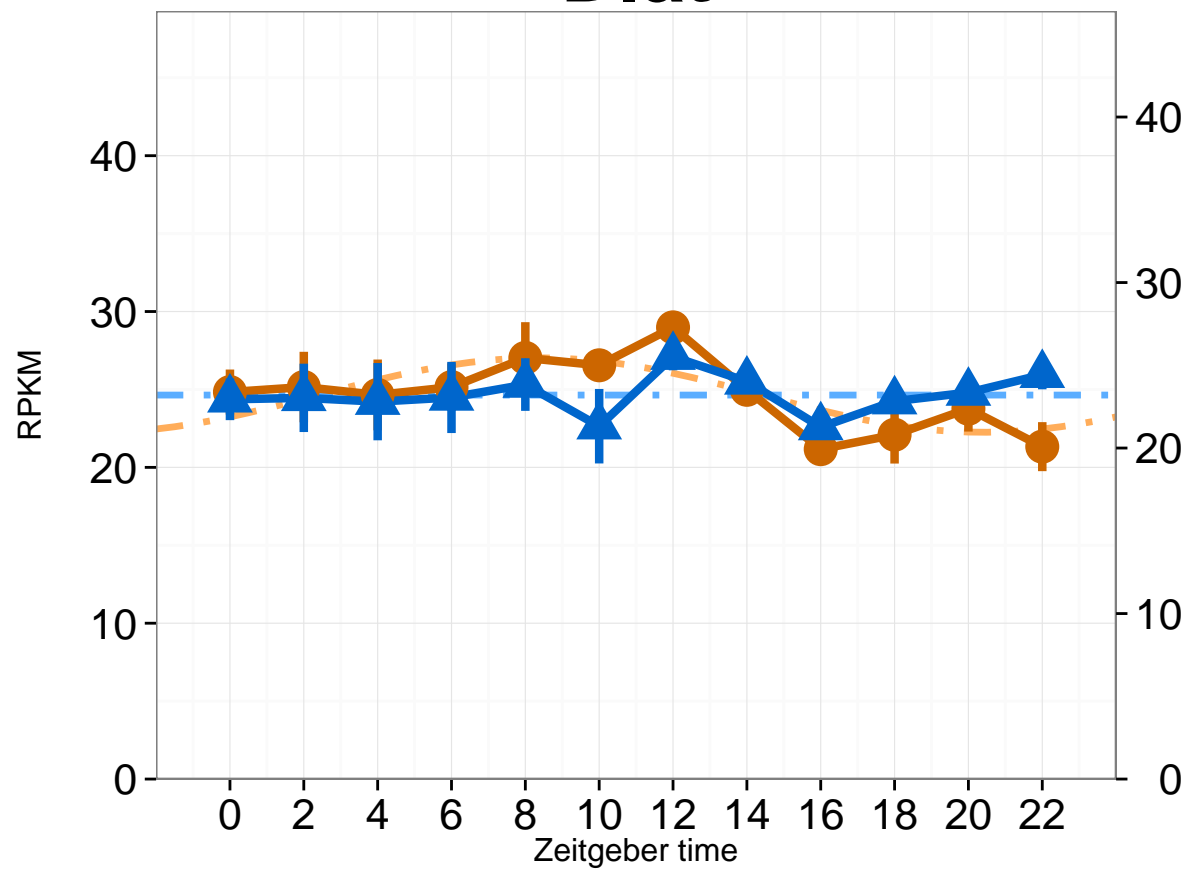

## Dlat

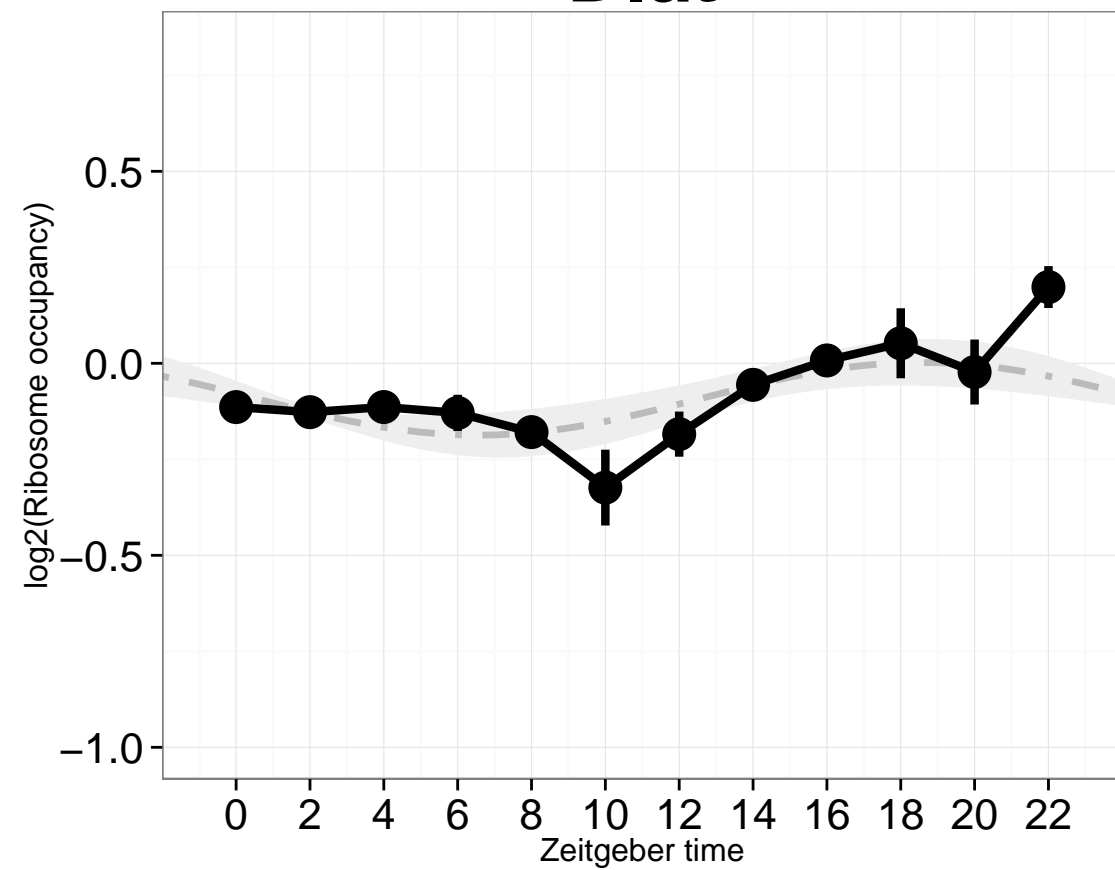

Supplement: SuppDataset_1.zip [file Dlat_set_A.pdf › Supplemental Dataset 1/A-mRNA_nonrhyth_translation_nonrhyth/Dlat_set_A.pdf]

## Dld

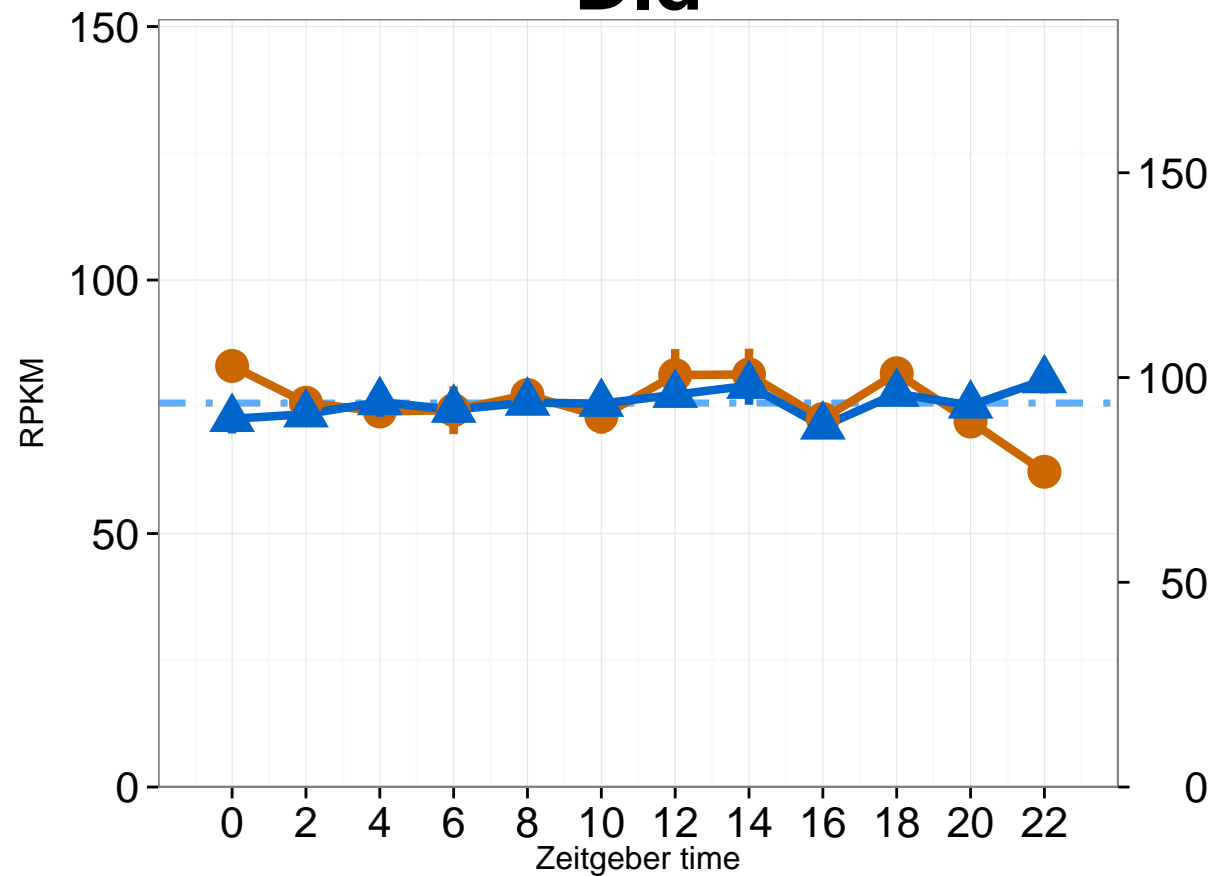

## Dld

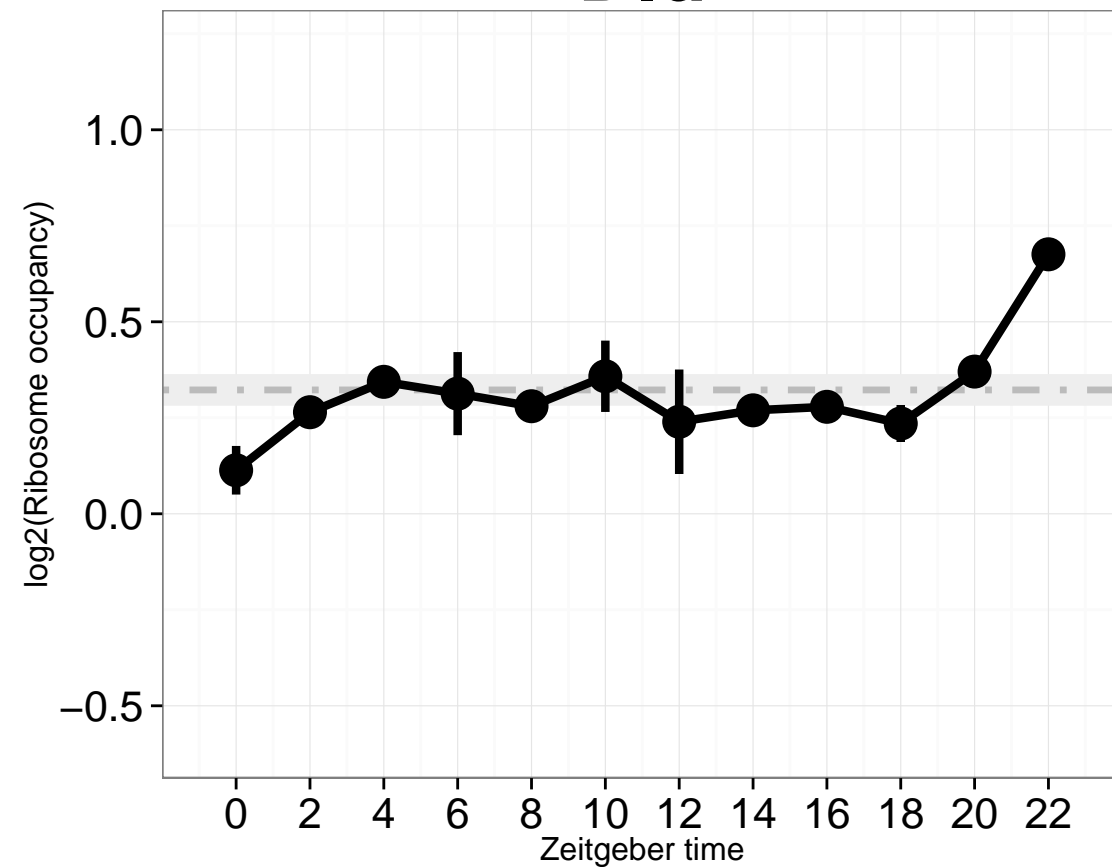

Supplement: SuppDataset_1.zip [file Dld_set_A.pdf › Supplemental Dataset 1/A-mRNA_nonrhyth_translation_nonrhyth/Dld_set_A.pdf]

## Dlgap1

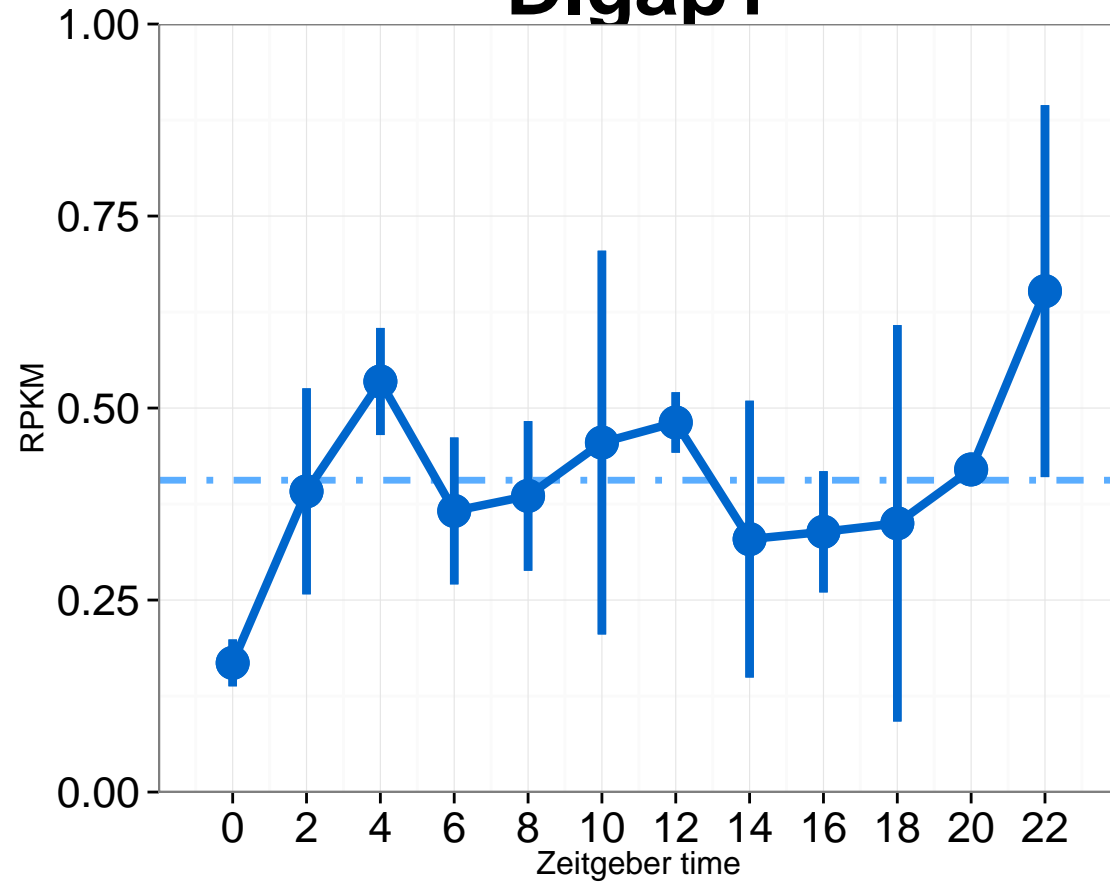

## Dlgap1 log2(Ribosome occupancy

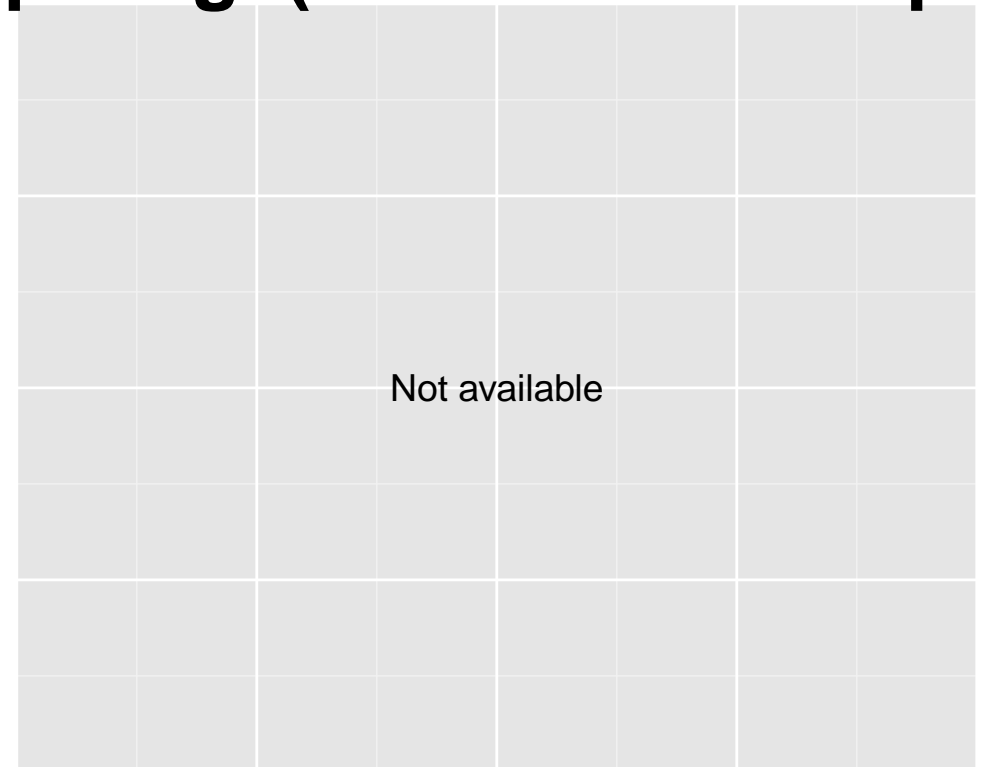

Supplement: SuppDataset_1.zip [file Dlgap1_set_A.pdf › Supplemental Dataset 1/A-mRNA_nonrhyth_translation_nonrhyth/Dlgap1_set_A.pdf]

## Dlgap4

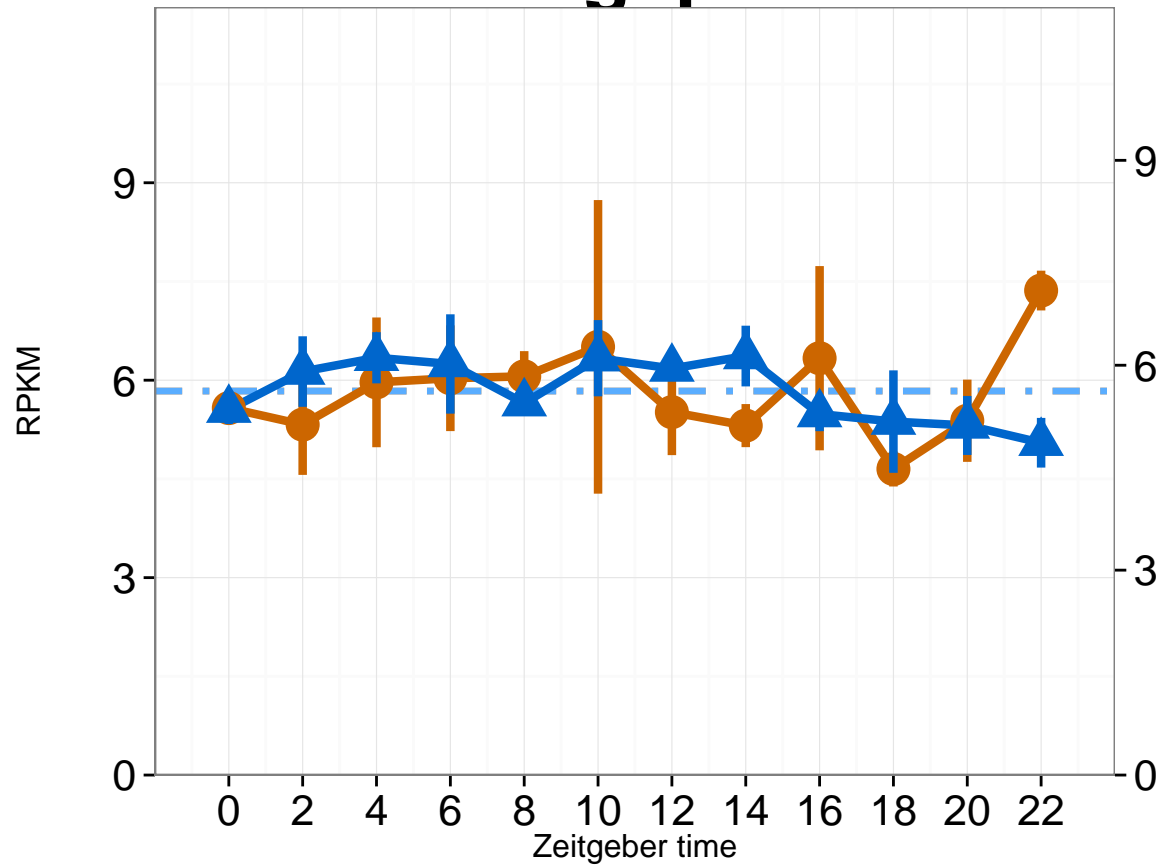

## Dlgap4

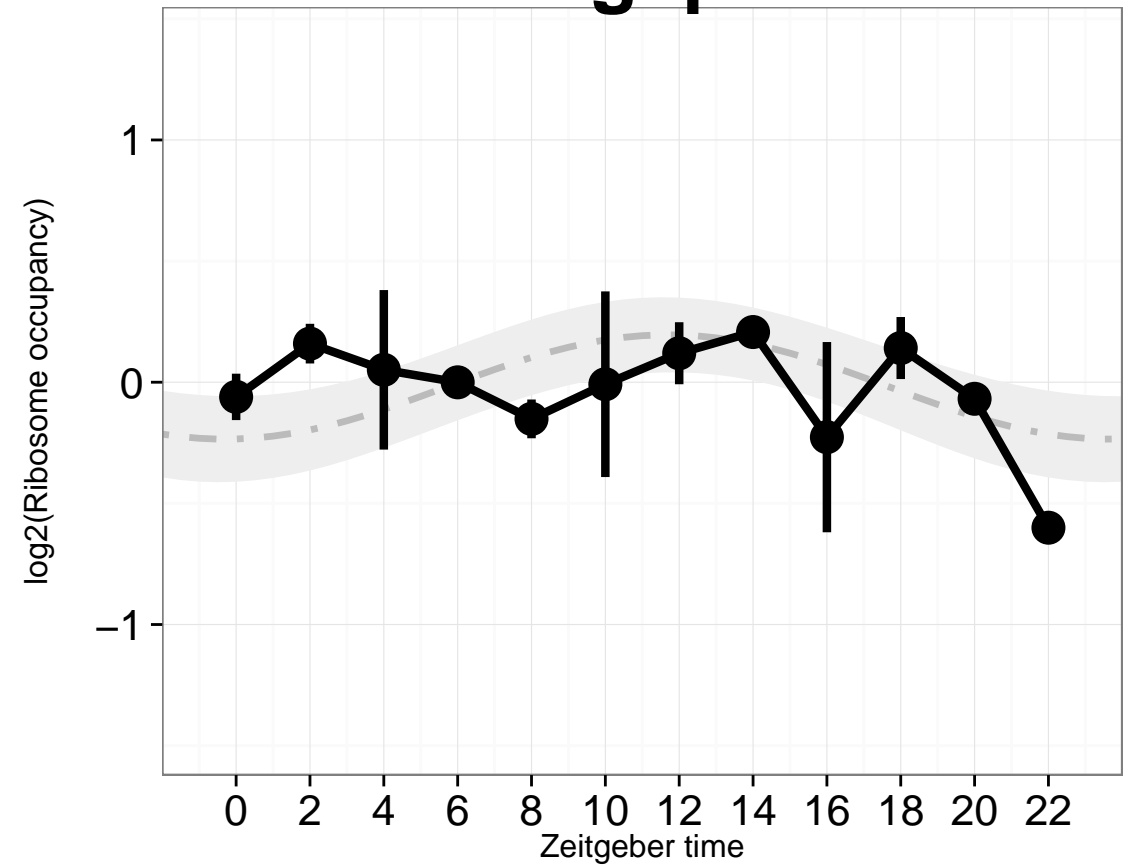

Supplement: SuppDataset_1.zip [file Dlgap4_set_A.pdf › Supplemental Dataset 1/A-mRNA_nonrhyth_translation_nonrhyth/Dlgap4_set_A.pdf]

## DII1

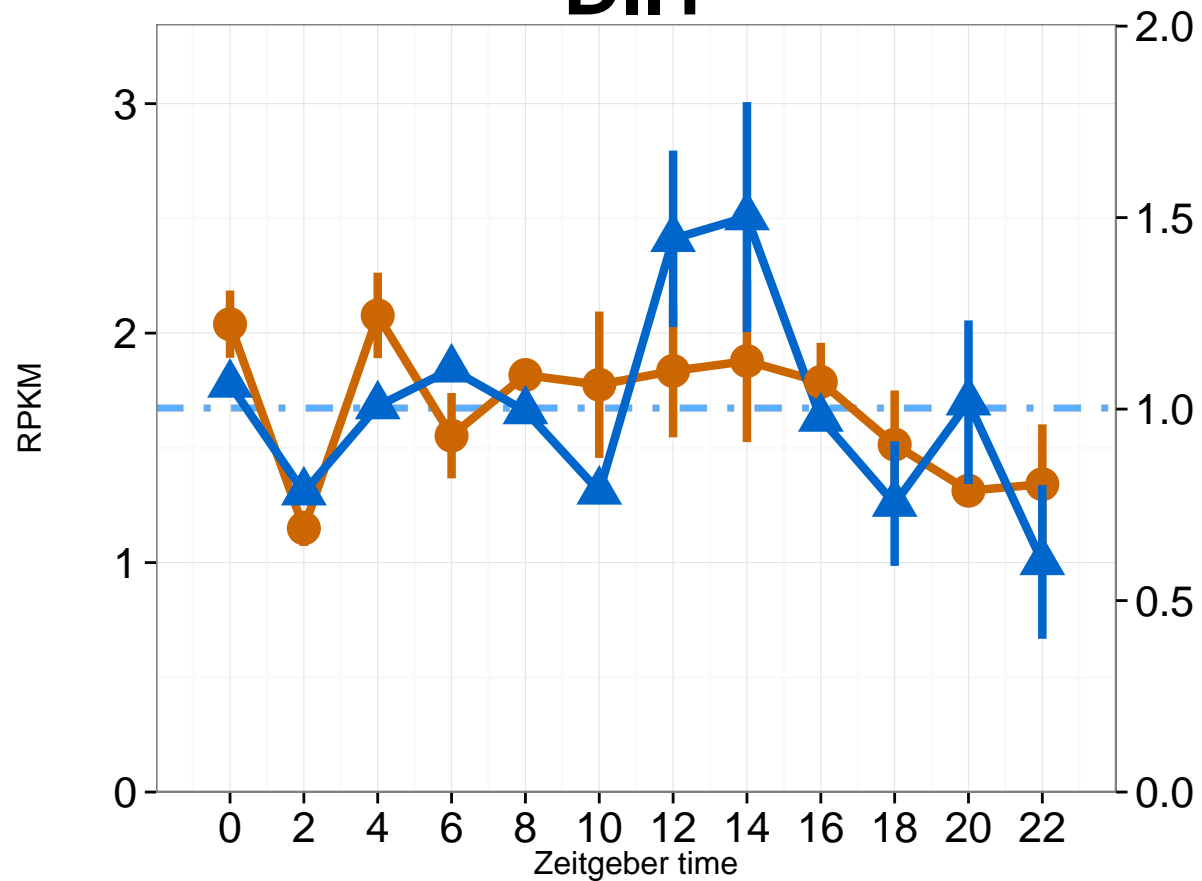

## DII1

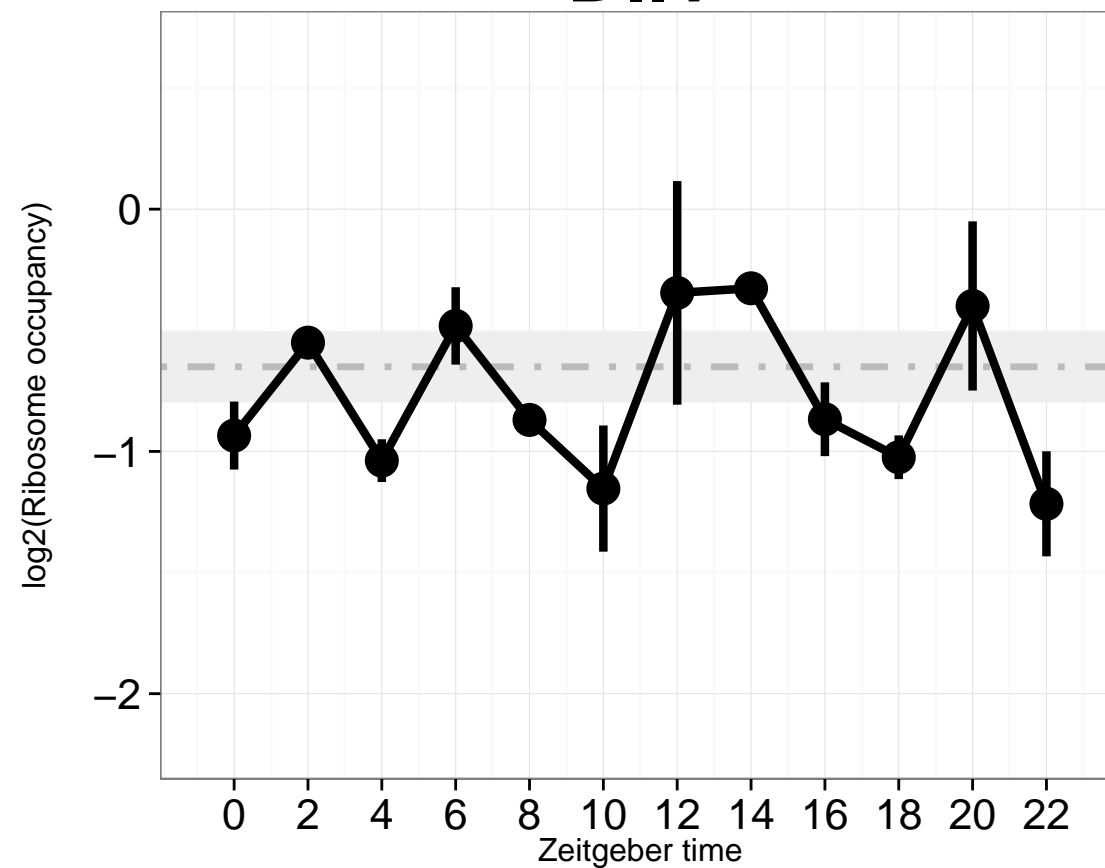

Supplement: SuppDataset_1.zip [file Dll1_set_A.pdf › Supplemental Dataset 1/A-mRNA_nonrhyth_translation_nonrhyth/Dll1_set_A.pdf]

## DII4

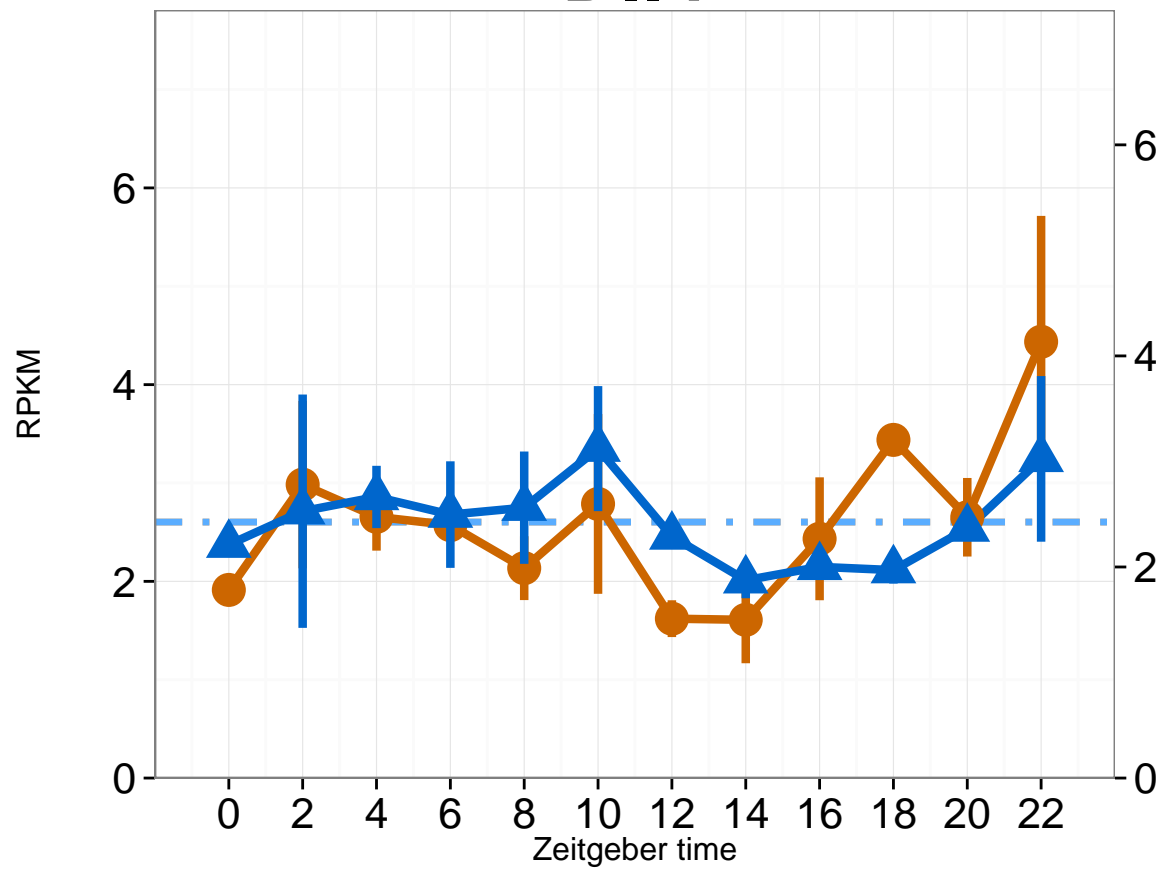

## DII4

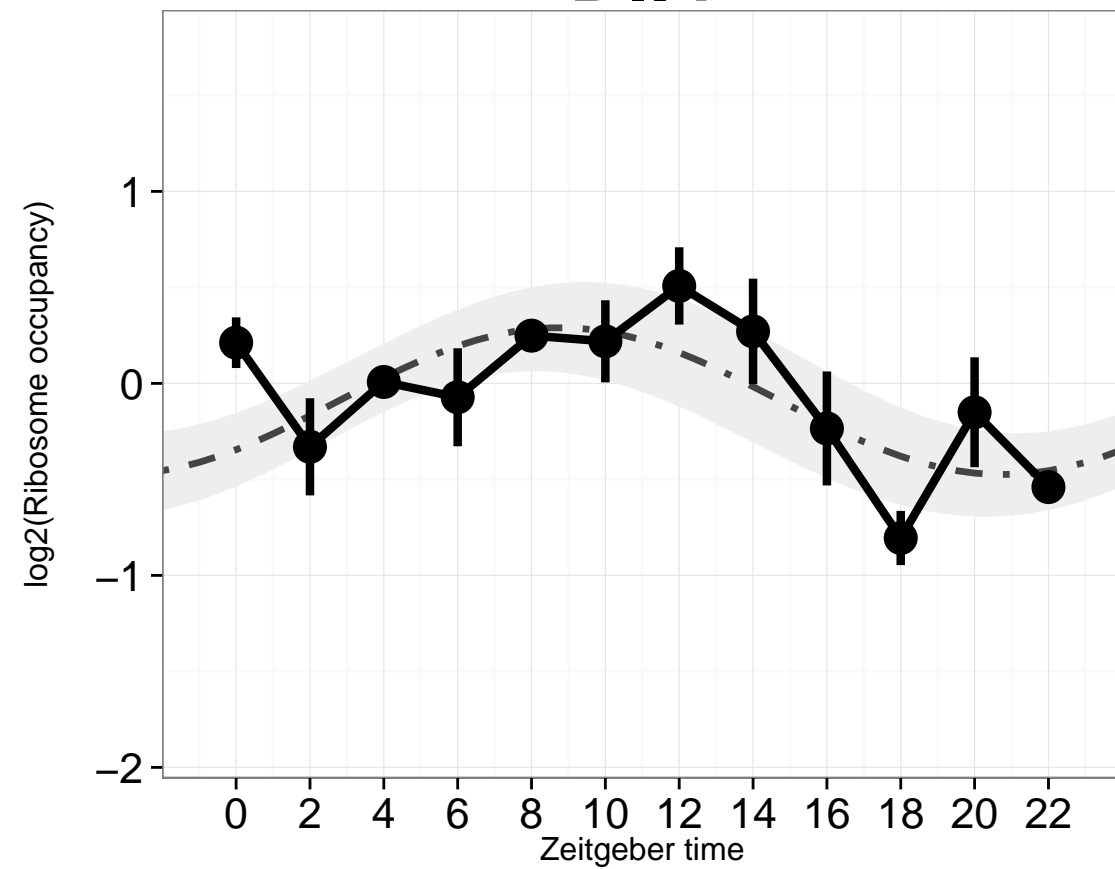

Supplement: SuppDataset_1.zip [file Dll4_set_A.pdf › Supplemental Dataset 1/A-mRNA_nonrhyth_translation_nonrhyth/Dll4_set_A.pdf]

## D1st

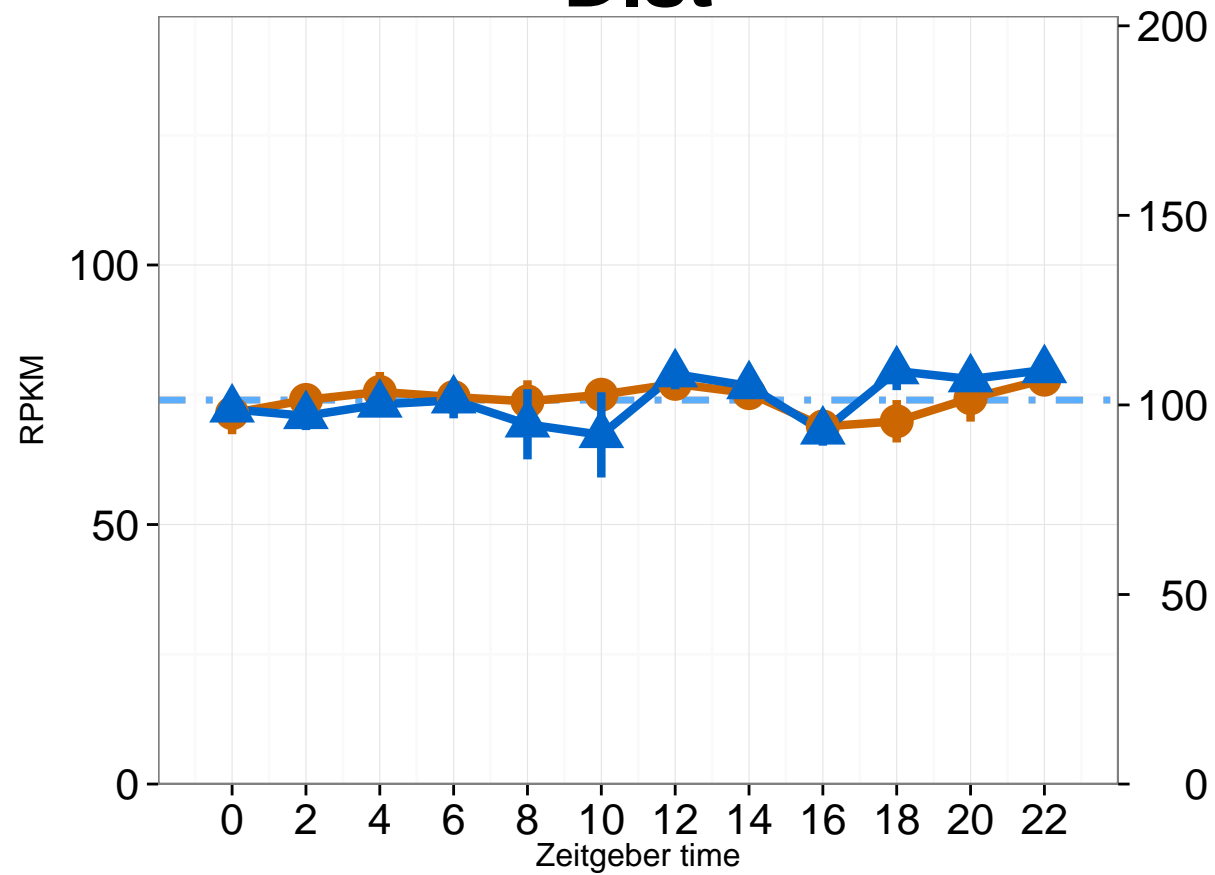

## D1st

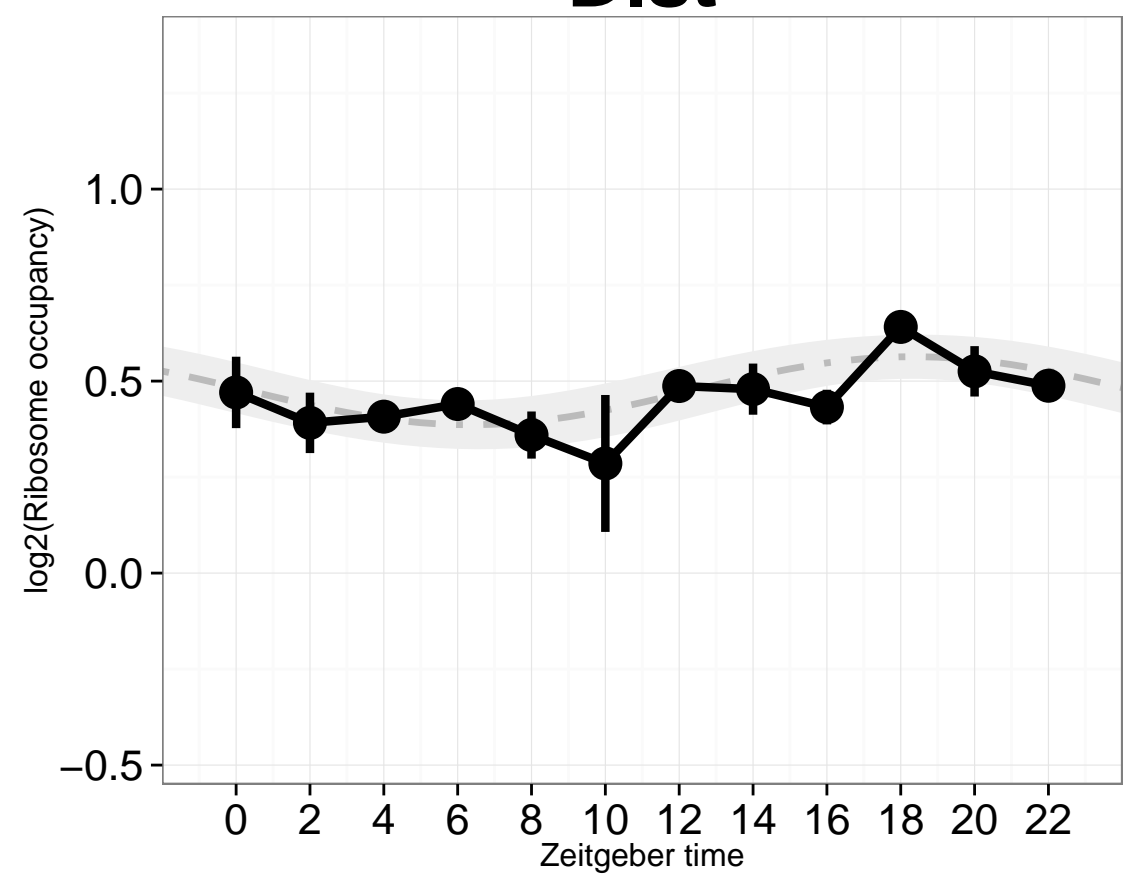

Supplement: SuppDataset_1.zip [file Dlst_set_A.pdf › Supplemental Dataset 1/A-mRNA_nonrhyth_translation_nonrhyth/Dlst_set_A.pdf]

## Dmbt1

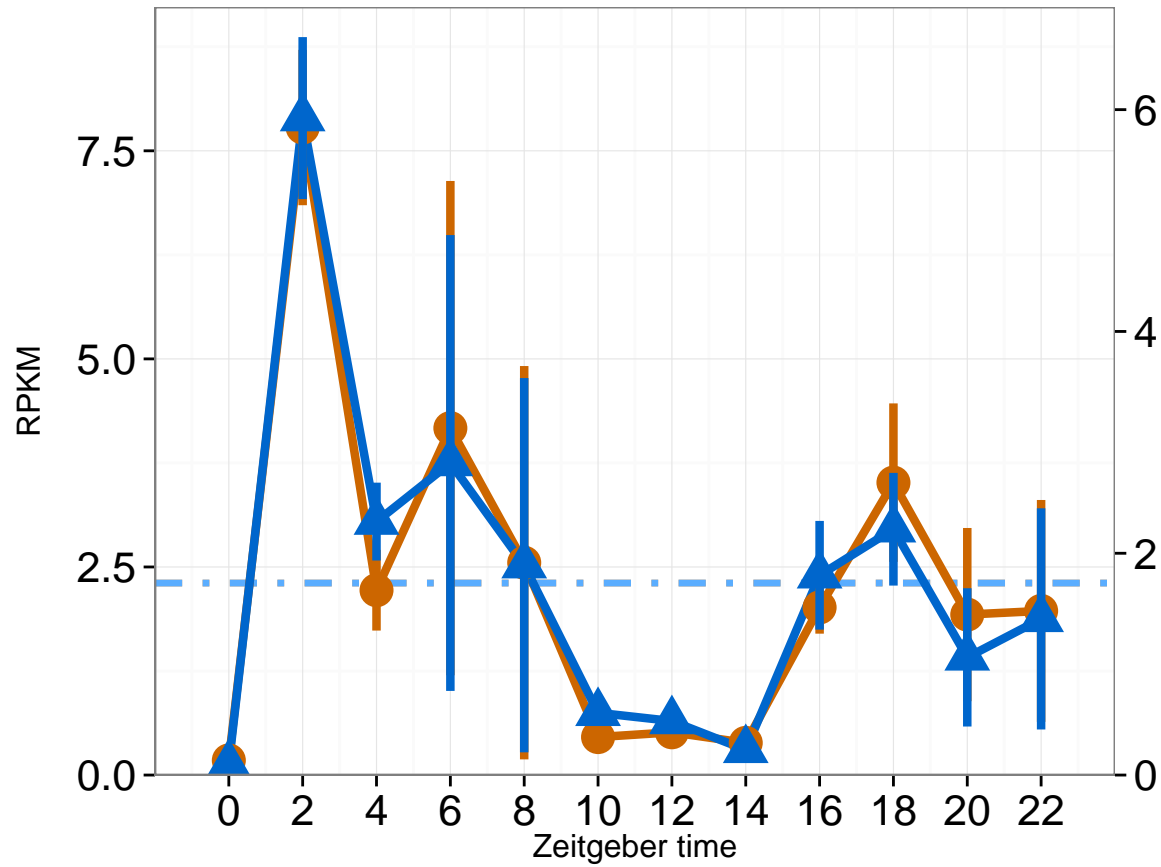

## Dmbt1

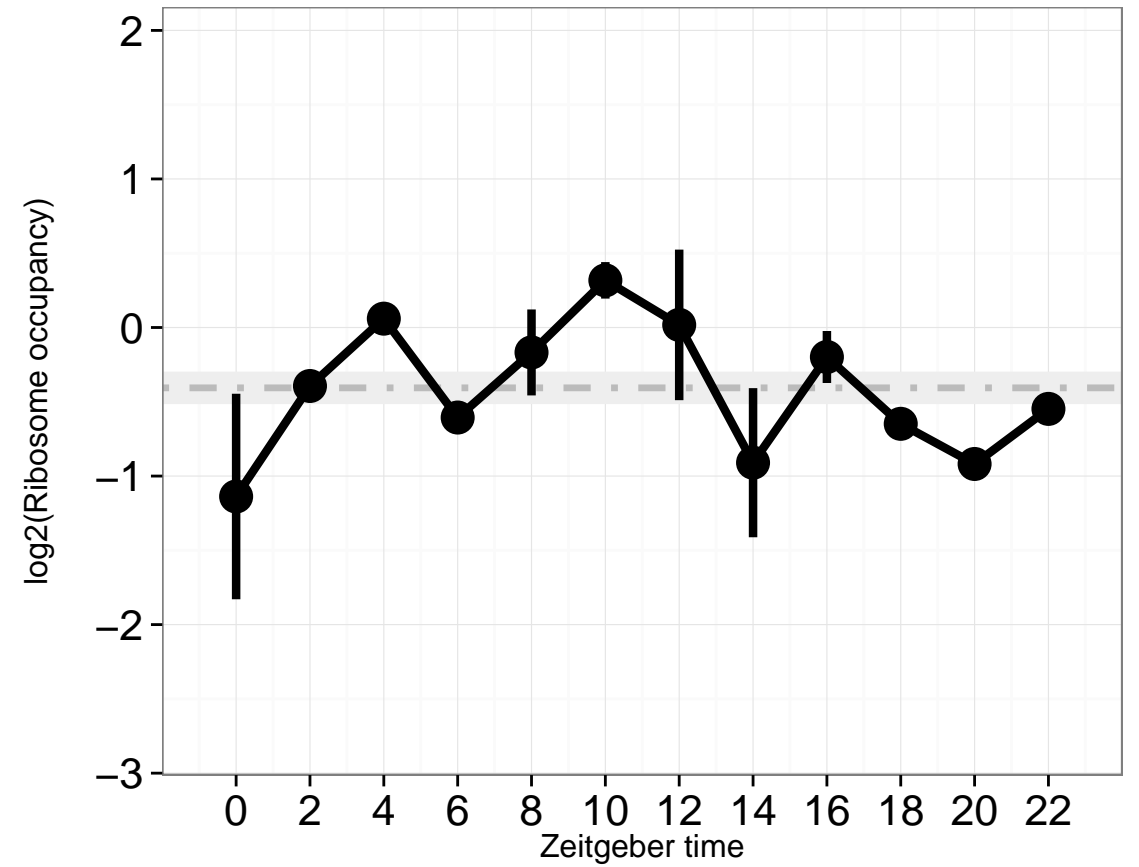

Supplement: SuppDataset_1.zip [file Dmbt1_set_A.pdf › Supplemental Dataset 1/A-mRNA_nonrhyth_translation_nonrhyth/Dmbt1_set_A.pdf]

## Dmgdh

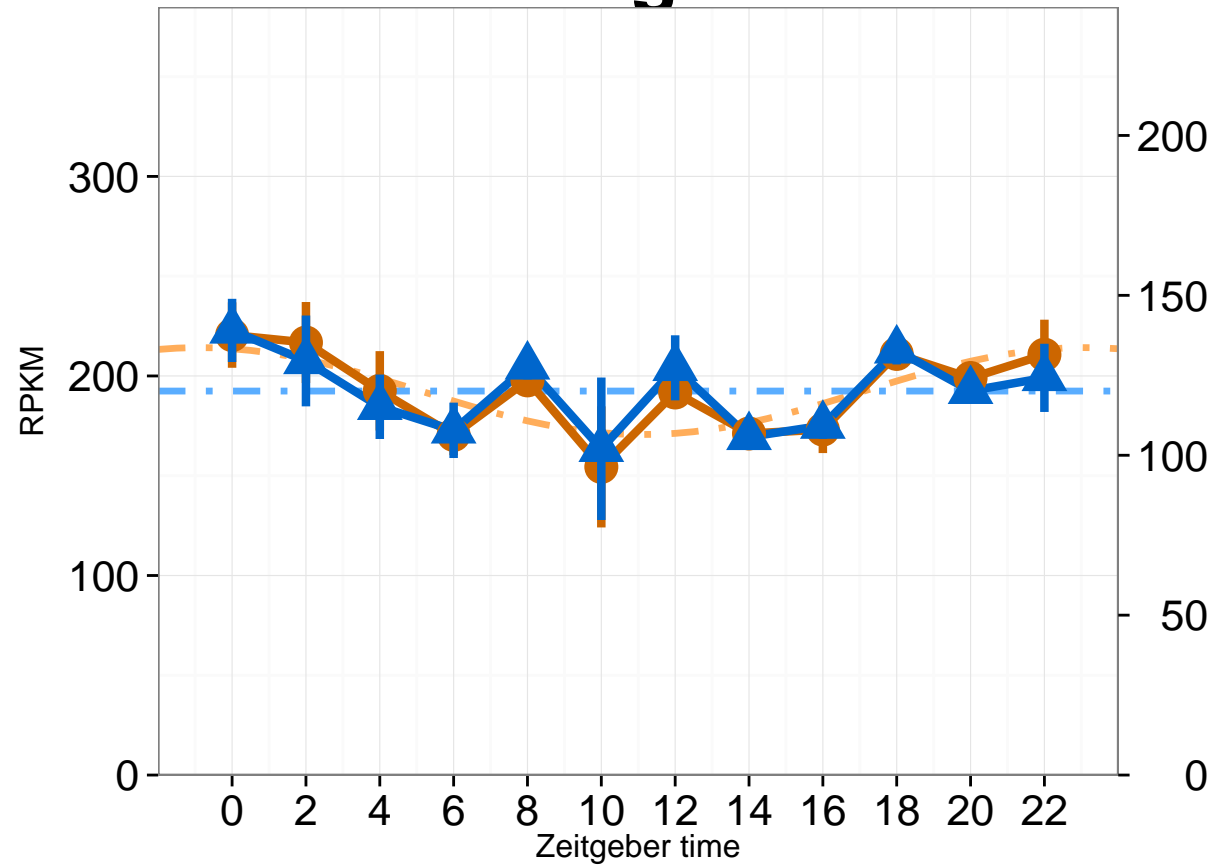

## Dmgdh

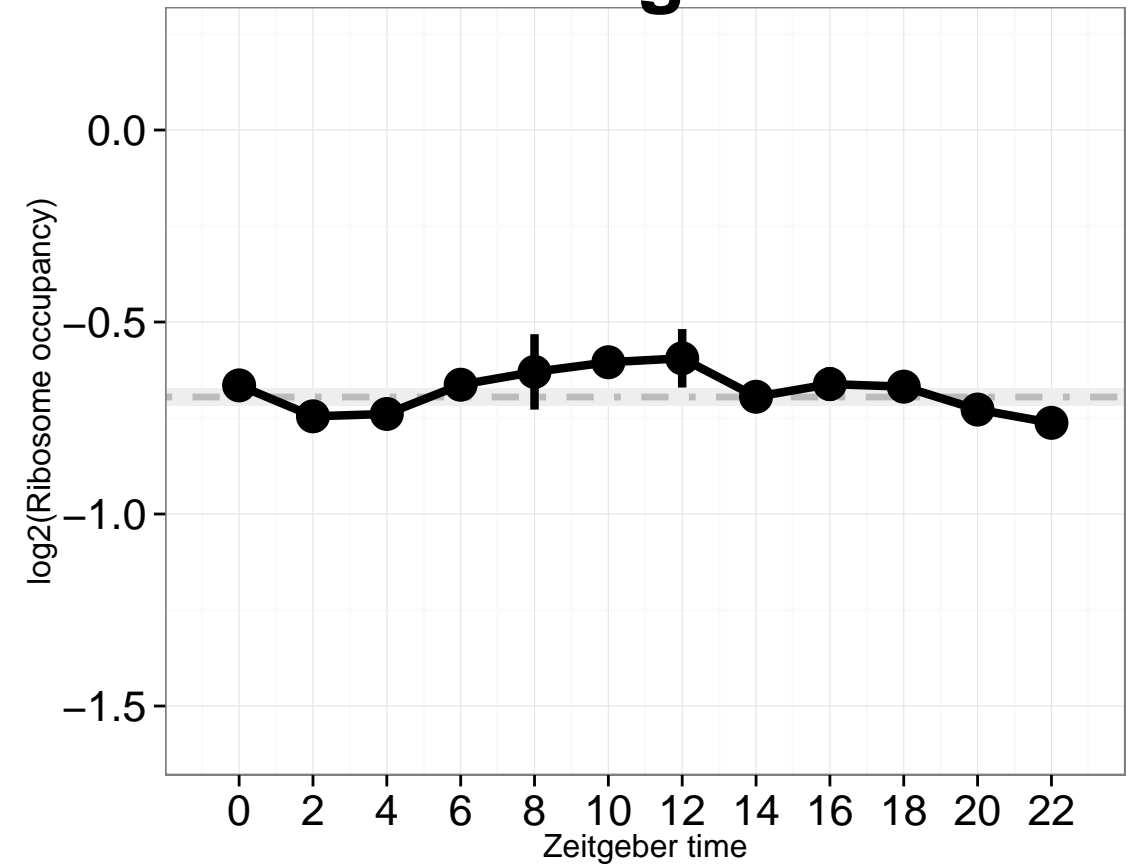

Supplement: SuppDataset_1.zip [file Dmgdh_set_A.pdf › Supplemental Dataset 1/A-mRNA_nonrhyth_translation_nonrhyth/Dmgdh_set_A.pdf]

## Dmpk

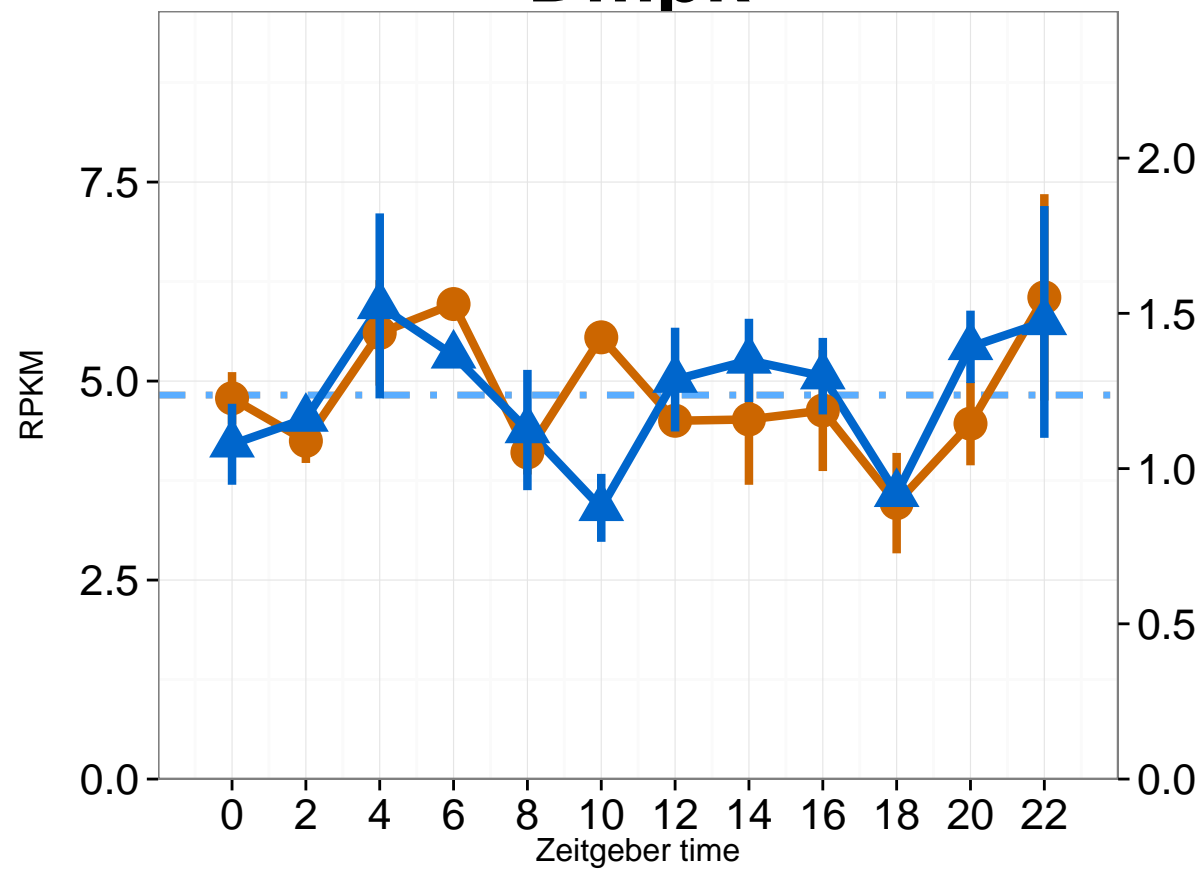

## Dmpk

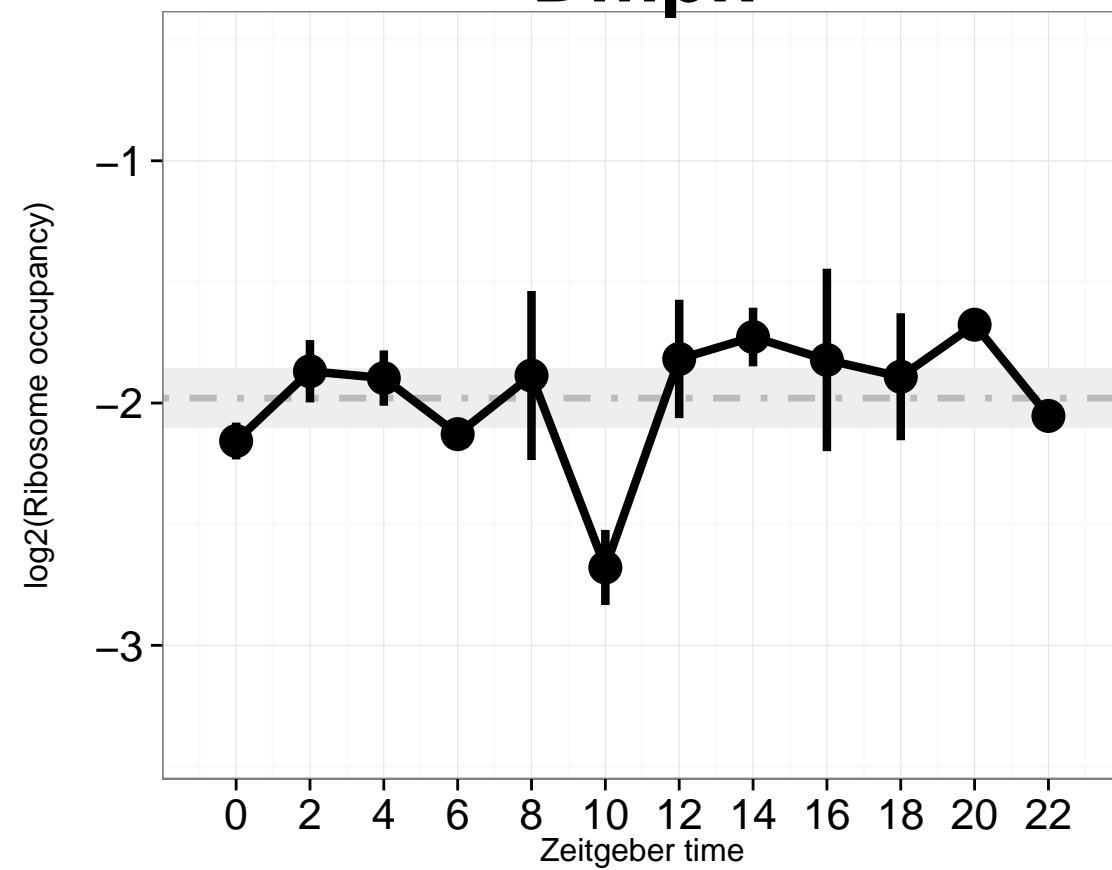

Supplement: SuppDataset_1.zip [file Dmpk_set_A.pdf › Supplemental Dataset 1/A-mRNA_nonrhyth_translation_nonrhyth/Dmpk_set_A.pdf]

## Dmtf1

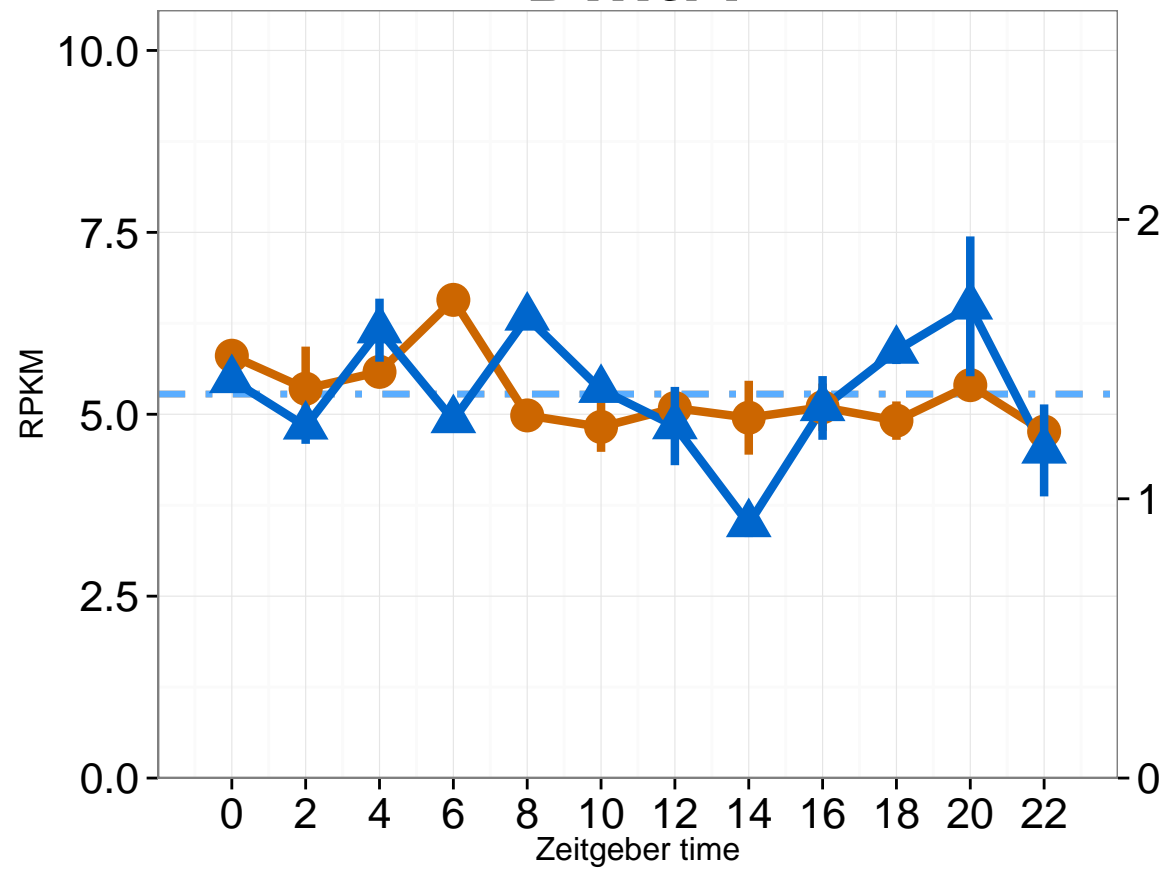

## Dmtf1

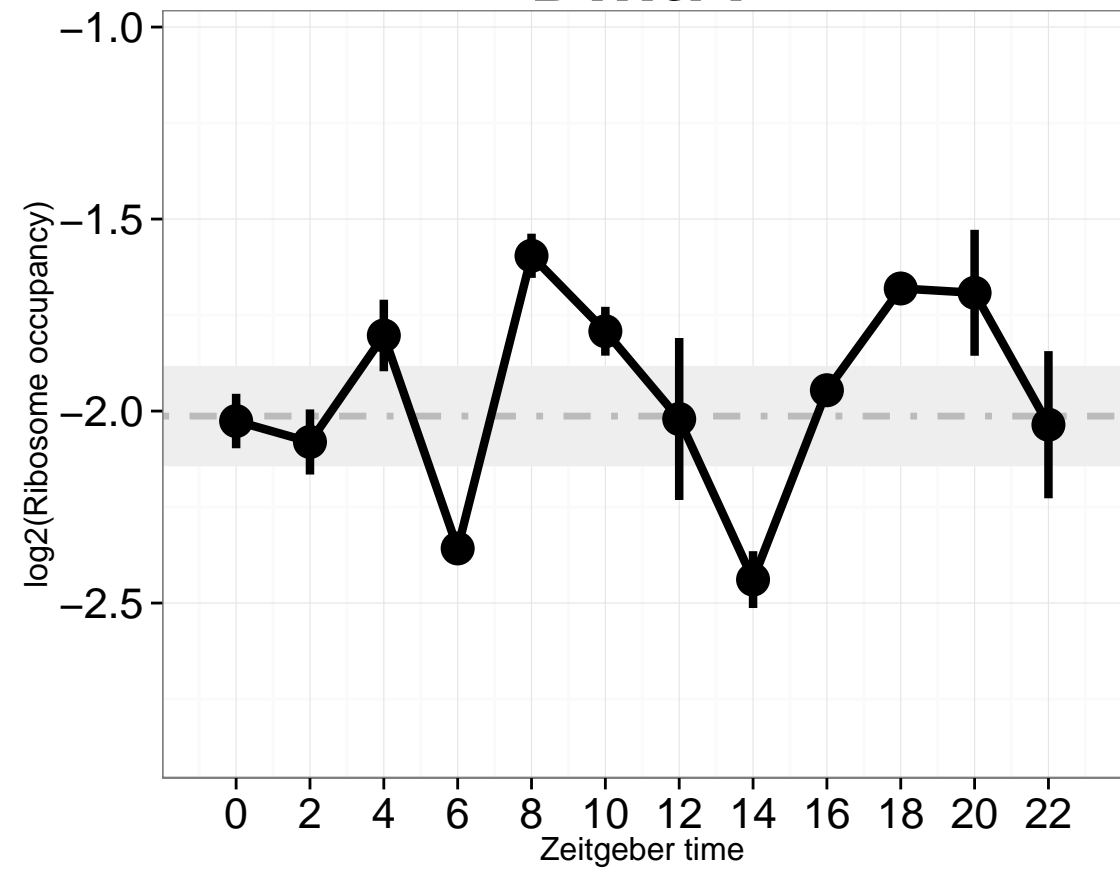

Supplement: SuppDataset_1.zip [file Dmtf1_set_A.pdf › Supplemental Dataset 1/A-mRNA_nonrhyth_translation_nonrhyth/Dmtf1_set_A.pdf]

## Dmwd

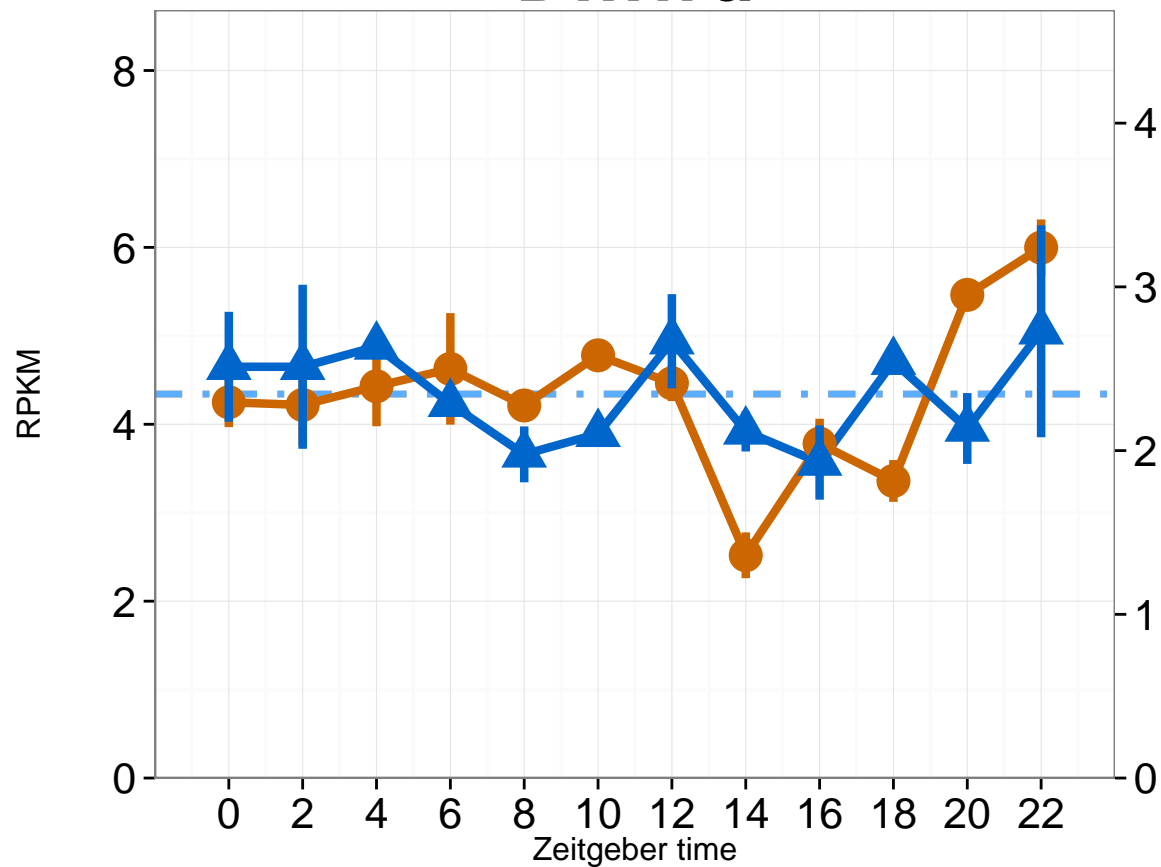

## Dmwd

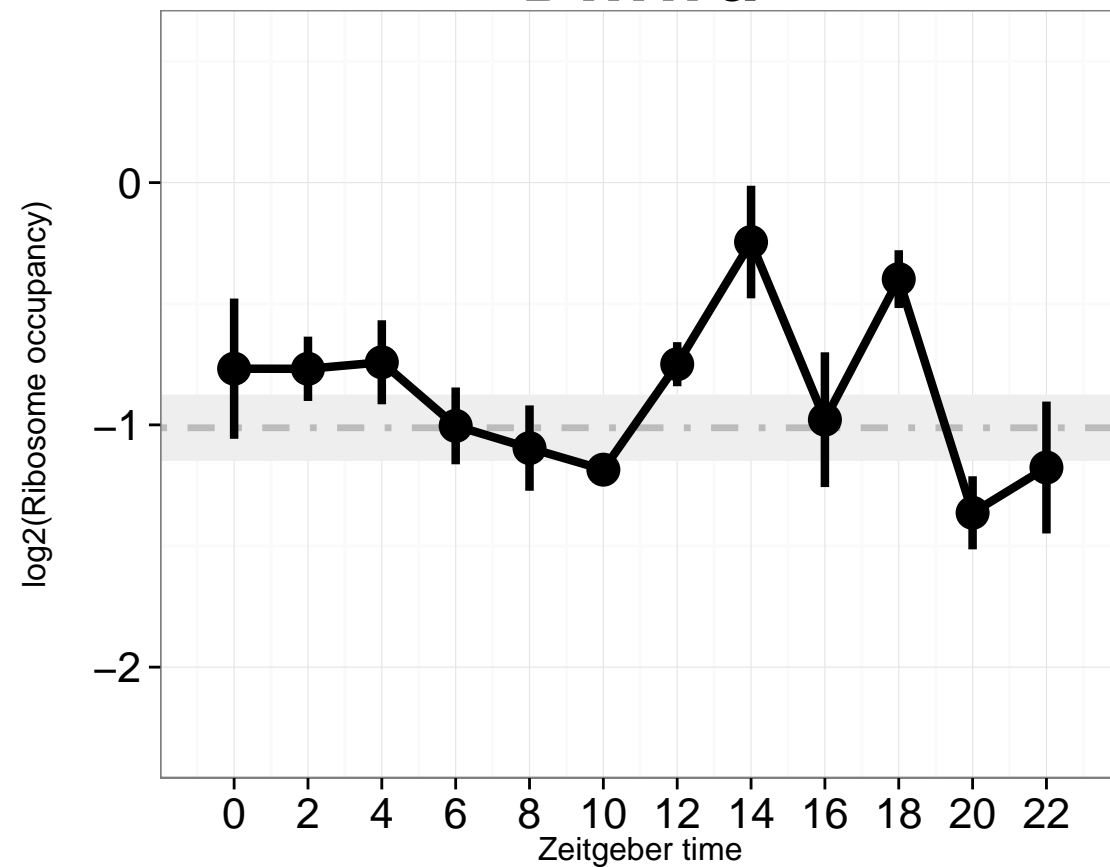

Supplement: SuppDataset_1.zip [file Dmwd_set_A.pdf › Supplemental Dataset 1/A-mRNA_nonrhyth_translation_nonrhyth/Dmwd_set_A.pdf]

# Dmxi1

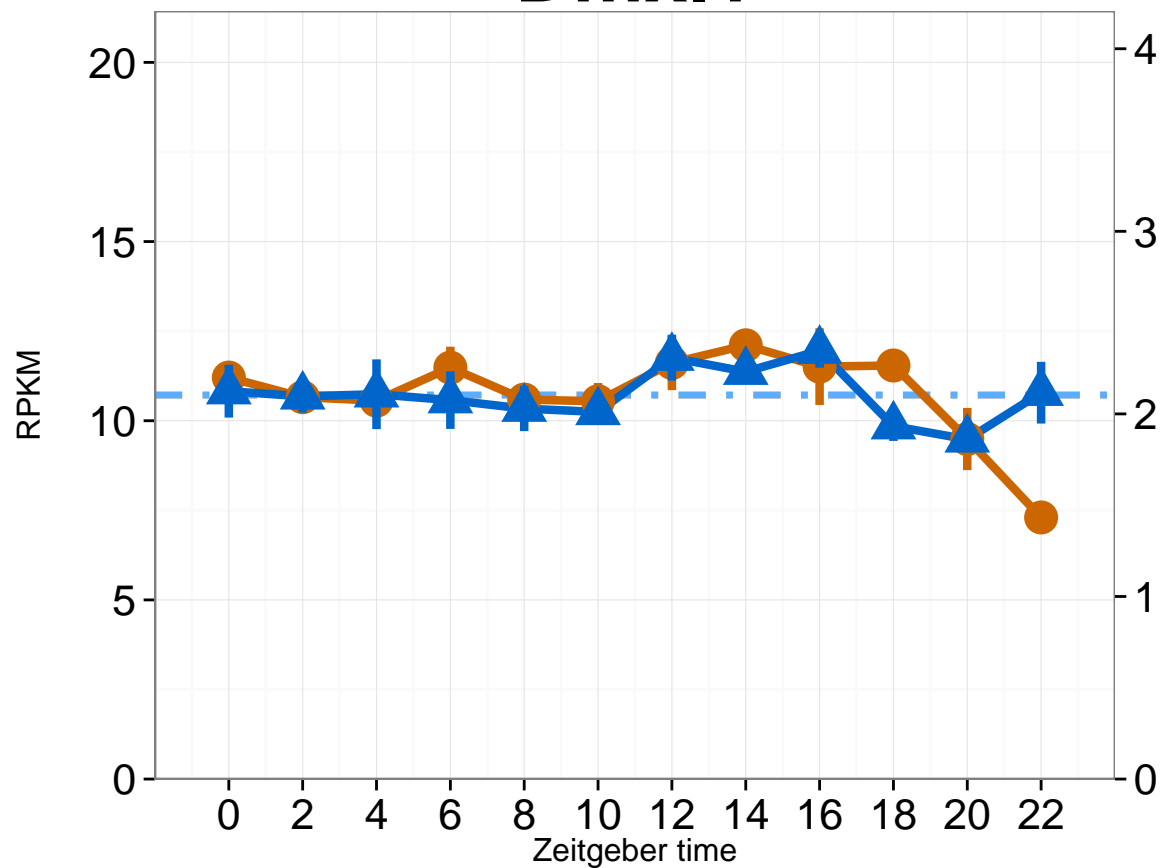

# Dmxi1

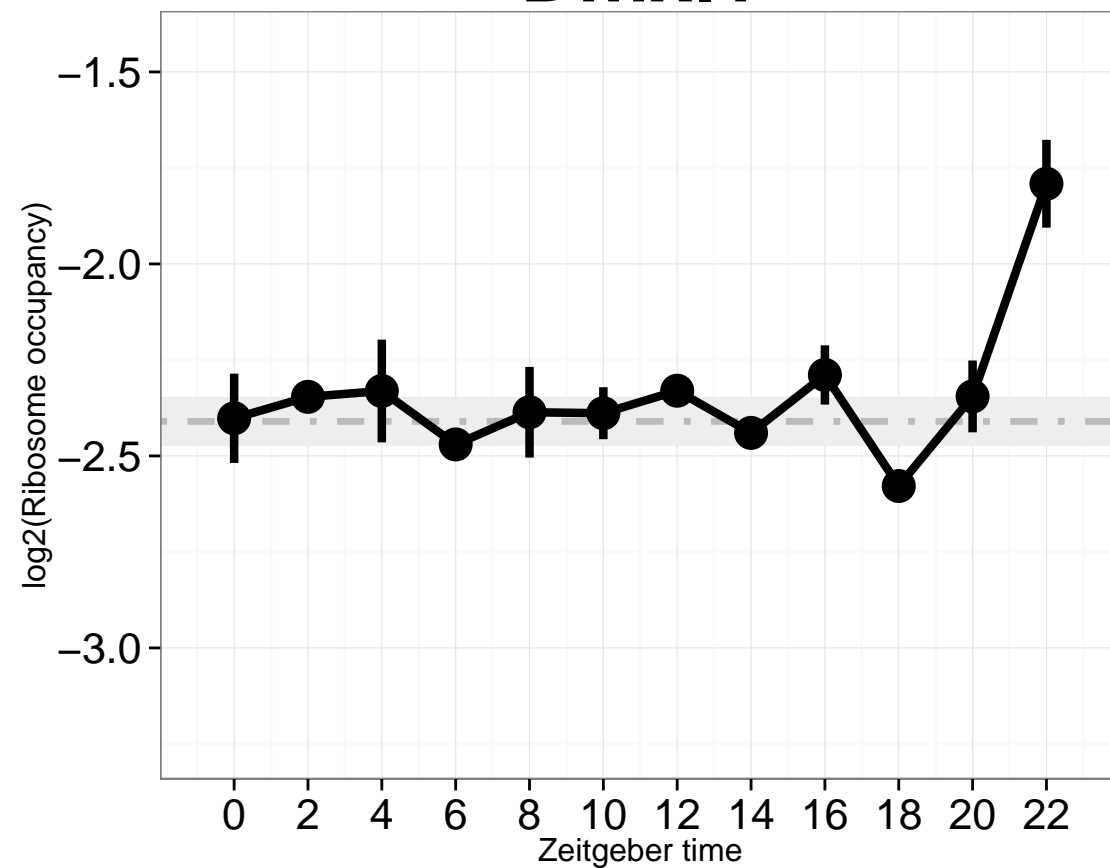

Supplement: SuppDataset_1.zip [file Dmxl1_set_A.pdf › Supplemental Dataset 1/A-mRNA_nonrhyth_translation_nonrhyth/Dmxl1_set_A.pdf]

# Dmxi2

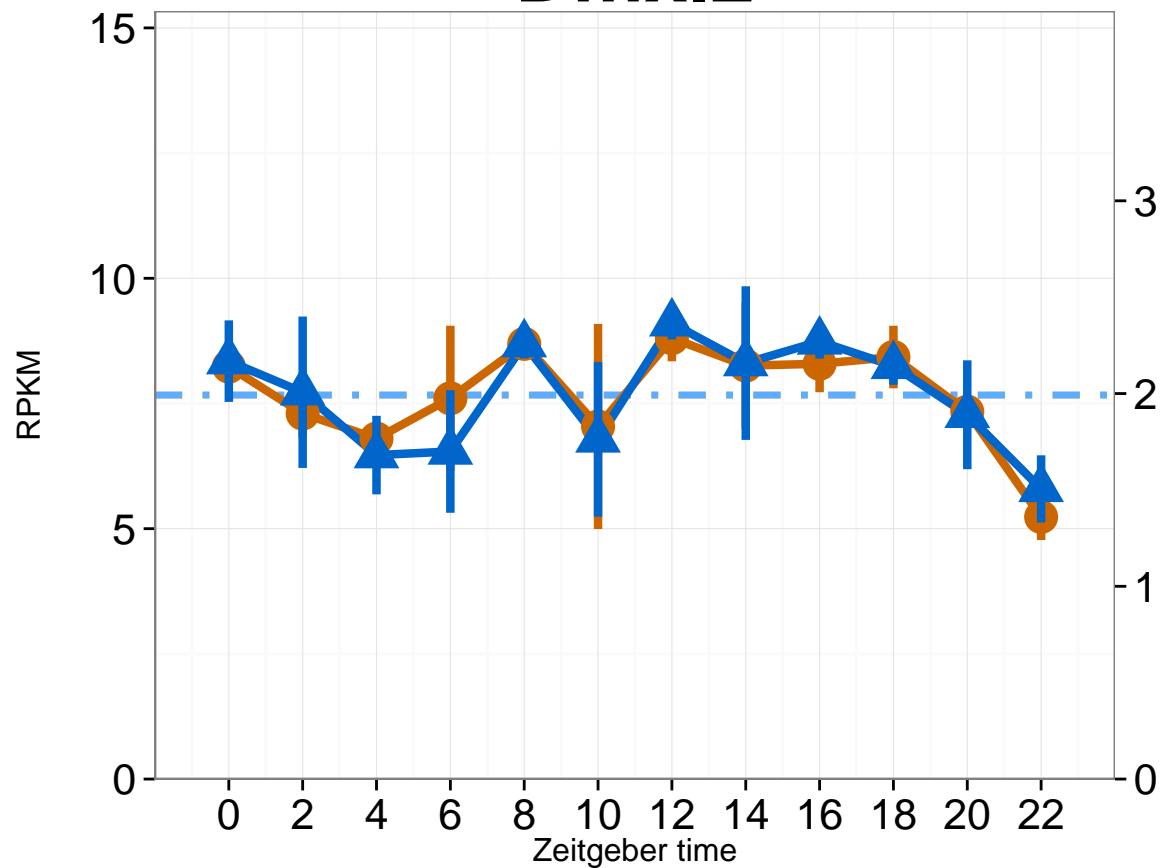

# Dmxi2

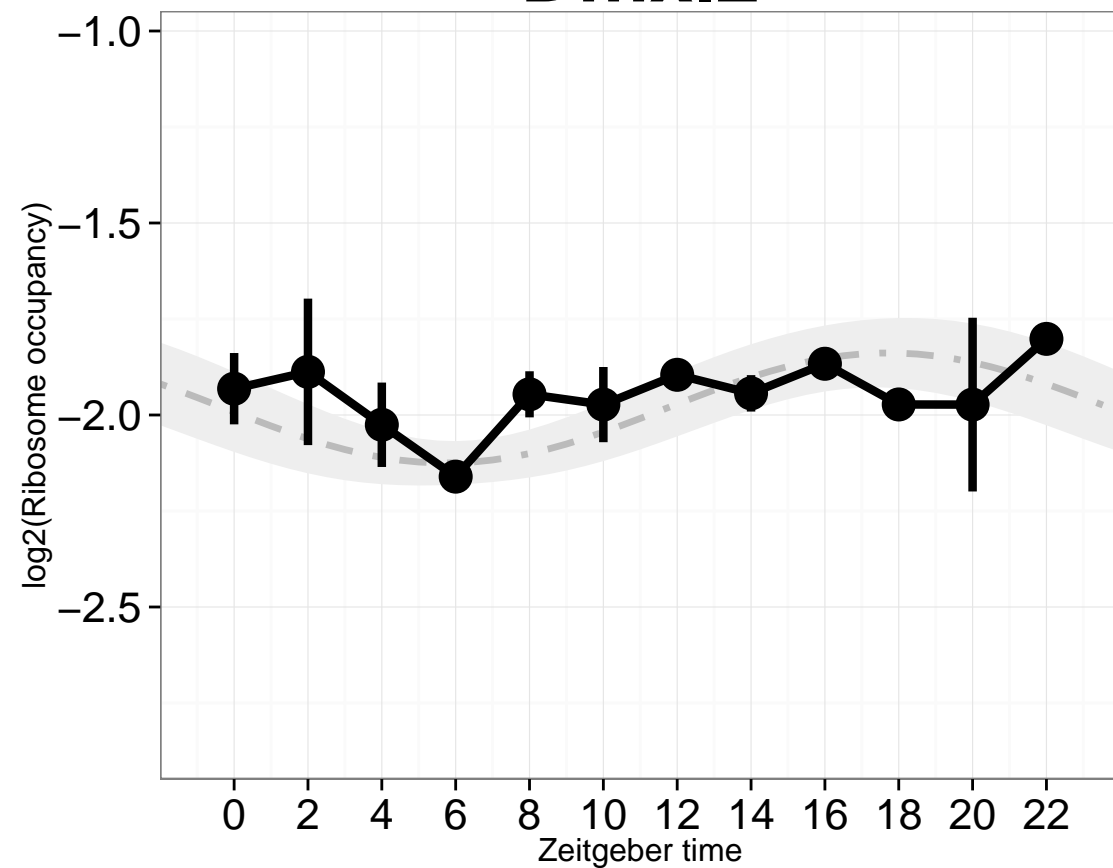

Supplement: SuppDataset_1.zip [file Dmxl2_set_A.pdf › Supplemental Dataset 1/A-mRNA_nonrhyth_translation_nonrhyth/Dmxl2_set_A.pdf]

## Dna2

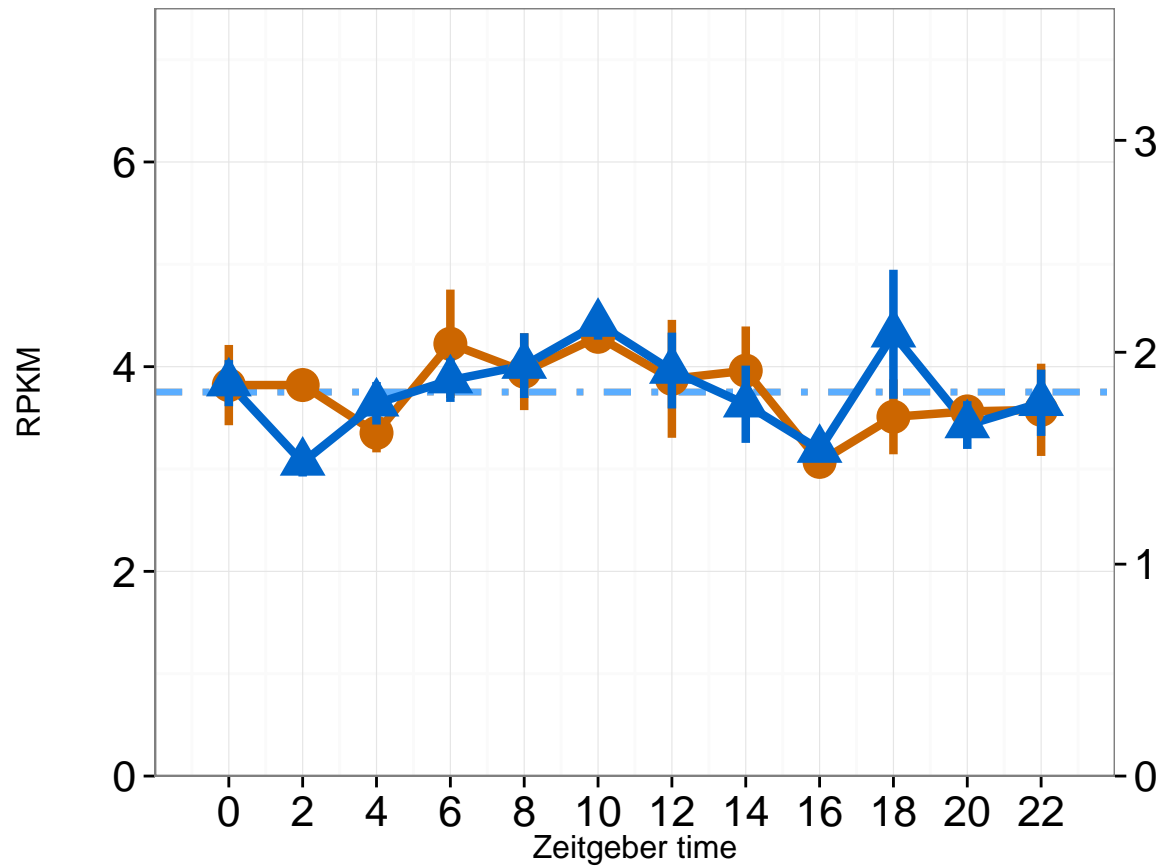

## Dna2

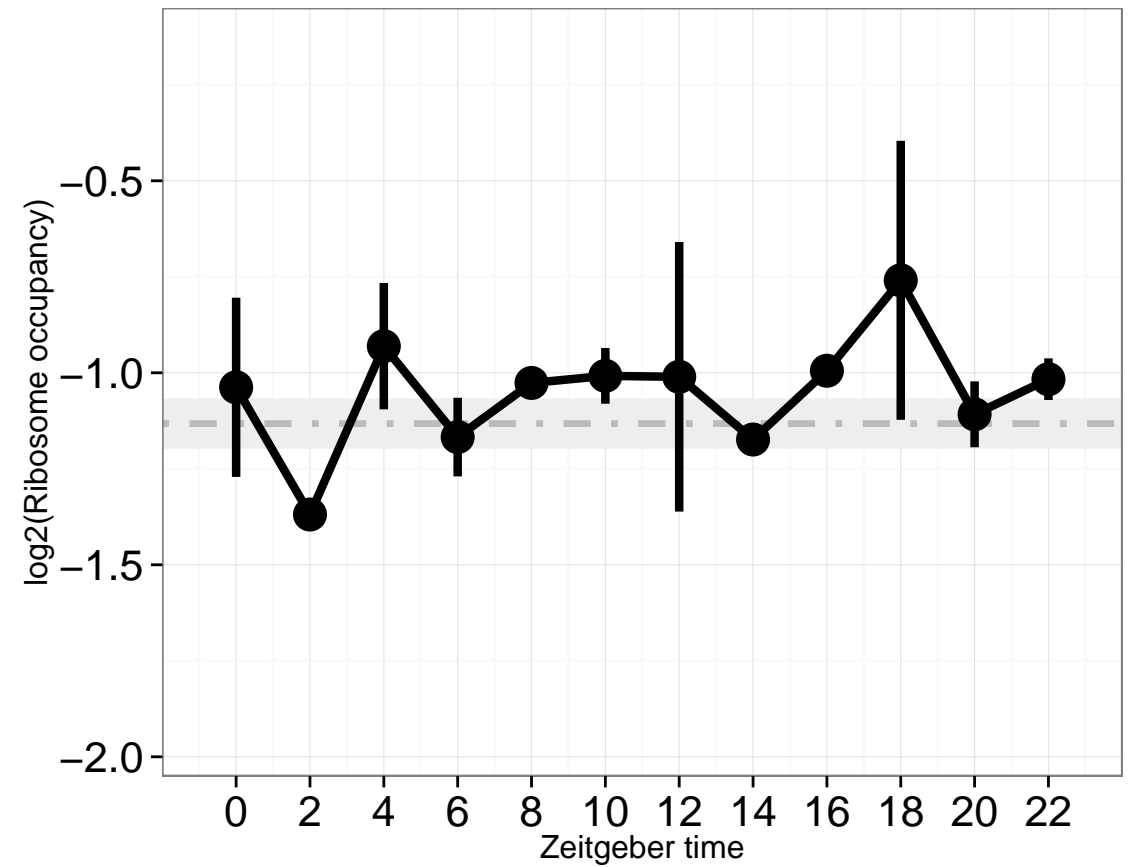

Supplement: SuppDataset_1.zip [file Dna2_set_A.pdf › Supplemental Dataset 1/A-mRNA_nonrhyth_translation_nonrhyth/Dna2_set_A.pdf]

## Dnaja2

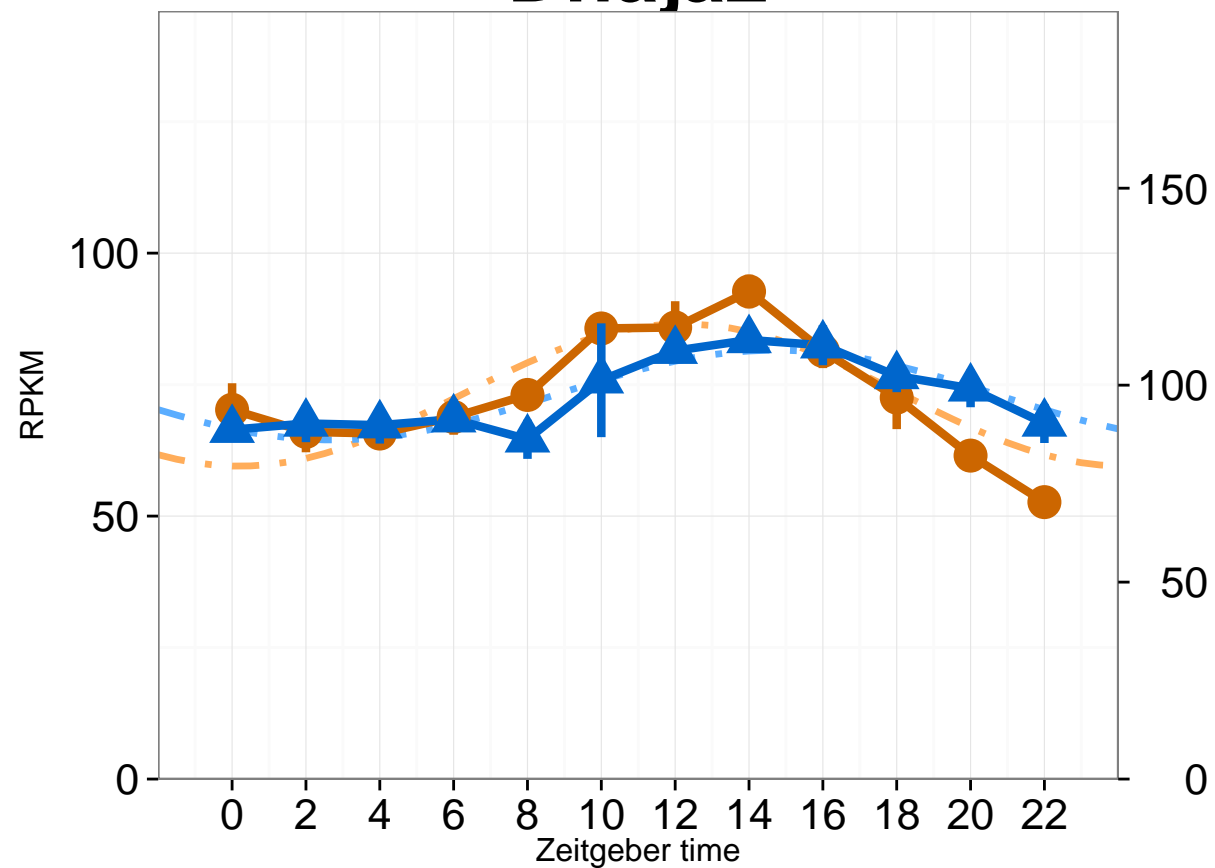

## Dnaja2

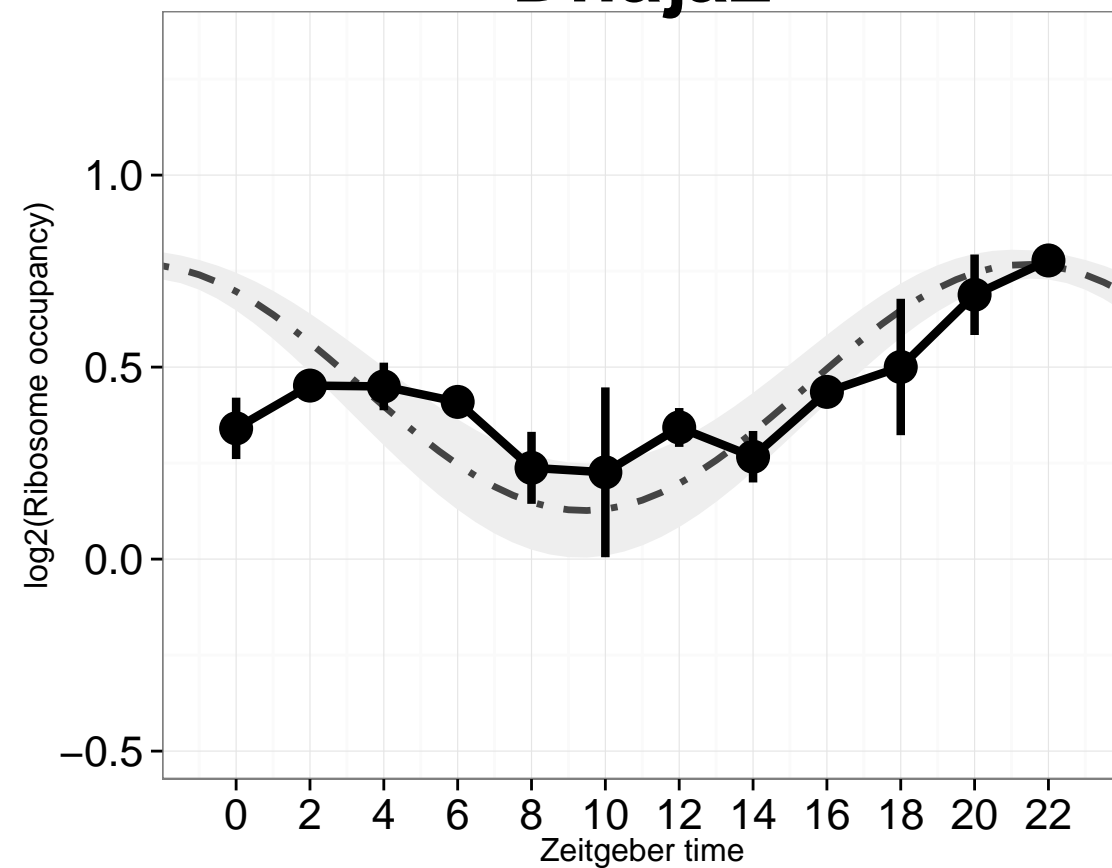

Supplement: SuppDataset_1.zip [file Dnaja2_set_A.pdf › Supplemental Dataset 1/A-mRNA_nonrhyth_translation_nonrhyth/Dnaja2_set_A.pdf]

## Dnaja3

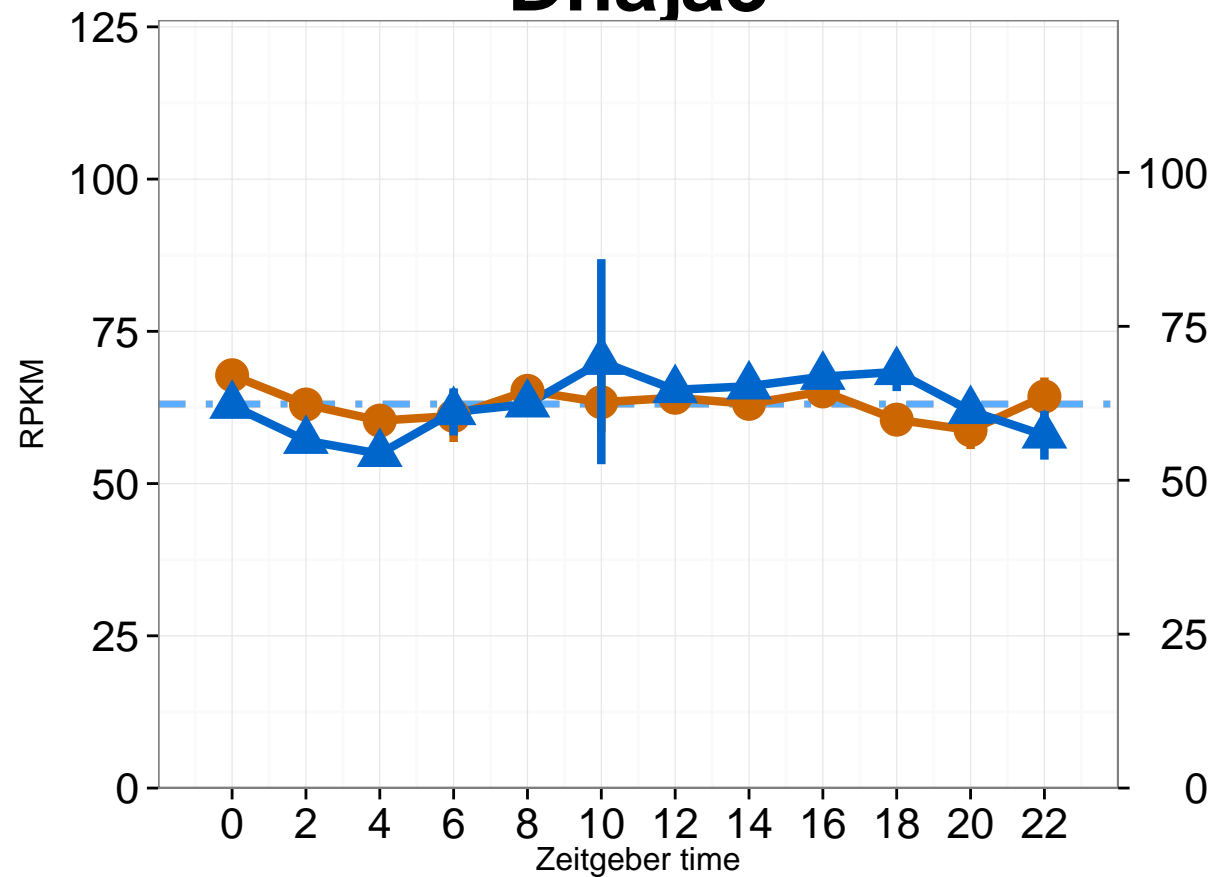

## Dnaja3

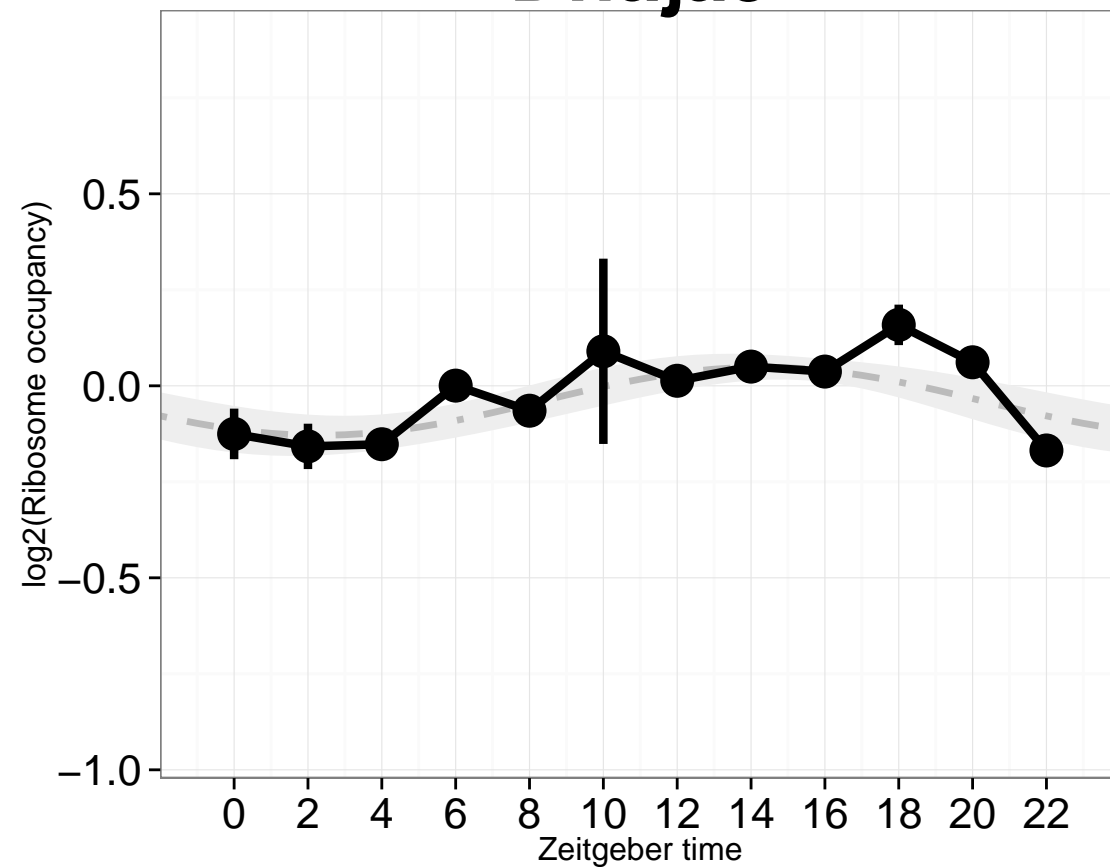

Supplement: SuppDataset_1.zip [file Dnaja3_set_A.pdf › Supplemental Dataset 1/A-mRNA_nonrhyth_translation_nonrhyth/Dnaja3_set_A.pdf]

## Dnajb11

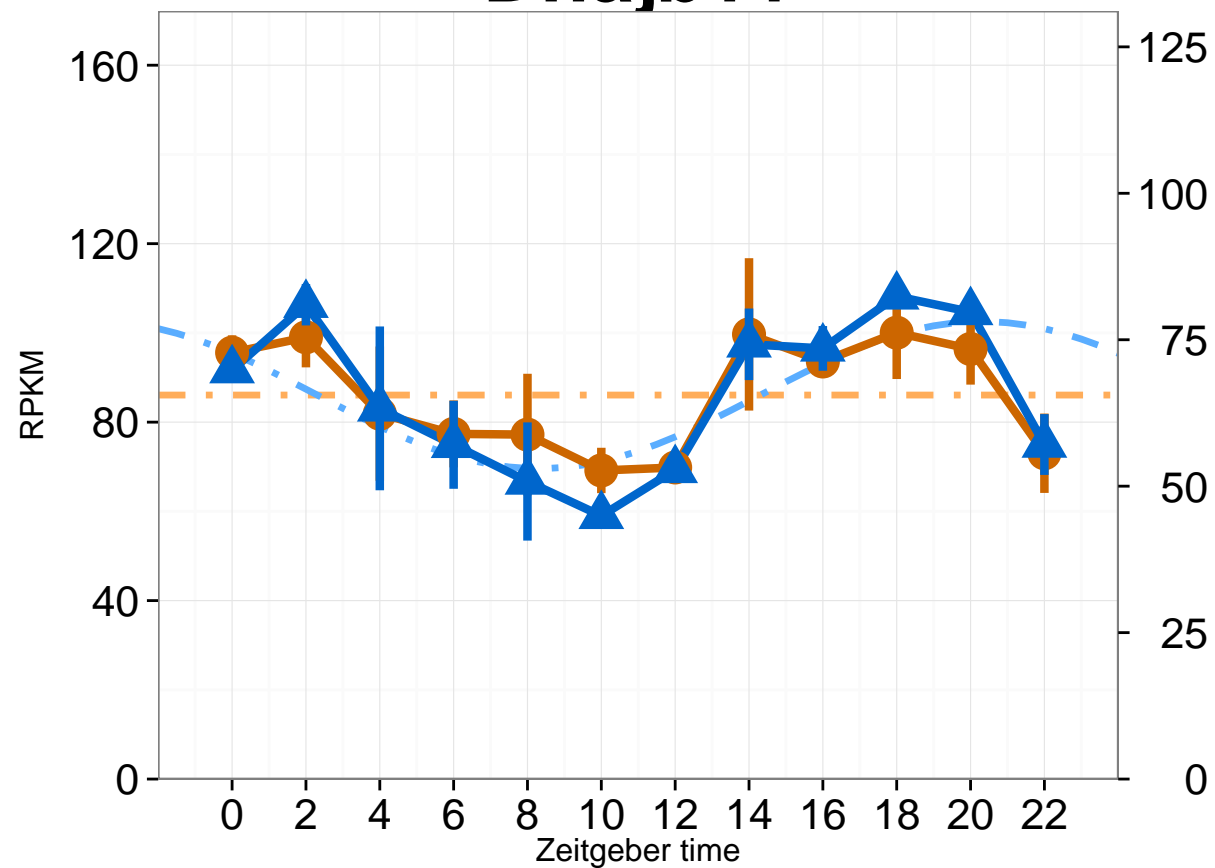

## Dnajb11

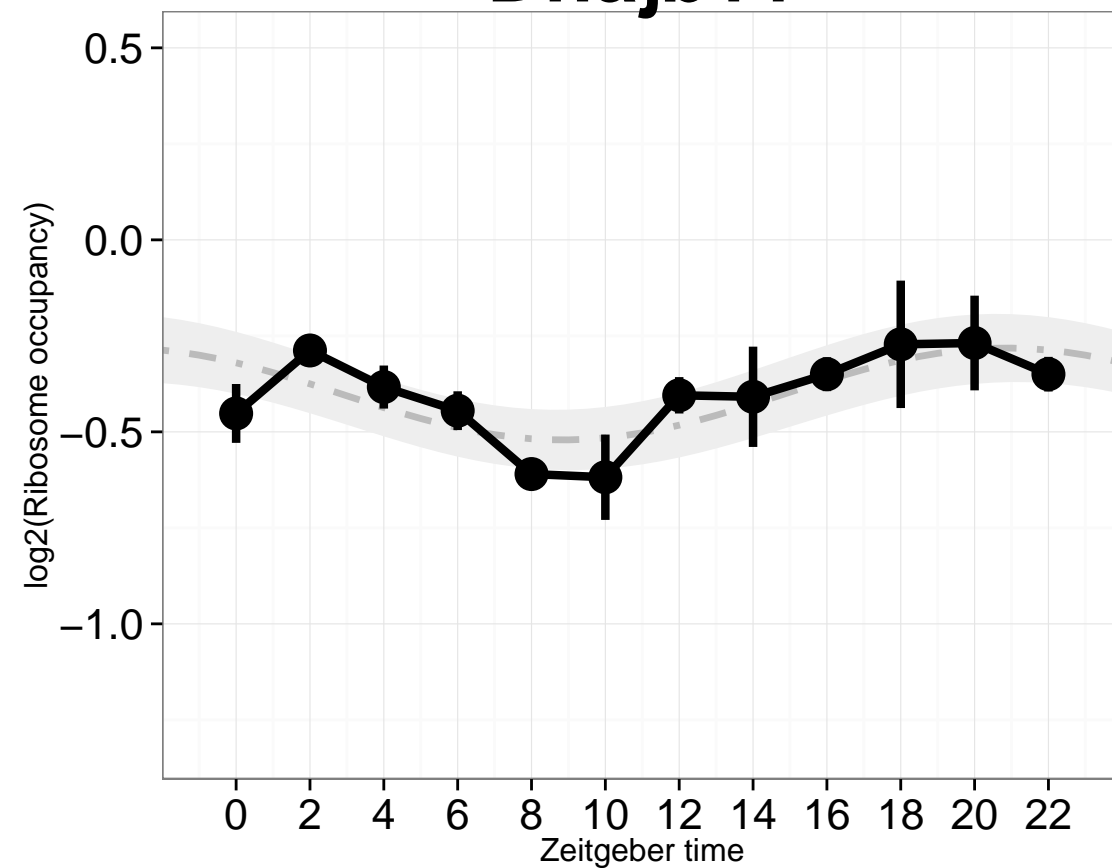

Supplement: SuppDataset_1.zip [file Dnajb11_set_A.pdf › Supplemental Dataset 1/A-mRNA_nonrhyth_translation_nonrhyth/Dnajb11_set_A.pdf]

# Dnajb12

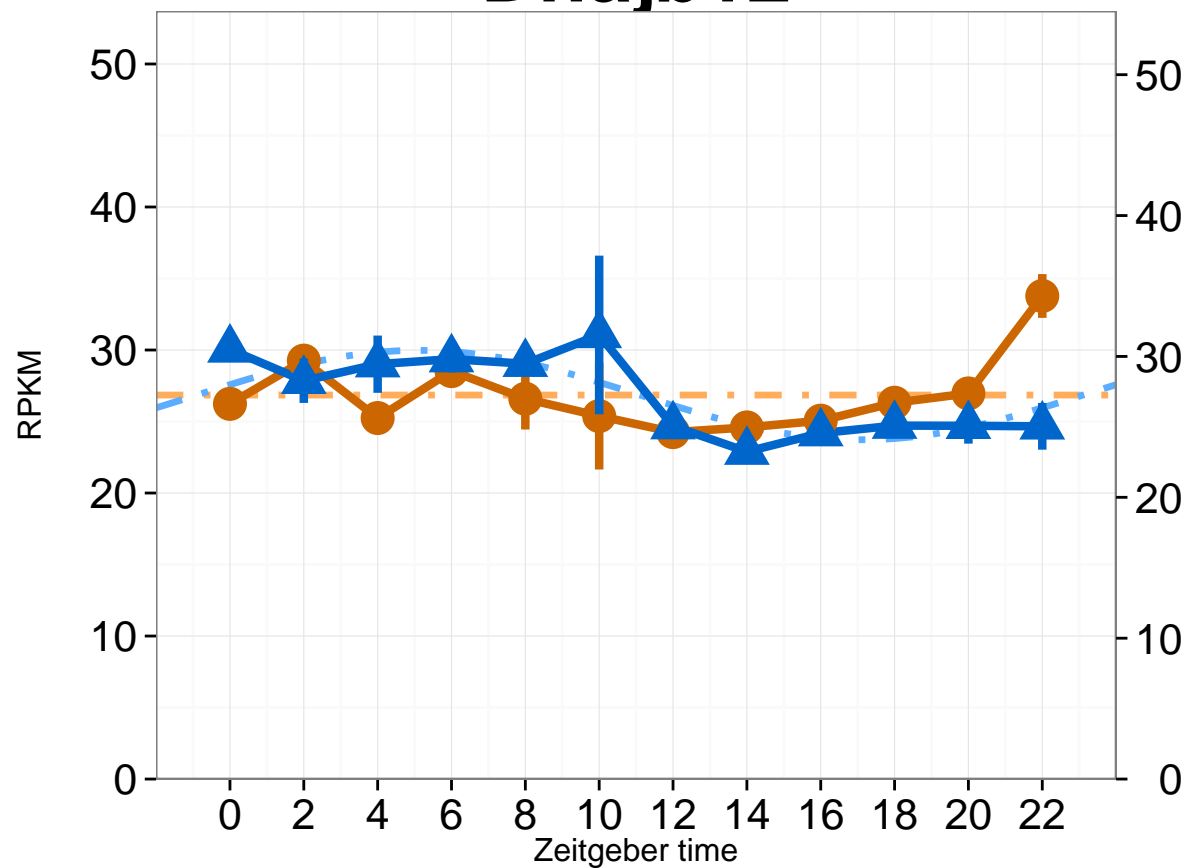

# Dnajb12

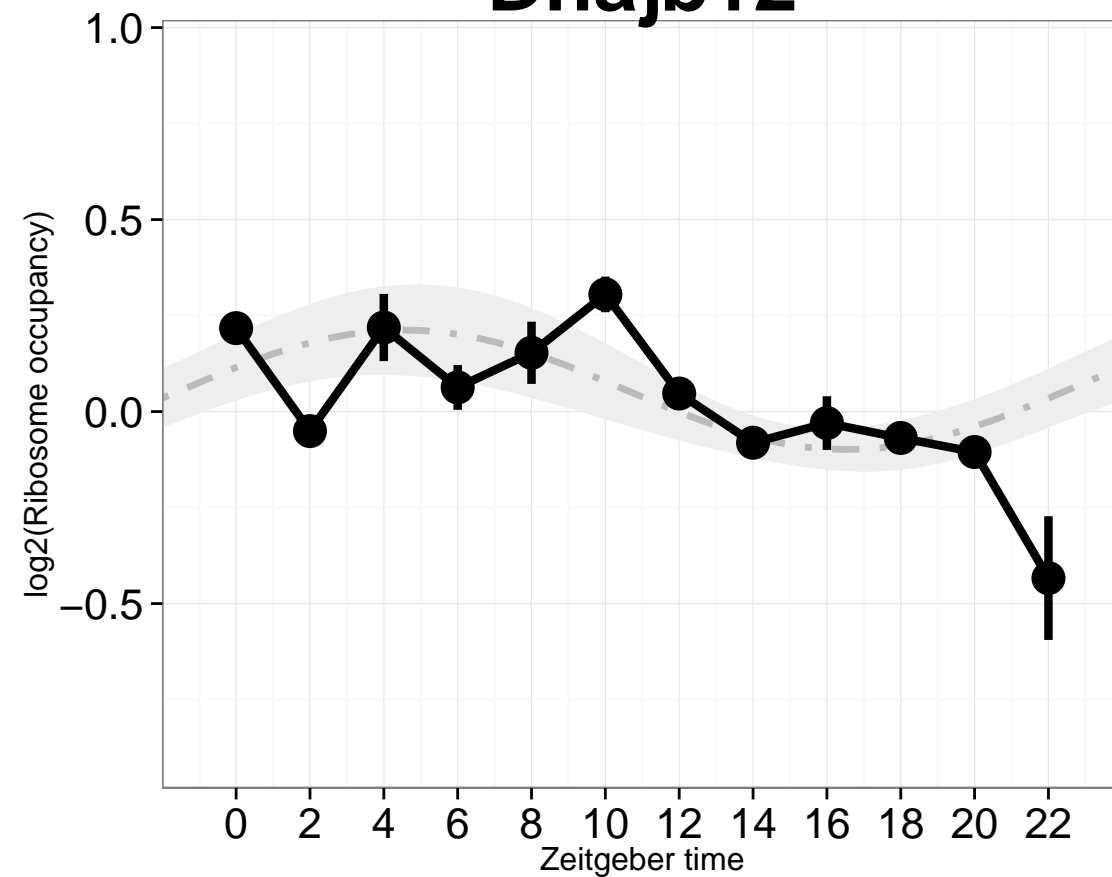

Supplement: SuppDataset_1.zip [file Dnajb12_set_A.pdf › Supplemental Dataset 1/A-mRNA_nonrhyth_translation_nonrhyth/Dnajb12_set_A.pdf]

## Dnajb14

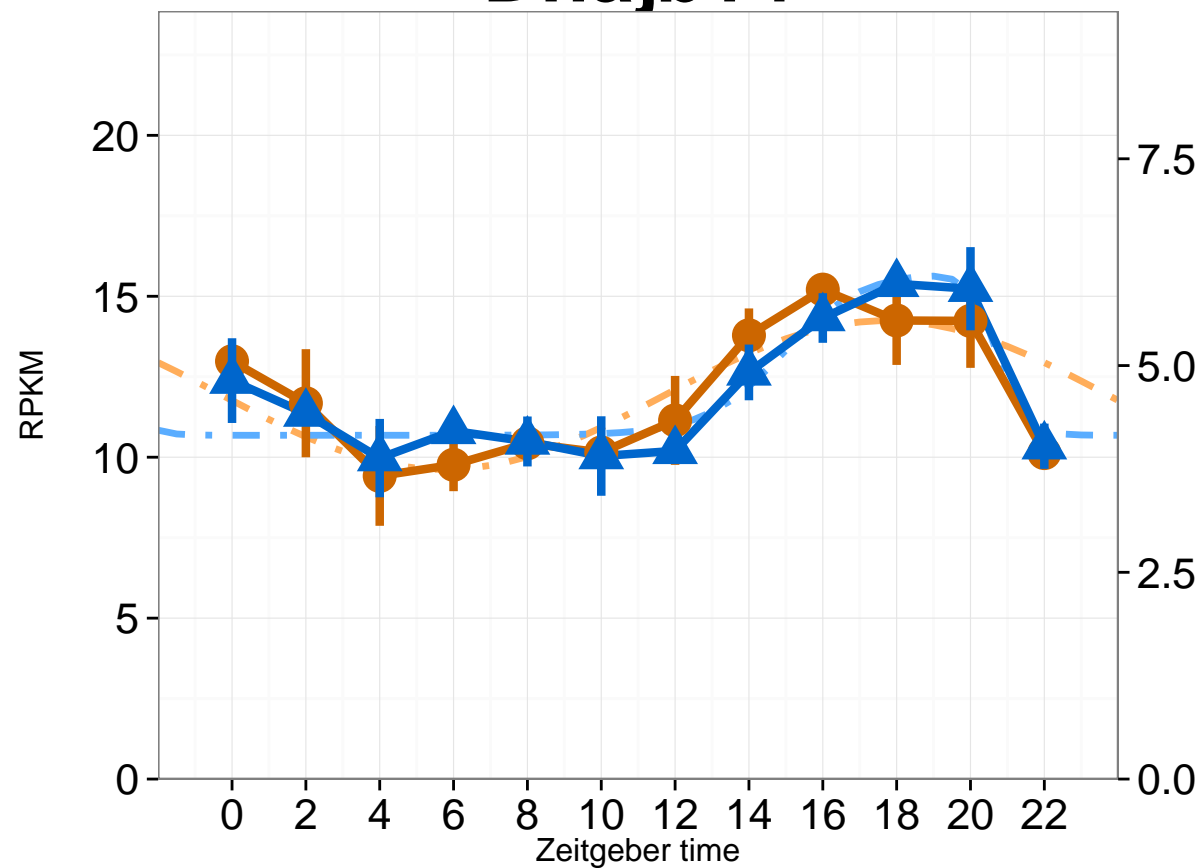

## Dnajb14

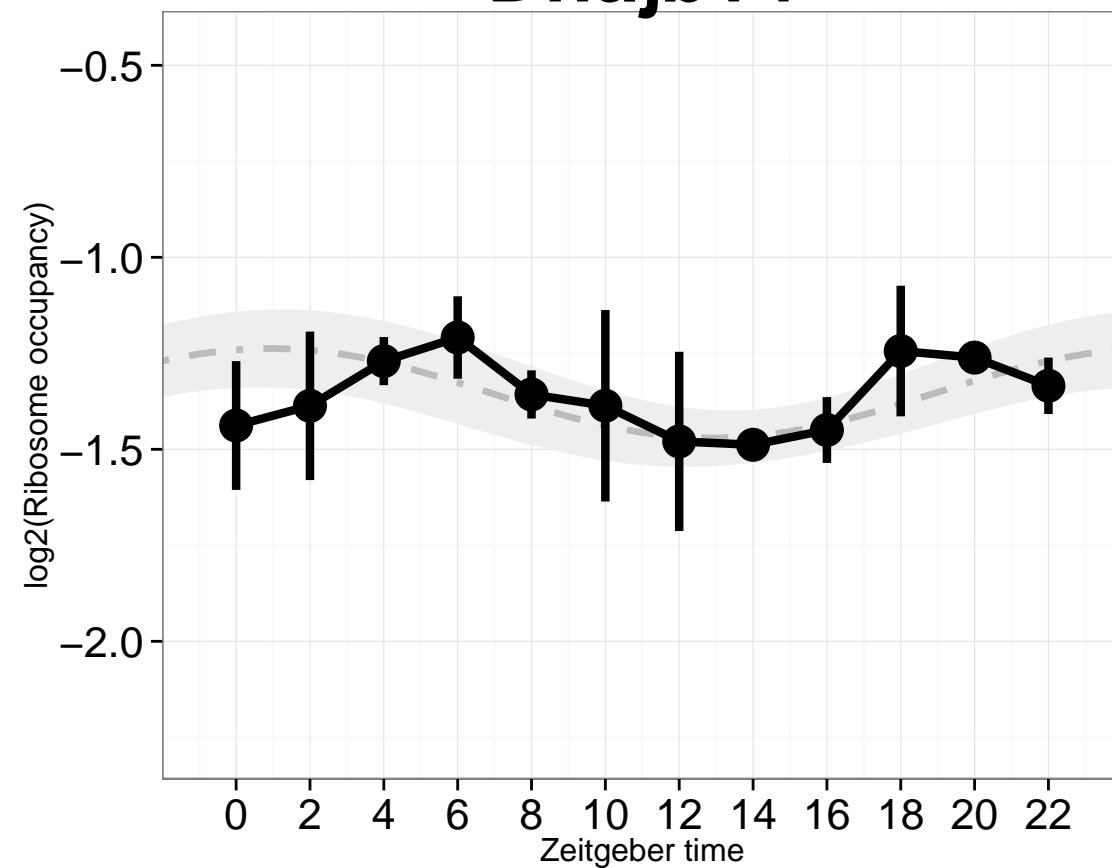

Supplement: SuppDataset_1.zip [file Dnajb14_set_A.pdf › Supplemental Dataset 1/A-mRNA_nonrhyth_translation_nonrhyth/Dnajb14_set_A.pdf]

# Dnajc10

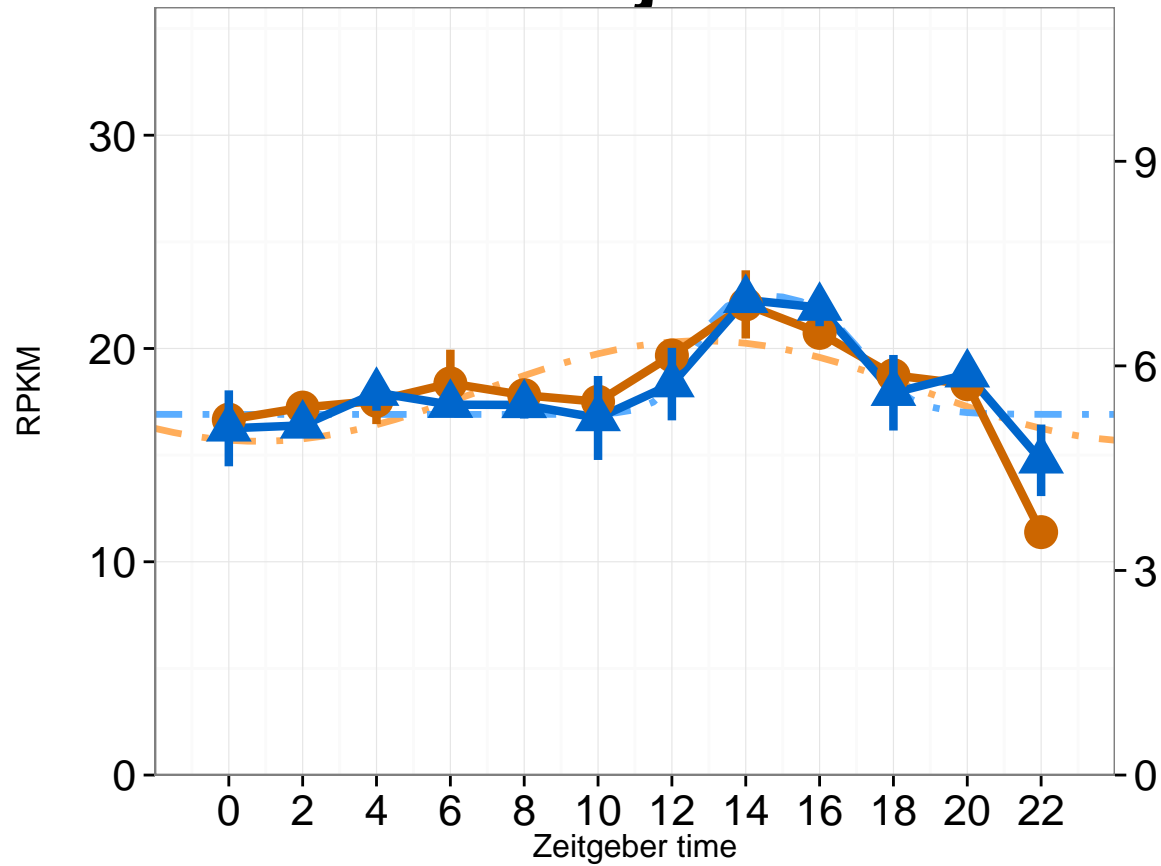

# Dnajc10

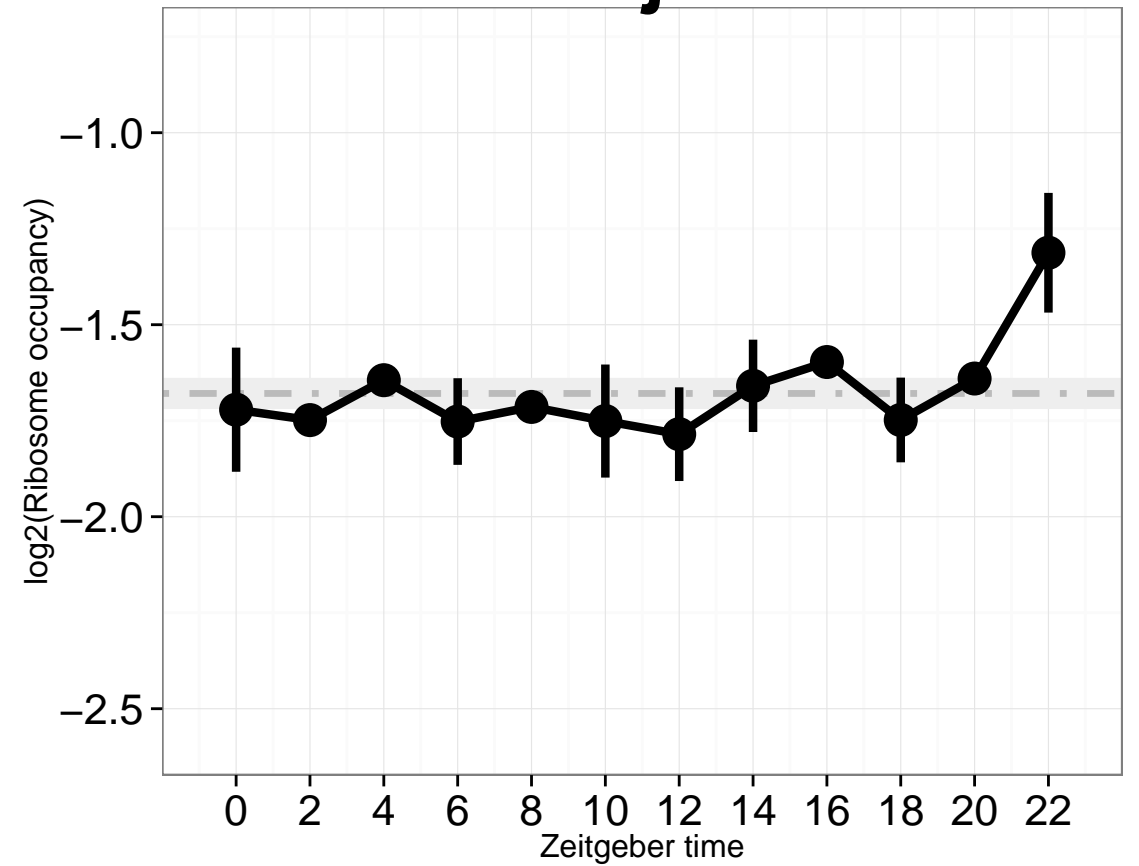

Supplement: SuppDataset_1.zip [file Dnajc10_set_A.pdf › Supplemental Dataset 1/A-mRNA_nonrhyth_translation_nonrhyth/Dnajc10_set_A.pdf]

# Dnajc11

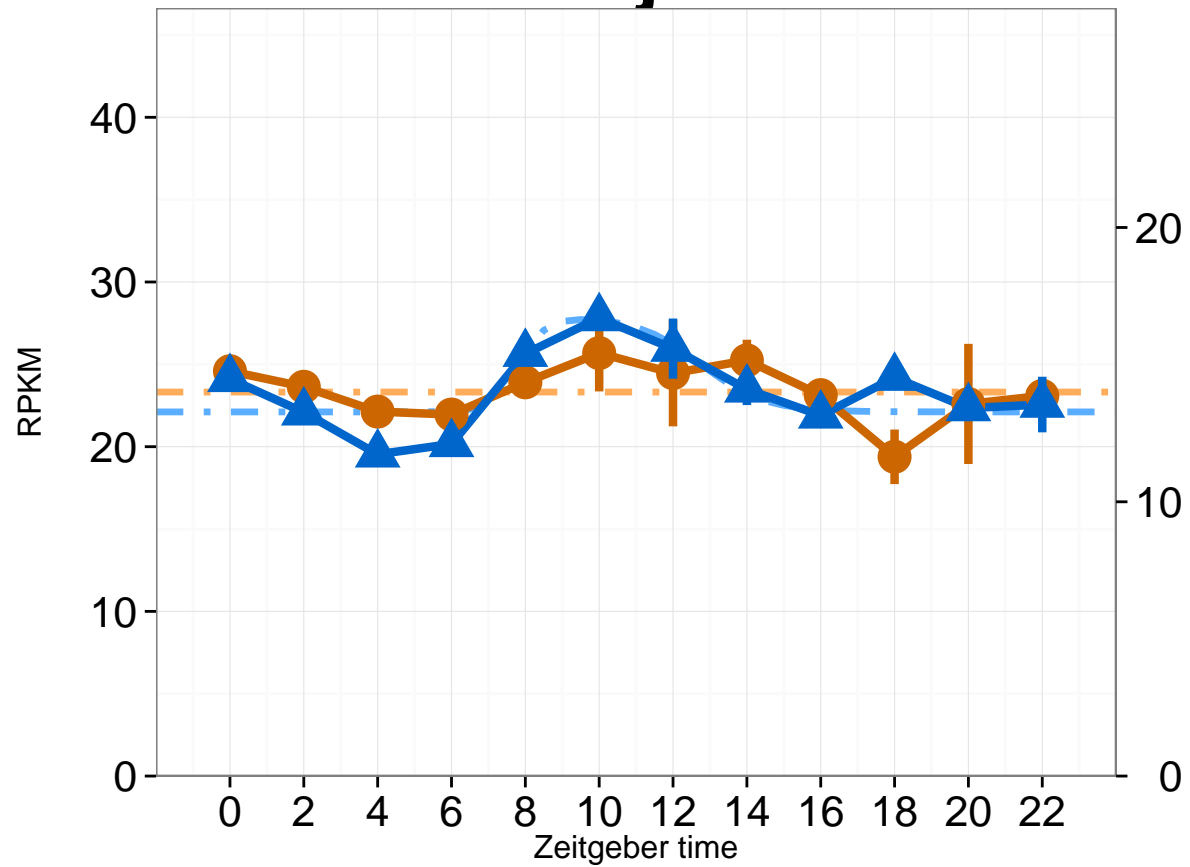

# Dnajc11

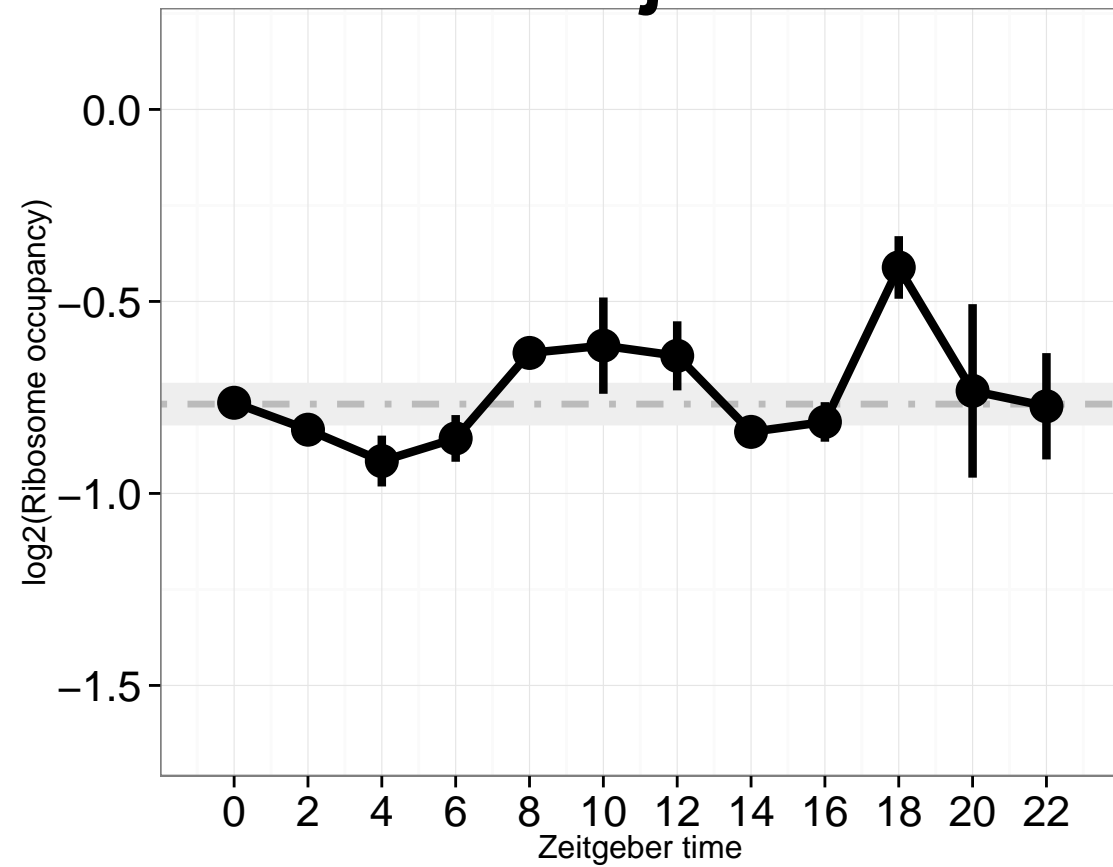

Supplement: SuppDataset_1.zip [file Dnajc11_set_A.pdf › Supplemental Dataset 1/A-mRNA_nonrhyth_translation_nonrhyth/Dnajc11_set_A.pdf]

# Dnajc13

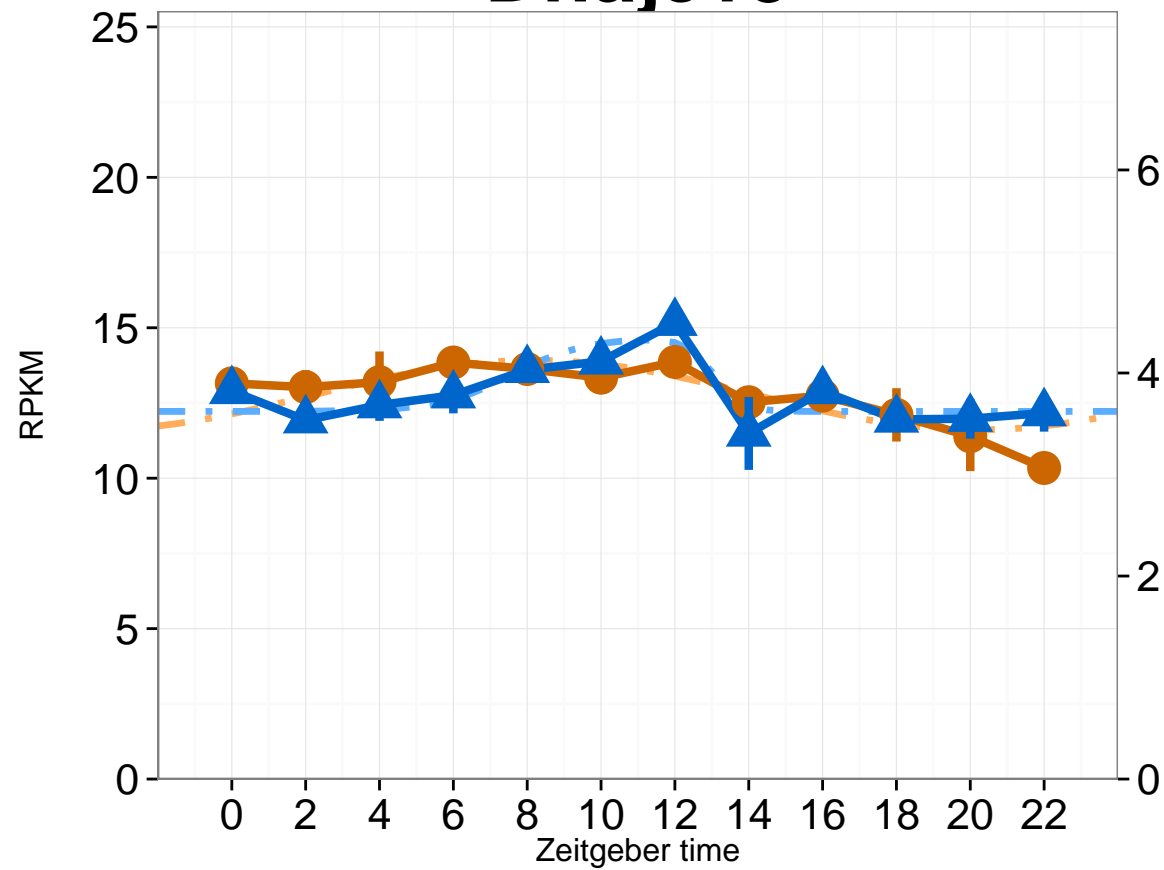

# Dnajc13

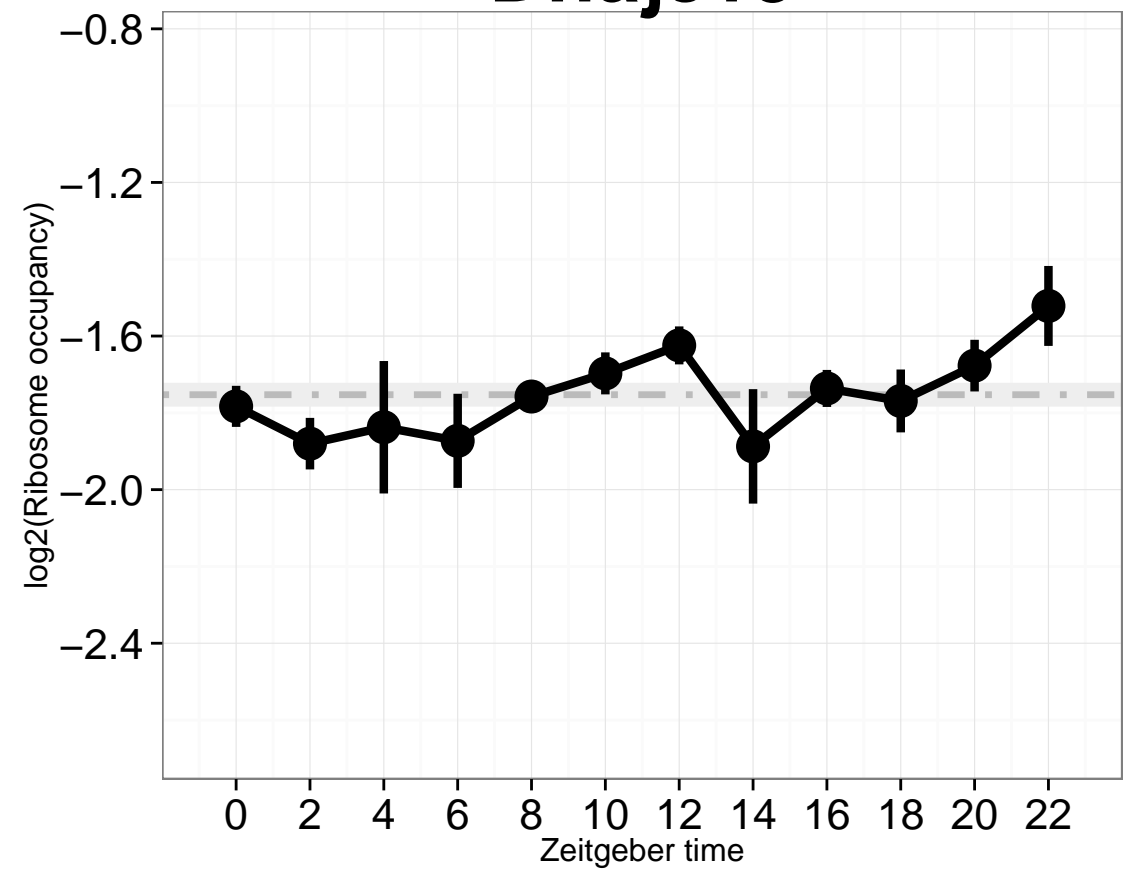

Supplement: SuppDataset_1.zip [file Dnajc13_set_A.pdf › Supplemental Dataset 1/A-mRNA_nonrhyth_translation_nonrhyth/Dnajc13_set_A.pdf]

# Dnajc14

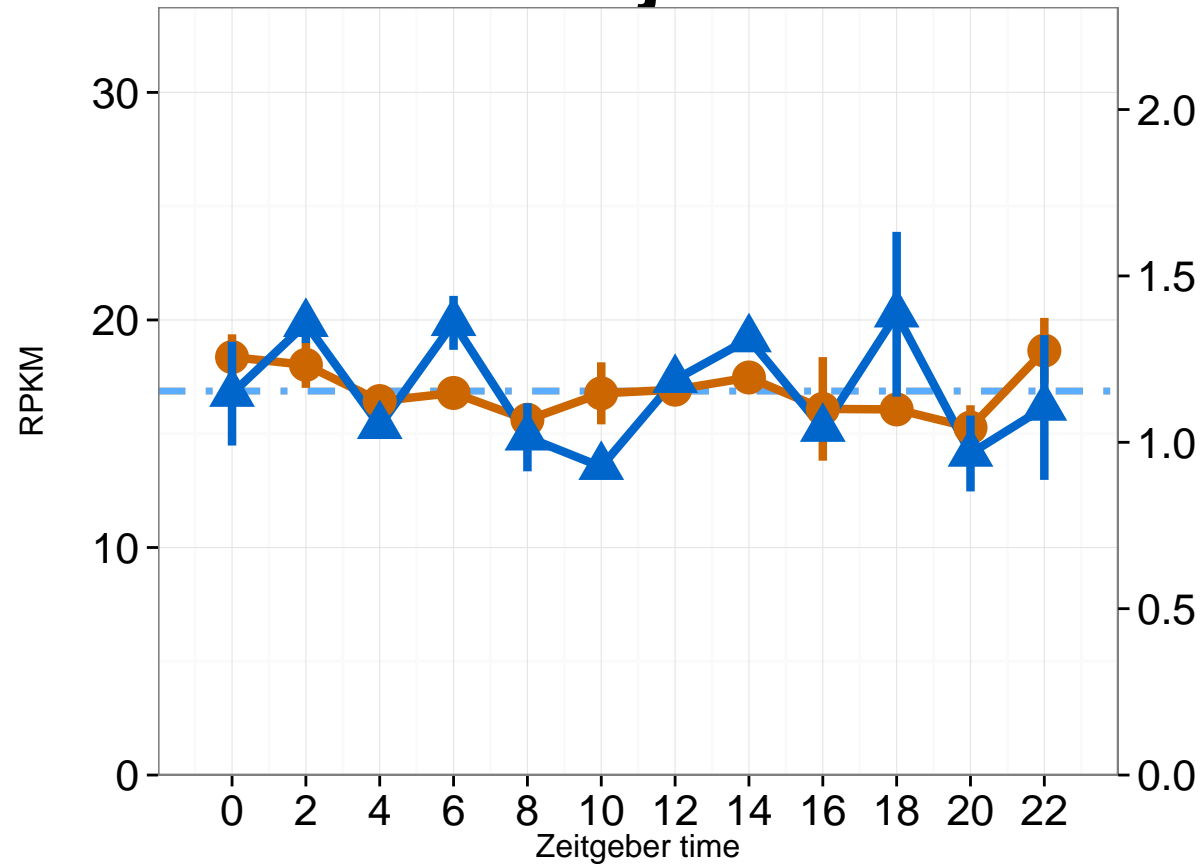

# Dnajc14

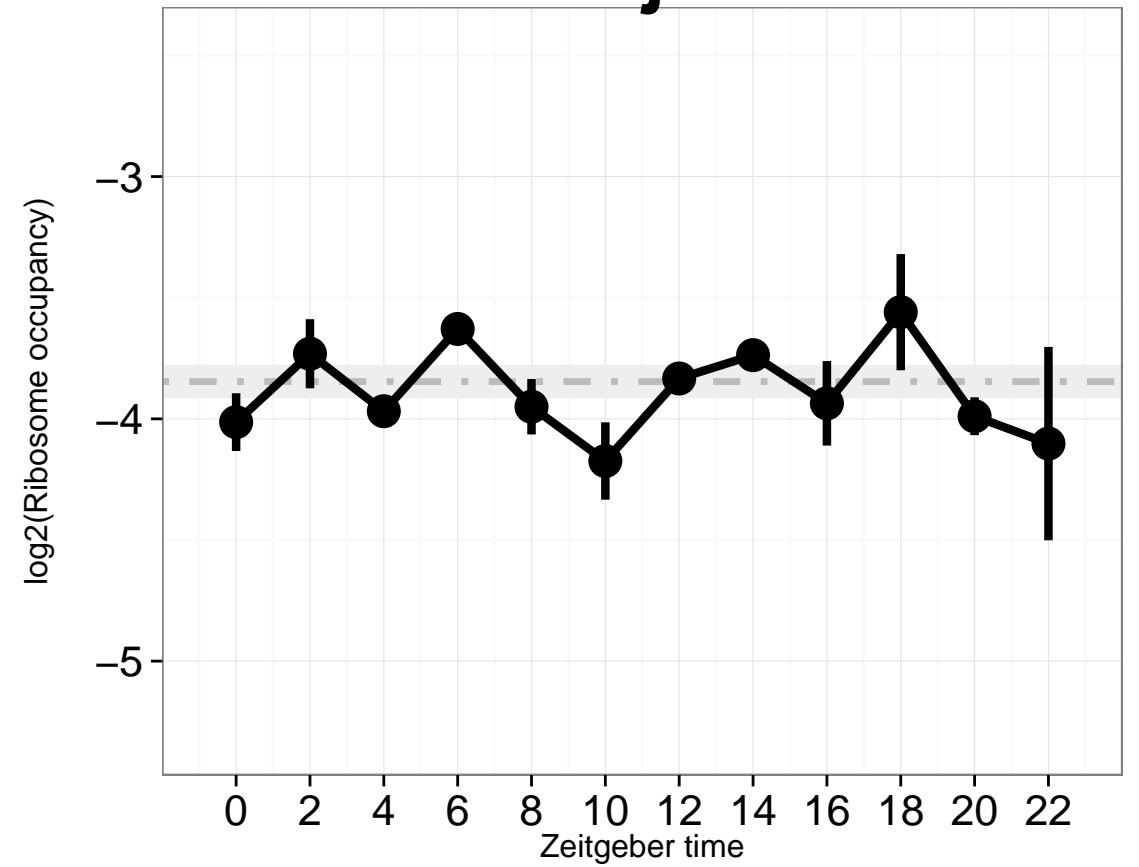

Supplement: SuppDataset_1.zip [file Dnajc14_set_A.pdf › Supplemental Dataset 1/A-mRNA_nonrhyth_translation_nonrhyth/Dnajc14_set_A.pdf]

# Dnajc15

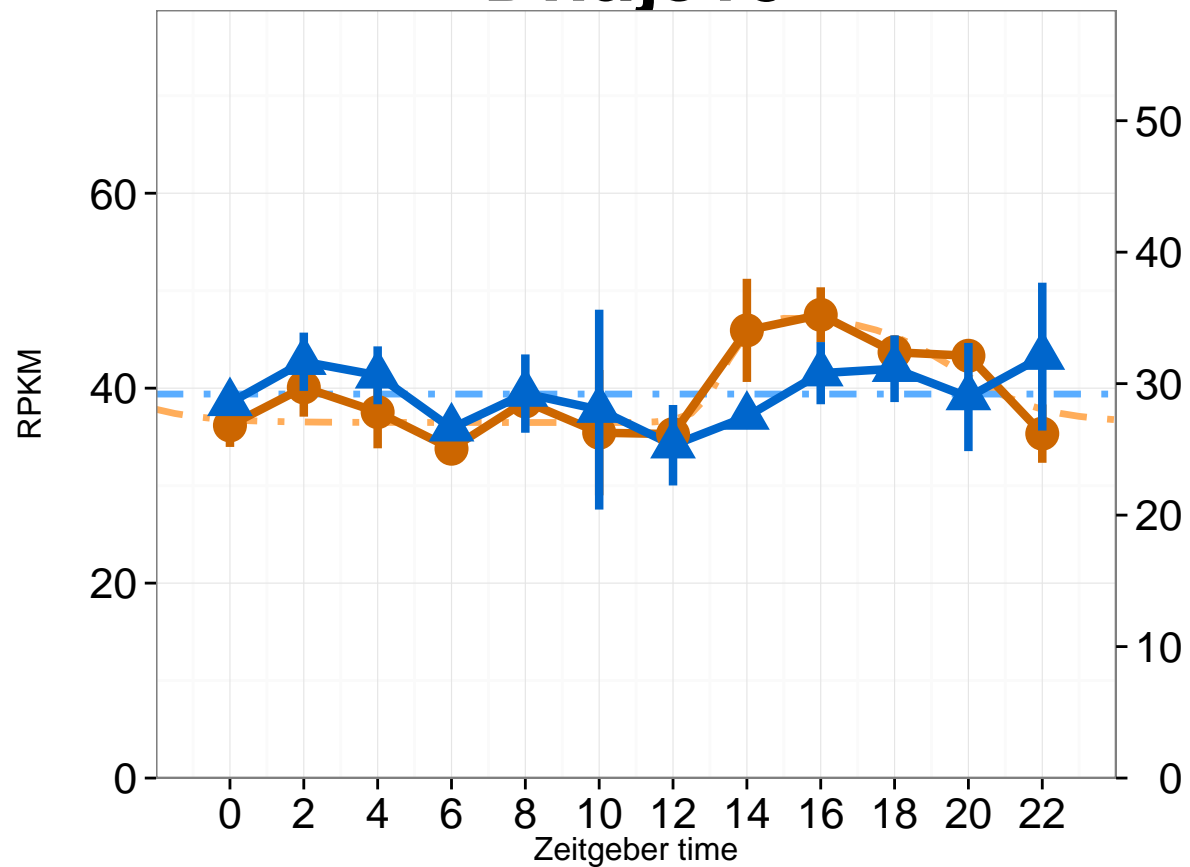

# Dnajc15

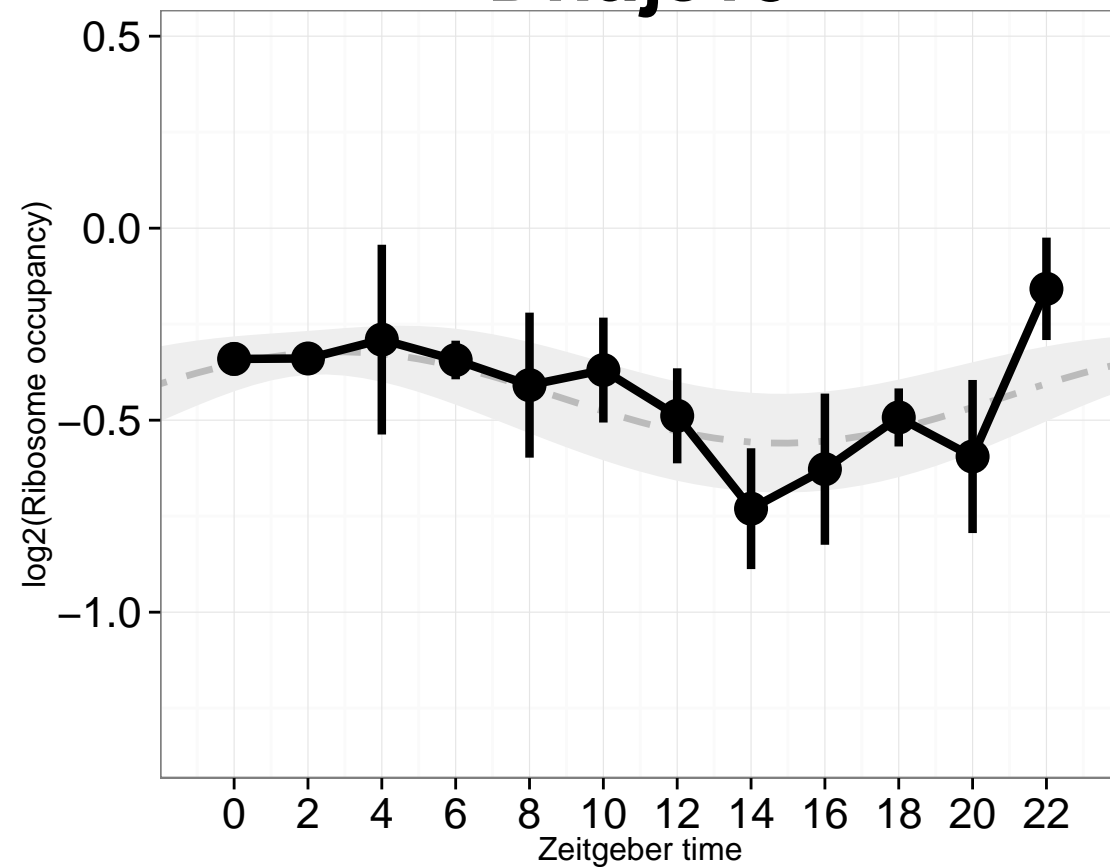

Supplement: SuppDataset_1.zip [file Dnajc15_set_A.pdf › Supplemental Dataset 1/A-mRNA_nonrhyth_translation_nonrhyth/Dnajc15_set_A.pdf]

# Dnajc16

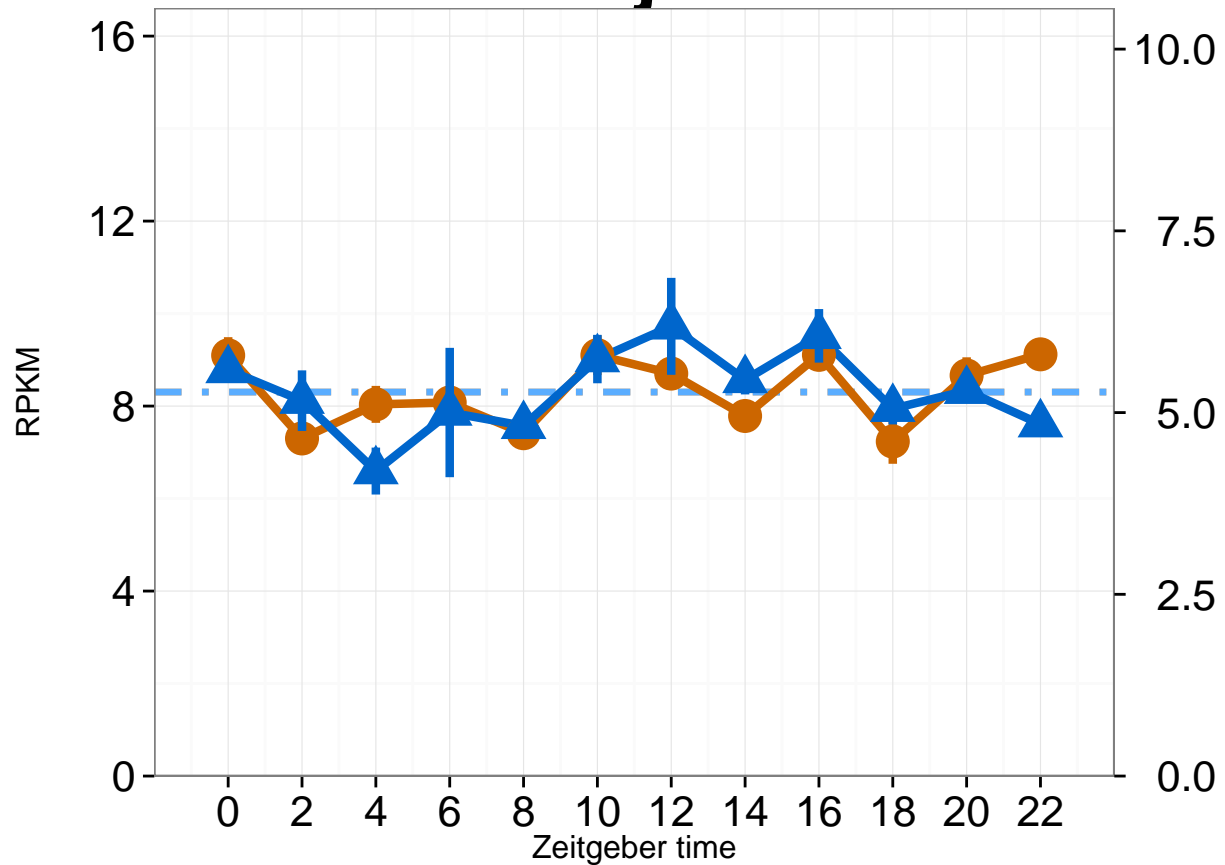

# Dnajc16

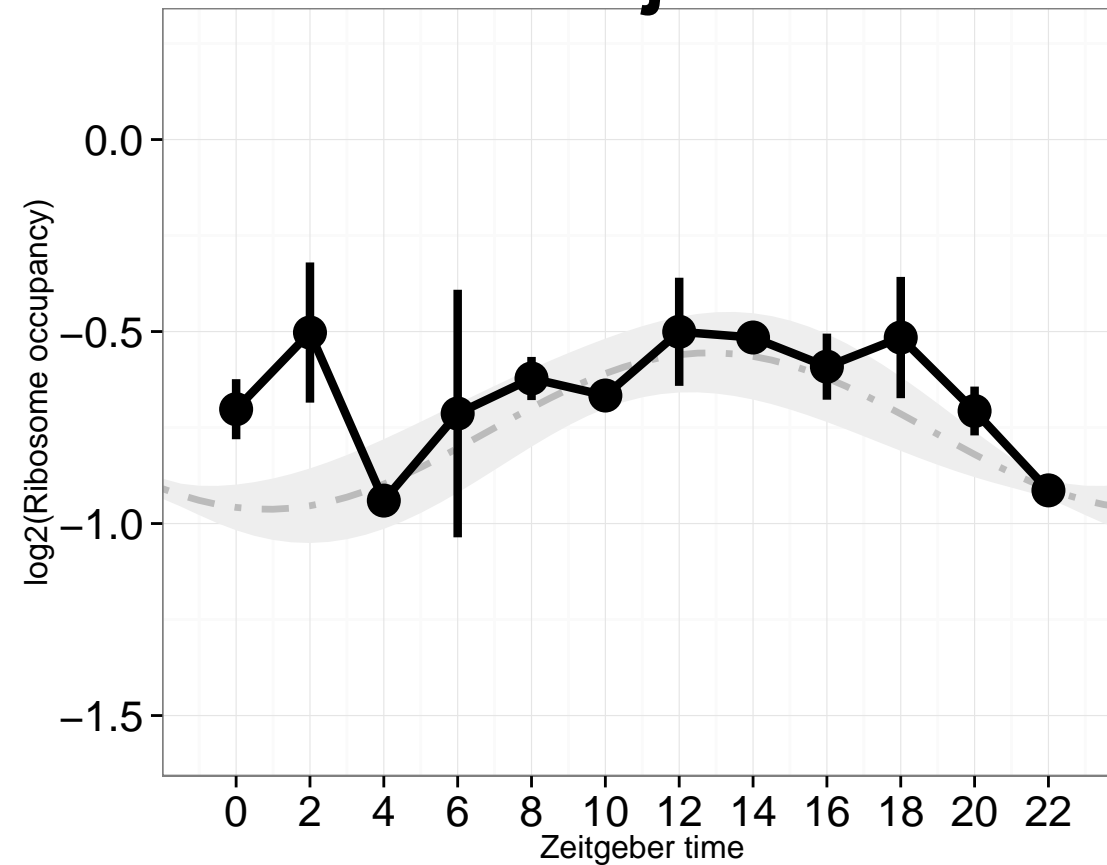

Supplement: SuppDataset_1.zip [file Dnajc16_set_A.pdf › Supplemental Dataset 1/A-mRNA_nonrhyth_translation_nonrhyth/Dnajc16_set_A.pdf]

# Dnajc17

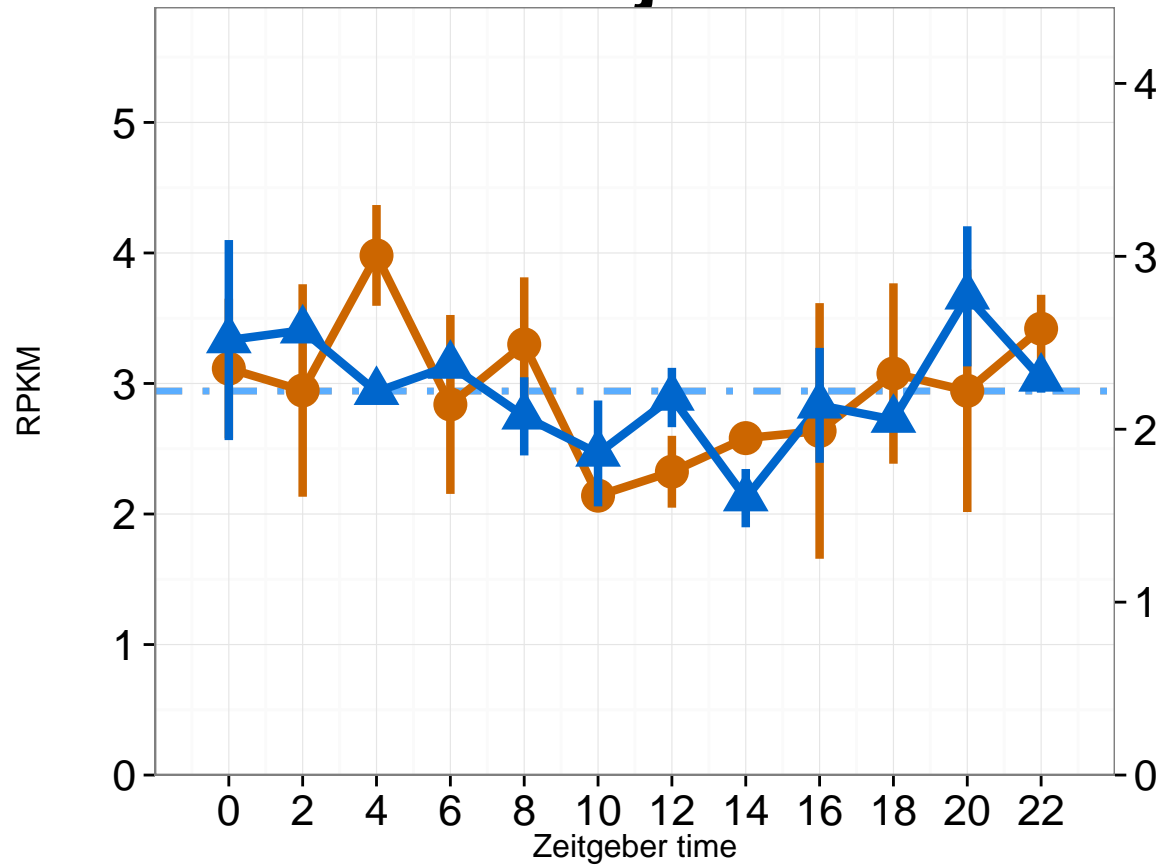

# Dnajc17

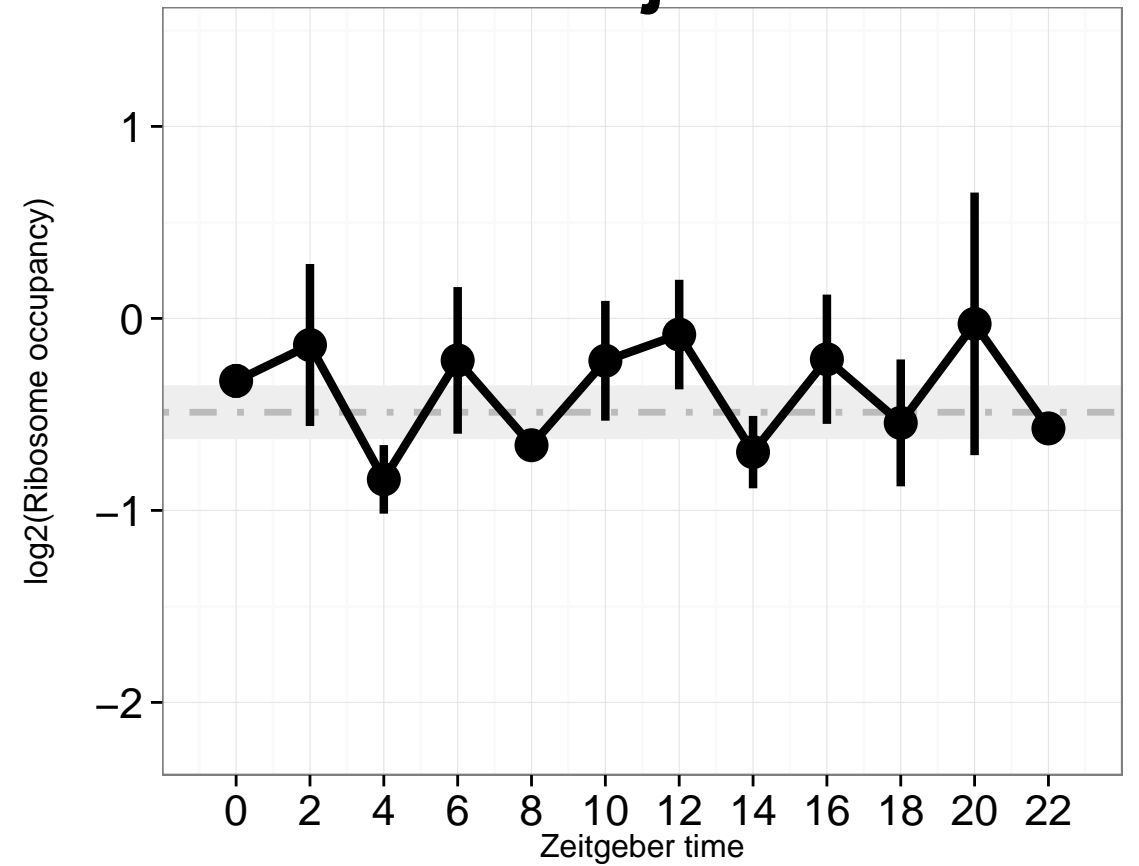

Supplement: SuppDataset_1.zip [file Dnajc17_set_A.pdf › Supplemental Dataset 1/A-mRNA_nonrhyth_translation_nonrhyth/Dnajc17_set_A.pdf]

# Dnajc18

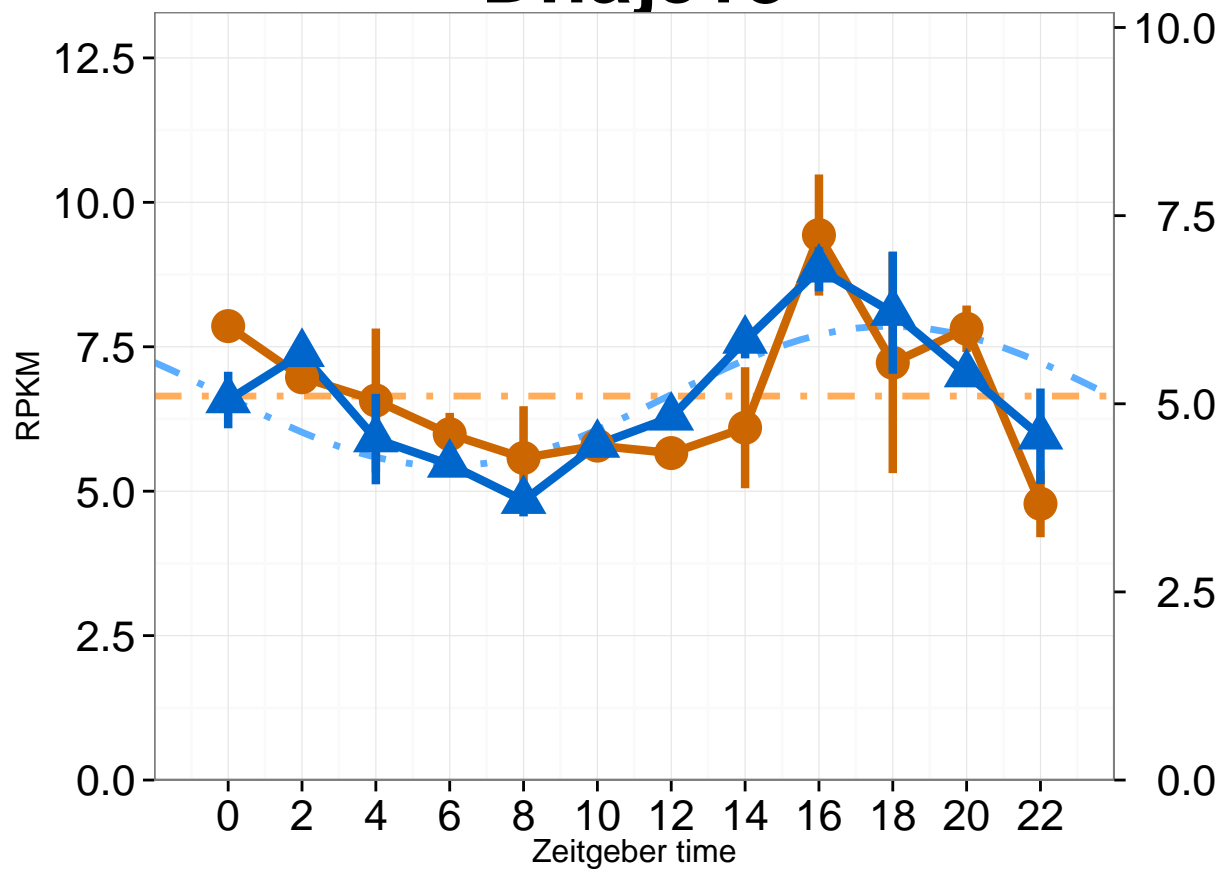

# Dnajc18

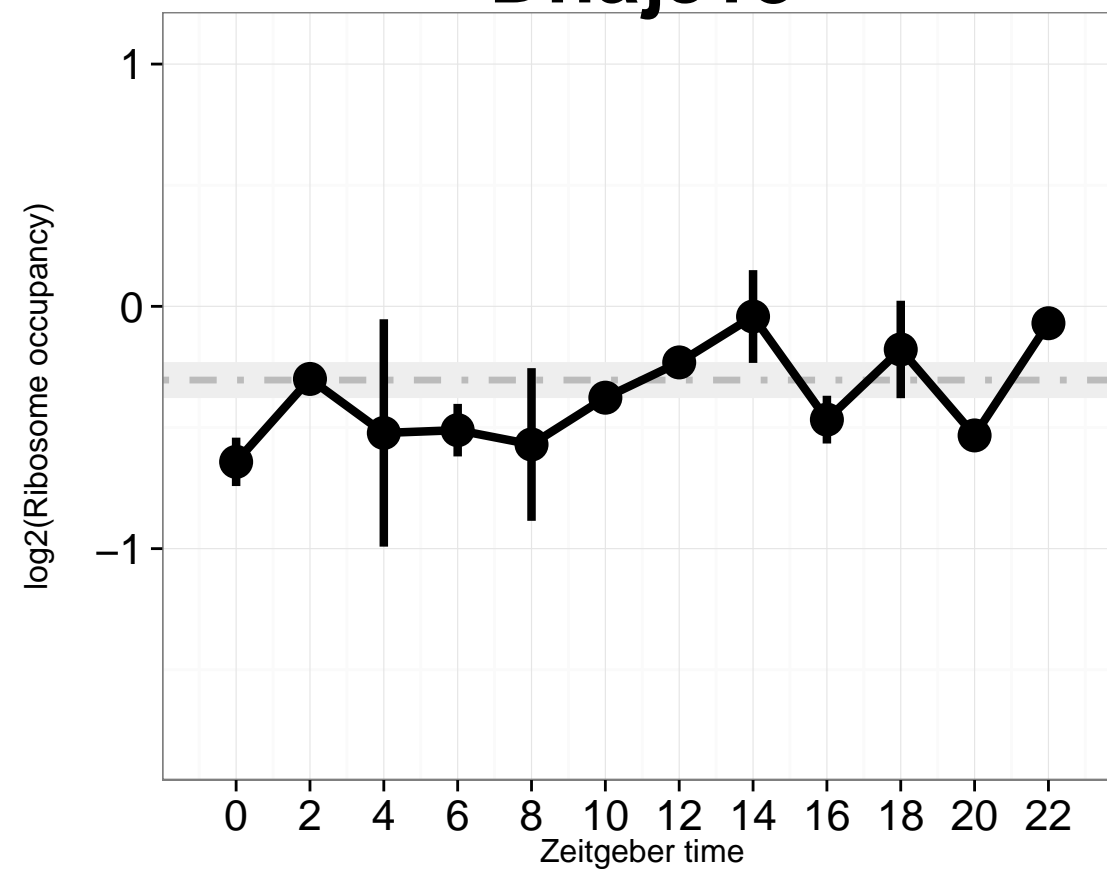

Supplement: SuppDataset_1.zip [file Dnajc18_set_A.pdf › Supplemental Dataset 1/A-mRNA_nonrhyth_translation_nonrhyth/Dnajc18_set_A.pdf]

# Dnajc19

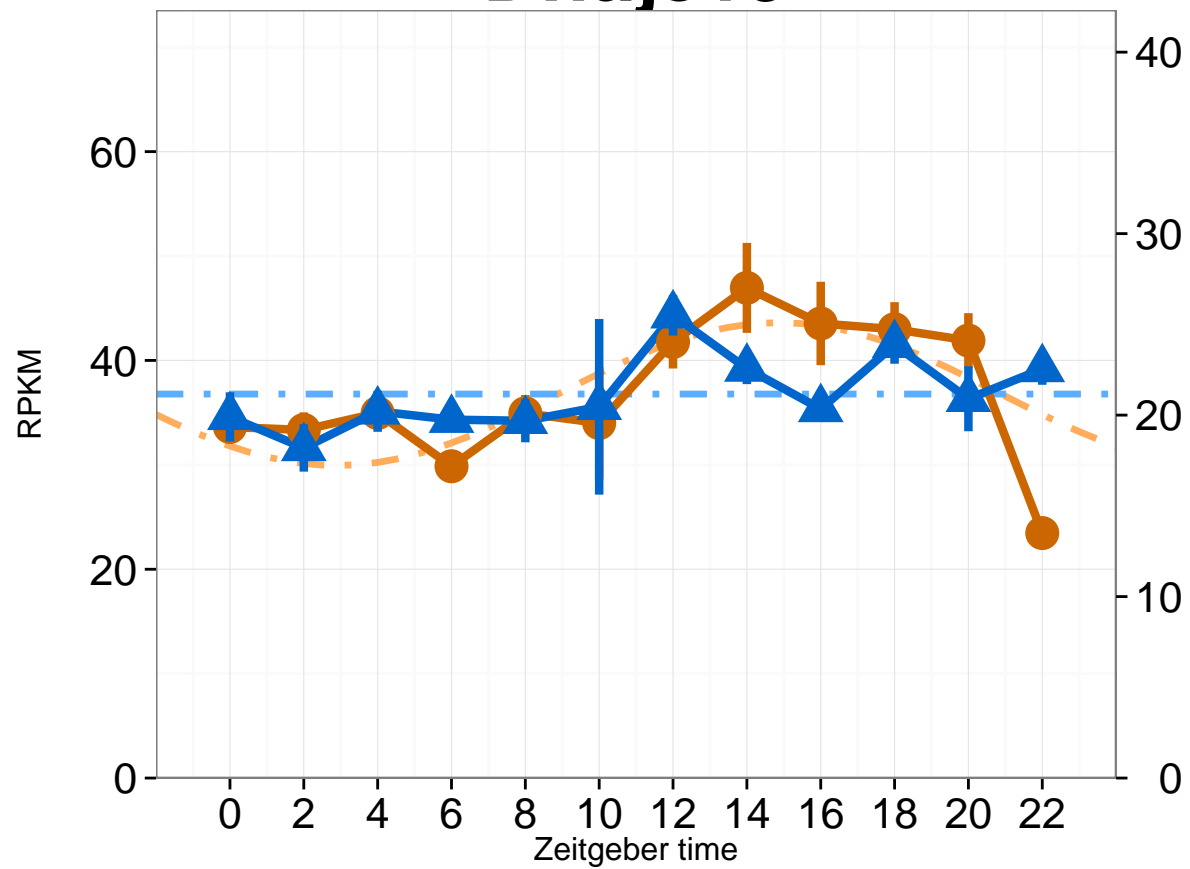

# Dnajc19

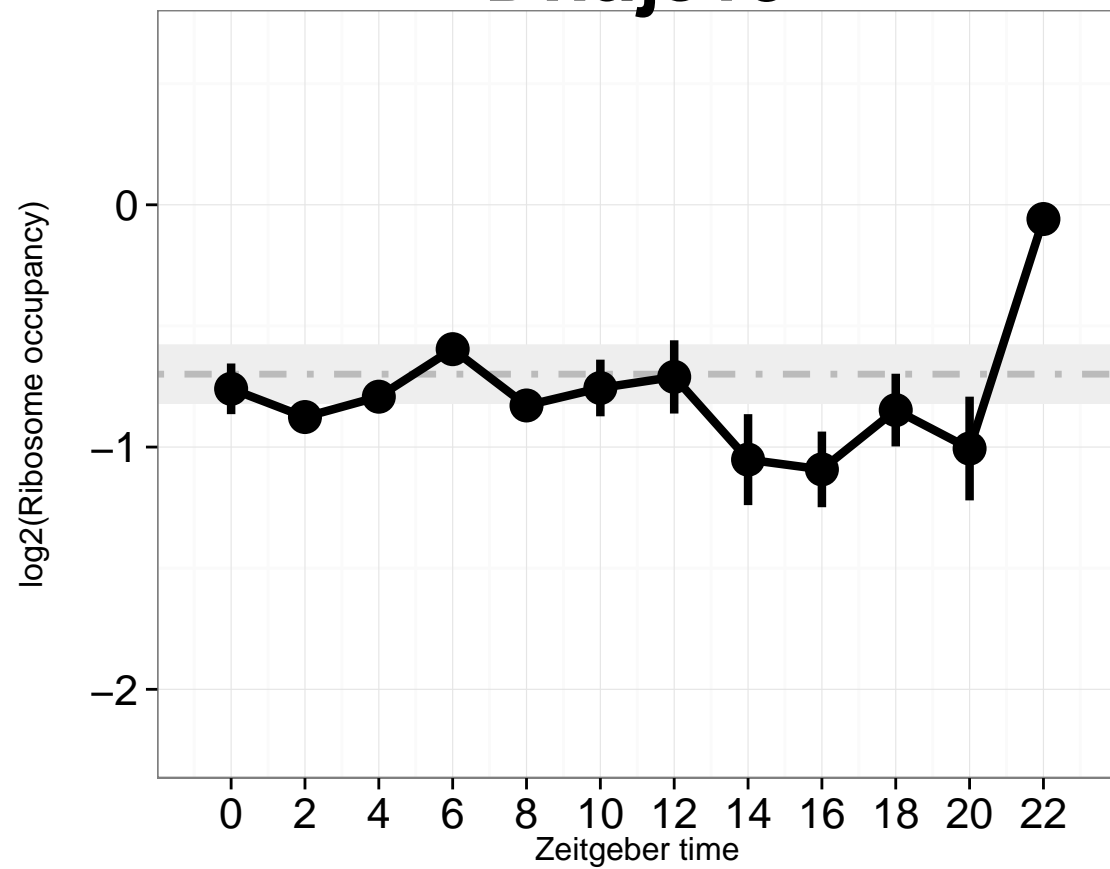

Supplement: SuppDataset_1.zip [file Dnajc19_set_A.pdf › Supplemental Dataset 1/A-mRNA_nonrhyth_translation_nonrhyth/Dnajc19_set_A.pdf]

# Dnajc1

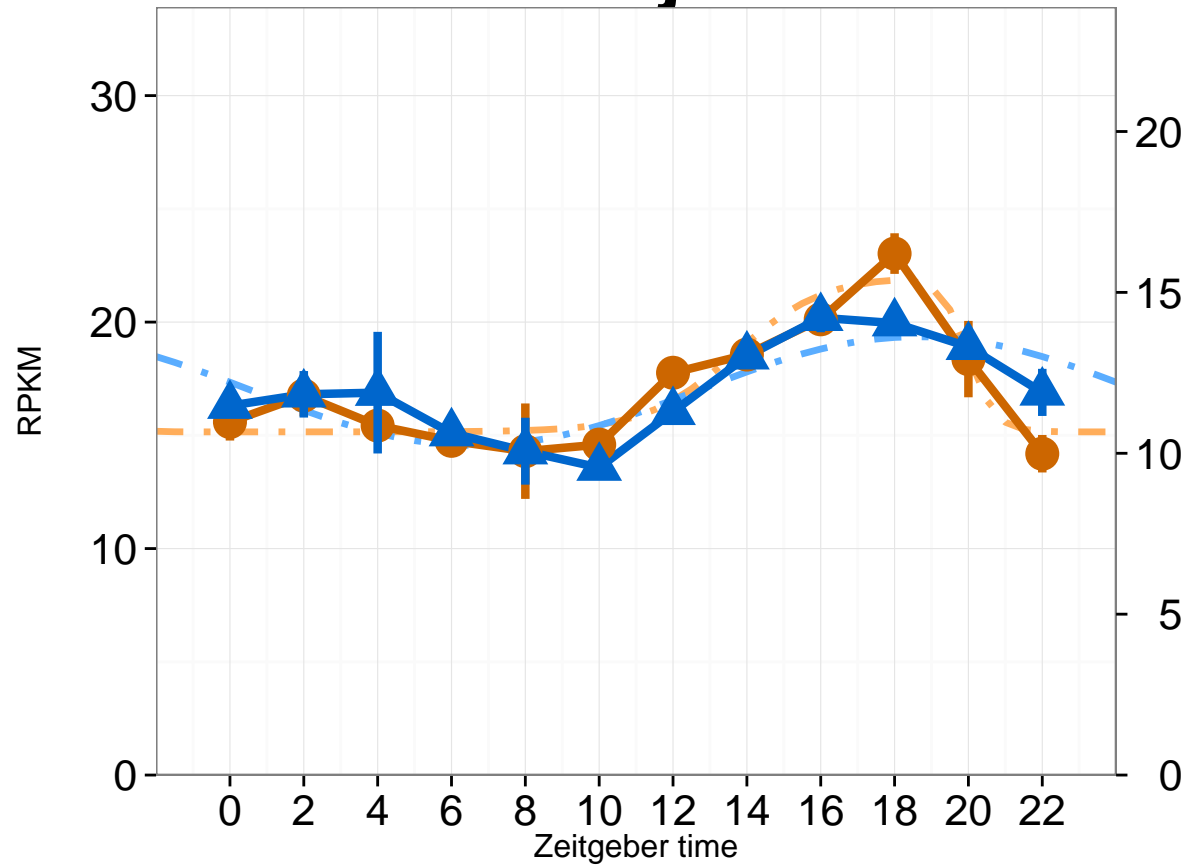

# Dnajc1

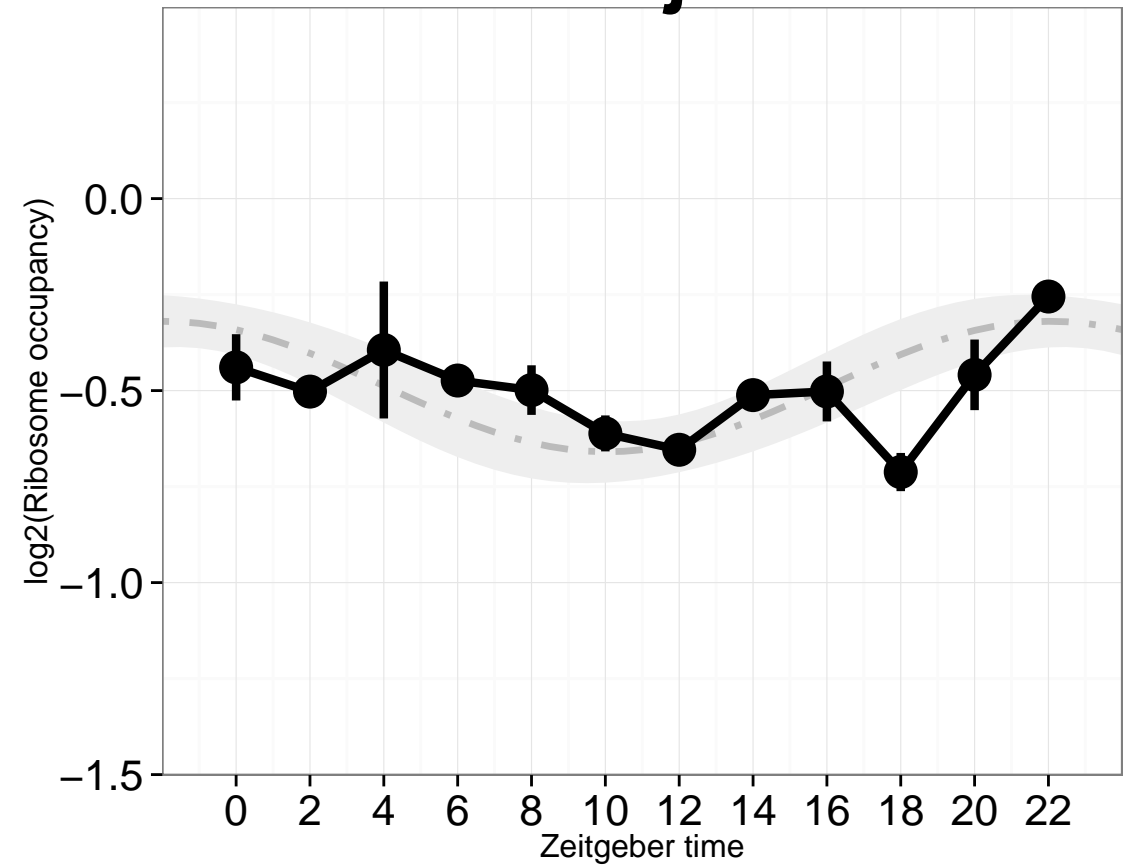

Supplement: SuppDataset_1.zip [file Dnajc1_set_A.pdf › Supplemental Dataset 1/A-mRNA_nonrhyth_translation_nonrhyth/Dnajc1_set_A.pdf]

# Dnajc21

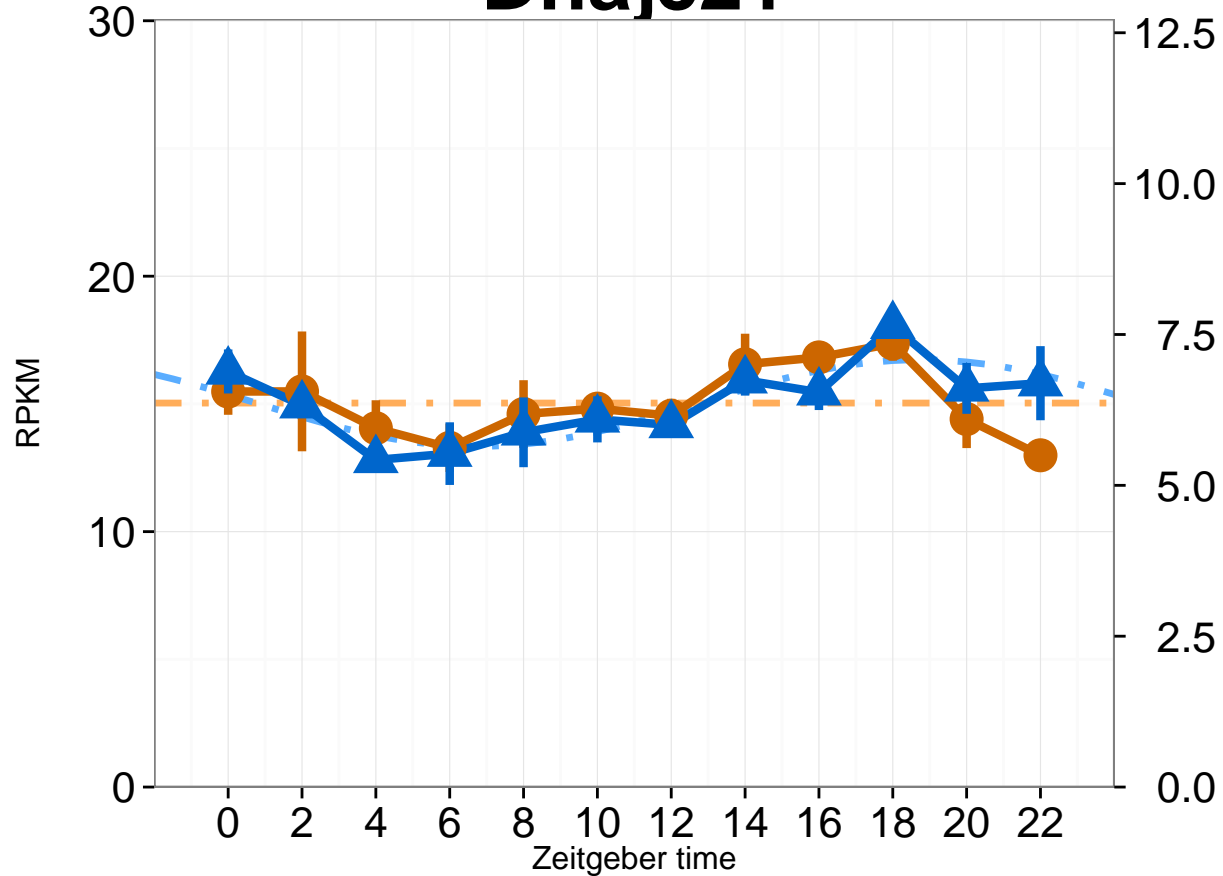

# Dnajc21

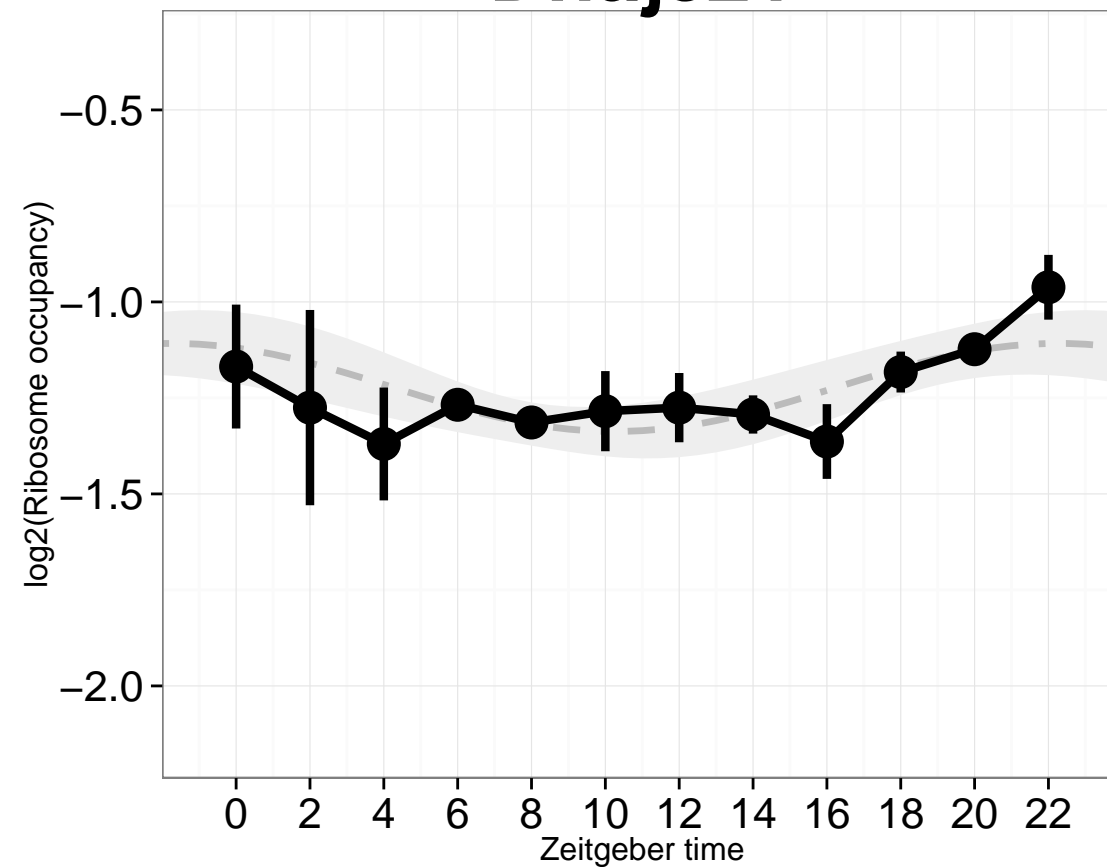

Supplement: SuppDataset_1.zip [file Dnajc21_set_A.pdf › Supplemental Dataset 1/A-mRNA_nonrhyth_translation_nonrhyth/Dnajc21_set_A.pdf]

# Dnajc22

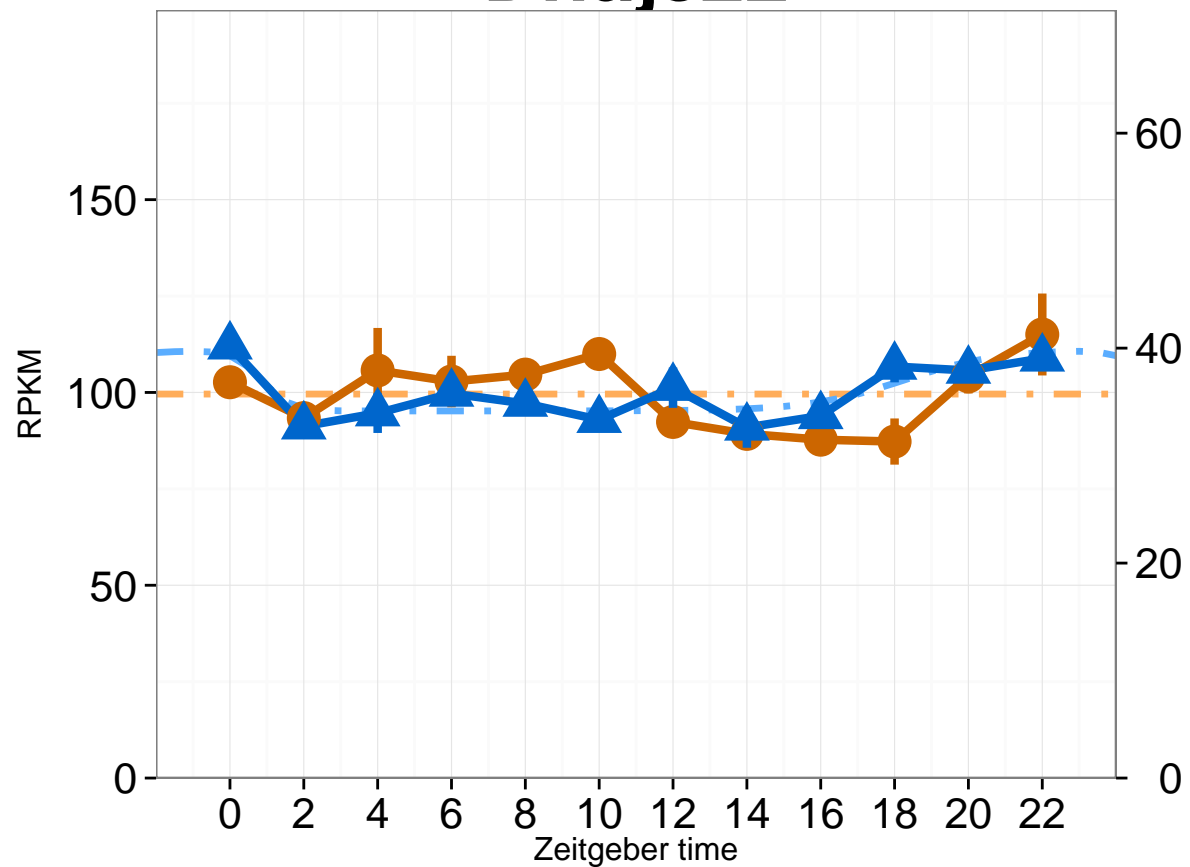

# Dnajc22

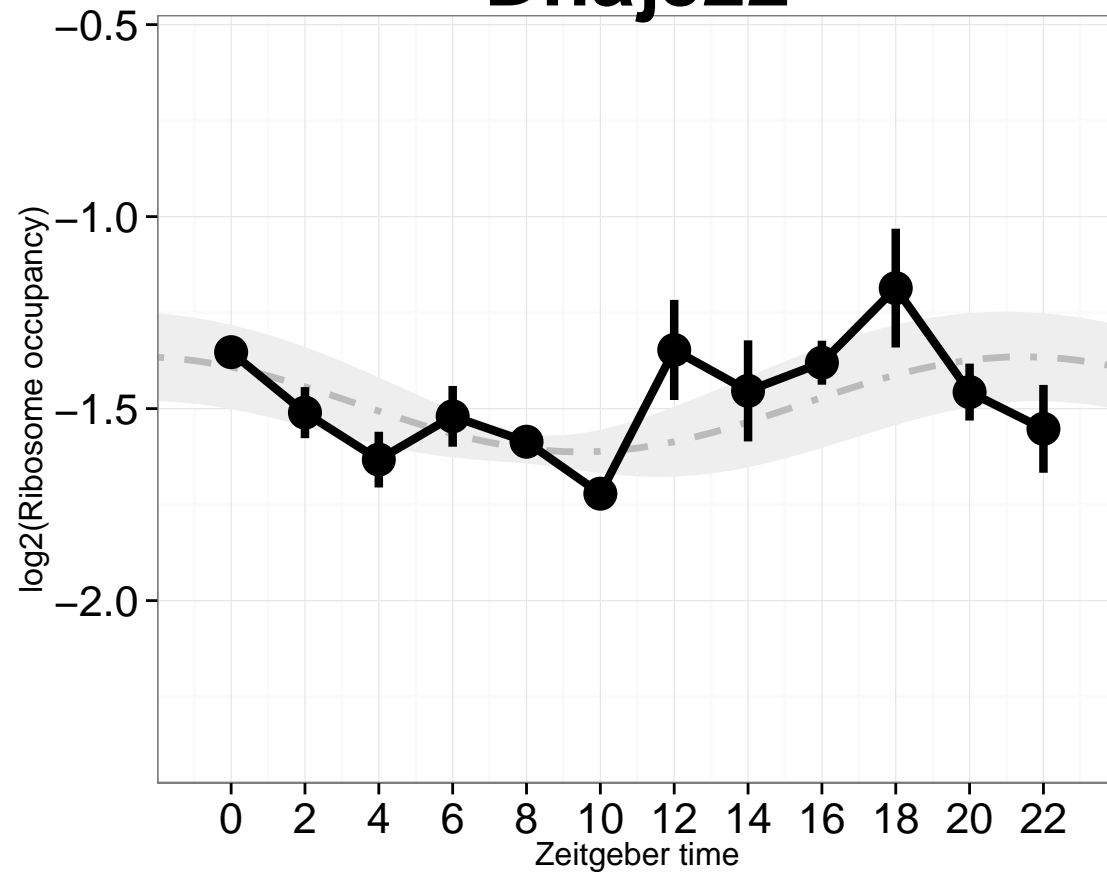

Supplement: SuppDataset_1.zip [file Dnajc22_set_A.pdf › Supplemental Dataset 1/A-mRNA_nonrhyth_translation_nonrhyth/Dnajc22_set_A.pdf]

## Dnajc24

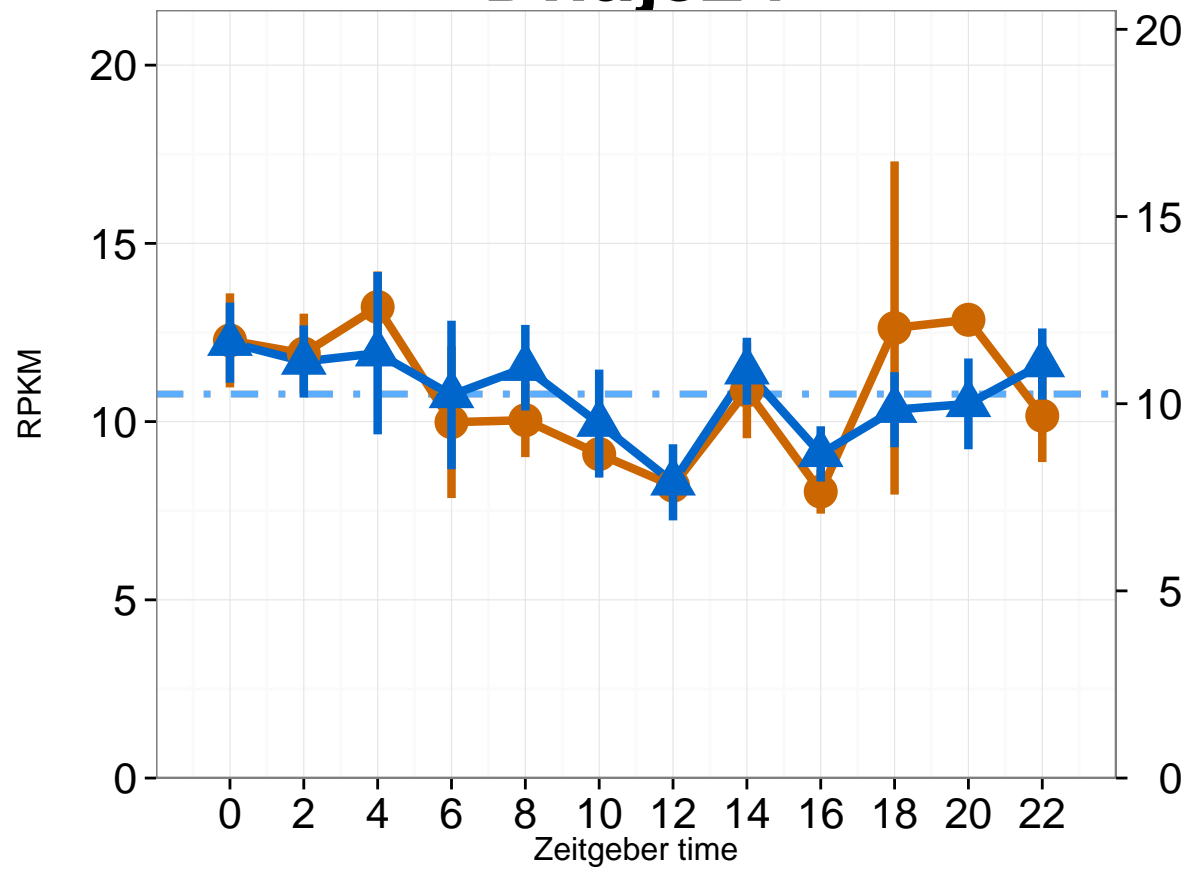

## Dnajc24

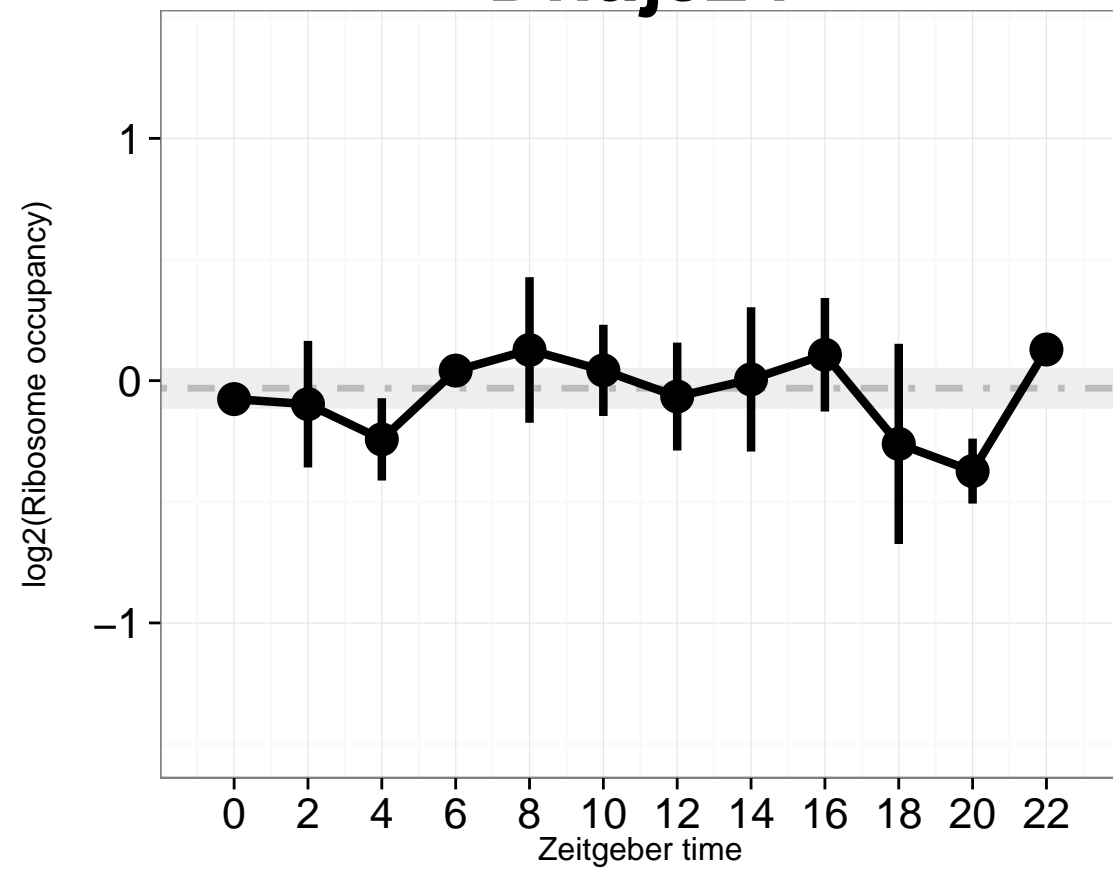

Supplement: SuppDataset_1.zip [file Dnajc24_set_A.pdf › Supplemental Dataset 1/A-mRNA_nonrhyth_translation_nonrhyth/Dnajc24_set_A.pdf]

# Dnajc25

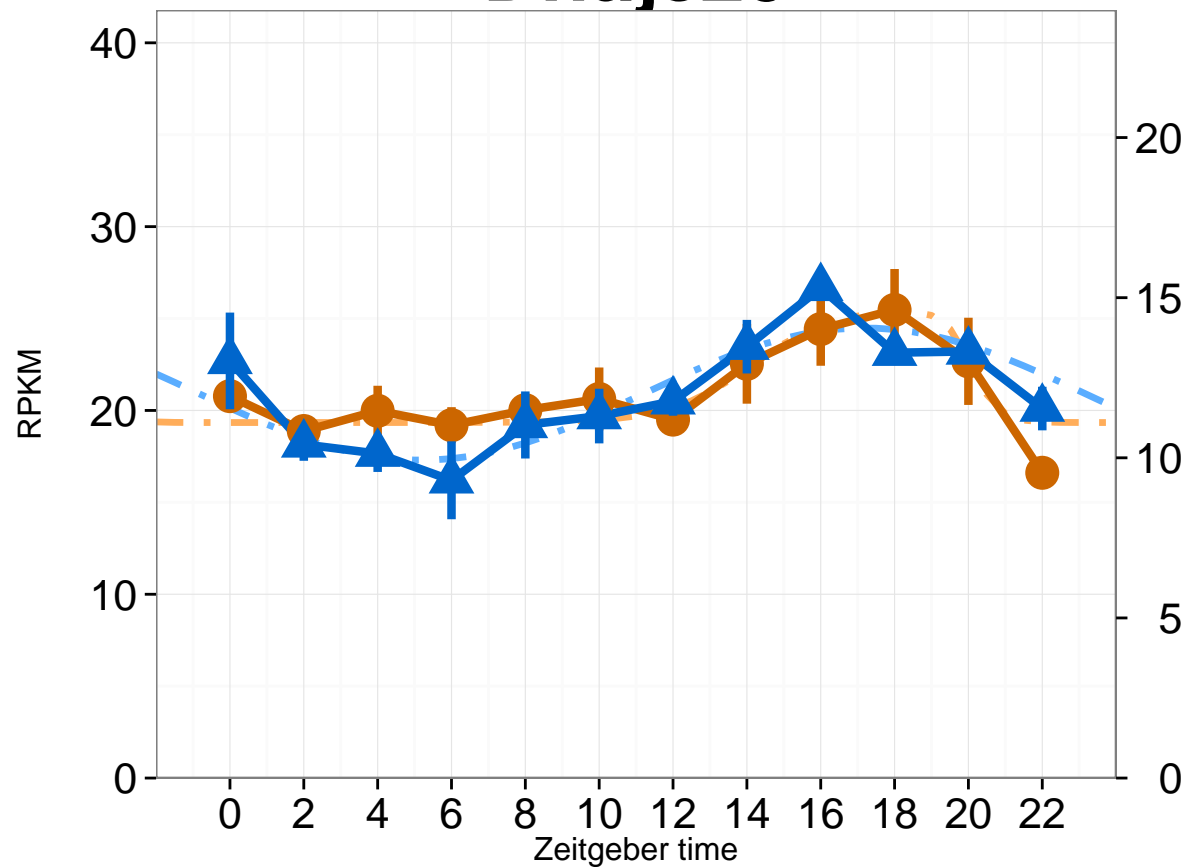

# Dnajc25

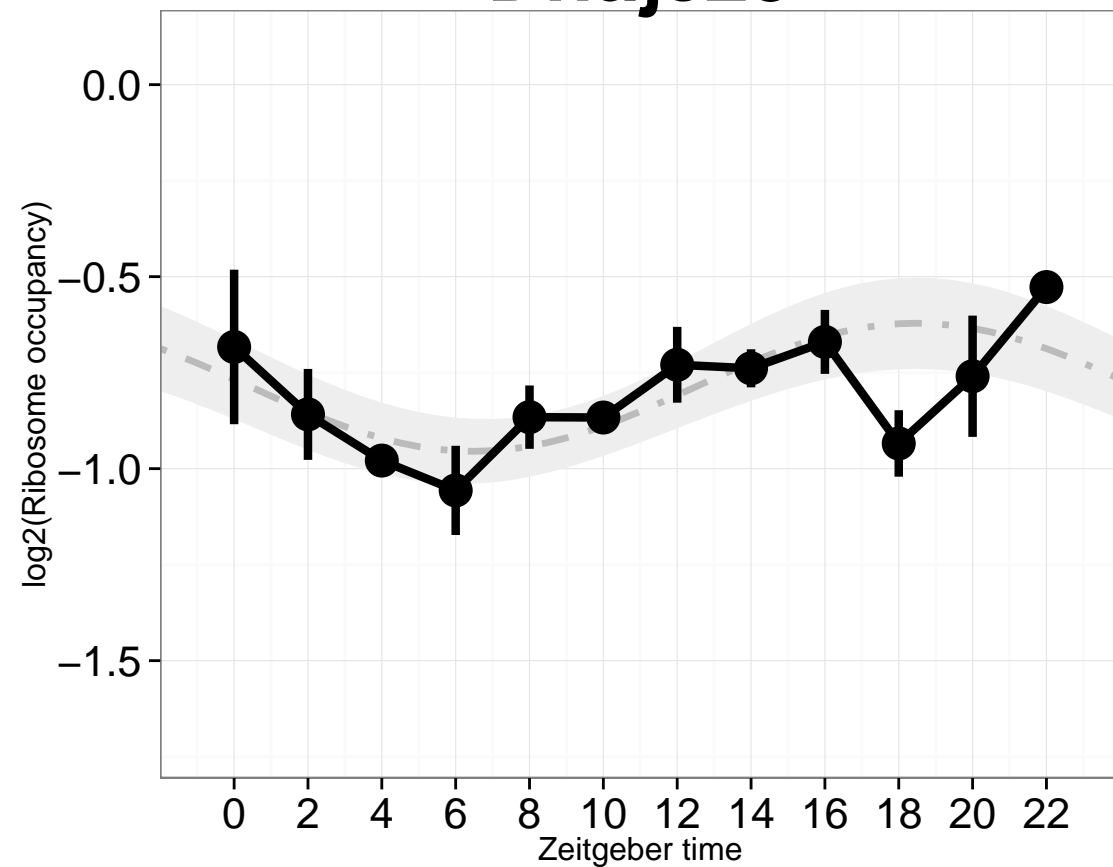

Supplement: SuppDataset_1.zip [file Dnajc25_set_A.pdf › Supplemental Dataset 1/A-mRNA_nonrhyth_translation_nonrhyth/Dnajc25_set_A.pdf]

# Dnajc28

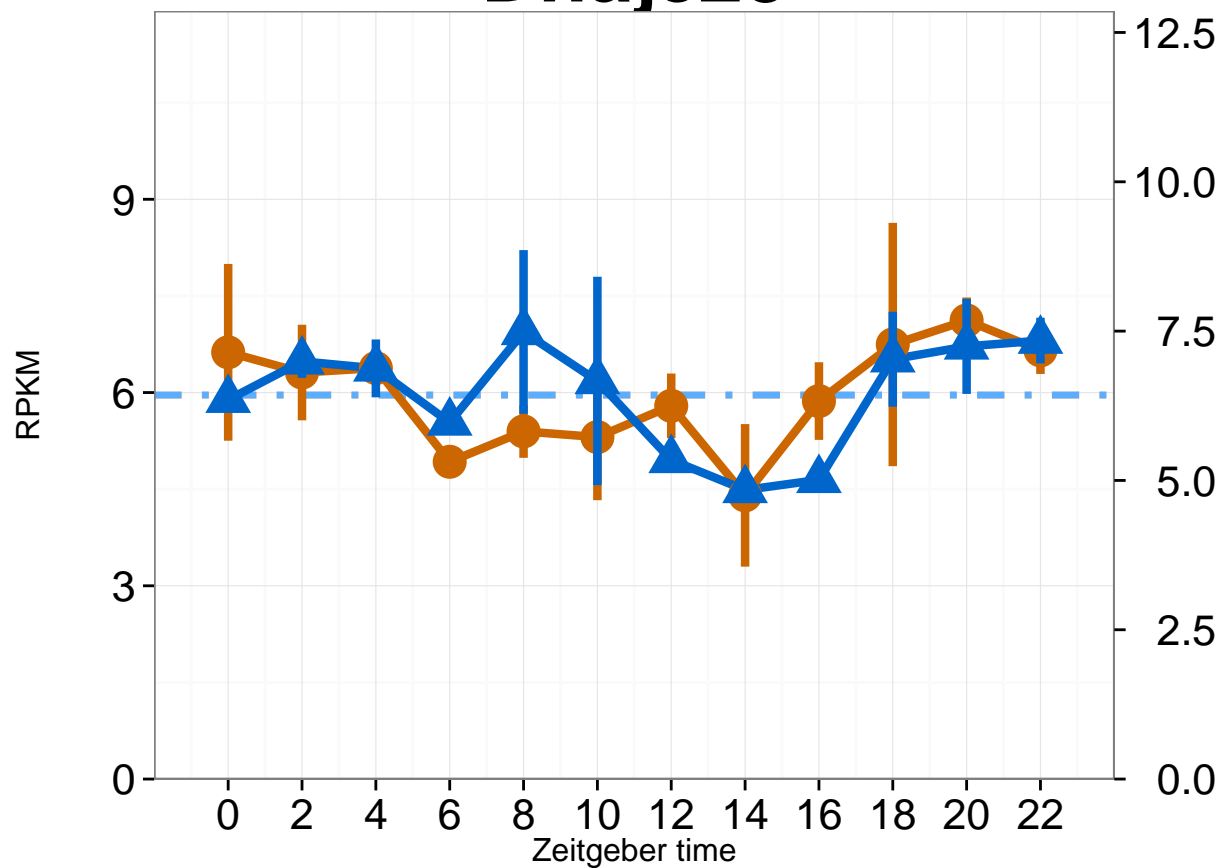

# Dnajc28

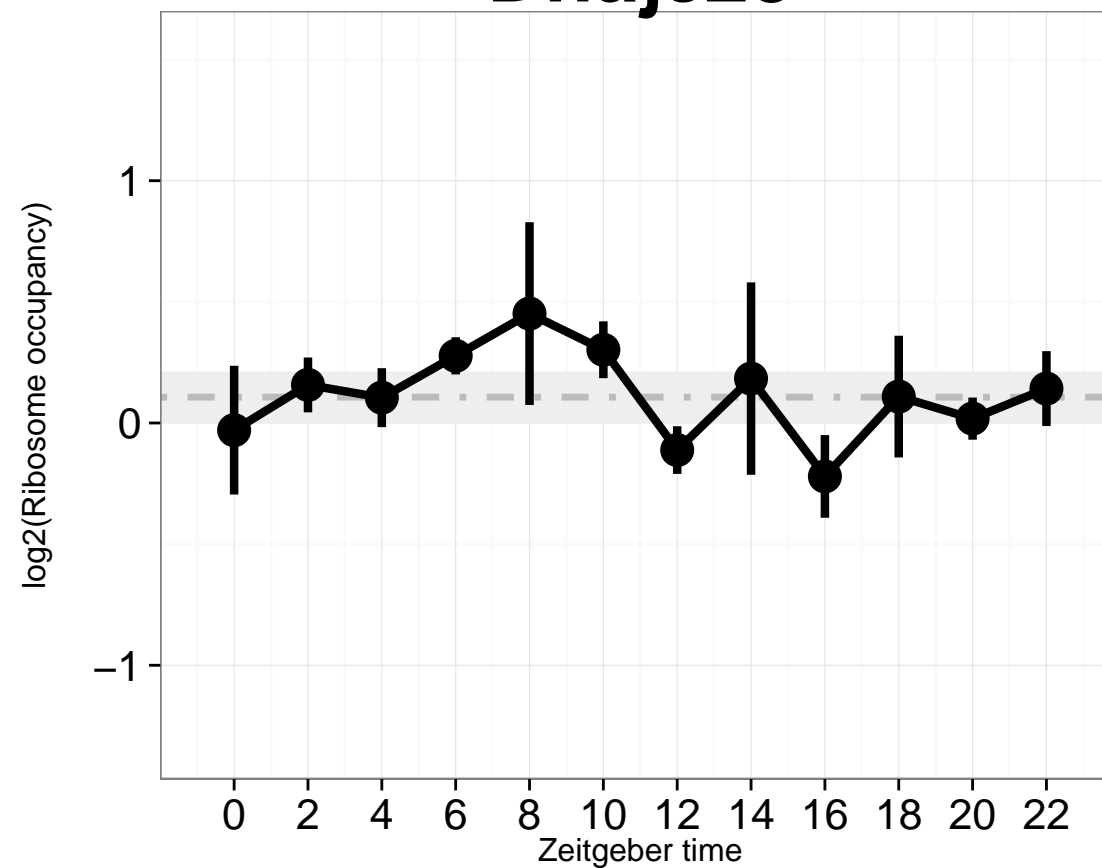

Supplement: SuppDataset_1.zip [file Dnajc28_set_A.pdf › Supplemental Dataset 1/A-mRNA_nonrhyth_translation_nonrhyth/Dnajc28_set_A.pdf]

# Dnajc2

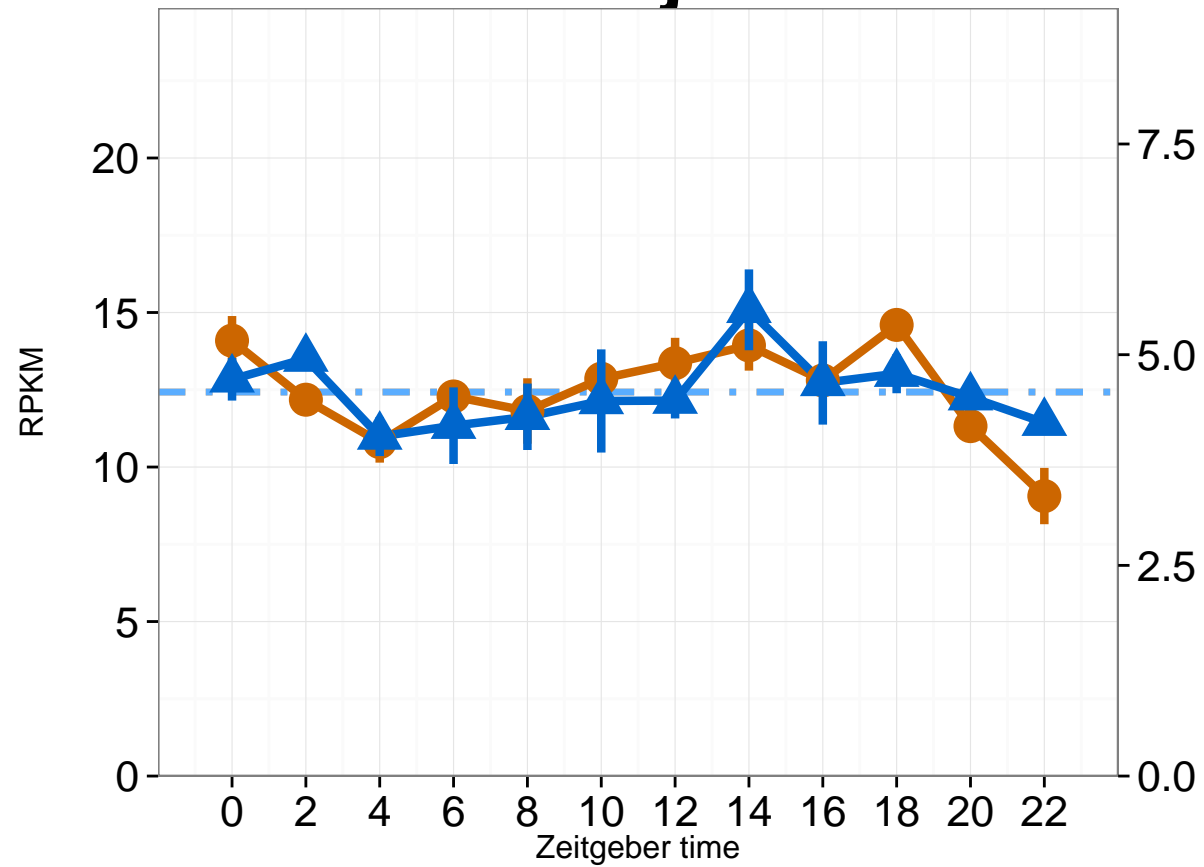

# Dnajc2

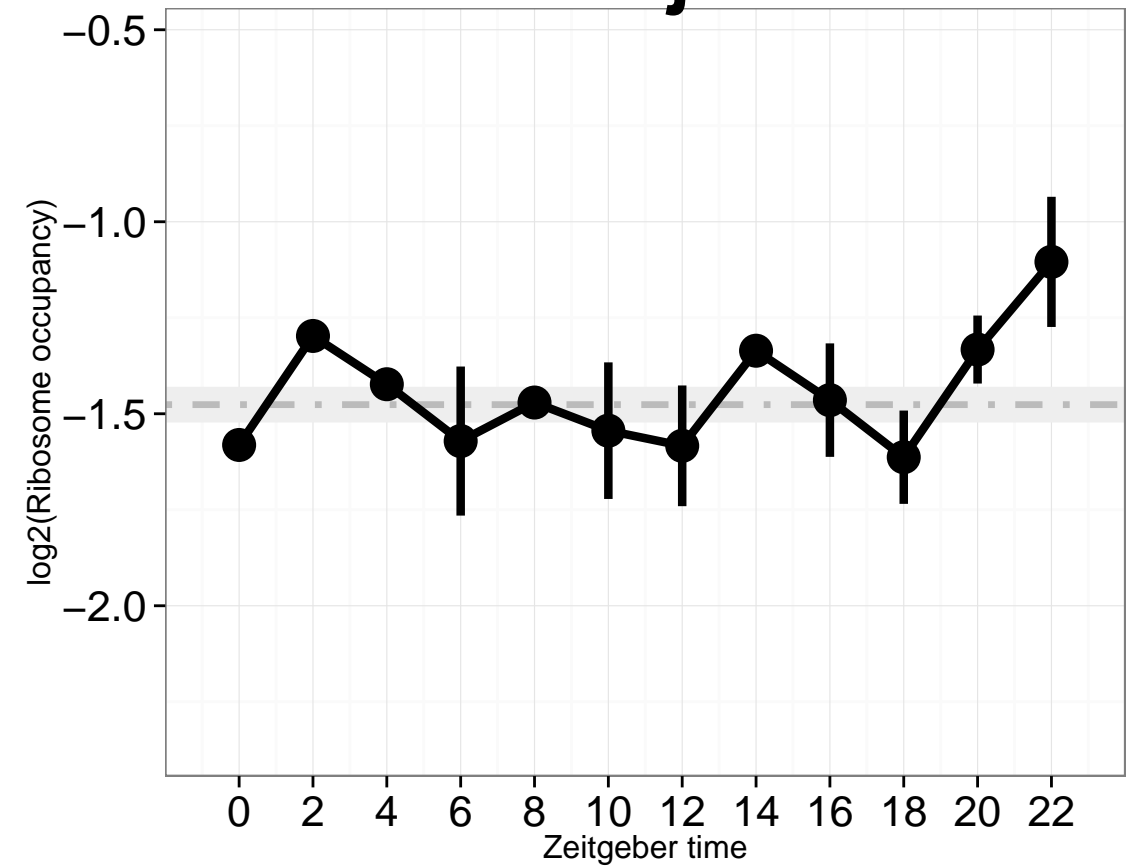

Supplement: SuppDataset_1.zip [file Dnajc2_set_A.pdf › Supplemental Dataset 1/A-mRNA_nonrhyth_translation_nonrhyth/Dnajc2_set_A.pdf]

# Dnajc30

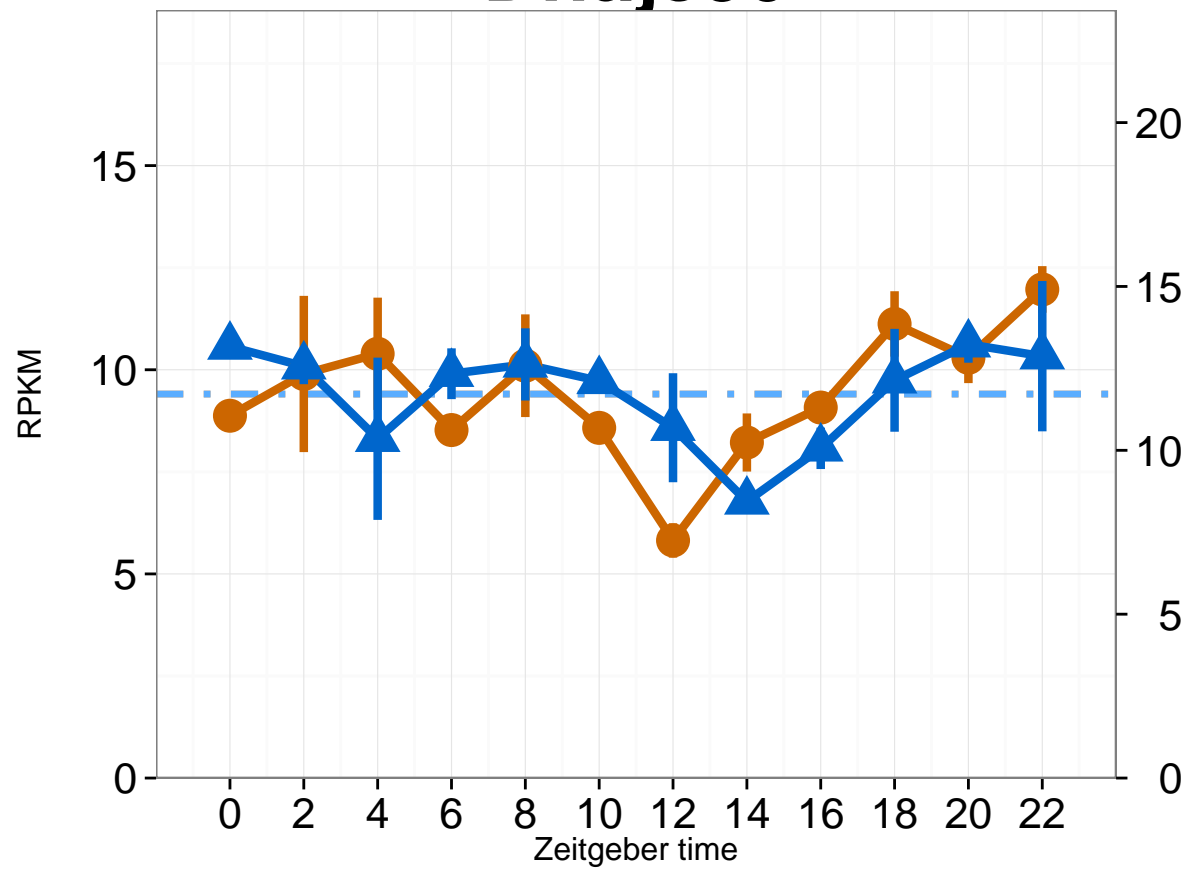

# Dnajc30

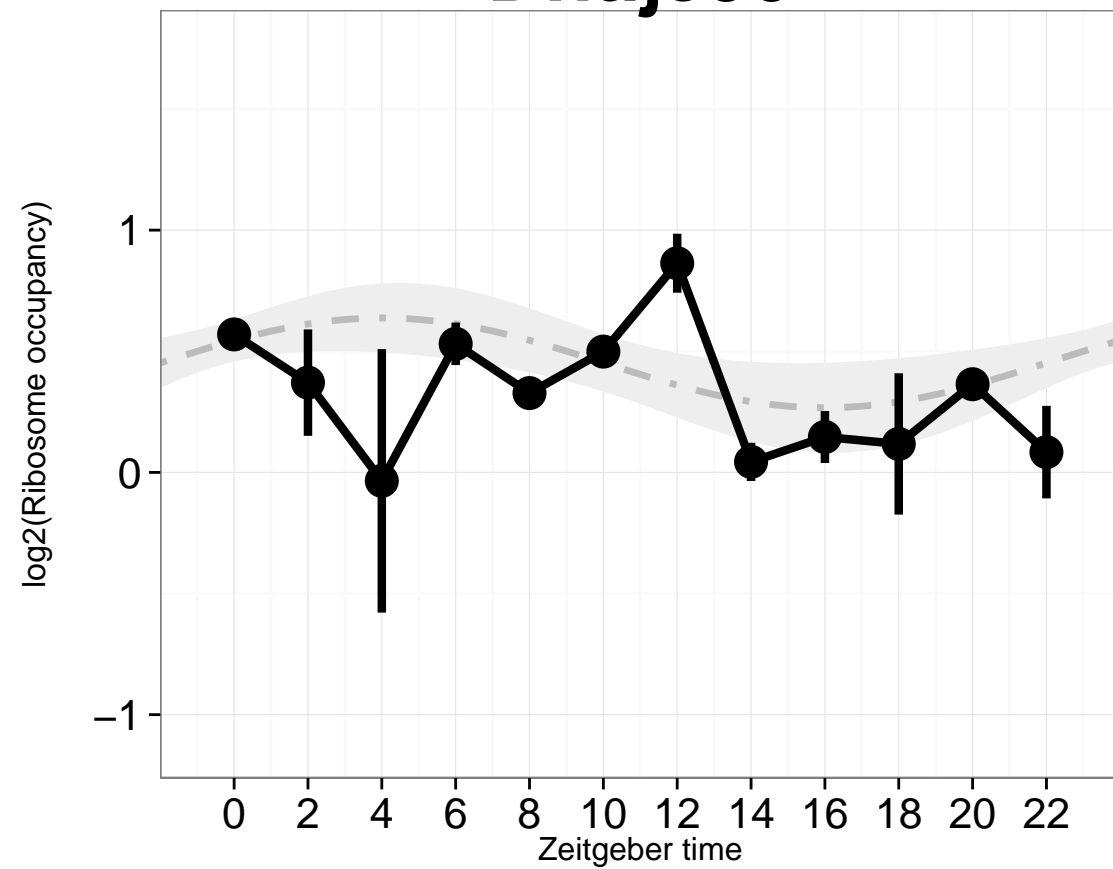

Supplement: SuppDataset_1.zip [file Dnajc30_set_A.pdf › Supplemental Dataset 1/A-mRNA_nonrhyth_translation_nonrhyth/Dnajc30_set_A.pdf]

# Dnajc3

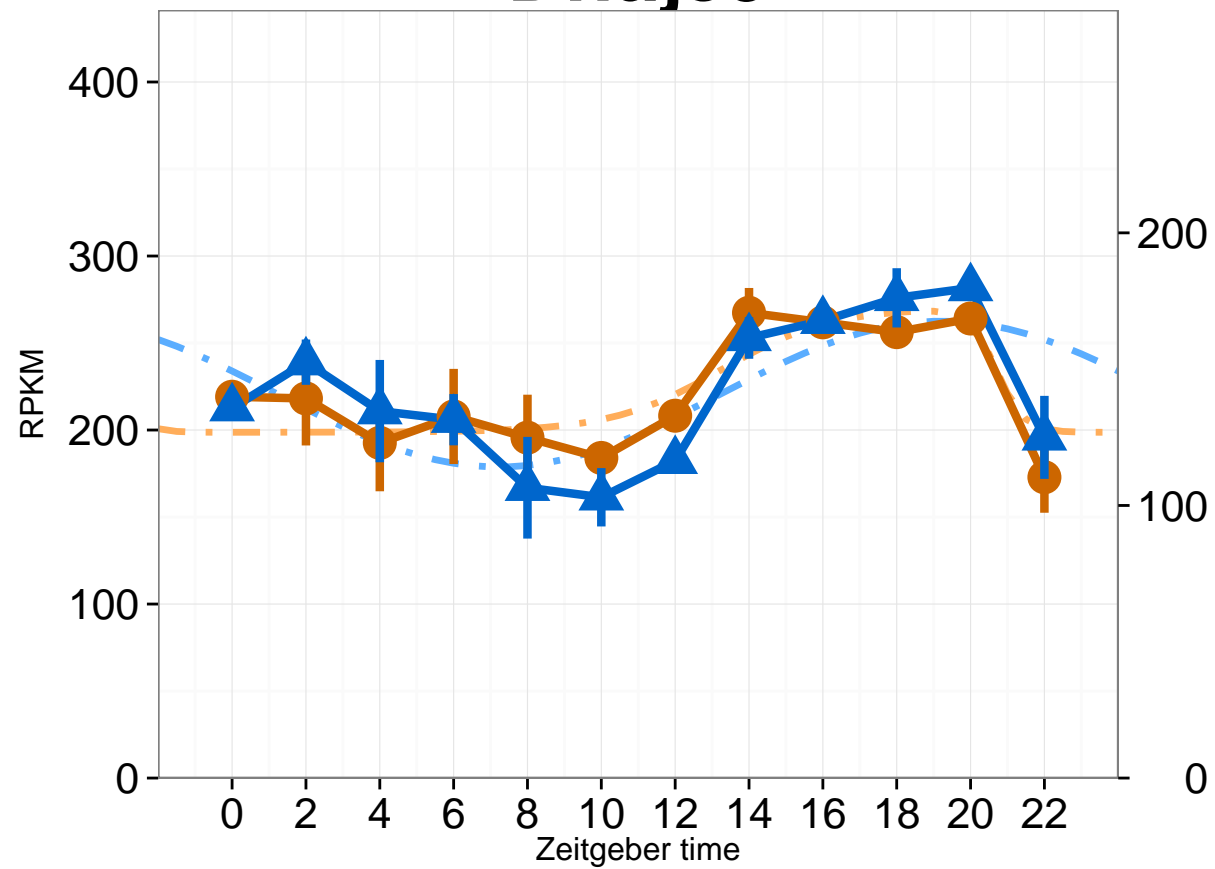

# Dnajc3

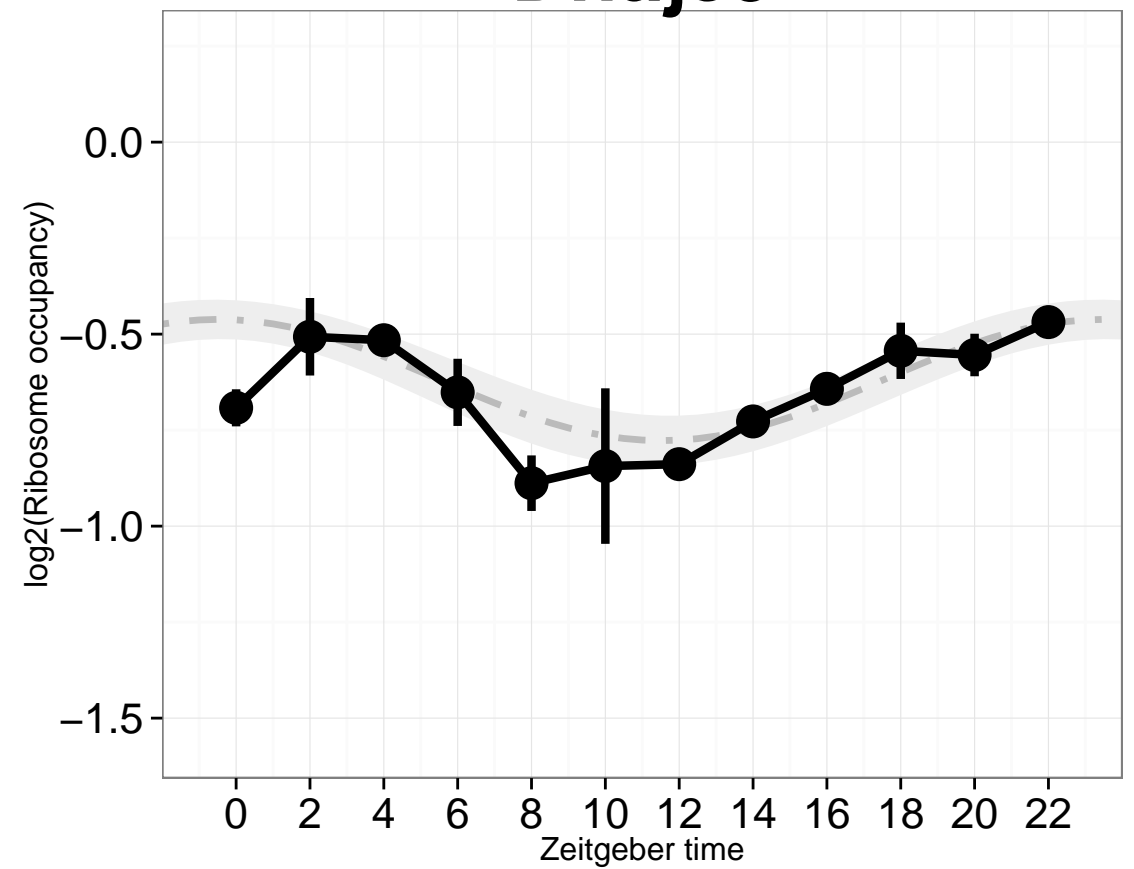

Supplement: SuppDataset_1.zip [file Dnajc3_set_A.pdf › Supplemental Dataset 1/A-mRNA_nonrhyth_translation_nonrhyth/Dnajc3_set_A.pdf]

# Dnajc4

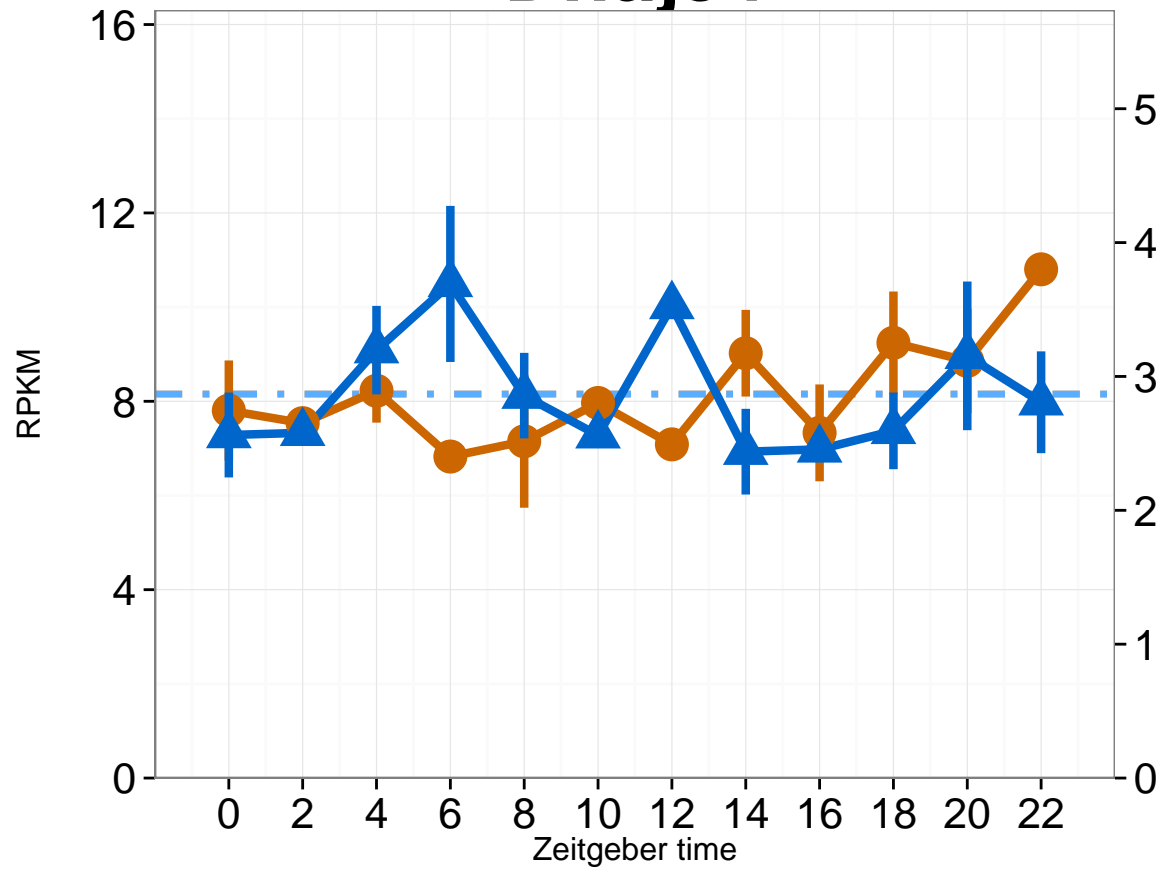

# Dnajc4

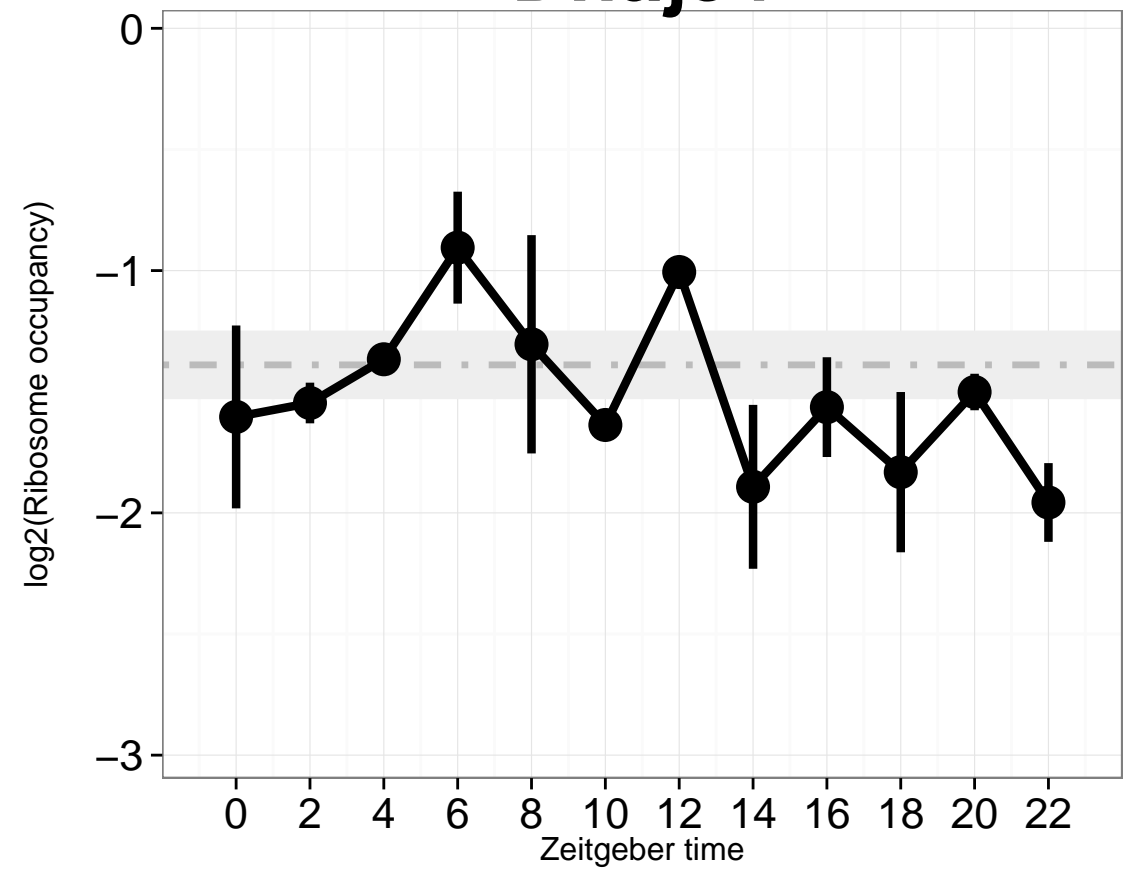

Supplement: SuppDataset_1.zip [file Dnajc4_set_A.pdf › Supplemental Dataset 1/A-mRNA_nonrhyth_translation_nonrhyth/Dnajc4_set_A.pdf]

## Dnajc5

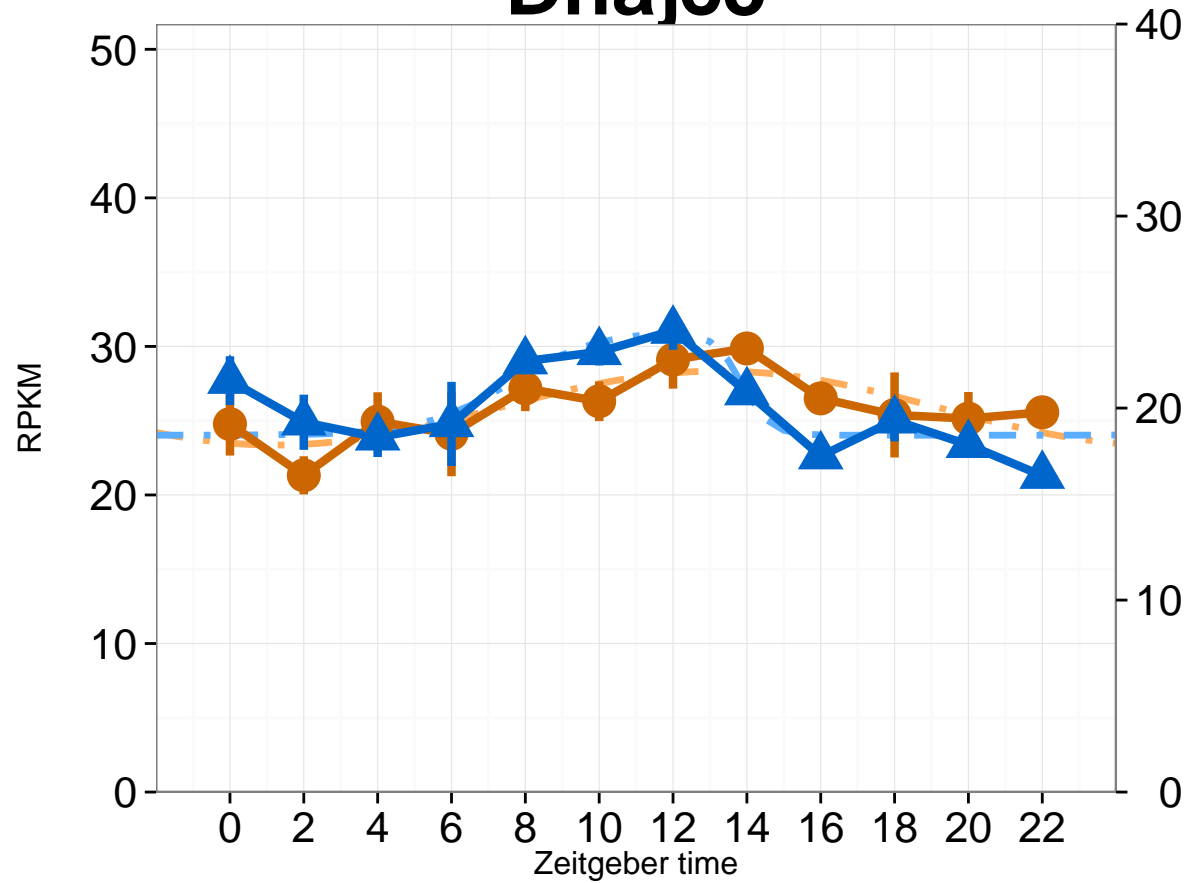

## Dnajc5

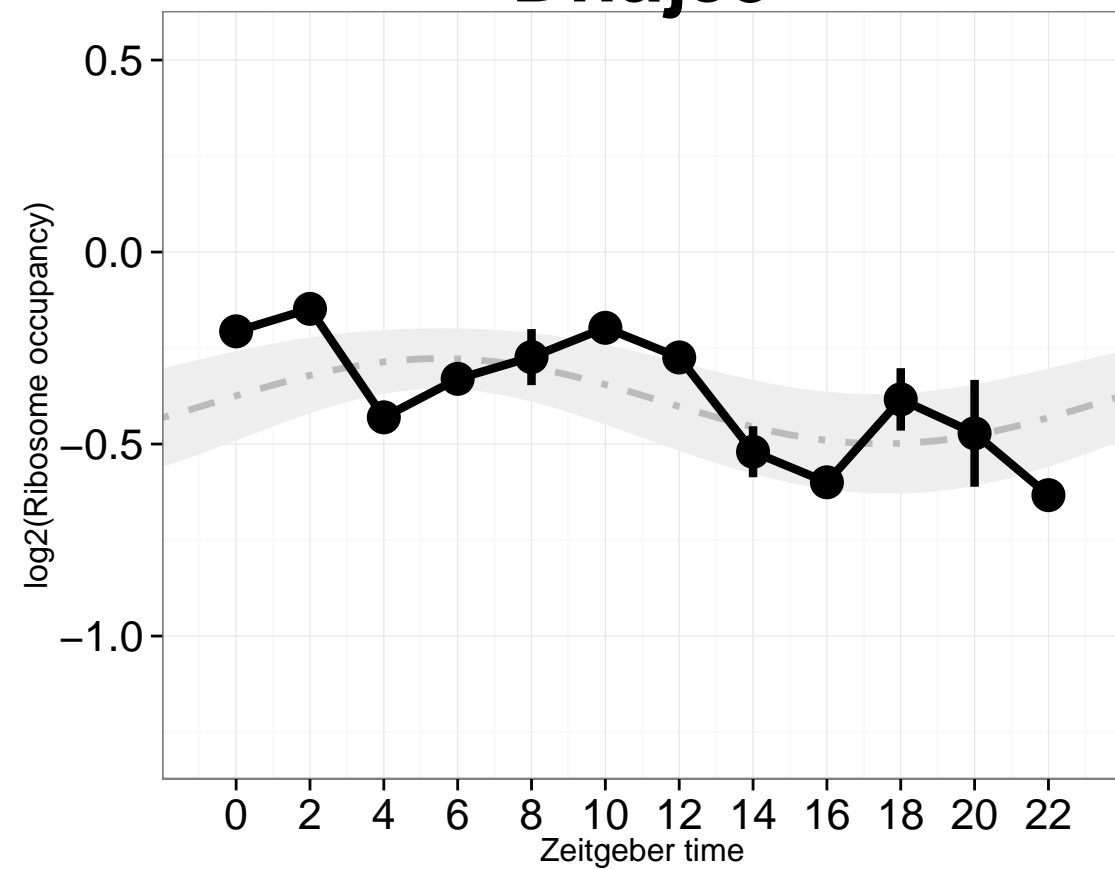

Supplement: SuppDataset_1.zip [file Dnajc5_set_A.pdf › Supplemental Dataset 1/A-mRNA_nonrhyth_translation_nonrhyth/Dnajc5_set_A.pdf]

## Dnajc7

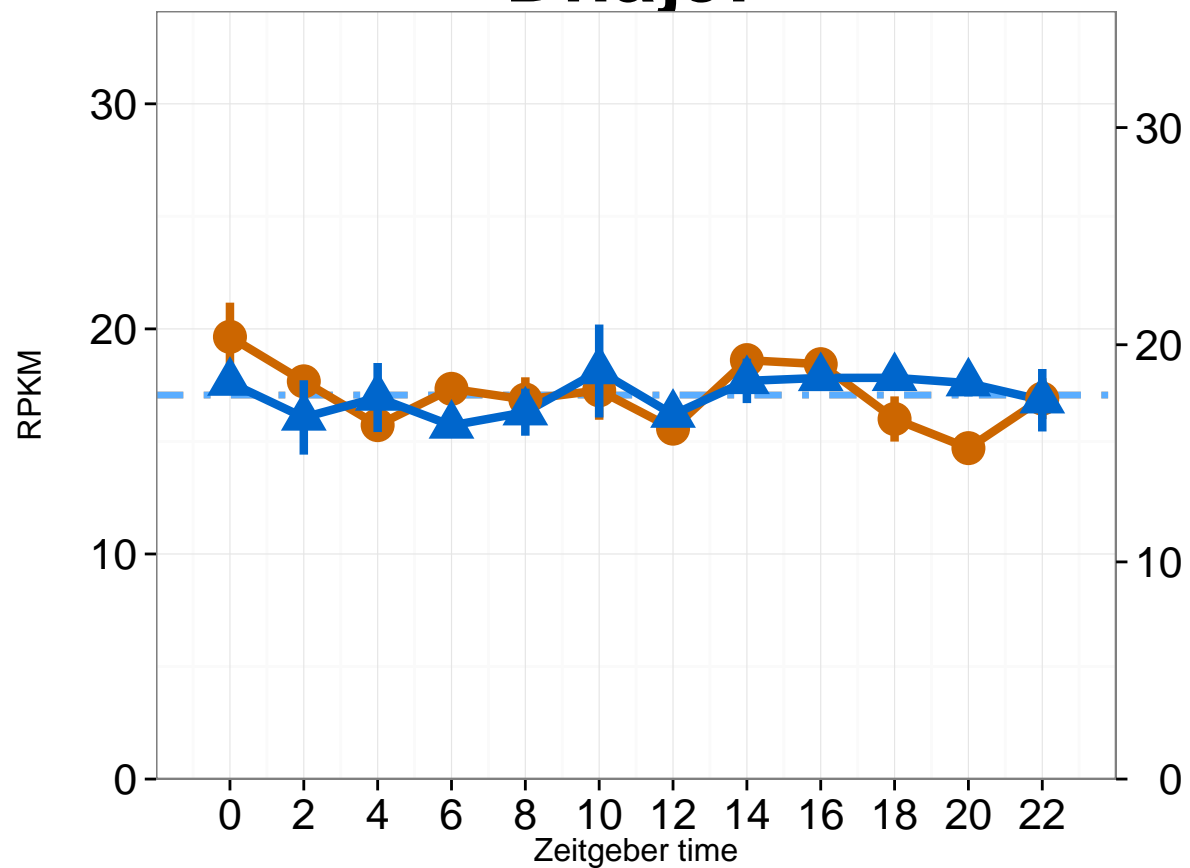

## Dnajc7

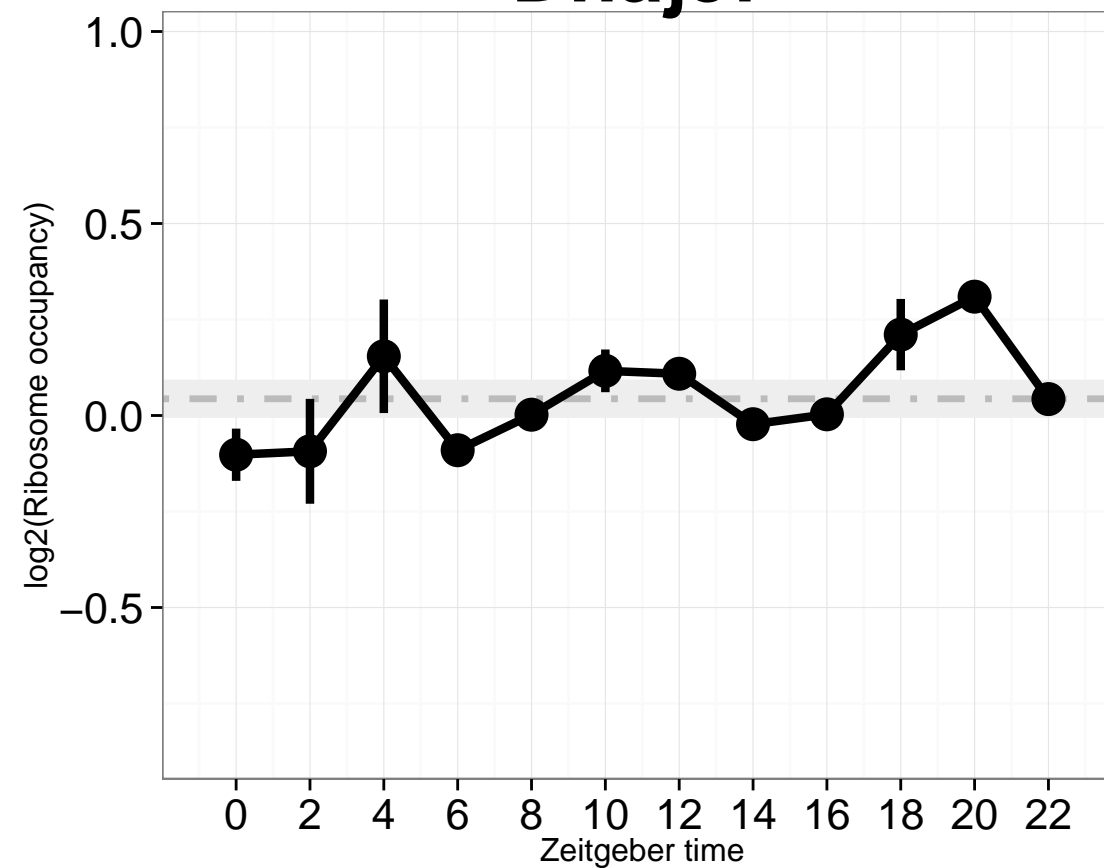

Supplement: SuppDataset_1.zip [file Dnajc7_set_A.pdf › Supplemental Dataset 1/A-mRNA_nonrhyth_translation_nonrhyth/Dnajc7_set_A.pdf]

# Dnajc8

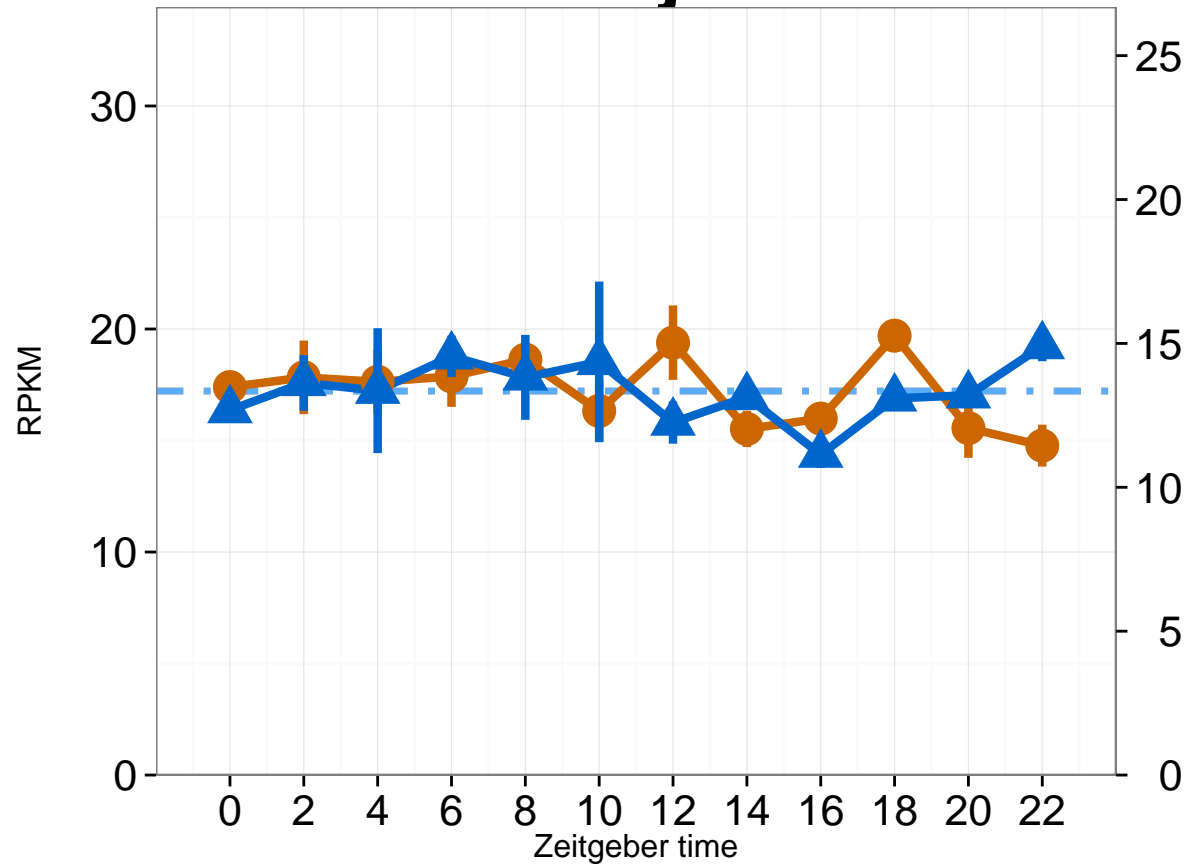

# Dnajc8

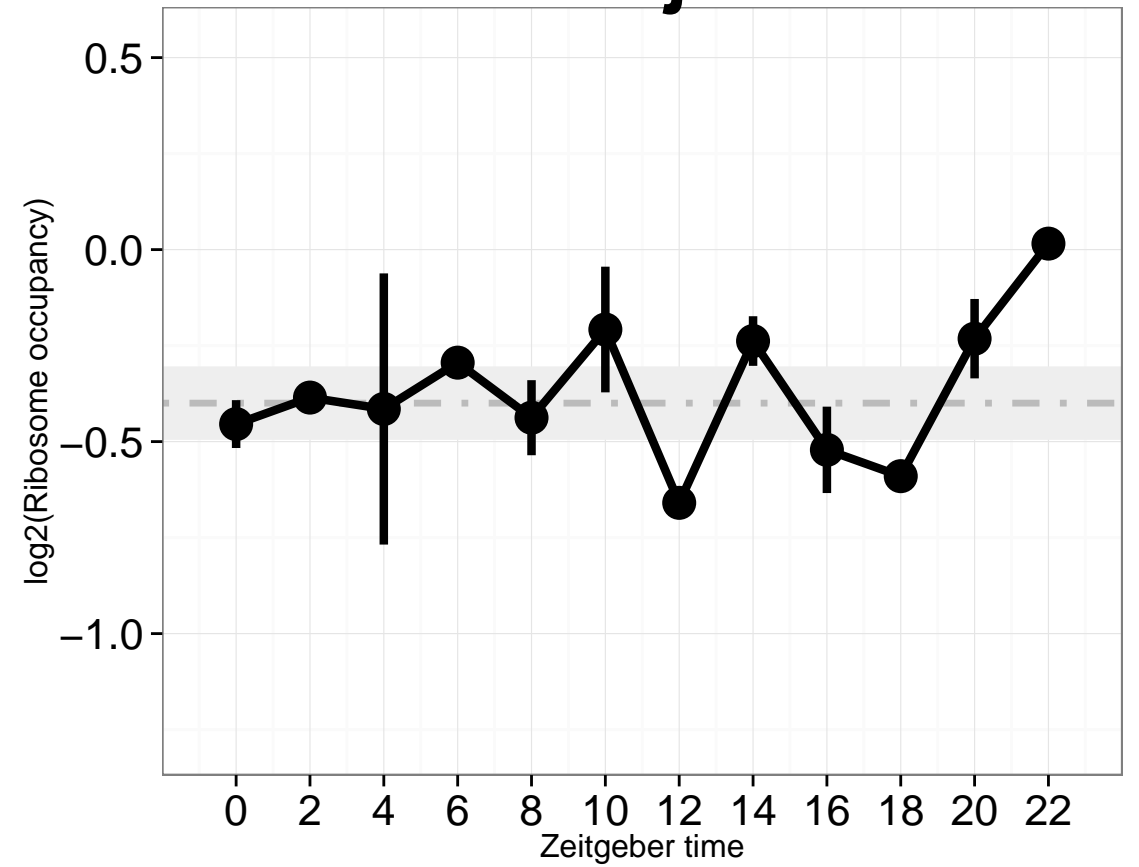

Supplement: SuppDataset_1.zip [file Dnajc8_set_A.pdf › Supplemental Dataset 1/A-mRNA_nonrhyth_translation_nonrhyth/Dnajc8_set_A.pdf]

## Dnajc9

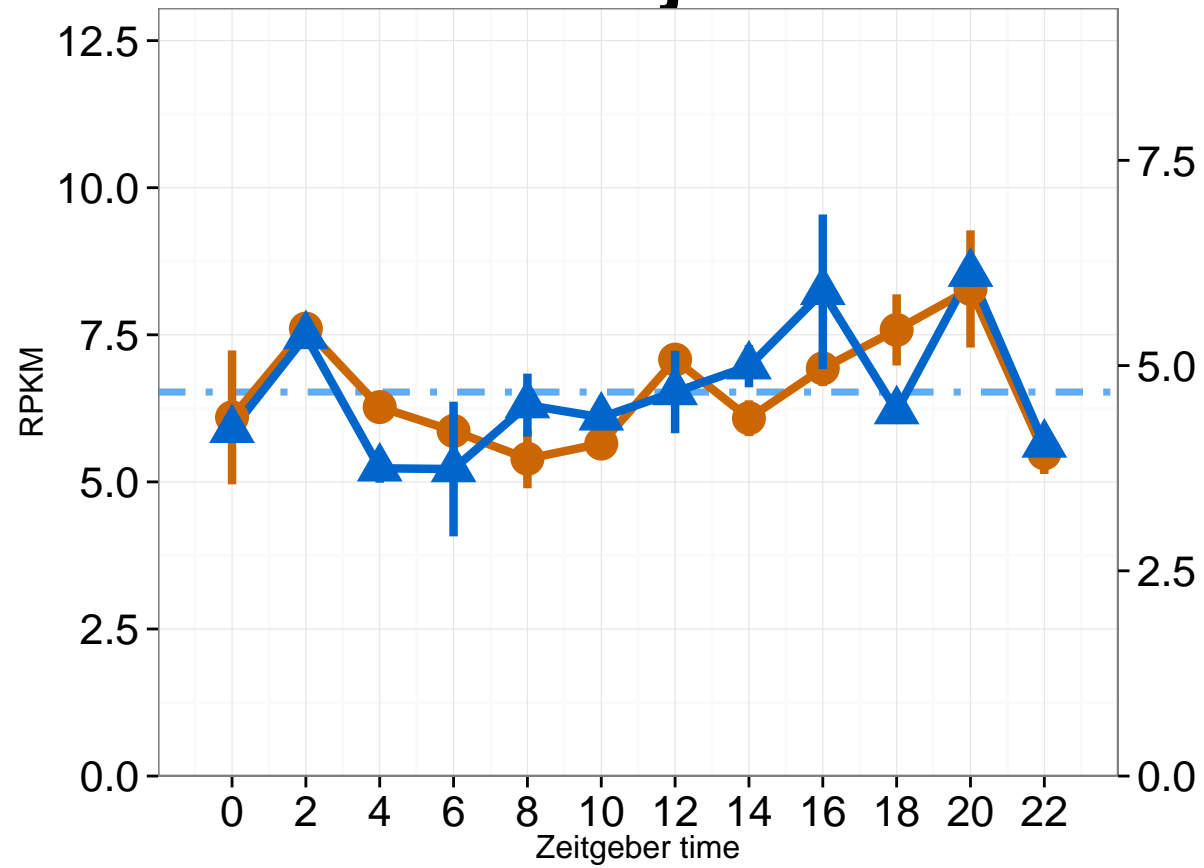

## Dnajc9

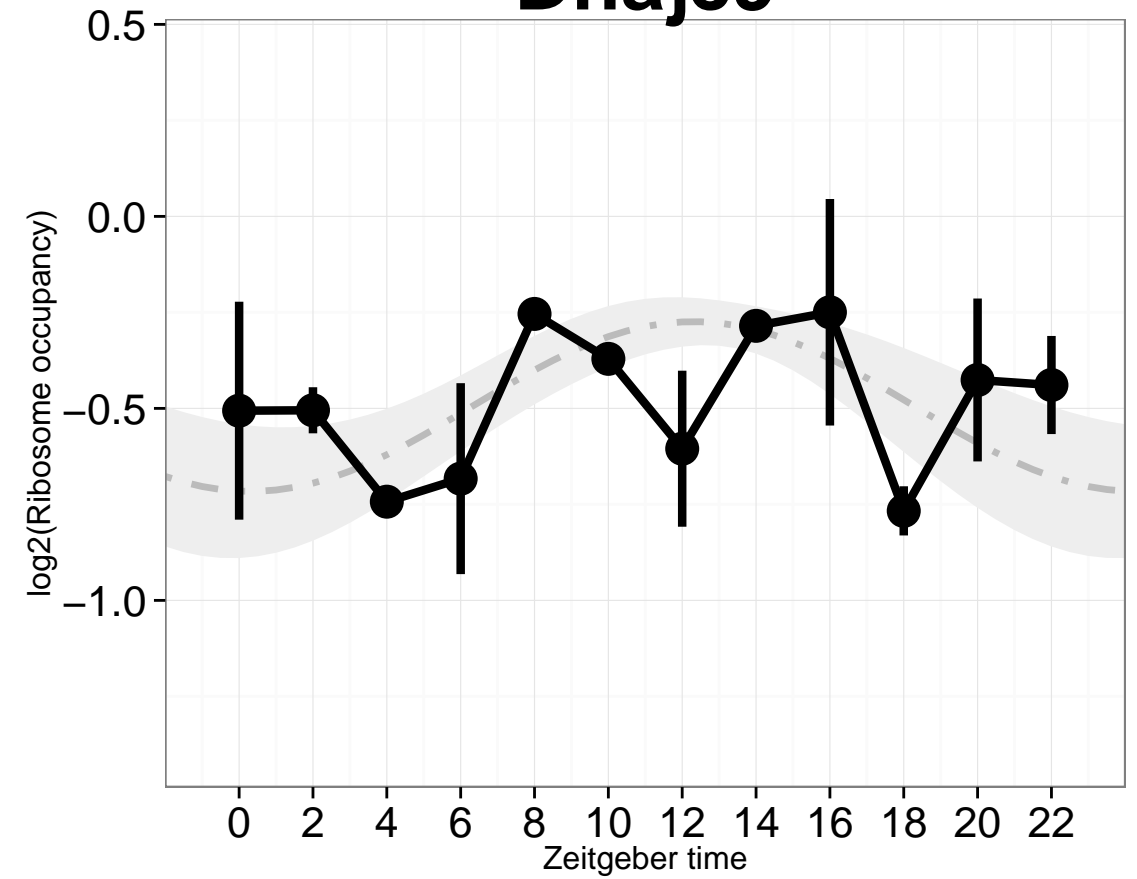

Supplement: SuppDataset_1.zip [file Dnajc9_set_A.pdf › Supplemental Dataset 1/A-mRNA_nonrhyth_translation_nonrhyth/Dnajc9_set_A.pdf]

## DnaI4

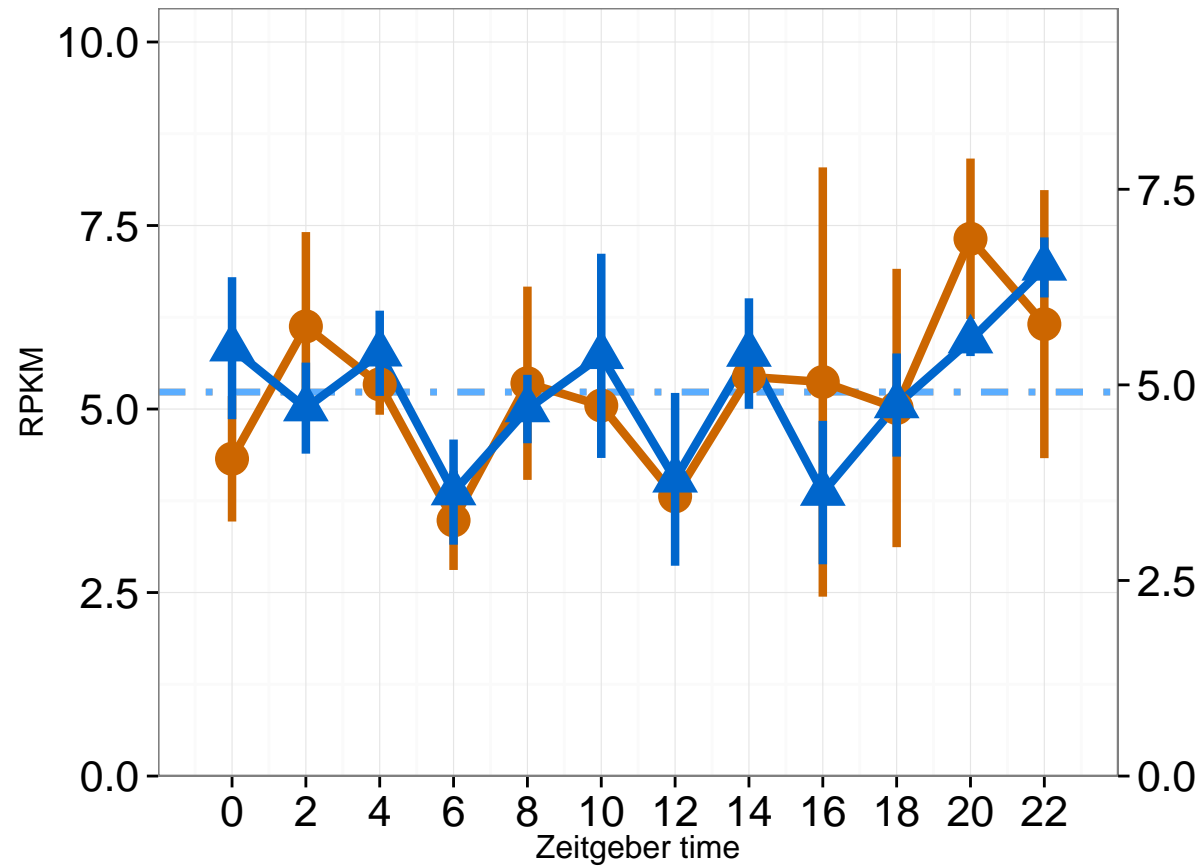

## DnaI4

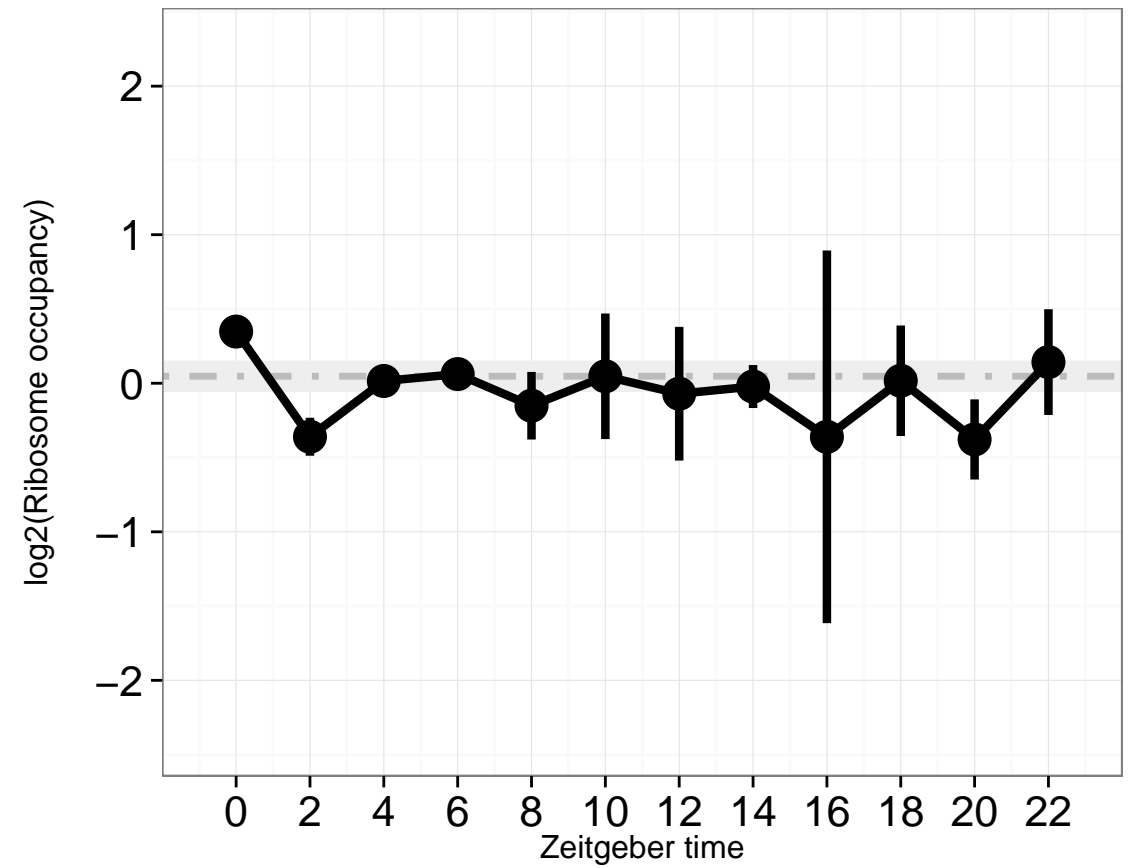

Supplement: SuppDataset_1.zip [file Dnal4_set_A.pdf › Supplemental Dataset 1/A-mRNA_nonrhyth_translation_nonrhyth/Dnal4_set_A.pdf]

## Dnase1l1

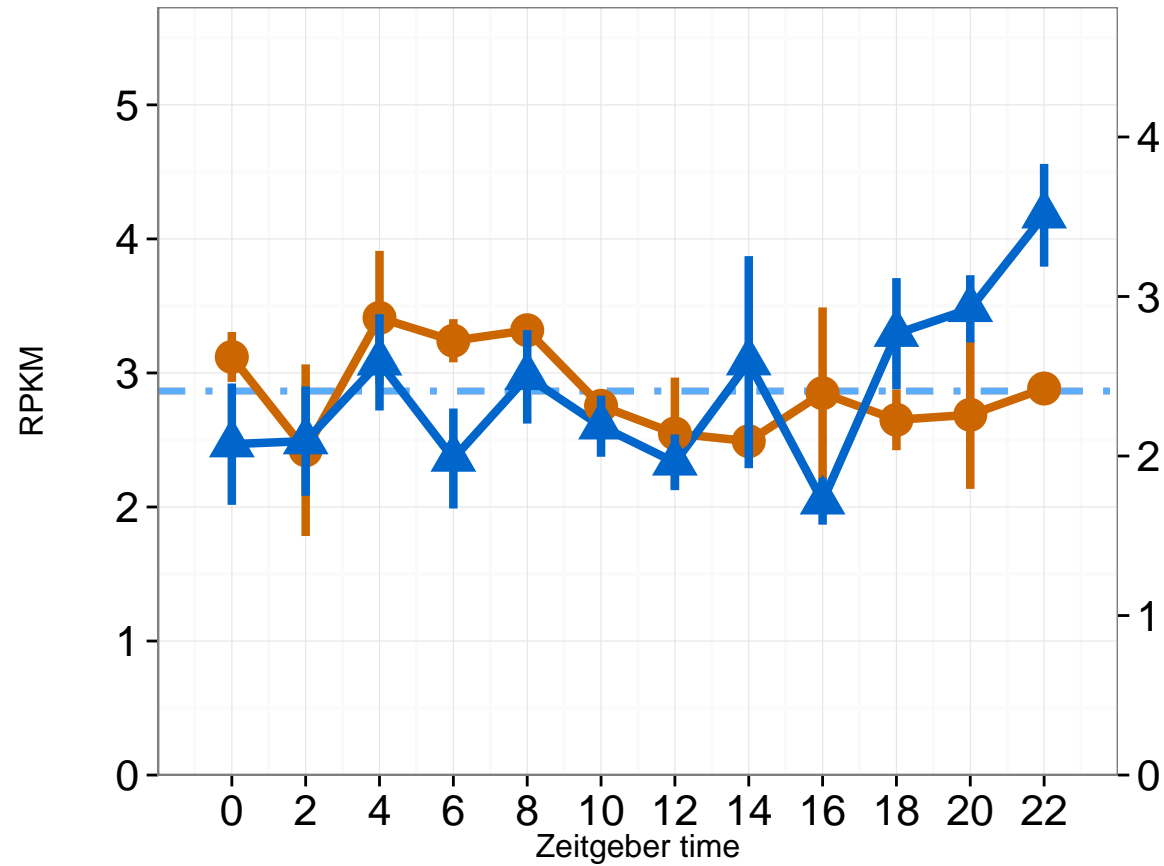

## Dnase1l1

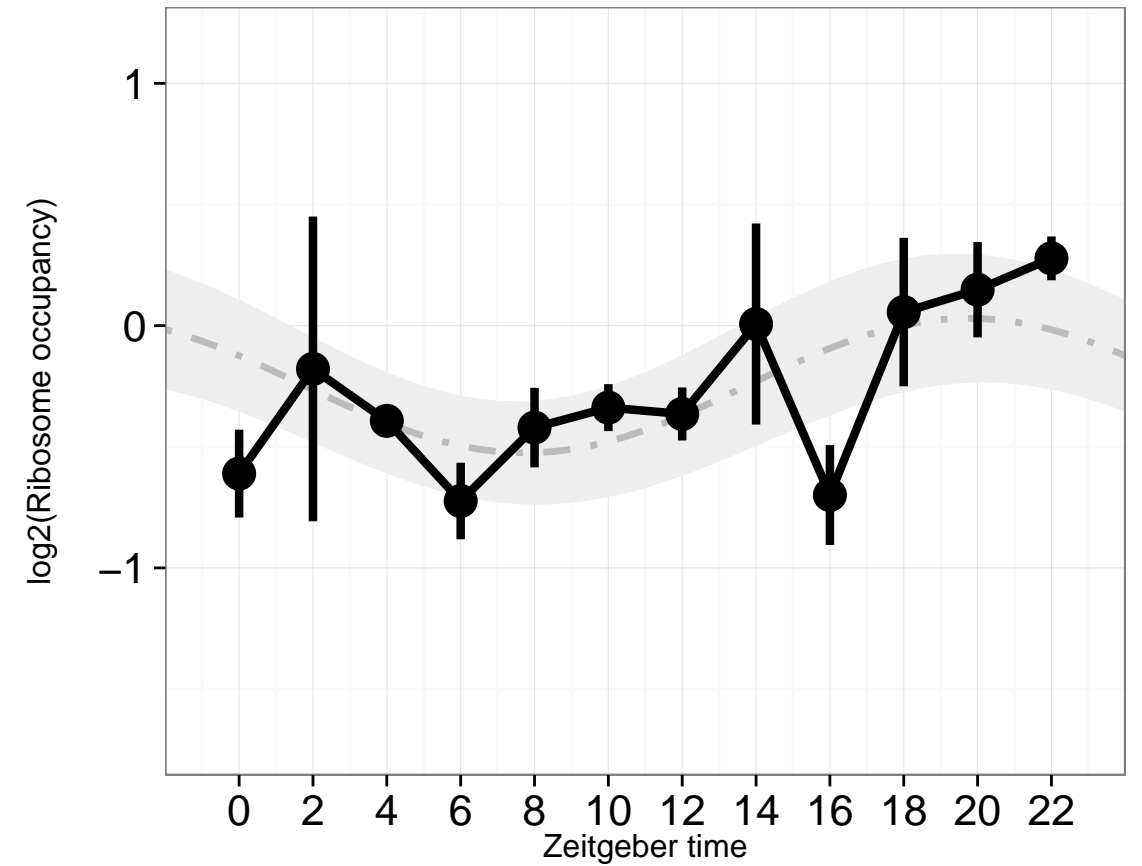

Supplement: SuppDataset_1.zip [file Dnase1l1_set_A.pdf › Supplemental Dataset 1/A-mRNA_nonrhyth_translation_nonrhyth/Dnase1l1_set_A.pdf]

## Dnase1I3

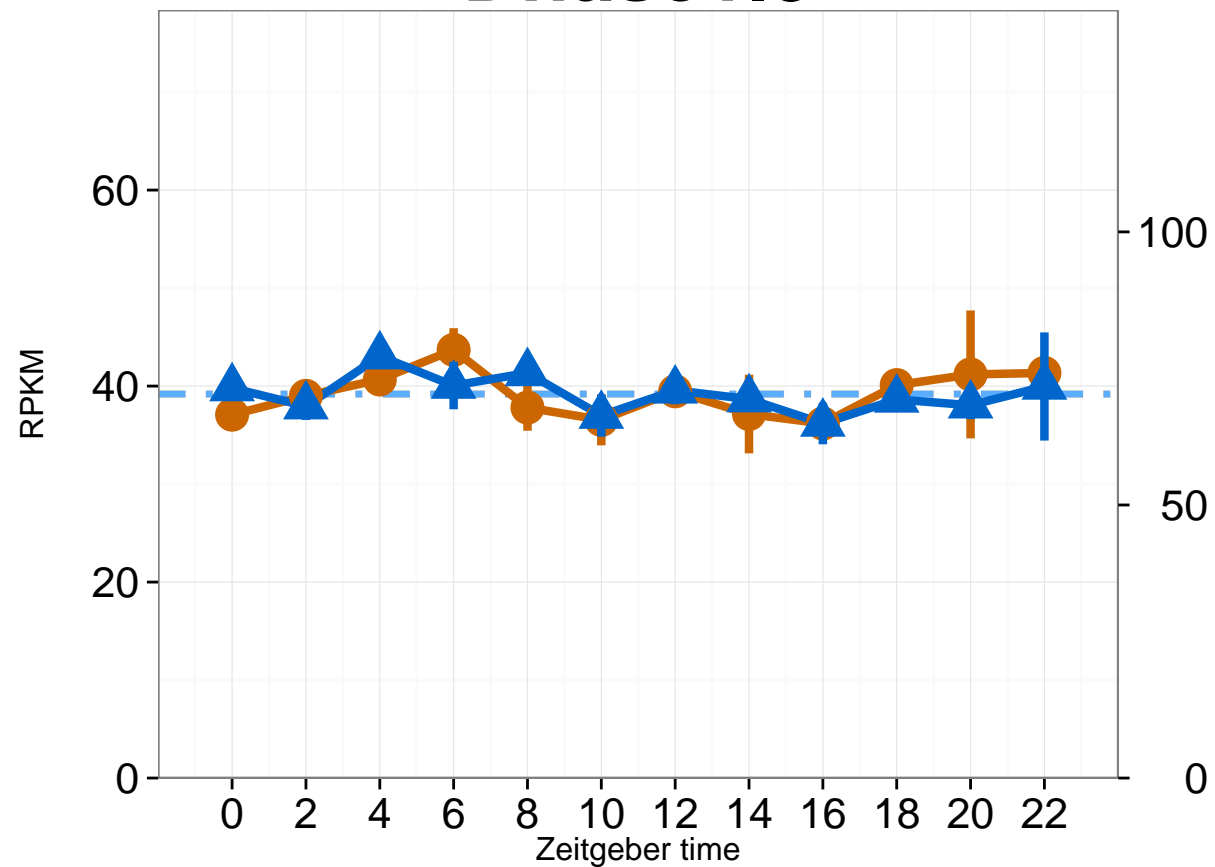

## Dnase1I3

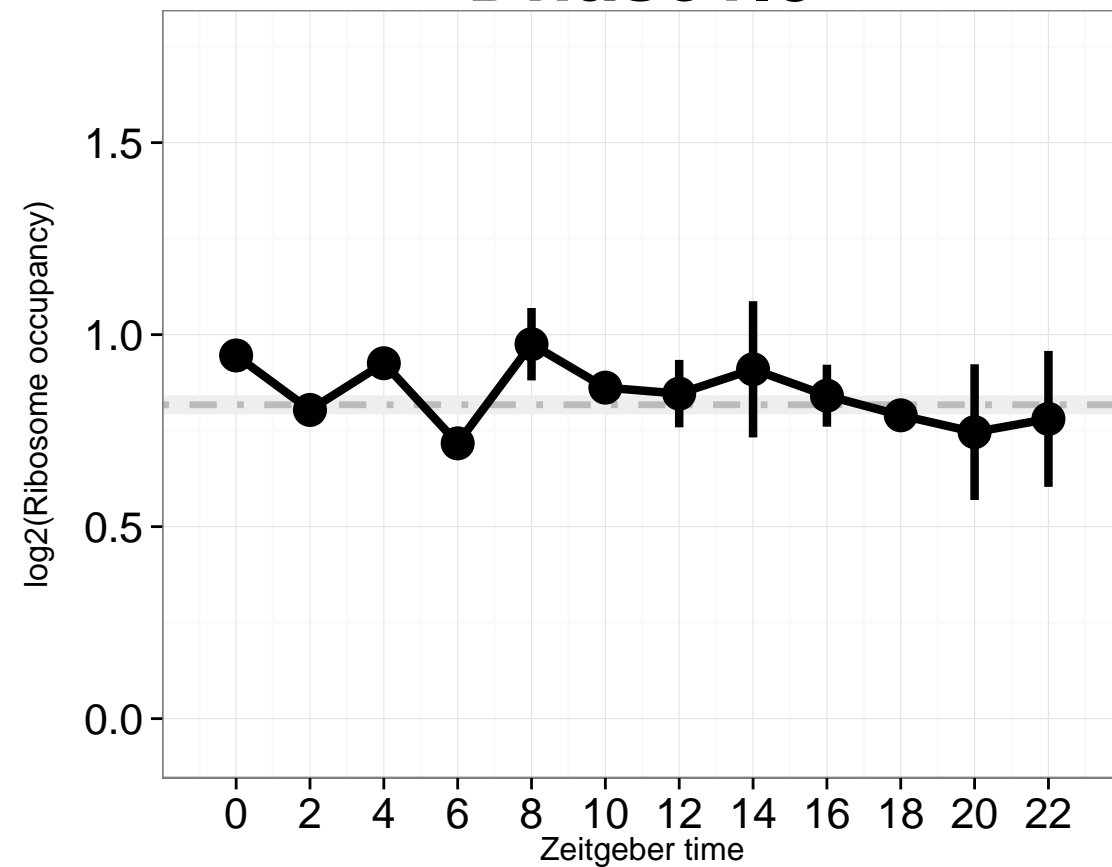

Supplement: SuppDataset_1.zip [file Dnase1l3_set_A.pdf › Supplemental Dataset 1/A-mRNA_nonrhyth_translation_nonrhyth/Dnase1l3_set_A.pdf]

## Dnhd1

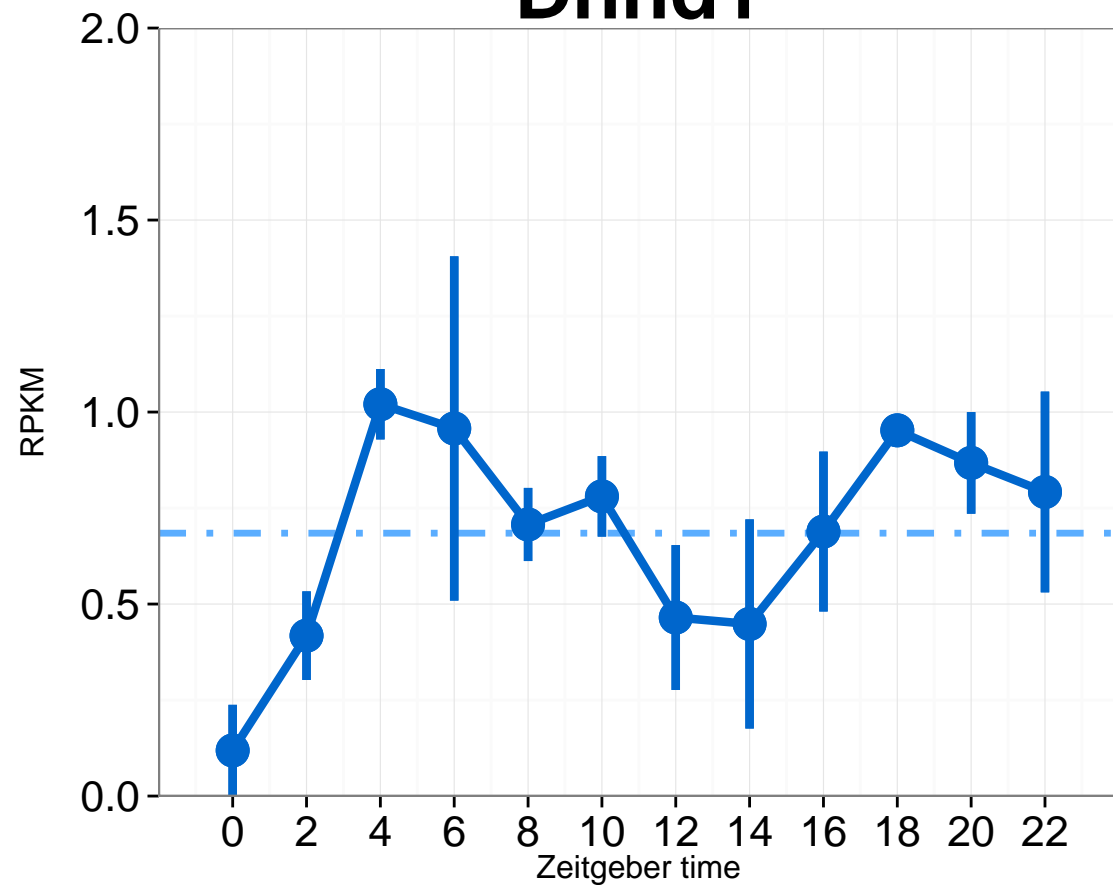

## Dnhd1 log2(Ribosome occupancy

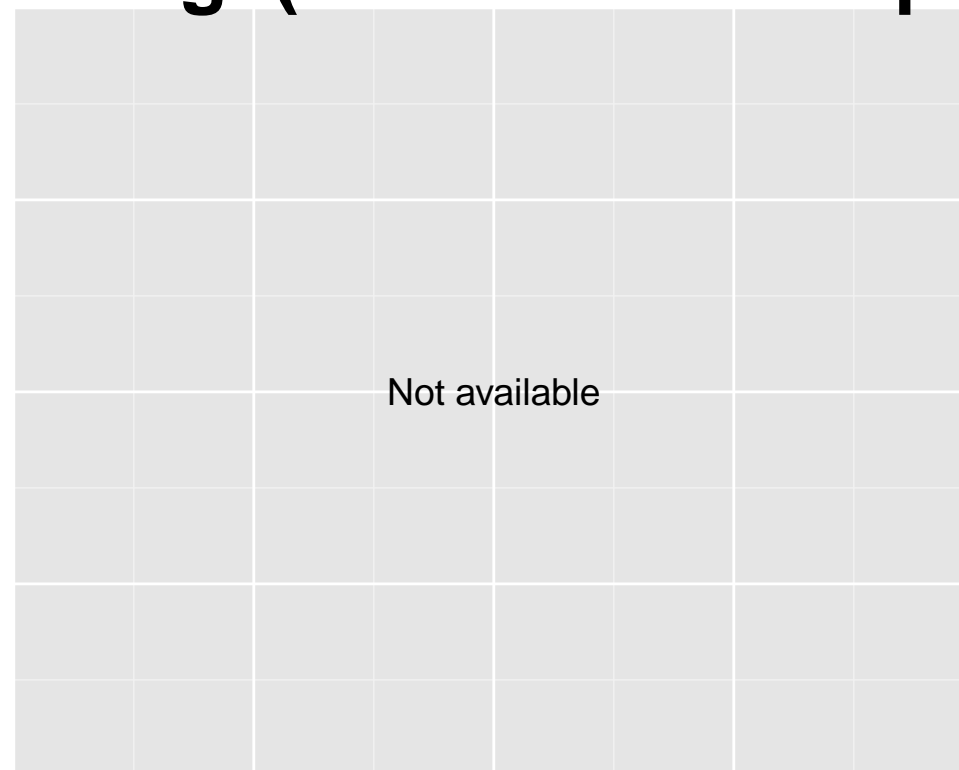

Supplement: SuppDataset_1.zip [file Dnhd1_set_A.pdf › Supplemental Dataset 1/A-mRNA_nonrhyth_translation_nonrhyth/Dnhd1_set_A.pdf]

## Dnlz

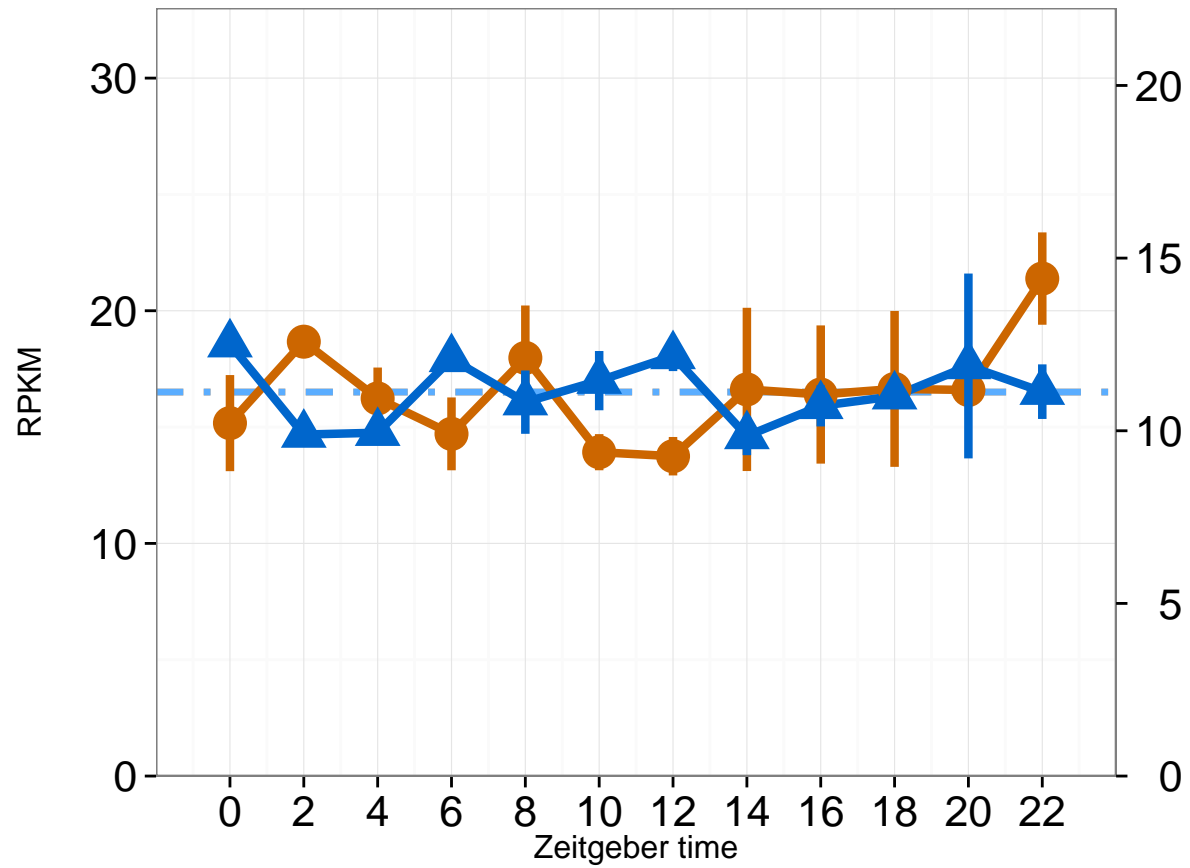

## Dnlz

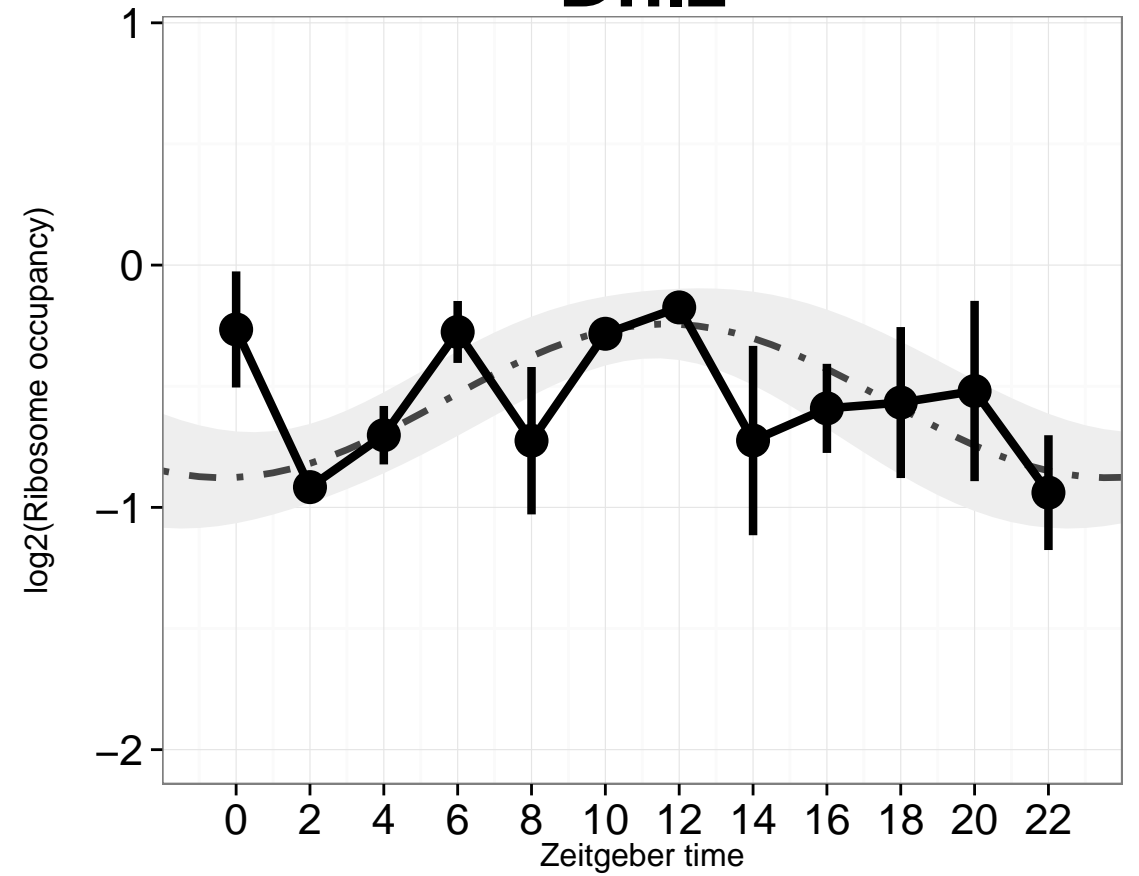

Supplement: SuppDataset_1.zip [file Dnlz_set_A.pdf › Supplemental Dataset 1/A-mRNA_nonrhyth_translation_nonrhyth/Dnlz_set_A.pdf]

## Dnm1l

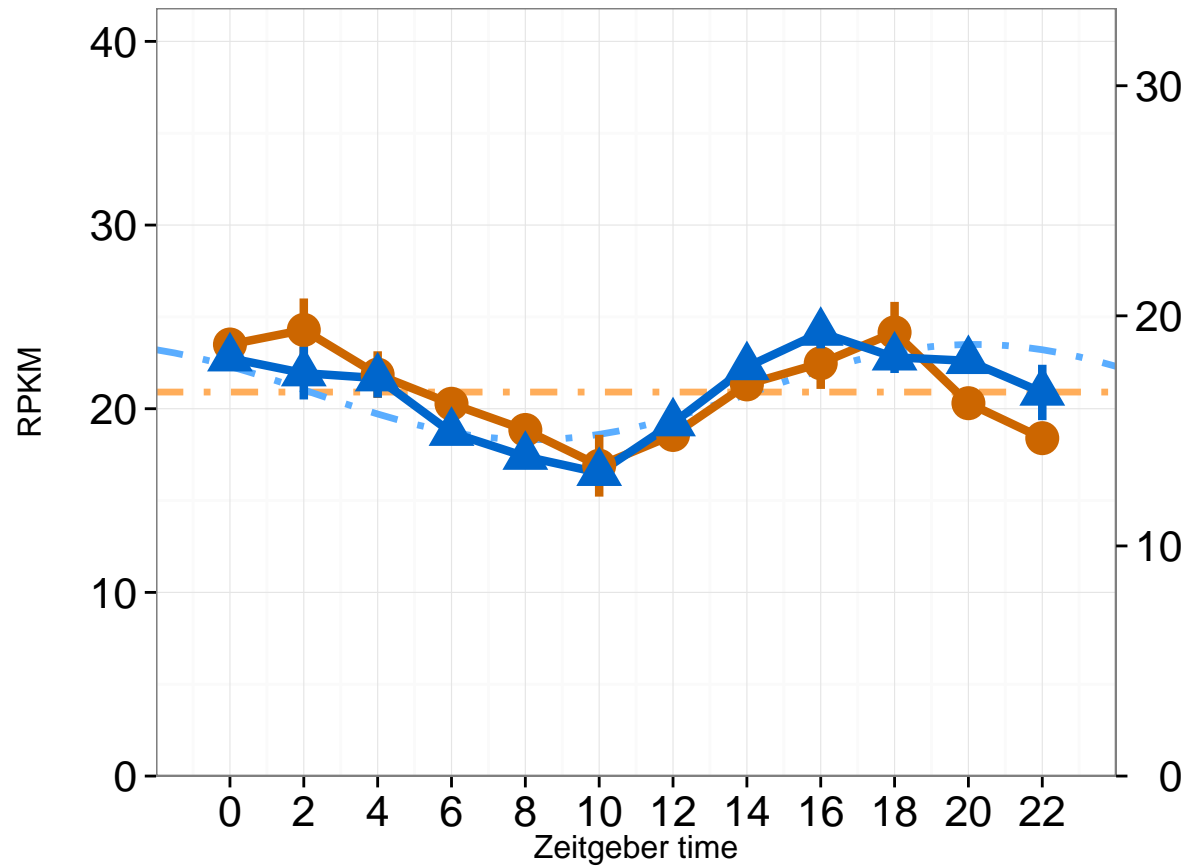

## Dnm1l

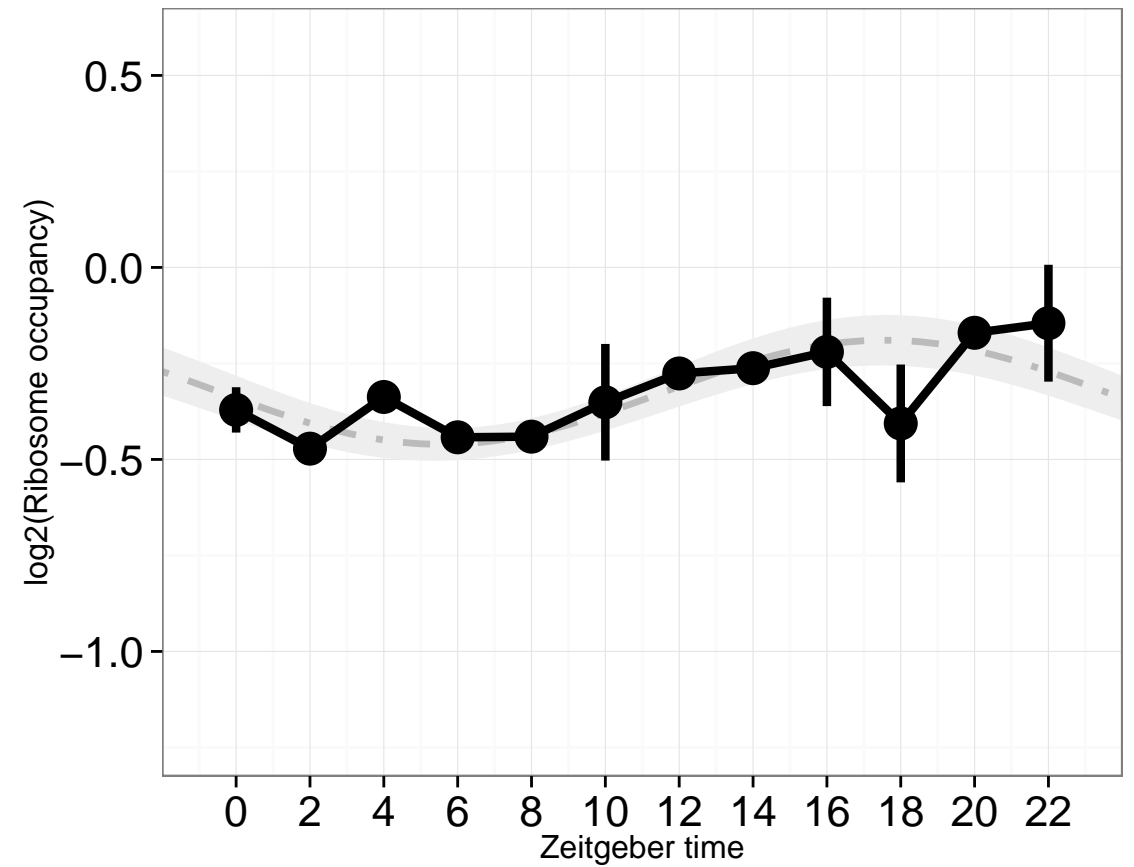

Supplement: SuppDataset_1.zip [file Dnm1l_set_A.pdf › Supplemental Dataset 1/A-mRNA_nonrhyth_translation_nonrhyth/Dnm1l_set_A.pdf]

## Dnm2

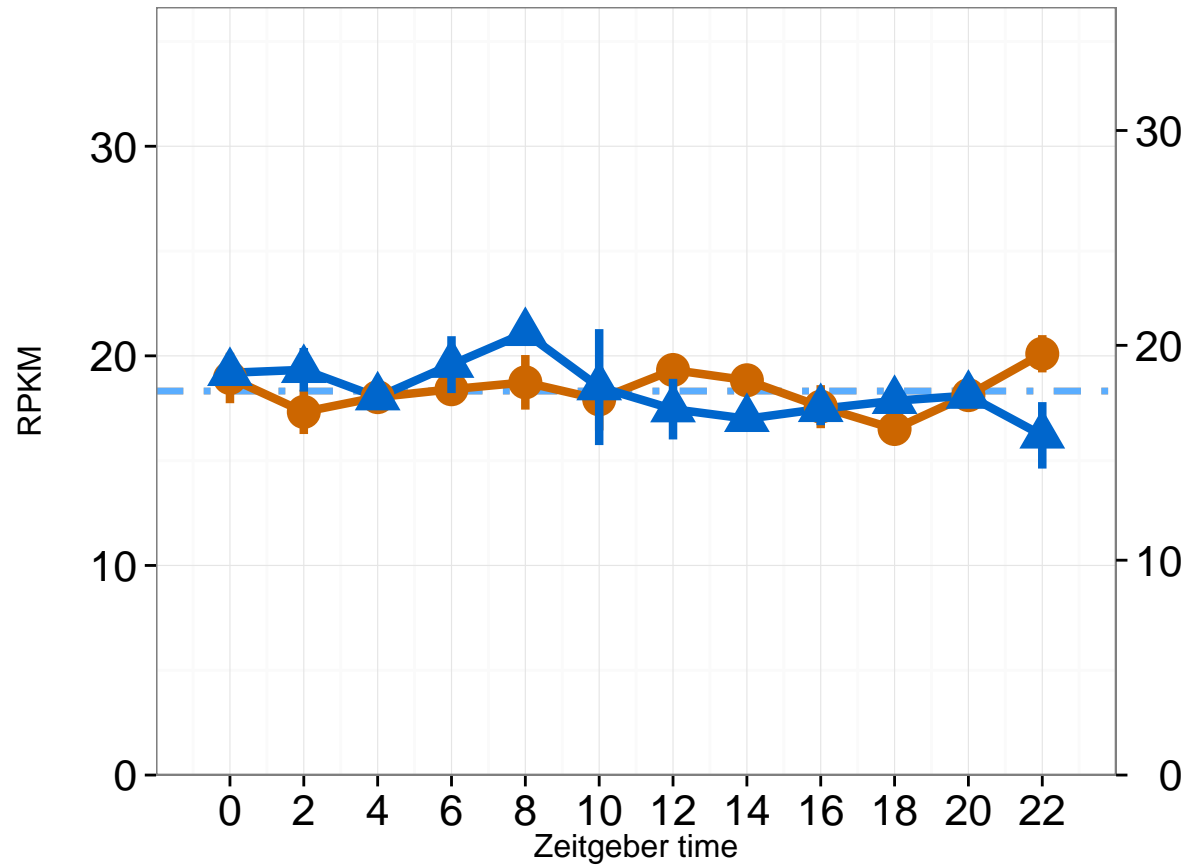

## Dnm2

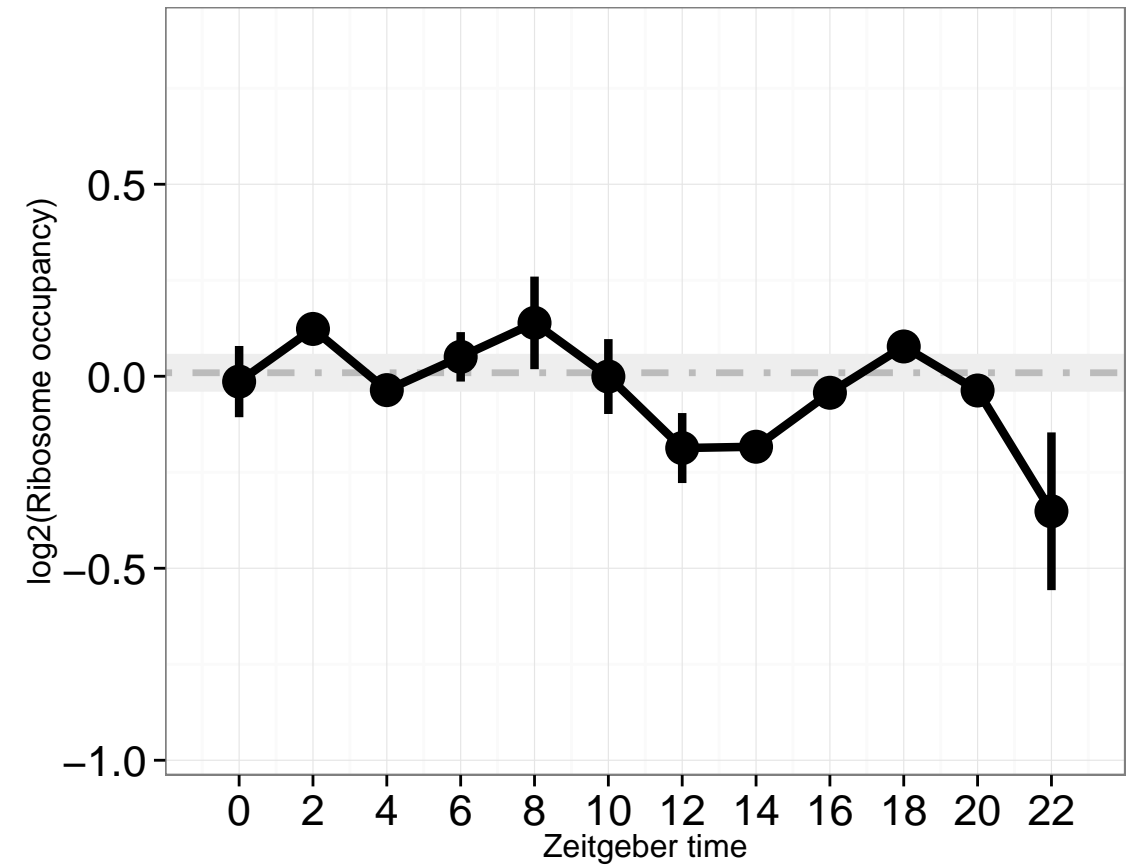

Supplement: SuppDataset_1.zip [file Dnm2_set_A.pdf › Supplemental Dataset 1/A-mRNA_nonrhyth_translation_nonrhyth/Dnm2_set_A.pdf]

## Dnmbp

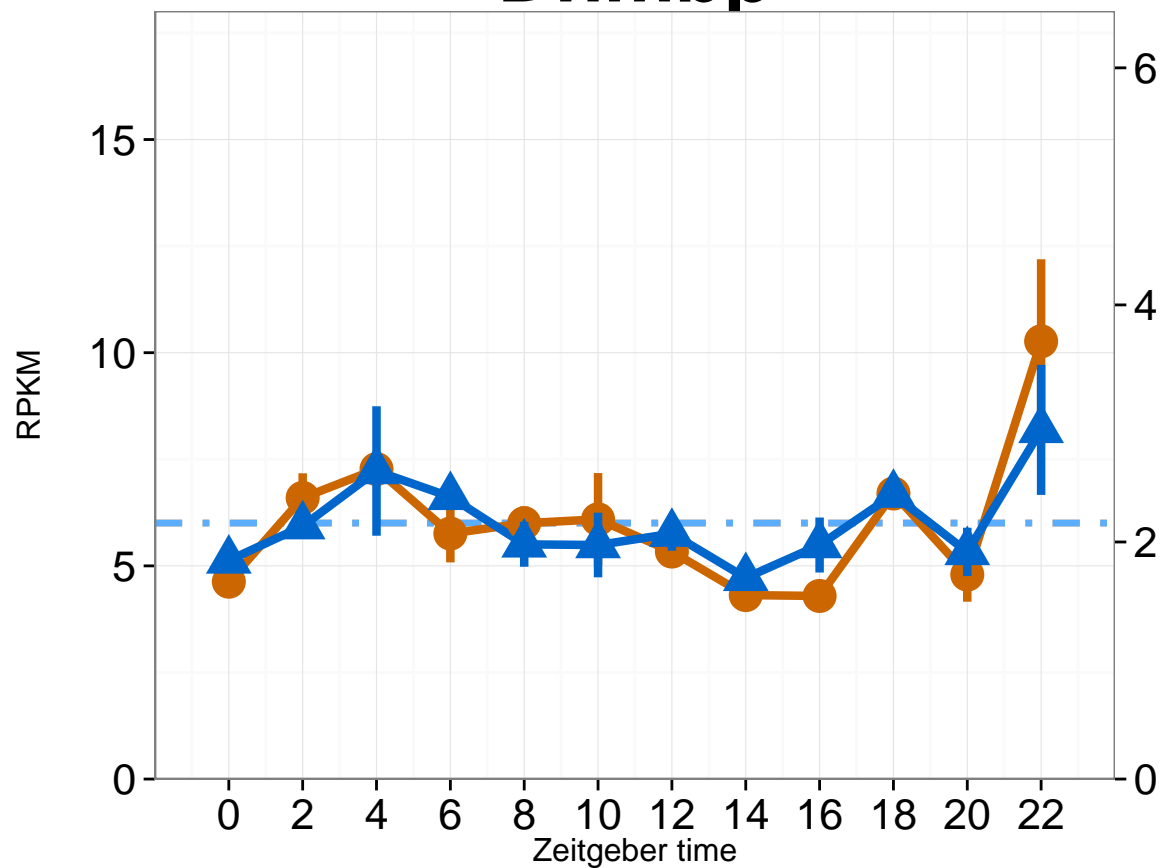

## Dnmbp

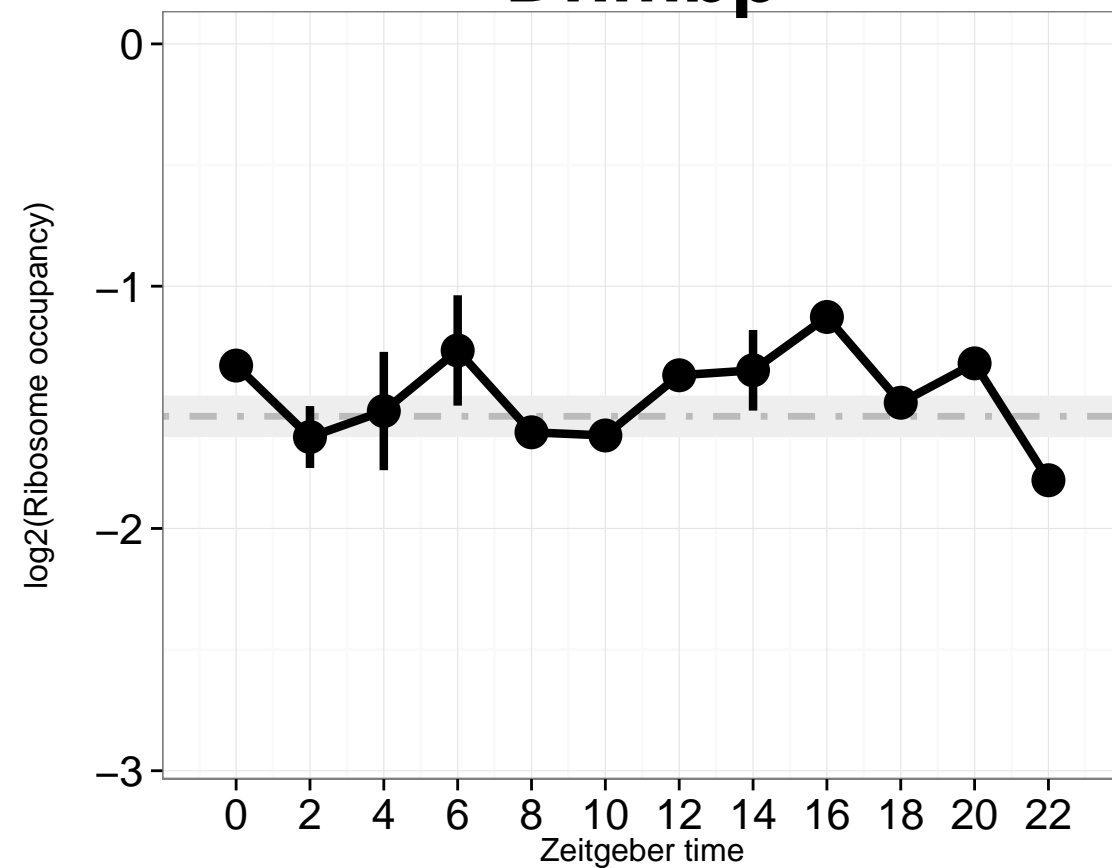

Supplement: SuppDataset_1.zip [file Dnmbp_set_A.pdf › Supplemental Dataset 1/A-mRNA_nonrhyth_translation_nonrhyth/Dnmbp_set_A.pdf]

## Dnmt1

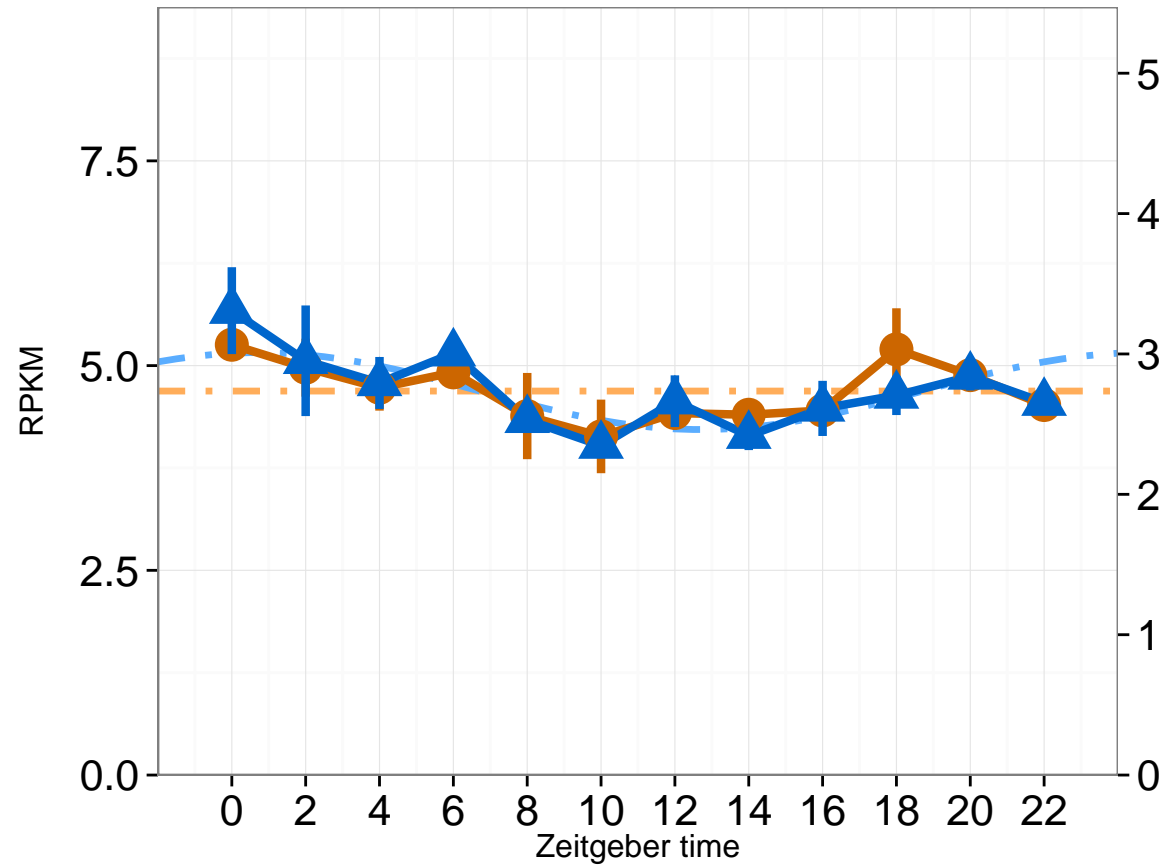

## Dnmt1

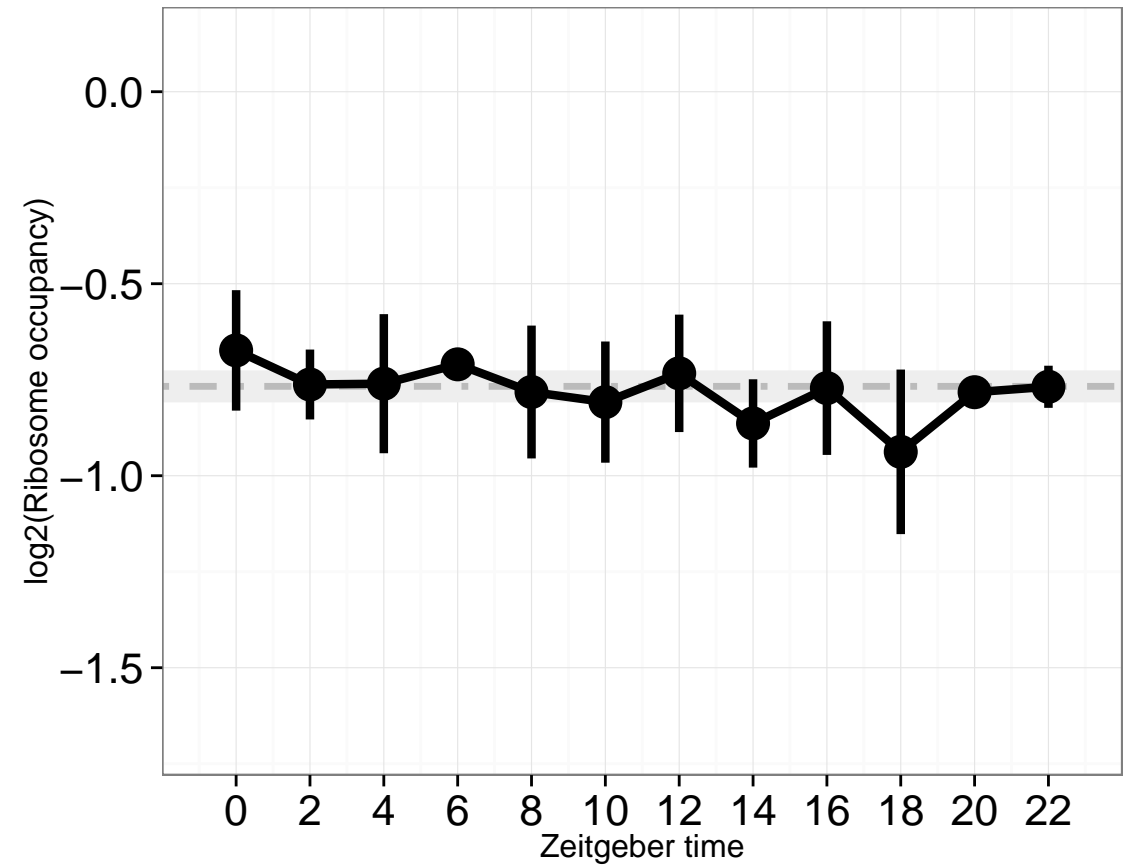

Supplement: SuppDataset_1.zip [file Dnmt1_set_A.pdf › Supplemental Dataset 1/A-mRNA_nonrhyth_translation_nonrhyth/Dnmt1_set_A.pdf]

## Dnmt3a

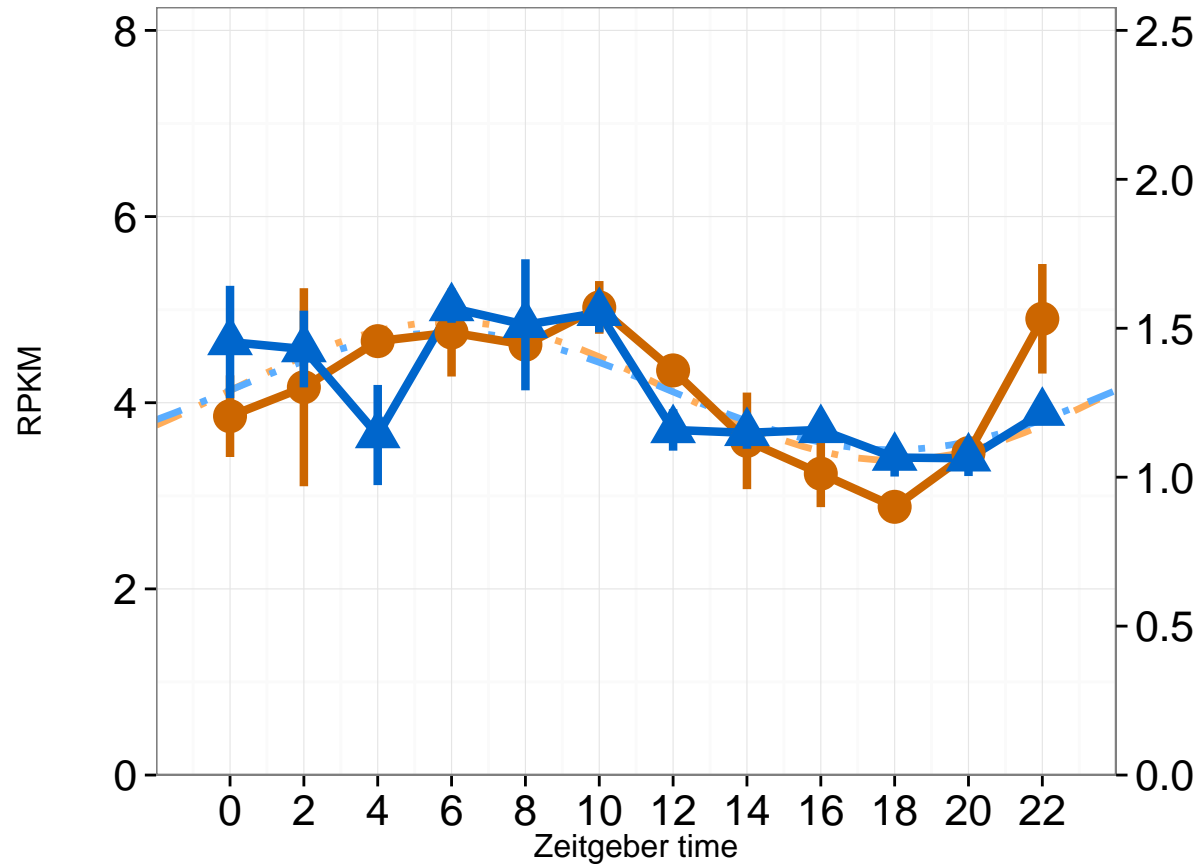

## Dnmt3a

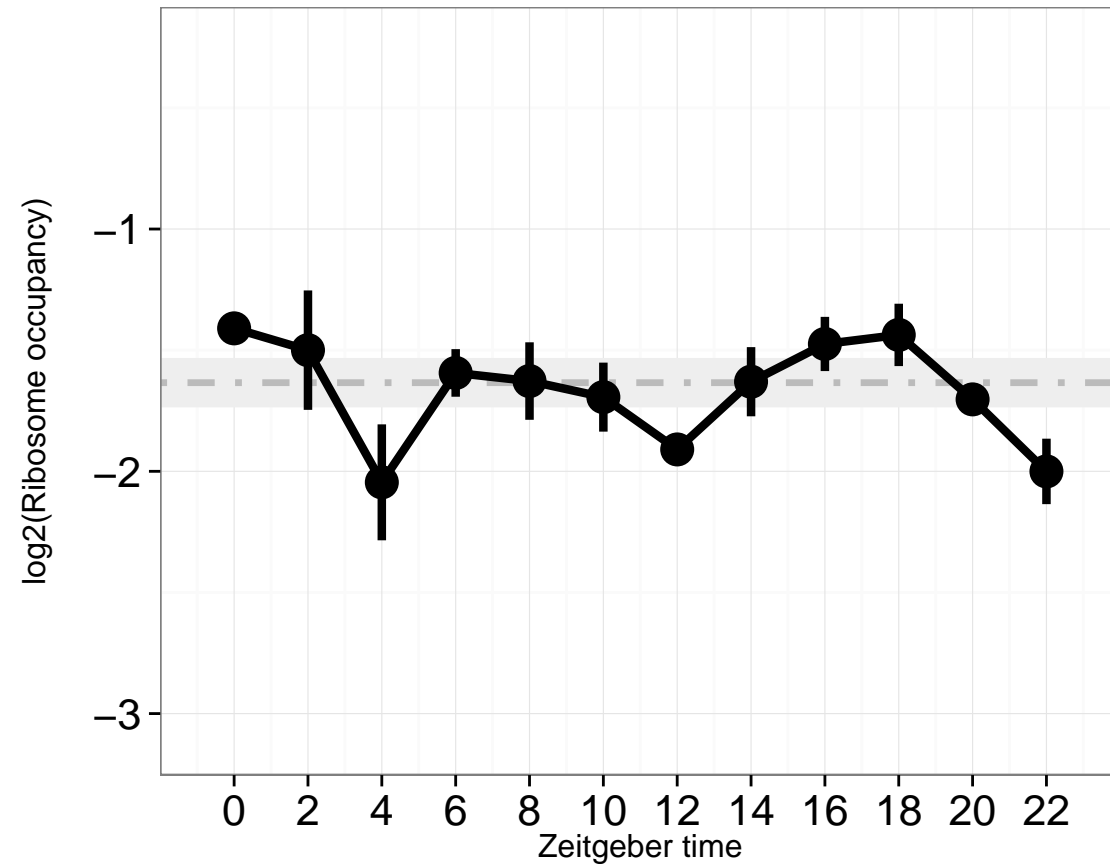

Supplement: SuppDataset_1.zip [file Dnmt3a_set_A.pdf › Supplemental Dataset 1/A-mRNA_nonrhyth_translation_nonrhyth/Dnmt3a_set_A.pdf]

## Dnpep

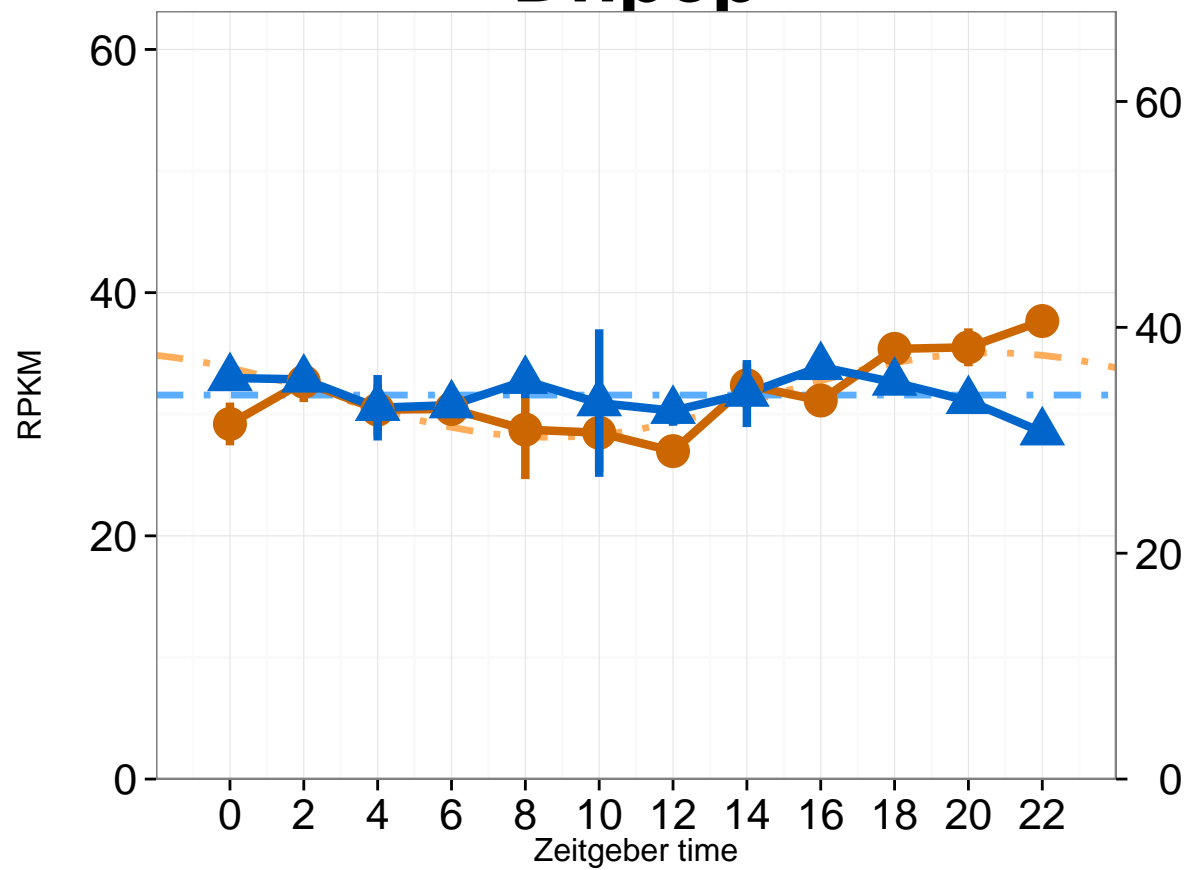

## Dnpep

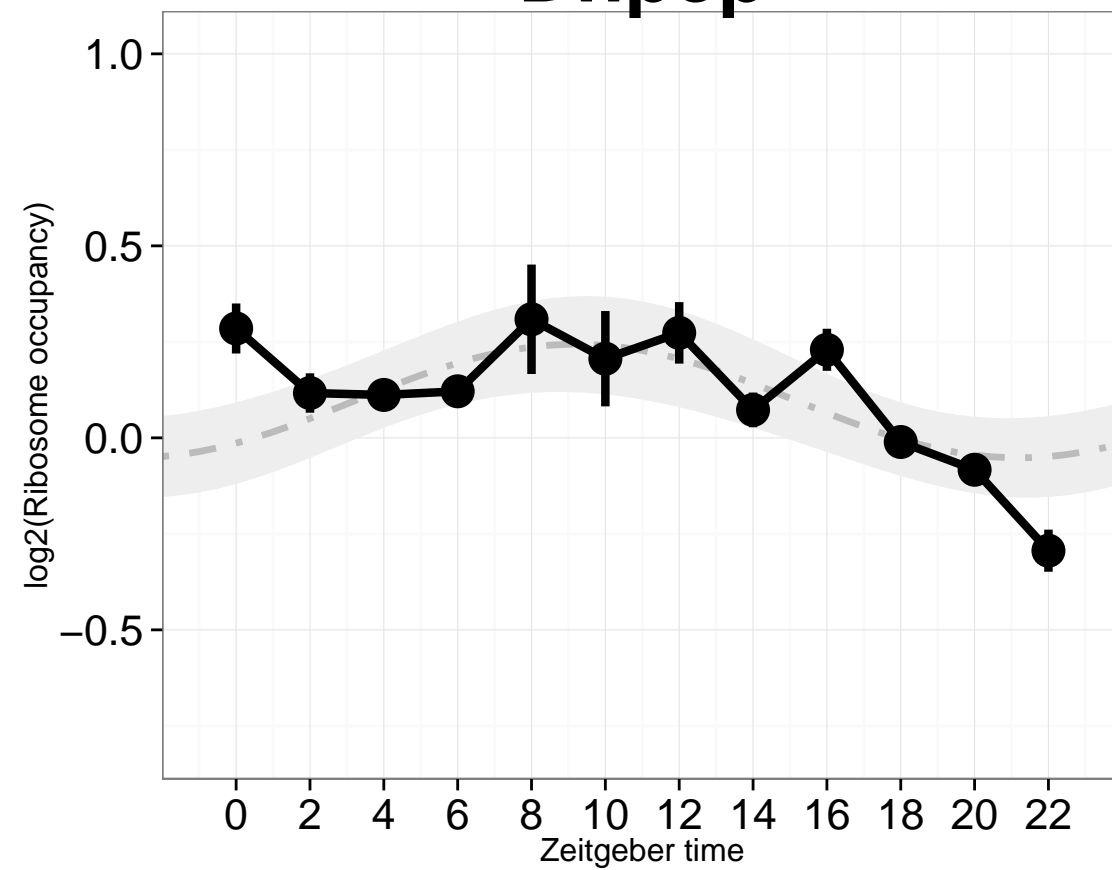

Supplement: SuppDataset_1.zip [file Dnpep_set_A.pdf › Supplemental Dataset 1/A-mRNA_nonrhyth_translation_nonrhyth/Dnpep_set_A.pdf]

# Dntt

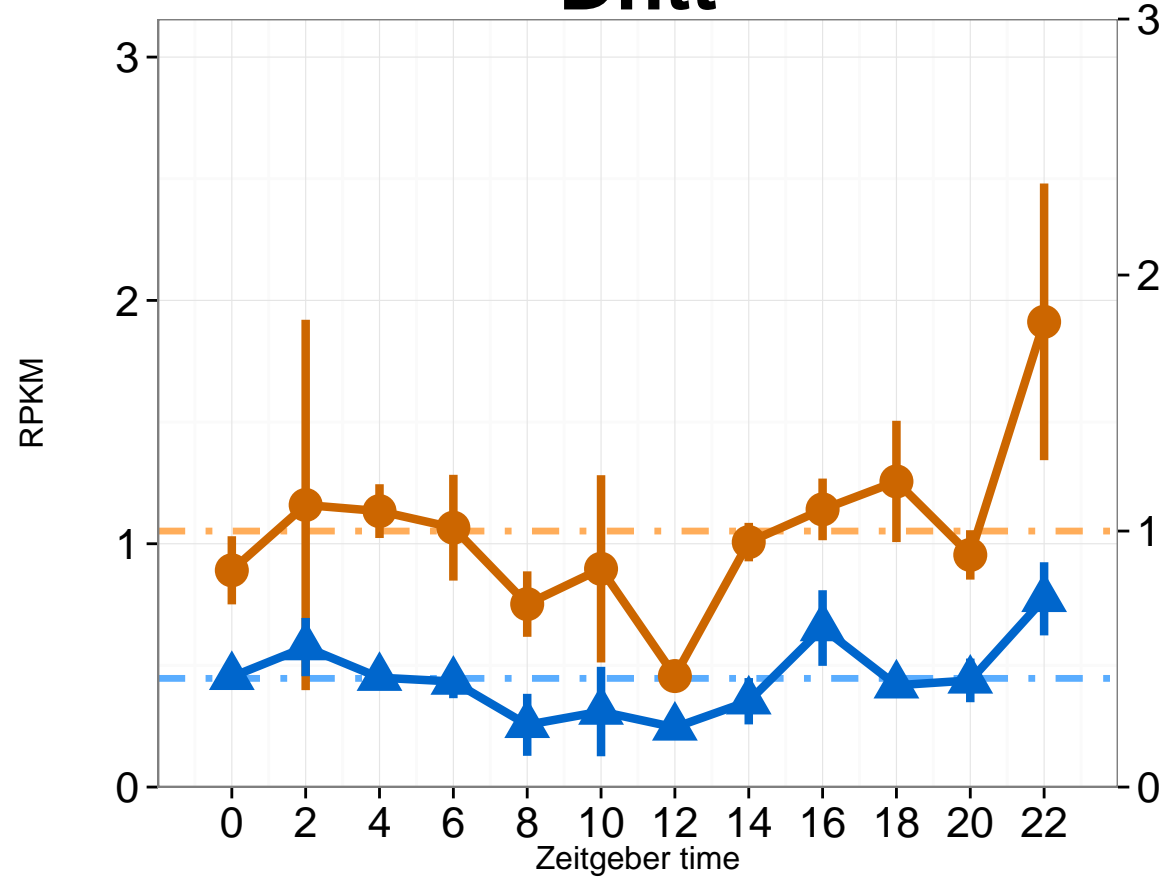

# Dntt

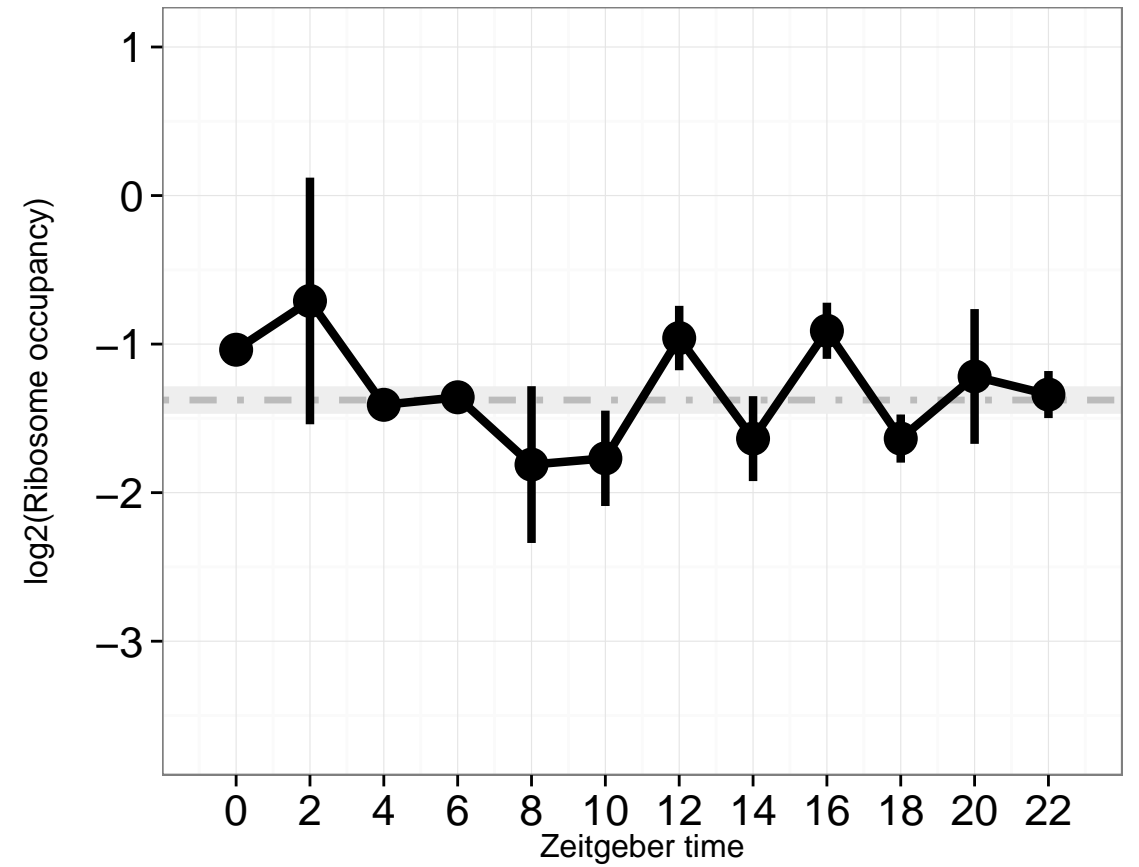

Supplement: SuppDataset_1.zip [file Dntt_set_A.pdf › Supplemental Dataset 1/A-mRNA_nonrhyth_translation_nonrhyth/Dntt_set_A.pdf]

## Dnttip2

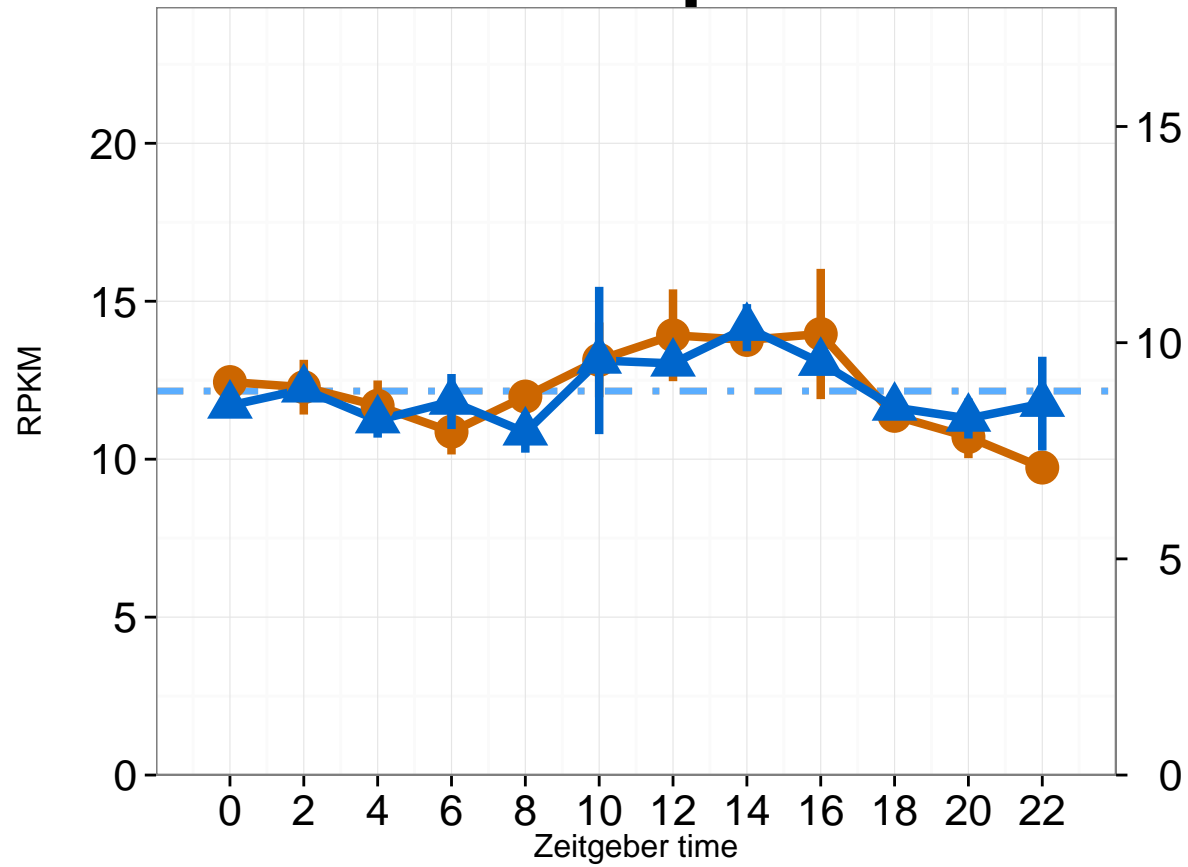

## Dnttip2

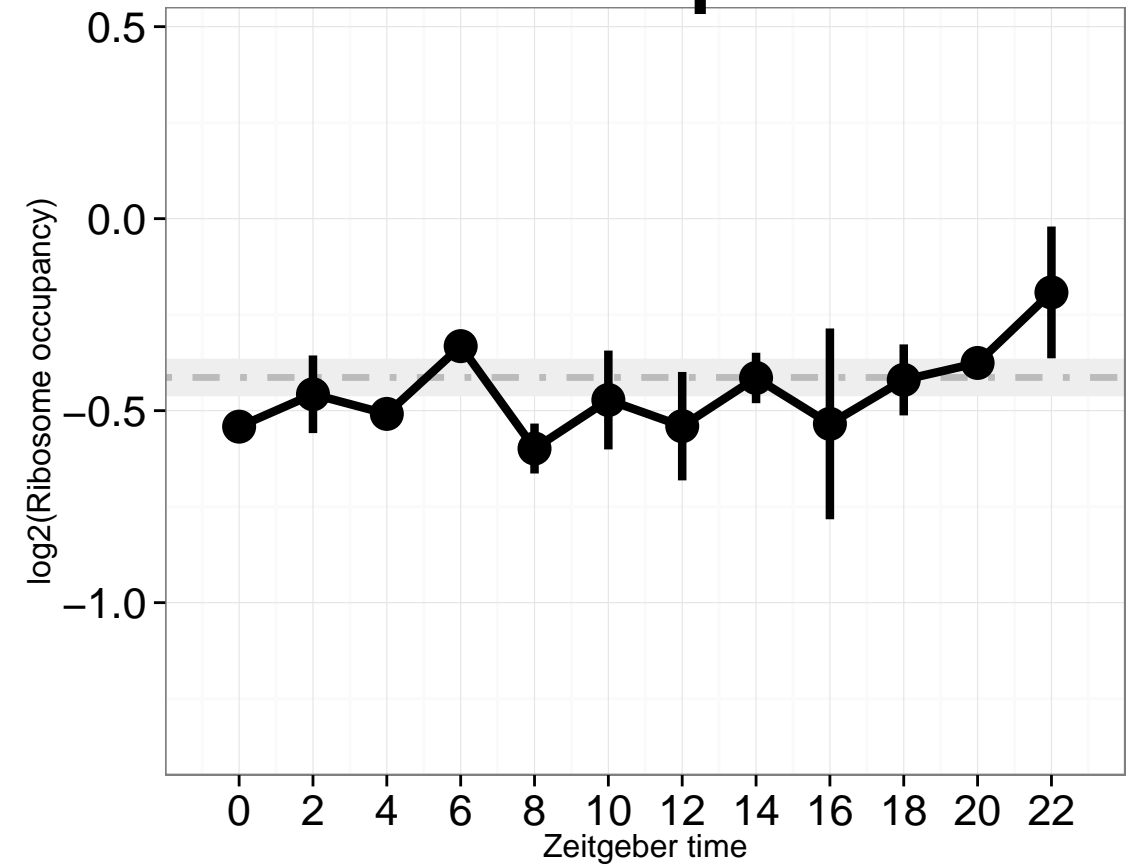

Supplement: SuppDataset_1.zip [file Dnttip2_set_A.pdf › Supplemental Dataset 1/A-mRNA_nonrhyth_translation_nonrhyth/Dnttip2_set_A.pdf]

# Dock10

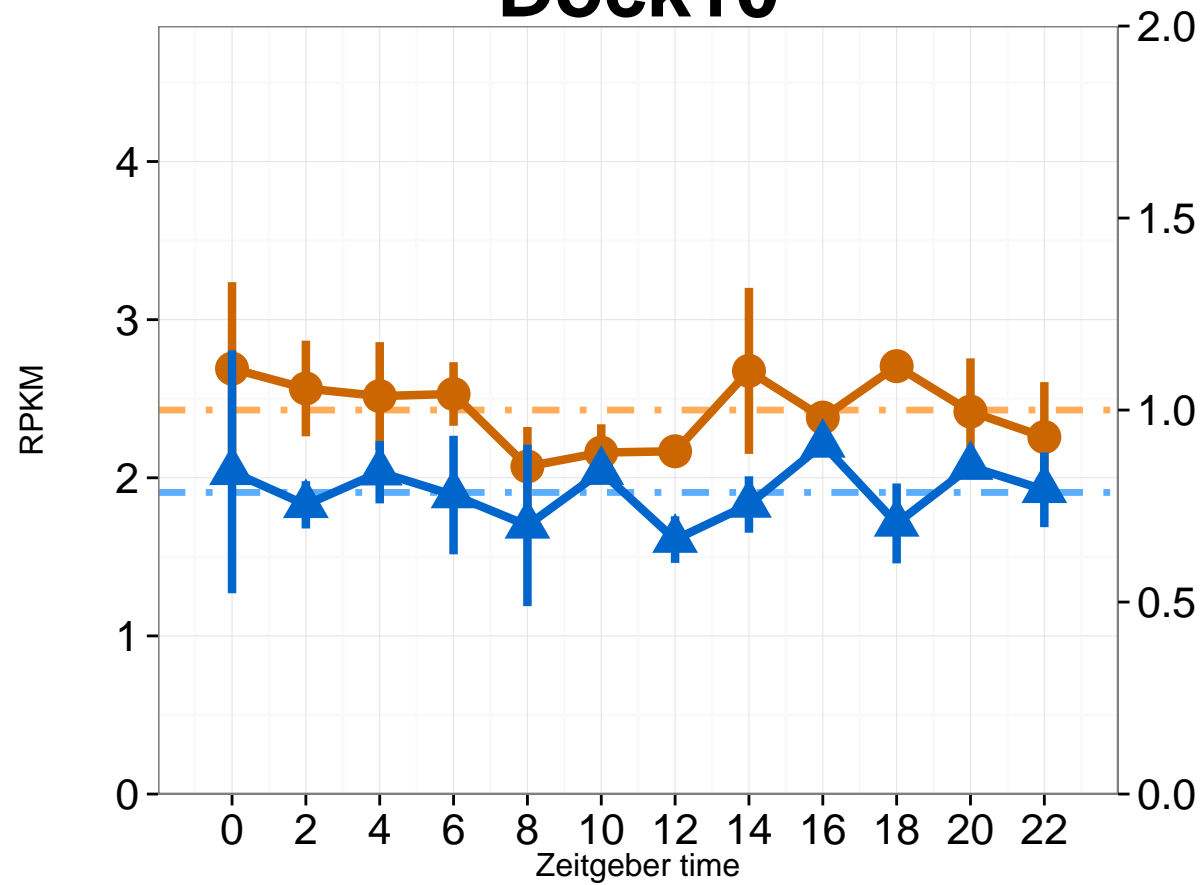

# Dock10

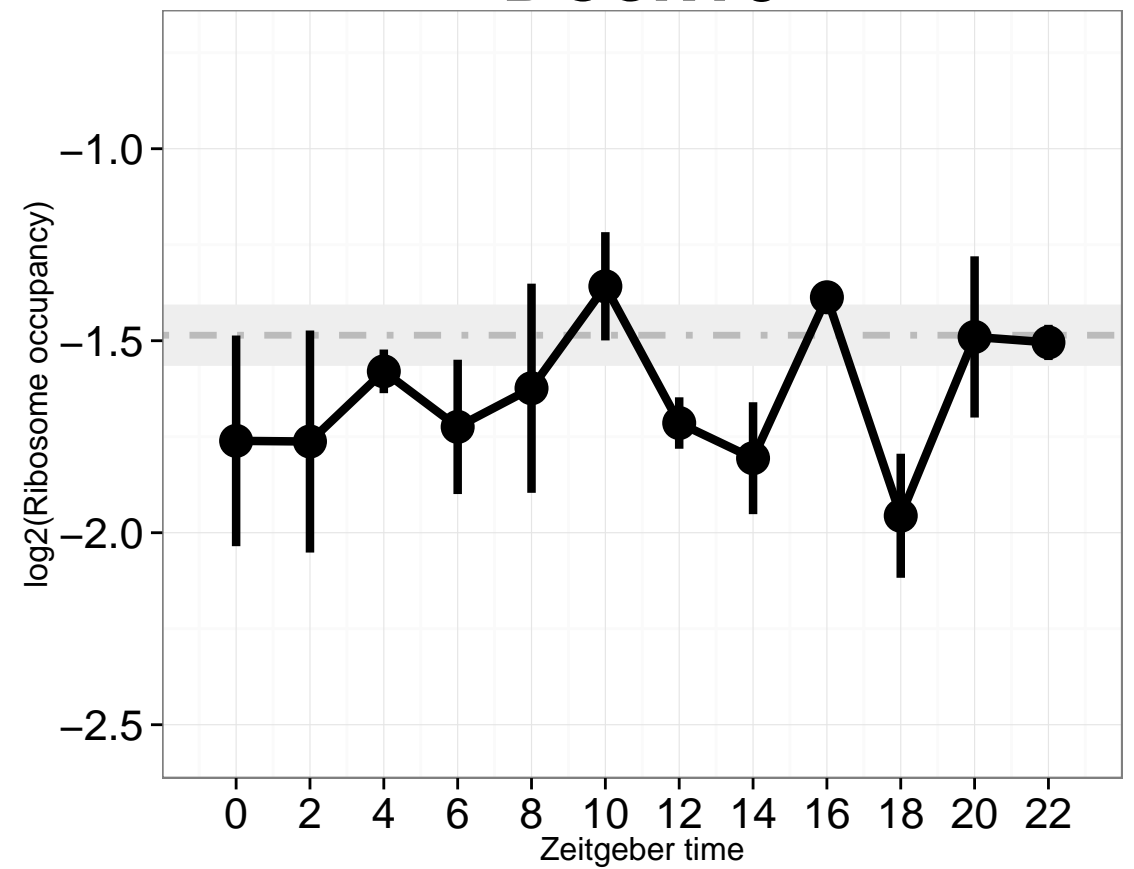

Supplement: SuppDataset_1.zip [file Dock10_set_A.pdf › Supplemental Dataset 1/A-mRNA_nonrhyth_translation_nonrhyth/Dock10_set_A.pdf]

# Dock1

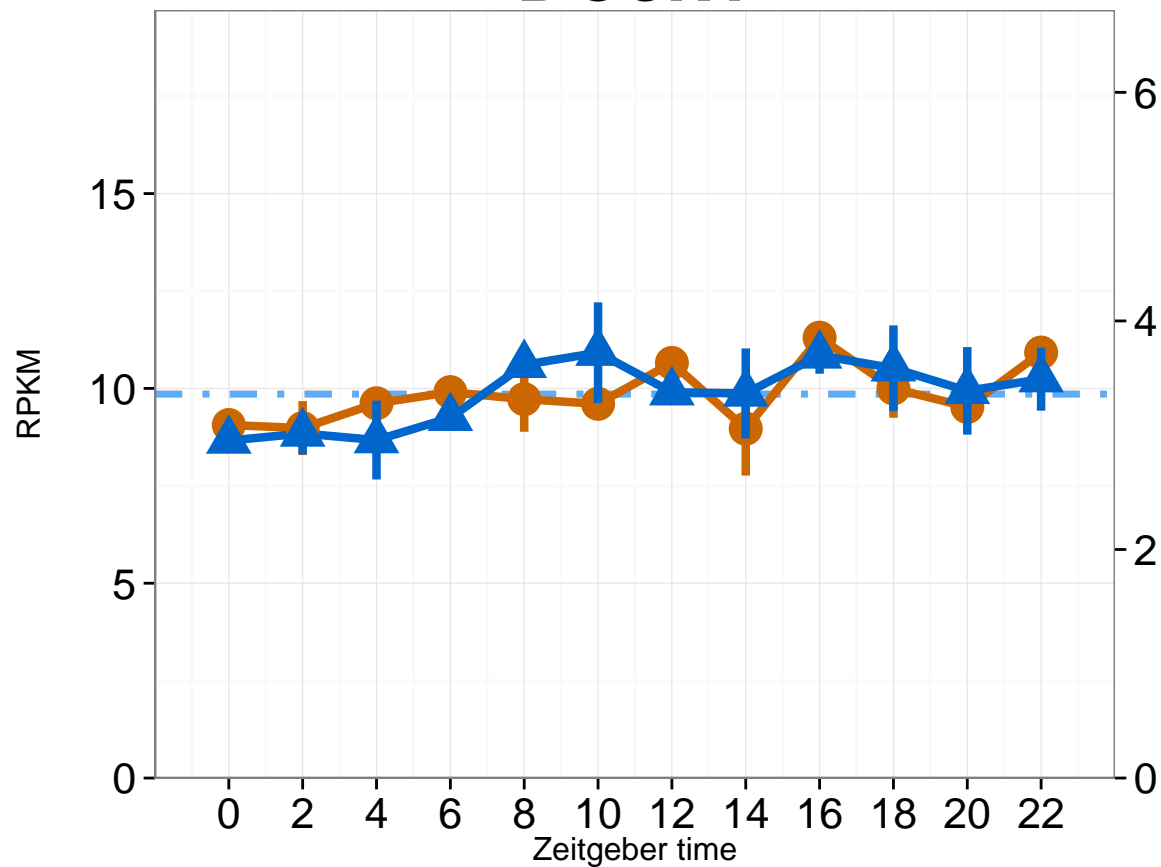

# Dock1

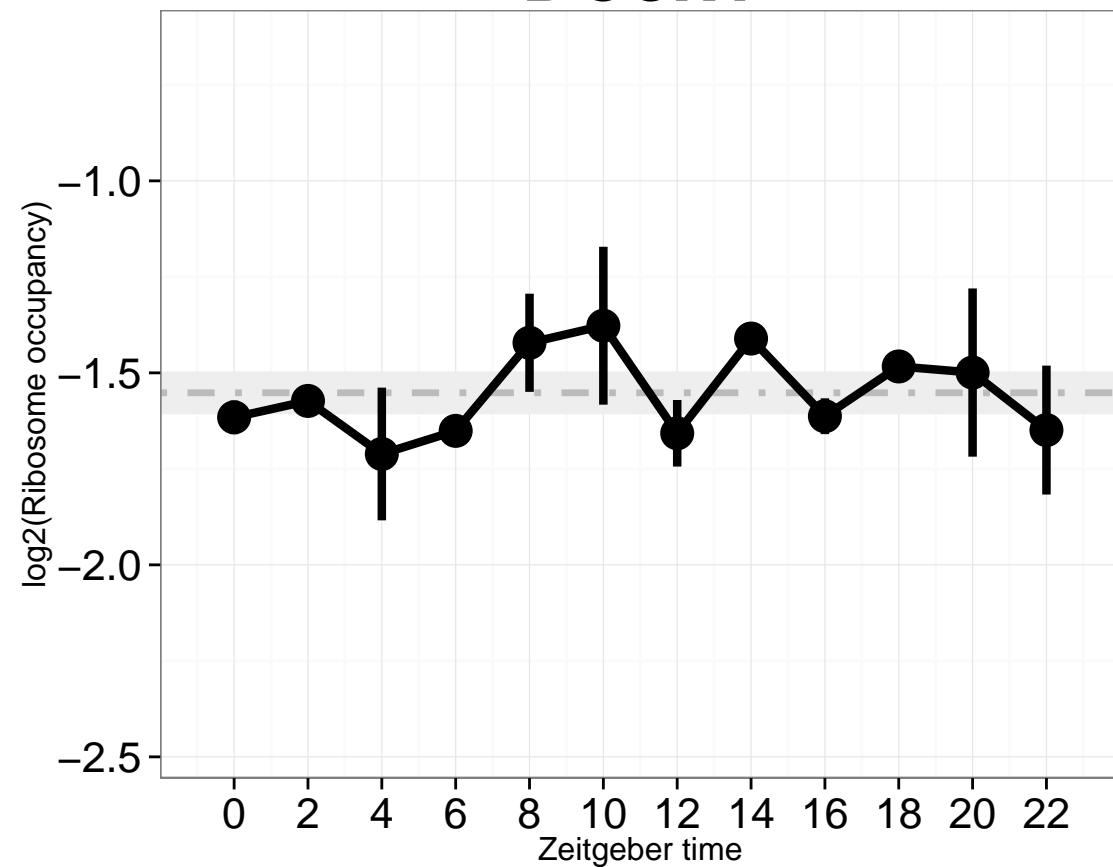

Supplement: SuppDataset_1.zip [file Dock1_set_A.pdf › Supplemental Dataset 1/A-mRNA_nonrhyth_translation_nonrhyth/Dock1_set_A.pdf]

# Dock2

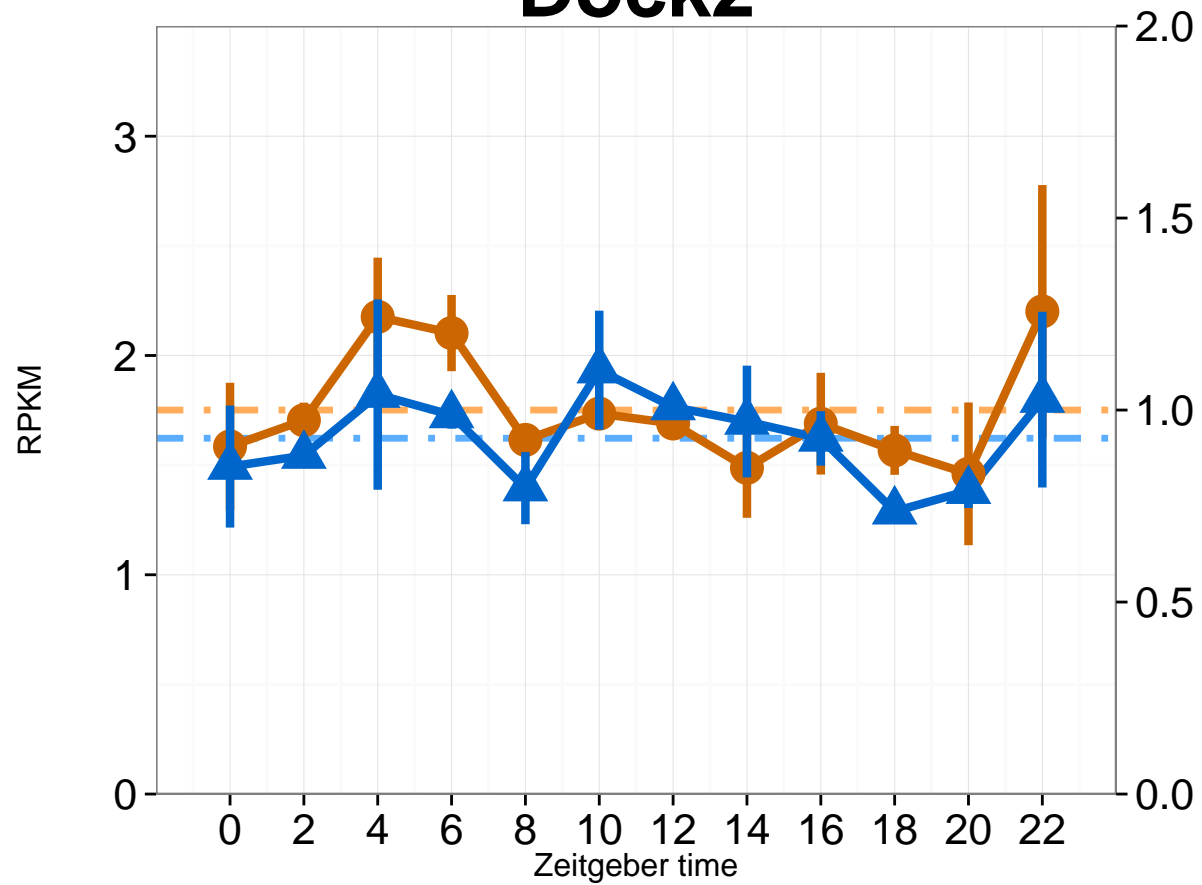

# Dock2

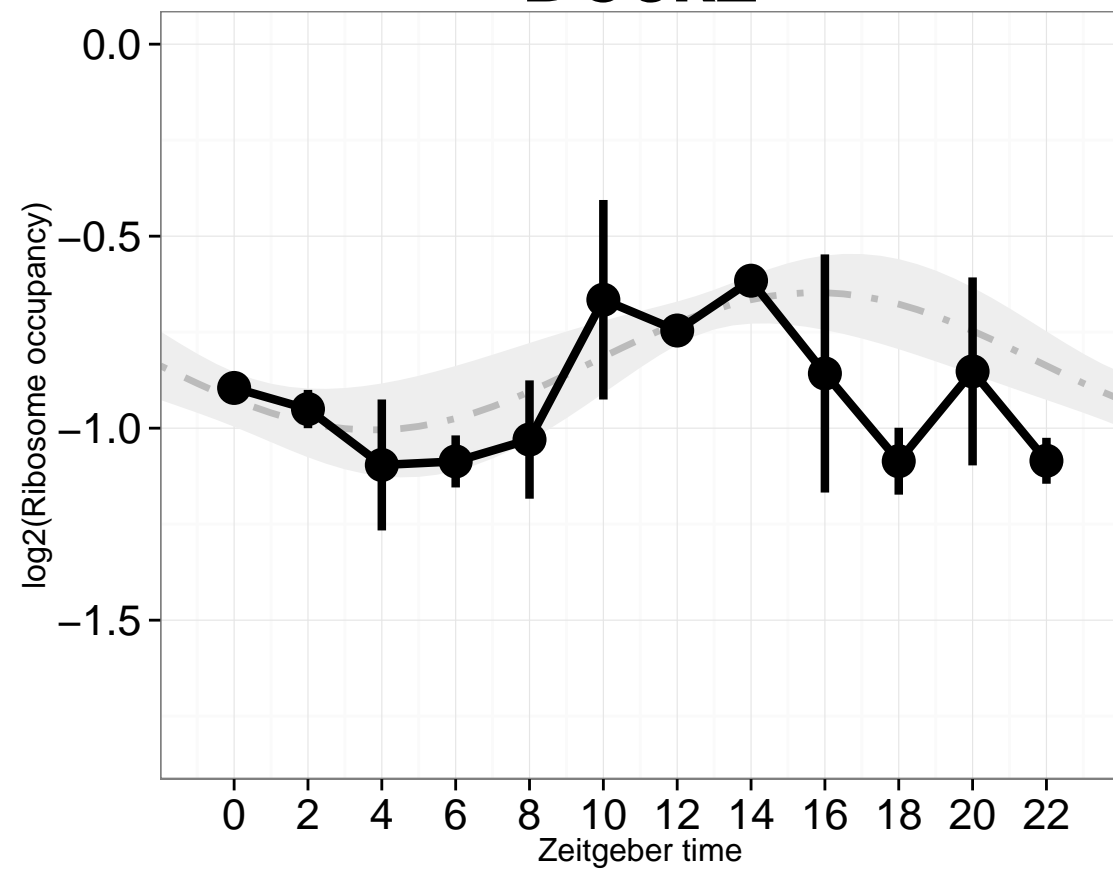

Supplement: SuppDataset_1.zip [file Dock2_set_A.pdf › Supplemental Dataset 1/A-mRNA_nonrhyth_translation_nonrhyth/Dock2_set_A.pdf]

# Dock4

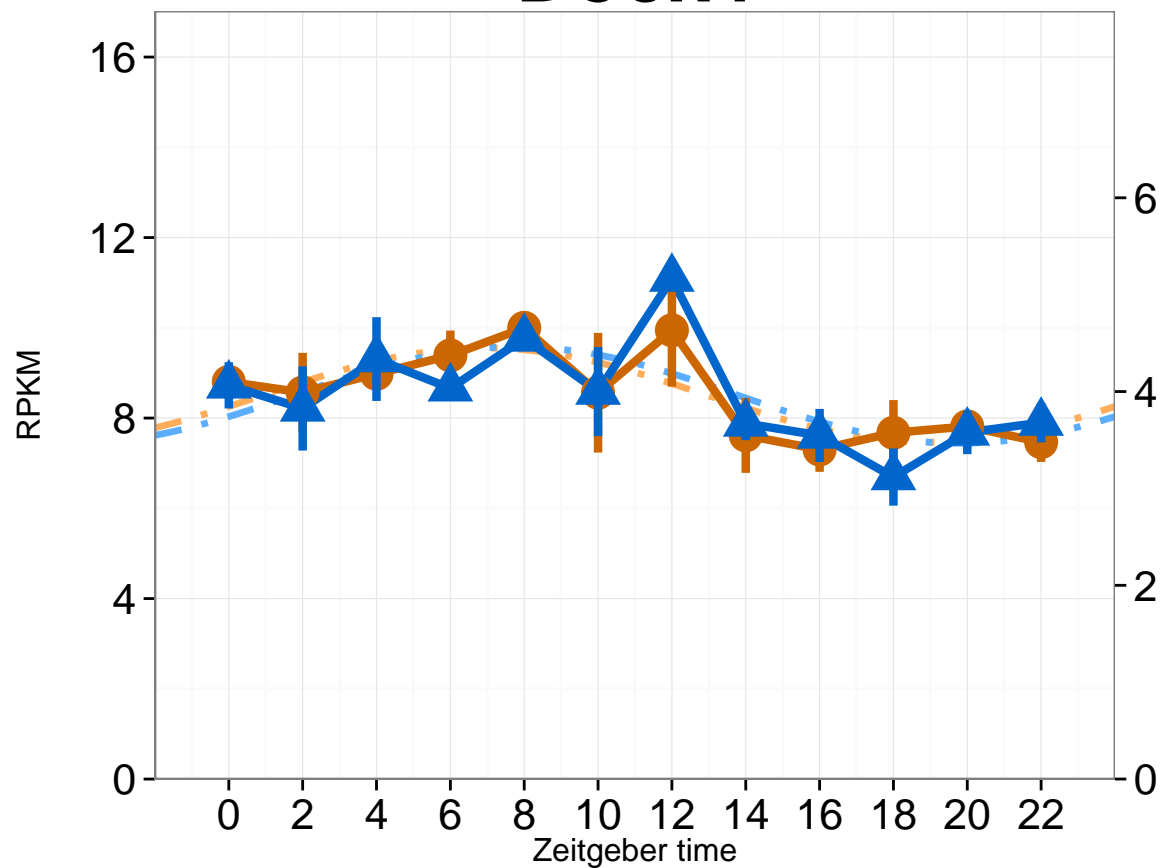

# Dock4

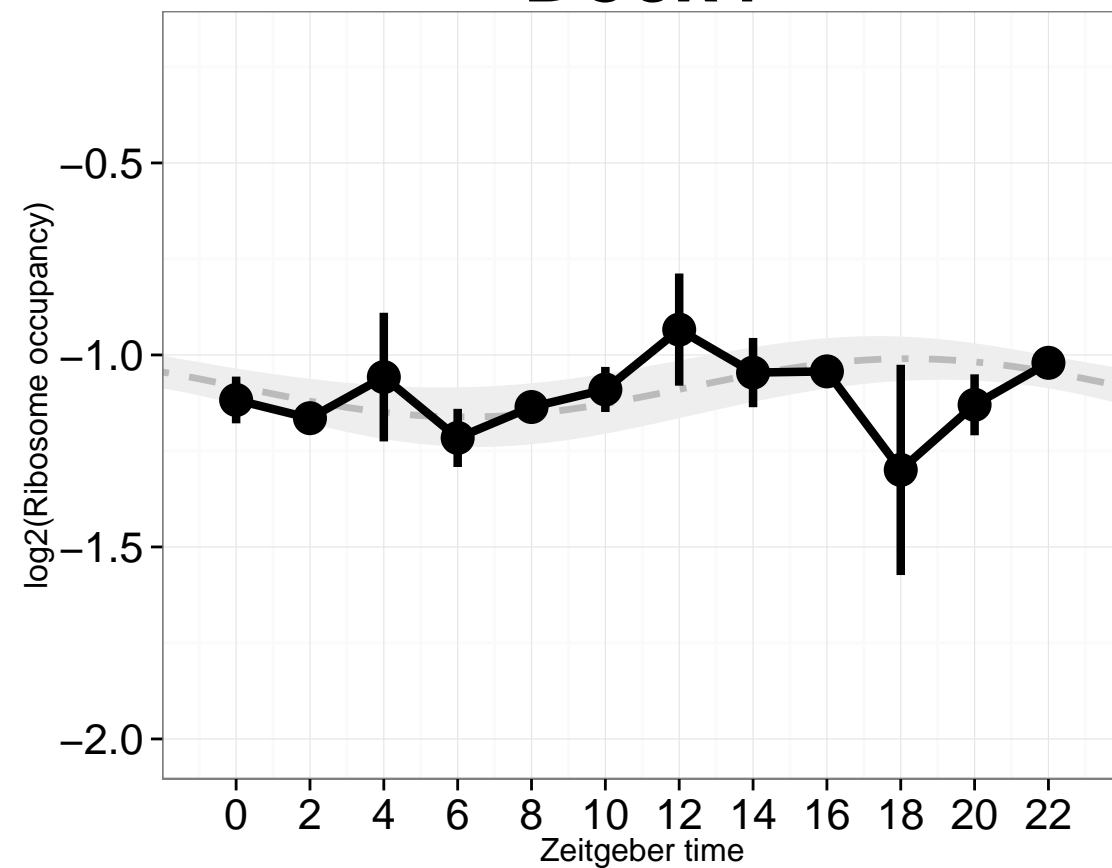

Supplement: SuppDataset_1.zip [file Dock4_set_A.pdf › Supplemental Dataset 1/A-mRNA_nonrhyth_translation_nonrhyth/Dock4_set_A.pdf]

# Dock5

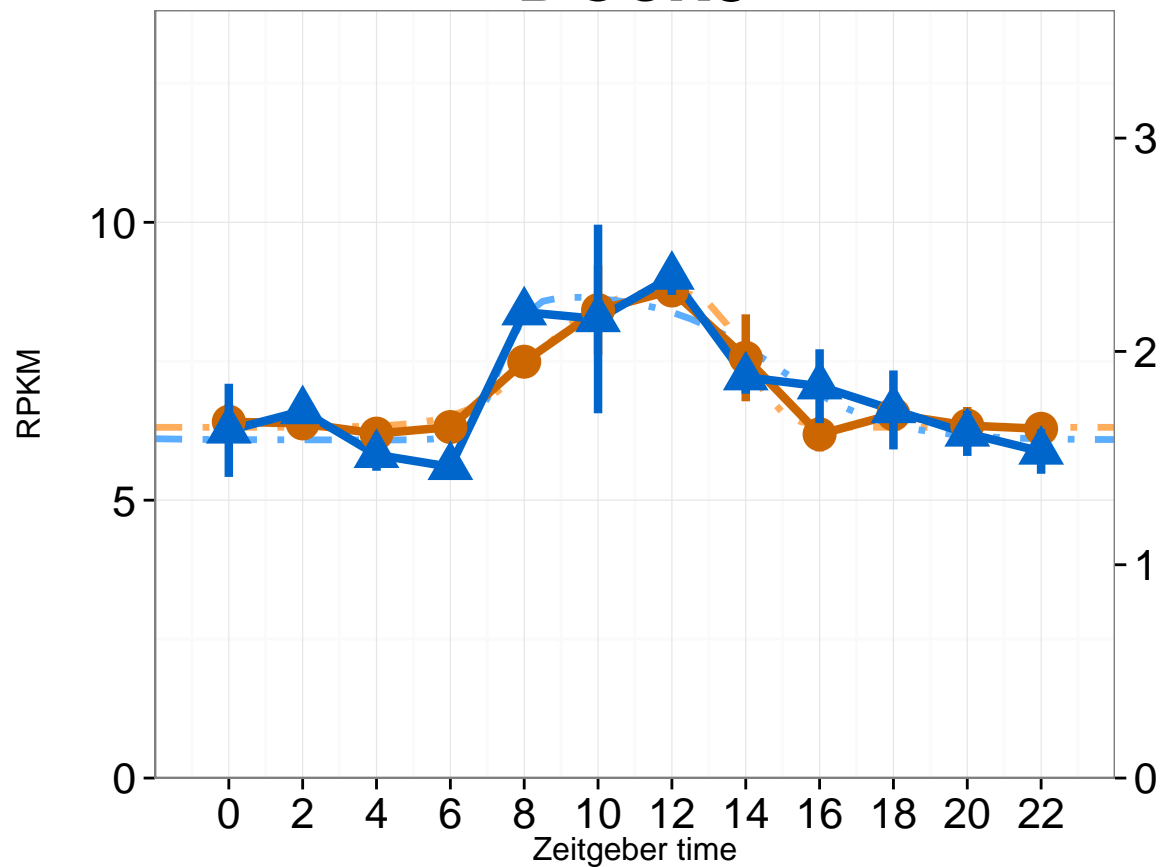

# Dock5

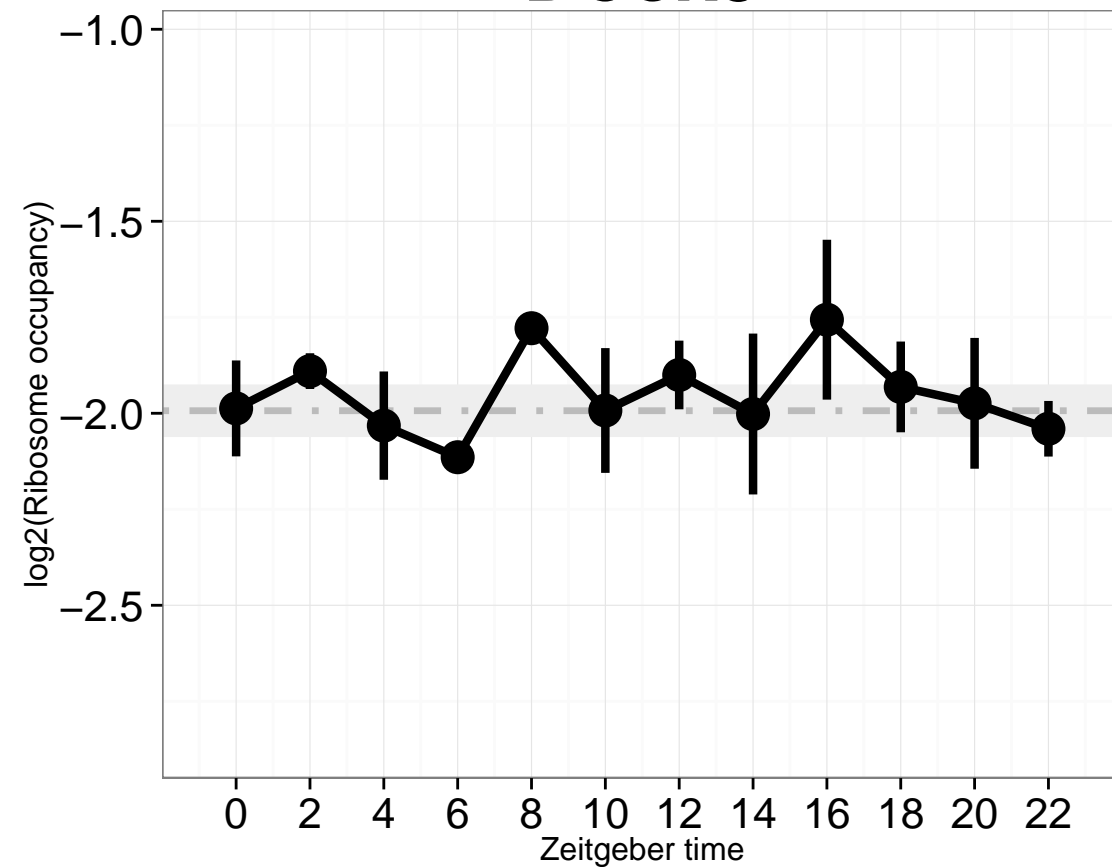

Supplement: SuppDataset_1.zip [file Dock5_set_A.pdf › Supplemental Dataset 1/A-mRNA_nonrhyth_translation_nonrhyth/Dock5_set_A.pdf]

# Dock7

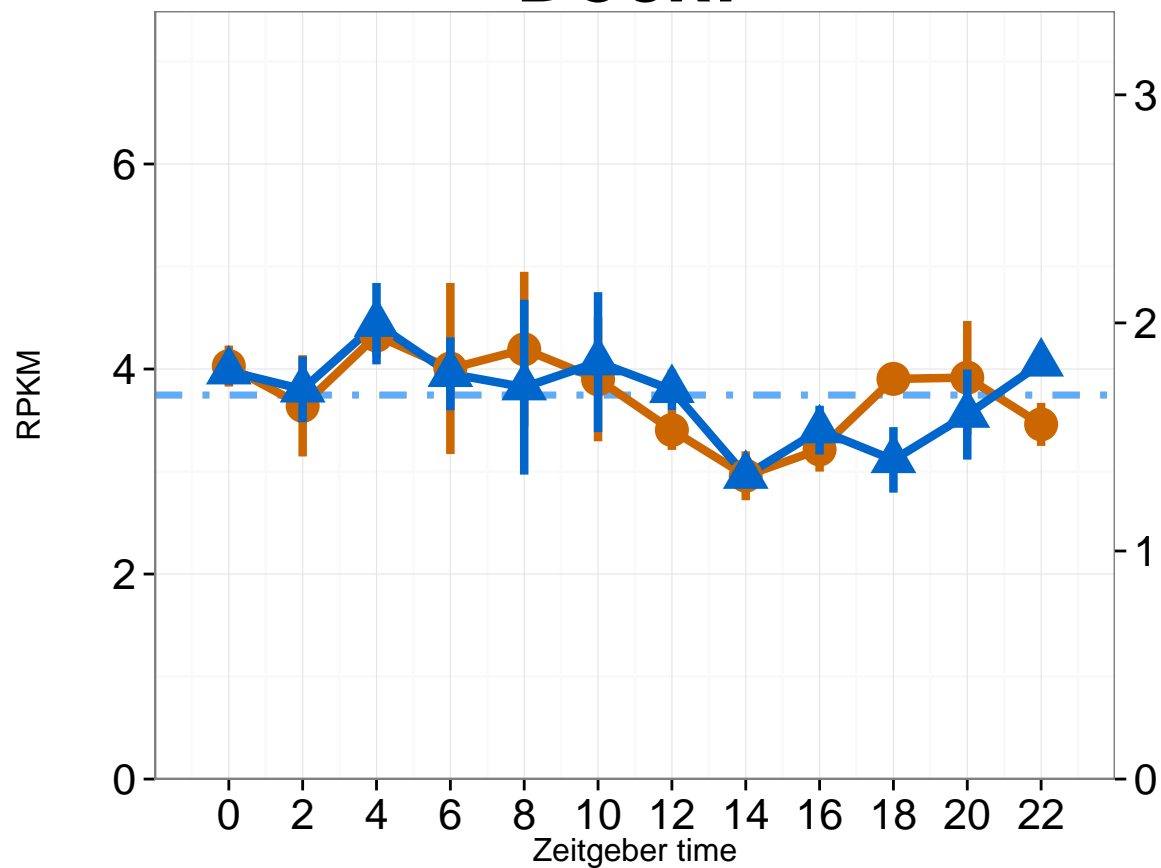

# Dock7

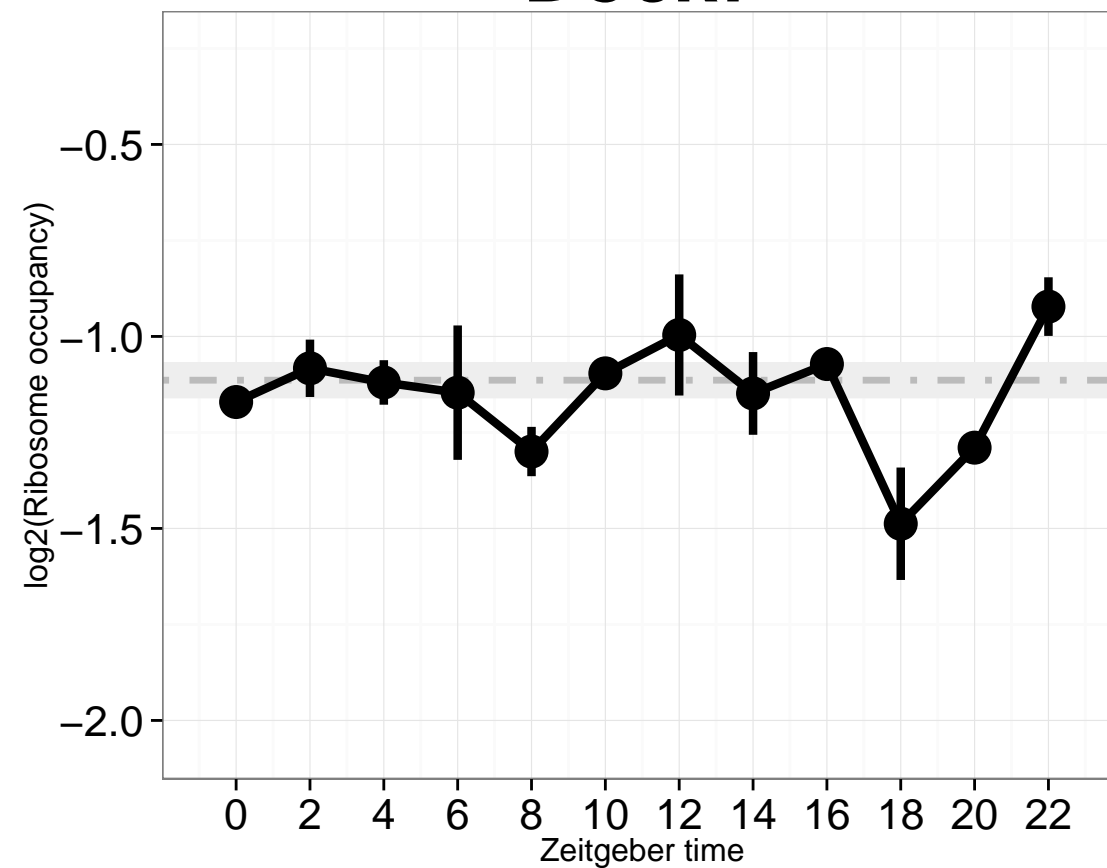

Supplement: SuppDataset_1.zip [file Dock7_set_A.pdf › Supplemental Dataset 1/A-mRNA_nonrhyth_translation_nonrhyth/Dock7_set_A.pdf]

## Dock8

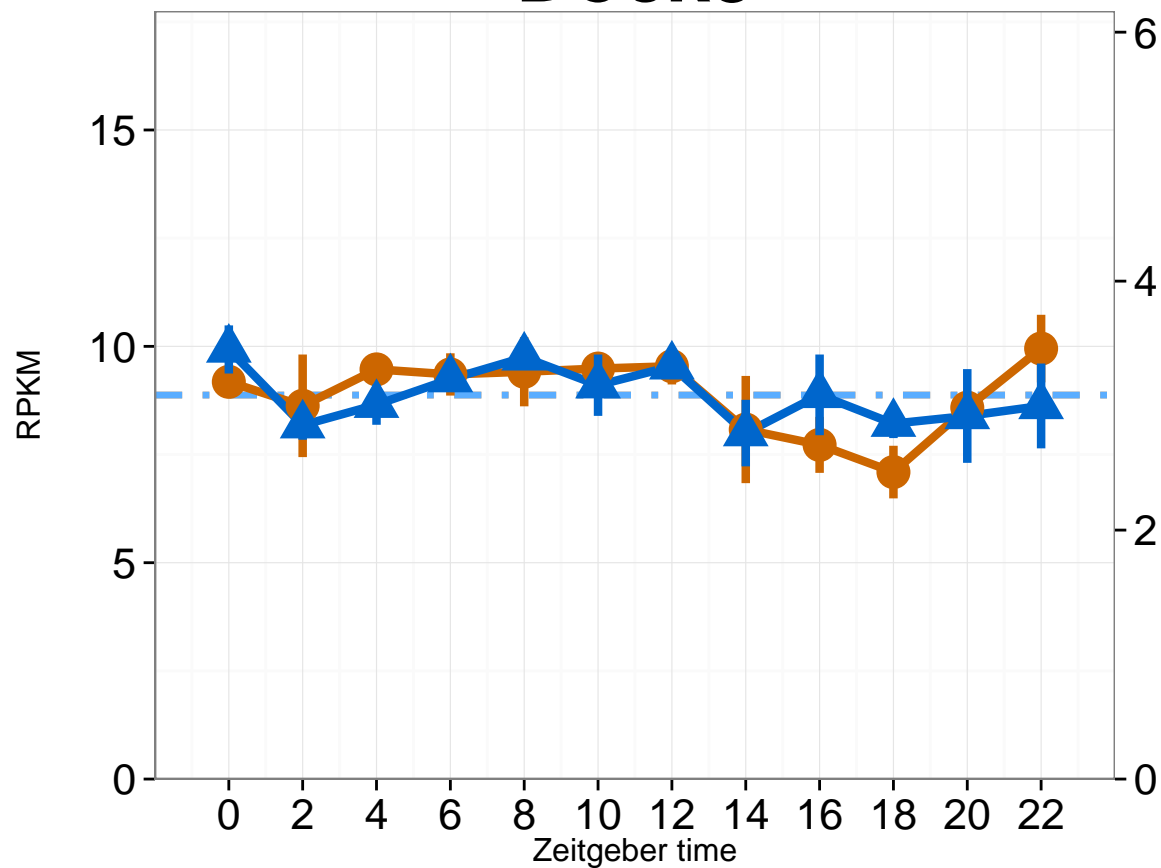

## Dock8

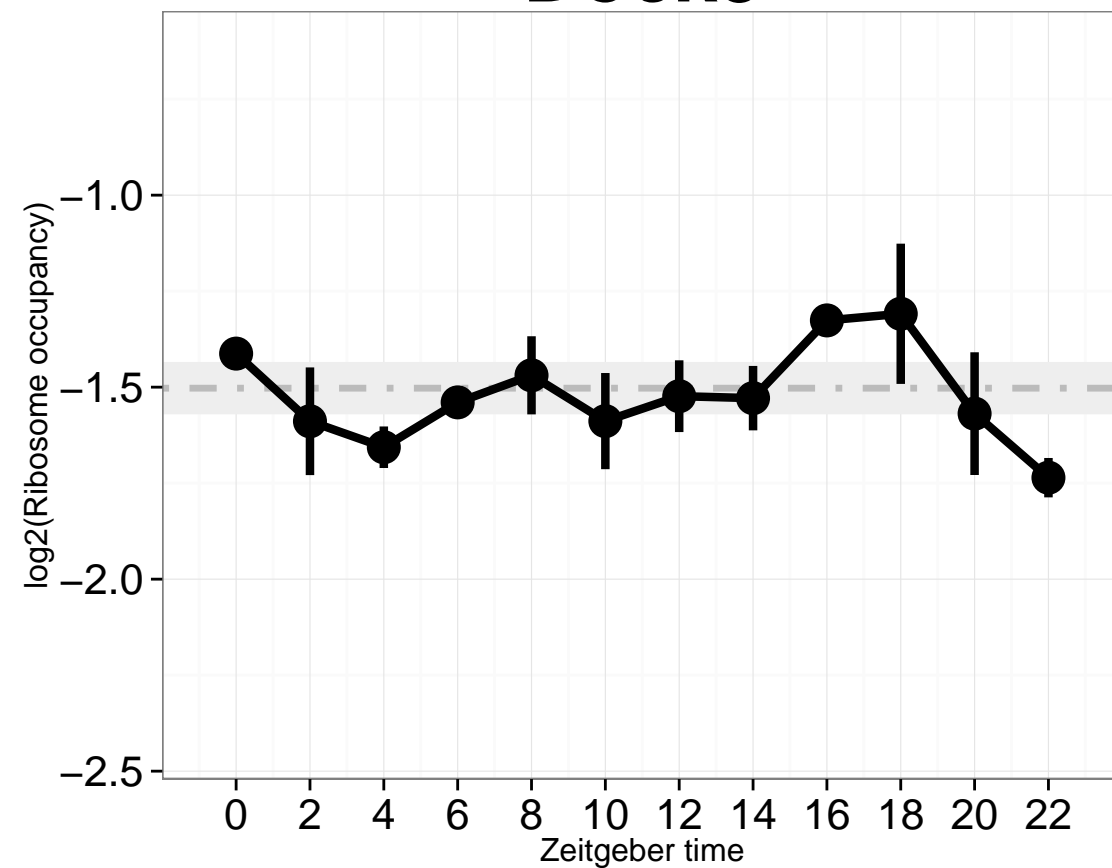

Supplement: SuppDataset_1.zip [file Dock8_set_A.pdf › Supplemental Dataset 1/A-mRNA_nonrhyth_translation_nonrhyth/Dock8_set_A.pdf]

# Dock9

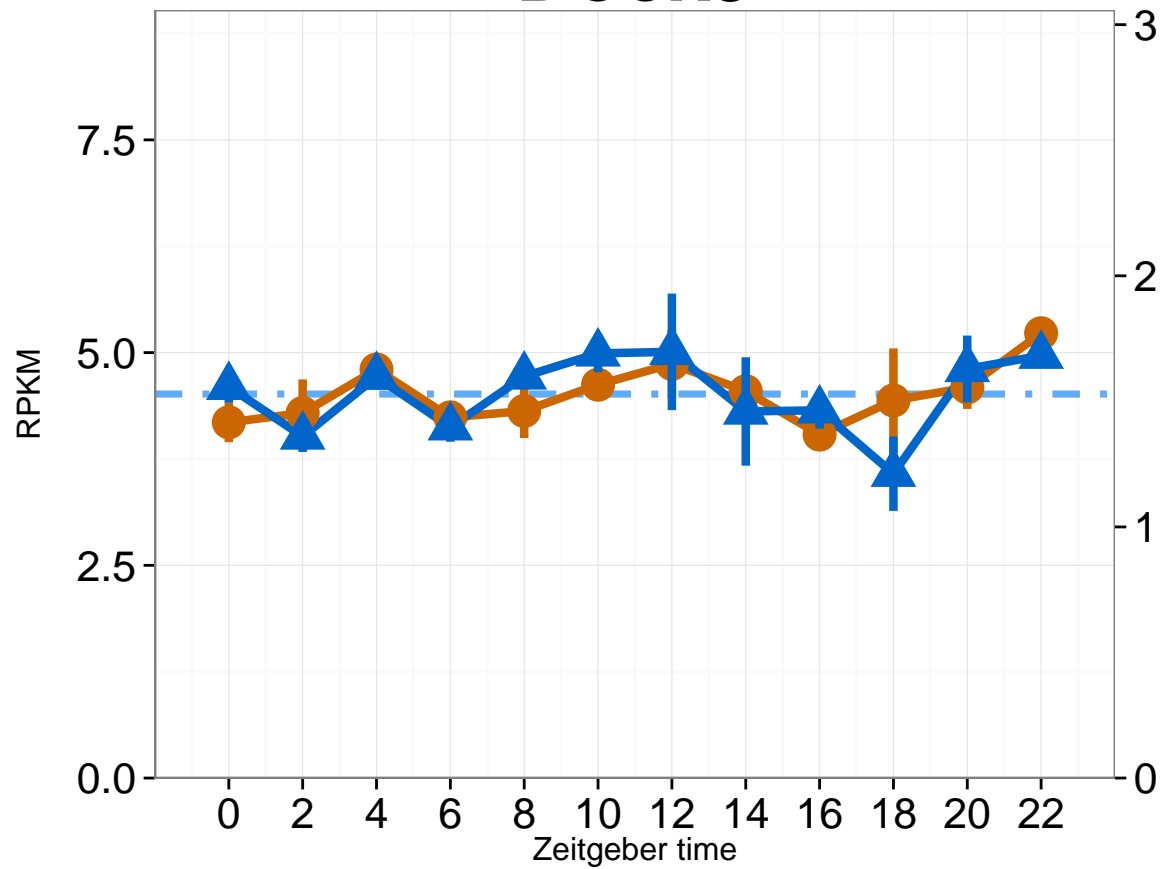

# Dock9

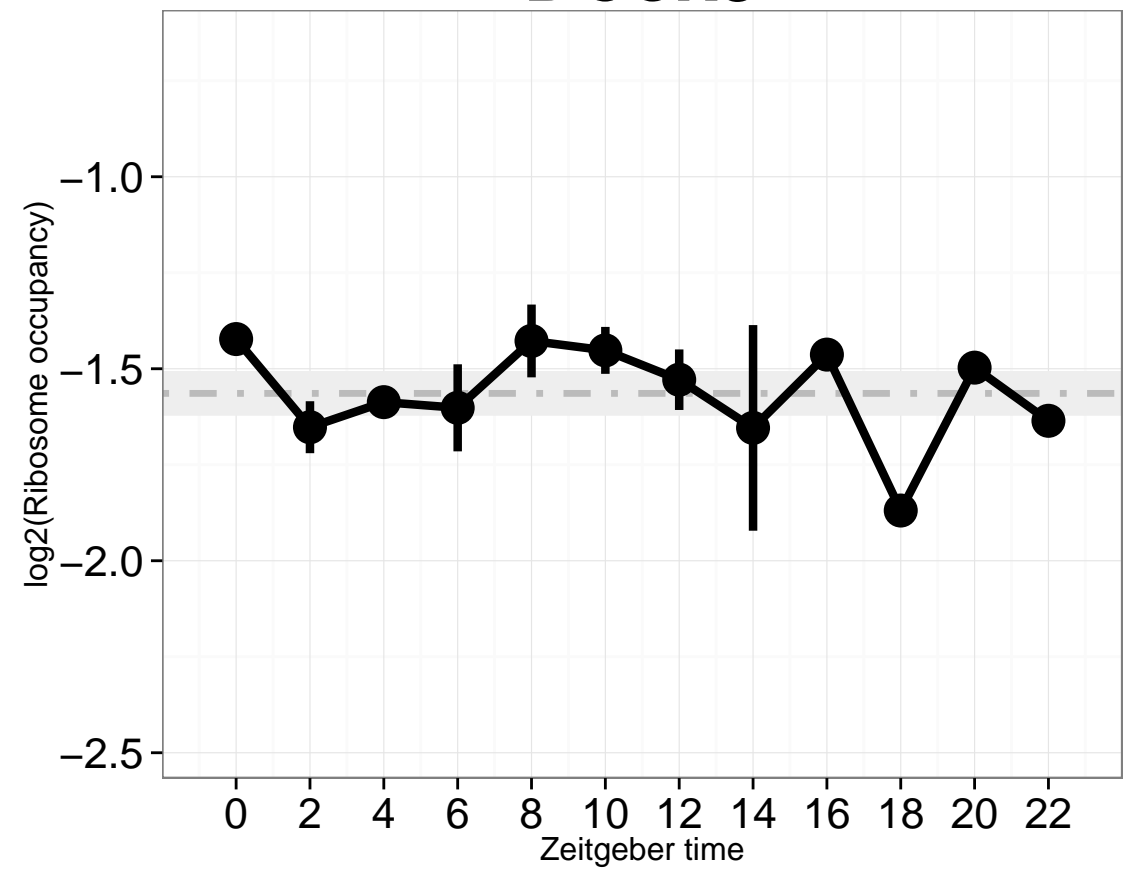

Supplement: SuppDataset_1.zip [file Dock9_set_A.pdf › Supplemental Dataset 1/A-mRNA_nonrhyth_translation_nonrhyth/Dock9_set_A.pdf]

## Dohh

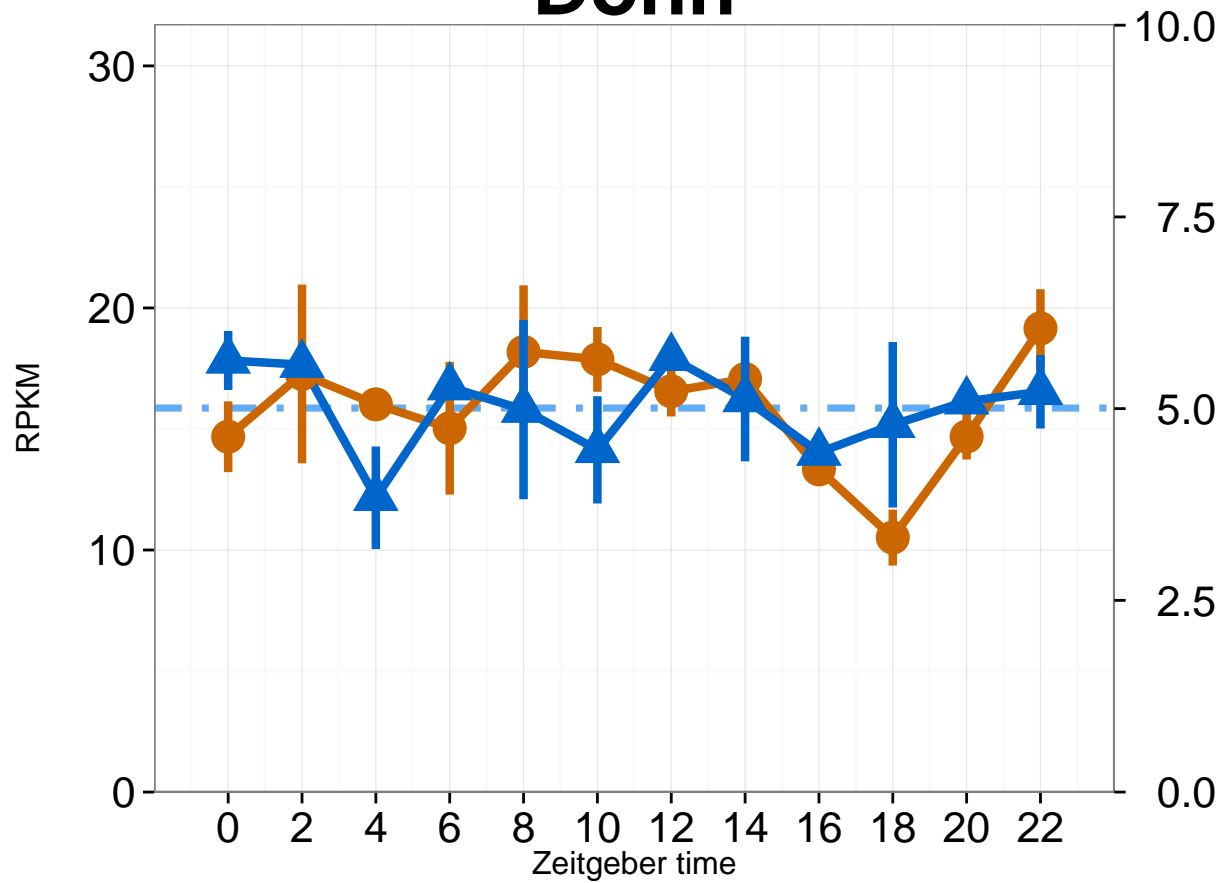

## Dohh

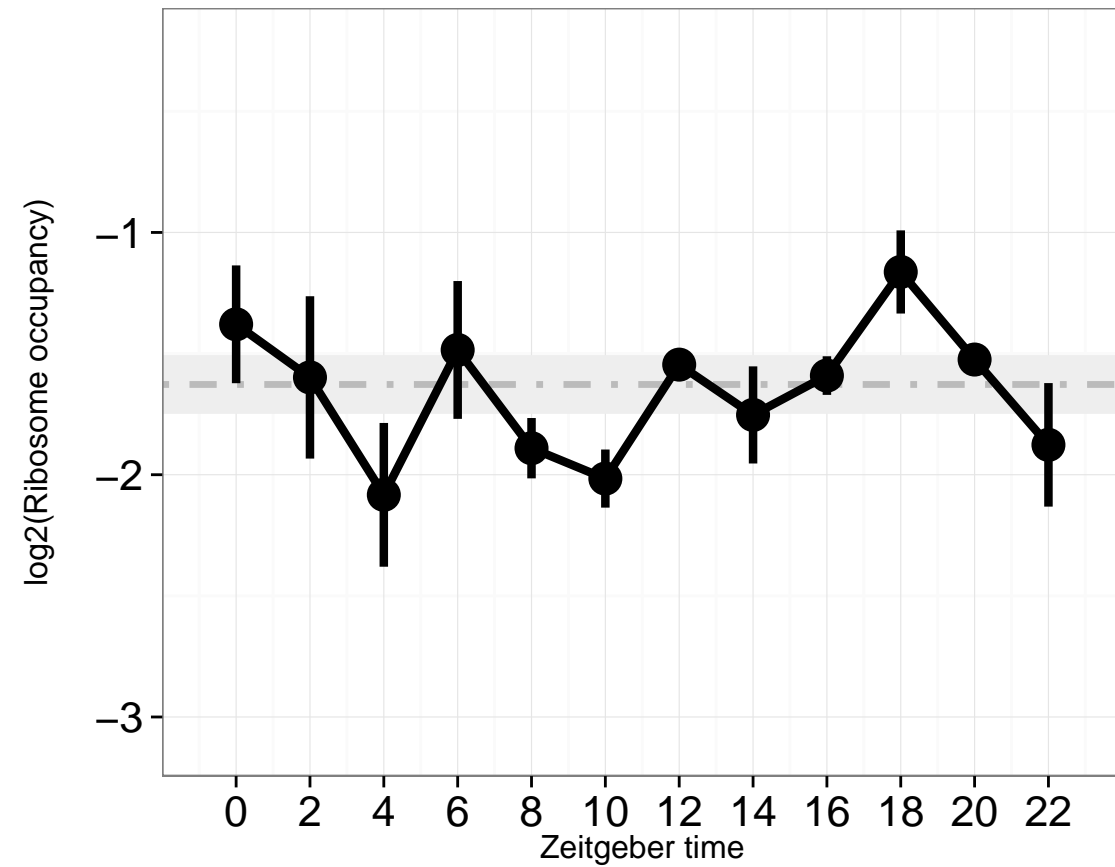

Supplement: SuppDataset_1.zip [file Dohh_set_A.pdf › Supplemental Dataset 1/A-mRNA_nonrhyth_translation_nonrhyth/Dohh_set_A.pdf]

## Dok1

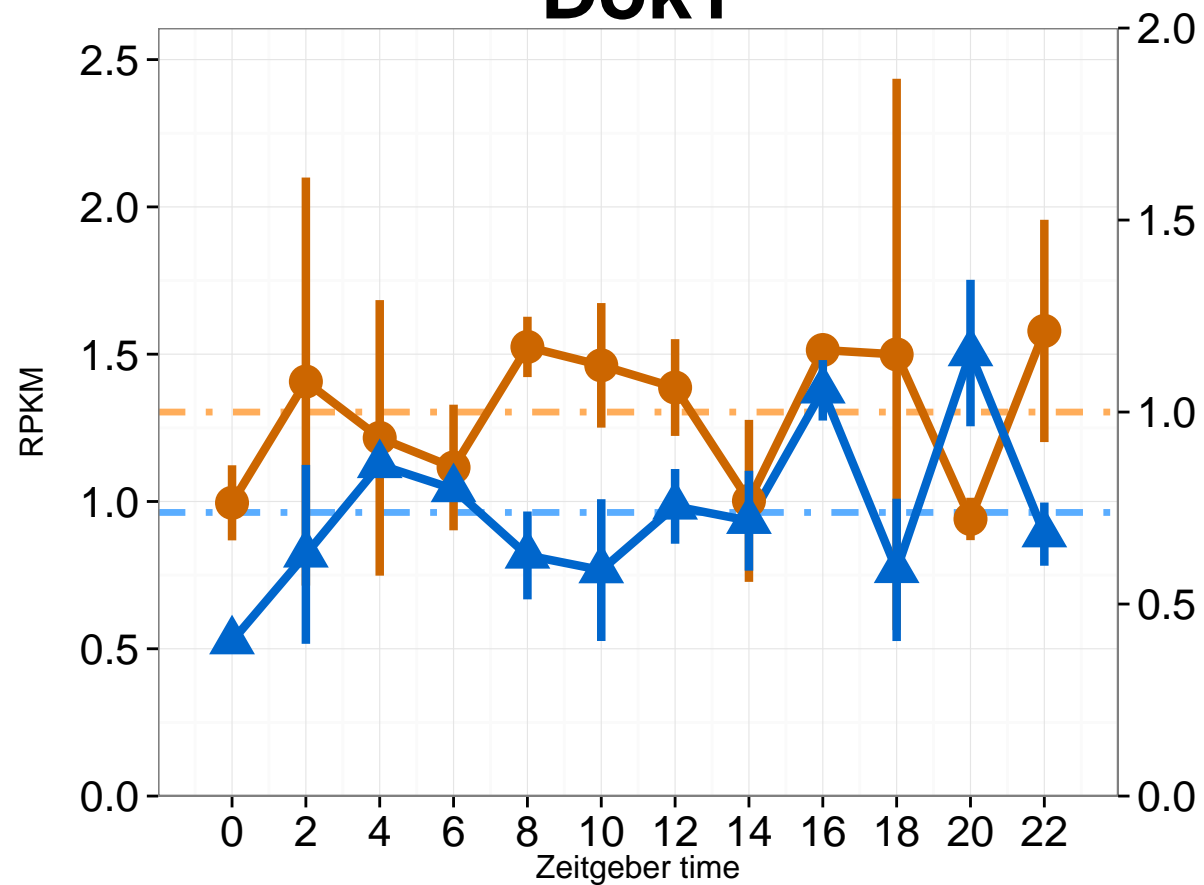

## Dok1

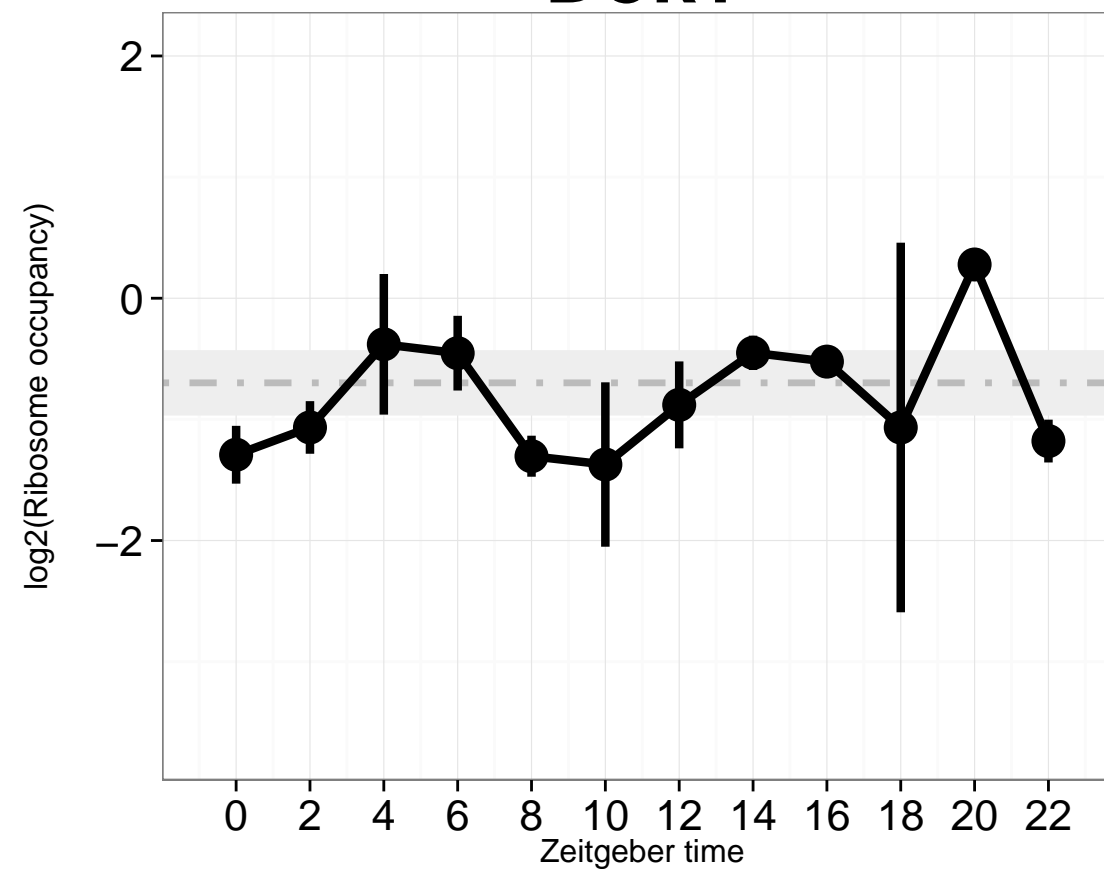

Supplement: SuppDataset_1.zip [file Dok1_set_A.pdf › Supplemental Dataset 1/A-mRNA_nonrhyth_translation_nonrhyth/Dok1_set_A.pdf]

## Dok3

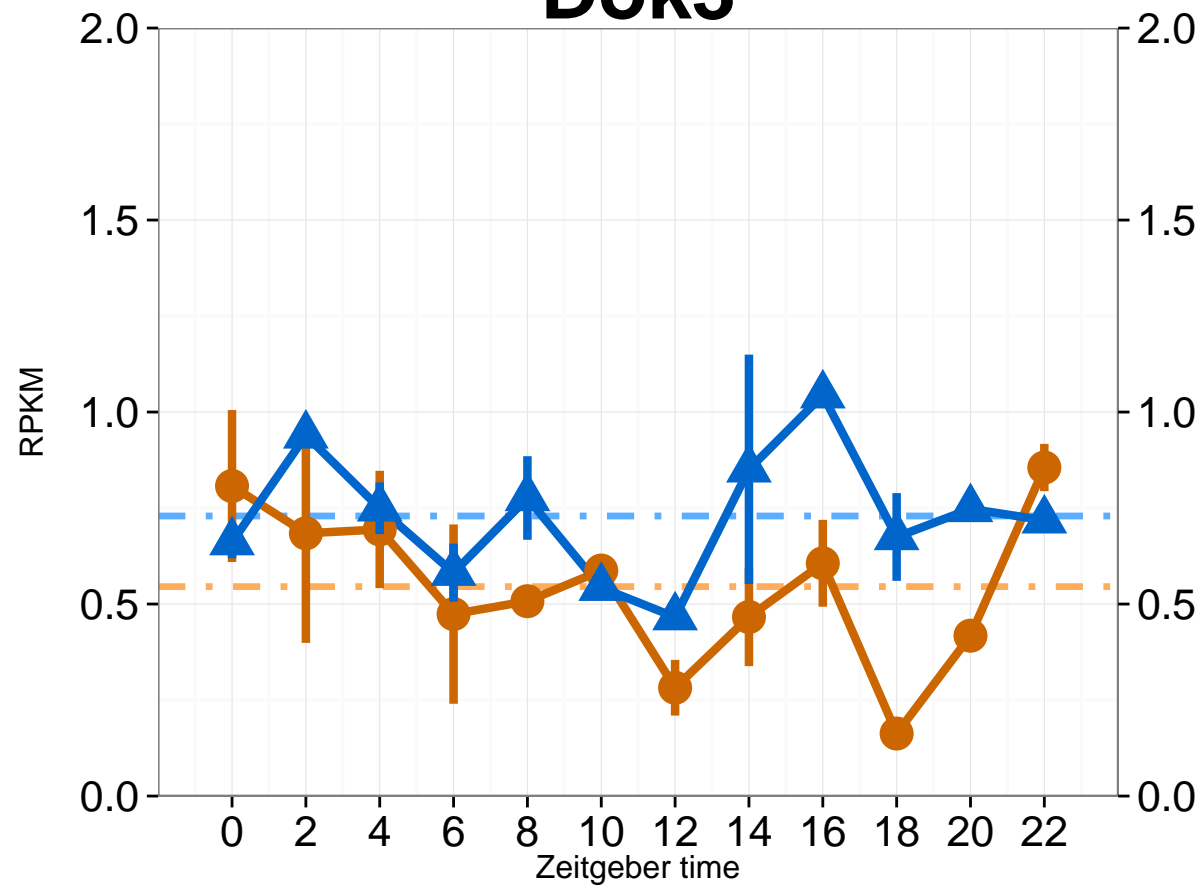

## Dok3

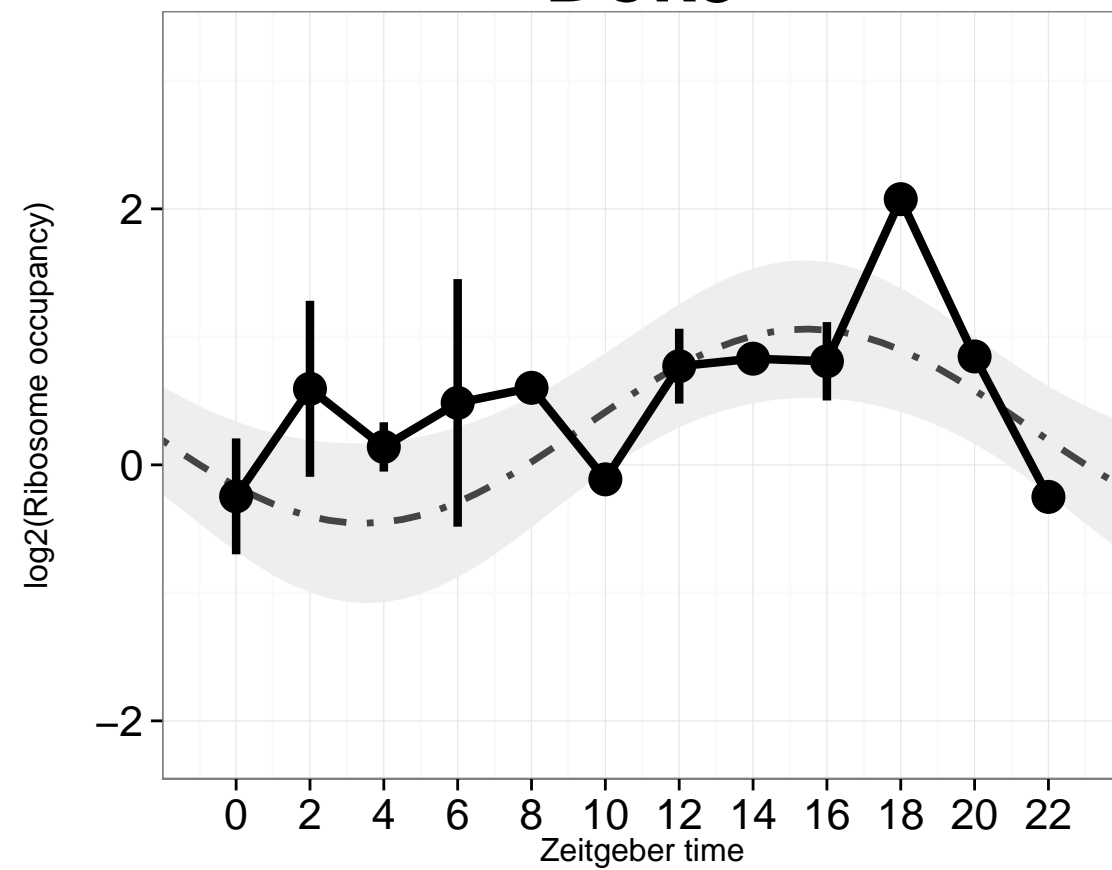

Supplement: SuppDataset_1.zip [file Dok3_set_A.pdf › Supplemental Dataset 1/A-mRNA_nonrhyth_translation_nonrhyth/Dok3_set_A.pdf]

## Dolk

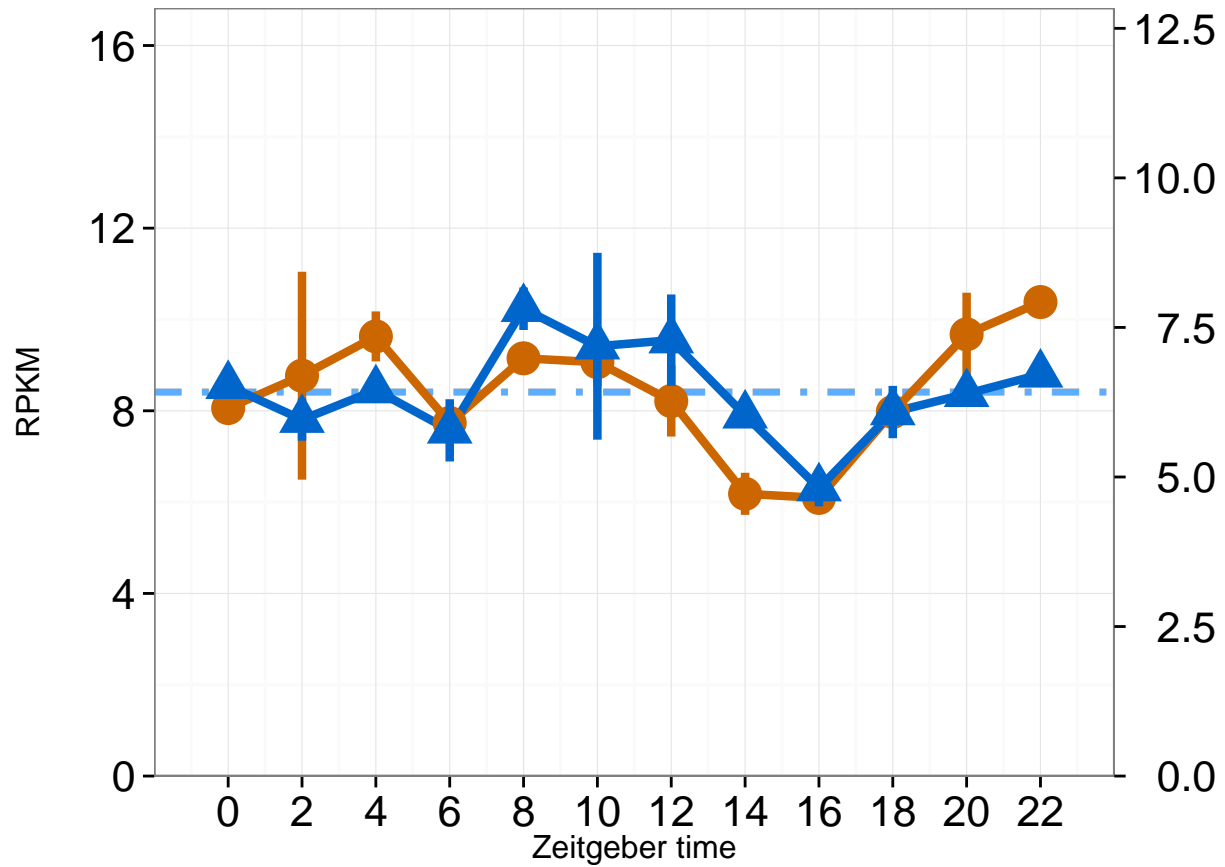

## Dolk

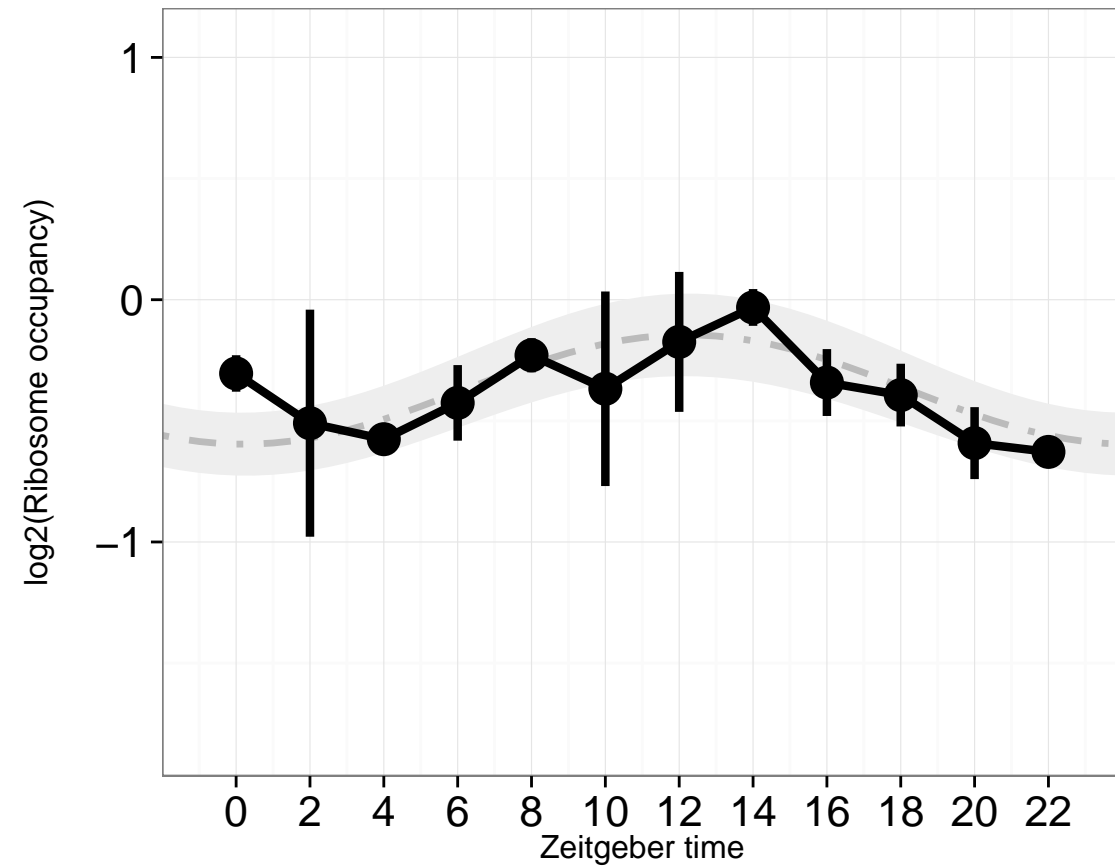

Supplement: SuppDataset_1.zip [file Dolk_set_A.pdf › Supplemental Dataset 1/A-mRNA_nonrhyth_translation_nonrhyth/Dolk_set_A.pdf]

## Dolpp1

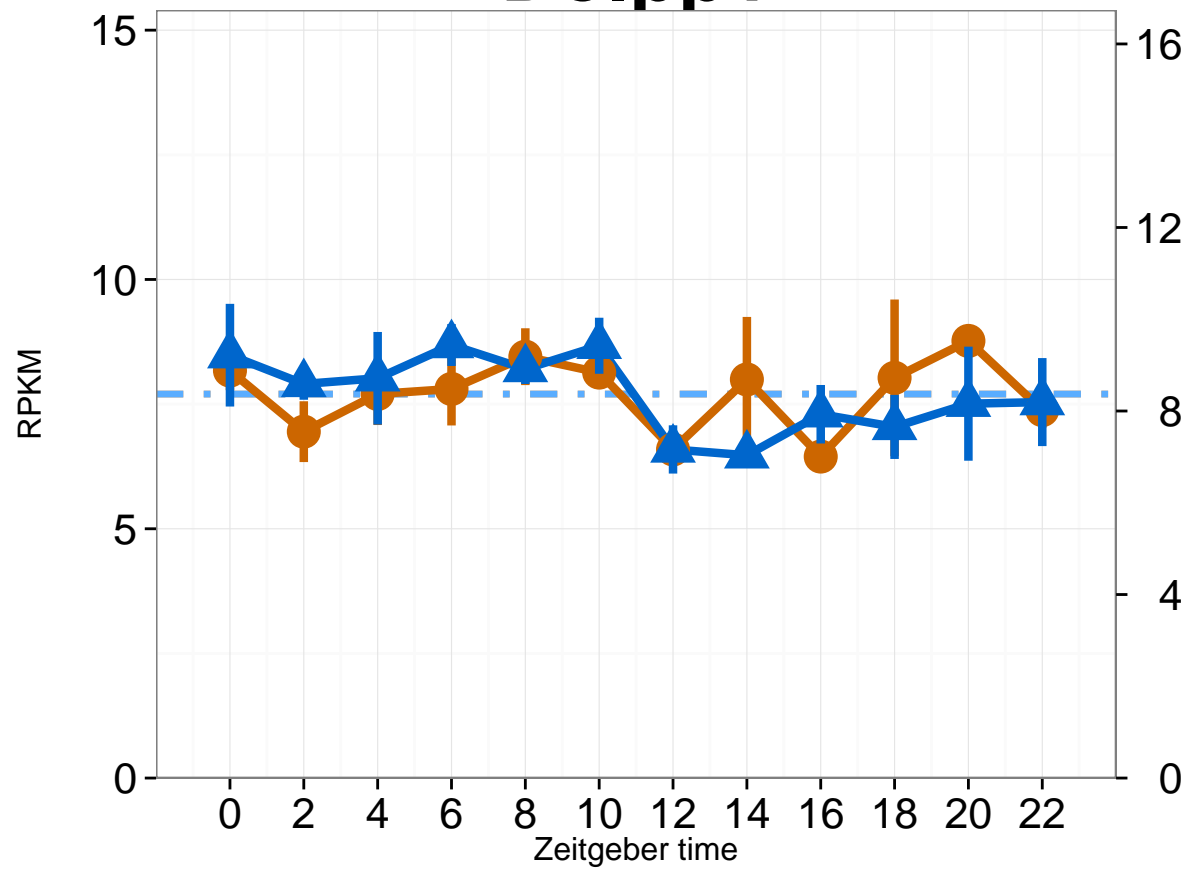

## Dolpp1

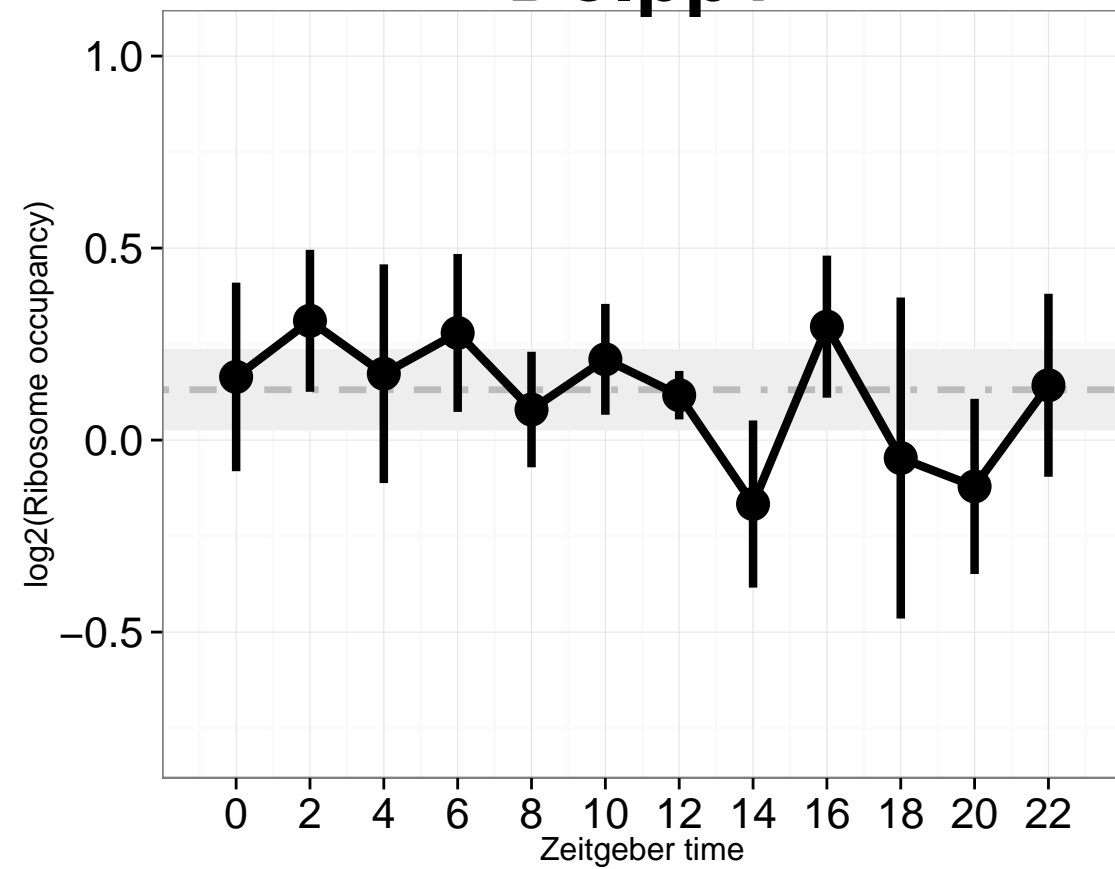

Supplement: SuppDataset_1.zip [file Dolpp1_set_A.pdf › Supplemental Dataset 1/A-mRNA_nonrhyth_translation_nonrhyth/Dolpp1_set_A.pdf]

# Dopey1

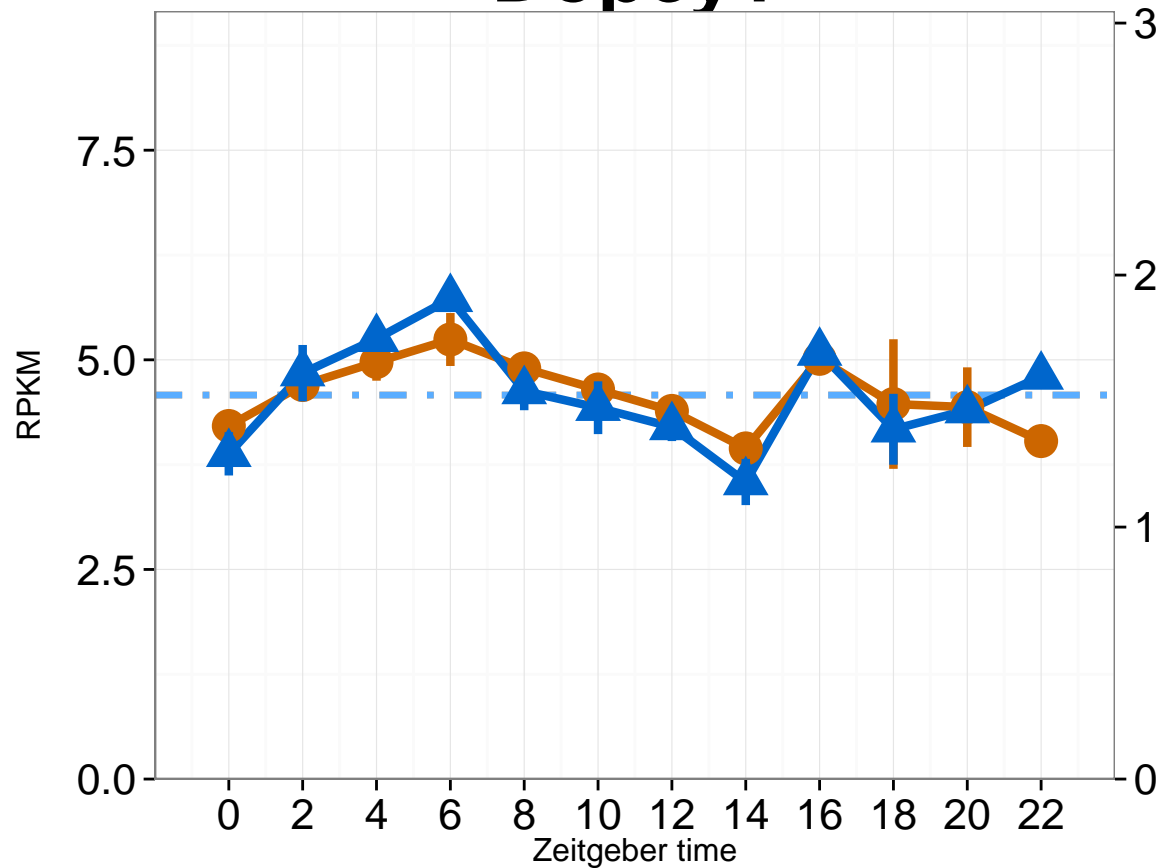

# Dopey1

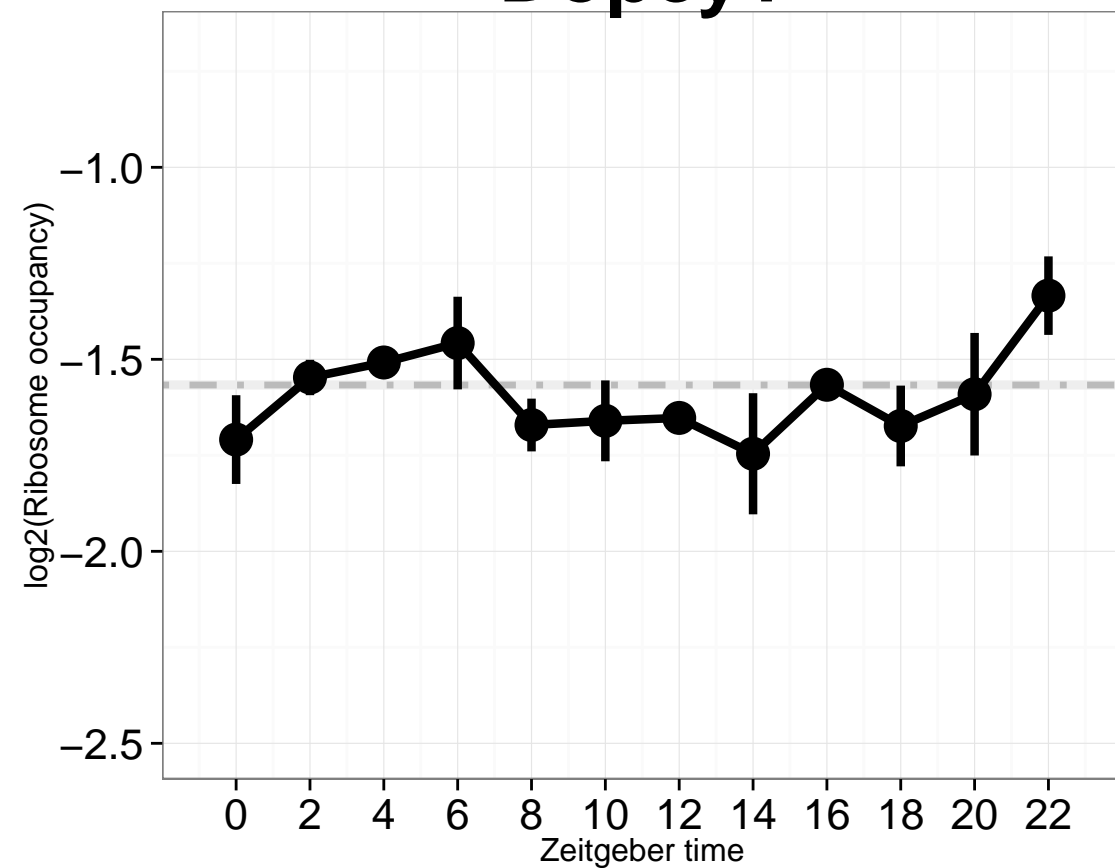

Supplement: SuppDataset_1.zip [file Dopey1_set_A.pdf › Supplemental Dataset 1/A-mRNA_nonrhyth_translation_nonrhyth/Dopey1_set_A.pdf]

## Dot1l

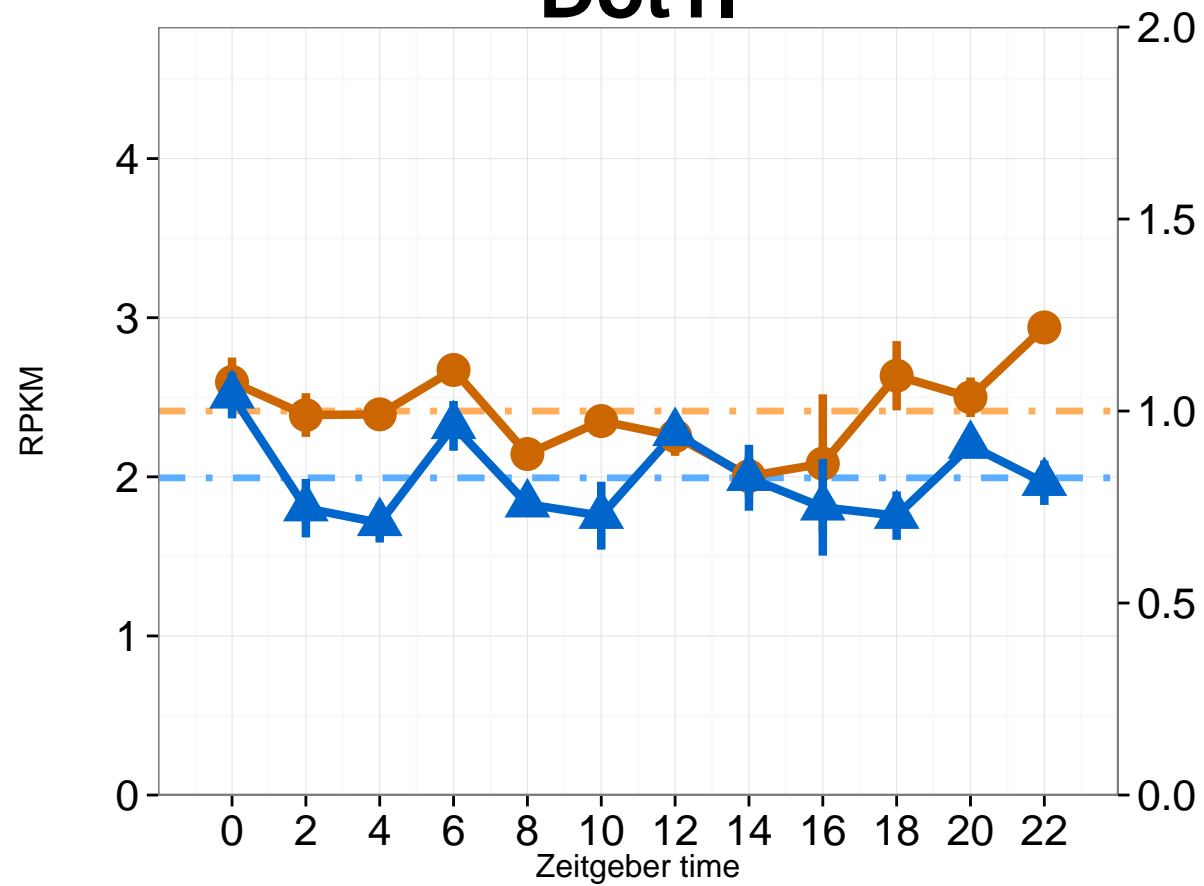

## Dot1l

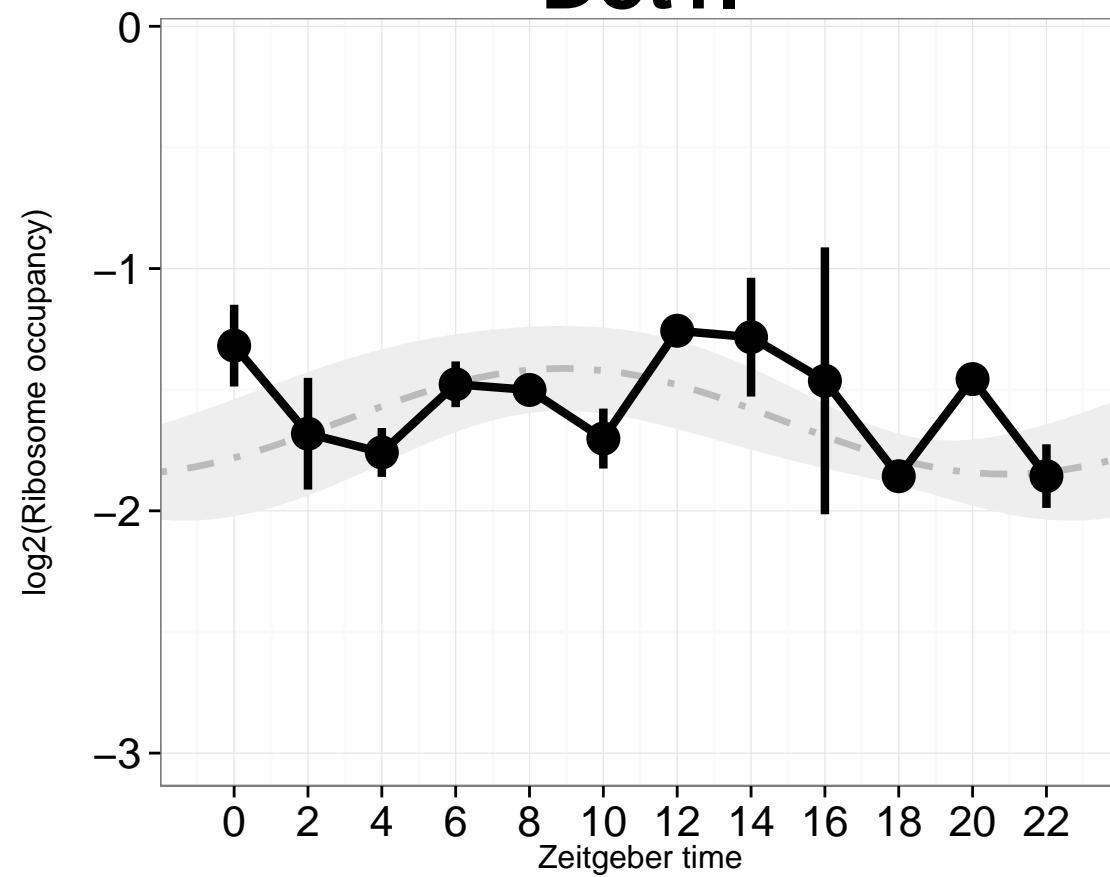

Supplement: SuppDataset_1.zip [file Dot1l_set_A.pdf › Supplemental Dataset 1/A-mRNA_nonrhyth_translation_nonrhyth/Dot1l_set_A.pdf]

# Dpagt1

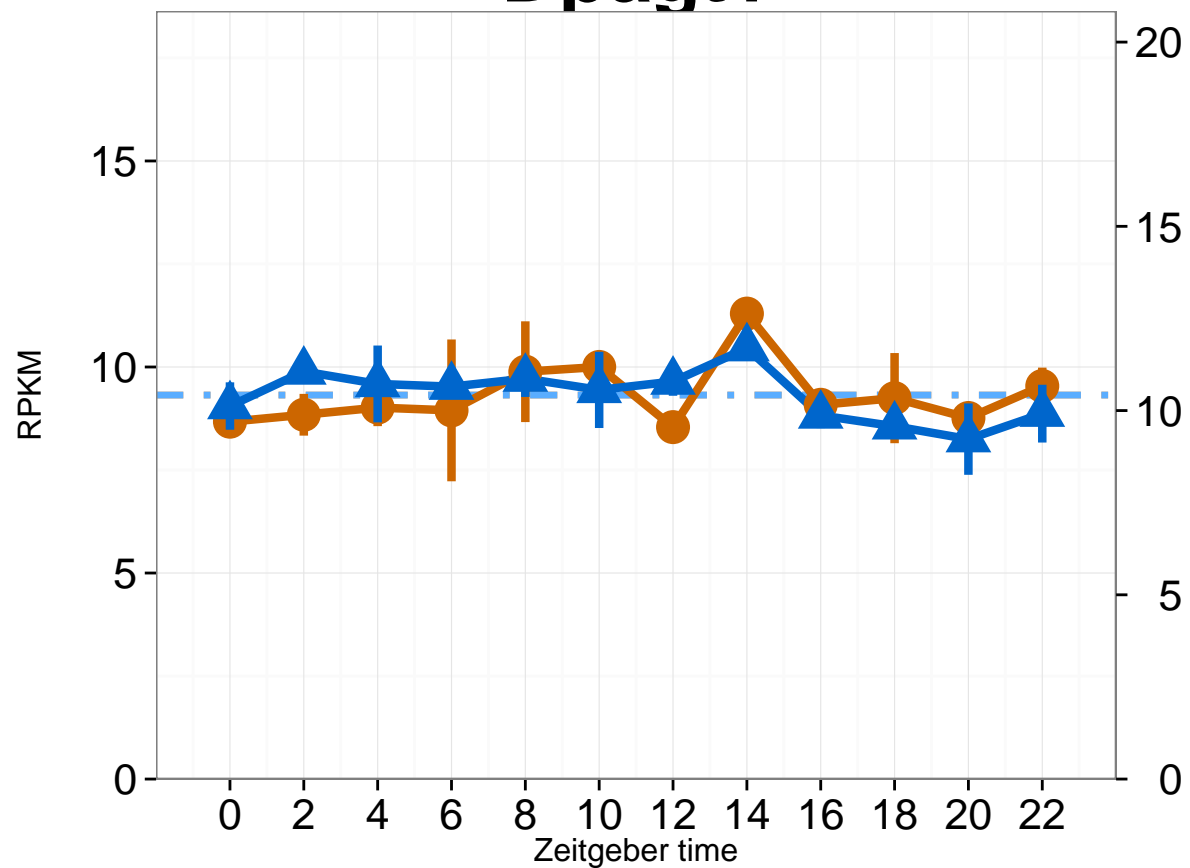

# Dpagt1

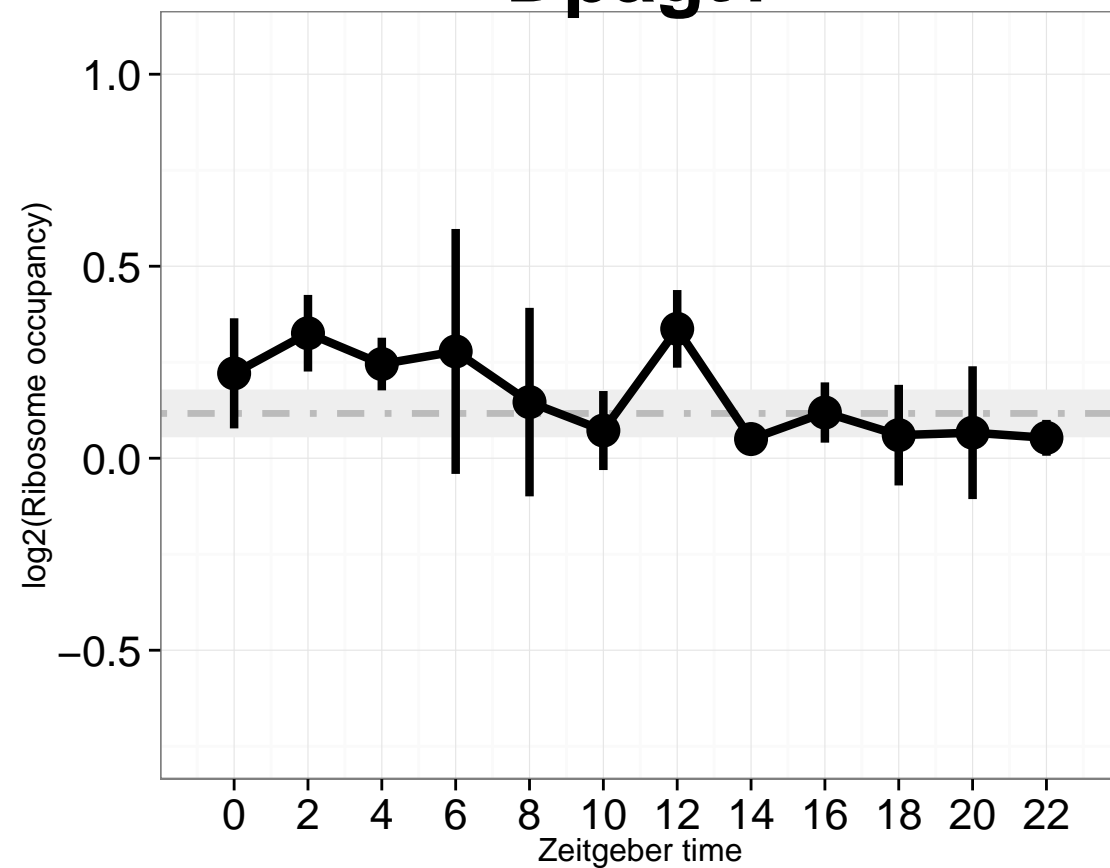

Supplement: SuppDataset_1.zip [file Dpagt1_set_A.pdf › Supplemental Dataset 1/A-mRNA_nonrhyth_translation_nonrhyth/Dpagt1_set_A.pdf]

## Dpcd

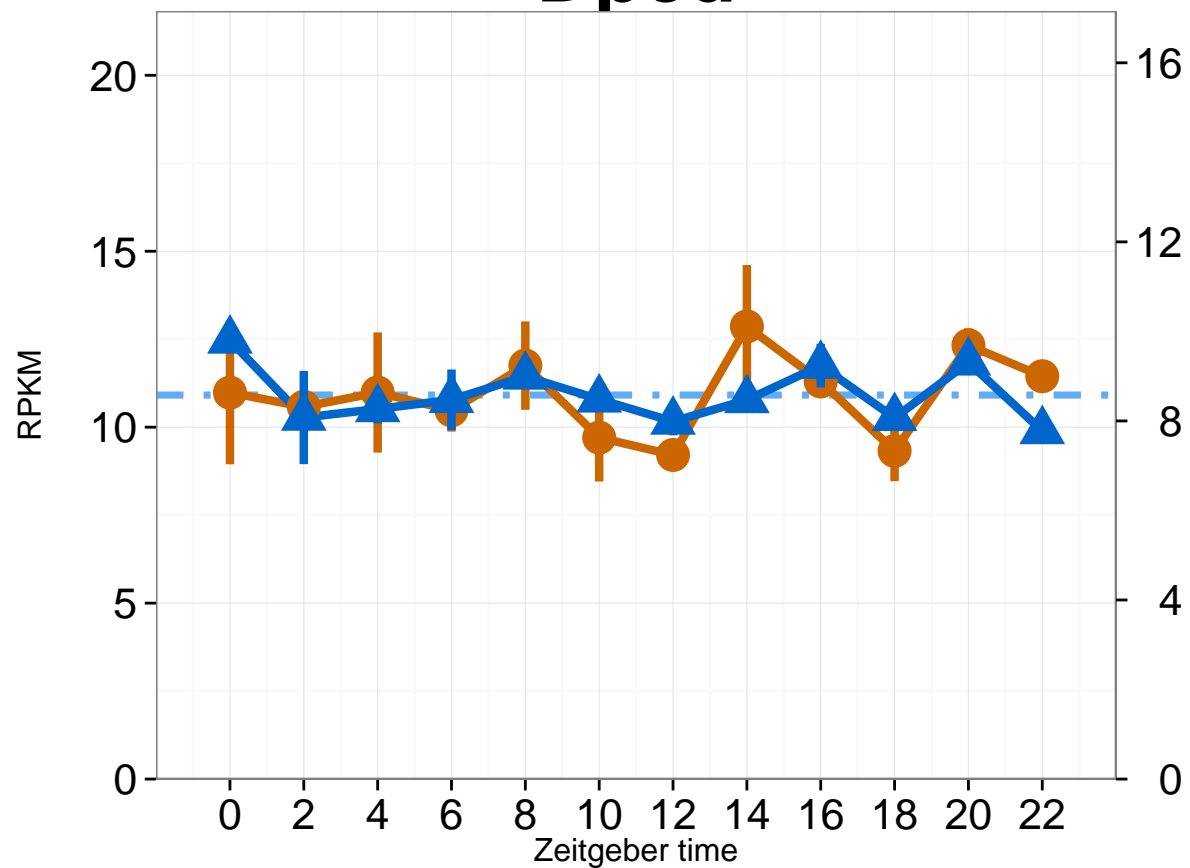

## Dpcd

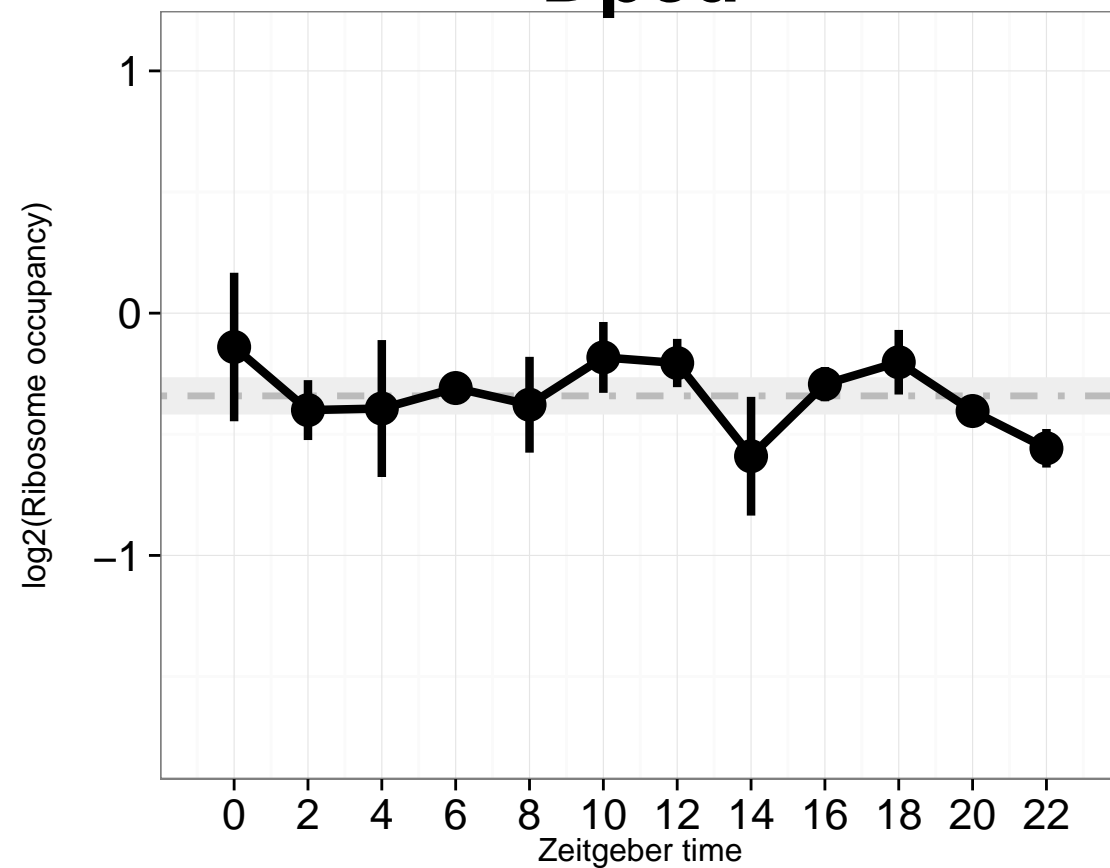

Supplement: SuppDataset_1.zip [file Dpcd_set_A.pdf › Supplemental Dataset 1/A-mRNA_nonrhyth_translation_nonrhyth/Dpcd_set_A.pdf]

## Dpf2

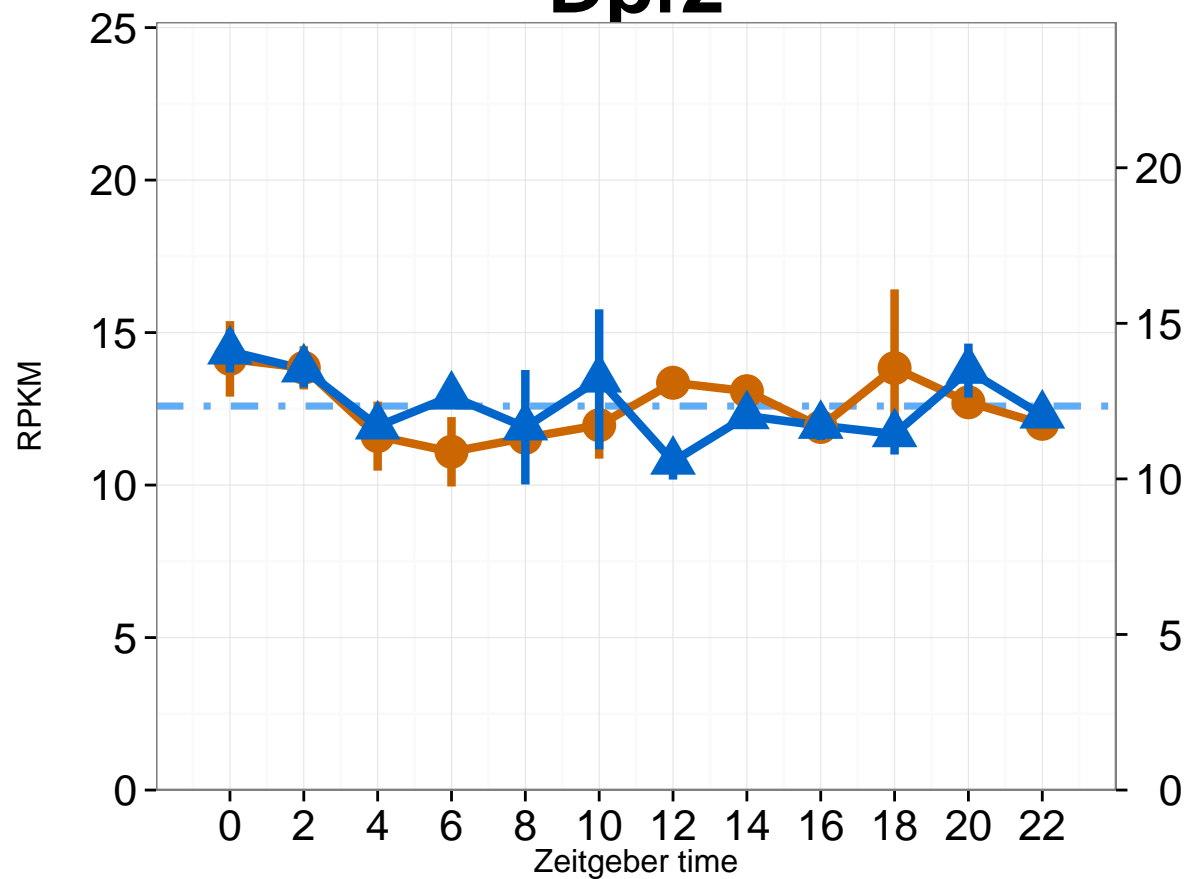

## Dpf2

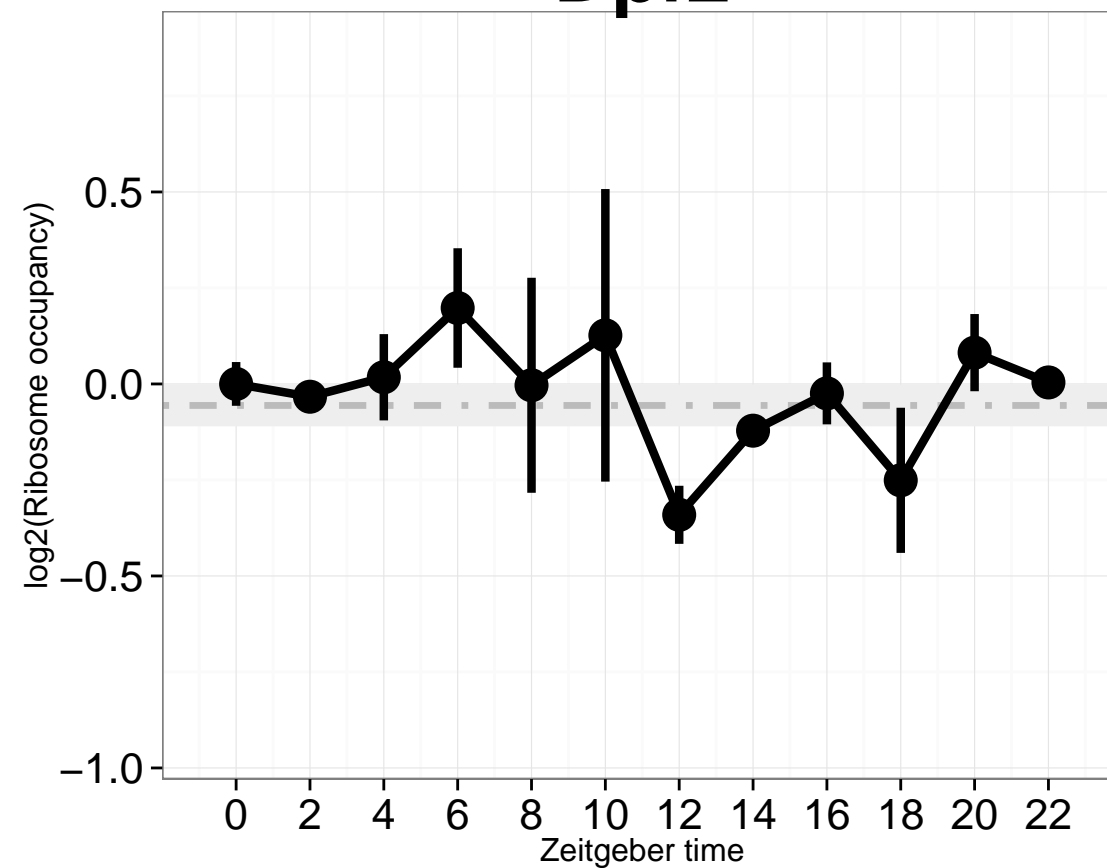

Supplement: SuppDataset_1.zip [file Dpf2_set_A.pdf › Supplemental Dataset 1/A-mRNA_nonrhyth_translation_nonrhyth/Dpf2_set_A.pdf]

## Dph1

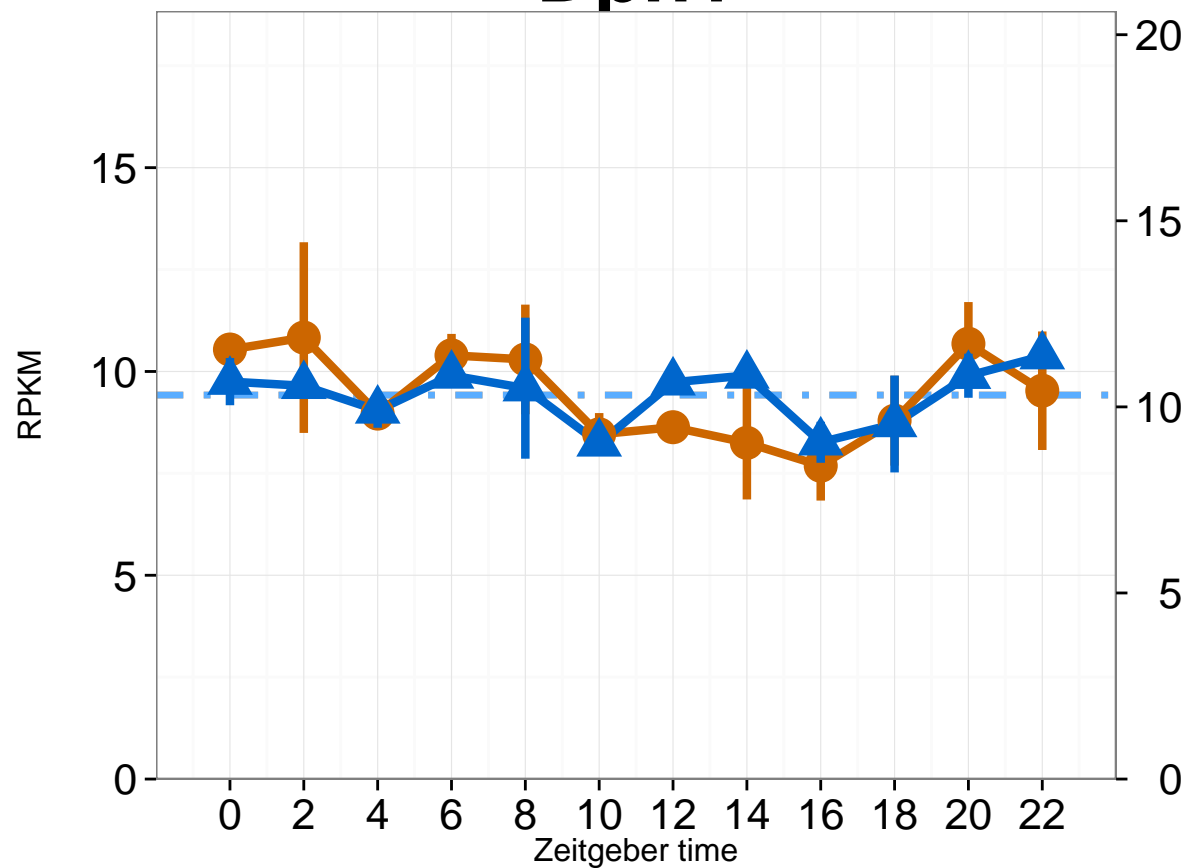

## Dph1

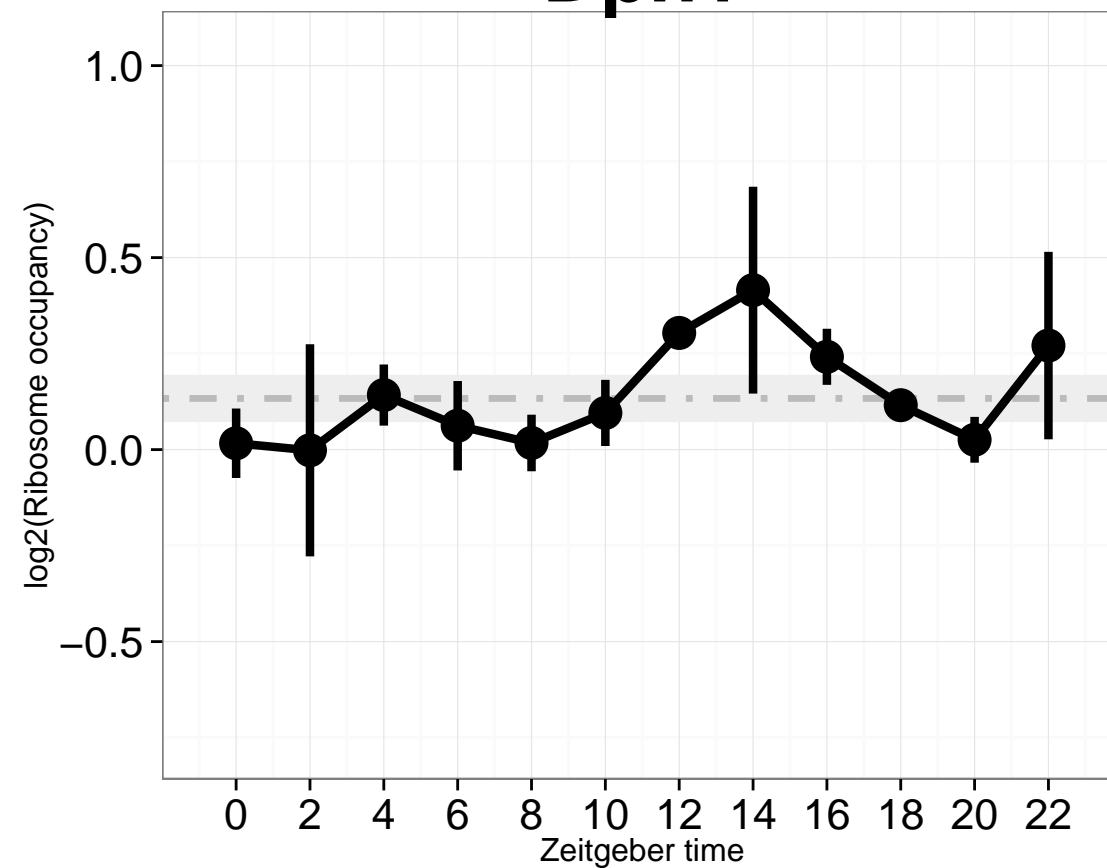

Supplement: SuppDataset_1.zip [file Dph1_set_A.pdf › Supplemental Dataset 1/A-mRNA_nonrhyth_translation_nonrhyth/Dph1_set_A.pdf]

## Dph2

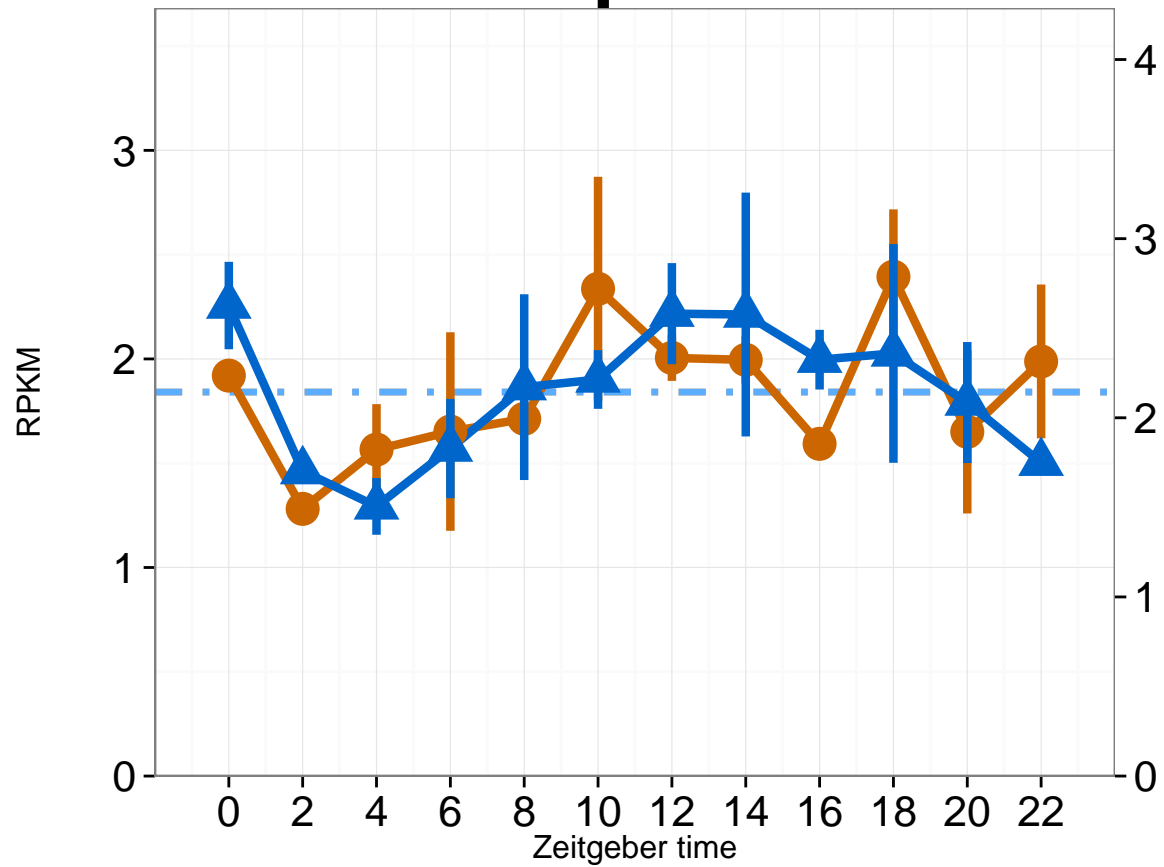

## Dph2

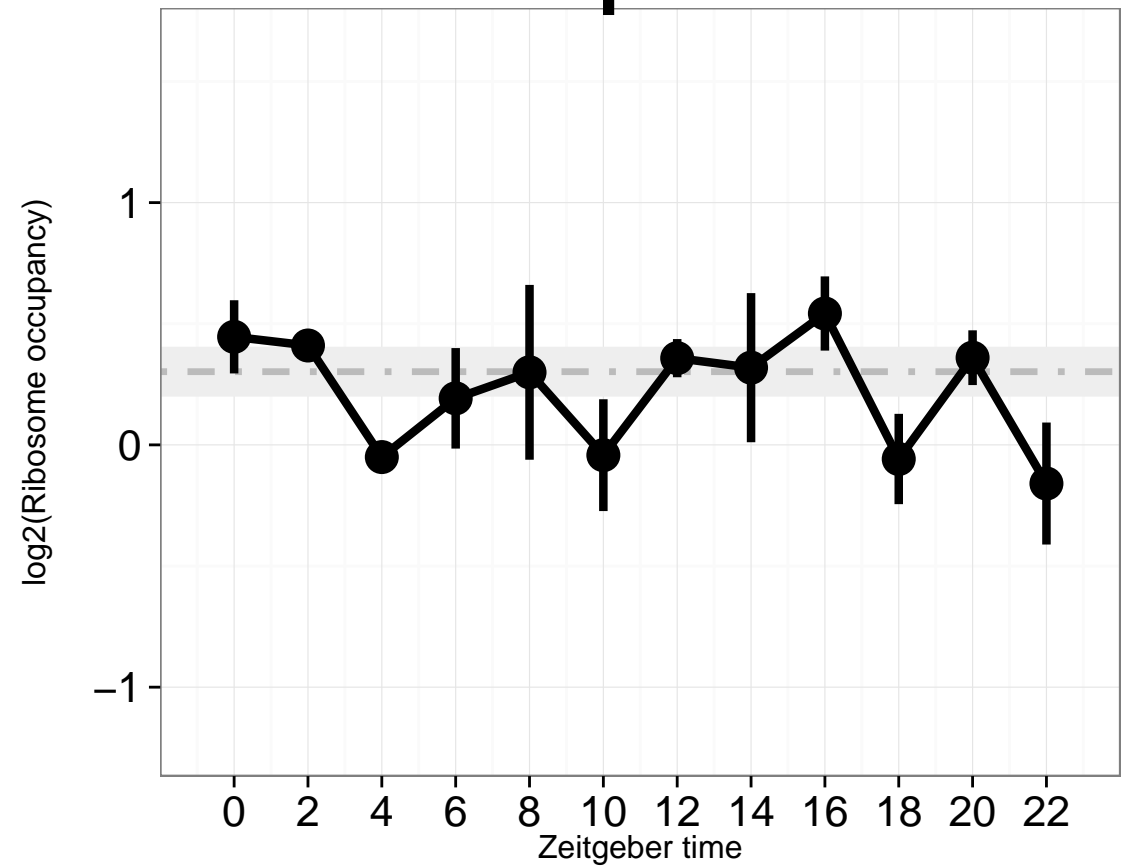

Supplement: SuppDataset_1.zip [file Dph2_set_A.pdf › Supplemental Dataset 1/A-mRNA_nonrhyth_translation_nonrhyth/Dph2_set_A.pdf]

## Dph5

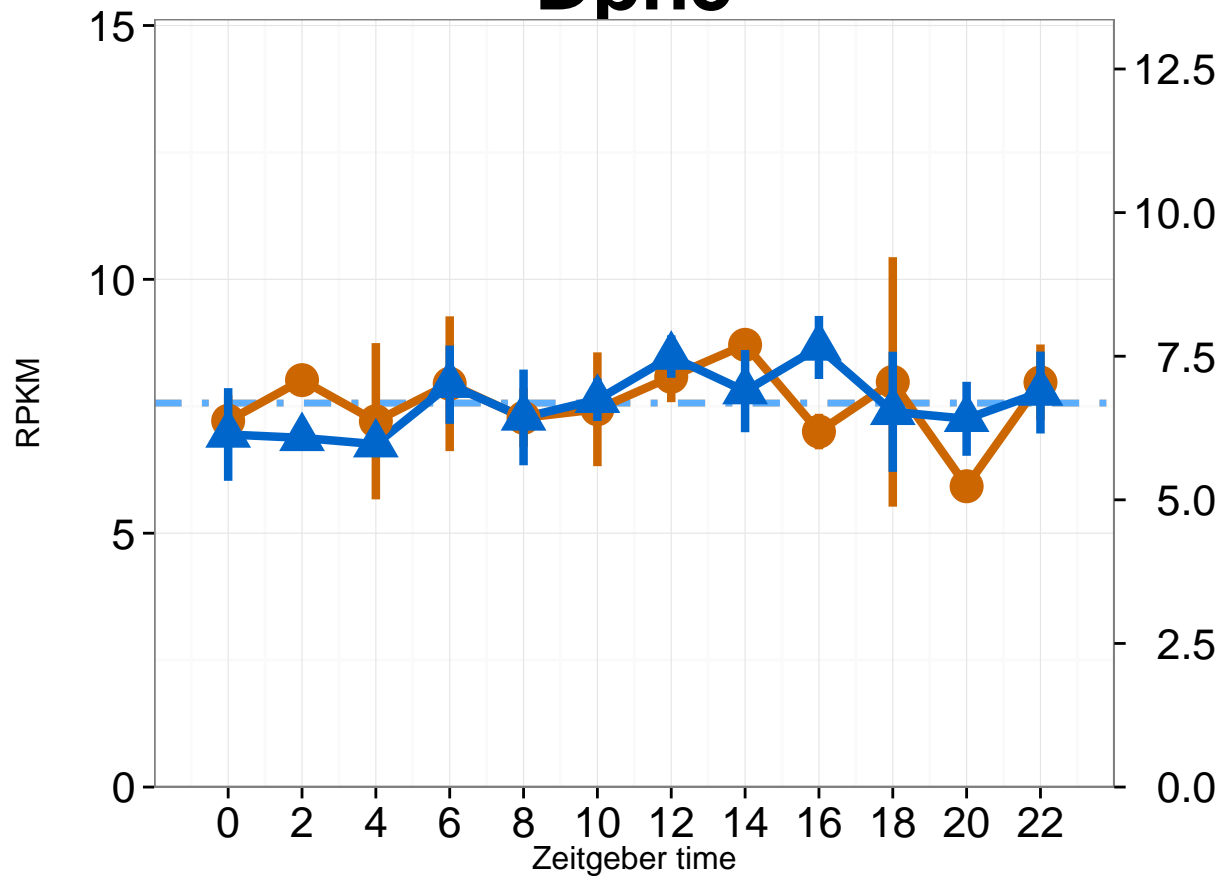

## Dph5

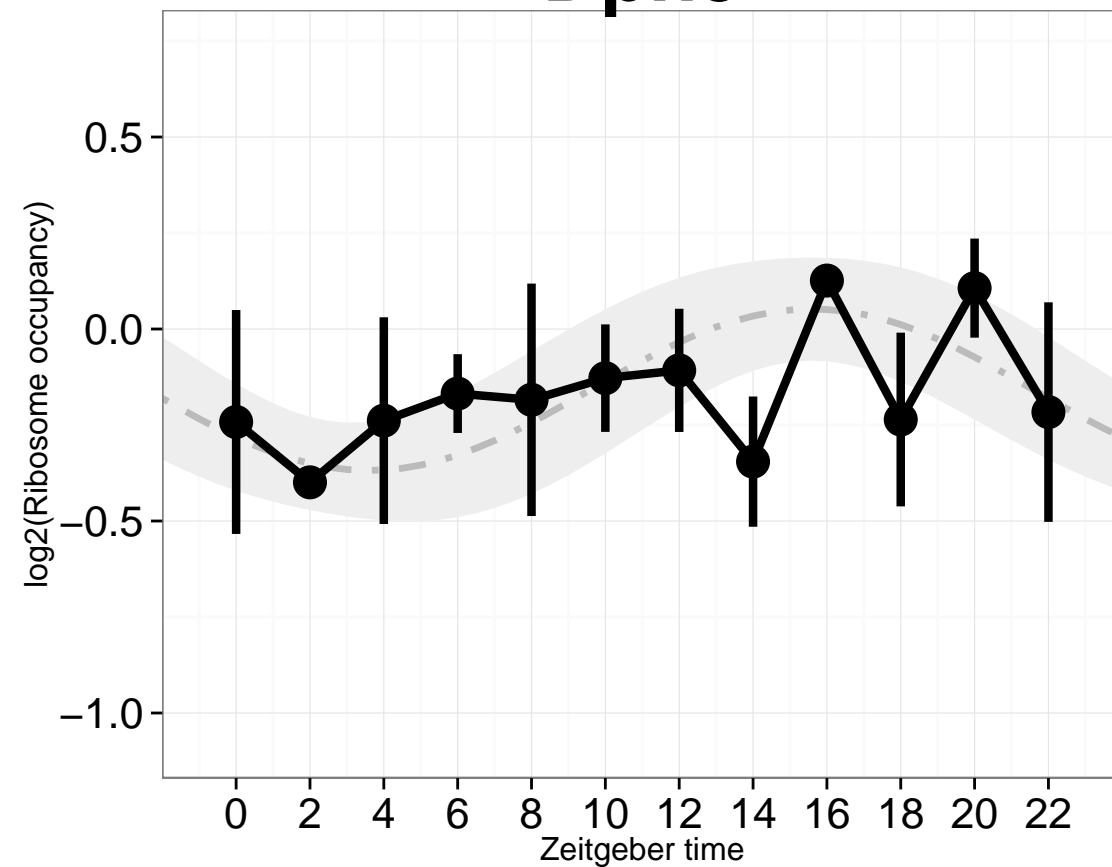

Supplement: SuppDataset_1.zip [file Dph5_set_A.pdf › Supplemental Dataset 1/A-mRNA_nonrhyth_translation_nonrhyth/Dph5_set_A.pdf]

## Dph7

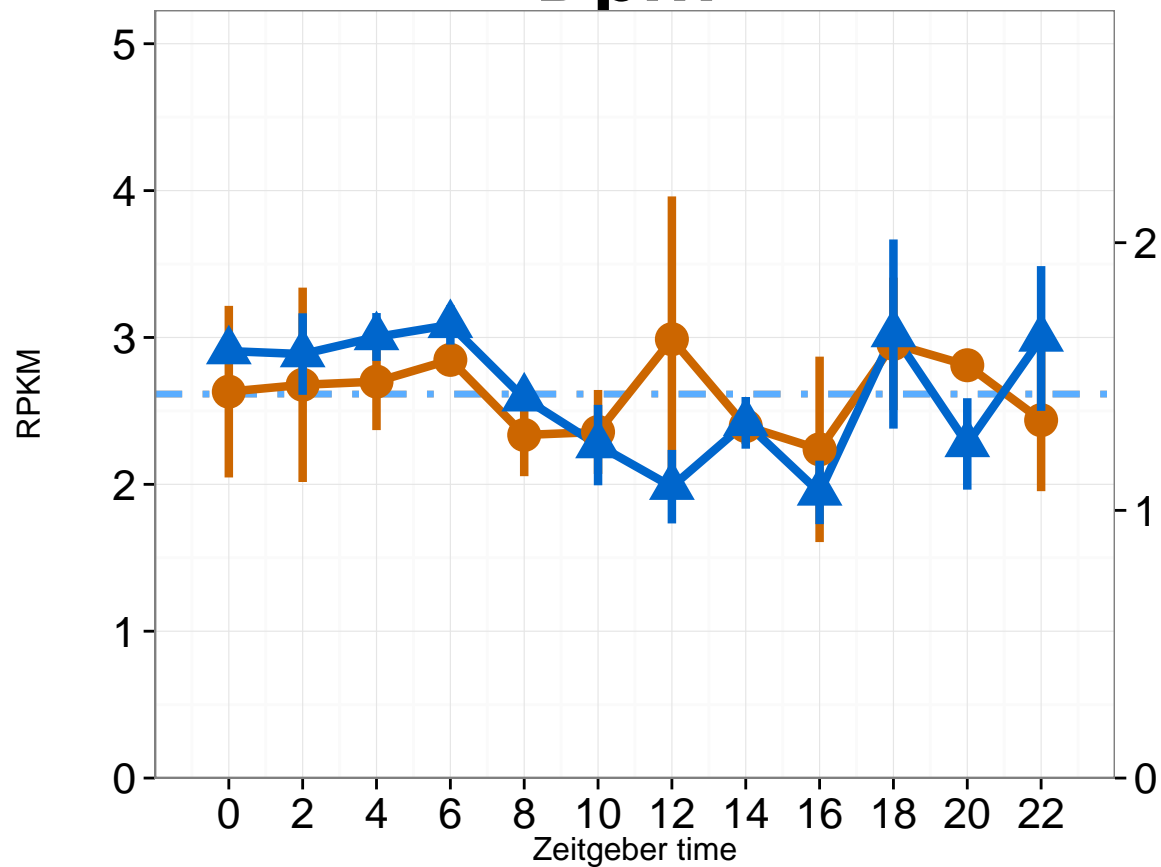

## Dph7

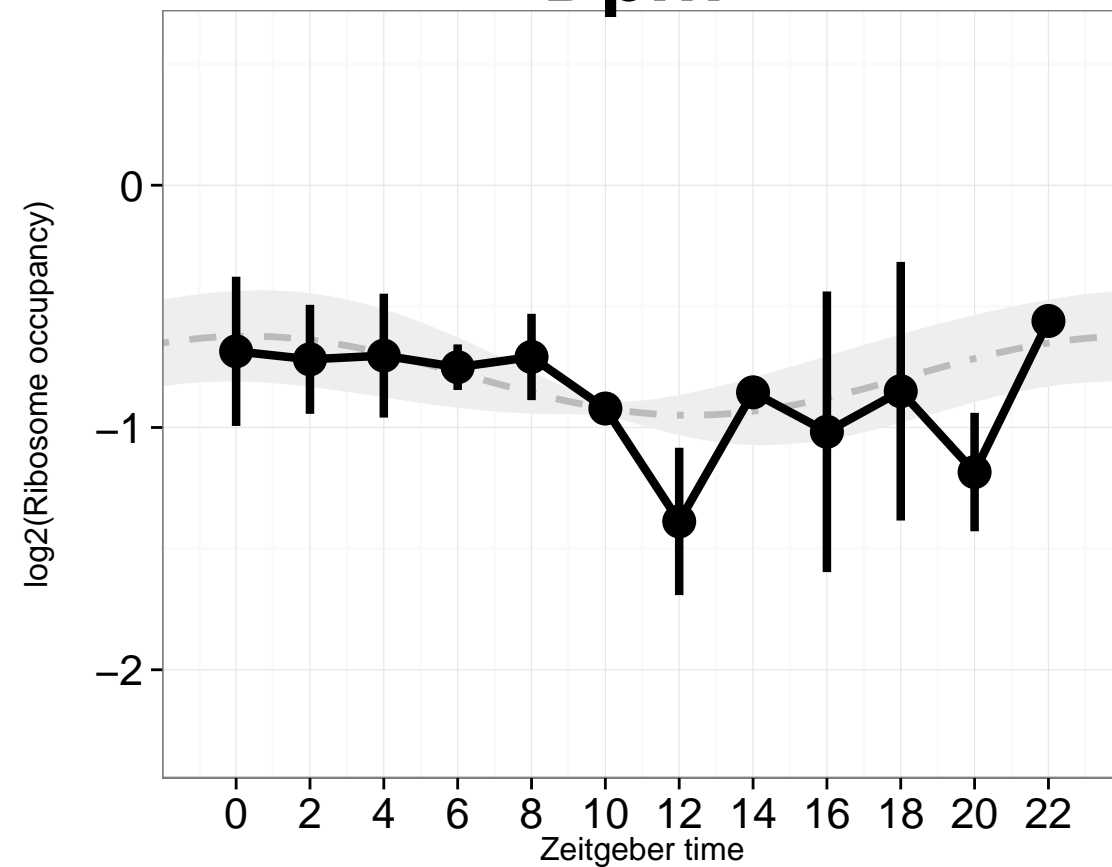

Supplement: SuppDataset_1.zip [file Dph7_set_A.pdf › Supplemental Dataset 1/A-mRNA_nonrhyth_translation_nonrhyth/Dph7_set_A.pdf]

# Dpm1

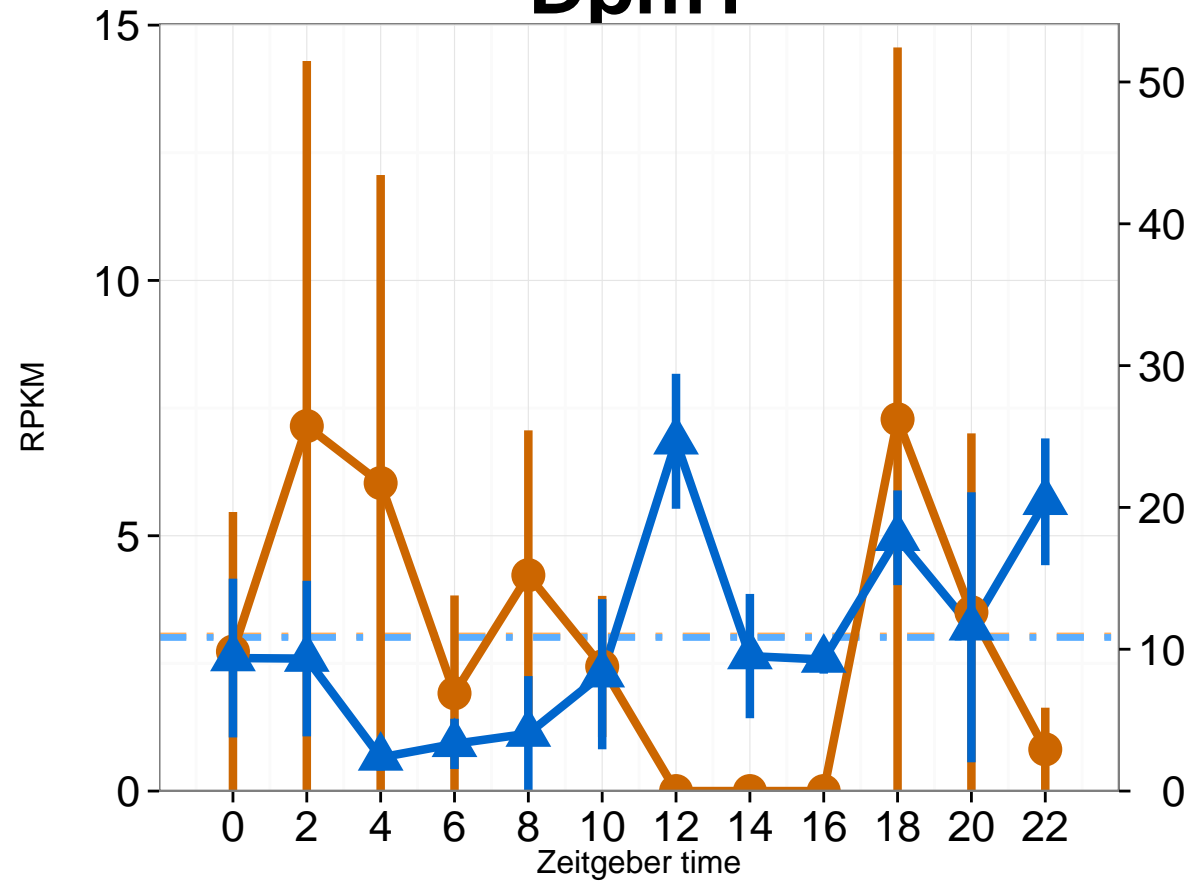

# Dpm1

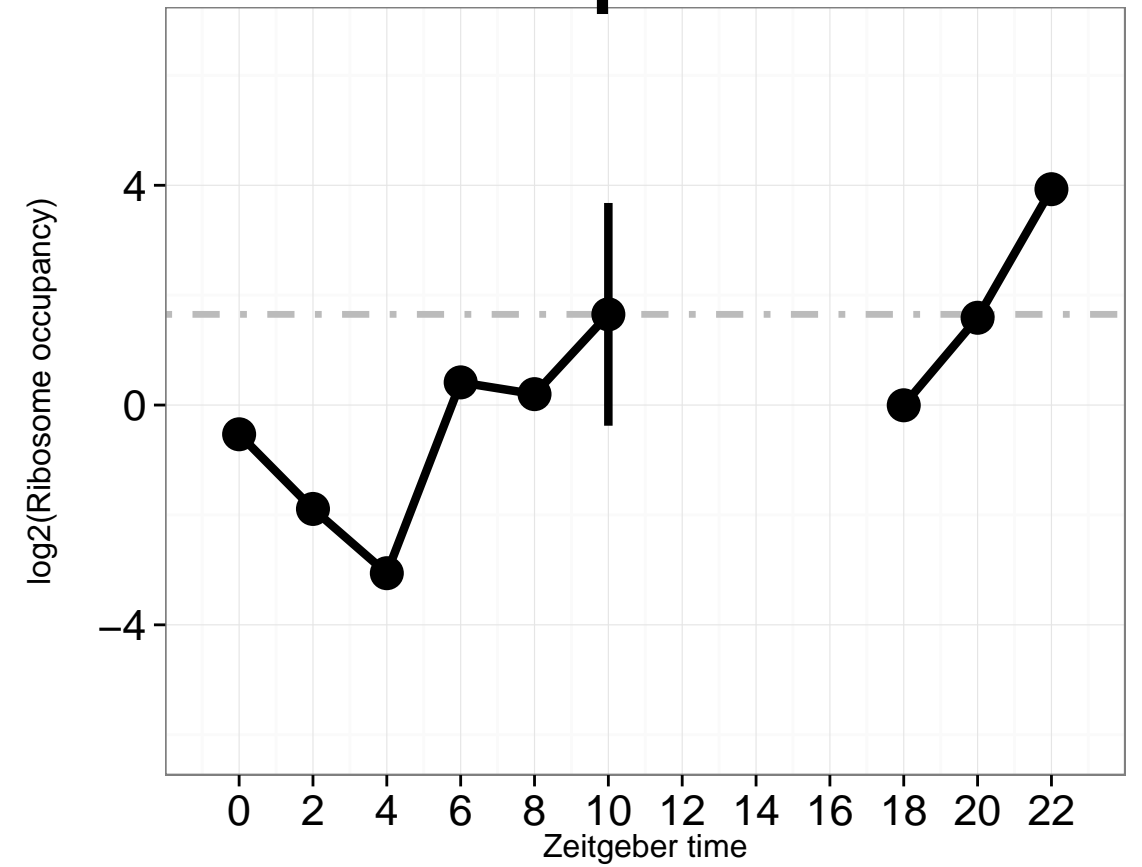

Supplement: SuppDataset_1.zip [file Dpm1_set_A.pdf › Supplemental Dataset 1/A-mRNA_nonrhyth_translation_nonrhyth/Dpm1_set_A.pdf]

# Dpm2

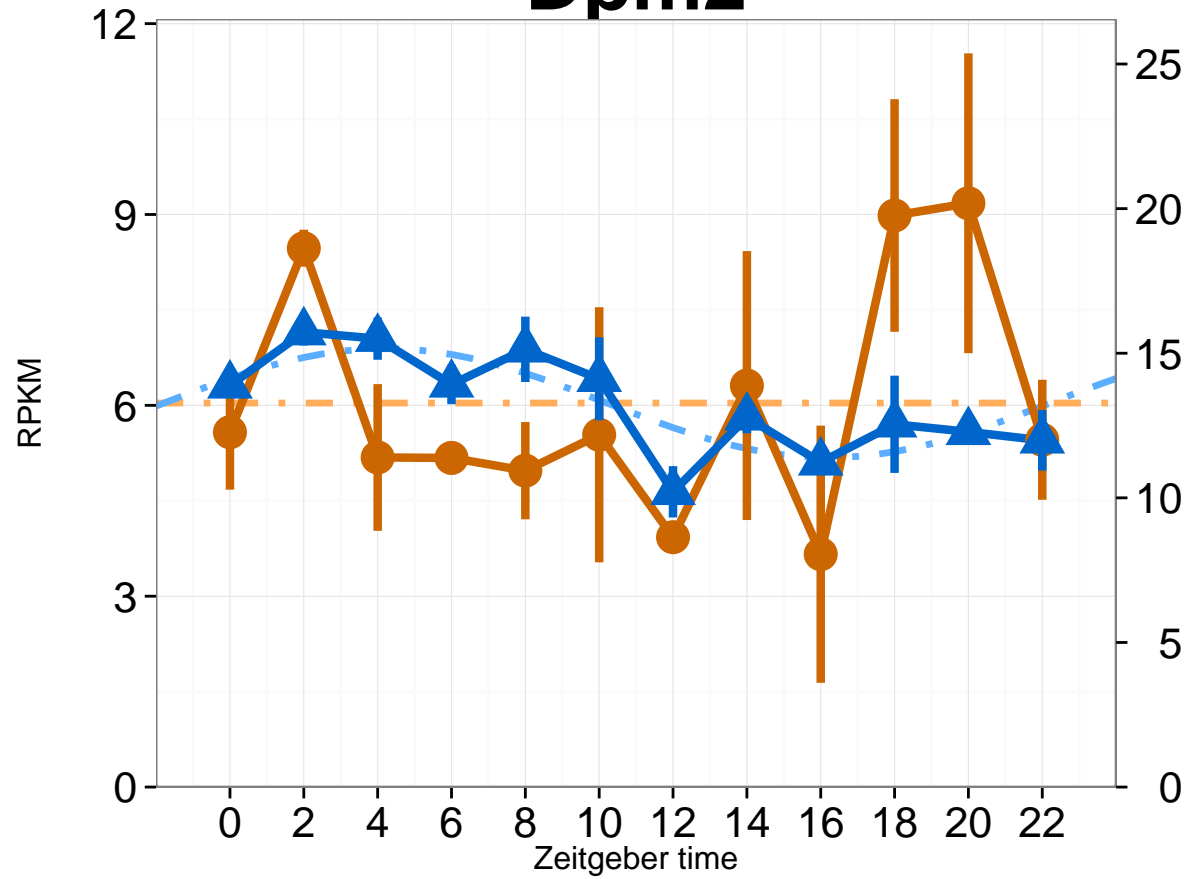

# Dpm2

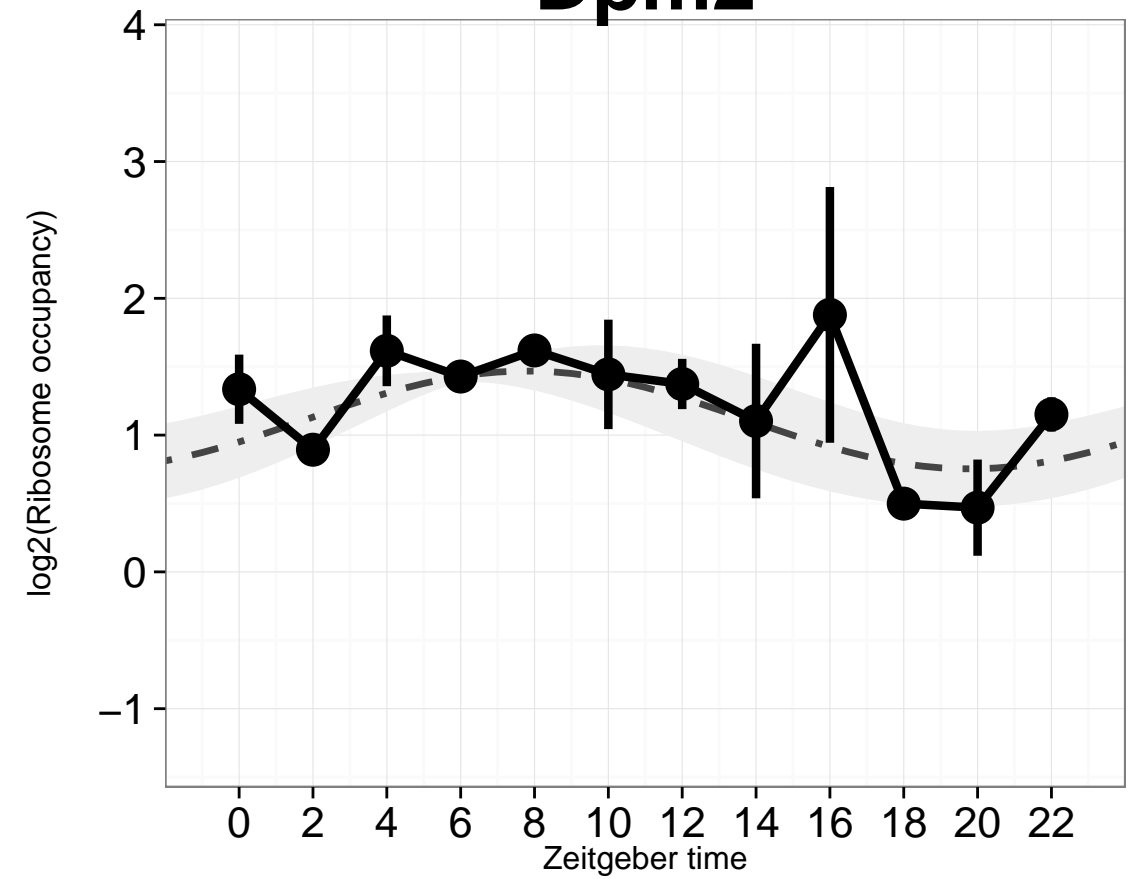

Supplement: SuppDataset_1.zip [file Dpm2_set_A.pdf › Supplemental Dataset 1/A-mRNA_nonrhyth_translation_nonrhyth/Dpm2_set_A.pdf]

## Dpp3

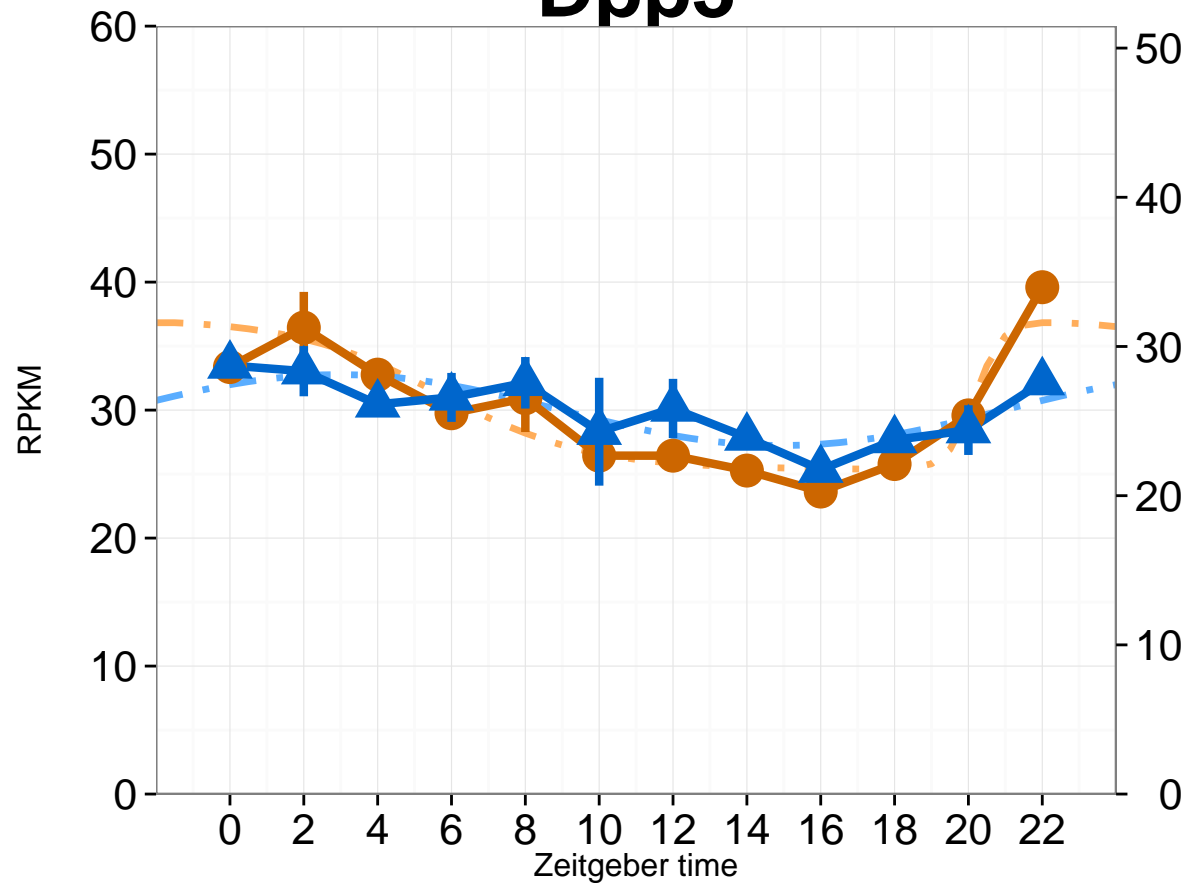

## Dpp3

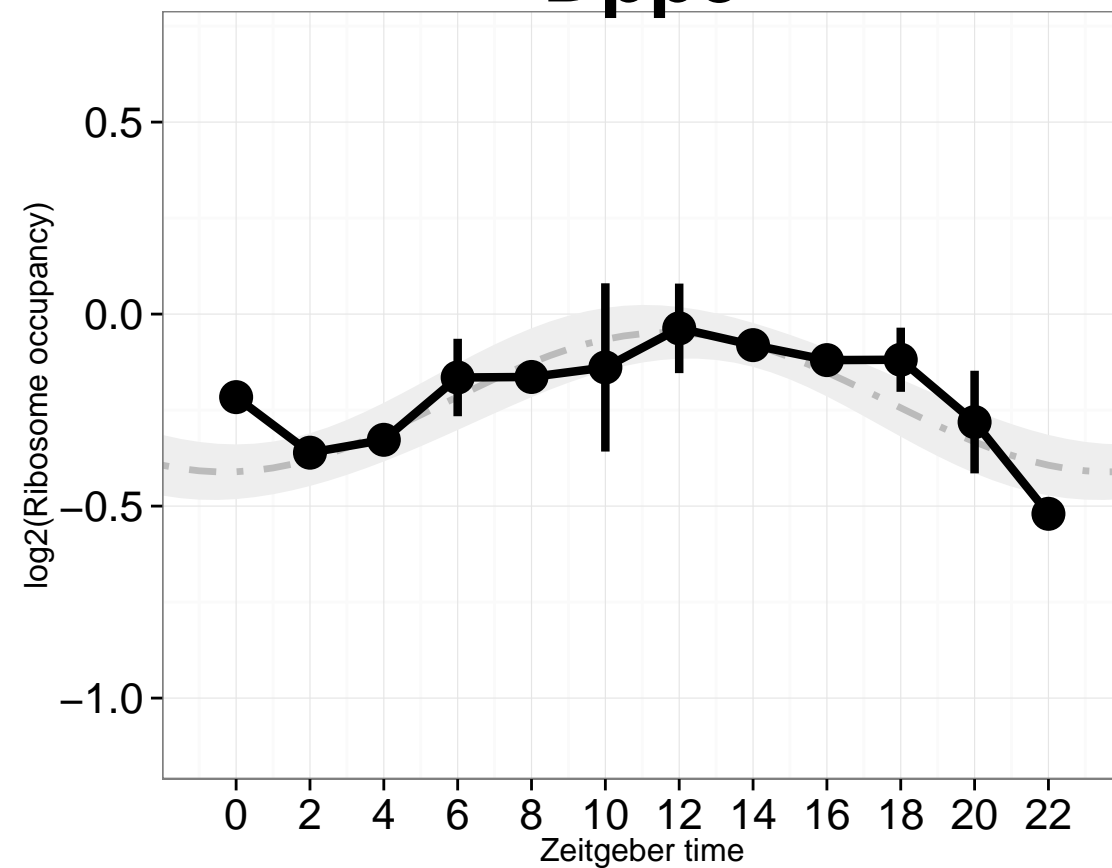

Supplement: SuppDataset_1.zip [file Dpp3_set_A.pdf › Supplemental Dataset 1/A-mRNA_nonrhyth_translation_nonrhyth/Dpp3_set_A.pdf]

## Dpp4

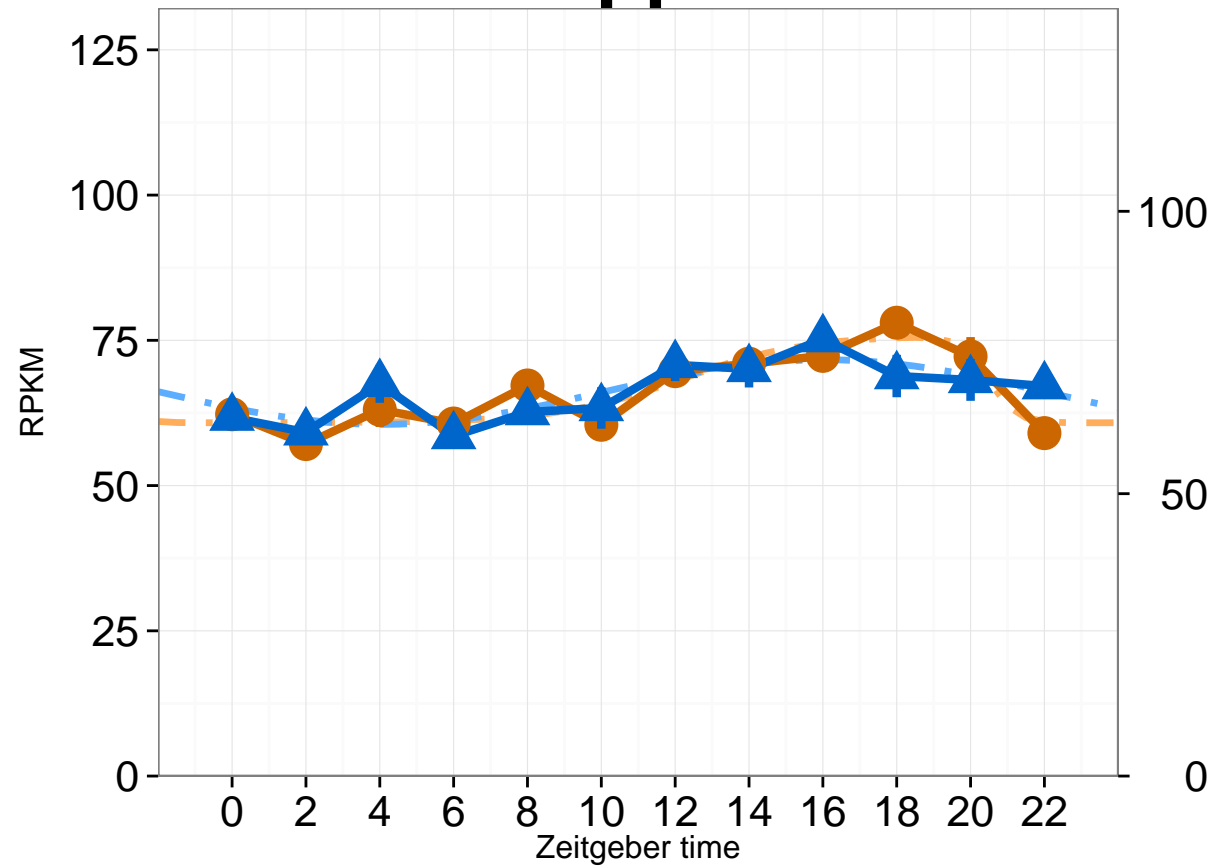

## Dpp4

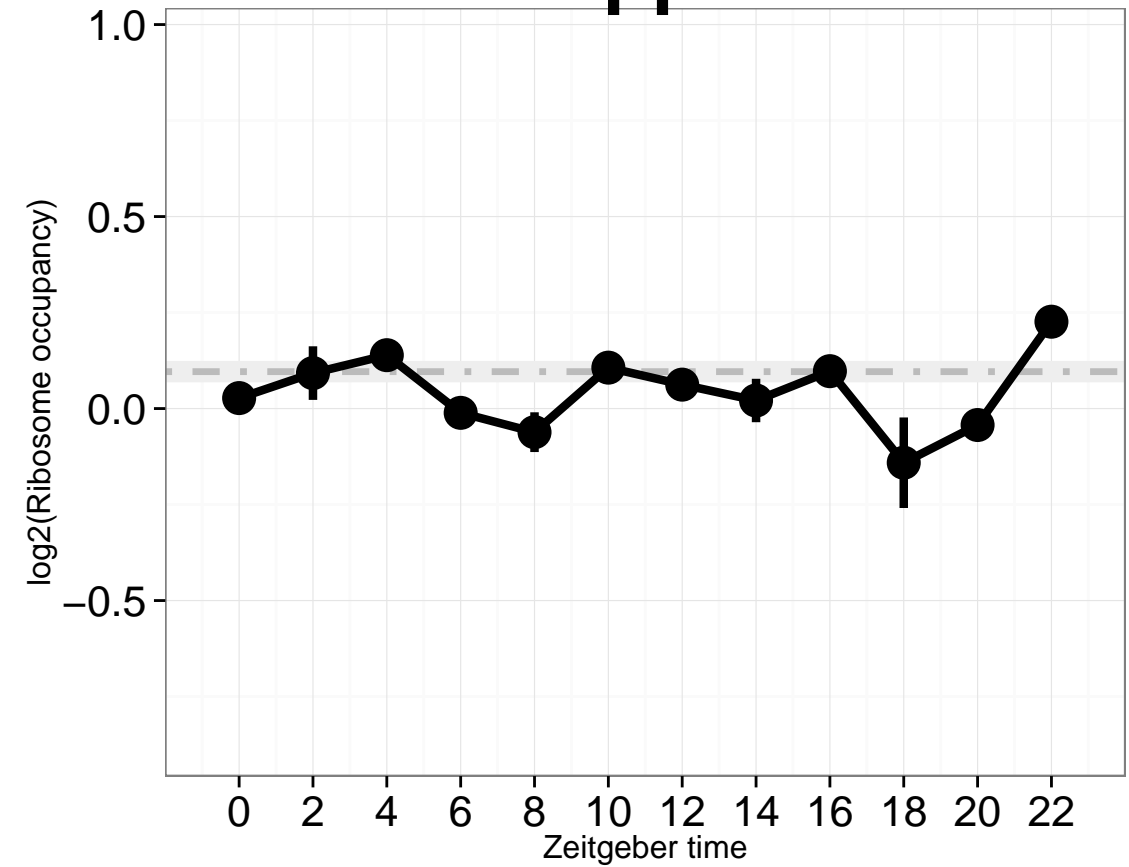

Supplement: SuppDataset_1.zip [file Dpp4_set_A.pdf › Supplemental Dataset 1/A-mRNA_nonrhyth_translation_nonrhyth/Dpp4_set_A.pdf]

## Dpp7

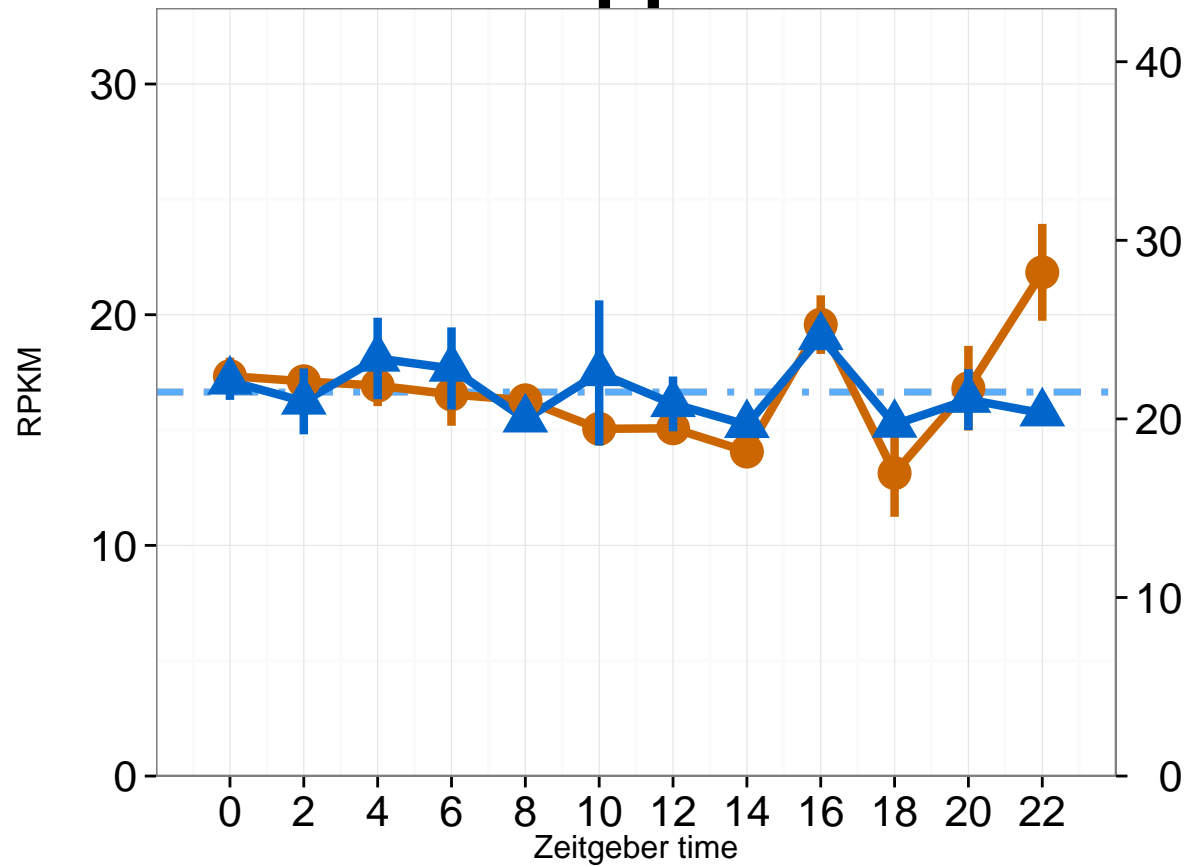

## Dpp7

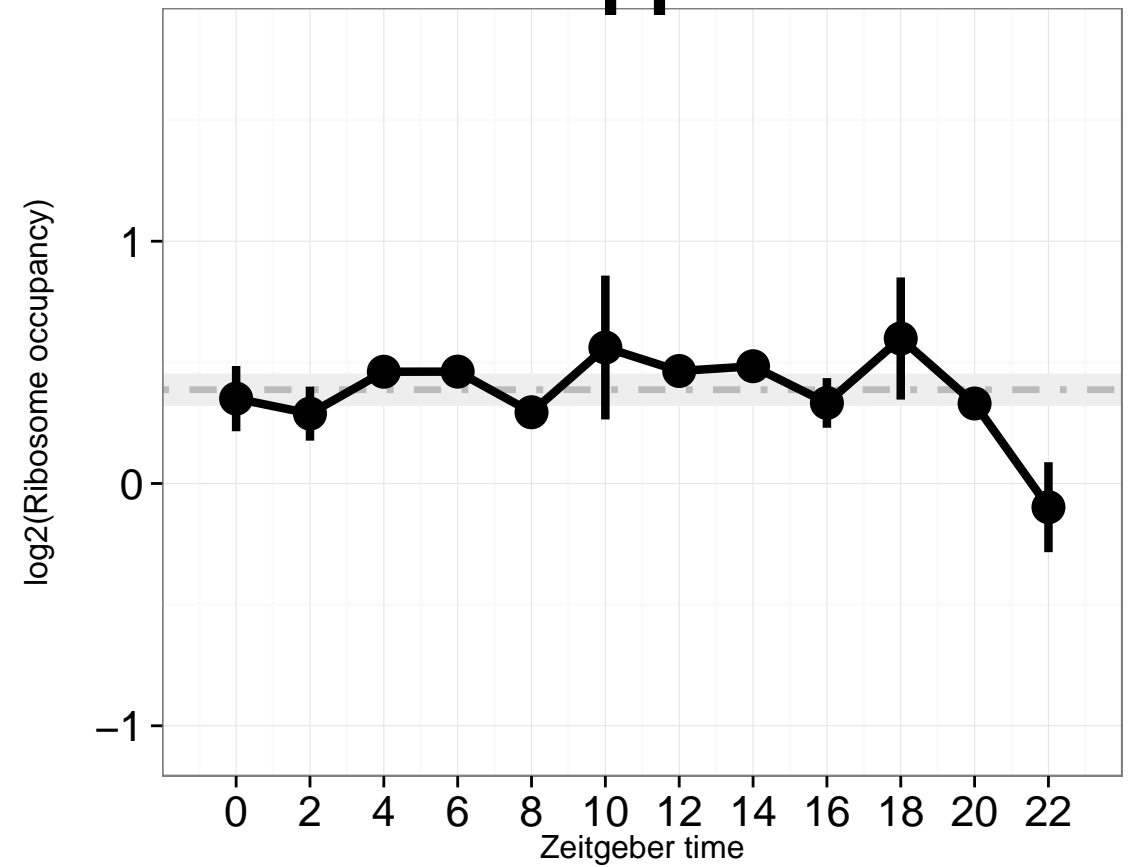

Supplement: SuppDataset_1.zip [file Dpp7_set_A.pdf › Supplemental Dataset 1/A-mRNA_nonrhyth_translation_nonrhyth/Dpp7_set_A.pdf]

## Dpp8

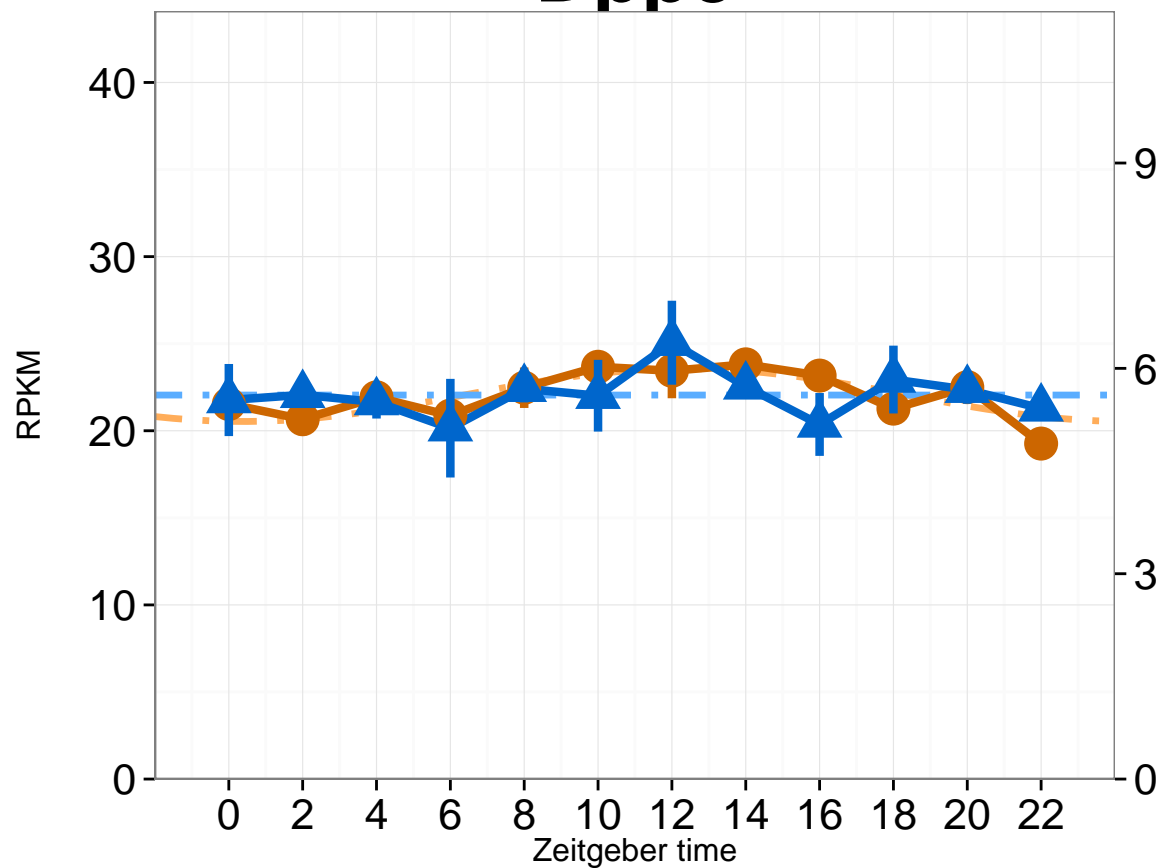

## Dpp8

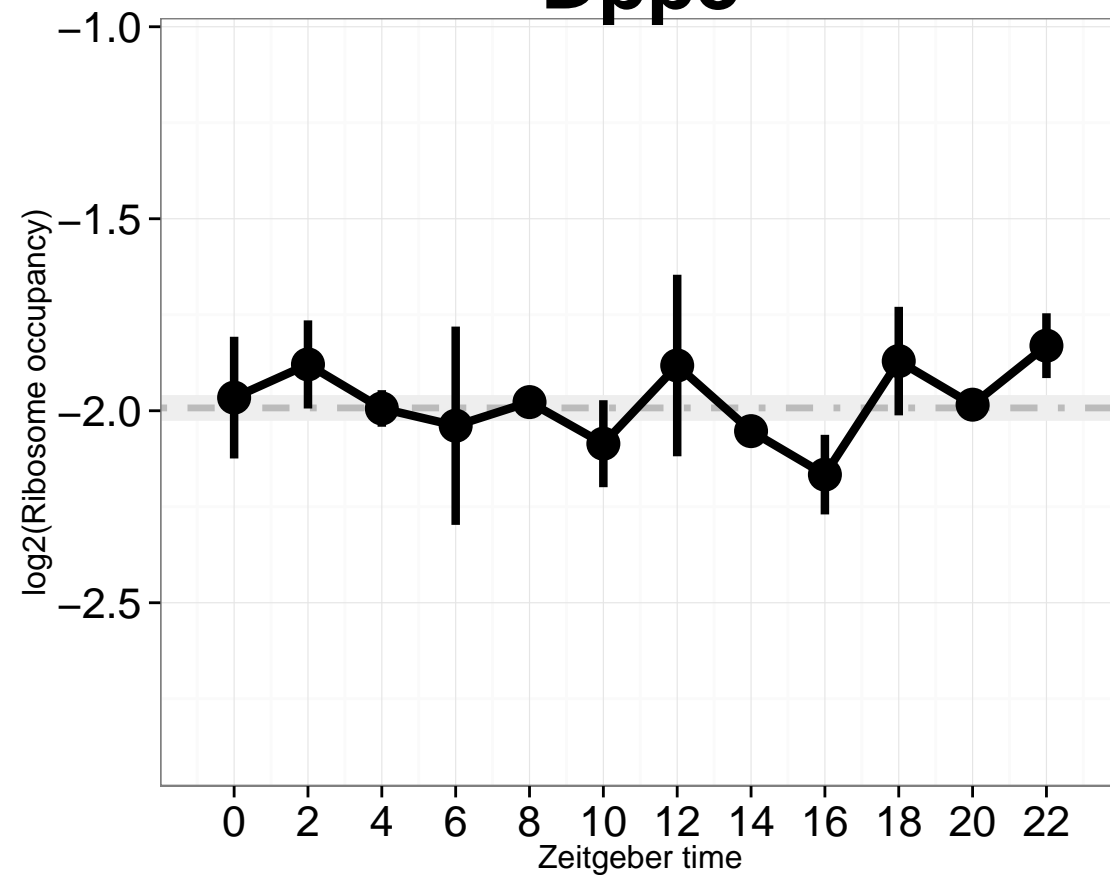

Supplement: SuppDataset_1.zip [file Dpp8_set_A.pdf › Supplemental Dataset 1/A-mRNA_nonrhyth_translation_nonrhyth/Dpp8_set_A.pdf]

## Dpt

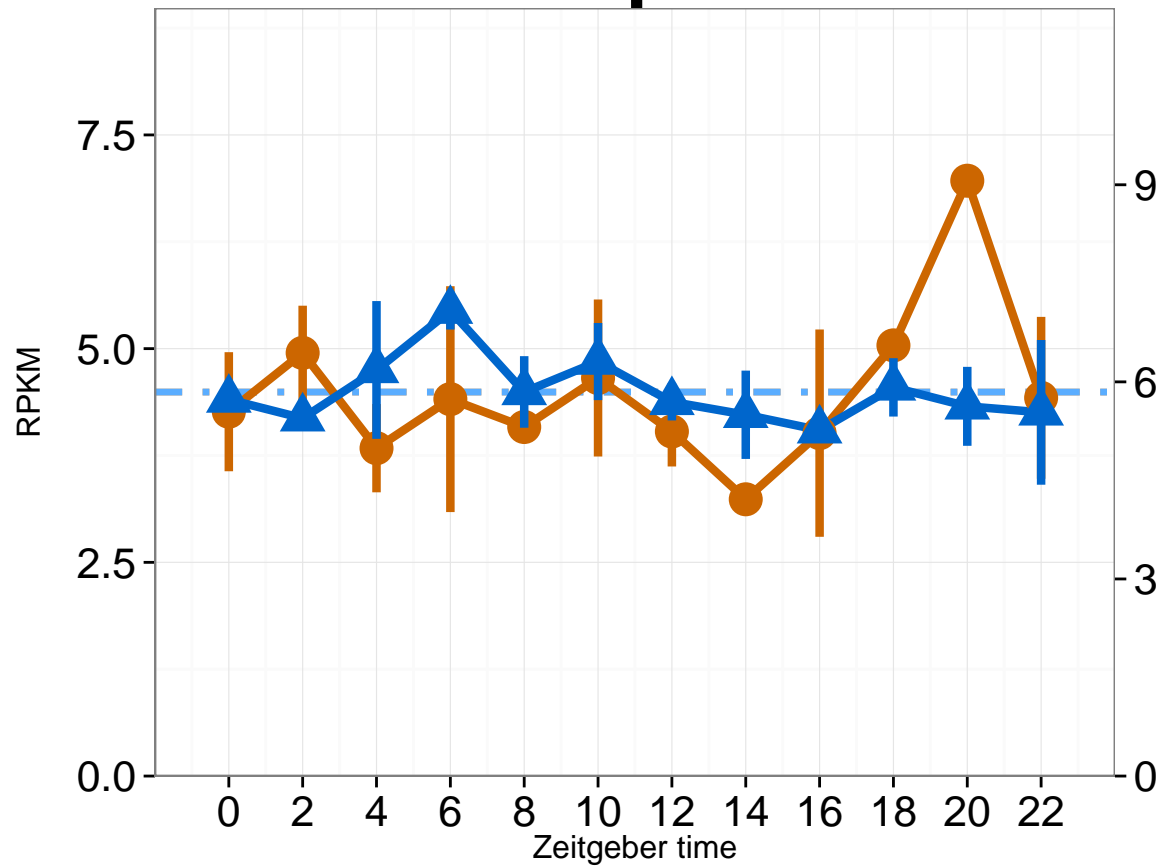

## Dpt

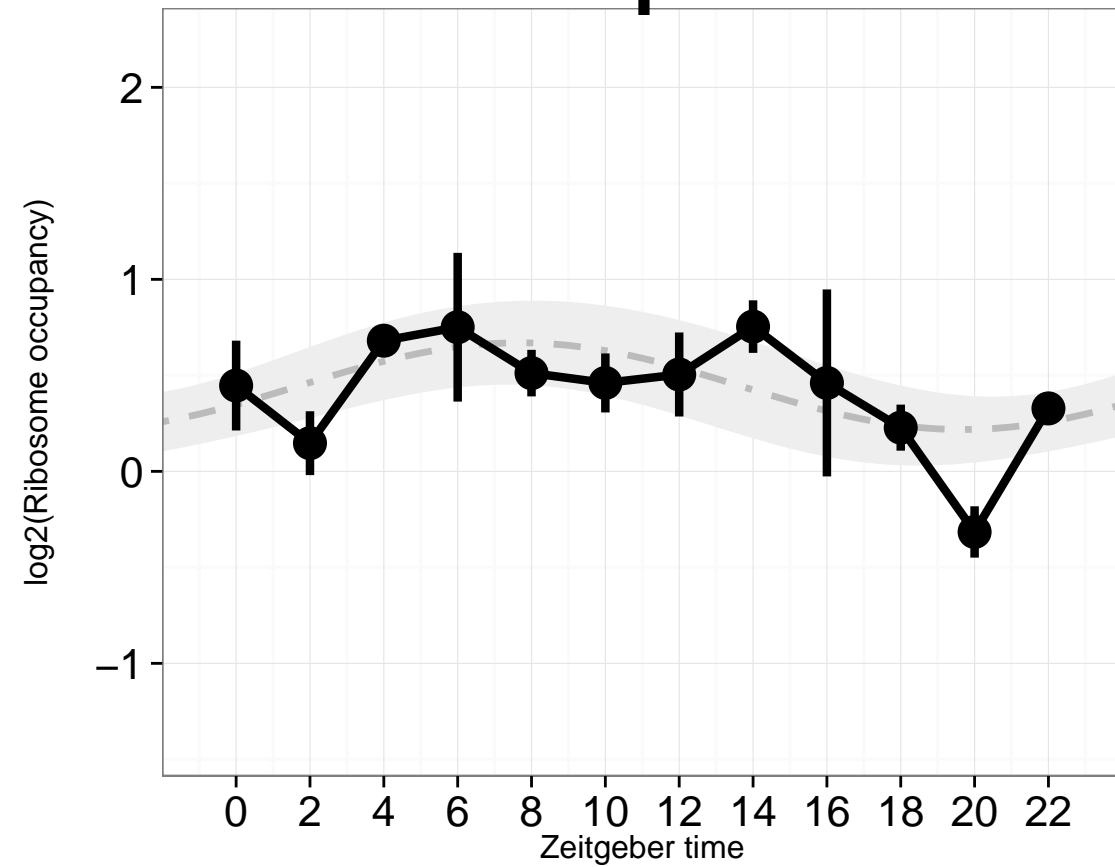

Supplement: SuppDataset_1.zip [file Dpt_set_A.pdf › Supplemental Dataset 1/A-mRNA_nonrhyth_translation_nonrhyth/Dpt_set_A.pdf]

# Dpy19l3

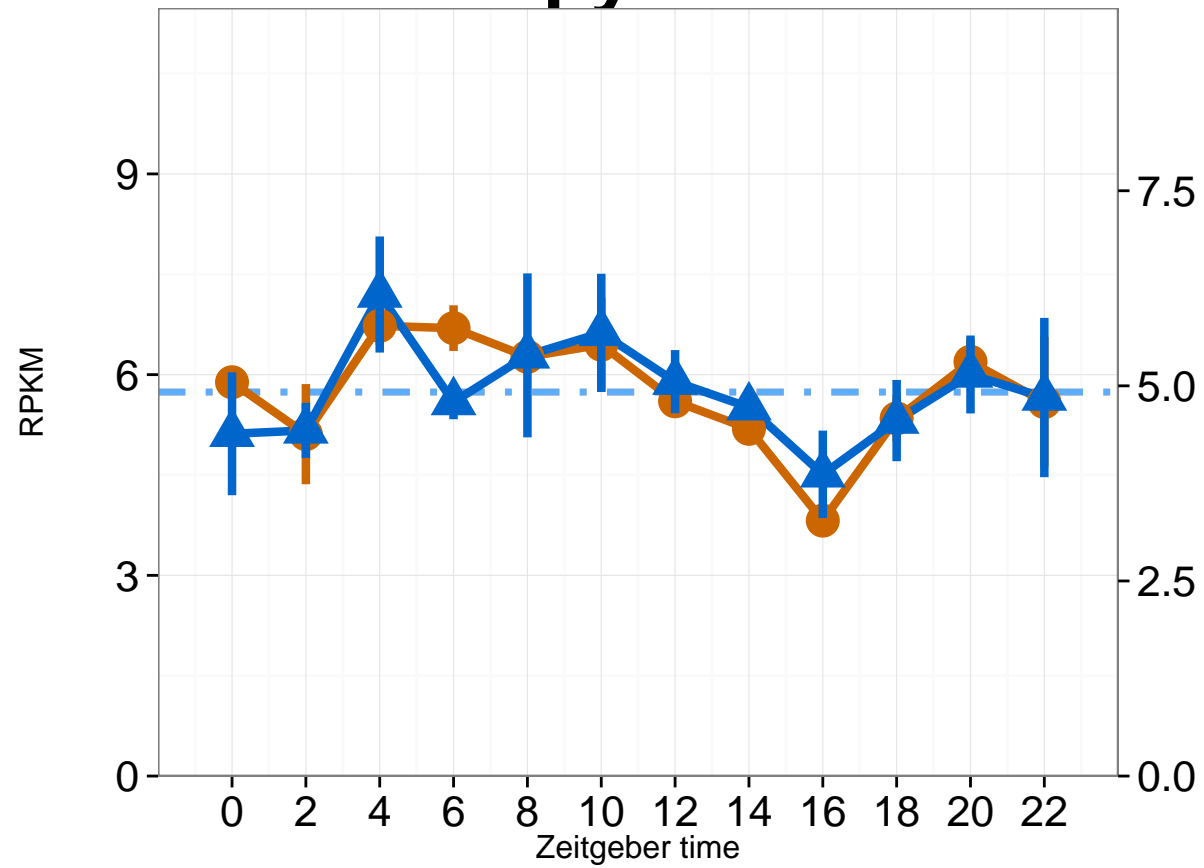

# Dpy19l3

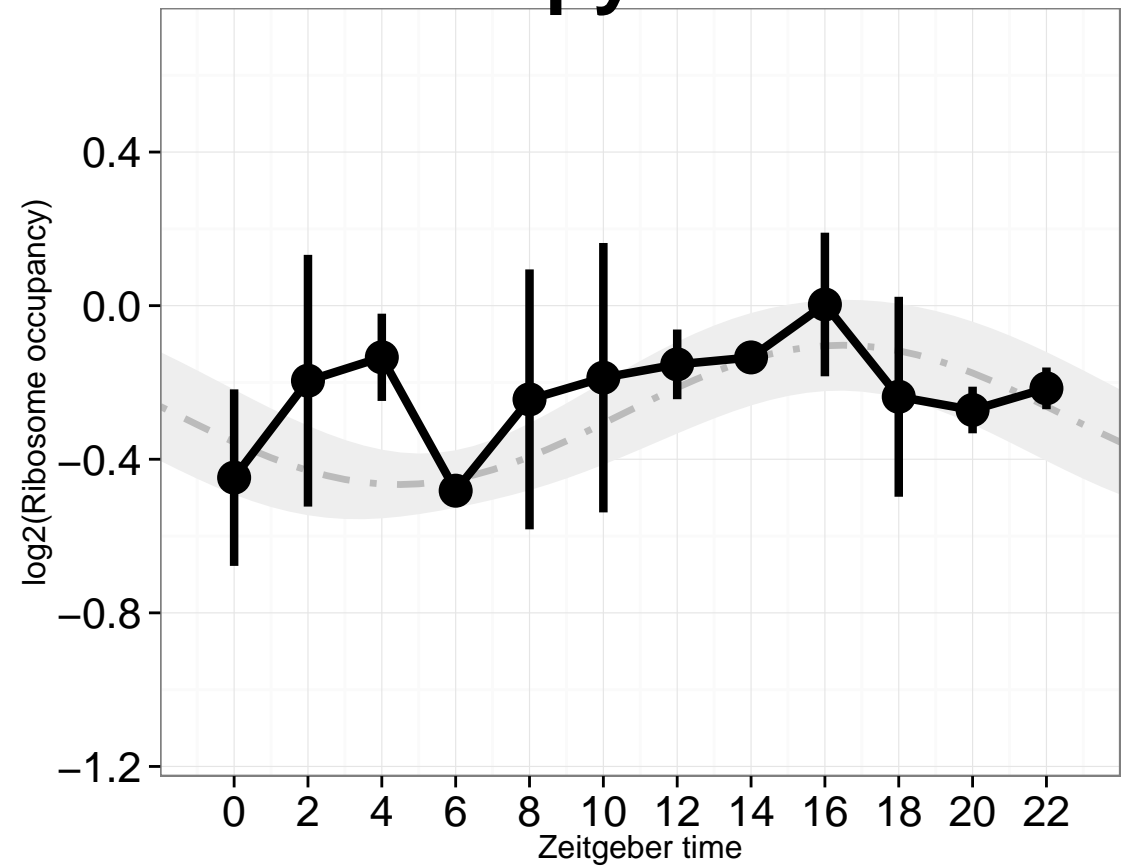

Supplement: SuppDataset_1.zip [file Dpy19l3_set_A.pdf › Supplemental Dataset 1/A-mRNA_nonrhyth_translation_nonrhyth/Dpy19l3_set_A.pdf]

# Dpy19l4

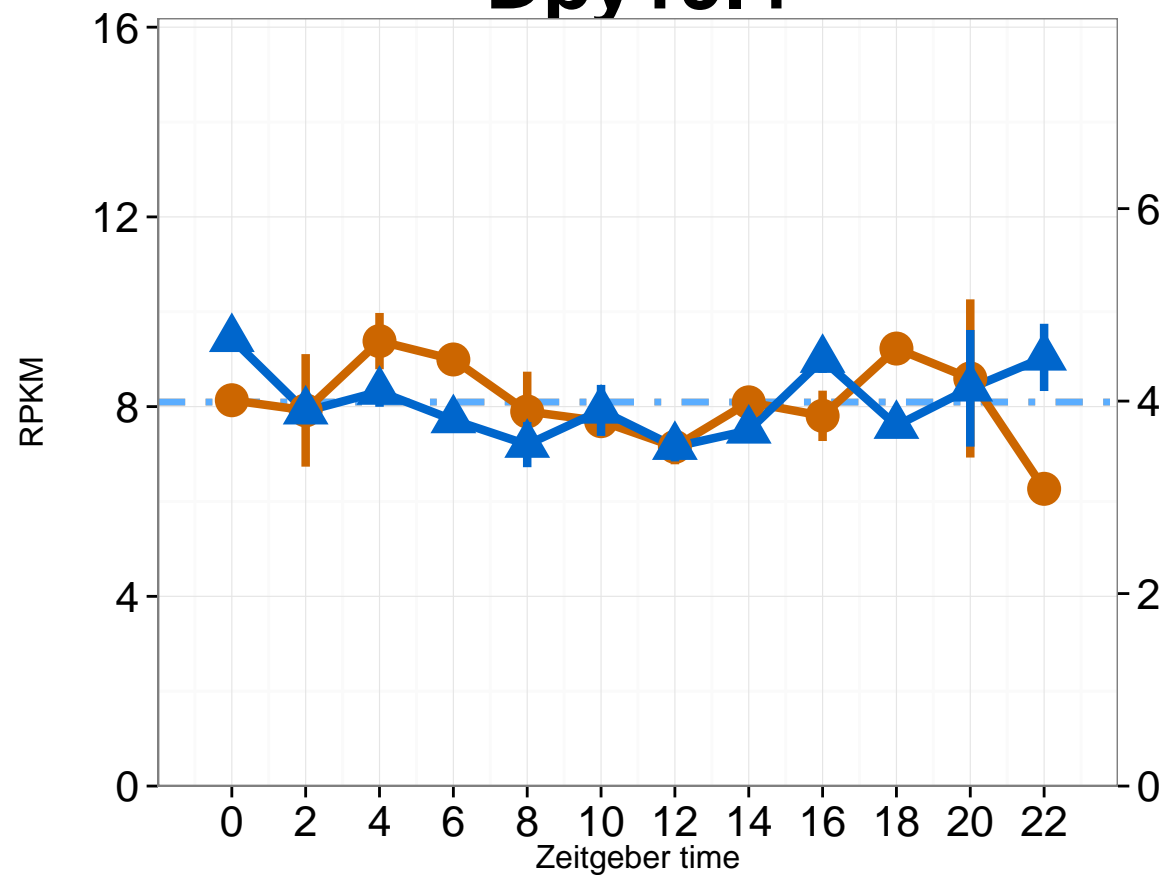

# Dpy19l4

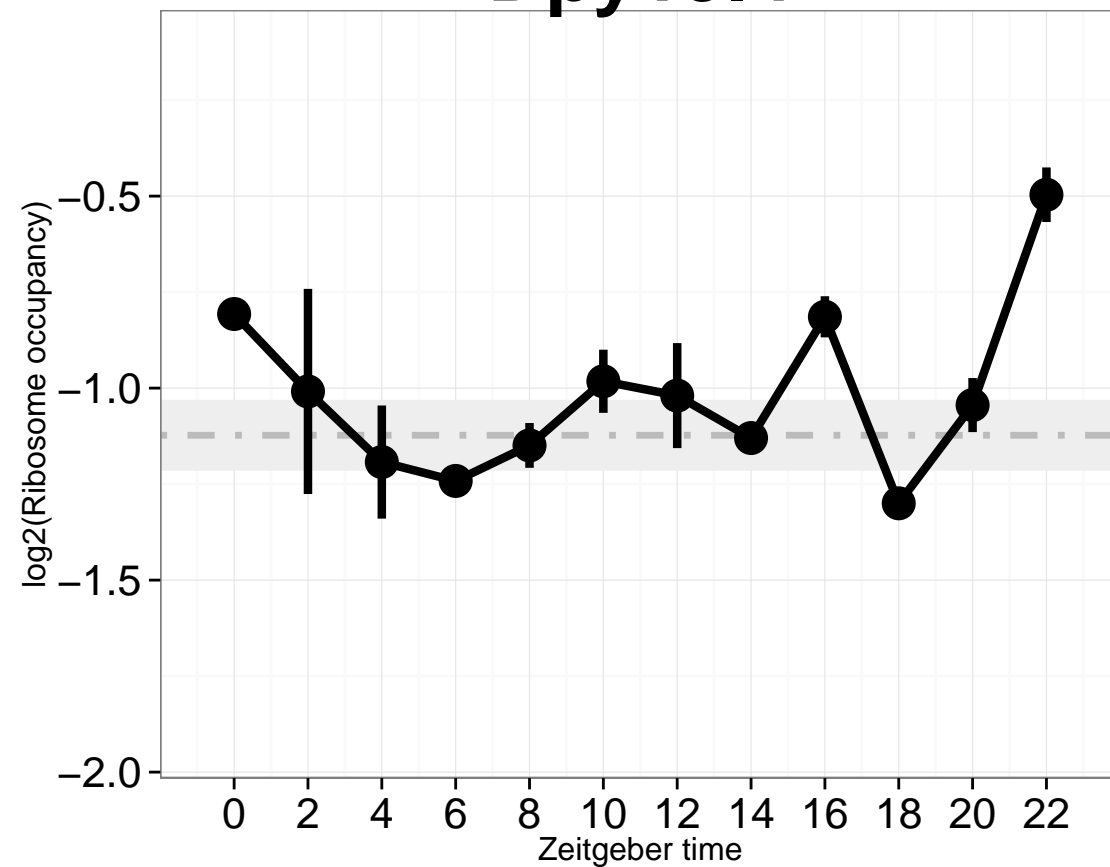

Supplement: SuppDataset_1.zip [file Dpy19l4_set_A.pdf › Supplemental Dataset 1/A-mRNA_nonrhyth_translation_nonrhyth/Dpy19l4_set_A.pdf]

## Dpy30

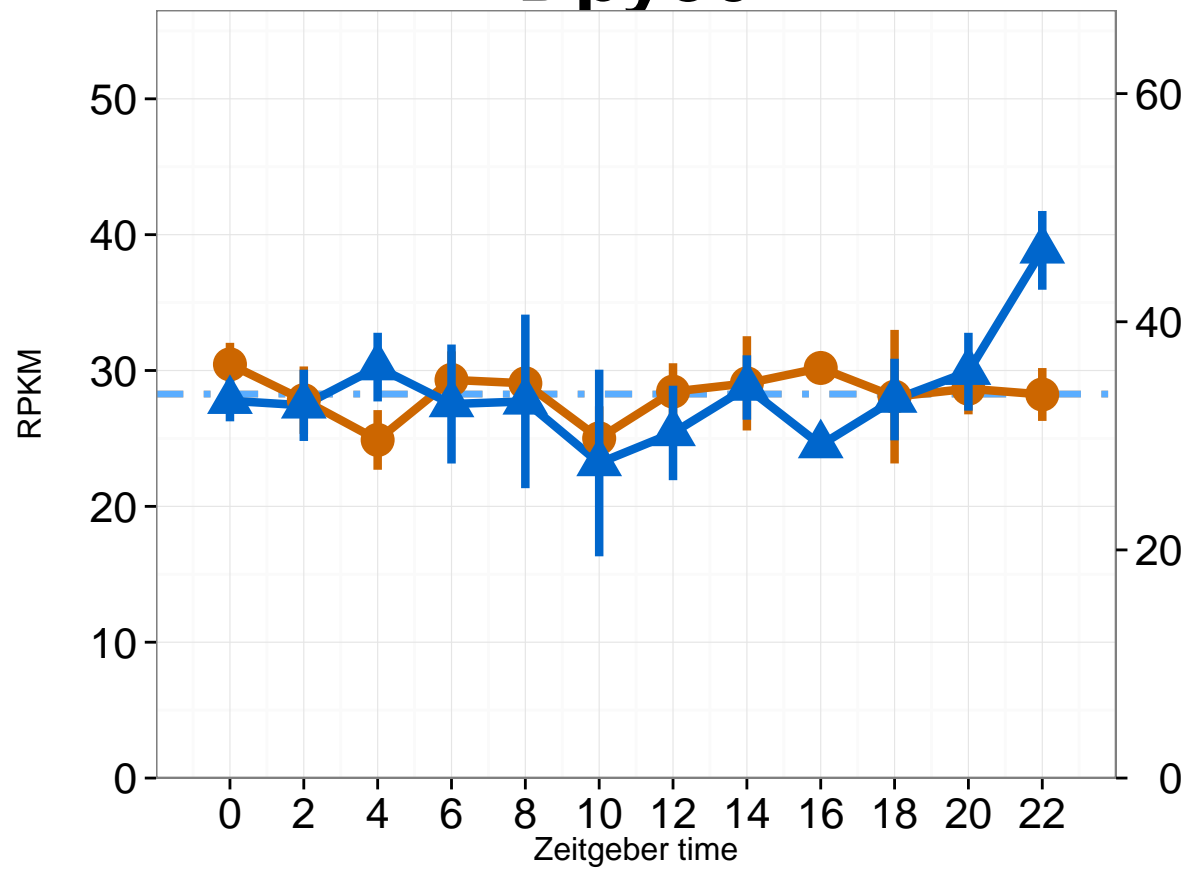

## Dpy30

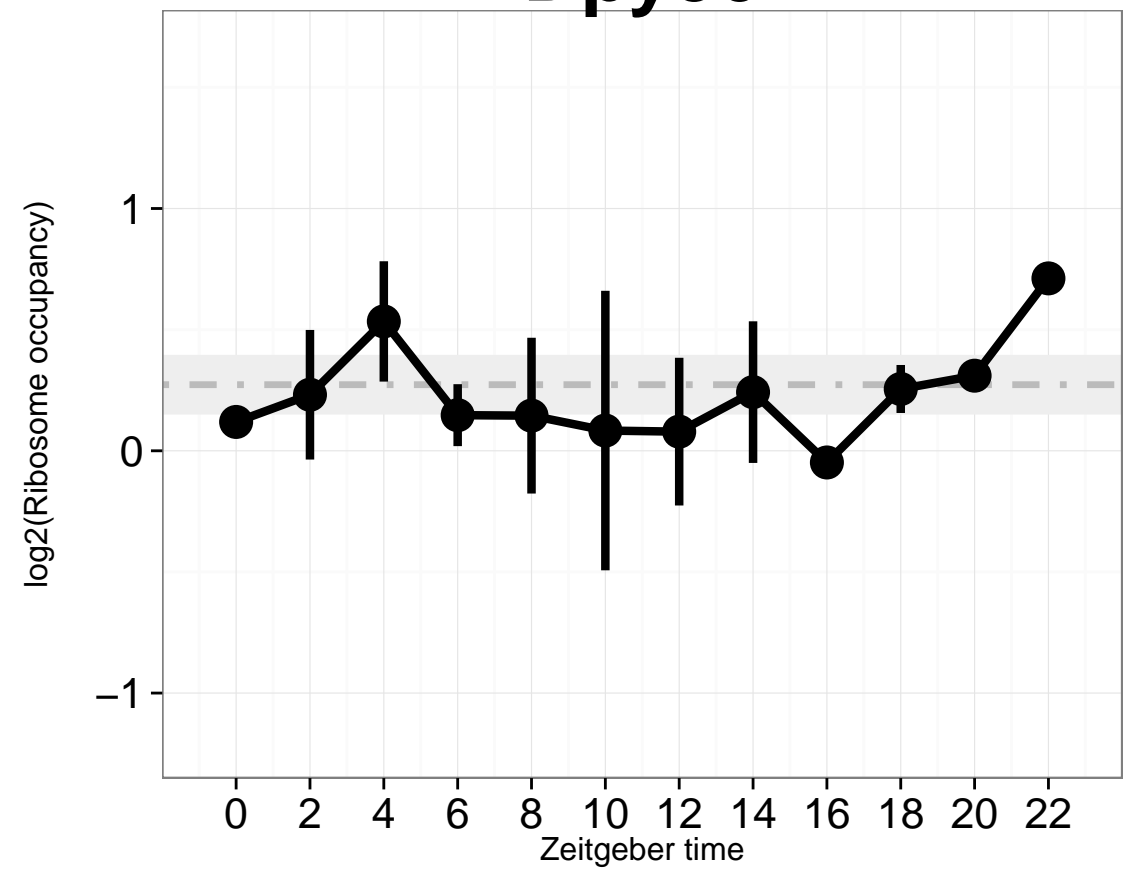

Supplement: SuppDataset_1.zip [file Dpy30_set_A.pdf › Supplemental Dataset 1/A-mRNA_nonrhyth_translation_nonrhyth/Dpy30_set_A.pdf]

## Dpyd

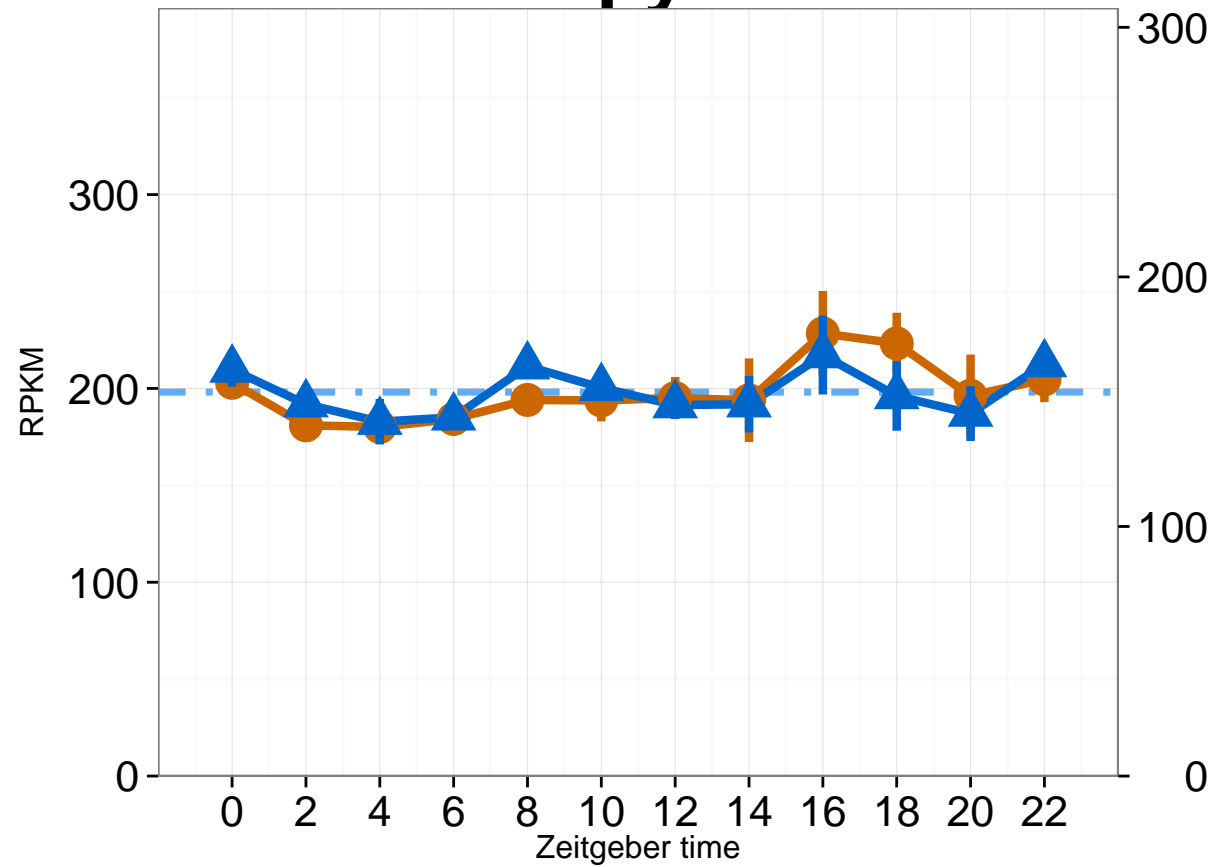

## Dpyd

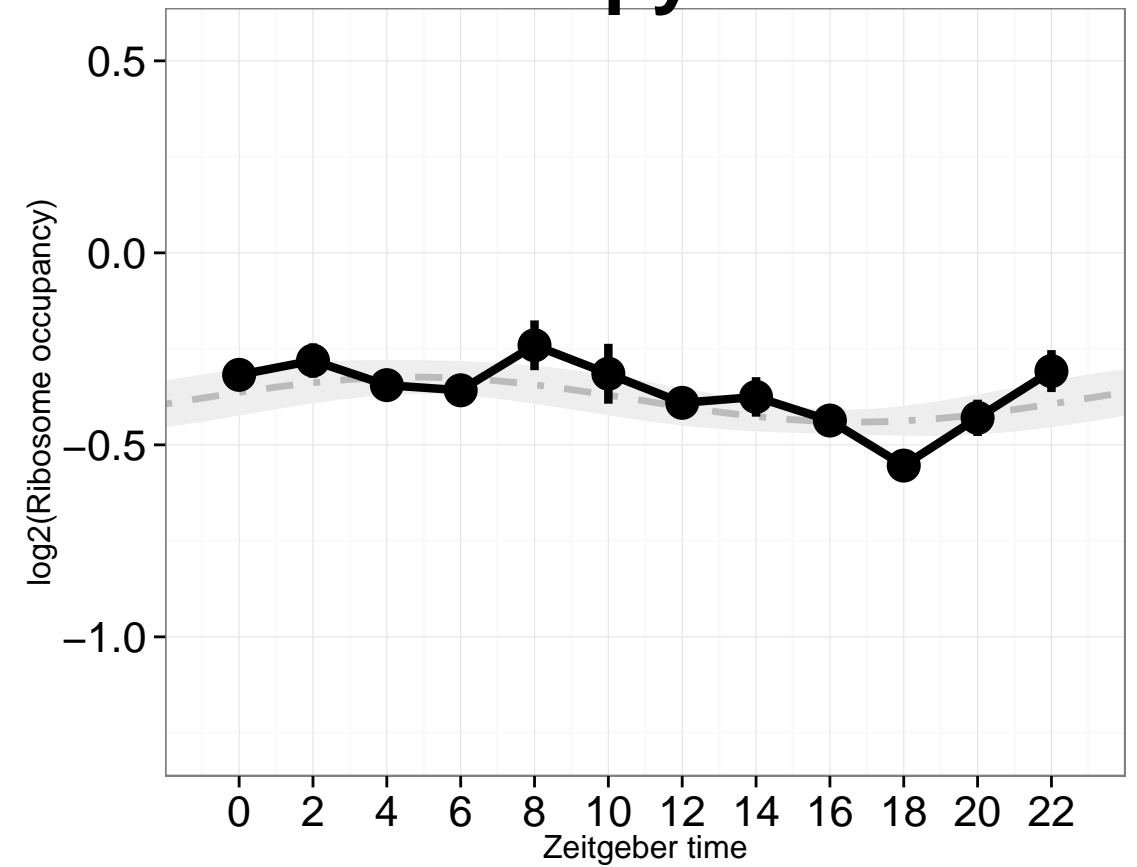

Supplement: SuppDataset_1.zip [file Dpyd_set_A.pdf › Supplemental Dataset 1/A-mRNA_nonrhyth_translation_nonrhyth/Dpyd_set_A.pdf]

## Dpys

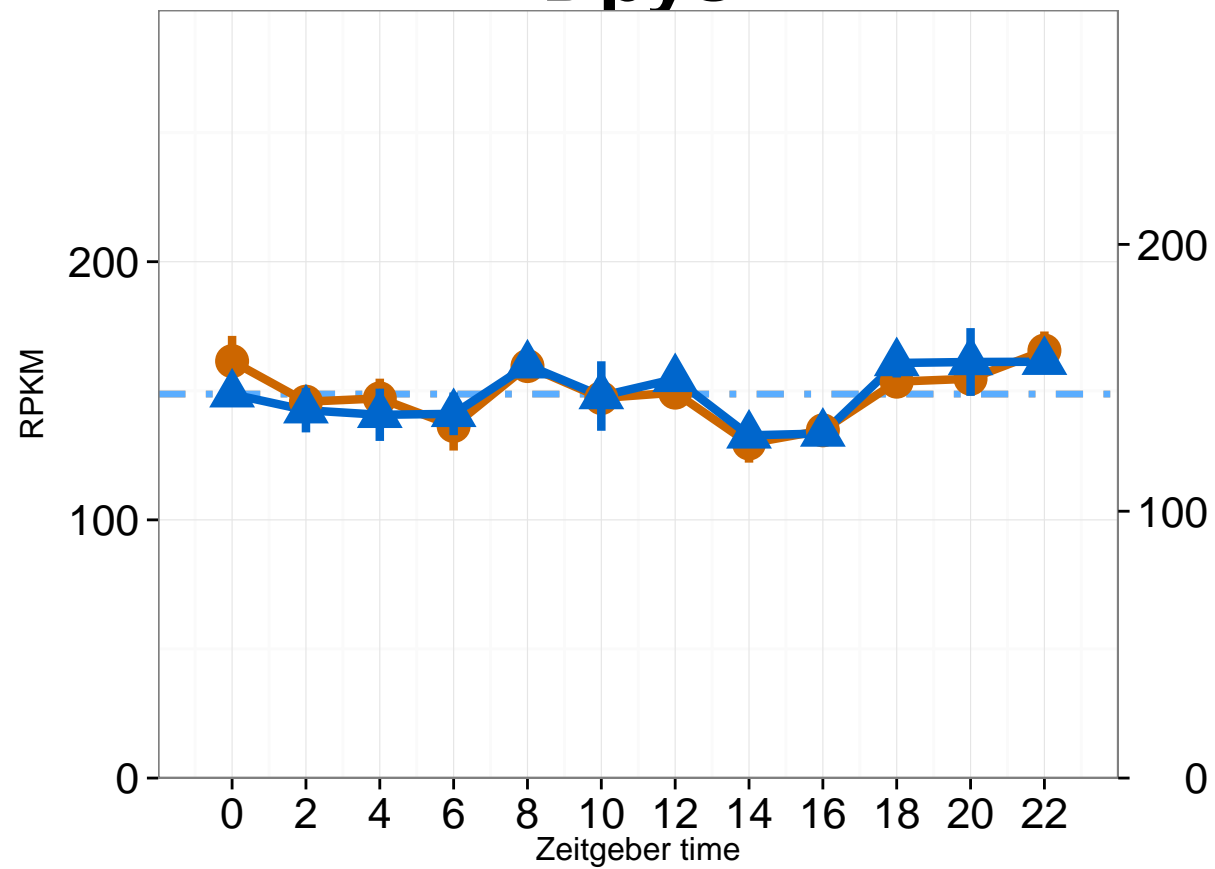

## Dpys

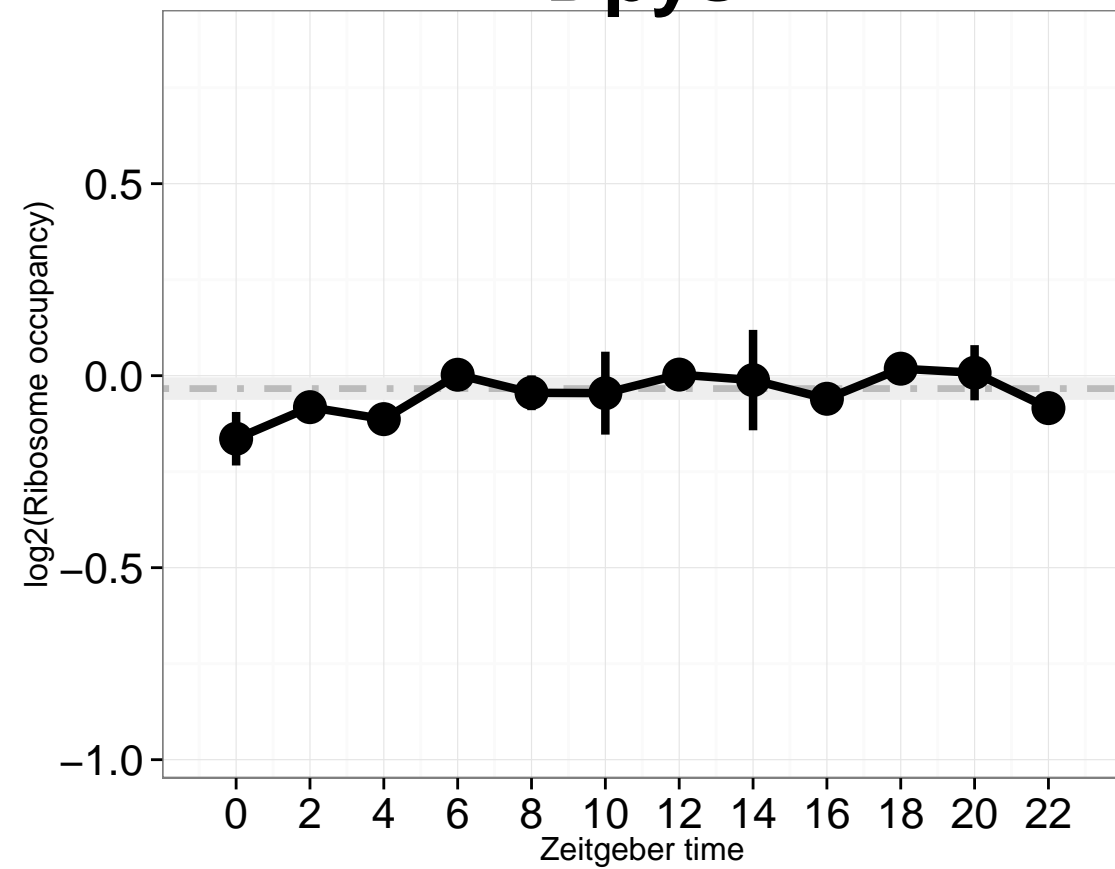

Supplement: SuppDataset_1.zip [file Dpys_set_A.pdf › Supplemental Dataset 1/A-mRNA_nonrhyth_translation_nonrhyth/Dpys_set_A.pdf]

# Dr1

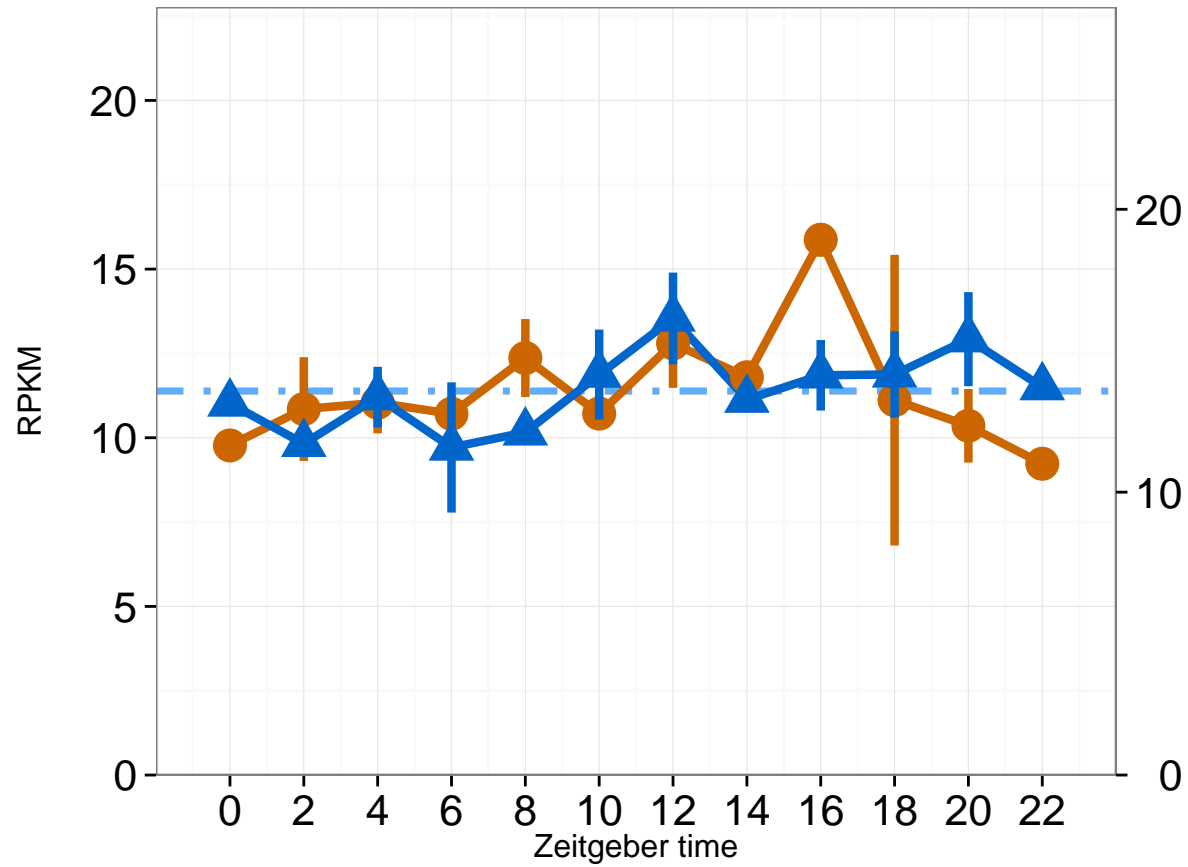

# Dr1

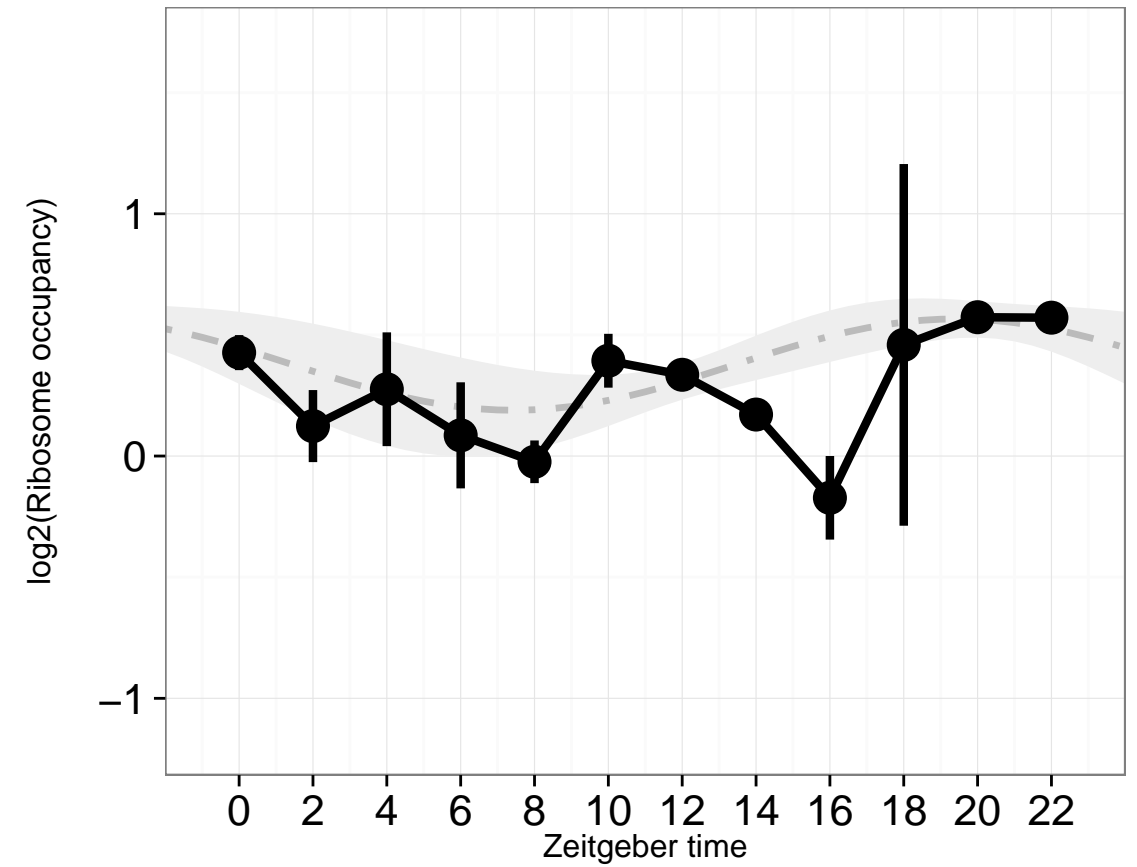

Supplement: SuppDataset_1.zip [file Dr1_set_A.pdf › Supplemental Dataset 1/A-mRNA_nonrhyth_translation_nonrhyth/Dr1_set_A.pdf]

**Dram1 TR**

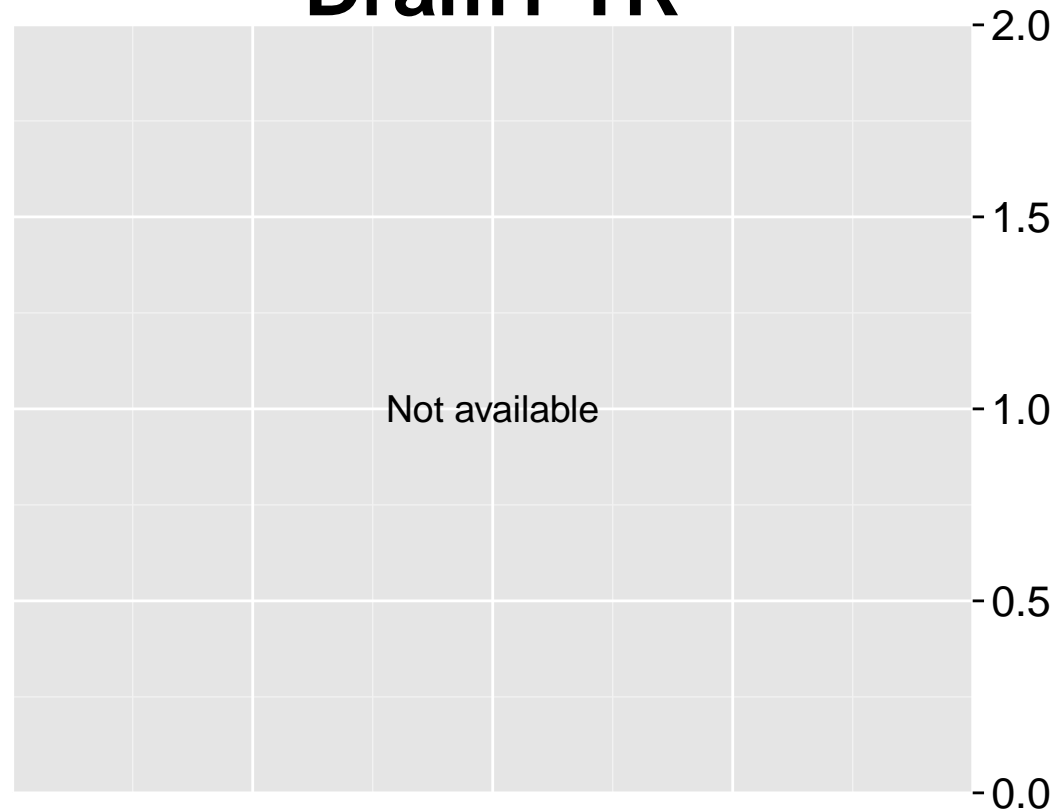

**Dram1 log2(Ribosome occupancy**

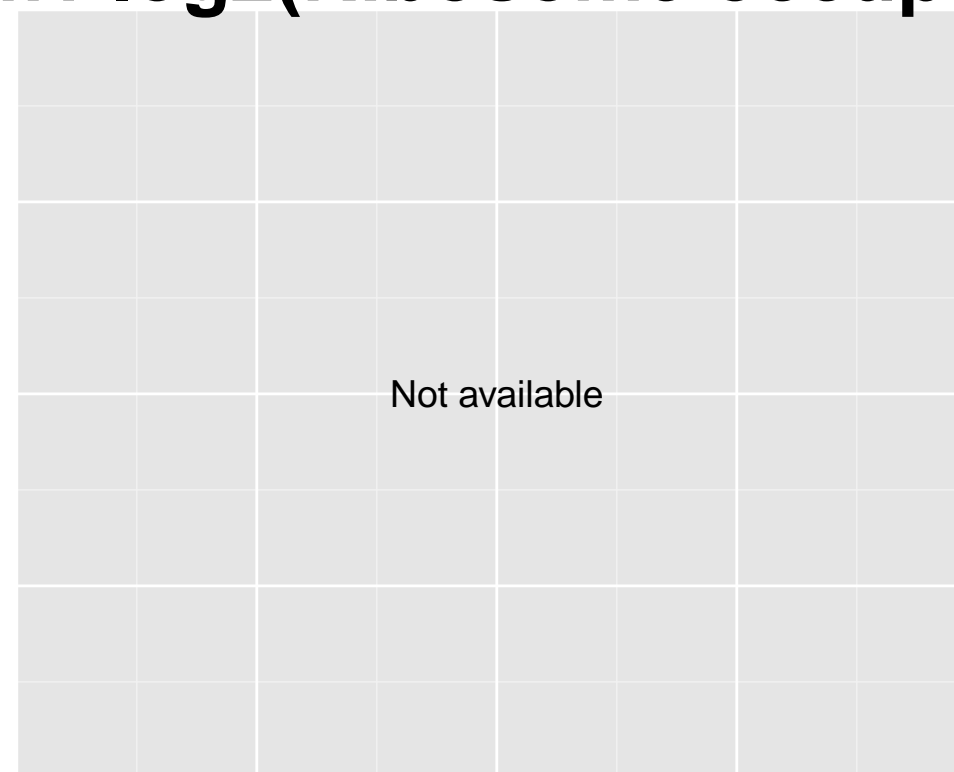

Supplement: SuppDataset_1.zip [file Dram1_set_A.pdf › Supplemental Dataset 1/A-mRNA_nonrhyth_translation_nonrhyth/Dram1_set_A.pdf]

# Dram2

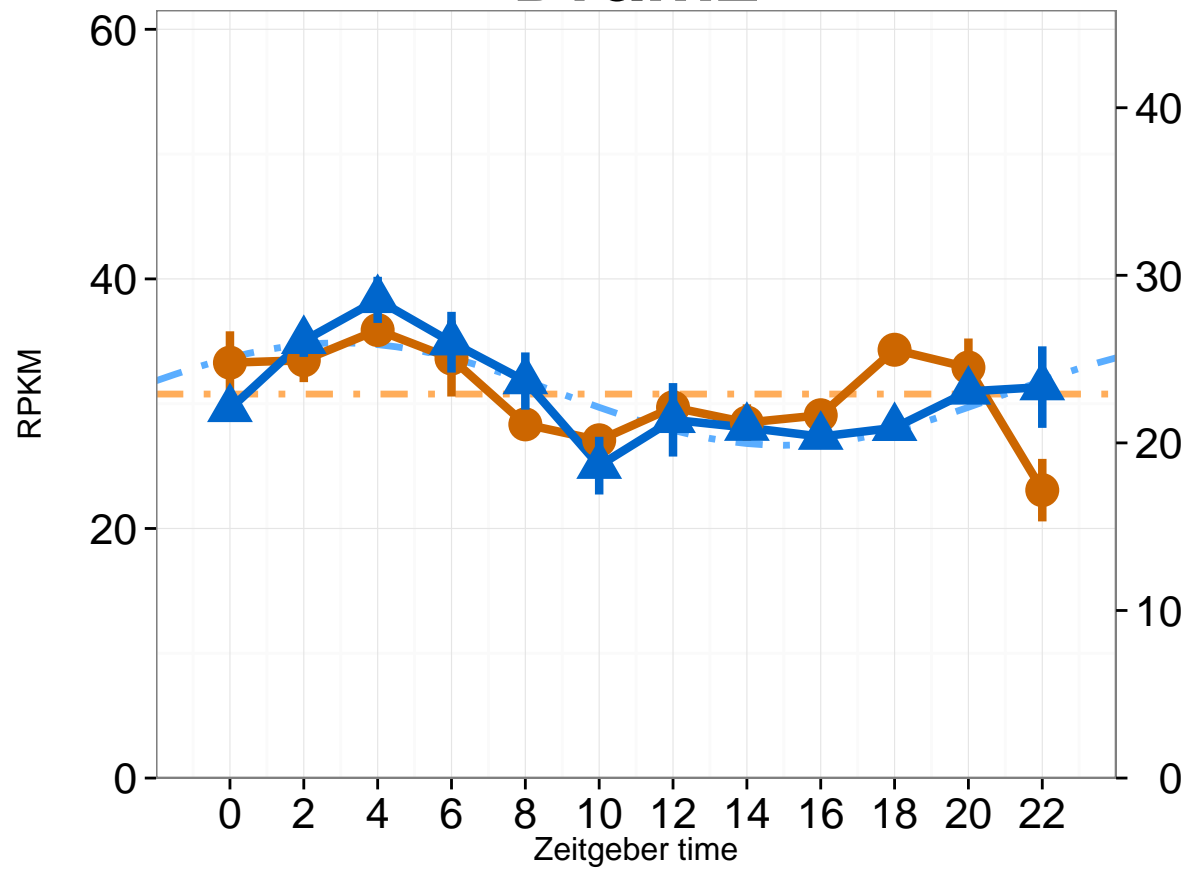

# Dram2

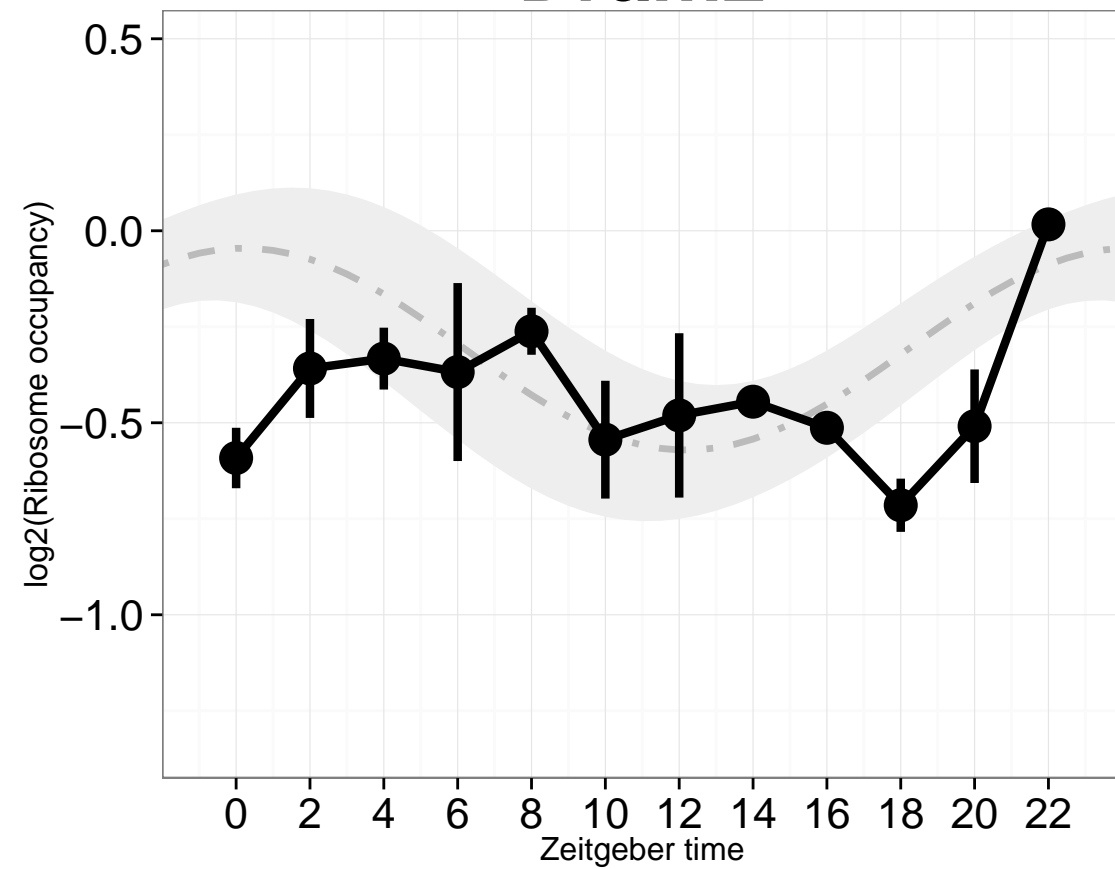

Supplement: SuppDataset_1.zip [file Dram2_set_A.pdf › Supplemental Dataset 1/A-mRNA_nonrhyth_translation_nonrhyth/Dram2_set_A.pdf]

# Drap1

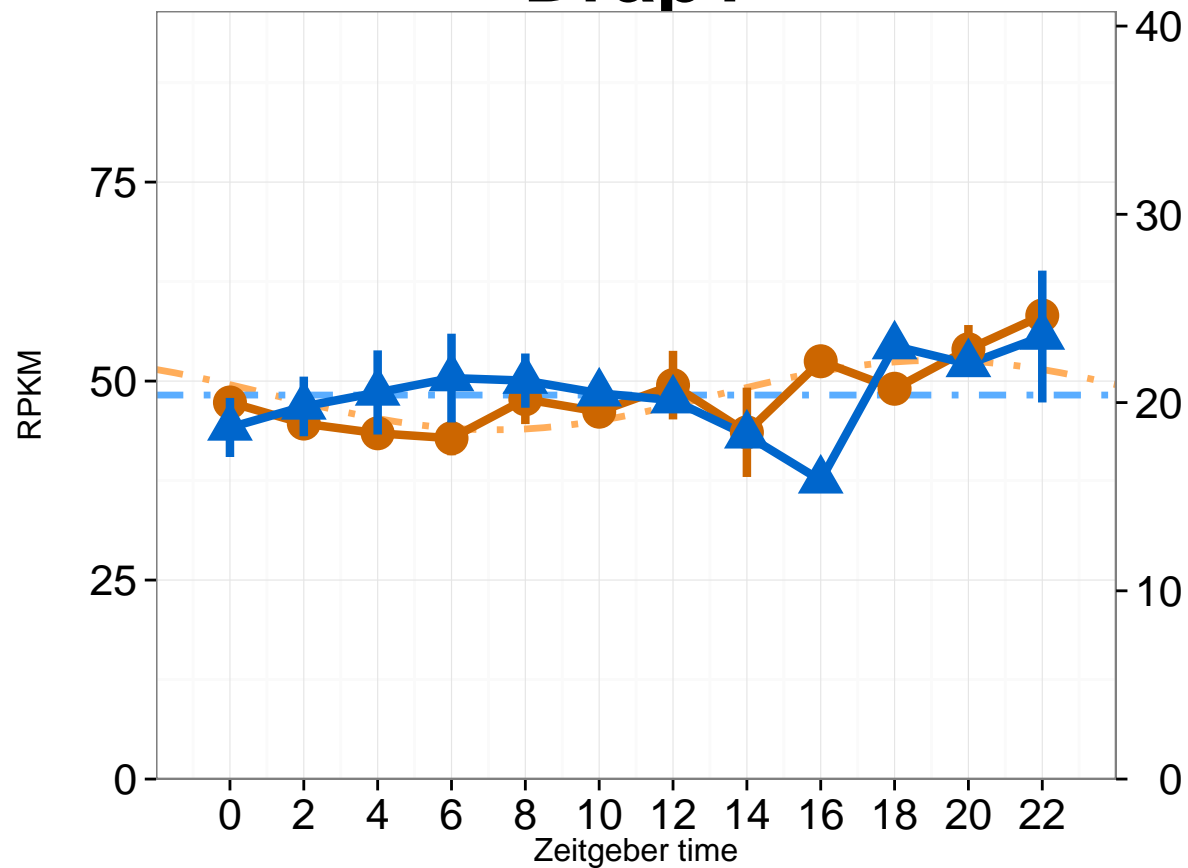

# Drap1

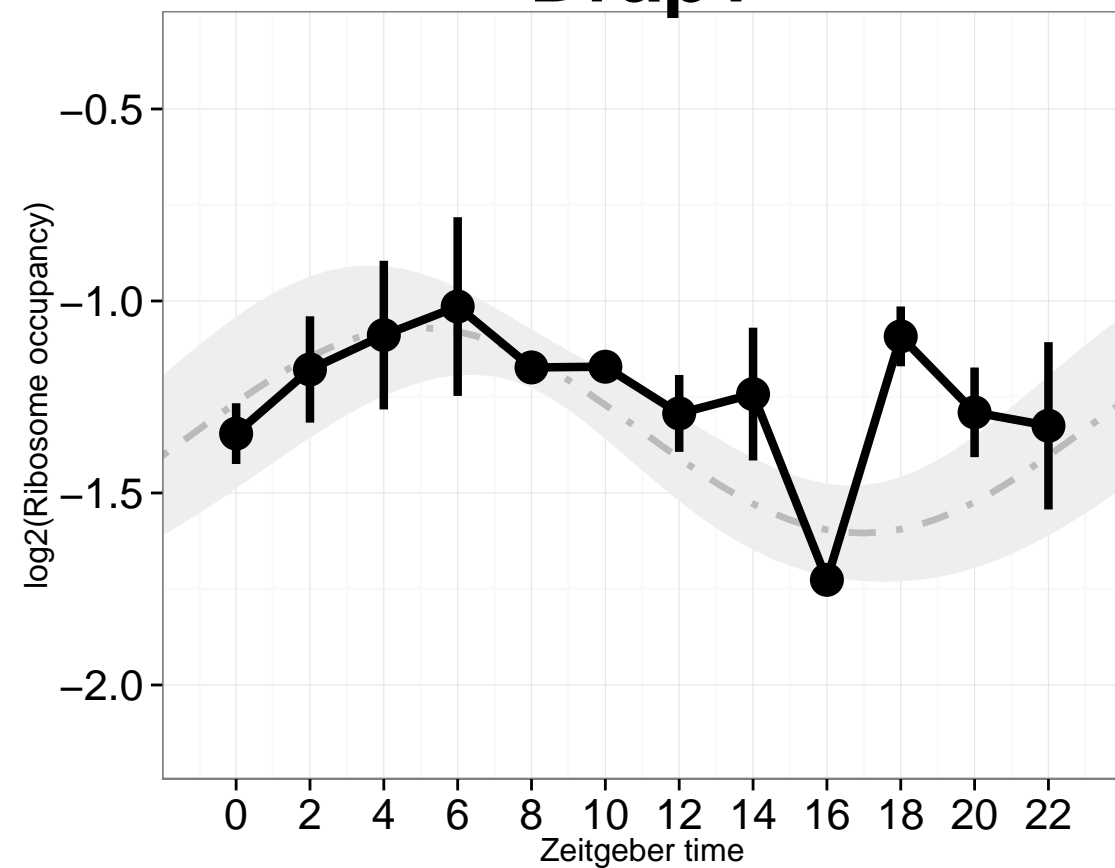

Supplement: SuppDataset_1.zip [file Drap1_set_A.pdf › Supplemental Dataset 1/A-mRNA_nonrhyth_translation_nonrhyth/Drap1_set_A.pdf]

# Drc1

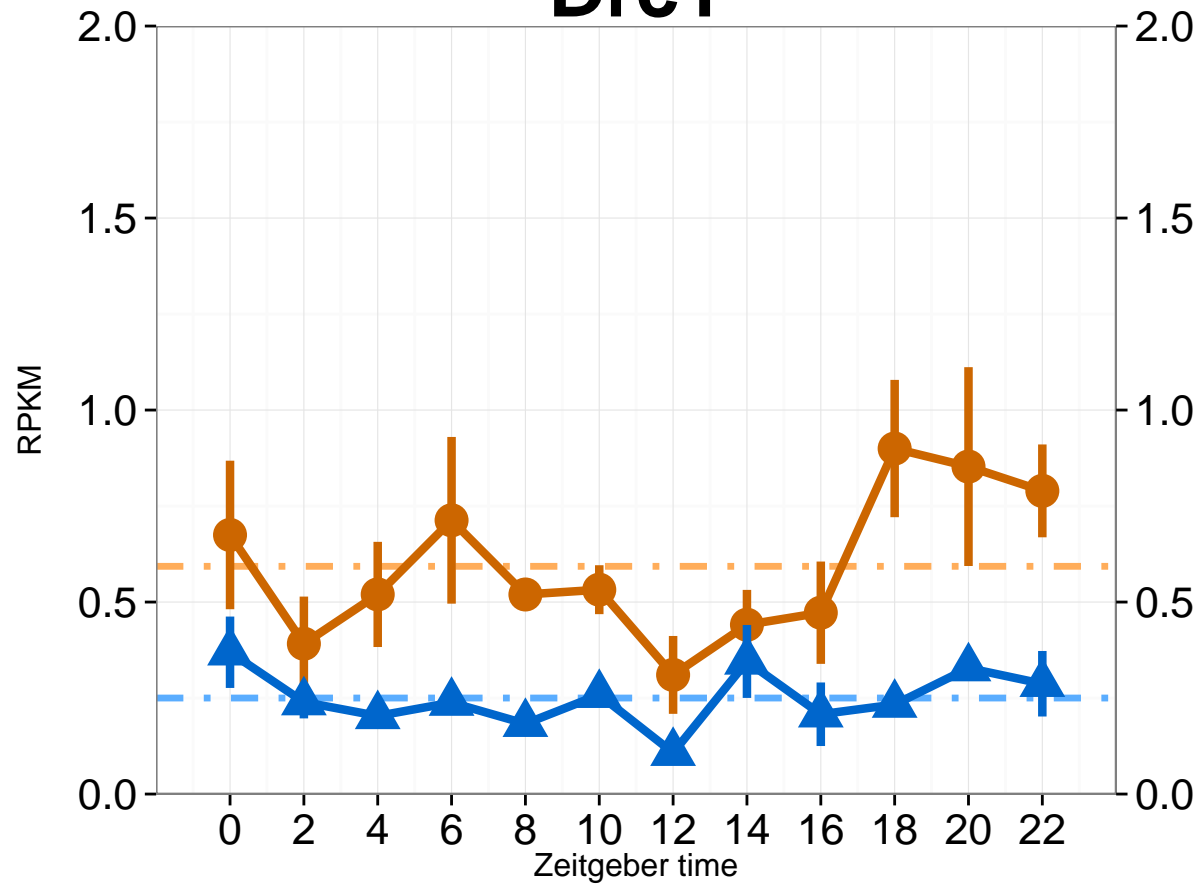

# Drc1

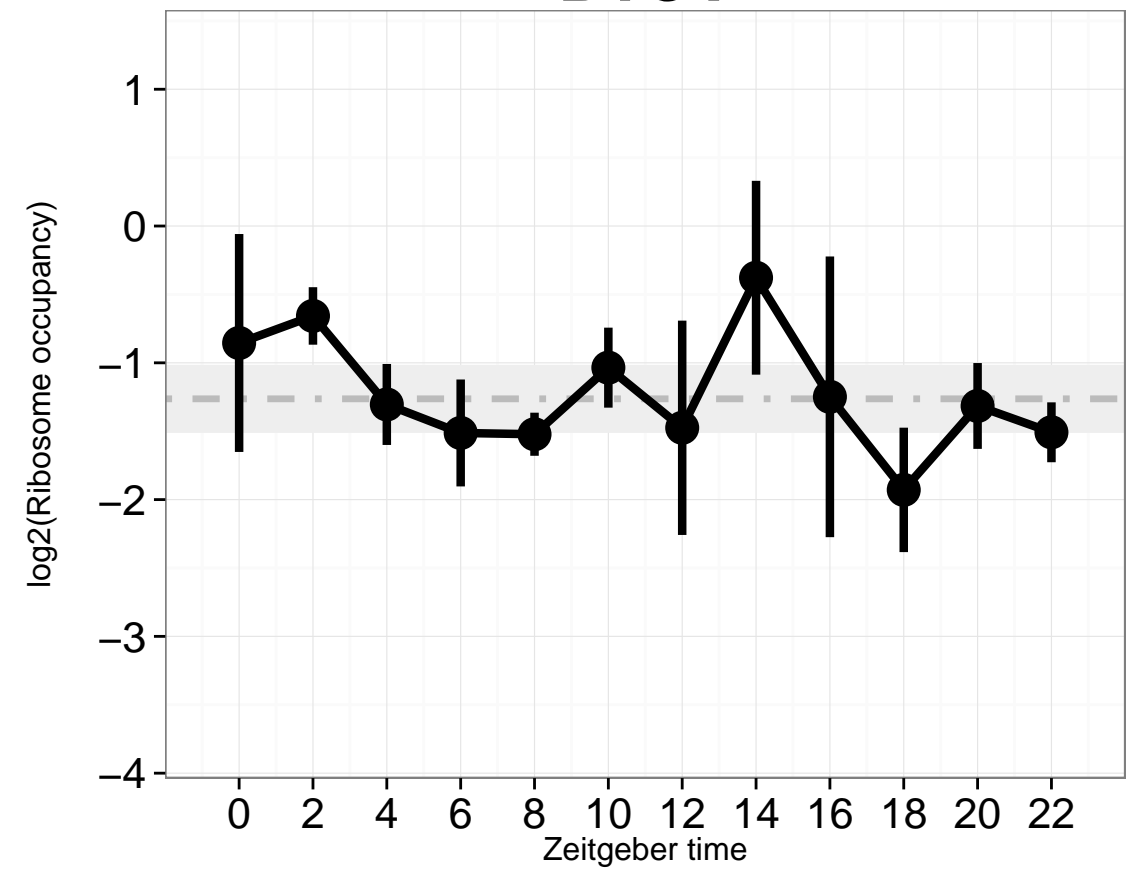

Supplement: SuppDataset_1.zip [file Drc1_set_A.pdf › Supplemental Dataset 1/A-mRNA_nonrhyth_translation_nonrhyth/Drc1_set_A.pdf]
