# Supplementary figures and images for: Ribosome profiling reveals the rhythmic liver translatome and circadian clock regulation by upstream open reading frames (part 89 of 113)
Source: HighWire-hosted journal article supplement (doi:10.1101/gr.195404.115), 2015-10-20

## Dnase2b

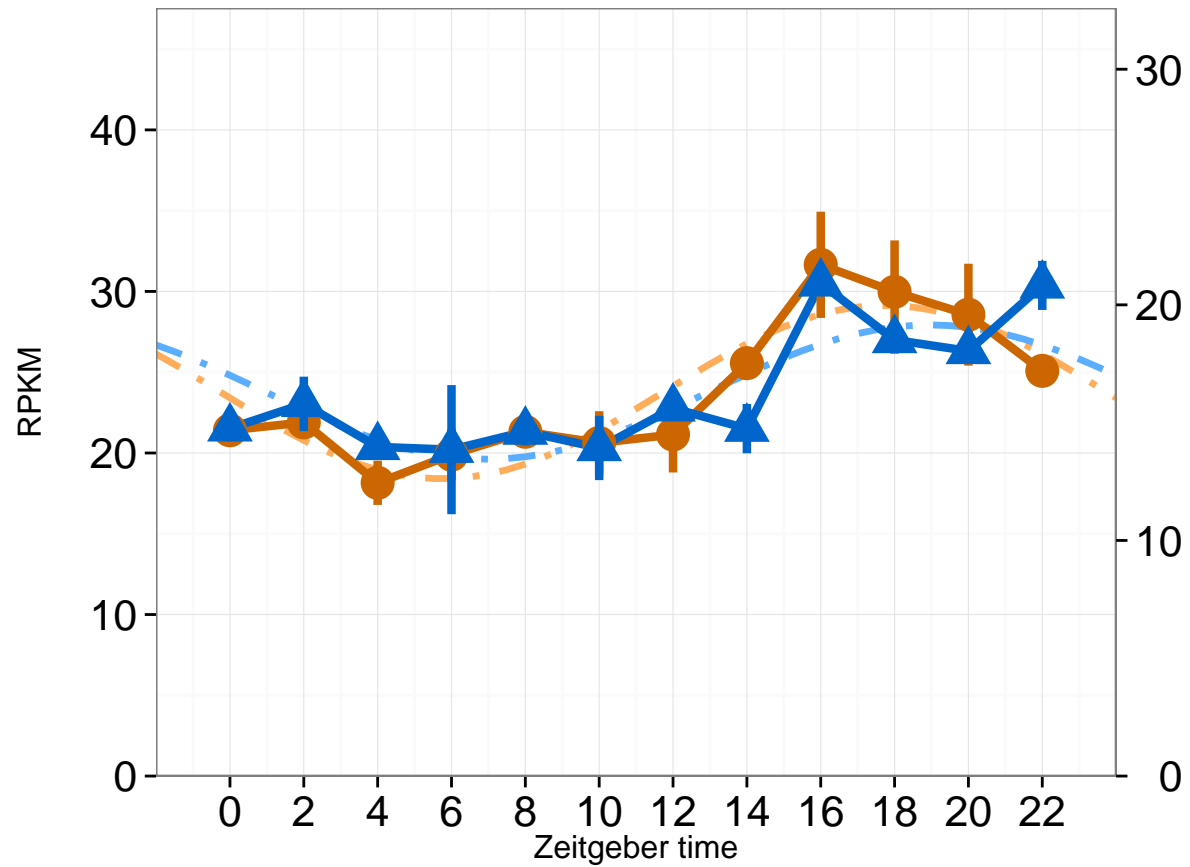

## Dnase2b

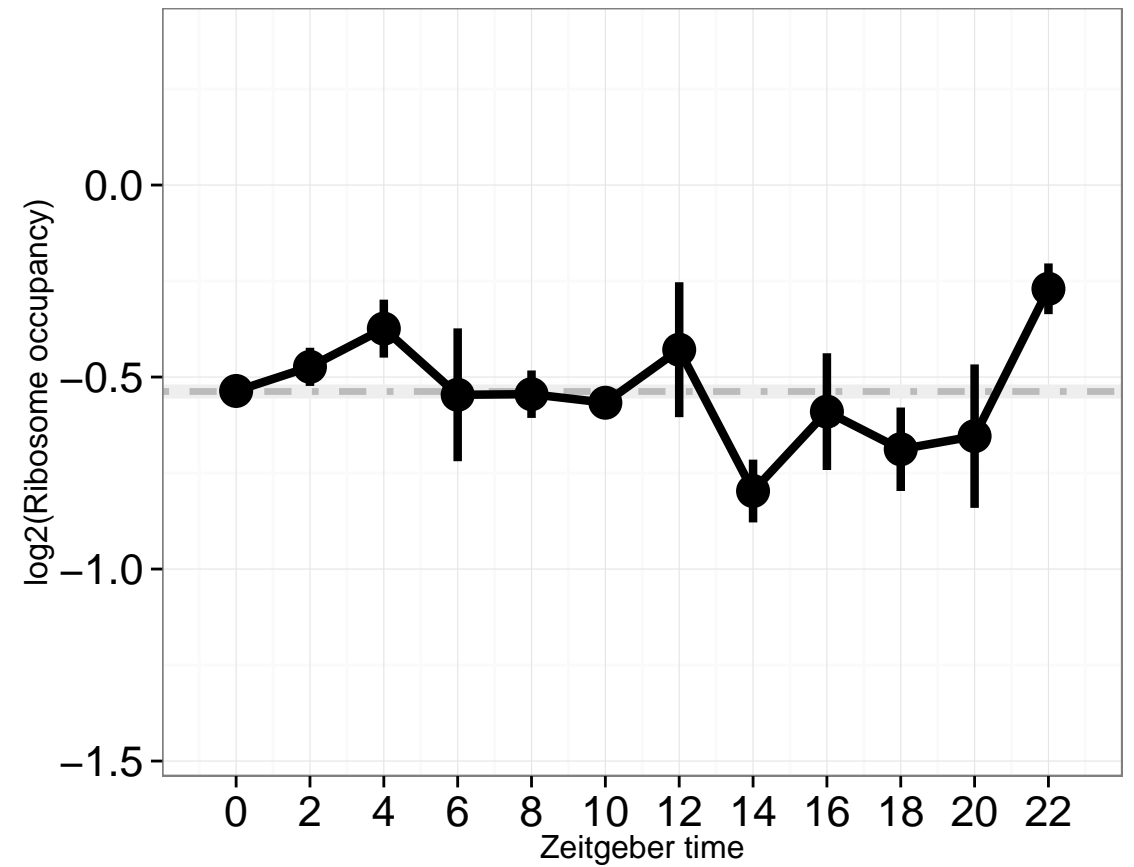

Supplement: SuppDataset_1.zip [file Dnase2b_set_B.pdf › Supplemental Dataset 1/B-mRNA_rhythm_translation_nonrhyth/Dnase2b_set_B.pdf]

# Dnttip1

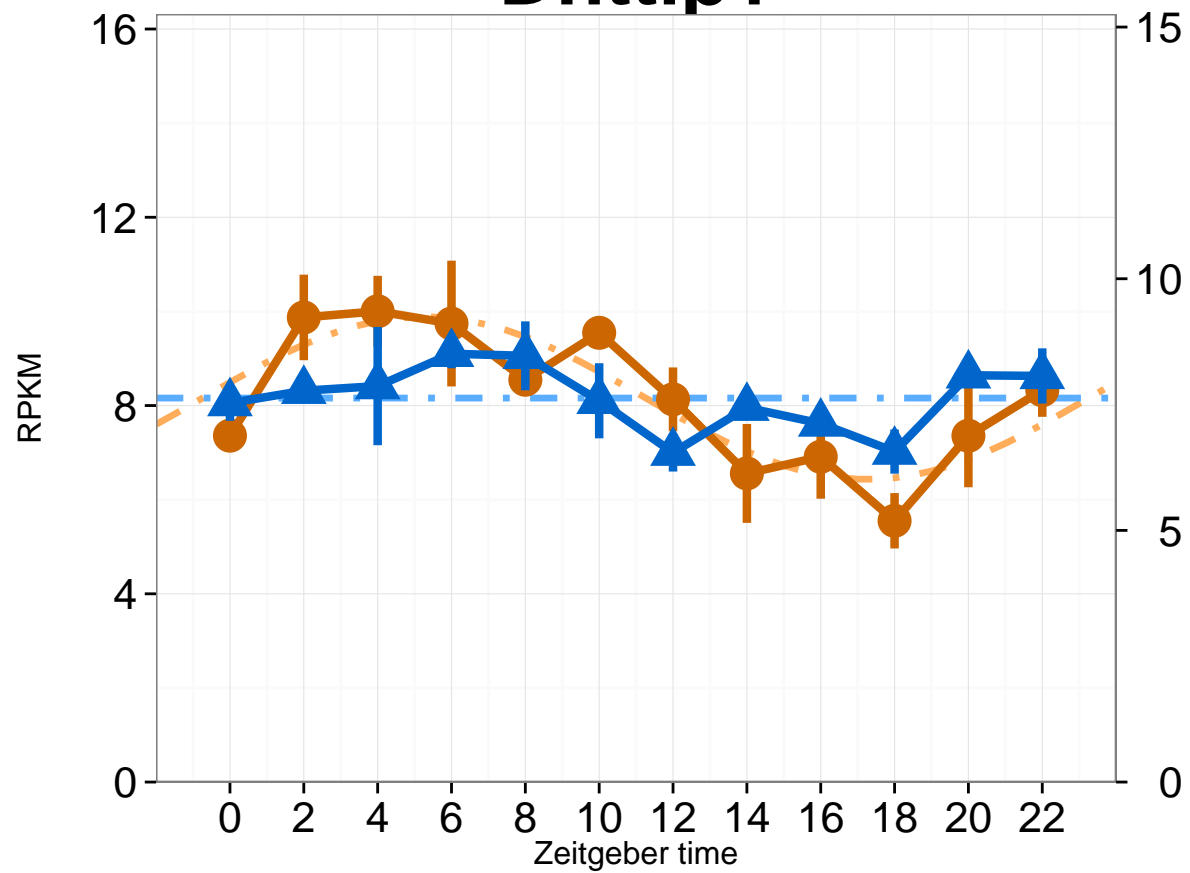

# Dnttip1

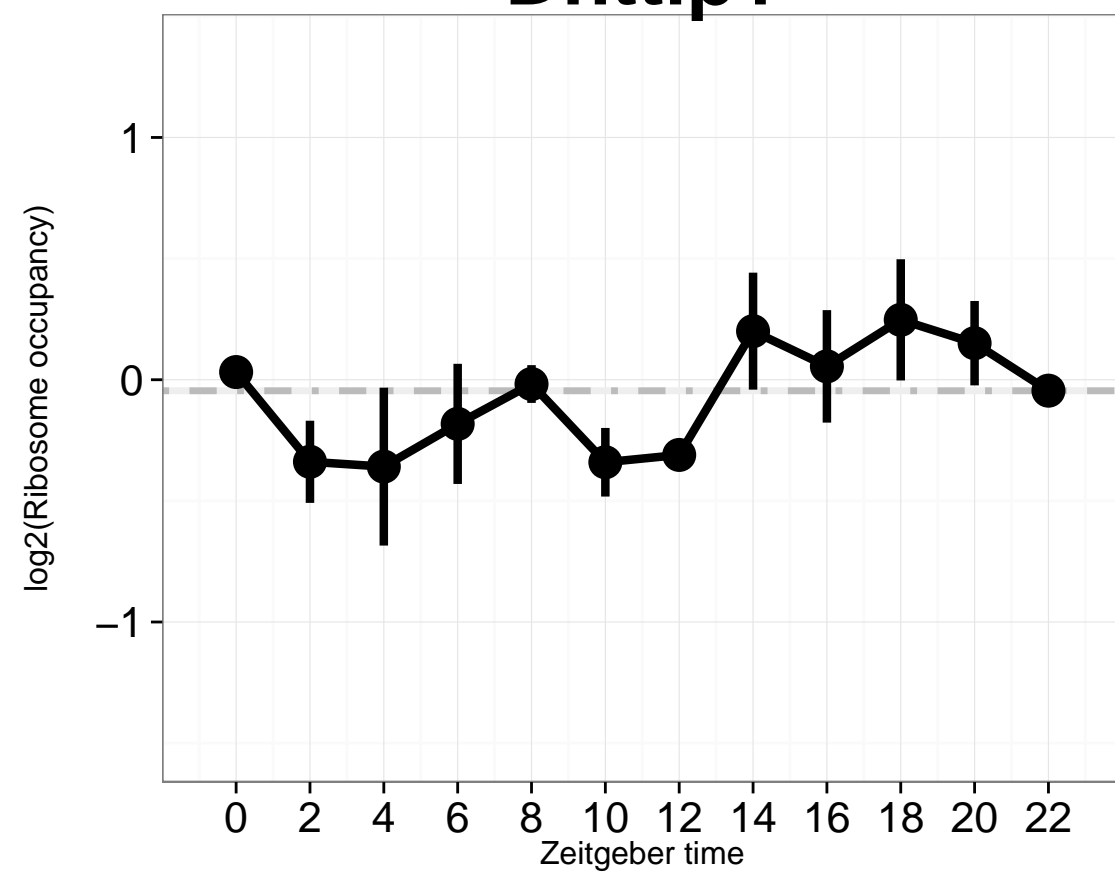

Supplement: SuppDataset_1.zip [file Dnttip1_set_B.pdf › Supplemental Dataset 1/B-mRNA_rhythm_translation_nonrhyth/Dnttip1_set_B.pdf]

## Dok2

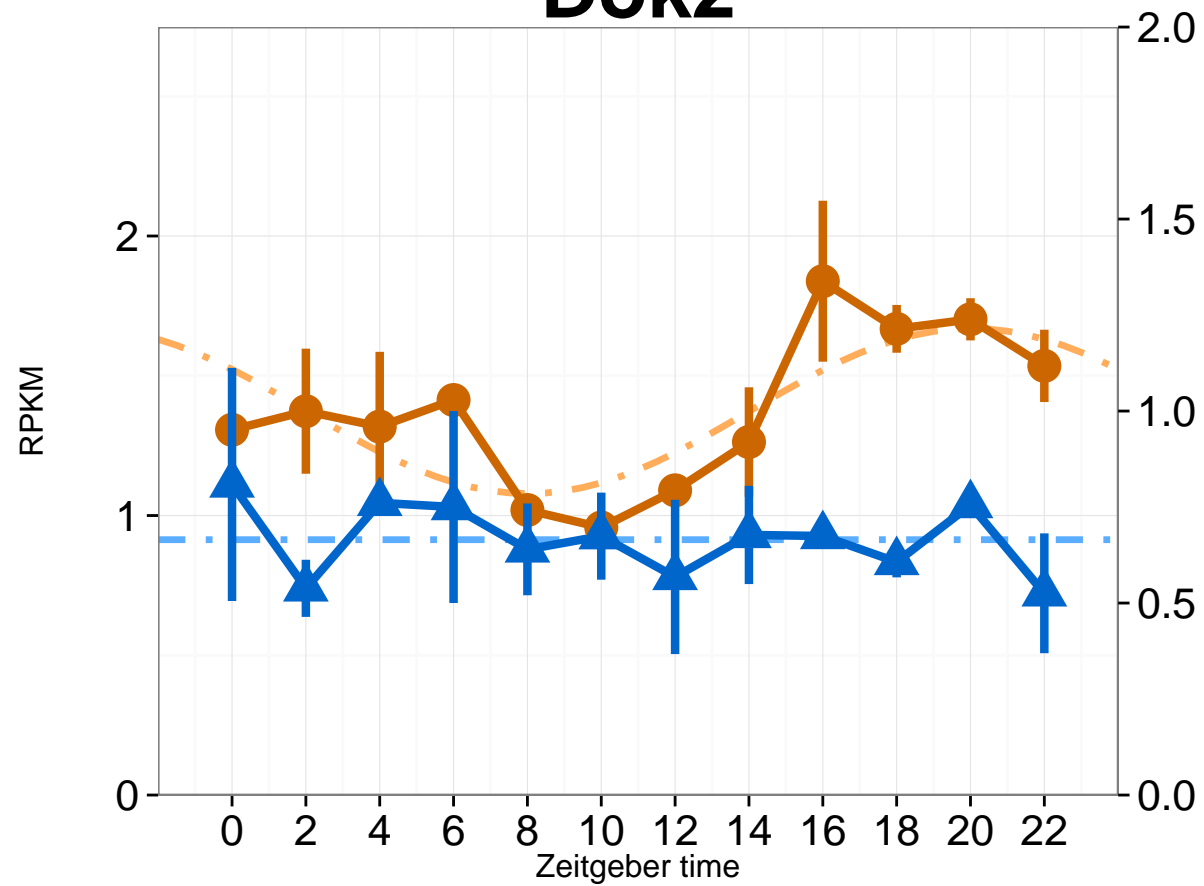

## Dok2

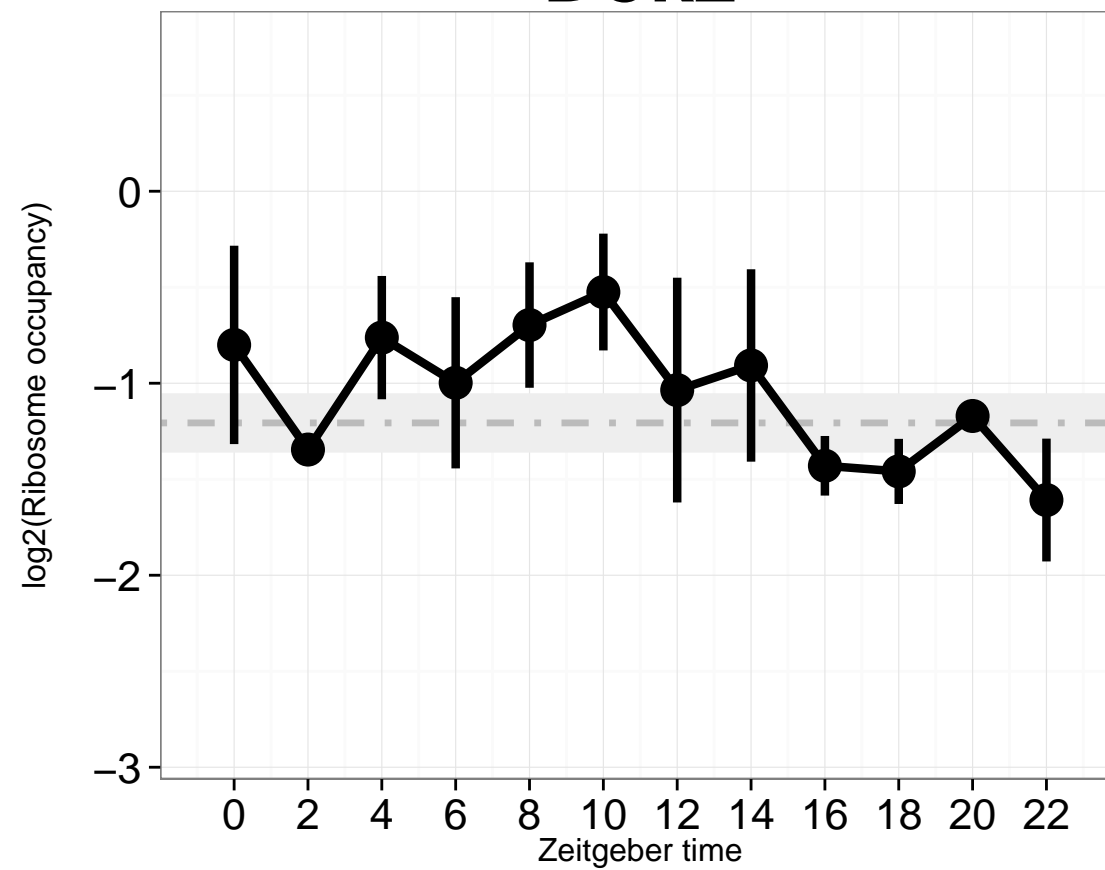

Supplement: SuppDataset_1.zip [file Dok2_set_B.pdf › Supplemental Dataset 1/B-mRNA_rhythm_translation_nonrhyth/Dok2_set_B.pdf]

## Dok4

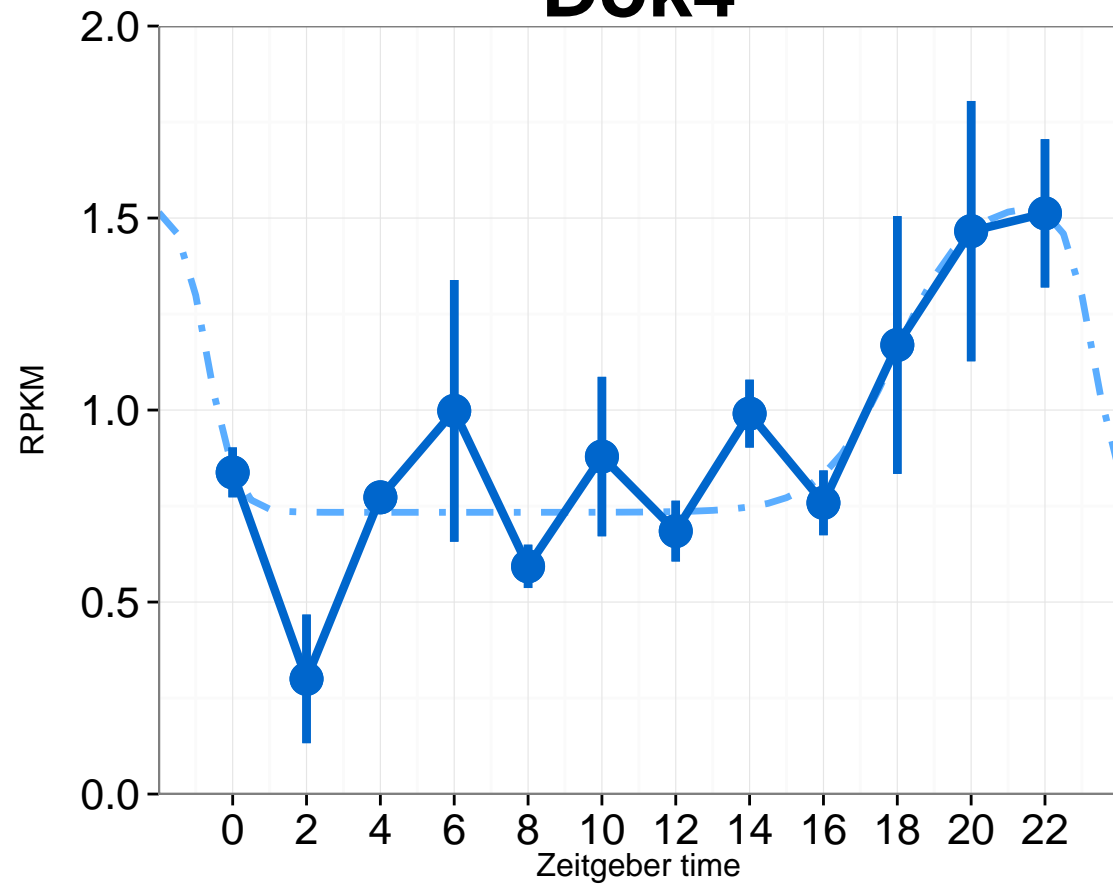

## Dok4 log2(Ribosome occupancy)

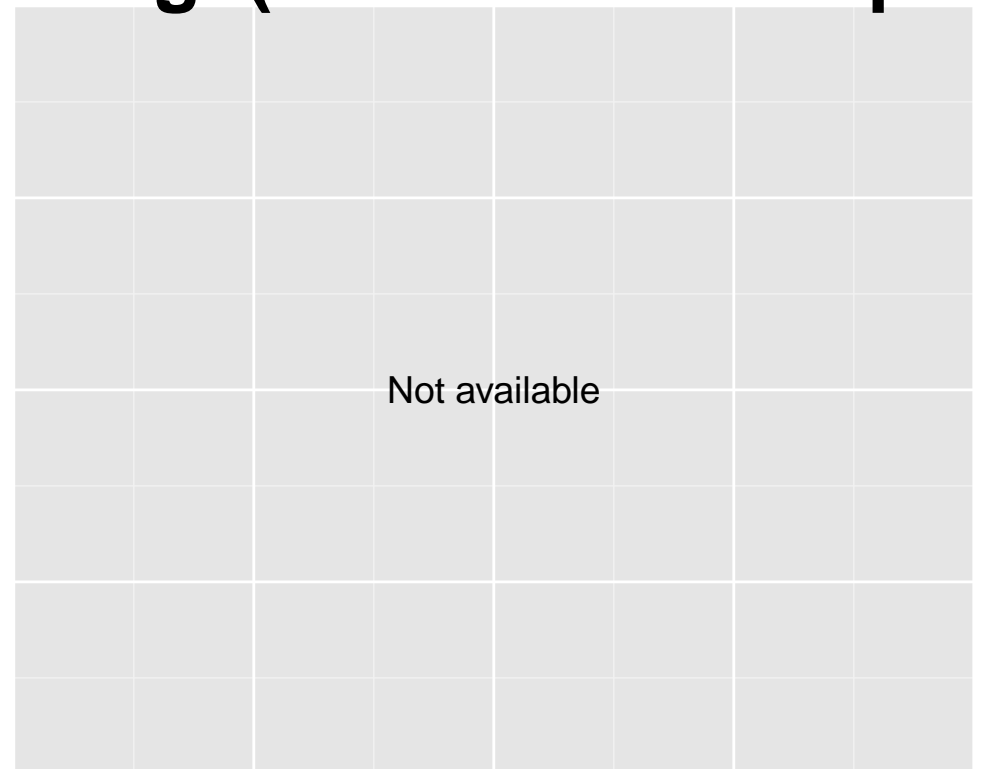

Supplement: SuppDataset_1.zip [file Dok4_set_B.pdf › Supplemental Dataset 1/B-mRNA_rhythm_translation_nonrhyth/Dok4_set_B.pdf]

## Dph3

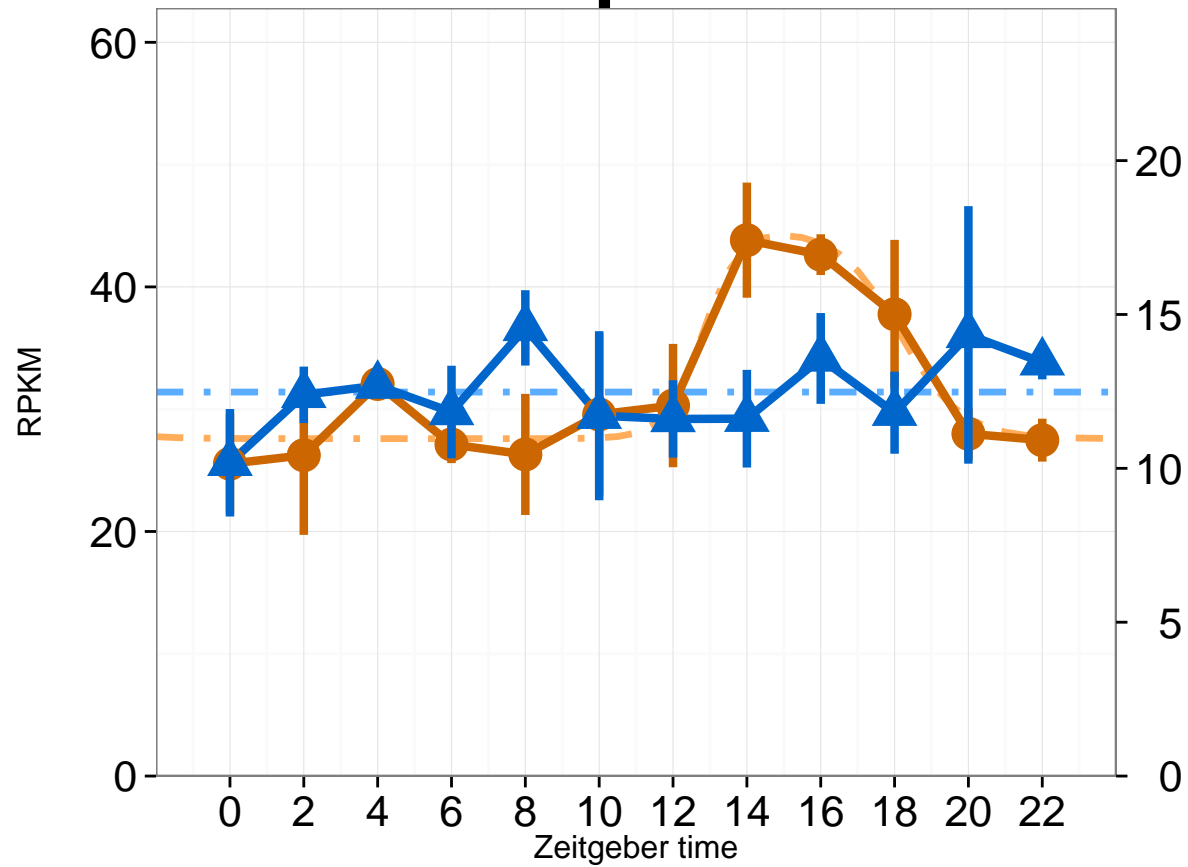

## Dph3

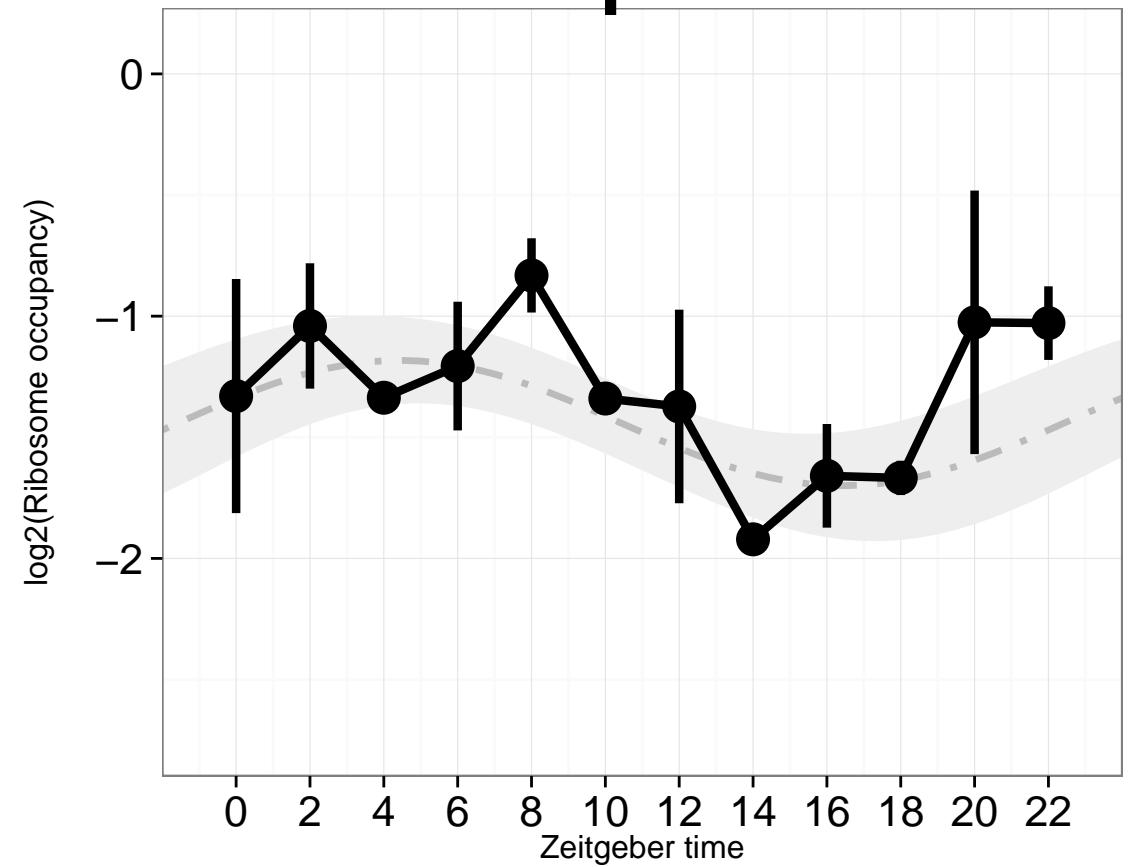

Supplement: SuppDataset_1.zip [file Dph3_set_B.pdf › Supplemental Dataset 1/B-mRNA_rhythm_translation_nonrhyth/Dph3_set_B.pdf]

## Dpysl2

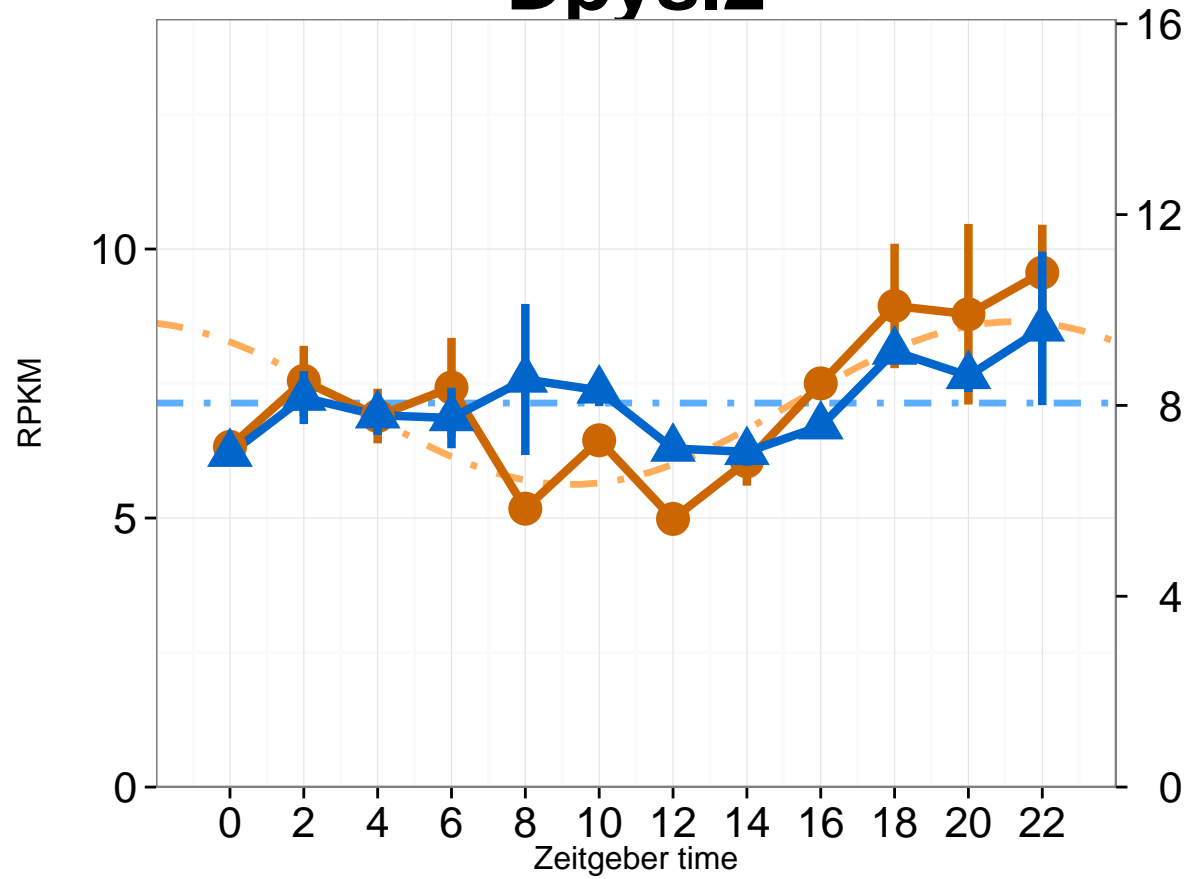

## Dpysl2

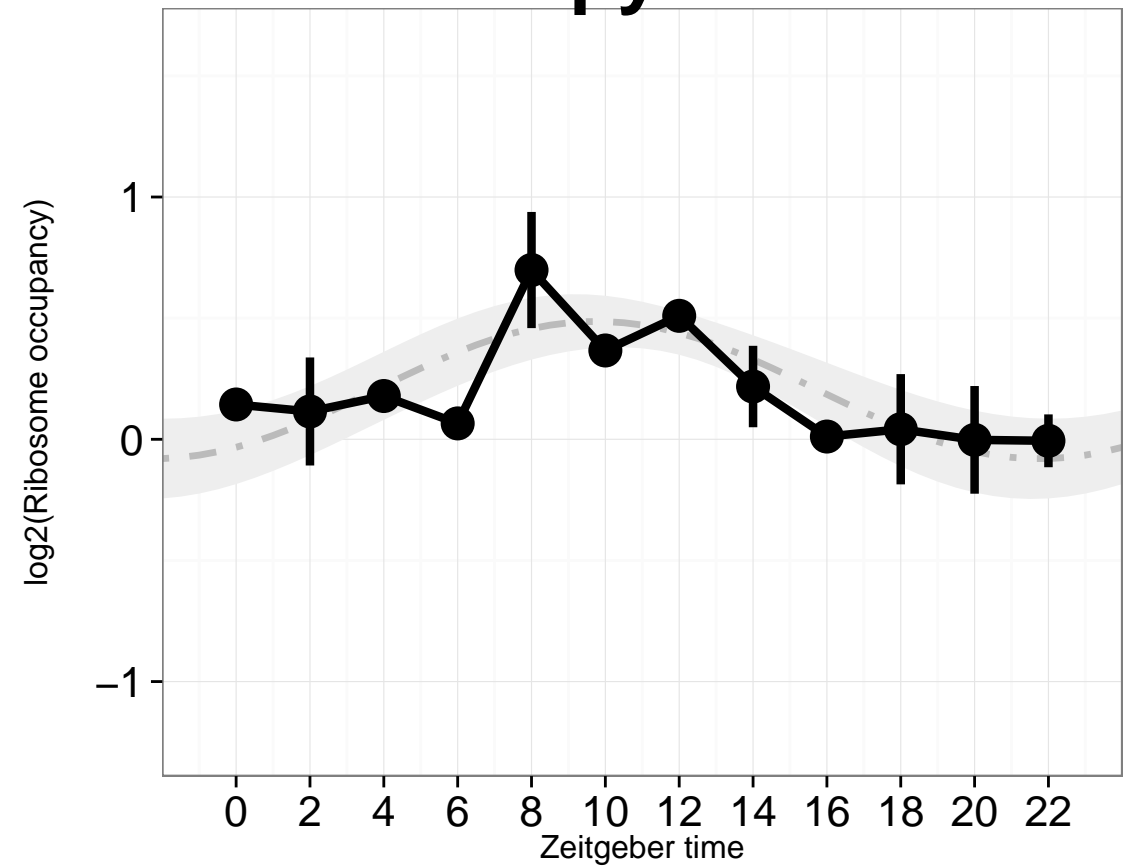

Supplement: SuppDataset_1.zip [file Dpysl2_set_B.pdf › Supplemental Dataset 1/B-mRNA_rhythm_translation_nonrhyth/Dpysl2_set_B.pdf]

# Dqx1

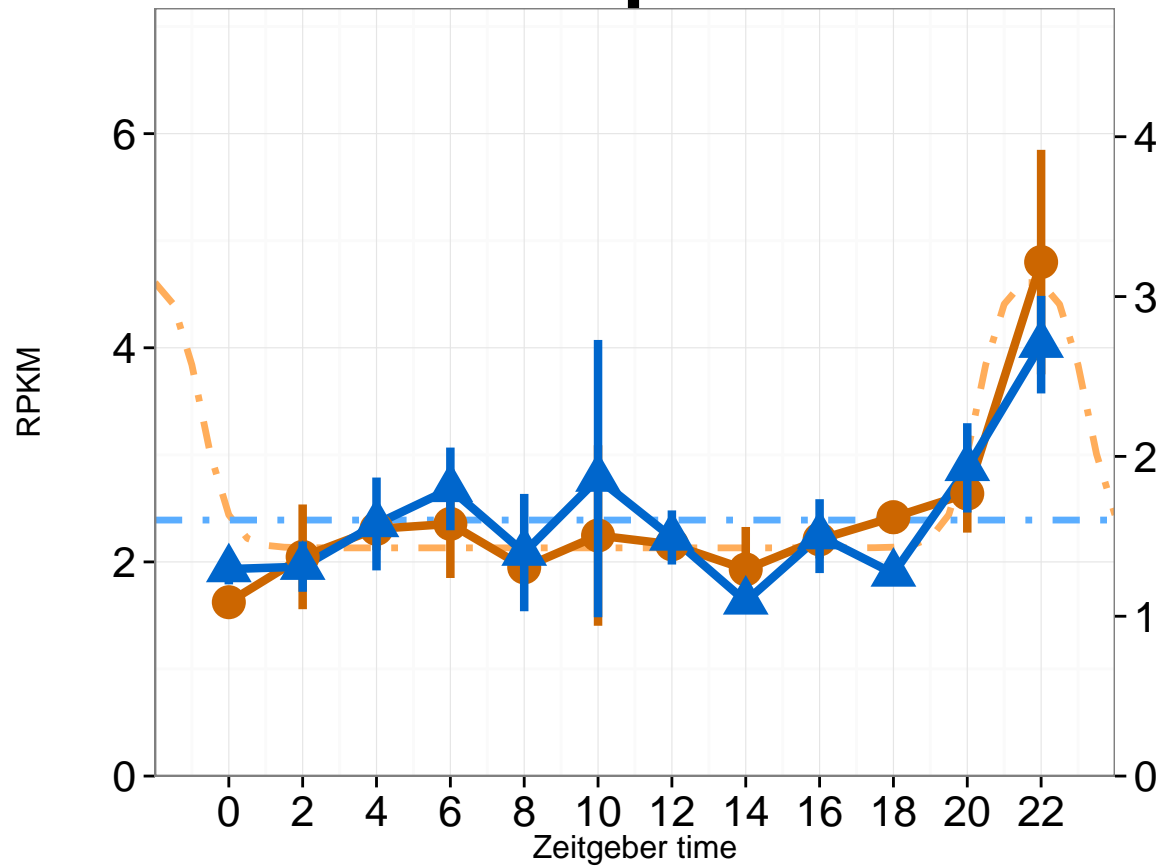

# Dqx1

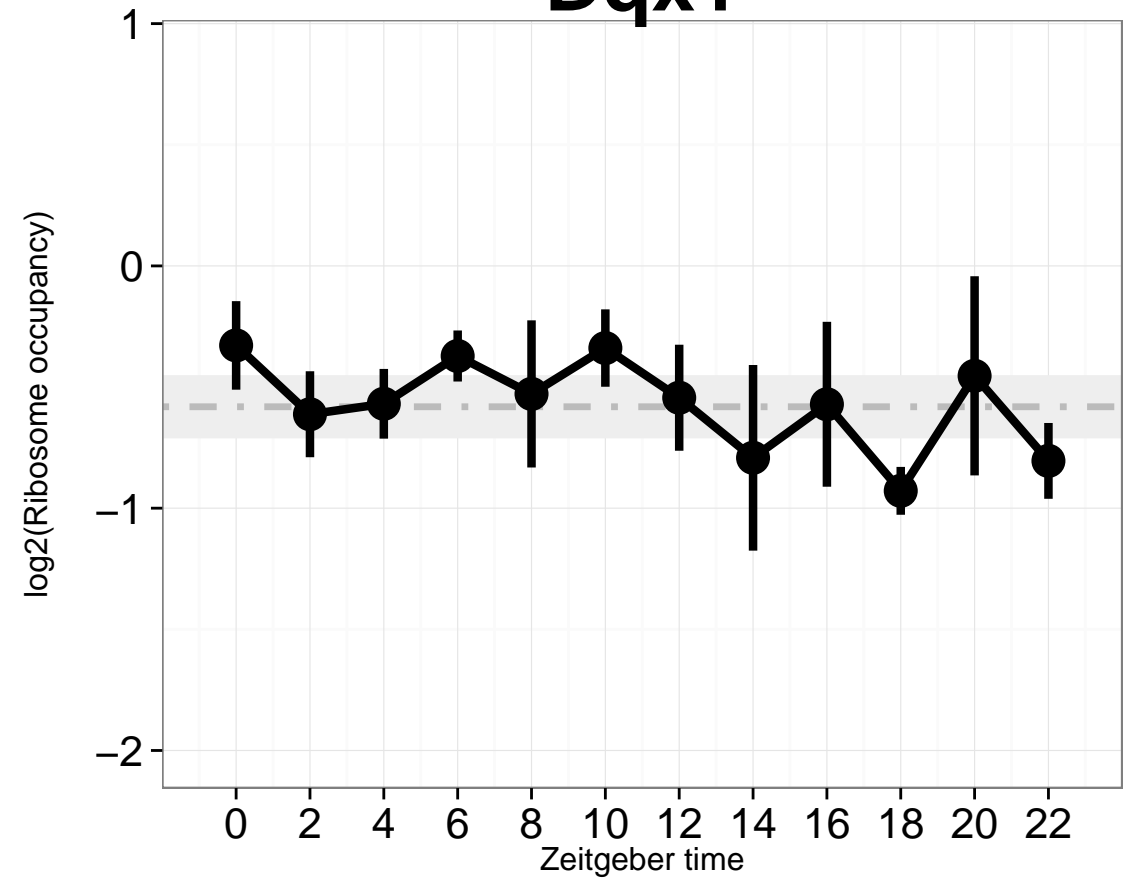

Supplement: SuppDataset_1.zip [file Dqx1_set_B.pdf › Supplemental Dataset 1/B-mRNA_rhythm_translation_nonrhyth/Dqx1_set_B.pdf]

# Dusp19

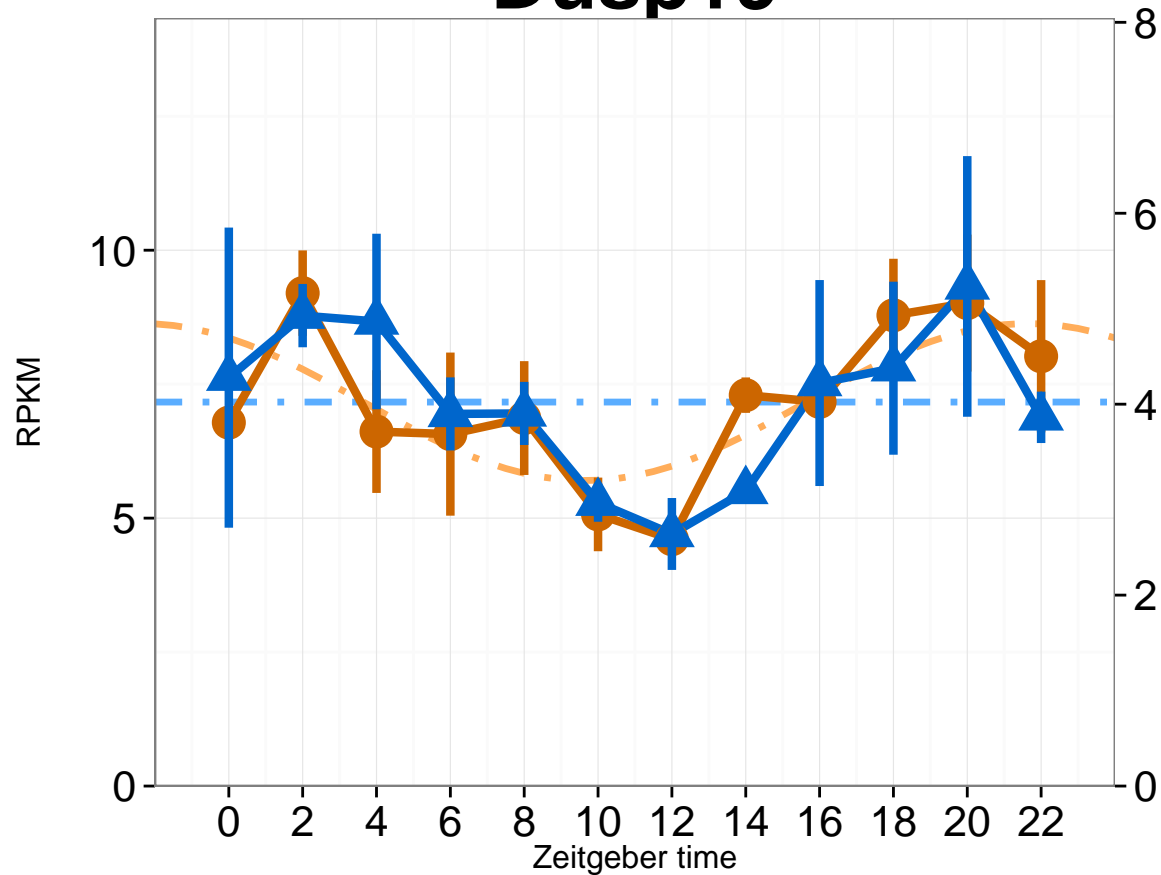

# Dusp19

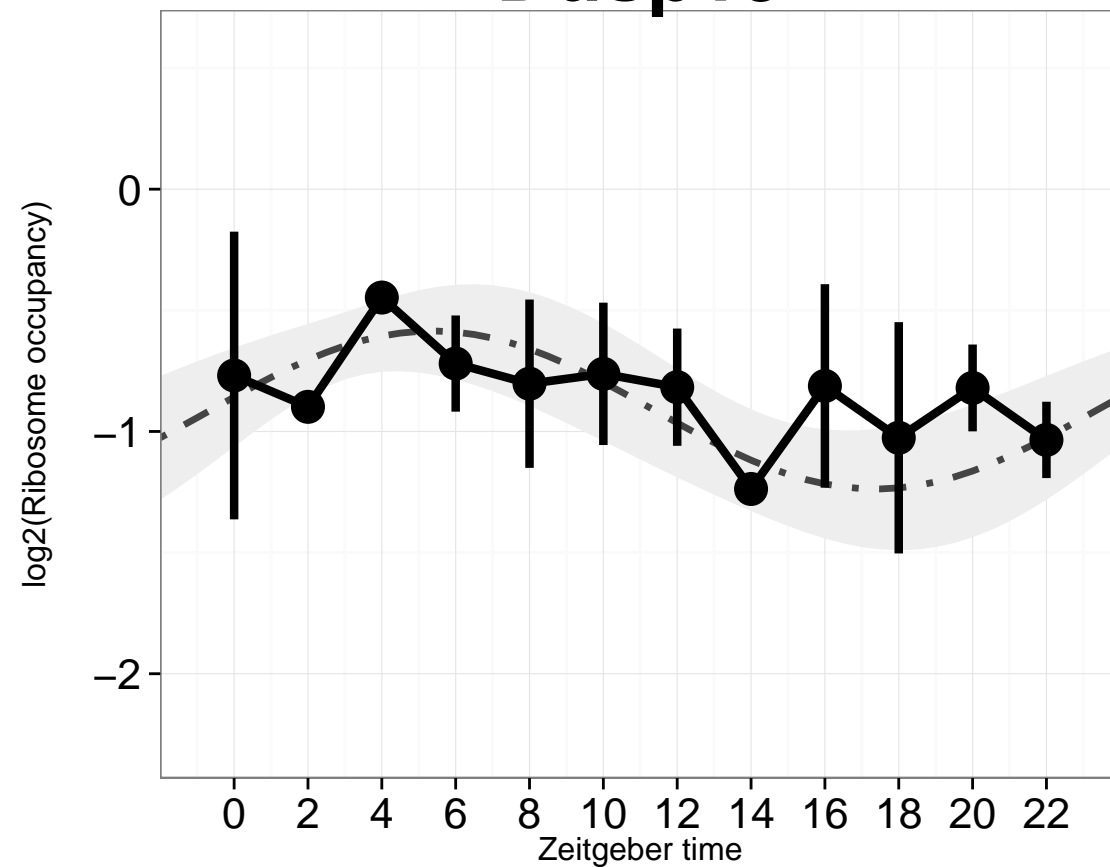

Supplement: SuppDataset_1.zip [file Dusp19_set_B.pdf › Supplemental Dataset 1/B-mRNA_rhythm_translation_nonrhyth/Dusp19_set_B.pdf]

## Dusp3

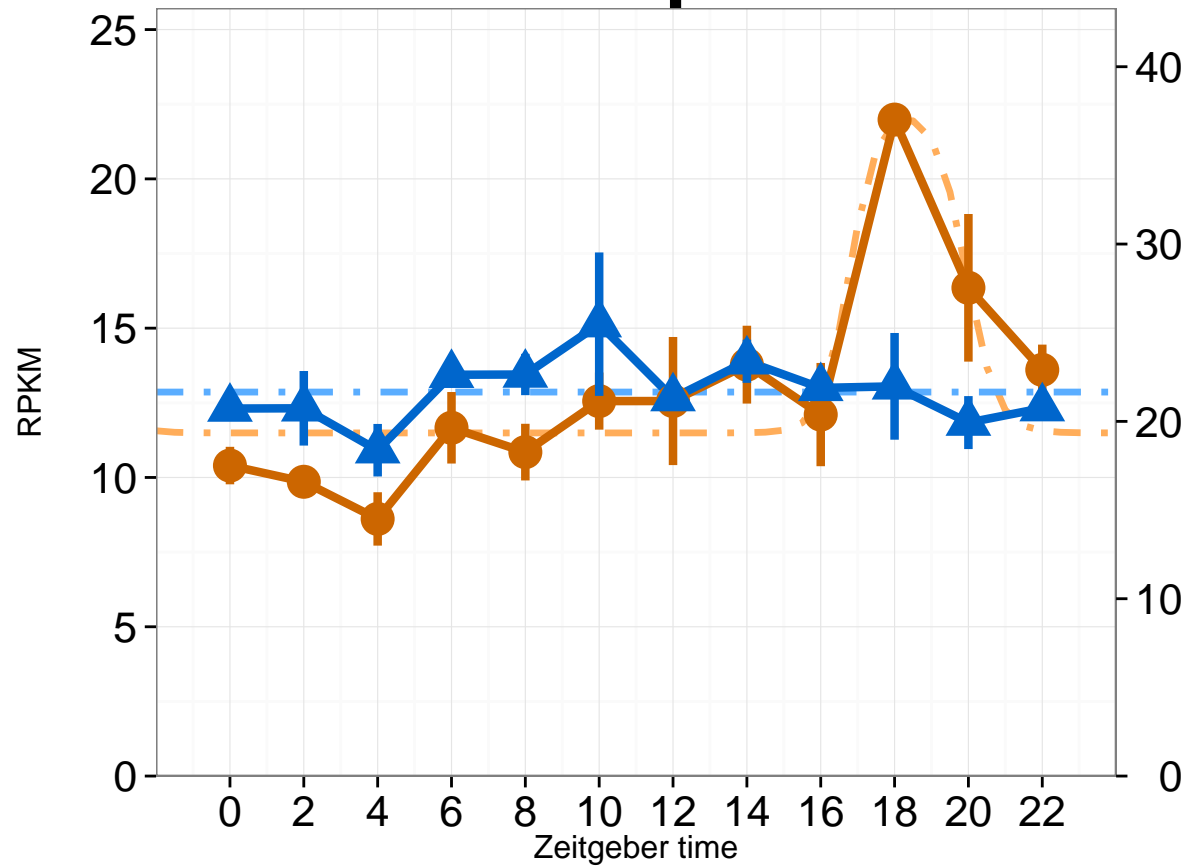

## Dusp3

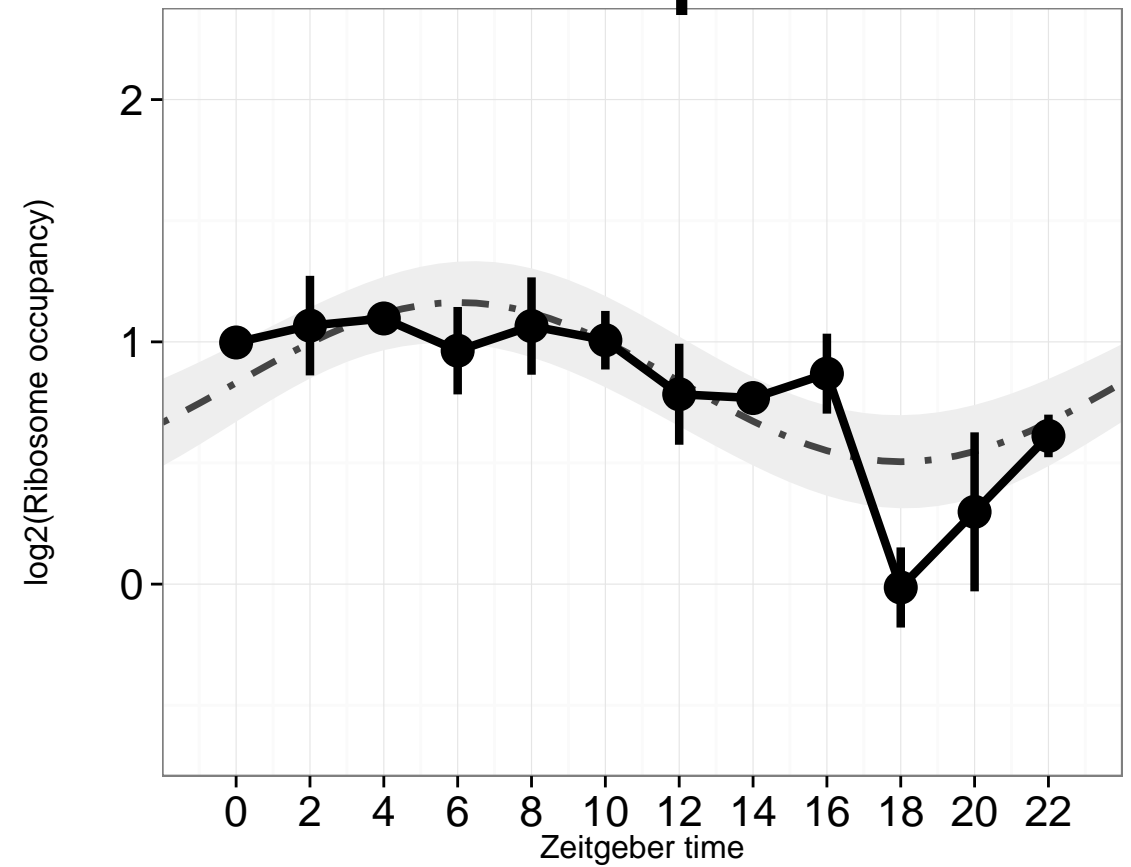

Supplement: SuppDataset_1.zip [file Dusp3_set_B.pdf › Supplemental Dataset 1/B-mRNA_rhythm_translation_nonrhyth/Dusp3_set_B.pdf]

## Dusp7

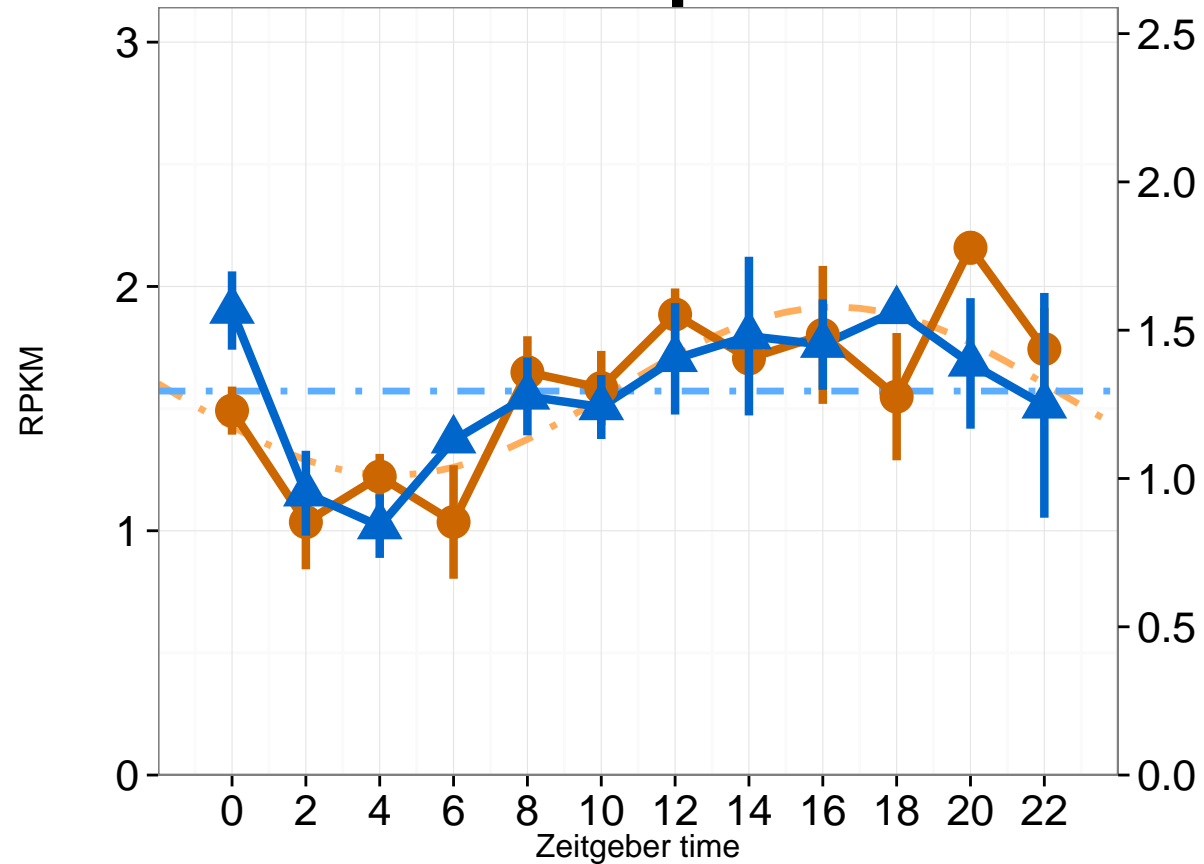

## Dusp7

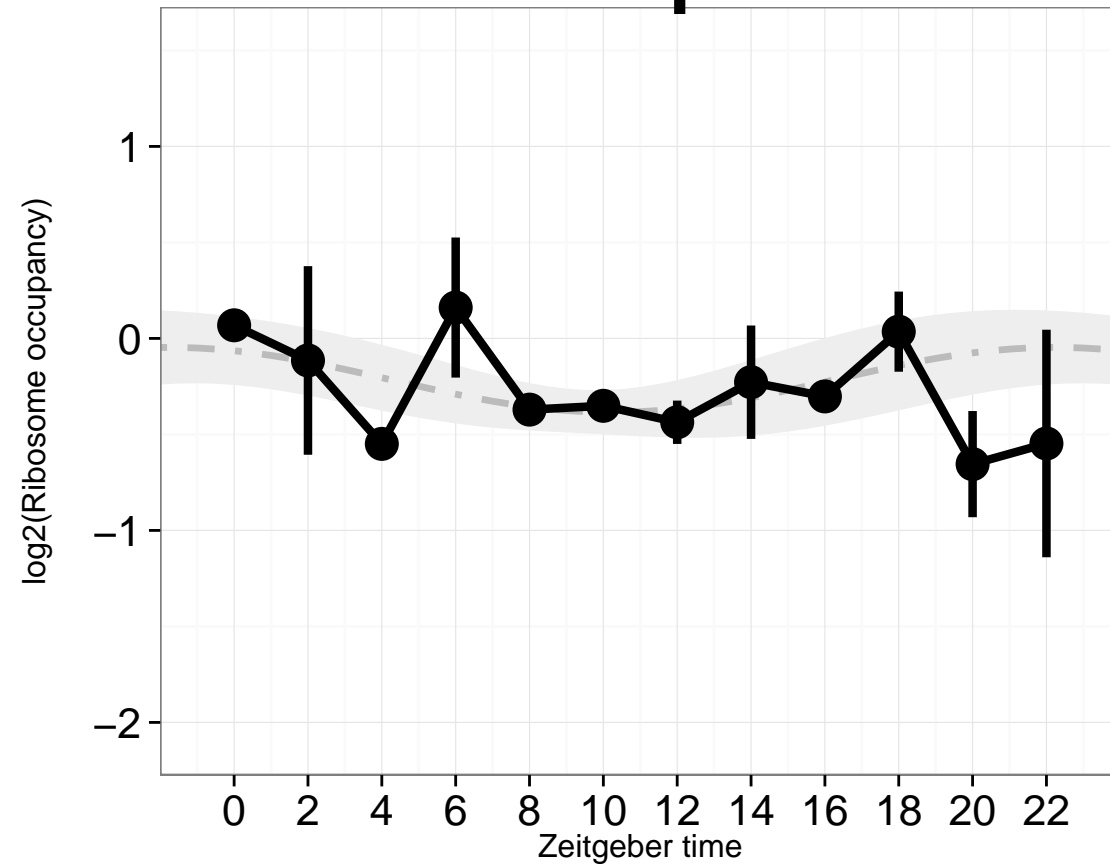

Supplement: SuppDataset_1.zip [file Dusp7_set_B.pdf › Supplemental Dataset 1/B-mRNA_rhythm_translation_nonrhyth/Dusp7_set_B.pdf]

# DynII1

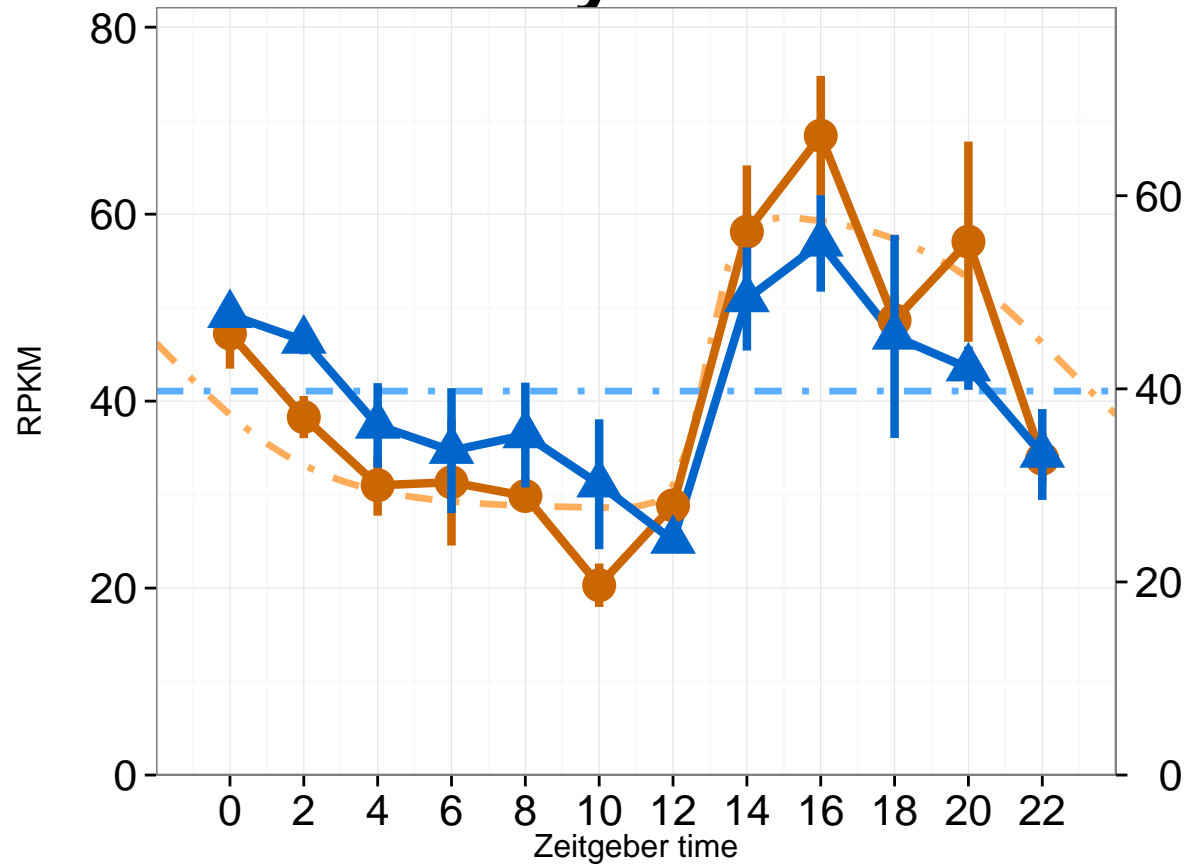

# DynII1

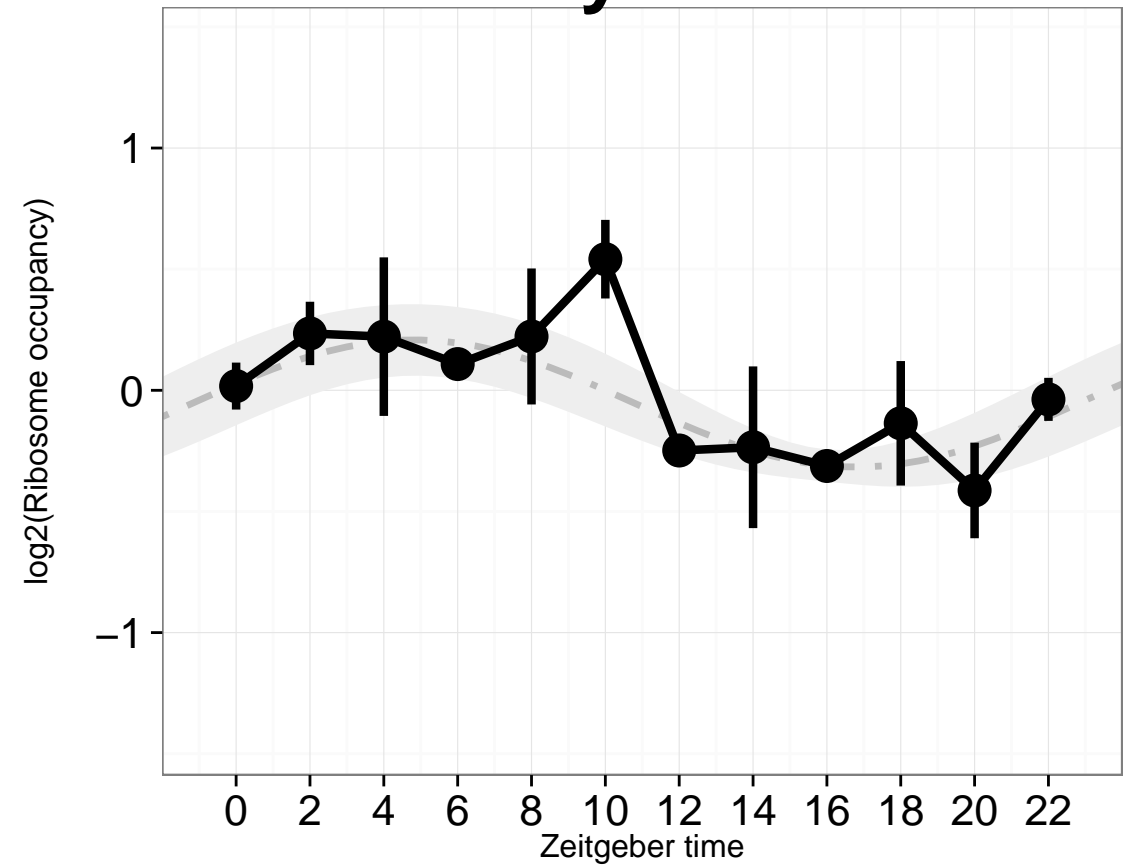

Supplement: SuppDataset_1.zip [file Dynll1_set_B.pdf › Supplemental Dataset 1/B-mRNA_rhythm_translation_nonrhyth/Dynll1_set_B.pdf]

## Dyrk2

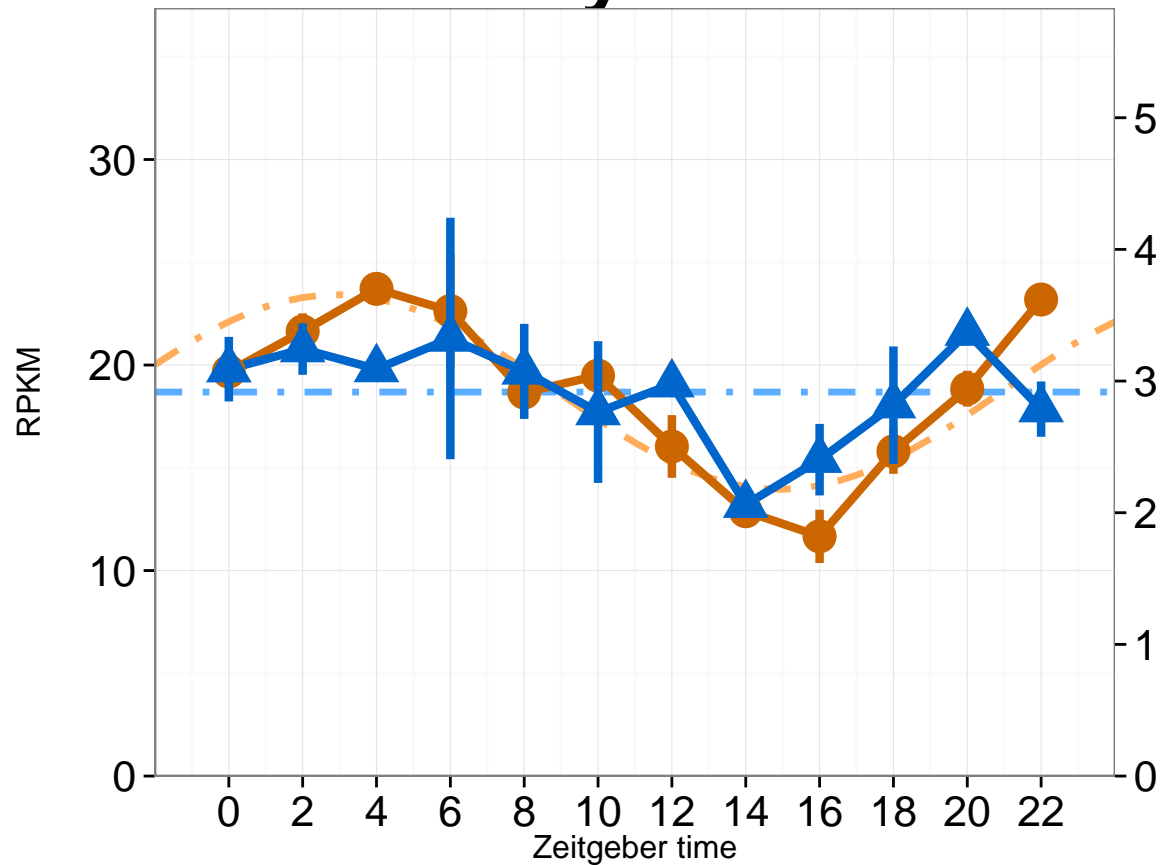

## Dyrk2

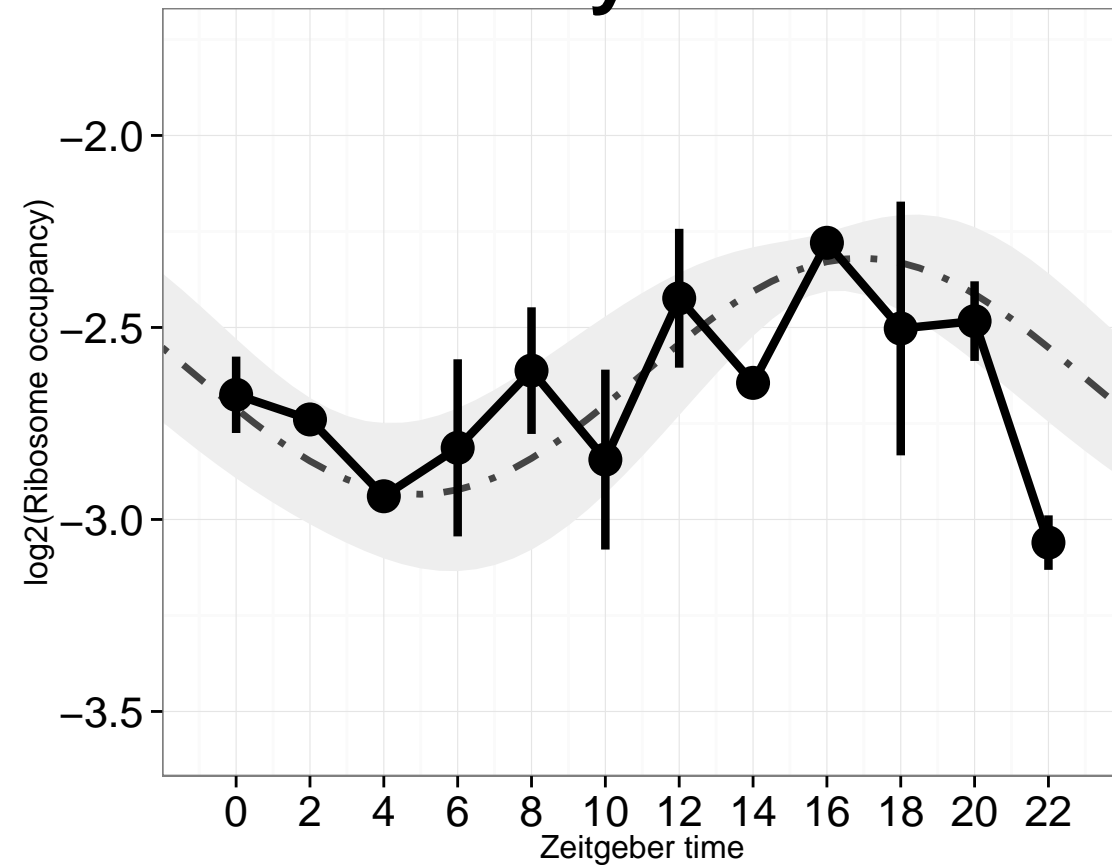

Supplement: SuppDataset_1.zip [file Dyrk2_set_B.pdf › Supplemental Dataset 1/B-mRNA_rhythm_translation_nonrhyth/Dyrk2_set_B.pdf]

## E2f1

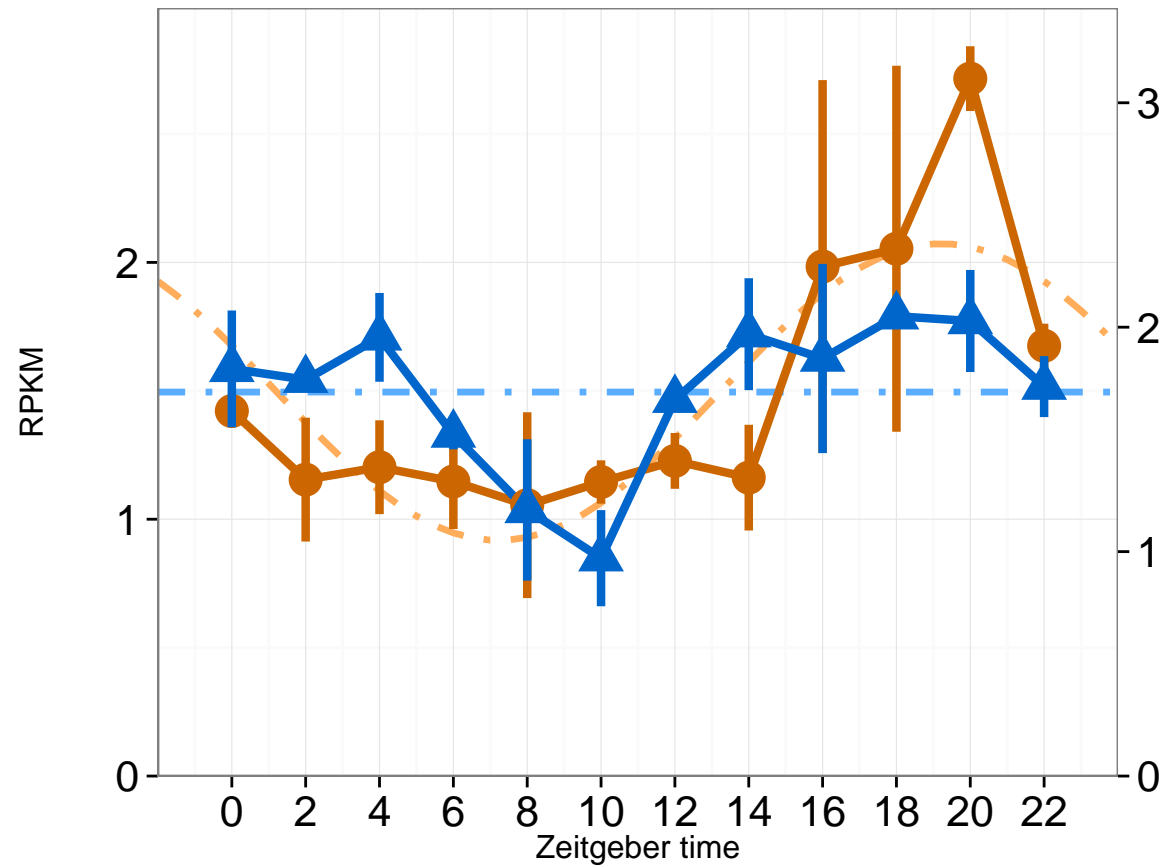

## E2f1

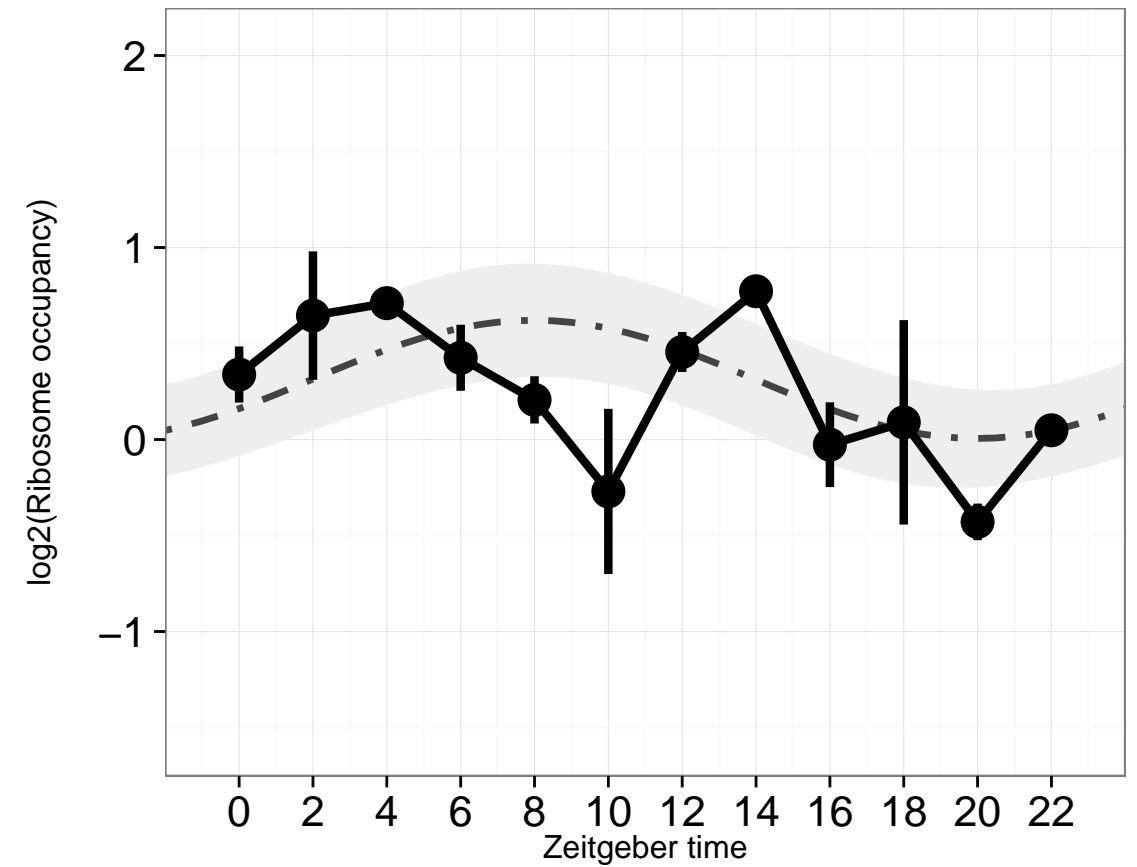

Supplement: SuppDataset_1.zip [file E2f1_set_B.pdf › Supplemental Dataset 1/B-mRNA_rhythm_translation_nonrhyth/E2f1_set_B.pdf]

## E4f1

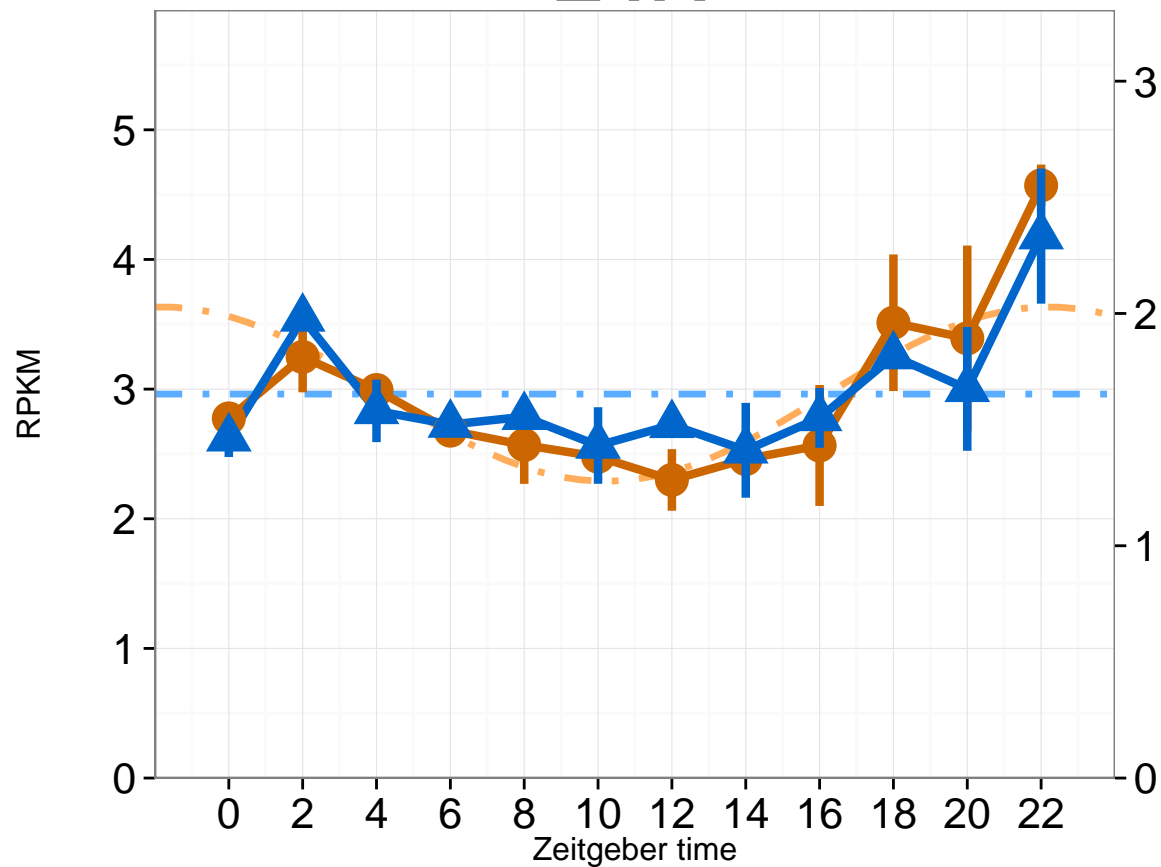

## E4f1

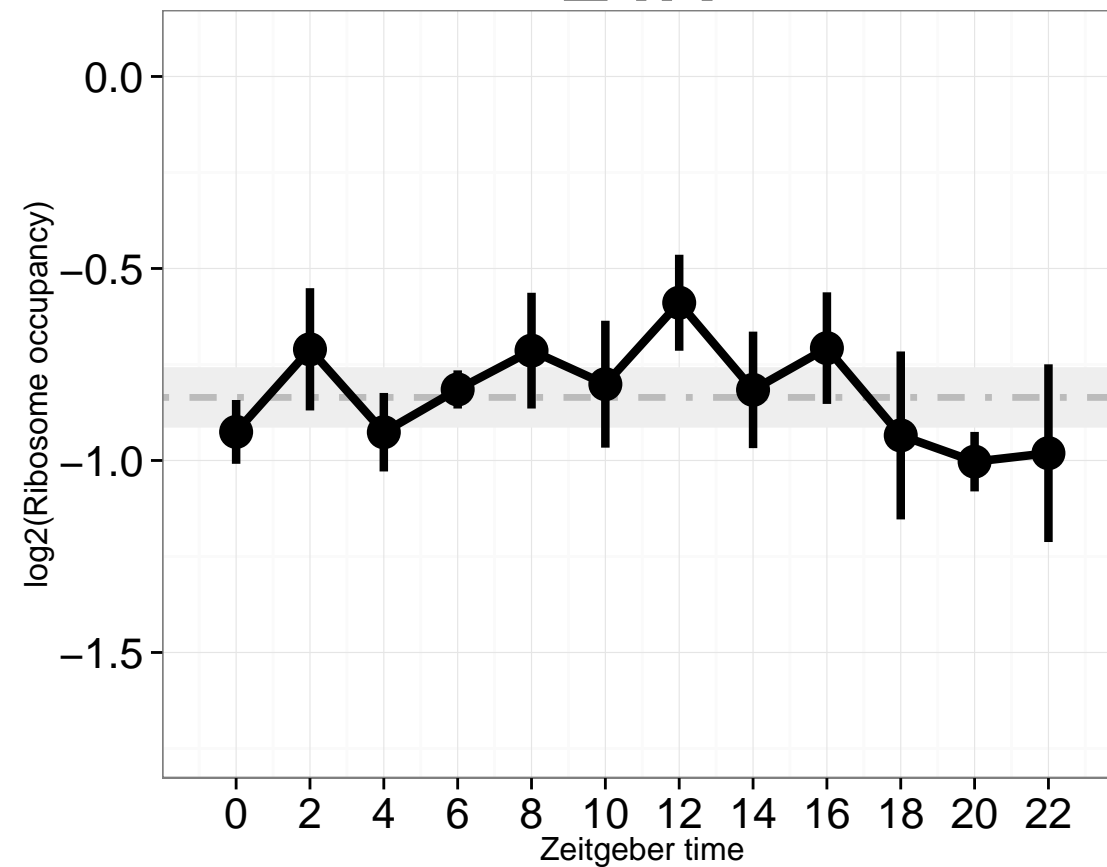

Supplement: SuppDataset_1.zip [file E4f1_set_B.pdf › Supplemental Dataset 1/B-mRNA_rhythm_translation_nonrhyth/E4f1_set_B.pdf]

## Ecm1

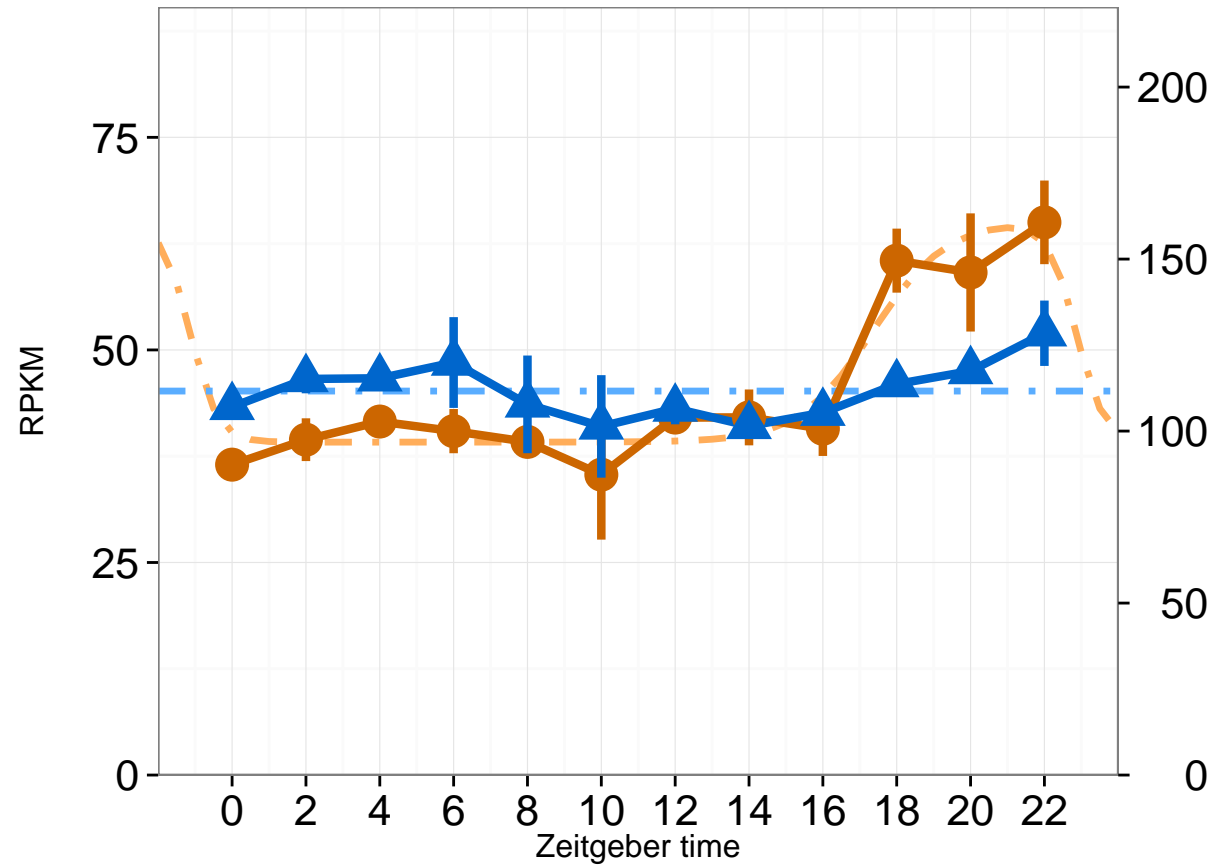

## Ecm1

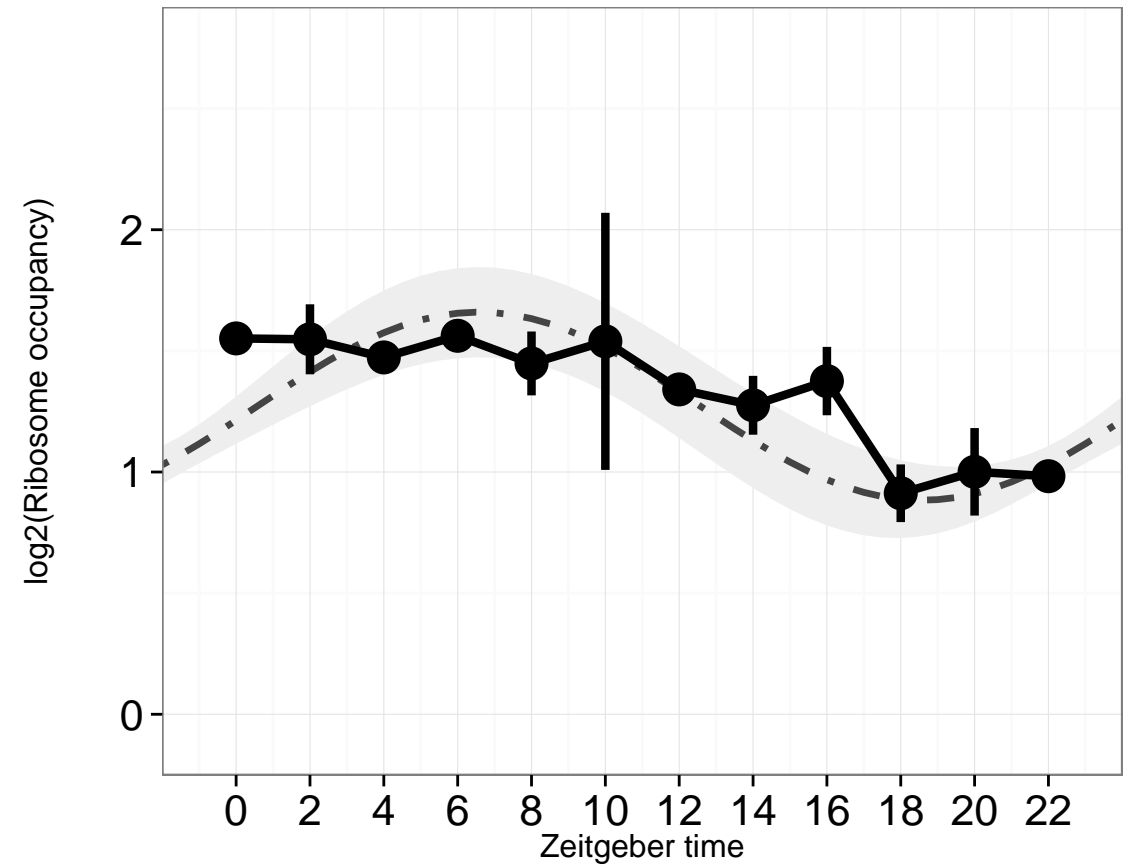

Supplement: SuppDataset_1.zip [file Ecm1_set_B.pdf › Supplemental Dataset 1/B-mRNA_rhythm_translation_nonrhyth/Ecm1_set_B.pdf]

## Ednrb

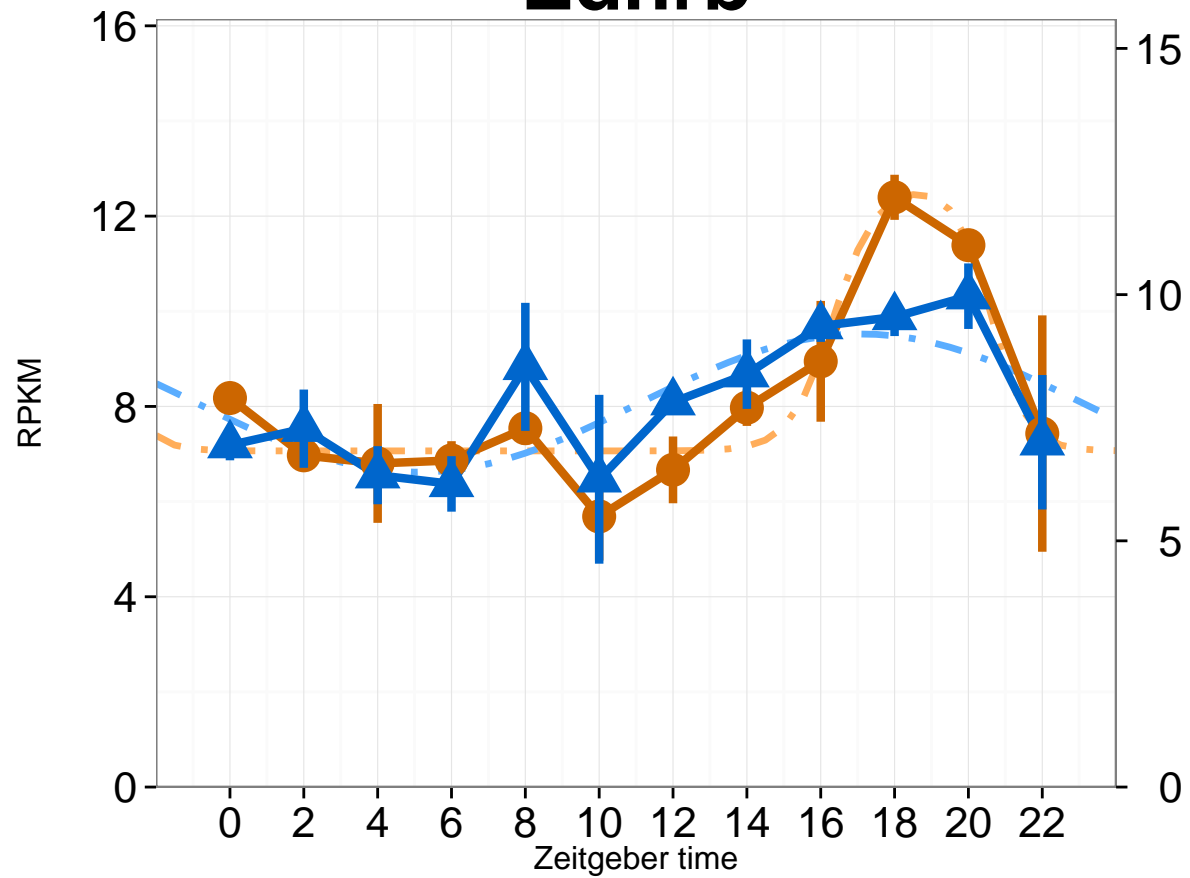

## Ednrb

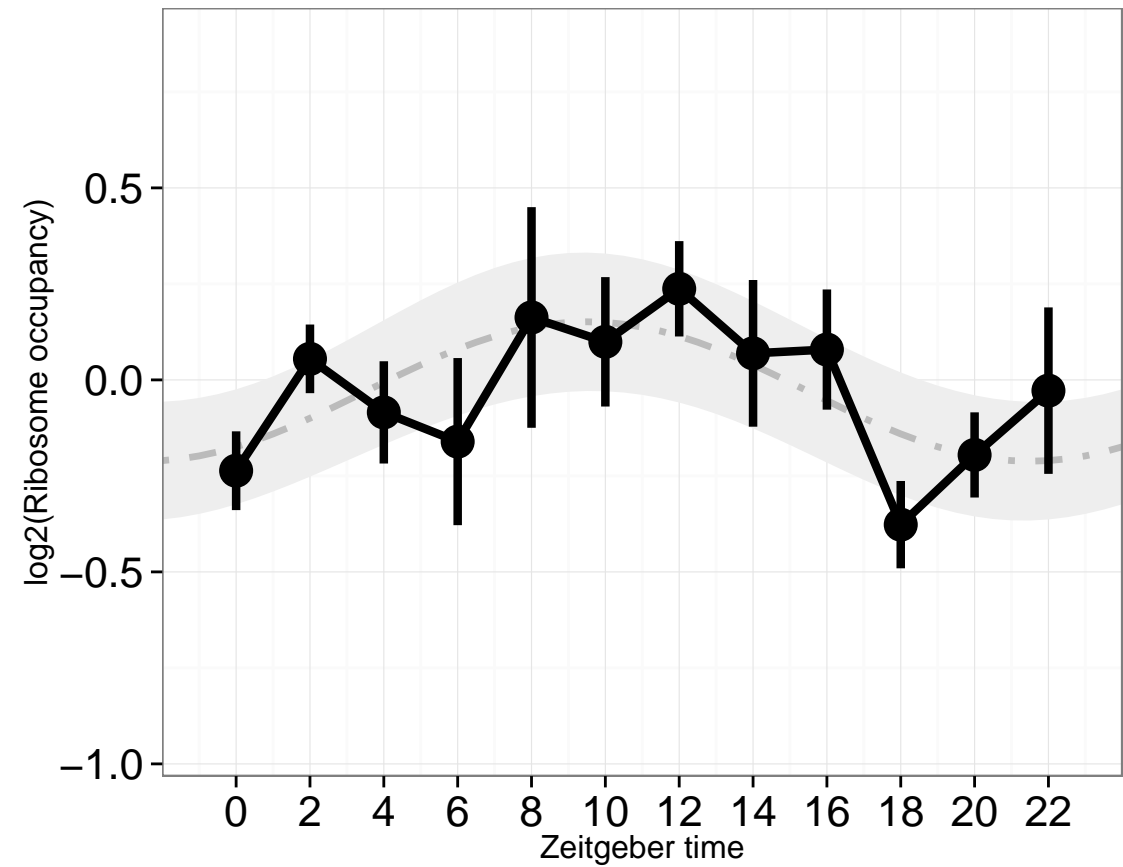

Supplement: SuppDataset_1.zip [file Ednrb_set_B.pdf › Supplemental Dataset 1/B-mRNA_rhythm_translation_nonrhyth/Ednrb_set_B.pdf]

# Efna1

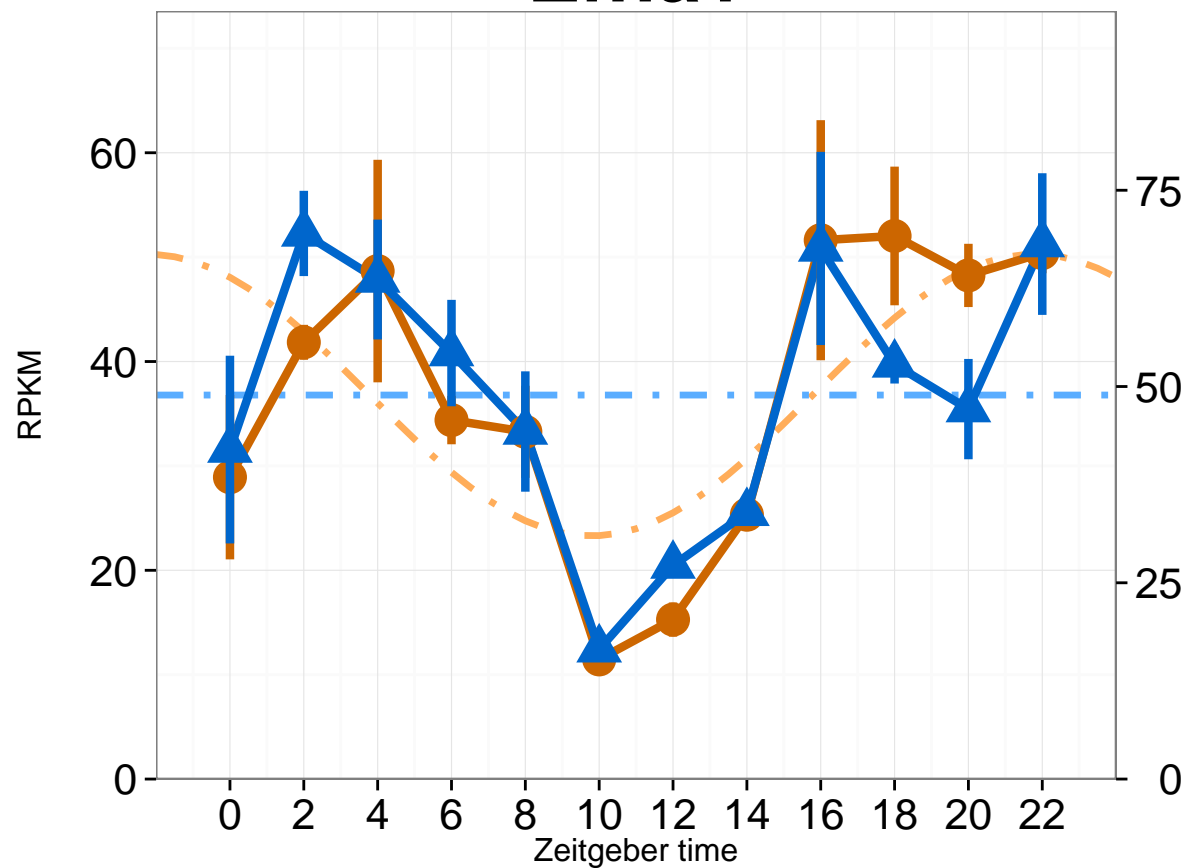

# Efna1

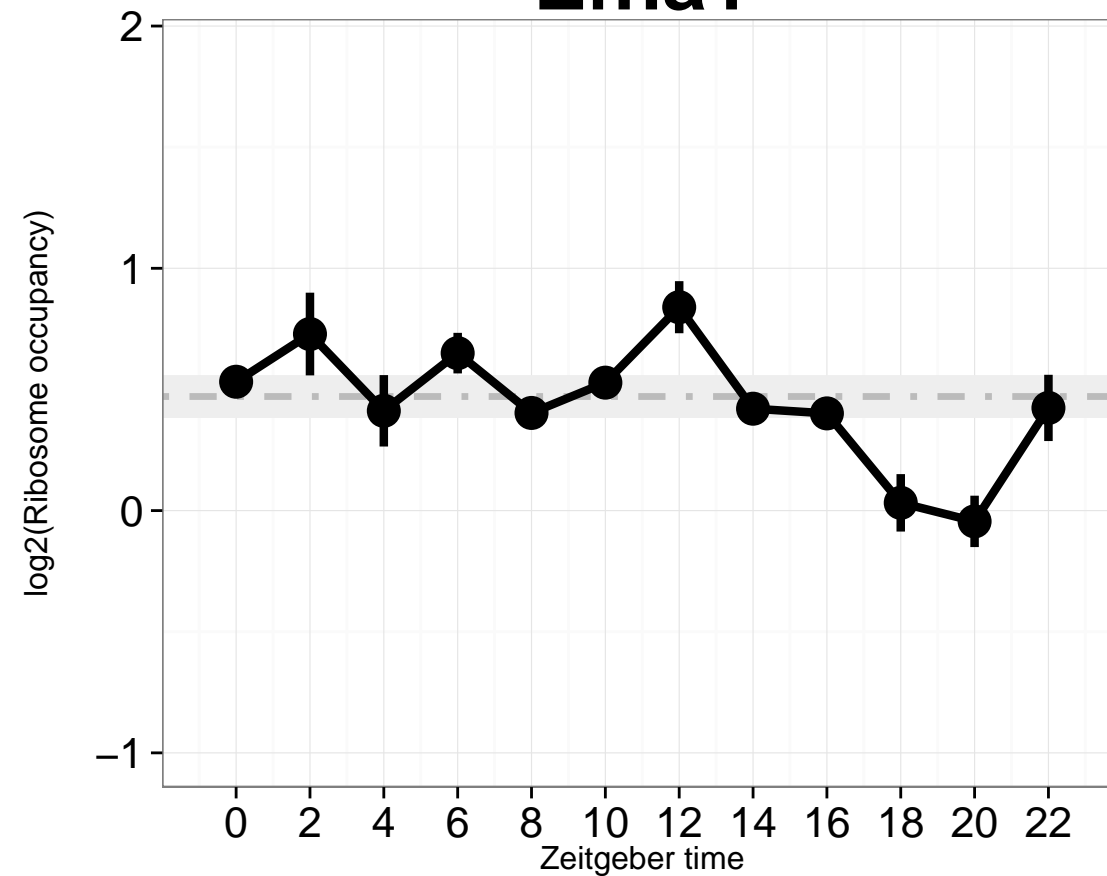

Supplement: SuppDataset_1.zip [file Efna1_set_B.pdf › Supplemental Dataset 1/B-mRNA_rhythm_translation_nonrhyth/Efna1_set_B.pdf]

## Ehd3

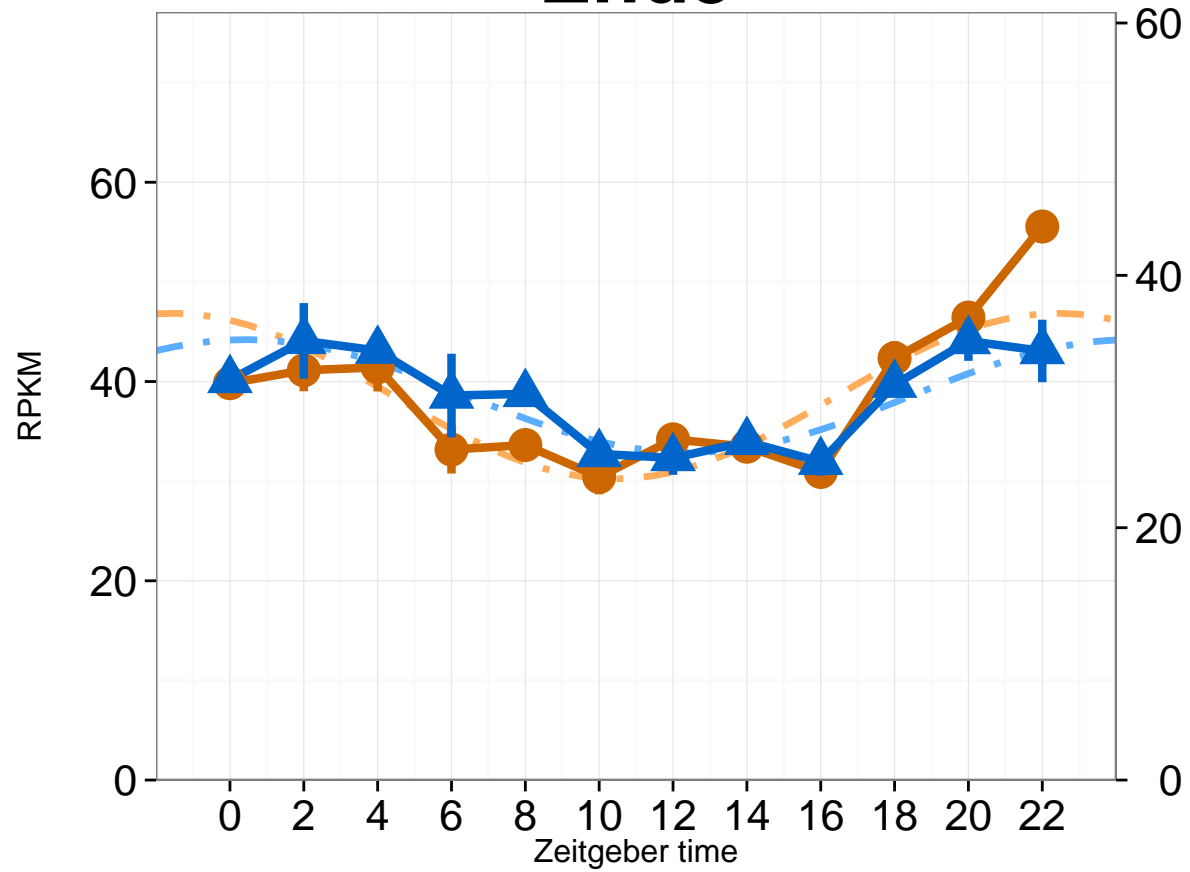

## Ehd3

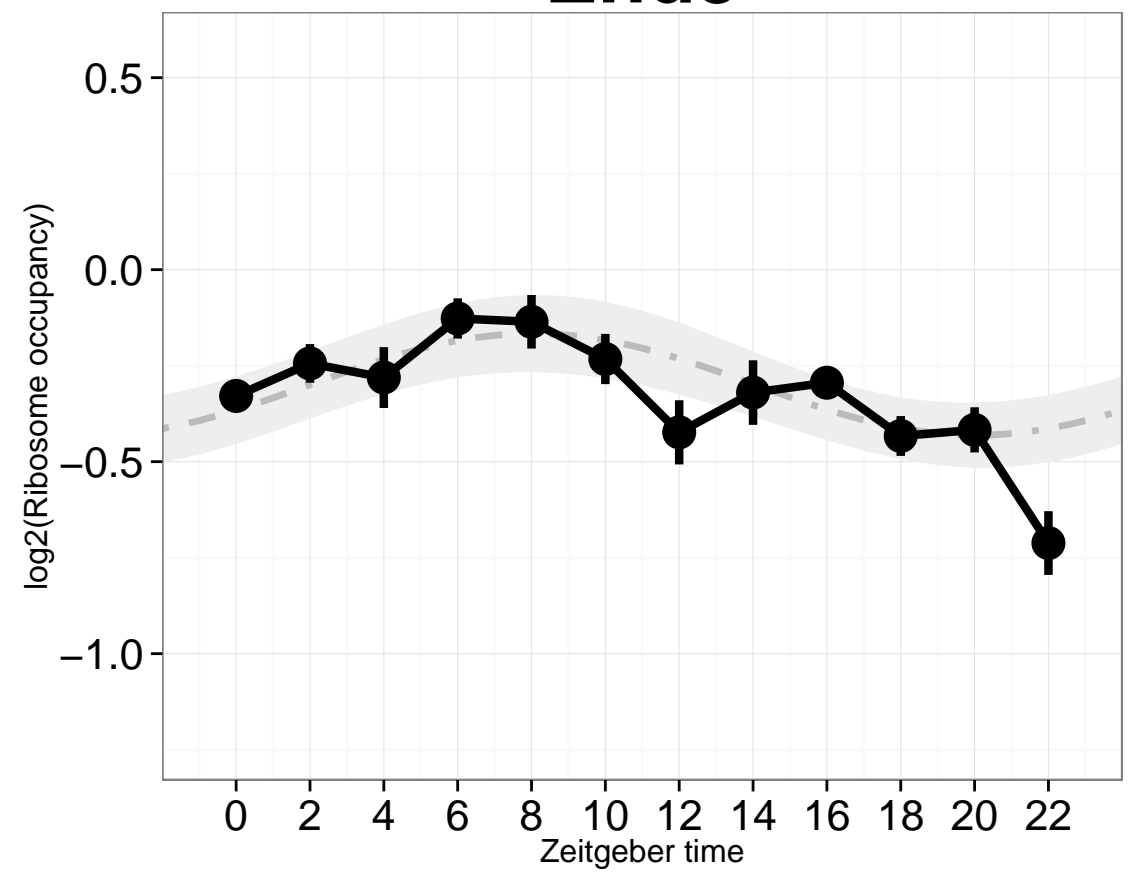

Supplement: SuppDataset_1.zip [file Ehd3_set_B.pdf › Supplemental Dataset 1/B-mRNA_rhythm_translation_nonrhyth/Ehd3_set_B.pdf]

## Eid1

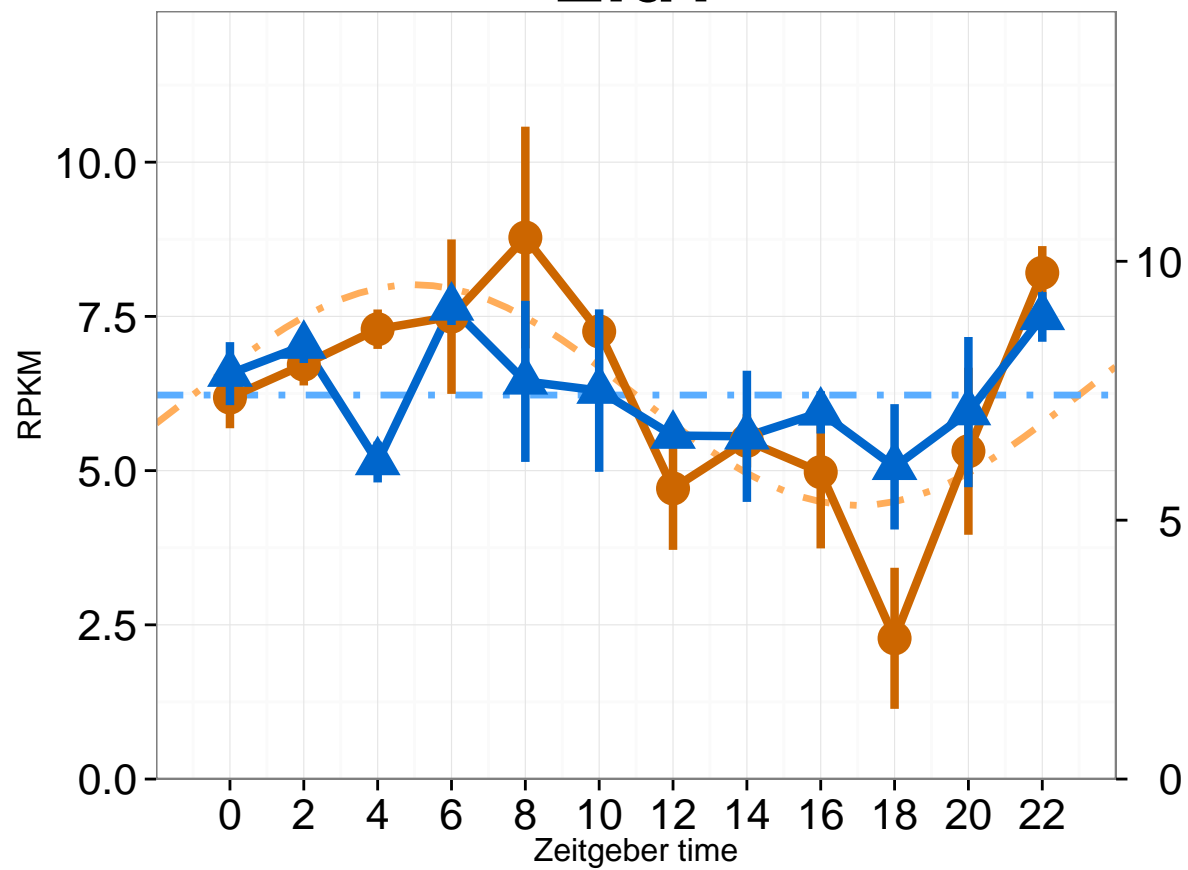

## Eid1

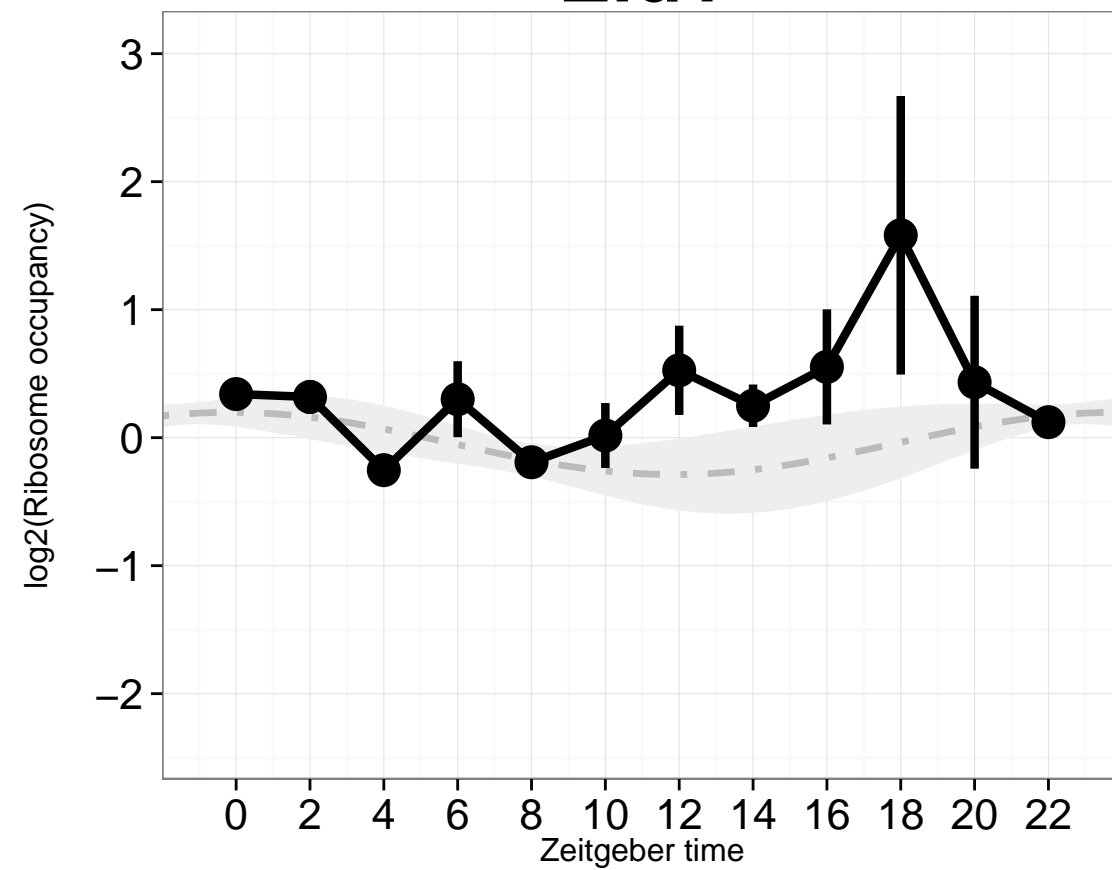

Supplement: SuppDataset_1.zip [file Eid1_set_B.pdf › Supplemental Dataset 1/B-mRNA_rhythm_translation_nonrhyth/Eid1_set_B.pdf]

# Eif3j1

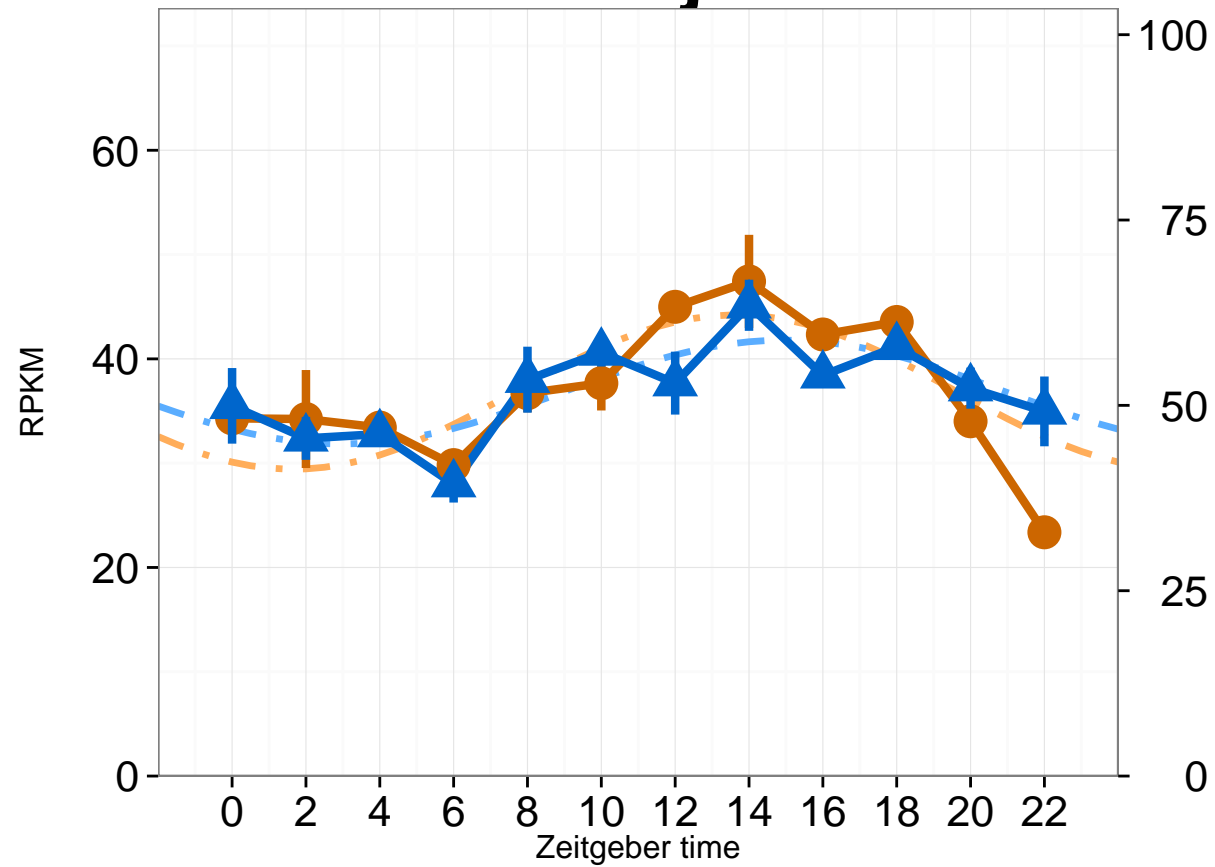

# Eif3j1

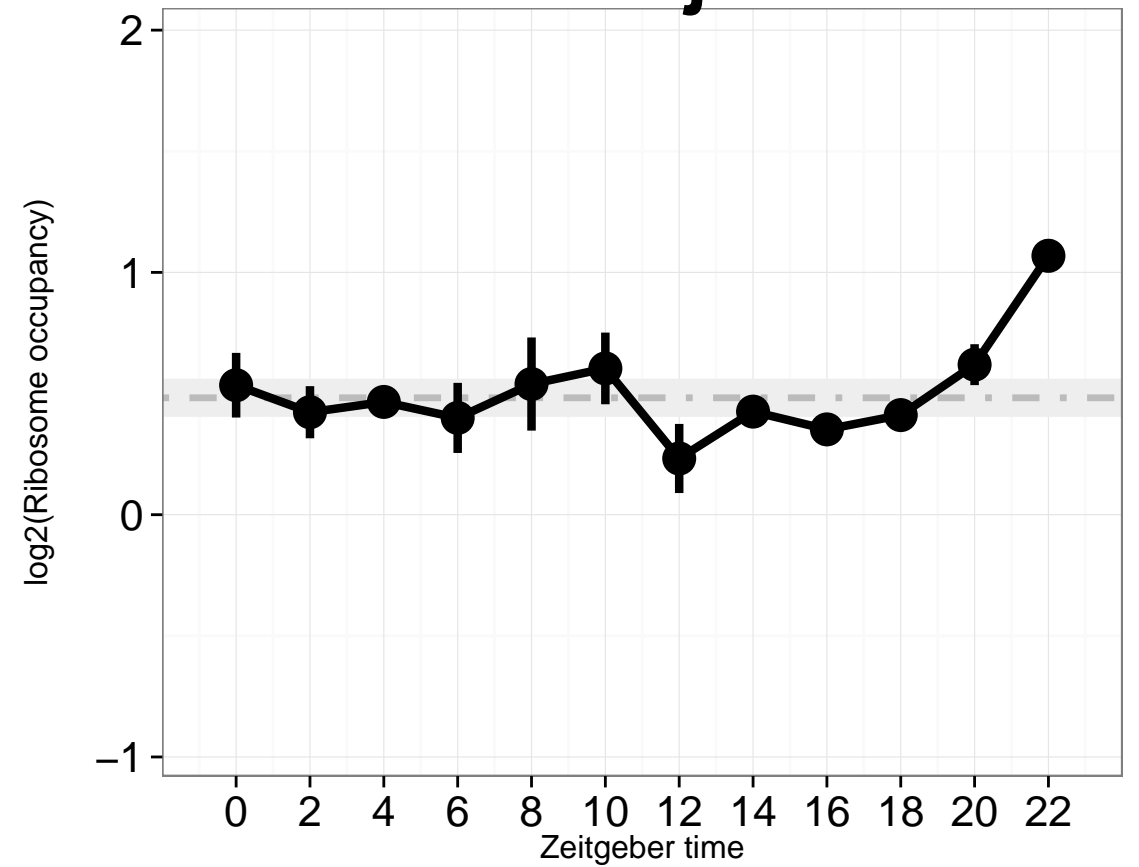

Supplement: SuppDataset_1.zip [file Eif3j1_set_B.pdf › Supplemental Dataset 1/B-mRNA_rhythm_translation_nonrhyth/Eif3j1_set_B.pdf]

## Elac1

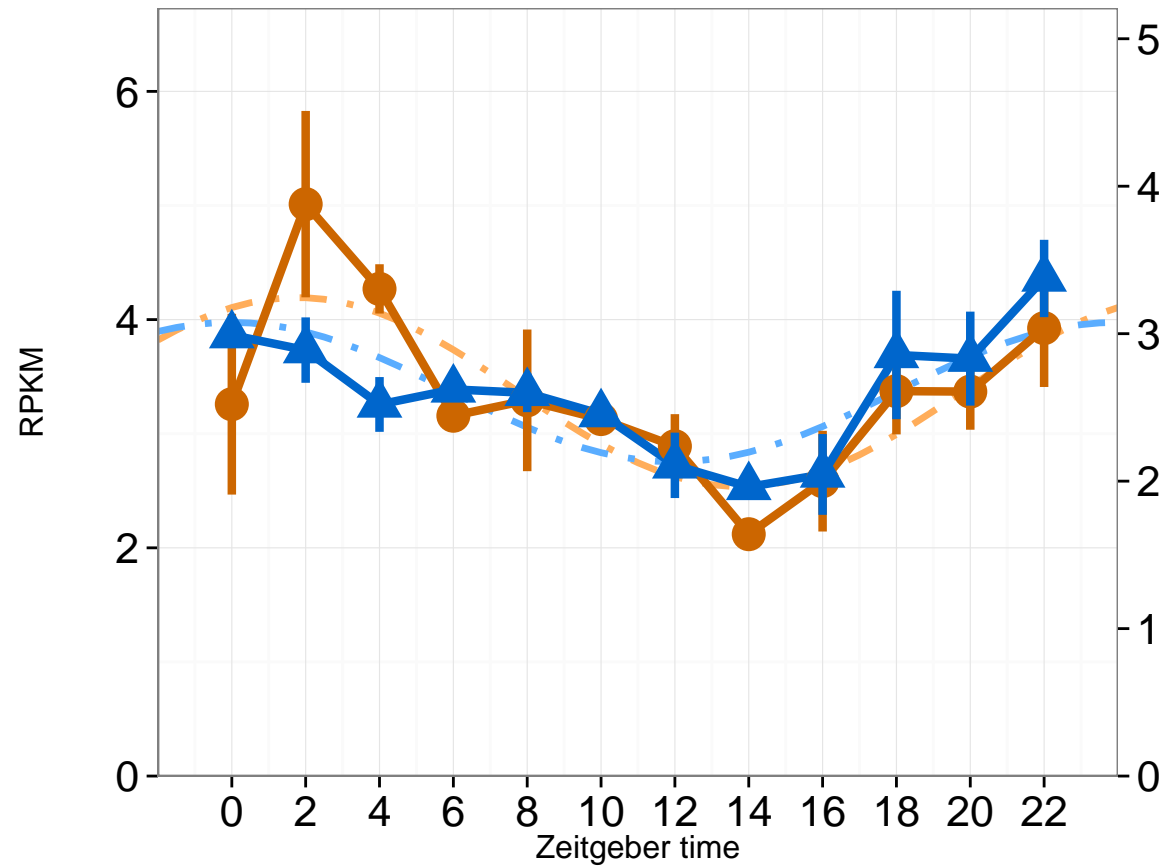

## Elac1

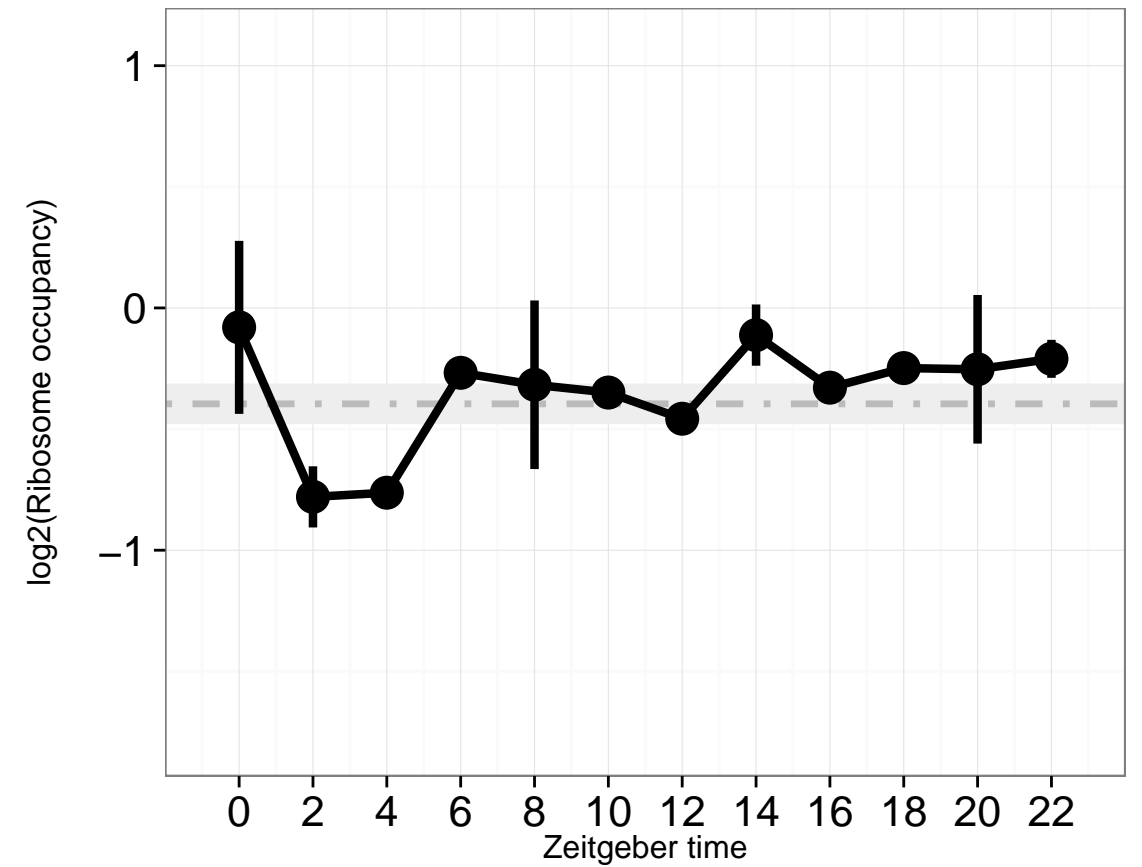

Supplement: SuppDataset_1.zip [file Elac1_set_B.pdf › Supplemental Dataset 1/B-mRNA_rhythm_translation_nonrhyth/Elac1_set_B.pdf]

## Elk3

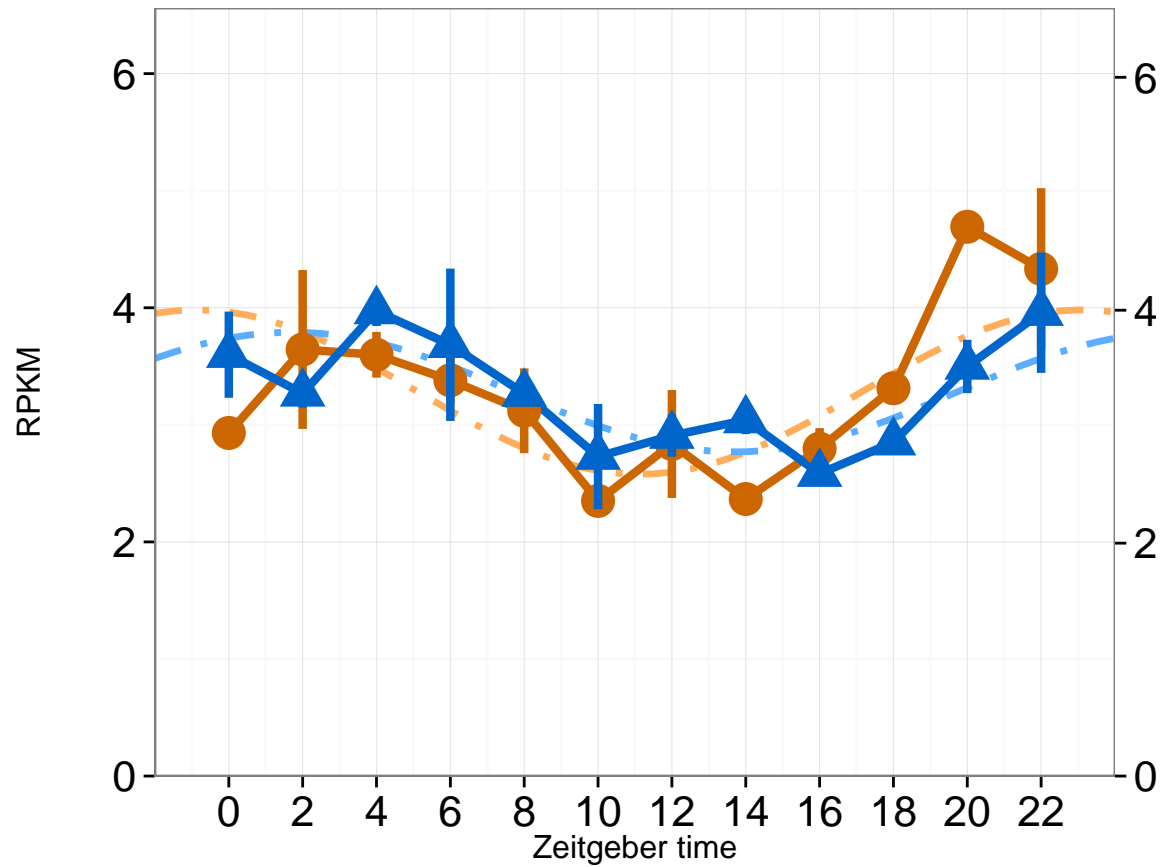

## Elk3

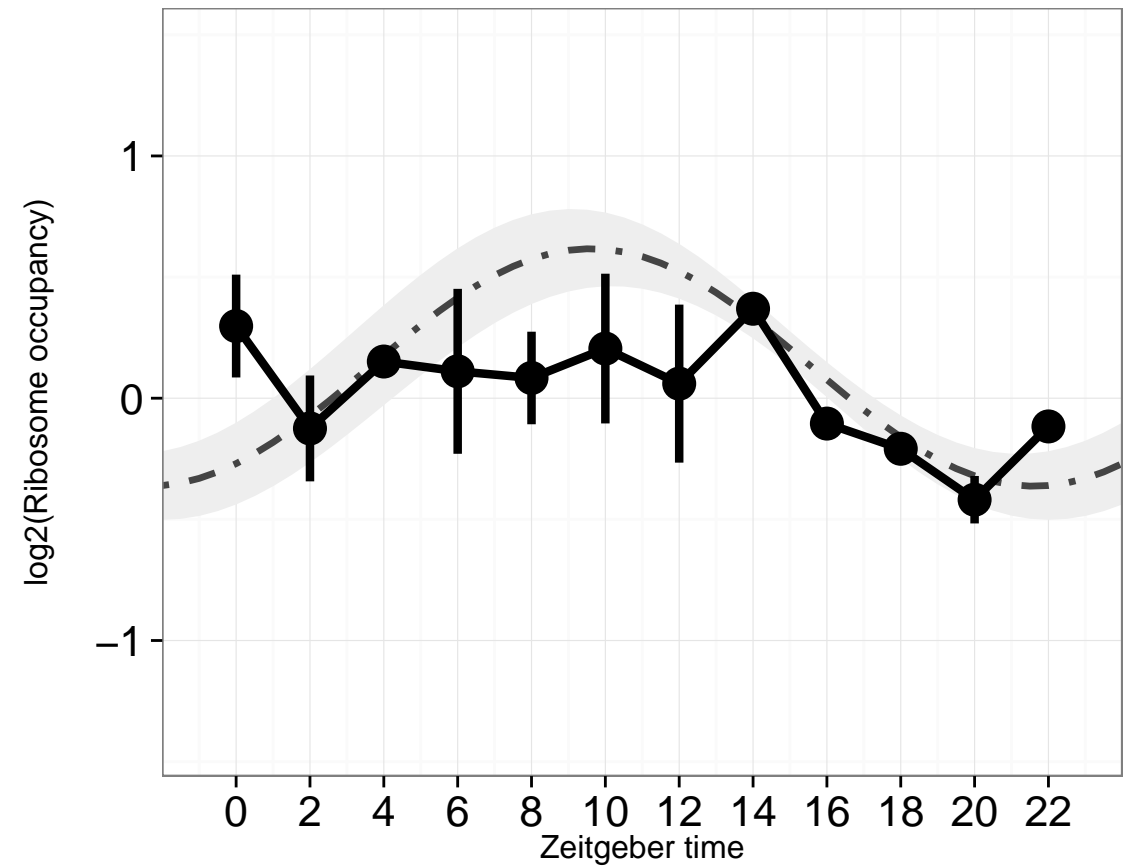

Supplement: SuppDataset_1.zip [file Elk3_set_B.pdf › Supplemental Dataset 1/B-mRNA_rhythm_translation_nonrhyth/Elk3_set_B.pdf]

# Elmod3

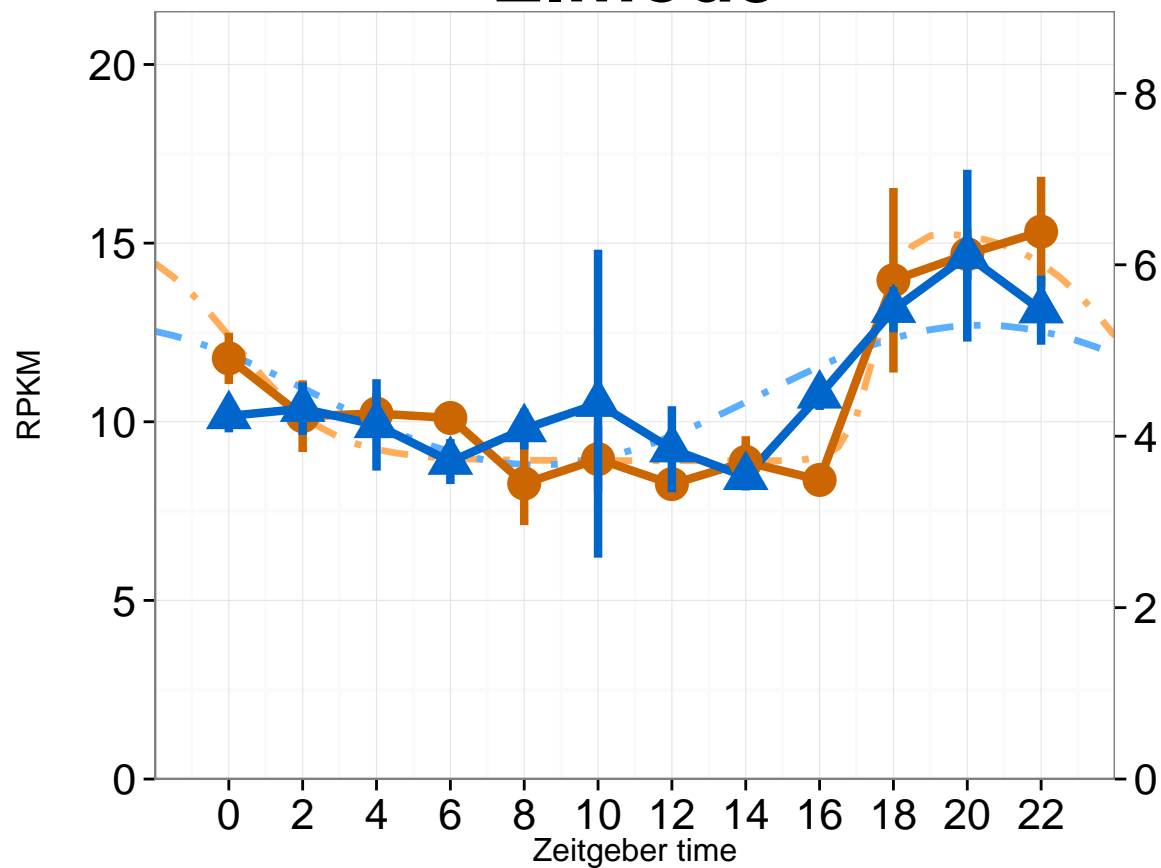

# Elmod3

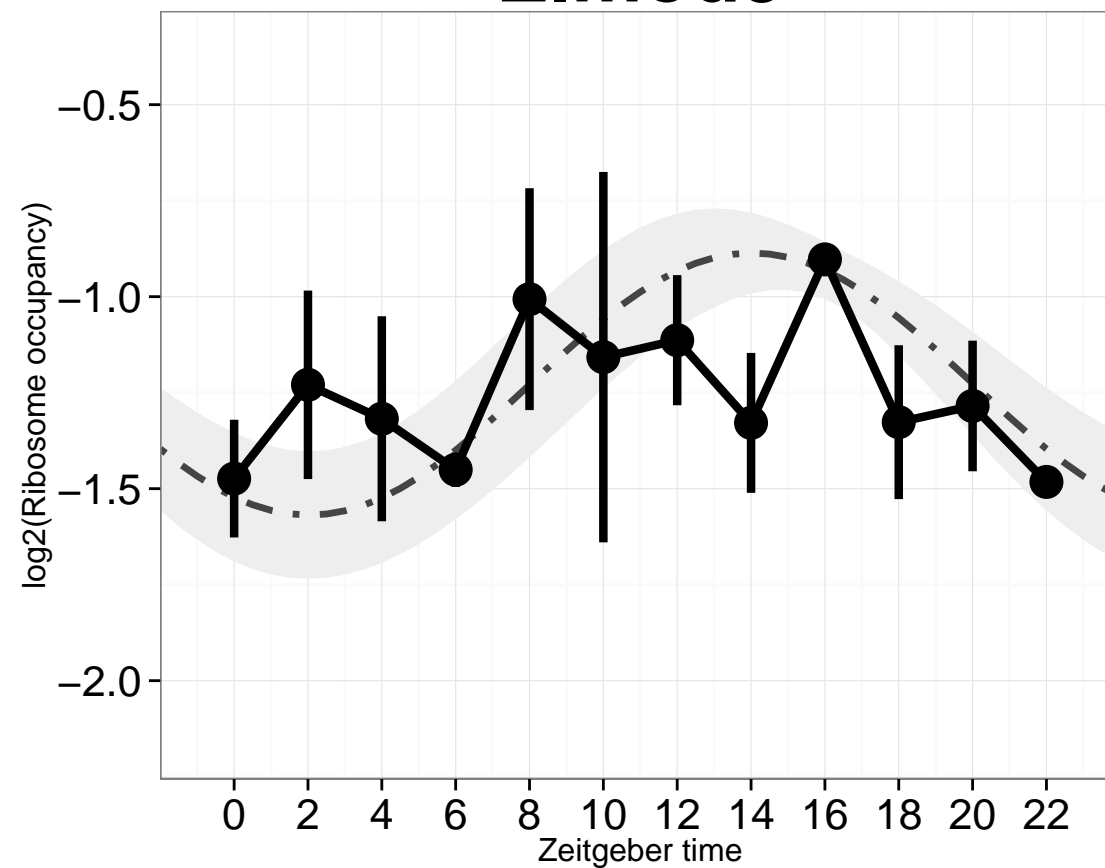

Supplement: SuppDataset_1.zip [file Elmod3_set_B.pdf › Supplemental Dataset 1/B-mRNA_rhythm_translation_nonrhyth/Elmod3_set_B.pdf]

## Elof1

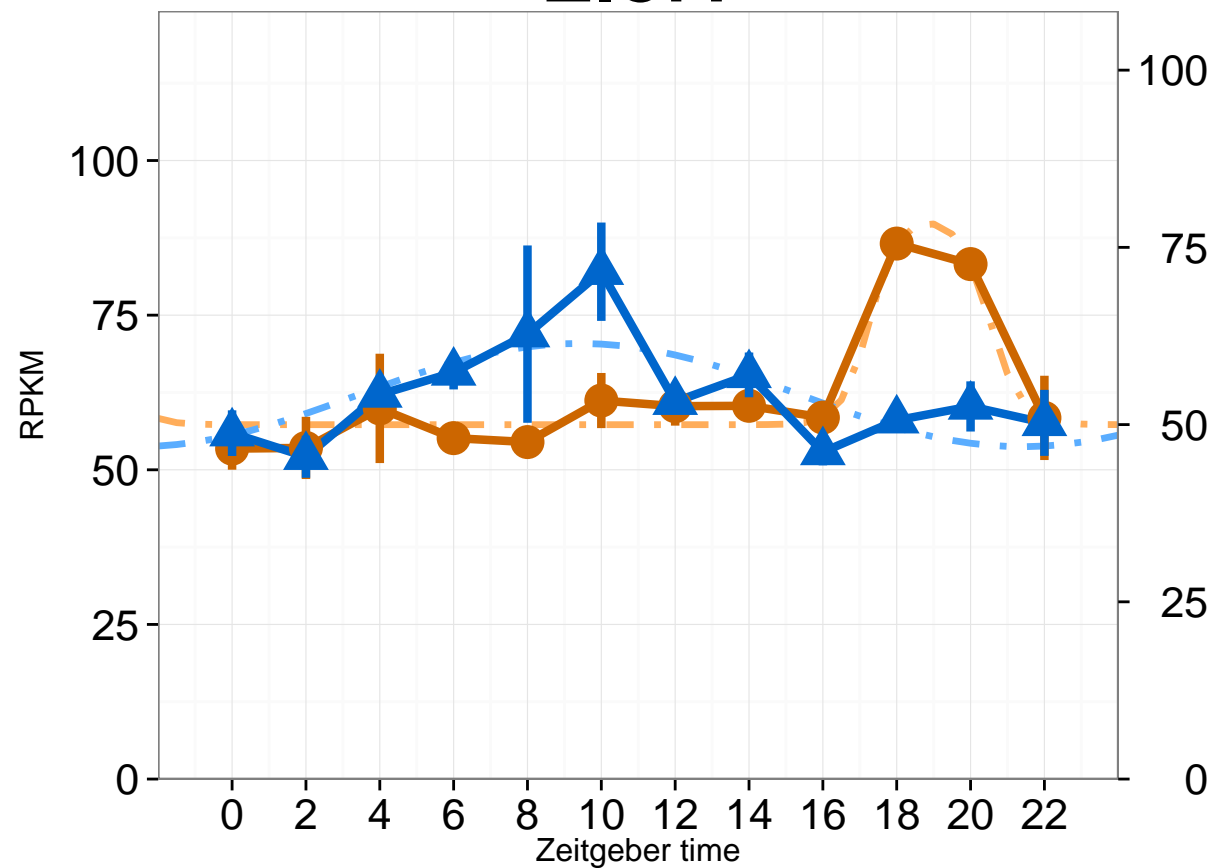

## Elof1

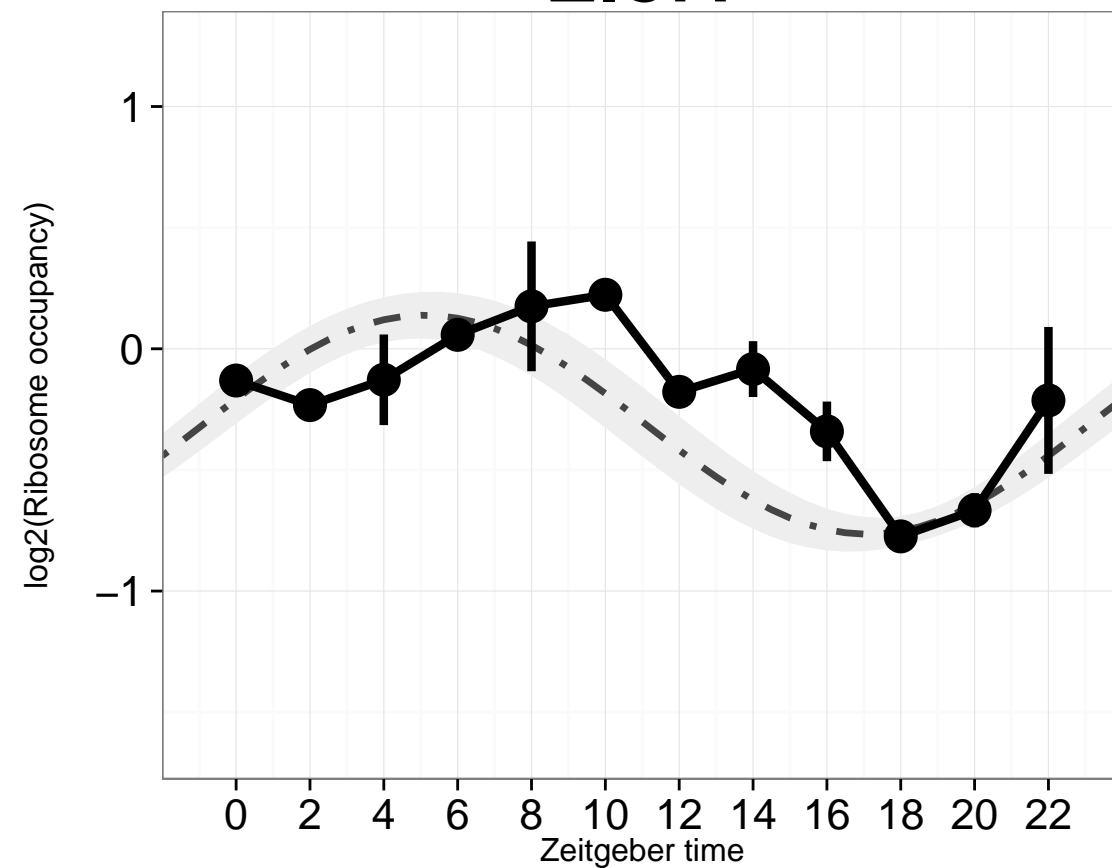

Supplement: SuppDataset_1.zip [file Elof1_set_B.pdf › Supplemental Dataset 1/B-mRNA_rhythm_translation_nonrhyth/Elof1_set_B.pdf]

## Emilin2

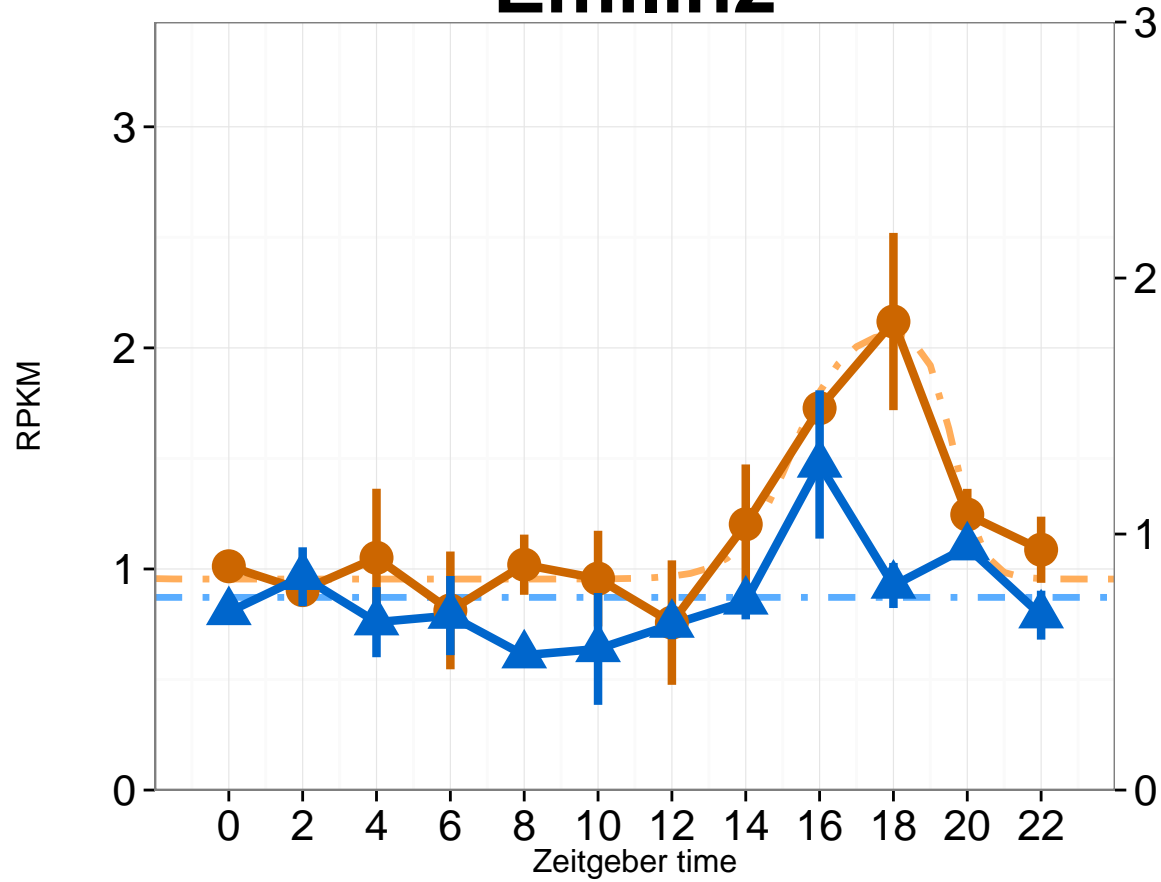

## Emilin2

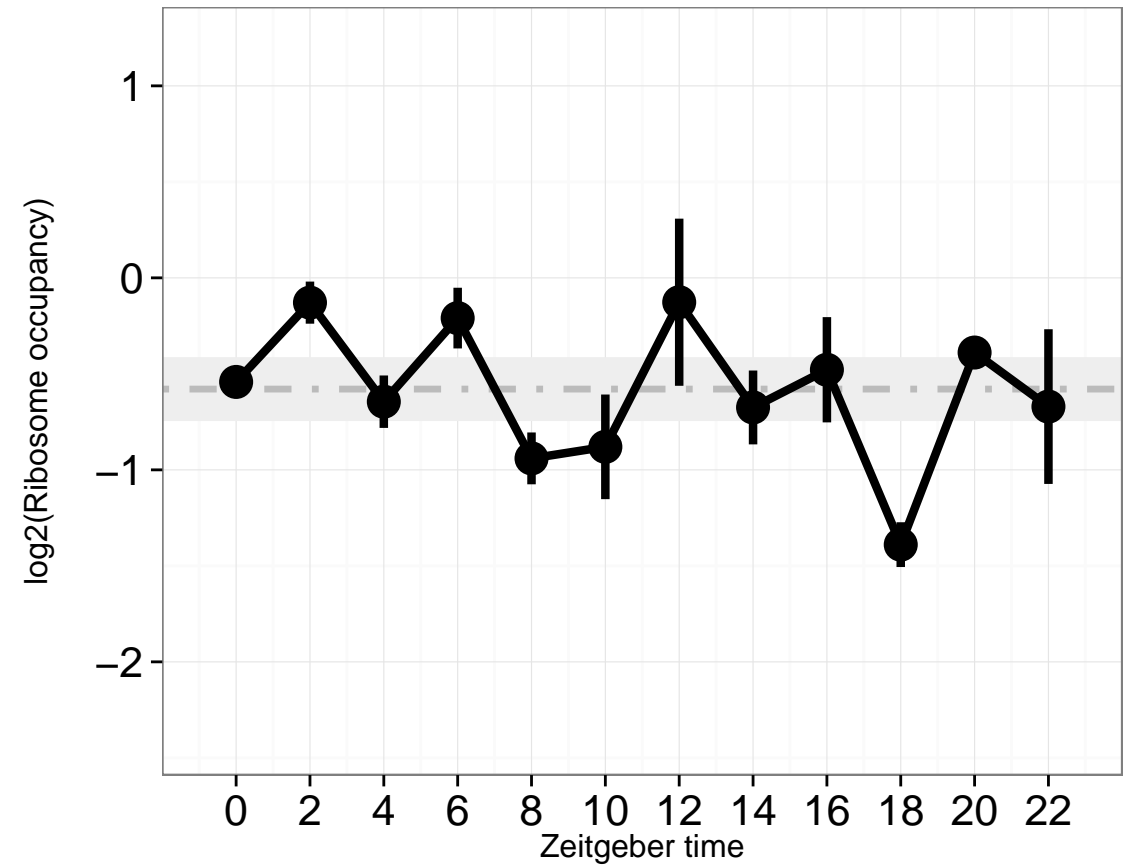

Supplement: SuppDataset_1.zip [file Emilin2_set_B.pdf › Supplemental Dataset 1/B-mRNA_rhythm_translation_nonrhyth/Emilin2_set_B.pdf]

# Endod1

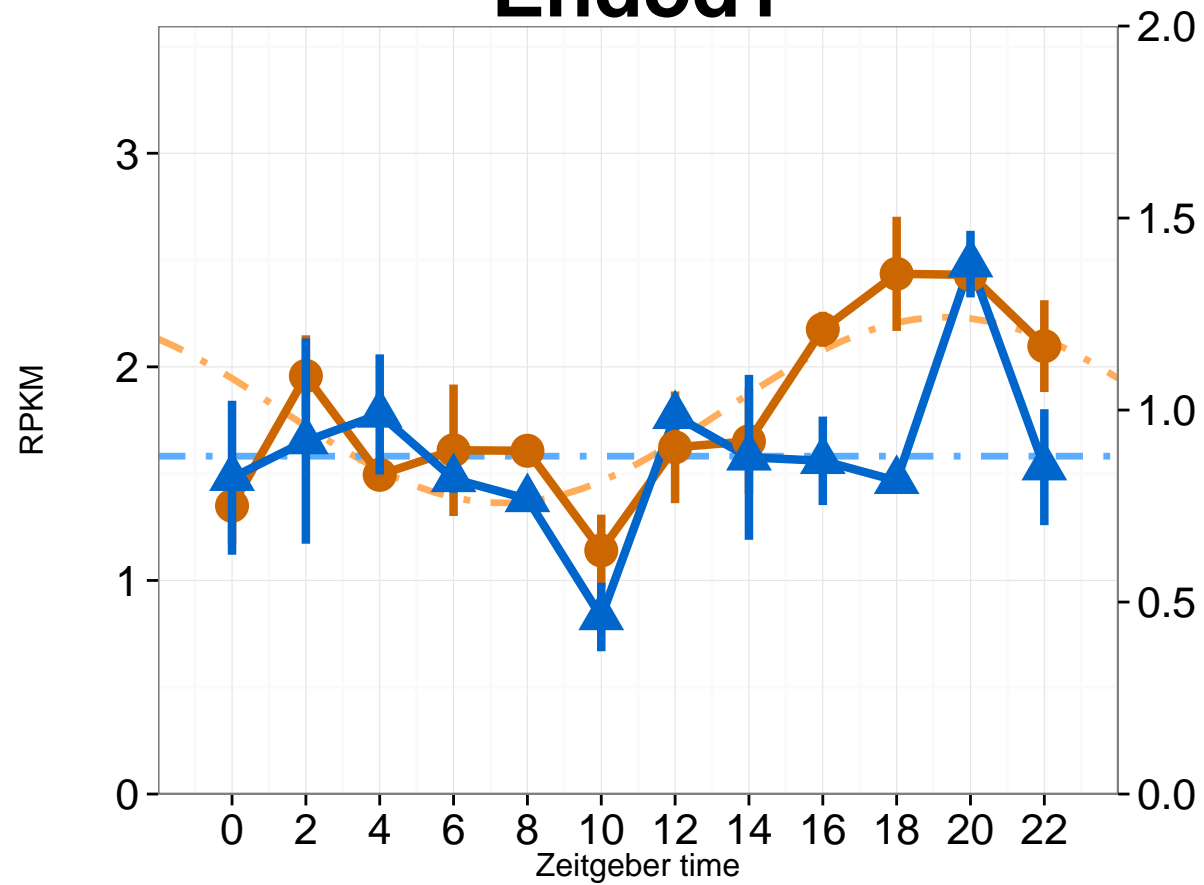

# Endod1

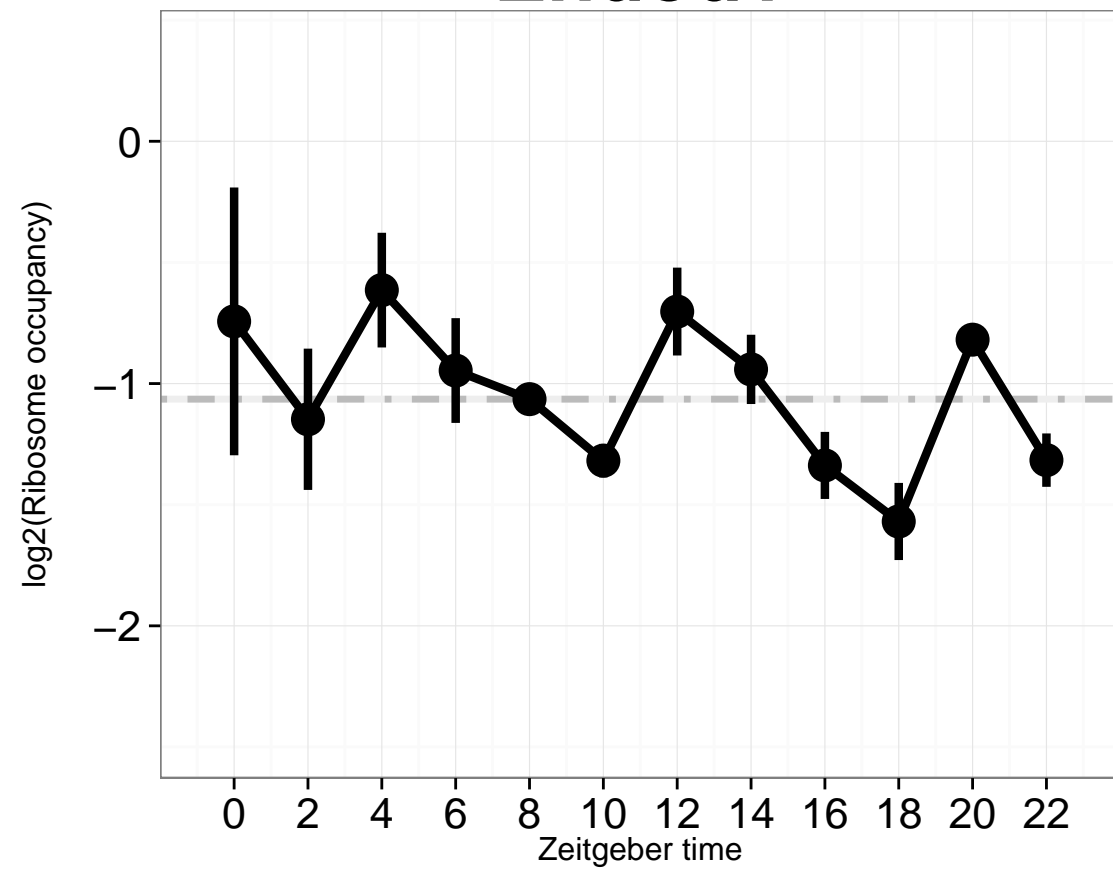

Supplement: SuppDataset_1.zip [file Endod1_set_B.pdf › Supplemental Dataset 1/B-mRNA_rhythm_translation_nonrhyth/Endod1_set_B.pdf]

## Endov

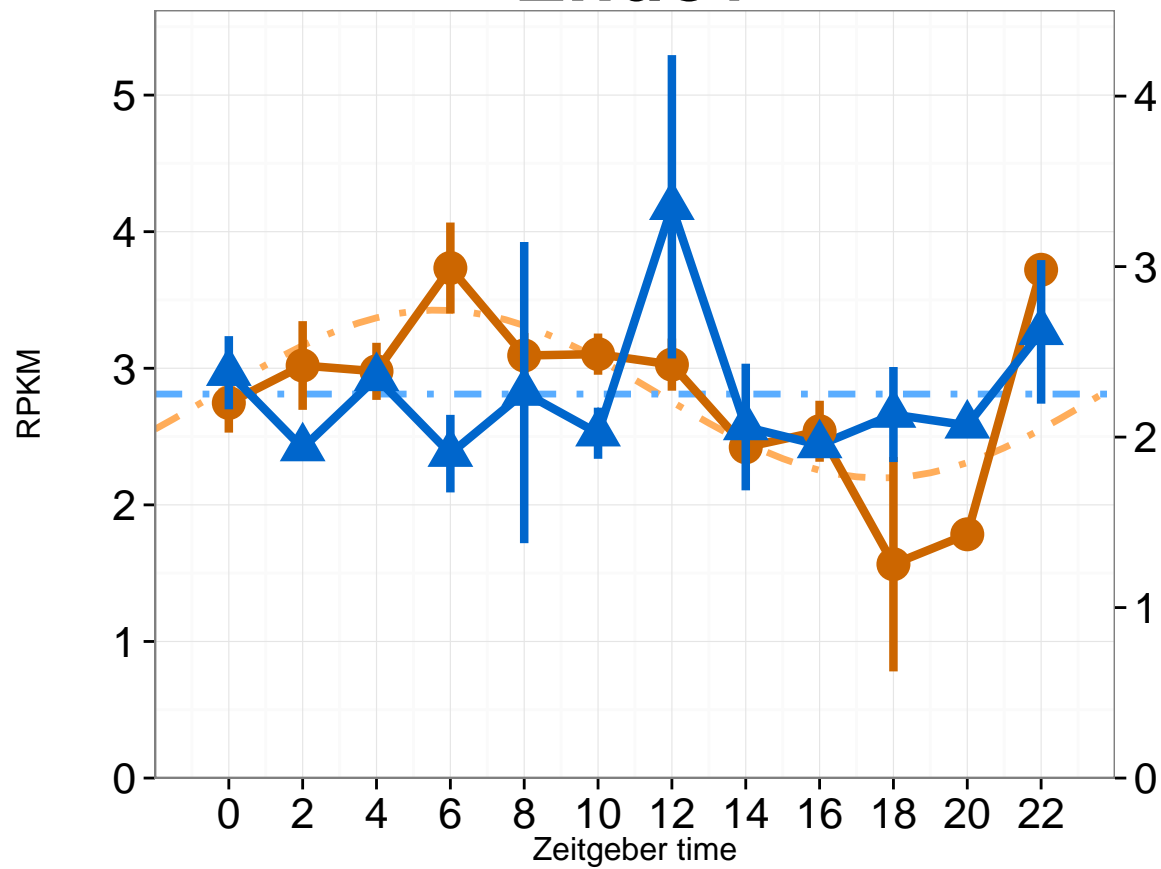

## Endov

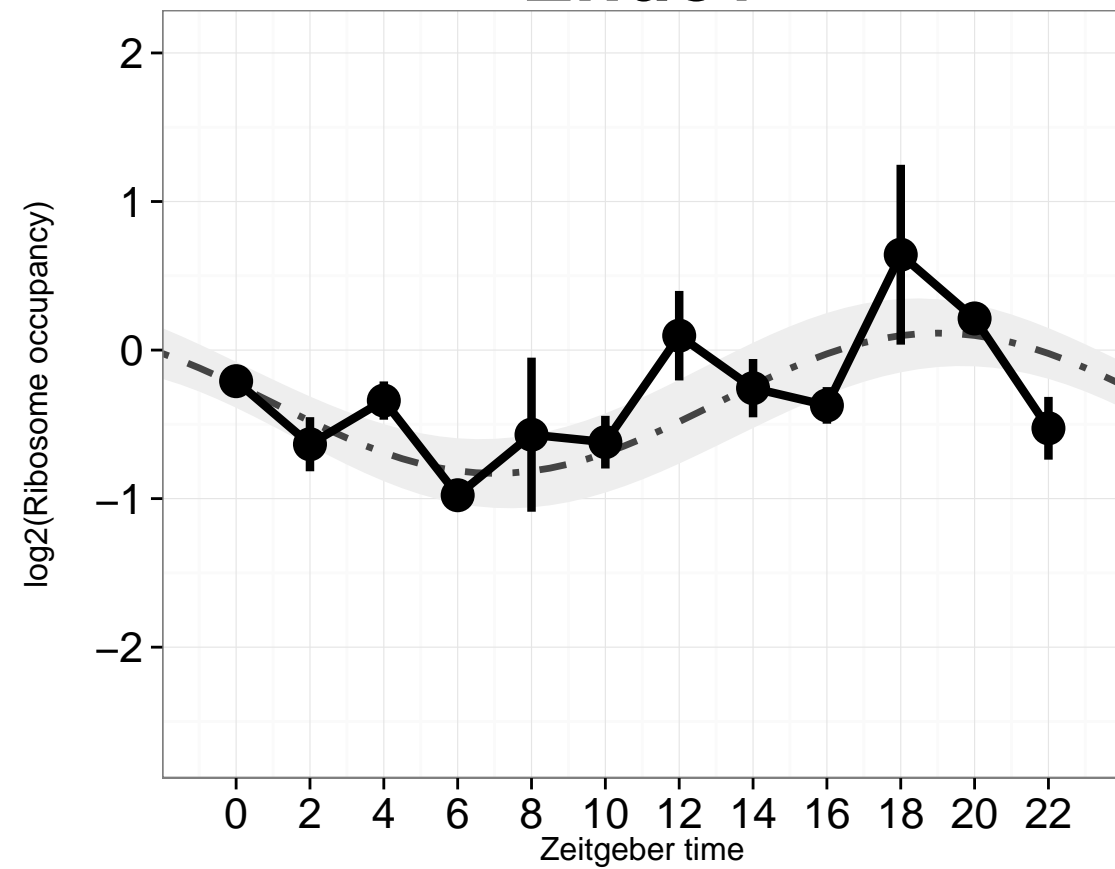

Supplement: SuppDataset_1.zip [file Endov_set_B.pdf › Supplemental Dataset 1/B-mRNA_rhythm_translation_nonrhyth/Endov_set_B.pdf]

# Enpp3

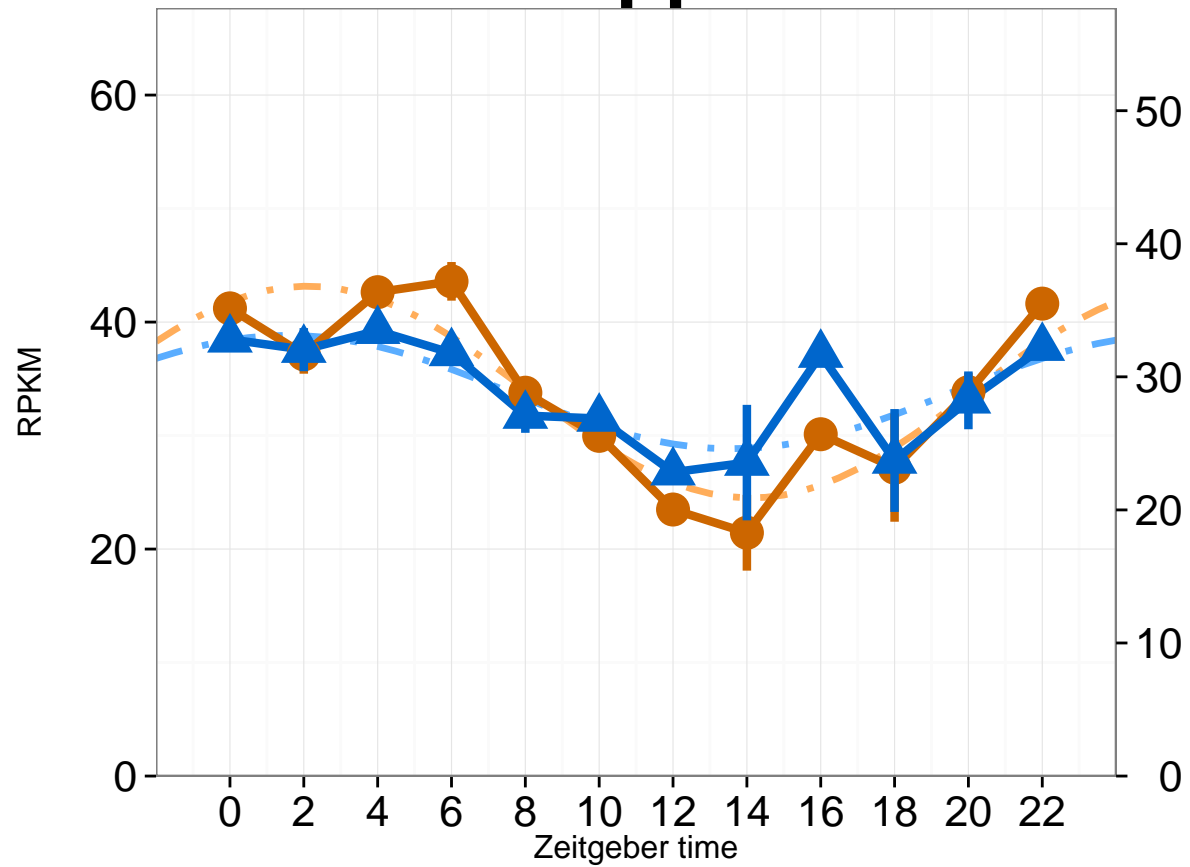

# Enpp3

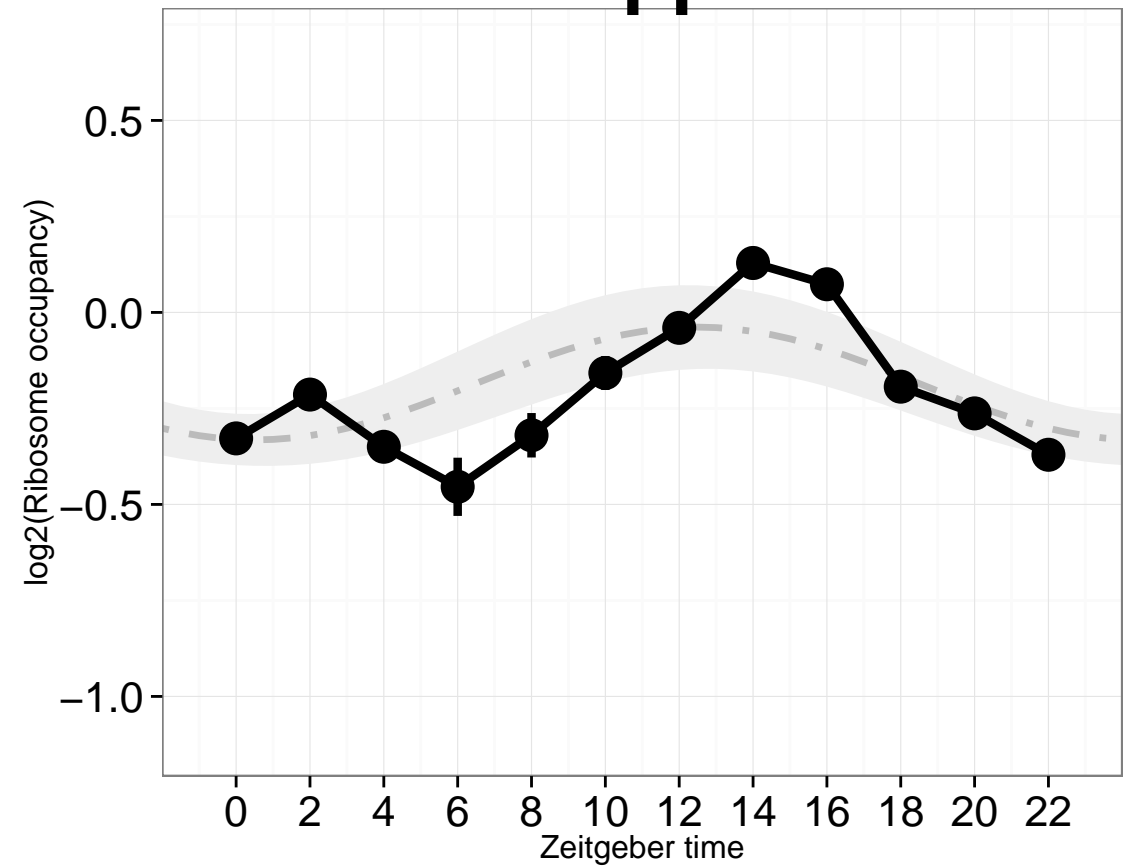

Supplement: SuppDataset_1.zip [file Enpp3_set_B.pdf › Supplemental Dataset 1/B-mRNA_rhythm_translation_nonrhyth/Enpp3_set_B.pdf]

# Enpp6

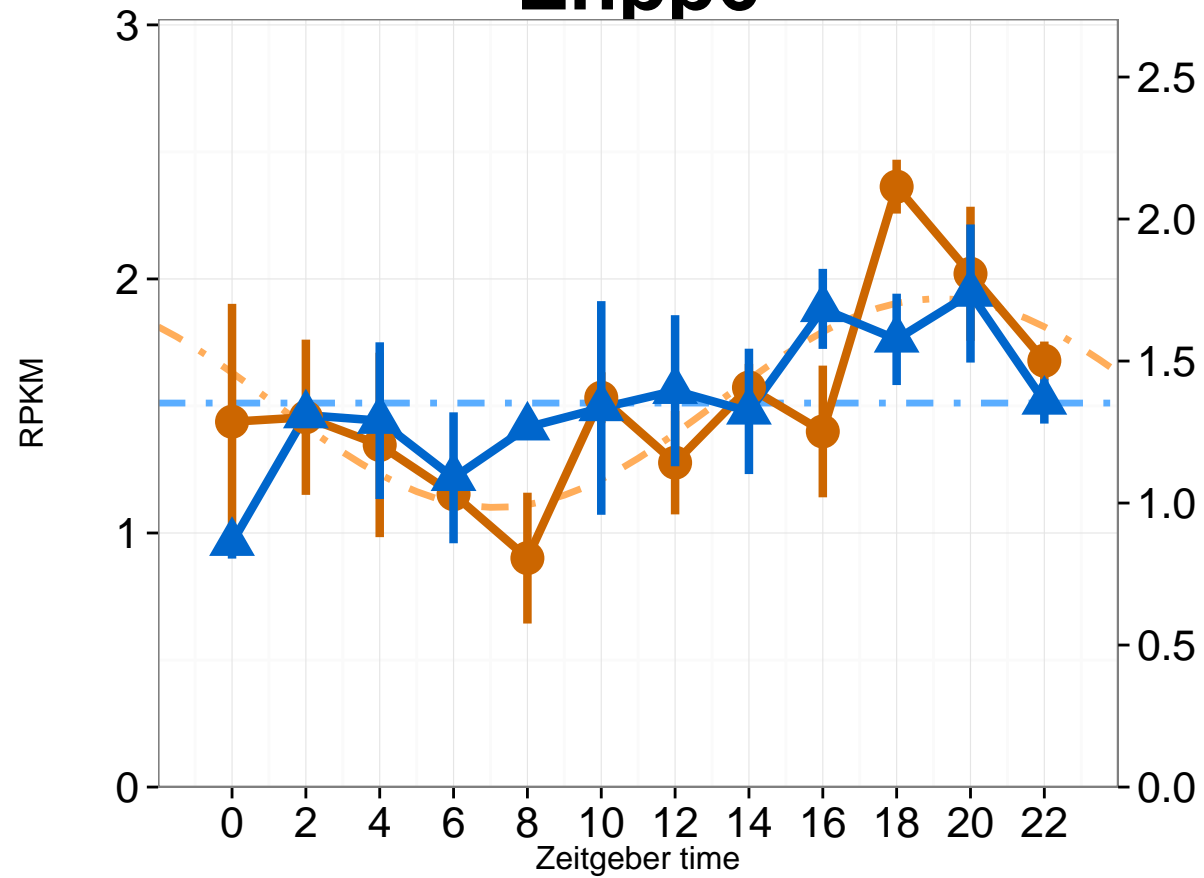

# Enpp6

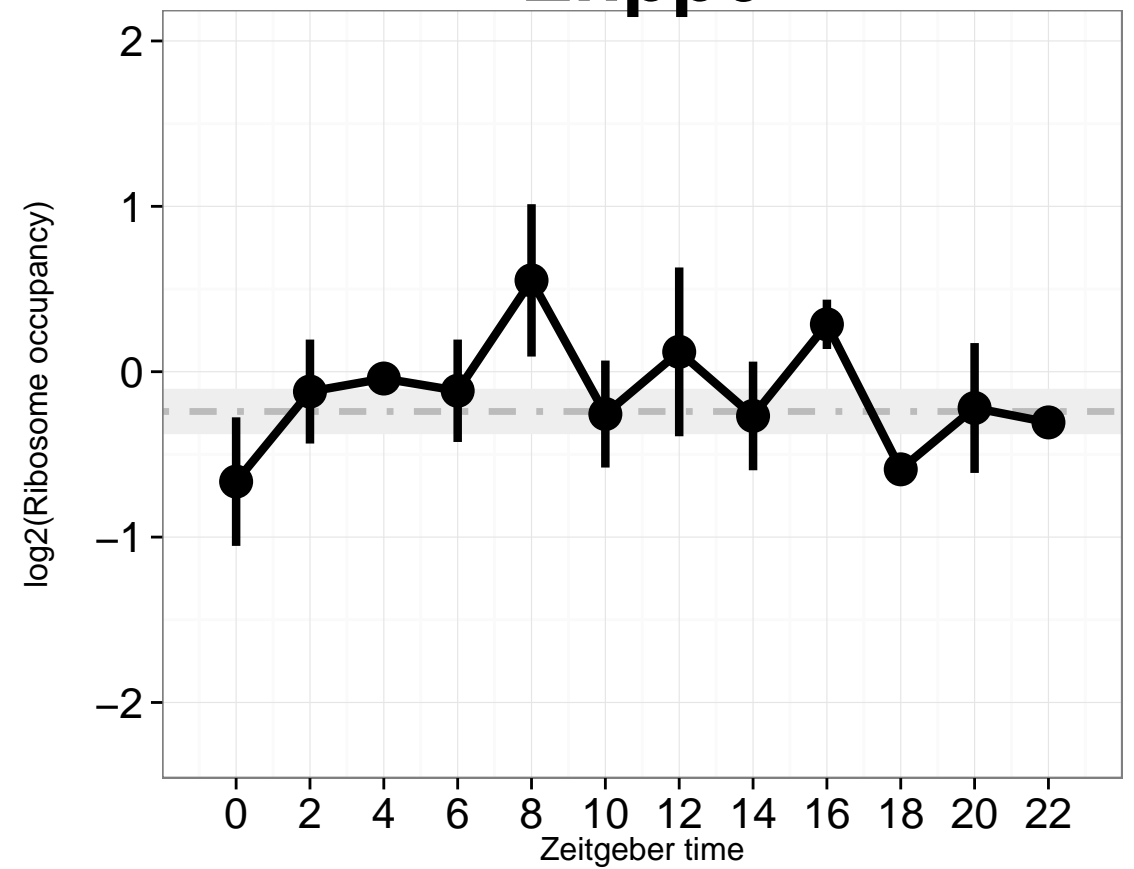

Supplement: SuppDataset_1.zip [file Enpp6_set_B.pdf › Supplemental Dataset 1/B-mRNA_rhythm_translation_nonrhyth/Enpp6_set_B.pdf]

## Eny2

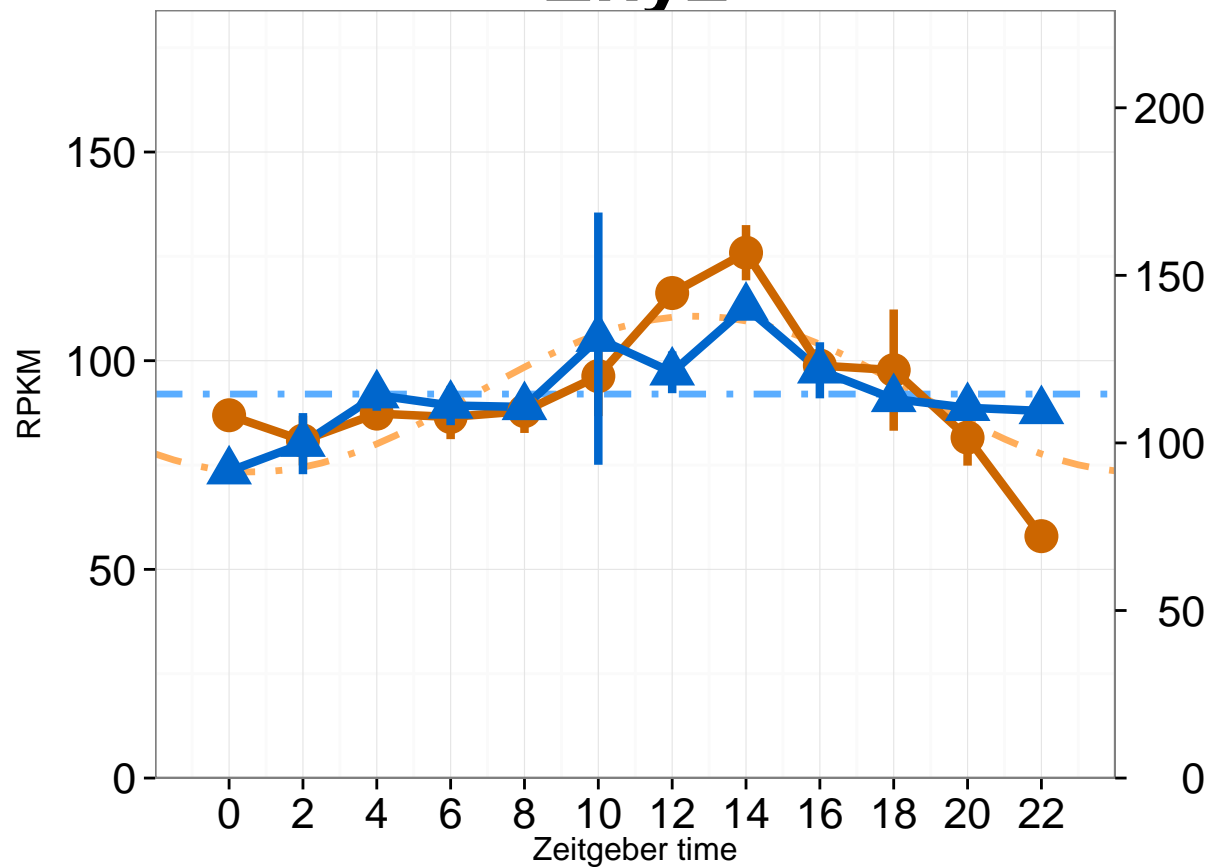

## Eny2

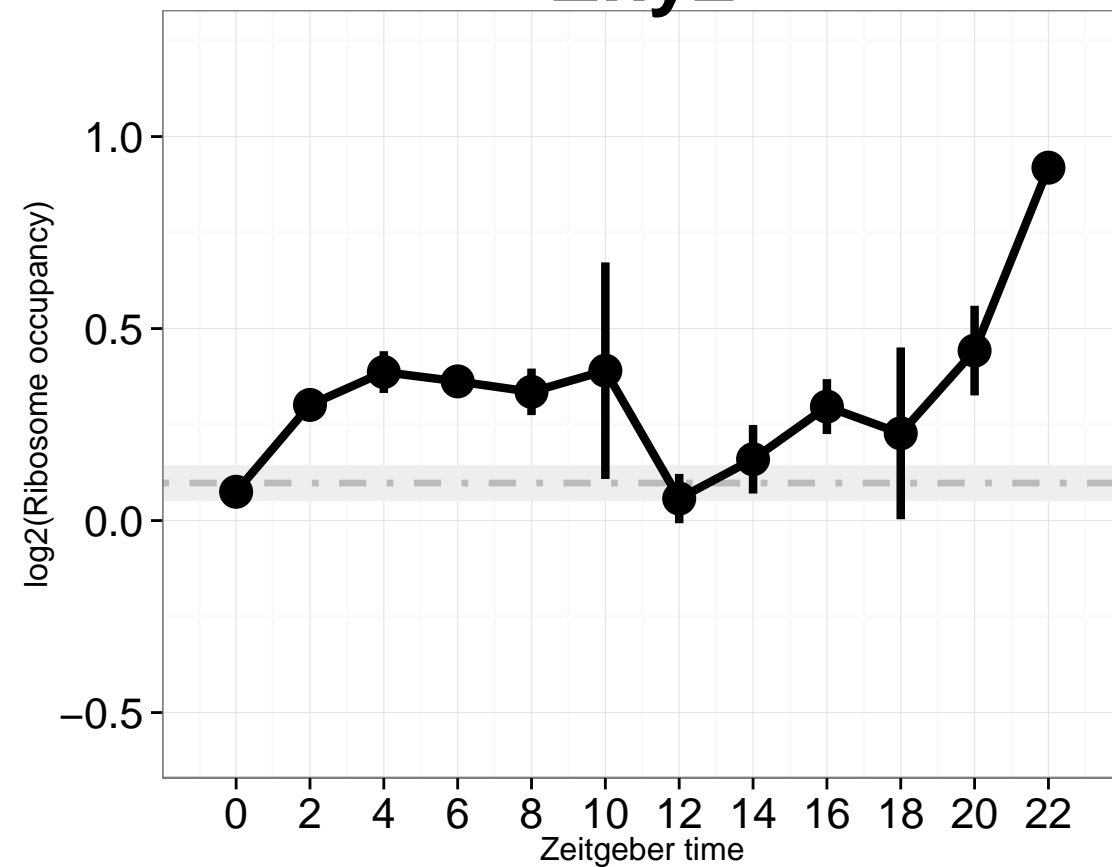

Supplement: SuppDataset_1.zip [file Eny2_set_B.pdf › Supplemental Dataset 1/B-mRNA_rhythm_translation_nonrhyth/Eny2_set_B.pdf]

# Ergic1

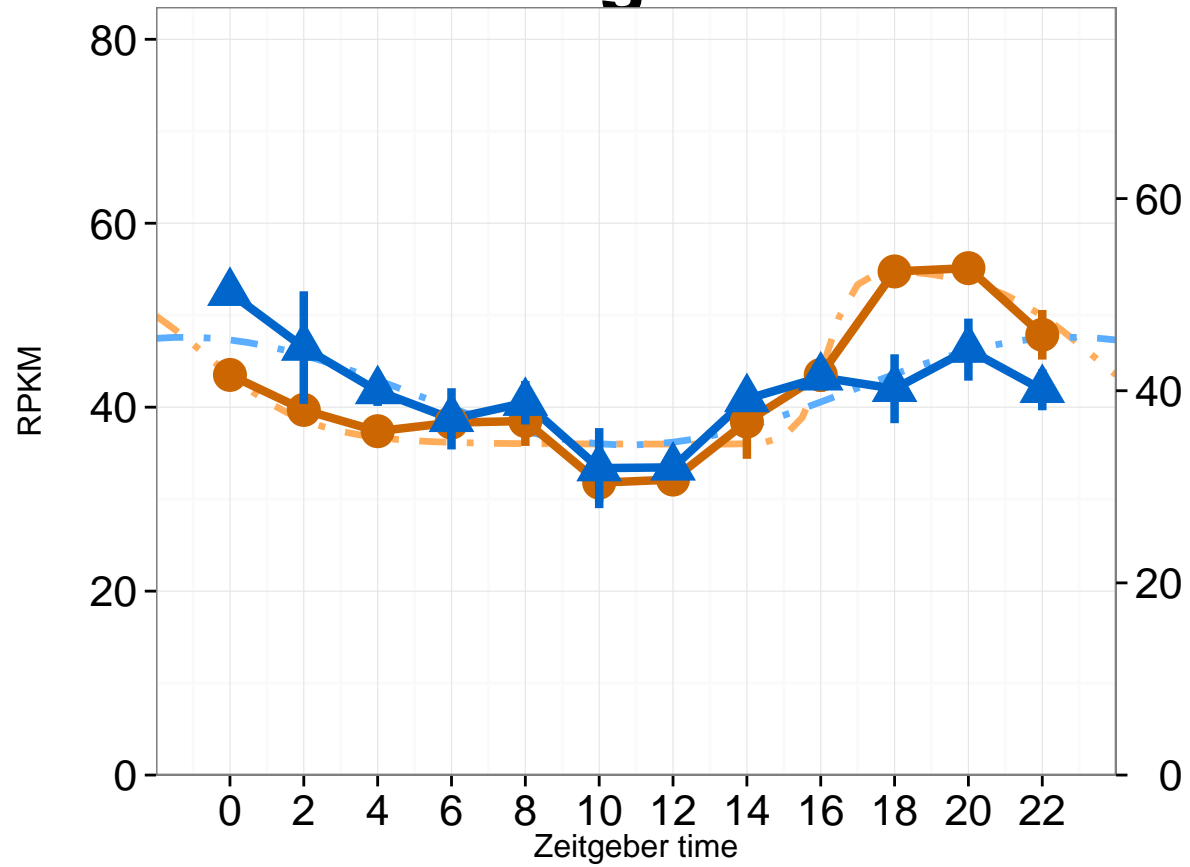

# Ergic1

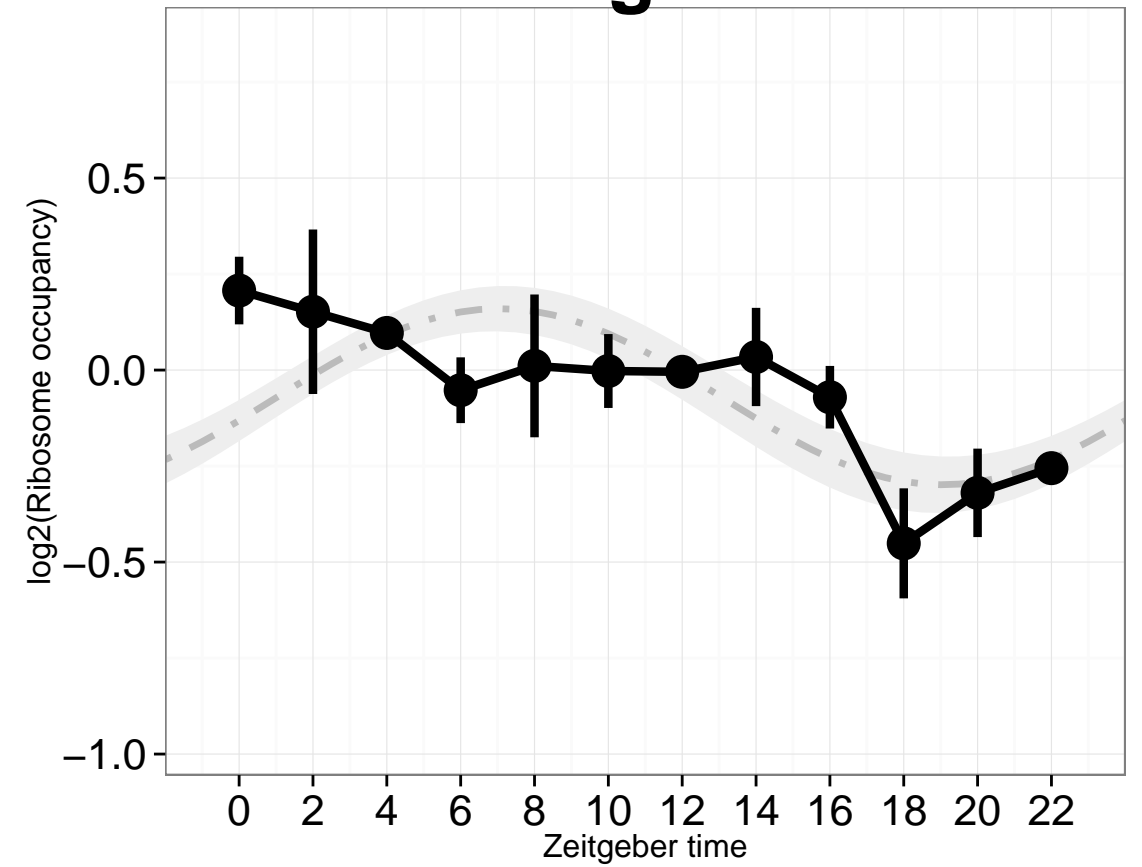

Supplement: SuppDataset_1.zip [file Ergic1_set_B.pdf › Supplemental Dataset 1/B-mRNA_rhythm_translation_nonrhyth/Ergic1_set_B.pdf]

## Erlec1

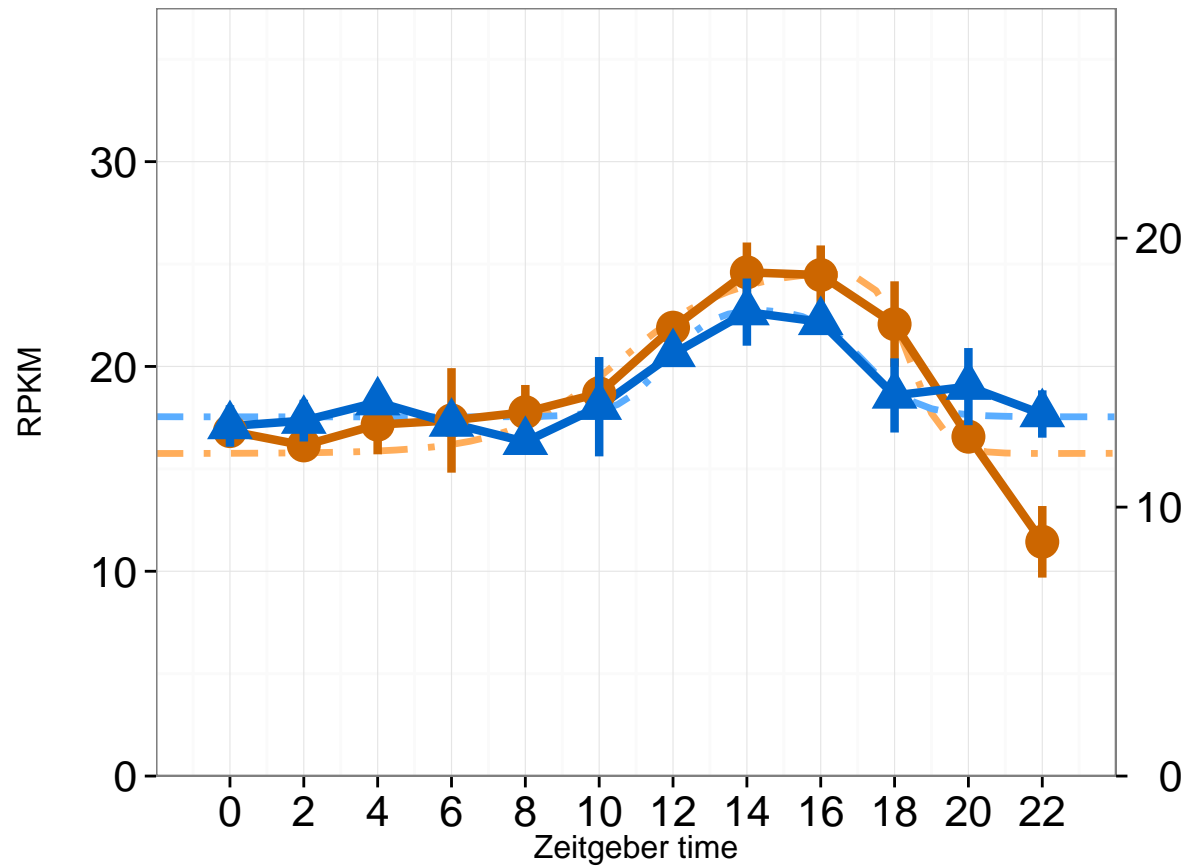

## Erlec1

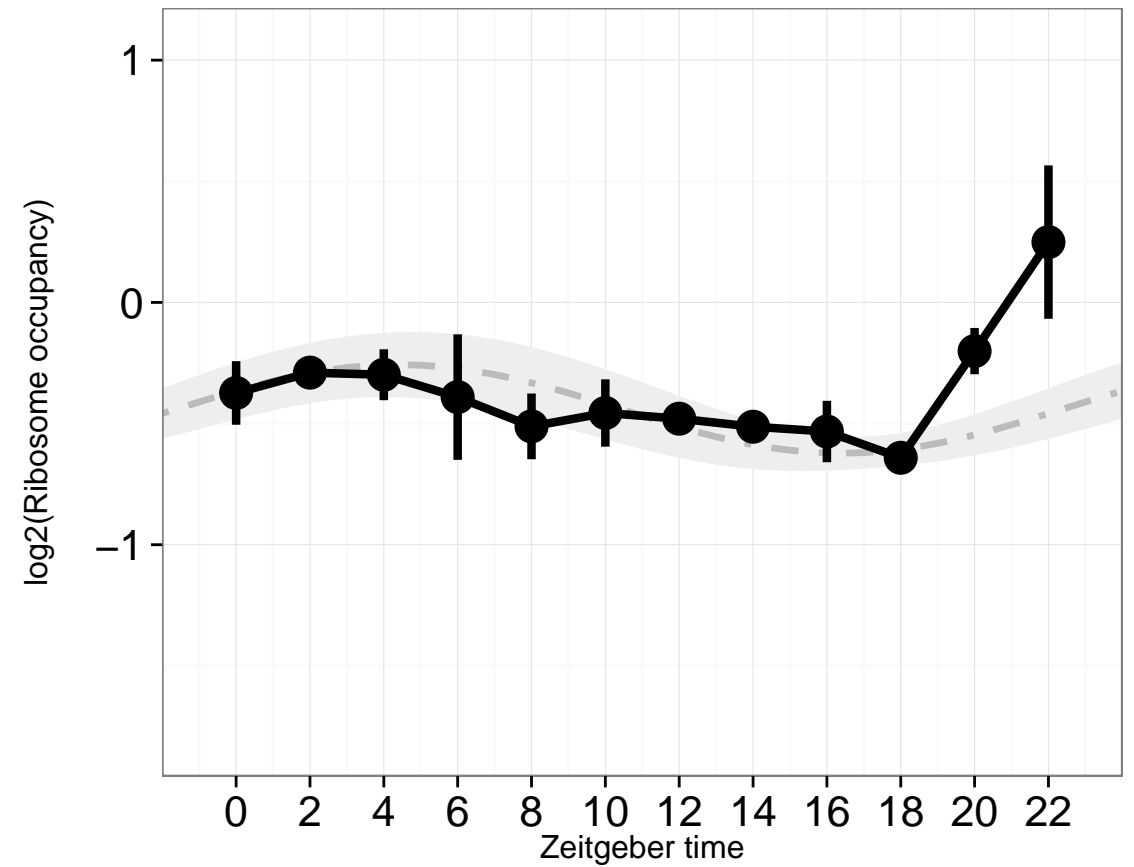

Supplement: SuppDataset_1.zip [file Erlec1_set_B.pdf › Supplemental Dataset 1/B-mRNA_rhythm_translation_nonrhyth/Erlec1_set_B.pdf]

## Exd1

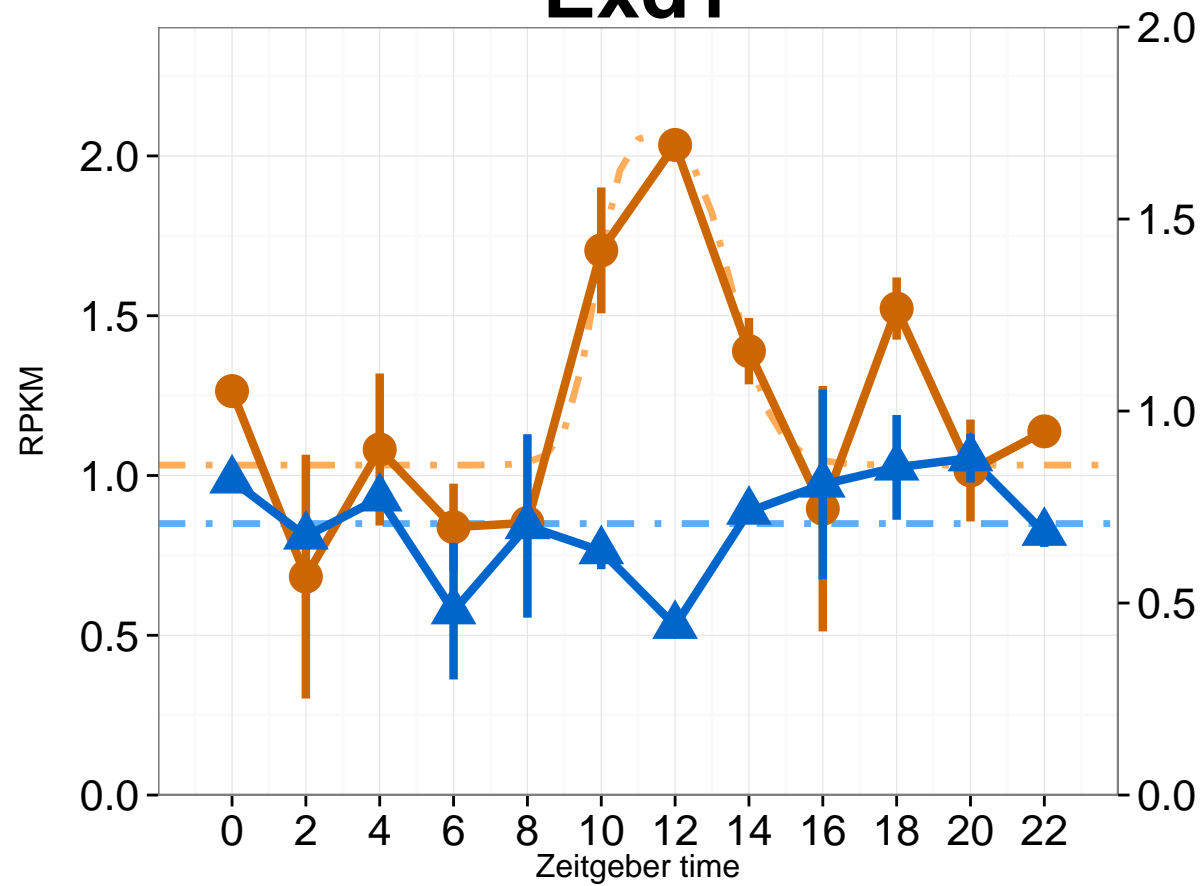

## Exd1

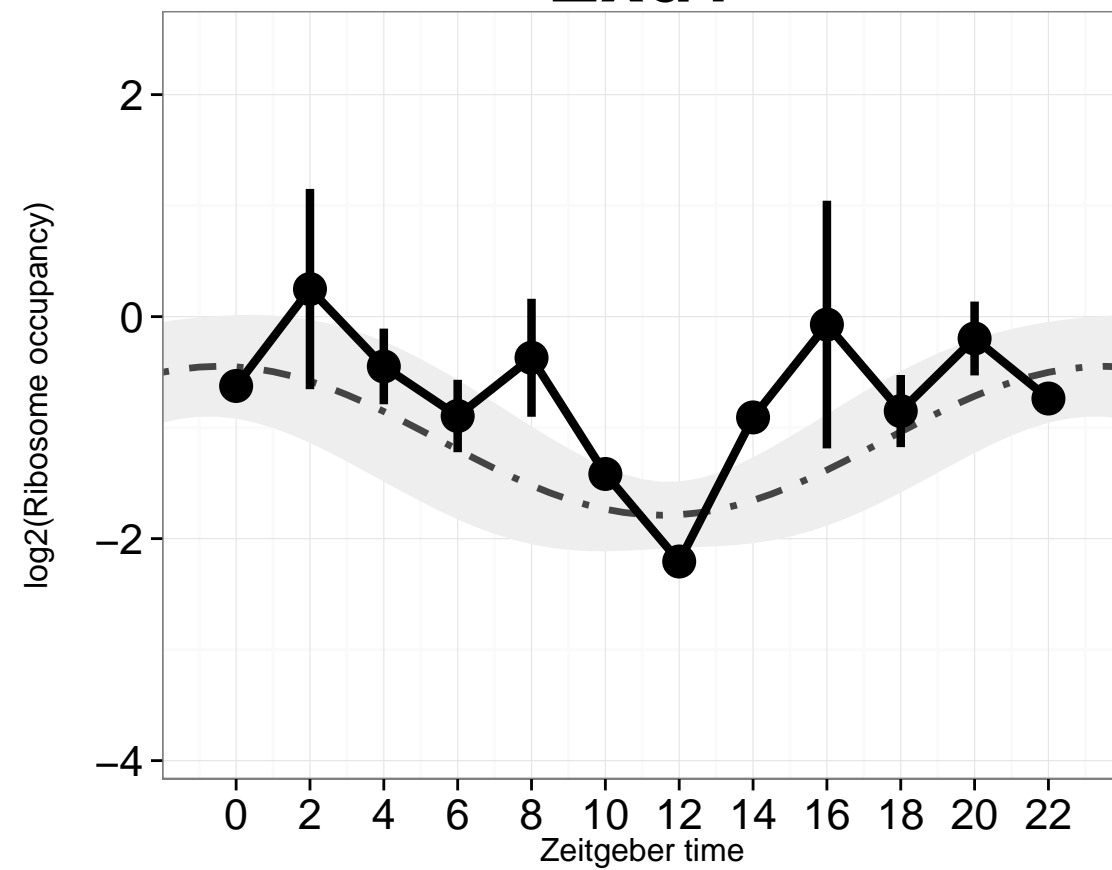

Supplement: SuppDataset_1.zip [file Exd1_set_B.pdf › Supplemental Dataset 1/B-mRNA_rhythm_translation_nonrhyth/Exd1_set_B.pdf]

## Exo5

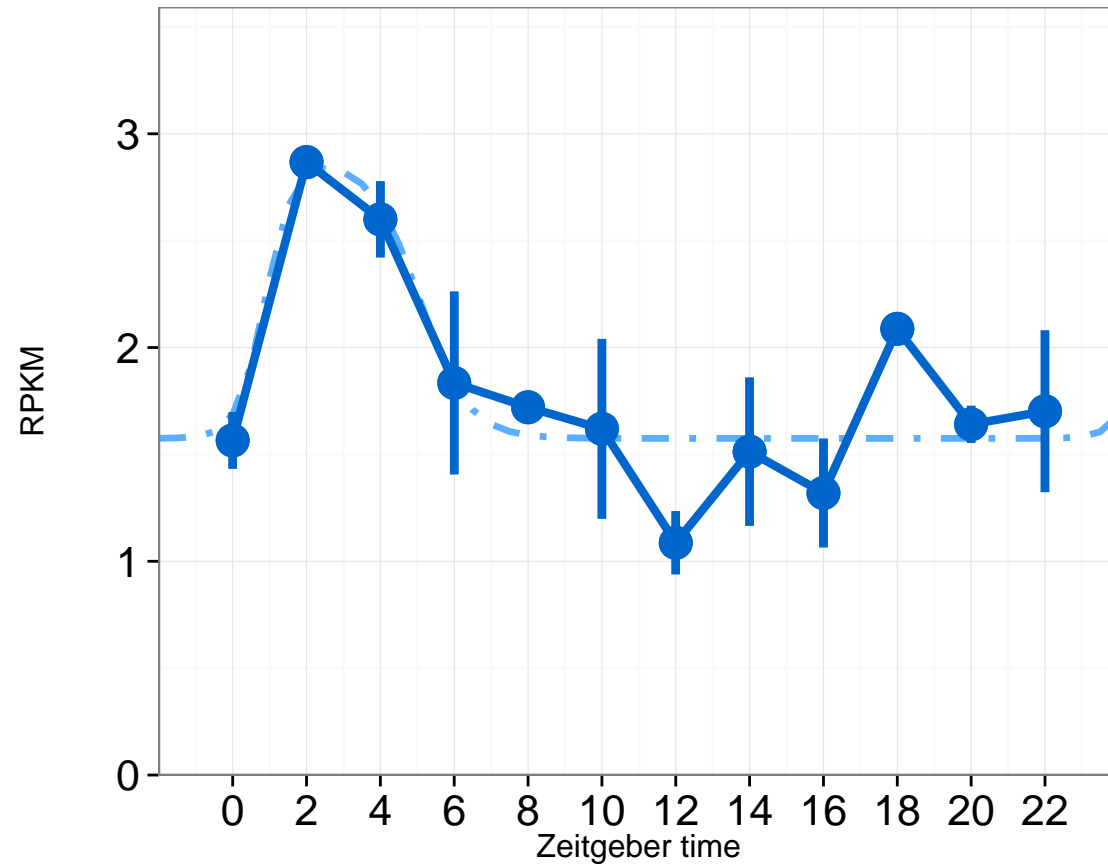

## Exo5 log2(Ribosome occupancy)

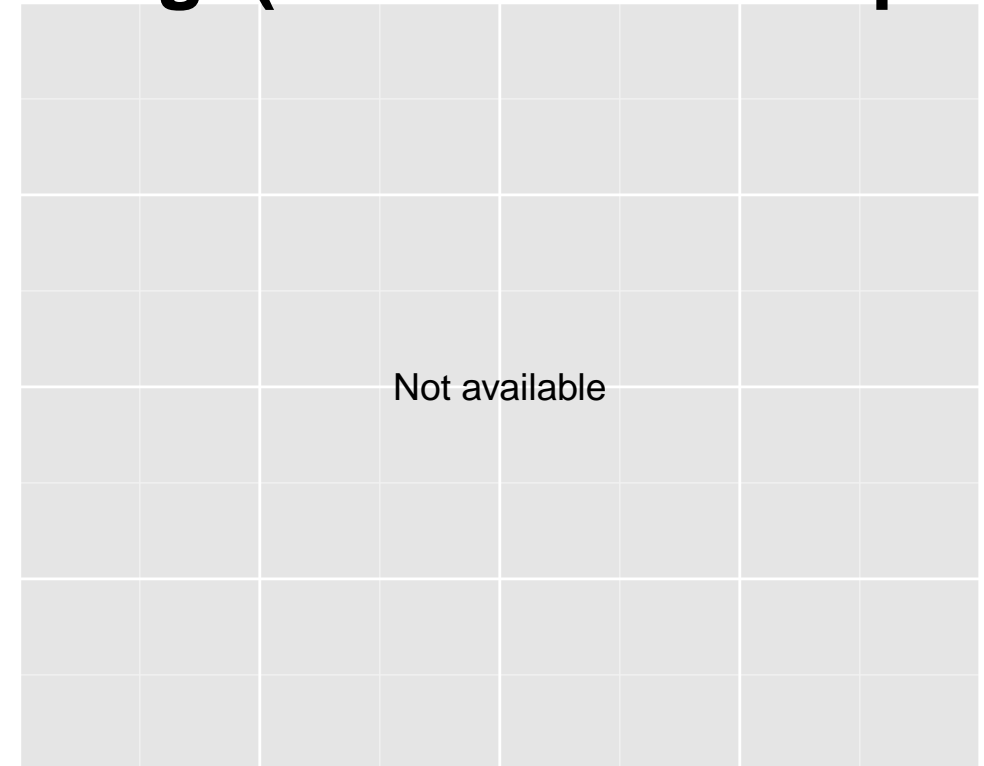

Supplement: SuppDataset_1.zip [file Exo5_set_B.pdf › Supplemental Dataset 1/B-mRNA_rhythm_translation_nonrhyth/Exo5_set_B.pdf]

## Exoc1

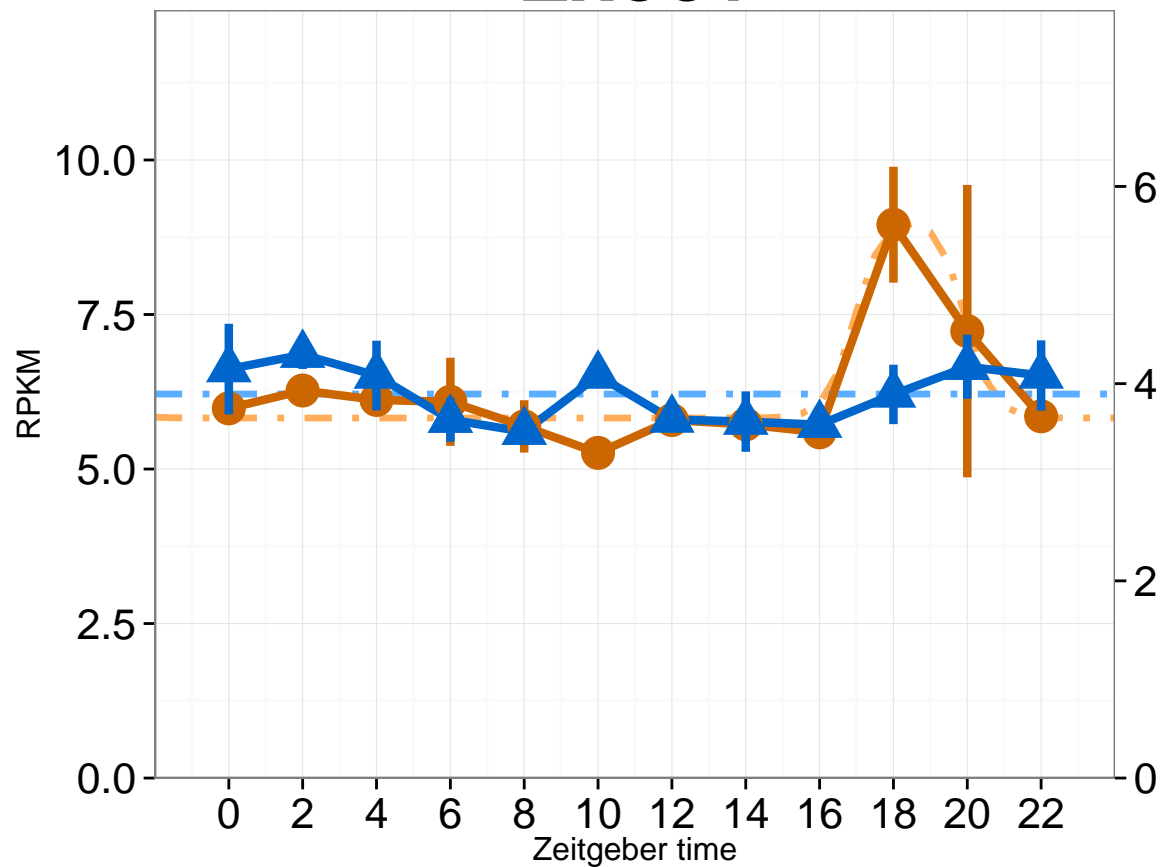

## Exoc1

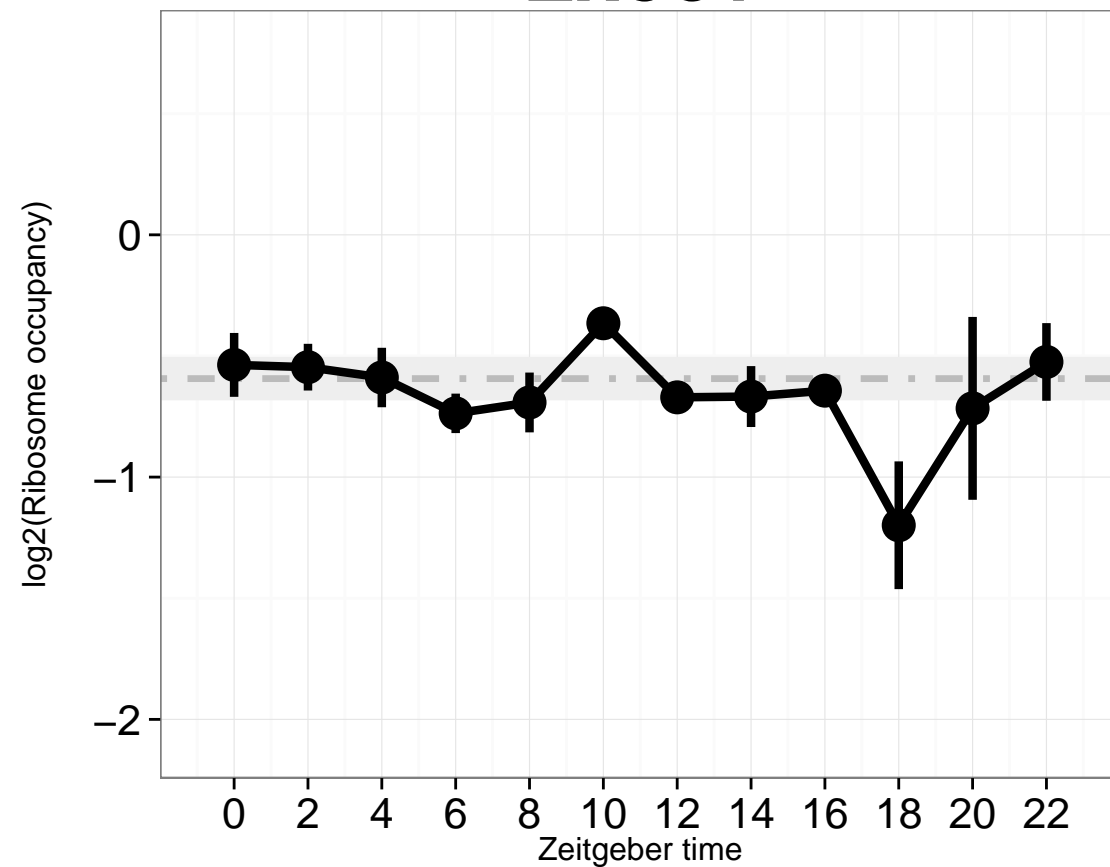

Supplement: SuppDataset_1.zip [file Exoc1_set_B.pdf › Supplemental Dataset 1/B-mRNA_rhythm_translation_nonrhyth/Exoc1_set_B.pdf]

## Exoc8

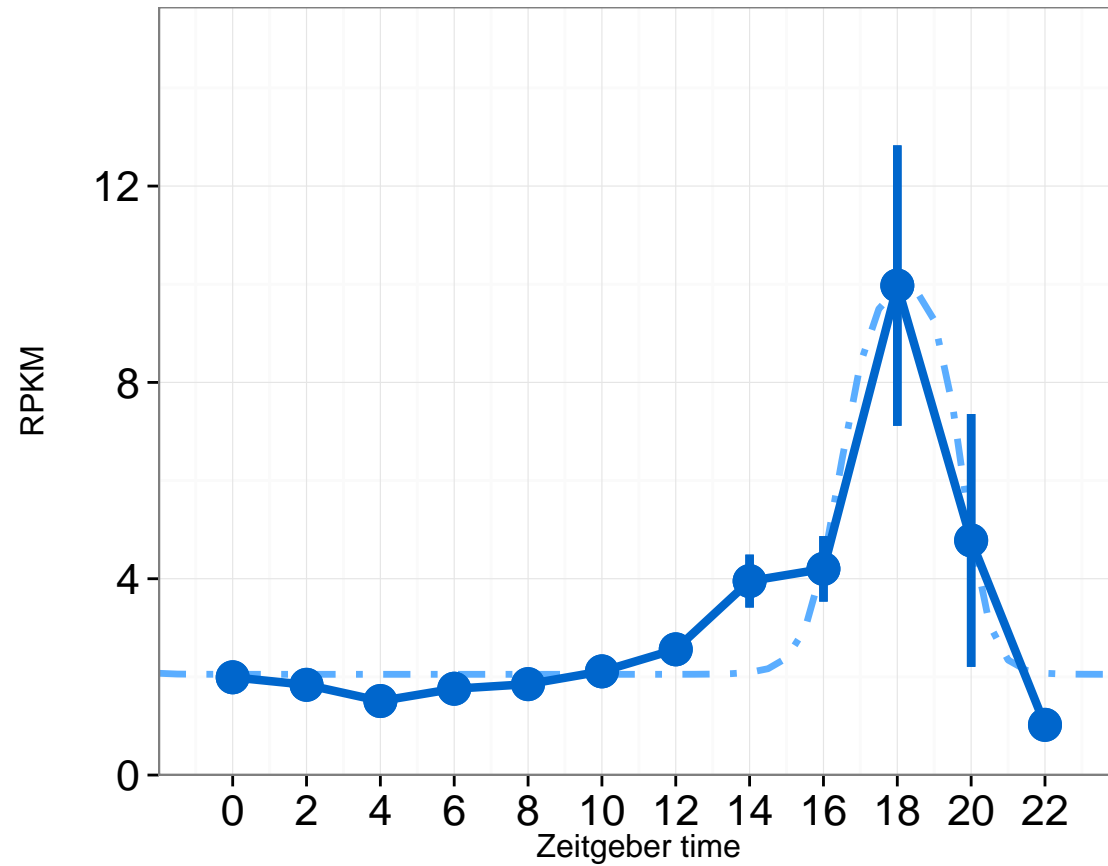

## Exoc8 log2(Ribosome occupancy

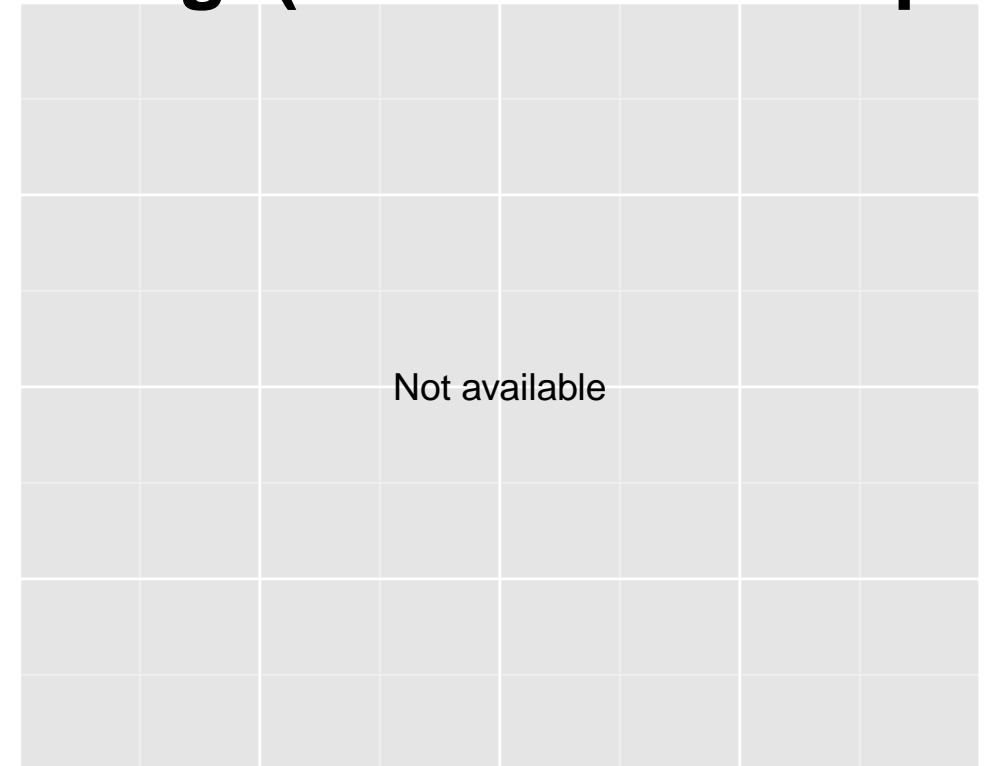

Supplement: SuppDataset_1.zip [file Exoc8_set_B.pdf › Supplemental Dataset 1/B-mRNA_rhythm_translation_nonrhyth/Exoc8_set_B.pdf]

## F830104G03Rik

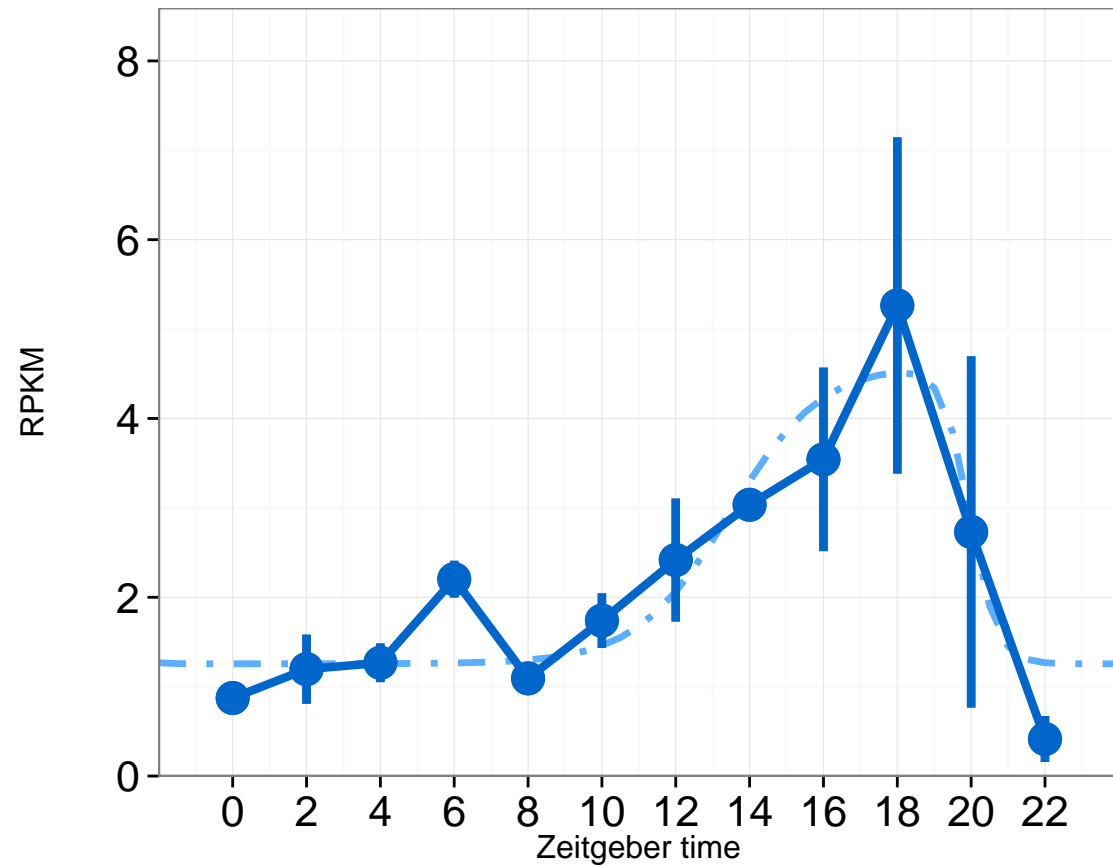

## F830104G03Rik log2(Ribosome occup

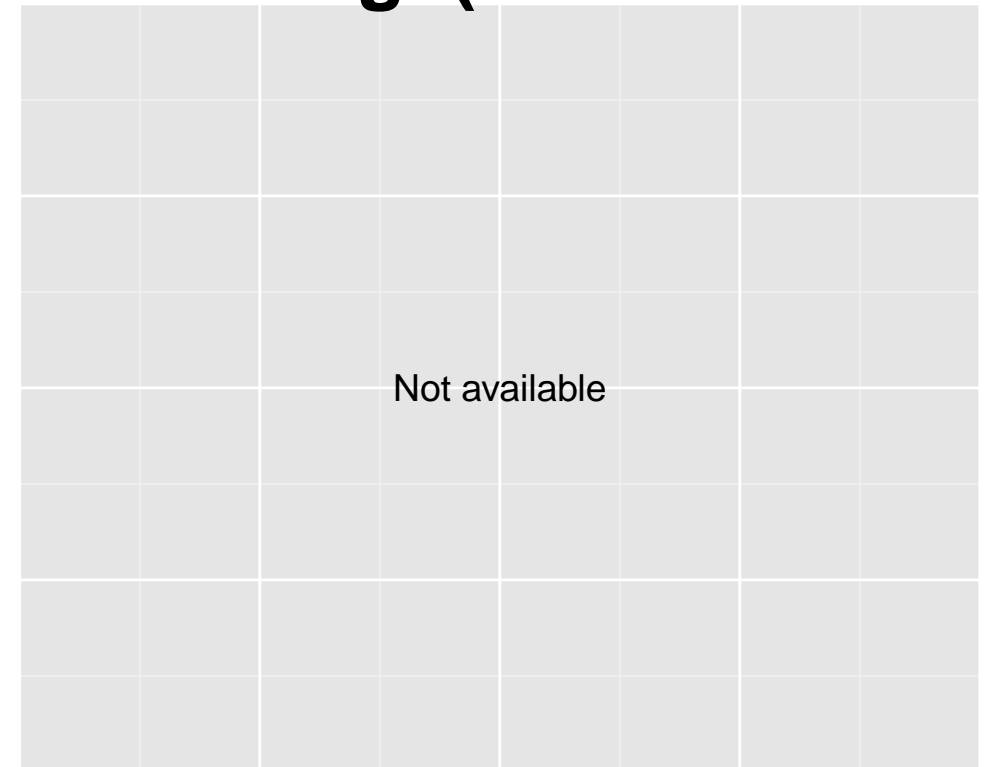

Supplement: SuppDataset_1.zip [file F830104G03Rik_set_B.pdf › Supplemental Dataset 1/B-mRNA_rhythm_translation_nonrhyth/F830104G03Rik_set_B.pdf]

# Fabp5

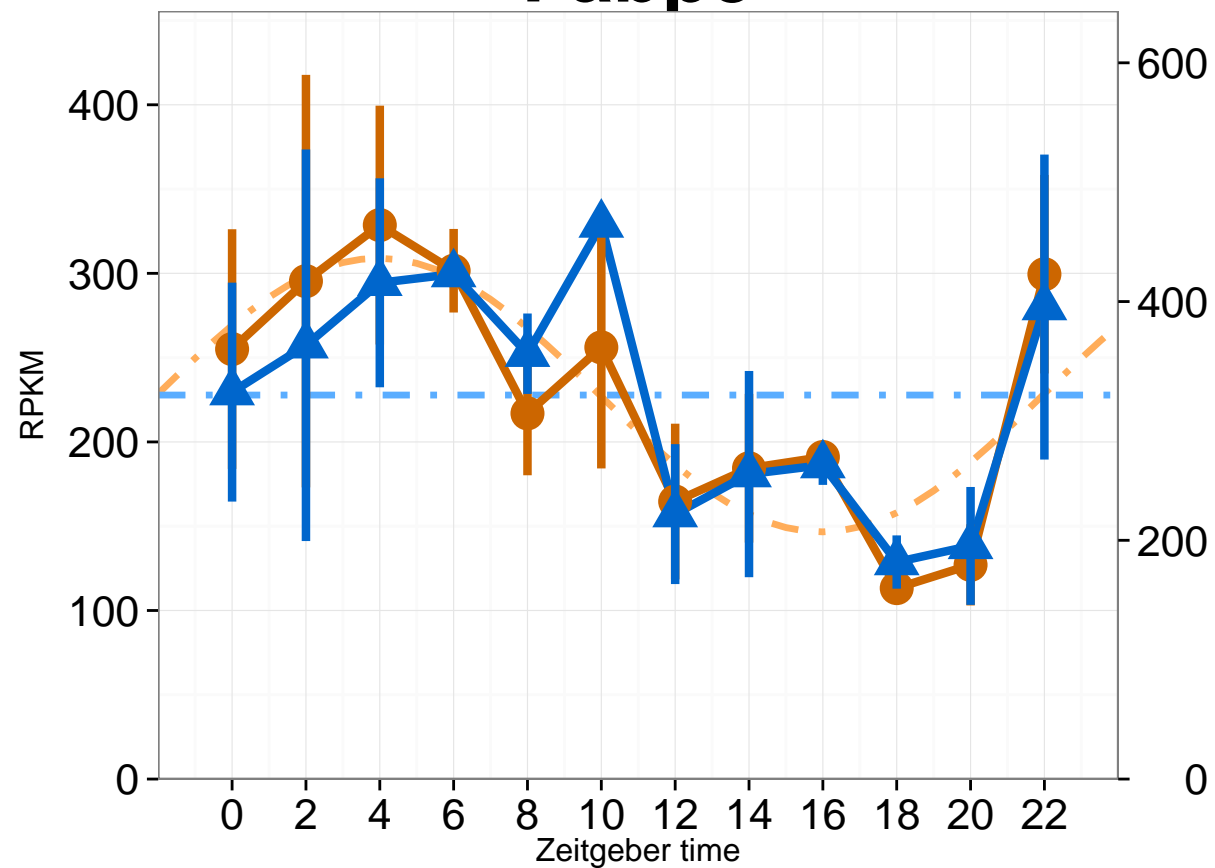

# Fabp5

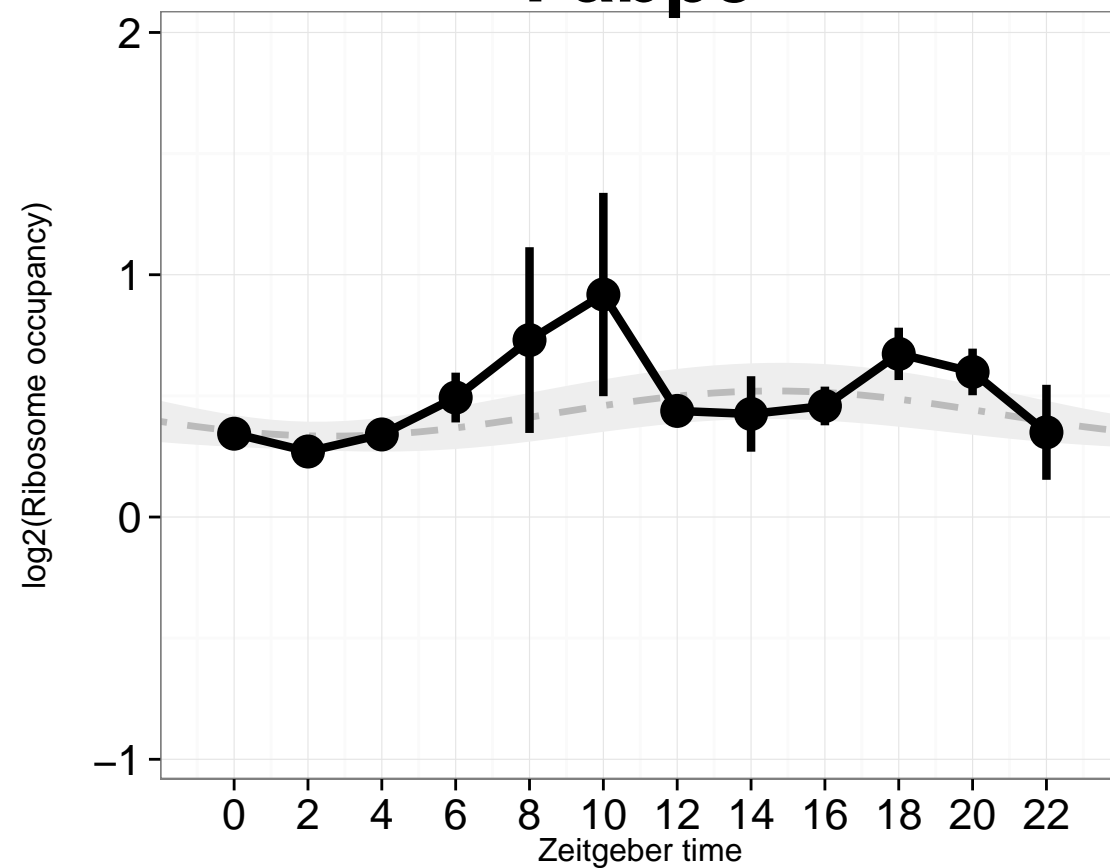

Supplement: SuppDataset_1.zip [file Fabp5_set_B.pdf › Supplemental Dataset 1/B-mRNA_rhythm_translation_nonrhyth/Fabp5_set_B.pdf]

# Fabp7

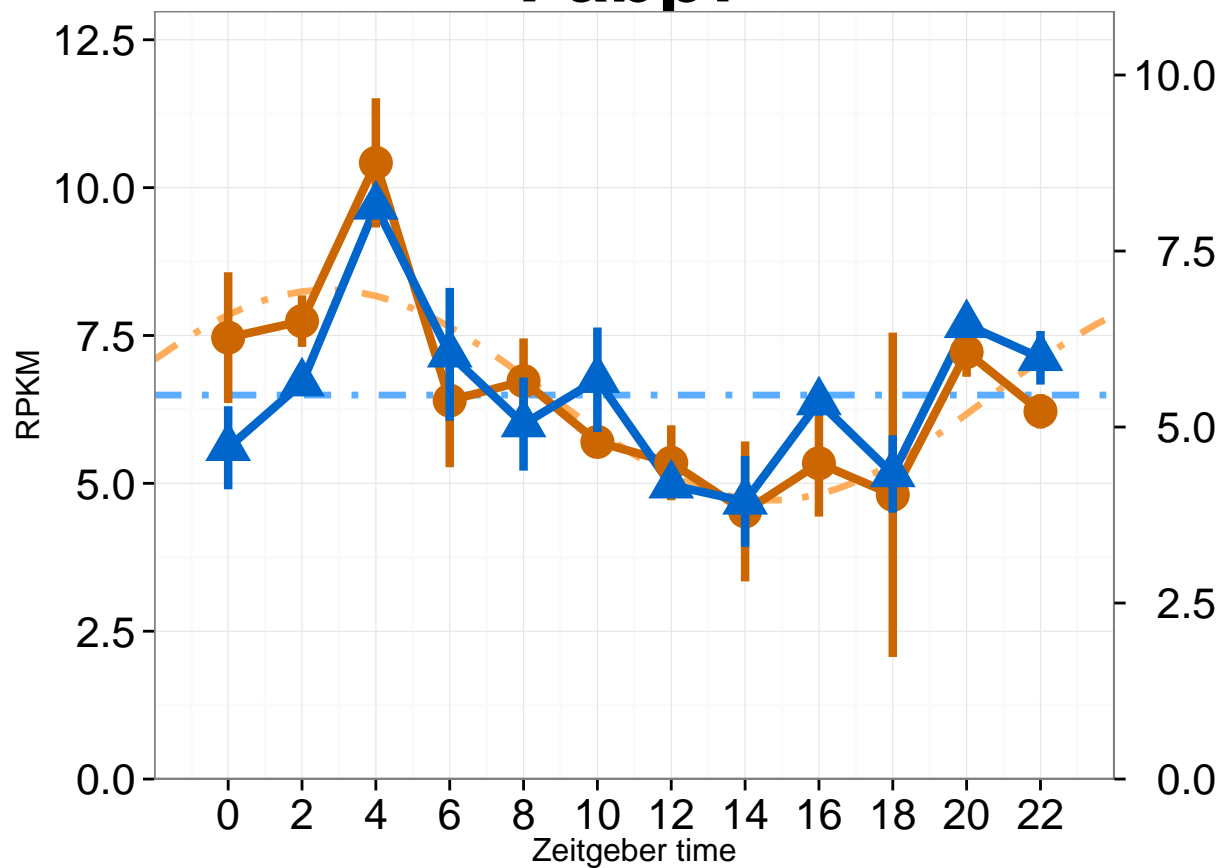

# Fabp7

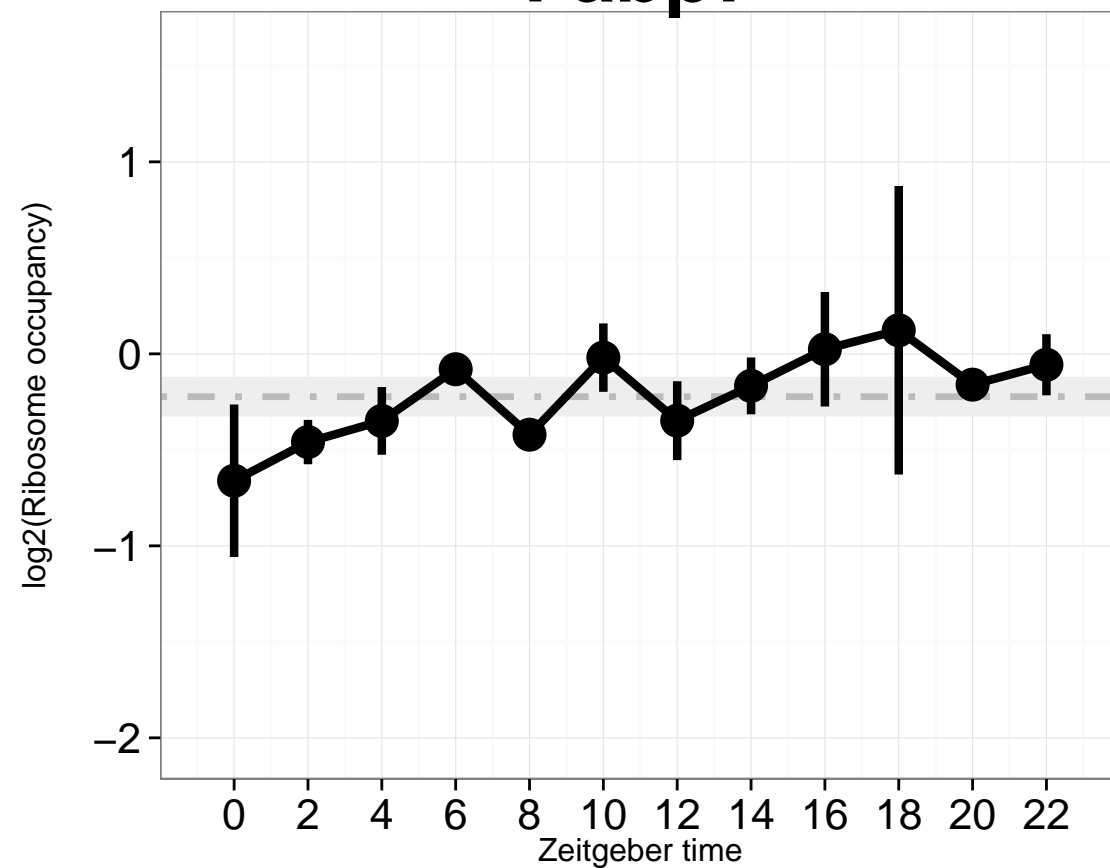

Supplement: SuppDataset_1.zip [file Fabp7_set_B.pdf › Supplemental Dataset 1/B-mRNA_rhythm_translation_nonrhyth/Fabp7_set_B.pdf]

## Fads1

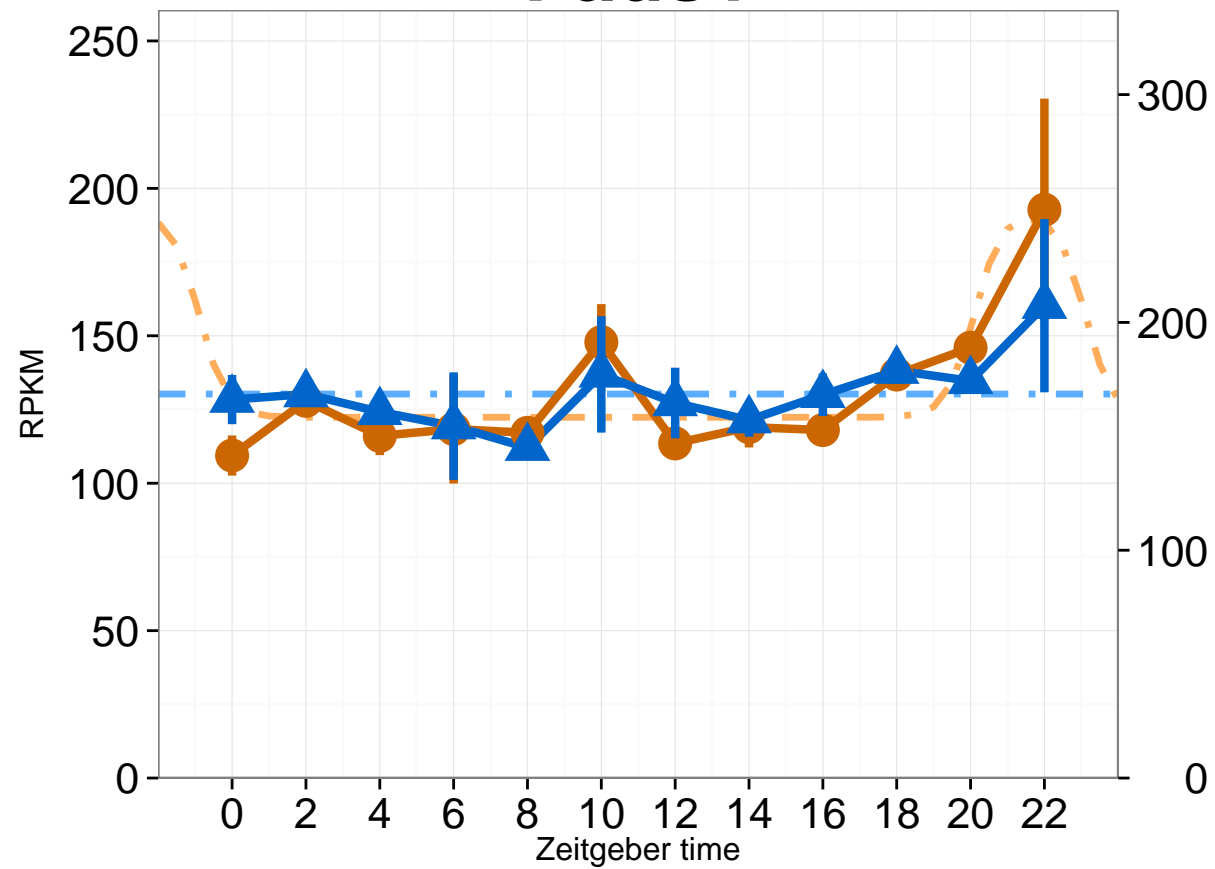

## Fads1

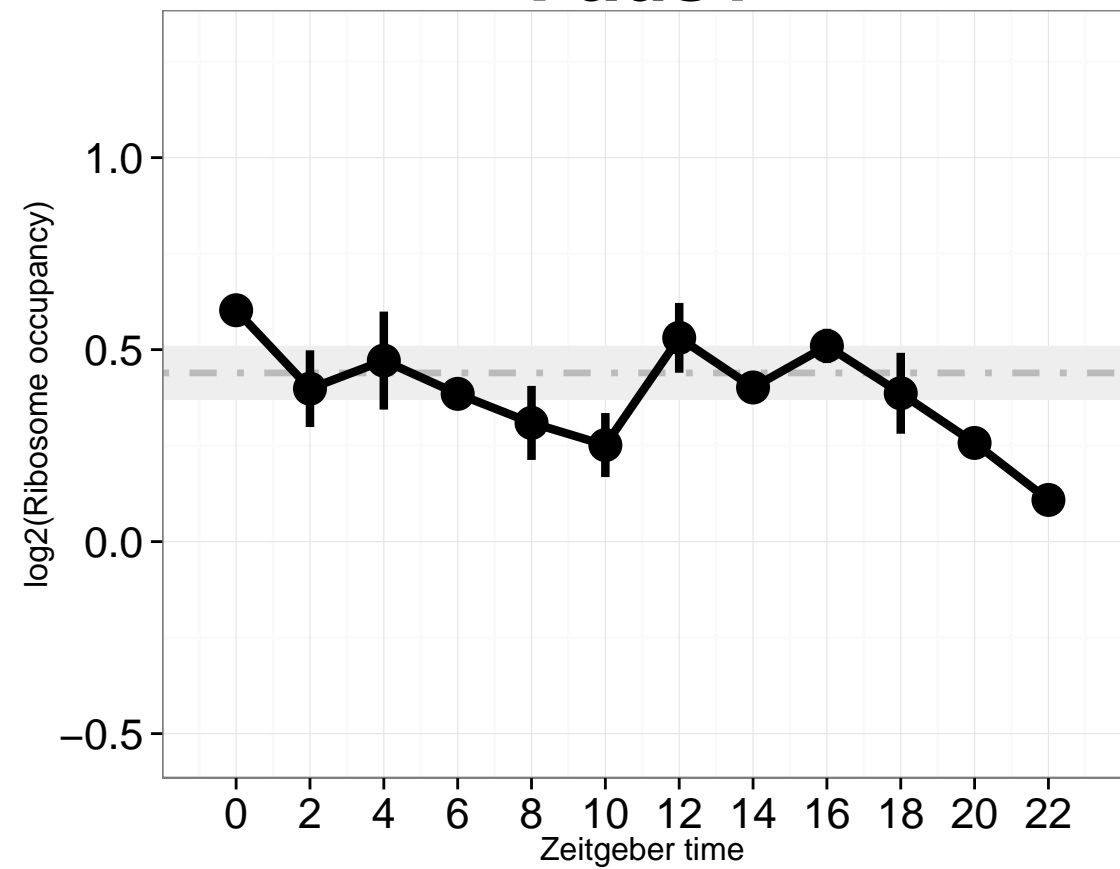

Supplement: SuppDataset_1.zip [file Fads1_set_B.pdf › Supplemental Dataset 1/B-mRNA_rhythm_translation_nonrhyth/Fads1_set_B.pdf]

# Fam120c

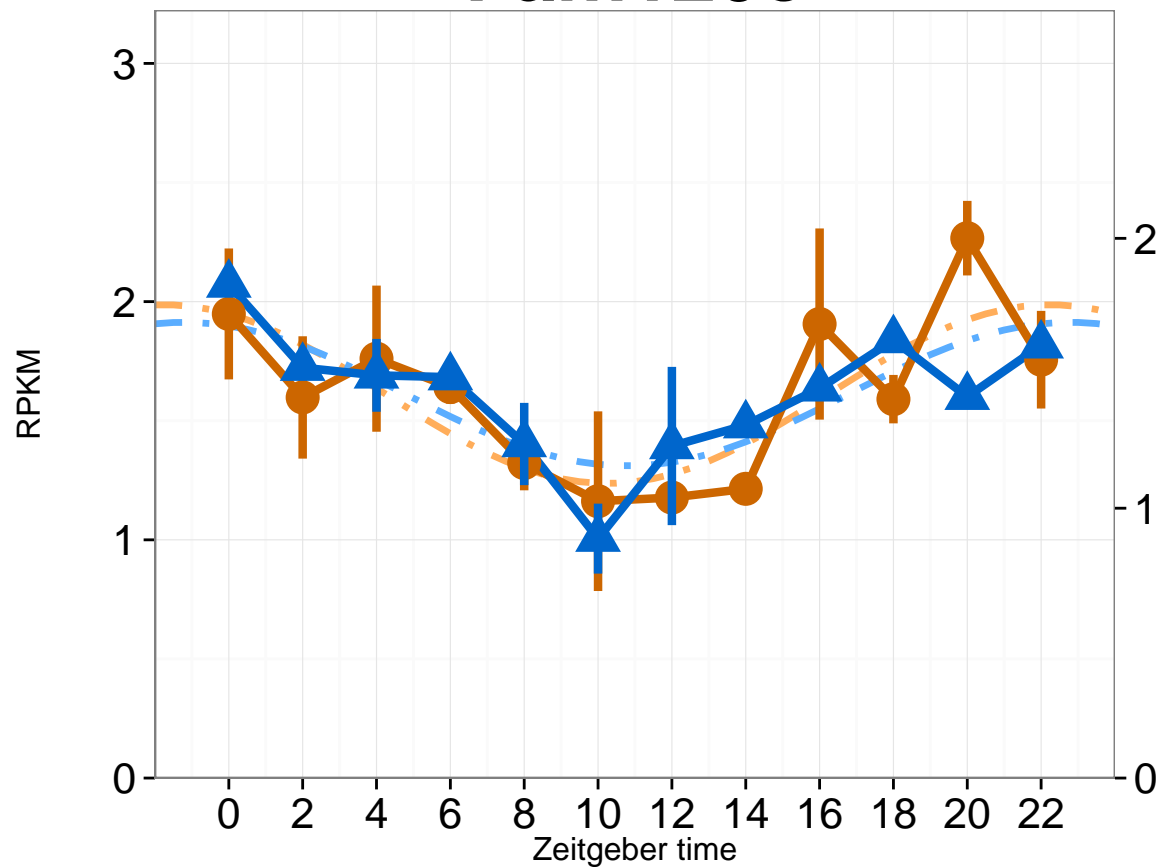

# Fam120c

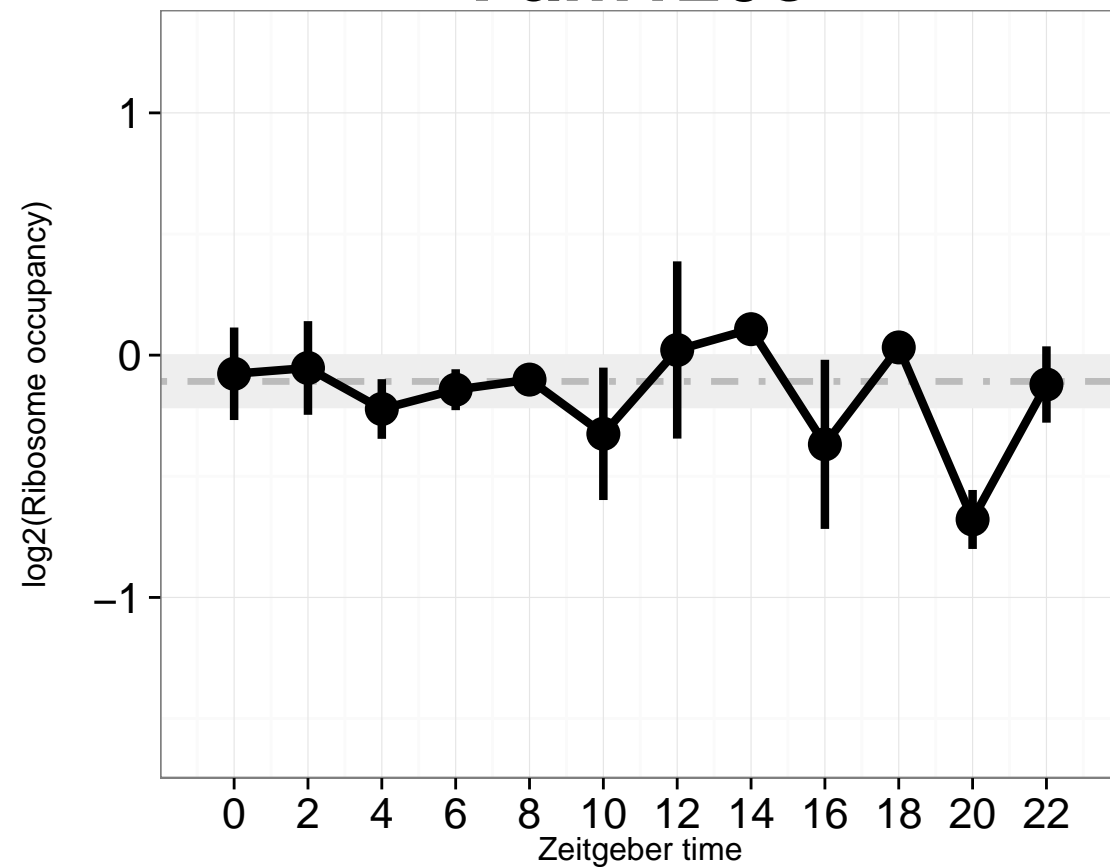

Supplement: SuppDataset_1.zip [file Fam120c_set_B.pdf › Supplemental Dataset 1/B-mRNA_rhythm_translation_nonrhyth/Fam120c_set_B.pdf]

# Fam129b

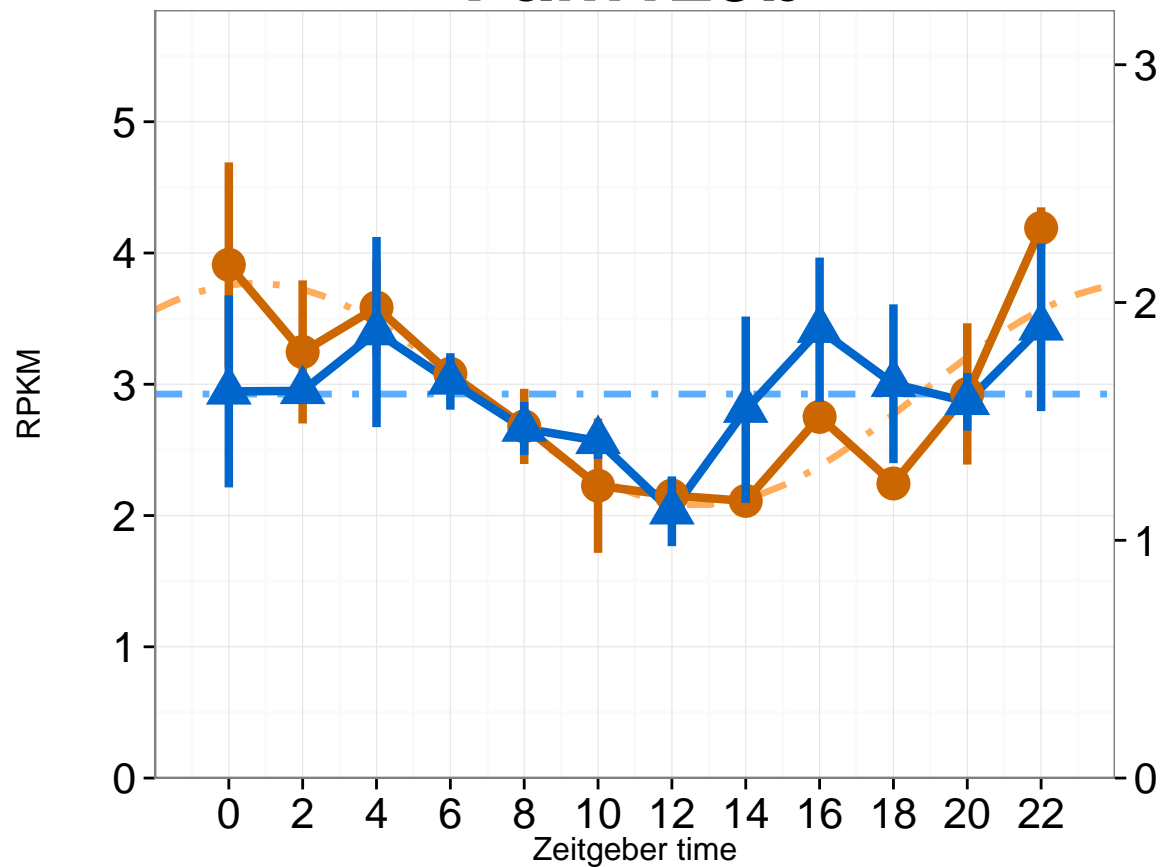

# Fam129b

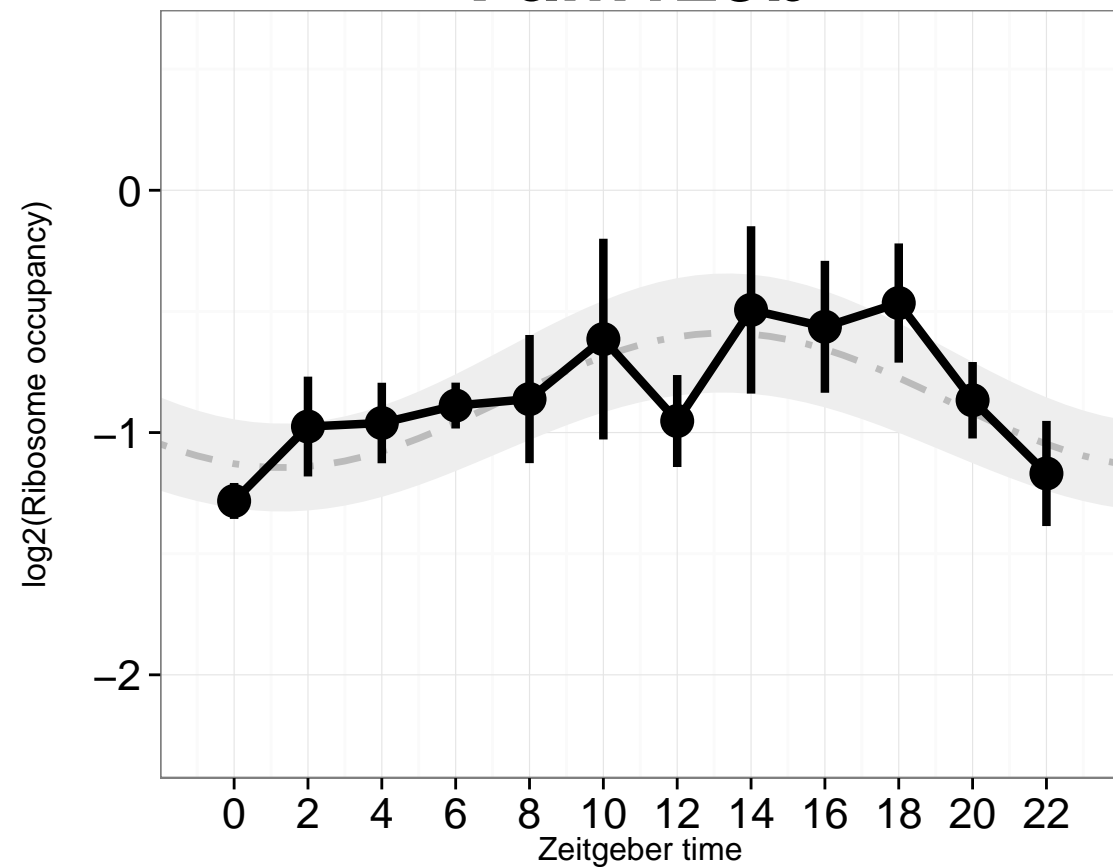

Supplement: SuppDataset_1.zip [file Fam129b_set_B.pdf › Supplemental Dataset 1/B-mRNA_rhythm_translation_nonrhyth/Fam129b_set_B.pdf]

# Fam160a2

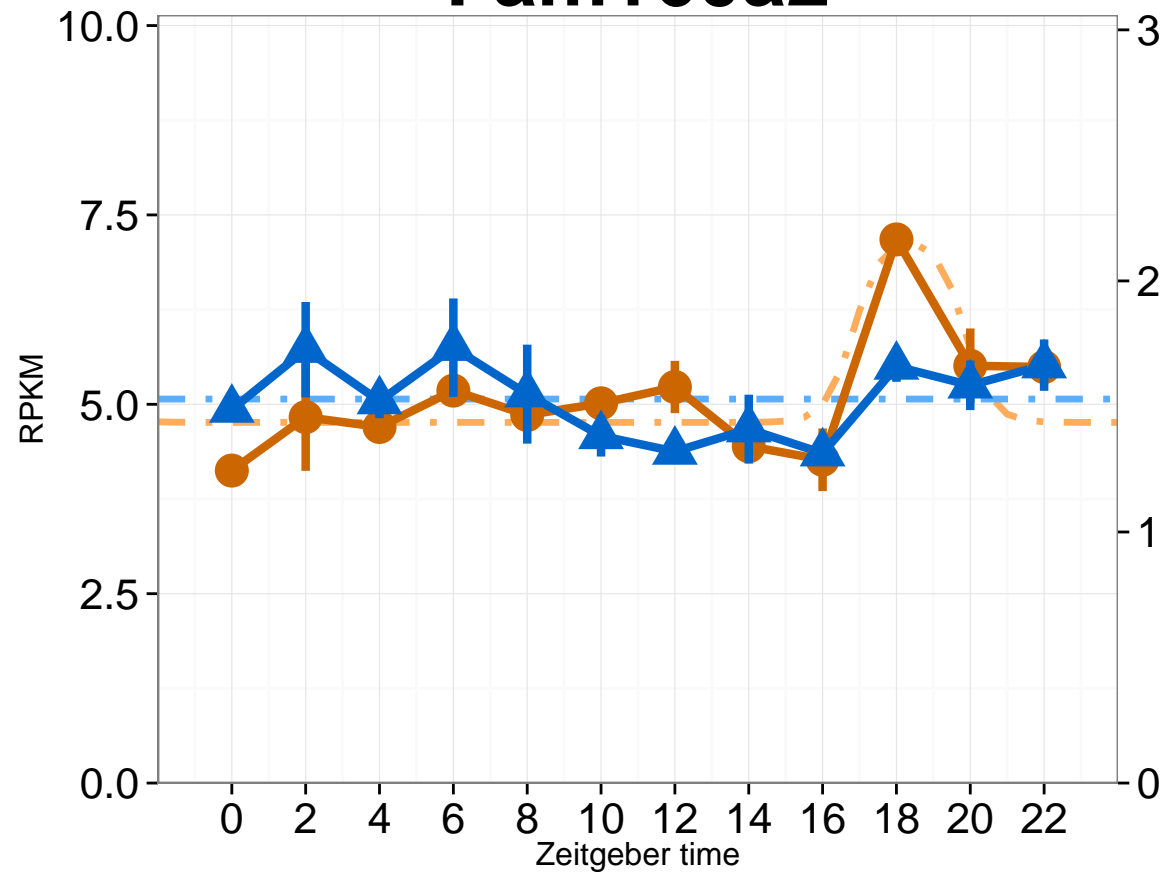

# Fam160a2

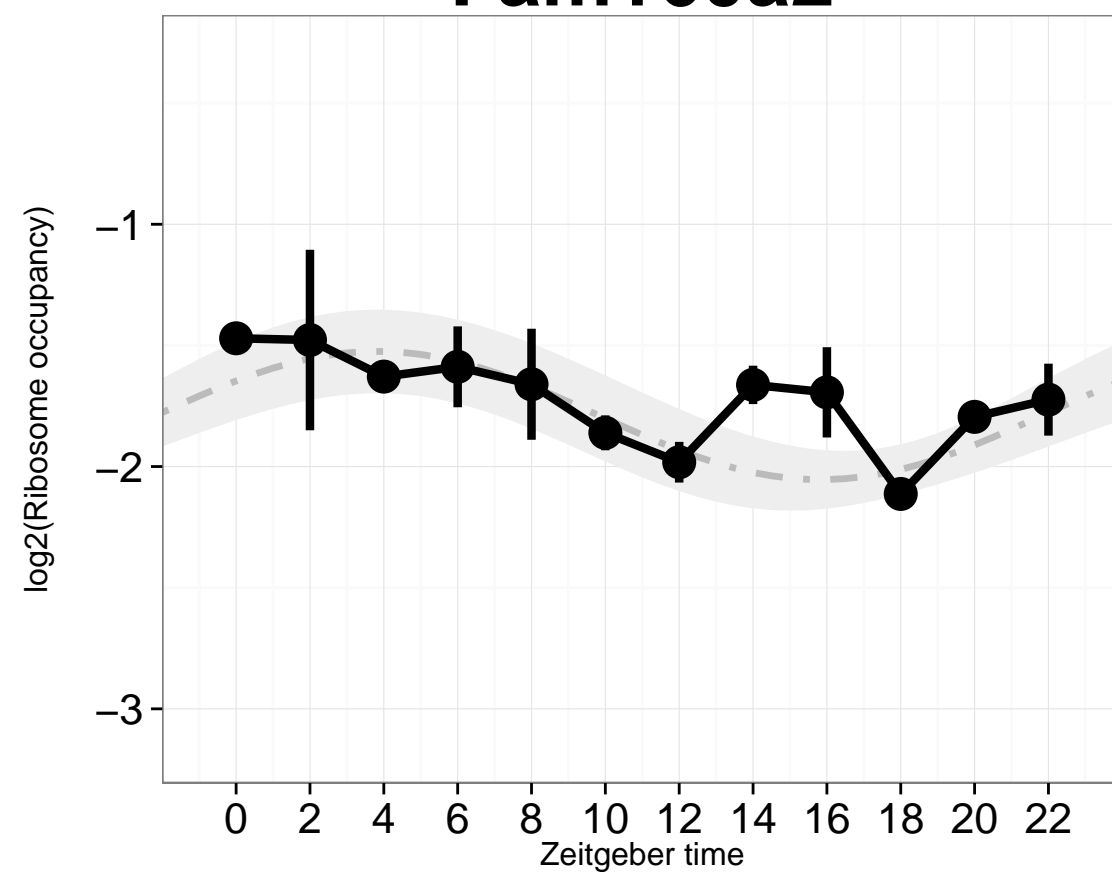

Supplement: SuppDataset_1.zip [file Fam160a2_set_B.pdf › Supplemental Dataset 1/B-mRNA_rhythm_translation_nonrhyth/Fam160a2_set_B.pdf]

## Fam161a

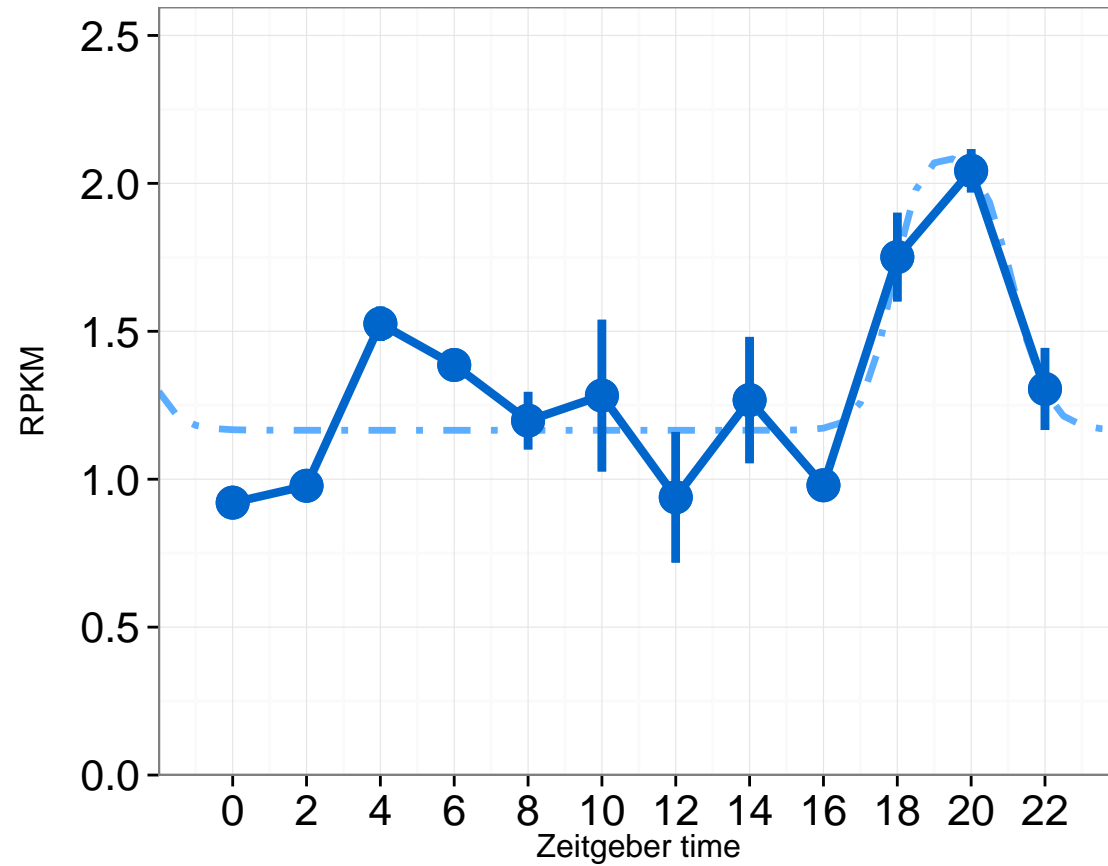

## Fam161a log2(Ribosome occupanc

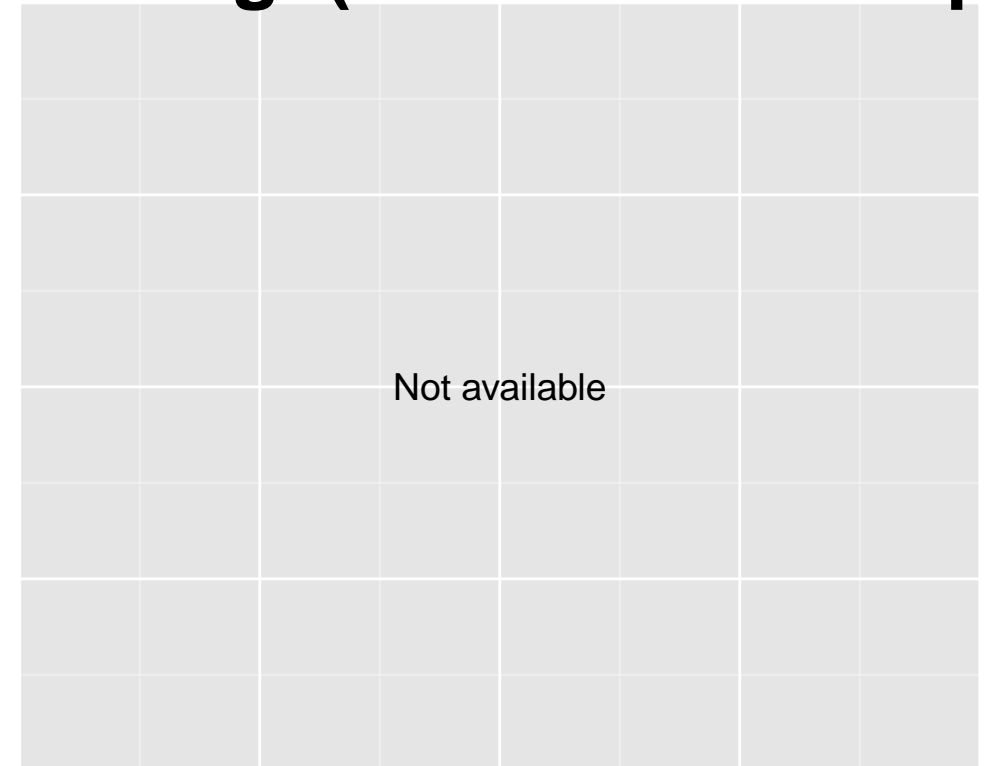

Supplement: SuppDataset_1.zip [file Fam161a_set_B.pdf › Supplemental Dataset 1/B-mRNA_rhythm_translation_nonrhyth/Fam161a_set_B.pdf]

## Fam184a

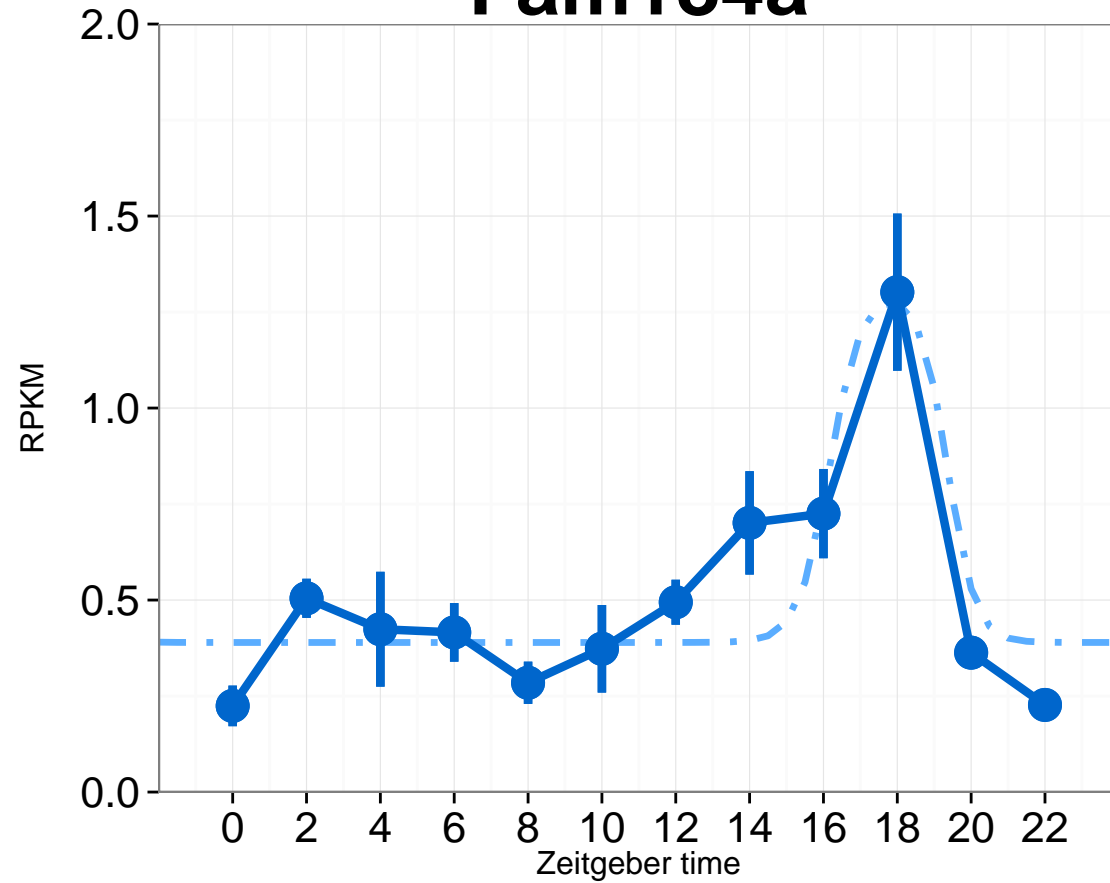

## Fam184a log2(Ribosome occupanc

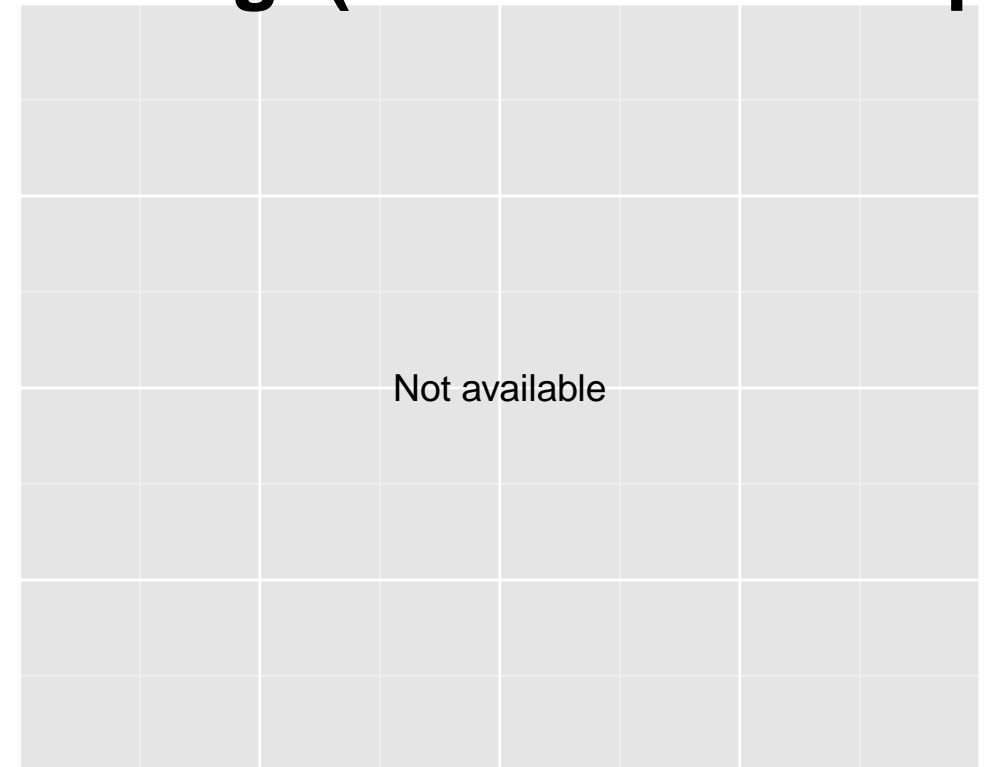

Supplement: SuppDataset_1.zip [file Fam184a_set_B.pdf › Supplemental Dataset 1/B-mRNA_rhythm_translation_nonrhyth/Fam184a_set_B.pdf]

# Fam228b

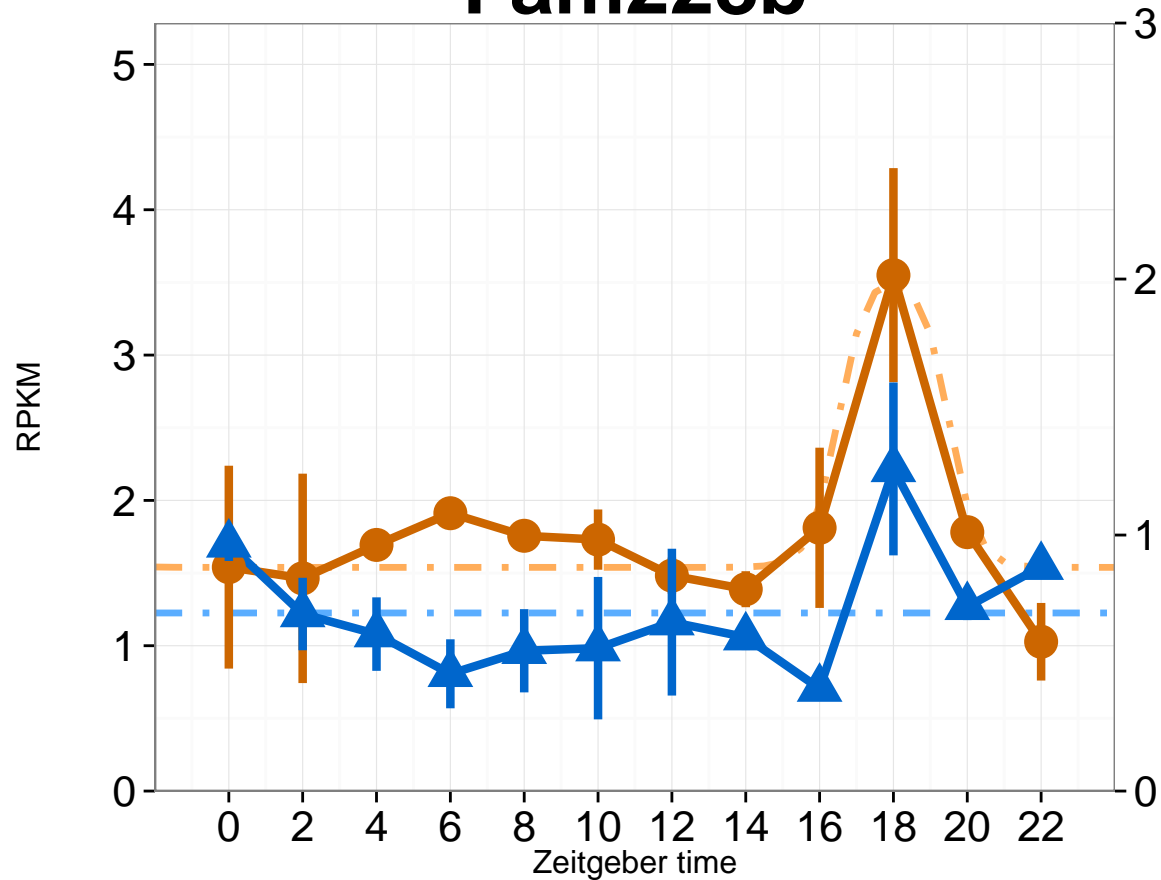

# Fam228b

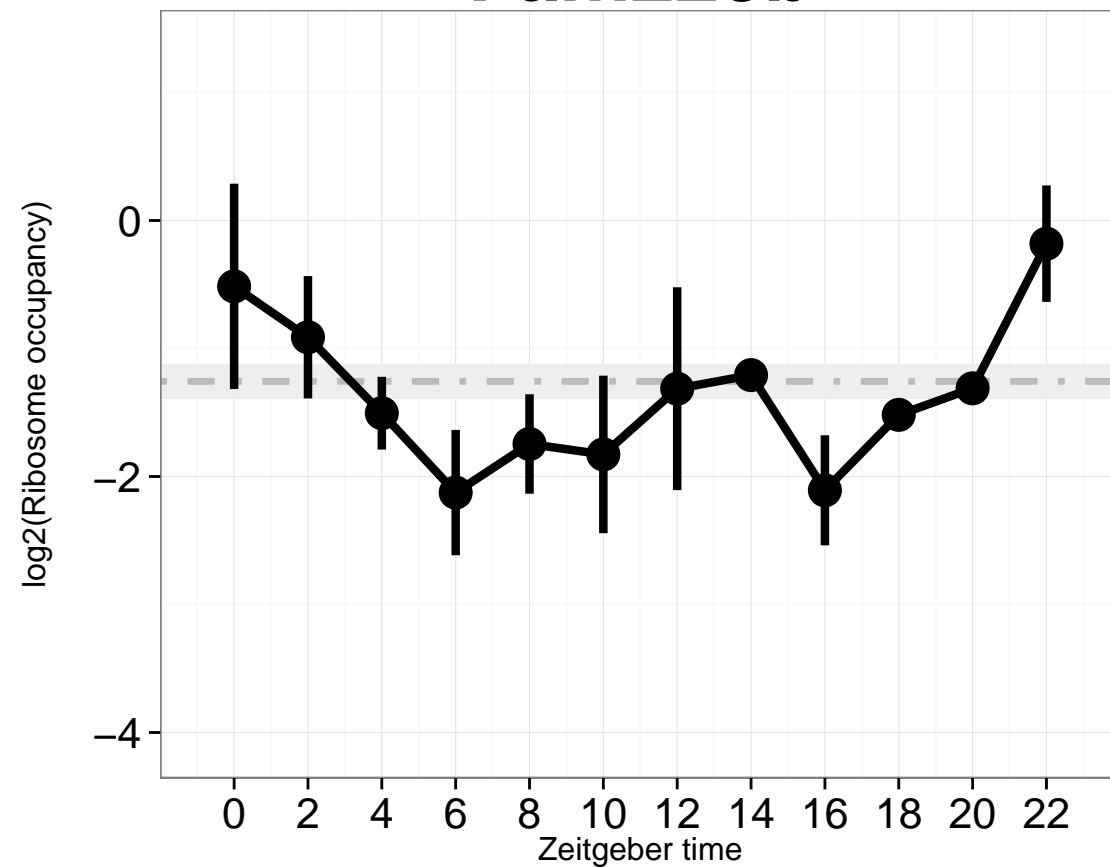

Supplement: SuppDataset_1.zip [file Fam228b_set_B.pdf › Supplemental Dataset 1/B-mRNA_rhythm_translation_nonrhyth/Fam228b_set_B.pdf]

# Fam53b

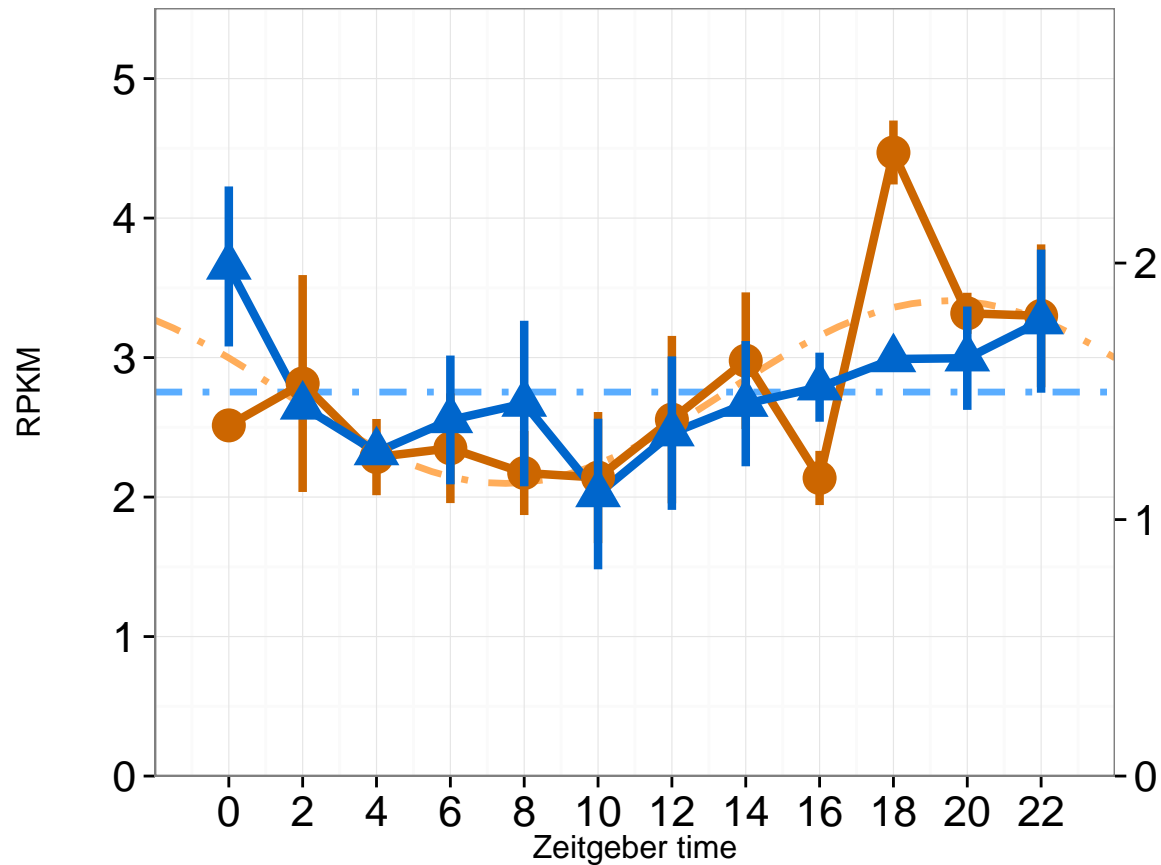

# Fam53b

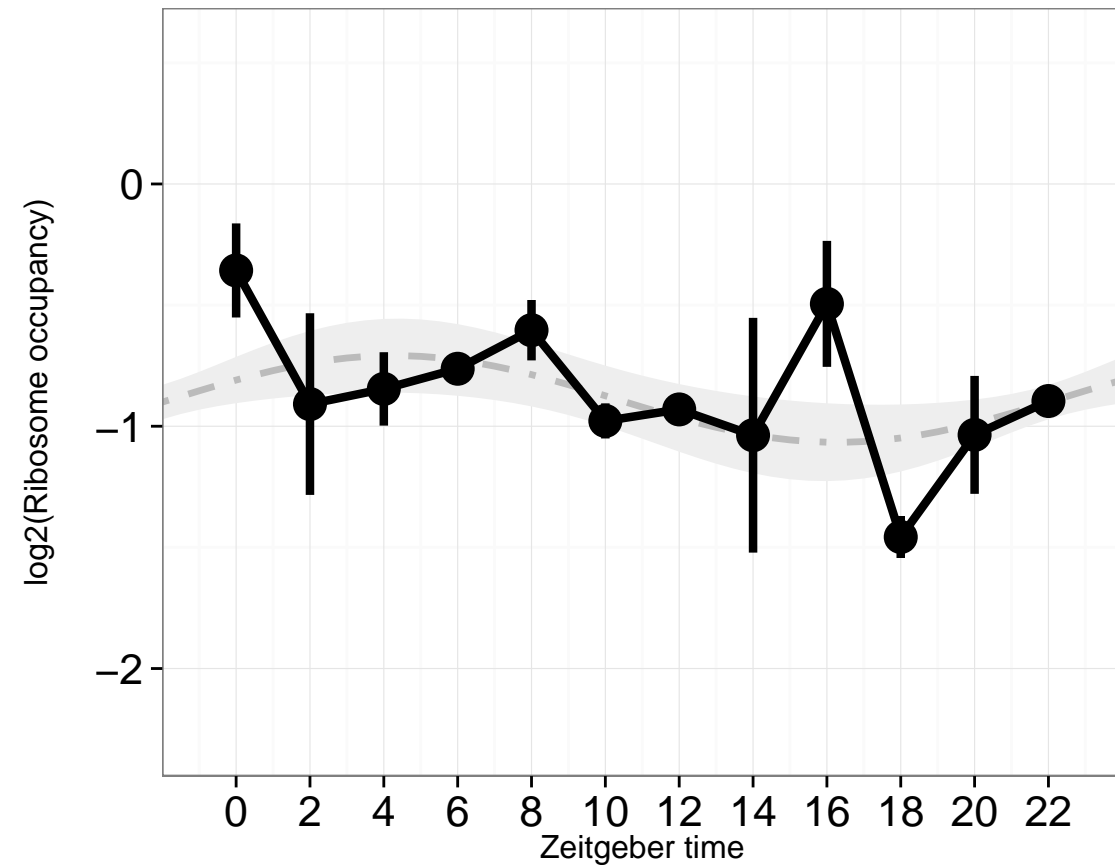

Supplement: SuppDataset_1.zip [file Fam53b_set_B.pdf › Supplemental Dataset 1/B-mRNA_rhythm_translation_nonrhyth/Fam53b_set_B.pdf]

## Fam81a

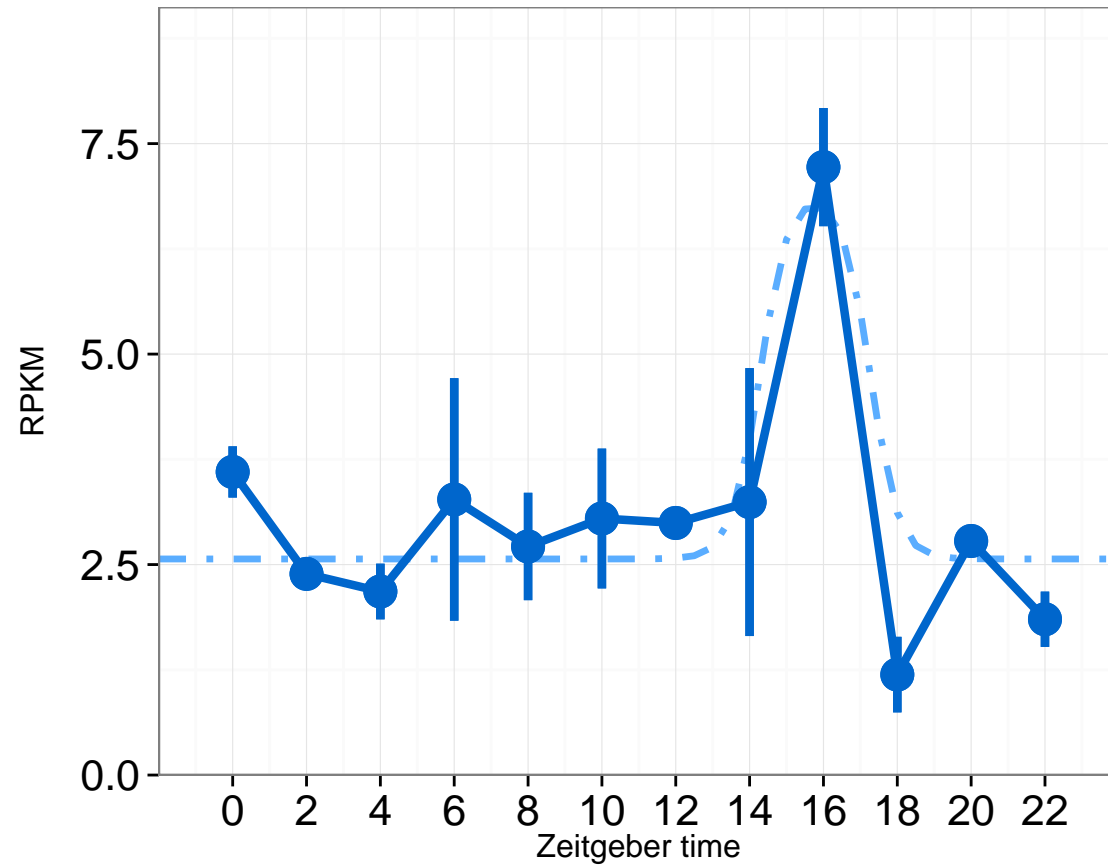

## Fam81a log2(Ribosome occupancy)

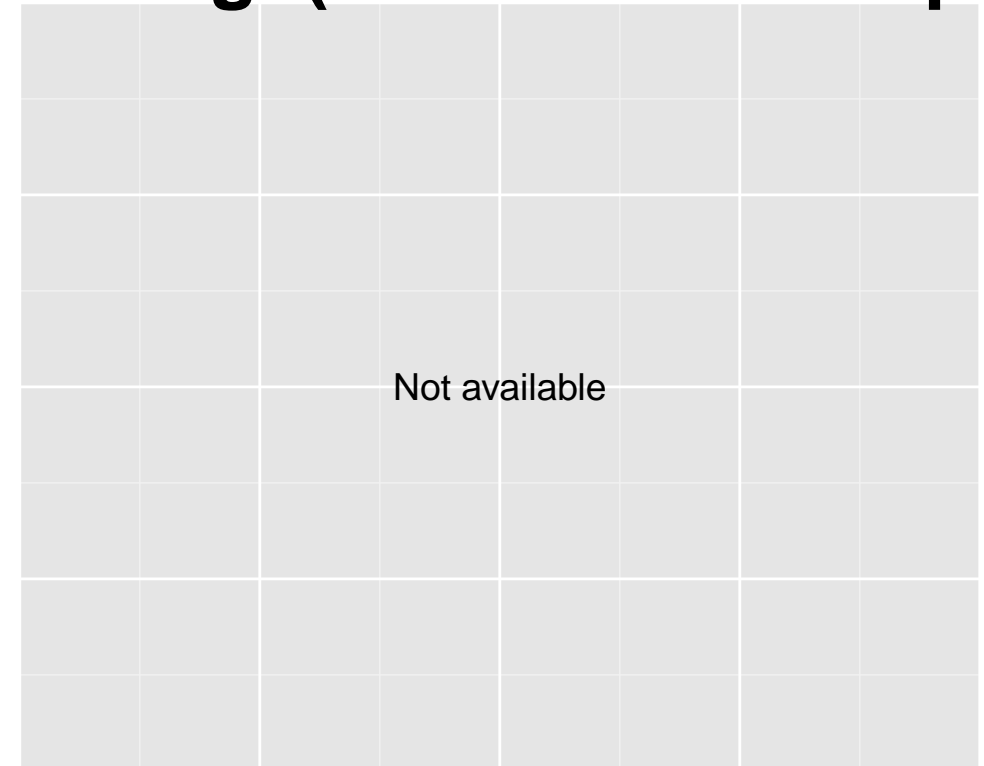

Supplement: SuppDataset_1.zip [file Fam81a_set_B.pdf › Supplemental Dataset 1/B-mRNA_rhythm_translation_nonrhyth/Fam81a_set_B.pdf]

# Fam84a

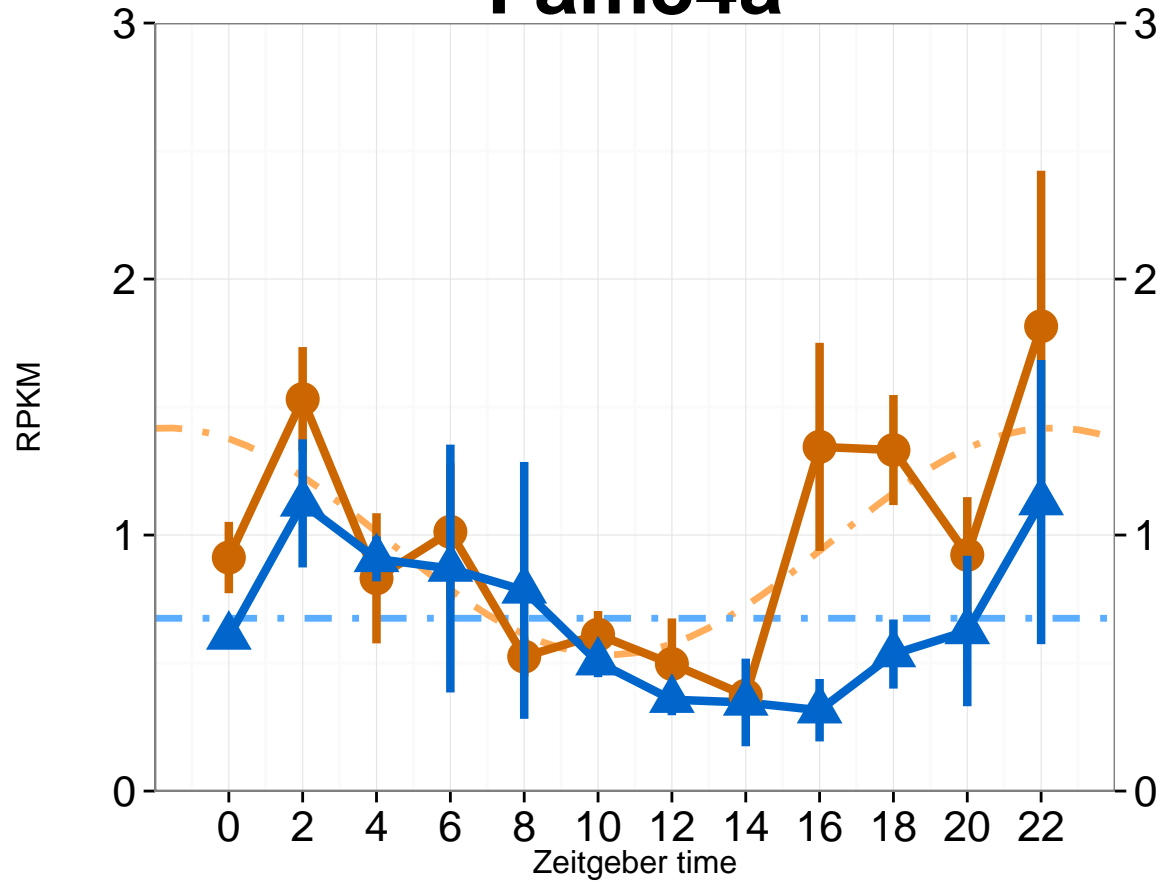

# Fam84a

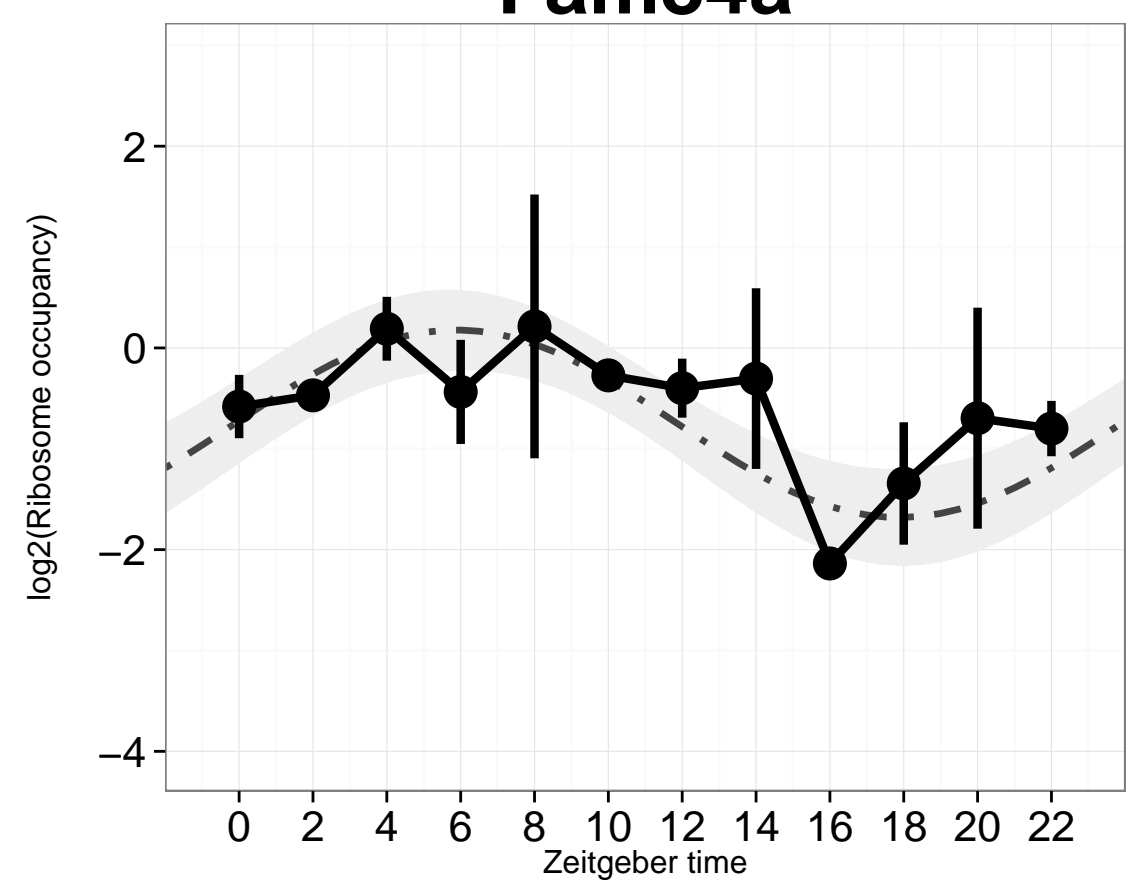

Supplement: SuppDataset_1.zip [file Fam84a_set_B.pdf › Supplemental Dataset 1/B-mRNA_rhythm_translation_nonrhyth/Fam84a_set_B.pdf]

# Fancb

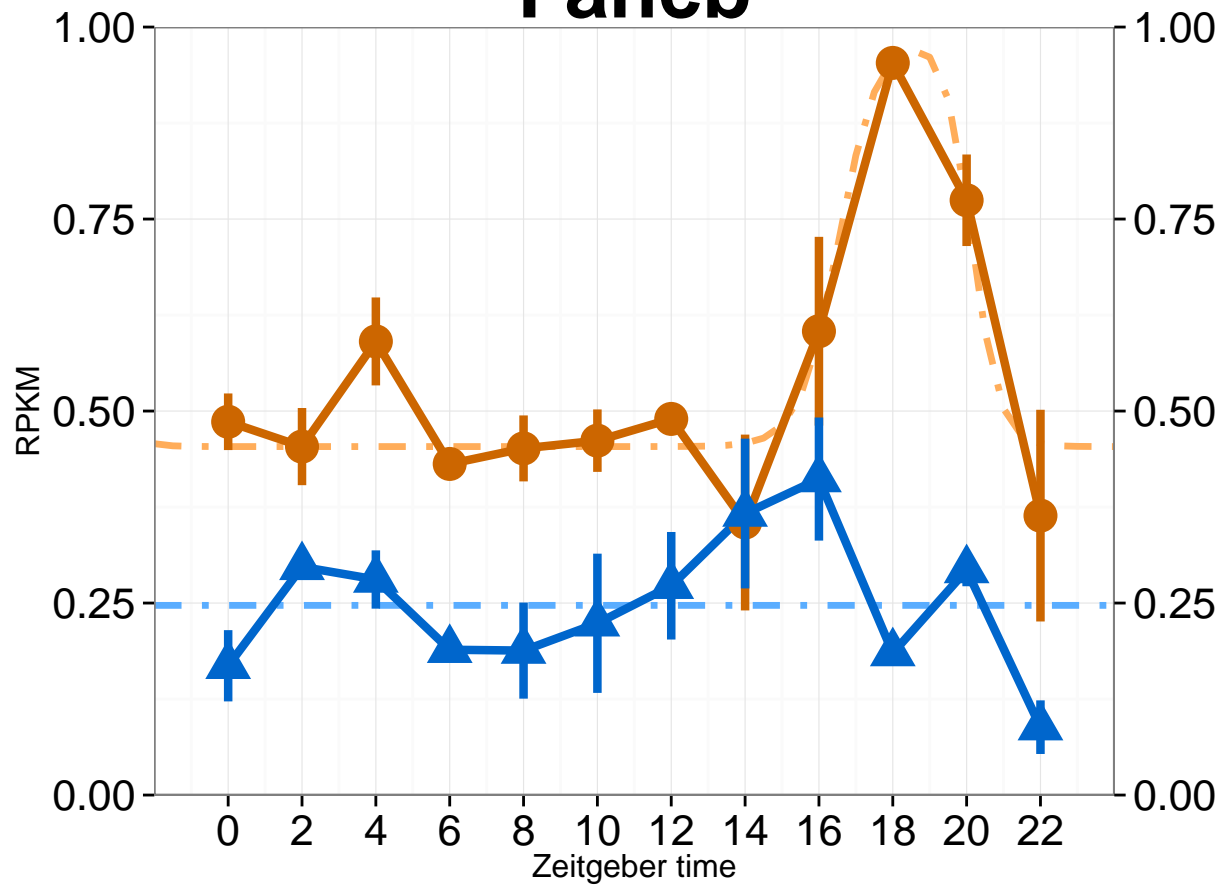

# Fancb

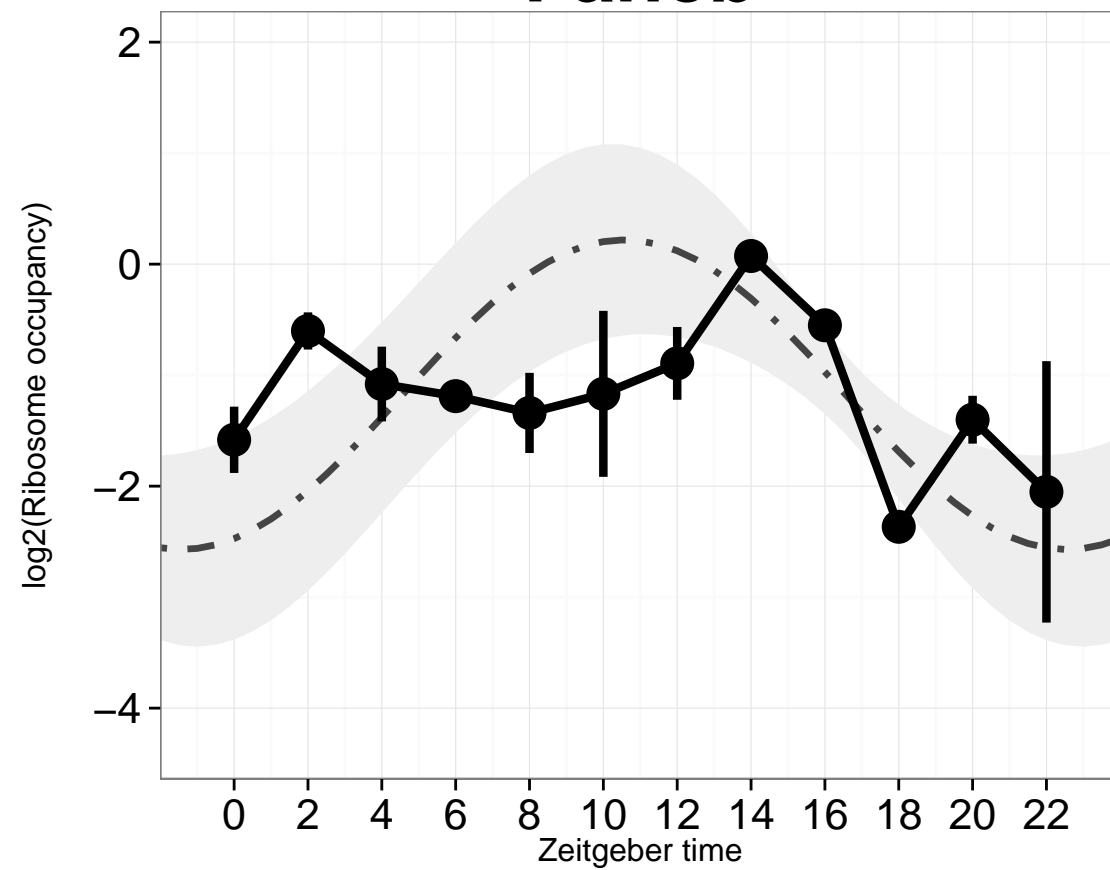

Supplement: SuppDataset_1.zip [file Fancb_set_B.pdf › Supplemental Dataset 1/B-mRNA_rhythm_translation_nonrhyth/Fancb_set_B.pdf]

## FancI

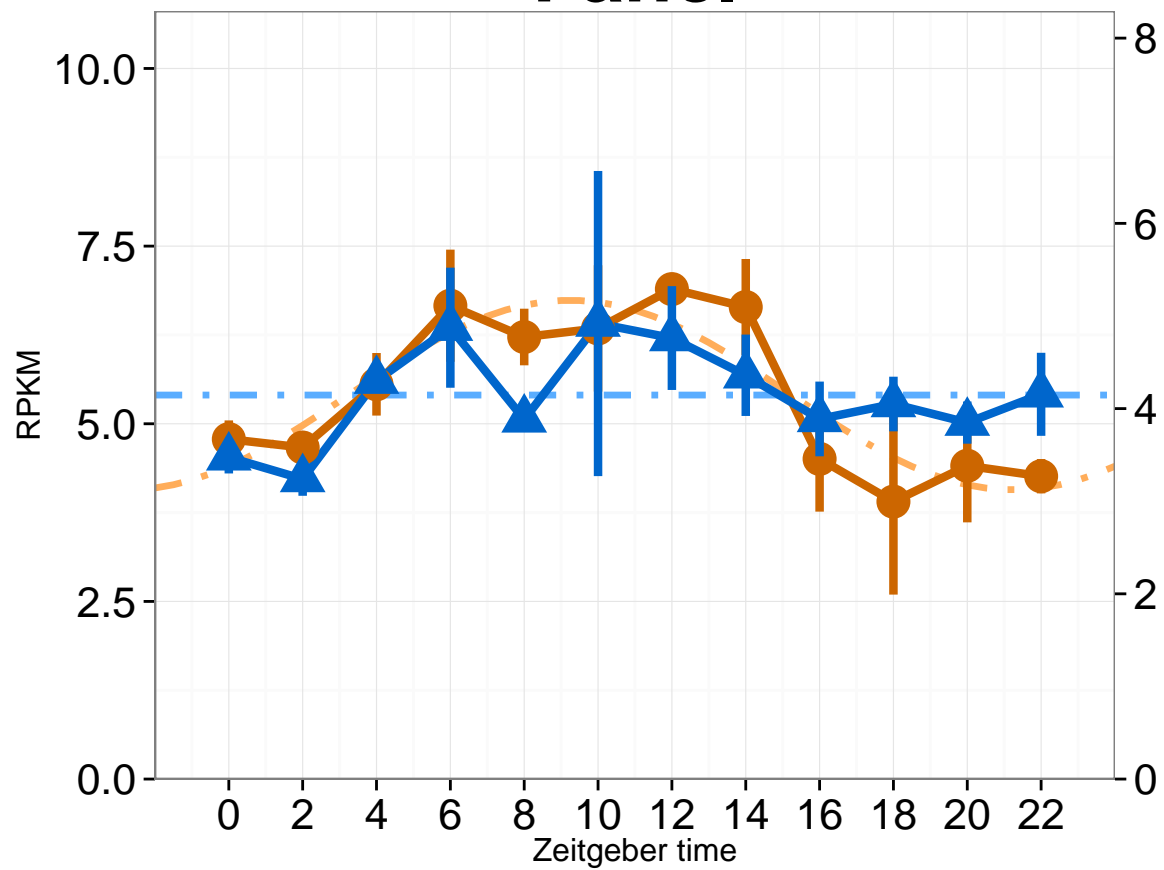

## FancI

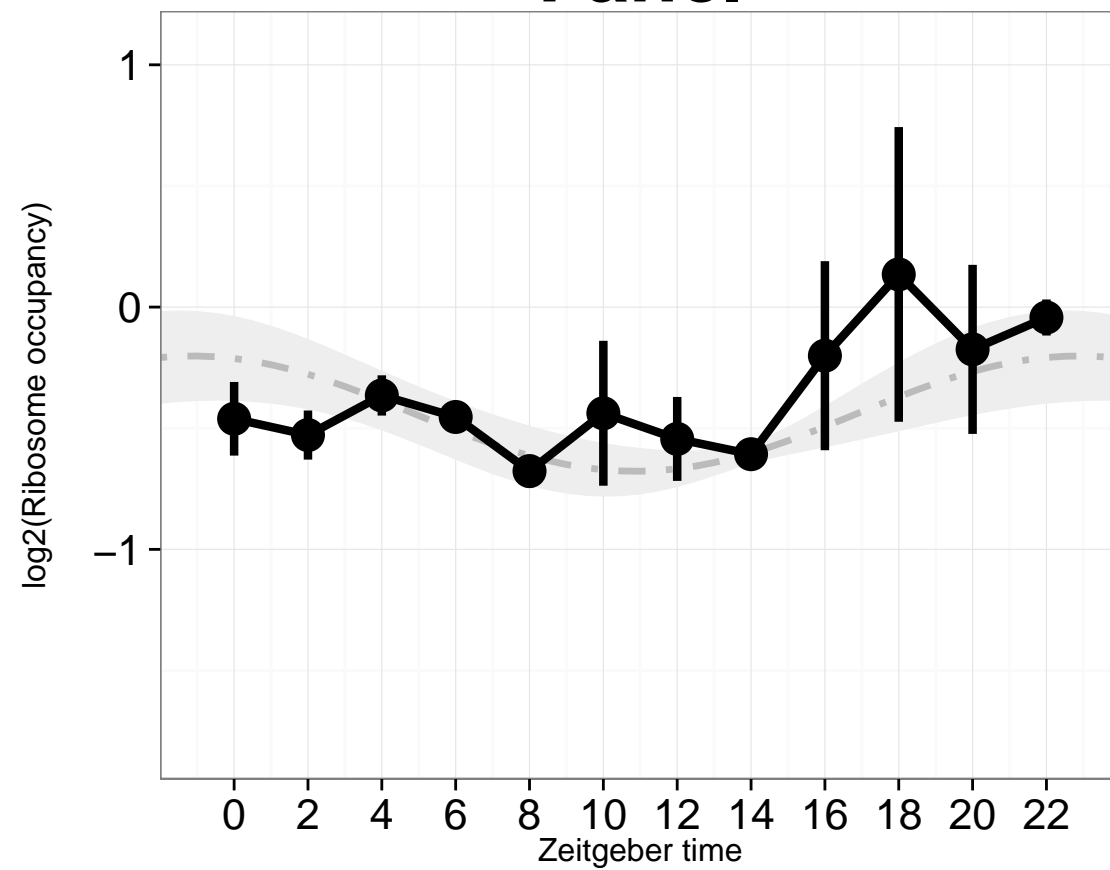

Supplement: SuppDataset_1.zip [file Fancl_set_B.pdf › Supplemental Dataset 1/B-mRNA_rhythm_translation_nonrhyth/Fancl_set_B.pdf]

# Fastkd5

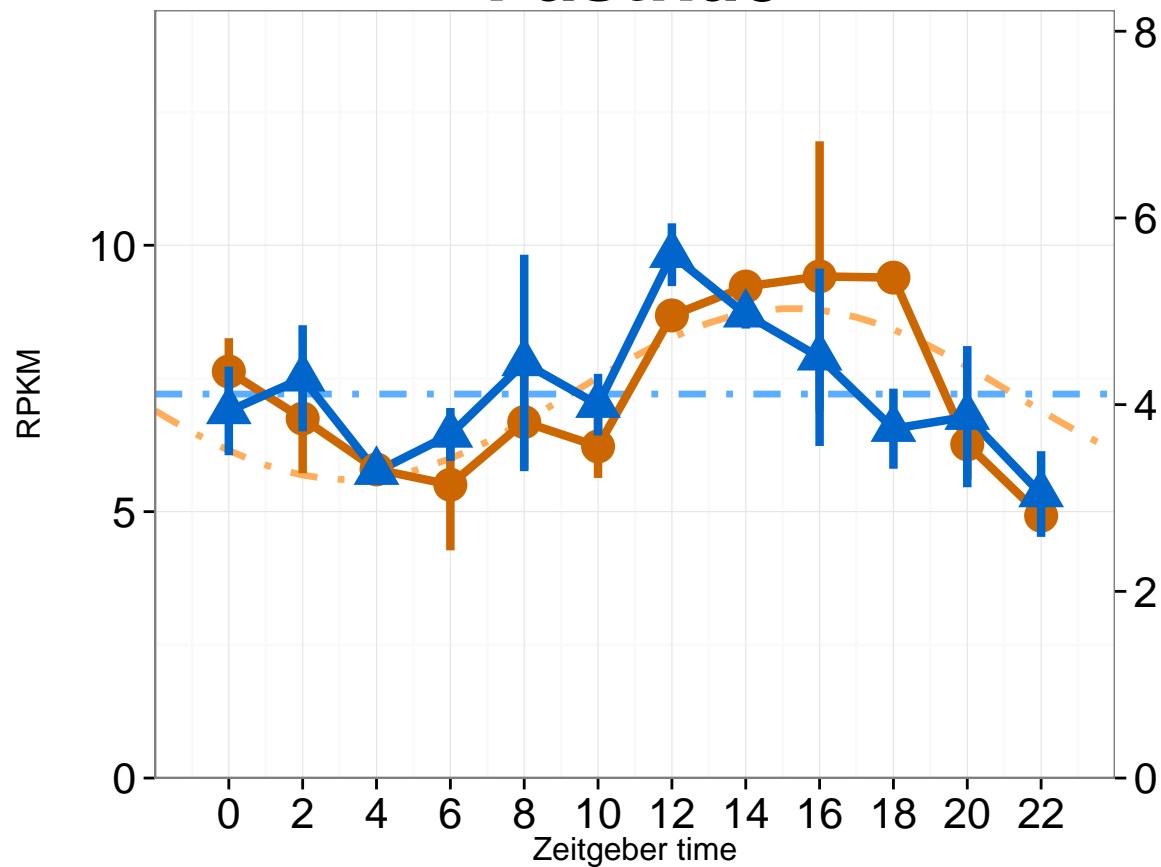

# Fastkd5

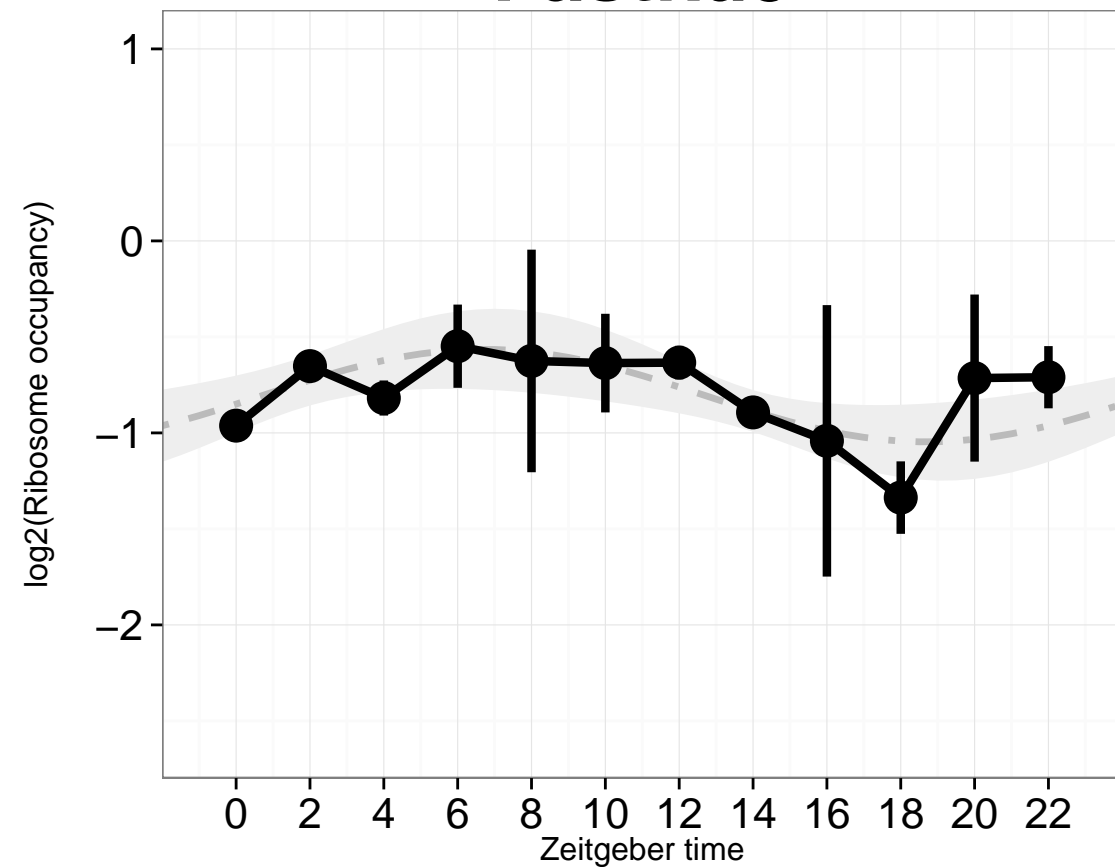

Supplement: SuppDataset_1.zip [file Fastkd5_set_B.pdf › Supplemental Dataset 1/B-mRNA_rhythm_translation_nonrhyth/Fastkd5_set_B.pdf]

## Fbxl19

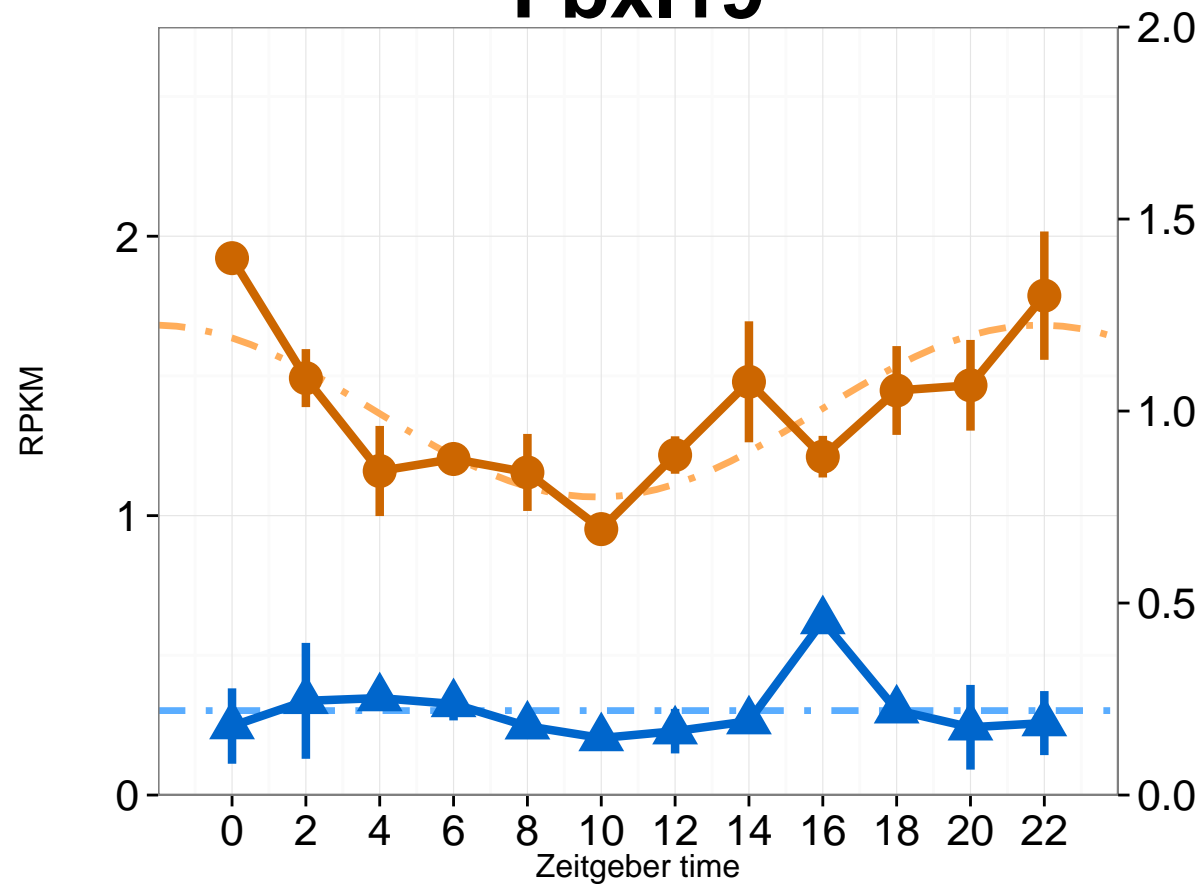

## Fbxl19

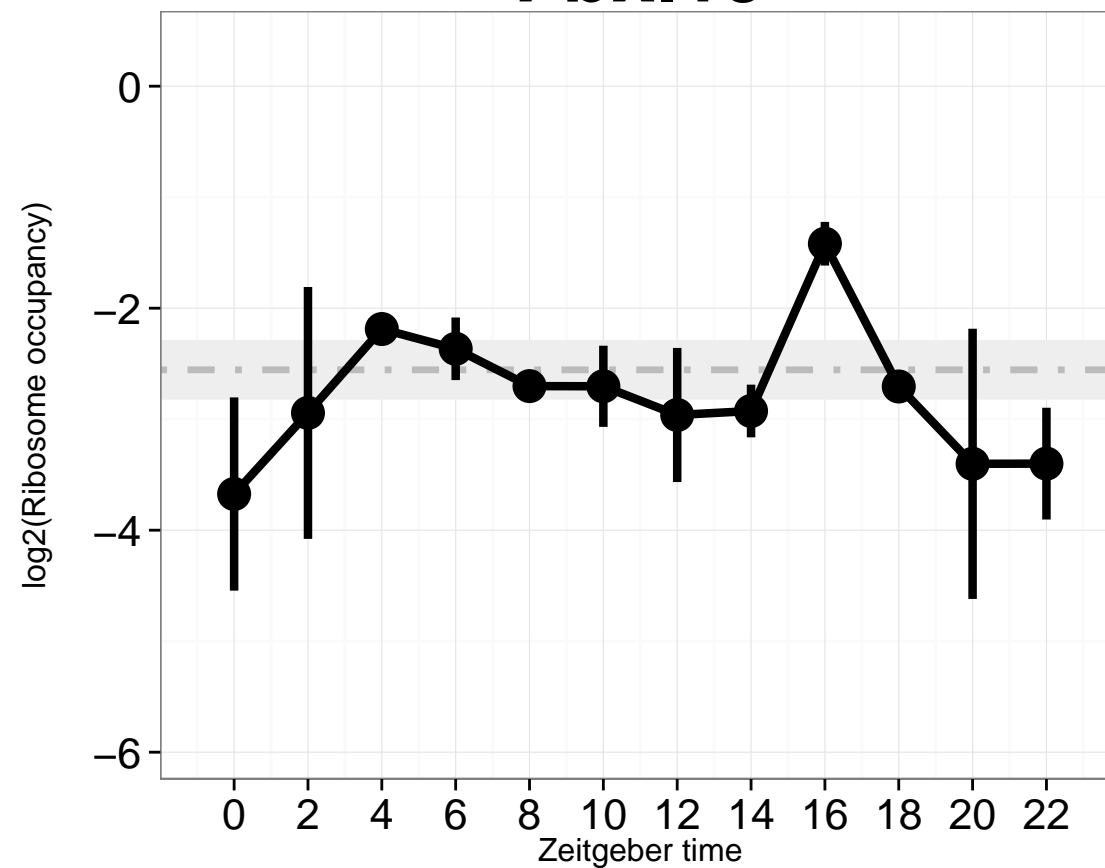

Supplement: SuppDataset_1.zip [file Fbxl19_set_B.pdf › Supplemental Dataset 1/B-mRNA_rhythm_translation_nonrhyth/Fbxl19_set_B.pdf]

## Fbxo10

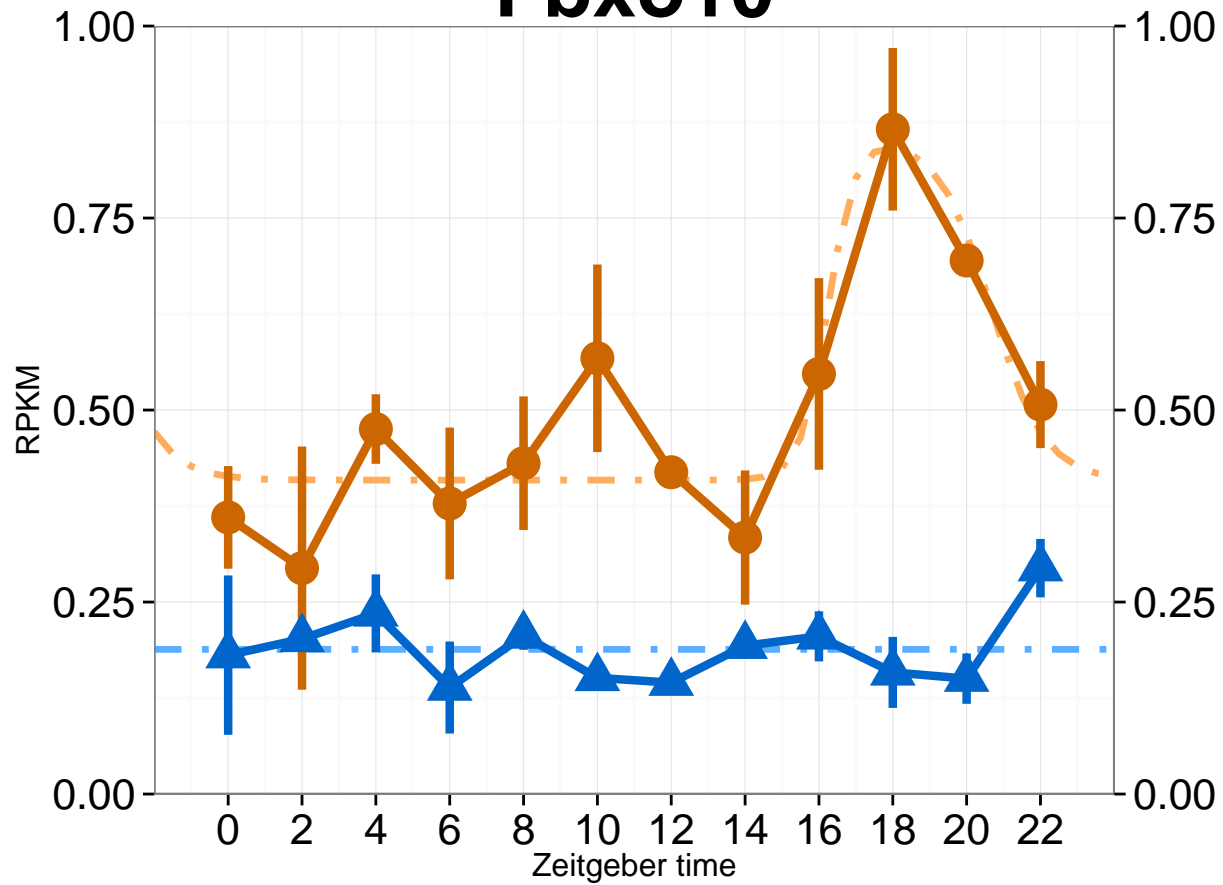

## Fbxo10

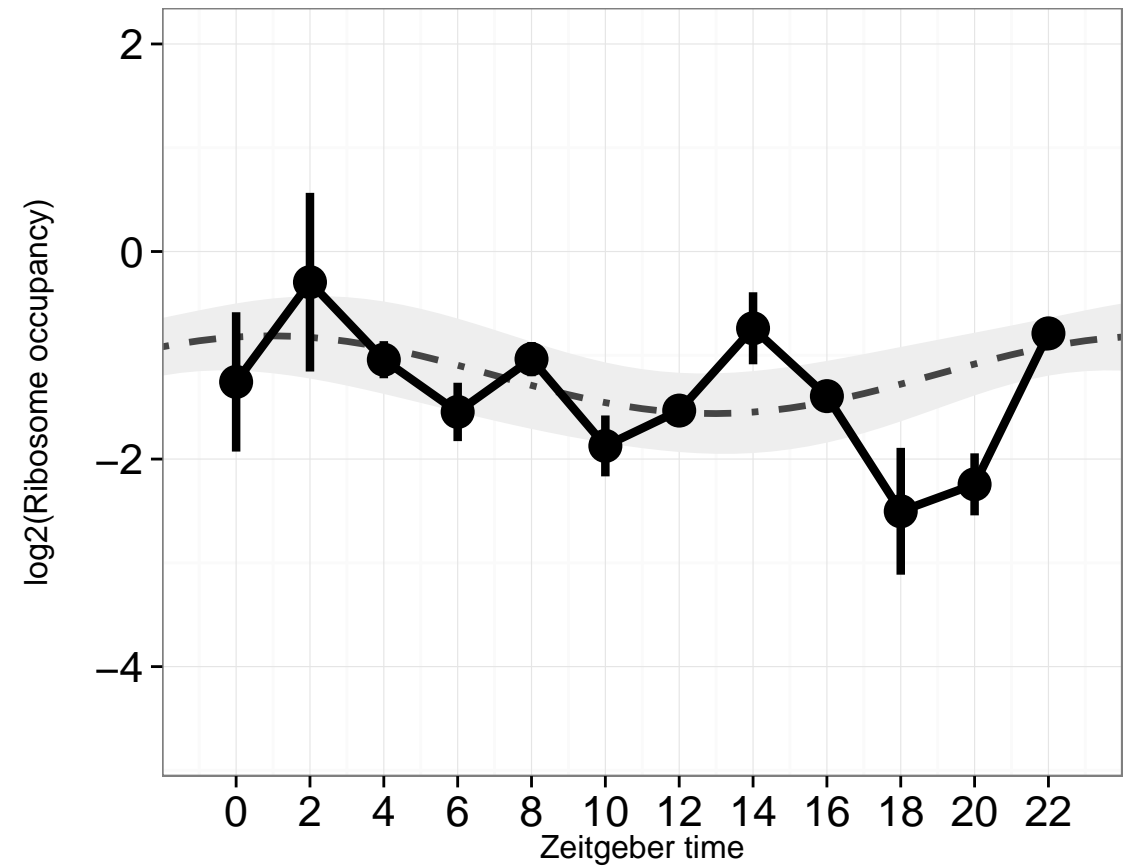

Supplement: SuppDataset_1.zip [file Fbxo10_set_B.pdf › Supplemental Dataset 1/B-mRNA_rhythm_translation_nonrhyth/Fbxo10_set_B.pdf]

## Fbxo34

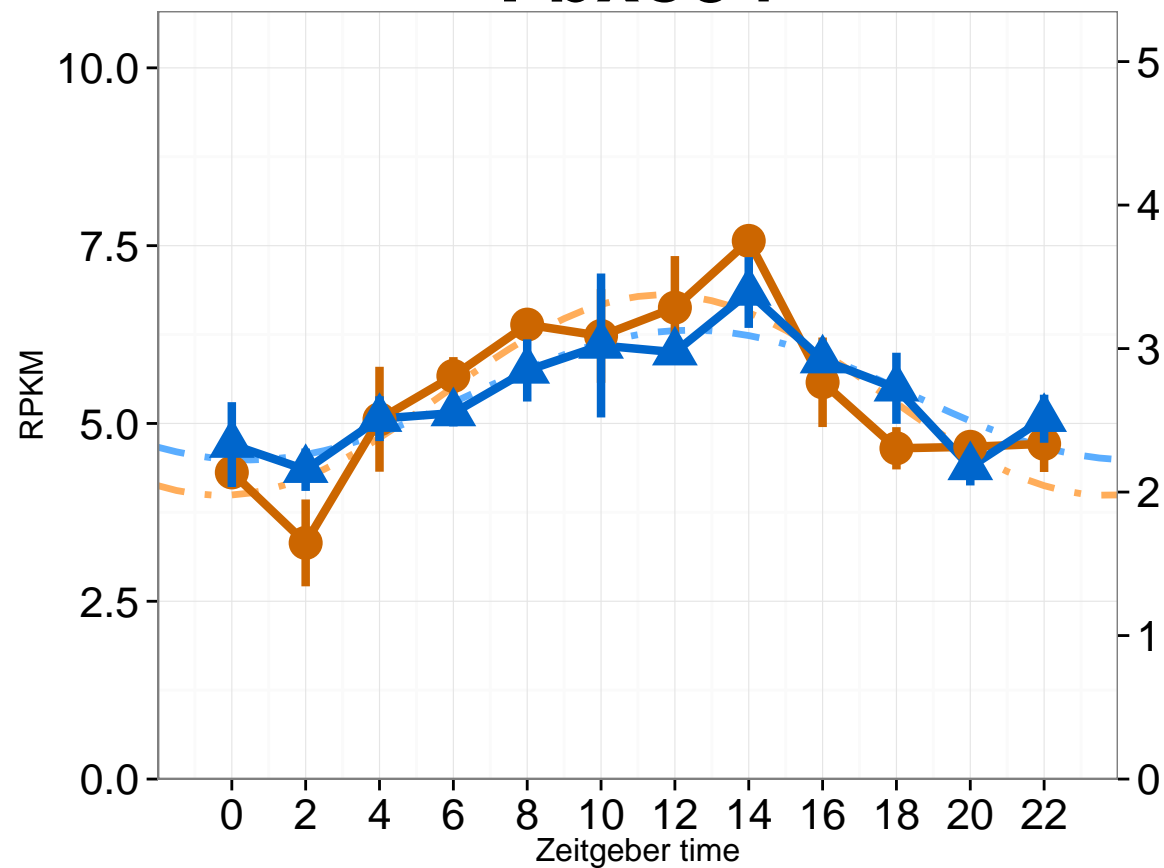

## Fbxo34

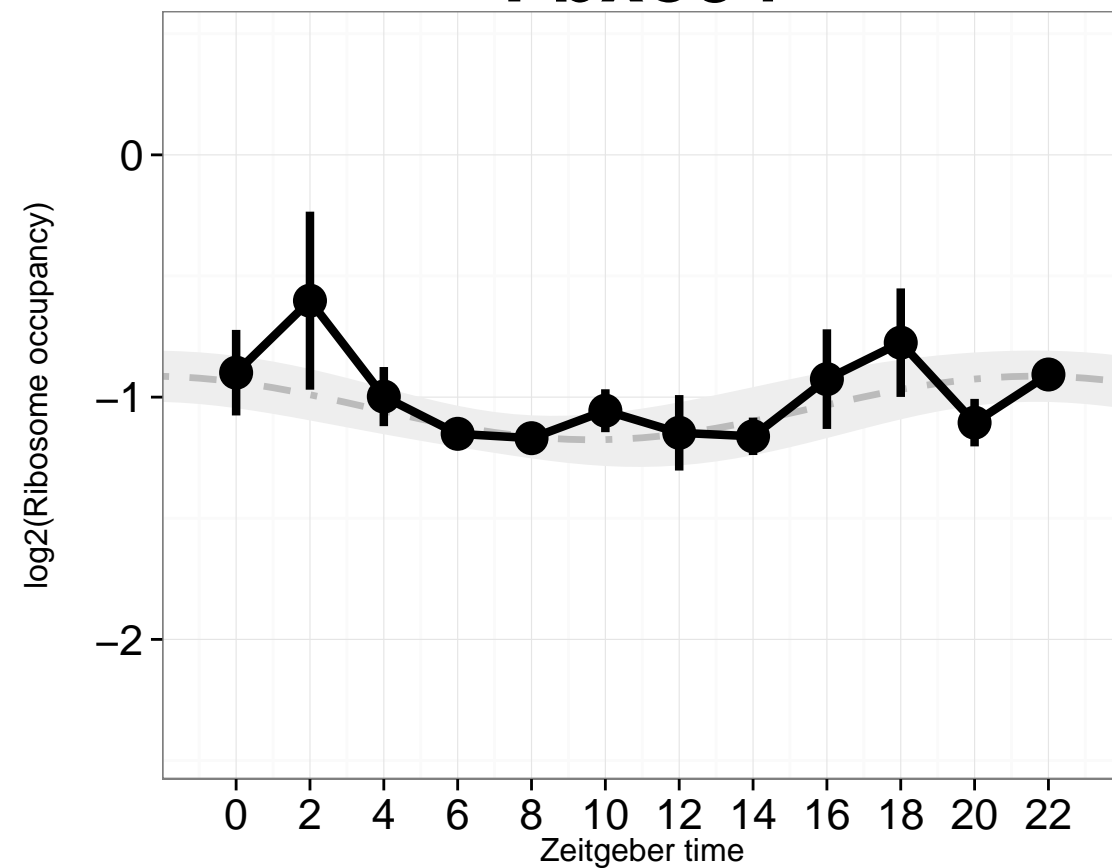

Supplement: SuppDataset_1.zip [file Fbxo34_set_B.pdf › Supplemental Dataset 1/B-mRNA_rhythm_translation_nonrhyth/Fbxo34_set_B.pdf]

# Fbxo36

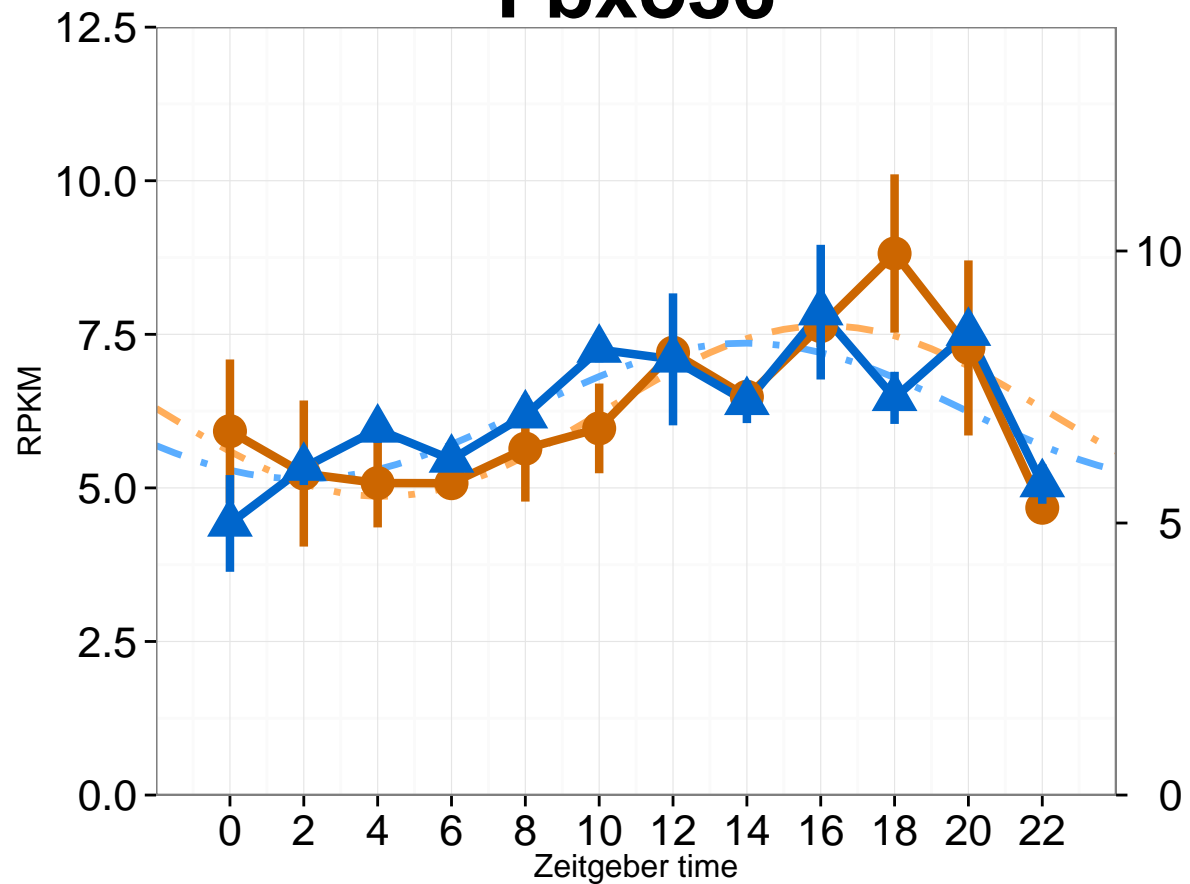

# Fbxo36

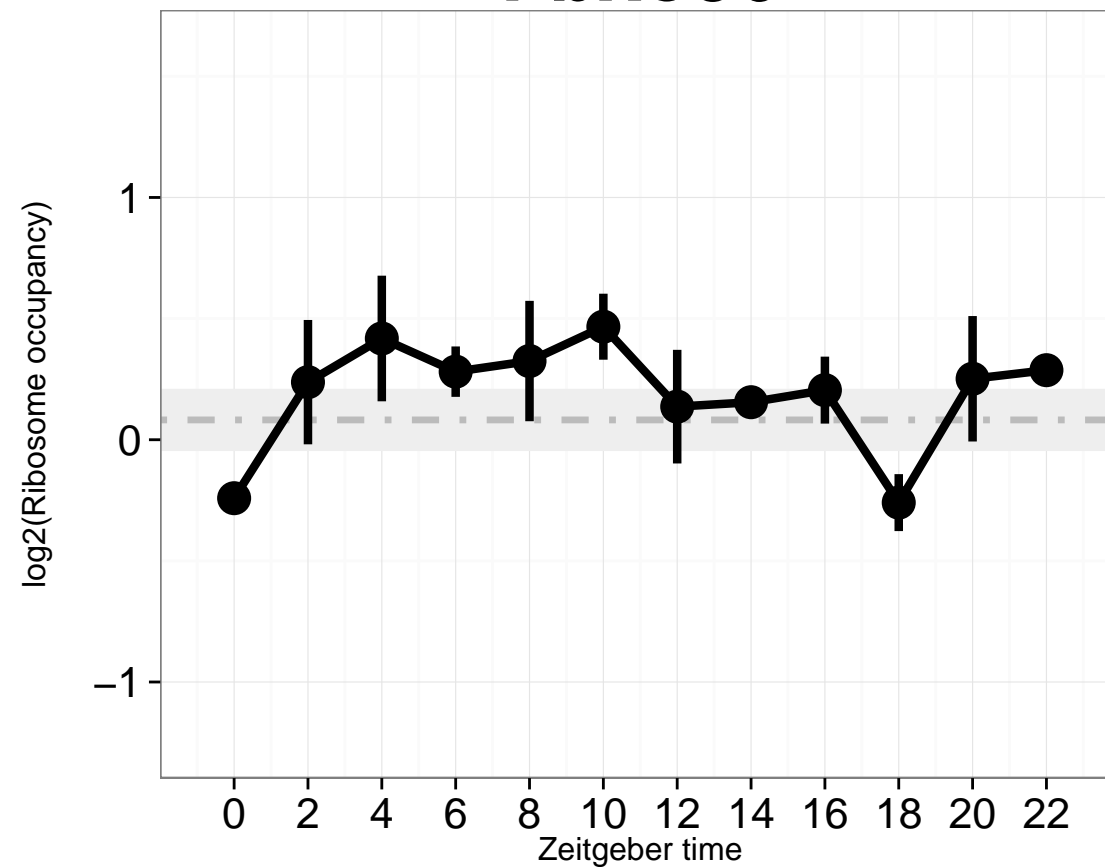

Supplement: SuppDataset_1.zip [file Fbxo36_set_B.pdf › Supplemental Dataset 1/B-mRNA_rhythm_translation_nonrhyth/Fbxo36_set_B.pdf]

# Fcgr3

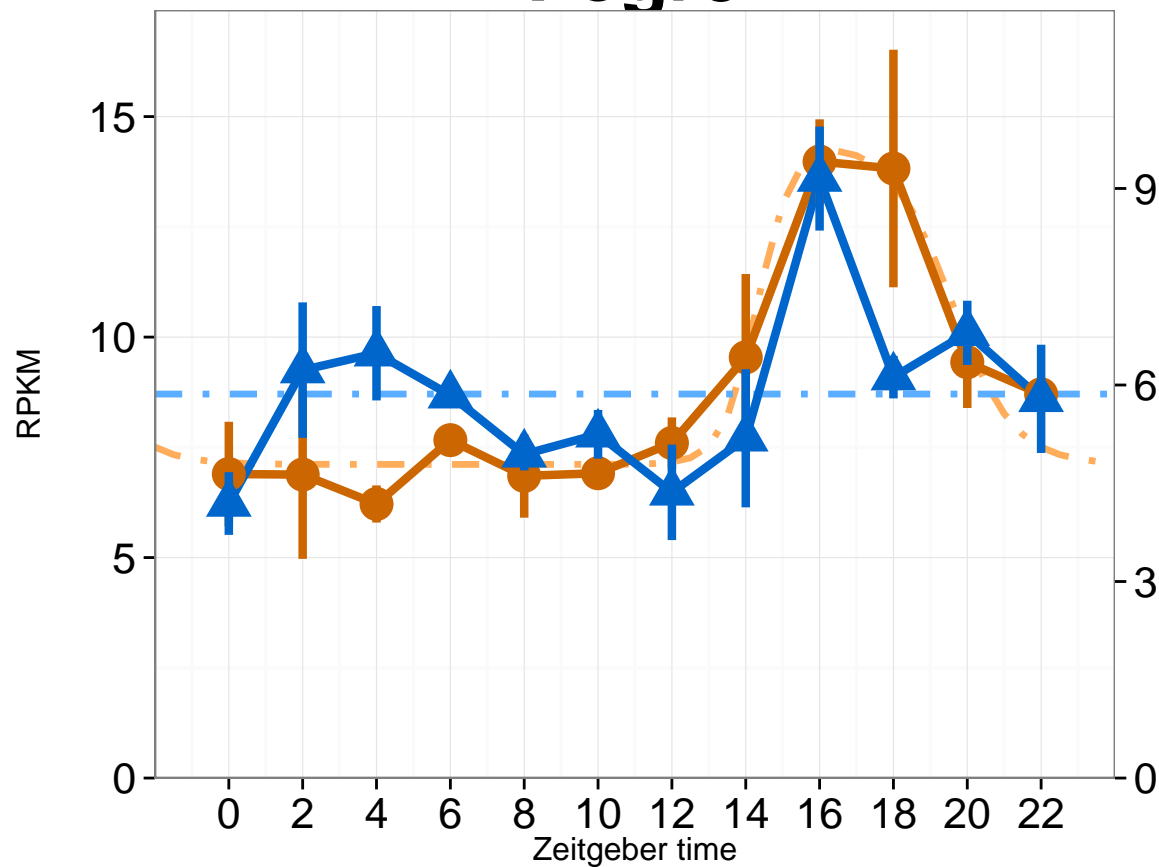

# Fcgr3

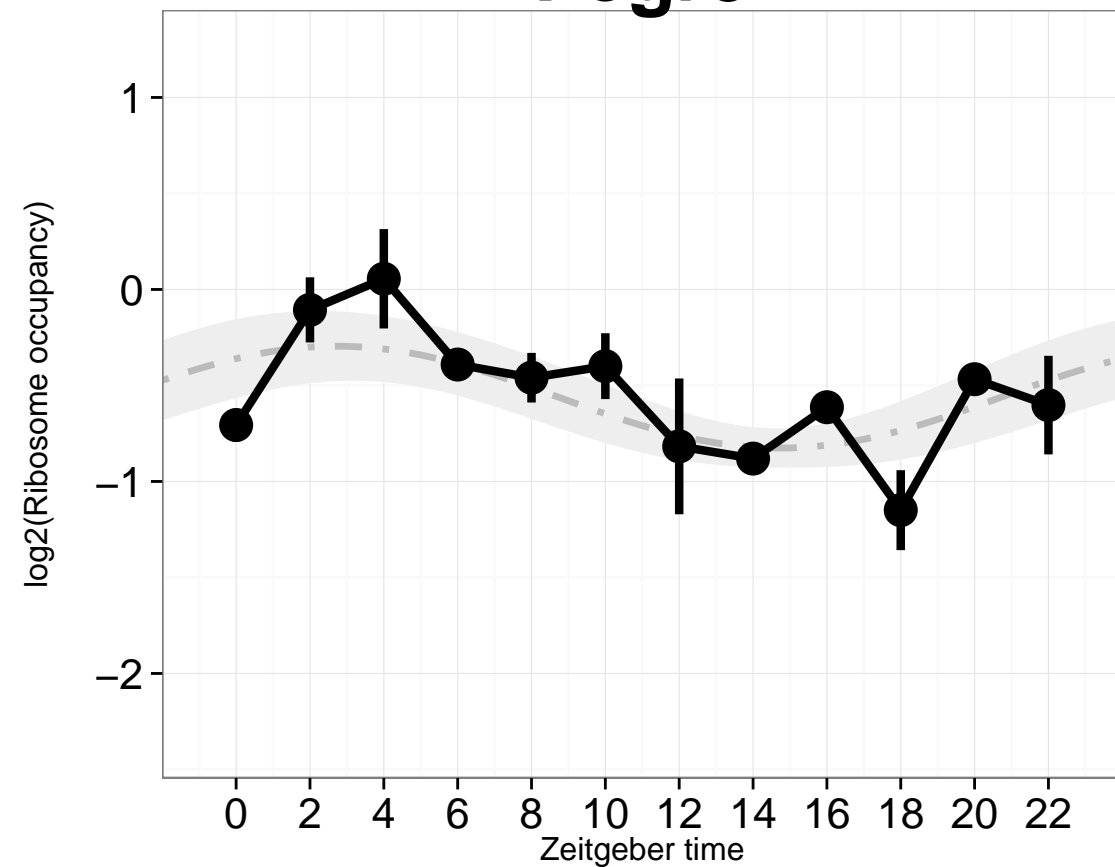

Supplement: SuppDataset_1.zip [file Fcgr3_set_B.pdf › Supplemental Dataset 1/B-mRNA_rhythm_translation_nonrhyth/Fcgr3_set_B.pdf]

# Fdxr

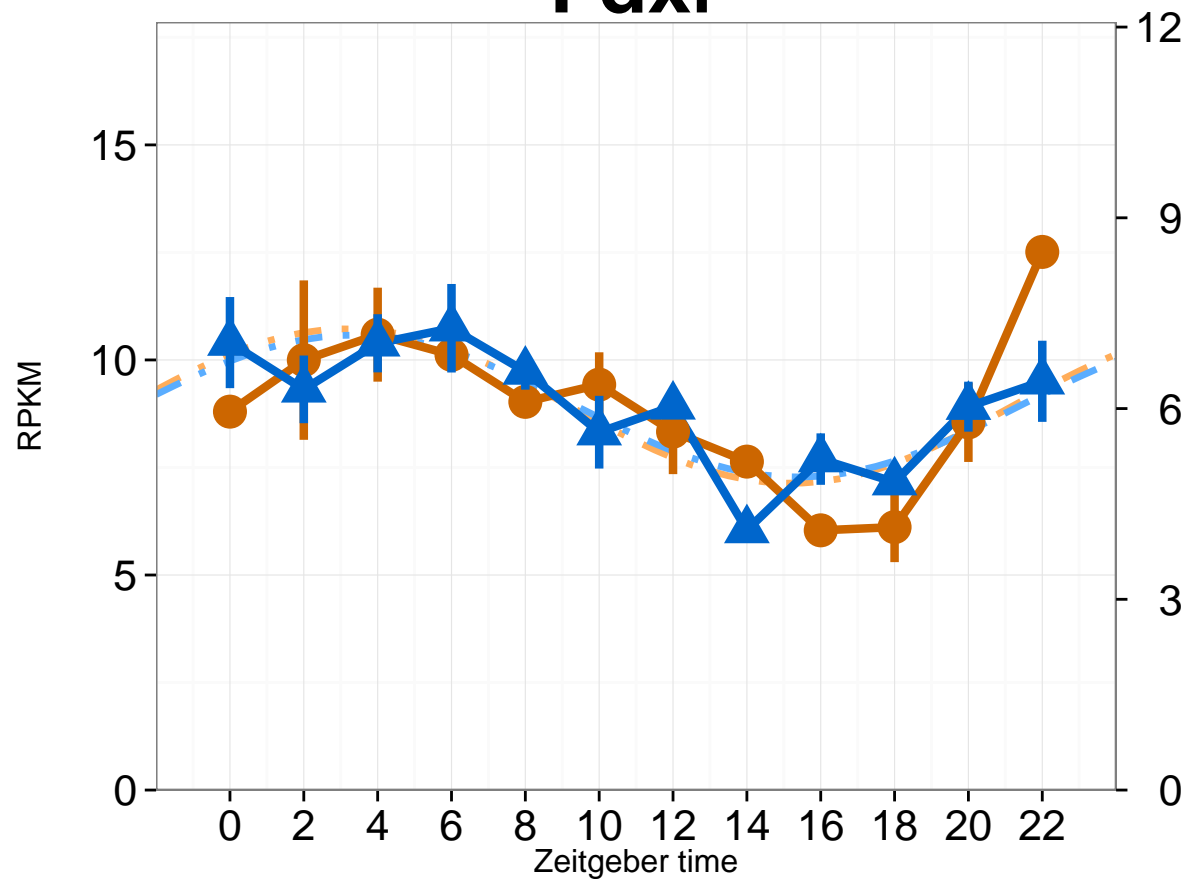

# Fdxr

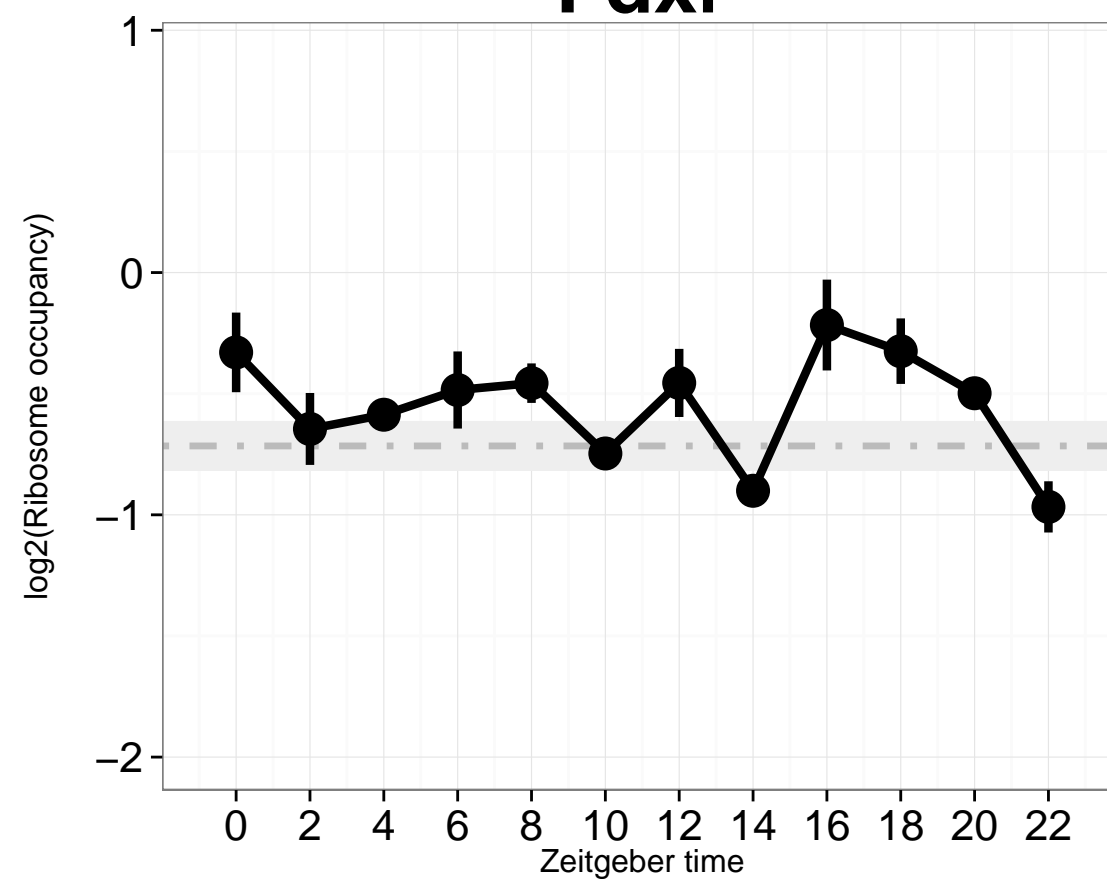

Supplement: SuppDataset_1.zip [file Fdxr_set_B.pdf › Supplemental Dataset 1/B-mRNA_rhythm_translation_nonrhyth/Fdxr_set_B.pdf]

# Fgd3

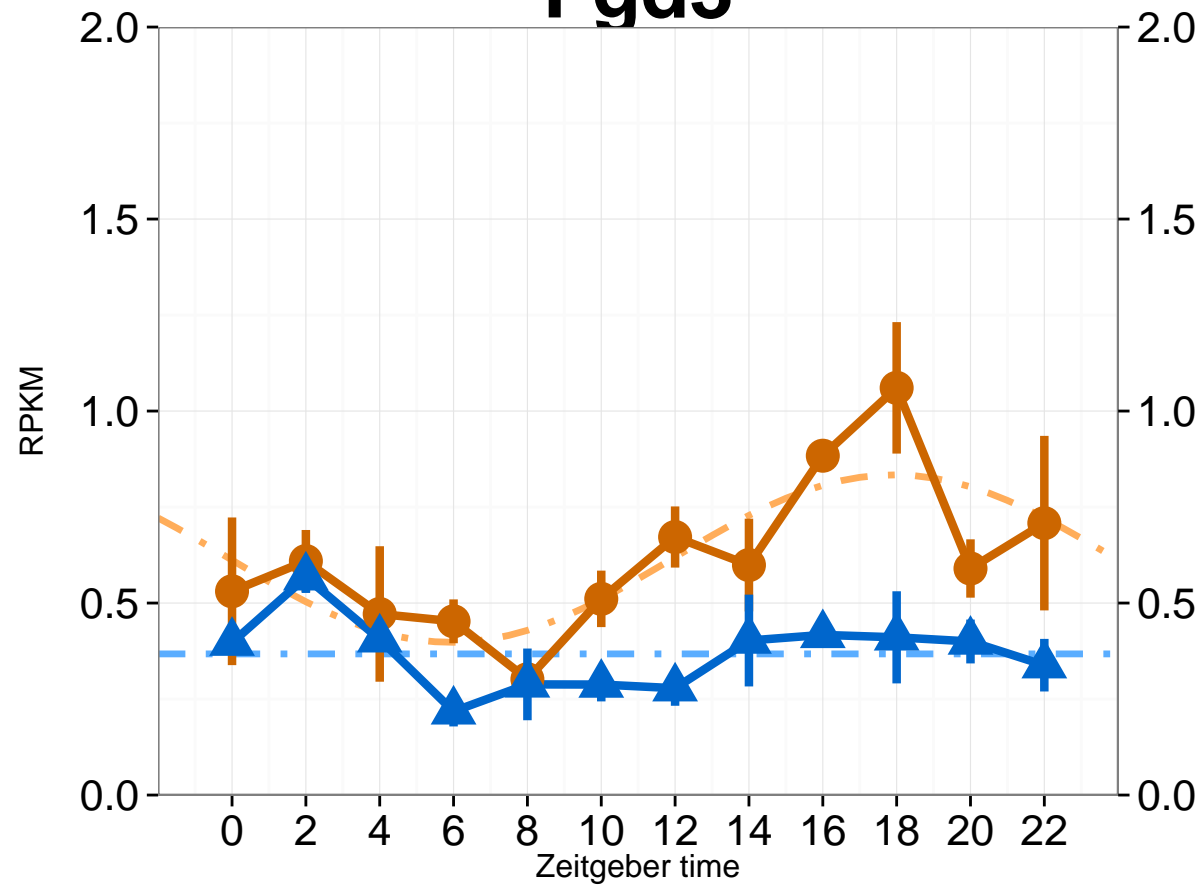

# Fgd3

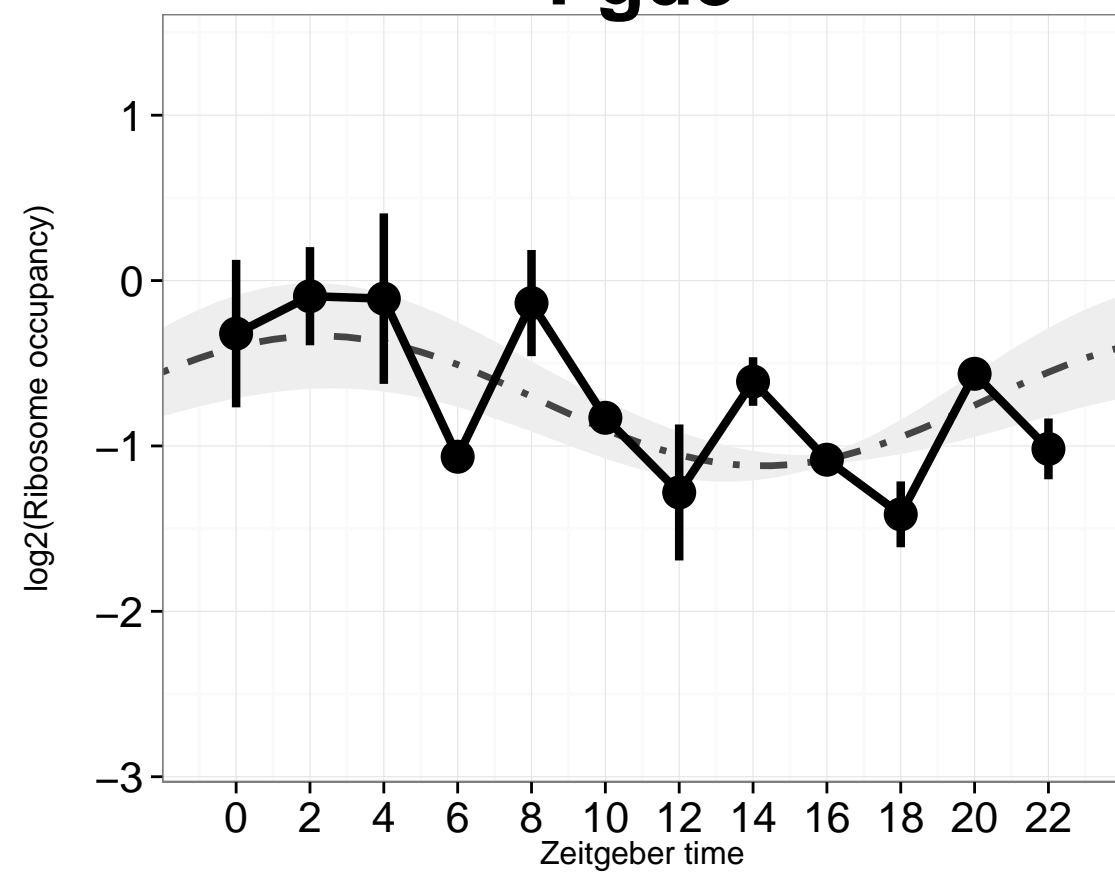

Supplement: SuppDataset_1.zip [file Fgd3_set_B.pdf › Supplemental Dataset 1/B-mRNA_rhythm_translation_nonrhyth/Fgd3_set_B.pdf]

# Fgf21

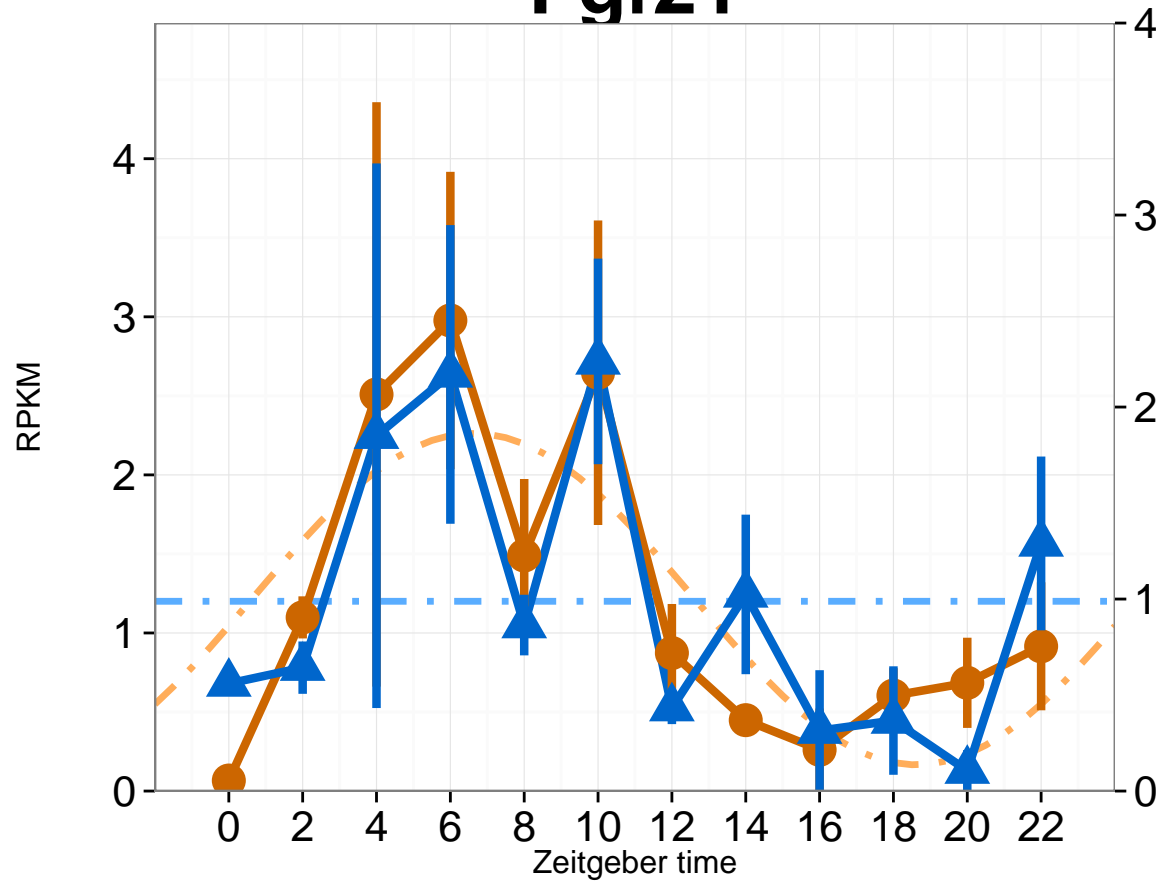

# Fgf21

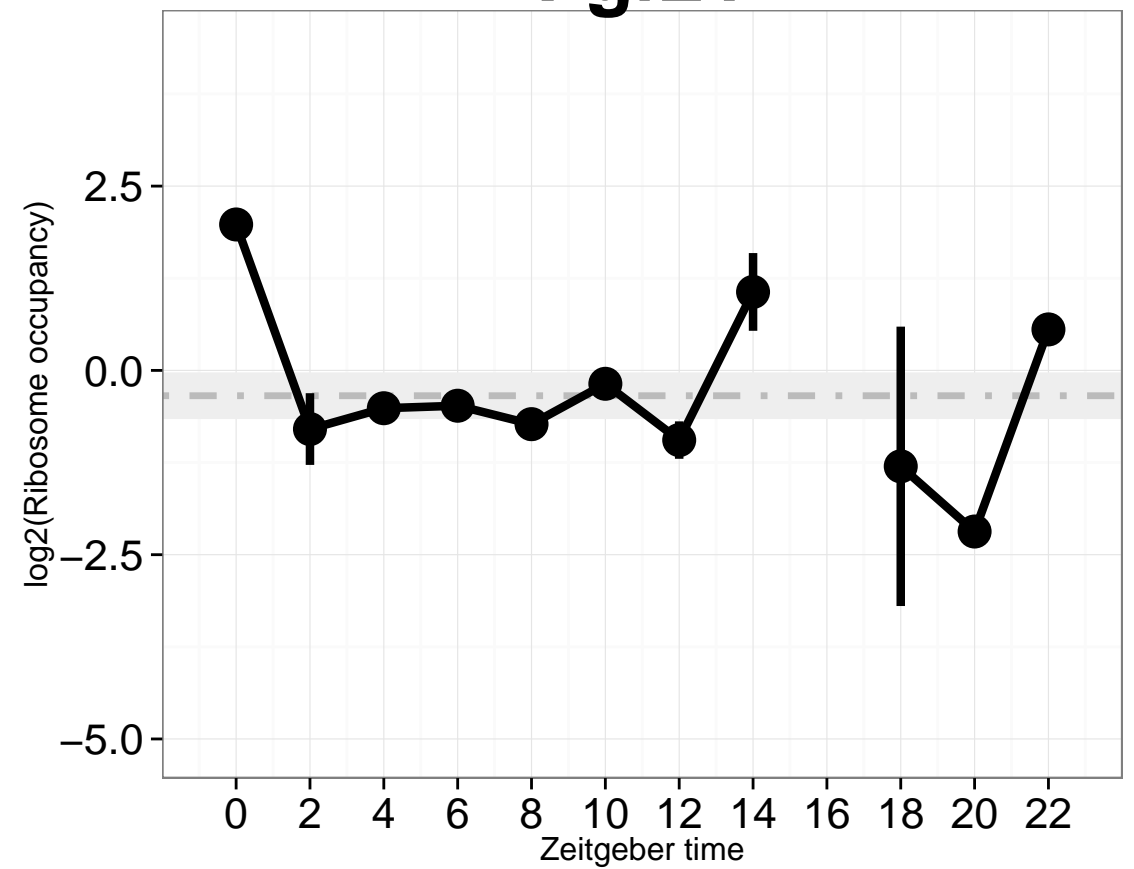

Supplement: SuppDataset_1.zip [file Fgf21_set_B.pdf › Supplemental Dataset 1/B-mRNA_rhythm_translation_nonrhyth/Fgf21_set_B.pdf]

## Fhl1

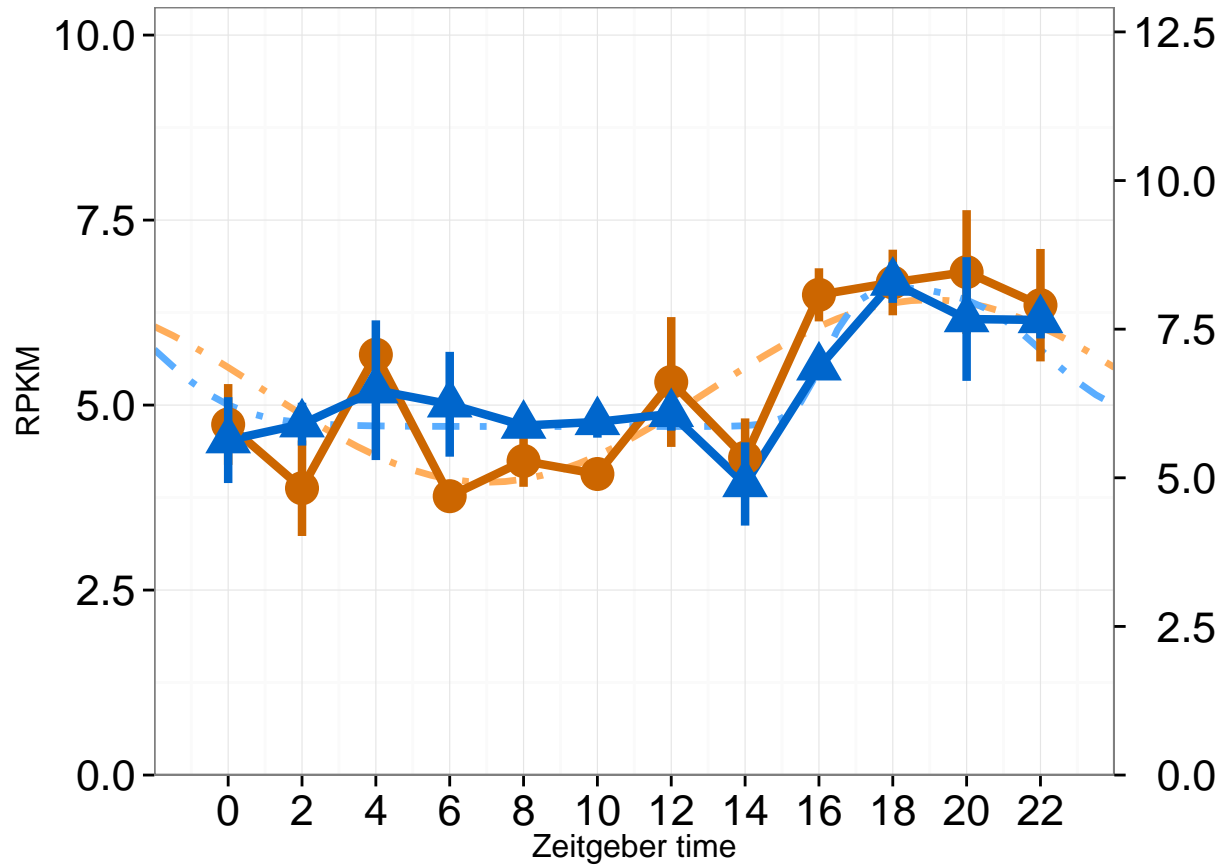

## Fhl1

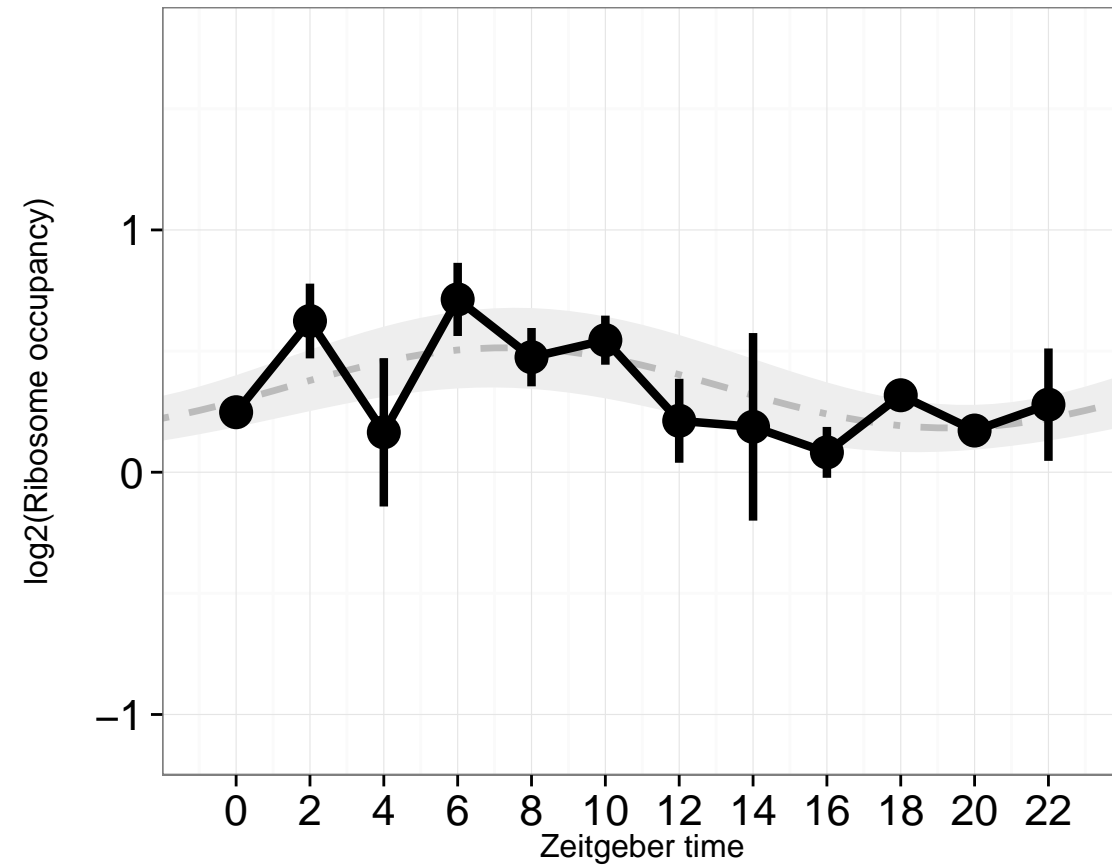

Supplement: SuppDataset_1.zip [file Fhl1_set_B.pdf › Supplemental Dataset 1/B-mRNA_rhythm_translation_nonrhyth/Fhl1_set_B.pdf]

## Fhod3

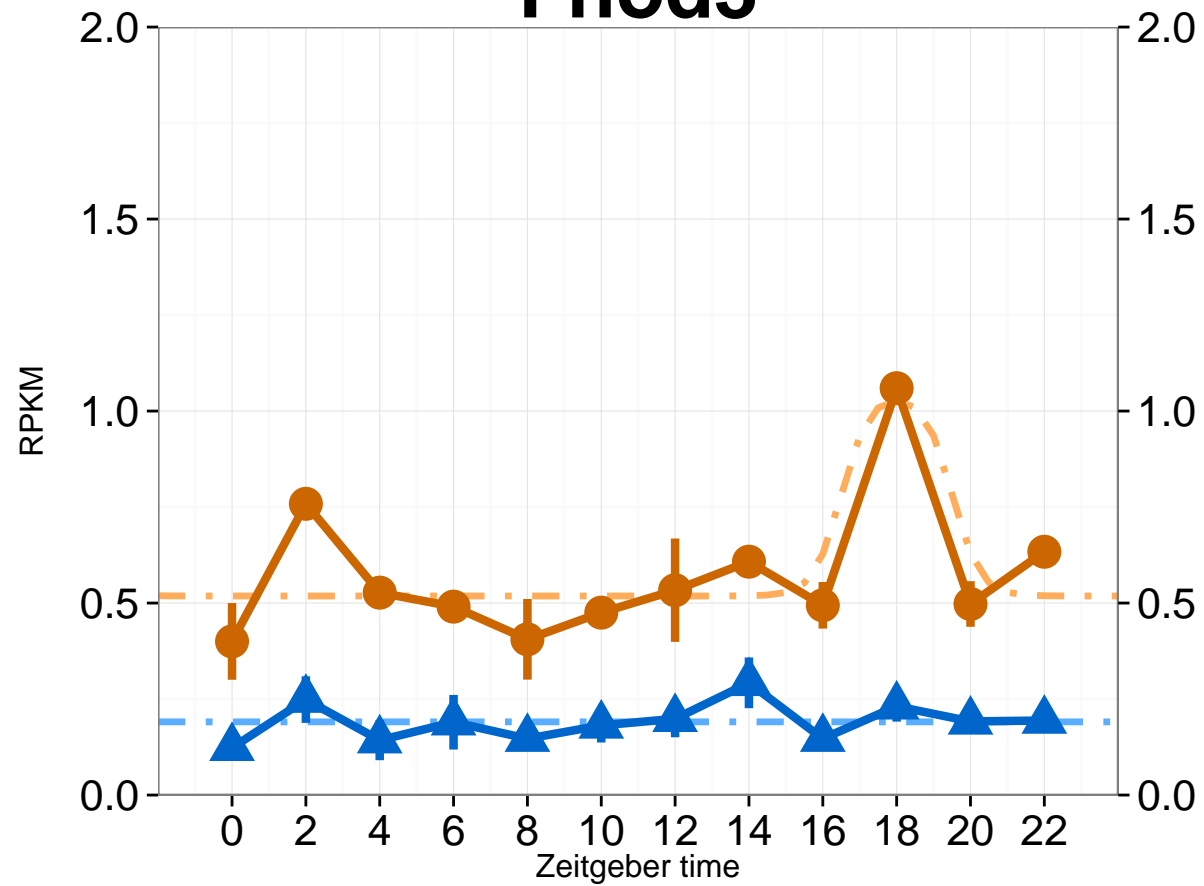

## Fhod3

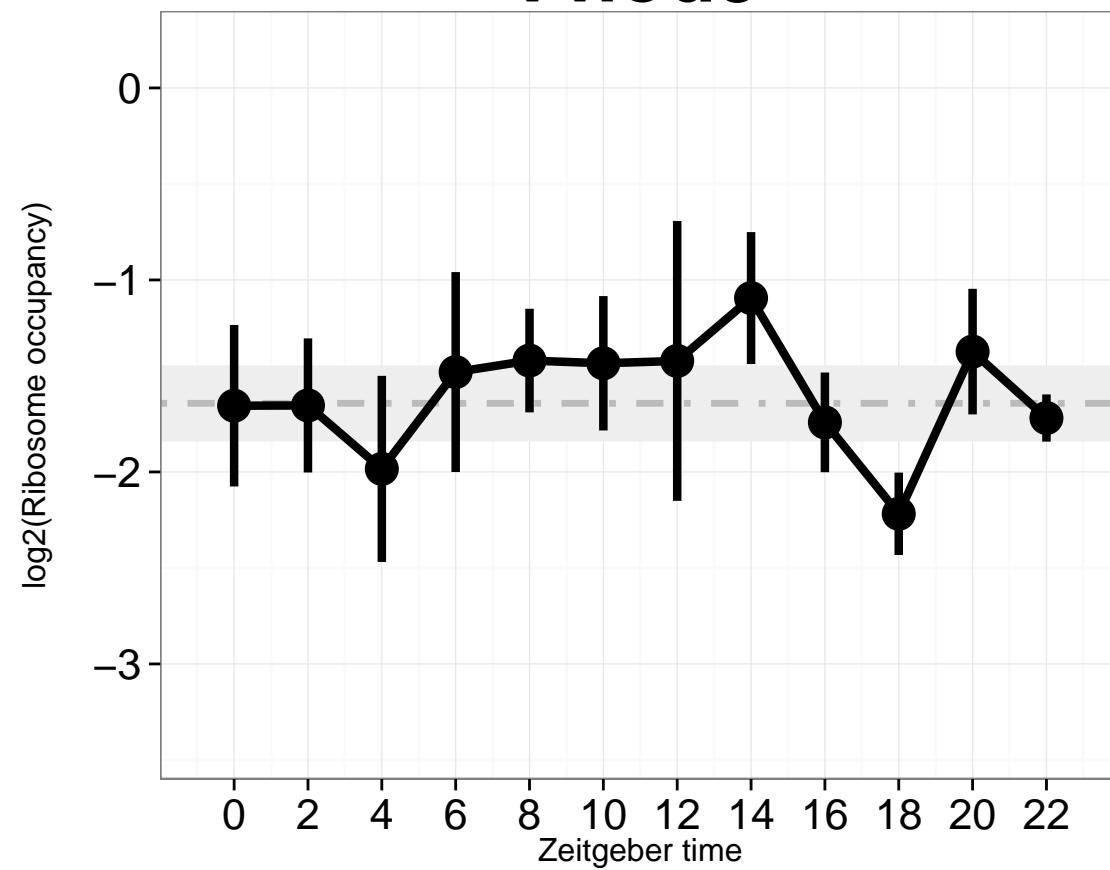

Supplement: SuppDataset_1.zip [file Fhod3_set_B.pdf › Supplemental Dataset 1/B-mRNA_rhythm_translation_nonrhyth/Fhod3_set_B.pdf]

## Ficd

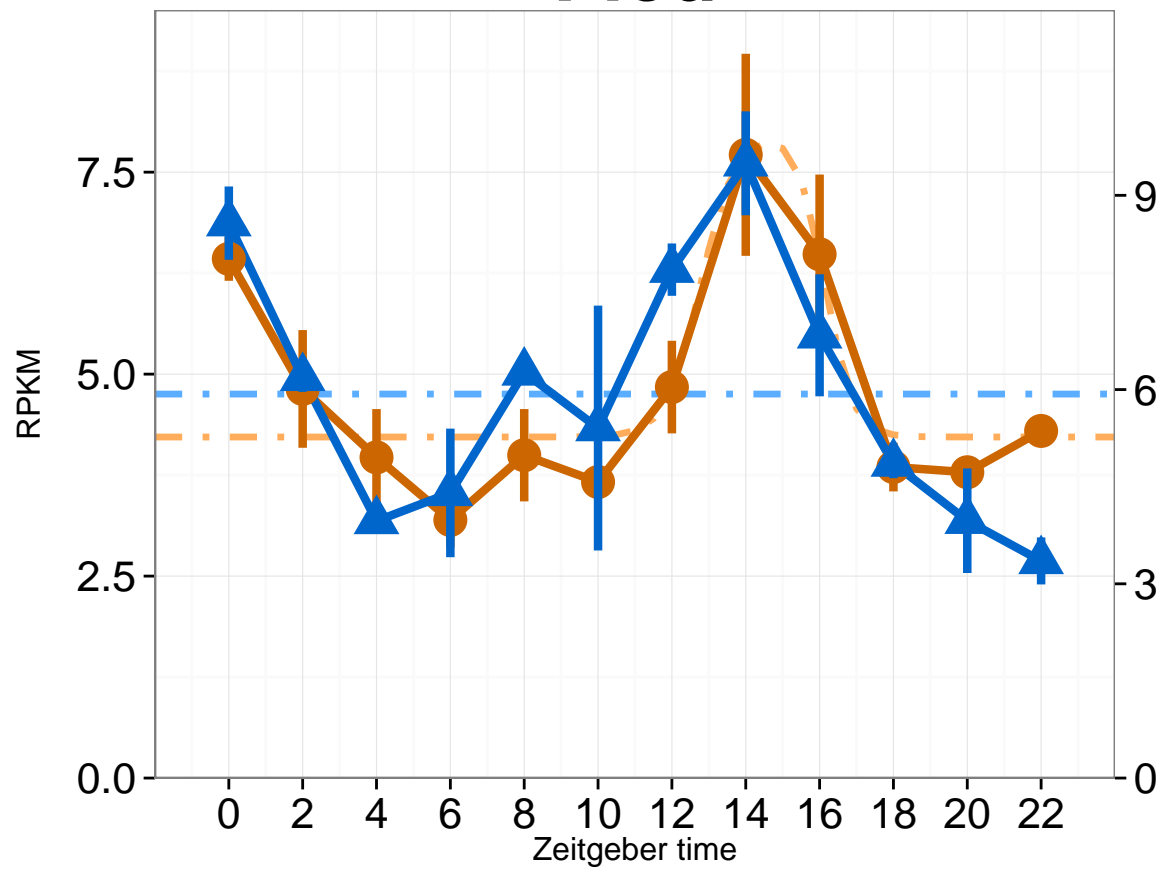

## Ficd

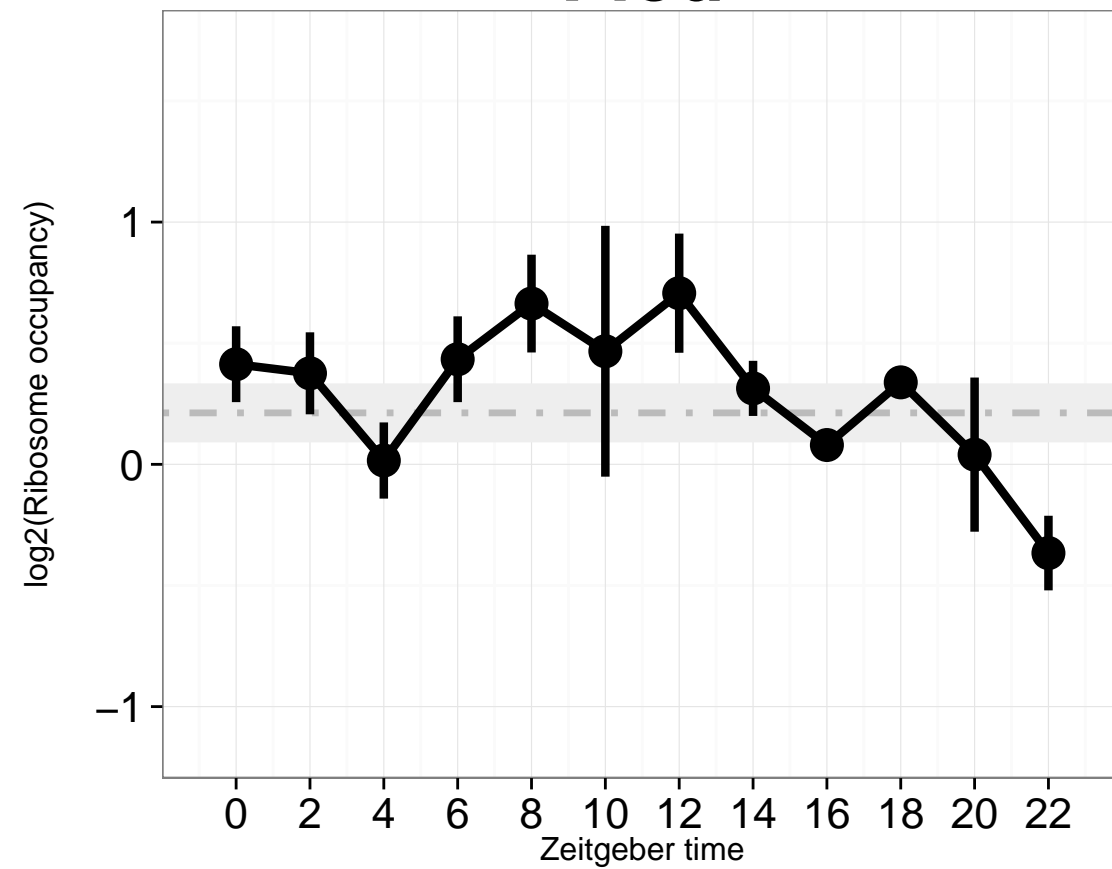

Supplement: SuppDataset_1.zip [file Ficd_set_B.pdf › Supplemental Dataset 1/B-mRNA_rhythm_translation_nonrhyth/Ficd_set_B.pdf]

# Fig1l2

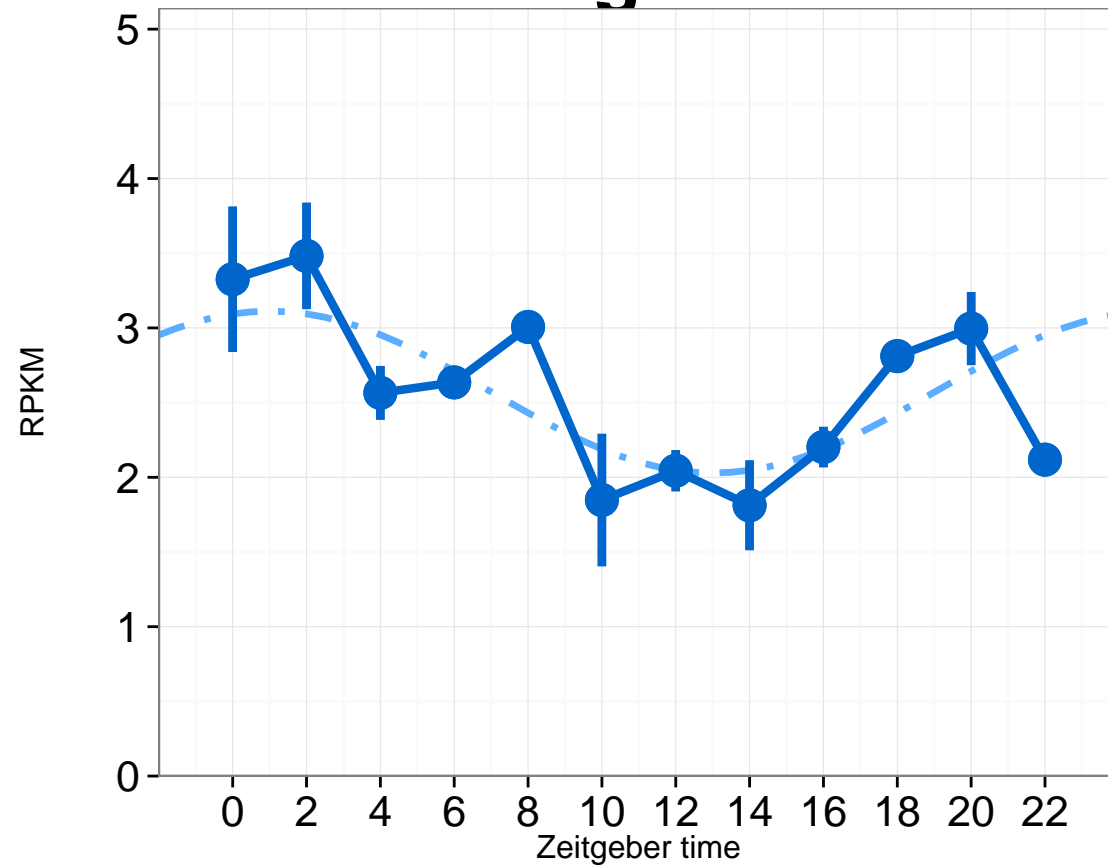

# Fig1l2 log2(Ribosome occupancy

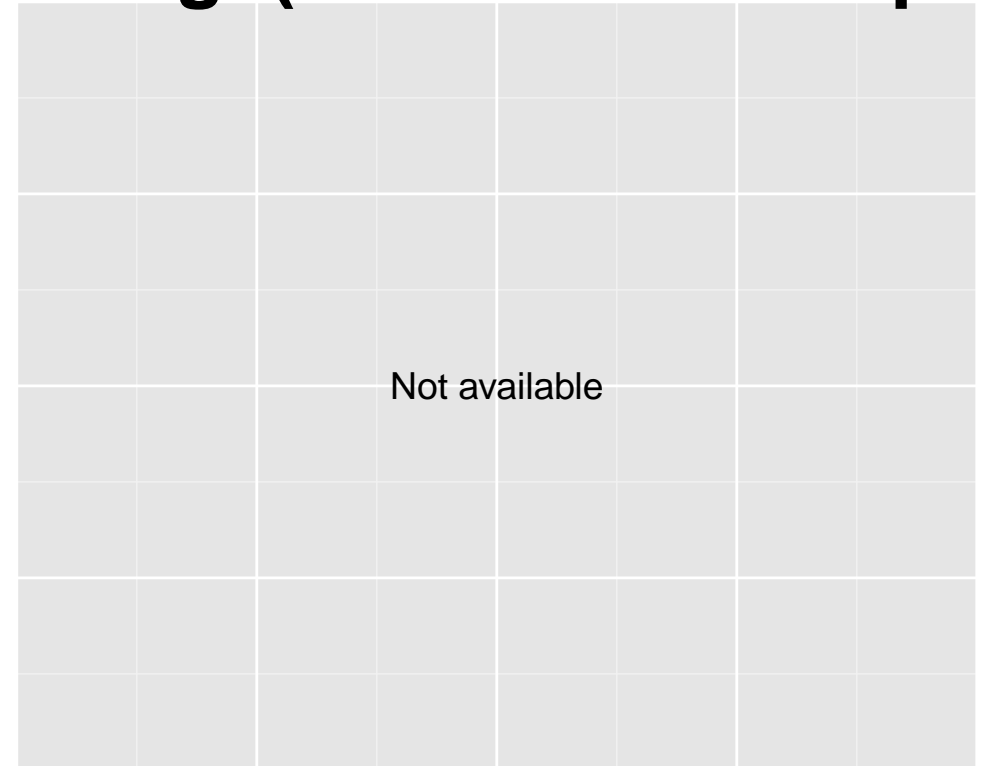

Supplement: SuppDataset_1.zip [file Fignl2_set_B.pdf › Supplemental Dataset 1/B-mRNA_rhythm_translation_nonrhyth/Fignl2_set_B.pdf]

# Fiz1

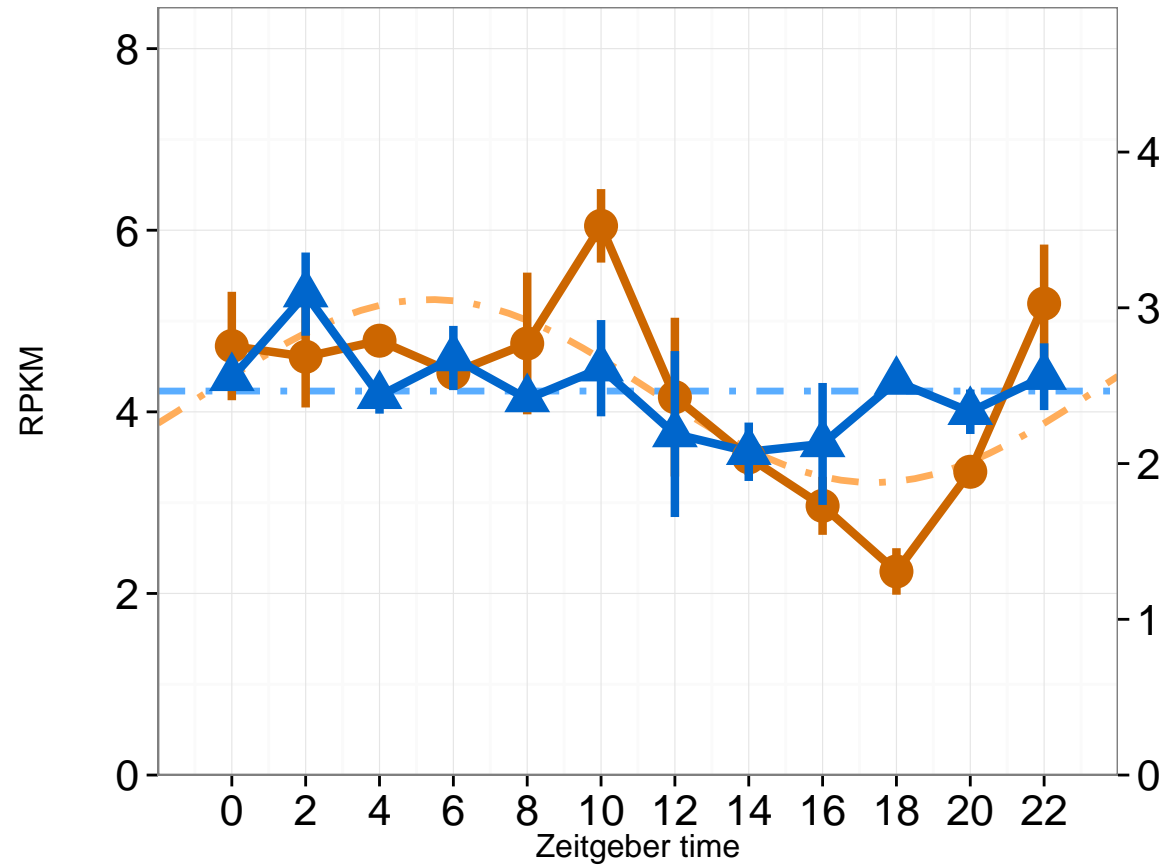

# Fiz1

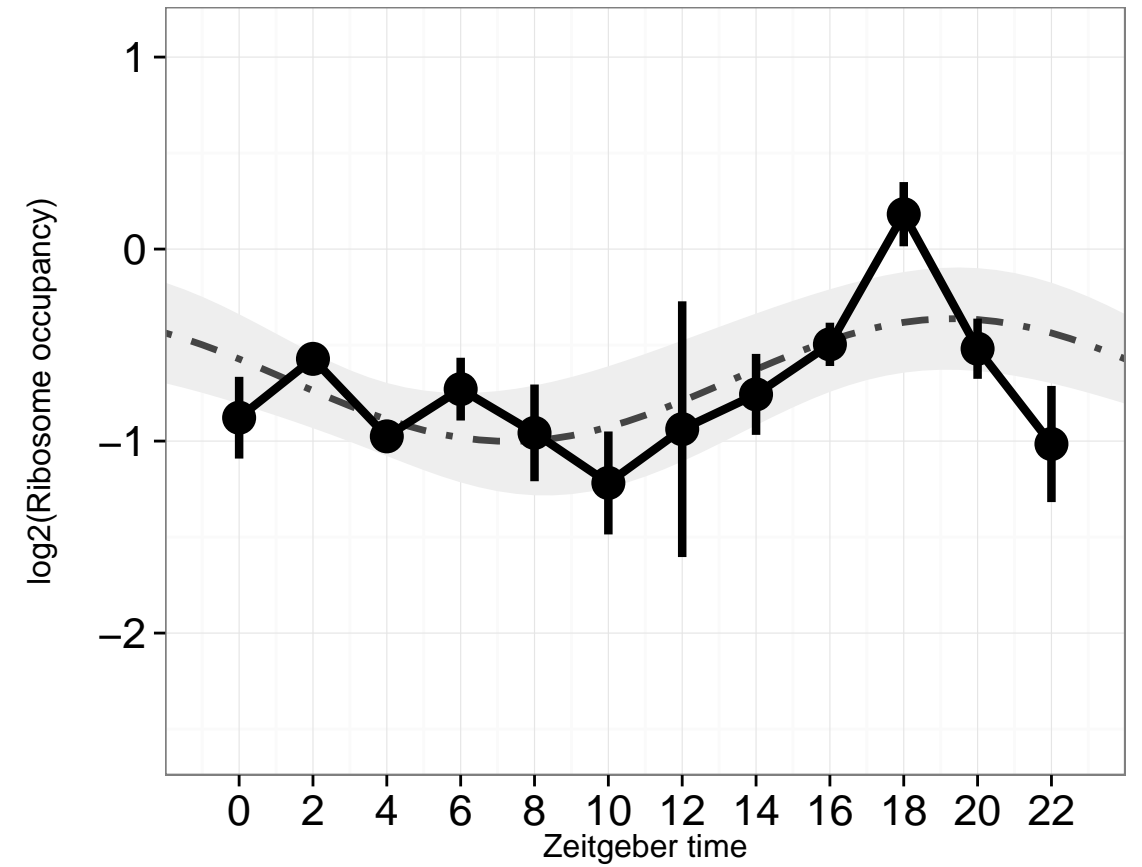

Supplement: SuppDataset_1.zip [file Fiz1_set_B.pdf › Supplemental Dataset 1/B-mRNA_rhythm_translation_nonrhyth/Fiz1_set_B.pdf]

## Fkbp11

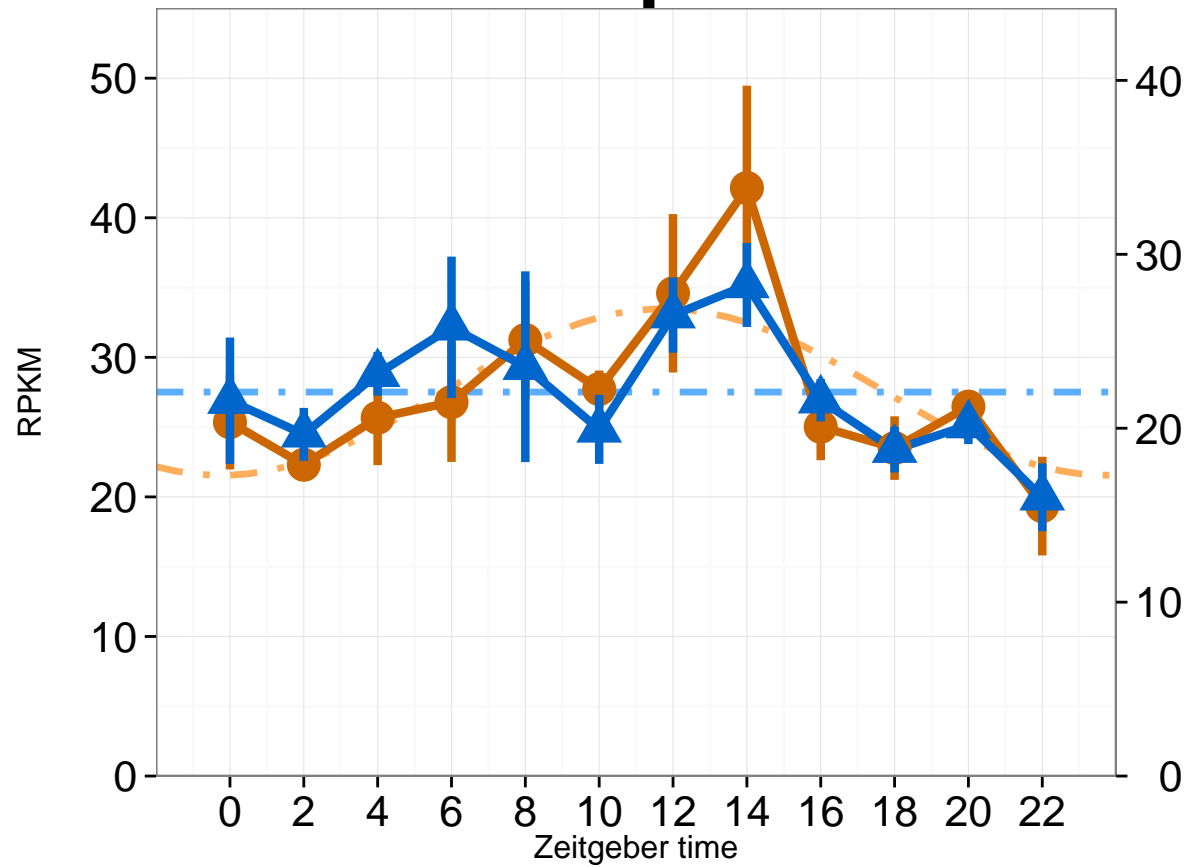

## Fkbp11

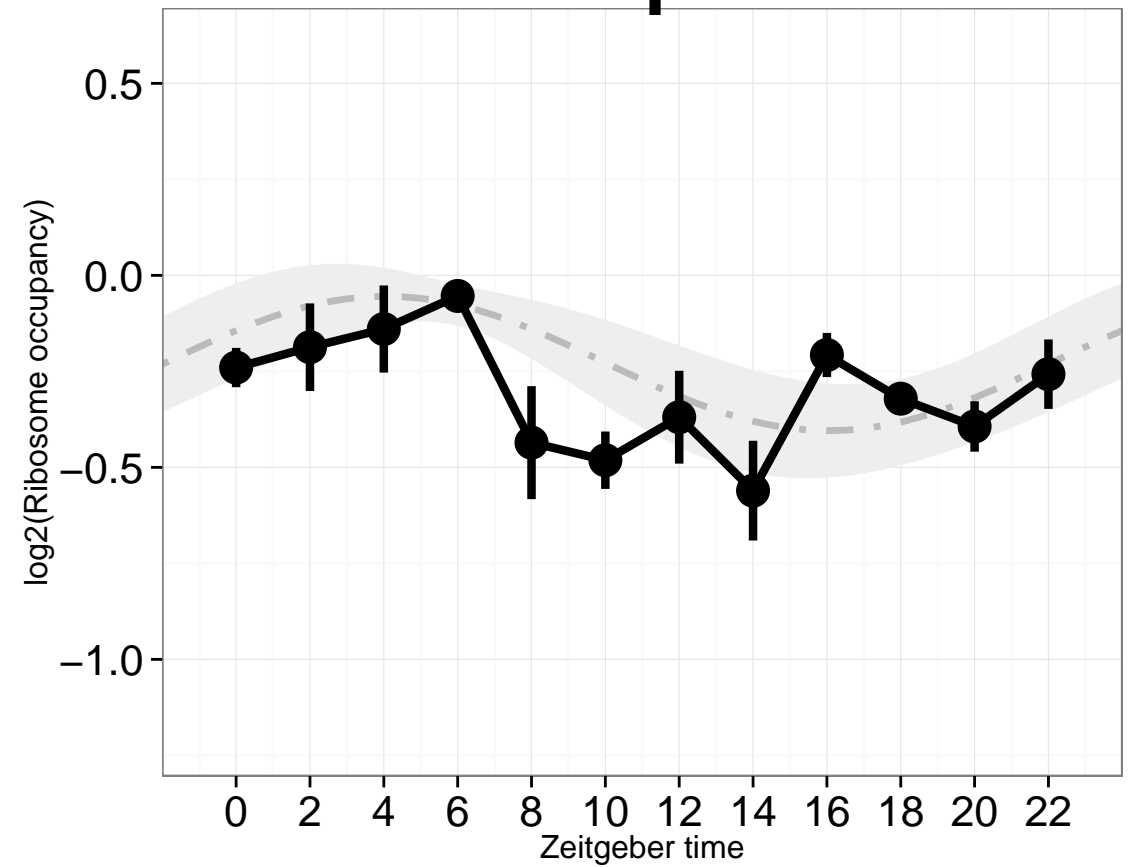

Supplement: SuppDataset_1.zip [file Fkbp11_set_B.pdf › Supplemental Dataset 1/B-mRNA_rhythm_translation_nonrhyth/Fkbp11_set_B.pdf]

## Flrt1

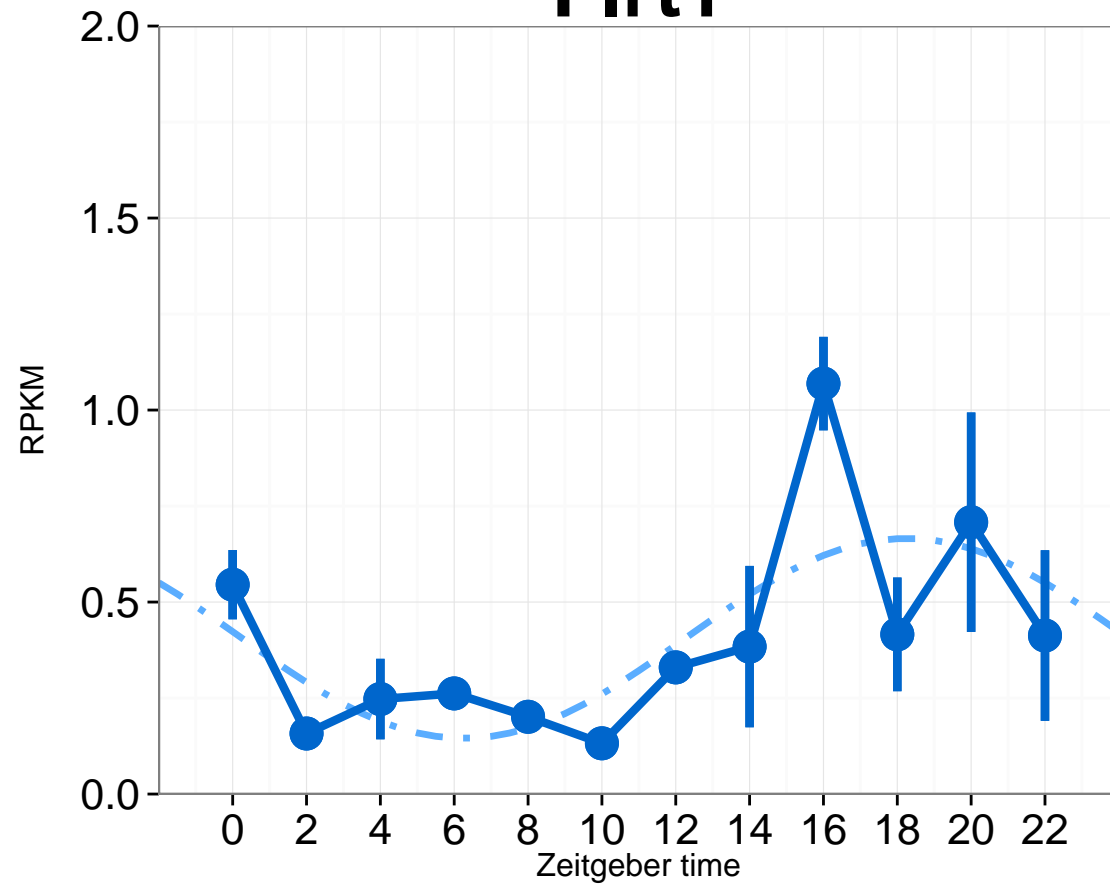

## Flrt1 log2(Ribosome occupancy)

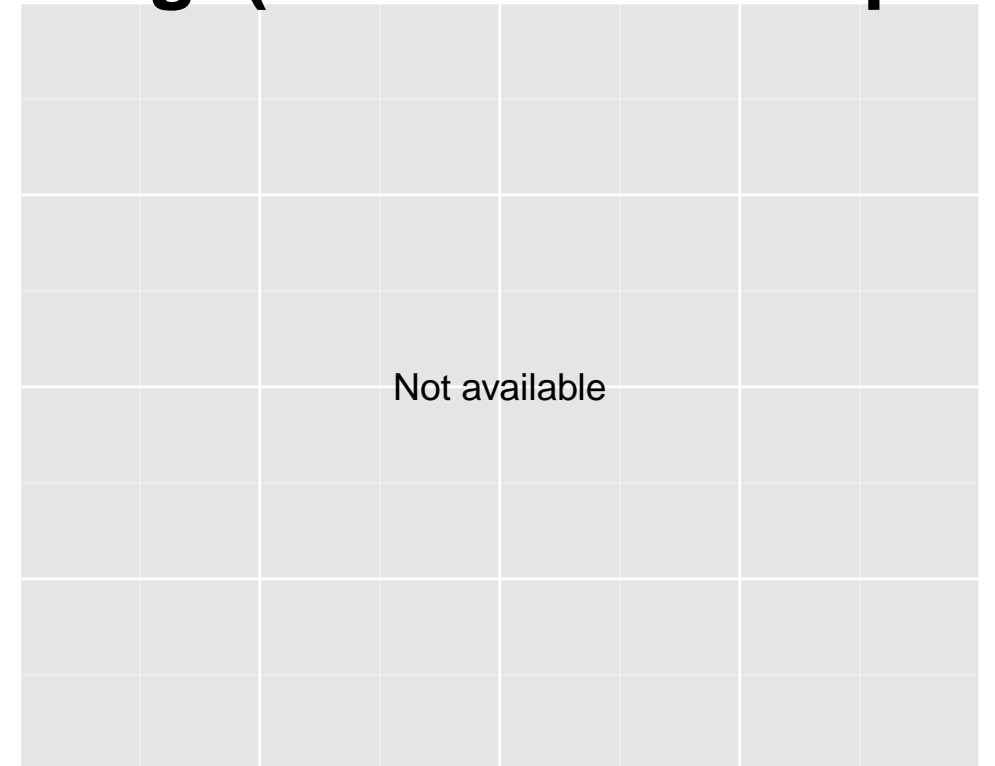

Supplement: SuppDataset_1.zip [file Flrt1_set_B.pdf › Supplemental Dataset 1/B-mRNA_rhythm_translation_nonrhyth/Flrt1_set_B.pdf]

## Fmod

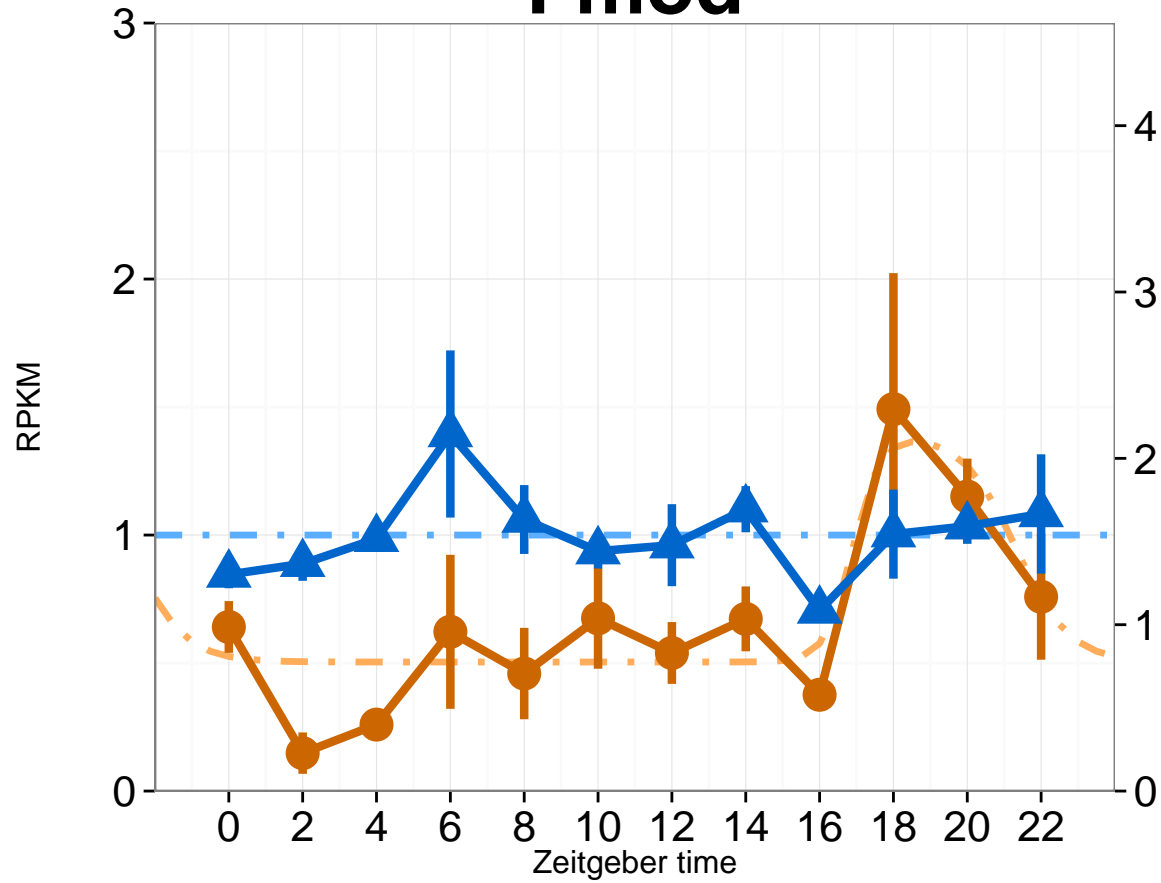

## Fmod

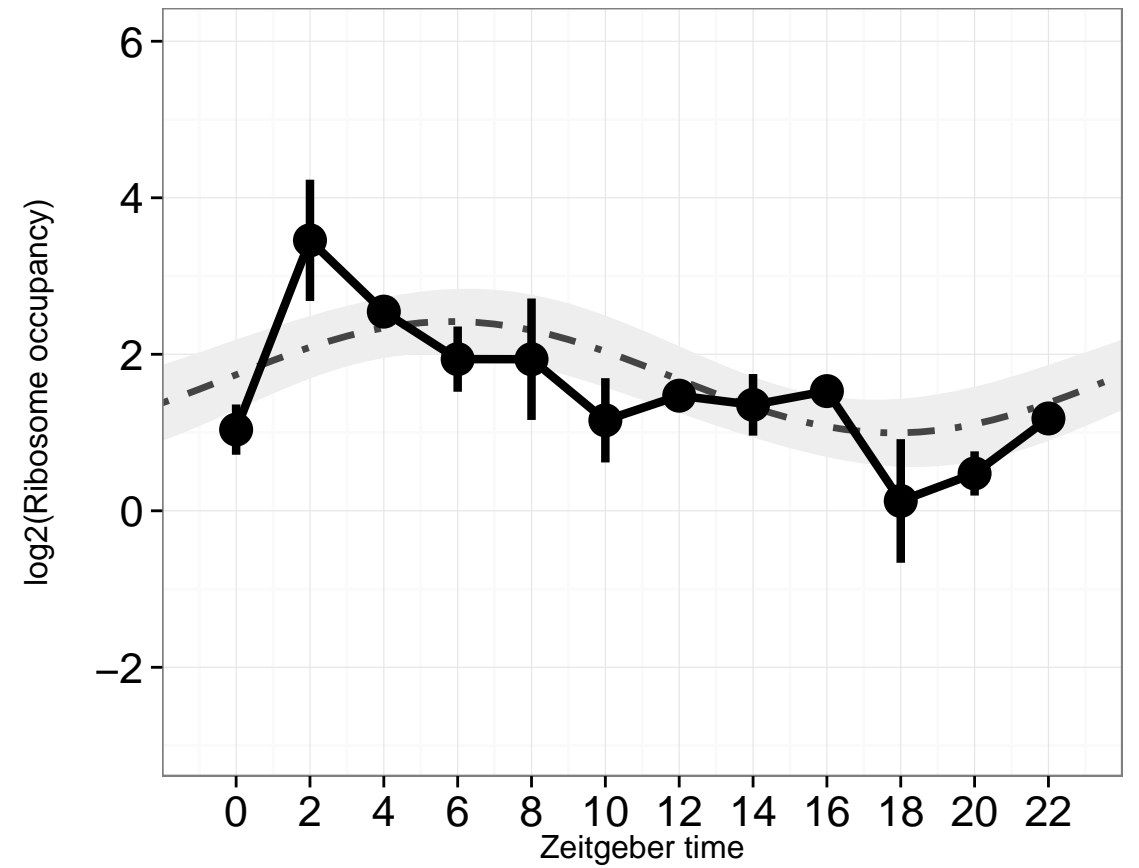

Supplement: SuppDataset_1.zip [file Fmod_set_B.pdf › Supplemental Dataset 1/B-mRNA_rhythm_translation_nonrhyth/Fmod_set_B.pdf]

# Fndc3b

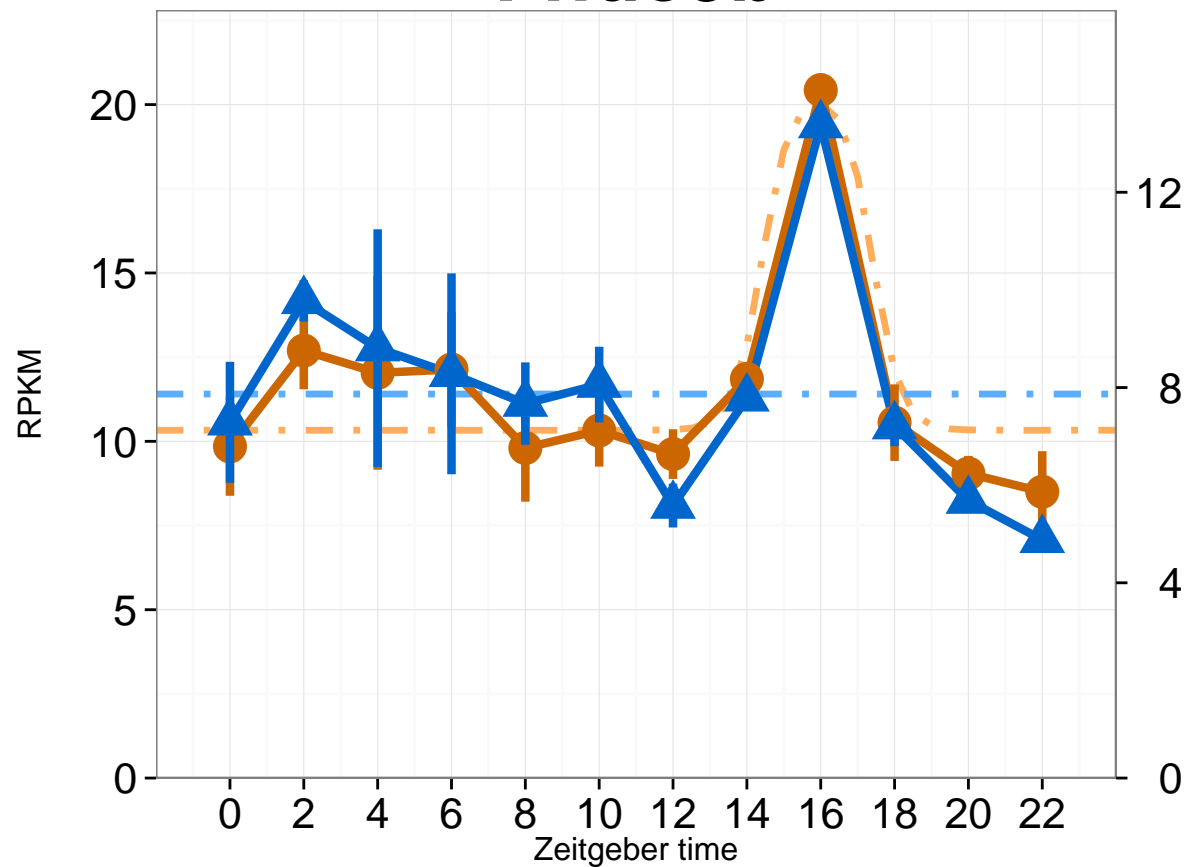

# Fndc3b

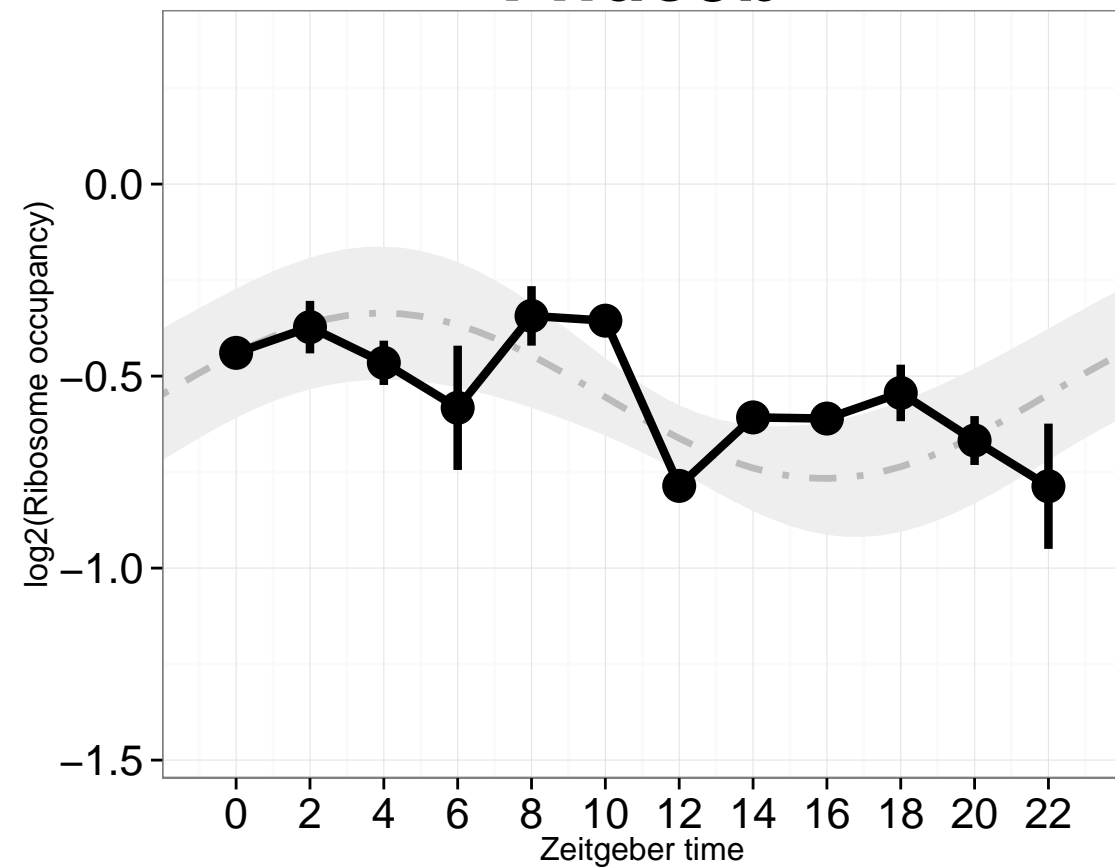

Supplement: SuppDataset_1.zip [file Fndc3b_set_B.pdf › Supplemental Dataset 1/B-mRNA_rhythm_translation_nonrhyth/Fndc3b_set_B.pdf]

## Fopnl

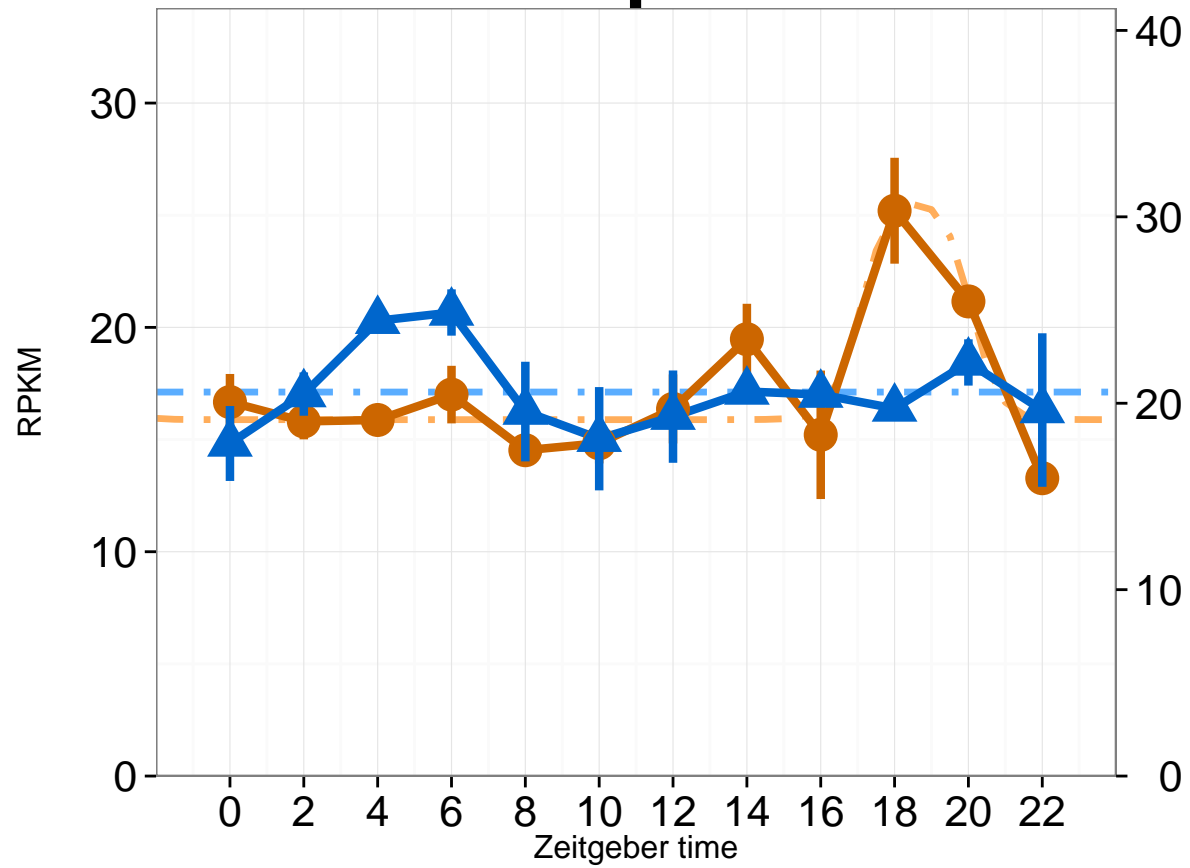

## Fopnl

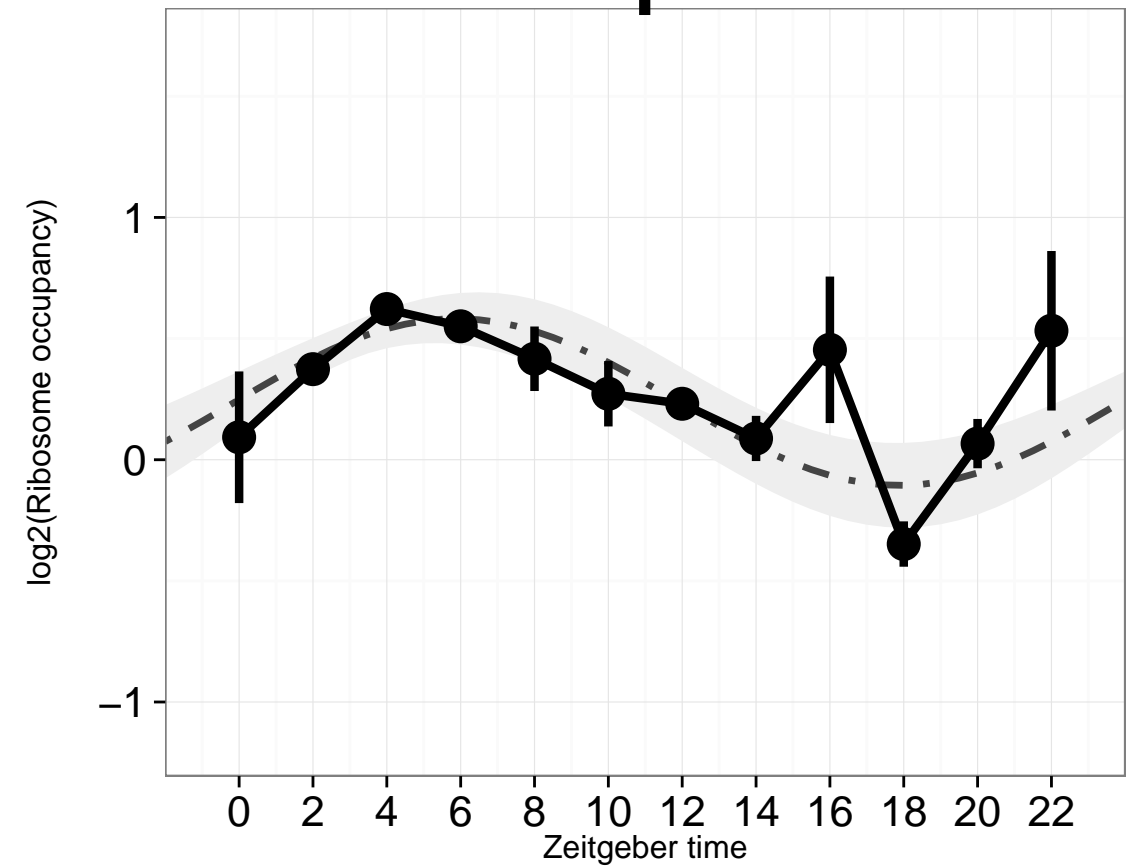

Supplement: SuppDataset_1.zip [file Fopnl_set_B.pdf › Supplemental Dataset 1/B-mRNA_rhythm_translation_nonrhyth/Fopnl_set_B.pdf]

## Foxa3

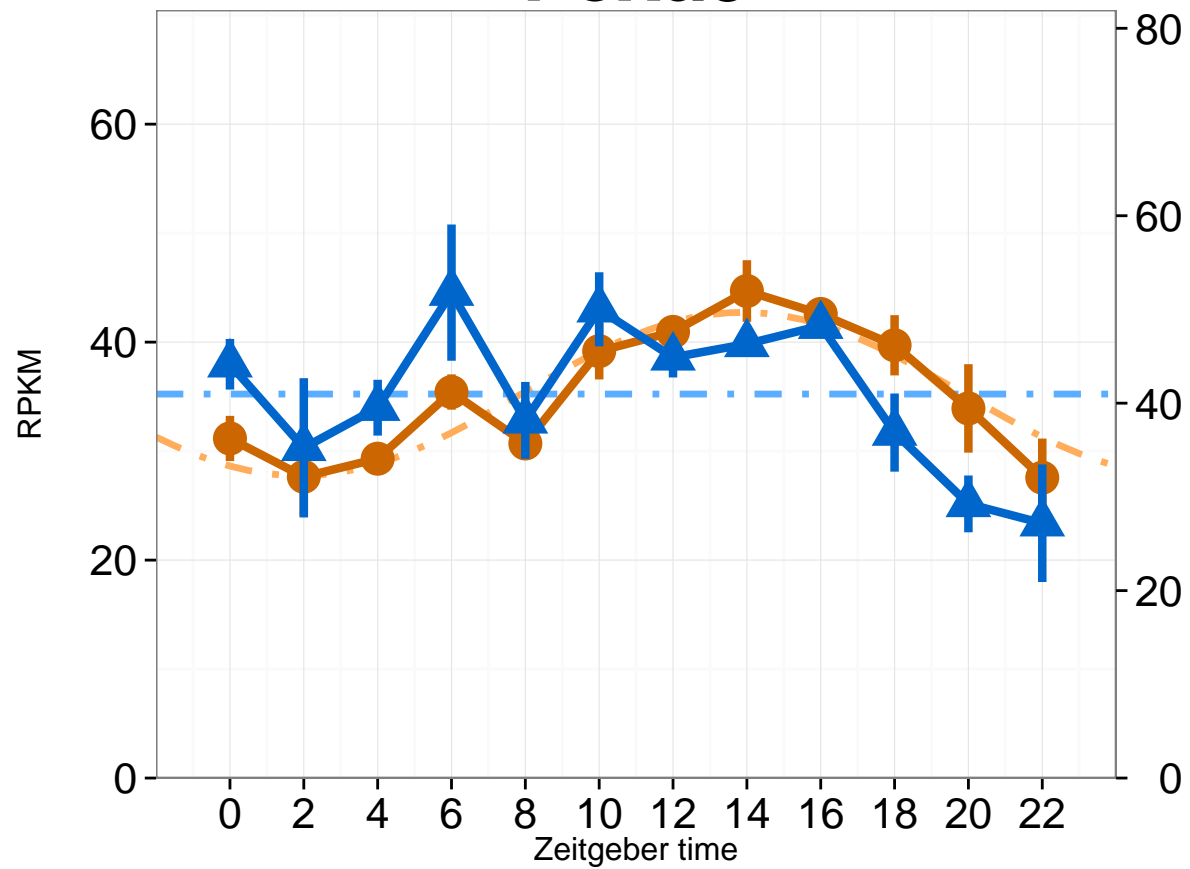

## Foxa3

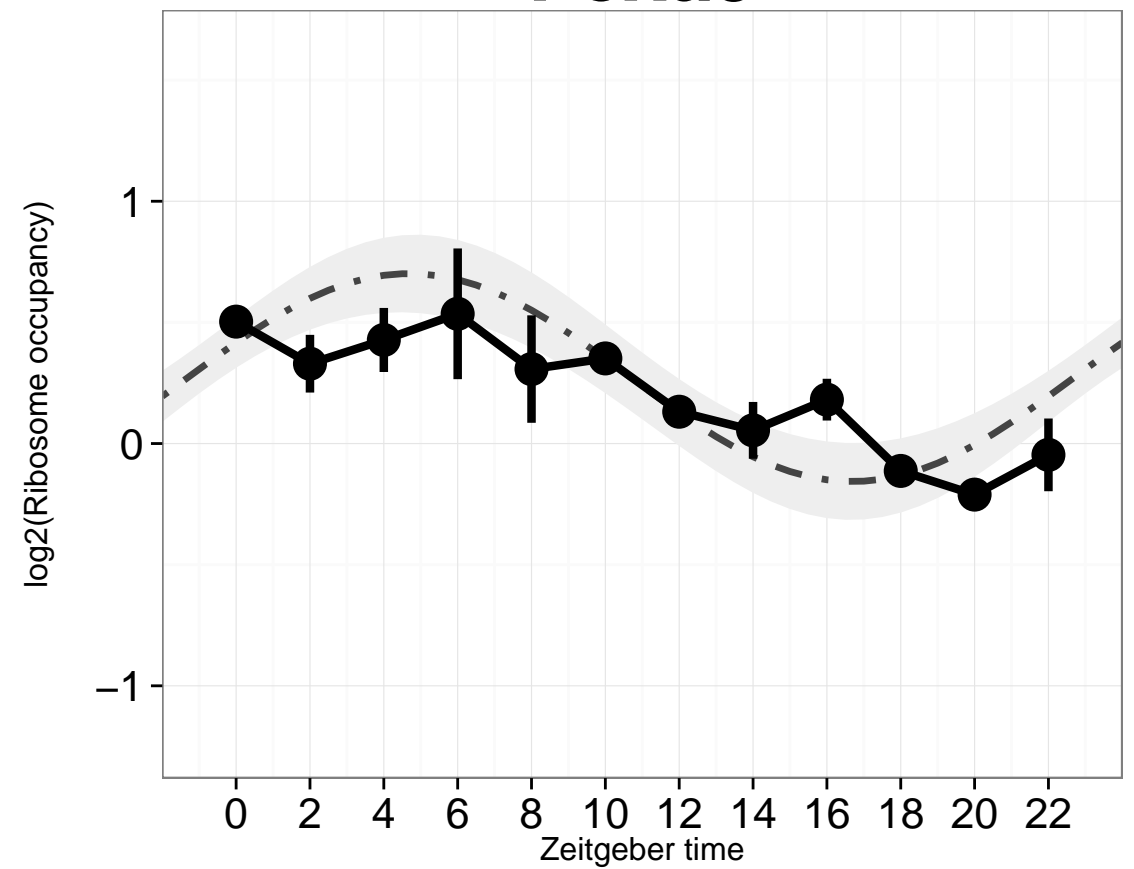

Supplement: SuppDataset_1.zip [file Foxa3_set_B.pdf › Supplemental Dataset 1/B-mRNA_rhythm_translation_nonrhyth/Foxa3_set_B.pdf]

## Fras1

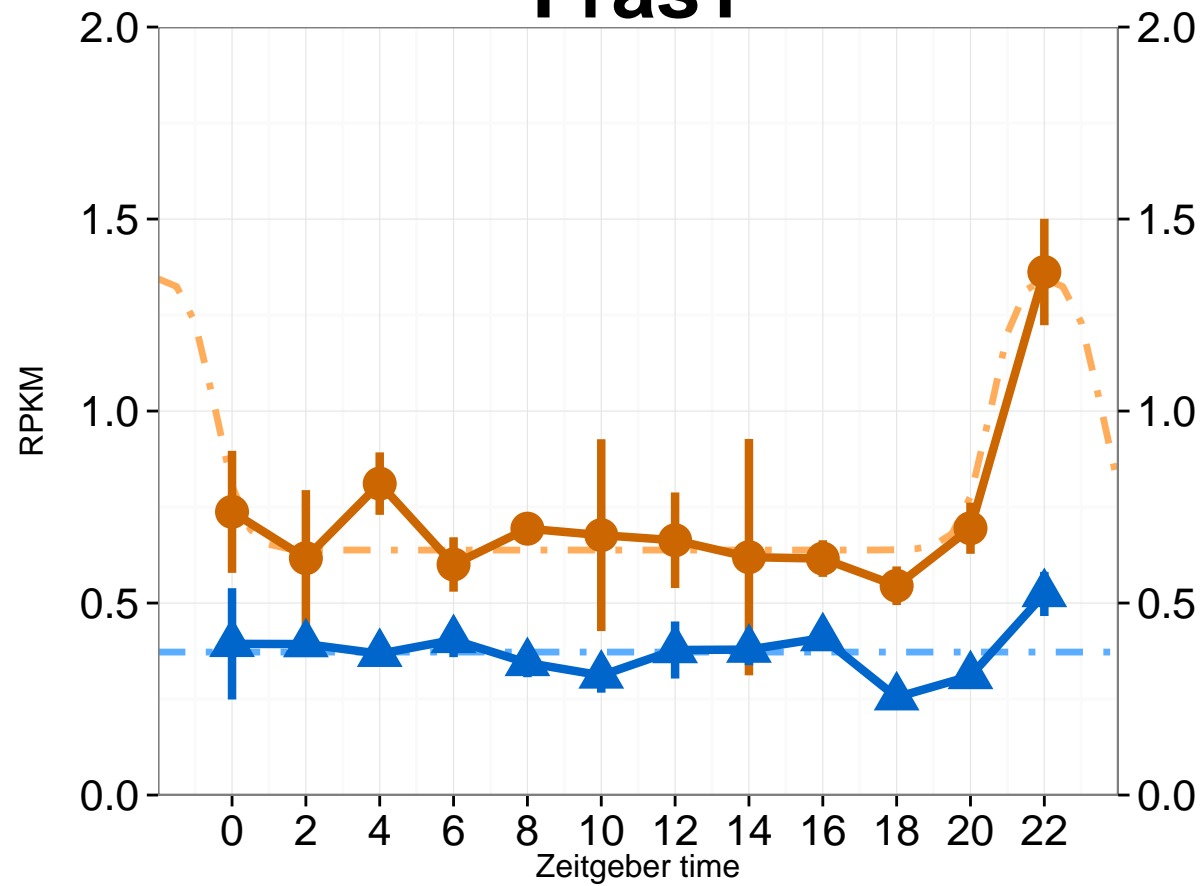

## Fras1

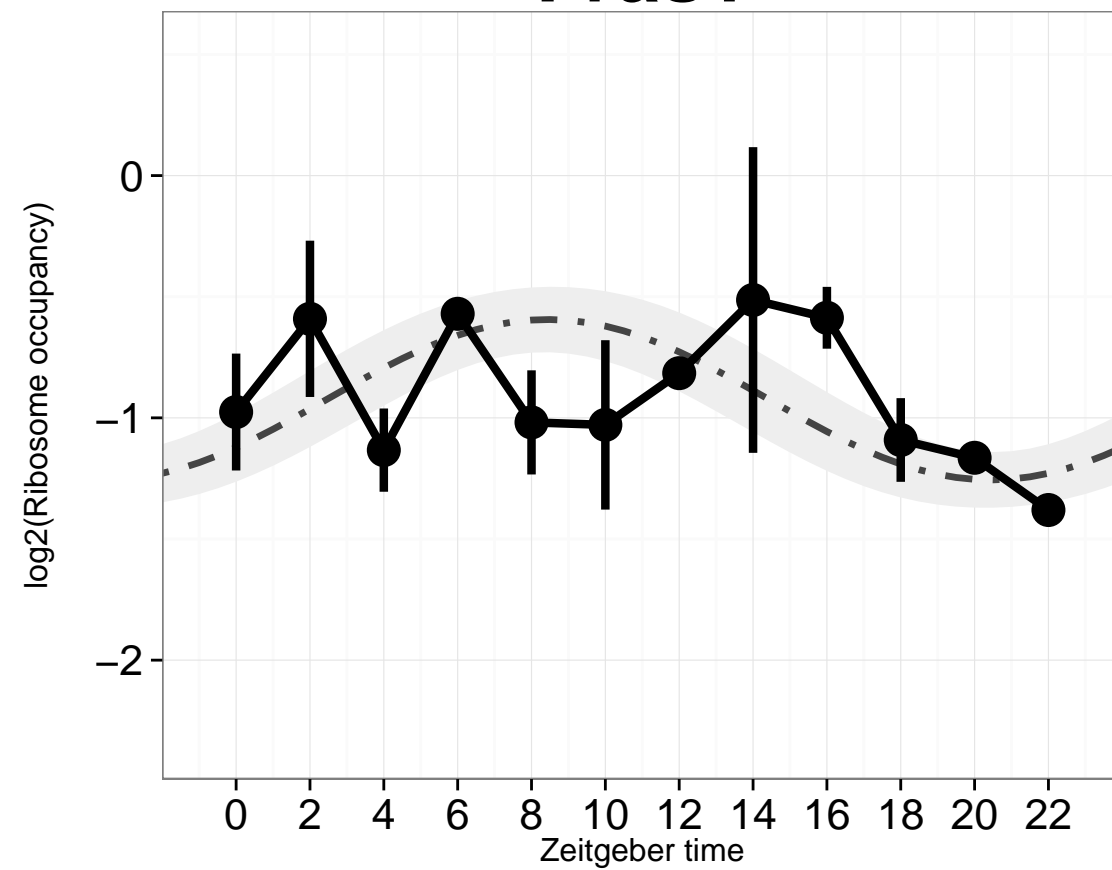

Supplement: SuppDataset_1.zip [file Fras1_set_B.pdf › Supplemental Dataset 1/B-mRNA_rhythm_translation_nonrhyth/Fras1_set_B.pdf]

## Ftsj1

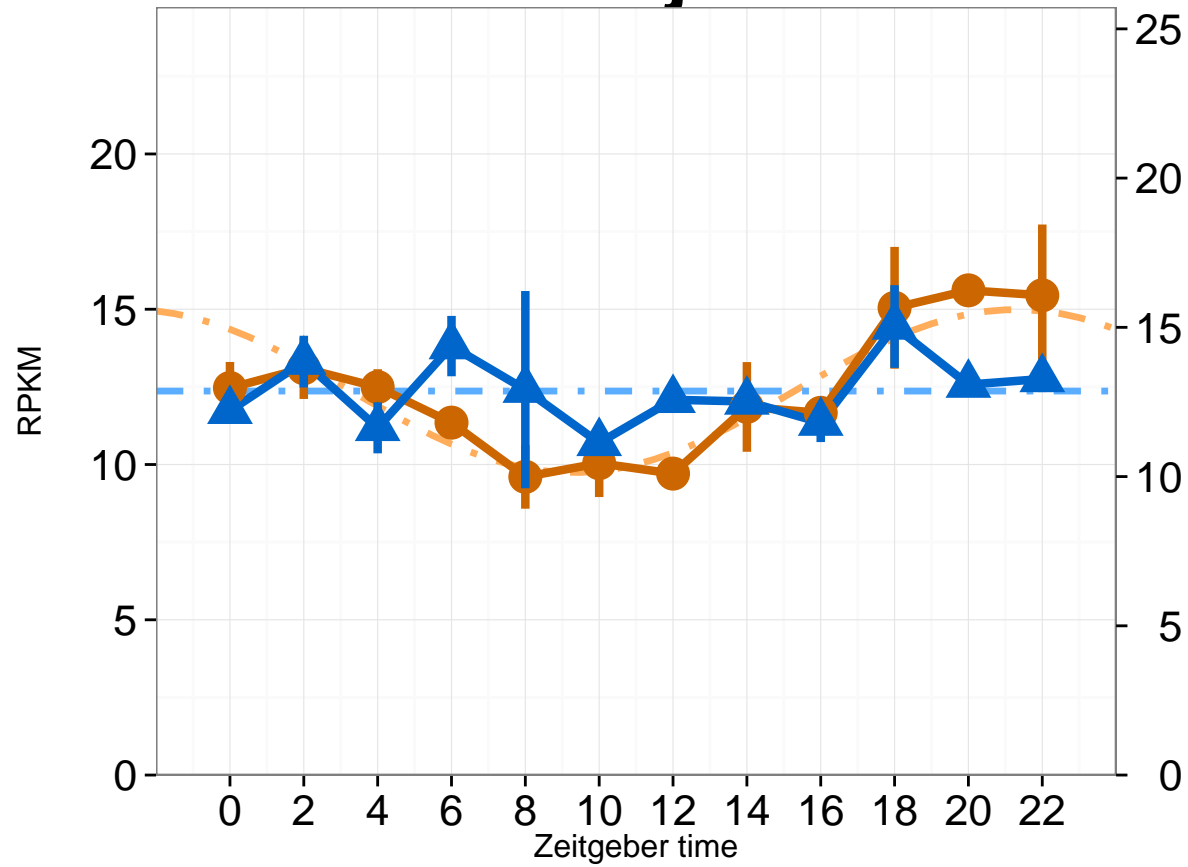

## Ftsj1

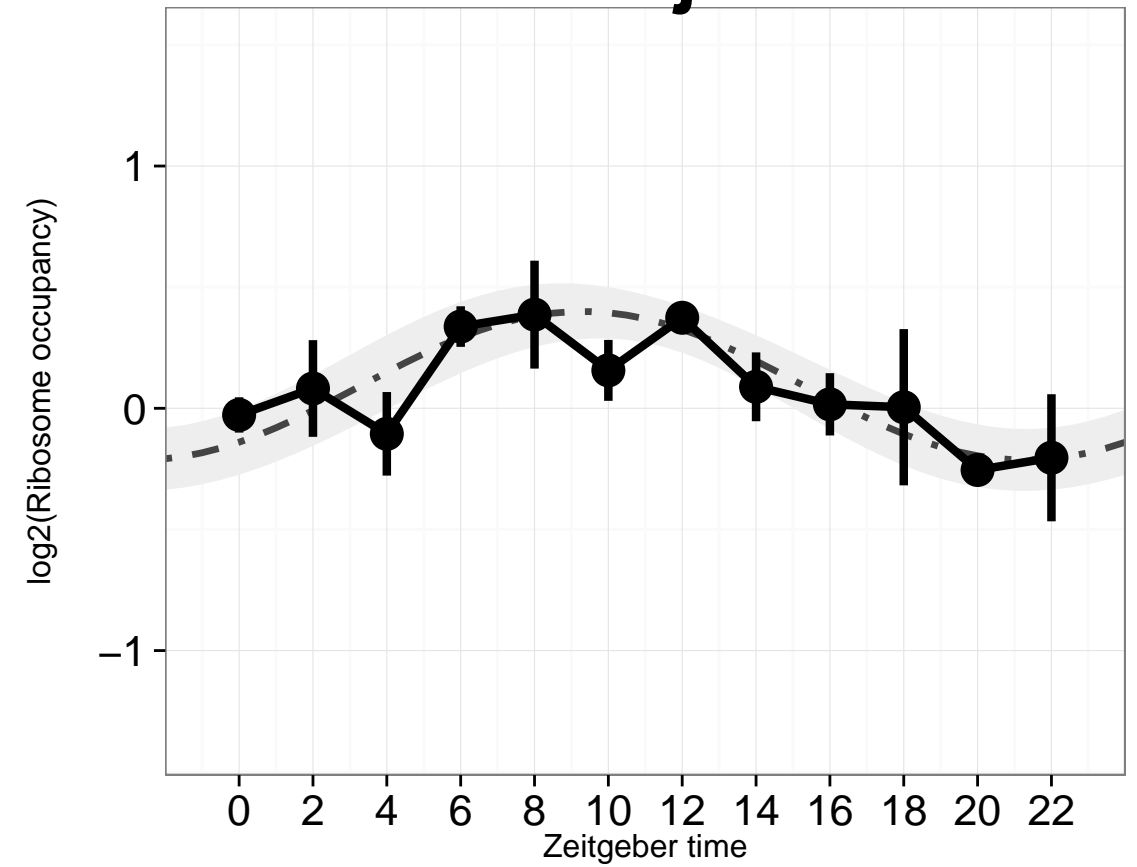

Supplement: SuppDataset_1.zip [file Ftsj1_set_B.pdf › Supplemental Dataset 1/B-mRNA_rhythm_translation_nonrhyth/Ftsj1_set_B.pdf]

# Fundc2

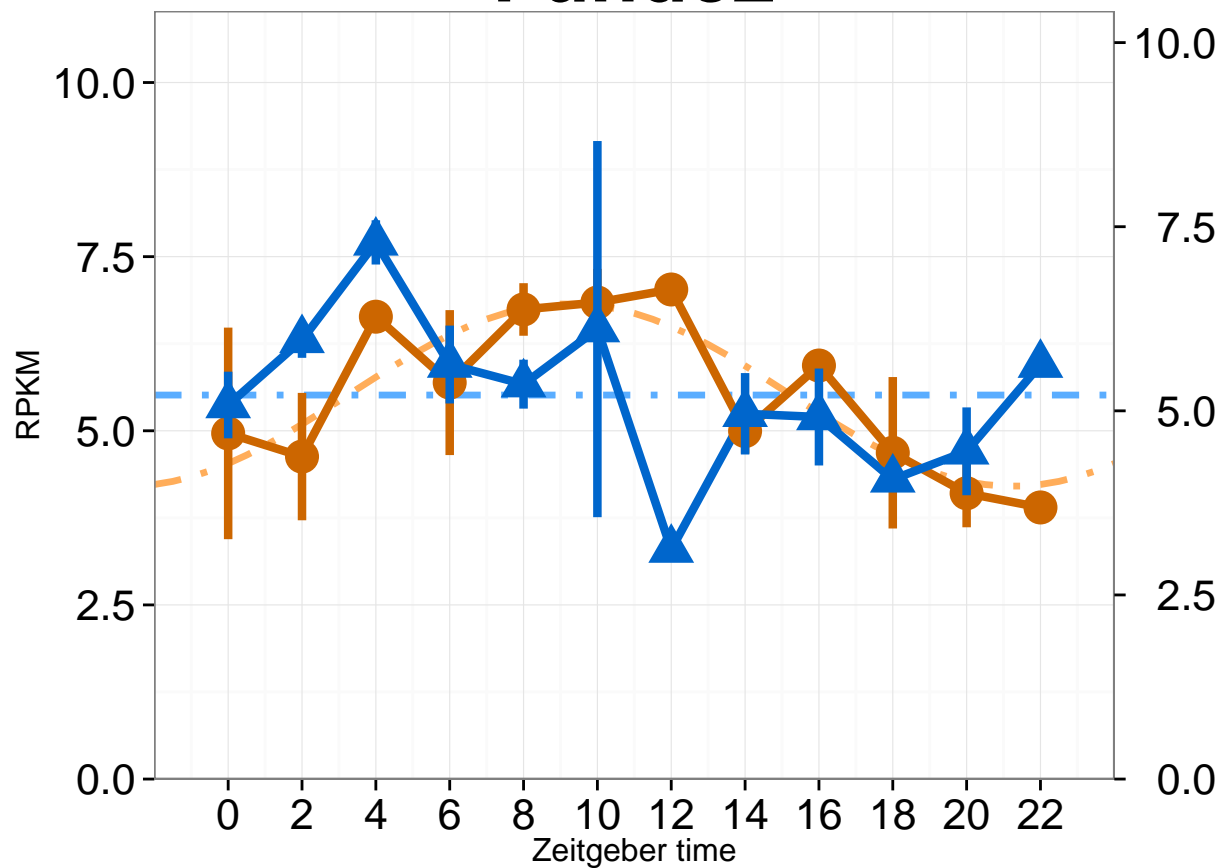

# Fundc2

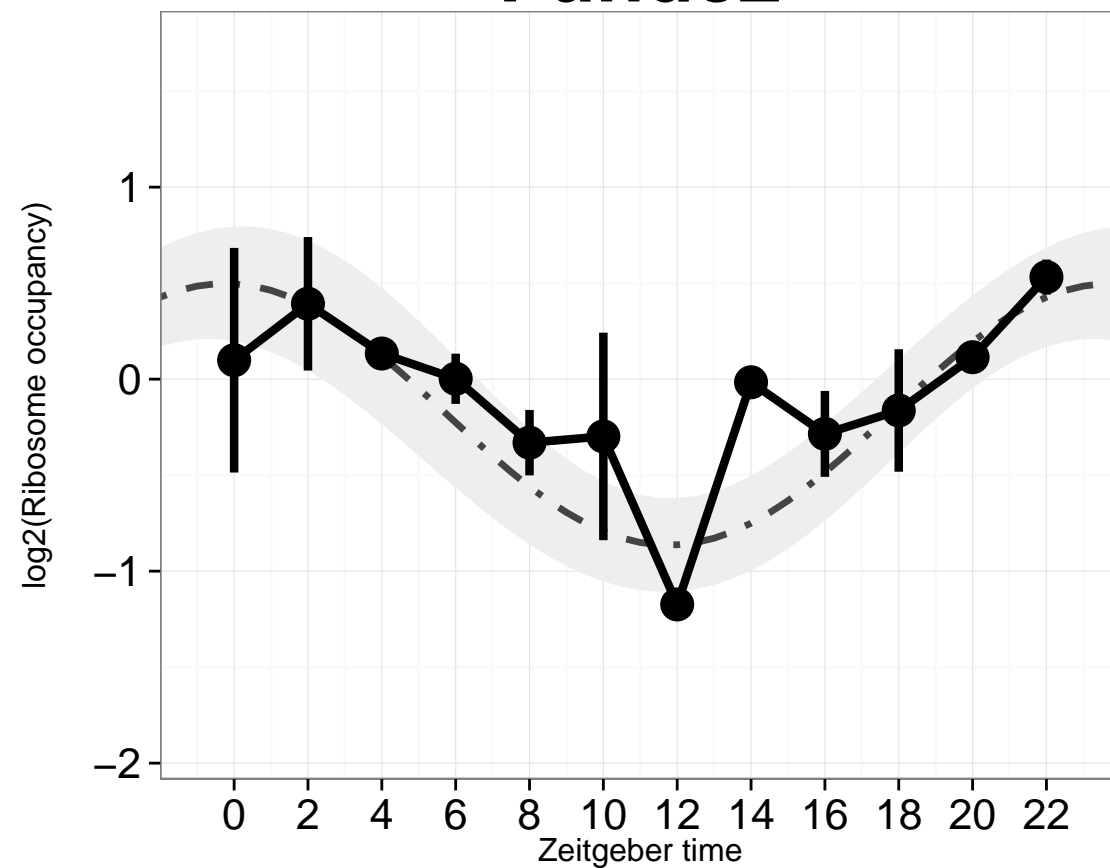

Supplement: SuppDataset_1.zip [file Fundc2_set_B.pdf › Supplemental Dataset 1/B-mRNA_rhythm_translation_nonrhyth/Fundc2_set_B.pdf]

# Fxyd1

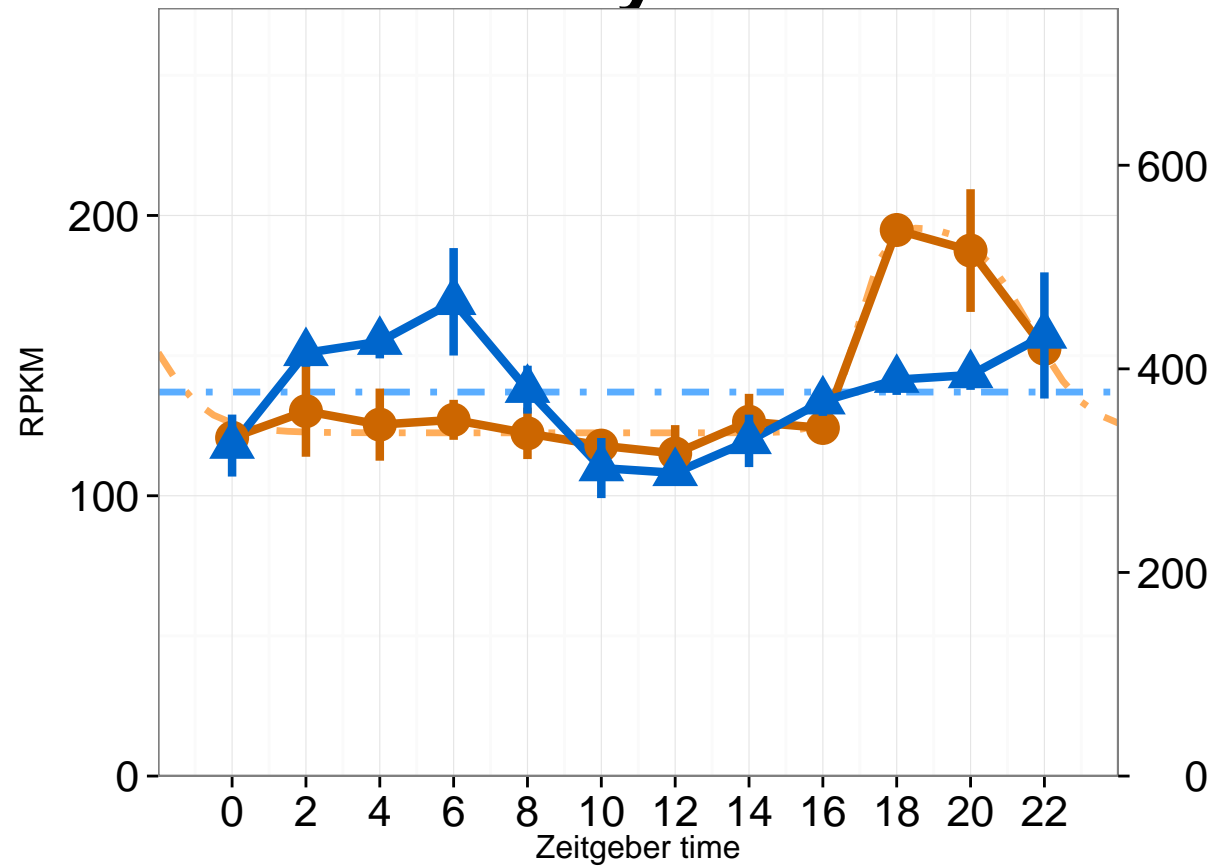

# Fxyd1

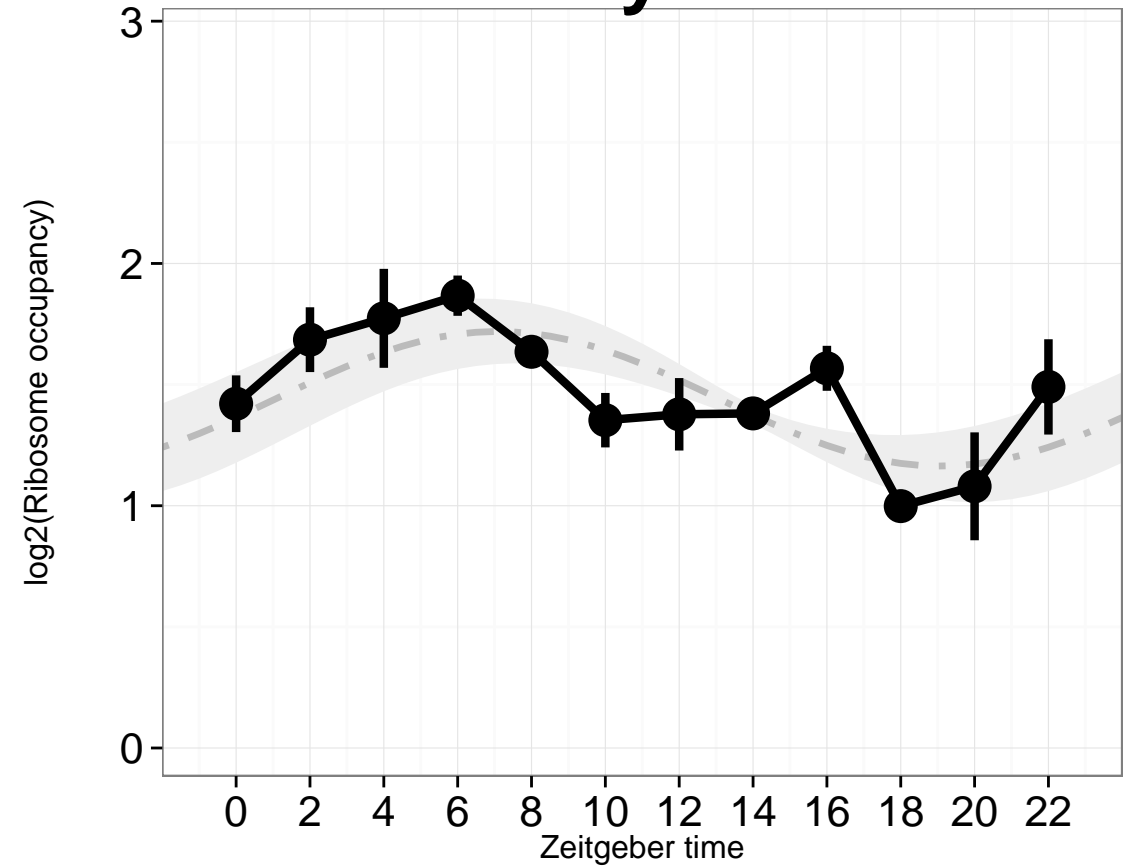

Supplement: SuppDataset_1.zip [file Fxyd1_set_B.pdf › Supplemental Dataset 1/B-mRNA_rhythm_translation_nonrhyth/Fxyd1_set_B.pdf]

## G630090E17Rik

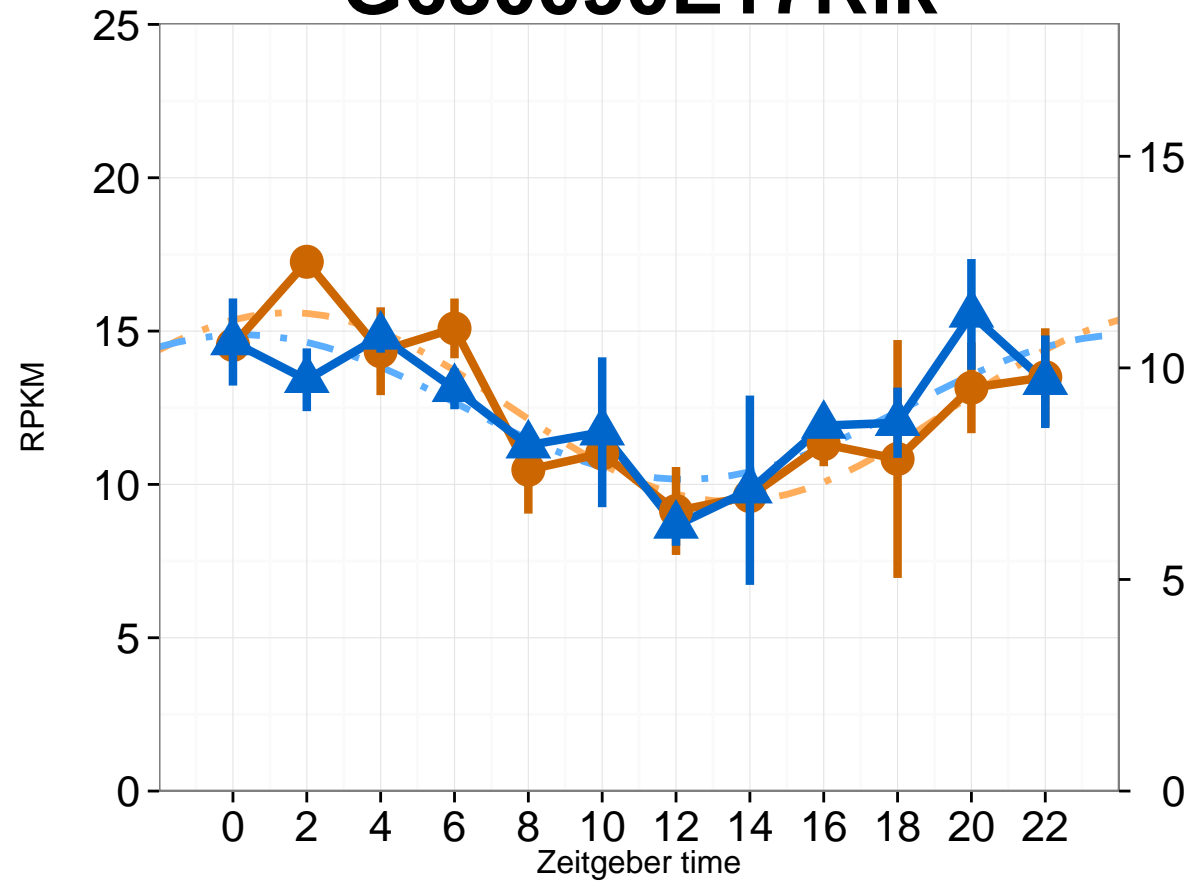

## G630090E17Rik

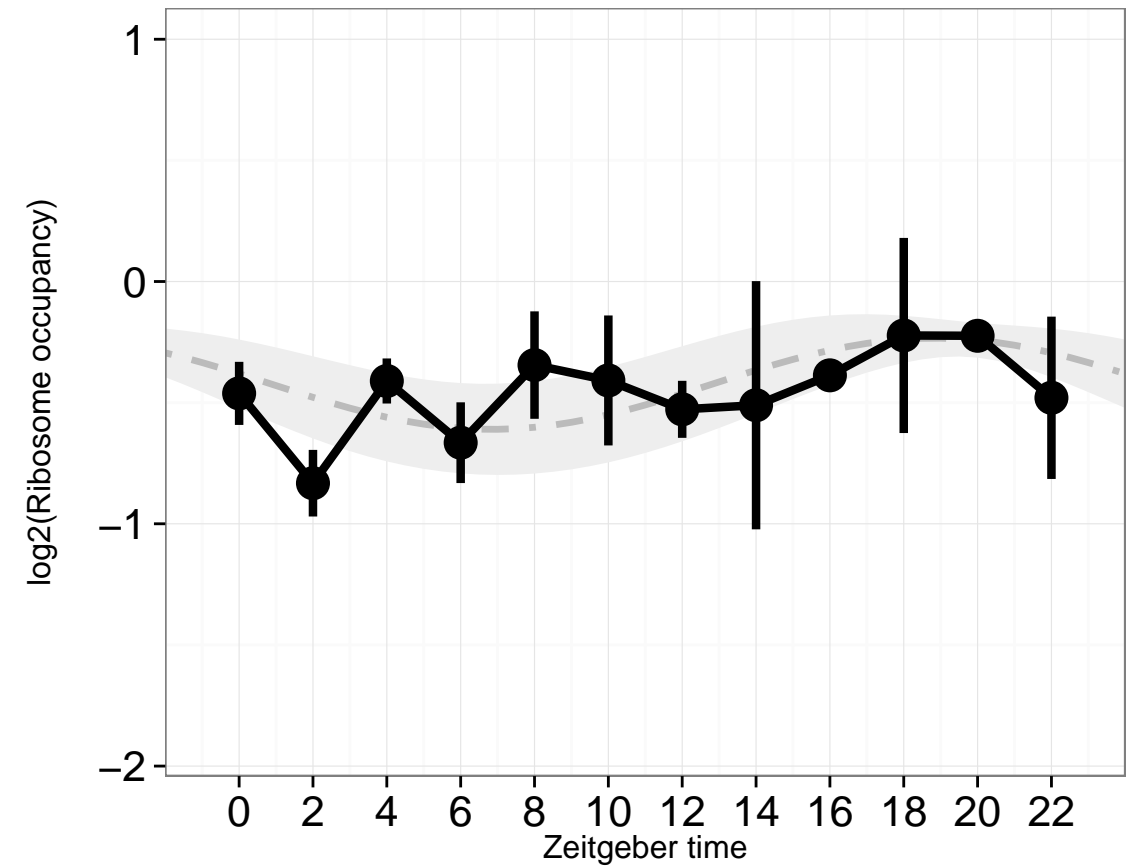

Supplement: SuppDataset_1.zip [file G630090E17Rik_set_B.pdf › Supplemental Dataset 1/B-mRNA_rhythm_translation_nonrhyth/G630090E17Rik_set_B.pdf]

# Galnt10

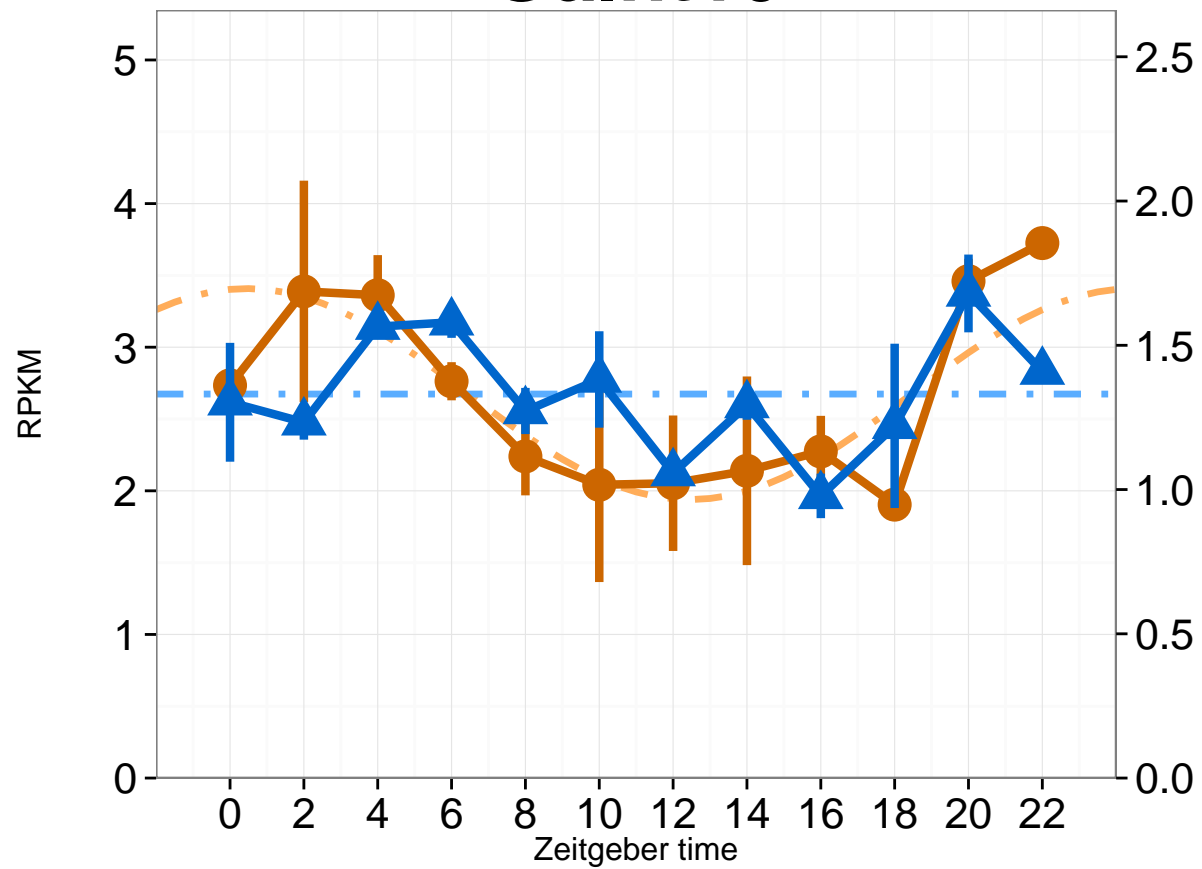

# Galnt10

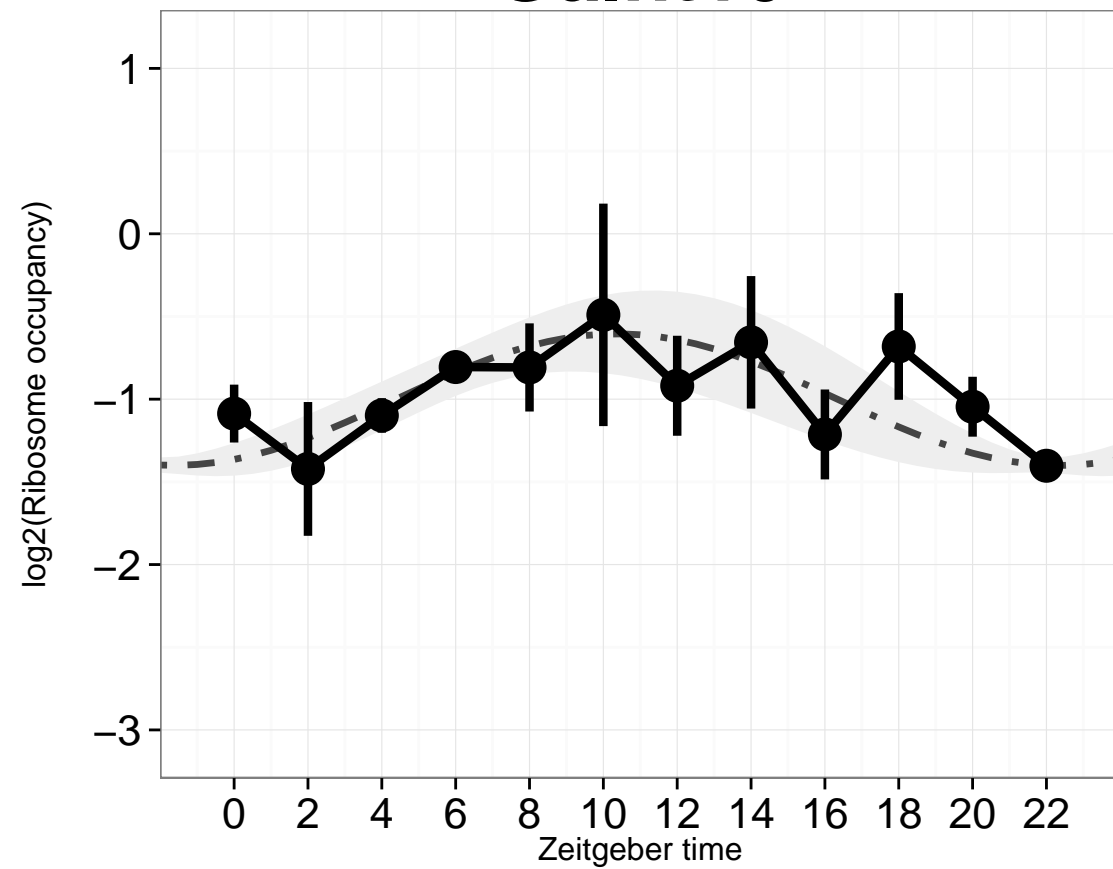

Supplement: SuppDataset_1.zip [file Galnt10_set_B.pdf › Supplemental Dataset 1/B-mRNA_rhythm_translation_nonrhyth/Galnt10_set_B.pdf]

## Gcat

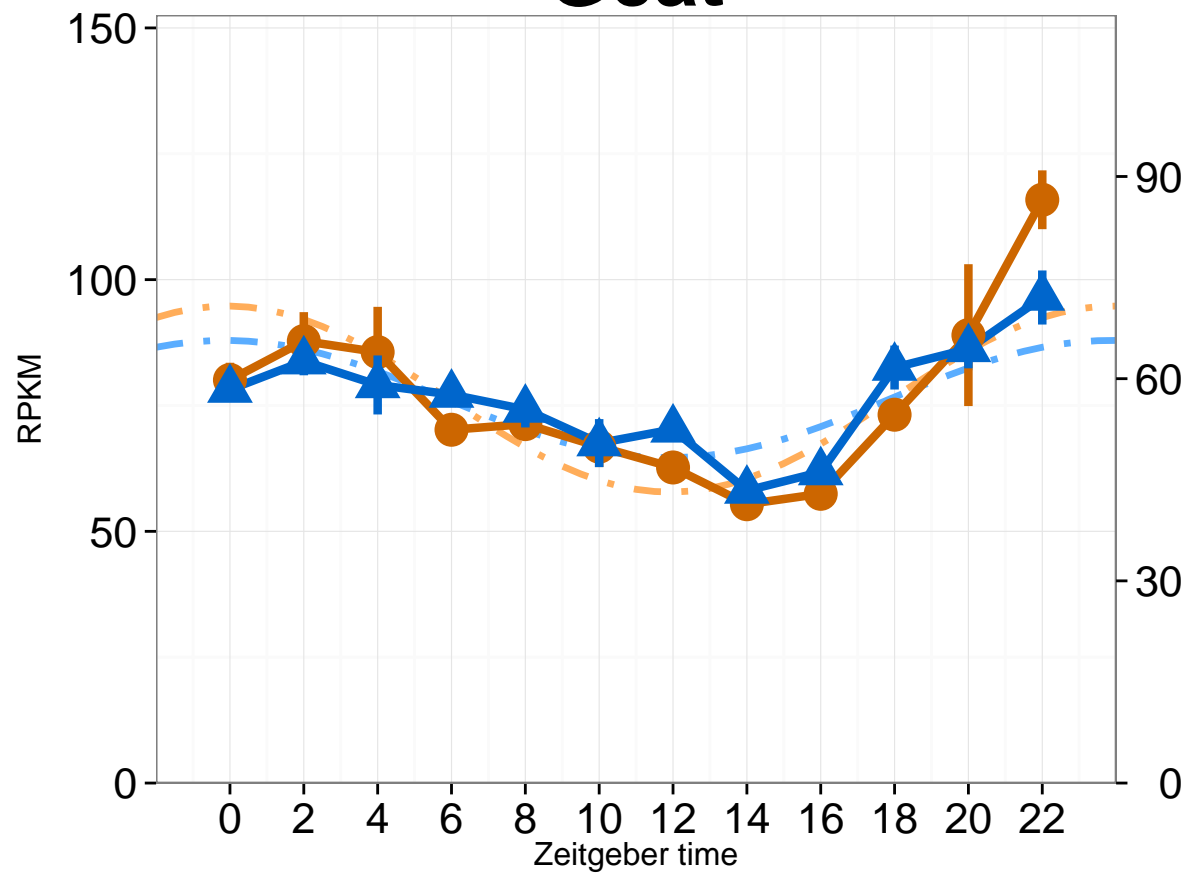

## Gcat

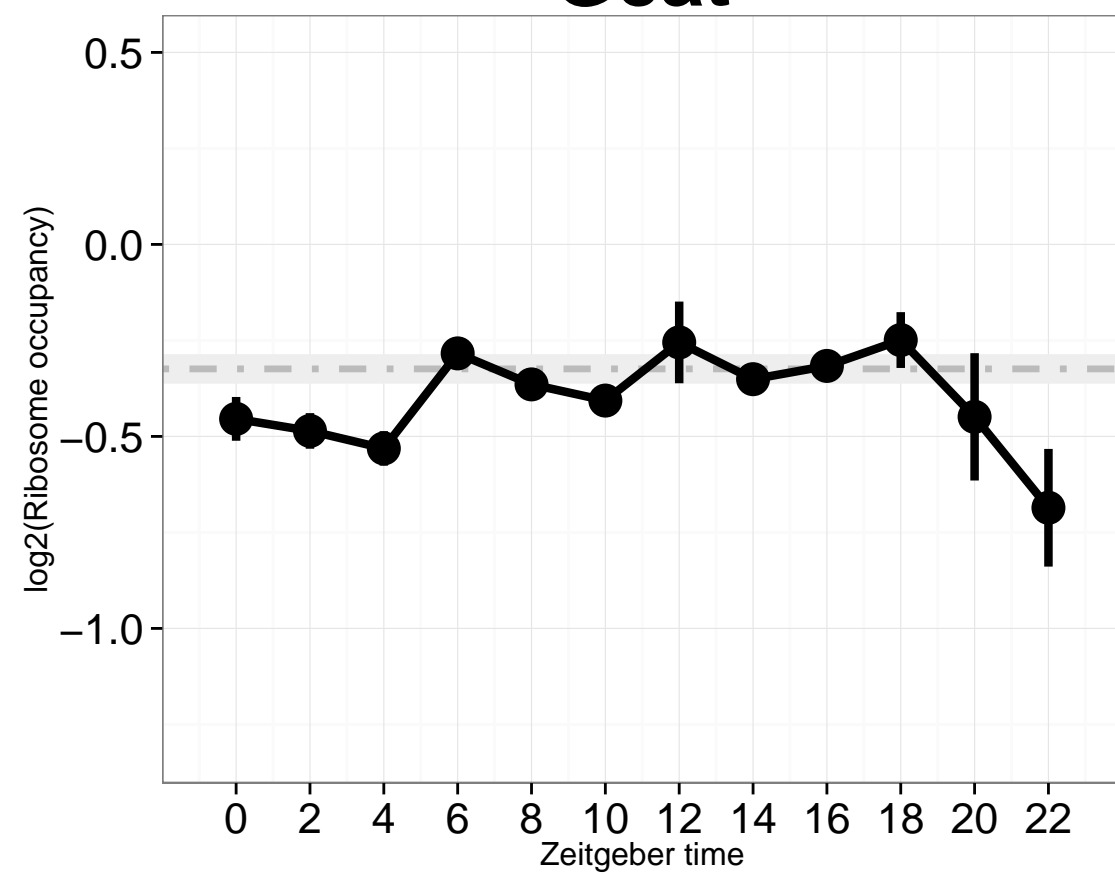

Supplement: SuppDataset_1.zip [file Gcat_set_B.pdf › Supplemental Dataset 1/B-mRNA_rhythm_translation_nonrhyth/Gcat_set_B.pdf]

## Gchfr

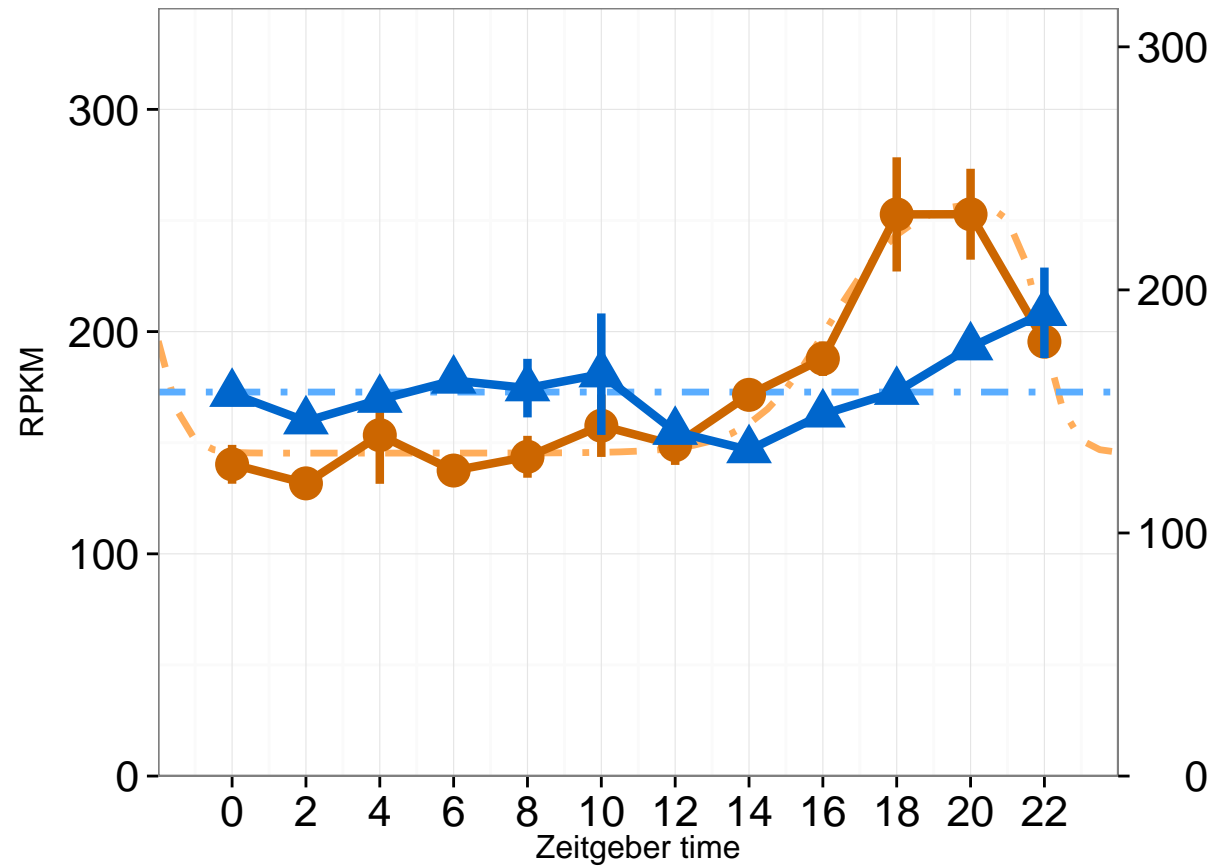

## Gchfr

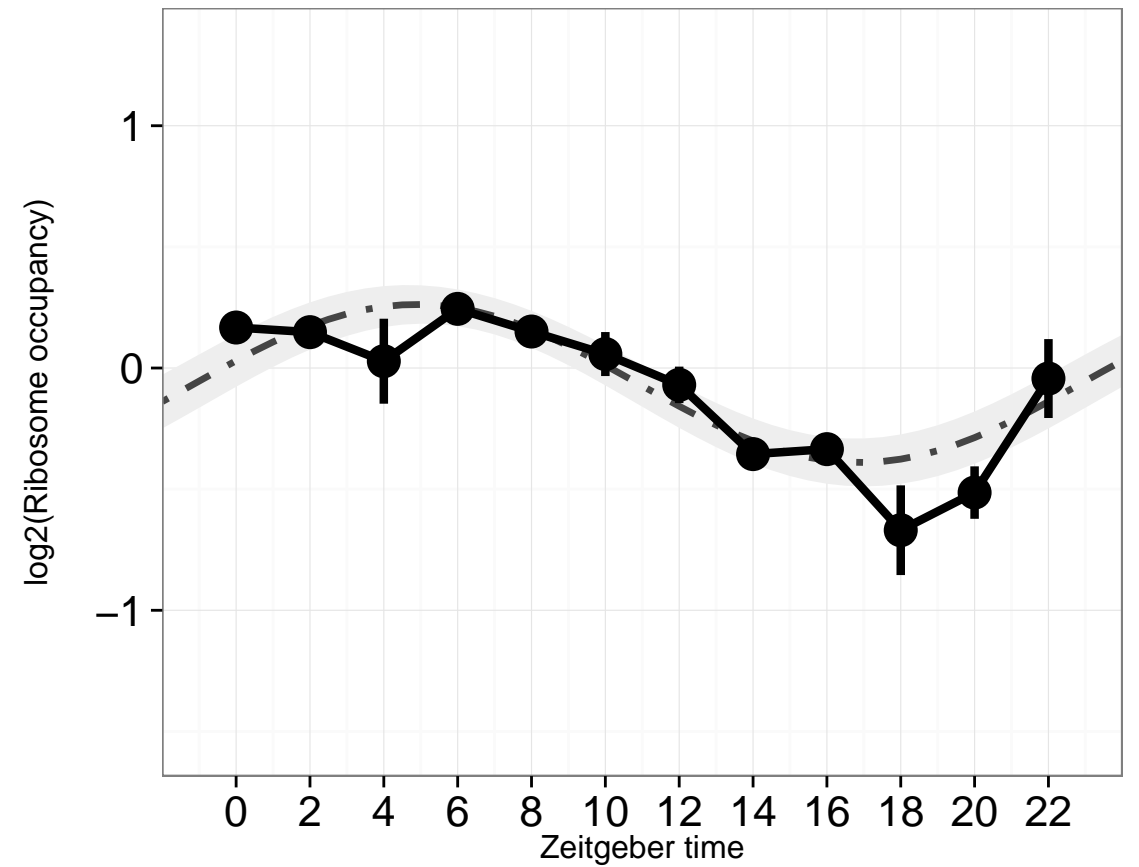

Supplement: SuppDataset_1.zip [file Gchfr_set_B.pdf › Supplemental Dataset 1/B-mRNA_rhythm_translation_nonrhyth/Gchfr_set_B.pdf]

## Gdf2

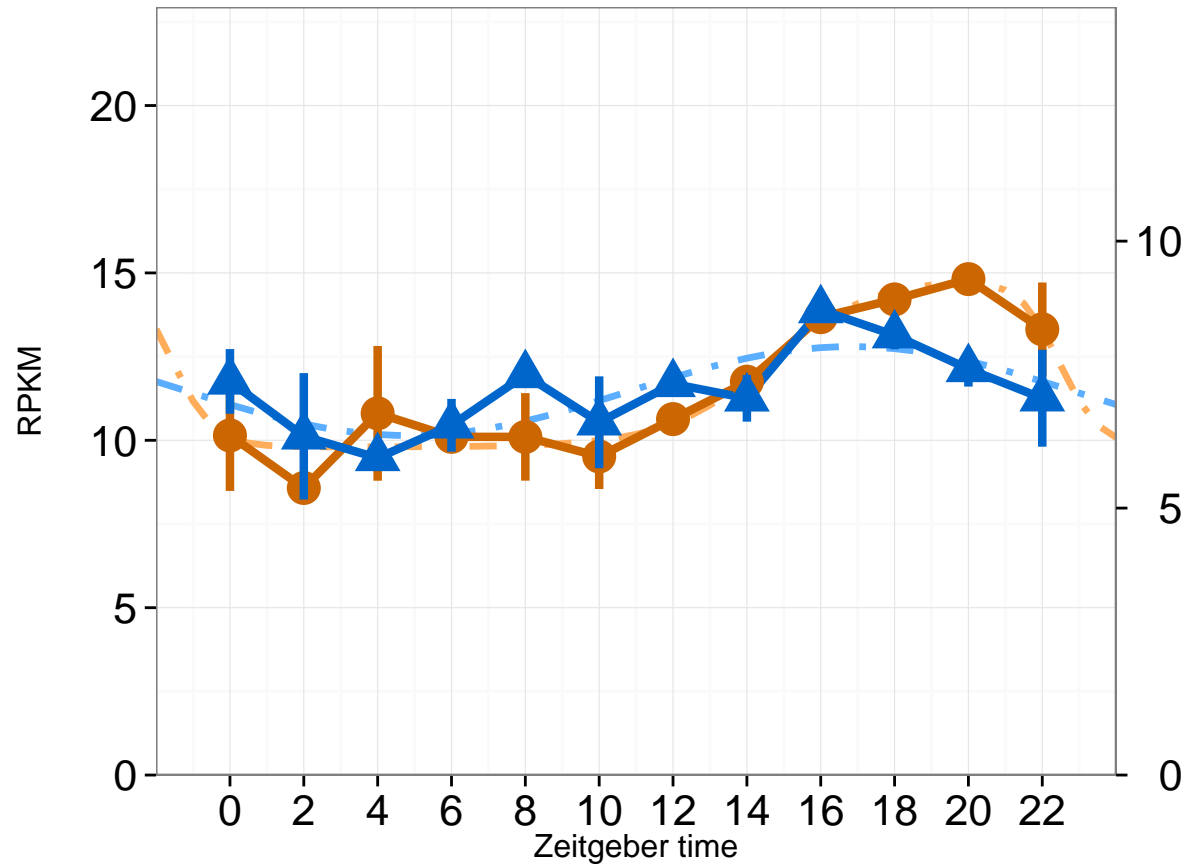

## Gdf2

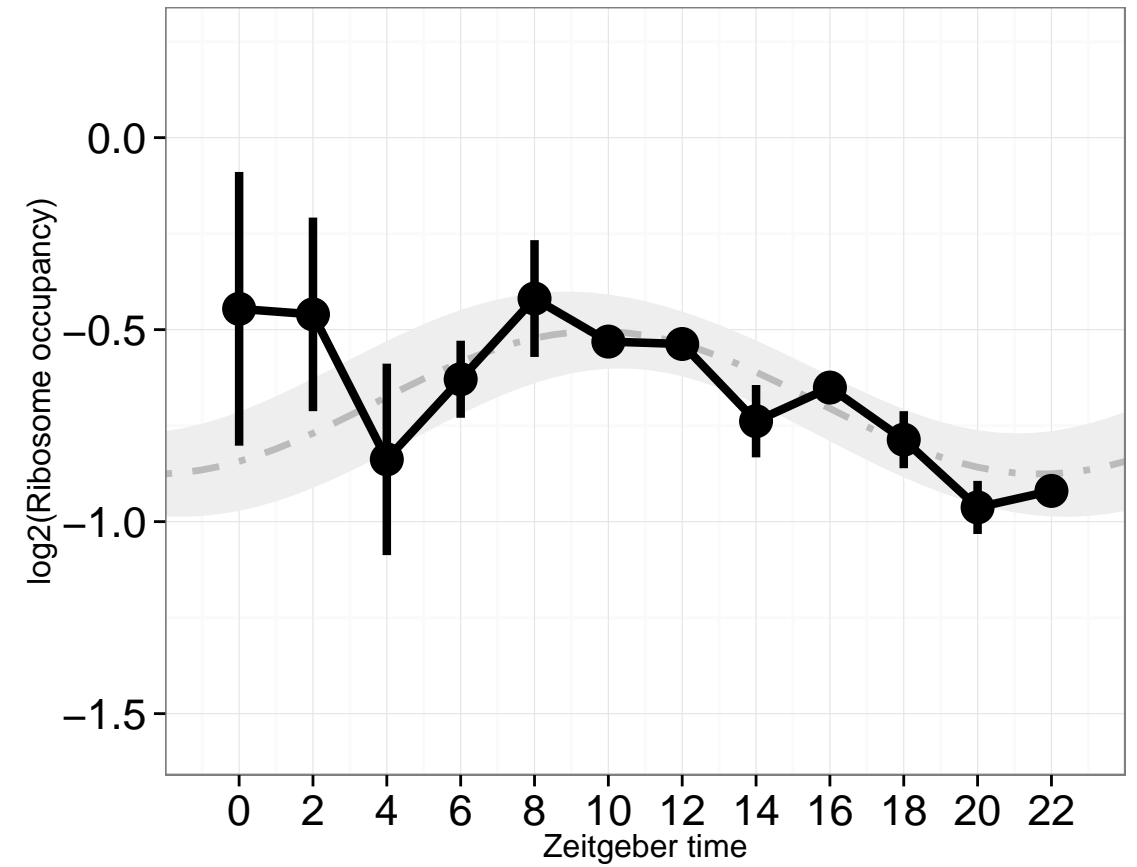

Supplement: SuppDataset_1.zip [file Gdf2_set_B.pdf › Supplemental Dataset 1/B-mRNA_rhythm_translation_nonrhyth/Gdf2_set_B.pdf]

## Gemin7

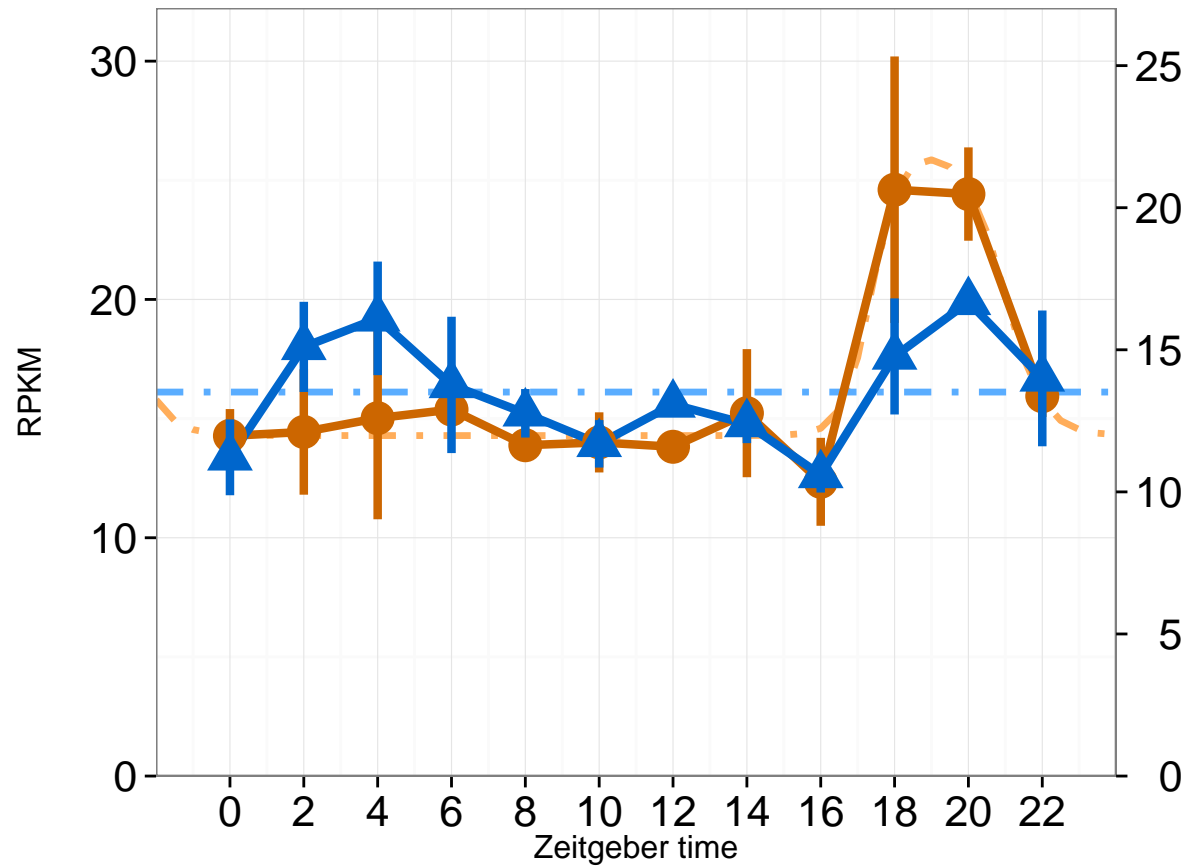

## Gemin7

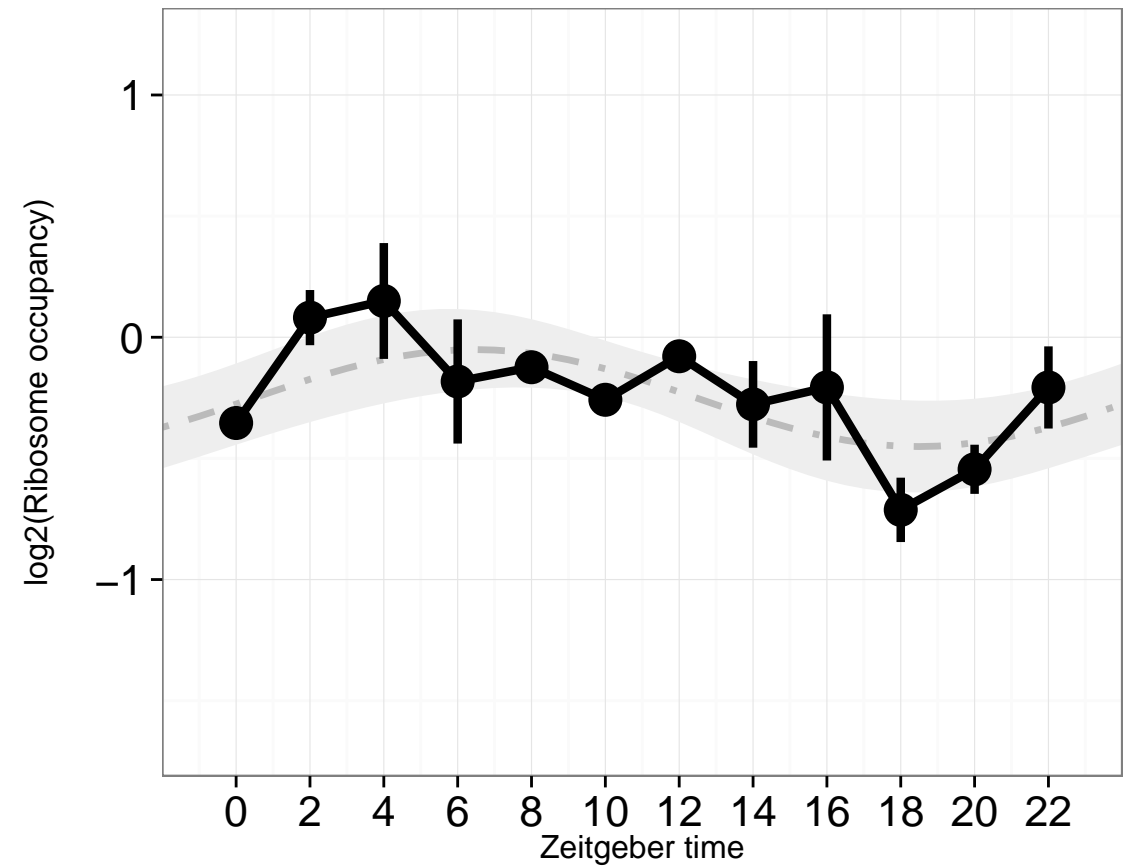

Supplement: SuppDataset_1.zip [file Gemin7_set_B.pdf › Supplemental Dataset 1/B-mRNA_rhythm_translation_nonrhyth/Gemin7_set_B.pdf]

## Ggact

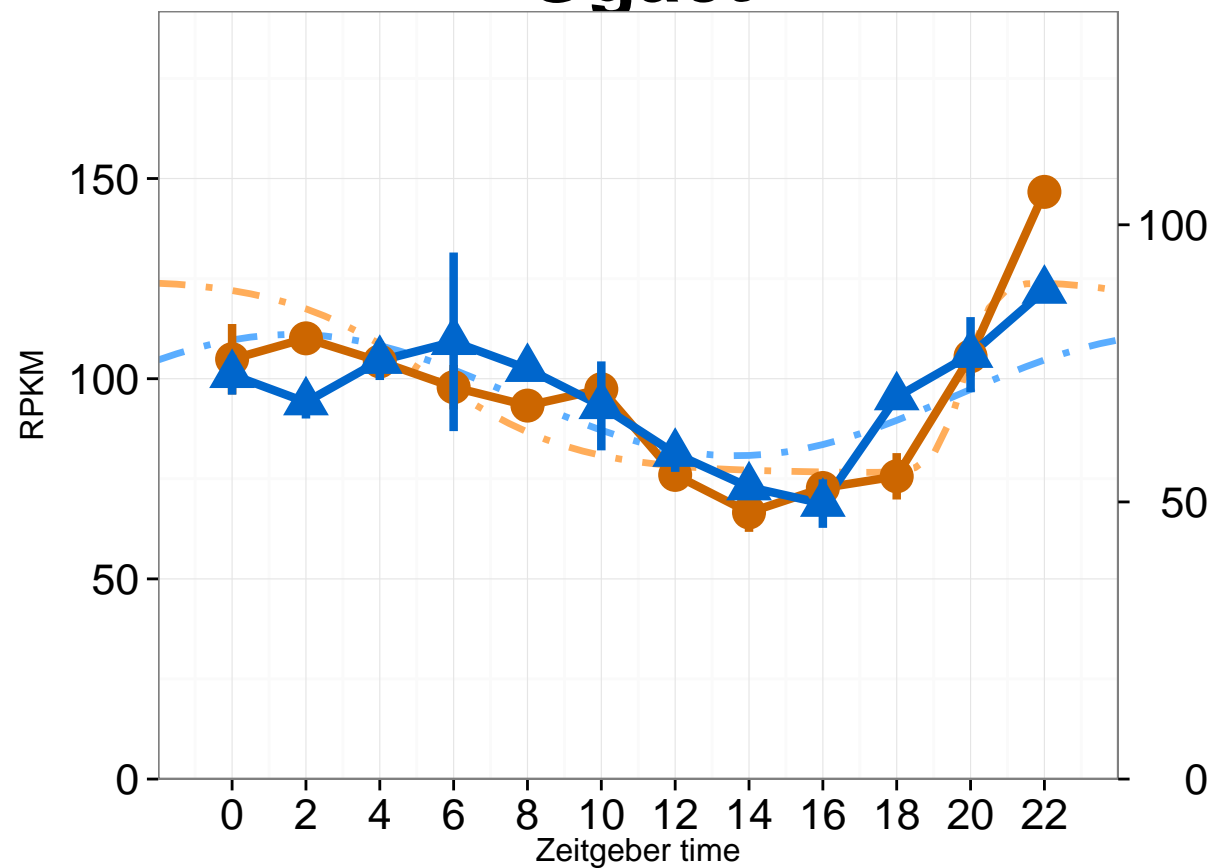

## Ggact

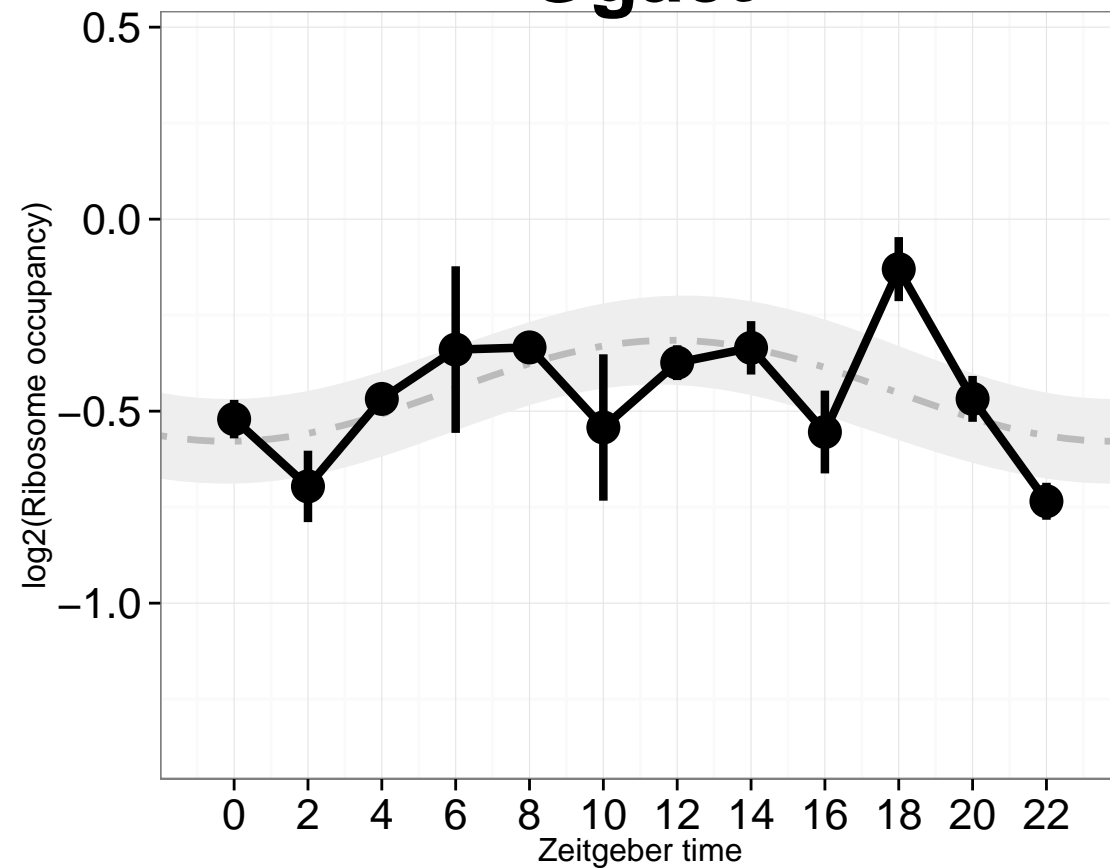

Supplement: SuppDataset_1.zip [file Ggact_set_B.pdf › Supplemental Dataset 1/B-mRNA_rhythm_translation_nonrhyth/Ggact_set_B.pdf]

## Ggt5

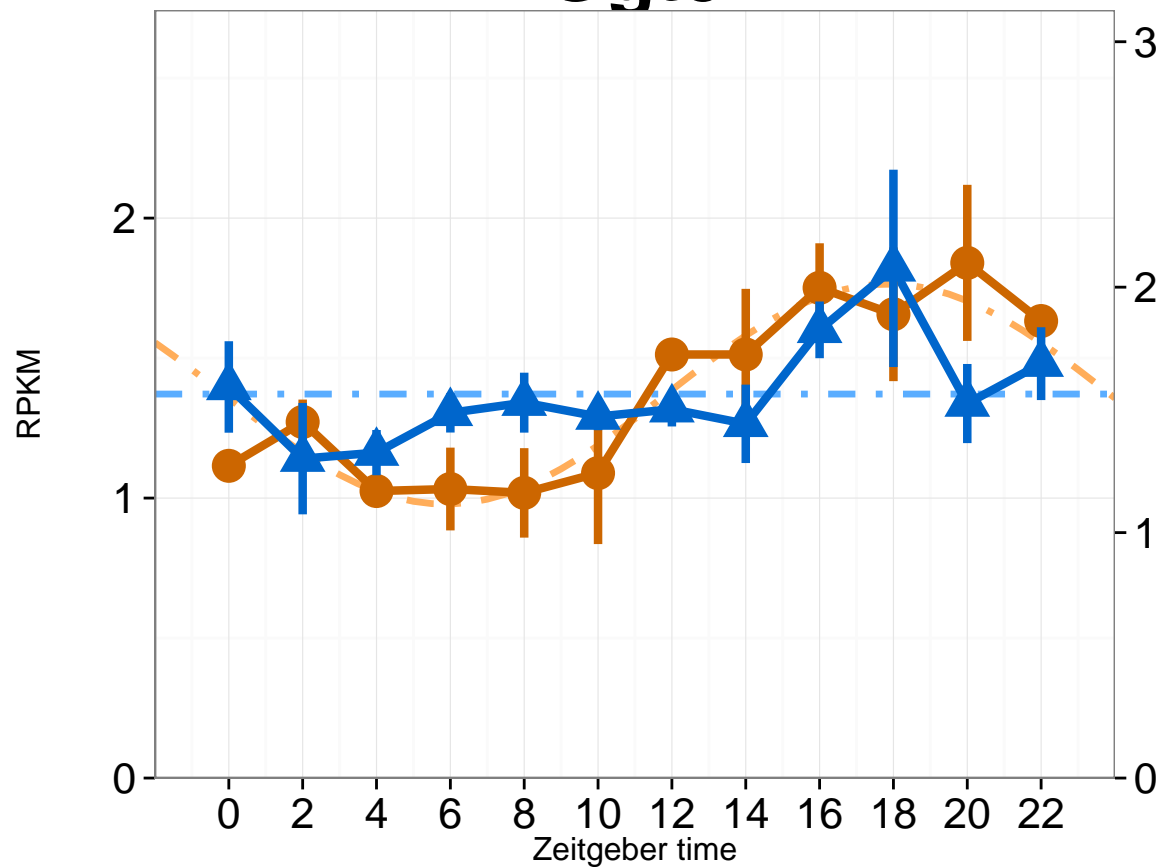

## Ggt5

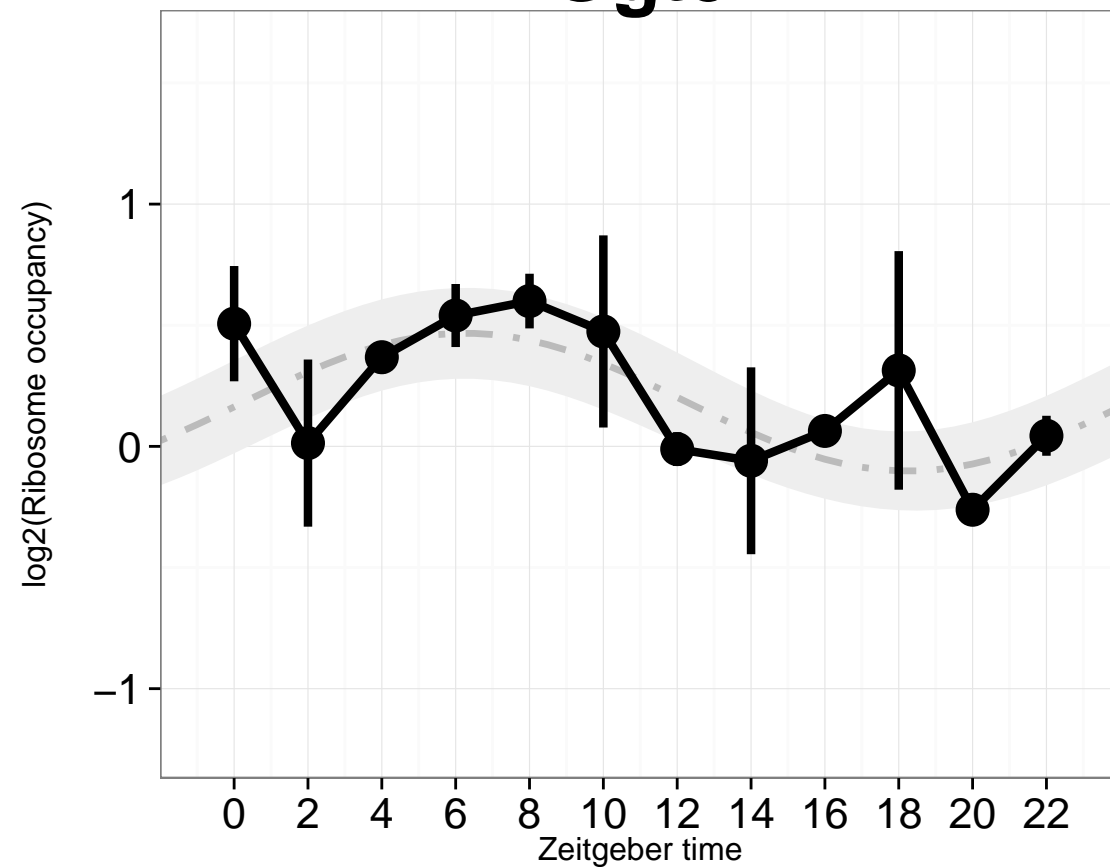

Supplement: SuppDataset_1.zip [file Ggt5_set_B.pdf › Supplemental Dataset 1/B-mRNA_rhythm_translation_nonrhyth/Ggt5_set_B.pdf]

## Gigyf1

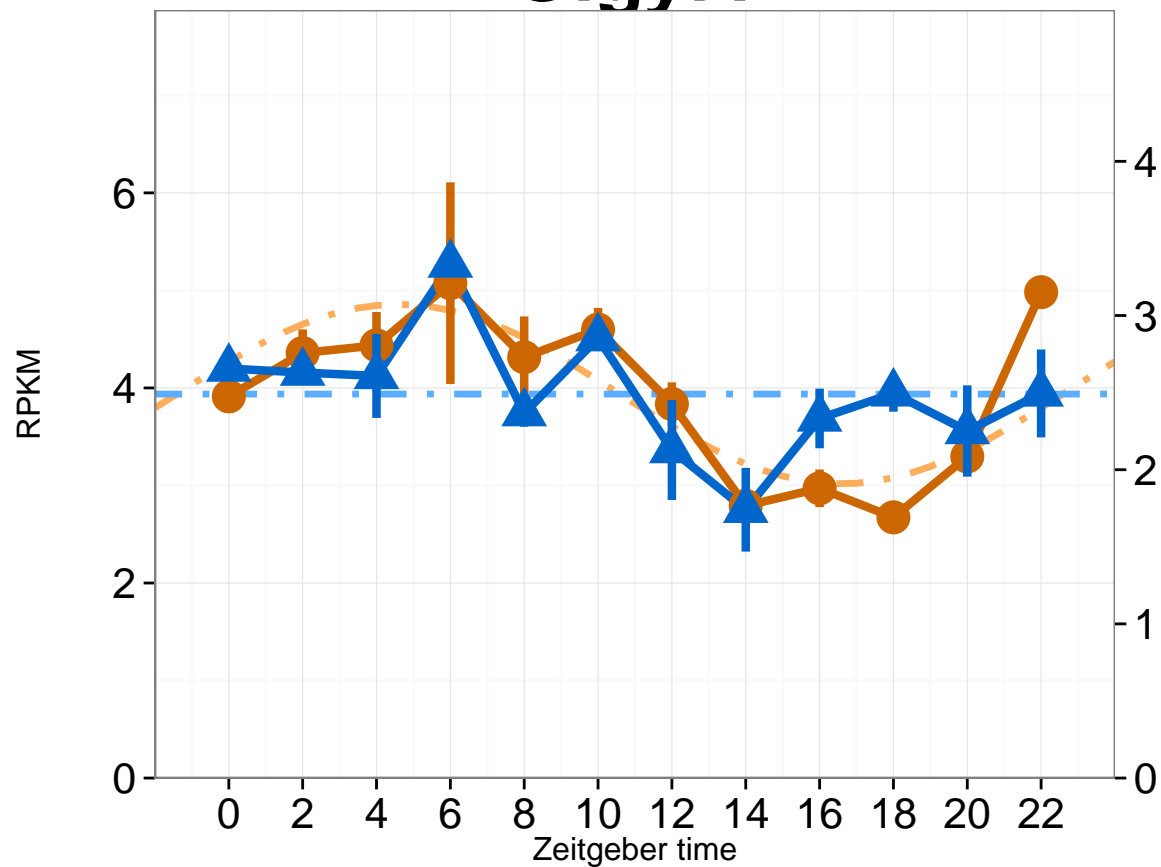

## Gigyf1

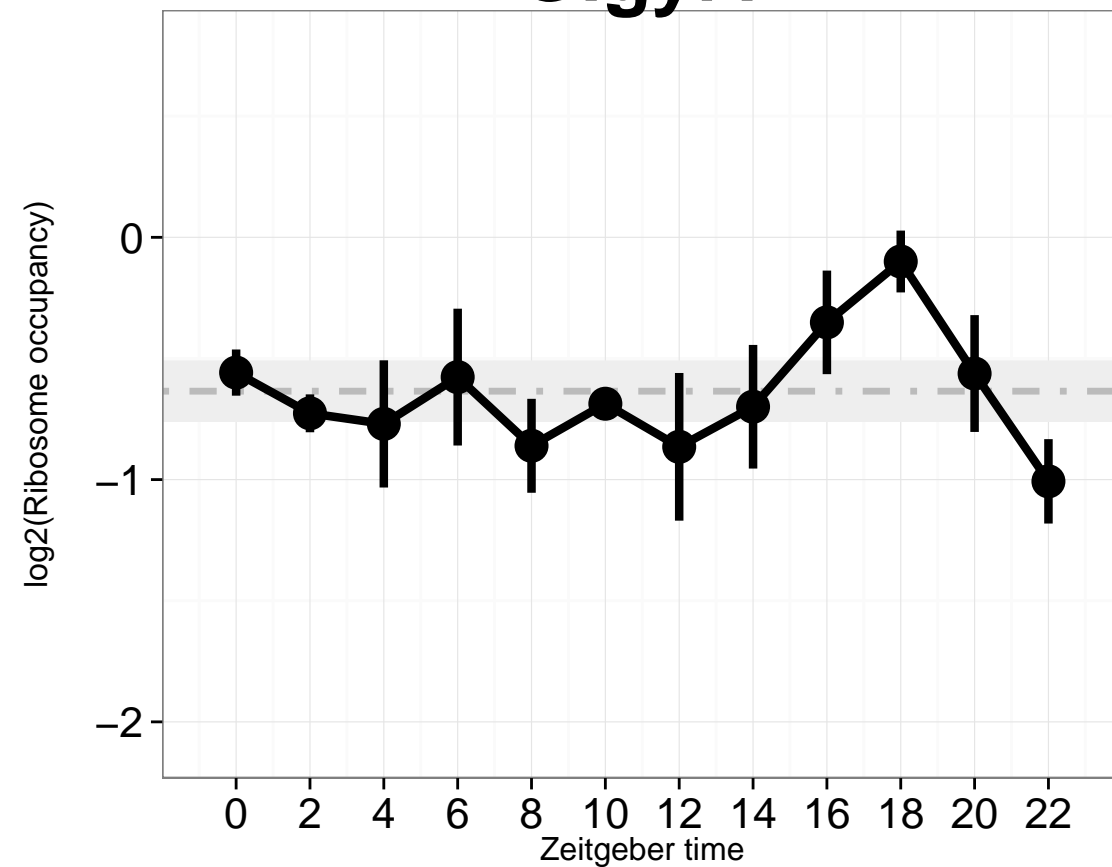

Supplement: SuppDataset_1.zip [file Gigyf1_set_B.pdf › Supplemental Dataset 1/B-mRNA_rhythm_translation_nonrhyth/Gigyf1_set_B.pdf]

## Gimap4

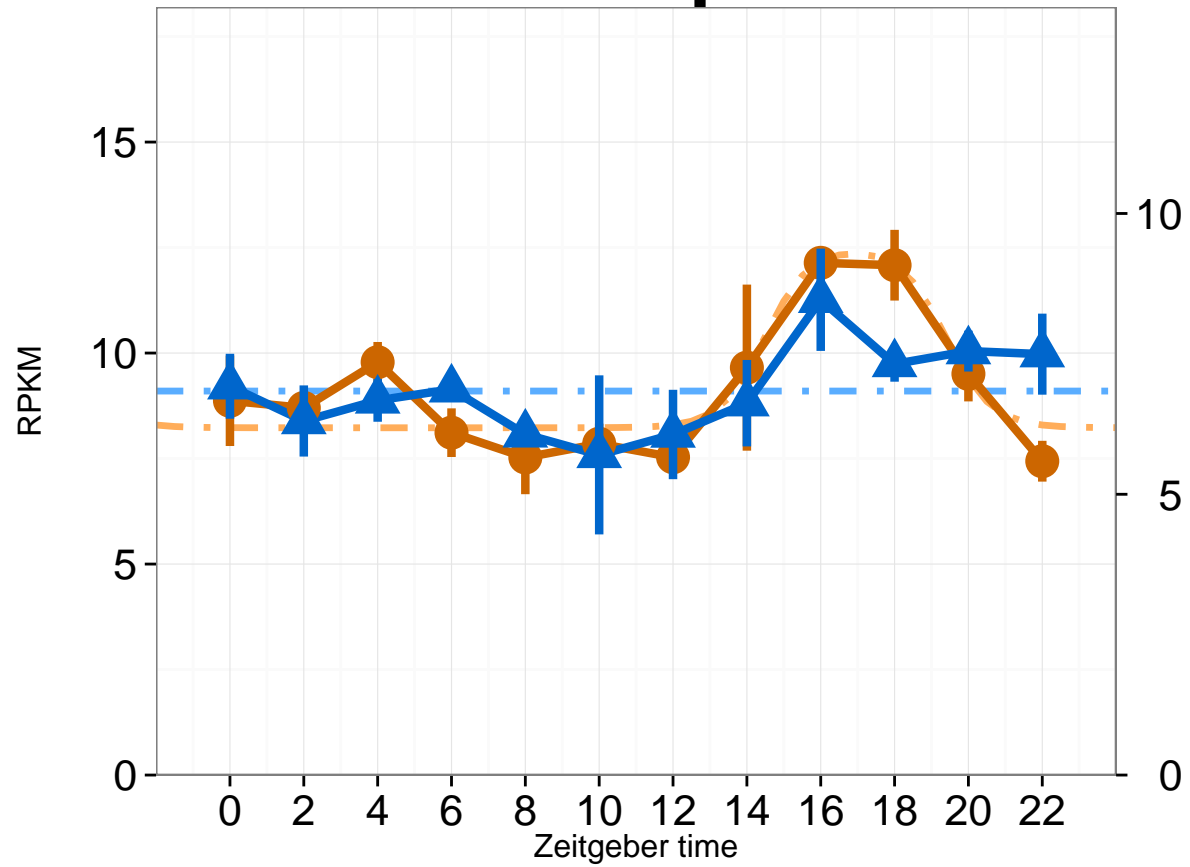

## Gimap4

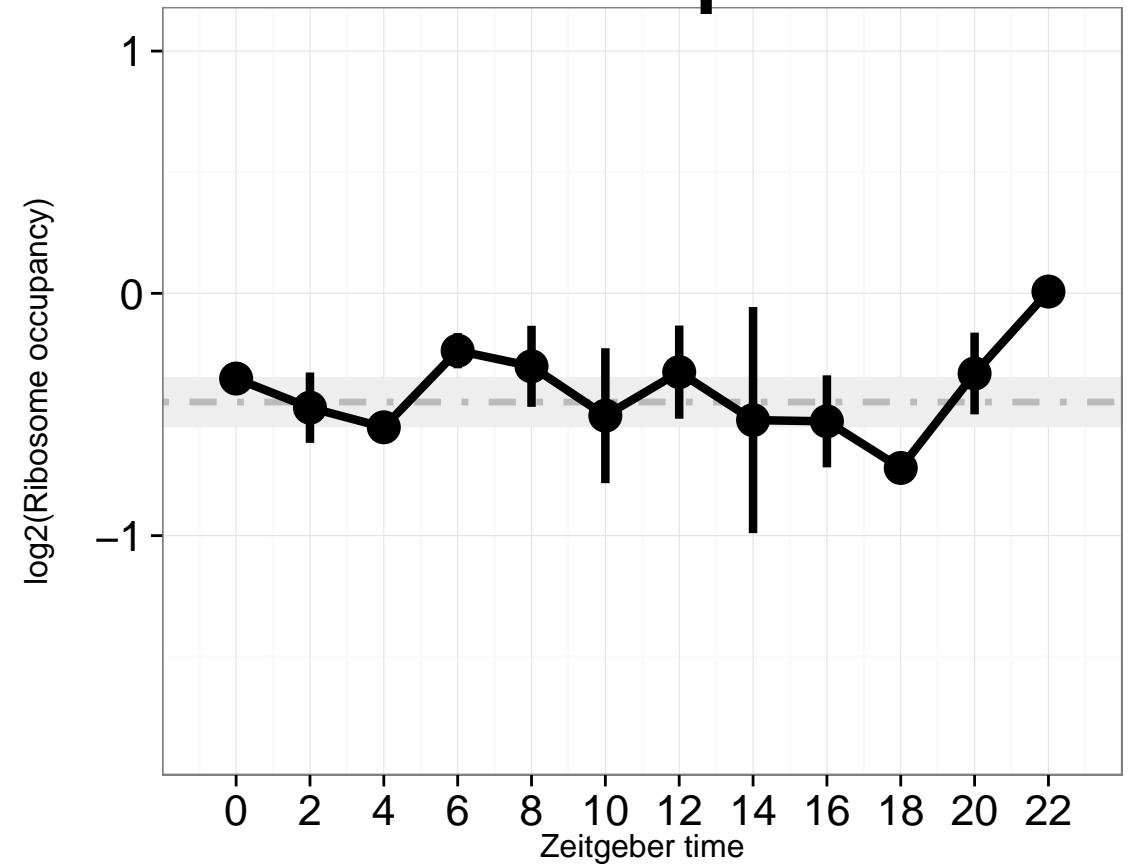

Supplement: SuppDataset_1.zip [file Gimap4_set_B.pdf › Supplemental Dataset 1/B-mRNA_rhythm_translation_nonrhyth/Gimap4_set_B.pdf]

## Gkap1

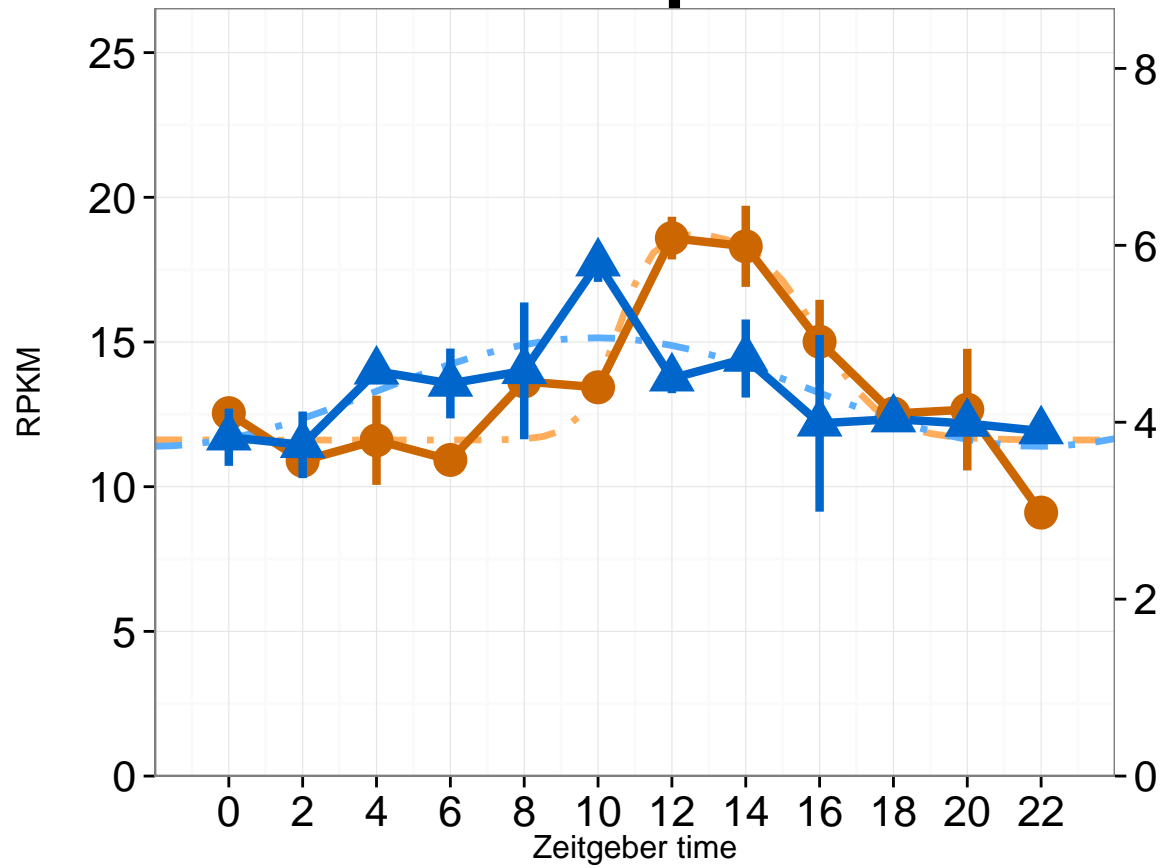

## Gkap1

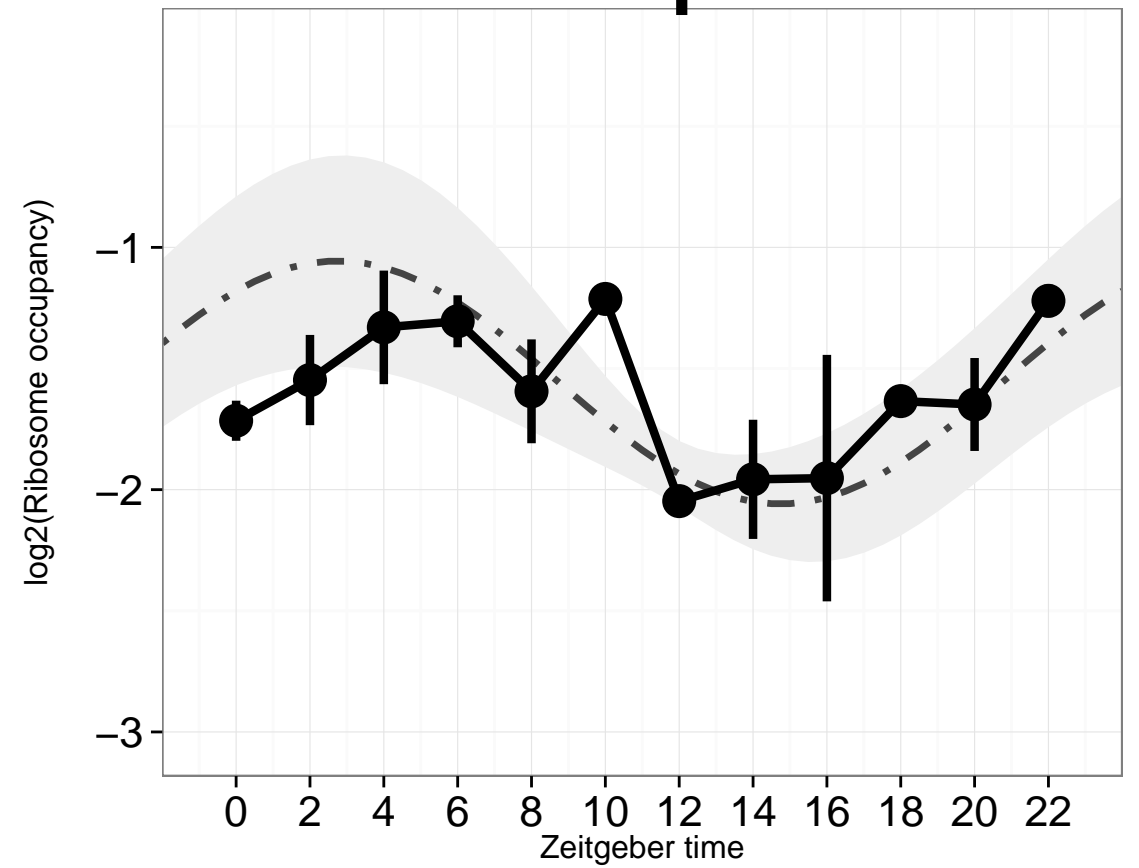

Supplement: SuppDataset_1.zip [file Gkap1_set_B.pdf › Supplemental Dataset 1/B-mRNA_rhythm_translation_nonrhyth/Gkap1_set_B.pdf]

## Gltpd1

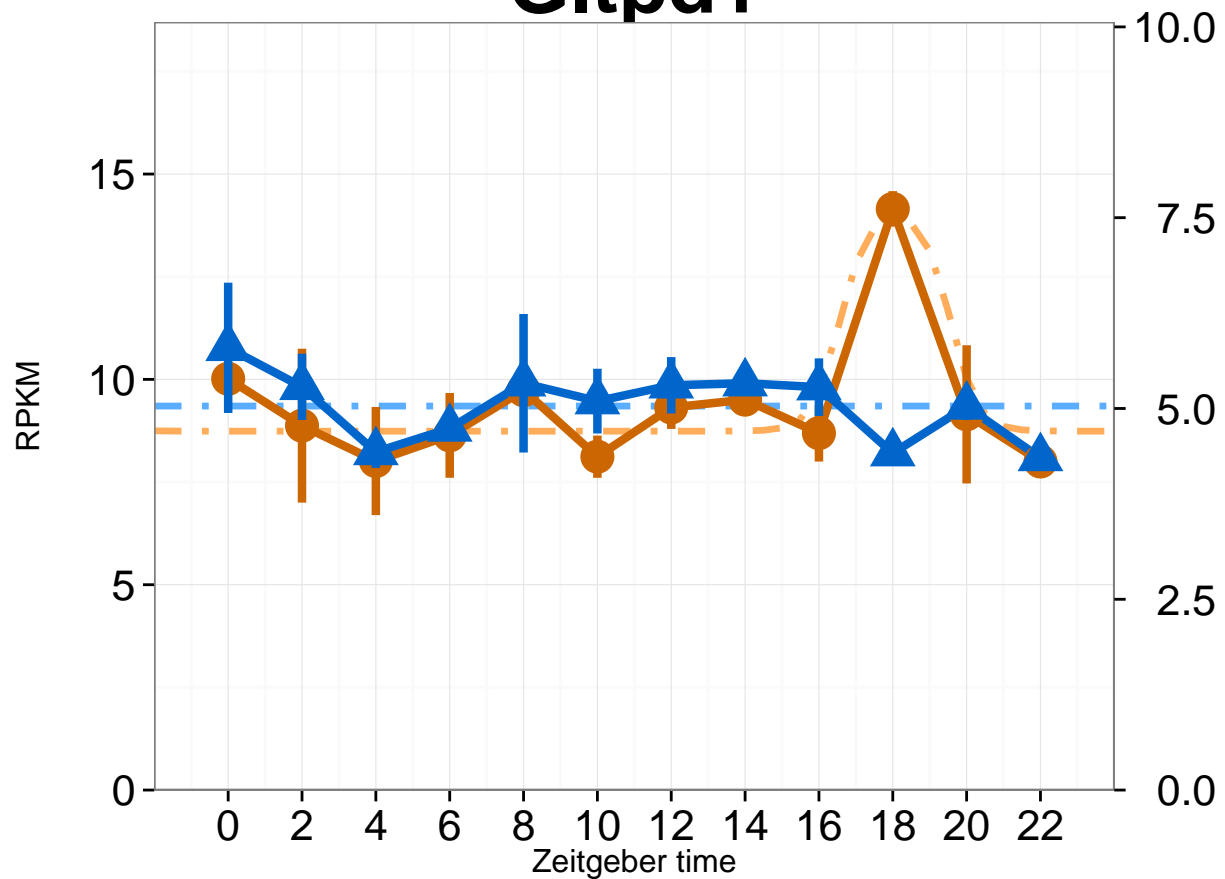

## Gltpd1

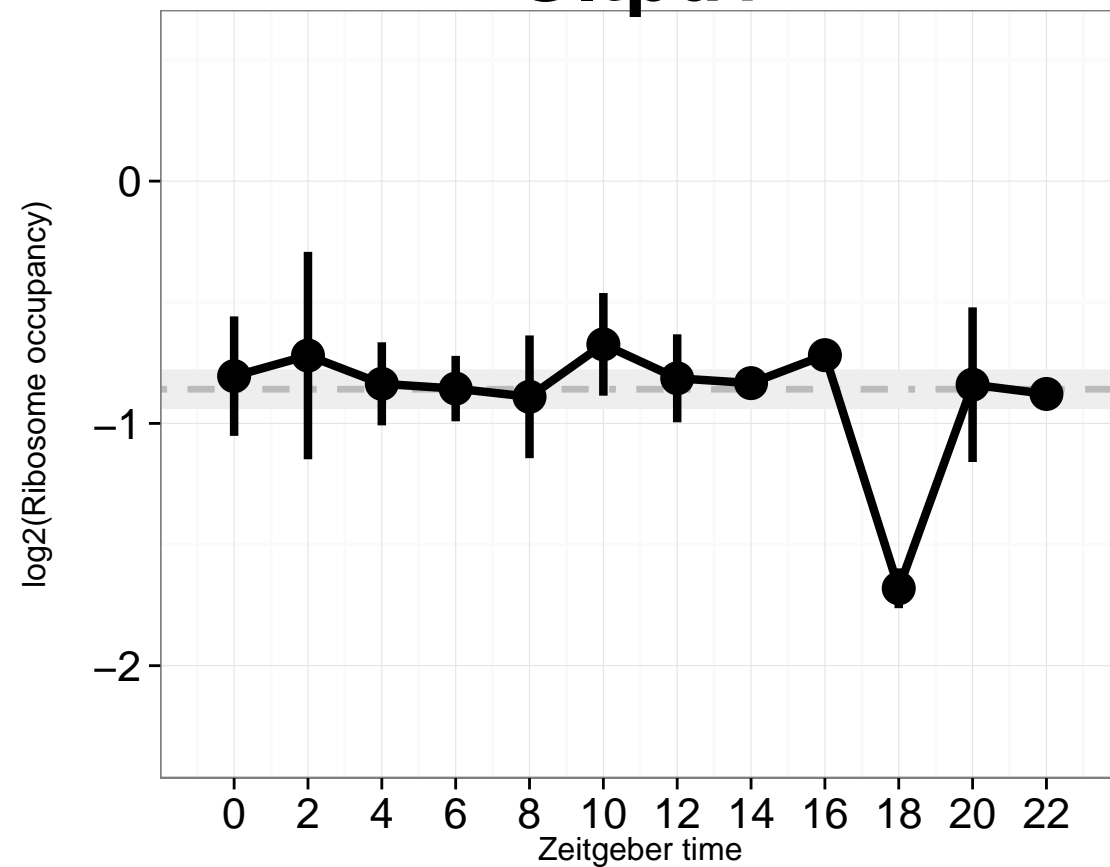

Supplement: SuppDataset_1.zip [file Gltpd1_set_B.pdf › Supplemental Dataset 1/B-mRNA_rhythm_translation_nonrhyth/Gltpd1_set_B.pdf]

## Gltscr2

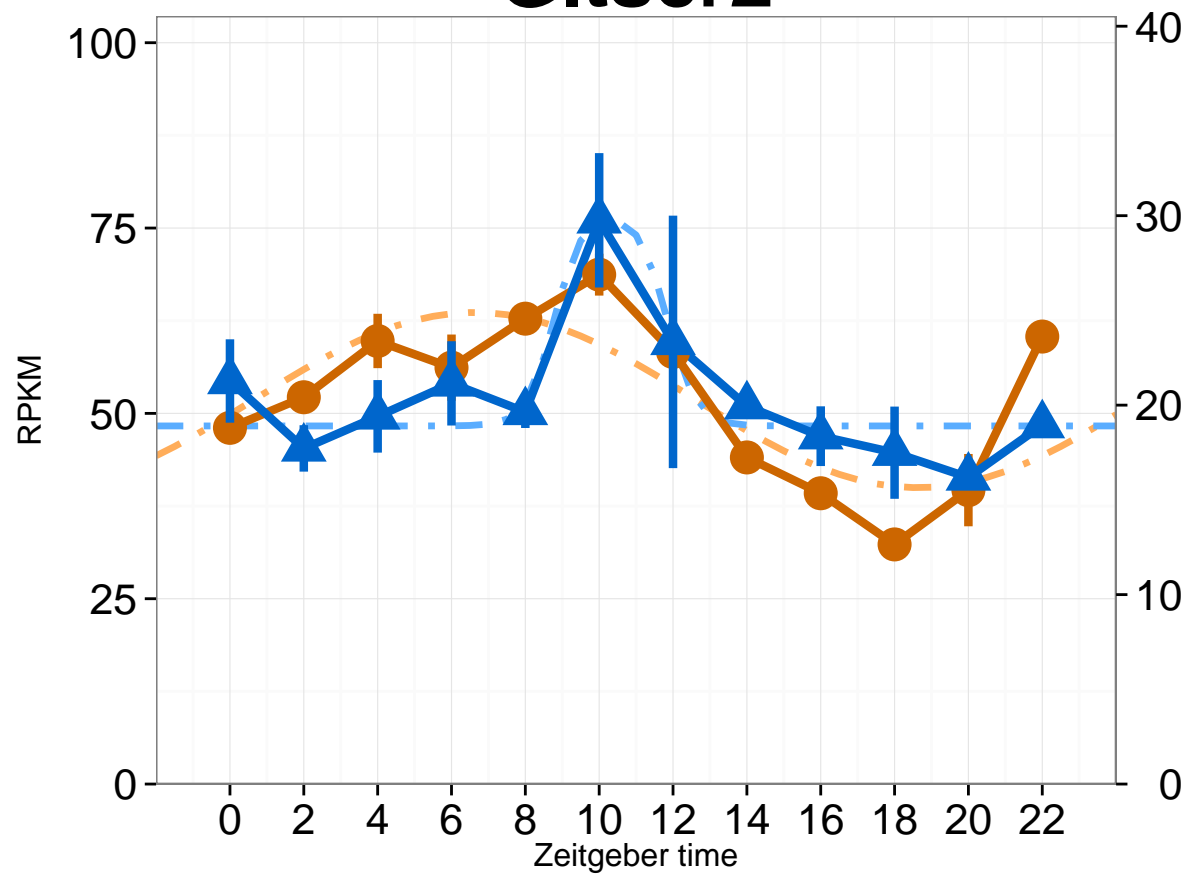

## Gltscr2

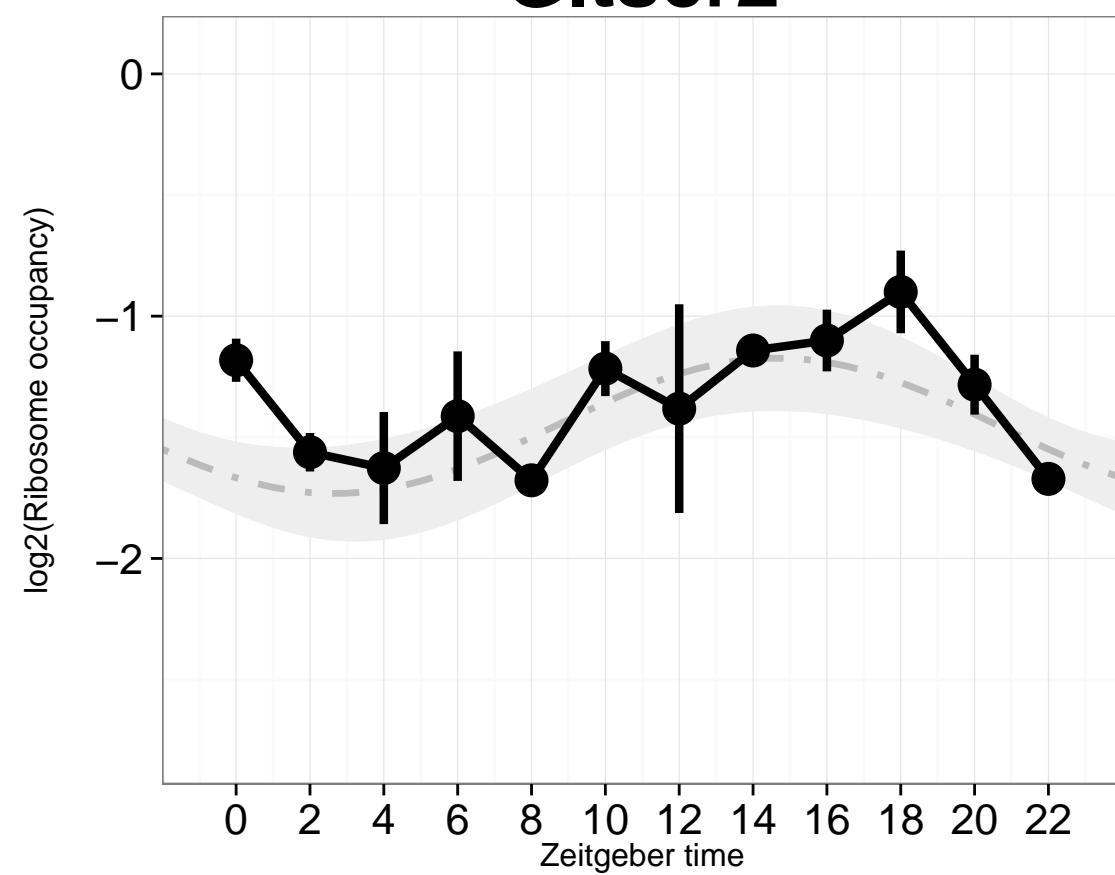

Supplement: SuppDataset_1.zip [file Gltscr2_set_B.pdf › Supplemental Dataset 1/B-mRNA_rhythm_translation_nonrhyth/Gltscr2_set_B.pdf]

## Gm10447

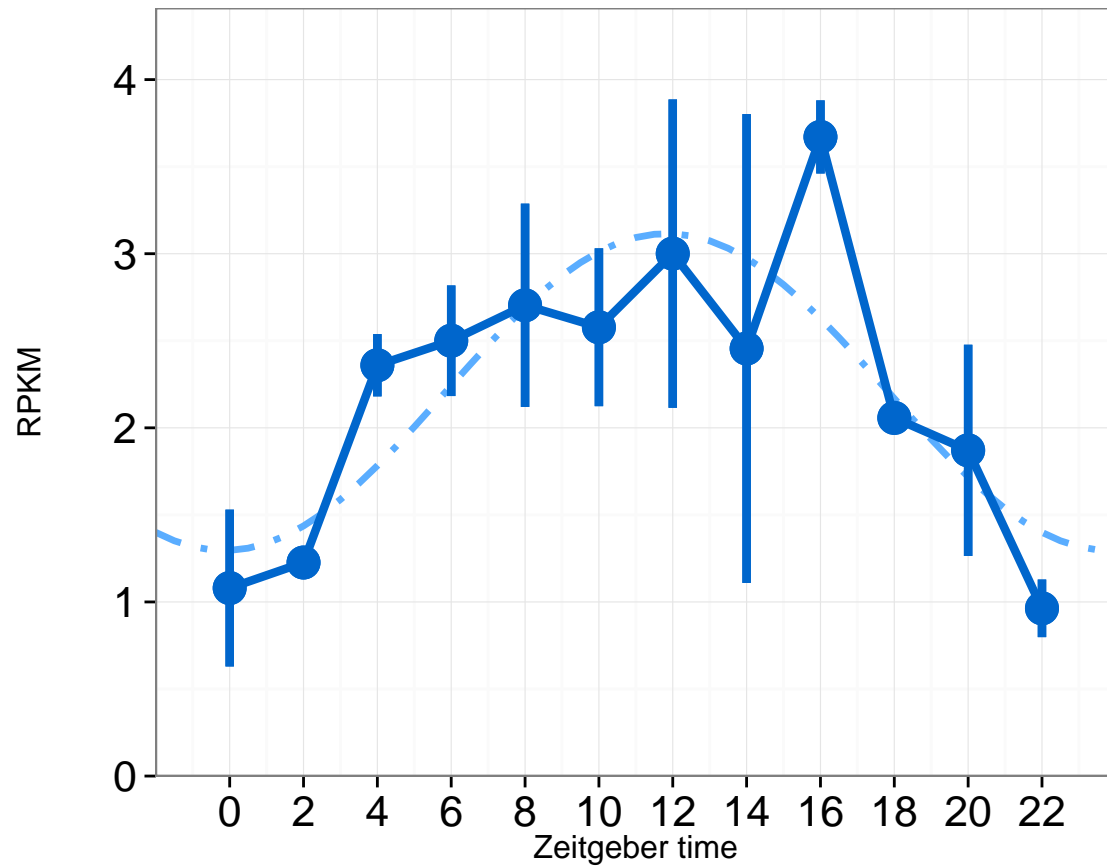

## Gm10447 log2(Ribosome occupancy)

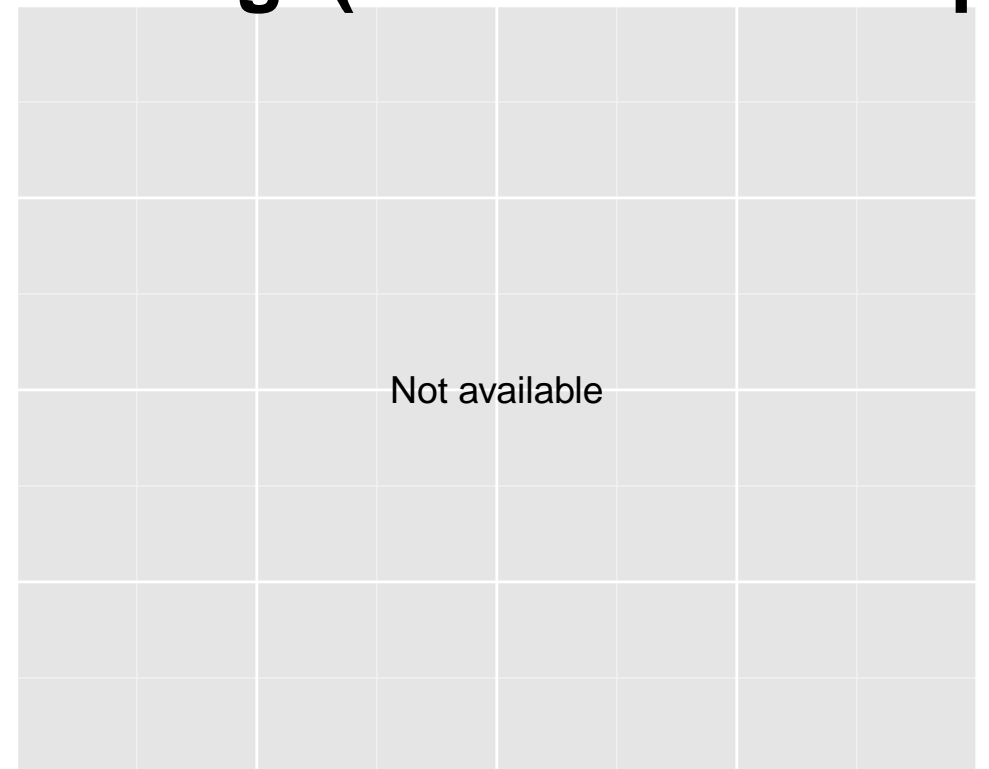

Supplement: SuppDataset_1.zip [file Gm10447_set_B.pdf › Supplemental Dataset 1/B-mRNA_rhythm_translation_nonrhyth/Gm10447_set_B.pdf]

## Gm10563

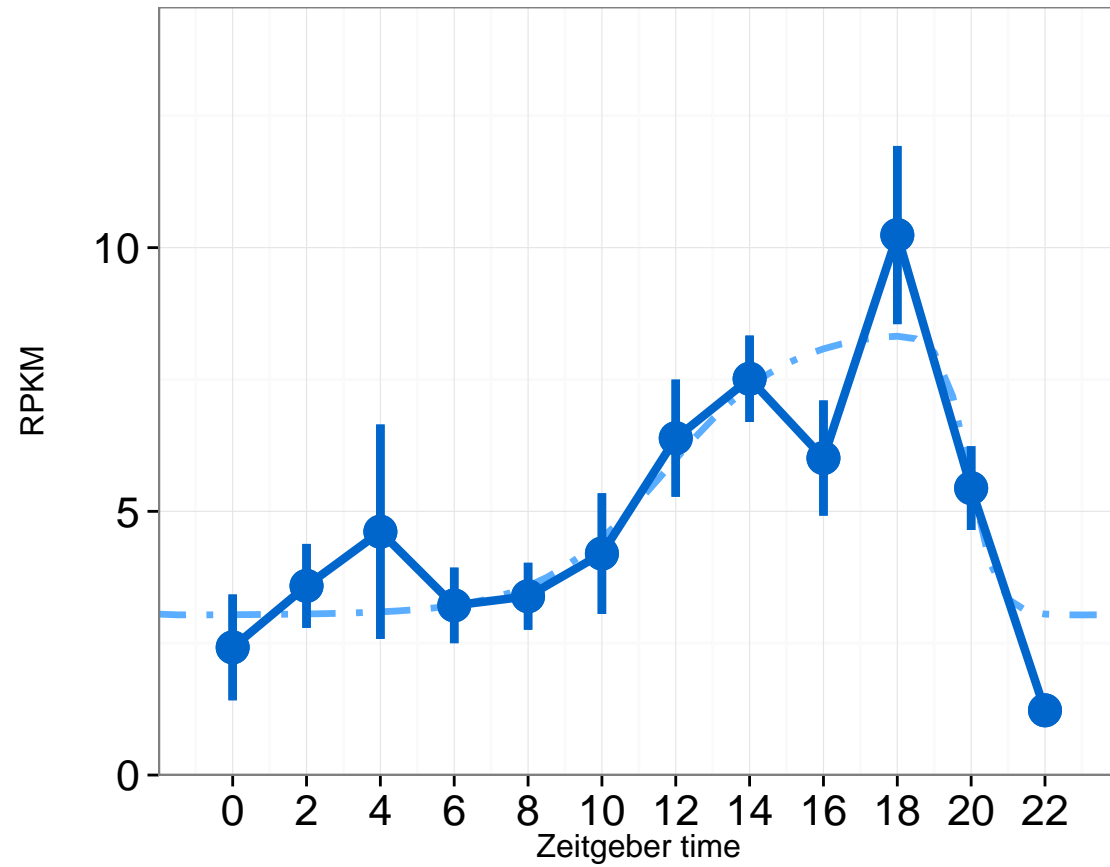

## Gm10563 log2(Ribosome occupanc

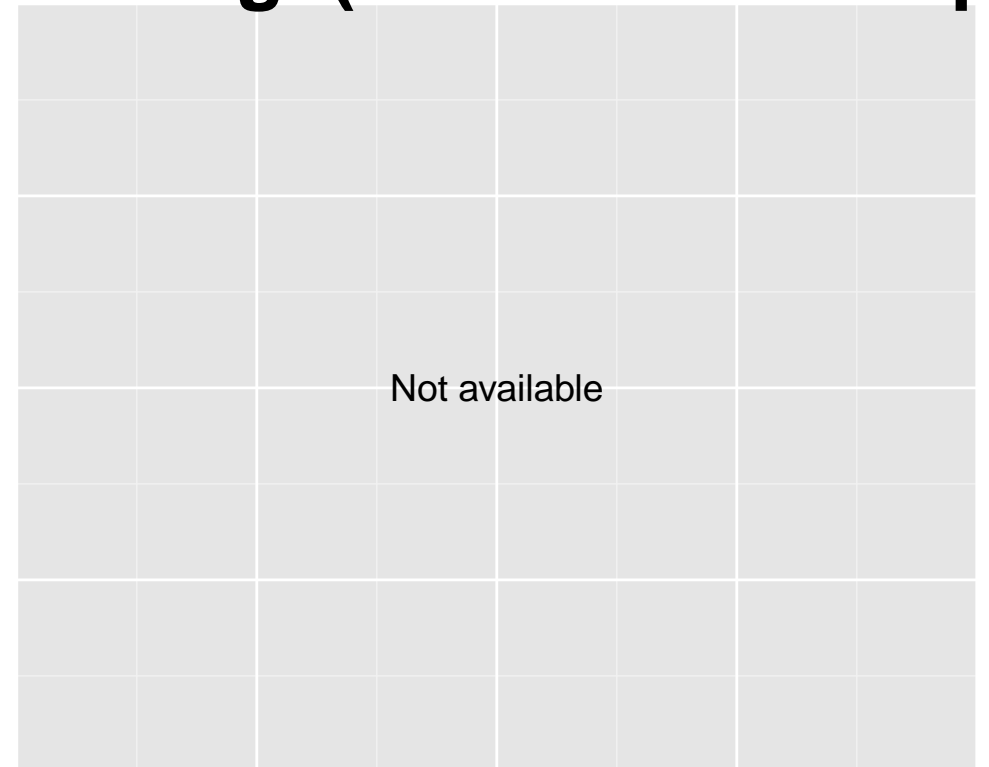

Supplement: SuppDataset_1.zip [file Gm10563_set_B.pdf › Supplemental Dataset 1/B-mRNA_rhythm_translation_nonrhyth/Gm10563_set_B.pdf]

# Gm10768

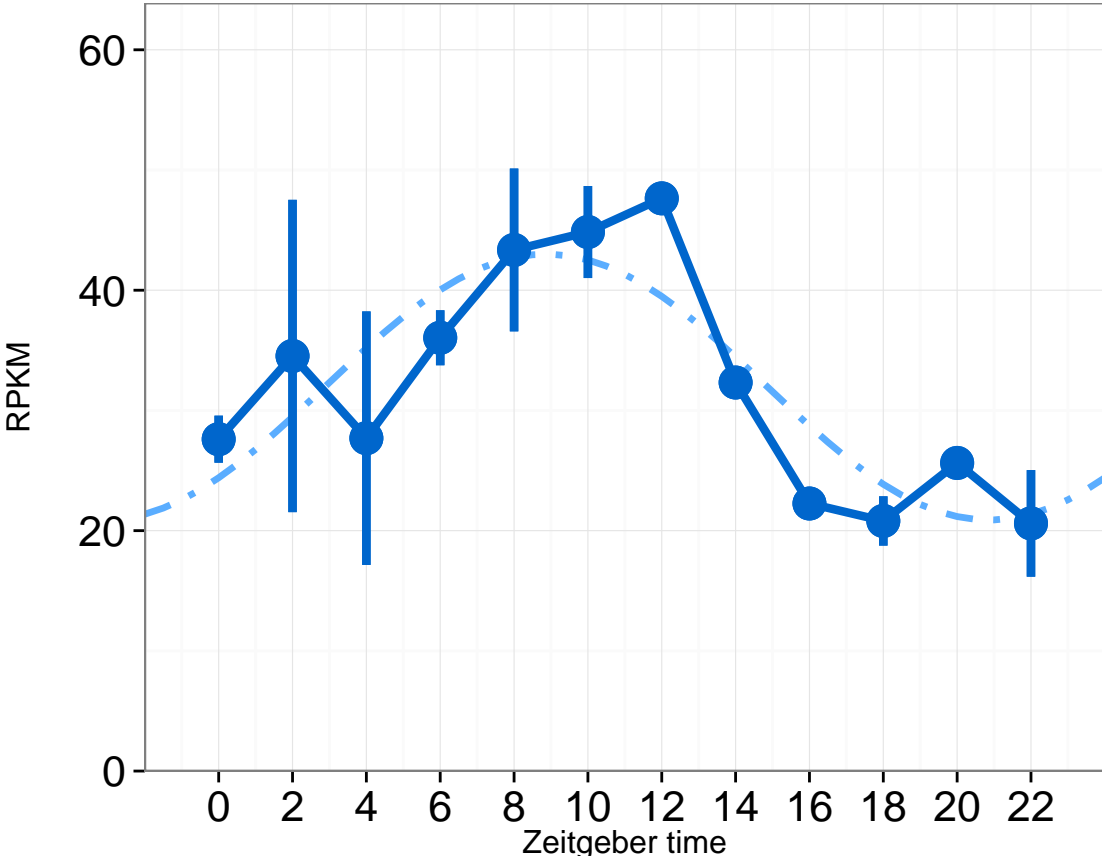

# Gm10768 log2(Ribosome occupancy)

Supplement: SuppDataset_1.zip [file Gm10768_set_B.pdf › Supplemental Dataset 1/B-mRNA_rhythm_translation_nonrhyth/Gm10768_set_B.pdf]

## Gm11032

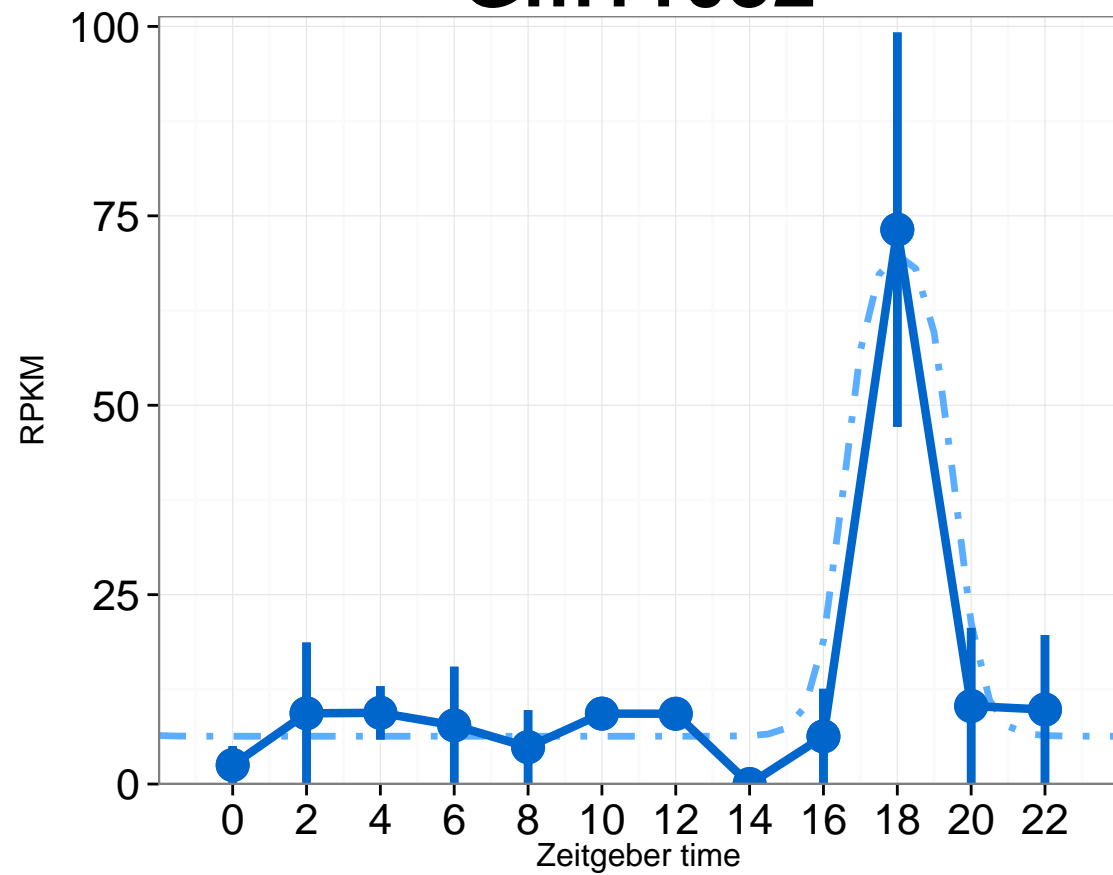

## Gm11032 log<sub>2</sub>(Ribosome occupancy)

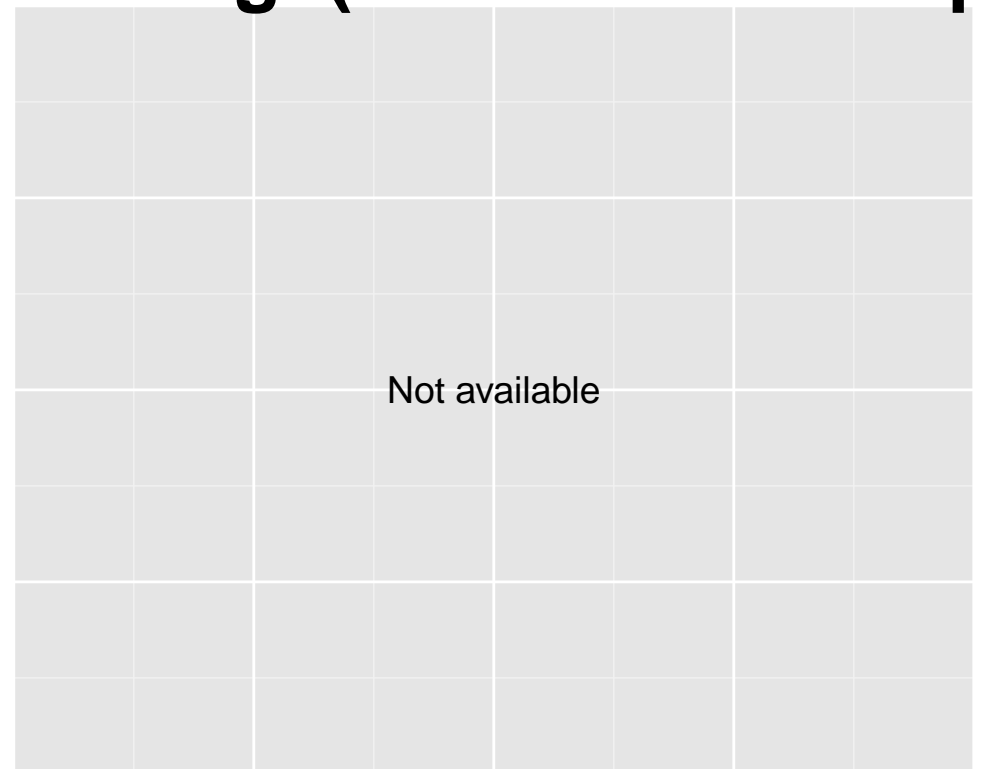

Supplement: SuppDataset_1.zip [file Gm11032_set_B.pdf › Supplemental Dataset 1/B-mRNA_rhythm_translation_nonrhyth/Gm11032_set_B.pdf]

## Gm17333

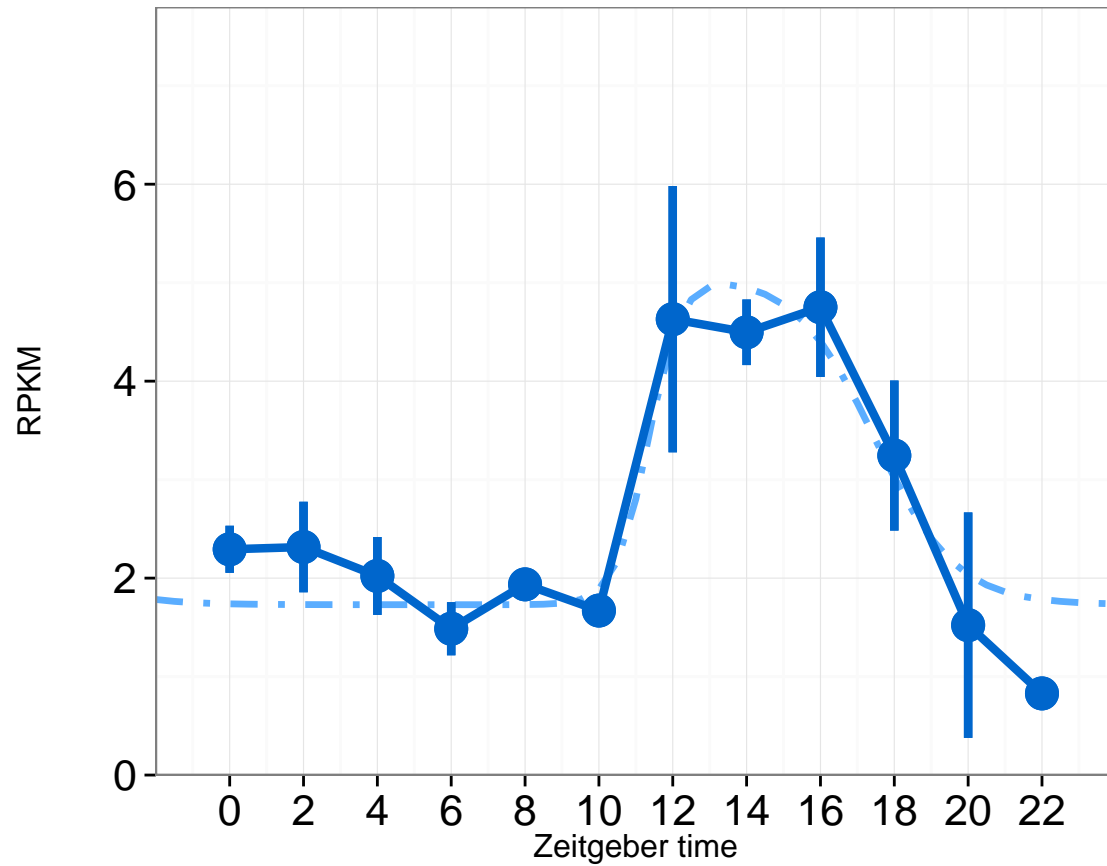

## Gm17333 log2(Ribosome occupanc



Supplement: SuppDataset_1.zip [file Gm17333_set_B.pdf › Supplemental Dataset 1/B-mRNA_rhythm_translation_nonrhyth/Gm17333_set_B.pdf]

## Gm17374

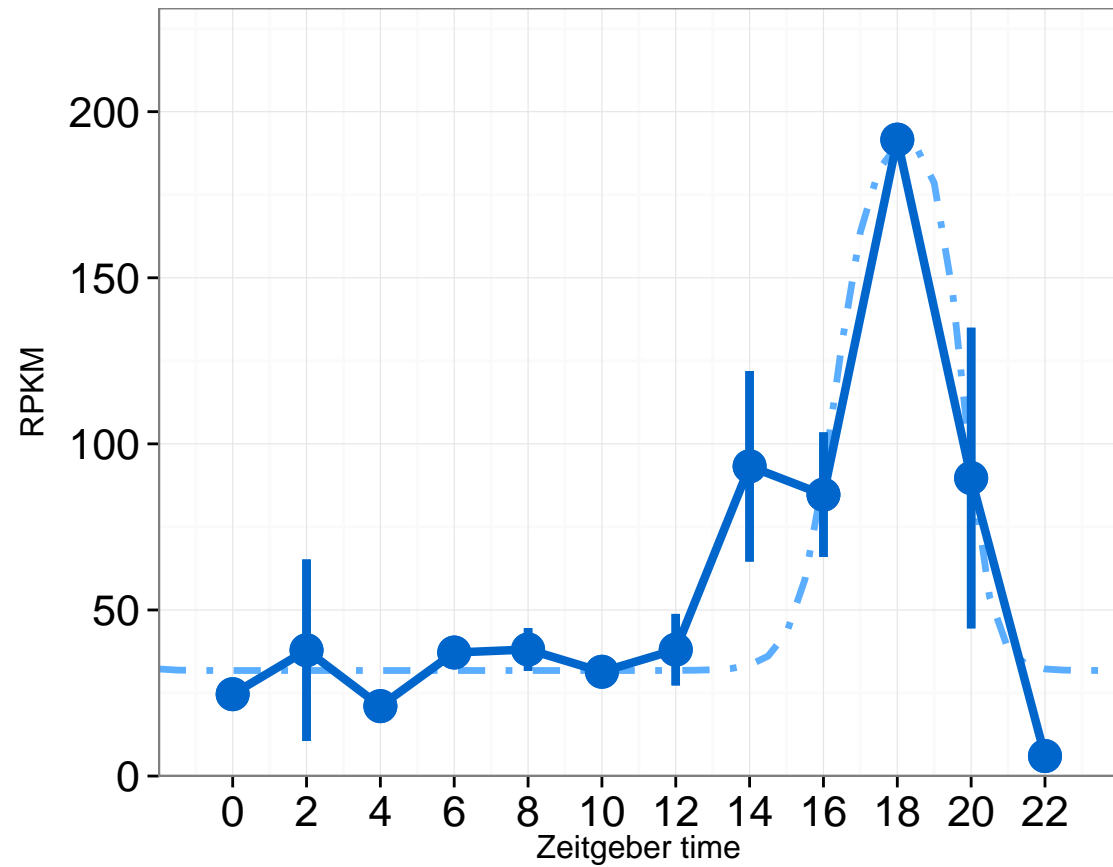

## Gm17374 log2(Ribosome occupanc

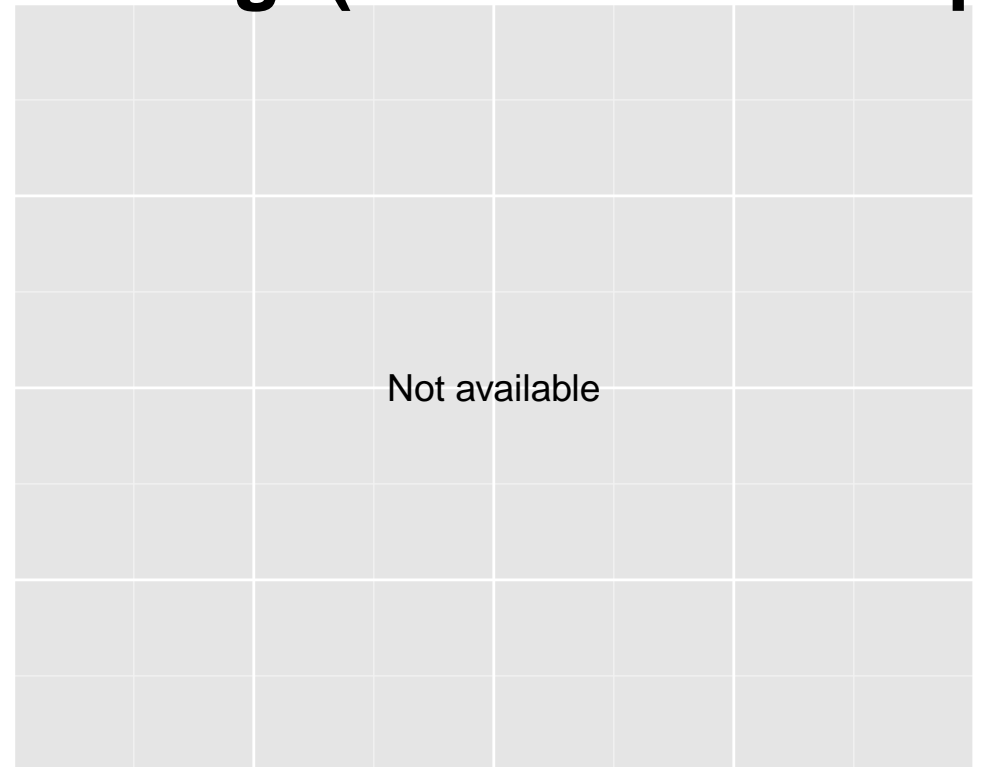

Supplement: SuppDataset_1.zip [file Gm17374_set_B.pdf › Supplemental Dataset 1/B-mRNA_rhythm_translation_nonrhyth/Gm17374_set_B.pdf]

# Gm17545

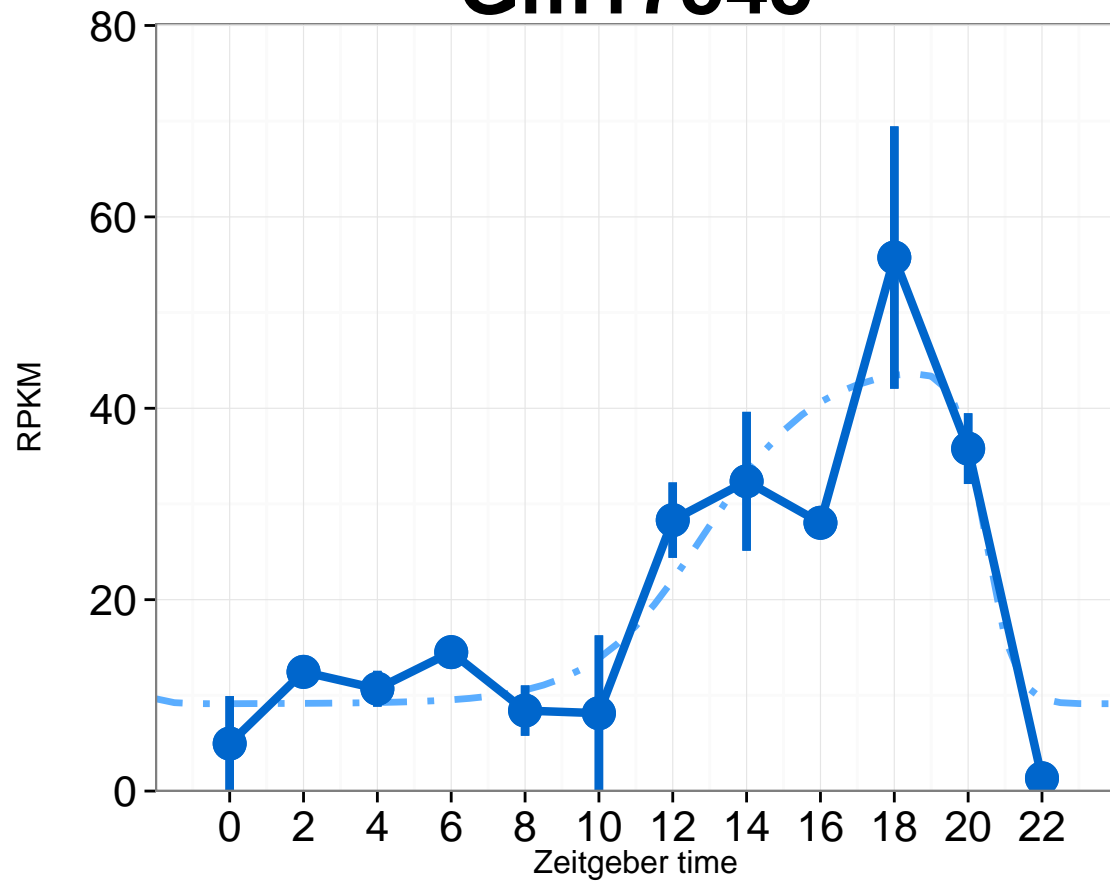

# Gm17545 log2(Ribosome occupancy)

Supplement: SuppDataset_1.zip [file Gm17545_set_B.pdf › Supplemental Dataset 1/B-mRNA_rhythm_translation_nonrhyth/Gm17545_set_B.pdf]

# Gm20594

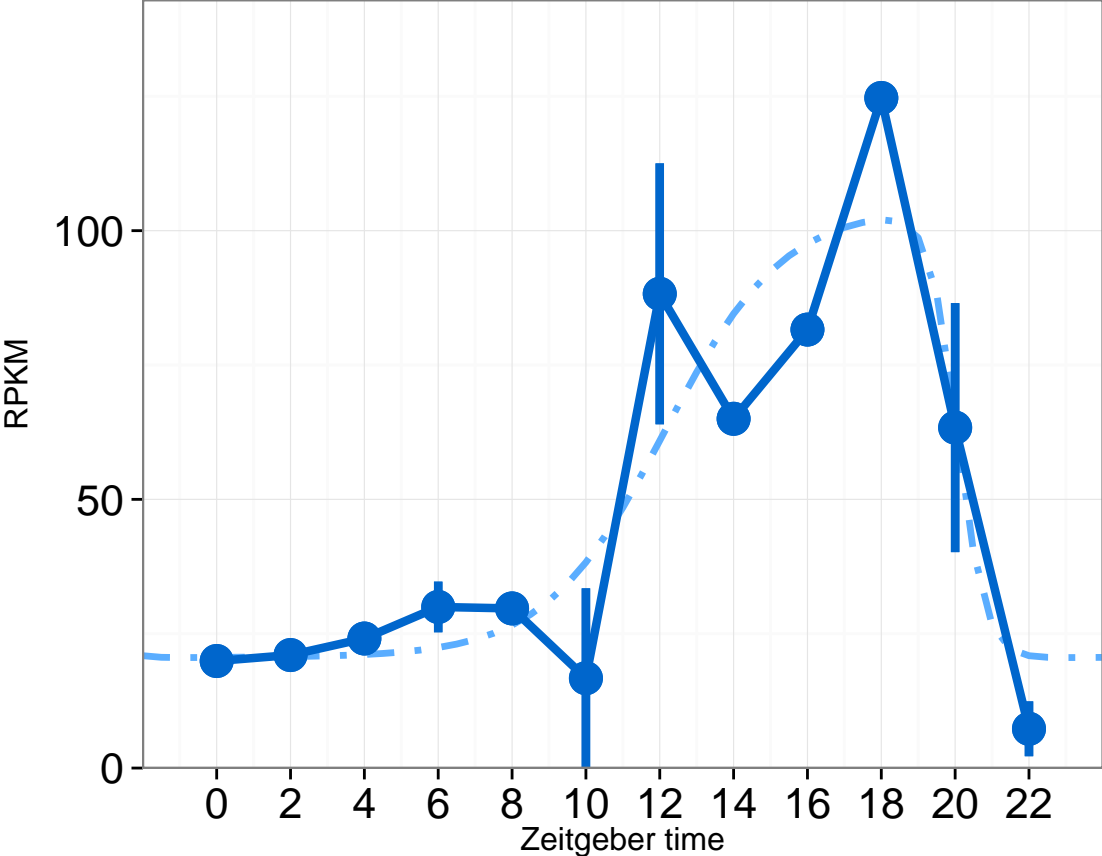

# Gm20594 log2(Ribosome occupanc

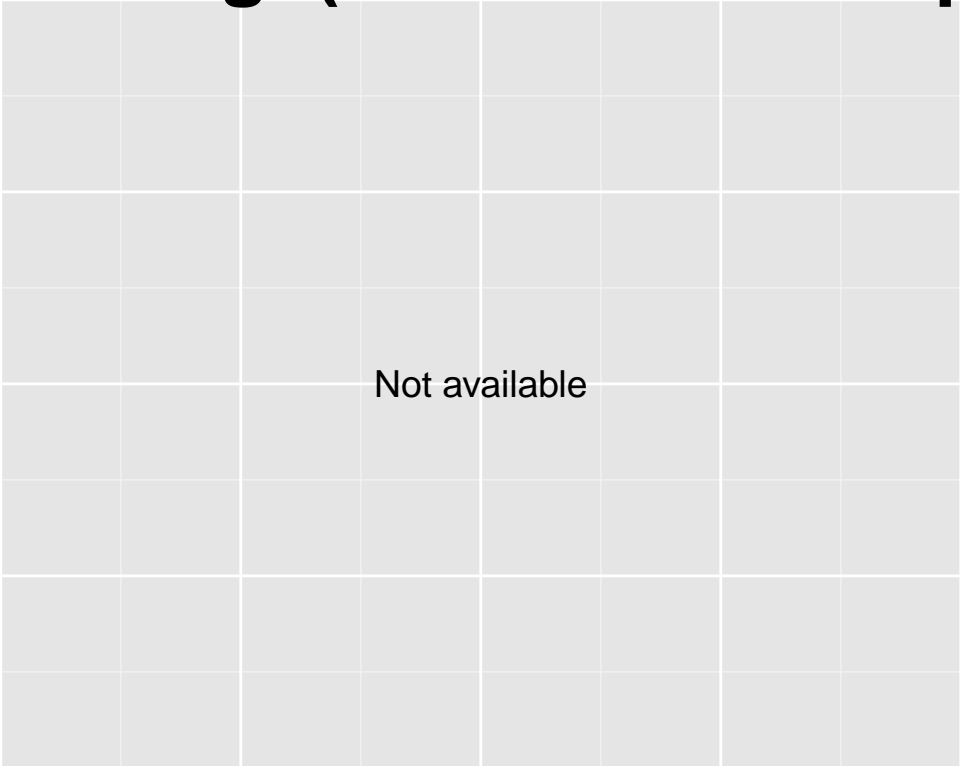

Supplement: SuppDataset_1.zip [file Gm20594_set_B.pdf › Supplemental Dataset 1/B-mRNA_rhythm_translation_nonrhyth/Gm20594_set_B.pdf]

## Gm7292

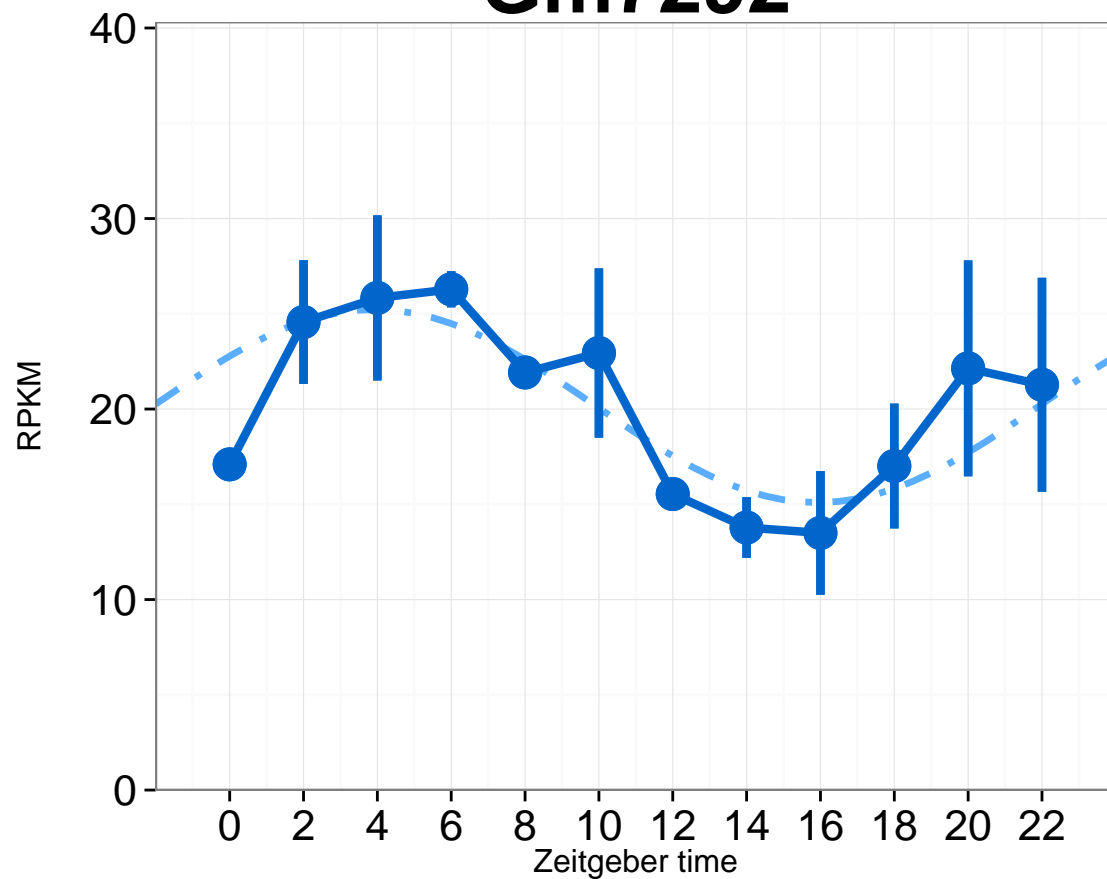

## Gm7292 log2(Ribosome occupanc

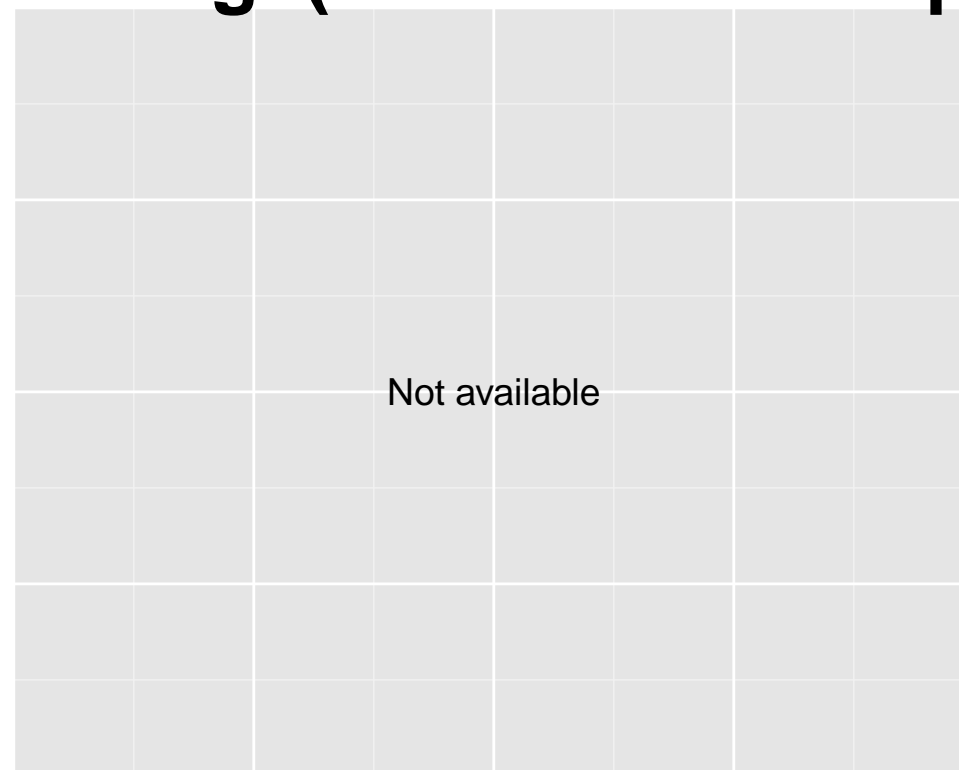

Supplement: SuppDataset_1.zip [file Gm7292_set_B.pdf › Supplemental Dataset 1/B-mRNA_rhythm_translation_nonrhyth/Gm7292_set_B.pdf]

# Gm9992

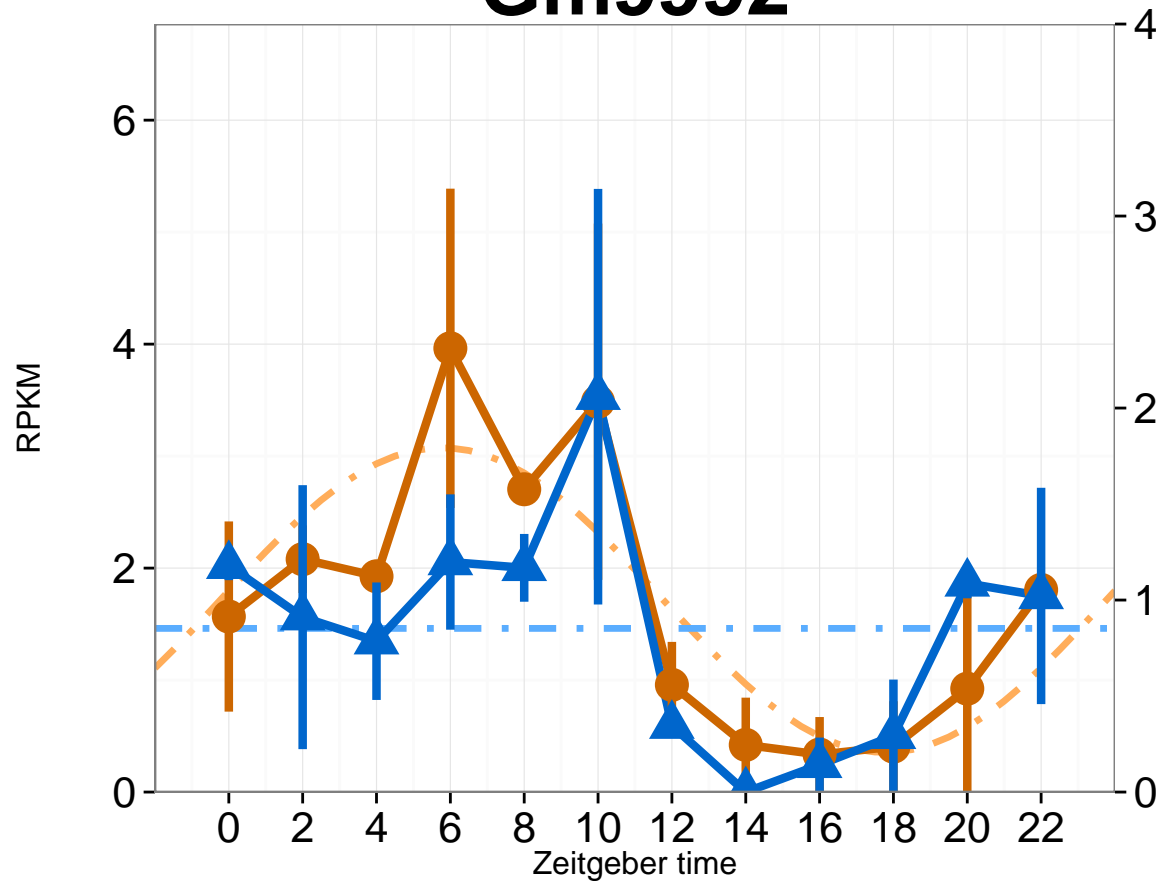

# Gm9992

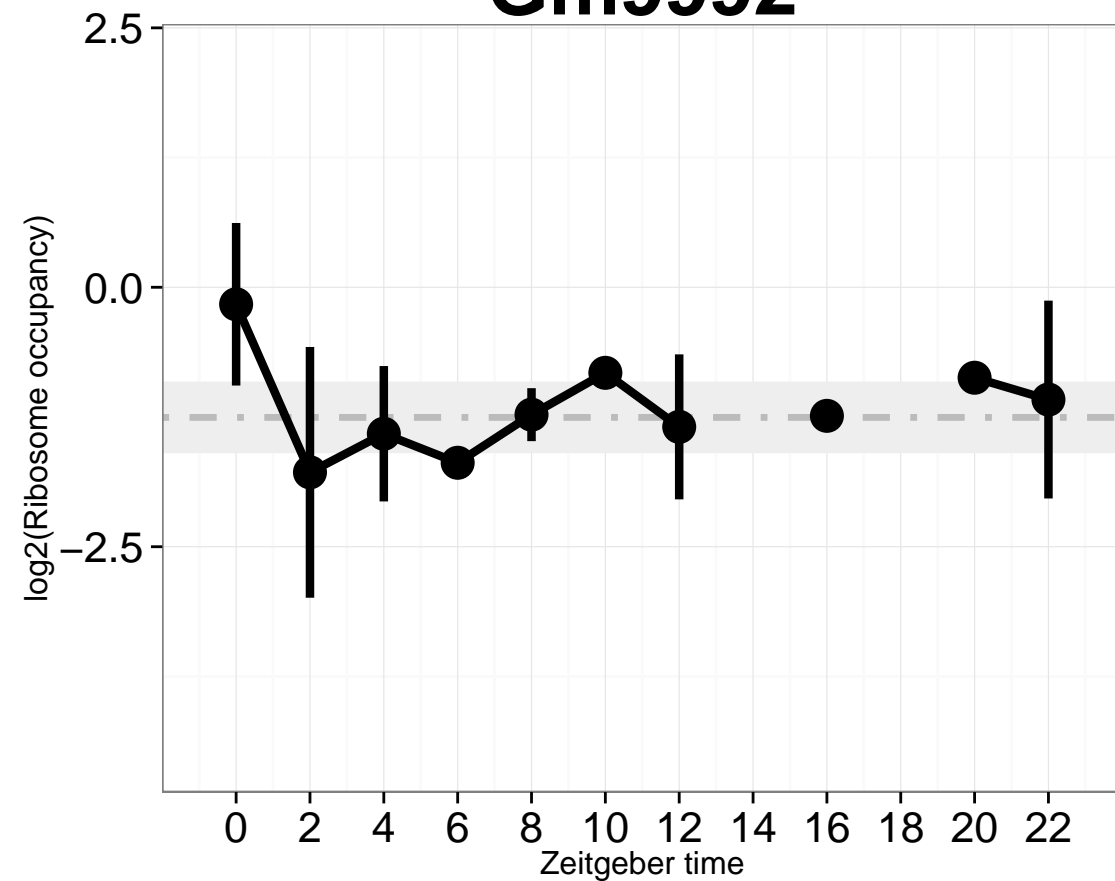

Supplement: SuppDataset_1.zip [file Gm9992_set_B.pdf › Supplemental Dataset 1/B-mRNA_rhythm_translation_nonrhyth/Gm9992_set_B.pdf]

## GmDs

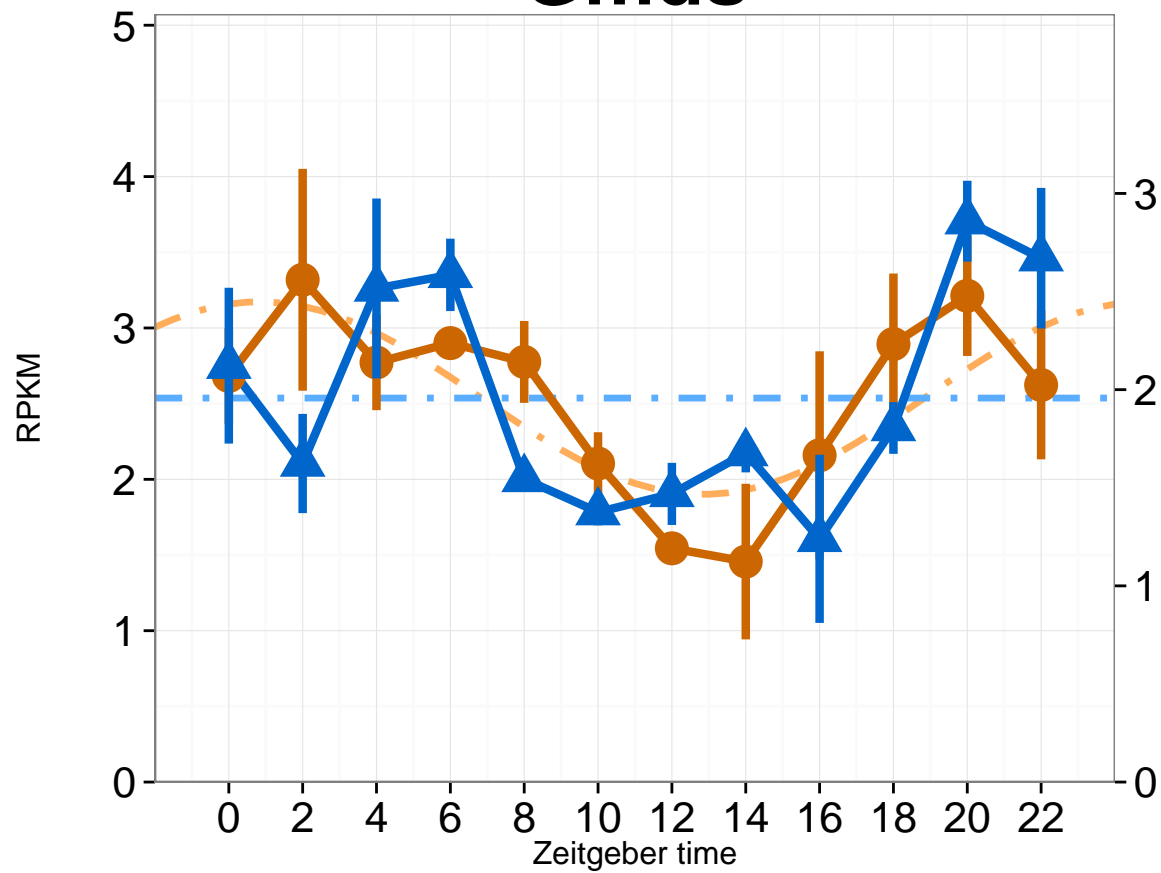

## GmDs

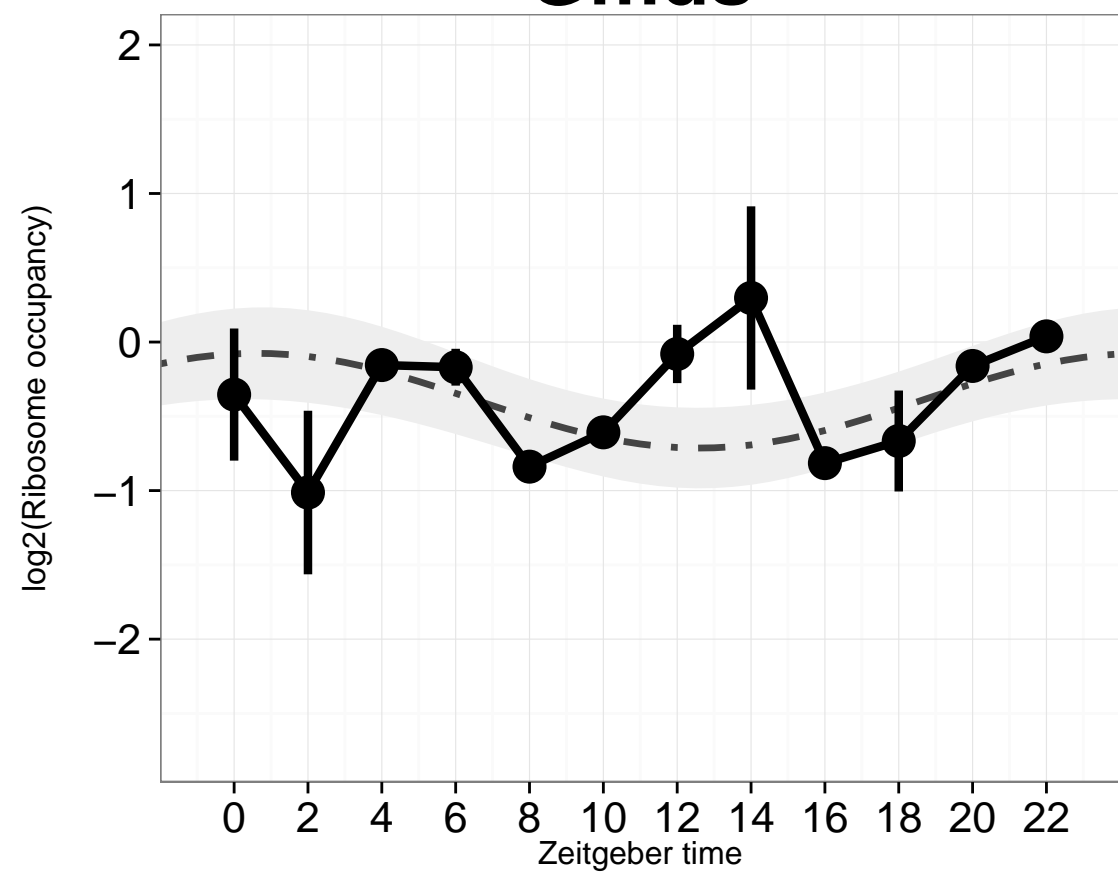

Supplement: SuppDataset_1.zip [file Gmds_set_B.pdf › Supplemental Dataset 1/B-mRNA_rhythm_translation_nonrhyth/Gmds_set_B.pdf]

# Gmpr

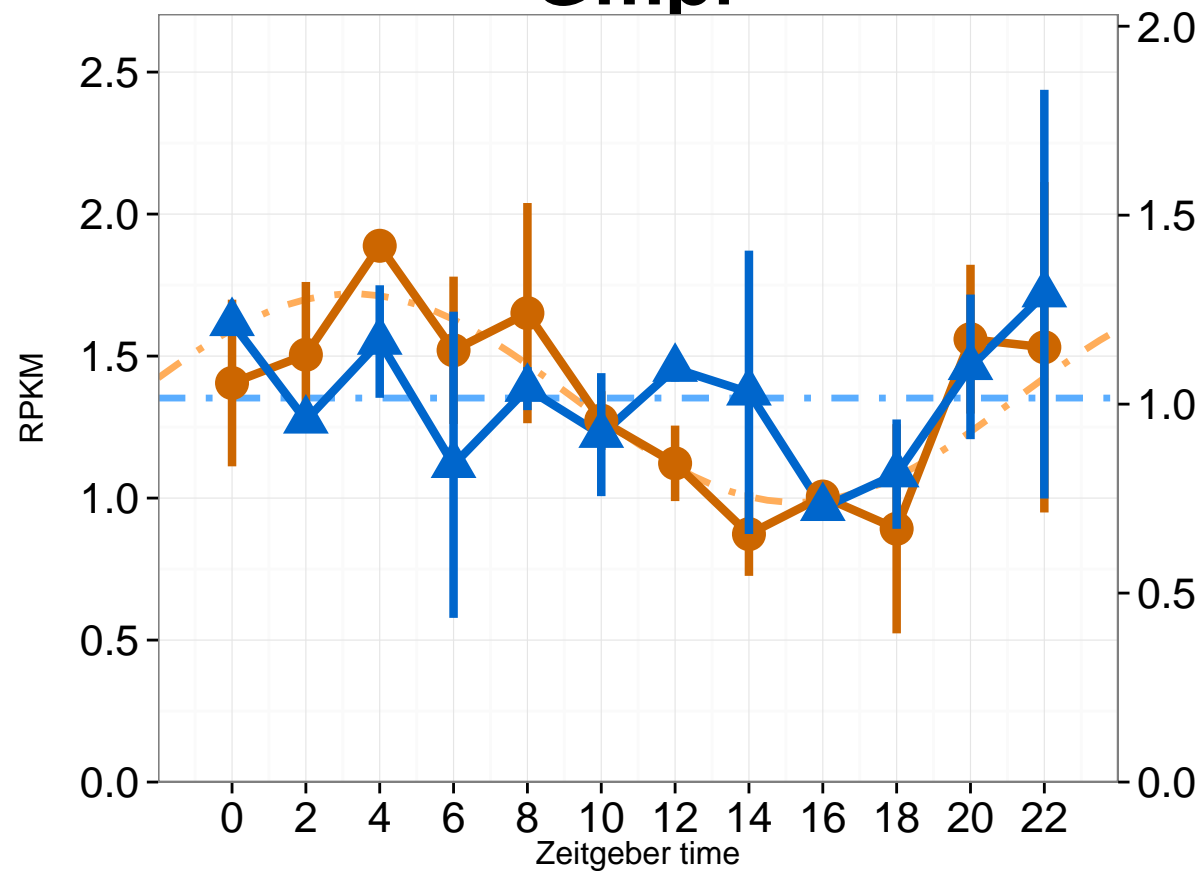

# Gmpr

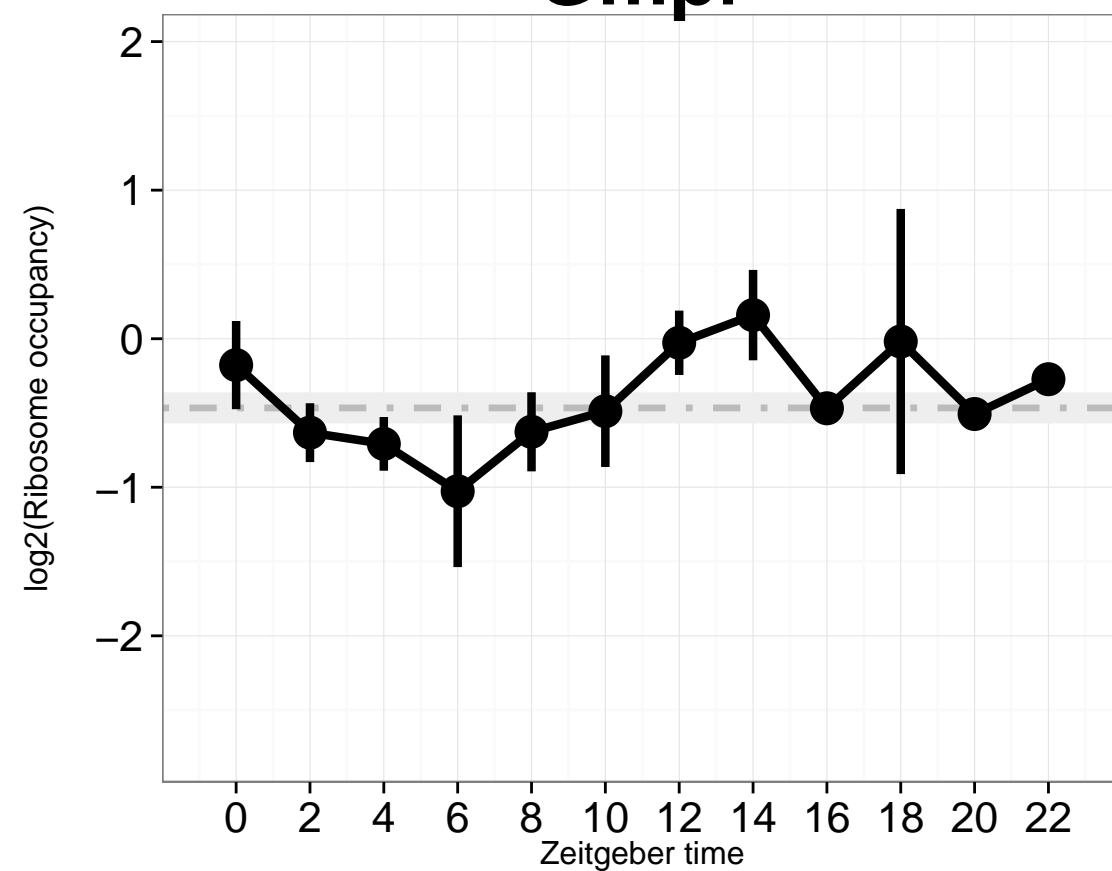

Supplement: SuppDataset_1.zip [file Gmpr_set_B.pdf › Supplemental Dataset 1/B-mRNA_rhythm_translation_nonrhyth/Gmpr_set_B.pdf]
