# Supplementary figures and images for: Ribosome profiling reveals the rhythmic liver translatome and circadian clock regulation by upstream open reading frames (part 23 of 113)
Source: HighWire-hosted journal article supplement (doi:10.1101/gr.195404.115), 2015-10-20

# Drg1

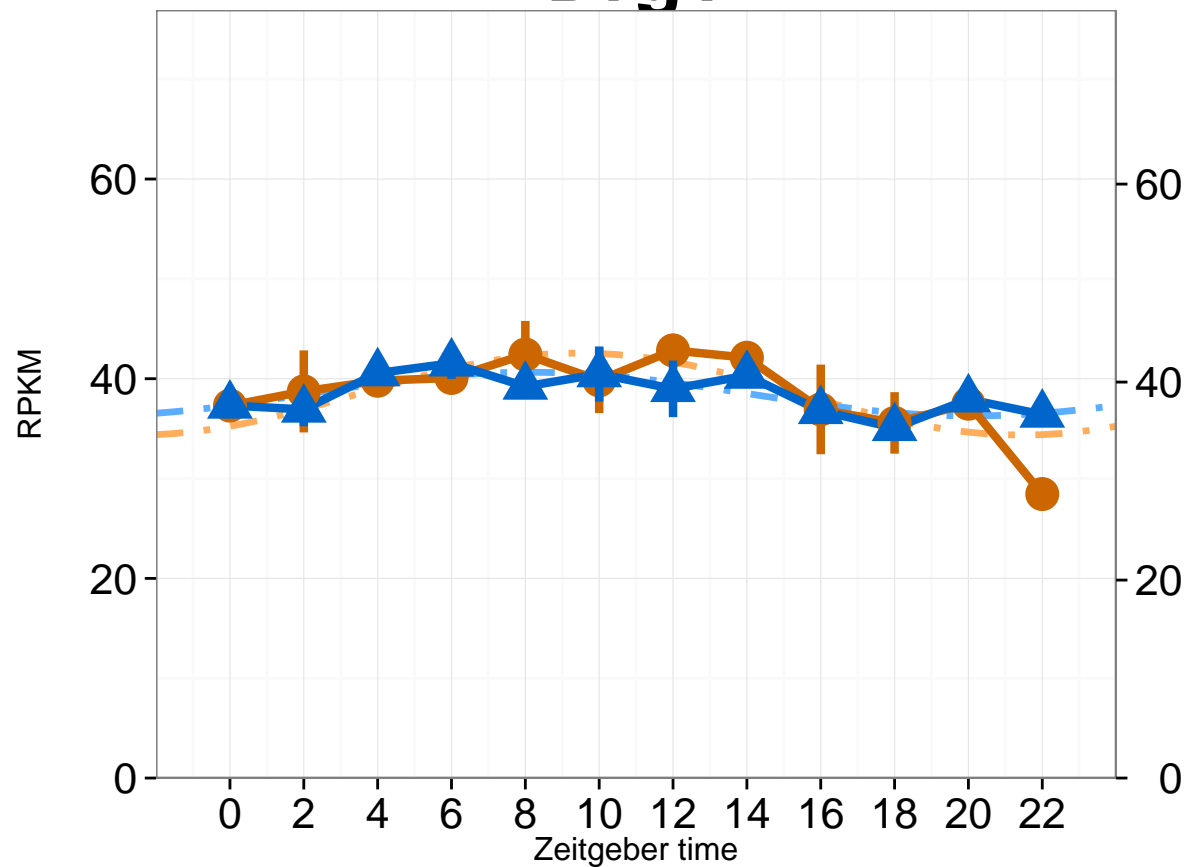

# Drg1

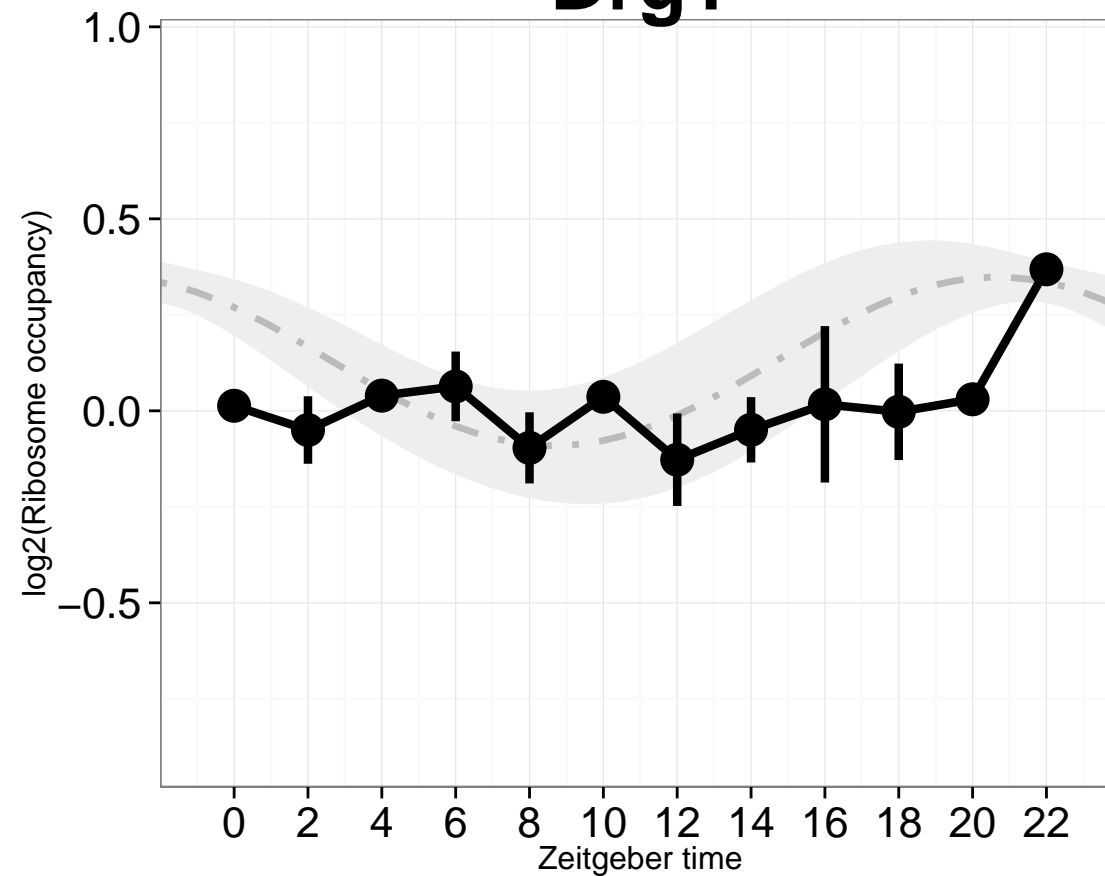

Supplement: SuppDataset_1.zip [file Drg1_set_A.pdf › Supplemental Dataset 1/A-mRNA_nonrhyth_translation_nonrhyth/Drg1_set_A.pdf]

# Drg2

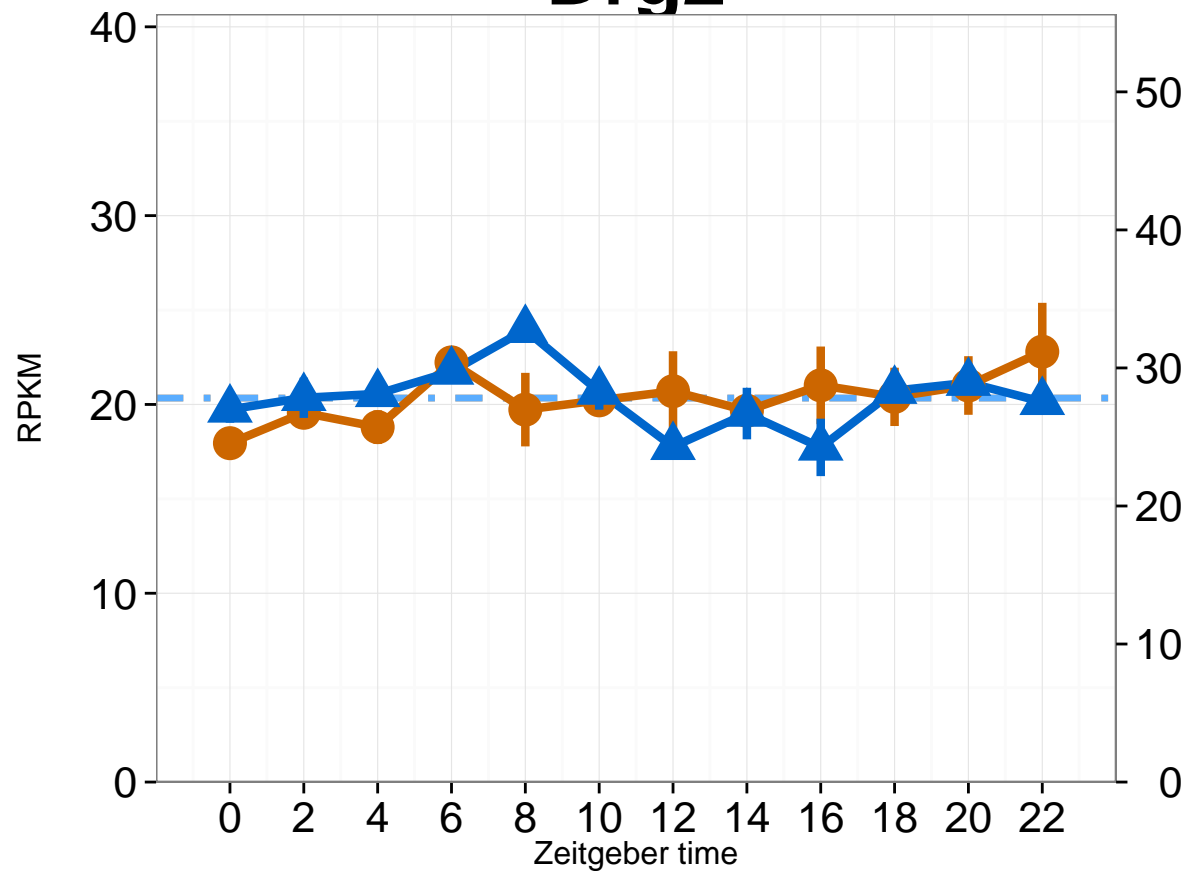

# Drg2

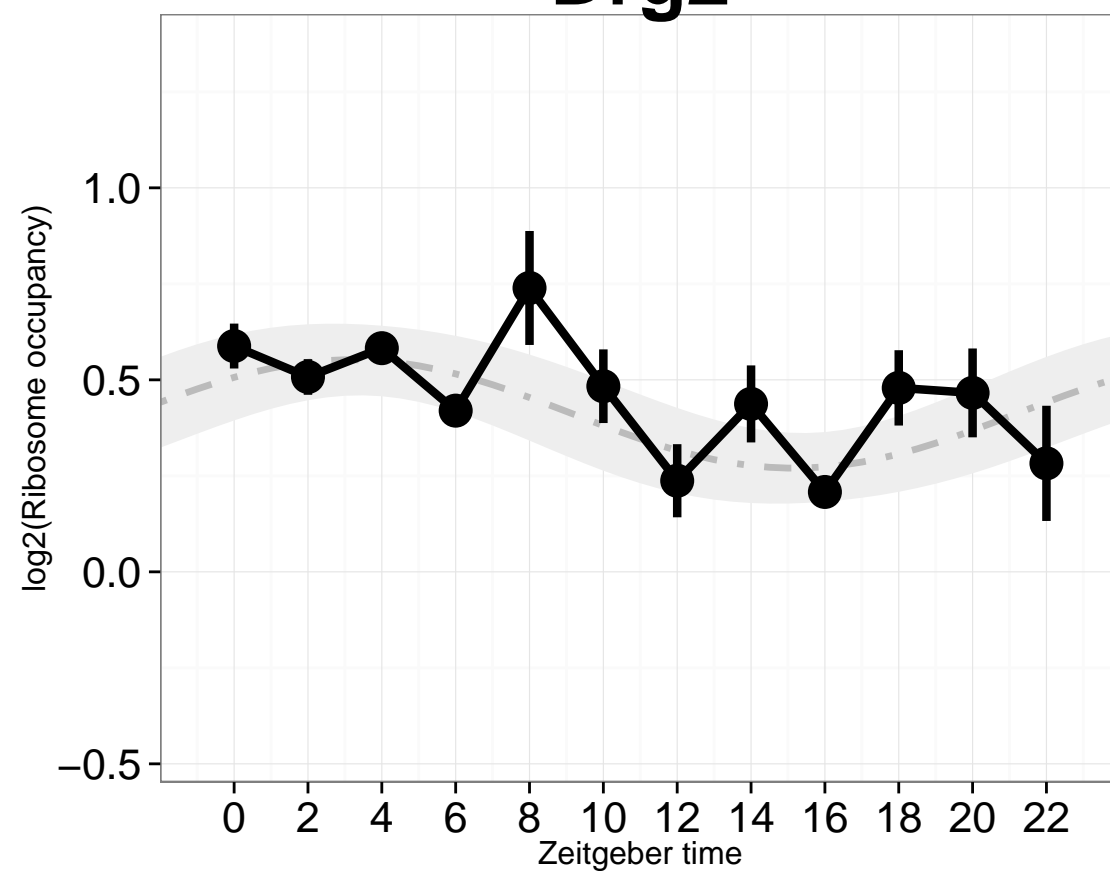

Supplement: SuppDataset_1.zip [file Drg2_set_A.pdf › Supplemental Dataset 1/A-mRNA_nonrhyth_translation_nonrhyth/Drg2_set_A.pdf]

## Drosha

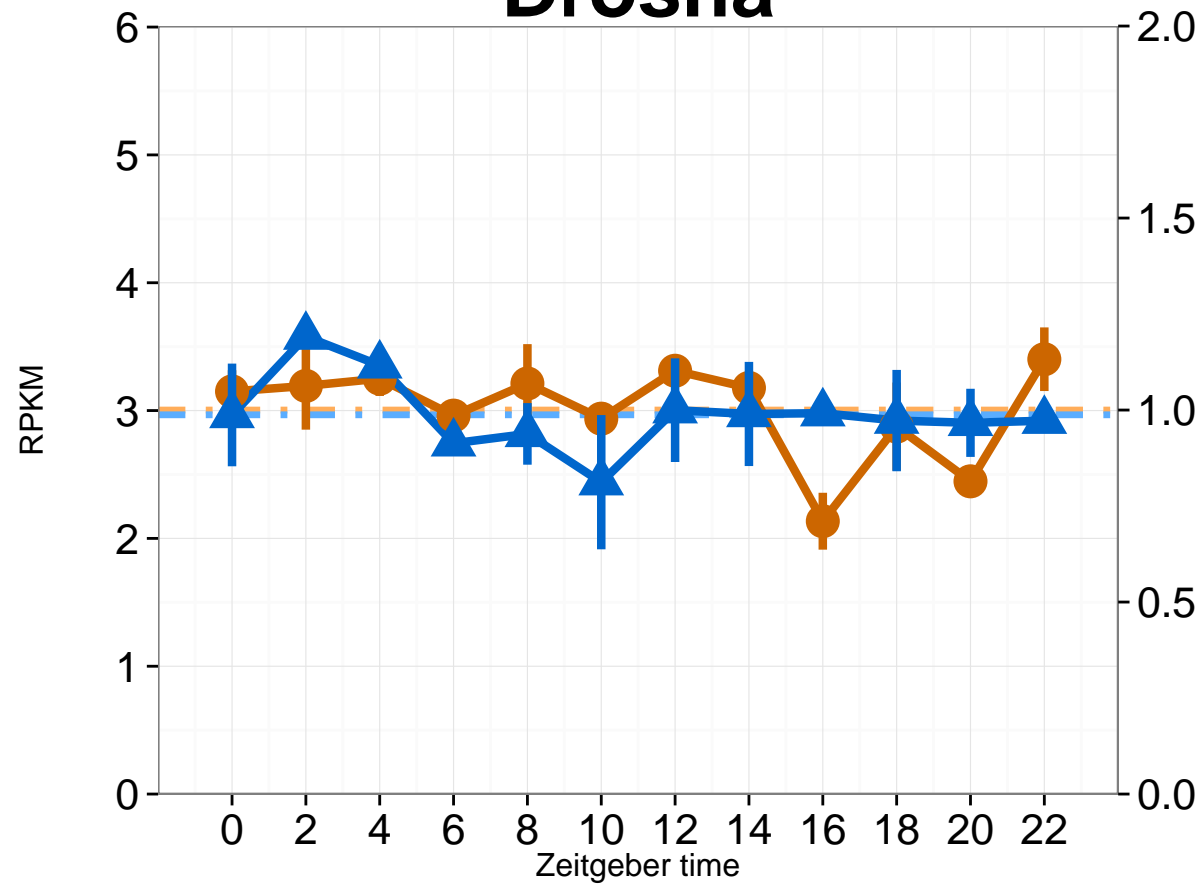

## Drosha

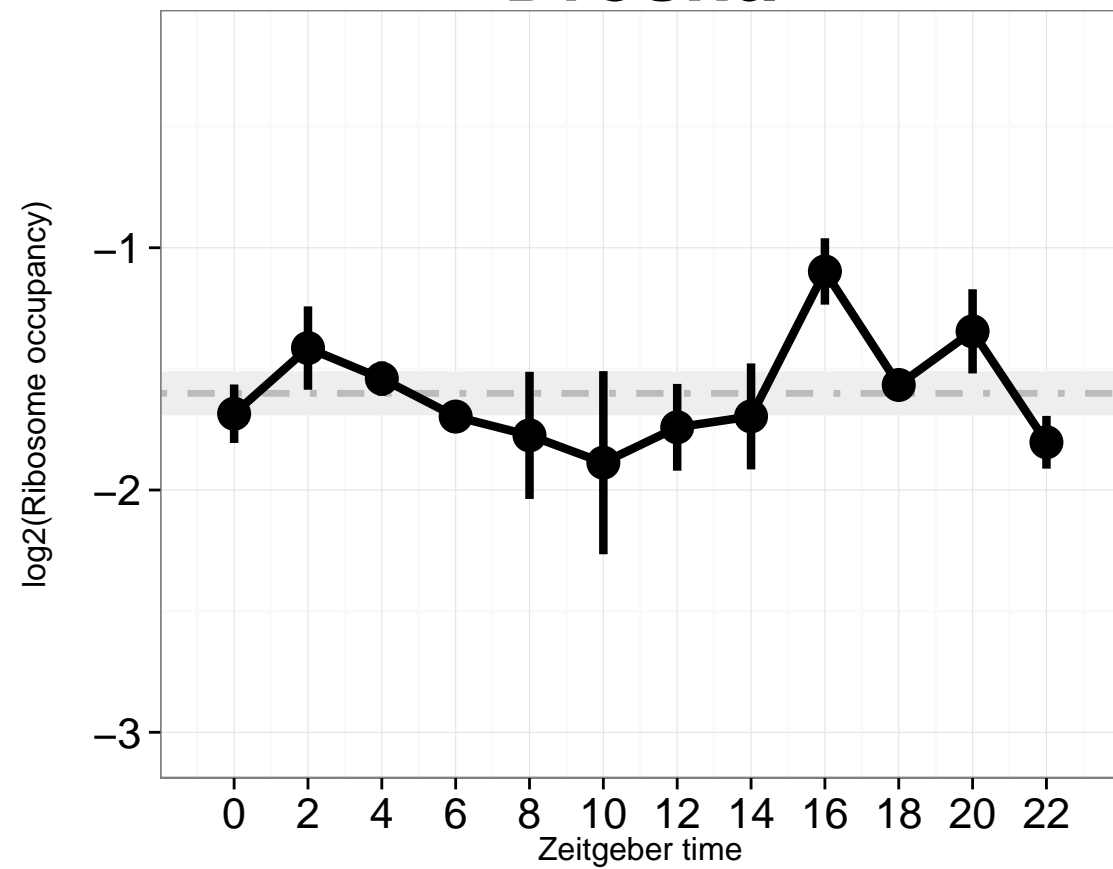

Supplement: SuppDataset_1.zip [file Drosha_set_A.pdf › Supplemental Dataset 1/A-mRNA_nonrhyth_translation_nonrhyth/Drosha_set_A.pdf]

## Dsc2

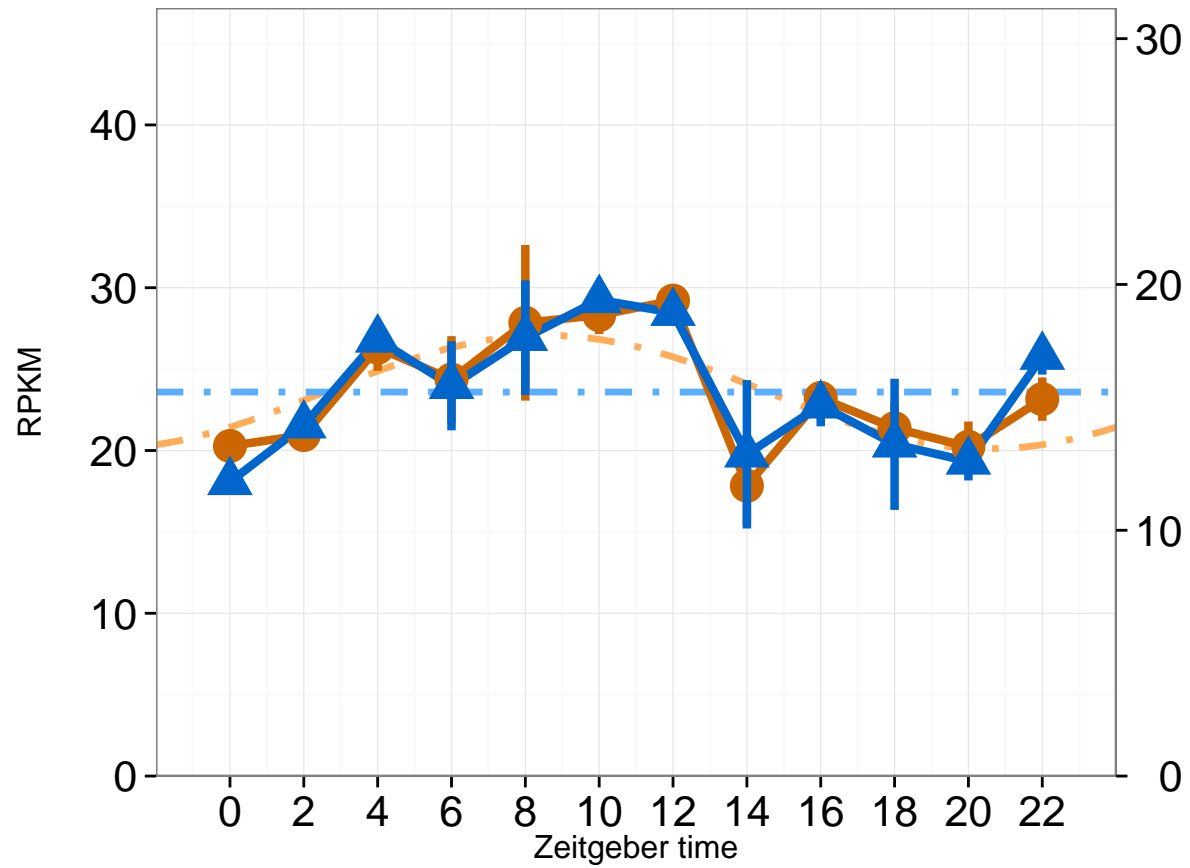

## Dsc2

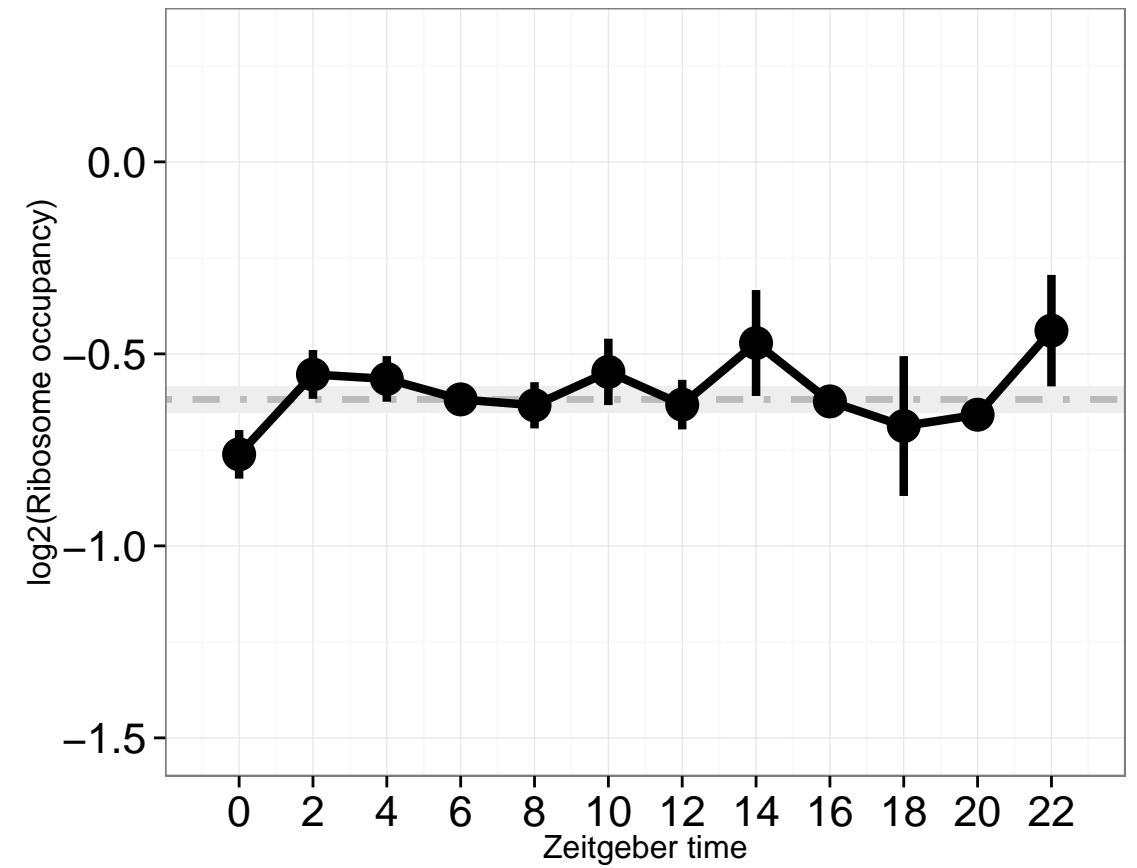

Supplement: SuppDataset_1.zip [file Dsc2_set_A.pdf › Supplemental Dataset 1/A-mRNA_nonrhyth_translation_nonrhyth/Dsc2_set_A.pdf]

# Dscr3

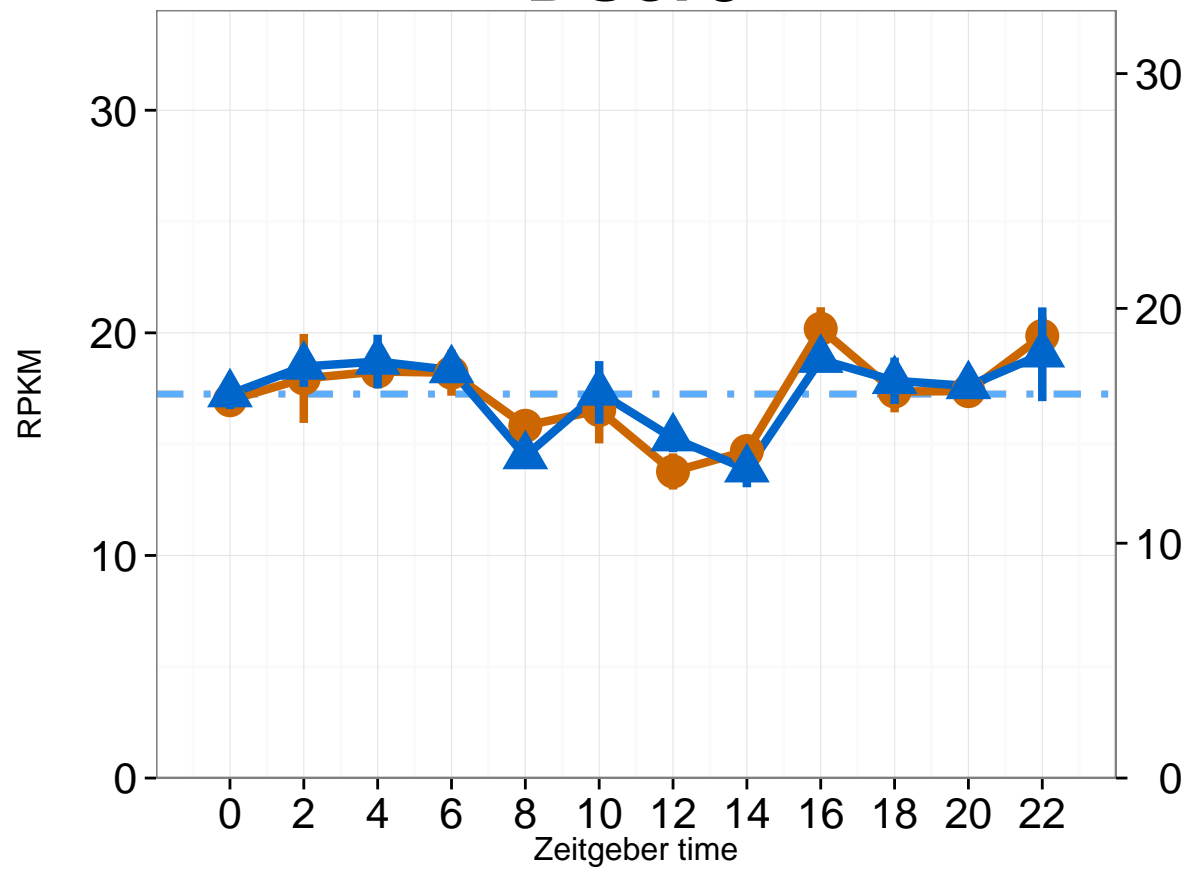

# Dscr3

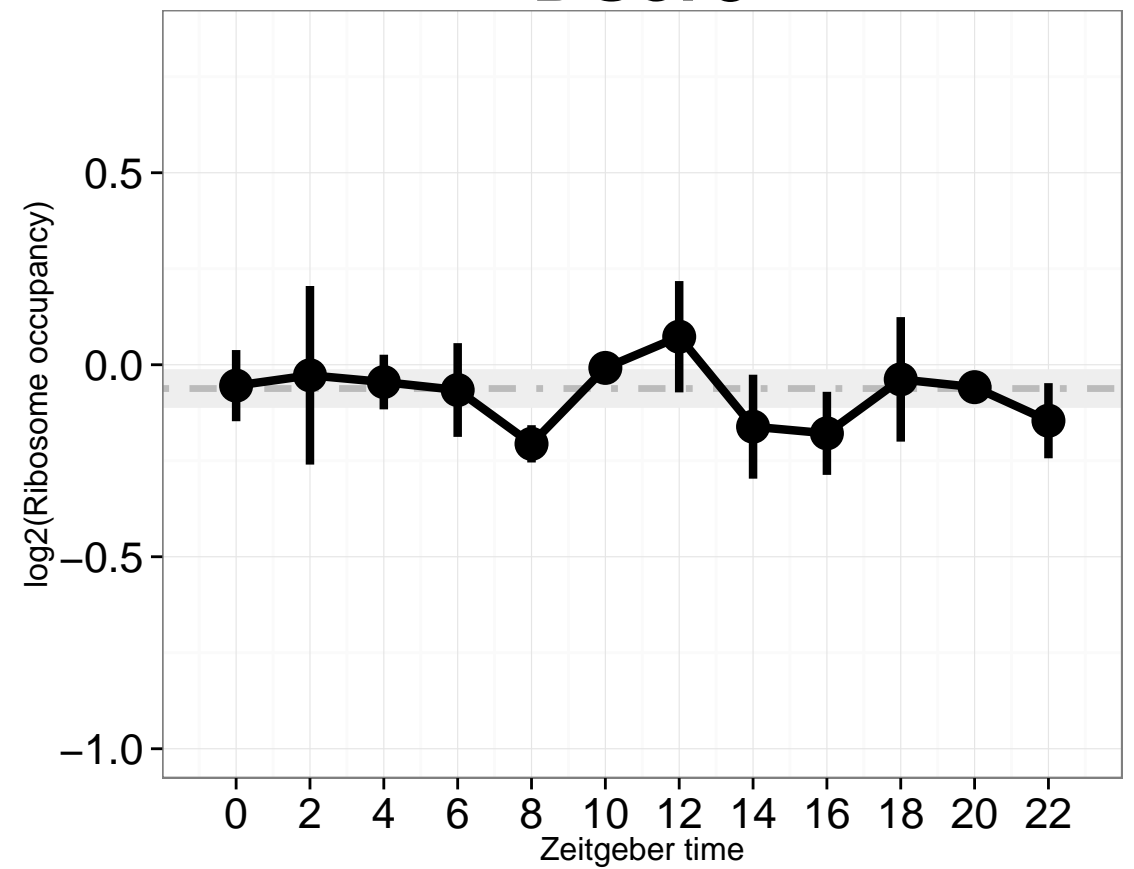

Supplement: SuppDataset_1.zip [file Dscr3_set_A.pdf › Supplemental Dataset 1/A-mRNA_nonrhyth_translation_nonrhyth/Dscr3_set_A.pdf]

## Dse

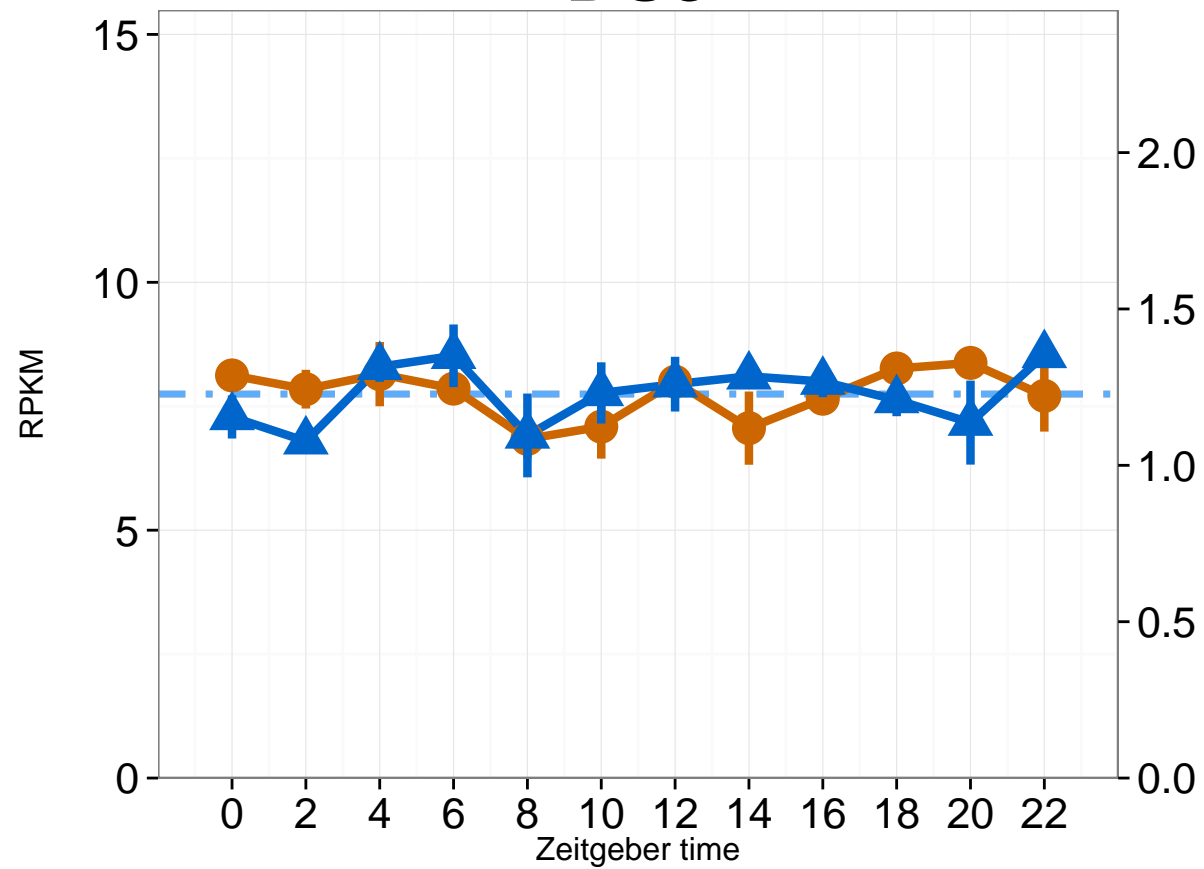

## Dse

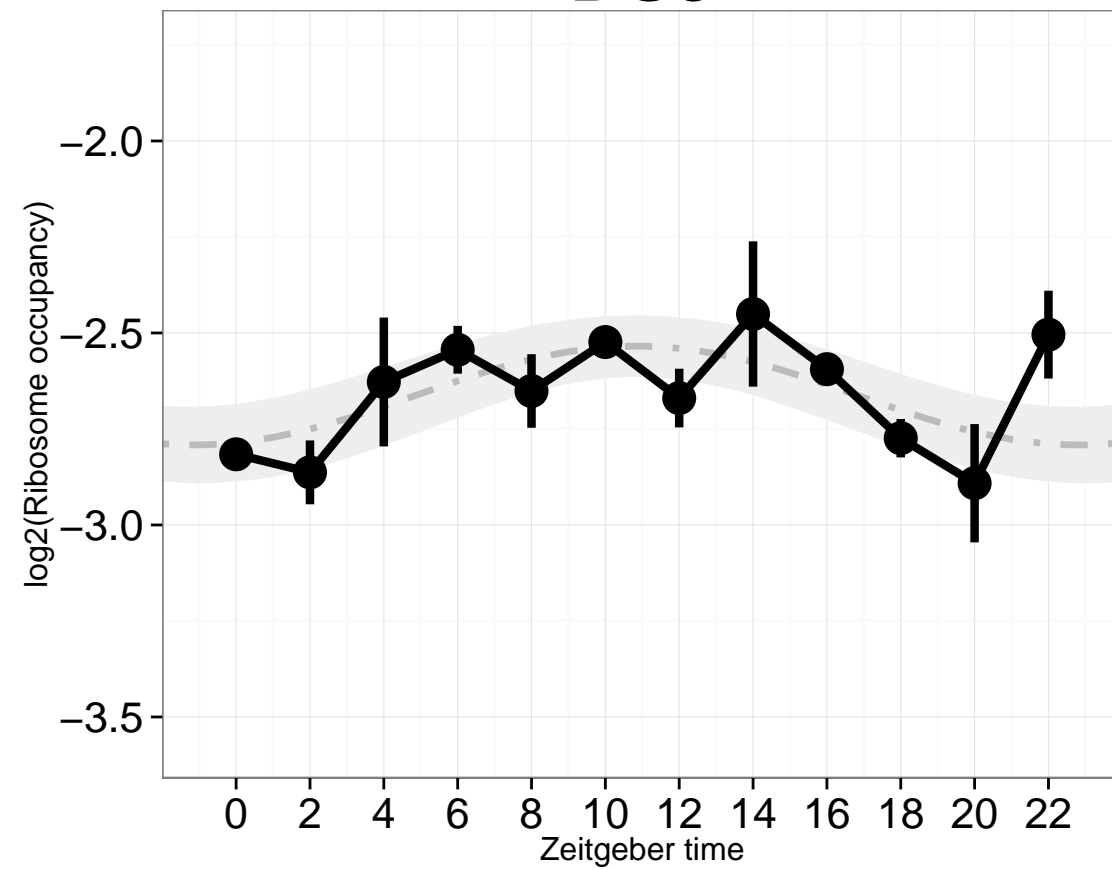

Supplement: SuppDataset_1.zip [file Dse_set_A.pdf › Supplemental Dataset 1/A-mRNA_nonrhyth_translation_nonrhyth/Dse_set_A.pdf]

## Dsel

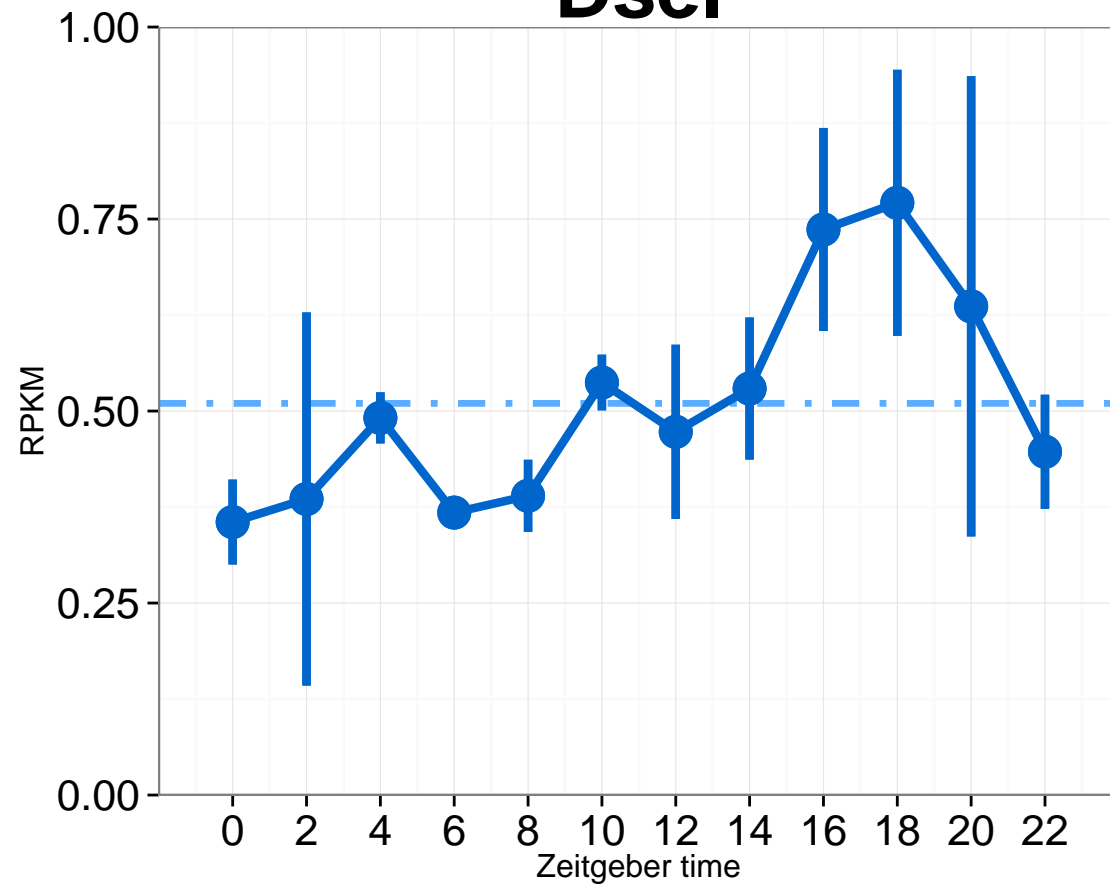

## Dsel log2(Ribosome occupancy)

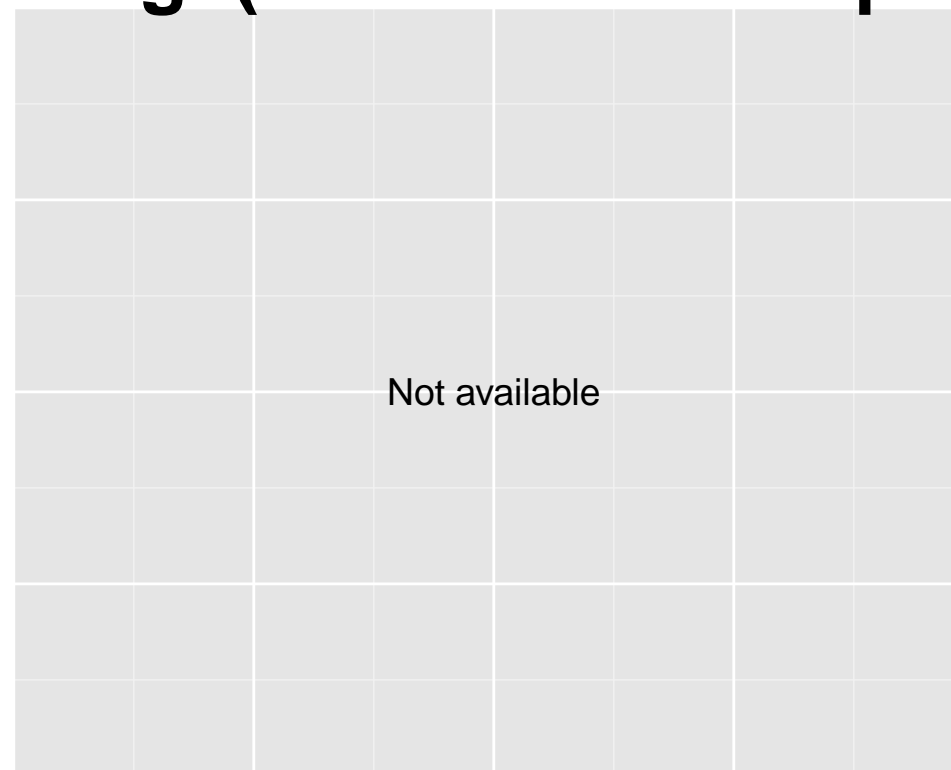

Supplement: SuppDataset_1.zip [file Dsel_set_A.pdf › Supplemental Dataset 1/A-mRNA_nonrhyth_translation_nonrhyth/Dsel_set_A.pdf]

# Dsg1c

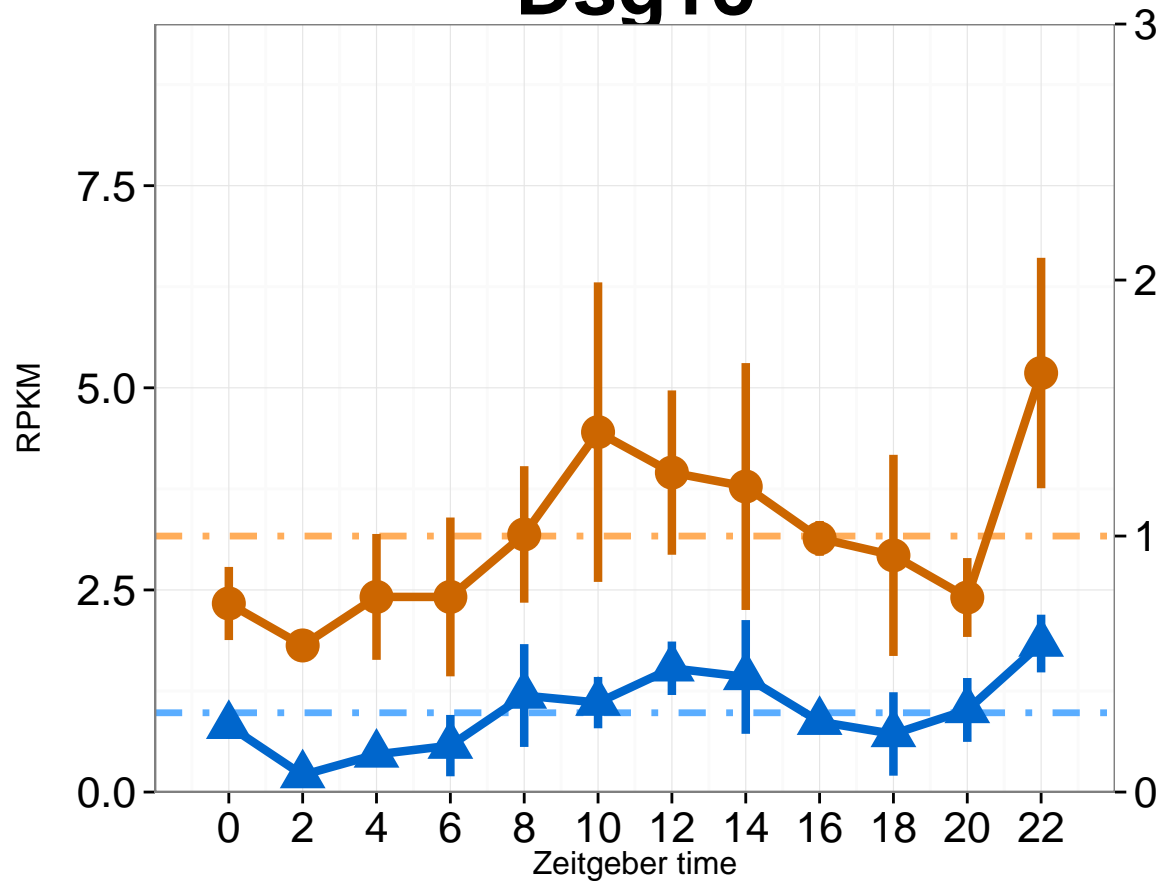

# Dsg1c

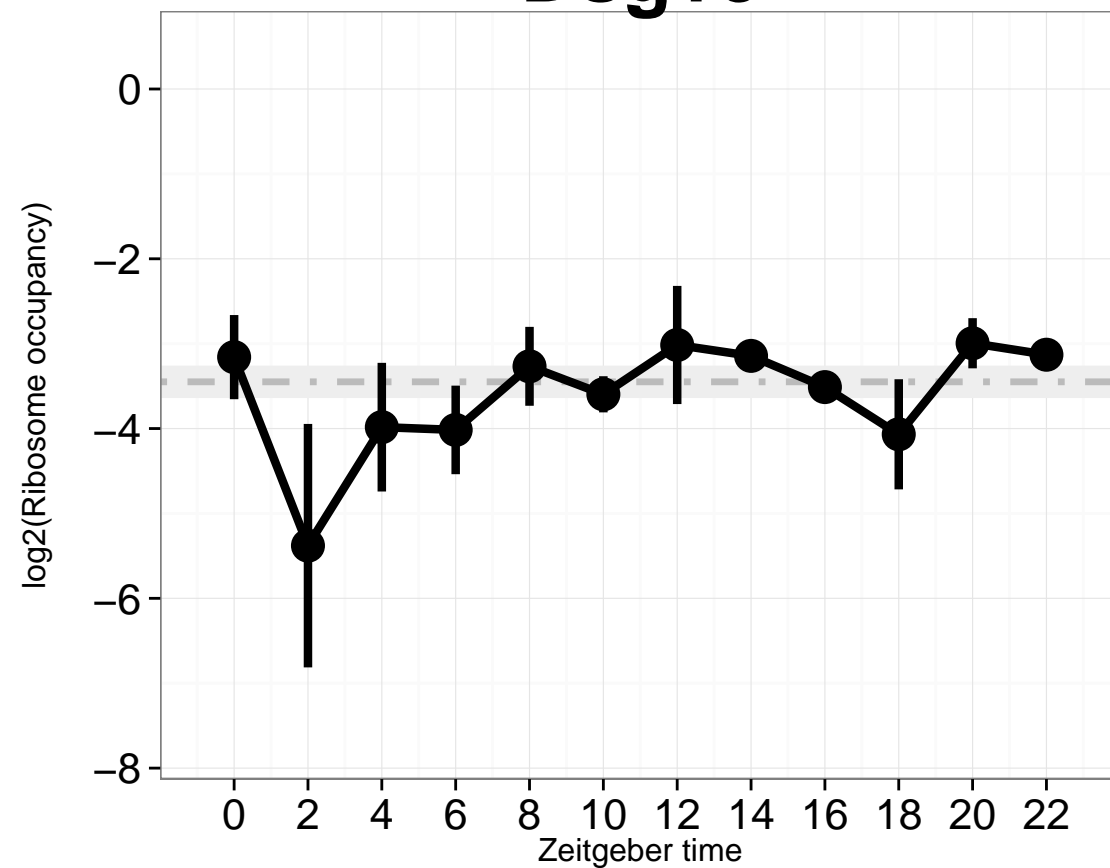

Supplement: SuppDataset_1.zip [file Dsg1c_set_A.pdf › Supplemental Dataset 1/A-mRNA_nonrhyth_translation_nonrhyth/Dsg1c_set_A.pdf]

# Dsg2

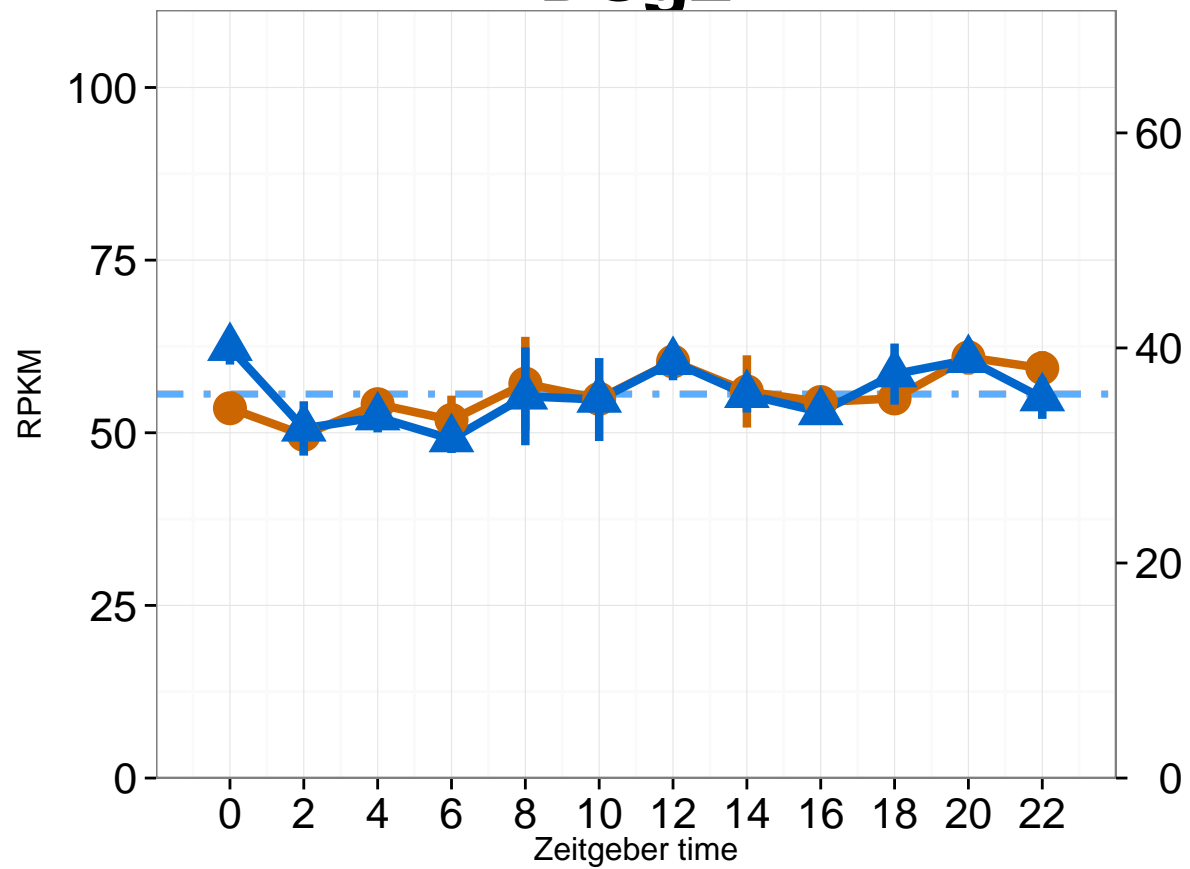

# Dsg2

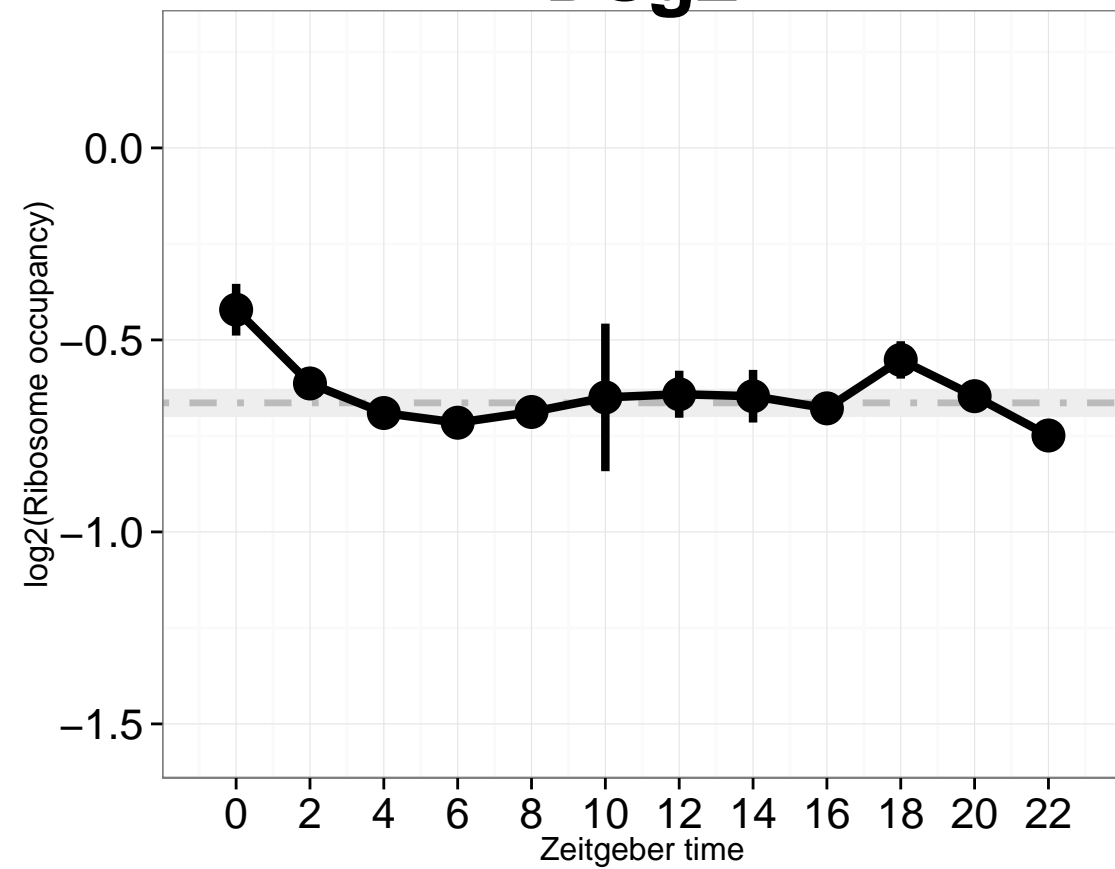

Supplement: SuppDataset_1.zip [file Dsg2_set_A.pdf › Supplemental Dataset 1/A-mRNA_nonrhyth_translation_nonrhyth/Dsg2_set_A.pdf]

**Dsn1 TR**

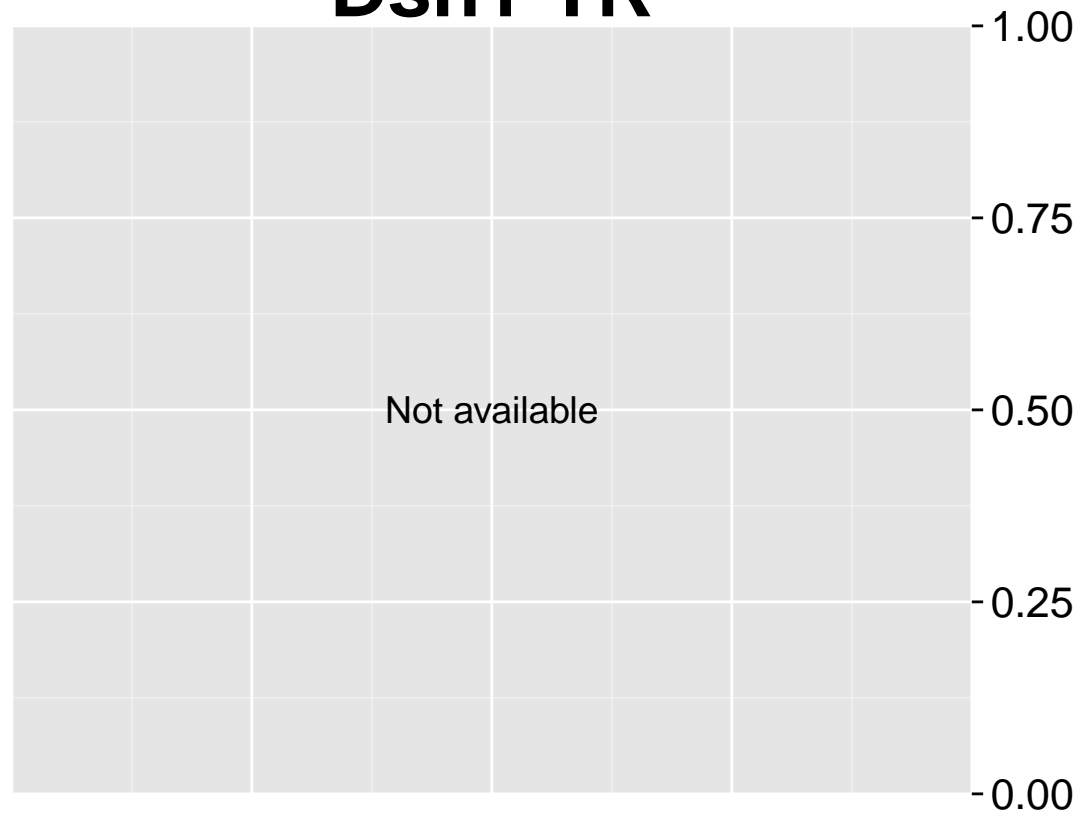

**Dsn1 log2(Ribosome occupancy)**

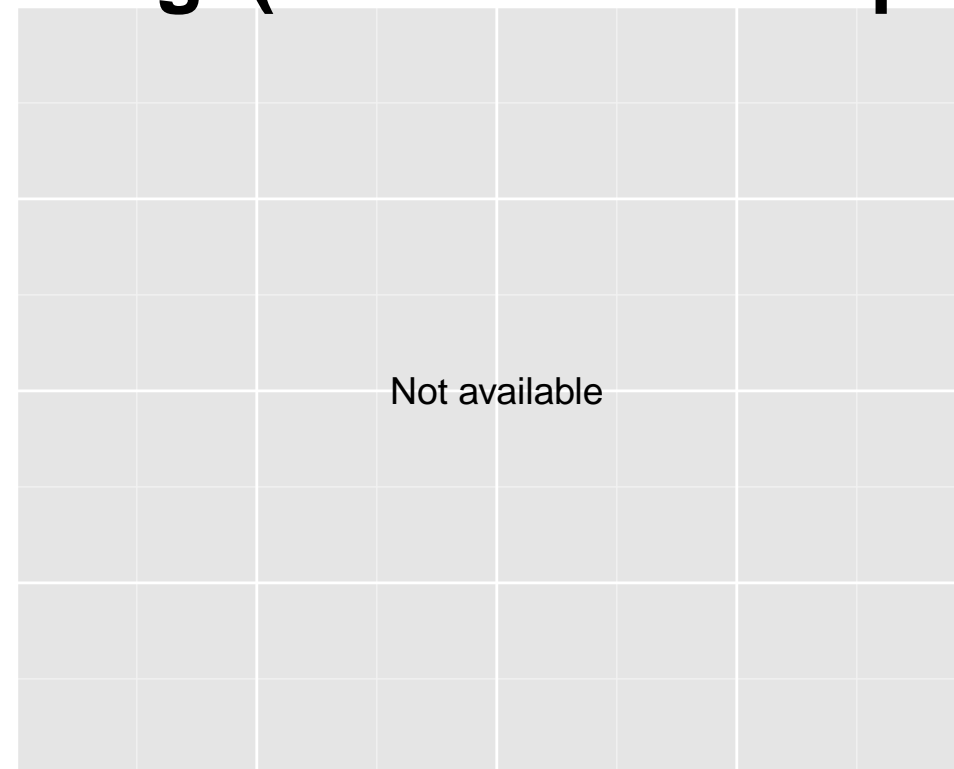

Supplement: SuppDataset_1.zip [file Dsn1_set_A.pdf › Supplemental Dataset 1/A-mRNA_nonrhyth_translation_nonrhyth/Dsn1_set_A.pdf]

## Dstn

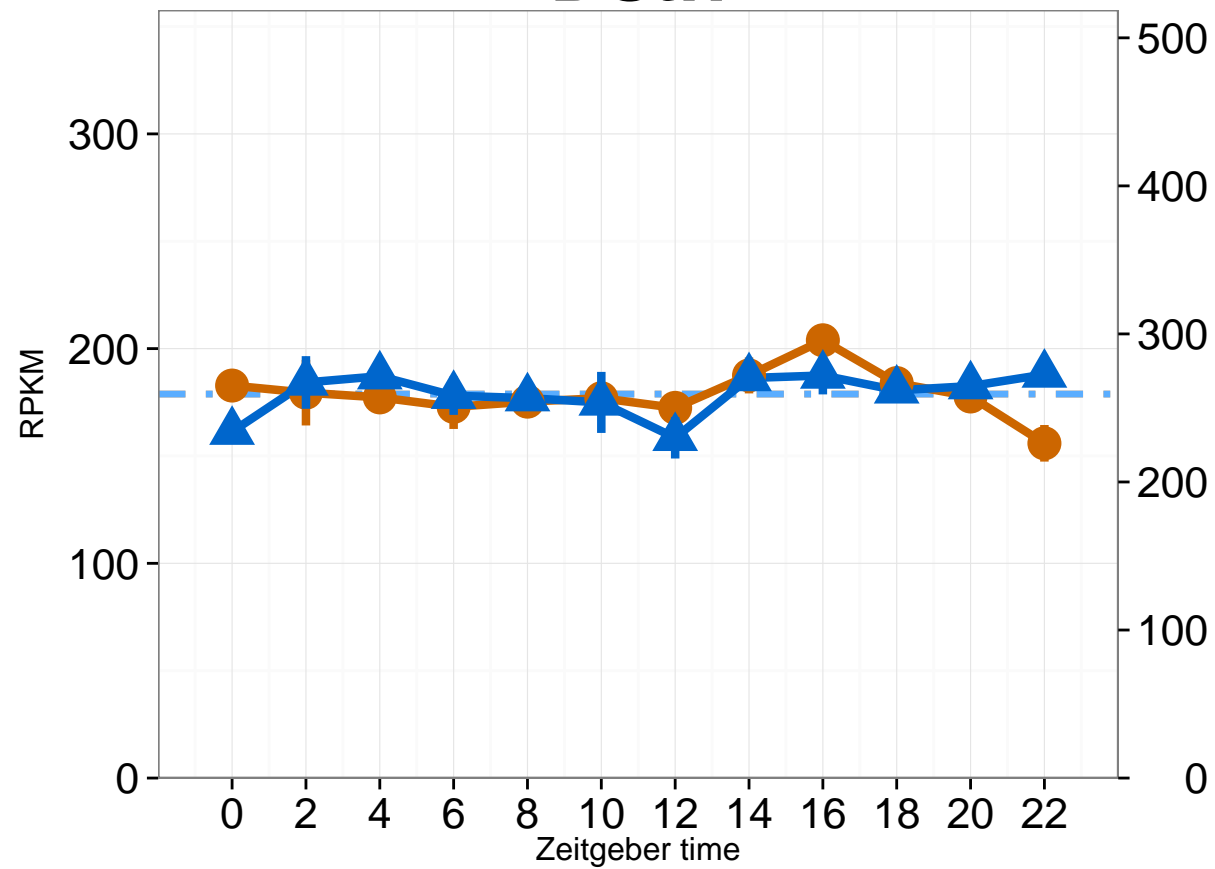

## Dstn

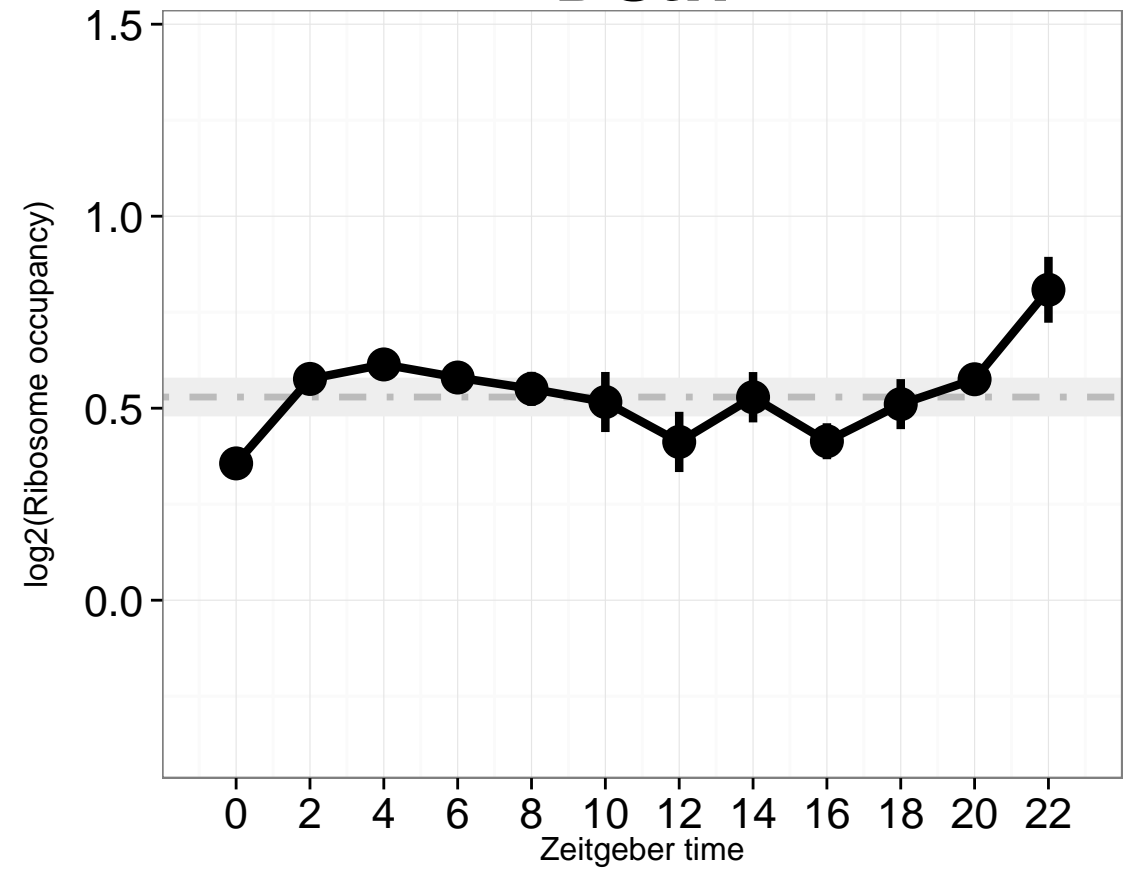

Supplement: SuppDataset_1.zip [file Dstn_set_A.pdf › Supplemental Dataset 1/A-mRNA_nonrhyth_translation_nonrhyth/Dstn_set_A.pdf]

## Dstyk

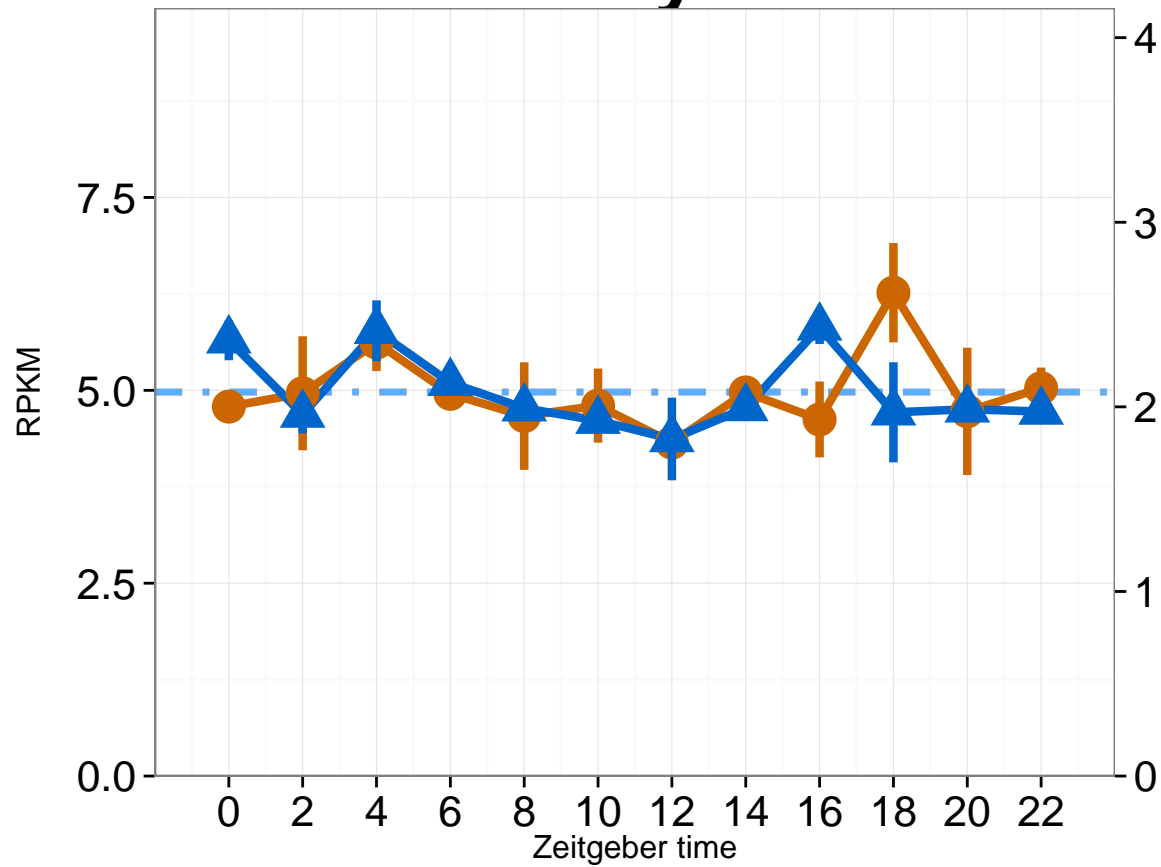

## Dstyk

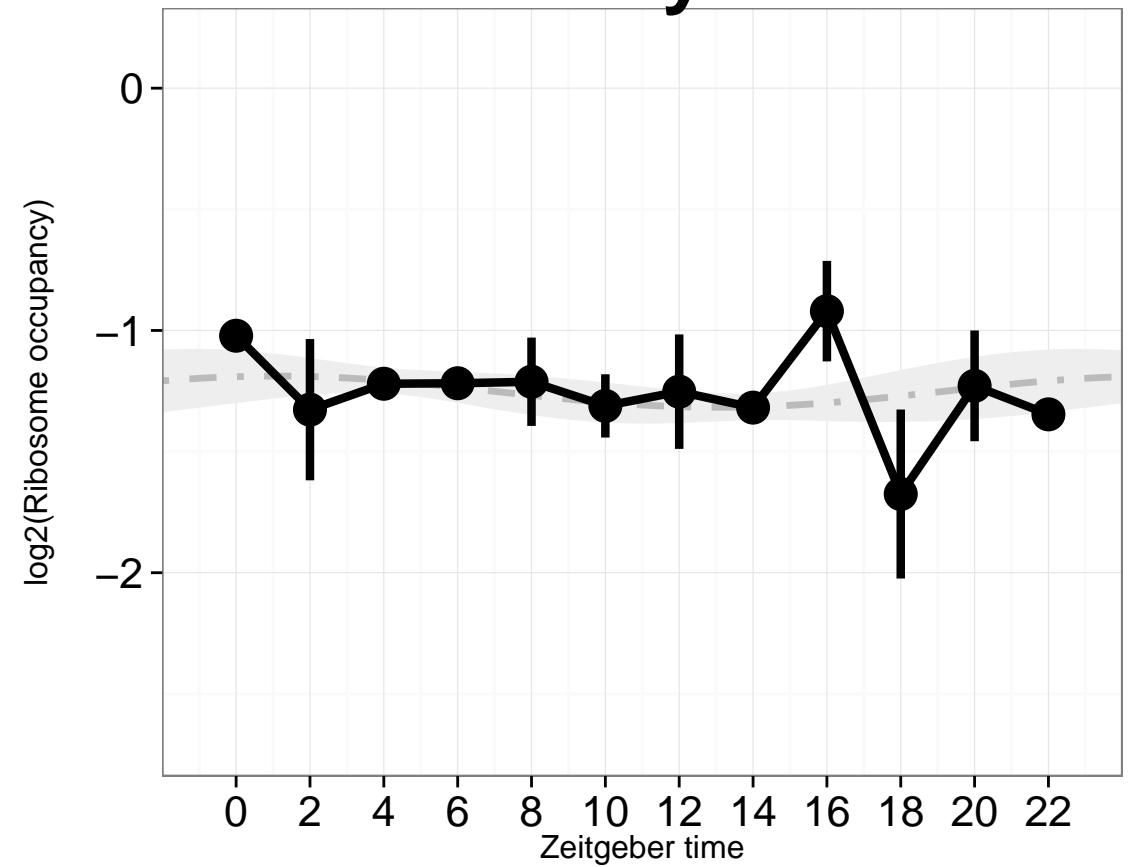

Supplement: SuppDataset_1.zip [file Dstyk_set_A.pdf › Supplemental Dataset 1/A-mRNA_nonrhyth_translation_nonrhyth/Dstyk_set_A.pdf]

## Dtd1

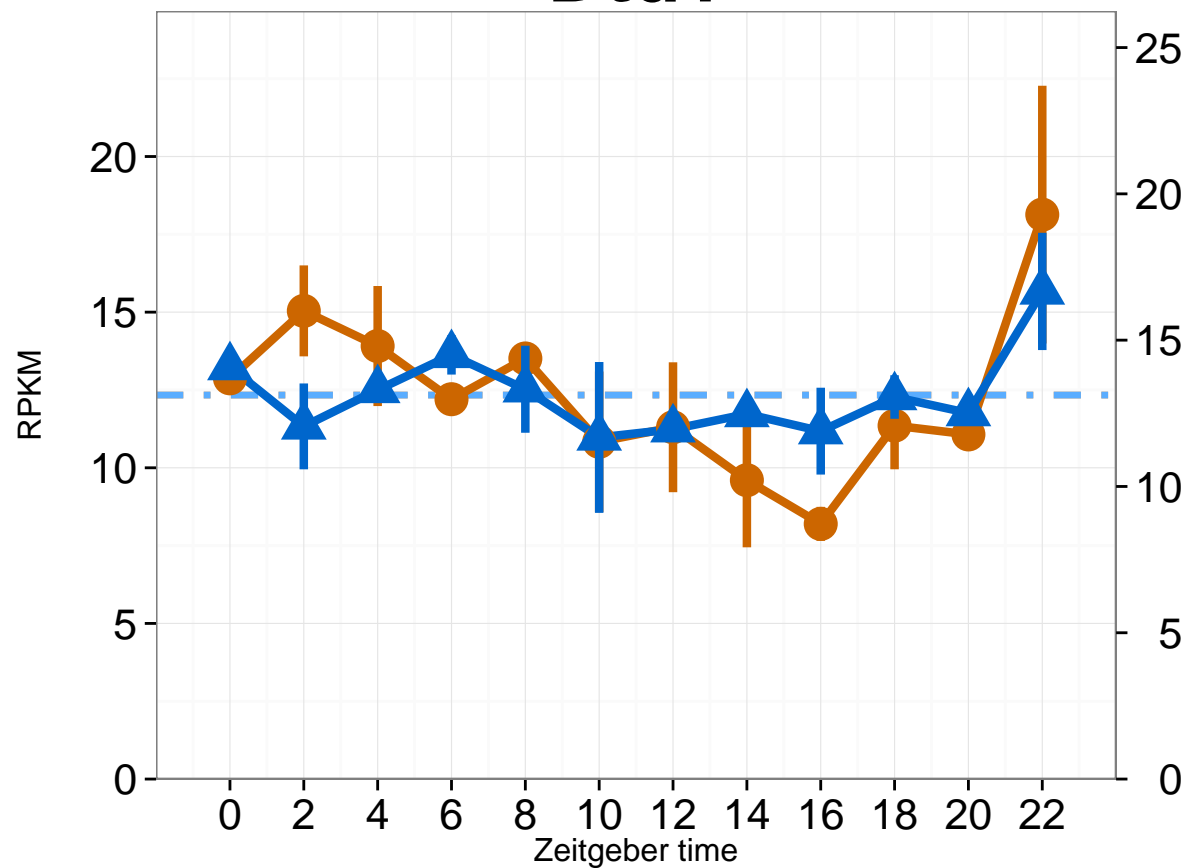

## Dtd1

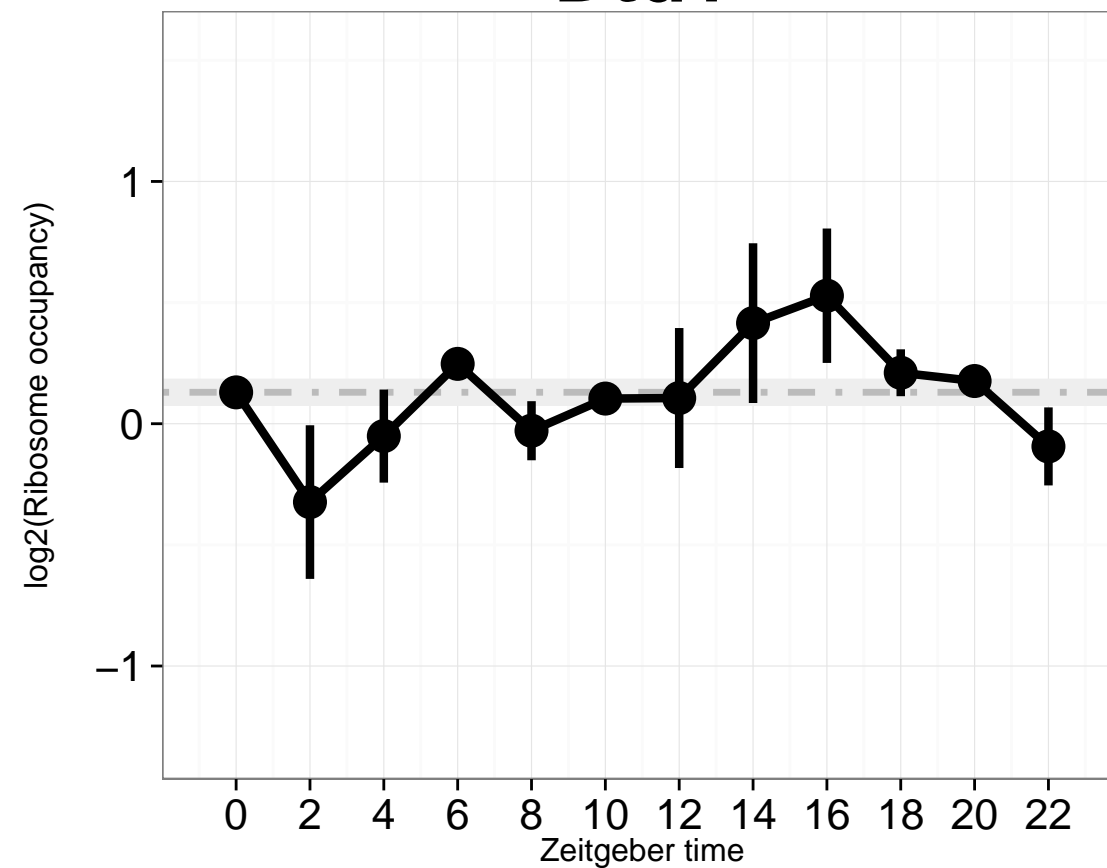

Supplement: SuppDataset_1.zip [file Dtd1_set_A.pdf › Supplemental Dataset 1/A-mRNA_nonrhyth_translation_nonrhyth/Dtd1_set_A.pdf]

## Dtd2

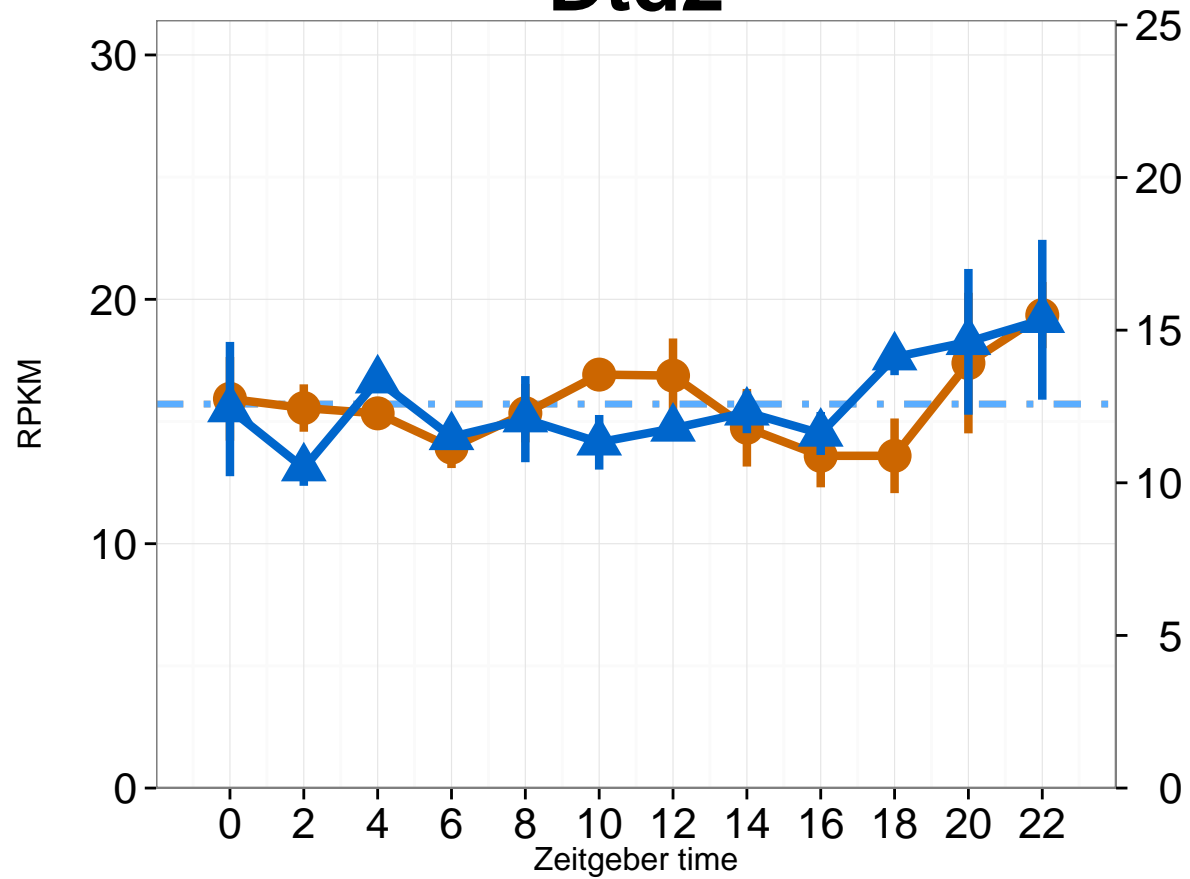

## Dtd2

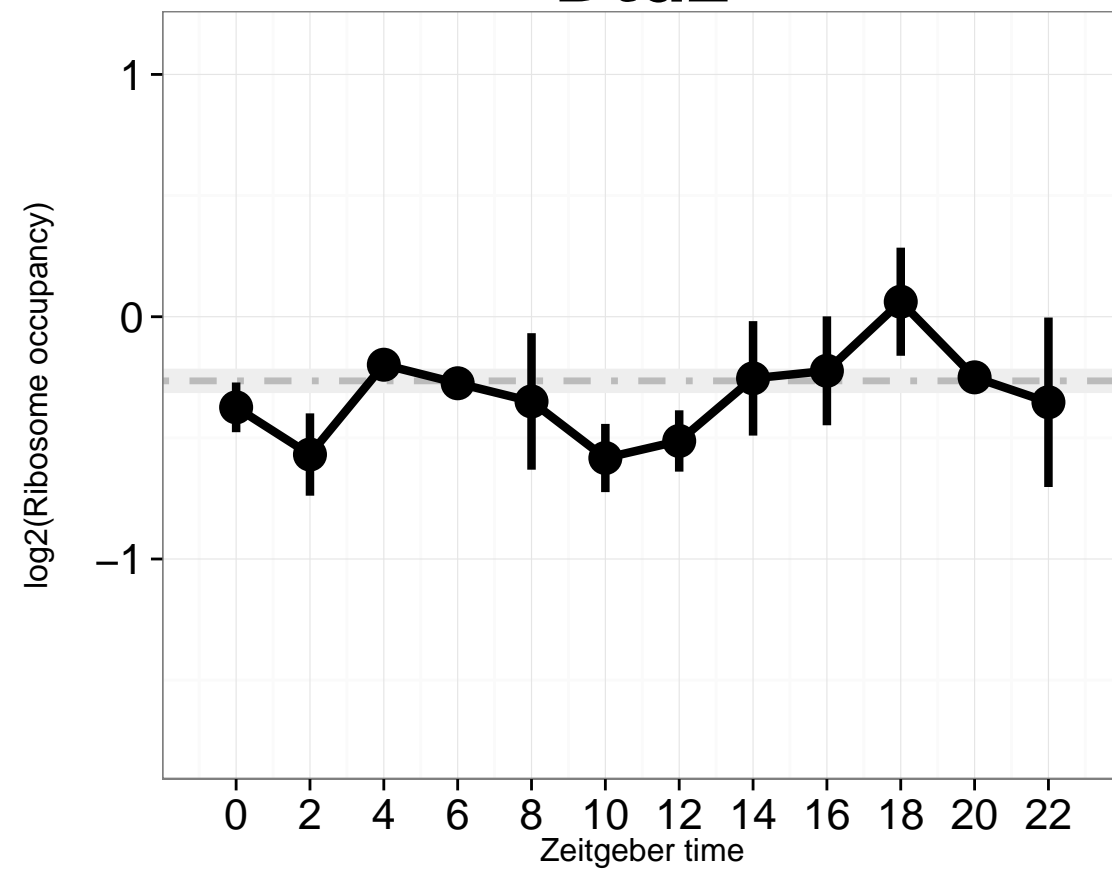

Supplement: SuppDataset_1.zip [file Dtd2_set_A.pdf › Supplemental Dataset 1/A-mRNA_nonrhyth_translation_nonrhyth/Dtd2_set_A.pdf]

## Dtl

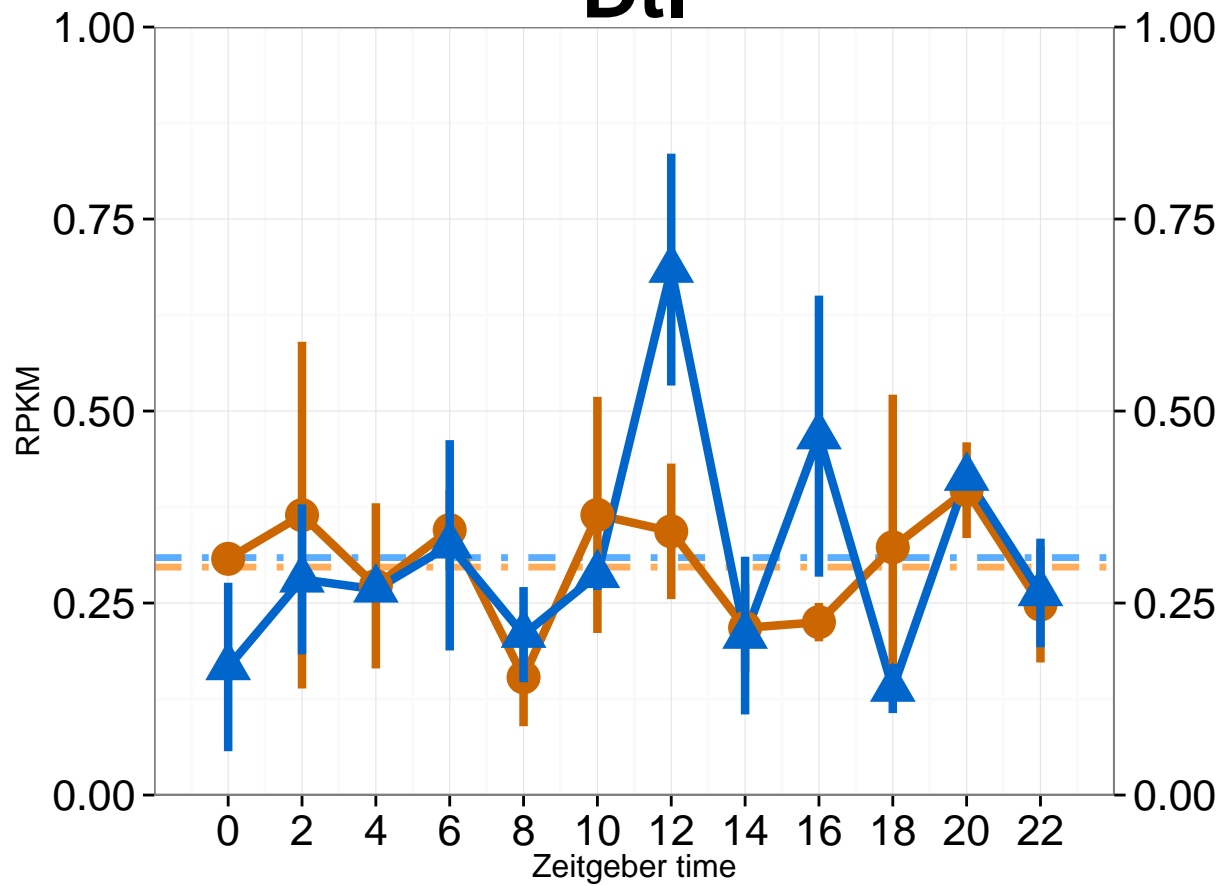

## Dtl

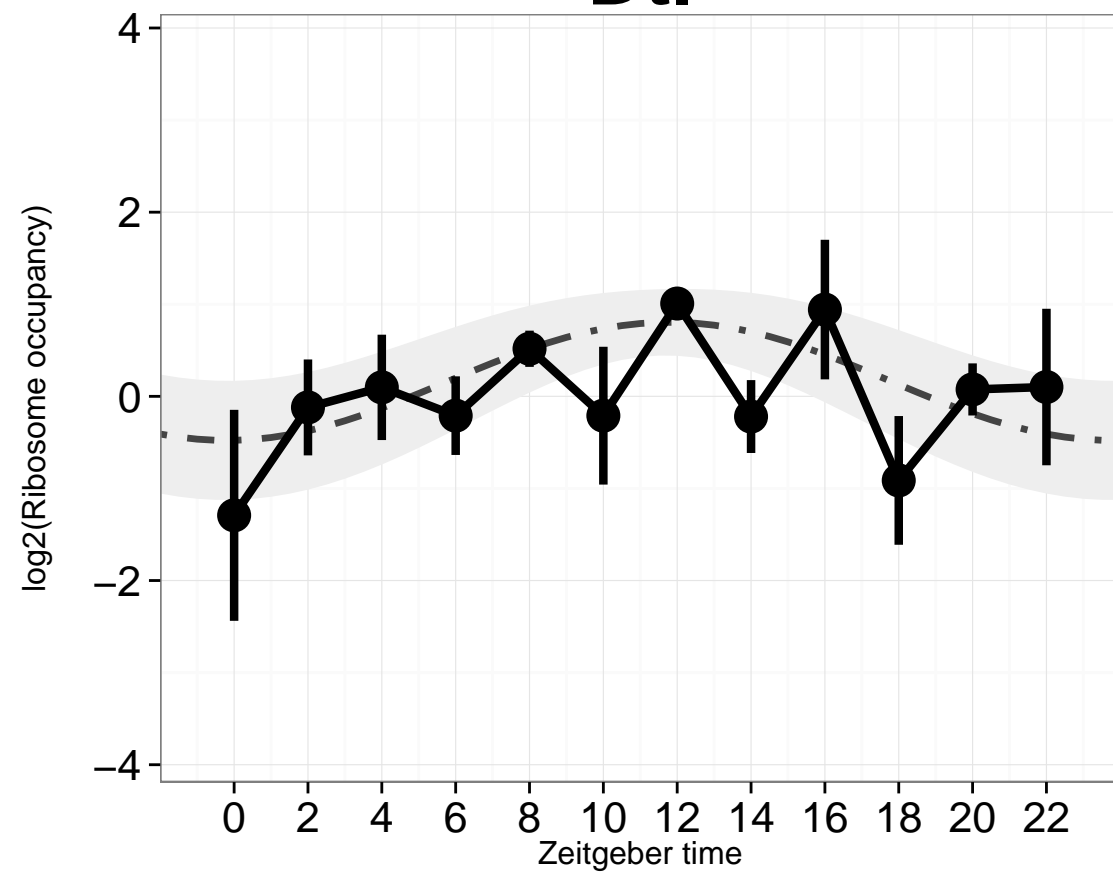

Supplement: SuppDataset_1.zip [file Dtl_set_A.pdf › Supplemental Dataset 1/A-mRNA_nonrhyth_translation_nonrhyth/Dtl_set_A.pdf]

## Dtnb

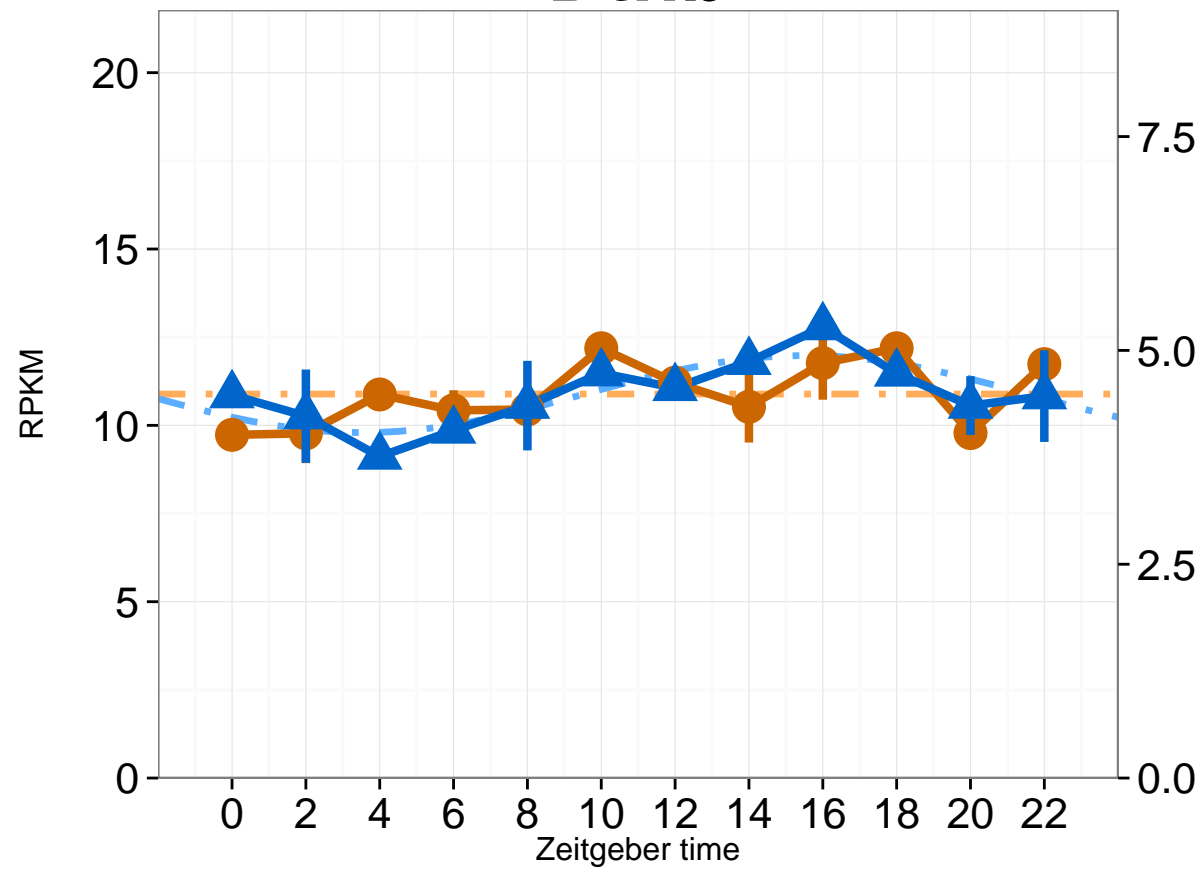

## Dtnb

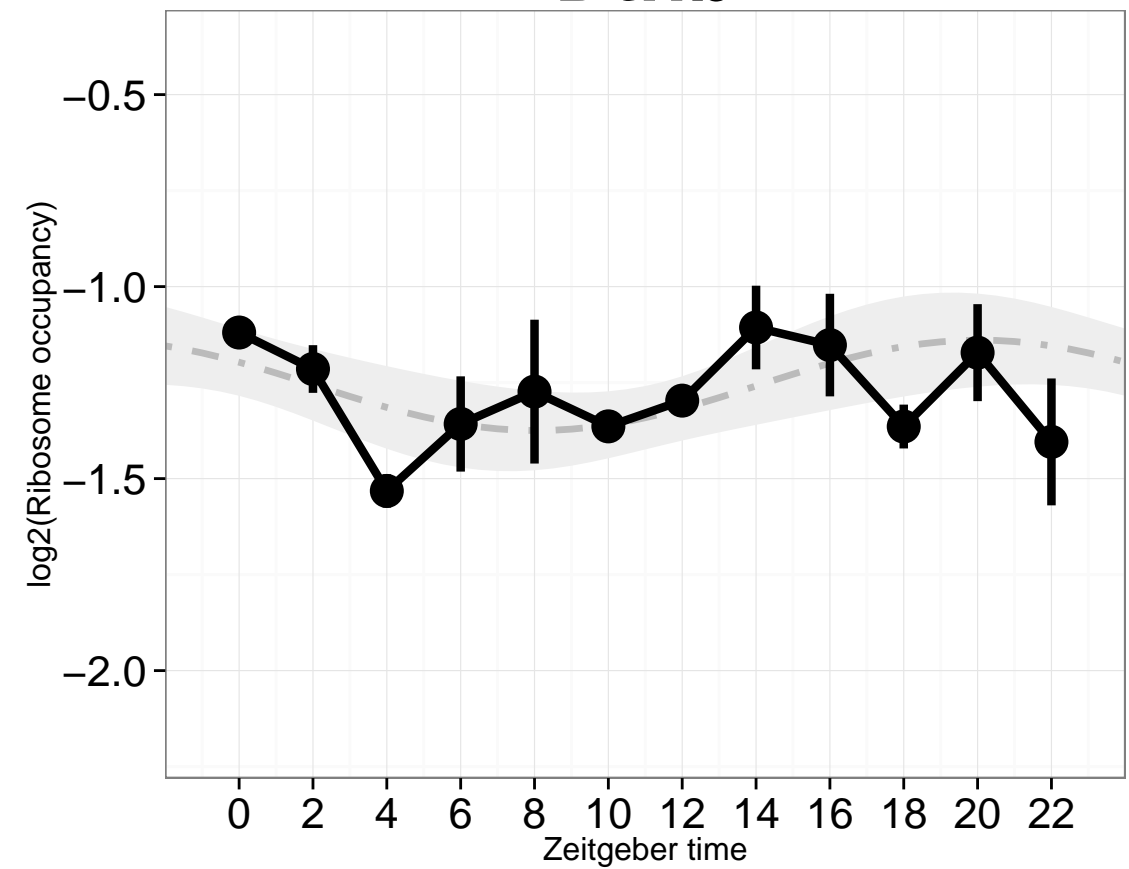

Supplement: SuppDataset_1.zip [file Dtnb_set_A.pdf › Supplemental Dataset 1/A-mRNA_nonrhyth_translation_nonrhyth/Dtnb_set_A.pdf]

## Dtnbp1

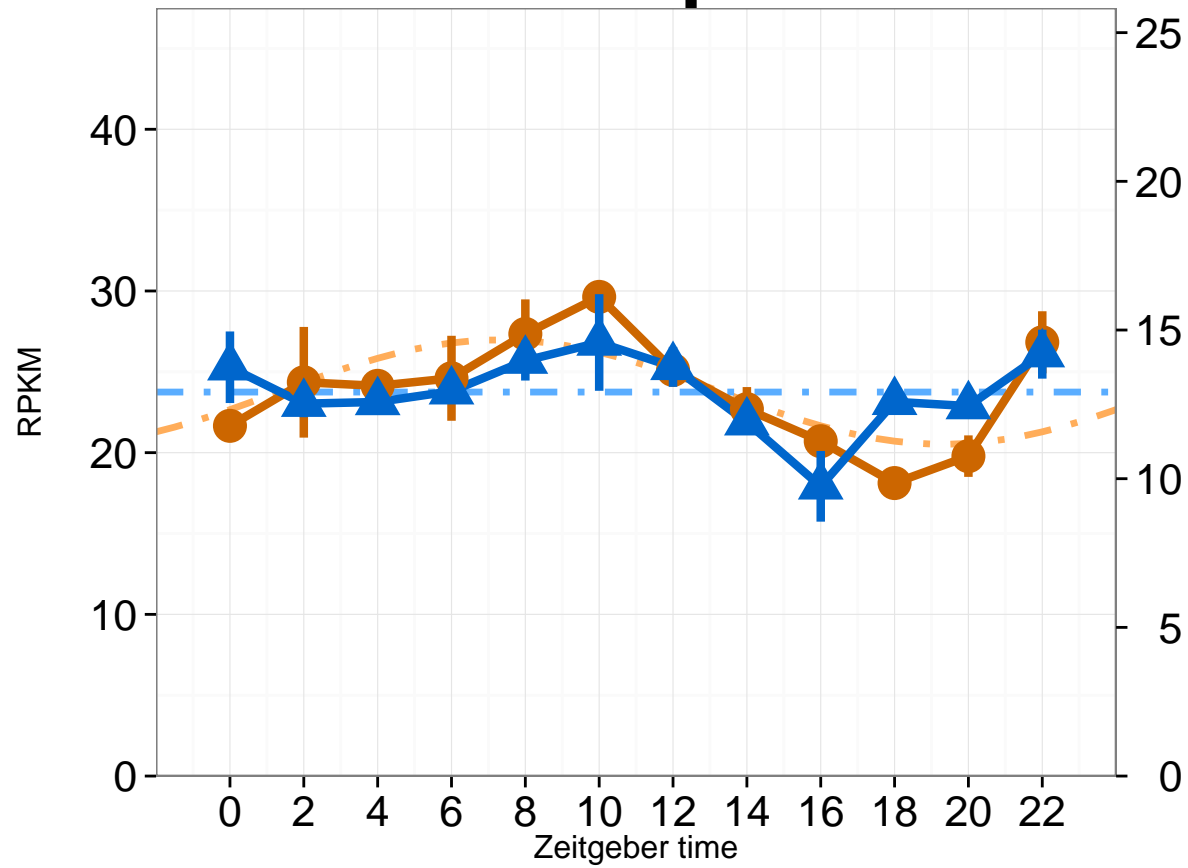

## Dtnbp1

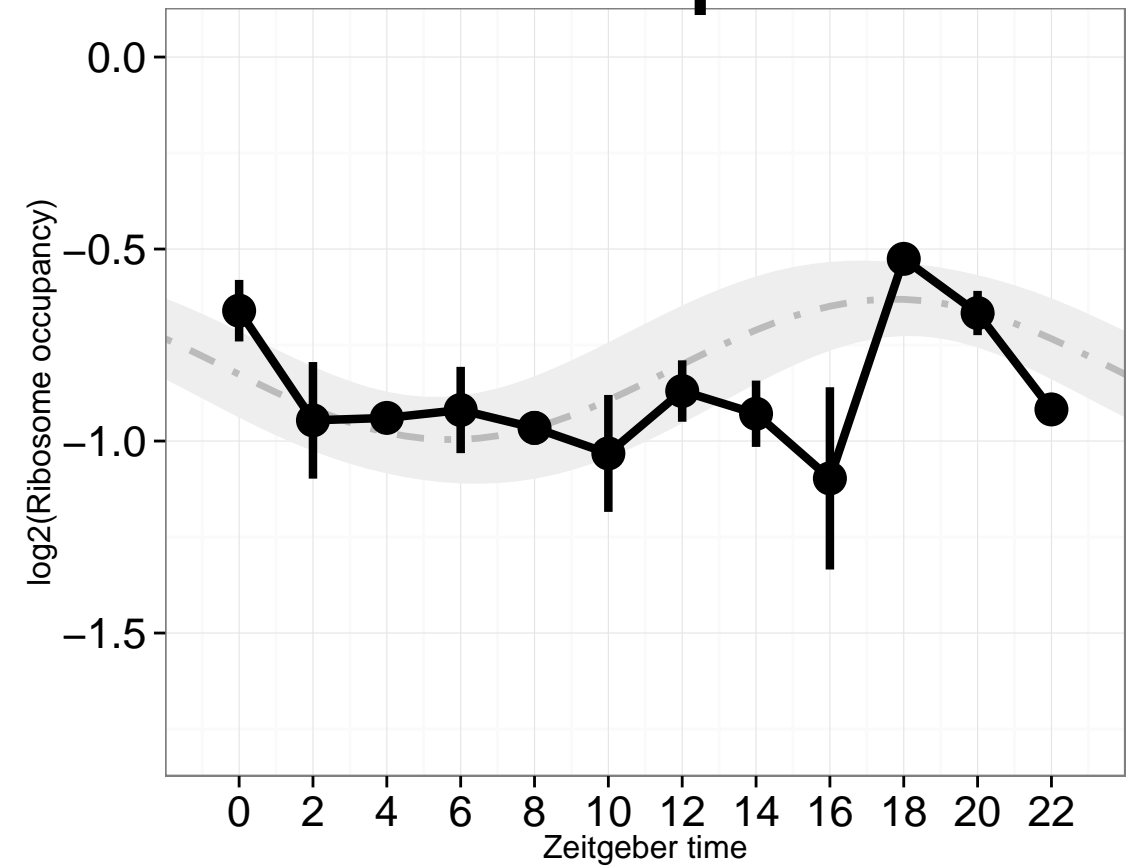

Supplement: SuppDataset_1.zip [file Dtnbp1_set_A.pdf › Supplemental Dataset 1/A-mRNA_nonrhyth_translation_nonrhyth/Dtnbp1_set_A.pdf]

# Dtwd1

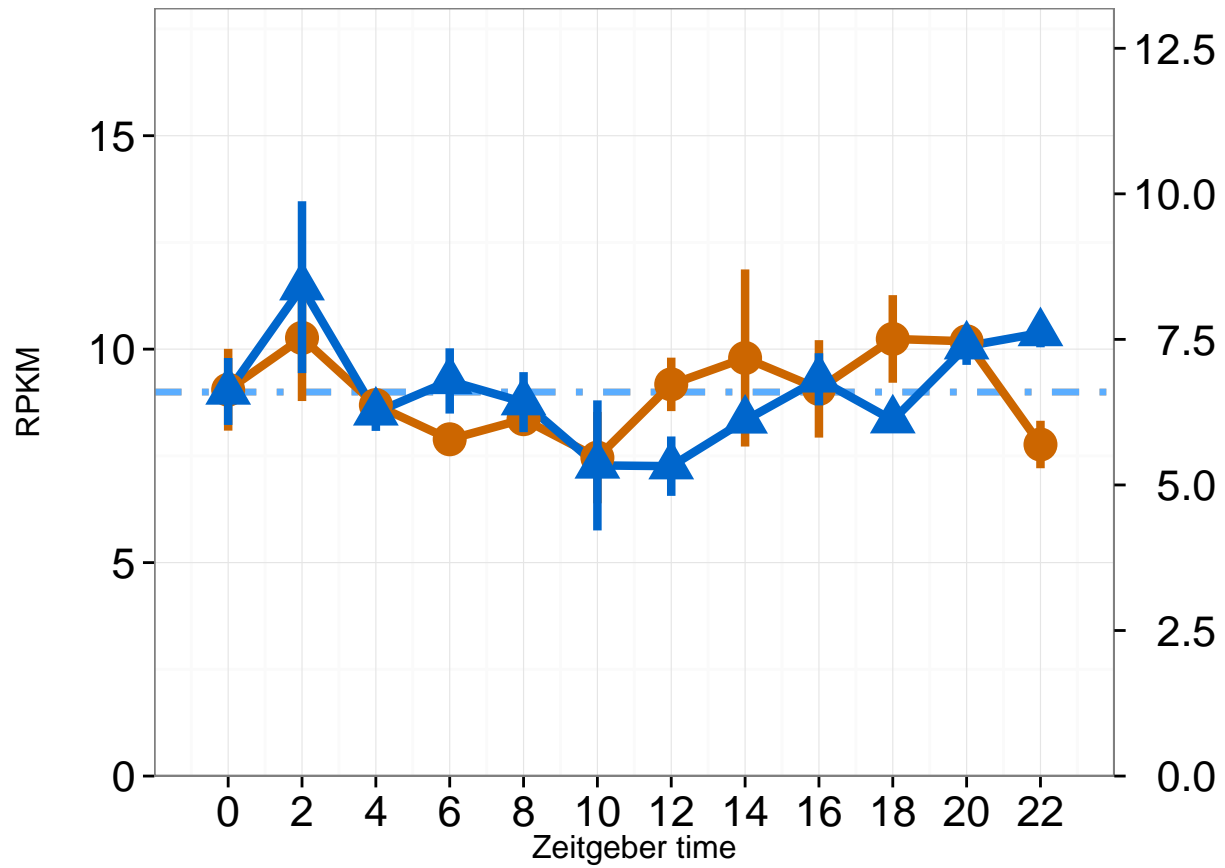

# Dtwd1

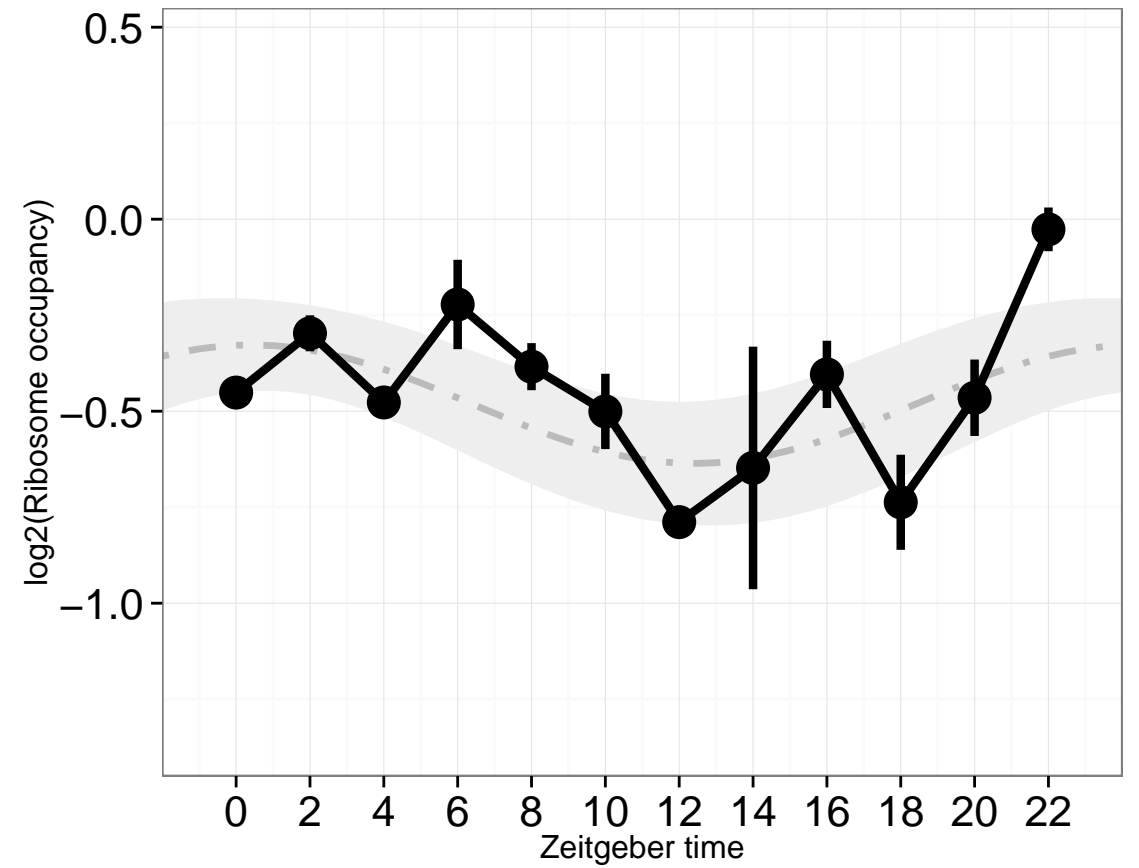

Supplement: SuppDataset_1.zip [file Dtwd1_set_A.pdf › Supplemental Dataset 1/A-mRNA_nonrhyth_translation_nonrhyth/Dtwd1_set_A.pdf]

# Dtwd2

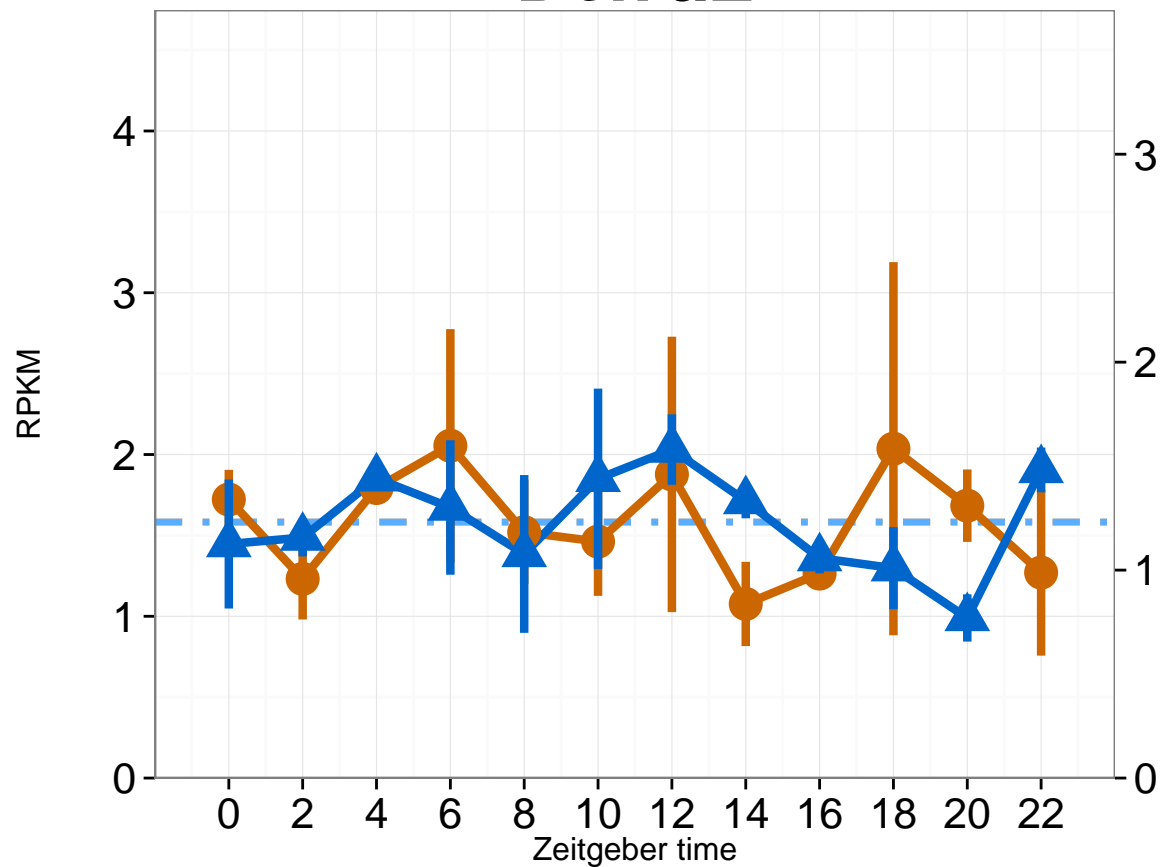

# Dtwd2

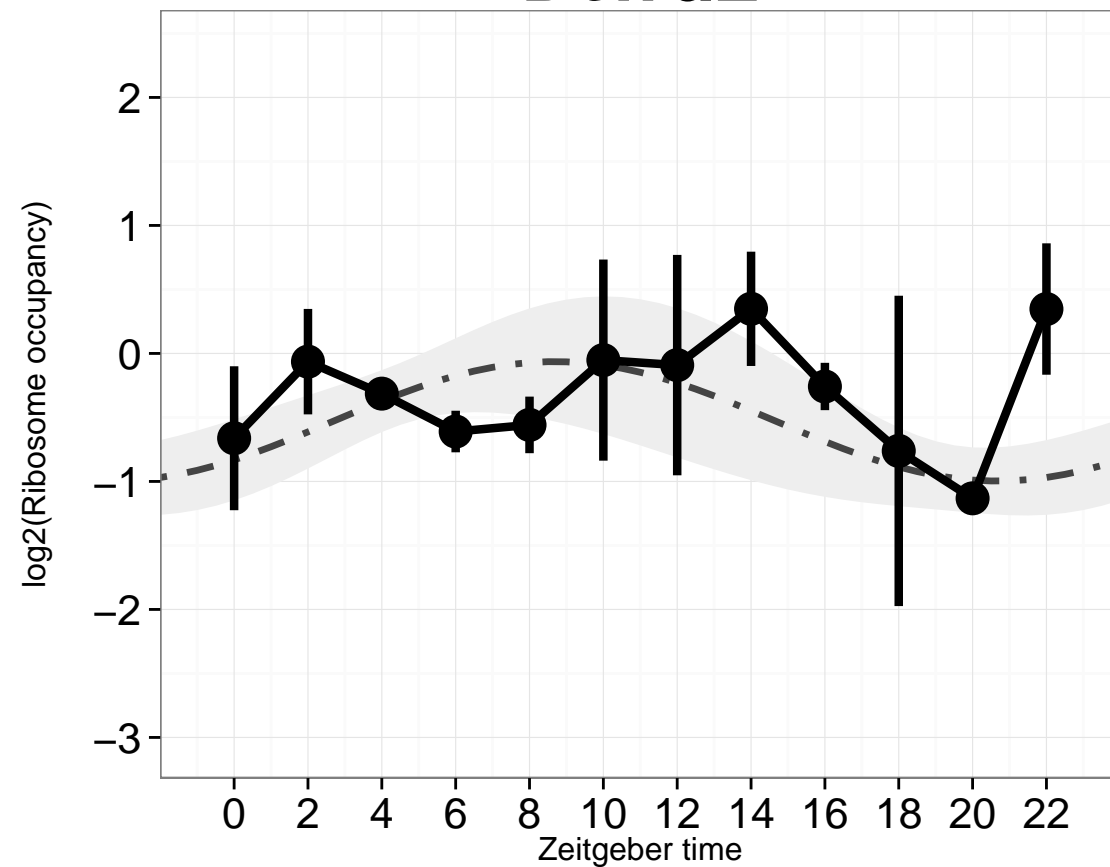

Supplement: SuppDataset_1.zip [file Dtwd2_set_A.pdf › Supplemental Dataset 1/A-mRNA_nonrhyth_translation_nonrhyth/Dtwd2_set_A.pdf]

# Dtx2

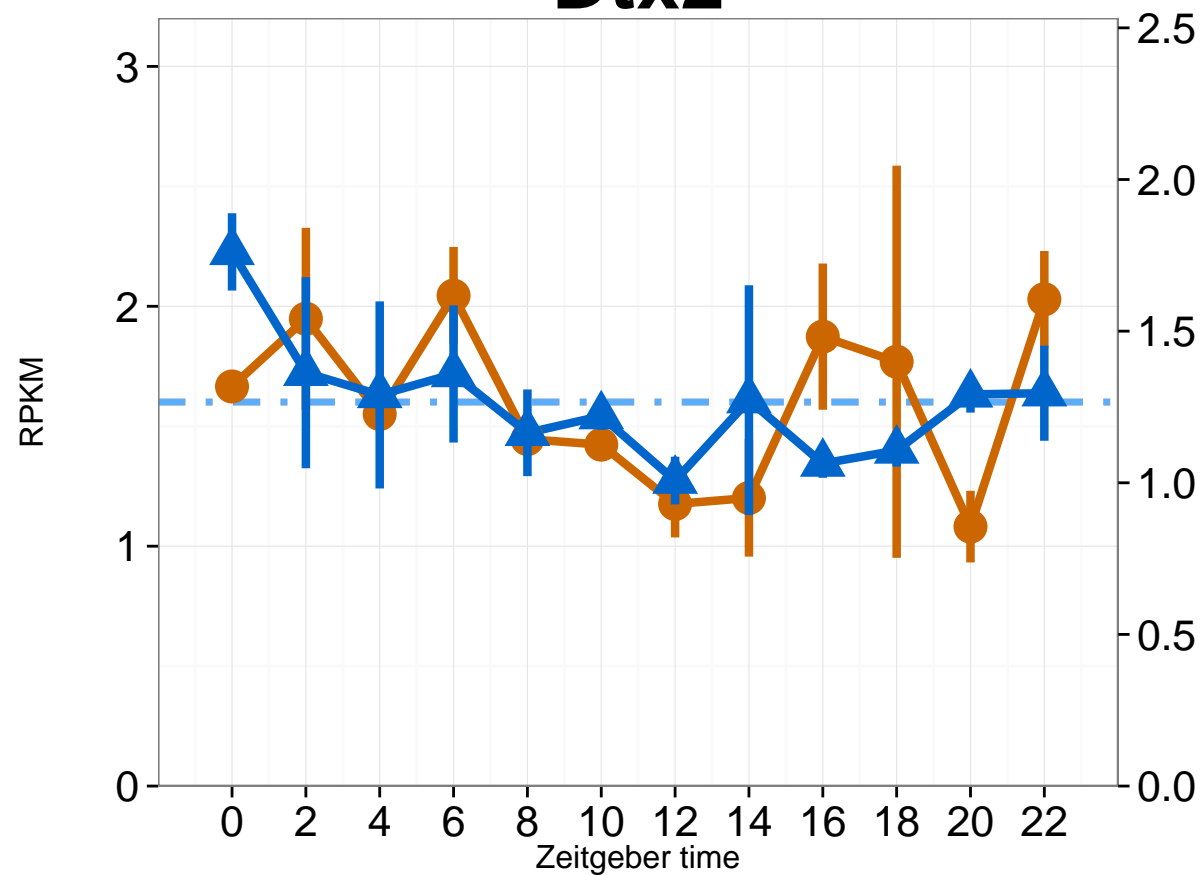

# Dtx2

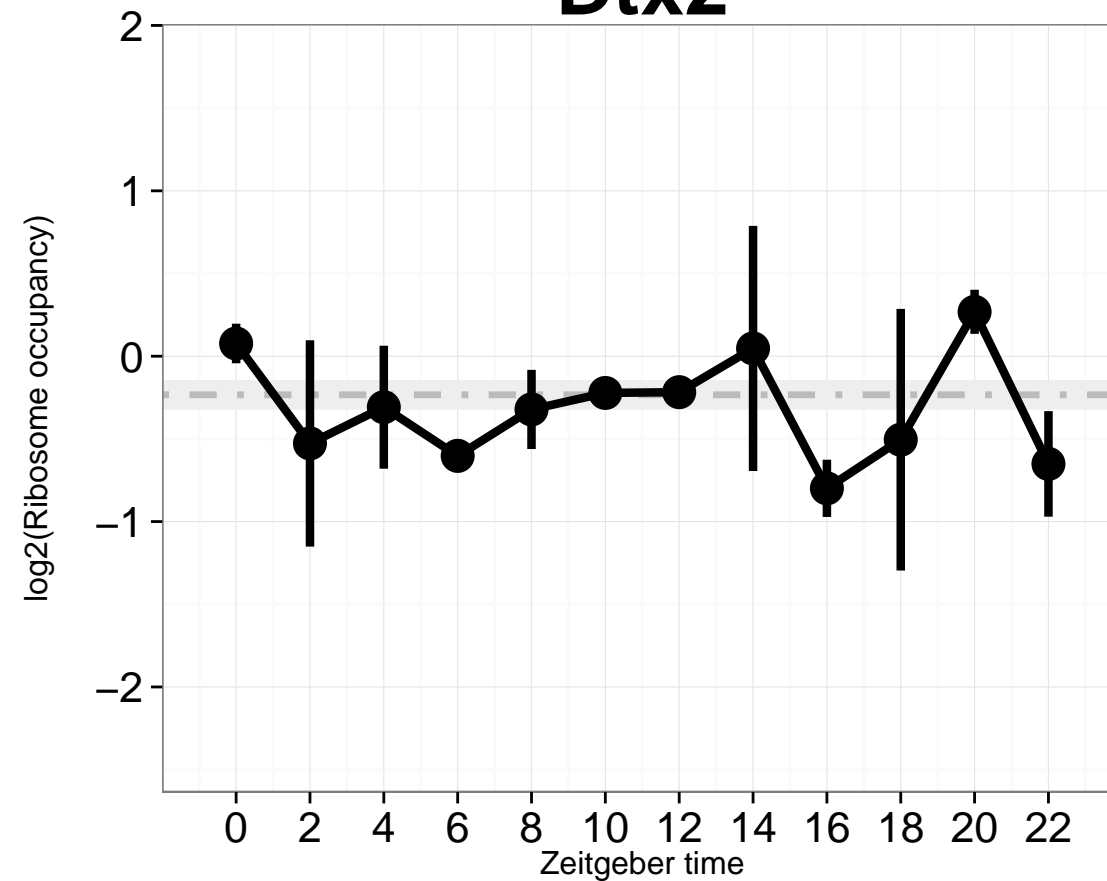

Supplement: SuppDataset_1.zip [file Dtx2_set_A.pdf › Supplemental Dataset 1/A-mRNA_nonrhyth_translation_nonrhyth/Dtx2_set_A.pdf]

# Dtx3

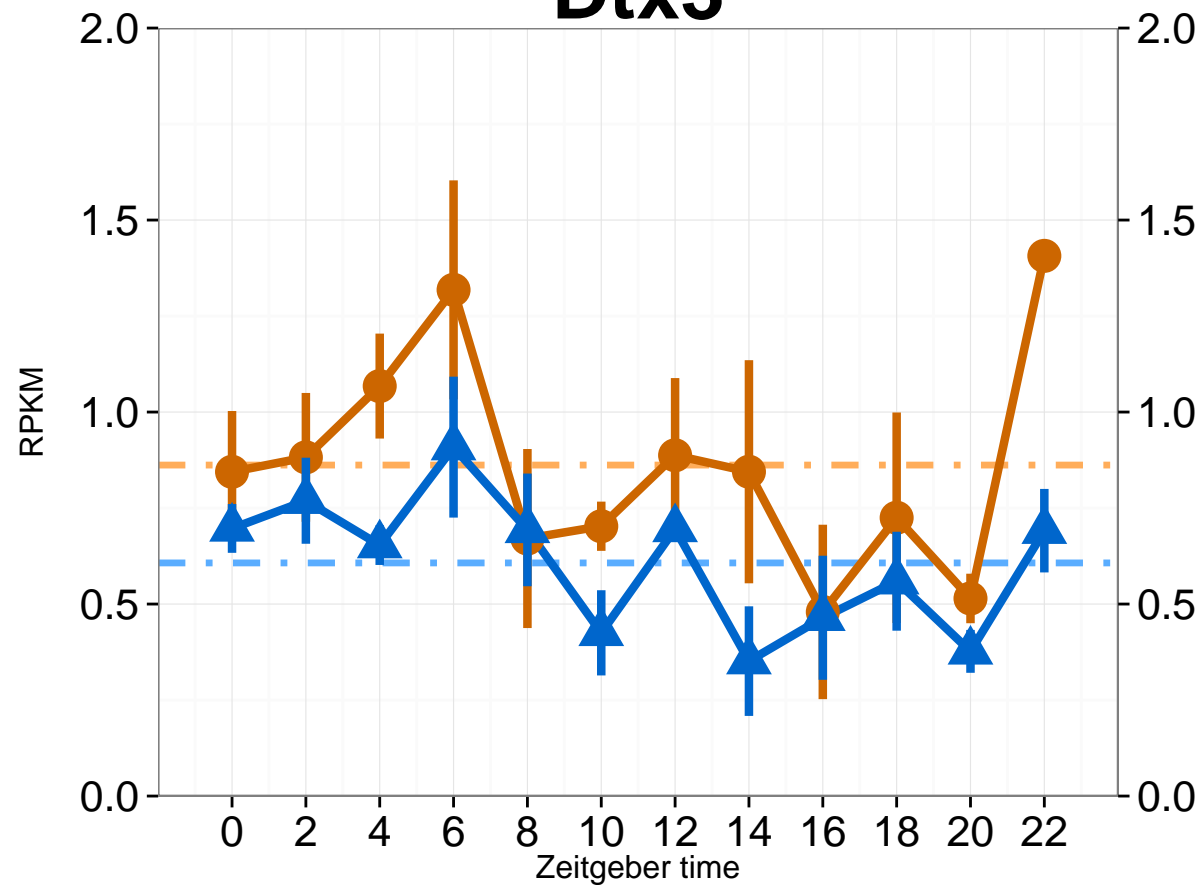

# Dtx3

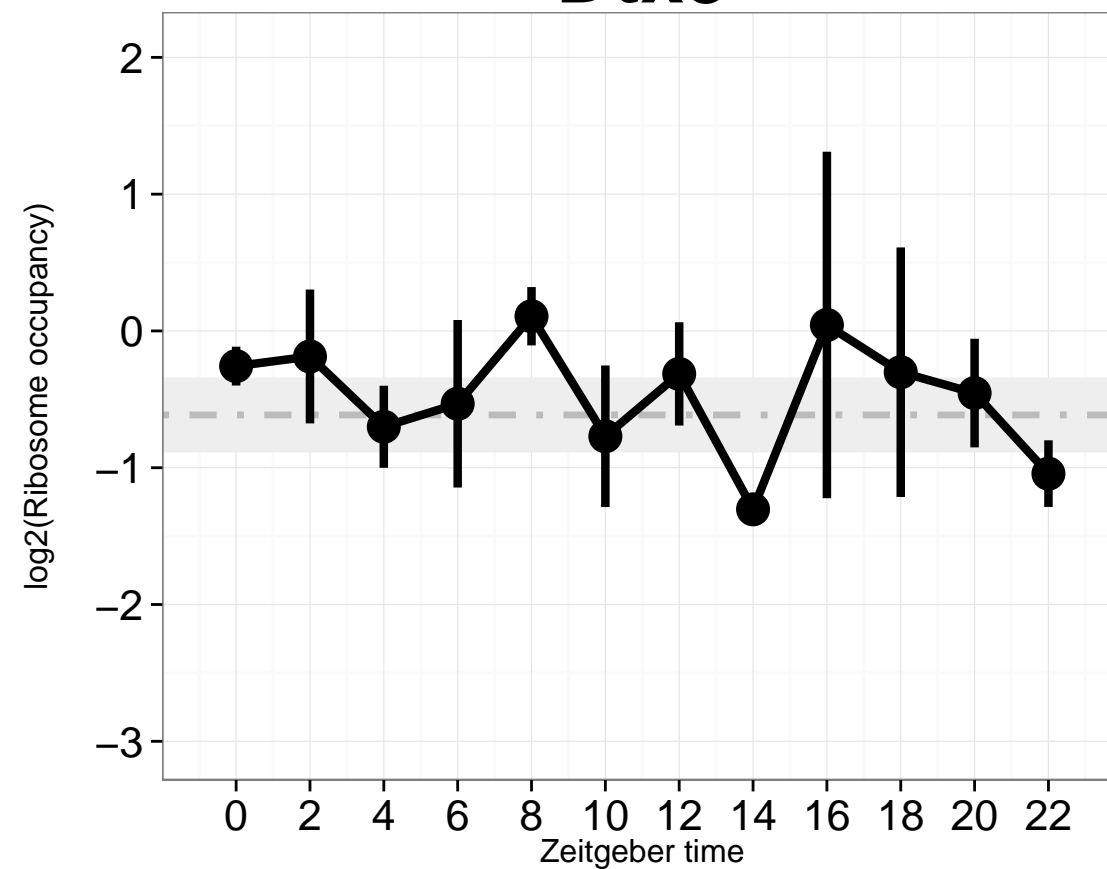

Supplement: SuppDataset_1.zip [file Dtx3_set_A.pdf › Supplemental Dataset 1/A-mRNA_nonrhyth_translation_nonrhyth/Dtx3_set_A.pdf]

# Dtx3l

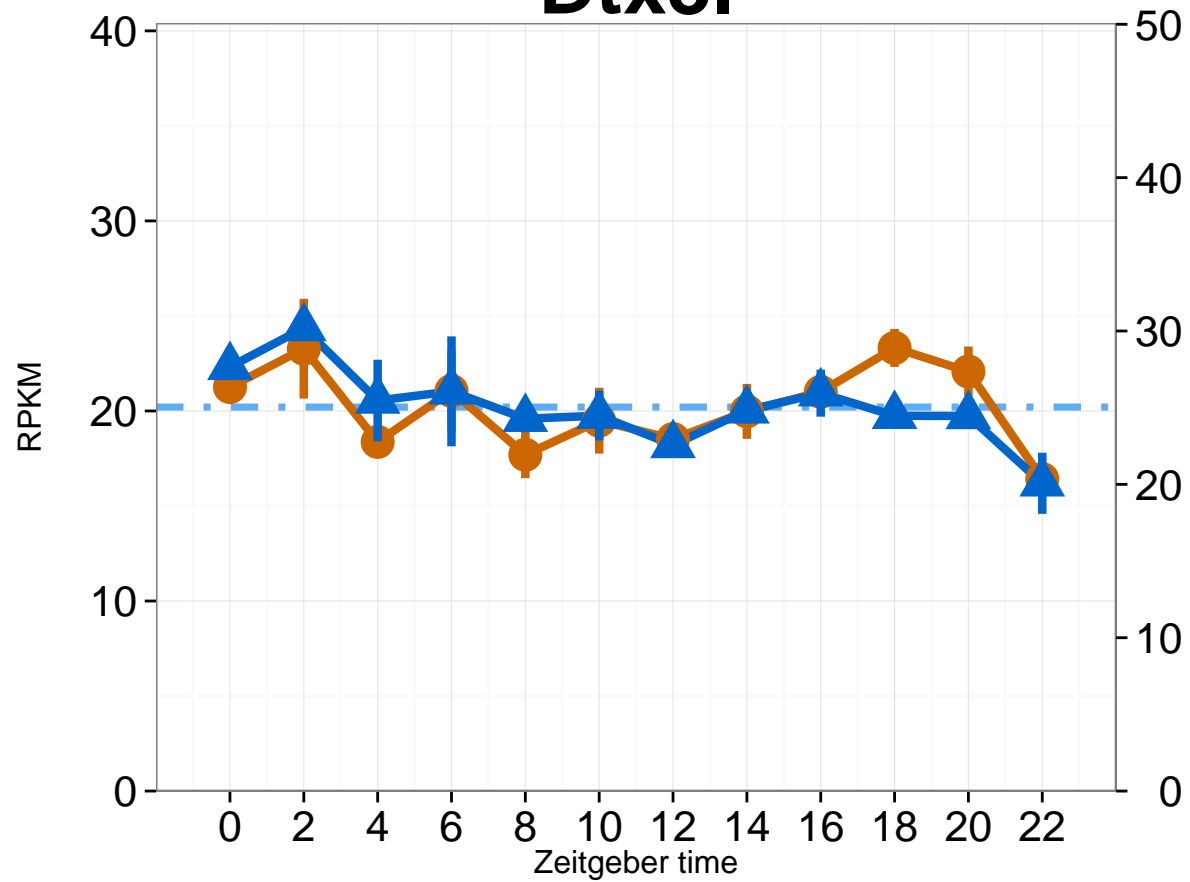

# Dtx3l

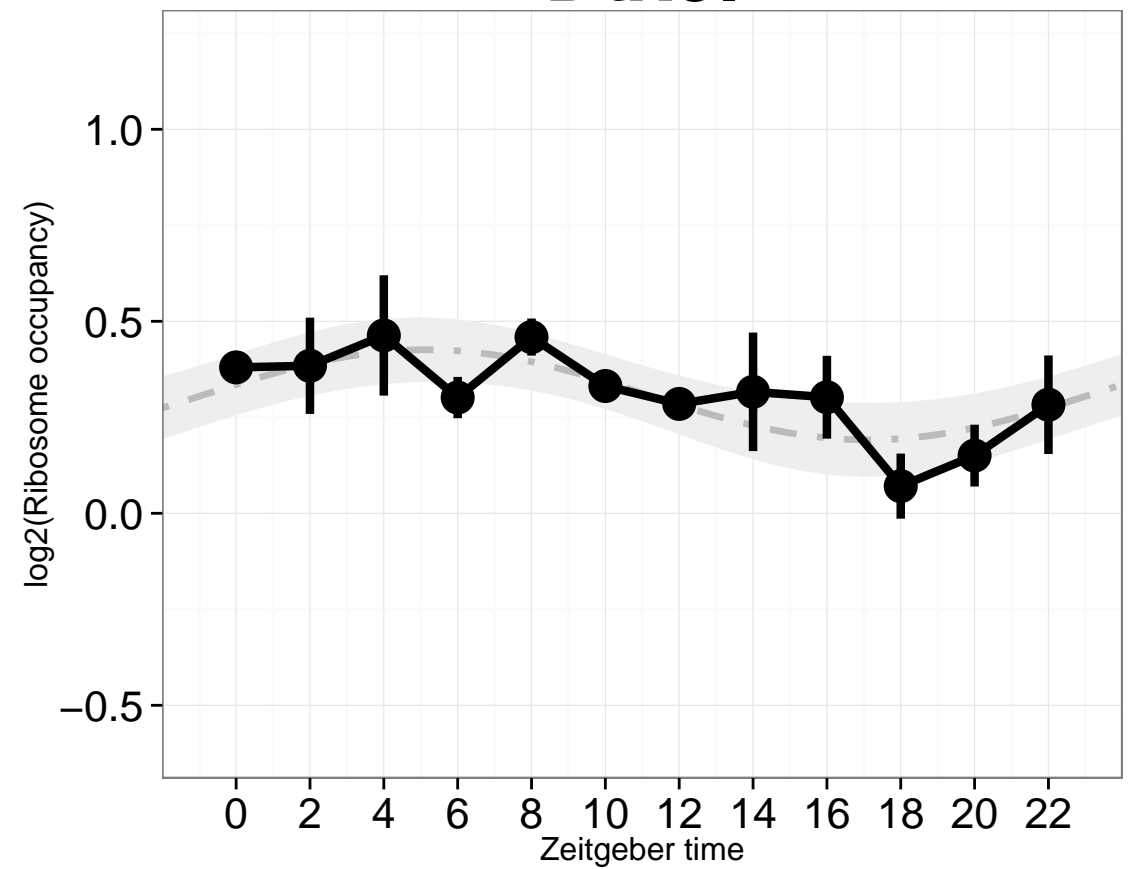

Supplement: SuppDataset_1.zip [file Dtx3l_set_A.pdf › Supplemental Dataset 1/A-mRNA_nonrhyth_translation_nonrhyth/Dtx3l_set_A.pdf]

# Dus1l

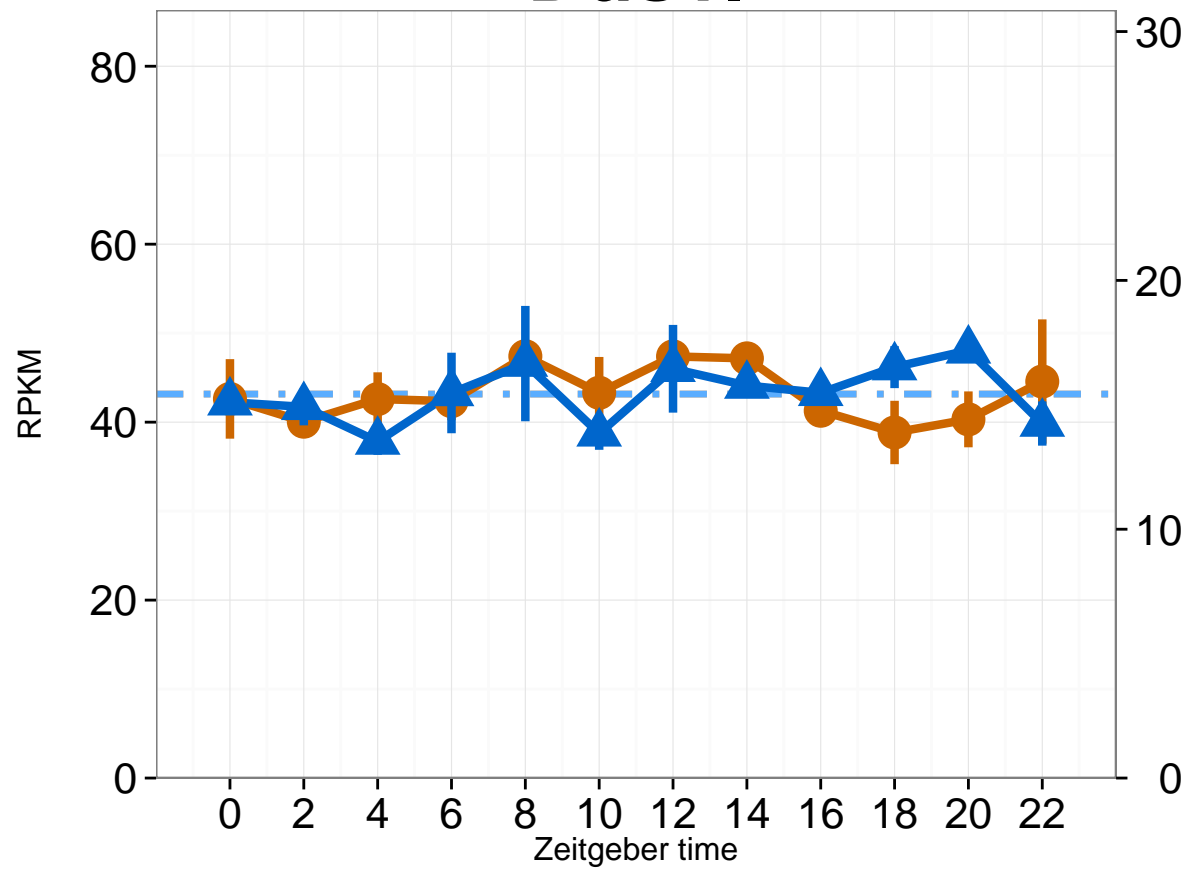

# Dus1l

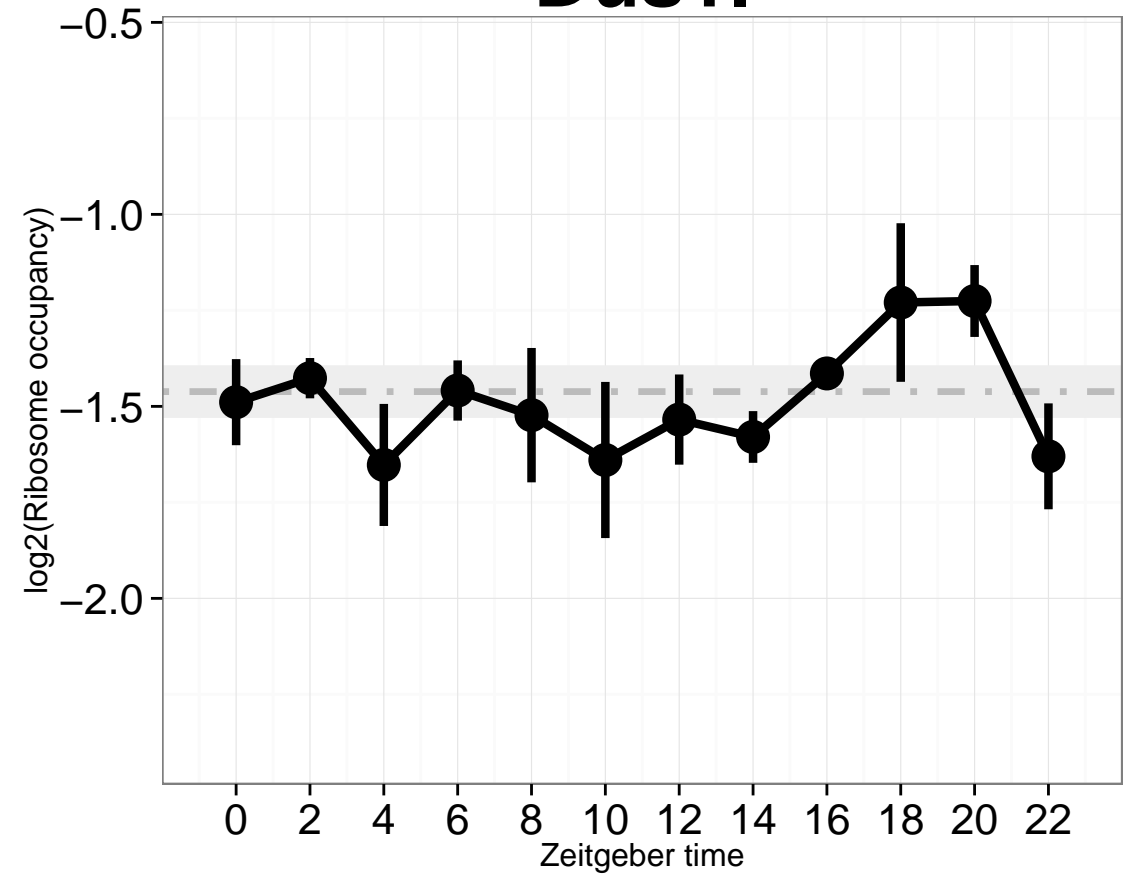

Supplement: SuppDataset_1.zip [file Dus1l_set_A.pdf › Supplemental Dataset 1/A-mRNA_nonrhyth_translation_nonrhyth/Dus1l_set_A.pdf]

## Dus3l

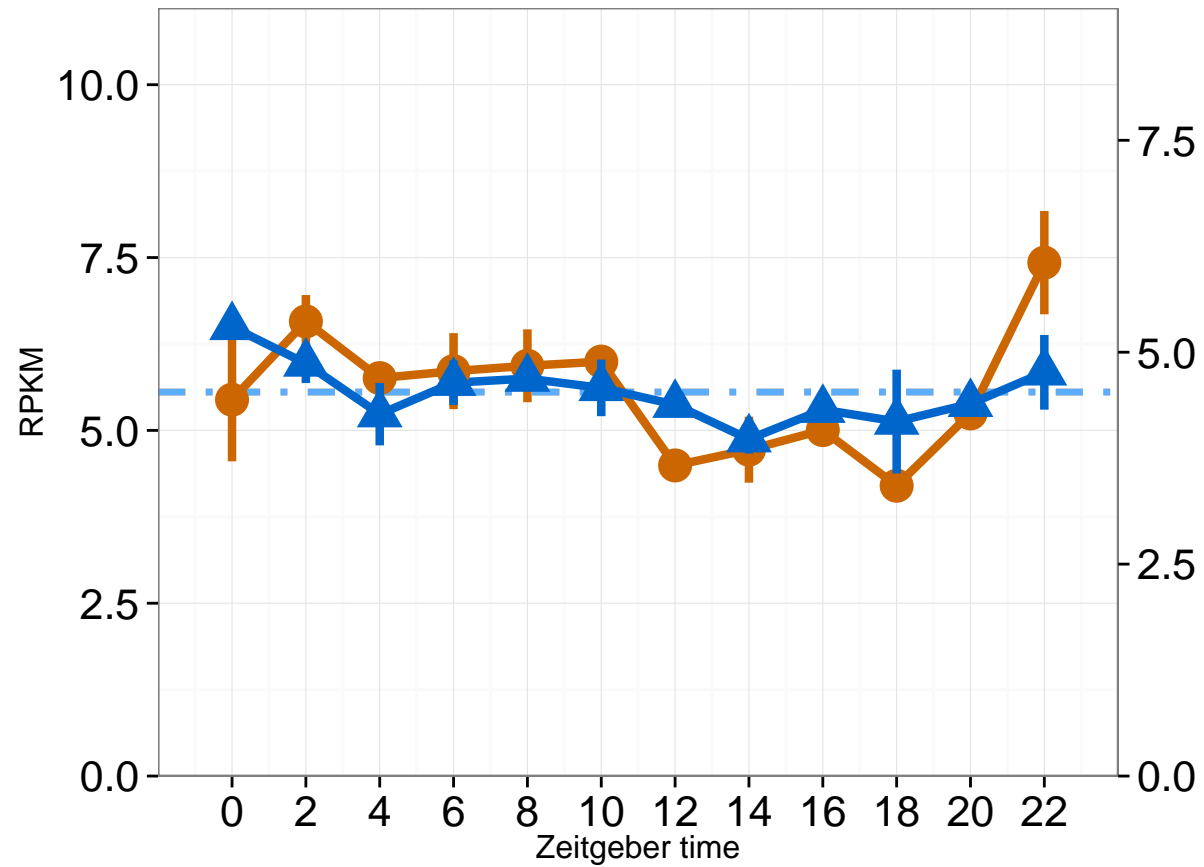

## Dus3l

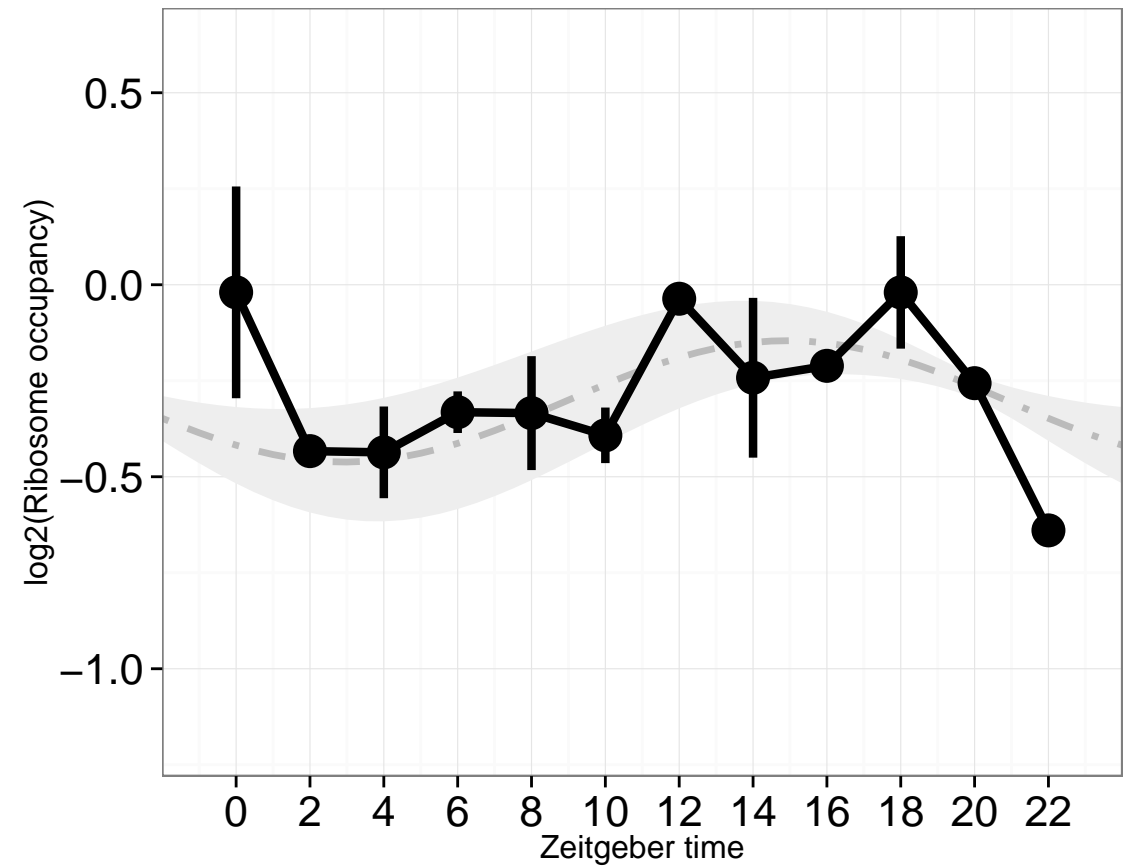

Supplement: SuppDataset_1.zip [file Dus3l_set_A.pdf › Supplemental Dataset 1/A-mRNA_nonrhyth_translation_nonrhyth/Dus3l_set_A.pdf]

## Dus4l

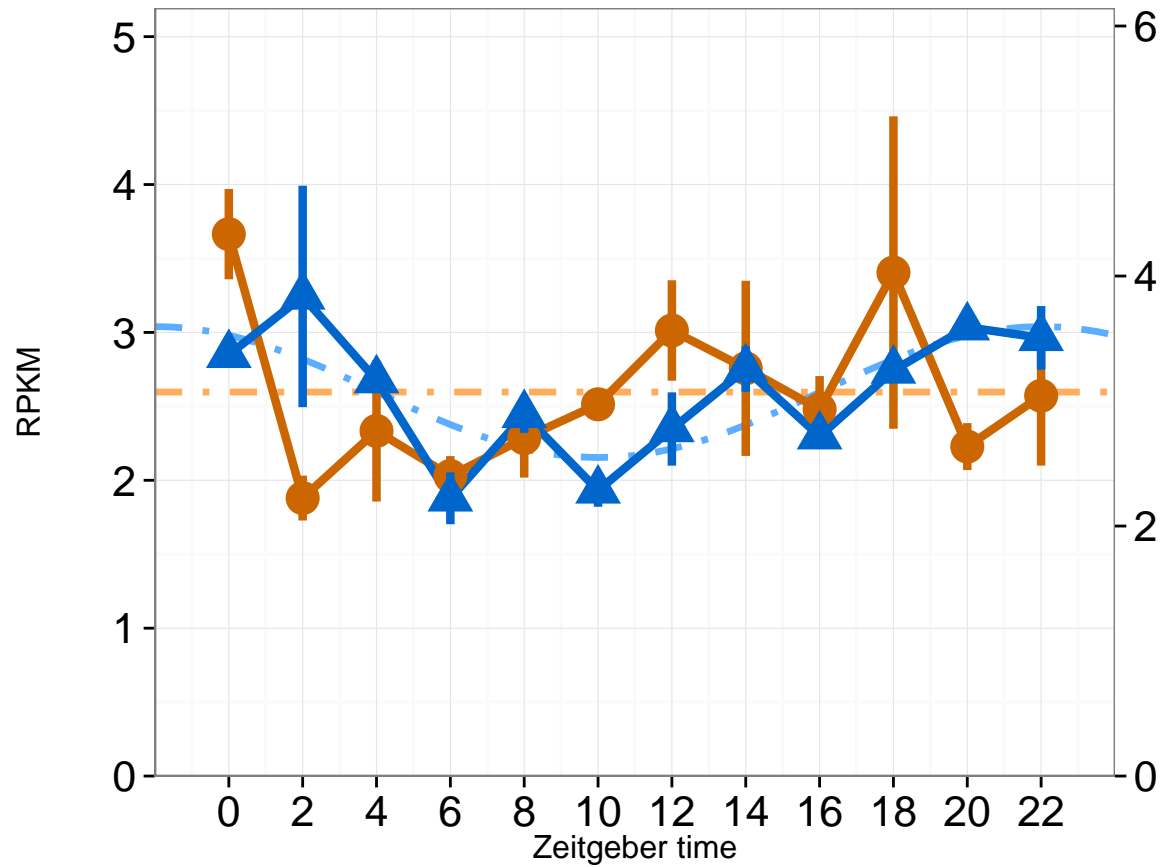

## Dus4l

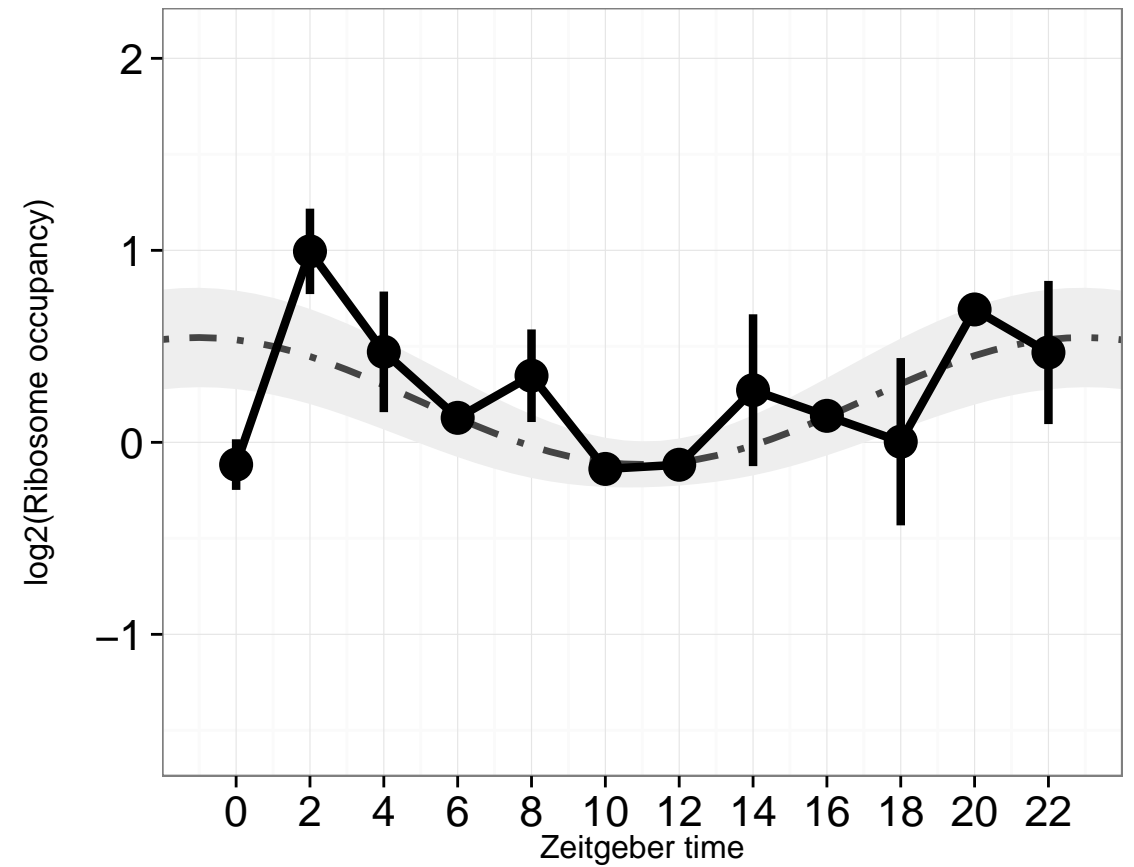

Supplement: SuppDataset_1.zip [file Dus4l_set_A.pdf › Supplemental Dataset 1/A-mRNA_nonrhyth_translation_nonrhyth/Dus4l_set_A.pdf]

# Dusp10

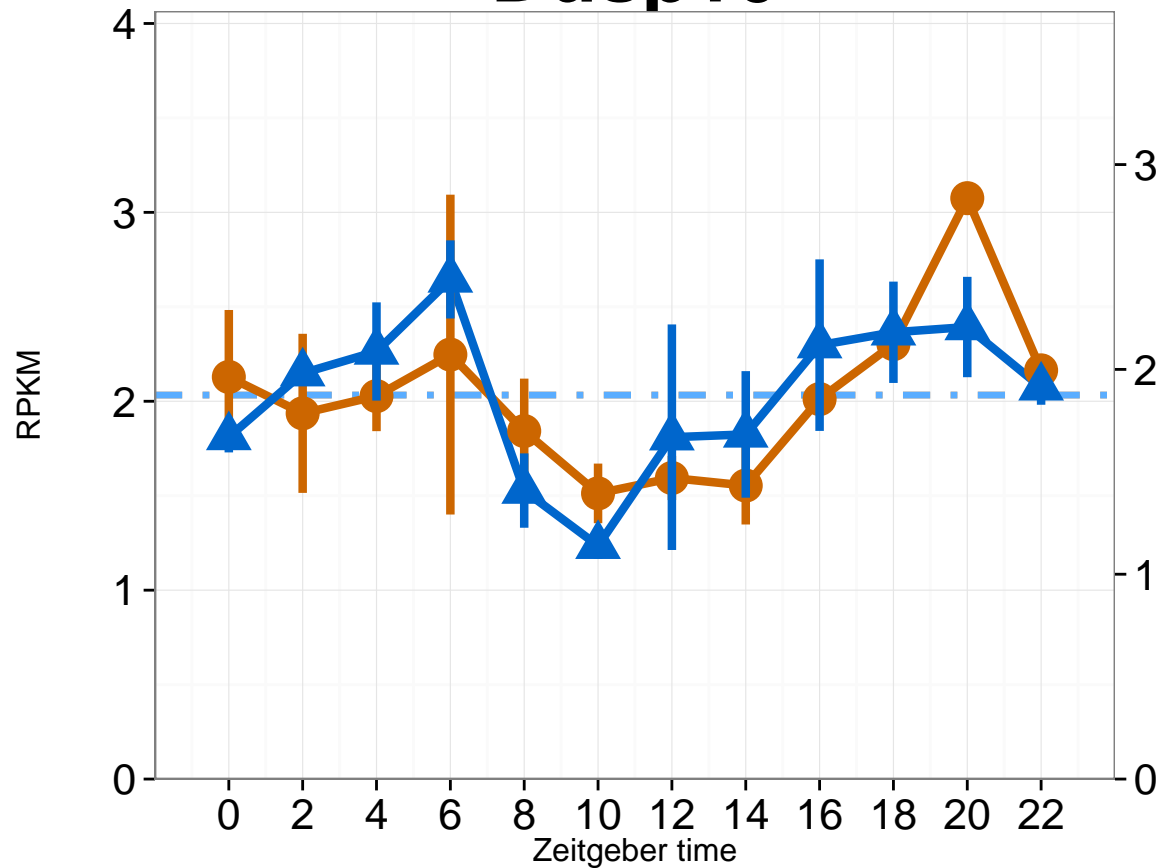

# Dusp10

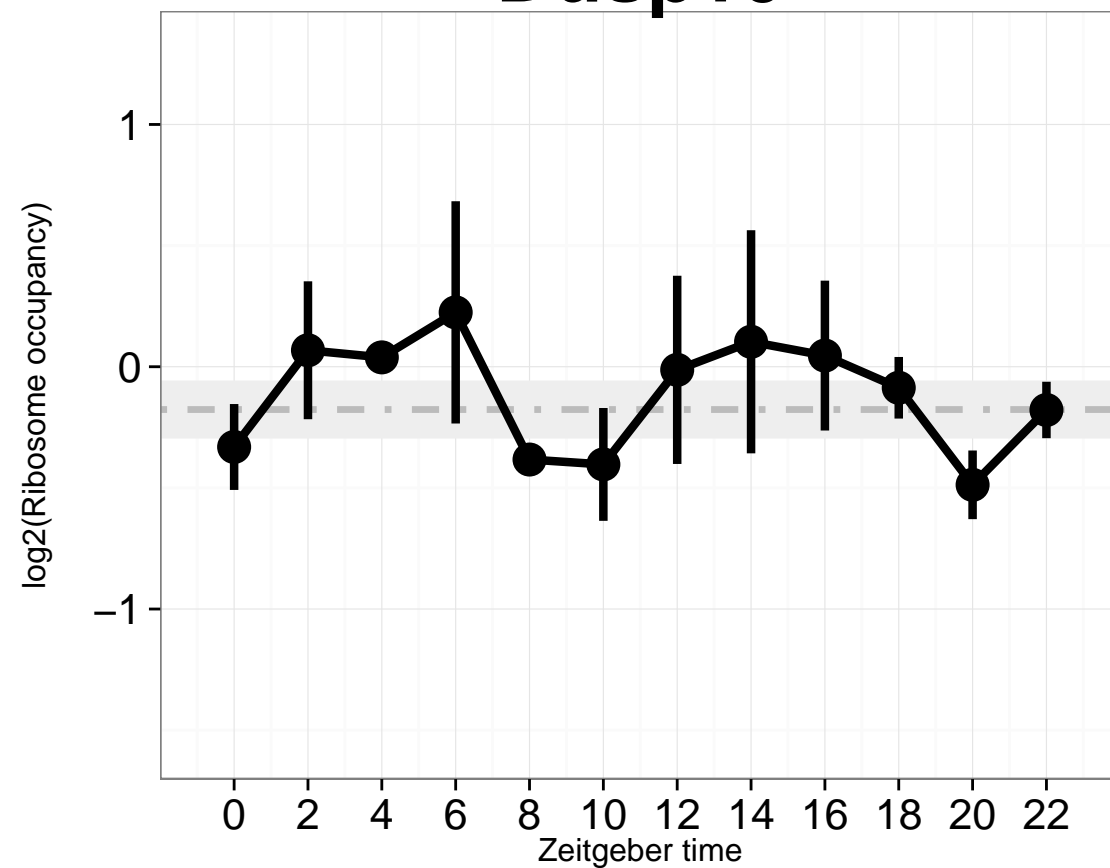

Supplement: SuppDataset_1.zip [file Dusp10_set_A.pdf › Supplemental Dataset 1/A-mRNA_nonrhyth_translation_nonrhyth/Dusp10_set_A.pdf]

# Dusp11

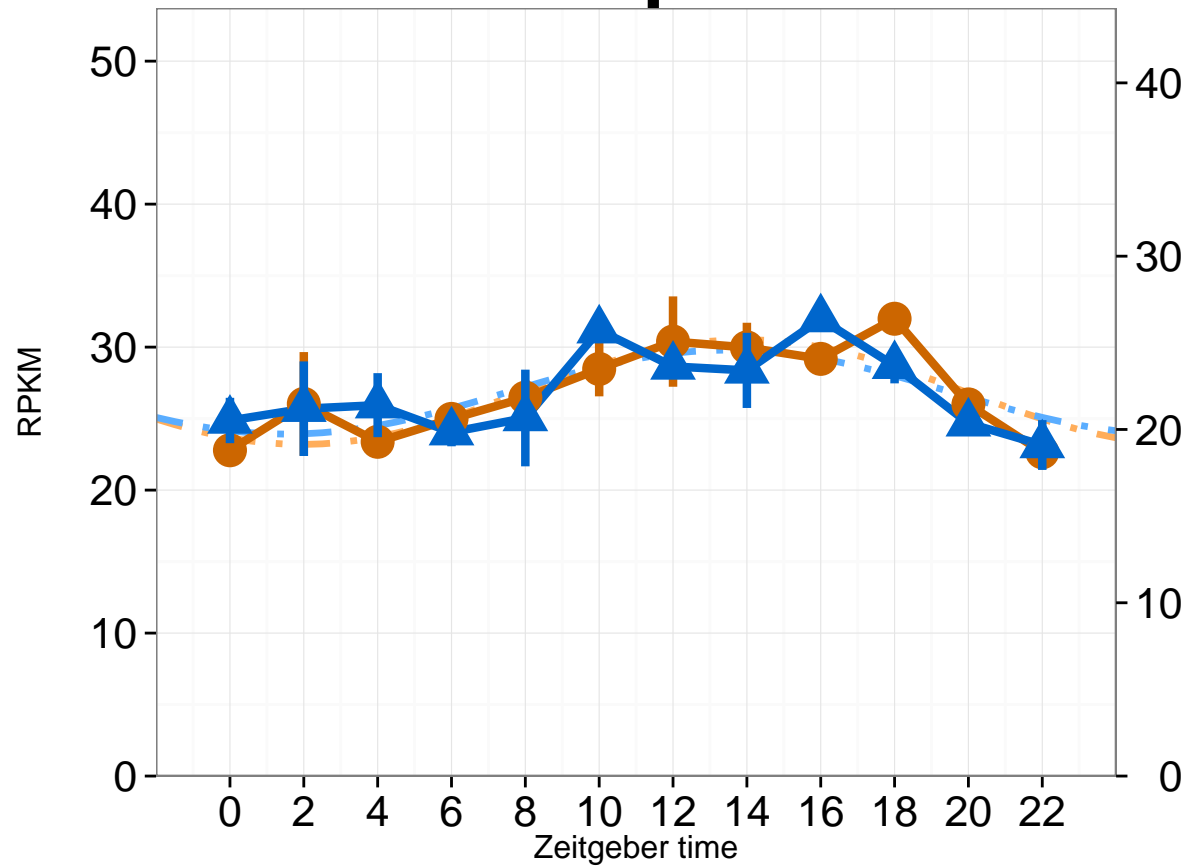

# Dusp11

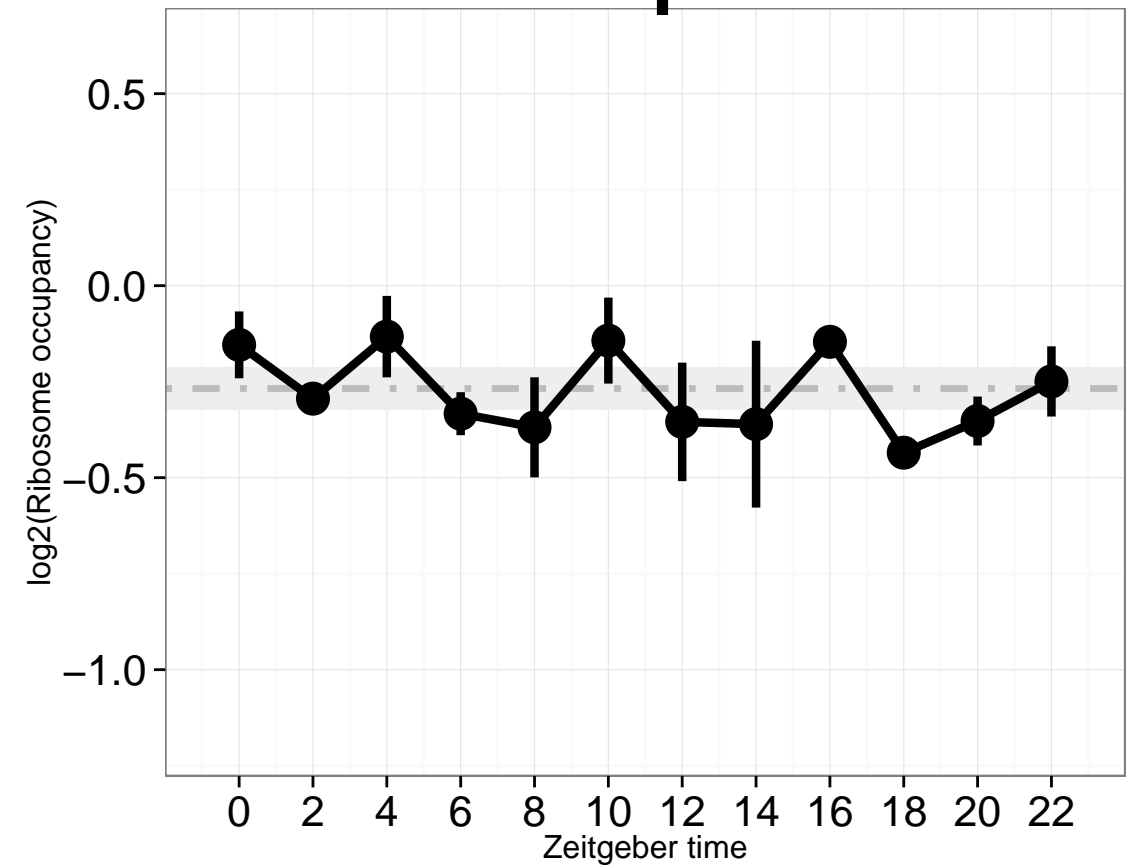

Supplement: SuppDataset_1.zip [file Dusp11_set_A.pdf › Supplemental Dataset 1/A-mRNA_nonrhyth_translation_nonrhyth/Dusp11_set_A.pdf]

## Dusp12

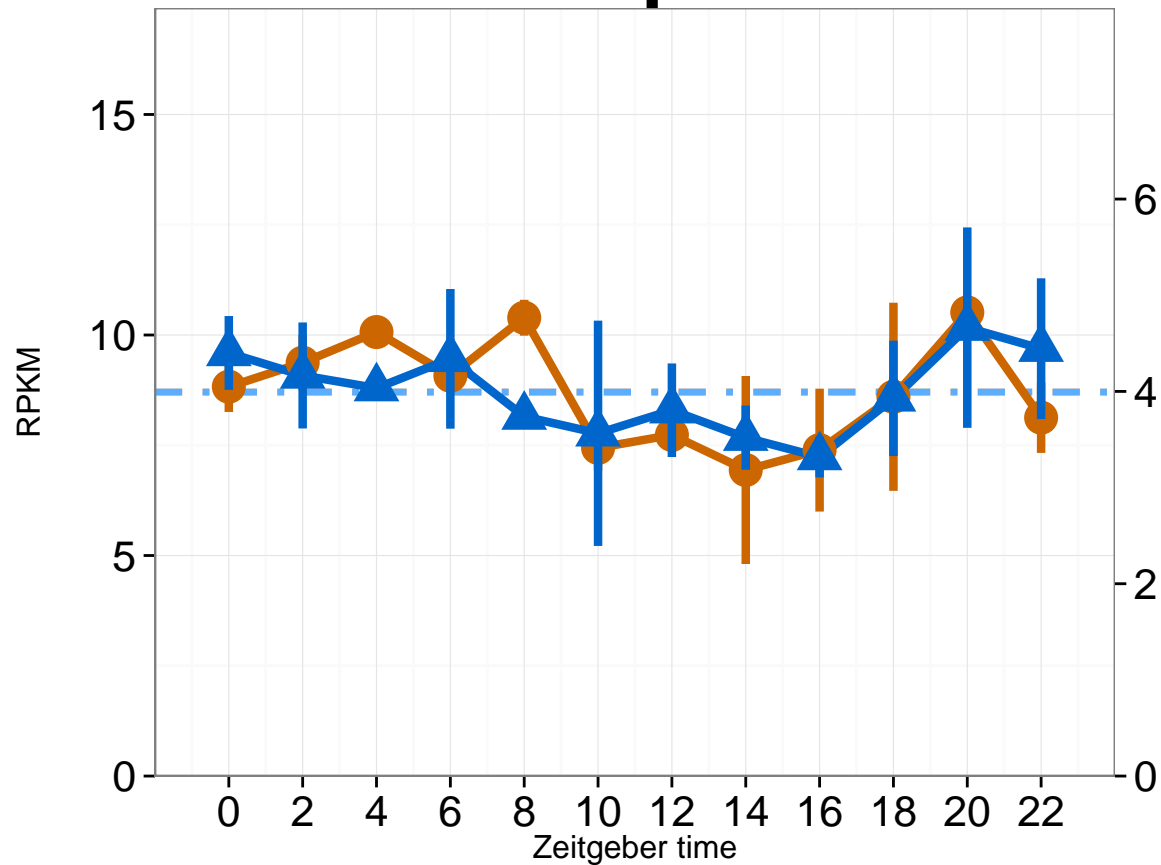

## Dusp12

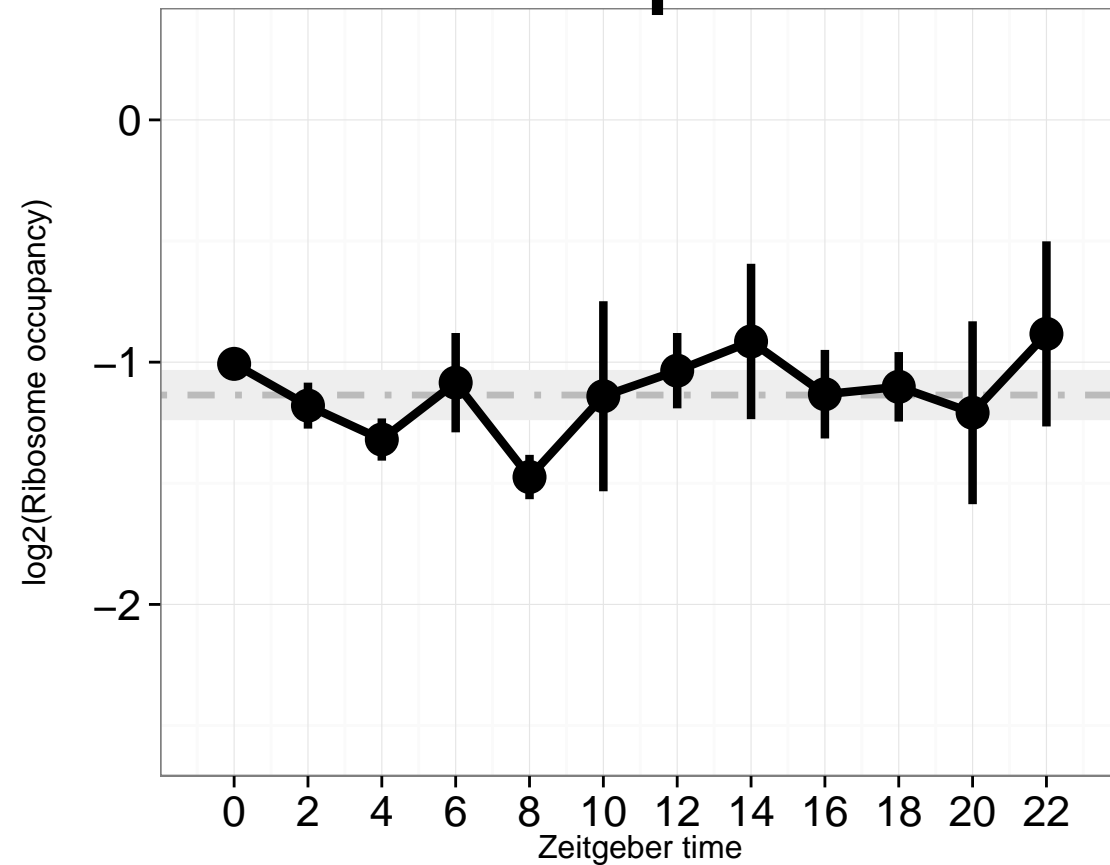

Supplement: SuppDataset_1.zip [file Dusp12_set_A.pdf › Supplemental Dataset 1/A-mRNA_nonrhyth_translation_nonrhyth/Dusp12_set_A.pdf]

## Dusp16

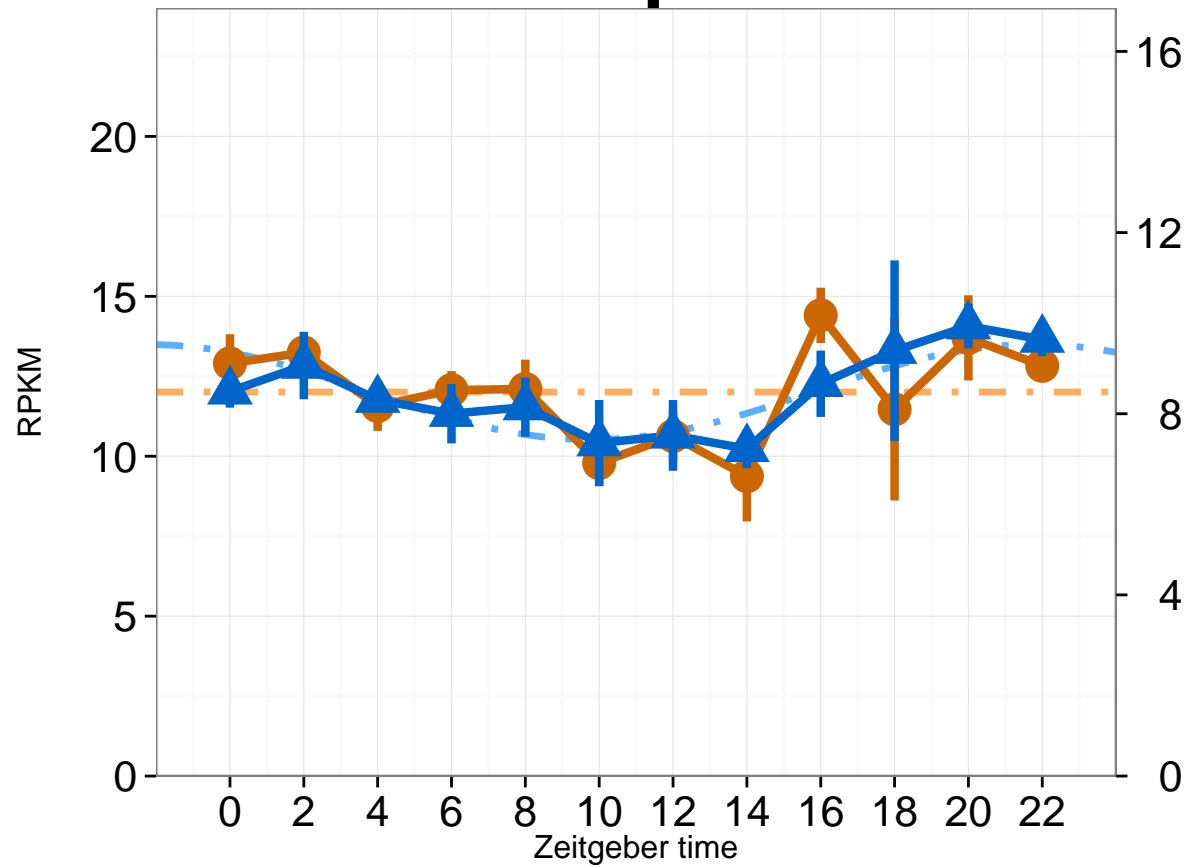

## Dusp16

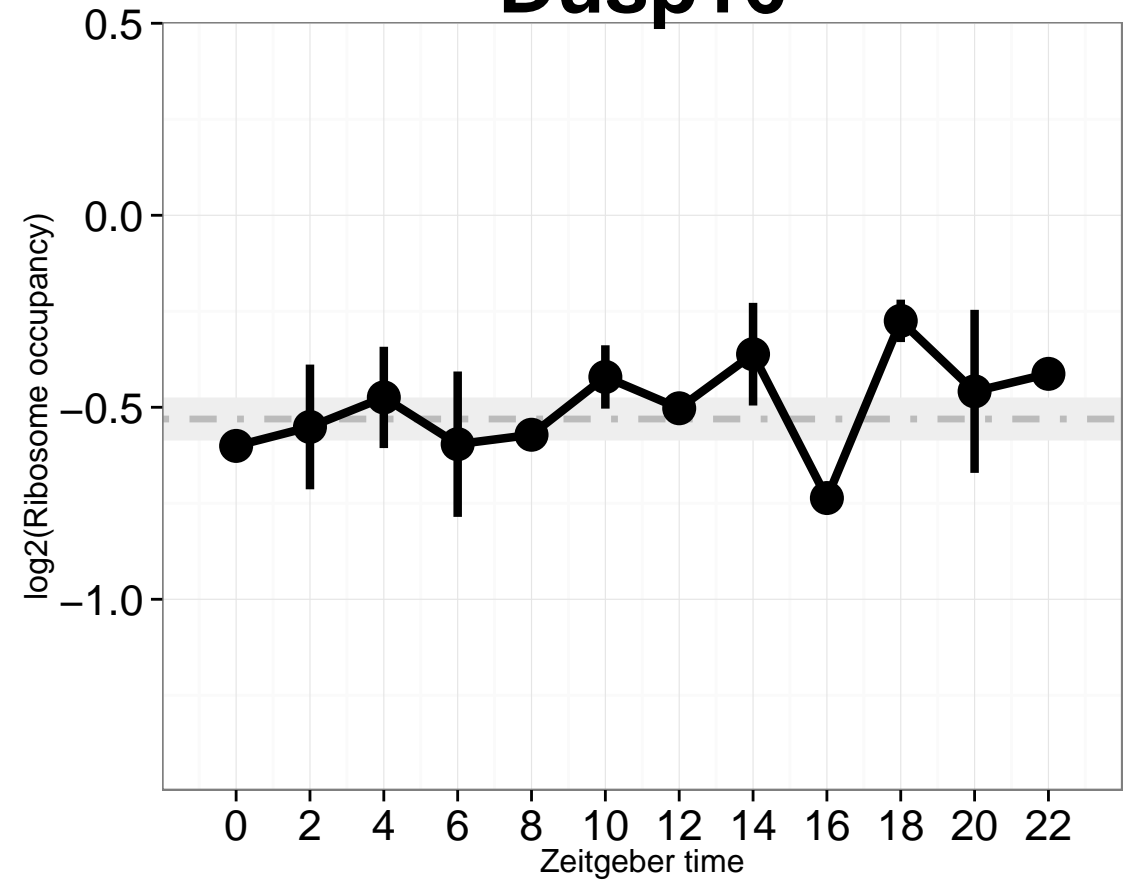

Supplement: SuppDataset_1.zip [file Dusp16_set_A.pdf › Supplemental Dataset 1/A-mRNA_nonrhyth_translation_nonrhyth/Dusp16_set_A.pdf]

## Dusp1

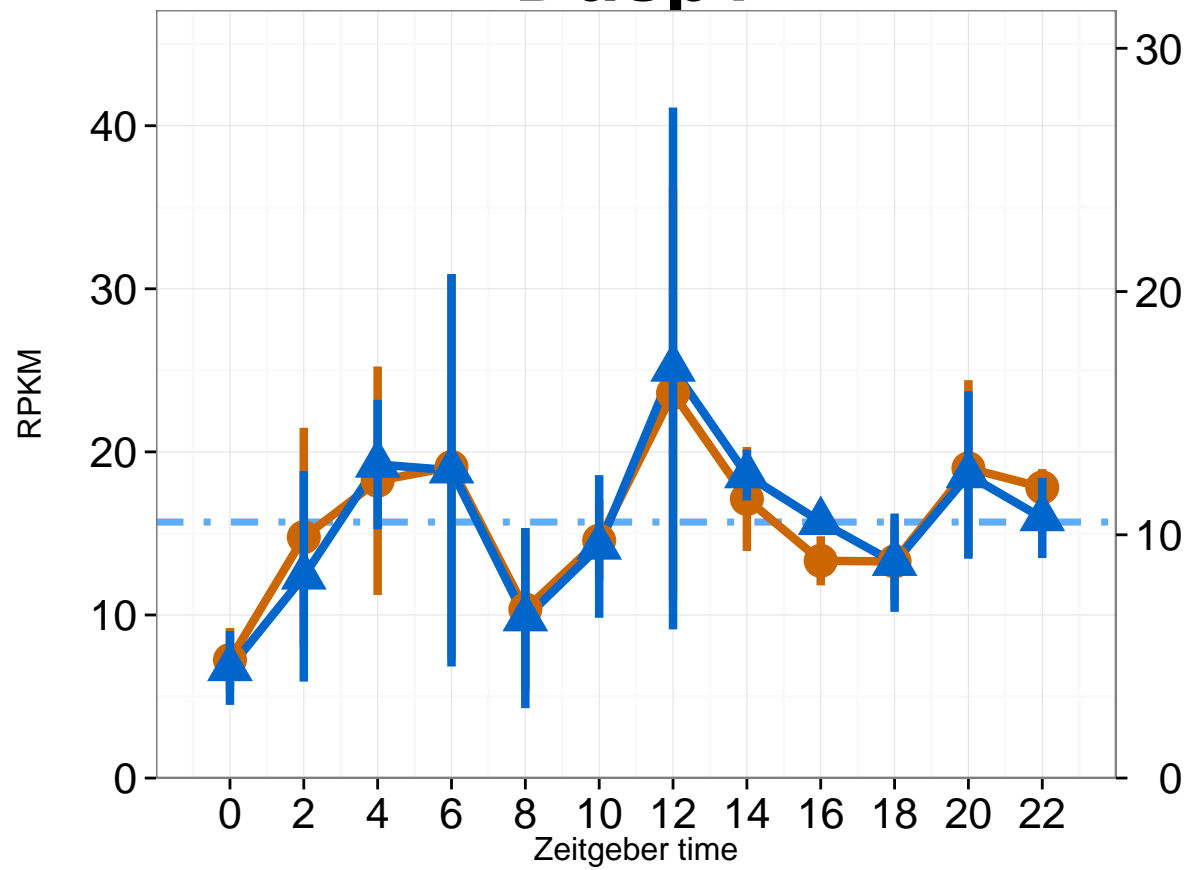

## Dusp1

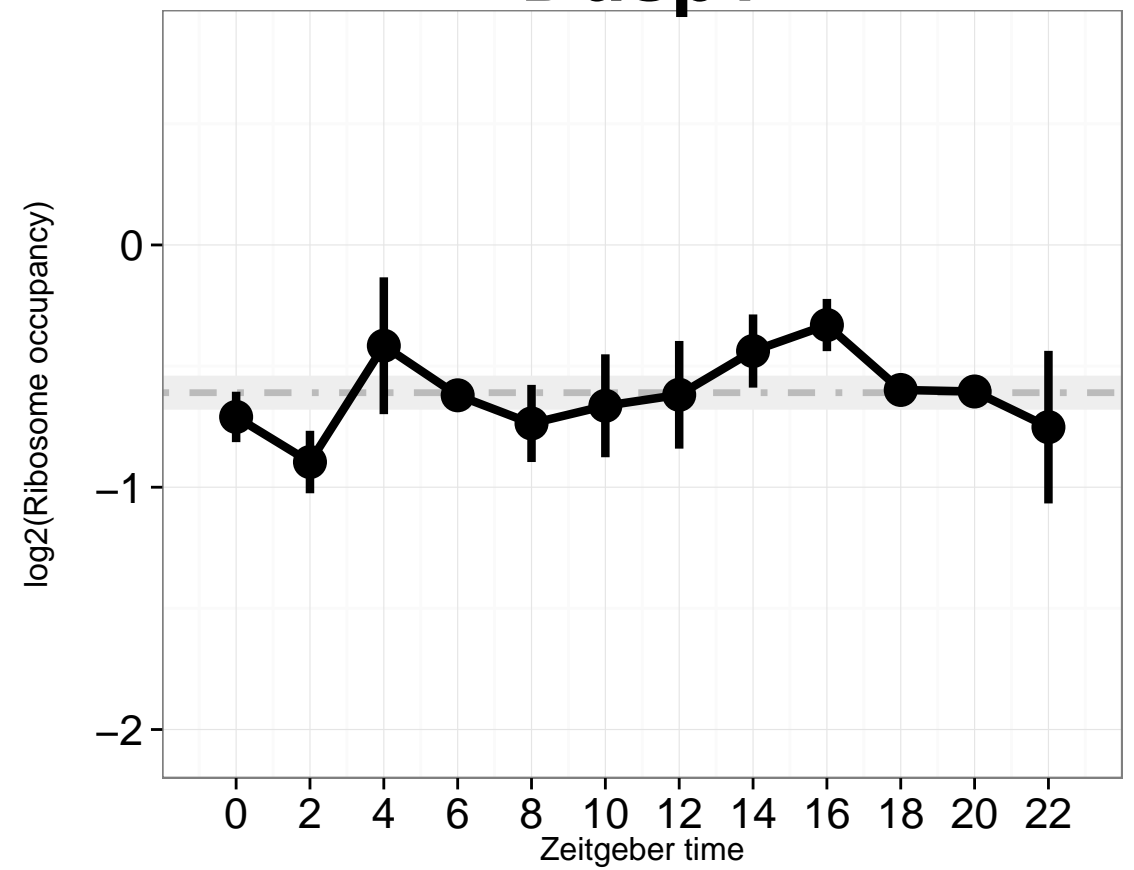

Supplement: SuppDataset_1.zip [file Dusp1_set_A.pdf › Supplemental Dataset 1/A-mRNA_nonrhyth_translation_nonrhyth/Dusp1_set_A.pdf]

## Dusp22

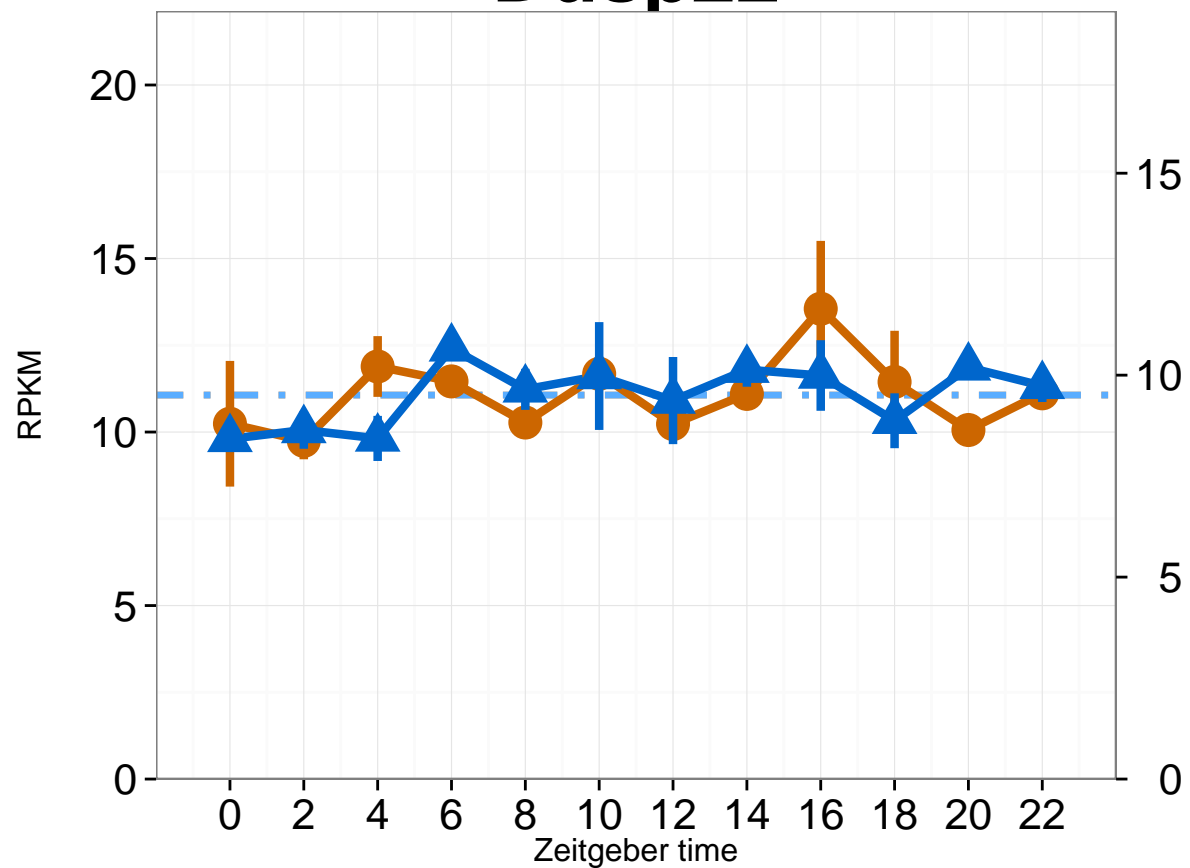

## Dusp22

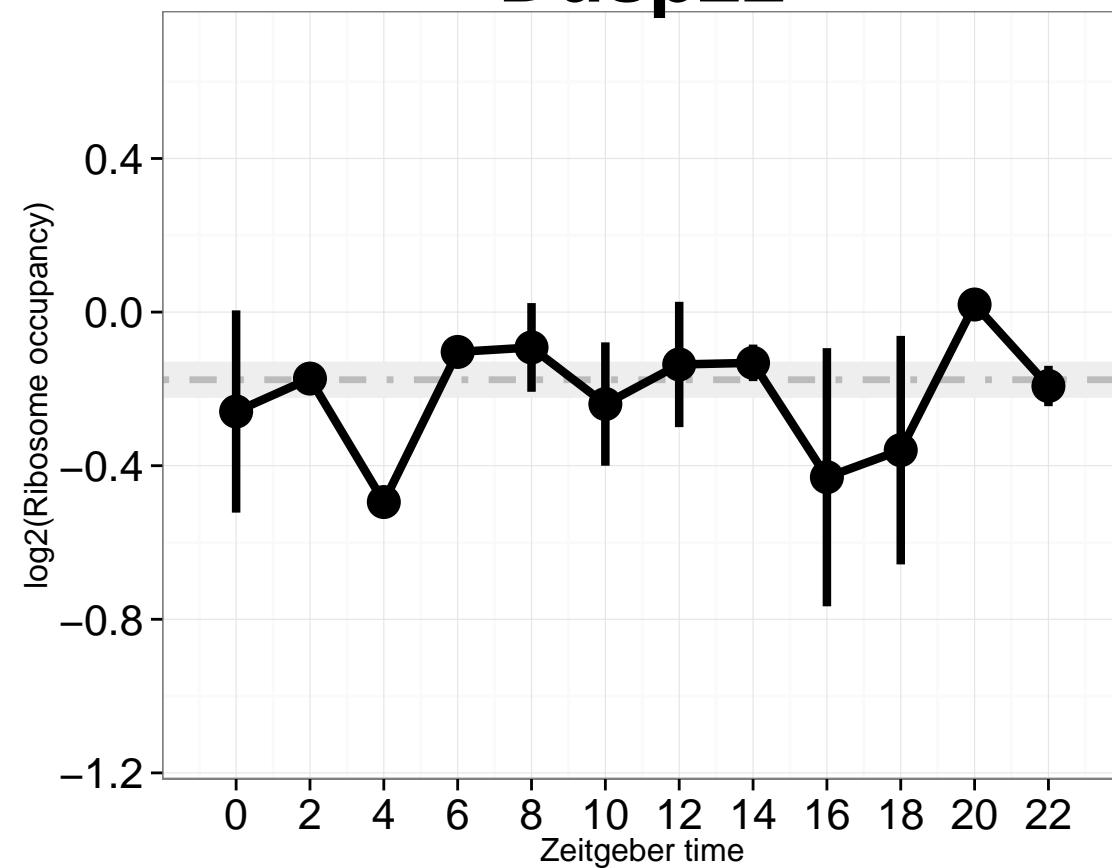

Supplement: SuppDataset_1.zip [file Dusp22_set_A.pdf › Supplemental Dataset 1/A-mRNA_nonrhyth_translation_nonrhyth/Dusp22_set_A.pdf]

# Dusp23

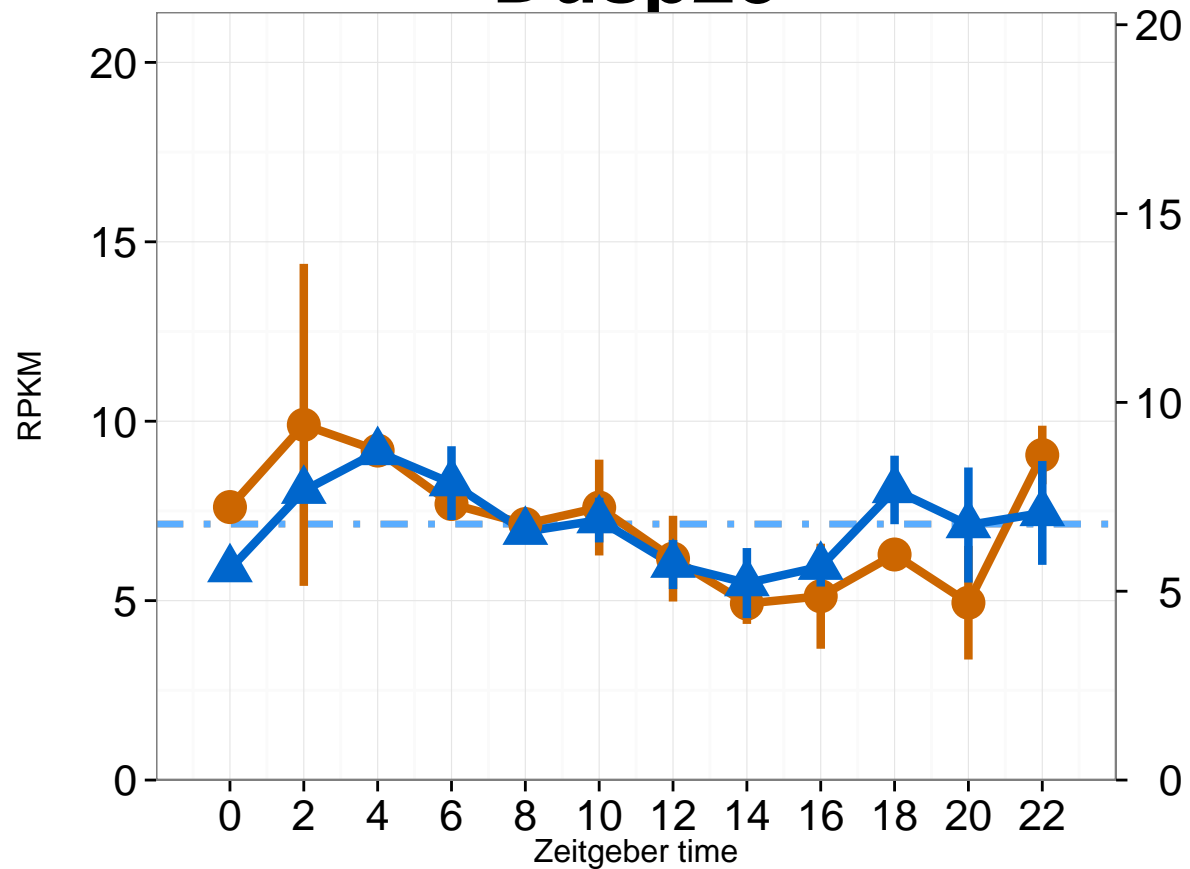

# Dusp23

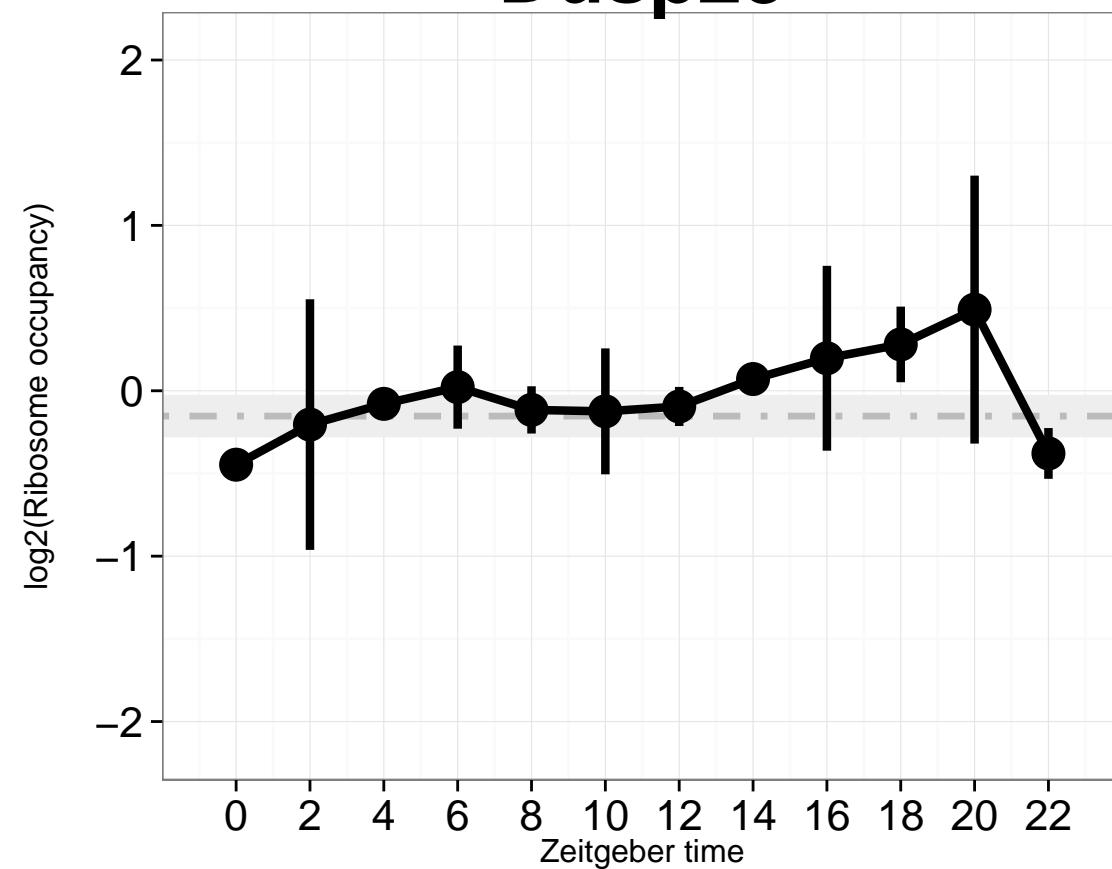

Supplement: SuppDataset_1.zip [file Dusp23_set_A.pdf › Supplemental Dataset 1/A-mRNA_nonrhyth_translation_nonrhyth/Dusp23_set_A.pdf]

## Dusp28

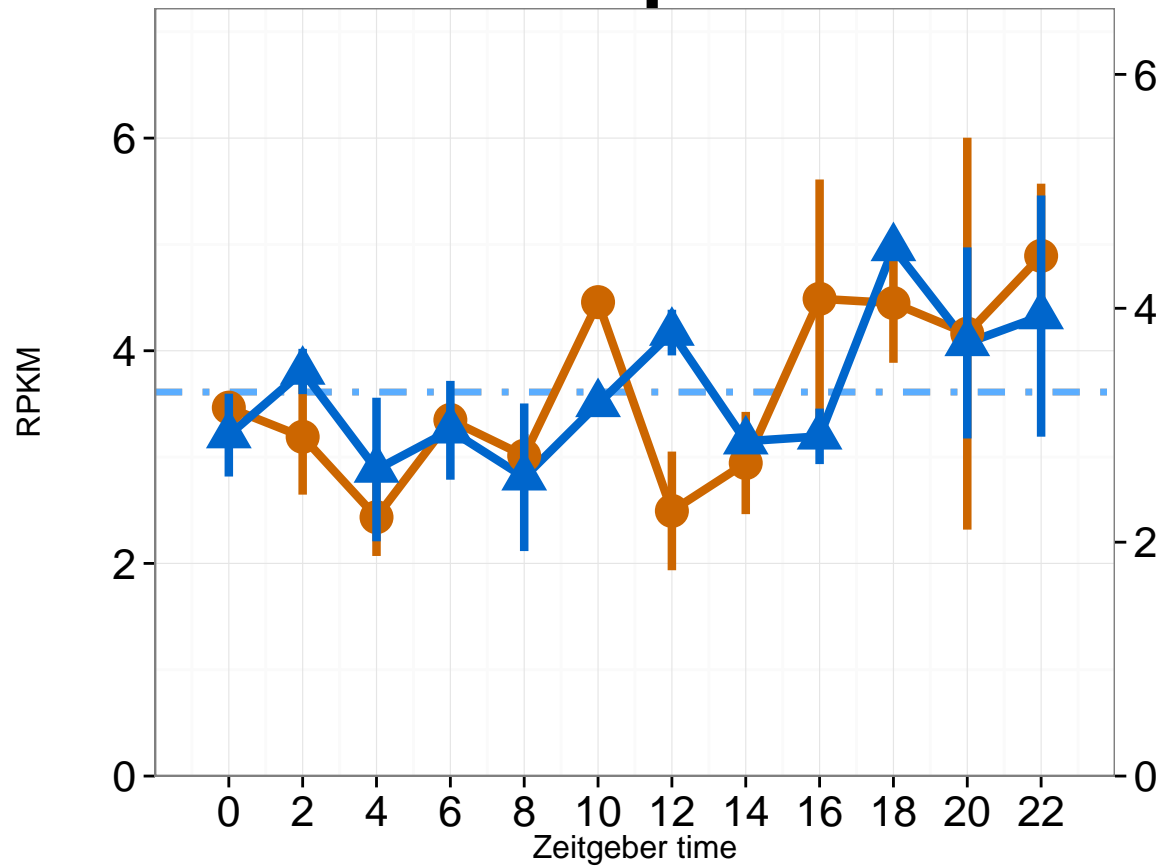

## Dusp28

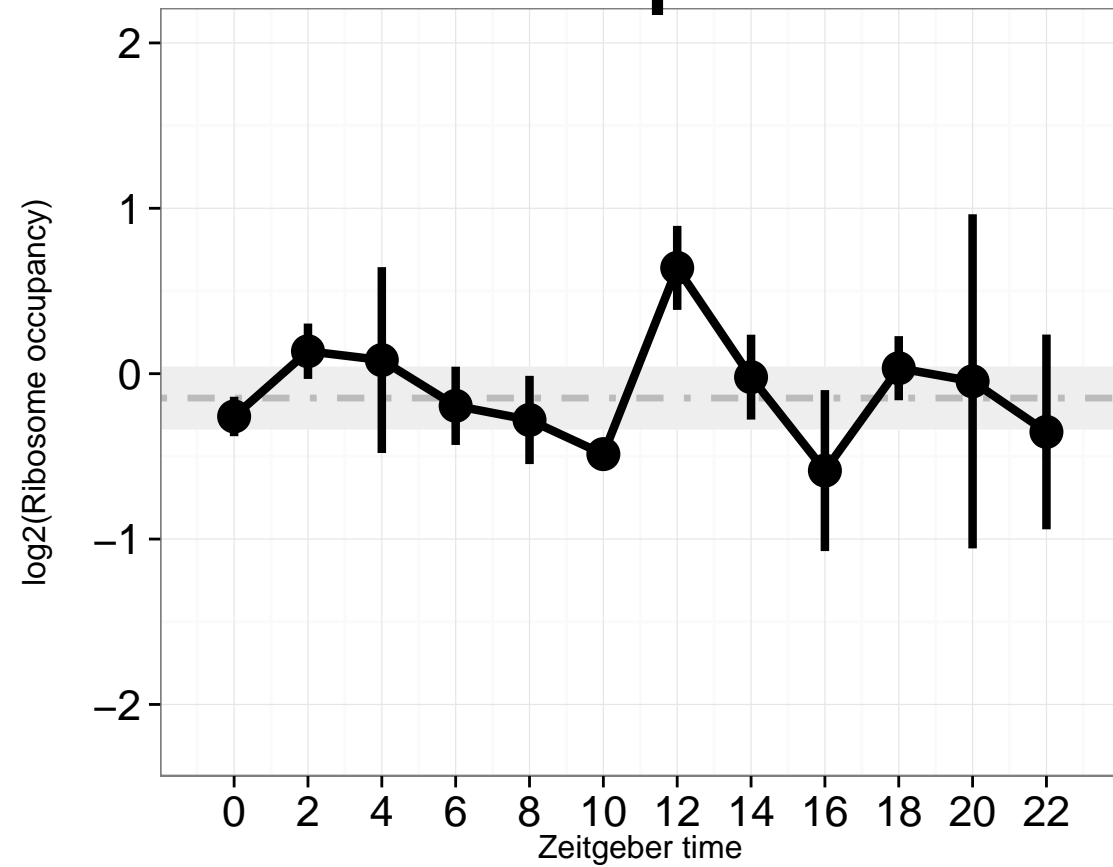

Supplement: SuppDataset_1.zip [file Dusp28_set_A.pdf › Supplemental Dataset 1/A-mRNA_nonrhyth_translation_nonrhyth/Dusp28_set_A.pdf]

# Dusp4

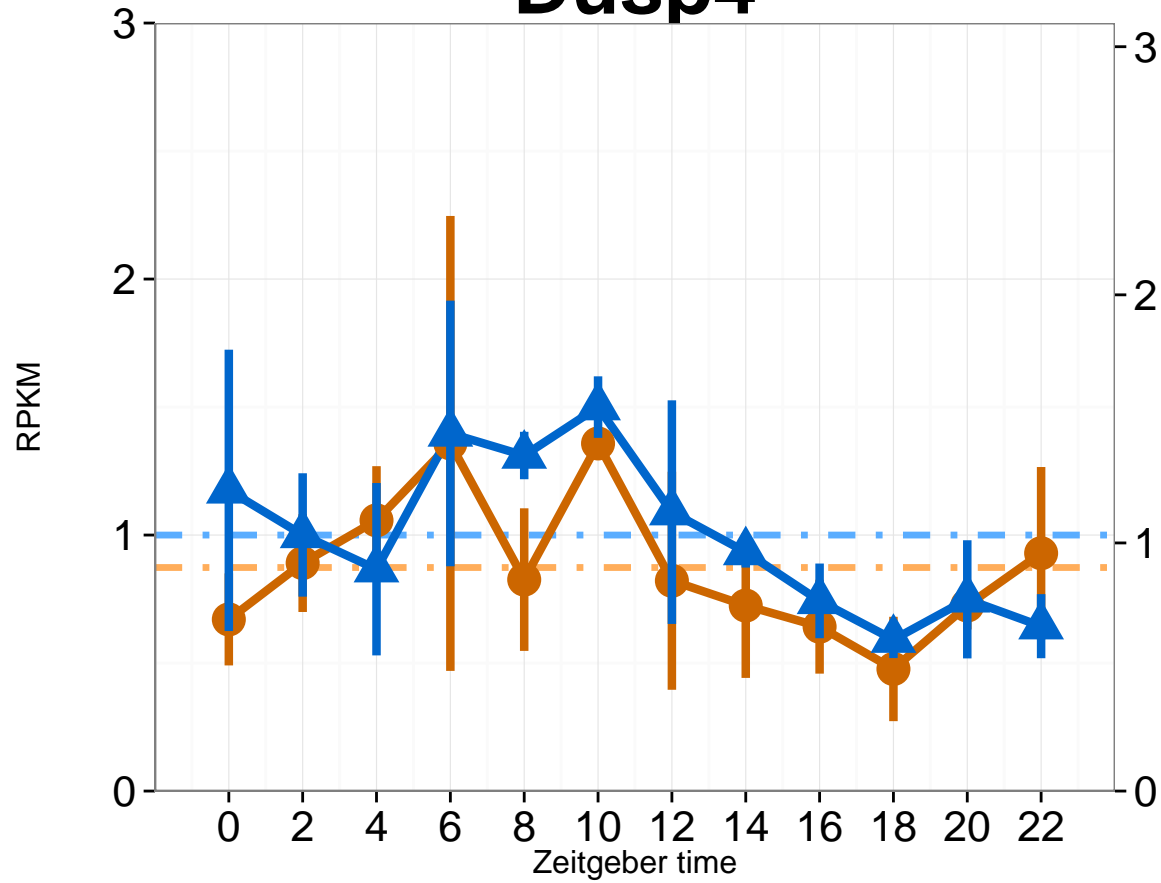

# Dusp4

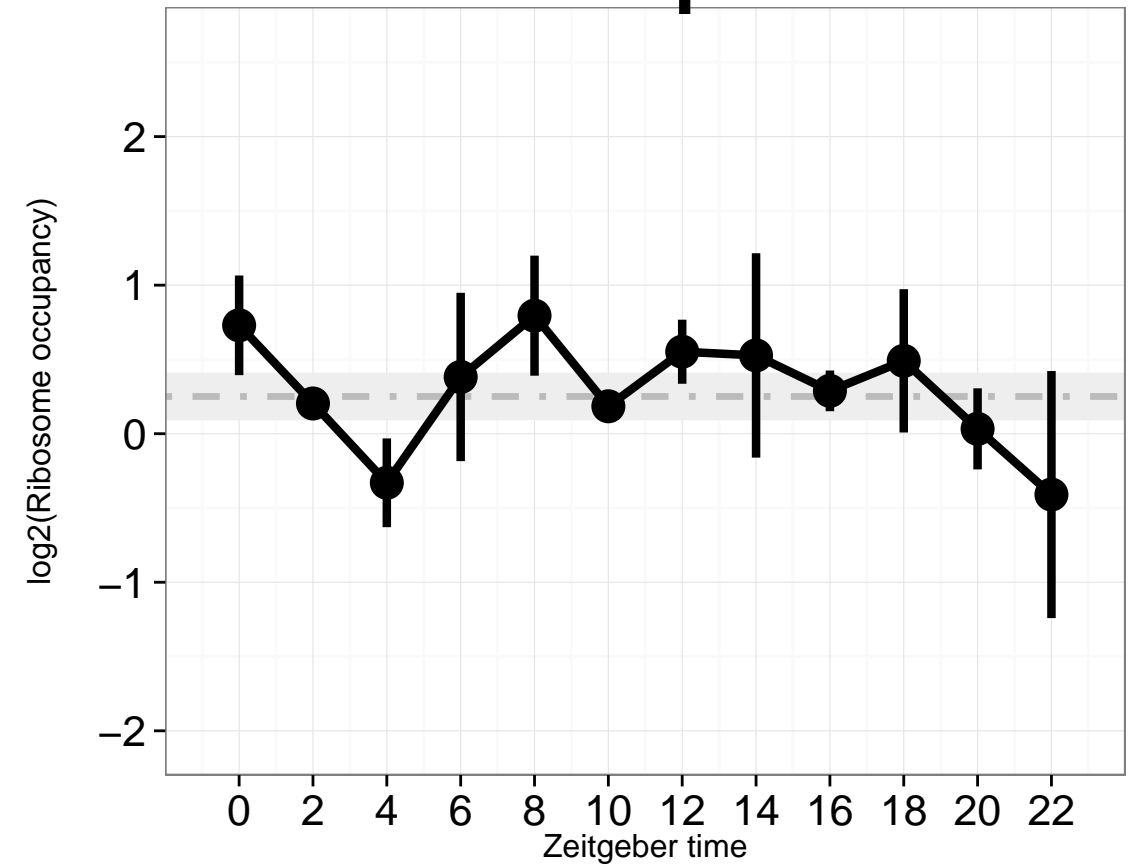

Supplement: SuppDataset_1.zip [file Dusp4_set_A.pdf › Supplemental Dataset 1/A-mRNA_nonrhyth_translation_nonrhyth/Dusp4_set_A.pdf]

## Dusp6

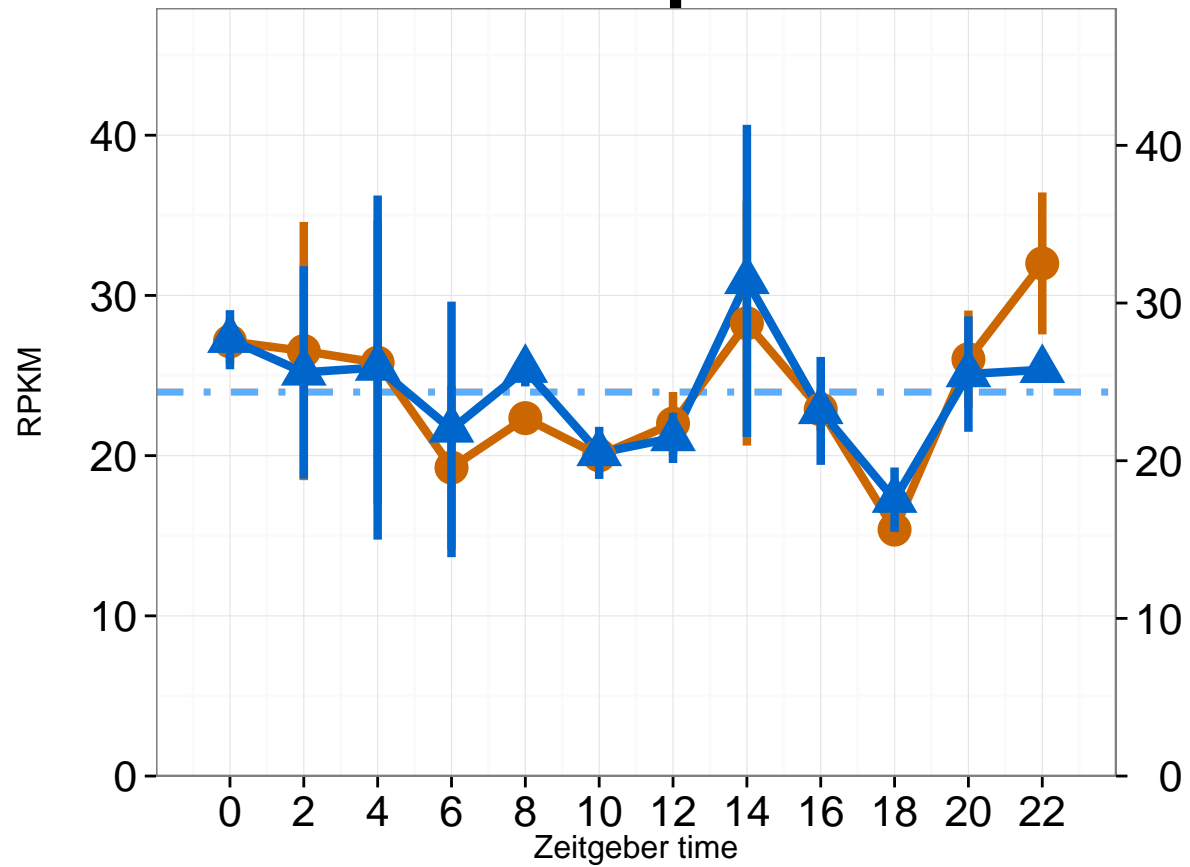

## Dusp6

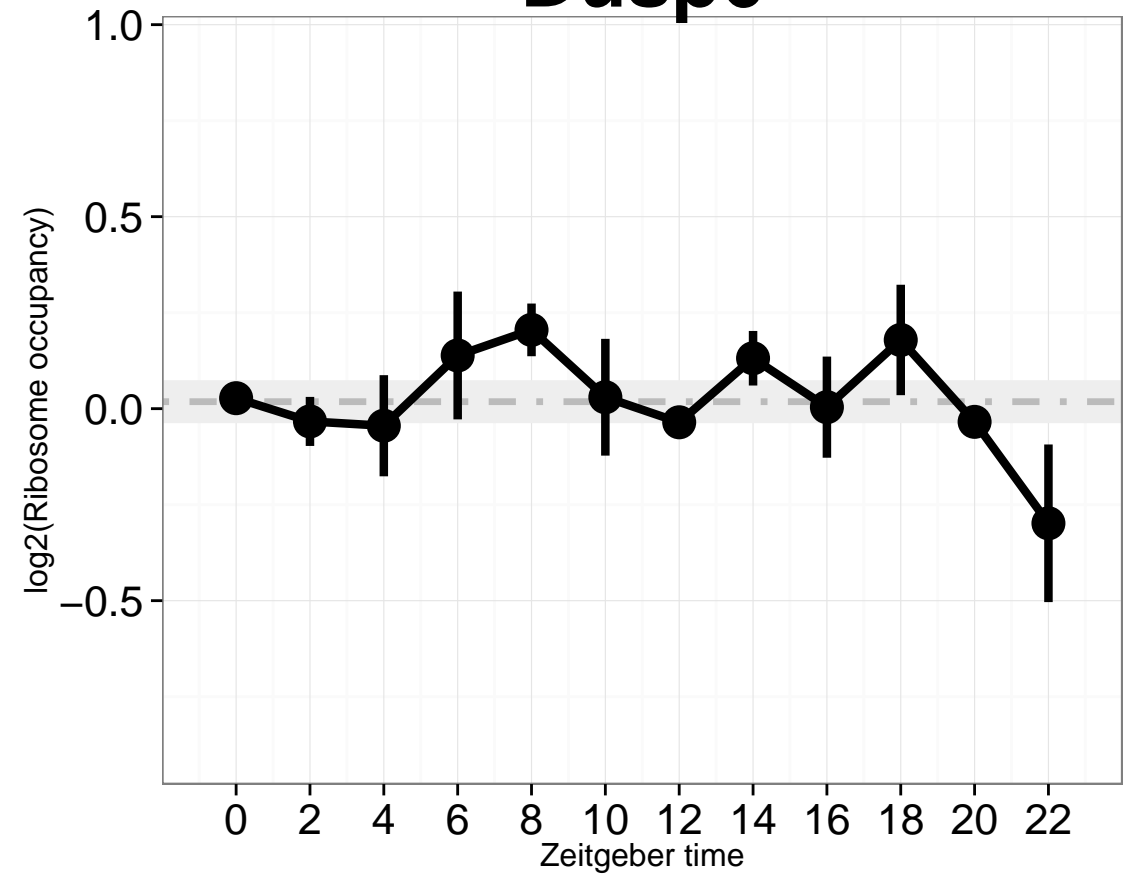

Supplement: SuppDataset_1.zip [file Dusp6_set_A.pdf › Supplemental Dataset 1/A-mRNA_nonrhyth_translation_nonrhyth/Dusp6_set_A.pdf]

## Dut

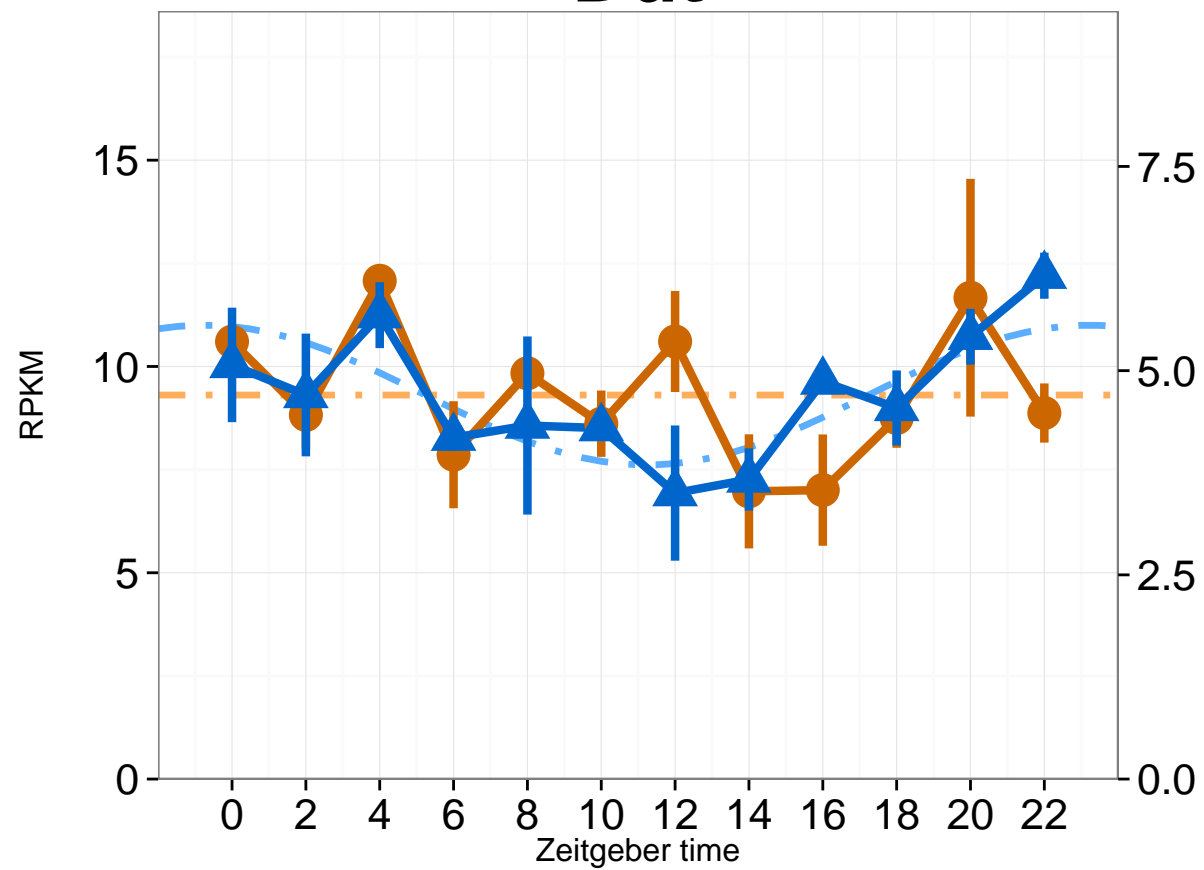

## Dut

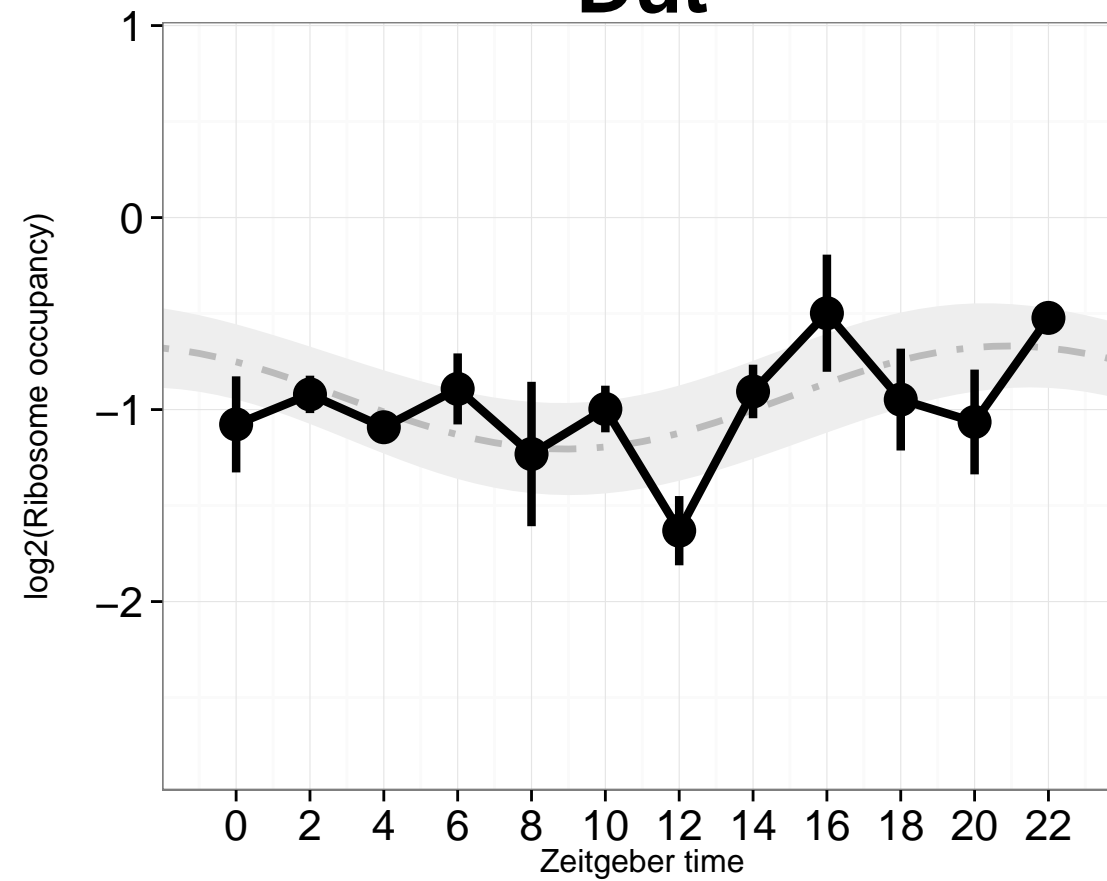

Supplement: SuppDataset_1.zip [file Dut_set_A.pdf › Supplemental Dataset 1/A-mRNA_nonrhyth_translation_nonrhyth/Dut_set_A.pdf]

# Dvl1

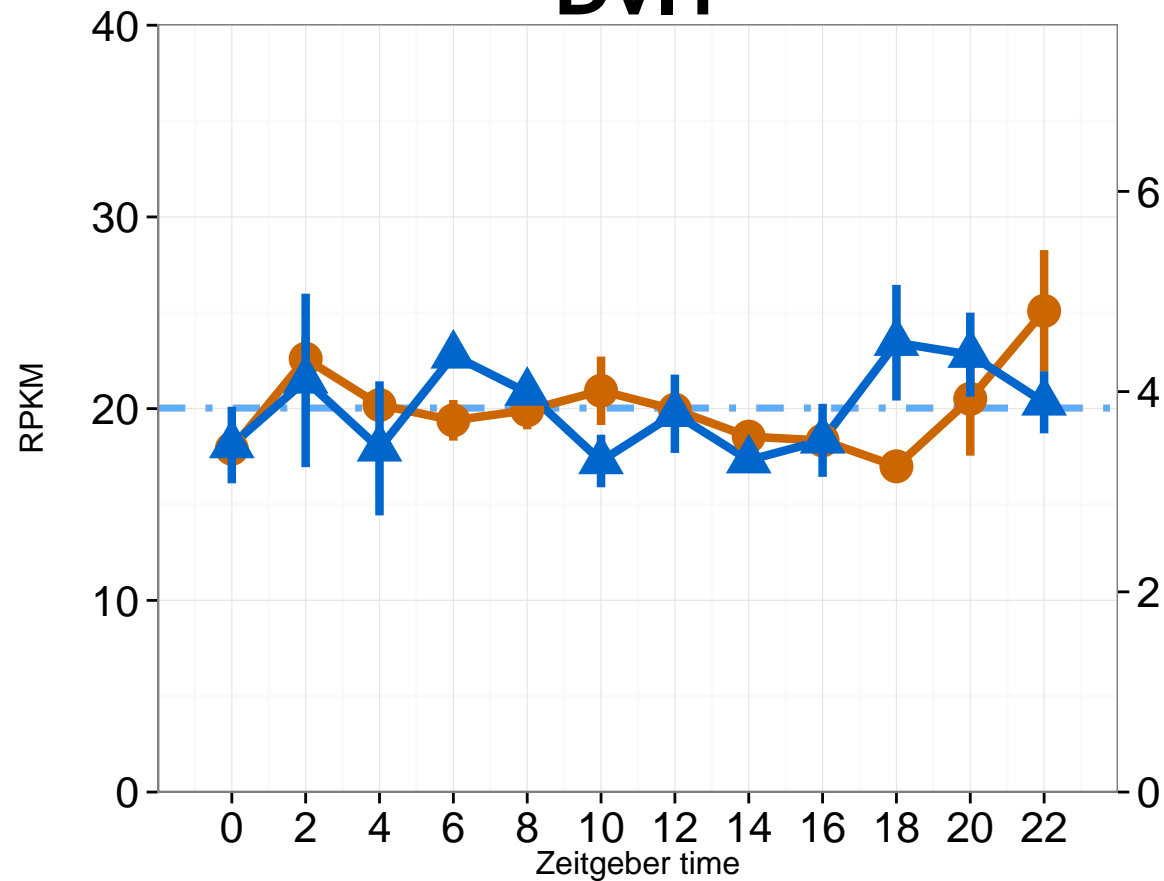

# Dvl1

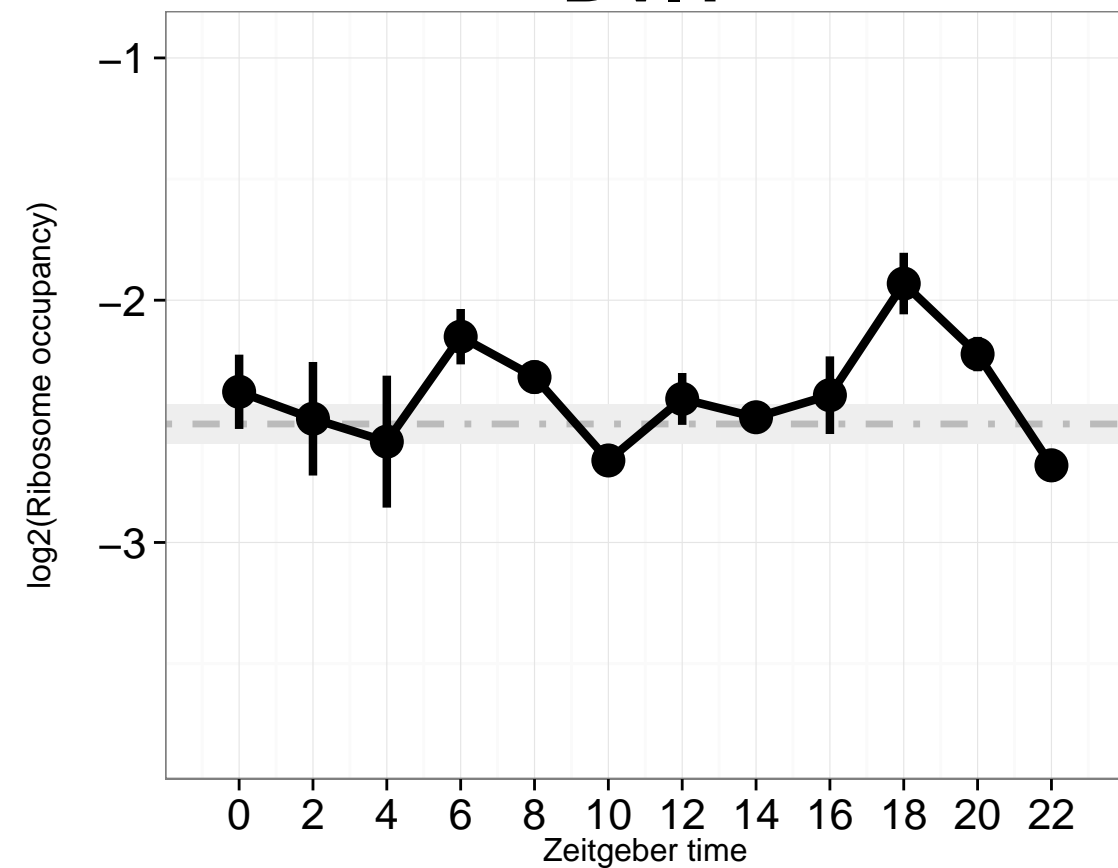

Supplement: SuppDataset_1.zip [file Dvl1_set_A.pdf › Supplemental Dataset 1/A-mRNA_nonrhyth_translation_nonrhyth/Dvl1_set_A.pdf]

## Dvl3

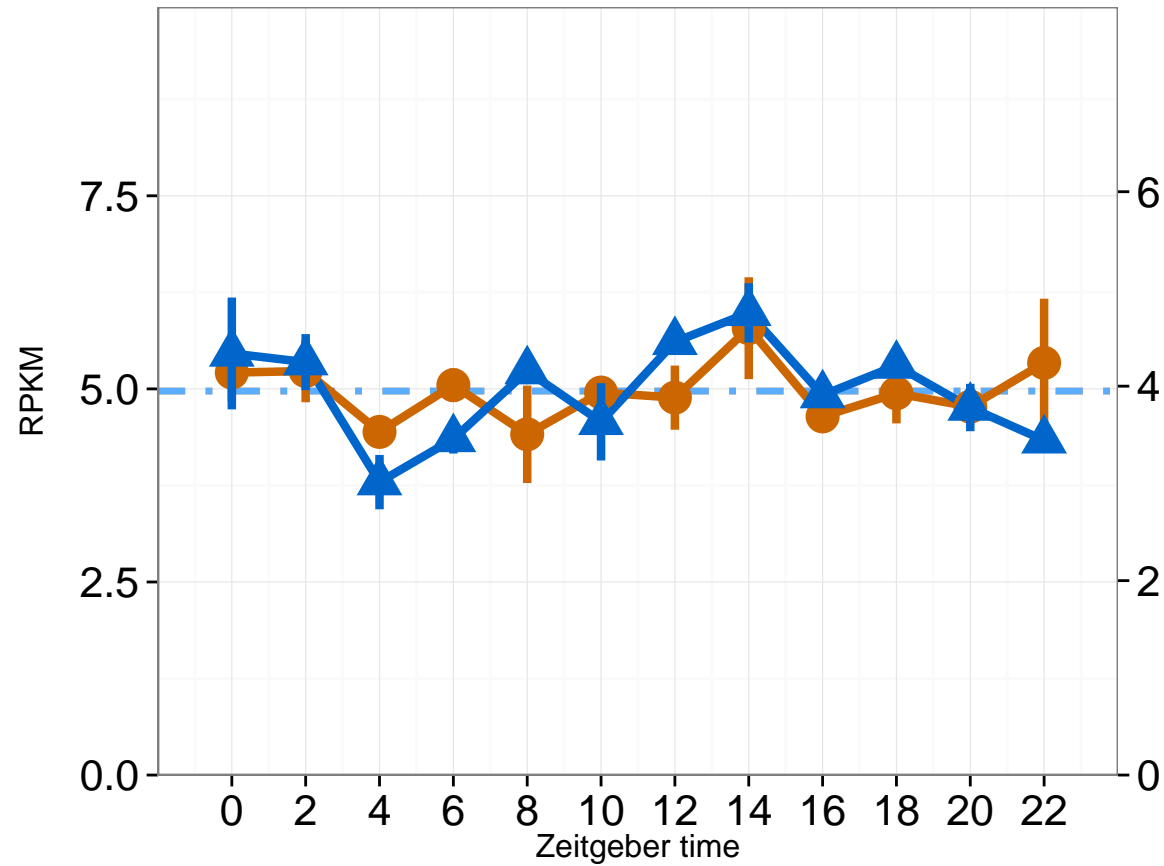

## Dvl3

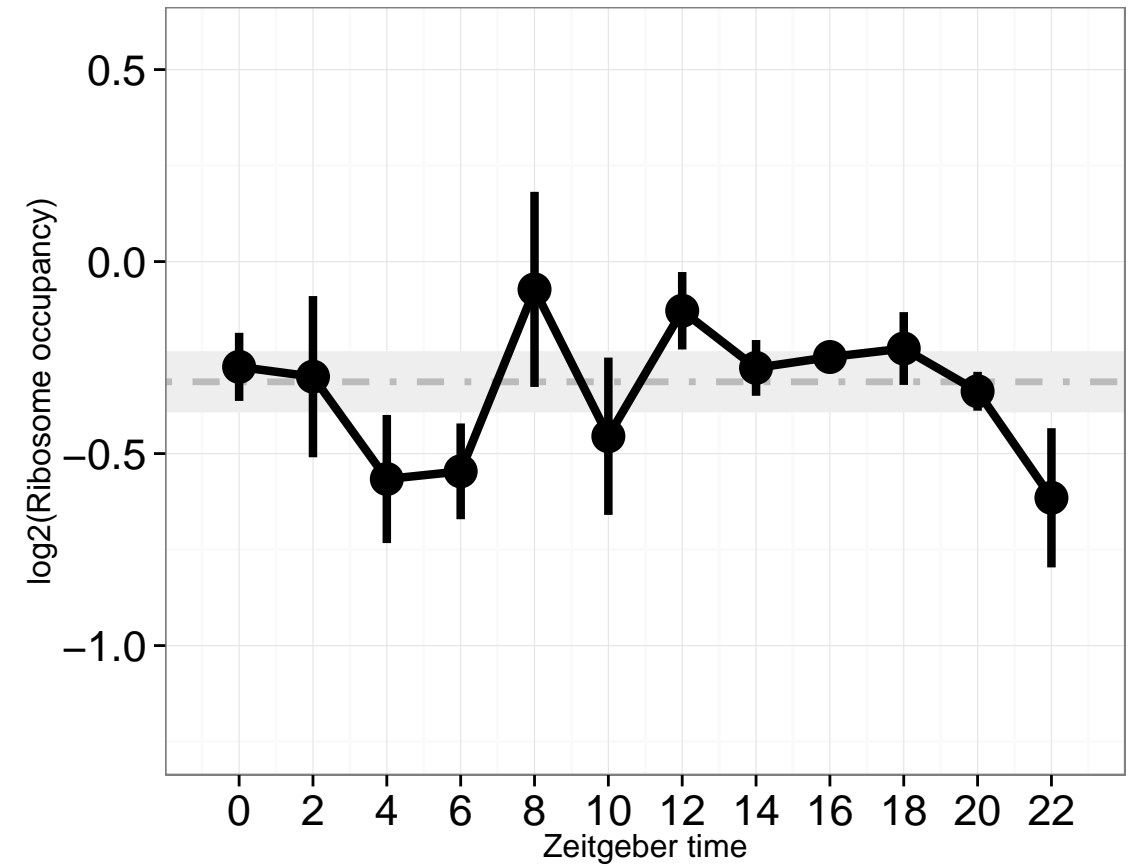

Supplement: SuppDataset_1.zip [file Dvl3_set_A.pdf › Supplemental Dataset 1/A-mRNA_nonrhyth_translation_nonrhyth/Dvl3_set_A.pdf]

## Dxo

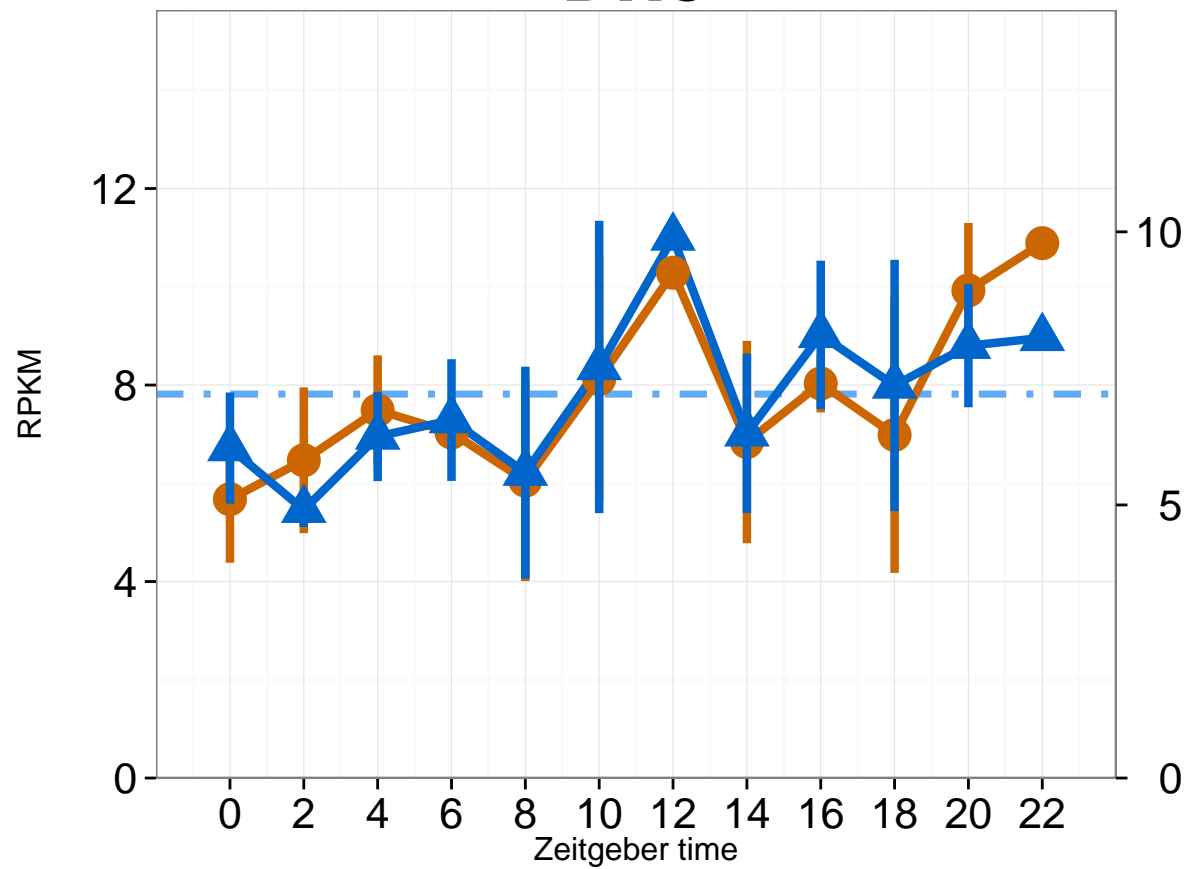

## Dxo

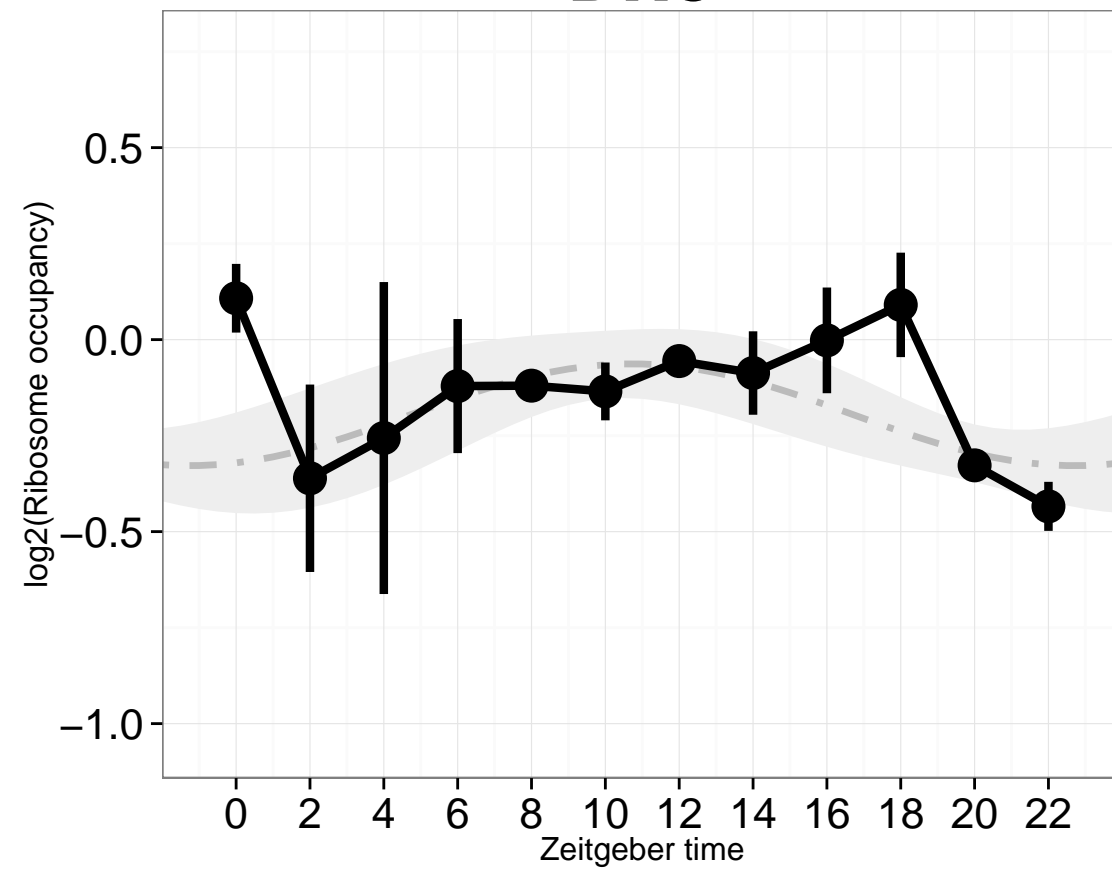

Supplement: SuppDataset_1.zip [file Dxo_set_A.pdf › Supplemental Dataset 1/A-mRNA_nonrhyth_translation_nonrhyth/Dxo_set_A.pdf]

## Dym

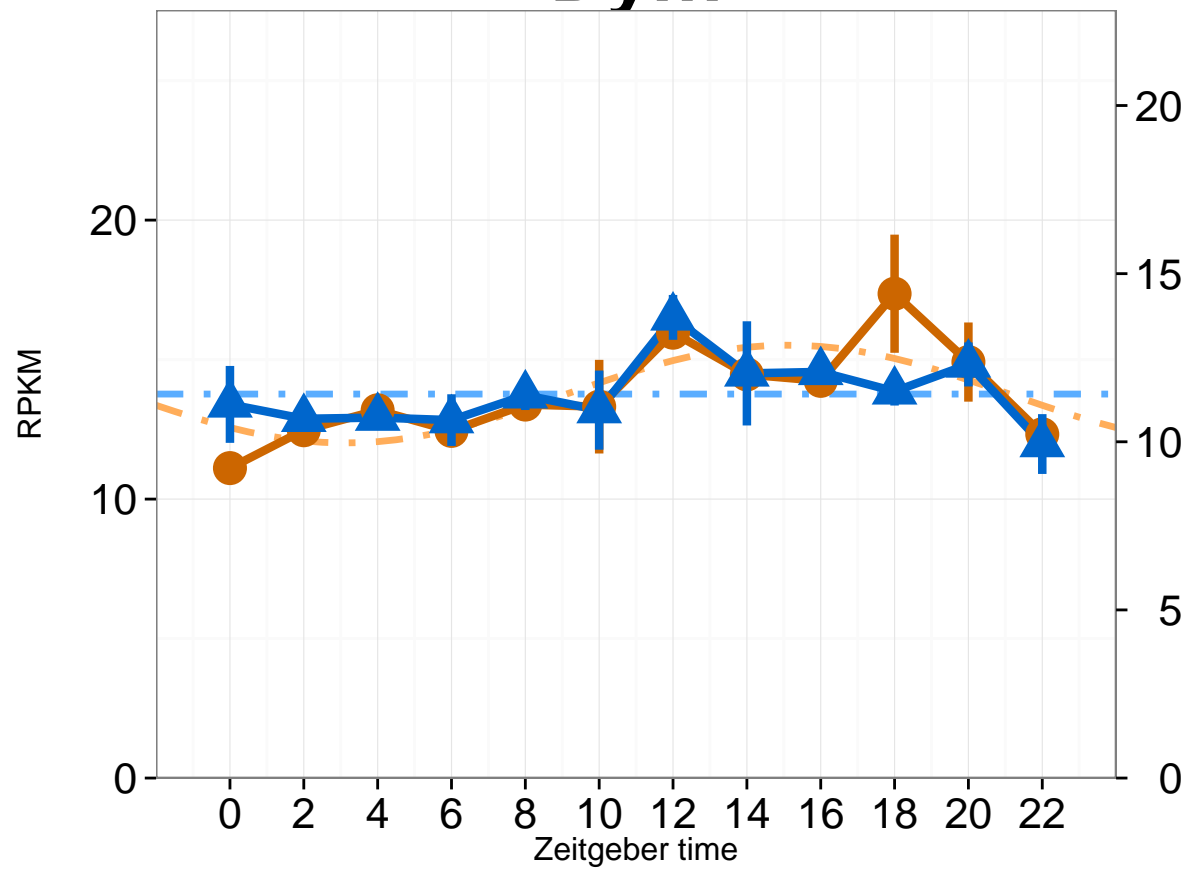

## Dym

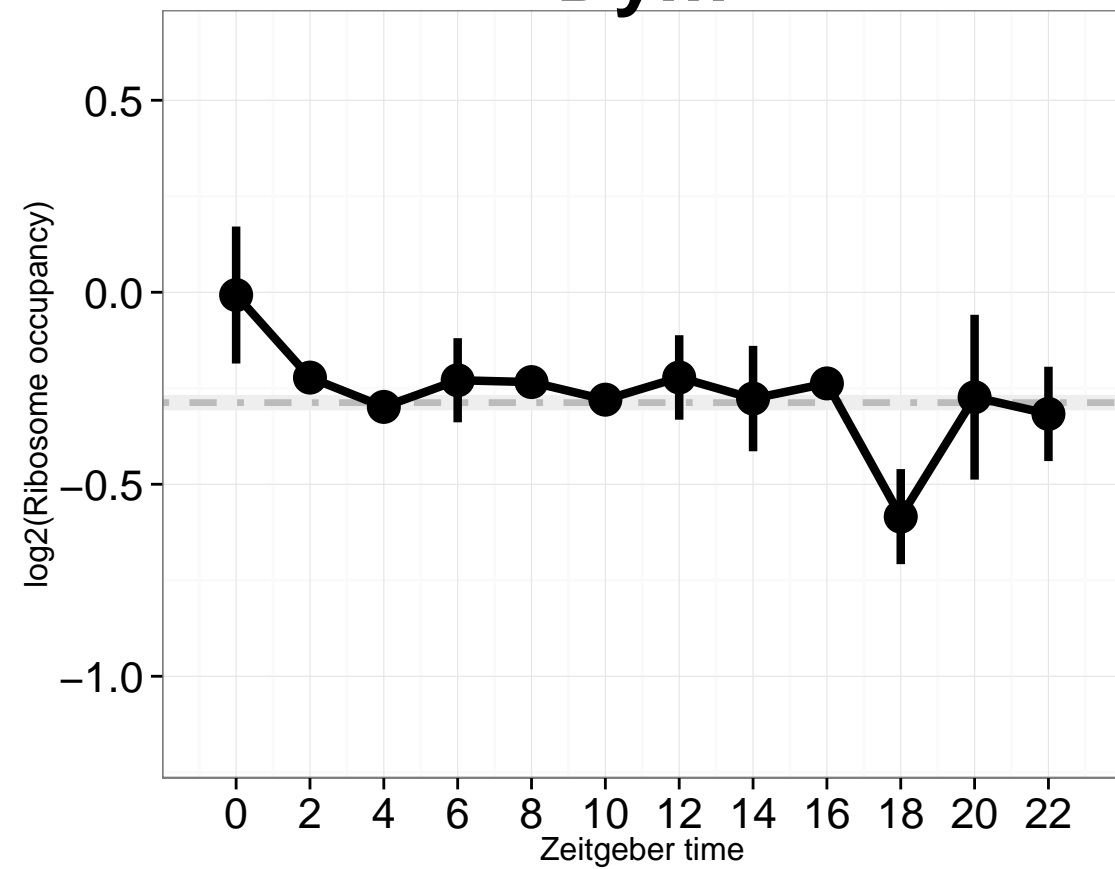

Supplement: SuppDataset_1.zip [file Dym_set_A.pdf › Supplemental Dataset 1/A-mRNA_nonrhyth_translation_nonrhyth/Dym_set_A.pdf]

# Dync1h1

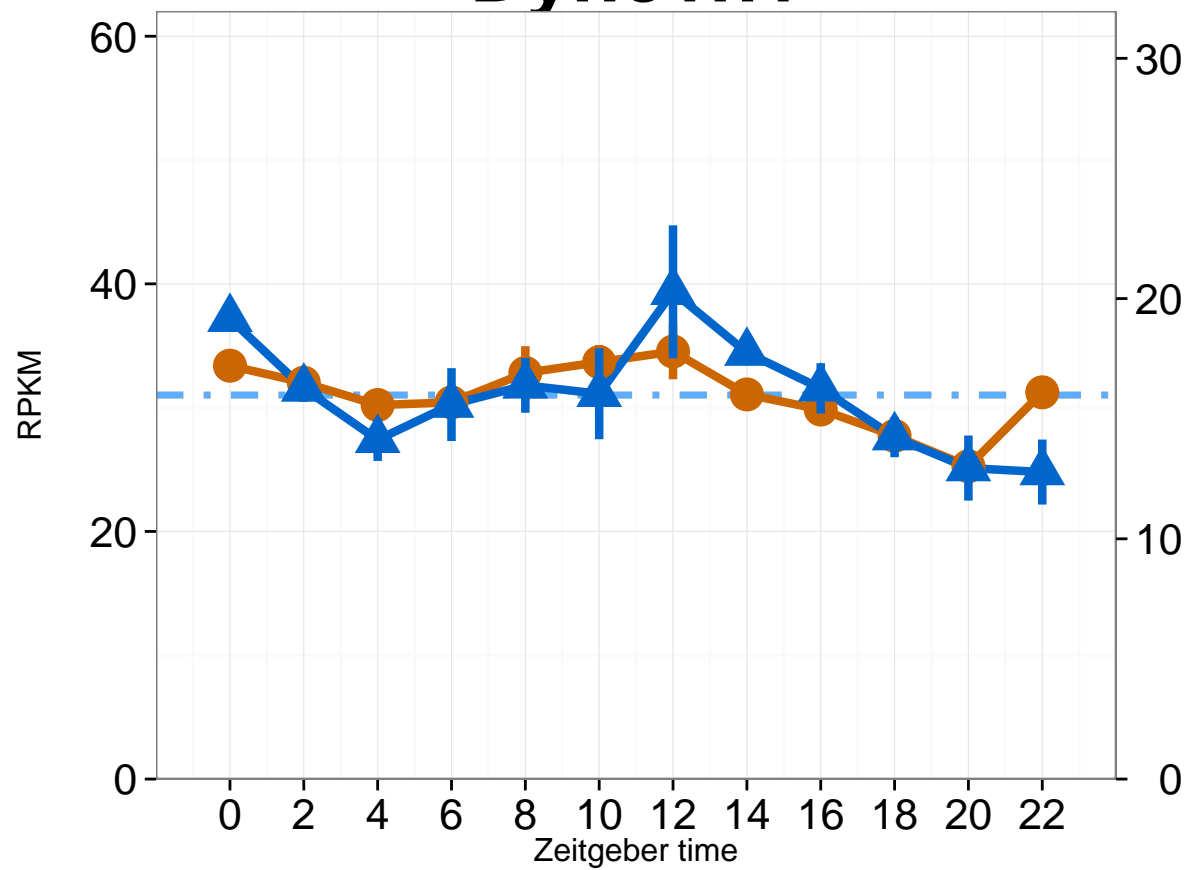

# Dync1h1

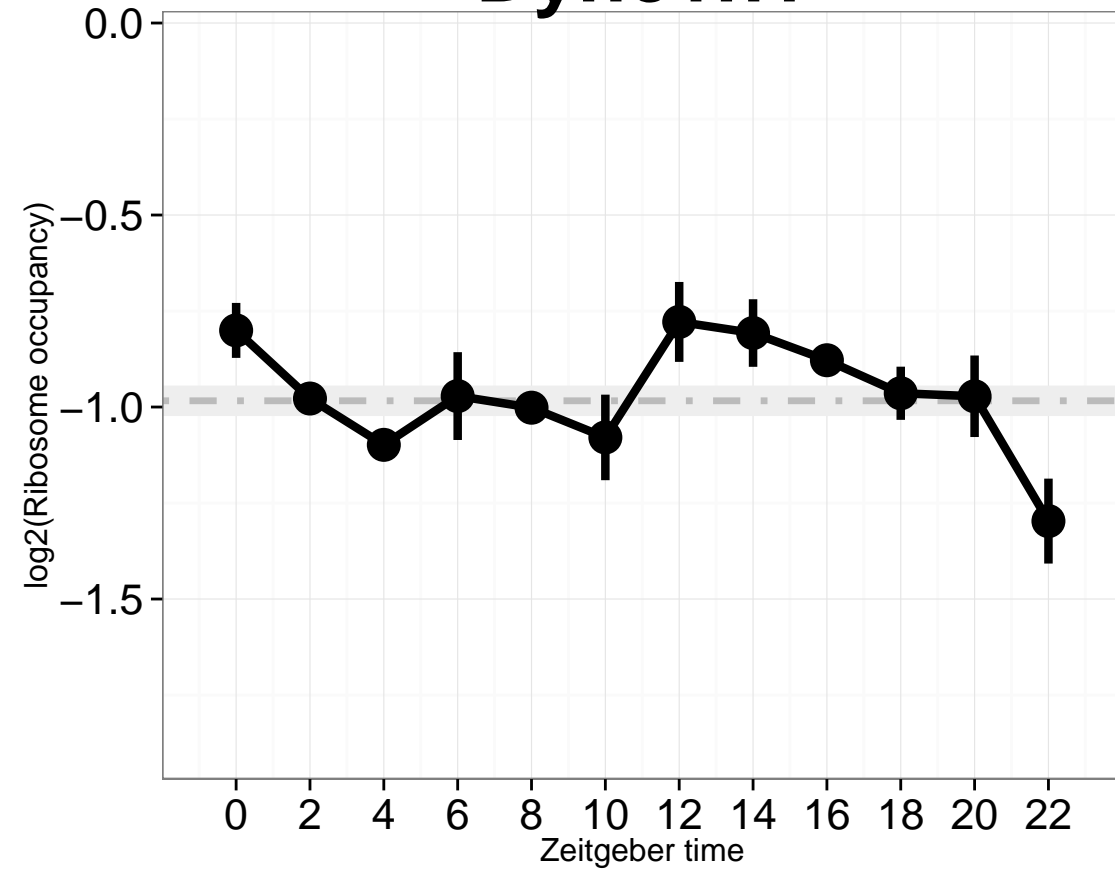

Supplement: SuppDataset_1.zip [file Dync1h1_set_A.pdf › Supplemental Dataset 1/A-mRNA_nonrhyth_translation_nonrhyth/Dync1h1_set_A.pdf]

Dync1i2

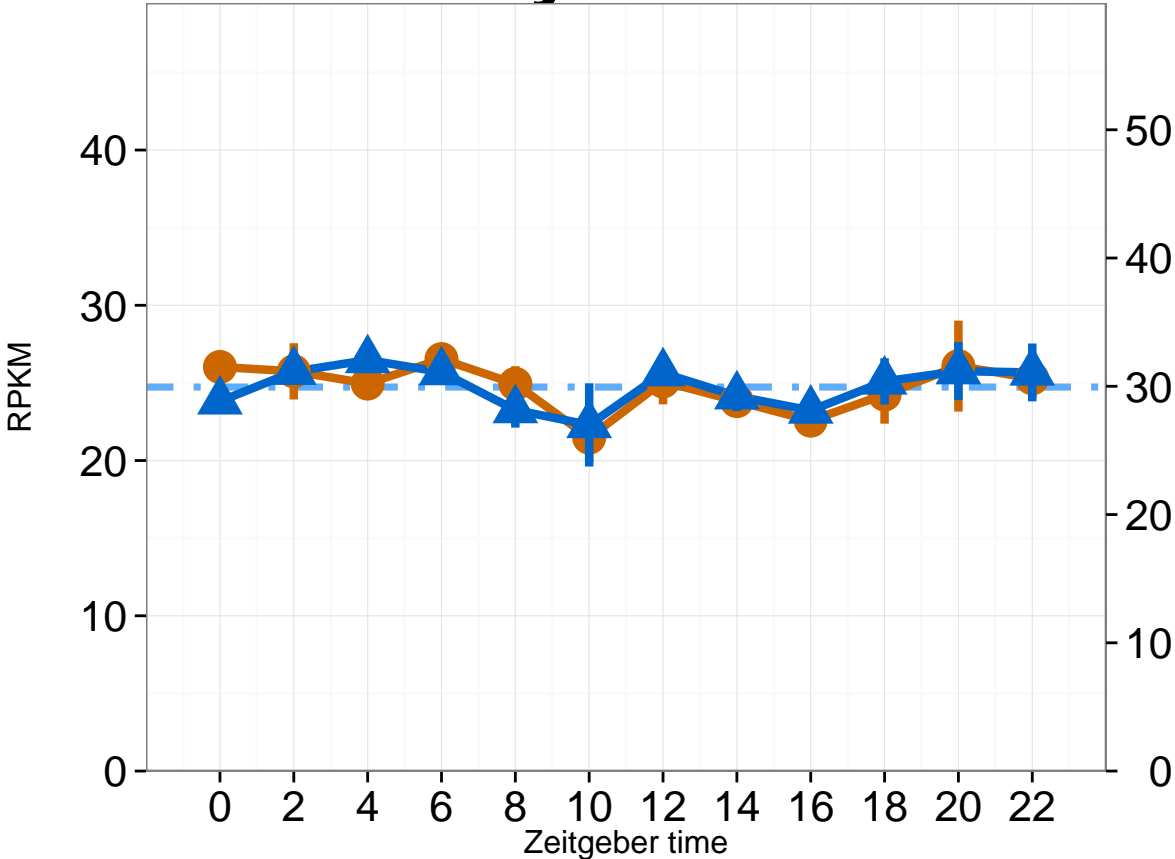

Dync1i2

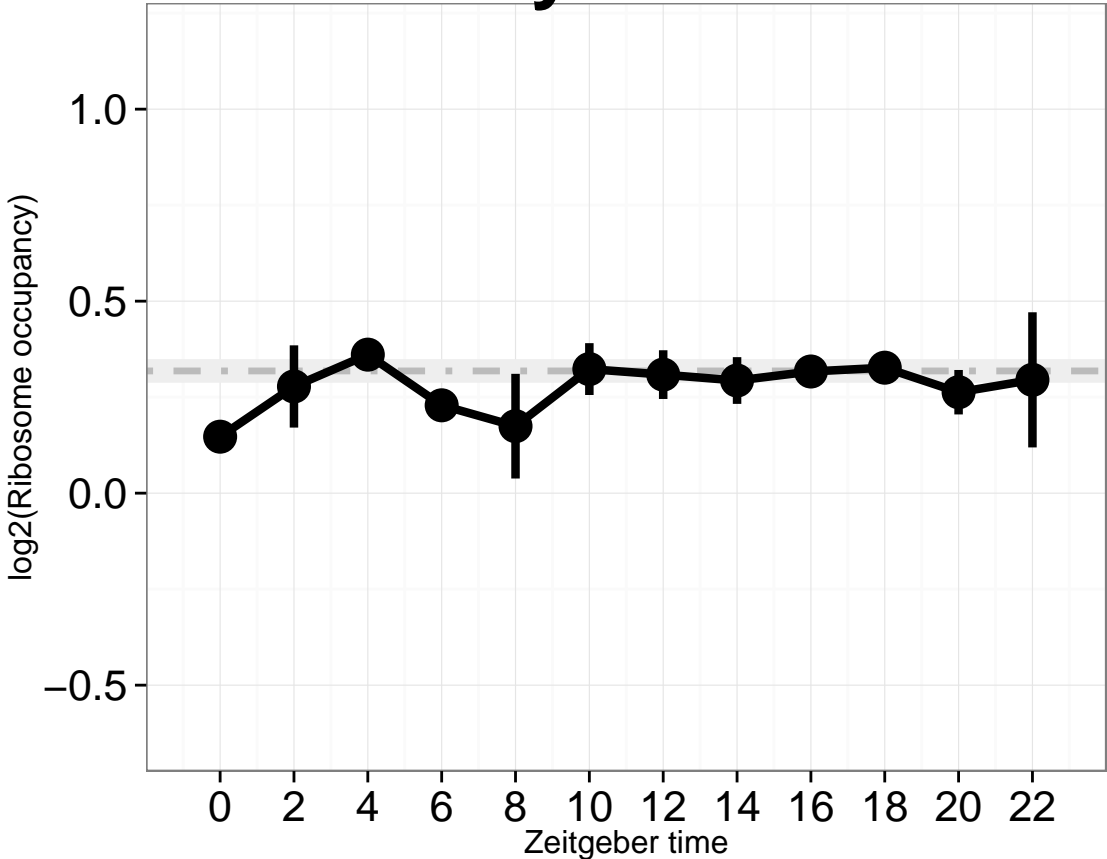

Supplement: SuppDataset_1.zip [file Dync1i2_set_A.pdf › Supplemental Dataset 1/A-mRNA_nonrhyth_translation_nonrhyth/Dync1i2_set_A.pdf]

## Dync1li1

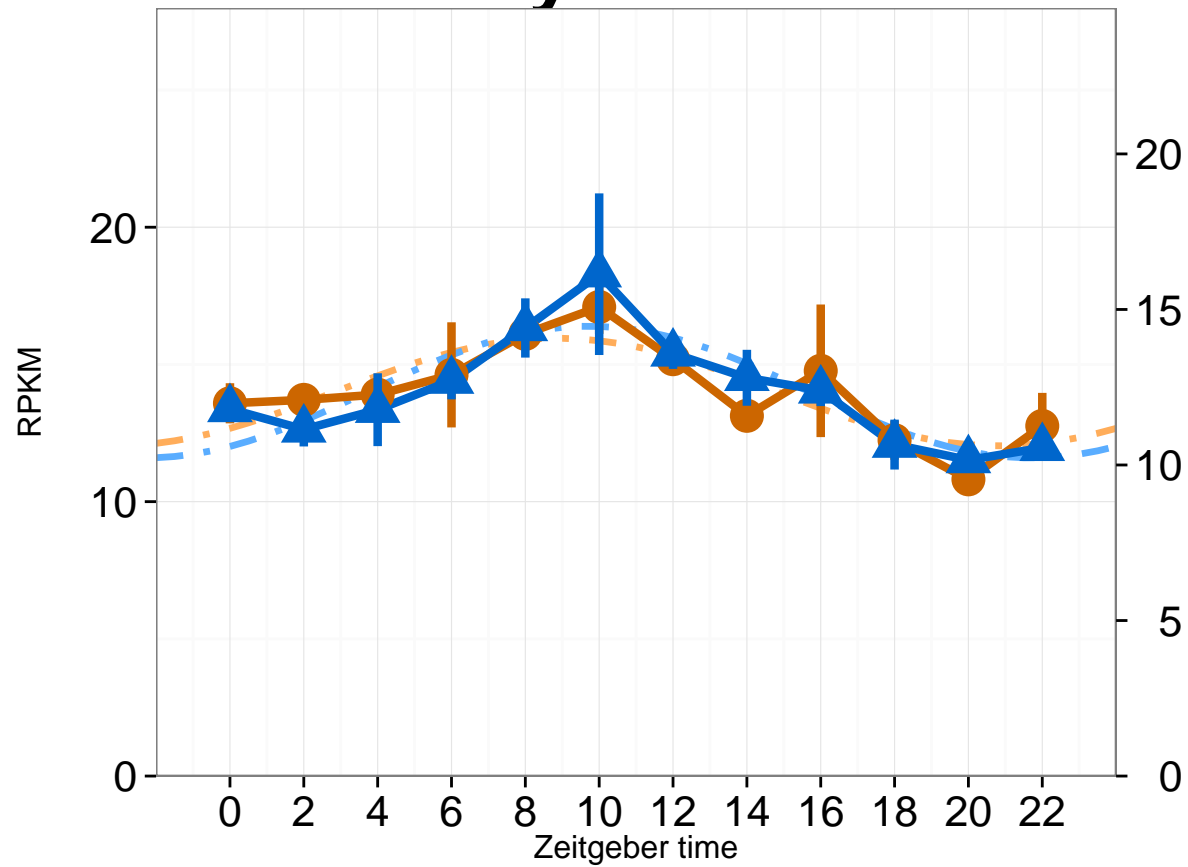

## Dync1li1

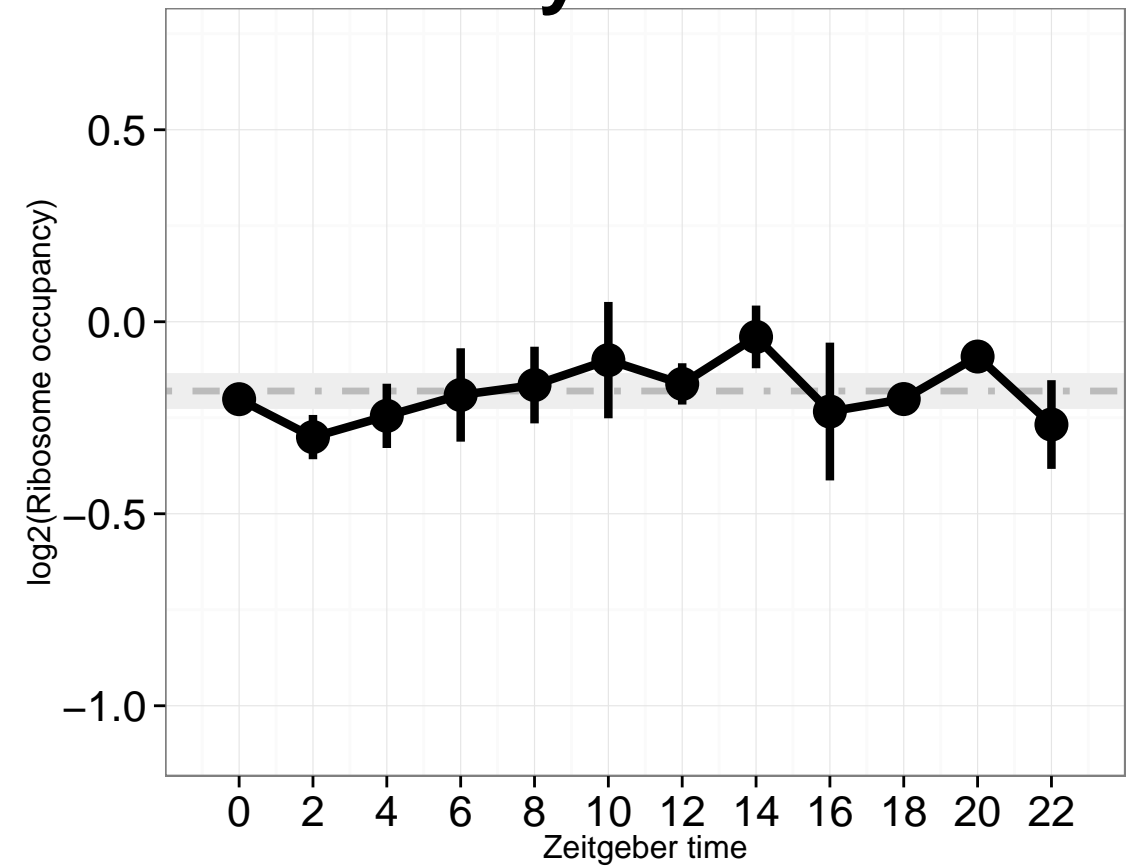

Supplement: SuppDataset_1.zip [file Dync1li1_set_A.pdf › Supplemental Dataset 1/A-mRNA_nonrhyth_translation_nonrhyth/Dync1li1_set_A.pdf]

## Dync1li2

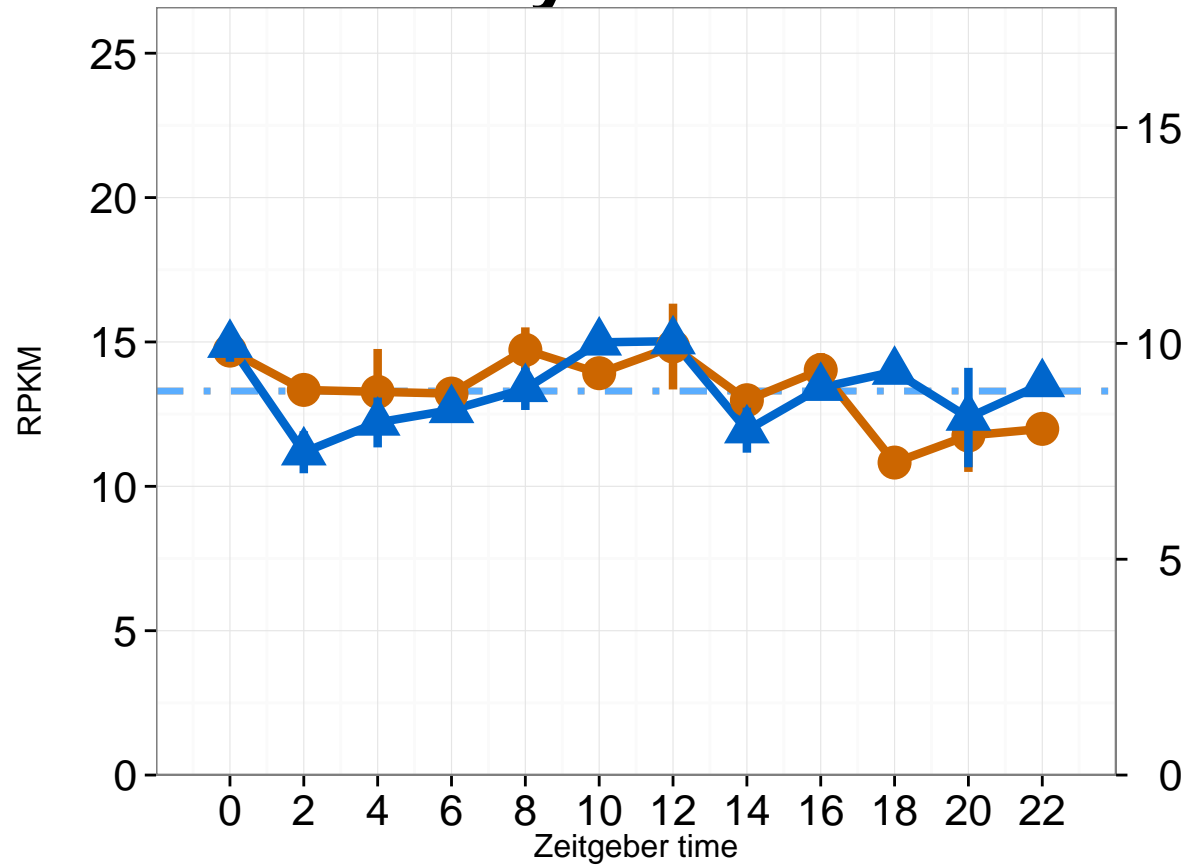

## Dync1li2

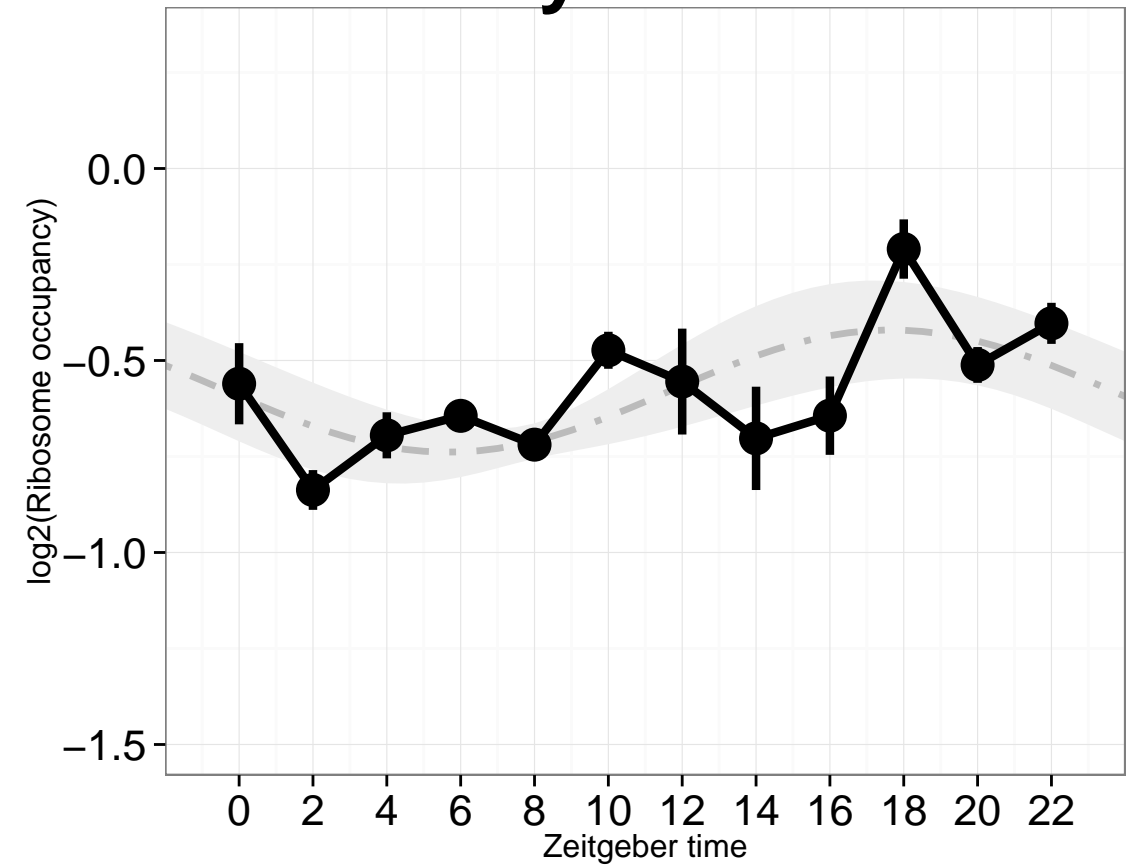

Supplement: SuppDataset_1.zip [file Dync1li2_set_A.pdf › Supplemental Dataset 1/A-mRNA_nonrhyth_translation_nonrhyth/Dync1li2_set_A.pdf]

**Dync2li1 TR**

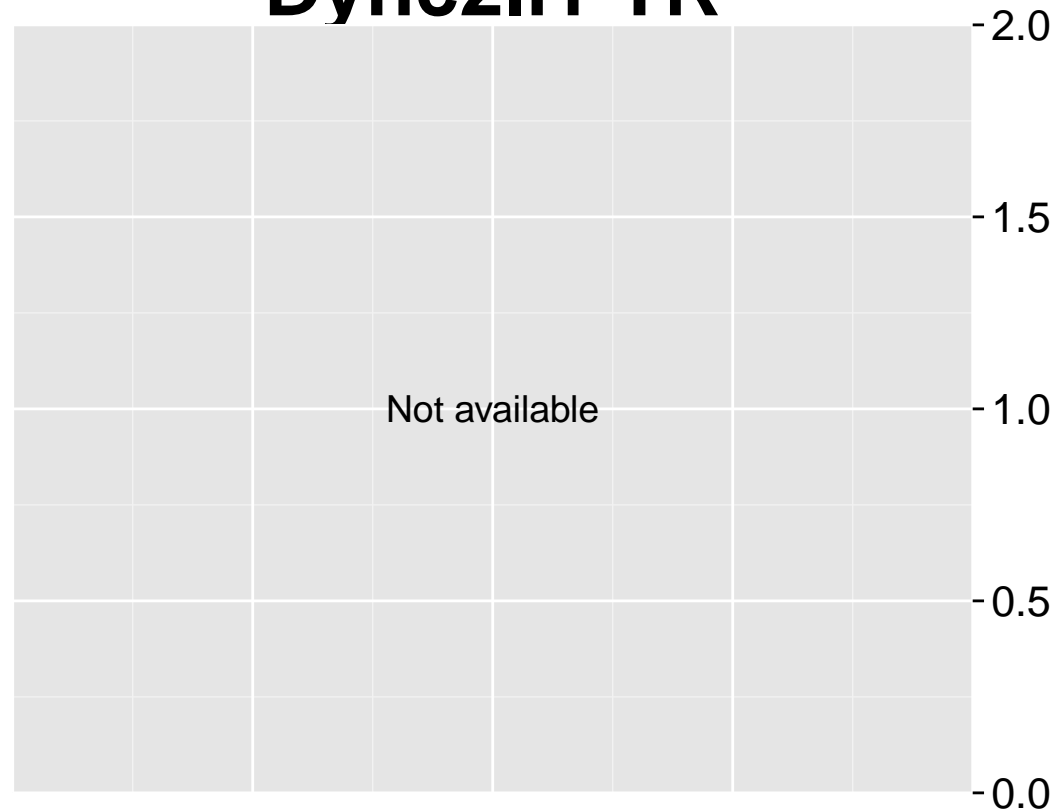

**Dync2li1 log2(Ribosome occupanc**

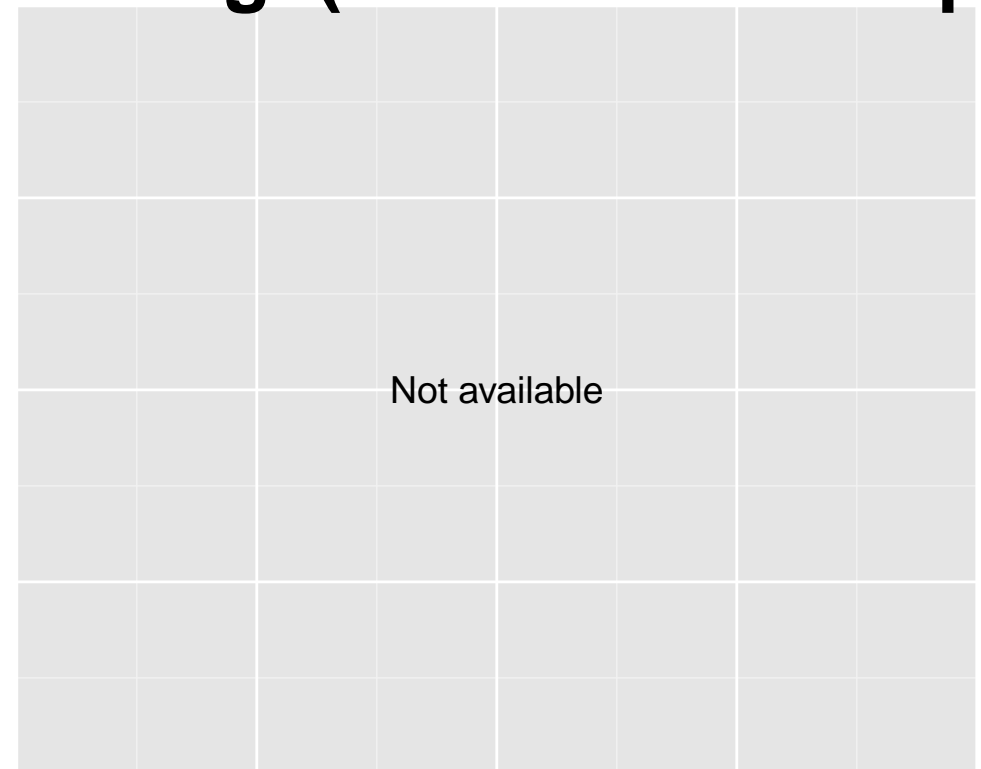

Supplement: SuppDataset_1.zip [file Dync2li1_set_A.pdf › Supplemental Dataset 1/A-mRNA_nonrhyth_translation_nonrhyth/Dync2li1_set_A.pdf]

## DynII2

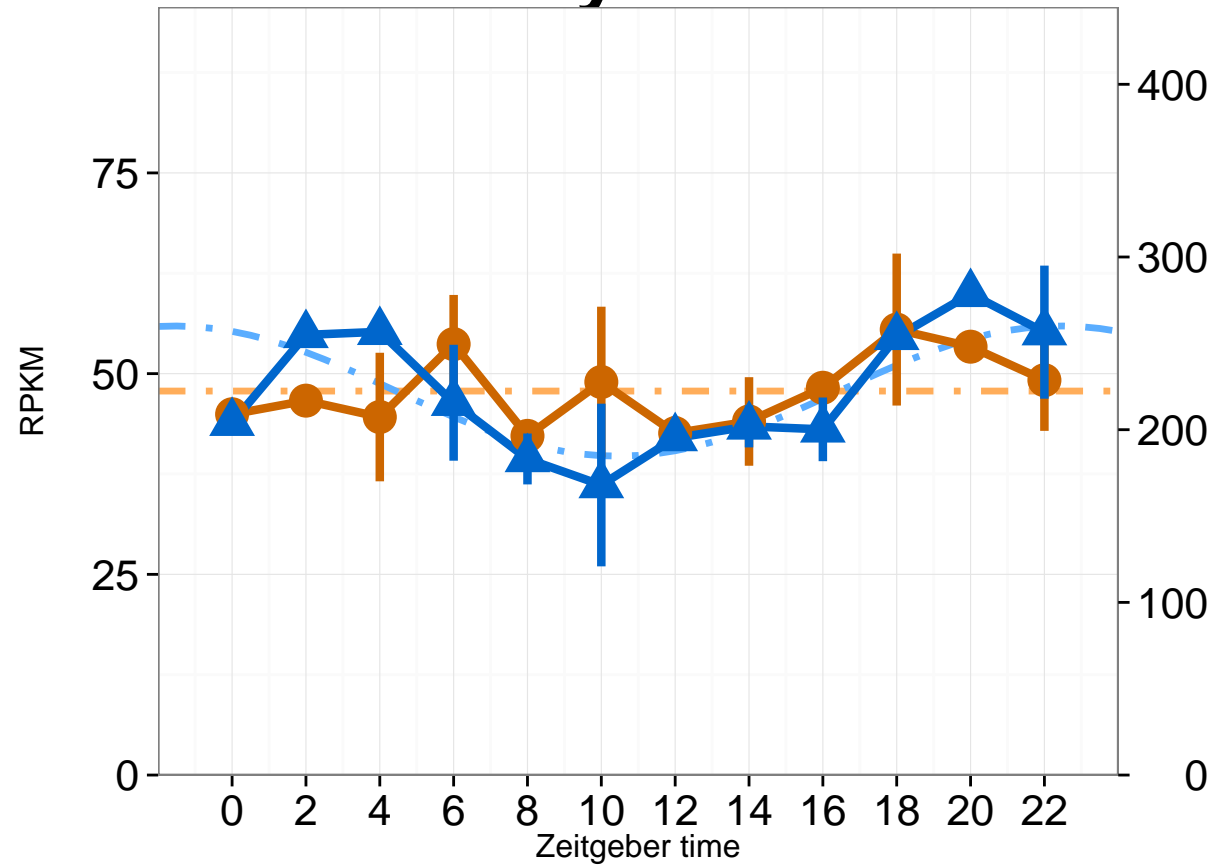

## DynII2

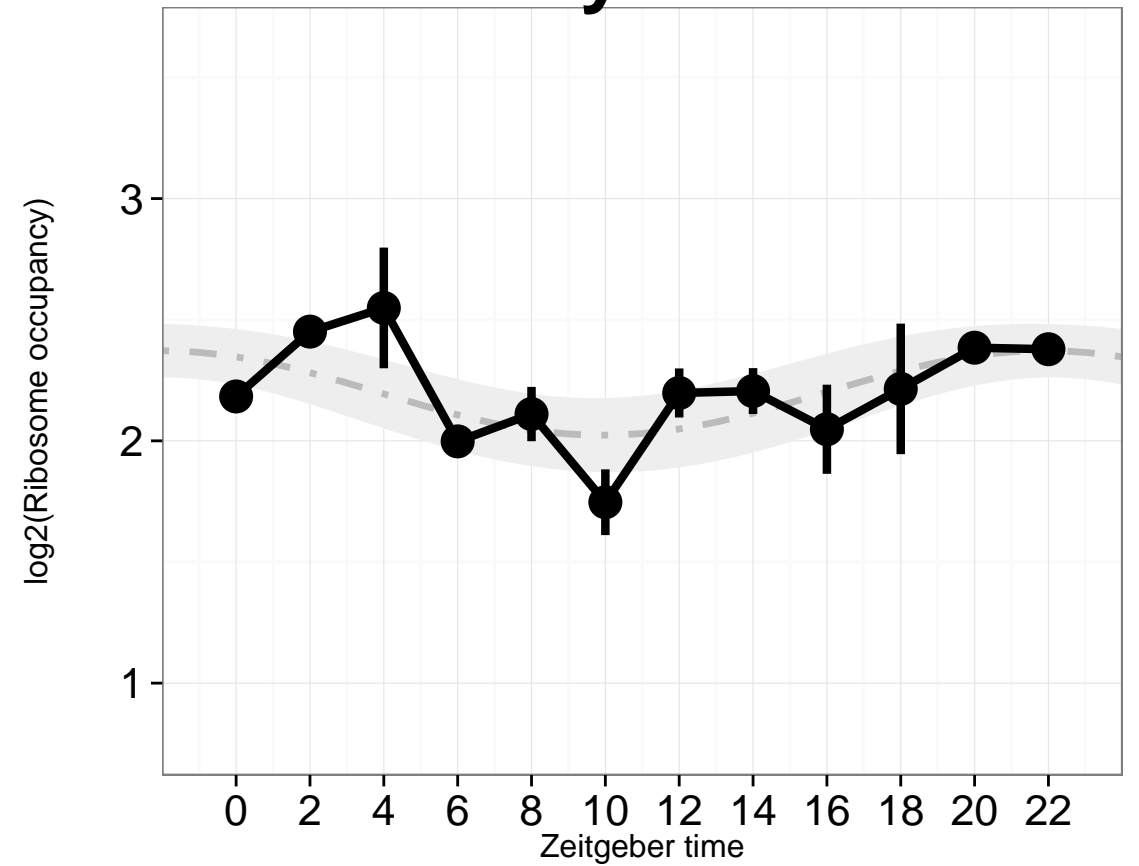

Supplement: SuppDataset_1.zip [file Dynll2_set_A.pdf › Supplemental Dataset 1/A-mRNA_nonrhyth_translation_nonrhyth/Dynll2_set_A.pdf]

# Dynlrb1

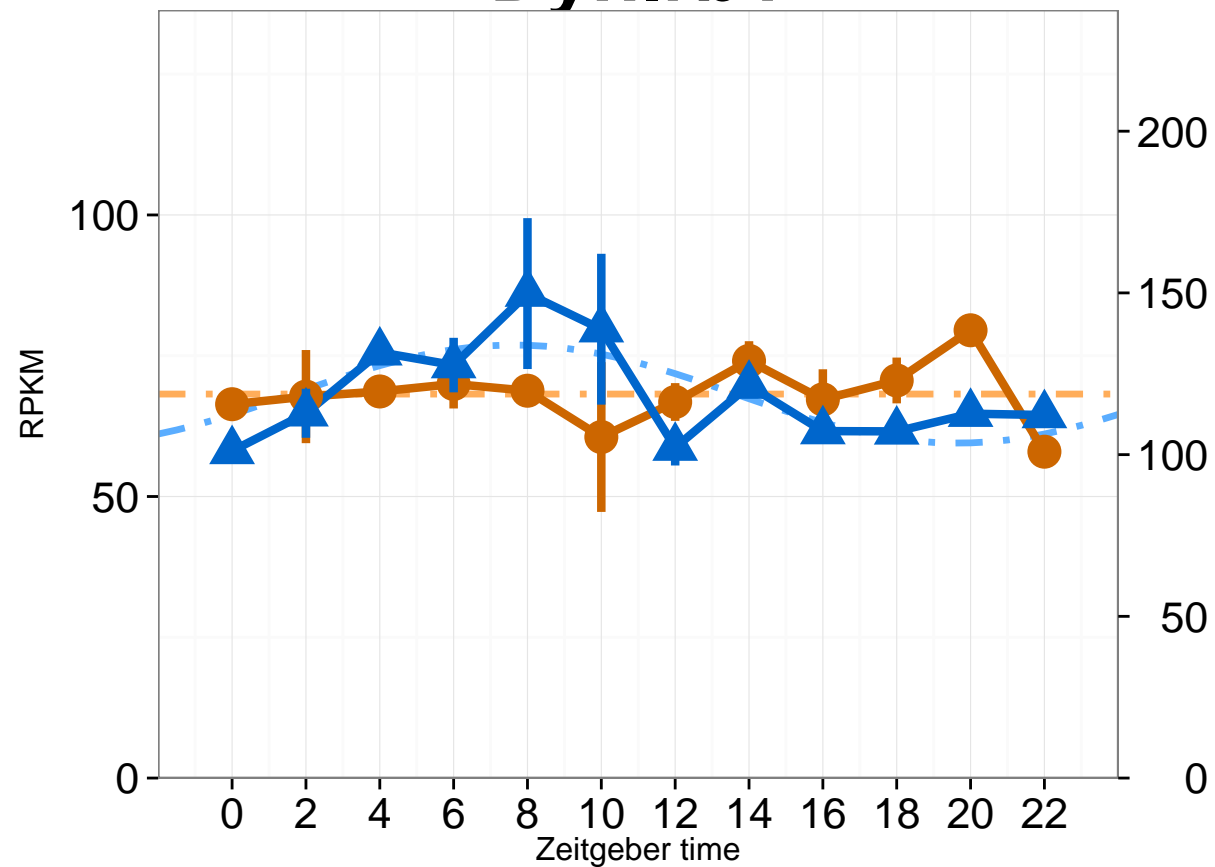

# Dynlrb1

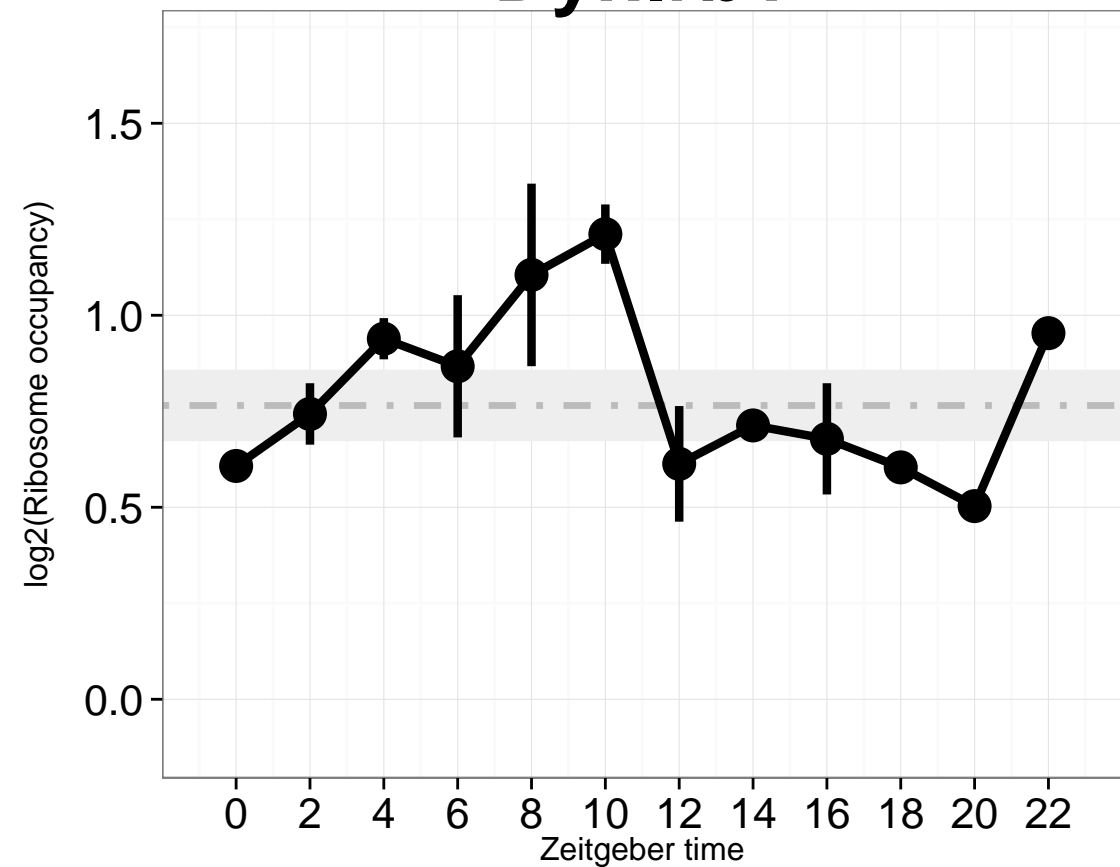

Supplement: SuppDataset_1.zip [file Dynlrb1_set_A.pdf › Supplemental Dataset 1/A-mRNA_nonrhyth_translation_nonrhyth/Dynlrb1_set_A.pdf]

# Dynlt1b

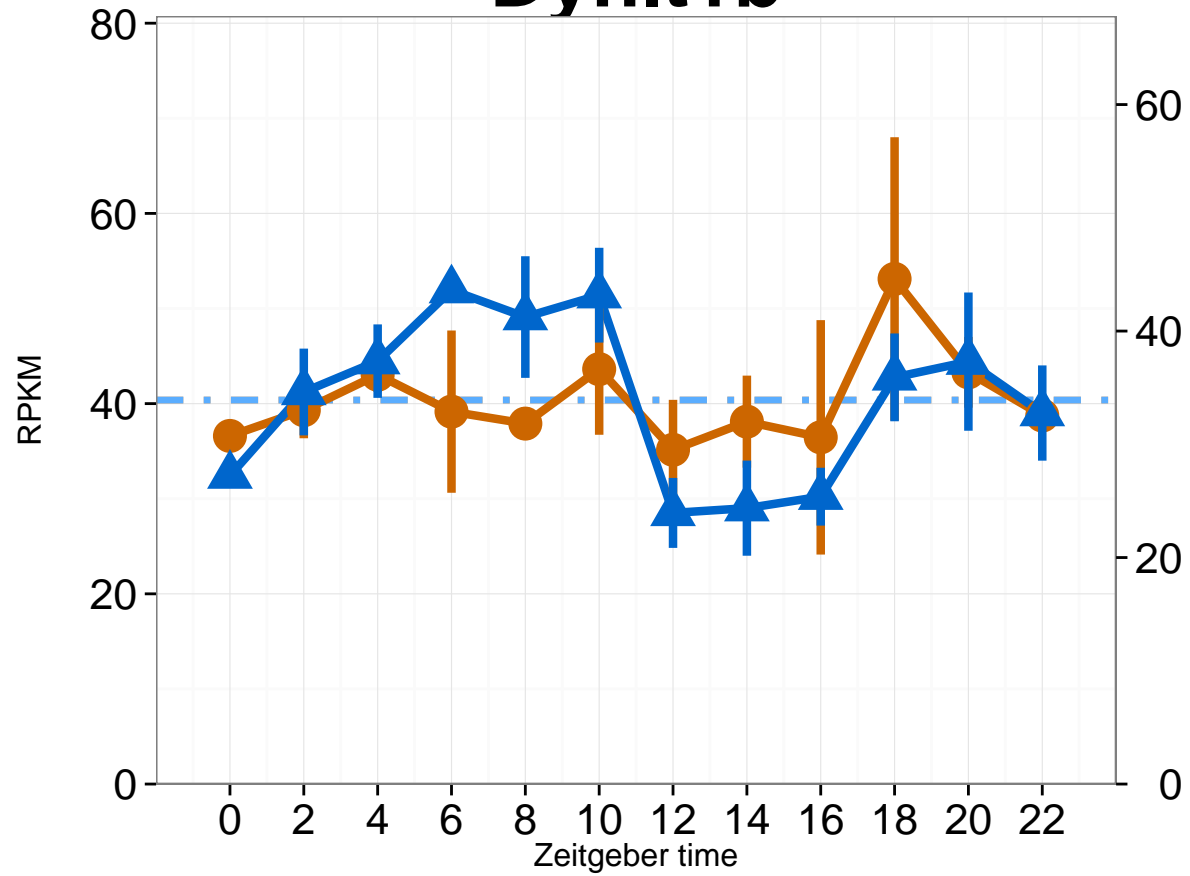

# Dynlt1b

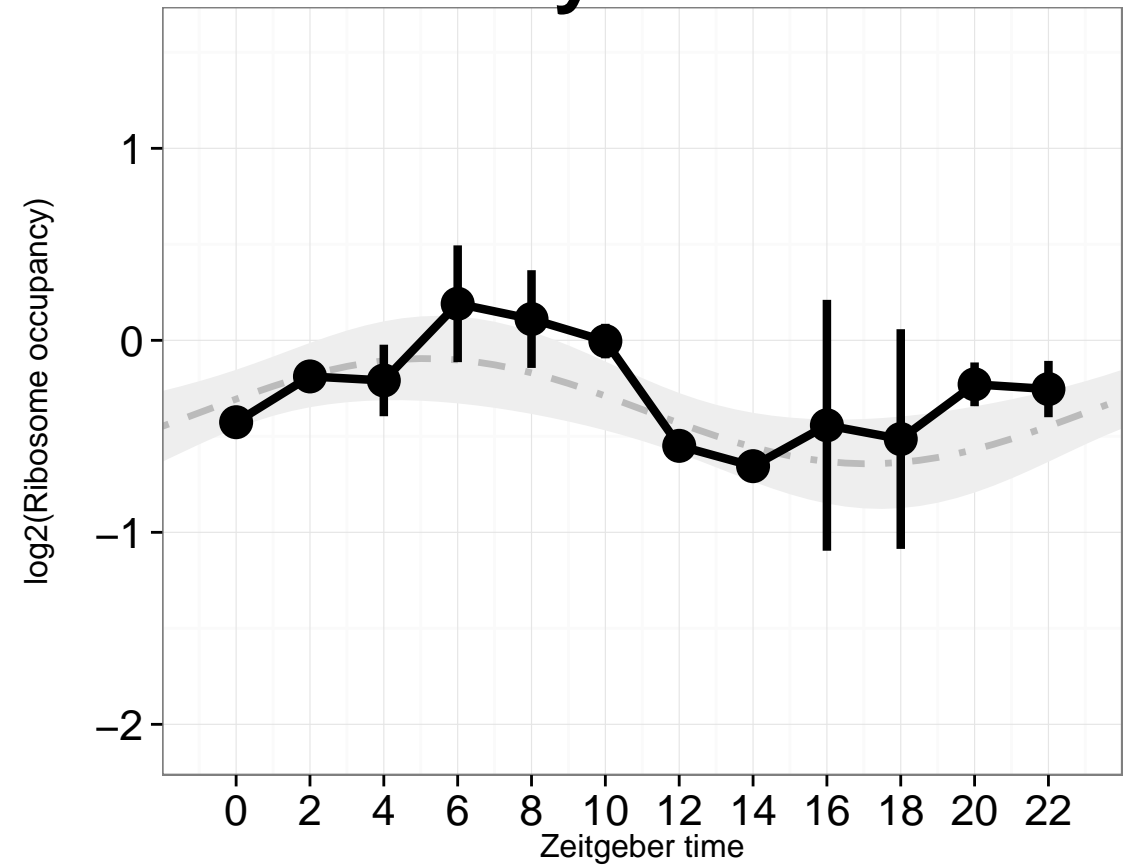

Supplement: SuppDataset_1.zip [file Dynlt1b_set_A.pdf › Supplemental Dataset 1/A-mRNA_nonrhyth_translation_nonrhyth/Dynlt1b_set_A.pdf]

## Dynlt3

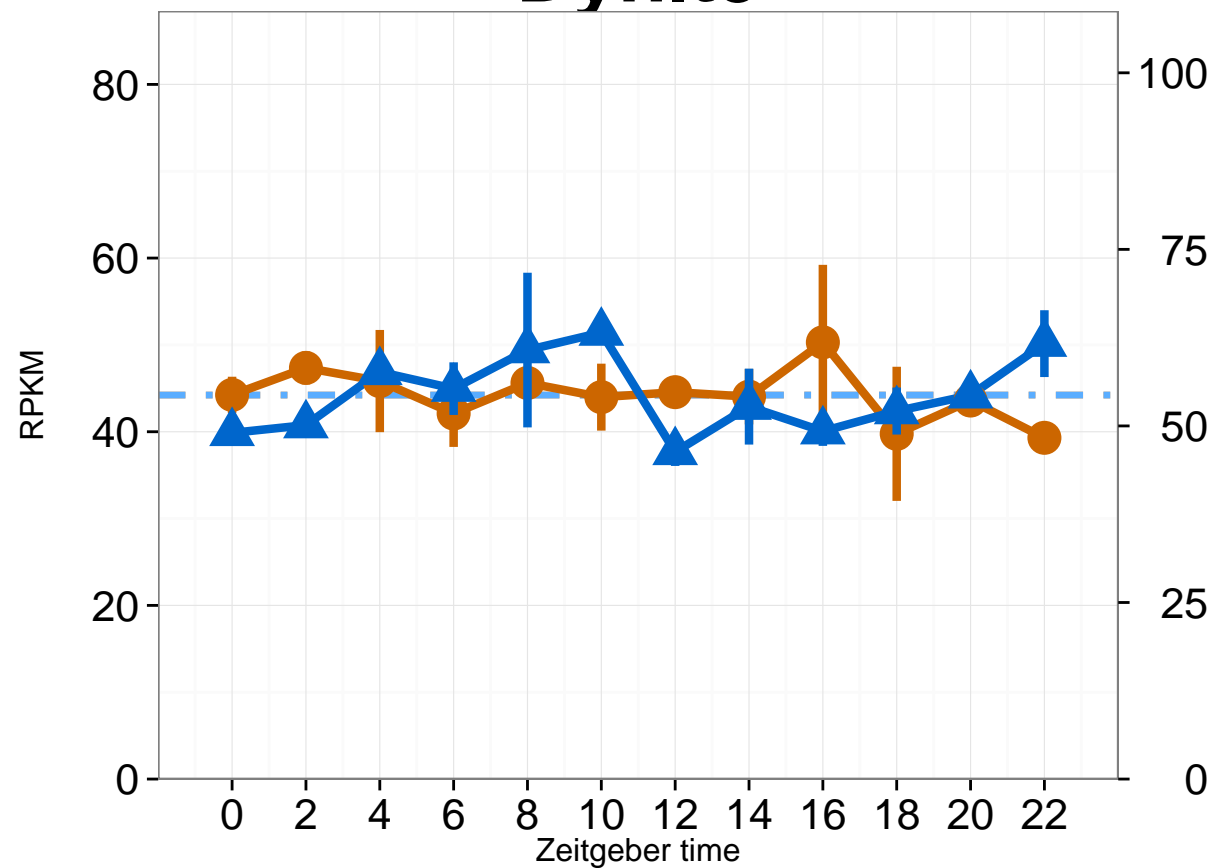

## Dynlt3

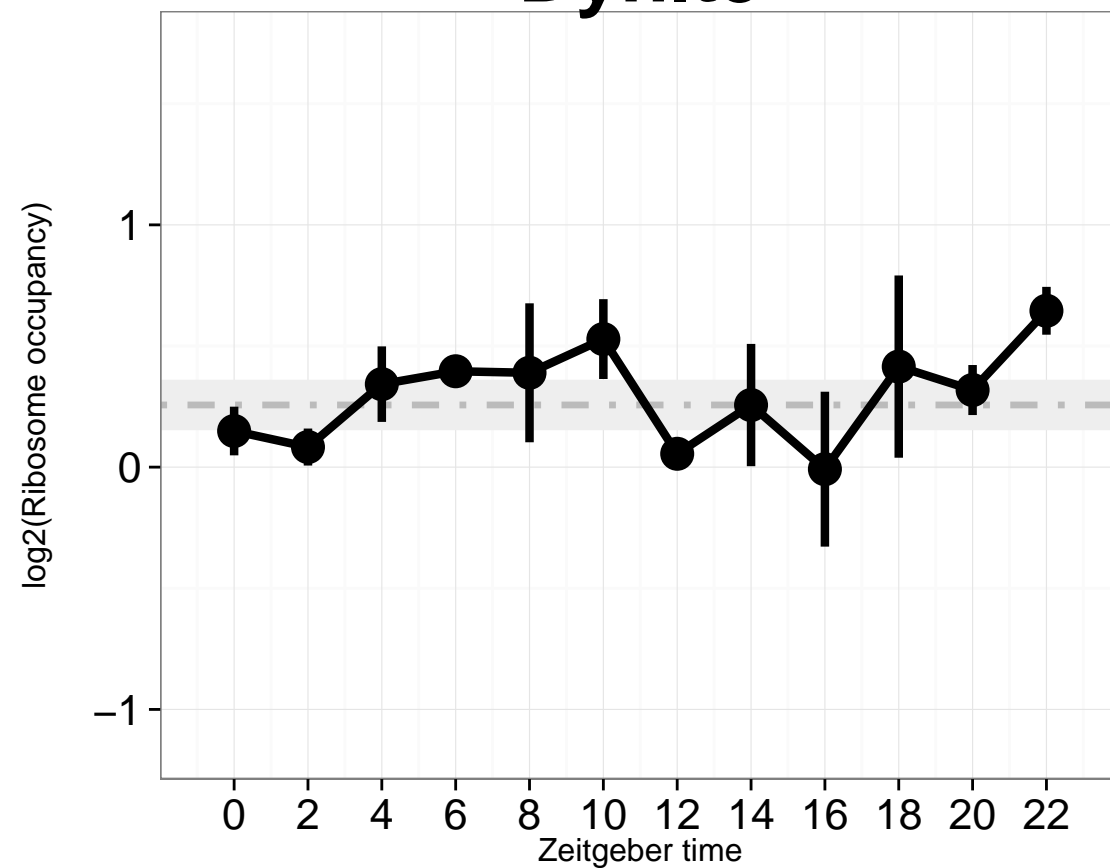

Supplement: SuppDataset_1.zip [file Dynlt3_set_A.pdf › Supplemental Dataset 1/A-mRNA_nonrhyth_translation_nonrhyth/Dynlt3_set_A.pdf]

# Dyrk1a

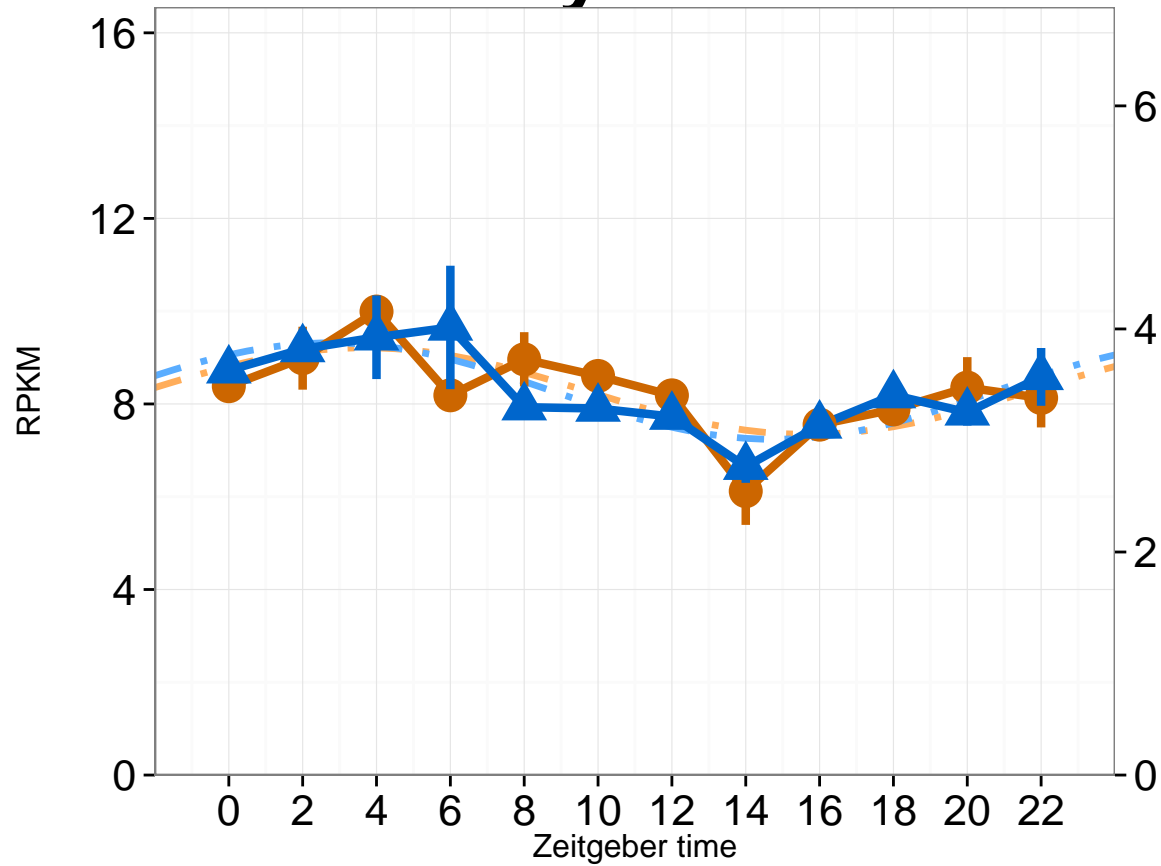

# Dyrk1a

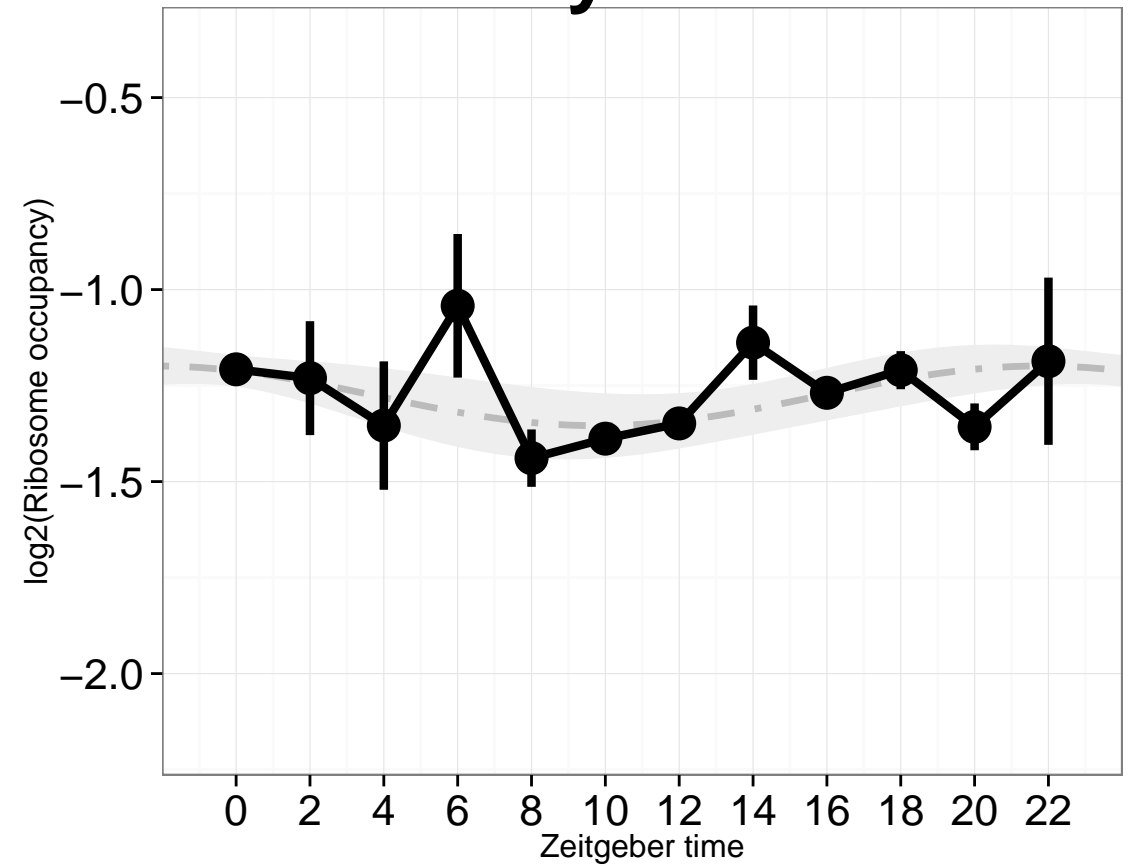

Supplement: SuppDataset_1.zip [file Dyrk1a_set_A.pdf › Supplemental Dataset 1/A-mRNA_nonrhyth_translation_nonrhyth/Dyrk1a_set_A.pdf]

## Dyrk3

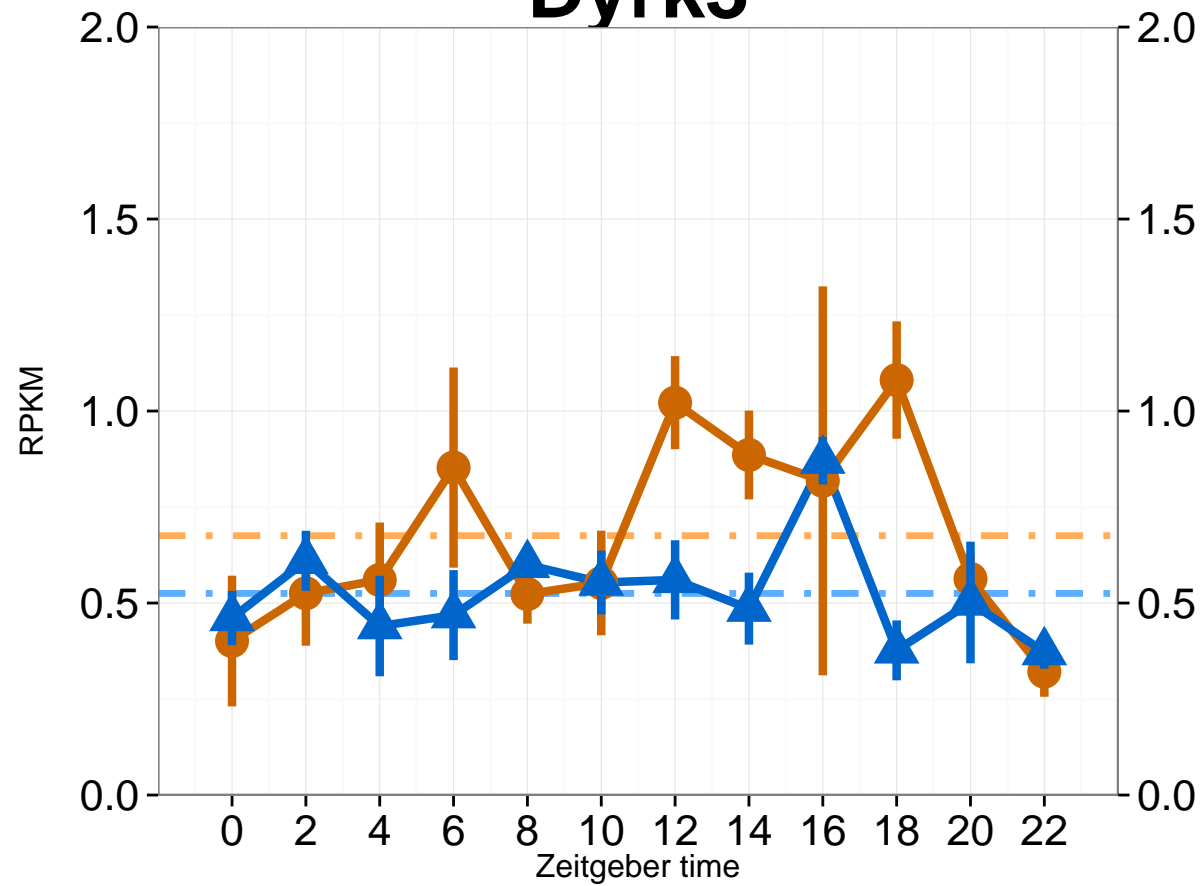

## Dyrk3

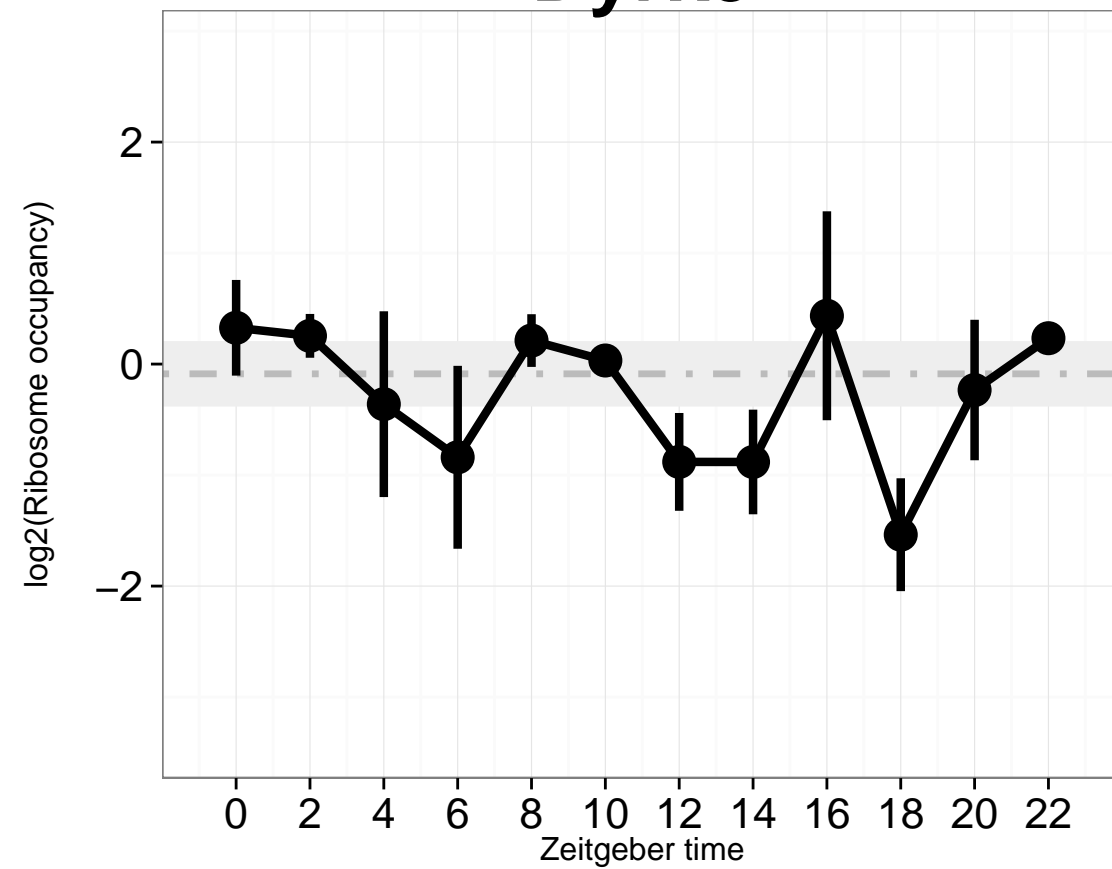

Supplement: SuppDataset_1.zip [file Dyrk3_set_A.pdf › Supplemental Dataset 1/A-mRNA_nonrhyth_translation_nonrhyth/Dyrk3_set_A.pdf]

## Dysf

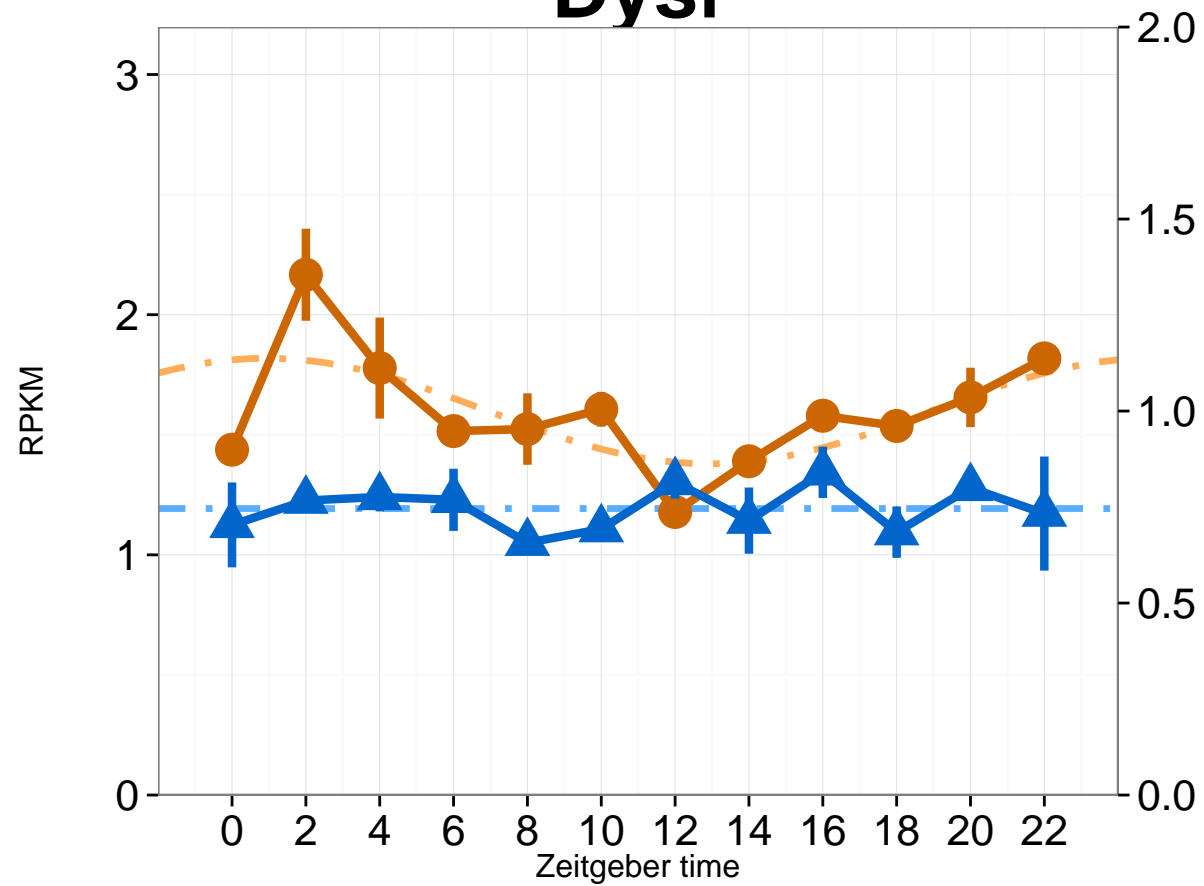

## Dysf

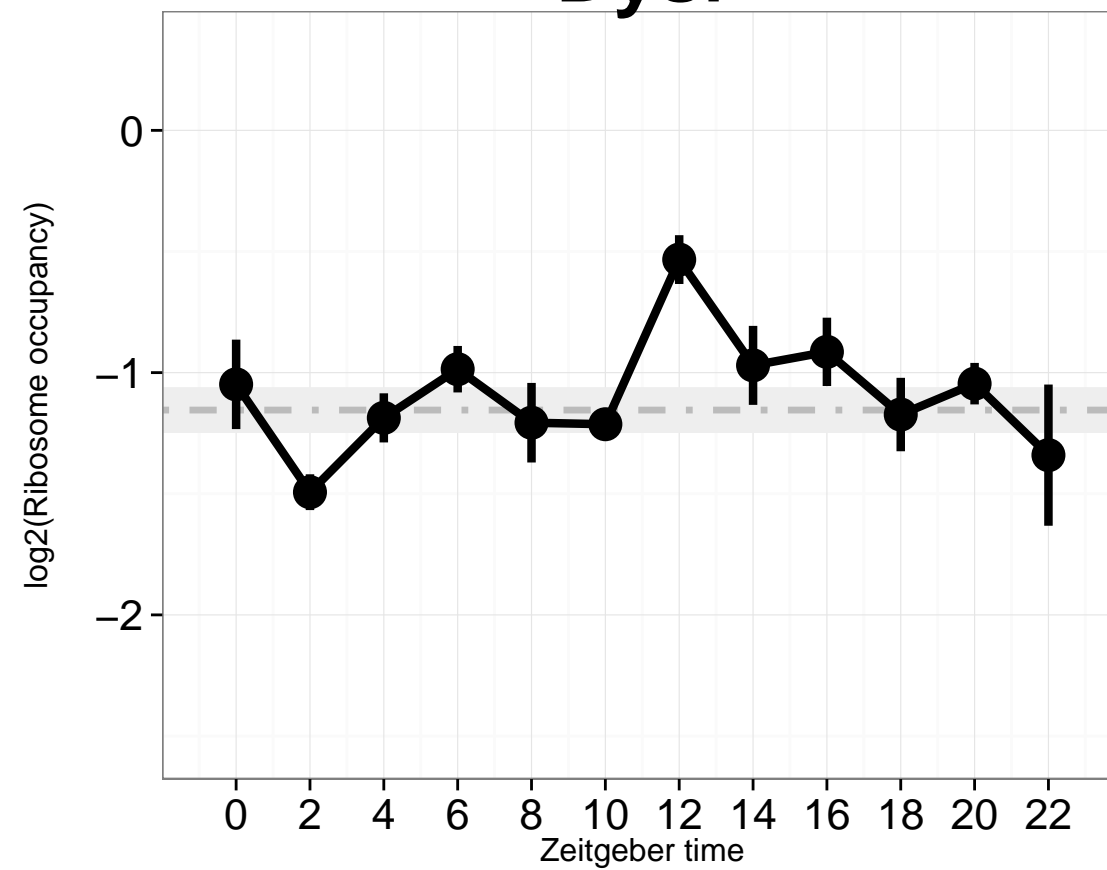

Supplement: SuppDataset_1.zip [file Dysf_set_A.pdf › Supplemental Dataset 1/A-mRNA_nonrhyth_translation_nonrhyth/Dysf_set_A.pdf]

# Dzip3

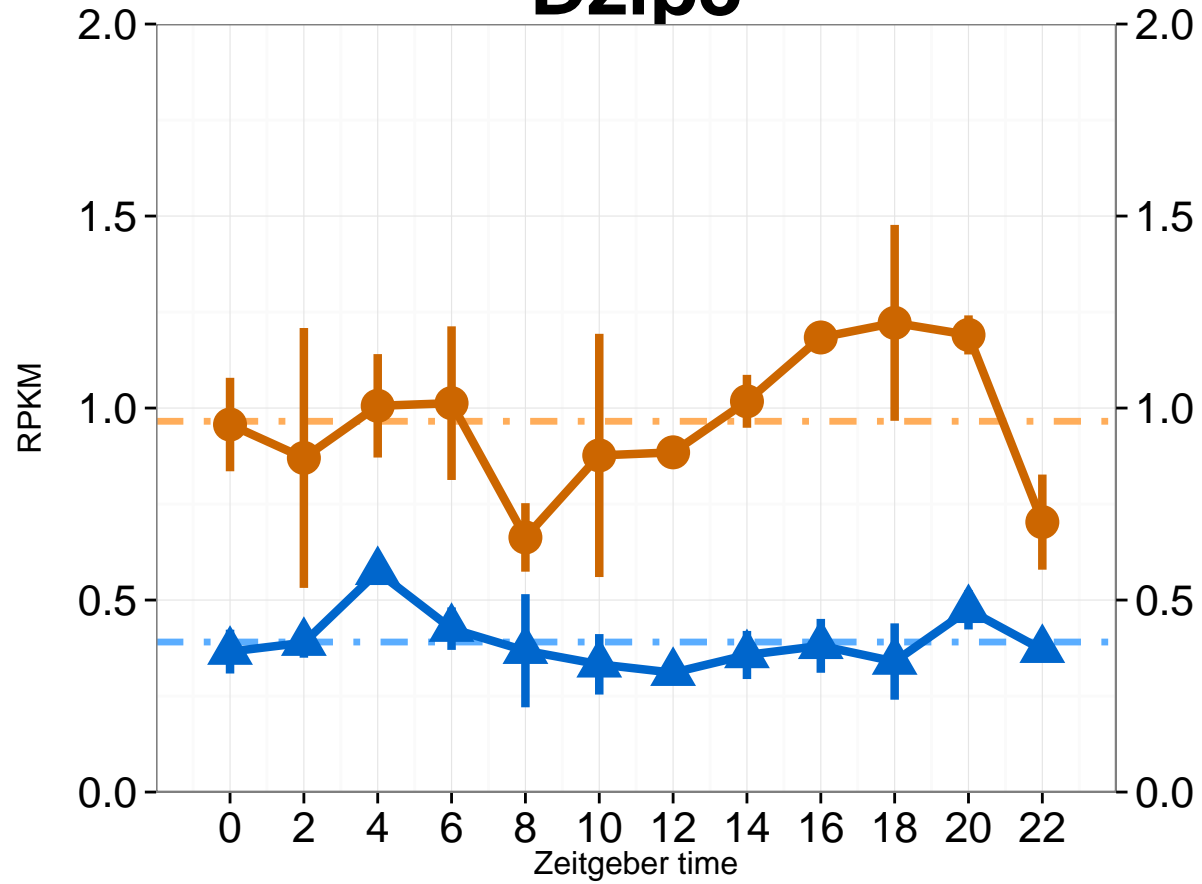

# Dzip3

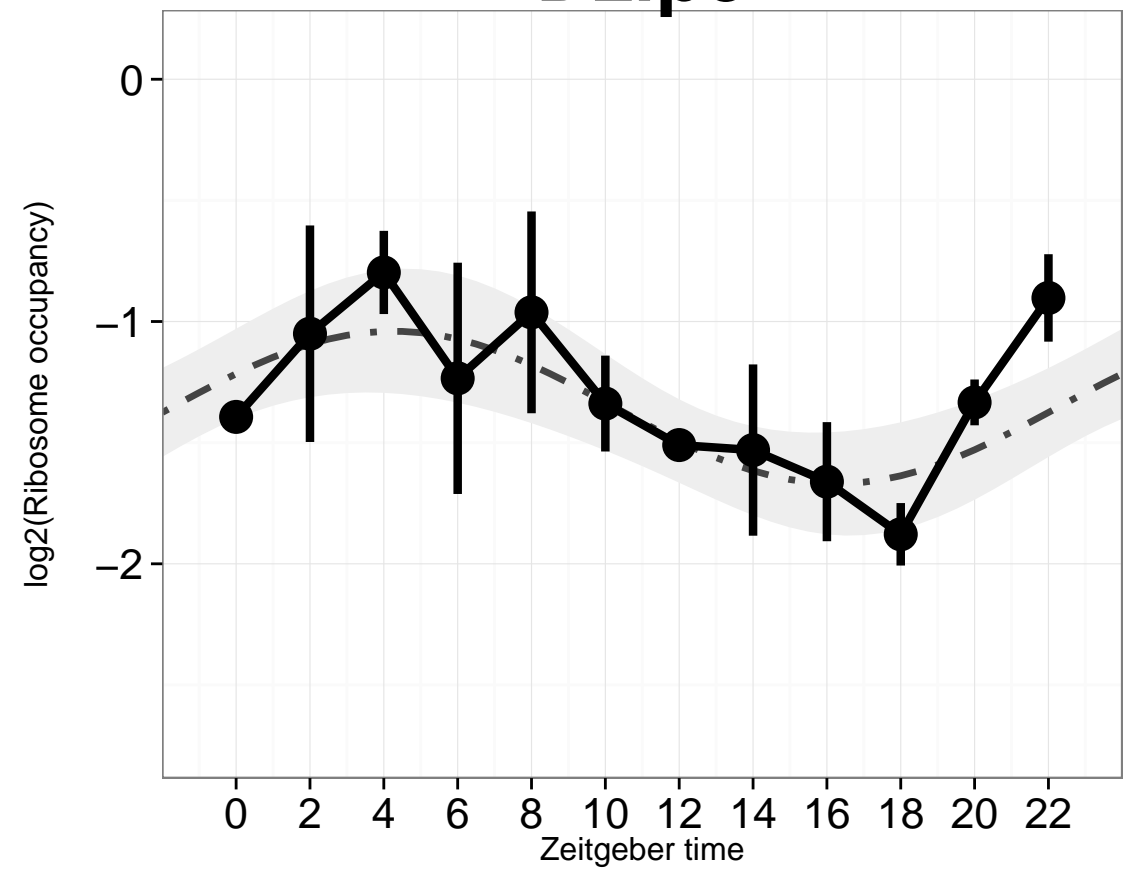

Supplement: SuppDataset_1.zip [file Dzip3_set_A.pdf › Supplemental Dataset 1/A-mRNA_nonrhyth_translation_nonrhyth/Dzip3_set_A.pdf]

**E030037K01Rik TR**

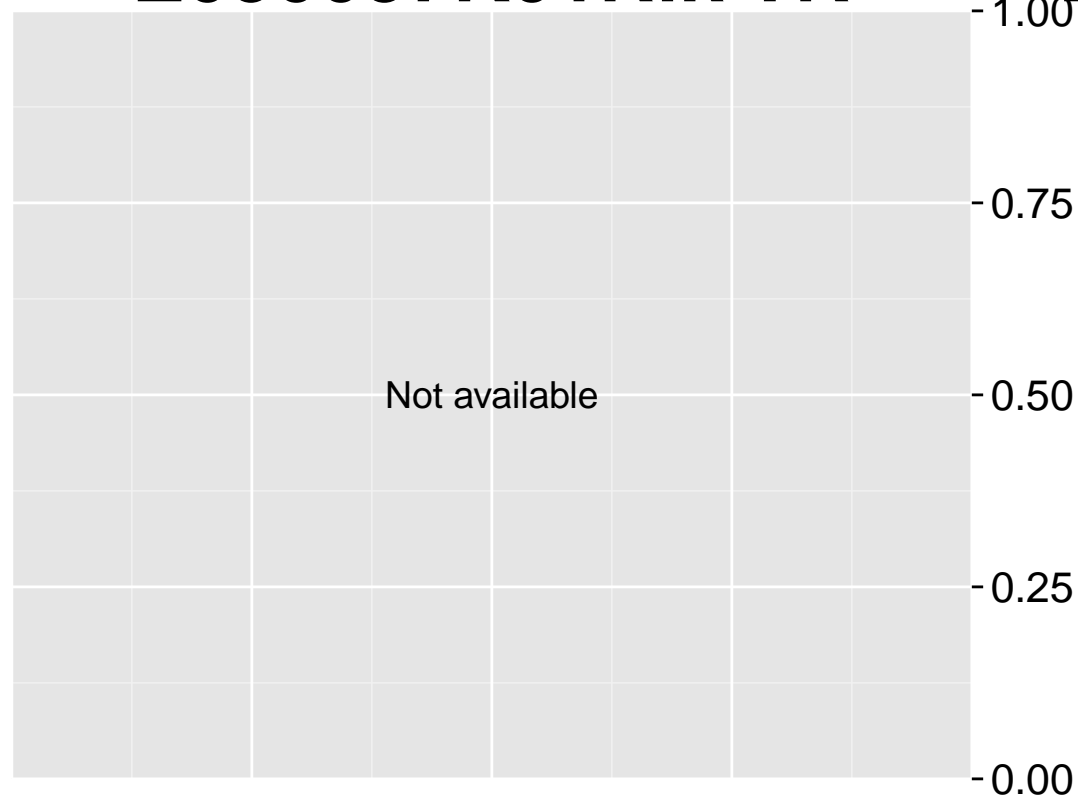

**E030037K01Rik log2(Ribosome occup**

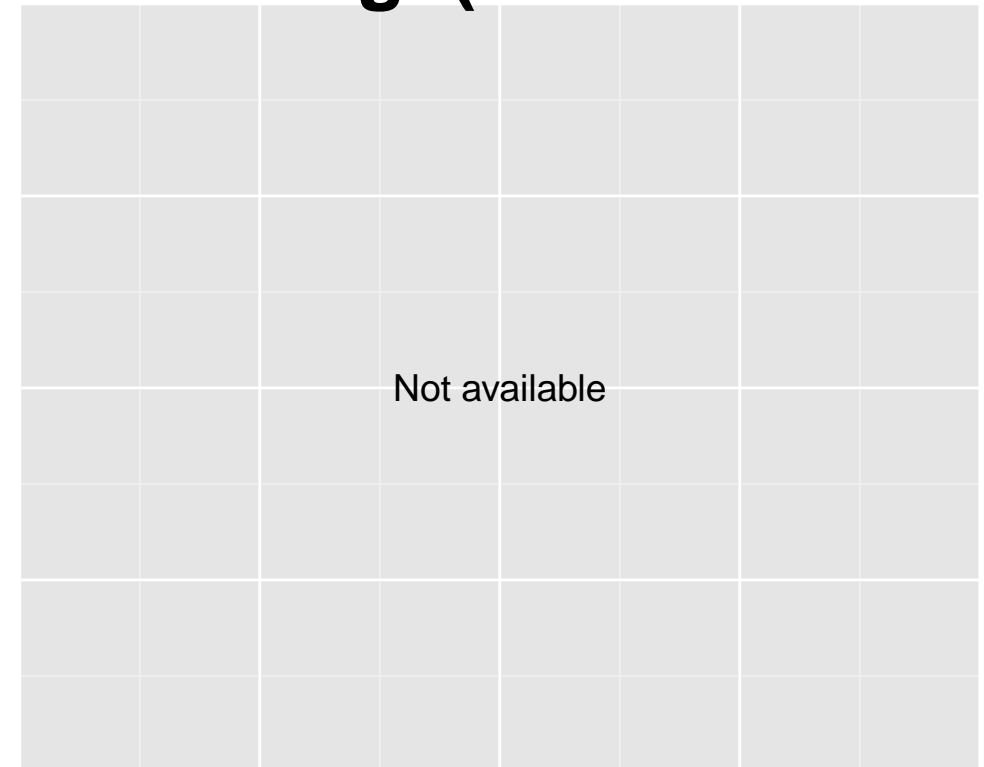

Supplement: SuppDataset_1.zip [file E030037K01Rik_set_A.pdf › Supplemental Dataset 1/A-mRNA_nonrhyth_translation_nonrhyth/E030037K01Rik_set_A.pdf]

## E130012A19Rik

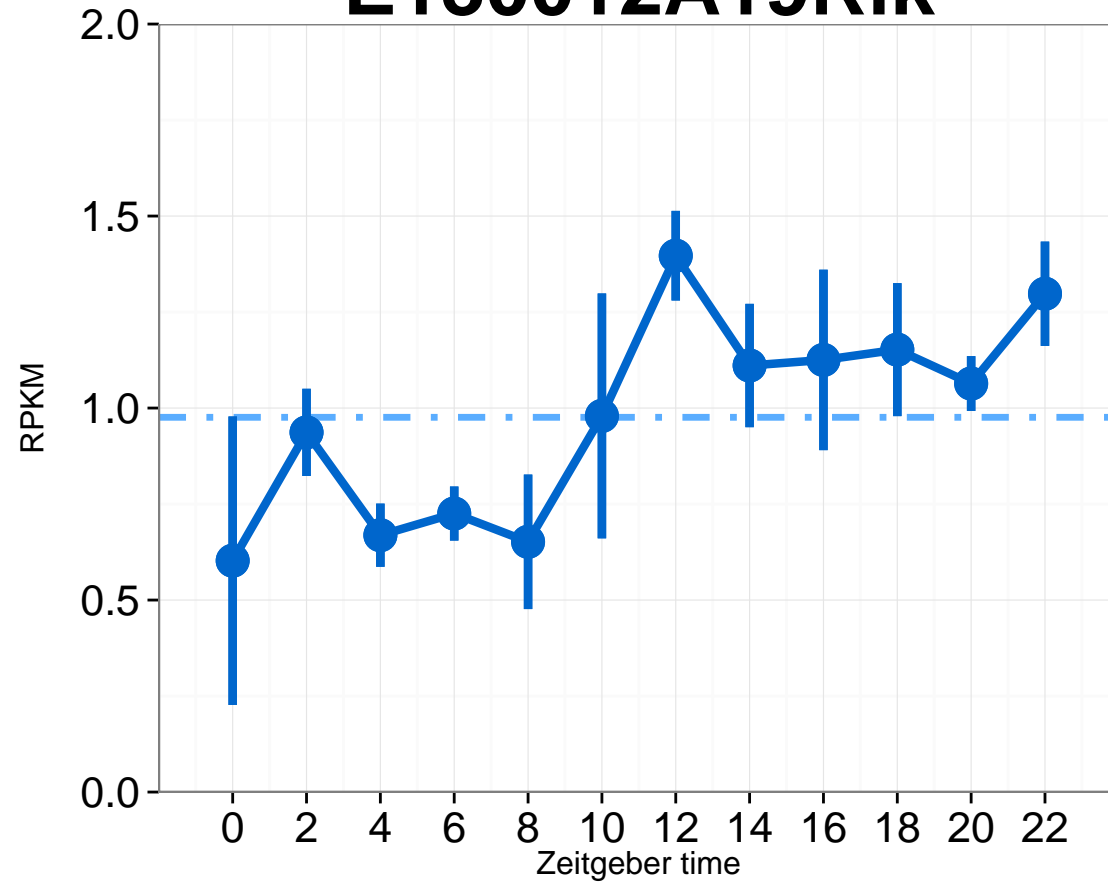

## E130012A19Rik log<sub>2</sub>(Ribosome occup

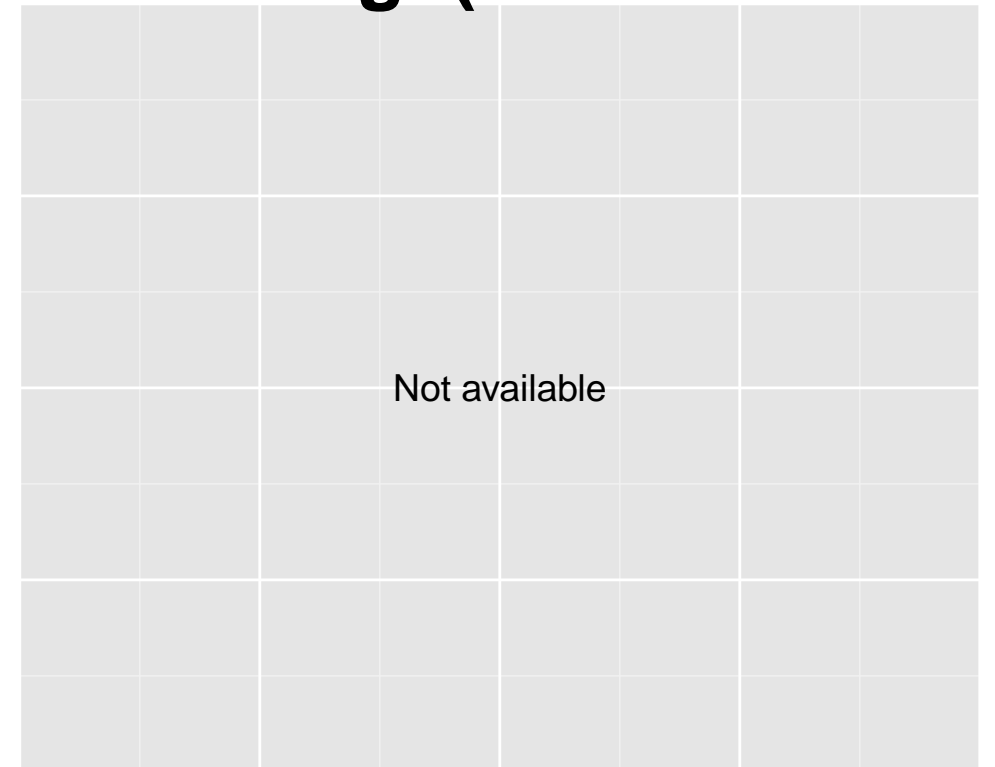

Supplement: SuppDataset_1.zip [file E130012A19Rik_set_A.pdf › Supplemental Dataset 1/A-mRNA_nonrhyth_translation_nonrhyth/E130012A19Rik_set_A.pdf]

# E130308A19Rik

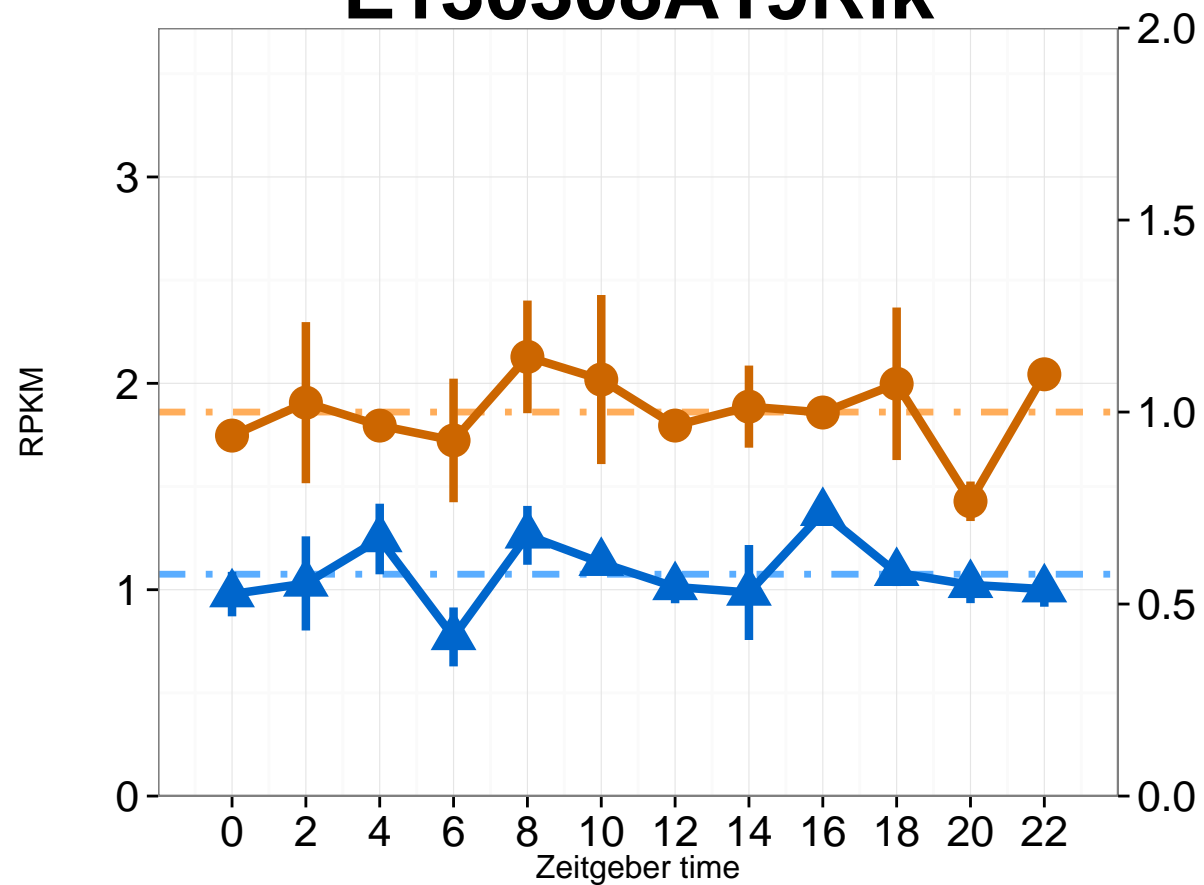

# E130308A19Rik

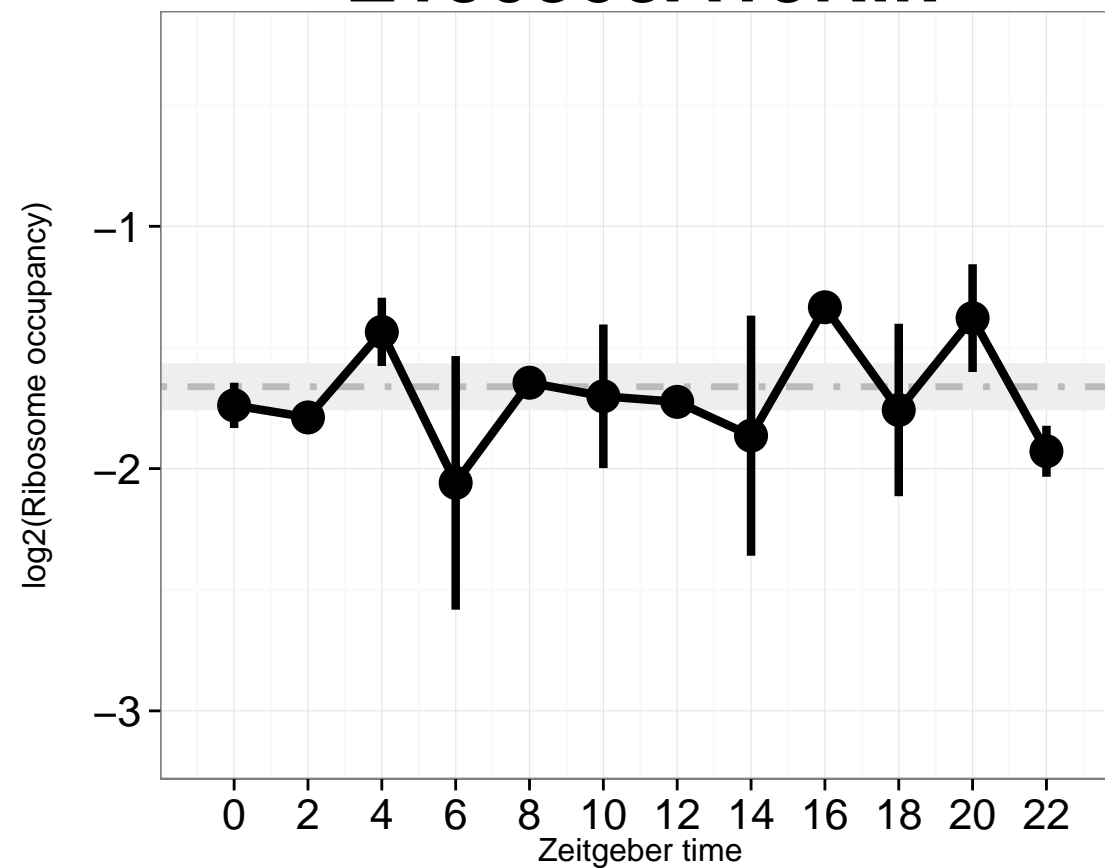

Supplement: SuppDataset_1.zip [file E130308A19Rik_set_A.pdf › Supplemental Dataset 1/A-mRNA_nonrhyth_translation_nonrhyth/E130308A19Rik_set_A.pdf]

# E130309D02Rik

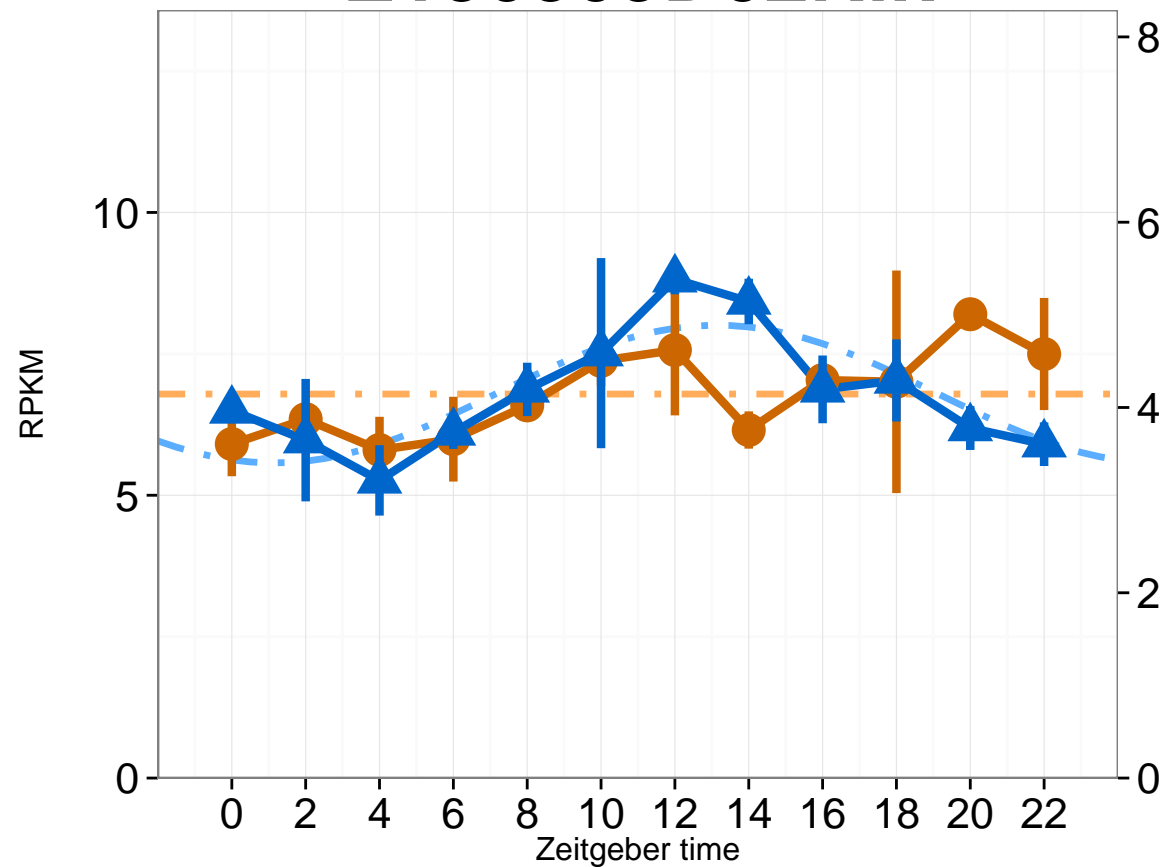

# E130309D02Rik

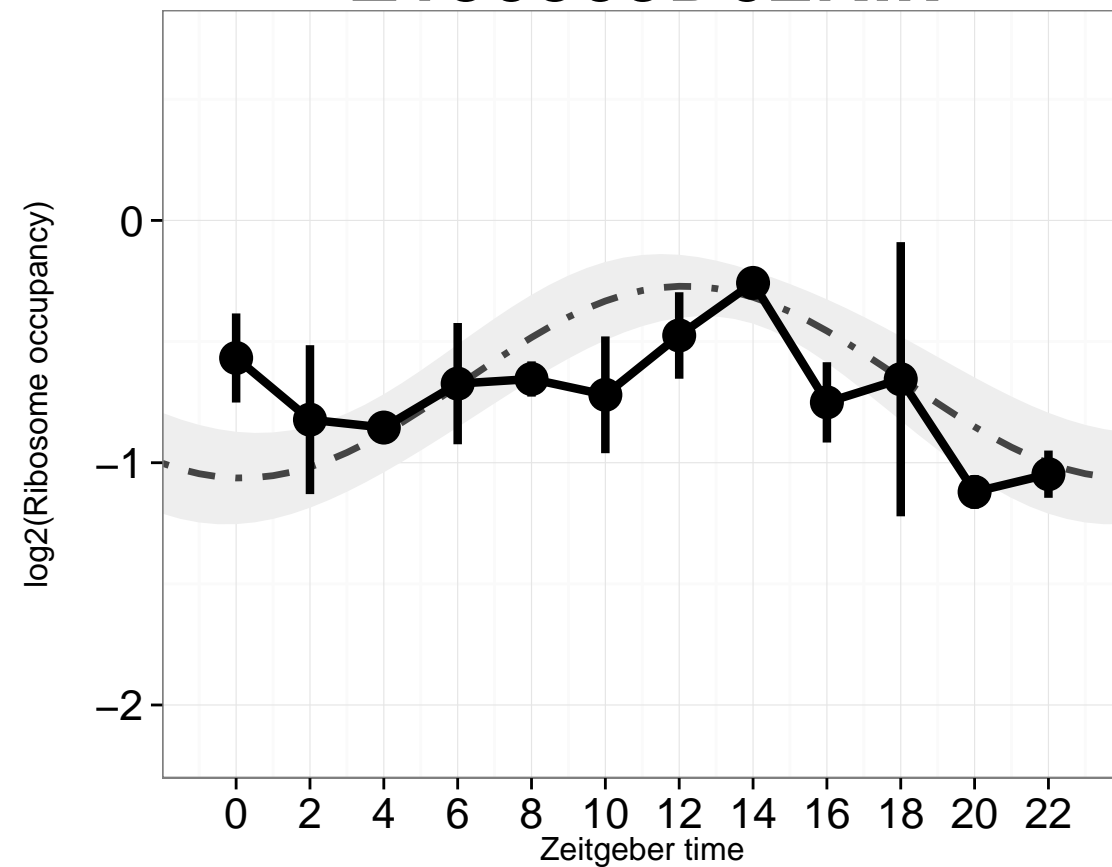

Supplement: SuppDataset_1.zip [file E130309D02Rik_set_A.pdf › Supplemental Dataset 1/A-mRNA_nonrhyth_translation_nonrhyth/E130309D02Rik_set_A.pdf]

**E2f2 TR**

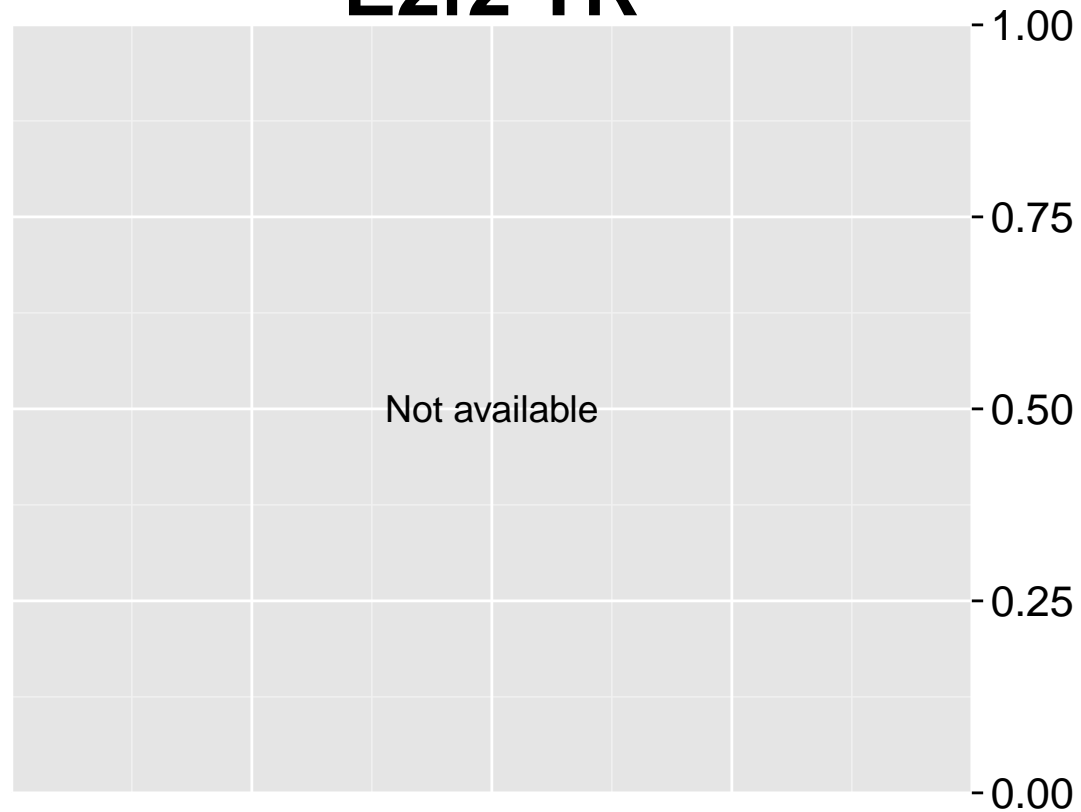

**E2f2 log2(Ribosome occupancy)**

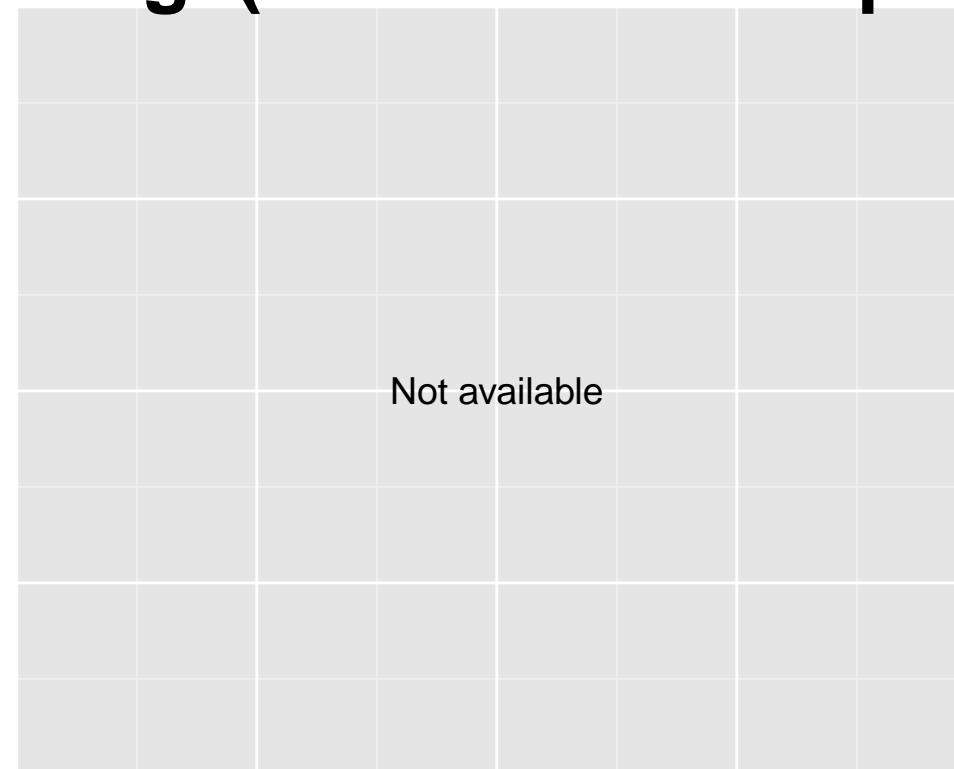

Supplement: SuppDataset_1.zip [file E2f2_set_A.pdf › Supplemental Dataset 1/A-mRNA_nonrhyth_translation_nonrhyth/E2f2_set_A.pdf]

## E2f3

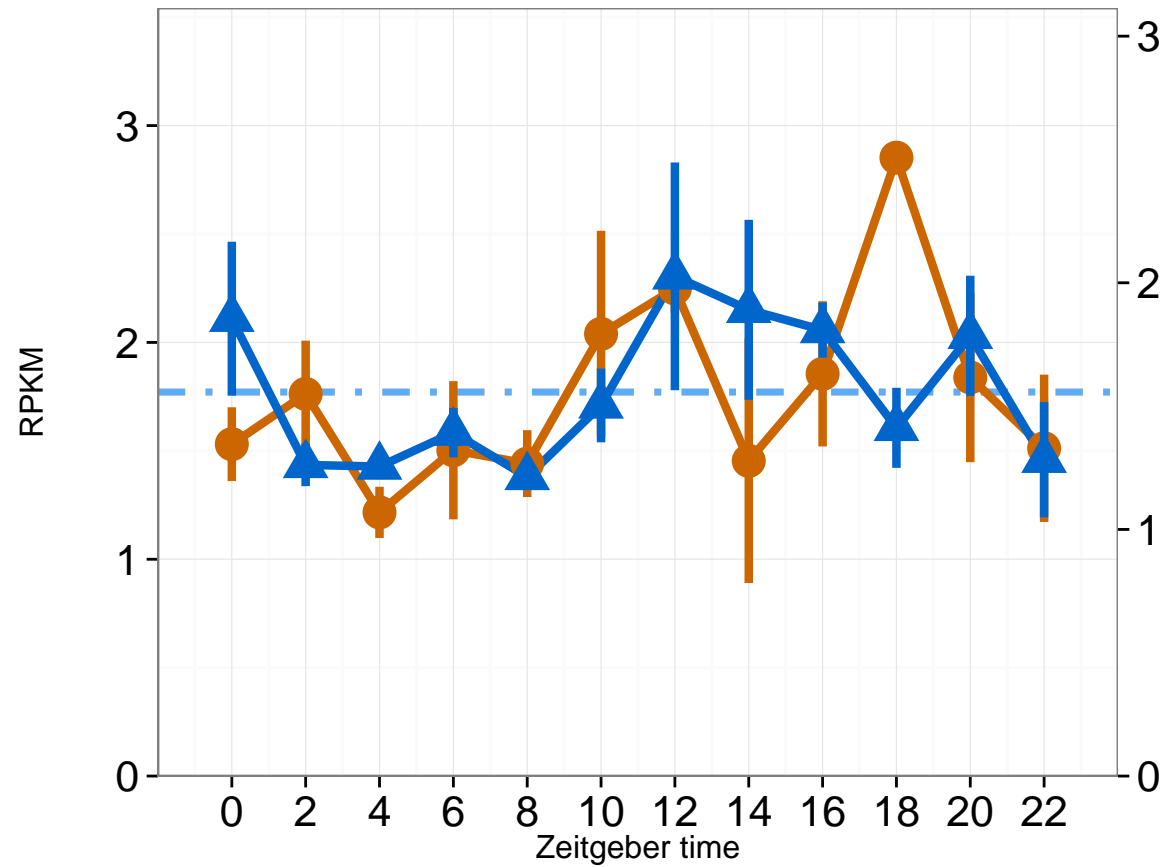

## E2f3

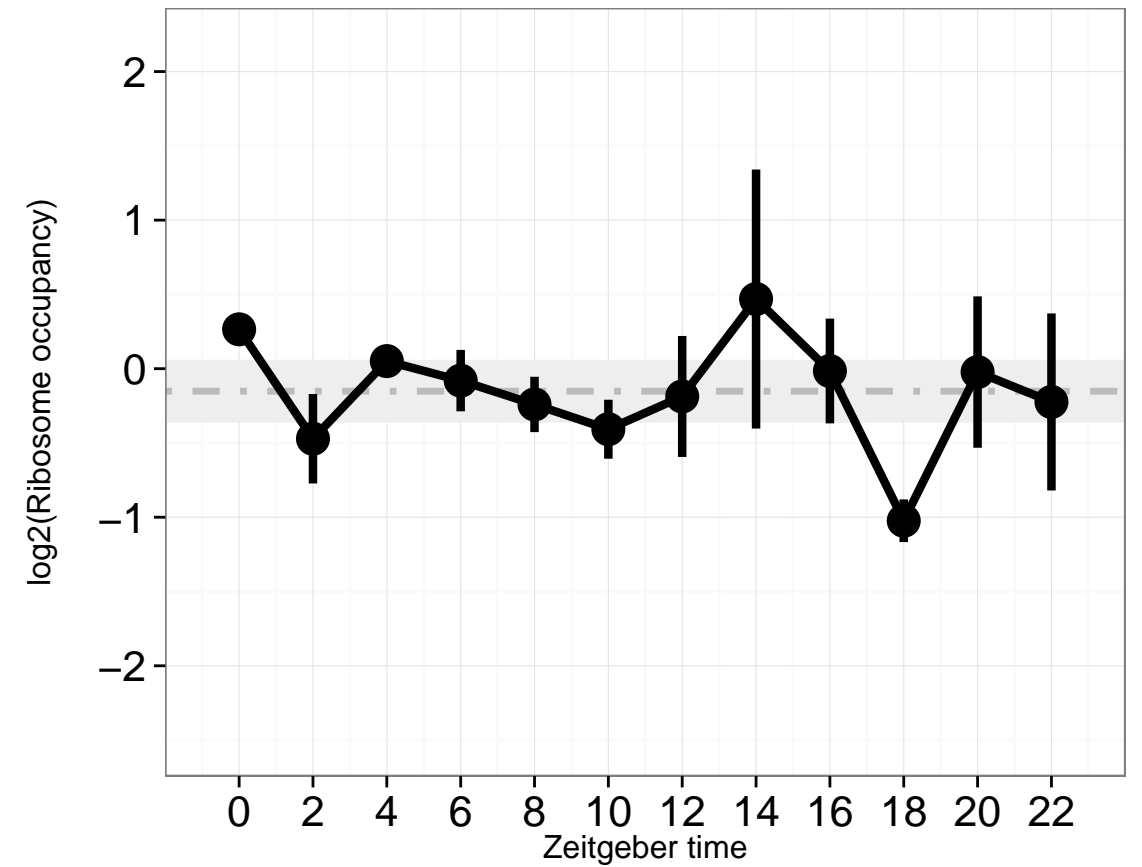

Supplement: SuppDataset_1.zip [file E2f3_set_A.pdf › Supplemental Dataset 1/A-mRNA_nonrhyth_translation_nonrhyth/E2f3_set_A.pdf]

## E2f4

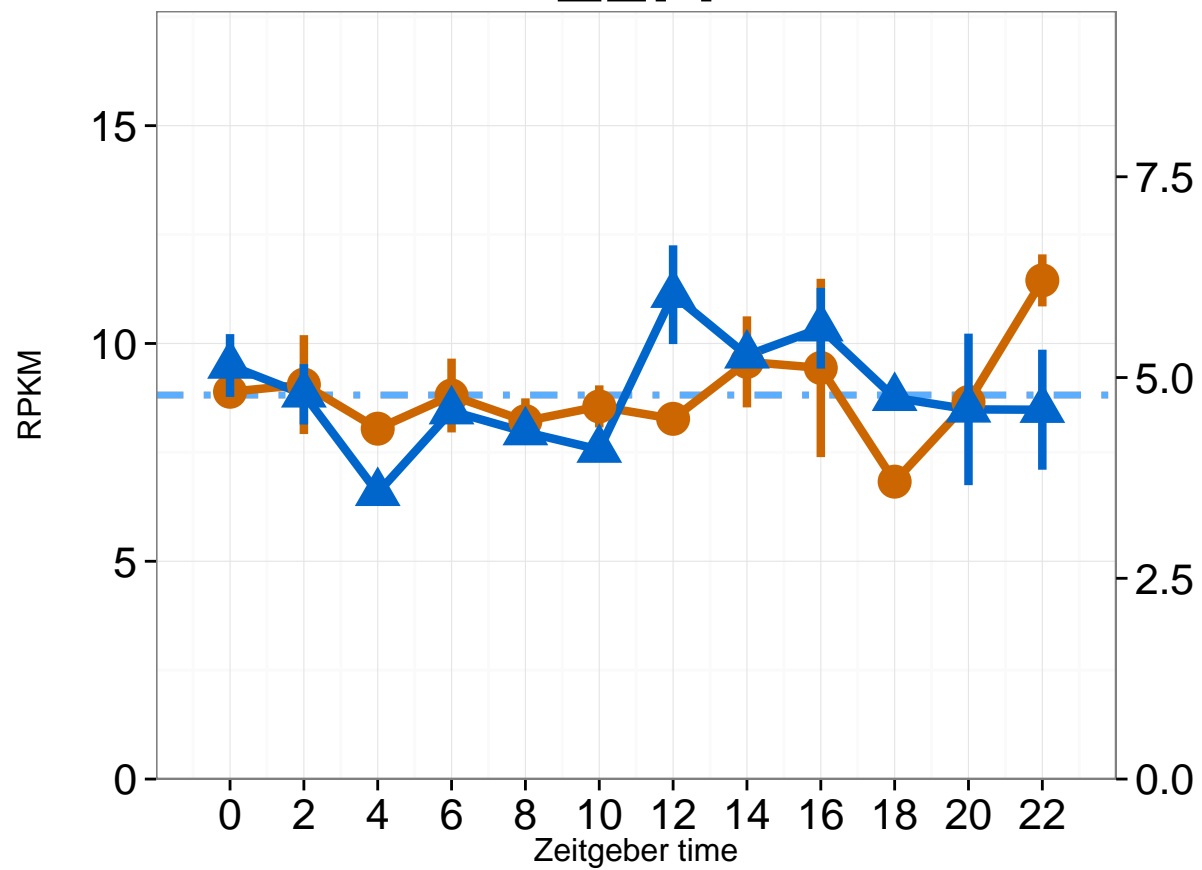

## E2f4

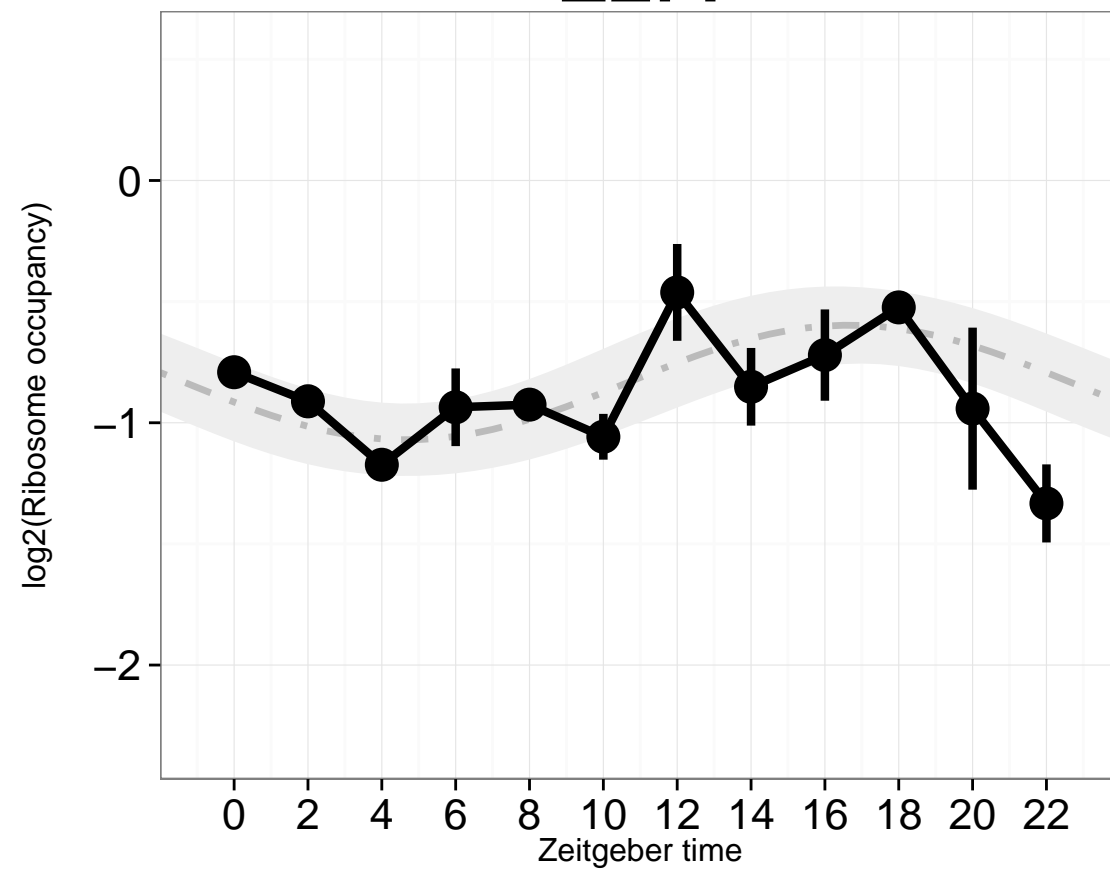

Supplement: SuppDataset_1.zip [file E2f4_set_A.pdf › Supplemental Dataset 1/A-mRNA_nonrhyth_translation_nonrhyth/E2f4_set_A.pdf]

# E2f5

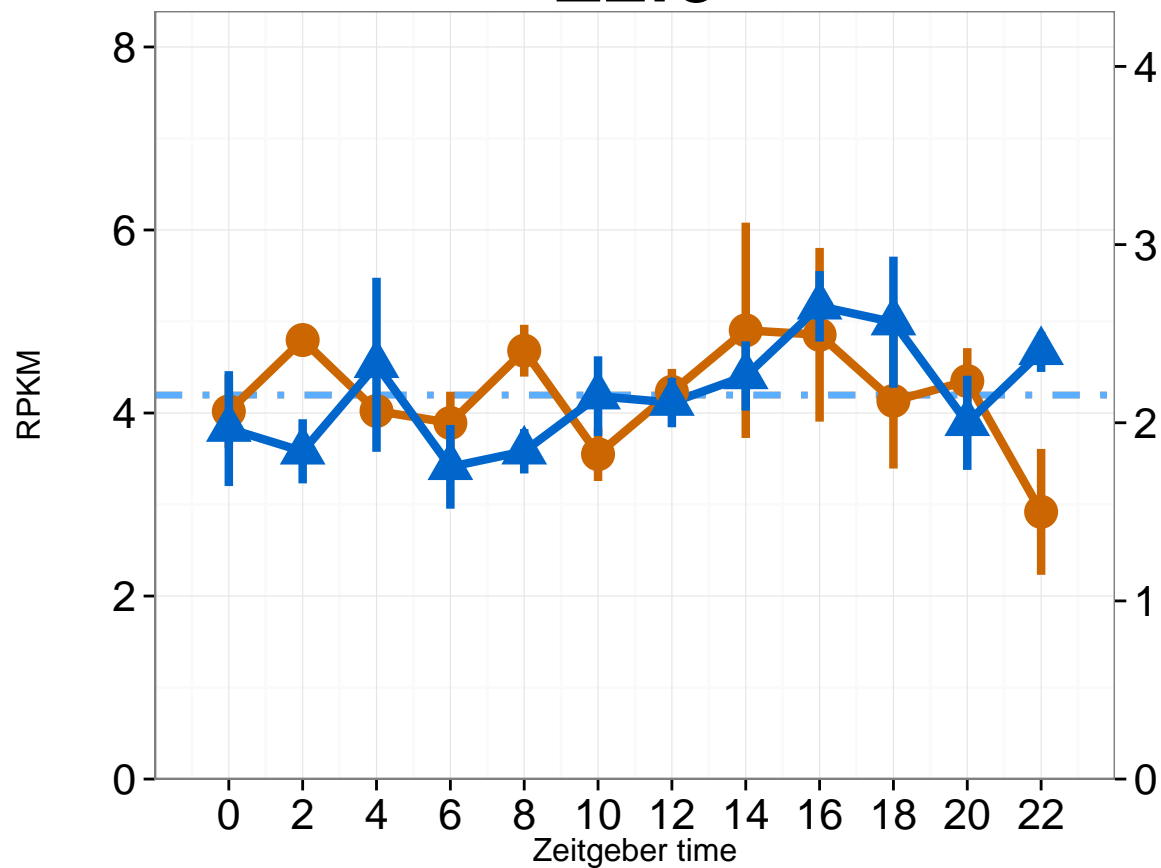

# E2f5

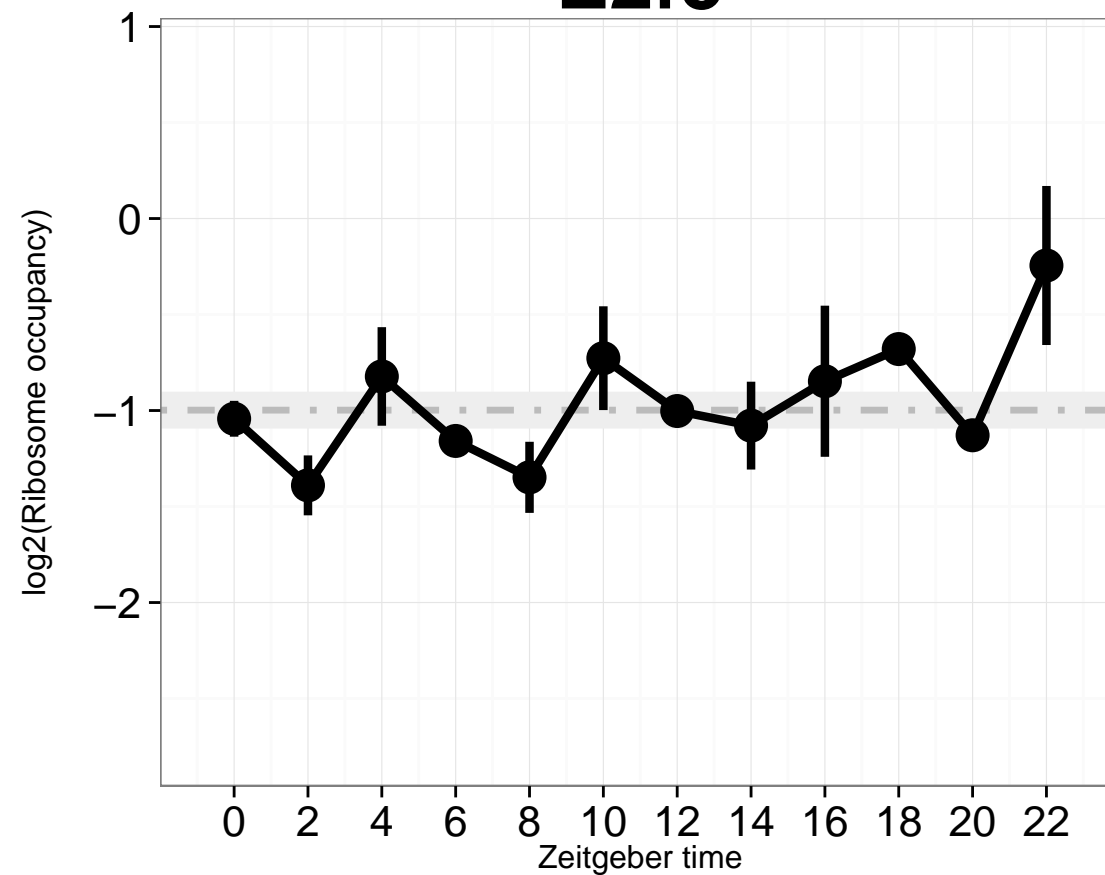

Supplement: SuppDataset_1.zip [file E2f5_set_A.pdf › Supplemental Dataset 1/A-mRNA_nonrhyth_translation_nonrhyth/E2f5_set_A.pdf]

## E2f6

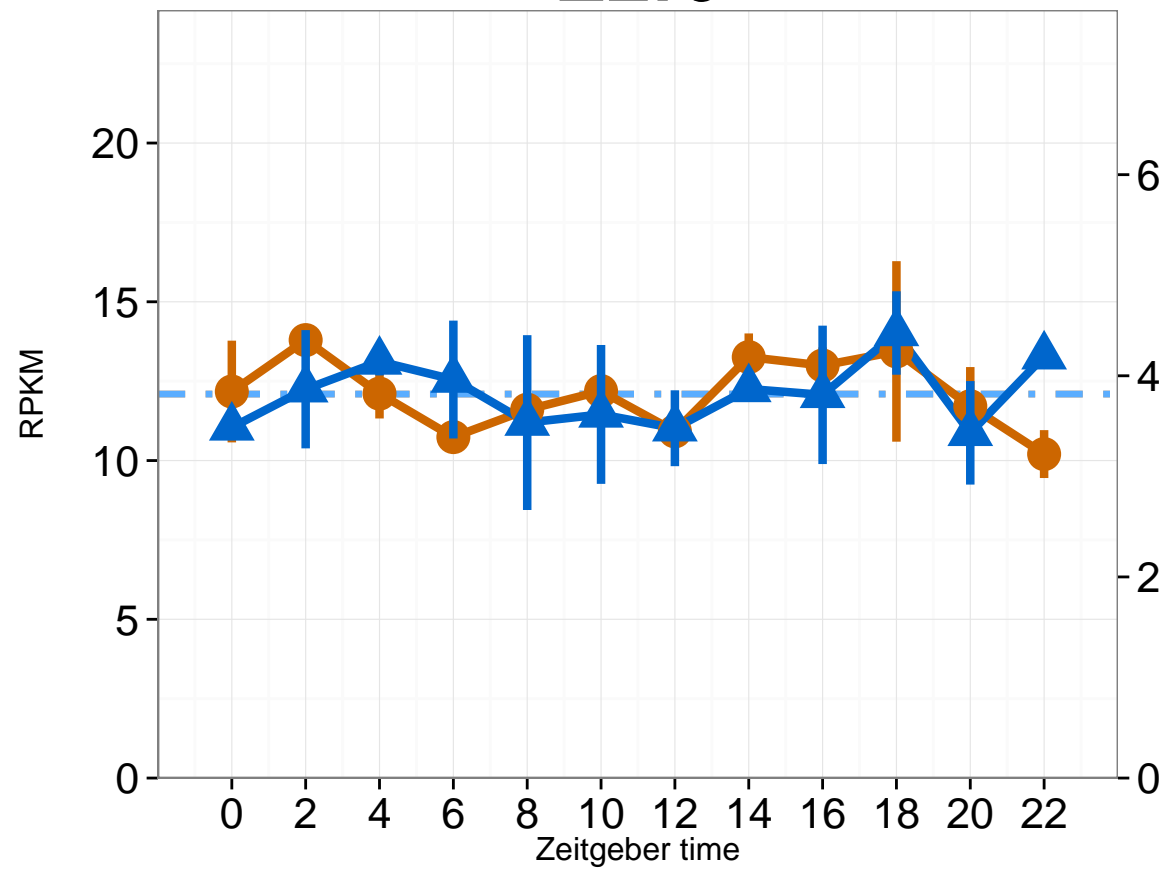

## E2f6

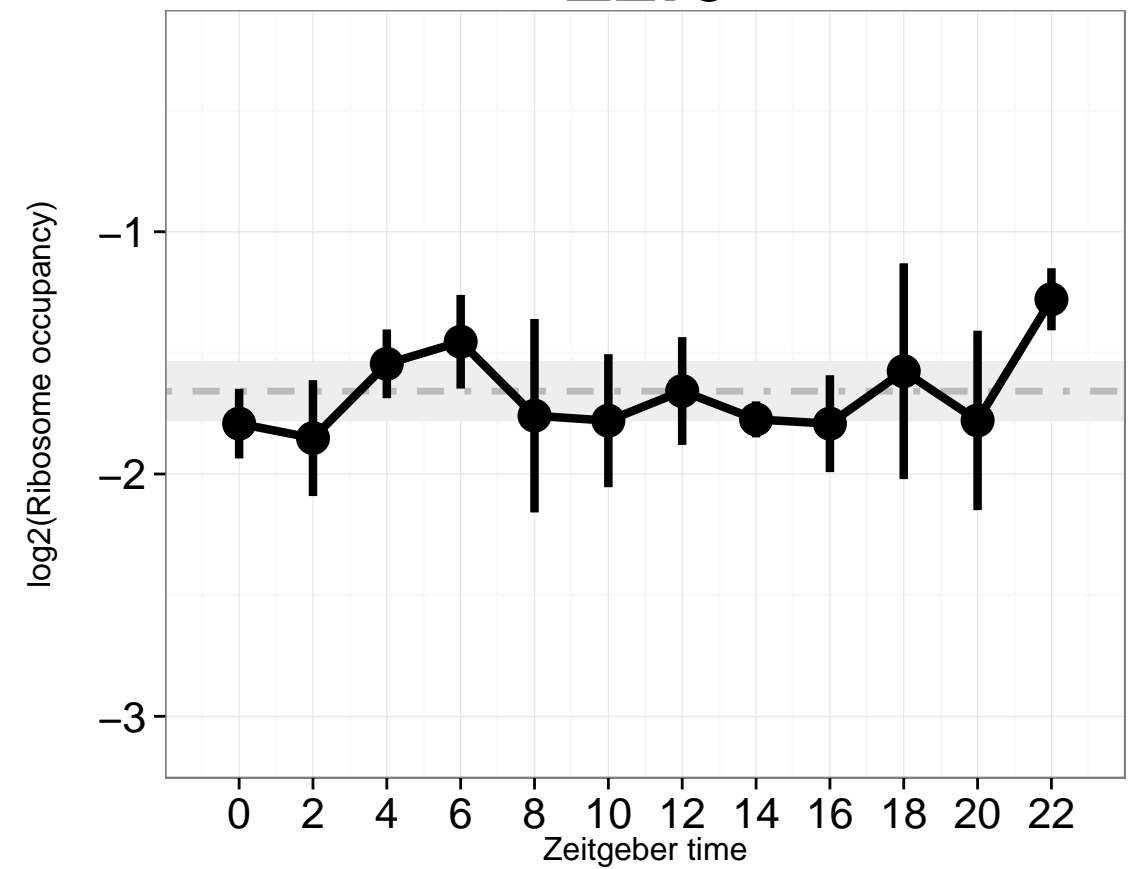

Supplement: SuppDataset_1.zip [file E2f6_set_A.pdf › Supplemental Dataset 1/A-mRNA_nonrhyth_translation_nonrhyth/E2f6_set_A.pdf]

## E2f8

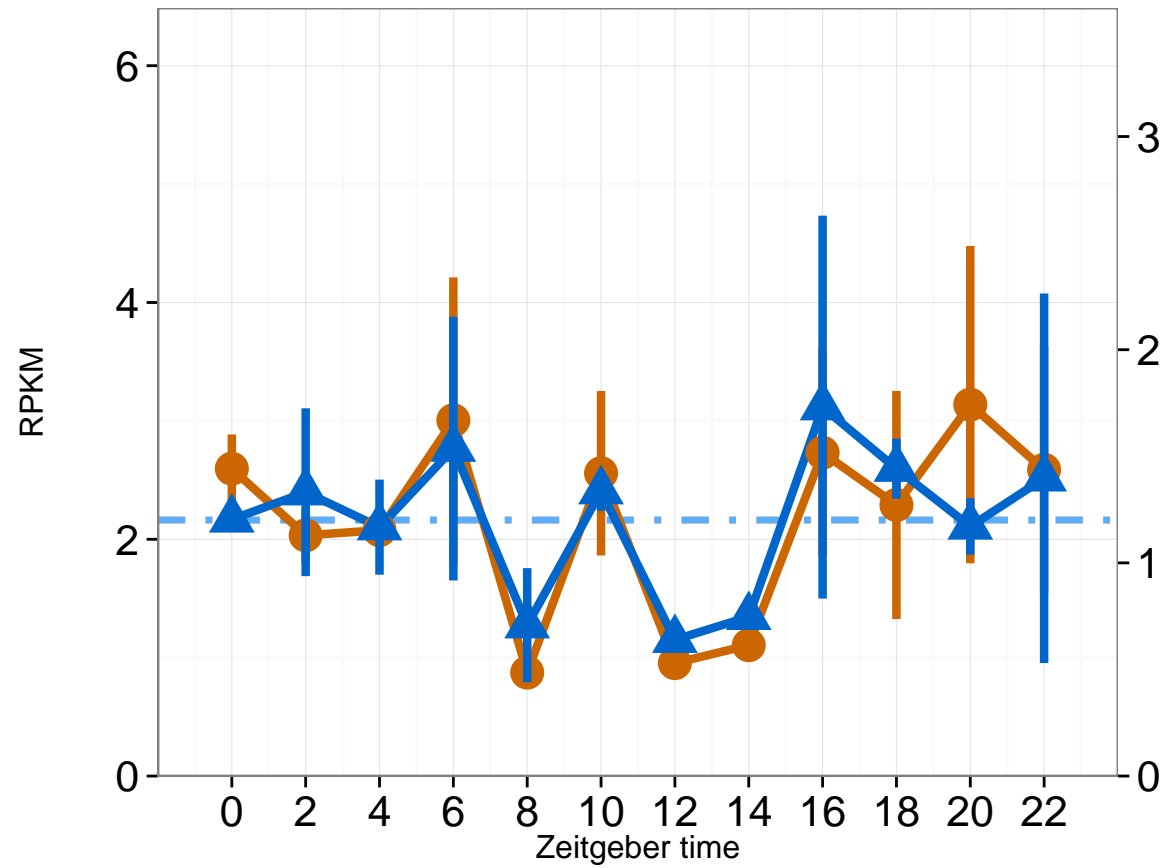

## E2f8

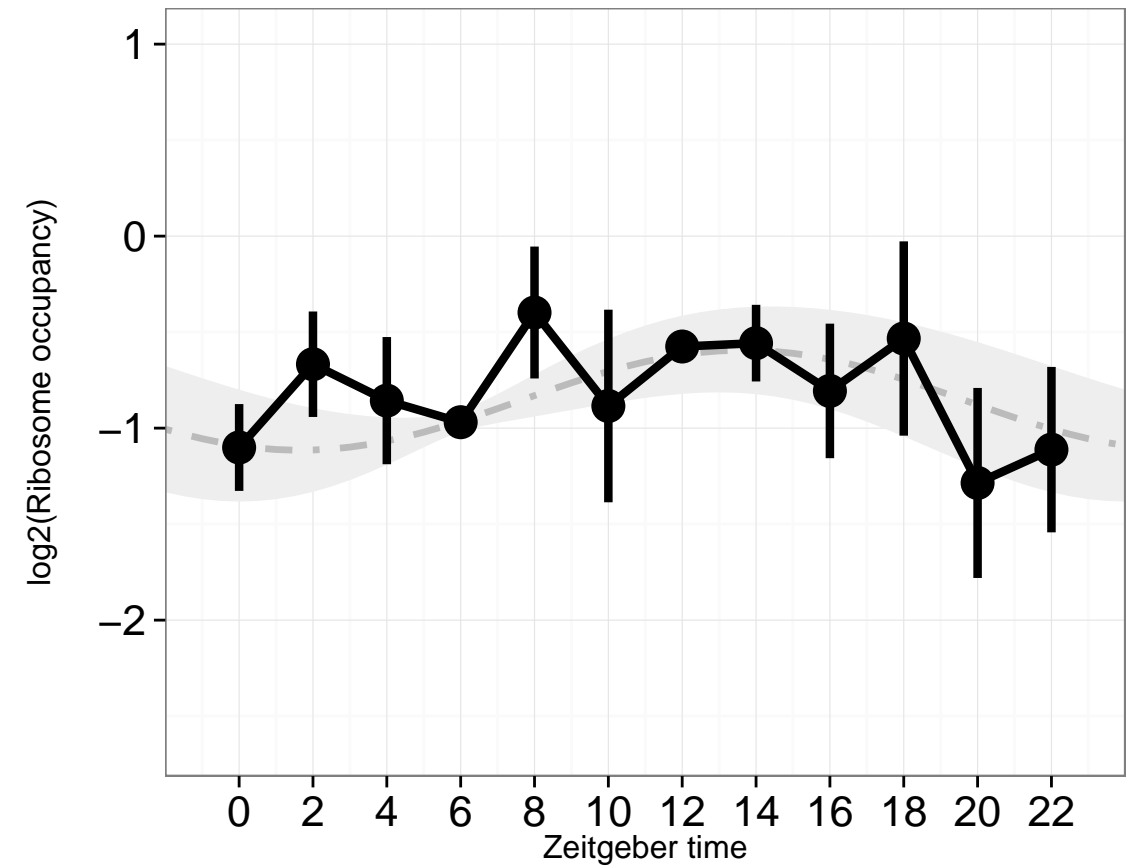

Supplement: SuppDataset_1.zip [file E2f8_set_A.pdf › Supplemental Dataset 1/A-mRNA_nonrhyth_translation_nonrhyth/E2f8_set_A.pdf]

# E430025E21Rik

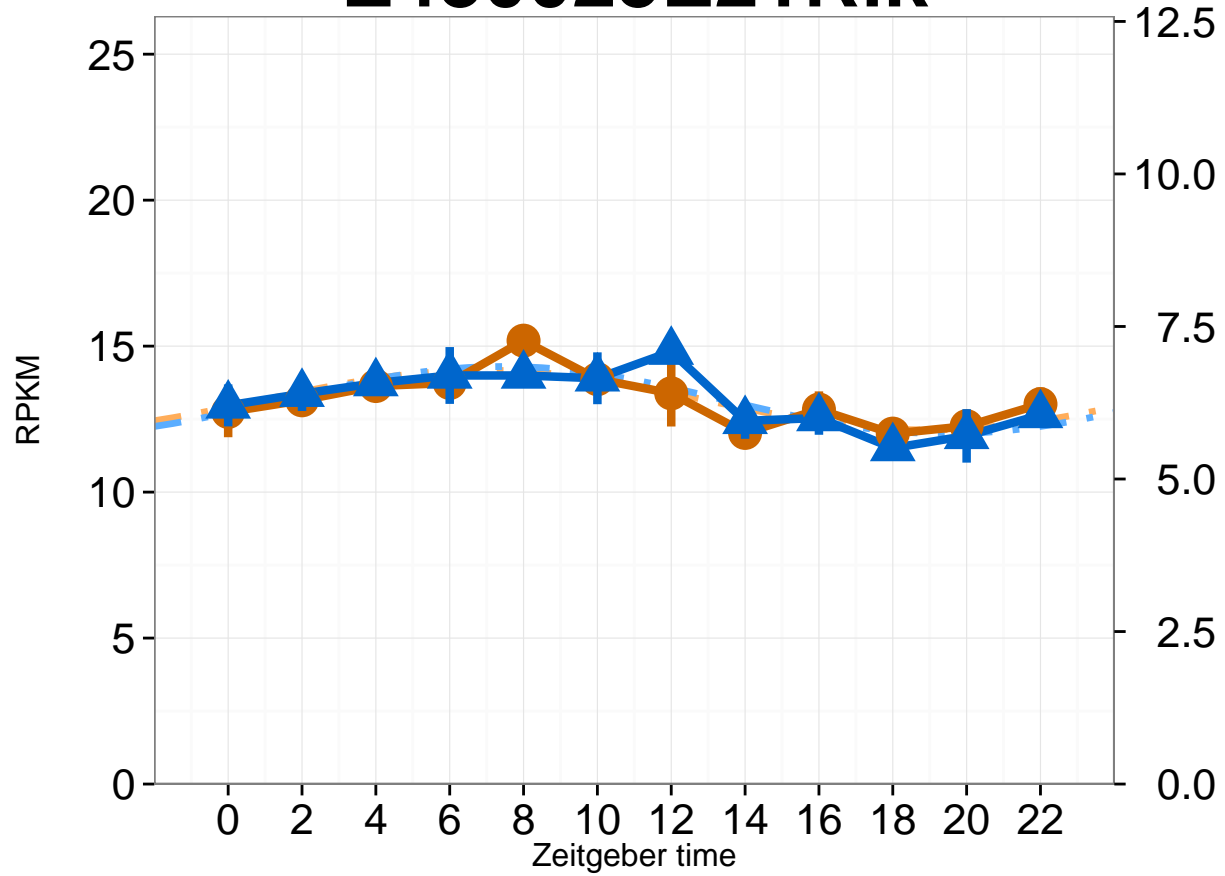

# E430025E21Rik

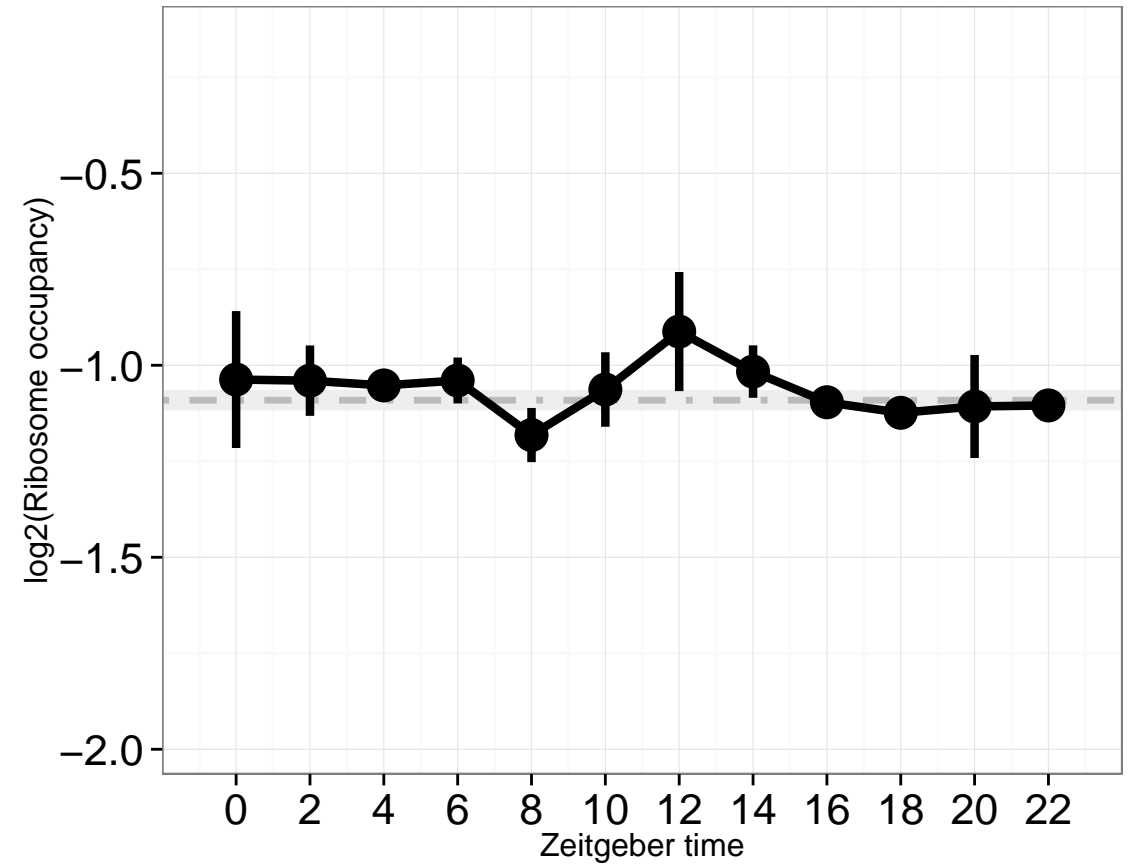

Supplement: SuppDataset_1.zip [file E430025E21Rik_set_A.pdf › Supplemental Dataset 1/A-mRNA_nonrhyth_translation_nonrhyth/E430025E21Rik_set_A.pdf]

## Eaf1

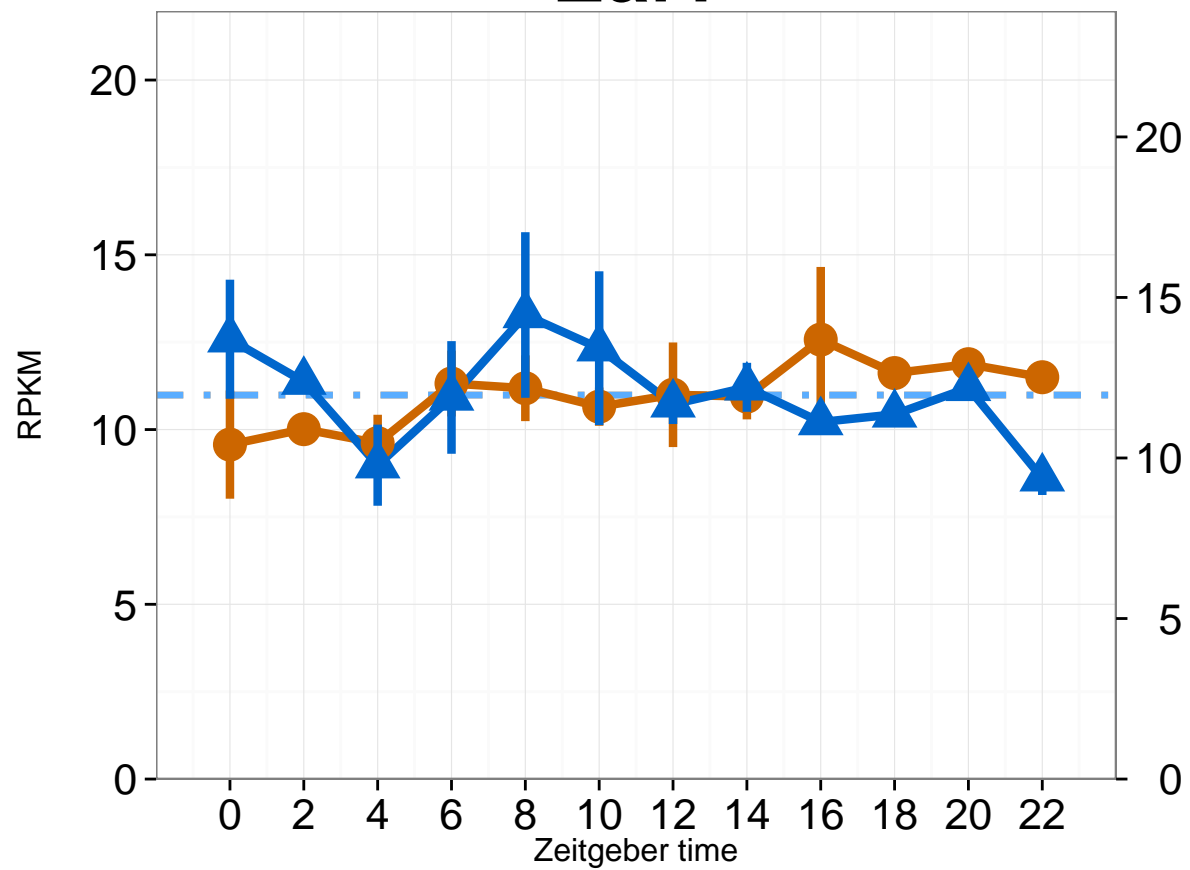

## Eaf1

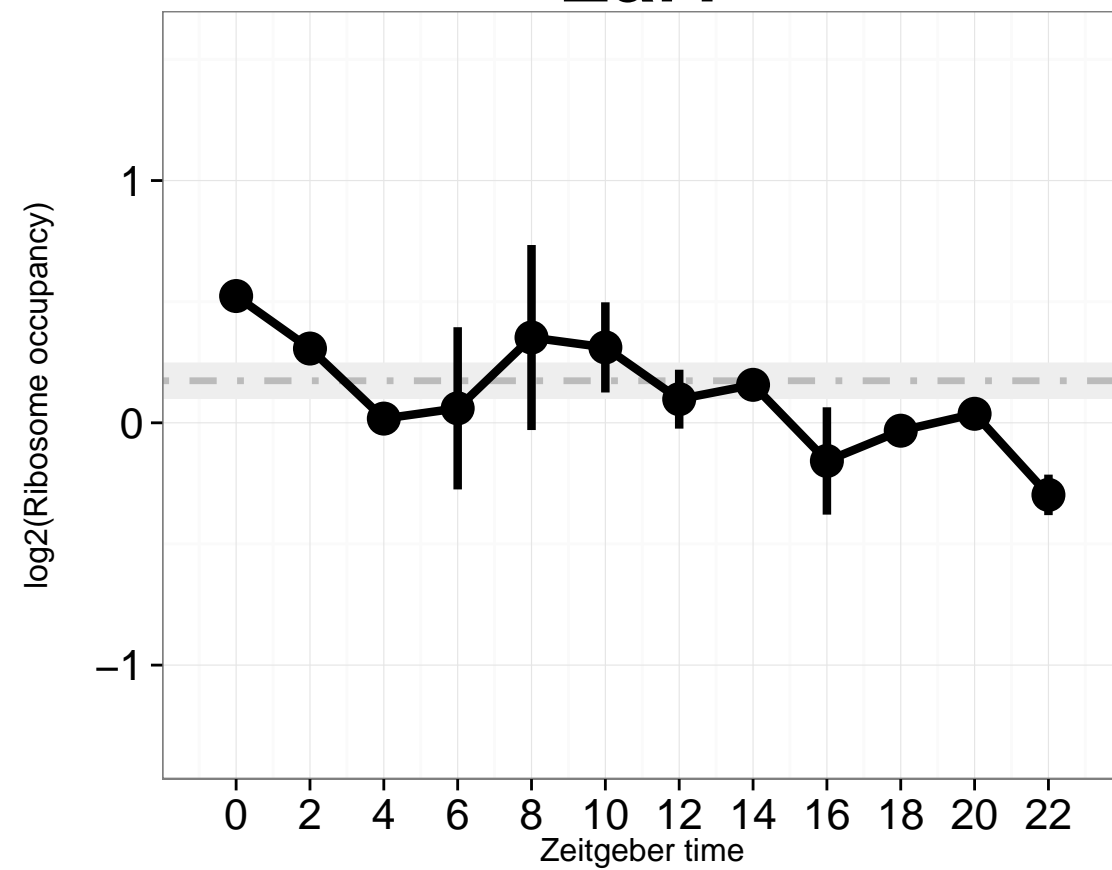

Supplement: SuppDataset_1.zip [file Eaf1_set_A.pdf › Supplemental Dataset 1/A-mRNA_nonrhyth_translation_nonrhyth/Eaf1_set_A.pdf]

## Eapp

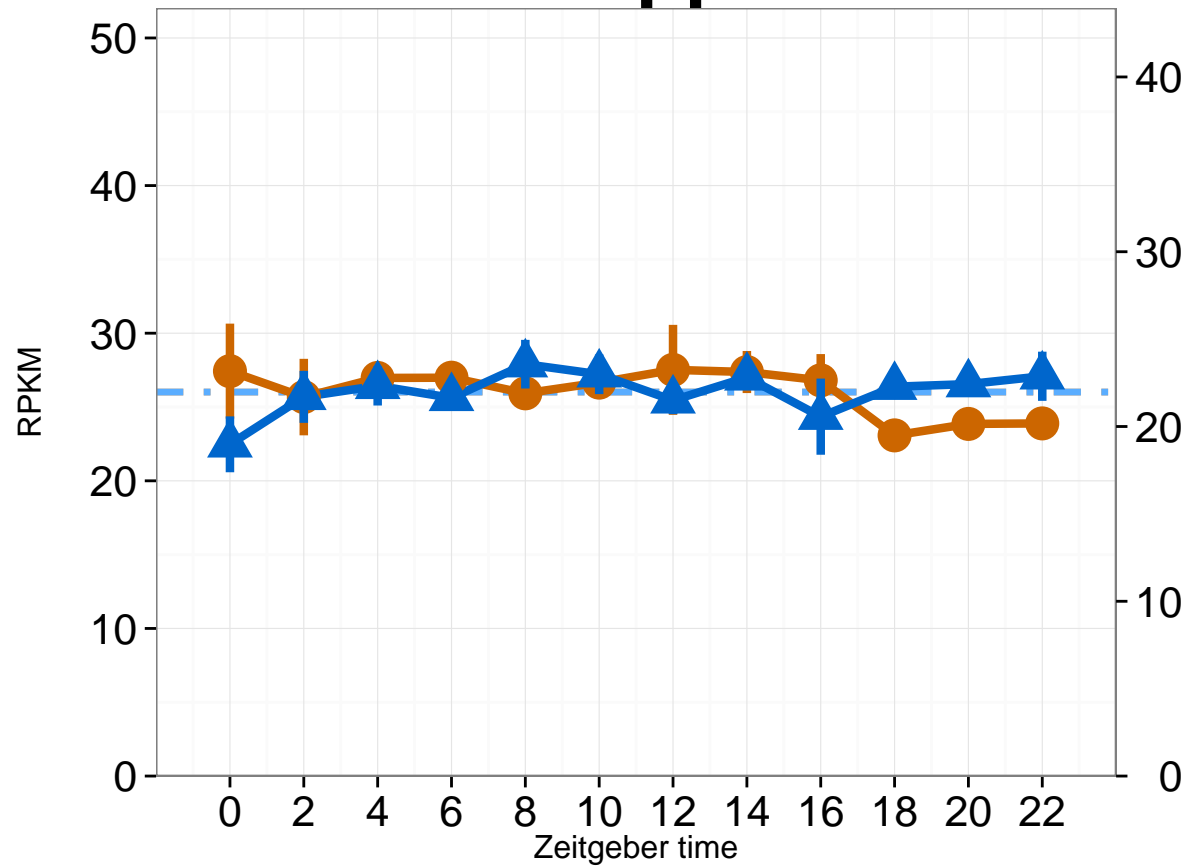

## Eapp

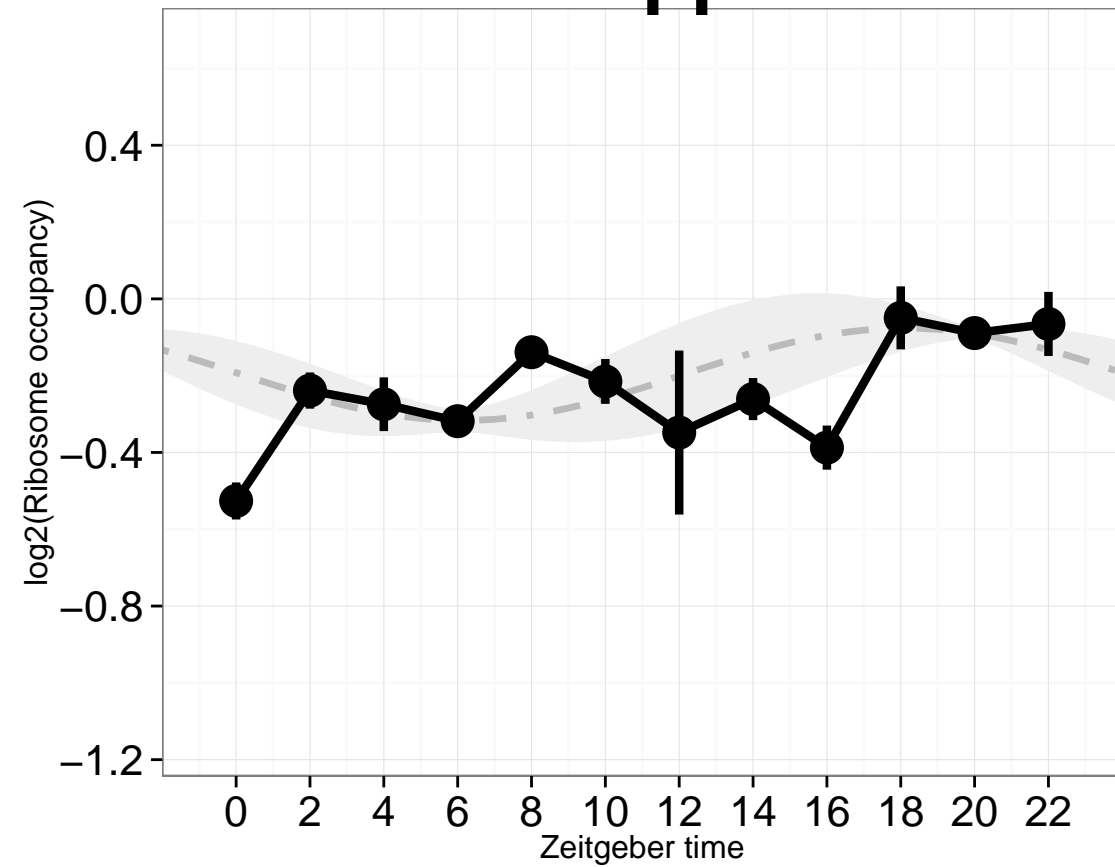

Supplement: SuppDataset_1.zip [file Eapp_set_A.pdf › Supplemental Dataset 1/A-mRNA_nonrhyth_translation_nonrhyth/Eapp_set_A.pdf]

## Ear2

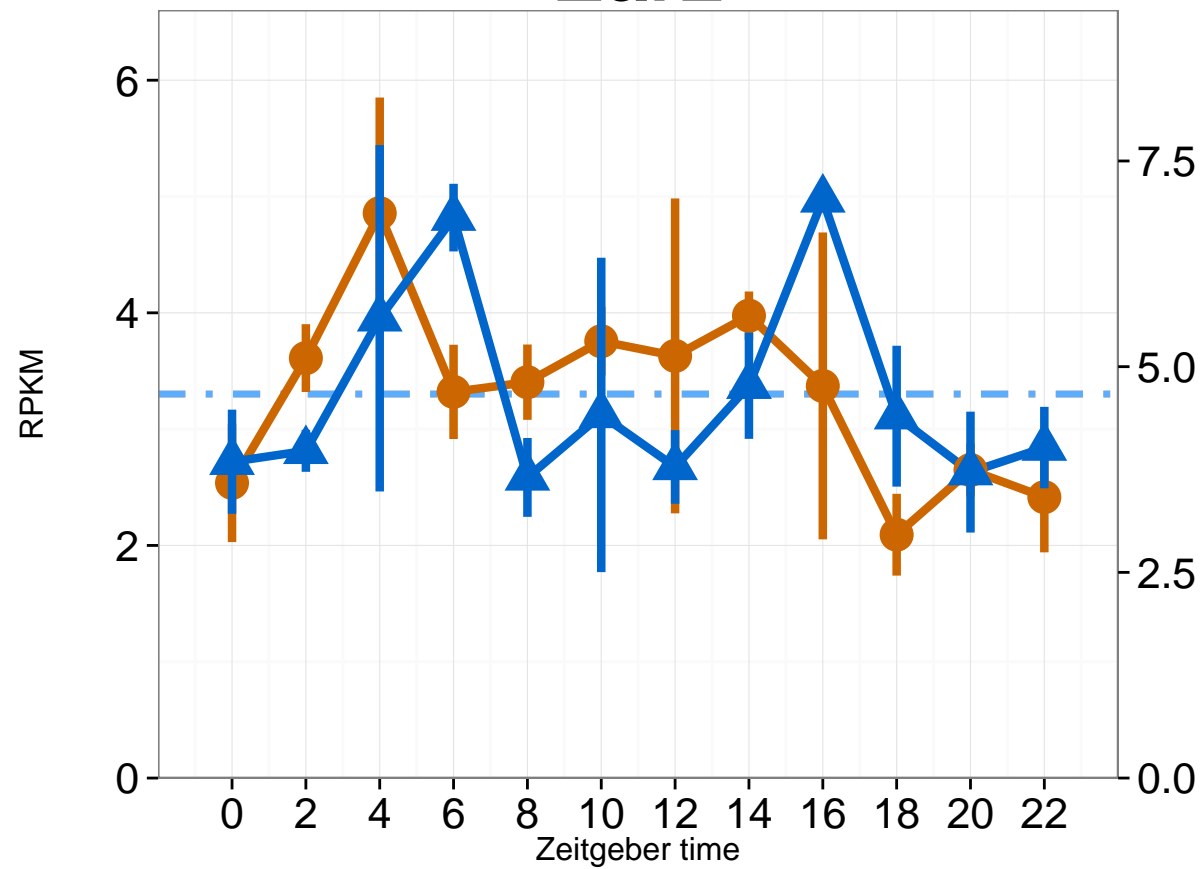

## Ear2

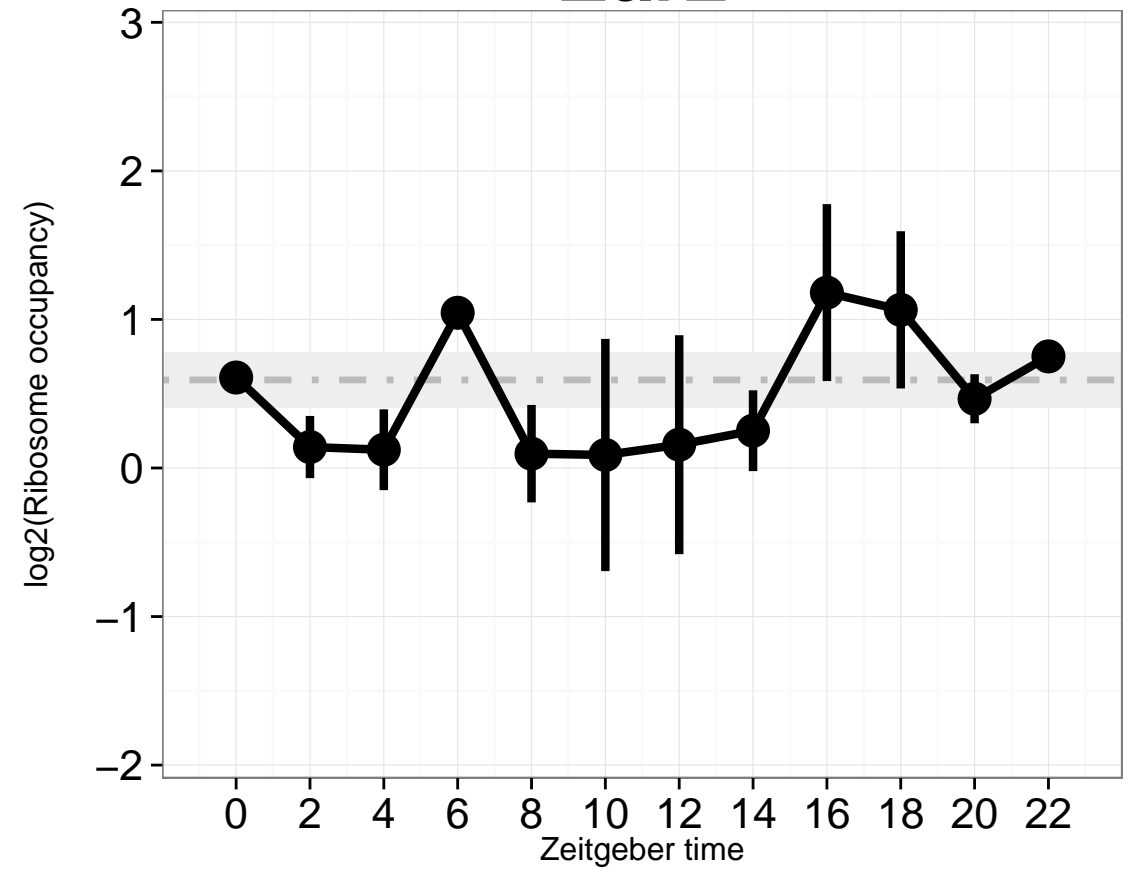

Supplement: SuppDataset_1.zip [file Ear2_set_A.pdf › Supplemental Dataset 1/A-mRNA_nonrhyth_translation_nonrhyth/Ear2_set_A.pdf]

## Ears2

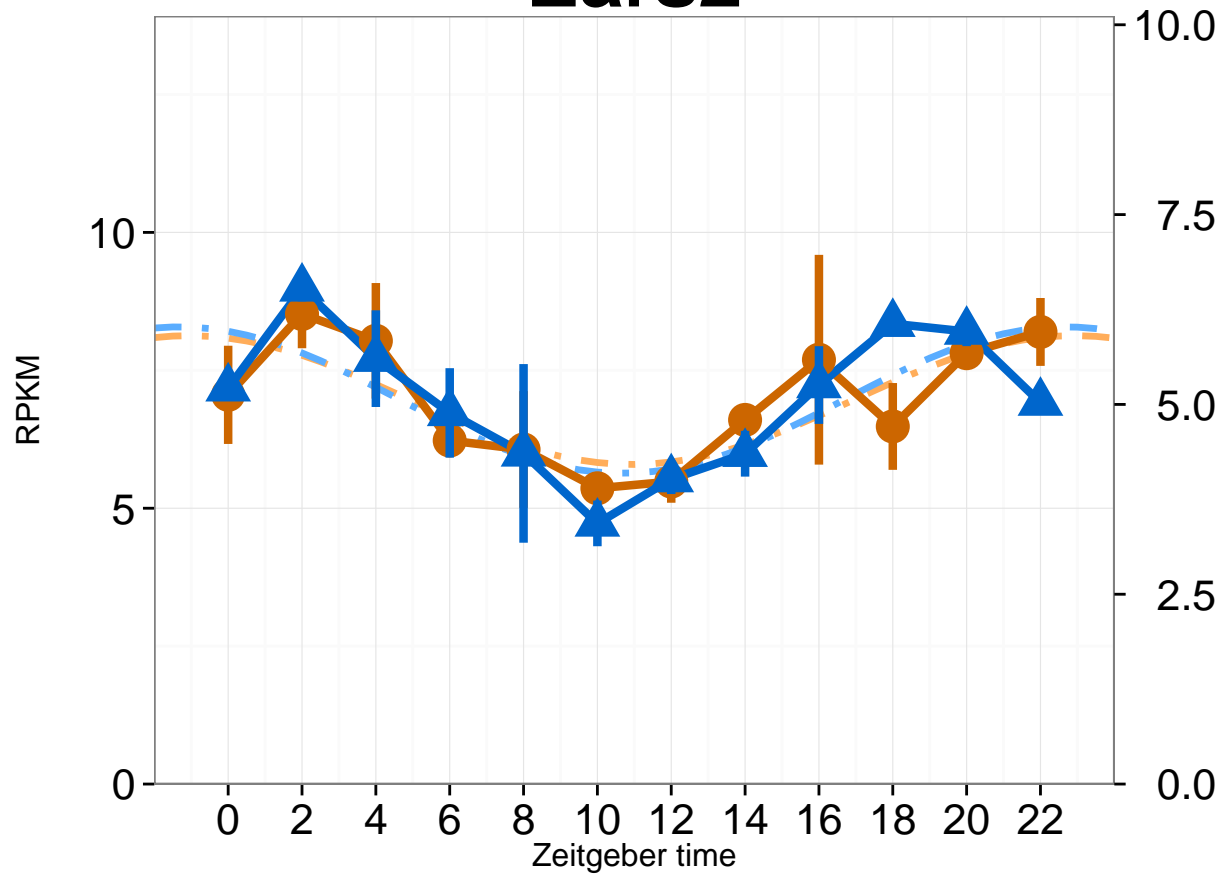

## Ears2

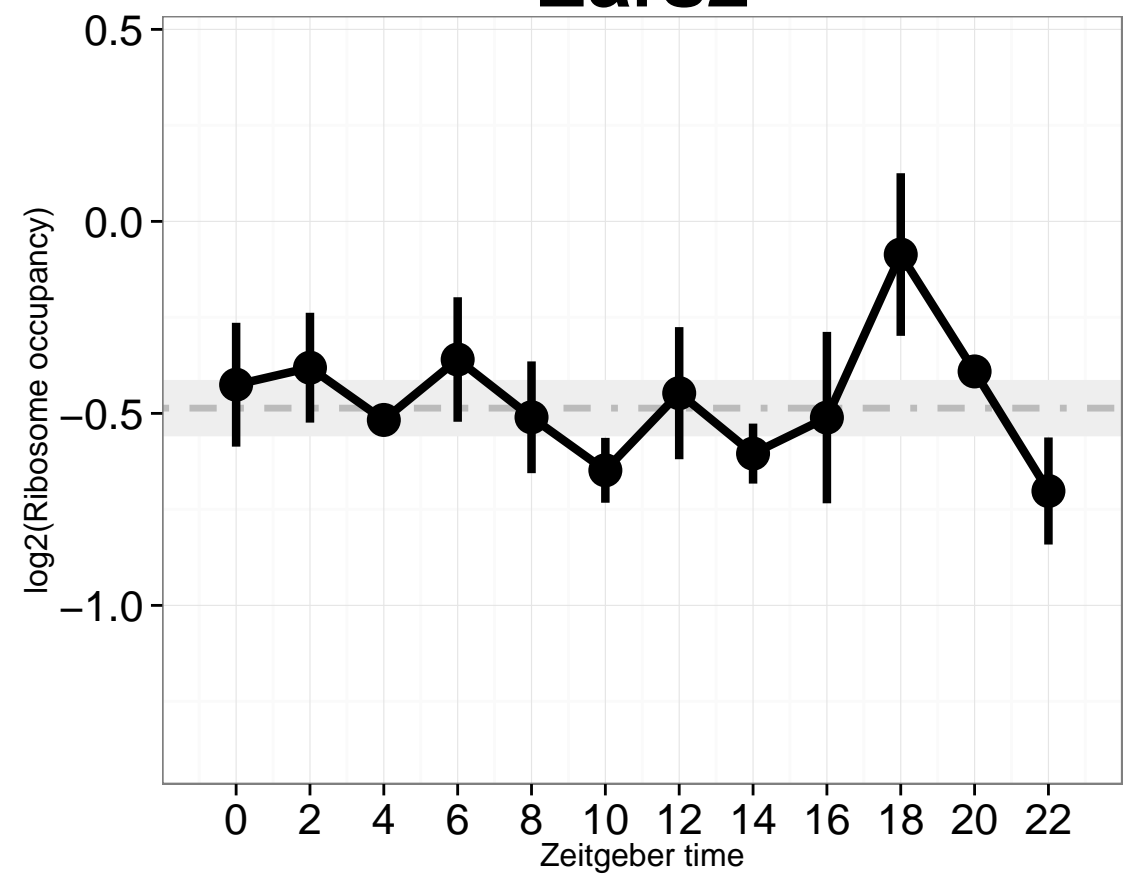

Supplement: SuppDataset_1.zip [file Ears2_set_A.pdf › Supplemental Dataset 1/A-mRNA_nonrhyth_translation_nonrhyth/Ears2_set_A.pdf]

# Ebag9

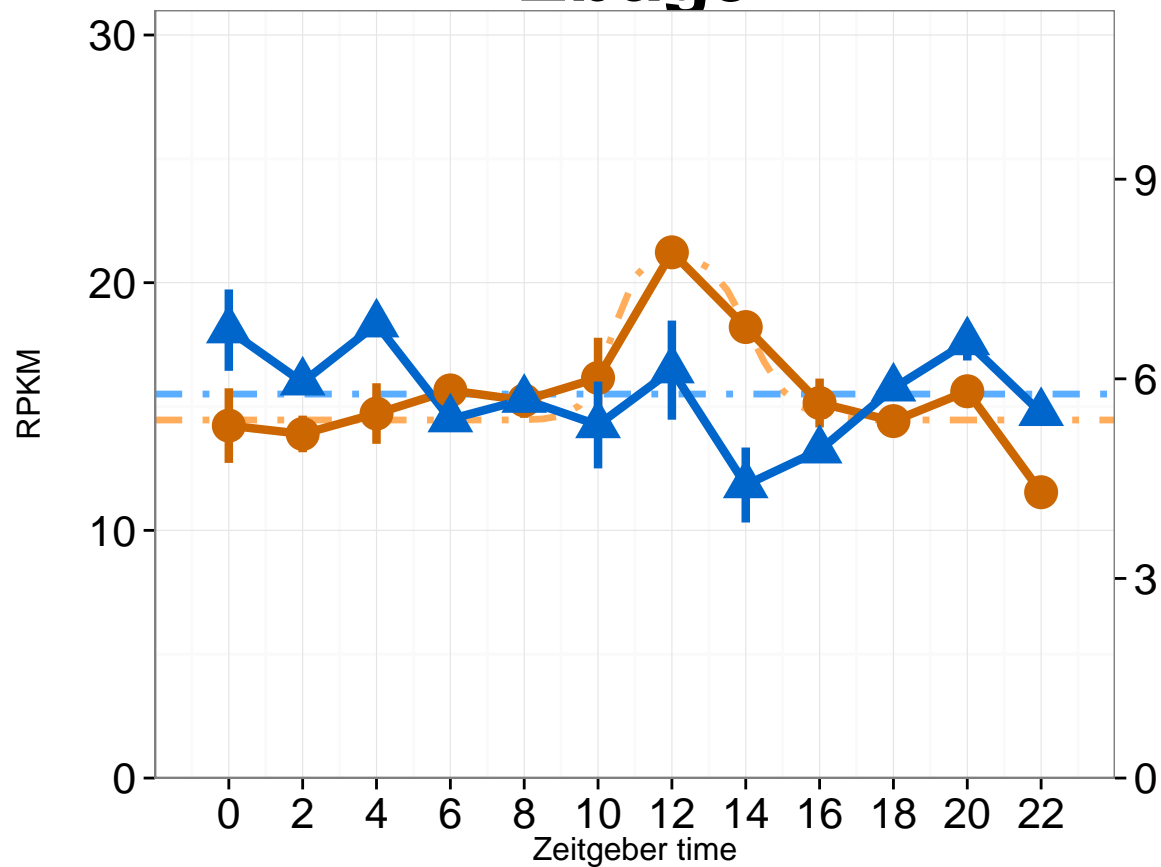

# Ebag9

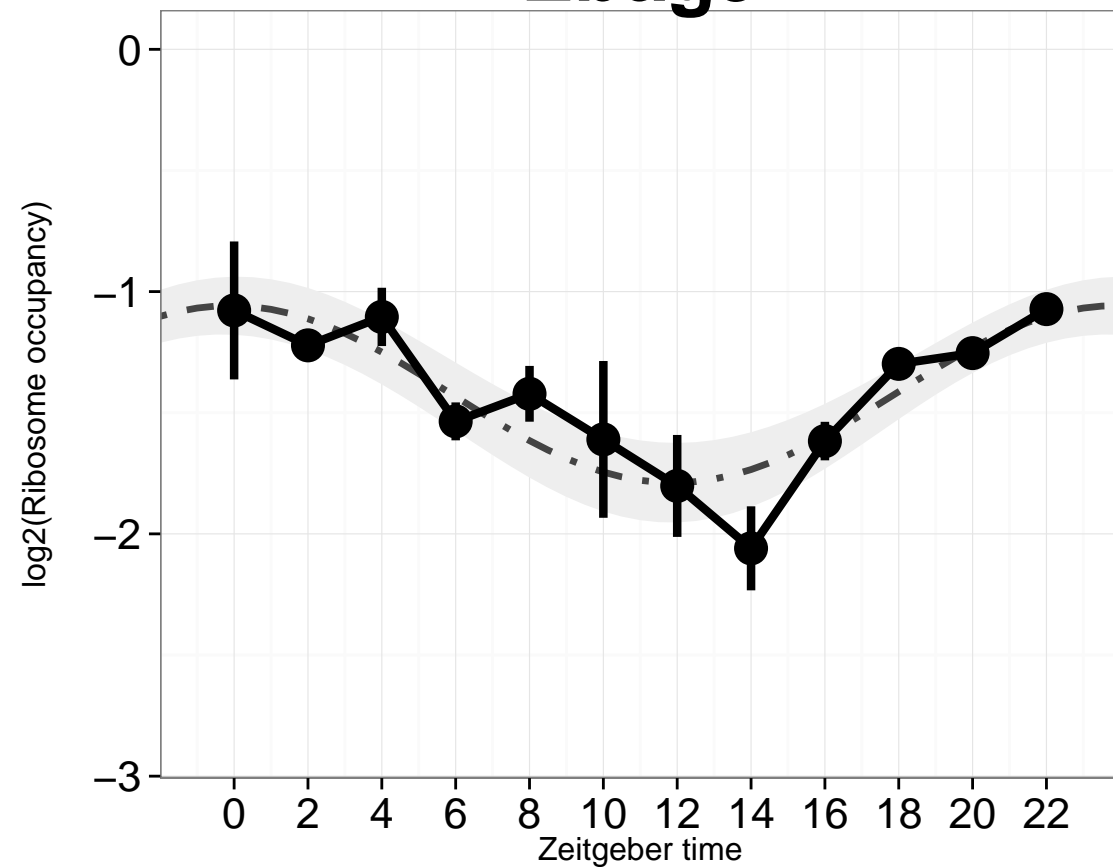

Supplement: SuppDataset_1.zip [file Ebag9_set_A.pdf › Supplemental Dataset 1/A-mRNA_nonrhyth_translation_nonrhyth/Ebag9_set_A.pdf]

# Ebna1bp2

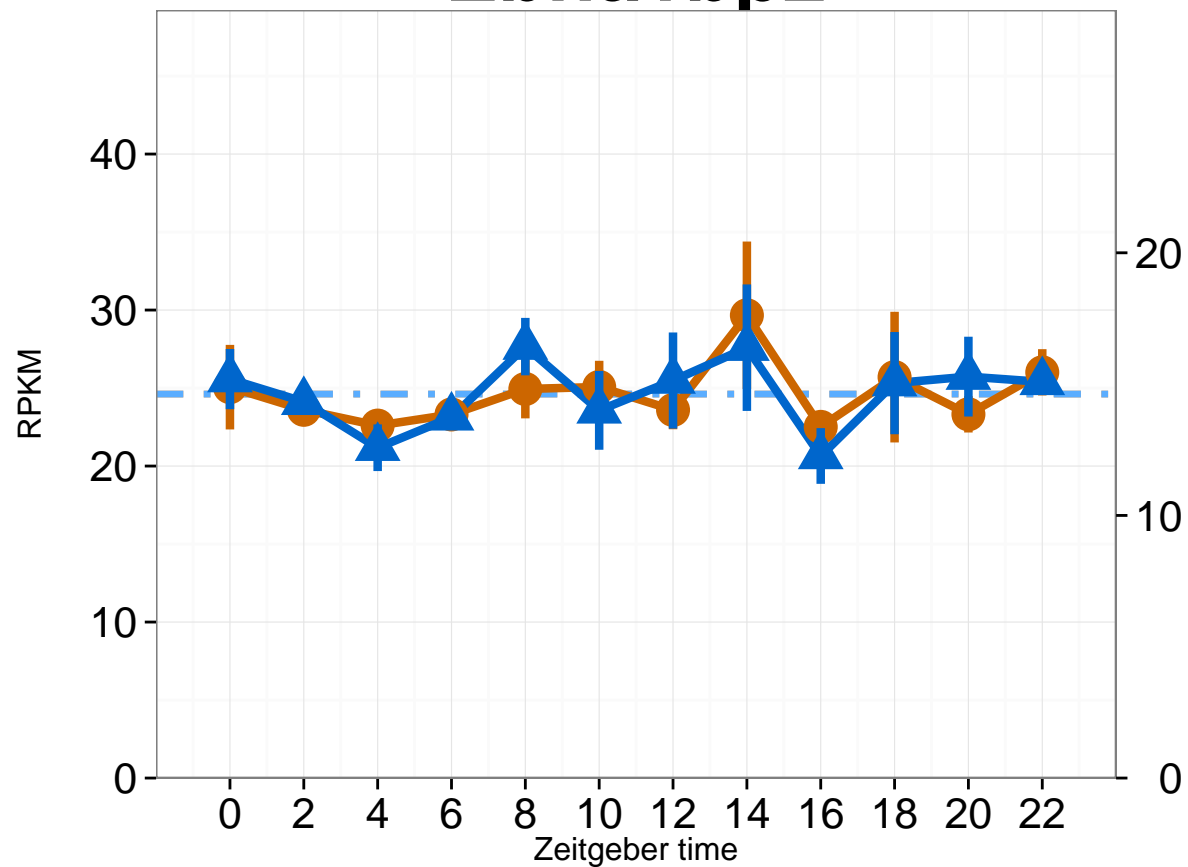

# Ebna1bp2

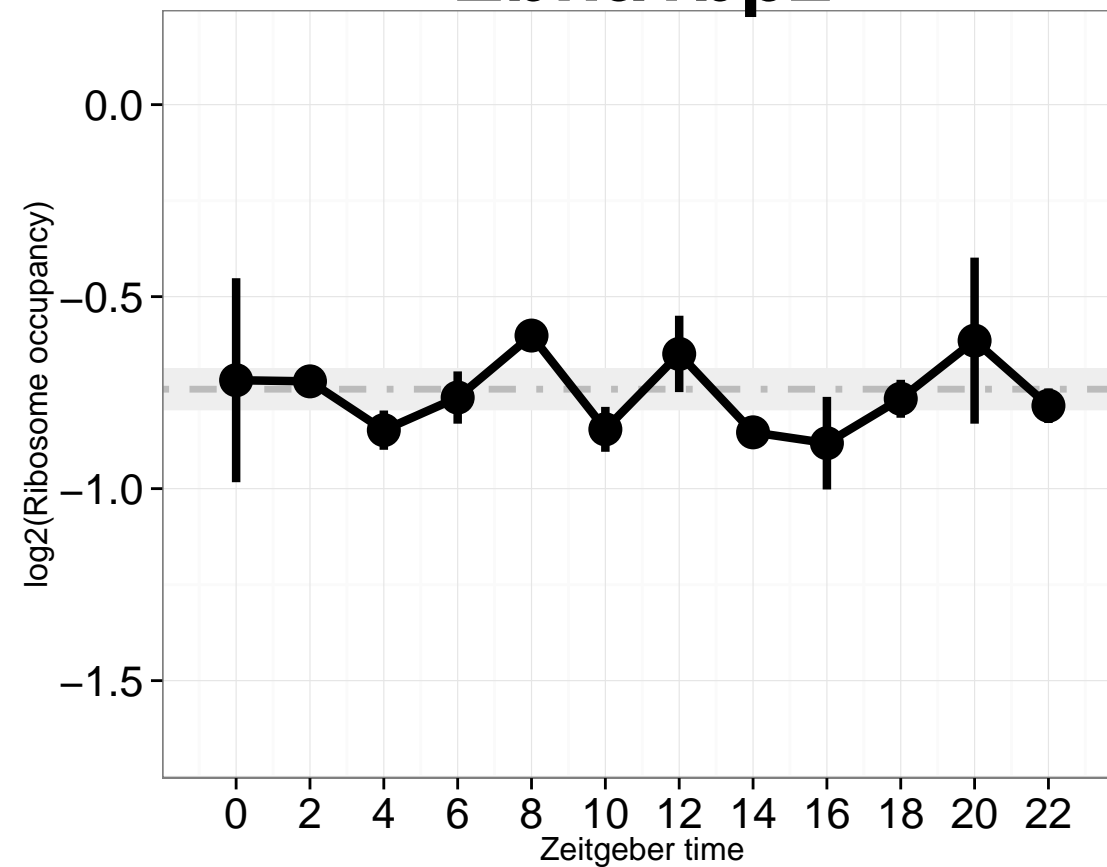

Supplement: SuppDataset_1.zip [file Ebna1bp2_set_A.pdf › Supplemental Dataset 1/A-mRNA_nonrhyth_translation_nonrhyth/Ebna1bp2_set_A.pdf]

## Ebp

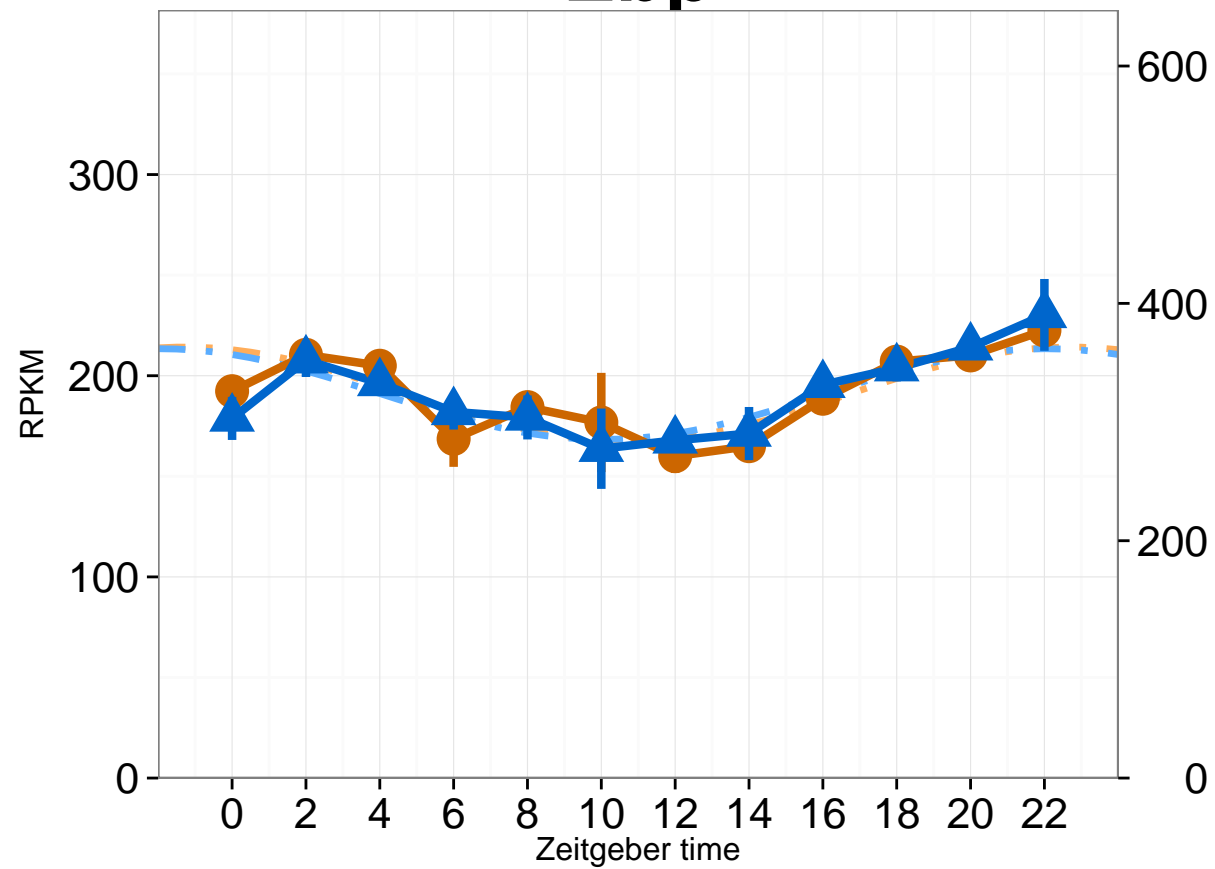

## Ebp

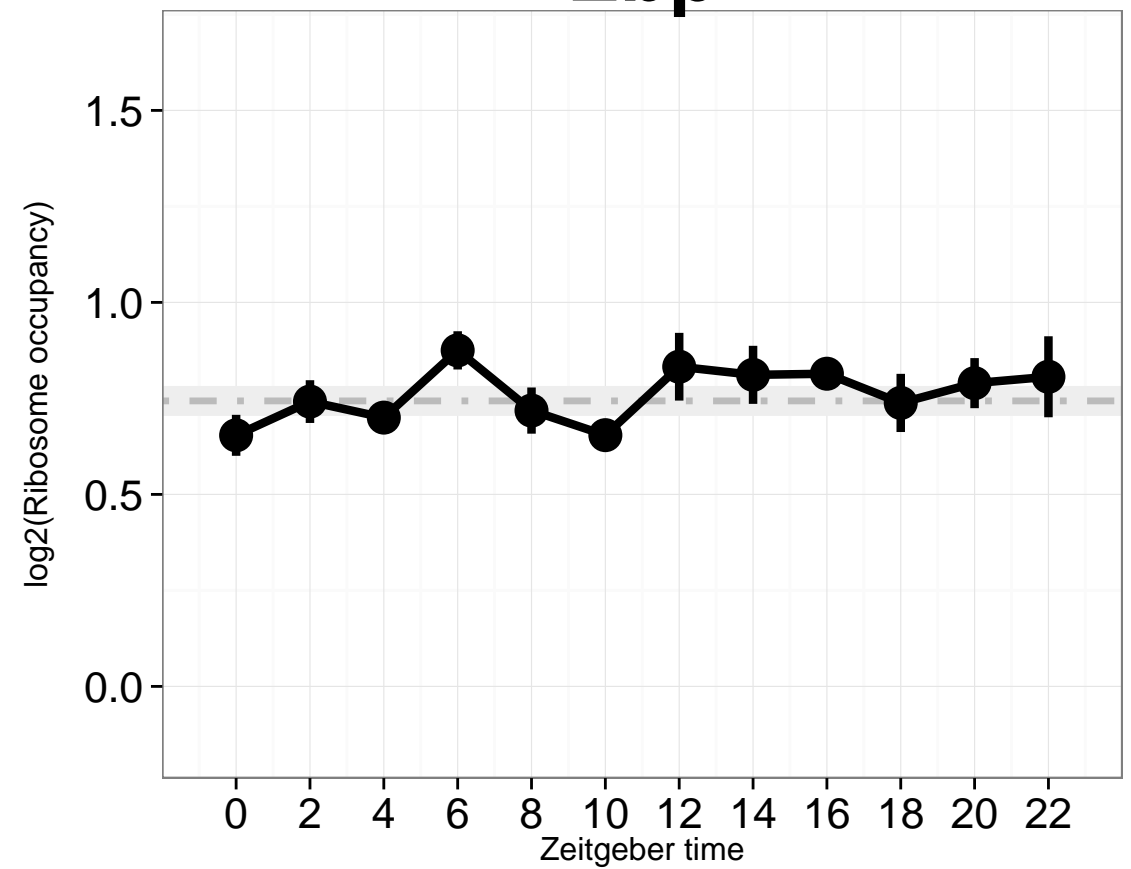

Supplement: SuppDataset_1.zip [file Ebp_set_A.pdf › Supplemental Dataset 1/A-mRNA_nonrhyth_translation_nonrhyth/Ebp_set_A.pdf]

## Ebpl

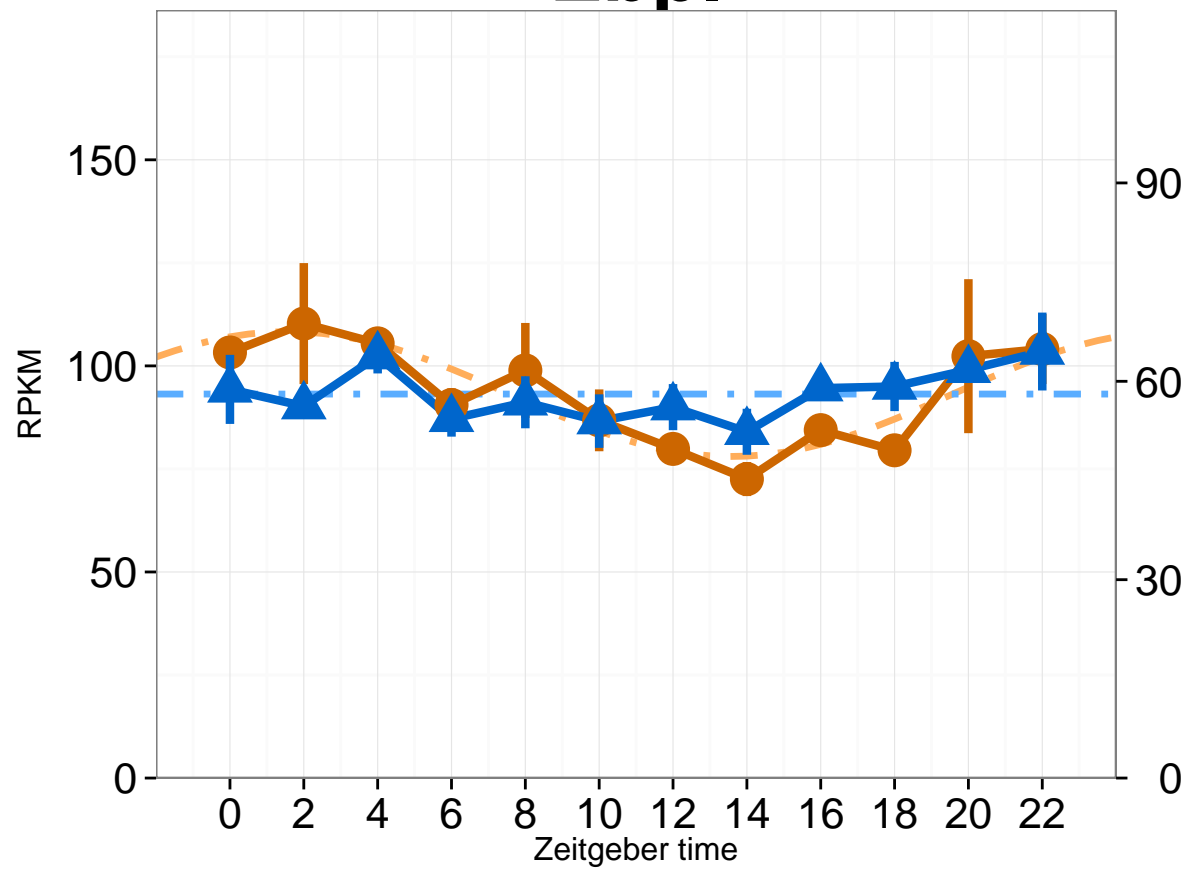

## Ebpl

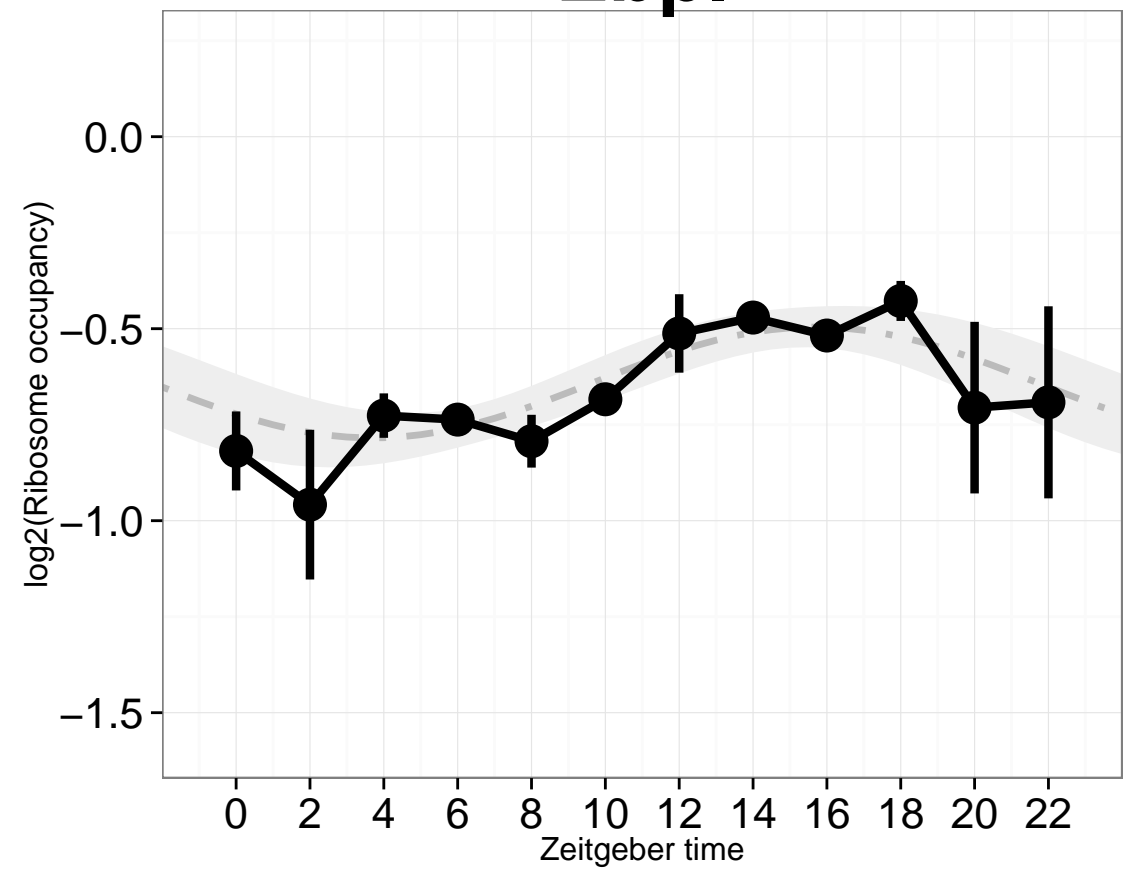

Supplement: SuppDataset_1.zip [file Ebpl_set_A.pdf › Supplemental Dataset 1/A-mRNA_nonrhyth_translation_nonrhyth/Ebpl_set_A.pdf]

## Ecd

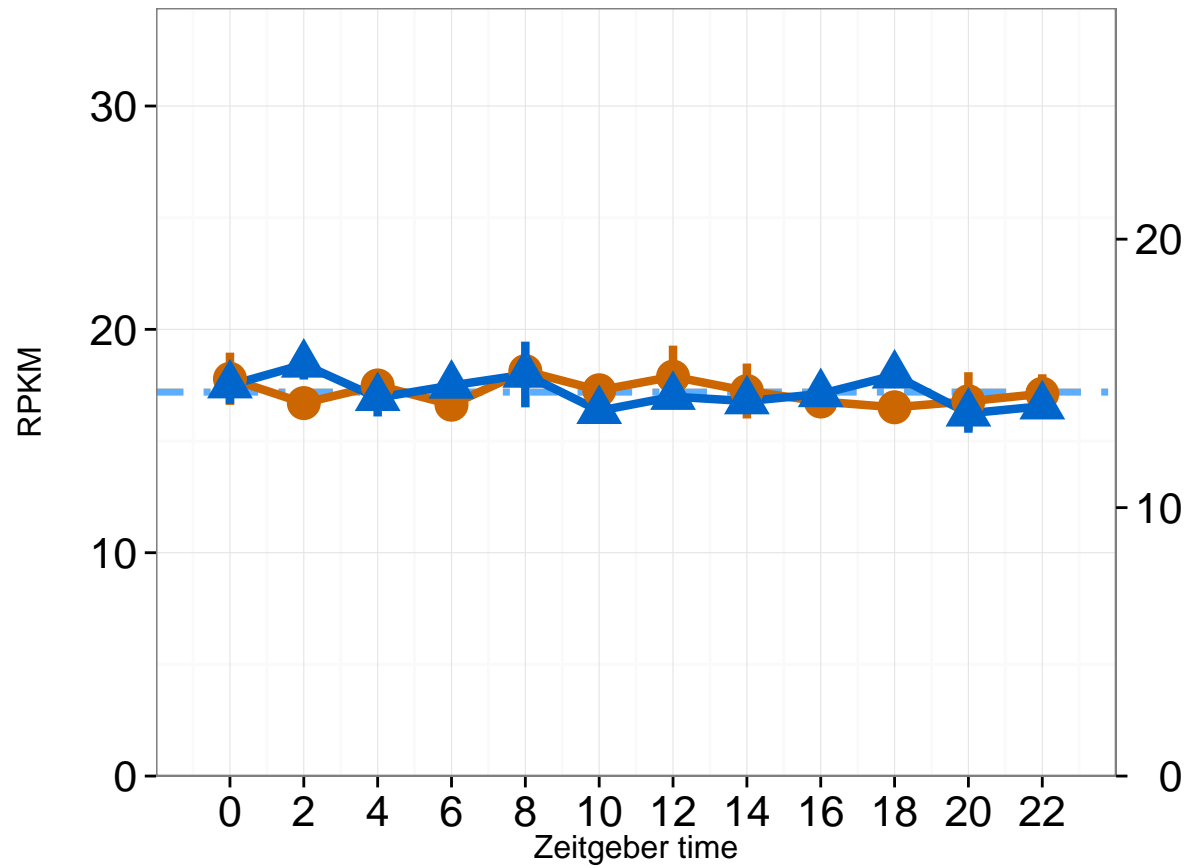

## Ecd

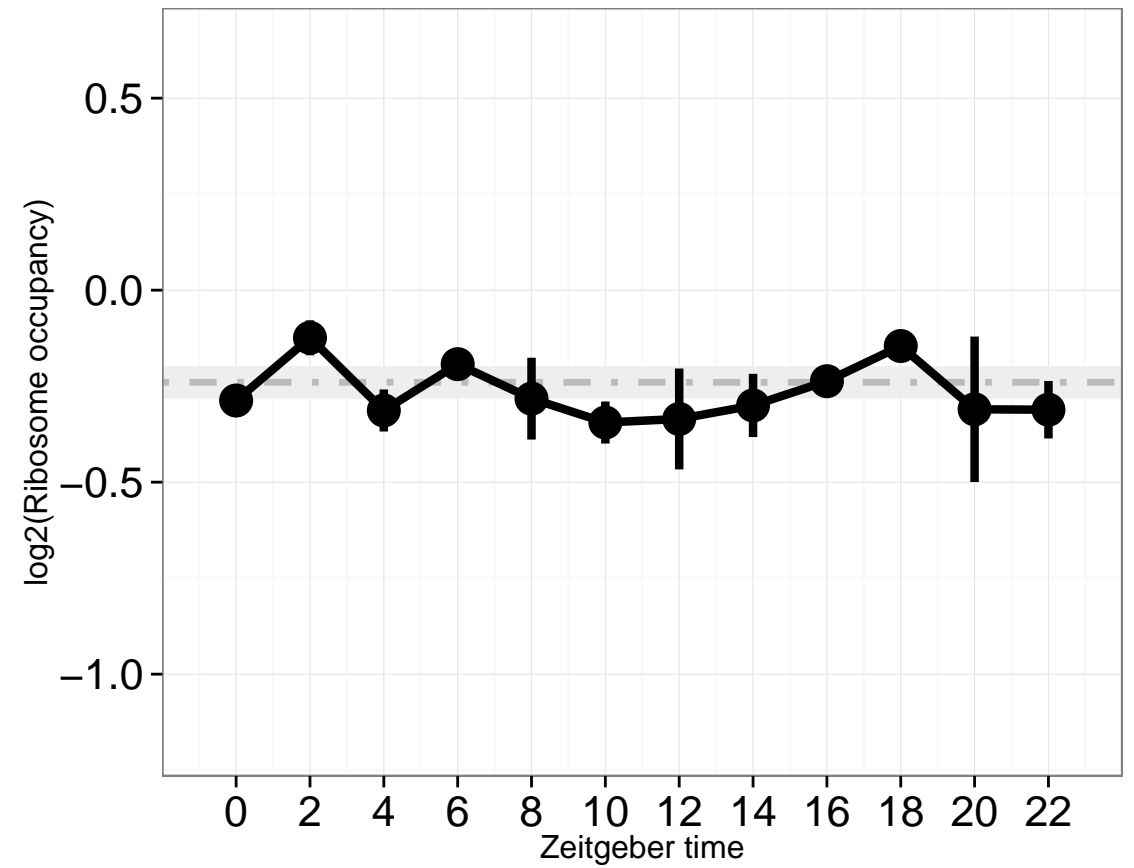

Supplement: SuppDataset_1.zip [file Ecd_set_A.pdf › Supplemental Dataset 1/A-mRNA_nonrhyth_translation_nonrhyth/Ecd_set_A.pdf]

## Ece1

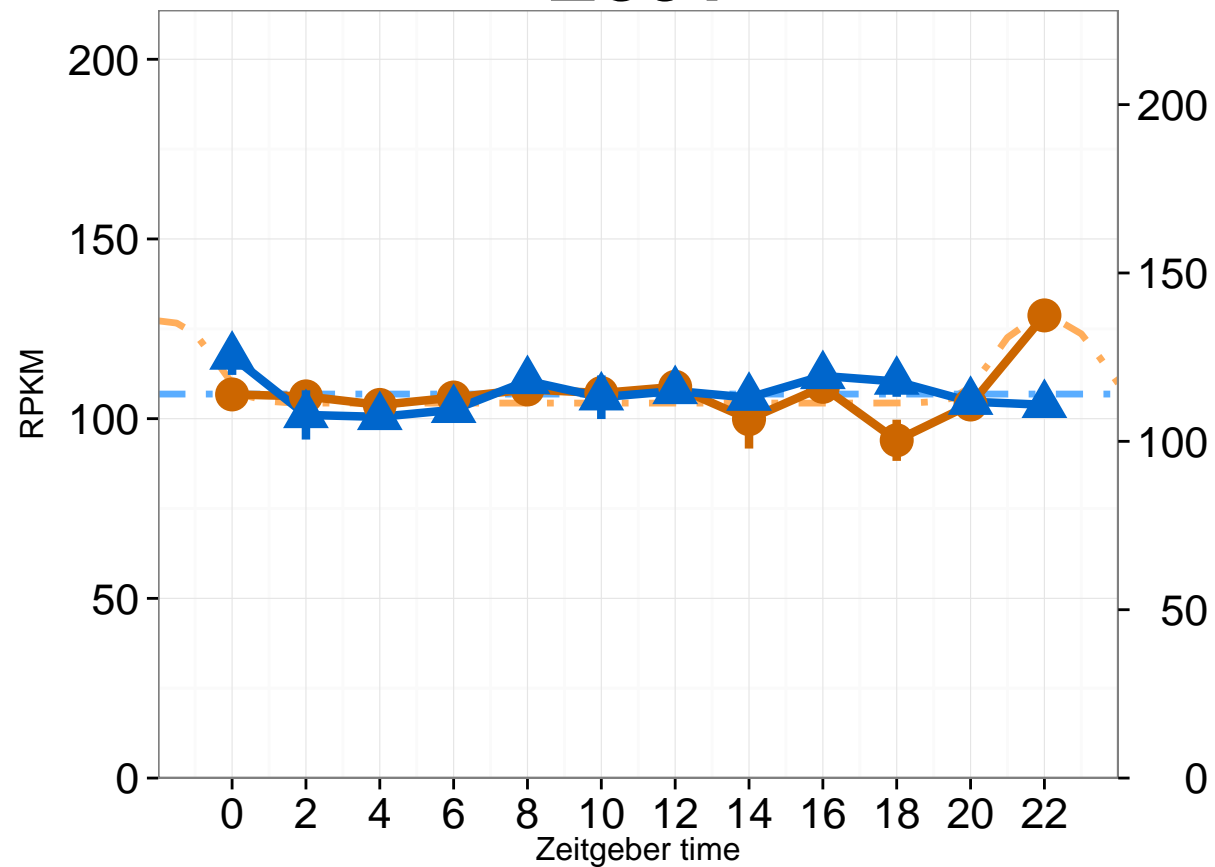

## Ece1

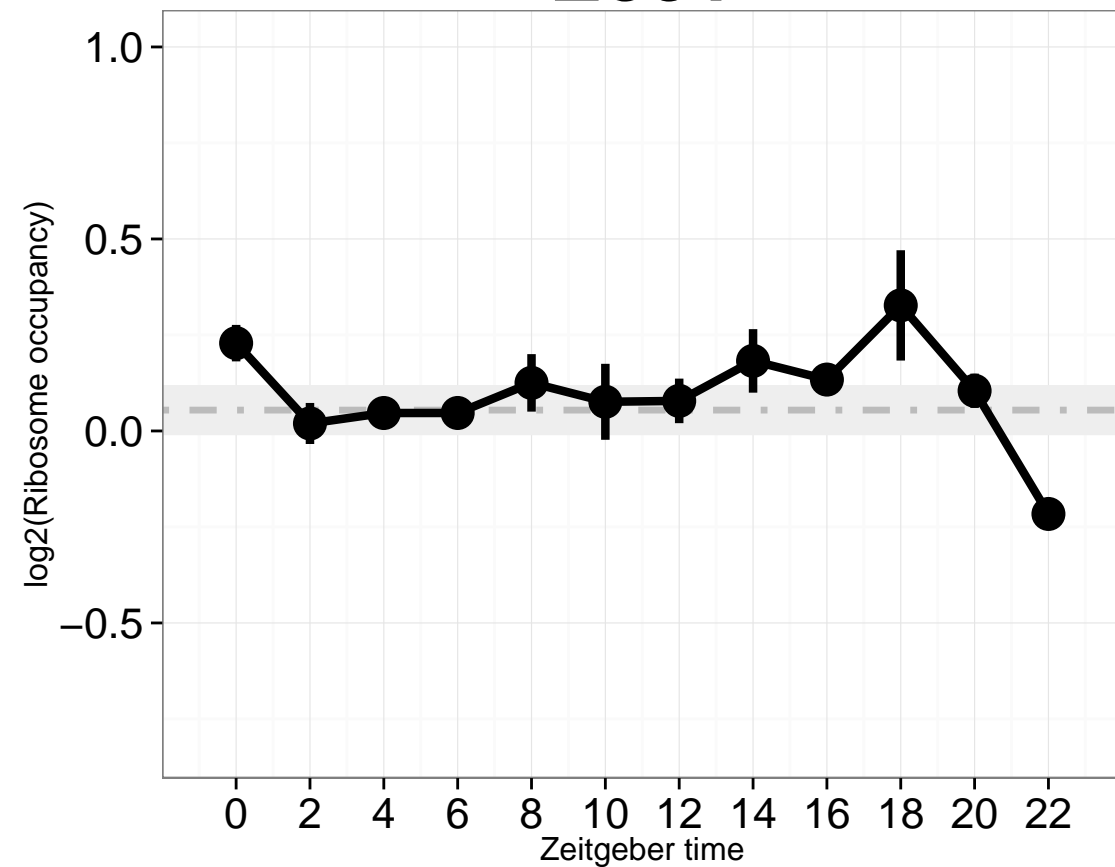

Supplement: SuppDataset_1.zip [file Ece1_set_A.pdf › Supplemental Dataset 1/A-mRNA_nonrhyth_translation_nonrhyth/Ece1_set_A.pdf]

## Ech1

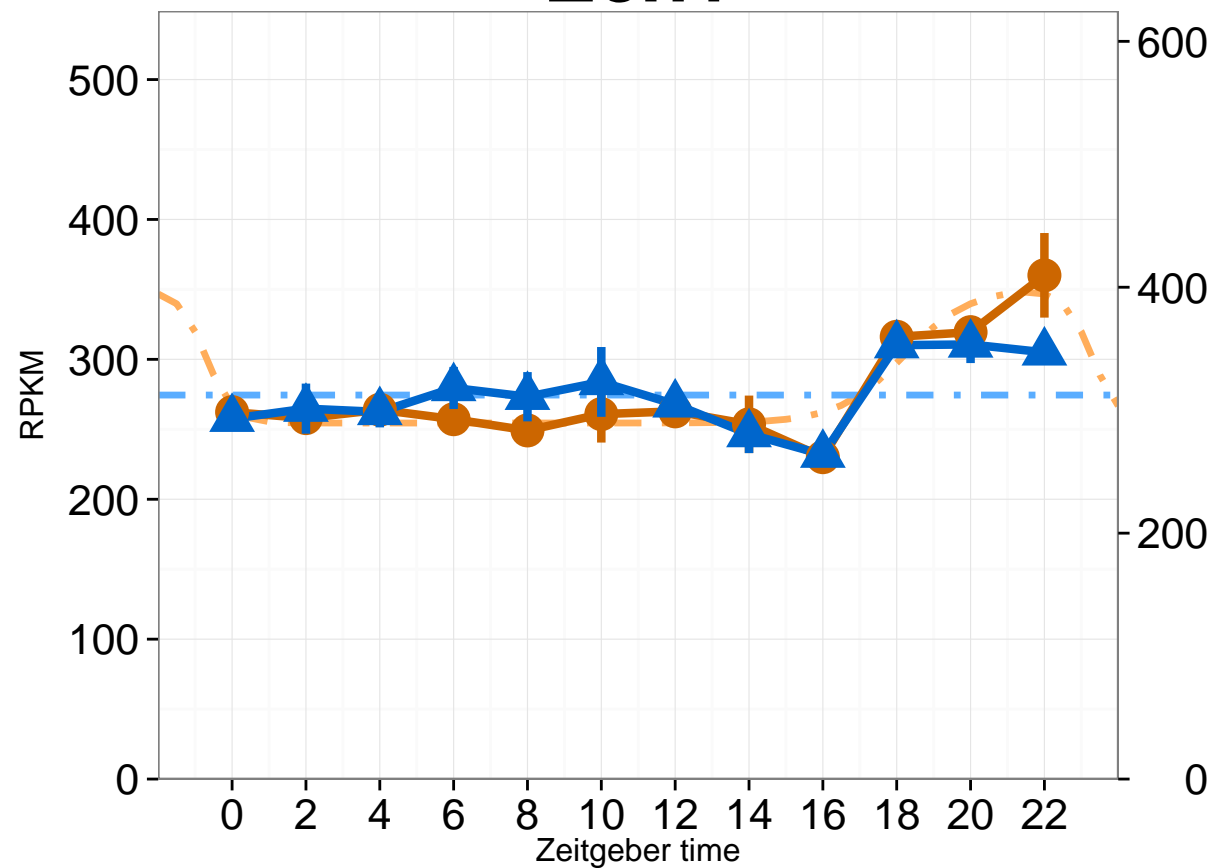

## Ech1

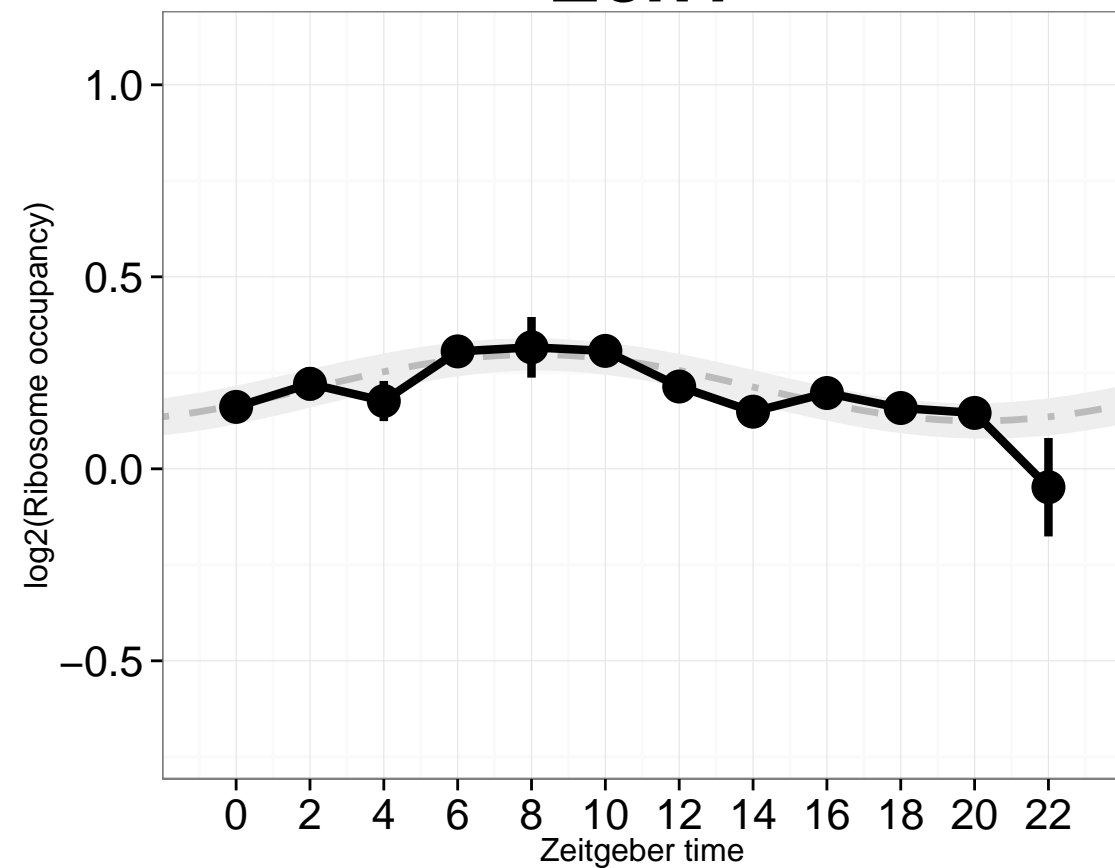

Supplement: SuppDataset_1.zip [file Ech1_set_A.pdf › Supplemental Dataset 1/A-mRNA_nonrhyth_translation_nonrhyth/Ech1_set_A.pdf]

## Echdc1

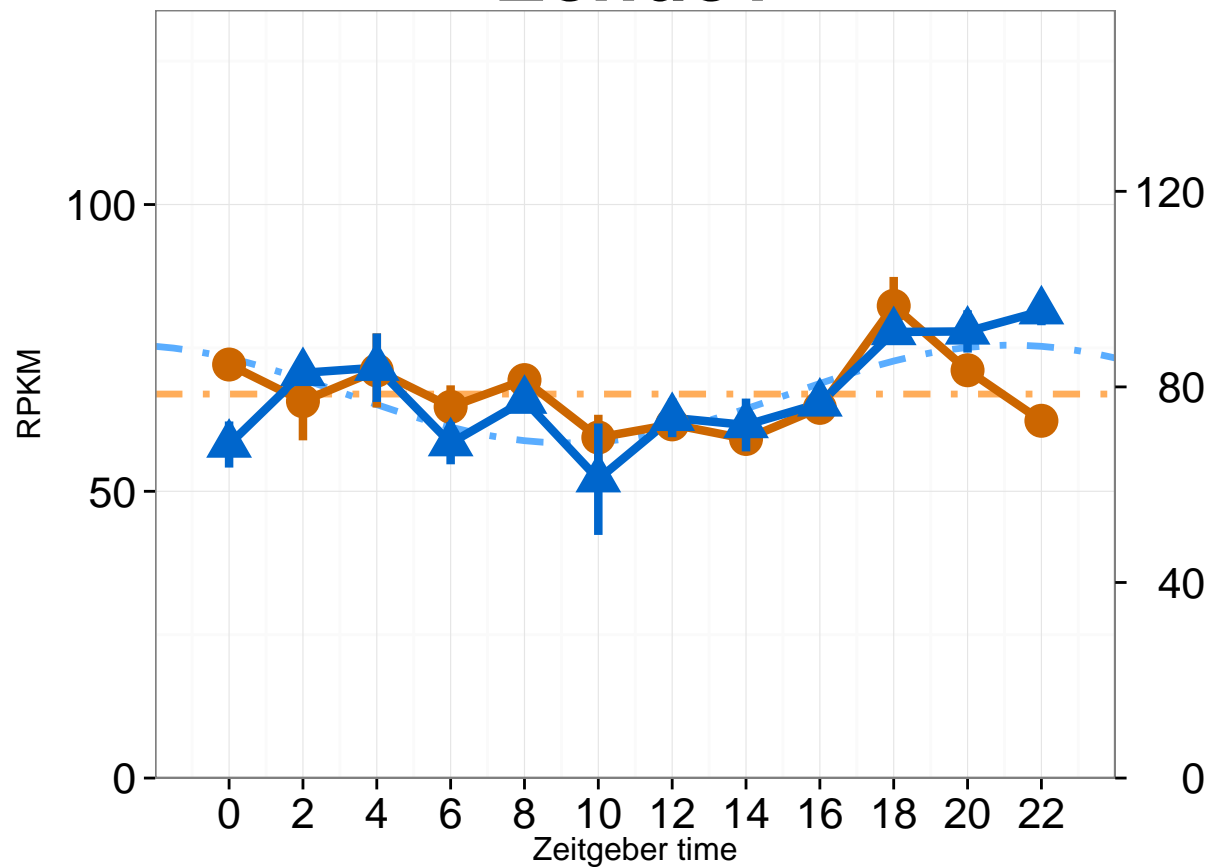

## Echdc1

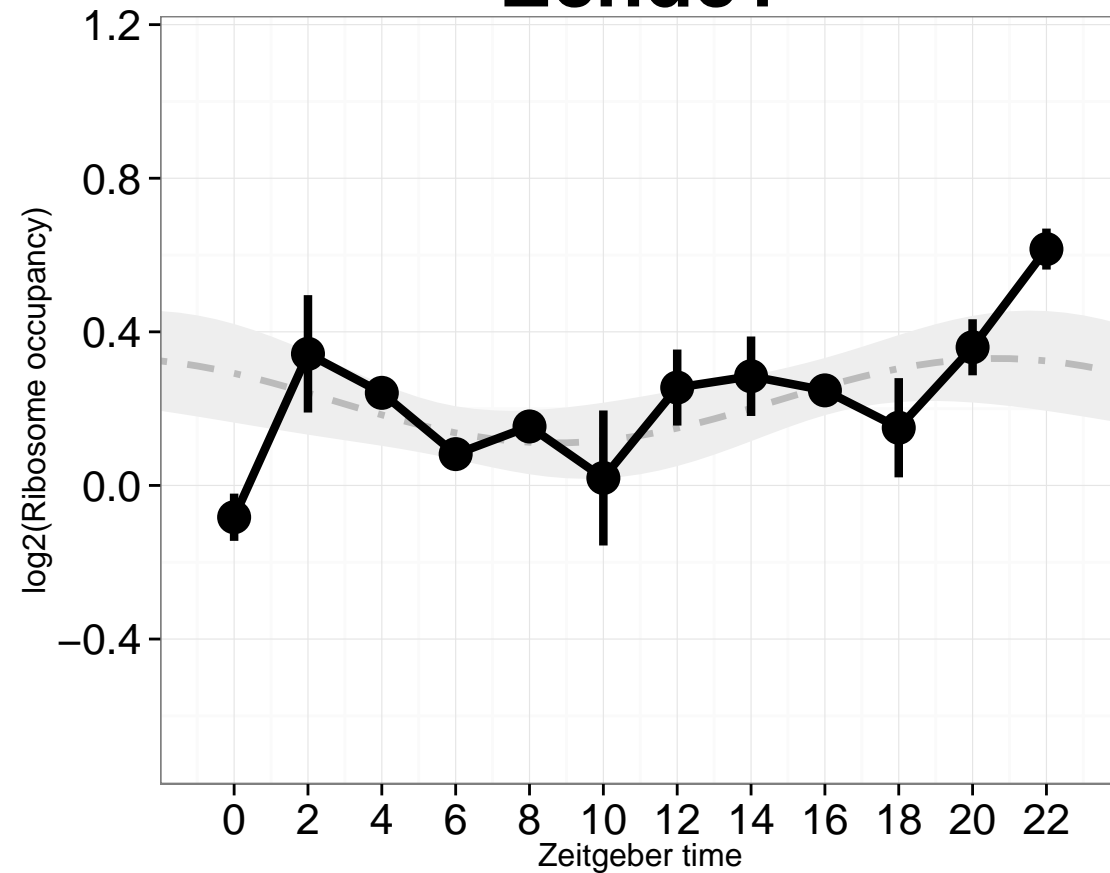

Supplement: SuppDataset_1.zip [file Echdc1_set_A.pdf › Supplemental Dataset 1/A-mRNA_nonrhyth_translation_nonrhyth/Echdc1_set_A.pdf]

# Echdc2

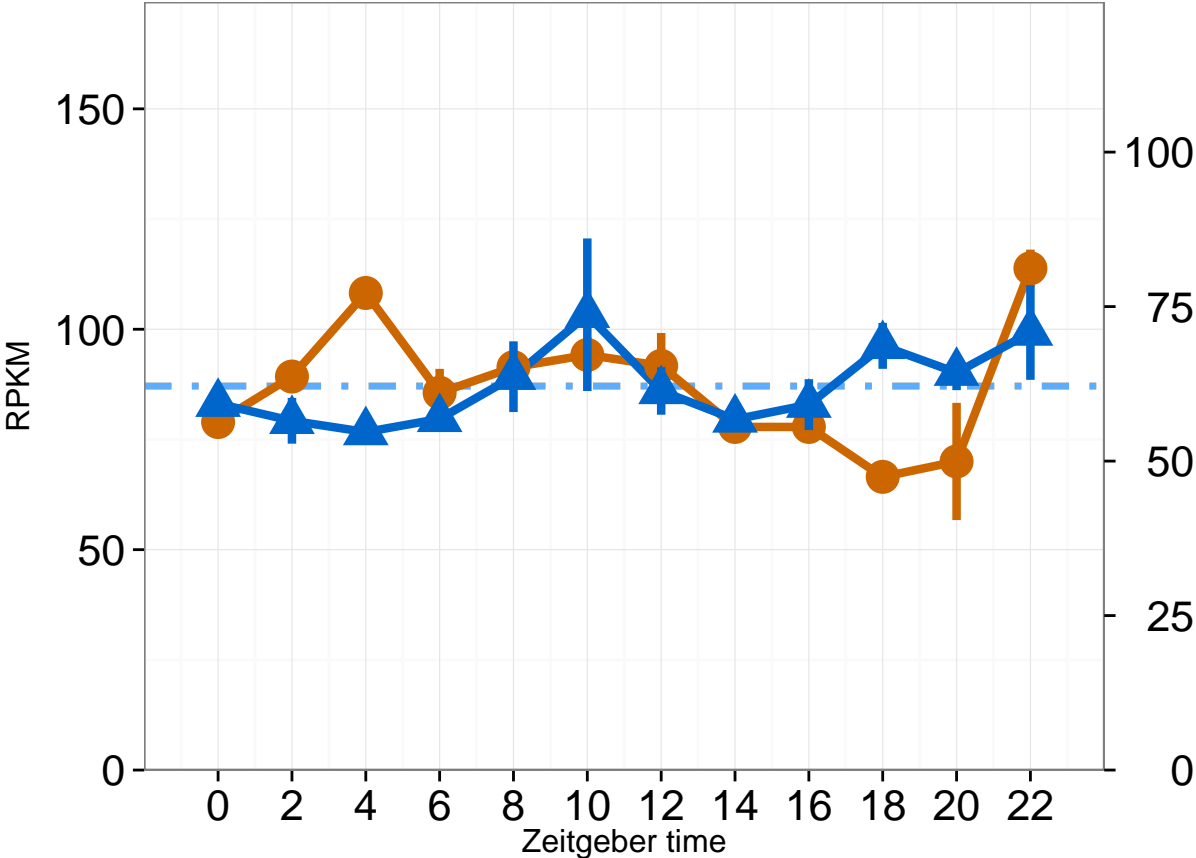

# Echdc2

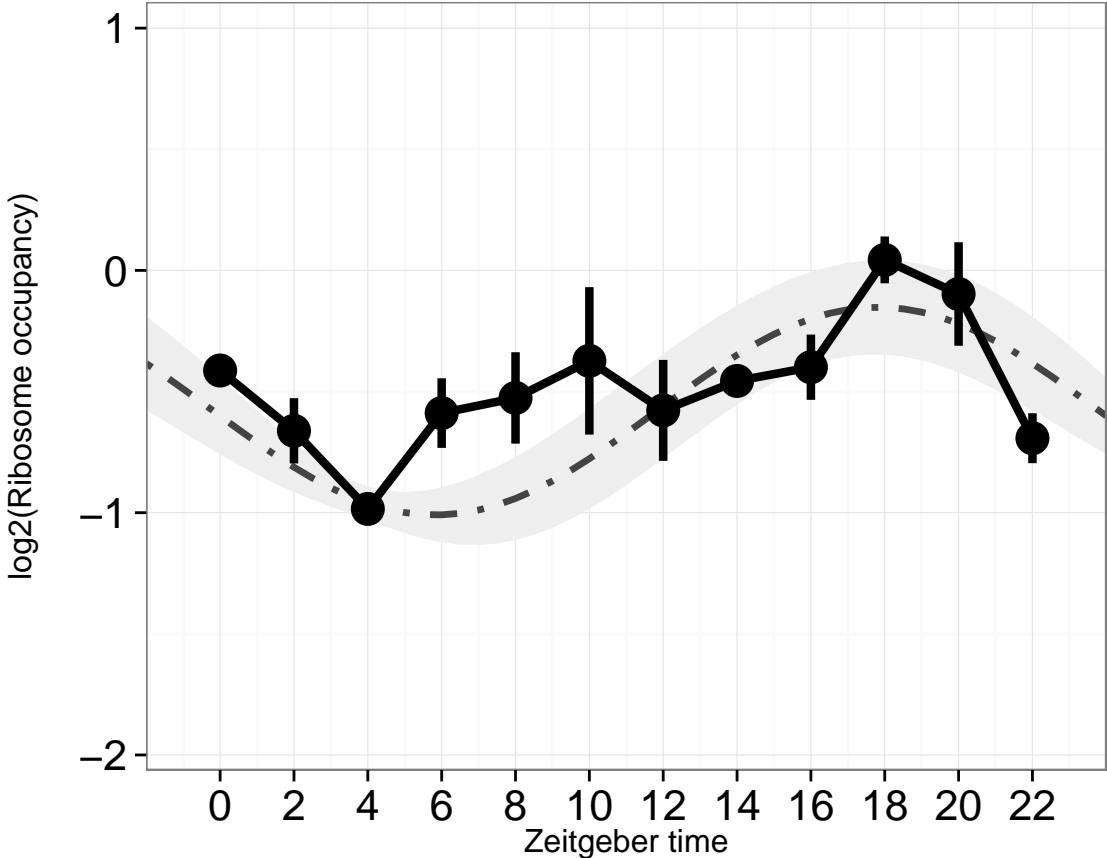

Supplement: SuppDataset_1.zip [file Echdc2_set_A.pdf › Supplemental Dataset 1/A-mRNA_nonrhyth_translation_nonrhyth/Echdc2_set_A.pdf]

## Echdc3

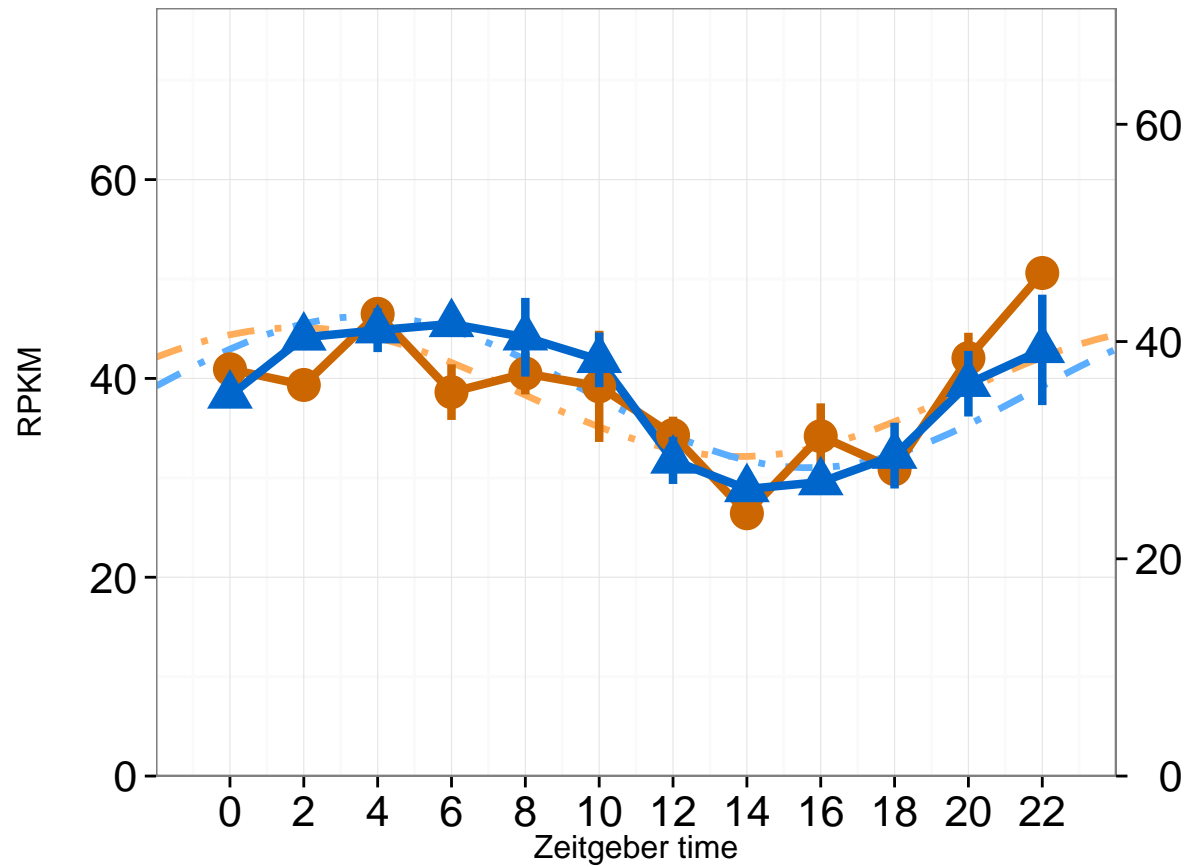

## Echdc3

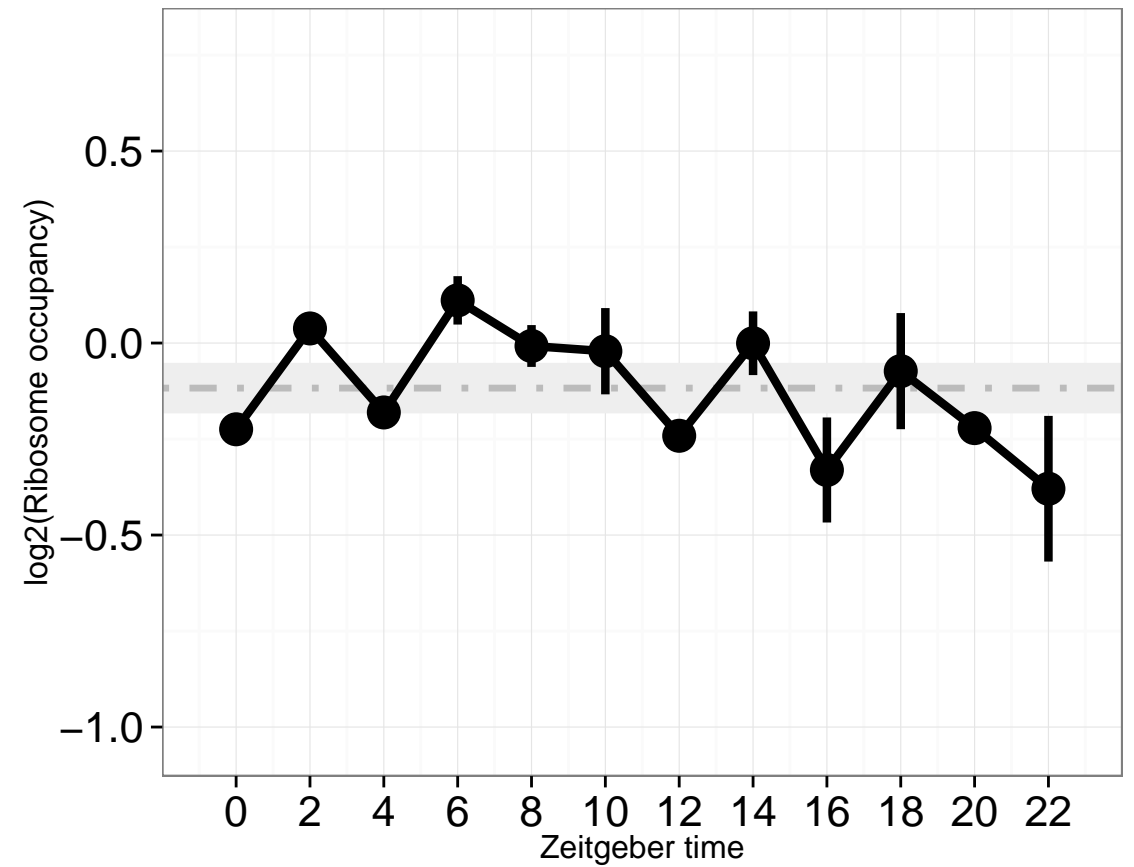

Supplement: SuppDataset_1.zip [file Echdc3_set_A.pdf › Supplemental Dataset 1/A-mRNA_nonrhyth_translation_nonrhyth/Echdc3_set_A.pdf]

## Echs1

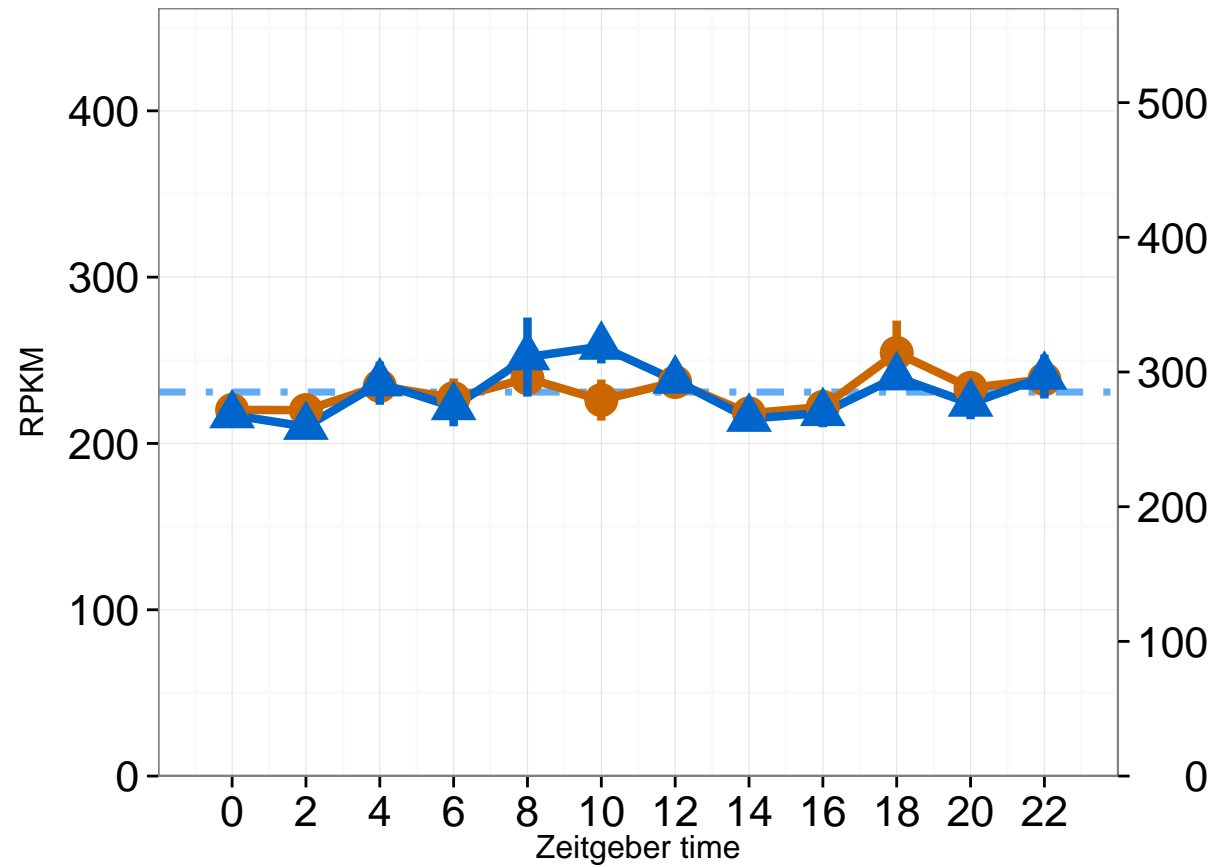

## Echs1

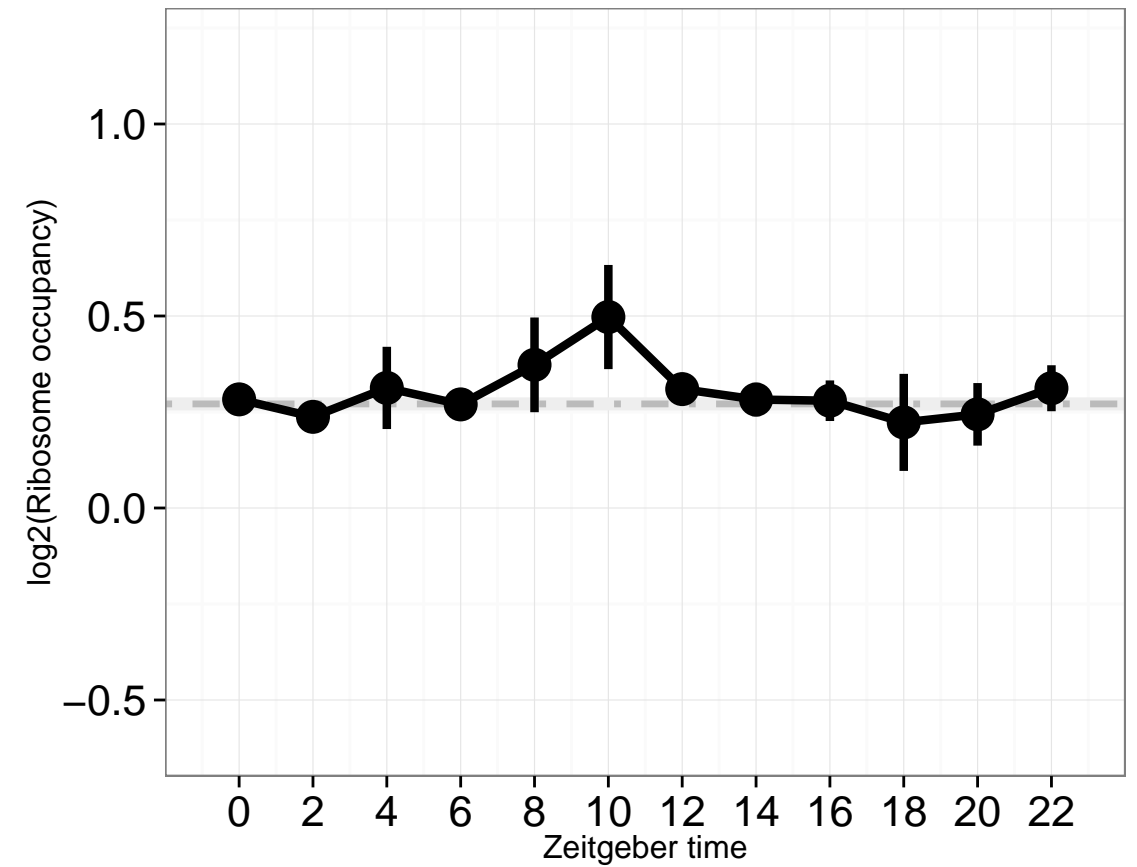

Supplement: SuppDataset_1.zip [file Echs1_set_A.pdf › Supplemental Dataset 1/A-mRNA_nonrhyth_translation_nonrhyth/Echs1_set_A.pdf]

## Eci1

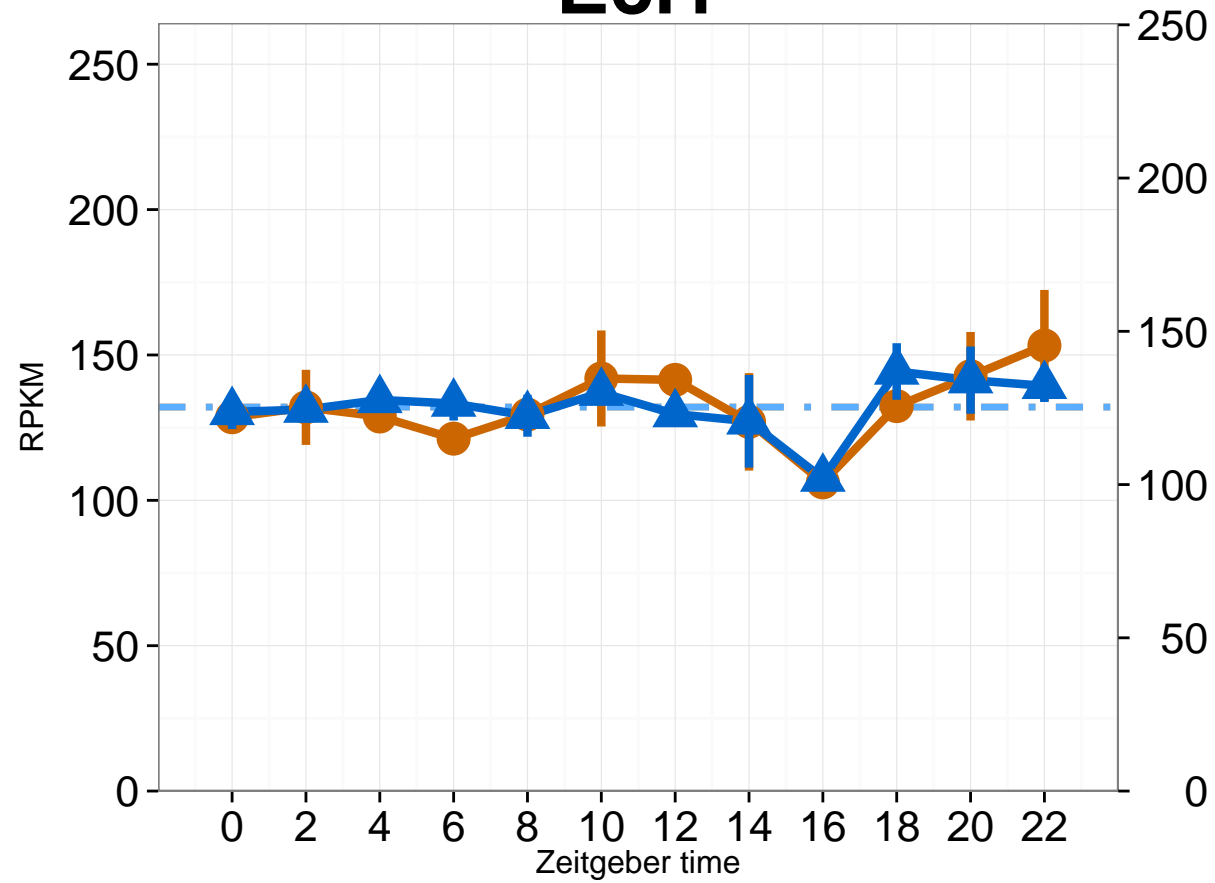

## Eci1

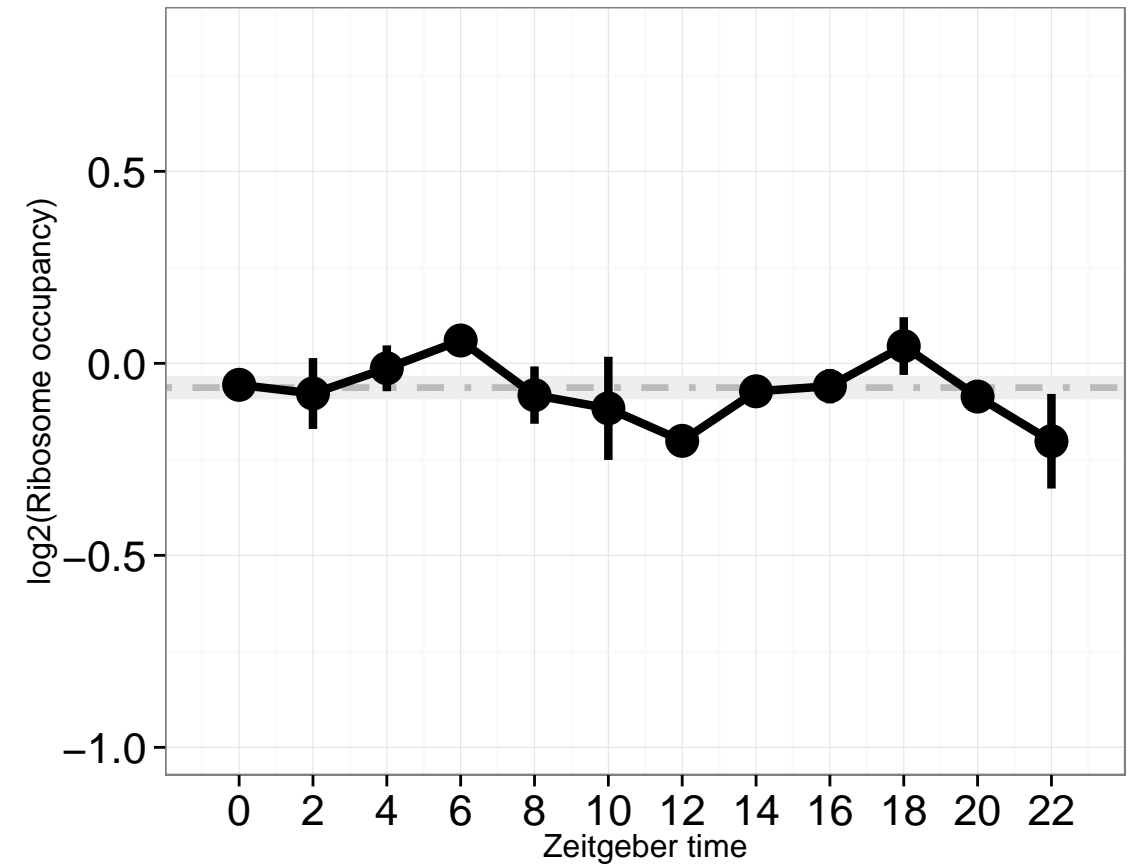

Supplement: SuppDataset_1.zip [file Eci1_set_A.pdf › Supplemental Dataset 1/A-mRNA_nonrhyth_translation_nonrhyth/Eci1_set_A.pdf]

## Ecm2

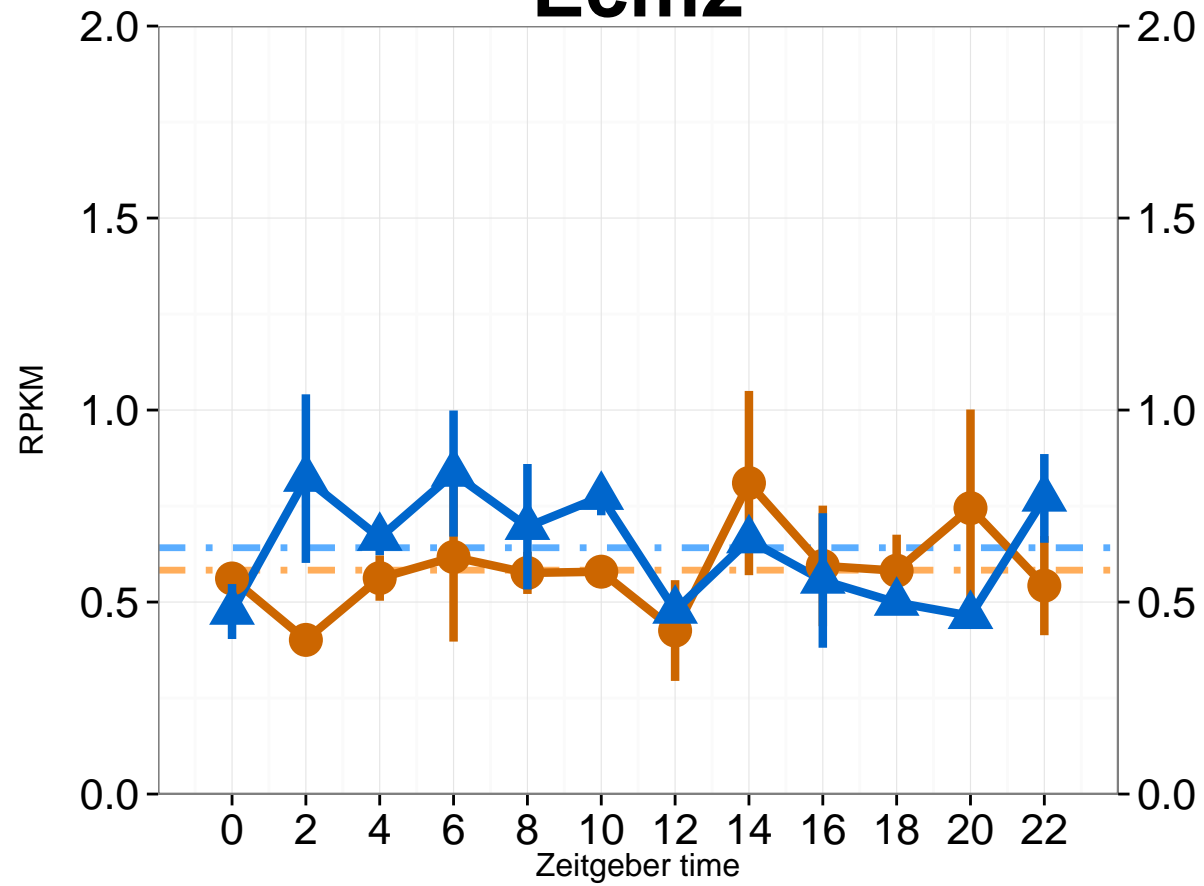

## Ecm2

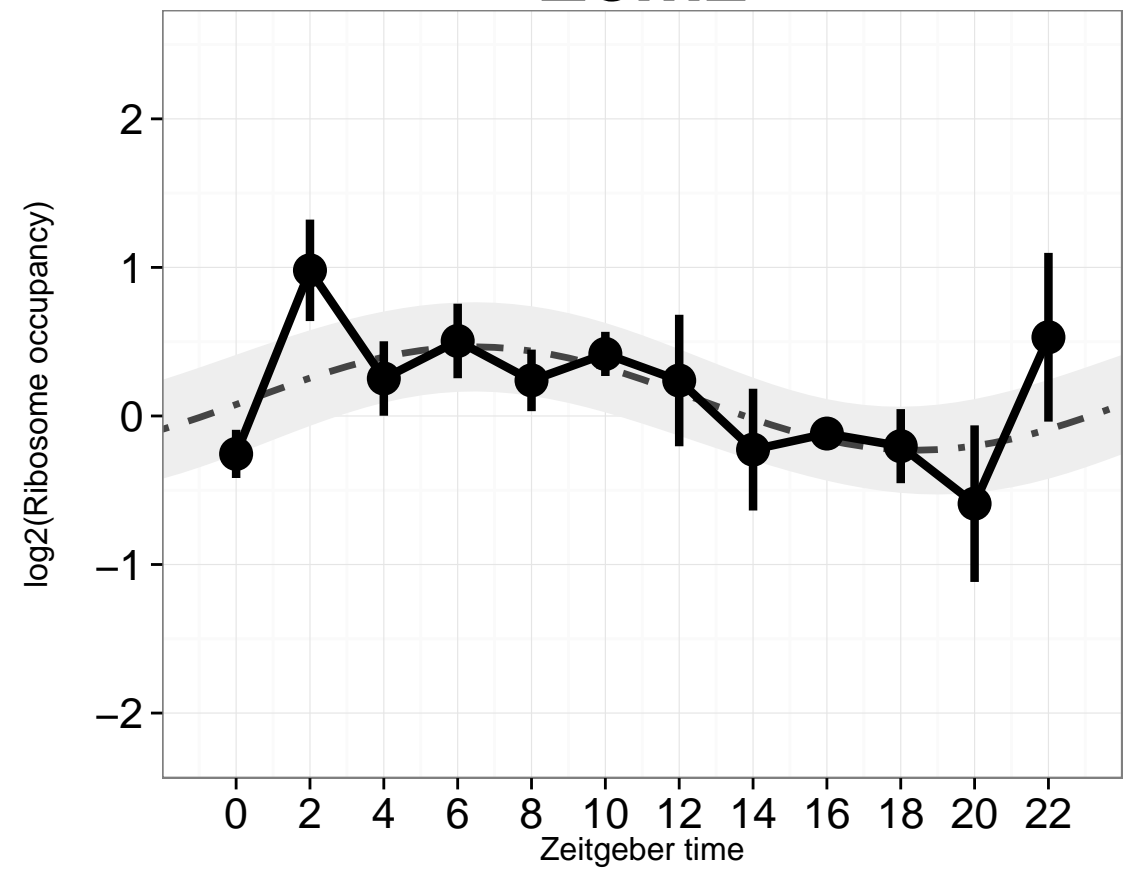

Supplement: SuppDataset_1.zip [file Ecm2_set_A.pdf › Supplemental Dataset 1/A-mRNA_nonrhyth_translation_nonrhyth/Ecm2_set_A.pdf]

## Ecsit

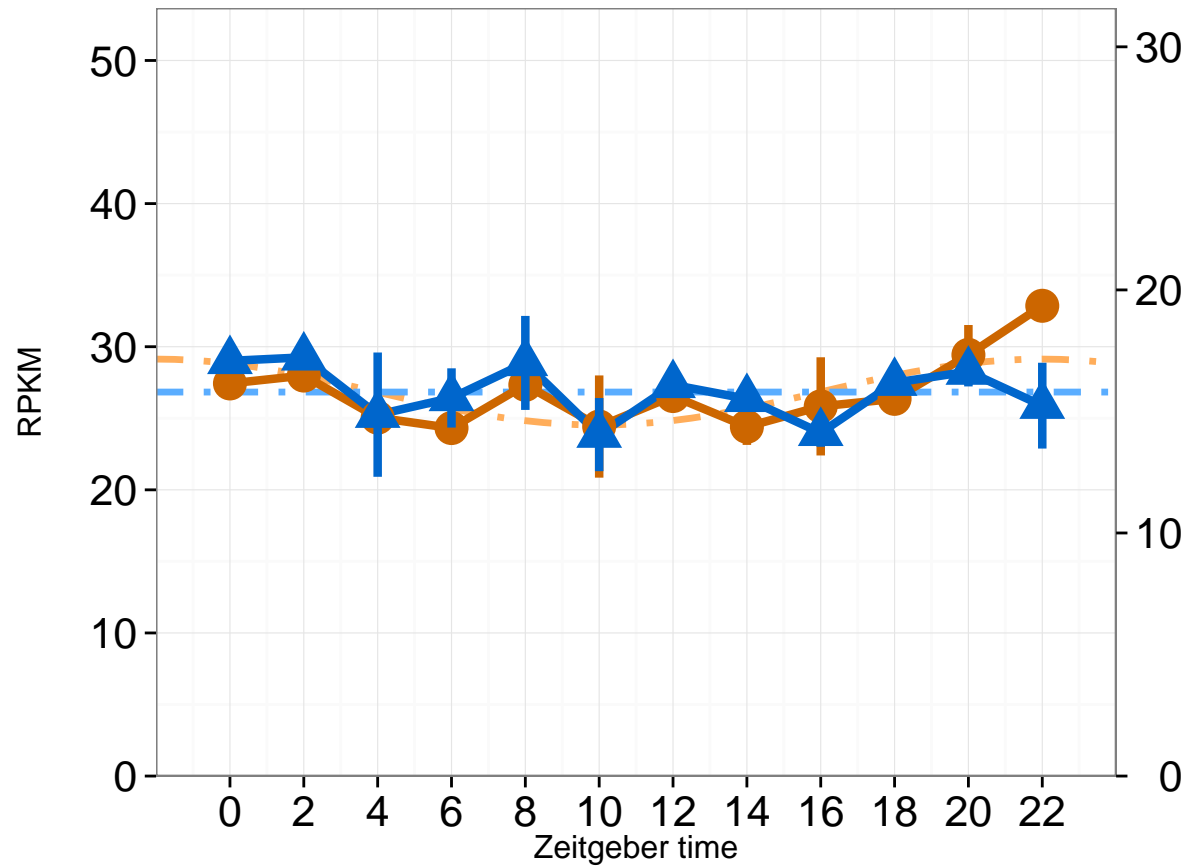

## Ecsit

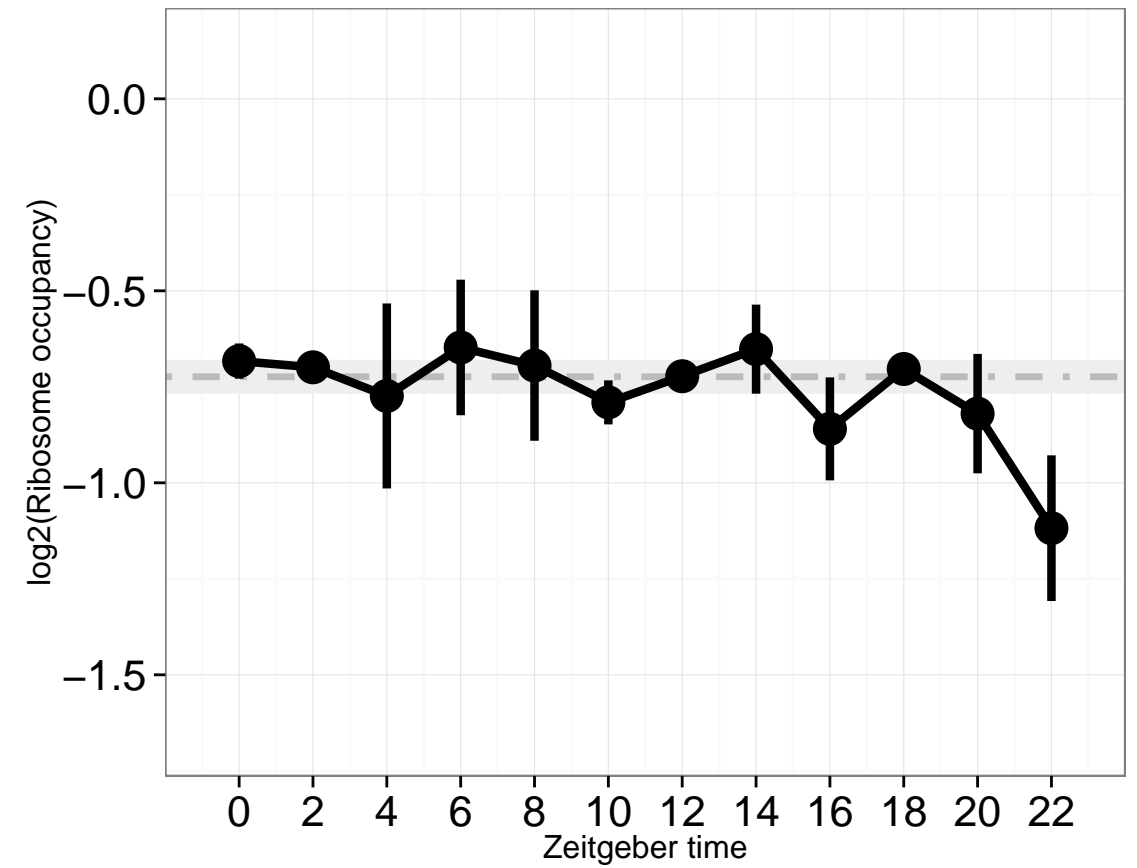

Supplement: SuppDataset_1.zip [file Ecsit_set_A.pdf › Supplemental Dataset 1/A-mRNA_nonrhyth_translation_nonrhyth/Ecsit_set_A.pdf]

## Ect2

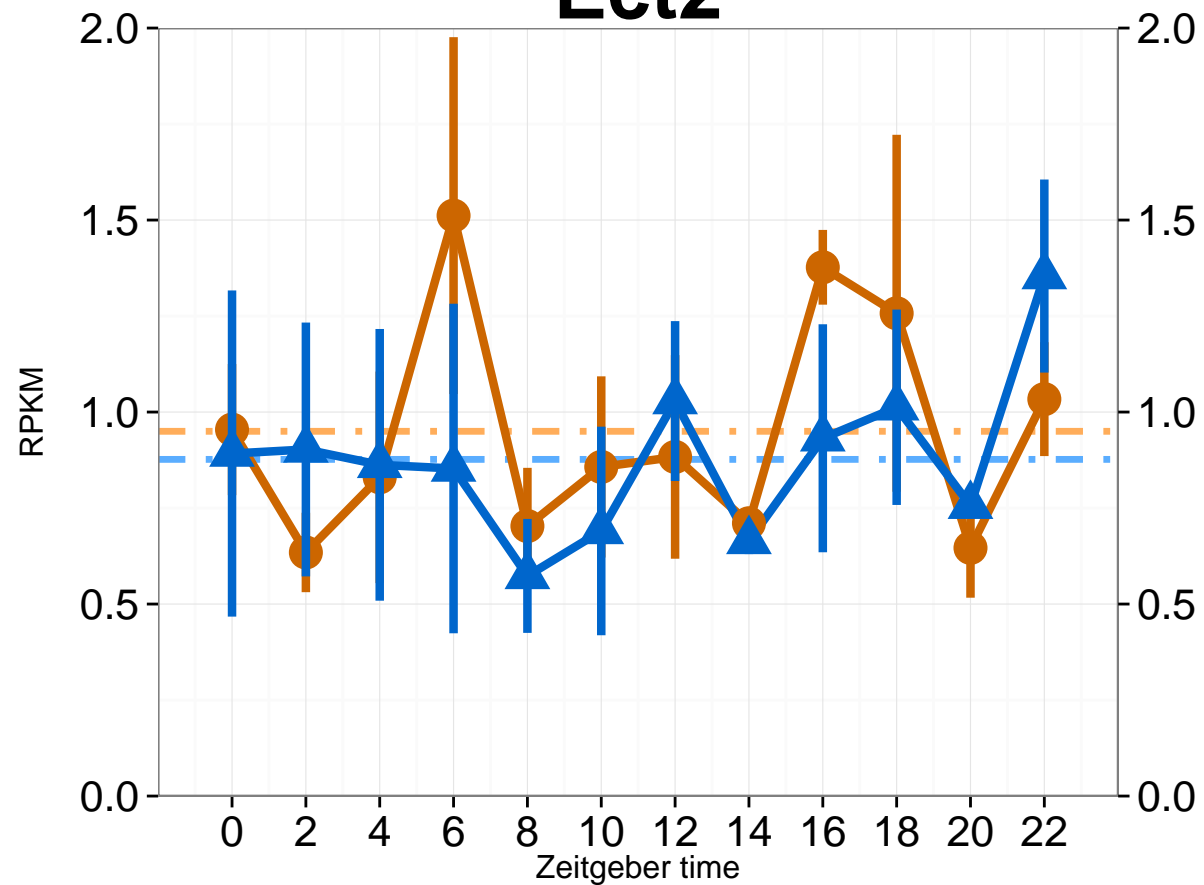

## Ect2

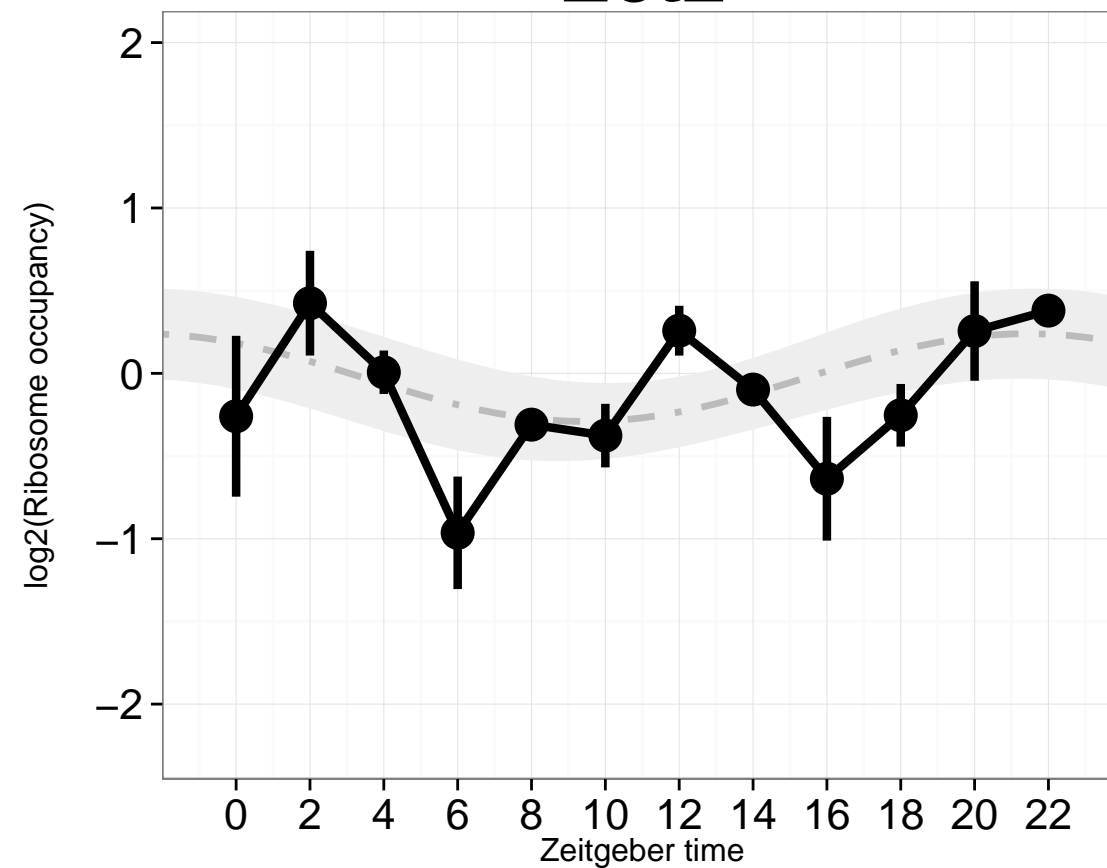

Supplement: SuppDataset_1.zip [file Ect2_set_A.pdf › Supplemental Dataset 1/A-mRNA_nonrhyth_translation_nonrhyth/Ect2_set_A.pdf]

## Edc3

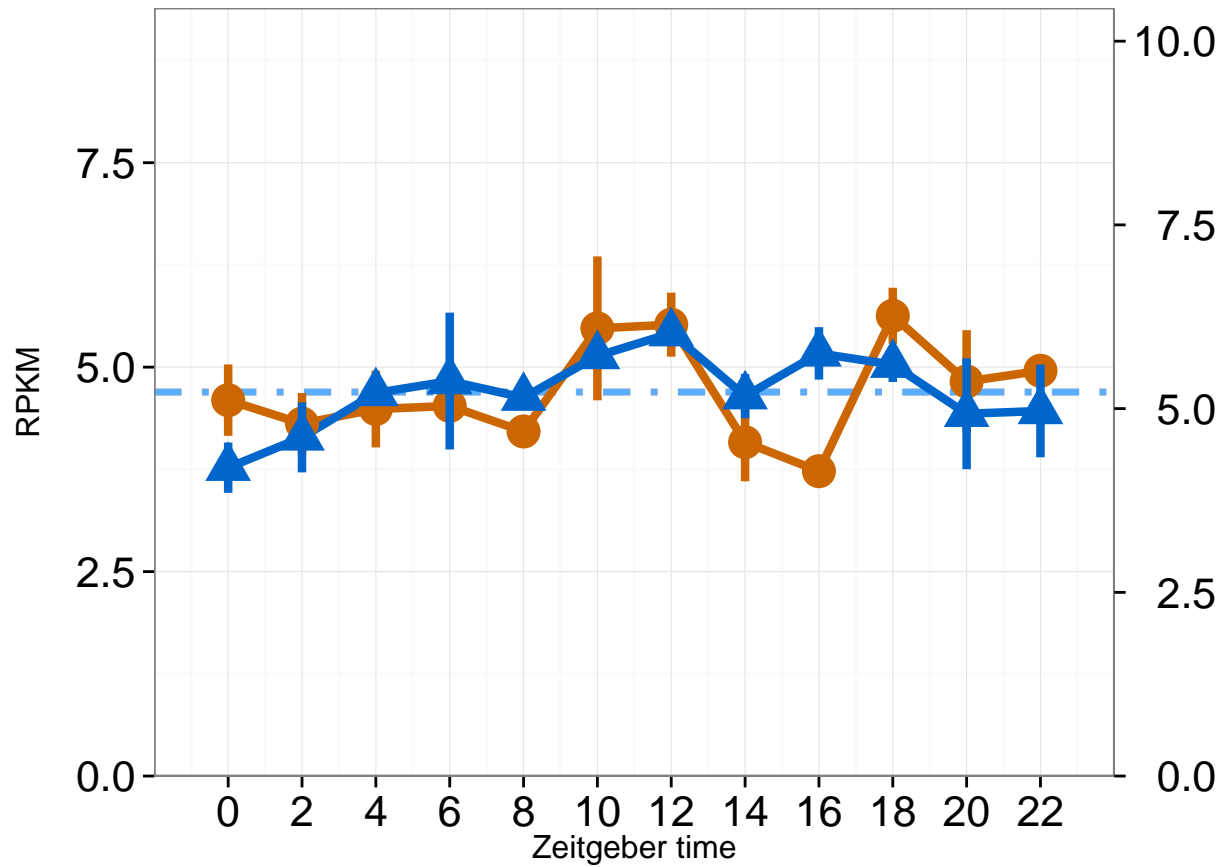

## Edc3

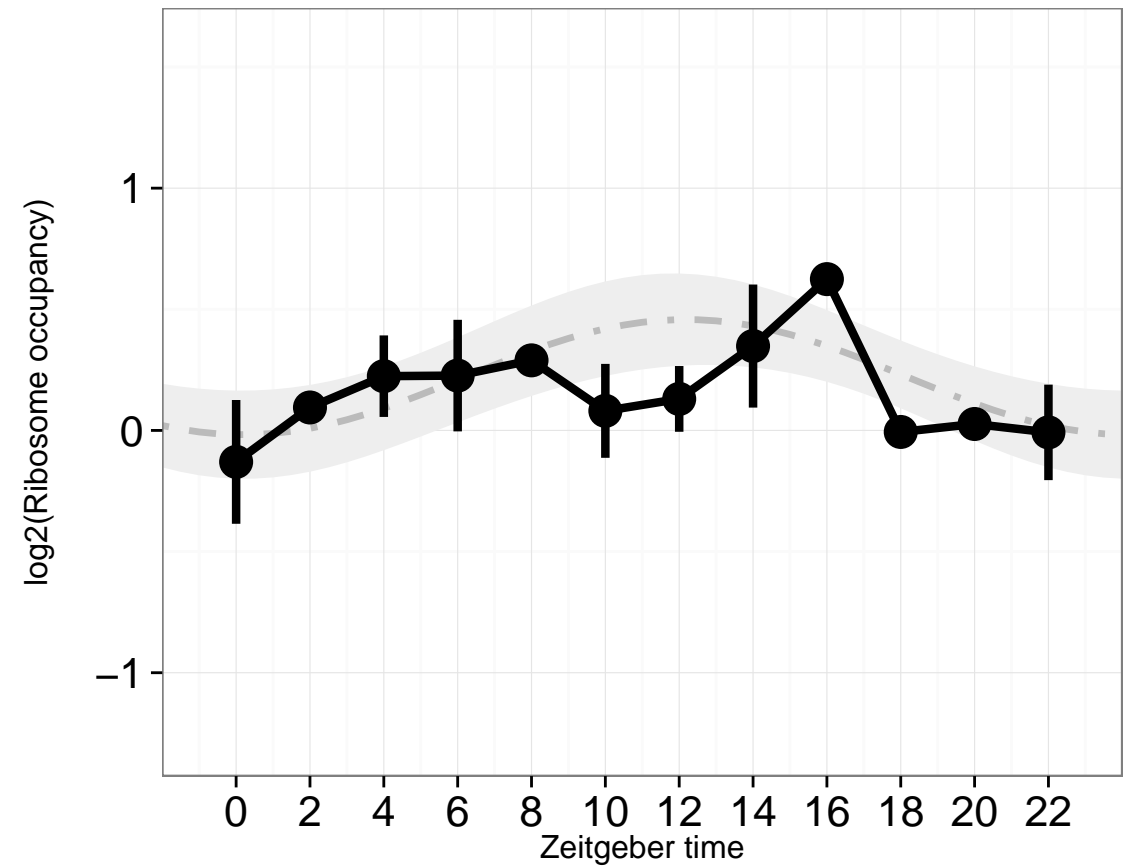

Supplement: SuppDataset_1.zip [file Edc3_set_A.pdf › Supplemental Dataset 1/A-mRNA_nonrhyth_translation_nonrhyth/Edc3_set_A.pdf]

## Edc4

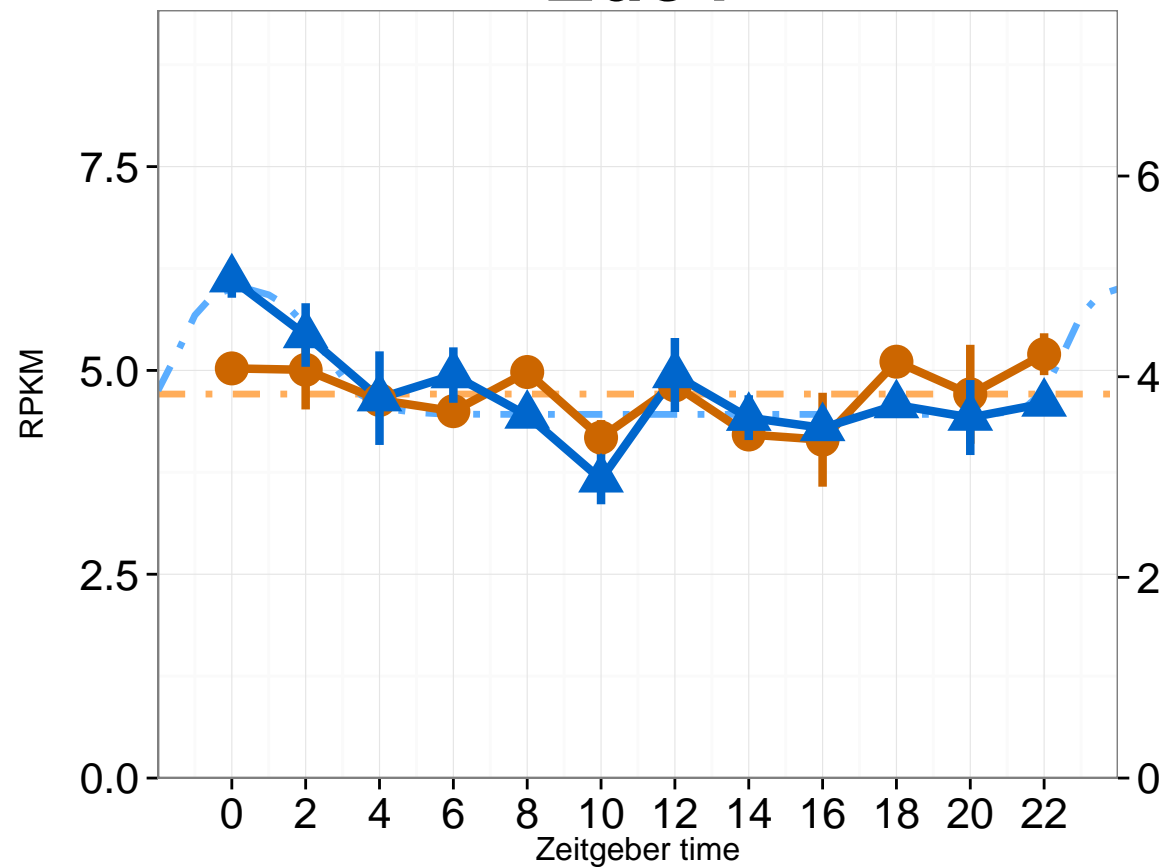

## Edc4

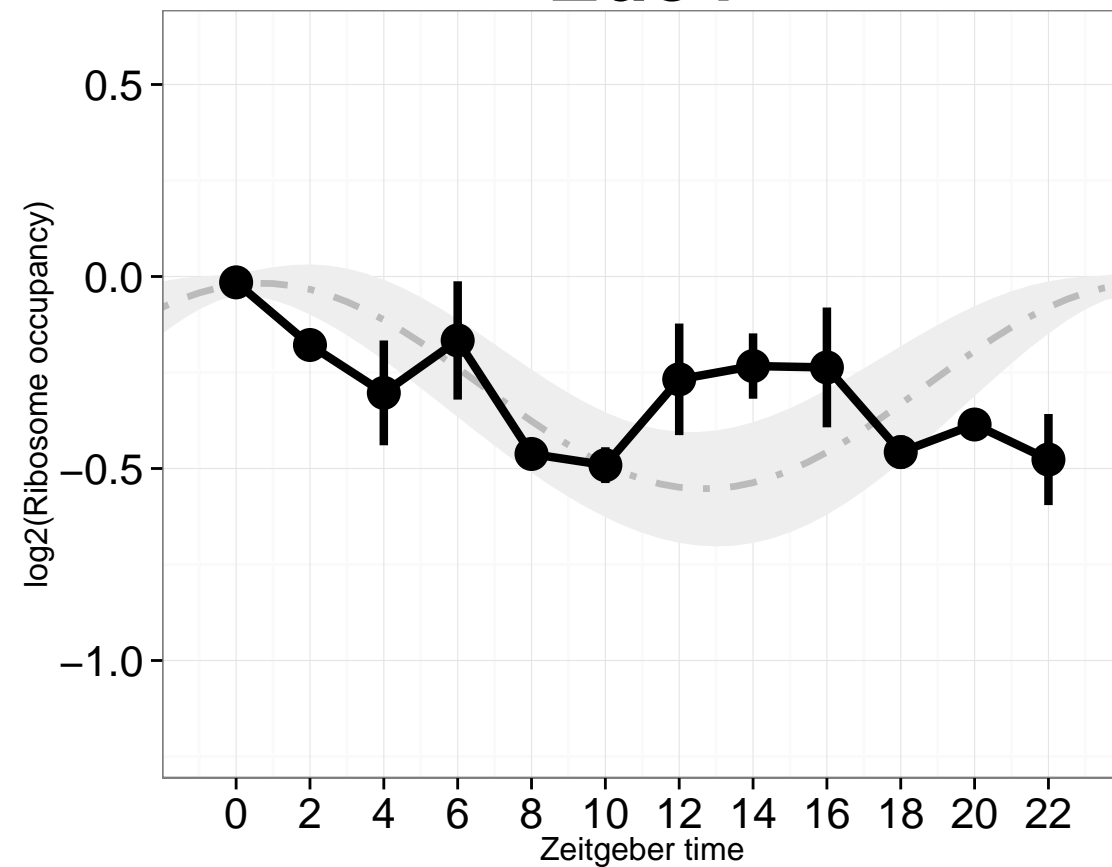

Supplement: SuppDataset_1.zip [file Edc4_set_A.pdf › Supplemental Dataset 1/A-mRNA_nonrhyth_translation_nonrhyth/Edc4_set_A.pdf]

## Edem1

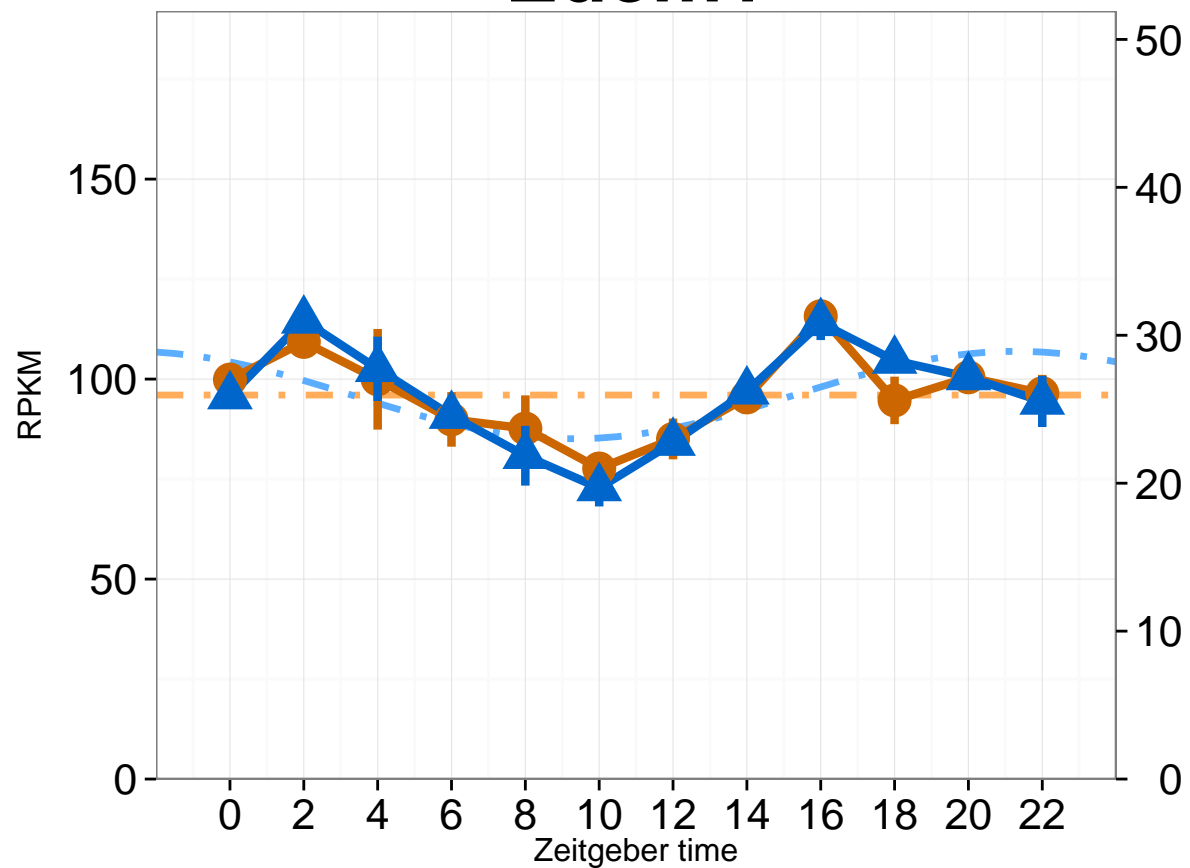

## Edem1

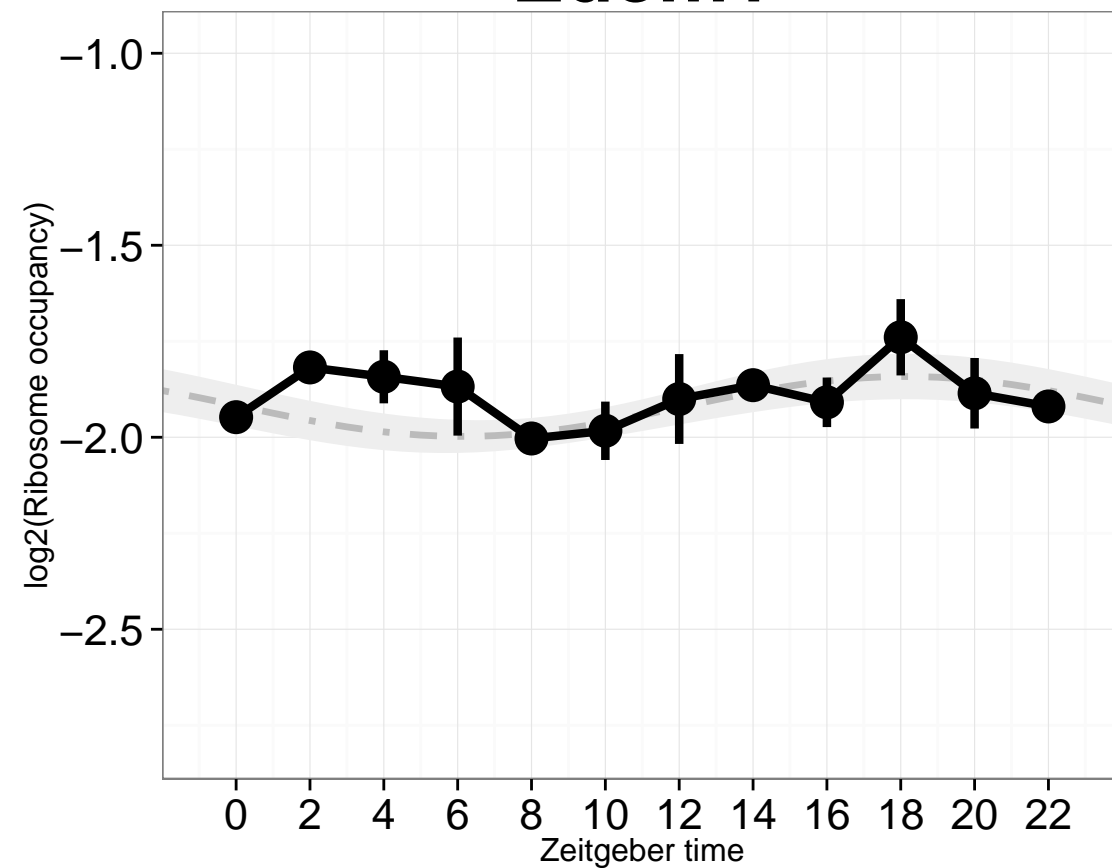

Supplement: SuppDataset_1.zip [file Edem1_set_A.pdf › Supplemental Dataset 1/A-mRNA_nonrhyth_translation_nonrhyth/Edem1_set_A.pdf]

## Edem2

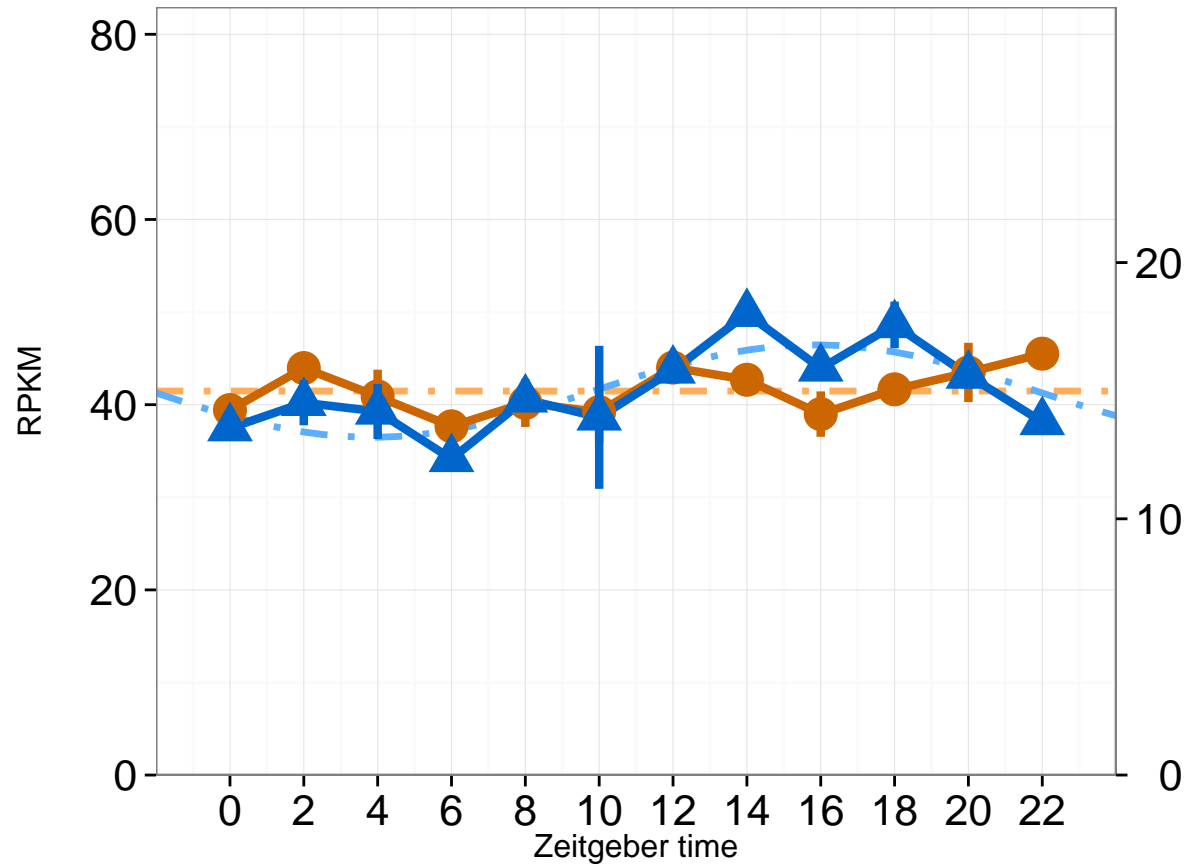

## Edem2

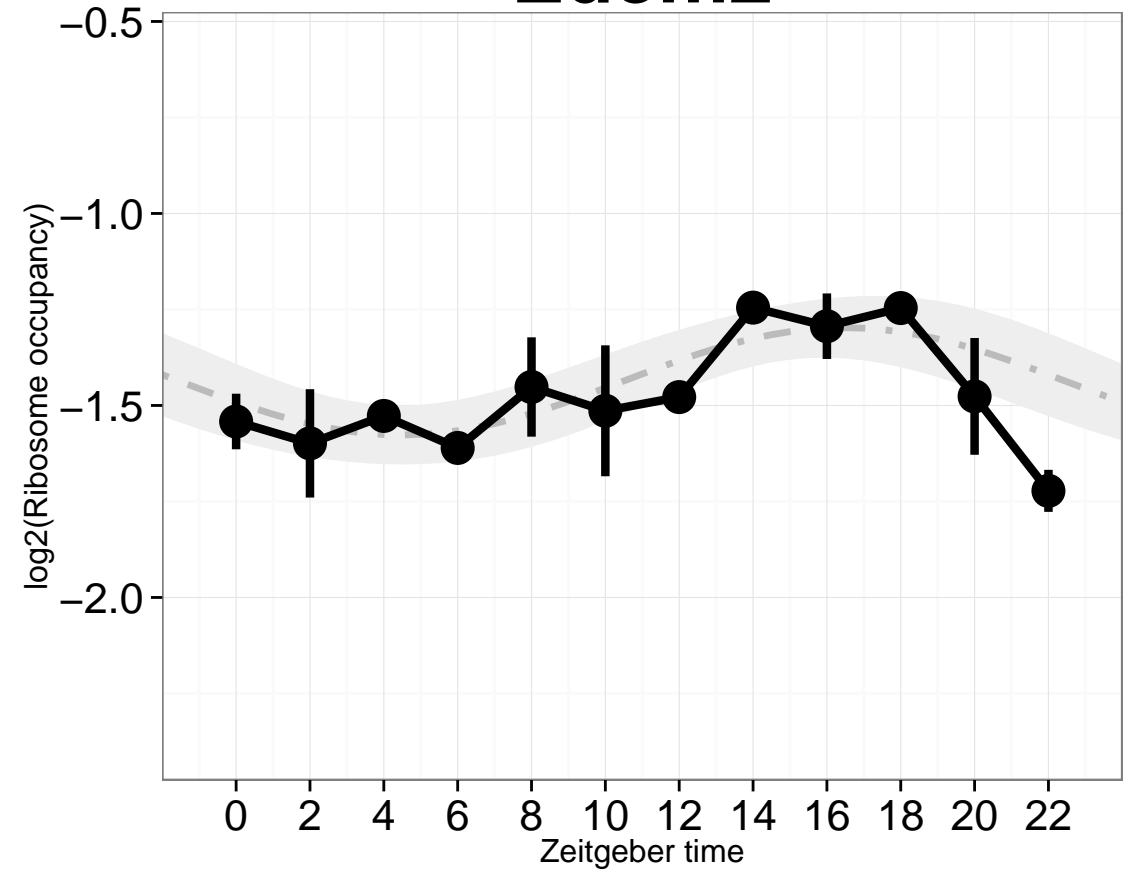

Supplement: SuppDataset_1.zip [file Edem2_set_A.pdf › Supplemental Dataset 1/A-mRNA_nonrhyth_translation_nonrhyth/Edem2_set_A.pdf]

# Edf1

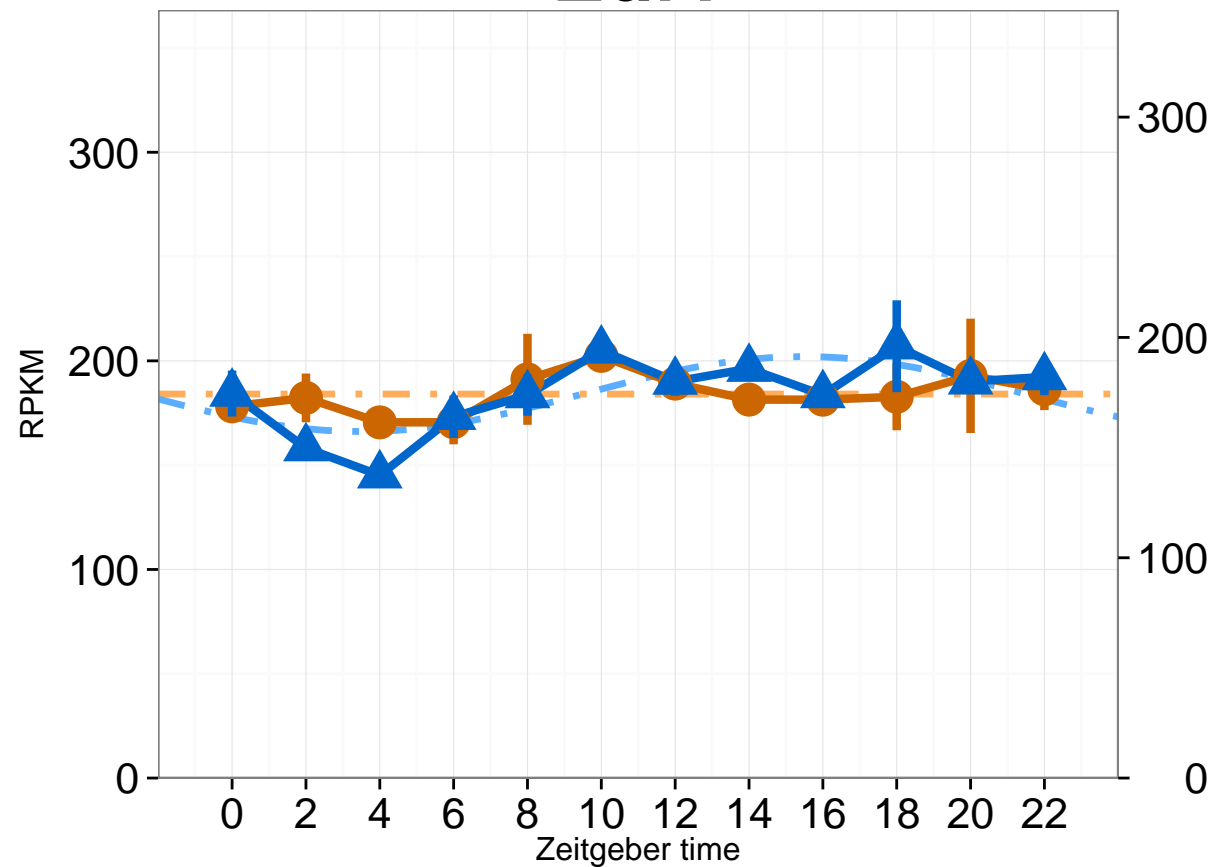

# Edf1

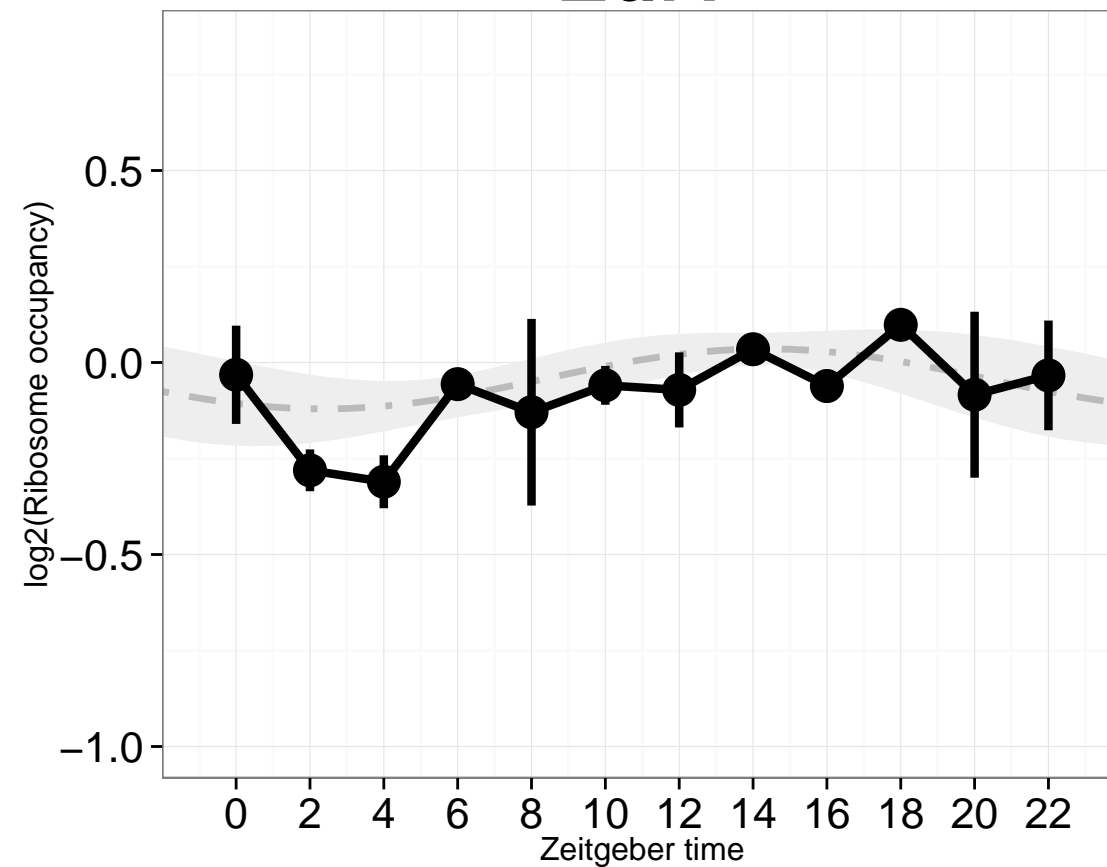

Supplement: SuppDataset_1.zip [file Edf1_set_A.pdf › Supplemental Dataset 1/A-mRNA_nonrhyth_translation_nonrhyth/Edf1_set_A.pdf]

## Ednra

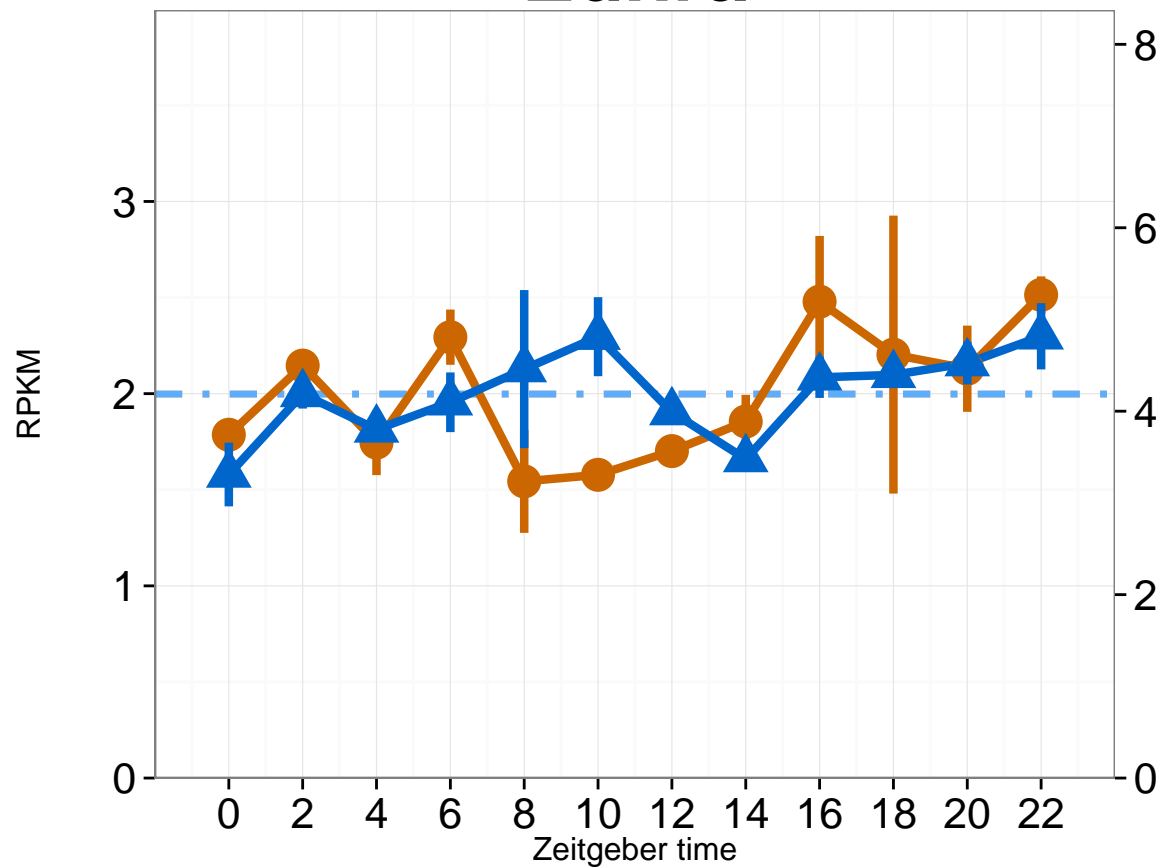

## Ednra

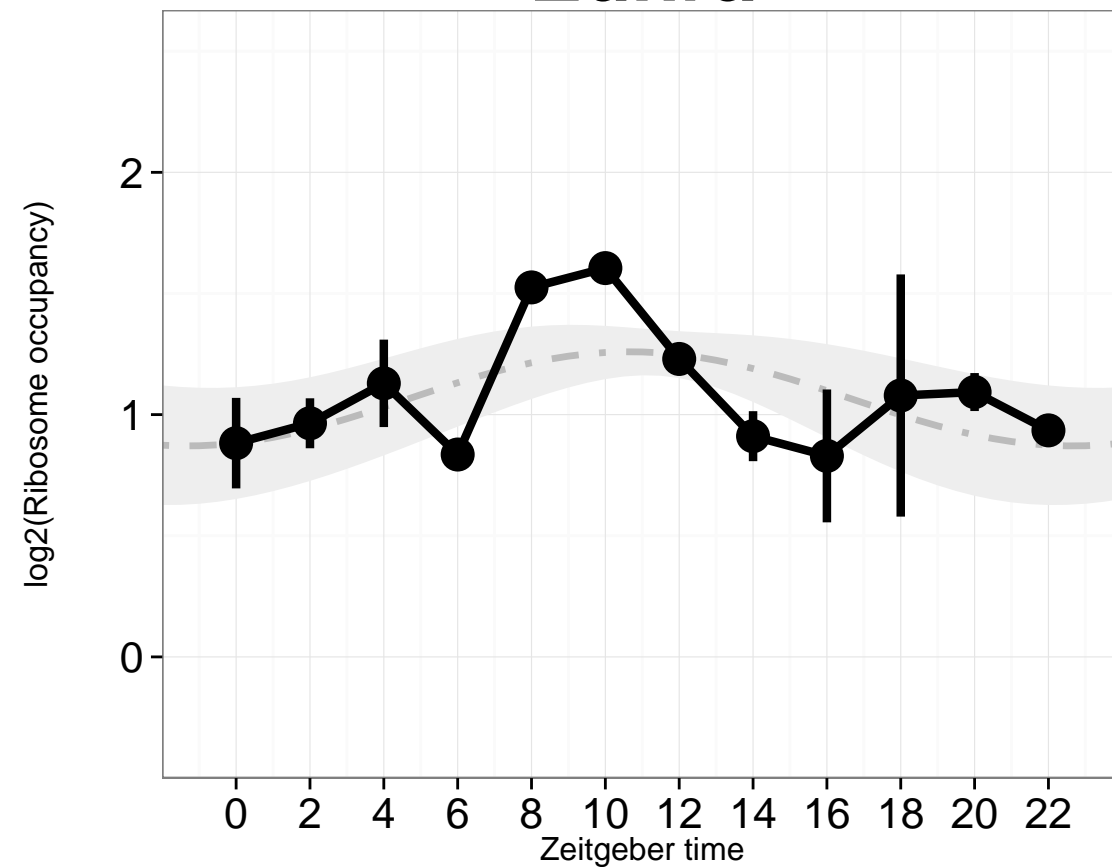

Supplement: SuppDataset_1.zip [file Ednra_set_A.pdf › Supplemental Dataset 1/A-mRNA_nonrhyth_translation_nonrhyth/Ednra_set_A.pdf]

## Eea1

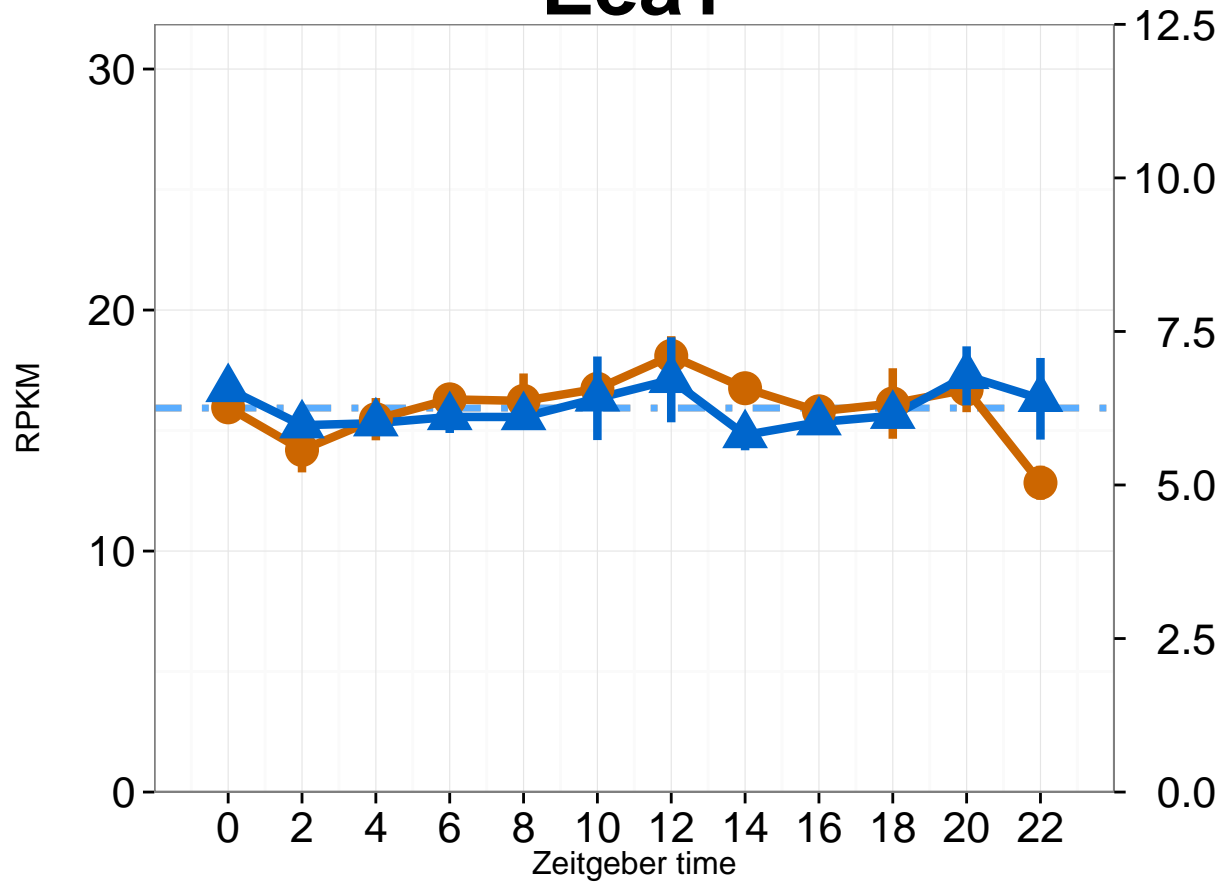

## Eea1

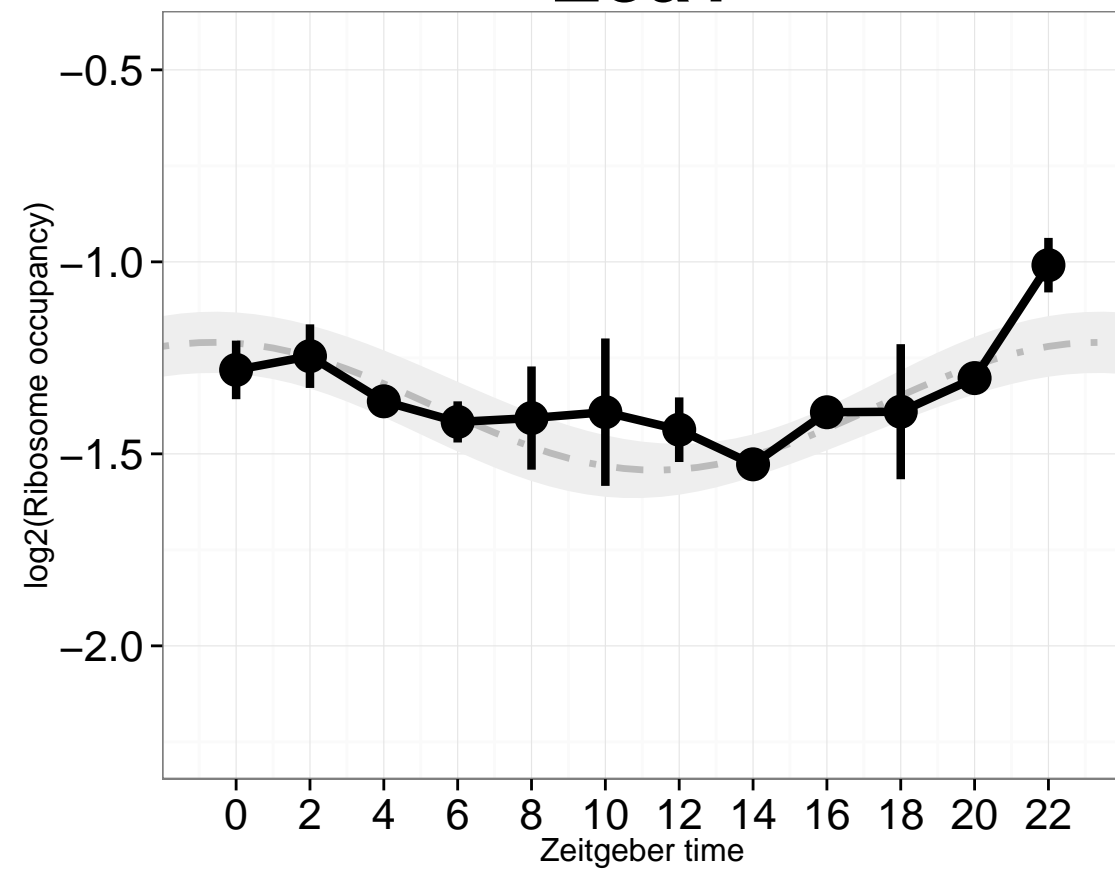

Supplement: SuppDataset_1.zip [file Eea1_set_A.pdf › Supplemental Dataset 1/A-mRNA_nonrhyth_translation_nonrhyth/Eea1_set_A.pdf]

## Eed

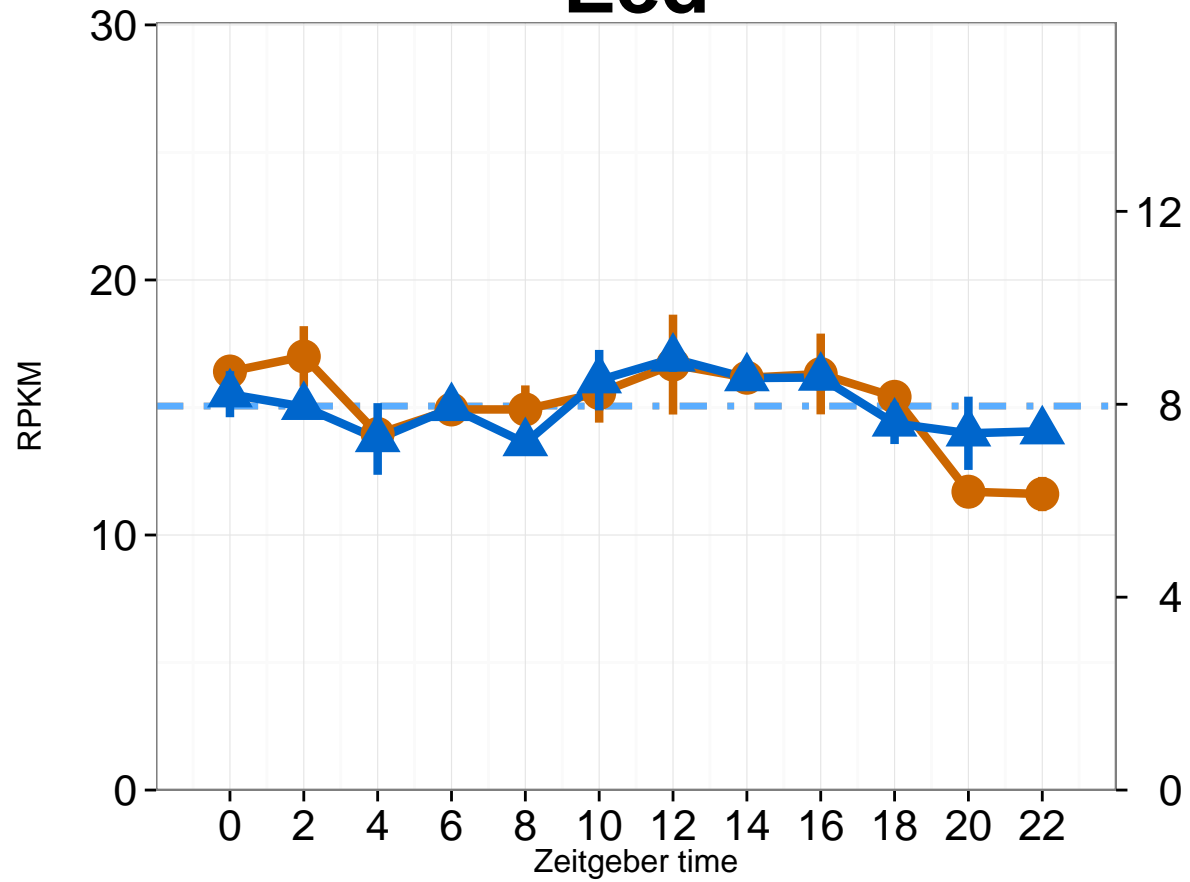

## Eed

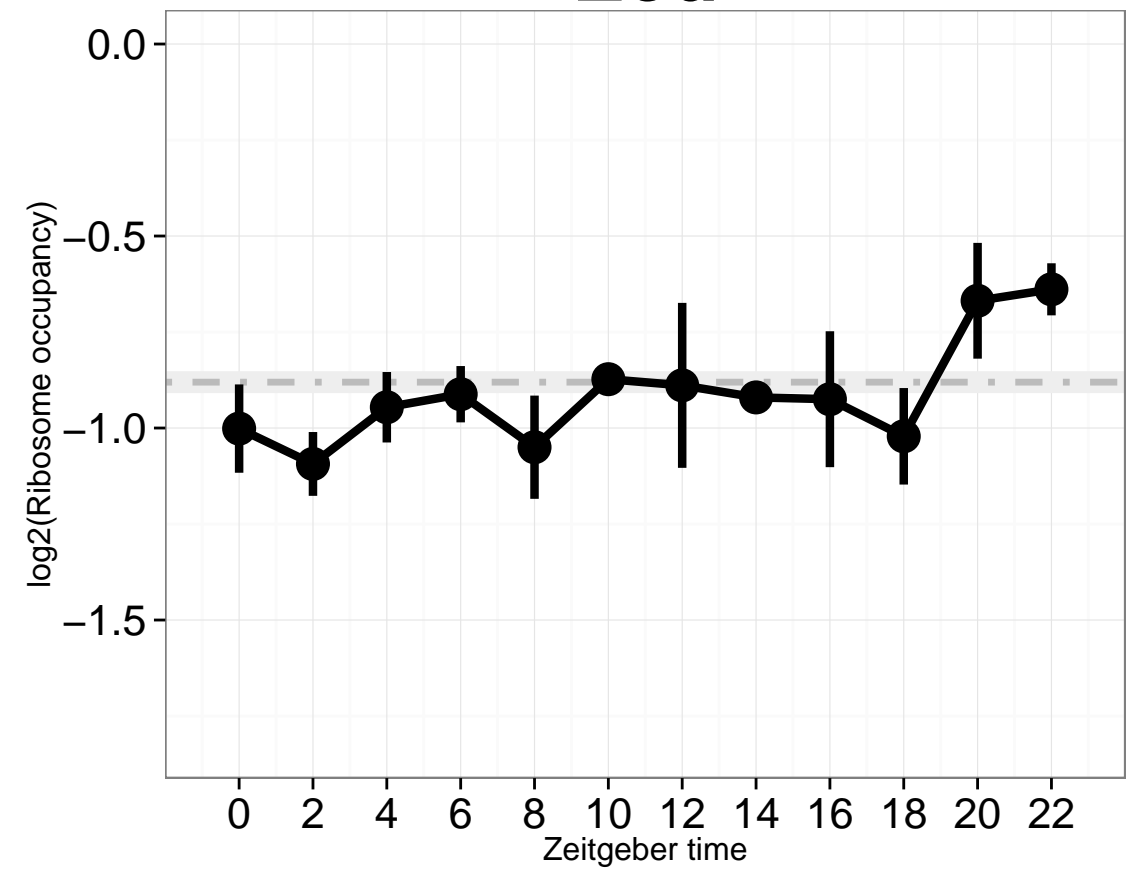

Supplement: SuppDataset_1.zip [file Eed_set_A.pdf › Supplemental Dataset 1/A-mRNA_nonrhyth_translation_nonrhyth/Eed_set_A.pdf]

## Eef1e1

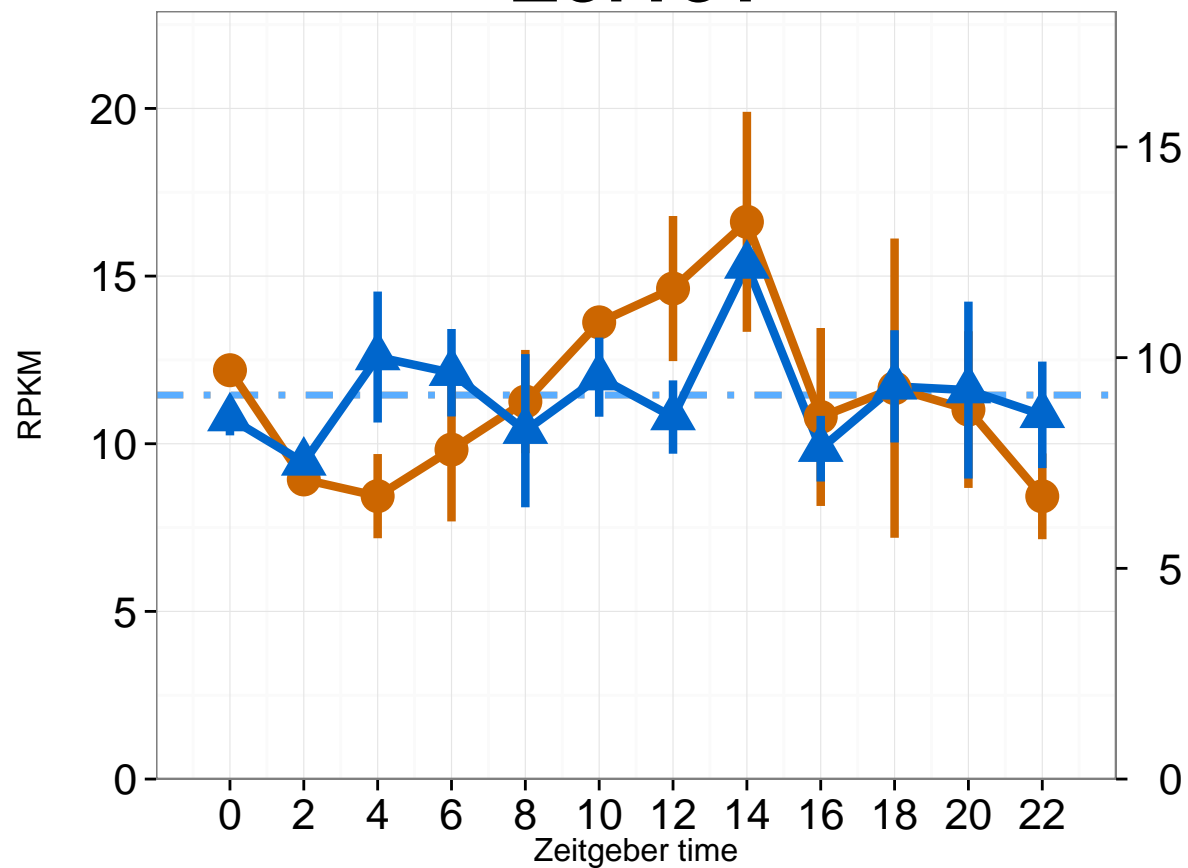

## Eef1e1

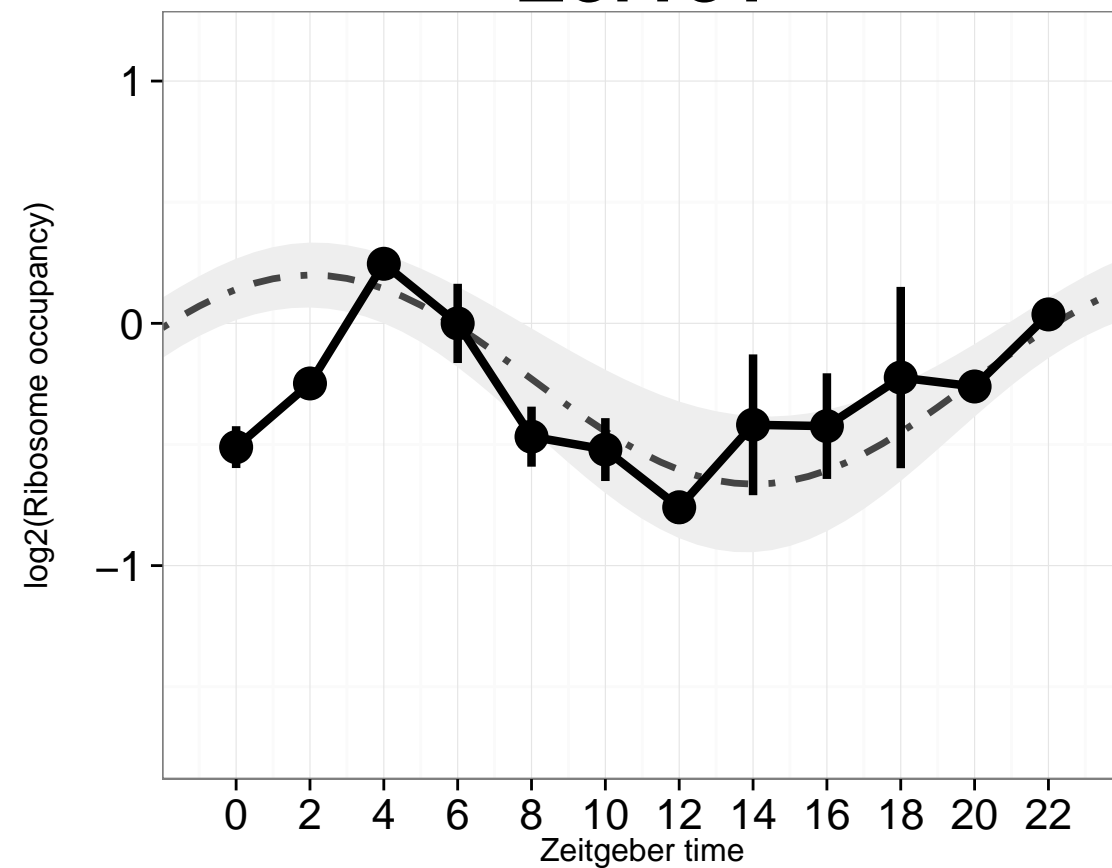

Supplement: SuppDataset_1.zip [file Eef1e1_set_A.pdf › Supplemental Dataset 1/A-mRNA_nonrhyth_translation_nonrhyth/Eef1e1_set_A.pdf]

## Eefsec

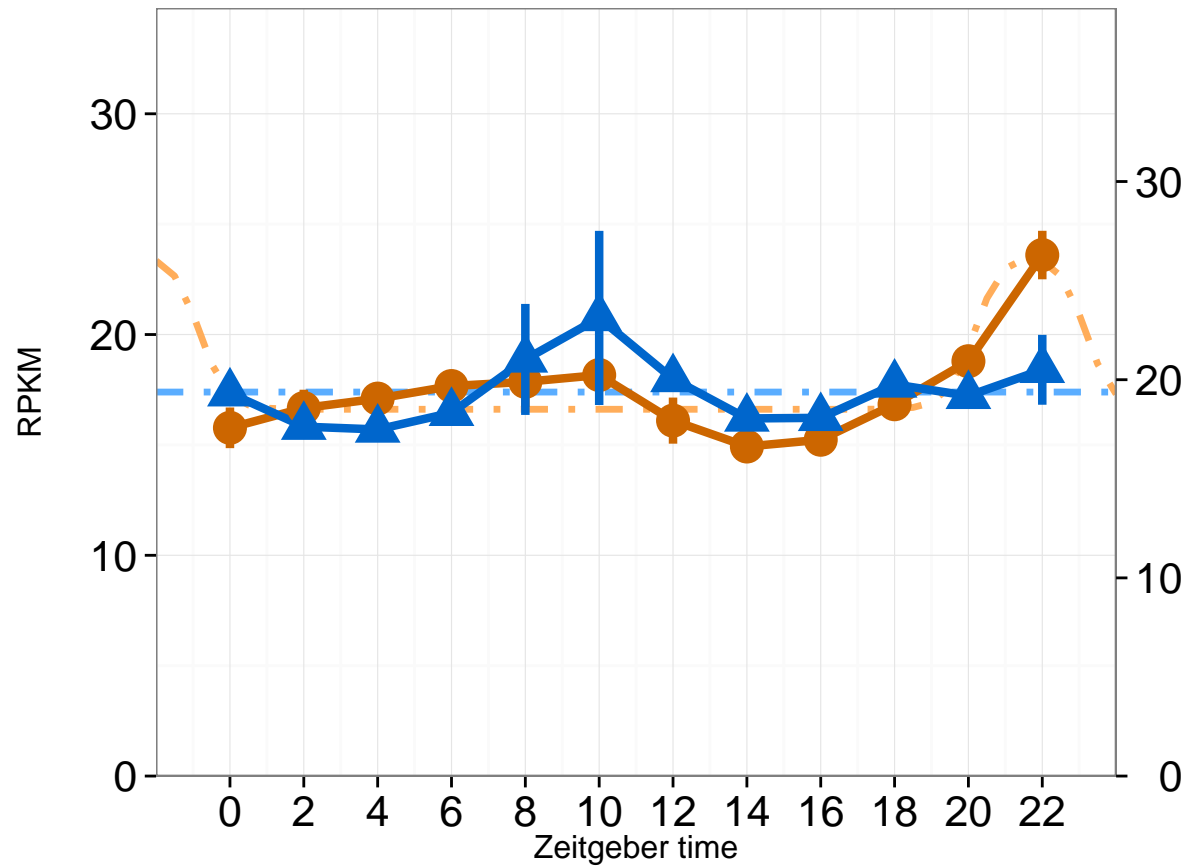

## Eefsec

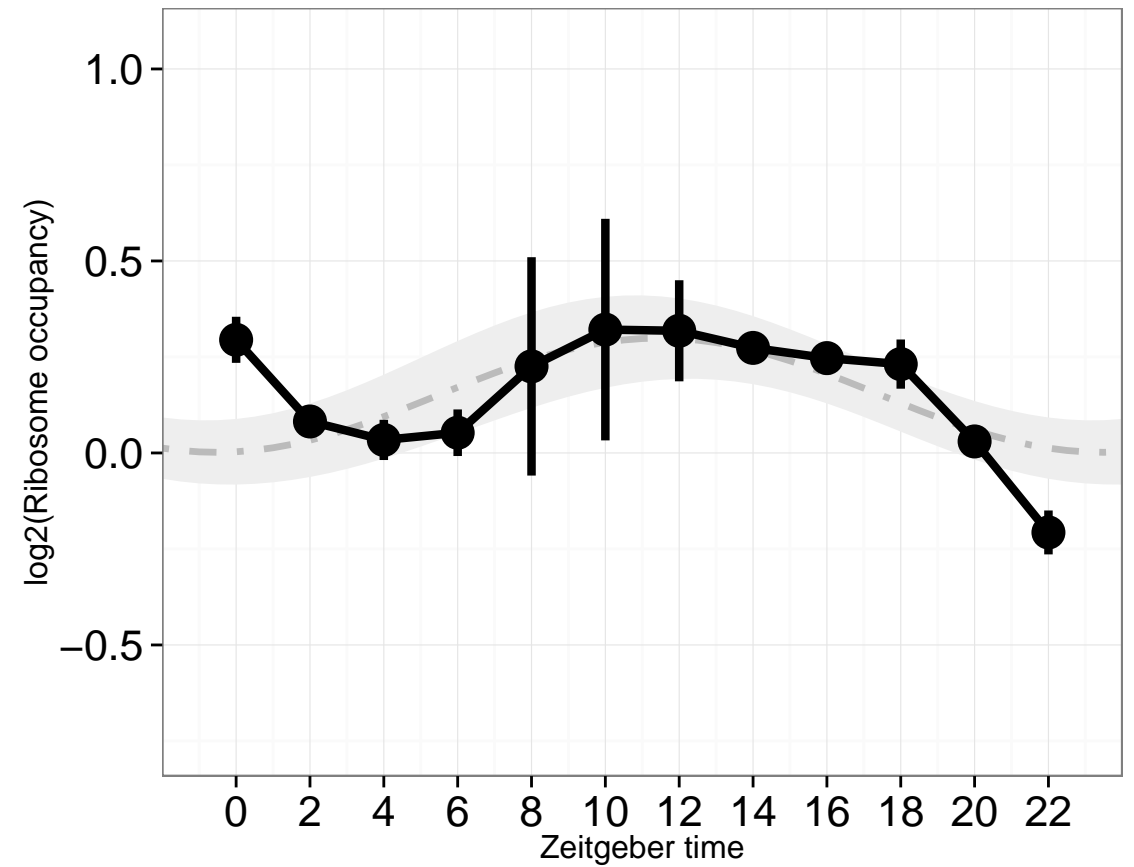

Supplement: SuppDataset_1.zip [file Eefsec_set_A.pdf › Supplemental Dataset 1/A-mRNA_nonrhyth_translation_nonrhyth/Eefsec_set_A.pdf]

## Efcab14

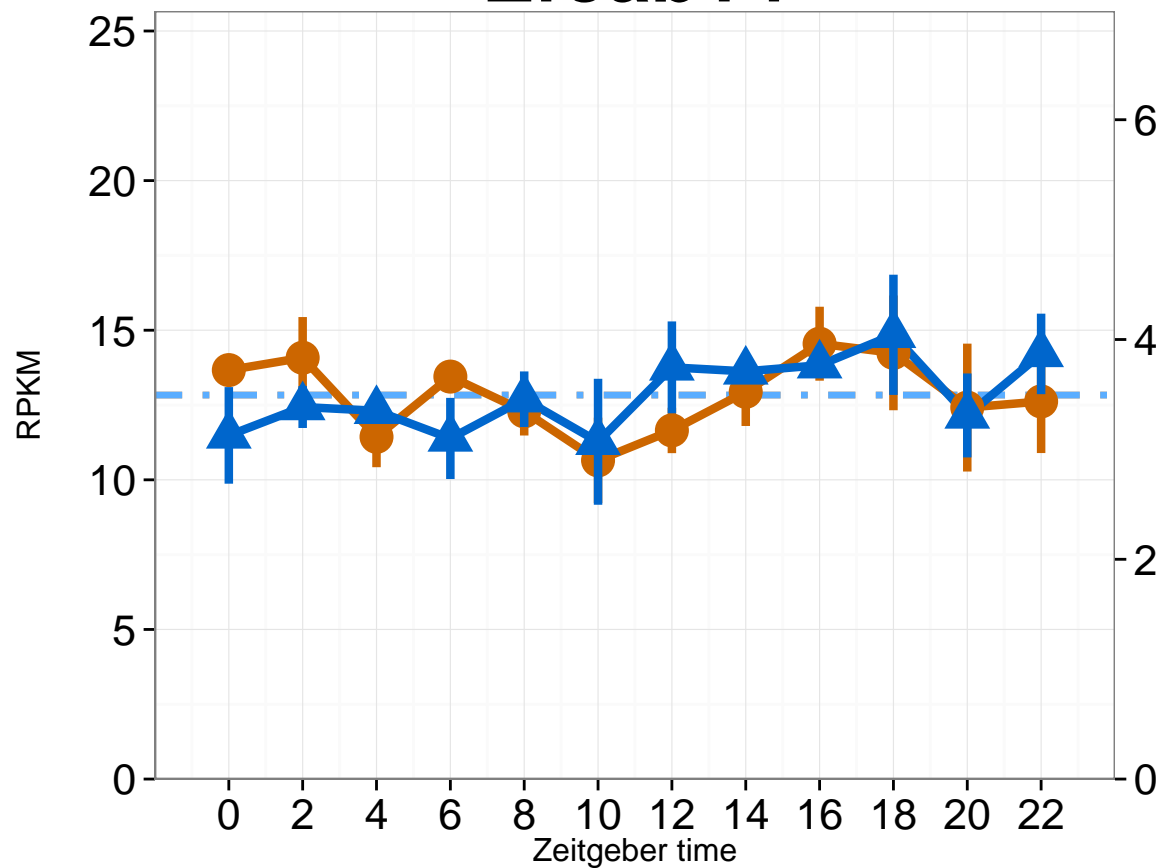

## Efcab14

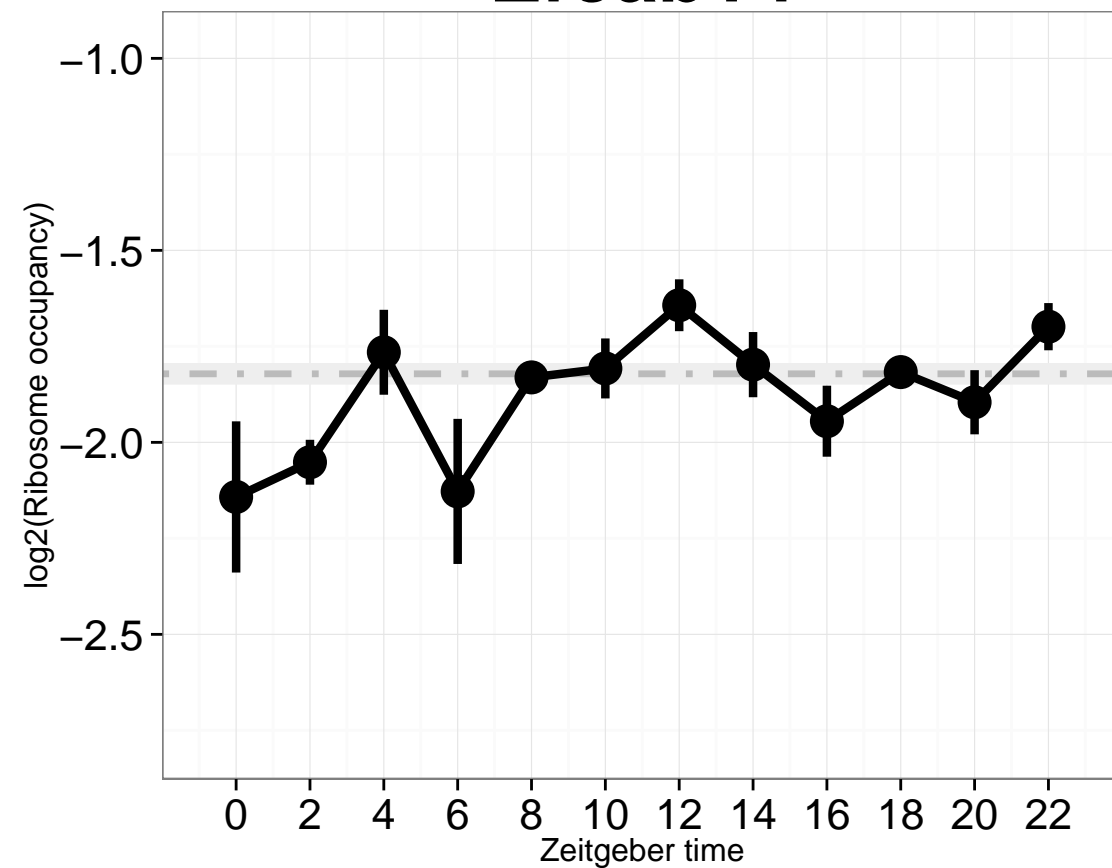

Supplement: SuppDataset_1.zip [file Efcab14_set_A.pdf › Supplemental Dataset 1/A-mRNA_nonrhyth_translation_nonrhyth/Efcab14_set_A.pdf]

# Efcab2

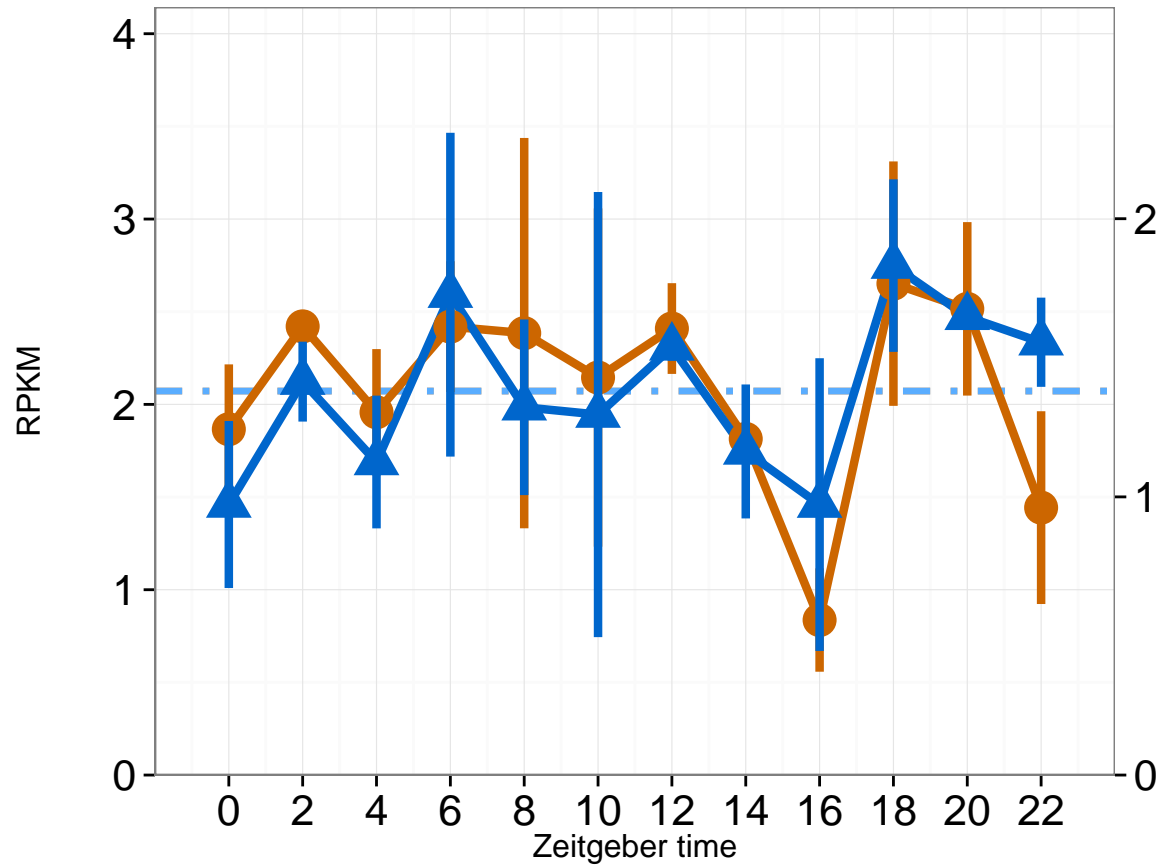

# Efcab2

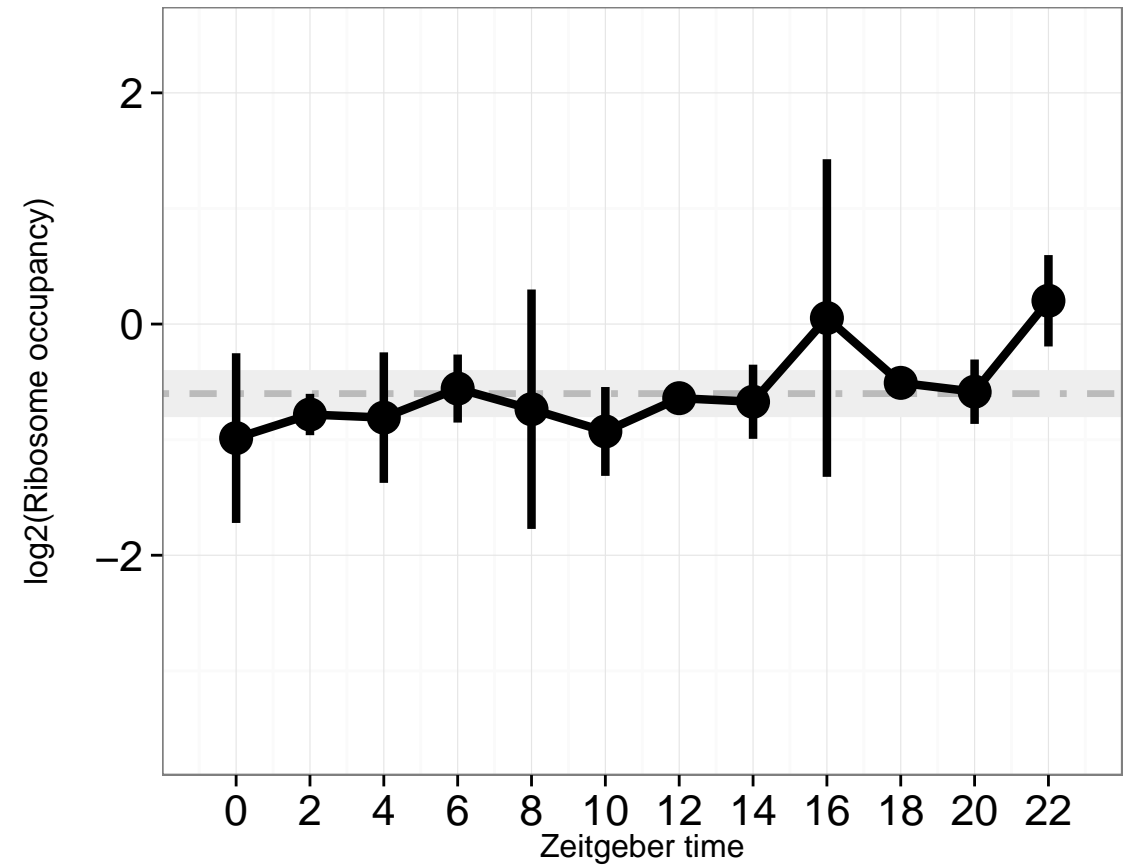

Supplement: SuppDataset_1.zip [file Efcab2_set_A.pdf › Supplemental Dataset 1/A-mRNA_nonrhyth_translation_nonrhyth/Efcab2_set_A.pdf]

# Efcab4a

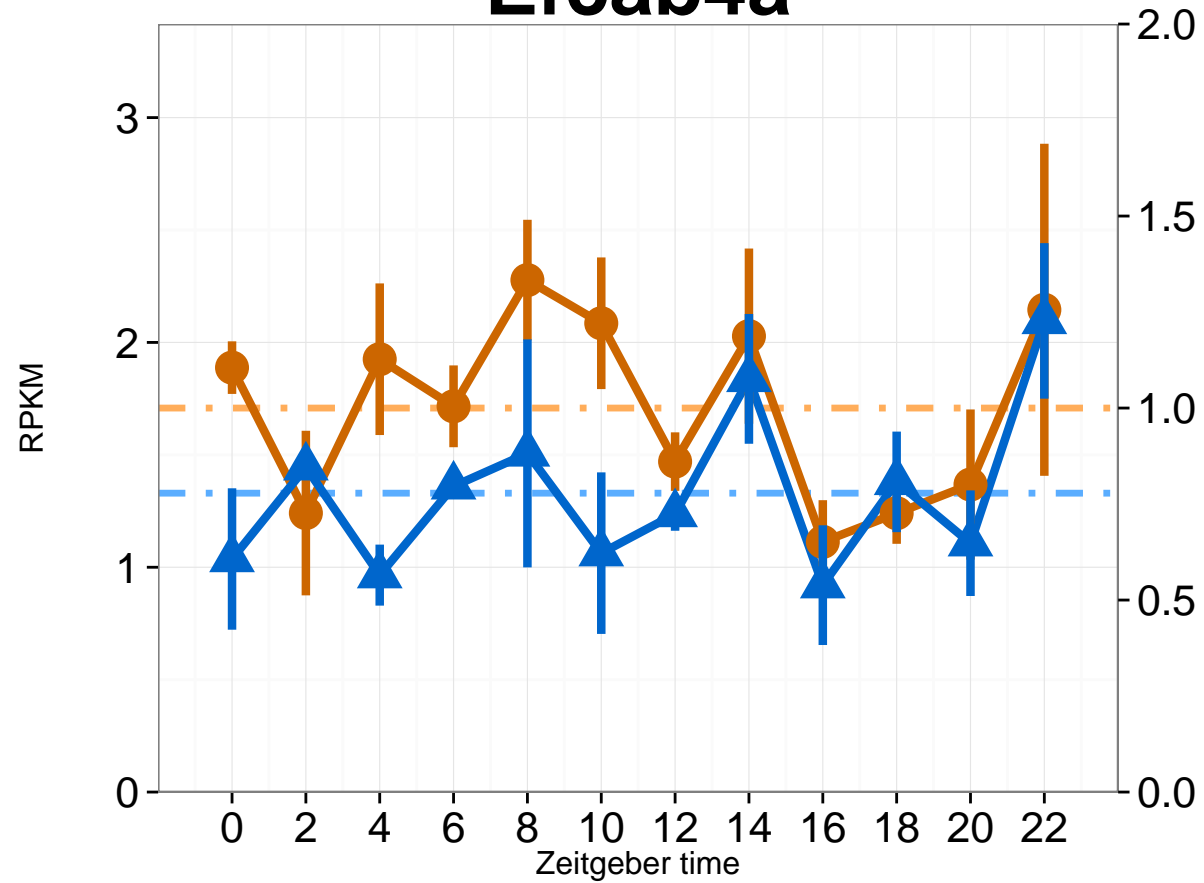

# Efcab4a

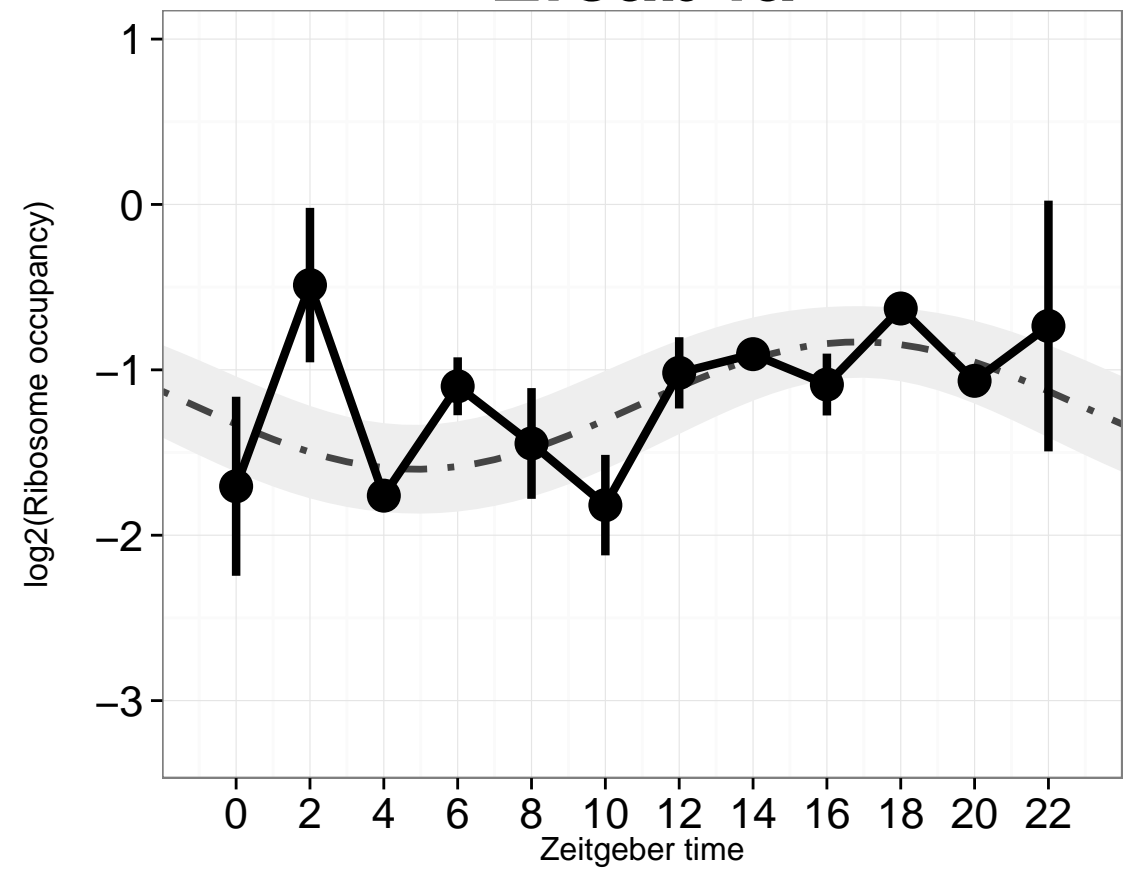

Supplement: SuppDataset_1.zip [file Efcab4a_set_A.pdf › Supplemental Dataset 1/A-mRNA_nonrhyth_translation_nonrhyth/Efcab4a_set_A.pdf]

# Efemp1

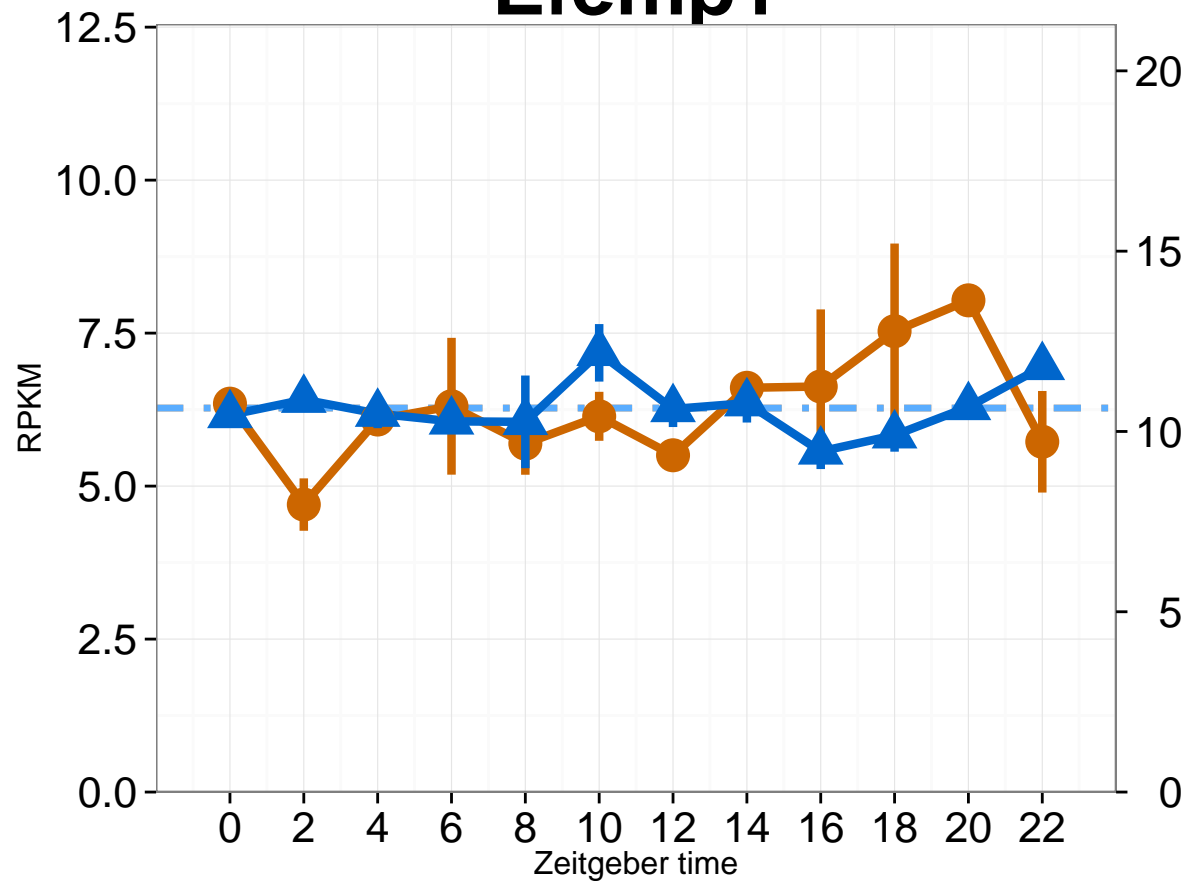

# Efemp1

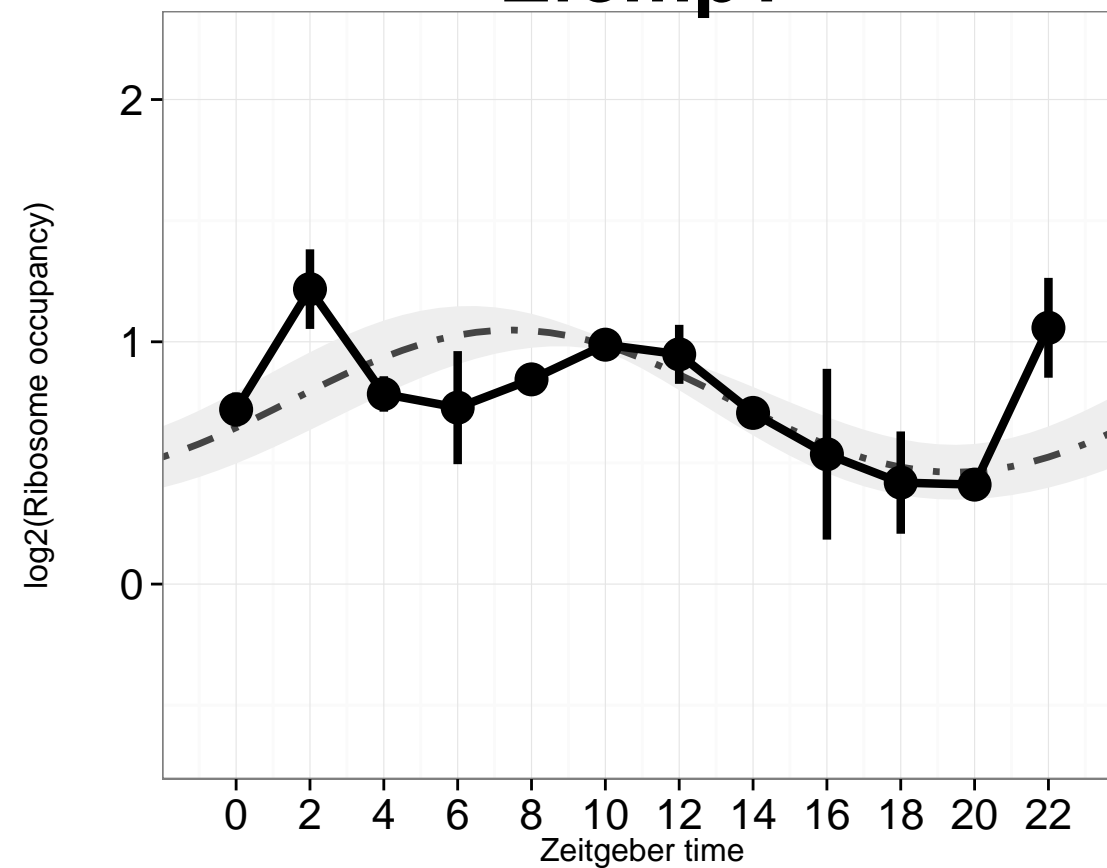

Supplement: SuppDataset_1.zip [file Efemp1_set_A.pdf › Supplemental Dataset 1/A-mRNA_nonrhyth_translation_nonrhyth/Efemp1_set_A.pdf]

## Efemp2

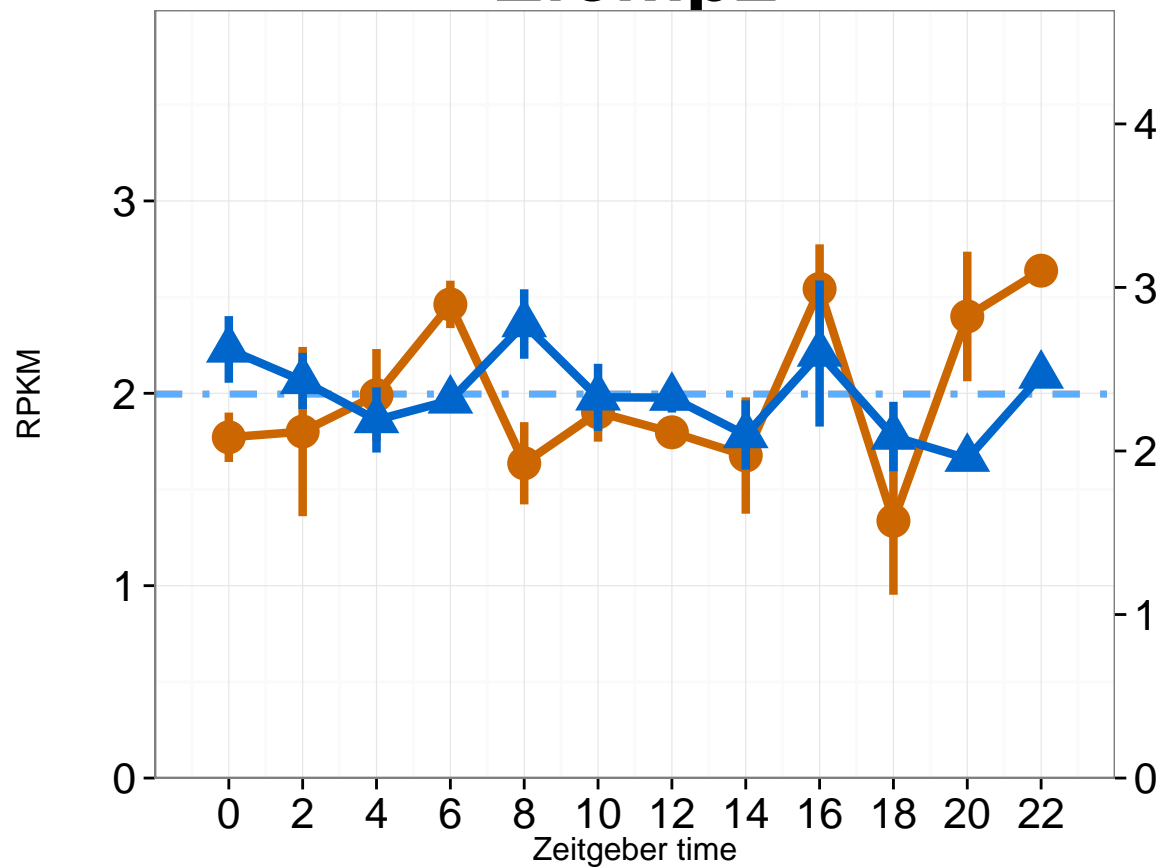

## Efemp2

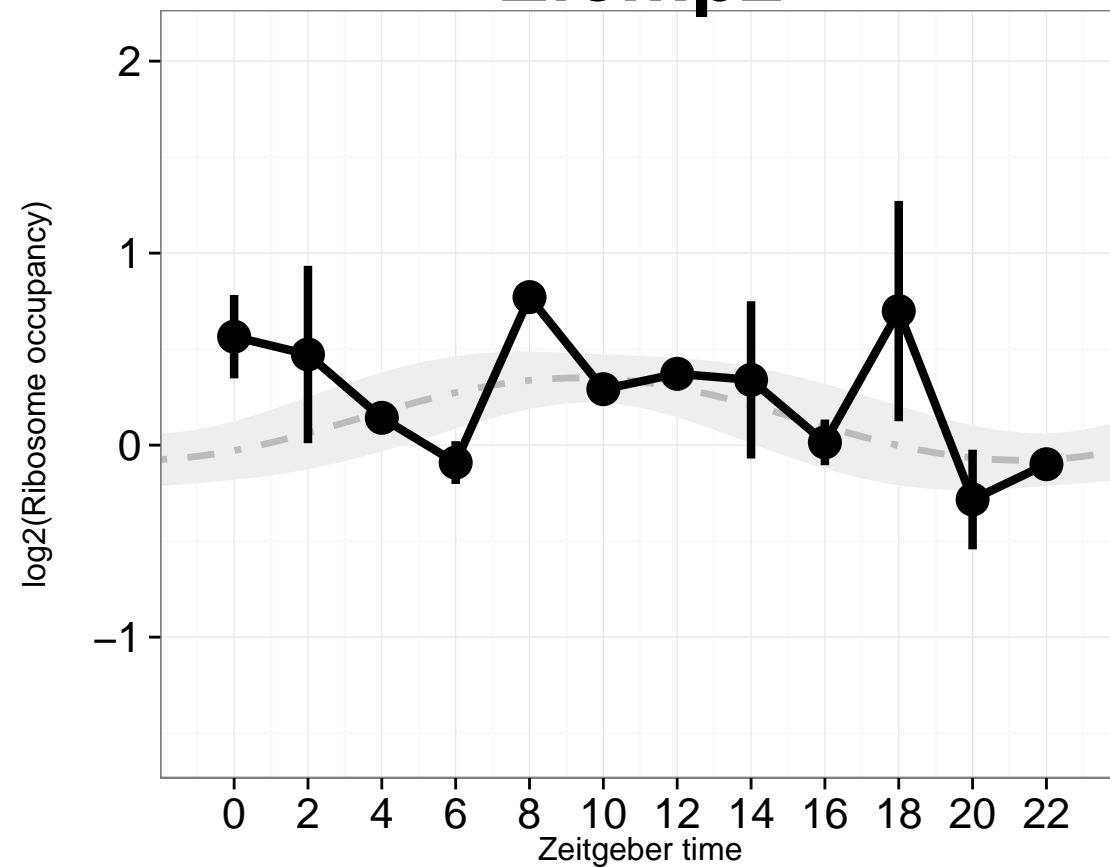

Supplement: SuppDataset_1.zip [file Efemp2_set_A.pdf › Supplemental Dataset 1/A-mRNA_nonrhyth_translation_nonrhyth/Efemp2_set_A.pdf]

# Efna5

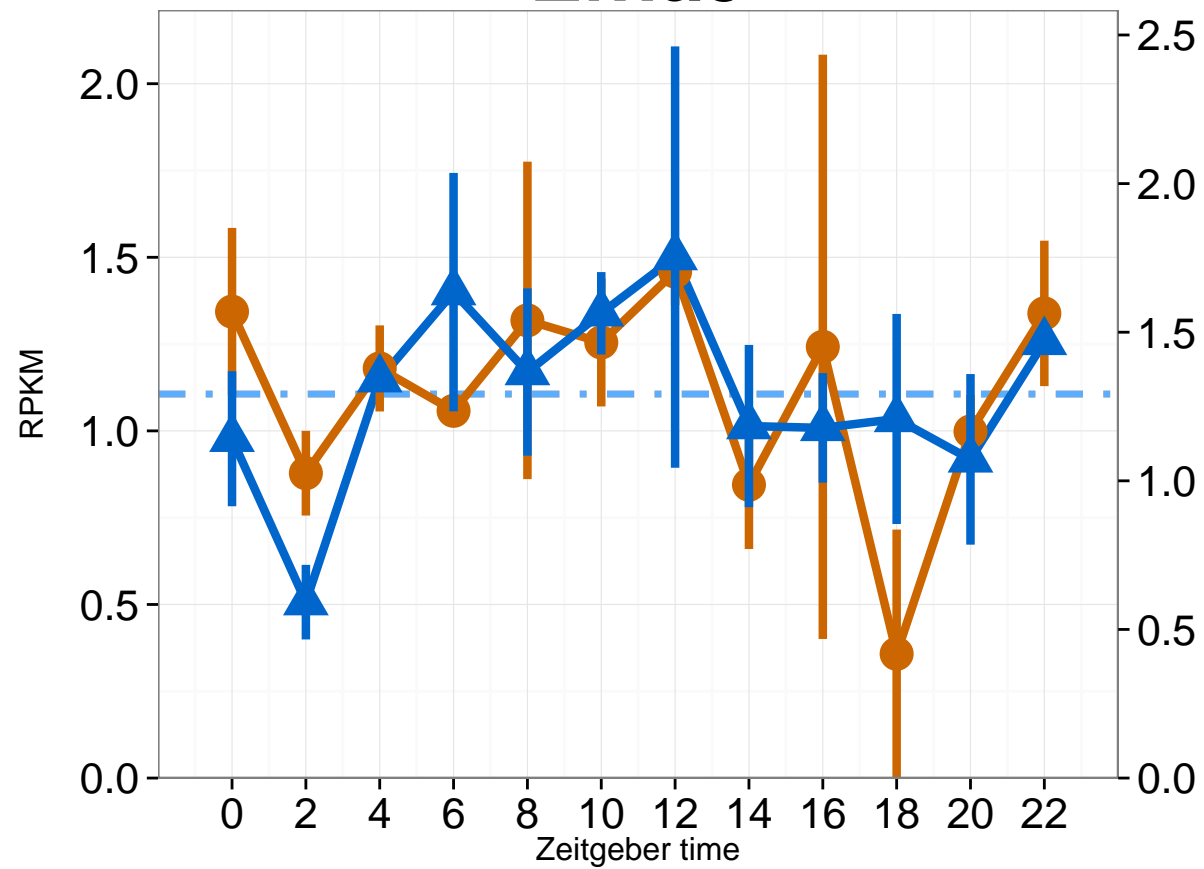

# Efna5

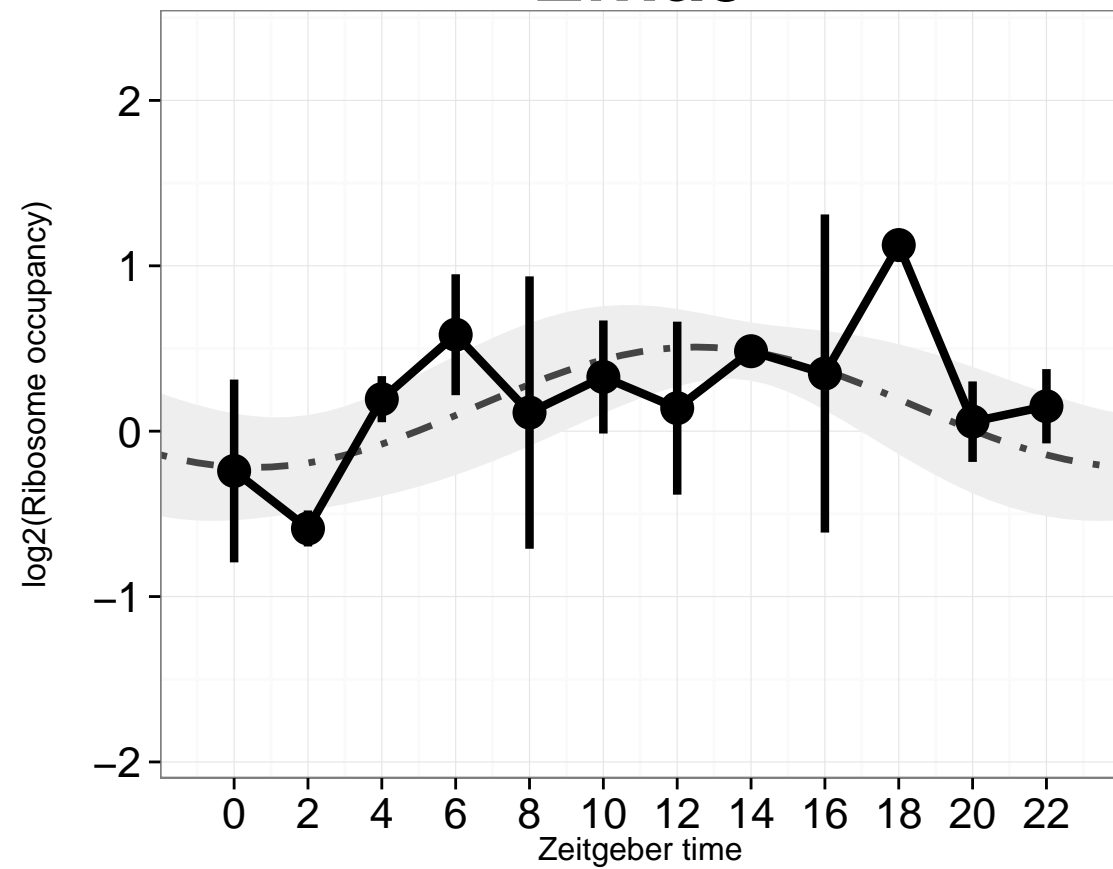

Supplement: SuppDataset_1.zip [file Efna5_set_A.pdf › Supplemental Dataset 1/A-mRNA_nonrhyth_translation_nonrhyth/Efna5_set_A.pdf]

# Efnb2

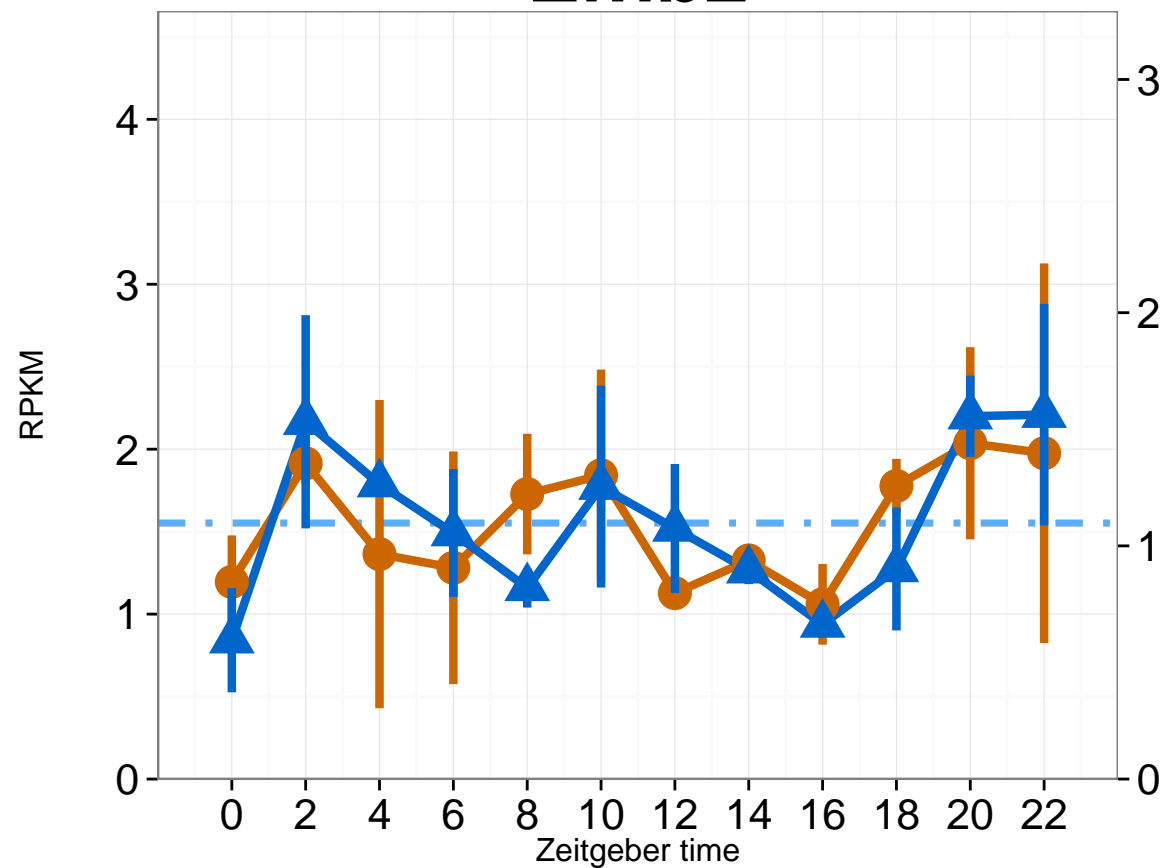

# Efnb2

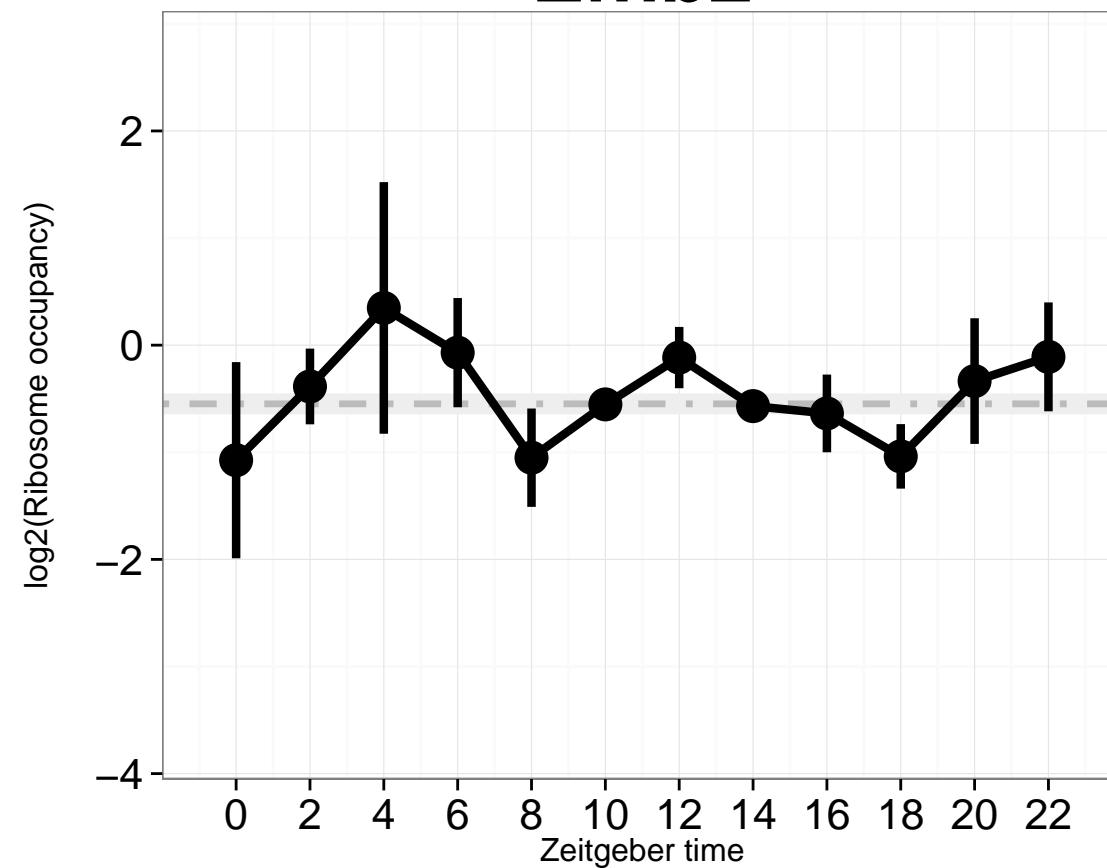

Supplement: SuppDataset_1.zip [file Efnb2_set_A.pdf › Supplemental Dataset 1/A-mRNA_nonrhyth_translation_nonrhyth/Efnb2_set_A.pdf]
