# Supplementary figures and images for: Ribosome profiling reveals the rhythmic liver translatome and circadian clock regulation by upstream open reading frames (part 105 of 113)
Source: HighWire-hosted journal article supplement (doi:10.1101/gr.195404.115), 2015-10-20

# Dync2h1

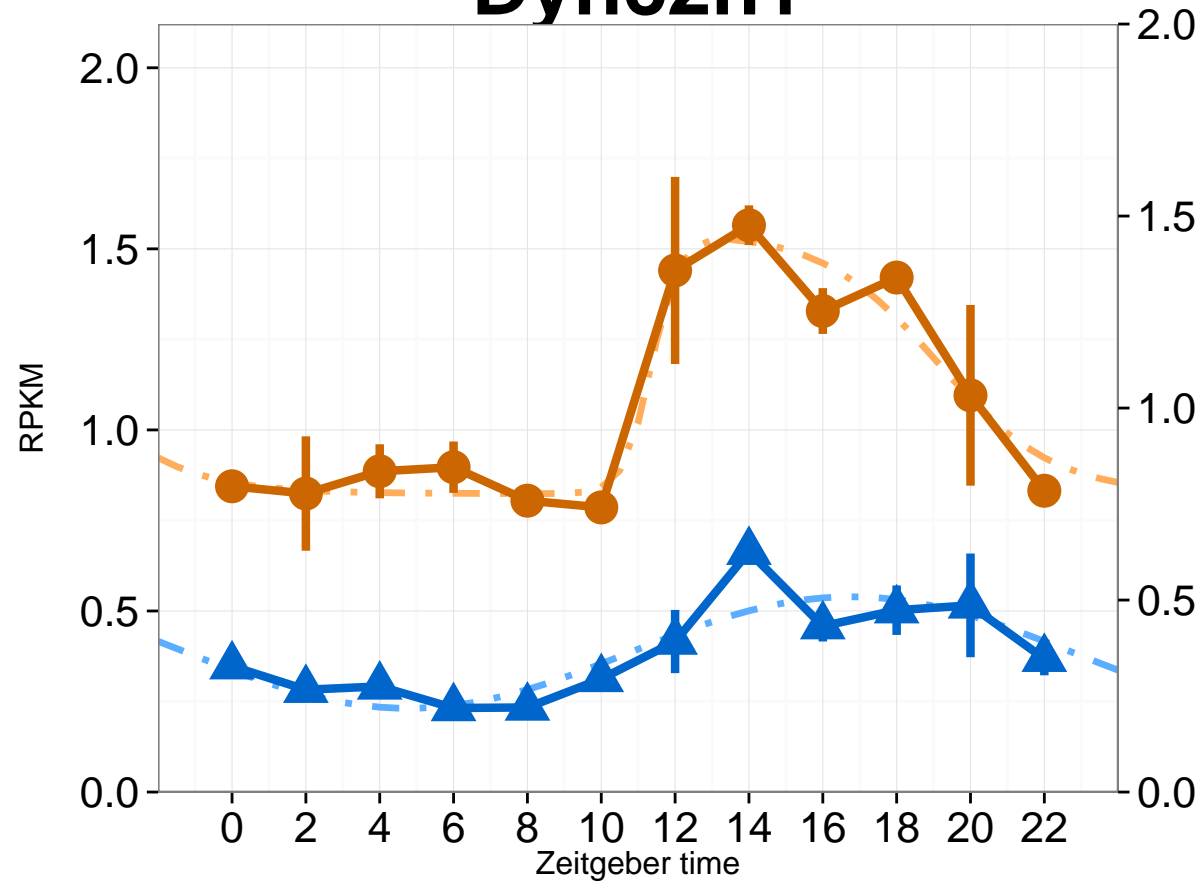

# Dync2h1

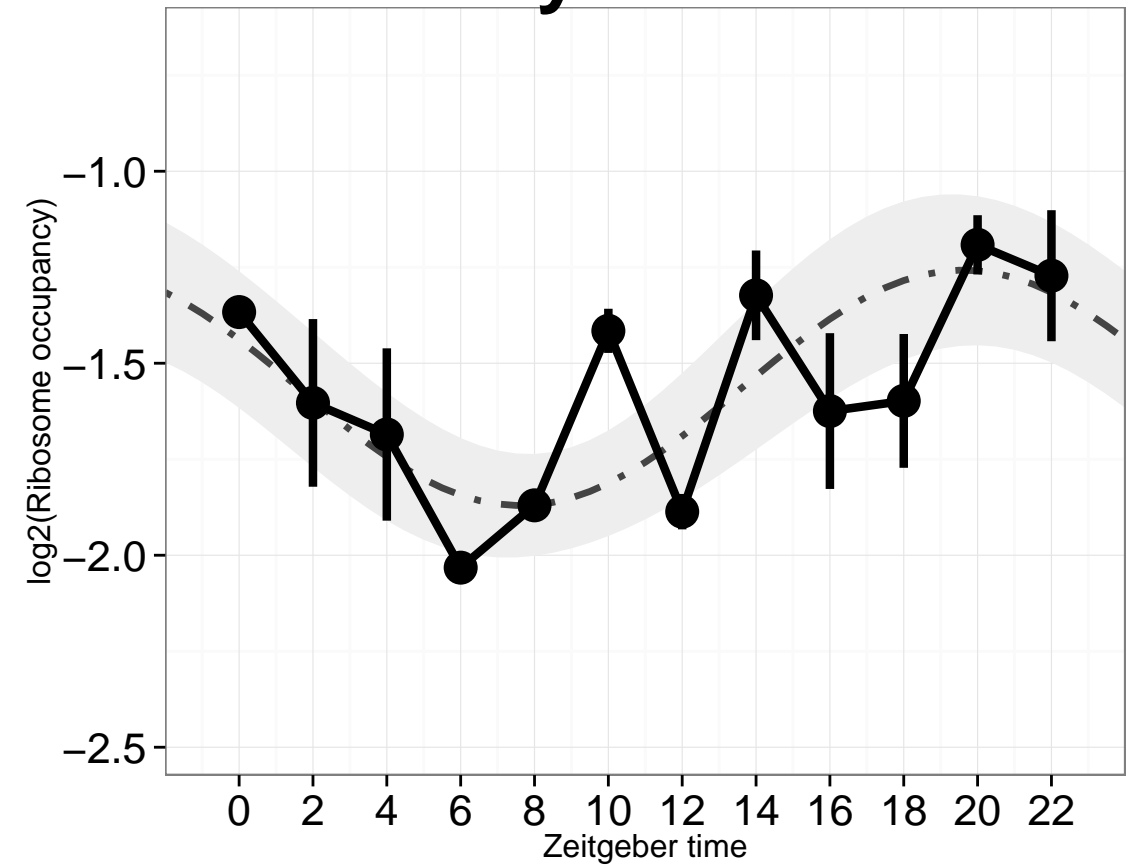

Supplement: SuppDataset_1.zip [file Dync2h1_set_D.pdf › Supplemental Dataset 1/D-mRNA_rhythm_translation_rhyth/Dync2h1_set_D.pdf]

# Dyrk1b

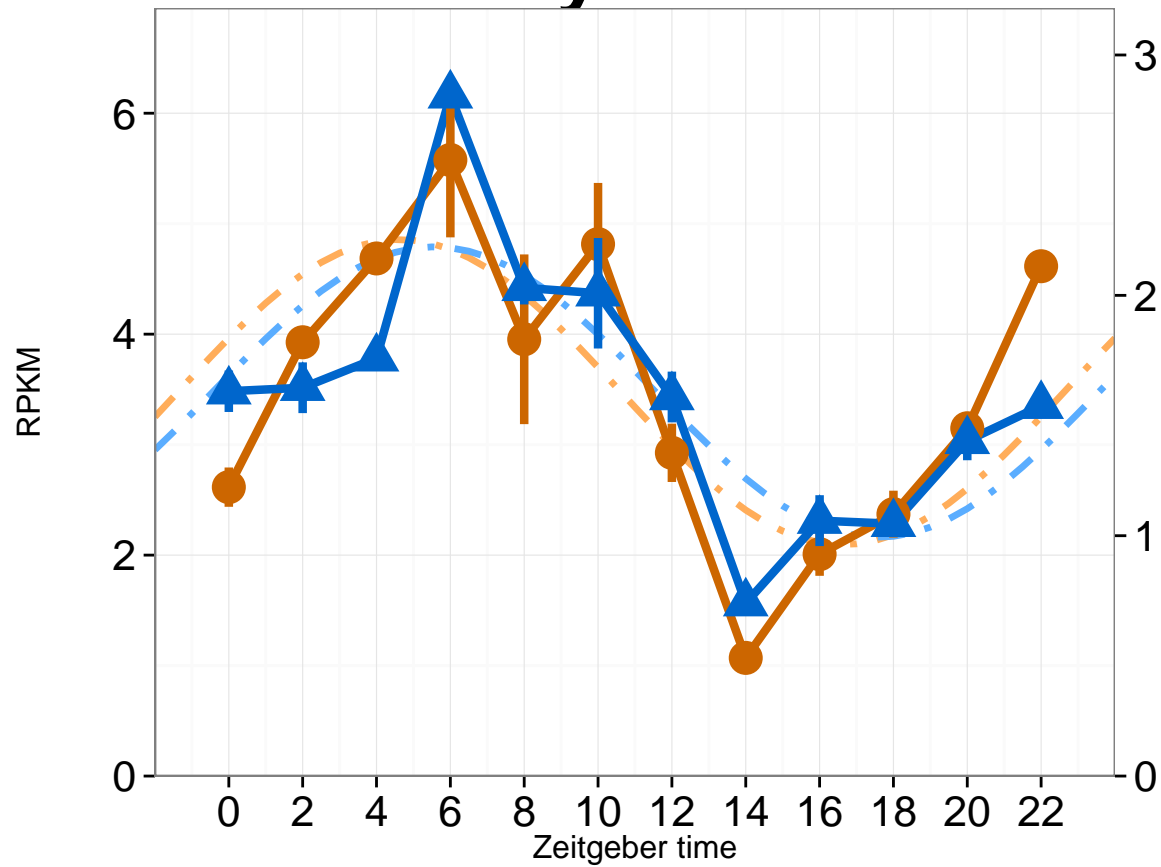

# Dyrk1b

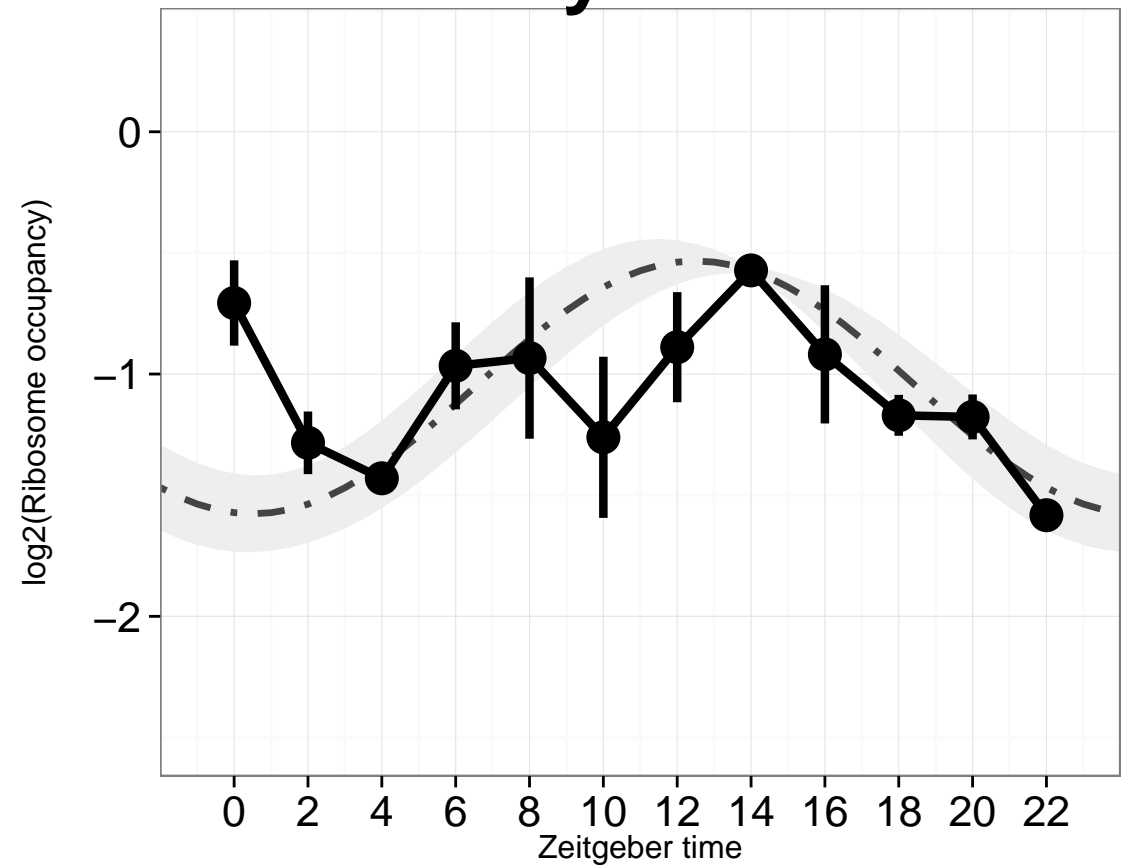

Supplement: SuppDataset_1.zip [file Dyrk1b_set_D.pdf › Supplemental Dataset 1/D-mRNA_rhythm_translation_rhyth/Dyrk1b_set_D.pdf]

## Eci2

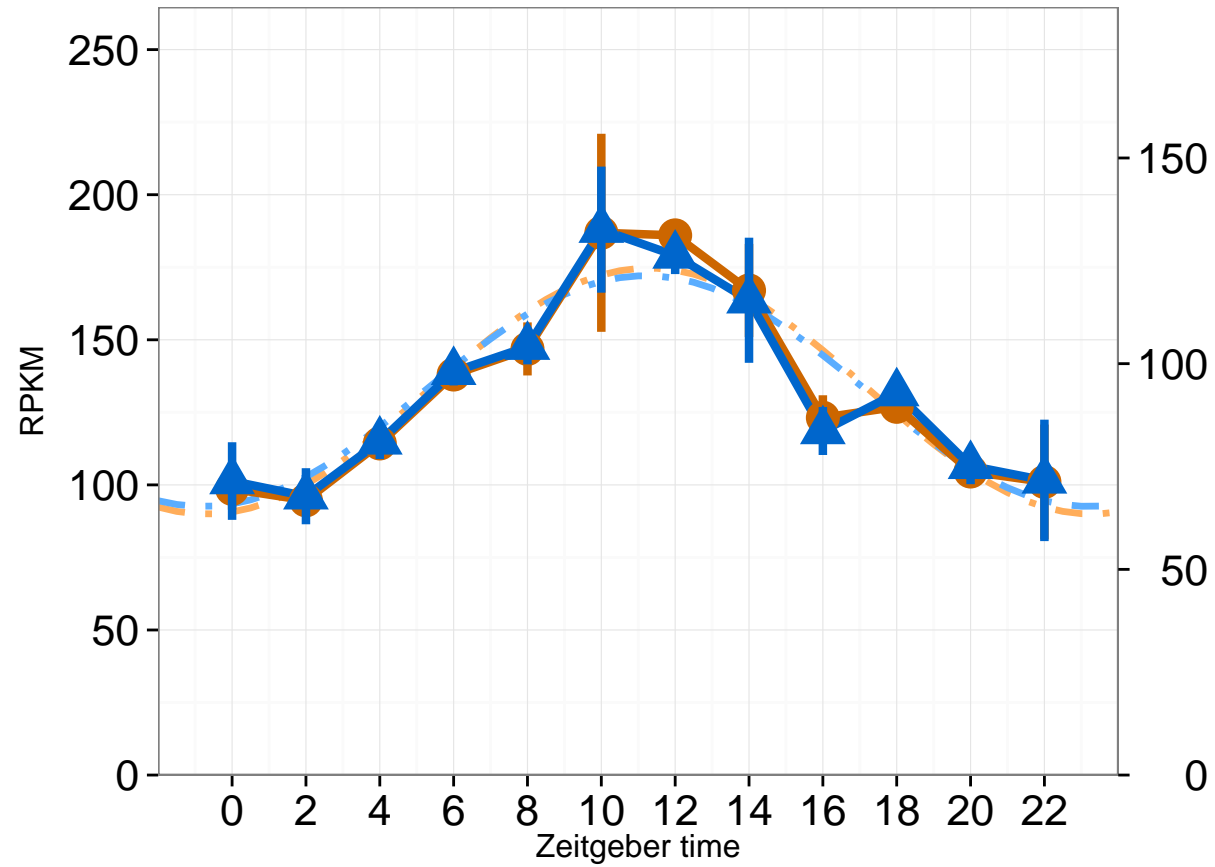

## Eci2

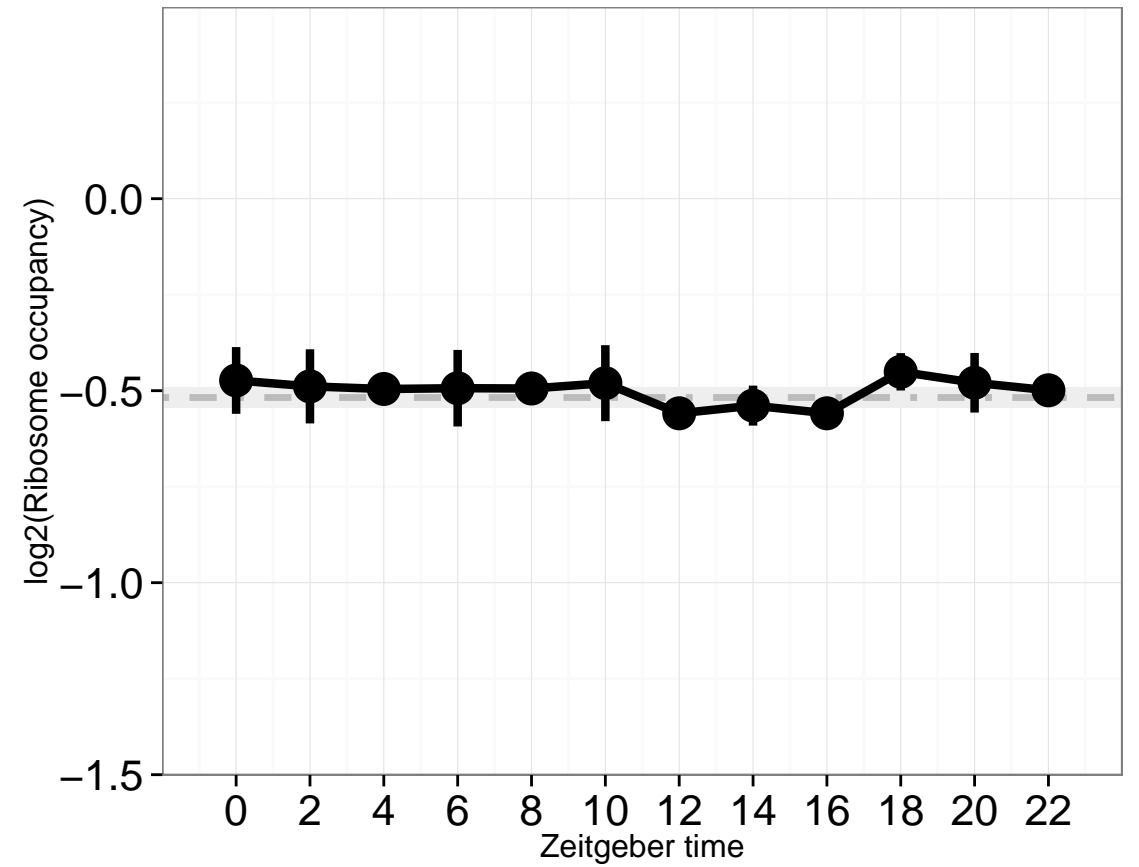

Supplement: SuppDataset_1.zip [file Eci2_set_D.pdf › Supplemental Dataset 1/D-mRNA_rhythm_translation_rhyth/Eci2_set_D.pdf]

# Eepd1

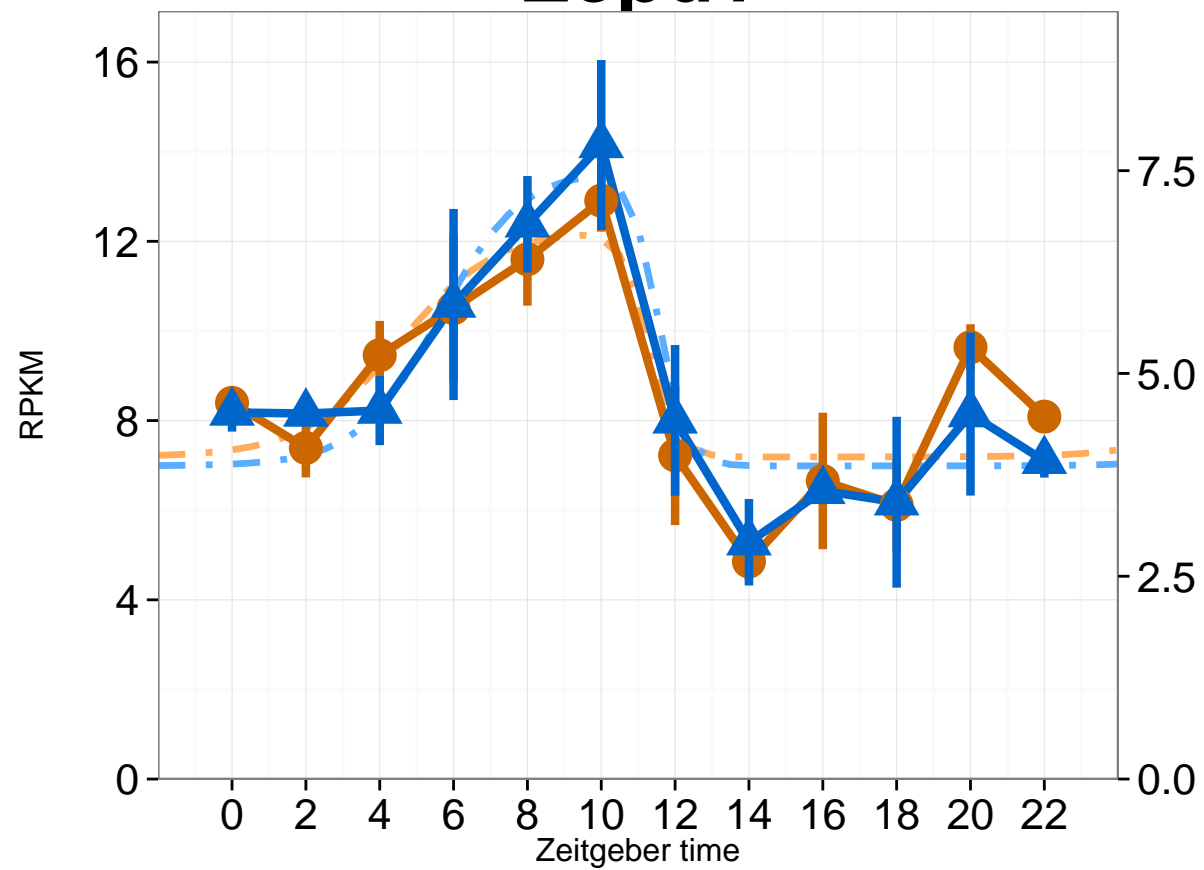

# Eepd1

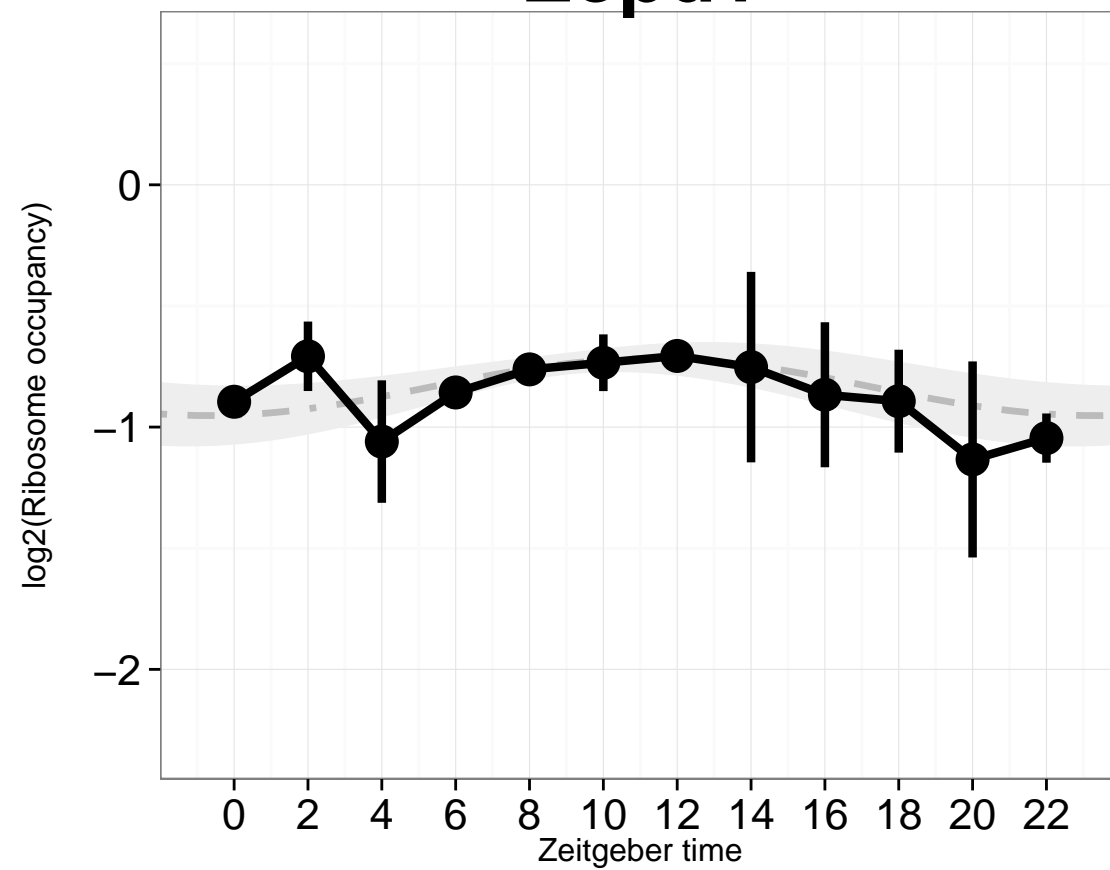

Supplement: SuppDataset_1.zip [file Eepd1_set_D.pdf › Supplemental Dataset 1/D-mRNA_rhythm_translation_rhyth/Eepd1_set_D.pdf]

## Efhd2

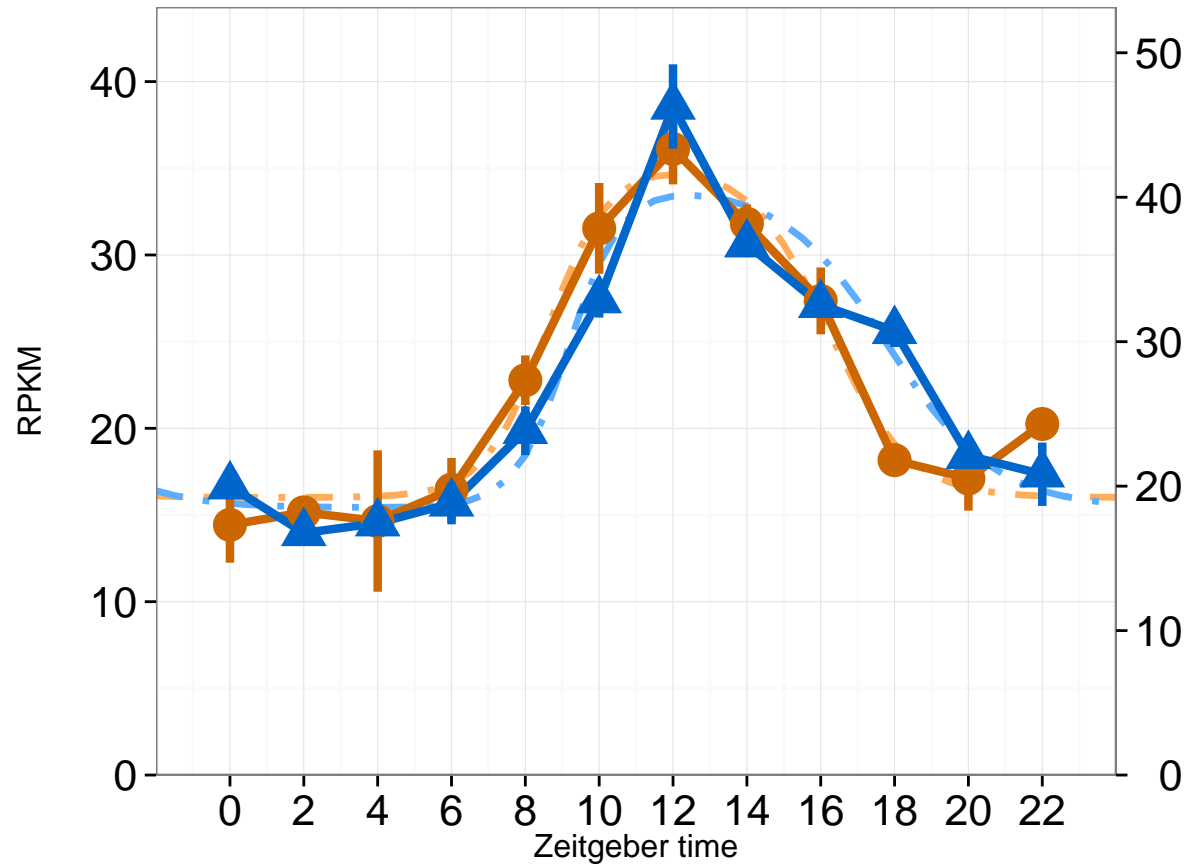

## Efhd2

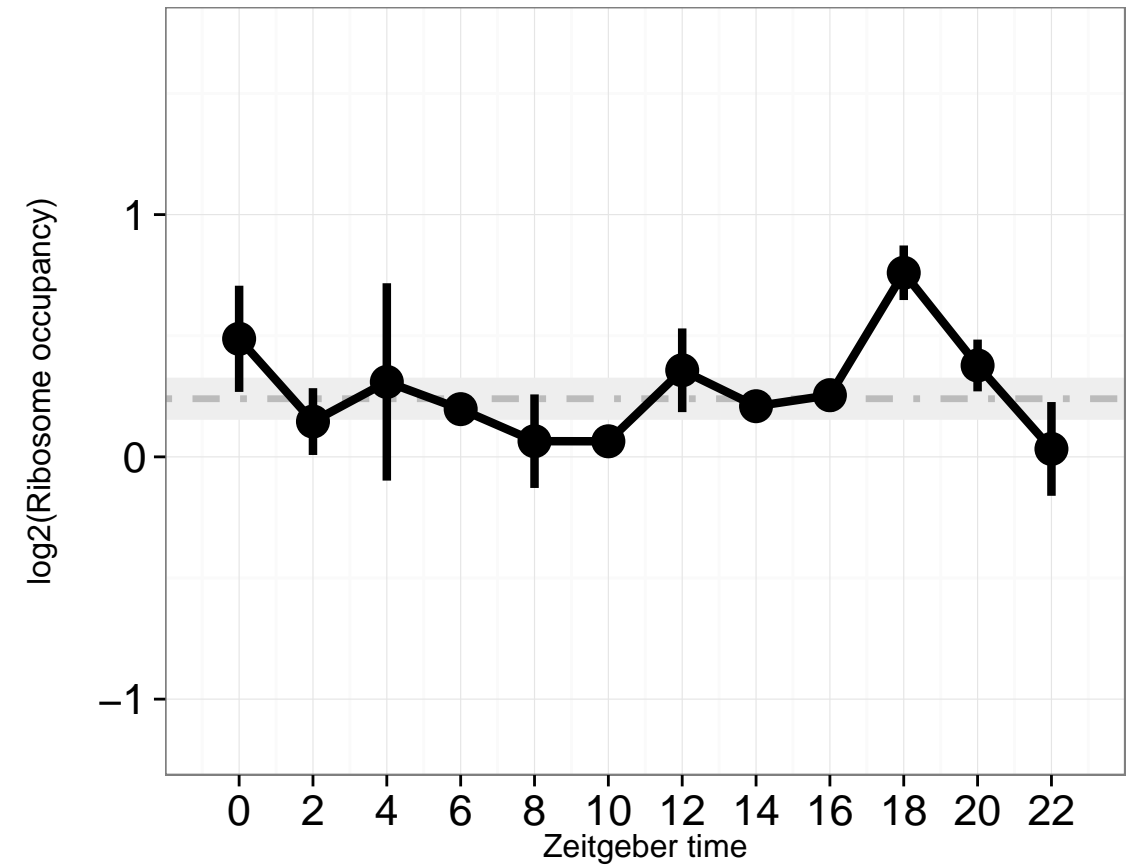

Supplement: SuppDataset_1.zip [file Efhd2_set_D.pdf › Supplemental Dataset 1/D-mRNA_rhythm_translation_rhyth/Efhd2_set_D.pdf]

## Efnb1

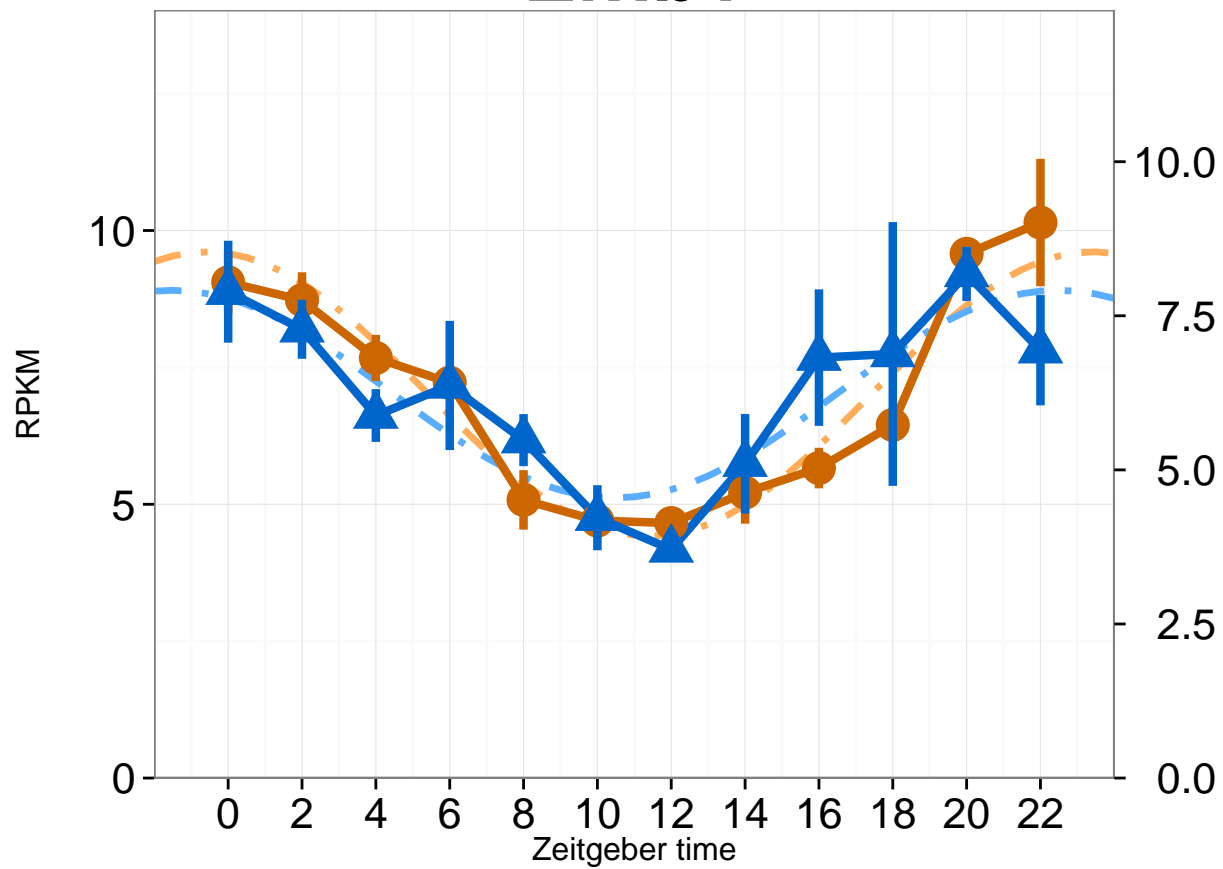

## Efnb1

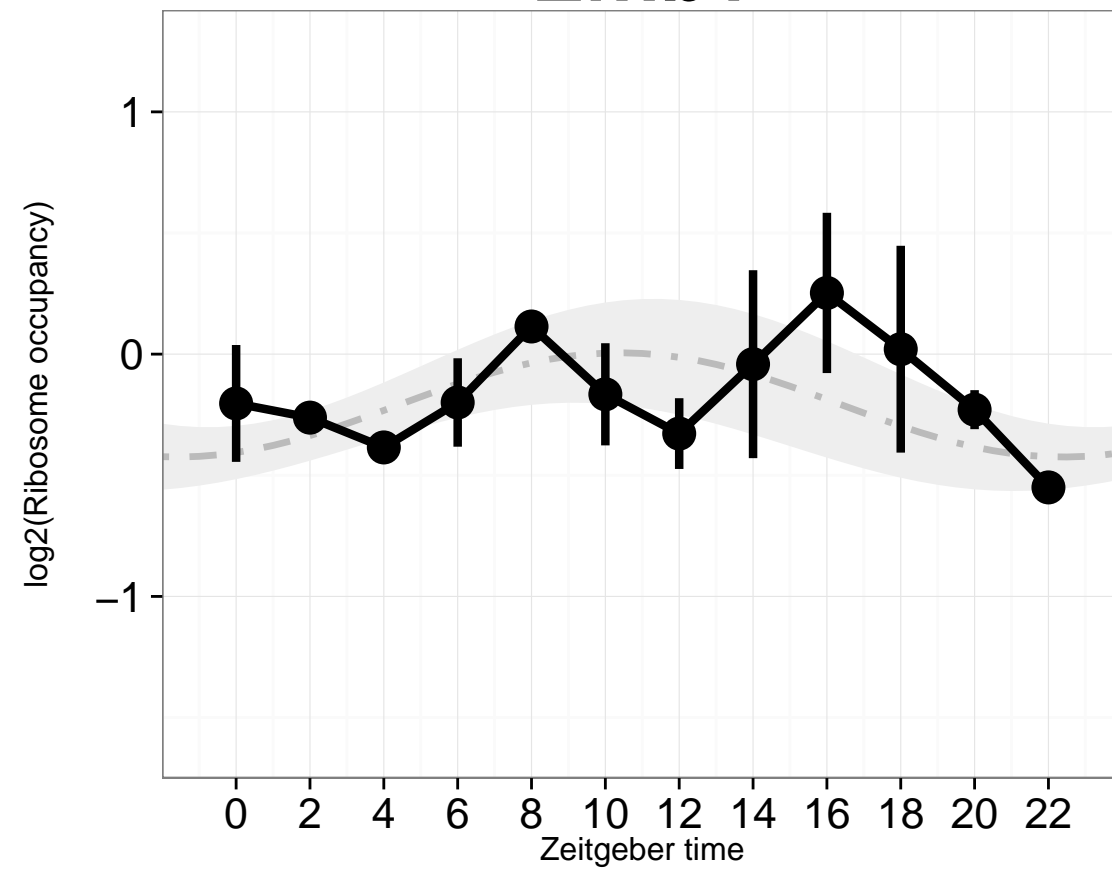

Supplement: SuppDataset_1.zip [file Efnb1_set_D.pdf › Supplemental Dataset 1/D-mRNA_rhythm_translation_rhyth/Efnb1_set_D.pdf]

## Egr1

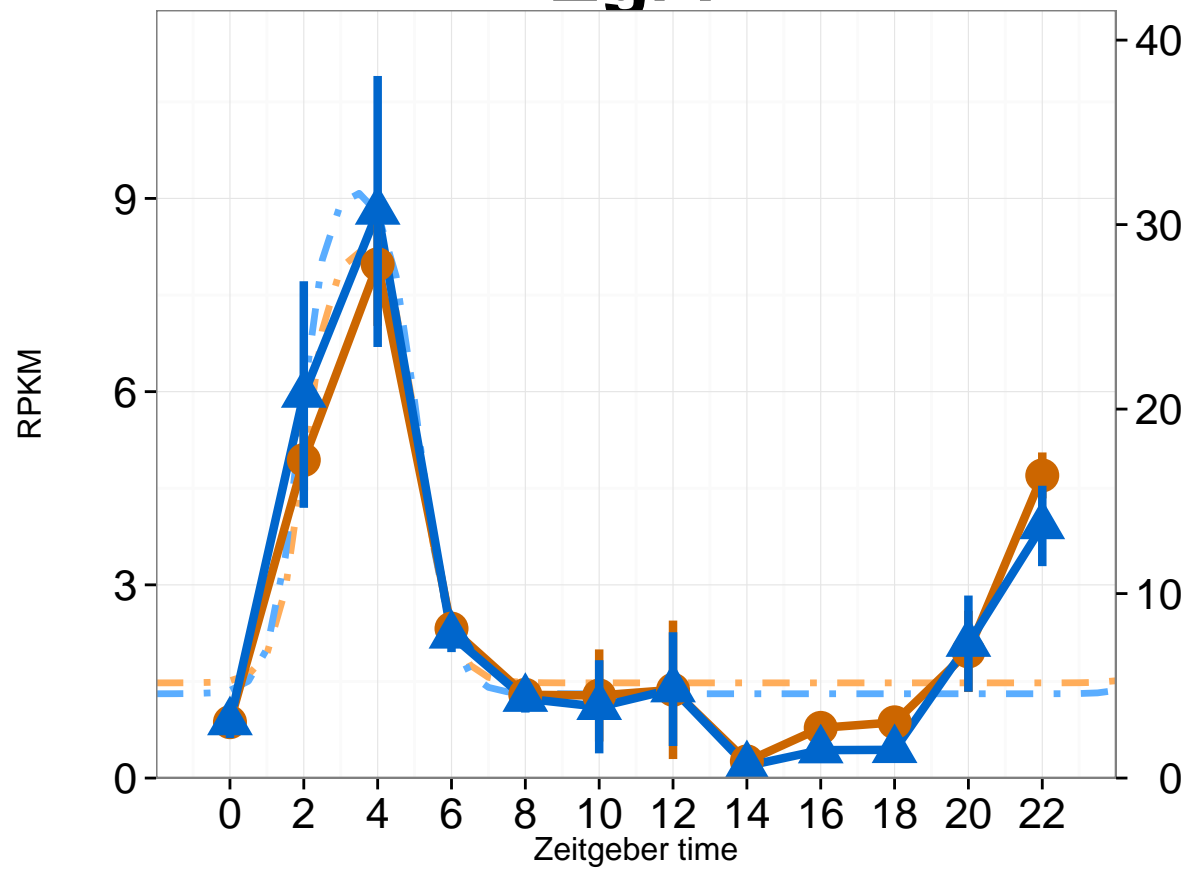

## Egr1

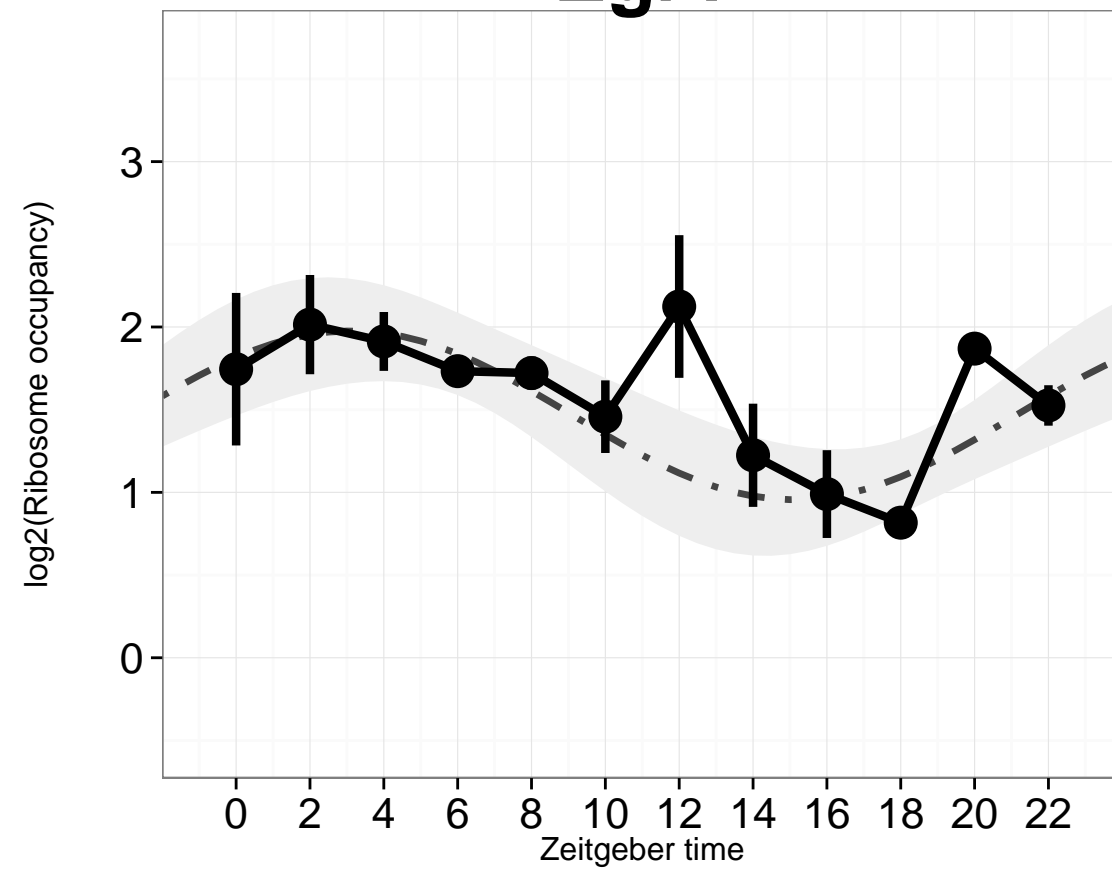

Supplement: SuppDataset_1.zip [file Egr1_set_D.pdf › Supplemental Dataset 1/D-mRNA_rhythm_translation_rhyth/Egr1_set_D.pdf]

## Eif2a

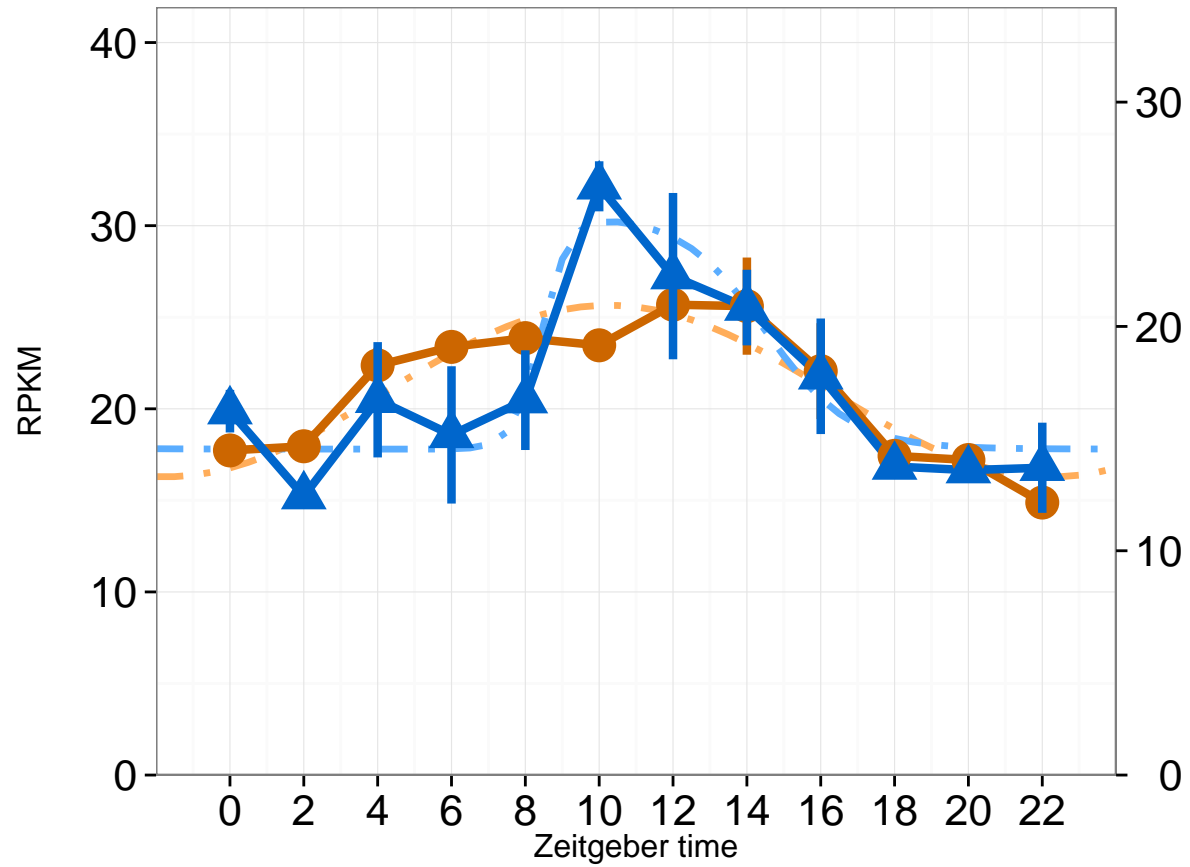

## Eif2a

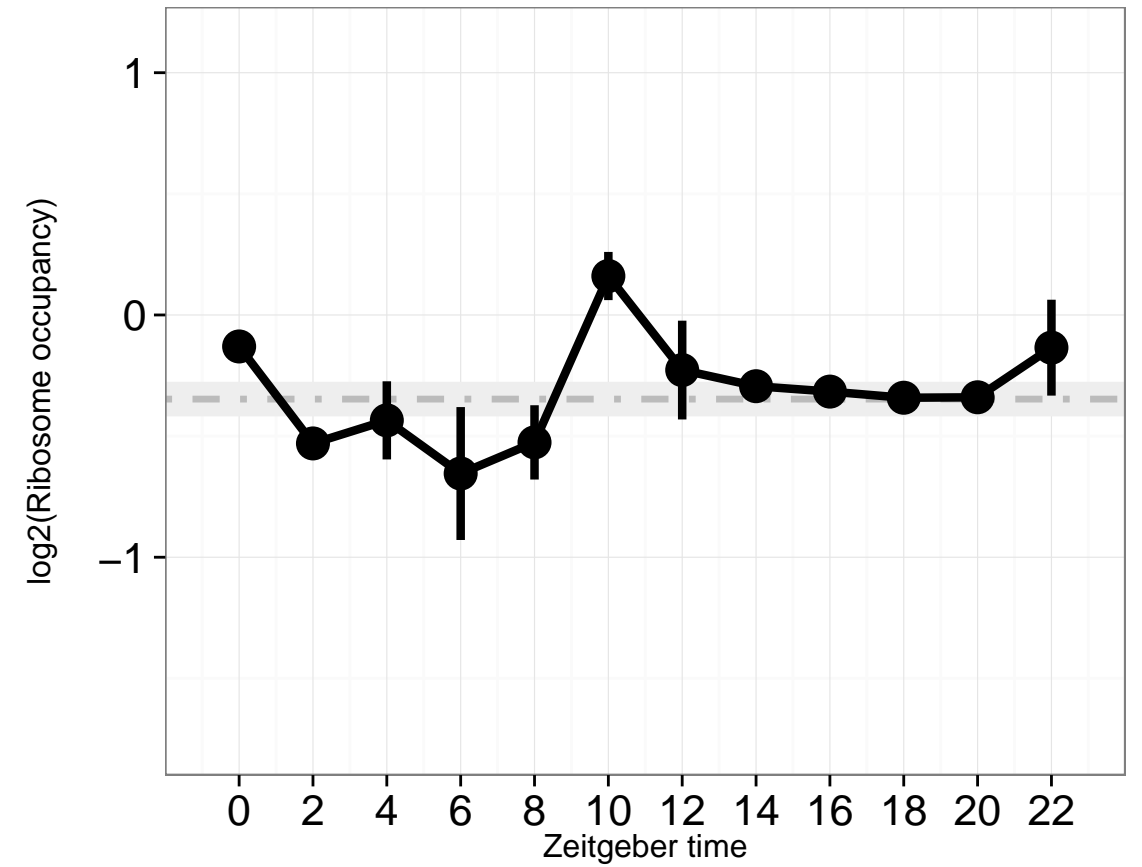

Supplement: SuppDataset_1.zip [file Eif2a_set_D.pdf › Supplemental Dataset 1/D-mRNA_rhythm_translation_rhyth/Eif2a_set_D.pdf]

# Eif4ebp3

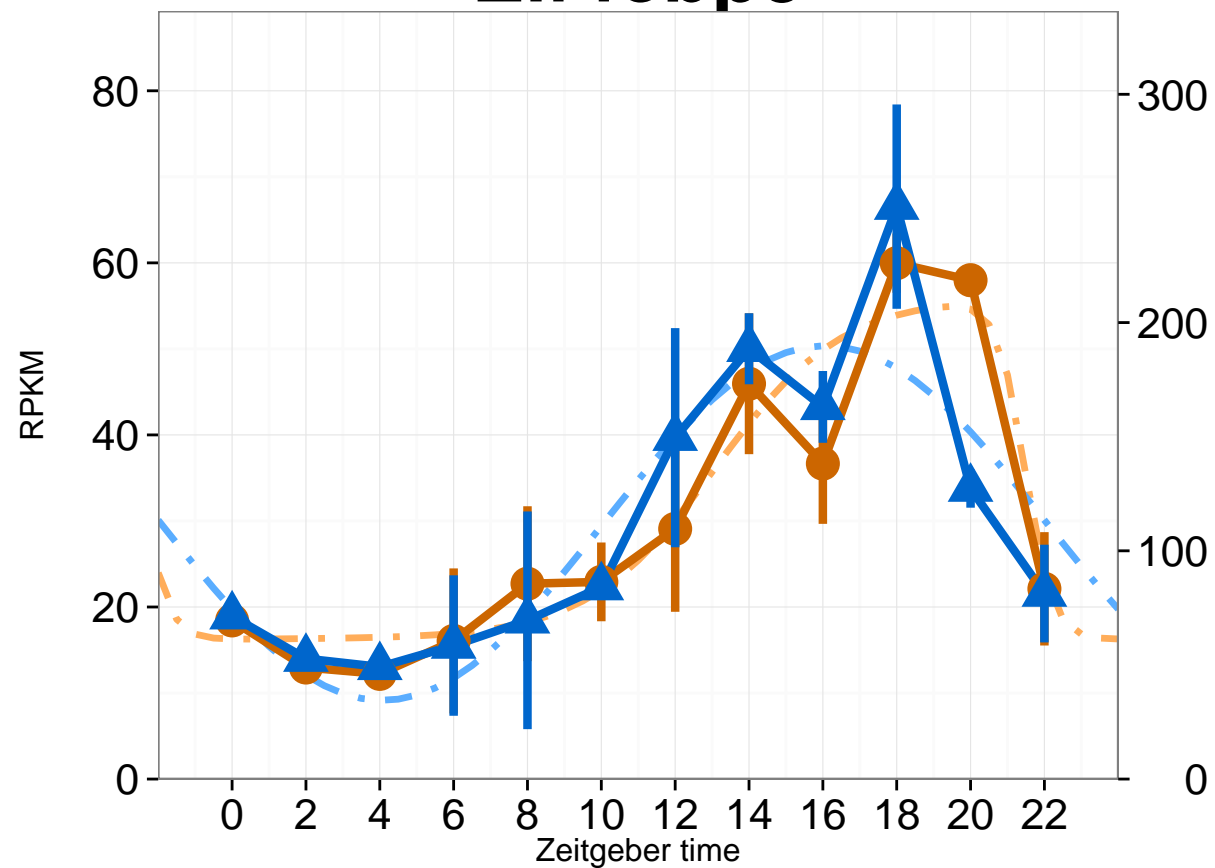

# Eif4ebp3

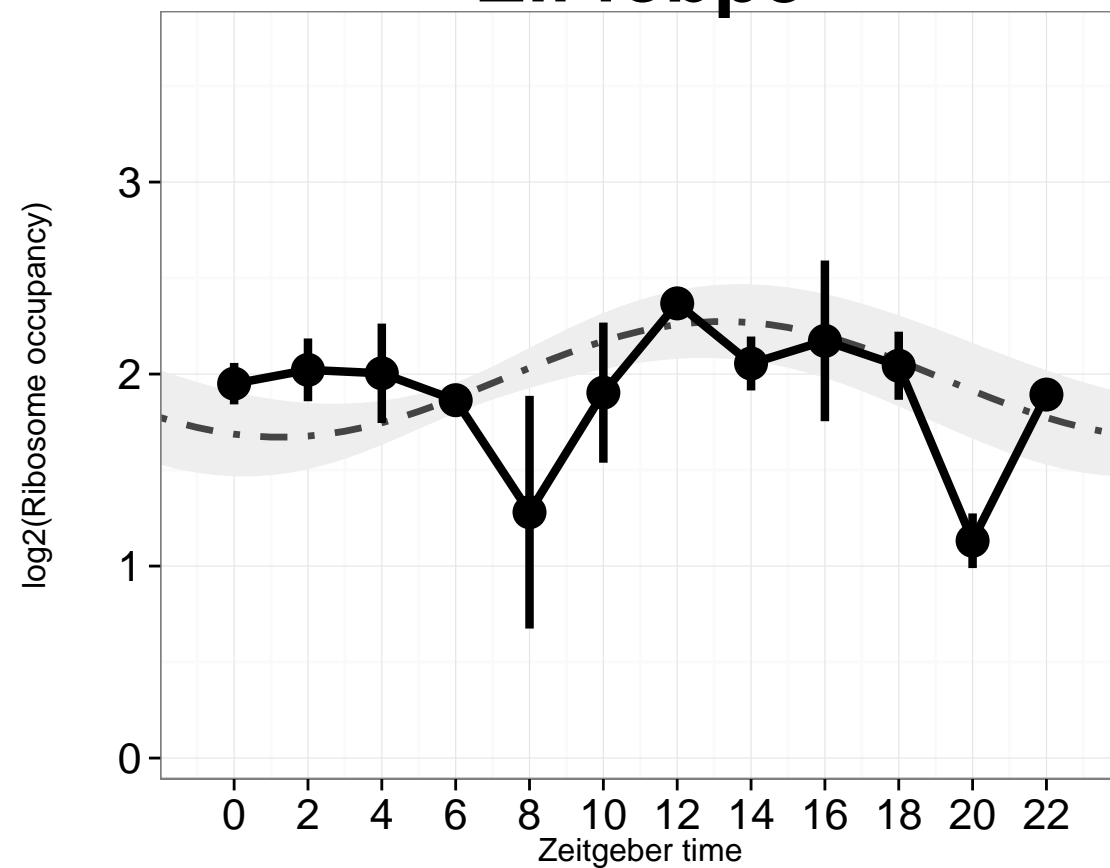

Supplement: SuppDataset_1.zip [file Eif4ebp3_set_D.pdf › Supplemental Dataset 1/D-mRNA_rhythm_translation_rhyth/Eif4ebp3_set_D.pdf]

## Elovl1

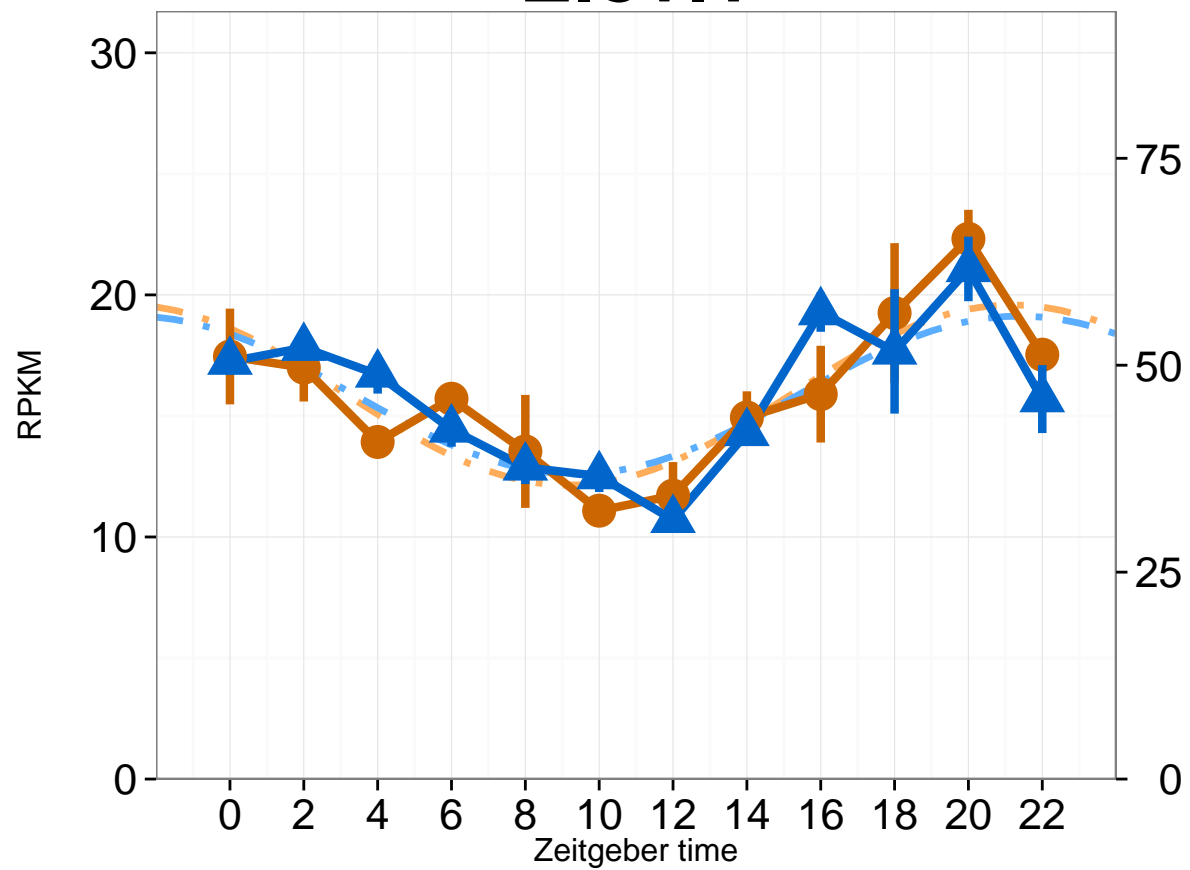

## Elovl1

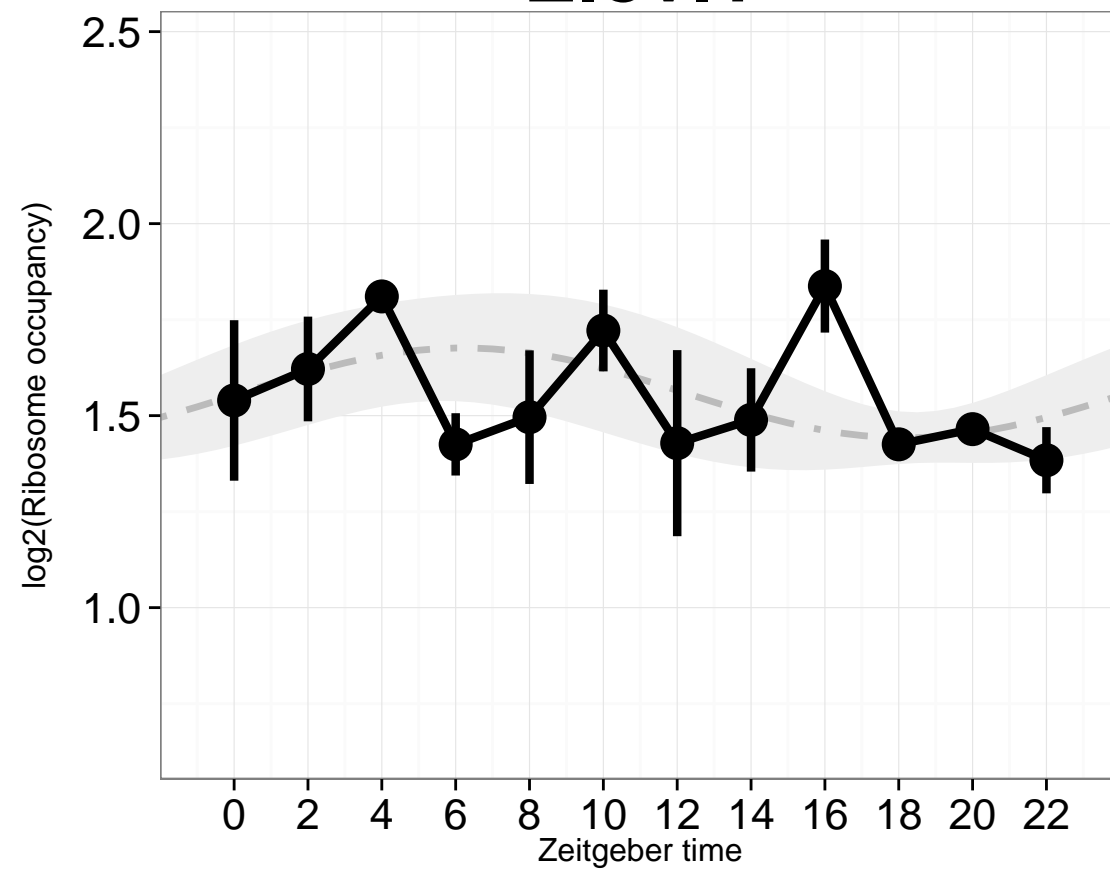

Supplement: SuppDataset_1.zip [file Elovl1_set_D.pdf › Supplemental Dataset 1/D-mRNA_rhythm_translation_rhyth/Elovl1_set_D.pdf]

## Elovl3

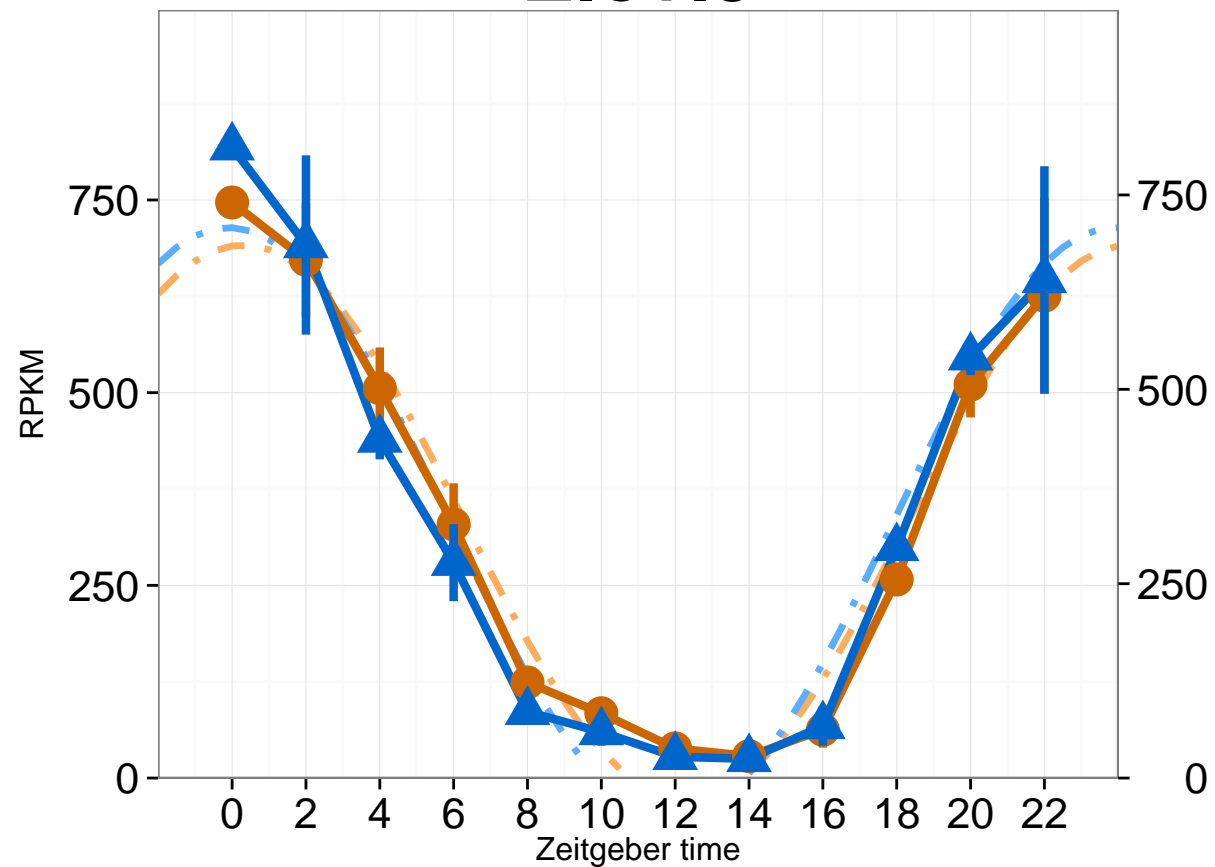

## Elovl3

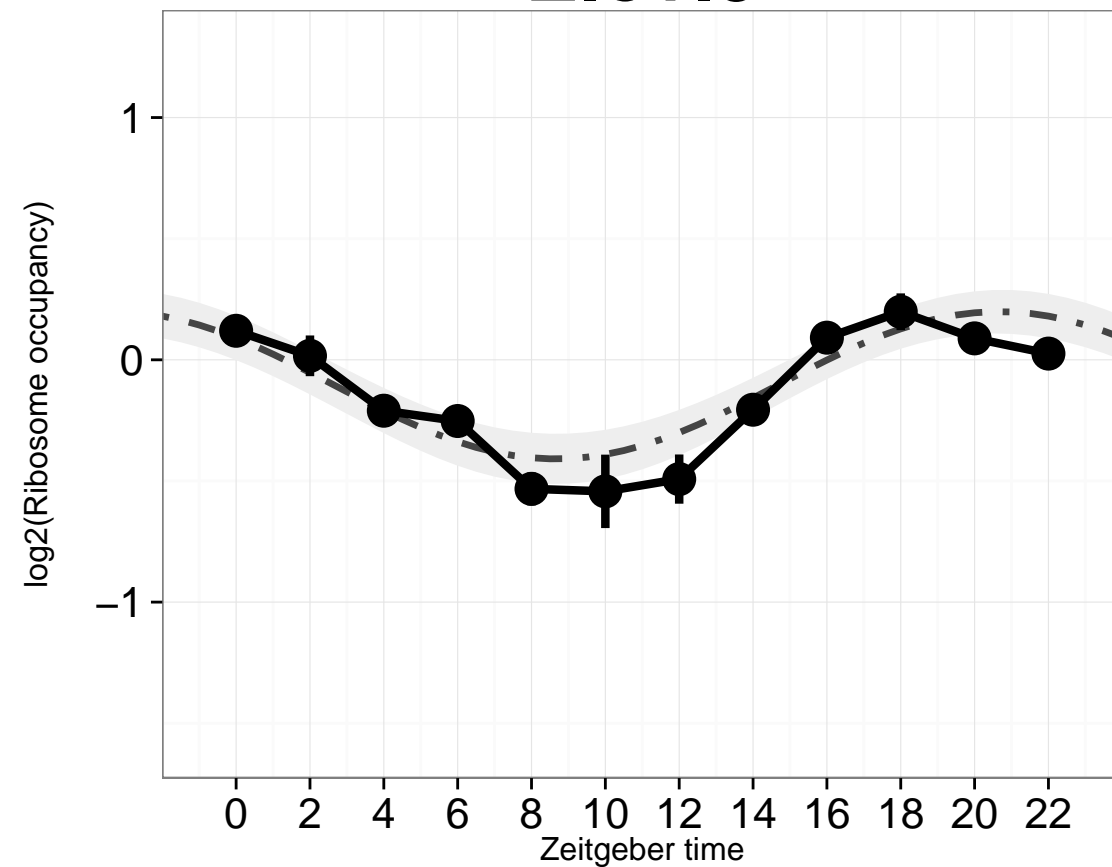

Supplement: SuppDataset_1.zip [file Elovl3_set_D.pdf › Supplemental Dataset 1/D-mRNA_rhythm_translation_rhyth/Elovl3_set_D.pdf]

## Elovl5

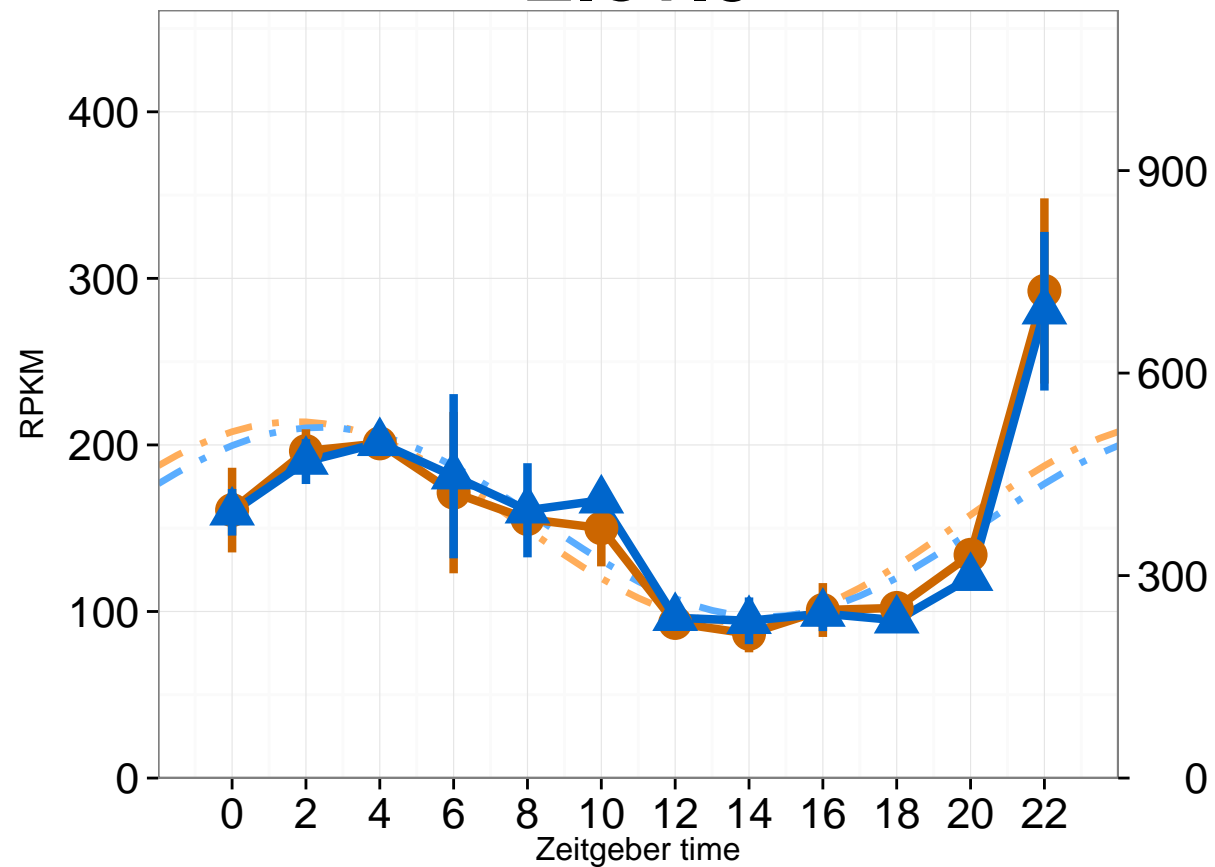

## Elovl5

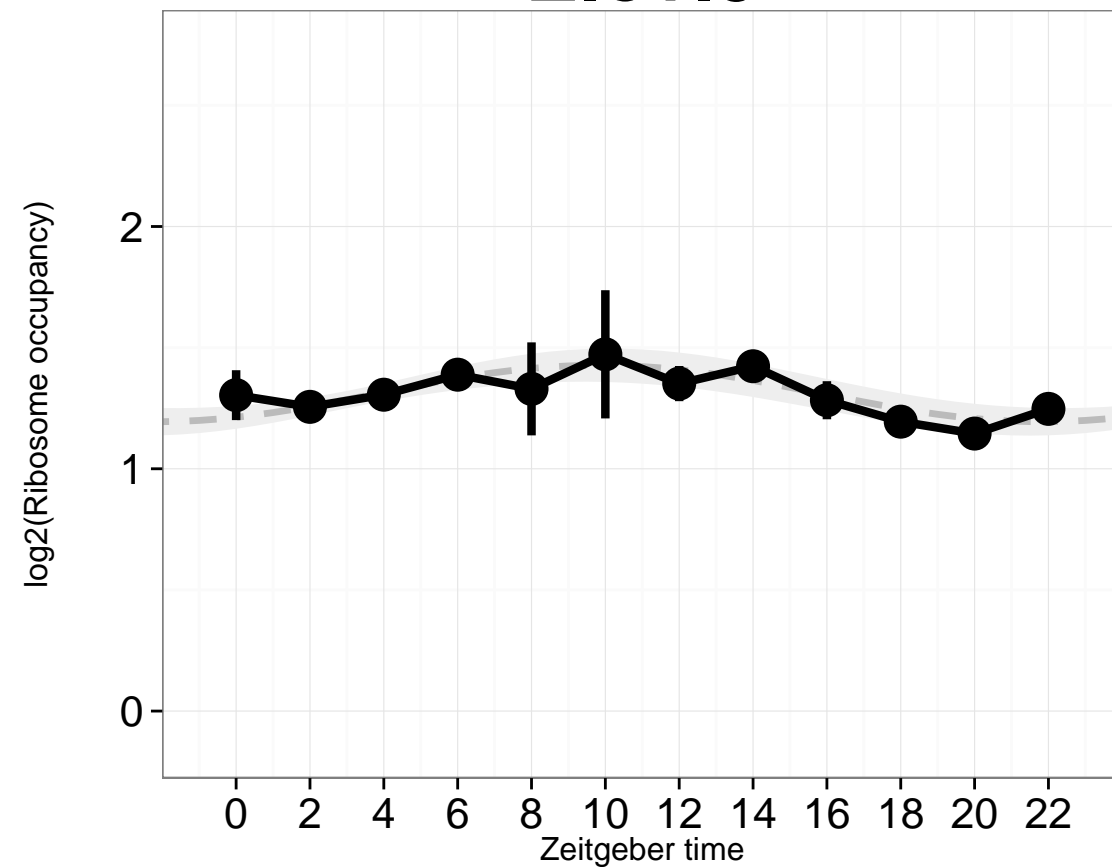

Supplement: SuppDataset_1.zip [file Elovl5_set_D.pdf › Supplemental Dataset 1/D-mRNA_rhythm_translation_rhyth/Elovl5_set_D.pdf]

## Elovl6

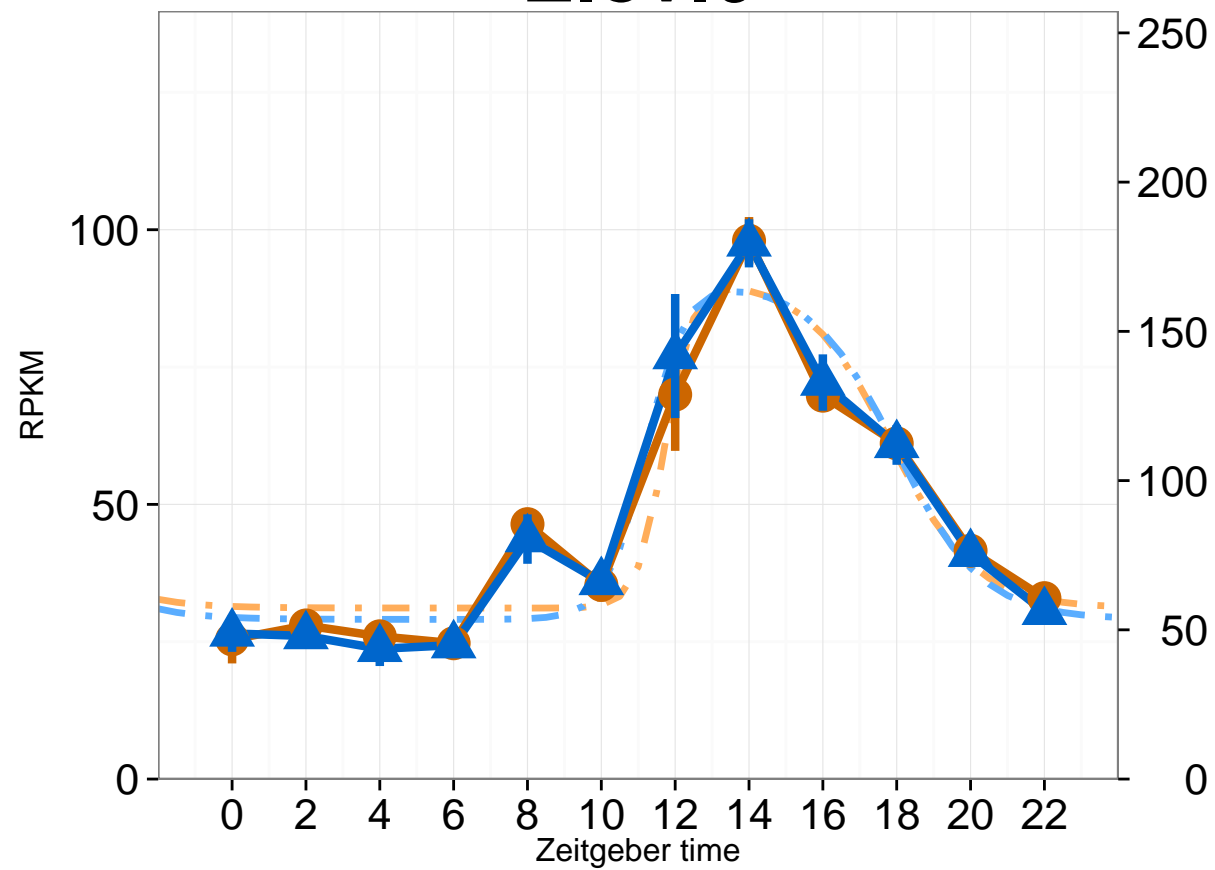

## Elovl6

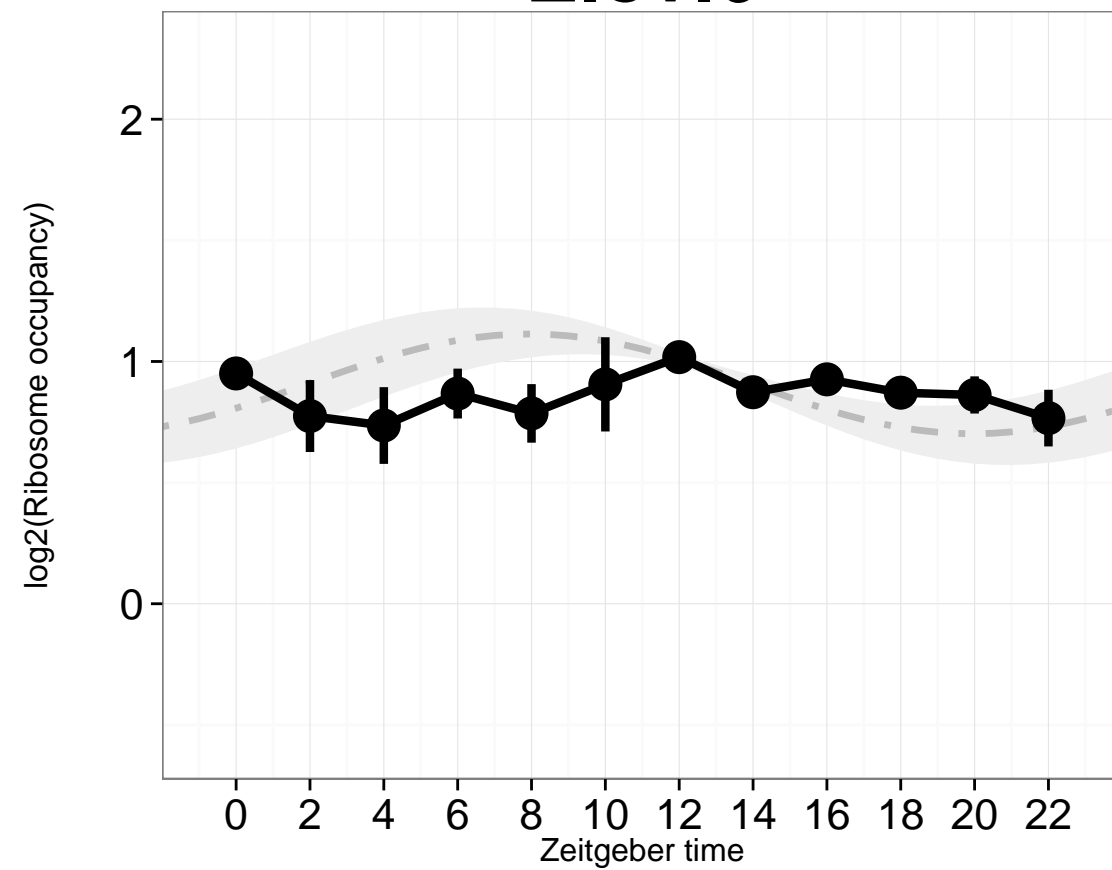

Supplement: SuppDataset_1.zip [file Elovl6_set_D.pdf › Supplemental Dataset 1/D-mRNA_rhythm_translation_rhyth/Elovl6_set_D.pdf]

## Elp4

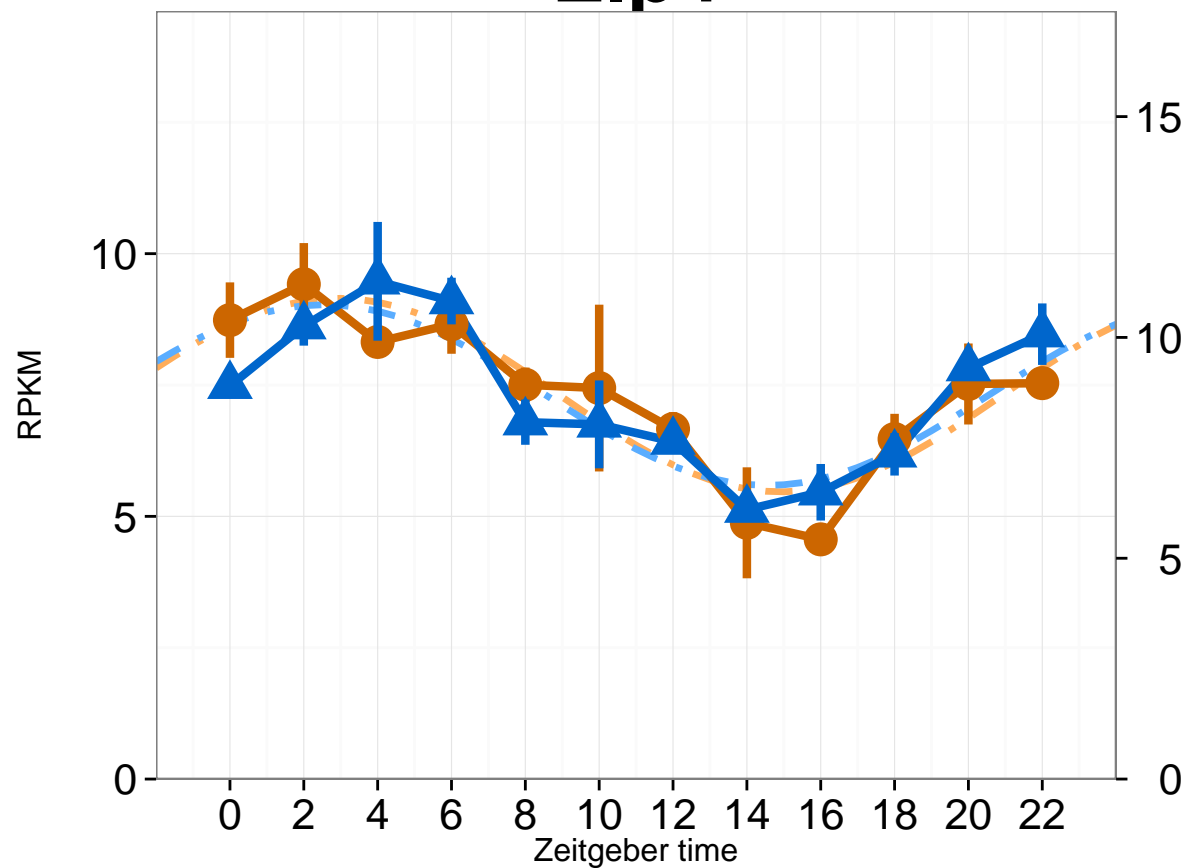

## Elp4

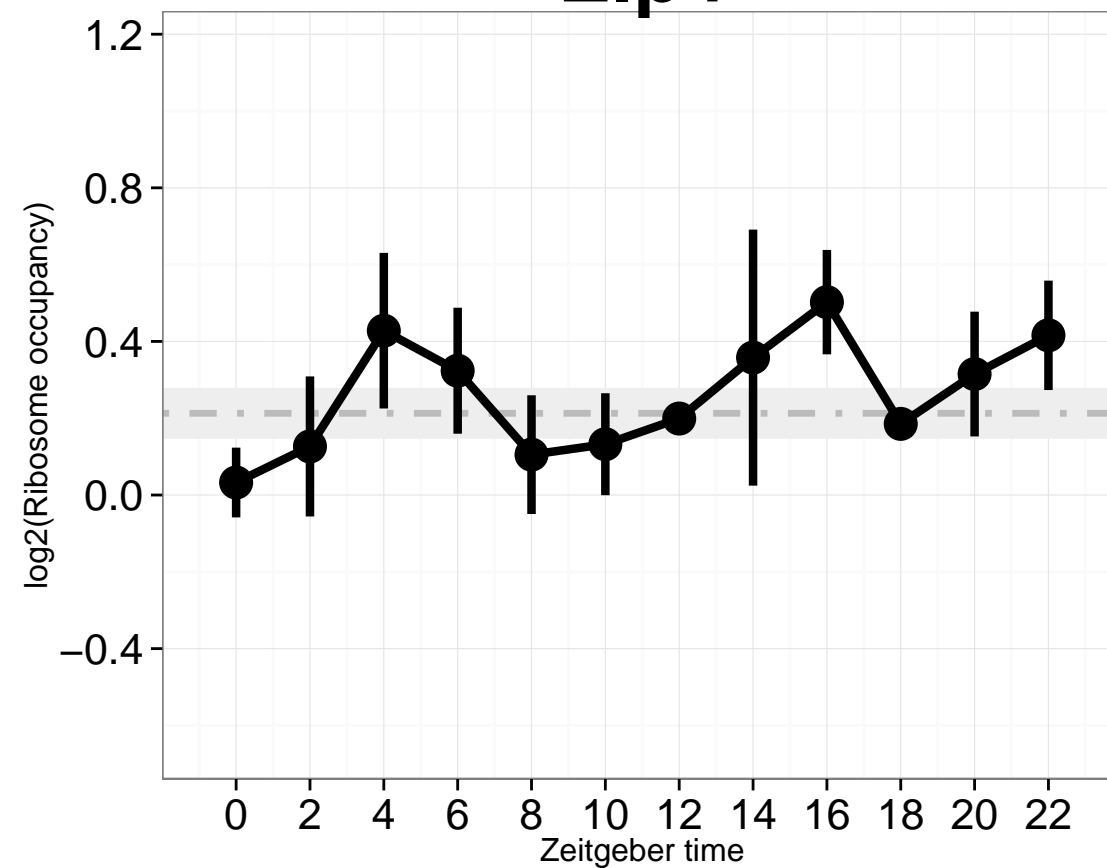

Supplement: SuppDataset_1.zip [file Elp4_set_D.pdf › Supplemental Dataset 1/D-mRNA_rhythm_translation_rhyth/Elp4_set_D.pdf]

## Enpp2

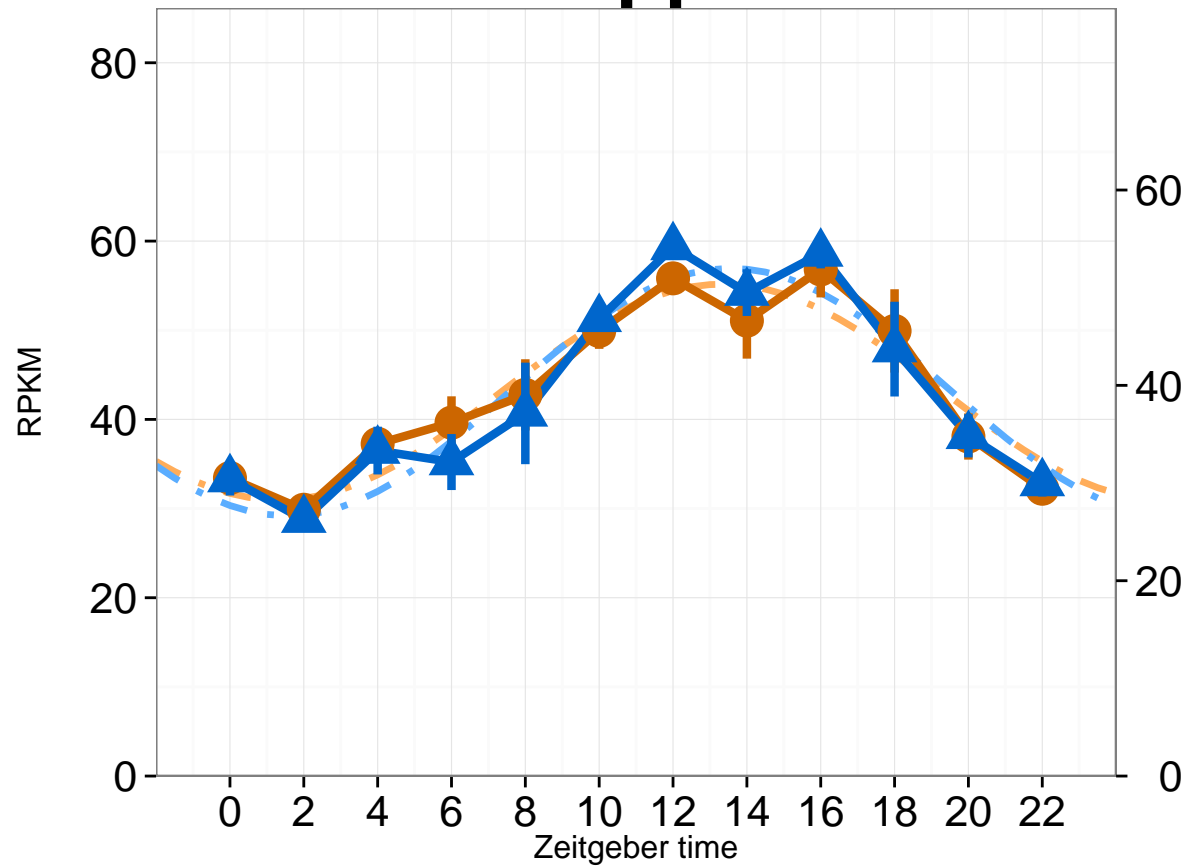

## Enpp2

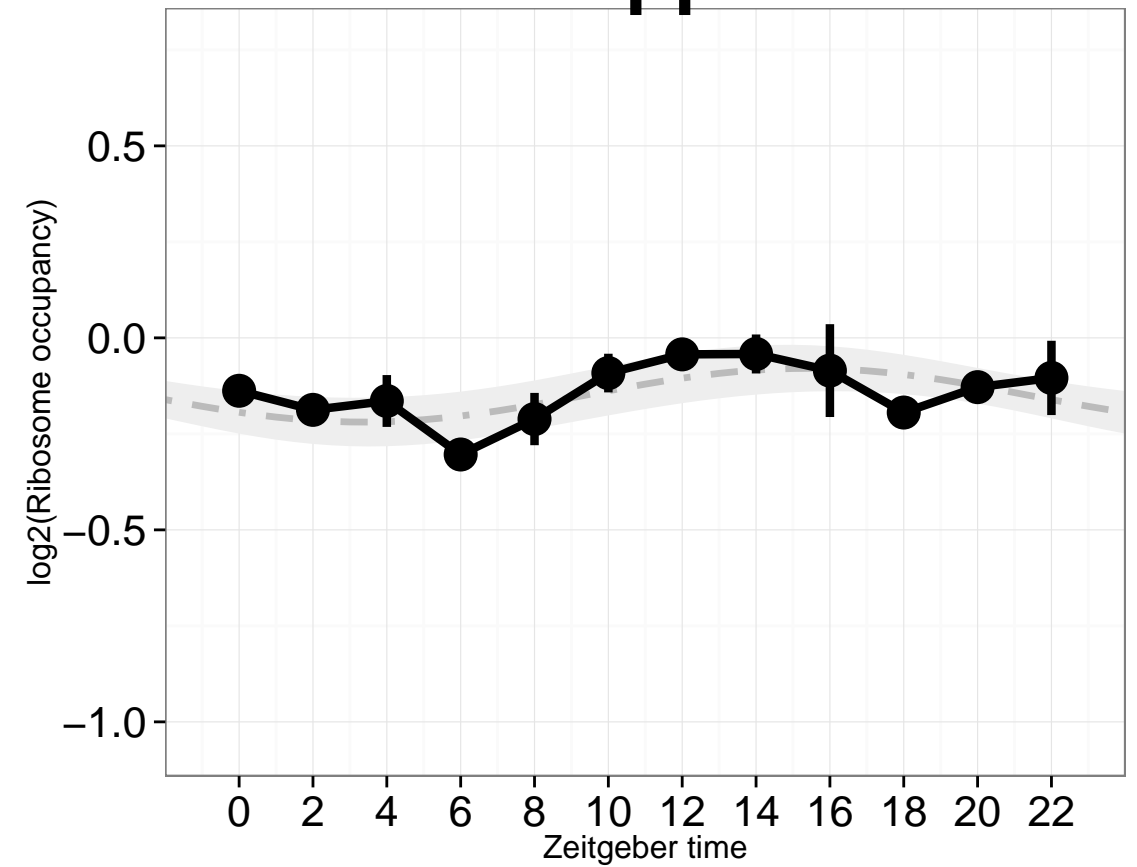

Supplement: SuppDataset_1.zip [file Enpp2_set_D.pdf › Supplemental Dataset 1/D-mRNA_rhythm_translation_rhyth/Enpp2_set_D.pdf]

## Entpd6

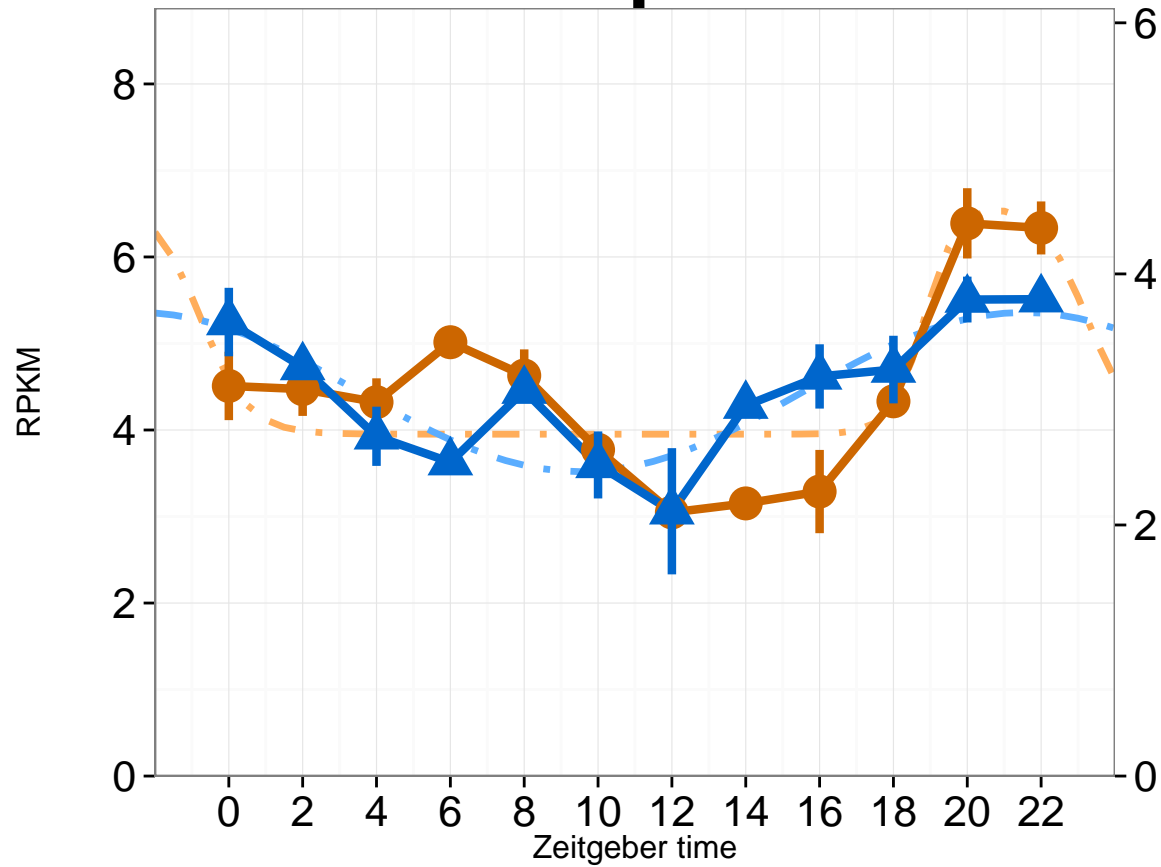

## Entpd6

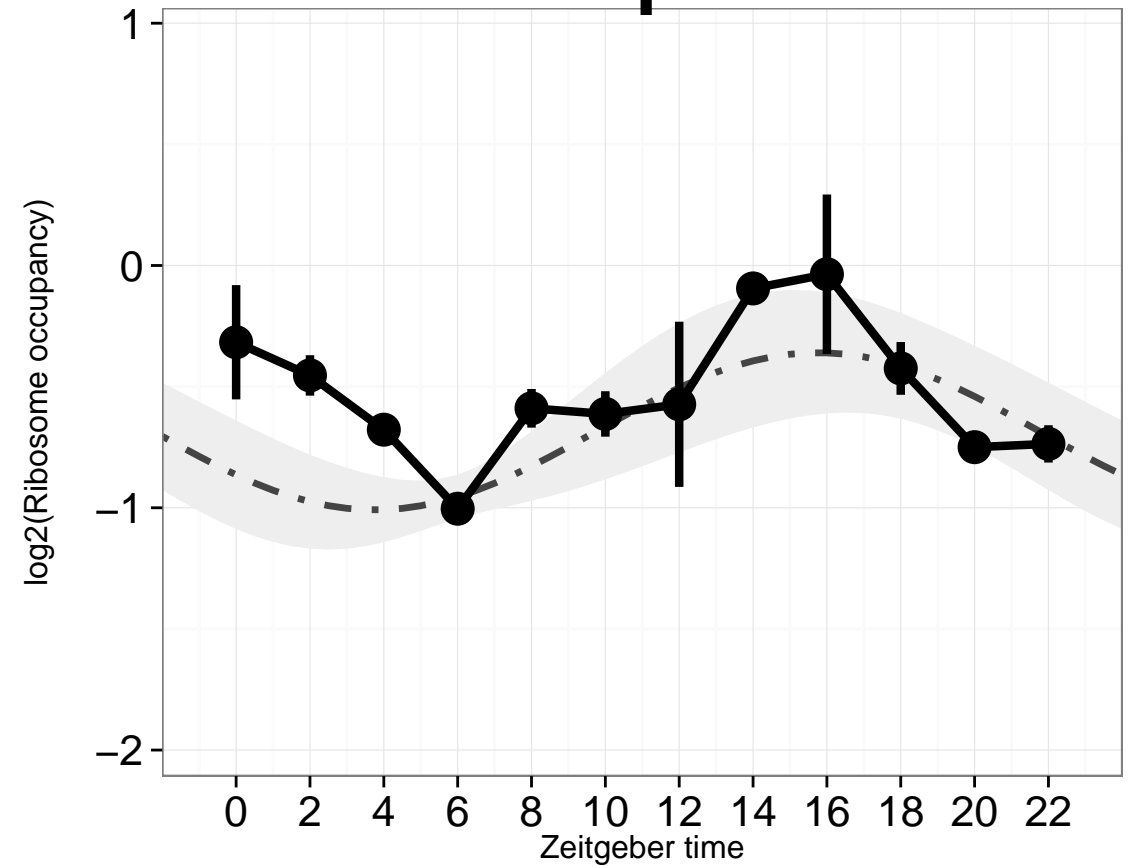

Supplement: SuppDataset_1.zip [file Entpd6_set_D.pdf › Supplemental Dataset 1/D-mRNA_rhythm_translation_rhyth/Entpd6_set_D.pdf]

# Epm2aip1

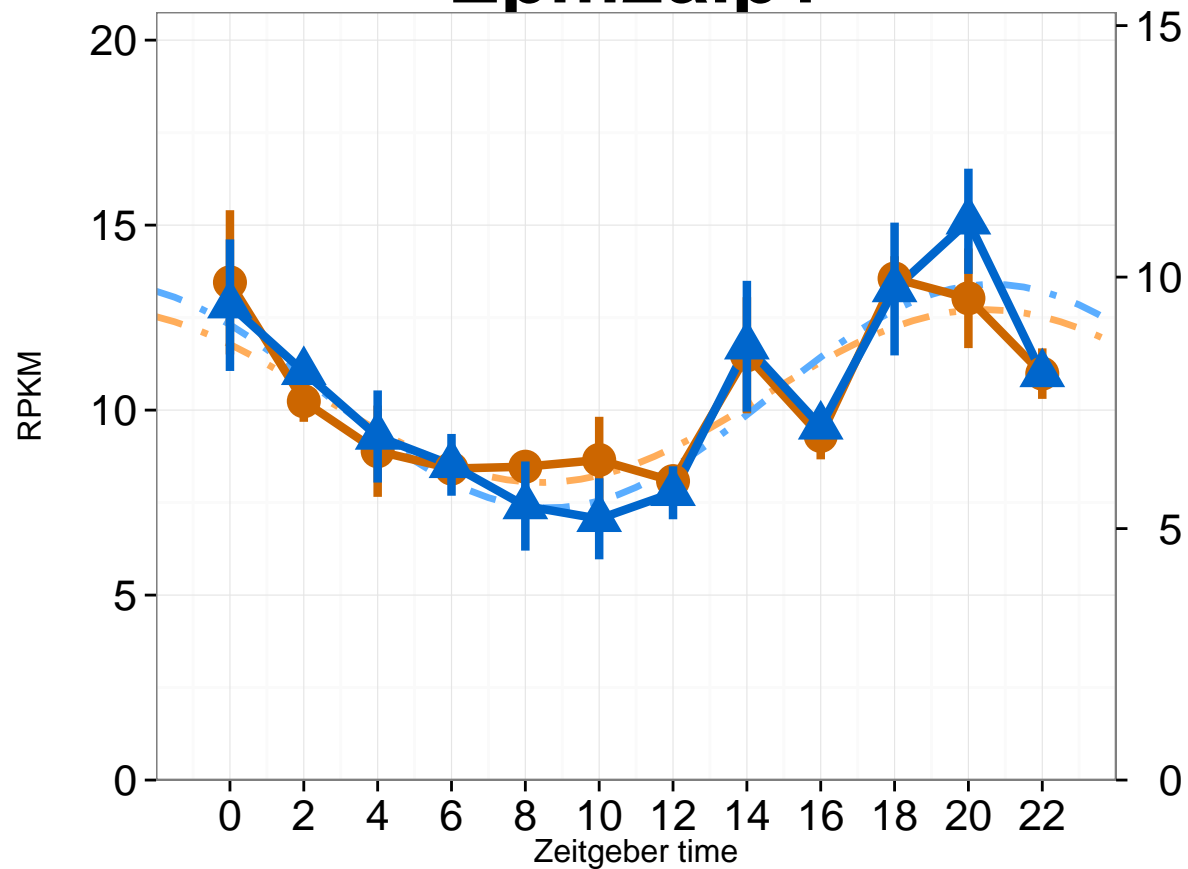

# Epm2aip1

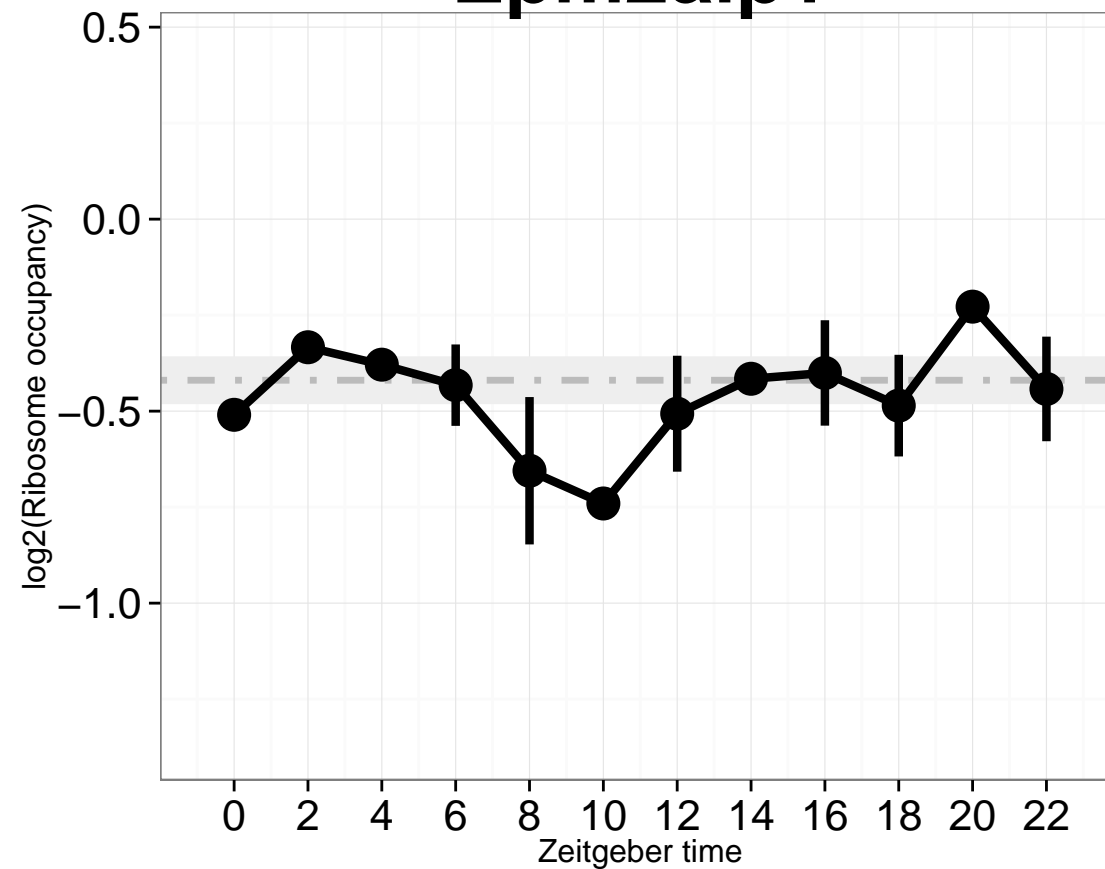

Supplement: SuppDataset_1.zip [file Epm2aip1_set_D.pdf › Supplemental Dataset 1/D-mRNA_rhythm_translation_rhyth/Epm2aip1_set_D.pdf]

# Eps8l2

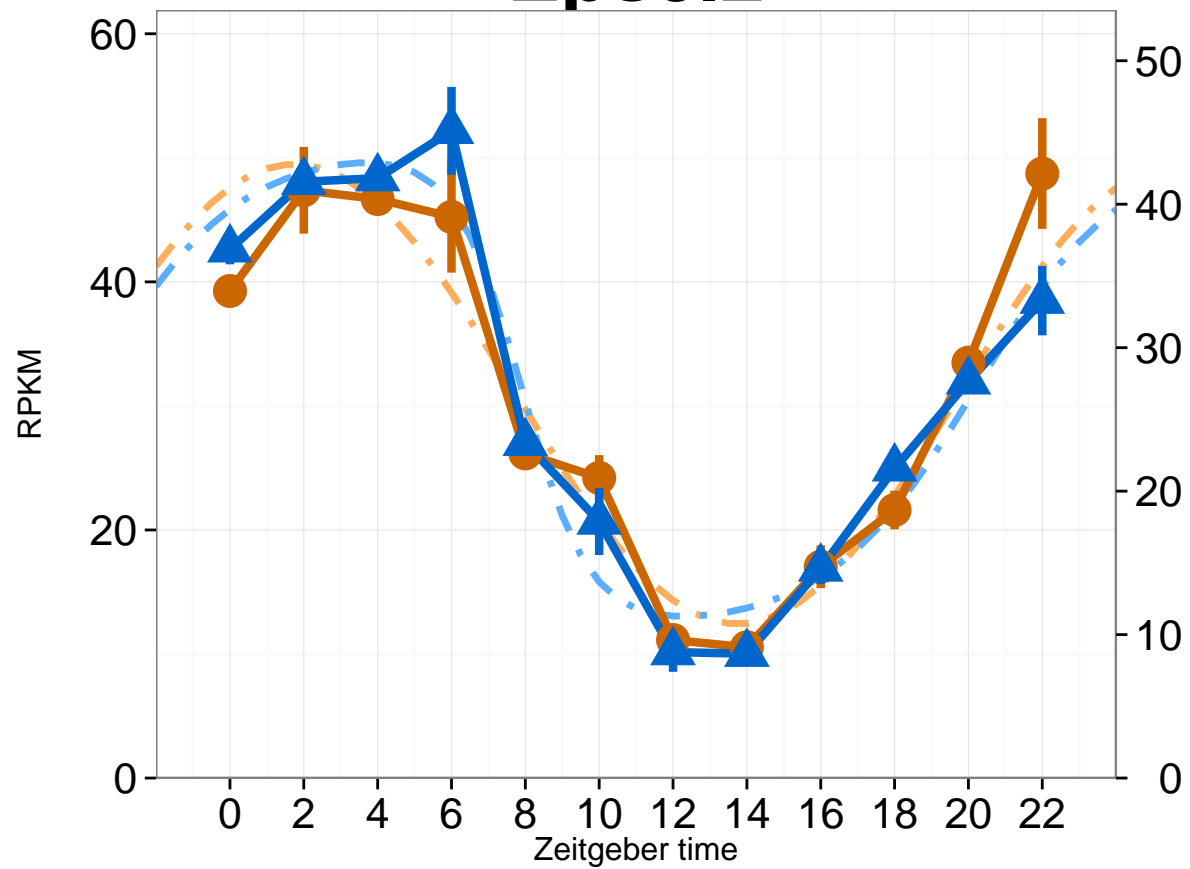

# Eps8l2

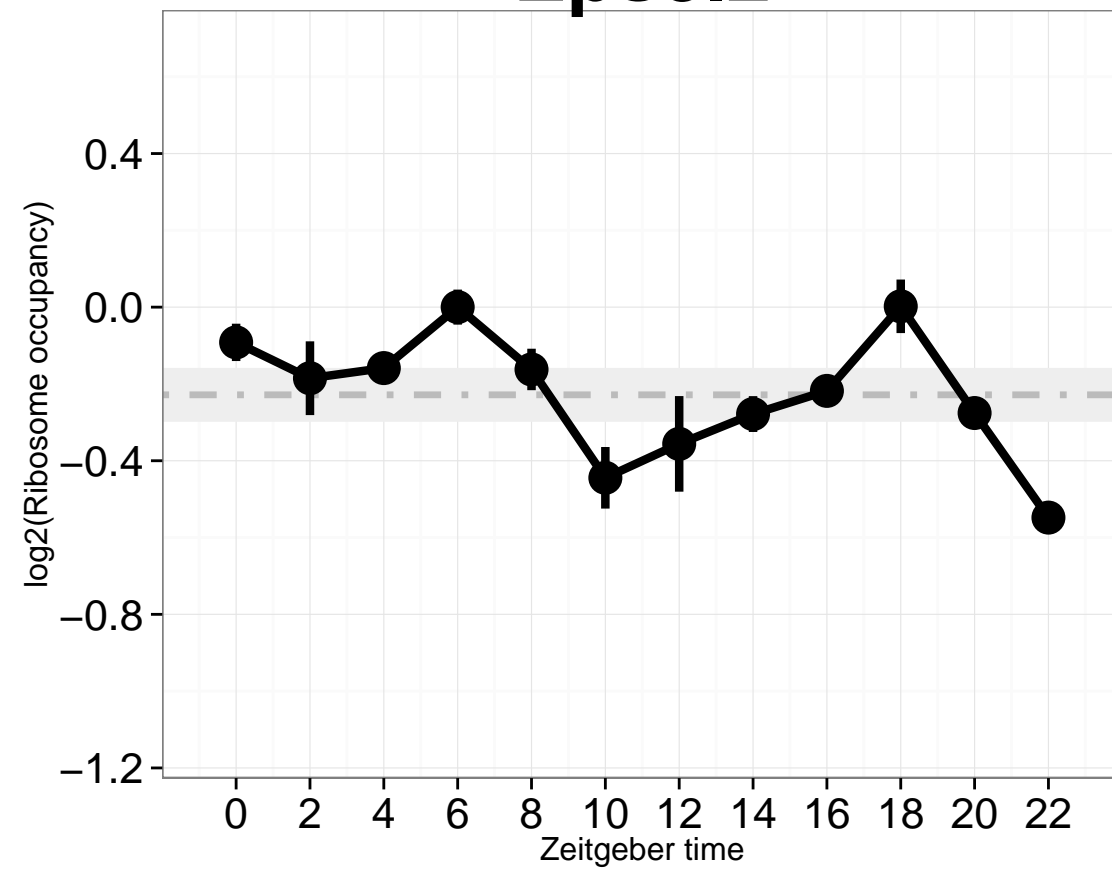

Supplement: SuppDataset_1.zip [file Eps8l2_set_D.pdf › Supplemental Dataset 1/D-mRNA_rhythm_translation_rhyth/Eps8l2_set_D.pdf]

# Ept1

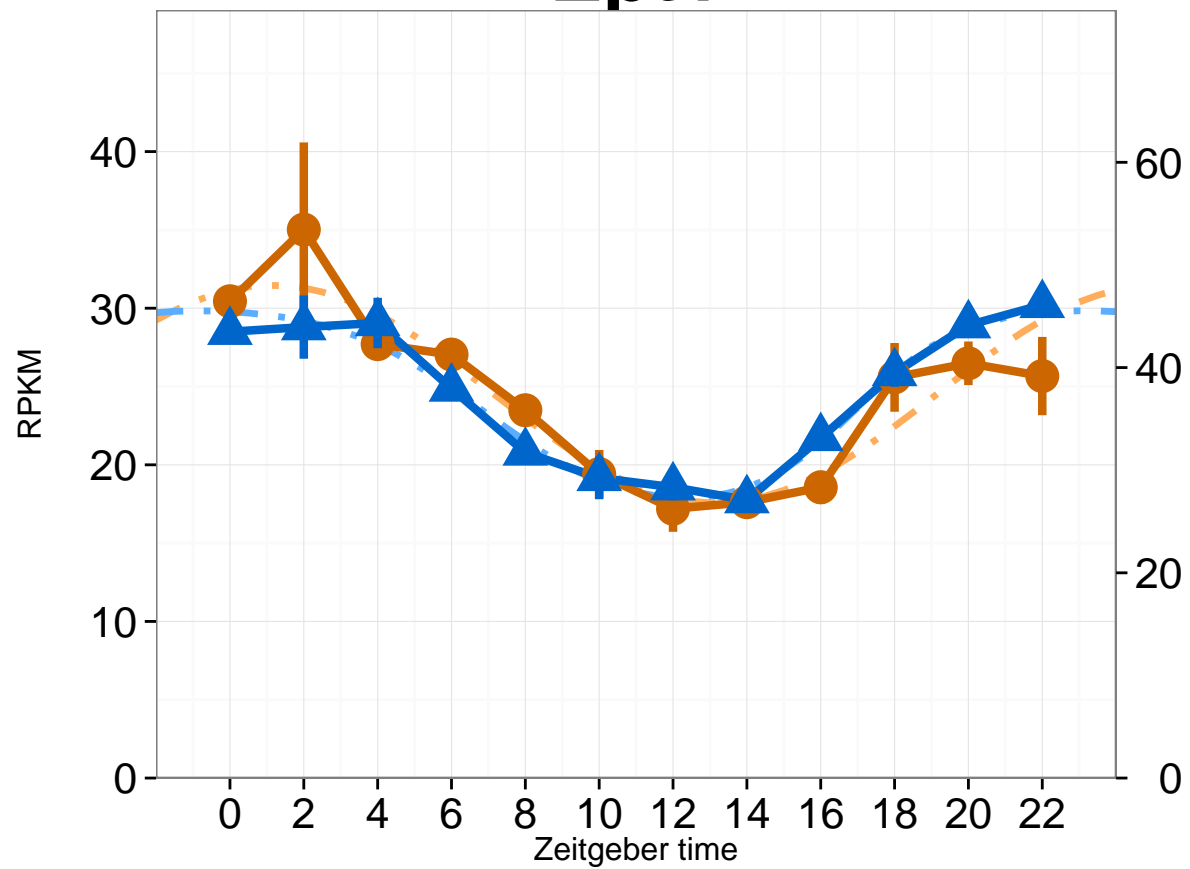

# Ept1

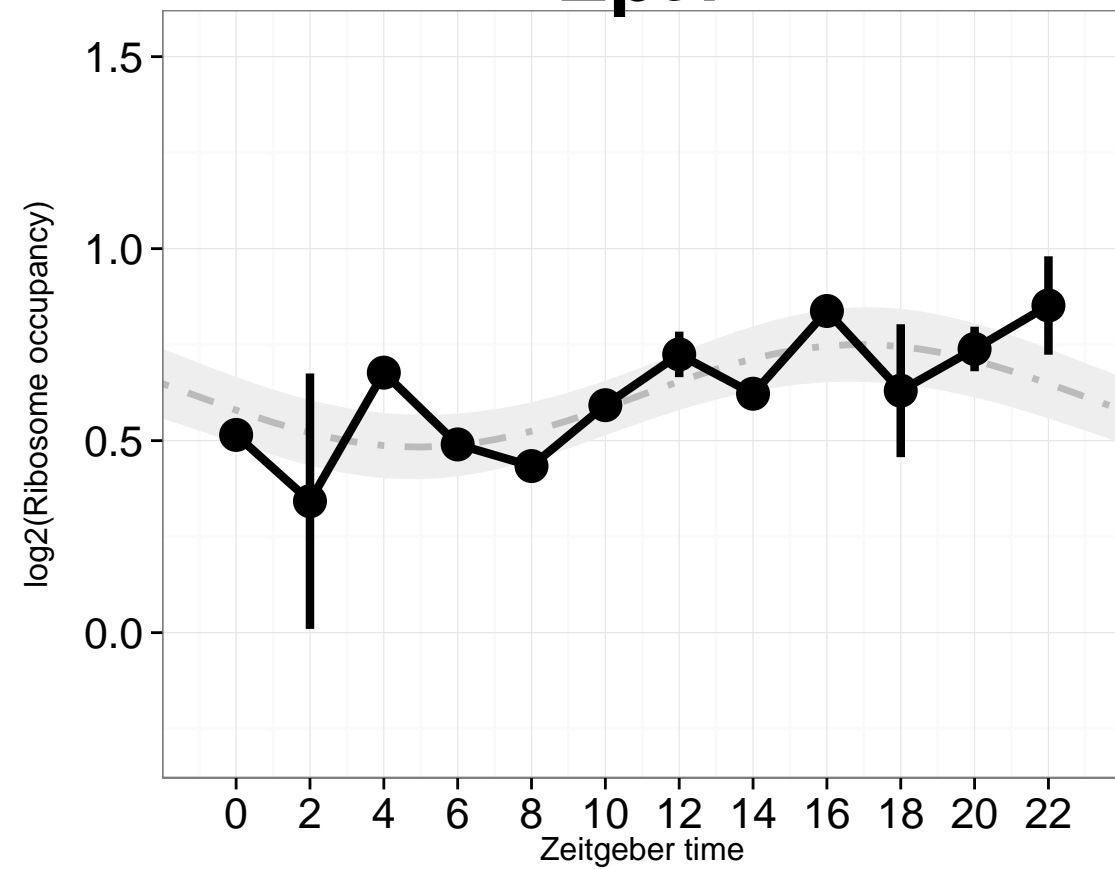

Supplement: SuppDataset_1.zip [file Ept1_set_D.pdf › Supplemental Dataset 1/D-mRNA_rhythm_translation_rhyth/Ept1_set_D.pdf]

## ErbB3

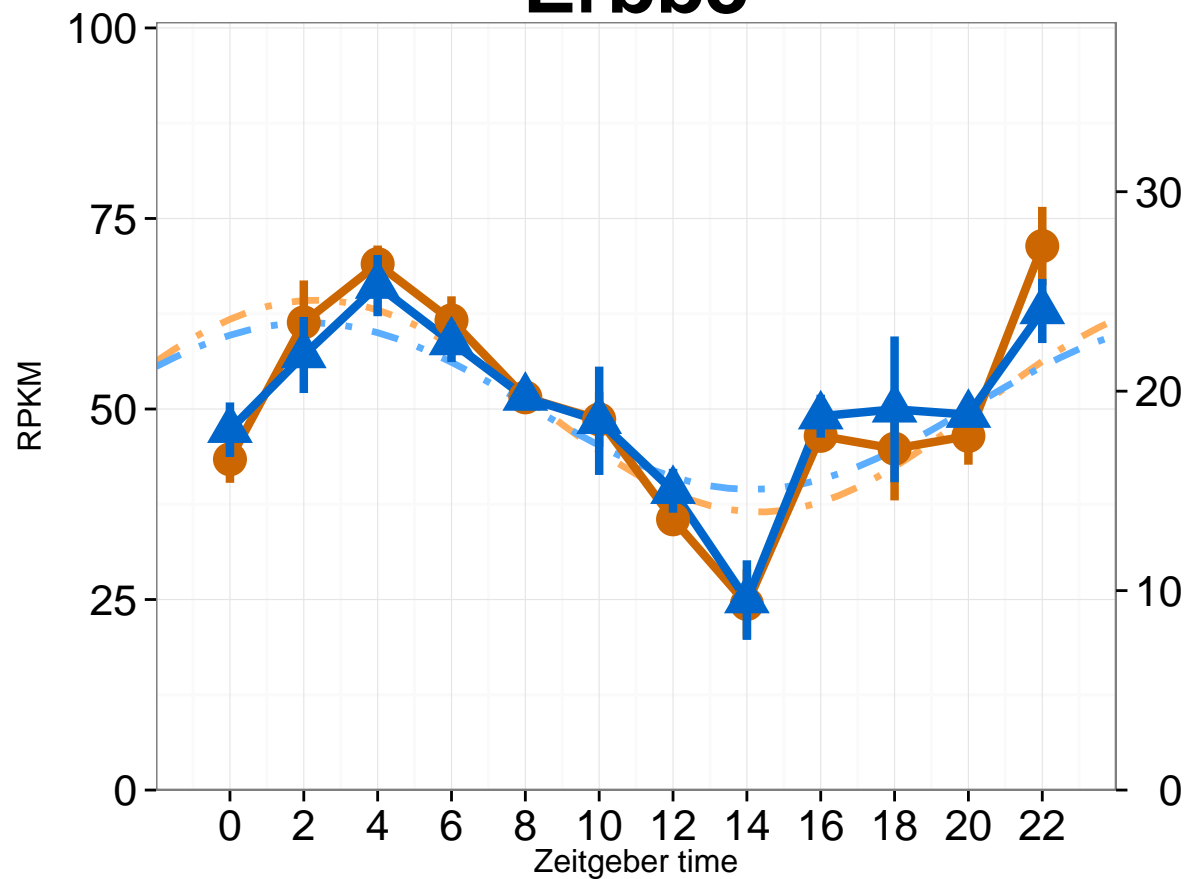

## ErbB3

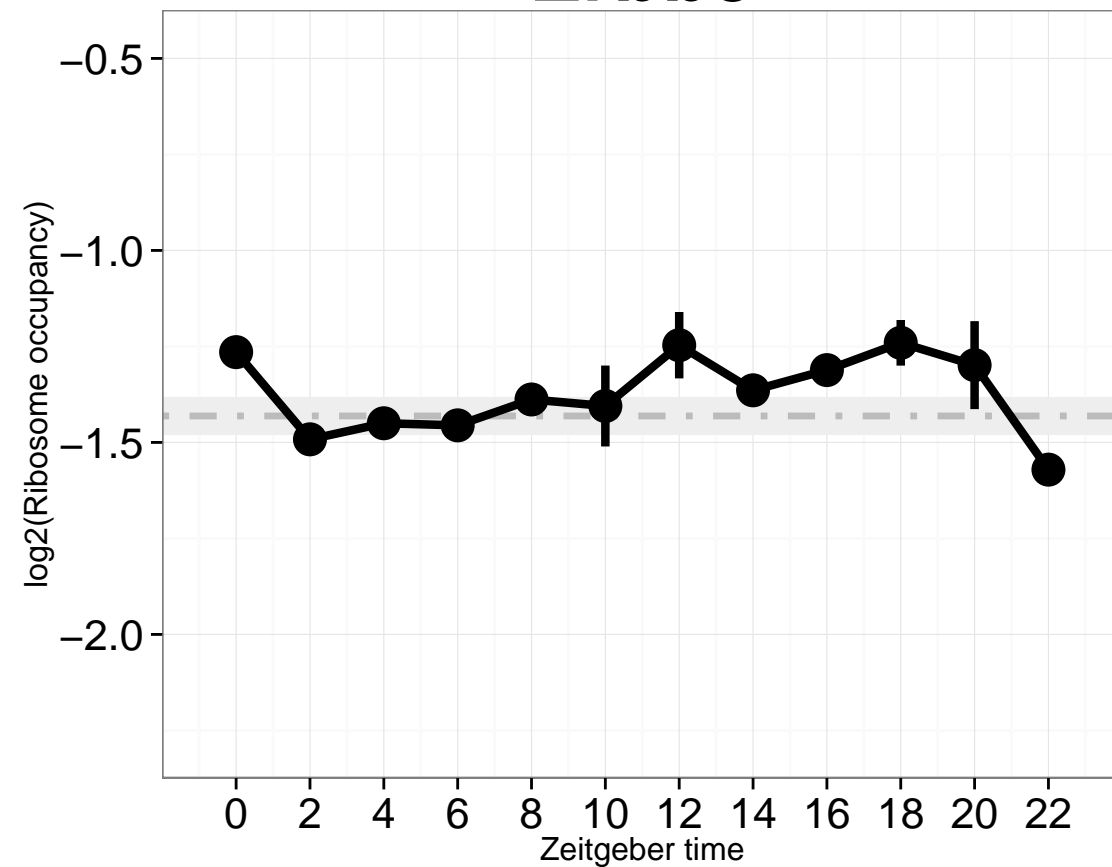

Supplement: SuppDataset_1.zip [file Erbb3_set_D.pdf › Supplemental Dataset 1/D-mRNA_rhythm_translation_rhyth/Erbb3_set_D.pdf]

## ErbB4

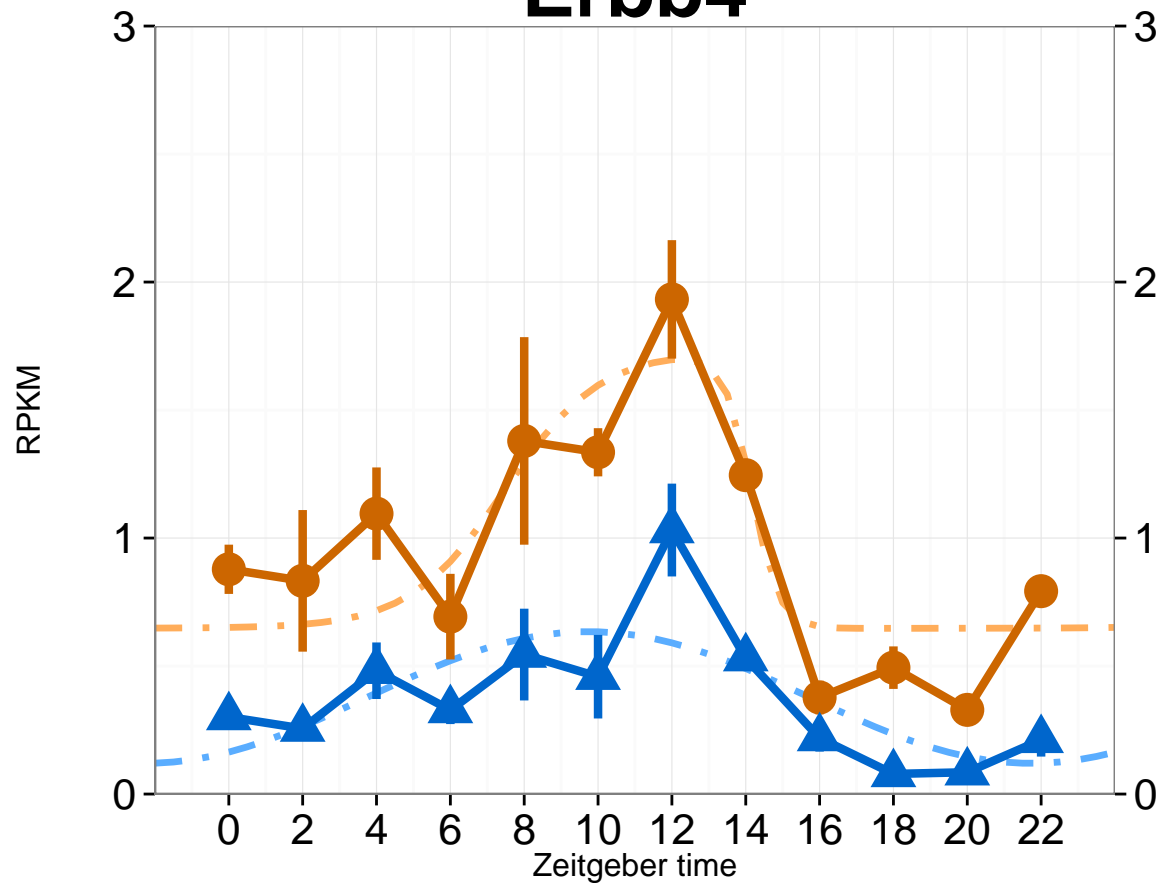

## ErbB4

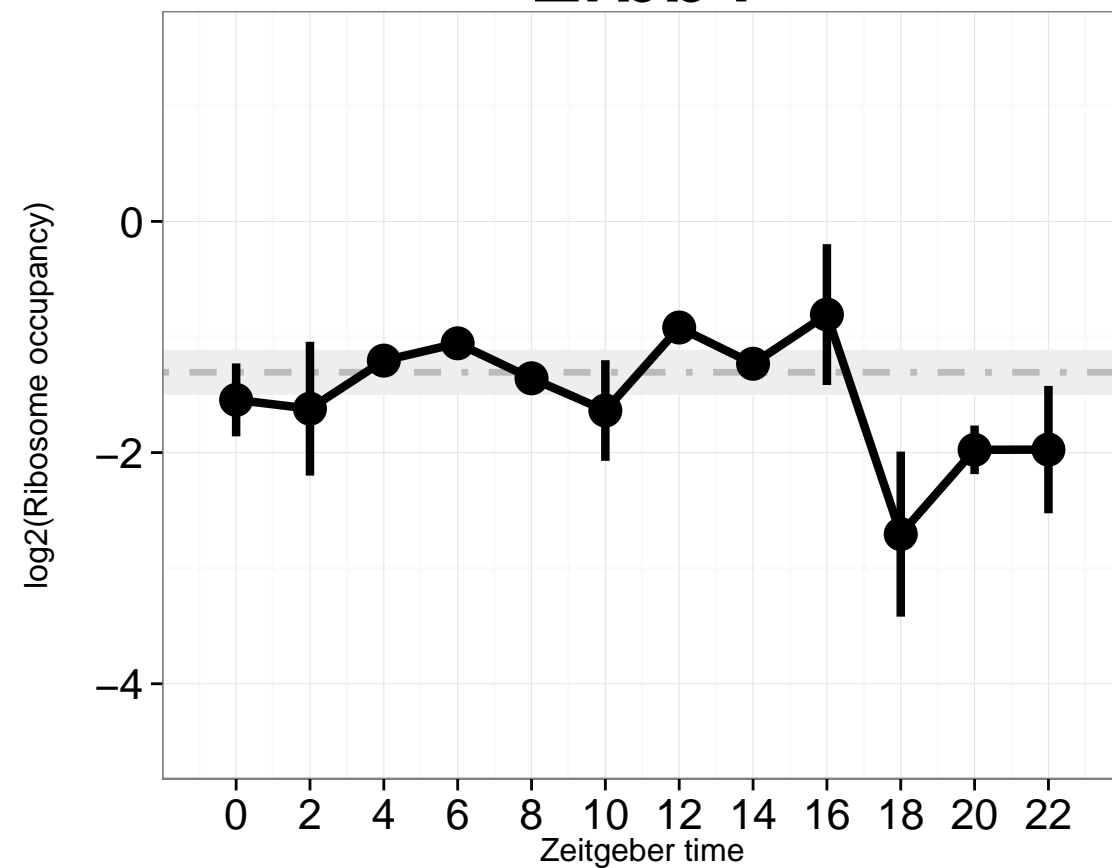

Supplement: SuppDataset_1.zip [file Erbb4_set_D.pdf › Supplemental Dataset 1/D-mRNA_rhythm_translation_rhyth/Erbb4_set_D.pdf]

## Erf

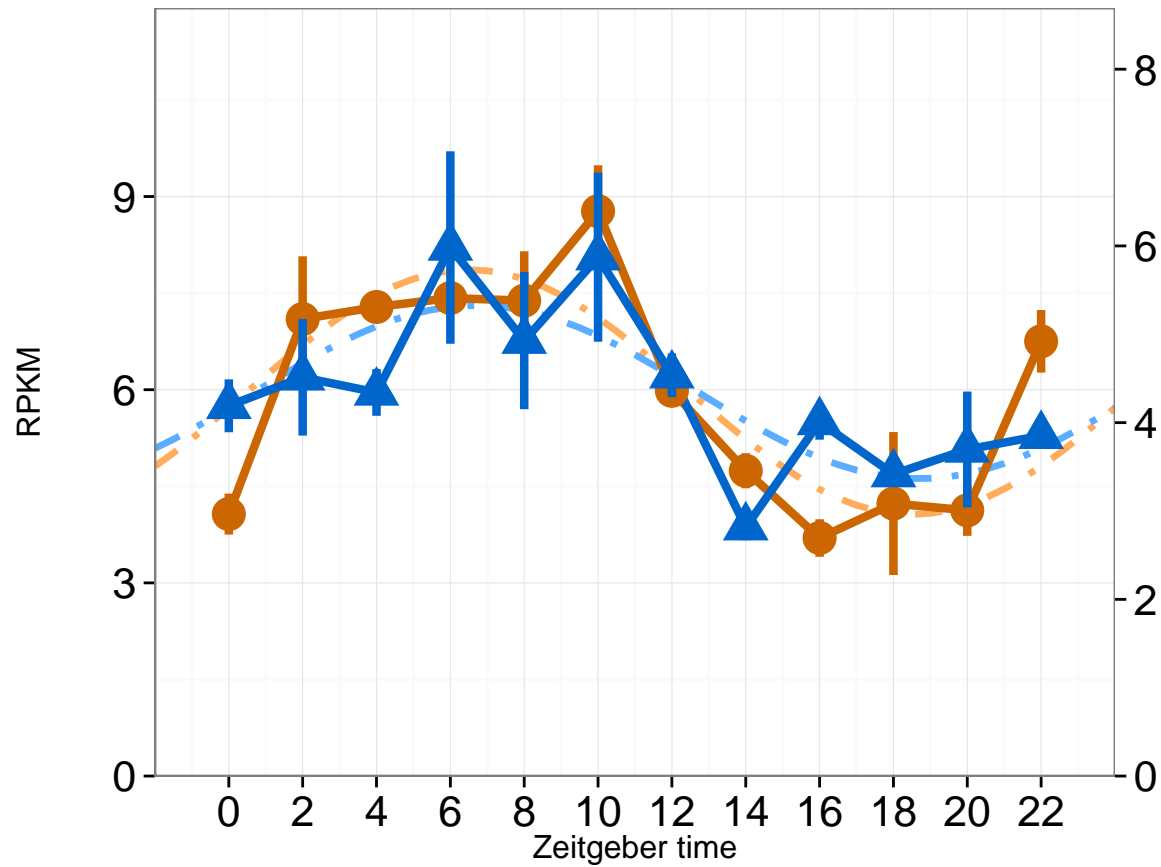

## Erf

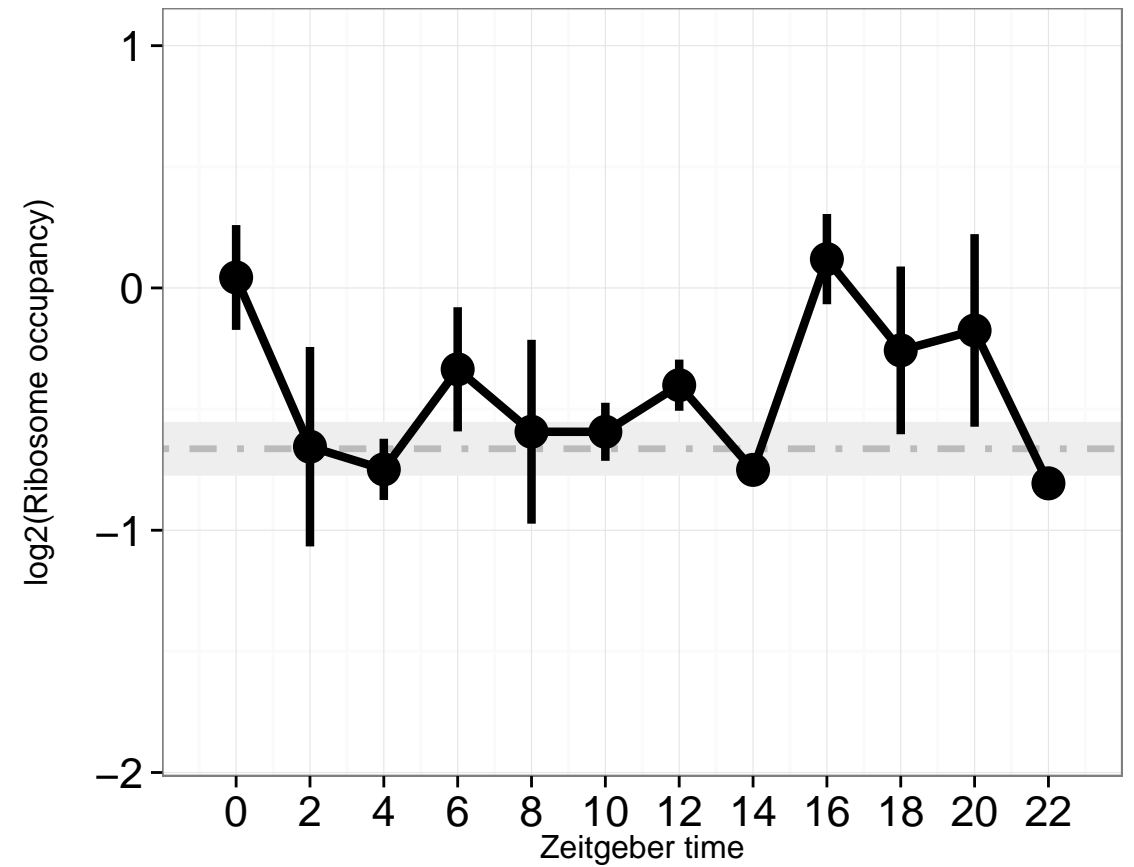

Supplement: SuppDataset_1.zip [file Erf_set_D.pdf › Supplemental Dataset 1/D-mRNA_rhythm_translation_rhyth/Erf_set_D.pdf]

## Ero1l

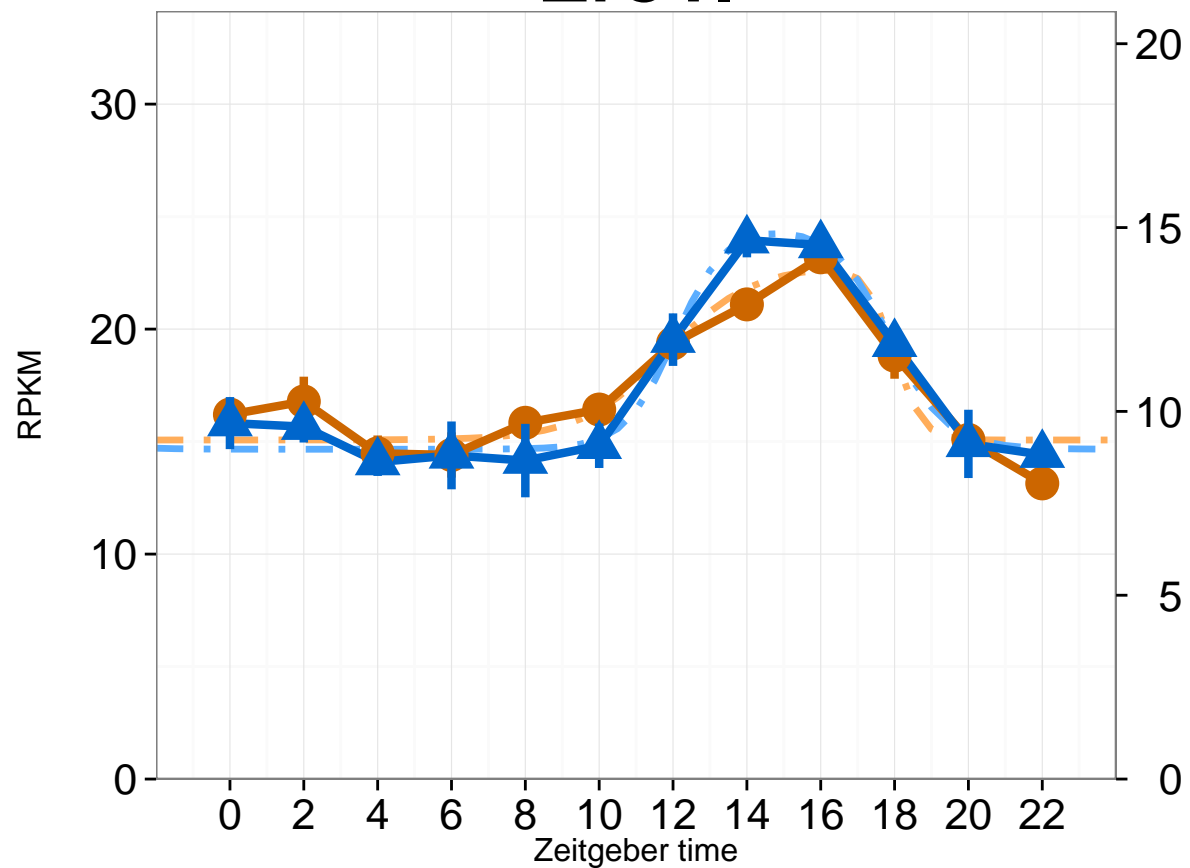

## Ero1l

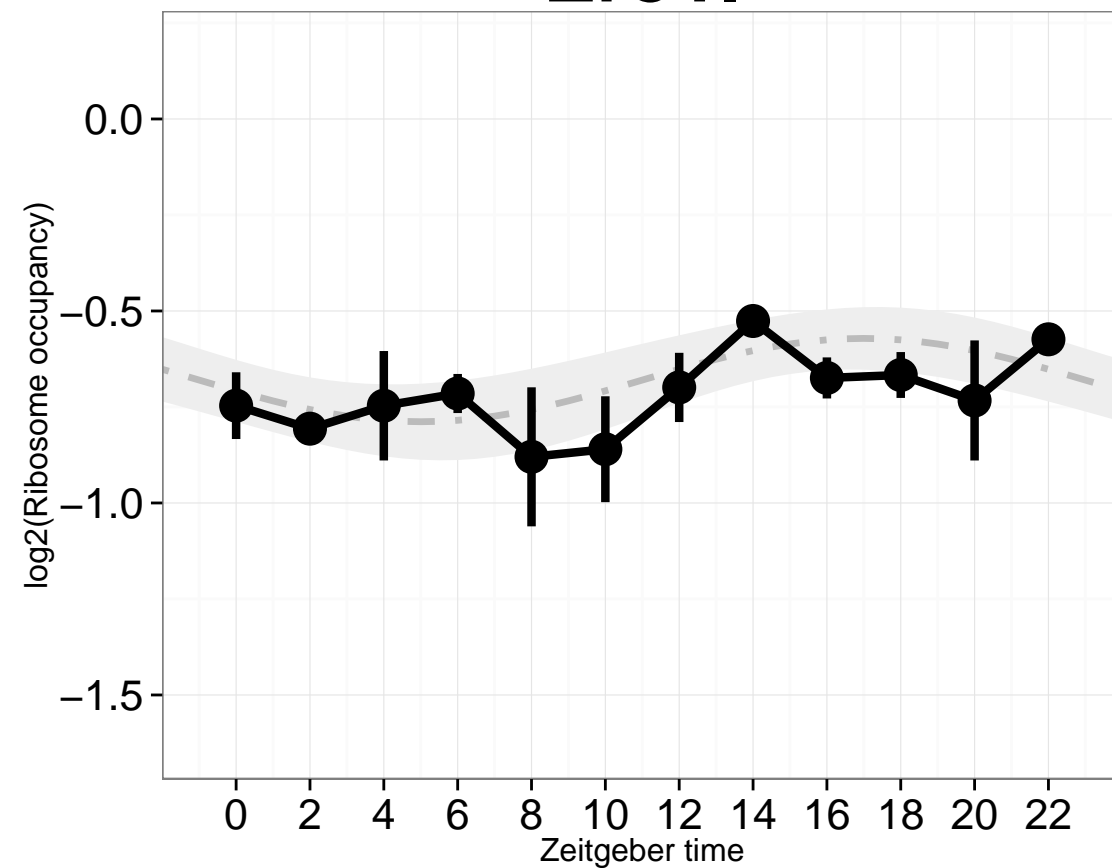

Supplement: SuppDataset_1.zip [file Ero1l_set_D.pdf › Supplemental Dataset 1/D-mRNA_rhythm_translation_rhyth/Ero1l_set_D.pdf]

## Errfi1

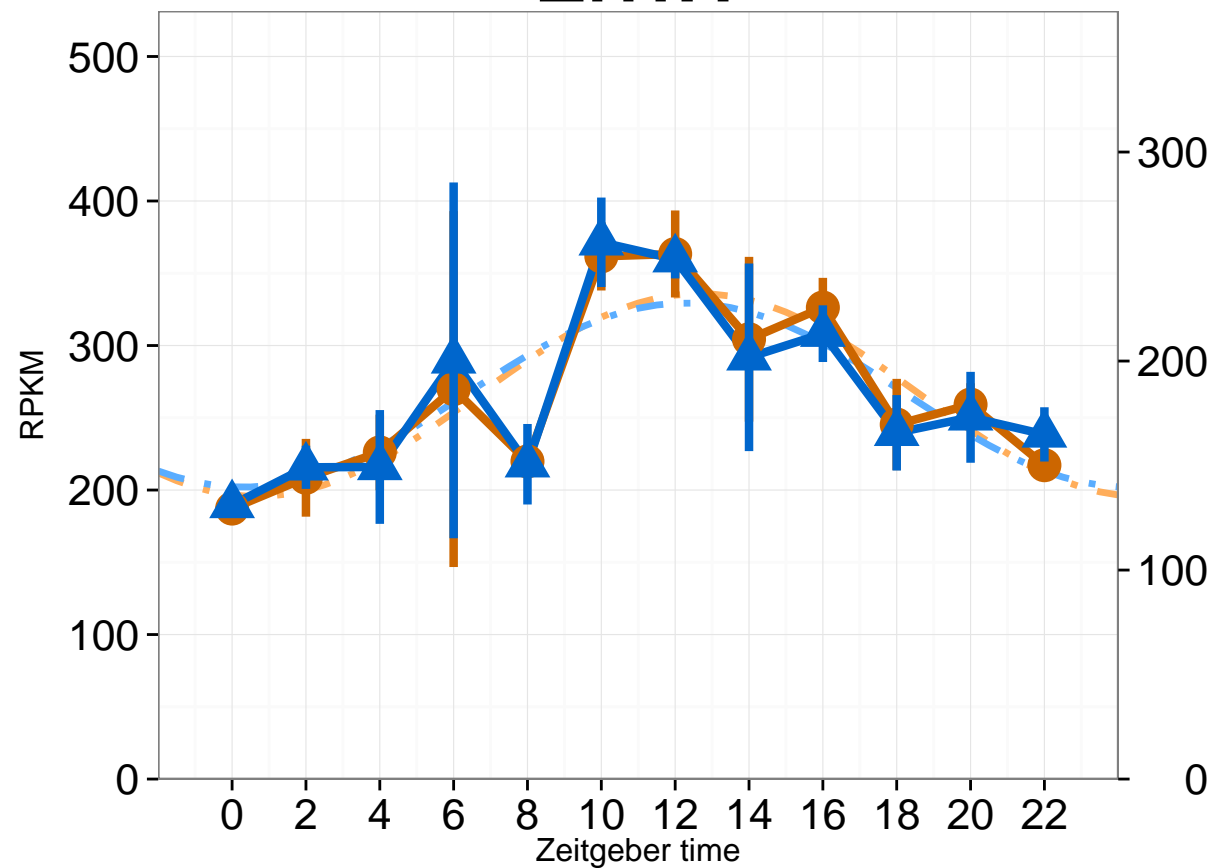

## Errfi1

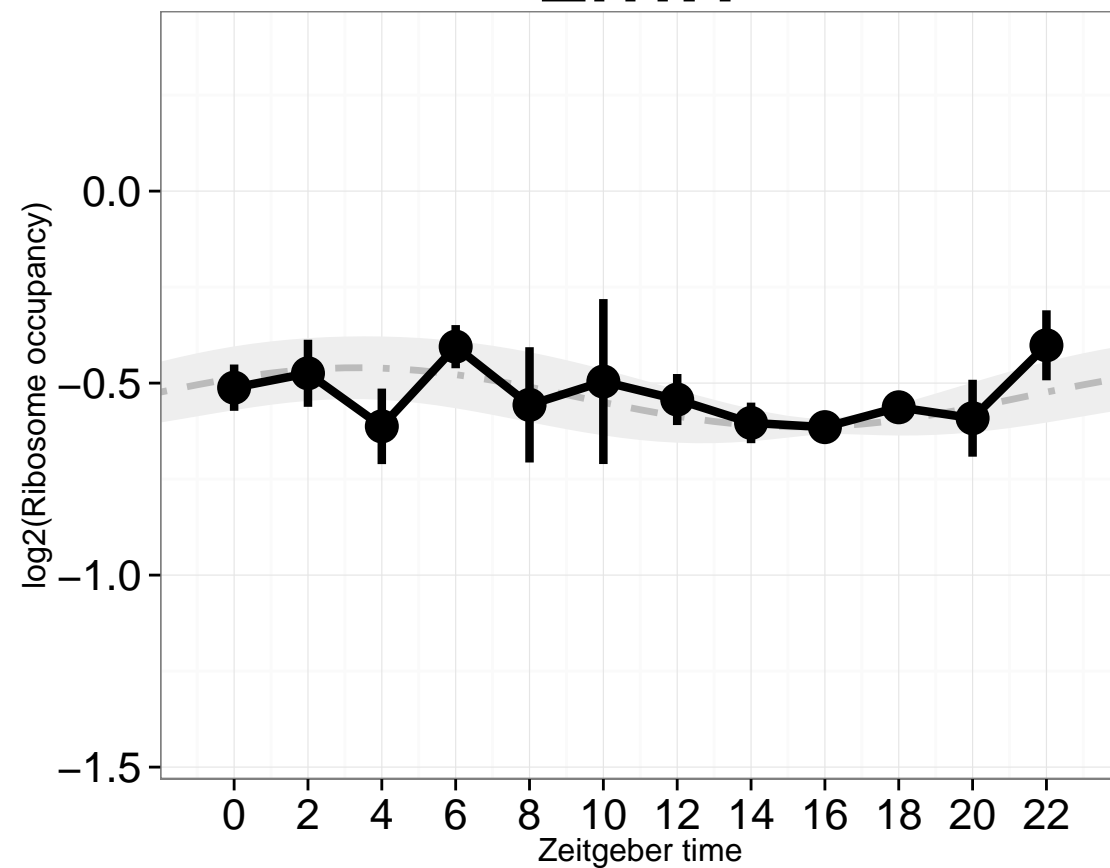

Supplement: SuppDataset_1.zip [file Errfi1_set_D.pdf › Supplemental Dataset 1/D-mRNA_rhythm_translation_rhyth/Errfi1_set_D.pdf]

## Esr1

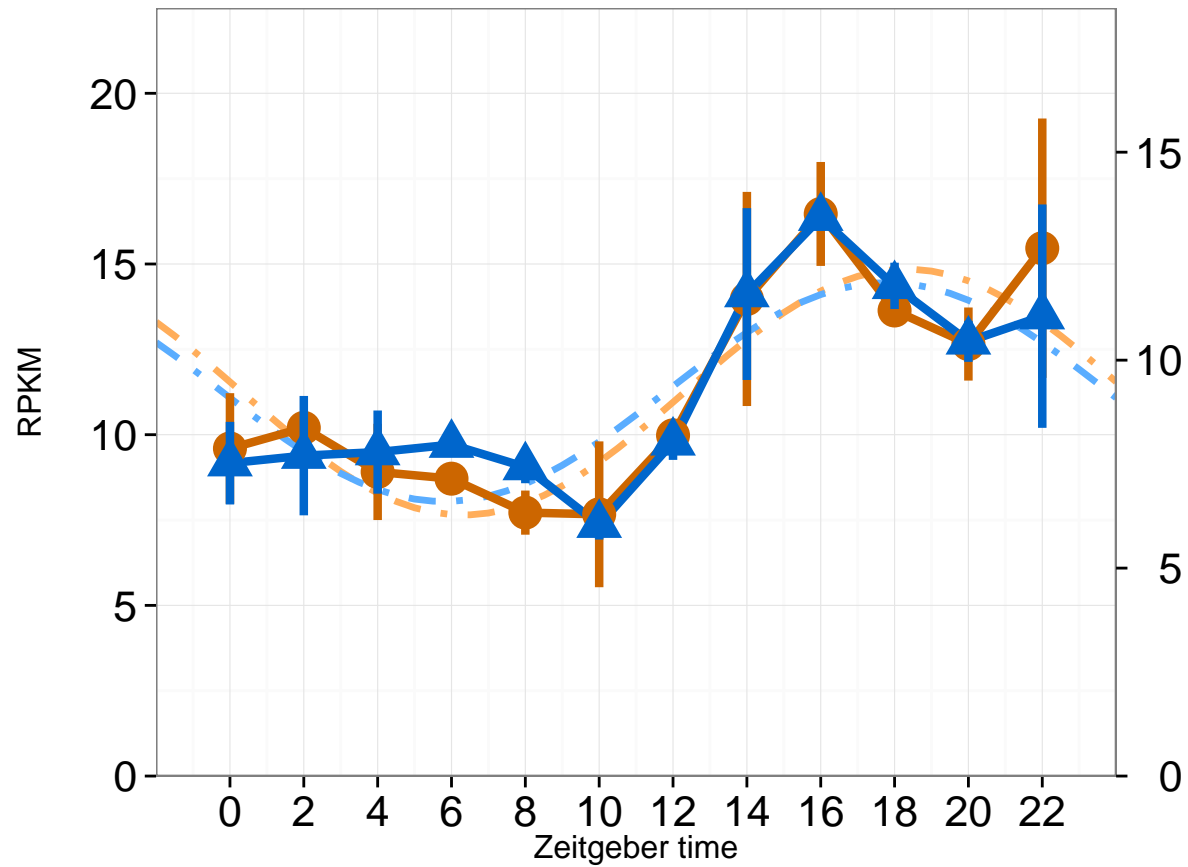

## Esr1

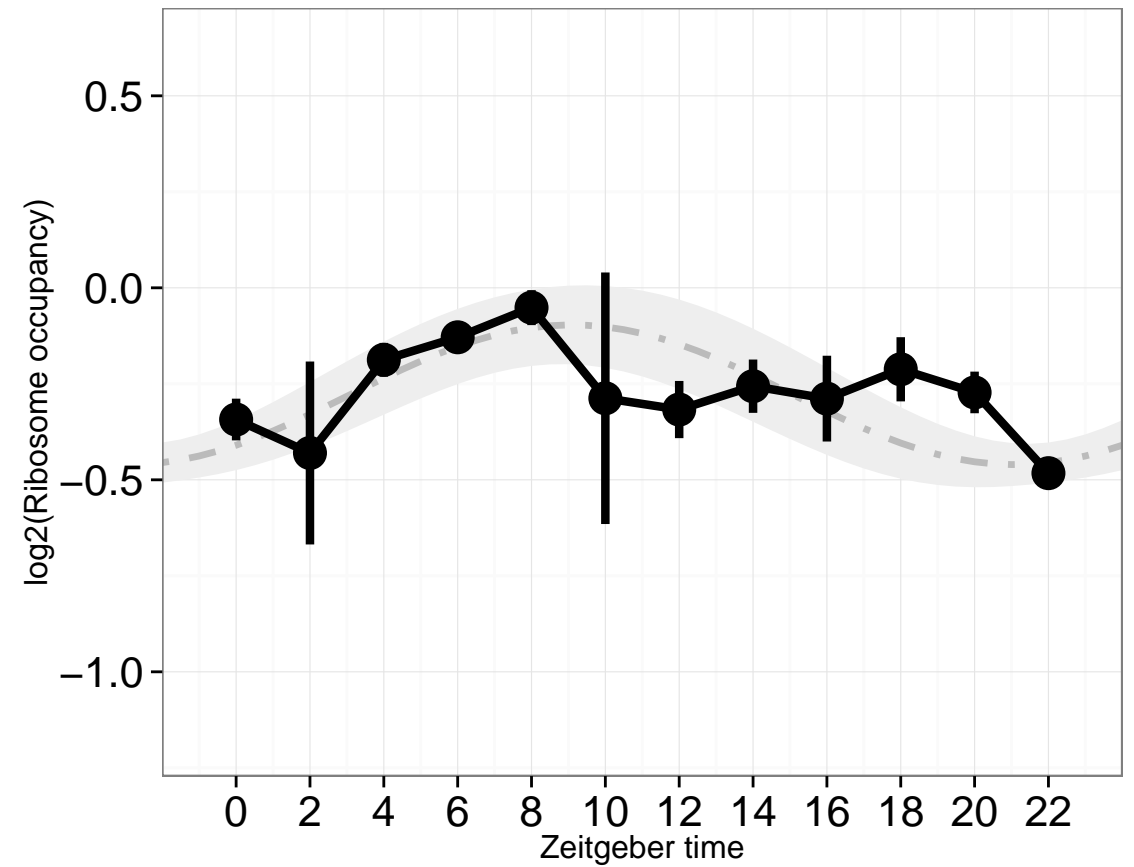

Supplement: SuppDataset_1.zip [file Esr1_set_D.pdf › Supplemental Dataset 1/D-mRNA_rhythm_translation_rhyth/Esr1_set_D.pdf]

## Ethe1

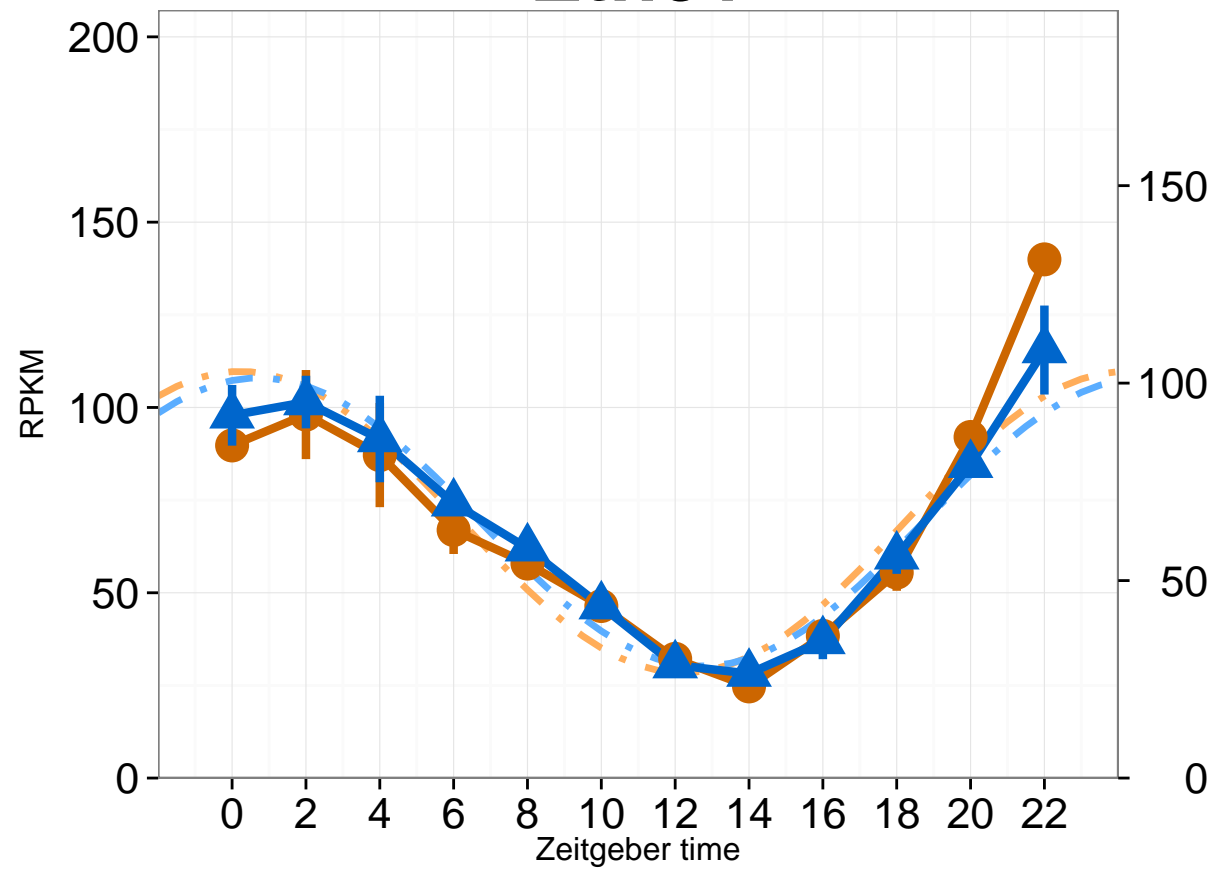

## Ethe1

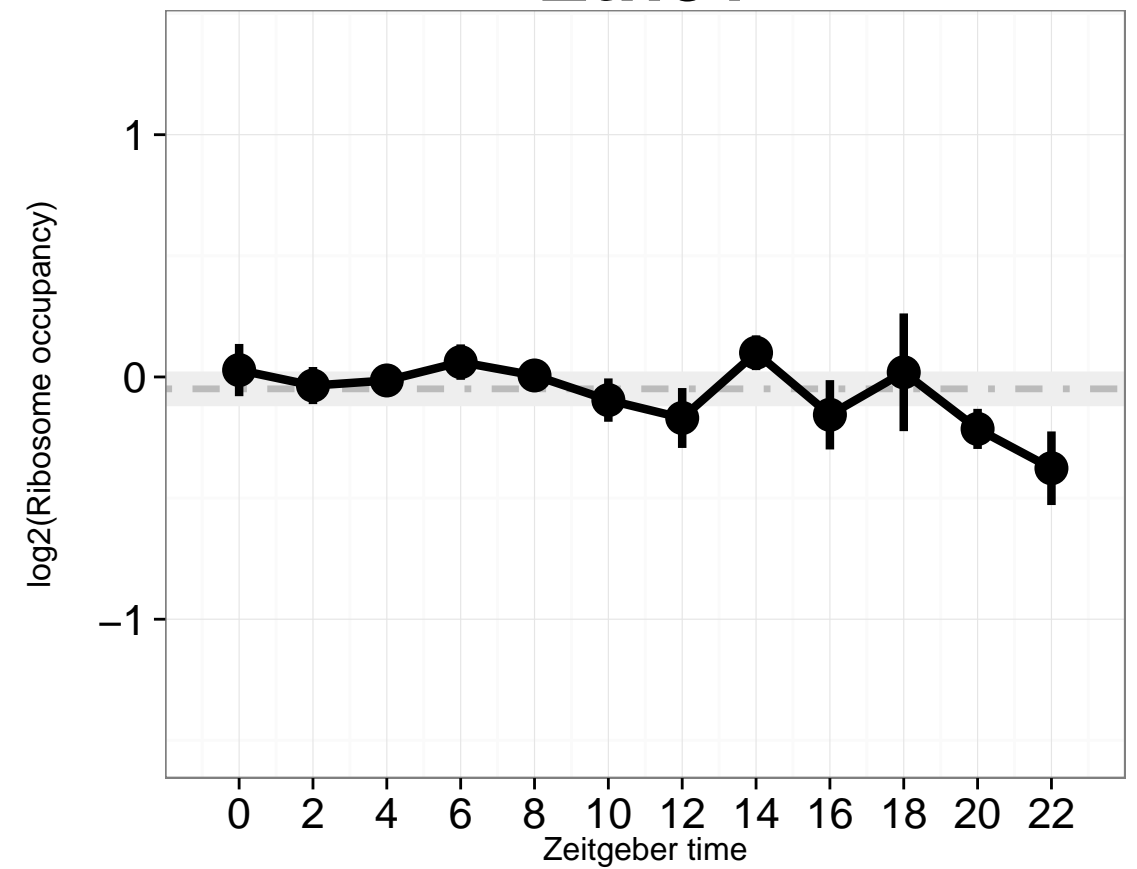

Supplement: SuppDataset_1.zip [file Ethe1_set_D.pdf › Supplemental Dataset 1/D-mRNA_rhythm_translation_rhyth/Ethe1_set_D.pdf]

## Etnk2

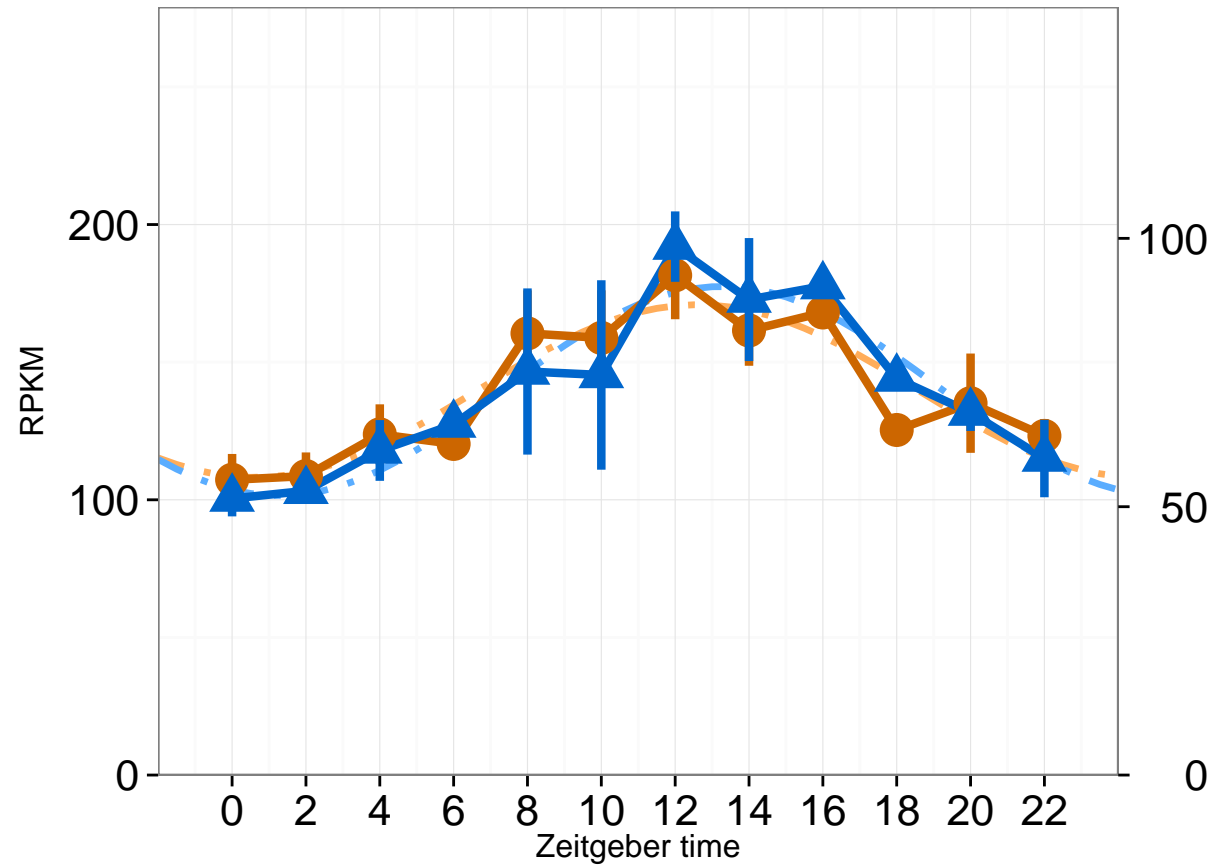

## Etnk2

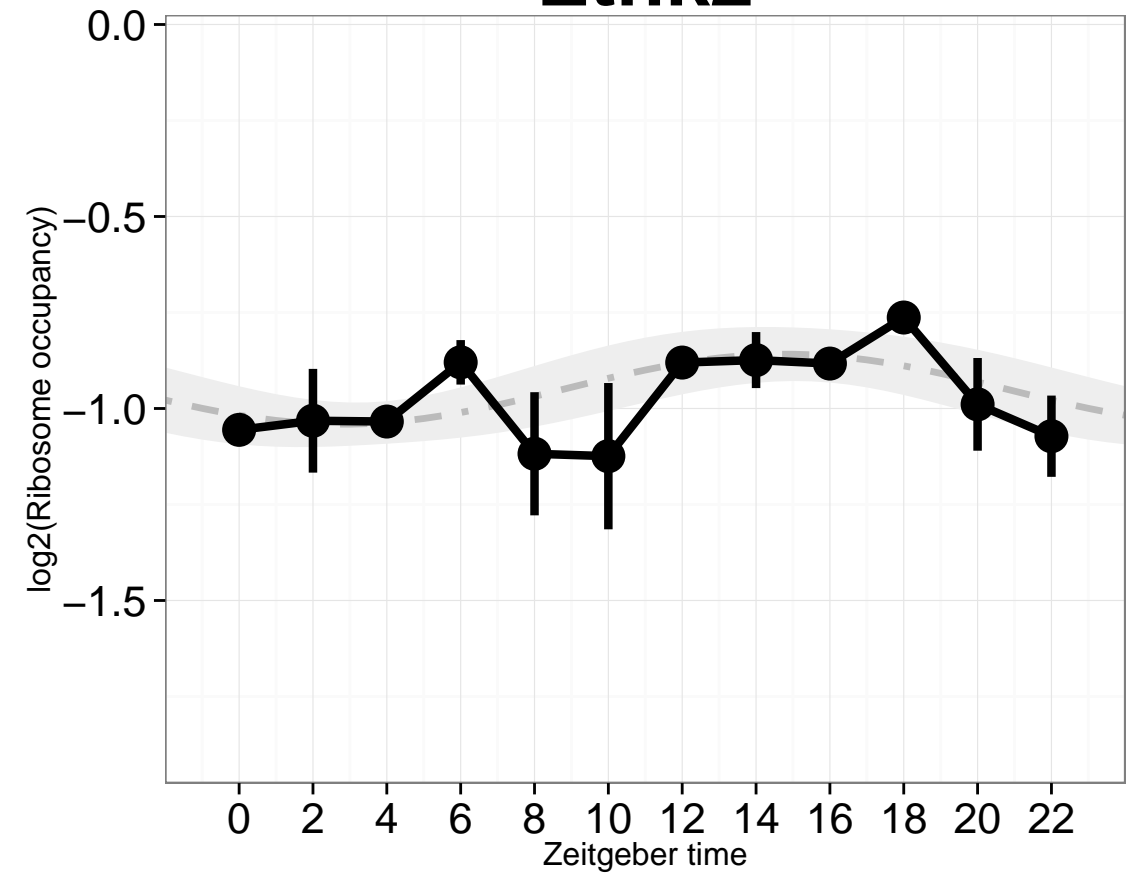

Supplement: SuppDataset_1.zip [file Etnk2_set_D.pdf › Supplemental Dataset 1/D-mRNA_rhythm_translation_rhyth/Etnk2_set_D.pdf]

## Eva1a

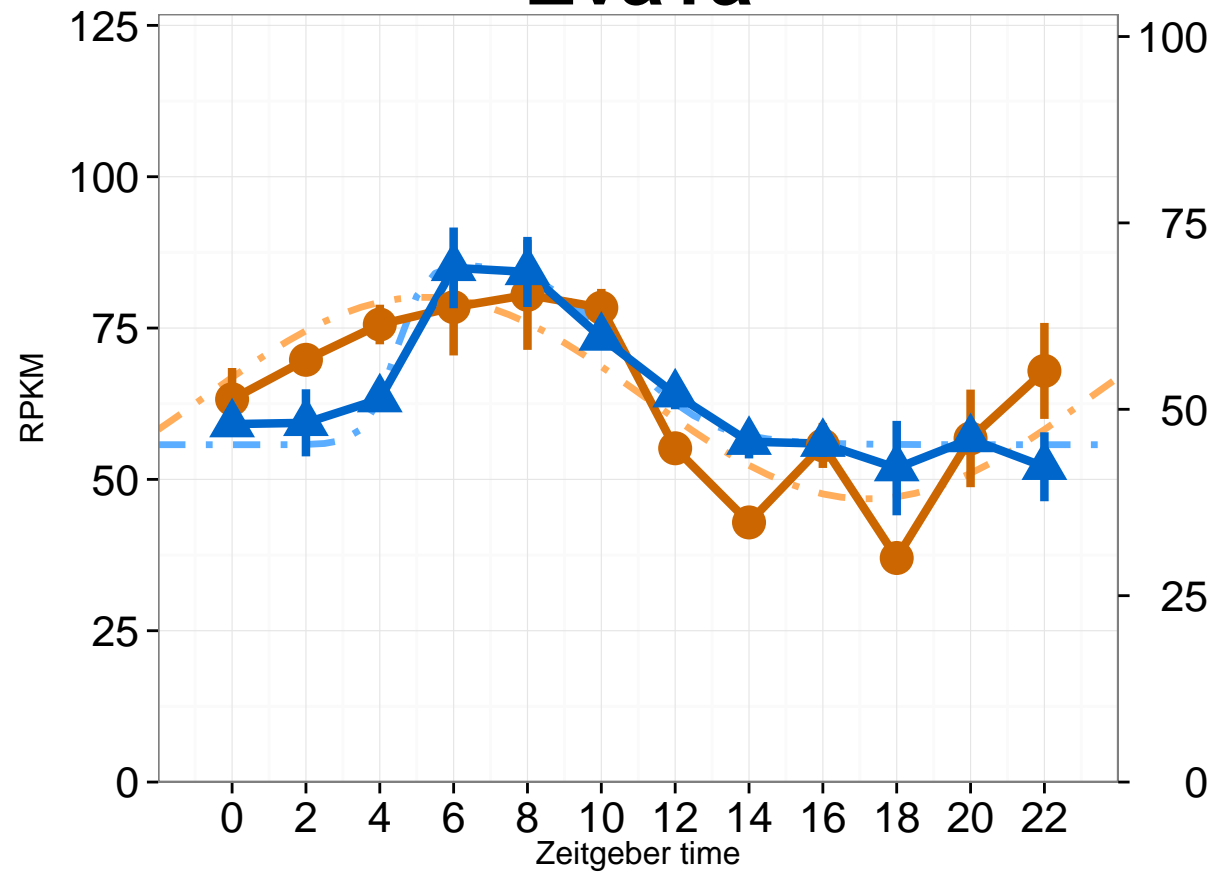

## Eva1a

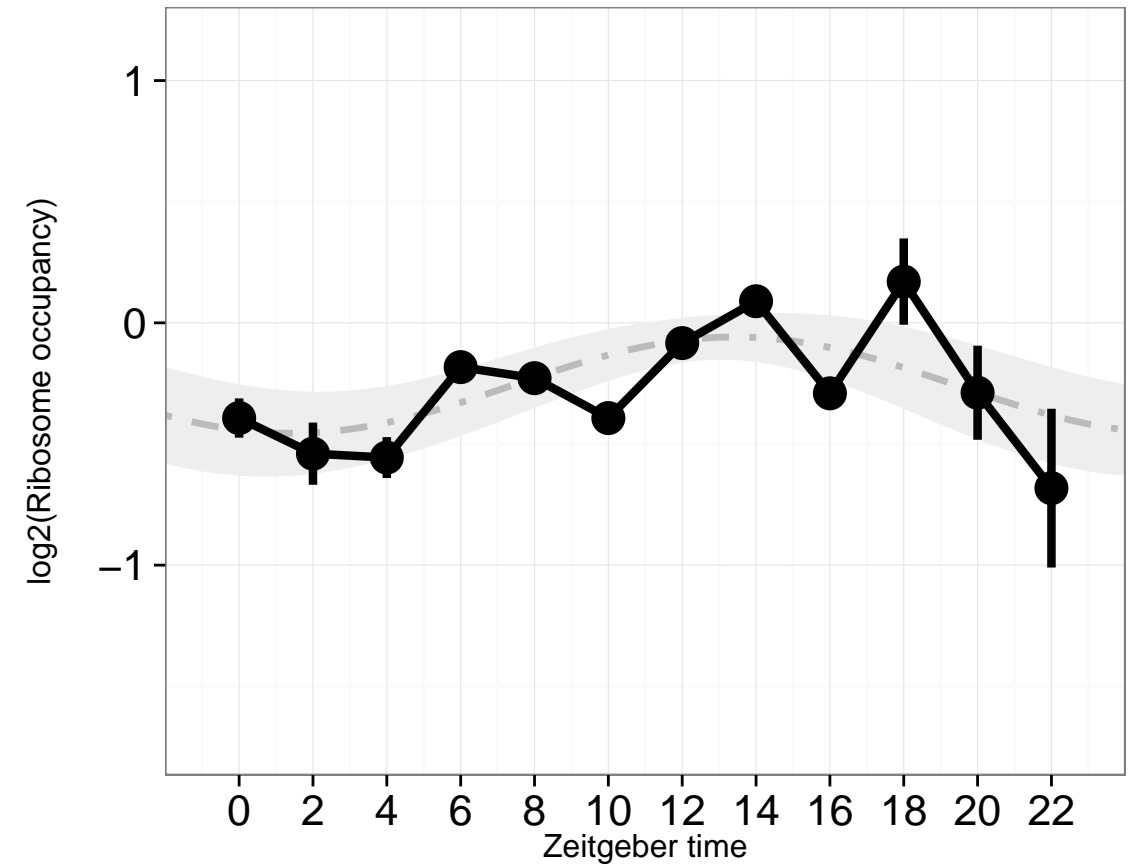

Supplement: SuppDataset_1.zip [file Eva1a_set_D.pdf › Supplemental Dataset 1/D-mRNA_rhythm_translation_rhyth/Eva1a_set_D.pdf]

# F3

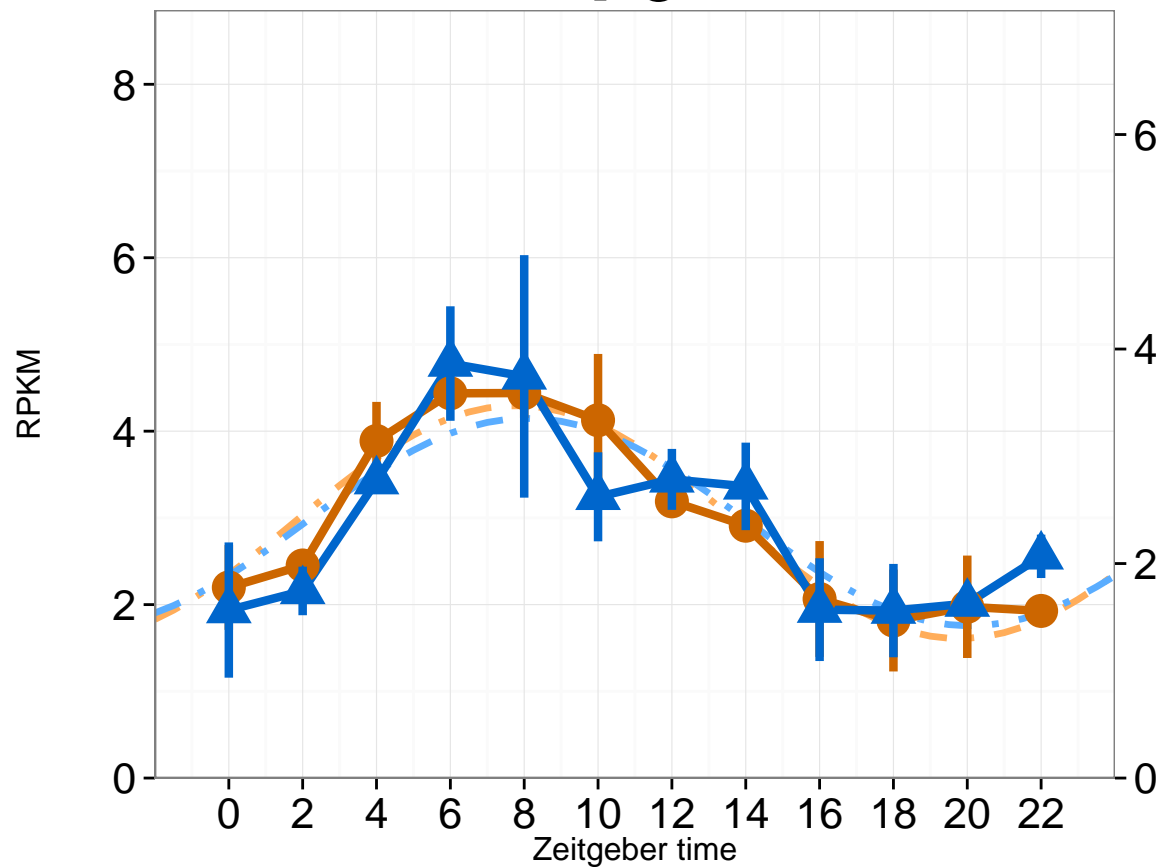

# F3

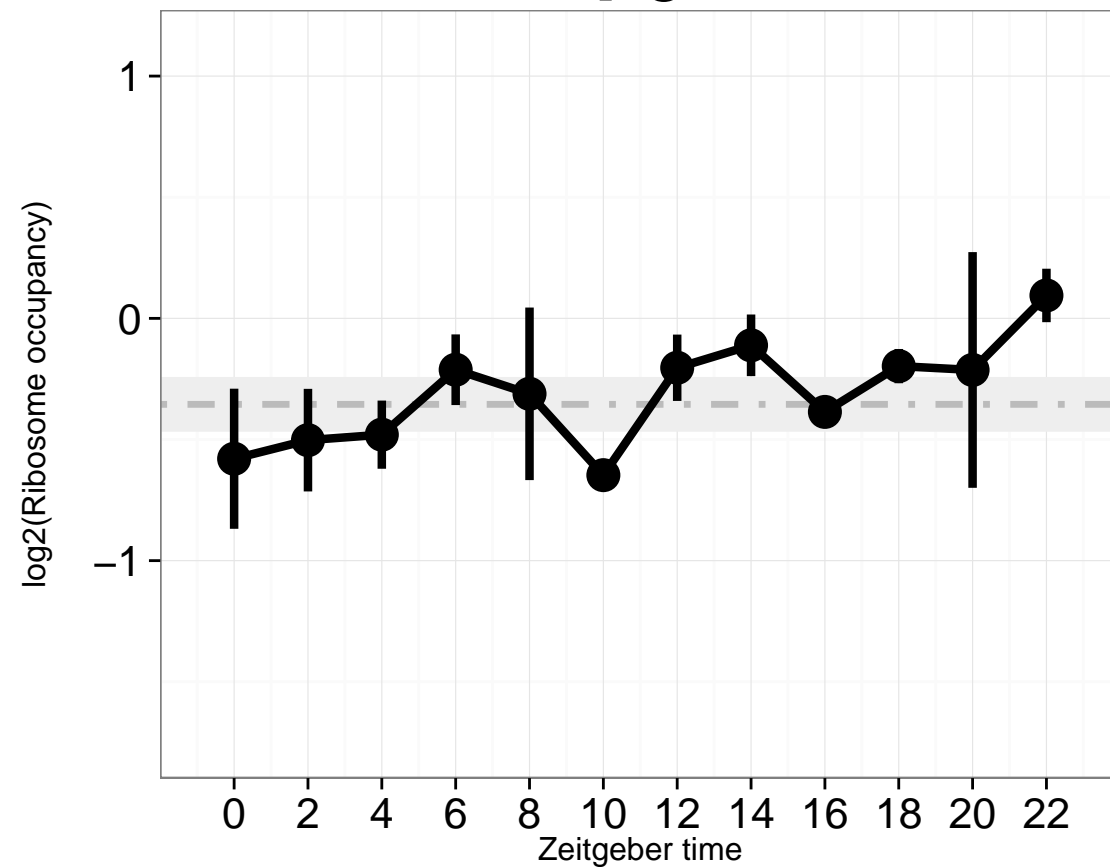

Supplement: SuppDataset_1.zip [file F3_set_D.pdf › Supplemental Dataset 1/D-mRNA_rhythm_translation_rhyth/F3_set_D.pdf]

# Fads2

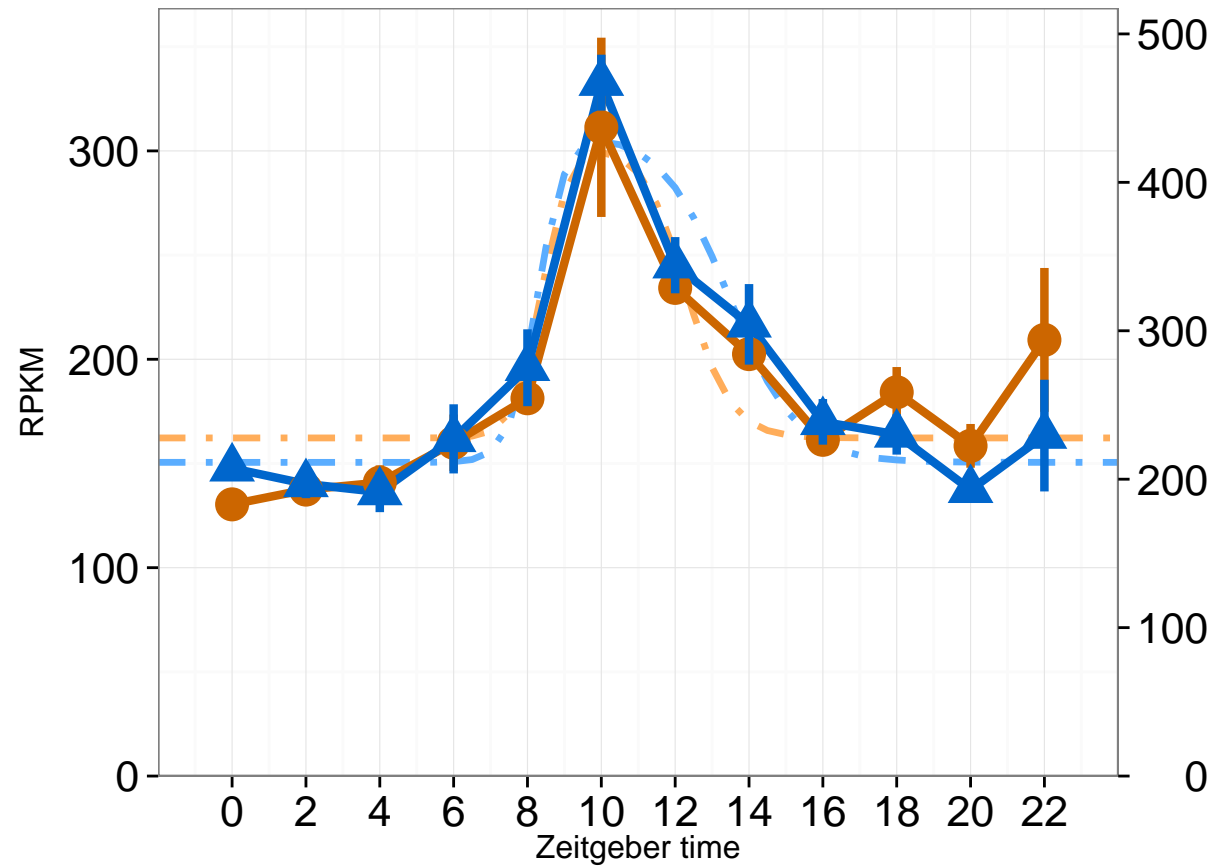

# Fads2

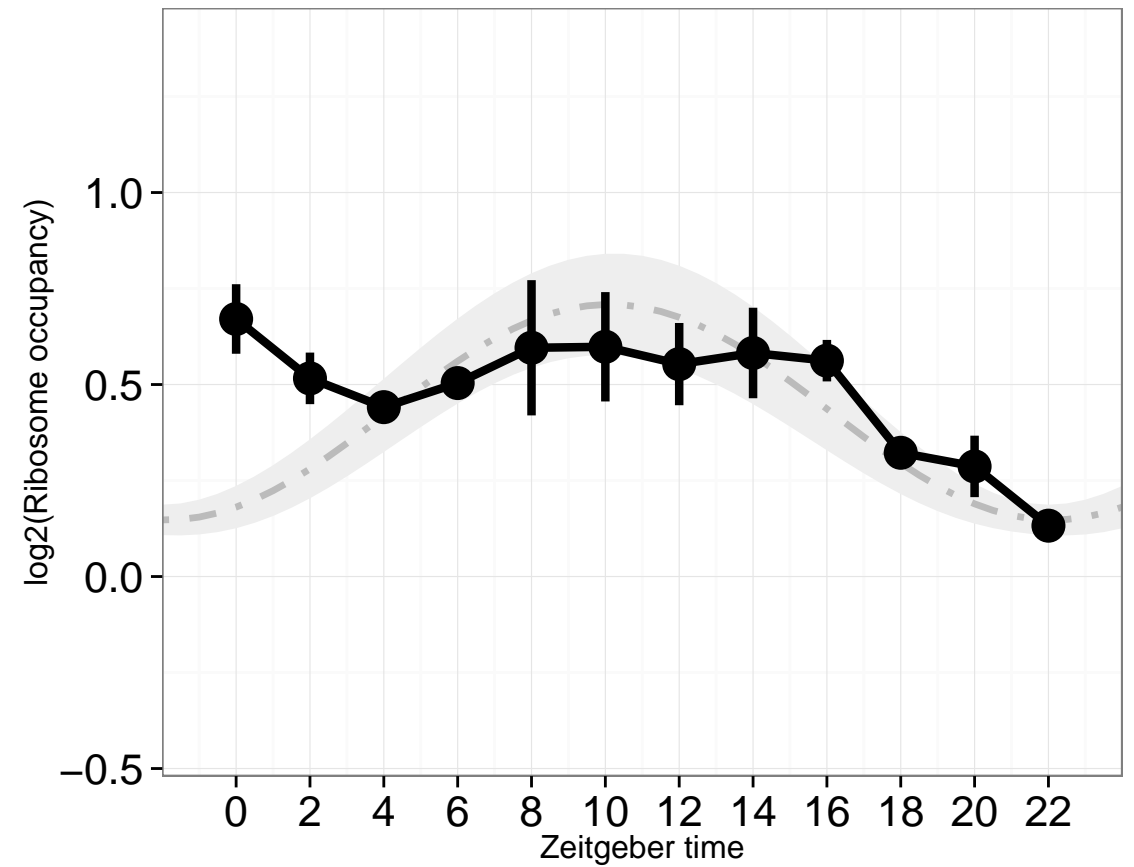

Supplement: SuppDataset_1.zip [file Fads2_set_D.pdf › Supplemental Dataset 1/D-mRNA_rhythm_translation_rhyth/Fads2_set_D.pdf]

# Fads3

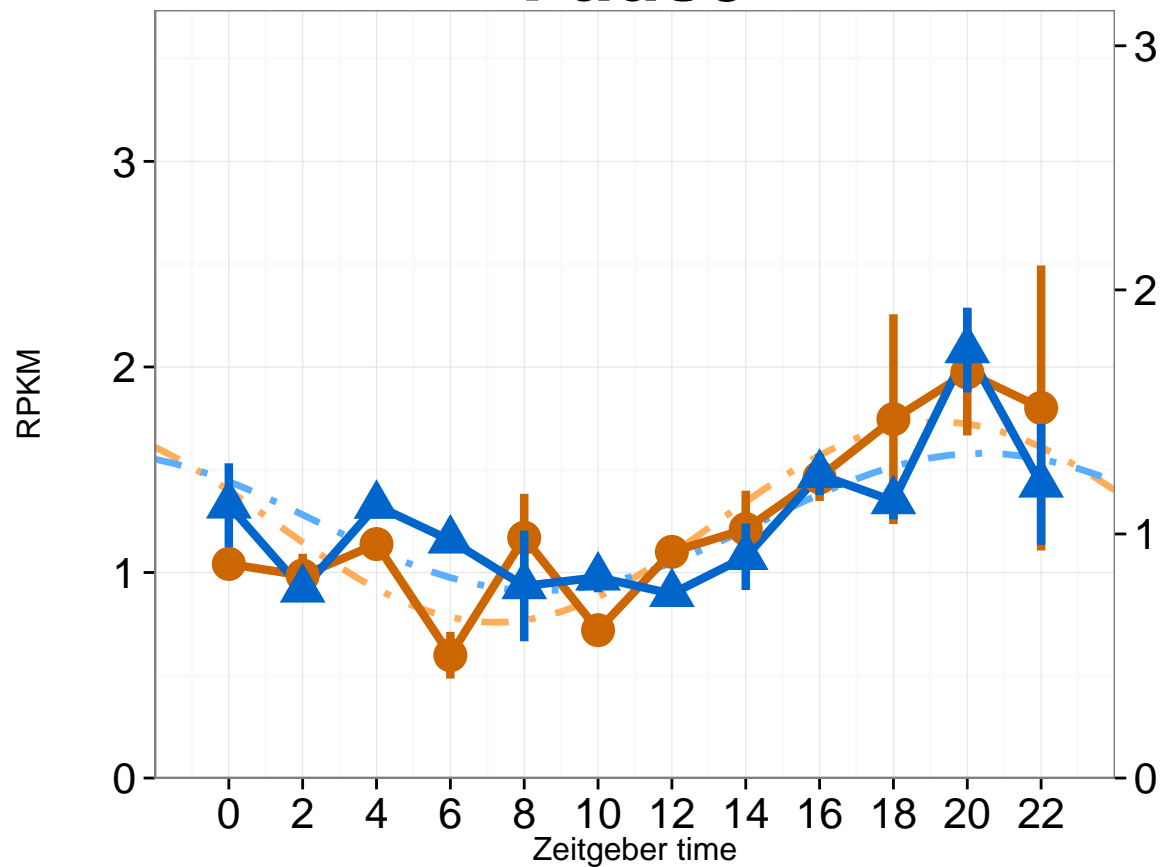

# Fads3

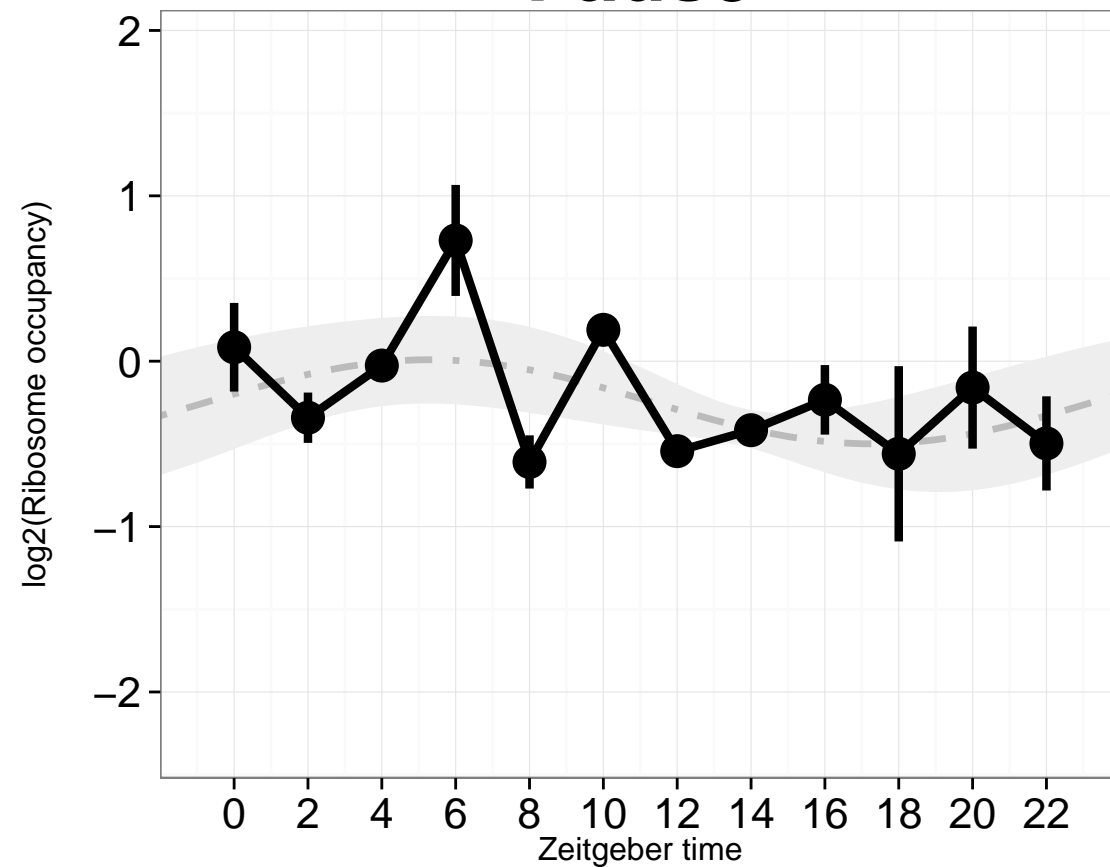

Supplement: SuppDataset_1.zip [file Fads3_set_D.pdf › Supplemental Dataset 1/D-mRNA_rhythm_translation_rhyth/Fads3_set_D.pdf]

# Fam102a

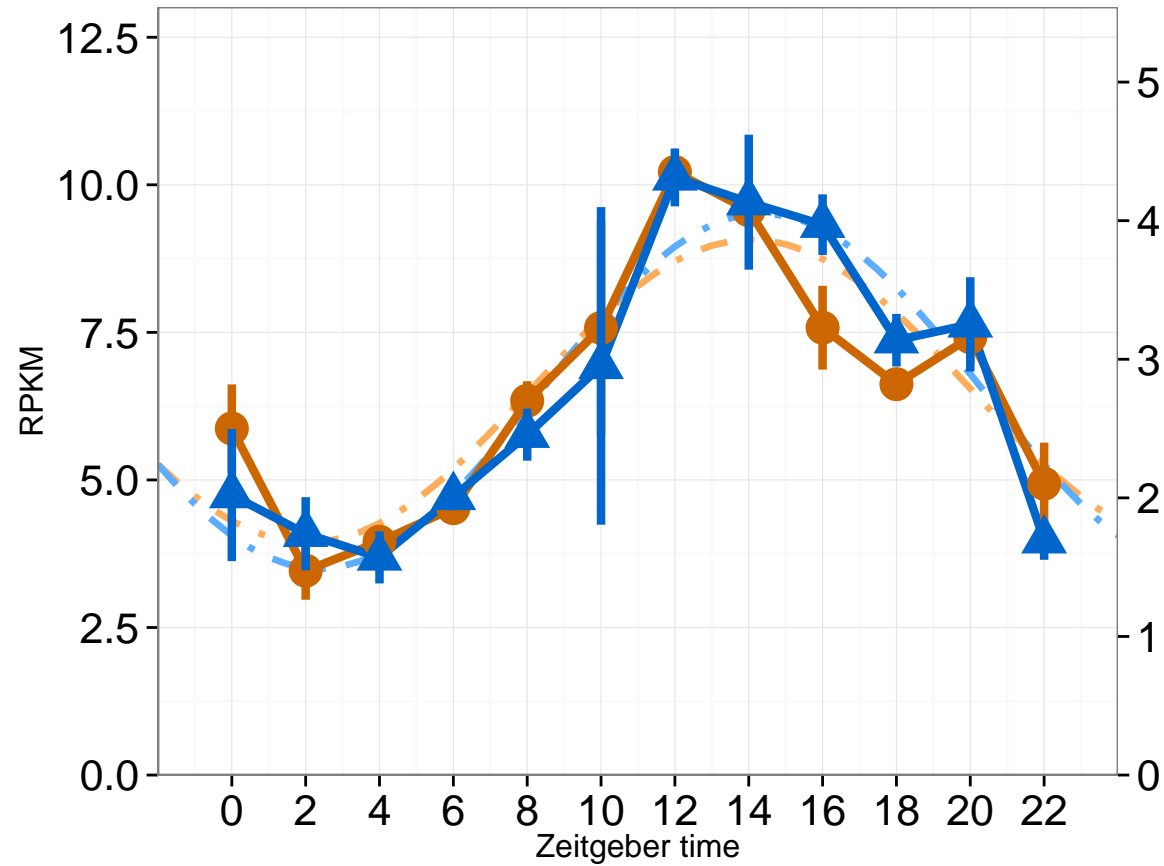

# Fam102a

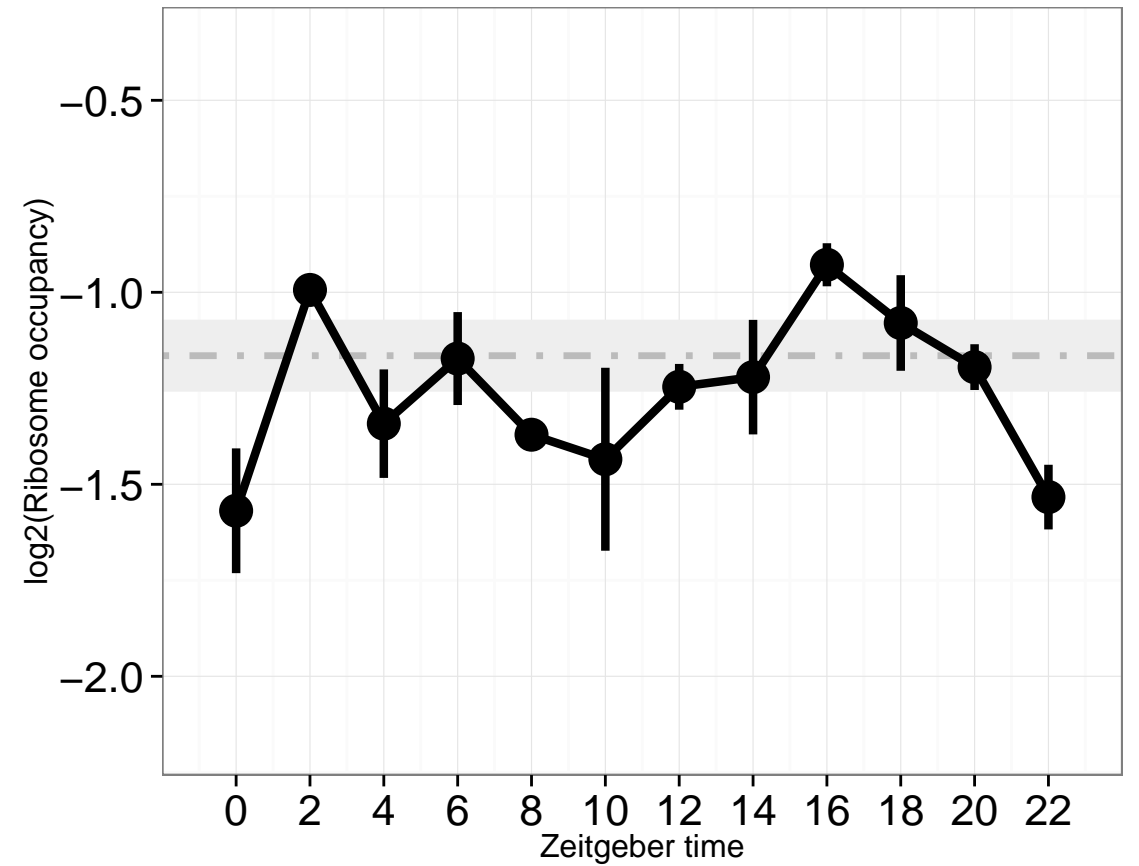

Supplement: SuppDataset_1.zip [file Fam102a_set_D.pdf › Supplemental Dataset 1/D-mRNA_rhythm_translation_rhyth/Fam102a_set_D.pdf]

# Fam110a

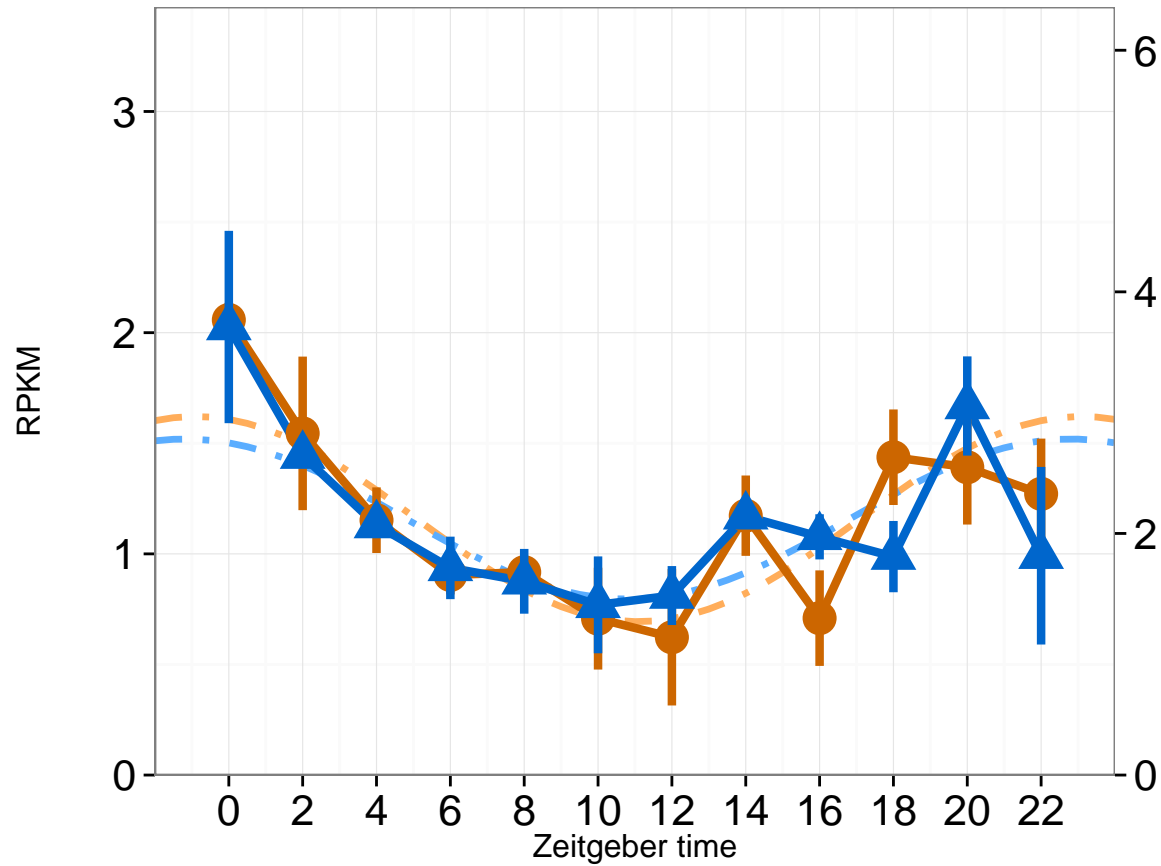

# Fam110a

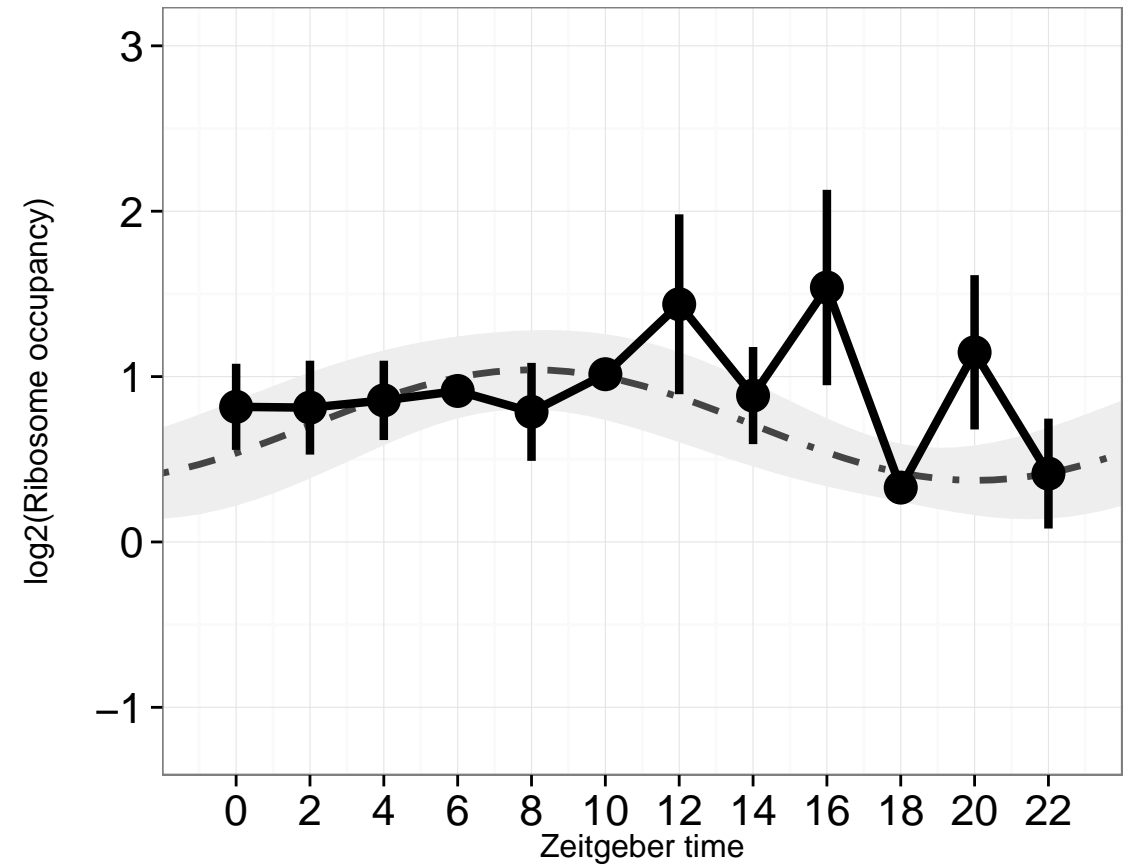

Supplement: SuppDataset_1.zip [file Fam110a_set_D.pdf › Supplemental Dataset 1/D-mRNA_rhythm_translation_rhyth/Fam110a_set_D.pdf]

# Fam126a

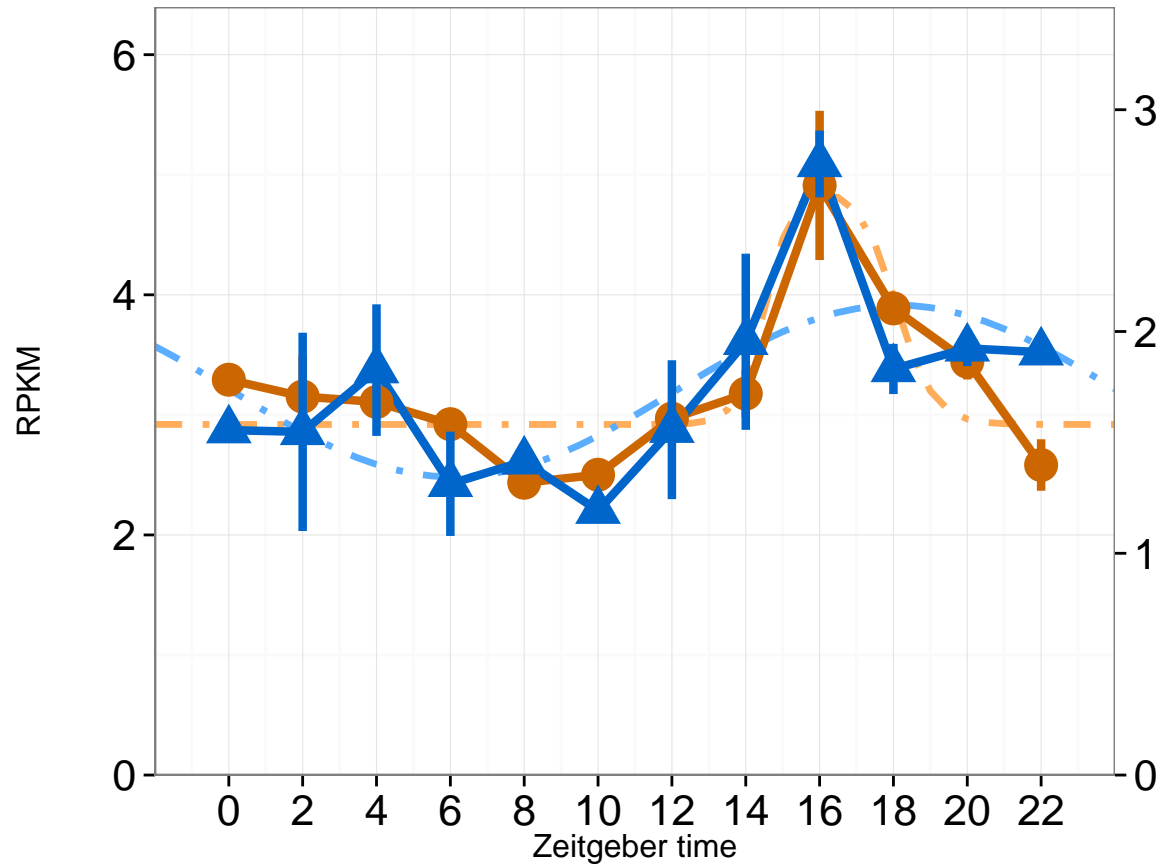

# Fam126a

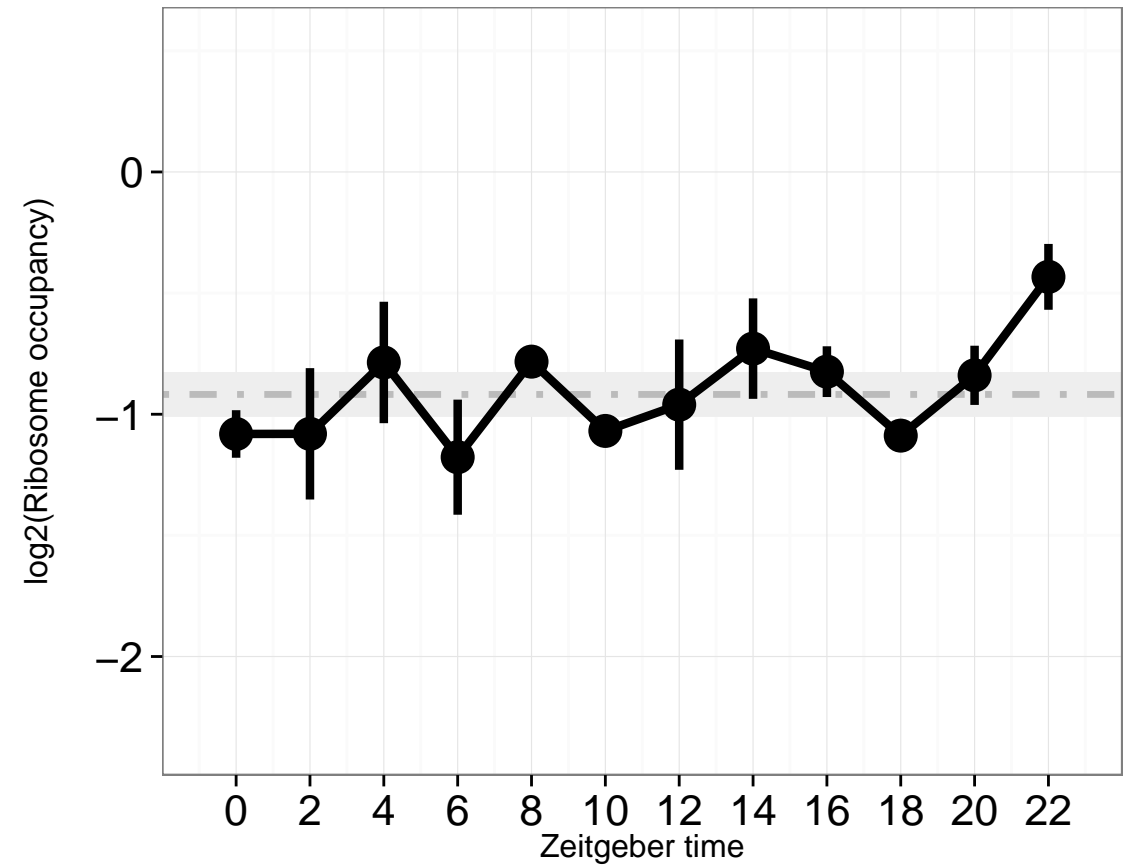

Supplement: SuppDataset_1.zip [file Fam126a_set_D.pdf › Supplemental Dataset 1/D-mRNA_rhythm_translation_rhyth/Fam126a_set_D.pdf]

# Fam126b

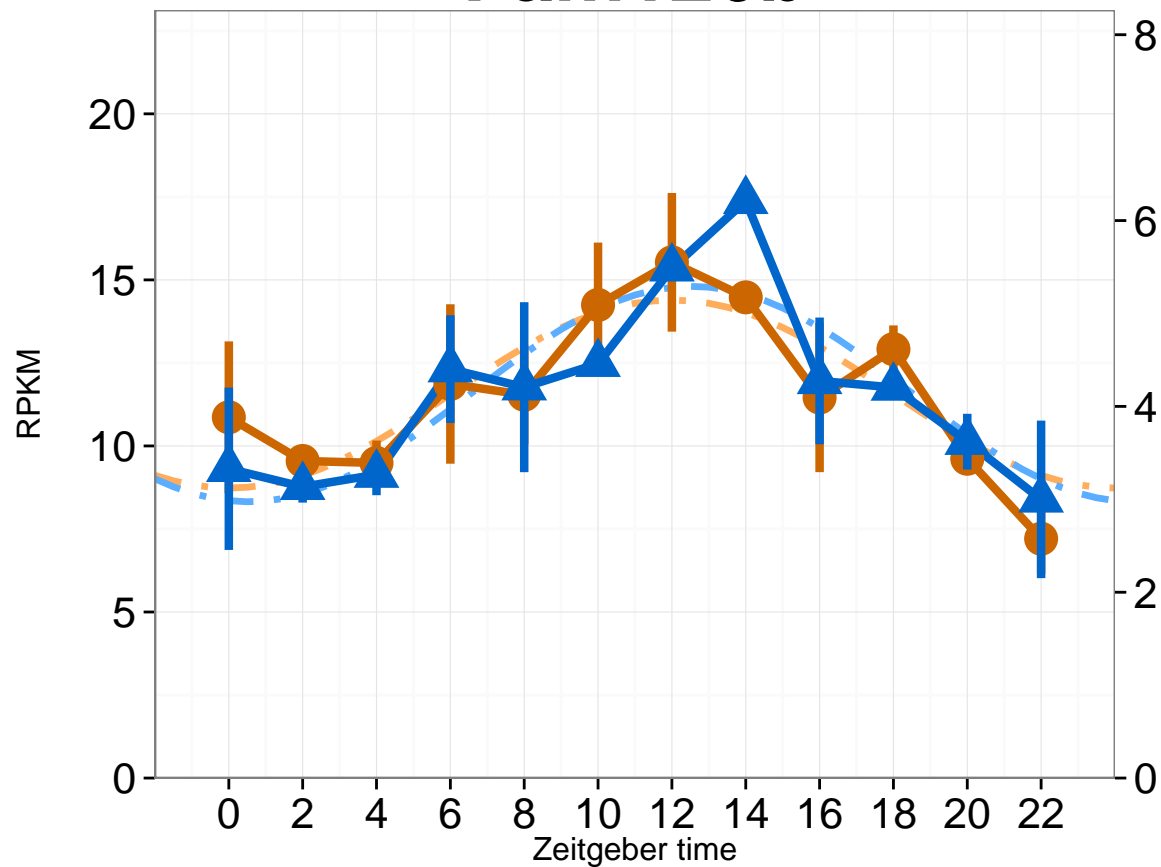

# Fam126b

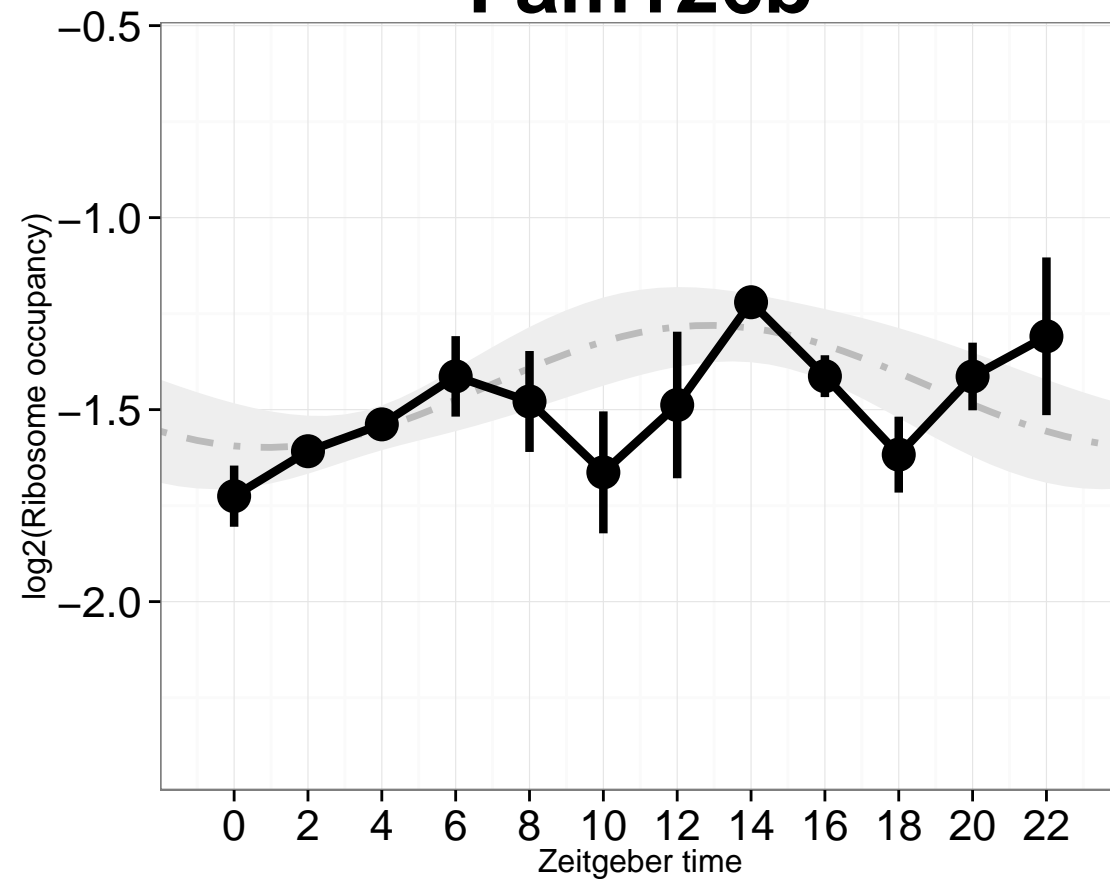

Supplement: SuppDataset_1.zip [file Fam126b_set_D.pdf › Supplemental Dataset 1/D-mRNA_rhythm_translation_rhyth/Fam126b_set_D.pdf]

# Fam160a1

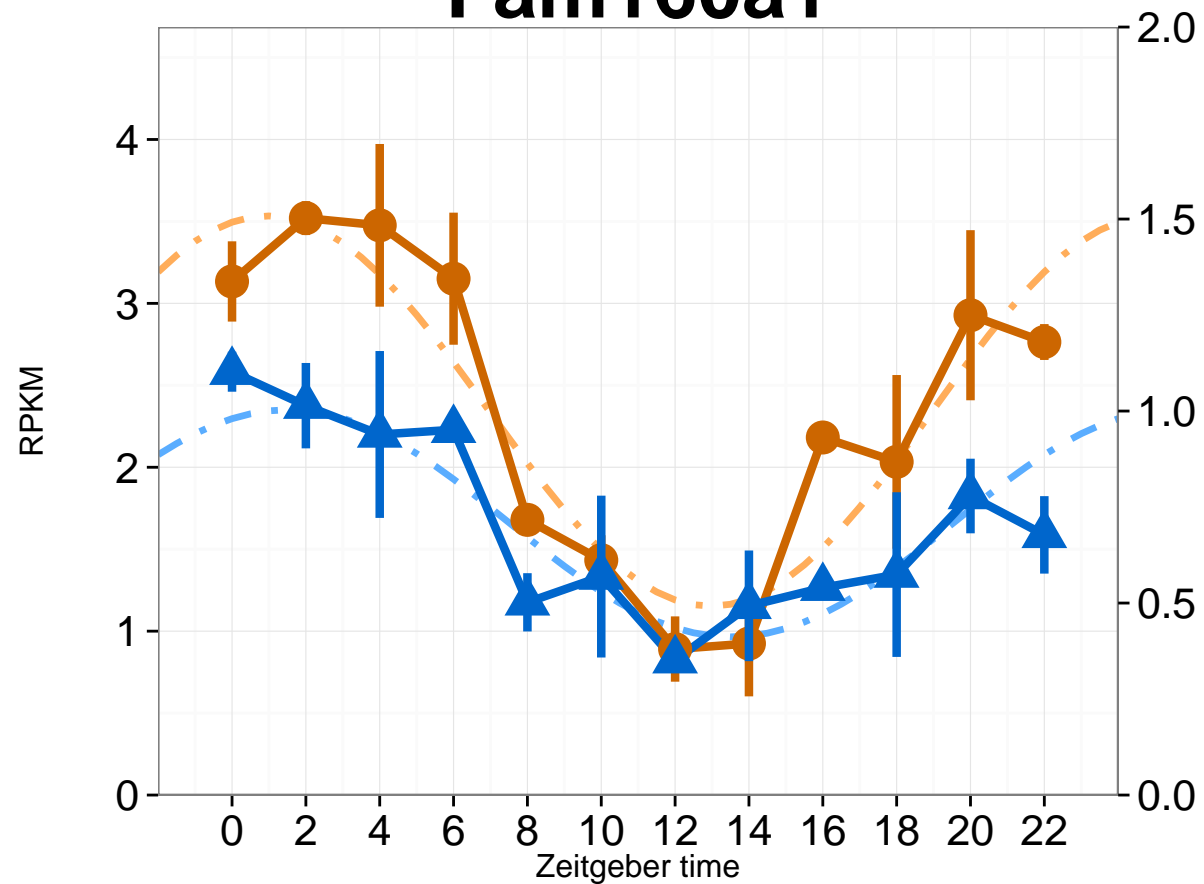

# Fam160a1

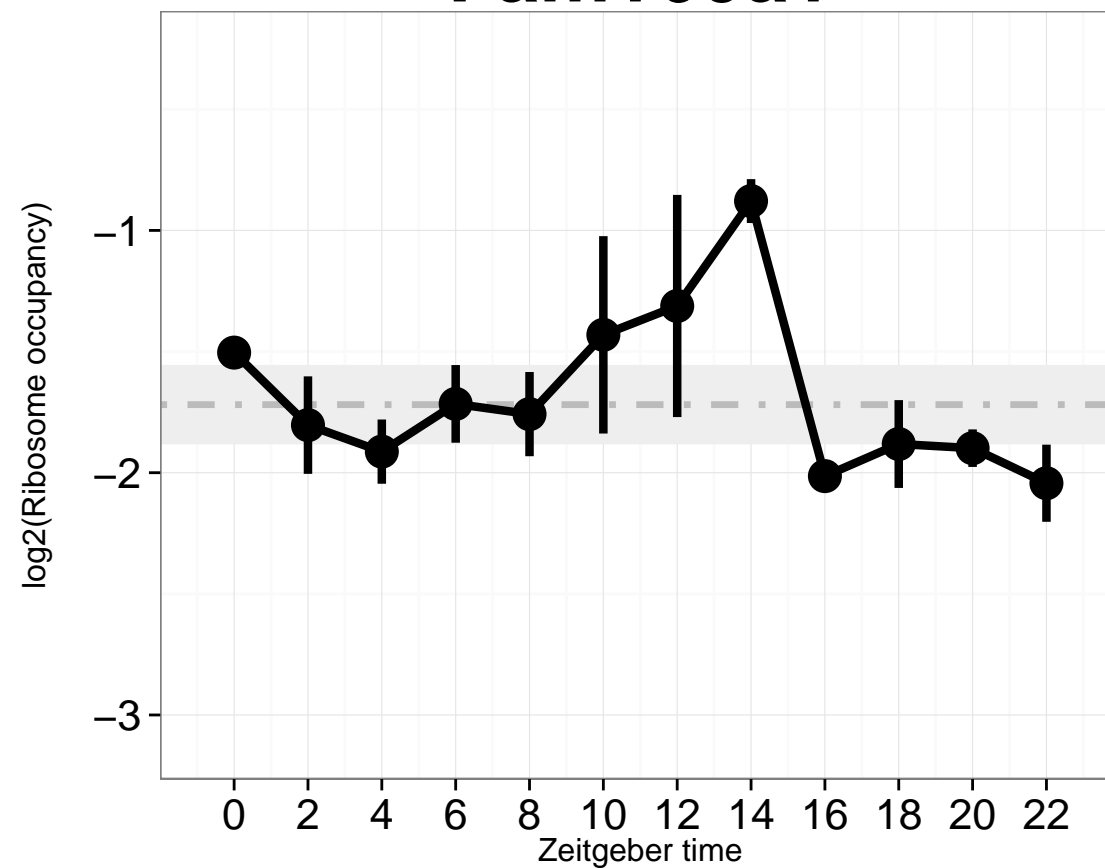

Supplement: SuppDataset_1.zip [file Fam160a1_set_D.pdf › Supplemental Dataset 1/D-mRNA_rhythm_translation_rhyth/Fam160a1_set_D.pdf]

# Fam172a

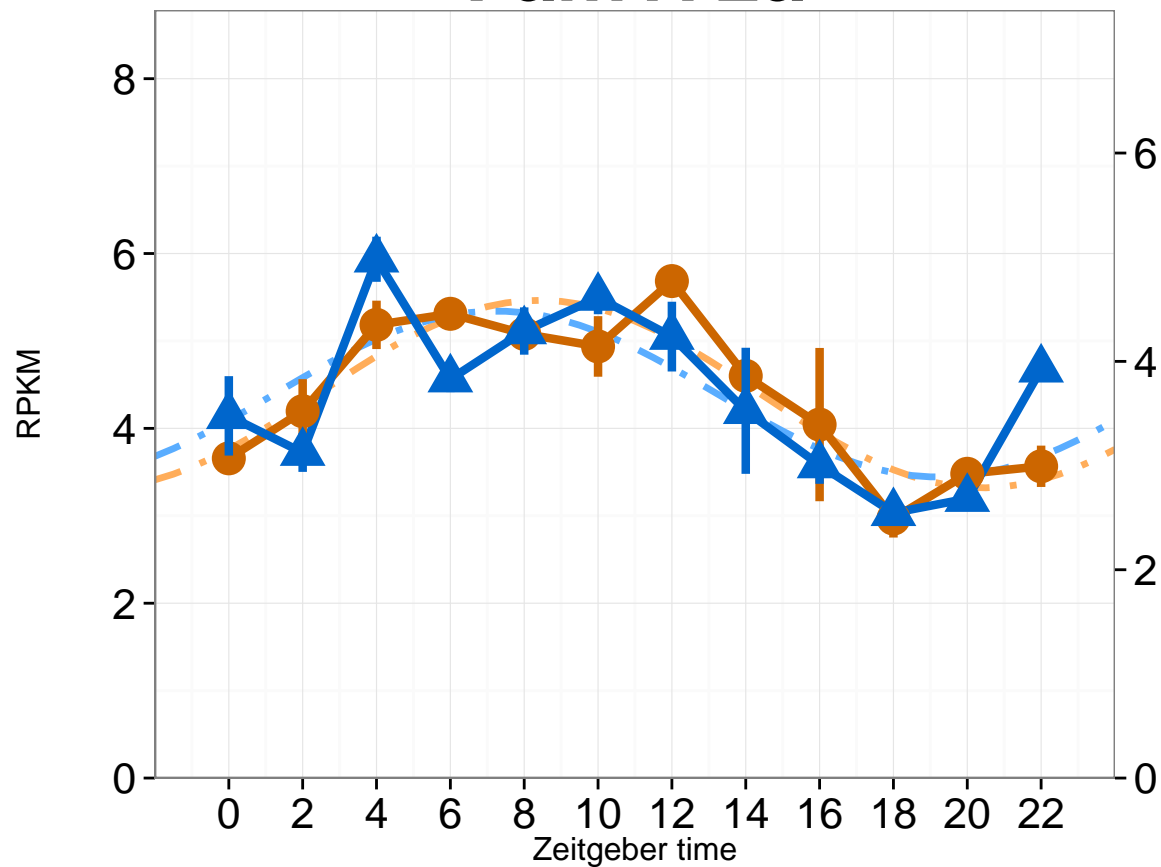

# Fam172a

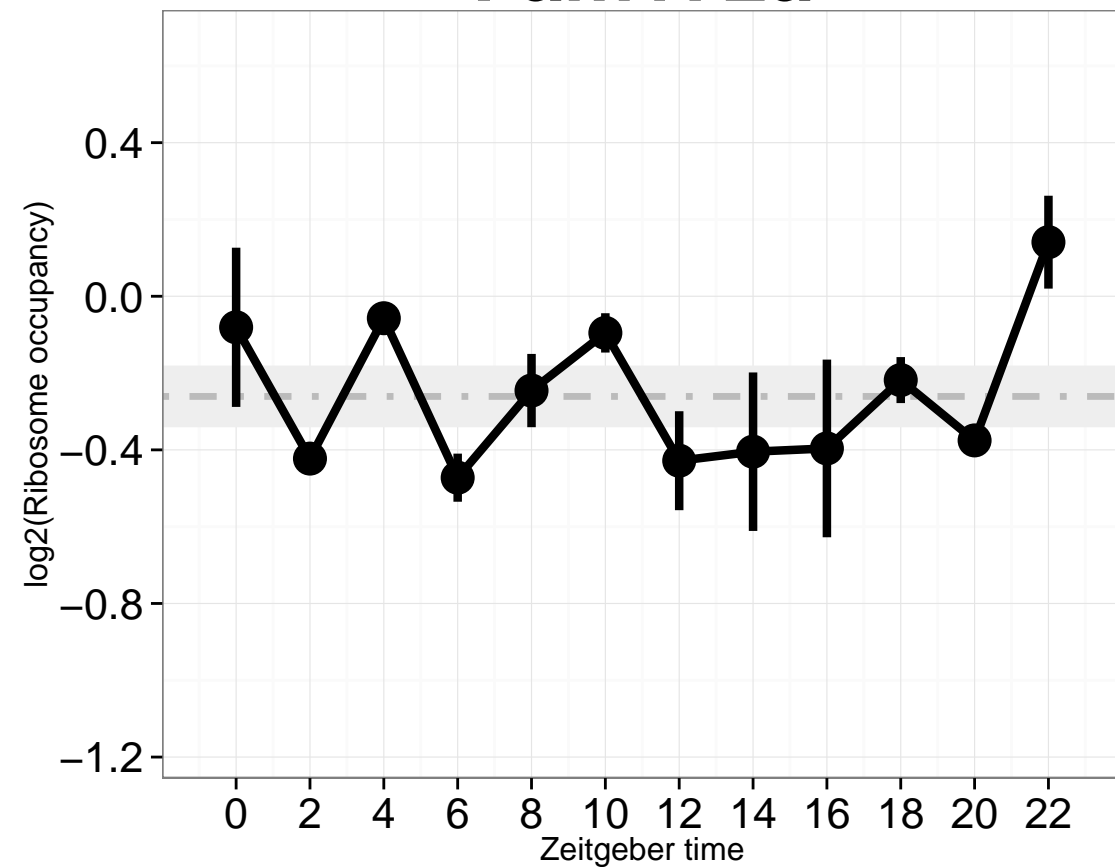

Supplement: SuppDataset_1.zip [file Fam172a_set_D.pdf › Supplemental Dataset 1/D-mRNA_rhythm_translation_rhyth/Fam172a_set_D.pdf]

## Fam195a

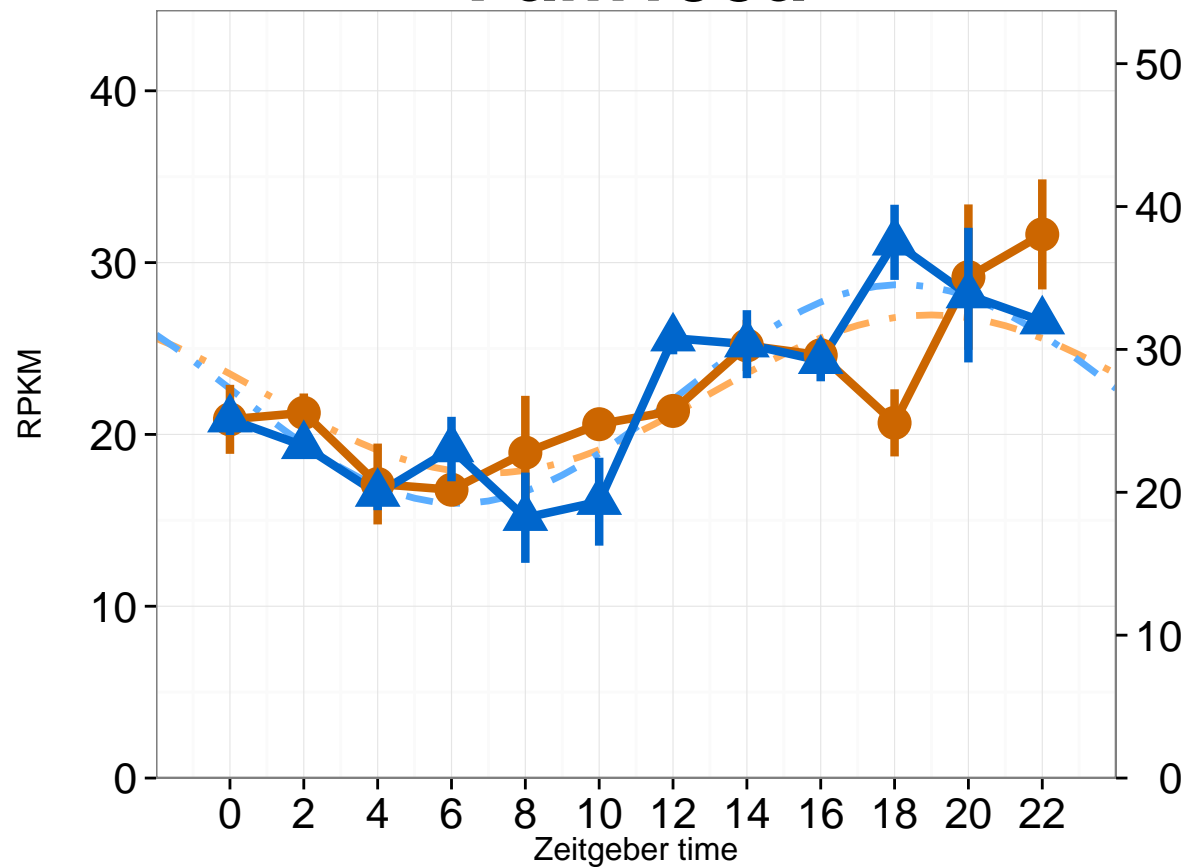

## Fam195a

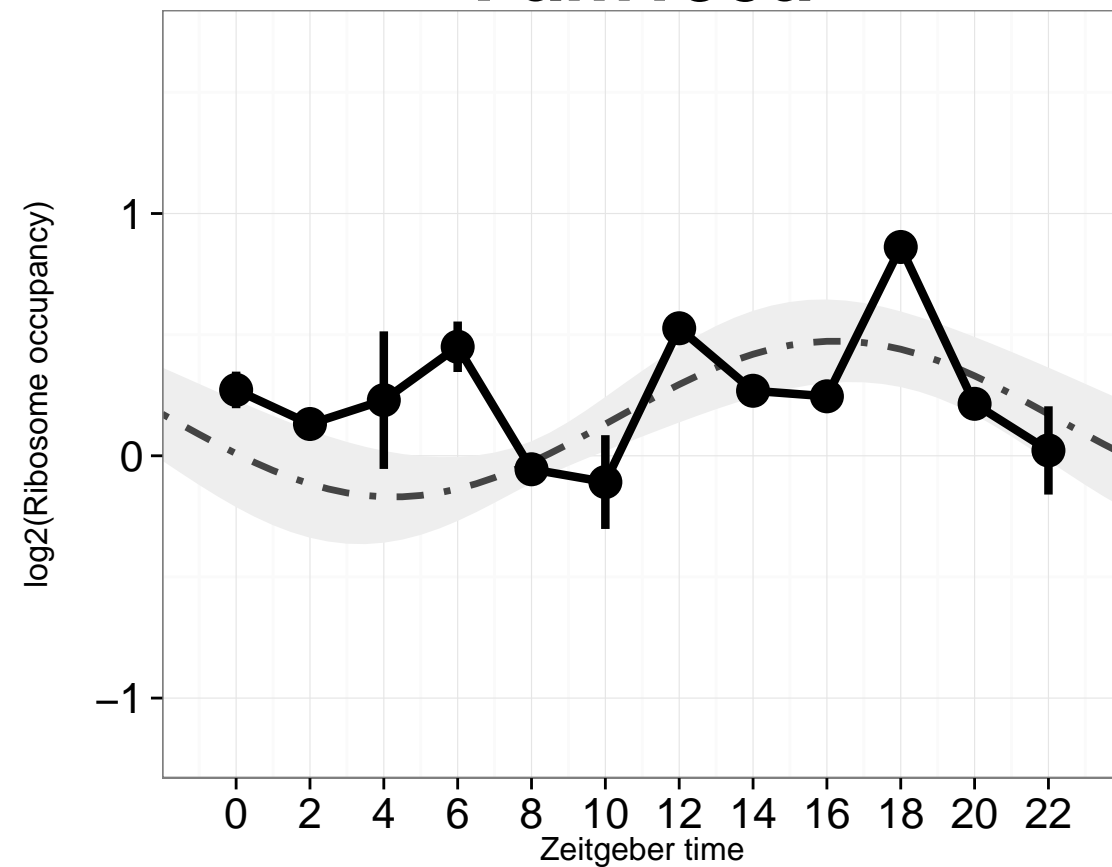

Supplement: SuppDataset_1.zip [file Fam195a_set_D.pdf › Supplemental Dataset 1/D-mRNA_rhythm_translation_rhyth/Fam195a_set_D.pdf]

# Fam198a

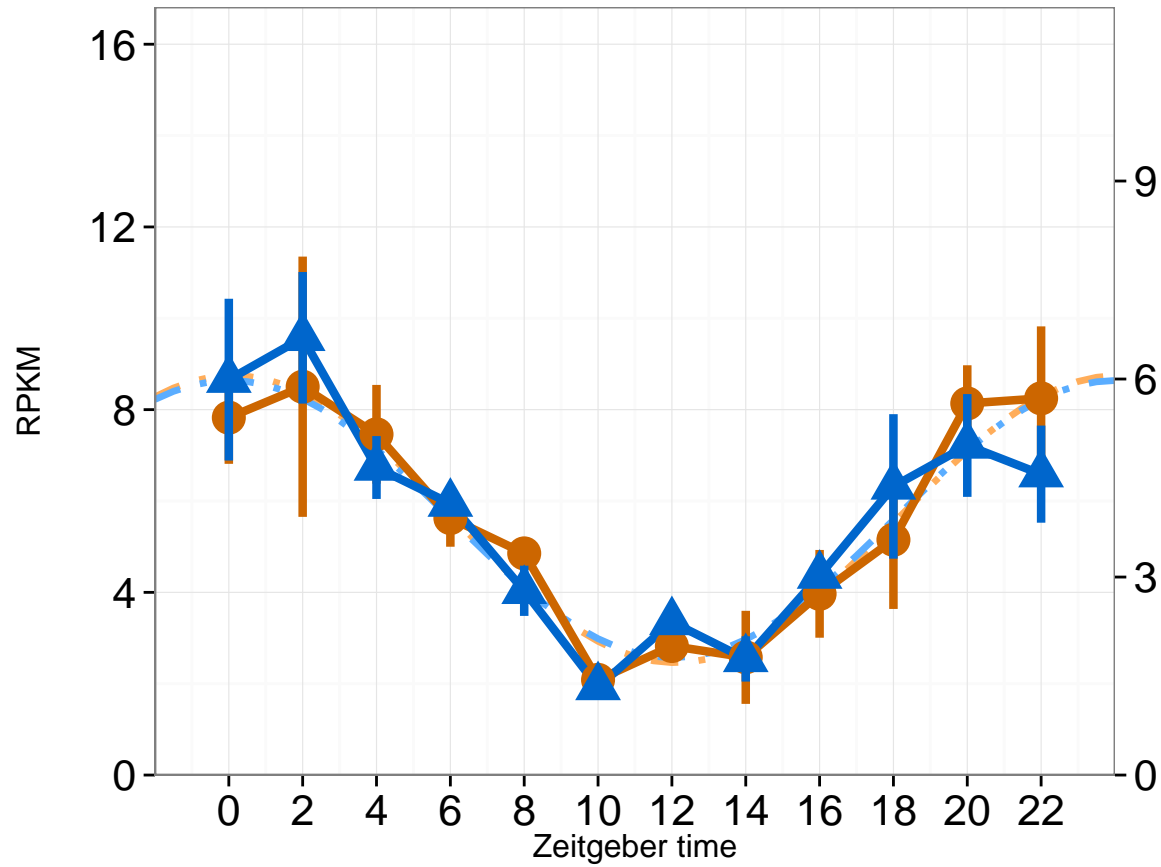

# Fam198a

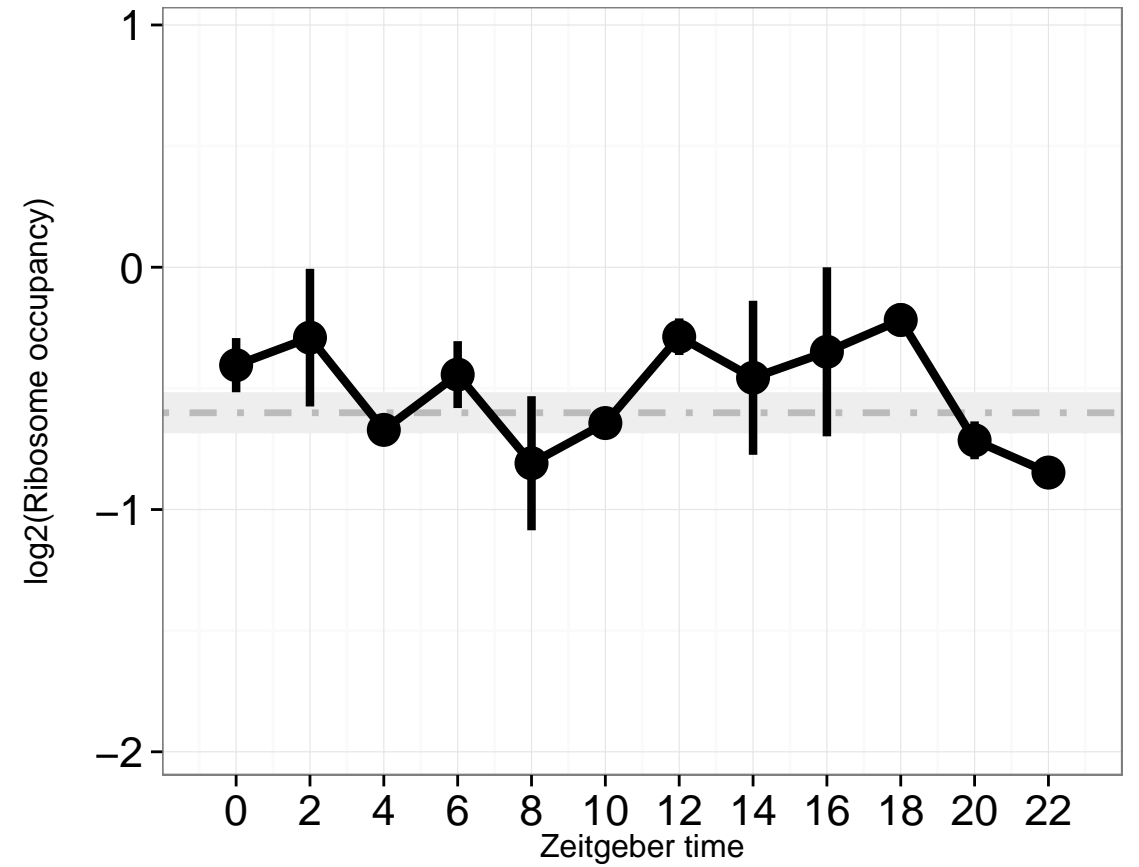

Supplement: SuppDataset_1.zip [file Fam198a_set_D.pdf › Supplemental Dataset 1/D-mRNA_rhythm_translation_rhyth/Fam198a_set_D.pdf]

## Fam20a

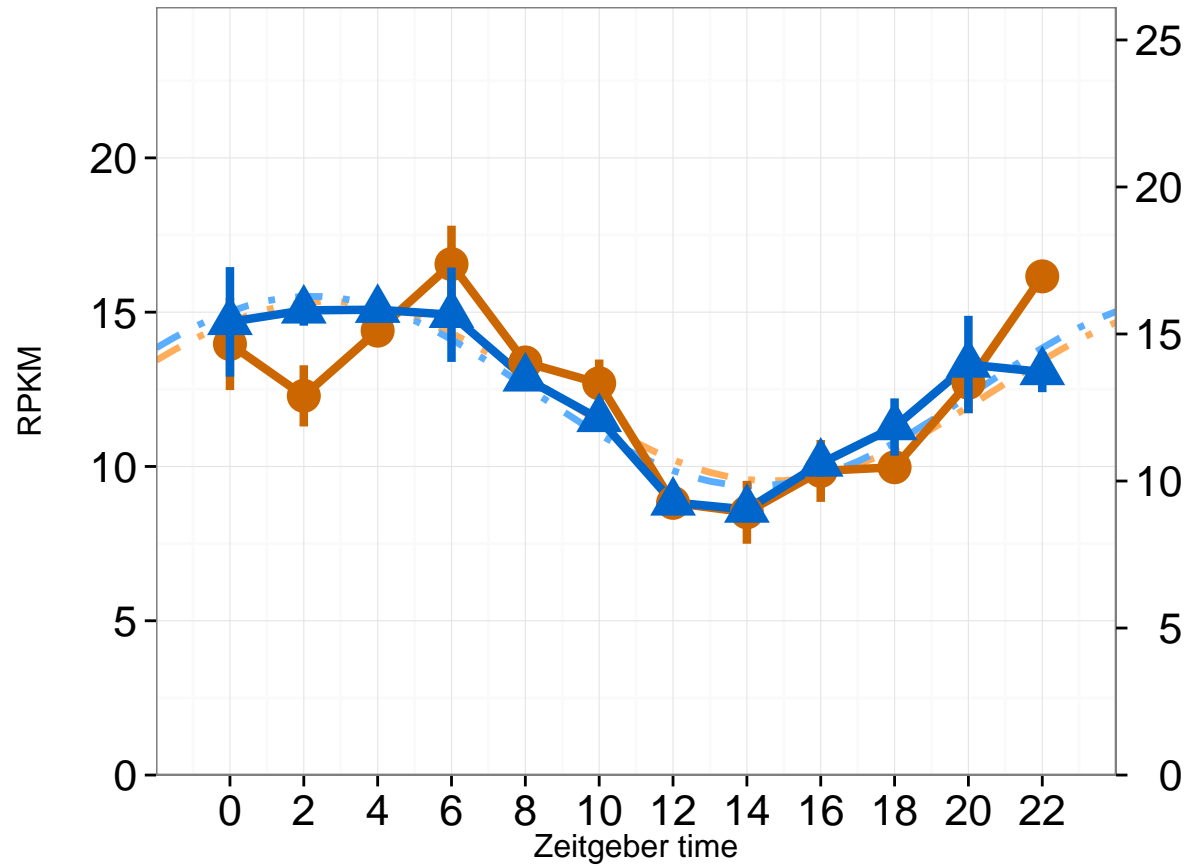

## Fam20a

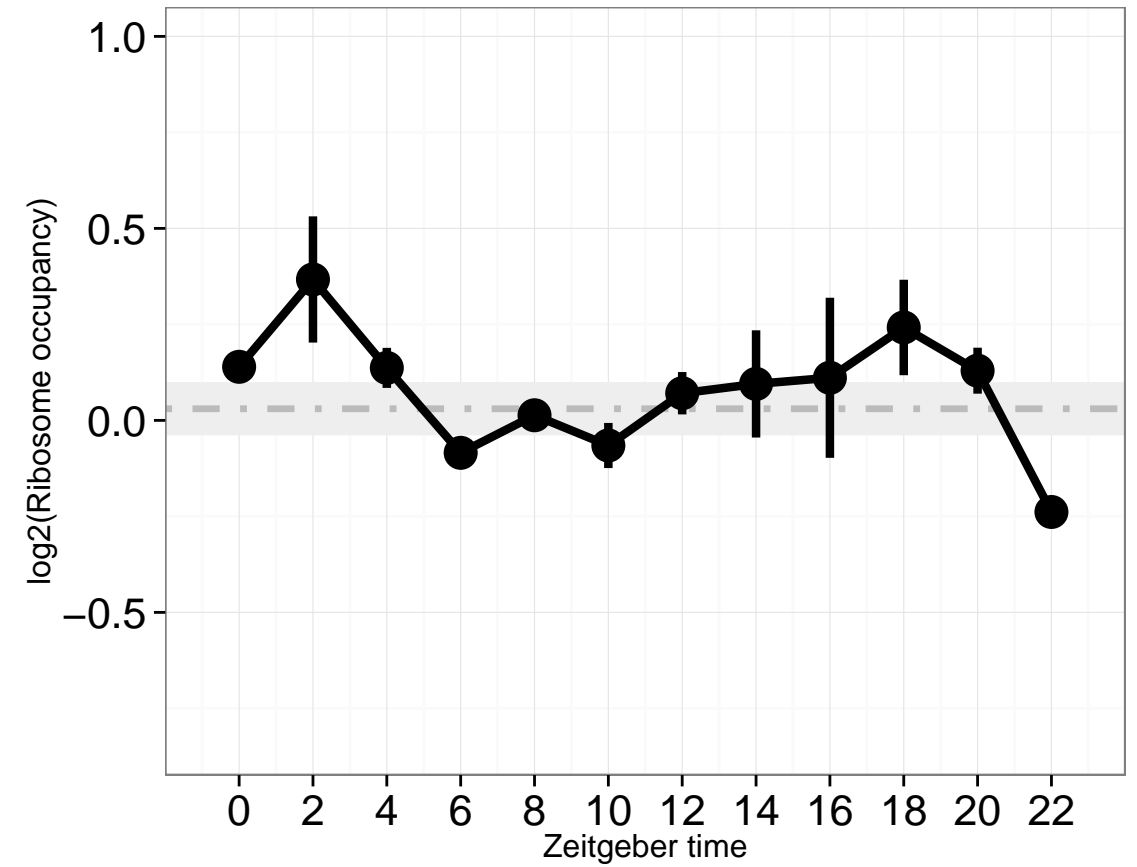

Supplement: SuppDataset_1.zip [file Fam20a_set_D.pdf › Supplemental Dataset 1/D-mRNA_rhythm_translation_rhyth/Fam20a_set_D.pdf]

# Fam213b

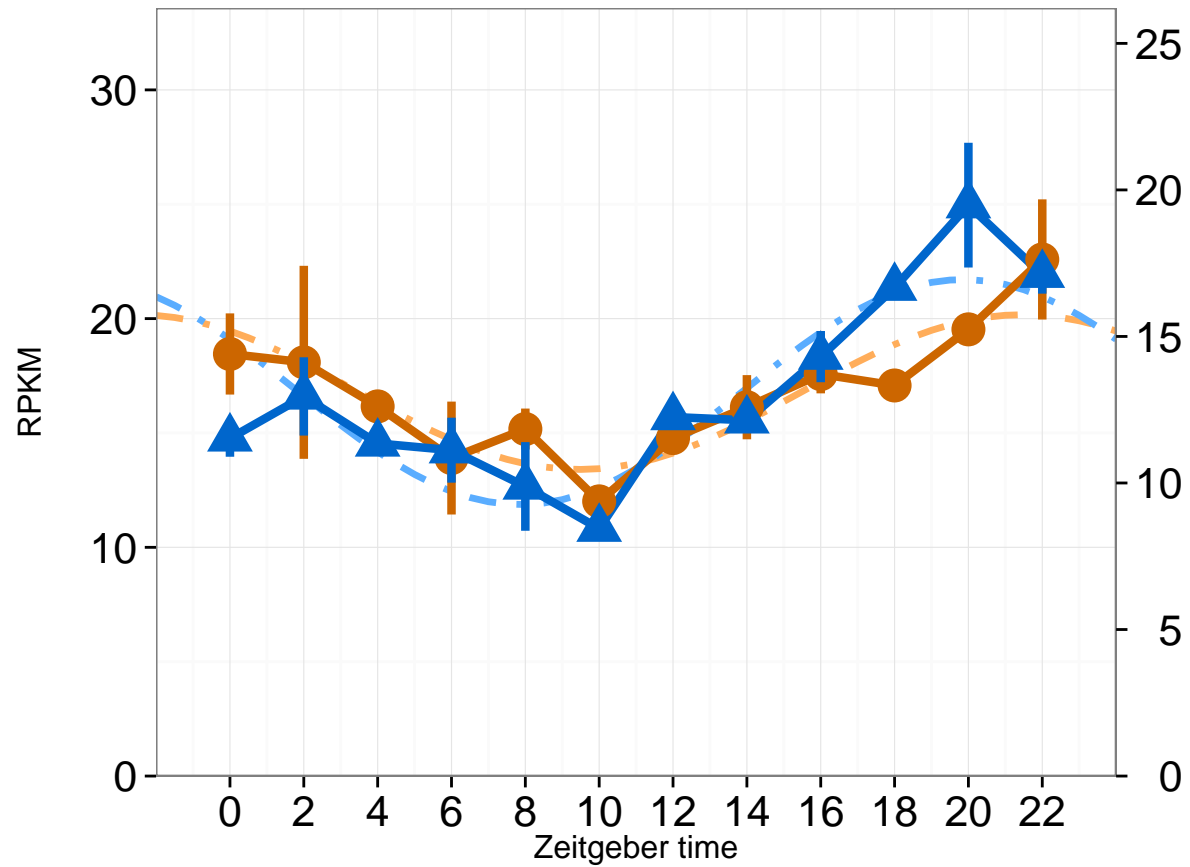

# Fam213b

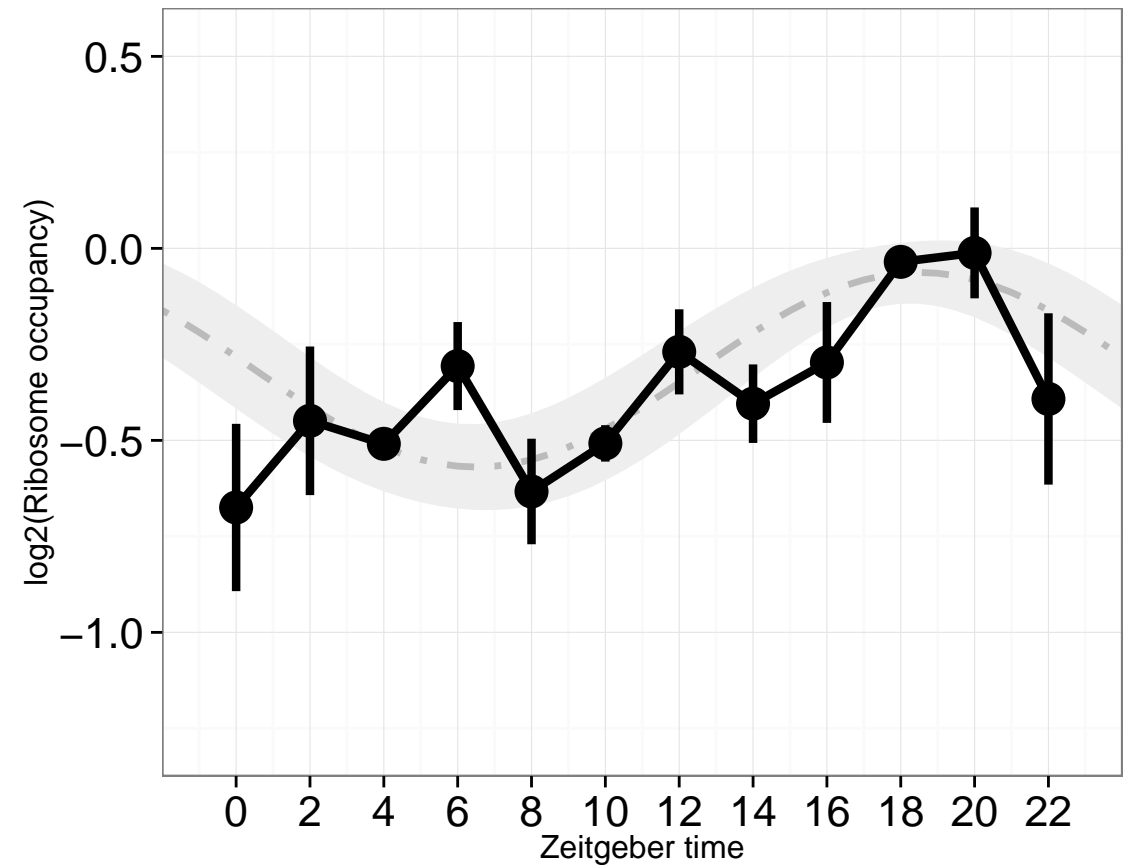

Supplement: SuppDataset_1.zip [file Fam213b_set_D.pdf › Supplemental Dataset 1/D-mRNA_rhythm_translation_rhyth/Fam213b_set_D.pdf]

# Fam214a

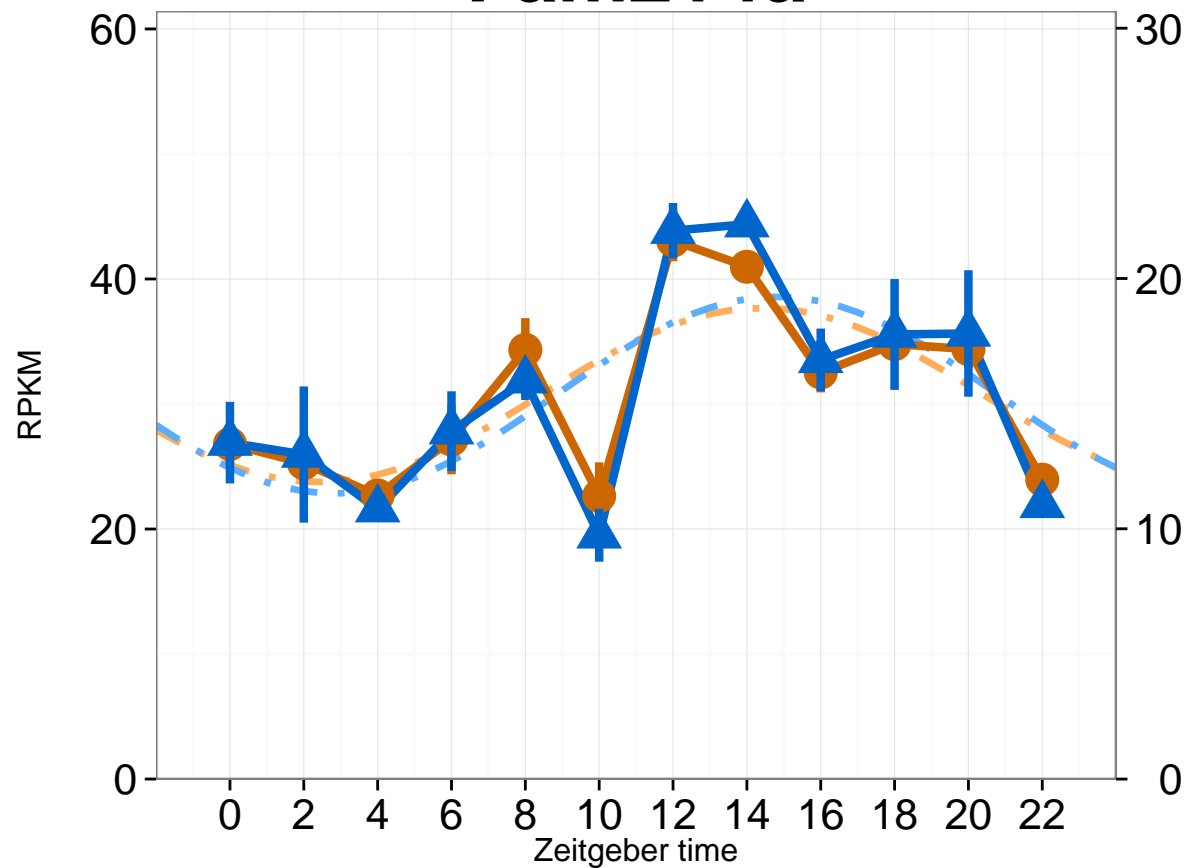

# Fam214a

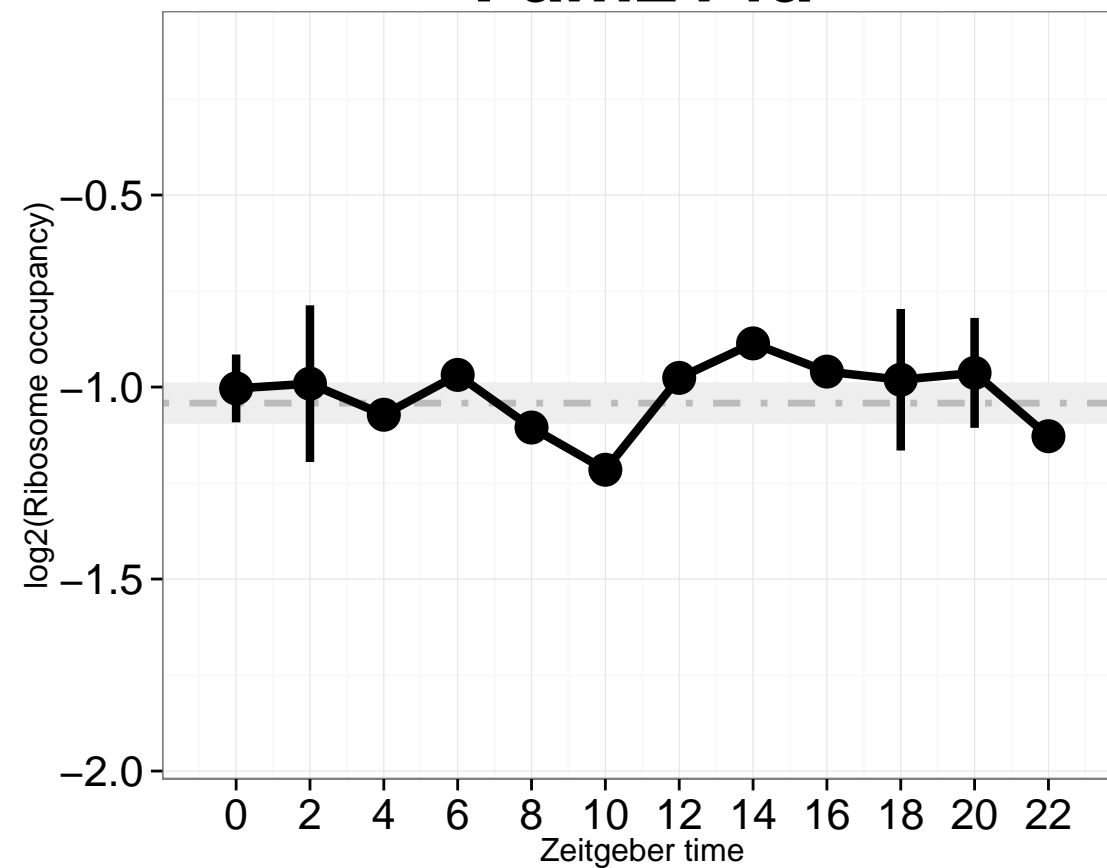

Supplement: SuppDataset_1.zip [file Fam214a_set_D.pdf › Supplemental Dataset 1/D-mRNA_rhythm_translation_rhyth/Fam214a_set_D.pdf]

# Fam222a

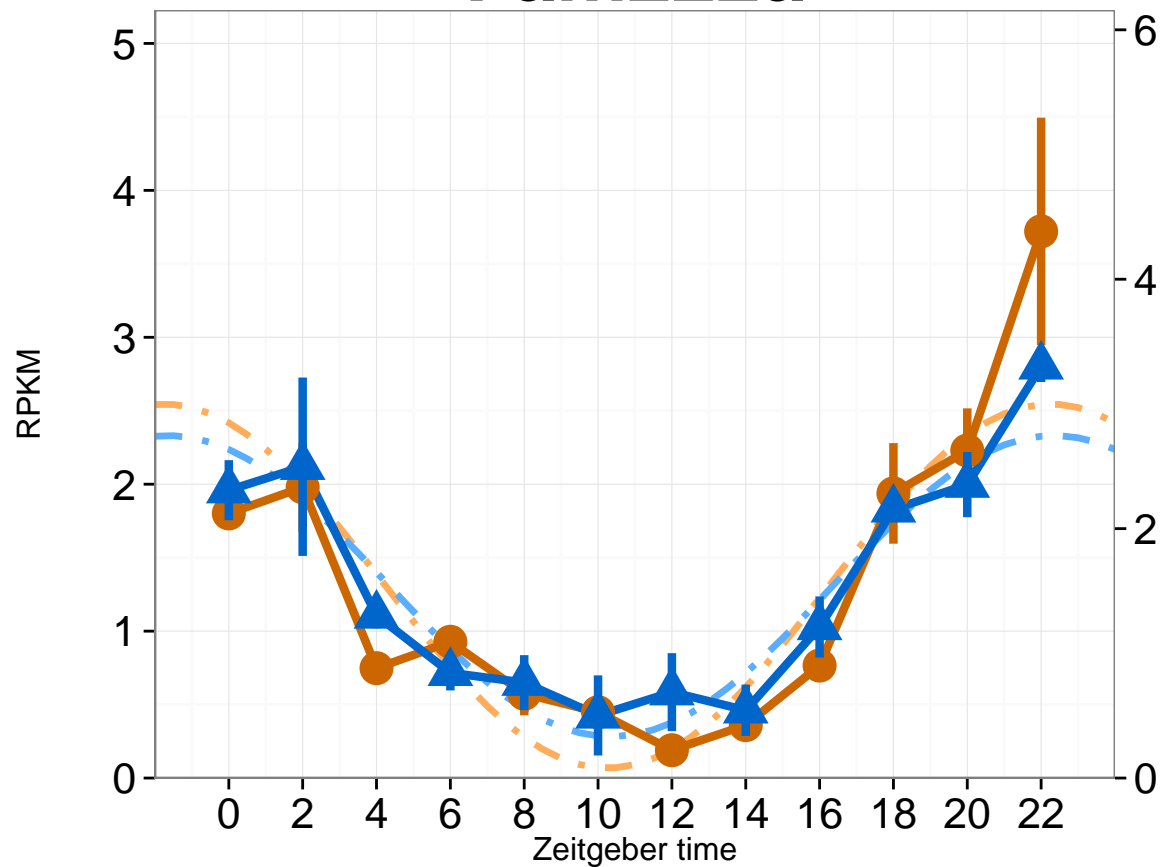

# Fam222a

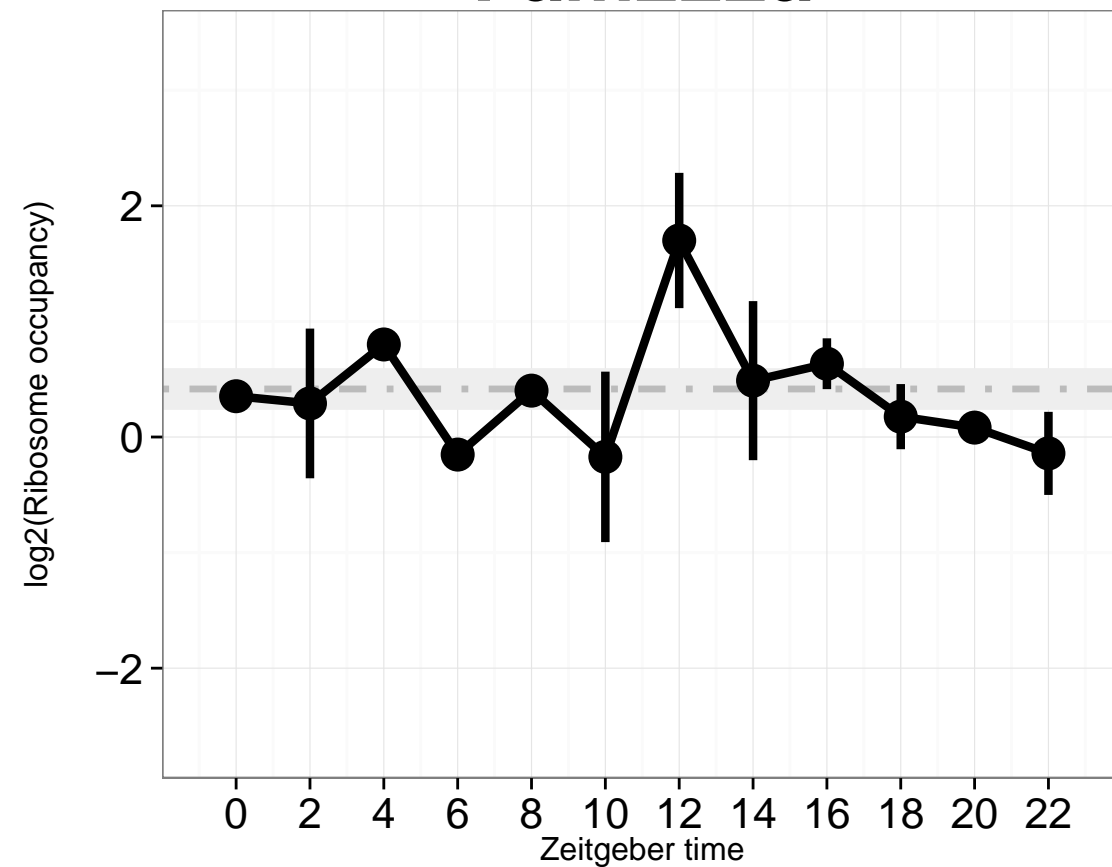

Supplement: SuppDataset_1.zip [file Fam222a_set_D.pdf › Supplemental Dataset 1/D-mRNA_rhythm_translation_rhyth/Fam222a_set_D.pdf]

# Fam222b

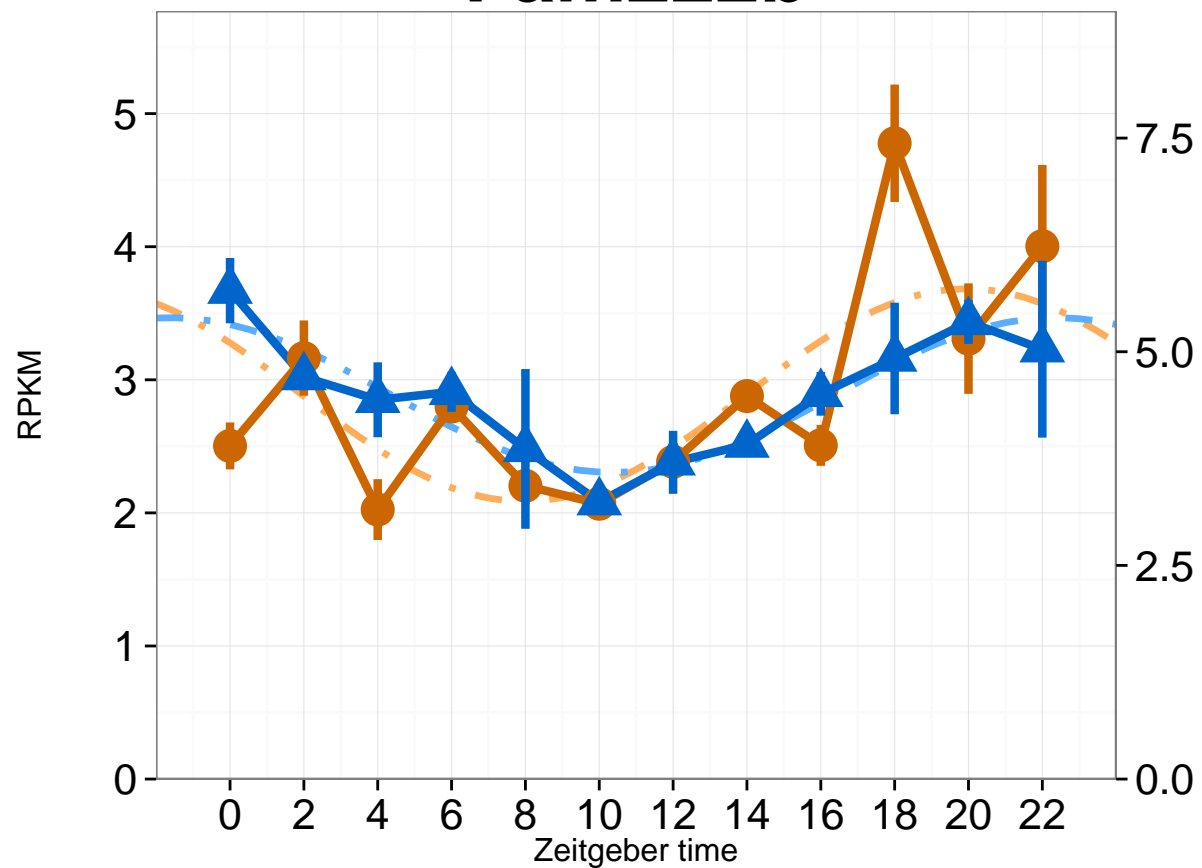

# Fam222b

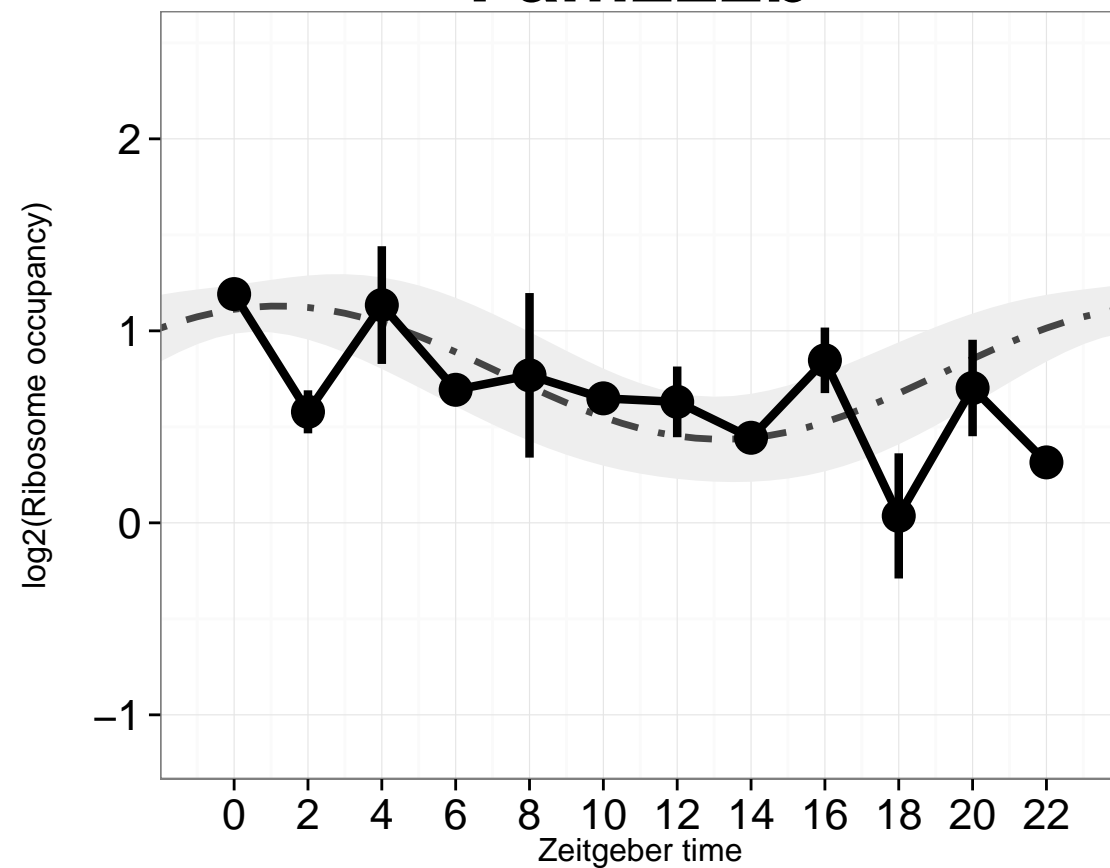

Supplement: SuppDataset_1.zip [file Fam222b_set_D.pdf › Supplemental Dataset 1/D-mRNA_rhythm_translation_rhyth/Fam222b_set_D.pdf]

# Fam35a

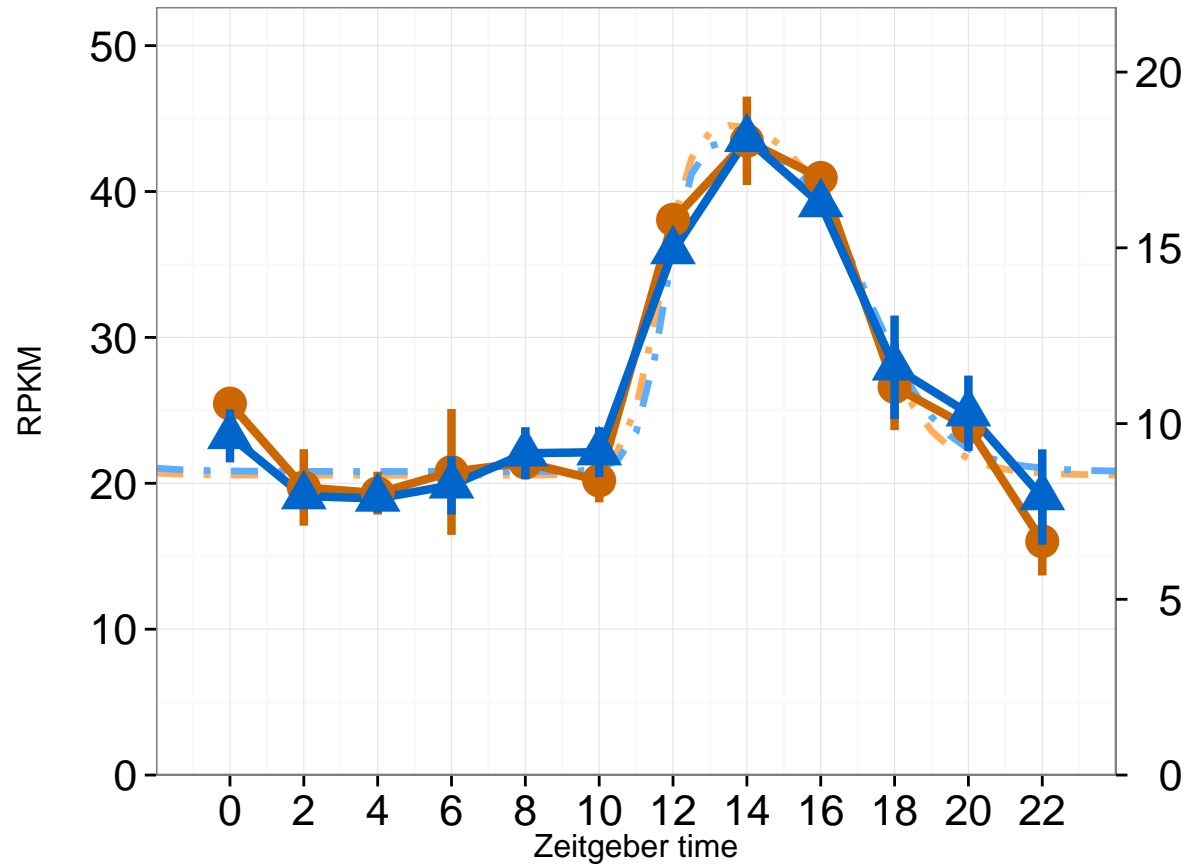

# Fam35a

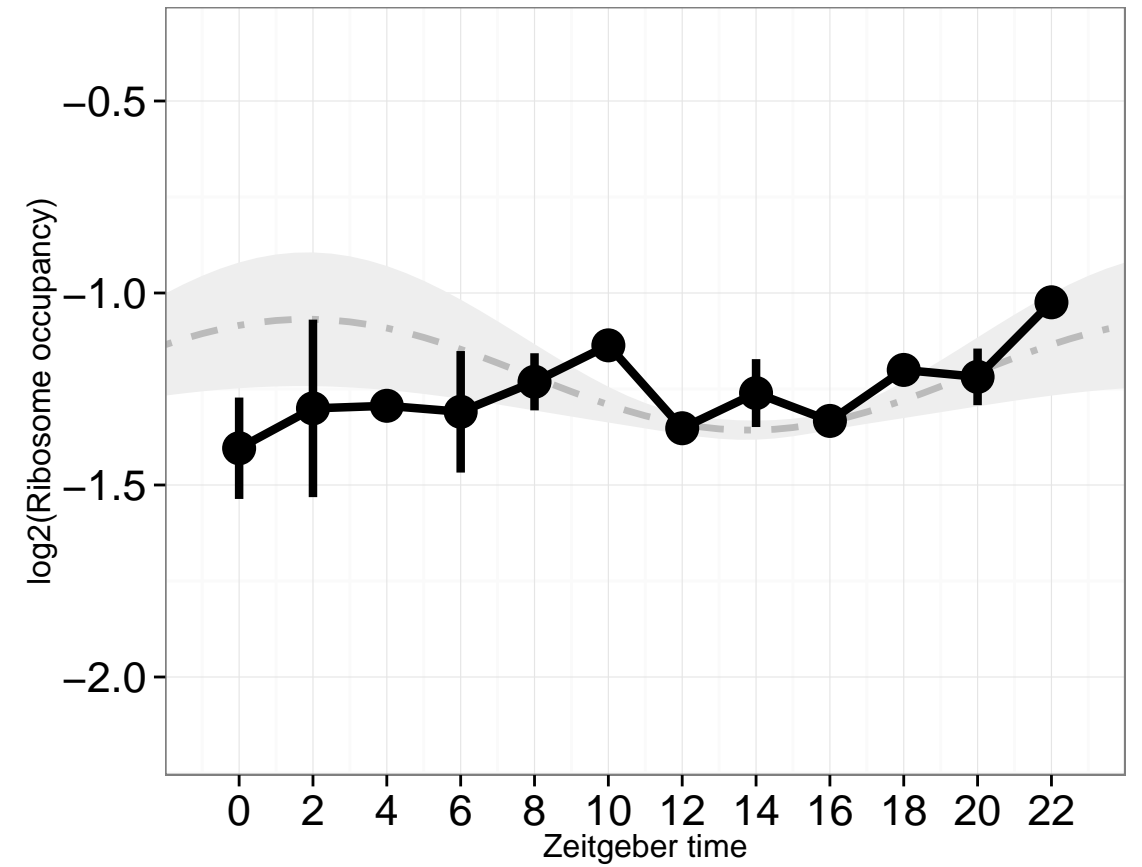

Supplement: SuppDataset_1.zip [file Fam35a_set_D.pdf › Supplemental Dataset 1/D-mRNA_rhythm_translation_rhyth/Fam35a_set_D.pdf]

# Fam46a

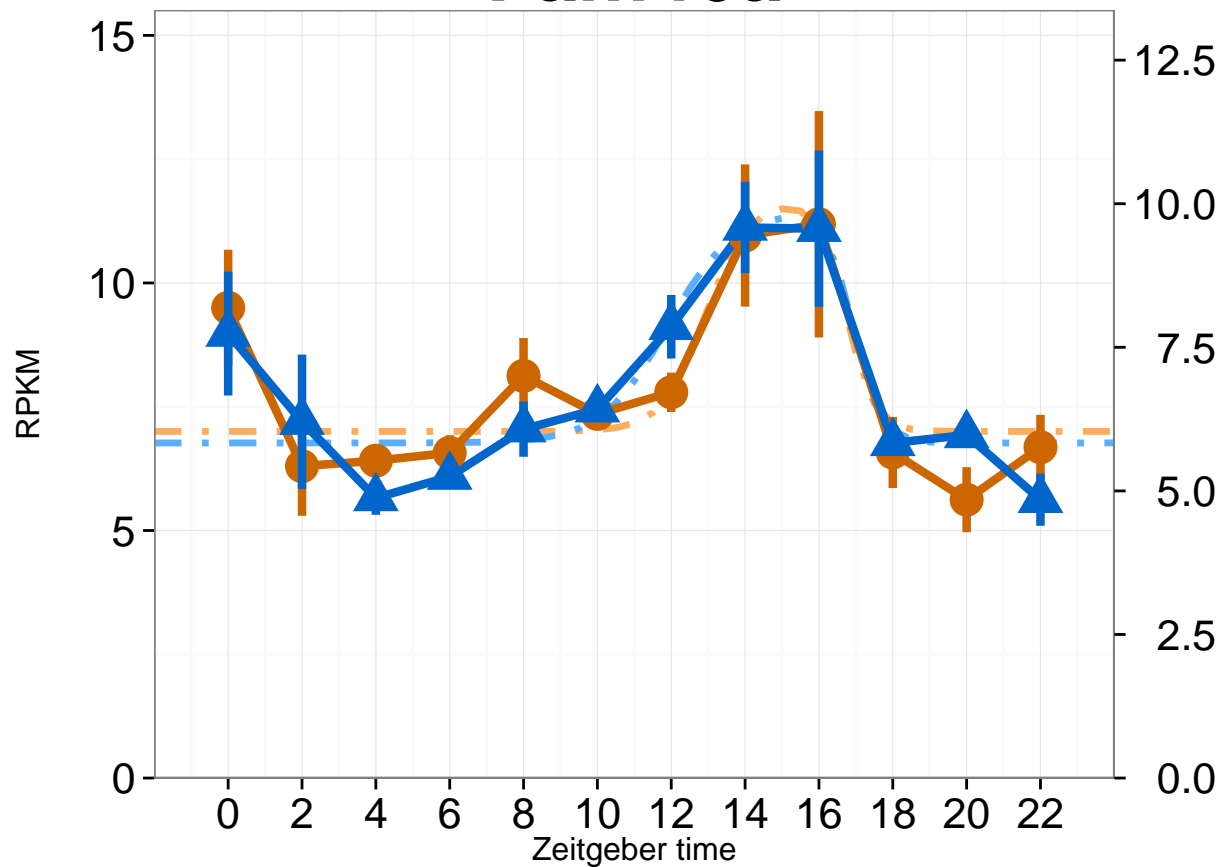

# Fam46a

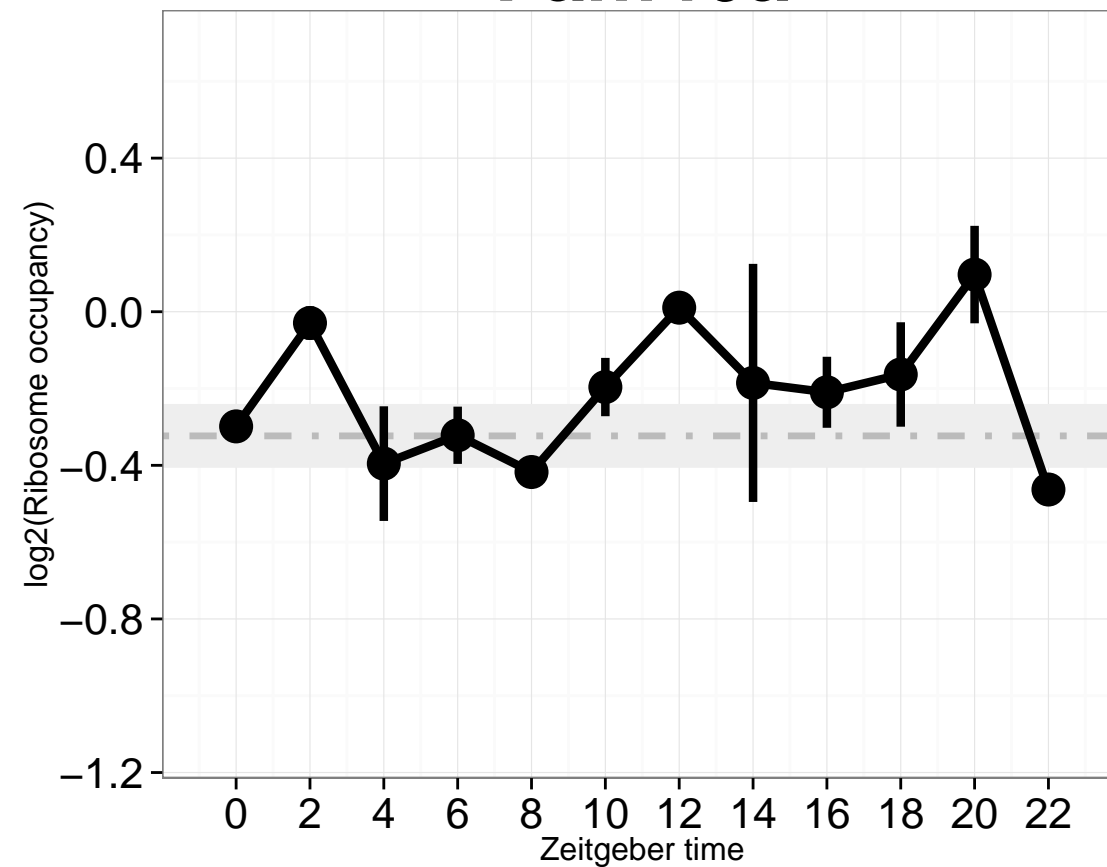

Supplement: SuppDataset_1.zip [file Fam46a_set_D.pdf › Supplemental Dataset 1/D-mRNA_rhythm_translation_rhyth/Fam46a_set_D.pdf]

# Fam47e

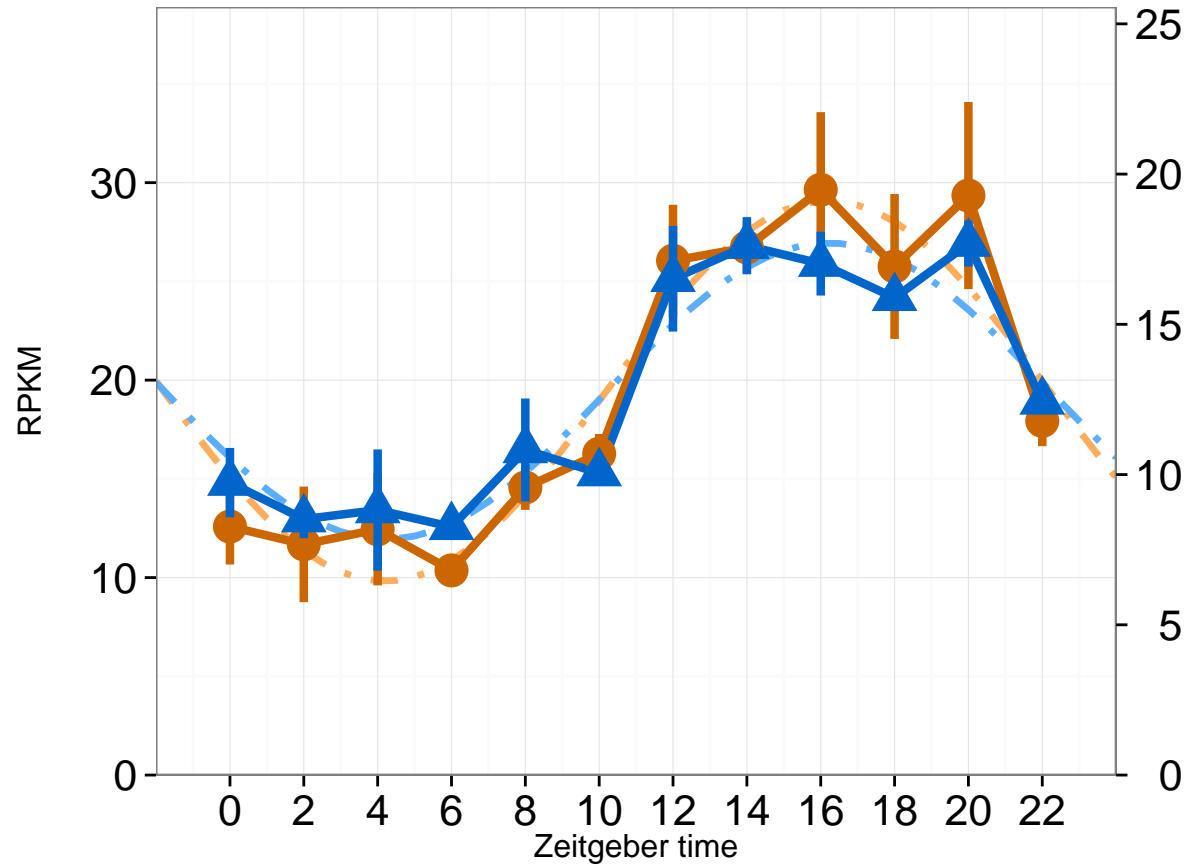

# Fam47e

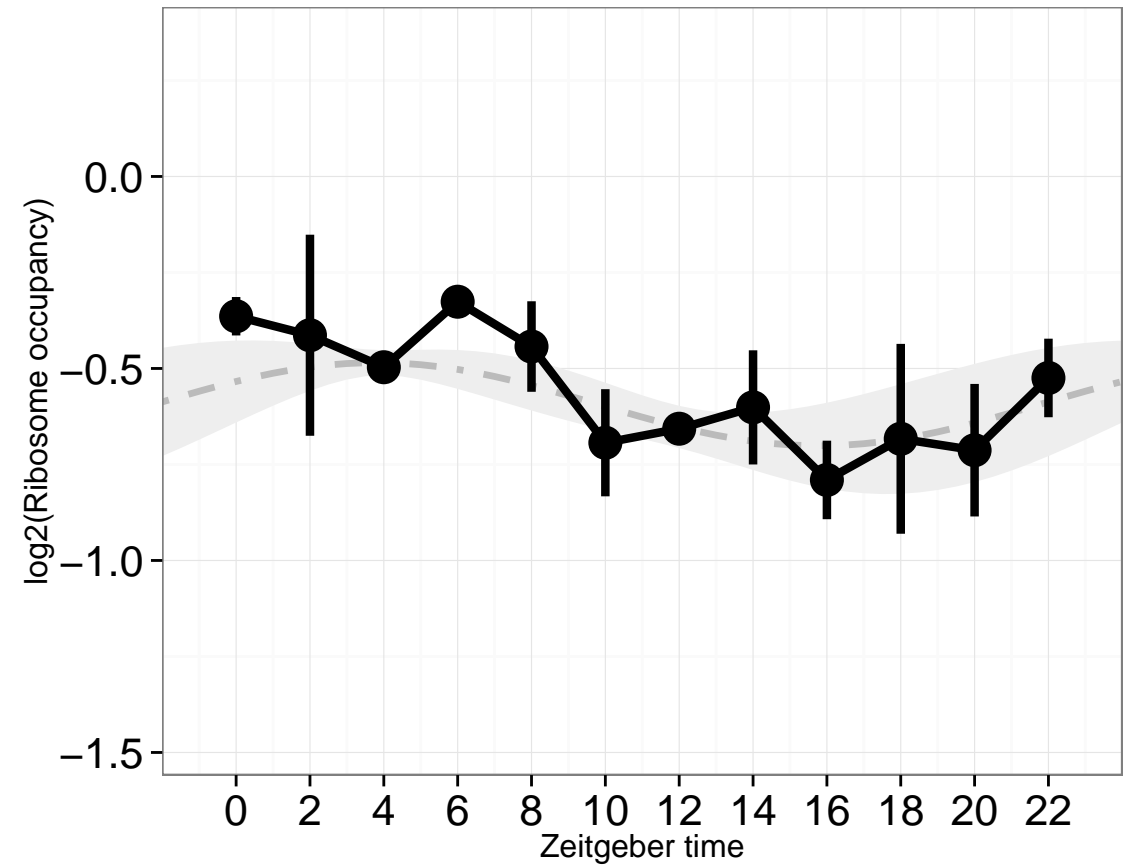

Supplement: SuppDataset_1.zip [file Fam47e_set_D.pdf › Supplemental Dataset 1/D-mRNA_rhythm_translation_rhyth/Fam47e_set_D.pdf]

# Fam57a

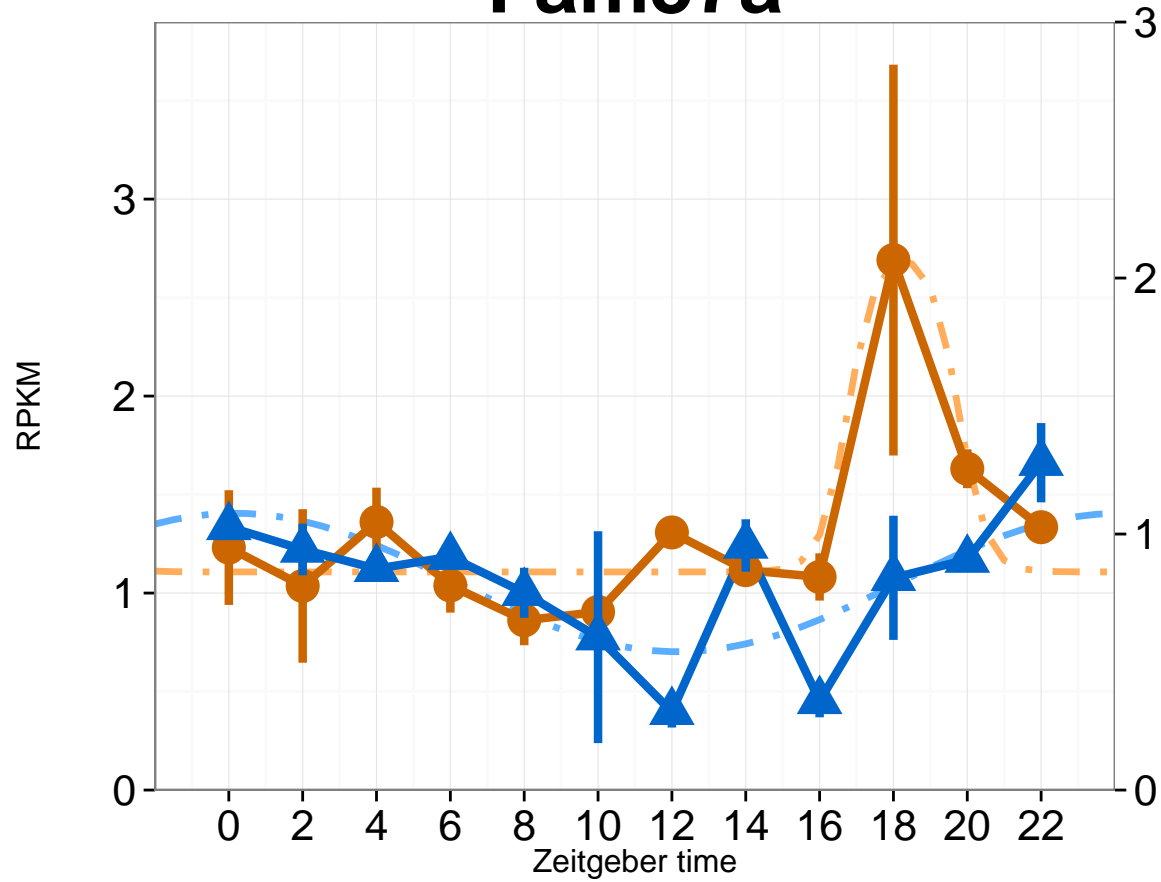

# Fam57a

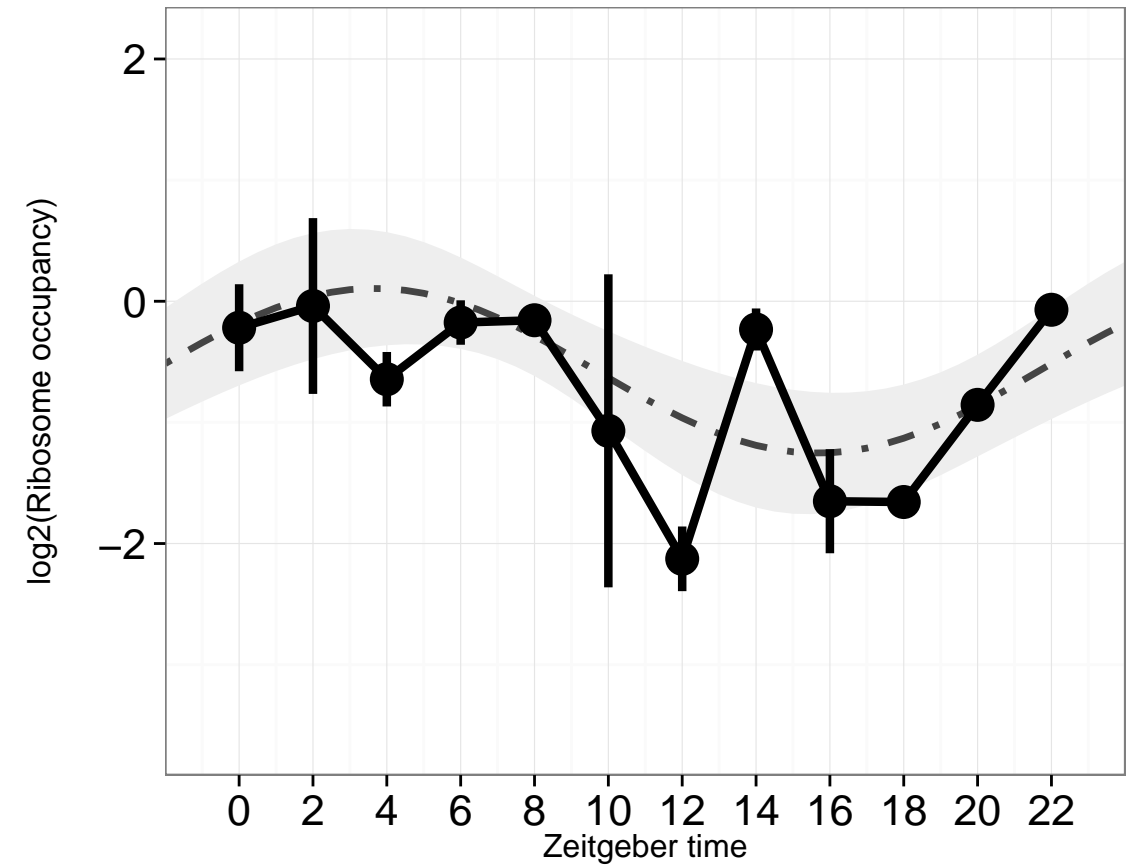

Supplement: SuppDataset_1.zip [file Fam57a_set_D.pdf › Supplemental Dataset 1/D-mRNA_rhythm_translation_rhyth/Fam57a_set_D.pdf]

# Fam76a

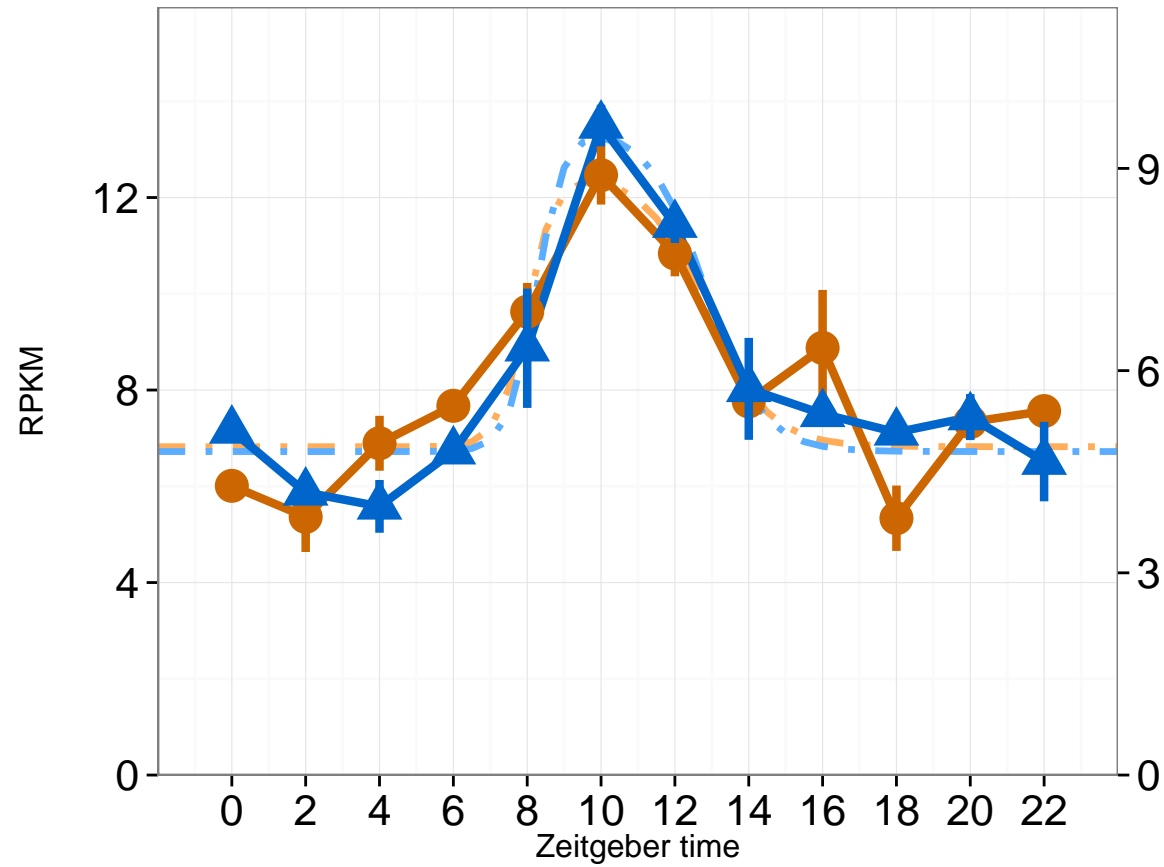

# Fam76a

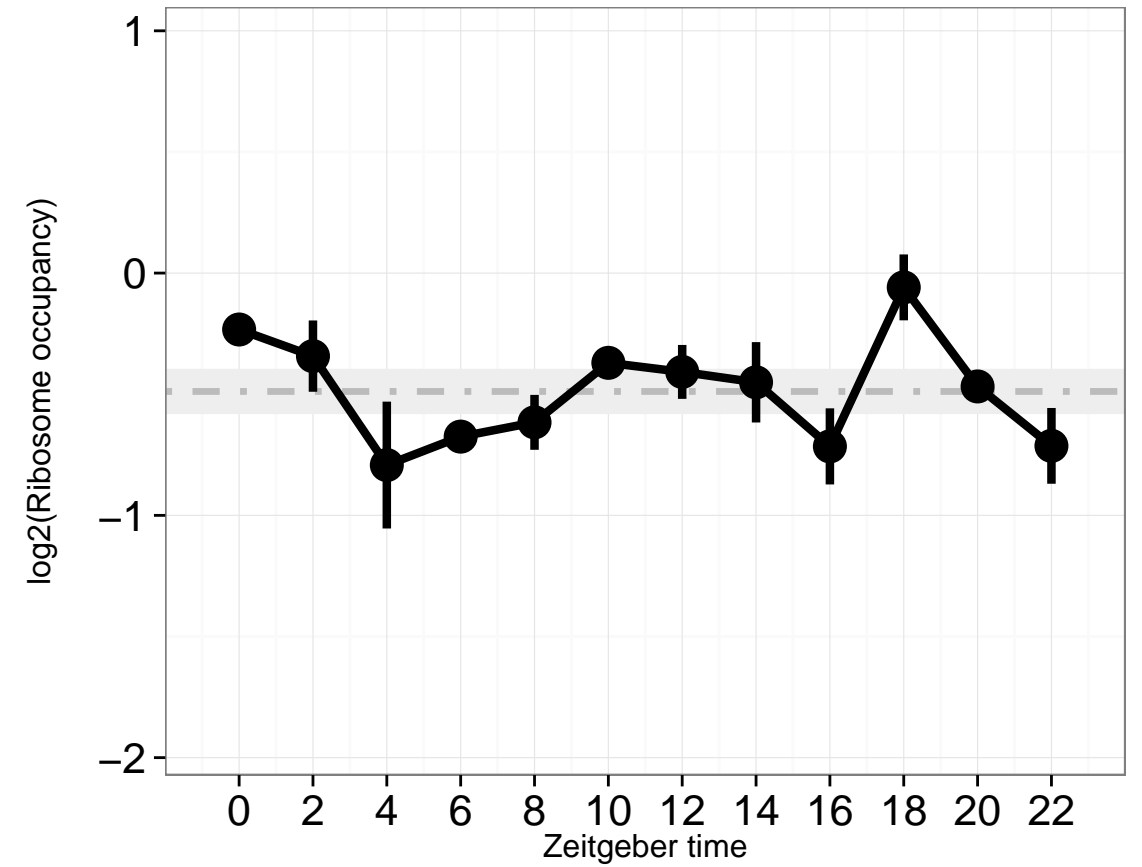

Supplement: SuppDataset_1.zip [file Fam76a_set_D.pdf › Supplemental Dataset 1/D-mRNA_rhythm_translation_rhyth/Fam76a_set_D.pdf]

# Fam83f

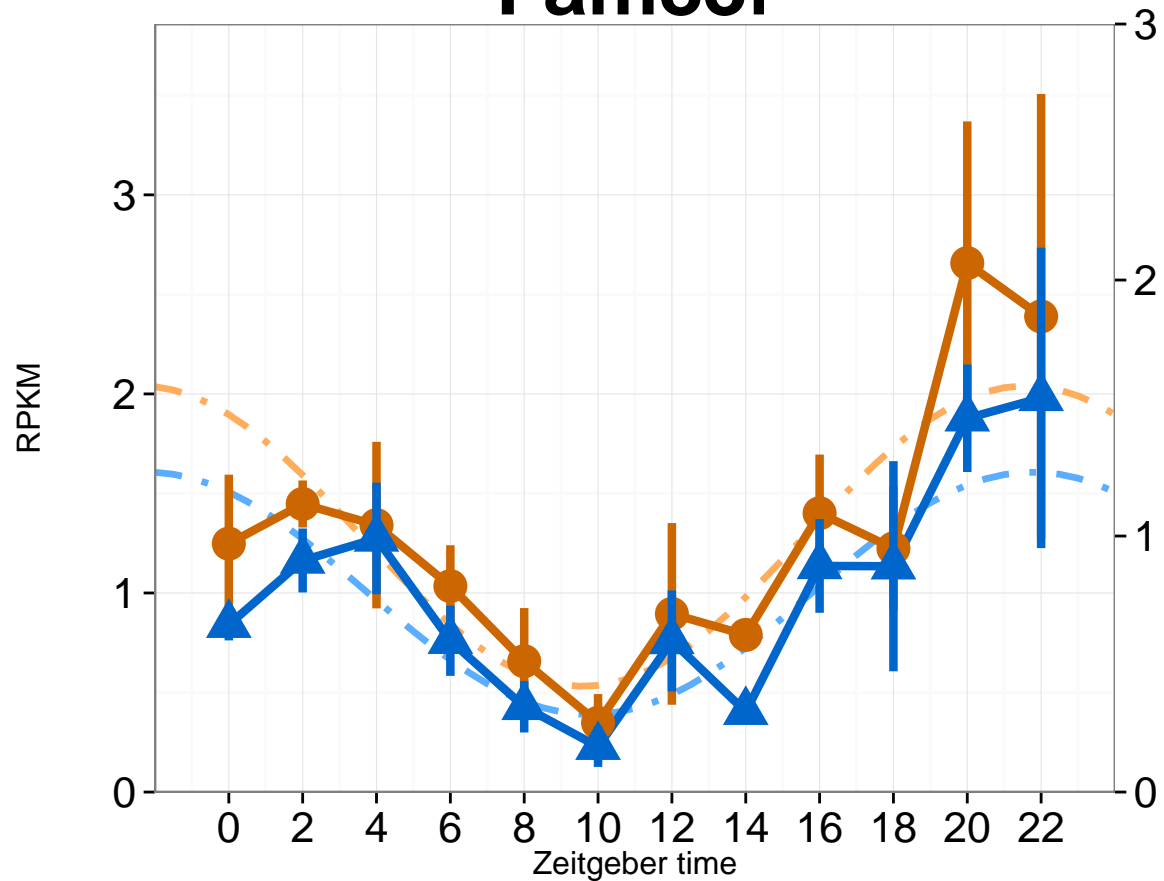

# Fam83f

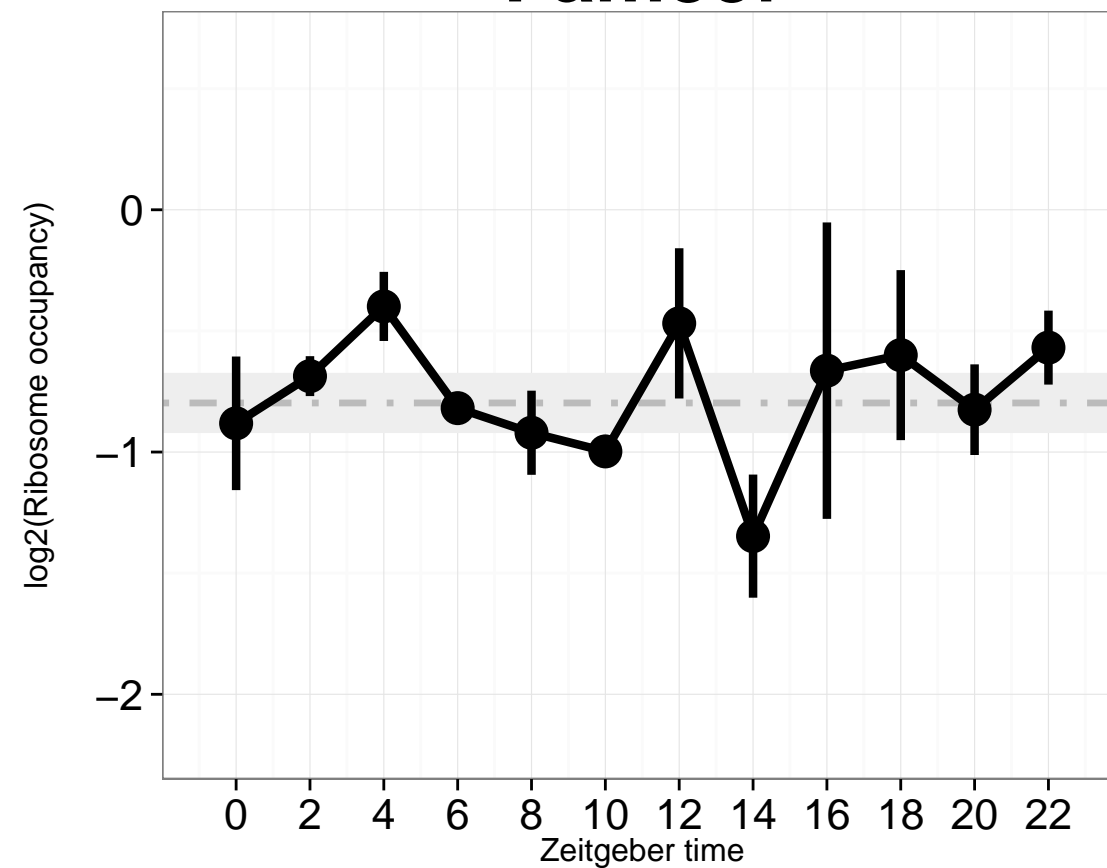

Supplement: SuppDataset_1.zip [file Fam83f_set_D.pdf › Supplemental Dataset 1/D-mRNA_rhythm_translation_rhyth/Fam83f_set_D.pdf]

# Fam83h

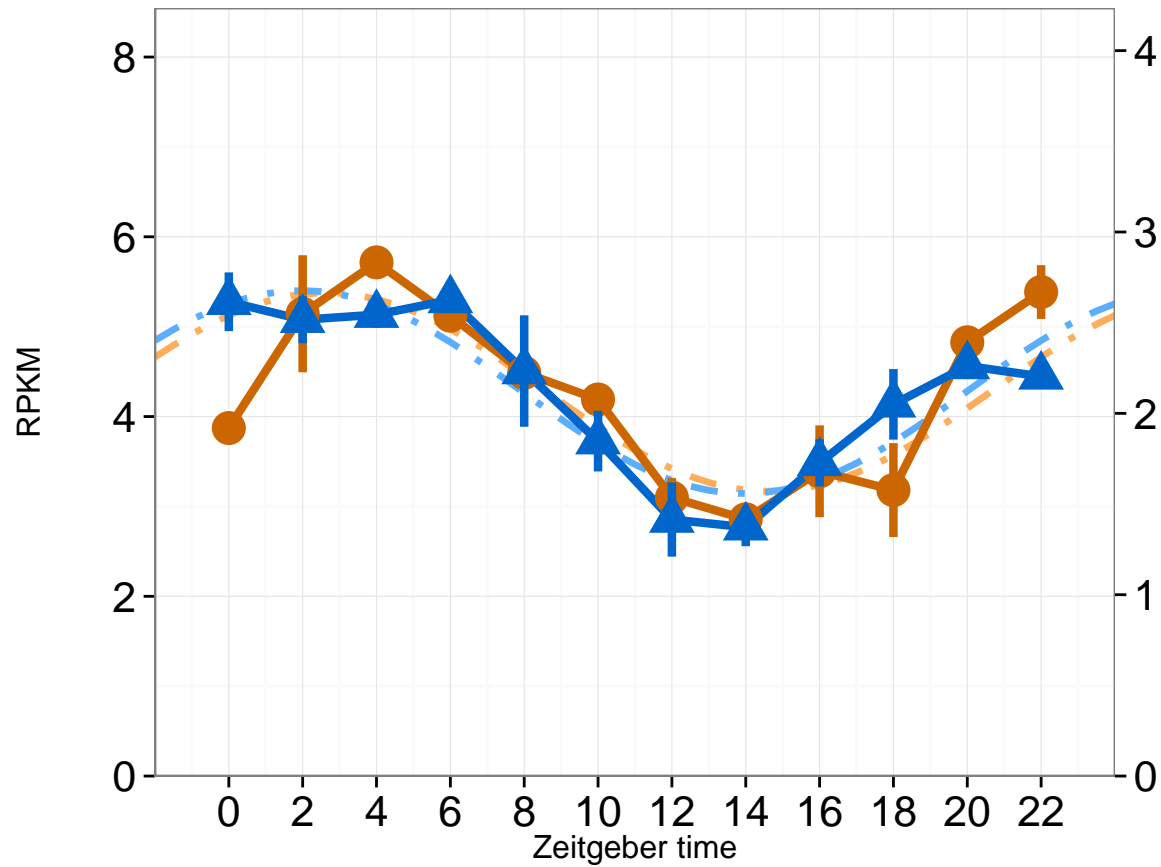

# Fam83h

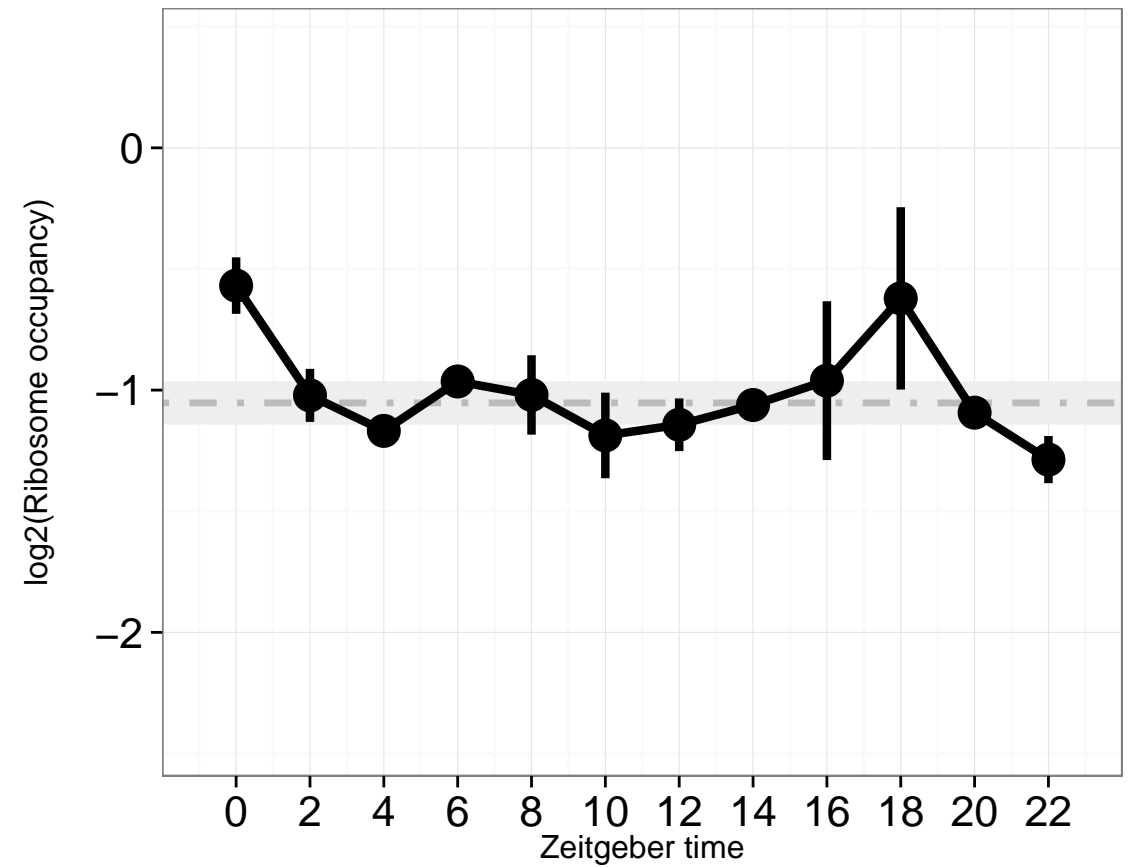

Supplement: SuppDataset_1.zip [file Fam83h_set_D.pdf › Supplemental Dataset 1/D-mRNA_rhythm_translation_rhyth/Fam83h_set_D.pdf]

# Fam89a

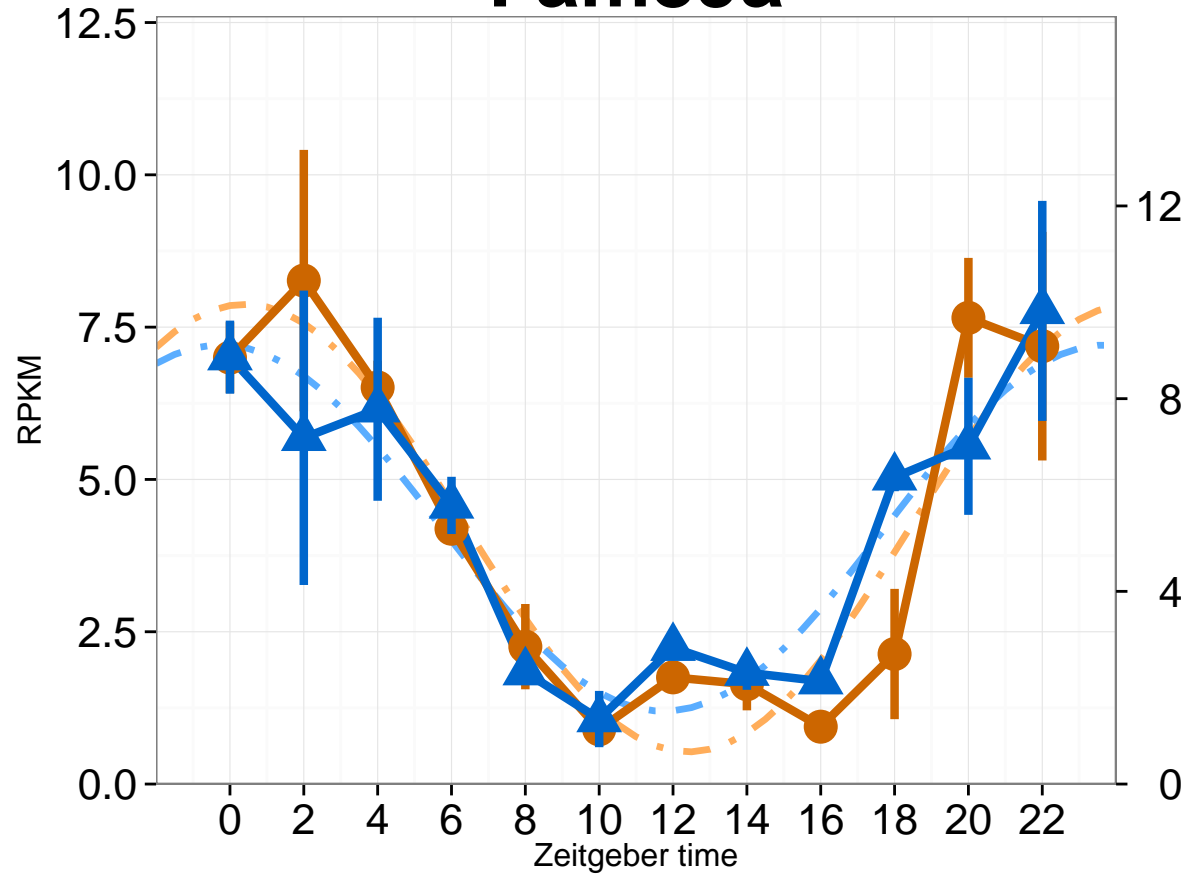

# Fam89a

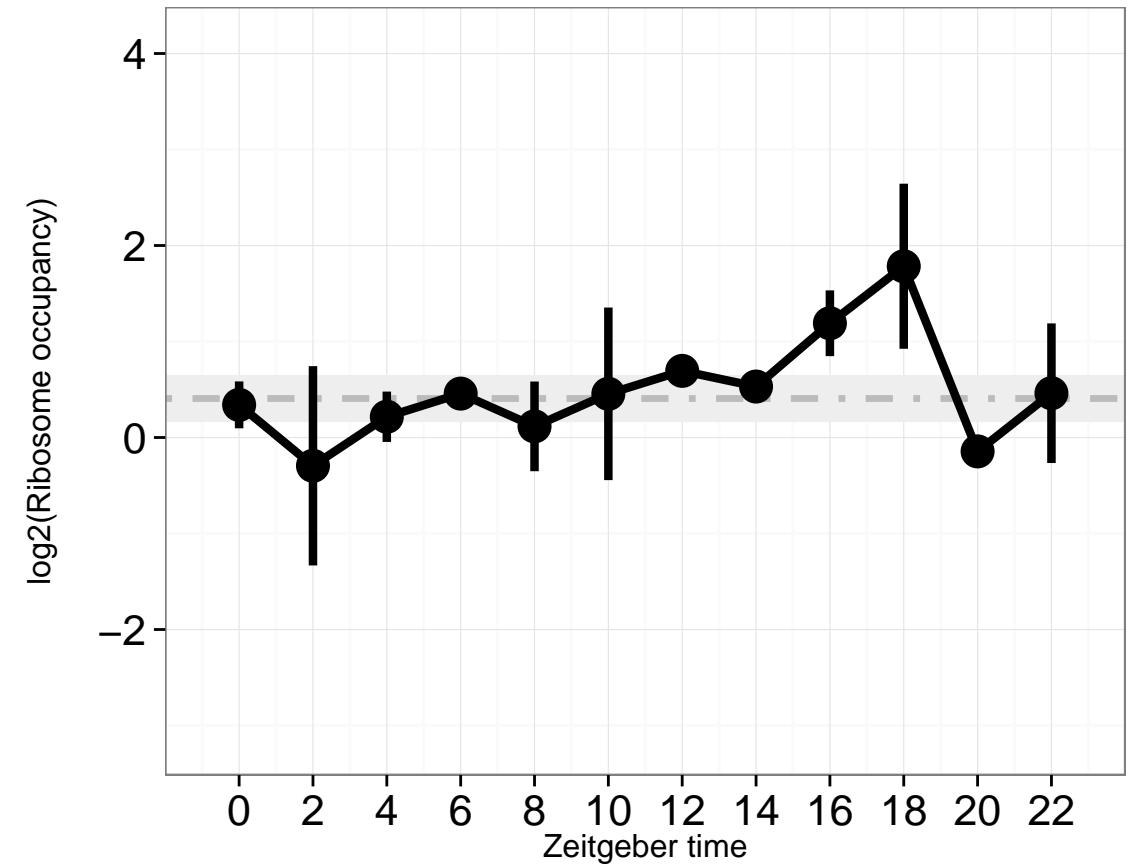

Supplement: SuppDataset_1.zip [file Fam89a_set_D.pdf › Supplemental Dataset 1/D-mRNA_rhythm_translation_rhyth/Fam89a_set_D.pdf]

## Fancg

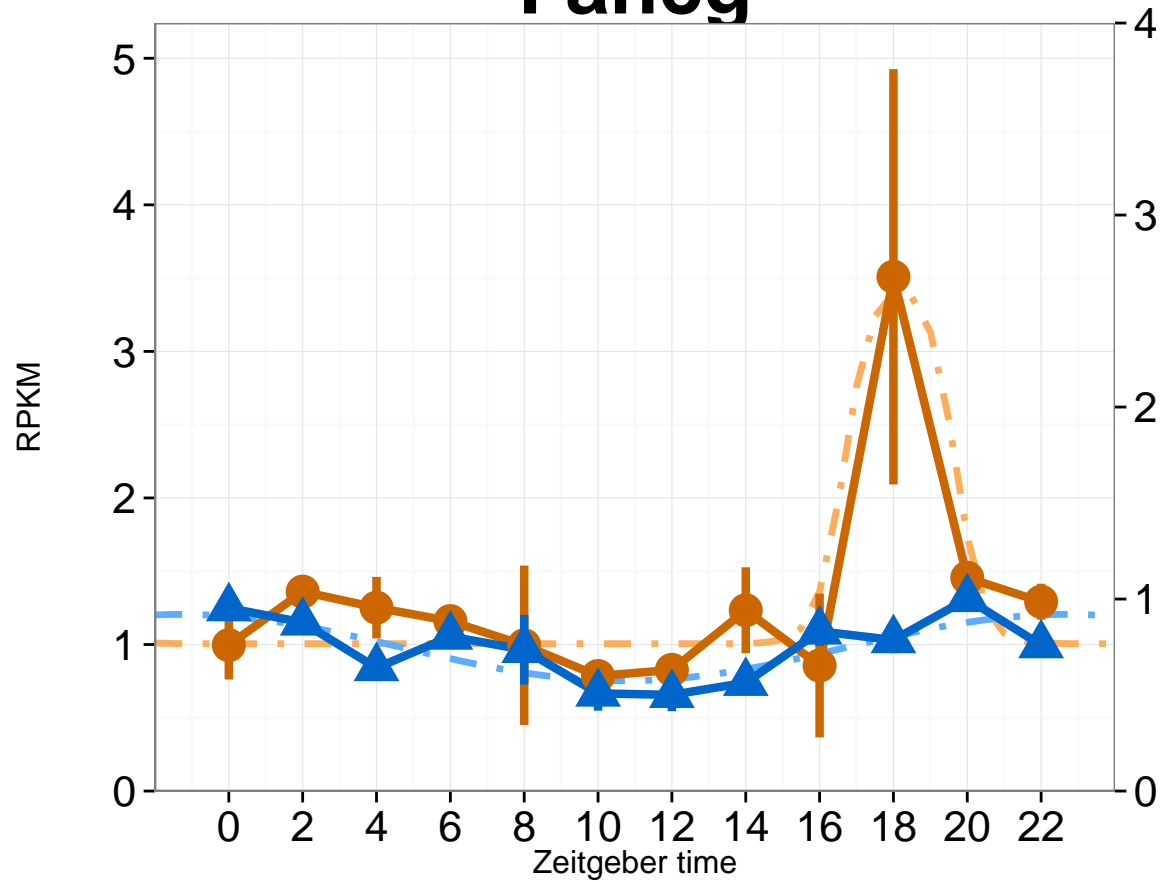

## Fancg

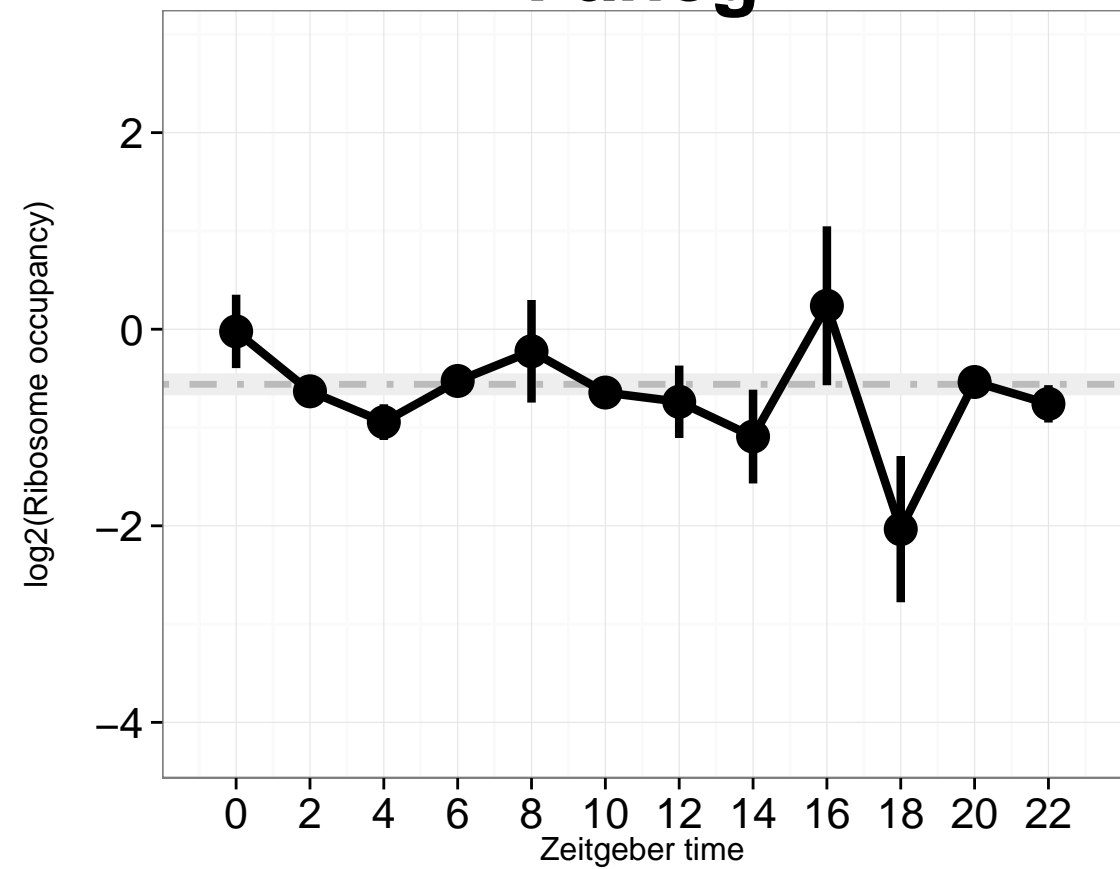

Supplement: SuppDataset_1.zip [file Fancg_set_D.pdf › Supplemental Dataset 1/D-mRNA_rhythm_translation_rhyth/Fancg_set_D.pdf]

## Fas

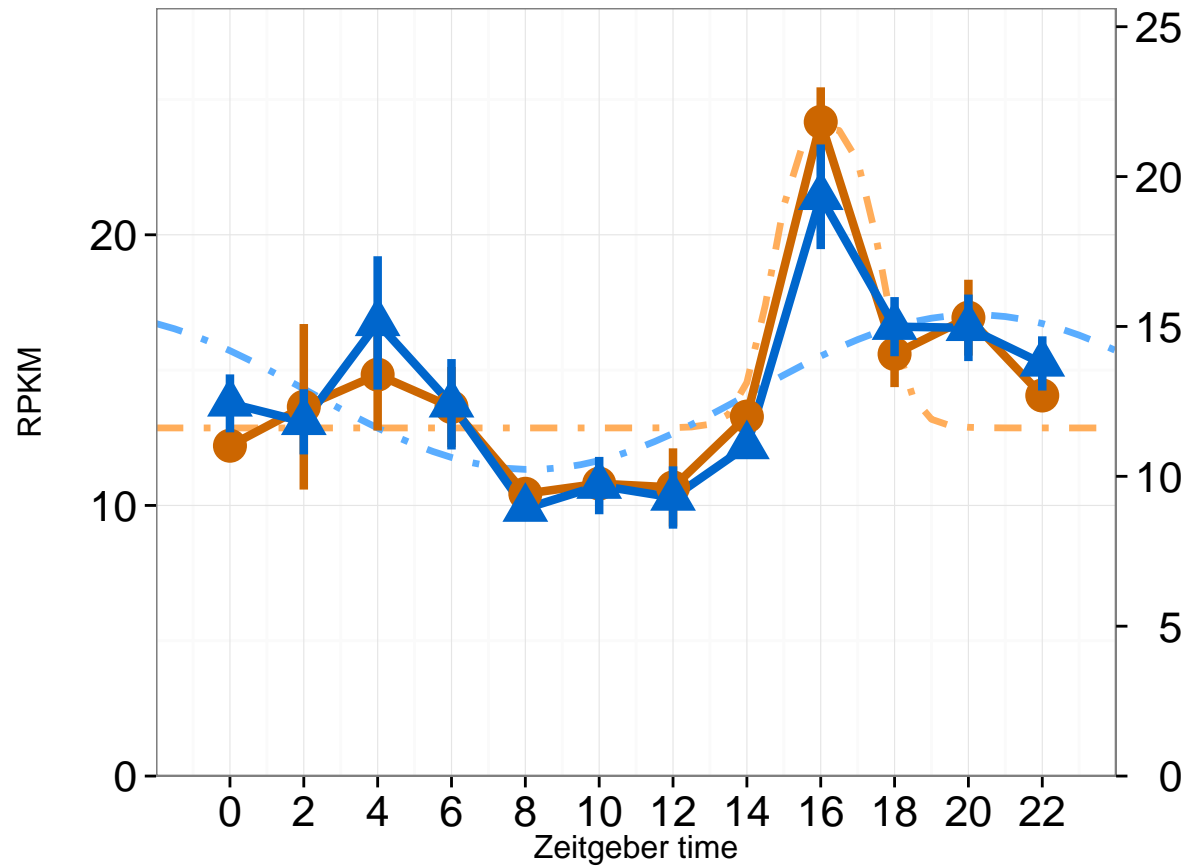

## Fas

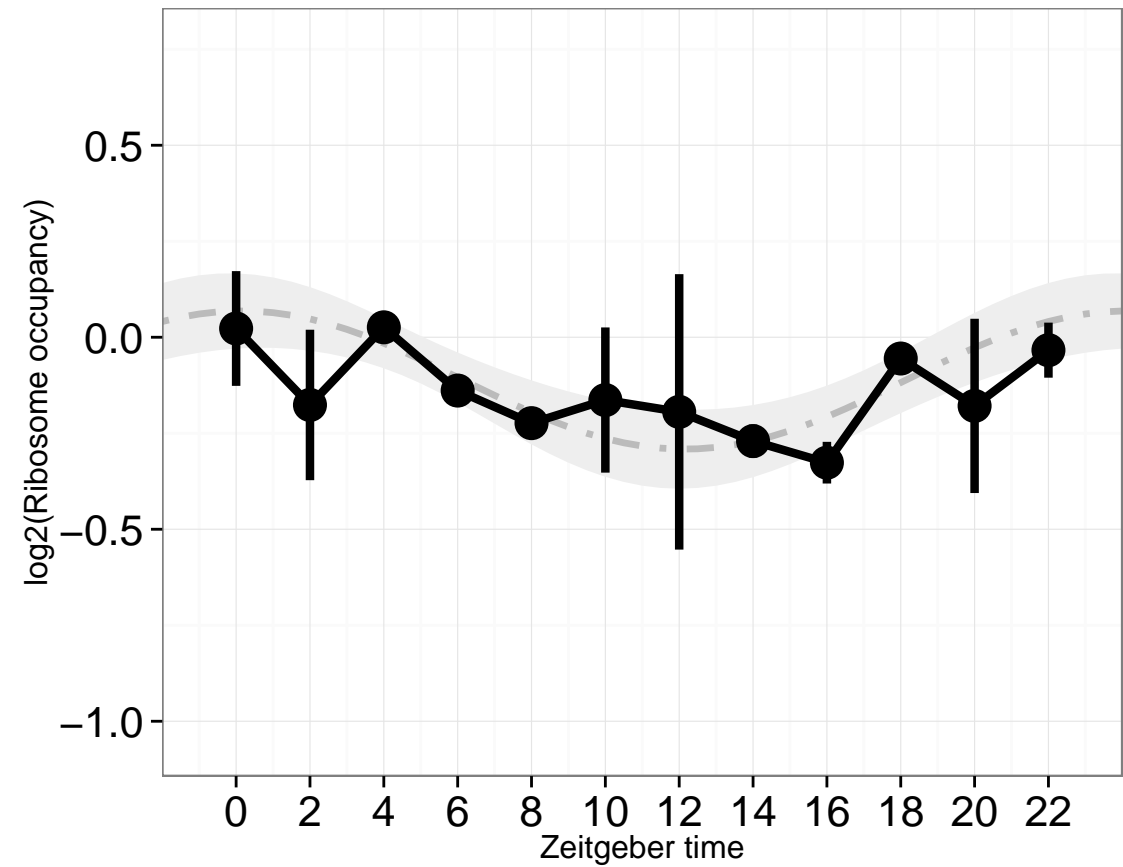

Supplement: SuppDataset_1.zip [file Fas_set_D.pdf › Supplemental Dataset 1/D-mRNA_rhythm_translation_rhyth/Fas_set_D.pdf]

## Fasn

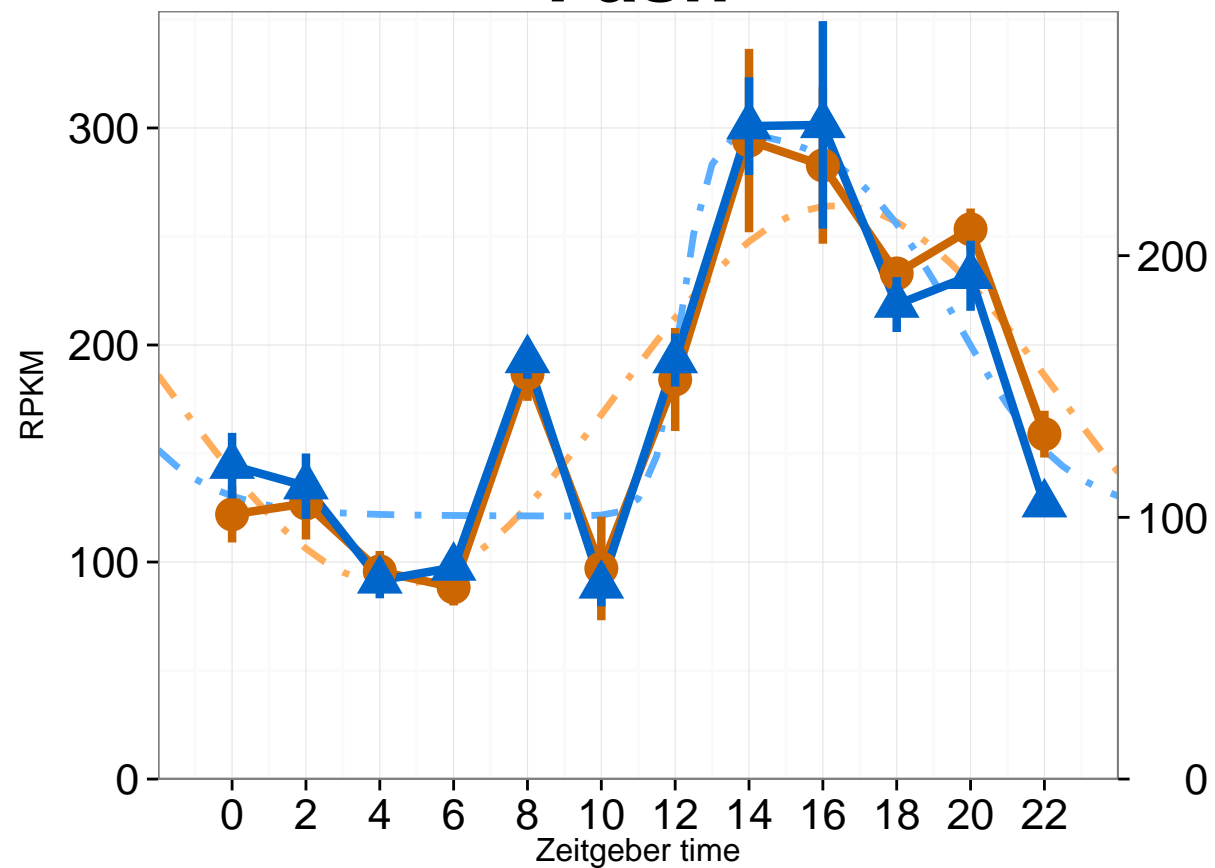

## Fasn

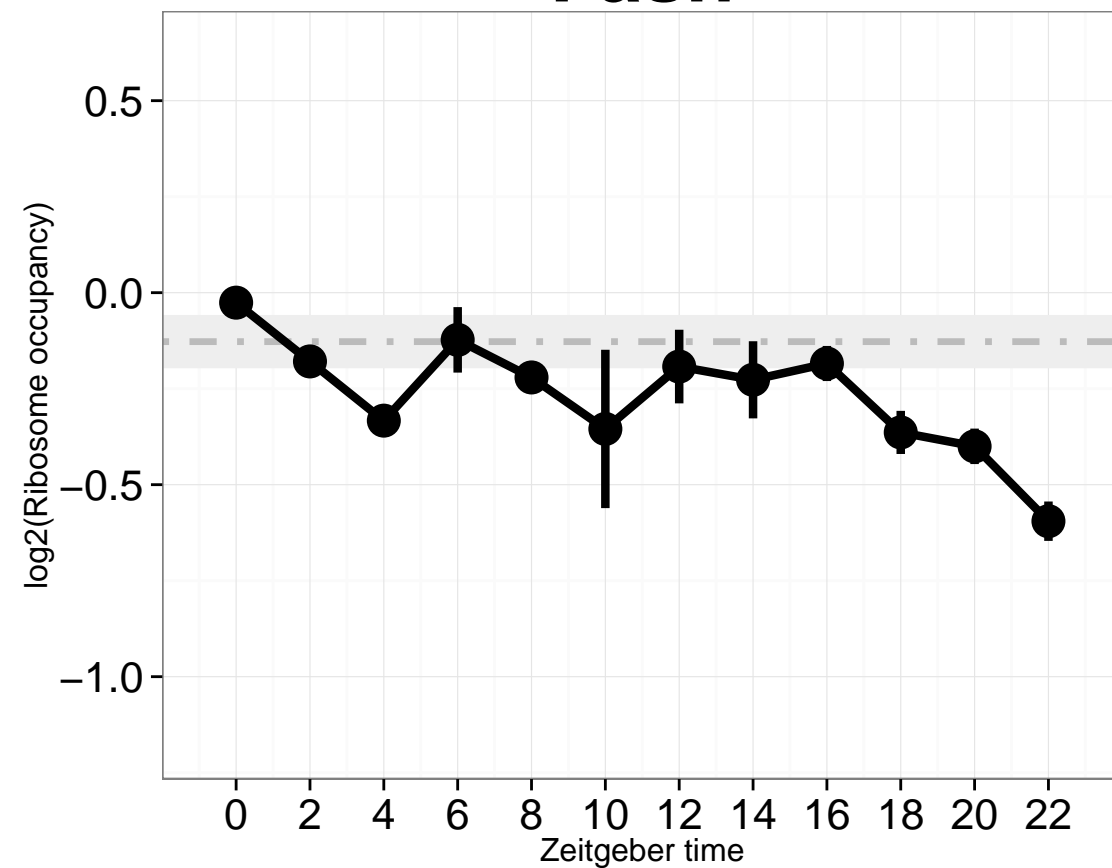

Supplement: SuppDataset_1.zip [file Fasn_set_D.pdf › Supplemental Dataset 1/D-mRNA_rhythm_translation_rhyth/Fasn_set_D.pdf]

## Fbxl20

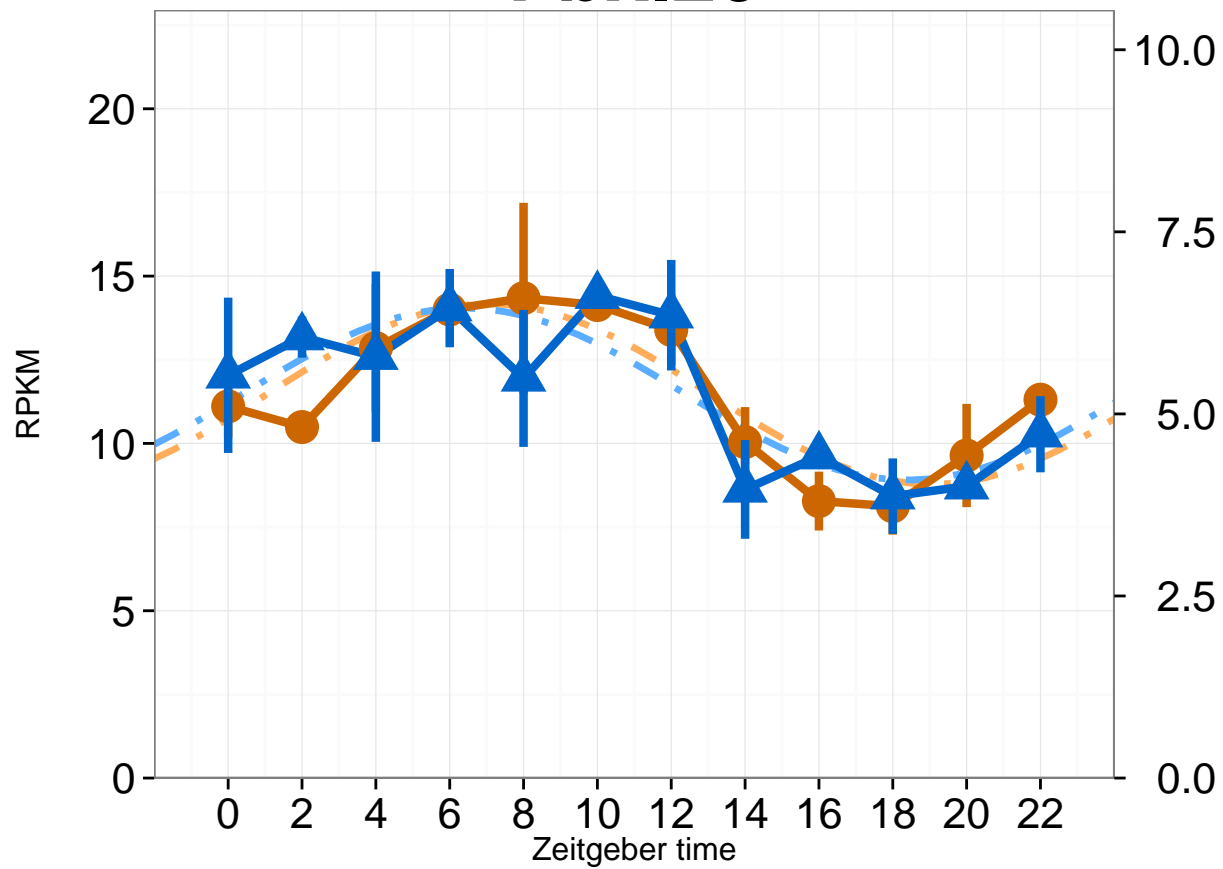

## Fbxl20

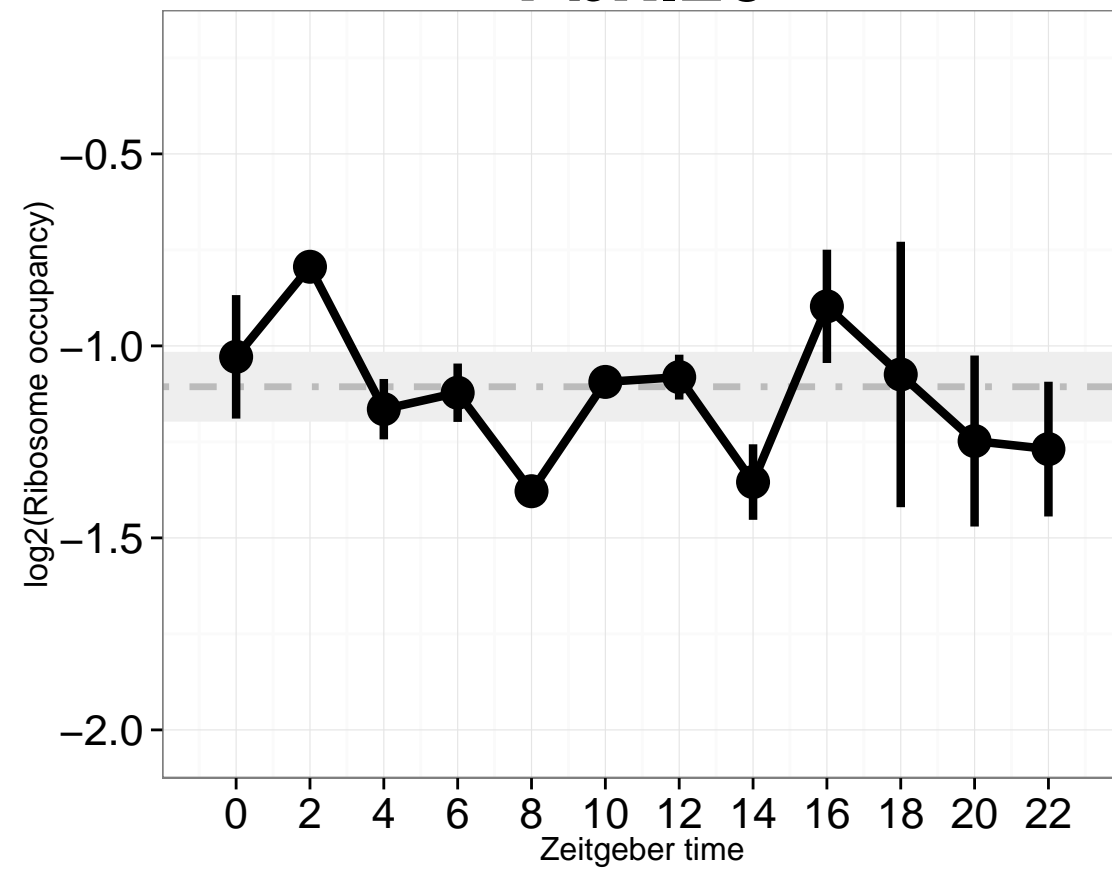

Supplement: SuppDataset_1.zip [file Fbxl20_set_D.pdf › Supplemental Dataset 1/D-mRNA_rhythm_translation_rhyth/Fbxl20_set_D.pdf]

## Fbxo21

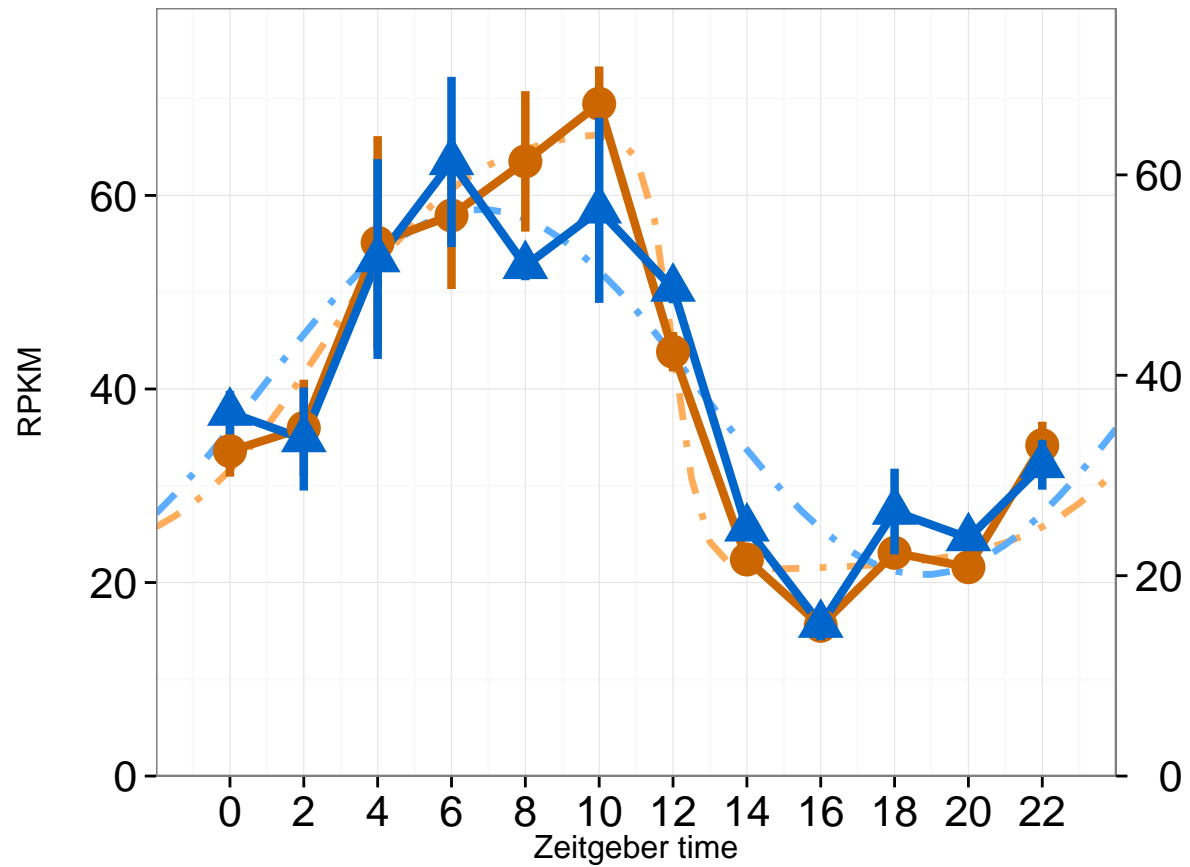

## Fbxo21

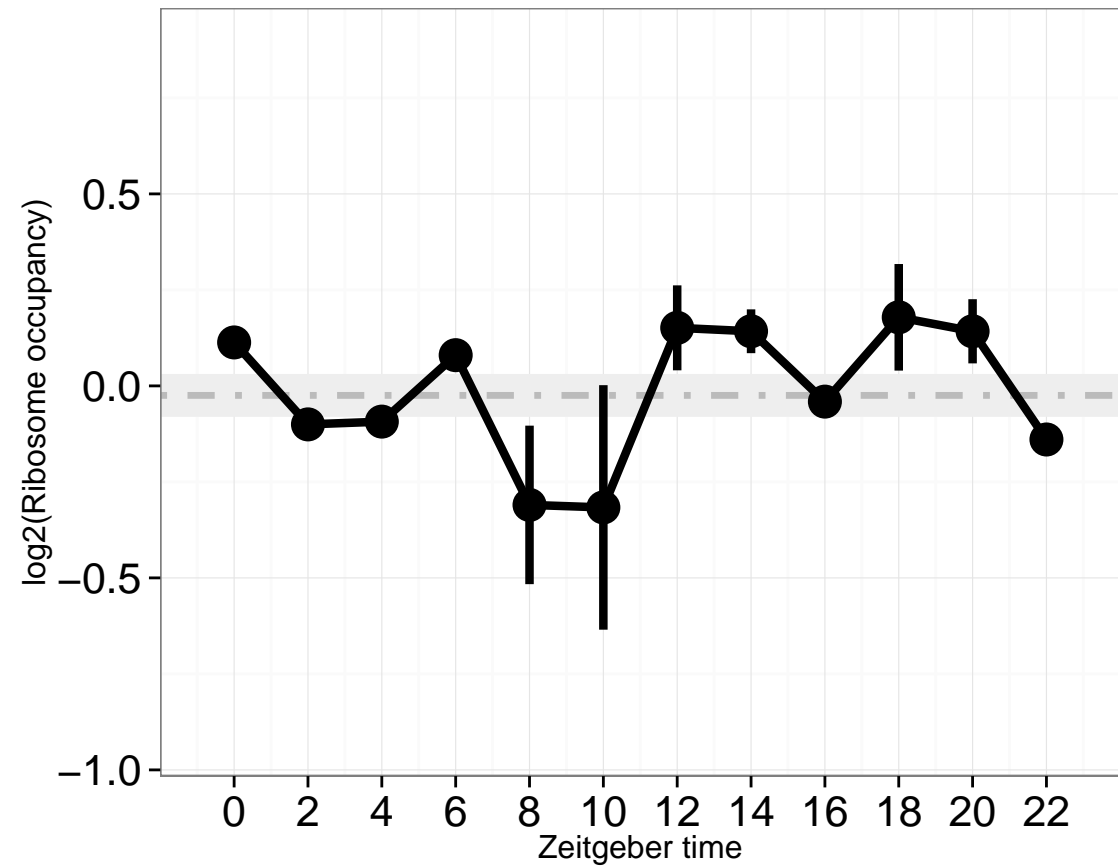

Supplement: SuppDataset_1.zip [file Fbxo21_set_D.pdf › Supplemental Dataset 1/D-mRNA_rhythm_translation_rhyth/Fbxo21_set_D.pdf]

## Fbxo32

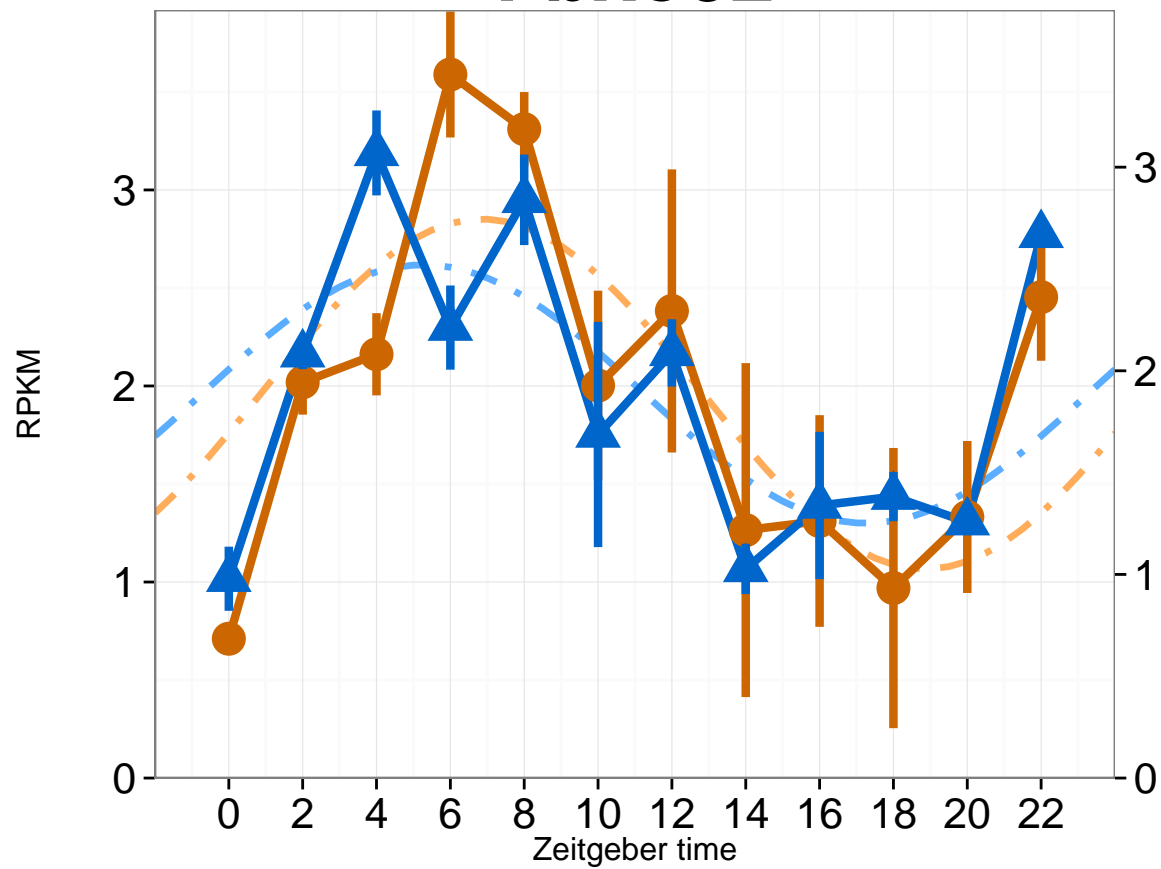

## Fbxo32

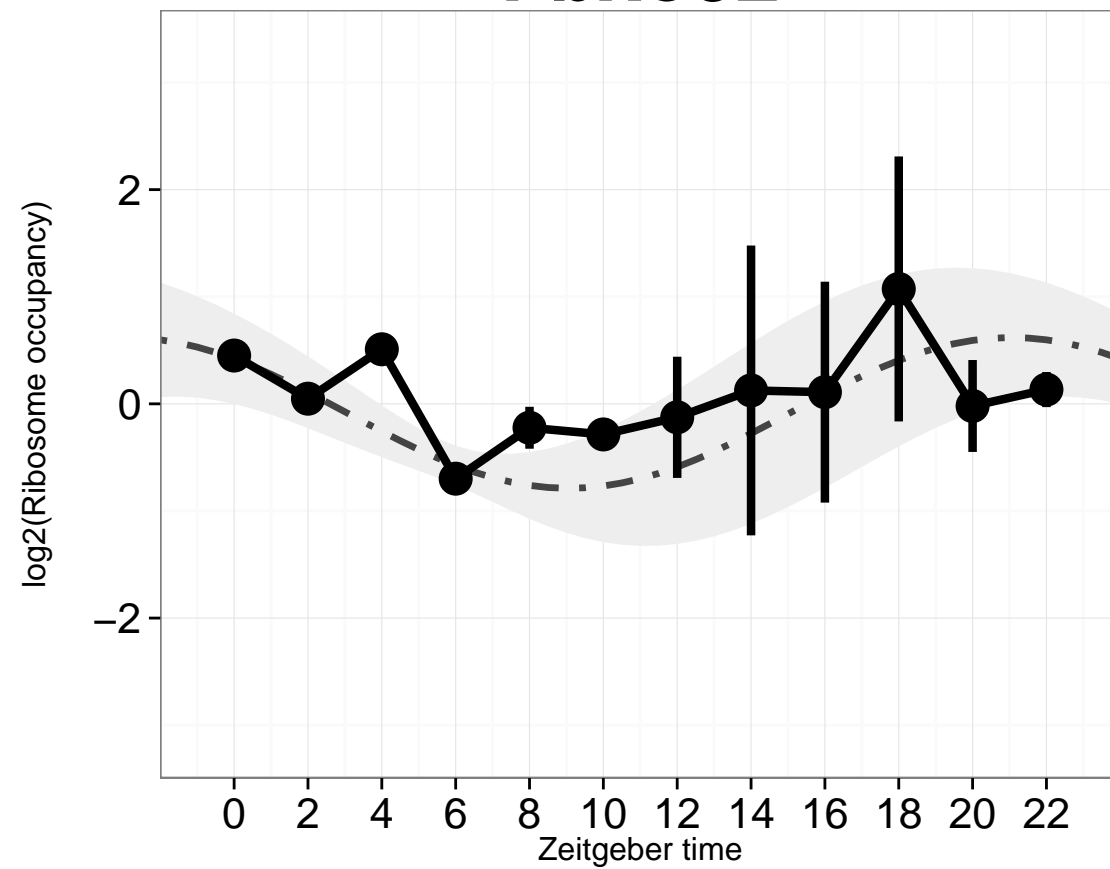

Supplement: SuppDataset_1.zip [file Fbxo32_set_D.pdf › Supplemental Dataset 1/D-mRNA_rhythm_translation_rhyth/Fbxo32_set_D.pdf]

## Fbxo33

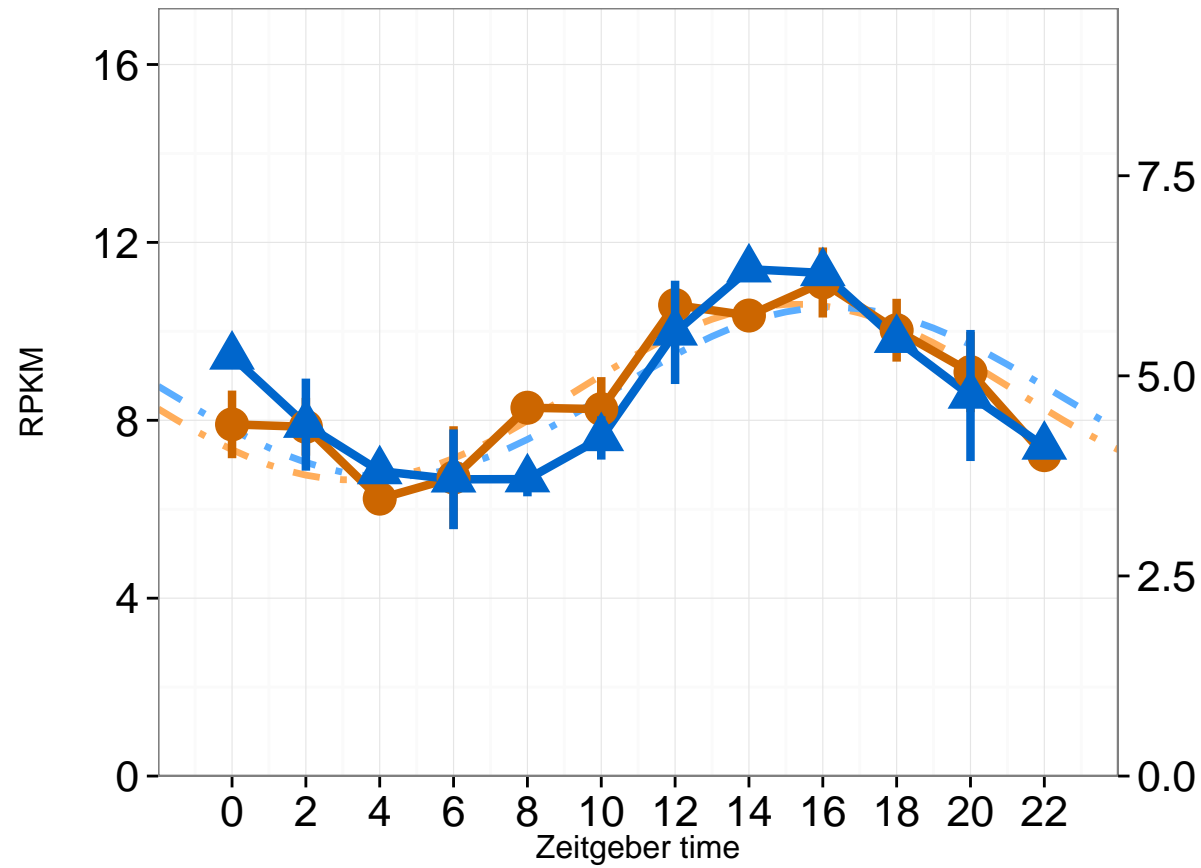

## Fbxo33

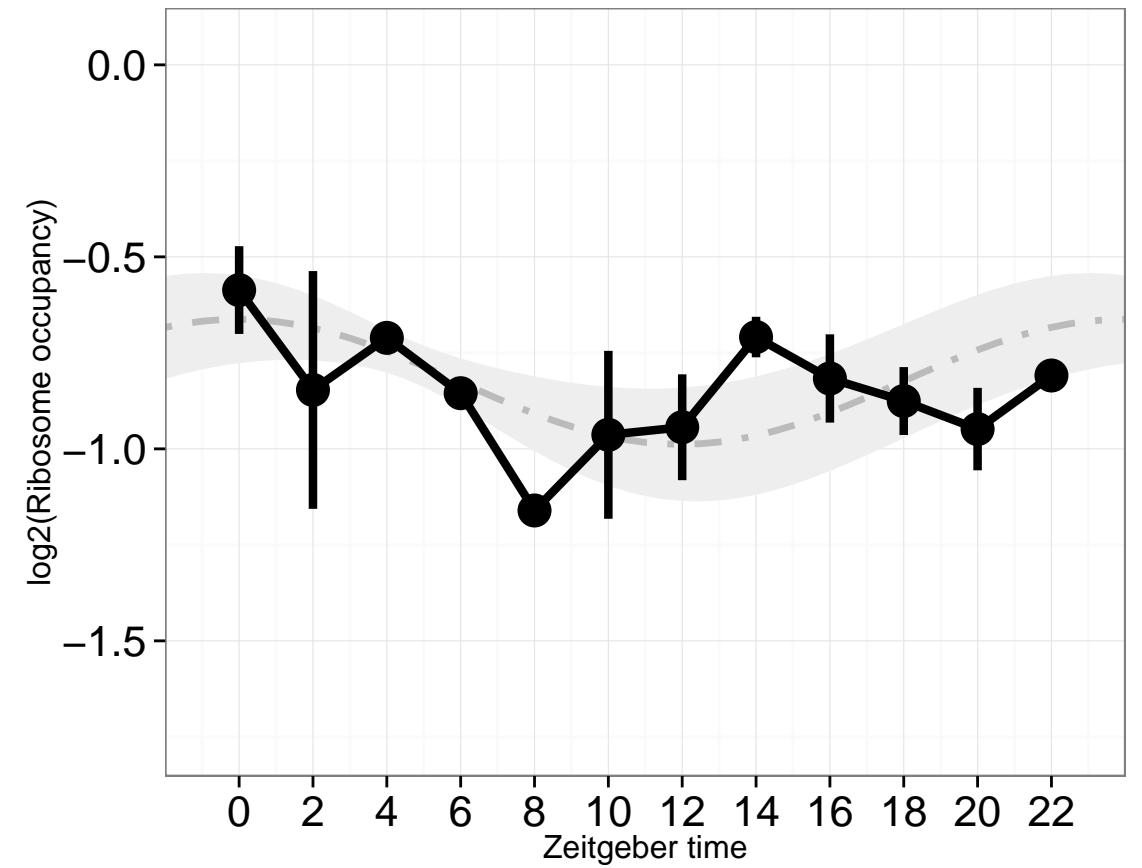

Supplement: SuppDataset_1.zip [file Fbxo33_set_D.pdf › Supplemental Dataset 1/D-mRNA_rhythm_translation_rhyth/Fbxo33_set_D.pdf]

## Fbxo44

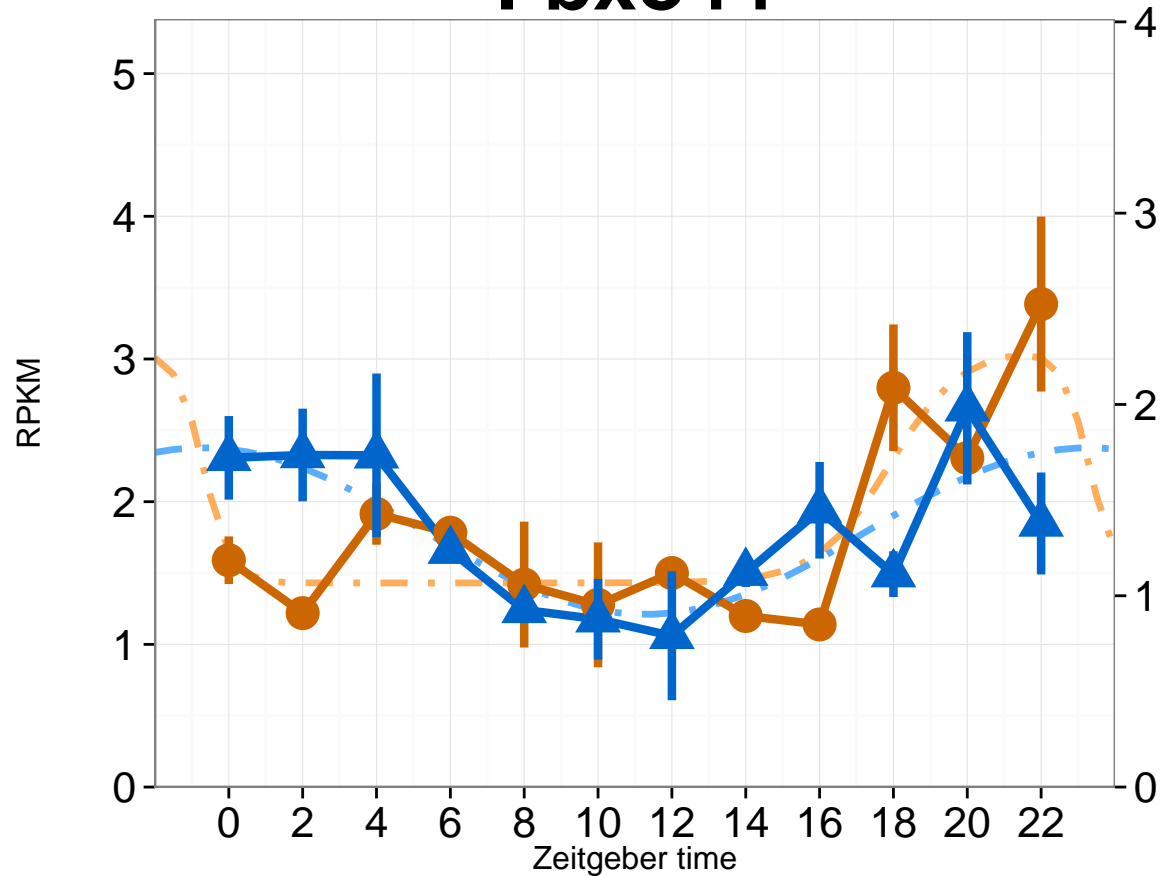

## Fbxo44

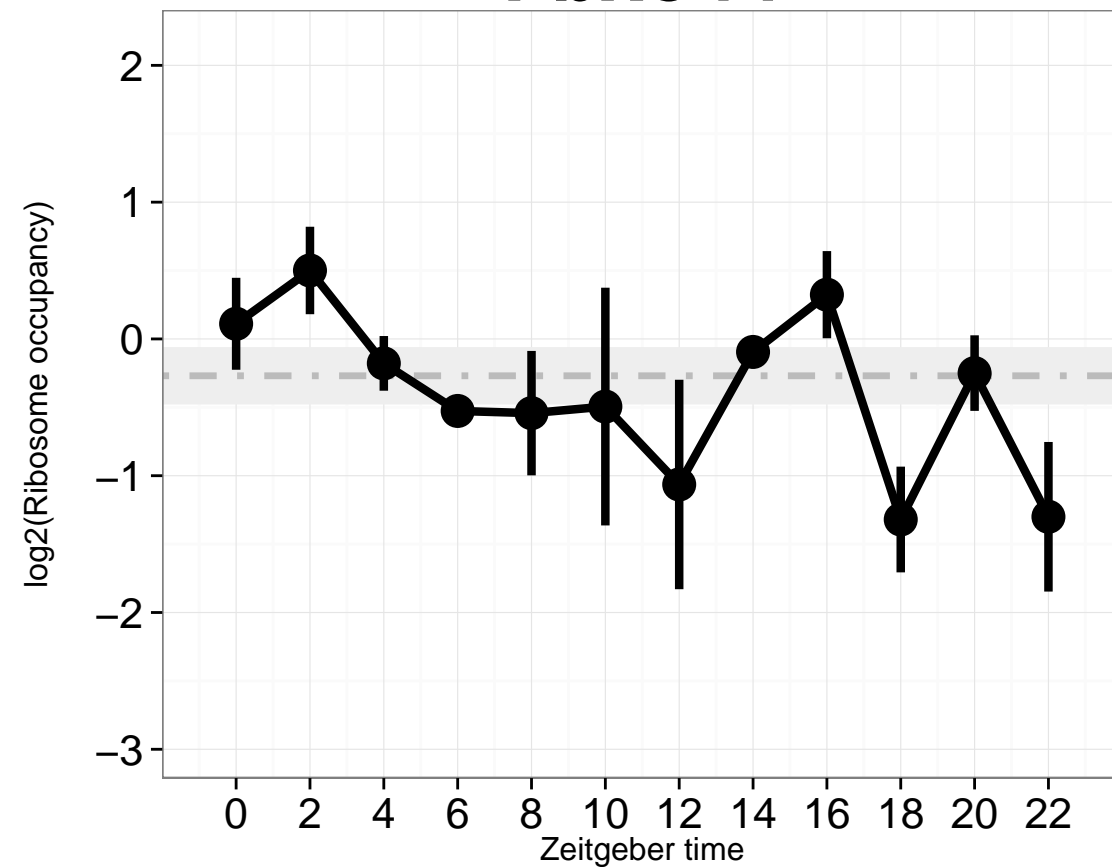

Supplement: SuppDataset_1.zip [file Fbxo44_set_D.pdf › Supplemental Dataset 1/D-mRNA_rhythm_translation_rhyth/Fbxo44_set_D.pdf]

# Fbxo6

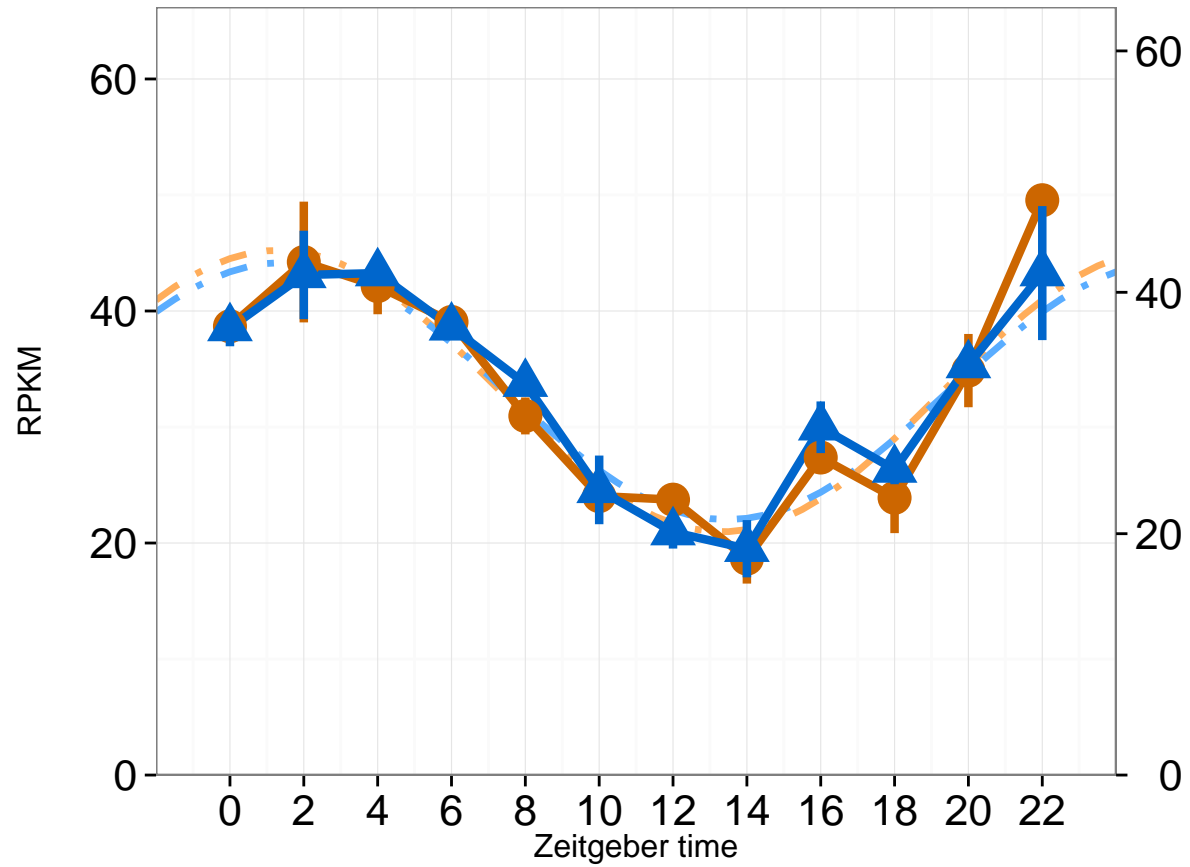

# Fbxo6

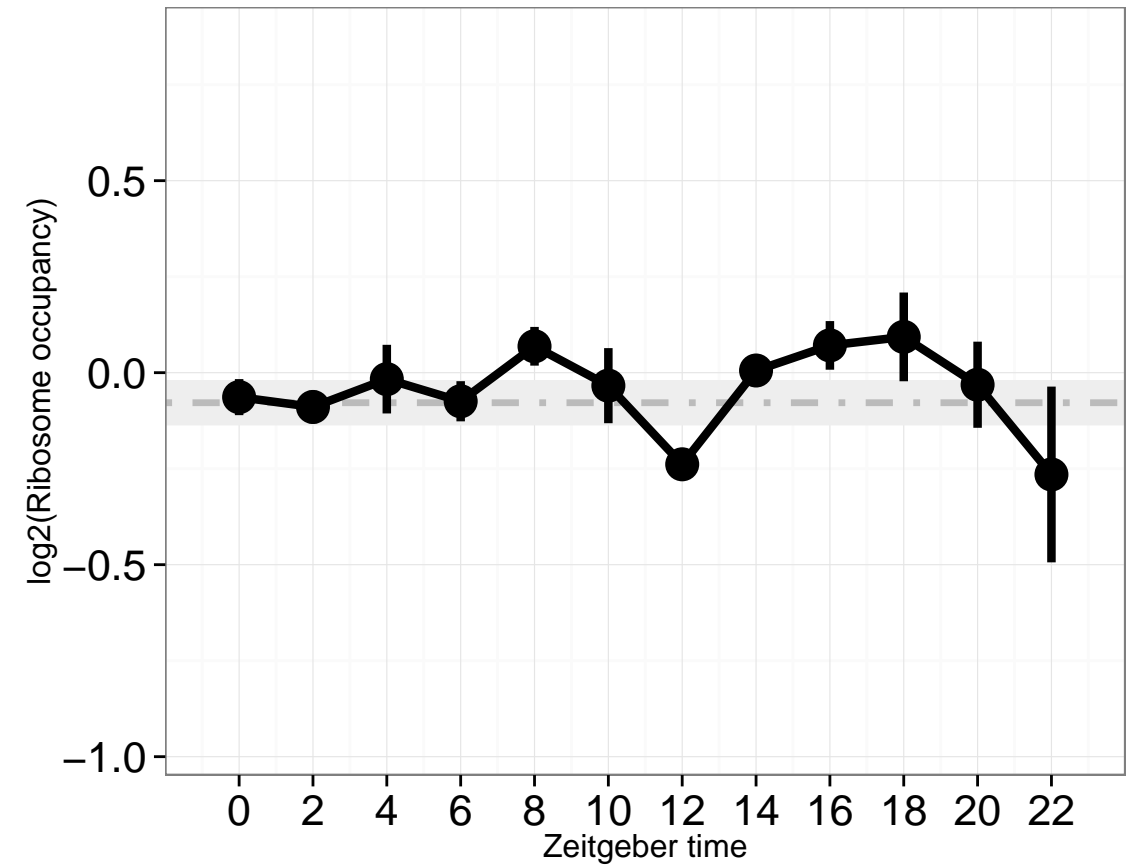

Supplement: SuppDataset_1.zip [file Fbxo6_set_D.pdf › Supplemental Dataset 1/D-mRNA_rhythm_translation_rhyth/Fbxo6_set_D.pdf]

## Fdps

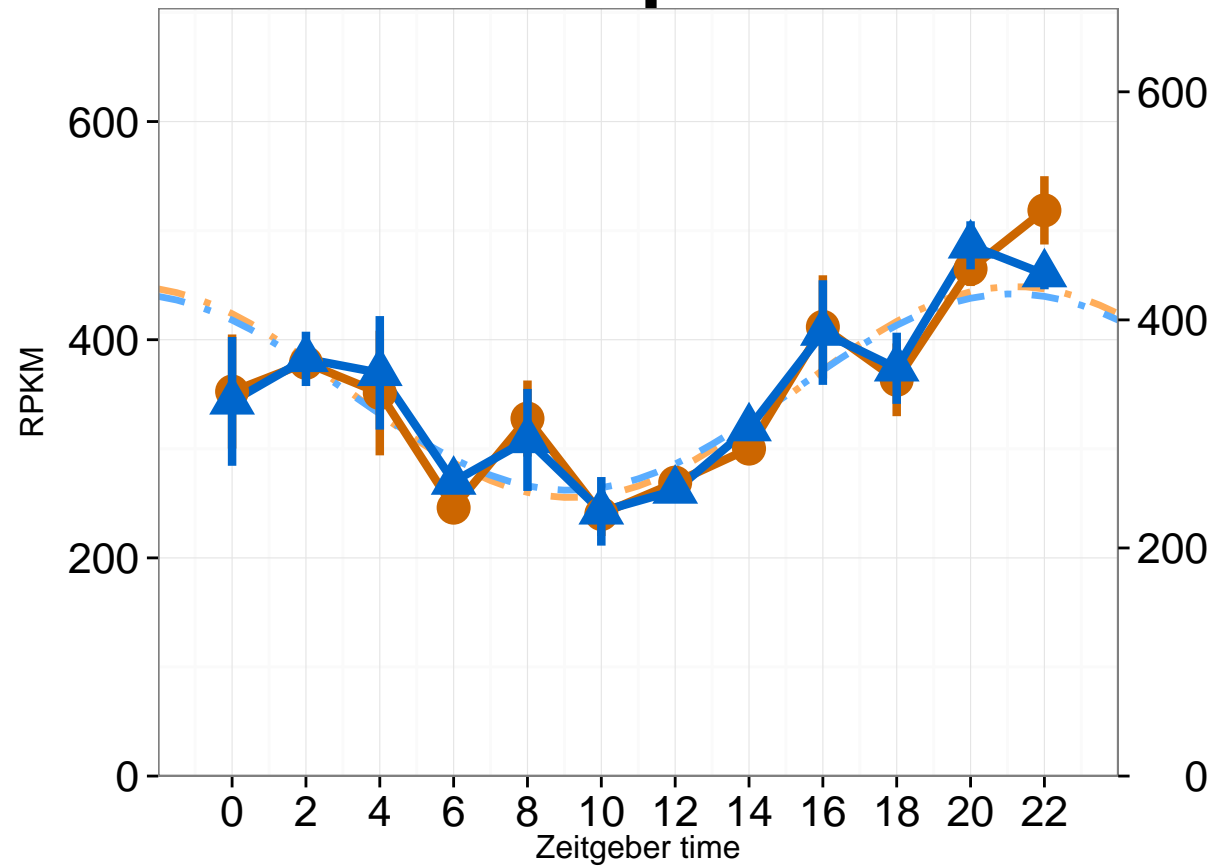

## Fdps

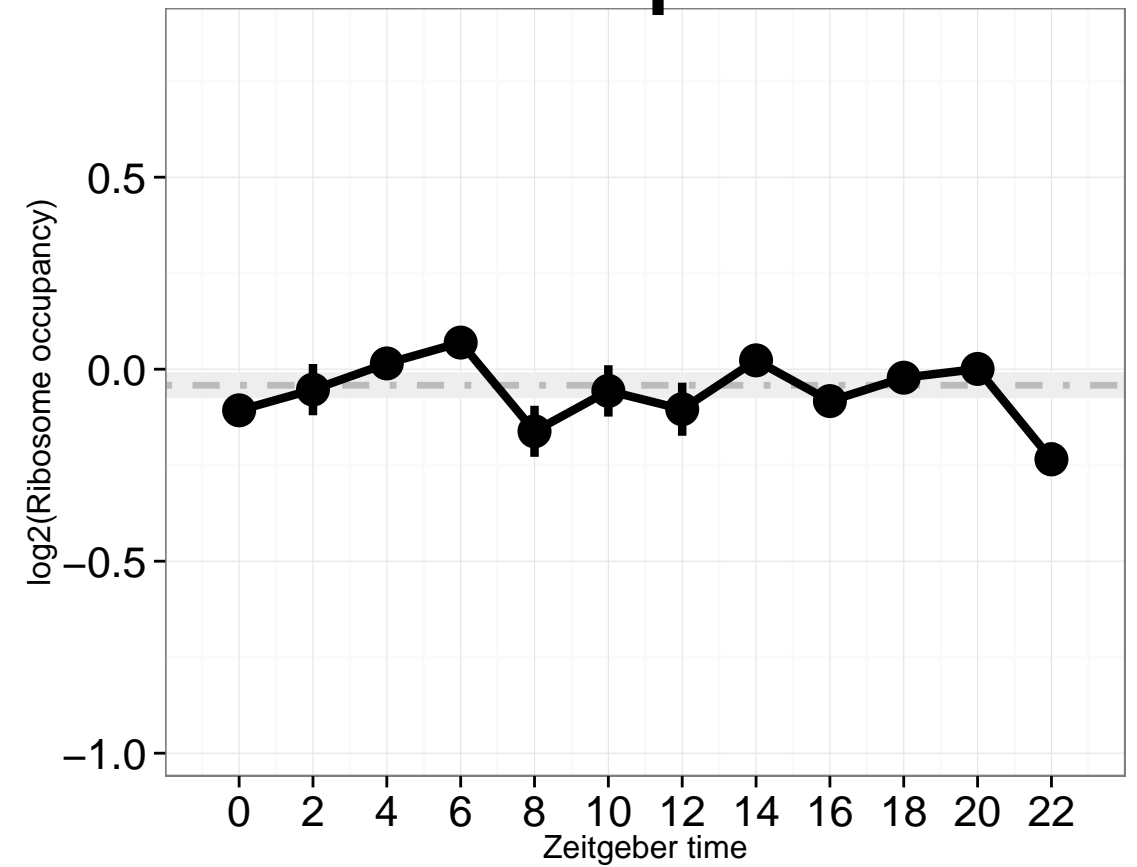

Supplement: SuppDataset_1.zip [file Fdps_set_D.pdf › Supplemental Dataset 1/D-mRNA_rhythm_translation_rhyth/Fdps_set_D.pdf]

## Fermt2

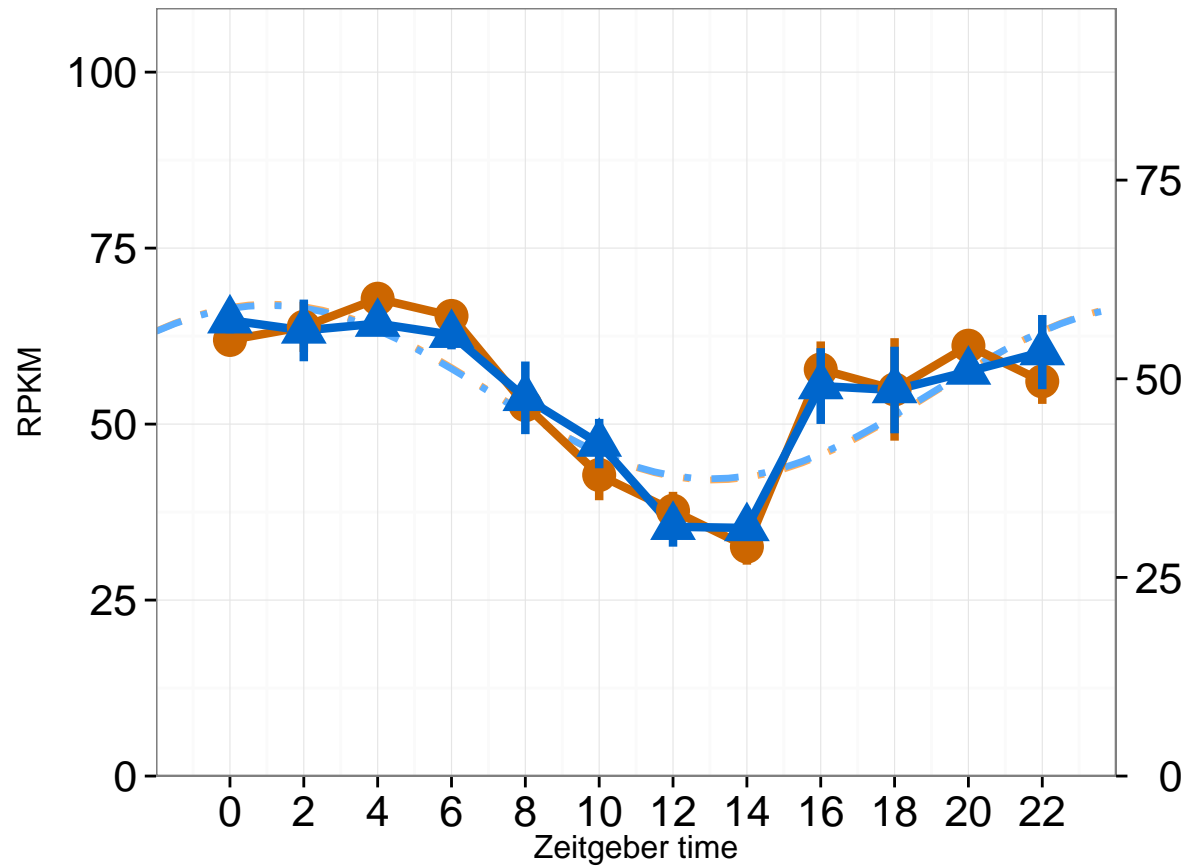

## Fermt2

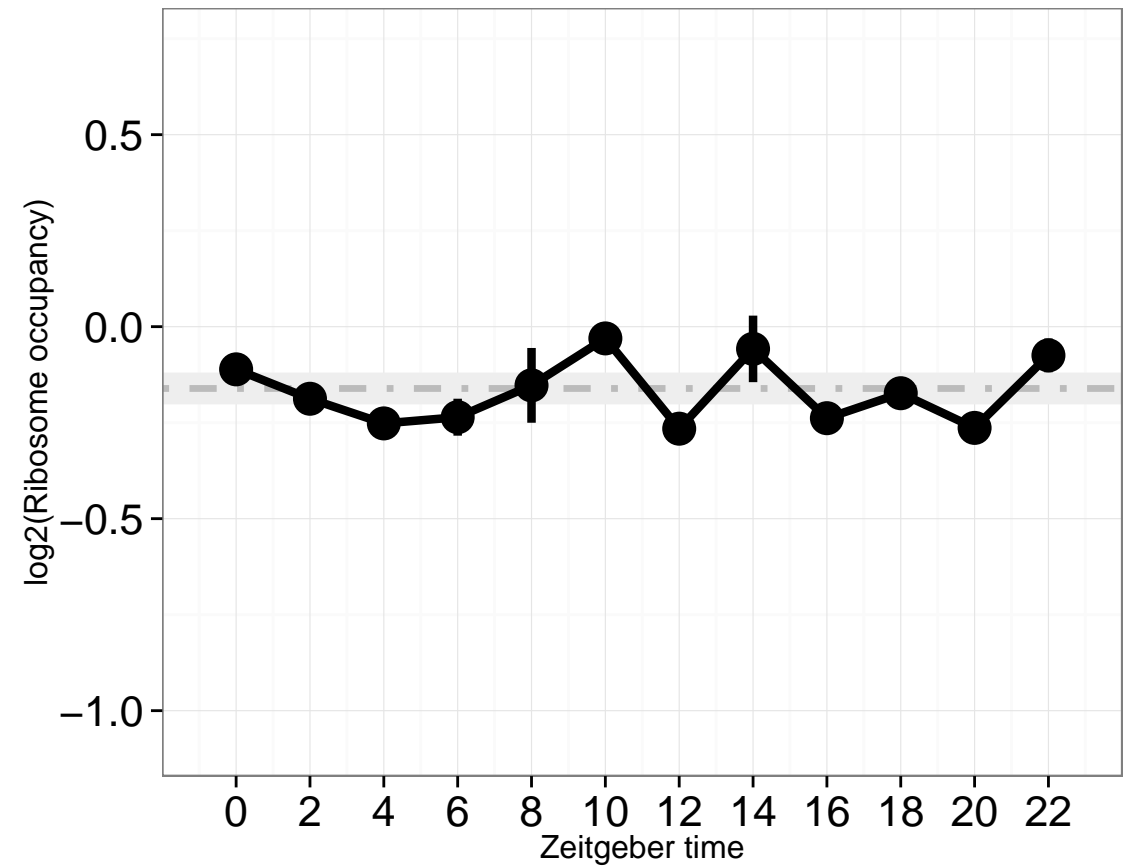

Supplement: SuppDataset_1.zip [file Fermt2_set_D.pdf › Supplemental Dataset 1/D-mRNA_rhythm_translation_rhyth/Fermt2_set_D.pdf]

# Fgf1

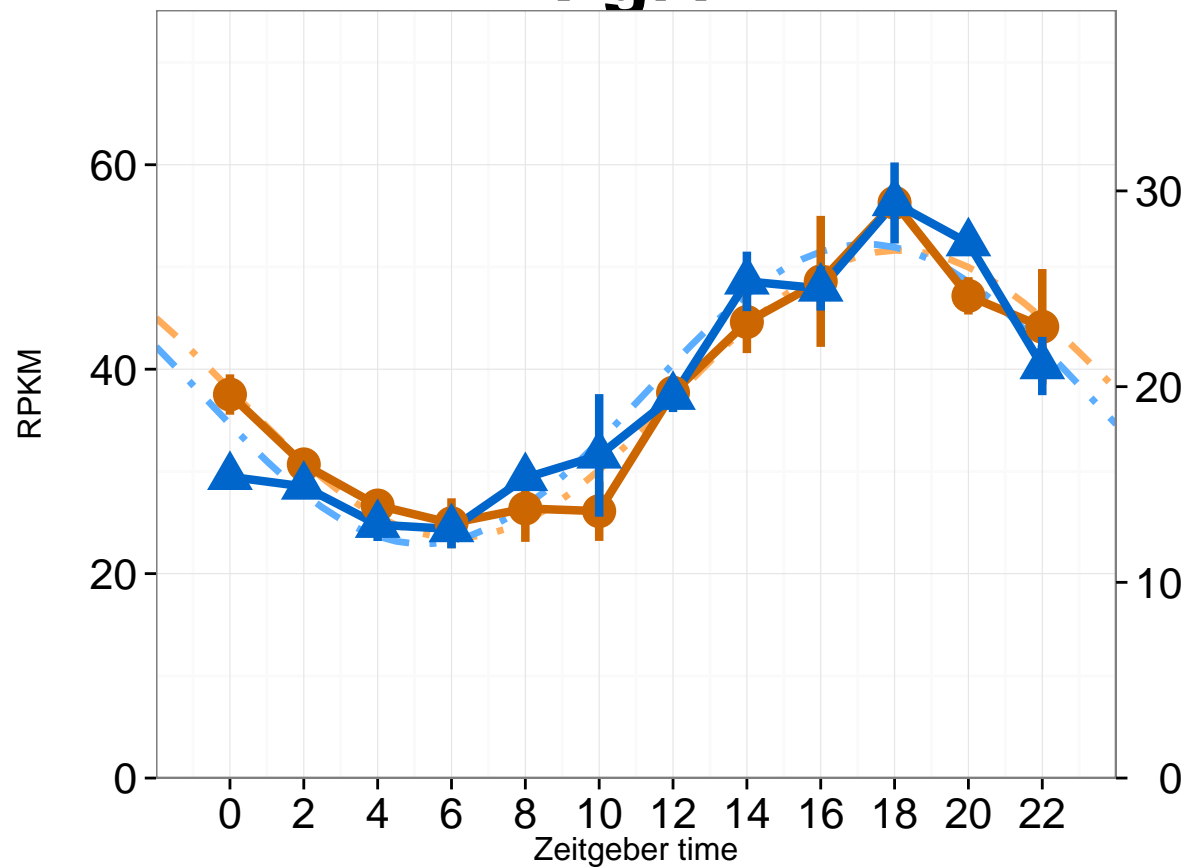

# Fgf1

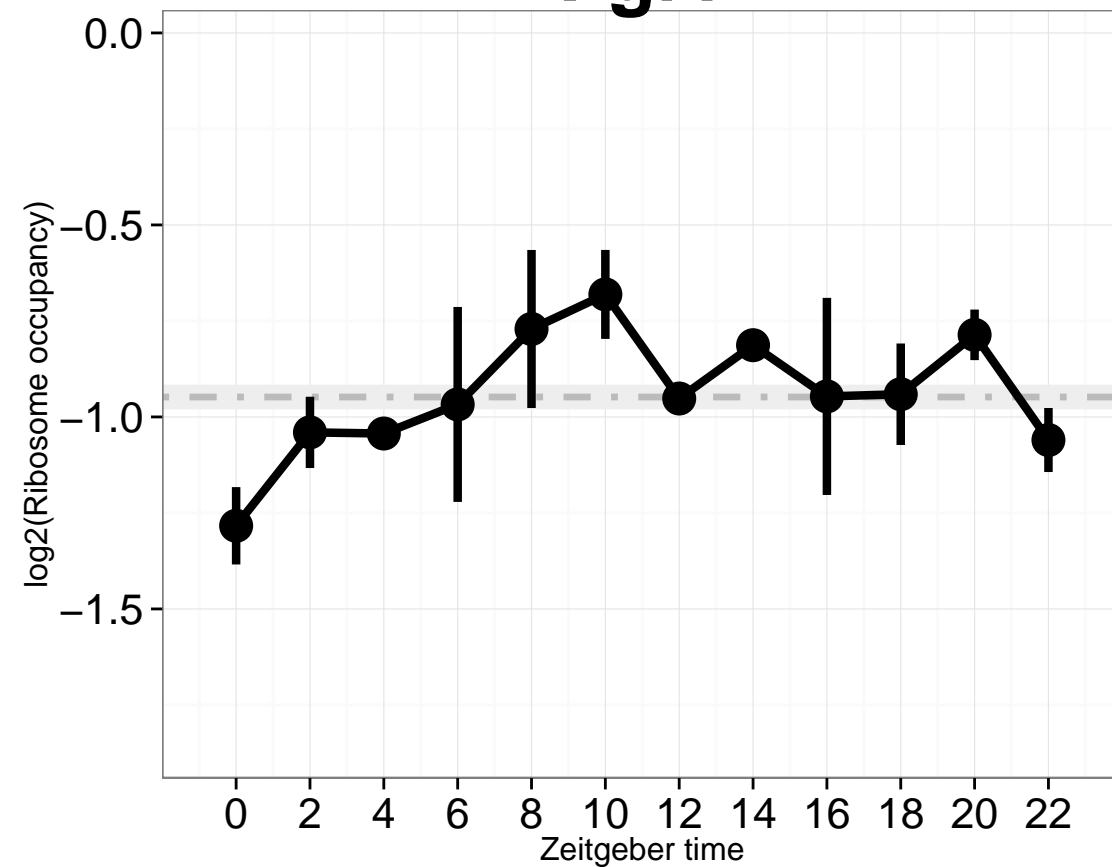

Supplement: SuppDataset_1.zip [file Fgf1_set_D.pdf › Supplemental Dataset 1/D-mRNA_rhythm_translation_rhyth/Fgf1_set_D.pdf]

# Fgfr1

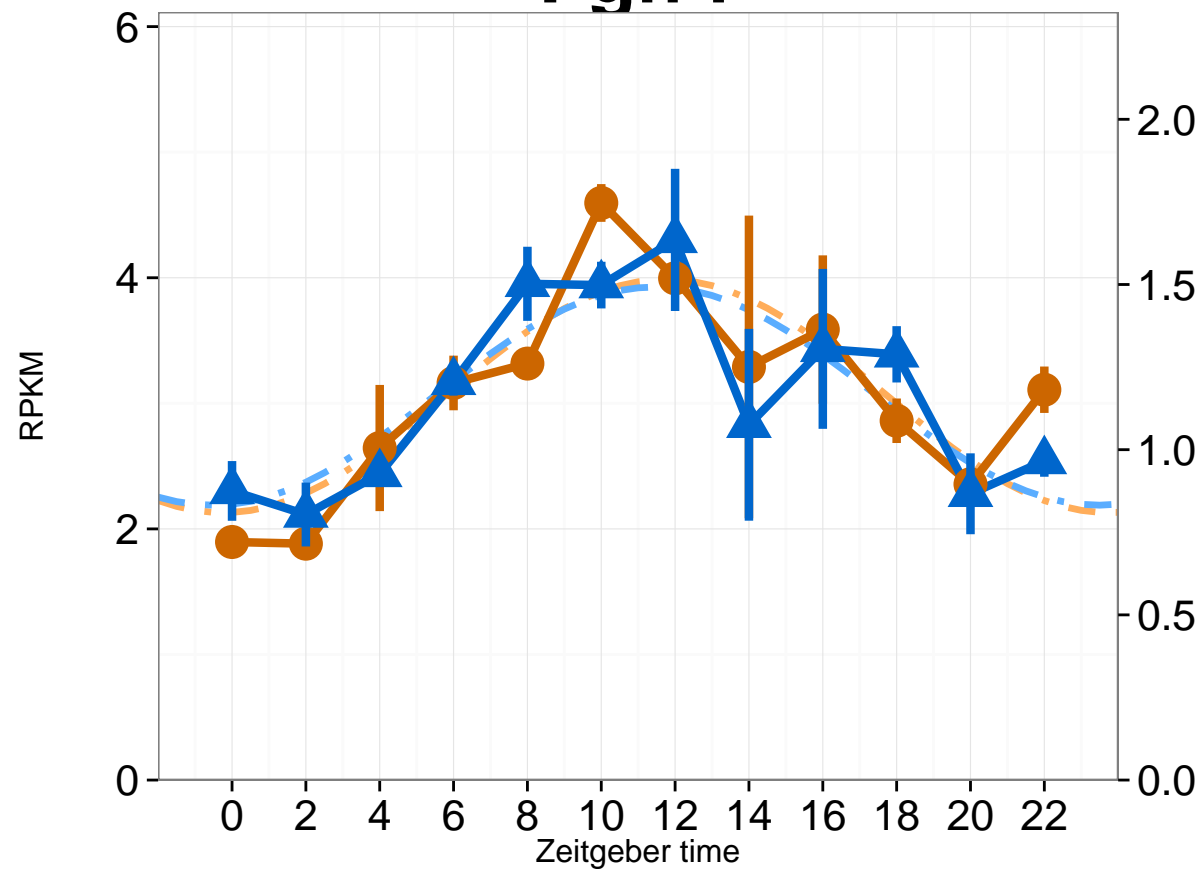

# Fgfr1

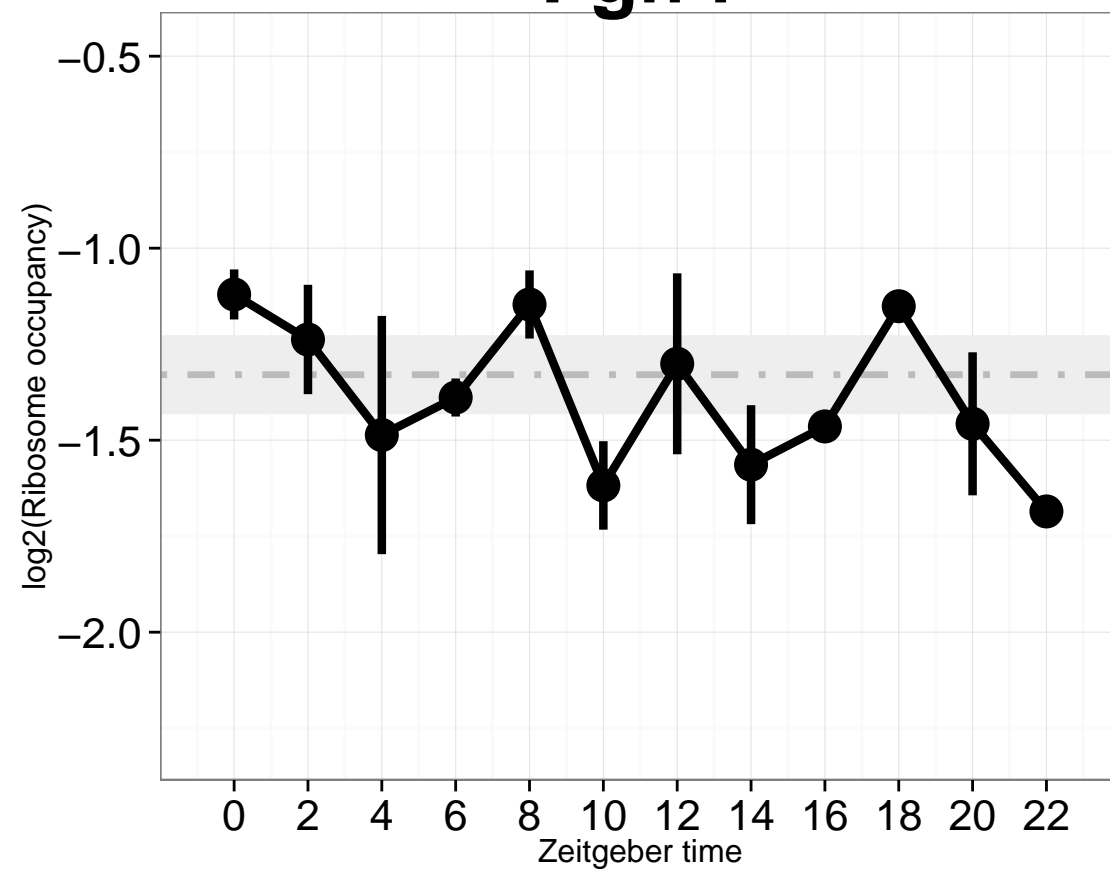

Supplement: SuppDataset_1.zip [file Fgfr1_set_D.pdf › Supplemental Dataset 1/D-mRNA_rhythm_translation_rhyth/Fgfr1_set_D.pdf]

## Fgfr2

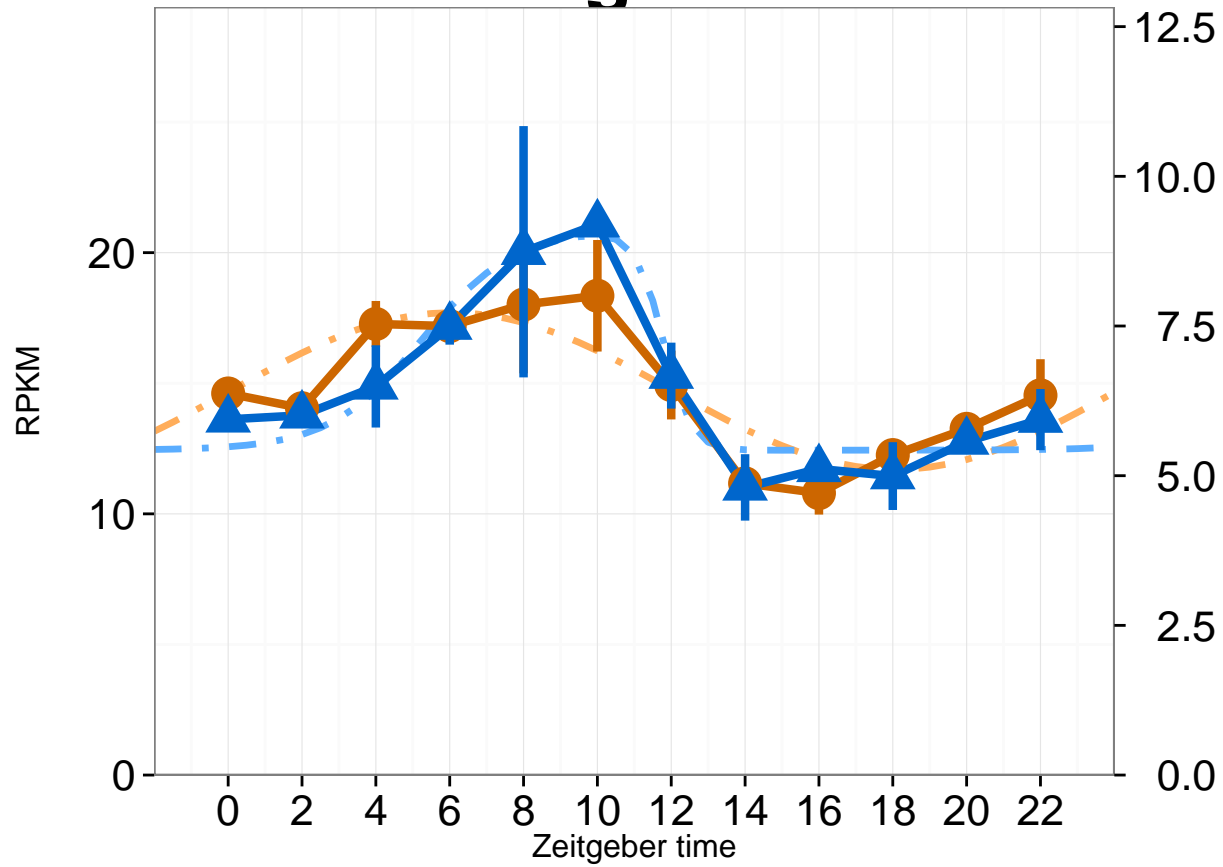

## Fgfr2

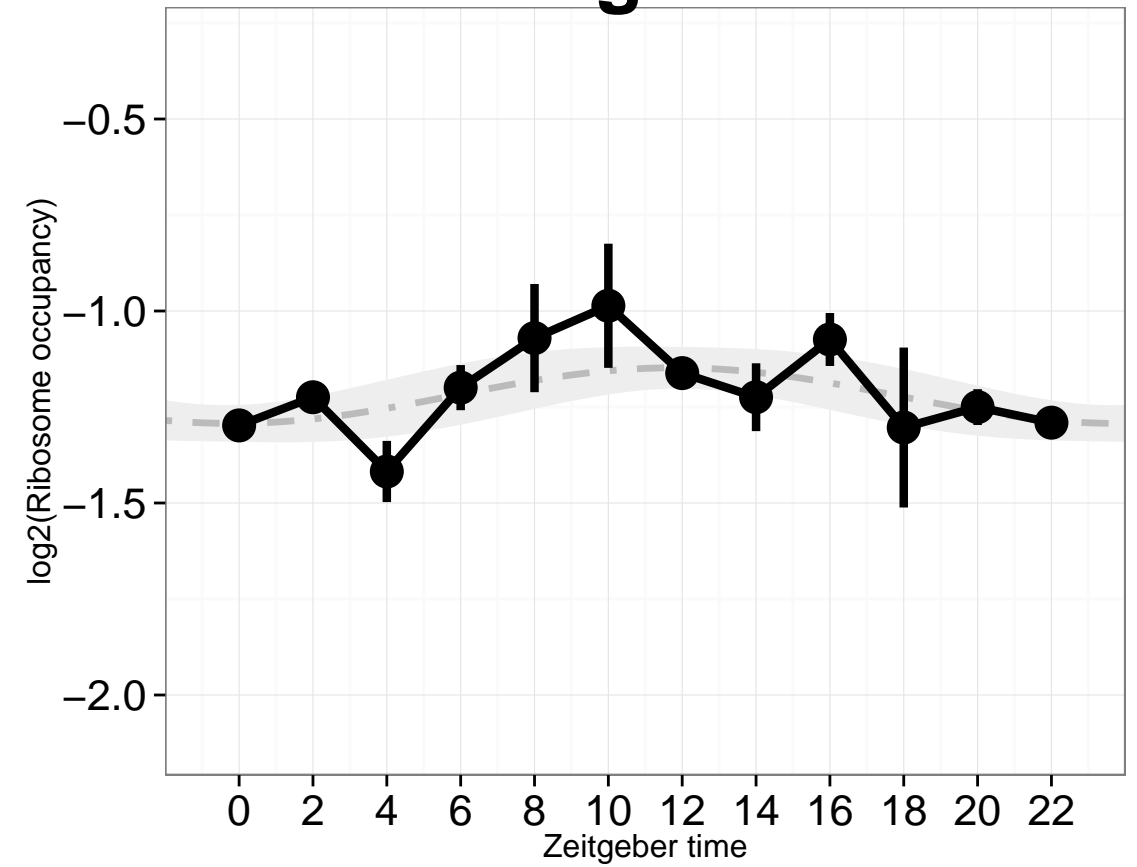

Supplement: SuppDataset_1.zip [file Fgfr2_set_D.pdf › Supplemental Dataset 1/D-mRNA_rhythm_translation_rhyth/Fgfr2_set_D.pdf]

# Fgfrl1

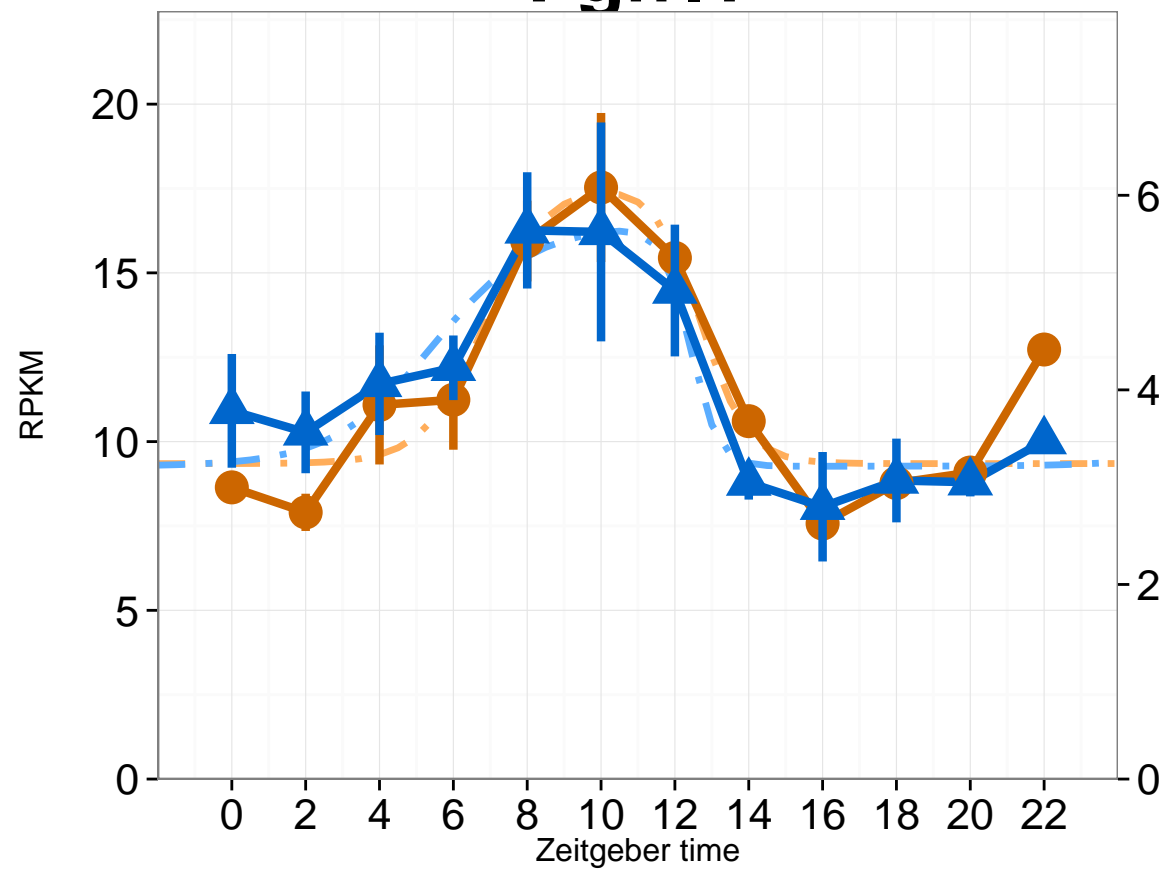

# Fgfrl1

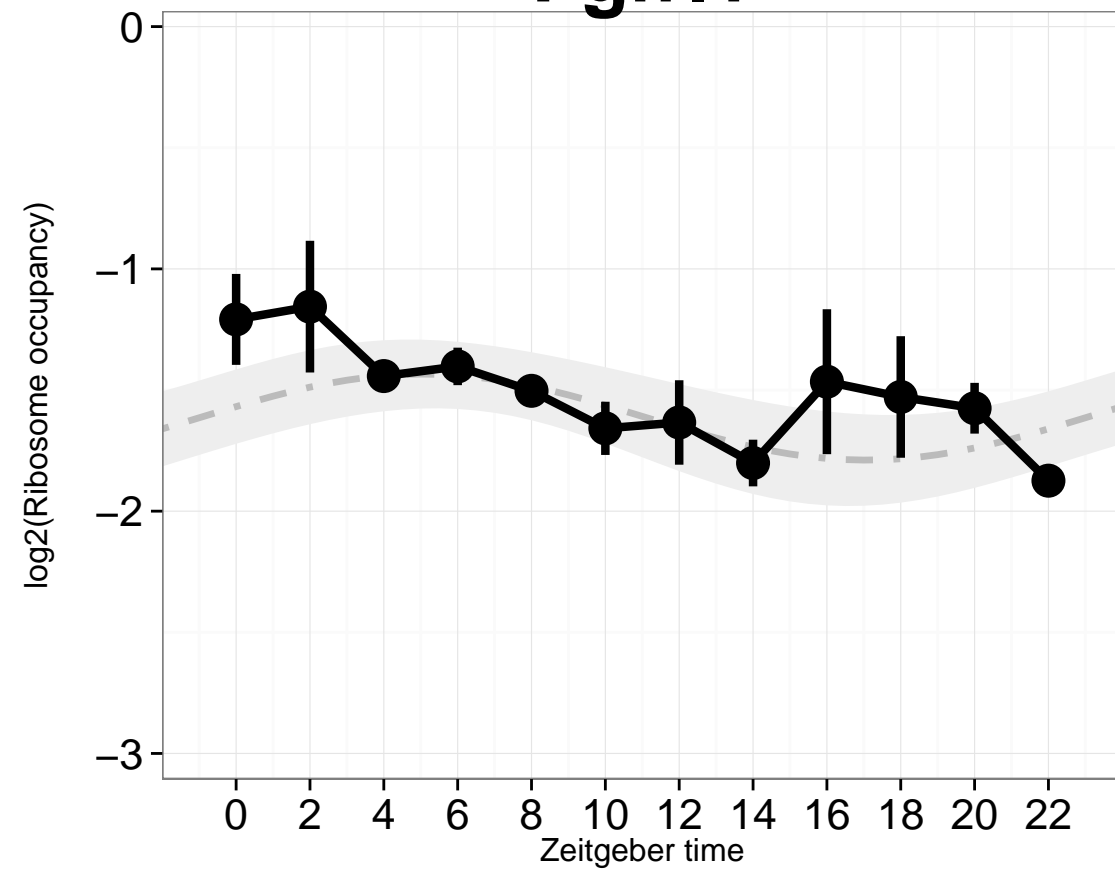

Supplement: SuppDataset_1.zip [file Fgfrl1_set_D.pdf › Supplemental Dataset 1/D-mRNA_rhythm_translation_rhyth/Fgfrl1_set_D.pdf]

# Fgl1

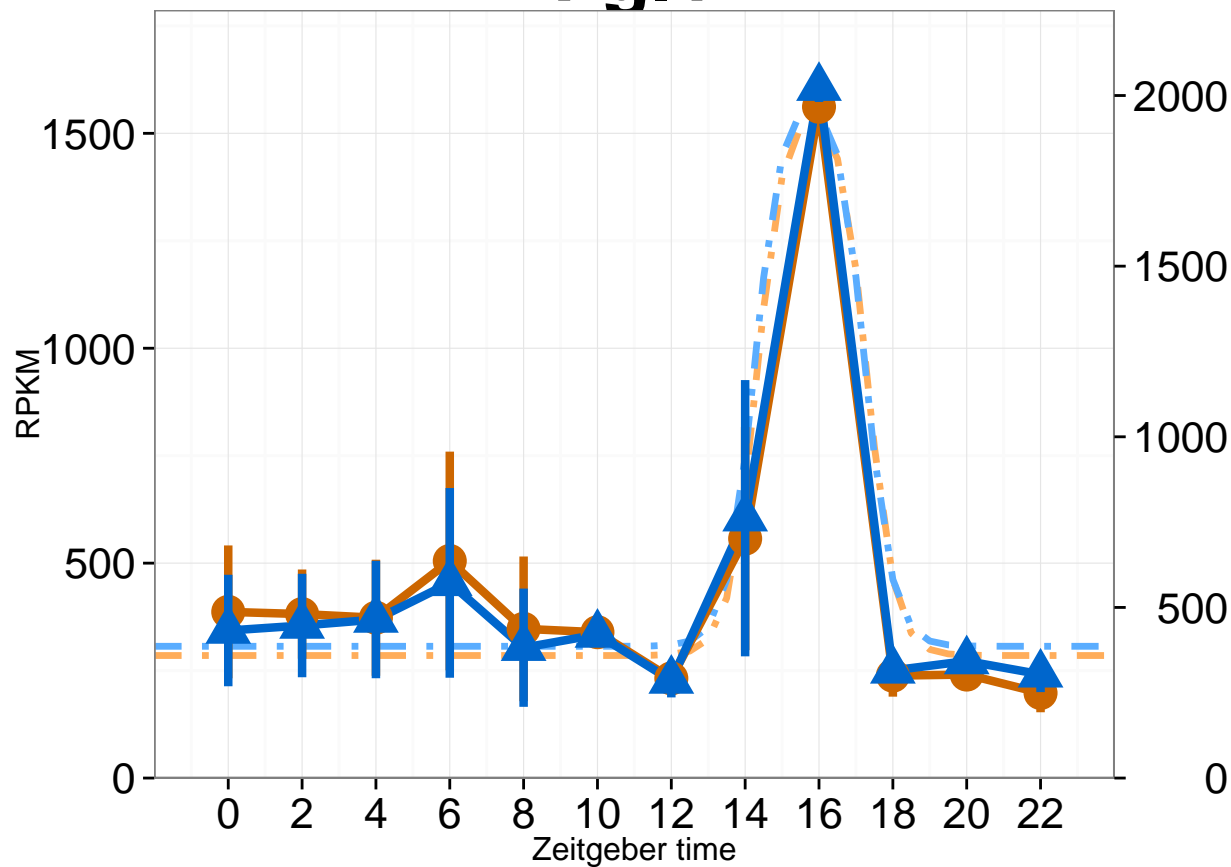

# Fgl1

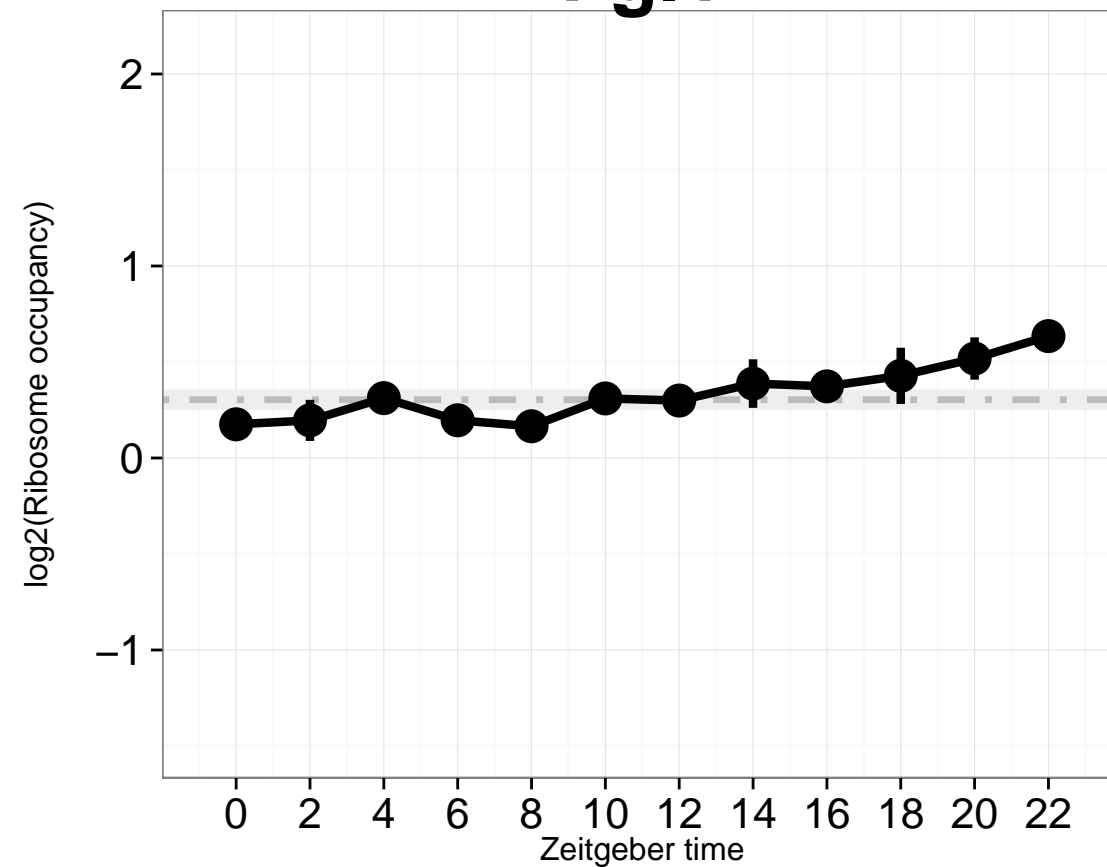

Supplement: SuppDataset_1.zip [file Fgl1_set_D.pdf › Supplemental Dataset 1/D-mRNA_rhythm_translation_rhyth/Fgl1_set_D.pdf]

# Fkbp4

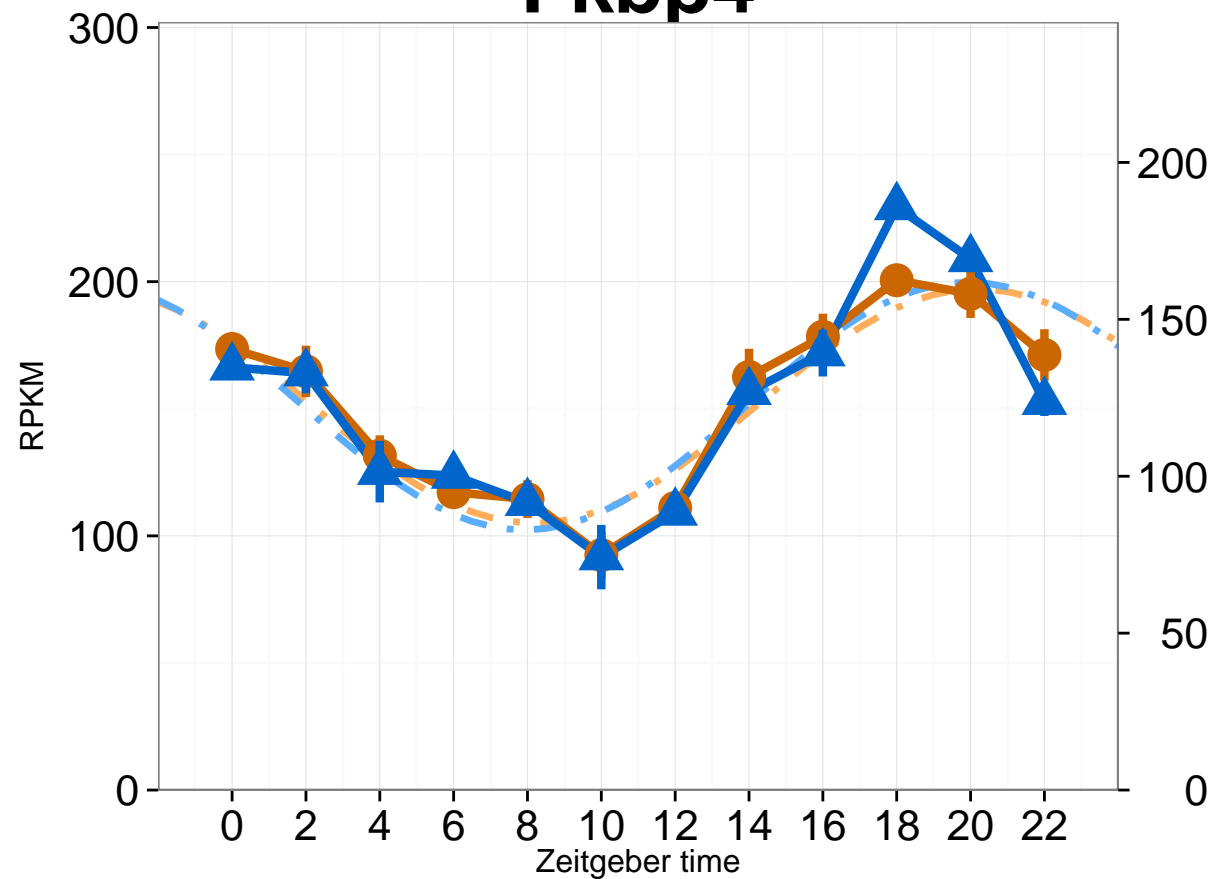

# Fkbp4

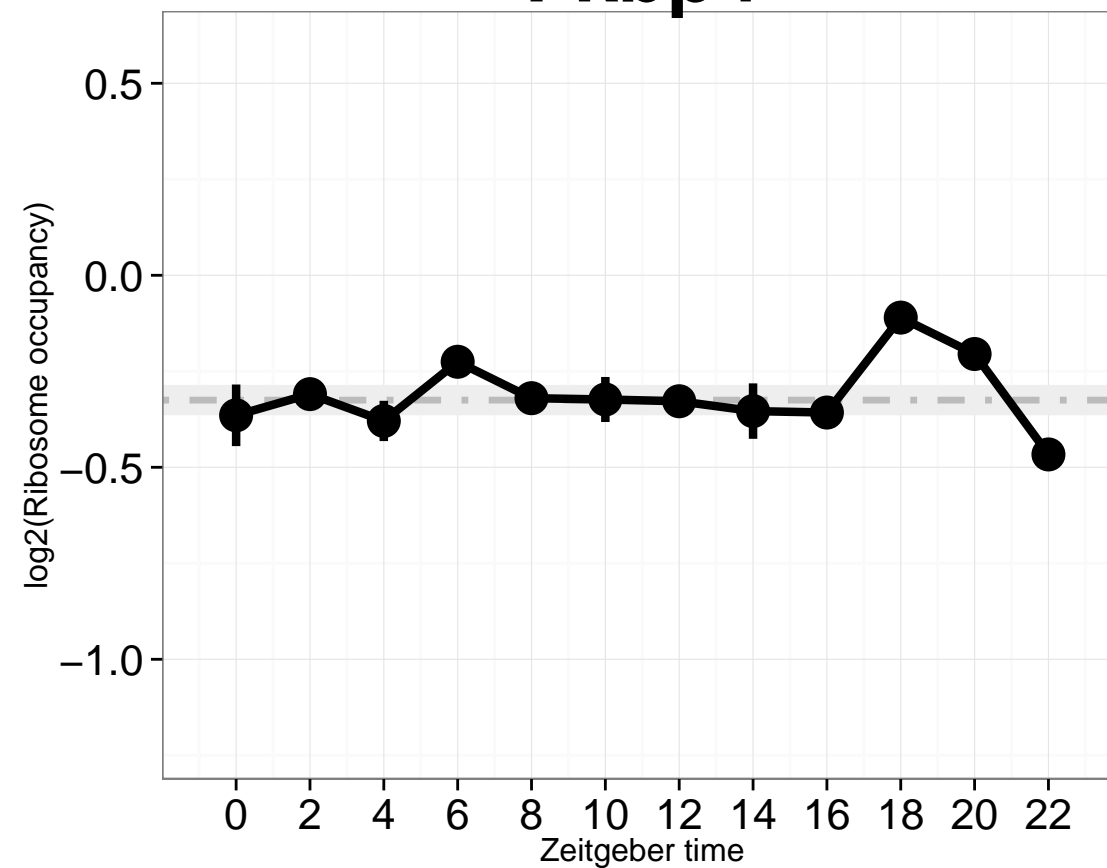

Supplement: SuppDataset_1.zip [file Fkbp4_set_D.pdf › Supplemental Dataset 1/D-mRNA_rhythm_translation_rhyth/Fkbp4_set_D.pdf]

# Fkbp5

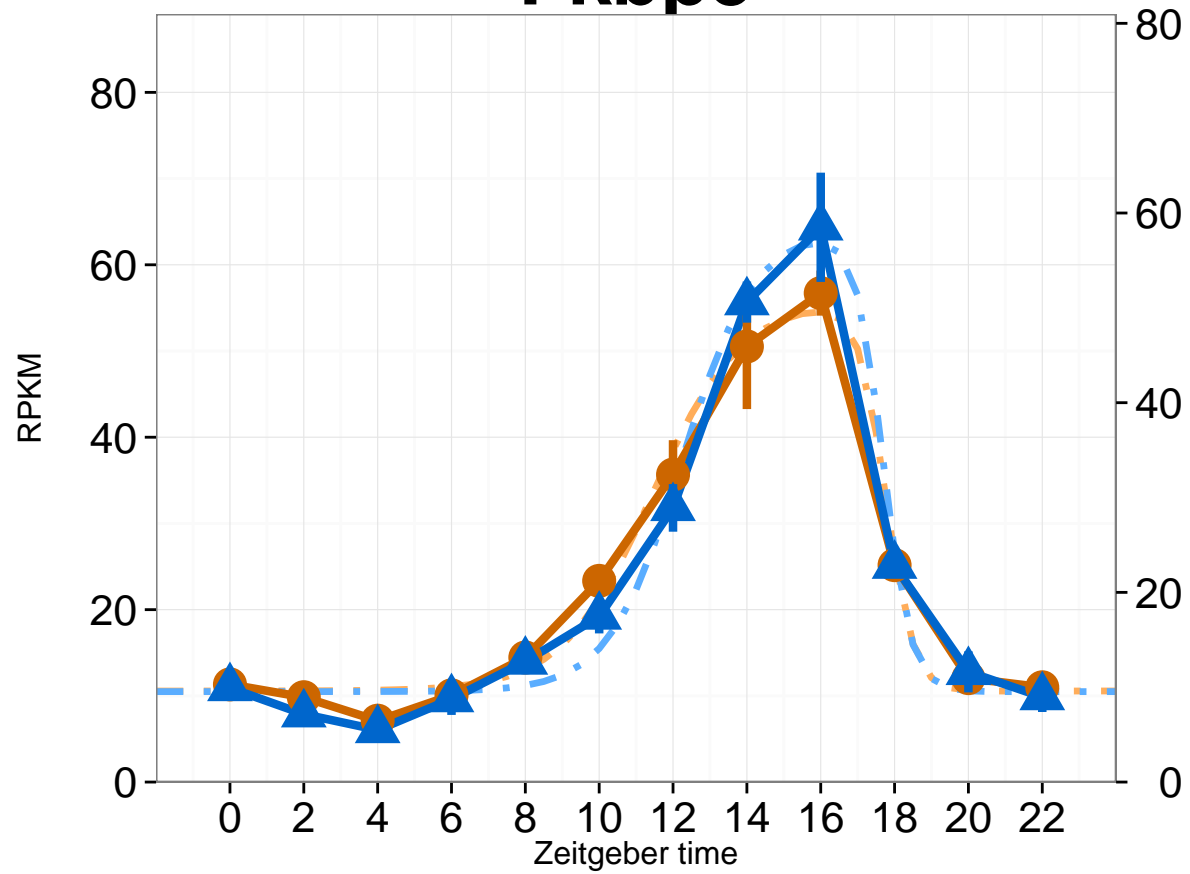

# Fkbp5

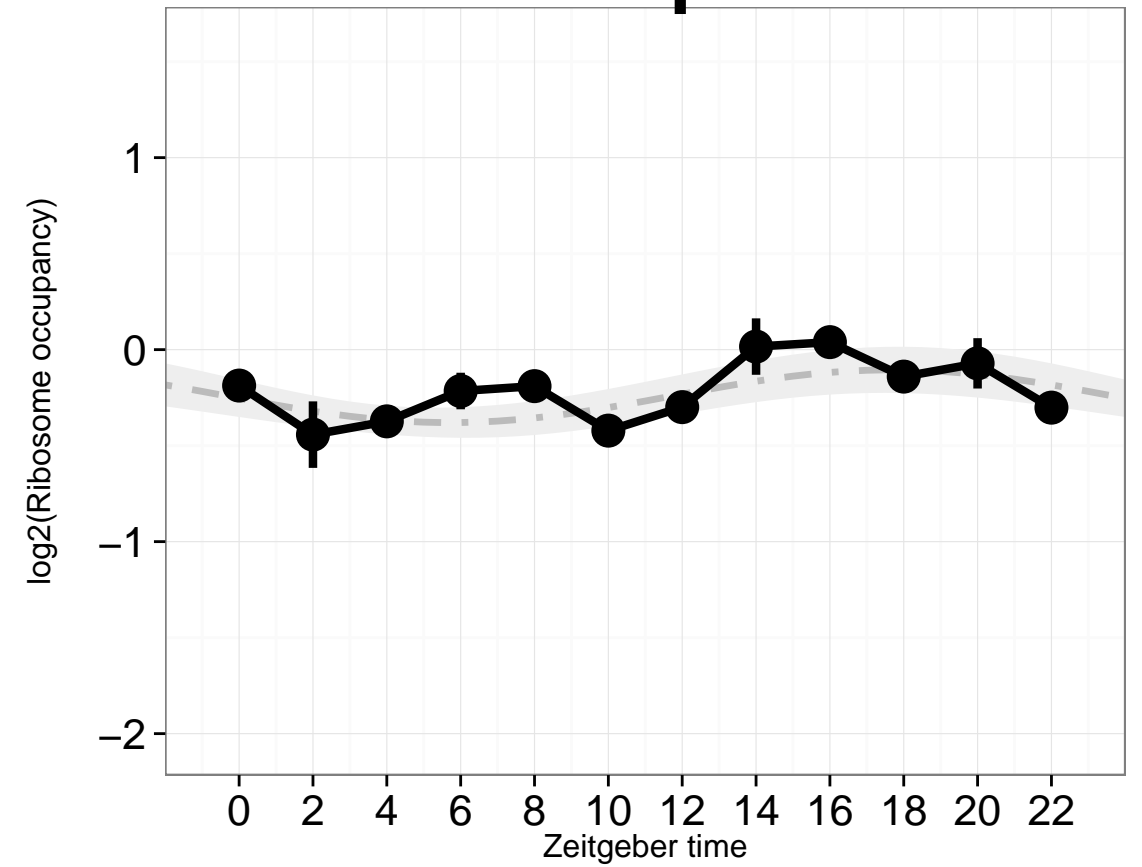

Supplement: SuppDataset_1.zip [file Fkbp5_set_D.pdf › Supplemental Dataset 1/D-mRNA_rhythm_translation_rhyth/Fkbp5_set_D.pdf]

## Flcn

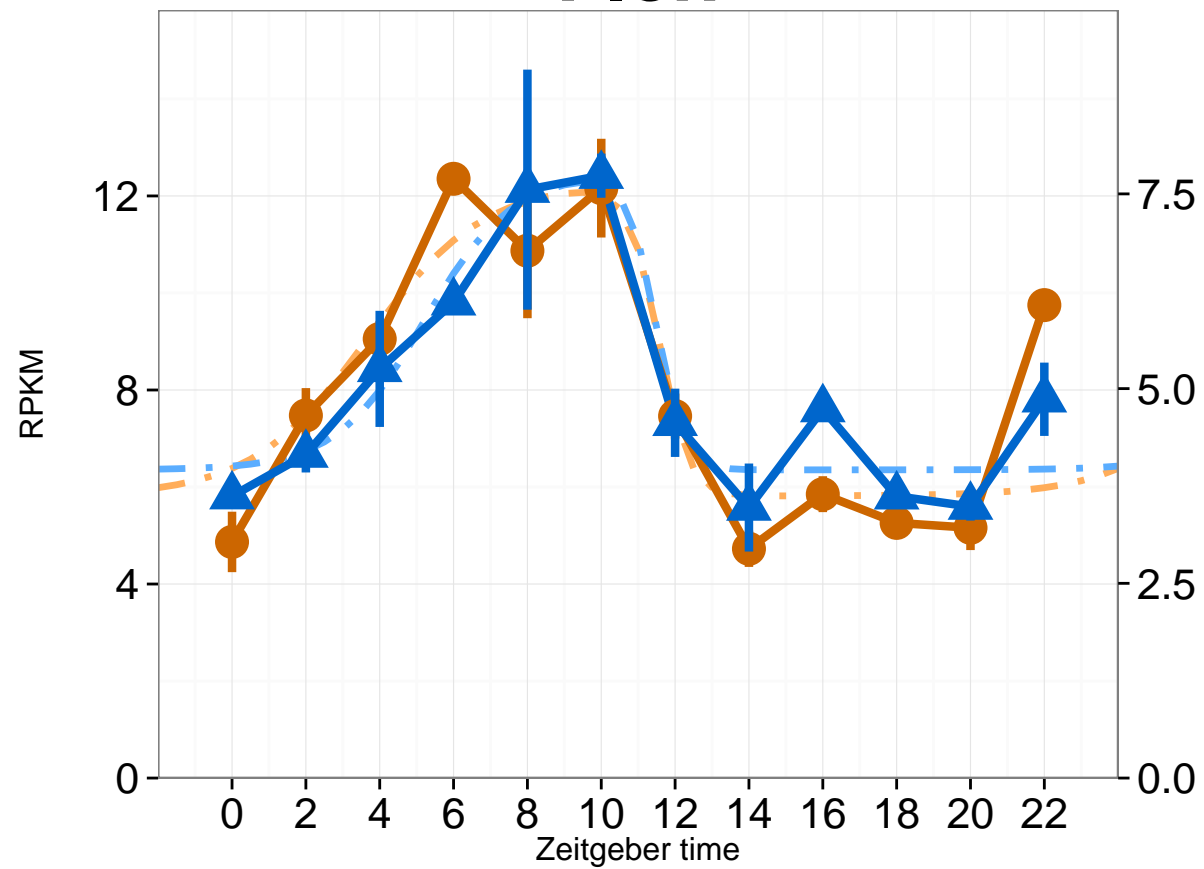

## Flcn

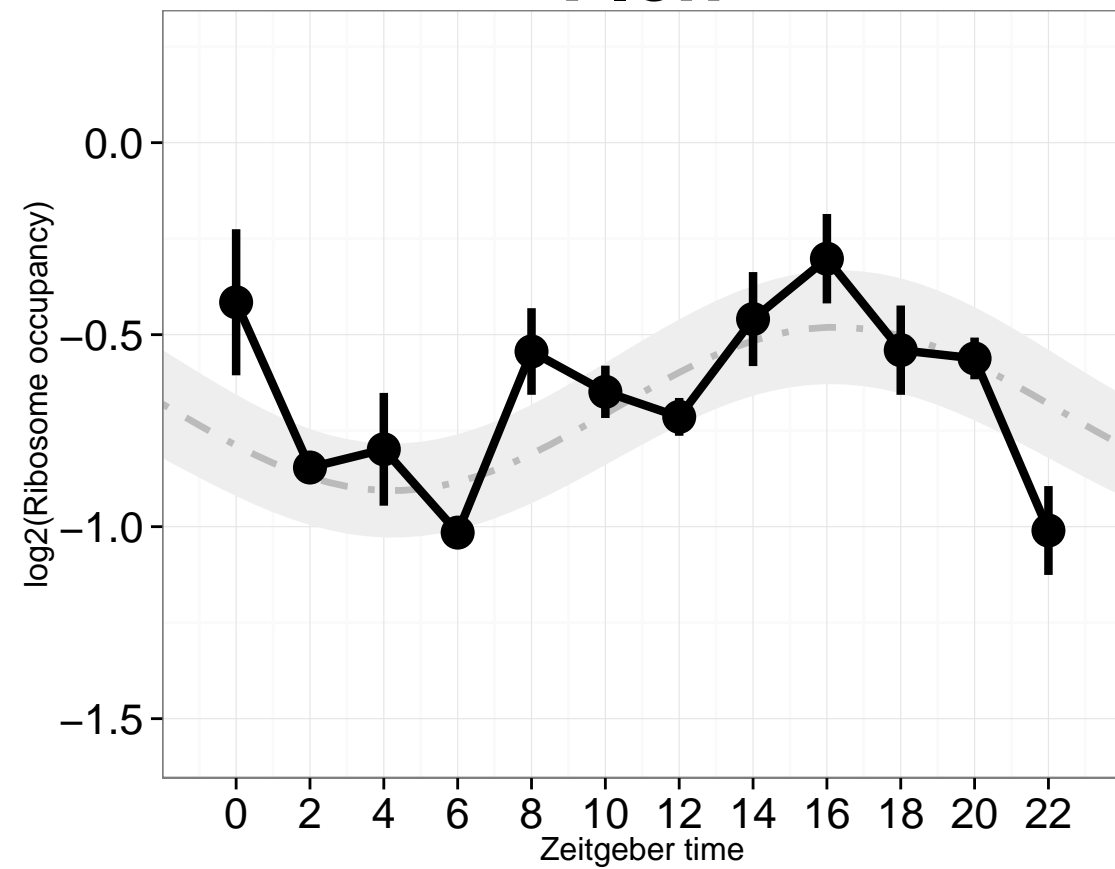

Supplement: SuppDataset_1.zip [file Flcn_set_D.pdf › Supplemental Dataset 1/D-mRNA_rhythm_translation_rhyth/Flcn_set_D.pdf]

# Flot1

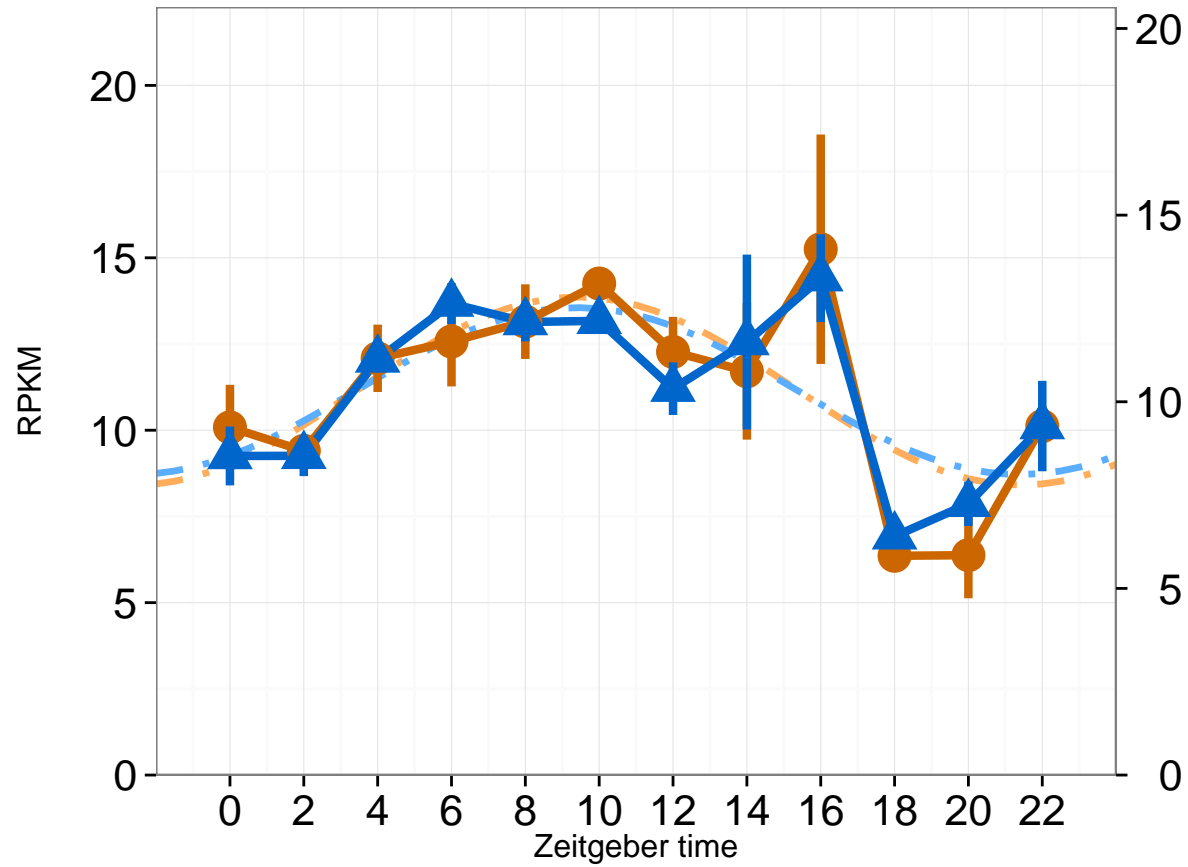

# Flot1

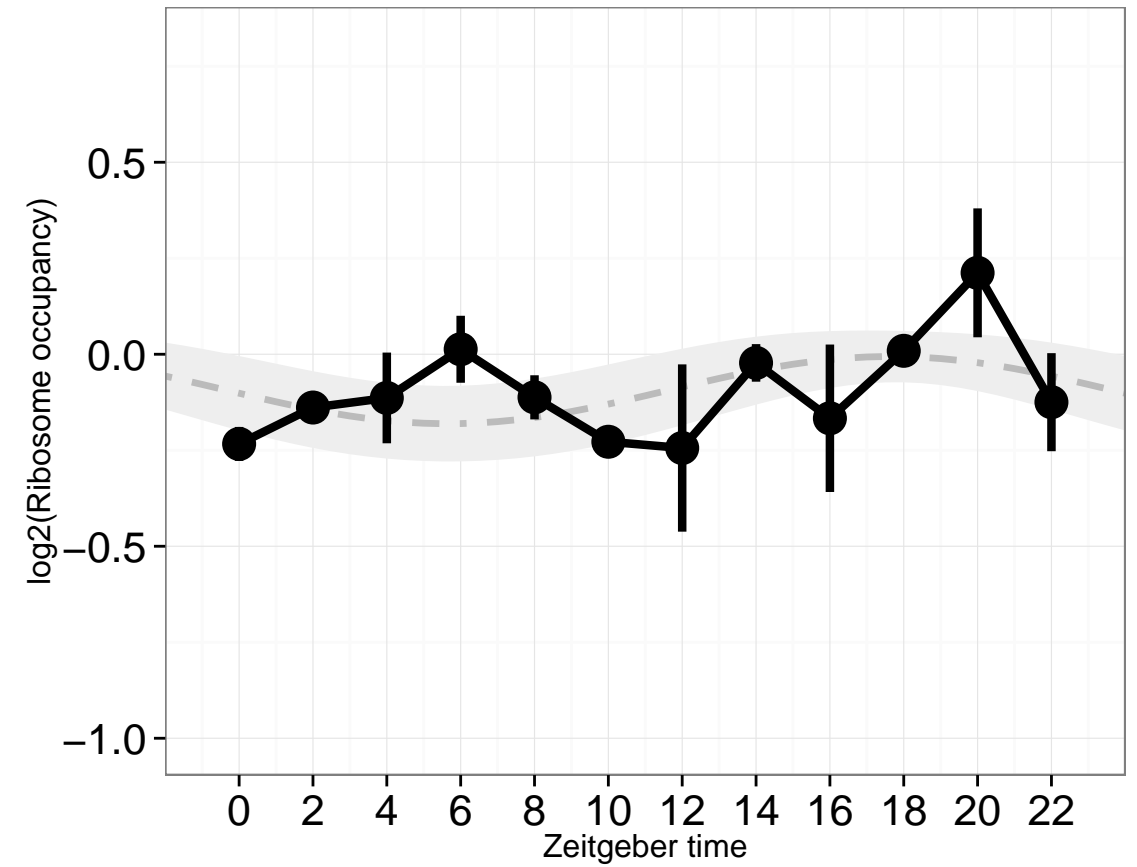

Supplement: SuppDataset_1.zip [file Flot1_set_D.pdf › Supplemental Dataset 1/D-mRNA_rhythm_translation_rhyth/Flot1_set_D.pdf]

## Fmo1

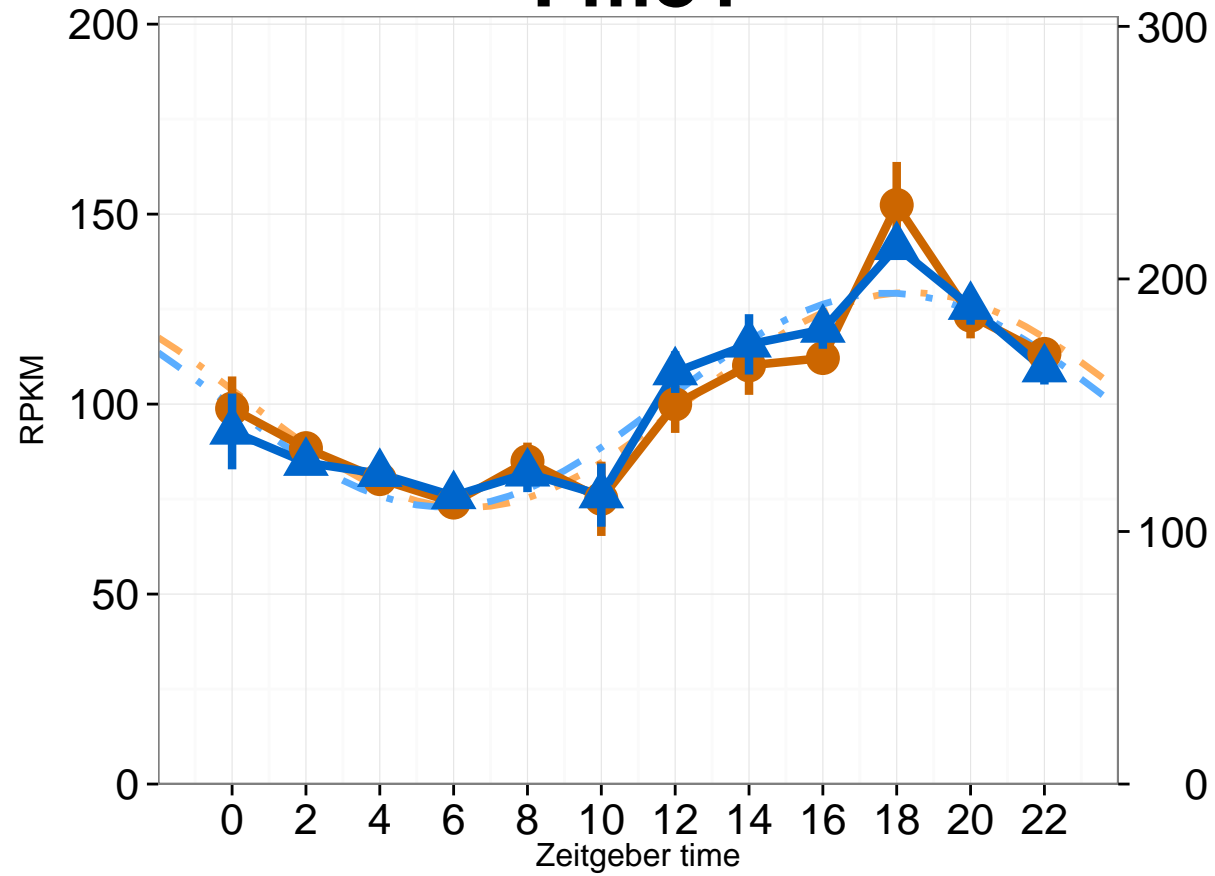

## Fmo1

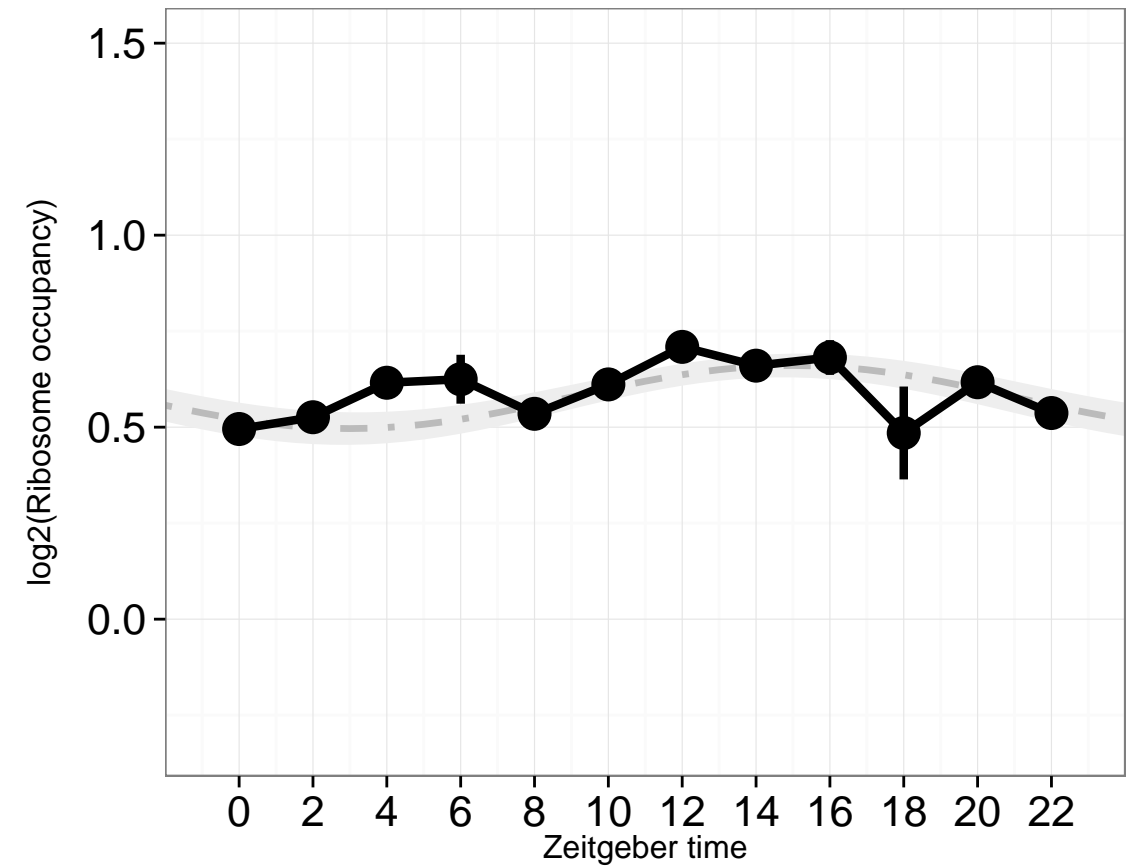

Supplement: SuppDataset_1.zip [file Fmo1_set_D.pdf › Supplemental Dataset 1/D-mRNA_rhythm_translation_rhyth/Fmo1_set_D.pdf]

## Fmo2

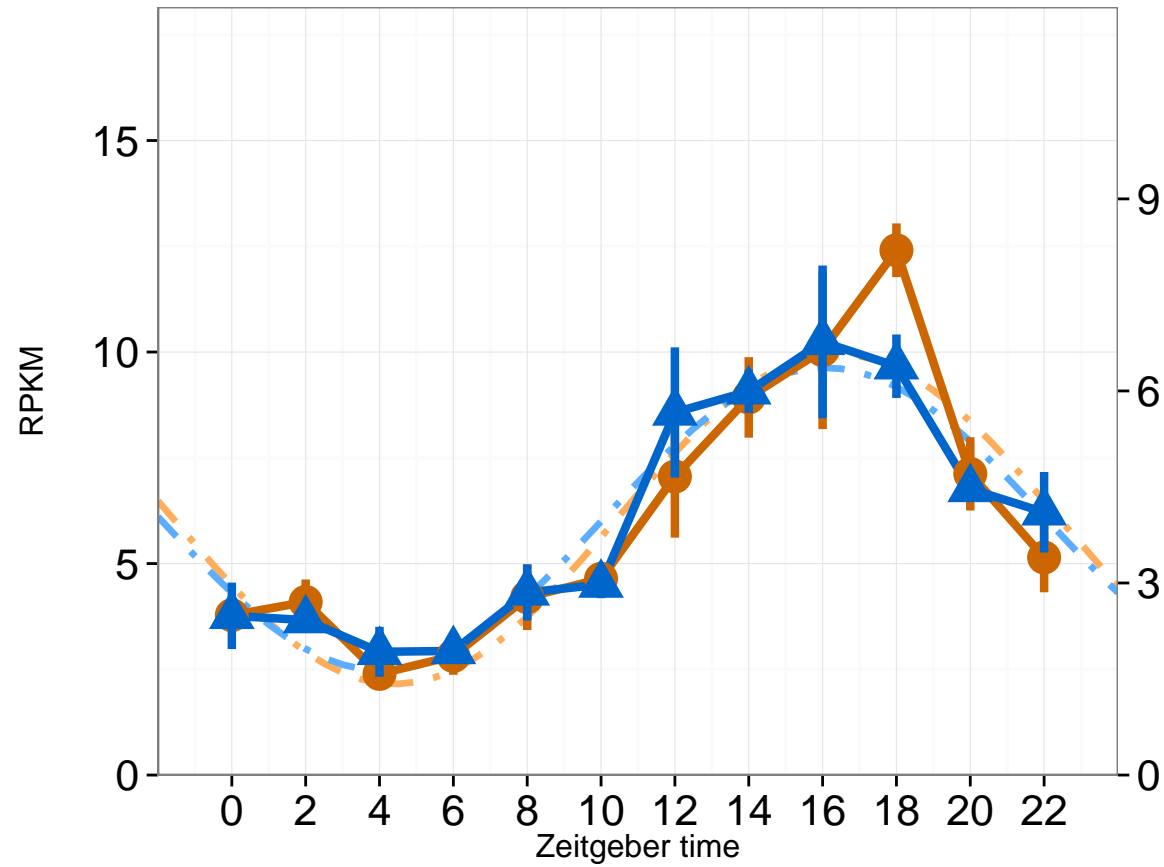

## Fmo2

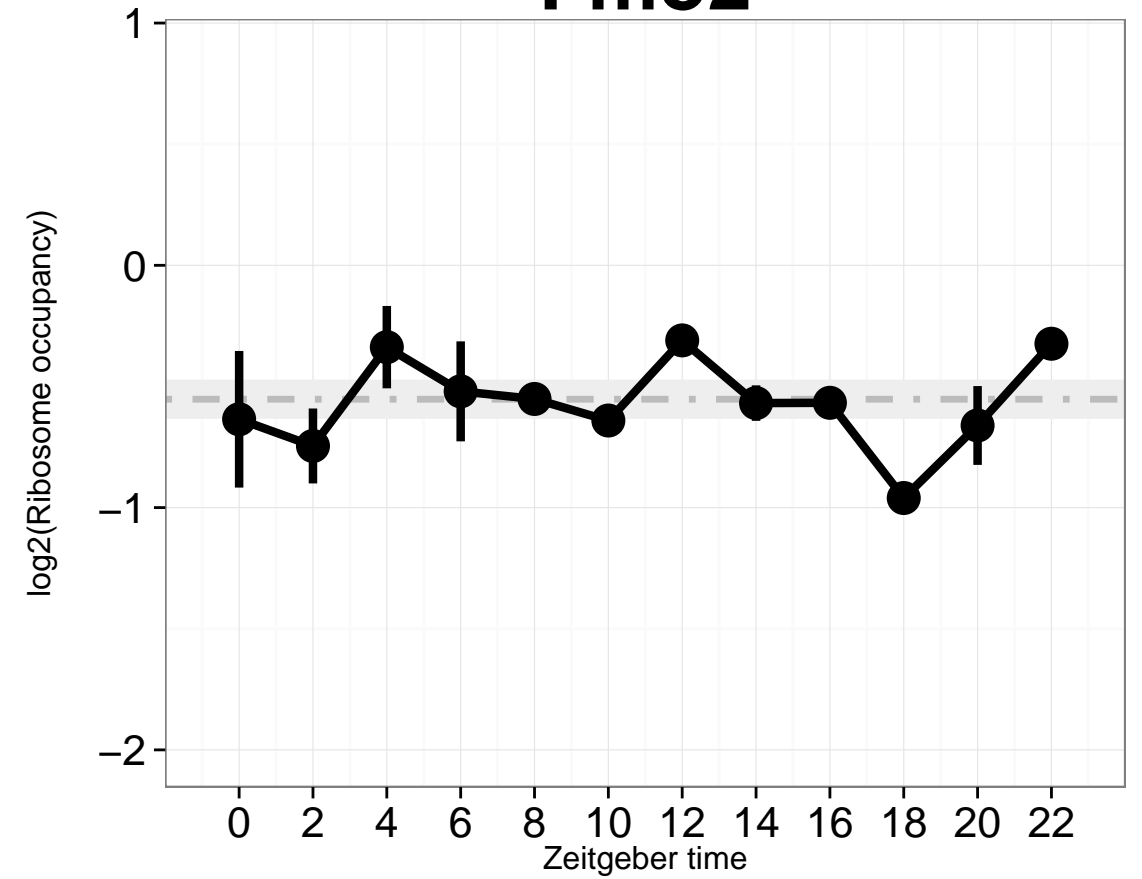

Supplement: SuppDataset_1.zip [file Fmo2_set_D.pdf › Supplemental Dataset 1/D-mRNA_rhythm_translation_rhyth/Fmo2_set_D.pdf]

## Fmo5

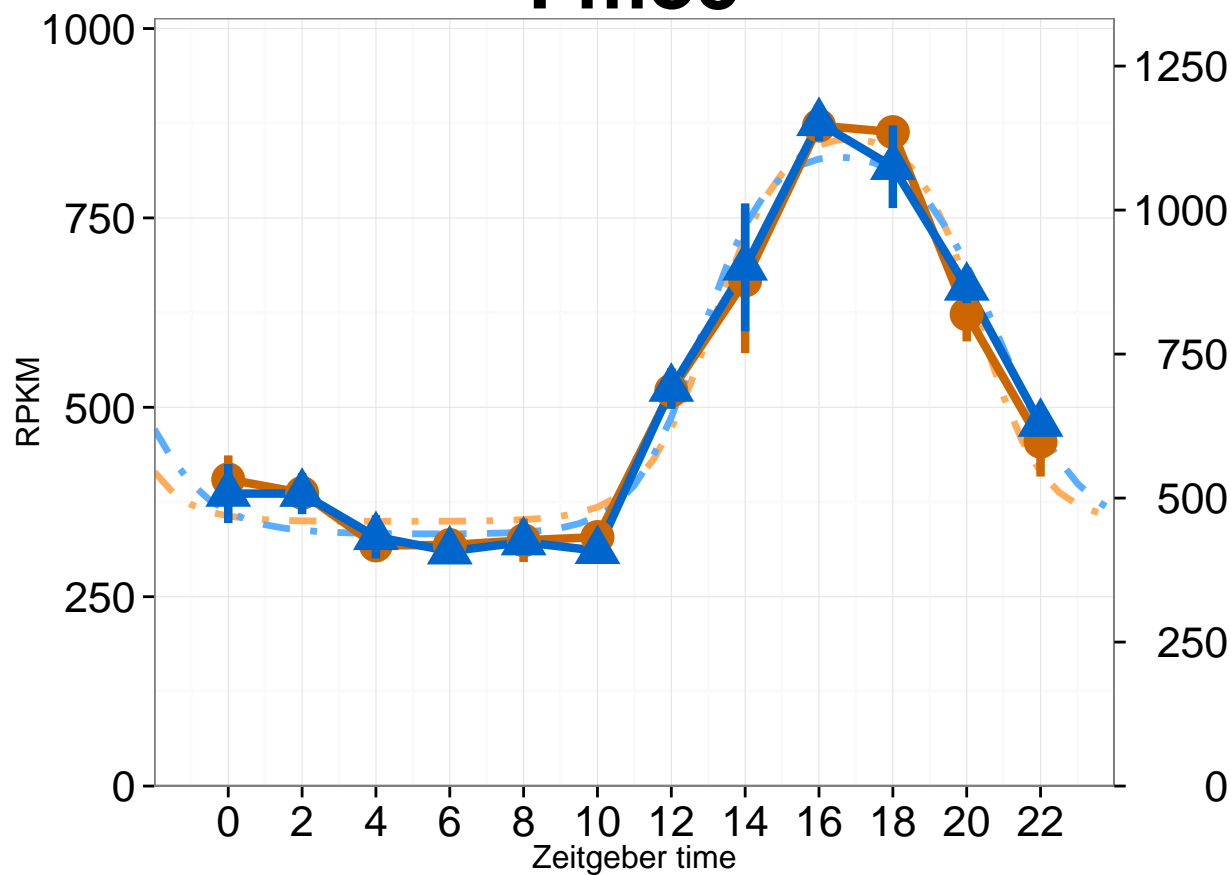

## Fmo5

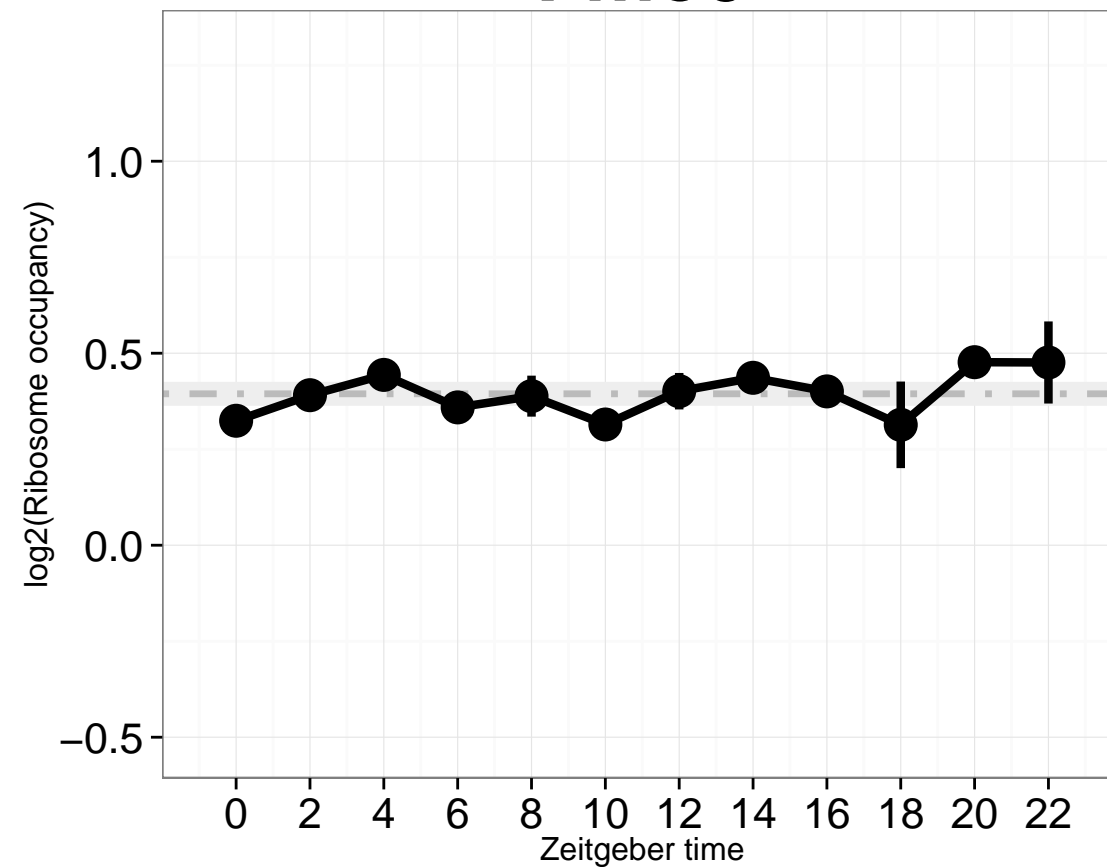

Supplement: SuppDataset_1.zip [file Fmo5_set_D.pdf › Supplemental Dataset 1/D-mRNA_rhythm_translation_rhyth/Fmo5_set_D.pdf]

# Fn1

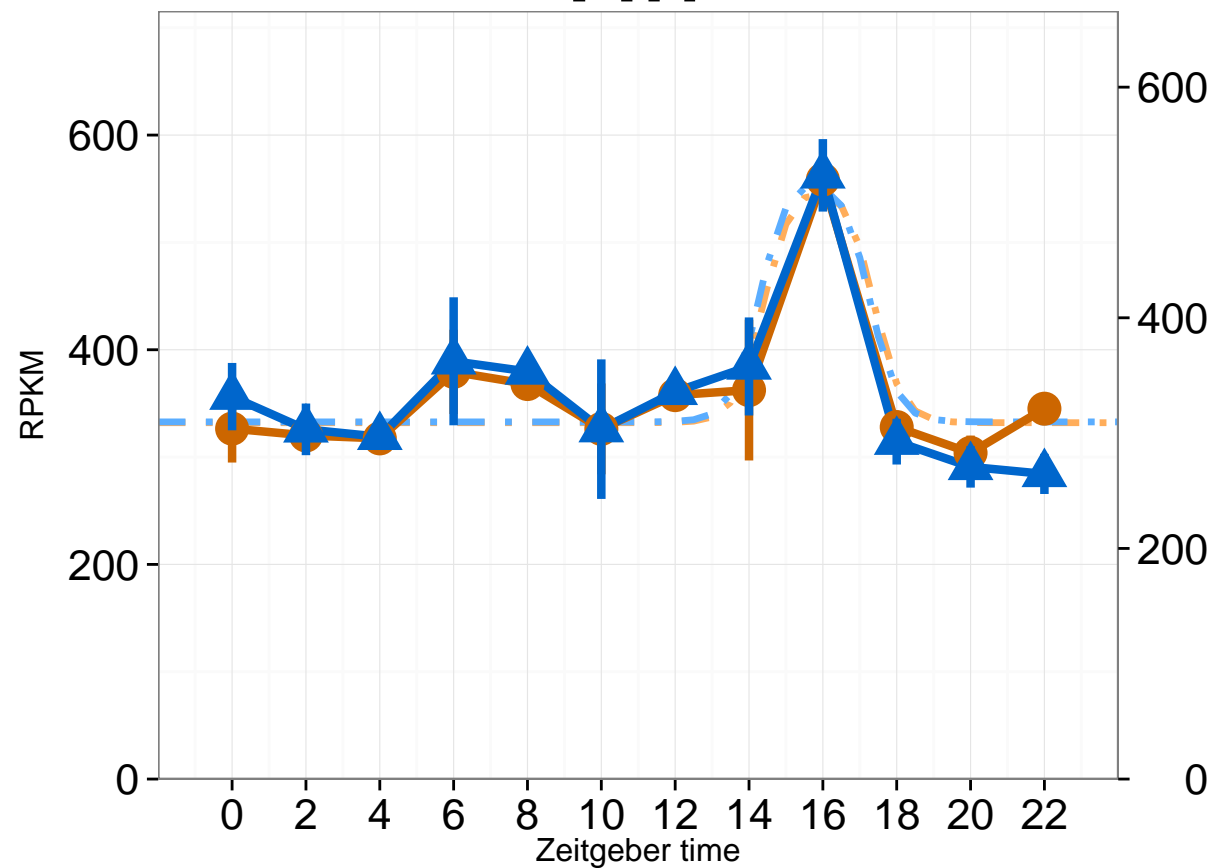

# Fn1

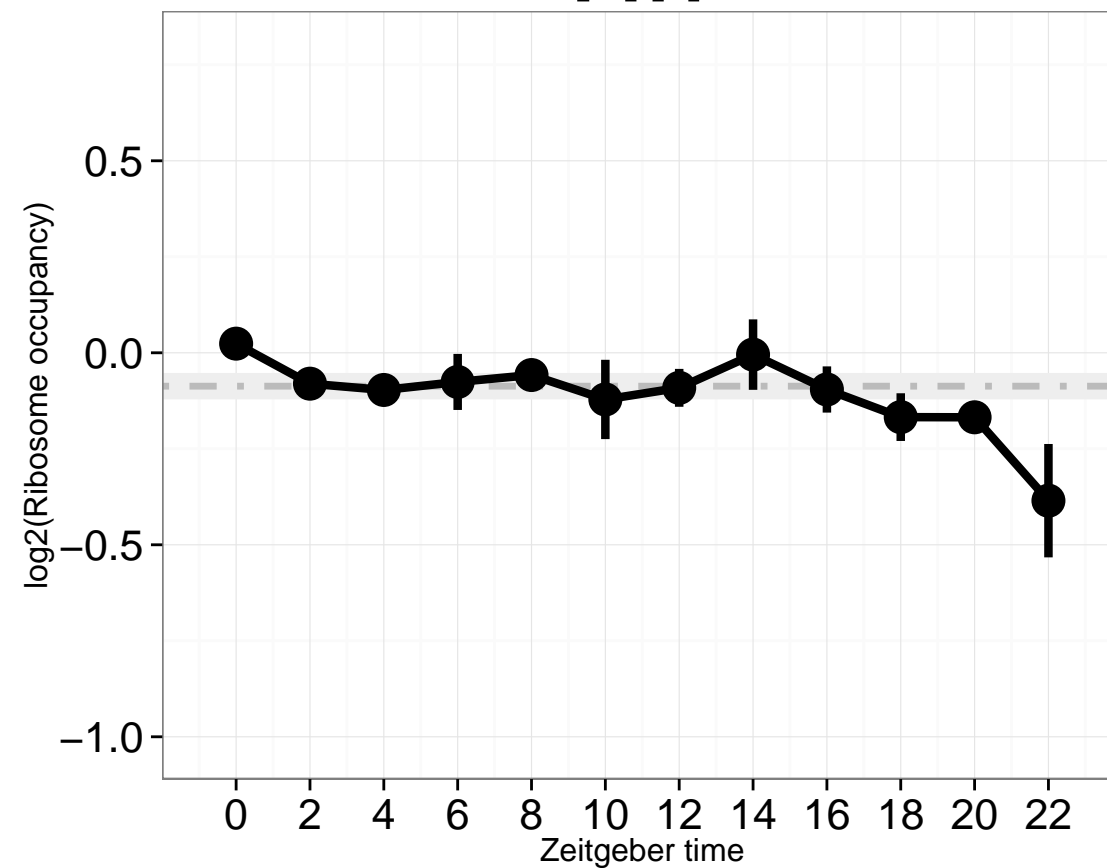

Supplement: SuppDataset_1.zip [file Fn1_set_D.pdf › Supplemental Dataset 1/D-mRNA_rhythm_translation_rhyth/Fn1_set_D.pdf]

## Fnip1

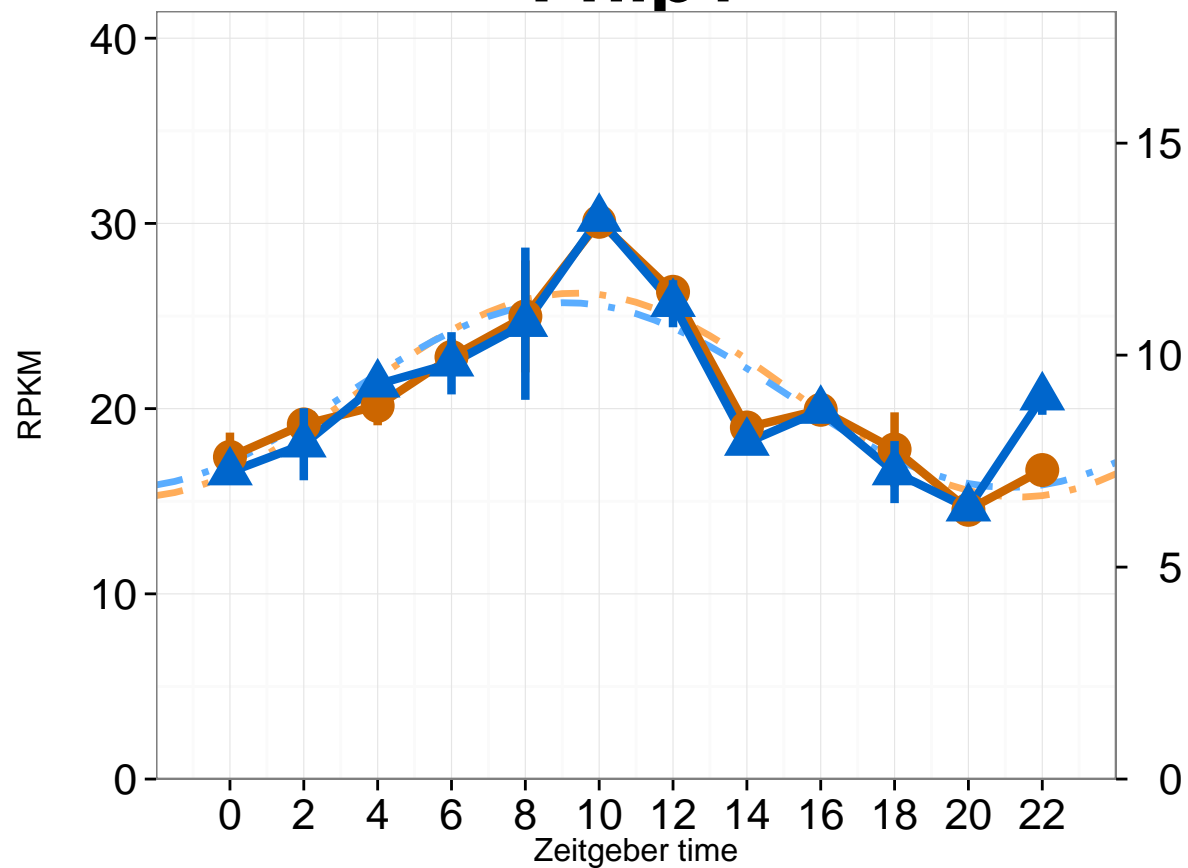

## Fnip1

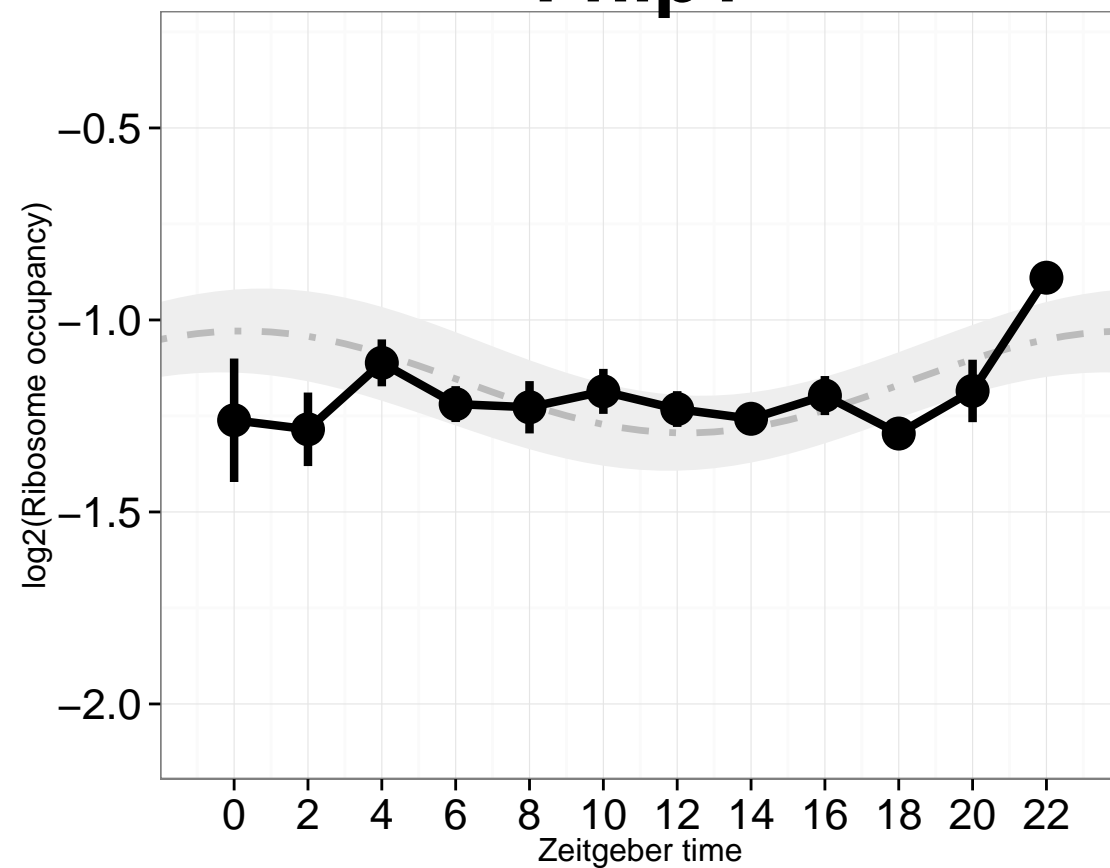

Supplement: SuppDataset_1.zip [file Fnip1_set_D.pdf › Supplemental Dataset 1/D-mRNA_rhythm_translation_rhyth/Fnip1_set_D.pdf]

# Fnip2

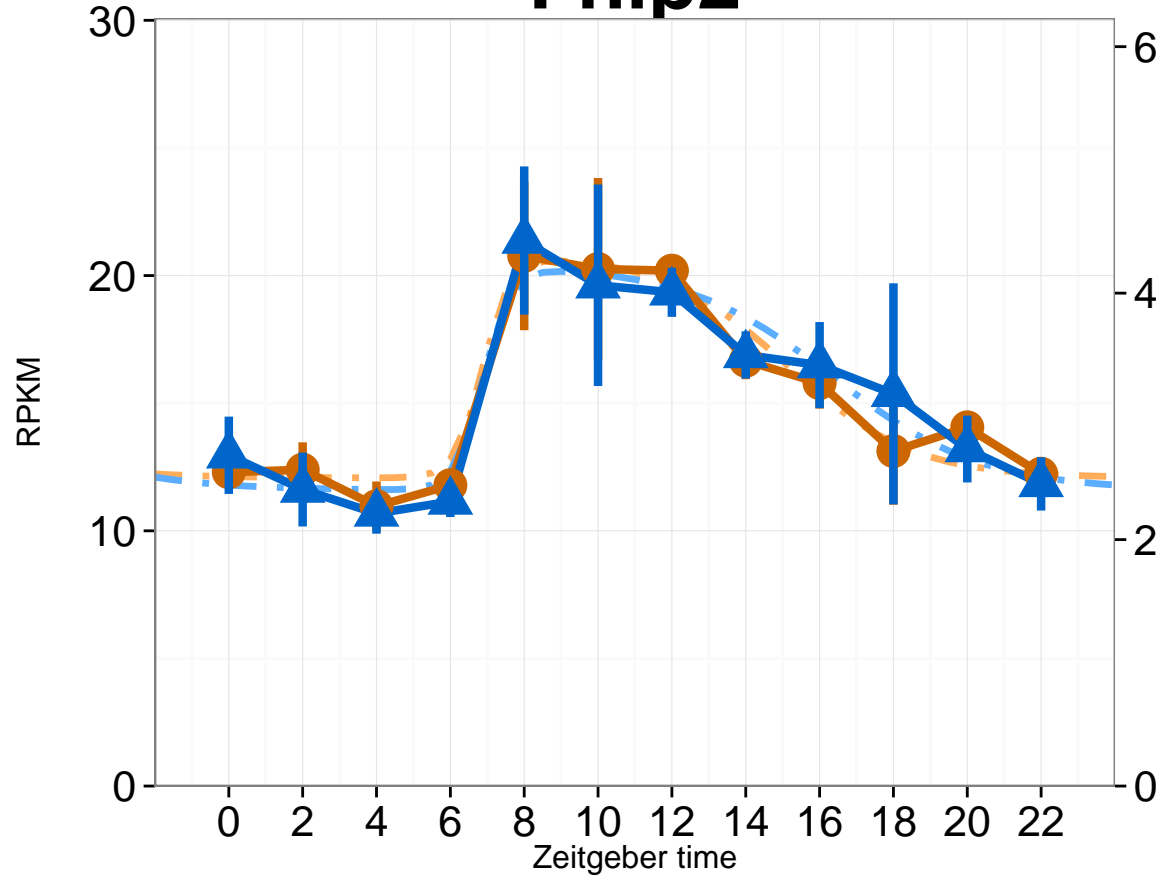

# Fnip2

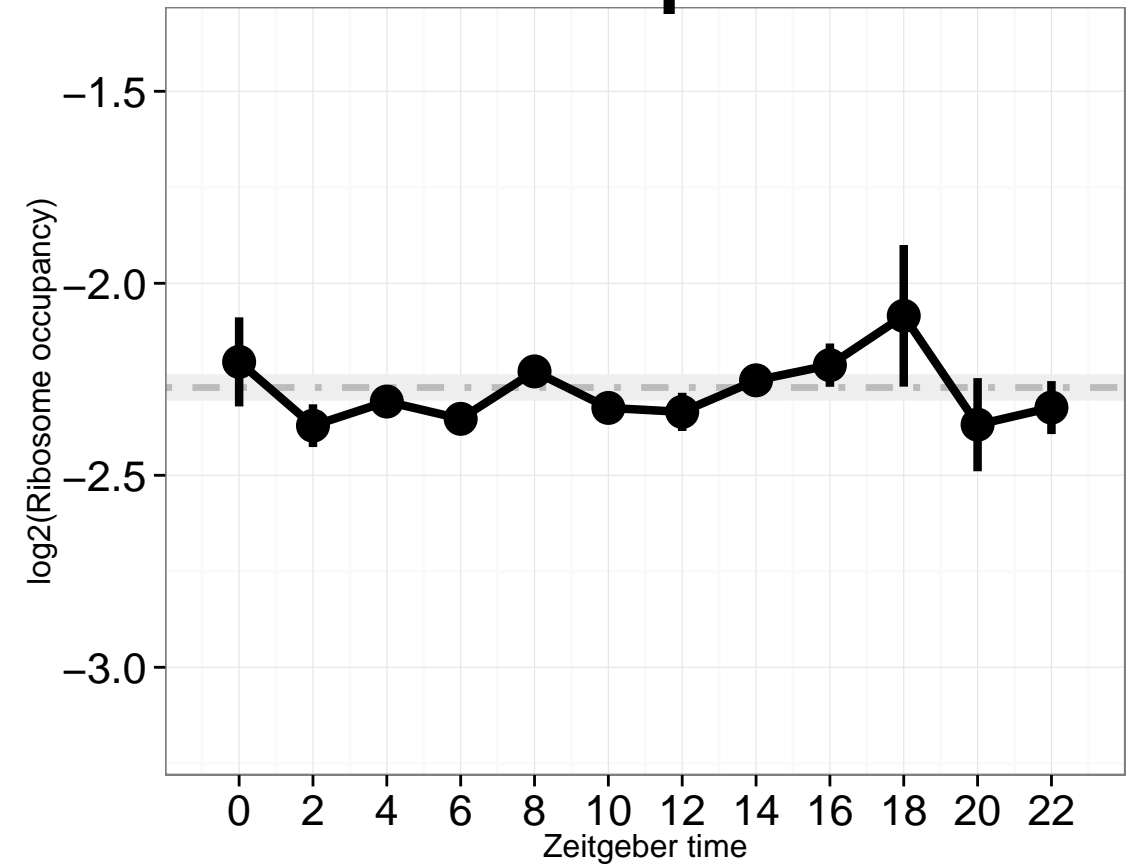

Supplement: SuppDataset_1.zip [file Fnip2_set_D.pdf › Supplemental Dataset 1/D-mRNA_rhythm_translation_rhyth/Fnip2_set_D.pdf]

## Foxp1

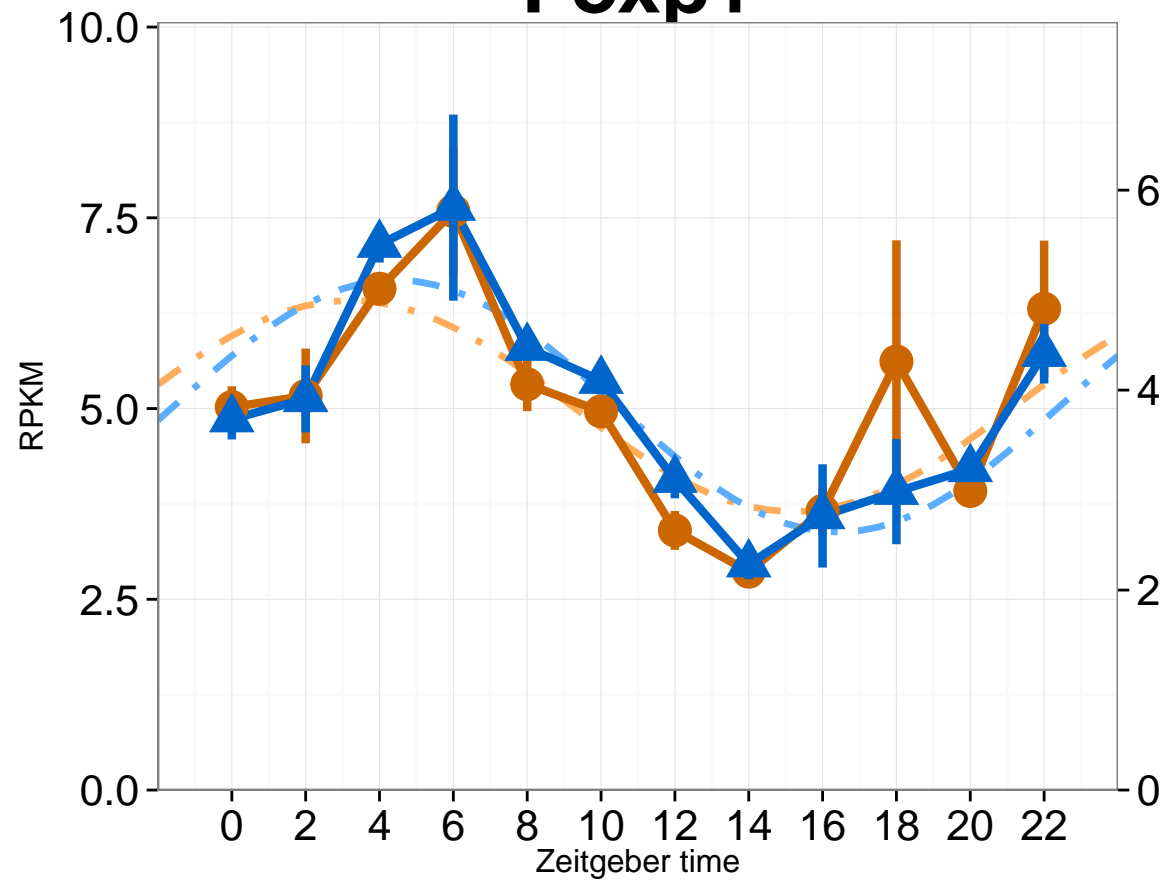

## Foxp1

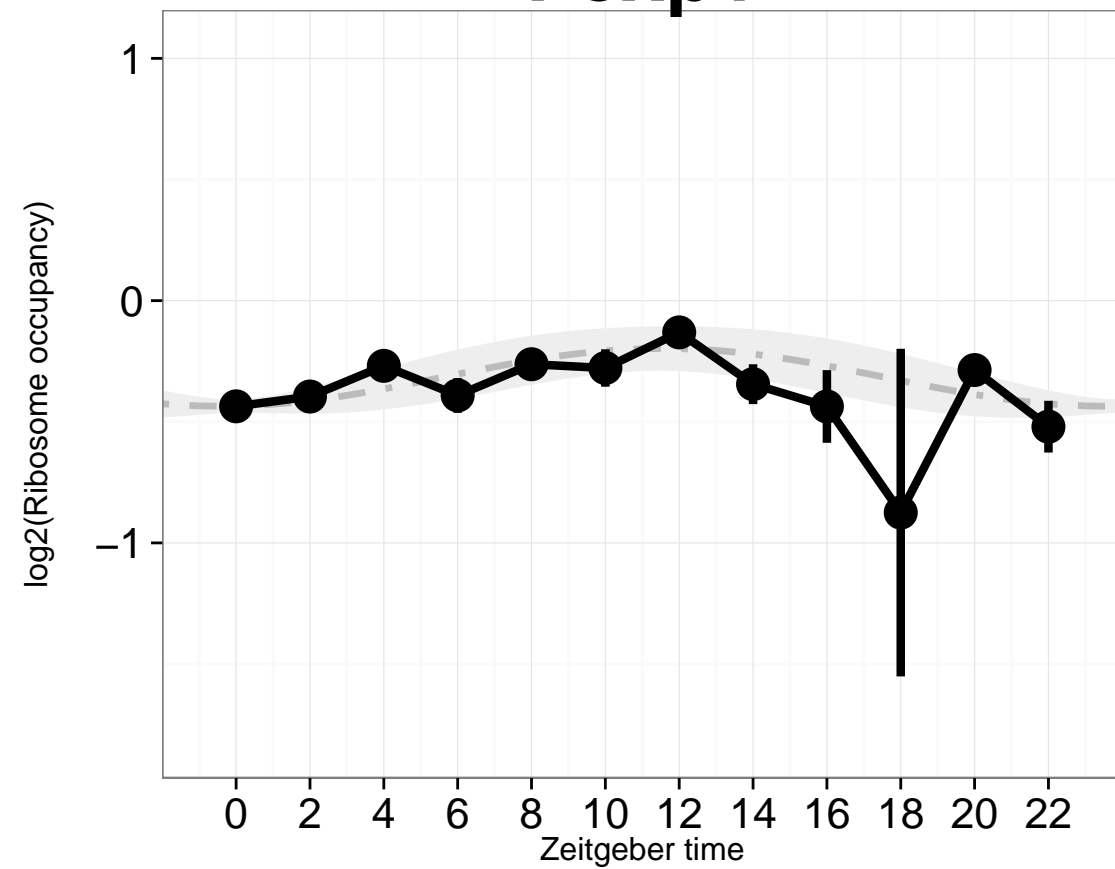

Supplement: SuppDataset_1.zip [file Foxp1_set_D.pdf › Supplemental Dataset 1/D-mRNA_rhythm_translation_rhyth/Foxp1_set_D.pdf]

## Fpgs

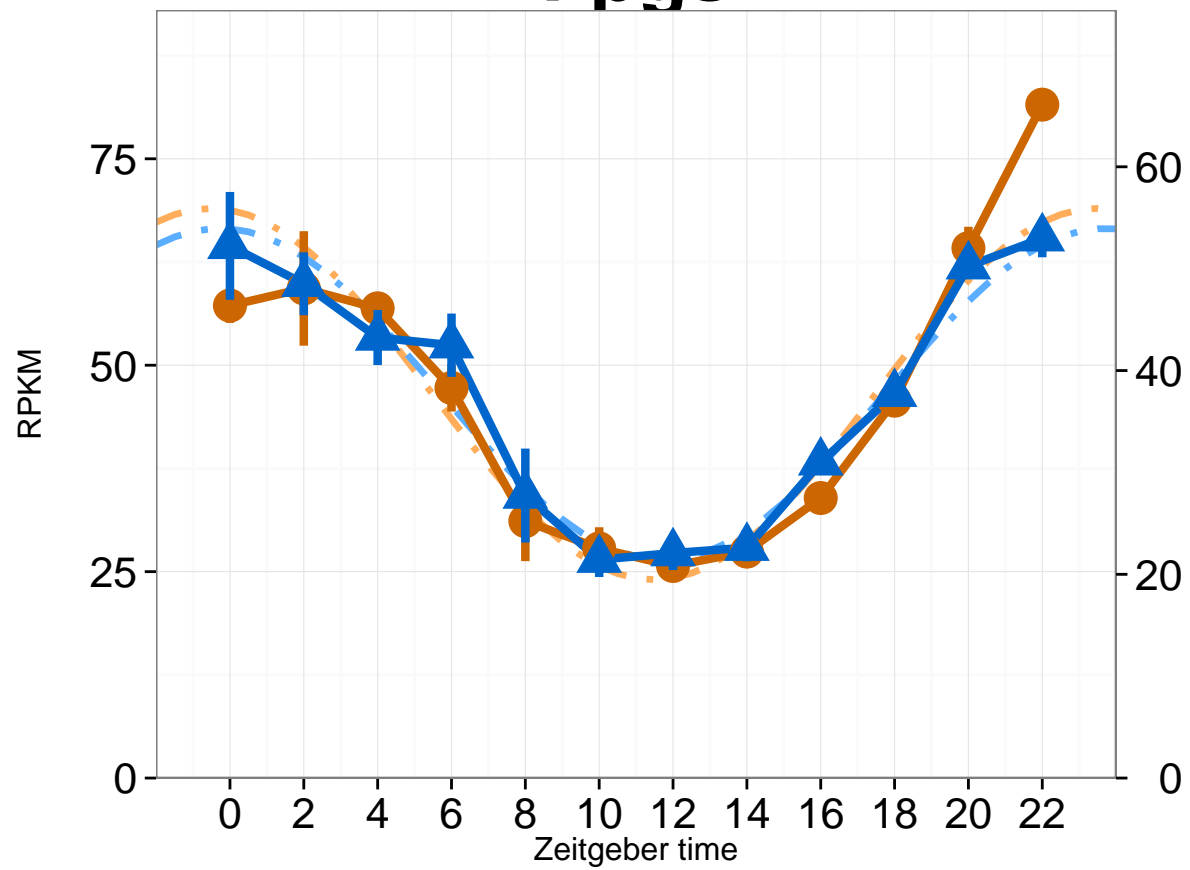

## Fpgs

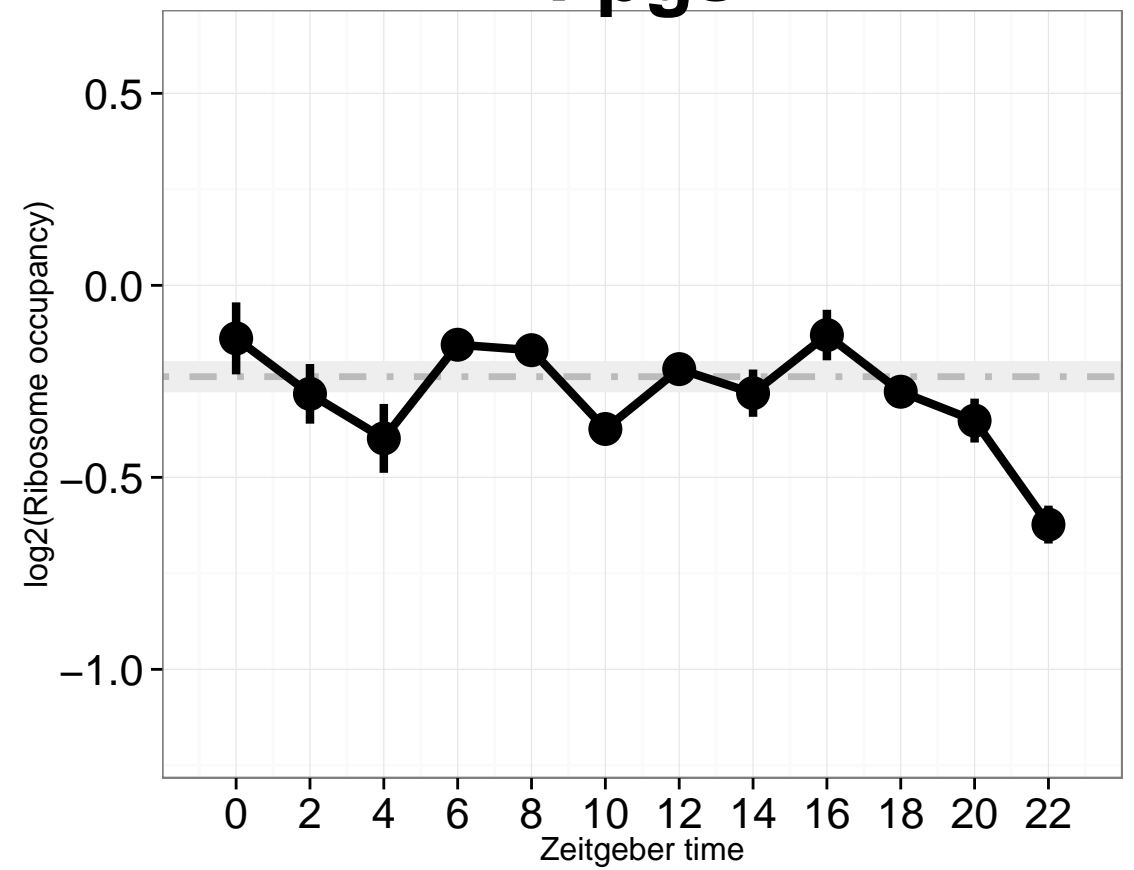

Supplement: SuppDataset_1.zip [file Fpgs_set_D.pdf › Supplemental Dataset 1/D-mRNA_rhythm_translation_rhyth/Fpgs_set_D.pdf]

## Fus

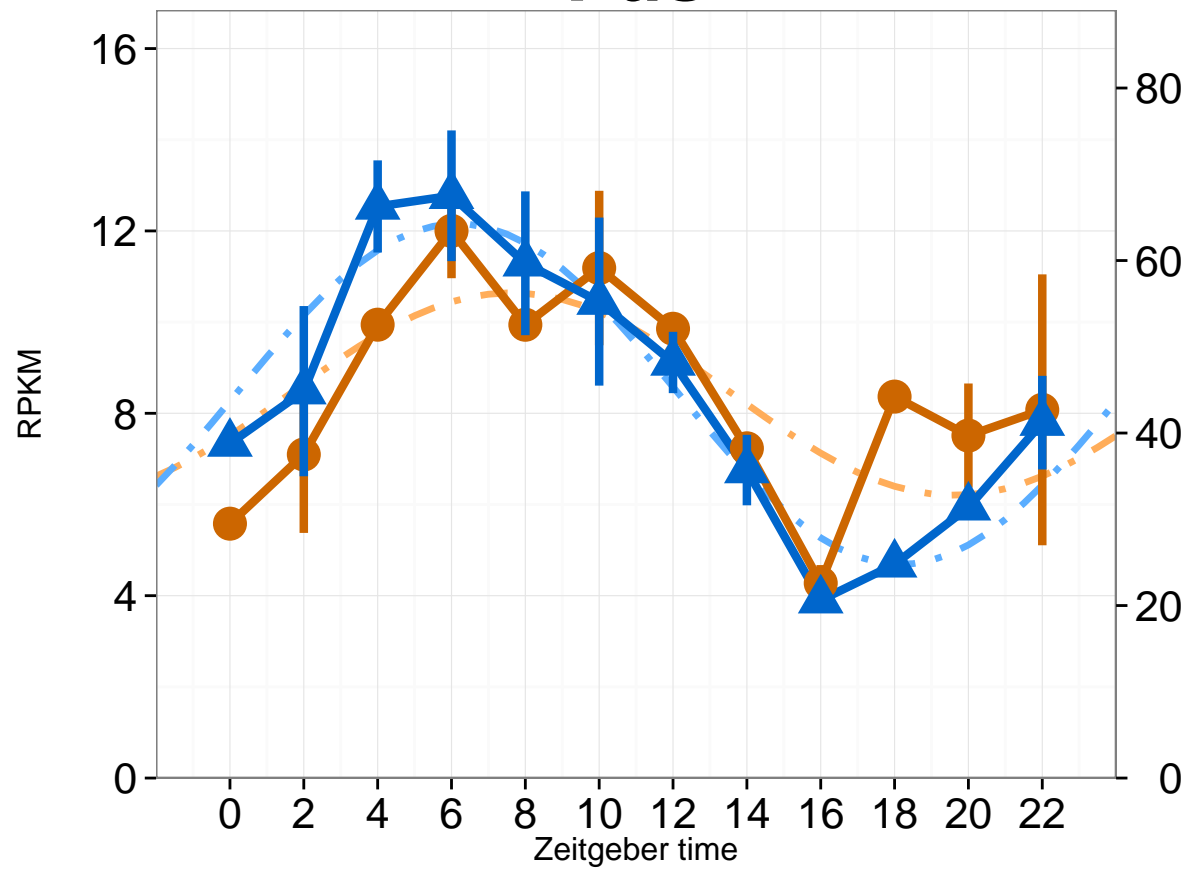

## Fus

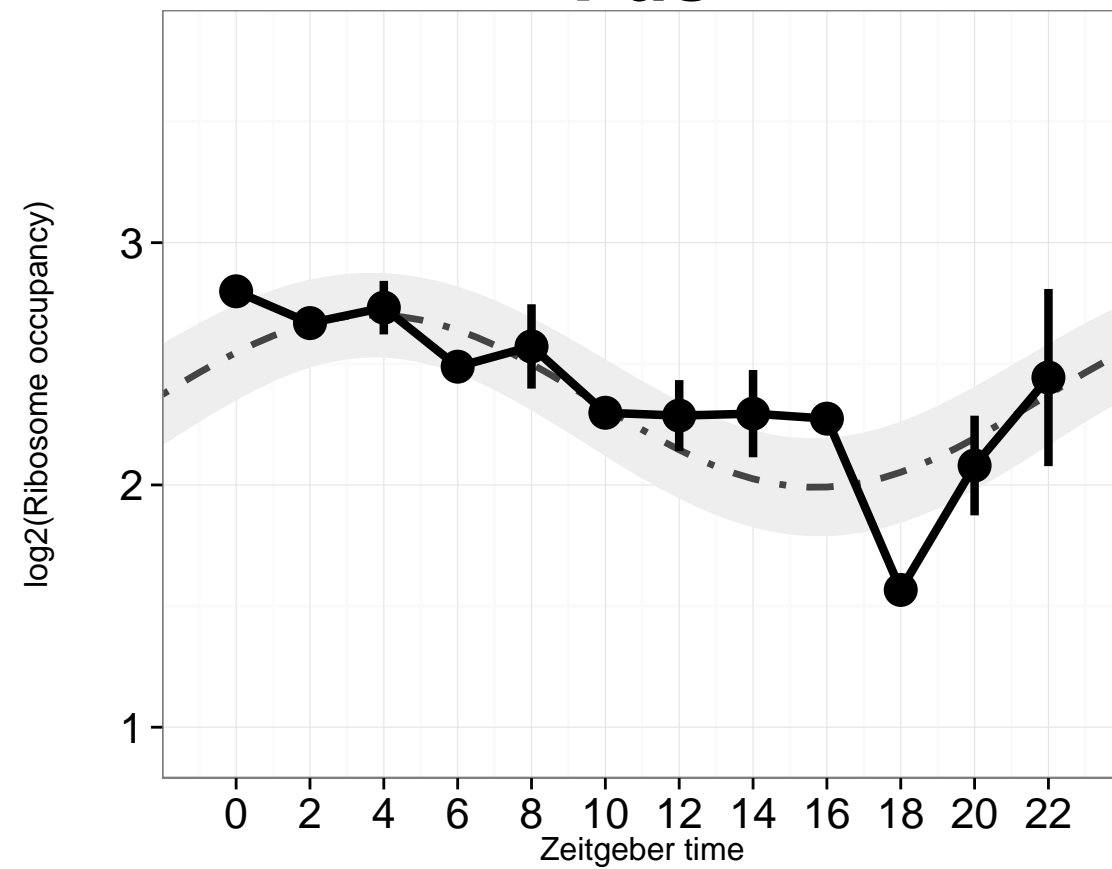

Supplement: SuppDataset_1.zip [file Fus_set_D.pdf › Supplemental Dataset 1/D-mRNA_rhythm_translation_rhyth/Fus_set_D.pdf]

## Fzd4

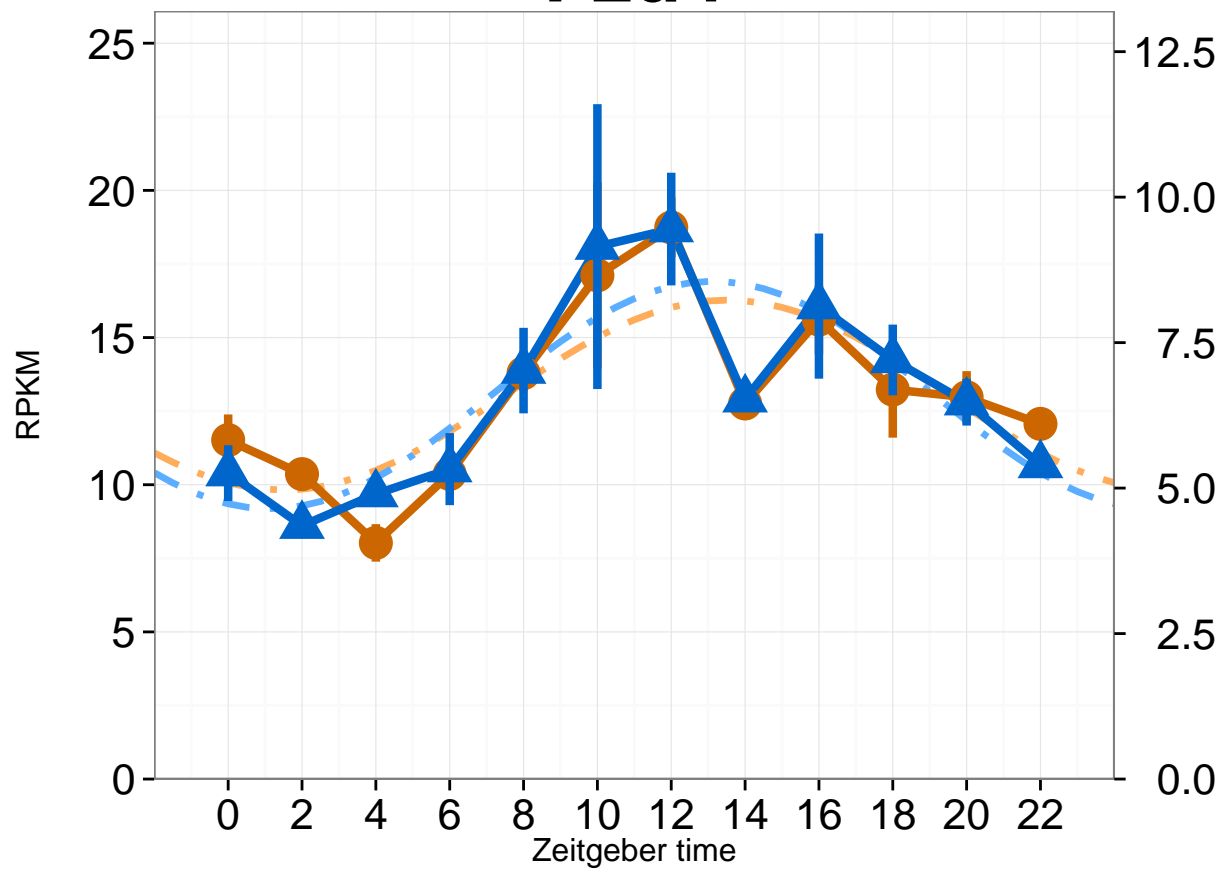

## Fzd4

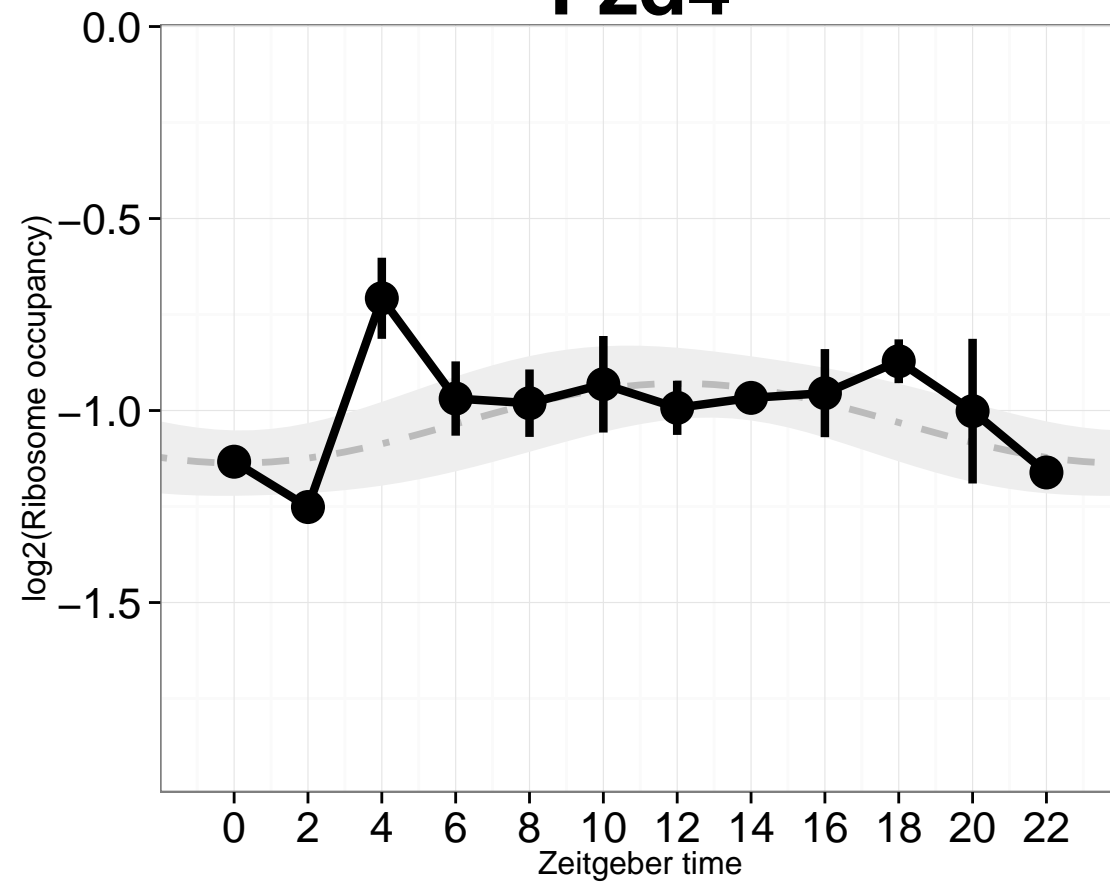

Supplement: SuppDataset_1.zip [file Fzd4_set_D.pdf › Supplemental Dataset 1/D-mRNA_rhythm_translation_rhyth/Fzd4_set_D.pdf]

## Fzd6

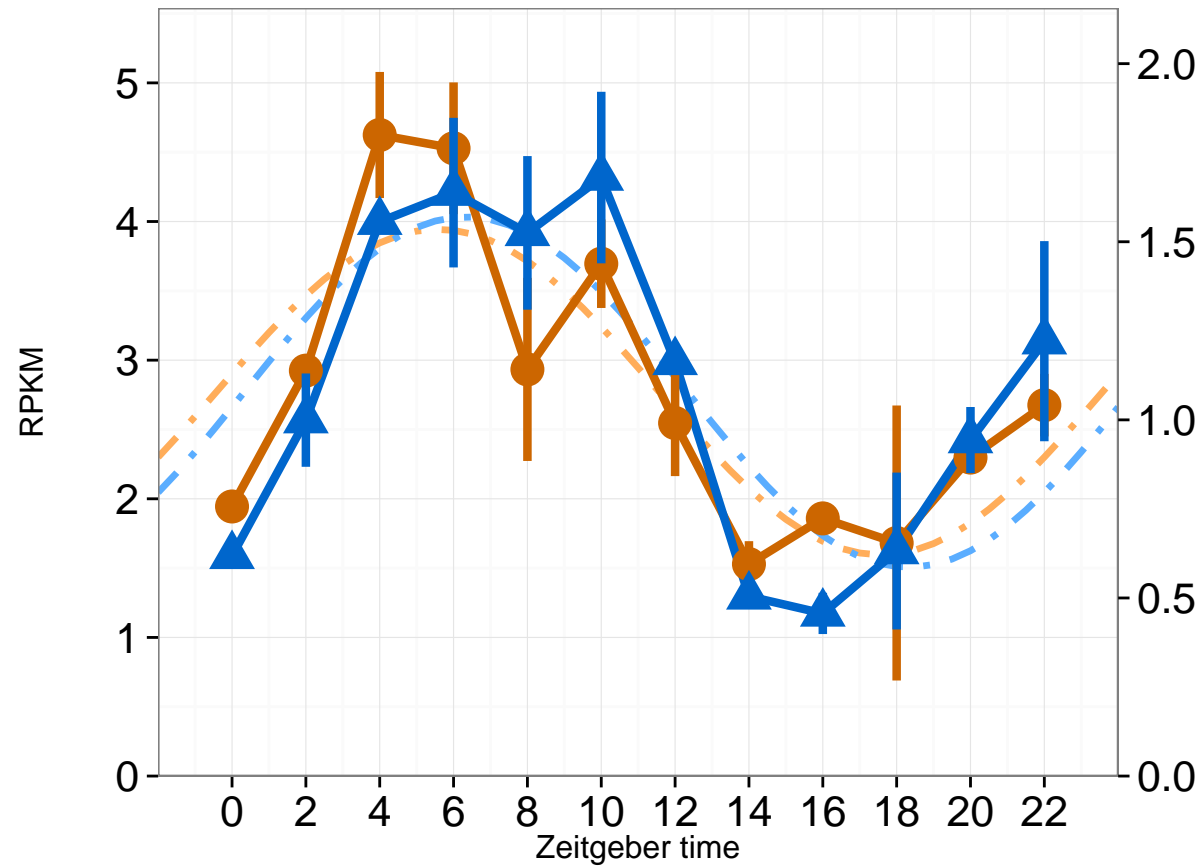

## Fzd6

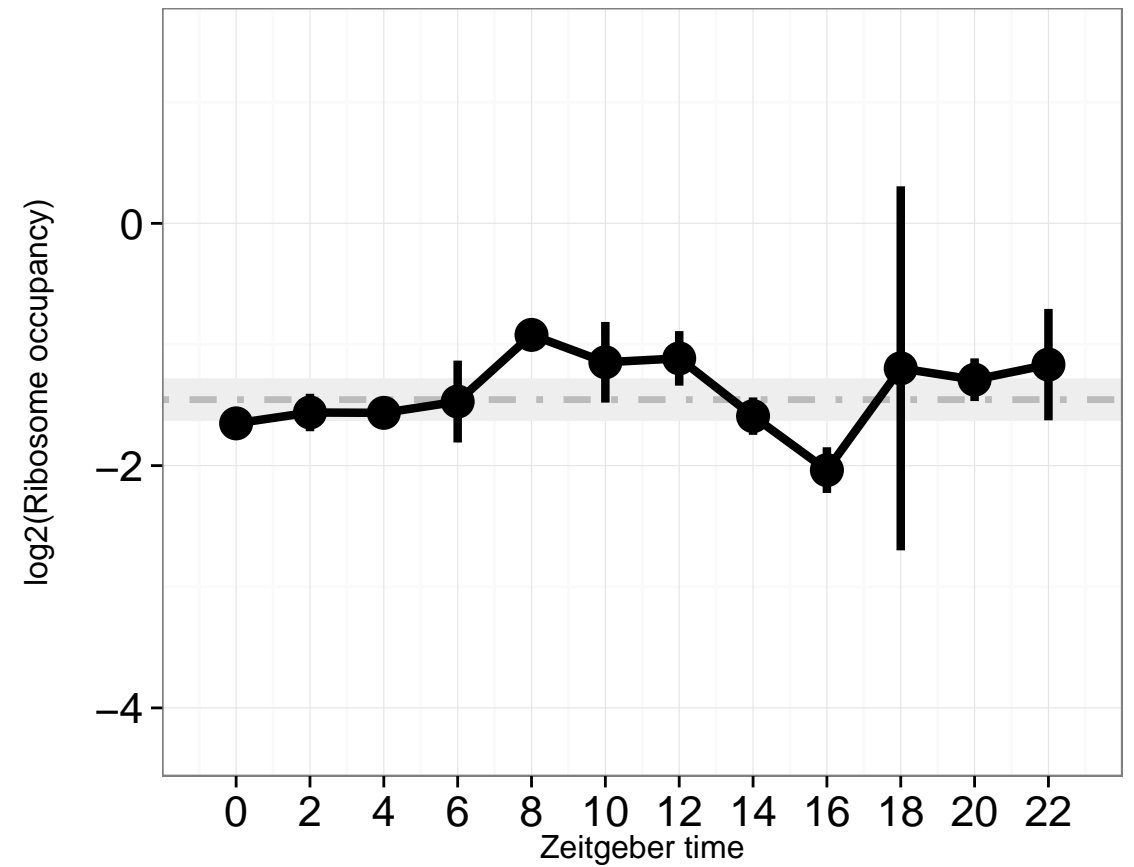

Supplement: SuppDataset_1.zip [file Fzd6_set_D.pdf › Supplemental Dataset 1/D-mRNA_rhythm_translation_rhyth/Fzd6_set_D.pdf]

## G0s2

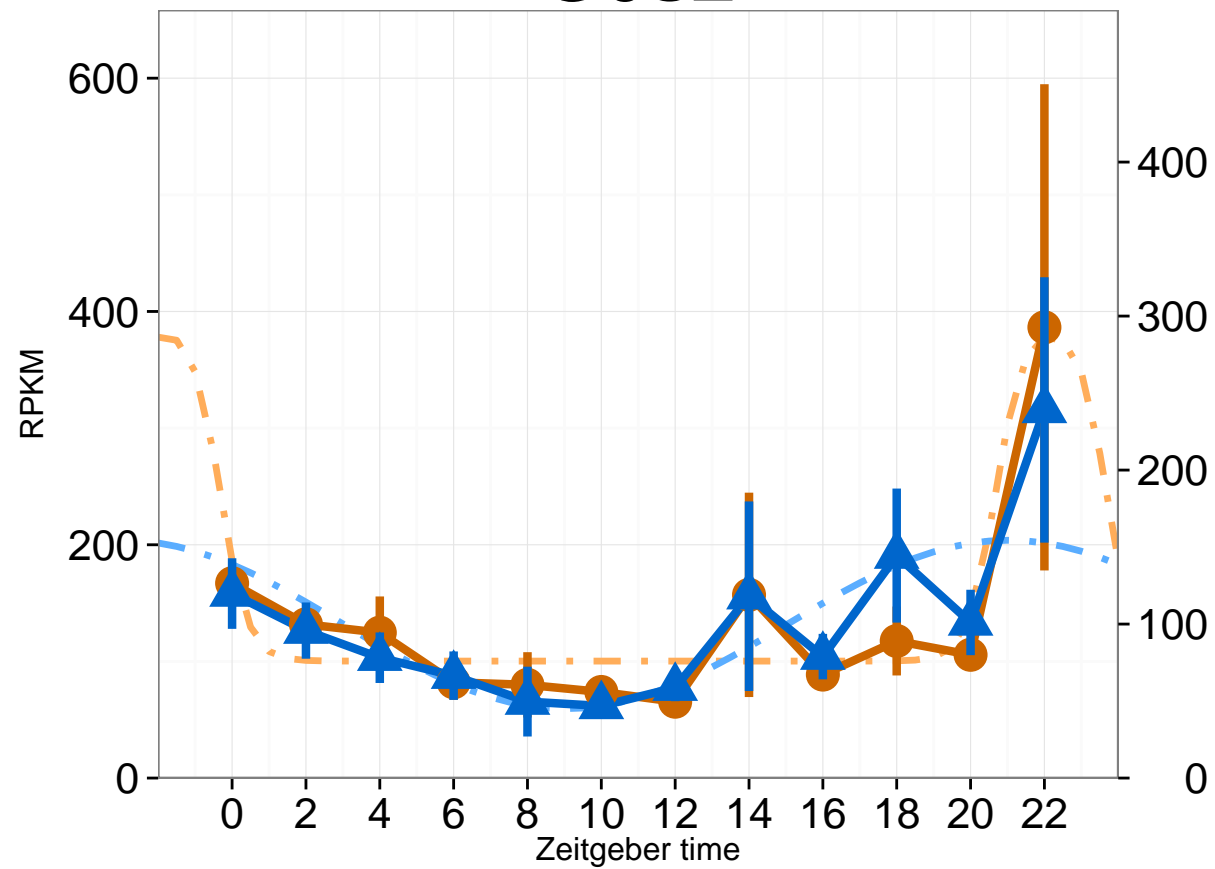

## G0s2

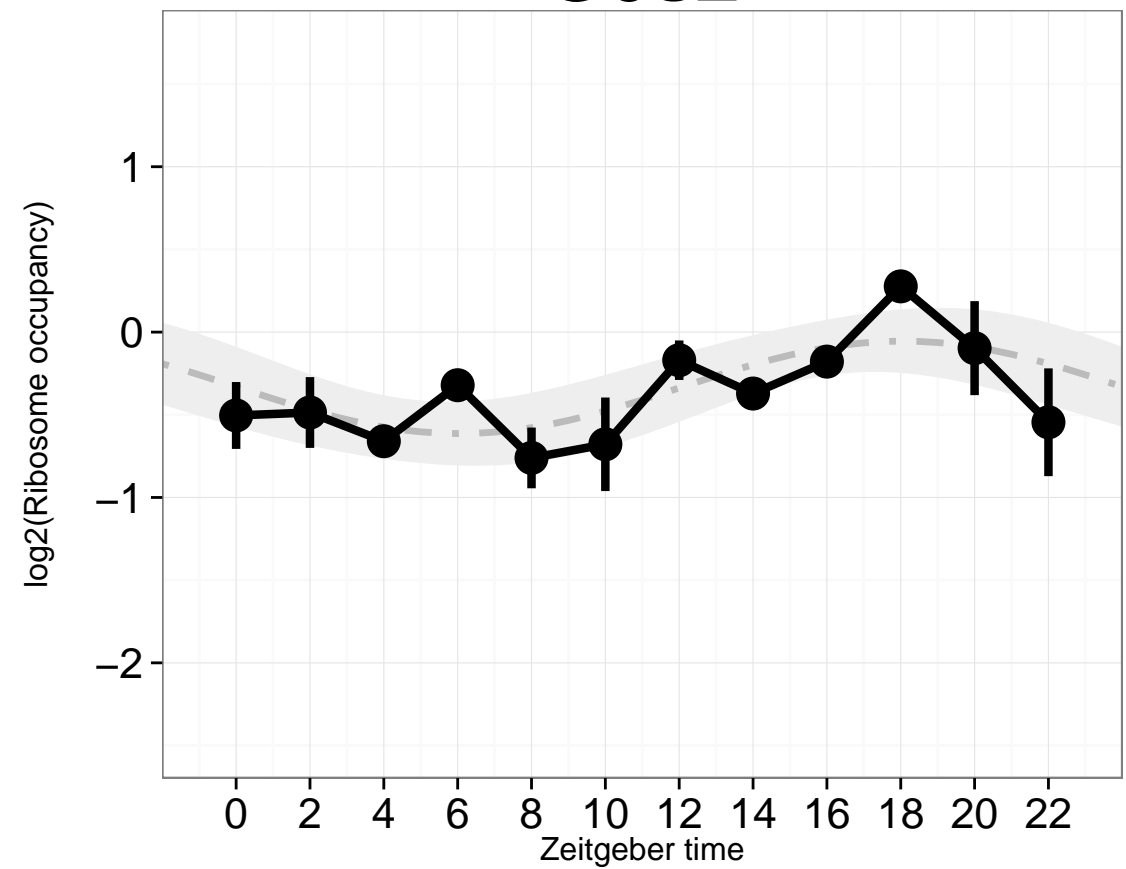

Supplement: SuppDataset_1.zip [file G0s2_set_D.pdf › Supplemental Dataset 1/D-mRNA_rhythm_translation_rhyth/G0s2_set_D.pdf]

# G6pdx

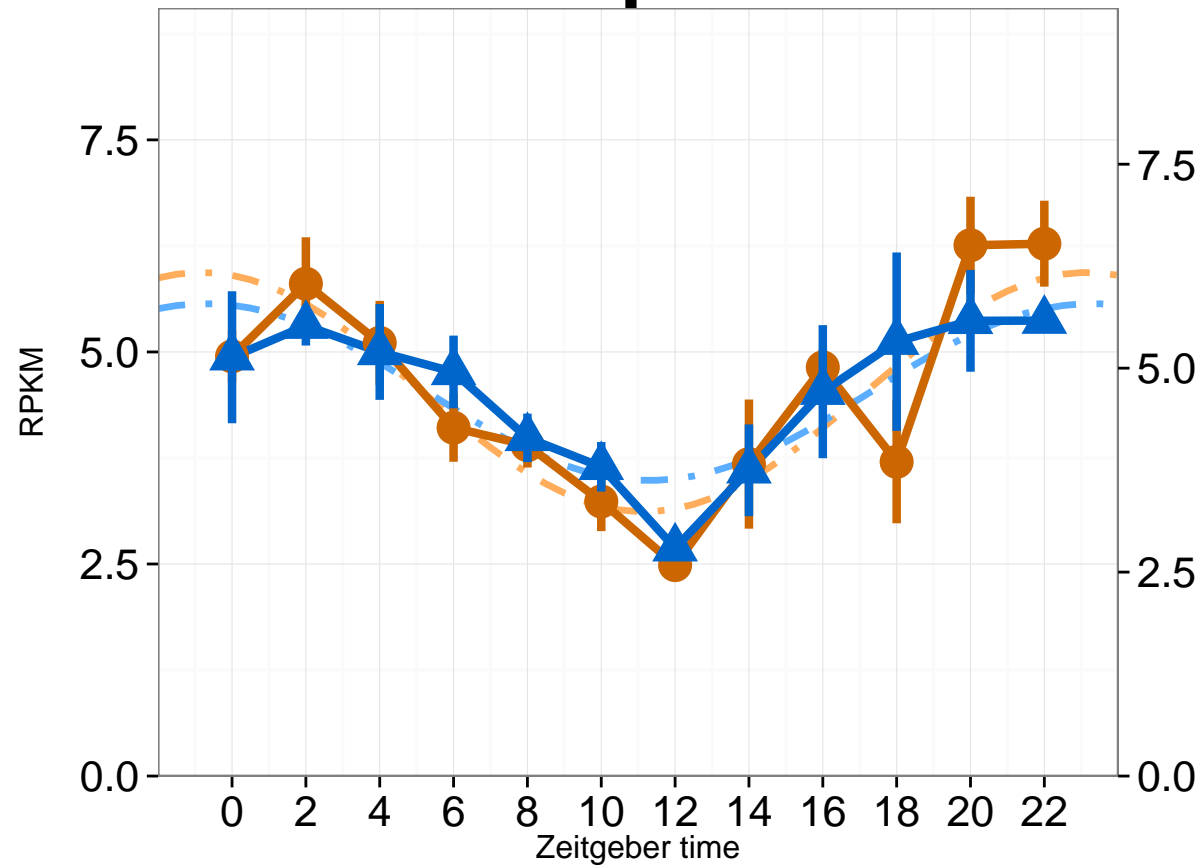

# G6pdx

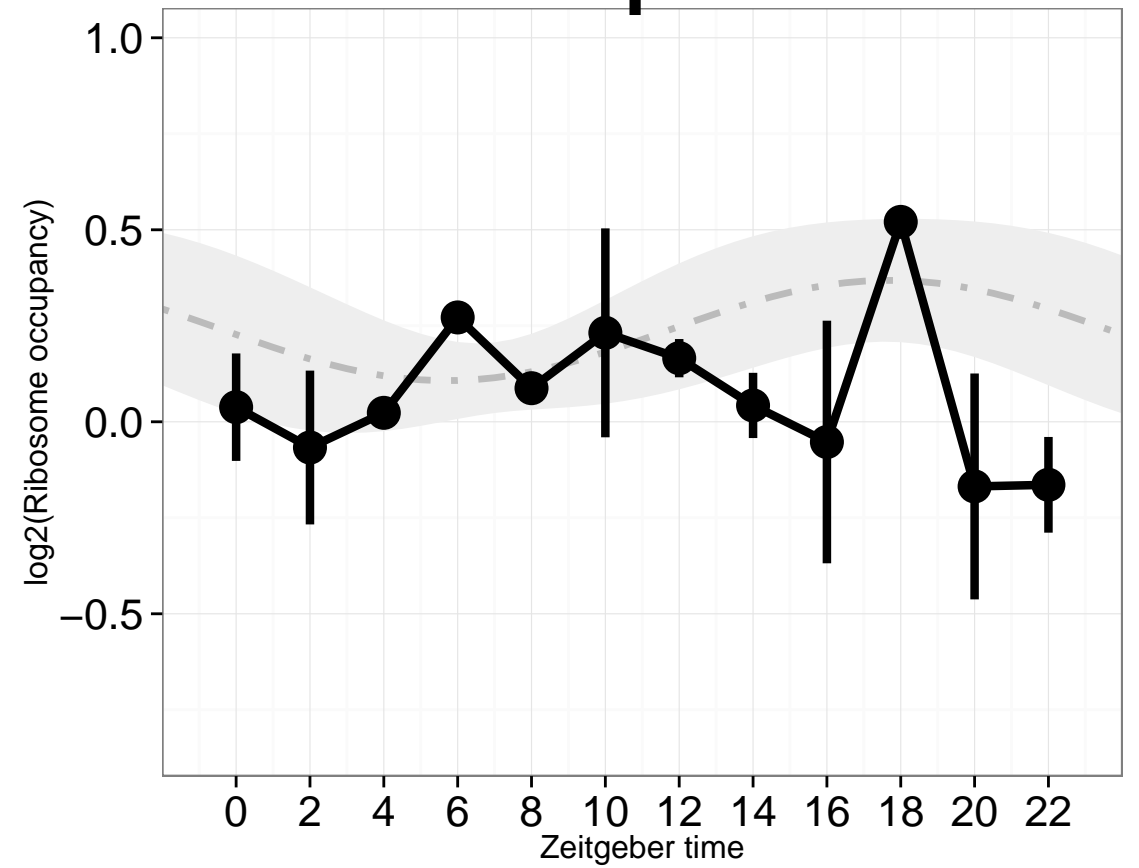

Supplement: SuppDataset_1.zip [file G6pdx_set_D.pdf › Supplemental Dataset 1/D-mRNA_rhythm_translation_rhyth/G6pdx_set_D.pdf]

# Gabarapl1

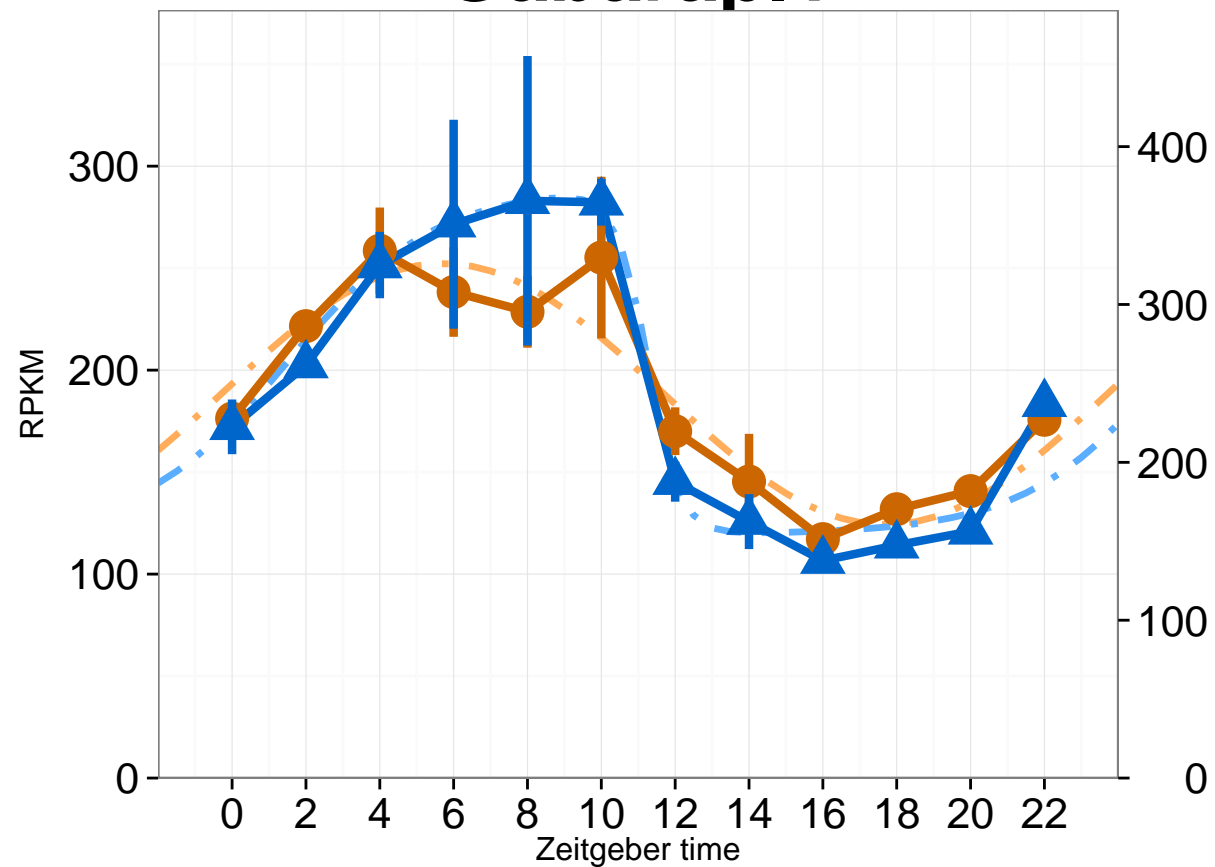

# Gabarapl1

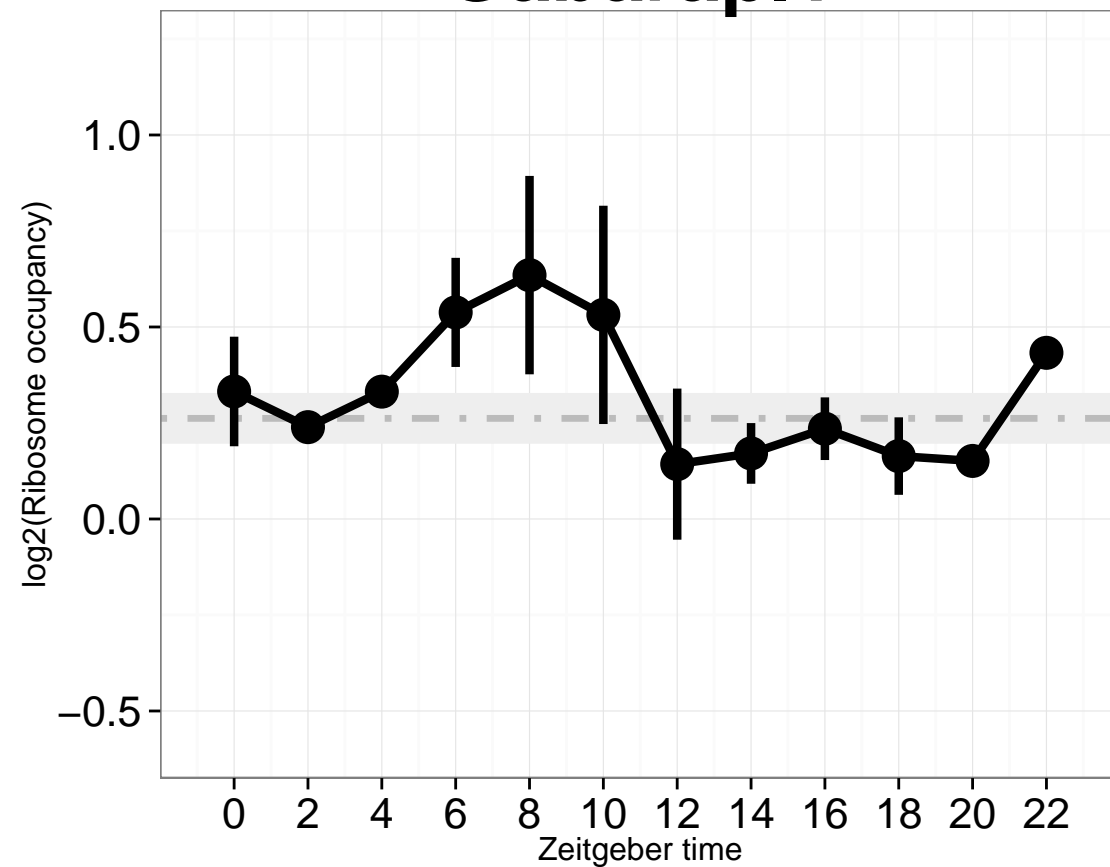

Supplement: SuppDataset_1.zip [file Gabarapl1_set_D.pdf › Supplemental Dataset 1/D-mRNA_rhythm_translation_rhyth/Gabarapl1_set_D.pdf]

# Gadd45a

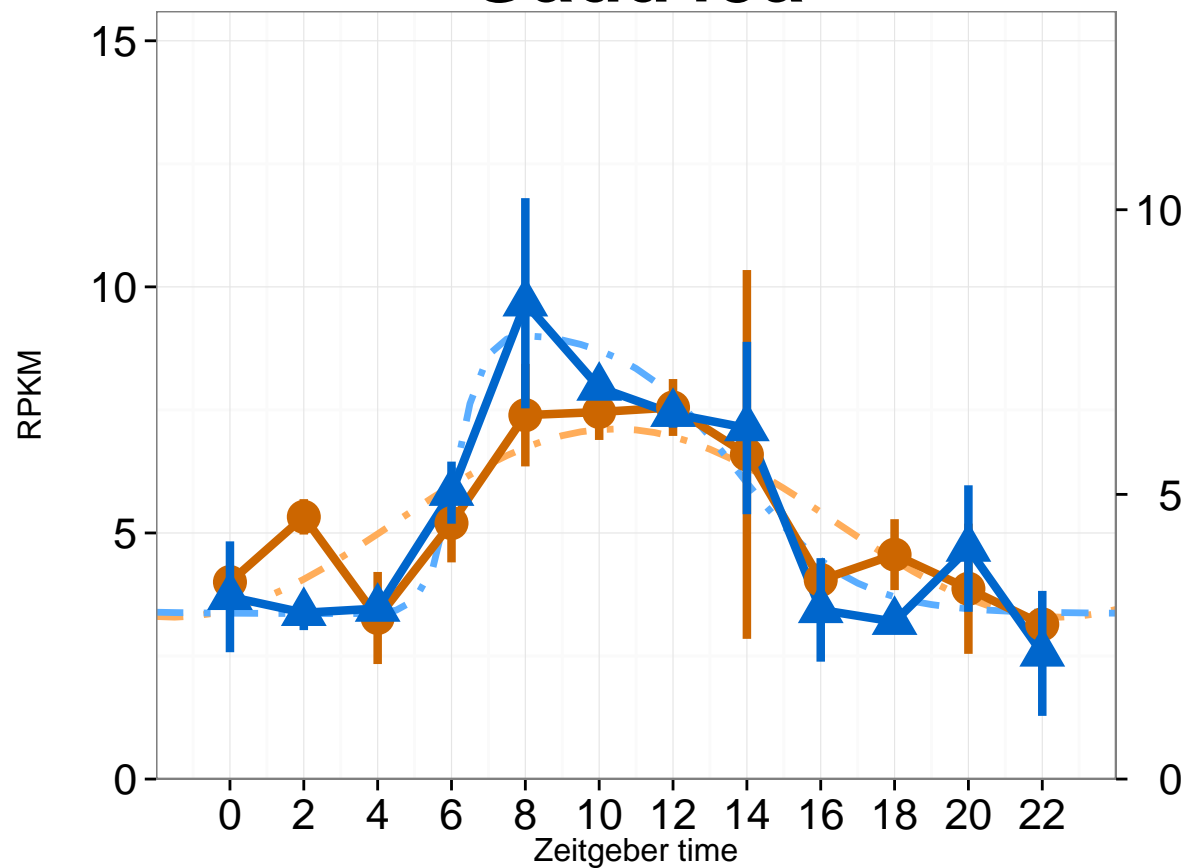

# Gadd45a

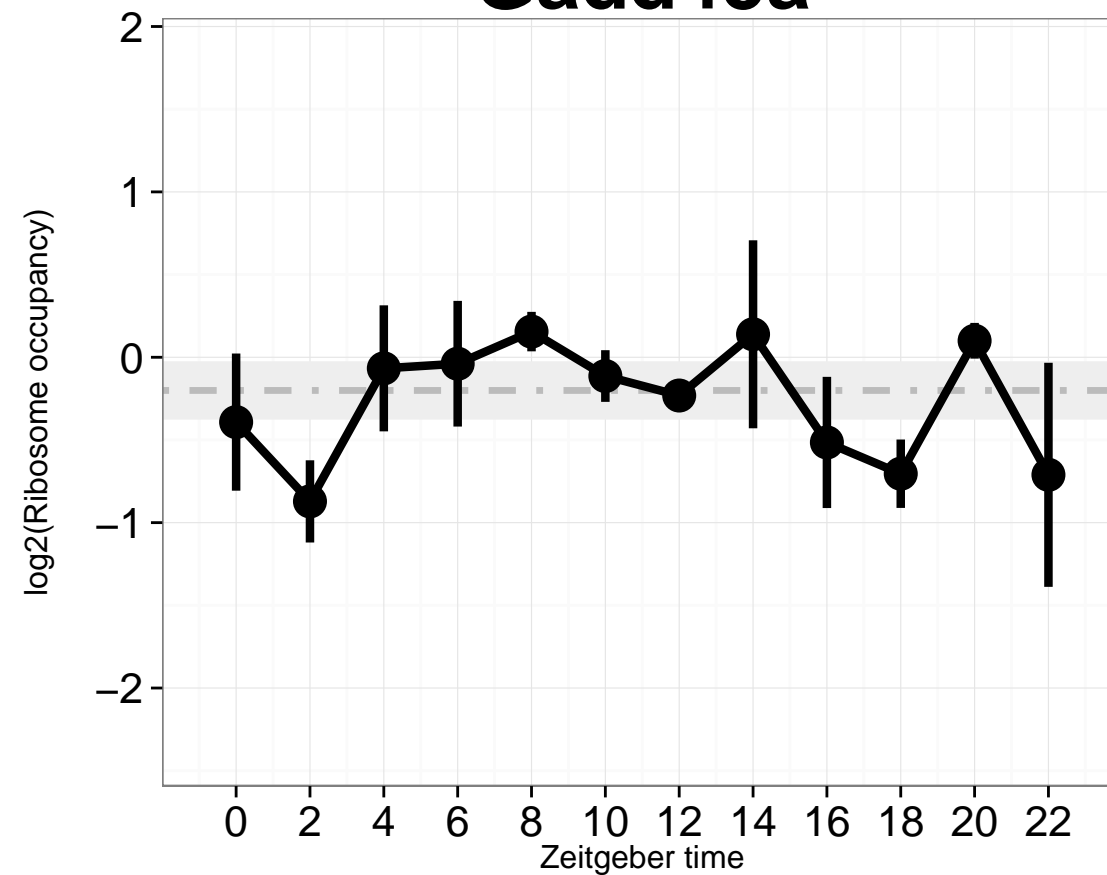

Supplement: SuppDataset_1.zip [file Gadd45a_set_D.pdf › Supplemental Dataset 1/D-mRNA_rhythm_translation_rhyth/Gadd45a_set_D.pdf]

## Gale

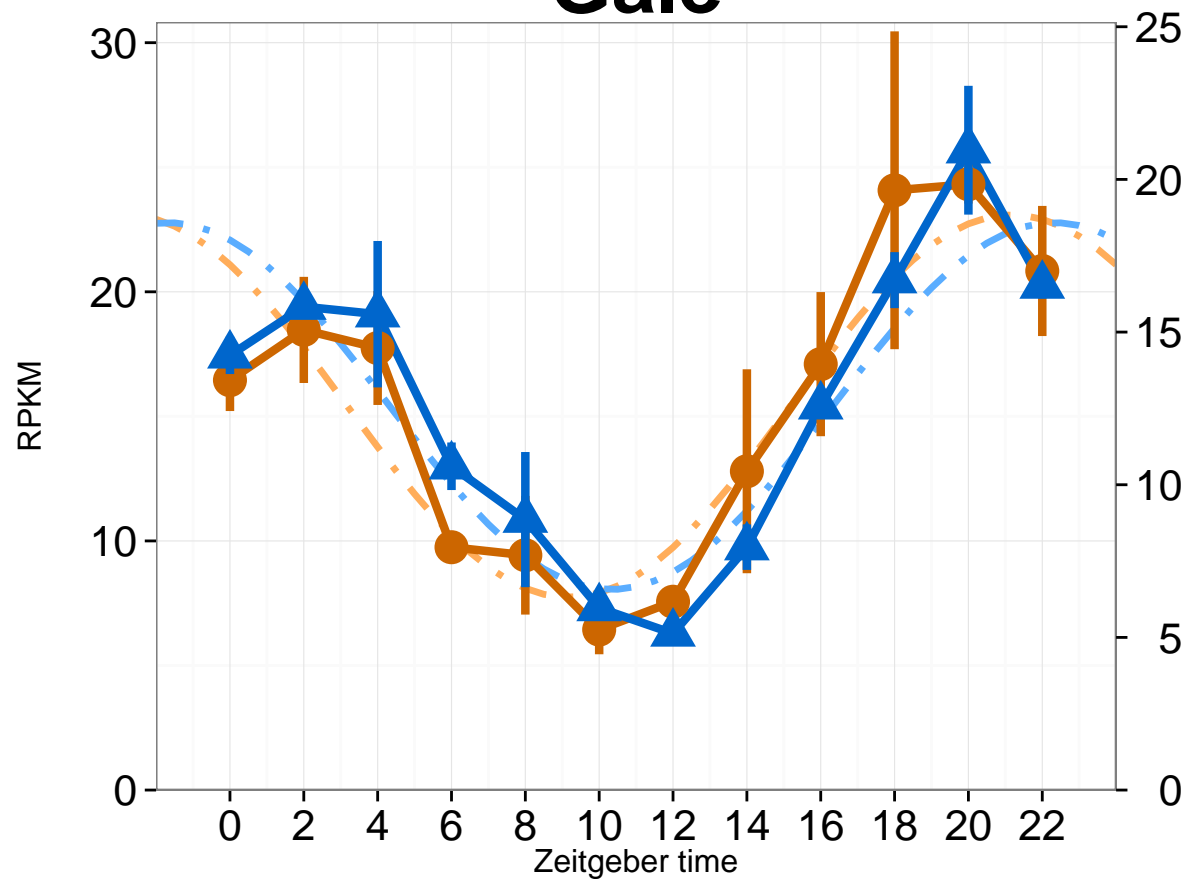

## Gale

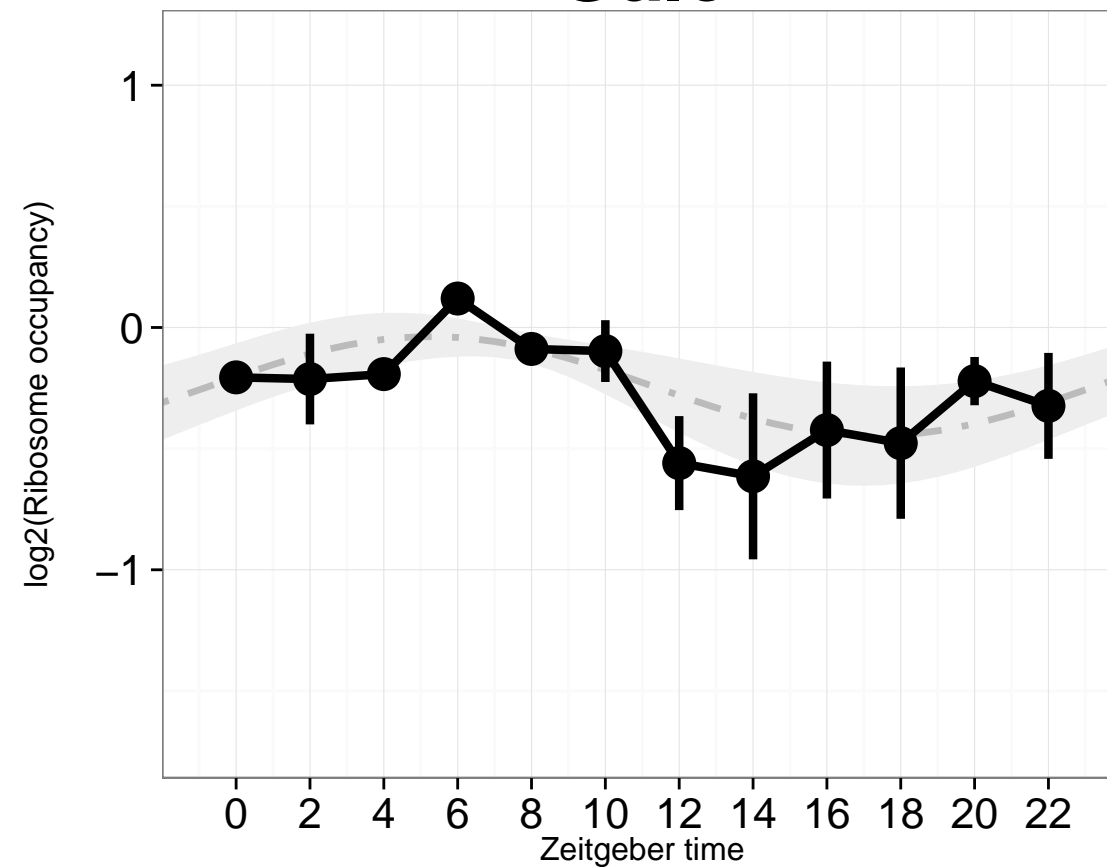

Supplement: SuppDataset_1.zip [file Gale_set_D.pdf › Supplemental Dataset 1/D-mRNA_rhythm_translation_rhyth/Gale_set_D.pdf]

## Galt

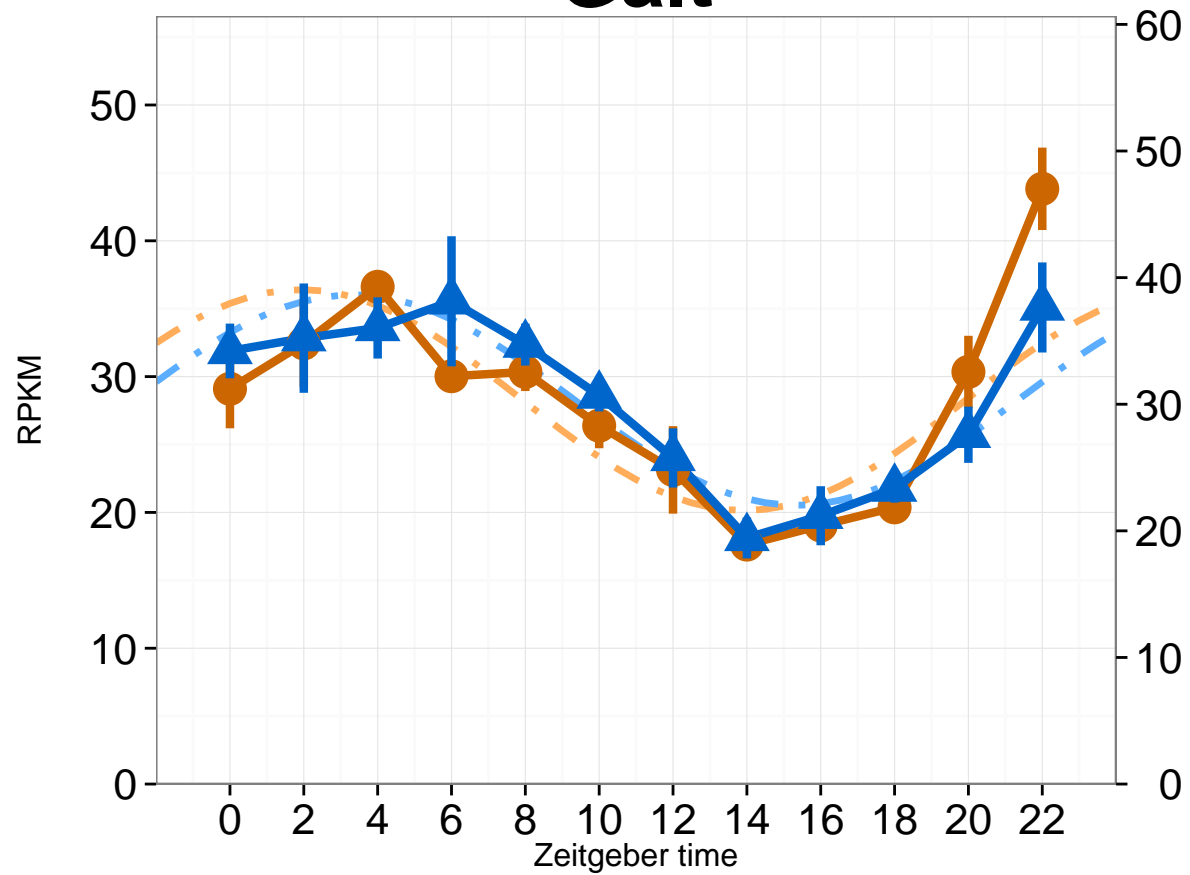

## Galt

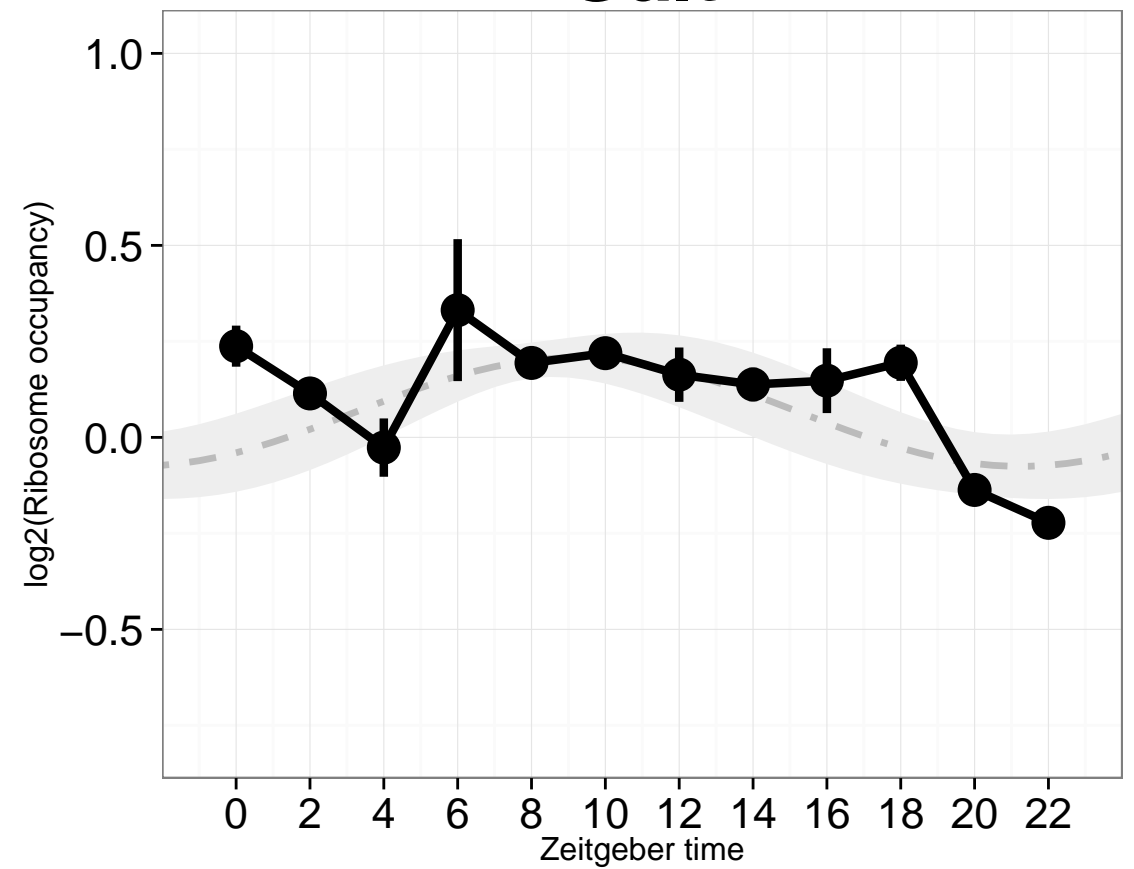

Supplement: SuppDataset_1.zip [file Galt_set_D.pdf › Supplemental Dataset 1/D-mRNA_rhythm_translation_rhyth/Galt_set_D.pdf]

## Gan

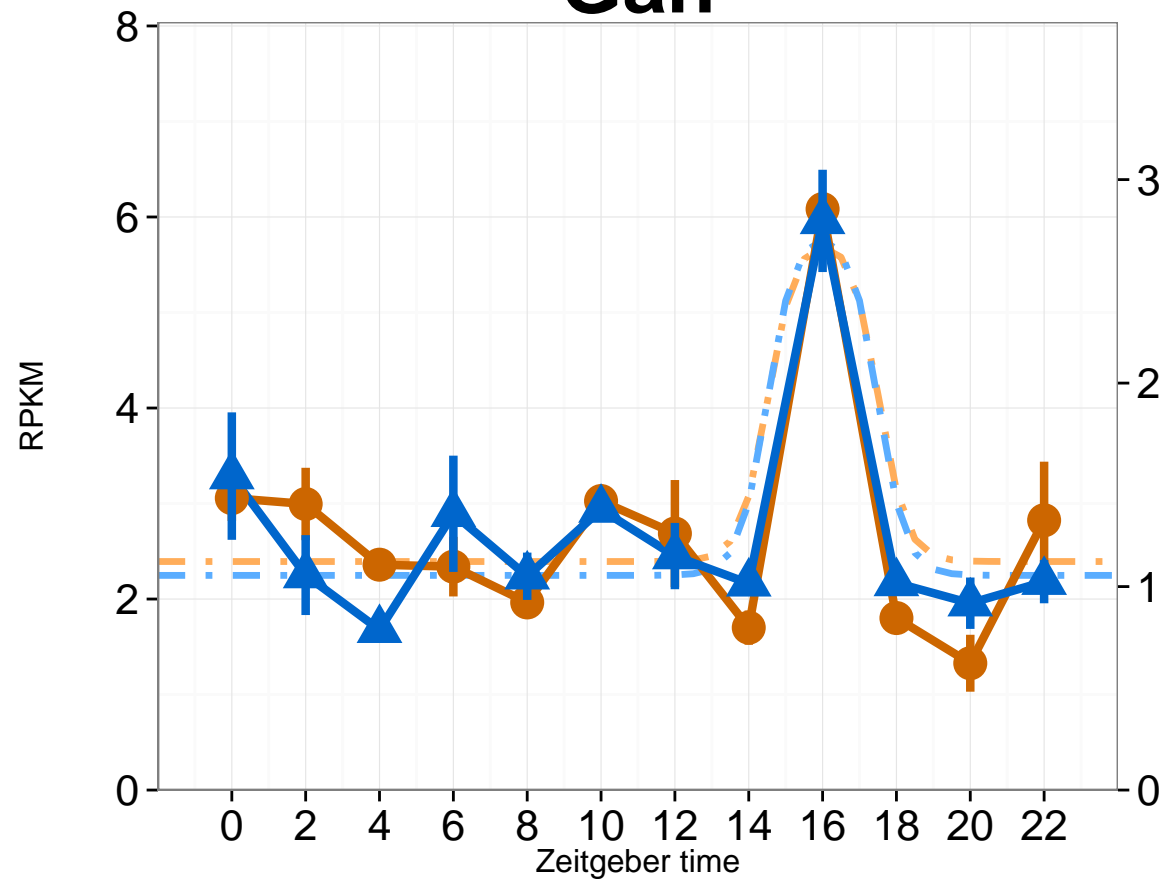

## Gan

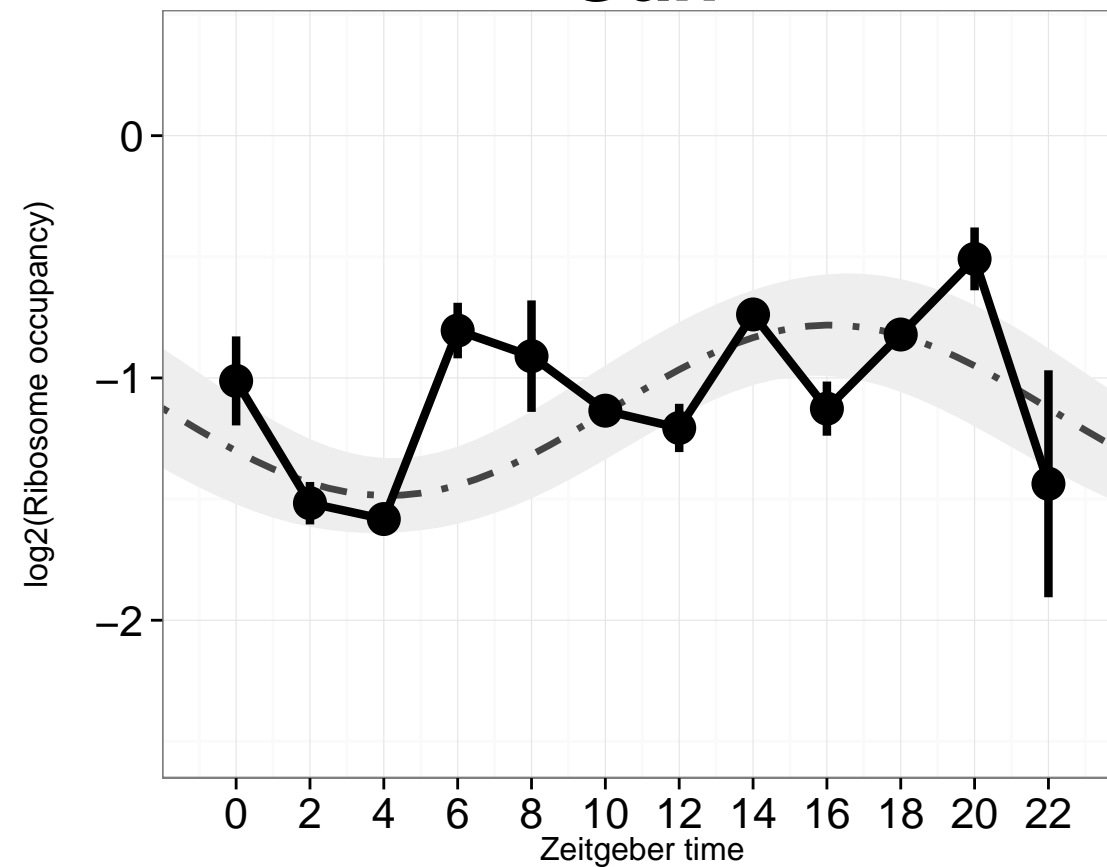

Supplement: SuppDataset_1.zip [file Gan_set_D.pdf › Supplemental Dataset 1/D-mRNA_rhythm_translation_rhyth/Gan_set_D.pdf]

# Gas2l3

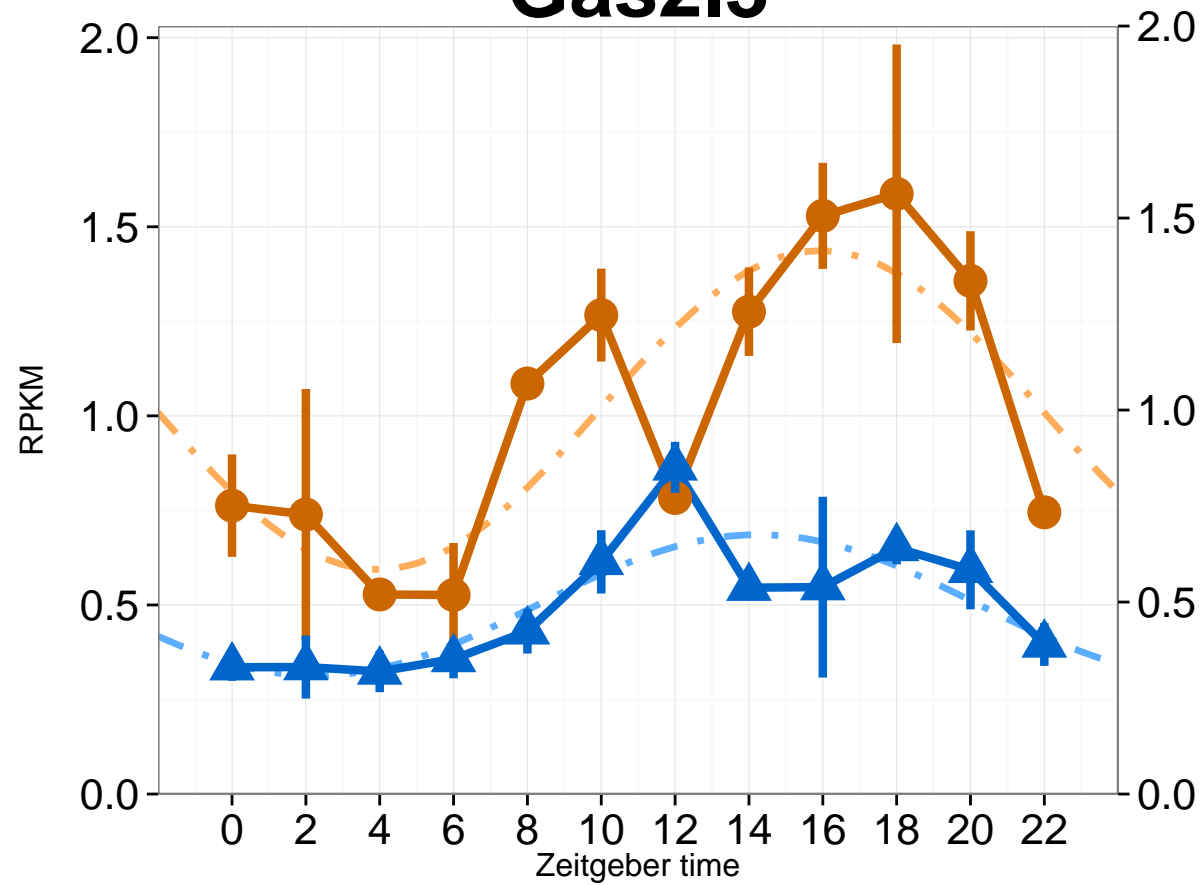

# Gas2l3

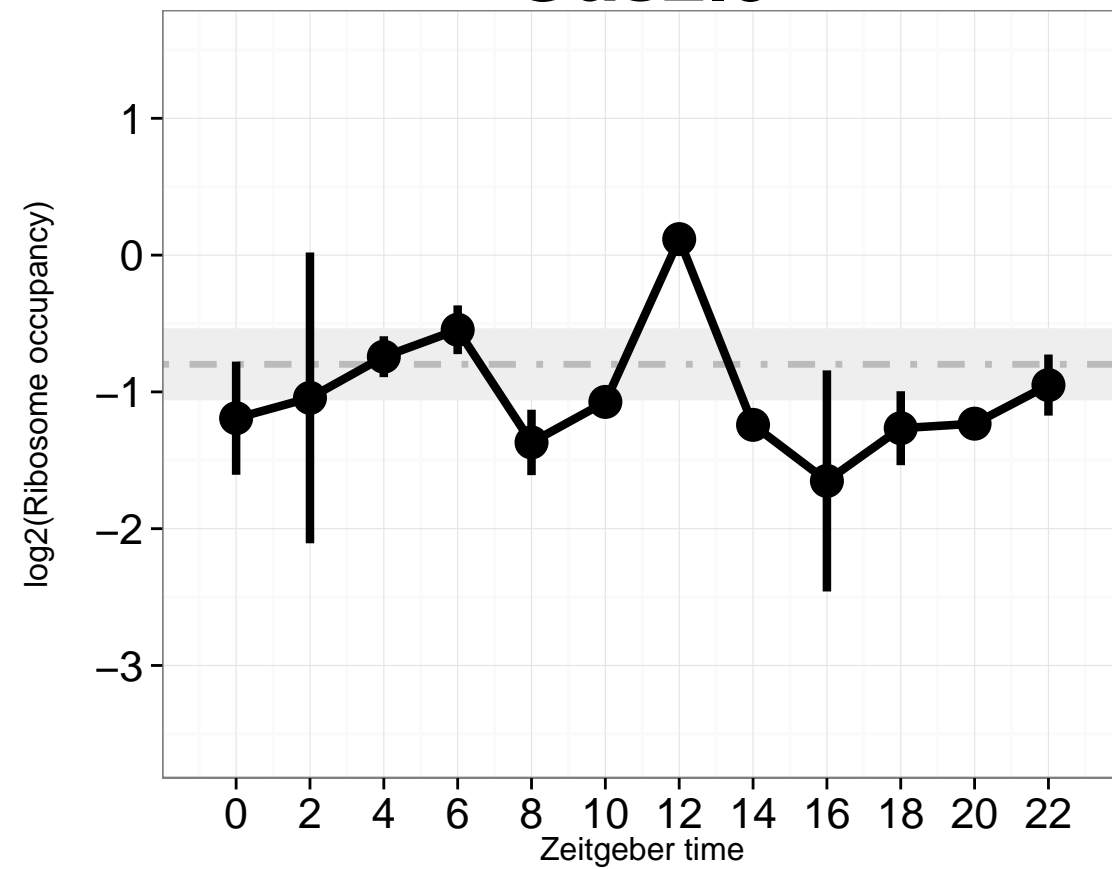

Supplement: SuppDataset_1.zip [file Gas2l3_set_D.pdf › Supplemental Dataset 1/D-mRNA_rhythm_translation_rhyth/Gas2l3_set_D.pdf]

## Gas6

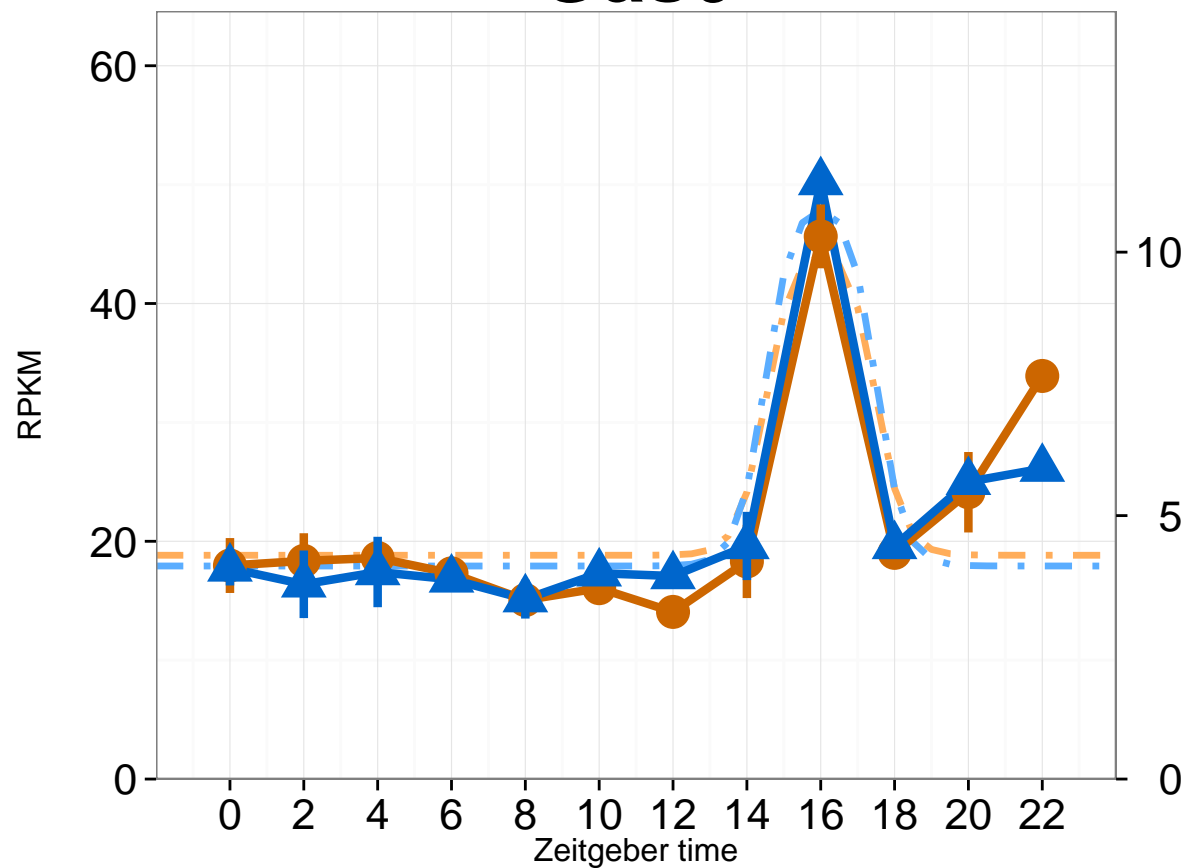

## Gas6

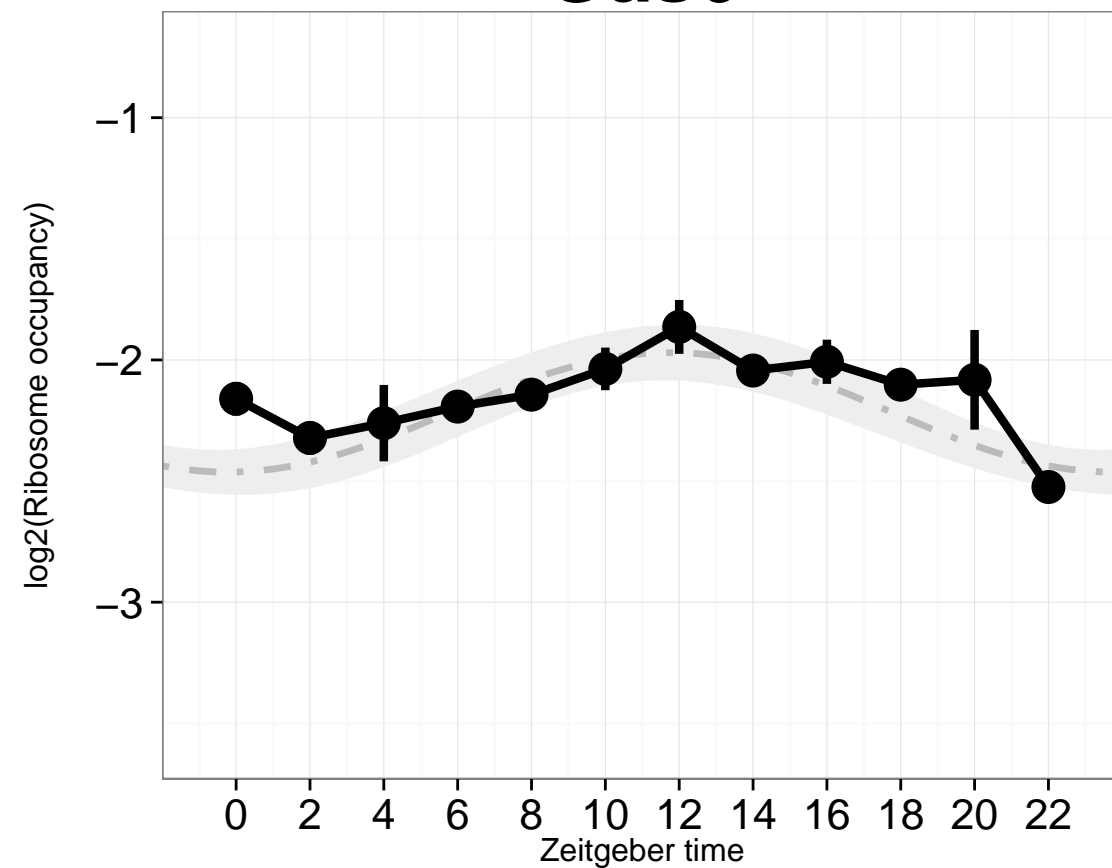

Supplement: SuppDataset_1.zip [file Gas6_set_D.pdf › Supplemental Dataset 1/D-mRNA_rhythm_translation_rhyth/Gas6_set_D.pdf]

## Gas7

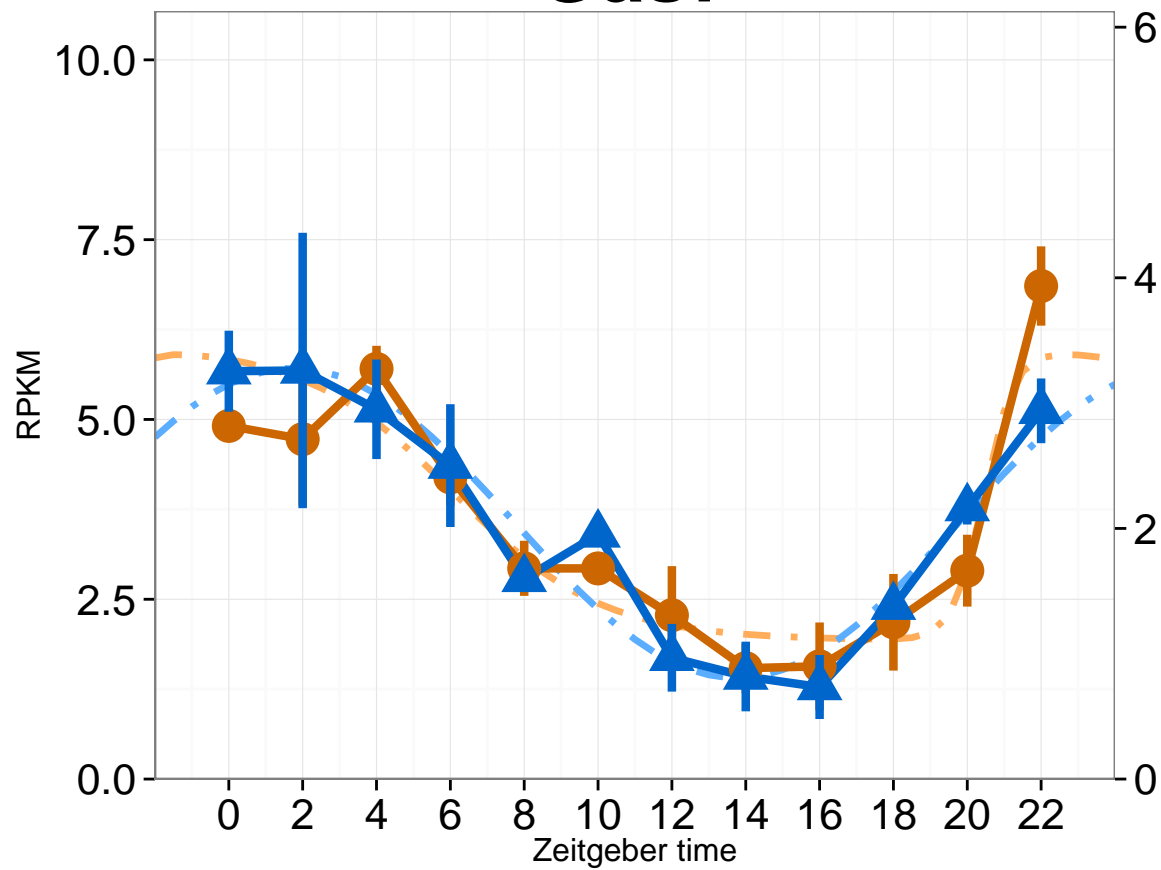

## Gas7

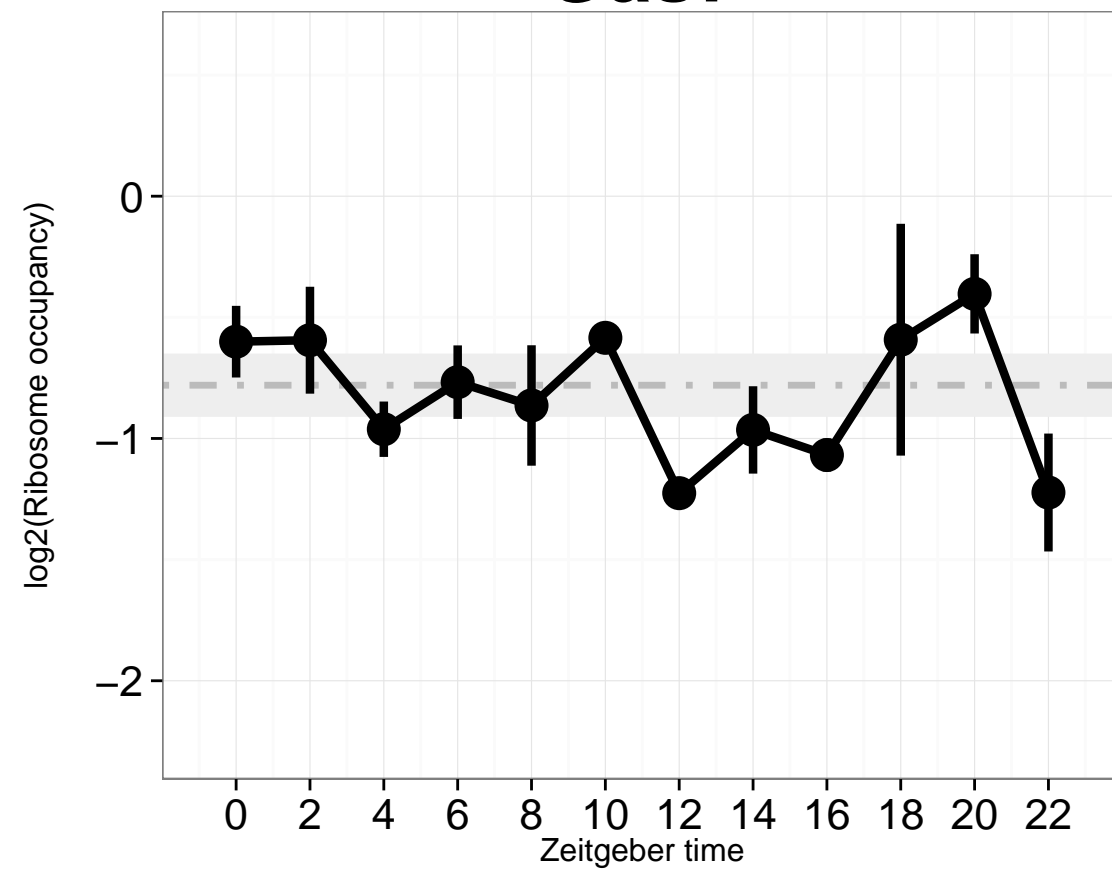

Supplement: SuppDataset_1.zip [file Gas7_set_D.pdf › Supplemental Dataset 1/D-mRNA_rhythm_translation_rhyth/Gas7_set_D.pdf]

## Gata4

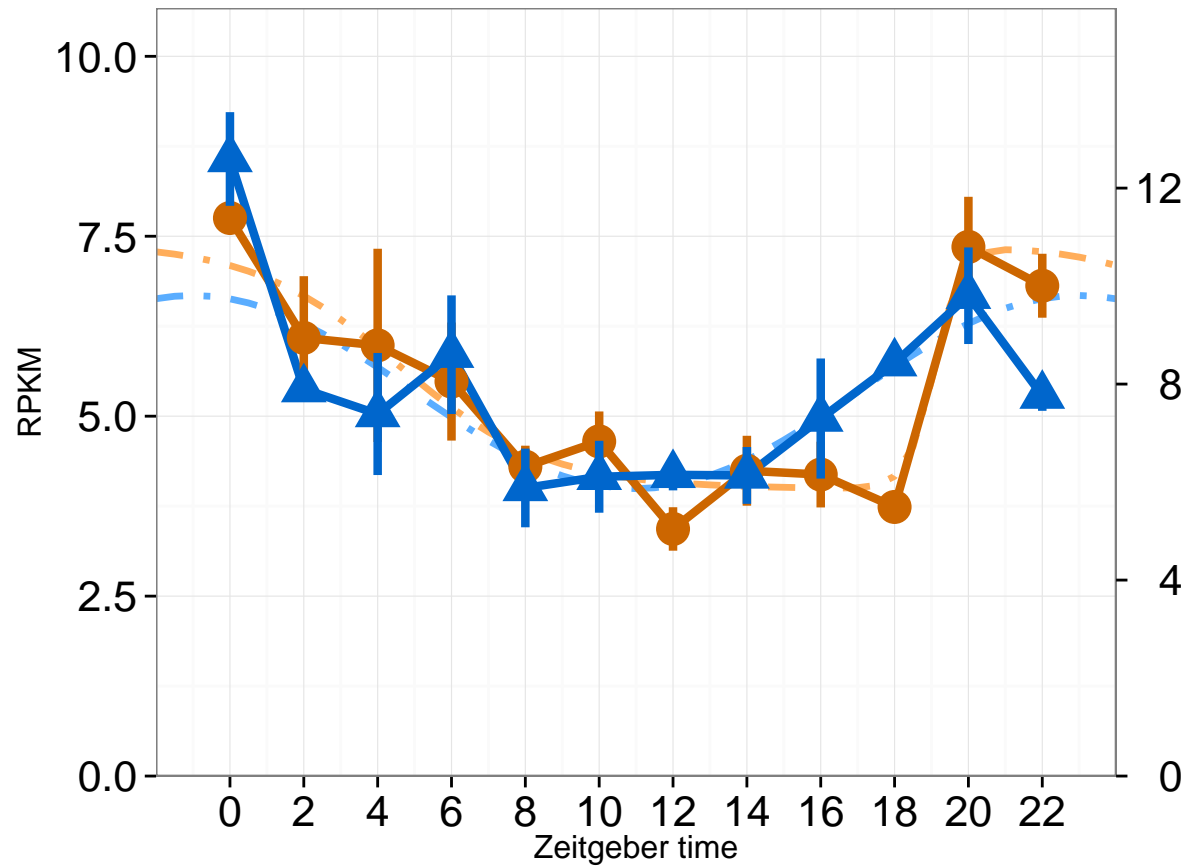

## Gata4

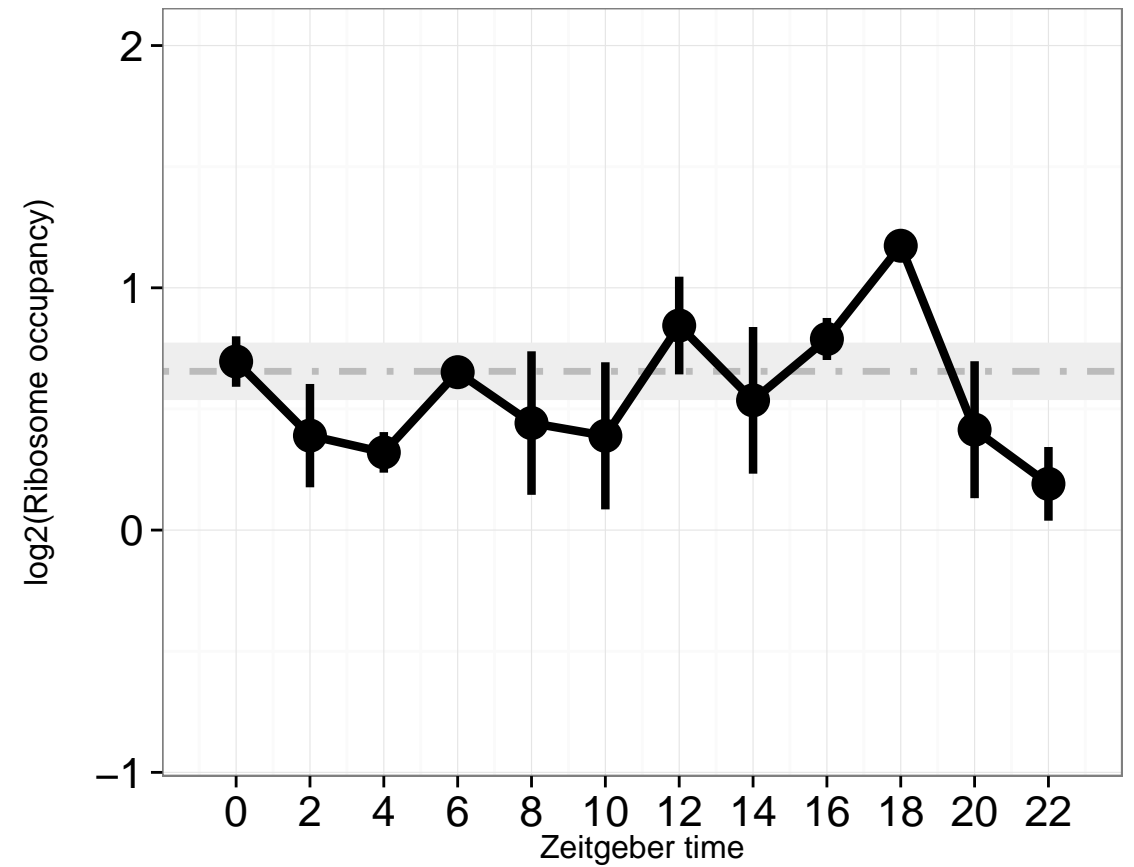

Supplement: SuppDataset_1.zip [file Gata4_set_D.pdf › Supplemental Dataset 1/D-mRNA_rhythm_translation_rhyth/Gata4_set_D.pdf]

## Gatsl3

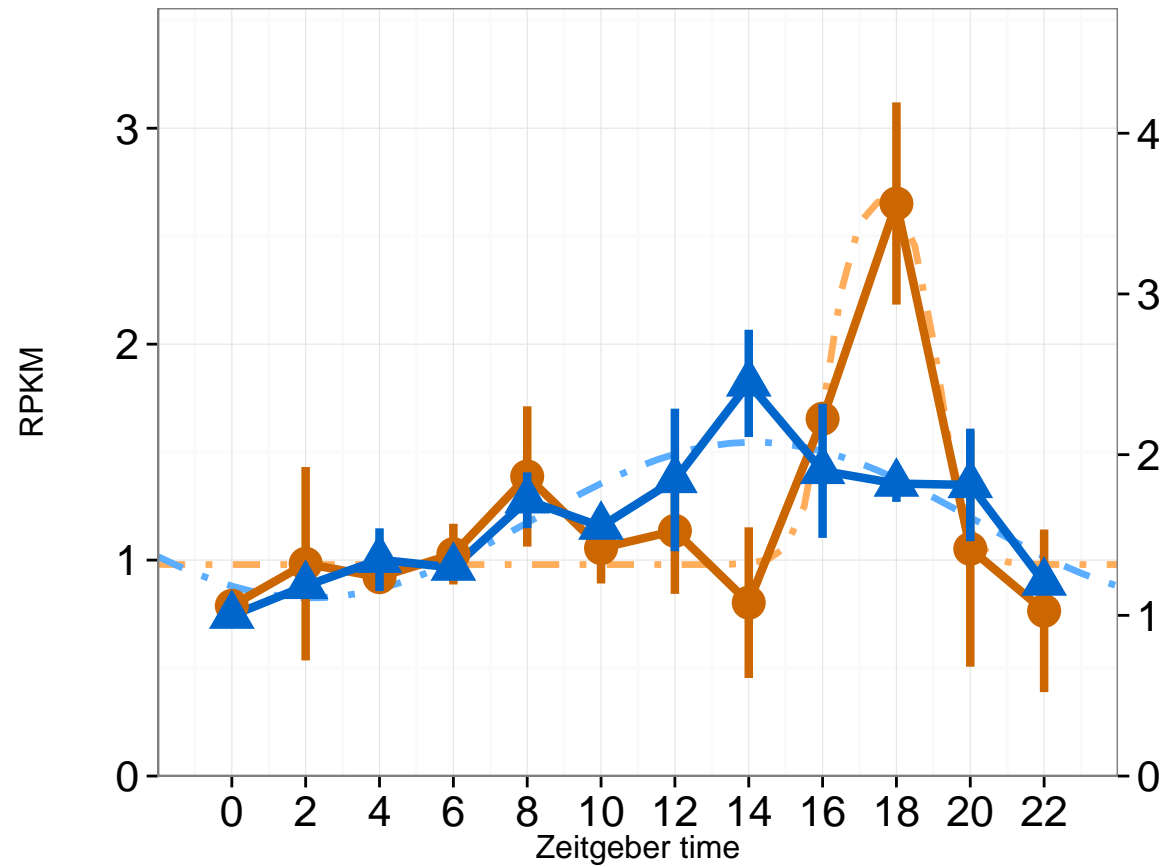

## Gatsl3

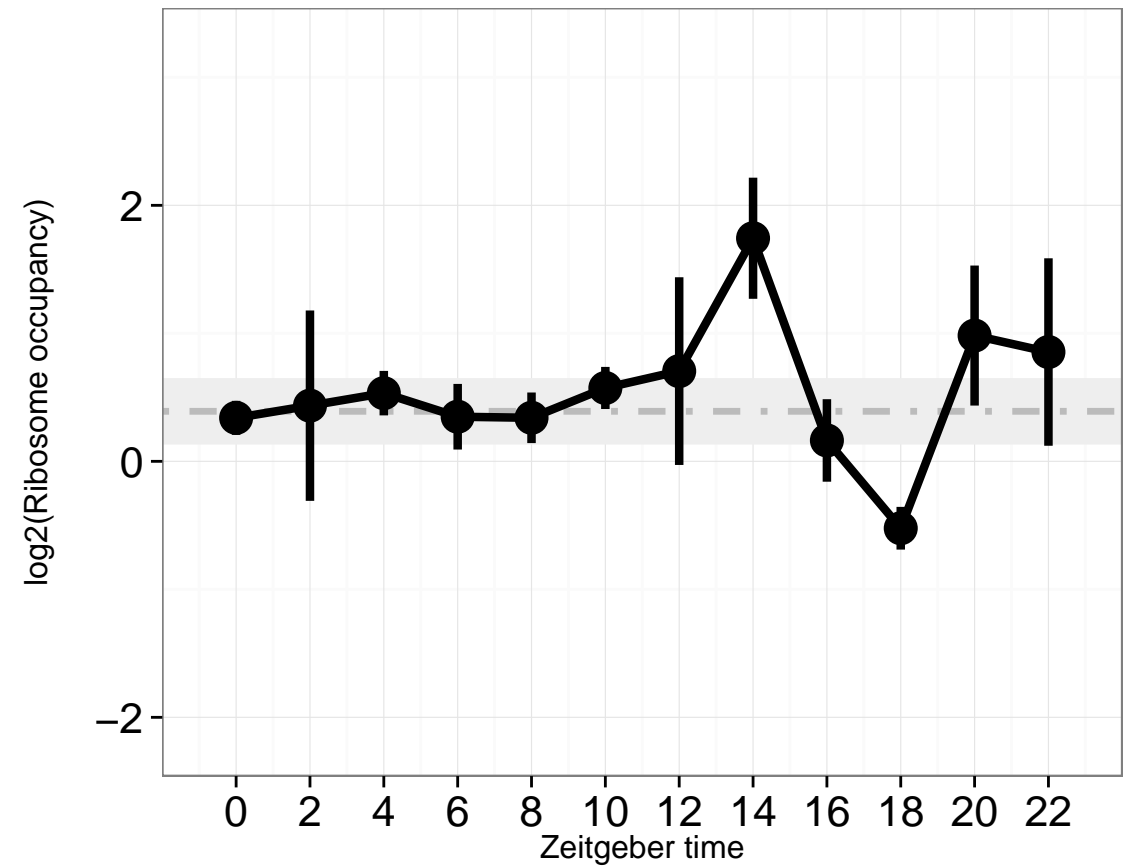

Supplement: SuppDataset_1.zip [file Gatsl3_set_D.pdf › Supplemental Dataset 1/D-mRNA_rhythm_translation_rhyth/Gatsl3_set_D.pdf]

# Gba2

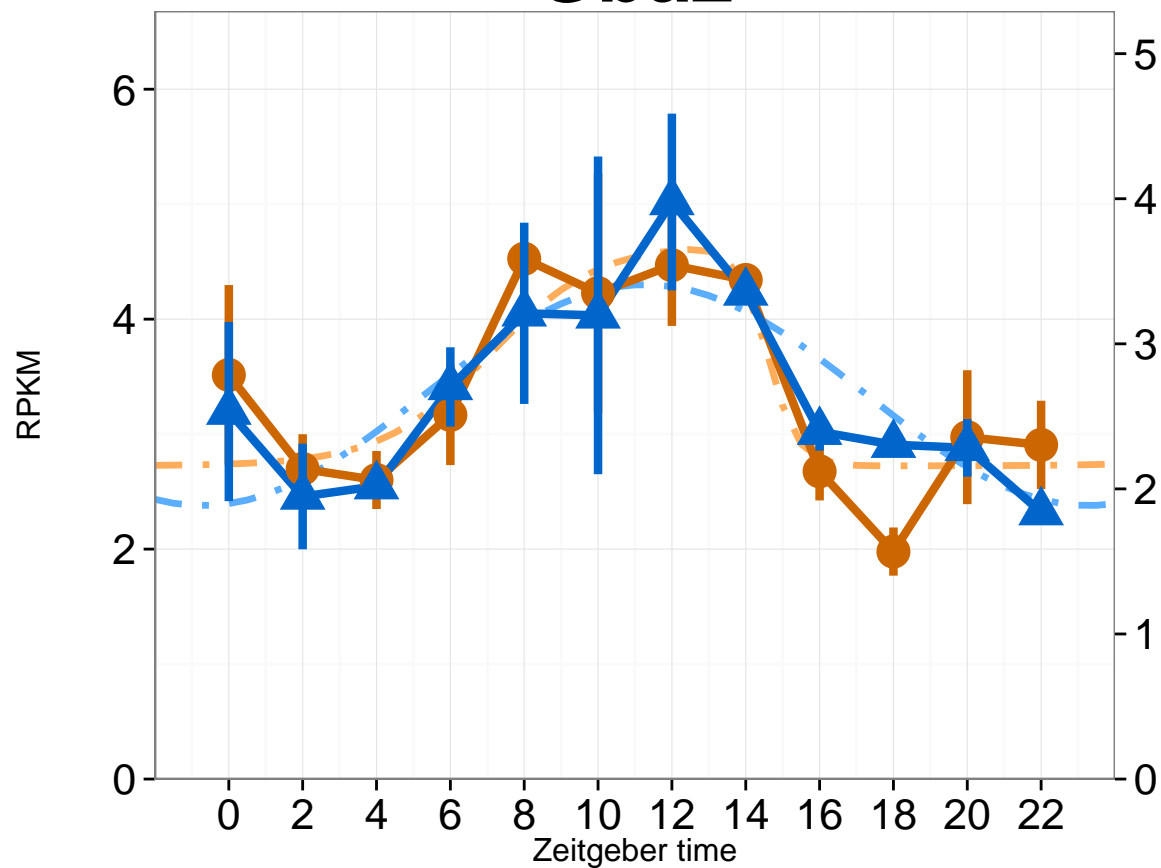

# Gba2

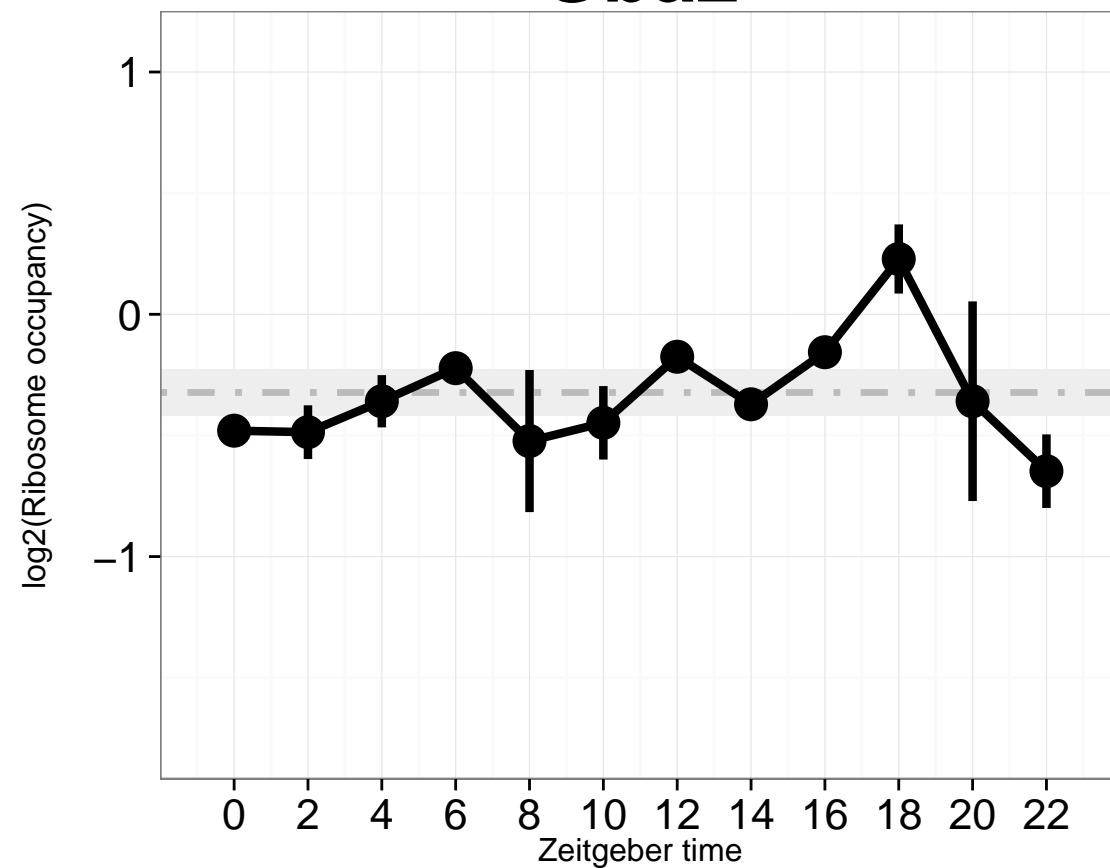

Supplement: SuppDataset_1.zip [file Gba2_set_D.pdf › Supplemental Dataset 1/D-mRNA_rhythm_translation_rhyth/Gba2_set_D.pdf]

## Gbe1

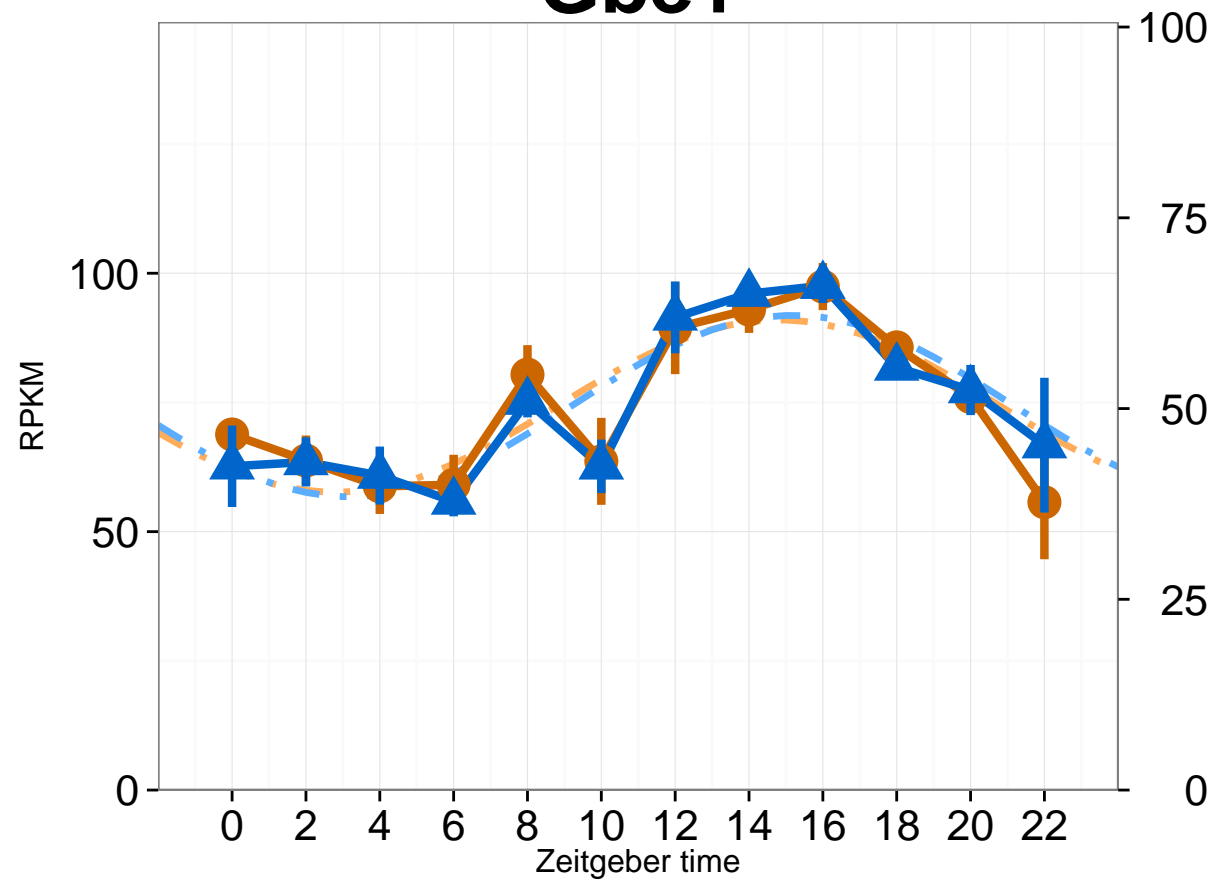

## Gbe1

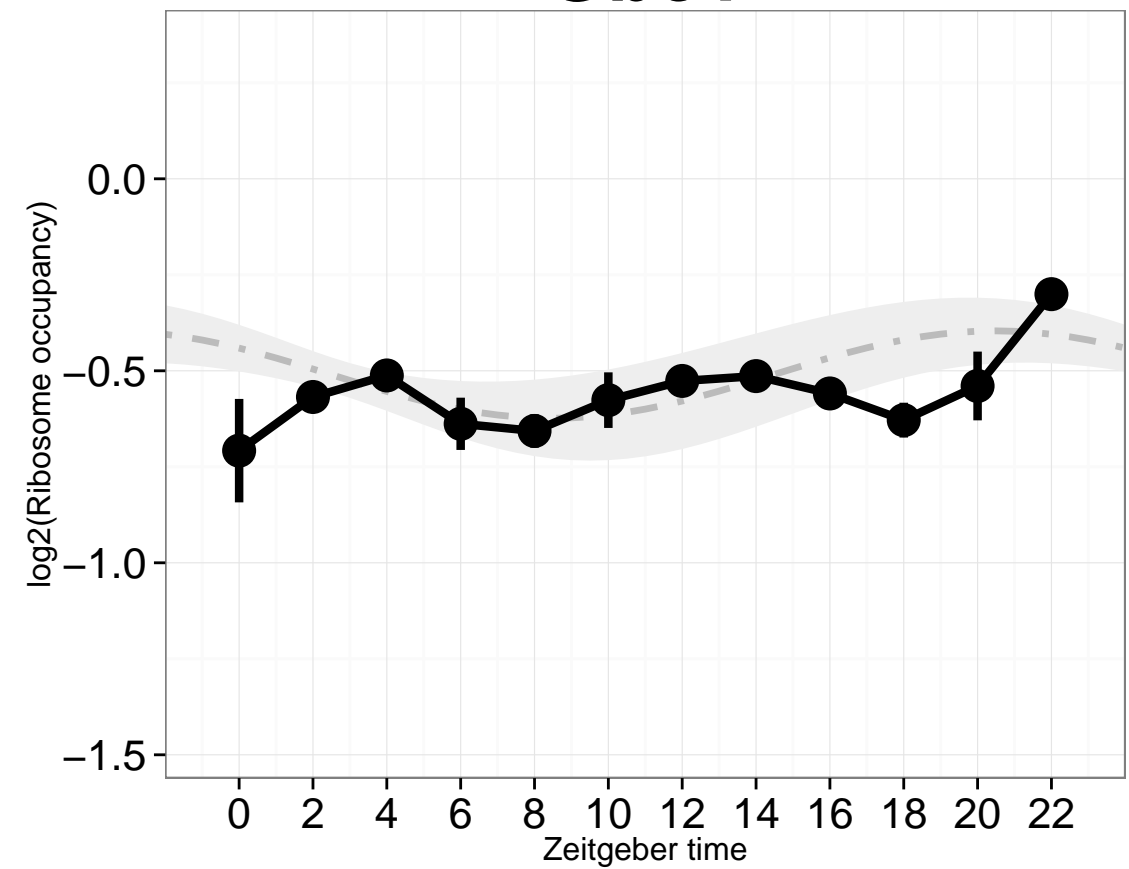

Supplement: SuppDataset_1.zip [file Gbe1_set_D.pdf › Supplemental Dataset 1/D-mRNA_rhythm_translation_rhyth/Gbe1_set_D.pdf]

## Gbp10

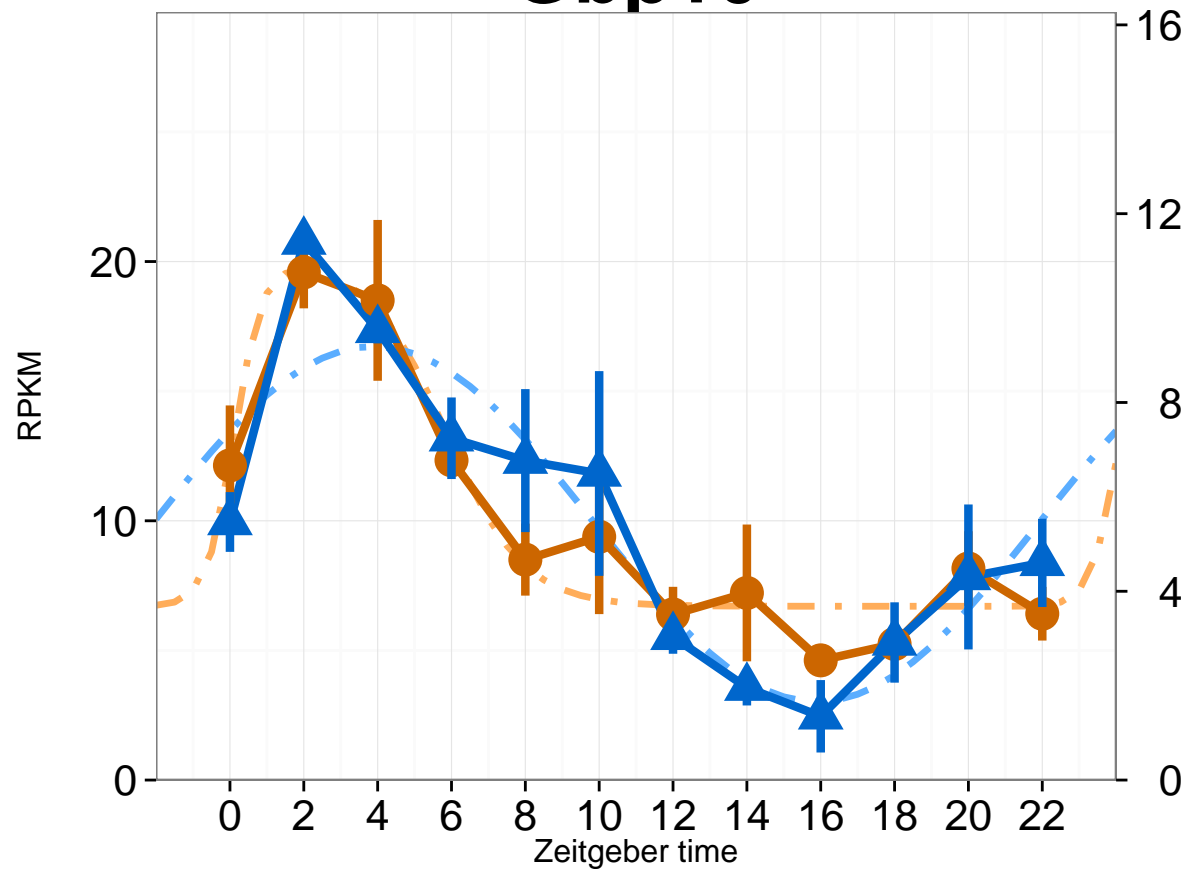

## Gbp10

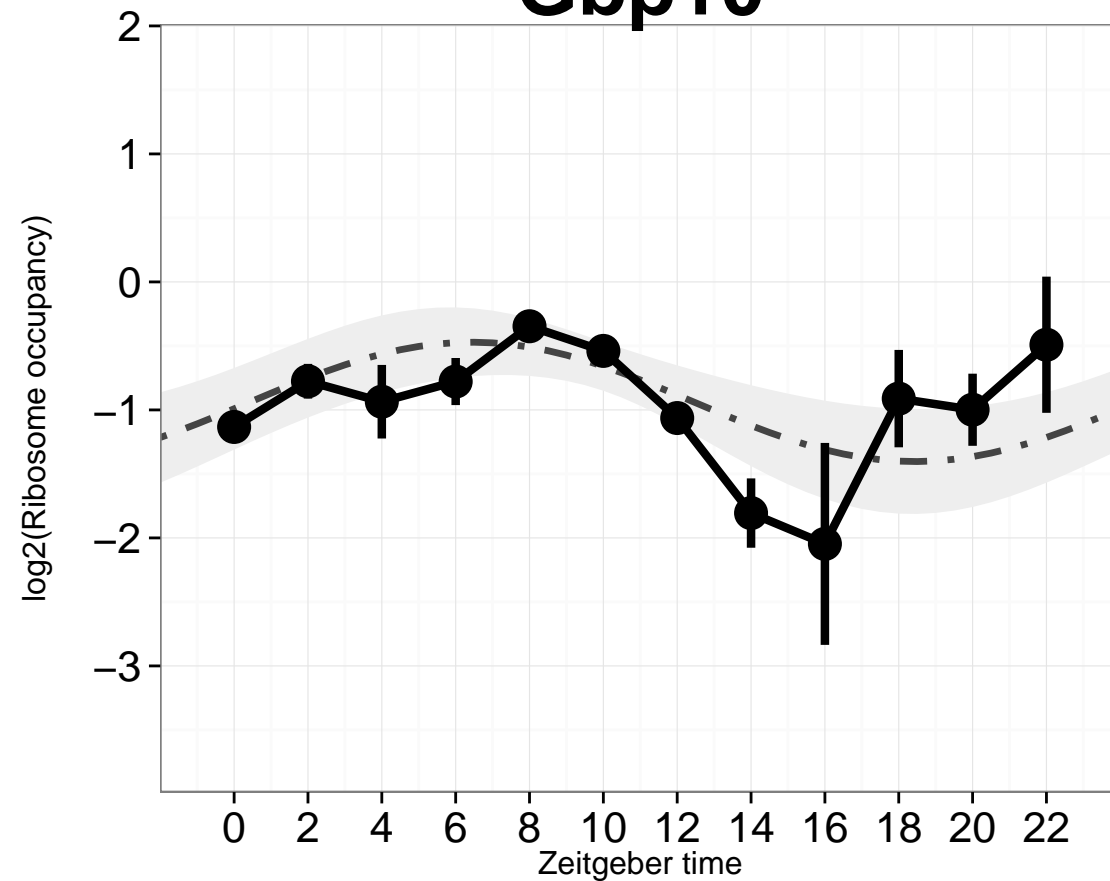

Supplement: SuppDataset_1.zip [file Gbp10_set_D.pdf › Supplemental Dataset 1/D-mRNA_rhythm_translation_rhyth/Gbp10_set_D.pdf]

# Gbp3

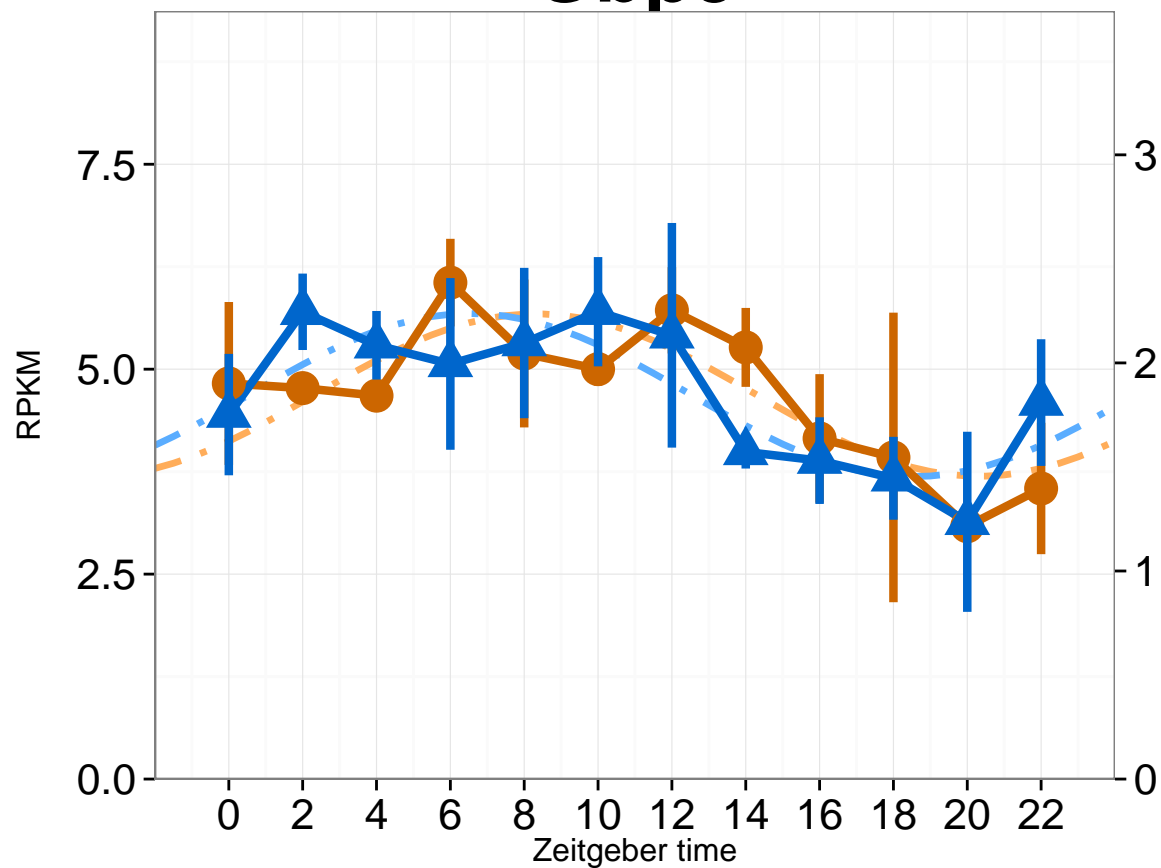

# Gbp3

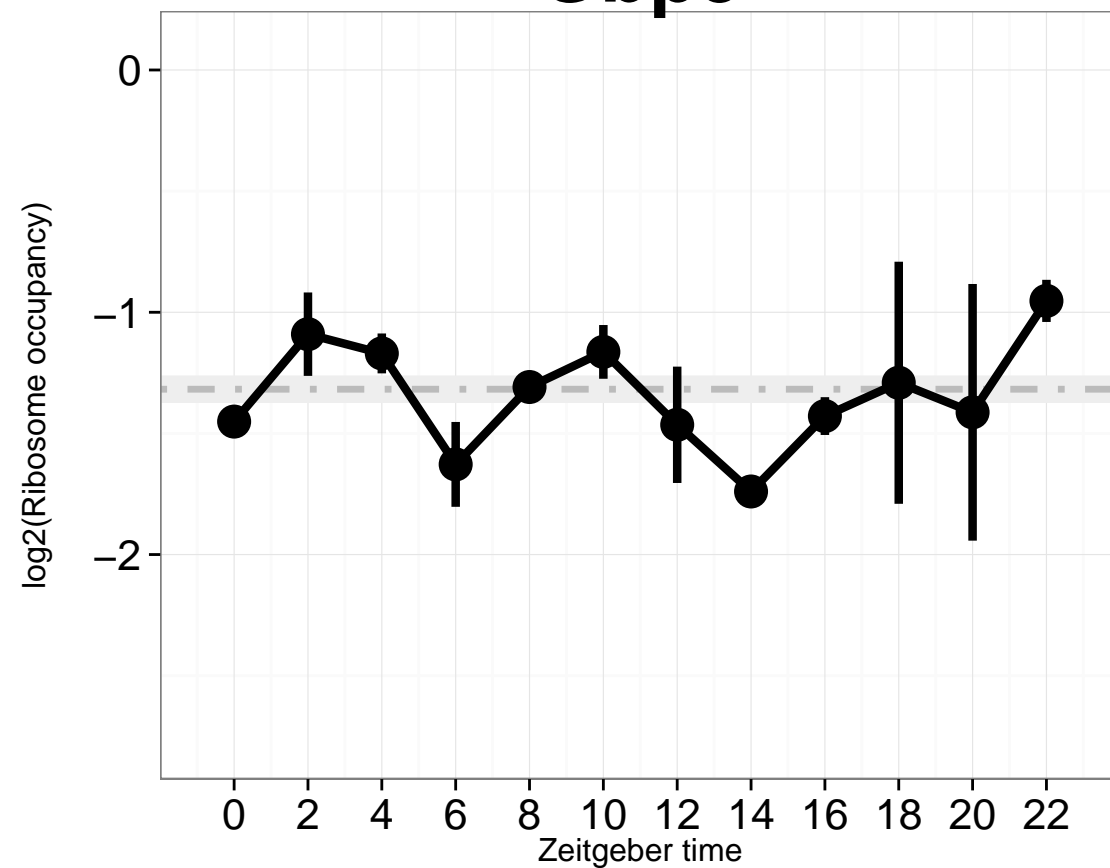

Supplement: SuppDataset_1.zip [file Gbp3_set_D.pdf › Supplemental Dataset 1/D-mRNA_rhythm_translation_rhyth/Gbp3_set_D.pdf]

# Gbp6

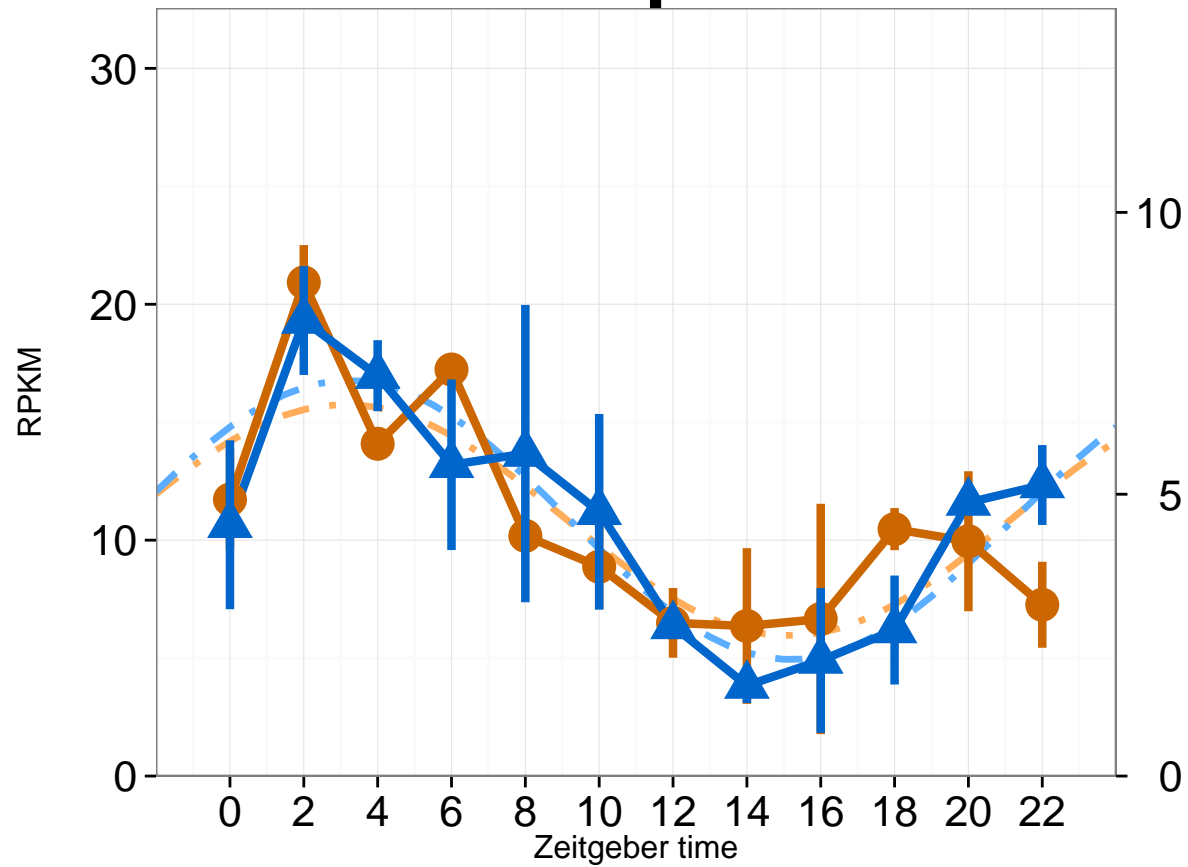

# Gbp6

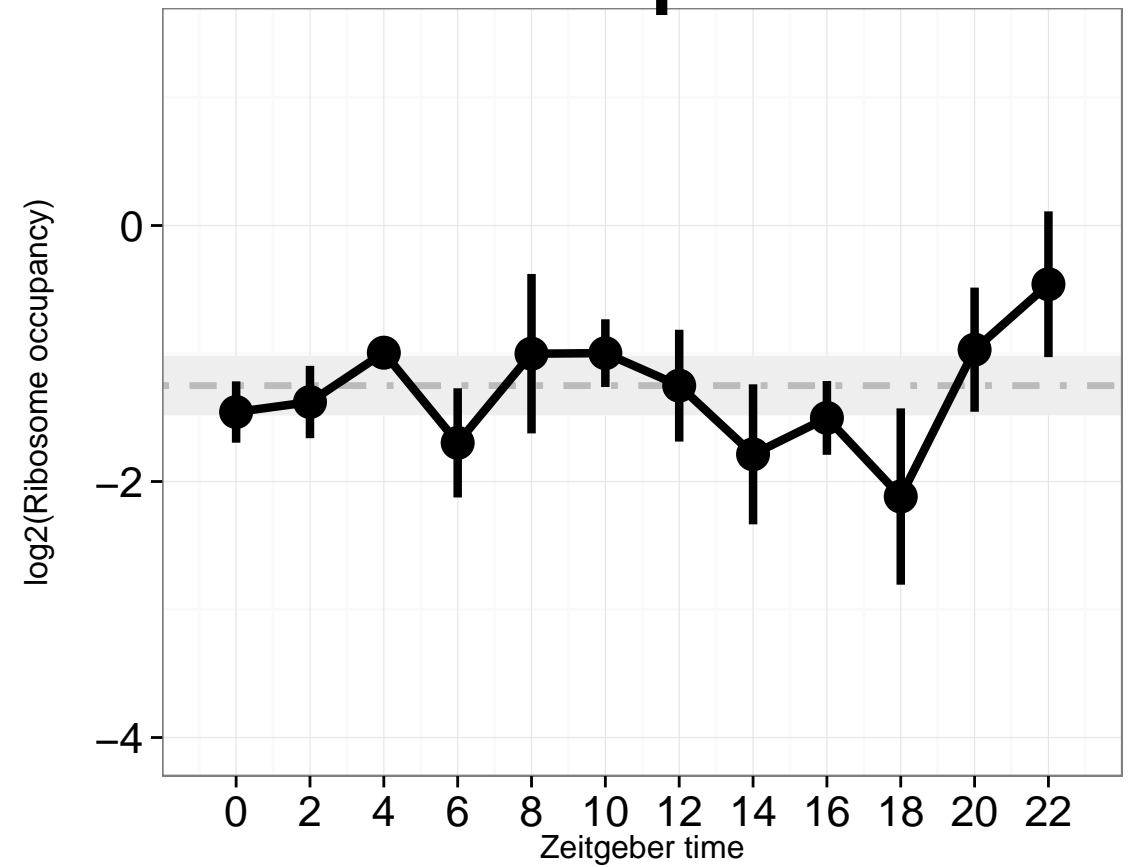

Supplement: SuppDataset_1.zip [file Gbp6_set_D.pdf › Supplemental Dataset 1/D-mRNA_rhythm_translation_rhyth/Gbp6_set_D.pdf]
