# Supplementary figures and images for: Ribosome profiling reveals the rhythmic liver translatome and circadian clock regulation by upstream open reading frames (part 24 of 113)
Source: HighWire-hosted journal article supplement (doi:10.1101/gr.195404.115), 2015-10-20

# Efr3a

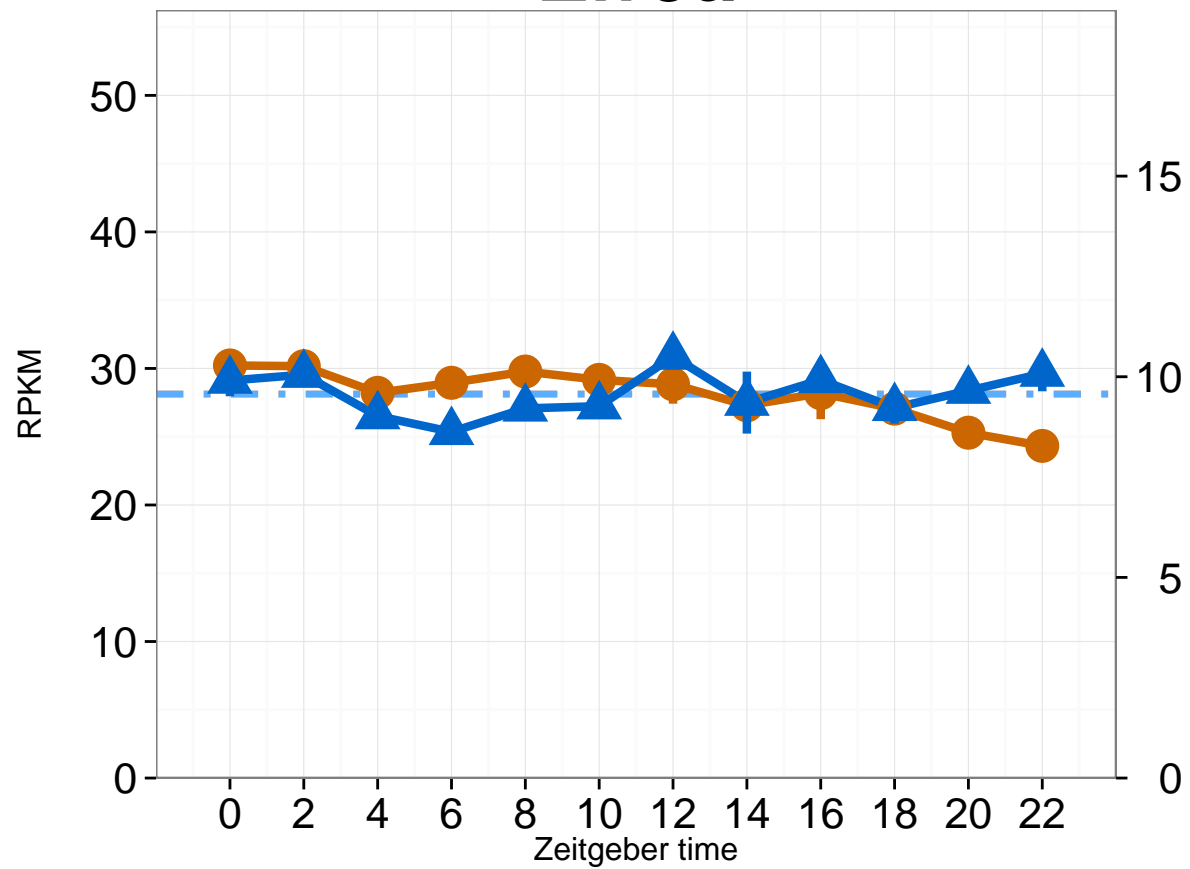

# Efr3a

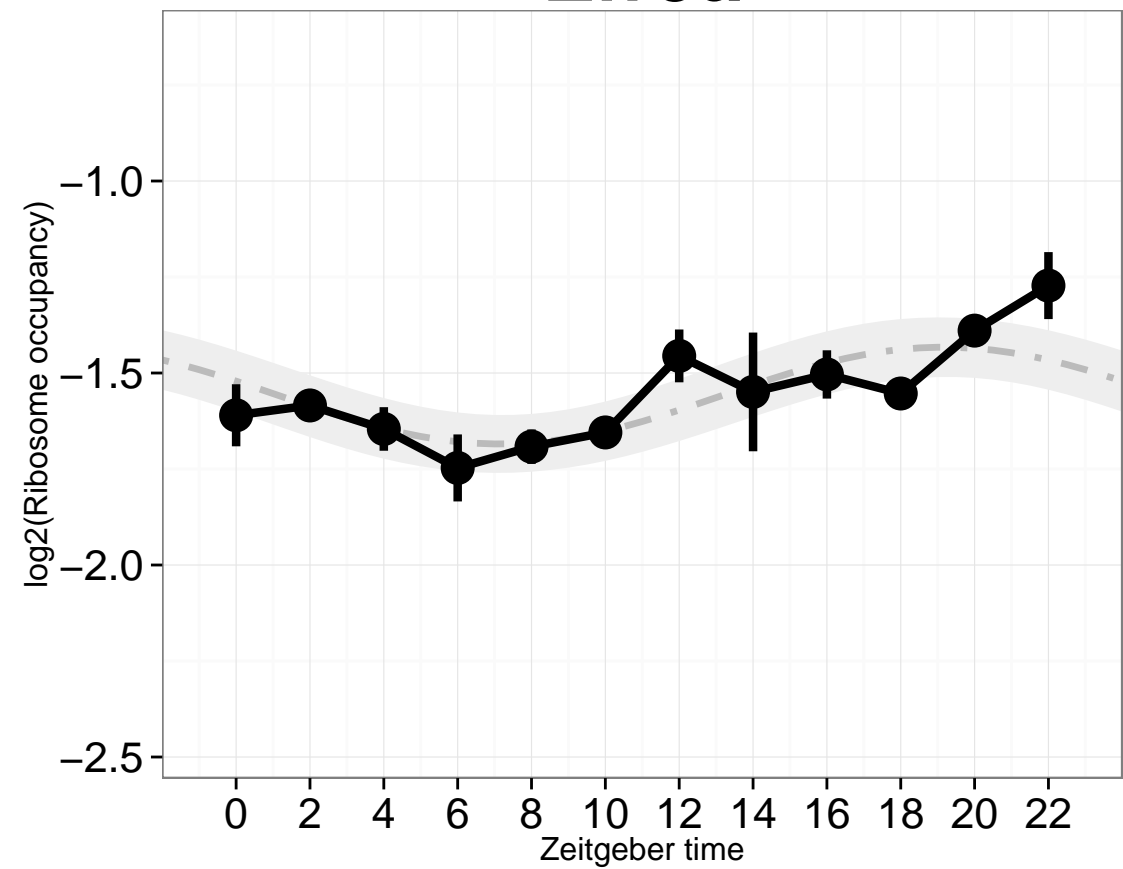

Supplement: SuppDataset_1.zip [file Efr3a_set_A.pdf › Supplemental Dataset 1/A-mRNA_nonrhyth_translation_nonrhyth/Efr3a_set_A.pdf]

# Eftud1

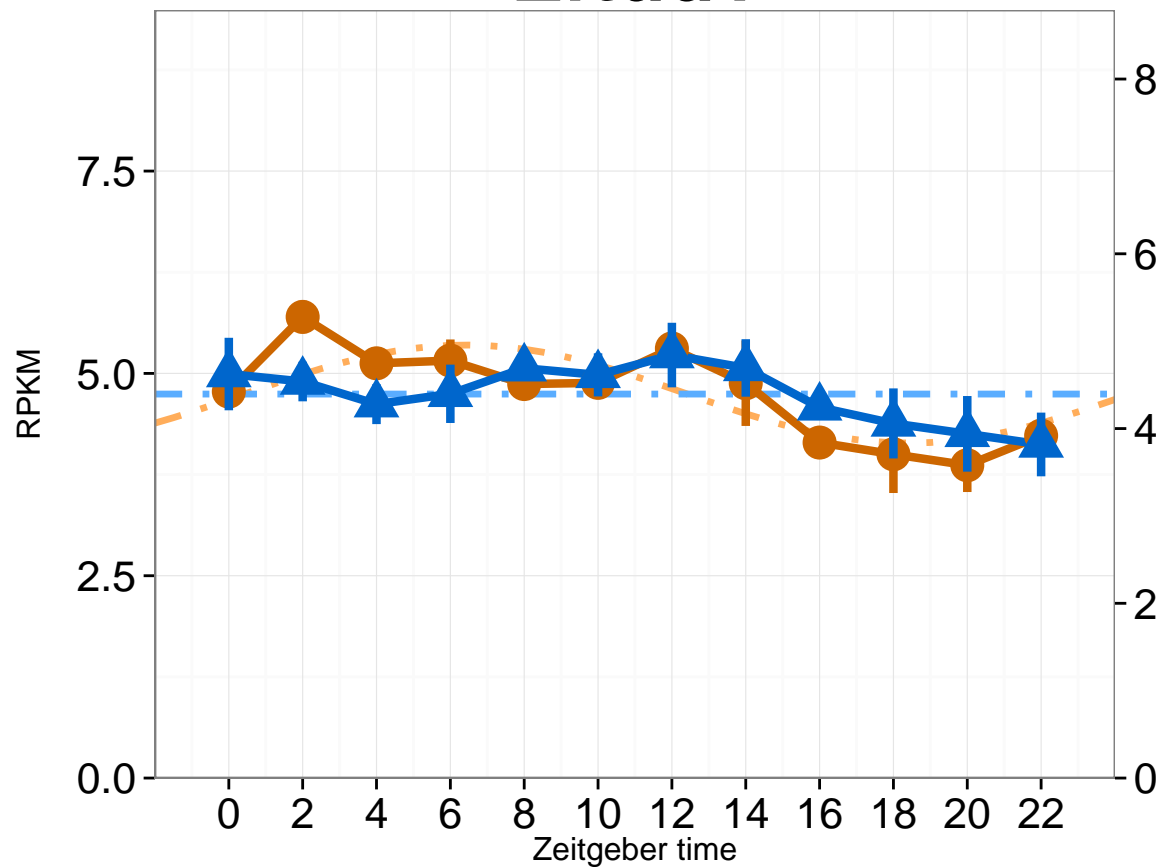

# Eftud1

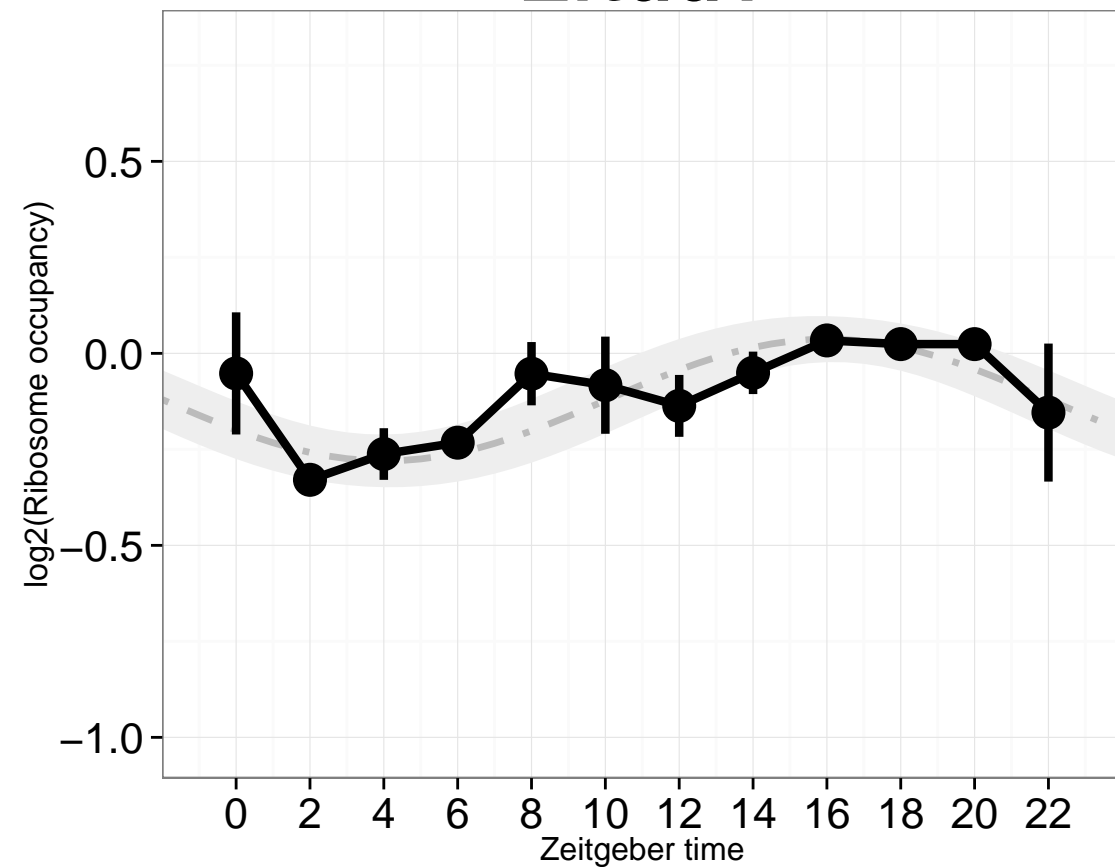

Supplement: SuppDataset_1.zip [file Eftud1_set_A.pdf › Supplemental Dataset 1/A-mRNA_nonrhyth_translation_nonrhyth/Eftud1_set_A.pdf]

# Eftud2

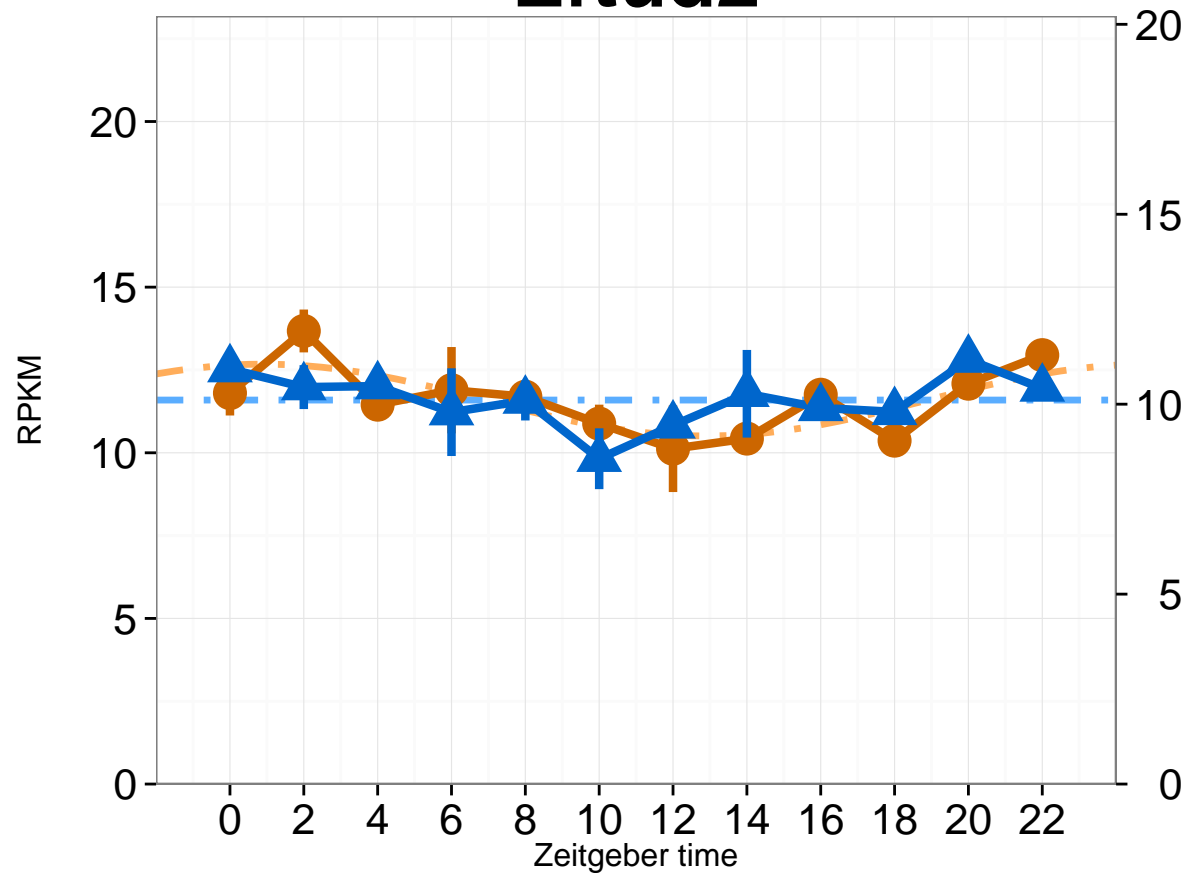

# Eftud2

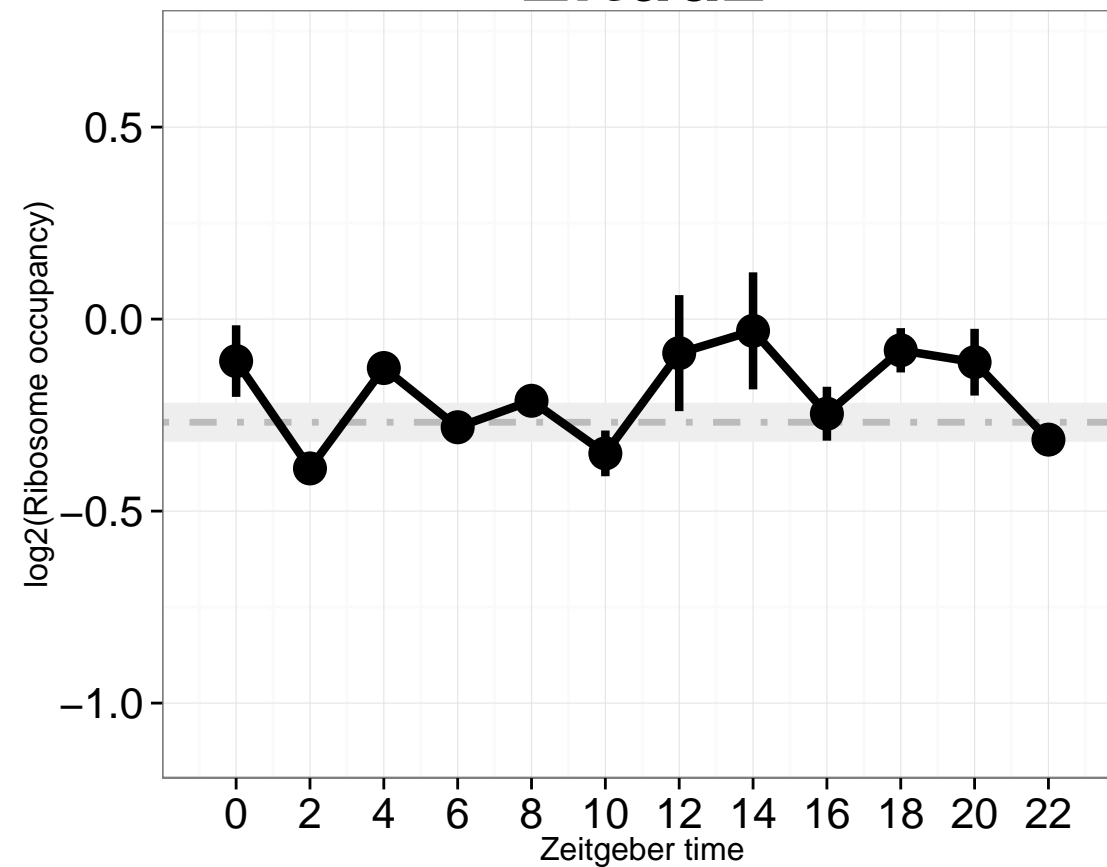

Supplement: SuppDataset_1.zip [file Eftud2_set_A.pdf › Supplemental Dataset 1/A-mRNA_nonrhyth_translation_nonrhyth/Eftud2_set_A.pdf]

## Egf

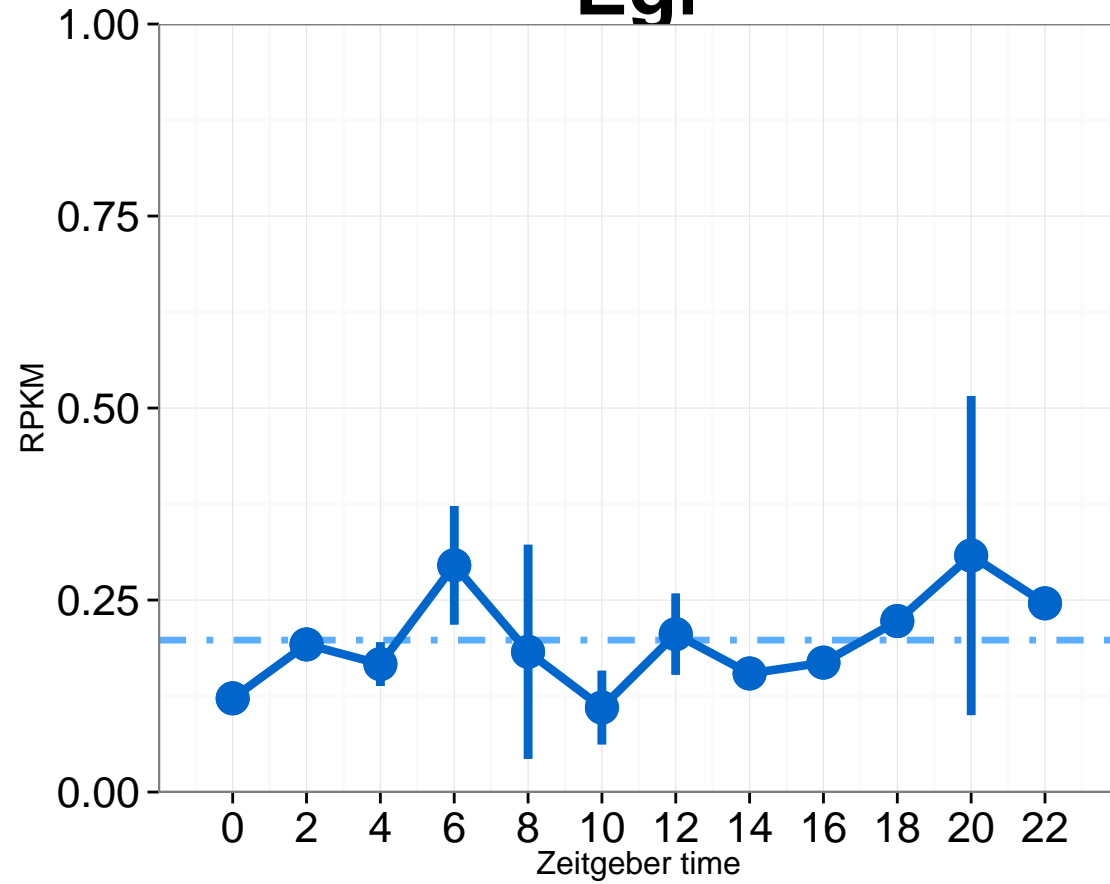

## Egf log2(Ribosome occupancy)

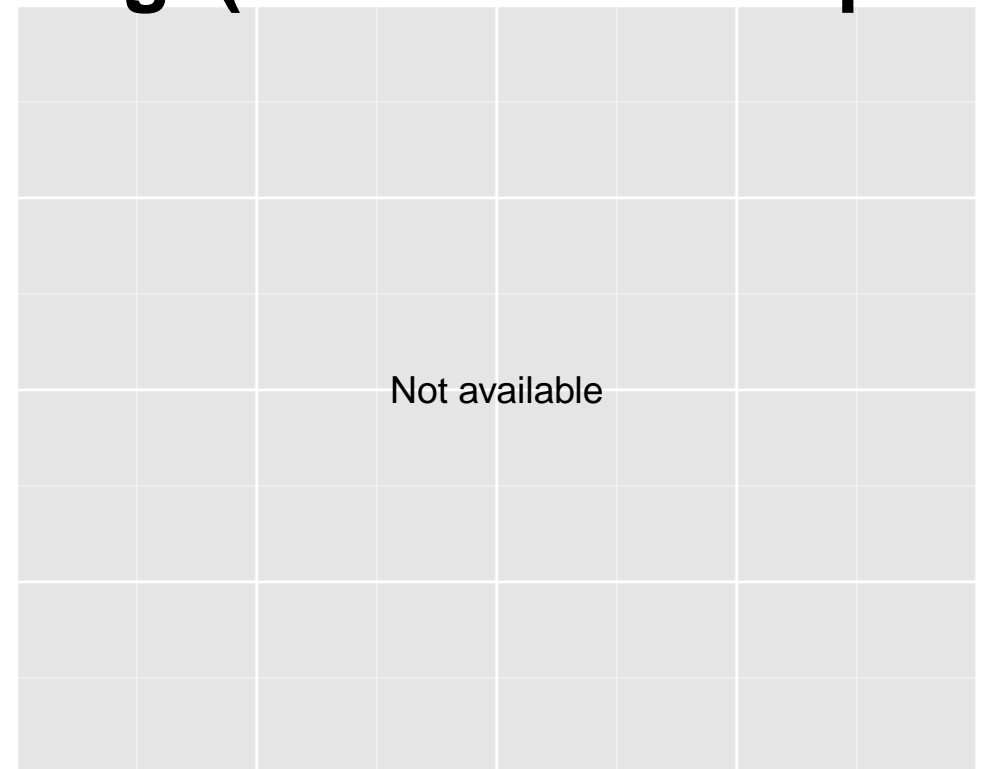

Supplement: SuppDataset_1.zip [file Egf_set_A.pdf › Supplemental Dataset 1/A-mRNA_nonrhyth_translation_nonrhyth/Egf_set_A.pdf]

# Egfl7

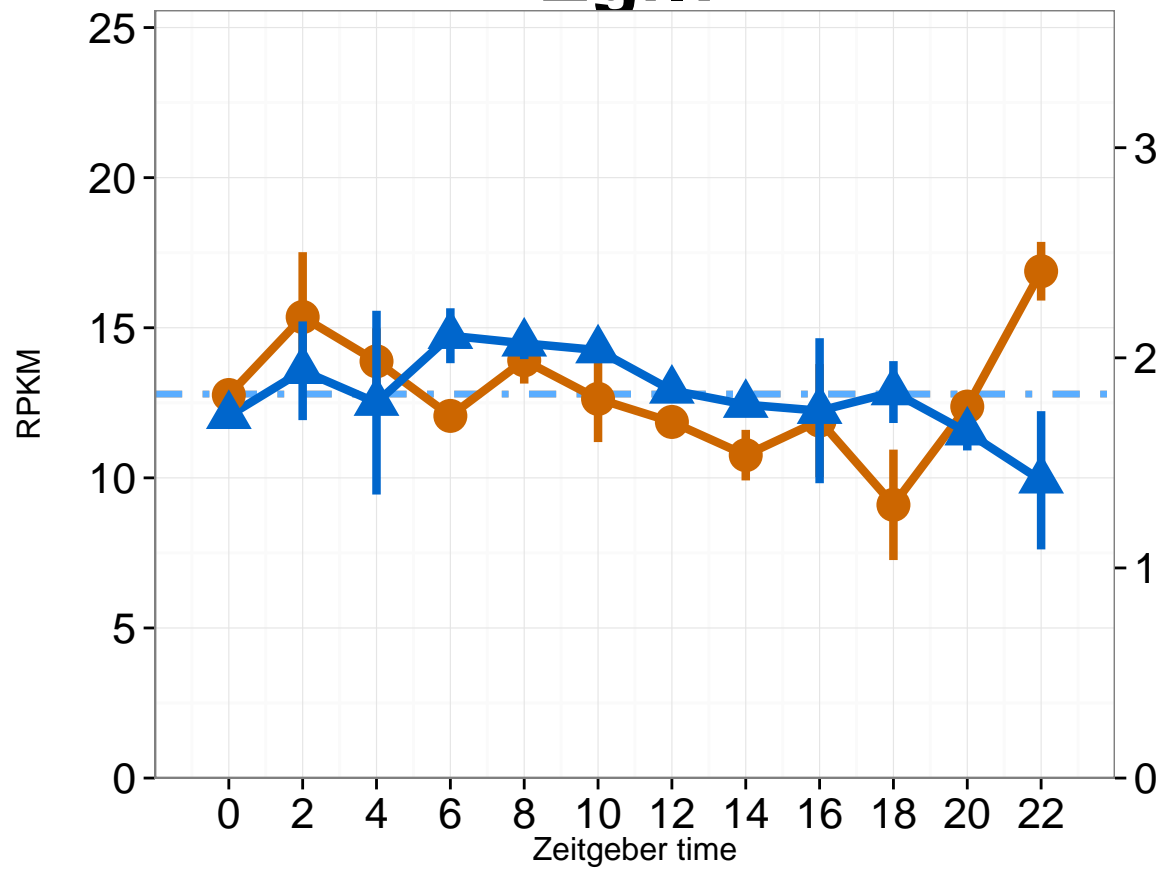

# Egfl7

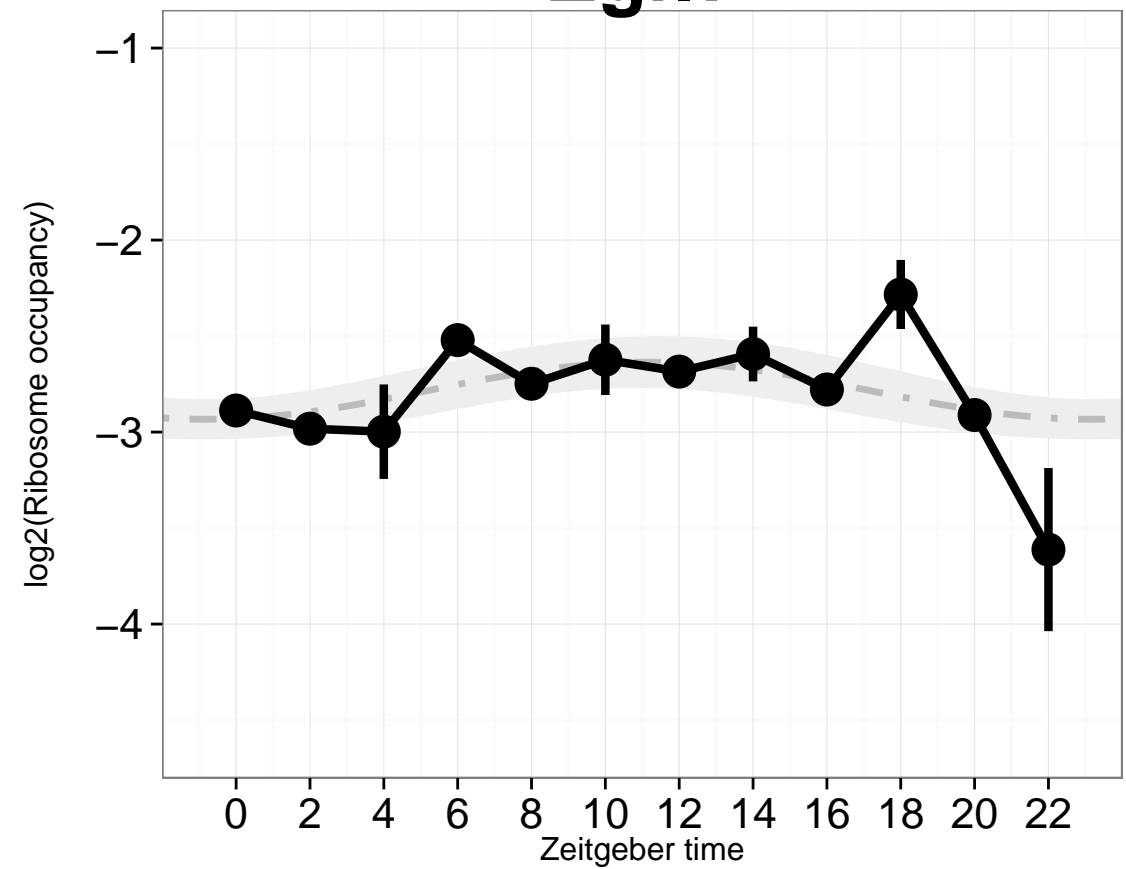

Supplement: SuppDataset_1.zip [file Egfl7_set_A.pdf › Supplemental Dataset 1/A-mRNA_nonrhyth_translation_nonrhyth/Egfl7_set_A.pdf]

# Egfr

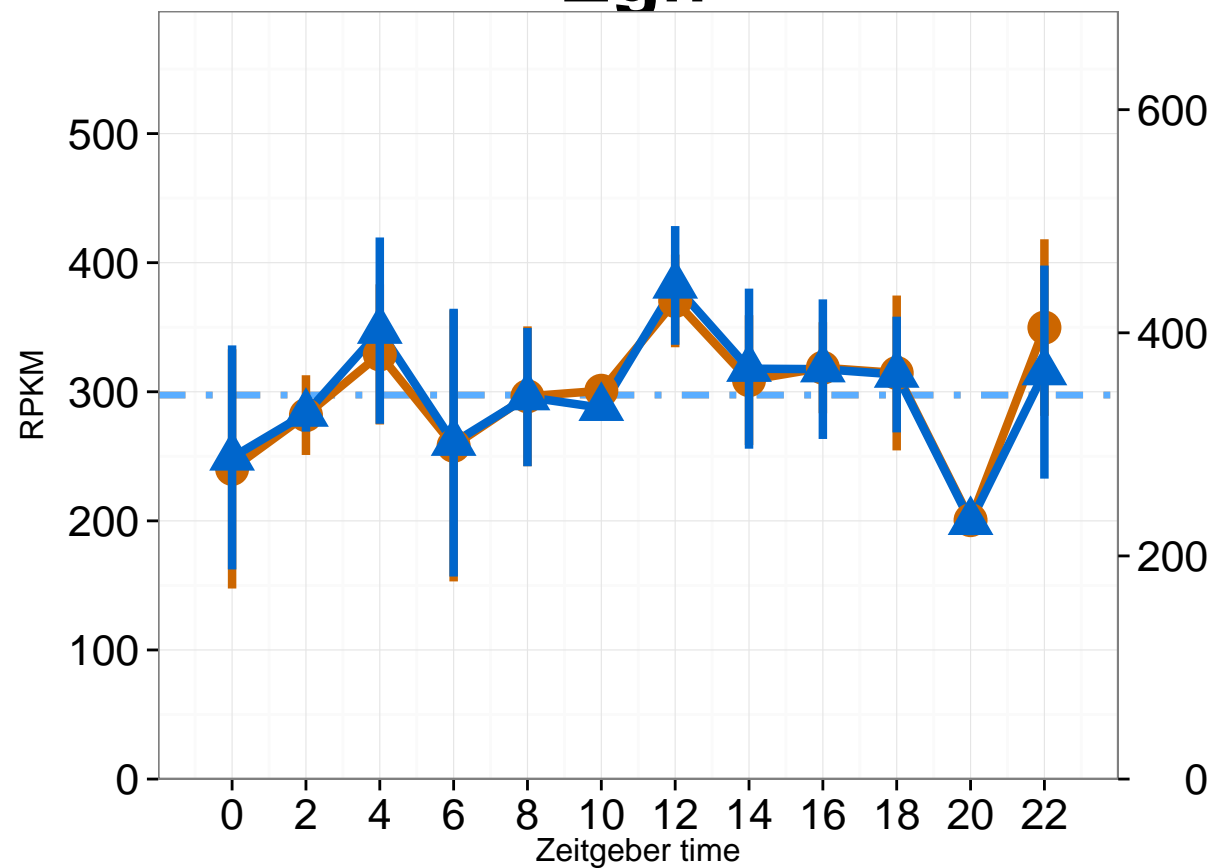

# Egfr

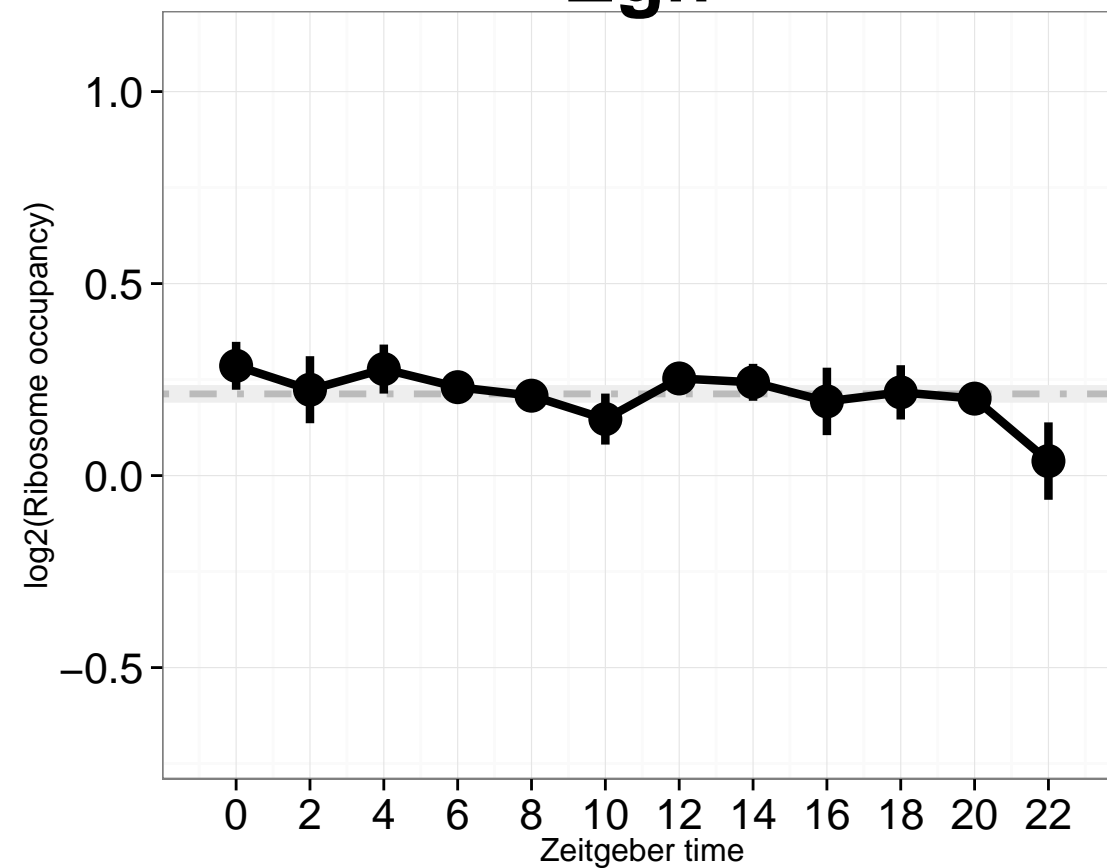

Supplement: SuppDataset_1.zip [file Egfr_set_A.pdf › Supplemental Dataset 1/A-mRNA_nonrhyth_translation_nonrhyth/Egfr_set_A.pdf]

# Egln1

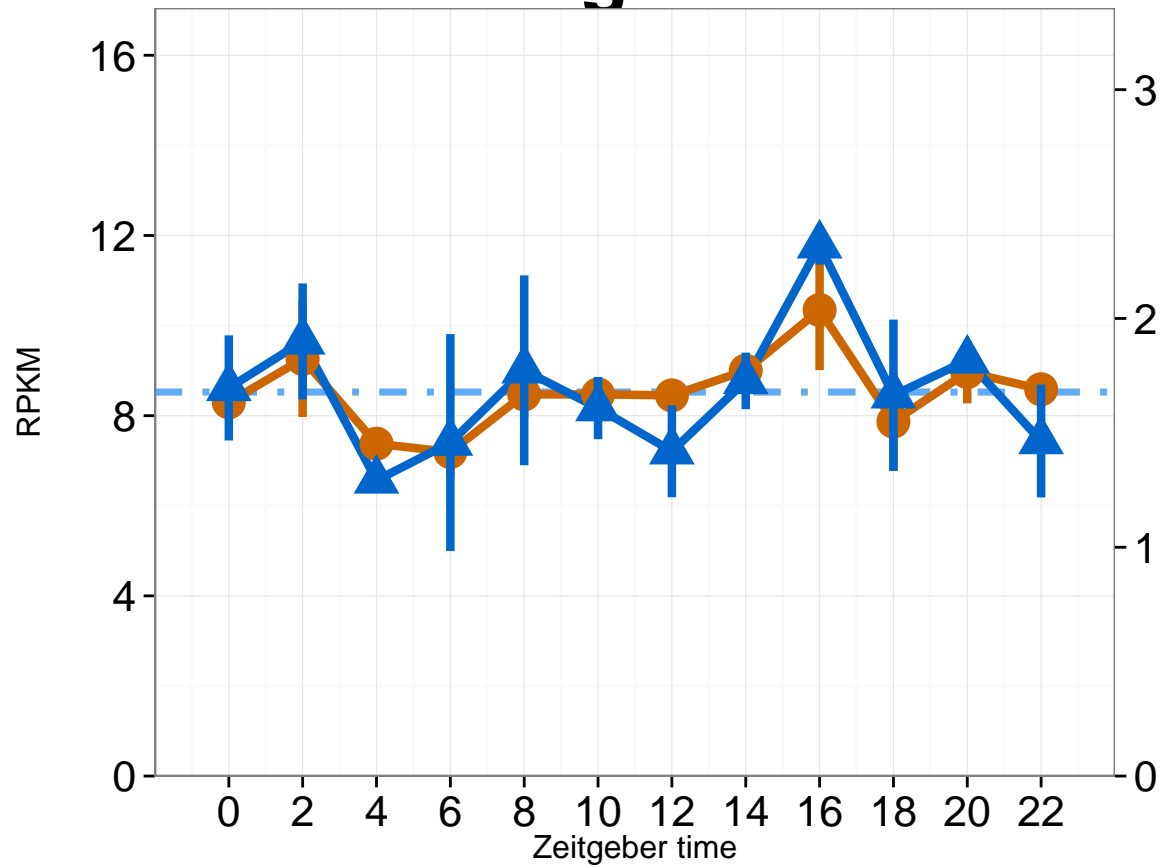

# Egln1

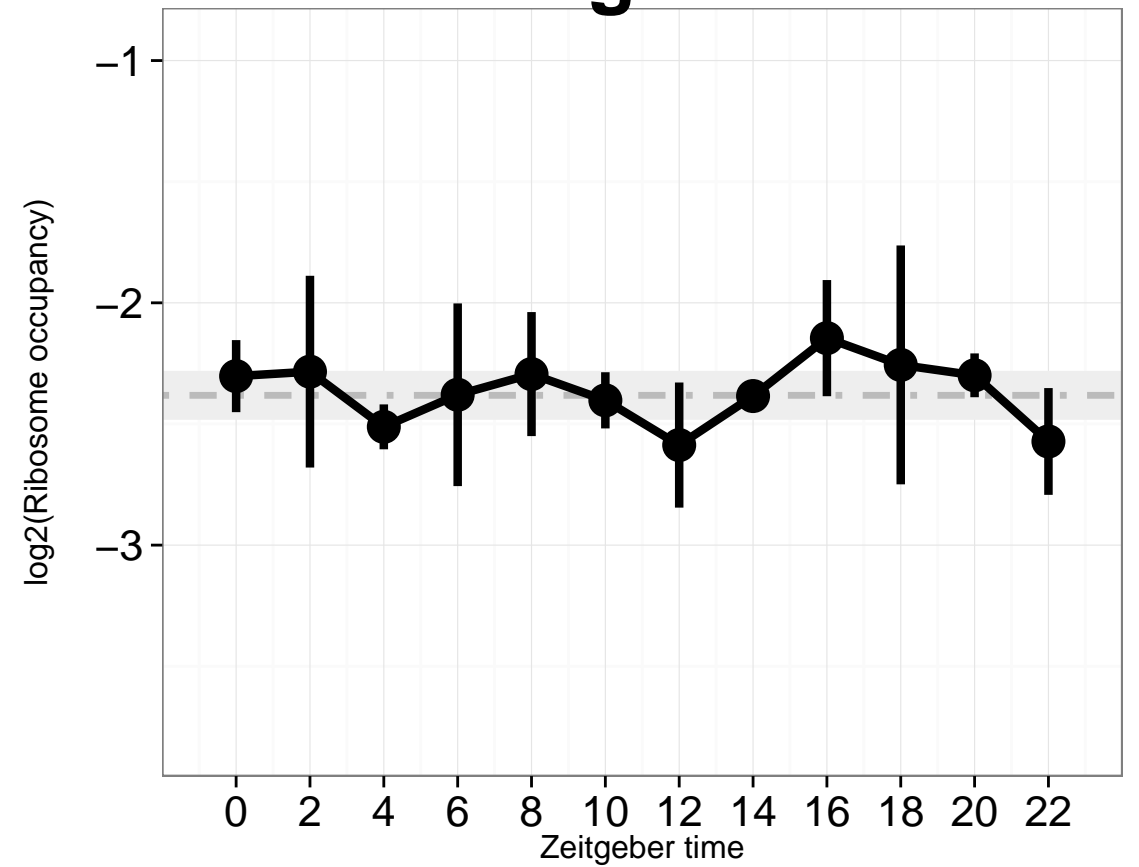

Supplement: SuppDataset_1.zip [file Egln1_set_A.pdf › Supplemental Dataset 1/A-mRNA_nonrhyth_translation_nonrhyth/Egln1_set_A.pdf]

## Egln2

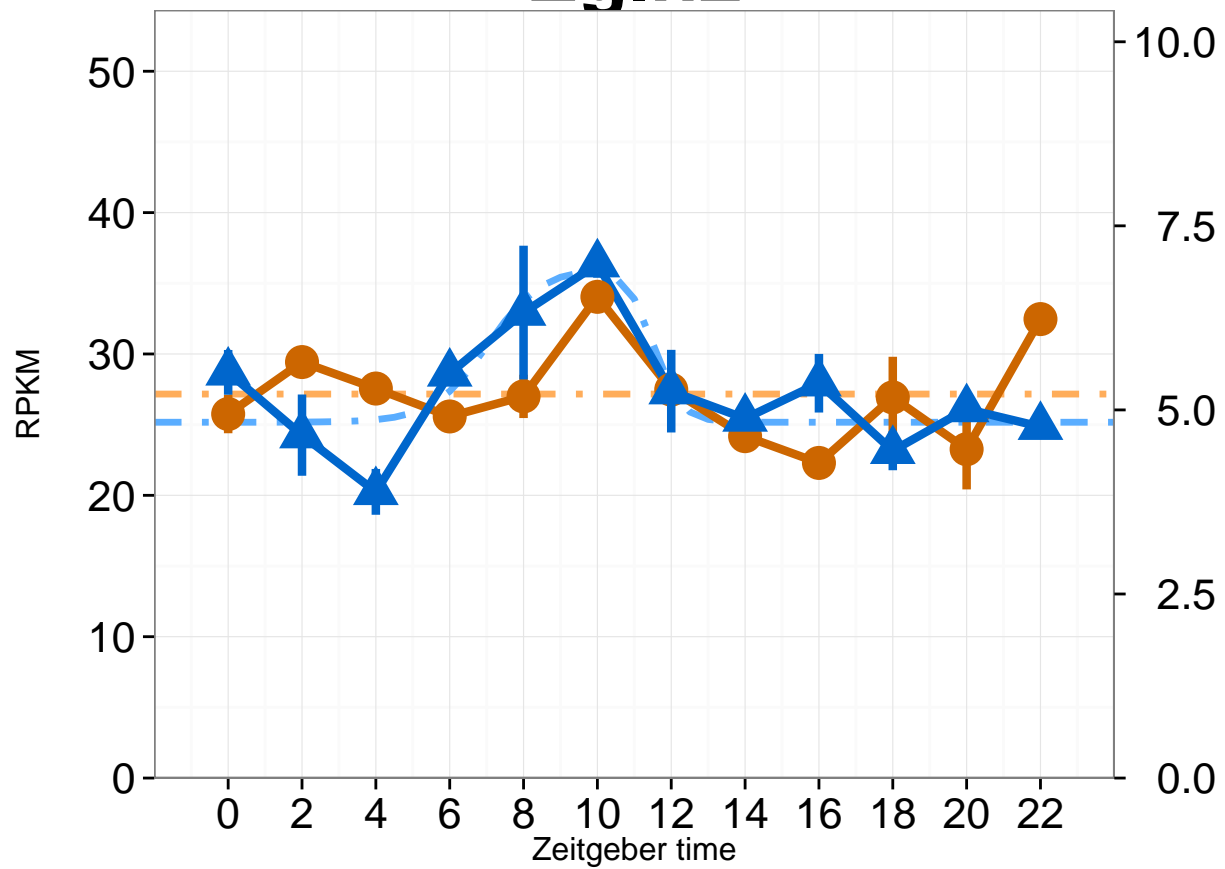

## Egln2

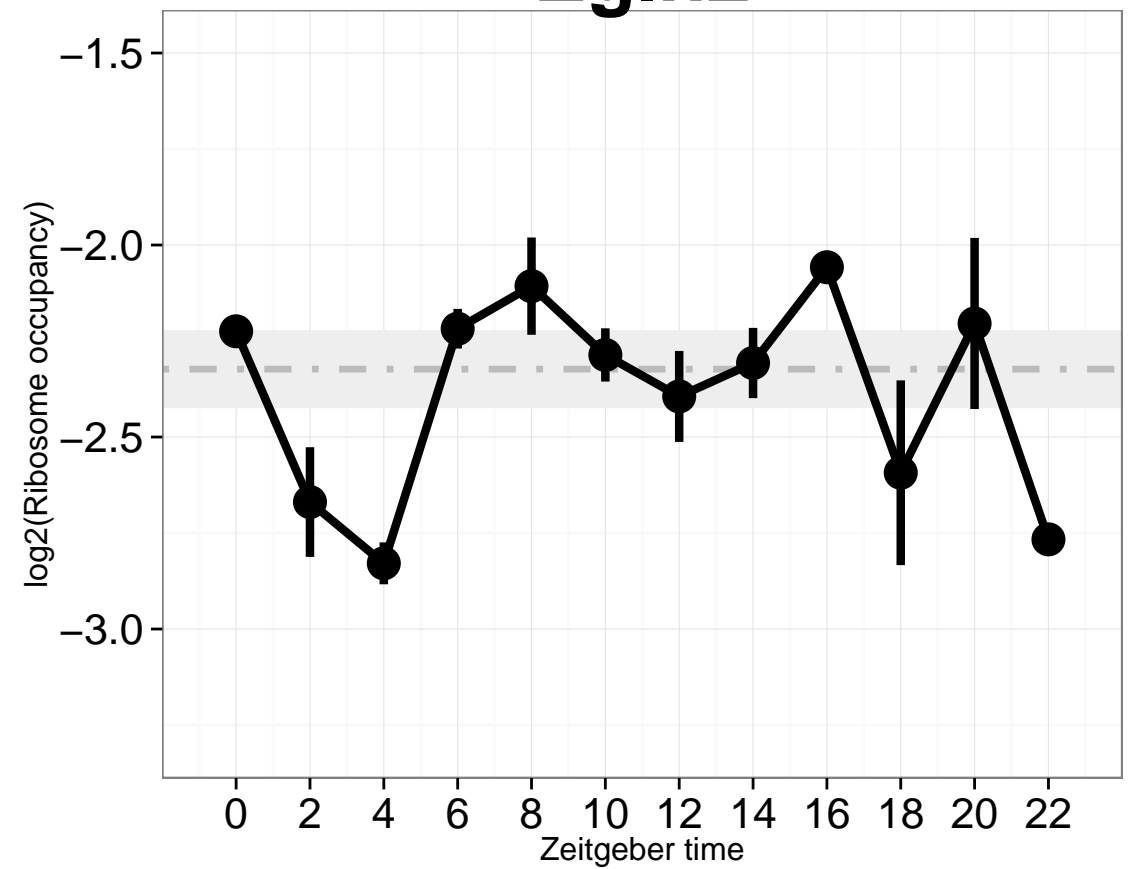

Supplement: SuppDataset_1.zip [file Egln2_set_A.pdf › Supplemental Dataset 1/A-mRNA_nonrhyth_translation_nonrhyth/Egln2_set_A.pdf]

## Egln3

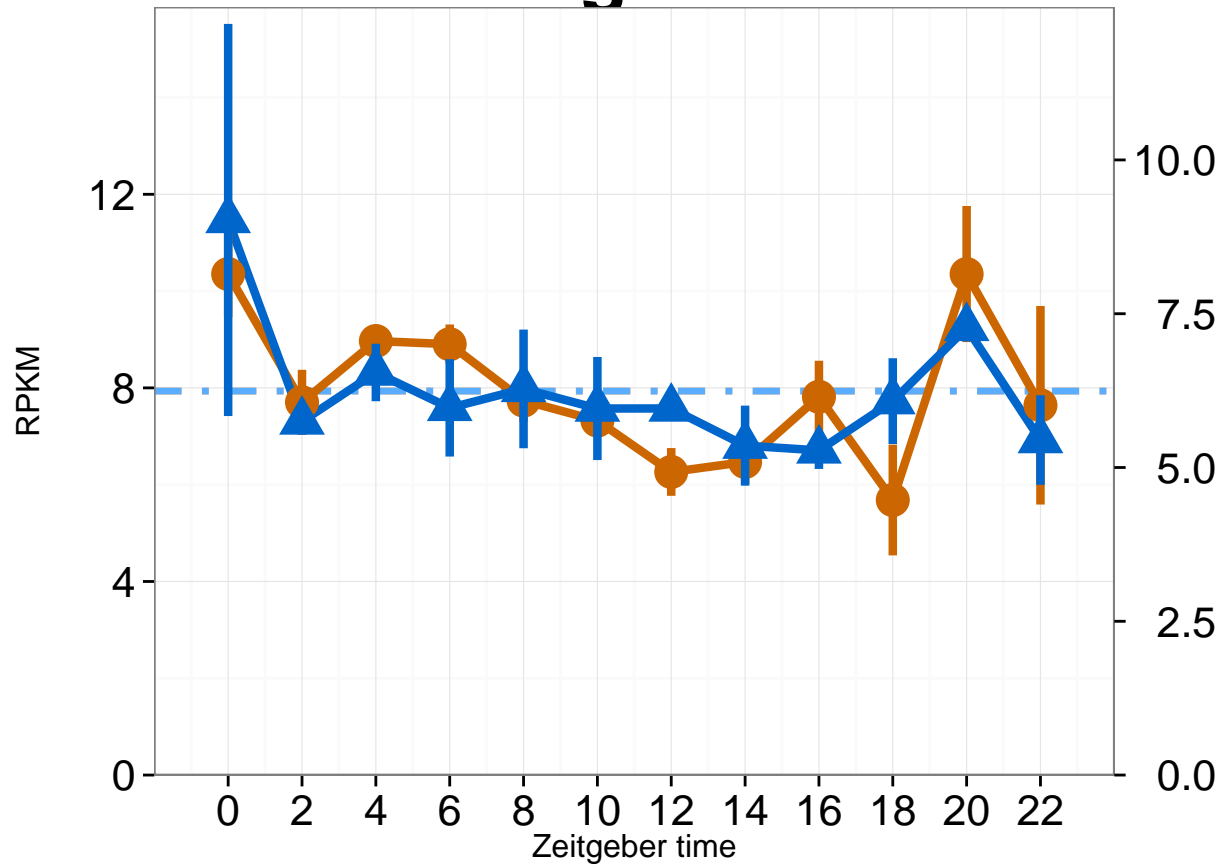

## Egln3

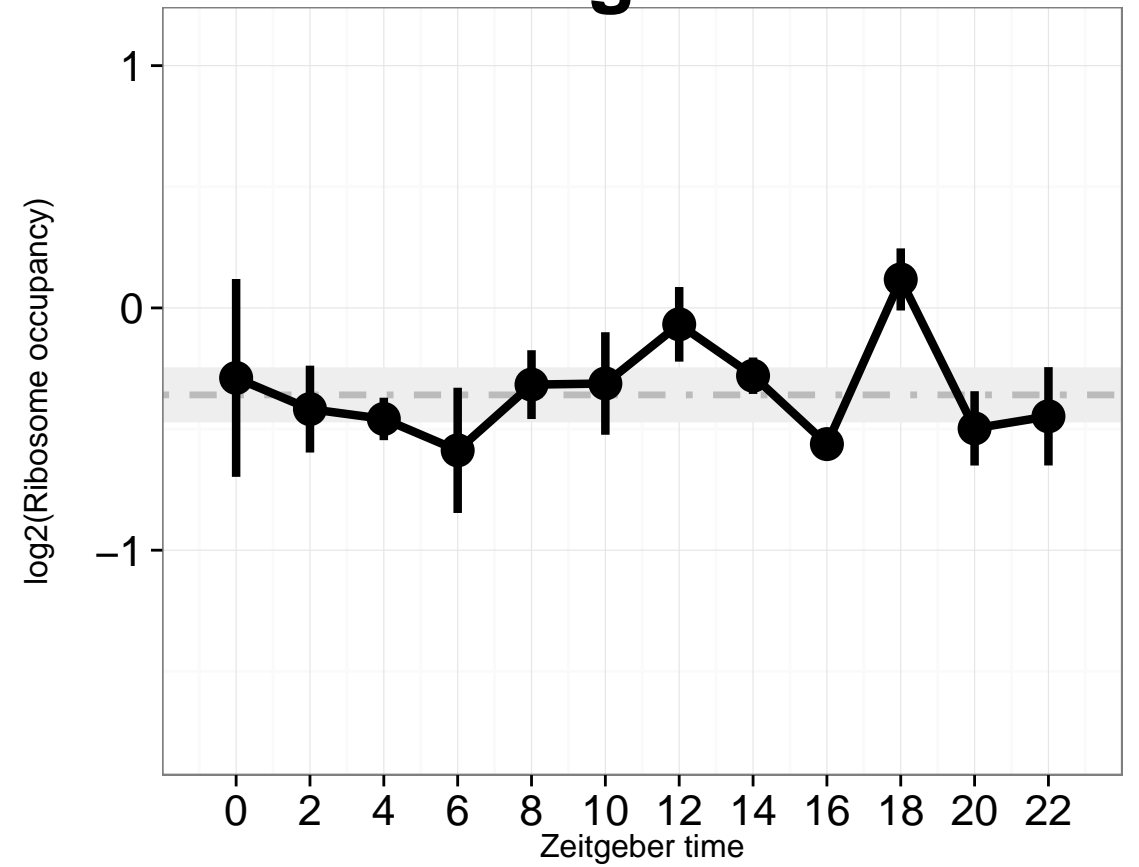

Supplement: SuppDataset_1.zip [file Egln3_set_A.pdf › Supplemental Dataset 1/A-mRNA_nonrhyth_translation_nonrhyth/Egln3_set_A.pdf]

## Ehbp1

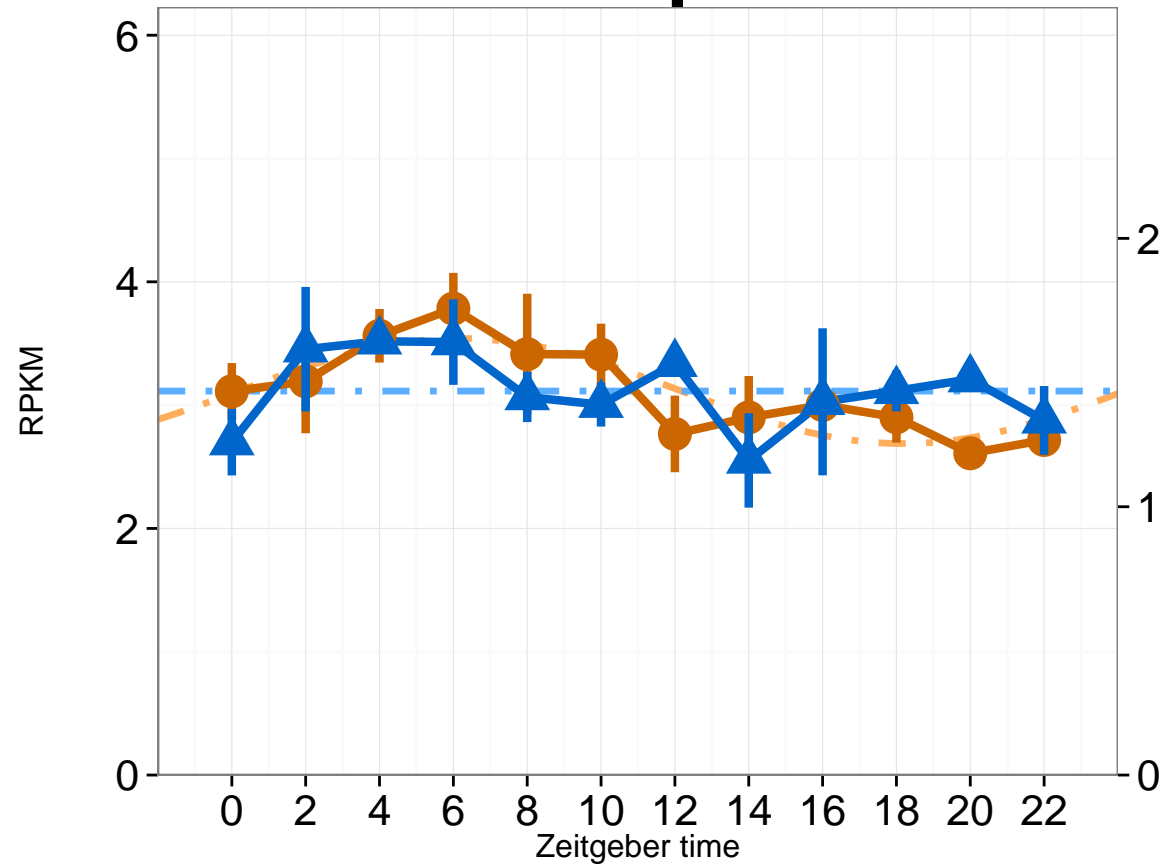

## Ehbp1

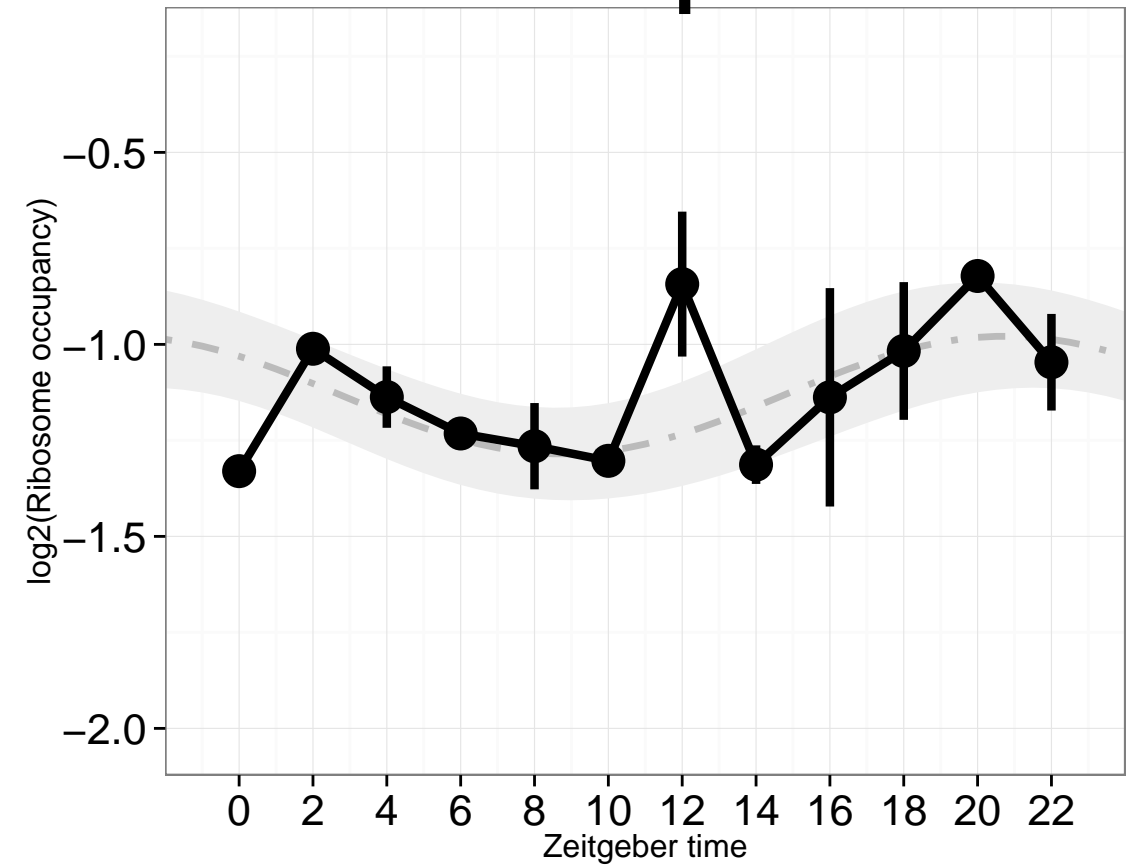

Supplement: SuppDataset_1.zip [file Ehbp1_set_A.pdf › Supplemental Dataset 1/A-mRNA_nonrhyth_translation_nonrhyth/Ehbp1_set_A.pdf]

# Ehbp1l1

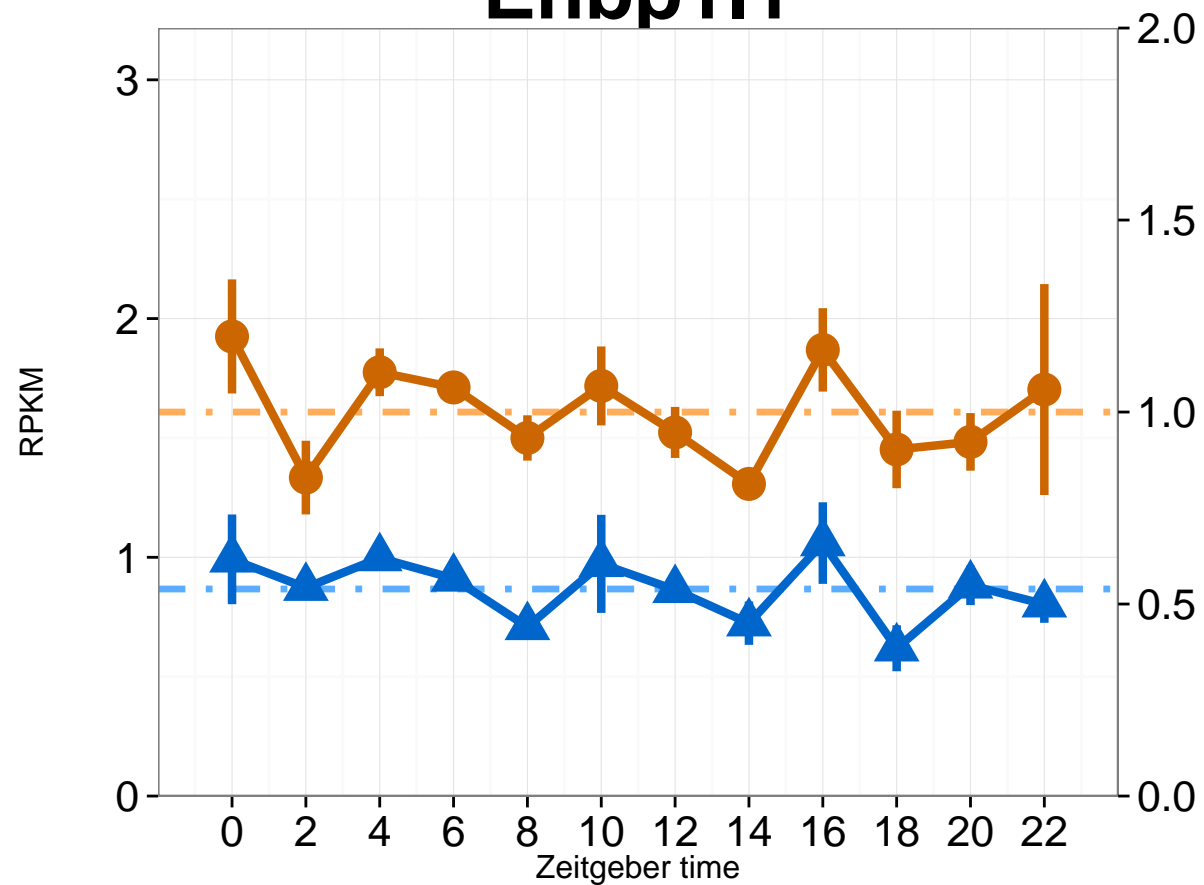

# Ehbp1l1

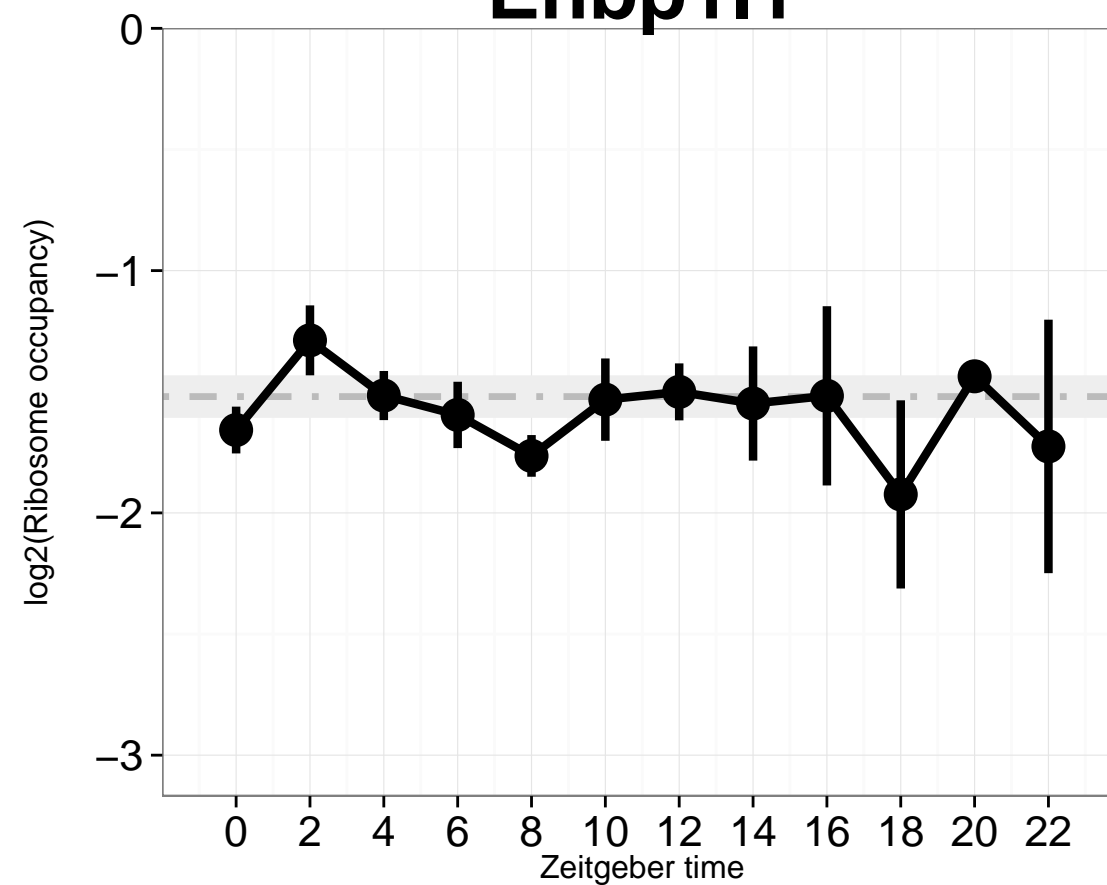

Supplement: SuppDataset_1.zip [file Ehbp1l1_set_A.pdf › Supplemental Dataset 1/A-mRNA_nonrhyth_translation_nonrhyth/Ehbp1l1_set_A.pdf]

## Ehd1

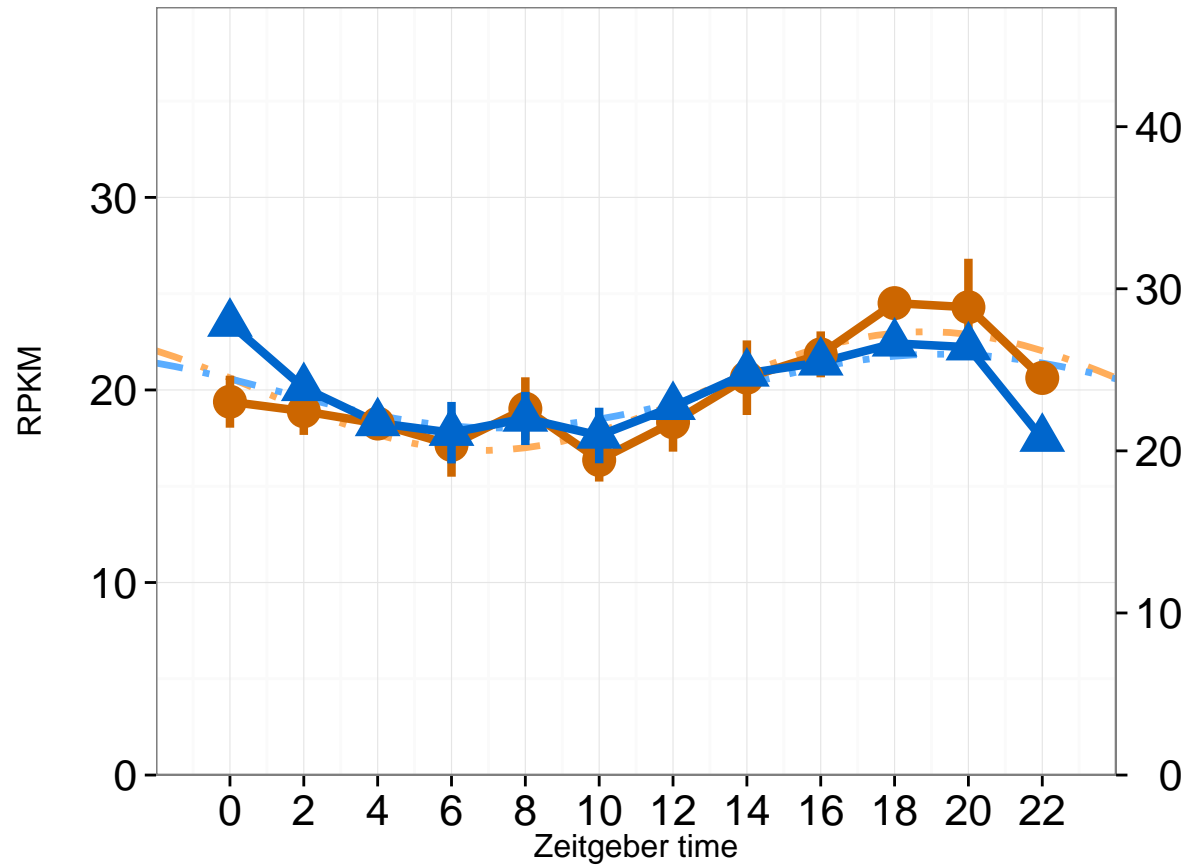

## Ehd1

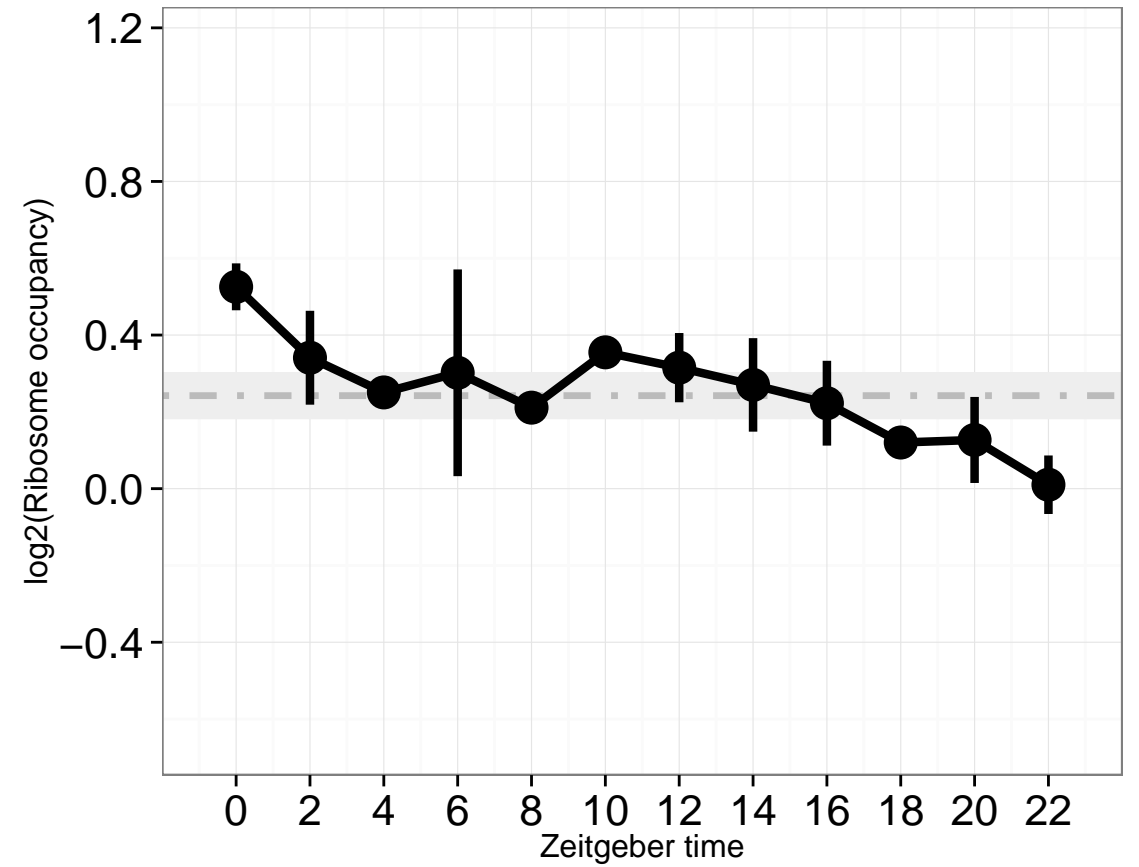

Supplement: SuppDataset_1.zip [file Ehd1_set_A.pdf › Supplemental Dataset 1/A-mRNA_nonrhyth_translation_nonrhyth/Ehd1_set_A.pdf]

## Ehd2

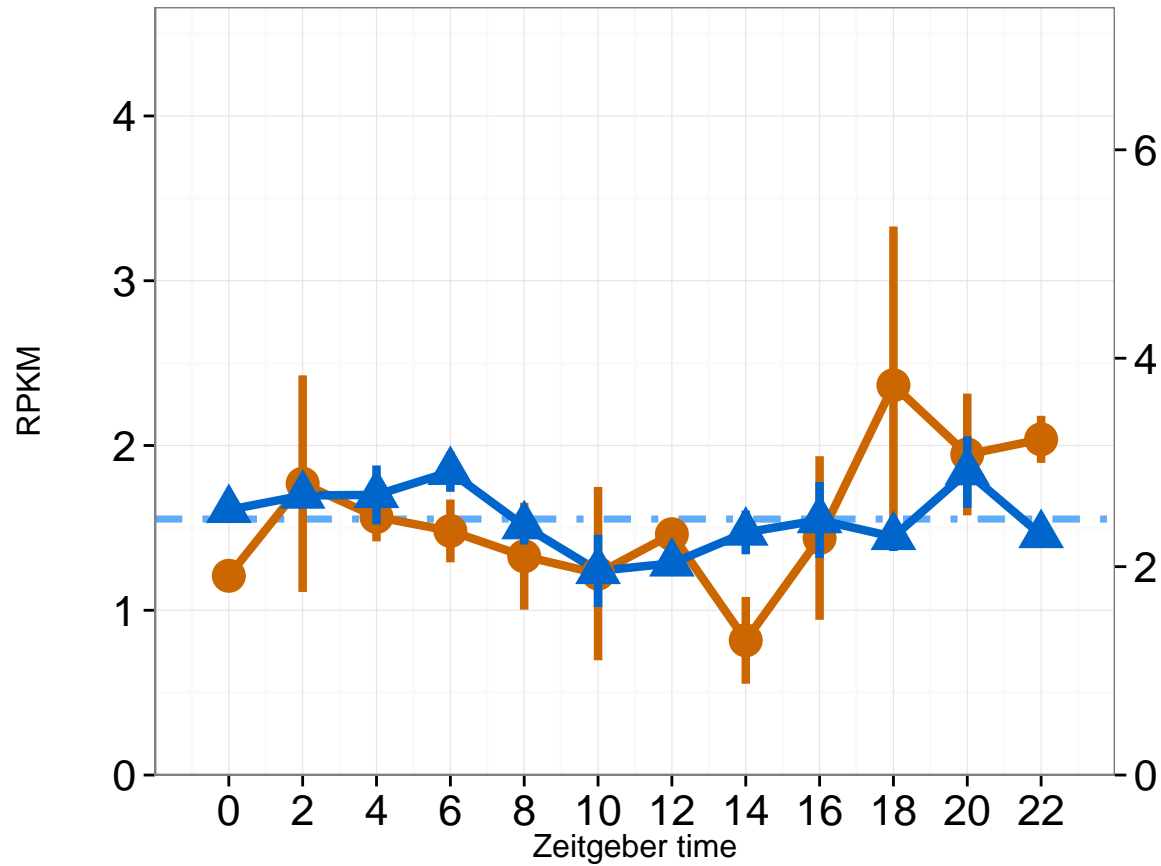

## Ehd2

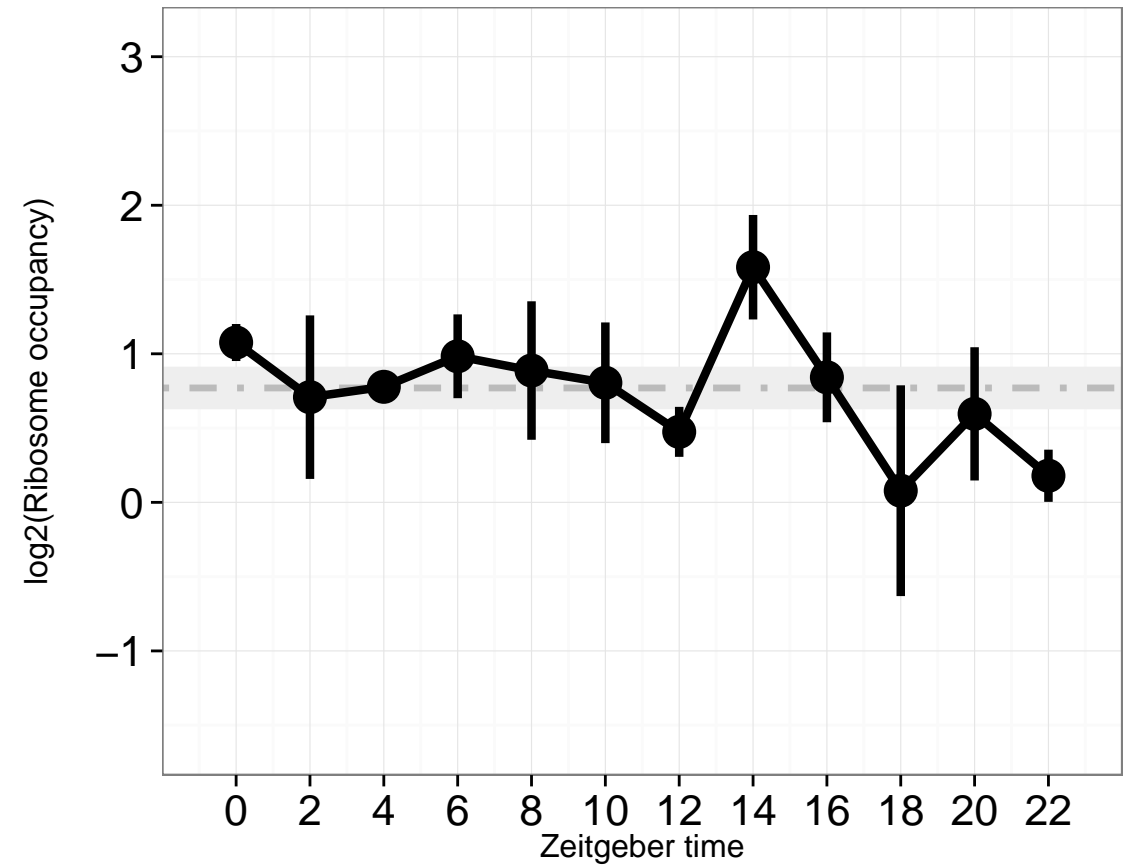

Supplement: SuppDataset_1.zip [file Ehd2_set_A.pdf › Supplemental Dataset 1/A-mRNA_nonrhyth_translation_nonrhyth/Ehd2_set_A.pdf]

## Ehd4

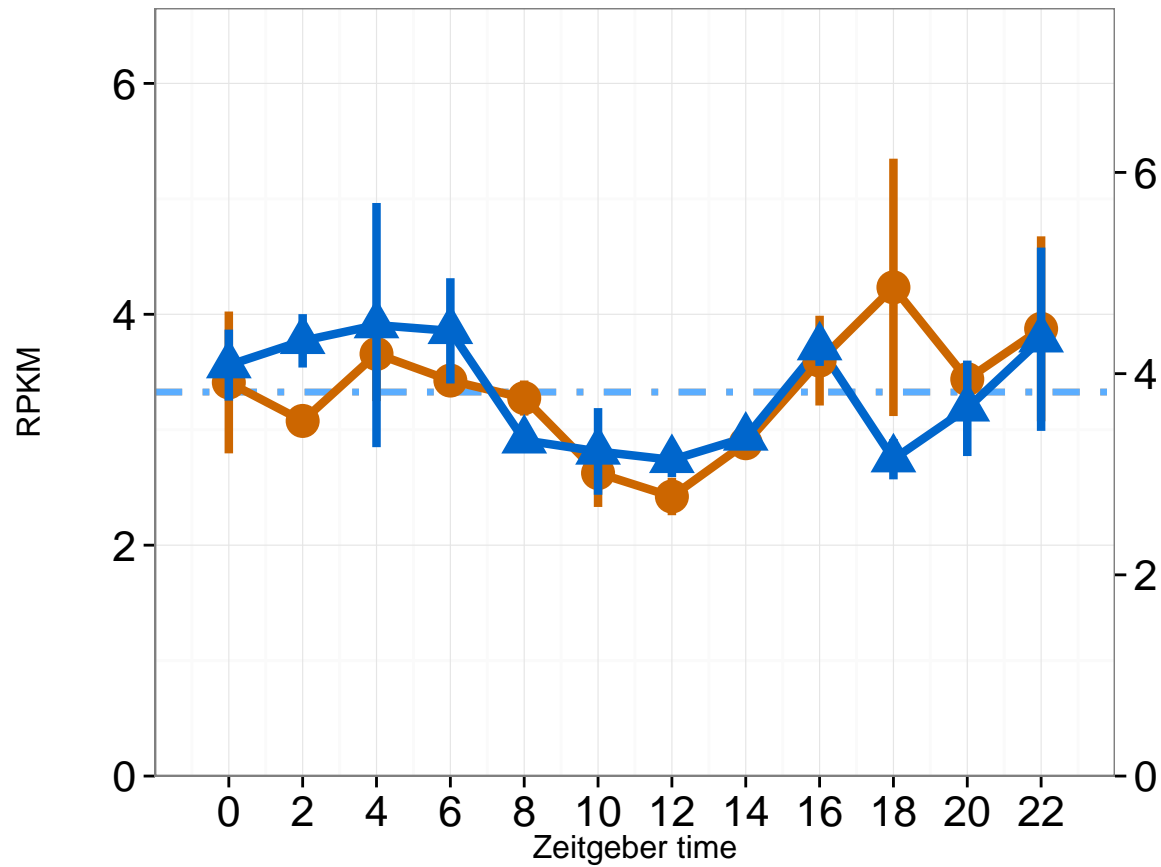

## Ehd4

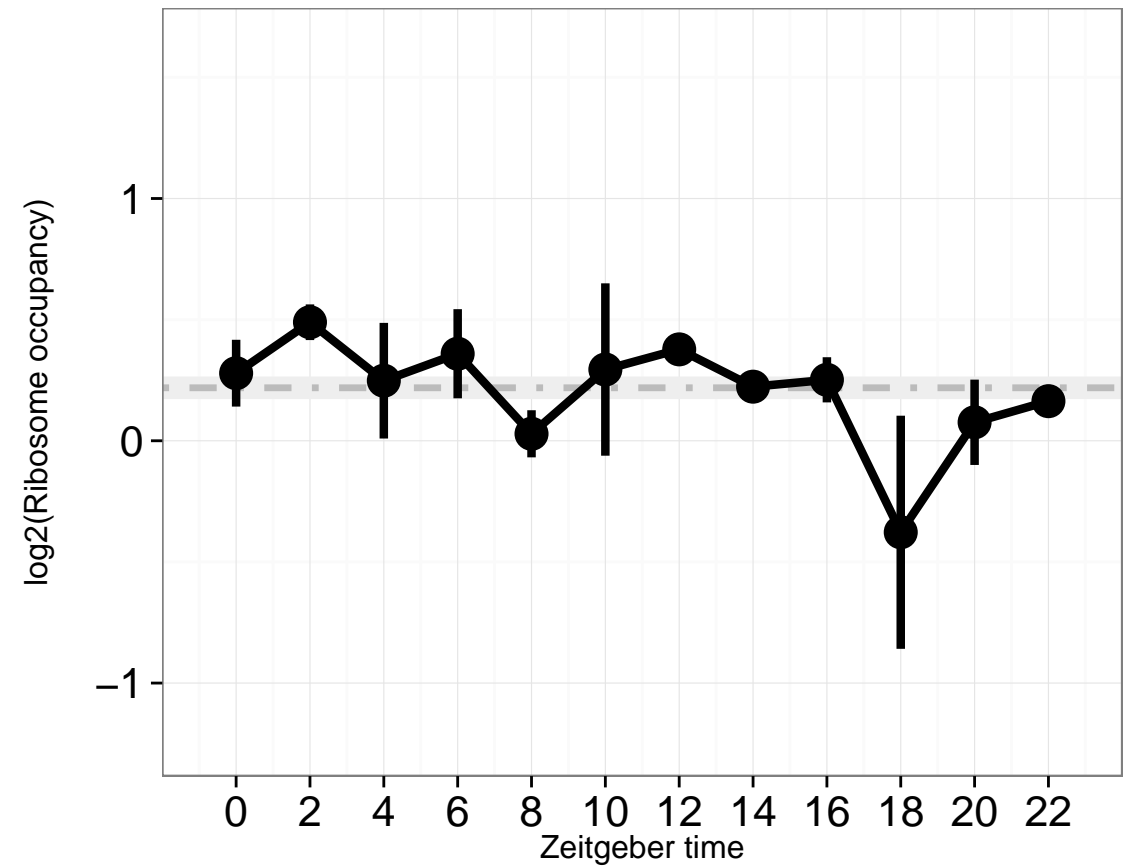

Supplement: SuppDataset_1.zip [file Ehd4_set_A.pdf › Supplemental Dataset 1/A-mRNA_nonrhyth_translation_nonrhyth/Ehd4_set_A.pdf]

## Ehhadh

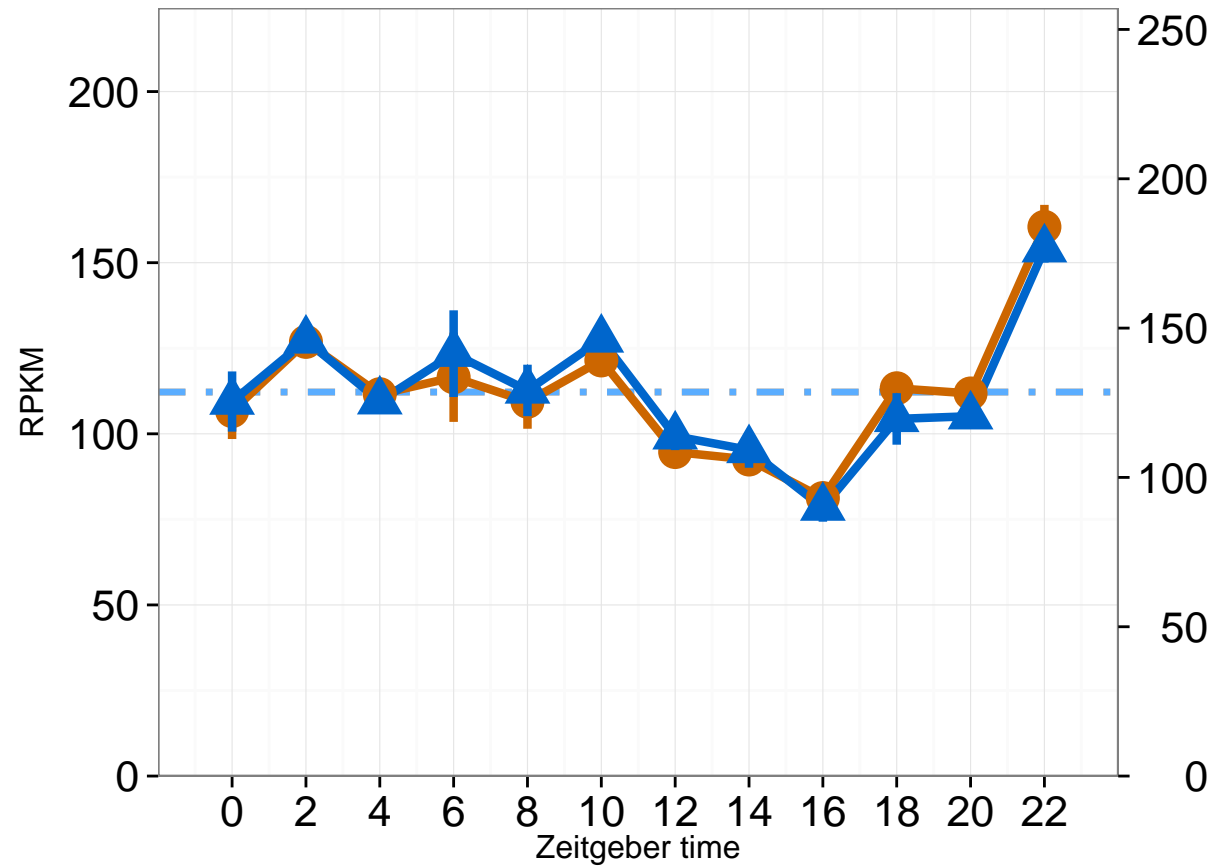

## Ehhadh

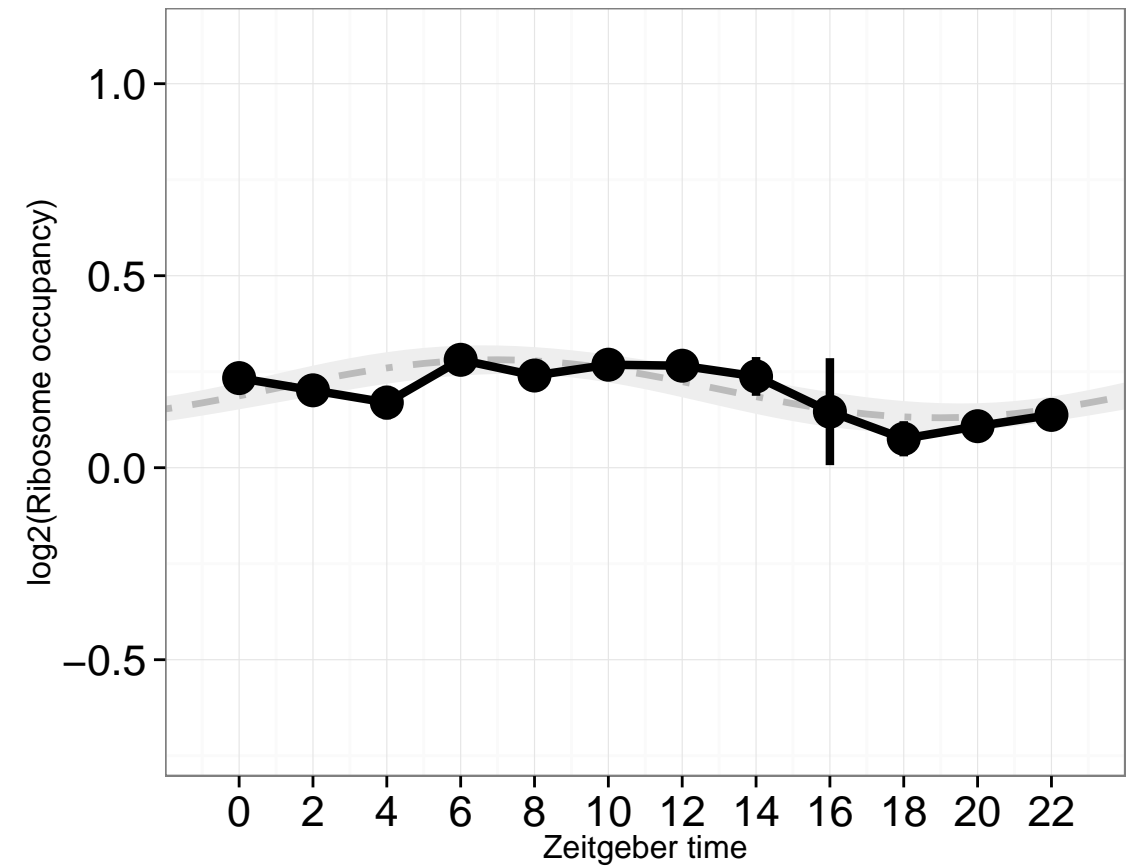

Supplement: SuppDataset_1.zip [file Ehhadh_set_A.pdf › Supplemental Dataset 1/A-mRNA_nonrhyth_translation_nonrhyth/Ehhadh_set_A.pdf]

## Ehmt1

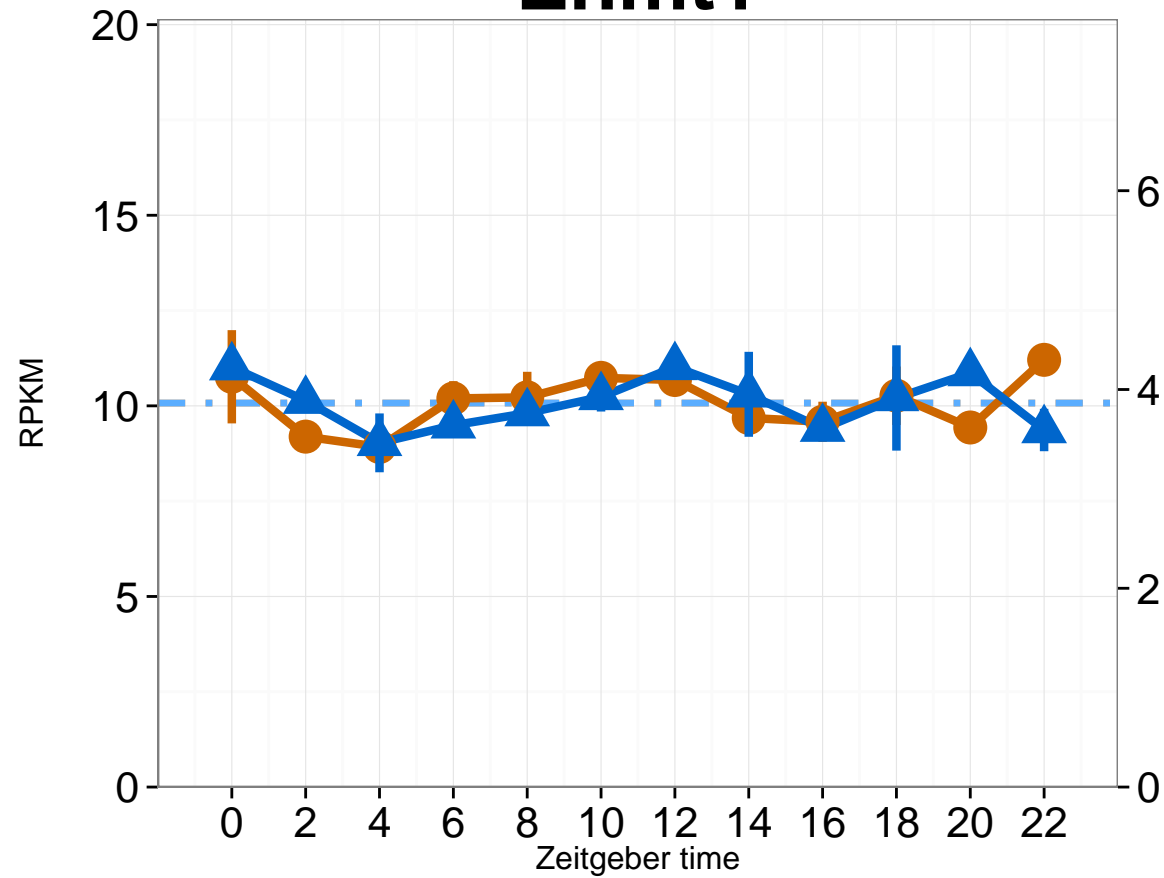

## Ehmt1

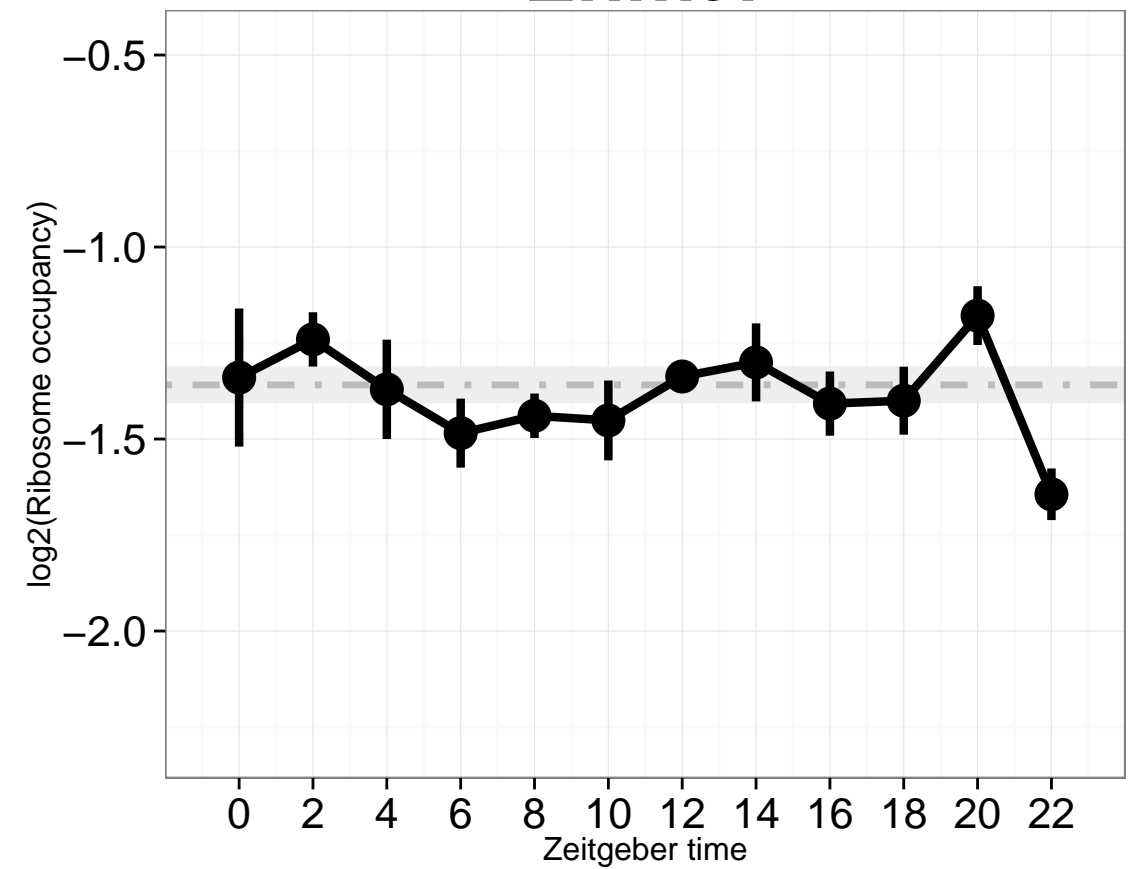

Supplement: SuppDataset_1.zip [file Ehmt1_set_A.pdf › Supplemental Dataset 1/A-mRNA_nonrhyth_translation_nonrhyth/Ehmt1_set_A.pdf]

## Ehmt2

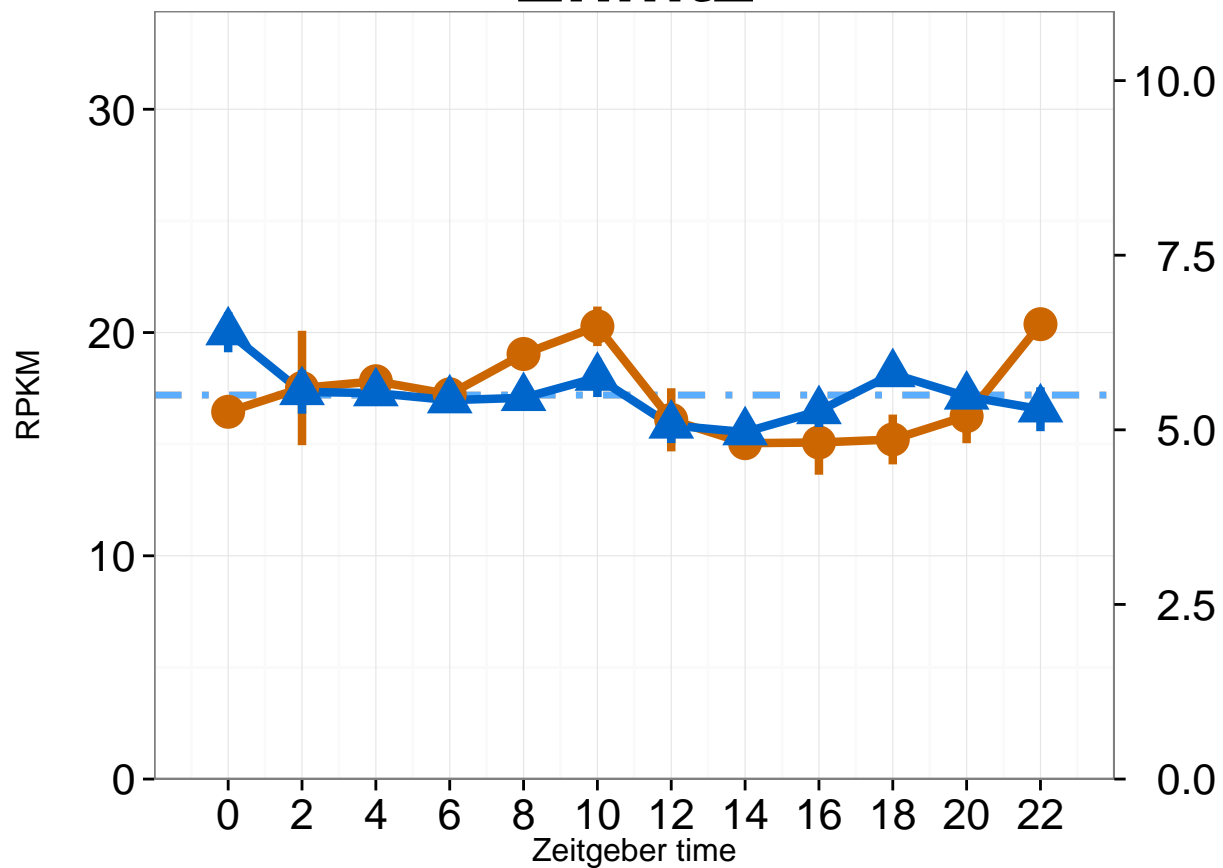

## Ehmt2

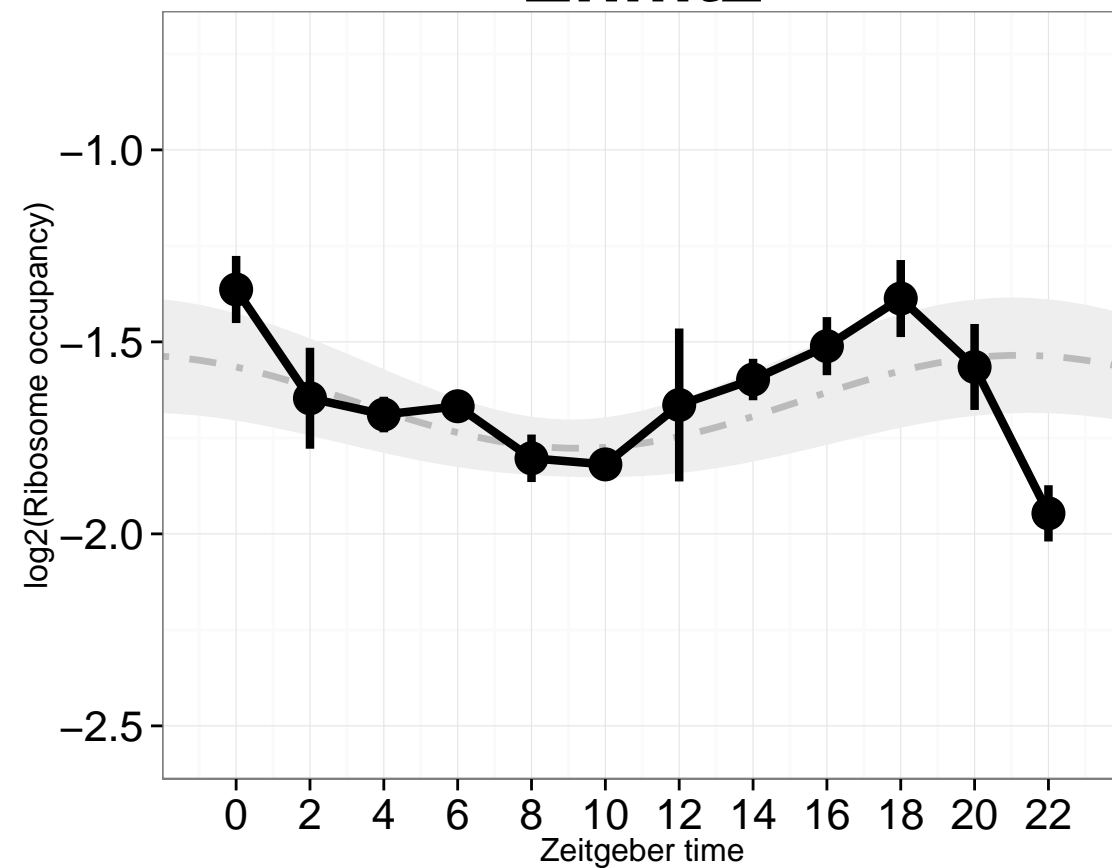

Supplement: SuppDataset_1.zip [file Ehmt2_set_A.pdf › Supplemental Dataset 1/A-mRNA_nonrhyth_translation_nonrhyth/Ehmt2_set_A.pdf]

## Ei24

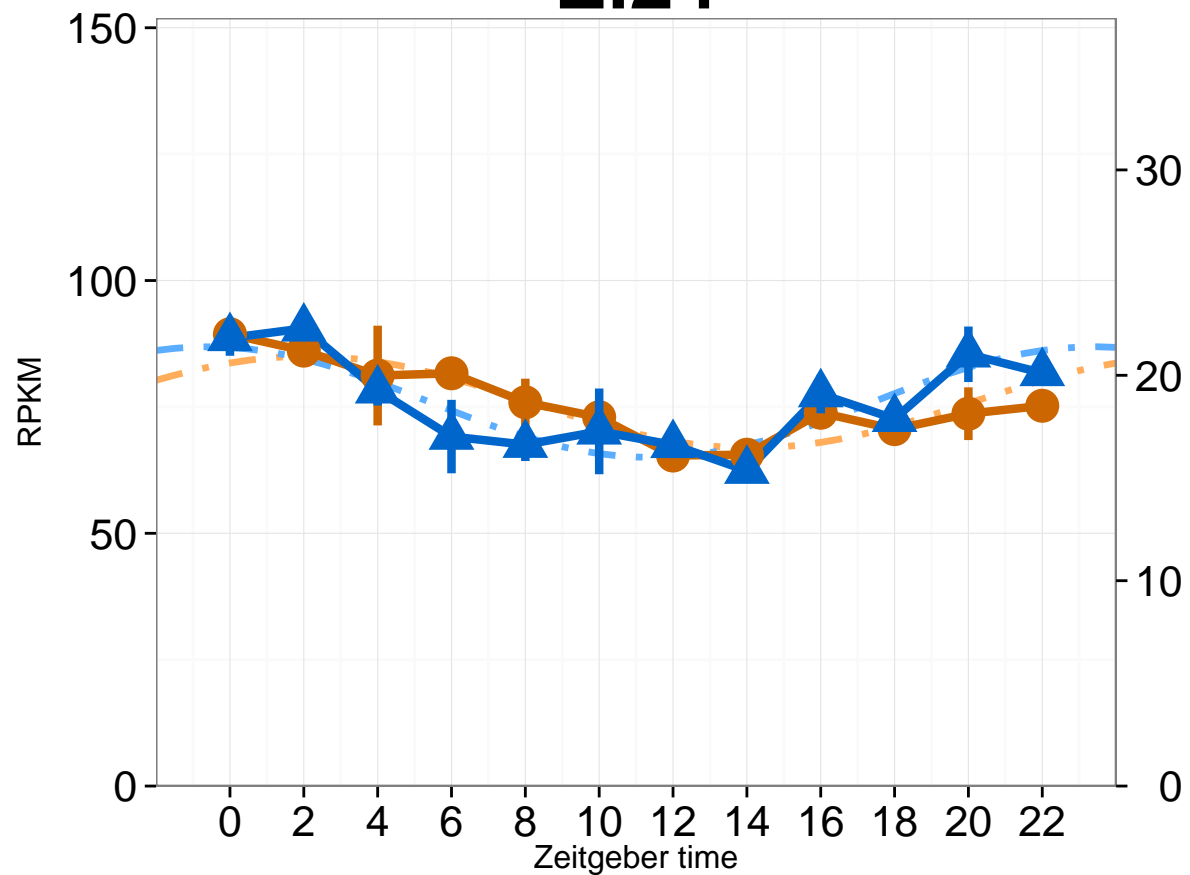

## Ei24

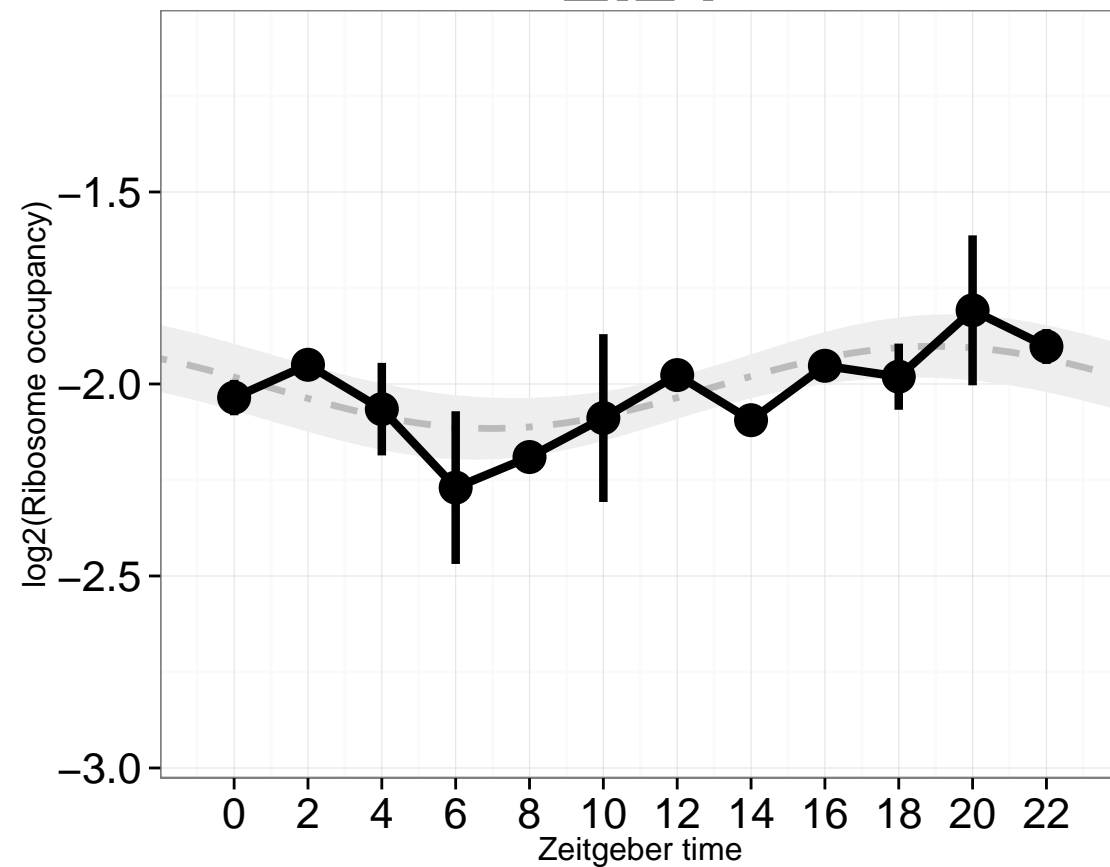

Supplement: SuppDataset_1.zip [file Ei24_set_A.pdf › Supplemental Dataset 1/A-mRNA_nonrhyth_translation_nonrhyth/Ei24_set_A.pdf]

## Eif1

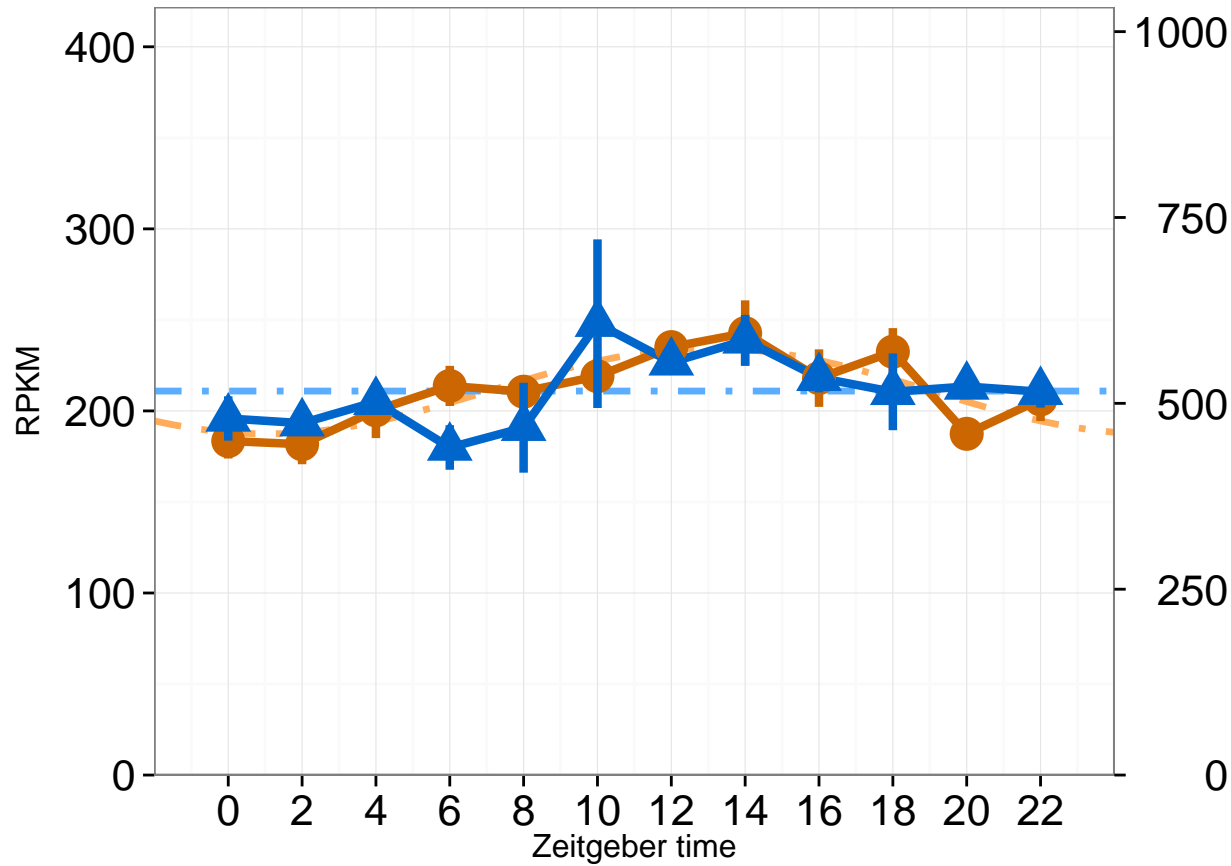

## Eif1

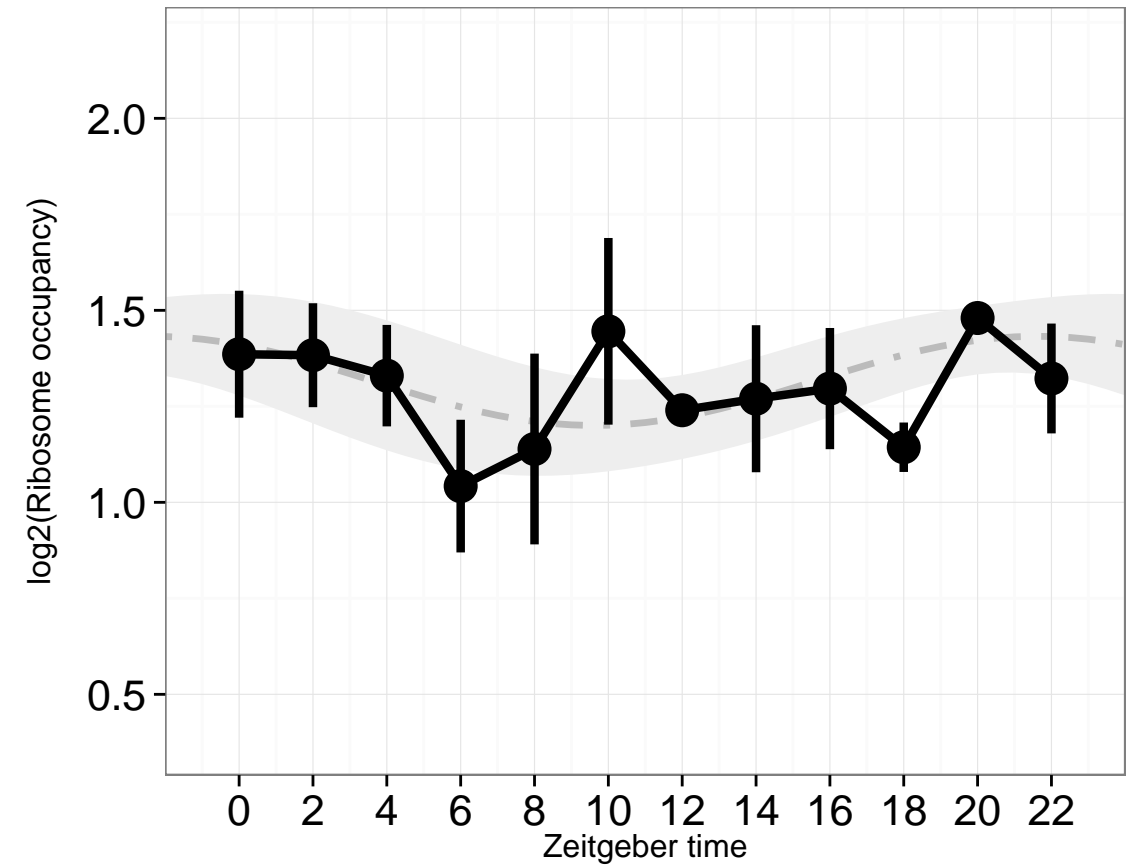

Supplement: SuppDataset_1.zip [file Eif1_set_A.pdf › Supplemental Dataset 1/A-mRNA_nonrhyth_translation_nonrhyth/Eif1_set_A.pdf]

# Eif1a

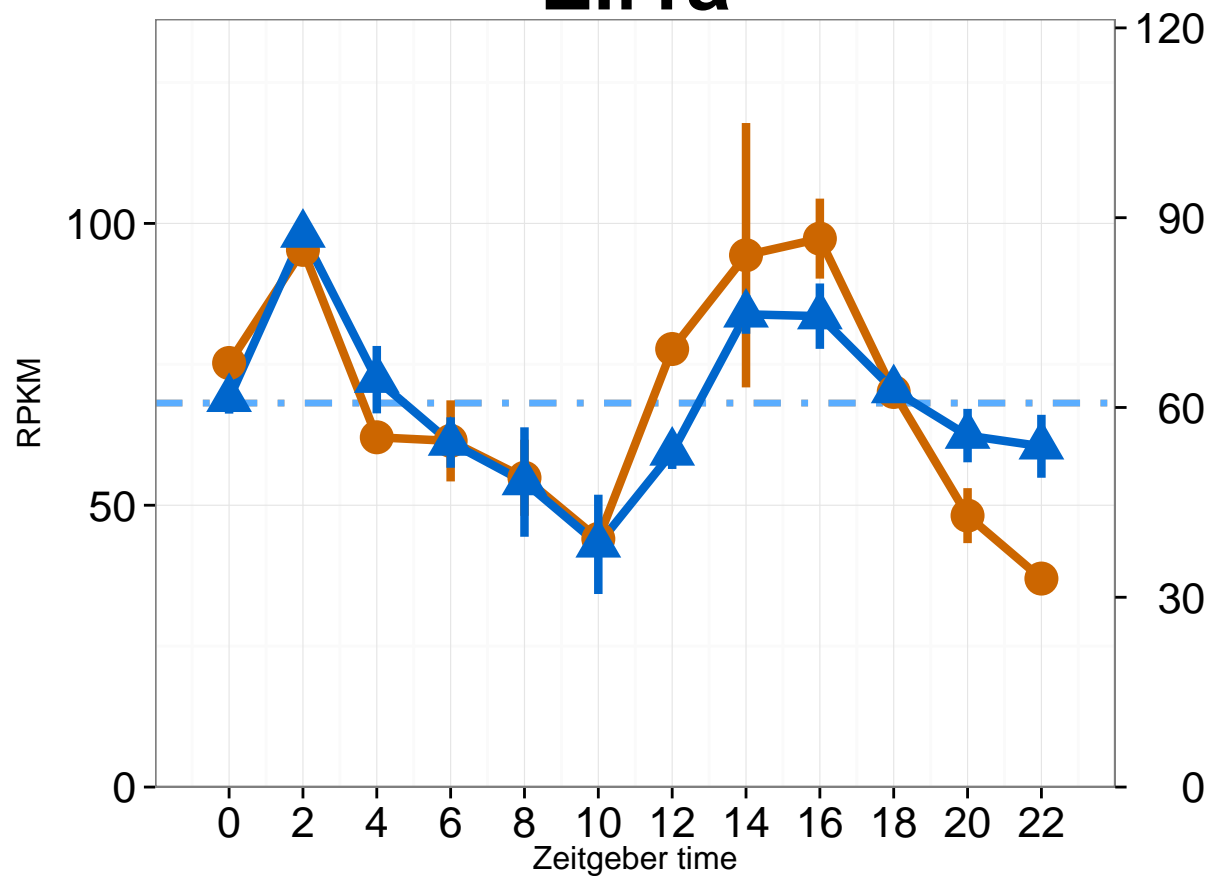

# Eif1a

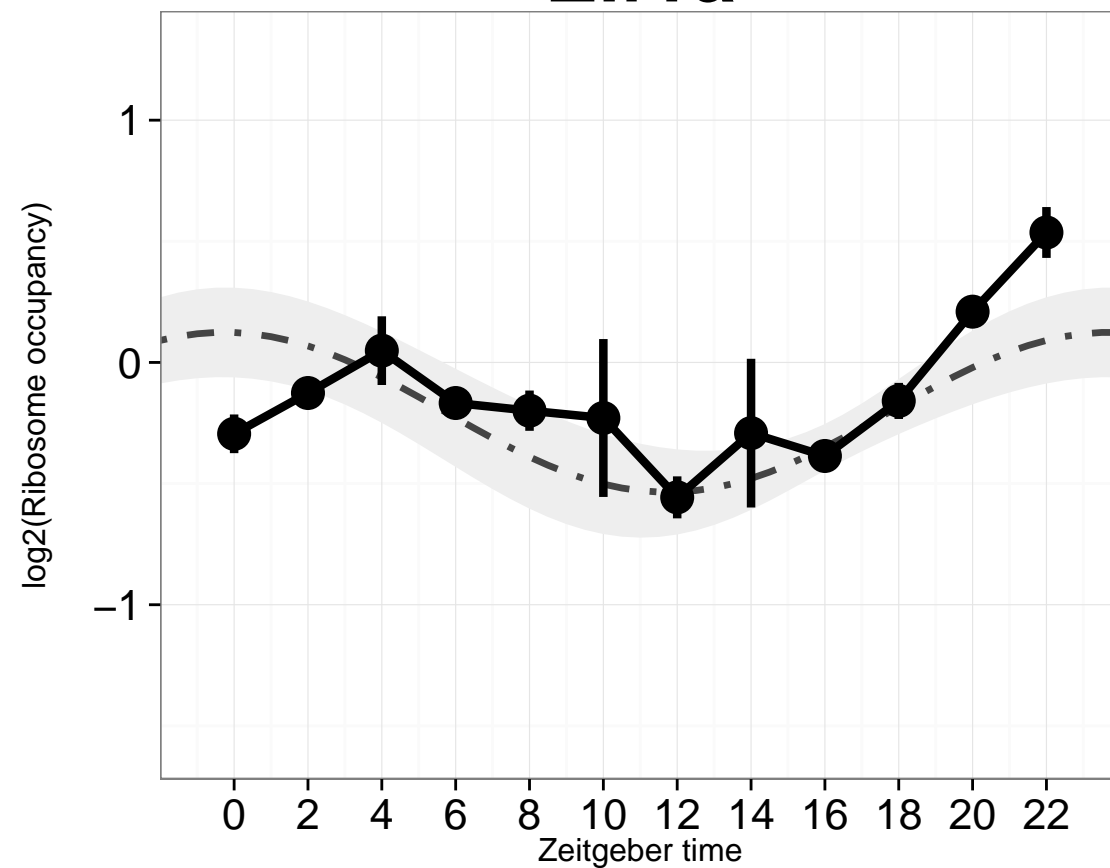

Supplement: SuppDataset_1.zip [file Eif1a_set_A.pdf › Supplemental Dataset 1/A-mRNA_nonrhyth_translation_nonrhyth/Eif1a_set_A.pdf]

# Eif1ad

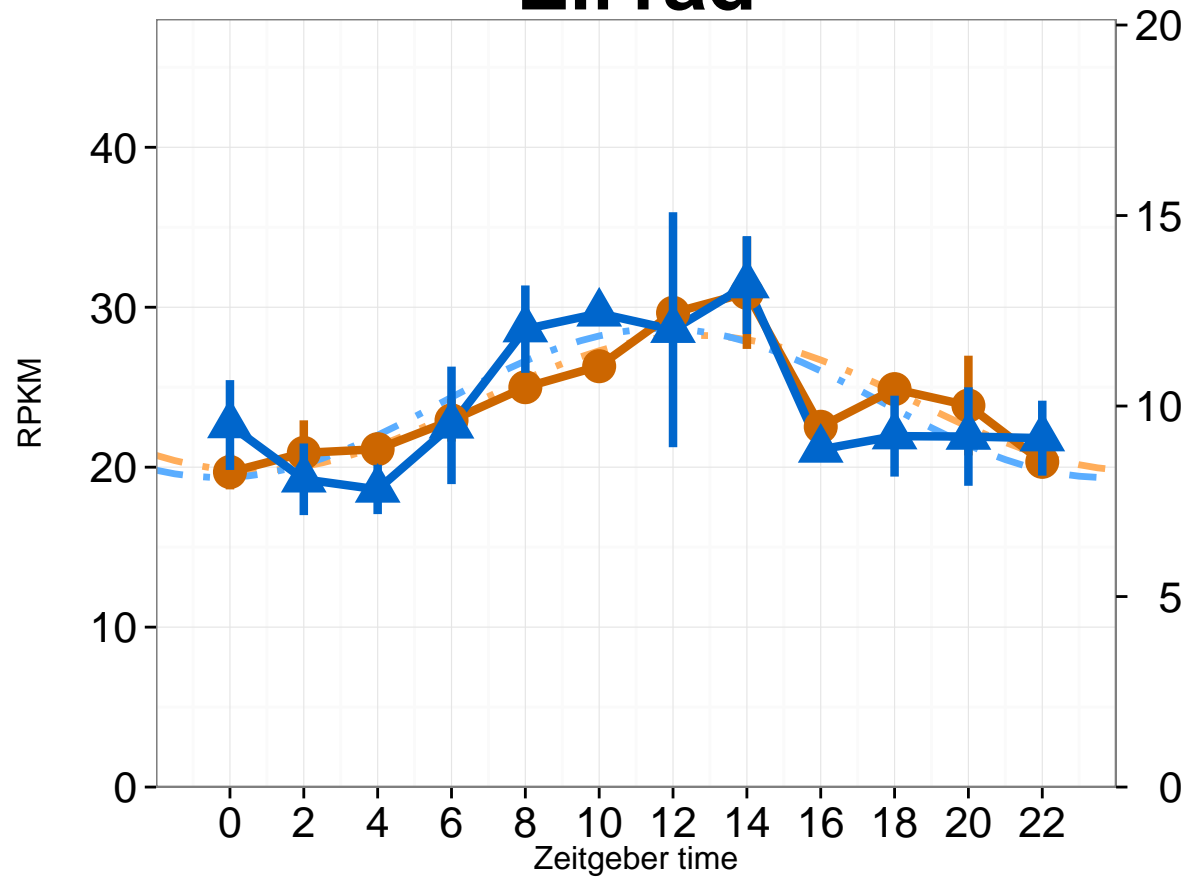

# Eif1ad

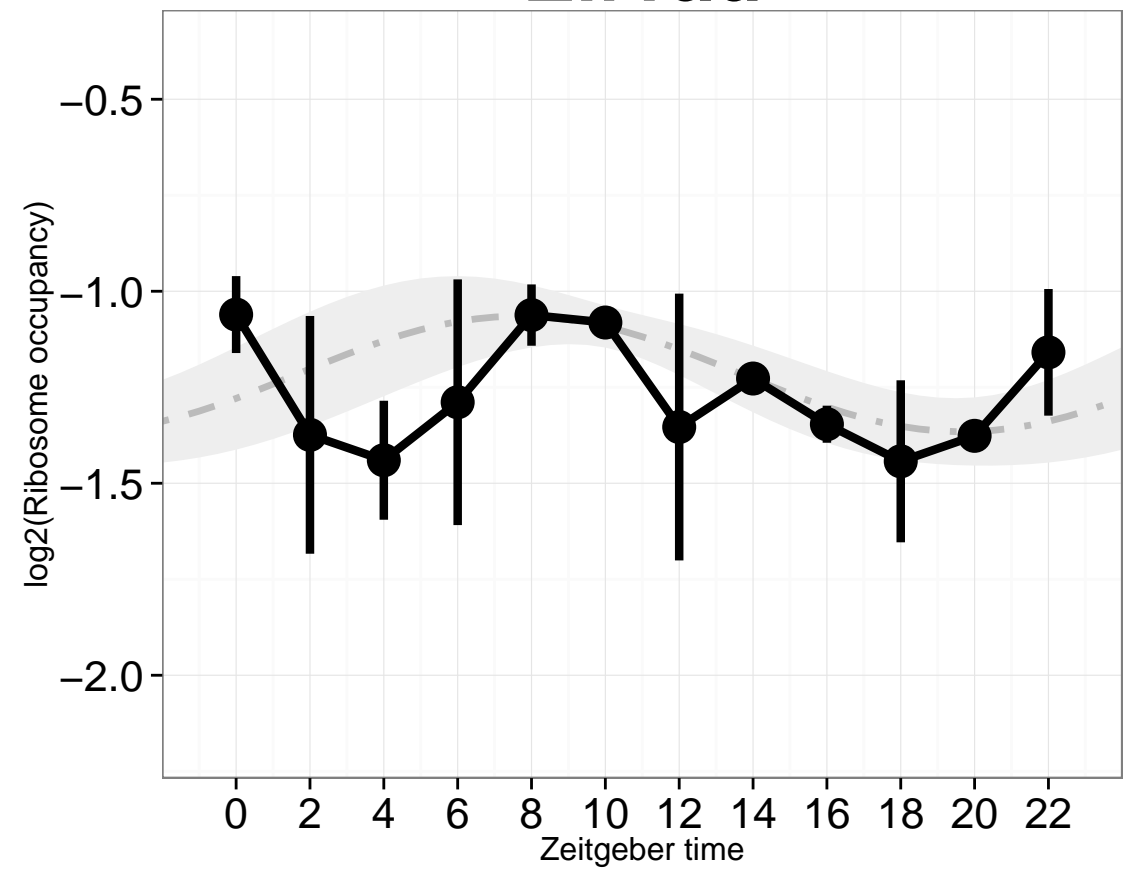

Supplement: SuppDataset_1.zip [file Eif1ad_set_A.pdf › Supplemental Dataset 1/A-mRNA_nonrhyth_translation_nonrhyth/Eif1ad_set_A.pdf]

# Eif1ax

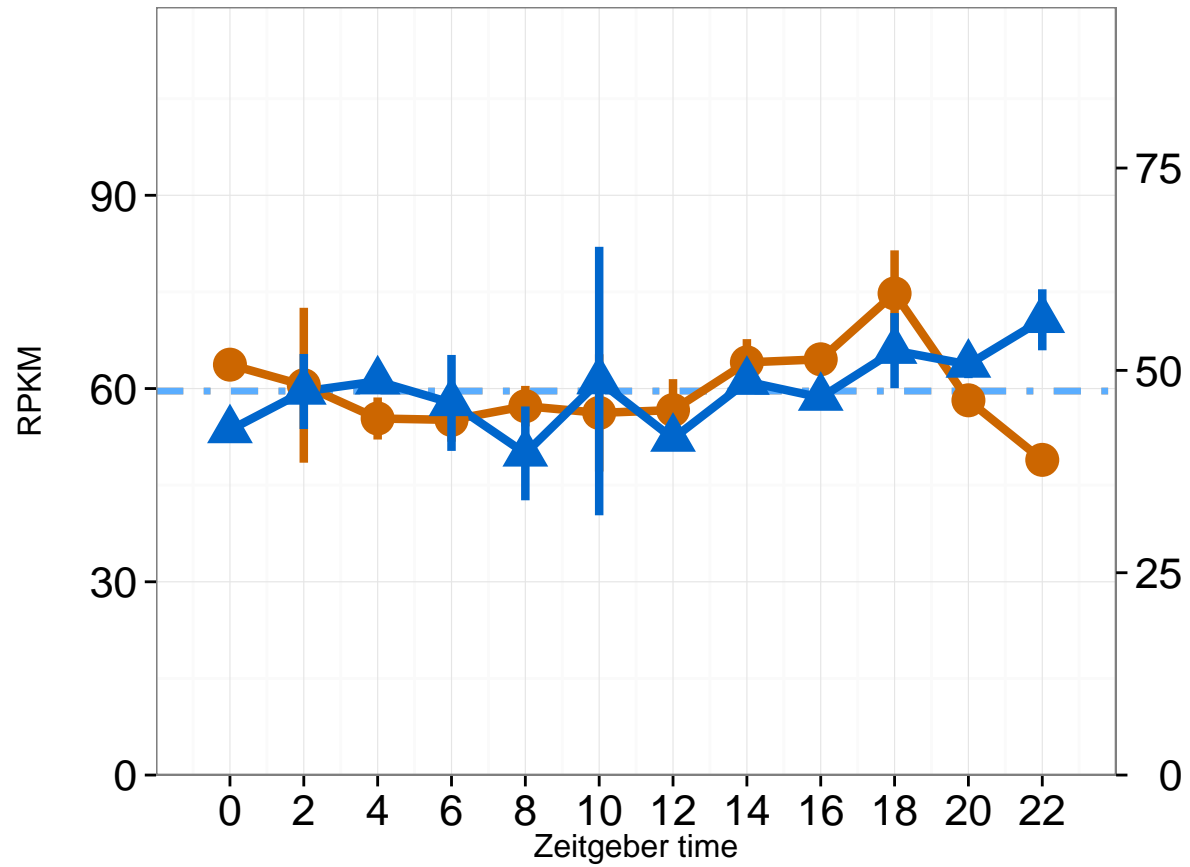

# Eif1ax

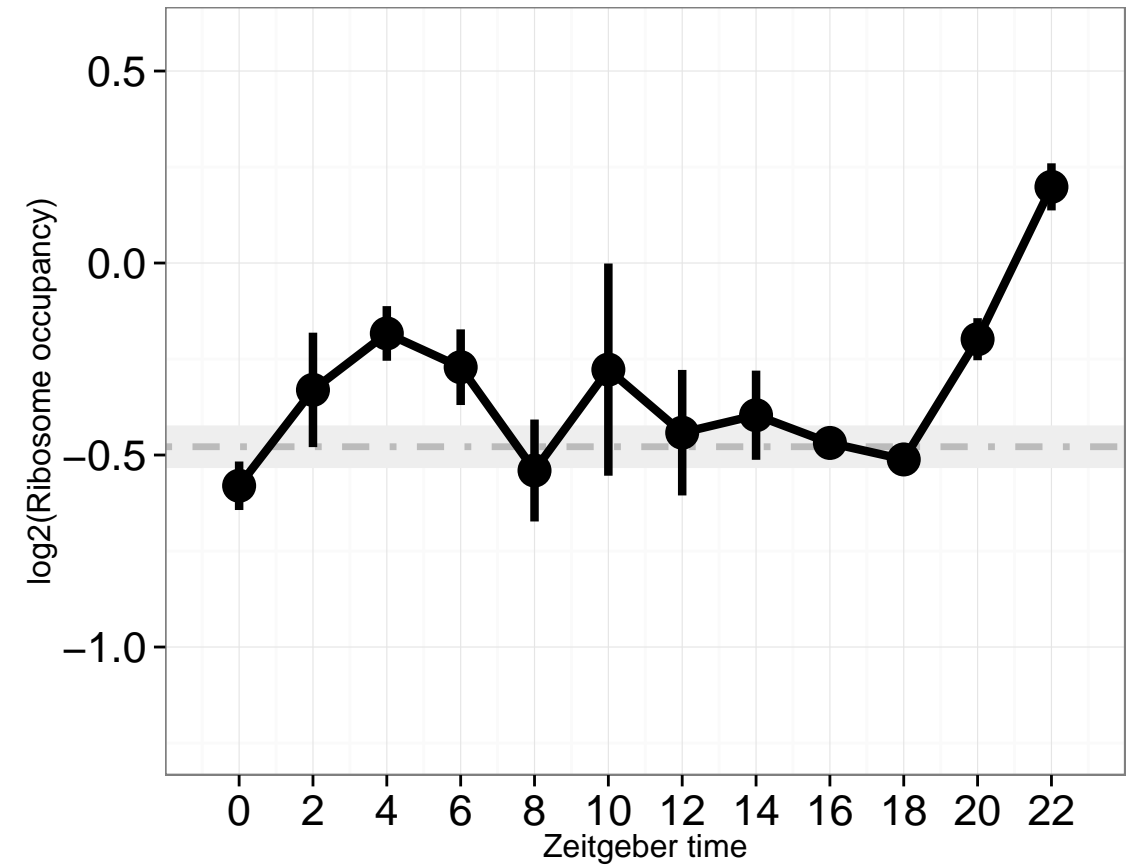

Supplement: SuppDataset_1.zip [file Eif1ax_set_A.pdf › Supplemental Dataset 1/A-mRNA_nonrhyth_translation_nonrhyth/Eif1ax_set_A.pdf]

# Eif1b

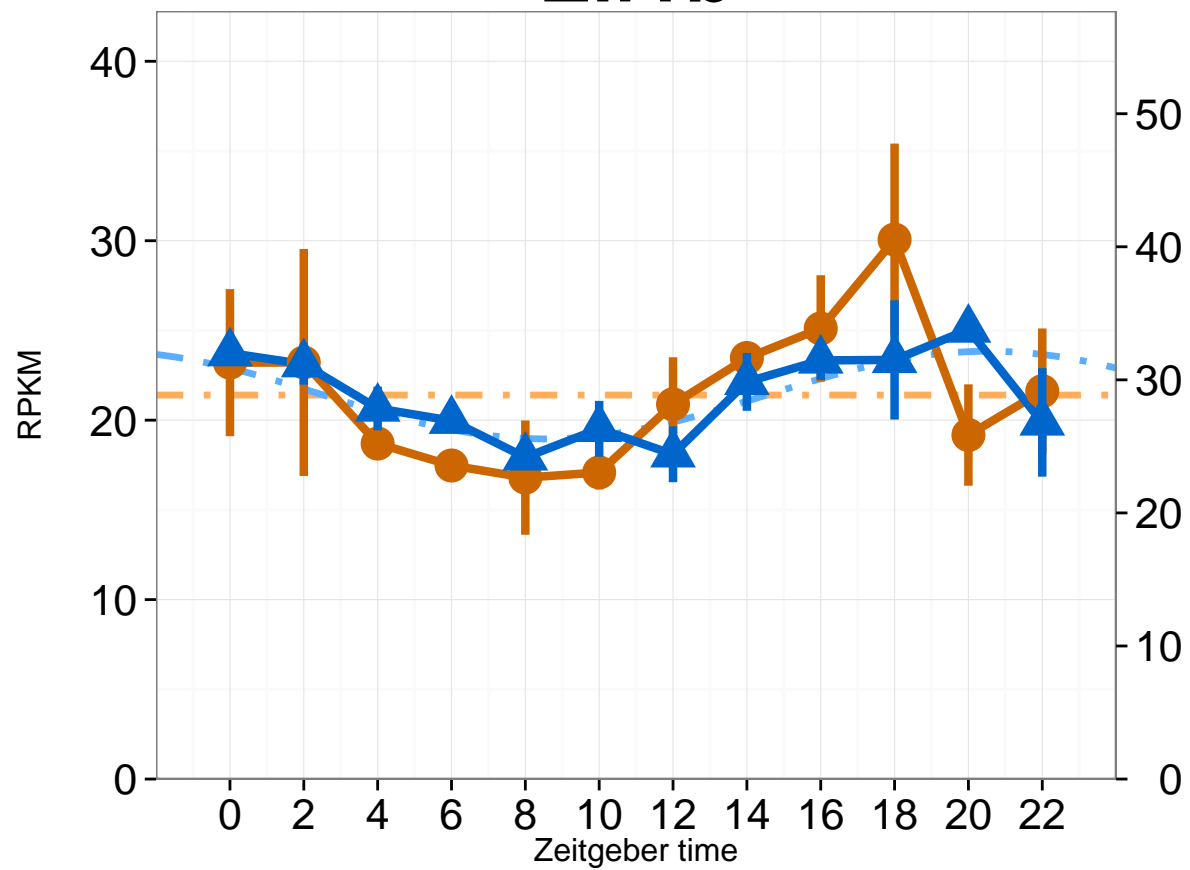

# Eif1b

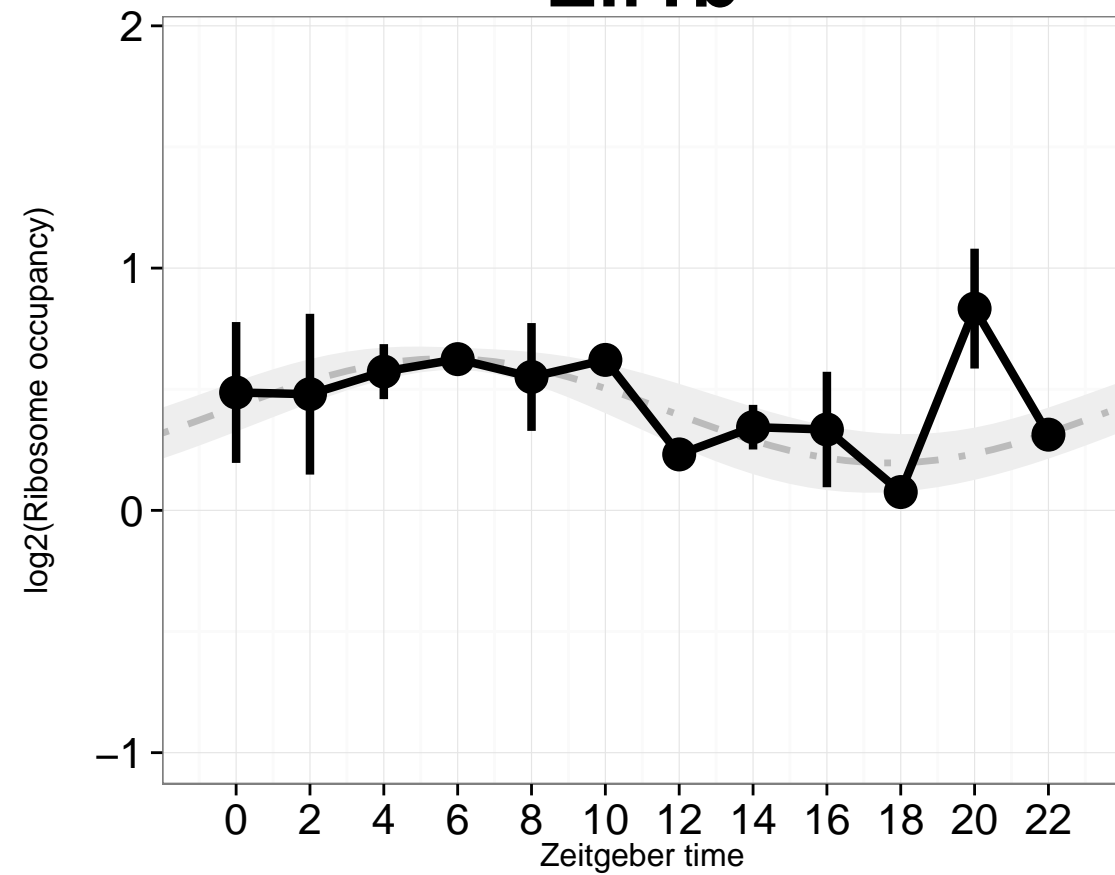

Supplement: SuppDataset_1.zip [file Eif1b_set_A.pdf › Supplemental Dataset 1/A-mRNA_nonrhyth_translation_nonrhyth/Eif1b_set_A.pdf]

## Eif2ak1

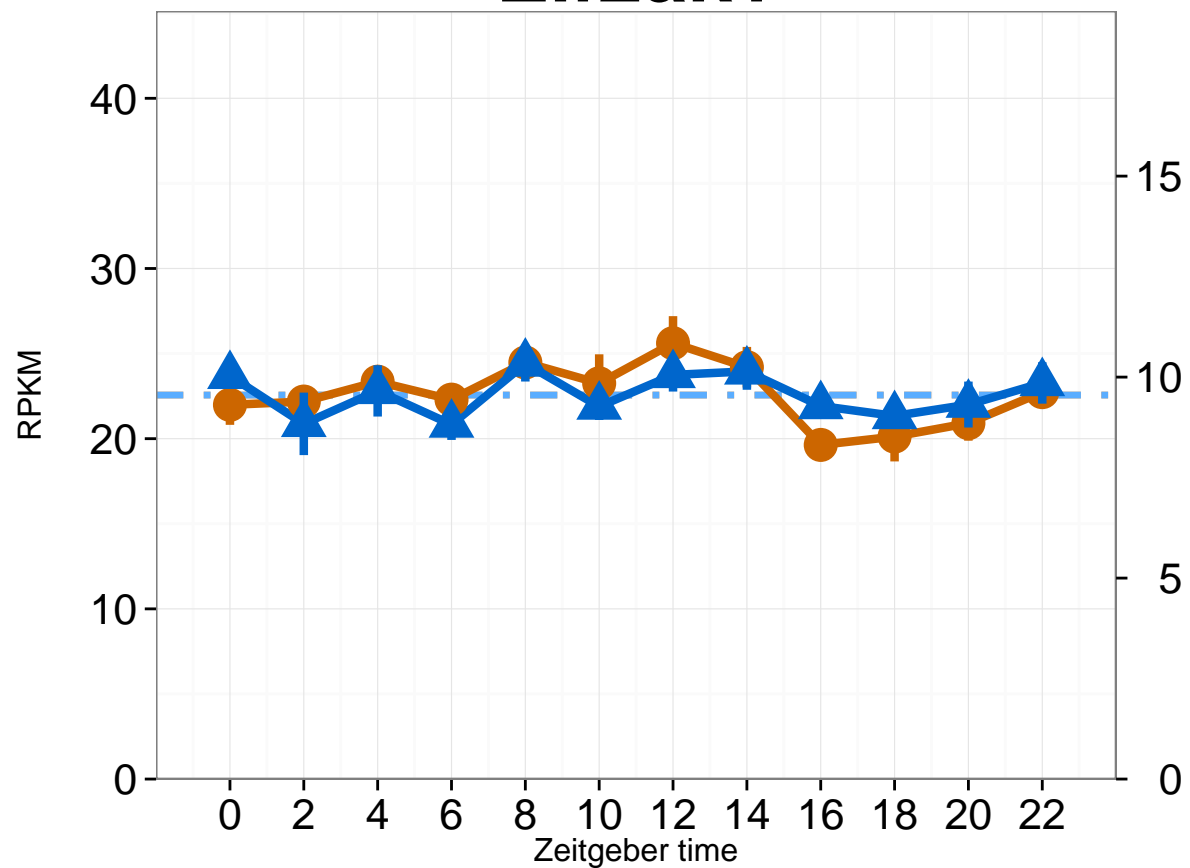

## Eif2ak1

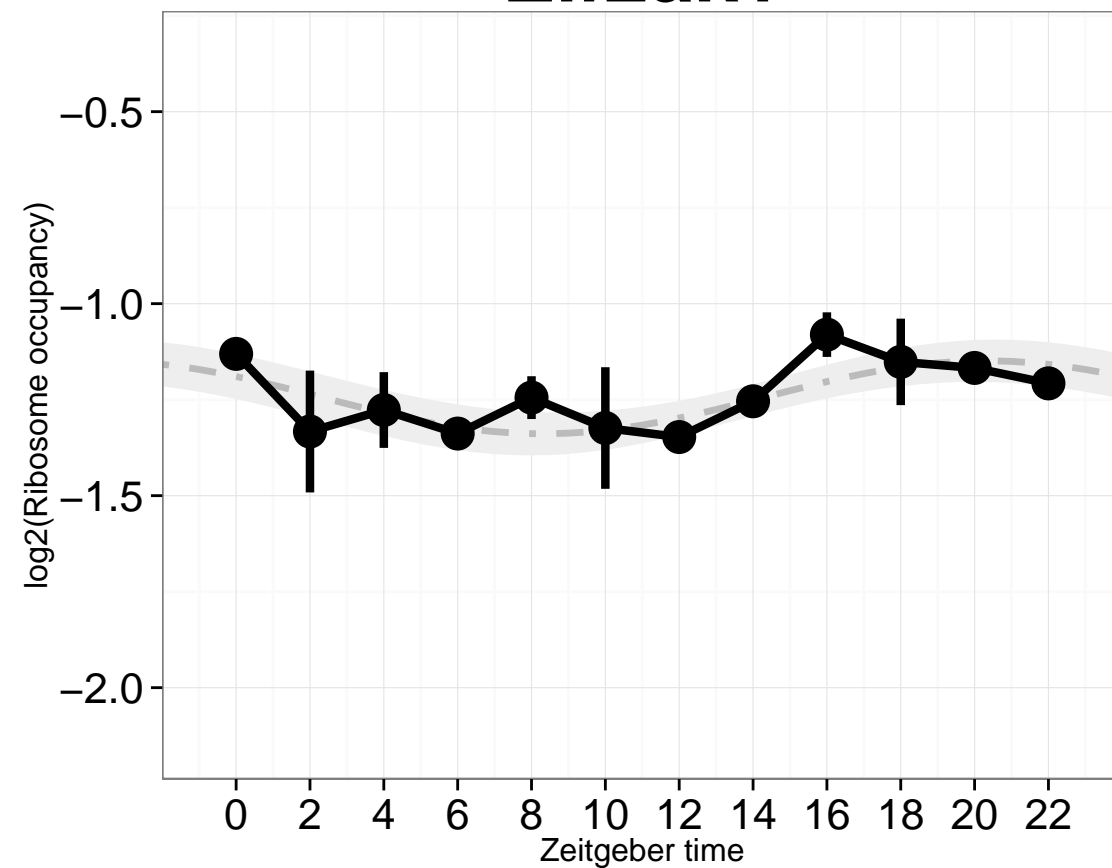

Supplement: SuppDataset_1.zip [file Eif2ak1_set_A.pdf › Supplemental Dataset 1/A-mRNA_nonrhyth_translation_nonrhyth/Eif2ak1_set_A.pdf]

## Eif2ak2

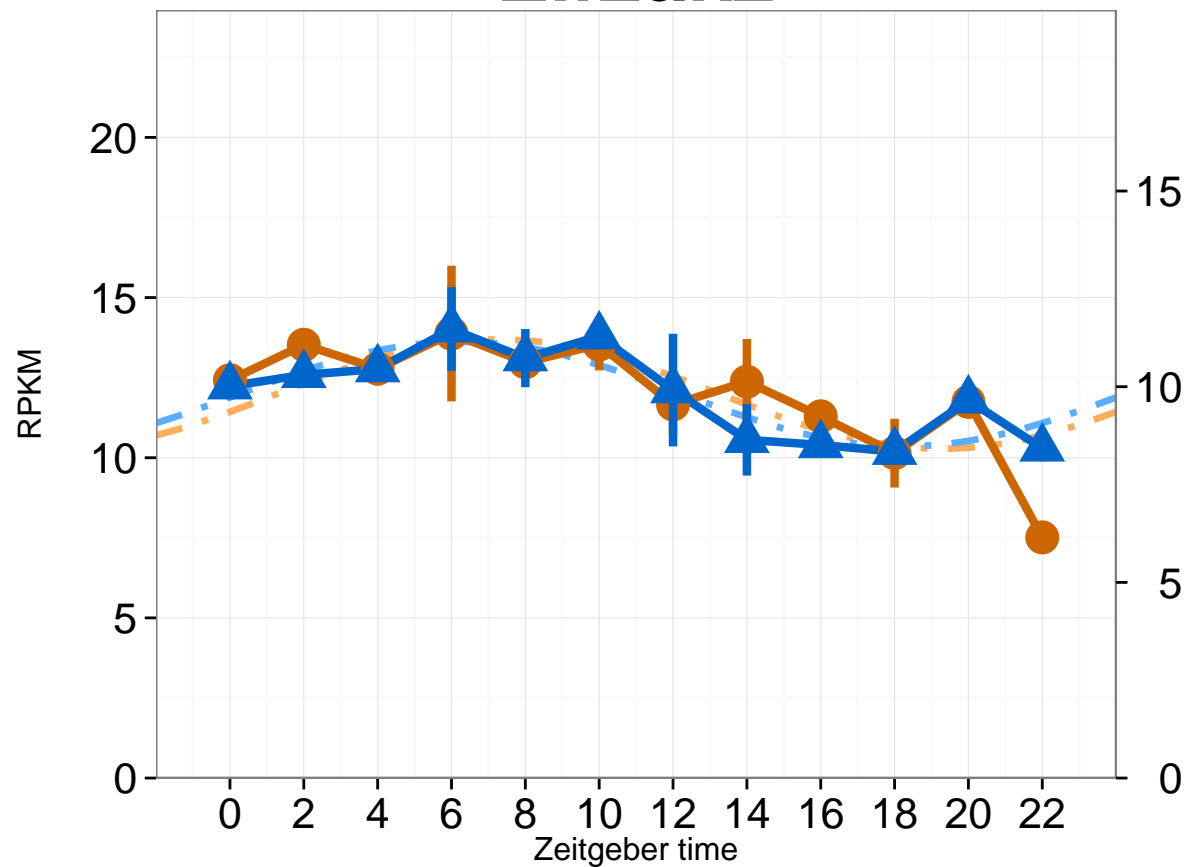

## Eif2ak2

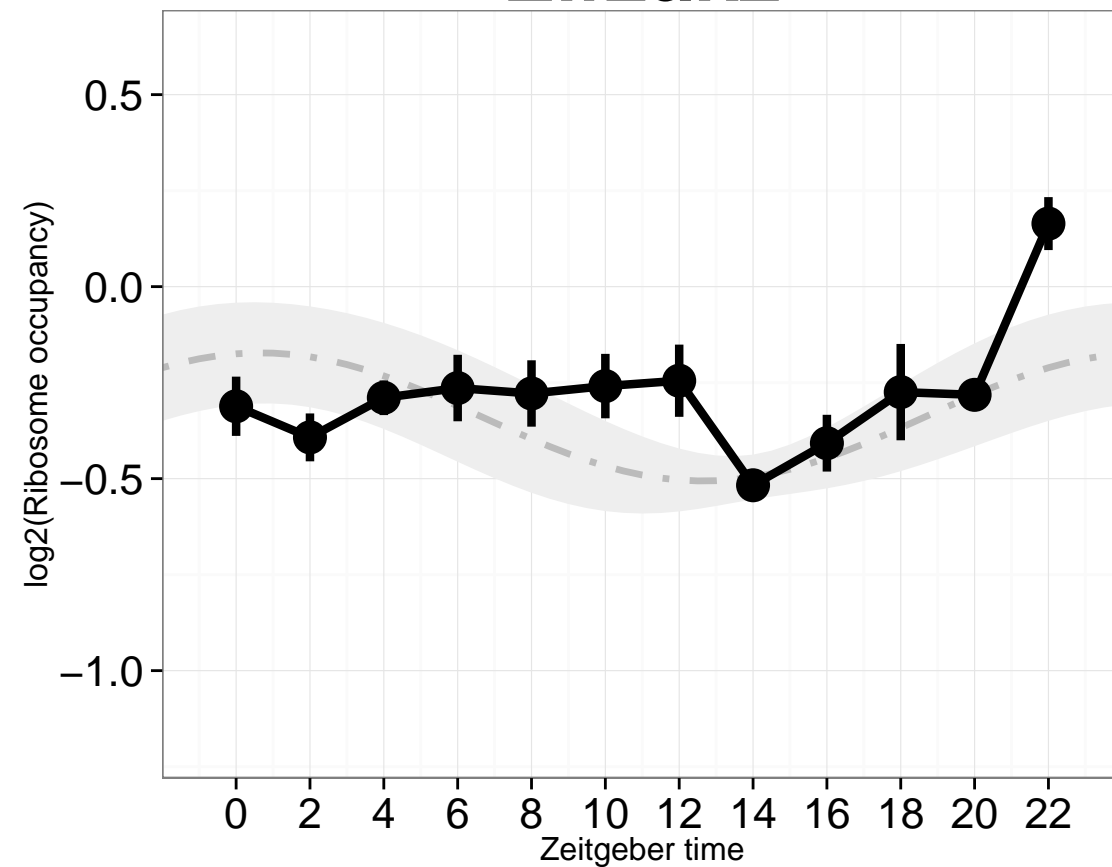

Supplement: SuppDataset_1.zip [file Eif2ak2_set_A.pdf › Supplemental Dataset 1/A-mRNA_nonrhyth_translation_nonrhyth/Eif2ak2_set_A.pdf]

# Eif2ak3

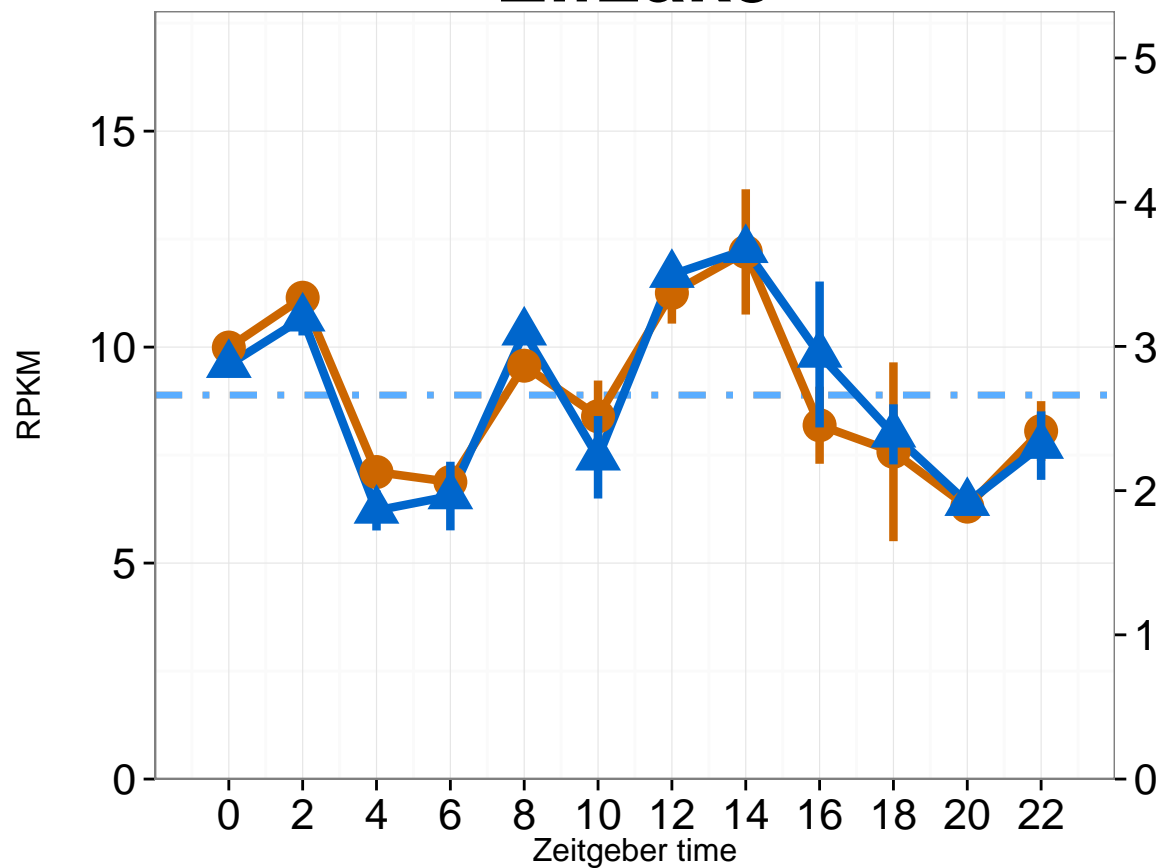

# Eif2ak3

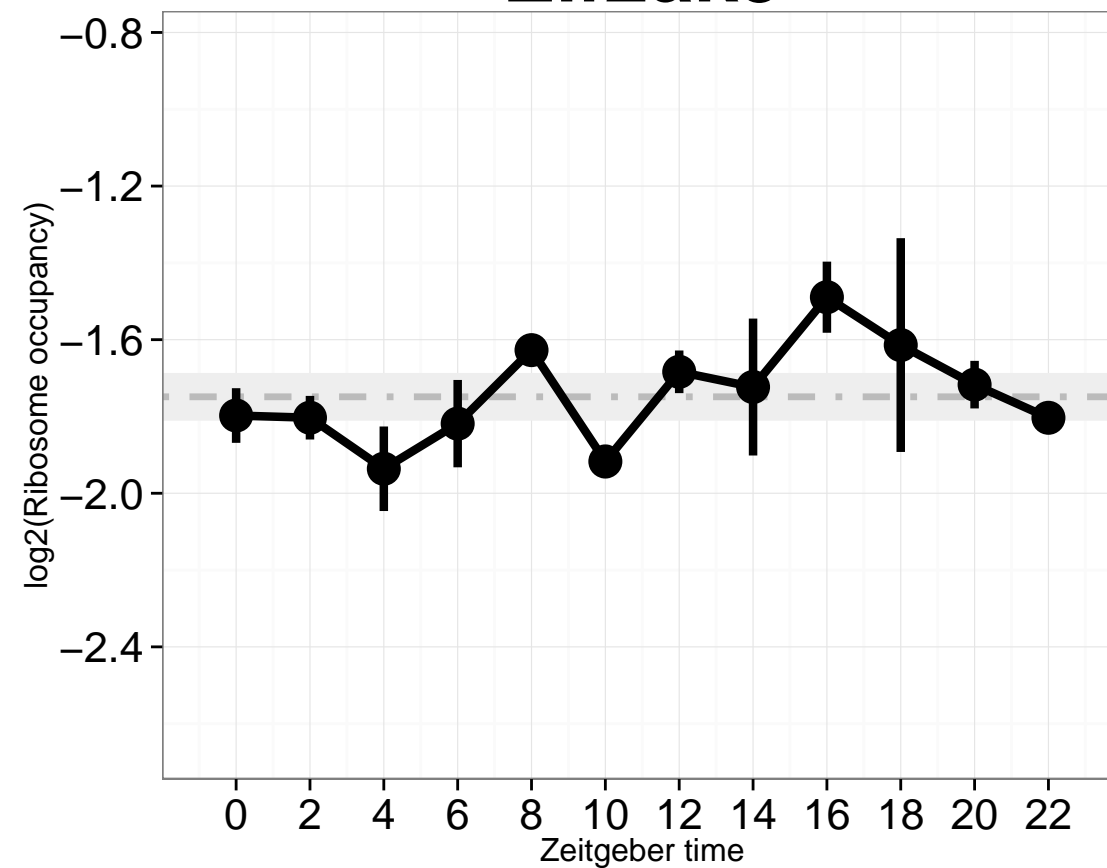

Supplement: SuppDataset_1.zip [file Eif2ak3_set_A.pdf › Supplemental Dataset 1/A-mRNA_nonrhyth_translation_nonrhyth/Eif2ak3_set_A.pdf]

## Eif2ak4

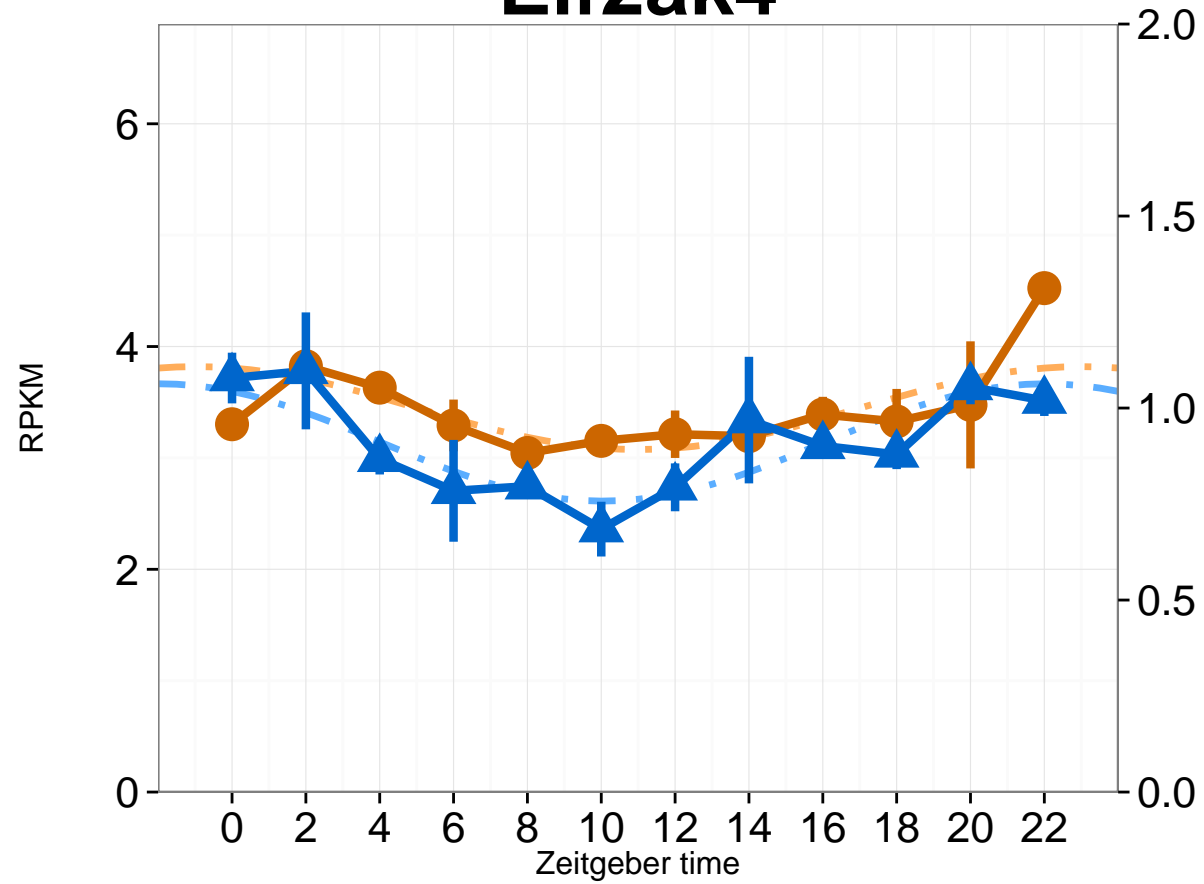

## Eif2ak4

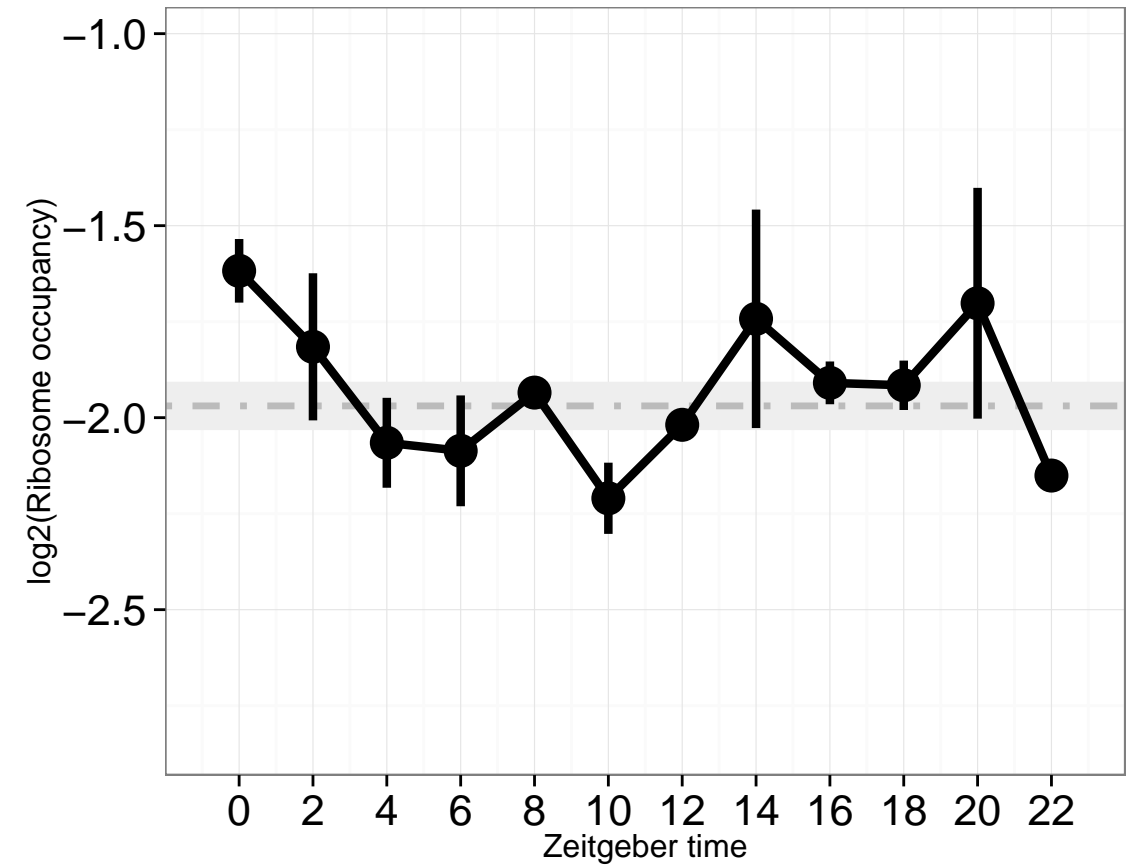

Supplement: SuppDataset_1.zip [file Eif2ak4_set_A.pdf › Supplemental Dataset 1/A-mRNA_nonrhyth_translation_nonrhyth/Eif2ak4_set_A.pdf]

# Eif2b1

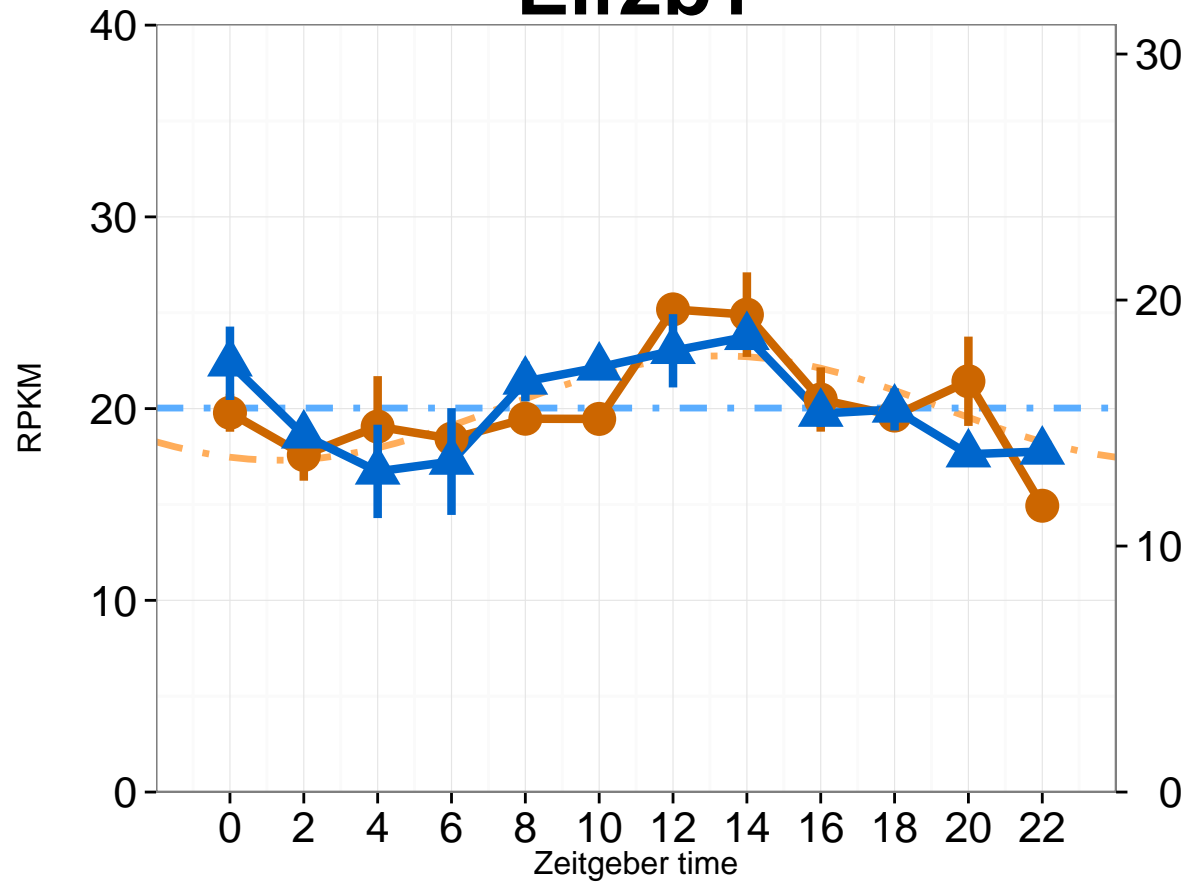

# Eif2b1

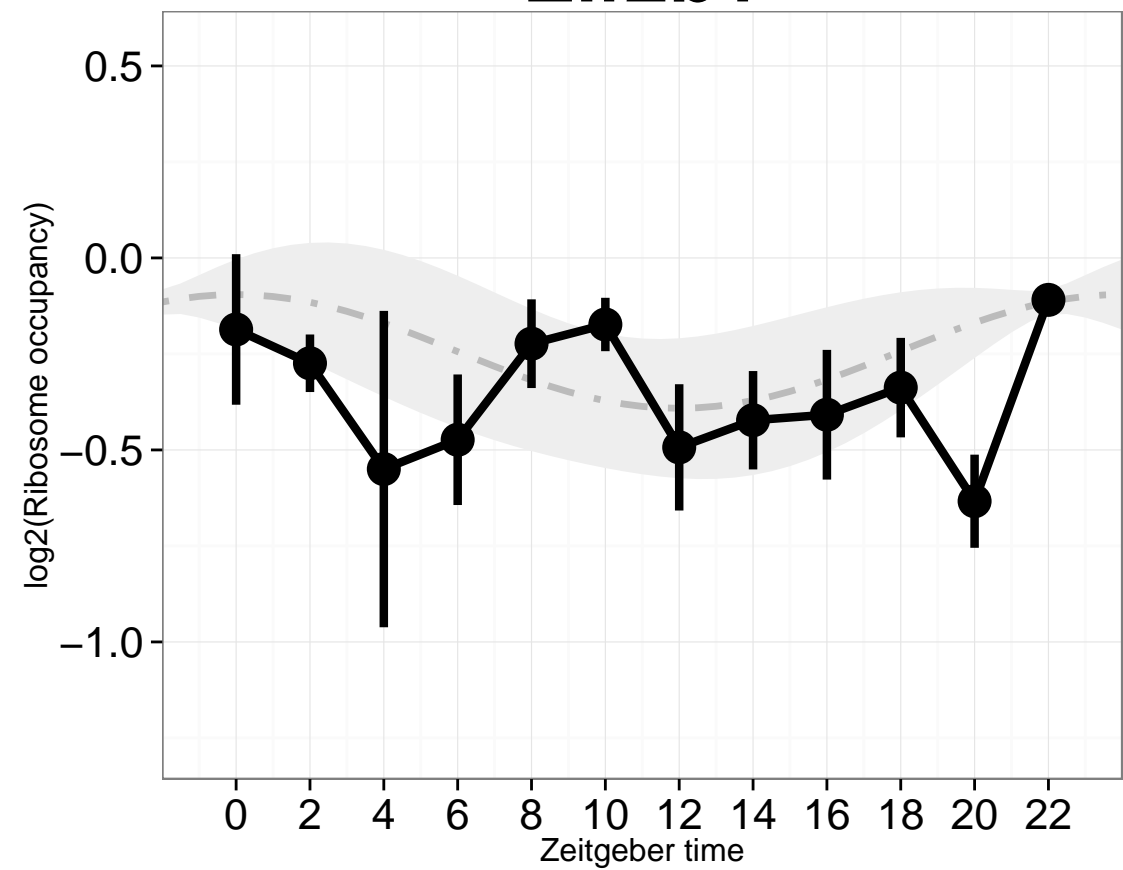

Supplement: SuppDataset_1.zip [file Eif2b1_set_A.pdf › Supplemental Dataset 1/A-mRNA_nonrhyth_translation_nonrhyth/Eif2b1_set_A.pdf]

## Eif2b2

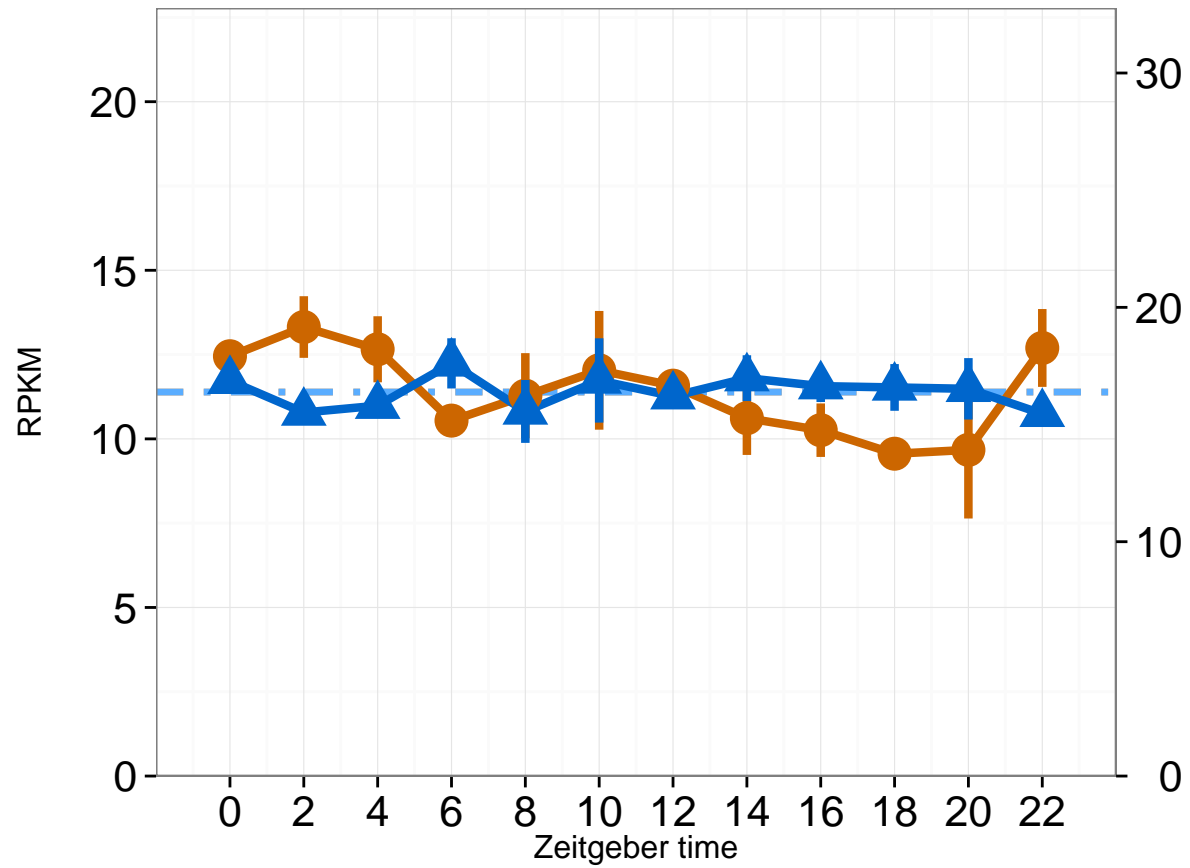

## Eif2b2

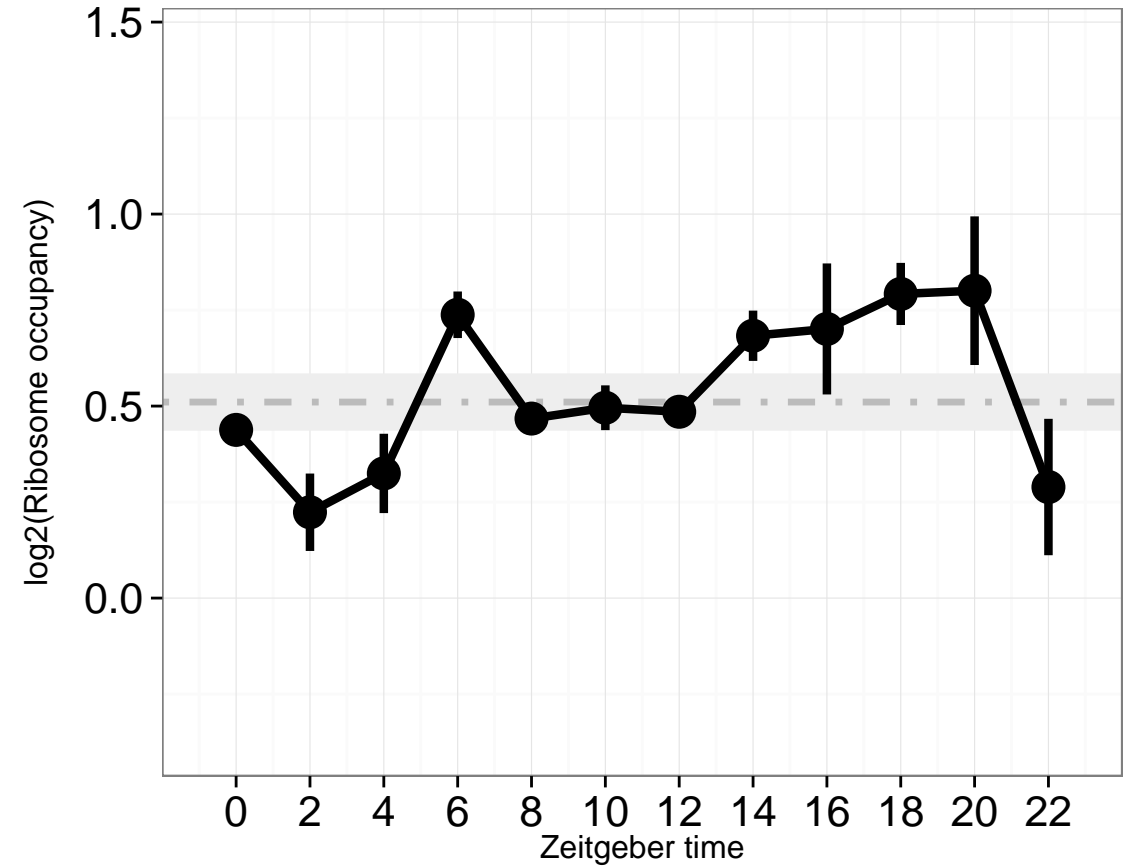

Supplement: SuppDataset_1.zip [file Eif2b2_set_A.pdf › Supplemental Dataset 1/A-mRNA_nonrhyth_translation_nonrhyth/Eif2b2_set_A.pdf]

# Eif2b4

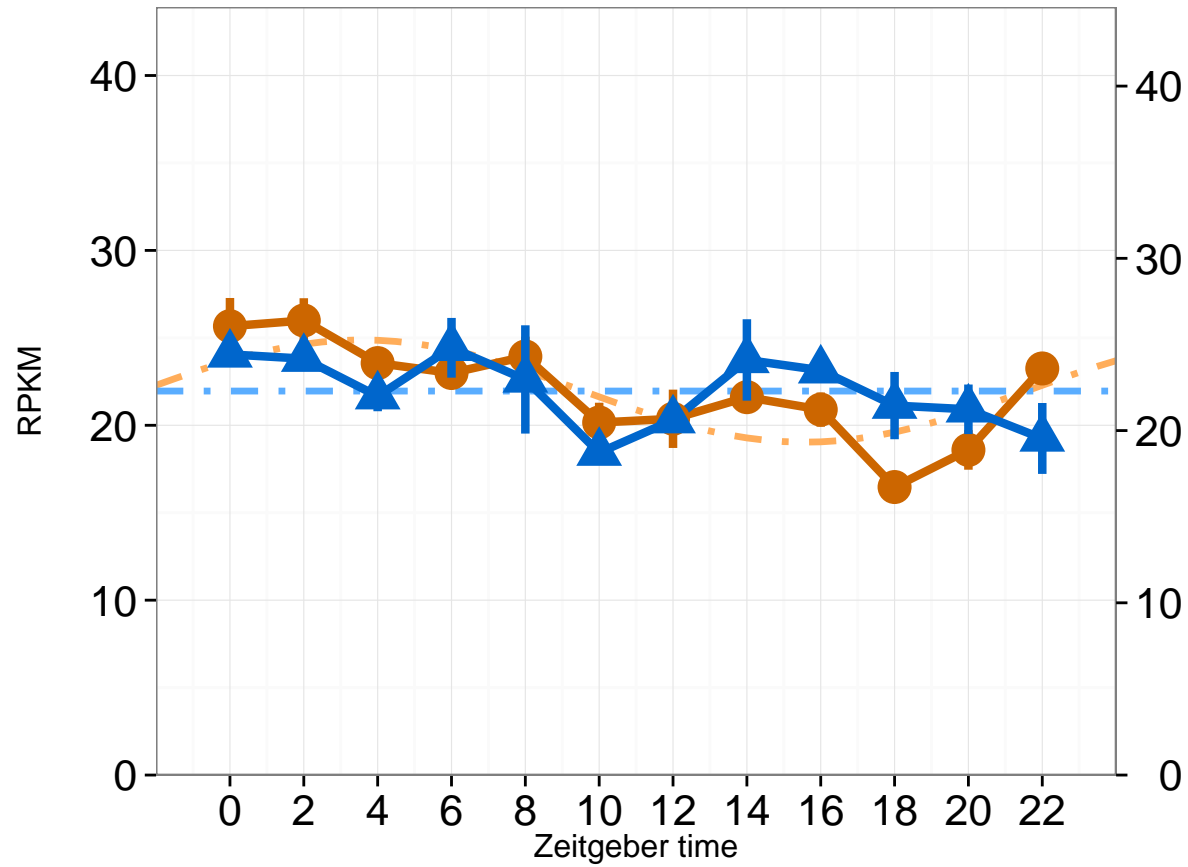

# Eif2b4

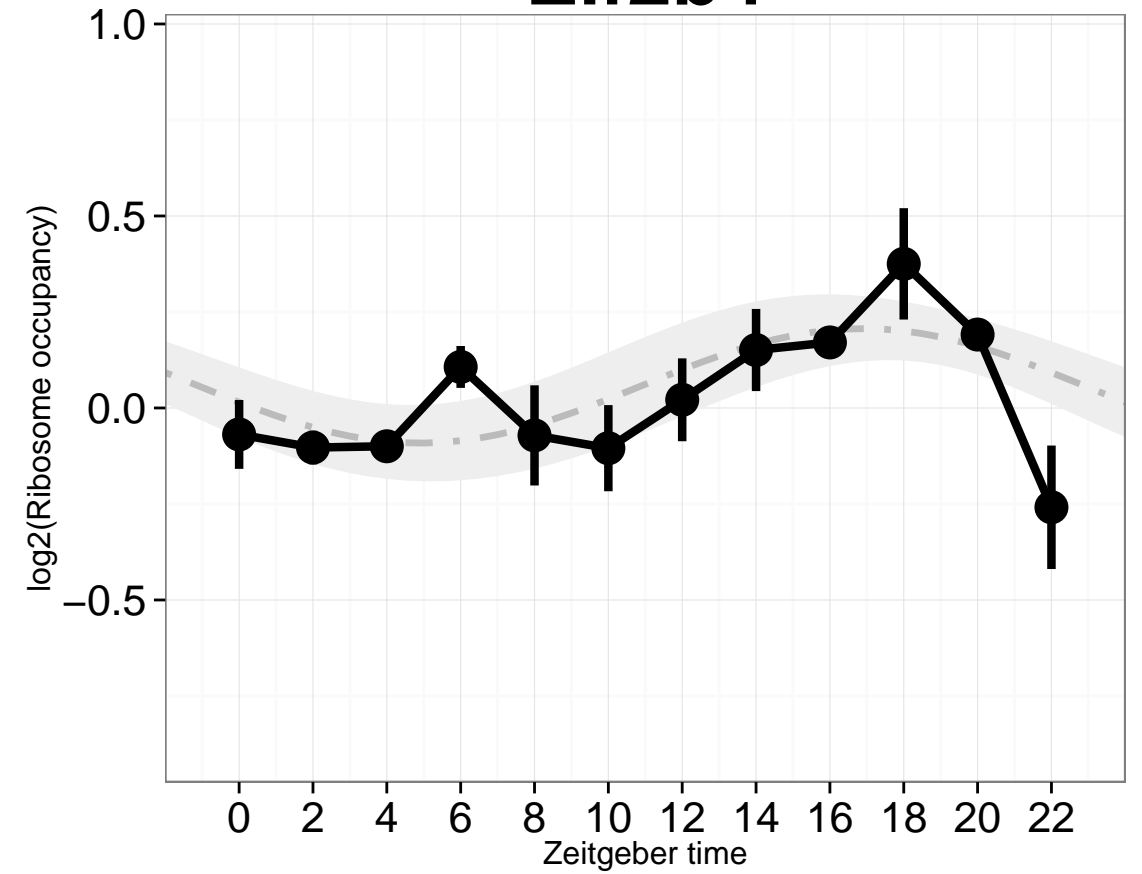

Supplement: SuppDataset_1.zip [file Eif2b4_set_A.pdf › Supplemental Dataset 1/A-mRNA_nonrhyth_translation_nonrhyth/Eif2b4_set_A.pdf]

## Eif2b5

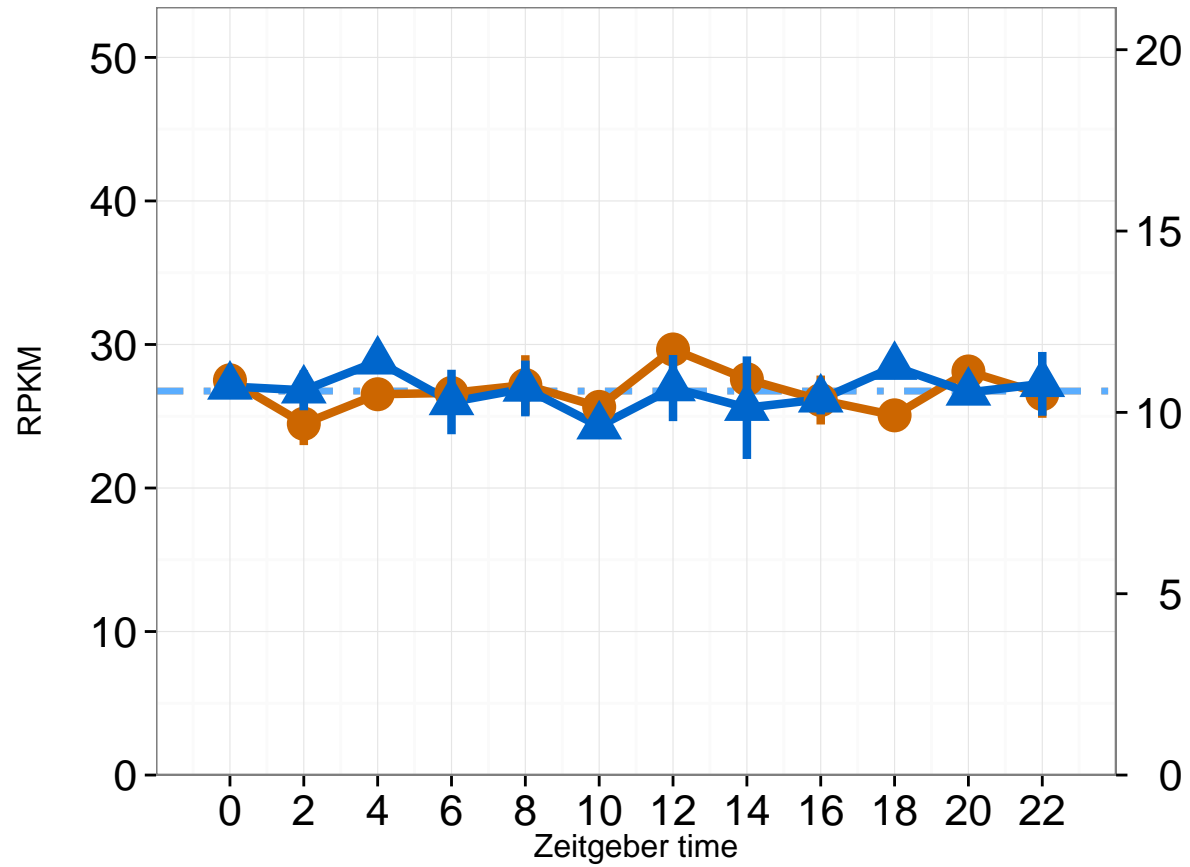

## Eif2b5

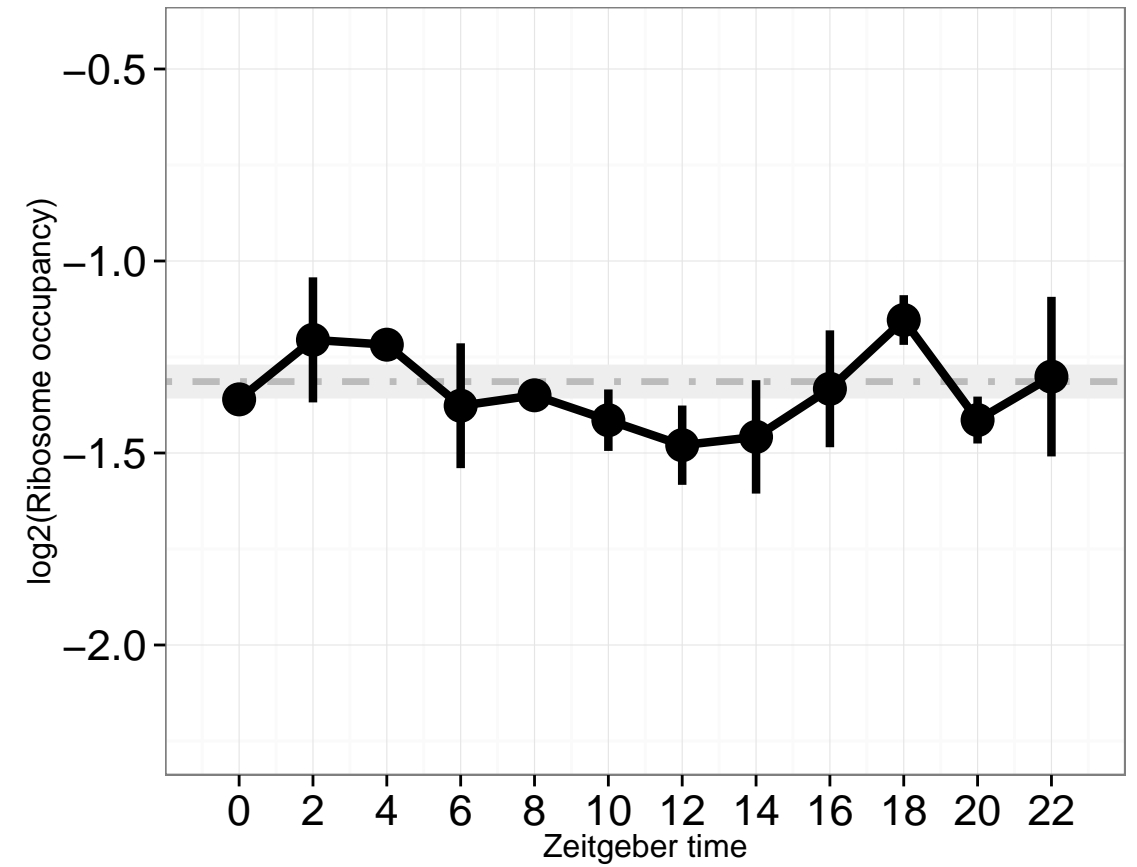

Supplement: SuppDataset_1.zip [file Eif2b5_set_A.pdf › Supplemental Dataset 1/A-mRNA_nonrhyth_translation_nonrhyth/Eif2b5_set_A.pdf]

## Eif2d

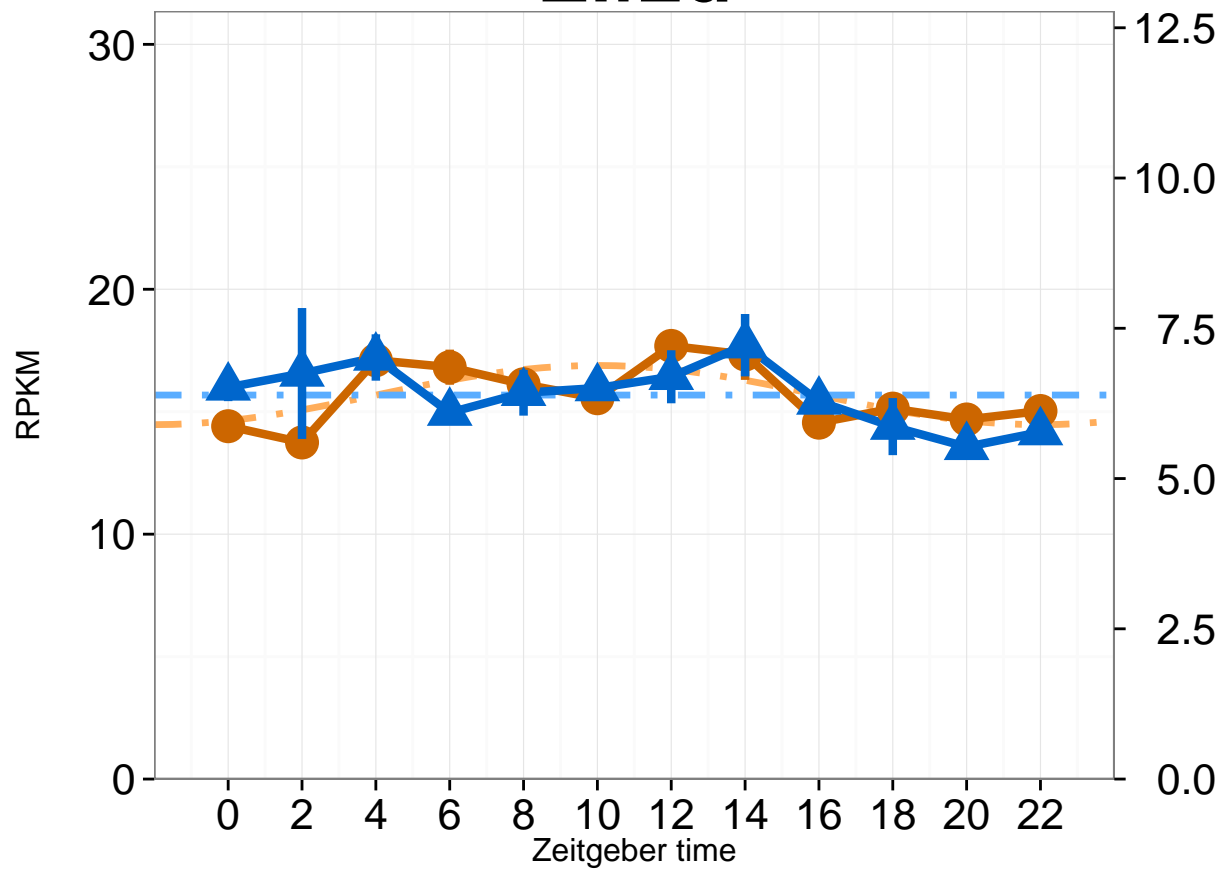

## Eif2d

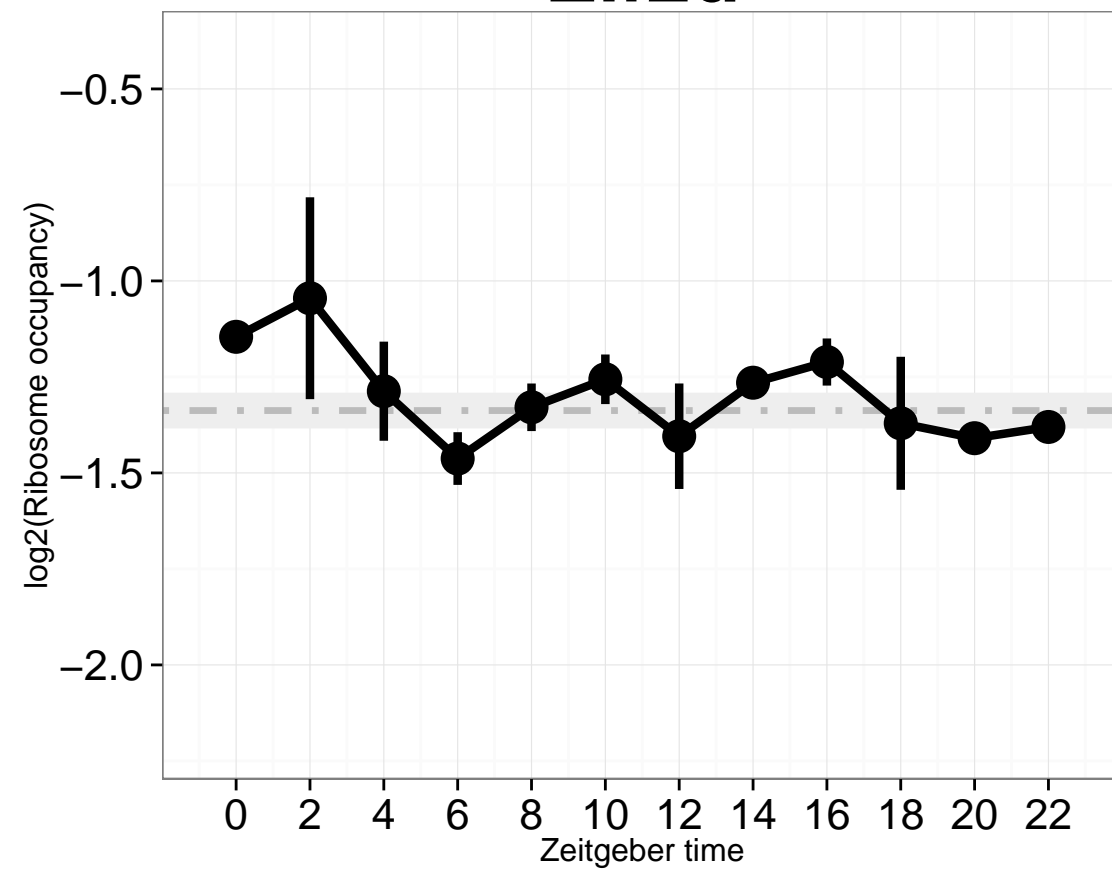

Supplement: SuppDataset_1.zip [file Eif2d_set_A.pdf › Supplemental Dataset 1/A-mRNA_nonrhyth_translation_nonrhyth/Eif2d_set_A.pdf]

# Eif2s1

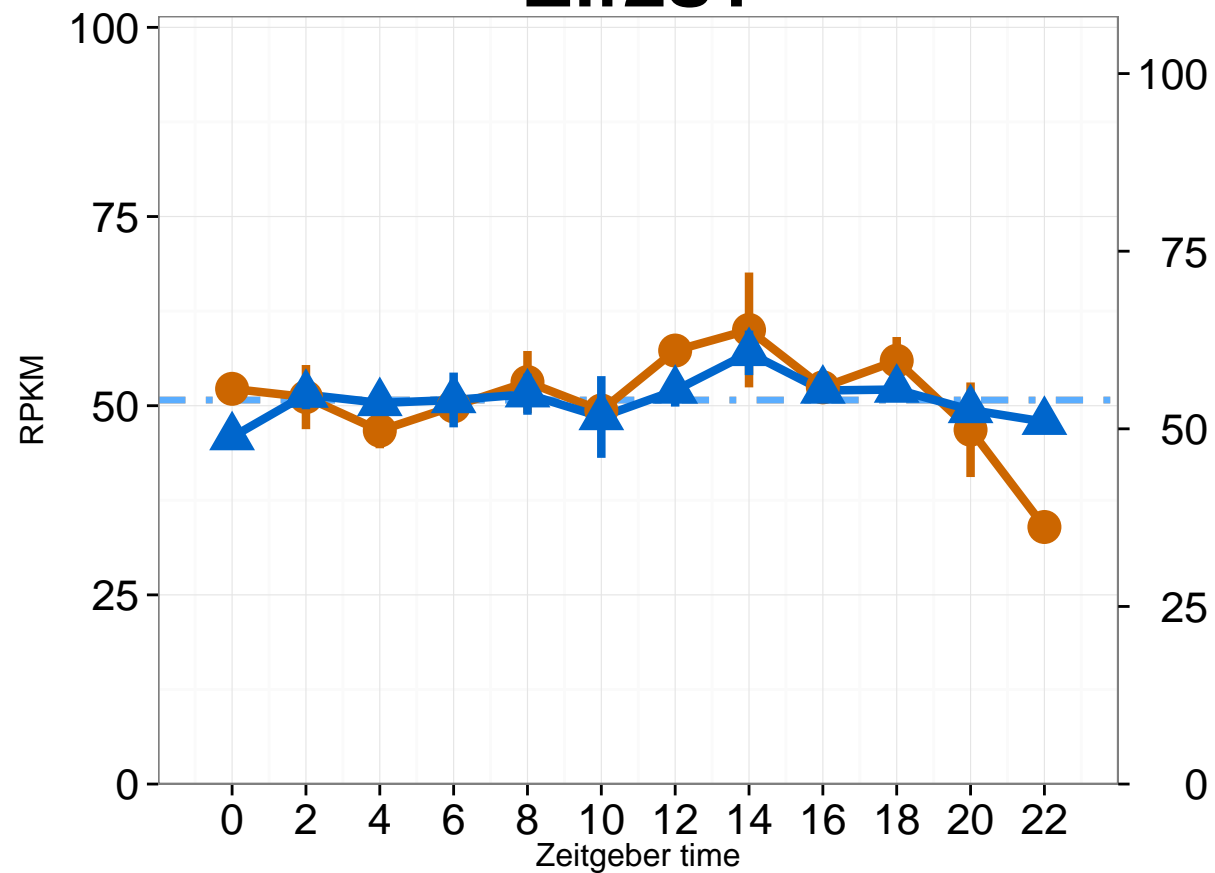

# Eif2s1

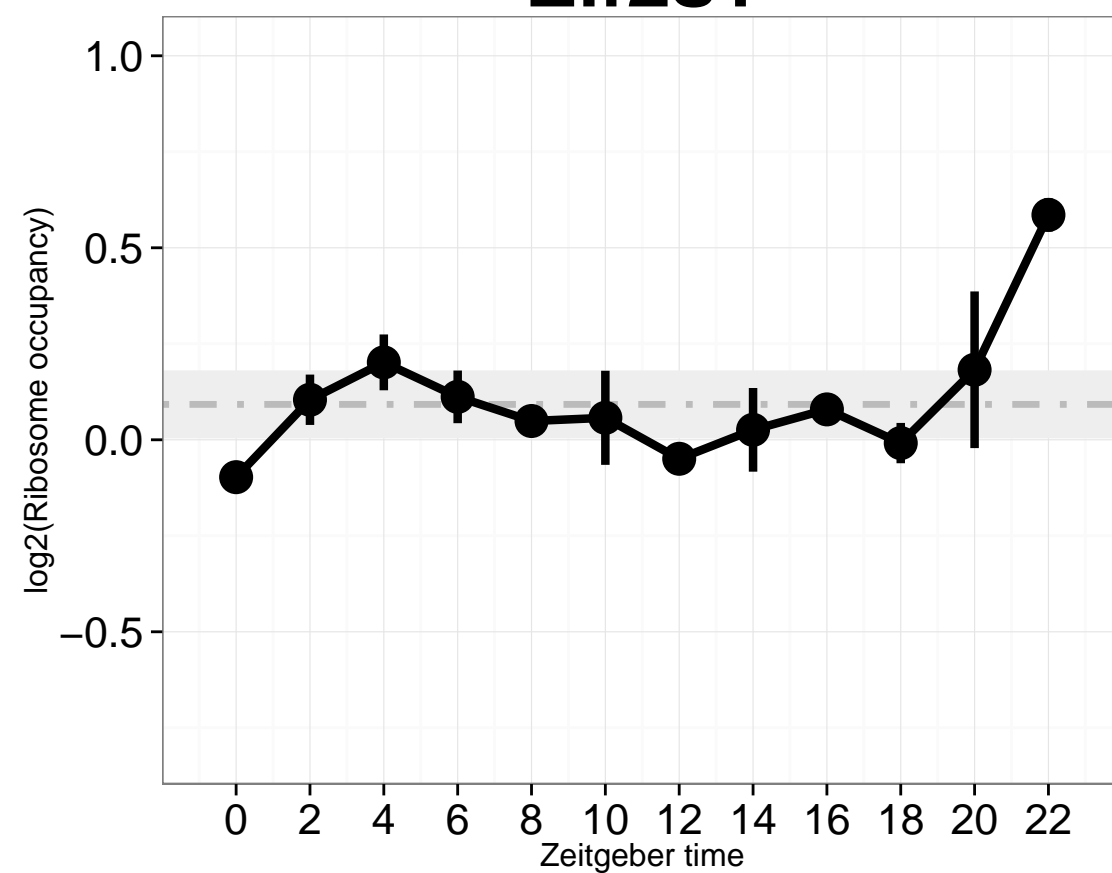

Supplement: SuppDataset_1.zip [file Eif2s1_set_A.pdf › Supplemental Dataset 1/A-mRNA_nonrhyth_translation_nonrhyth/Eif2s1_set_A.pdf]

## Eif2s2

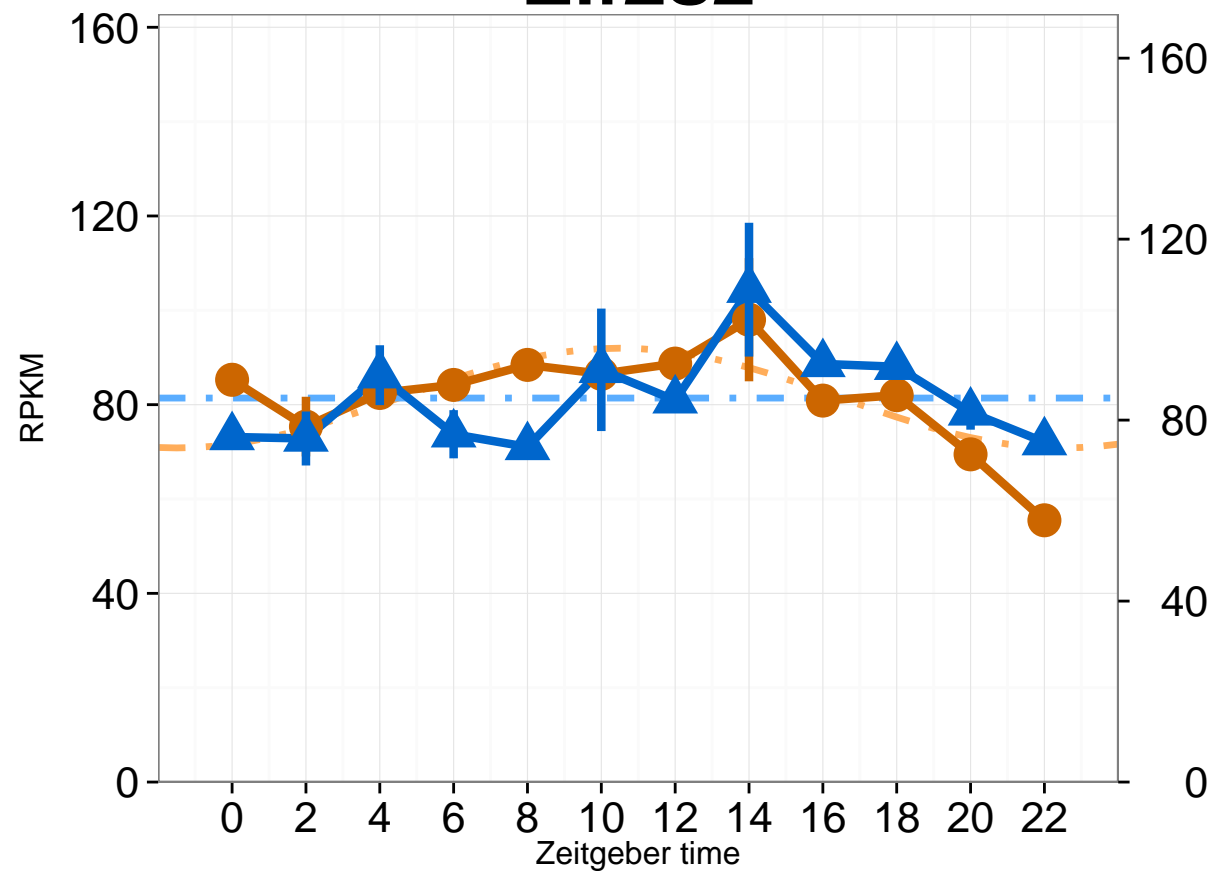

## Eif2s2

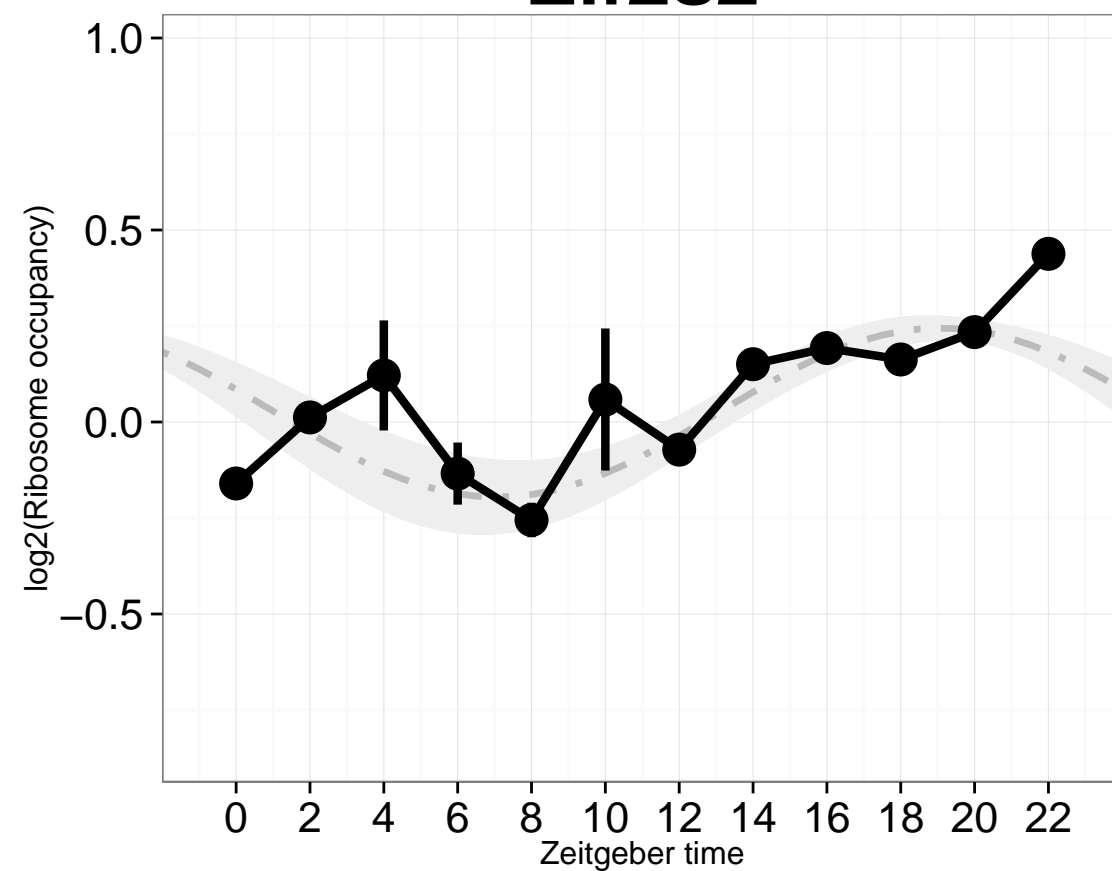

Supplement: SuppDataset_1.zip [file Eif2s2_set_A.pdf › Supplemental Dataset 1/A-mRNA_nonrhyth_translation_nonrhyth/Eif2s2_set_A.pdf]

## Eif2s3x

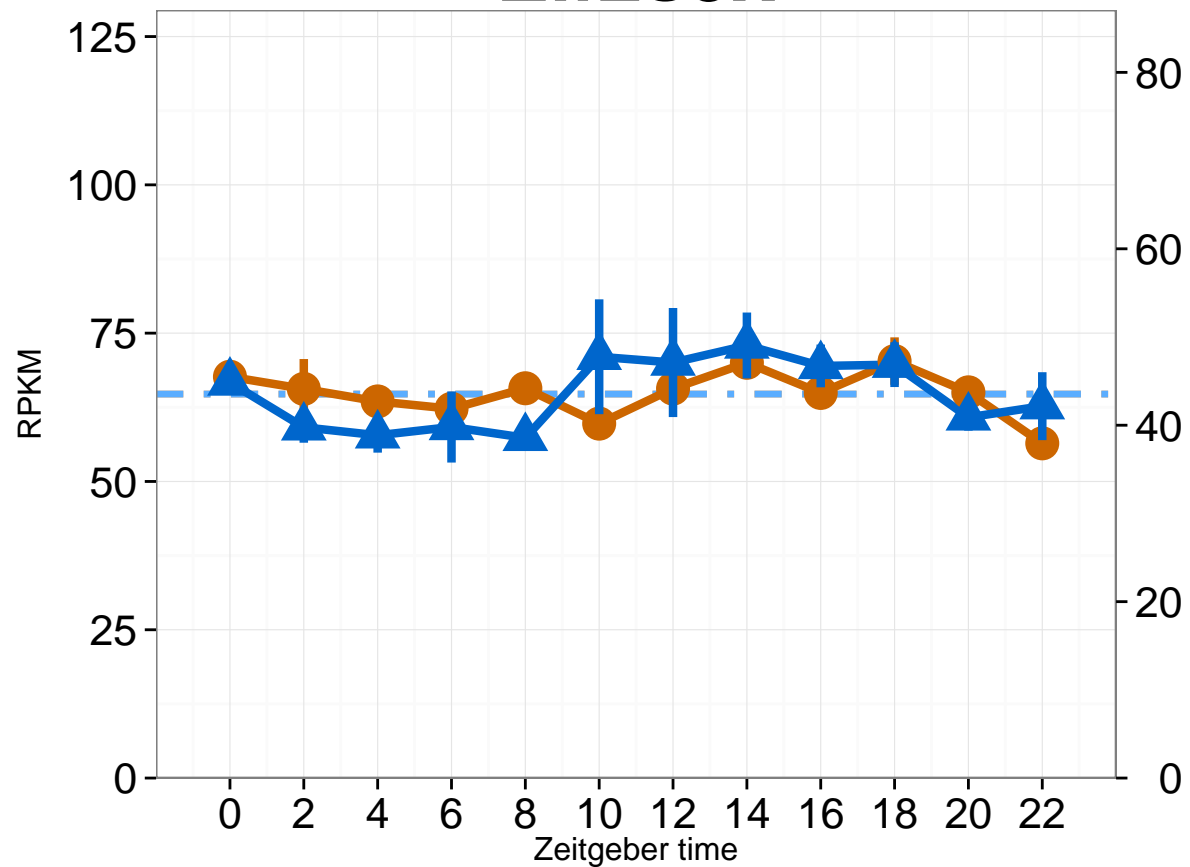

## Eif2s3x

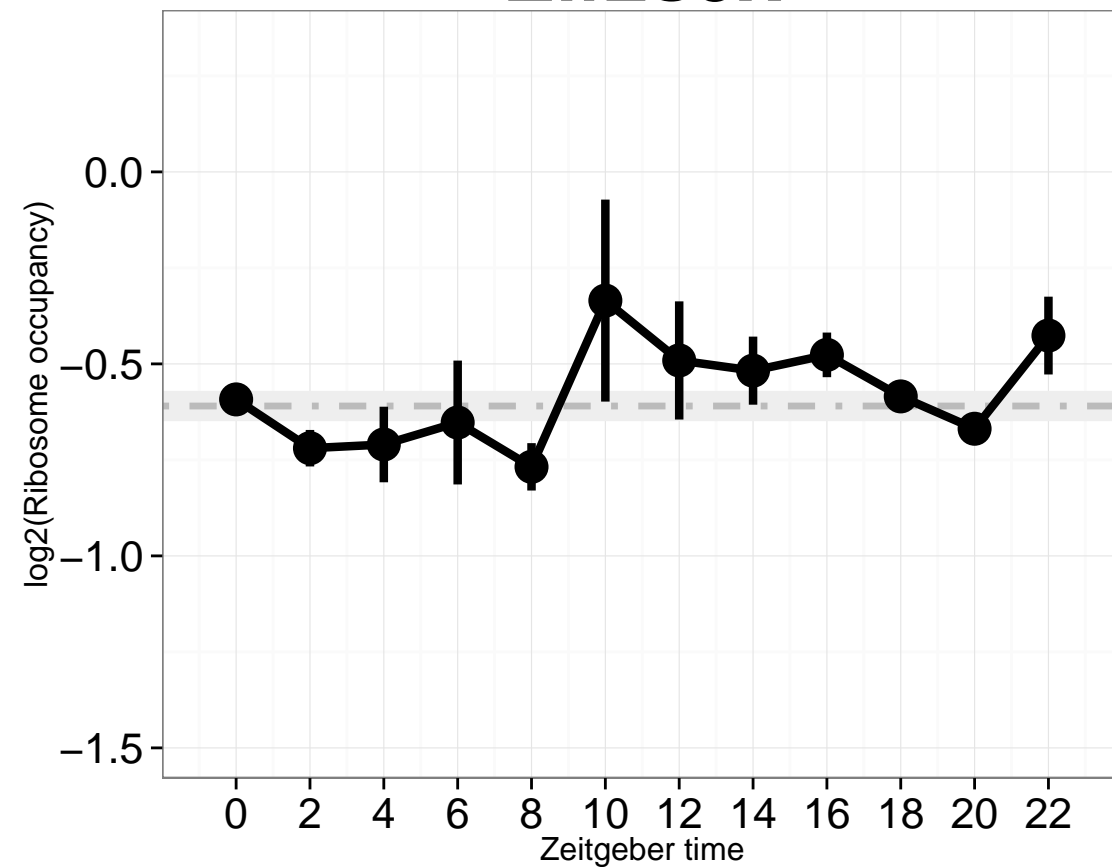

Supplement: SuppDataset_1.zip [file Eif2s3x_set_A.pdf › Supplemental Dataset 1/A-mRNA_nonrhyth_translation_nonrhyth/Eif2s3x_set_A.pdf]

# Eif2s3y

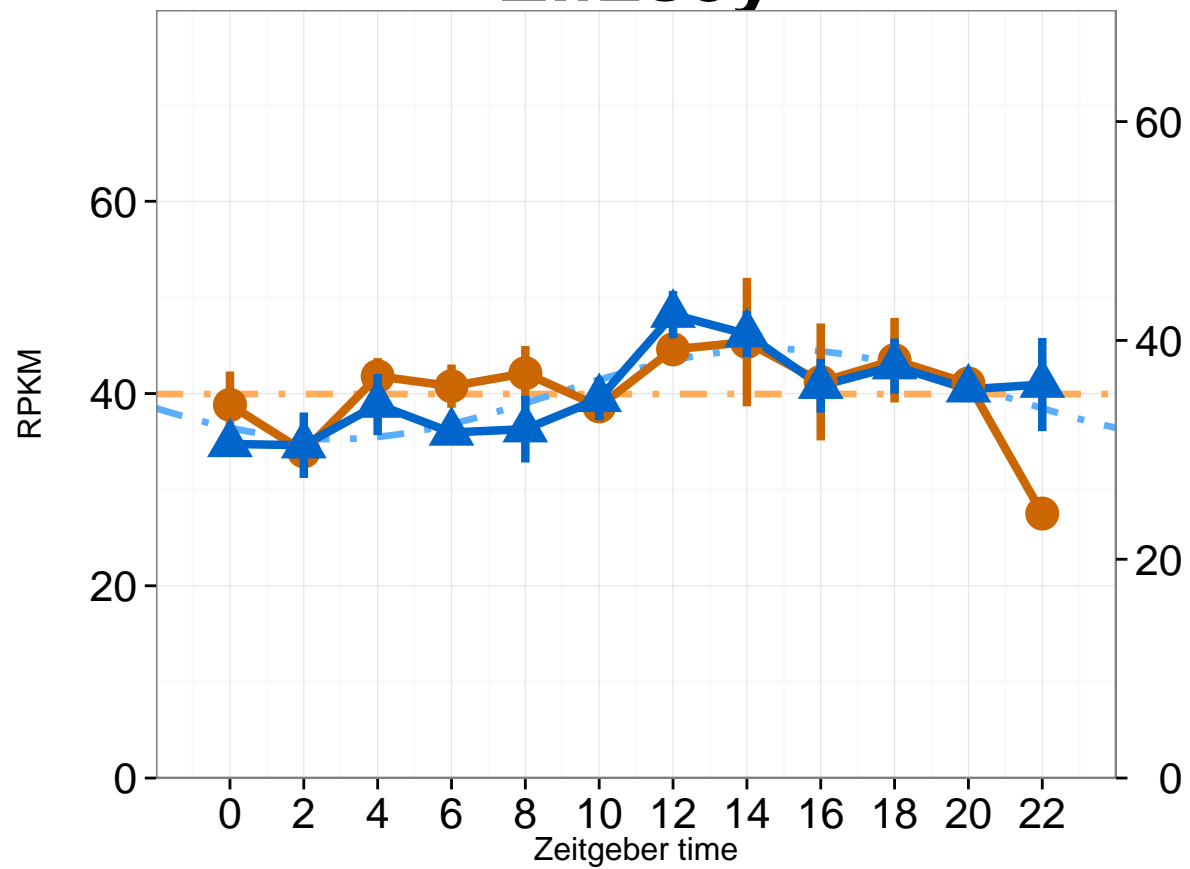

# Eif2s3y

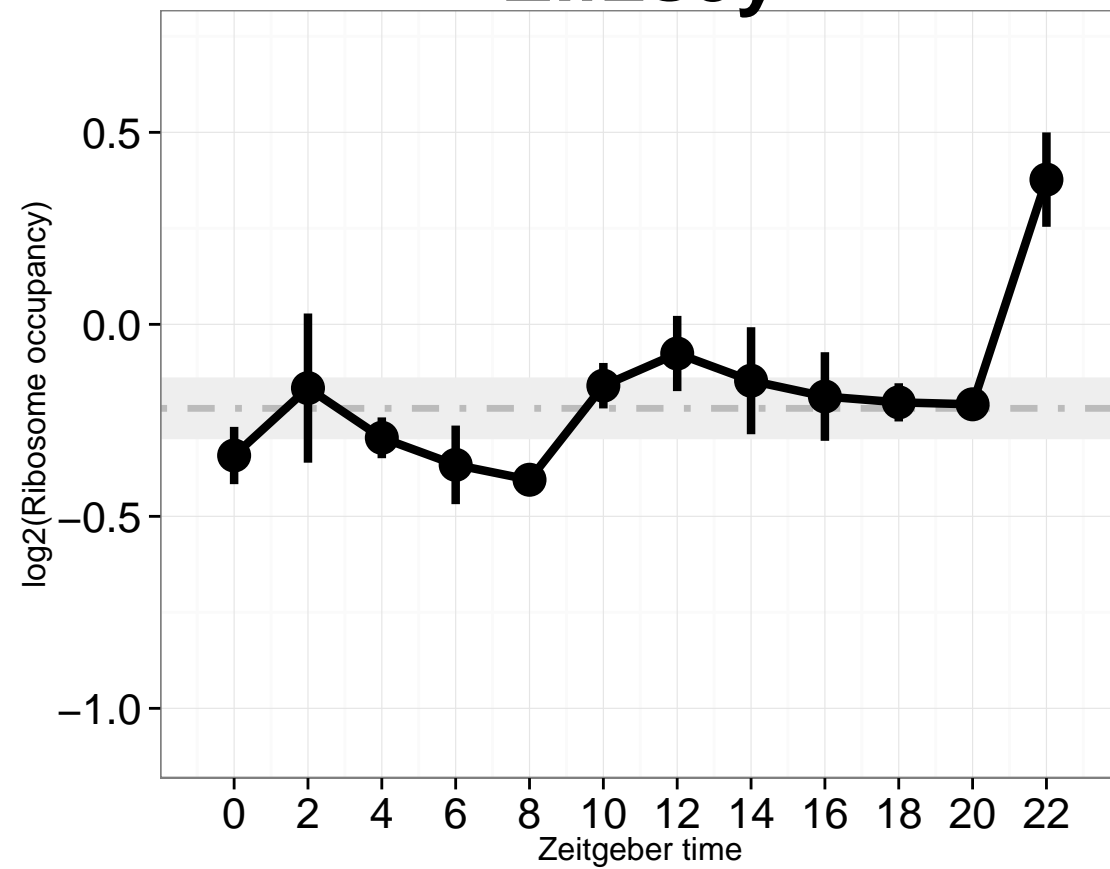

Supplement: SuppDataset_1.zip [file Eif2s3y_set_A.pdf › Supplemental Dataset 1/A-mRNA_nonrhyth_translation_nonrhyth/Eif2s3y_set_A.pdf]

# Eif3a

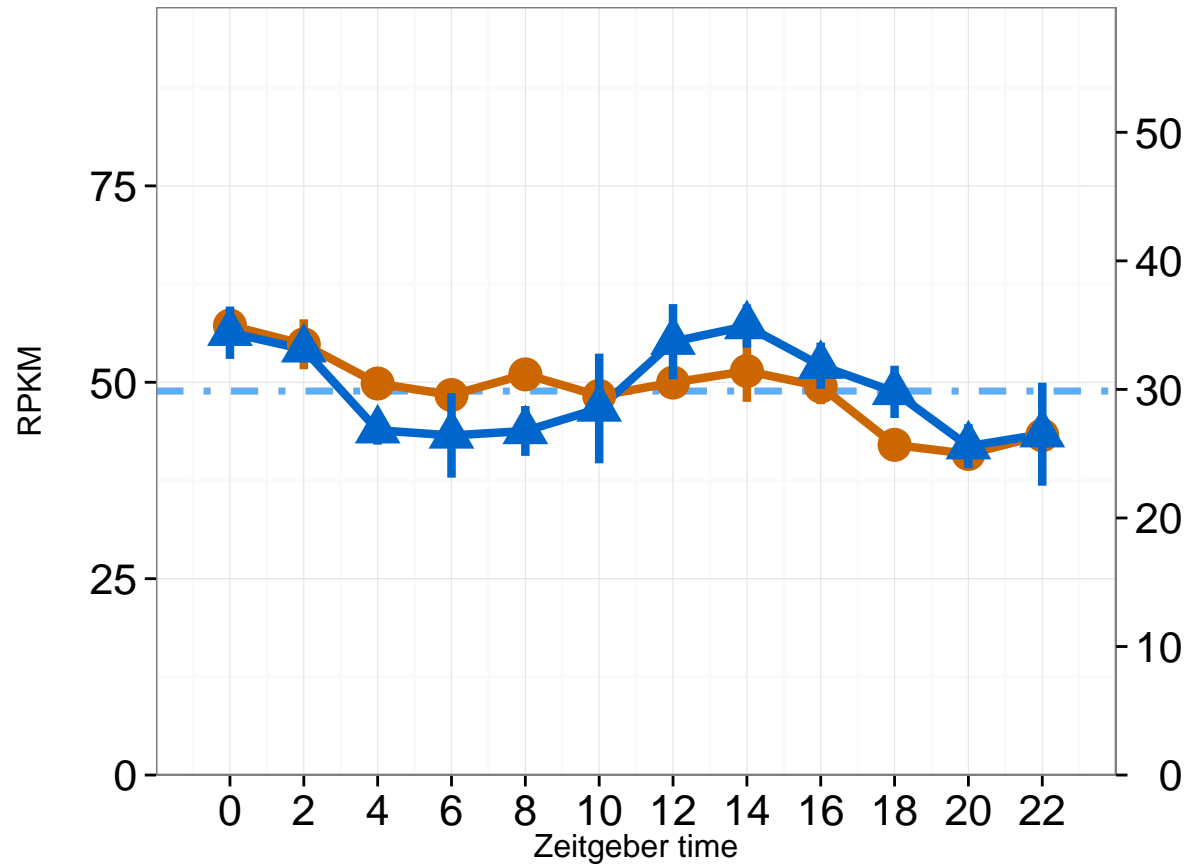

# Eif3a

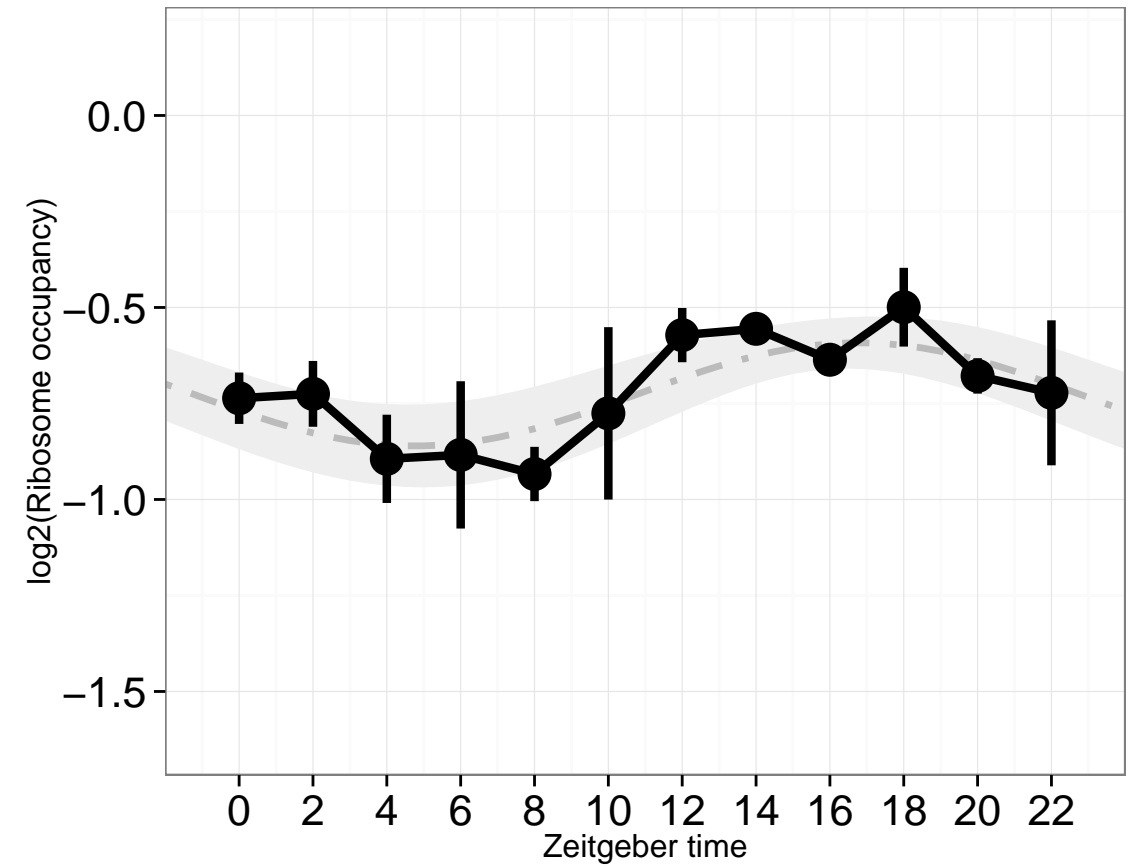

Supplement: SuppDataset_1.zip [file Eif3a_set_A.pdf › Supplemental Dataset 1/A-mRNA_nonrhyth_translation_nonrhyth/Eif3a_set_A.pdf]

# Eif3b

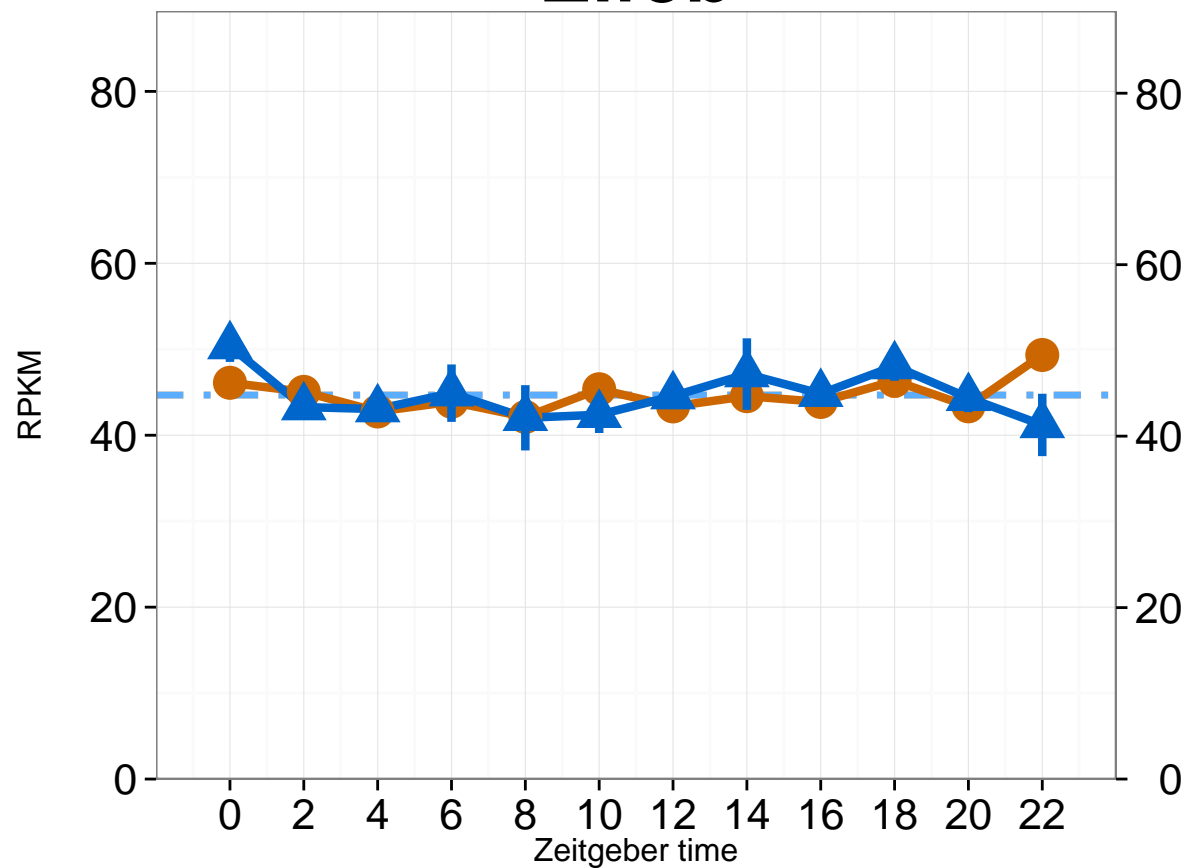

# Eif3b

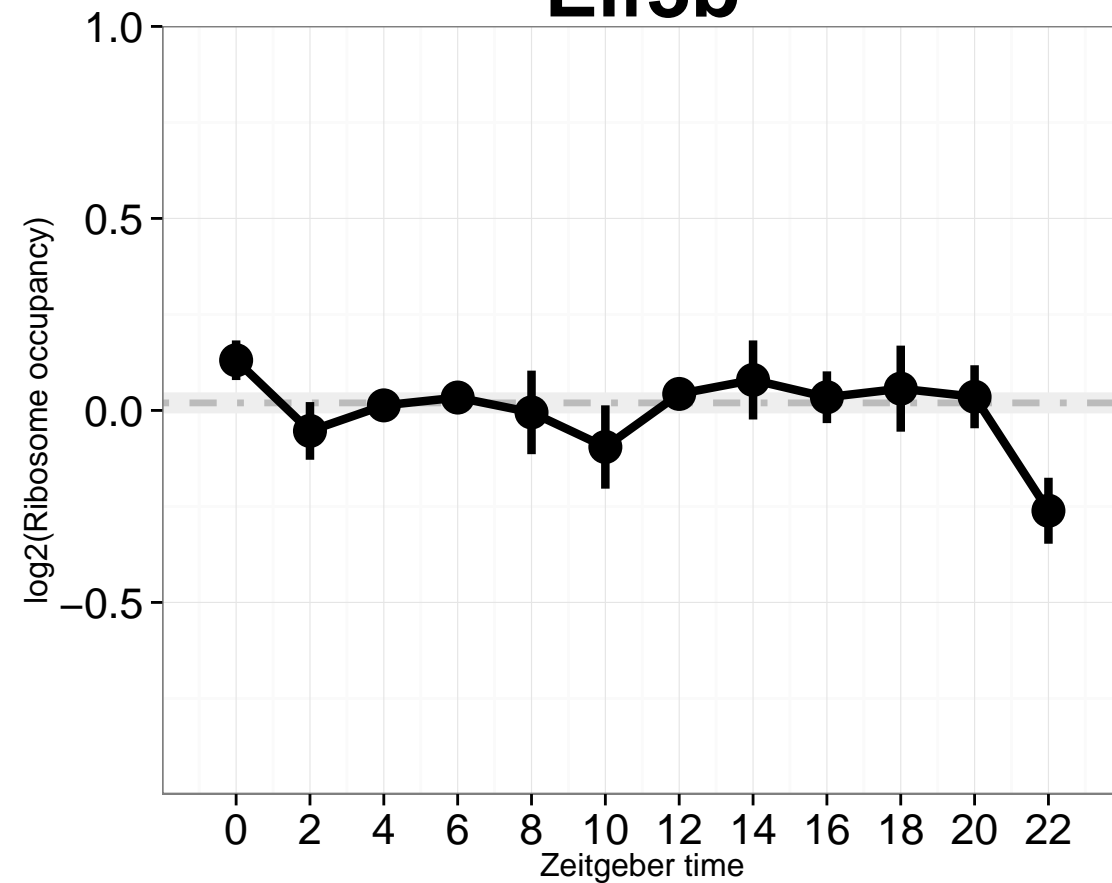

Supplement: SuppDataset_1.zip [file Eif3b_set_A.pdf › Supplemental Dataset 1/A-mRNA_nonrhyth_translation_nonrhyth/Eif3b_set_A.pdf]

## Eif3c

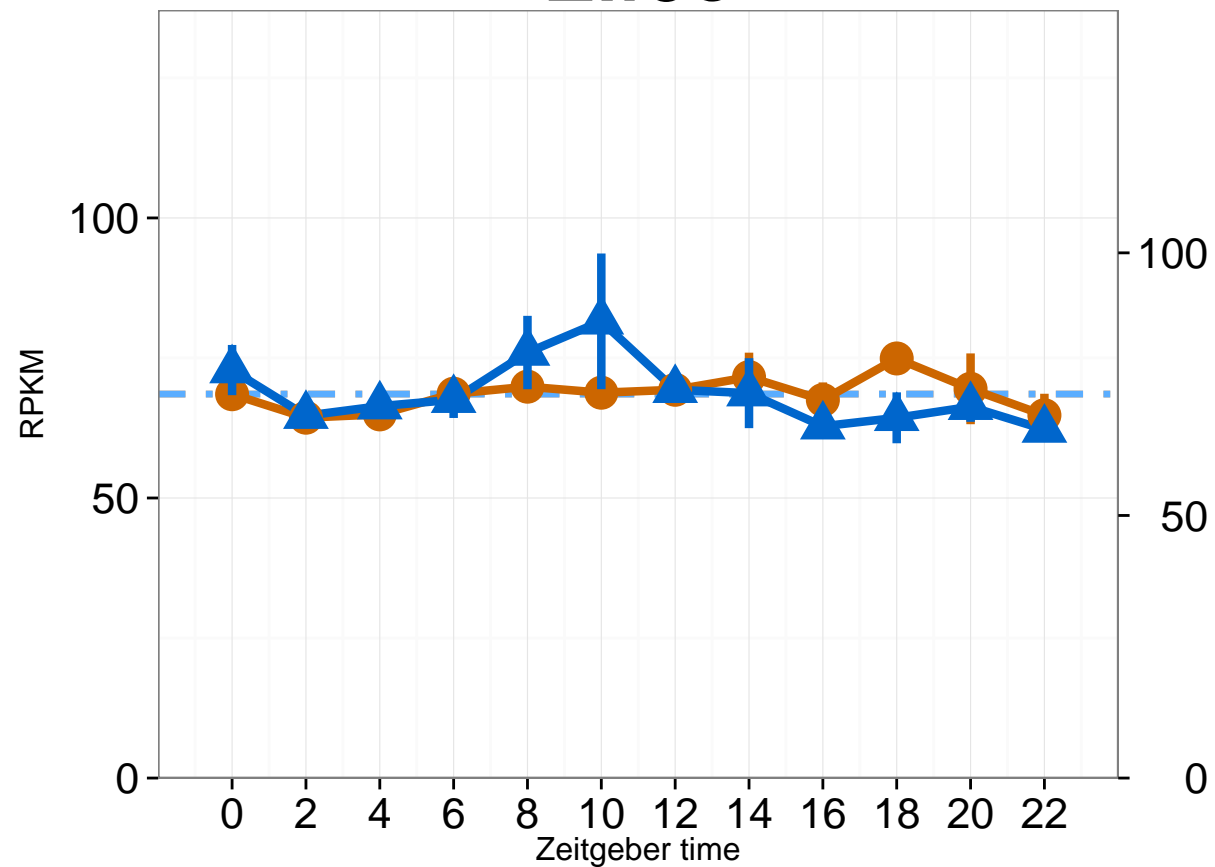

## Eif3c

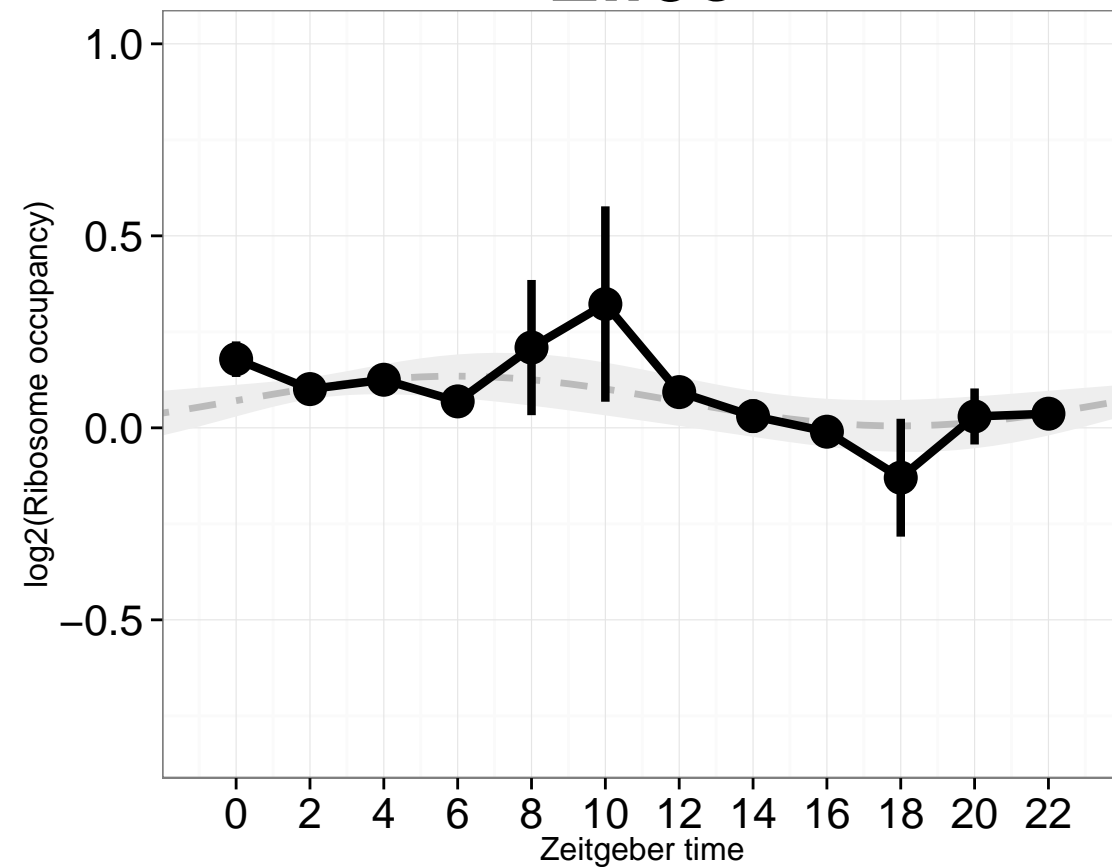

Supplement: SuppDataset_1.zip [file Eif3c_set_A.pdf › Supplemental Dataset 1/A-mRNA_nonrhyth_translation_nonrhyth/Eif3c_set_A.pdf]

## Eif3d

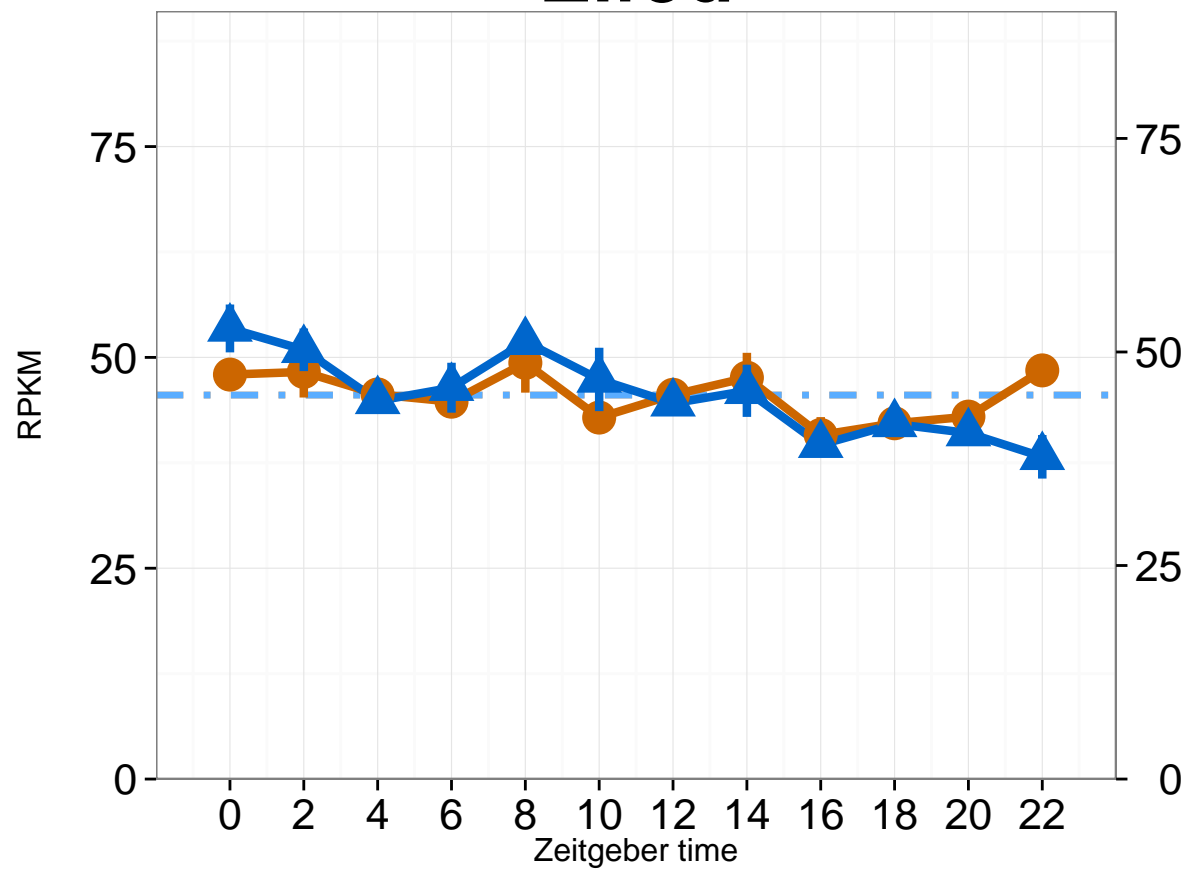

## Eif3d

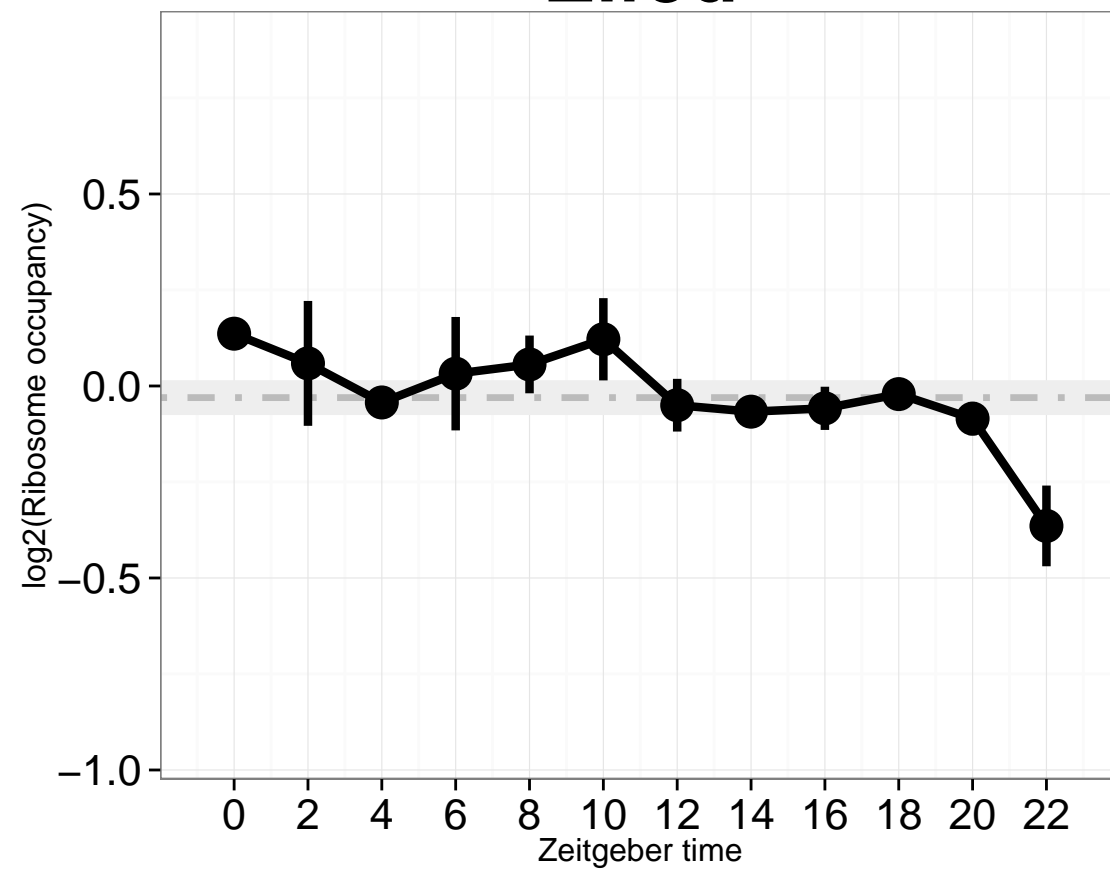

Supplement: SuppDataset_1.zip [file Eif3d_set_A.pdf › Supplemental Dataset 1/A-mRNA_nonrhyth_translation_nonrhyth/Eif3d_set_A.pdf]

## Eif3e

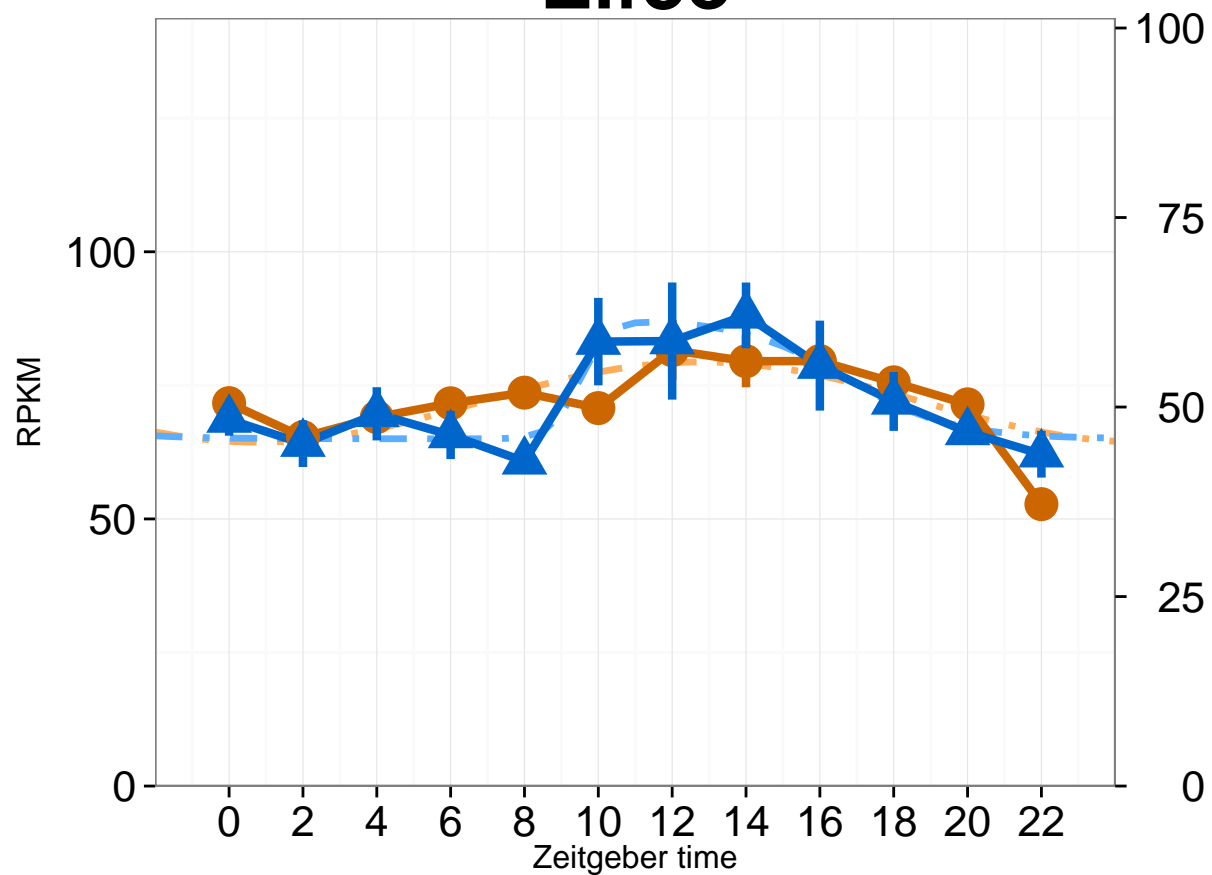

## Eif3e

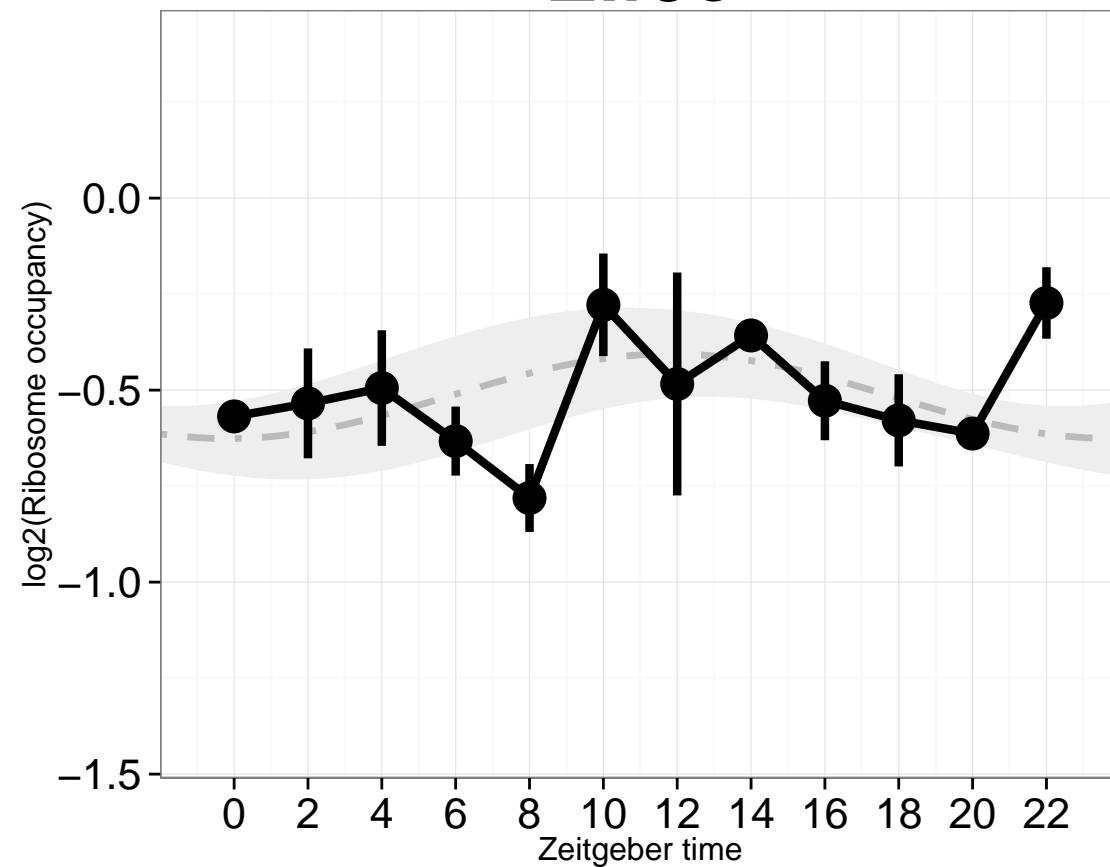

Supplement: SuppDataset_1.zip [file Eif3e_set_A.pdf › Supplemental Dataset 1/A-mRNA_nonrhyth_translation_nonrhyth/Eif3e_set_A.pdf]

## Eif3g

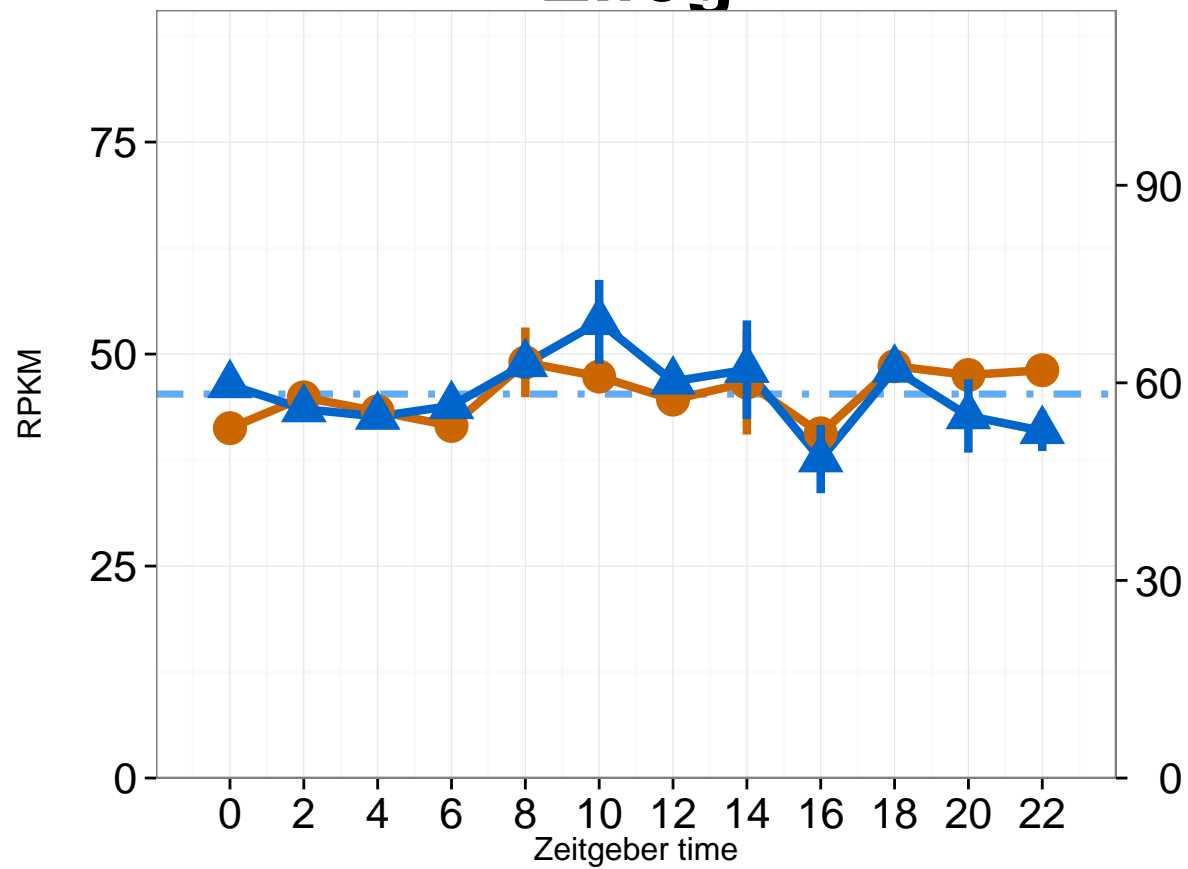

## Eif3g

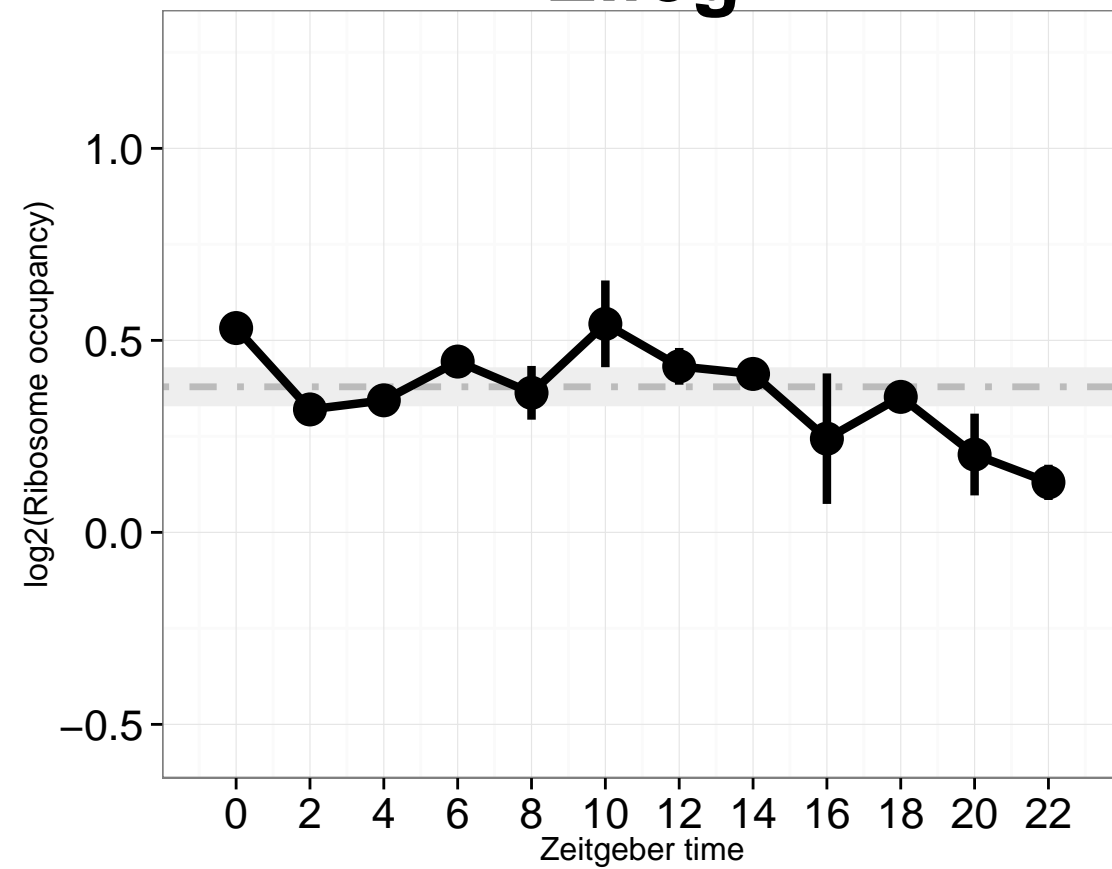

Supplement: SuppDataset_1.zip [file Eif3g_set_A.pdf › Supplemental Dataset 1/A-mRNA_nonrhyth_translation_nonrhyth/Eif3g_set_A.pdf]

## Eif3i

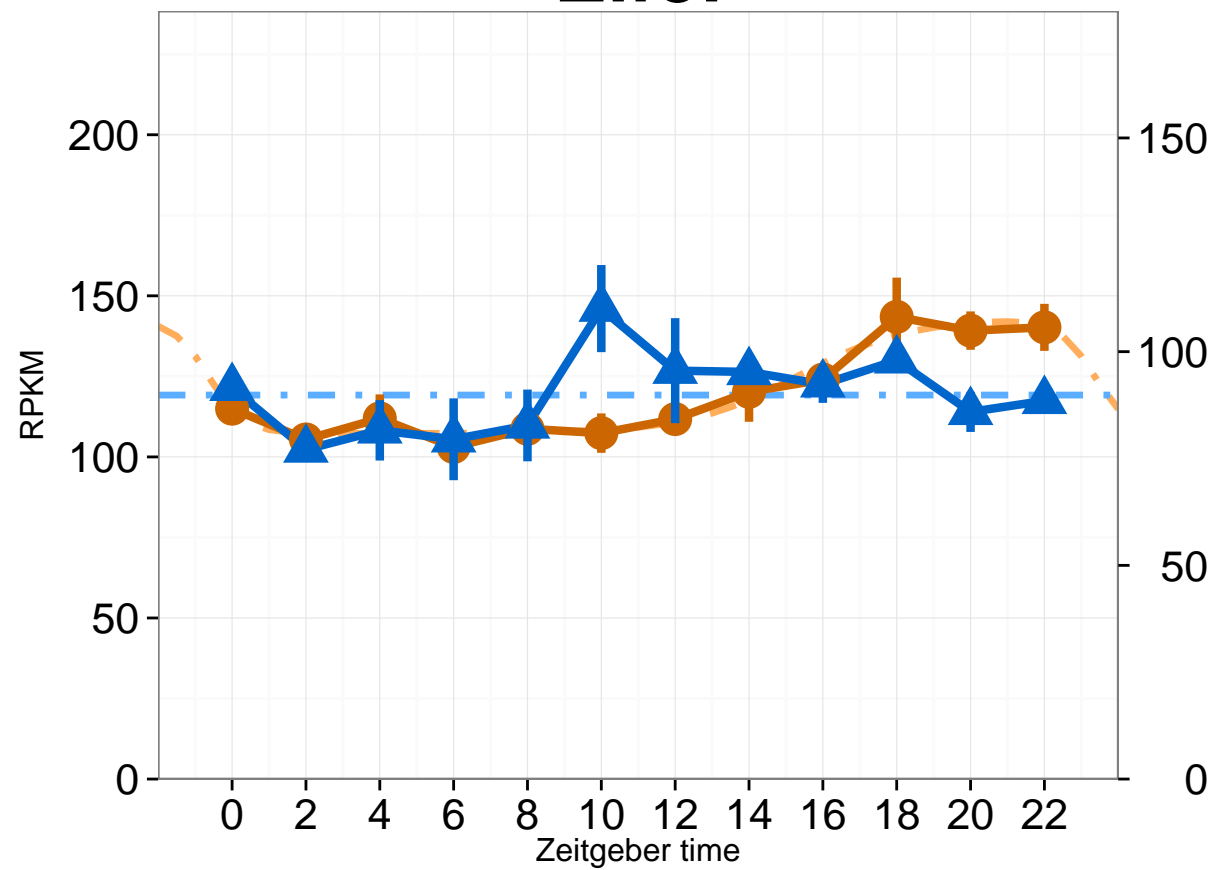

## Eif3i

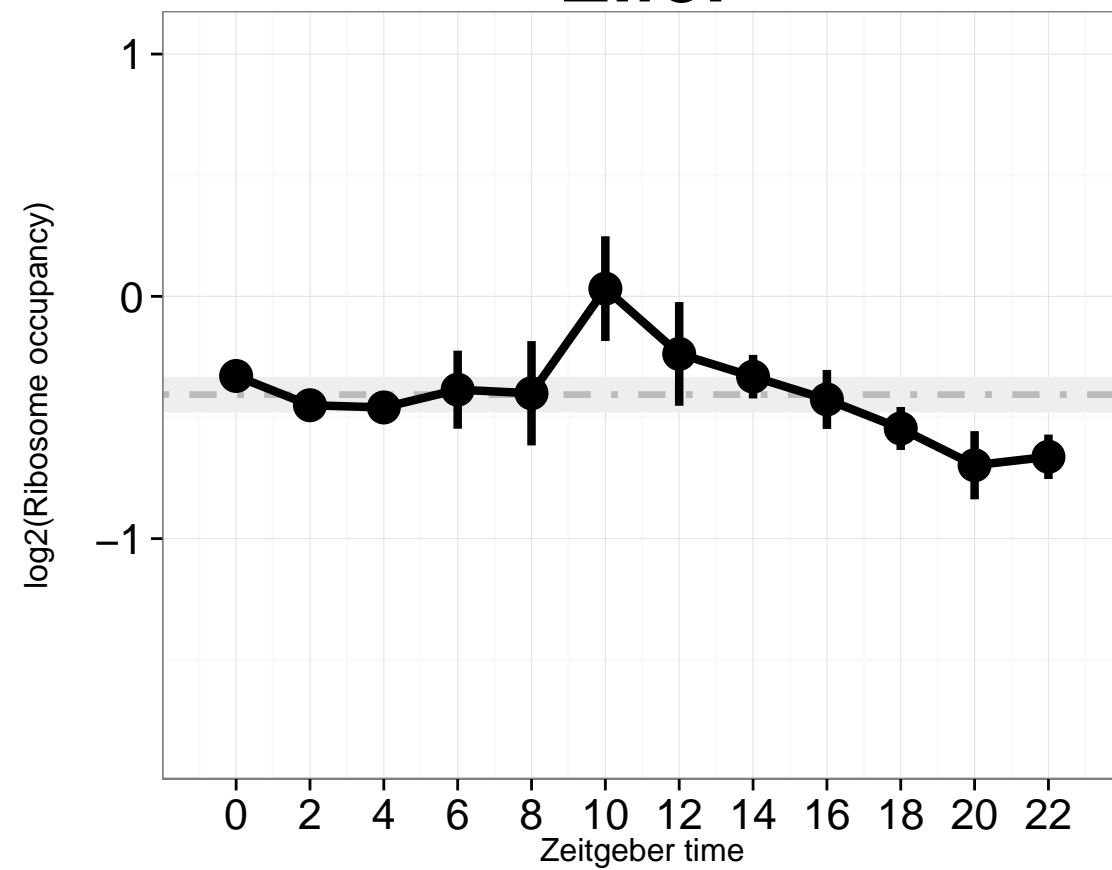

Supplement: SuppDataset_1.zip [file Eif3i_set_A.pdf › Supplemental Dataset 1/A-mRNA_nonrhyth_translation_nonrhyth/Eif3i_set_A.pdf]

## Eif3k

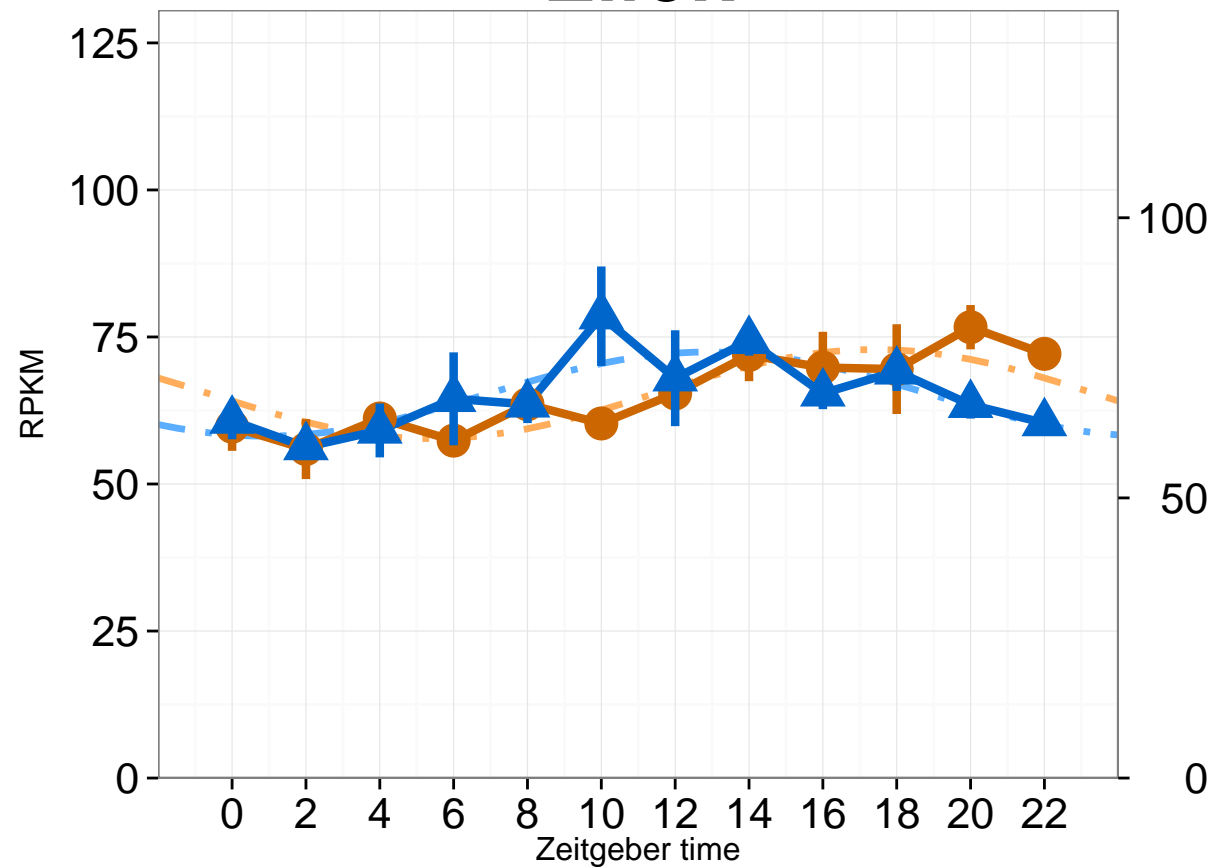

## Eif3k

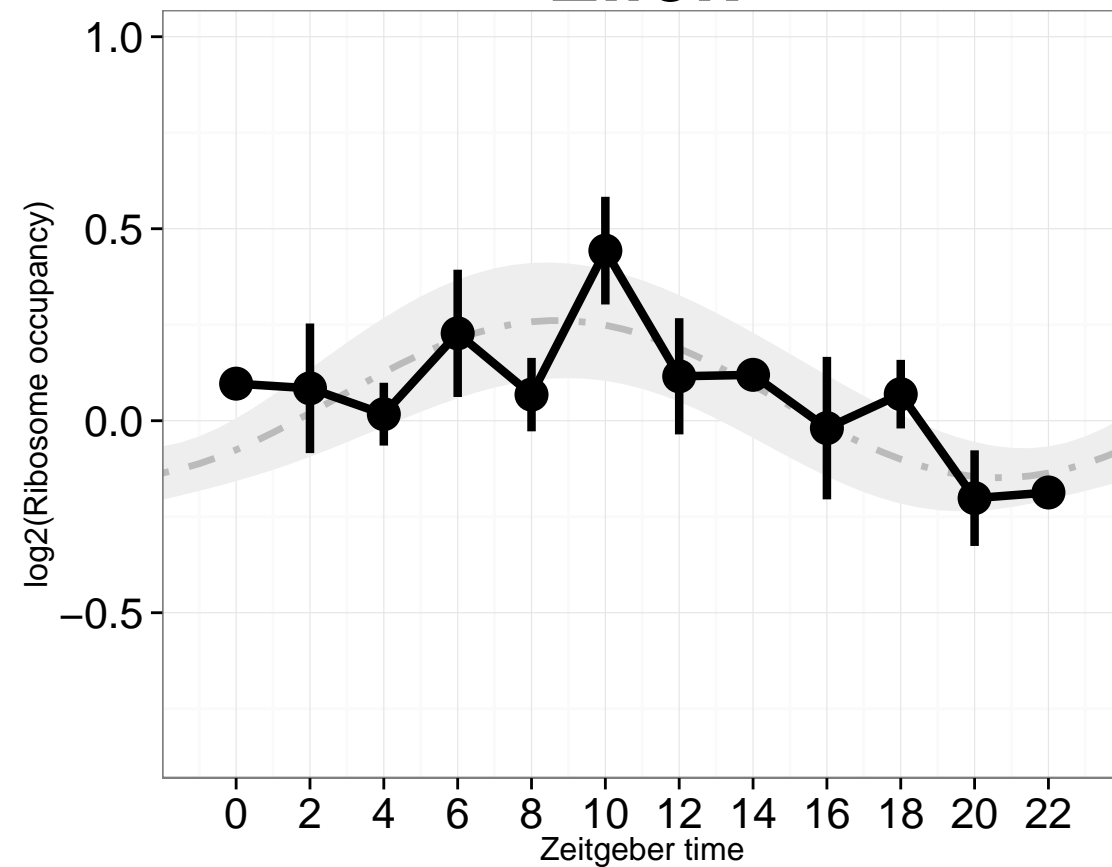

Supplement: SuppDataset_1.zip [file Eif3k_set_A.pdf › Supplemental Dataset 1/A-mRNA_nonrhyth_translation_nonrhyth/Eif3k_set_A.pdf]

# Eif3l

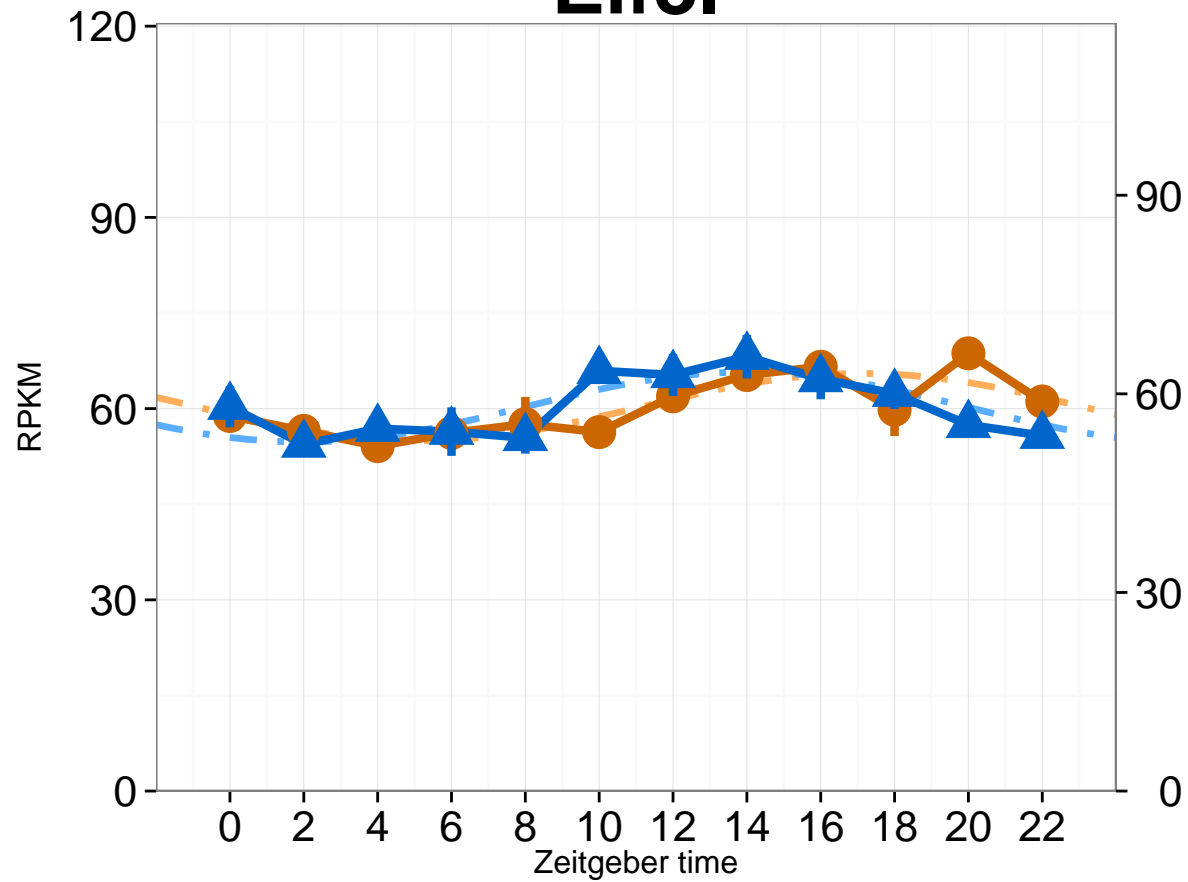

# Eif3l

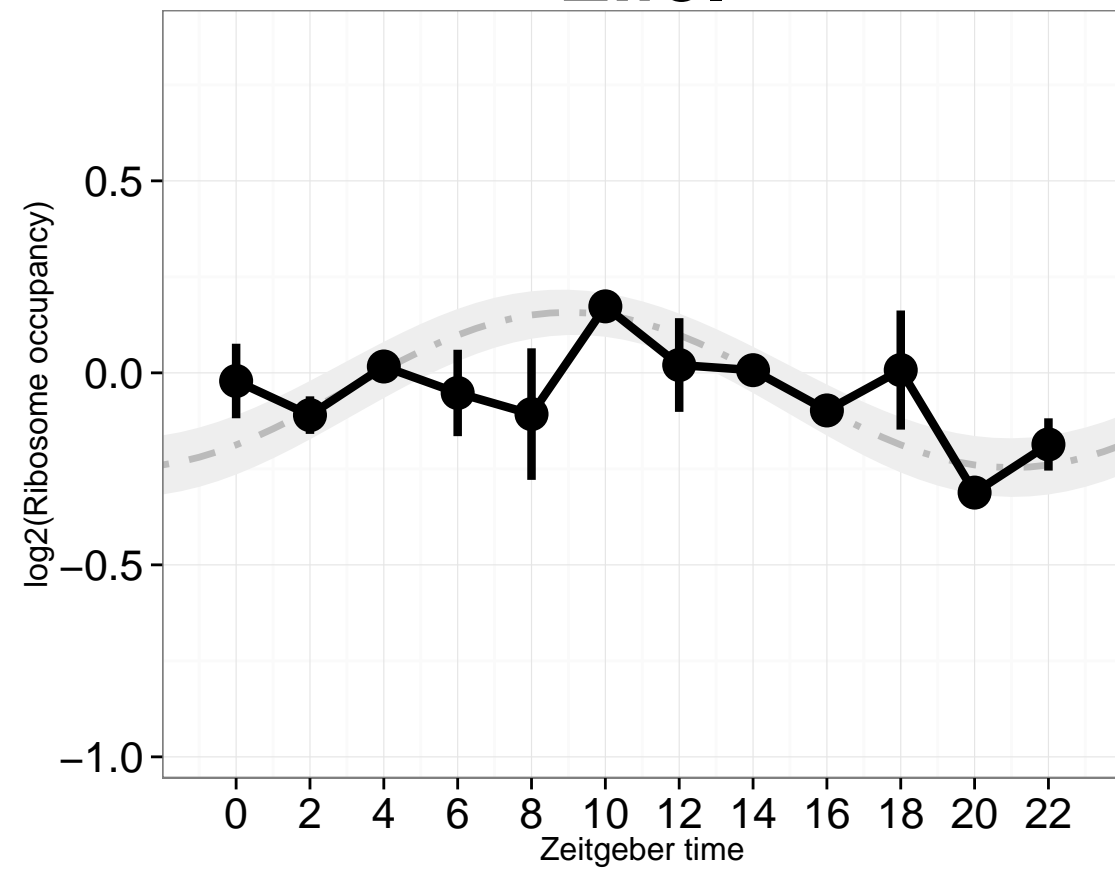

Supplement: SuppDataset_1.zip [file Eif3l_set_A.pdf › Supplemental Dataset 1/A-mRNA_nonrhyth_translation_nonrhyth/Eif3l_set_A.pdf]

# Eif3m

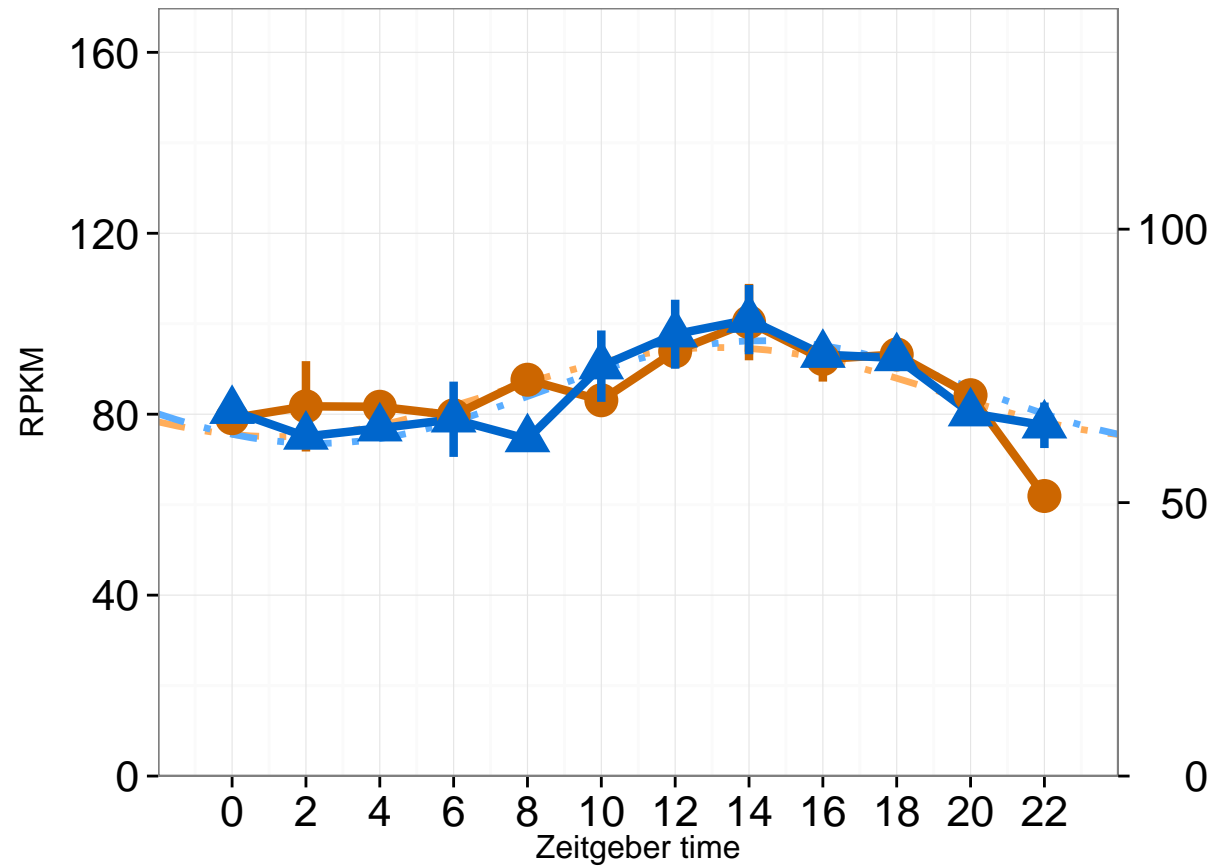

# Eif3m

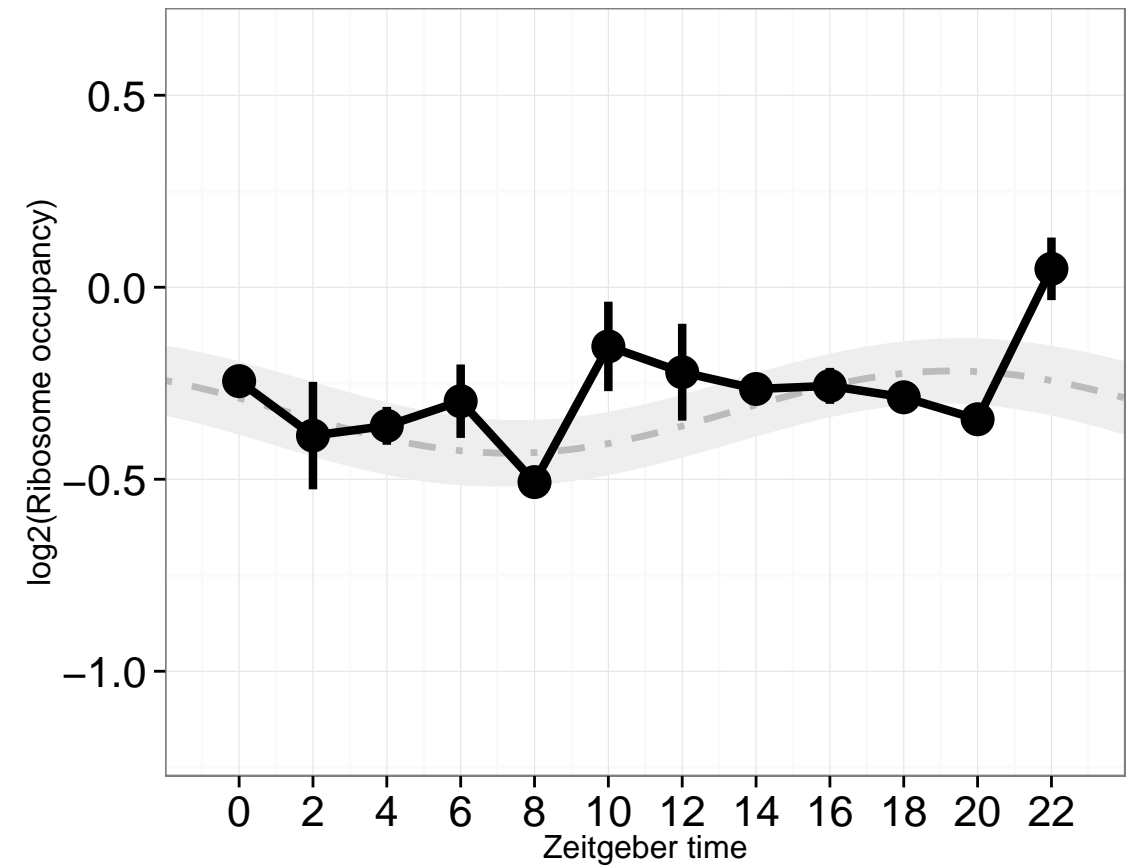

Supplement: SuppDataset_1.zip [file Eif3m_set_A.pdf › Supplemental Dataset 1/A-mRNA_nonrhyth_translation_nonrhyth/Eif3m_set_A.pdf]

## Eif4a1

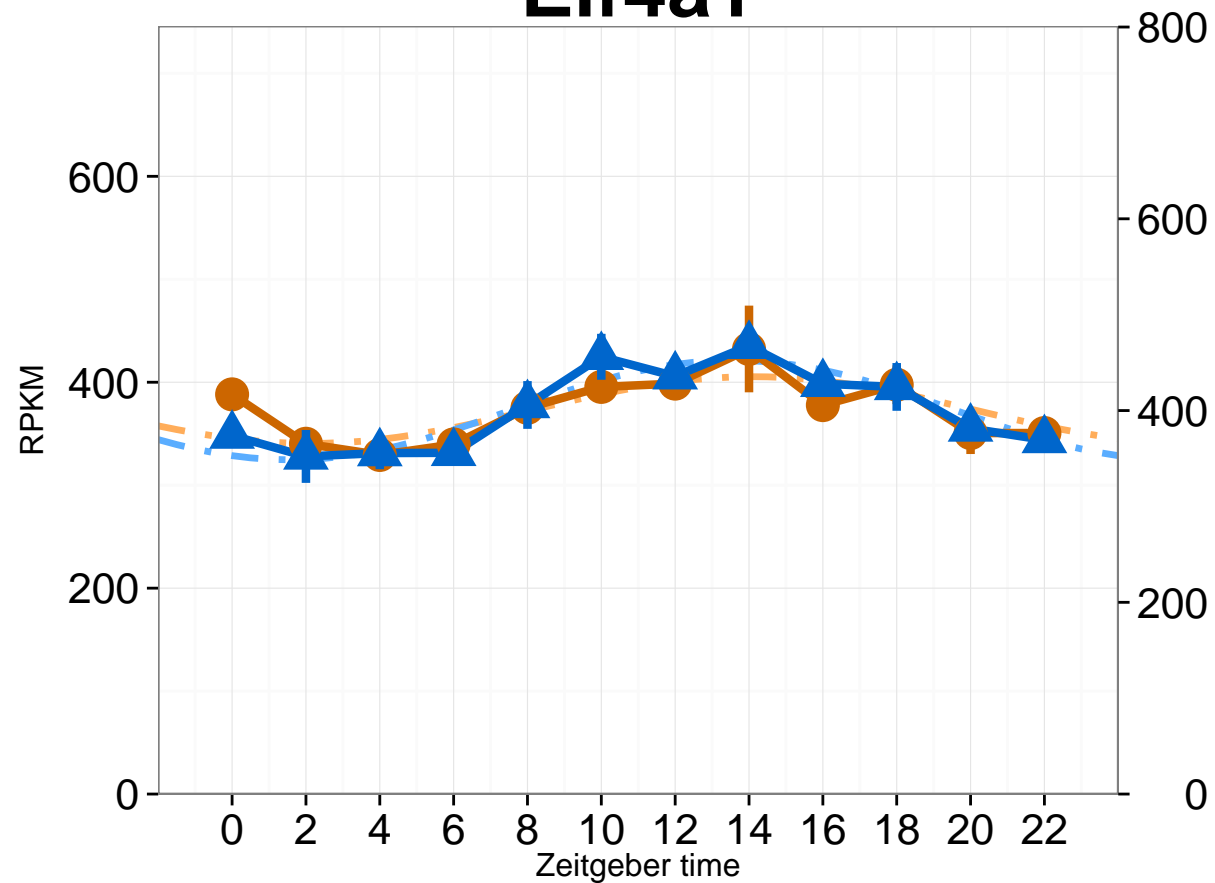

## Eif4a1

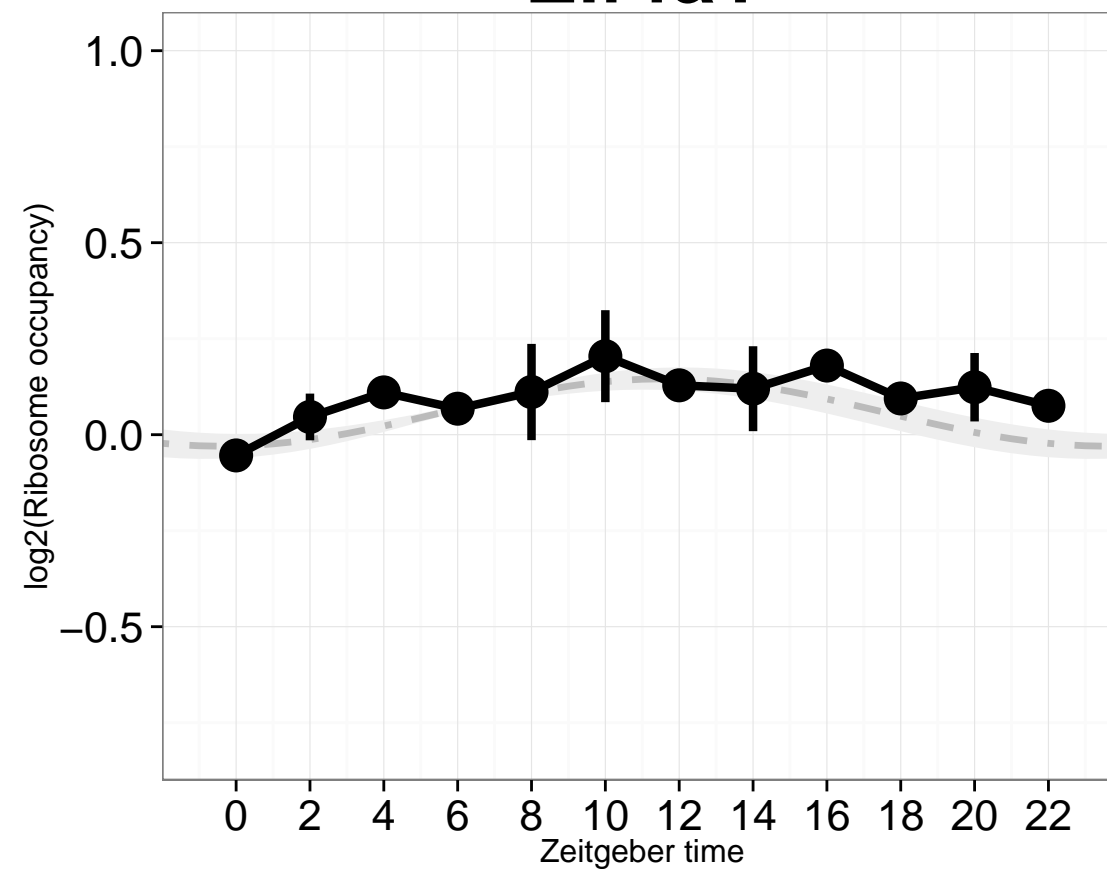

Supplement: SuppDataset_1.zip [file Eif4a1_set_A.pdf › Supplemental Dataset 1/A-mRNA_nonrhyth_translation_nonrhyth/Eif4a1_set_A.pdf]

## Eif4a2

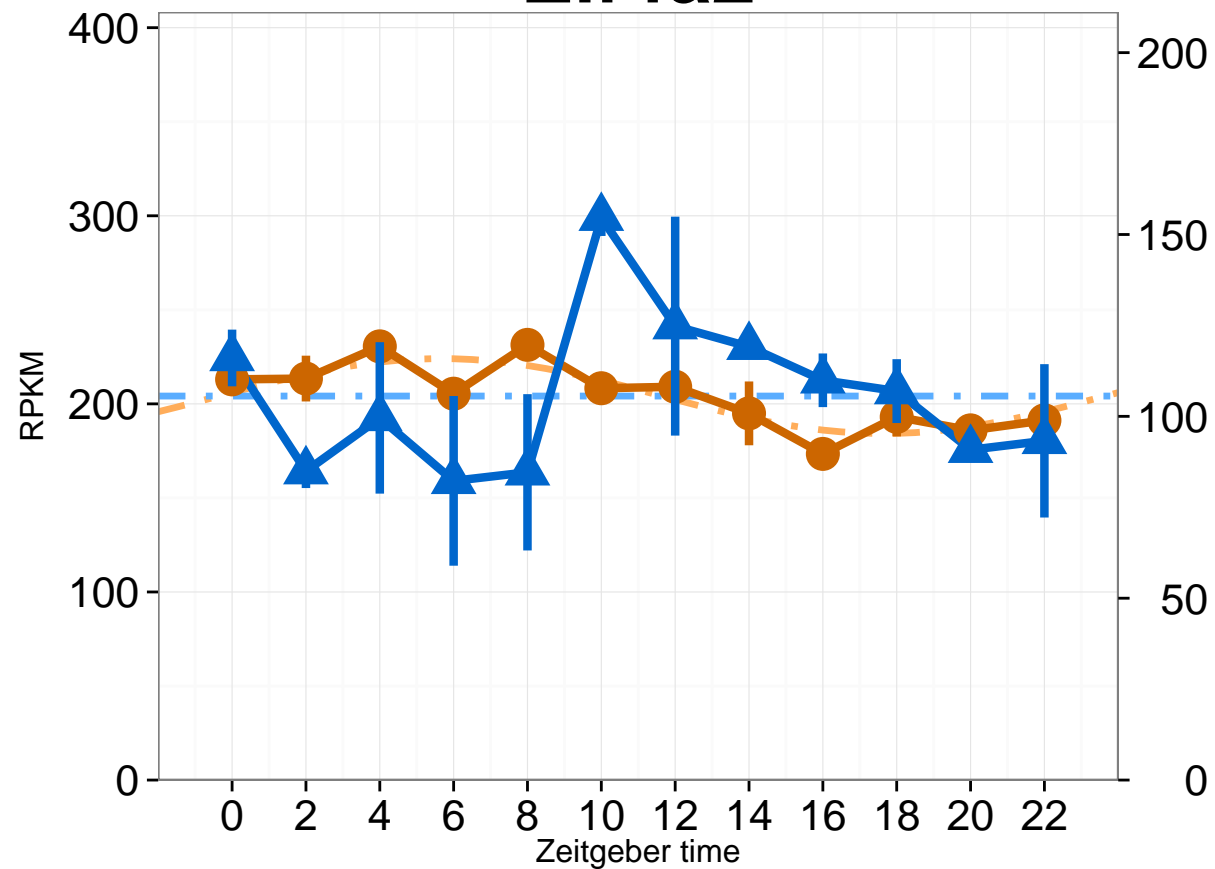

## Eif4a2

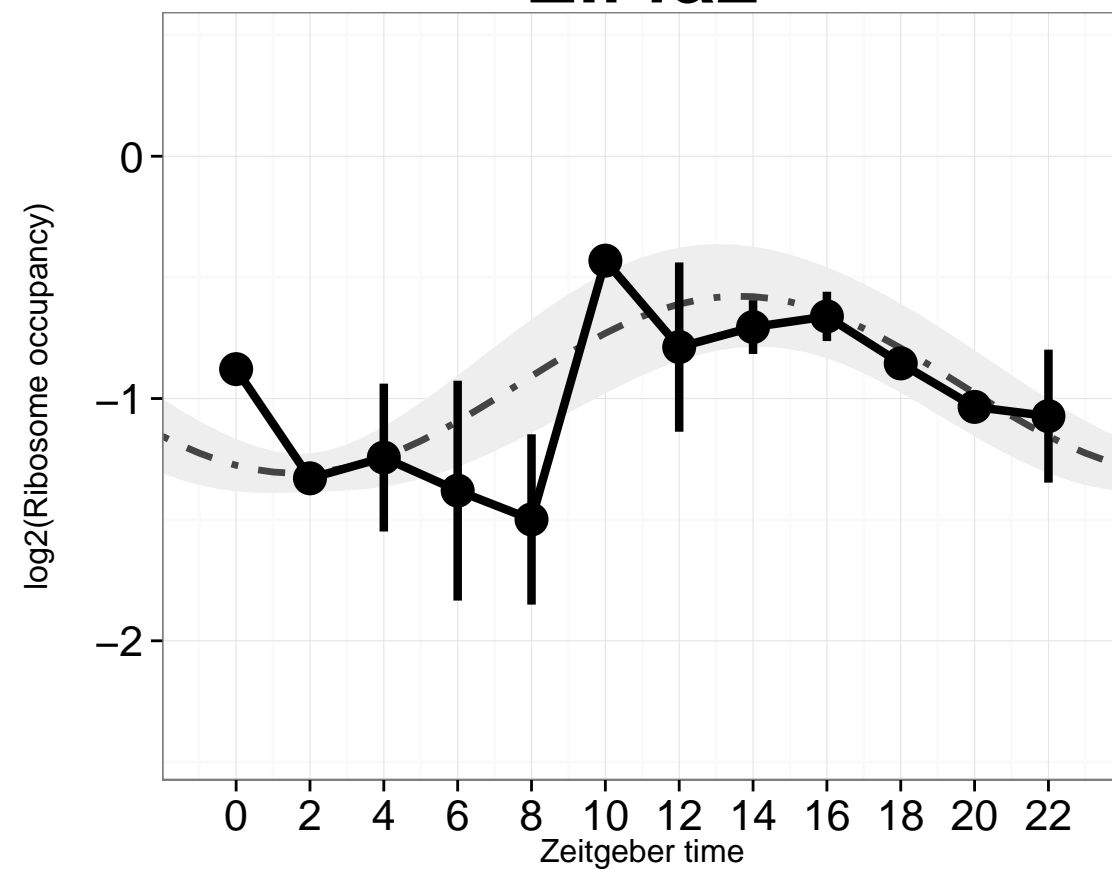

Supplement: SuppDataset_1.zip [file Eif4a2_set_A.pdf › Supplemental Dataset 1/A-mRNA_nonrhyth_translation_nonrhyth/Eif4a2_set_A.pdf]

# Eif4a3

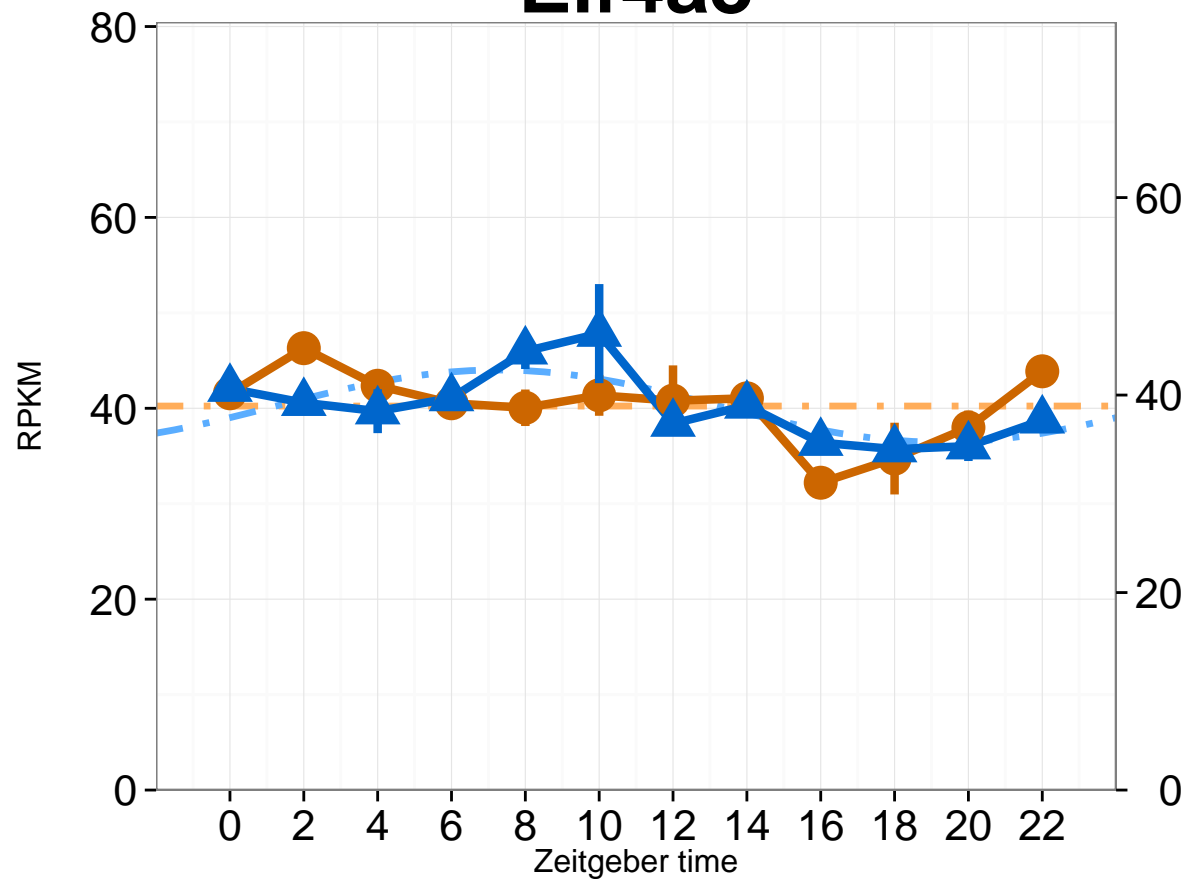

# Eif4a3

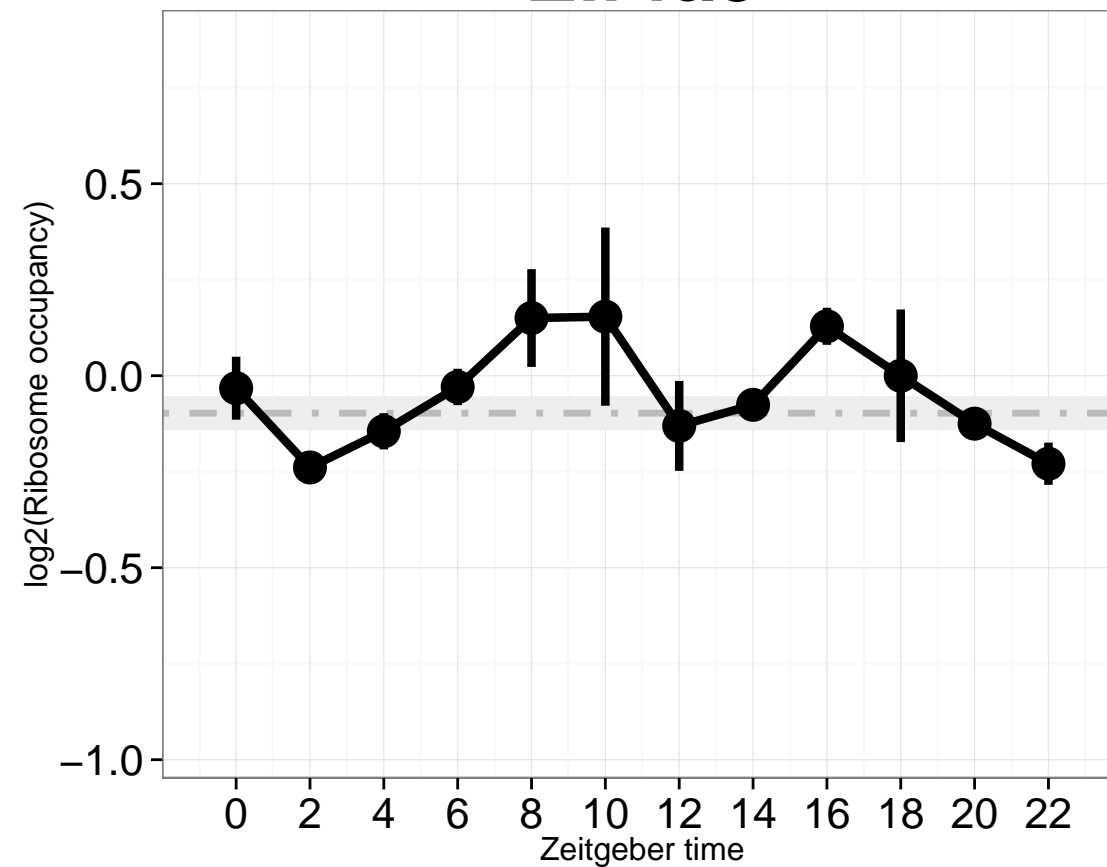

Supplement: SuppDataset_1.zip [file Eif4a3_set_A.pdf › Supplemental Dataset 1/A-mRNA_nonrhyth_translation_nonrhyth/Eif4a3_set_A.pdf]

# Eif4b

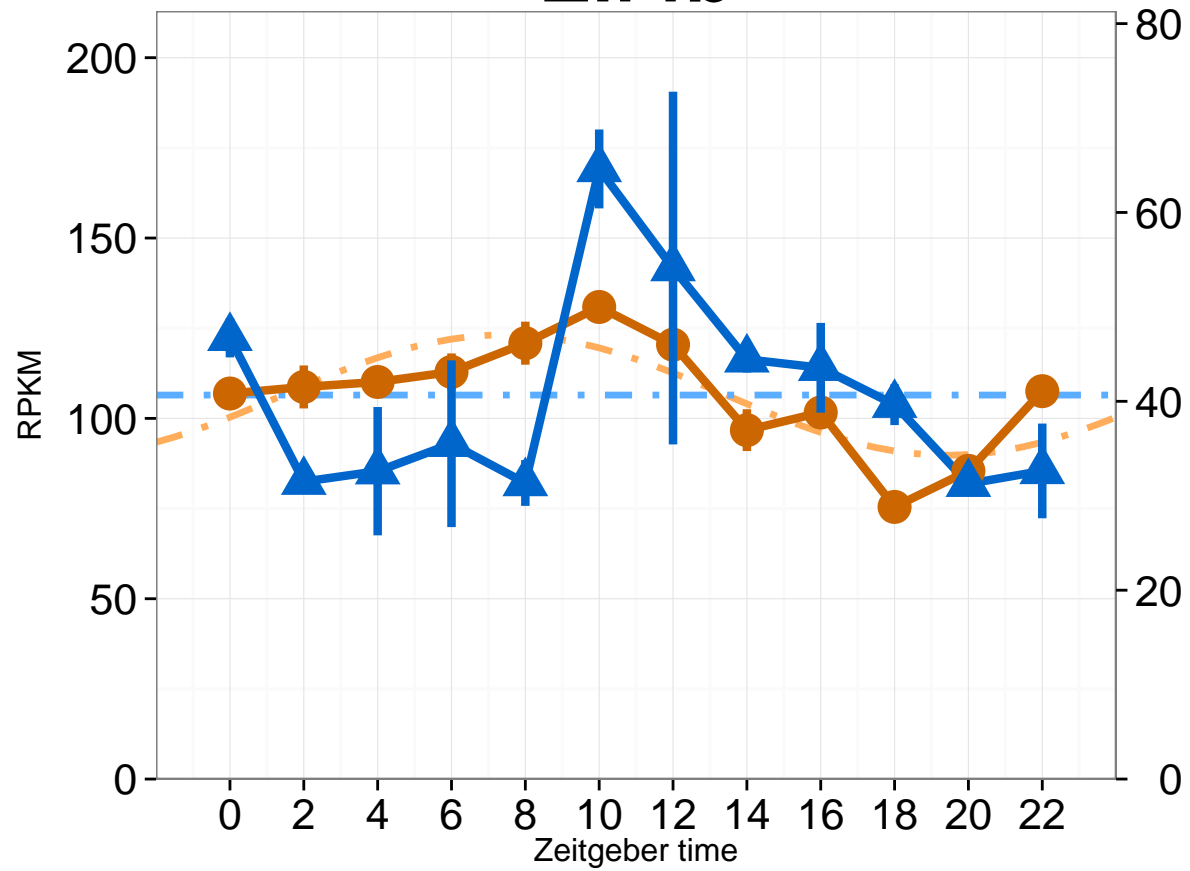

# Eif4b

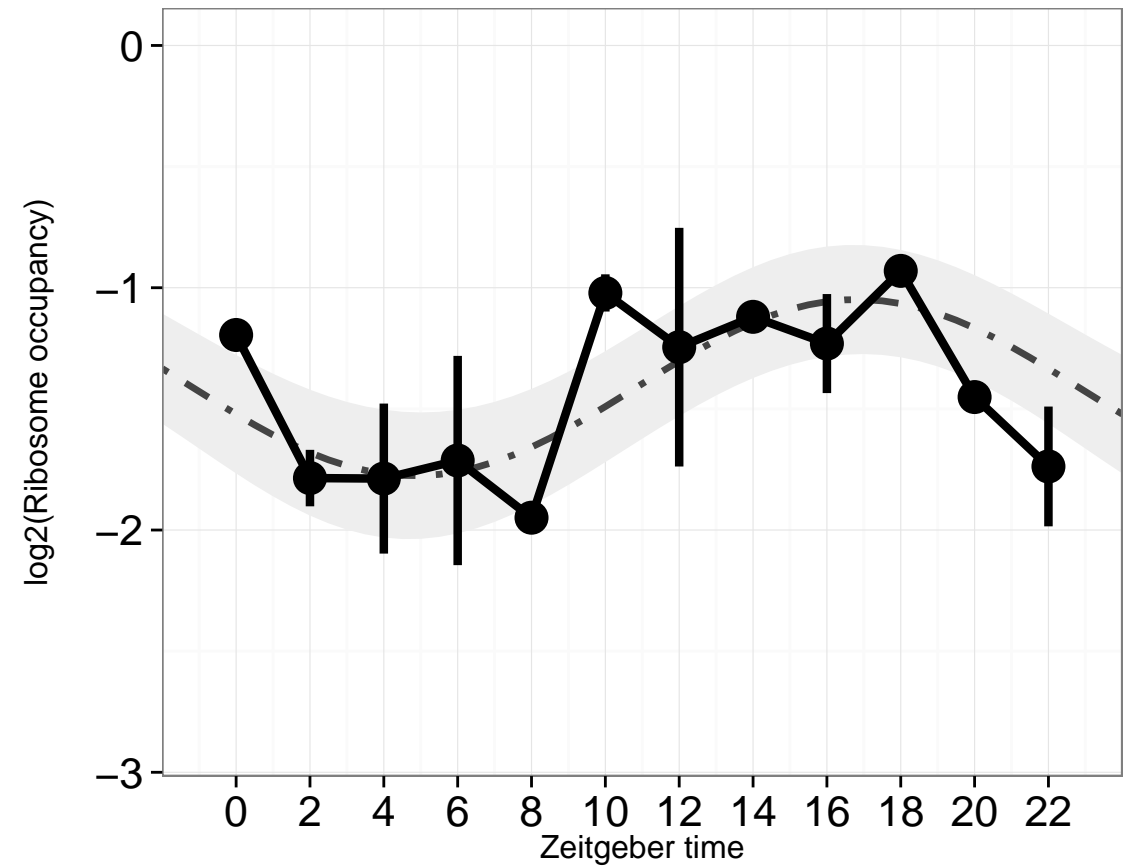

Supplement: SuppDataset_1.zip [file Eif4b_set_A.pdf › Supplemental Dataset 1/A-mRNA_nonrhyth_translation_nonrhyth/Eif4b_set_A.pdf]

## Eif4e2

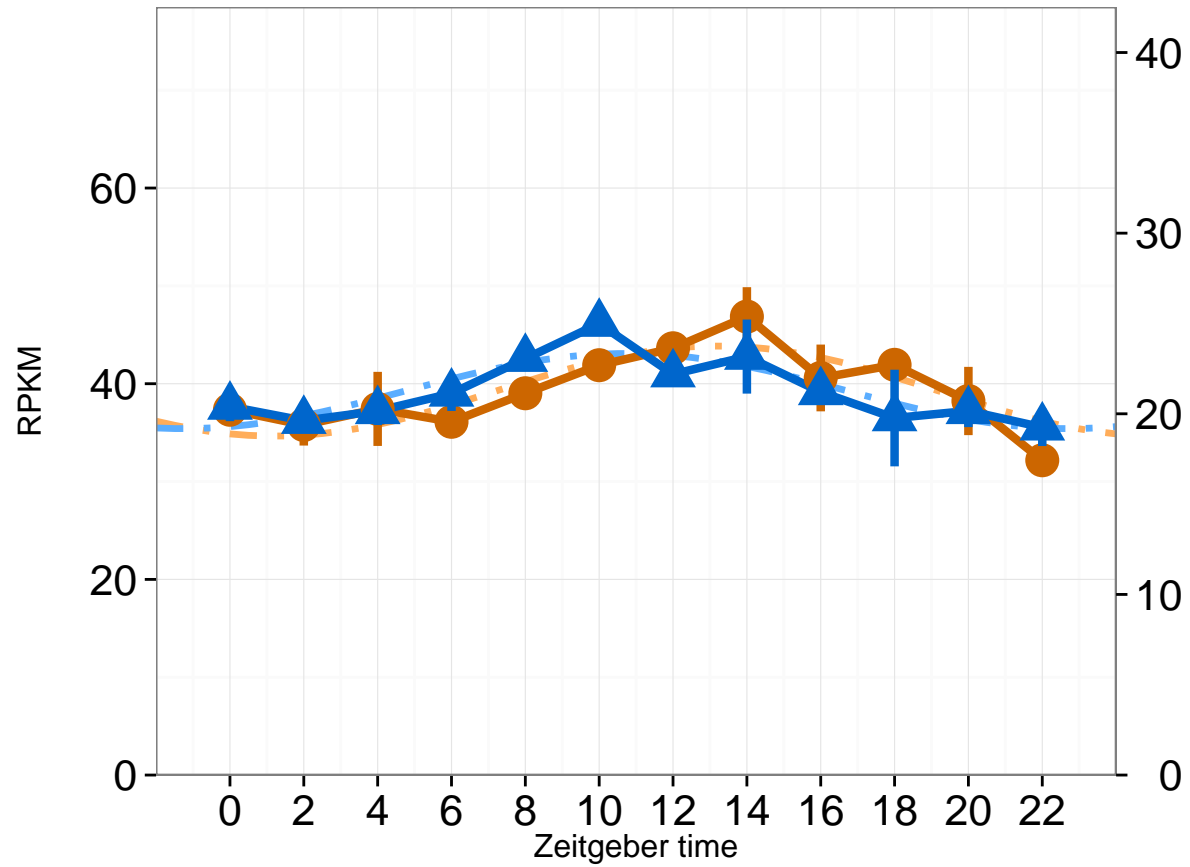

## Eif4e2

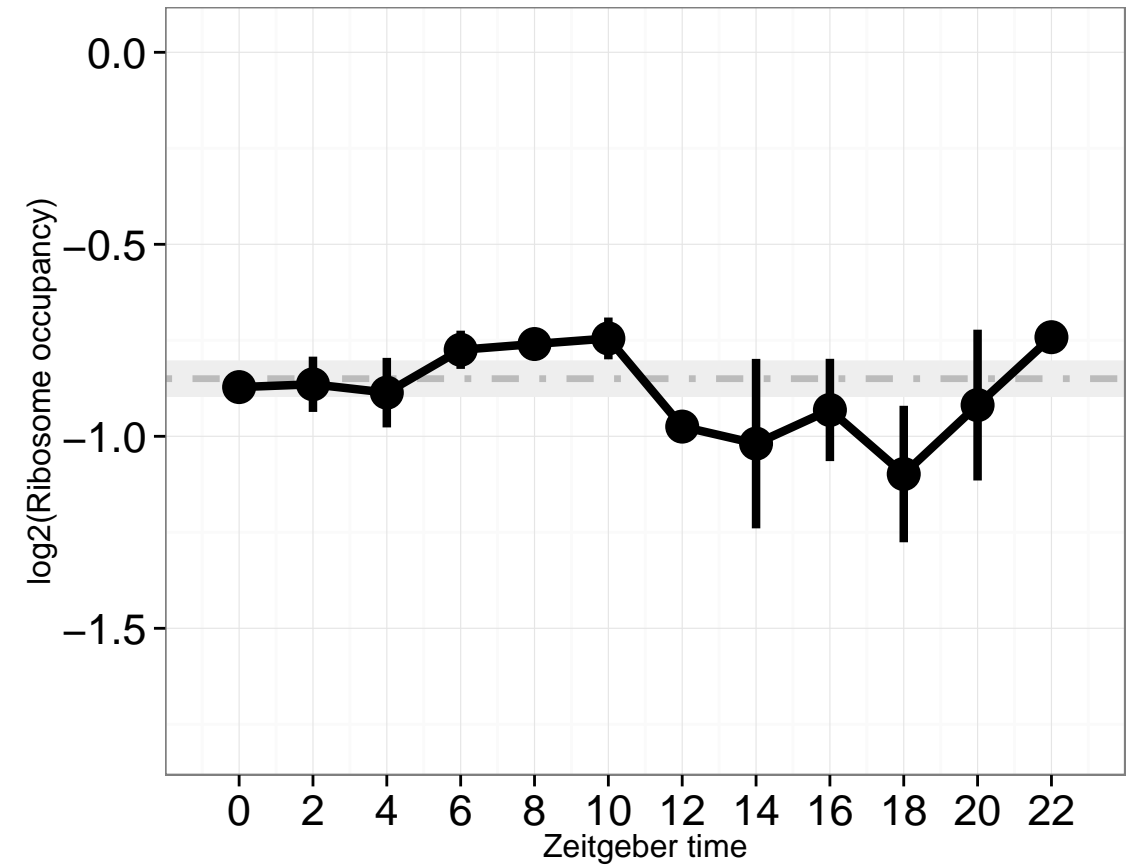

Supplement: SuppDataset_1.zip [file Eif4e2_set_A.pdf › Supplemental Dataset 1/A-mRNA_nonrhyth_translation_nonrhyth/Eif4e2_set_A.pdf]

# Eif4e3

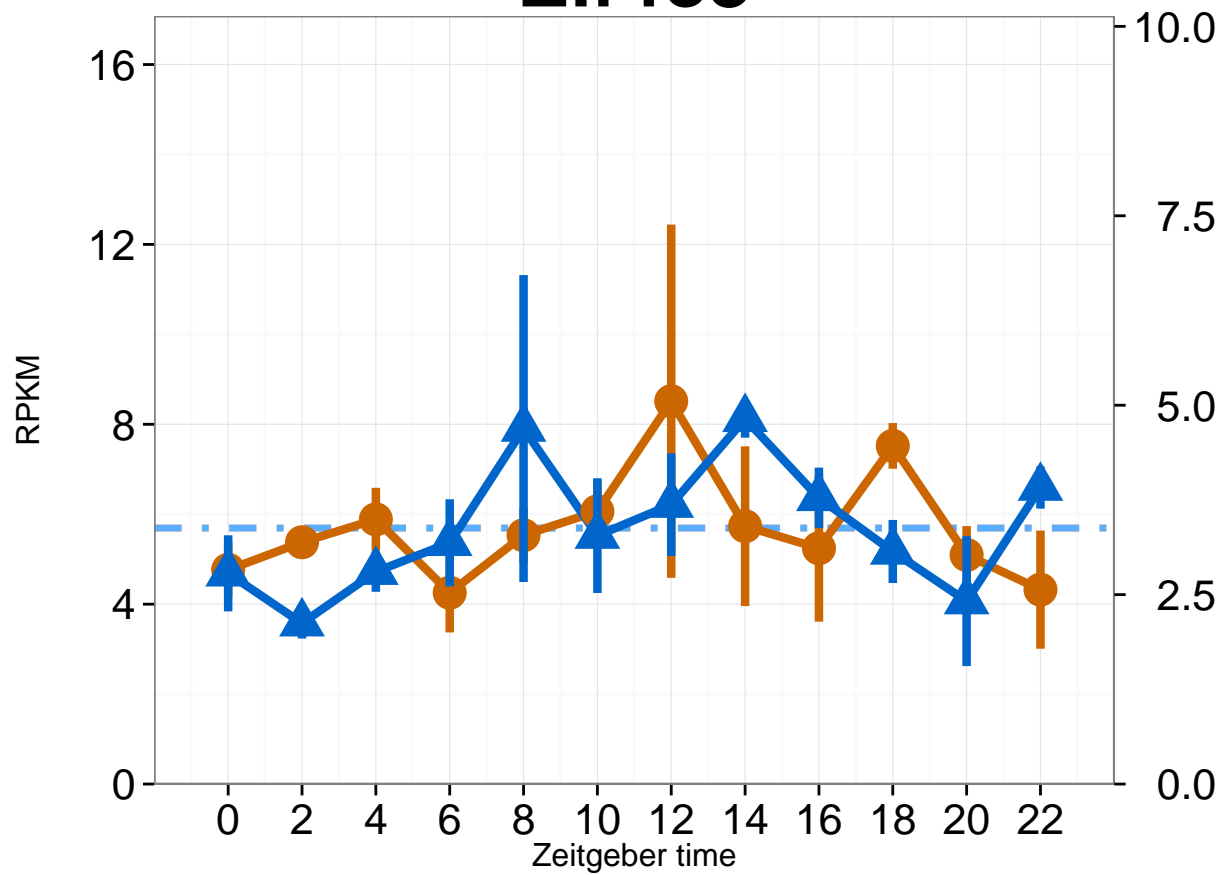

# Eif4e3

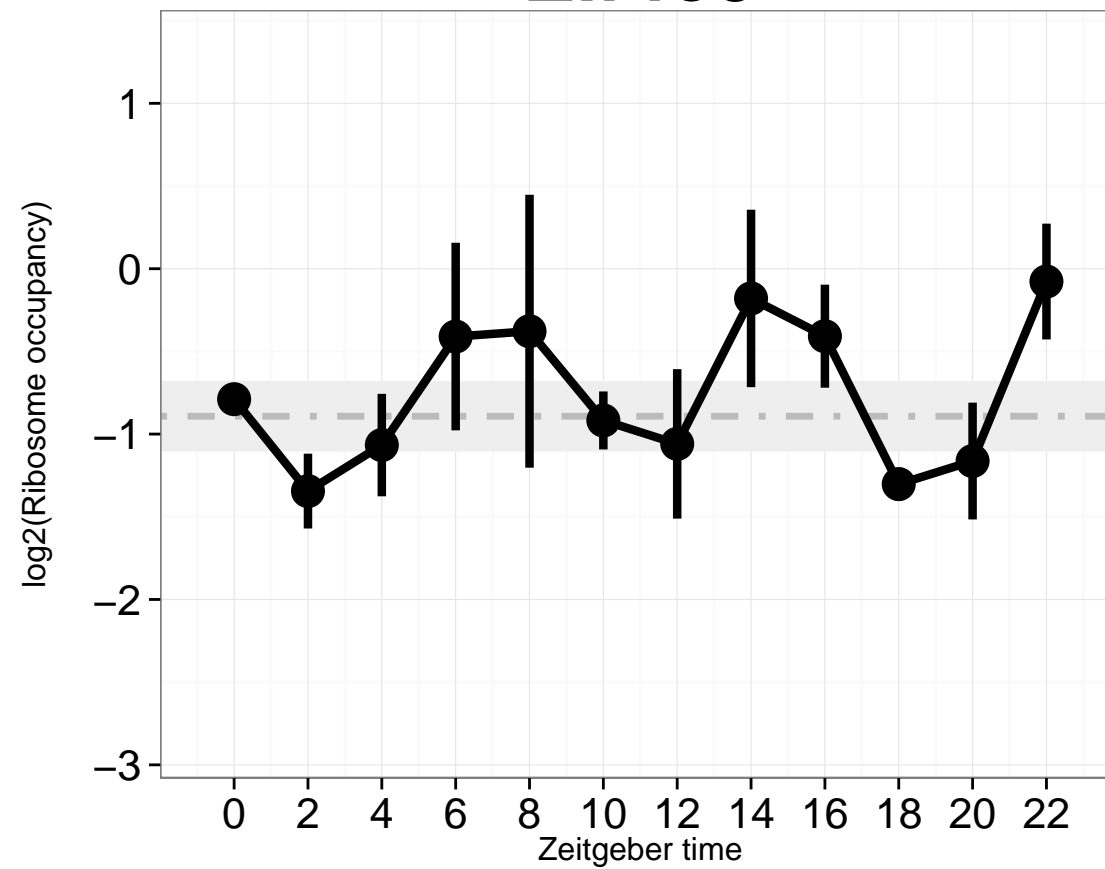

Supplement: SuppDataset_1.zip [file Eif4e3_set_A.pdf › Supplemental Dataset 1/A-mRNA_nonrhyth_translation_nonrhyth/Eif4e3_set_A.pdf]

## Eif4e

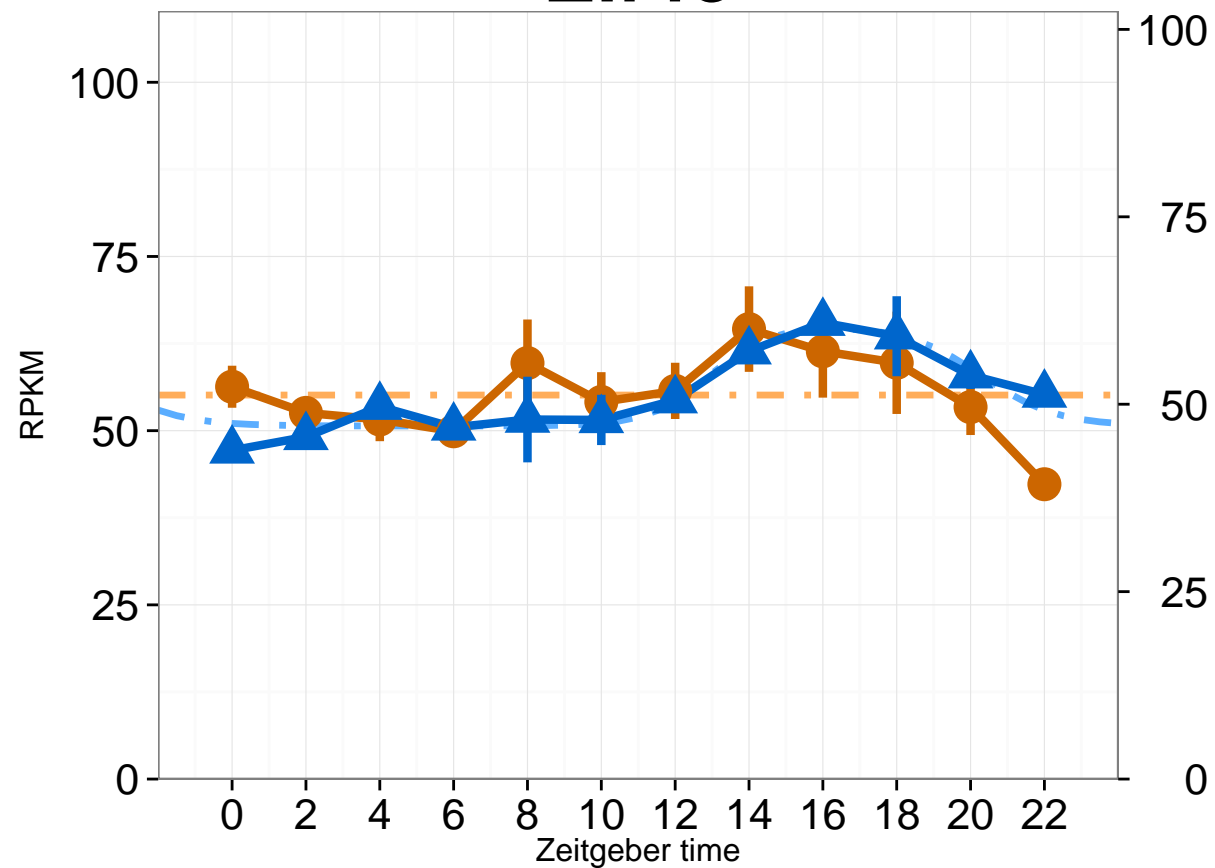

## Eif4e

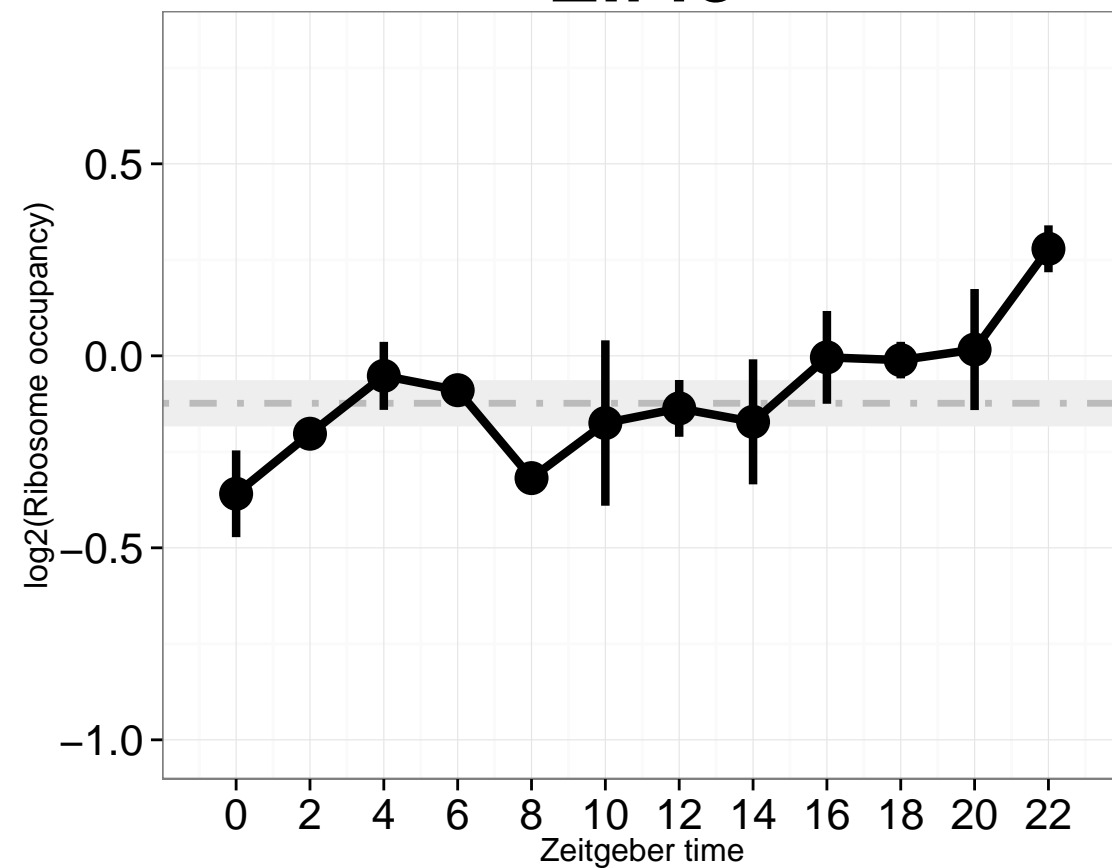

Supplement: SuppDataset_1.zip [file Eif4e_set_A.pdf › Supplemental Dataset 1/A-mRNA_nonrhyth_translation_nonrhyth/Eif4e_set_A.pdf]

# Eif4ebp1

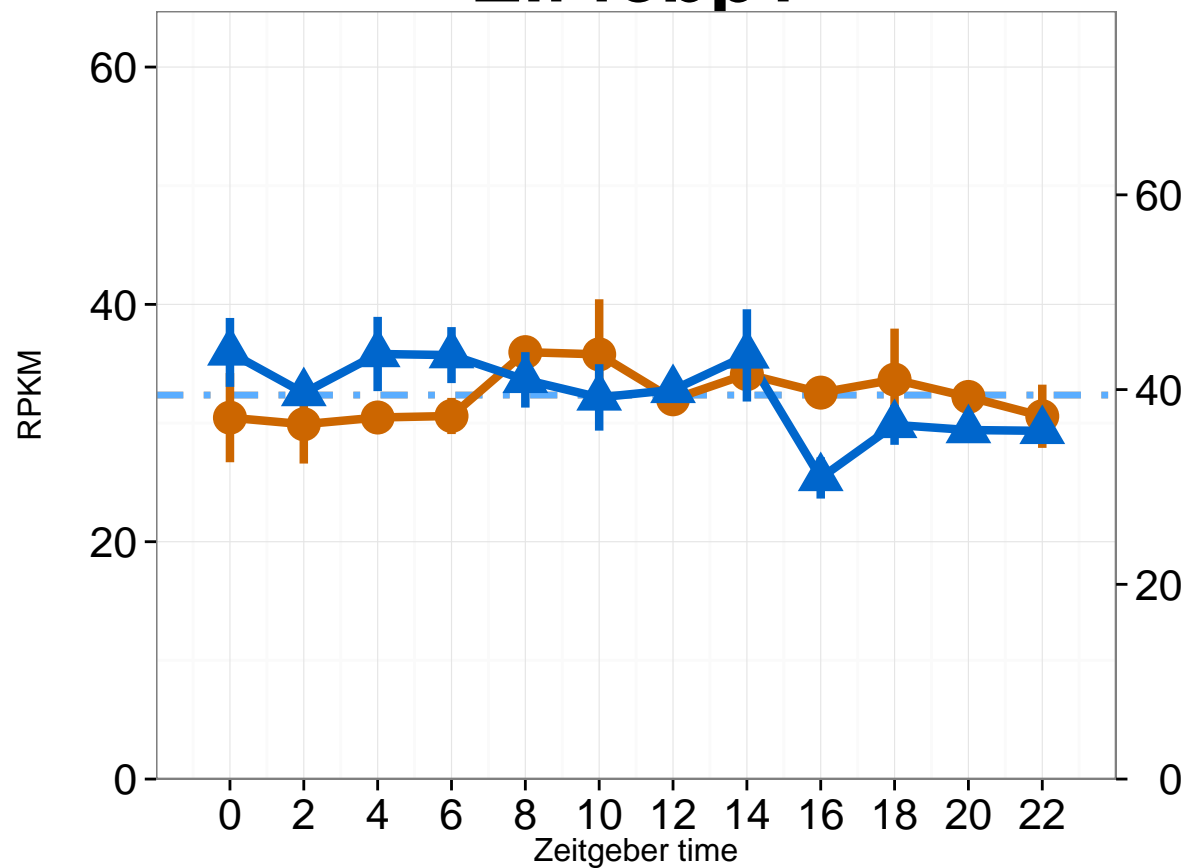

# Eif4ebp1

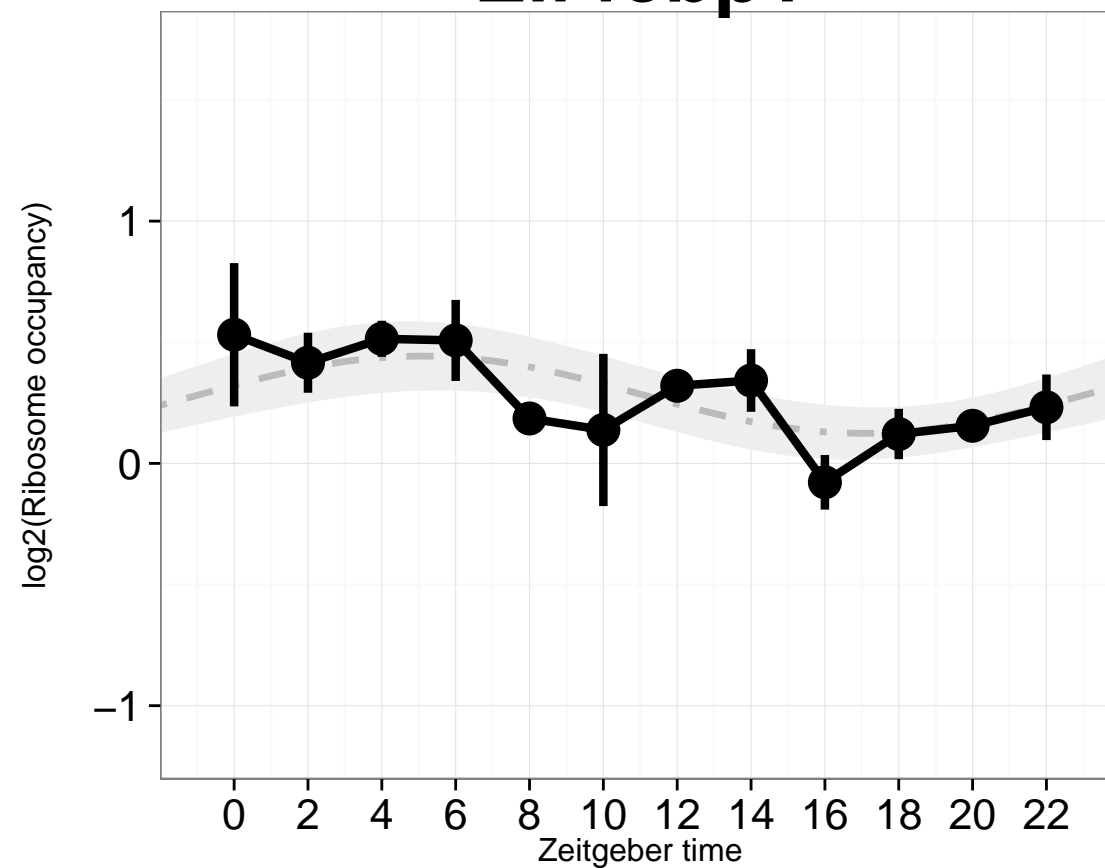

Supplement: SuppDataset_1.zip [file Eif4ebp1_set_A.pdf › Supplemental Dataset 1/A-mRNA_nonrhyth_translation_nonrhyth/Eif4ebp1_set_A.pdf]

# Eif4ebp2

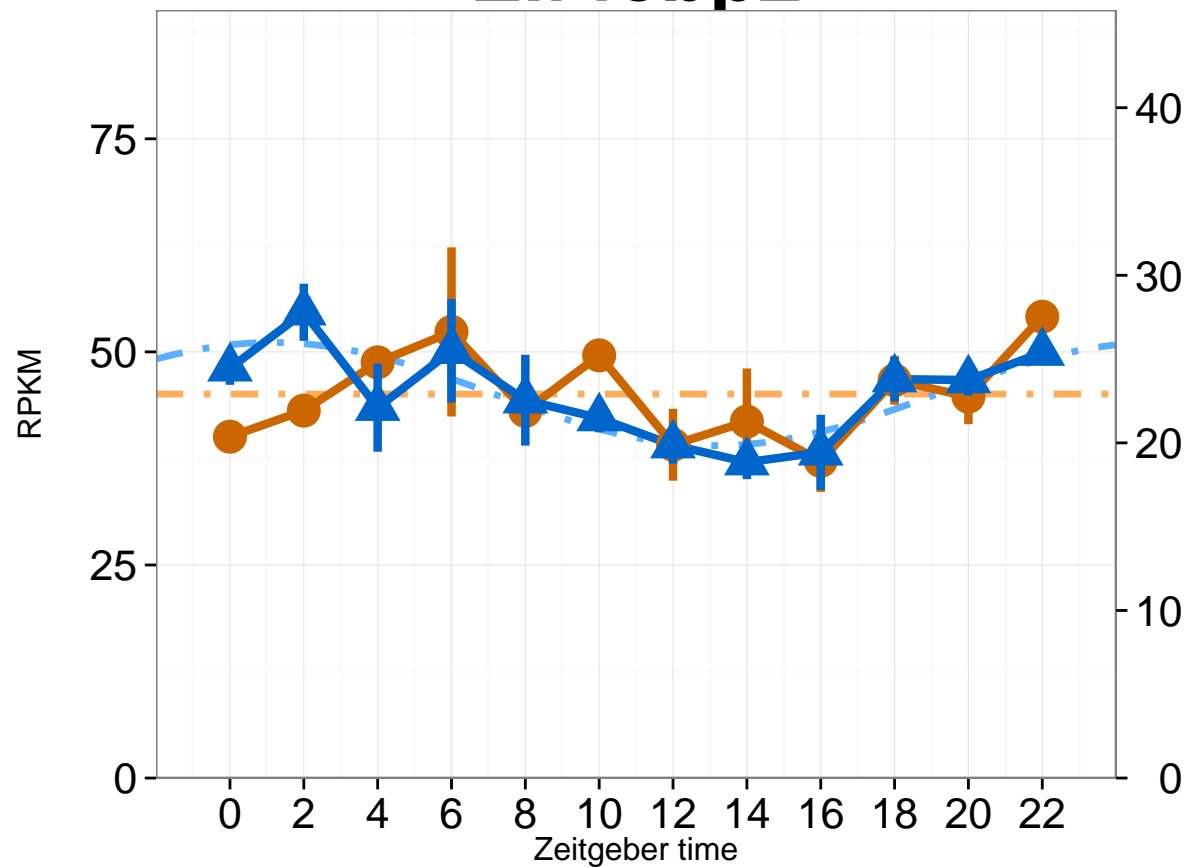

# Eif4ebp2

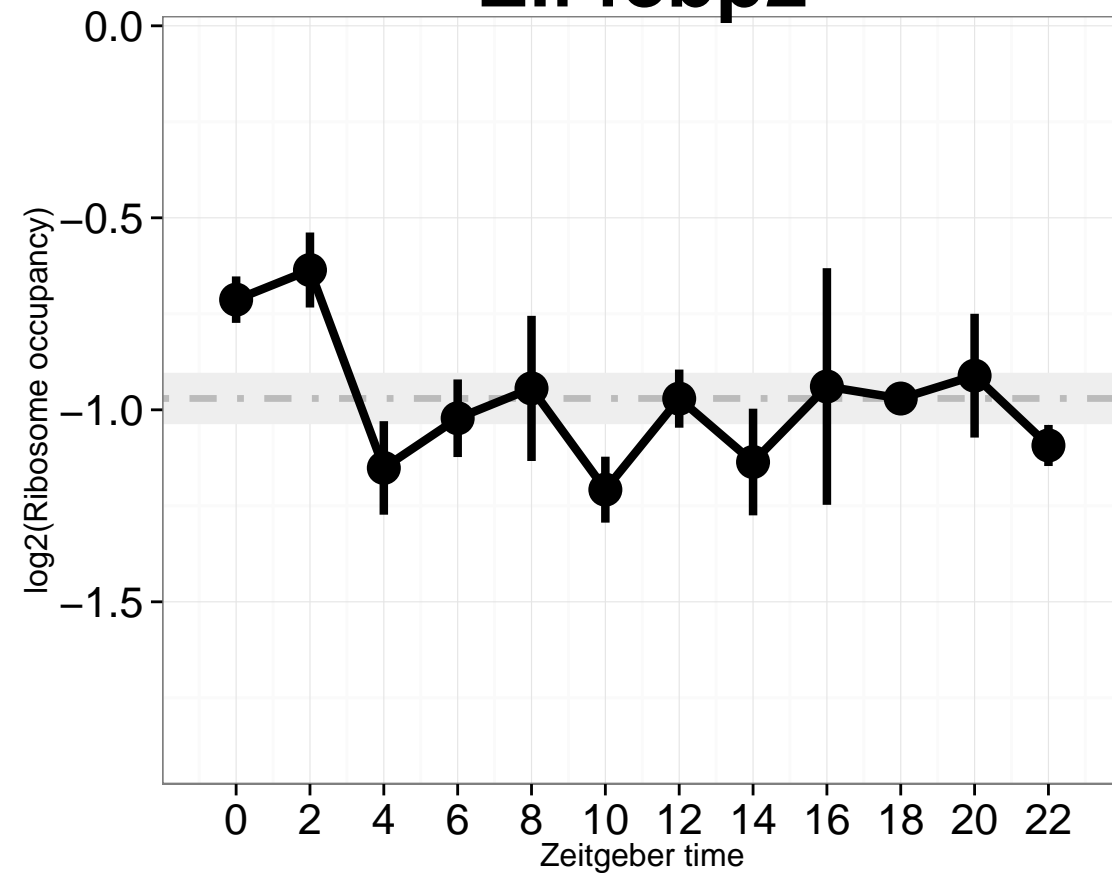

Supplement: SuppDataset_1.zip [file Eif4ebp2_set_A.pdf › Supplemental Dataset 1/A-mRNA_nonrhyth_translation_nonrhyth/Eif4ebp2_set_A.pdf]

Eif4enif1

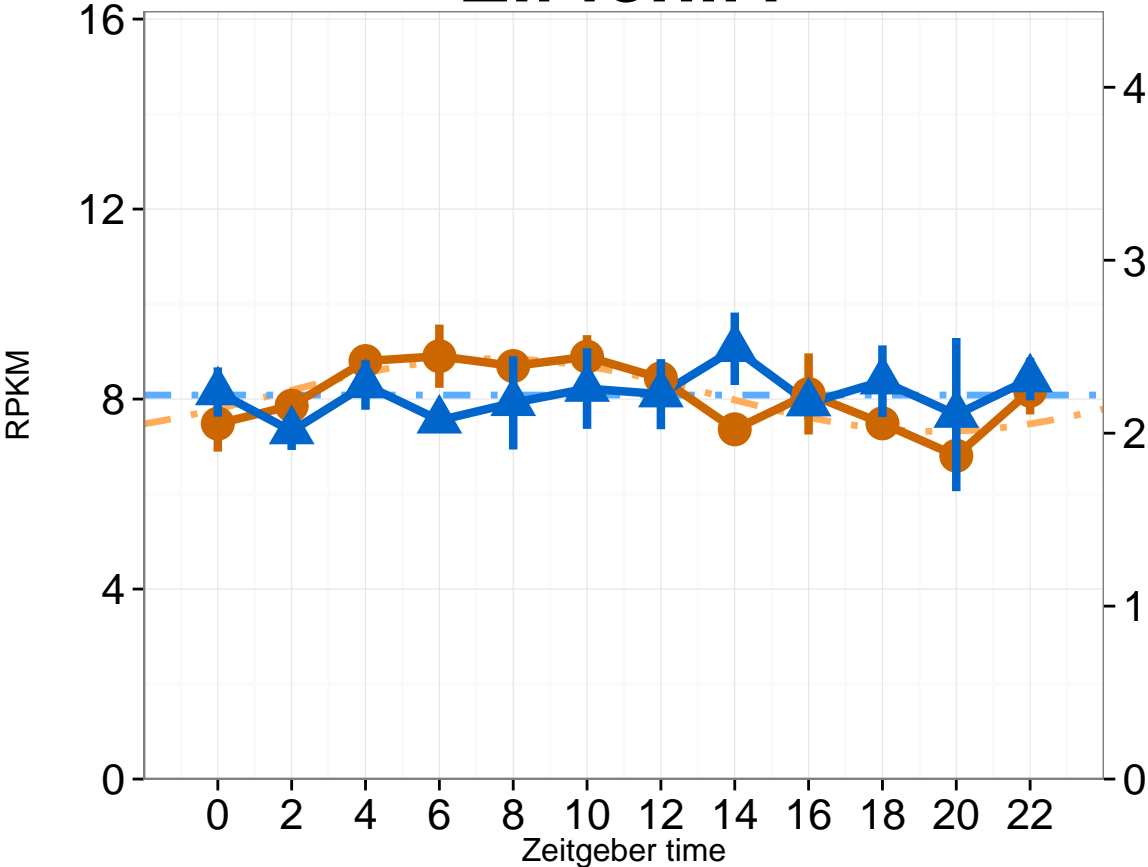

Eif4enif1

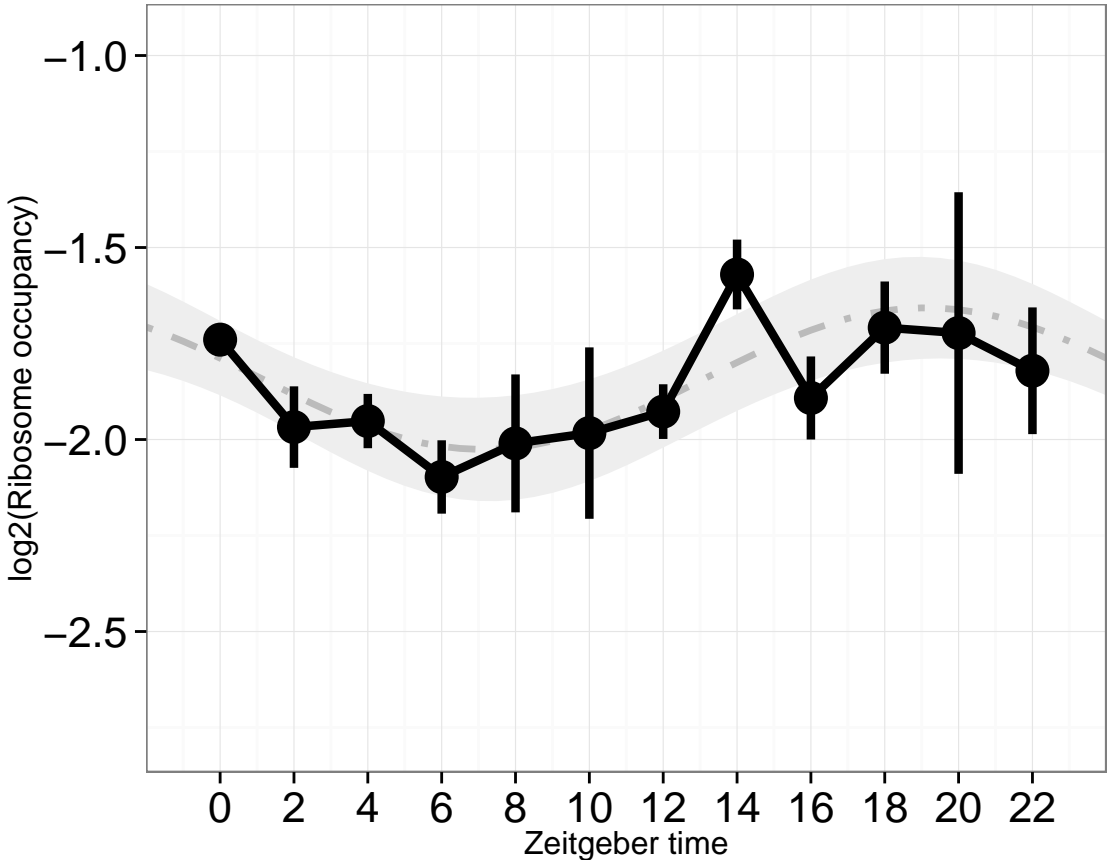

Supplement: SuppDataset_1.zip [file Eif4enif1_set_A.pdf › Supplemental Dataset 1/A-mRNA_nonrhyth_translation_nonrhyth/Eif4enif1_set_A.pdf]

# Eif4g1

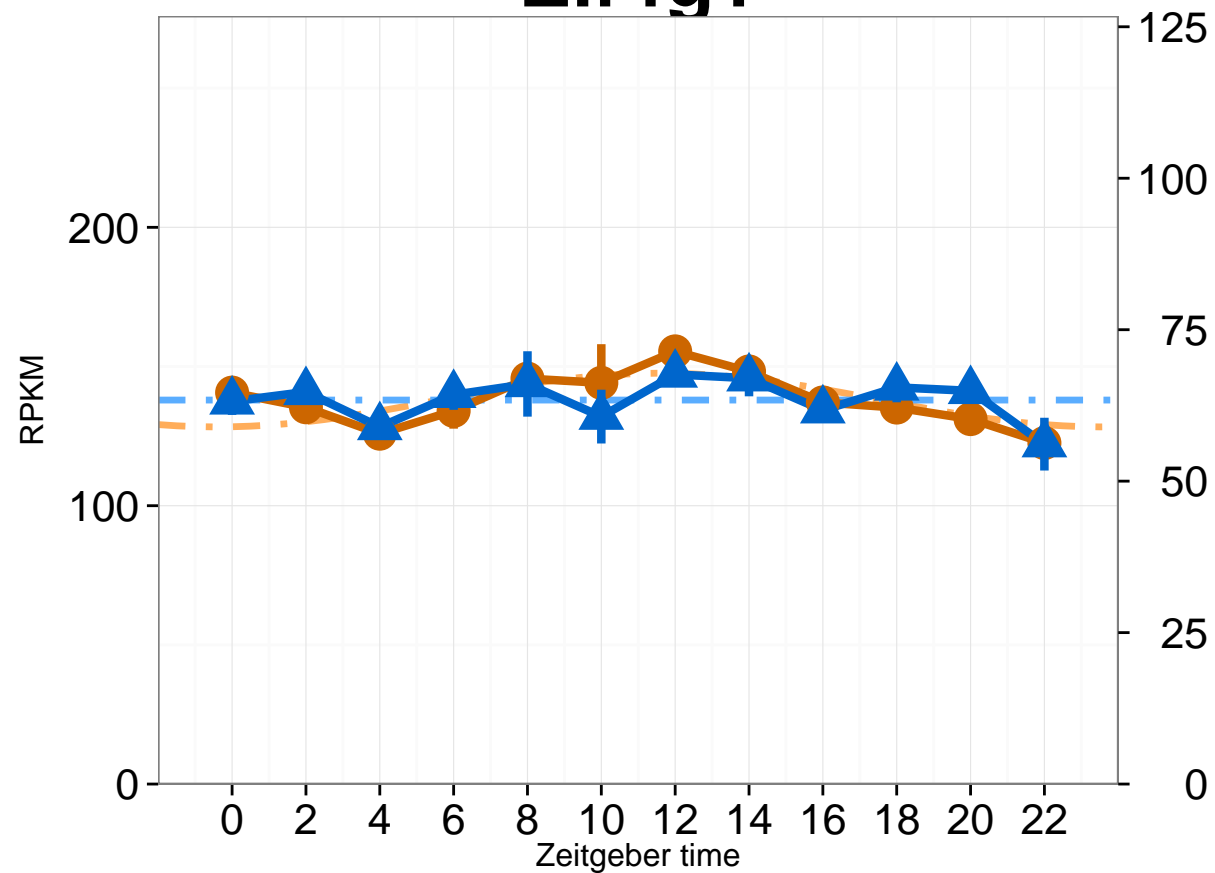

# Eif4g1

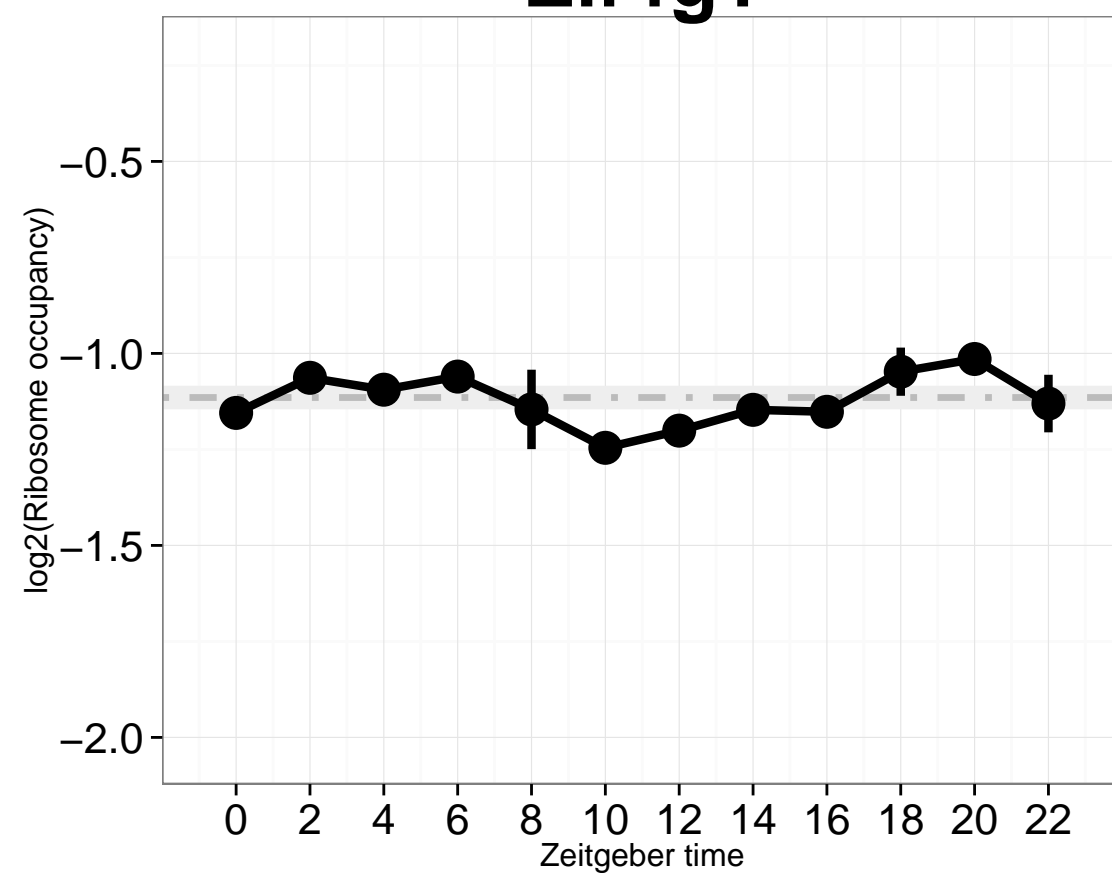

Supplement: SuppDataset_1.zip [file Eif4g1_set_A.pdf › Supplemental Dataset 1/A-mRNA_nonrhyth_translation_nonrhyth/Eif4g1_set_A.pdf]

# Eif4g2

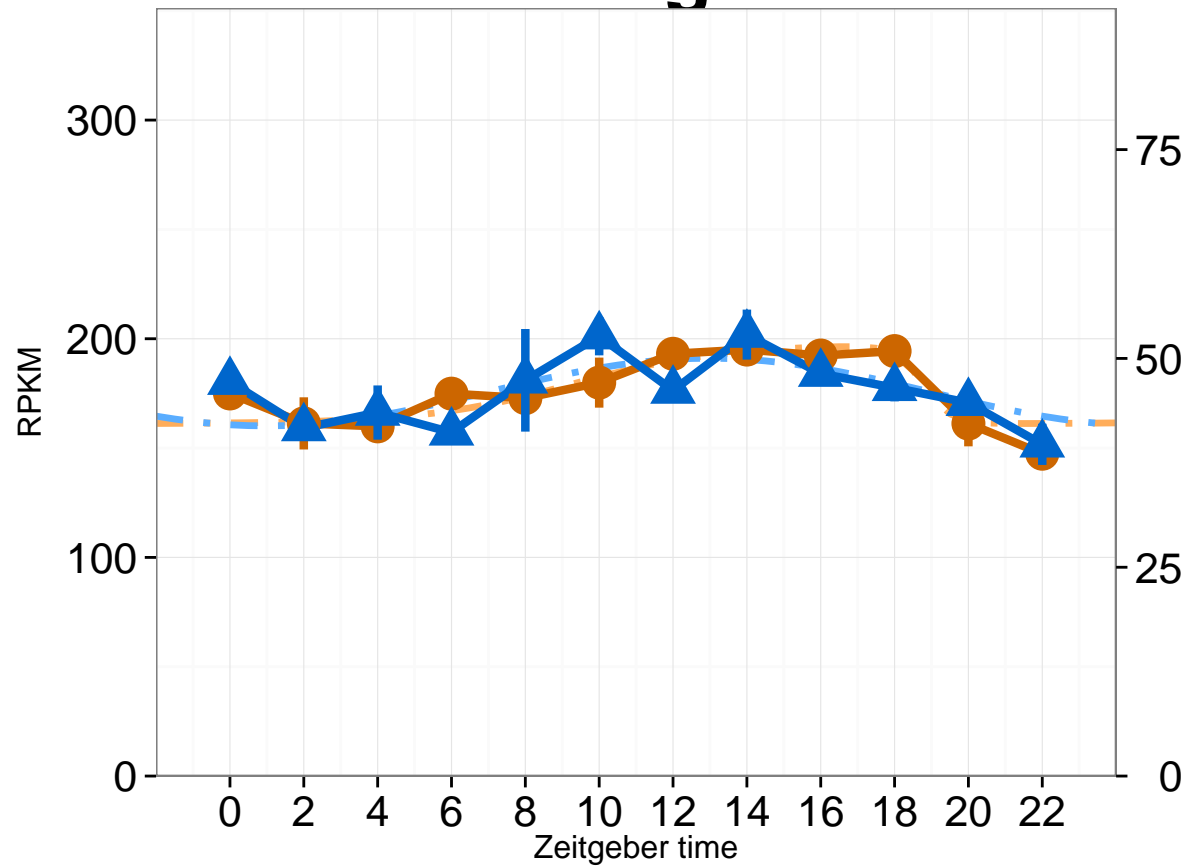

# Eif4g2

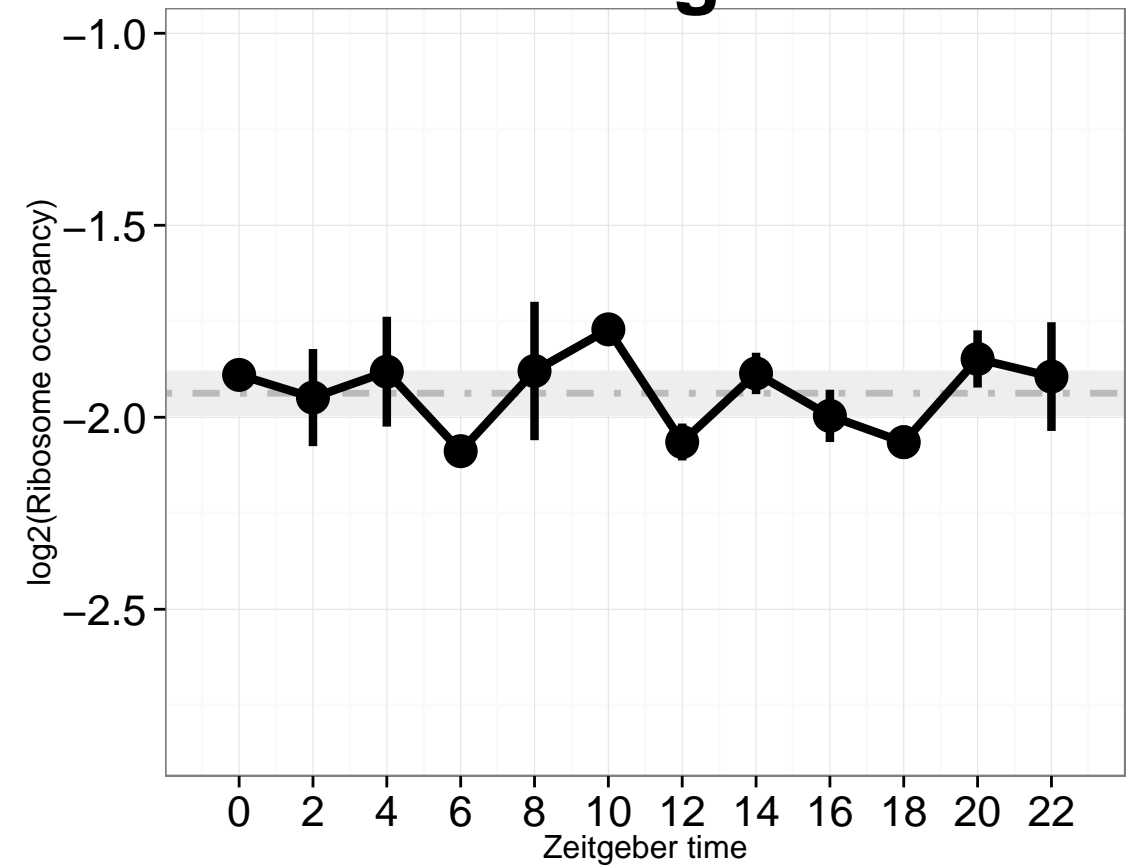

Supplement: SuppDataset_1.zip [file Eif4g2_set_A.pdf › Supplemental Dataset 1/A-mRNA_nonrhyth_translation_nonrhyth/Eif4g2_set_A.pdf]

# Eif4g3

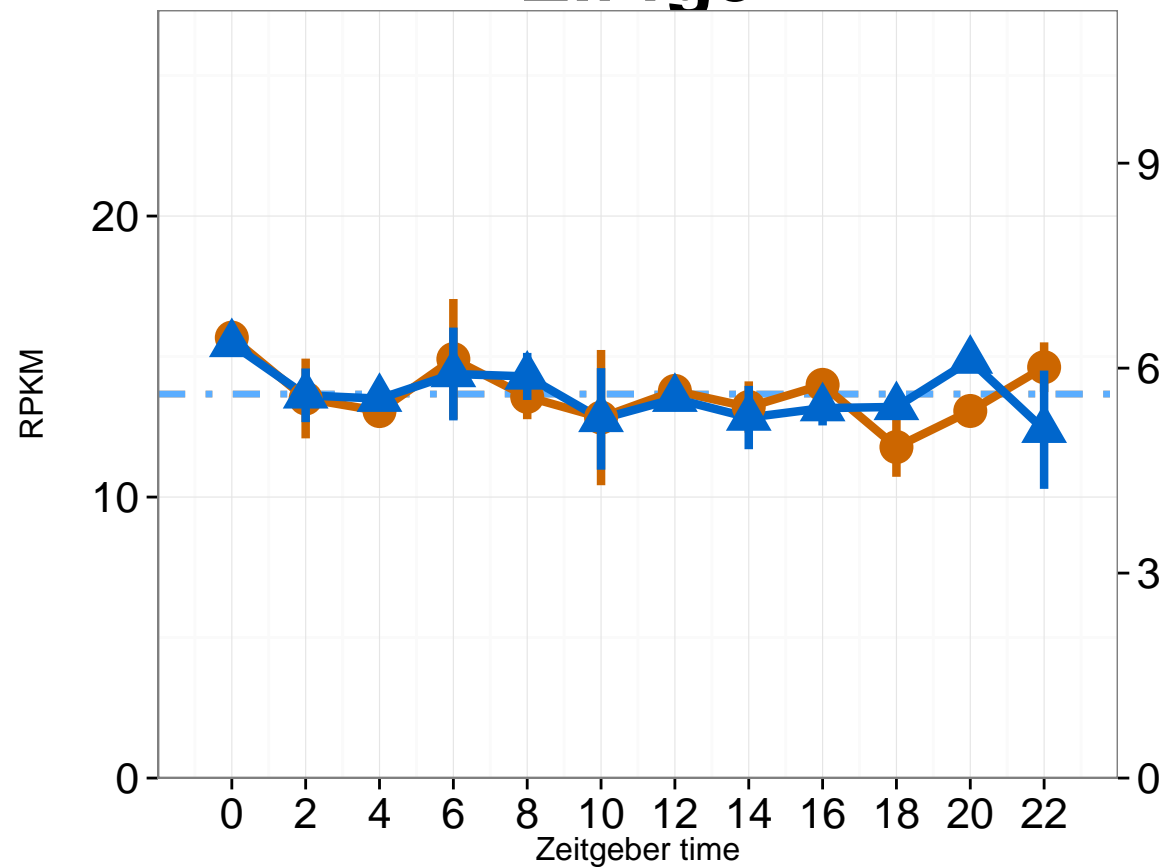

# Eif4g3

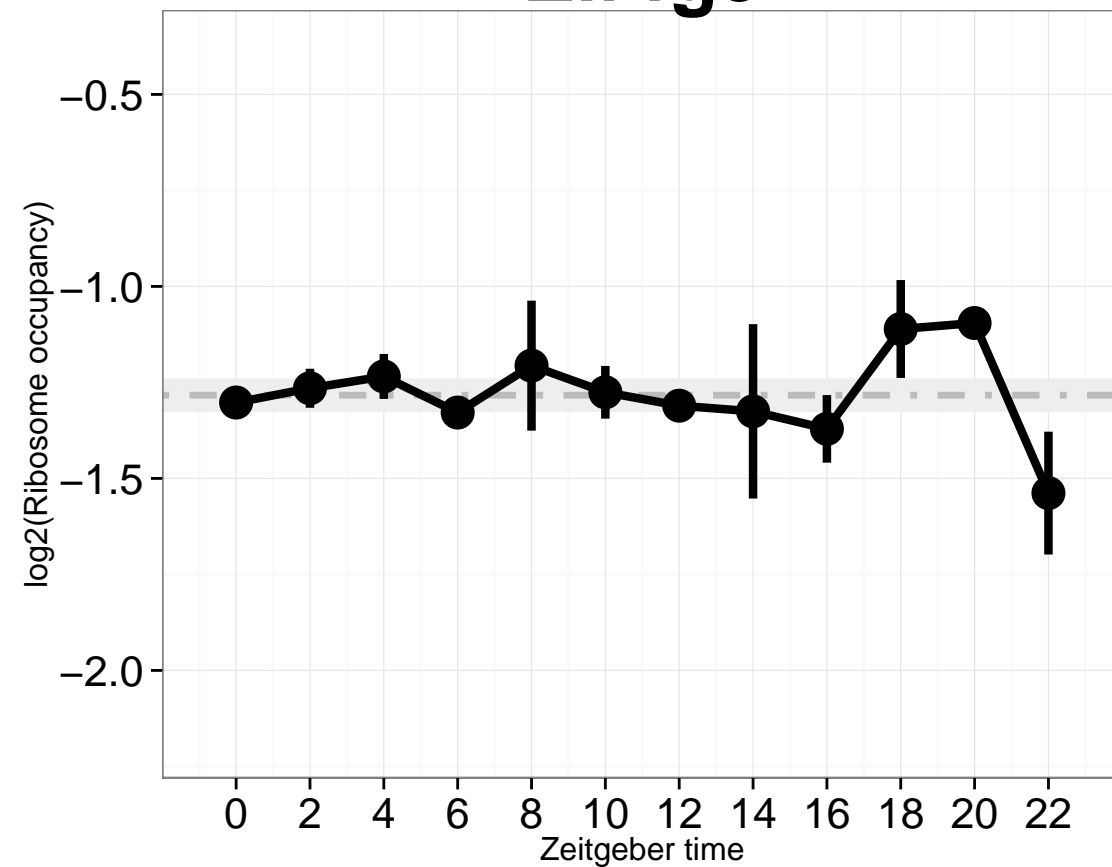

Supplement: SuppDataset_1.zip [file Eif4g3_set_A.pdf › Supplemental Dataset 1/A-mRNA_nonrhyth_translation_nonrhyth/Eif4g3_set_A.pdf]

## Eif4h

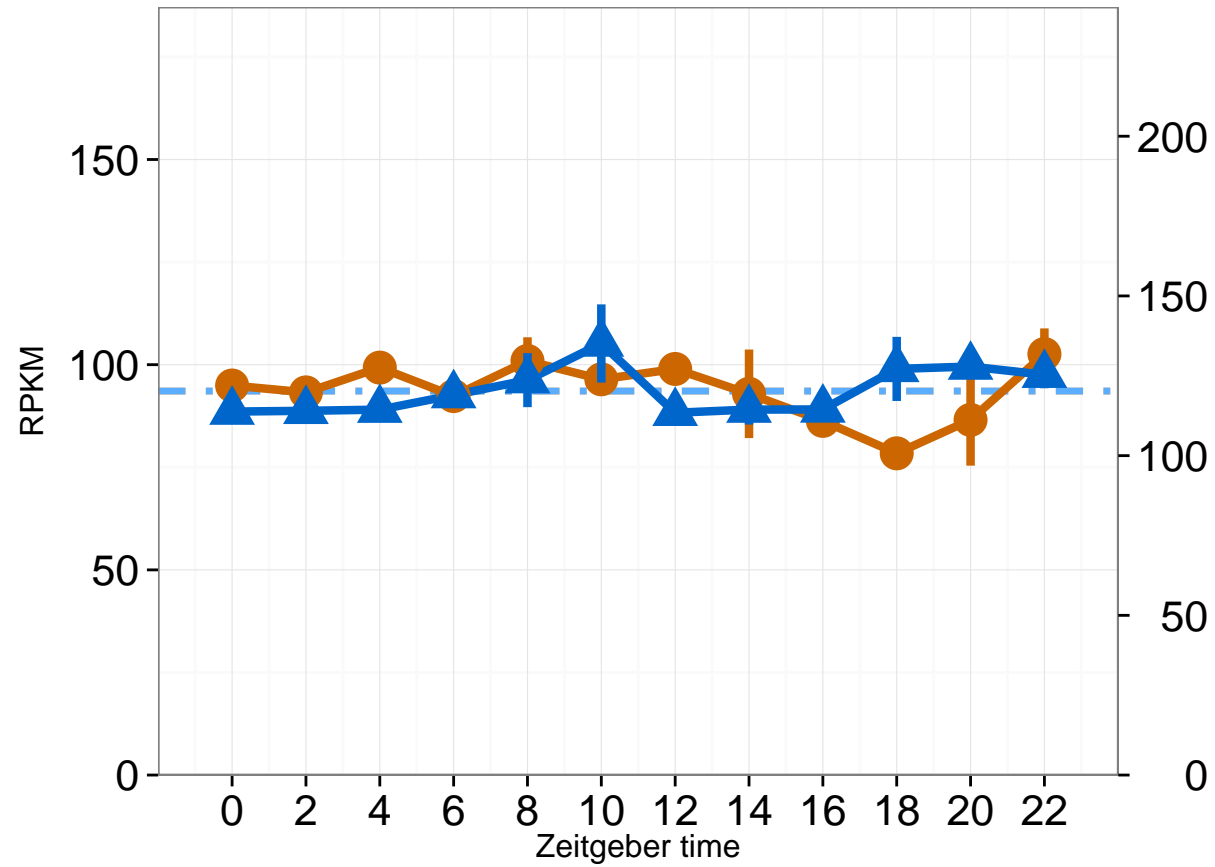

## Eif4h

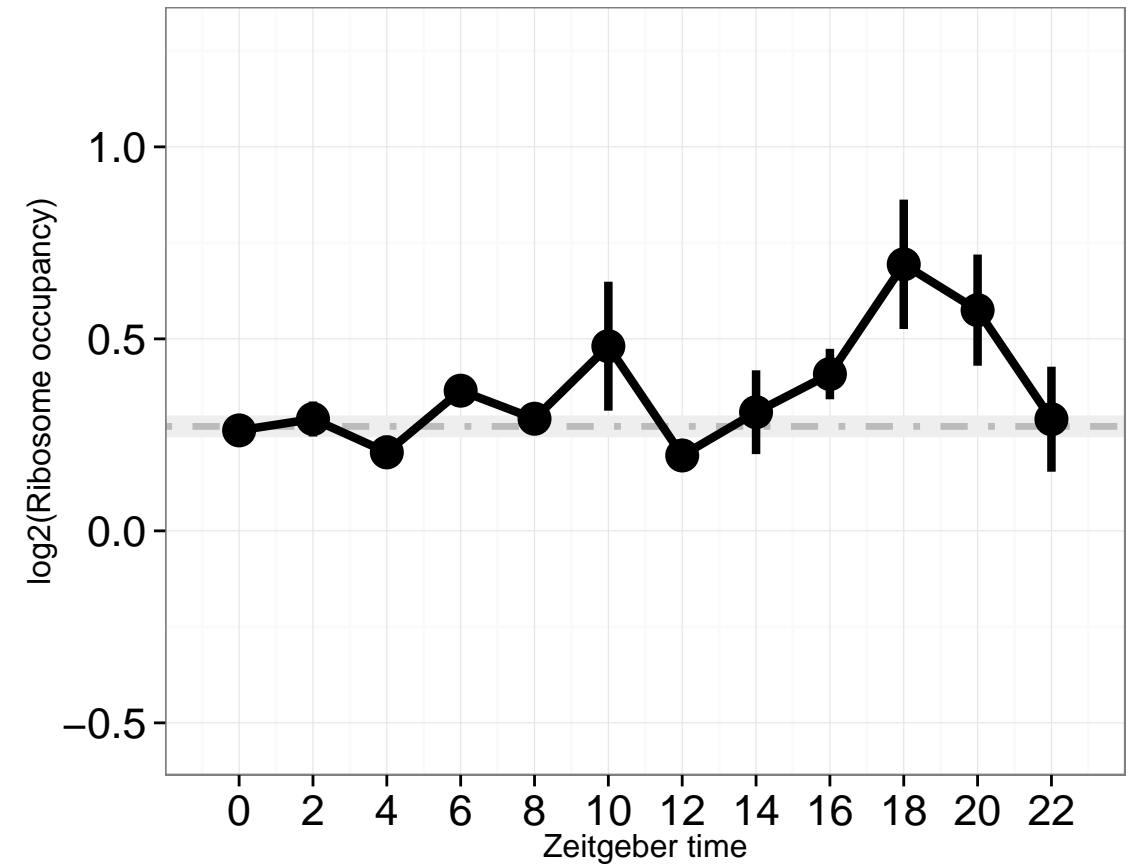

Supplement: SuppDataset_1.zip [file Eif4h_set_A.pdf › Supplemental Dataset 1/A-mRNA_nonrhyth_translation_nonrhyth/Eif4h_set_A.pdf]

## Eif5

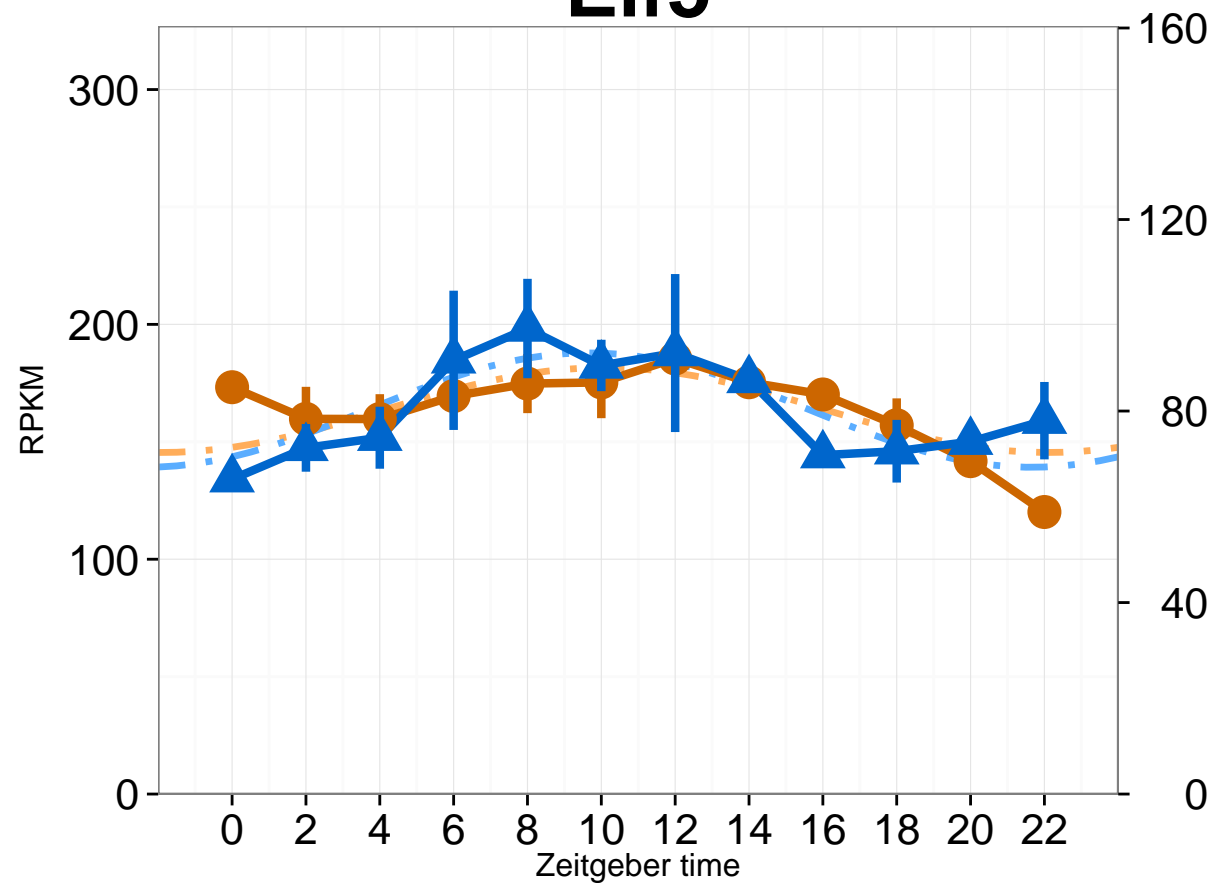

## Eif5

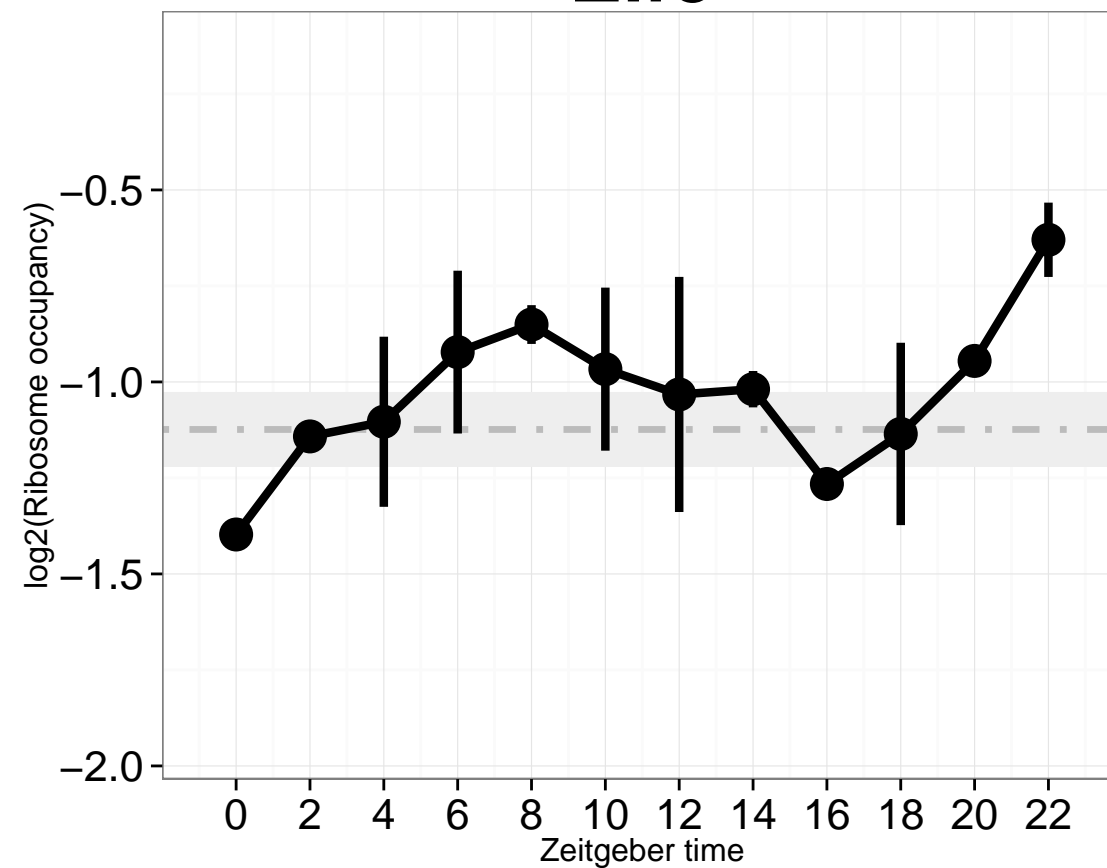

Supplement: SuppDataset_1.zip [file Eif5_set_A.pdf › Supplemental Dataset 1/A-mRNA_nonrhyth_translation_nonrhyth/Eif5_set_A.pdf]

## Eif5a

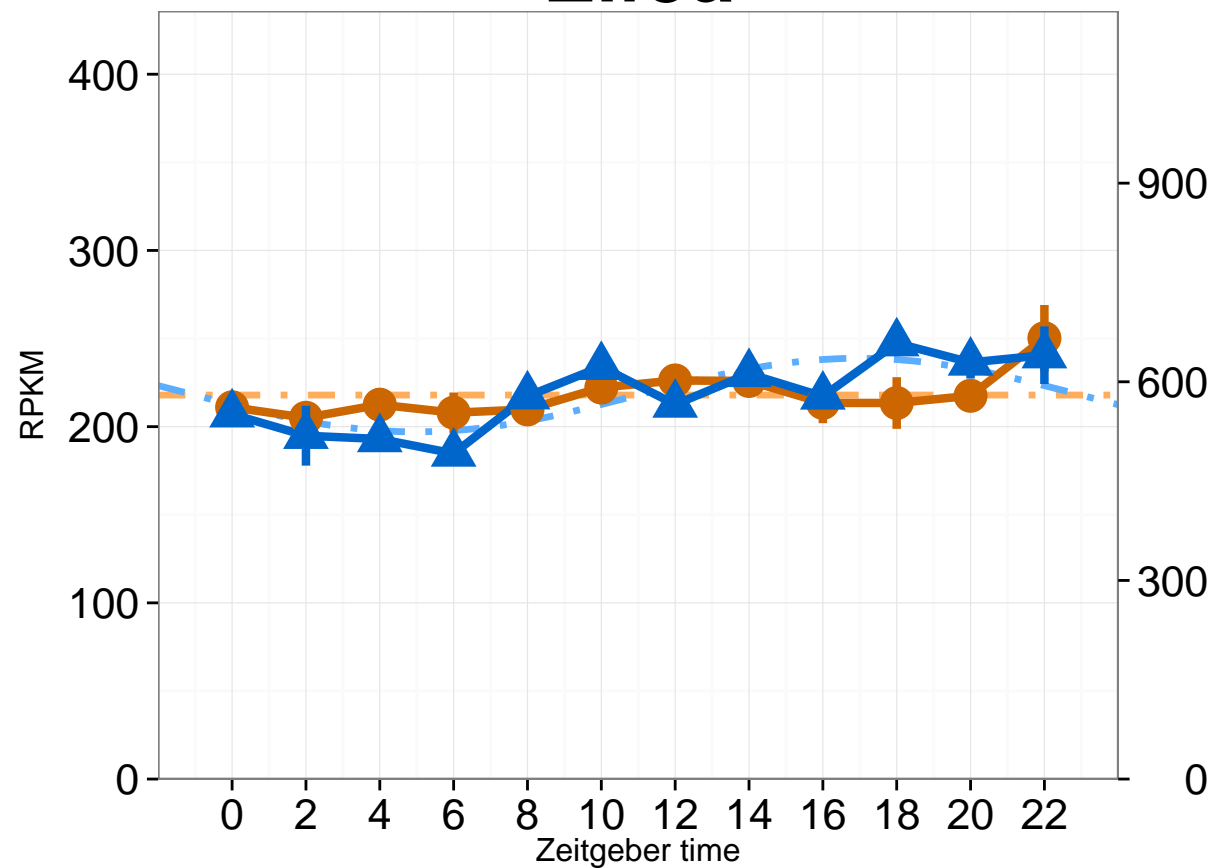

## Eif5a

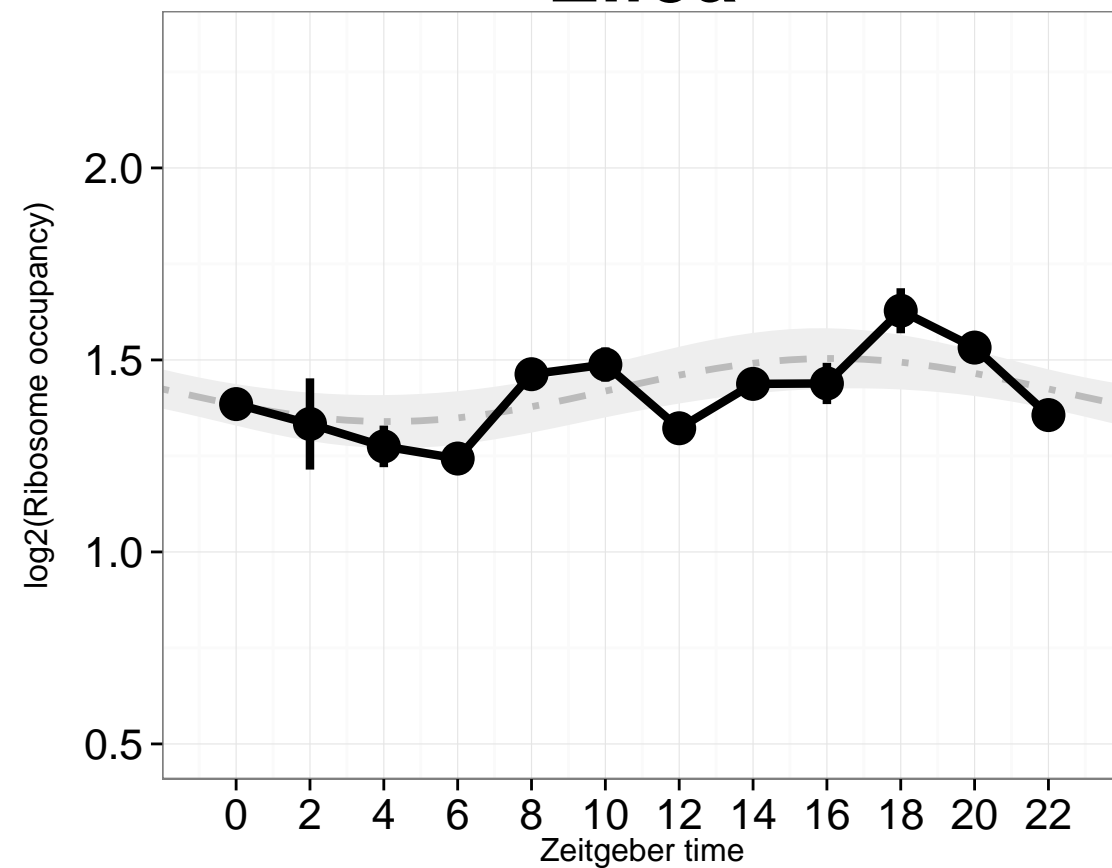

Supplement: SuppDataset_1.zip [file Eif5a_set_A.pdf › Supplemental Dataset 1/A-mRNA_nonrhyth_translation_nonrhyth/Eif5a_set_A.pdf]

# Eif5b

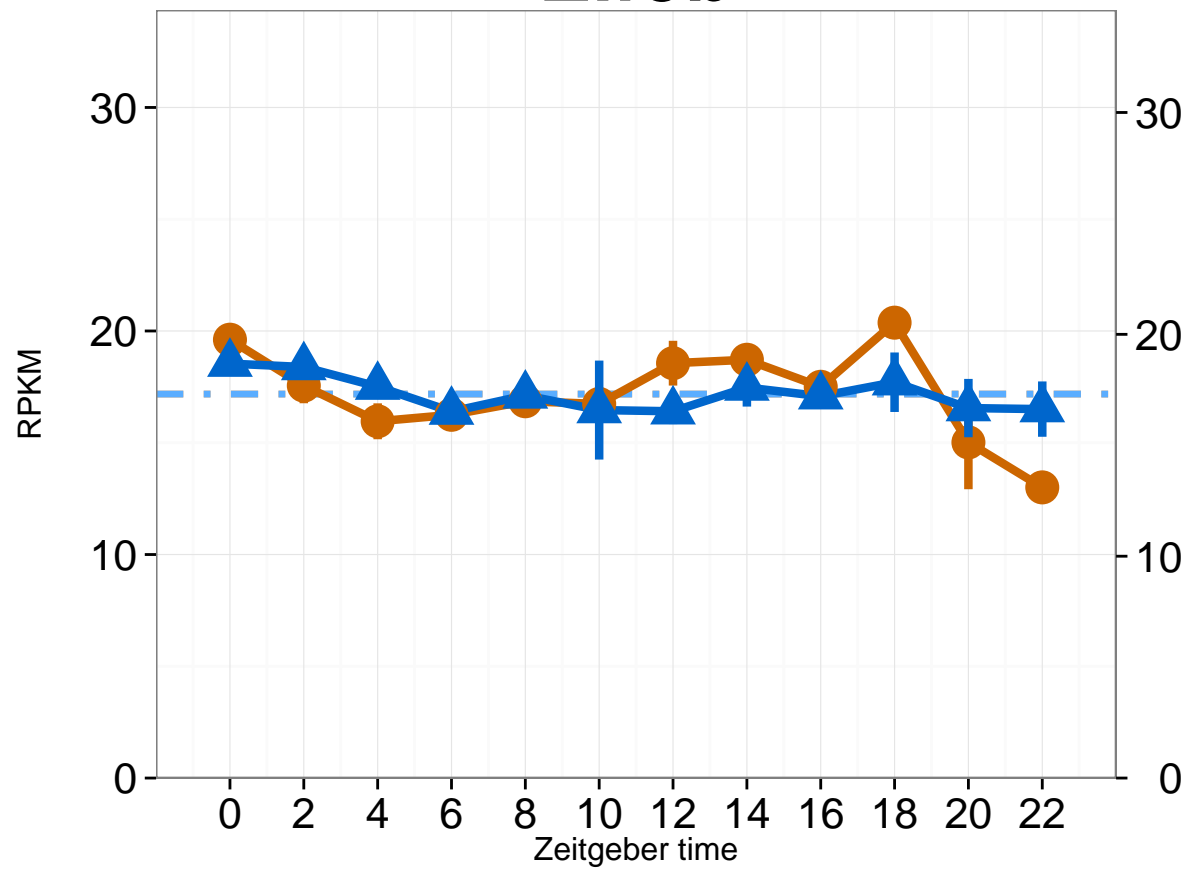

# Eif5b

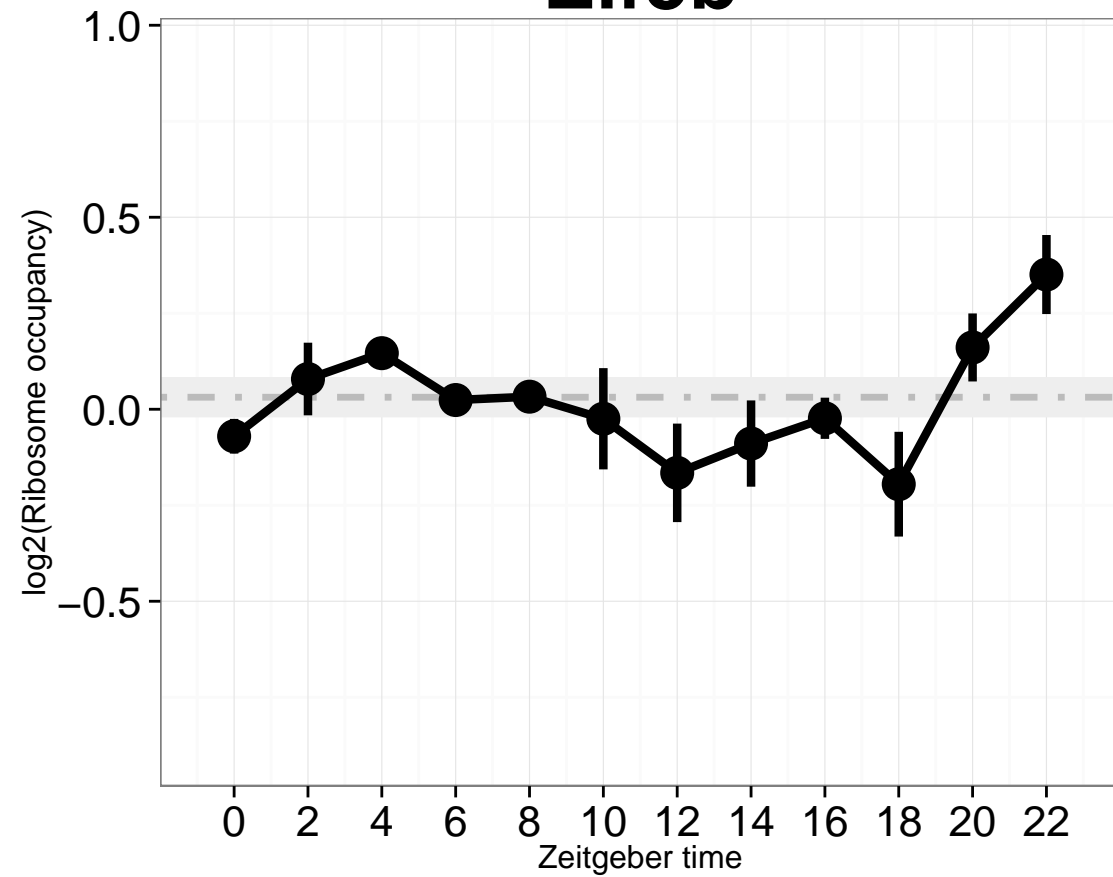

Supplement: SuppDataset_1.zip [file Eif5b_set_A.pdf › Supplemental Dataset 1/A-mRNA_nonrhyth_translation_nonrhyth/Eif5b_set_A.pdf]

## Eif6

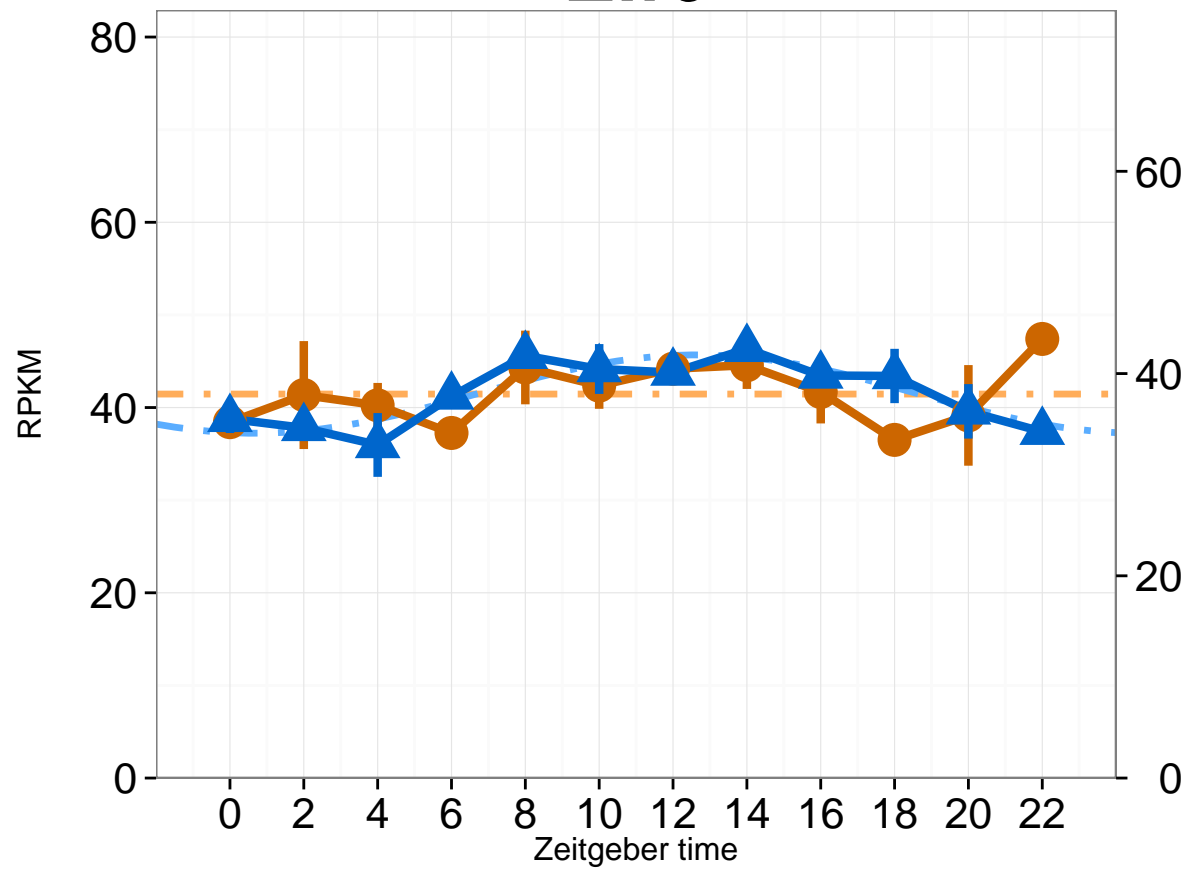

## Eif6

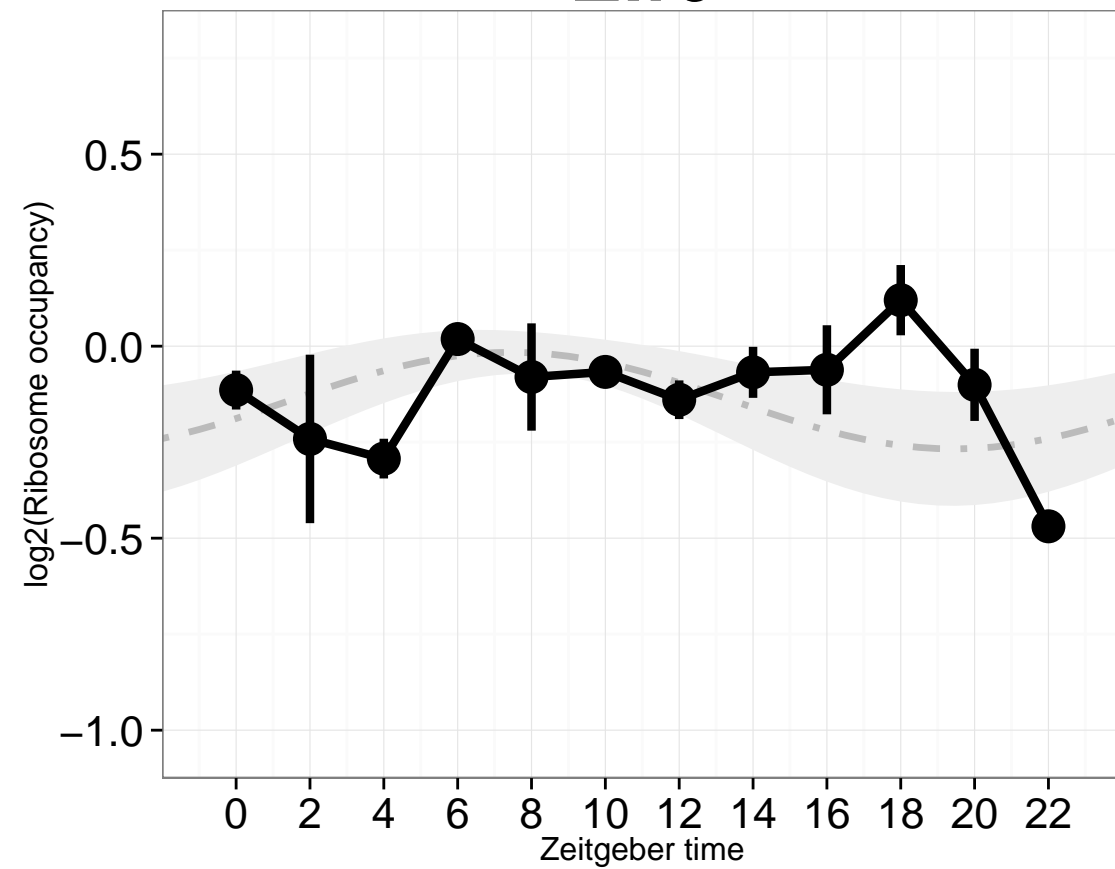

Supplement: SuppDataset_1.zip [file Eif6_set_A.pdf › Supplemental Dataset 1/A-mRNA_nonrhyth_translation_nonrhyth/Eif6_set_A.pdf]

## Elac2

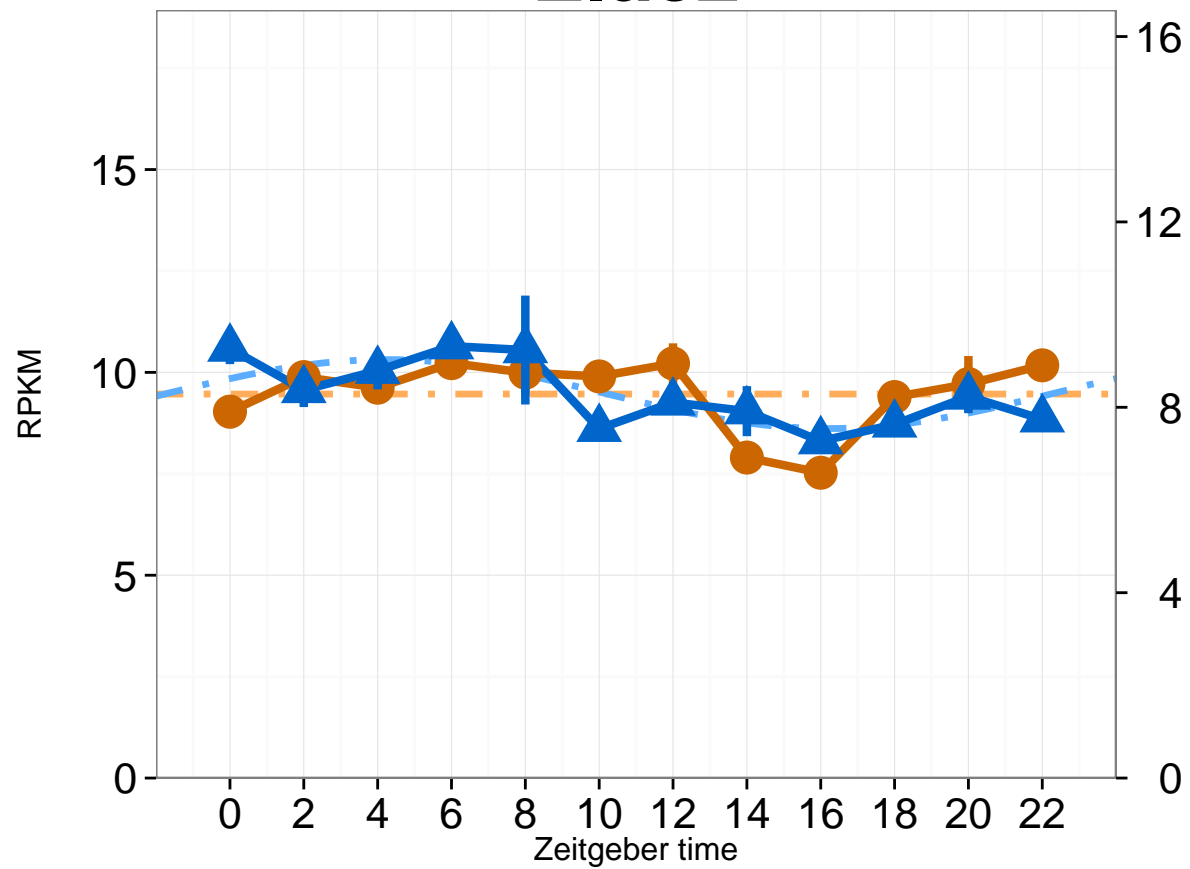

## Elac2

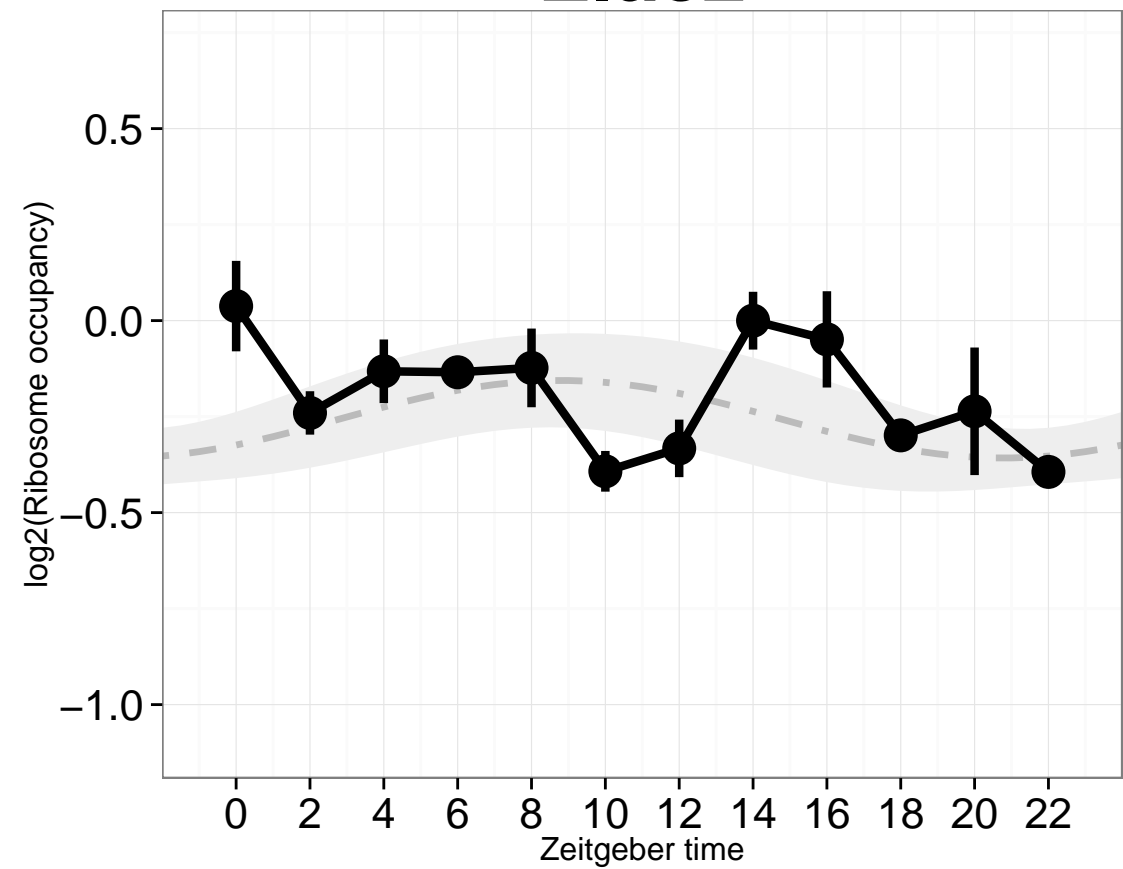

Supplement: SuppDataset_1.zip [file Elac2_set_A.pdf › Supplemental Dataset 1/A-mRNA_nonrhyth_translation_nonrhyth/Elac2_set_A.pdf]

## Elavl1

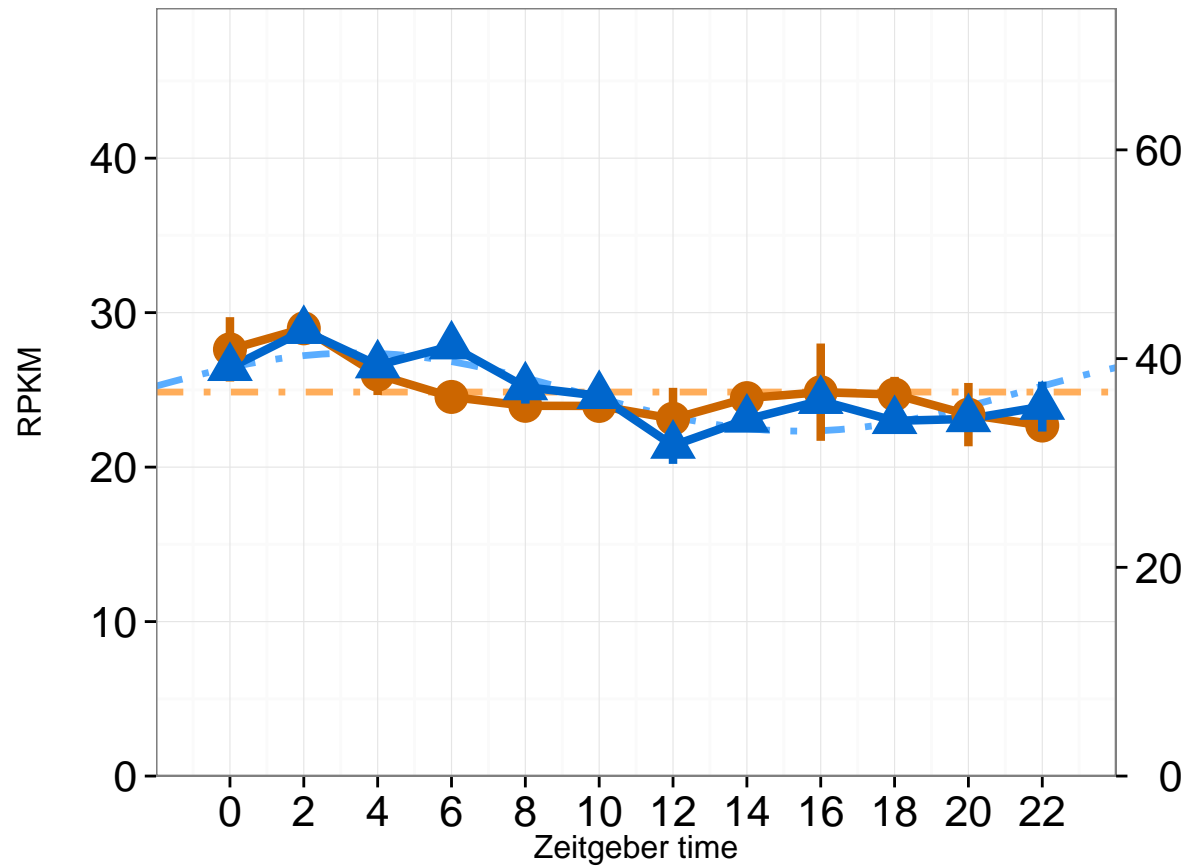

## Elavl1

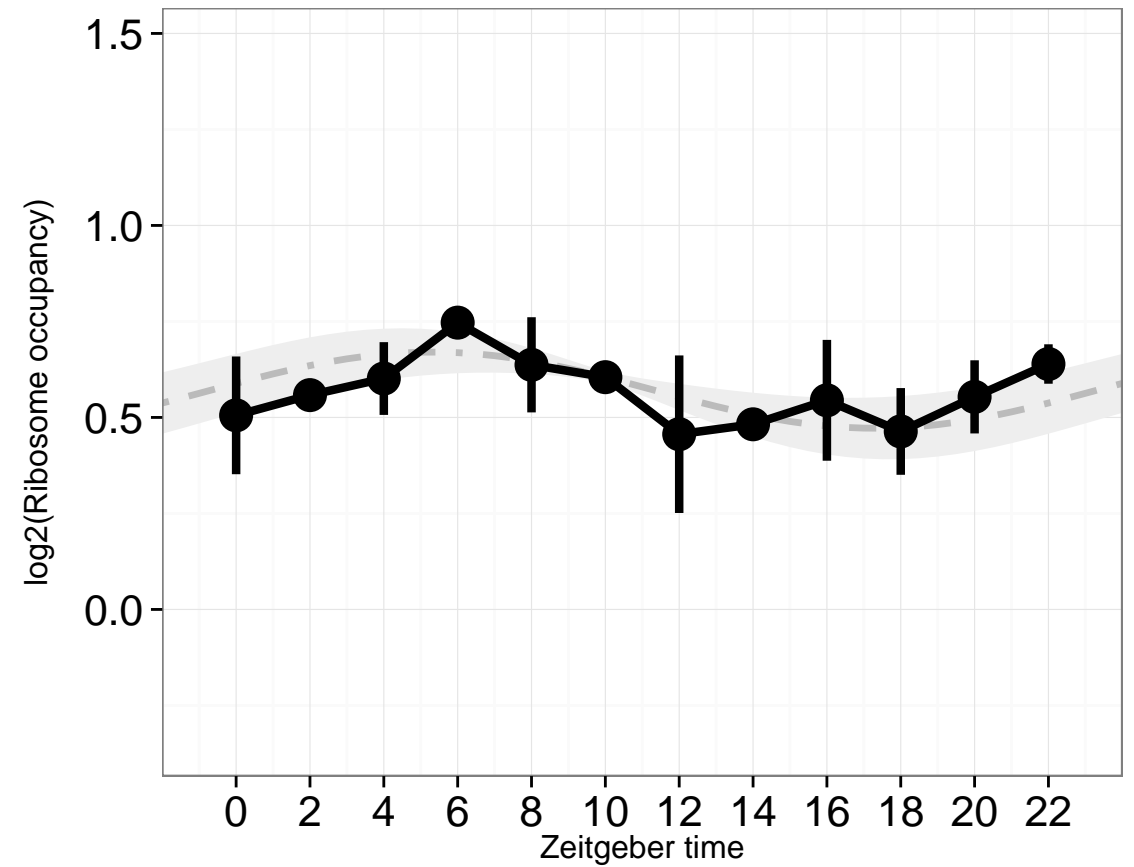

Supplement: SuppDataset_1.zip [file Elavl1_set_A.pdf › Supplemental Dataset 1/A-mRNA_nonrhyth_translation_nonrhyth/Elavl1_set_A.pdf]

## Elf1

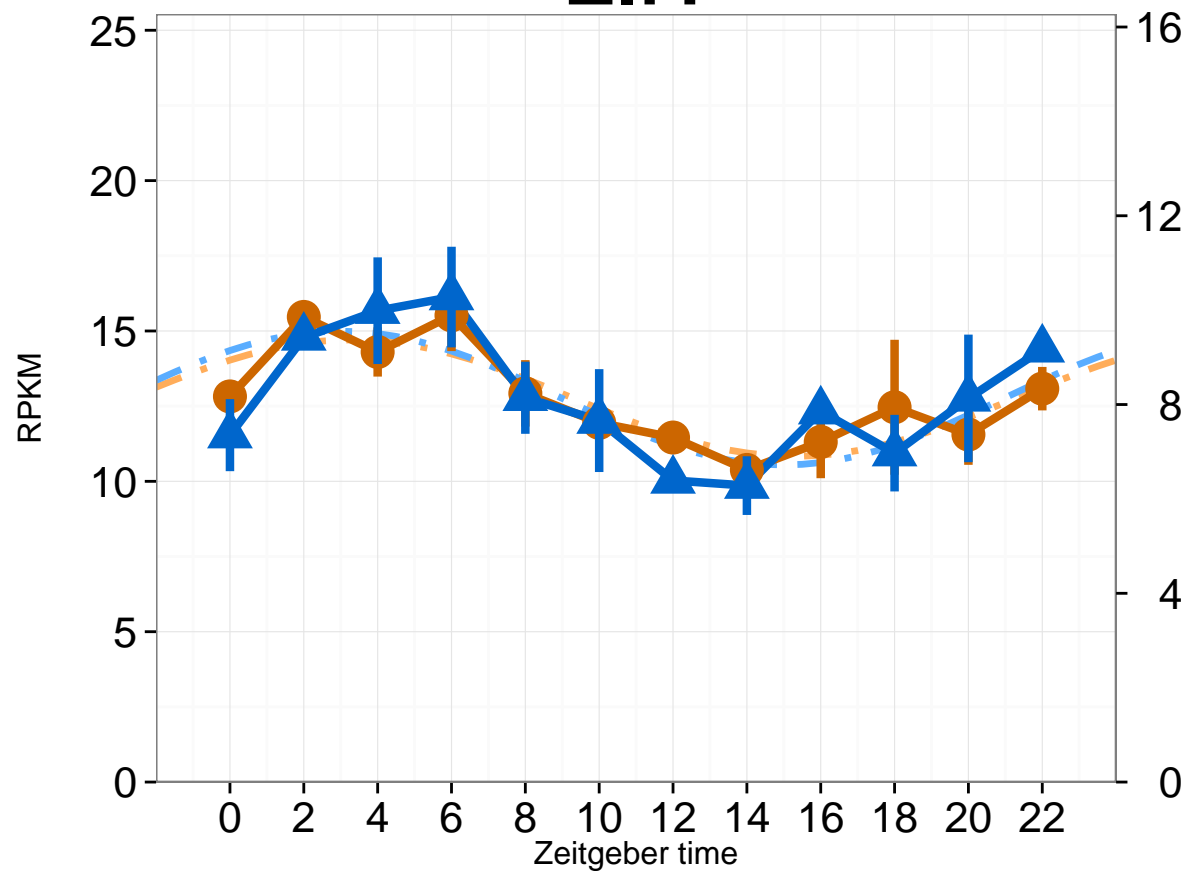

## Elf1

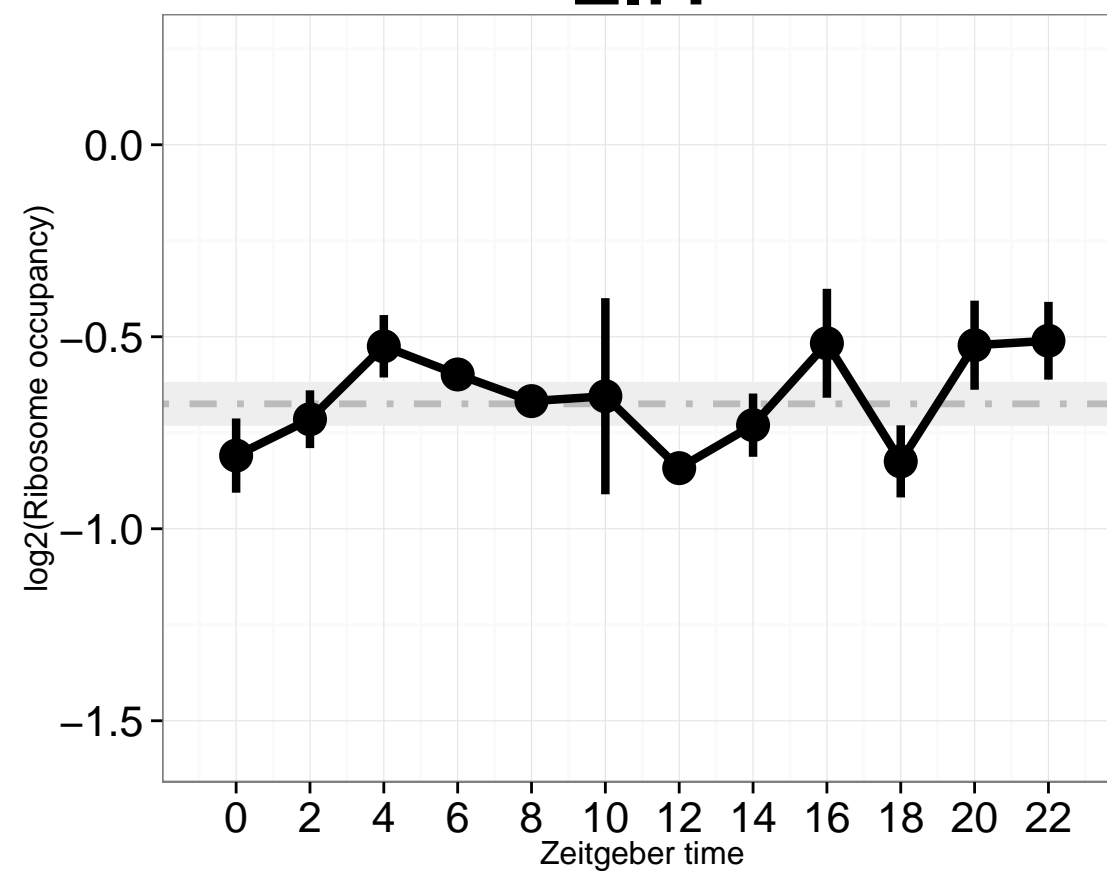

Supplement: SuppDataset_1.zip [file Elf1_set_A.pdf › Supplemental Dataset 1/A-mRNA_nonrhyth_translation_nonrhyth/Elf1_set_A.pdf]

## Elf2

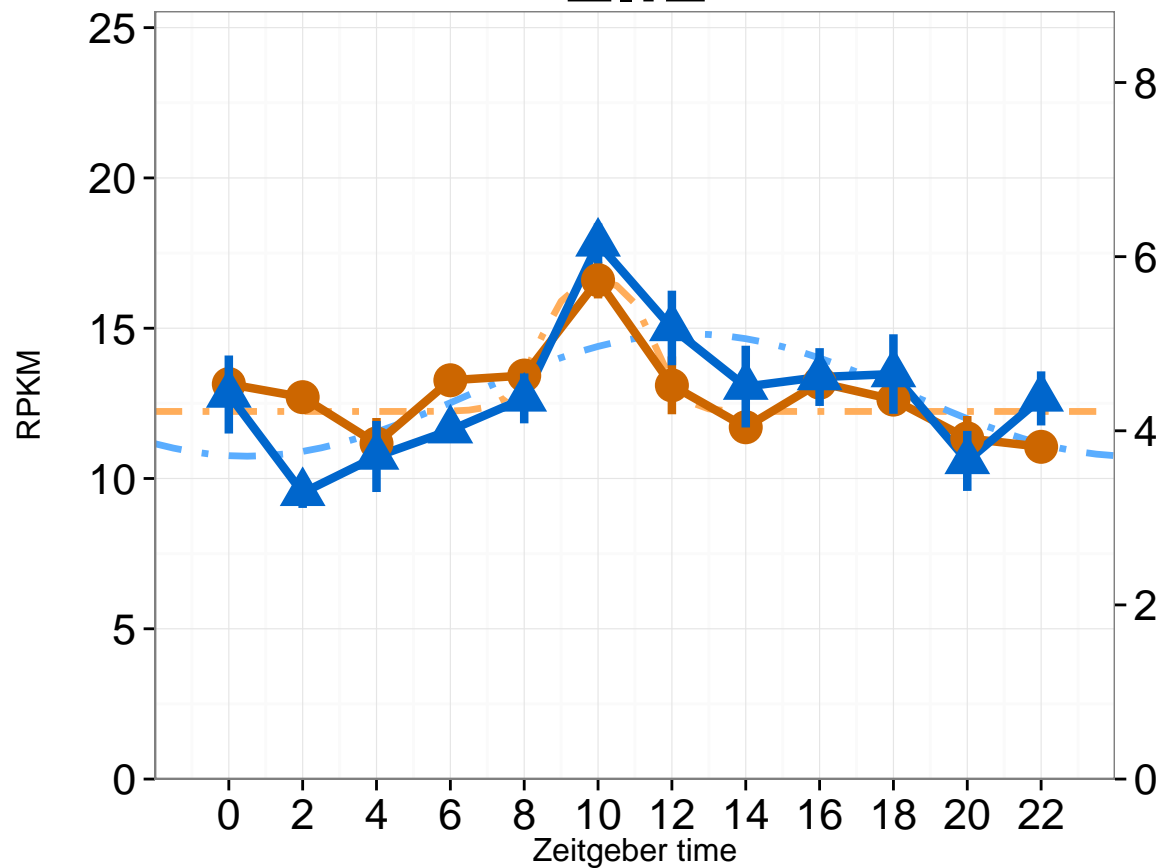

## Elf2

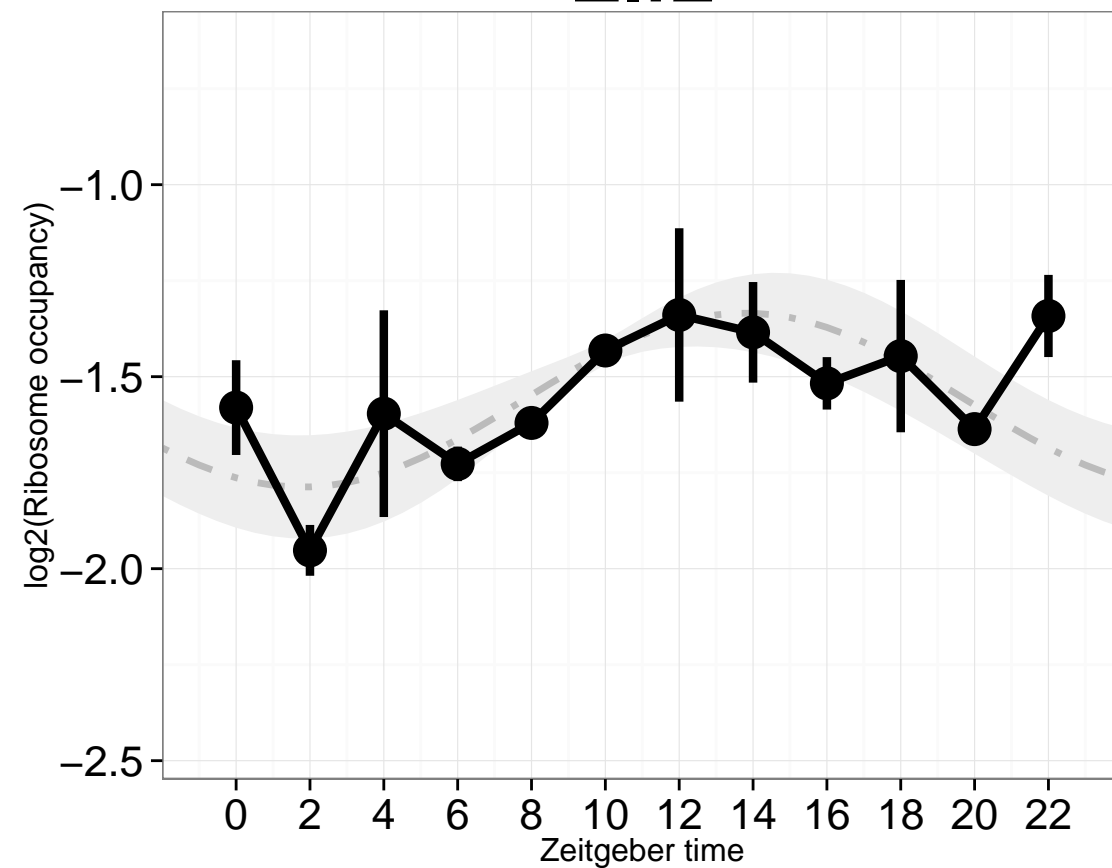

Supplement: SuppDataset_1.zip [file Elf2_set_A.pdf › Supplemental Dataset 1/A-mRNA_nonrhyth_translation_nonrhyth/Elf2_set_A.pdf]

## Elf3 TR

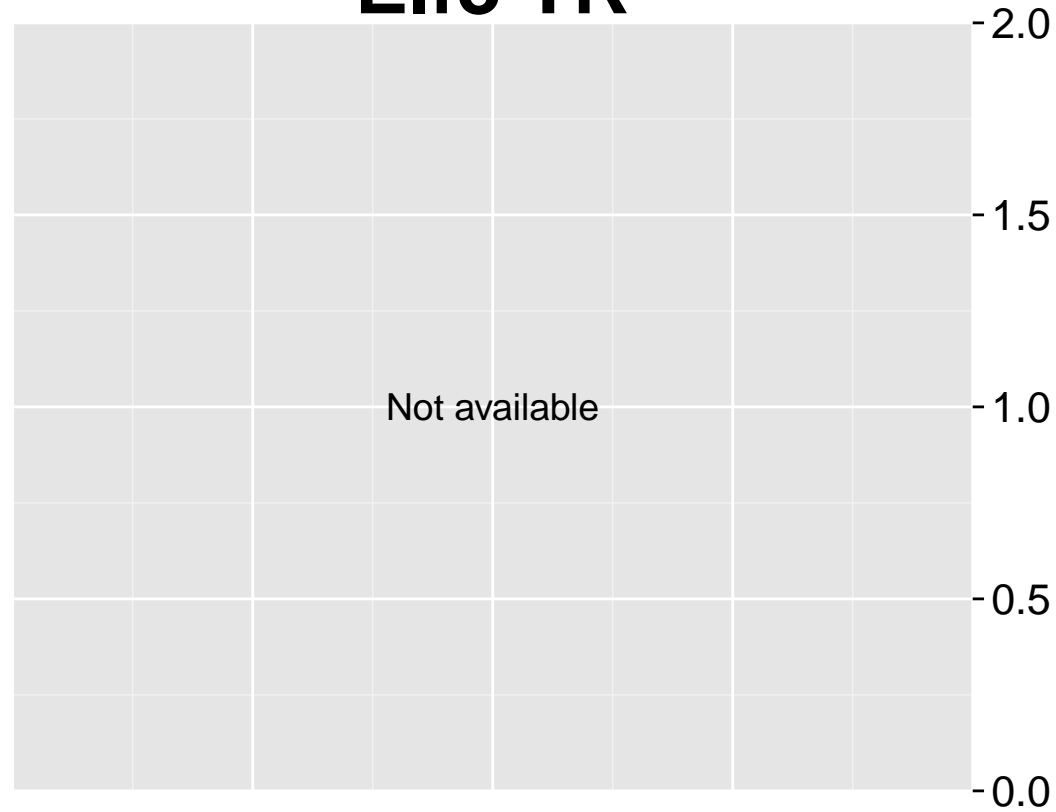

## Elf3 log2(Ribosome occupancy)

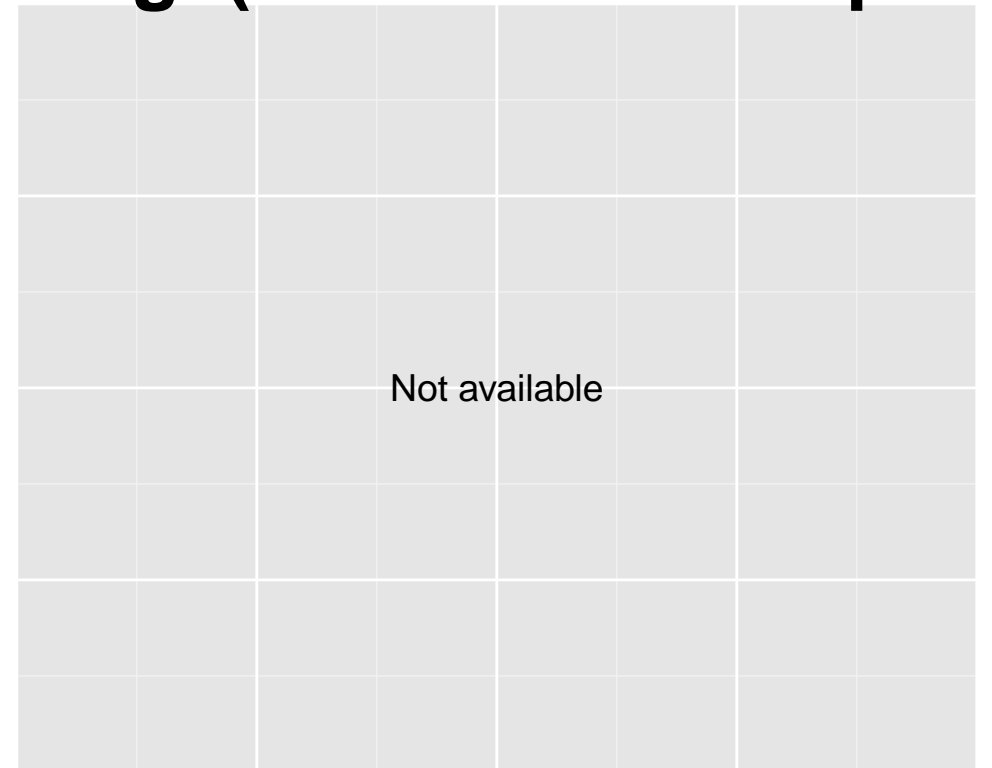

Supplement: SuppDataset_1.zip [file Elf3_set_A.pdf › Supplemental Dataset 1/A-mRNA_nonrhyth_translation_nonrhyth/Elf3_set_A.pdf]

## Elf4

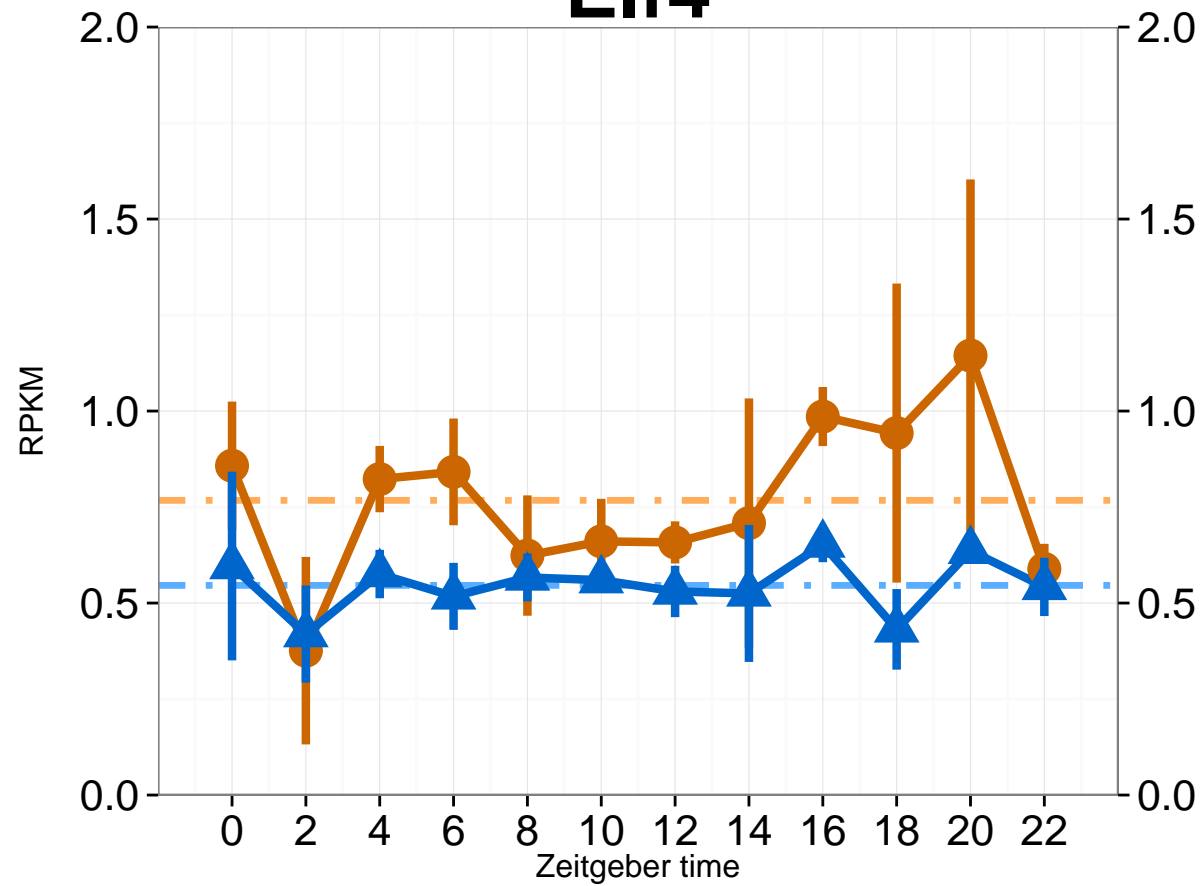

## Elf4

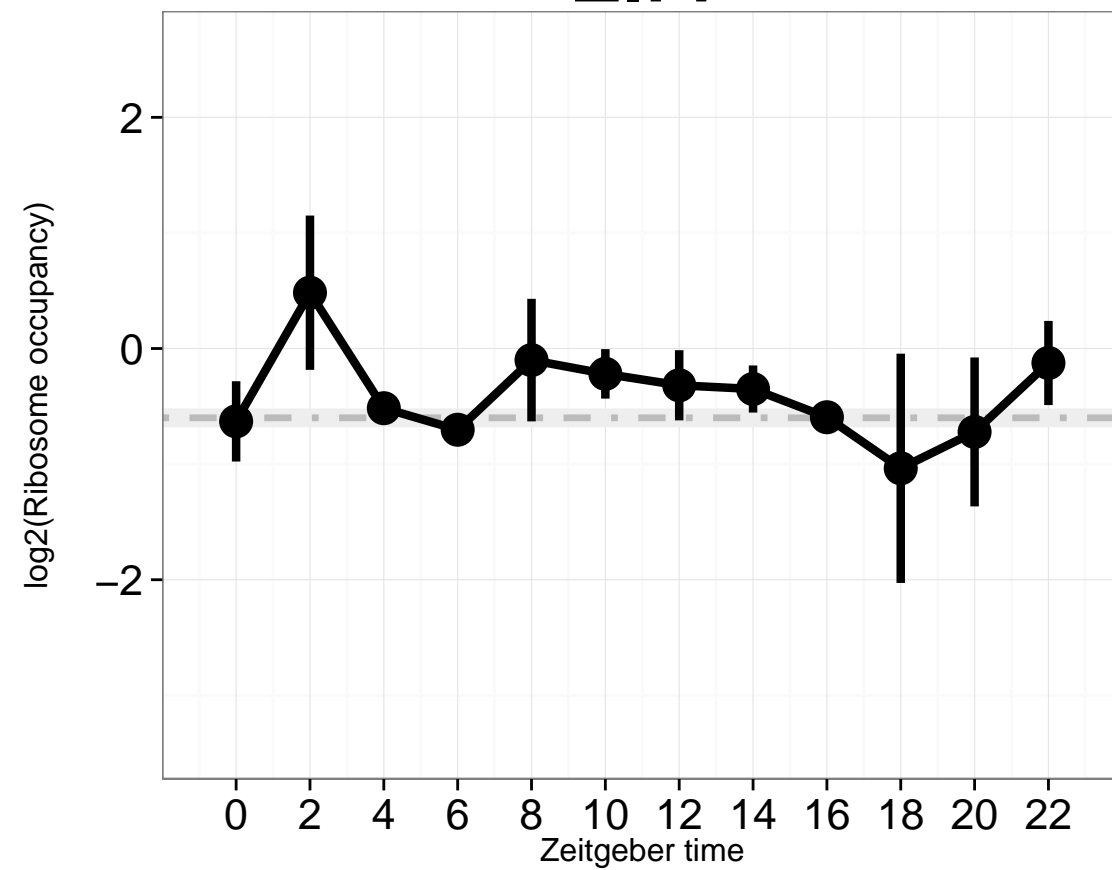

Supplement: SuppDataset_1.zip [file Elf4_set_A.pdf › Supplemental Dataset 1/A-mRNA_nonrhyth_translation_nonrhyth/Elf4_set_A.pdf]

## Elk1

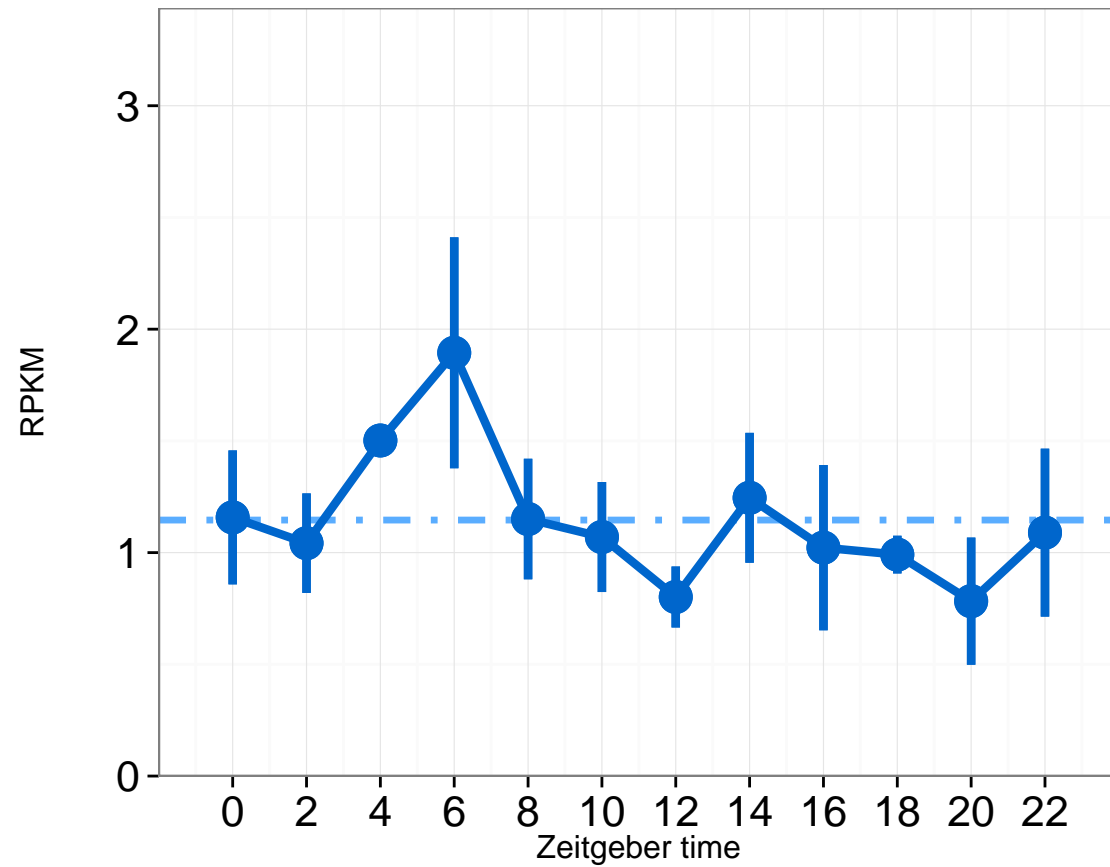

## Elk1 log2(Ribosome occupancy)

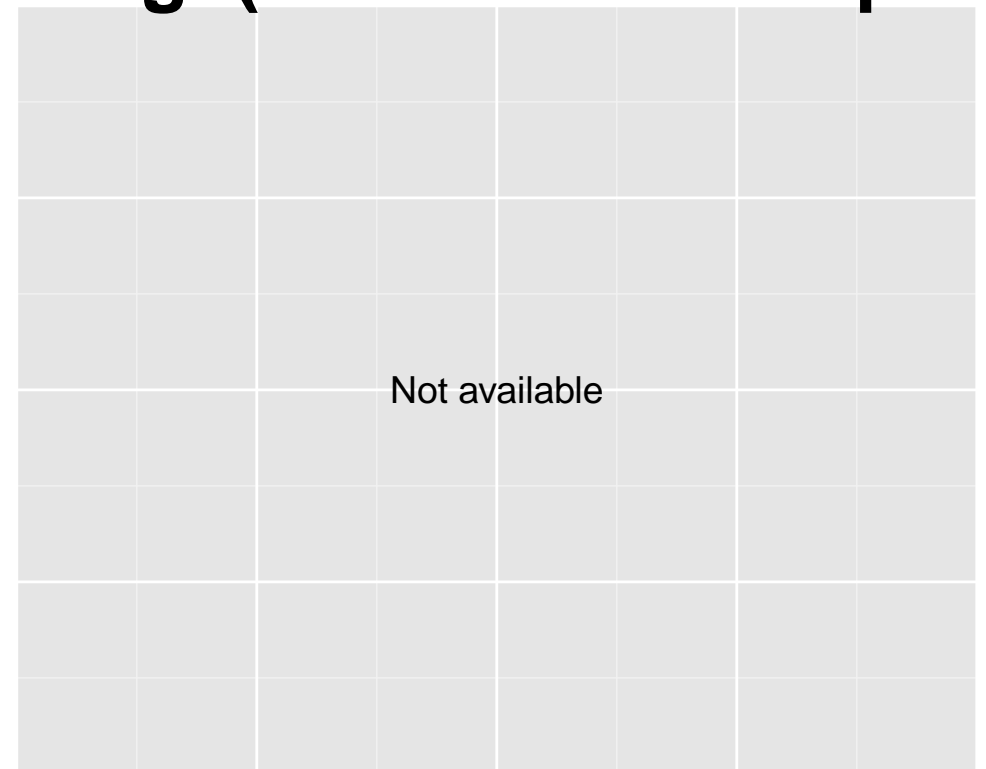

Supplement: SuppDataset_1.zip [file Elk1_set_A.pdf › Supplemental Dataset 1/A-mRNA_nonrhyth_translation_nonrhyth/Elk1_set_A.pdf]

## Elk4

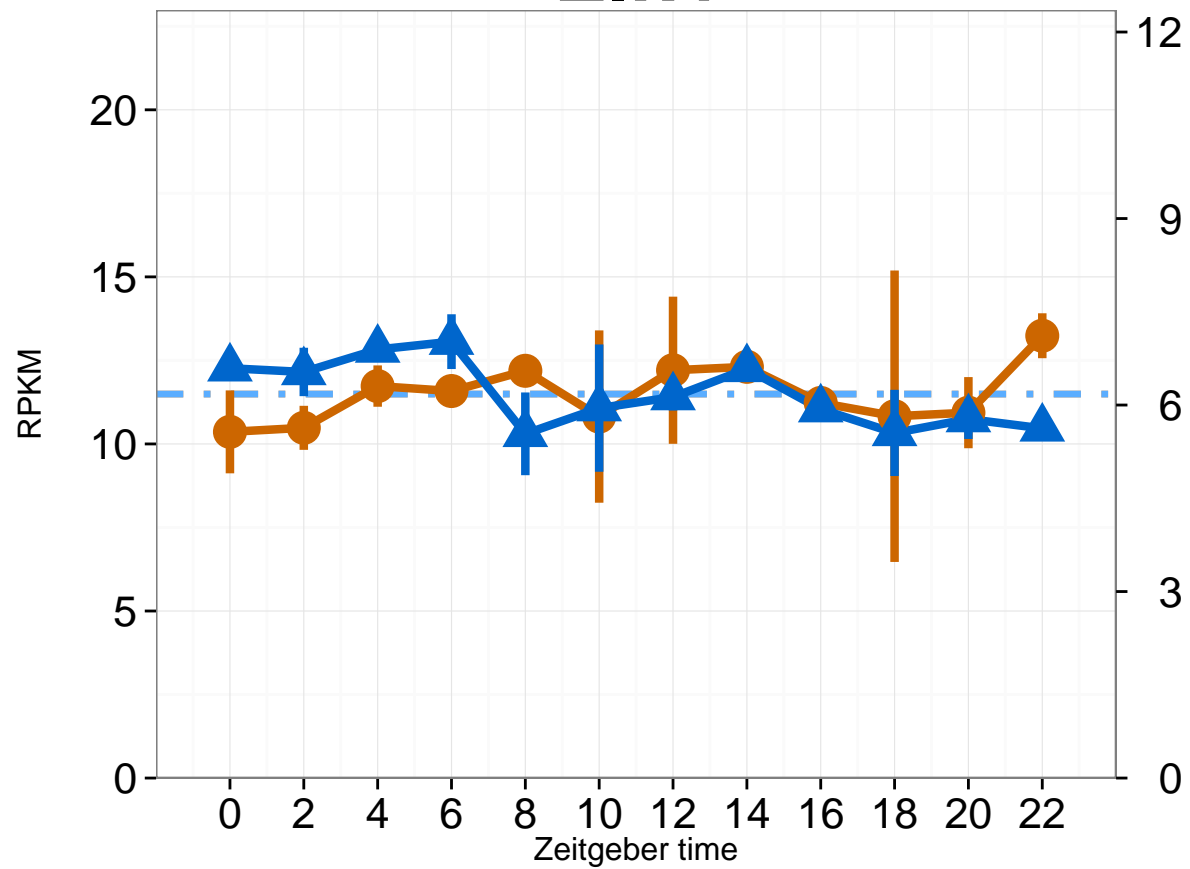

## Elk4

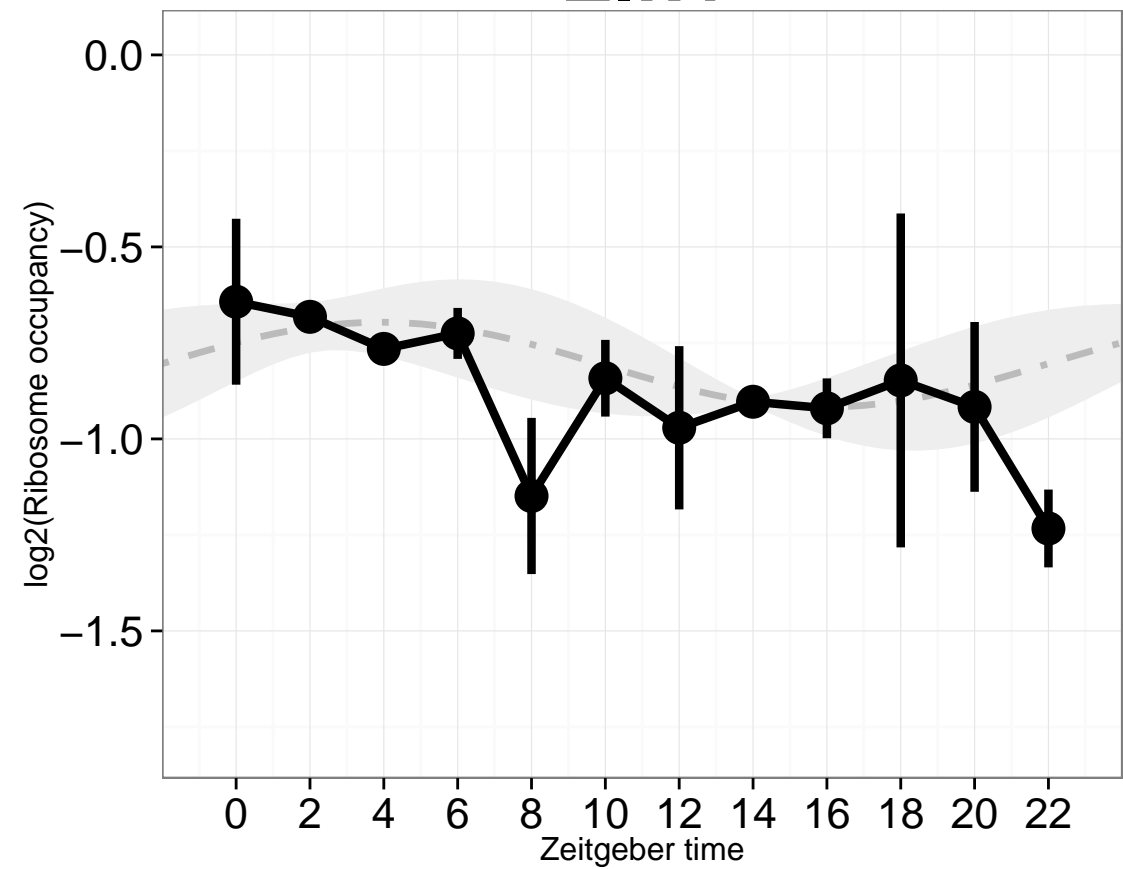

Supplement: SuppDataset_1.zip [file Elk4_set_A.pdf › Supplemental Dataset 1/A-mRNA_nonrhyth_translation_nonrhyth/Elk4_set_A.pdf]

## EII2

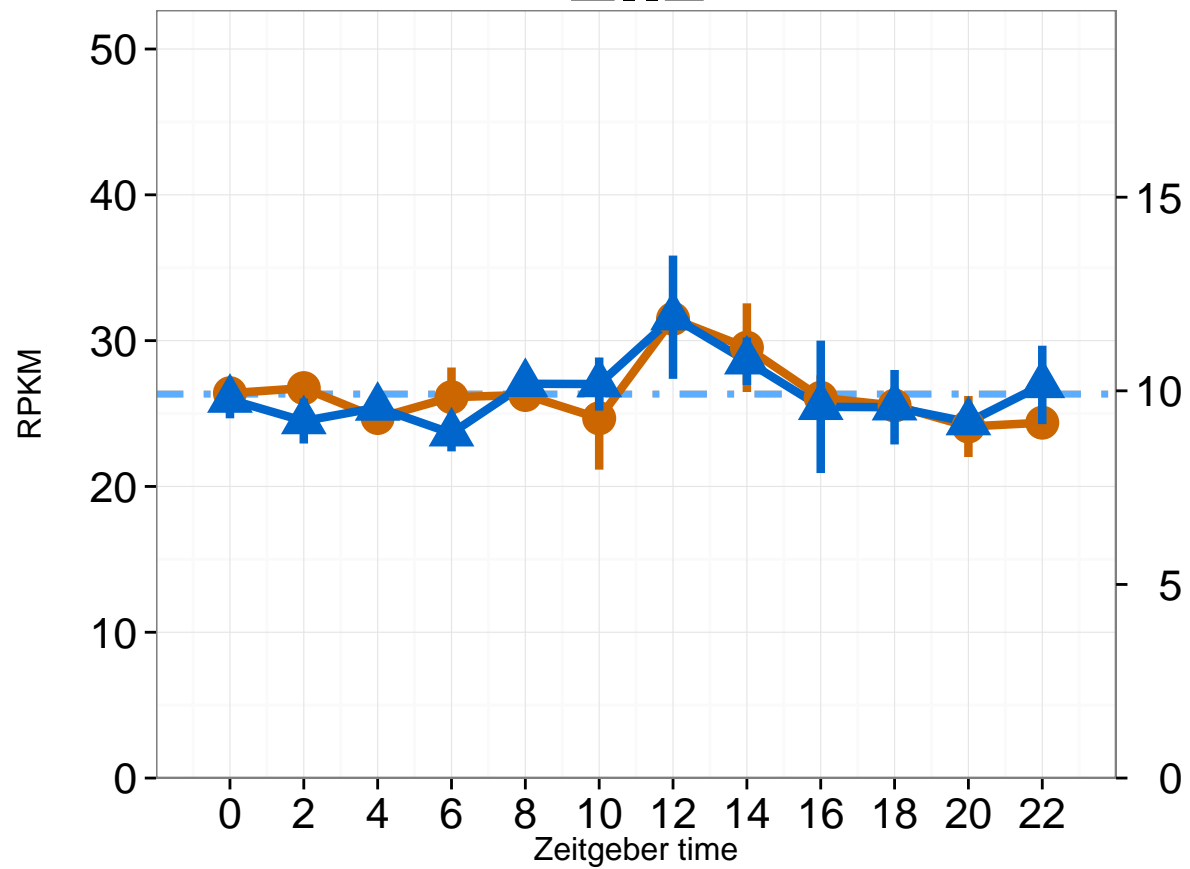

## EII2

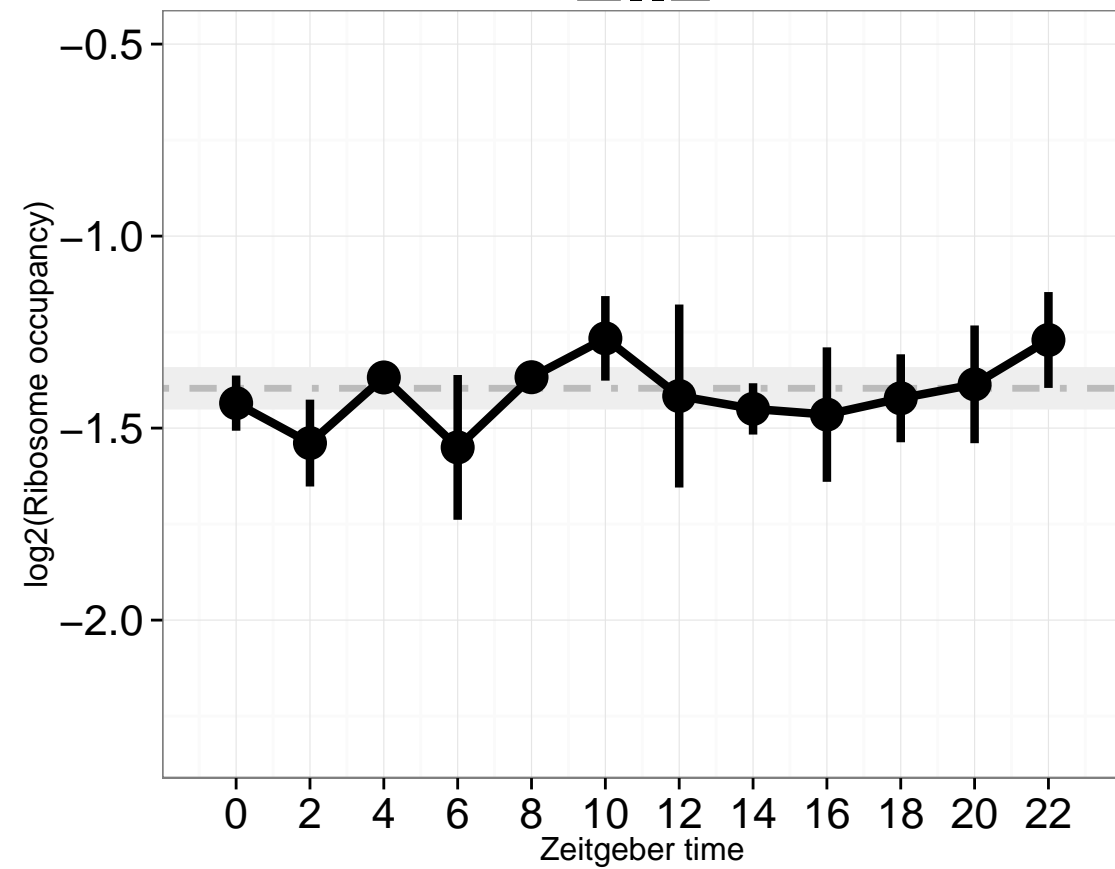

Supplement: SuppDataset_1.zip [file Ell2_set_A.pdf › Supplemental Dataset 1/A-mRNA_nonrhyth_translation_nonrhyth/Ell2_set_A.pdf]

## EII3

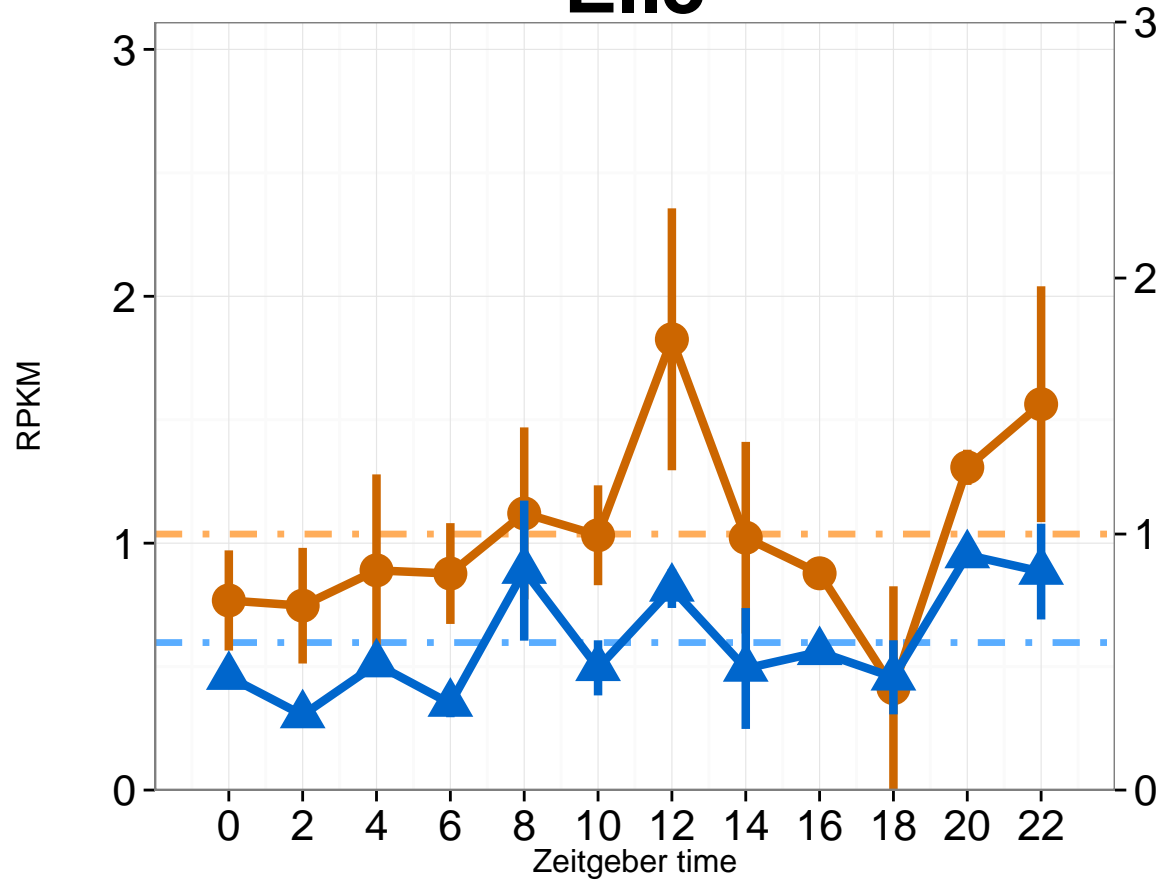

## EII3

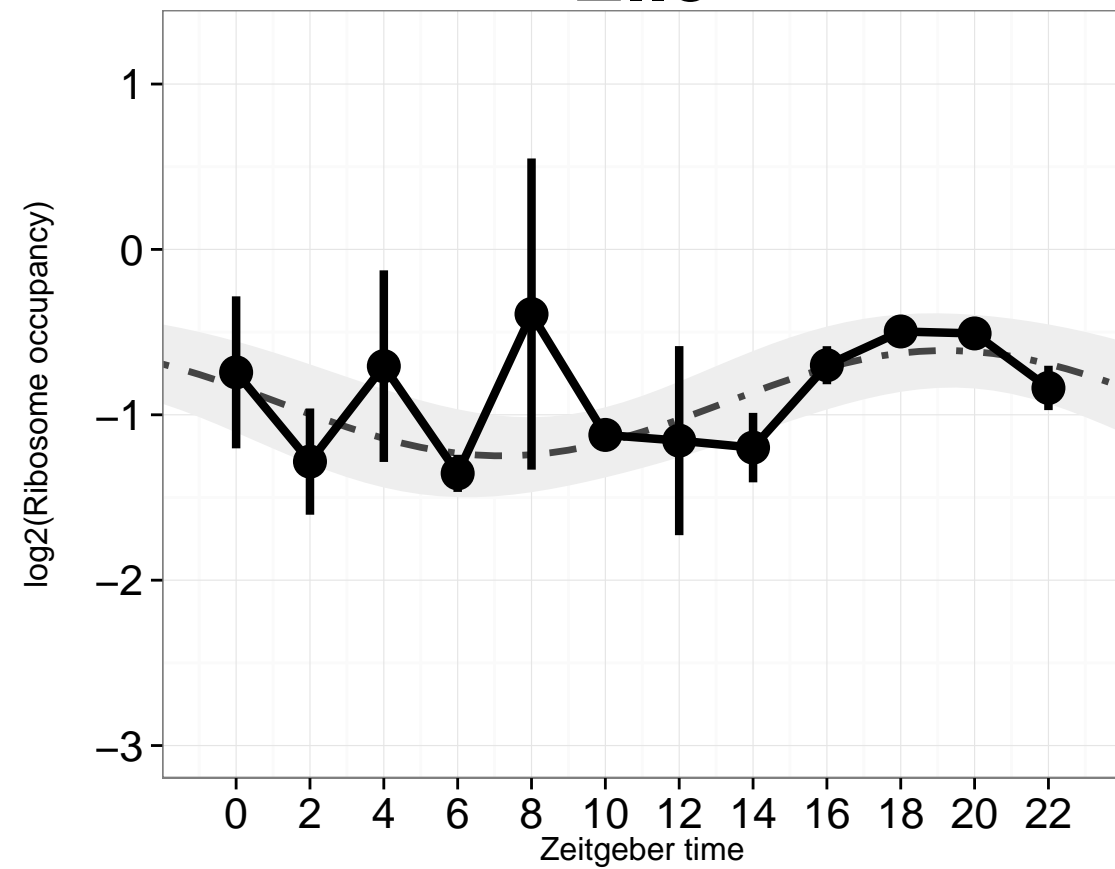

Supplement: SuppDataset_1.zip [file Ell3_set_A.pdf › Supplemental Dataset 1/A-mRNA_nonrhyth_translation_nonrhyth/Ell3_set_A.pdf]

# EII

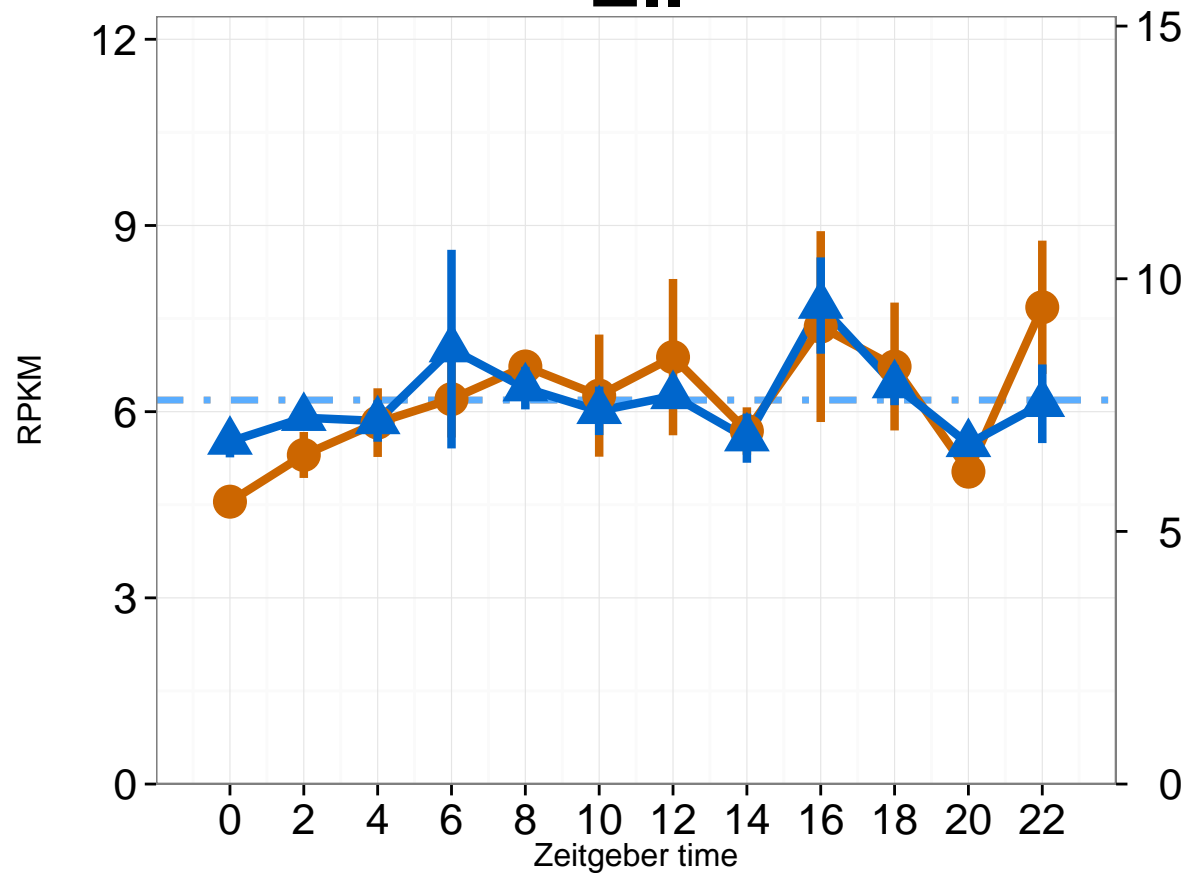

# EII

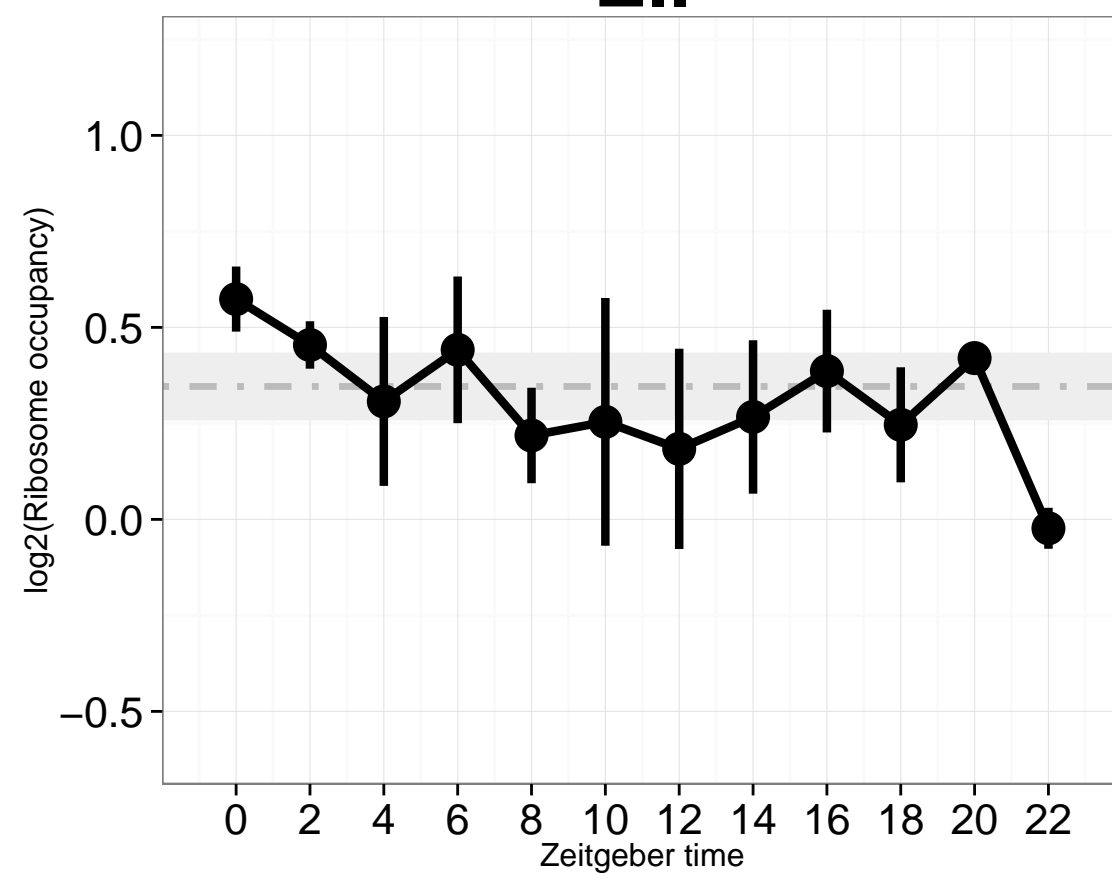

Supplement: SuppDataset_1.zip [file Ell_set_A.pdf › Supplemental Dataset 1/A-mRNA_nonrhyth_translation_nonrhyth/Ell_set_A.pdf]

## Elmo2

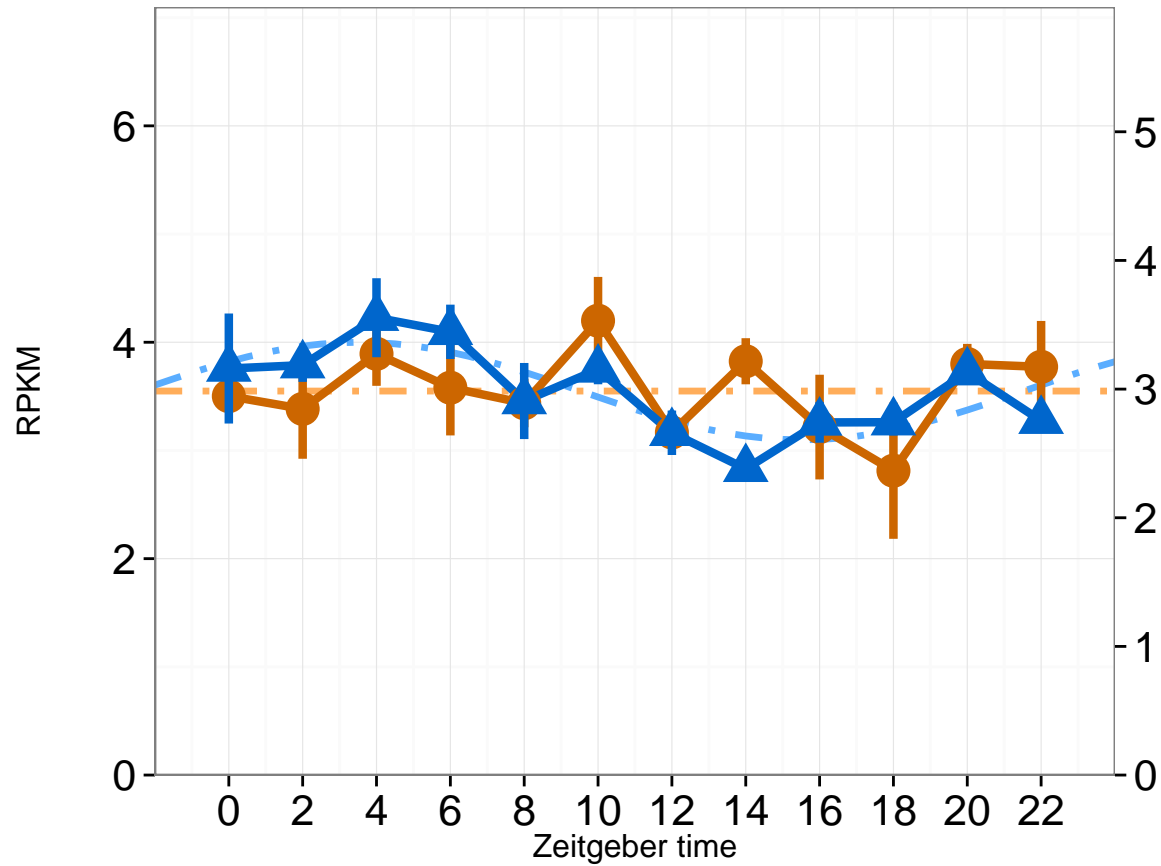

## Elmo2

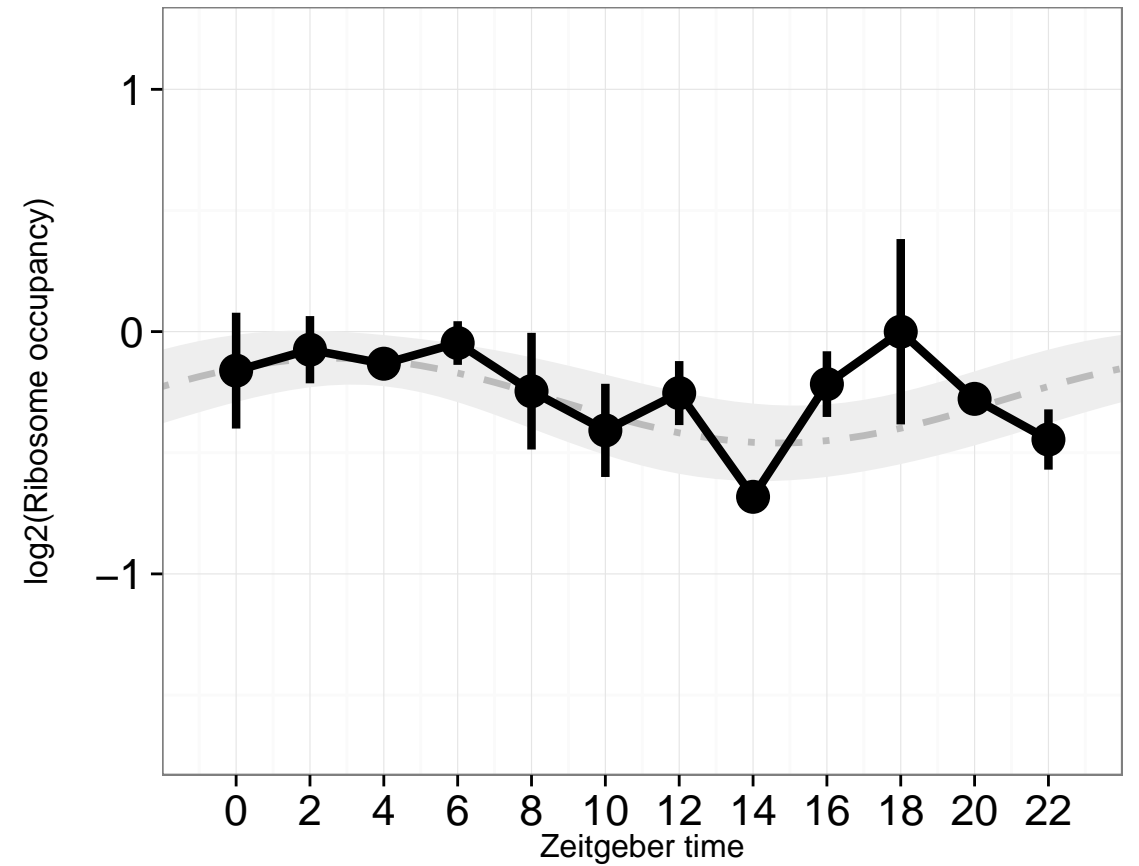

Supplement: SuppDataset_1.zip [file Elmo2_set_A.pdf › Supplemental Dataset 1/A-mRNA_nonrhyth_translation_nonrhyth/Elmo2_set_A.pdf]

## Elmod2

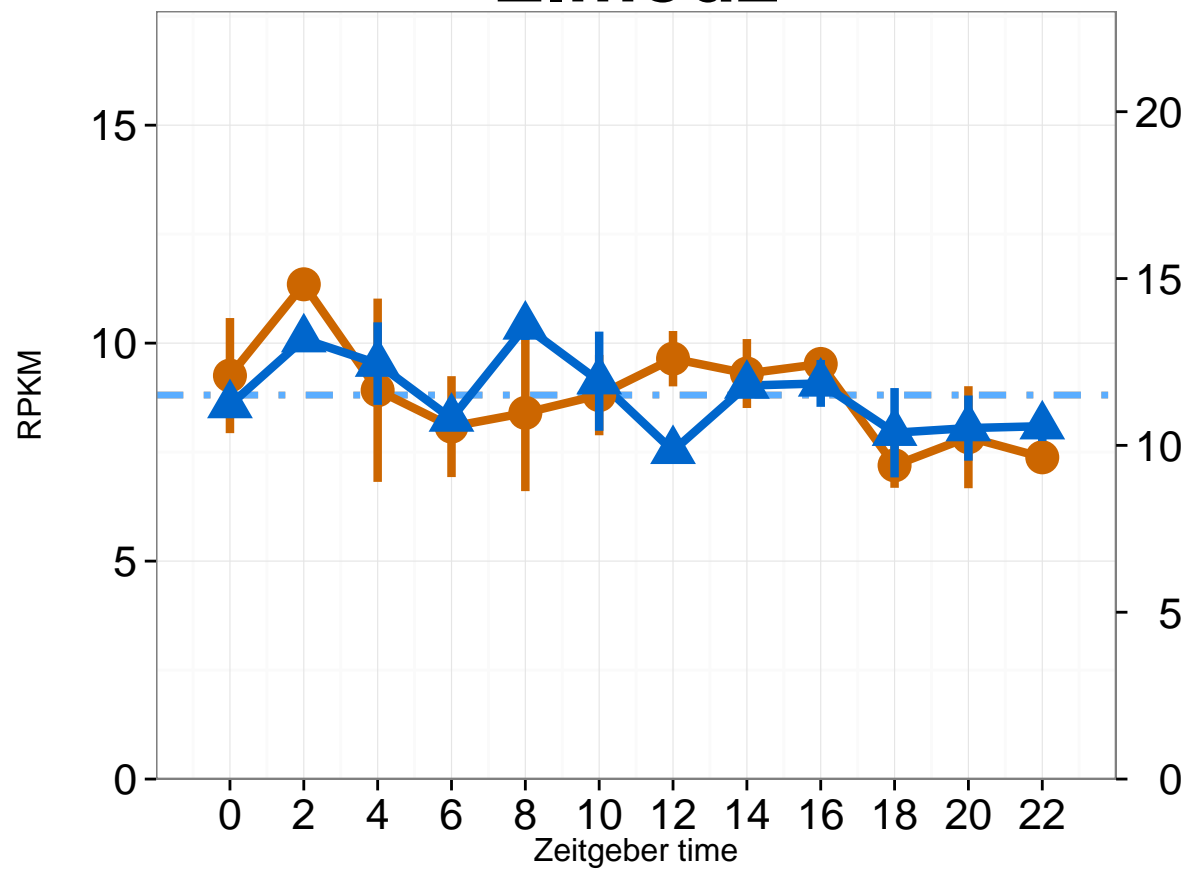

## Elmod2

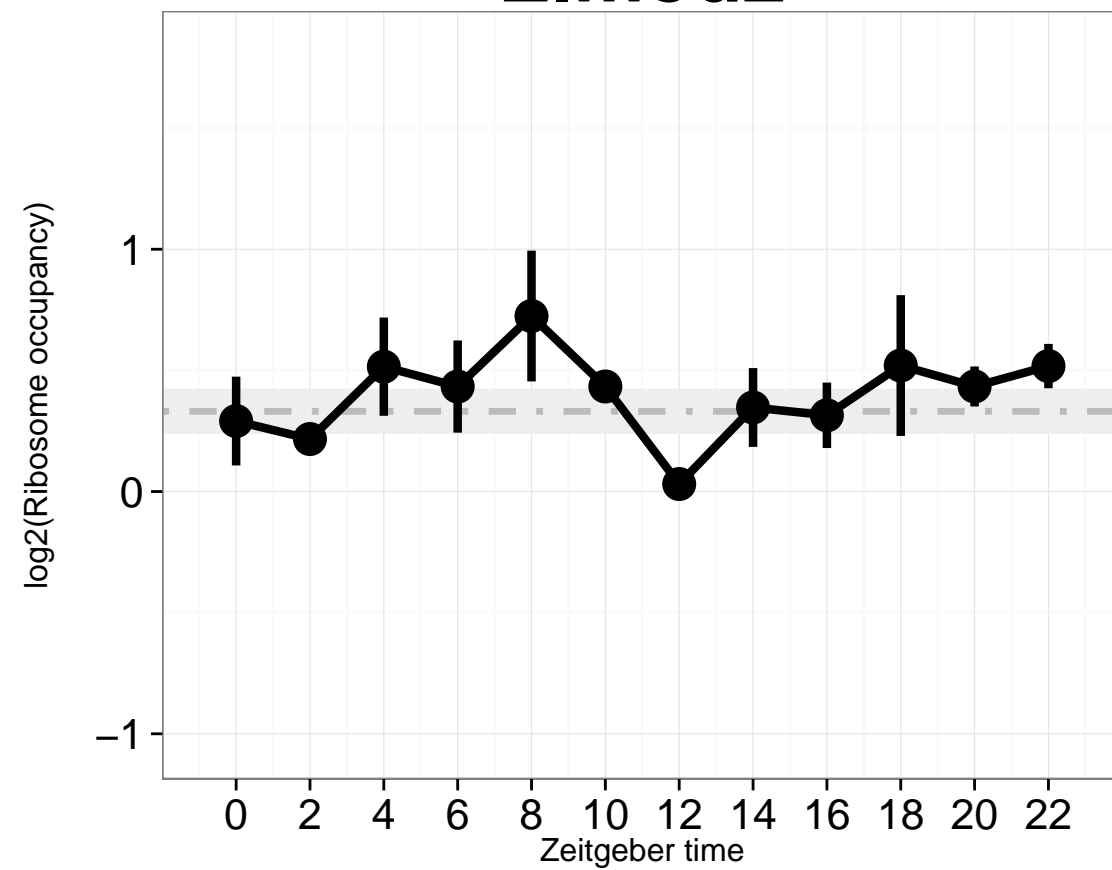

Supplement: SuppDataset_1.zip [file Elmod2_set_A.pdf › Supplemental Dataset 1/A-mRNA_nonrhyth_translation_nonrhyth/Elmod2_set_A.pdf]

# Elmsan1

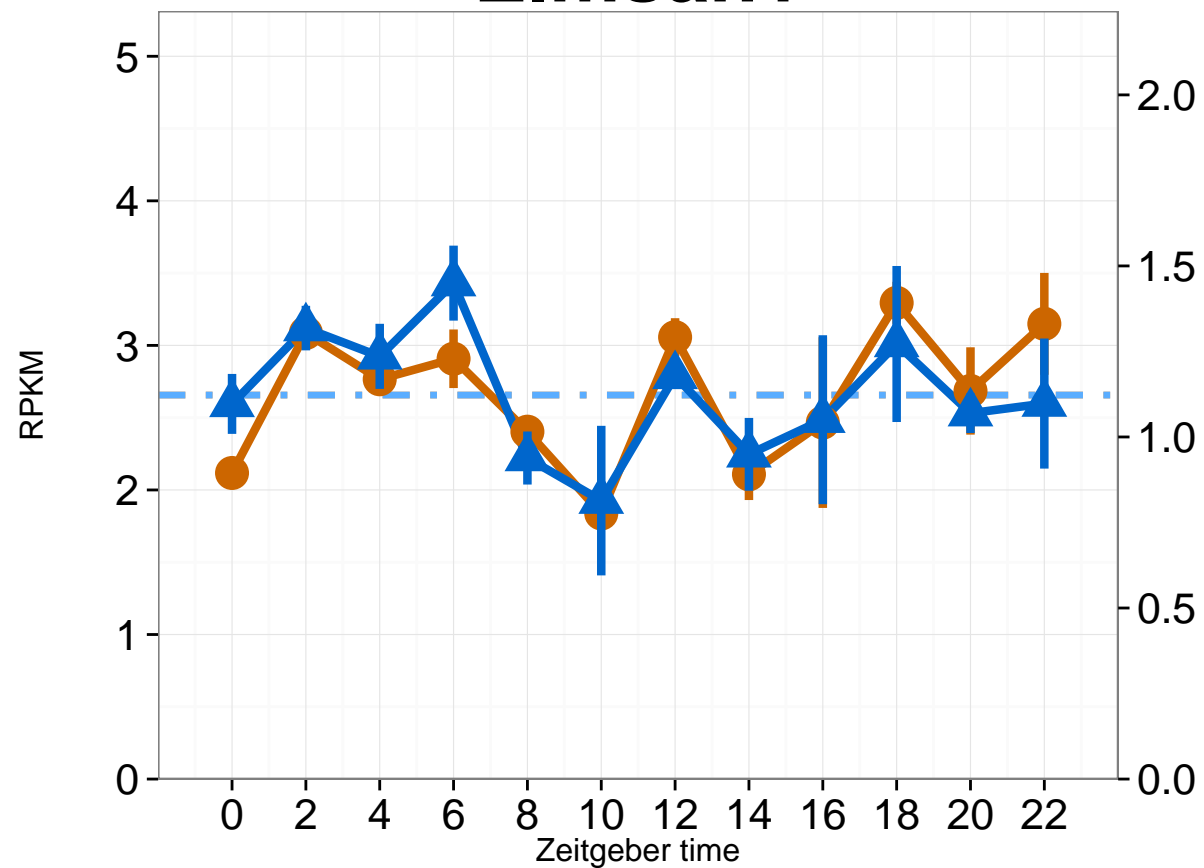

# Elmsan1

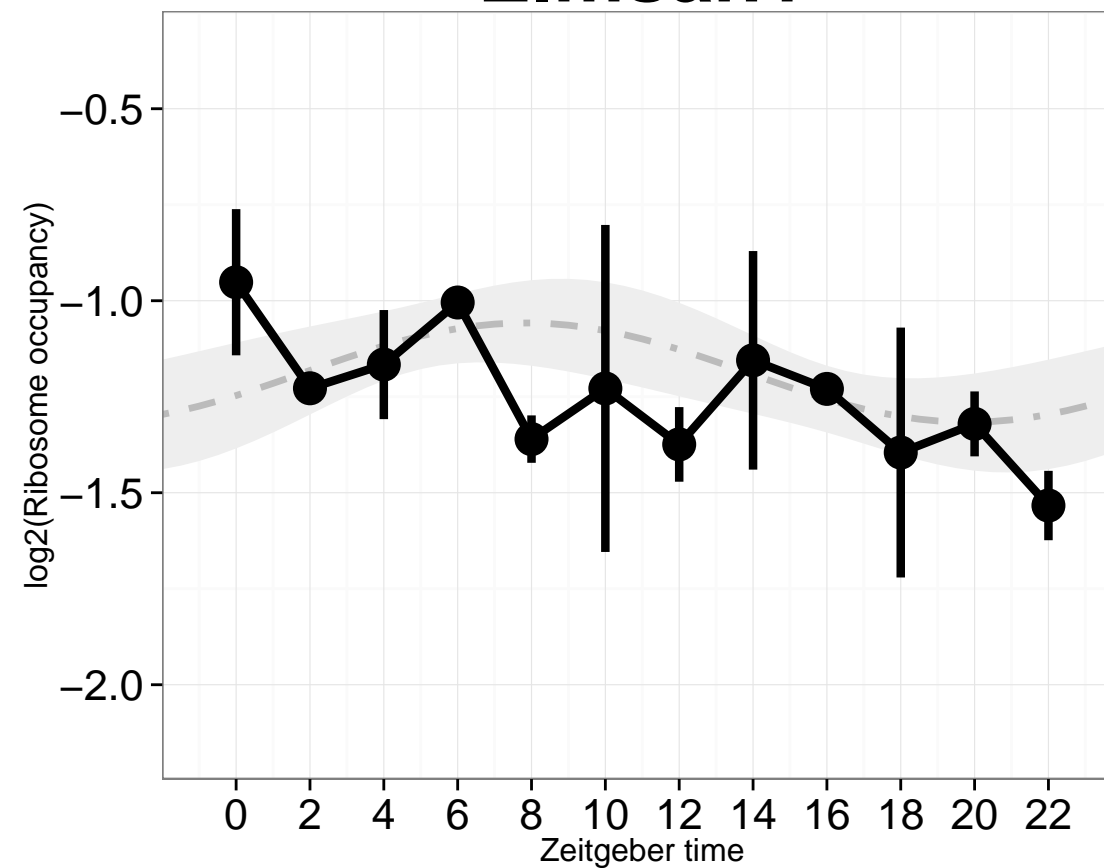

Supplement: SuppDataset_1.zip [file Elmsan1_set_A.pdf › Supplemental Dataset 1/A-mRNA_nonrhyth_translation_nonrhyth/Elmsan1_set_A.pdf]

## Elovl2

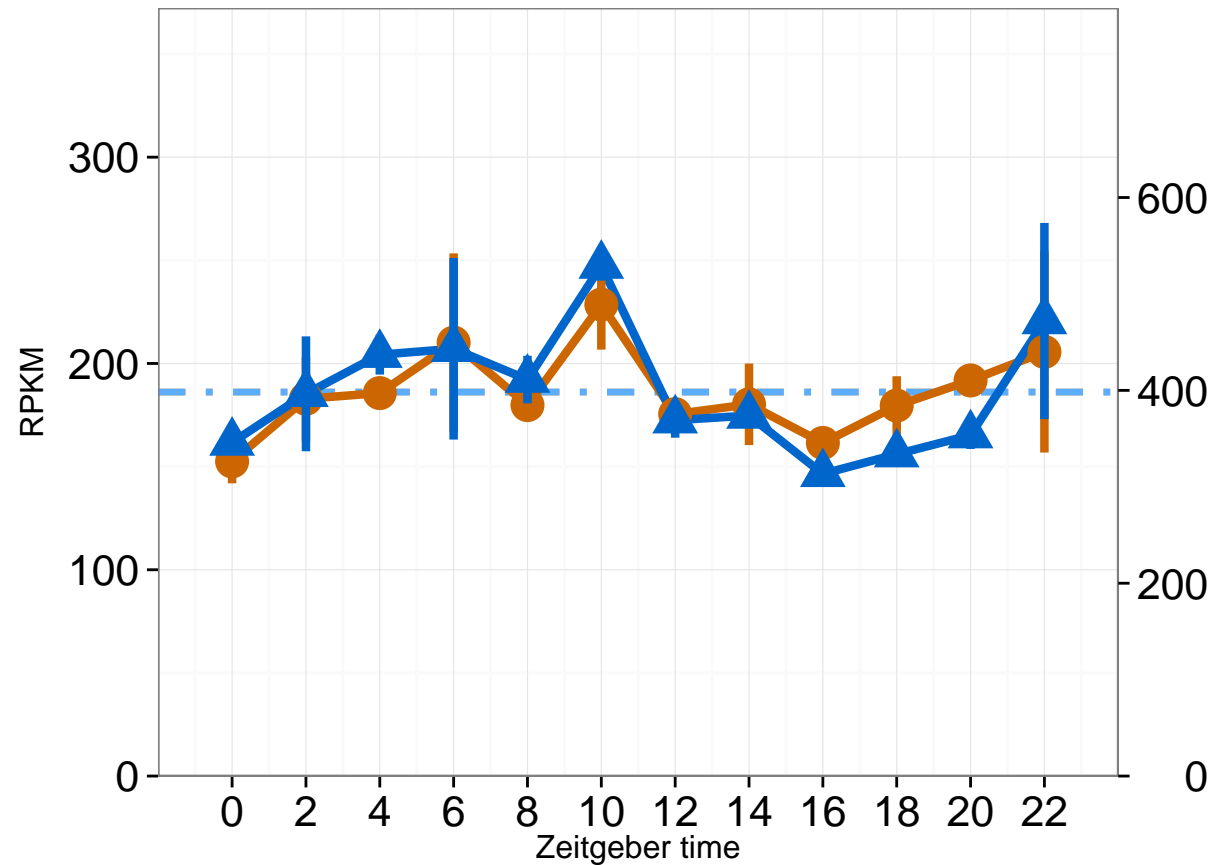

## Elovl2

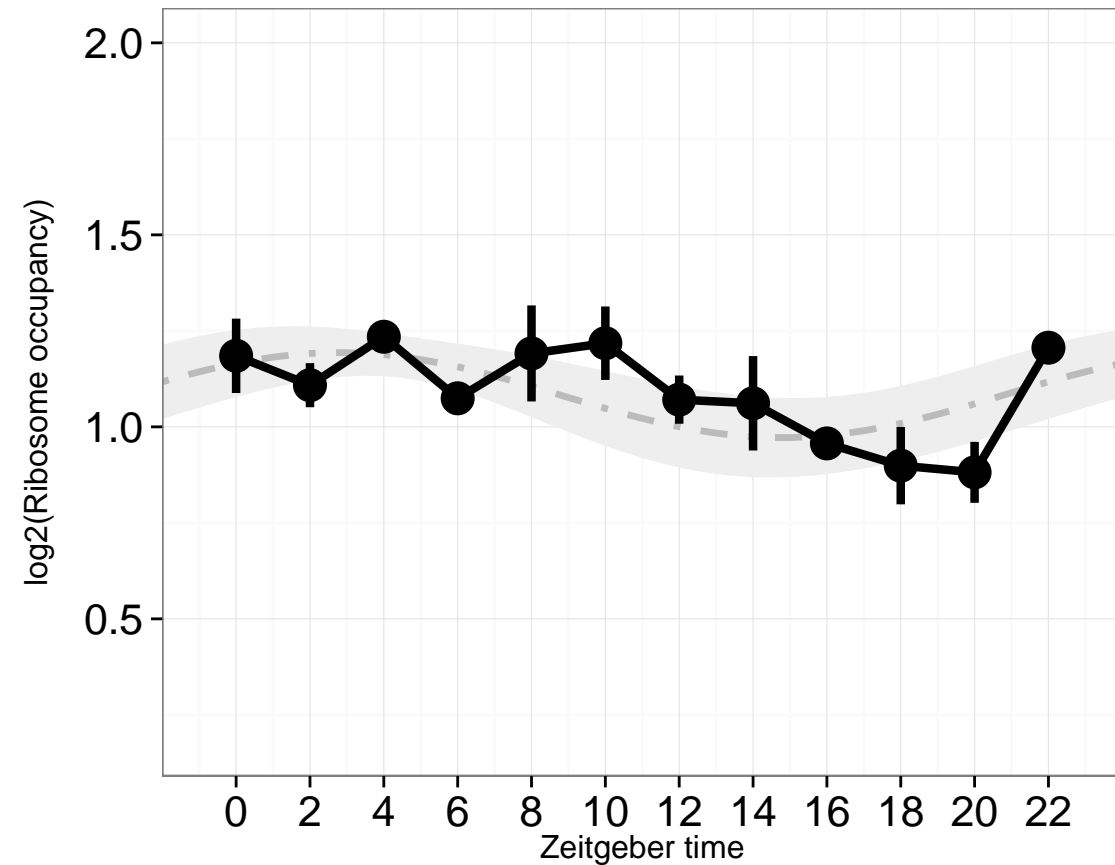

Supplement: SuppDataset_1.zip [file Elovl2_set_A.pdf › Supplemental Dataset 1/A-mRNA_nonrhyth_translation_nonrhyth/Elovl2_set_A.pdf]

## Elp2

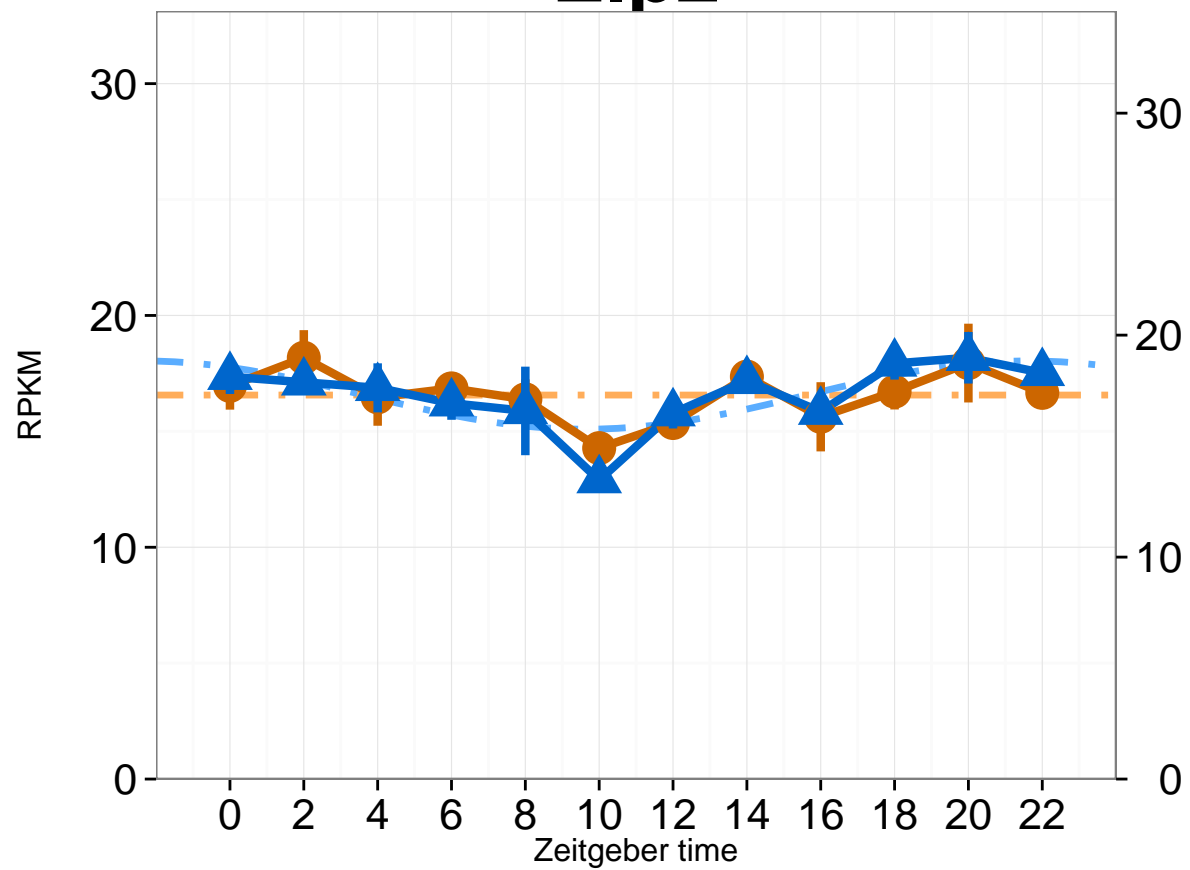

## Elp2

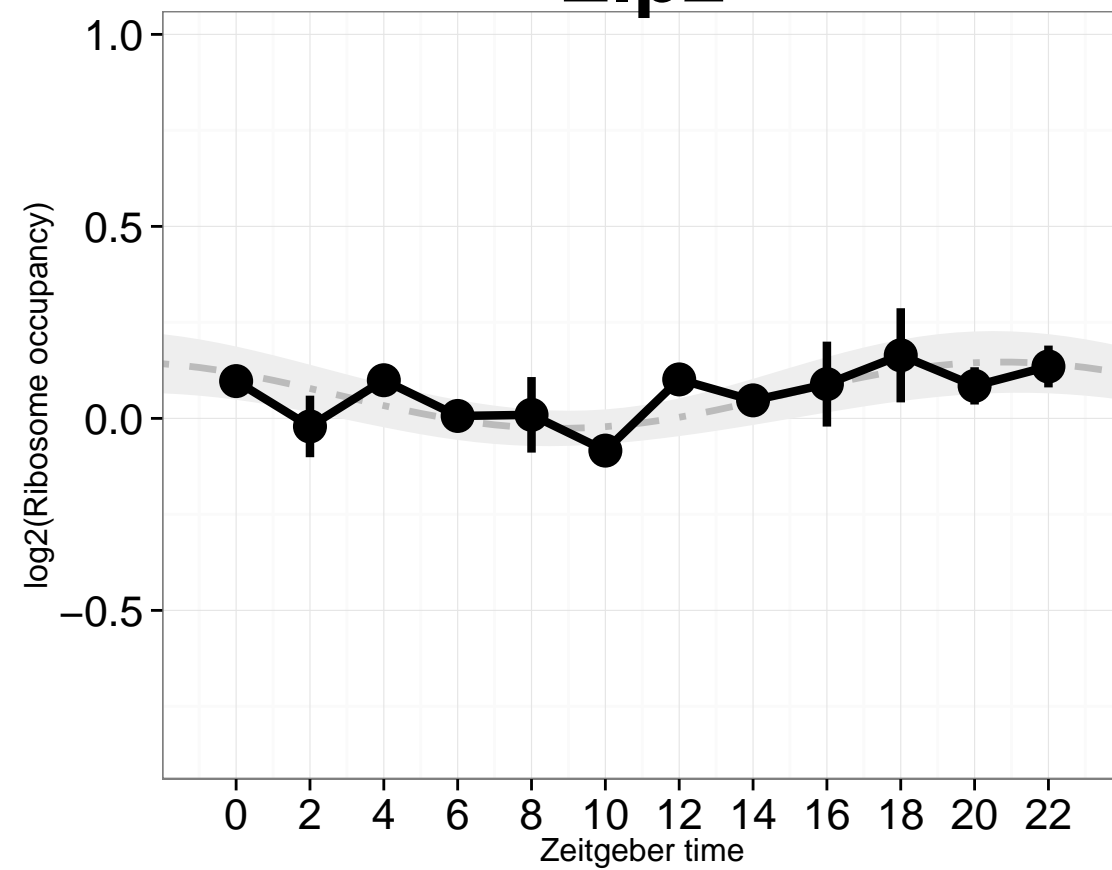

Supplement: SuppDataset_1.zip [file Elp2_set_A.pdf › Supplemental Dataset 1/A-mRNA_nonrhyth_translation_nonrhyth/Elp2_set_A.pdf]

## Elp3

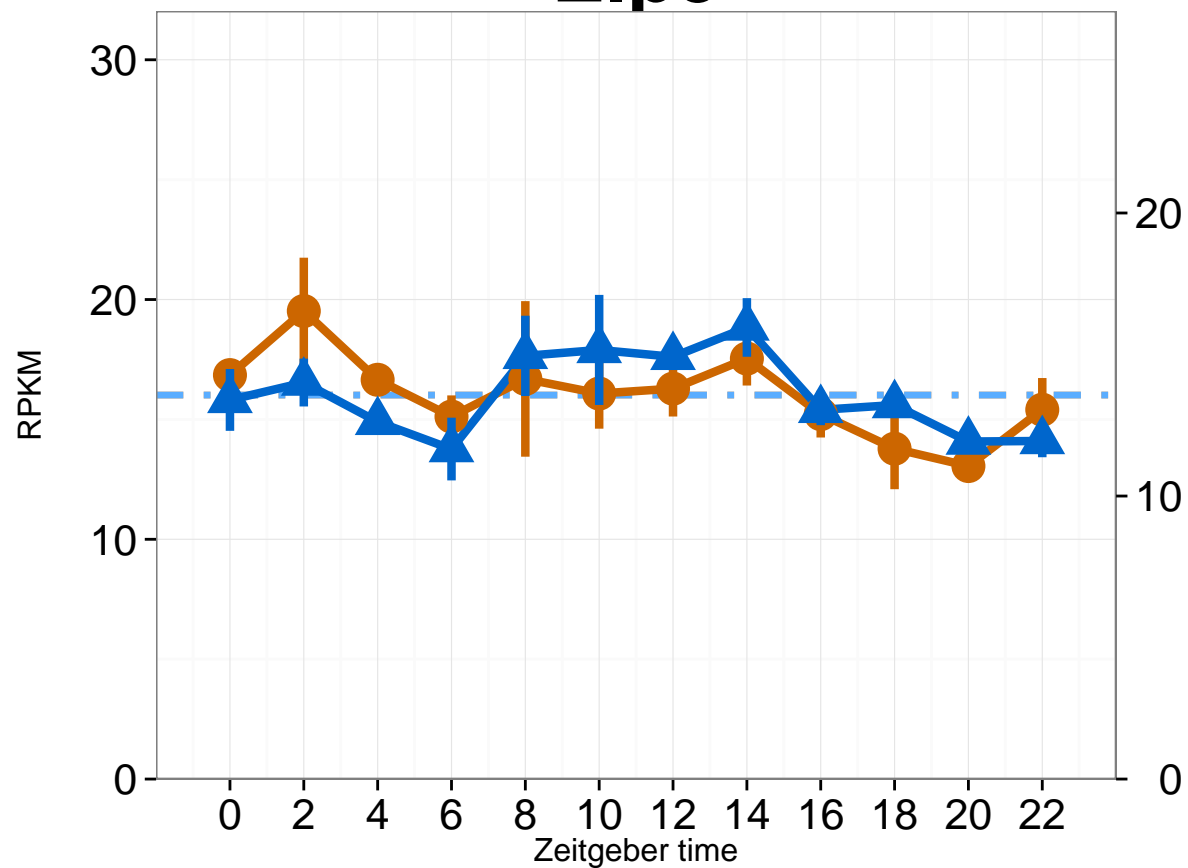

## Elp3

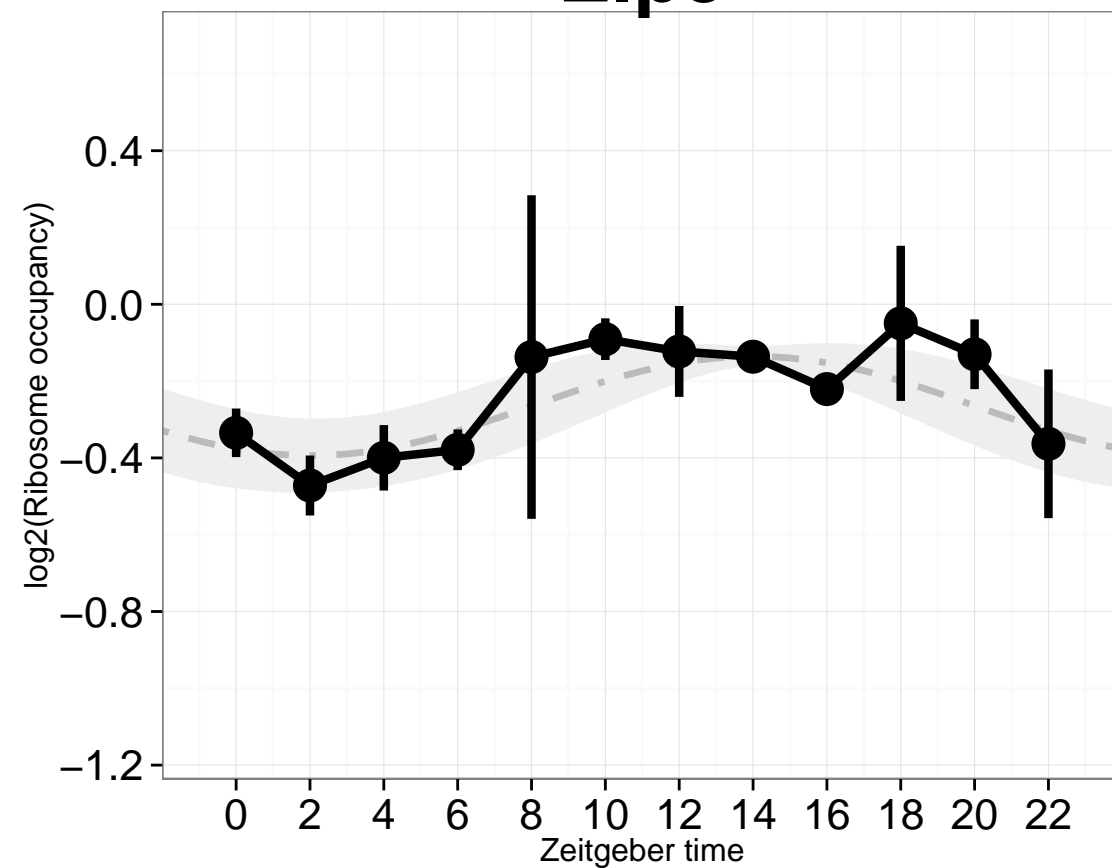

Supplement: SuppDataset_1.zip [file Elp3_set_A.pdf › Supplemental Dataset 1/A-mRNA_nonrhyth_translation_nonrhyth/Elp3_set_A.pdf]

## Elp5

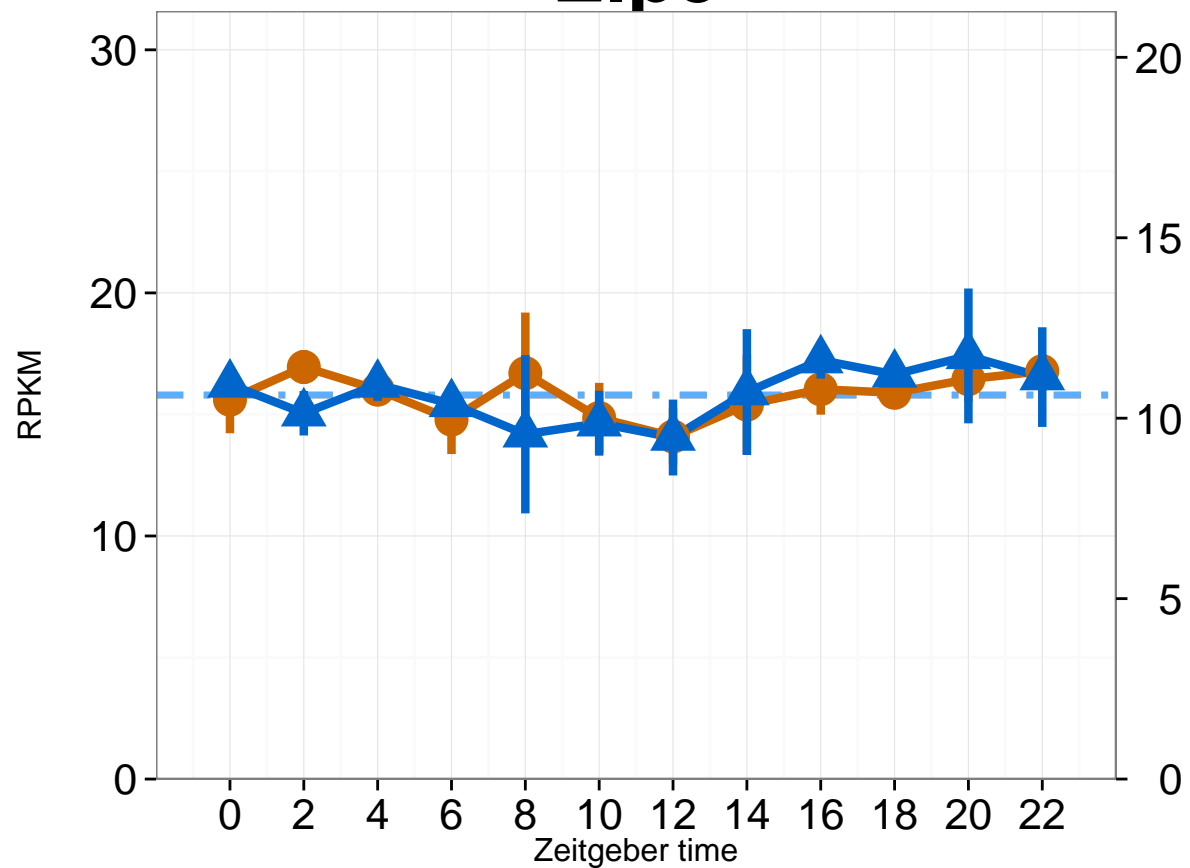

## Elp5

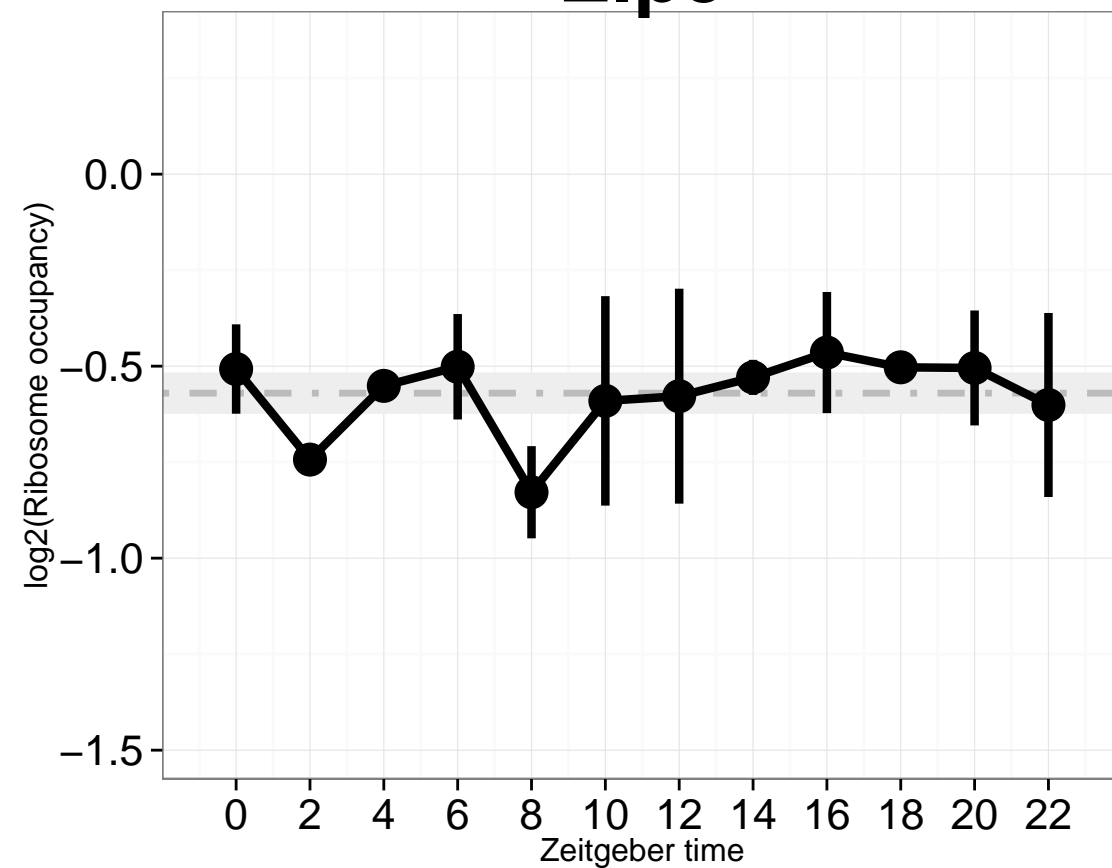

Supplement: SuppDataset_1.zip [file Elp5_set_A.pdf › Supplemental Dataset 1/A-mRNA_nonrhyth_translation_nonrhyth/Elp5_set_A.pdf]

## Eltd1

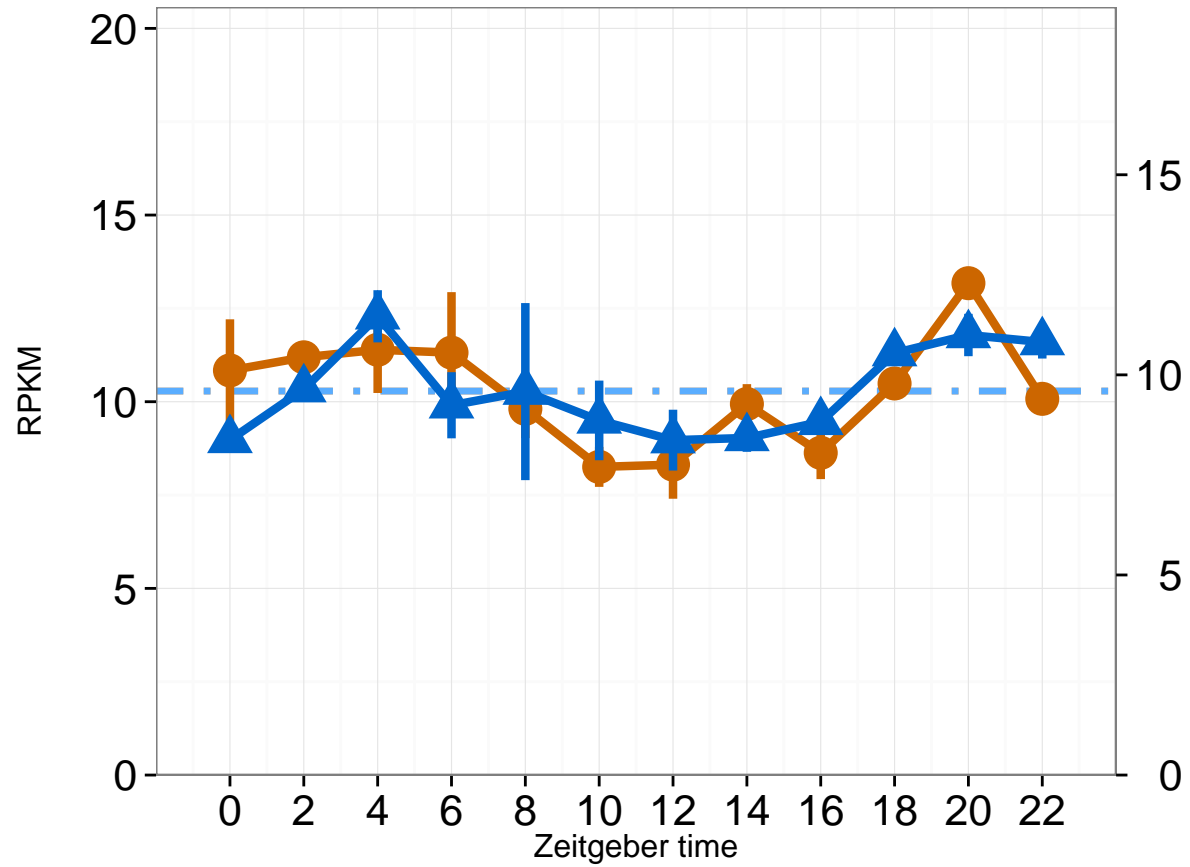

## Eltd1

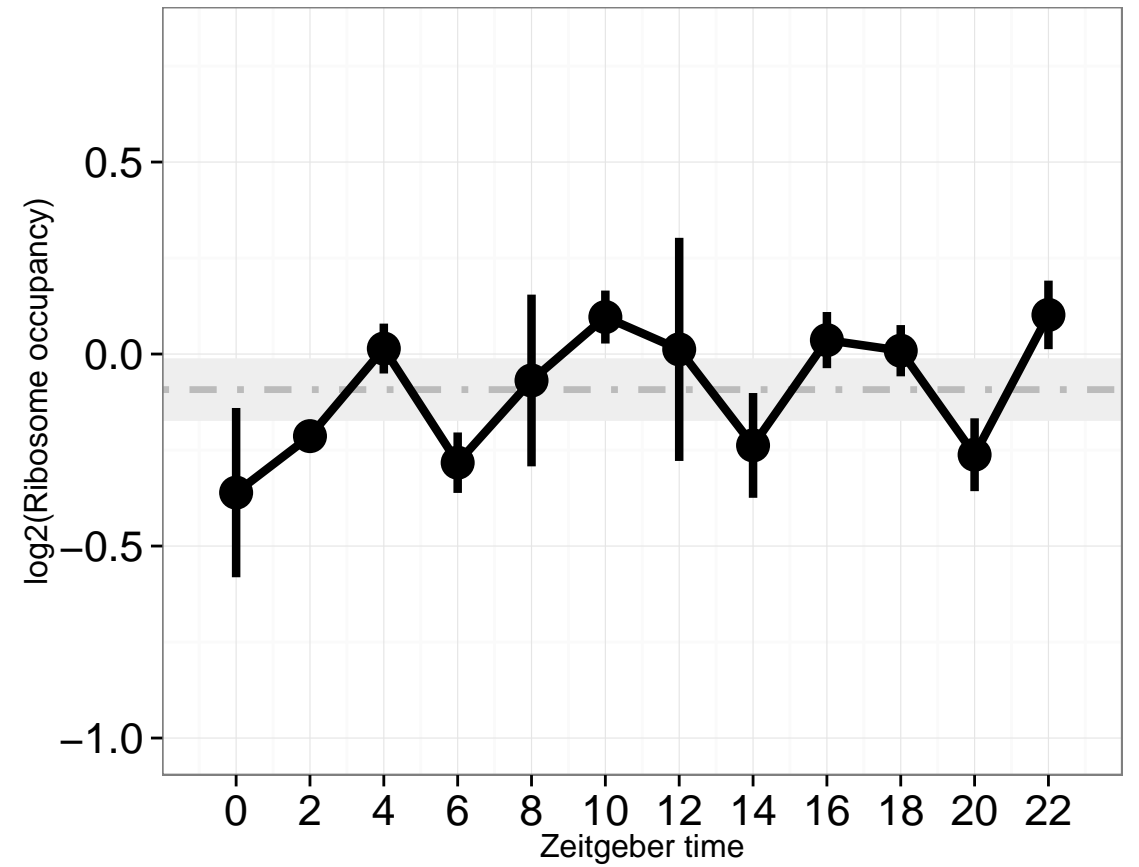

Supplement: SuppDataset_1.zip [file Eltd1_set_A.pdf › Supplemental Dataset 1/A-mRNA_nonrhyth_translation_nonrhyth/Eltd1_set_A.pdf]

## Emc1

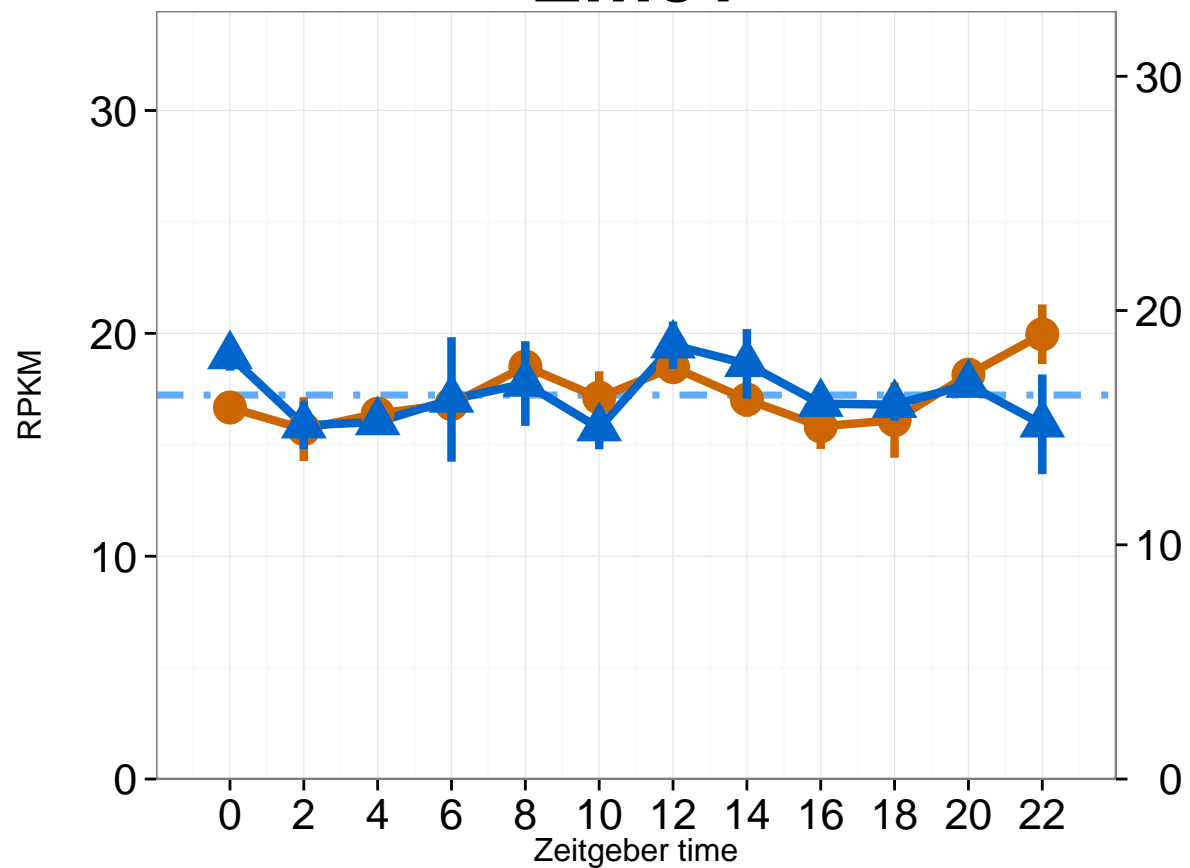

## Emc1

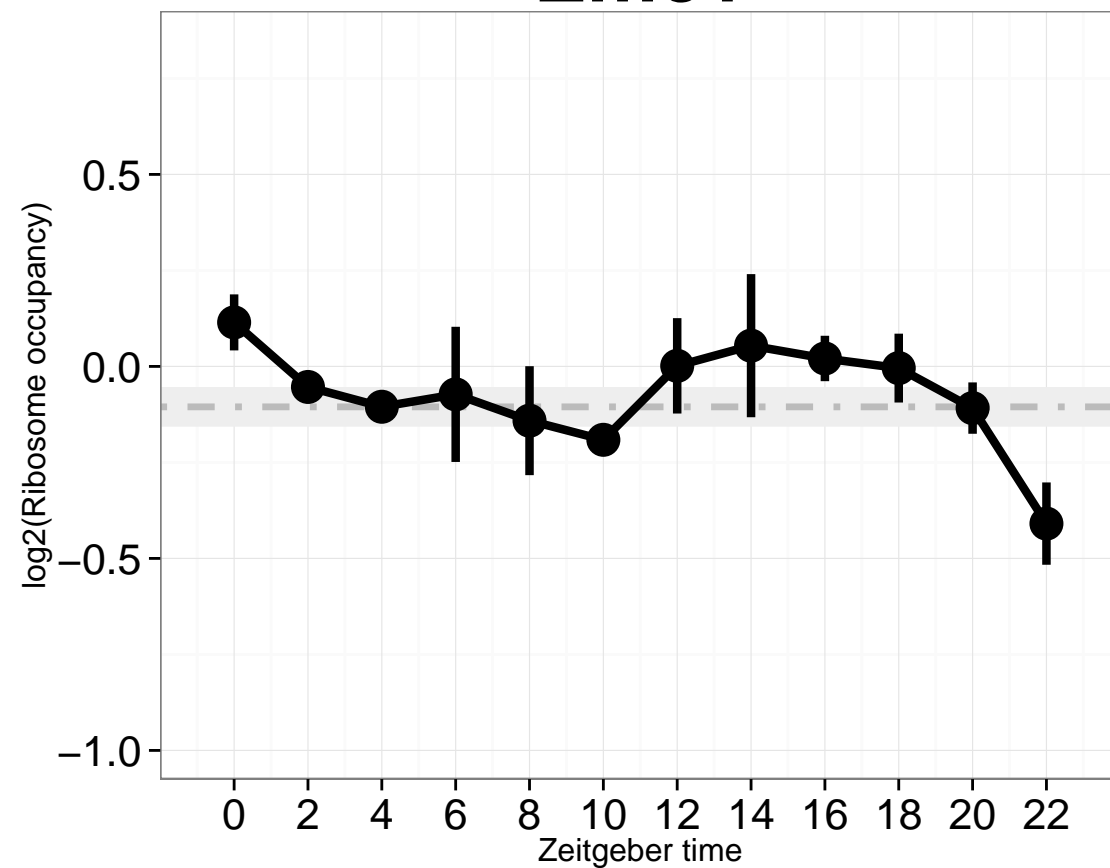

Supplement: SuppDataset_1.zip [file Emc1_set_A.pdf › Supplemental Dataset 1/A-mRNA_nonrhyth_translation_nonrhyth/Emc1_set_A.pdf]

## Emc2

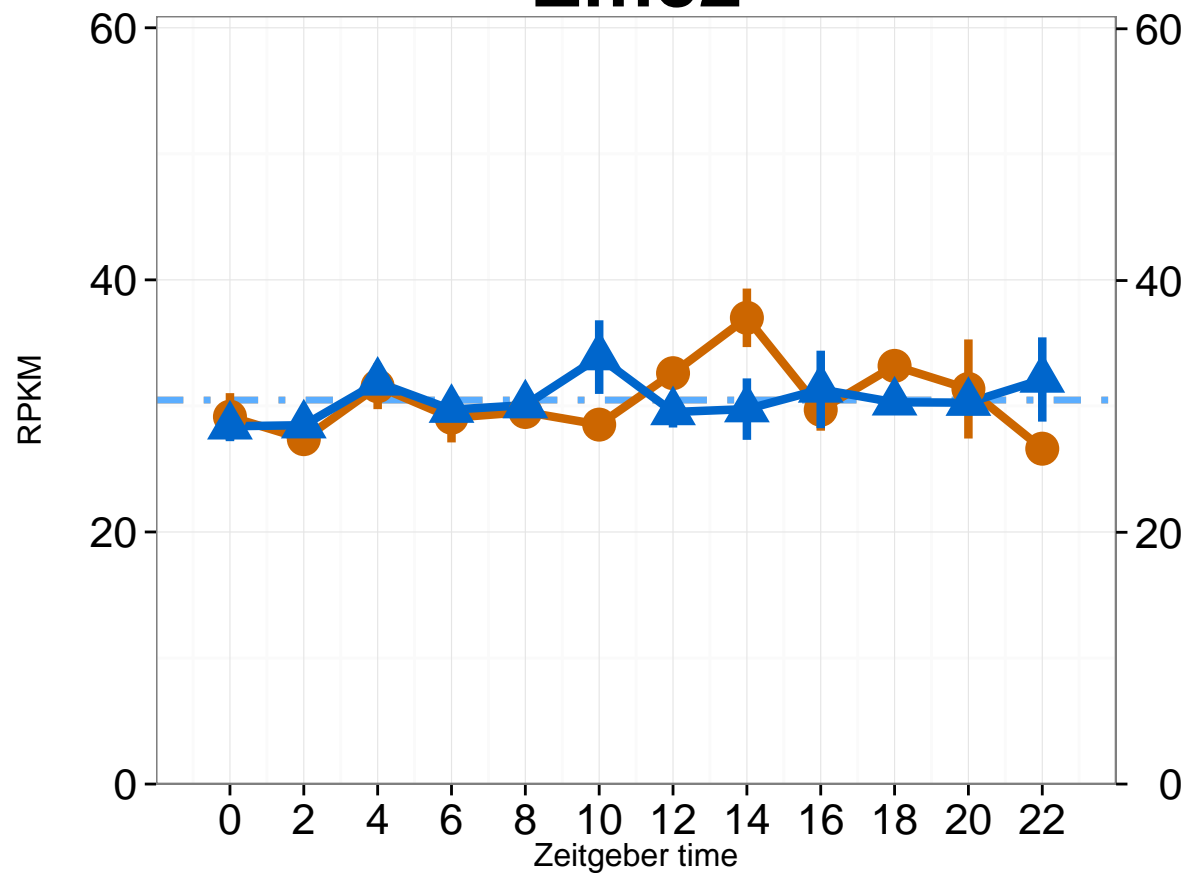

## Emc2

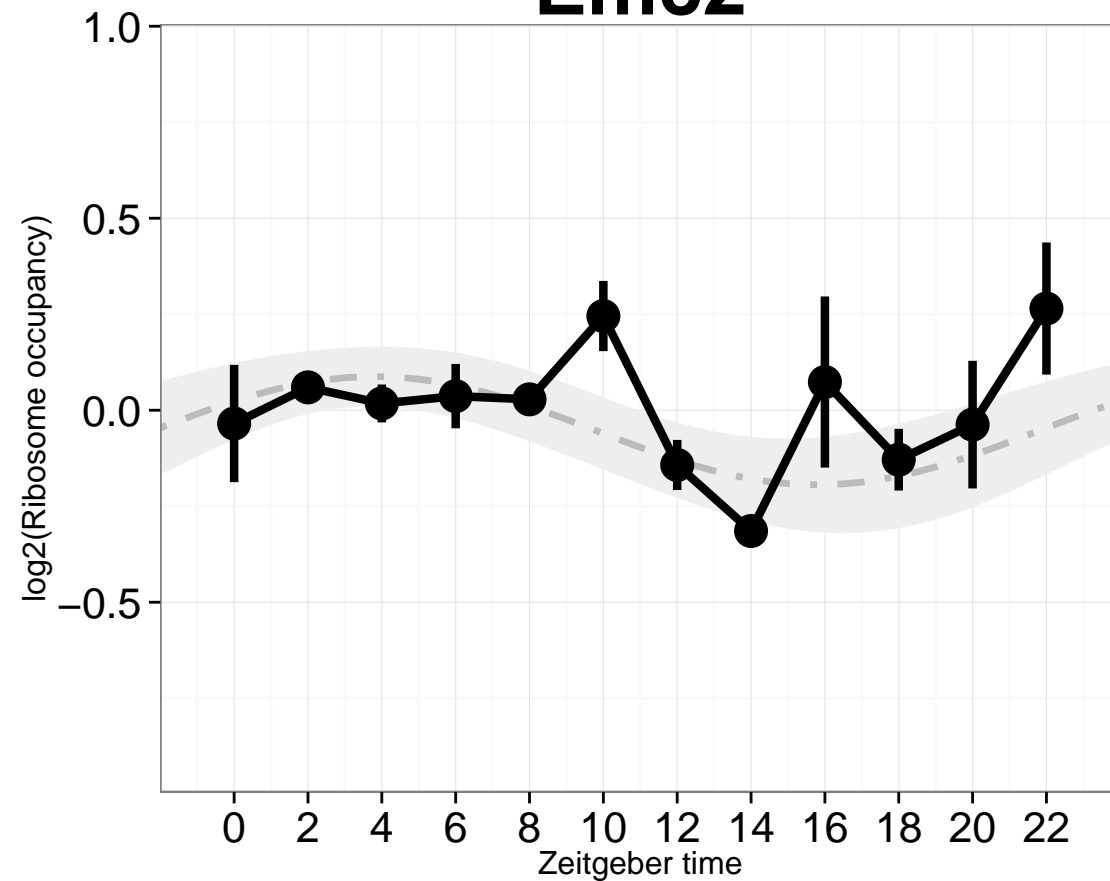

Supplement: SuppDataset_1.zip [file Emc2_set_A.pdf › Supplemental Dataset 1/A-mRNA_nonrhyth_translation_nonrhyth/Emc2_set_A.pdf]

## Emc3

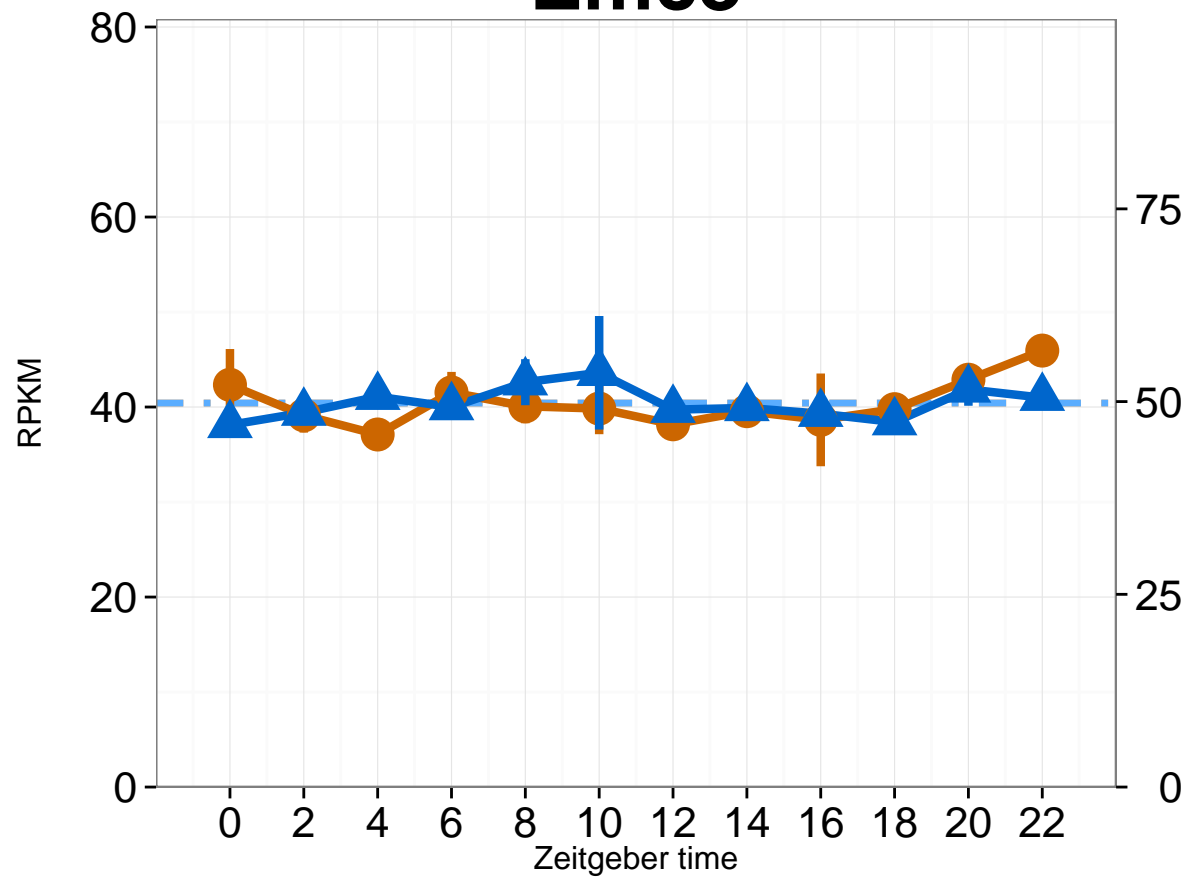

## Emc3

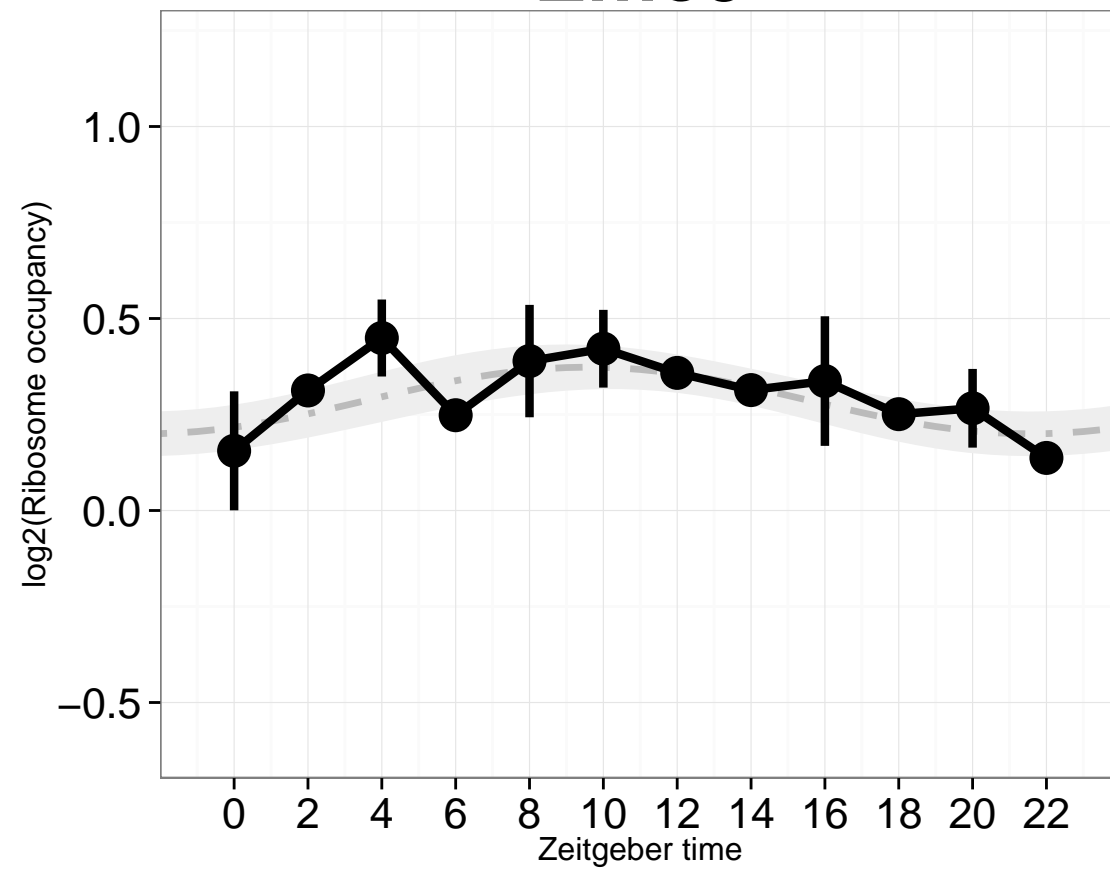

Supplement: SuppDataset_1.zip [file Emc3_set_A.pdf › Supplemental Dataset 1/A-mRNA_nonrhyth_translation_nonrhyth/Emc3_set_A.pdf]

## Emc4

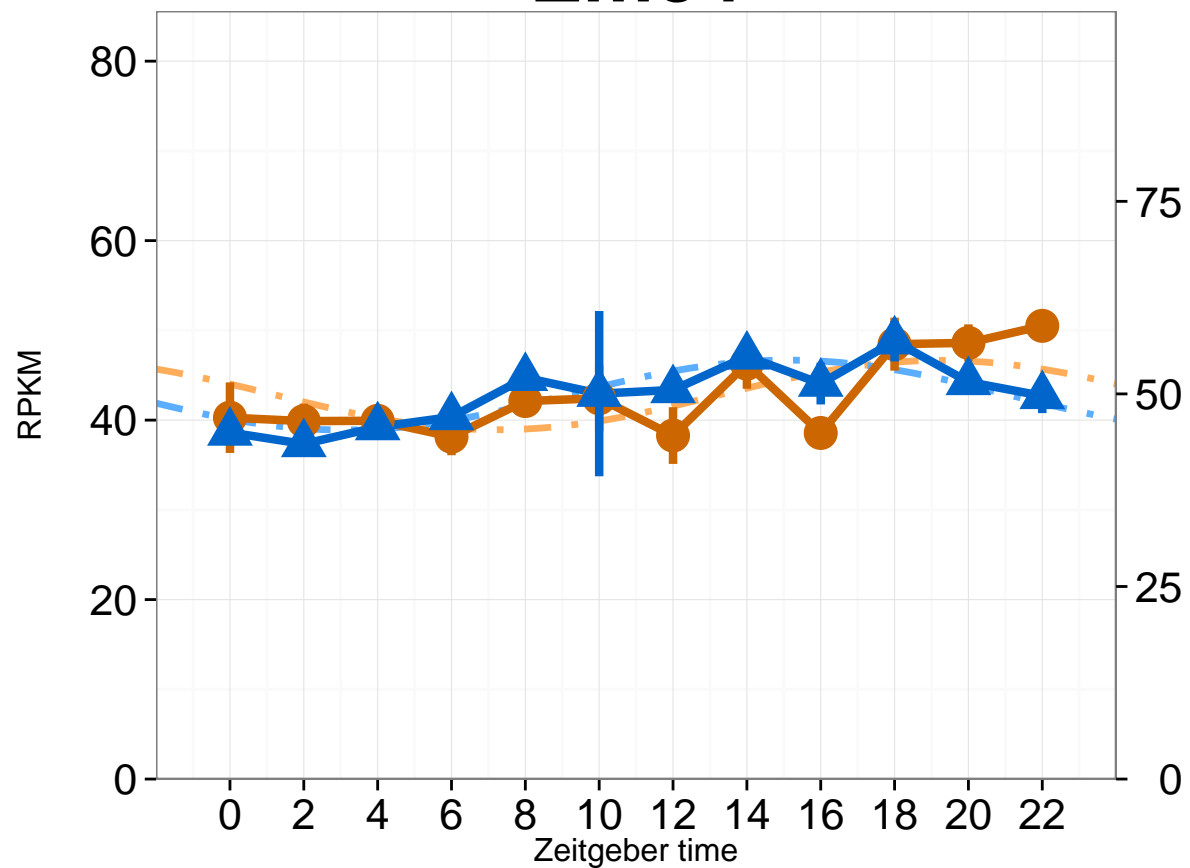

## Emc4

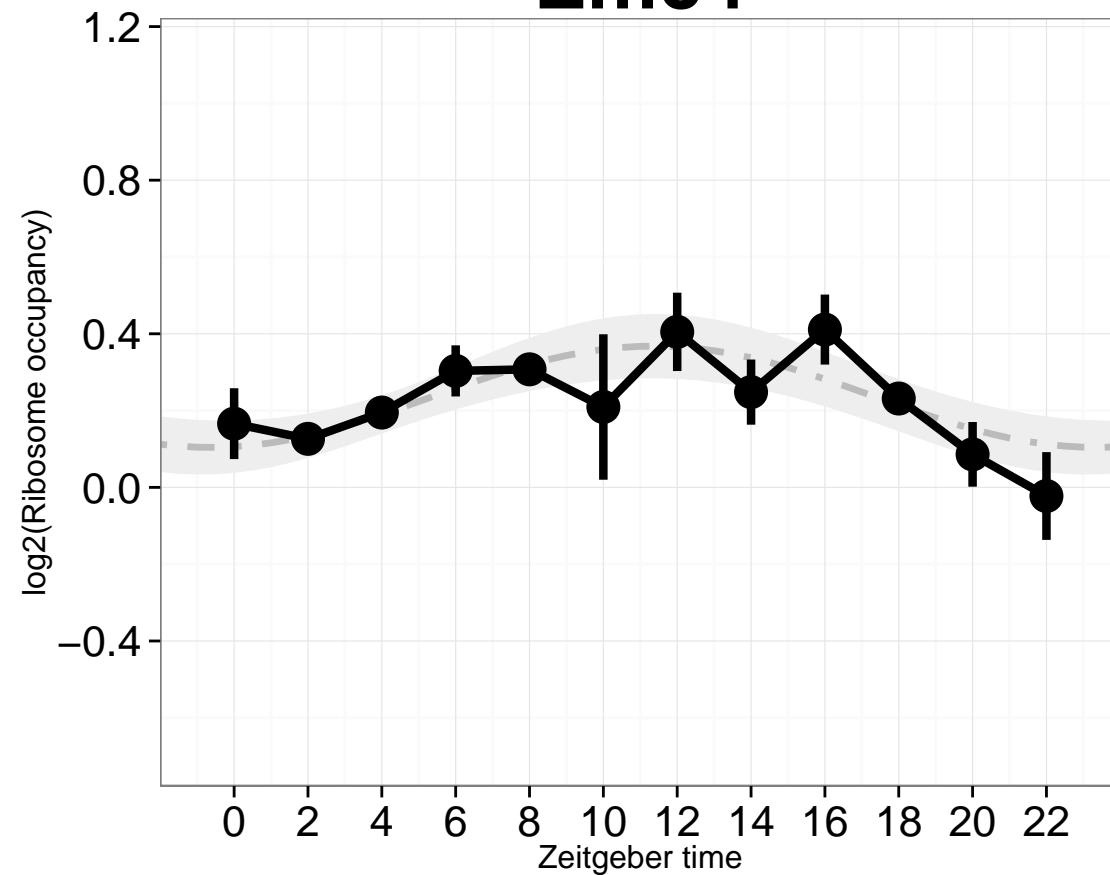

Supplement: SuppDataset_1.zip [file Emc4_set_A.pdf › Supplemental Dataset 1/A-mRNA_nonrhyth_translation_nonrhyth/Emc4_set_A.pdf]

## Emc6

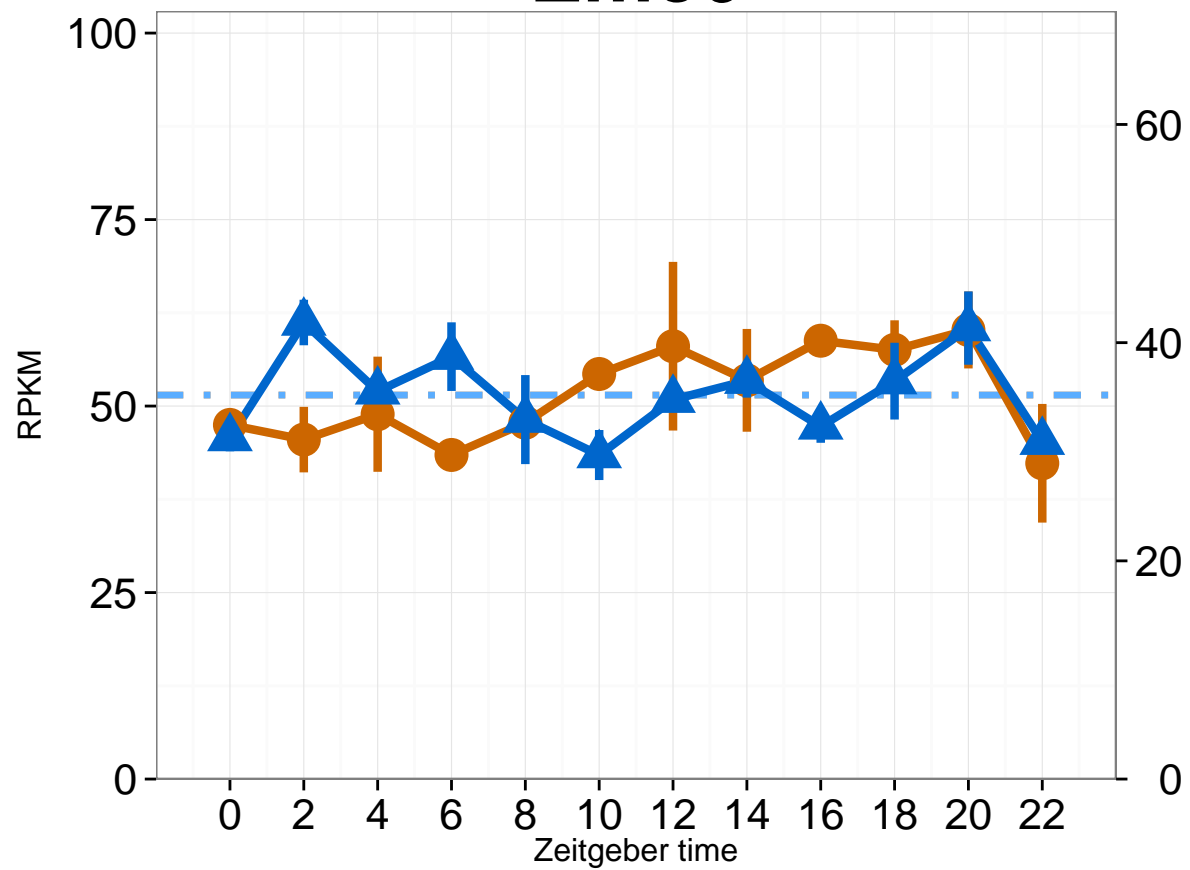

## Emc6

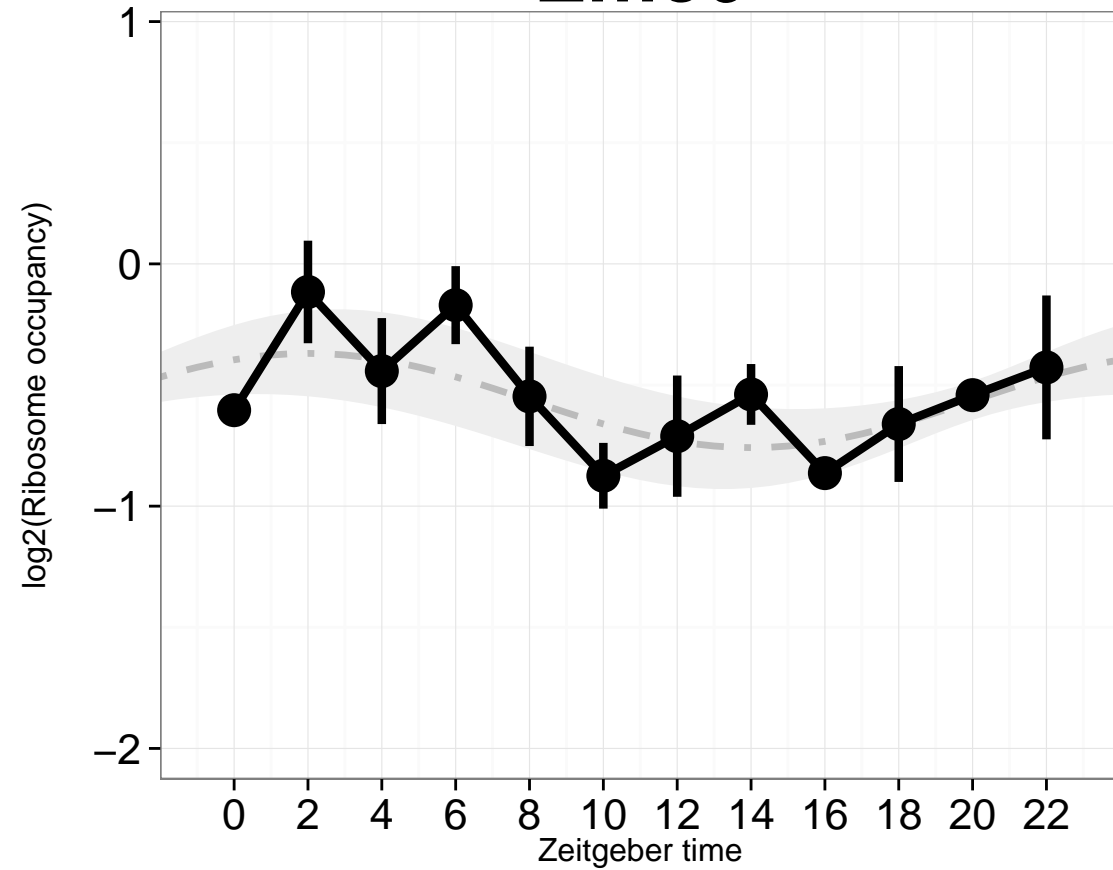

Supplement: SuppDataset_1.zip [file Emc6_set_A.pdf › Supplemental Dataset 1/A-mRNA_nonrhyth_translation_nonrhyth/Emc6_set_A.pdf]

## Emc7

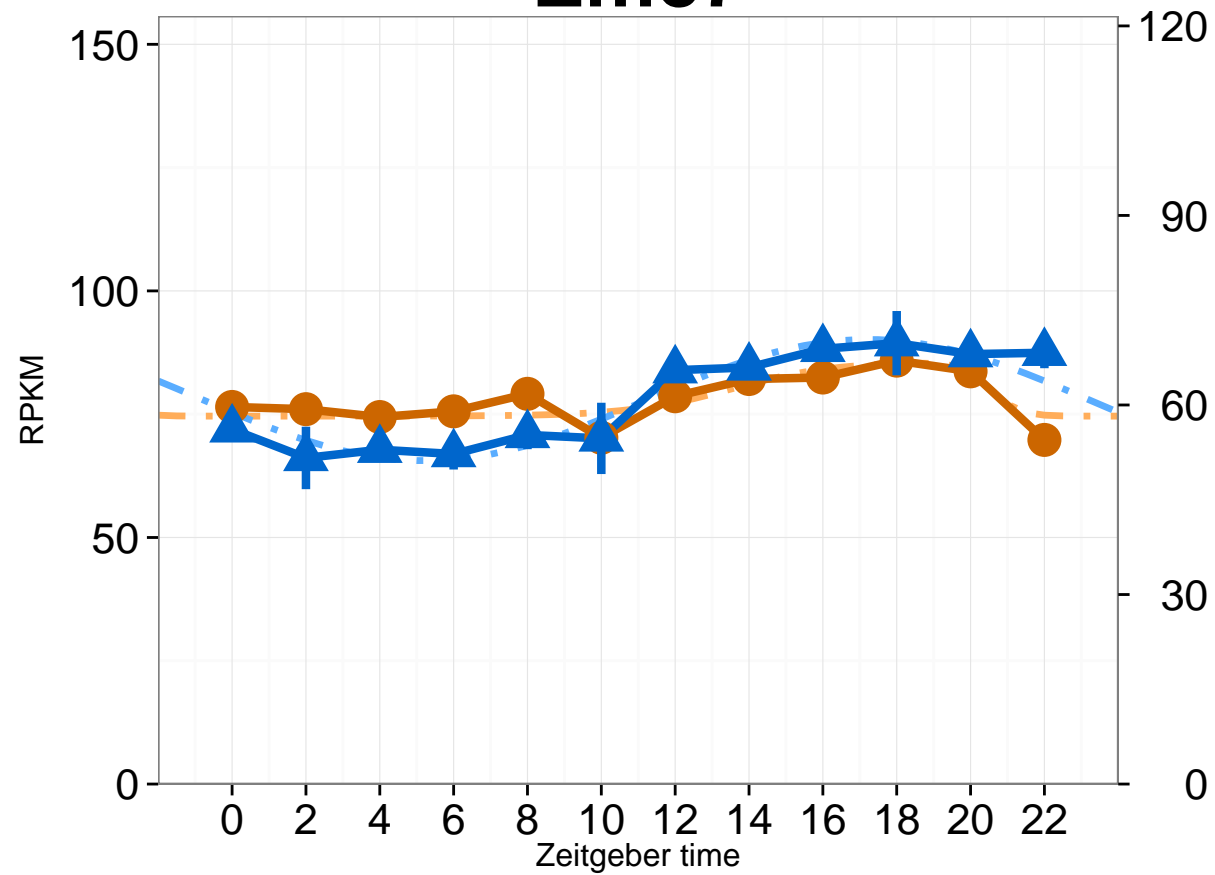

## Emc7

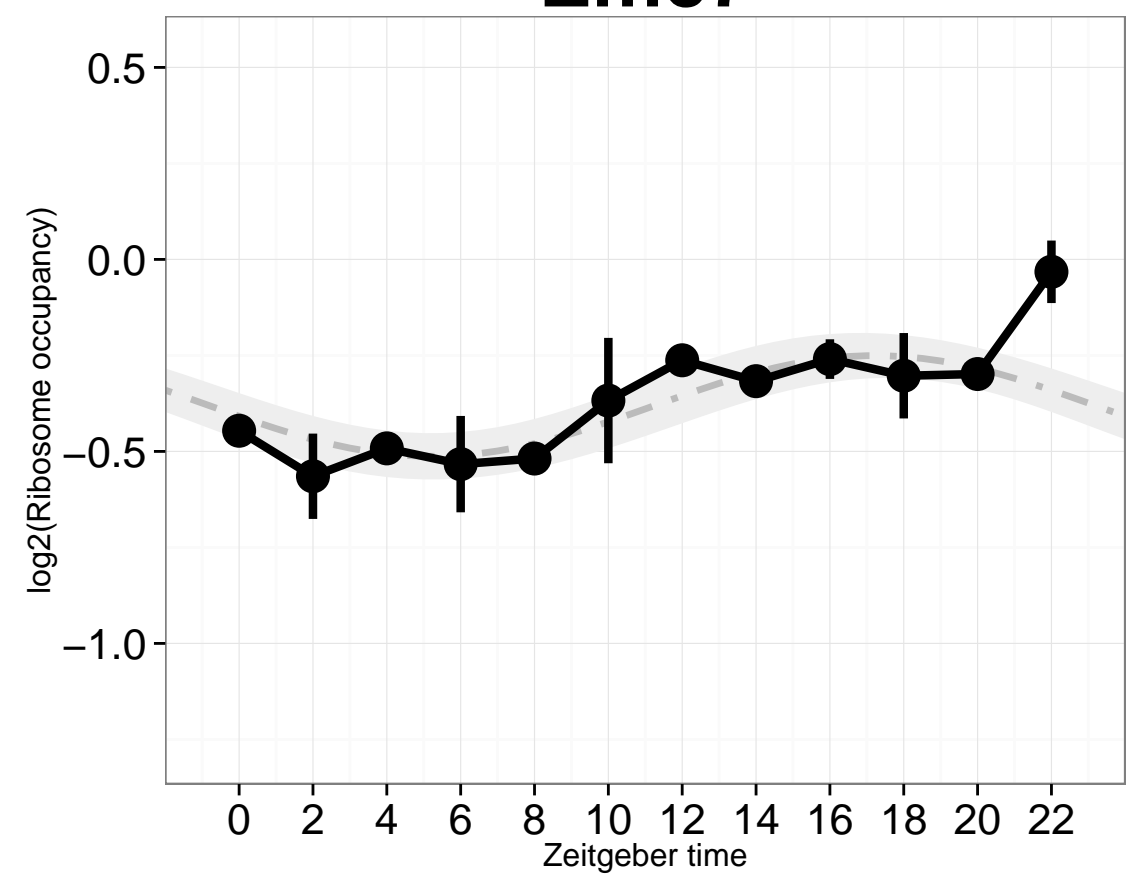

Supplement: SuppDataset_1.zip [file Emc7_set_A.pdf › Supplemental Dataset 1/A-mRNA_nonrhyth_translation_nonrhyth/Emc7_set_A.pdf]

## Emc9

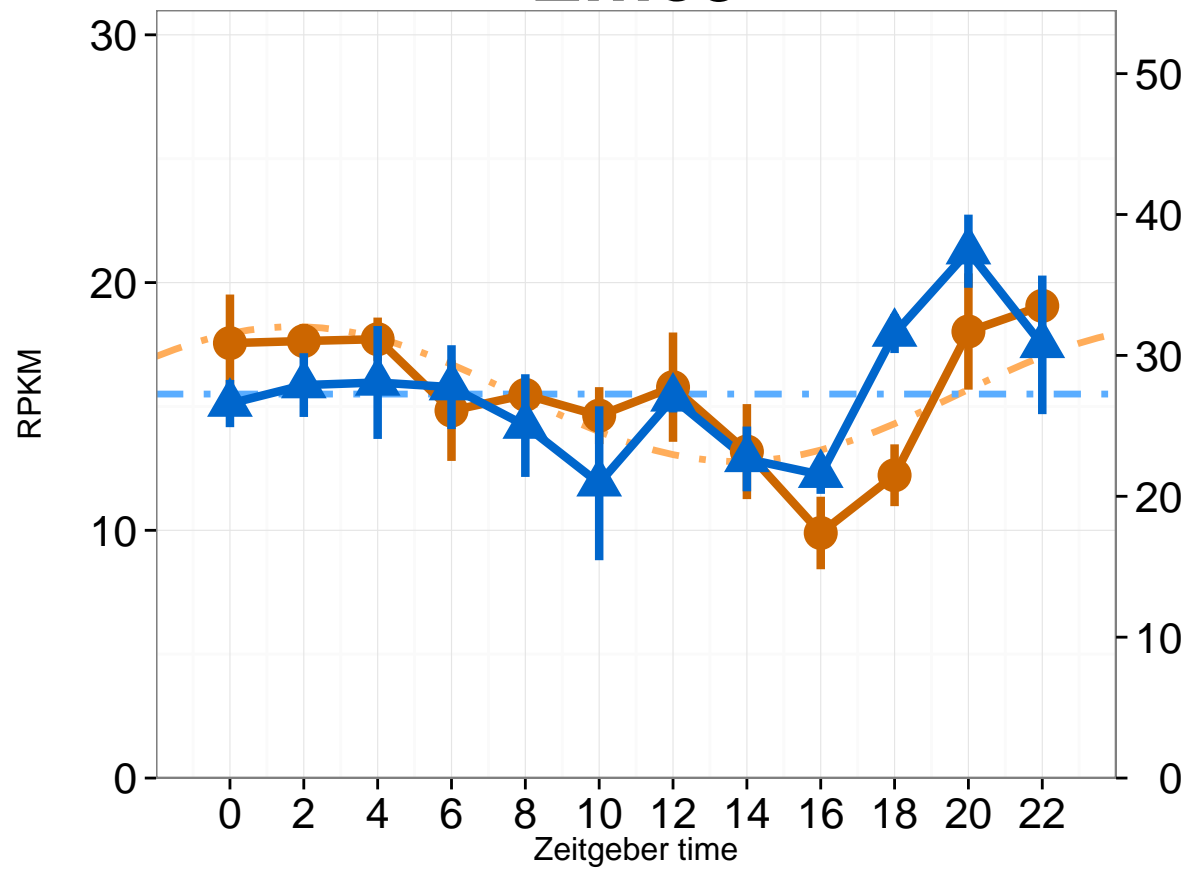

## Emc9

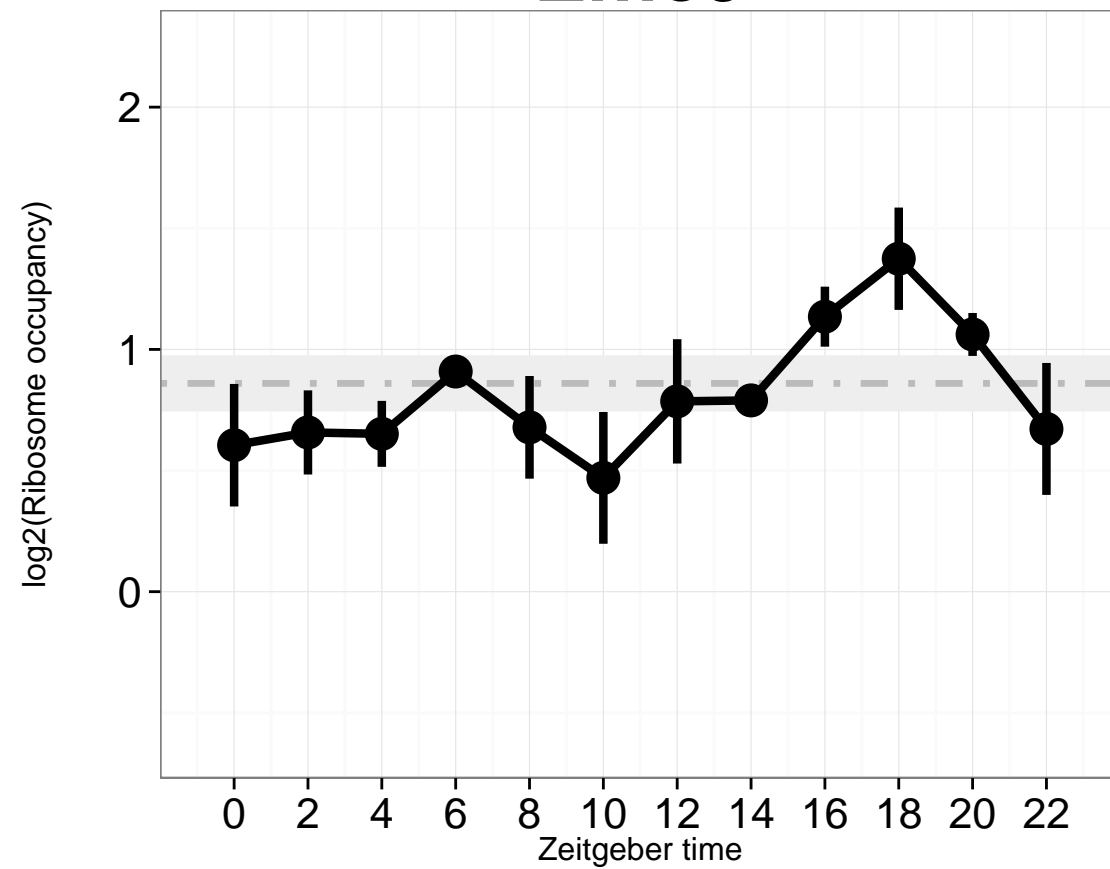

Supplement: SuppDataset_1.zip [file Emc9_set_A.pdf › Supplemental Dataset 1/A-mRNA_nonrhyth_translation_nonrhyth/Emc9_set_A.pdf]

## Emcn

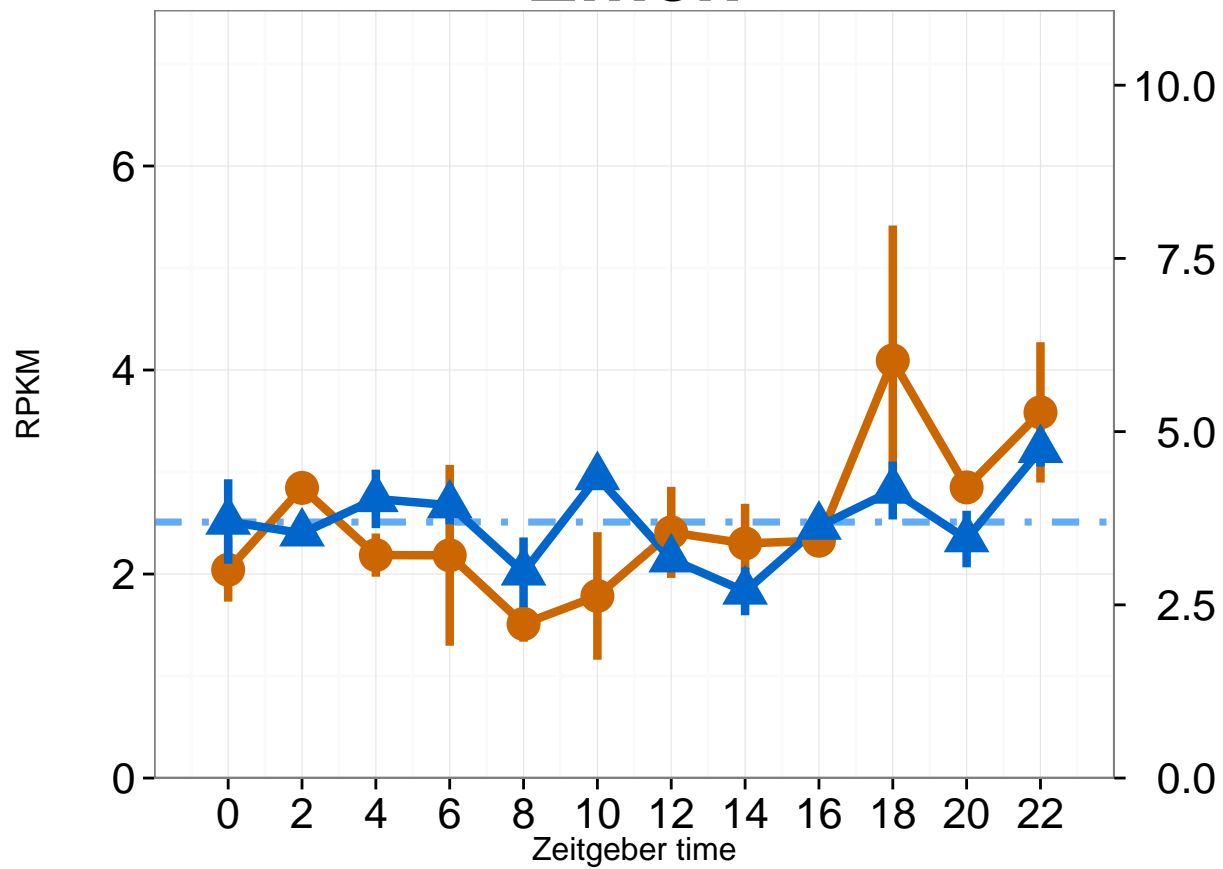

## Emcn

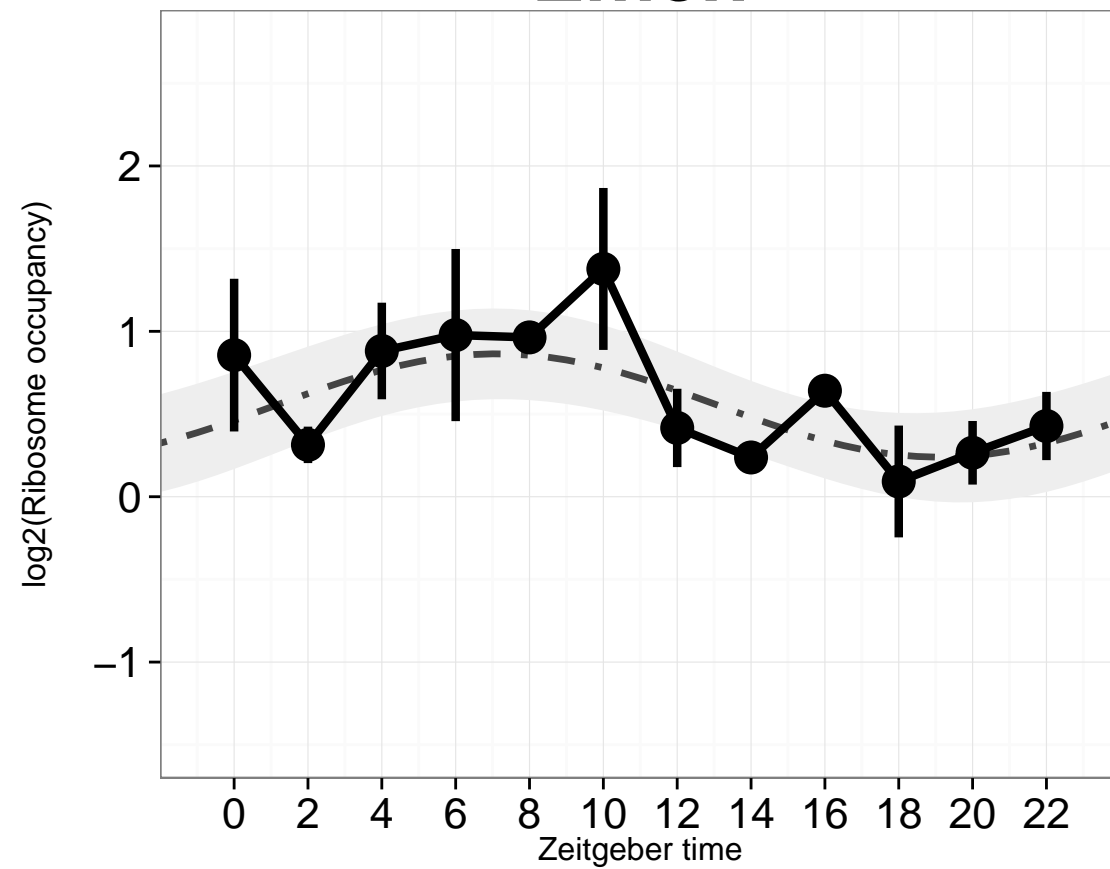

Supplement: SuppDataset_1.zip [file Emcn_set_A.pdf › Supplemental Dataset 1/A-mRNA_nonrhyth_translation_nonrhyth/Emcn_set_A.pdf]

# End

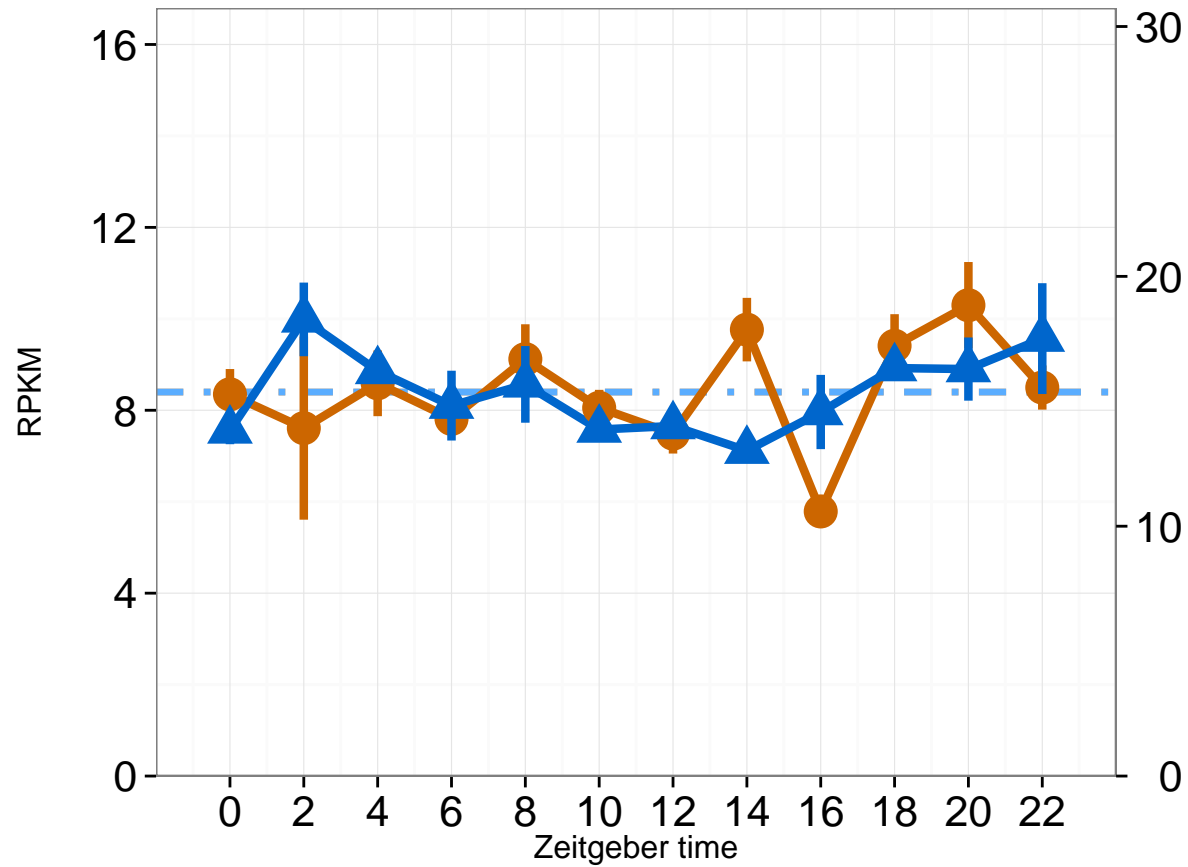

# End

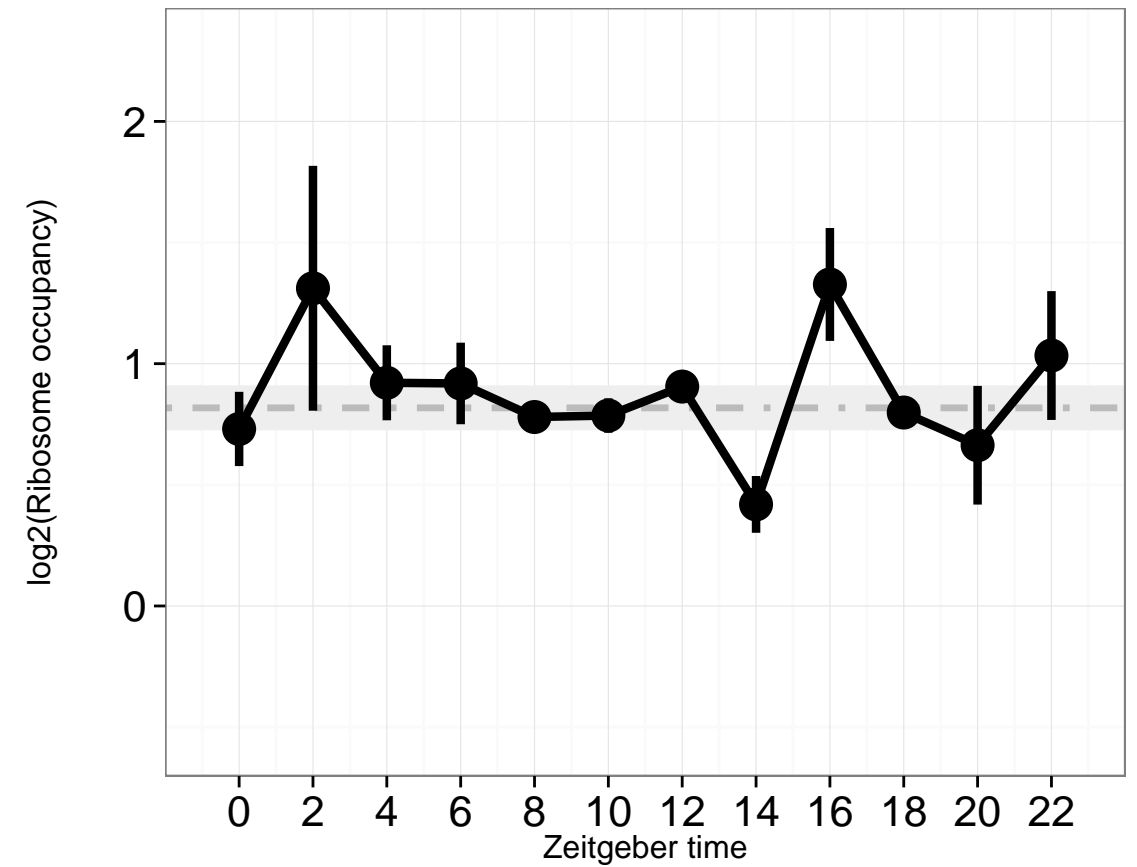

Supplement: SuppDataset_1.zip [file Emd_set_A.pdf › Supplemental Dataset 1/A-mRNA_nonrhyth_translation_nonrhyth/Emd_set_A.pdf]

# Emg1

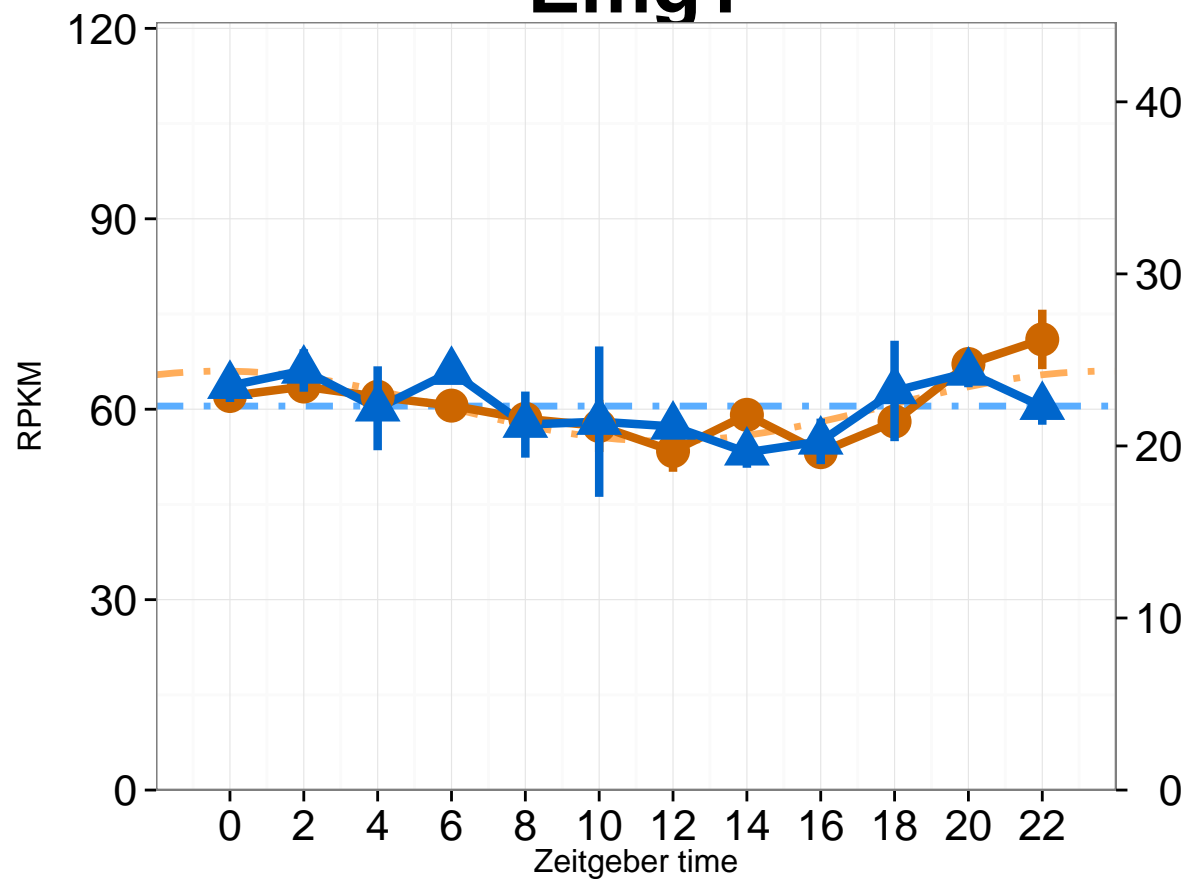

# Emg1

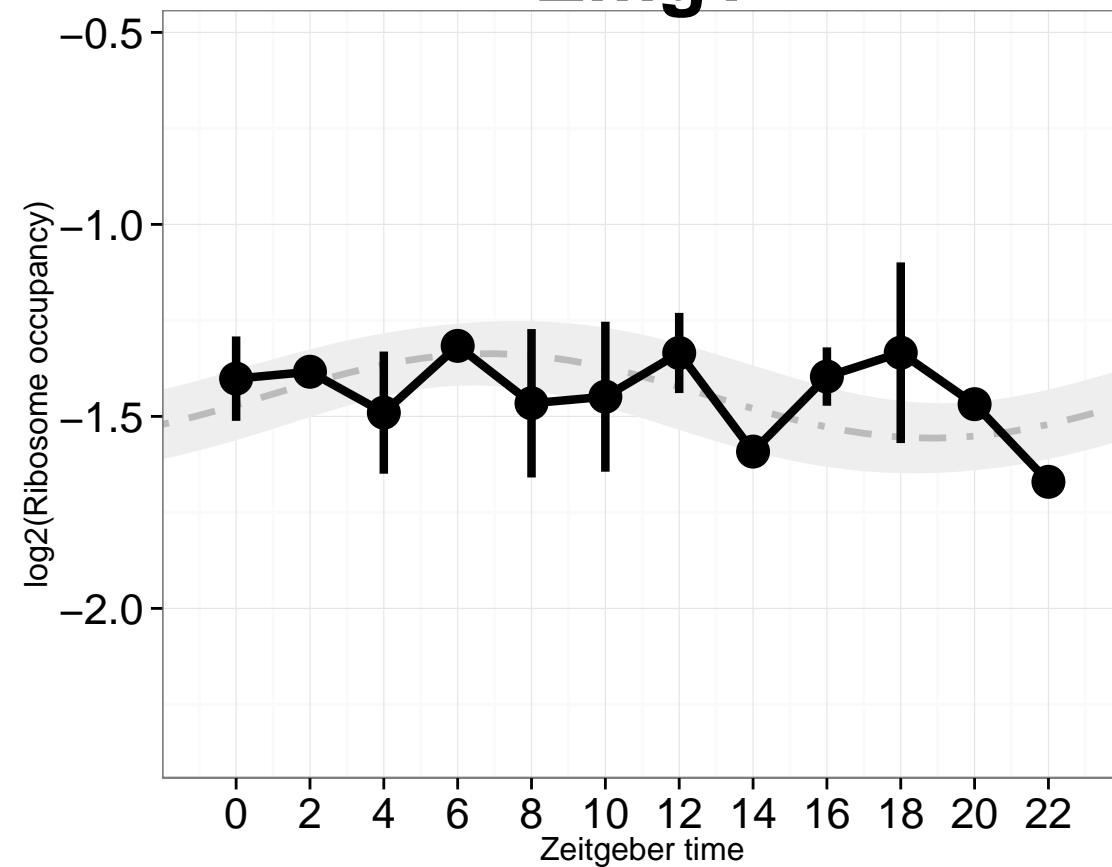

Supplement: SuppDataset_1.zip [file Emg1_set_A.pdf › Supplemental Dataset 1/A-mRNA_nonrhyth_translation_nonrhyth/Emg1_set_A.pdf]

# Emilin1

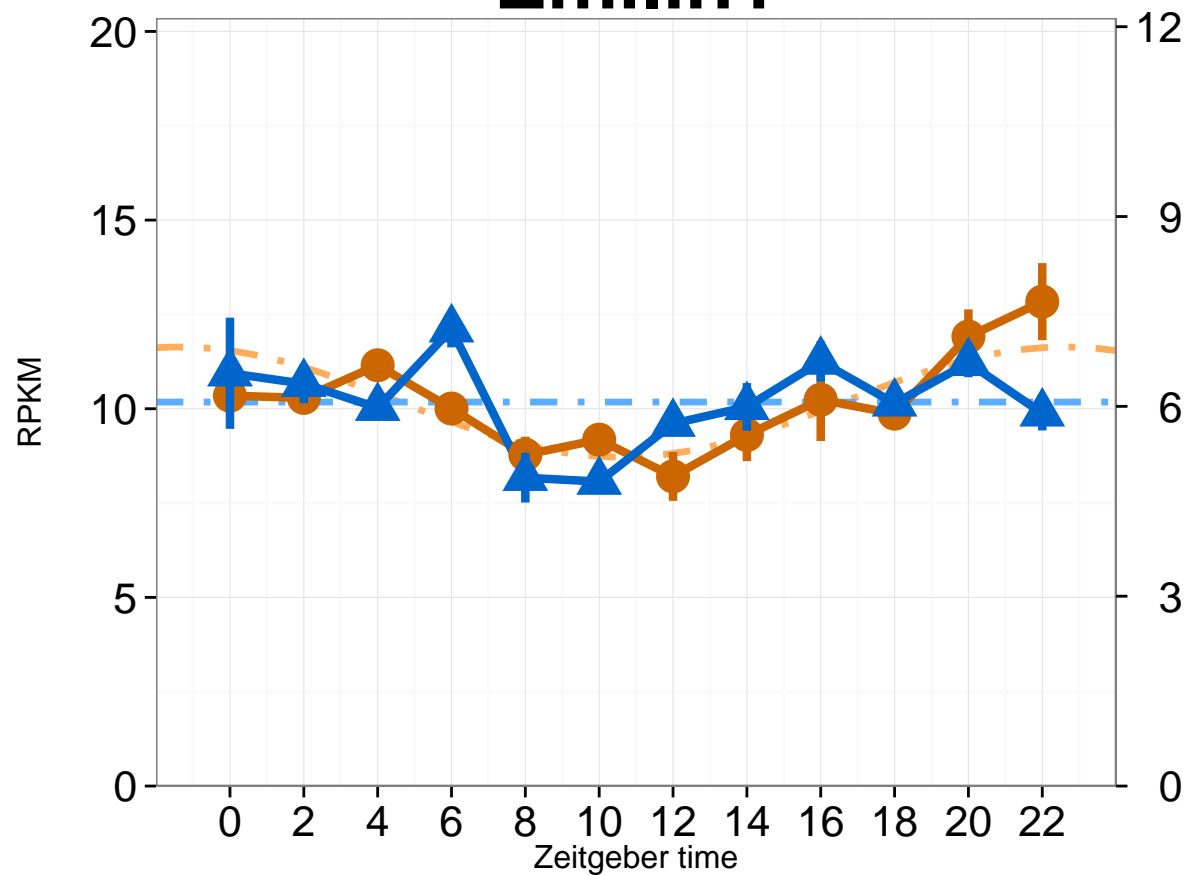

# Emilin1

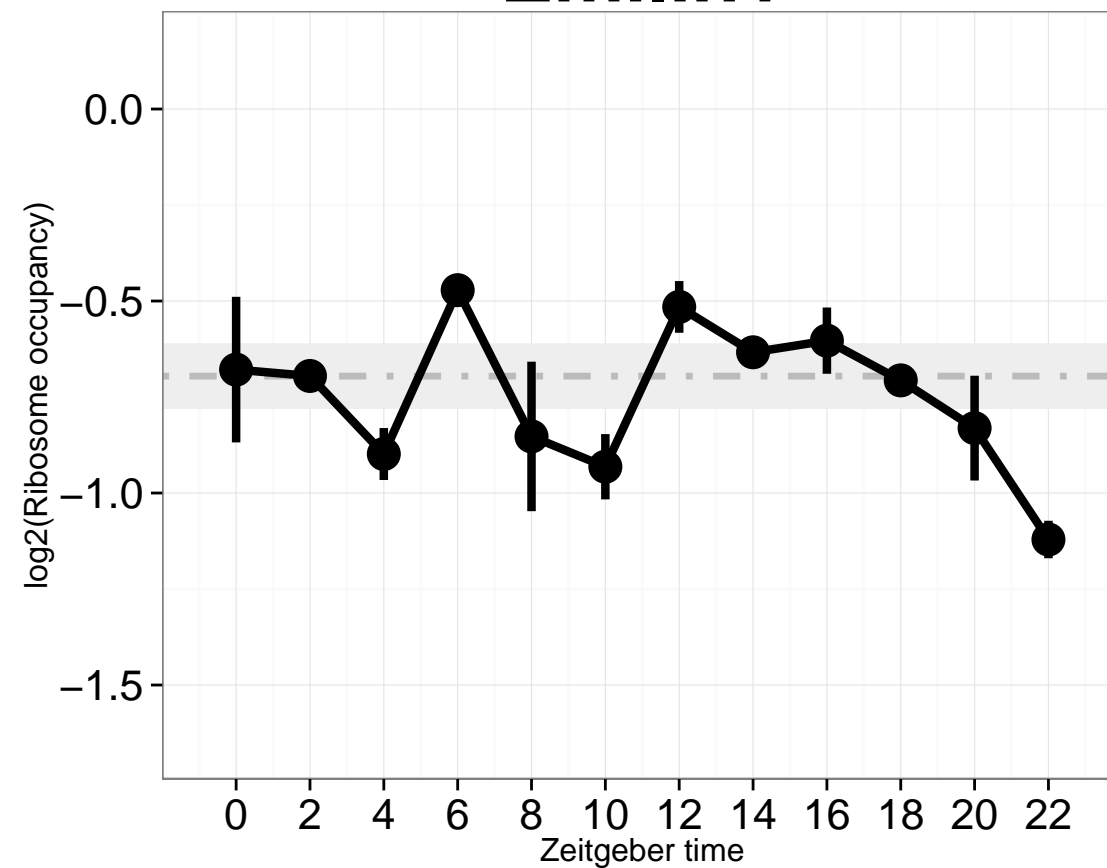

Supplement: SuppDataset_1.zip [file Emilin1_set_A.pdf › Supplemental Dataset 1/A-mRNA_nonrhyth_translation_nonrhyth/Emilin1_set_A.pdf]

## Eml3

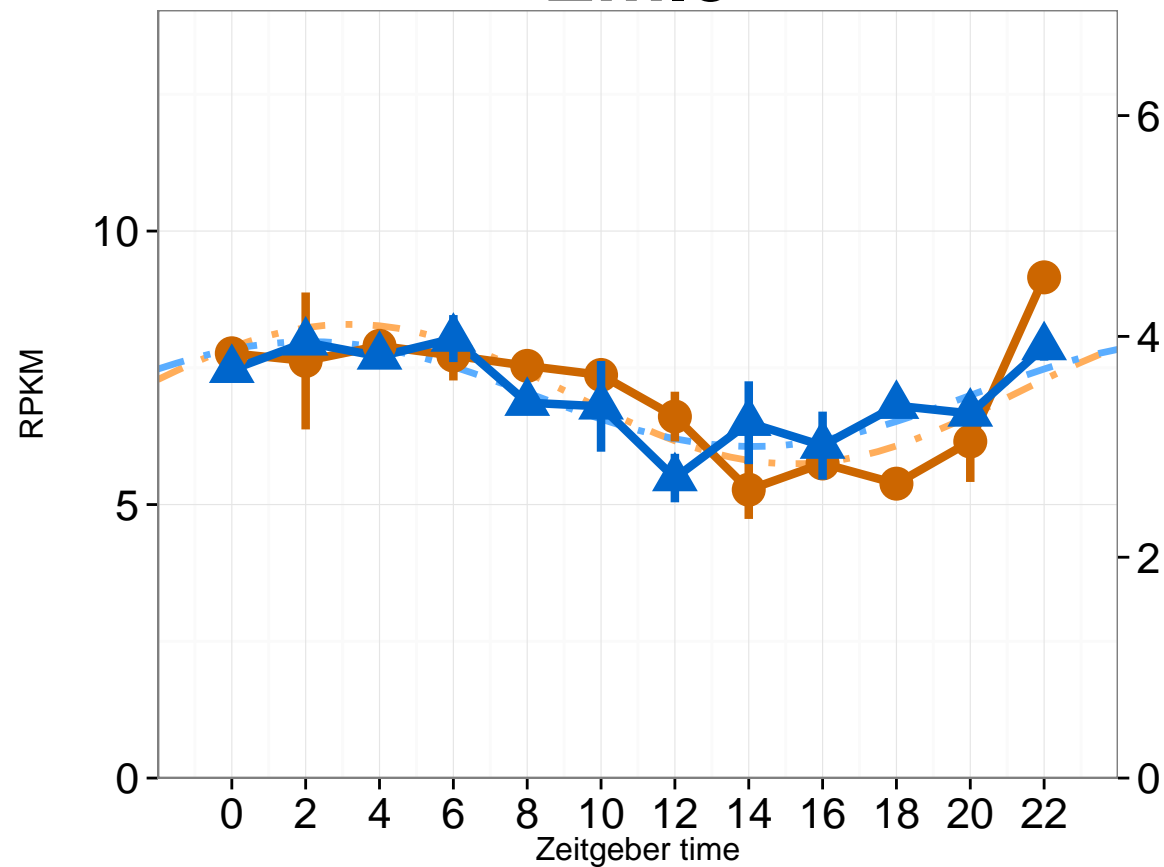

## Eml3

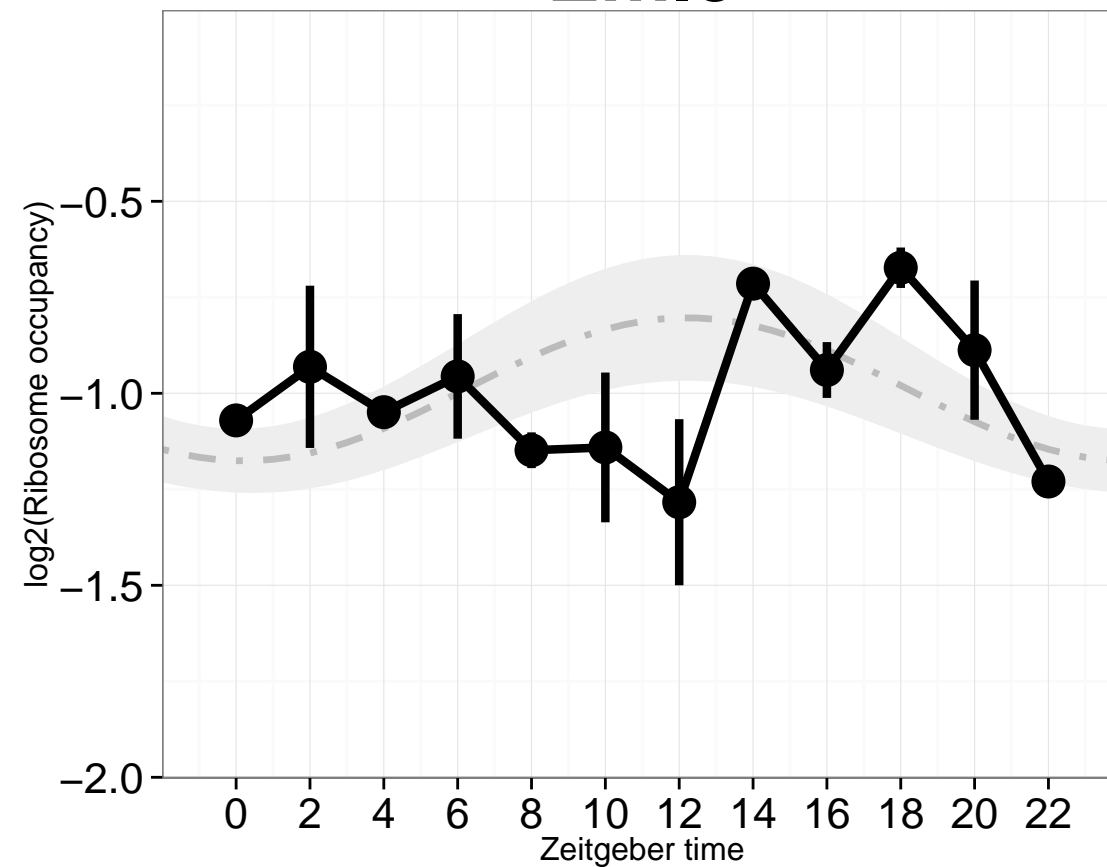

Supplement: SuppDataset_1.zip [file Eml3_set_A.pdf › Supplemental Dataset 1/A-mRNA_nonrhyth_translation_nonrhyth/Eml3_set_A.pdf]

## Eml4

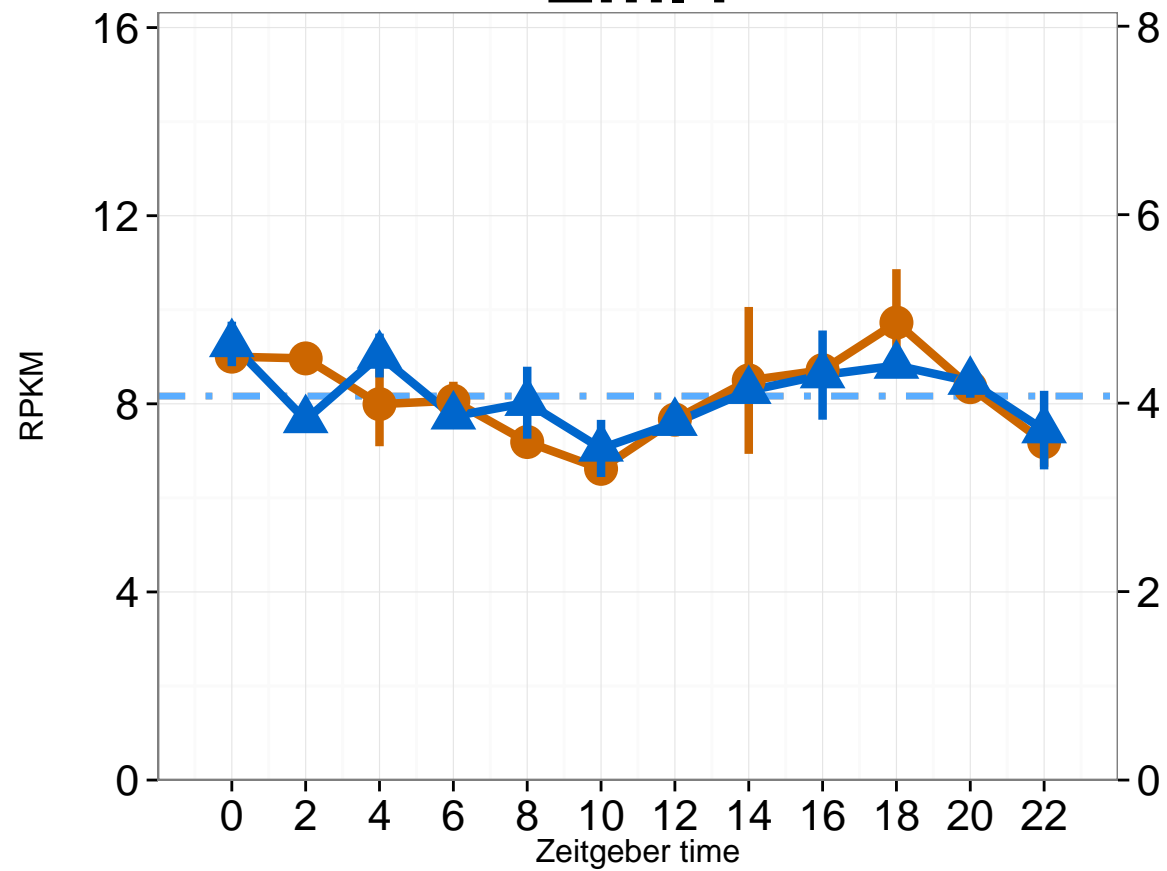

## Eml4

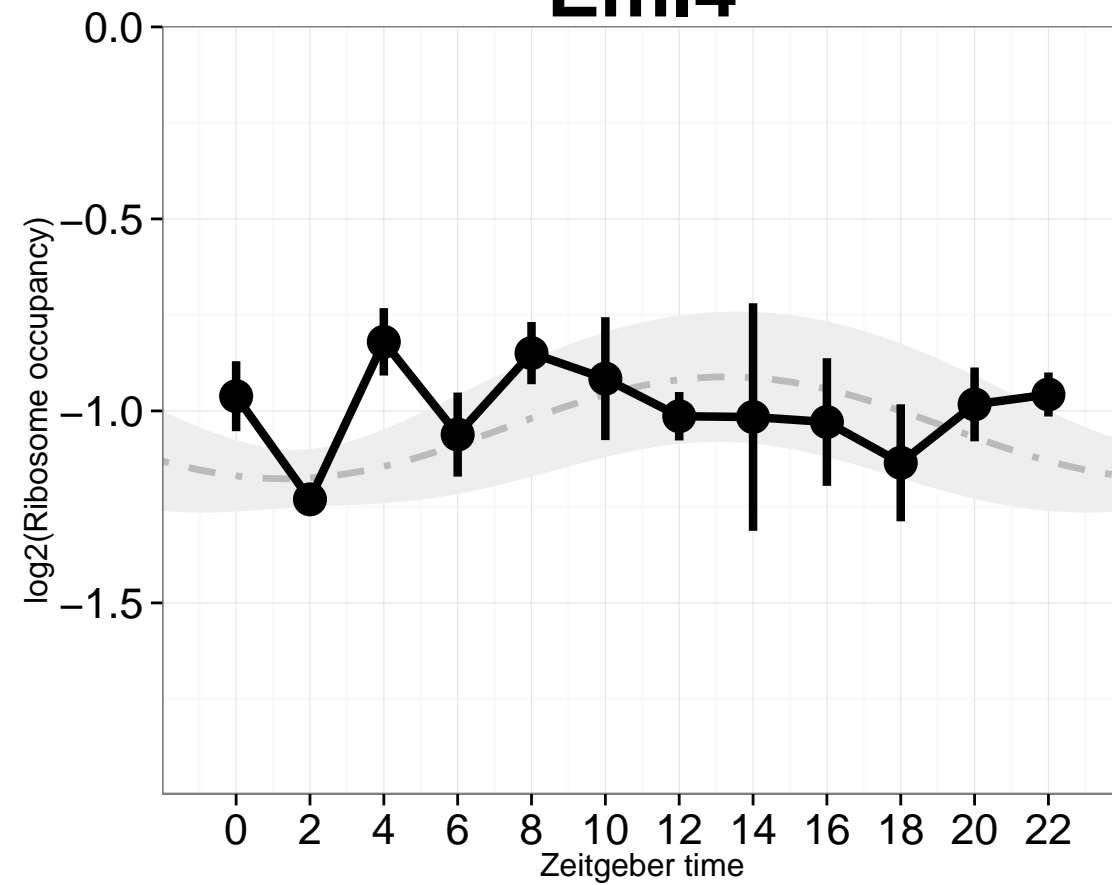

Supplement: SuppDataset_1.zip [file Eml4_set_A.pdf › Supplemental Dataset 1/A-mRNA_nonrhyth_translation_nonrhyth/Eml4_set_A.pdf]

## EmI5

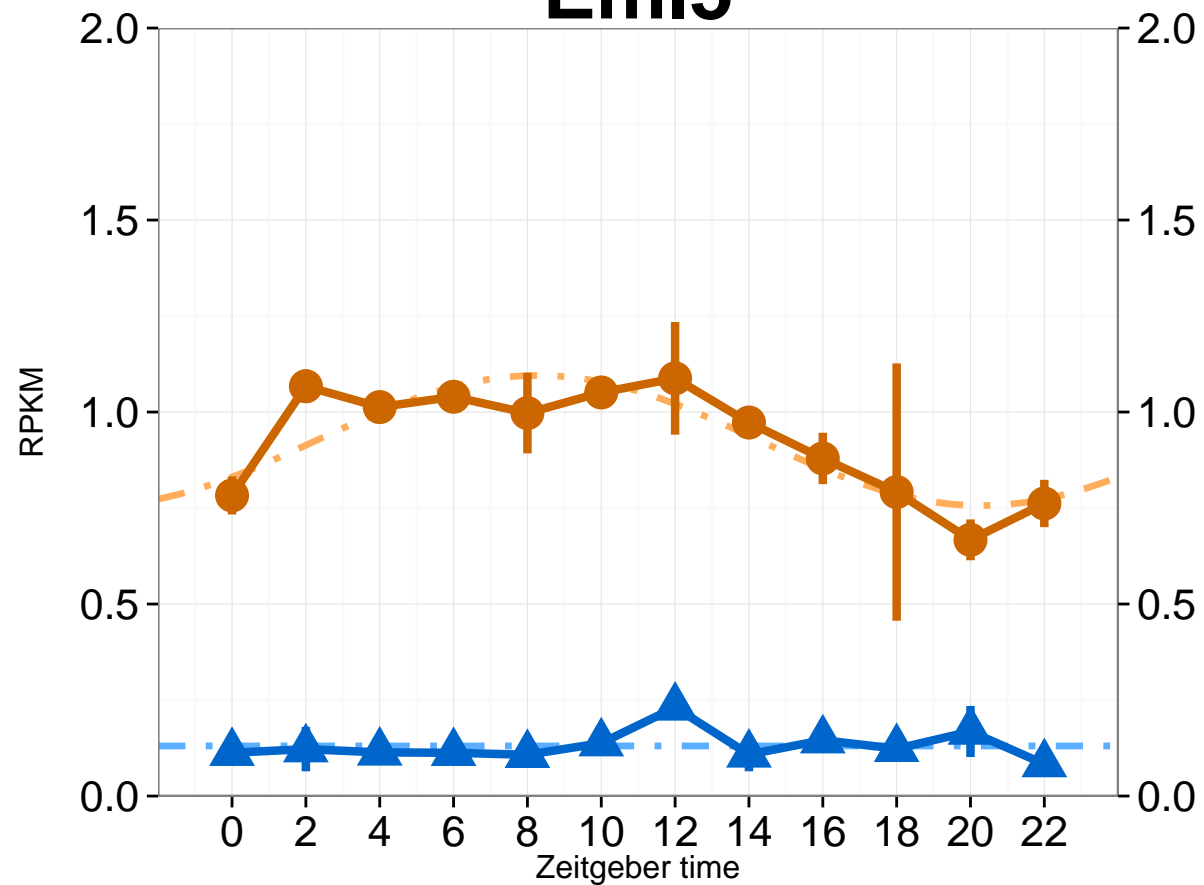

## EmI5

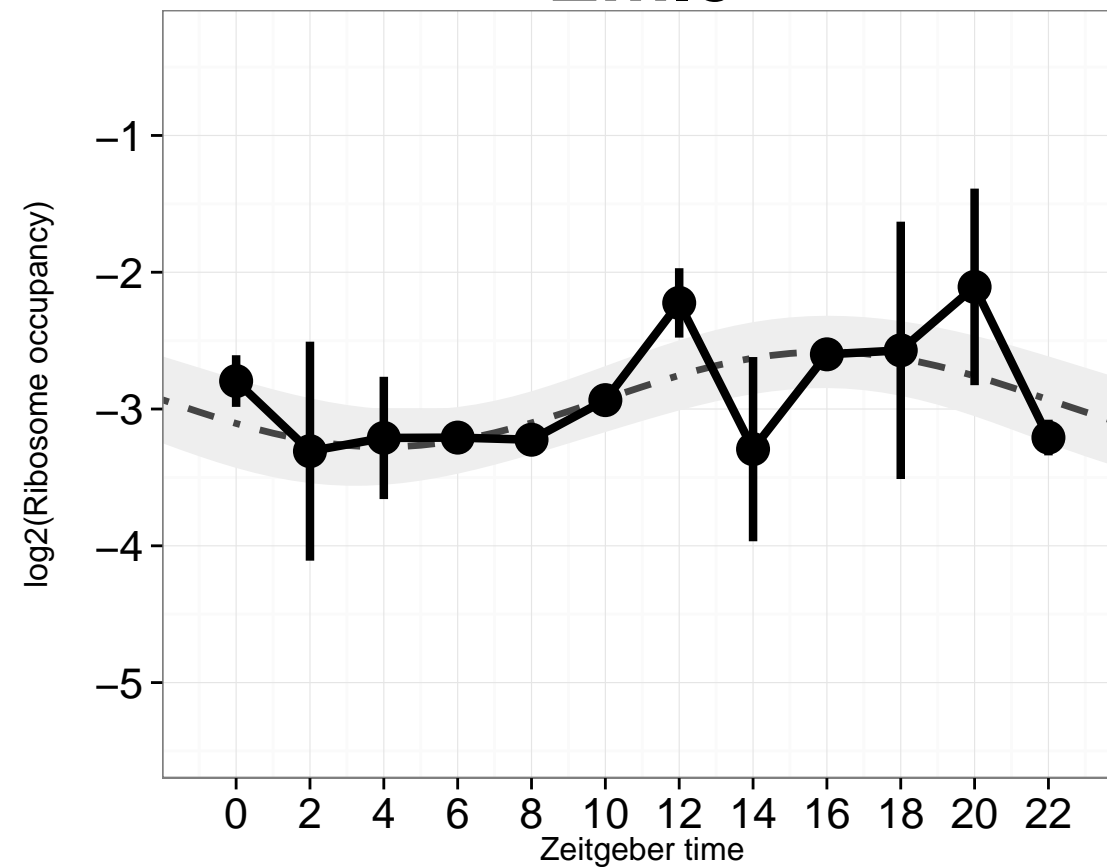

Supplement: SuppDataset_1.zip [file Eml5_set_A.pdf › Supplemental Dataset 1/A-mRNA_nonrhyth_translation_nonrhyth/Eml5_set_A.pdf]

# Emp2

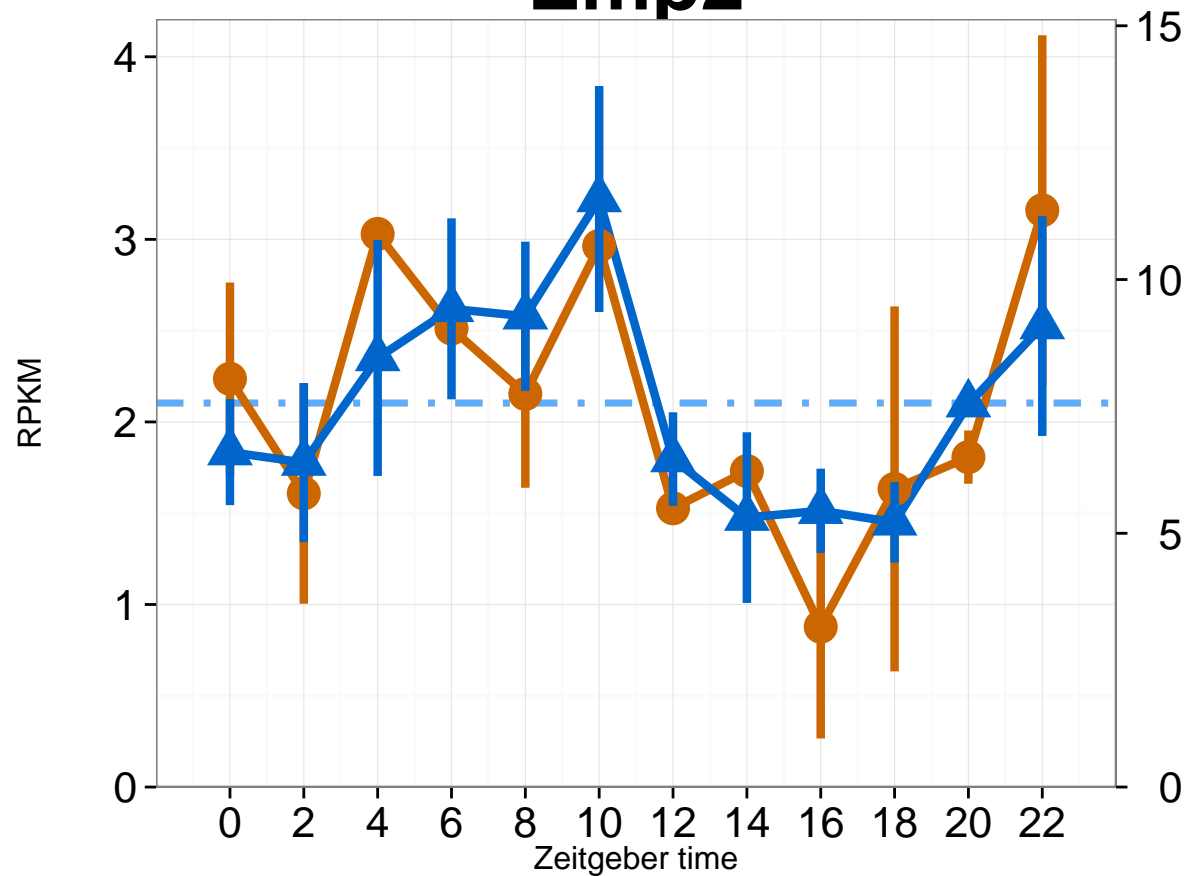

# Emp2

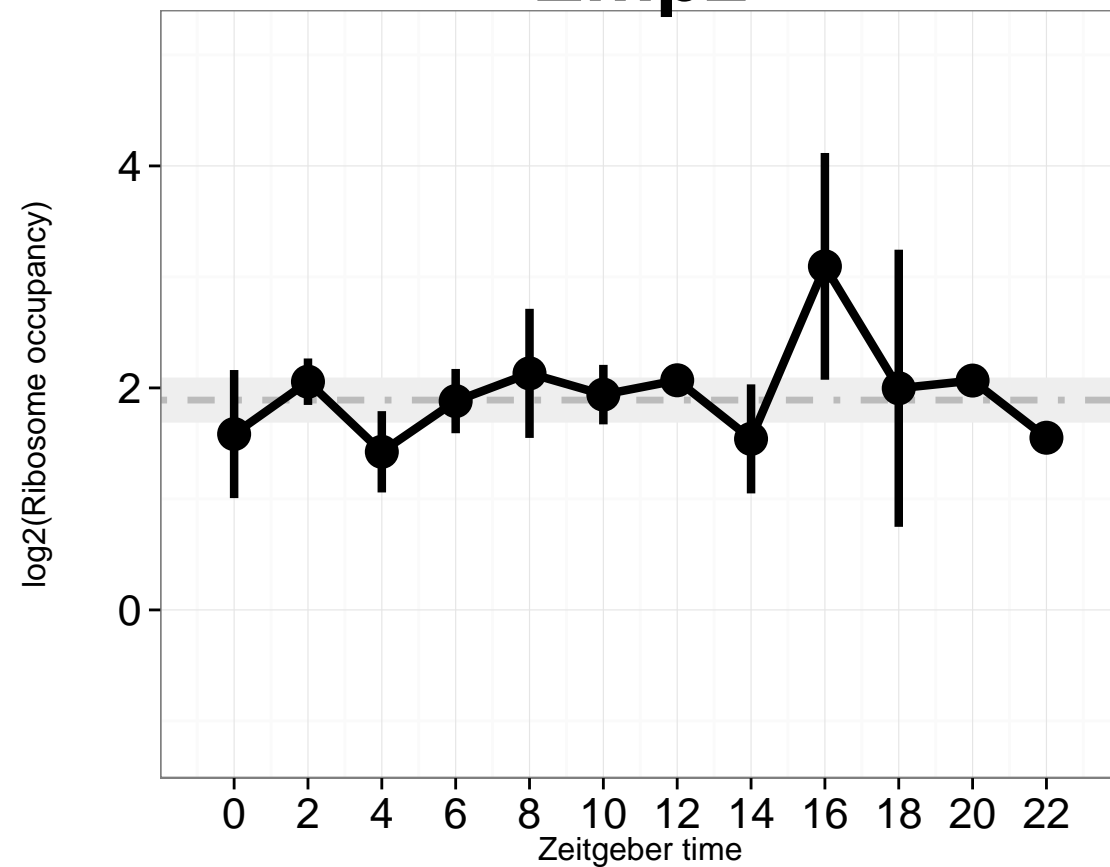

Supplement: SuppDataset_1.zip [file Emp2_set_A.pdf › Supplemental Dataset 1/A-mRNA_nonrhyth_translation_nonrhyth/Emp2_set_A.pdf]

## Emp3

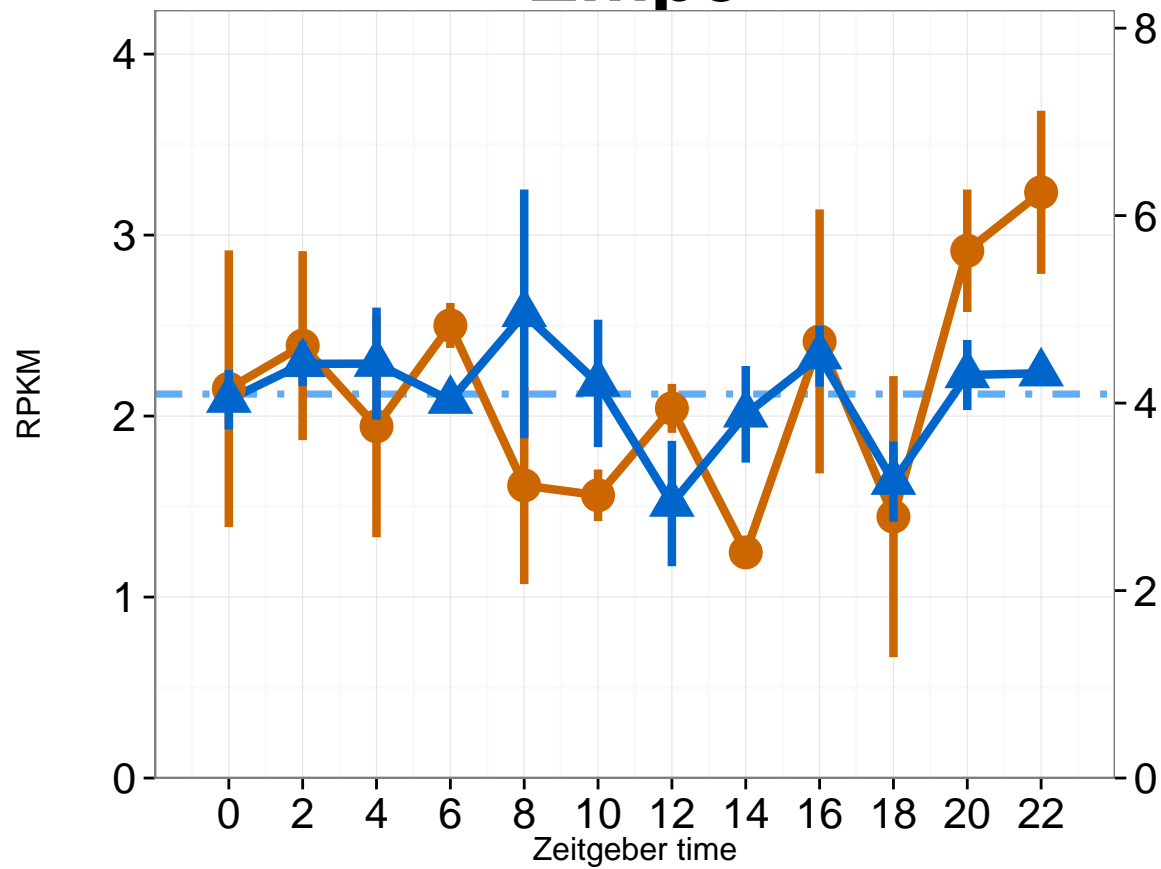

## Emp3

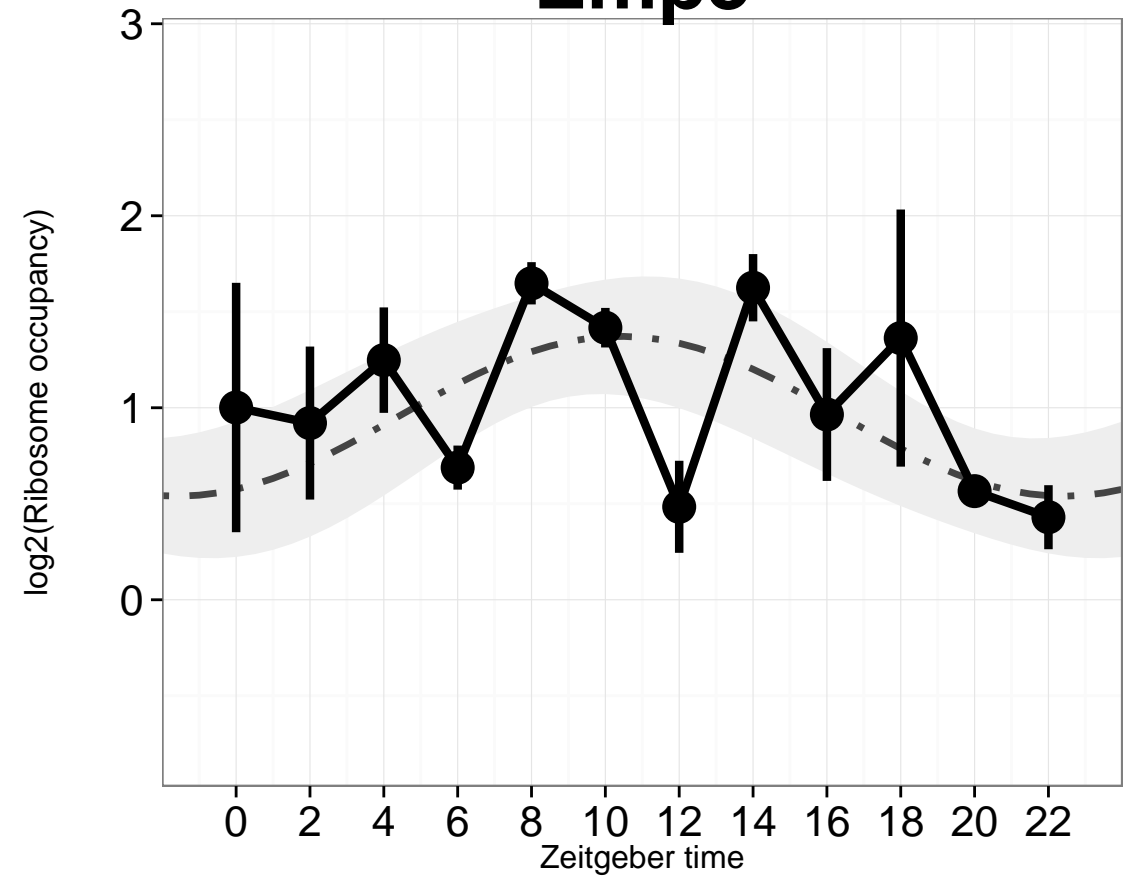

Supplement: SuppDataset_1.zip [file Emp3_set_A.pdf › Supplemental Dataset 1/A-mRNA_nonrhyth_translation_nonrhyth/Emp3_set_A.pdf]

## Emr1

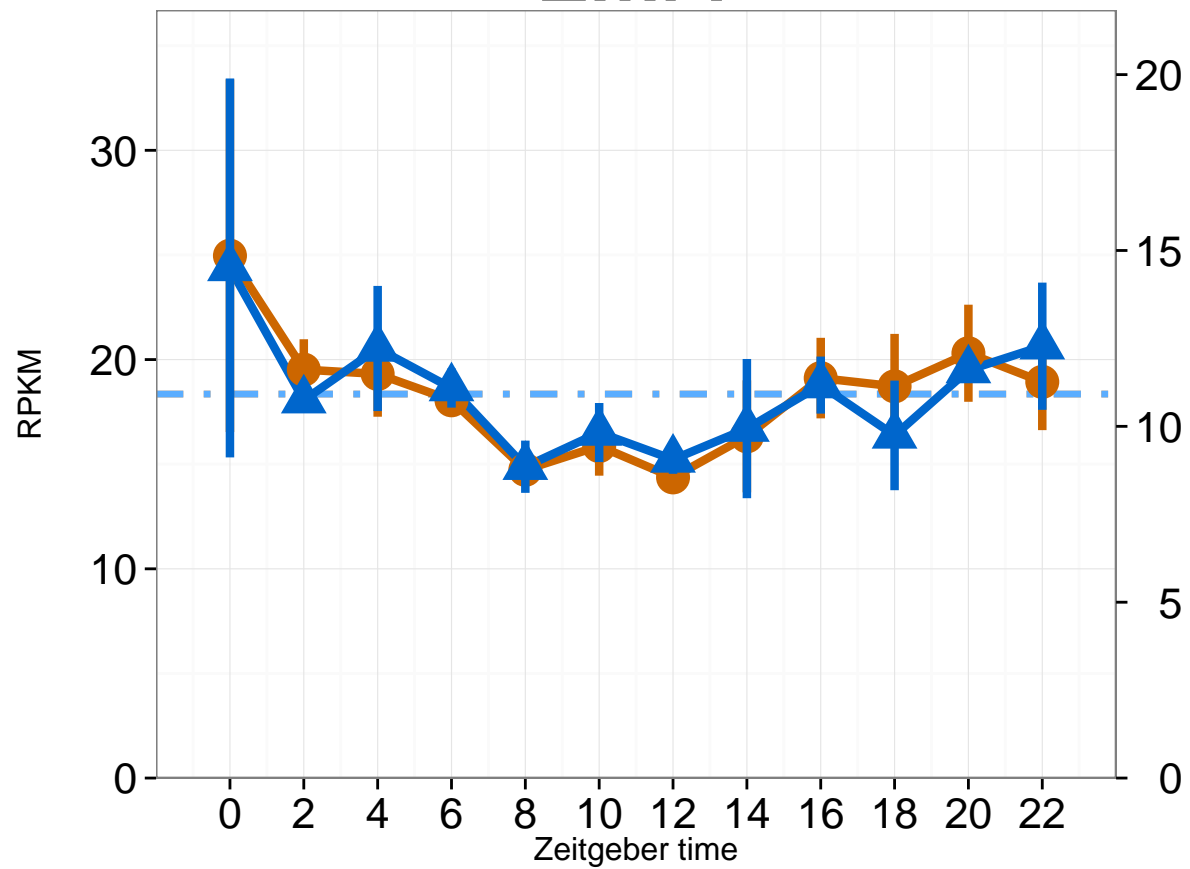

## Emr1

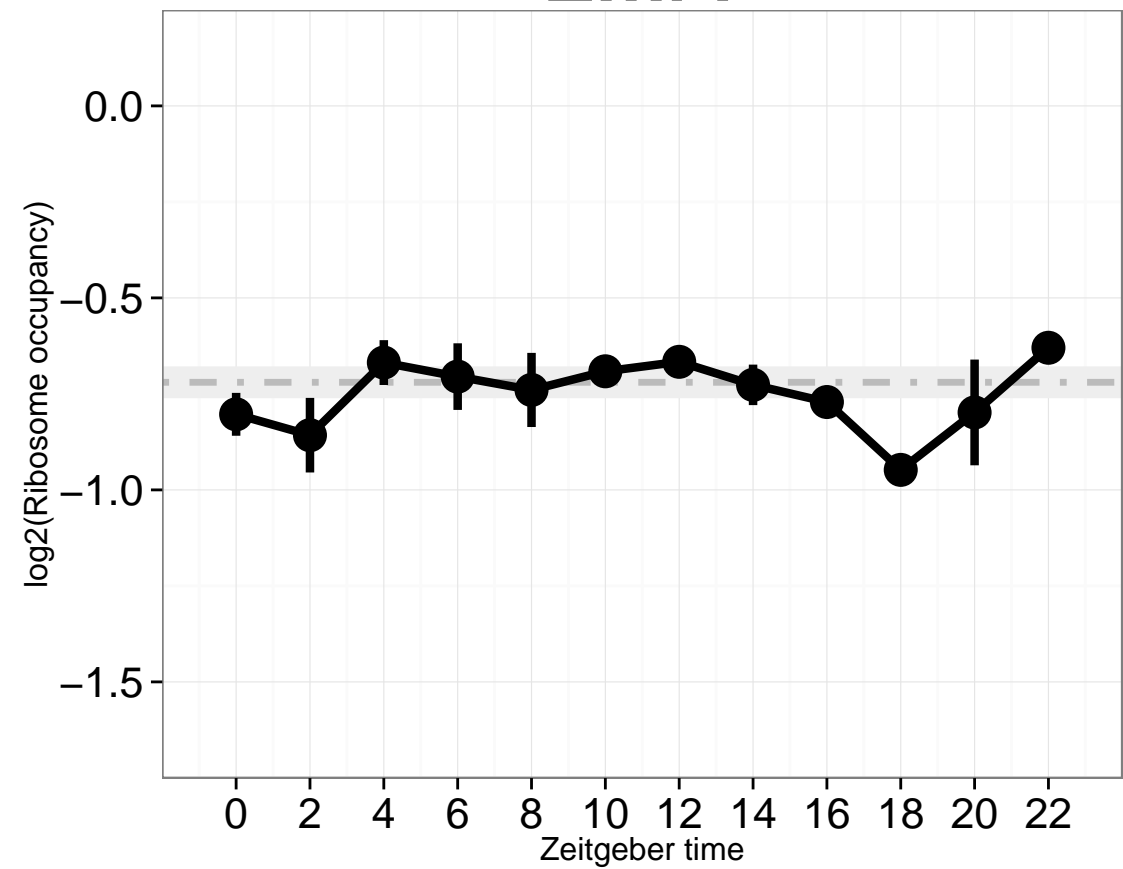

Supplement: SuppDataset_1.zip [file Emr1_set_A.pdf › Supplemental Dataset 1/A-mRNA_nonrhyth_translation_nonrhyth/Emr1_set_A.pdf]
