# Supplementary figures and images for: Ribosome profiling reveals the rhythmic liver translatome and circadian clock regulation by upstream open reading frames (part 25 of 113)
Source: HighWire-hosted journal article supplement (doi:10.1101/gr.195404.115), 2015-10-20

## Emr4

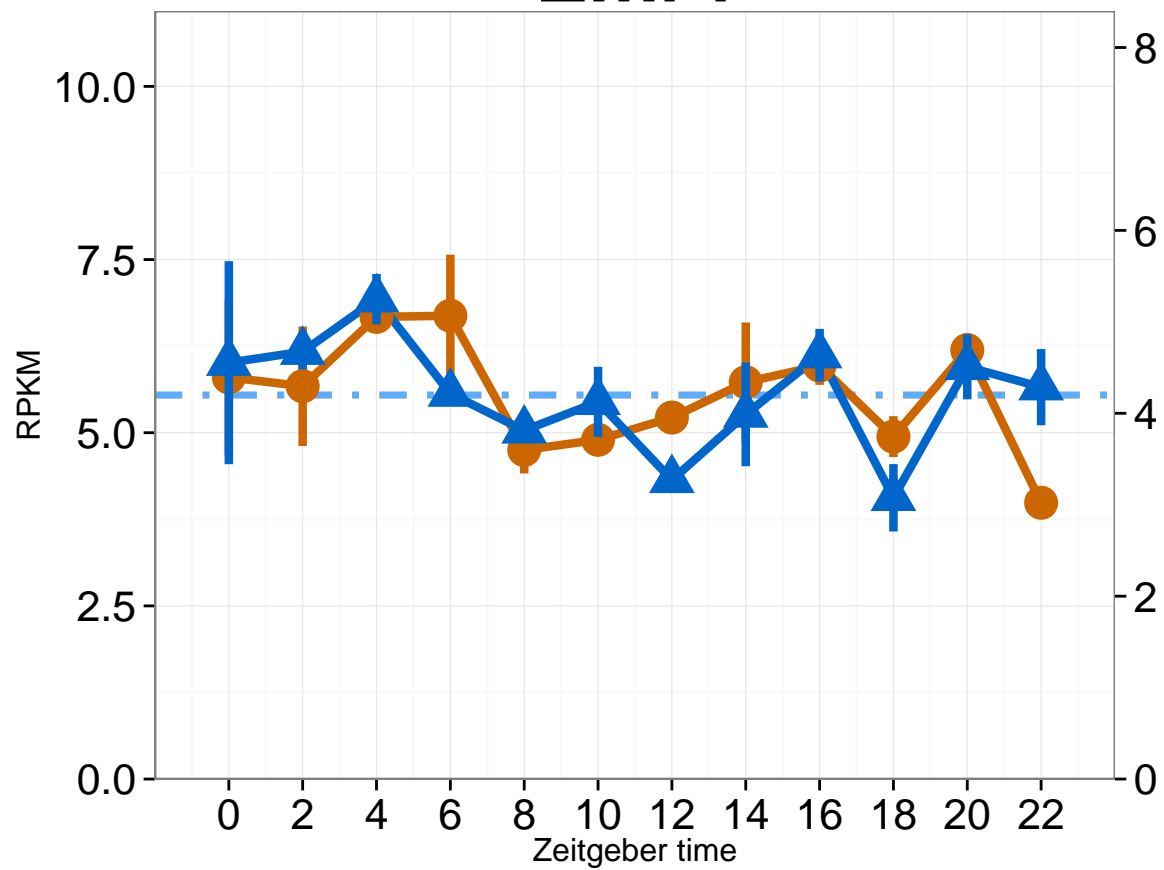

## Emr4

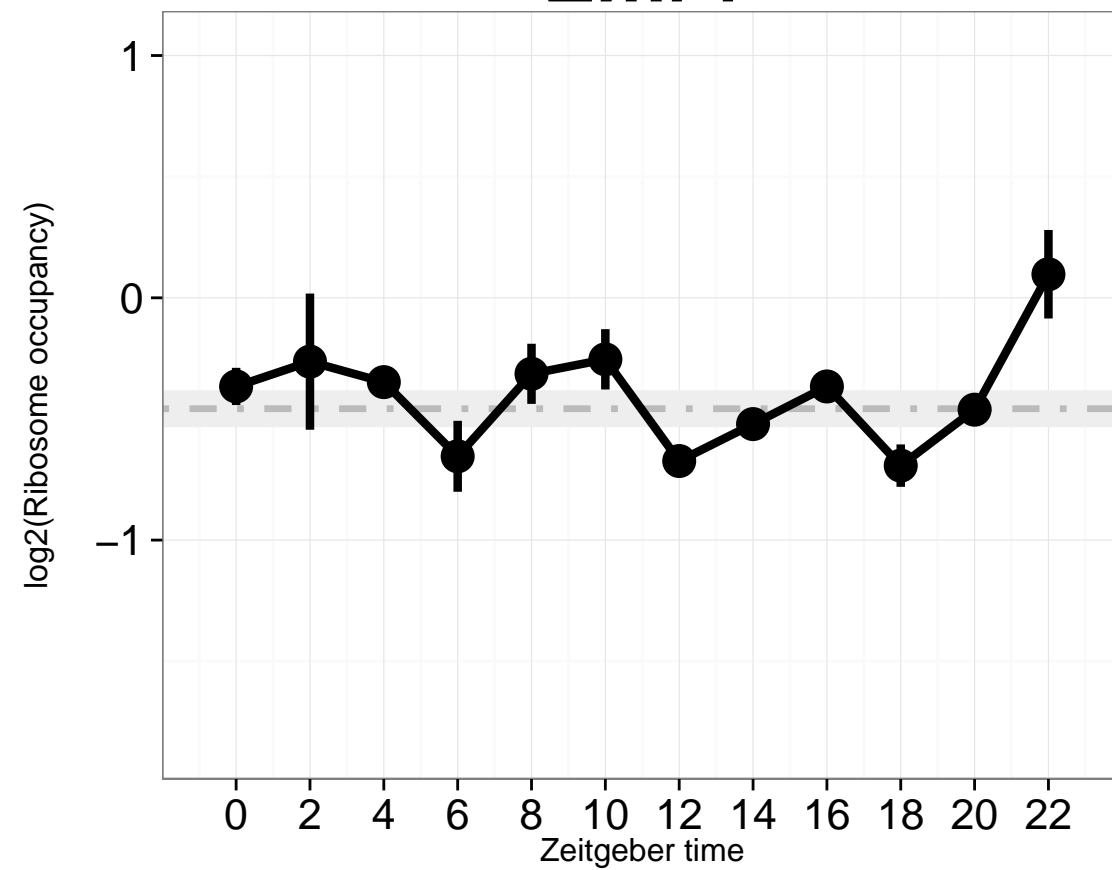

Supplement: SuppDataset_1.zip [file Emr4_set_A.pdf › Supplemental Dataset 1/A-mRNA_nonrhyth_translation_nonrhyth/Emr4_set_A.pdf]

## Eng

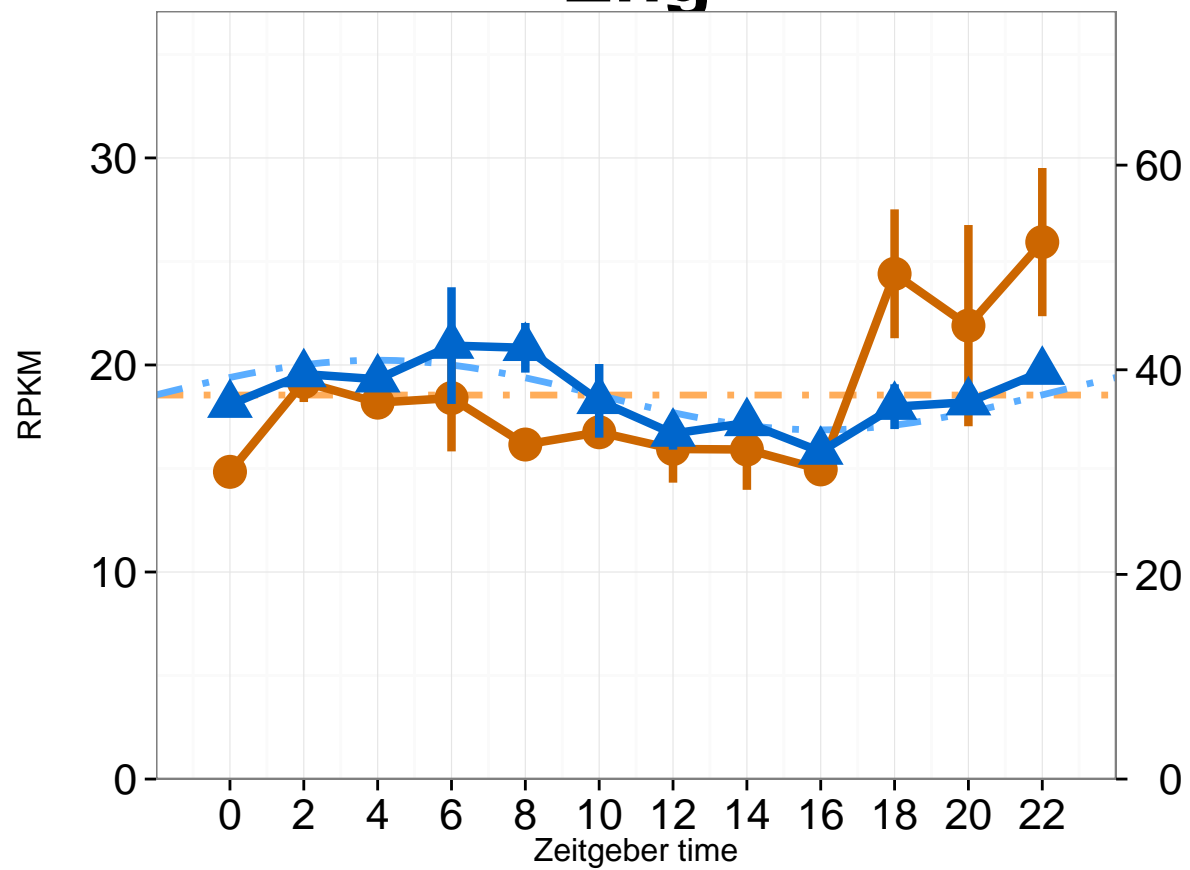

## Eng

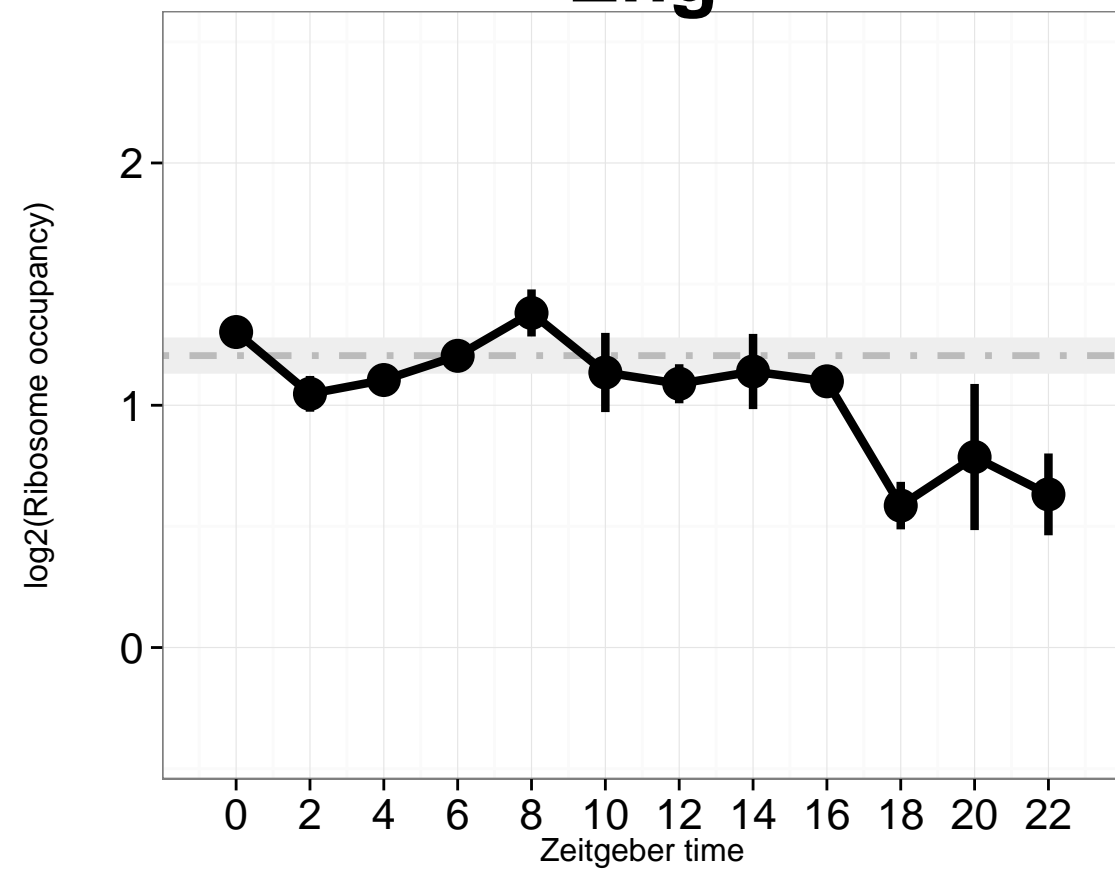

Supplement: SuppDataset_1.zip [file Eng_set_A.pdf › Supplemental Dataset 1/A-mRNA_nonrhyth_translation_nonrhyth/Eng_set_A.pdf]

## Engase

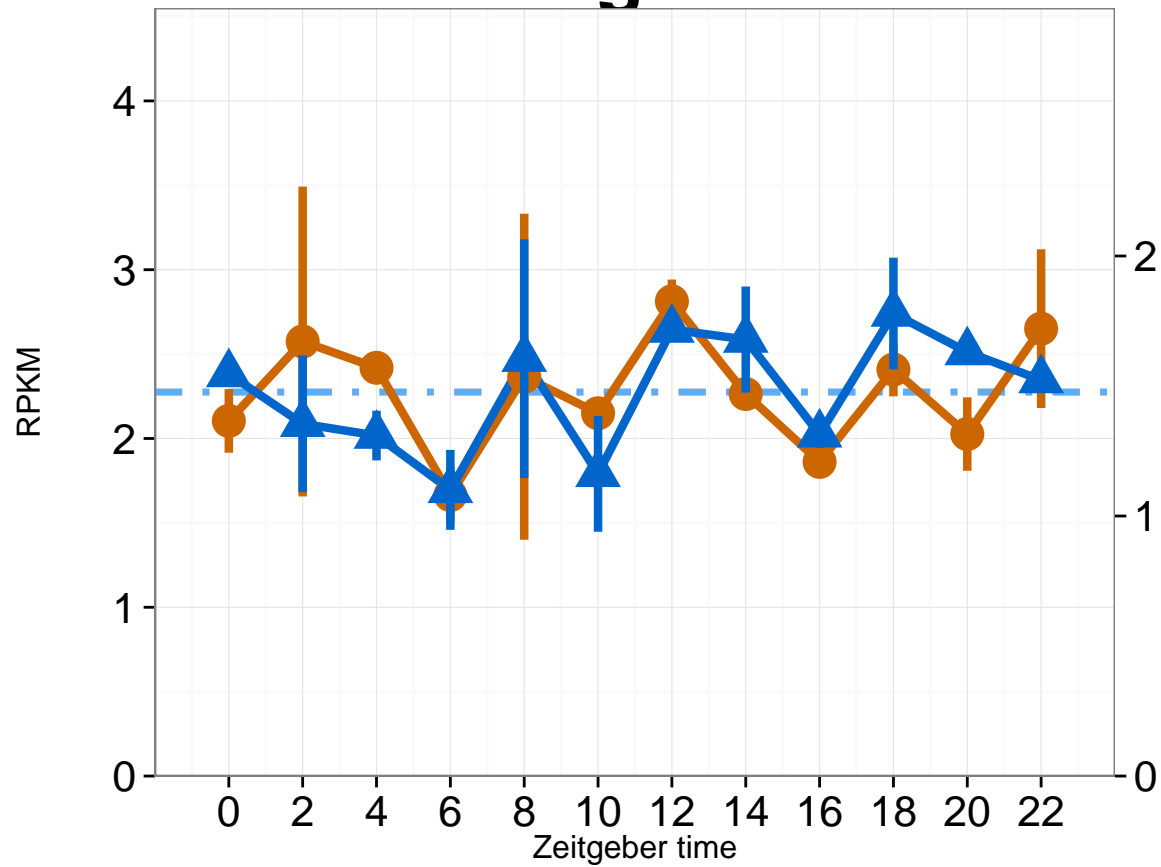

## Engase

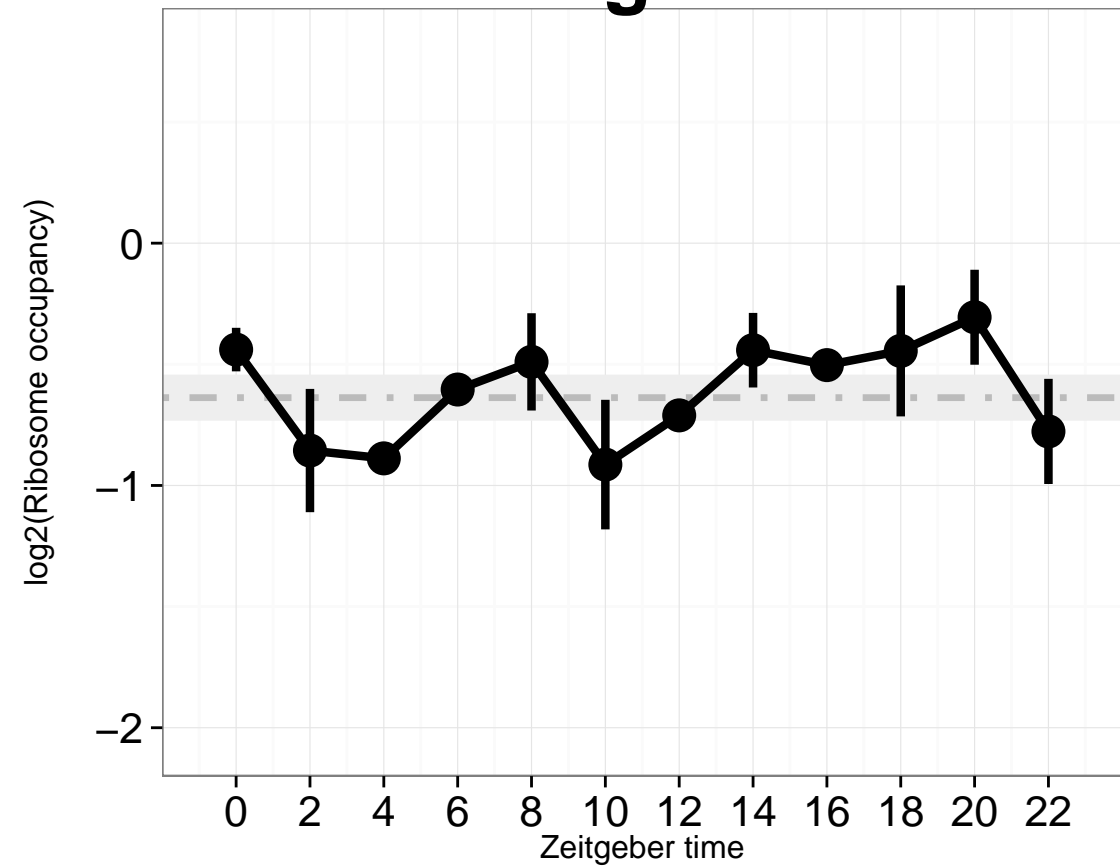

Supplement: SuppDataset_1.zip [file Engase_set_A.pdf › Supplemental Dataset 1/A-mRNA_nonrhyth_translation_nonrhyth/Engase_set_A.pdf]

## Eno1

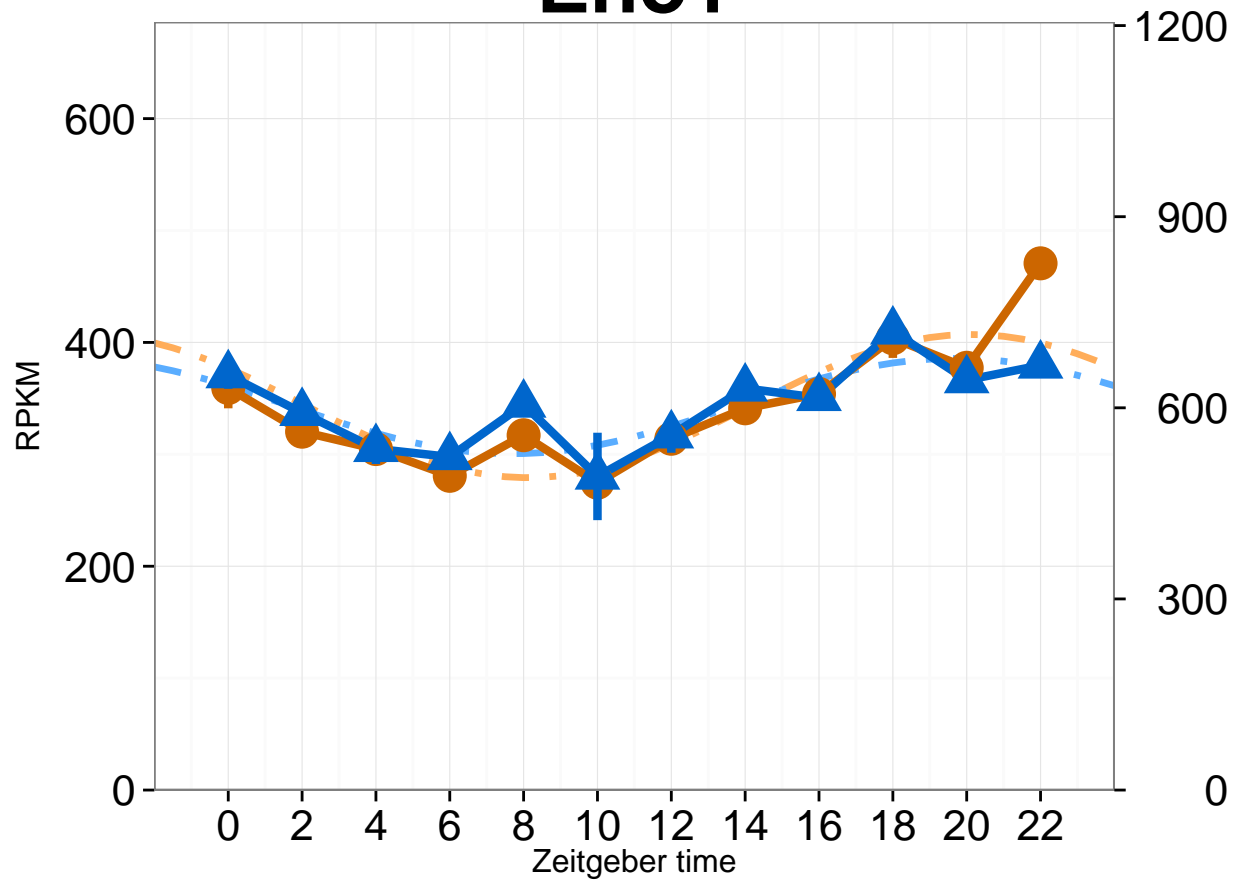

## Eno1

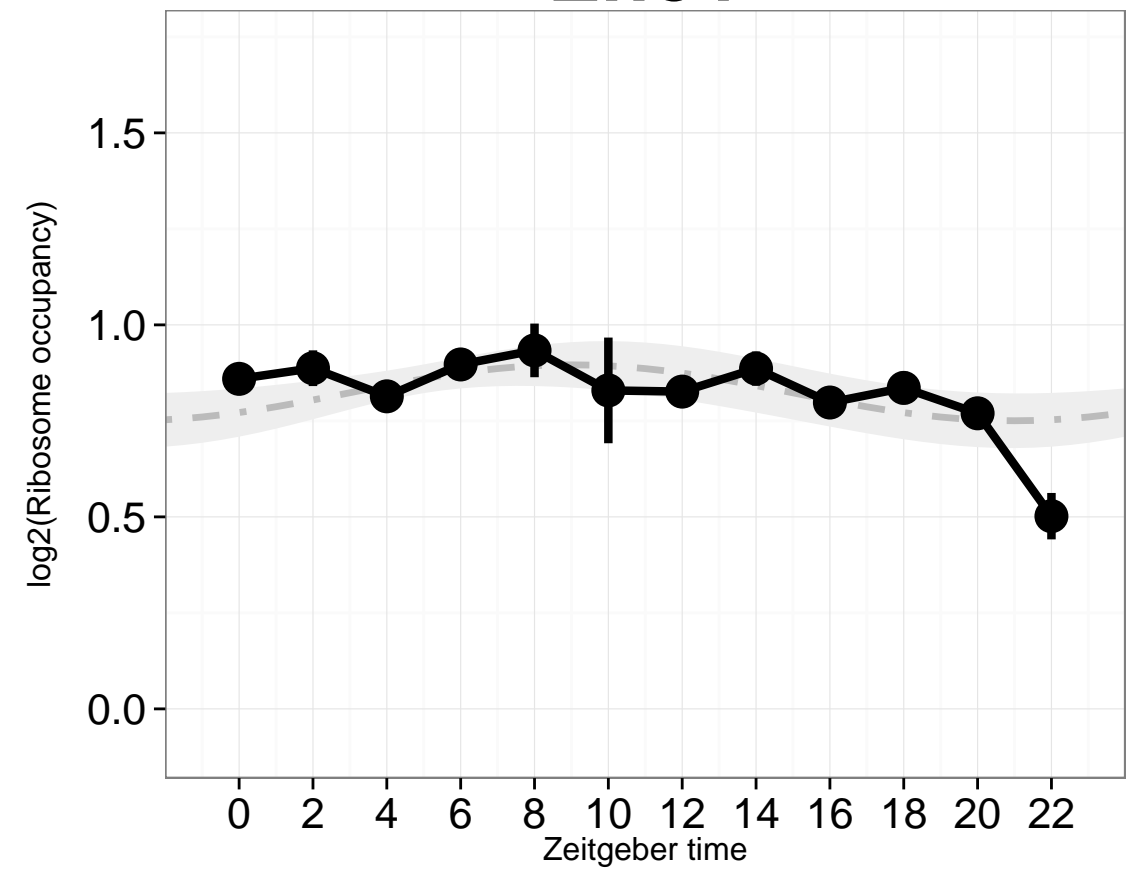

Supplement: SuppDataset_1.zip [file Eno1_set_A.pdf › Supplemental Dataset 1/A-mRNA_nonrhyth_translation_nonrhyth/Eno1_set_A.pdf]

# Enoph1

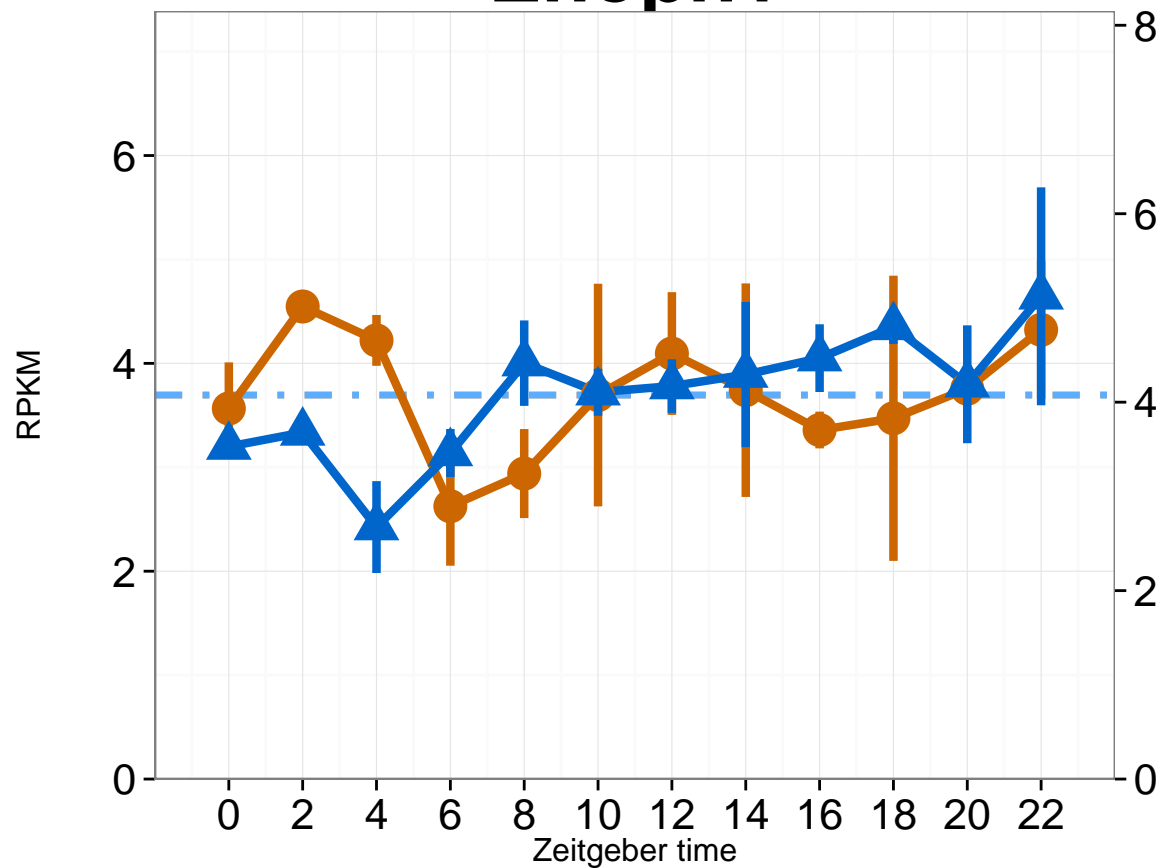

# Enoph1

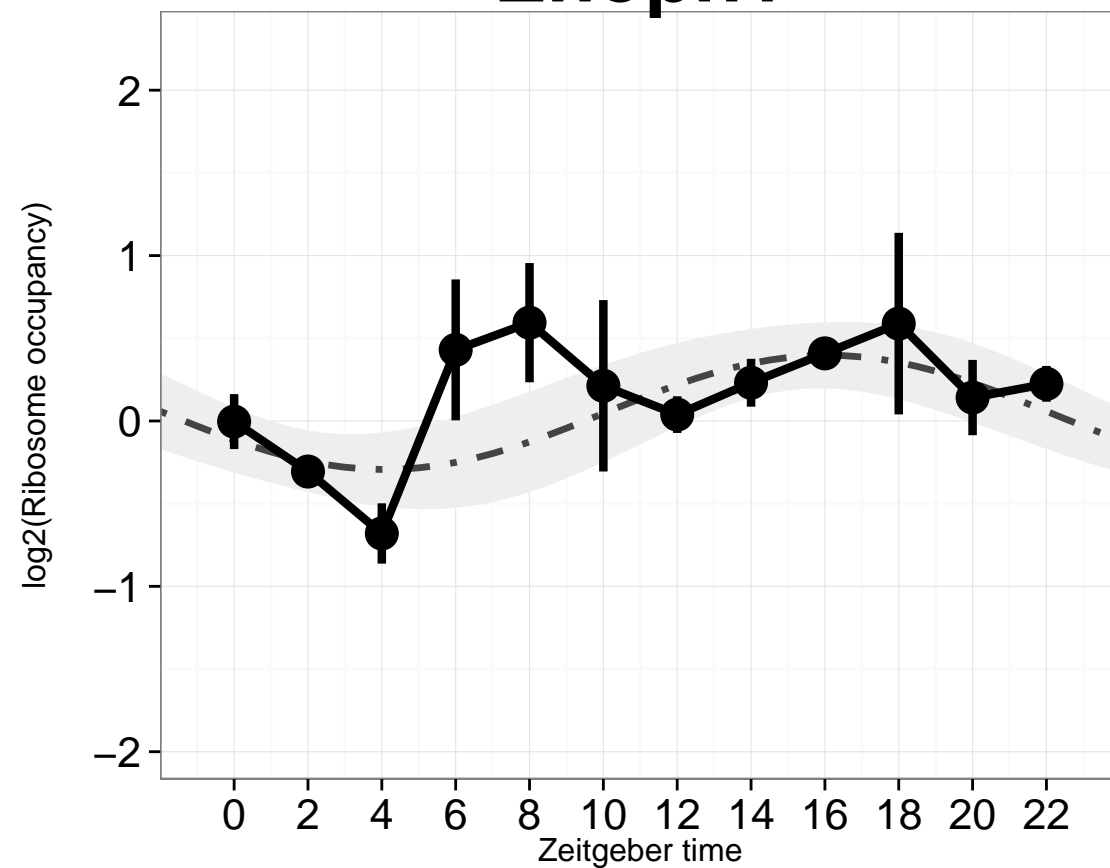

Supplement: SuppDataset_1.zip [file Enoph1_set_A.pdf › Supplemental Dataset 1/A-mRNA_nonrhyth_translation_nonrhyth/Enoph1_set_A.pdf]

## Enox2

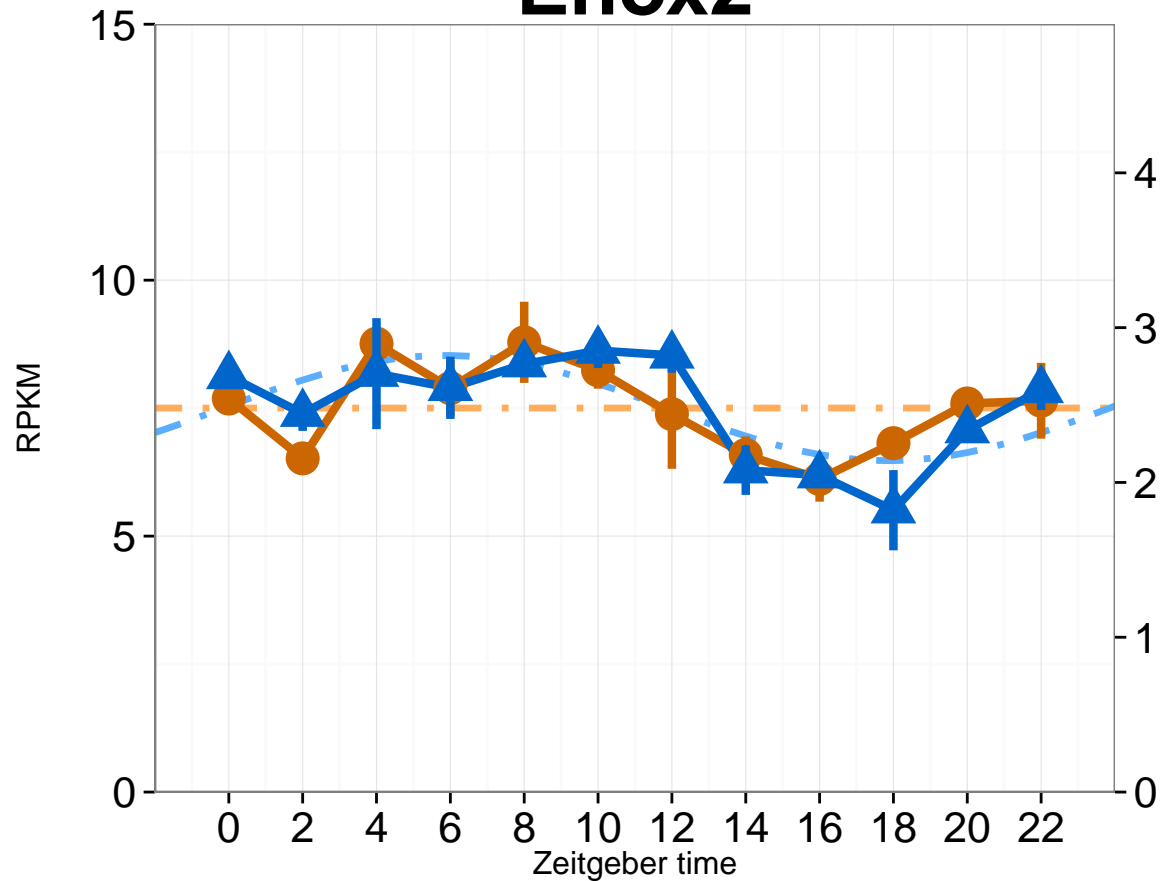

## Enox2

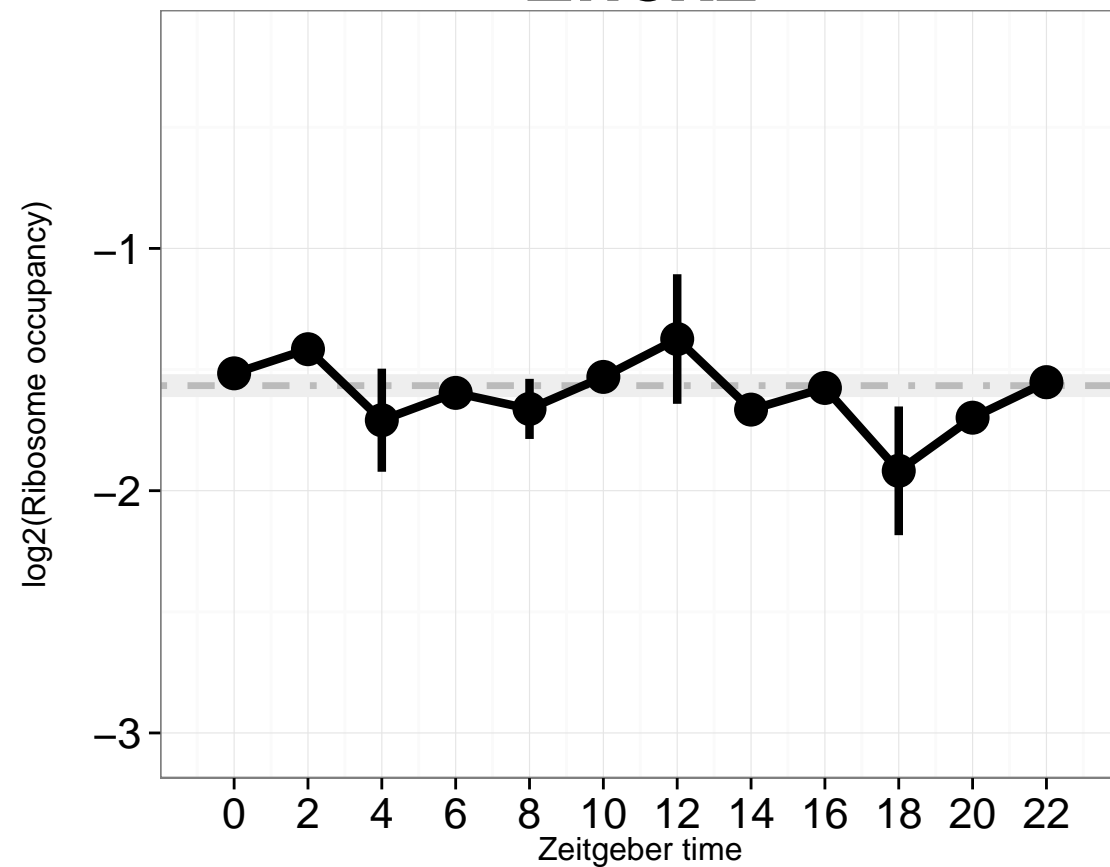

Supplement: SuppDataset_1.zip [file Enox2_set_A.pdf › Supplemental Dataset 1/A-mRNA_nonrhyth_translation_nonrhyth/Enox2_set_A.pdf]

## Enpep

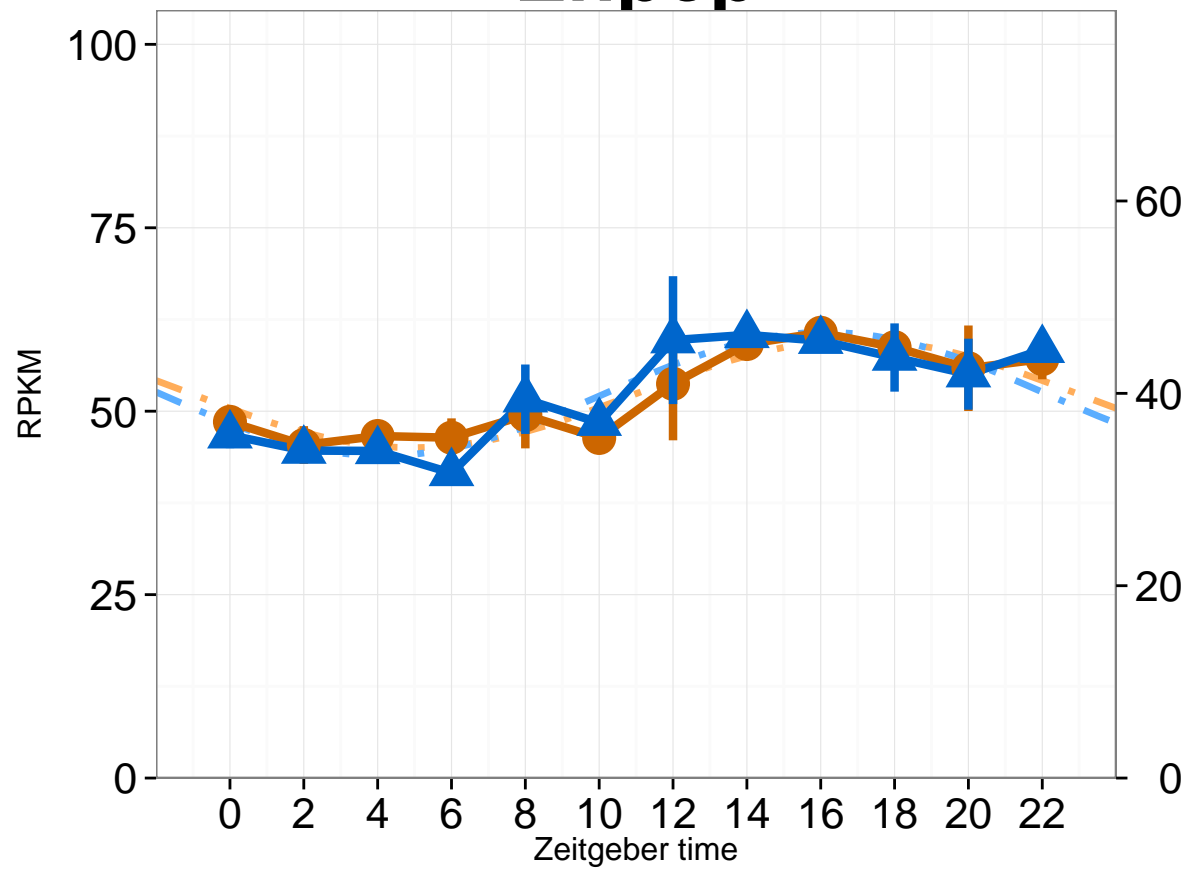

## Enpep

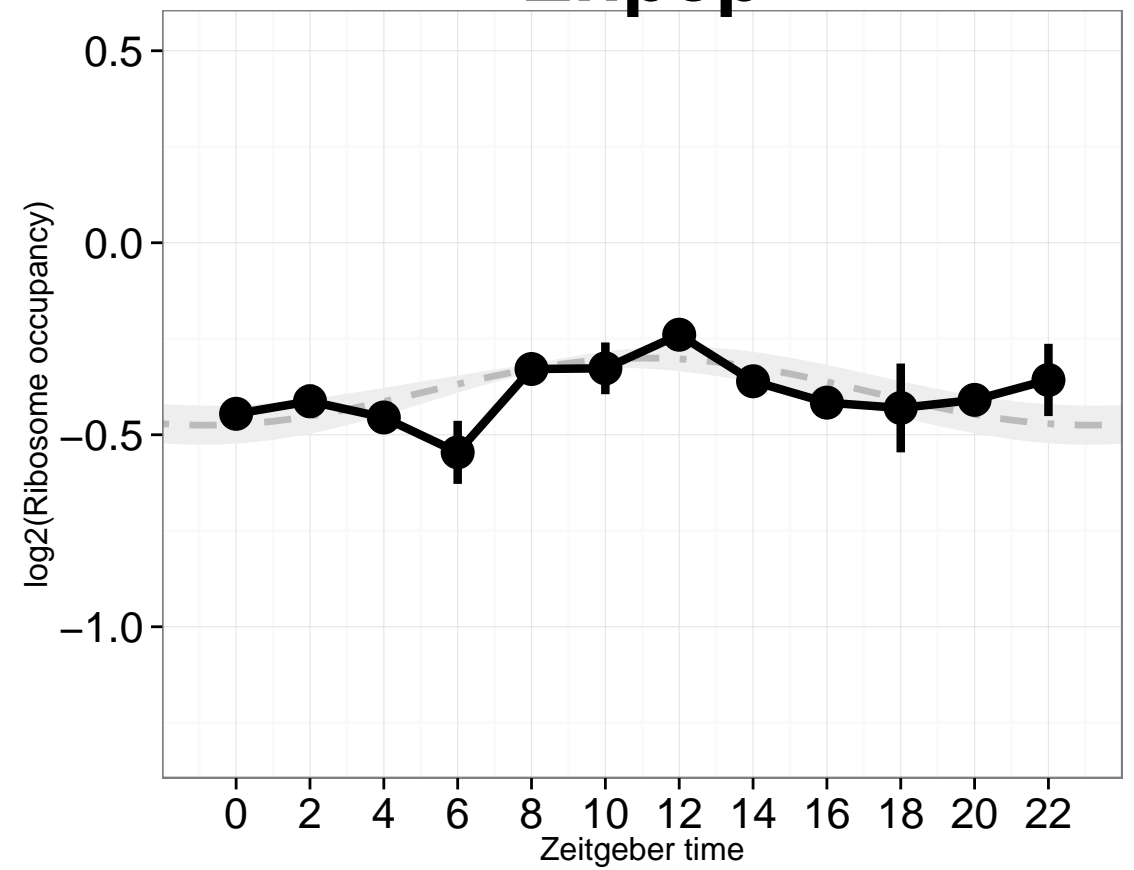

Supplement: SuppDataset_1.zip [file Enpep_set_A.pdf › Supplemental Dataset 1/A-mRNA_nonrhyth_translation_nonrhyth/Enpep_set_A.pdf]

## Enpp4

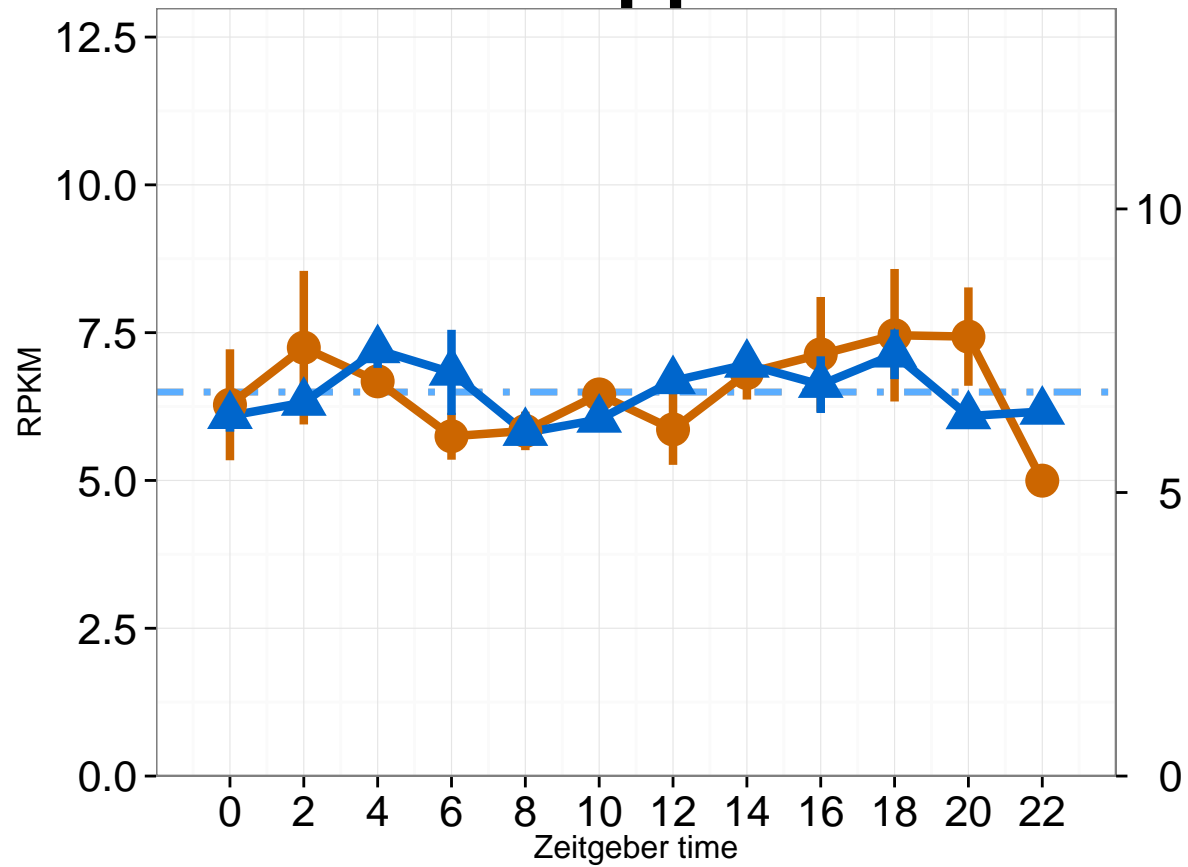

## Enpp4

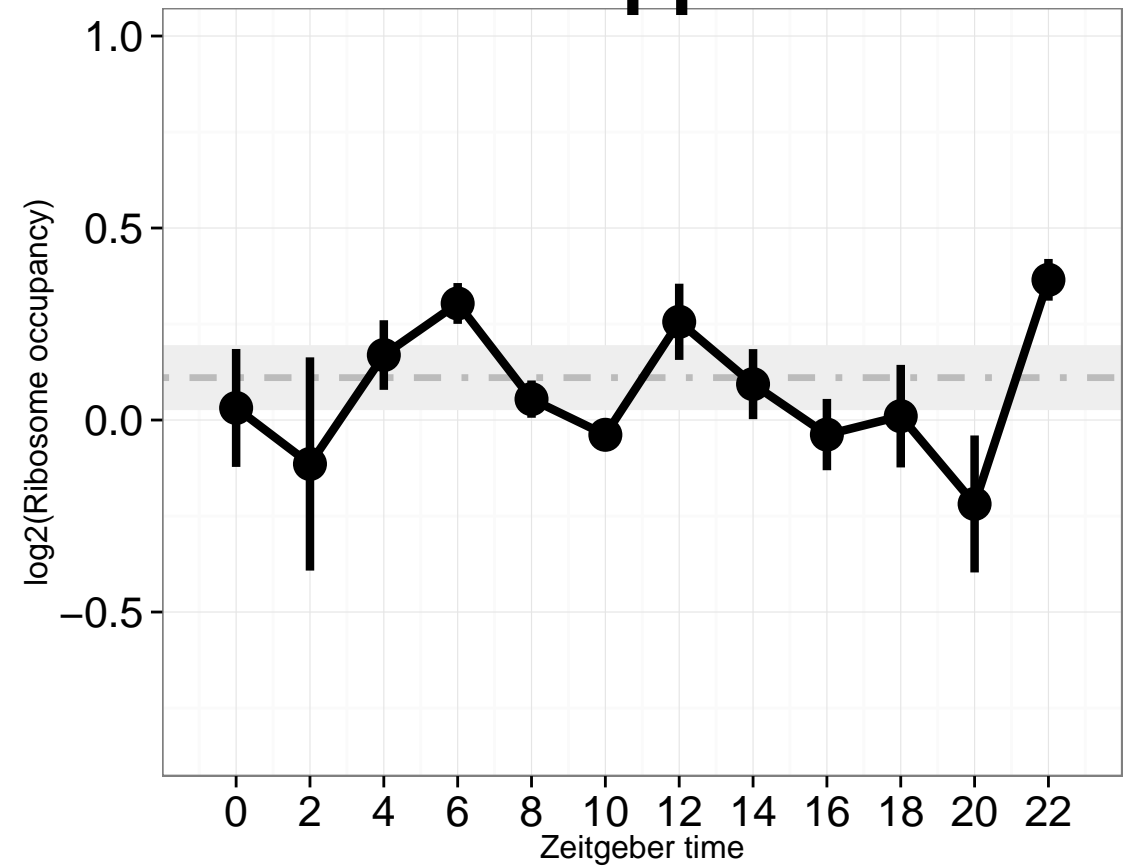

Supplement: SuppDataset_1.zip [file Enpp4_set_A.pdf › Supplemental Dataset 1/A-mRNA_nonrhyth_translation_nonrhyth/Enpp4_set_A.pdf]

## Enpp5

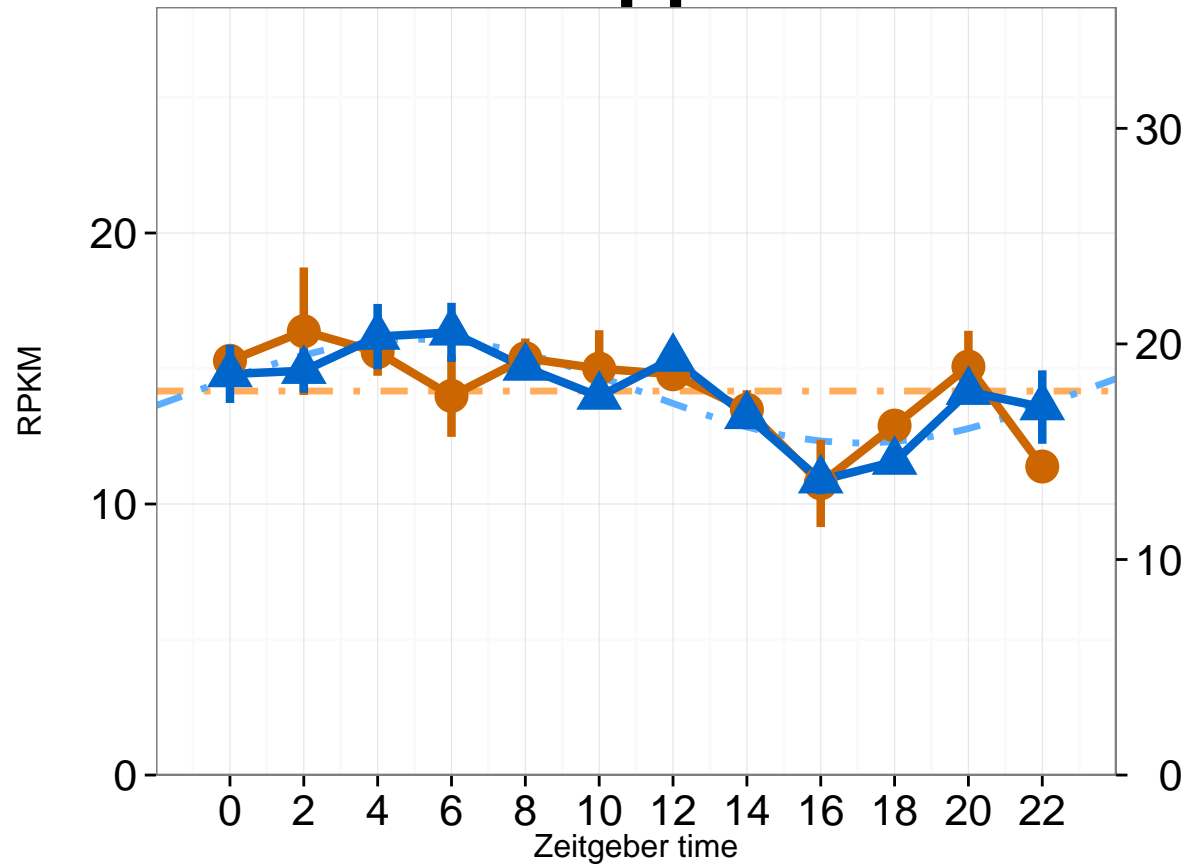

## Enpp5

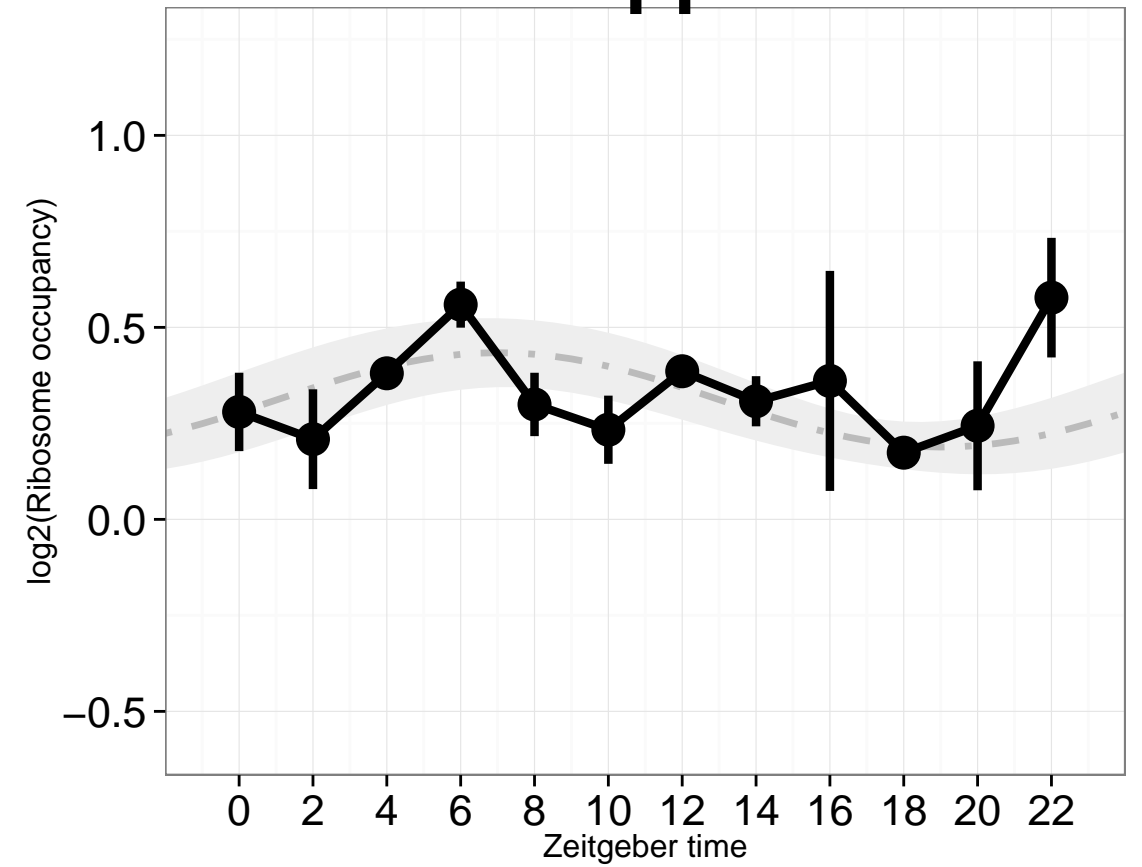

Supplement: SuppDataset_1.zip [file Enpp5_set_A.pdf › Supplemental Dataset 1/A-mRNA_nonrhyth_translation_nonrhyth/Enpp5_set_A.pdf]

## Ensa

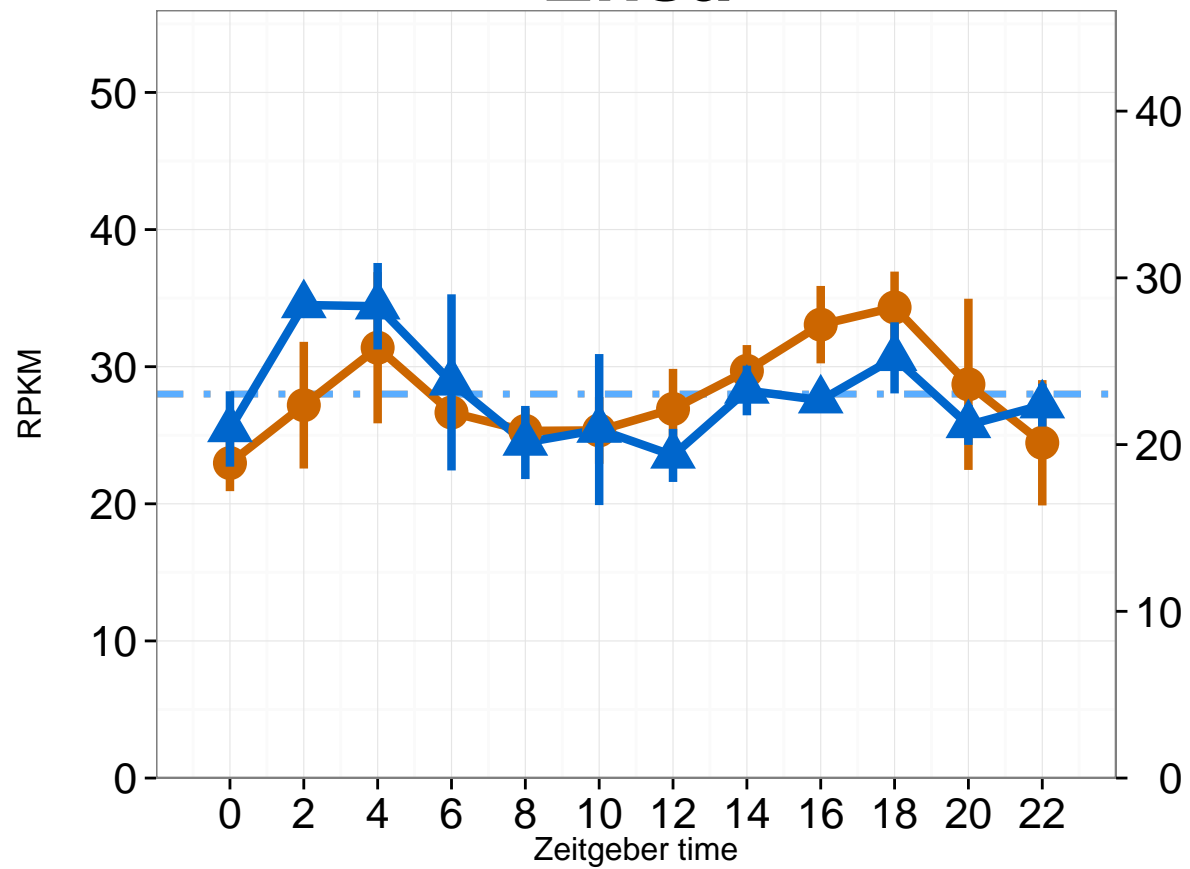

## Ensa

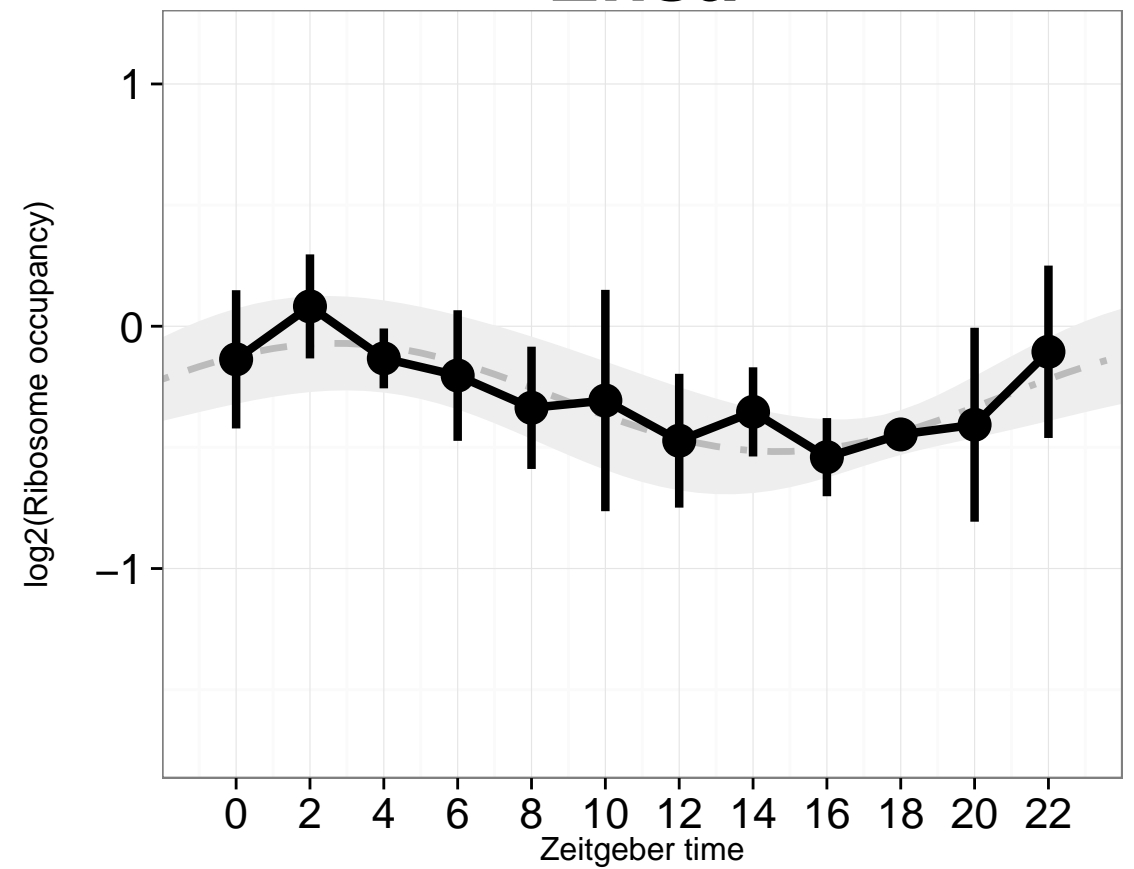

Supplement: SuppDataset_1.zip [file Ensa_set_A.pdf › Supplemental Dataset 1/A-mRNA_nonrhyth_translation_nonrhyth/Ensa_set_A.pdf]

## Enthd2

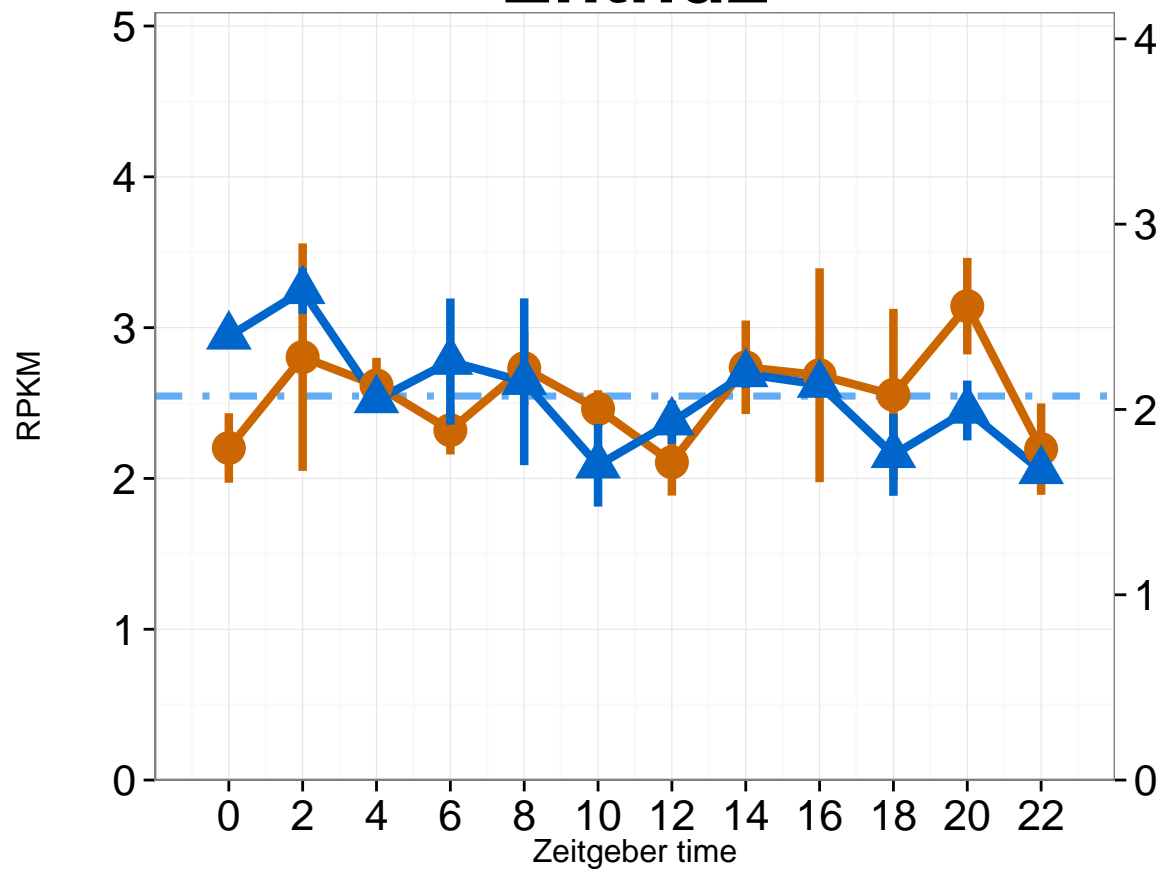

## Enthd2

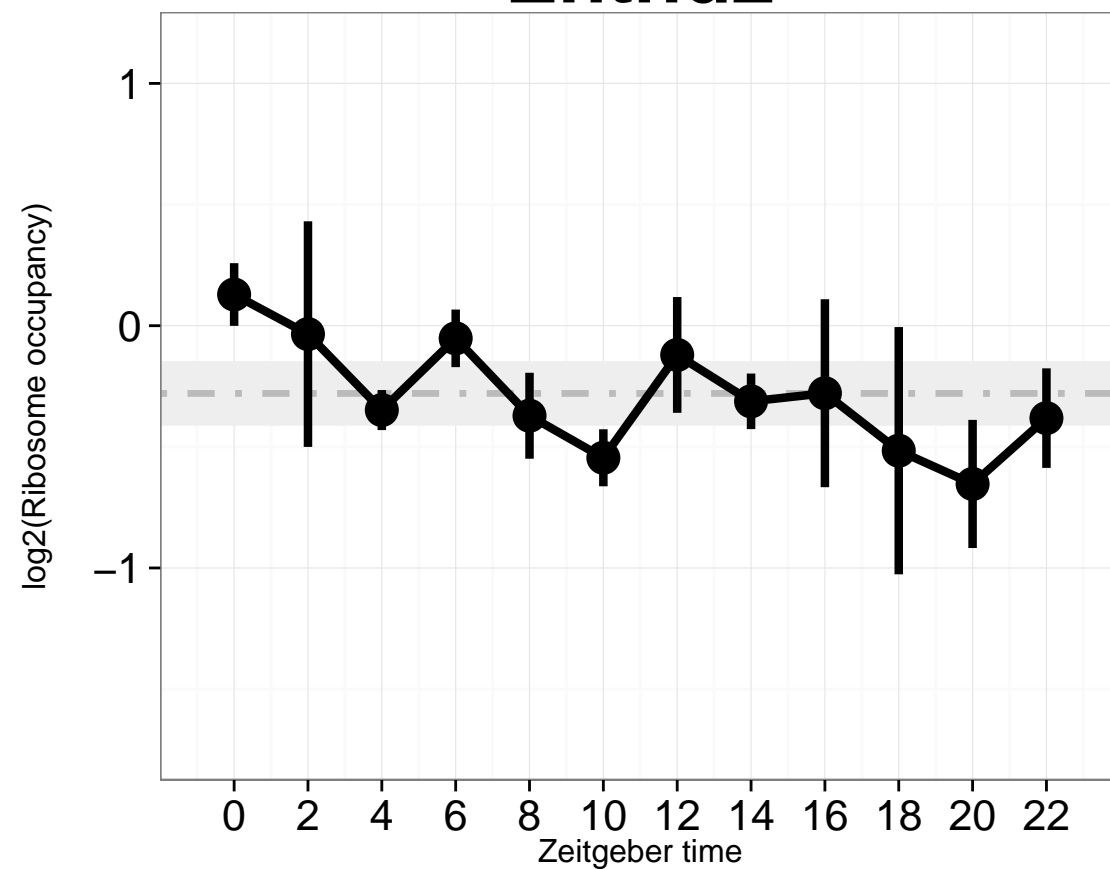

Supplement: SuppDataset_1.zip [file Enthd2_set_A.pdf › Supplemental Dataset 1/A-mRNA_nonrhyth_translation_nonrhyth/Enthd2_set_A.pdf]

# Entpd1

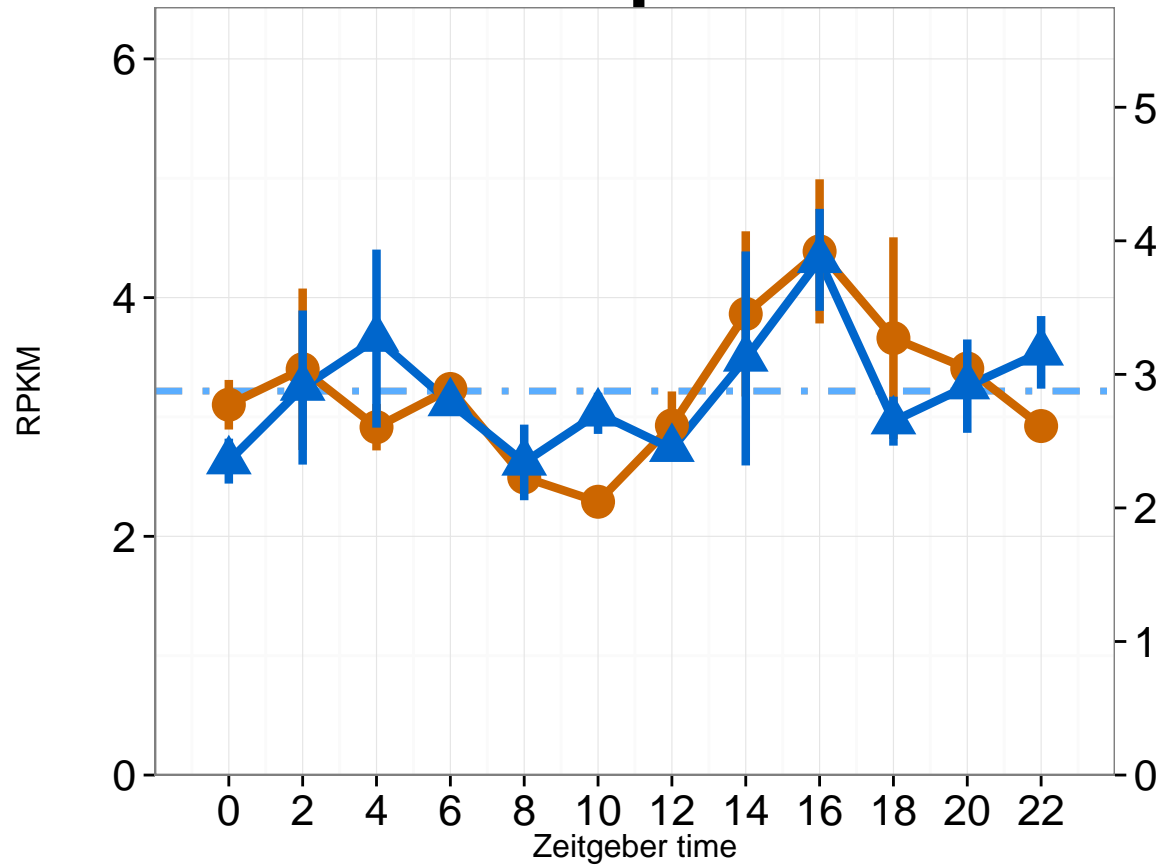

# Entpd1

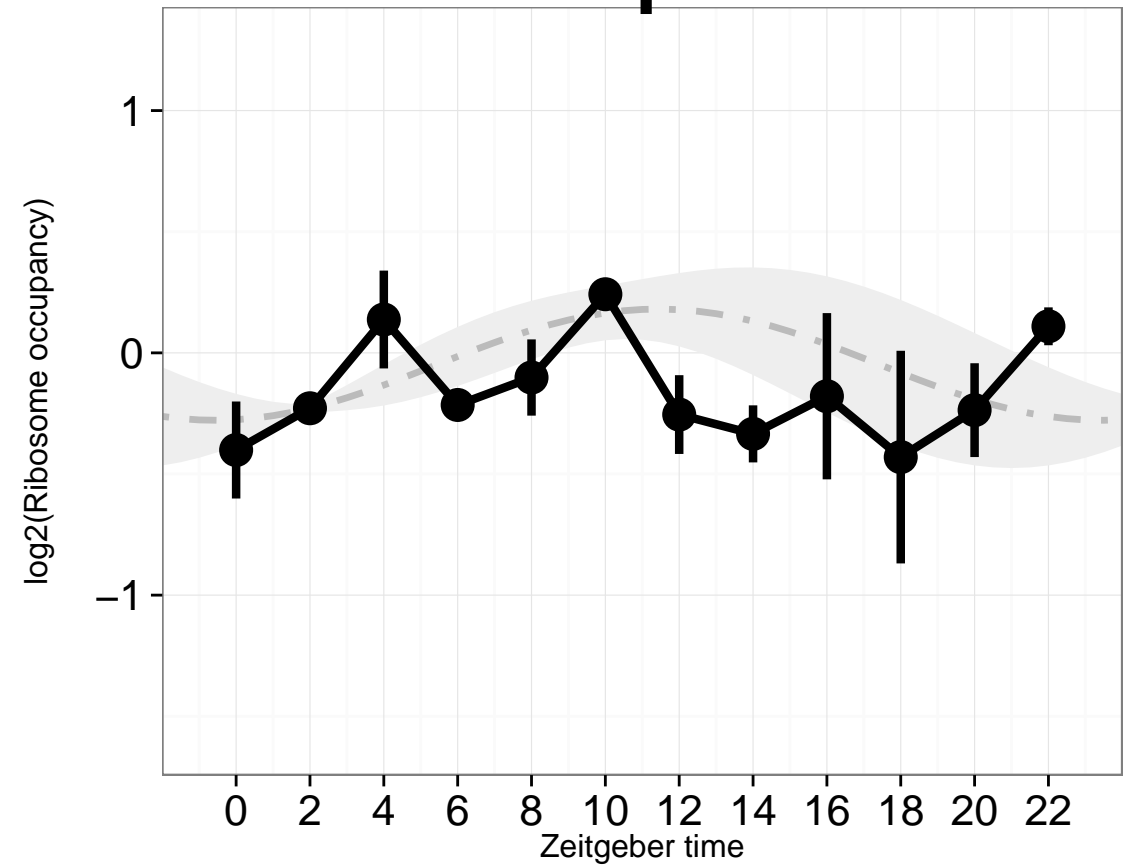

Supplement: SuppDataset_1.zip [file Entpd1_set_A.pdf › Supplemental Dataset 1/A-mRNA_nonrhyth_translation_nonrhyth/Entpd1_set_A.pdf]

# Entpd2

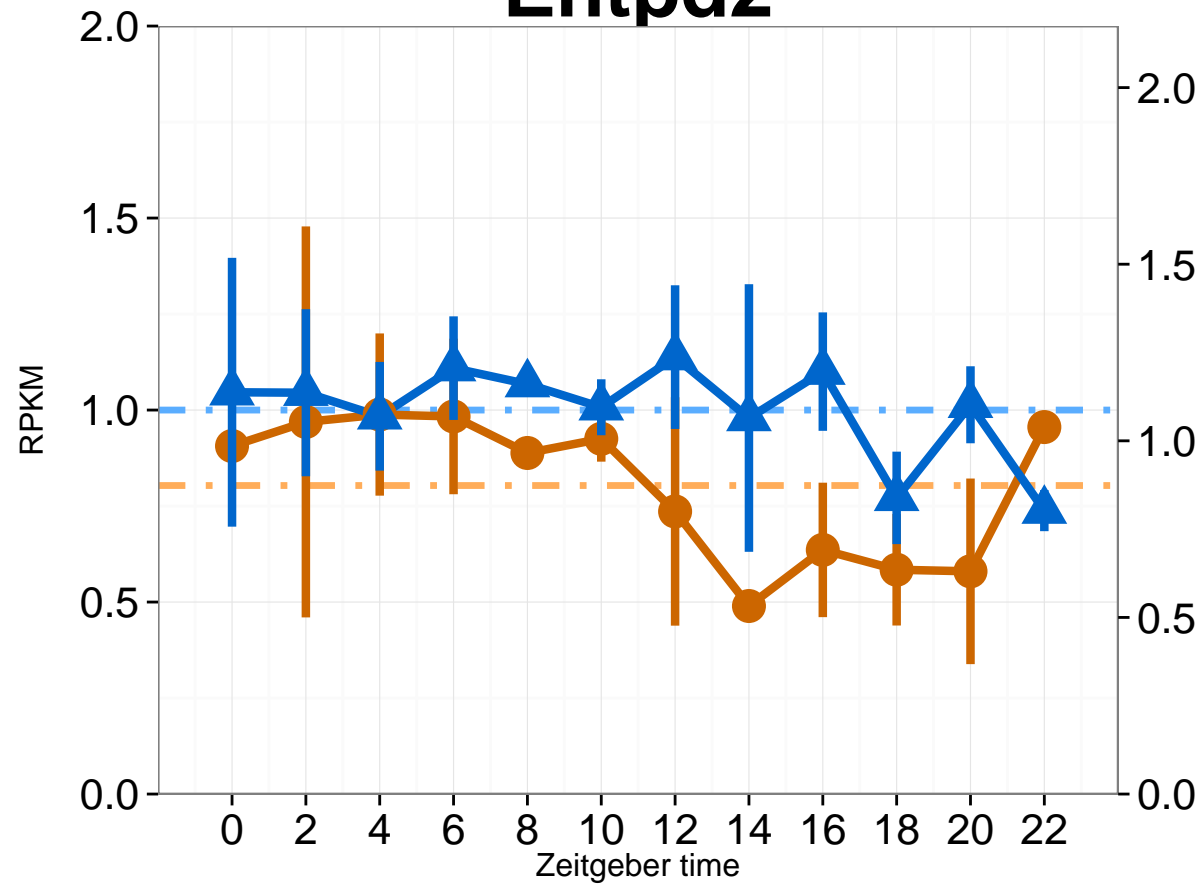

# Entpd2

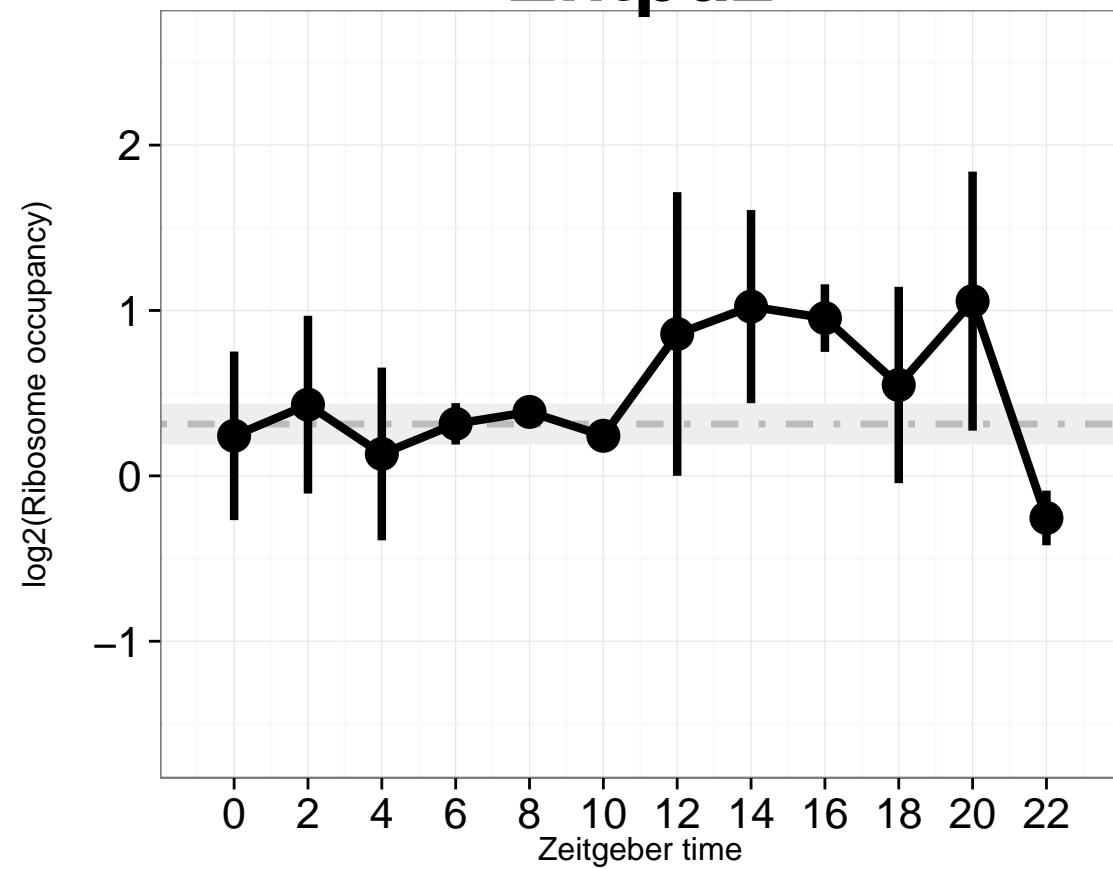

Supplement: SuppDataset_1.zip [file Entpd2_set_A.pdf › Supplemental Dataset 1/A-mRNA_nonrhyth_translation_nonrhyth/Entpd2_set_A.pdf]

## Entpd5

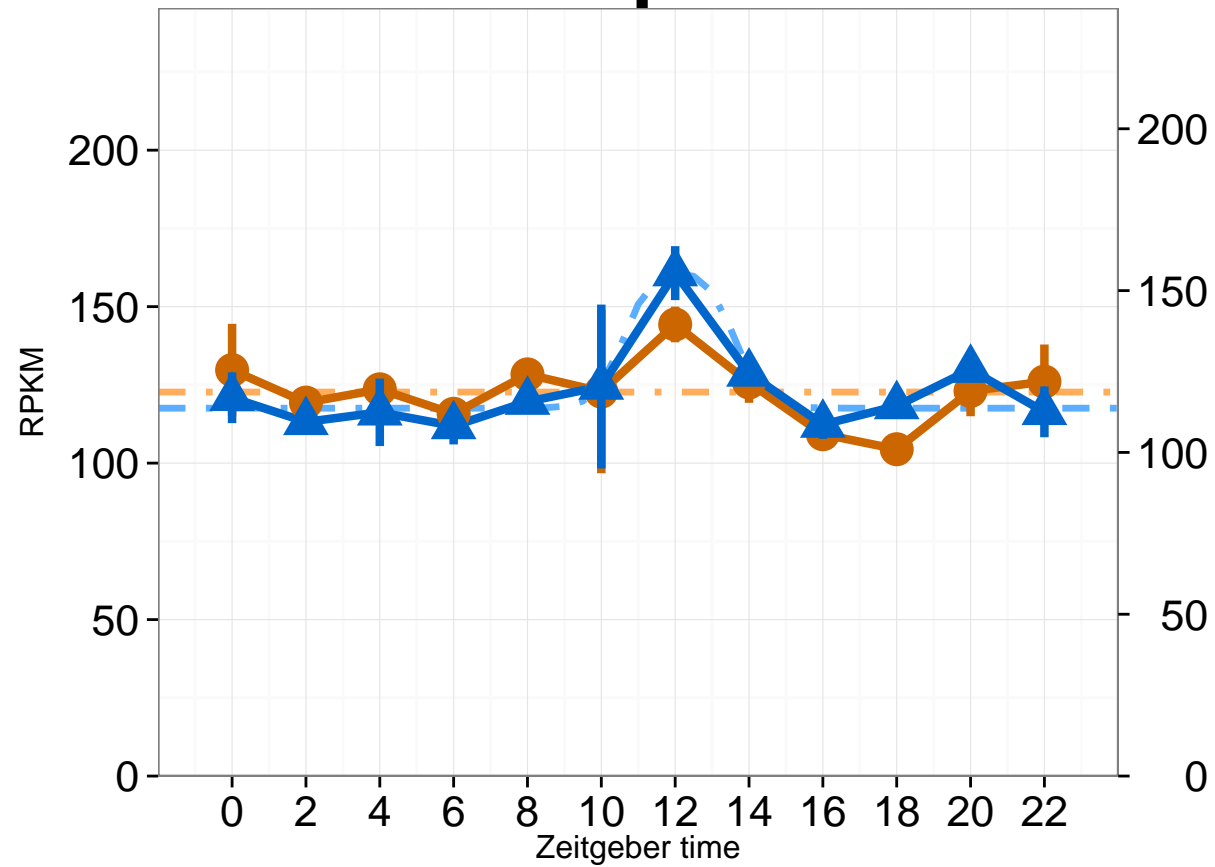

## Entpd5

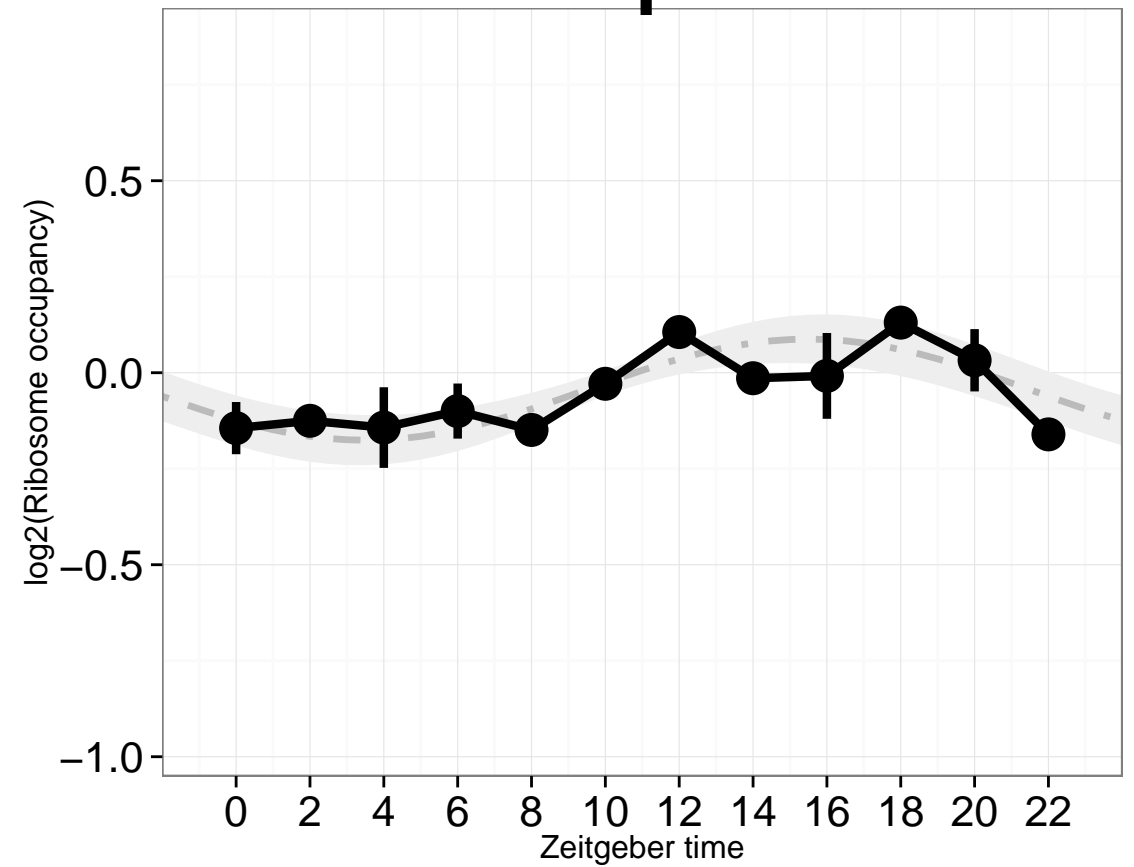

Supplement: SuppDataset_1.zip [file Entpd5_set_A.pdf › Supplemental Dataset 1/A-mRNA_nonrhyth_translation_nonrhyth/Entpd5_set_A.pdf]

## Entpd8

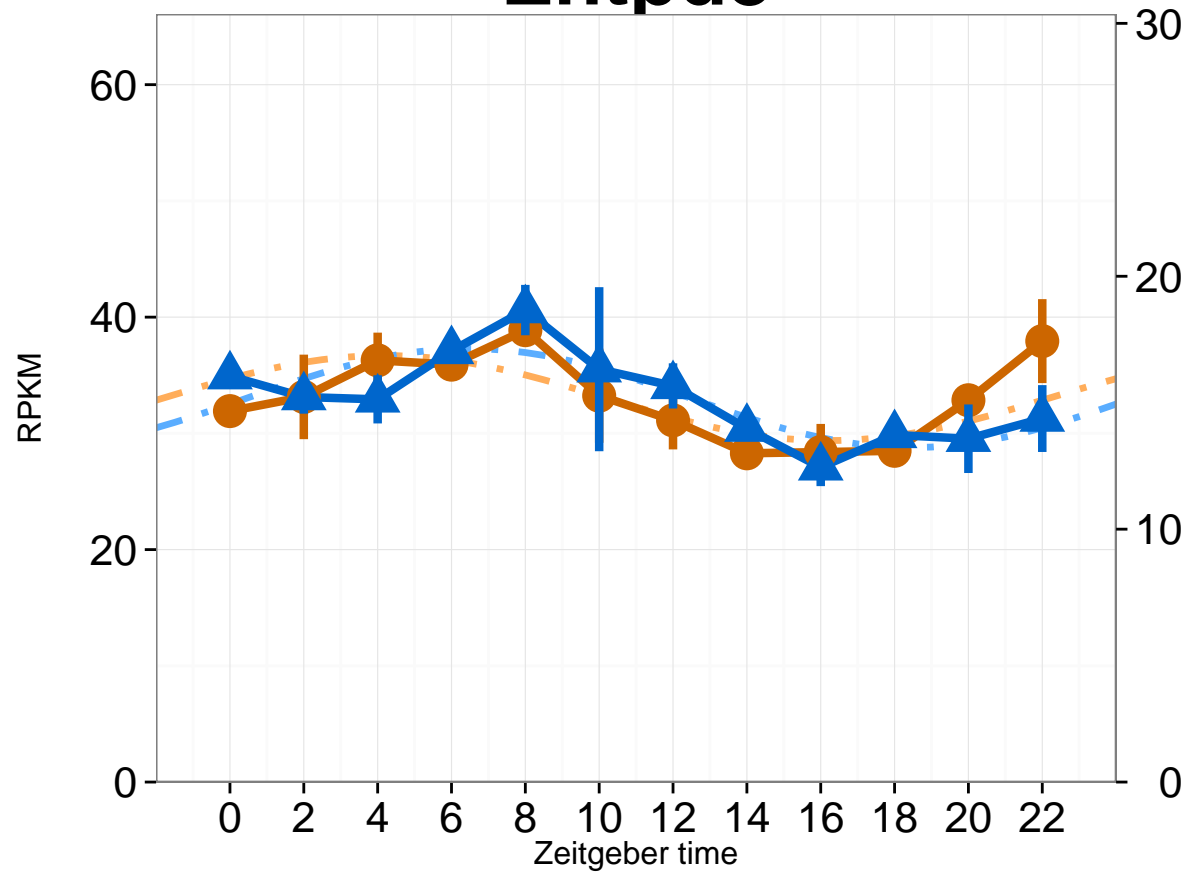

## Entpd8

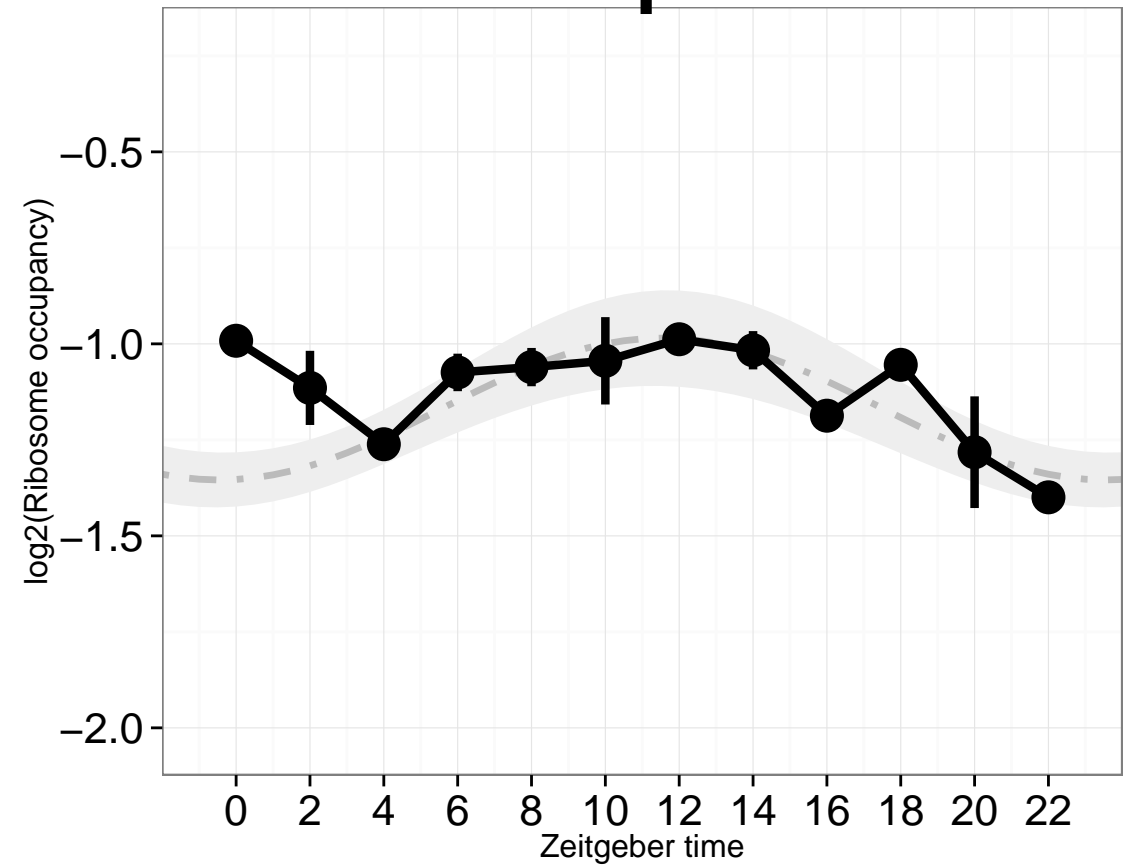

Supplement: SuppDataset_1.zip [file Entpd8_set_A.pdf › Supplemental Dataset 1/A-mRNA_nonrhyth_translation_nonrhyth/Entpd8_set_A.pdf]

## Eogt

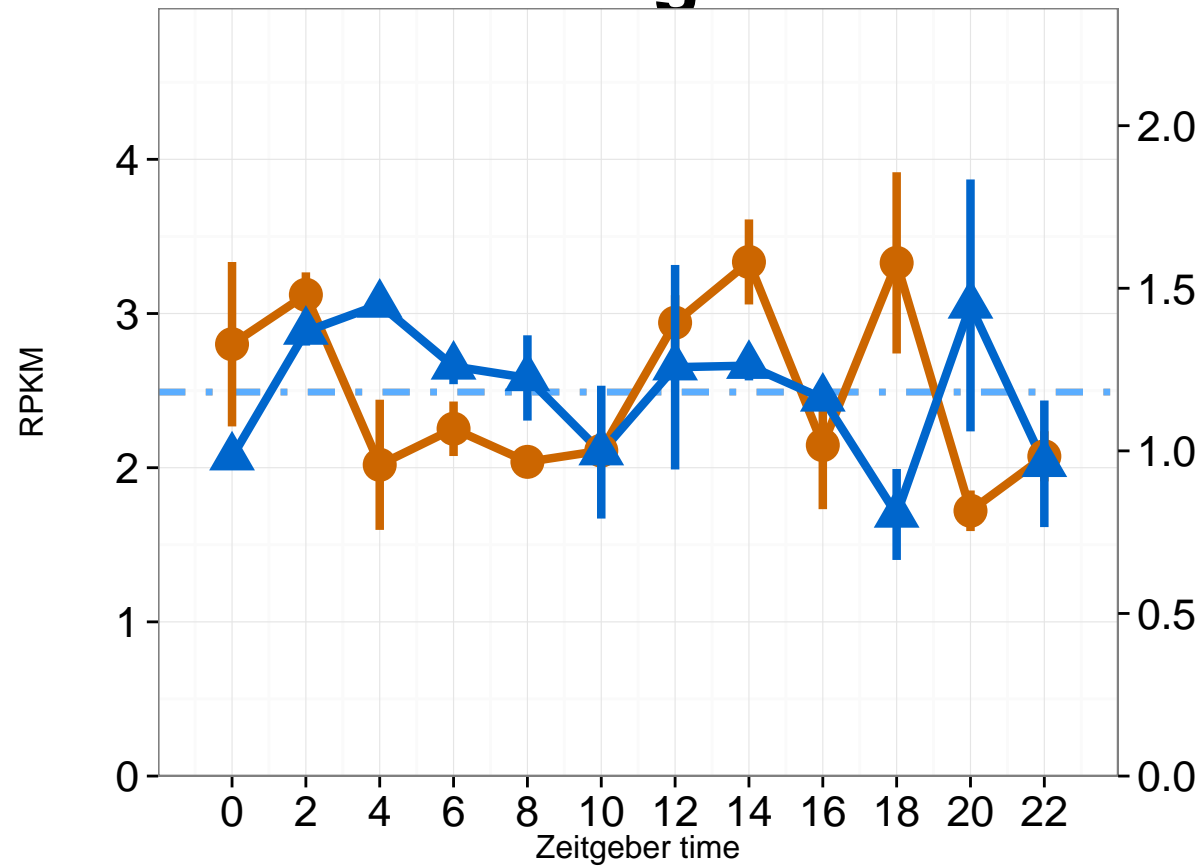

## Eogt

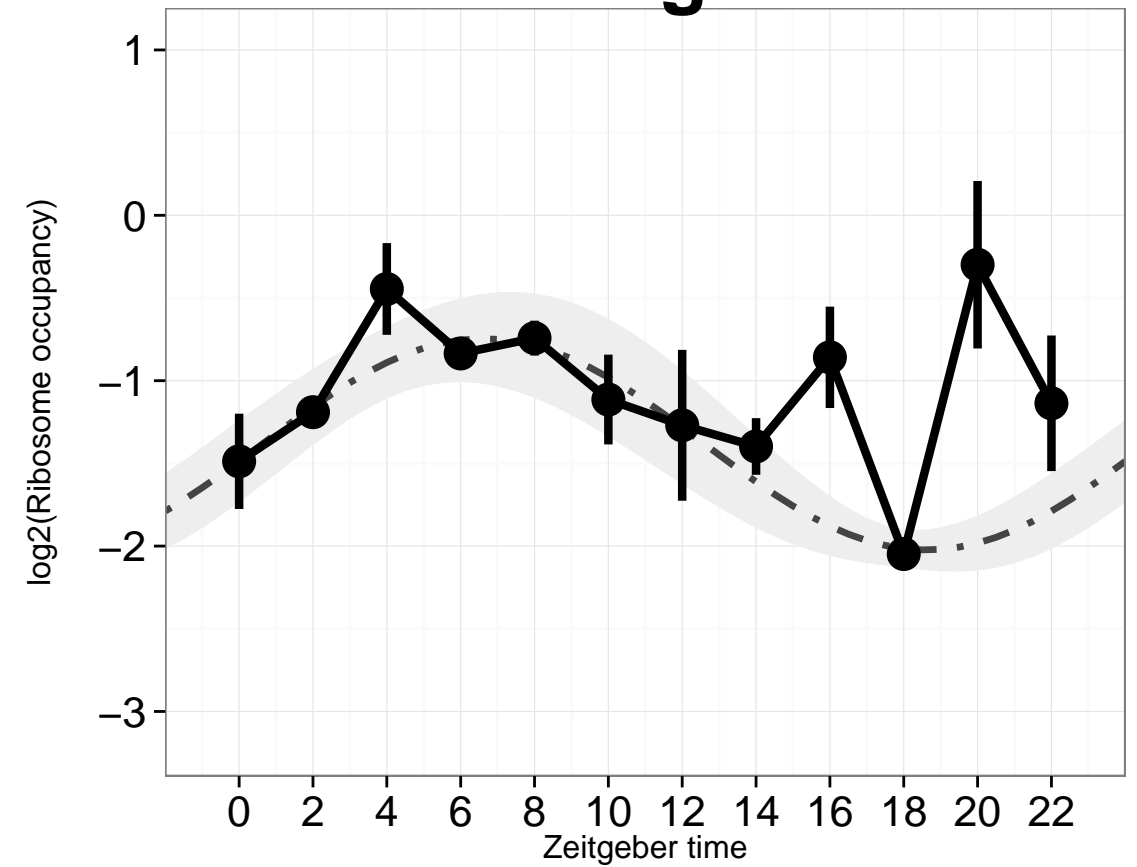

Supplement: SuppDataset_1.zip [file Eogt_set_A.pdf › Supplemental Dataset 1/A-mRNA_nonrhyth_translation_nonrhyth/Eogt_set_A.pdf]

## Ep300

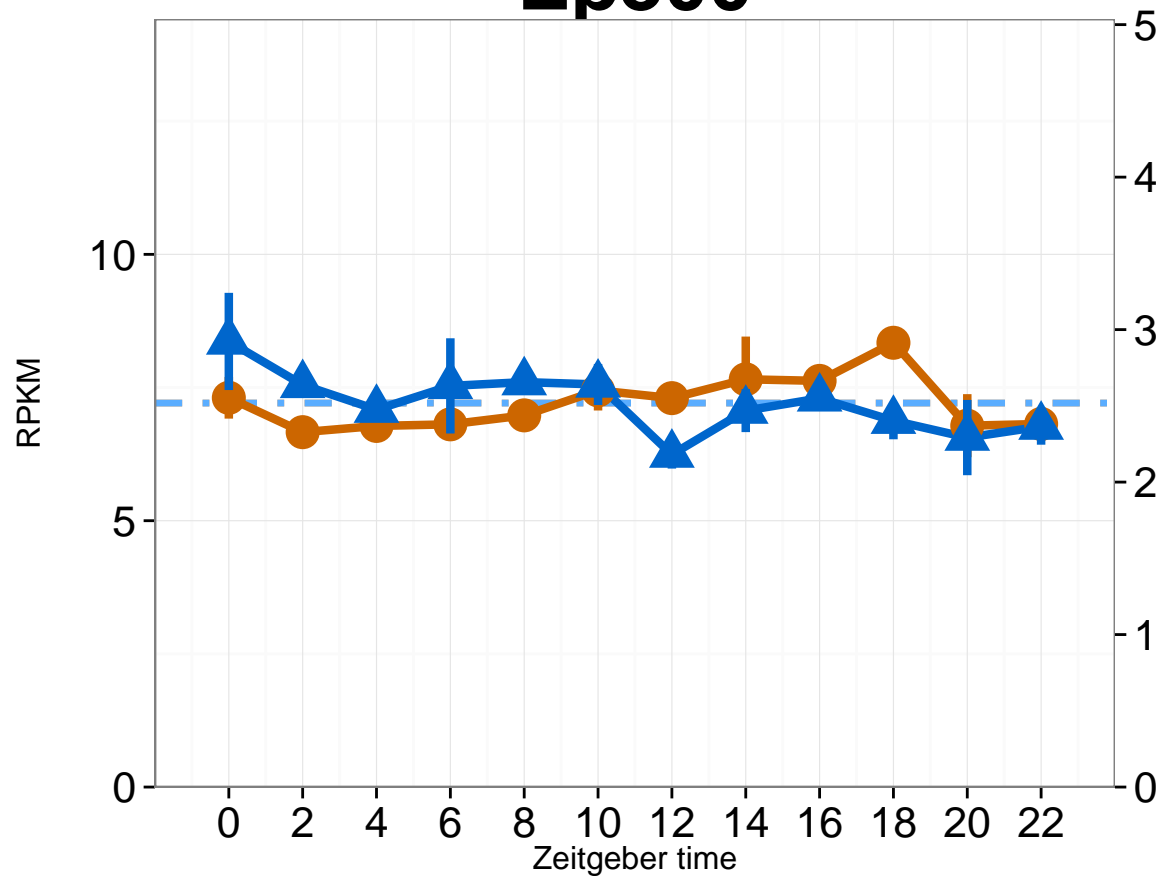

## Ep300

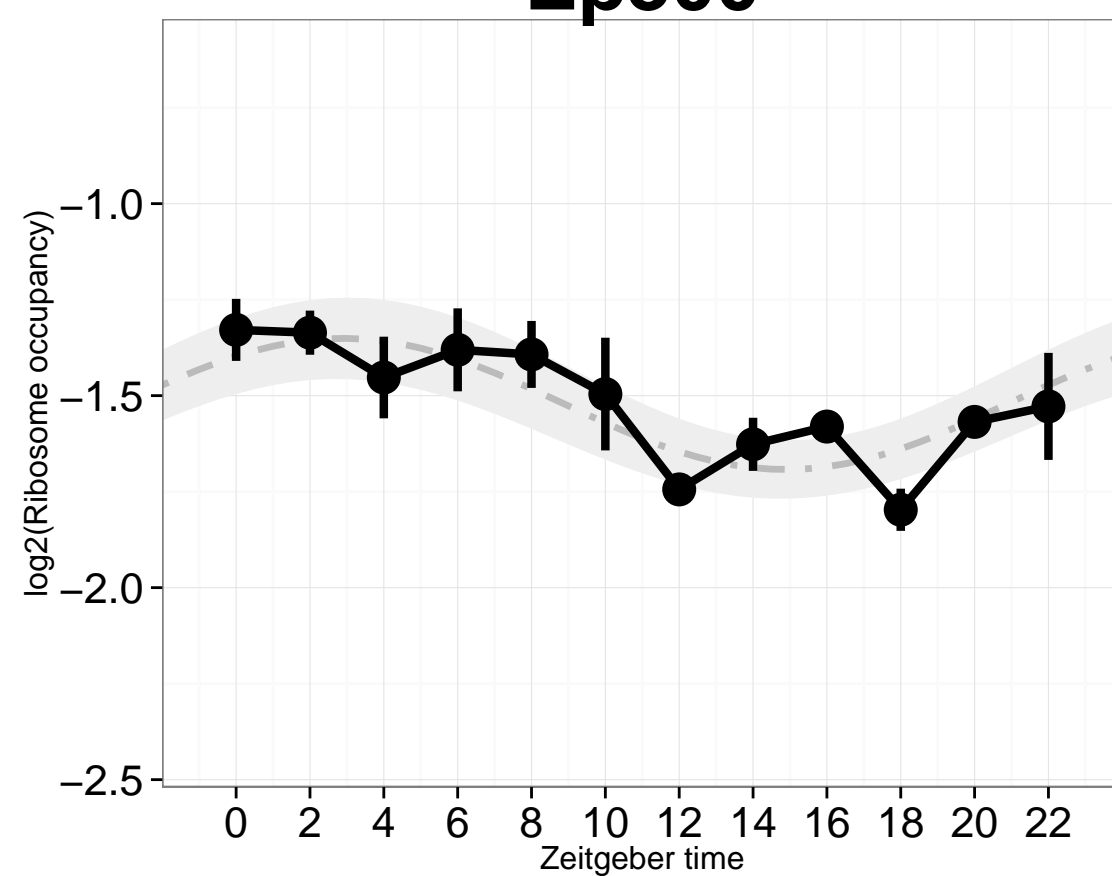

Supplement: SuppDataset_1.zip [file Ep300_set_A.pdf › Supplemental Dataset 1/A-mRNA_nonrhyth_translation_nonrhyth/Ep300_set_A.pdf]

## Ep400

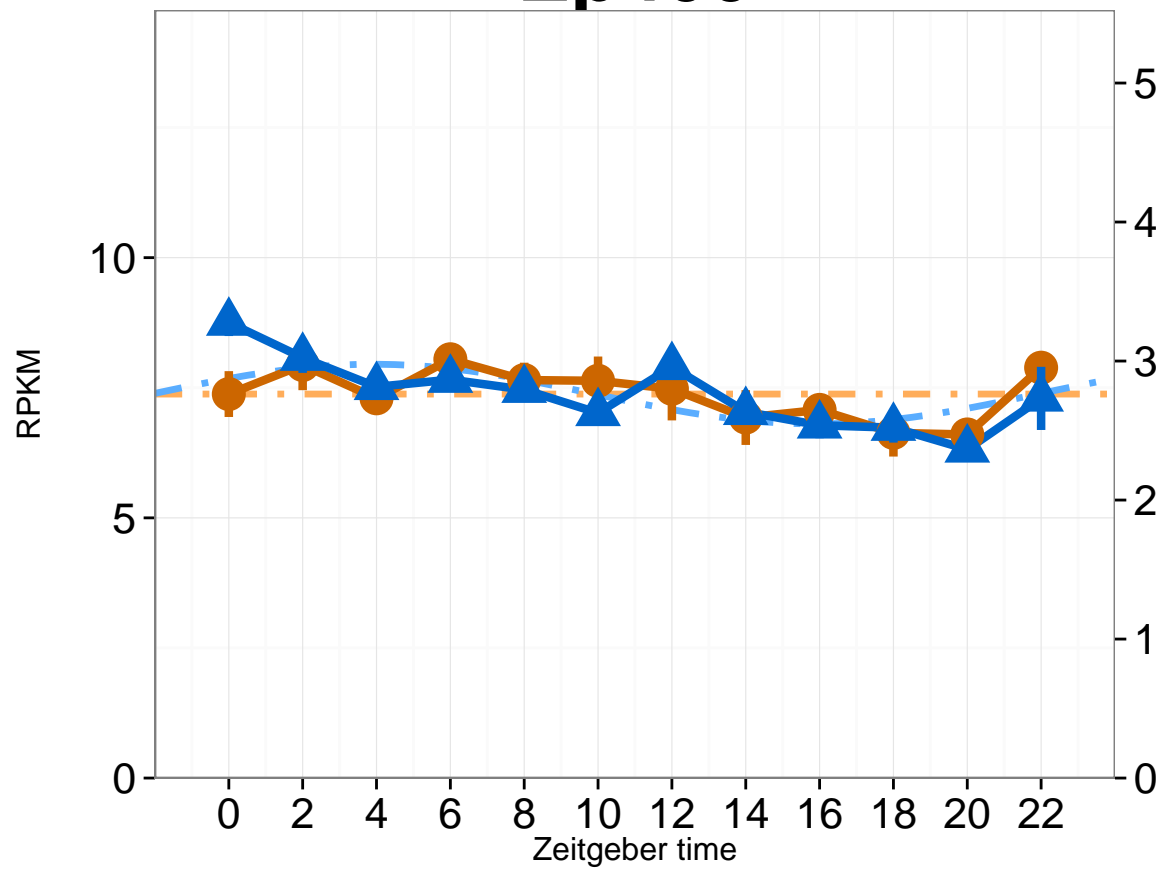

## Ep400

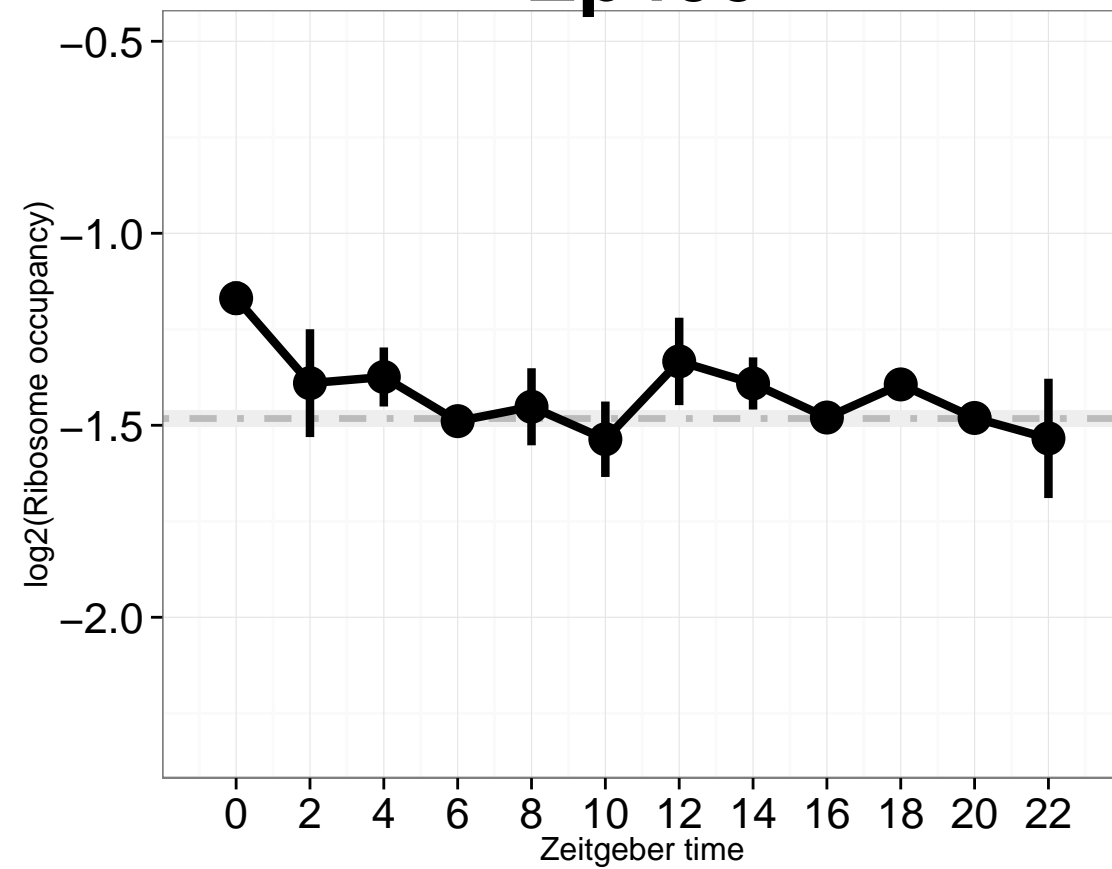

Supplement: SuppDataset_1.zip [file Ep400_set_A.pdf › Supplemental Dataset 1/A-mRNA_nonrhyth_translation_nonrhyth/Ep400_set_A.pdf]

## Epas1

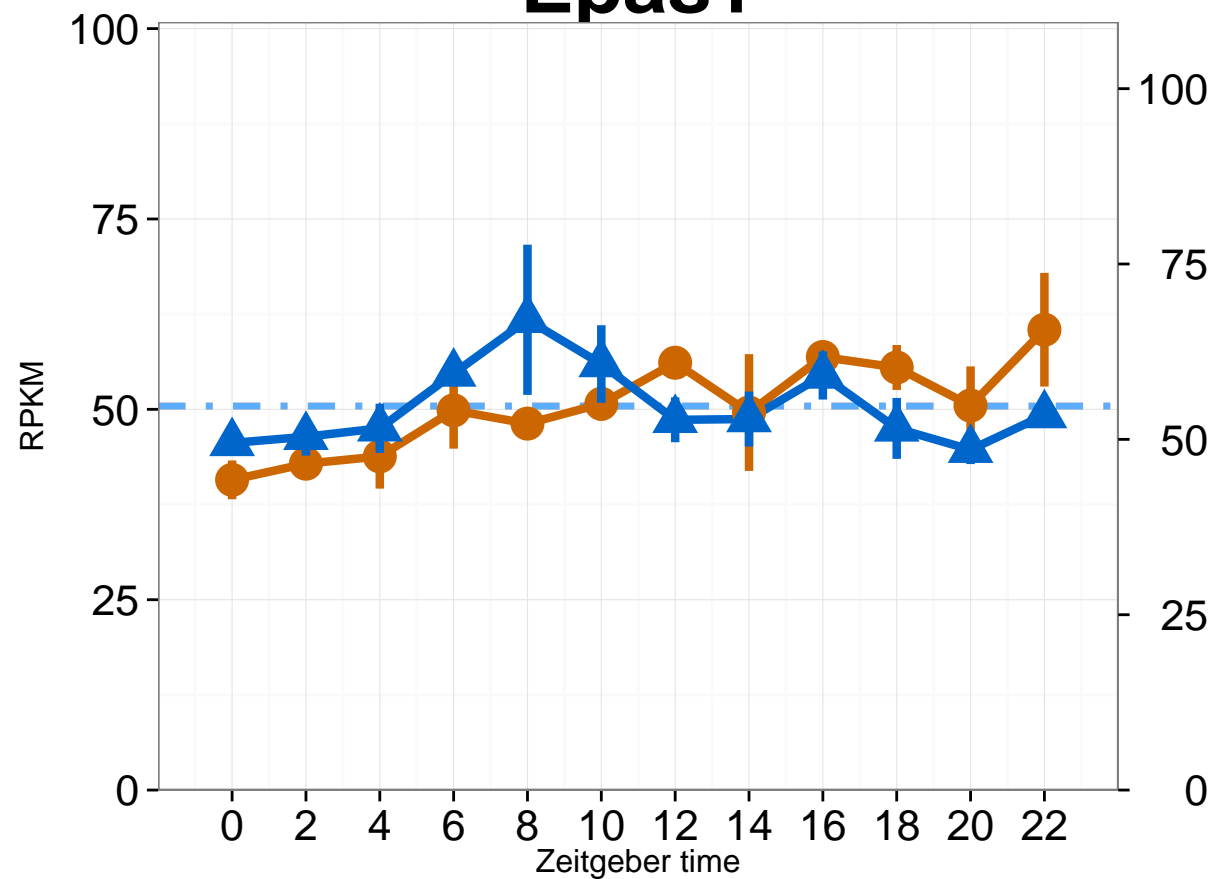

## Epas1

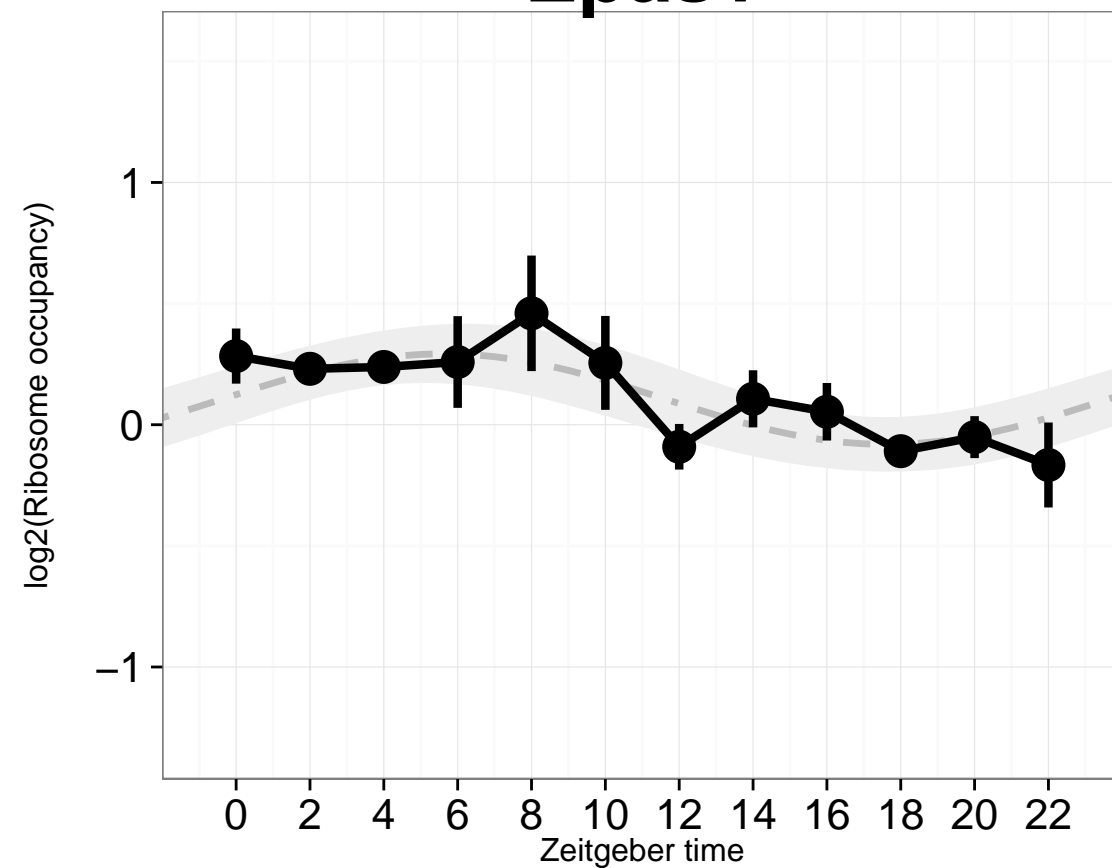

Supplement: SuppDataset_1.zip [file Epas1_set_A.pdf › Supplemental Dataset 1/A-mRNA_nonrhyth_translation_nonrhyth/Epas1_set_A.pdf]

# Epb4.1

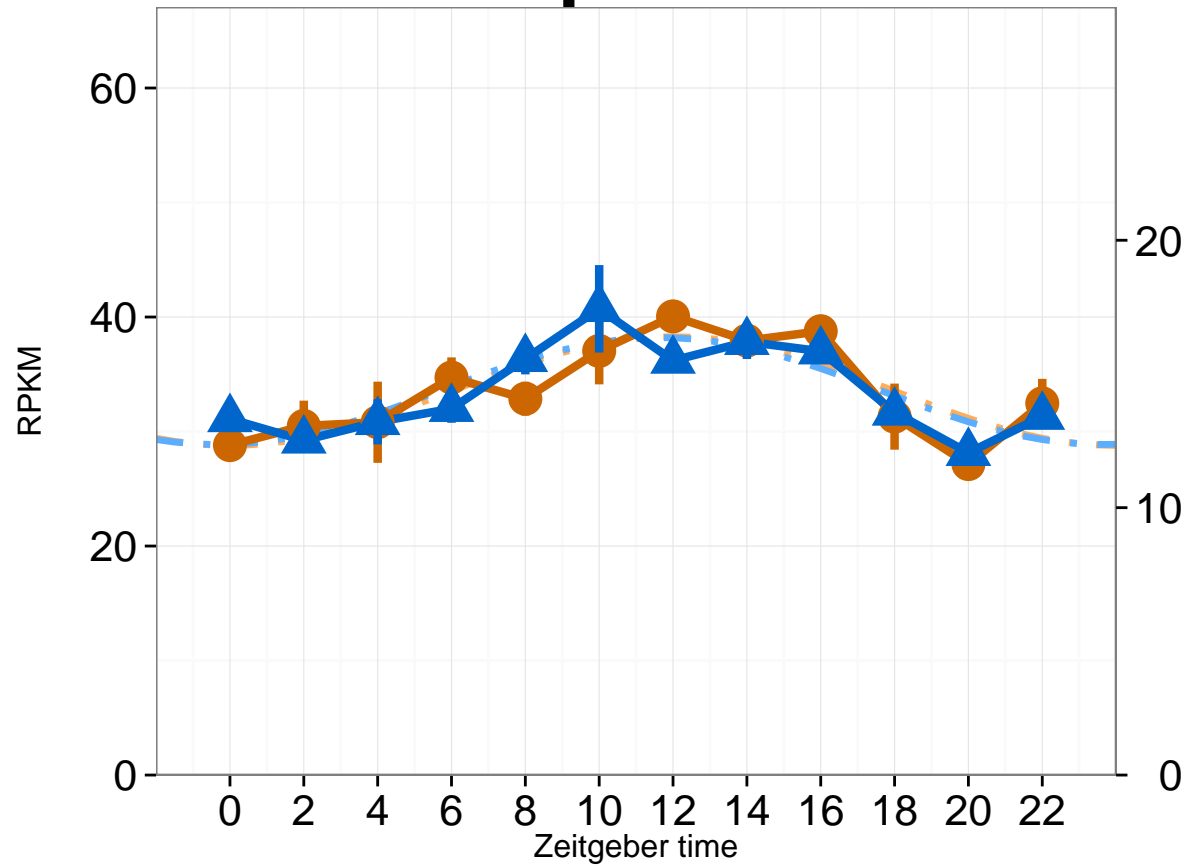

# Epb4.1

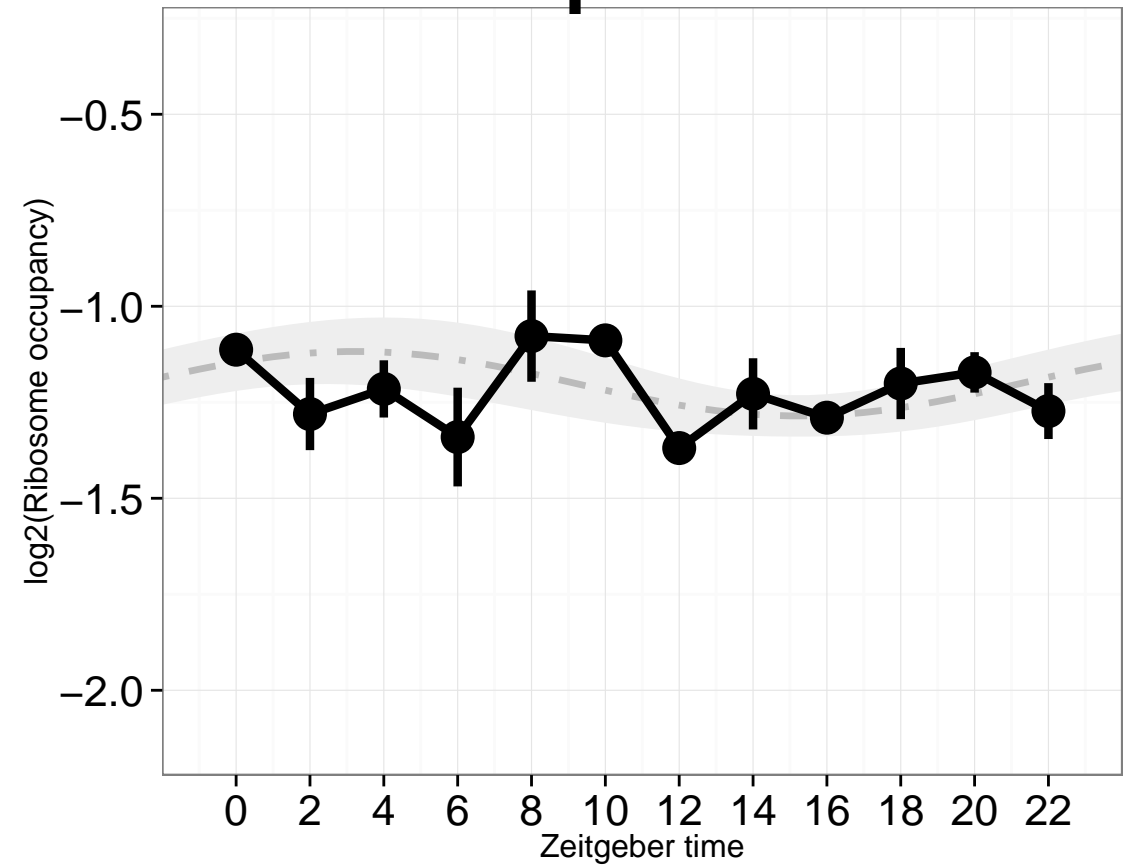

Supplement: SuppDataset_1.zip [file Epb4.1_set_A.pdf › Supplemental Dataset 1/A-mRNA_nonrhyth_translation_nonrhyth/Epb4.1_set_A.pdf]

# Epb4.1I2

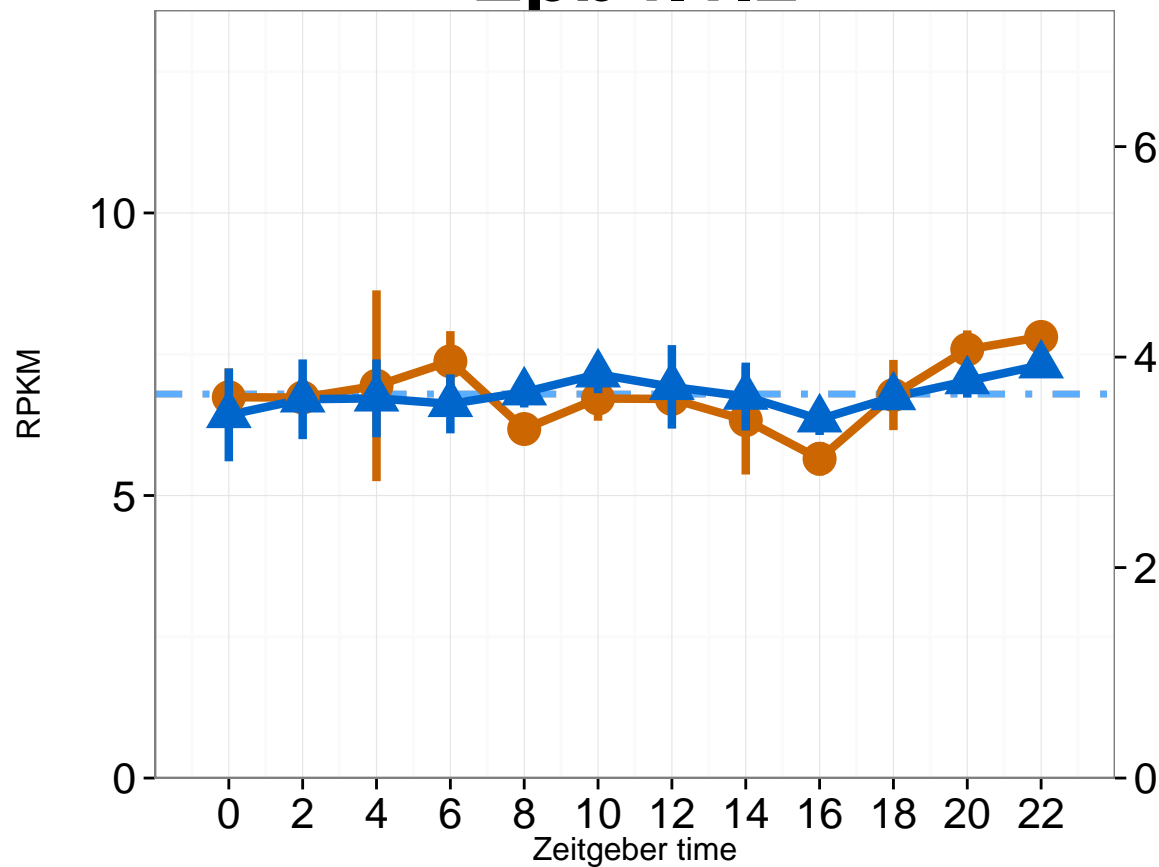

# Epb4.1I2

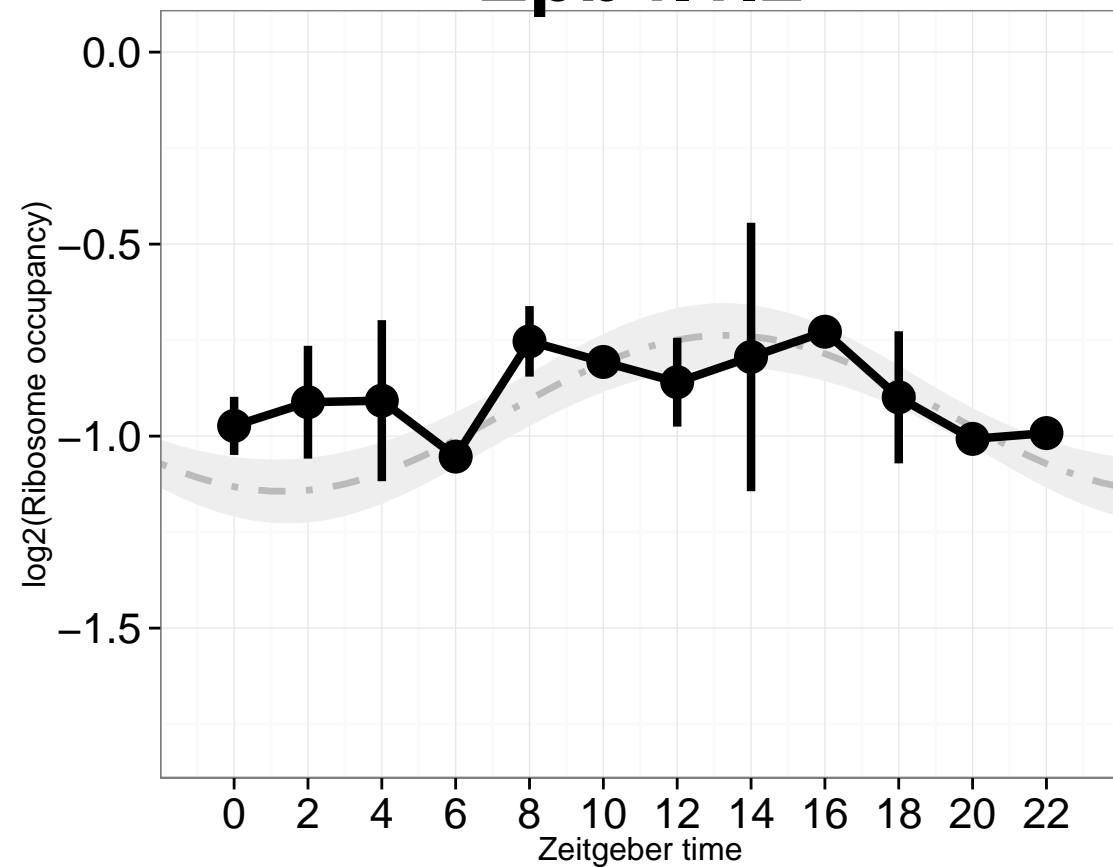

Supplement: SuppDataset_1.zip [file Epb4.1l2_set_A.pdf › Supplemental Dataset 1/A-mRNA_nonrhyth_translation_nonrhyth/Epb4.1l2_set_A.pdf]

# Epb4.1I3

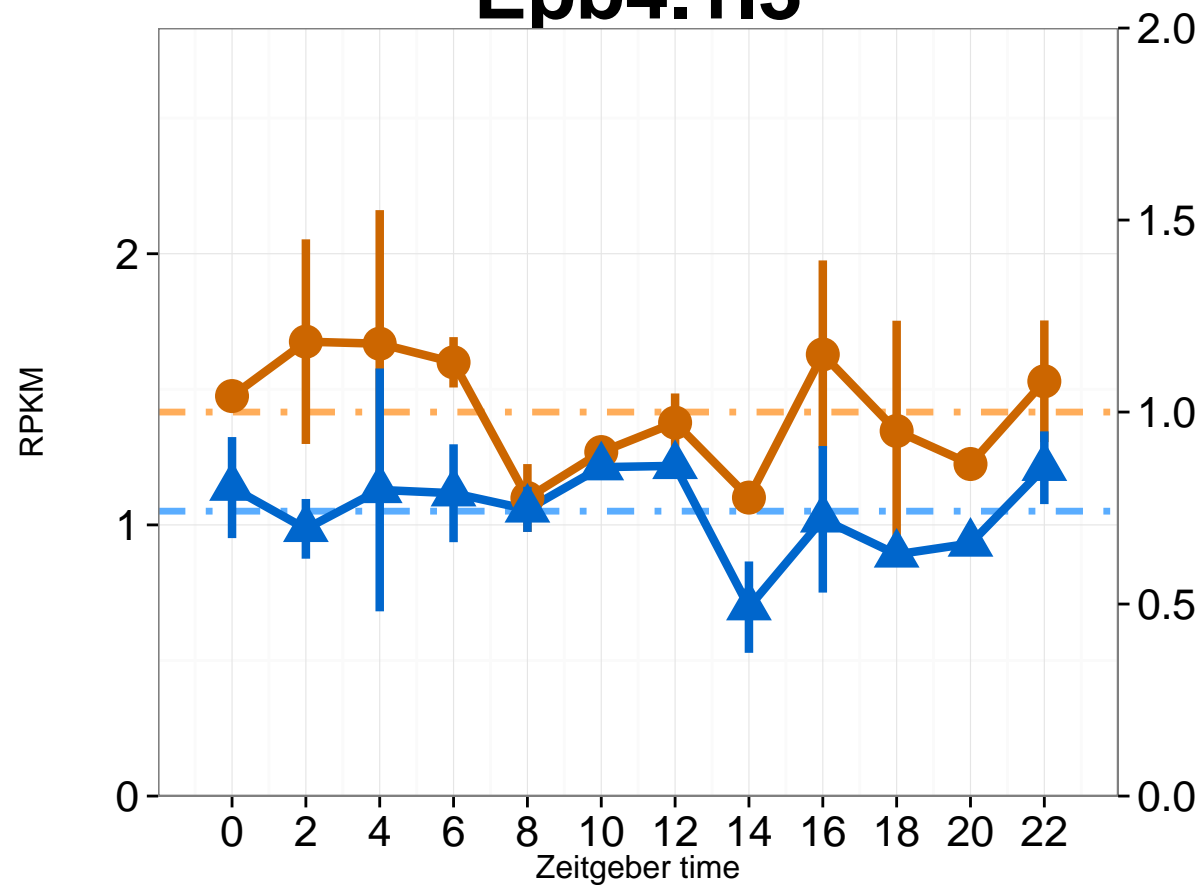

# Epb4.1I3

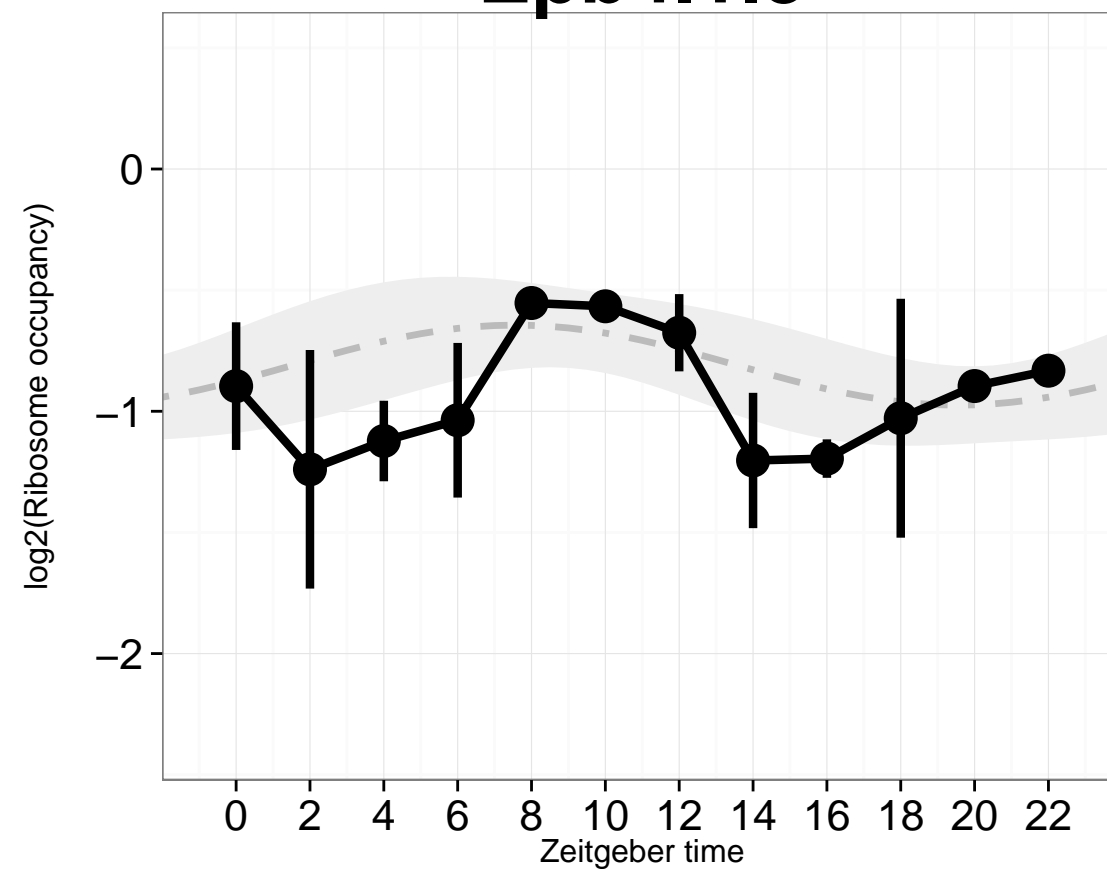

Supplement: SuppDataset_1.zip [file Epb4.1l3_set_A.pdf › Supplemental Dataset 1/A-mRNA_nonrhyth_translation_nonrhyth/Epb4.1l3_set_A.pdf]

# Epb4.1l4b

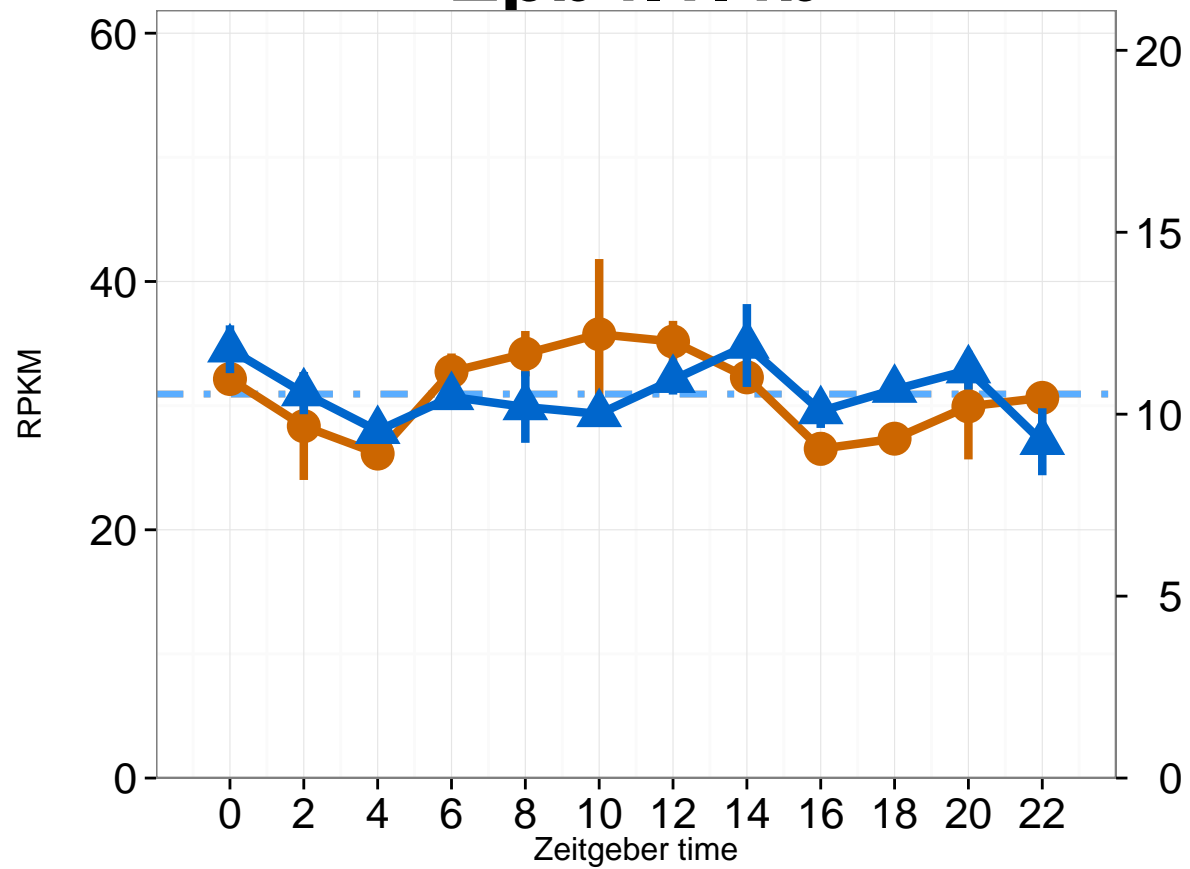

# Epb4.1l4b

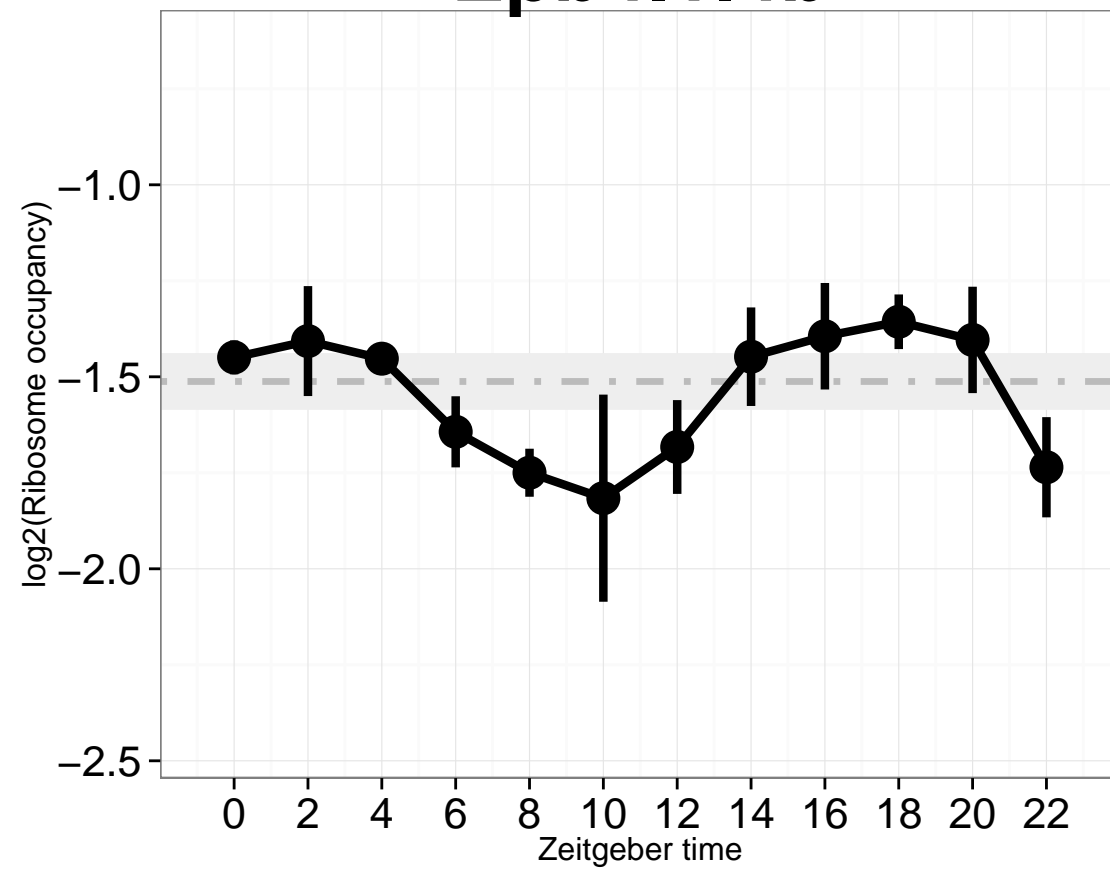

Supplement: SuppDataset_1.zip [file Epb4.1l4b_set_A.pdf › Supplemental Dataset 1/A-mRNA_nonrhyth_translation_nonrhyth/Epb4.1l4b_set_A.pdf]

## Epb4.1I5

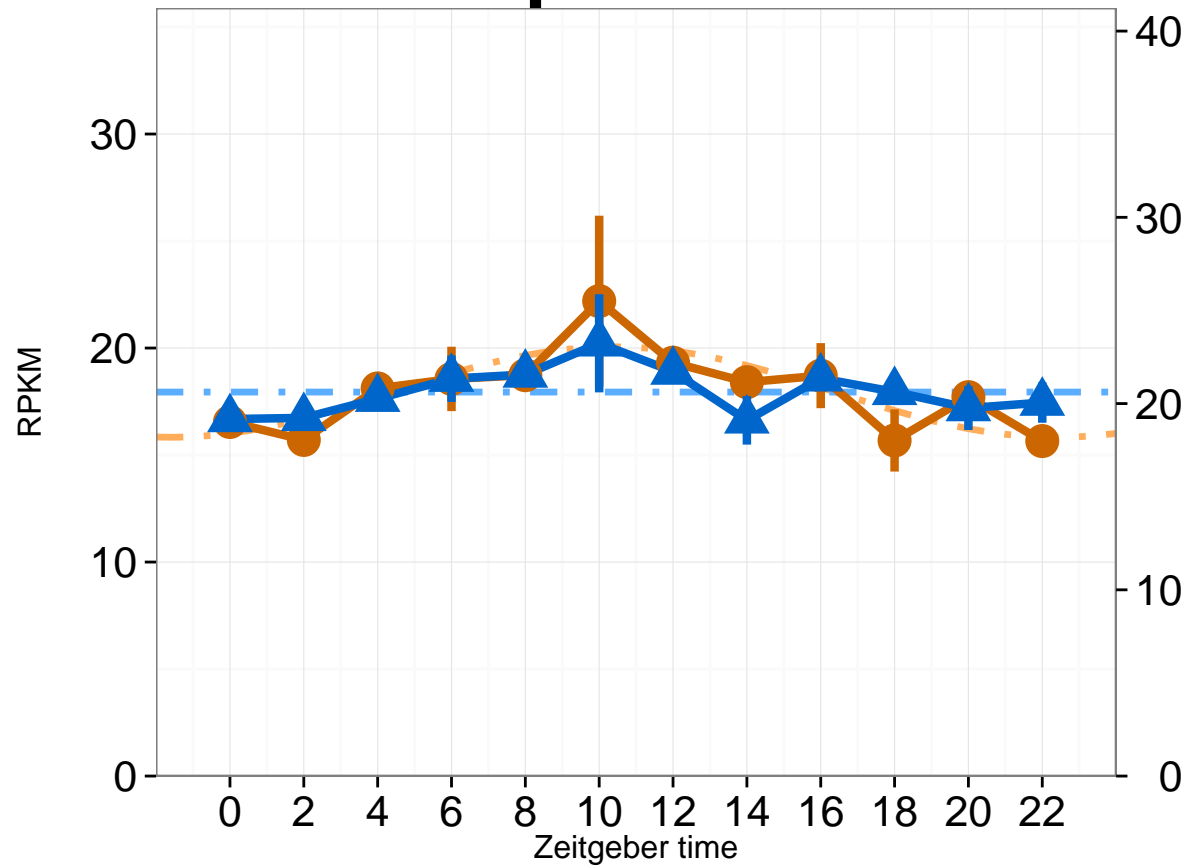

## Epb4.1I5

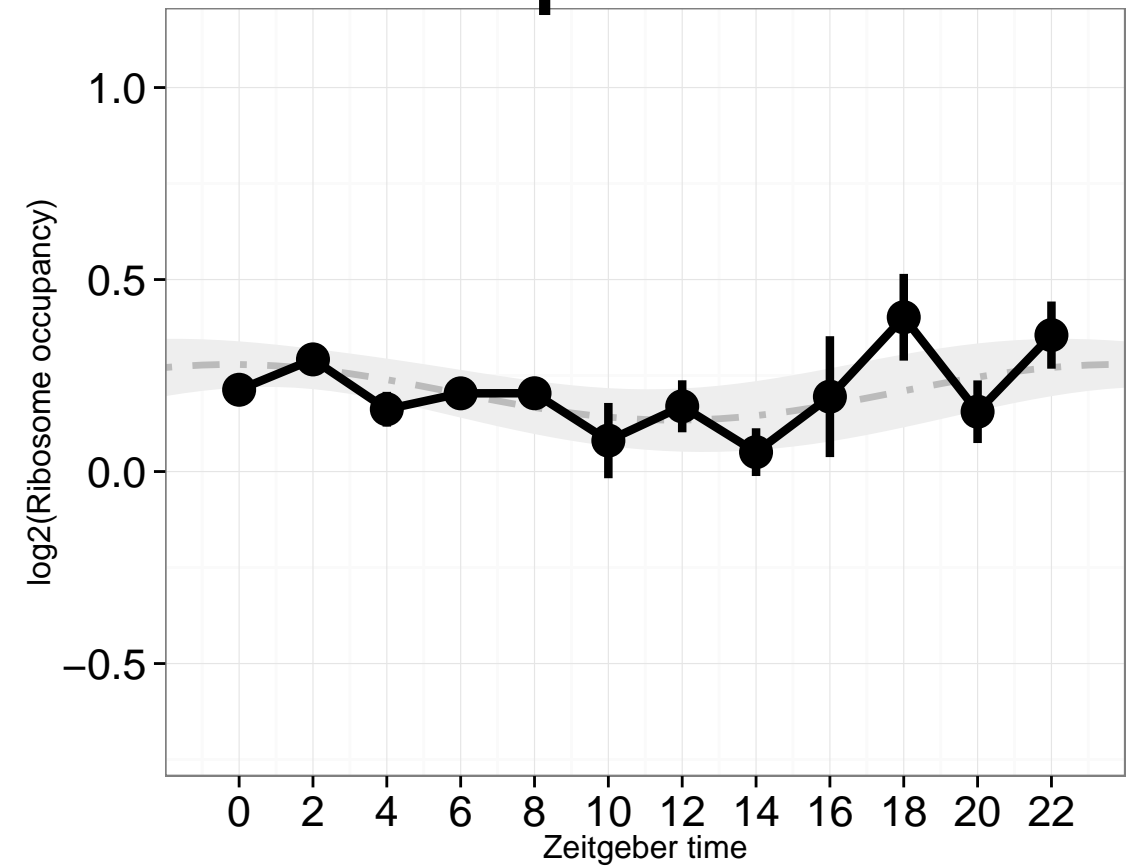

Supplement: SuppDataset_1.zip [file Epb4.1l5_set_A.pdf › Supplemental Dataset 1/A-mRNA_nonrhyth_translation_nonrhyth/Epb4.1l5_set_A.pdf]

# Epc1

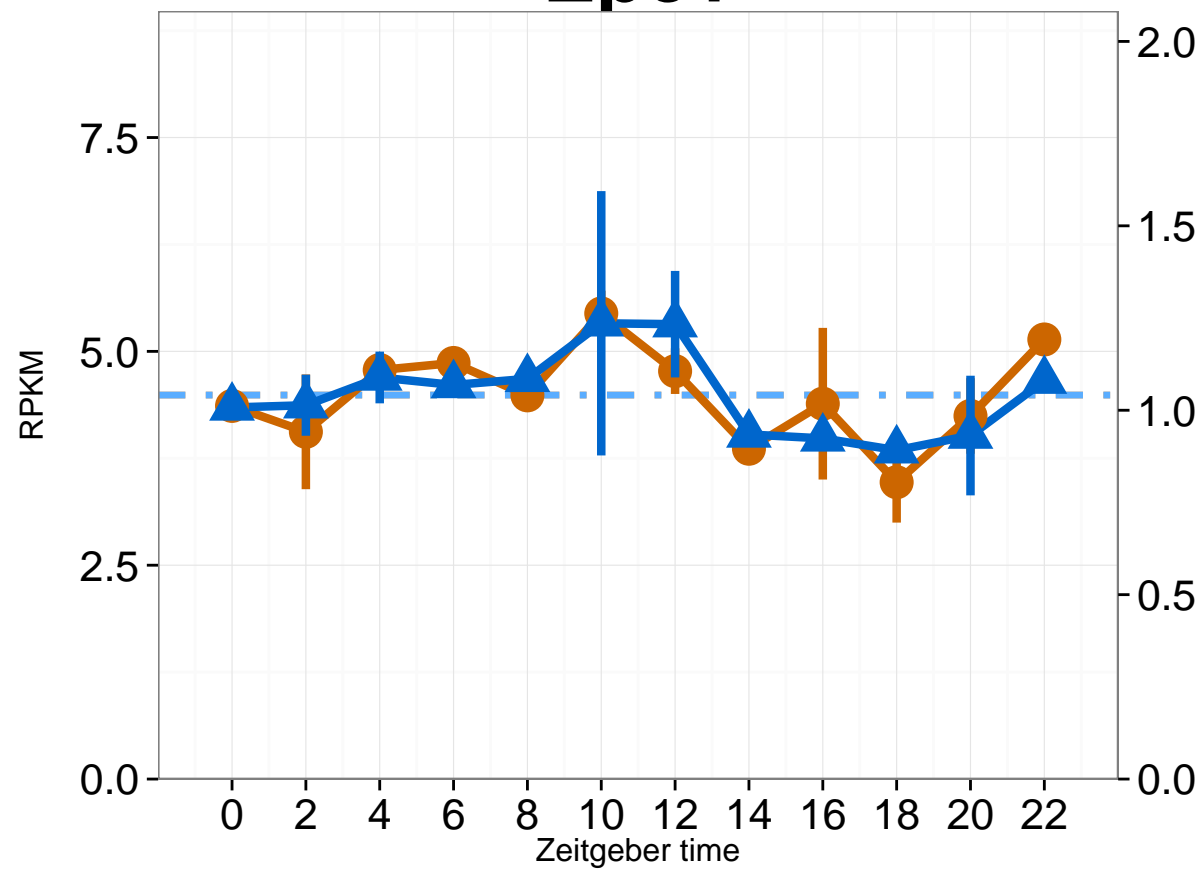

# Epc1

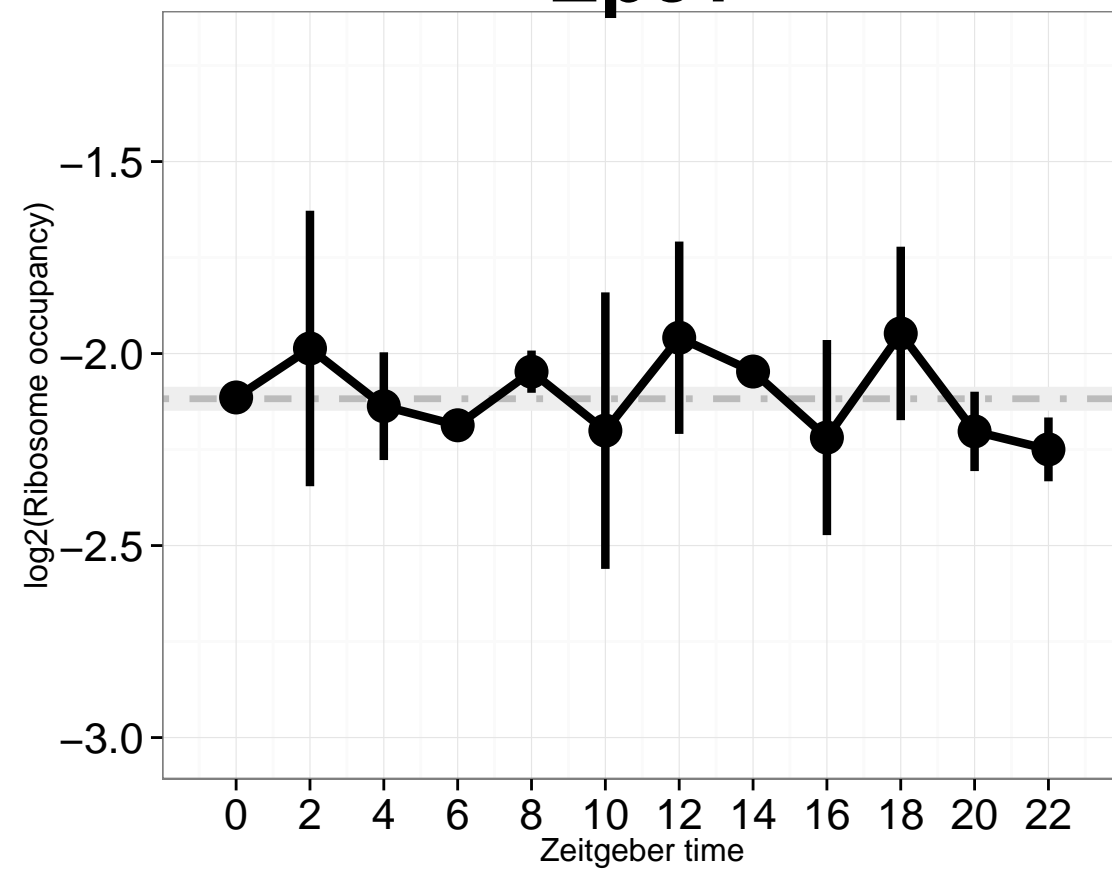

Supplement: SuppDataset_1.zip [file Epc1_set_A.pdf › Supplemental Dataset 1/A-mRNA_nonrhyth_translation_nonrhyth/Epc1_set_A.pdf]

## Epc2

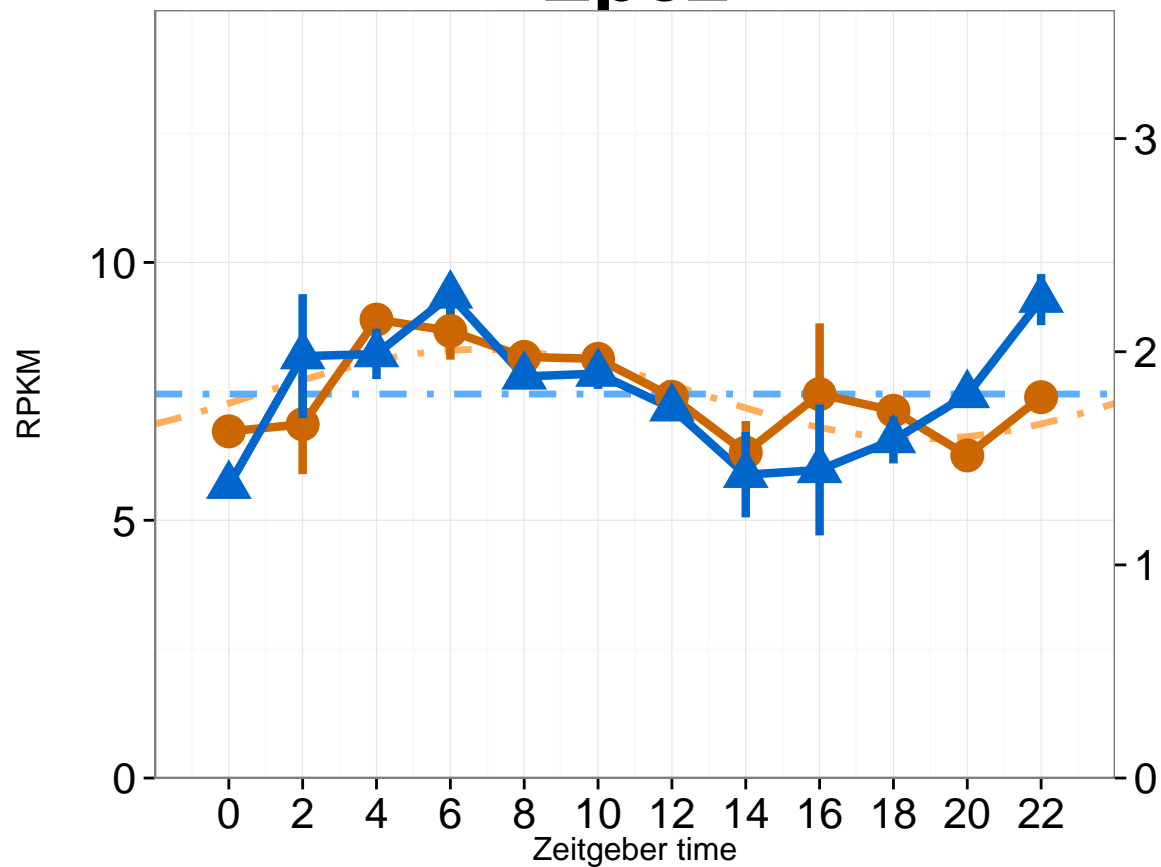

## Epc2

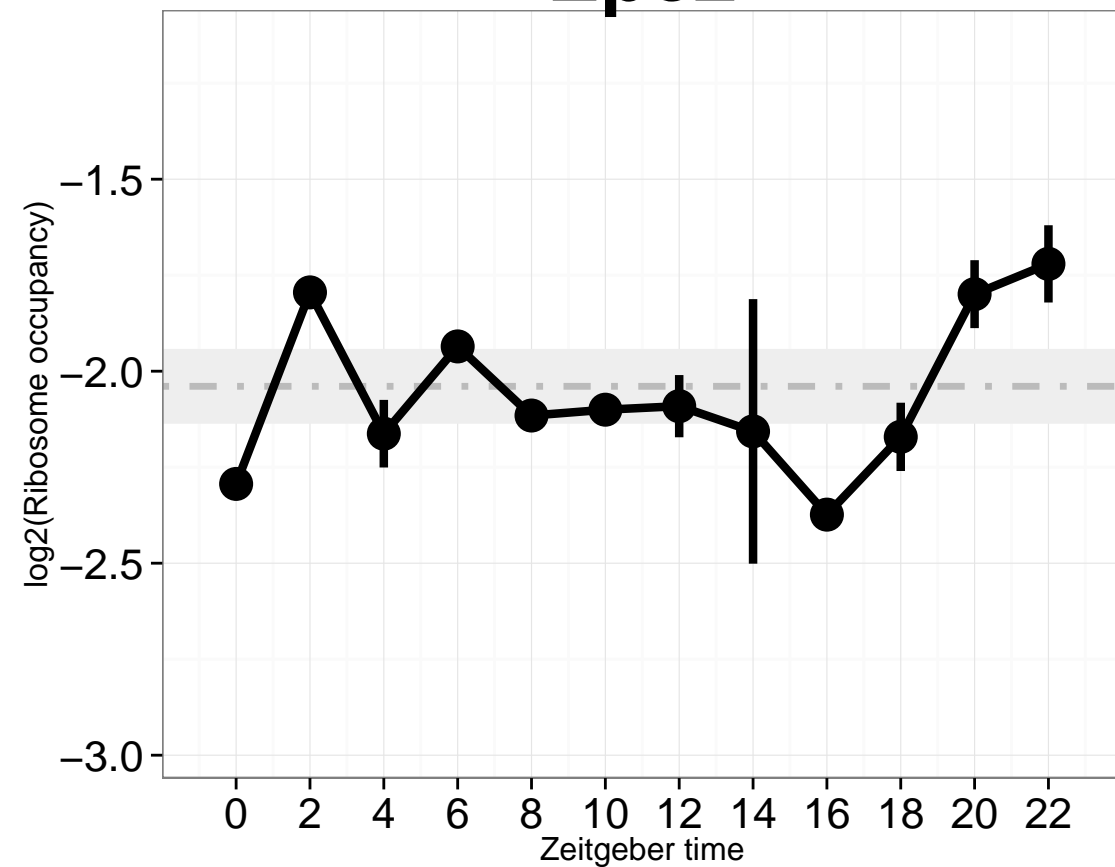

Supplement: SuppDataset_1.zip [file Epc2_set_A.pdf › Supplemental Dataset 1/A-mRNA_nonrhyth_translation_nonrhyth/Epc2_set_A.pdf]

## Epcam

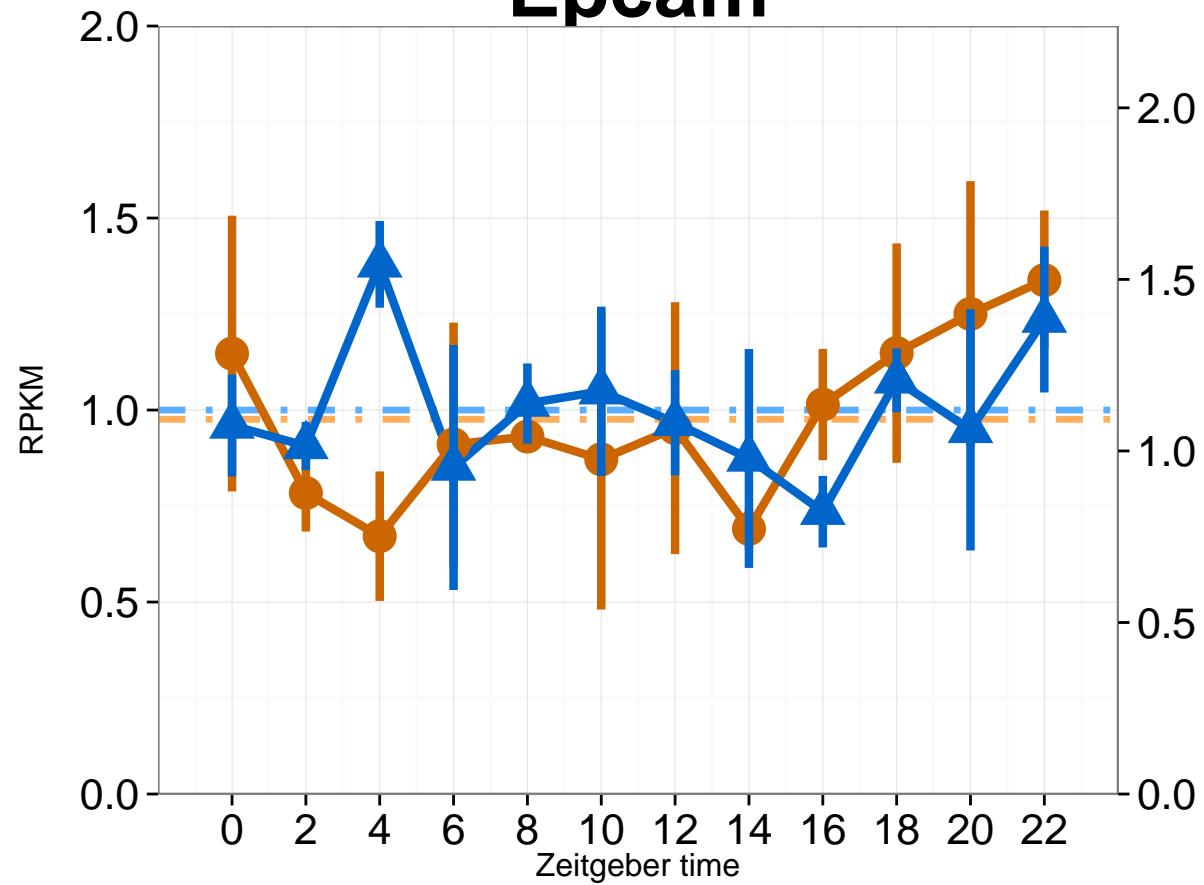

## Epcam

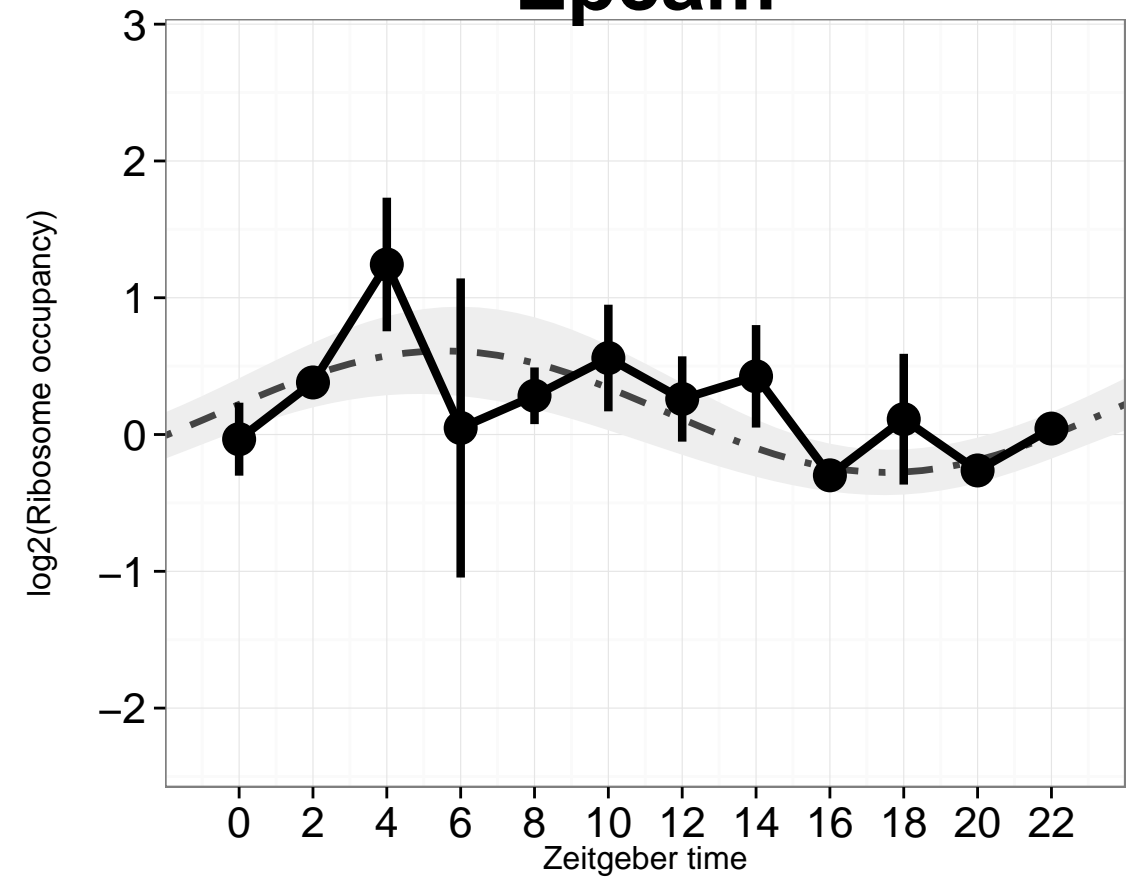

Supplement: SuppDataset_1.zip [file Epcam_set_A.pdf › Supplemental Dataset 1/A-mRNA_nonrhyth_translation_nonrhyth/Epcam_set_A.pdf]

## Epg5

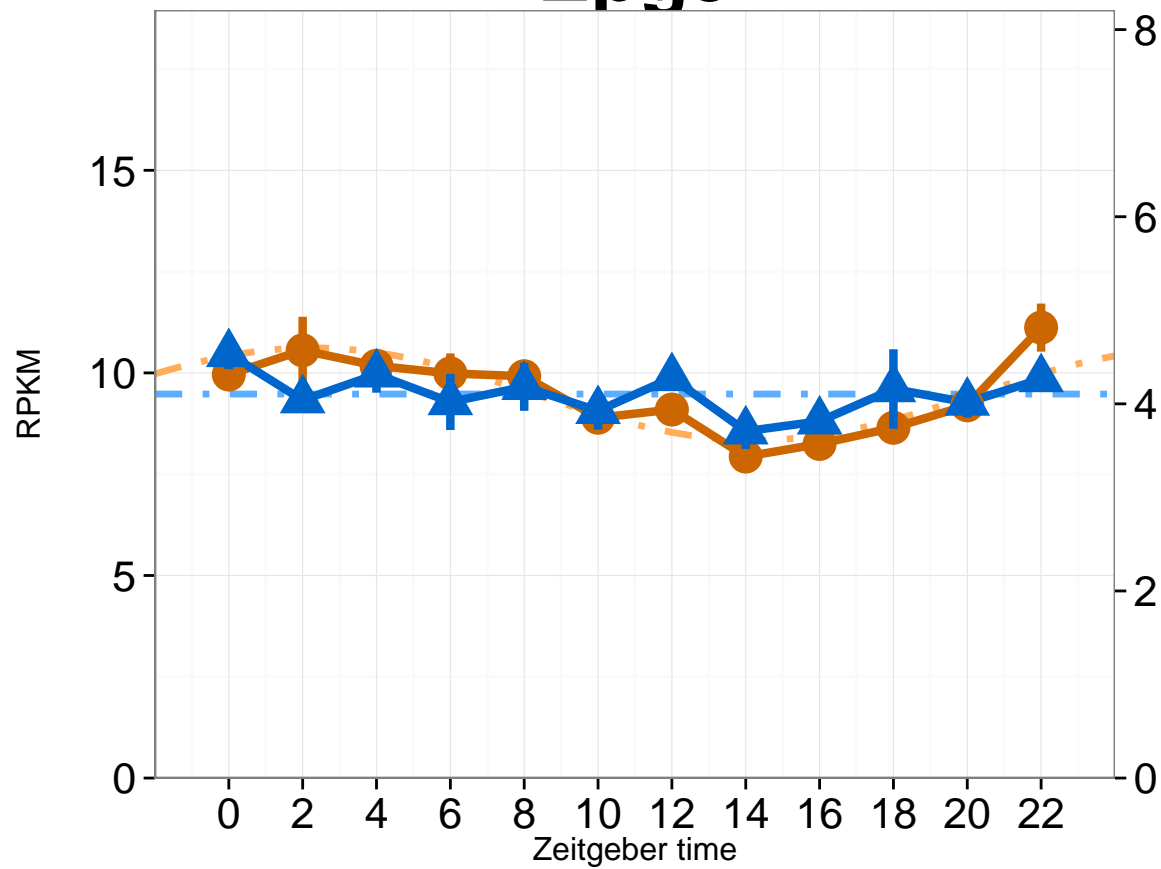

## Epg5

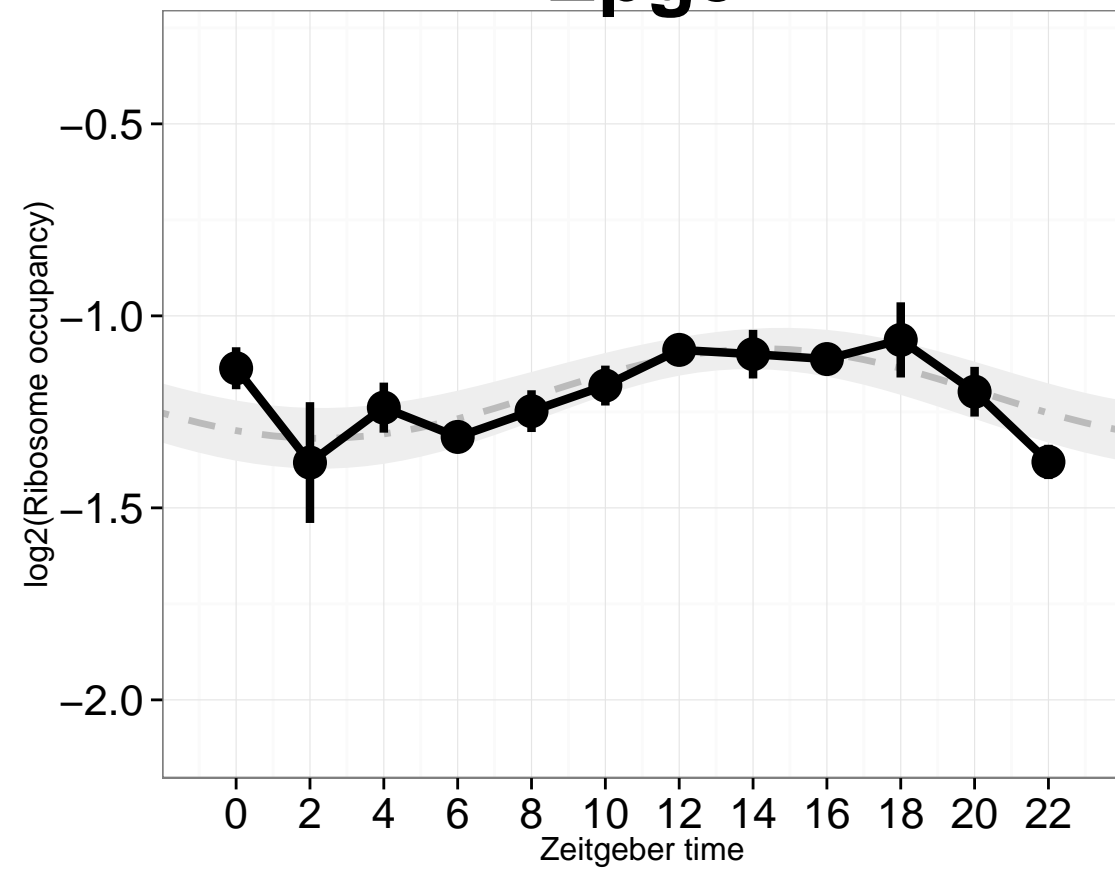

Supplement: SuppDataset_1.zip [file Epg5_set_A.pdf › Supplemental Dataset 1/A-mRNA_nonrhyth_translation_nonrhyth/Epg5_set_A.pdf]

## Epha1

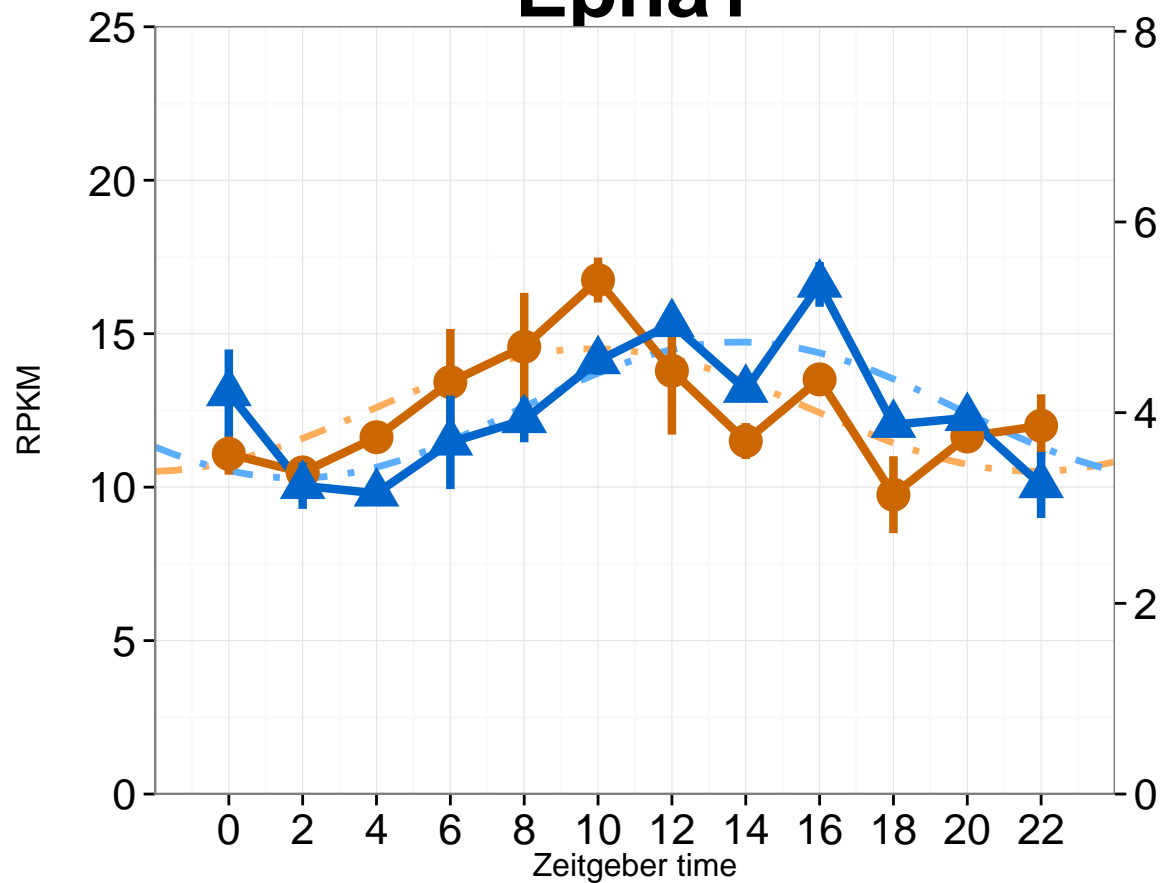

## Epha1

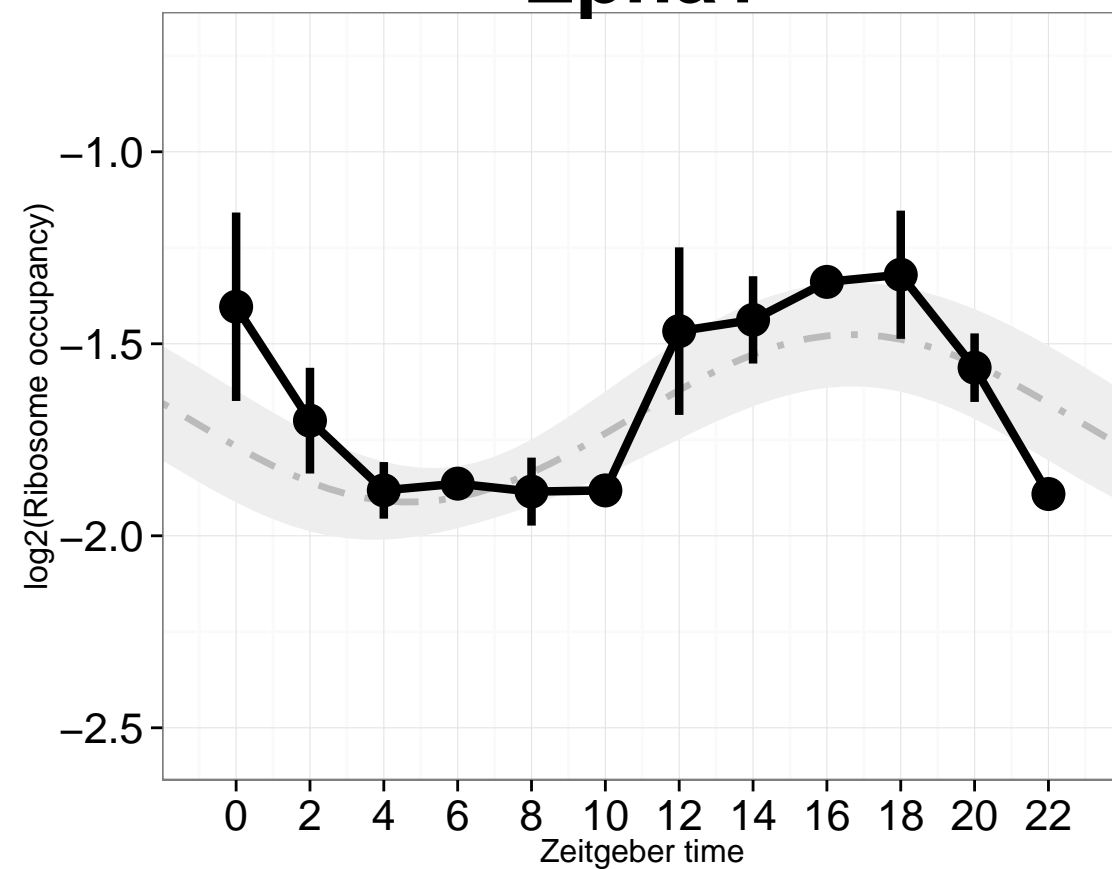

Supplement: SuppDataset_1.zip [file Epha1_set_A.pdf › Supplemental Dataset 1/A-mRNA_nonrhyth_translation_nonrhyth/Epha1_set_A.pdf]

## Epha2

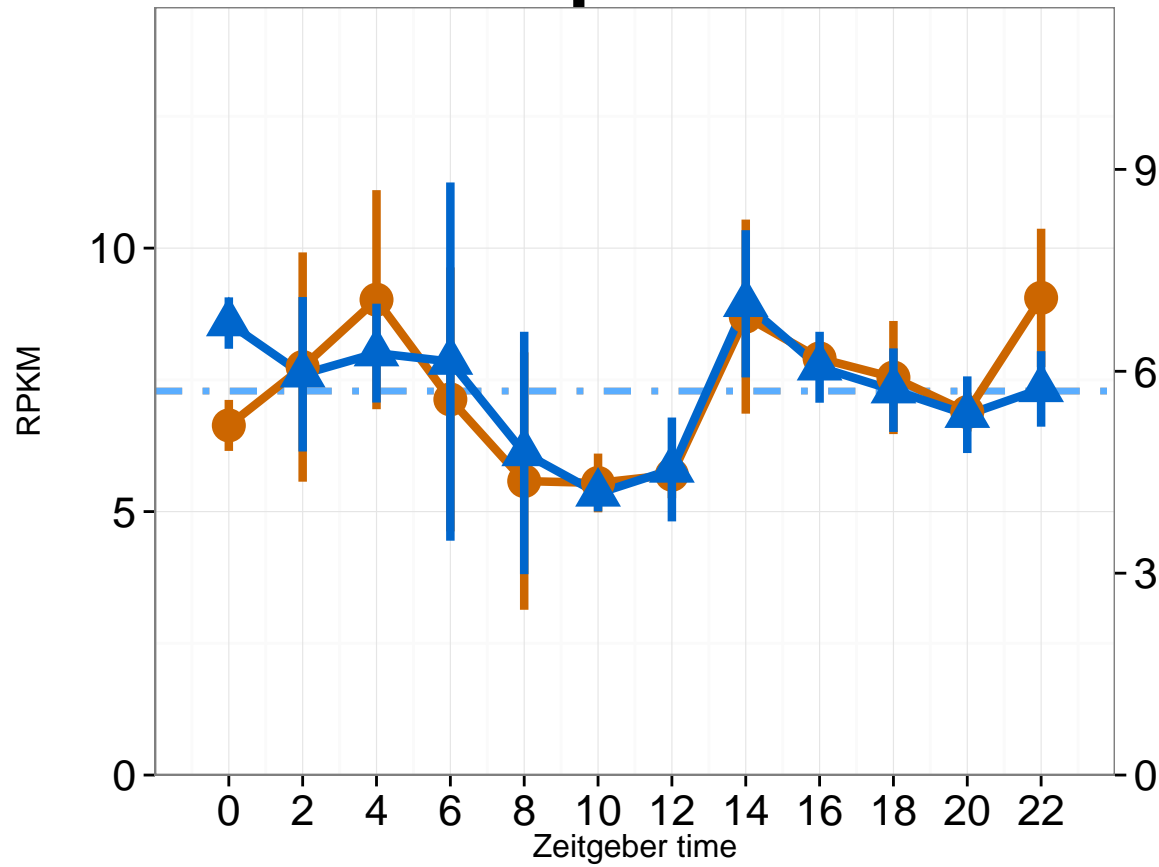

## Epha2

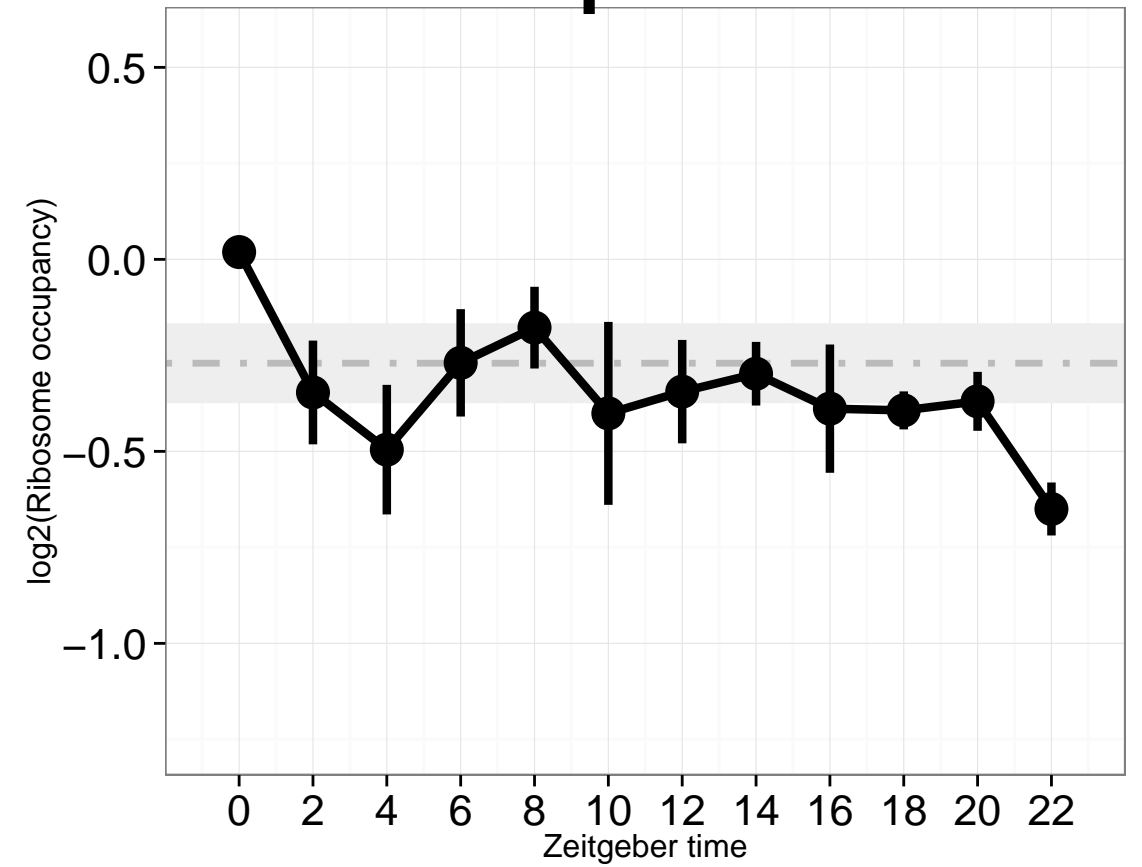

Supplement: SuppDataset_1.zip [file Epha2_set_A.pdf › Supplemental Dataset 1/A-mRNA_nonrhyth_translation_nonrhyth/Epha2_set_A.pdf]

## Epha3

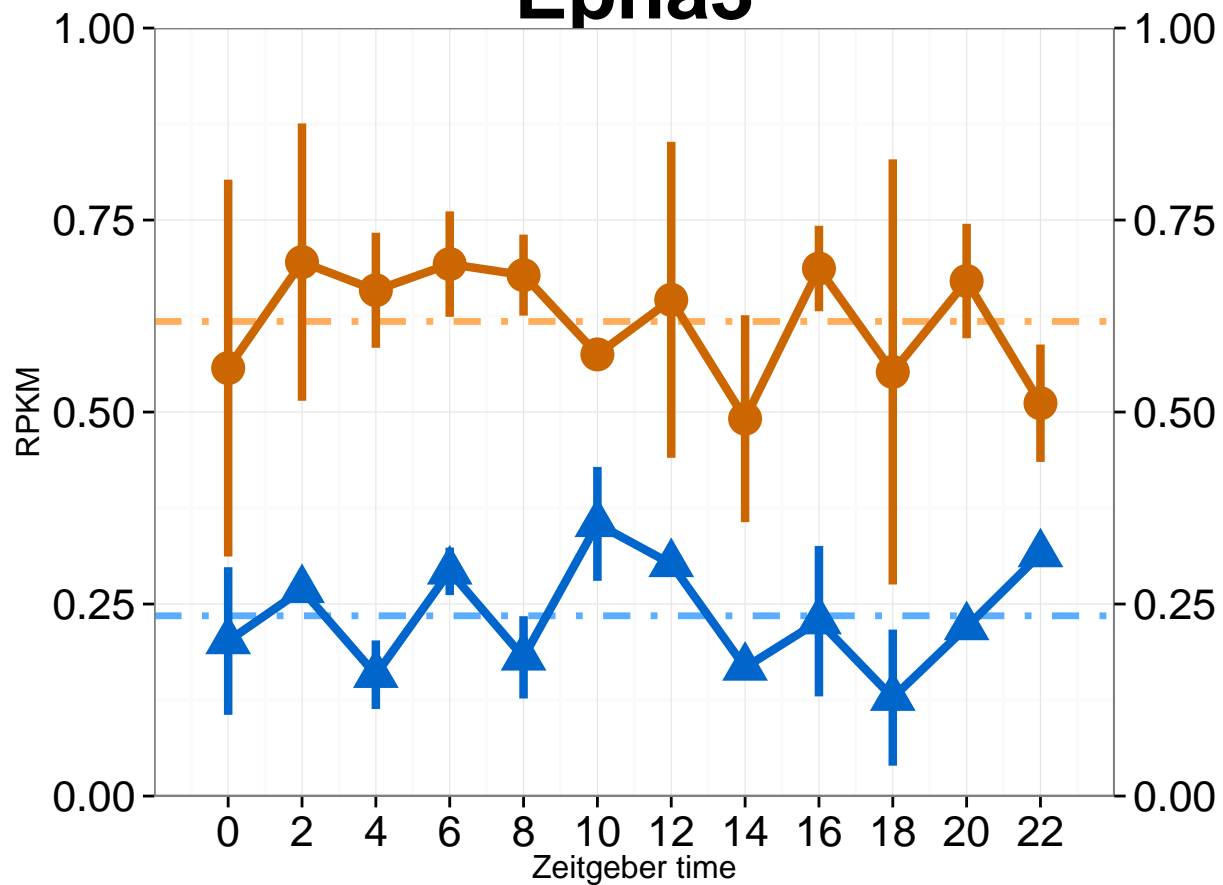

## Epha3

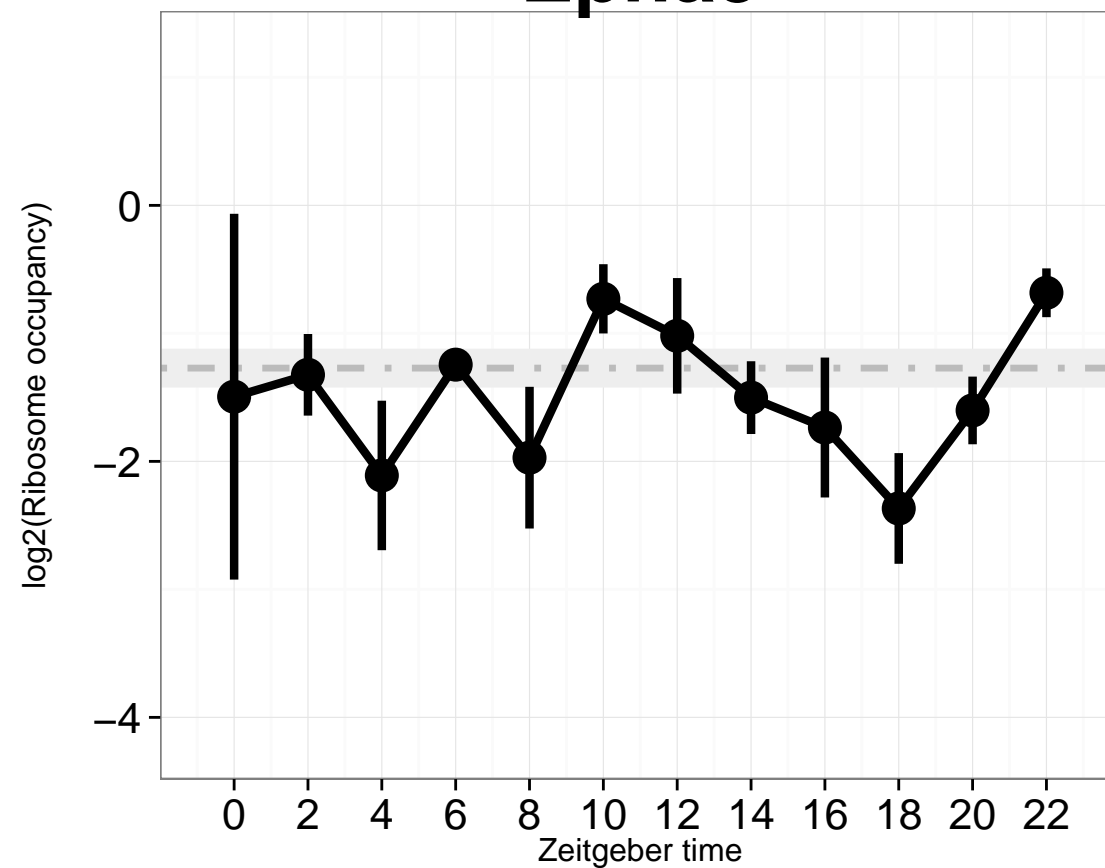

Supplement: SuppDataset_1.zip [file Epha3_set_A.pdf › Supplemental Dataset 1/A-mRNA_nonrhyth_translation_nonrhyth/Epha3_set_A.pdf]

**Epha4 TR**

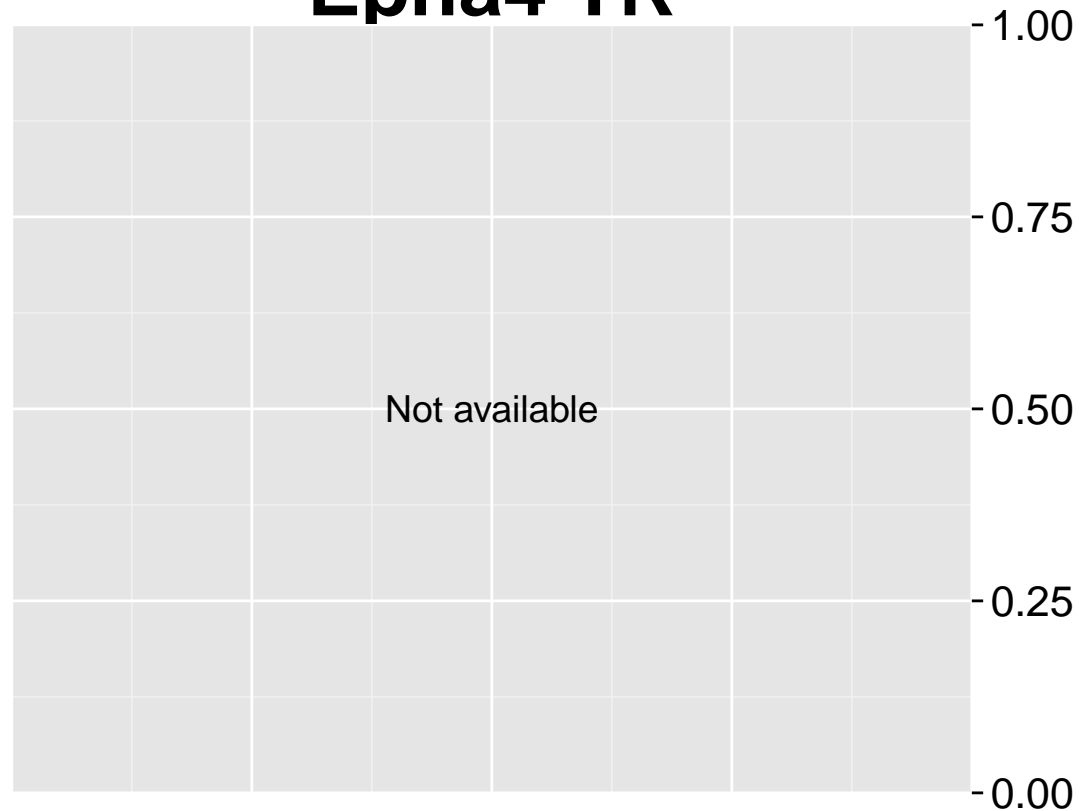

**Epha4 log2(Ribosome occupancy**

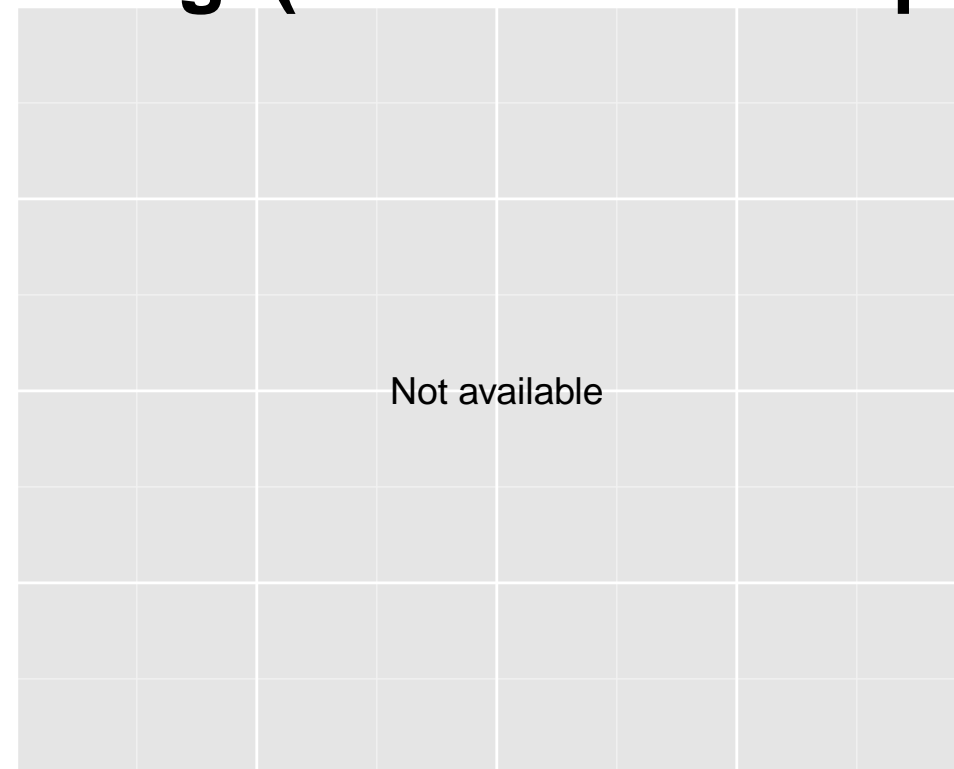

Supplement: SuppDataset_1.zip [file Epha4_set_A.pdf › Supplemental Dataset 1/A-mRNA_nonrhyth_translation_nonrhyth/Epha4_set_A.pdf]

## Epha7

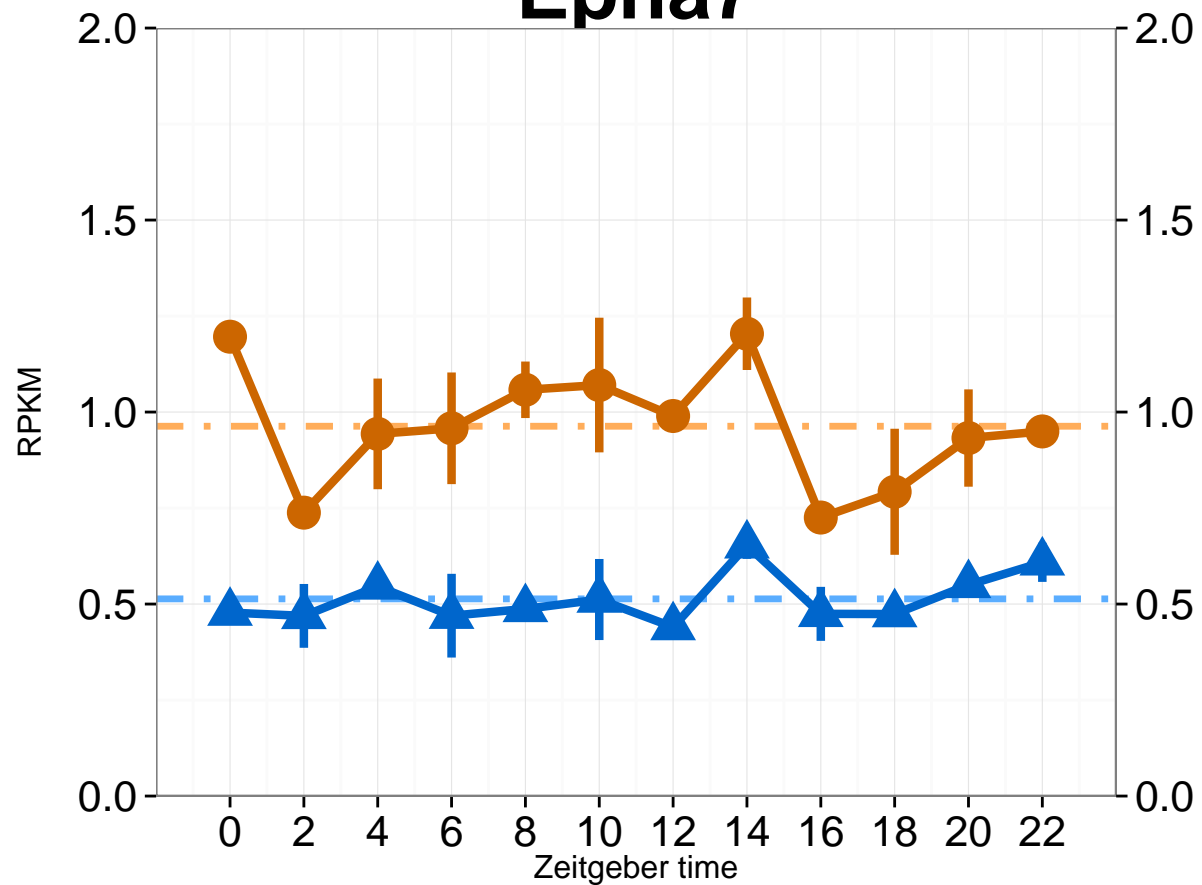

## Epha7

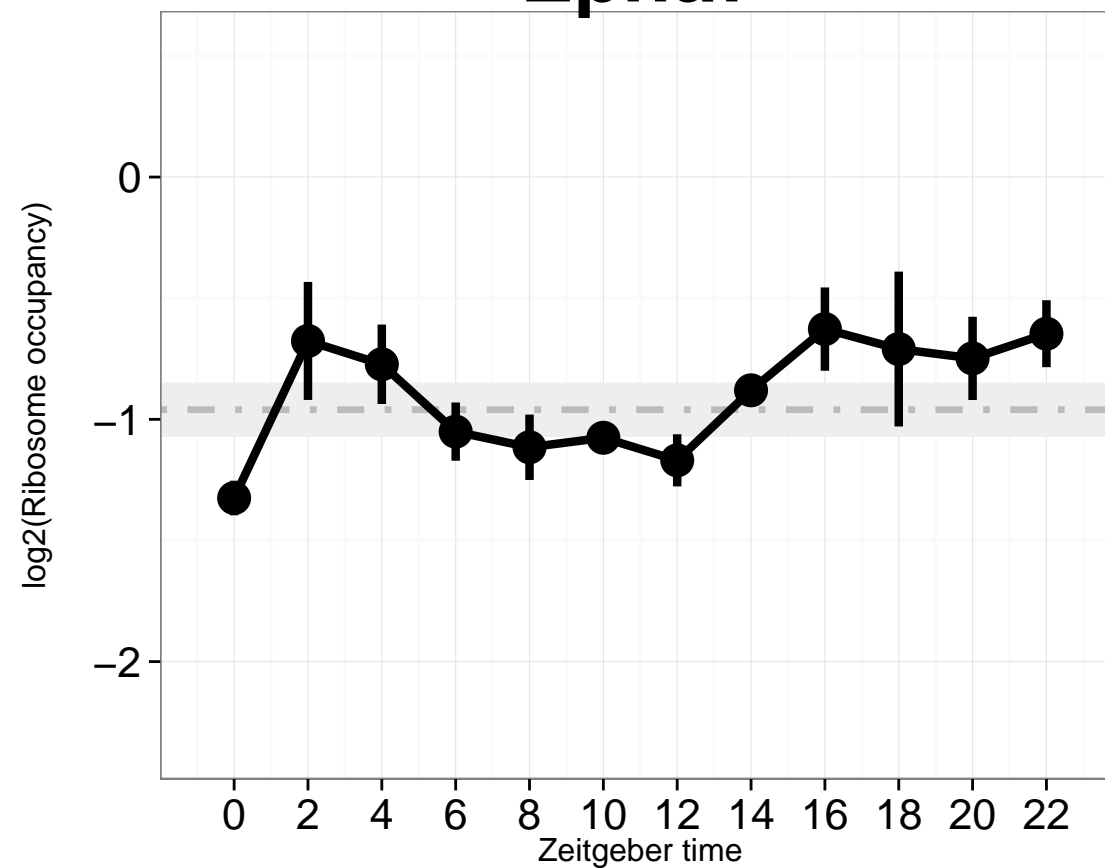

Supplement: SuppDataset_1.zip [file Epha7_set_A.pdf › Supplemental Dataset 1/A-mRNA_nonrhyth_translation_nonrhyth/Epha7_set_A.pdf]

## Ephb4

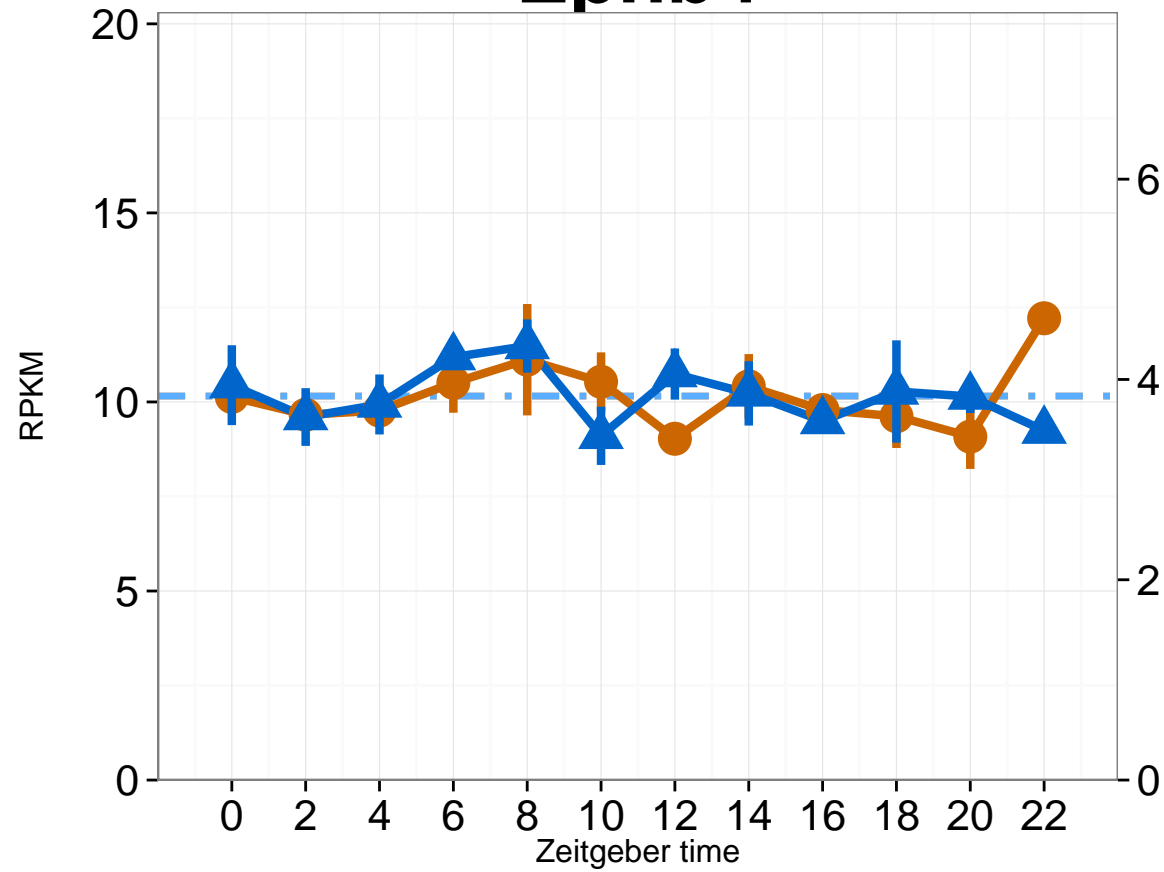

## Ephb4

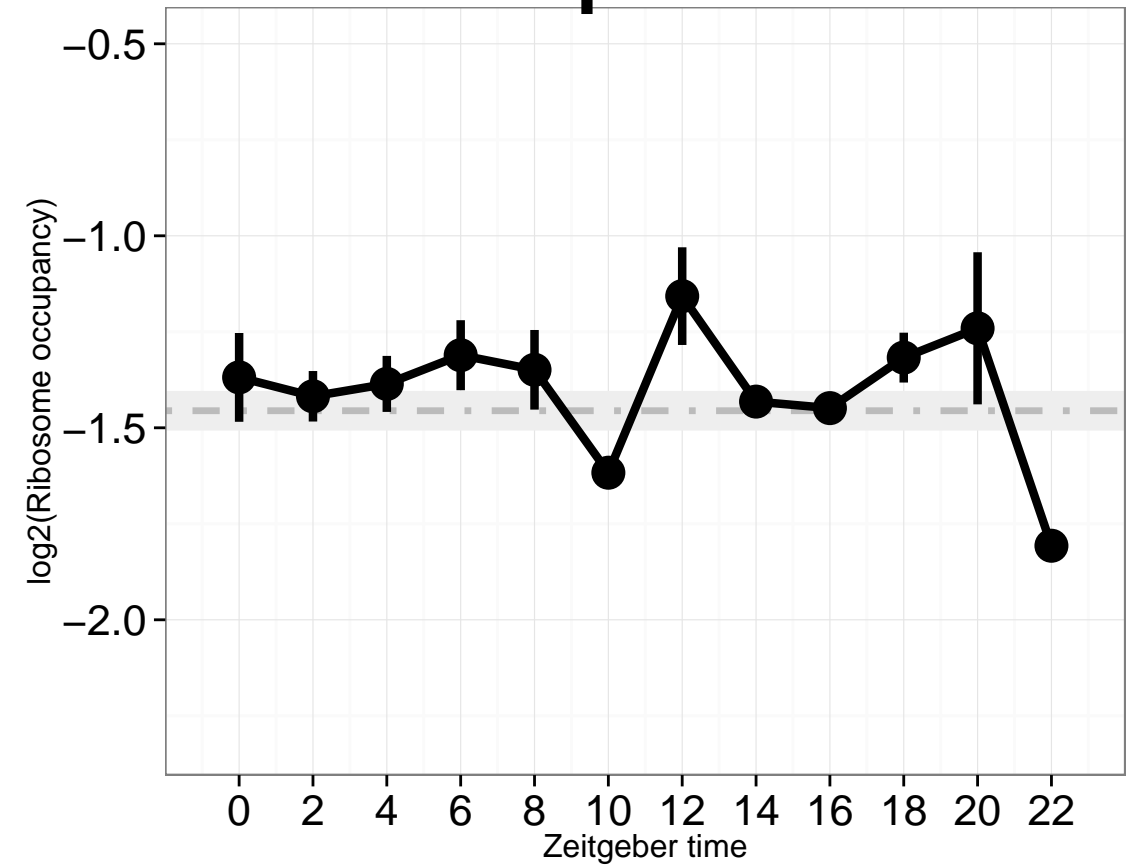

Supplement: SuppDataset_1.zip [file Ephb4_set_A.pdf › Supplemental Dataset 1/A-mRNA_nonrhyth_translation_nonrhyth/Ephb4_set_A.pdf]

## Ephb6

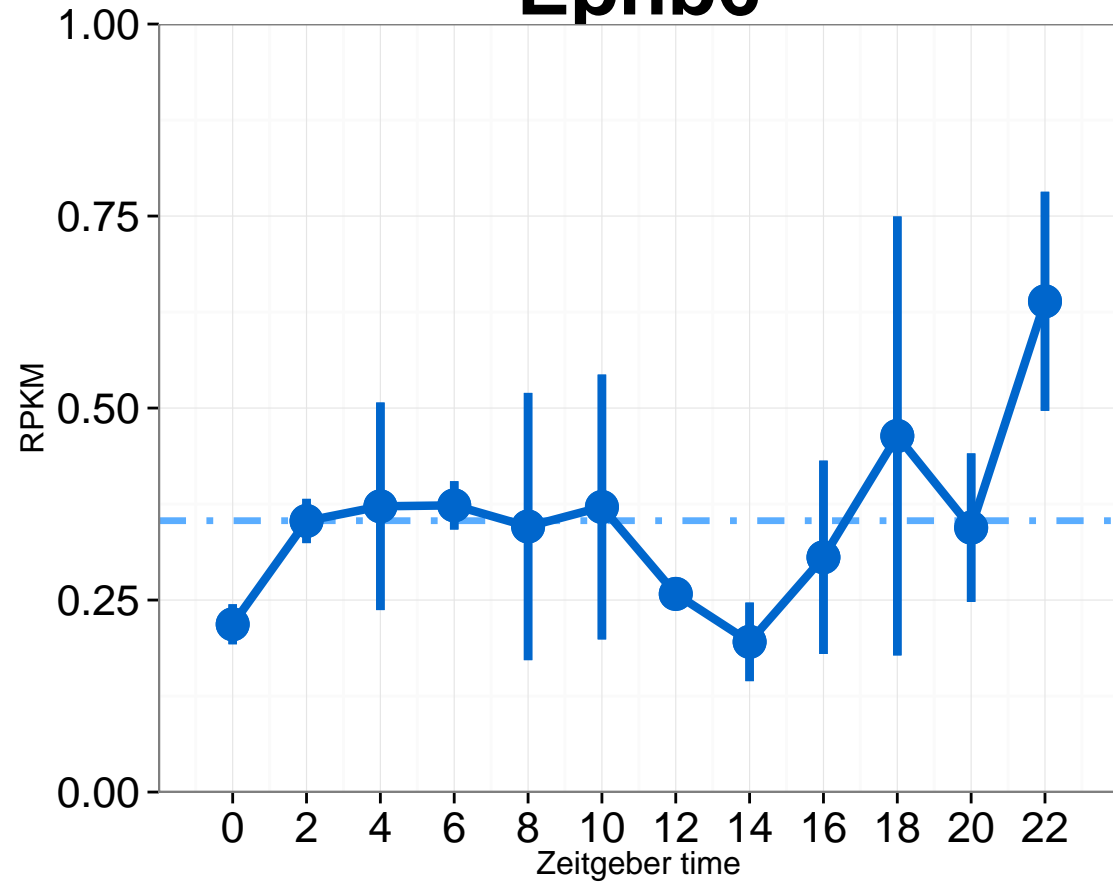

## Ephb6 log2(Ribosome occupancy

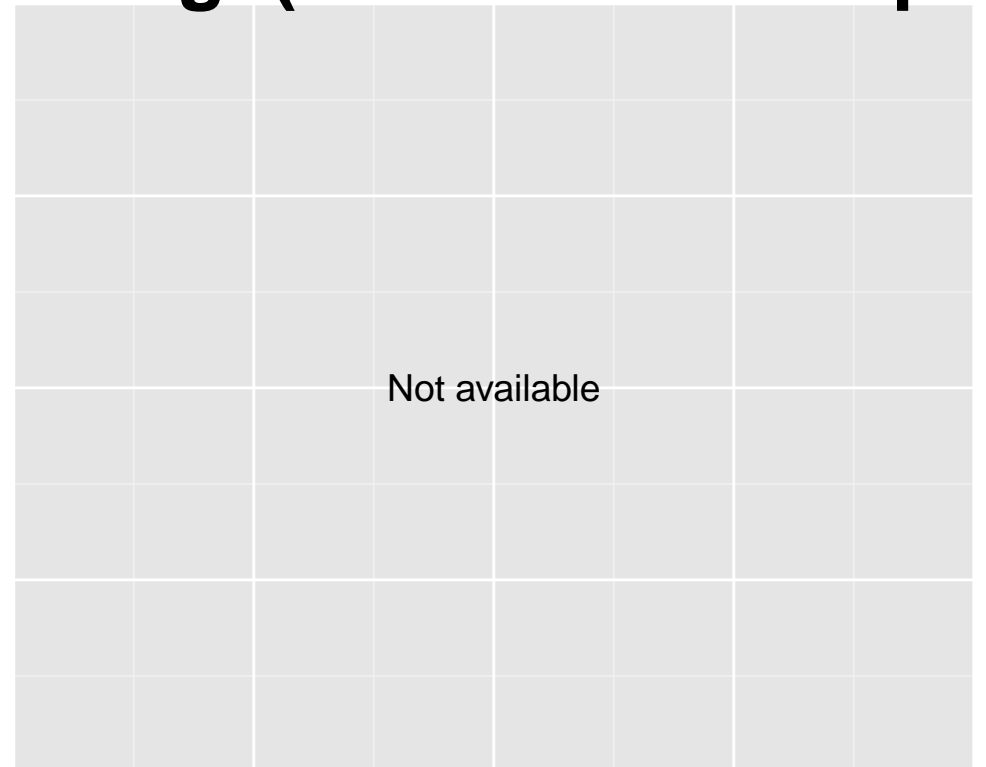

Supplement: SuppDataset_1.zip [file Ephb6_set_A.pdf › Supplemental Dataset 1/A-mRNA_nonrhyth_translation_nonrhyth/Ephb6_set_A.pdf]

## Ephx1

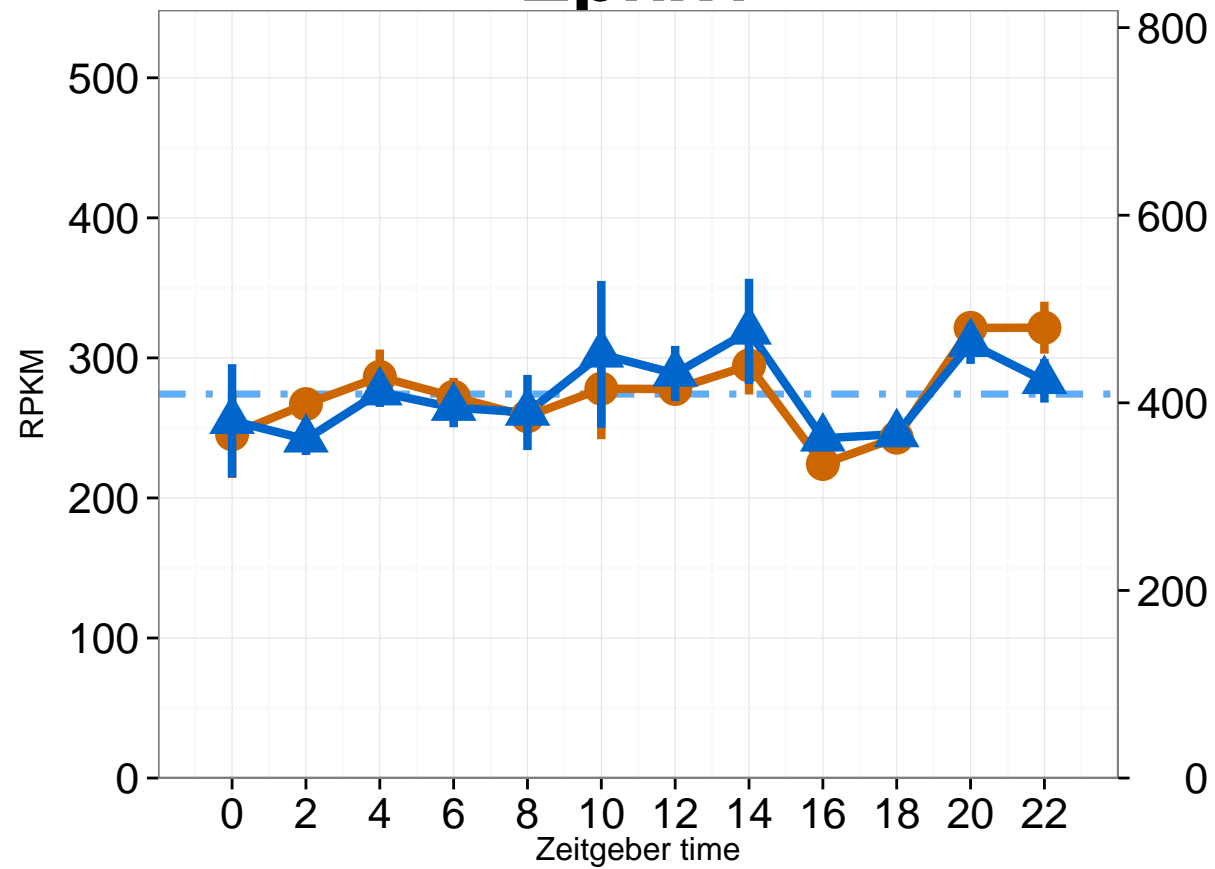

## Ephx1

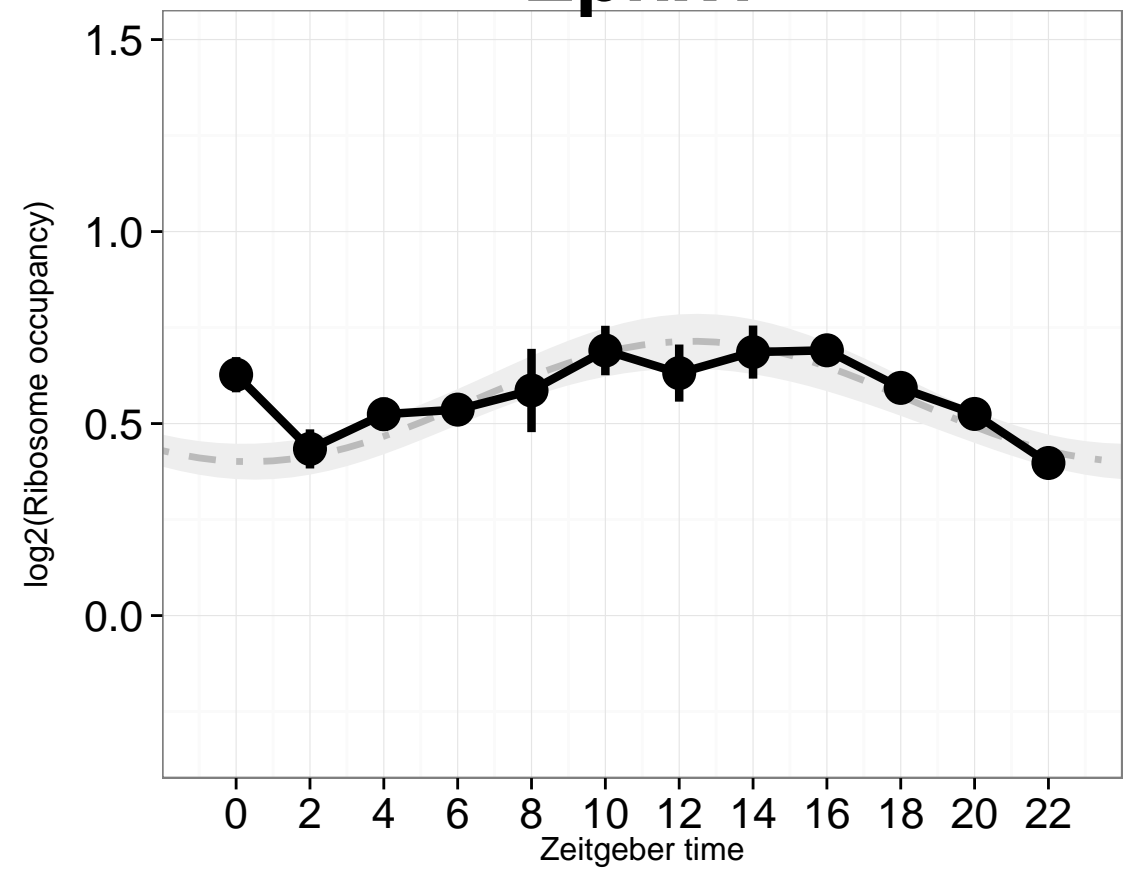

Supplement: SuppDataset_1.zip [file Ephx1_set_A.pdf › Supplemental Dataset 1/A-mRNA_nonrhyth_translation_nonrhyth/Ephx1_set_A.pdf]

## Ephx2

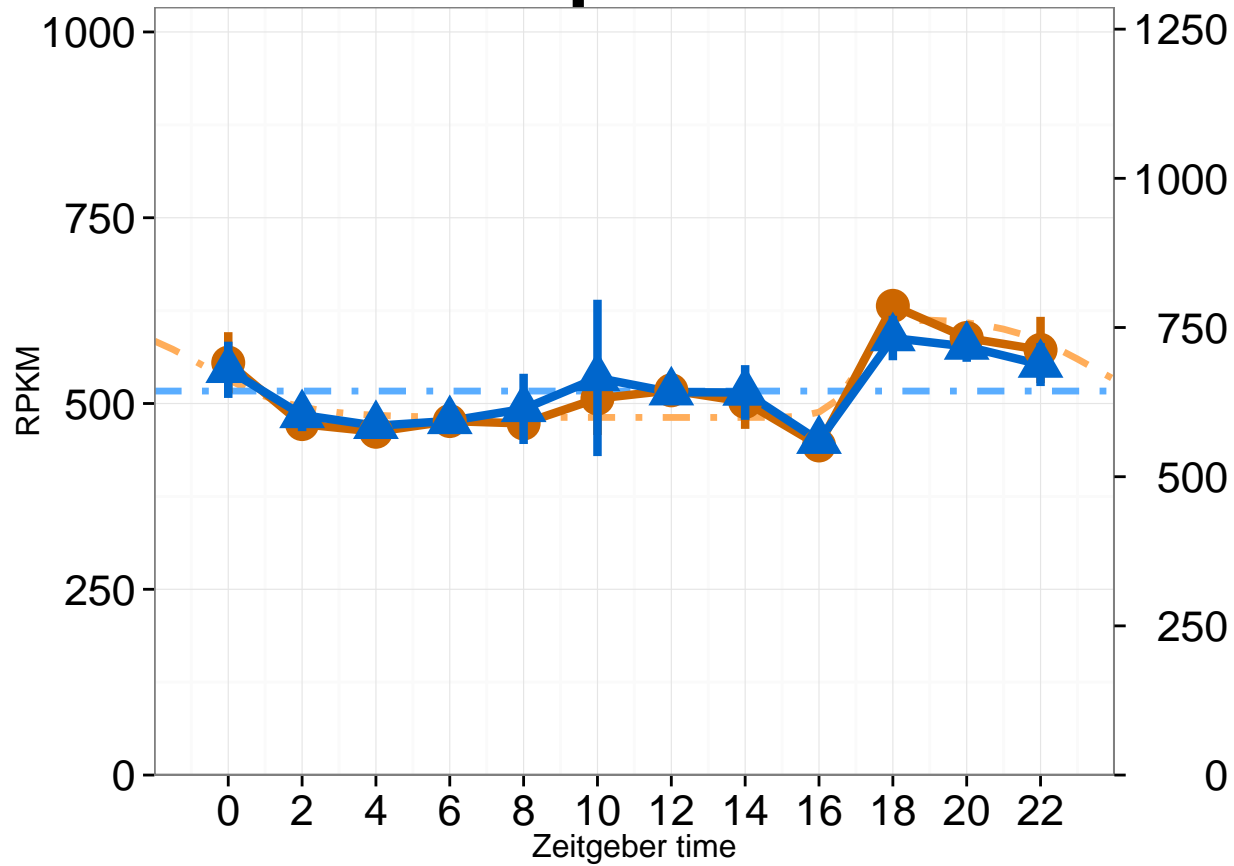

## Ephx2

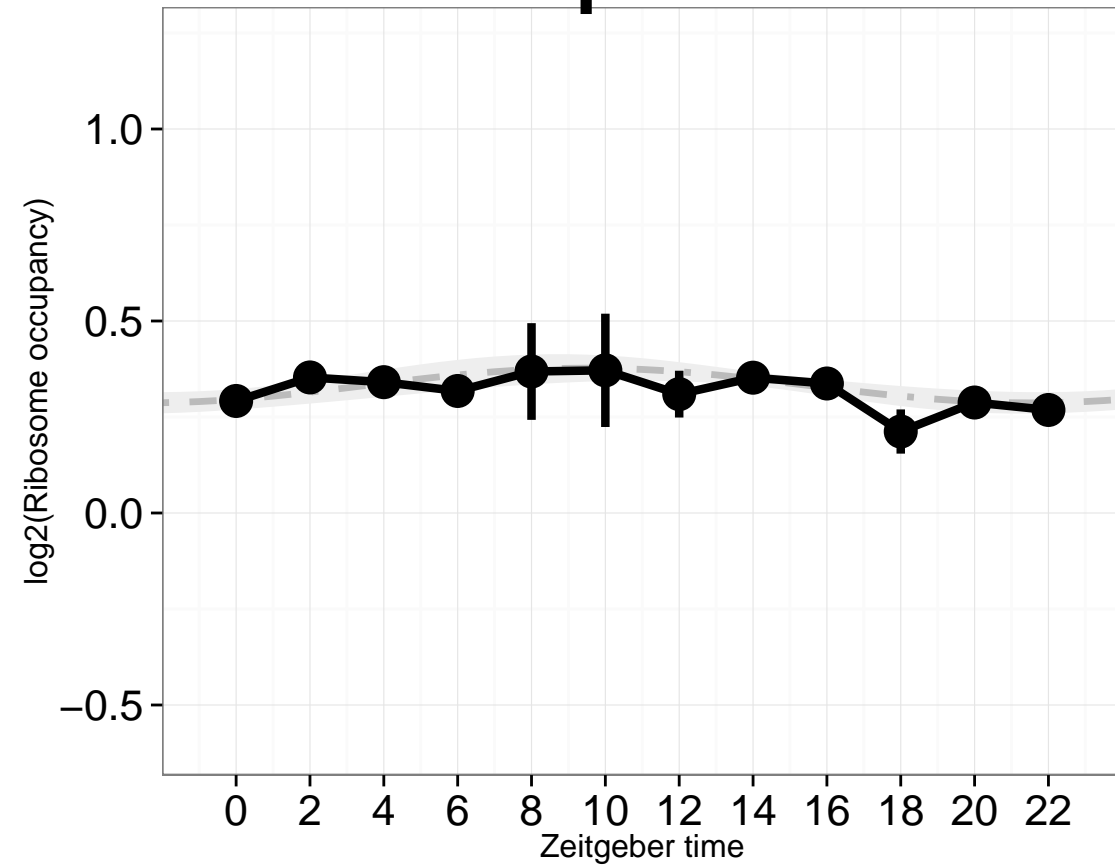

Supplement: SuppDataset_1.zip [file Ephx2_set_A.pdf › Supplemental Dataset 1/A-mRNA_nonrhyth_translation_nonrhyth/Ephx2_set_A.pdf]

# Epm2a

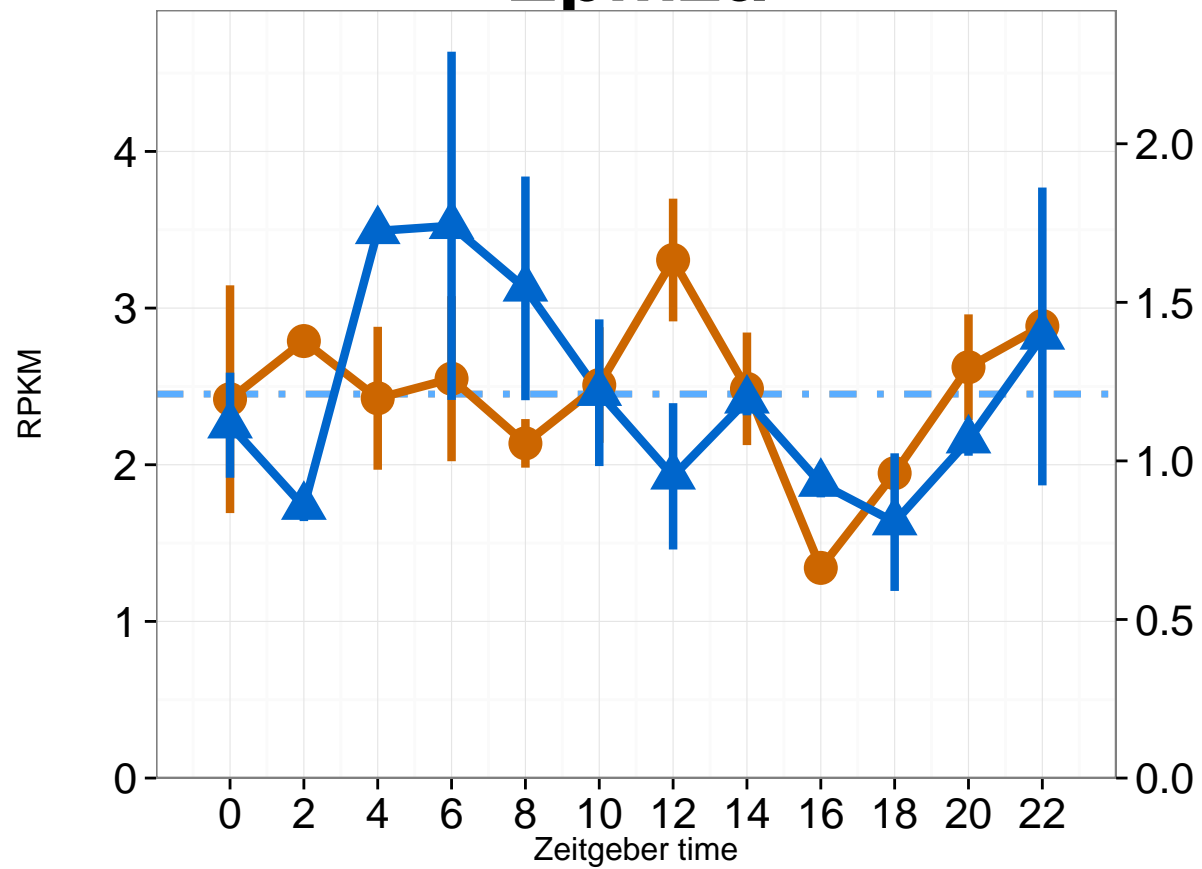

# Epm2a

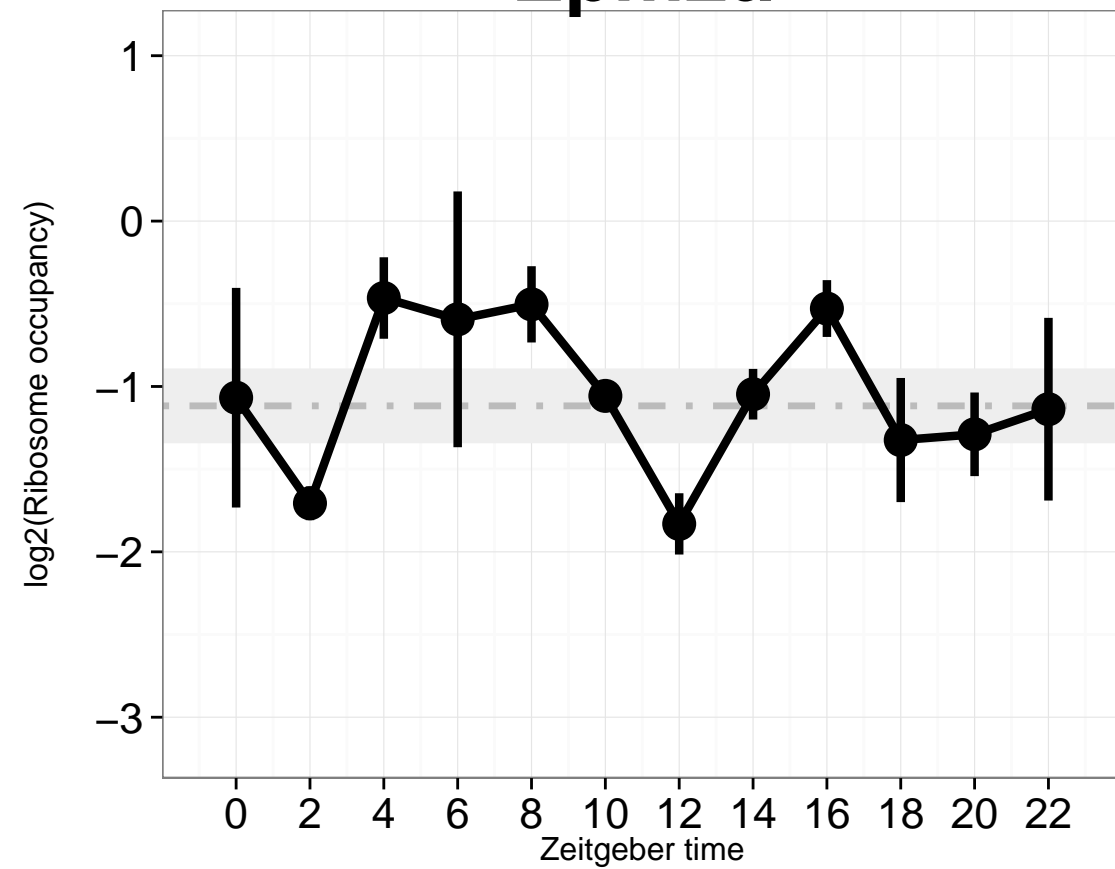

Supplement: SuppDataset_1.zip [file Epm2a_set_A.pdf › Supplemental Dataset 1/A-mRNA_nonrhyth_translation_nonrhyth/Epm2a_set_A.pdf]

# Epn1

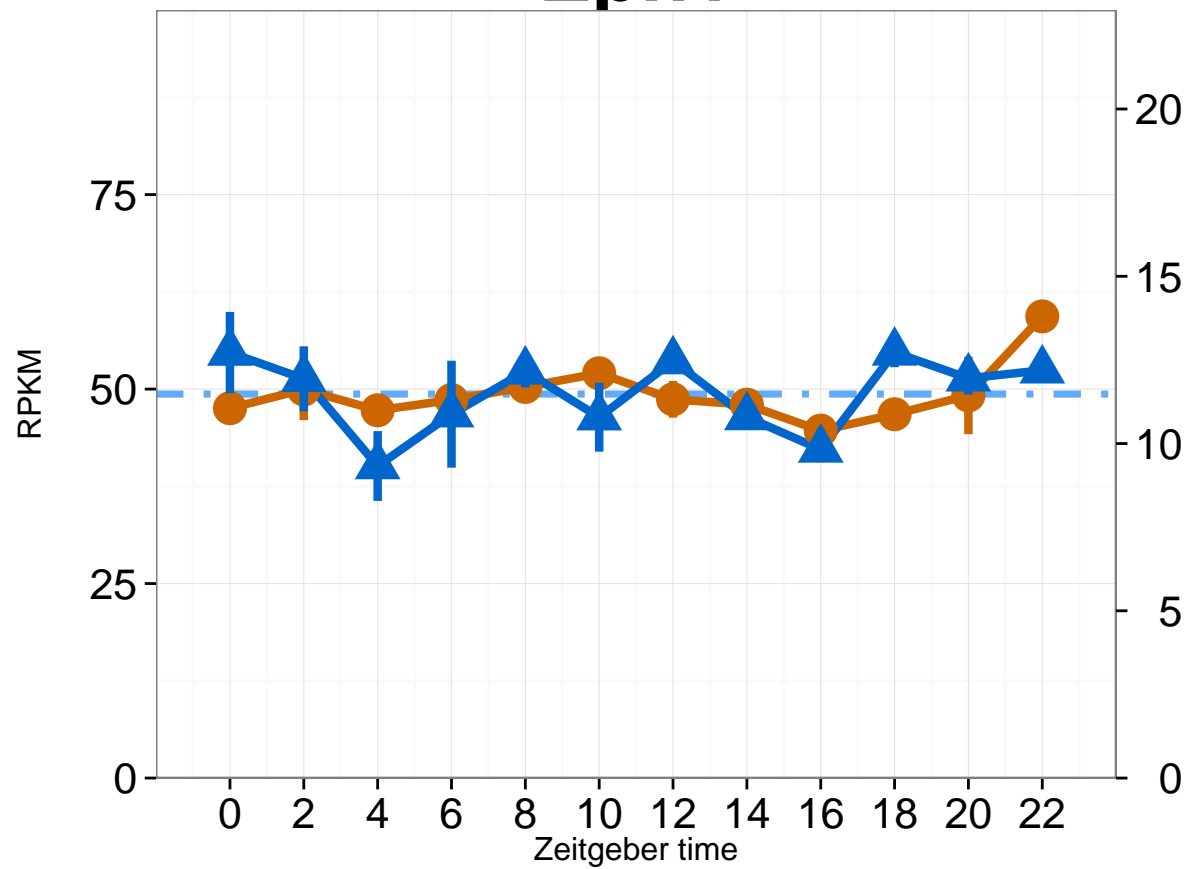

# Epn1

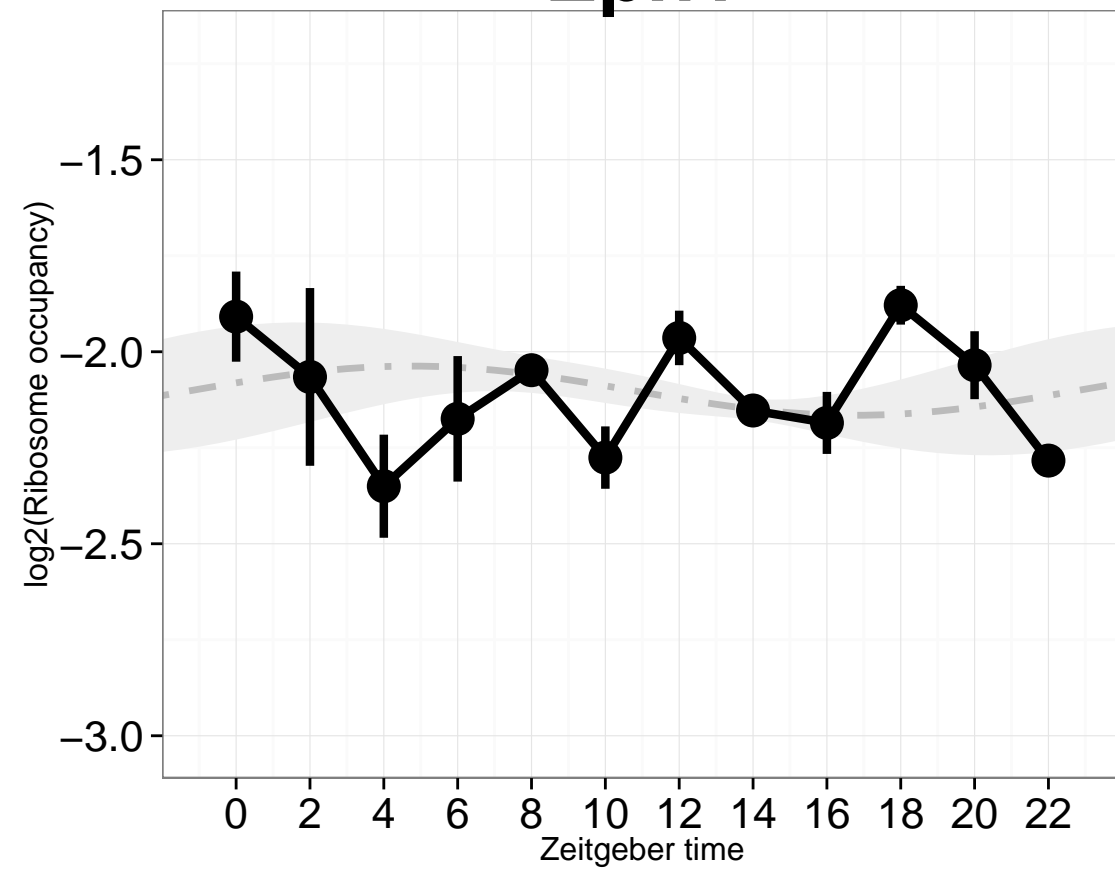

Supplement: SuppDataset_1.zip [file Epn1_set_A.pdf › Supplemental Dataset 1/A-mRNA_nonrhyth_translation_nonrhyth/Epn1_set_A.pdf]

## Epn2

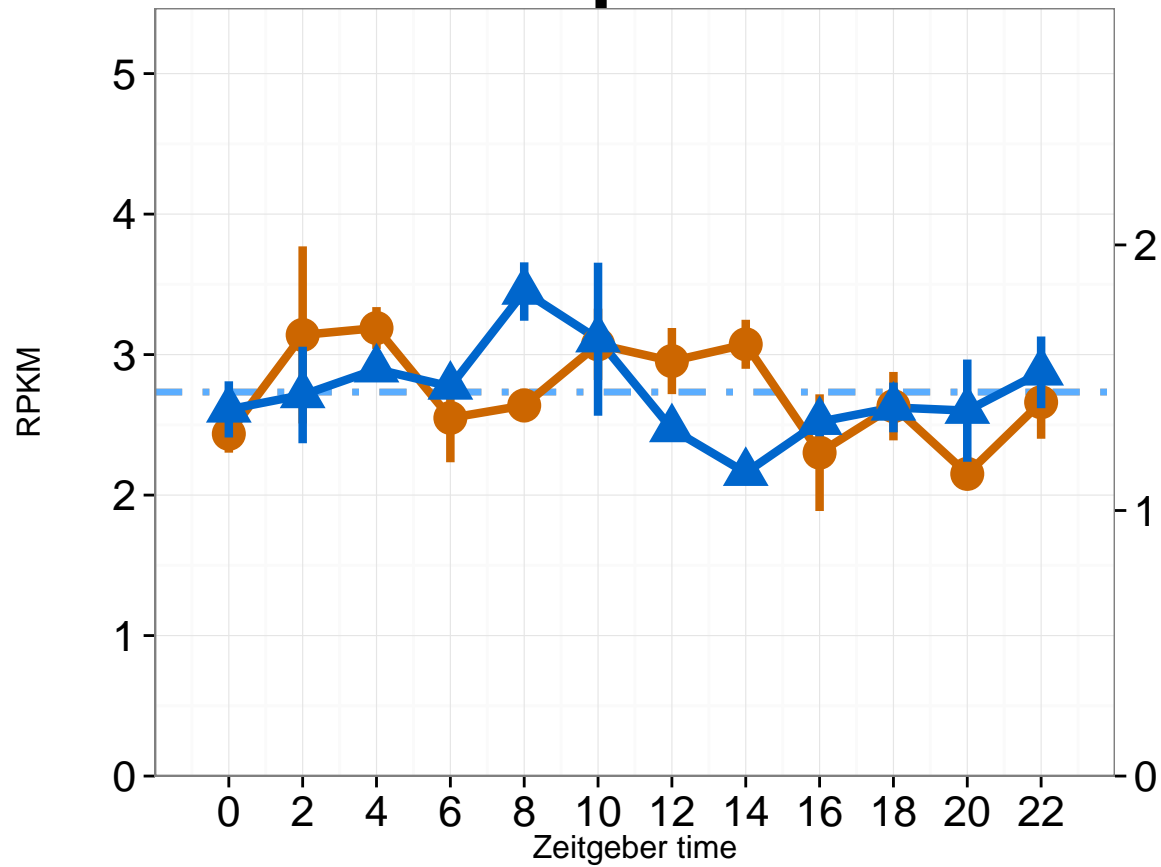

## Epn2

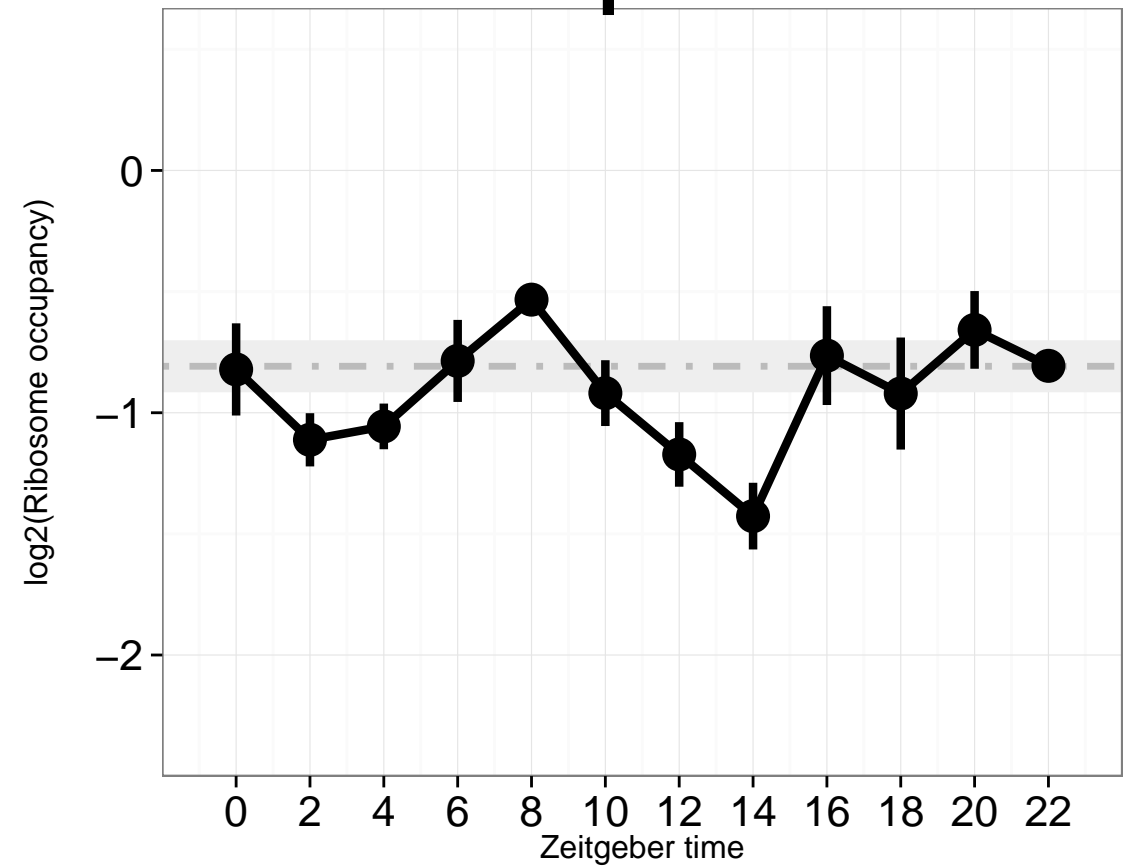

Supplement: SuppDataset_1.zip [file Epn2_set_A.pdf › Supplemental Dataset 1/A-mRNA_nonrhyth_translation_nonrhyth/Epn2_set_A.pdf]

## Epor

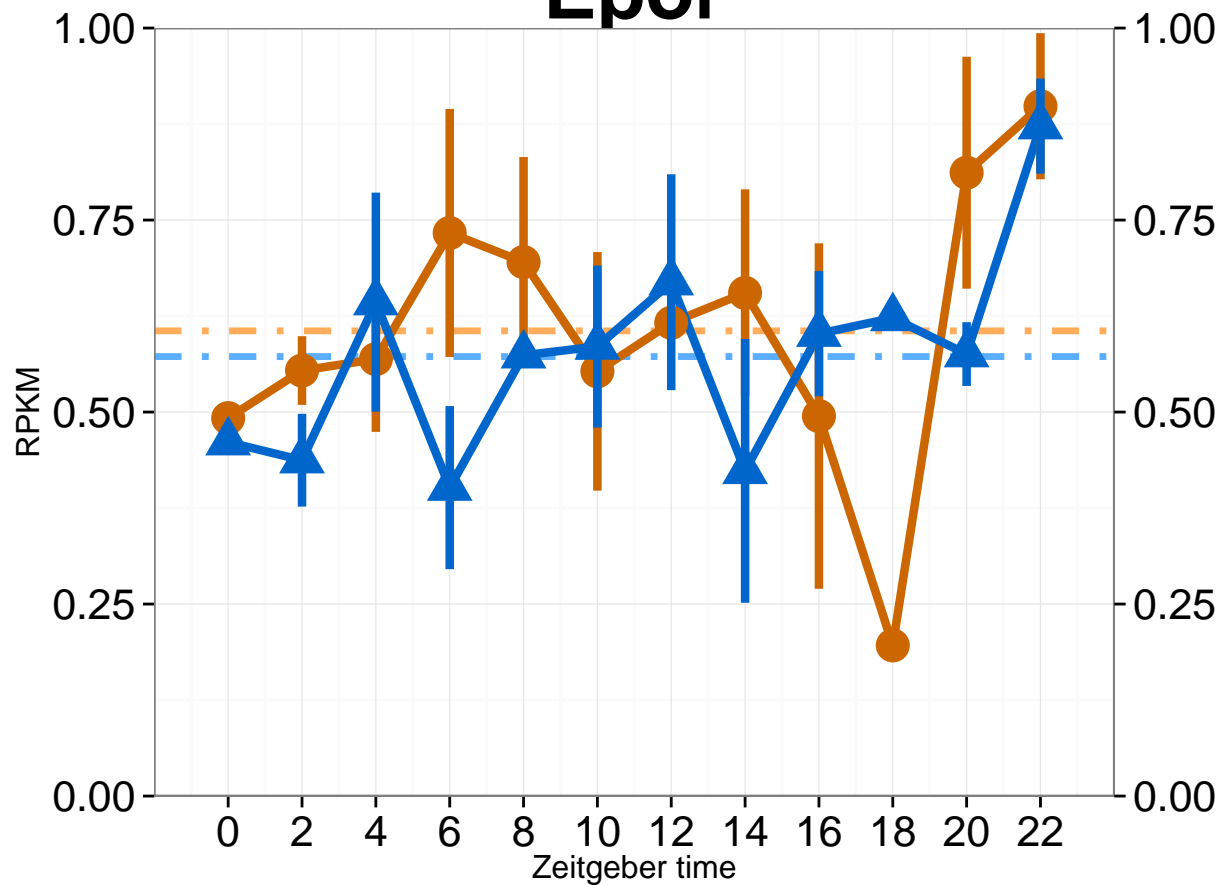

## Epor

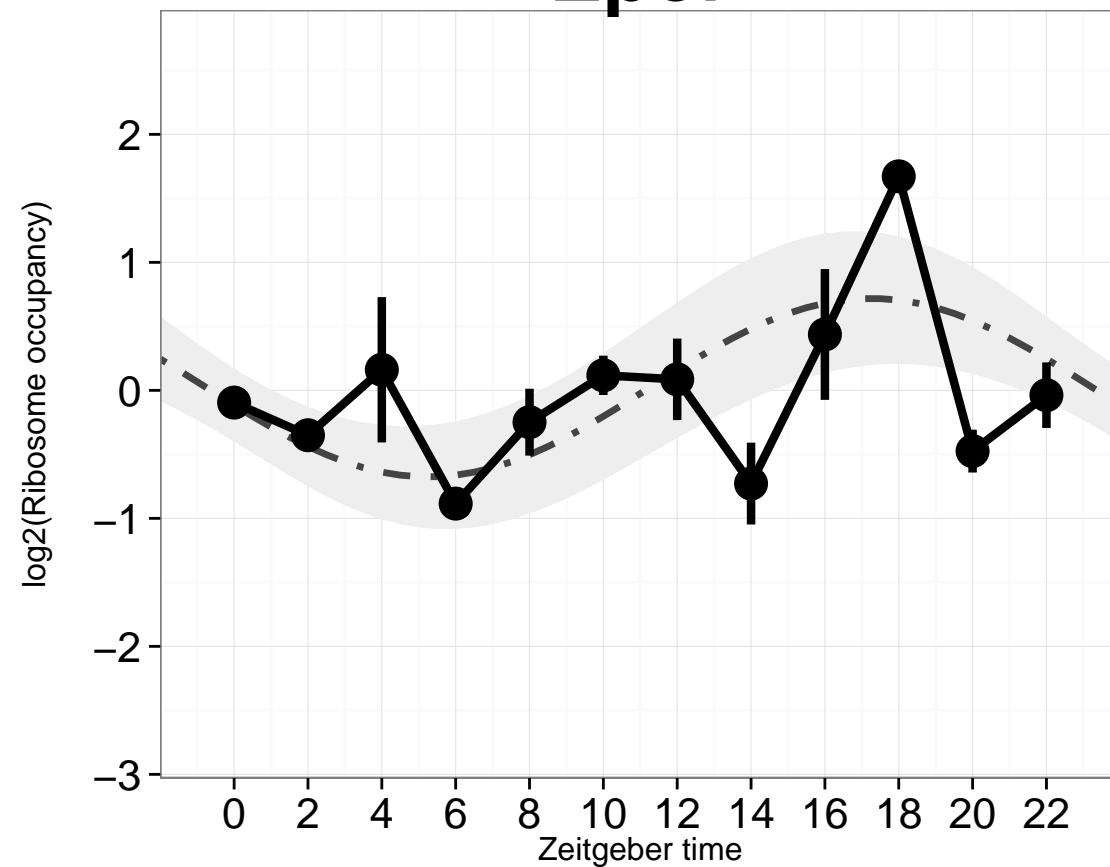

Supplement: SuppDataset_1.zip [file Epor_set_A.pdf › Supplemental Dataset 1/A-mRNA_nonrhyth_translation_nonrhyth/Epor_set_A.pdf]

## Eprs

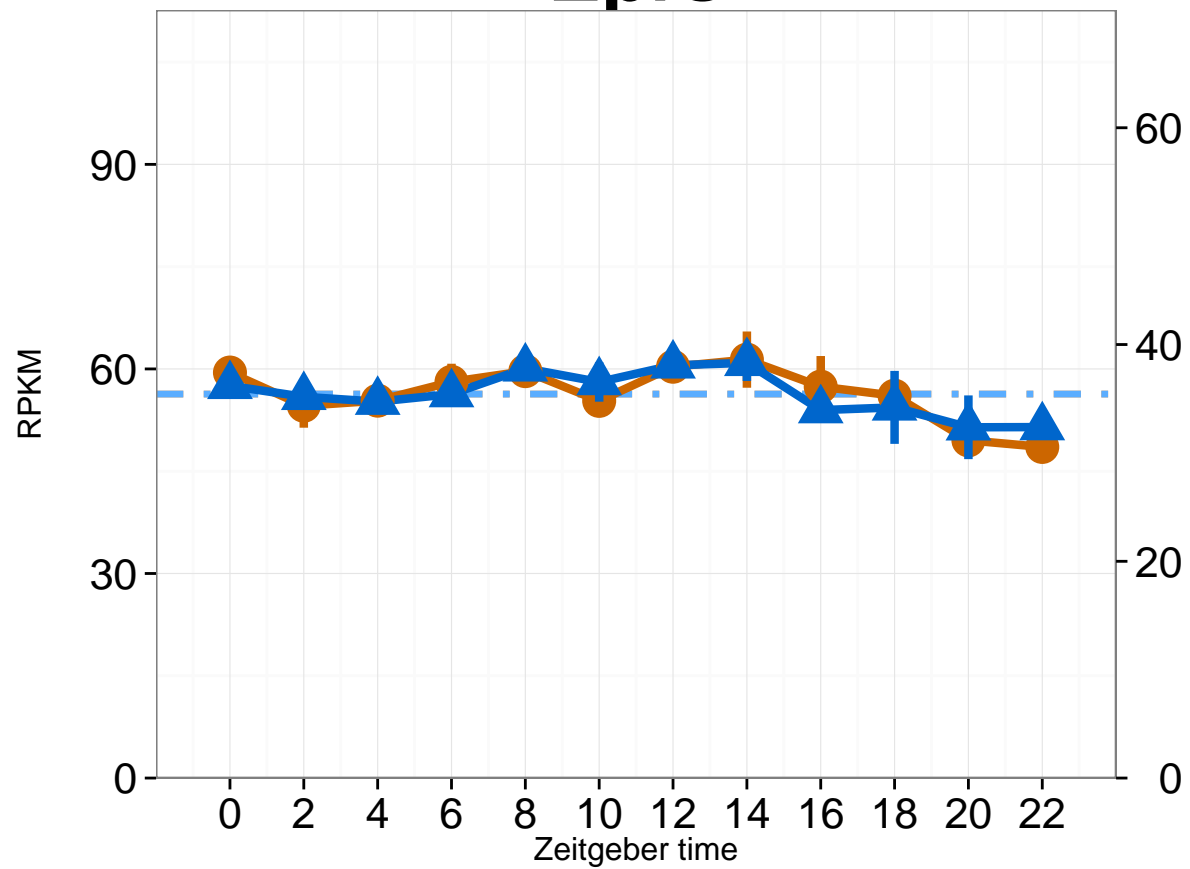

## Eprs

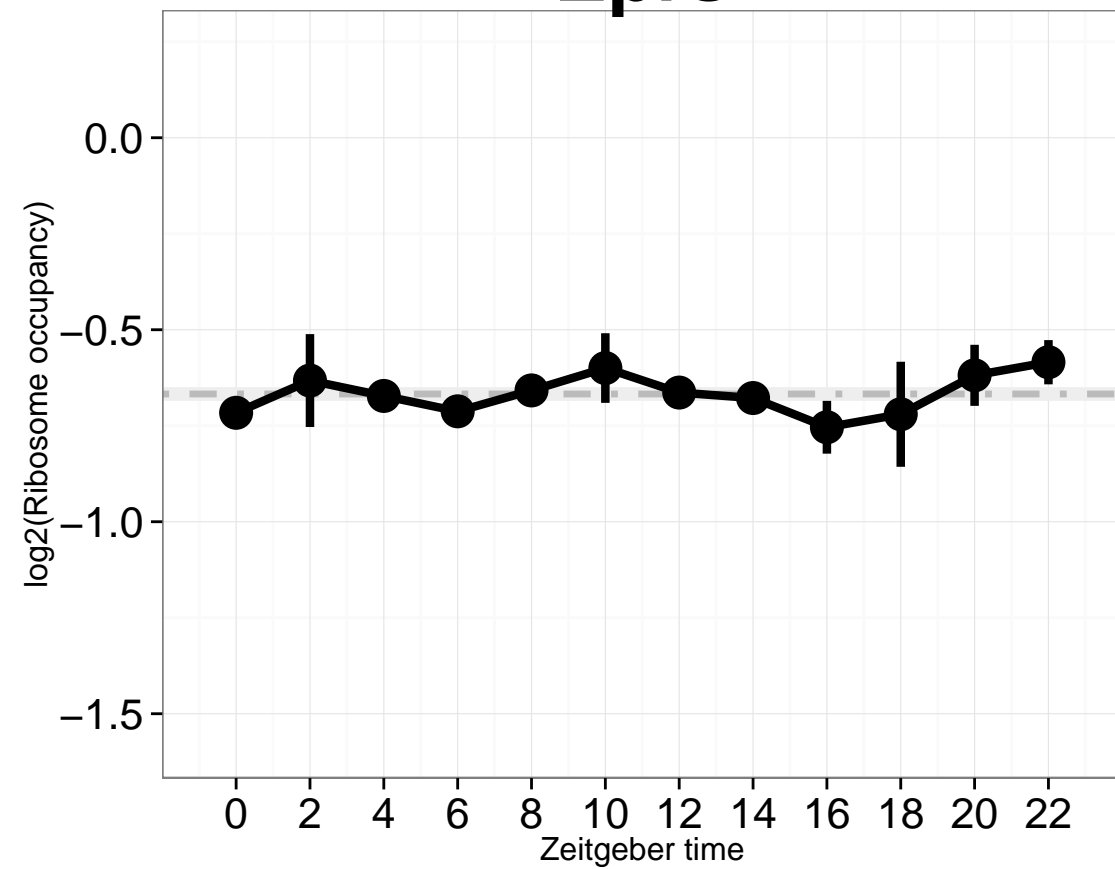

Supplement: SuppDataset_1.zip [file Eprs_set_A.pdf › Supplemental Dataset 1/A-mRNA_nonrhyth_translation_nonrhyth/Eprs_set_A.pdf]

## Eps15

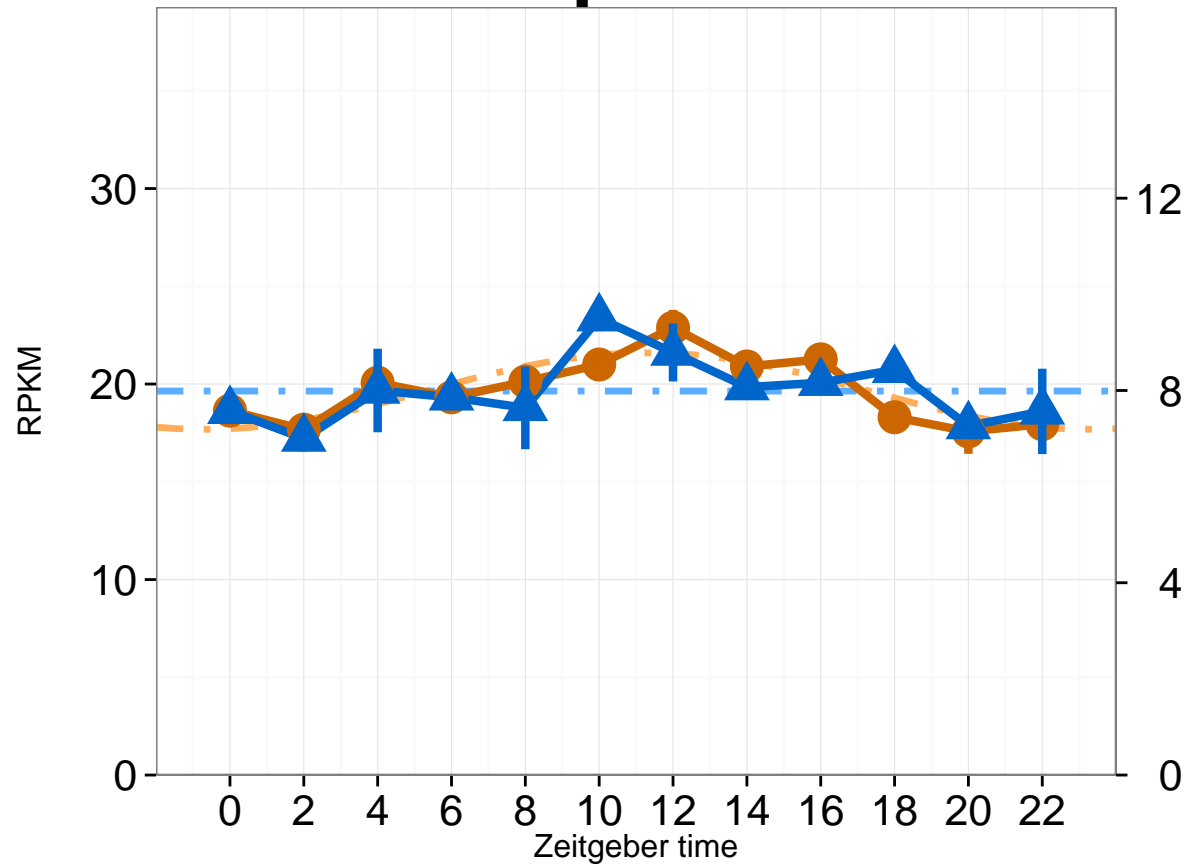

## Eps15

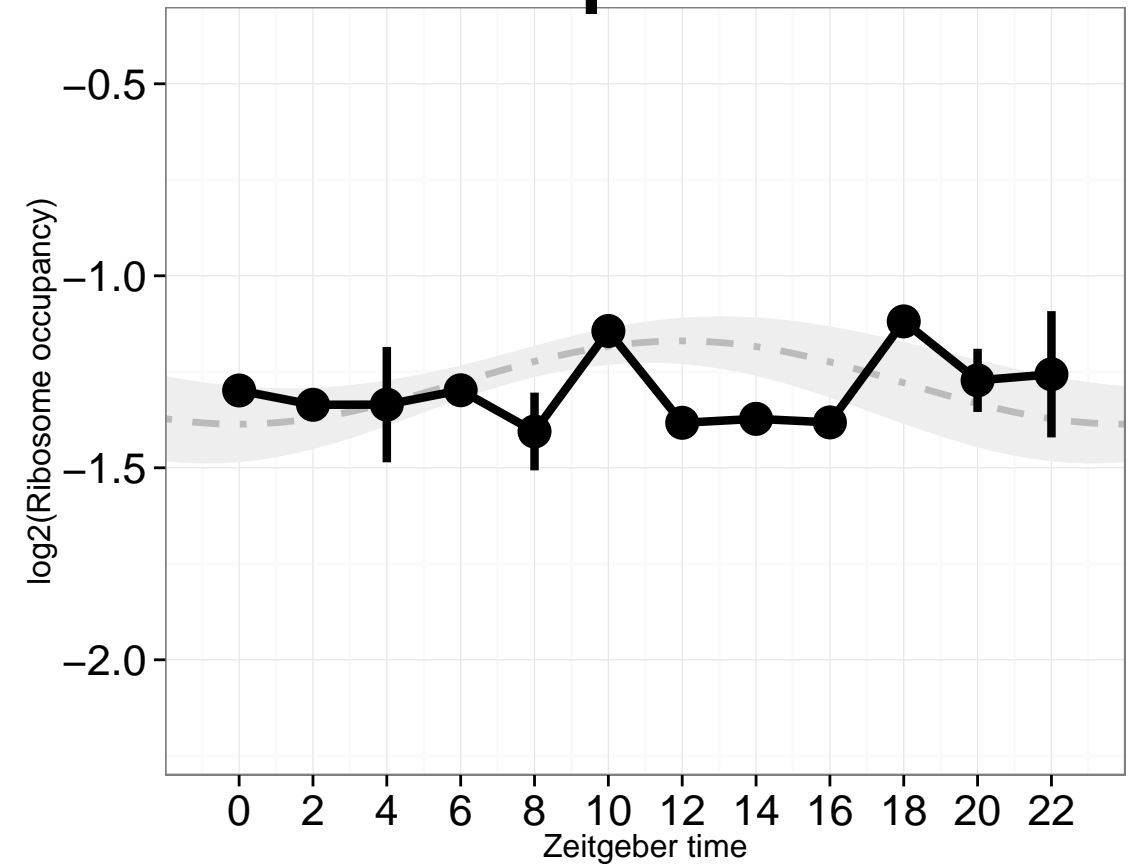

Supplement: SuppDataset_1.zip [file Eps15_set_A.pdf › Supplemental Dataset 1/A-mRNA_nonrhyth_translation_nonrhyth/Eps15_set_A.pdf]

## Eps15l1

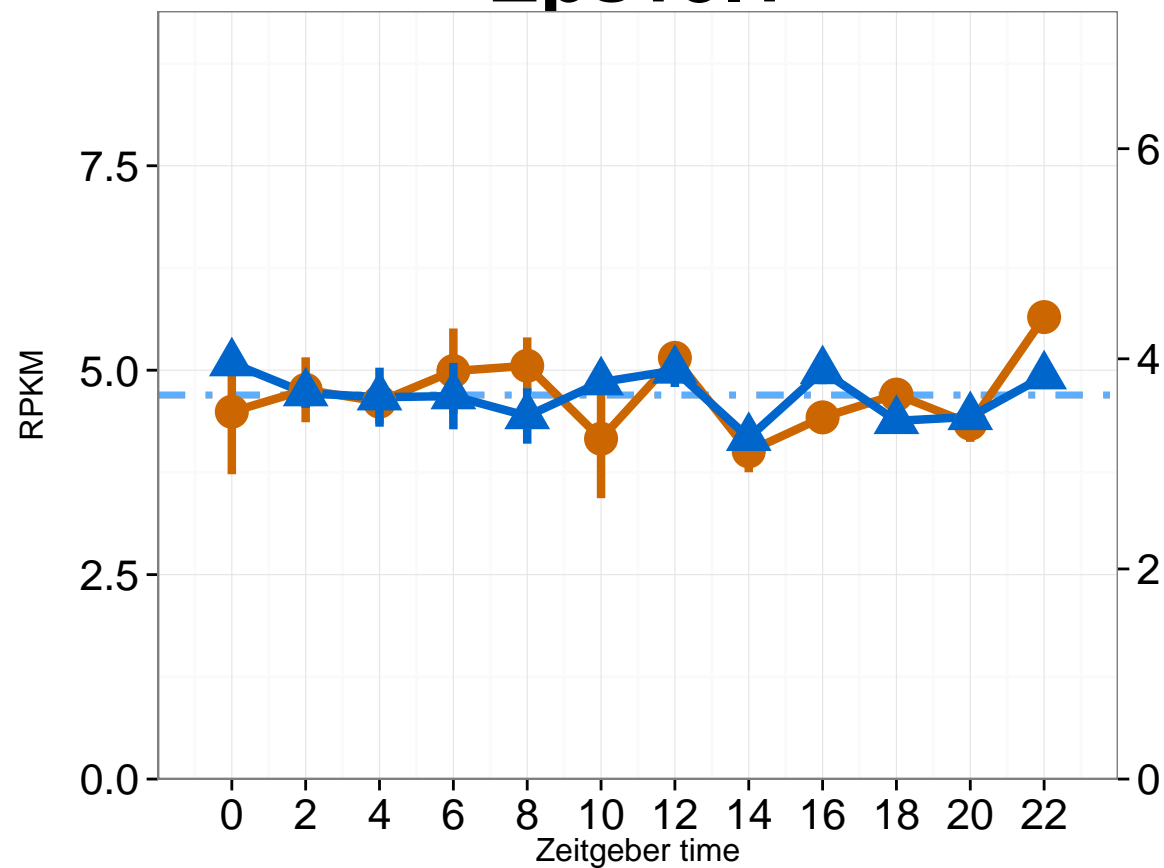

## Eps15l1

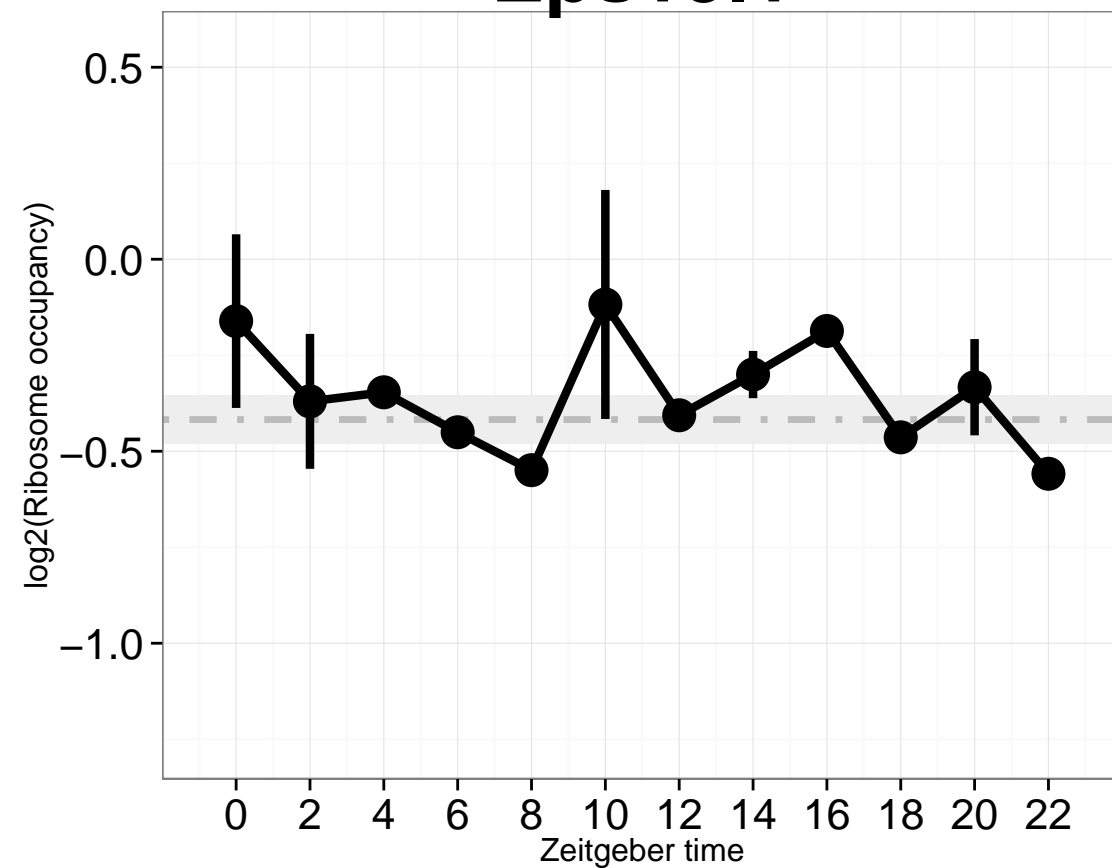

Supplement: SuppDataset_1.zip [file Eps15l1_set_A.pdf › Supplemental Dataset 1/A-mRNA_nonrhyth_translation_nonrhyth/Eps15l1_set_A.pdf]

## Eps8

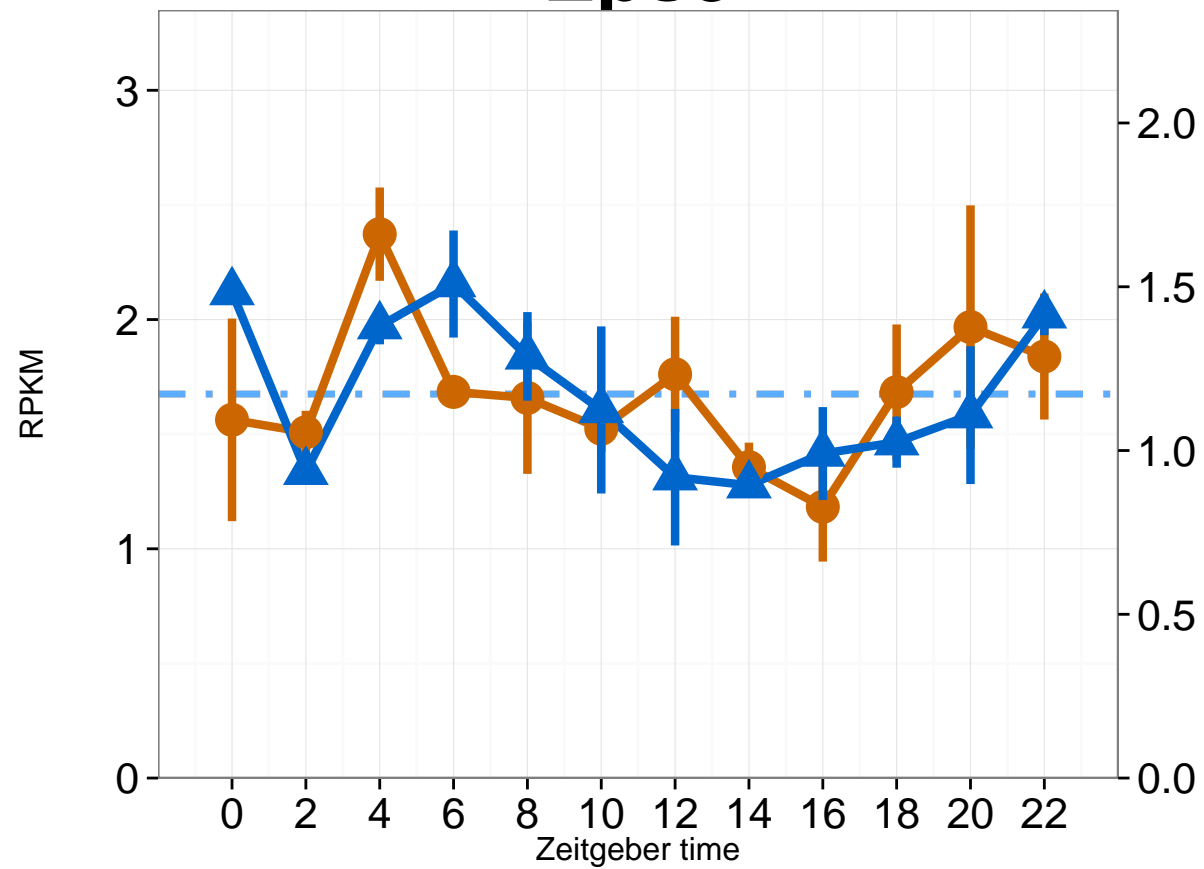

## Eps8

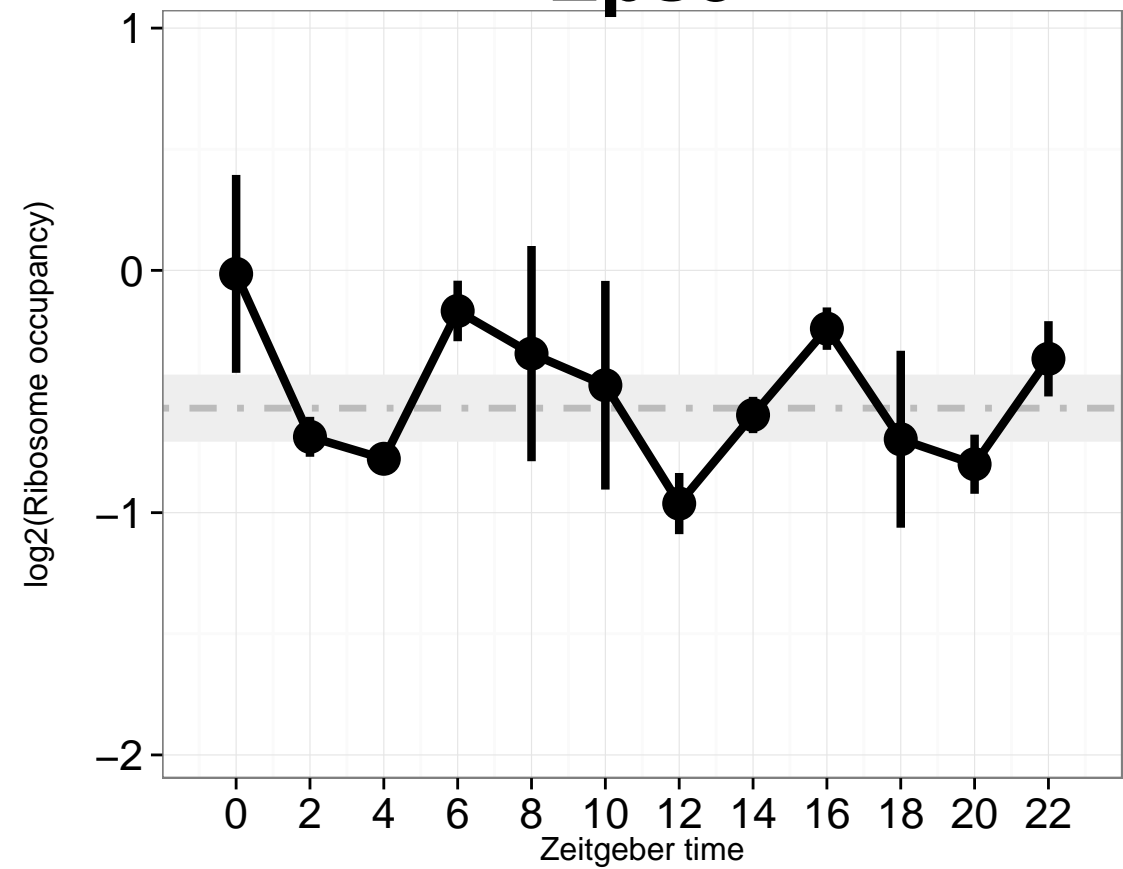

Supplement: SuppDataset_1.zip [file Eps8_set_A.pdf › Supplemental Dataset 1/A-mRNA_nonrhyth_translation_nonrhyth/Eps8_set_A.pdf]

## Eps8l1

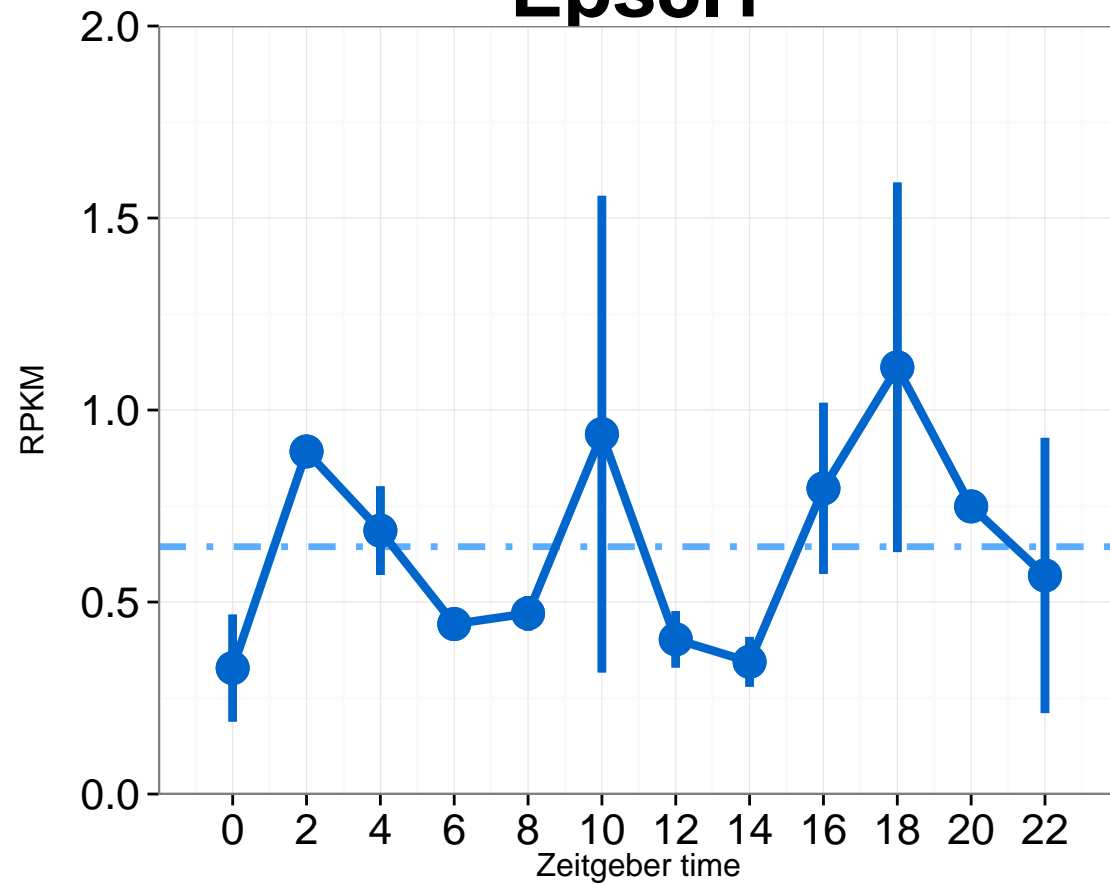

## Eps8l1 log2(Ribosome occupancy

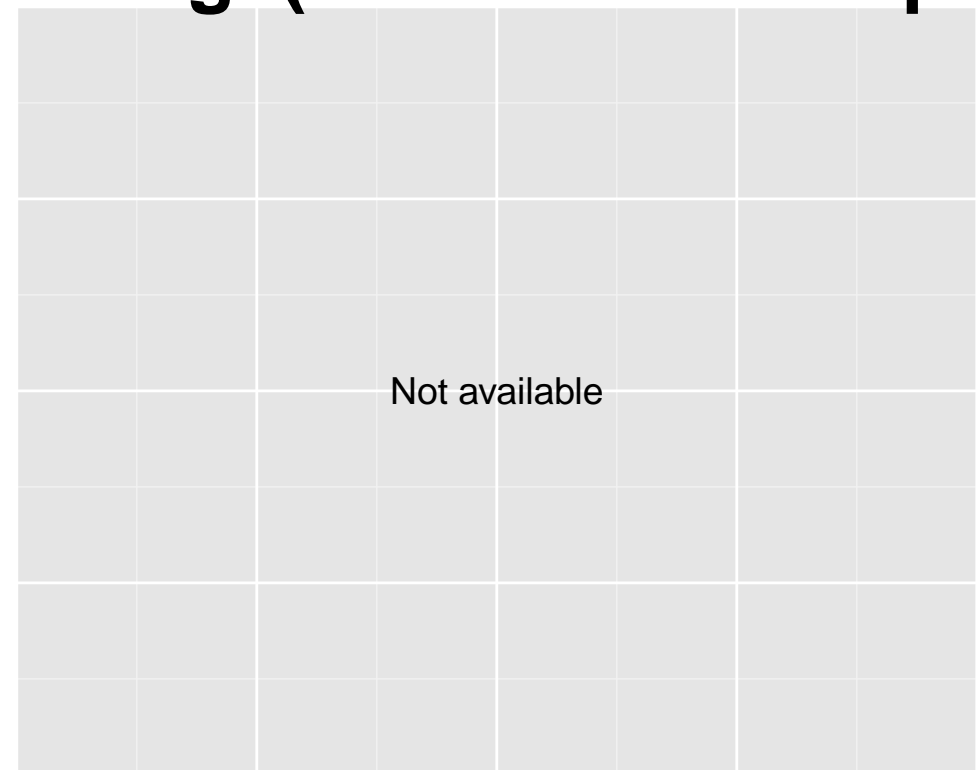

Supplement: SuppDataset_1.zip [file Eps8l1_set_A.pdf › Supplemental Dataset 1/A-mRNA_nonrhyth_translation_nonrhyth/Eps8l1_set_A.pdf]

# Epsti1

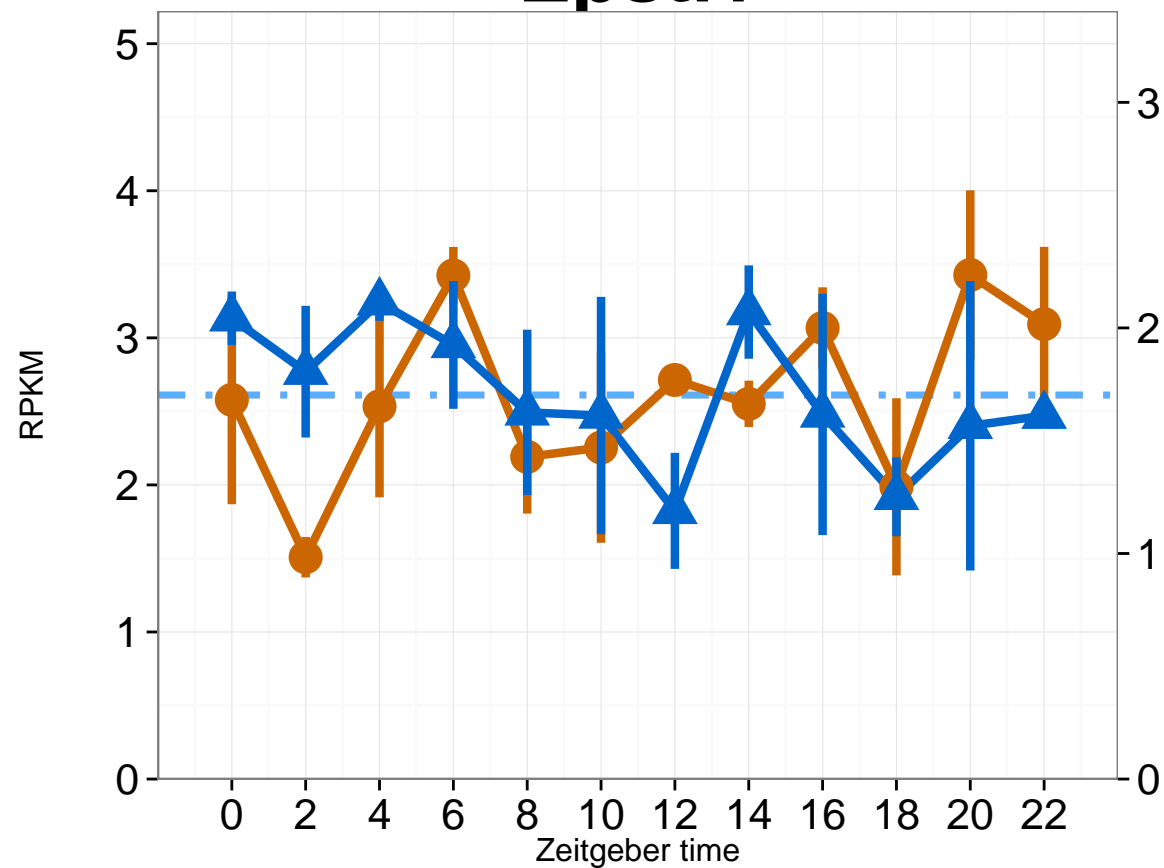

# Epsti1

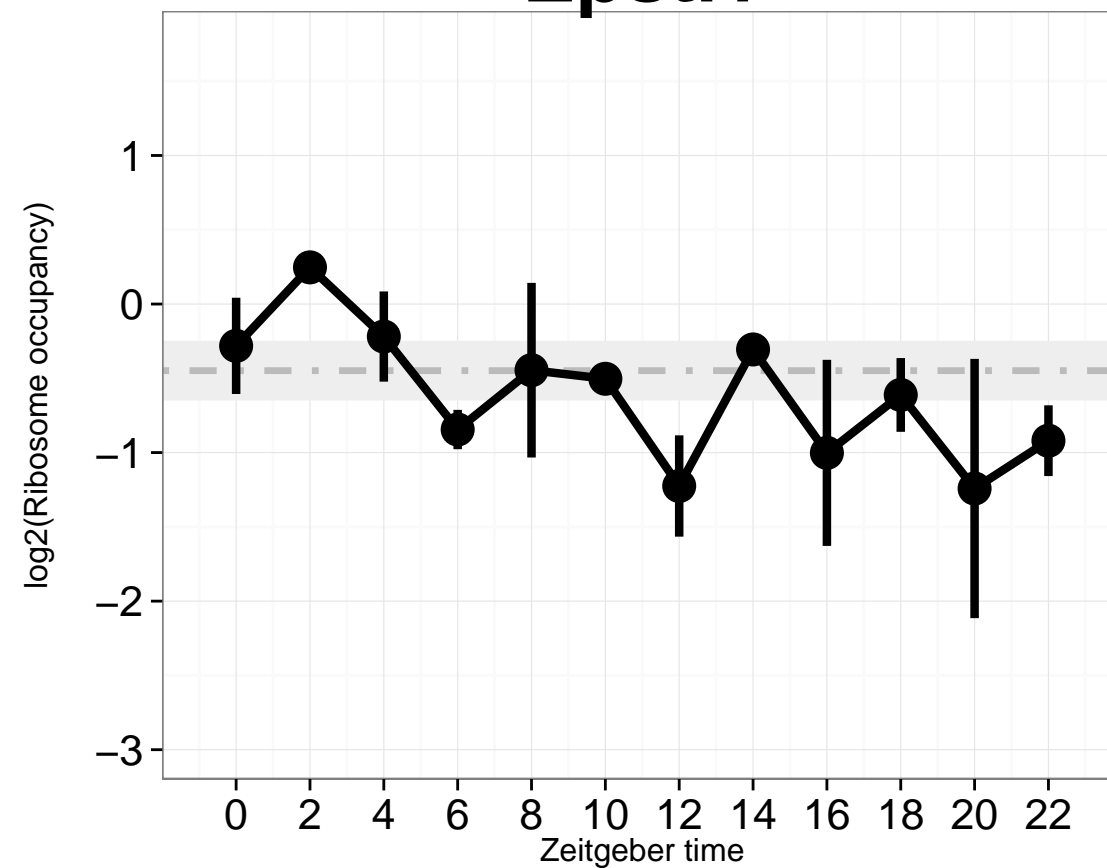

Supplement: SuppDataset_1.zip [file Epsti1_set_A.pdf › Supplemental Dataset 1/A-mRNA_nonrhyth_translation_nonrhyth/Epsti1_set_A.pdf]

## Eral1

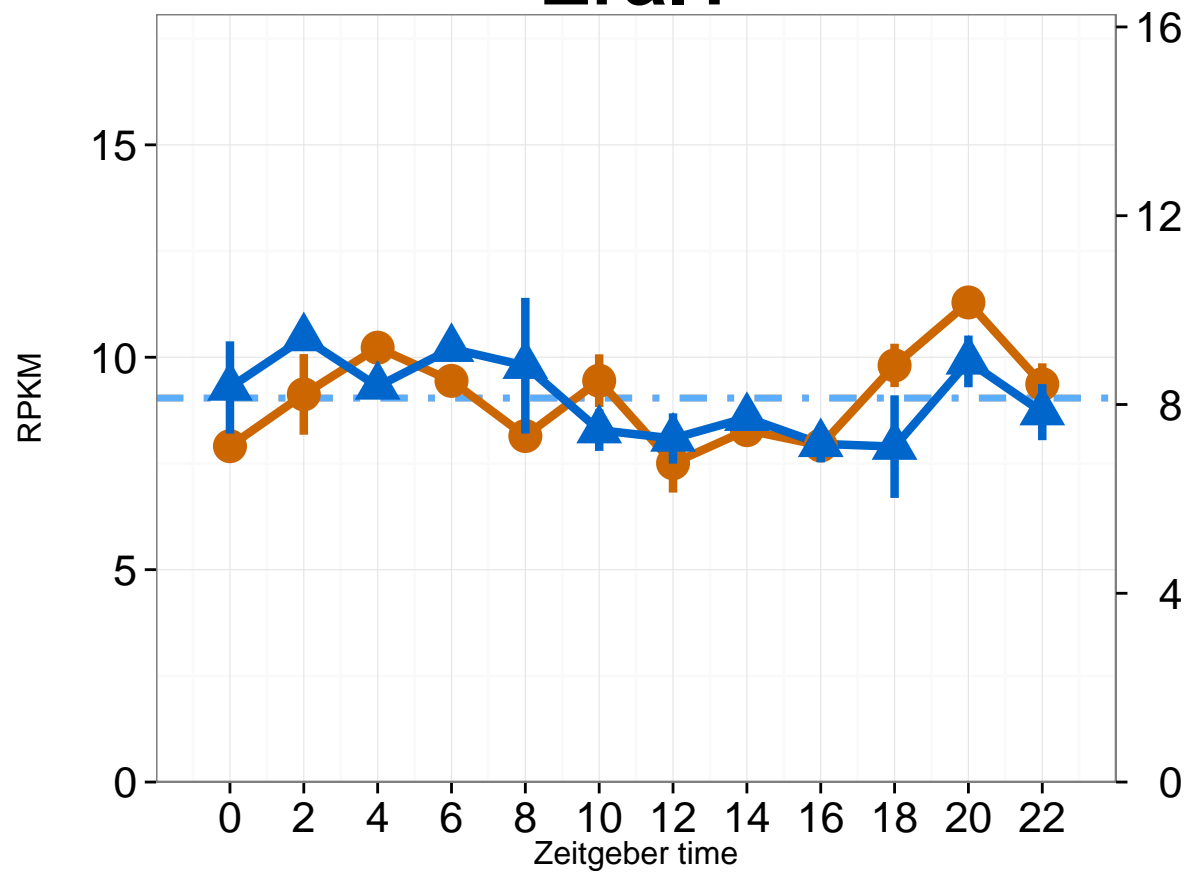

## Eral1

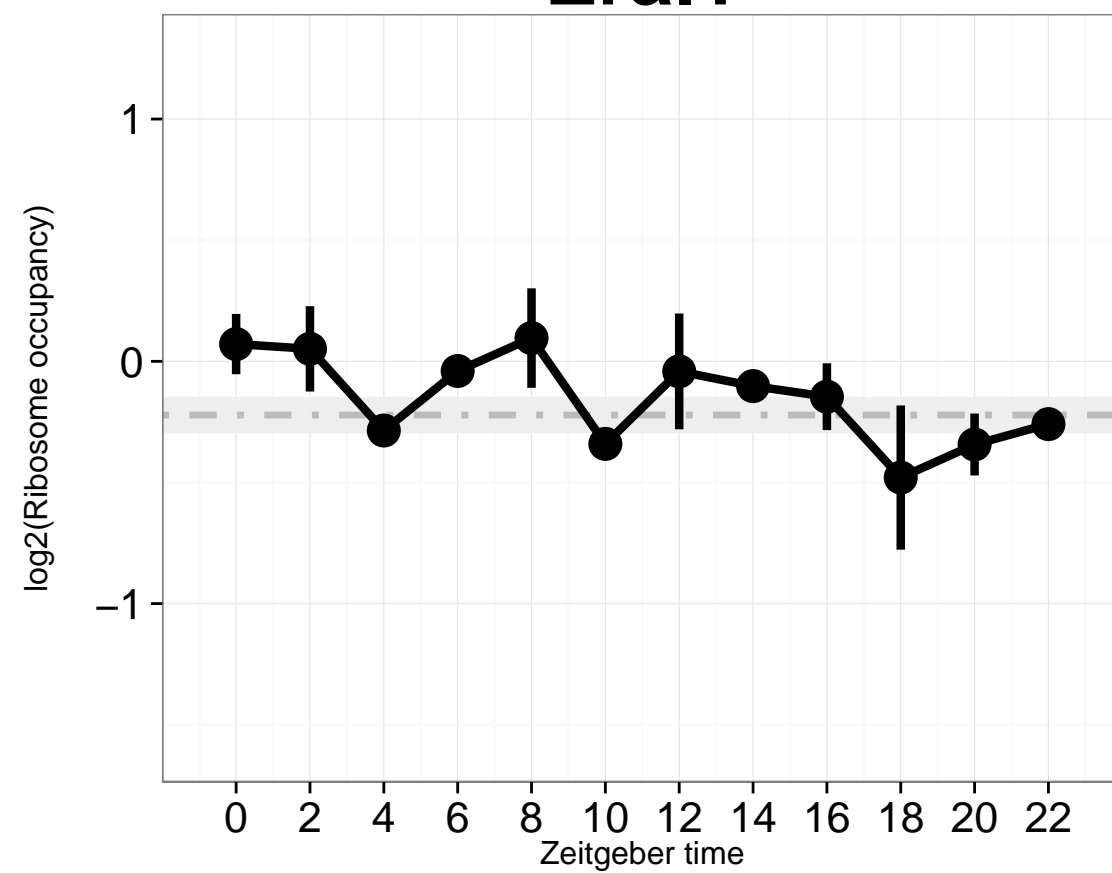

Supplement: SuppDataset_1.zip [file Eral1_set_A.pdf › Supplemental Dataset 1/A-mRNA_nonrhyth_translation_nonrhyth/Eral1_set_A.pdf]

## Erap1

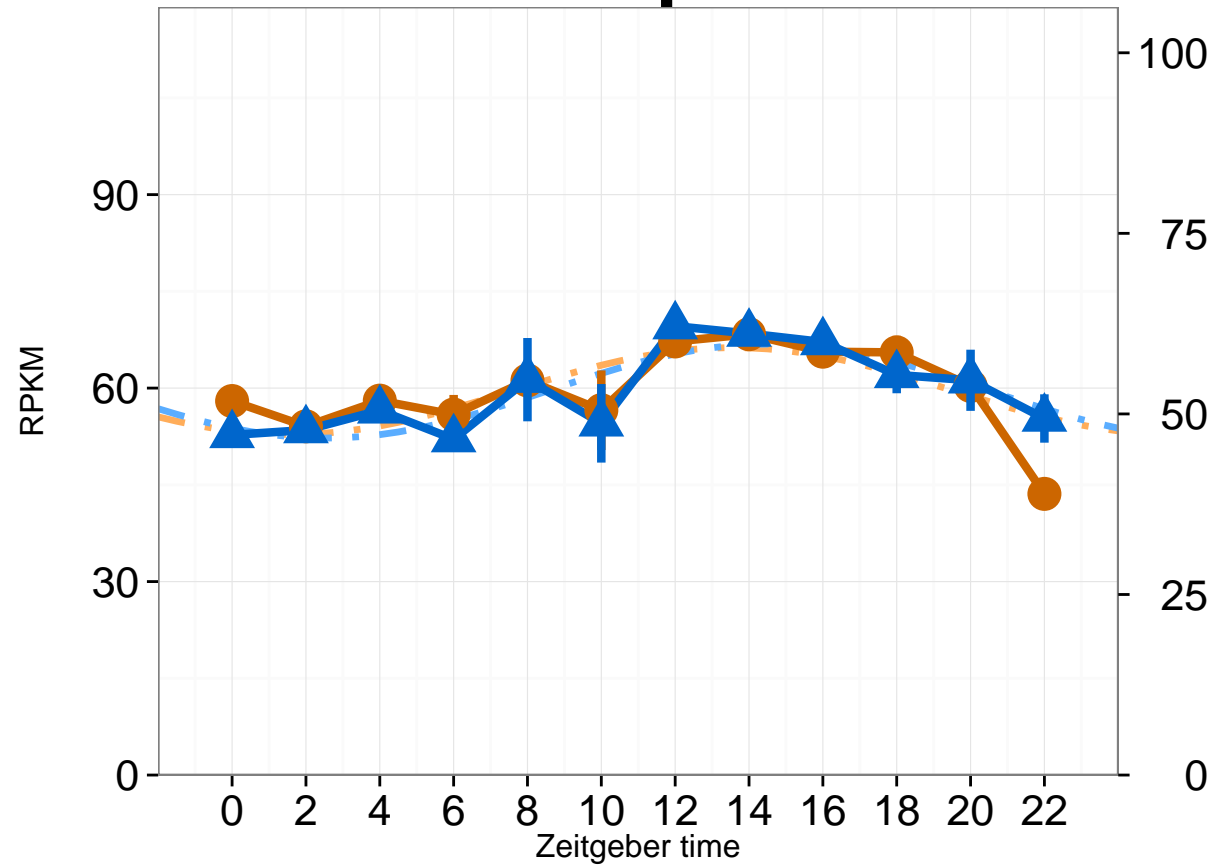

## Erap1

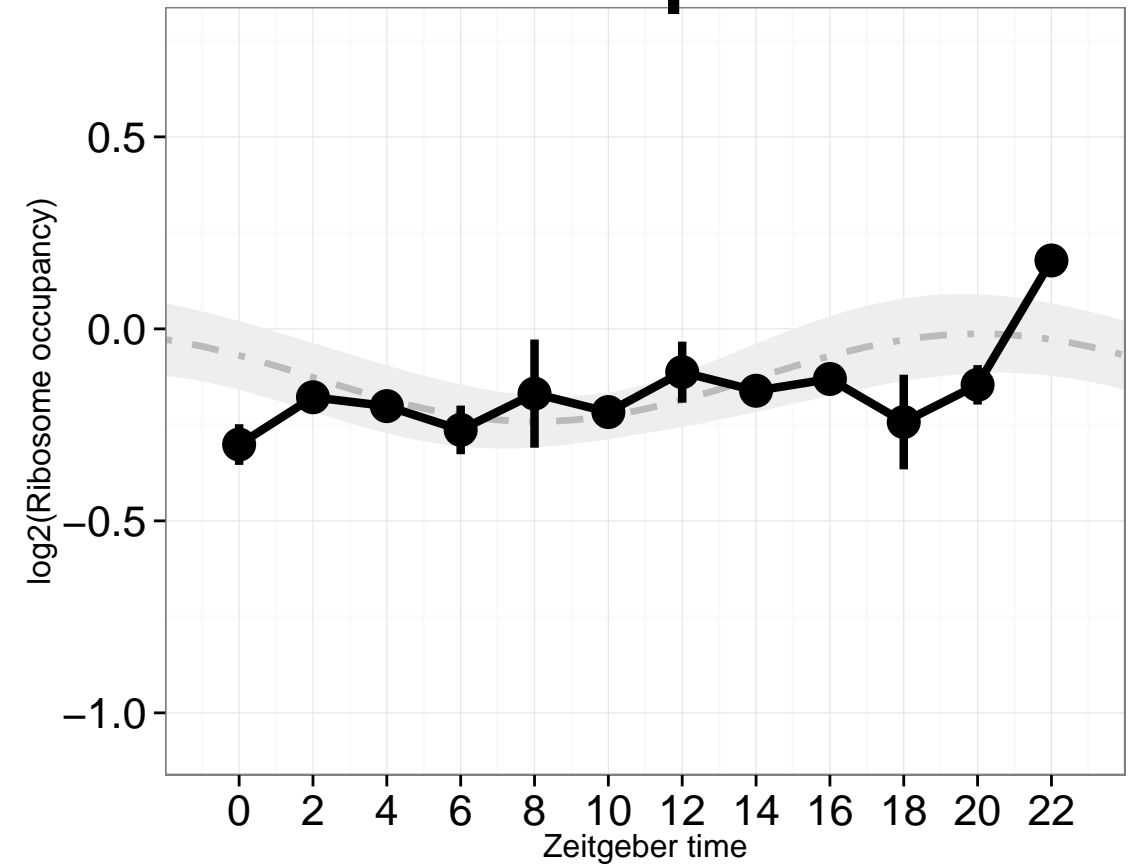

Supplement: SuppDataset_1.zip [file Erap1_set_A.pdf › Supplemental Dataset 1/A-mRNA_nonrhyth_translation_nonrhyth/Erap1_set_A.pdf]

## ErbB2

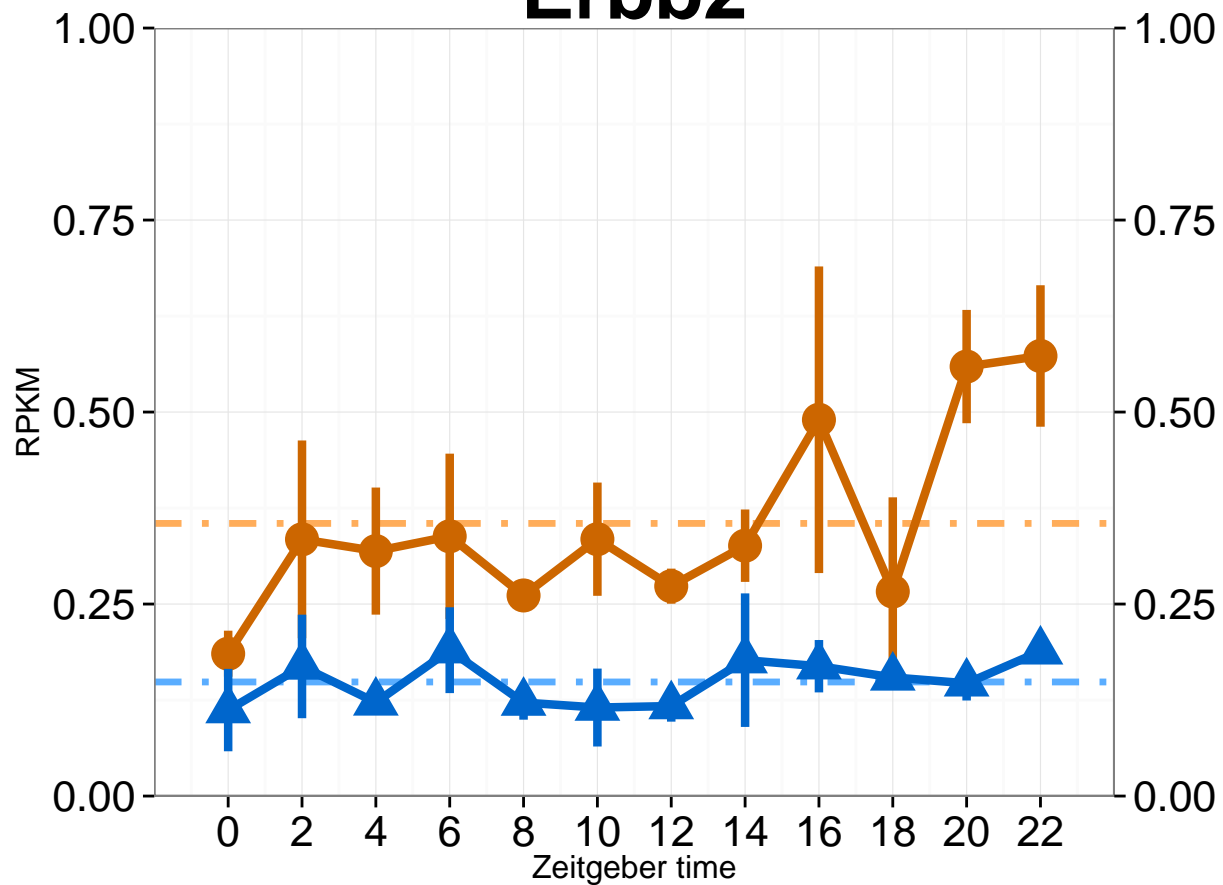

## ErbB2

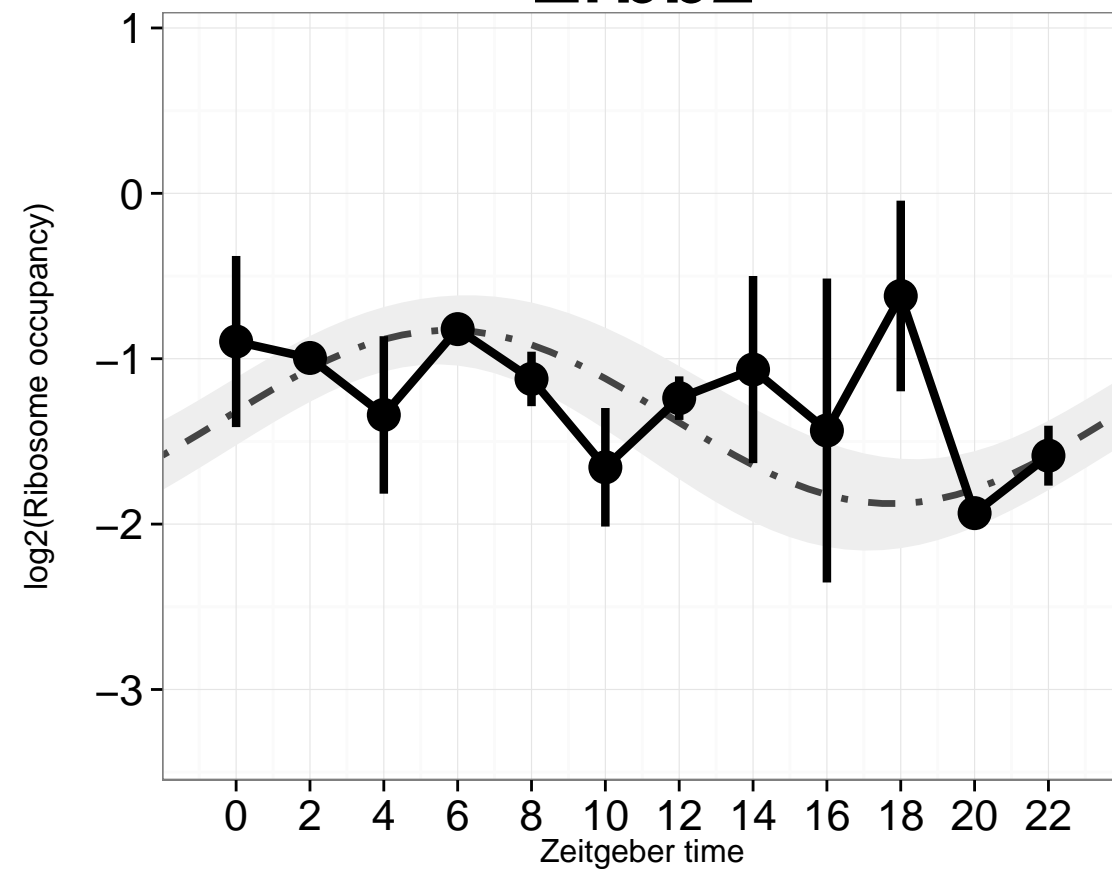

Supplement: SuppDataset_1.zip [file Erbb2_set_A.pdf › Supplemental Dataset 1/A-mRNA_nonrhyth_translation_nonrhyth/Erbb2_set_A.pdf]

## ErbB2ip

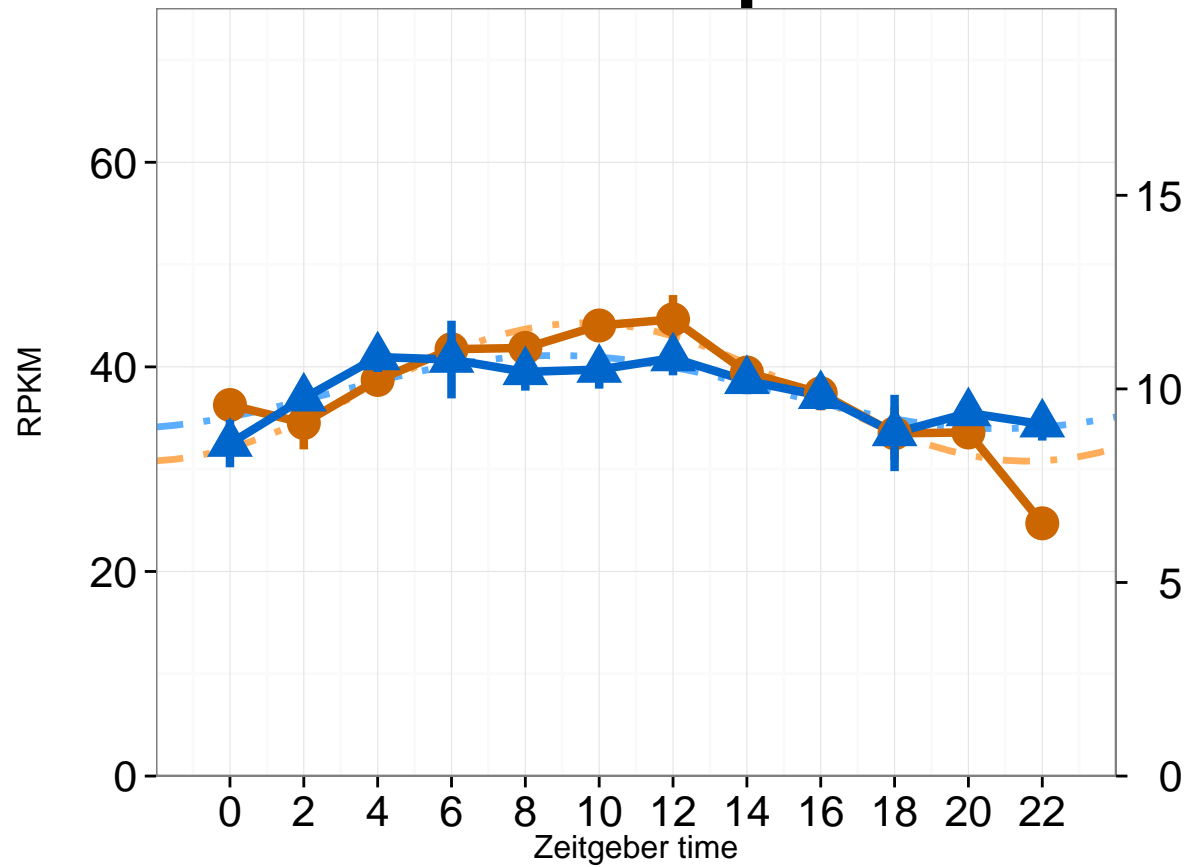

## ErbB2ip

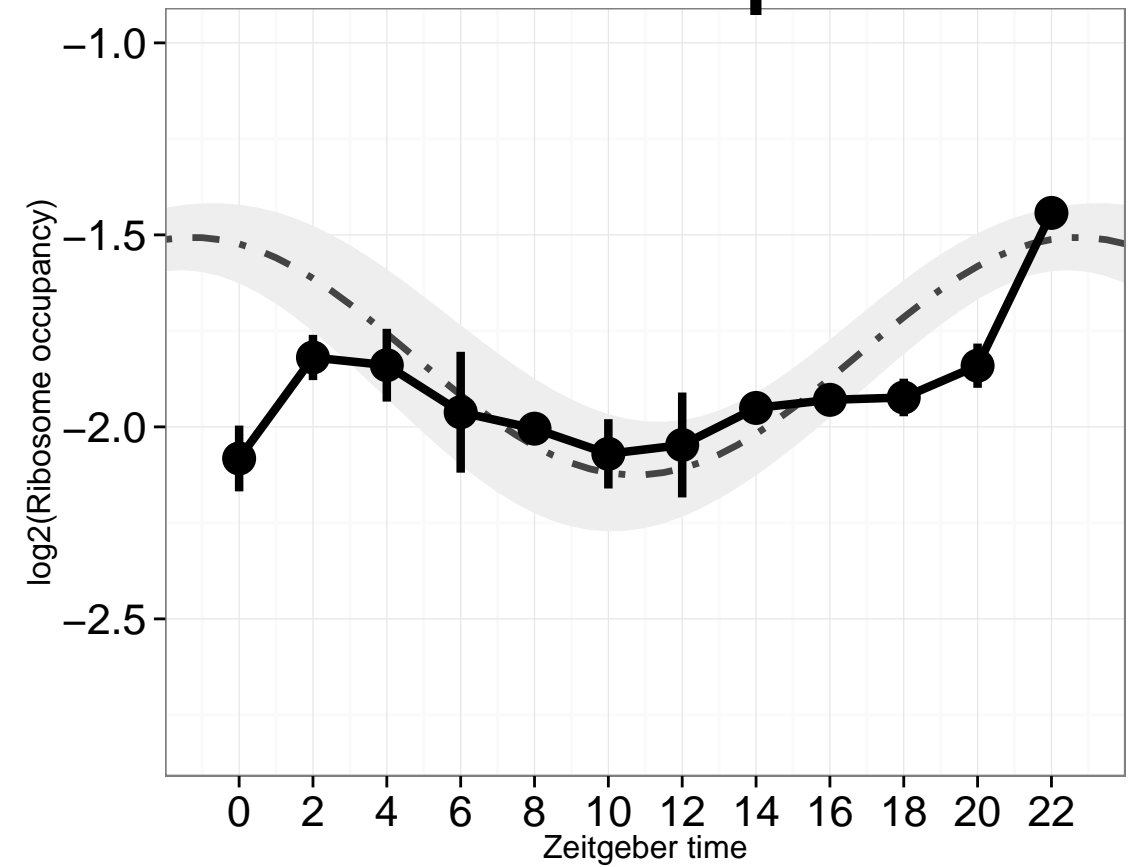

Supplement: SuppDataset_1.zip [file Erbb2ip_set_A.pdf › Supplemental Dataset 1/A-mRNA_nonrhyth_translation_nonrhyth/Erbb2ip_set_A.pdf]

## Erc1

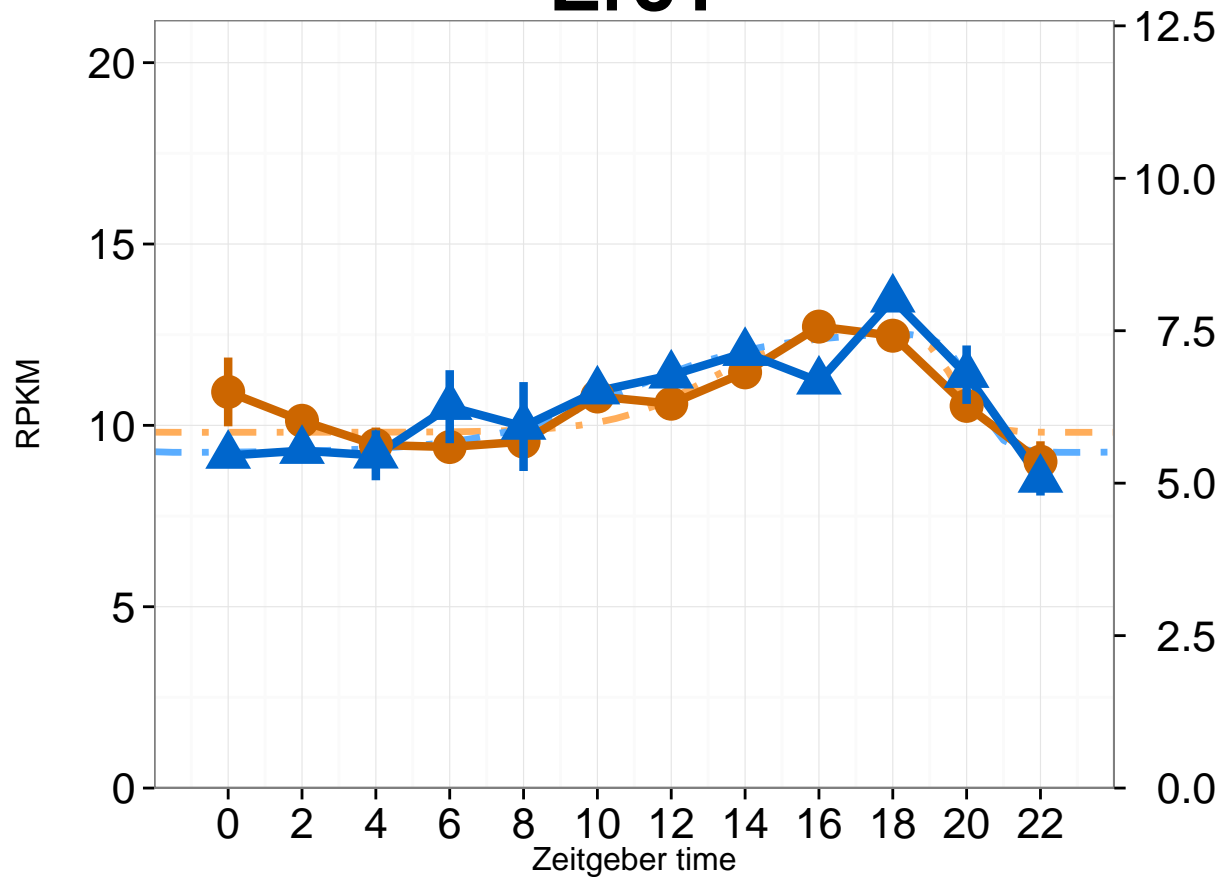

## Erc1

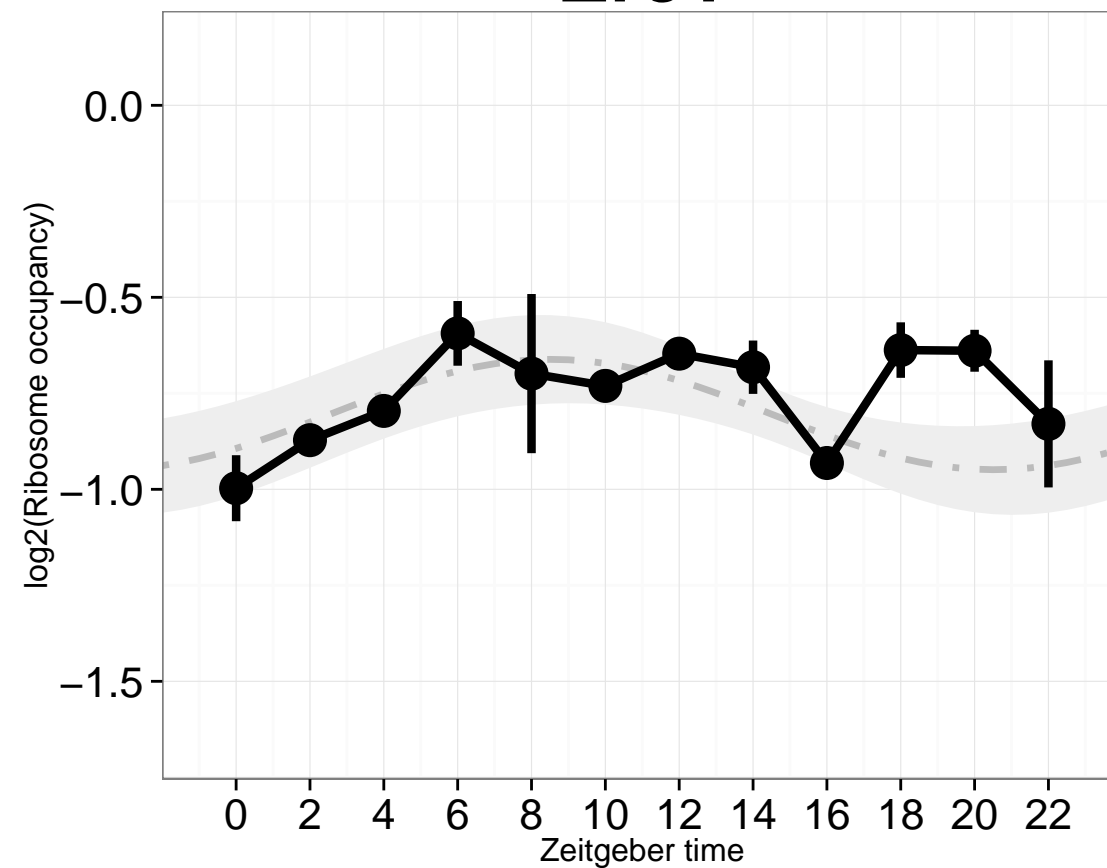

Supplement: SuppDataset_1.zip [file Erc1_set_A.pdf › Supplemental Dataset 1/A-mRNA_nonrhyth_translation_nonrhyth/Erc1_set_A.pdf]

## Erc2

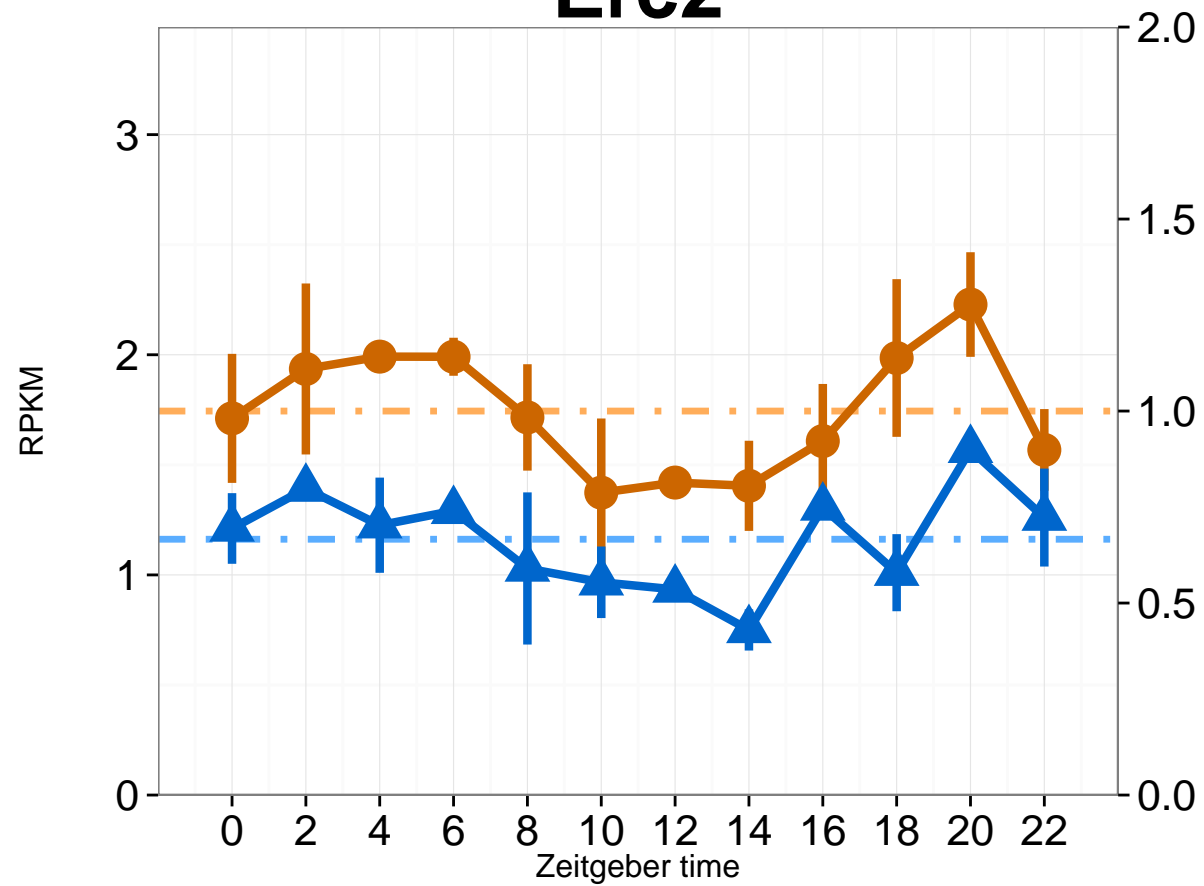

## Erc2

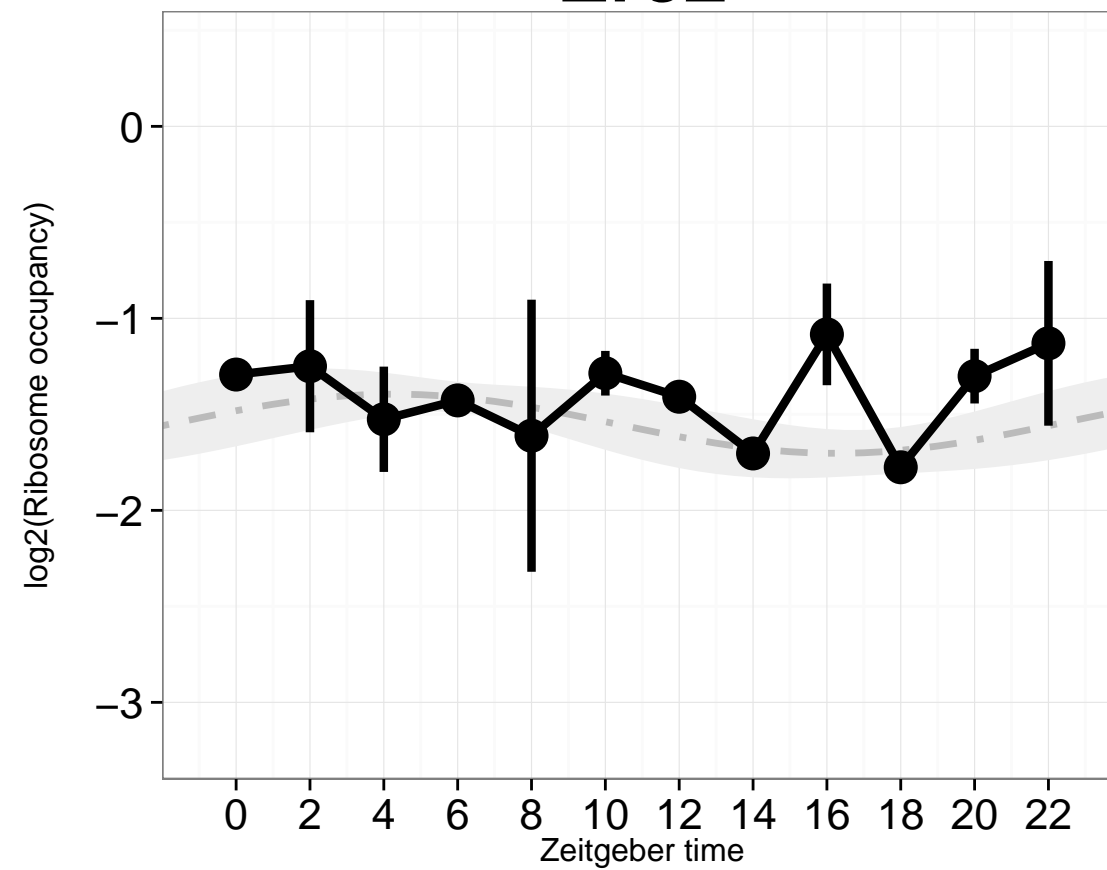

Supplement: SuppDataset_1.zip [file Erc2_set_A.pdf › Supplemental Dataset 1/A-mRNA_nonrhyth_translation_nonrhyth/Erc2_set_A.pdf]

# Ercc2

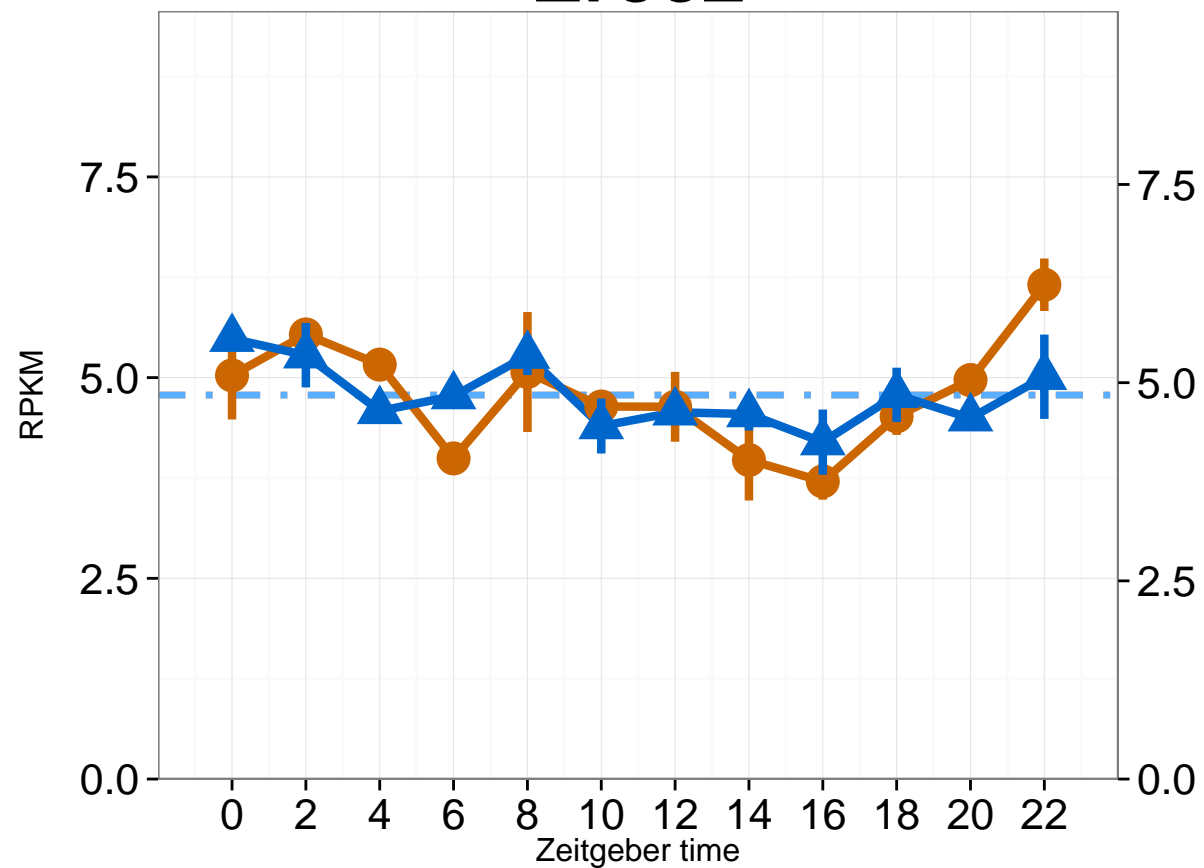

# Ercc2

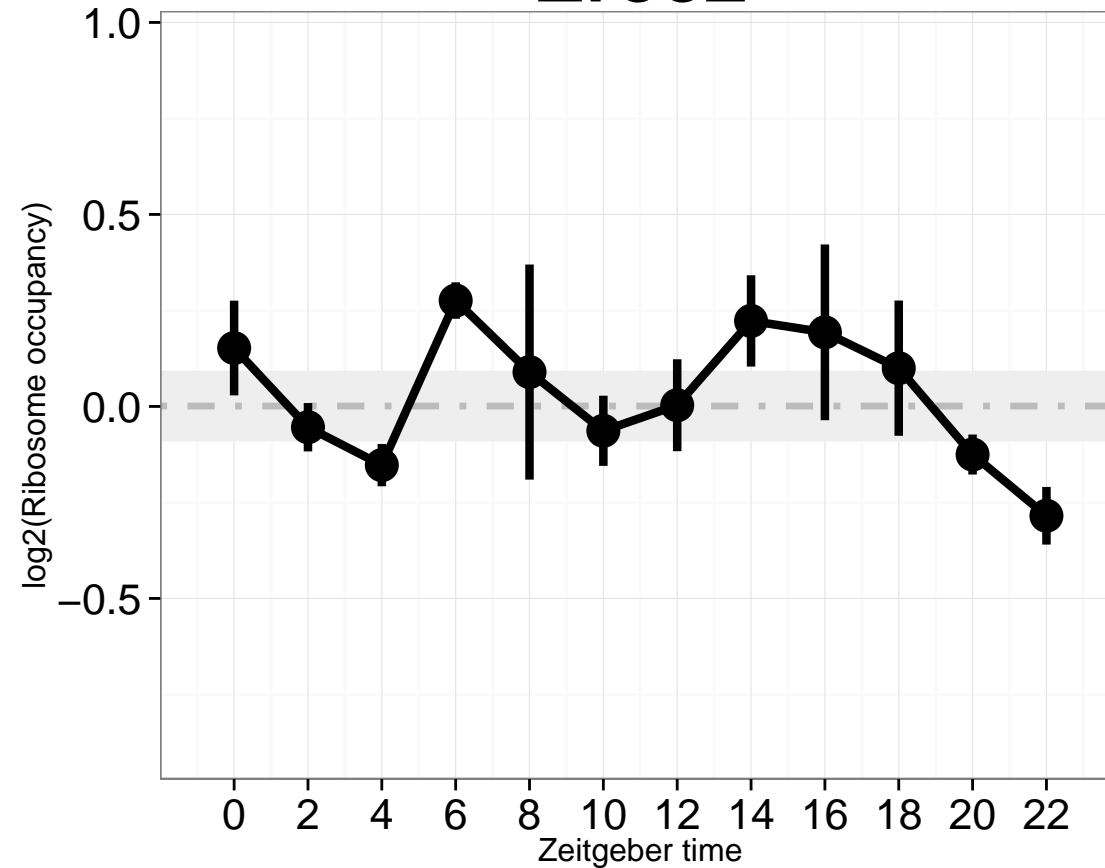

Supplement: SuppDataset_1.zip [file Ercc2_set_A.pdf › Supplemental Dataset 1/A-mRNA_nonrhyth_translation_nonrhyth/Ercc2_set_A.pdf]

# Ercc3

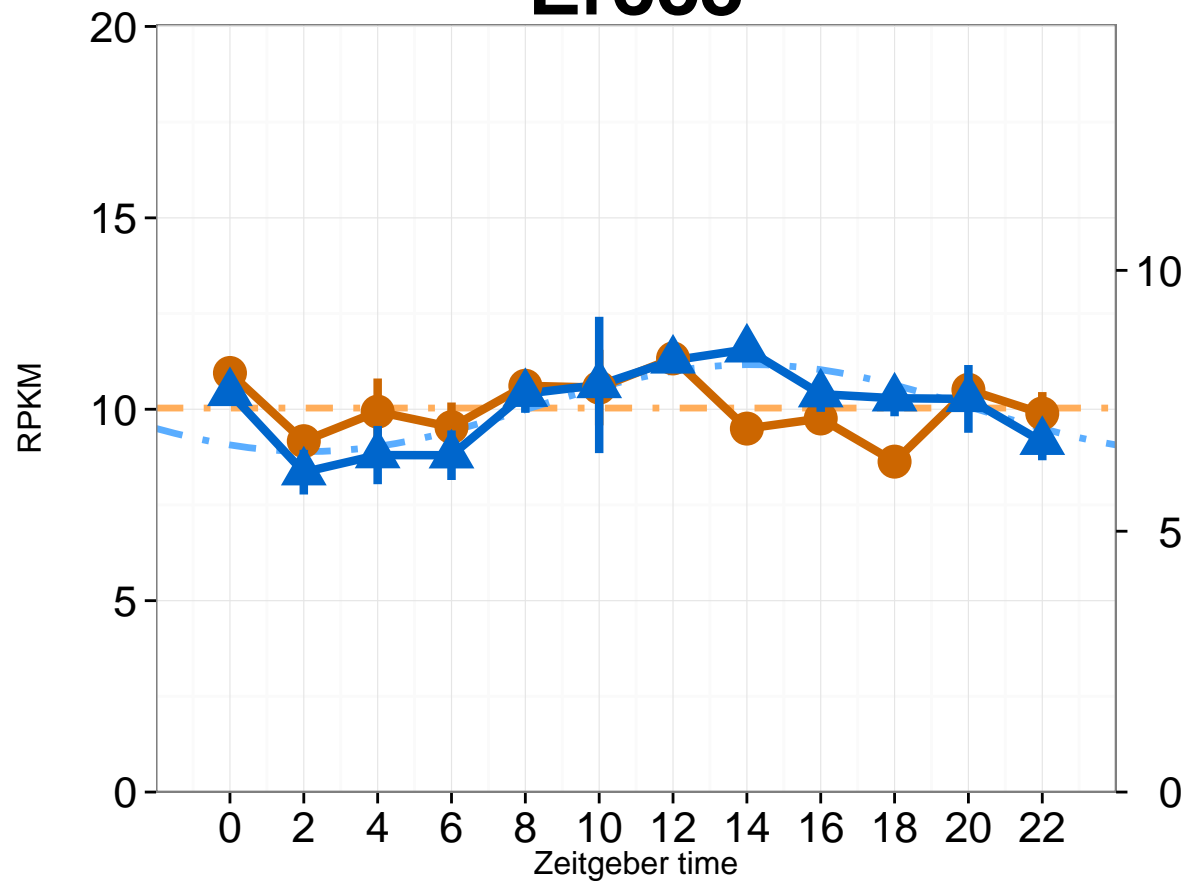

# Ercc3

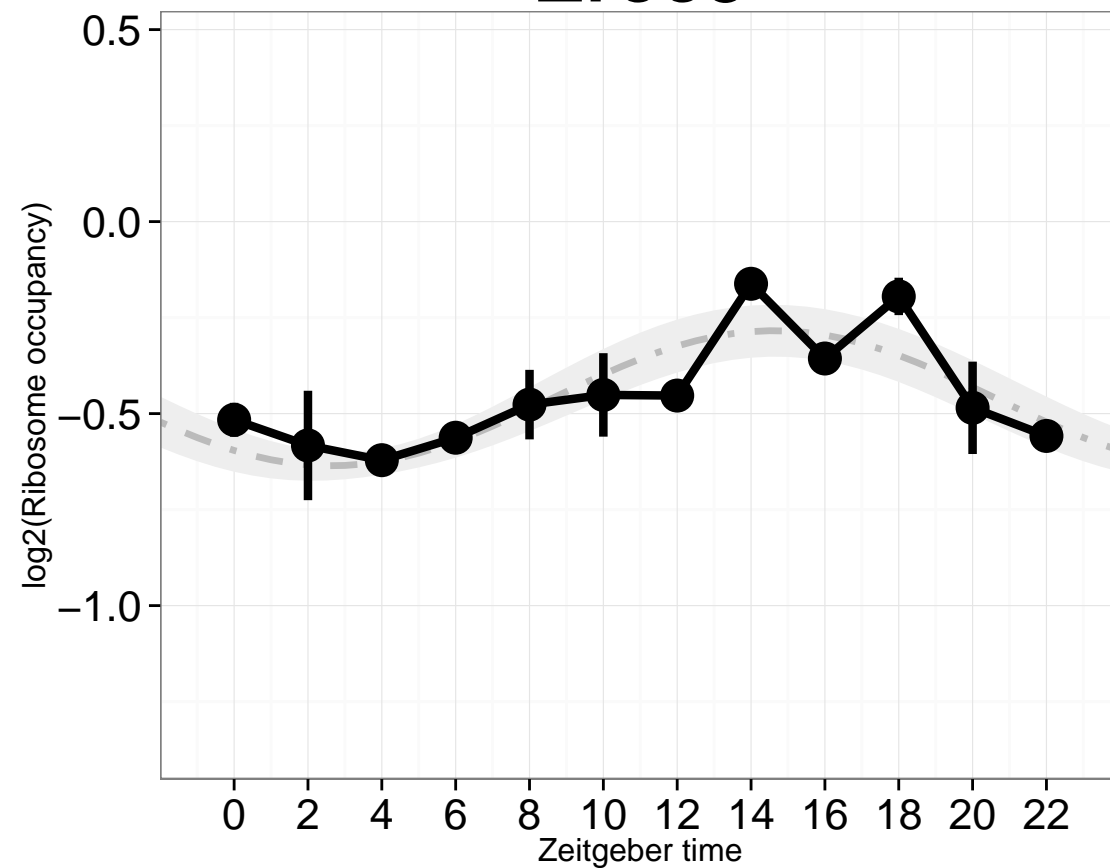

Supplement: SuppDataset_1.zip [file Ercc3_set_A.pdf › Supplemental Dataset 1/A-mRNA_nonrhyth_translation_nonrhyth/Ercc3_set_A.pdf]

## Ercc4

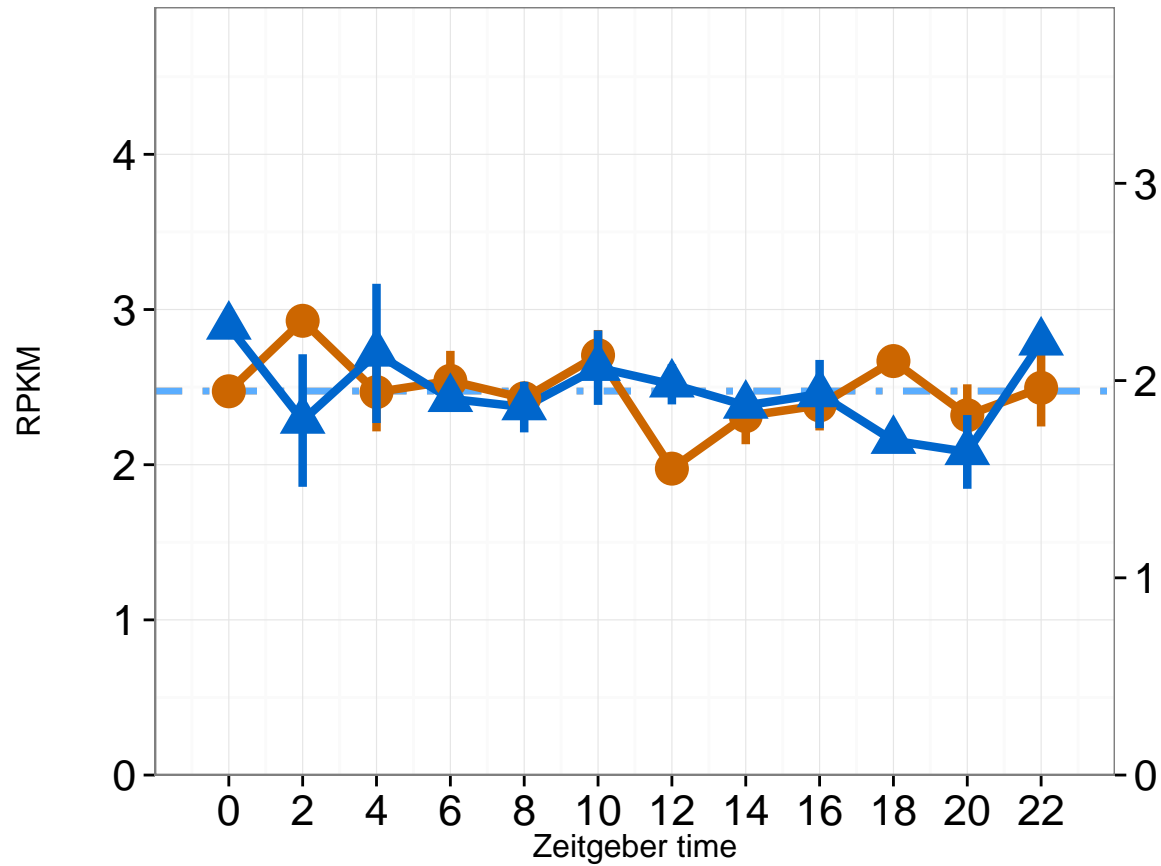

## Ercc4

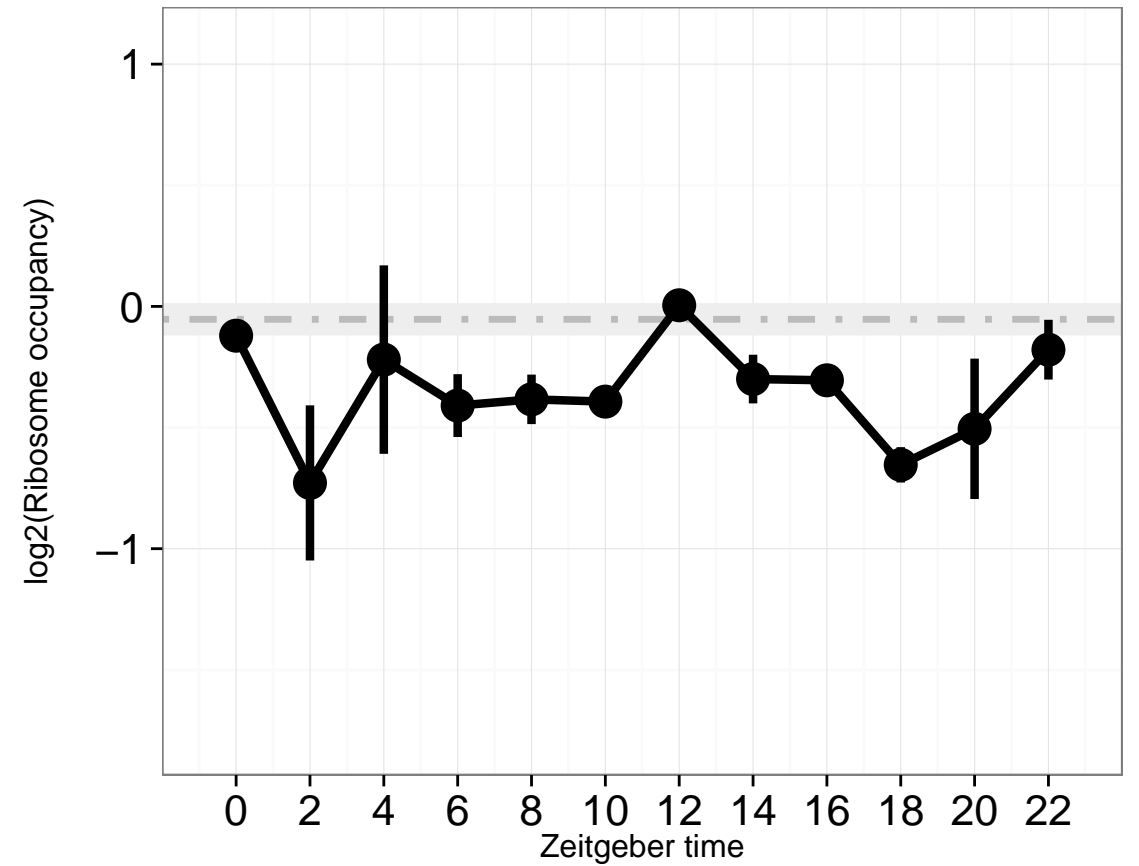

Supplement: SuppDataset_1.zip [file Ercc4_set_A.pdf › Supplemental Dataset 1/A-mRNA_nonrhyth_translation_nonrhyth/Ercc4_set_A.pdf]

# Ercc5

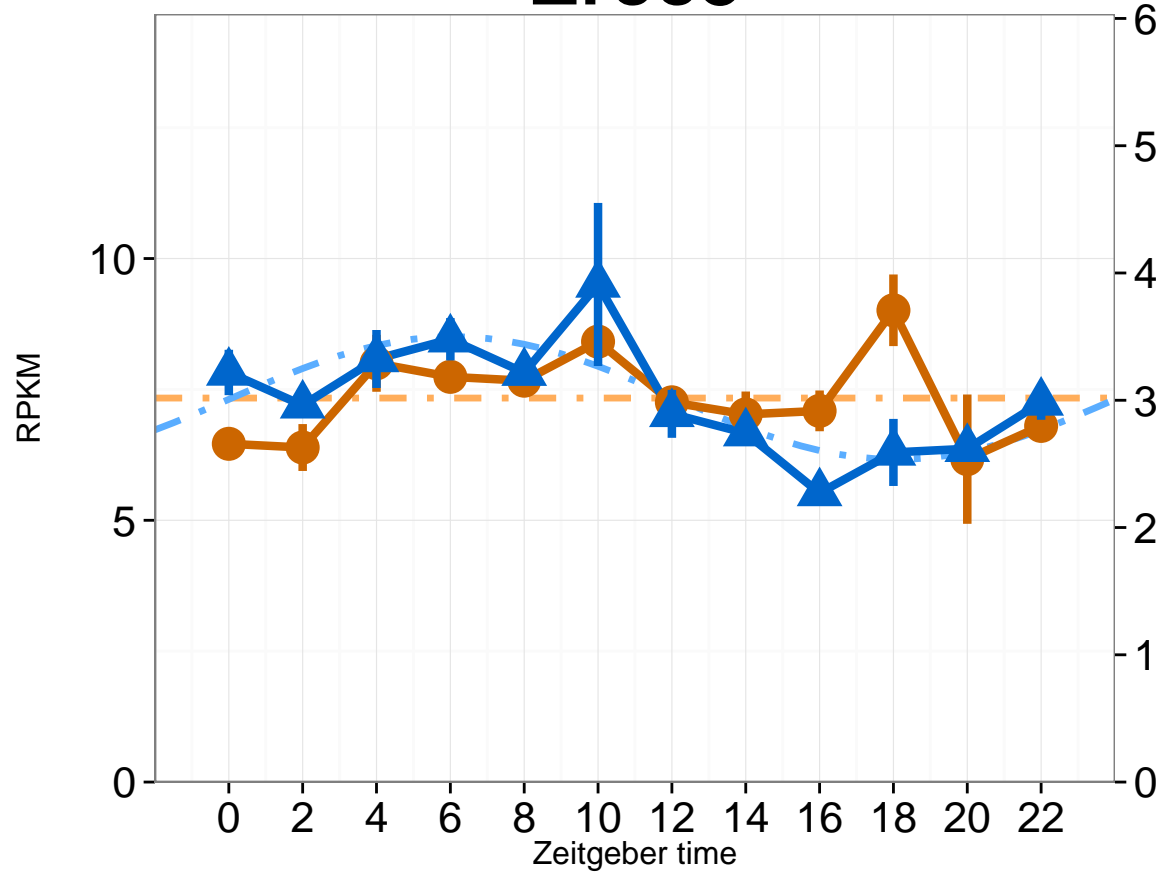

# Ercc5

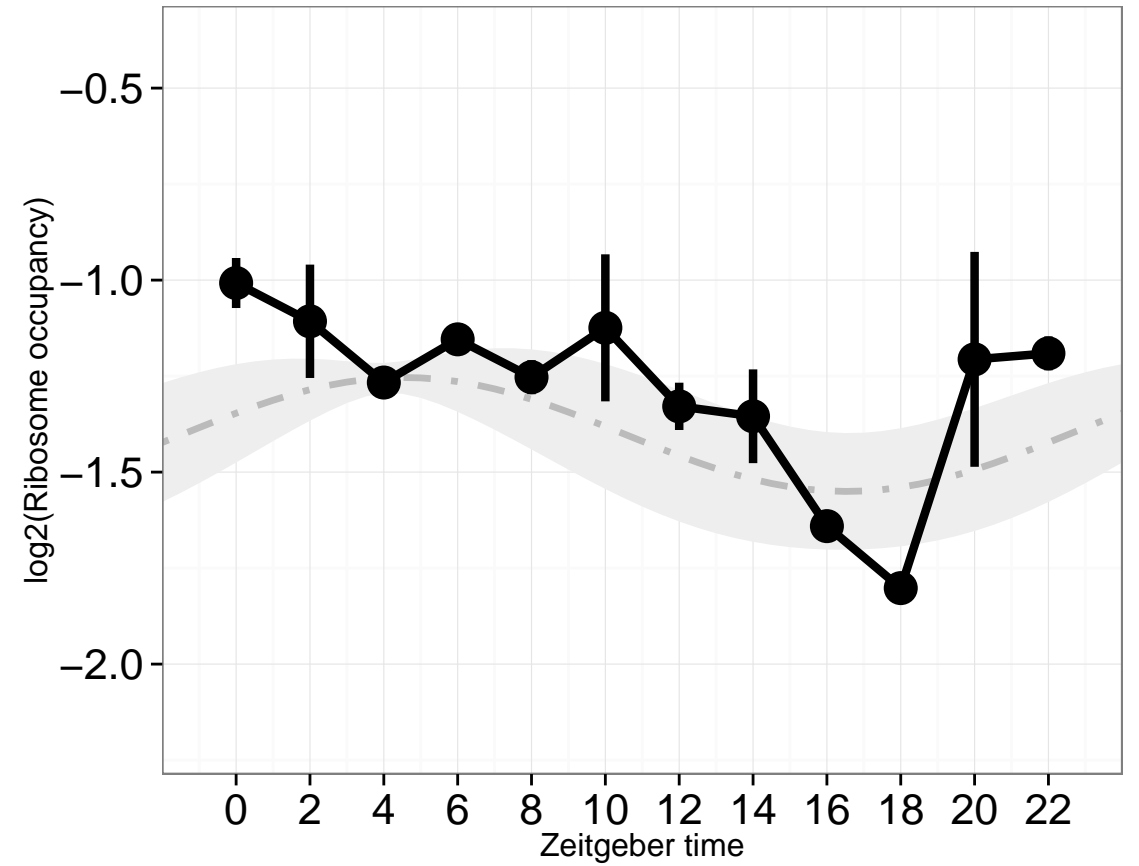

Supplement: SuppDataset_1.zip [file Ercc5_set_A.pdf › Supplemental Dataset 1/A-mRNA_nonrhyth_translation_nonrhyth/Ercc5_set_A.pdf]

# Ercc6

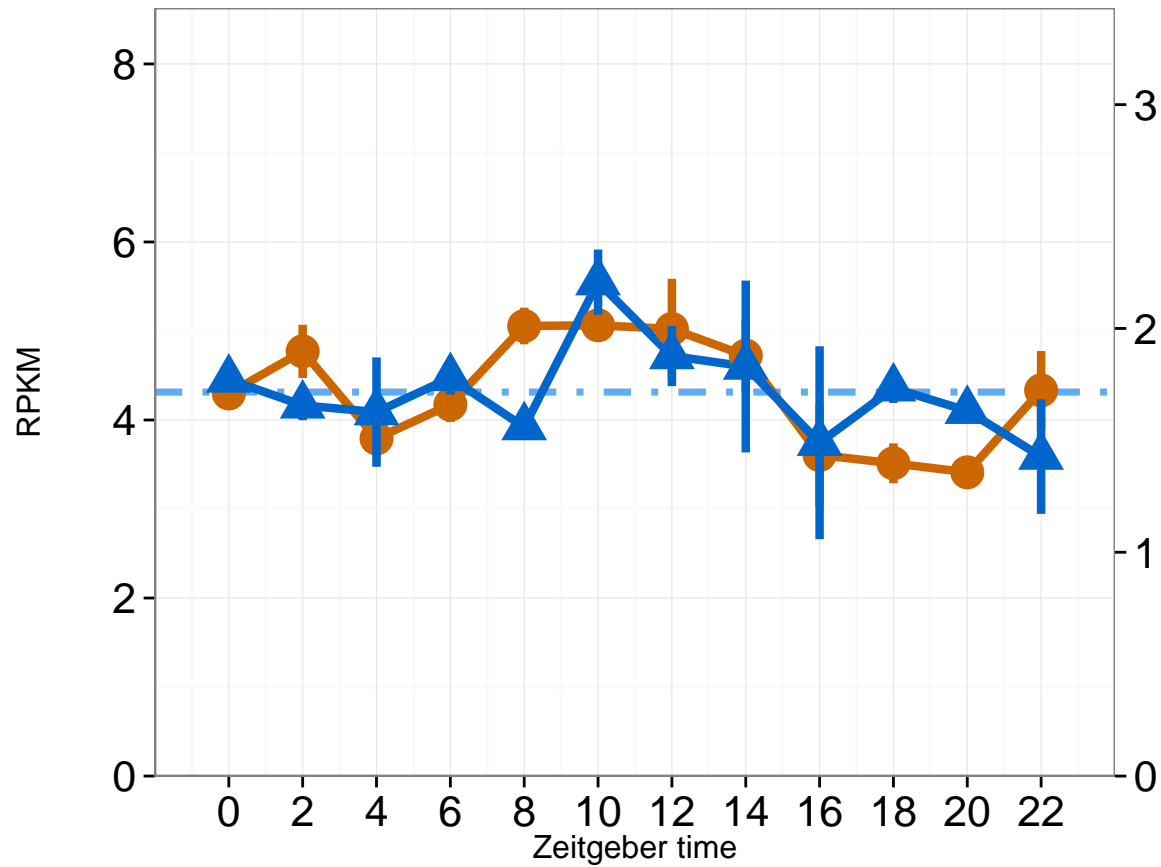

# Ercc6

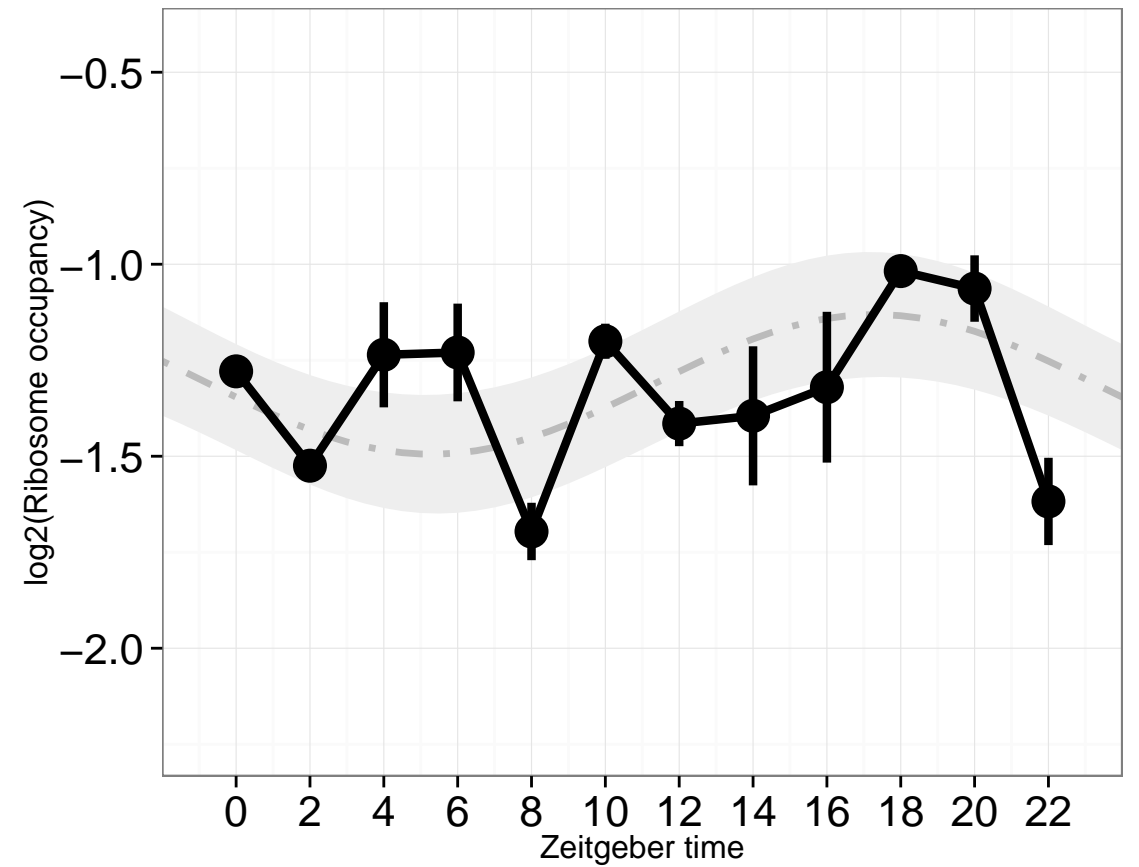

Supplement: SuppDataset_1.zip [file Ercc6_set_A.pdf › Supplemental Dataset 1/A-mRNA_nonrhyth_translation_nonrhyth/Ercc6_set_A.pdf]

# Ercc6l2

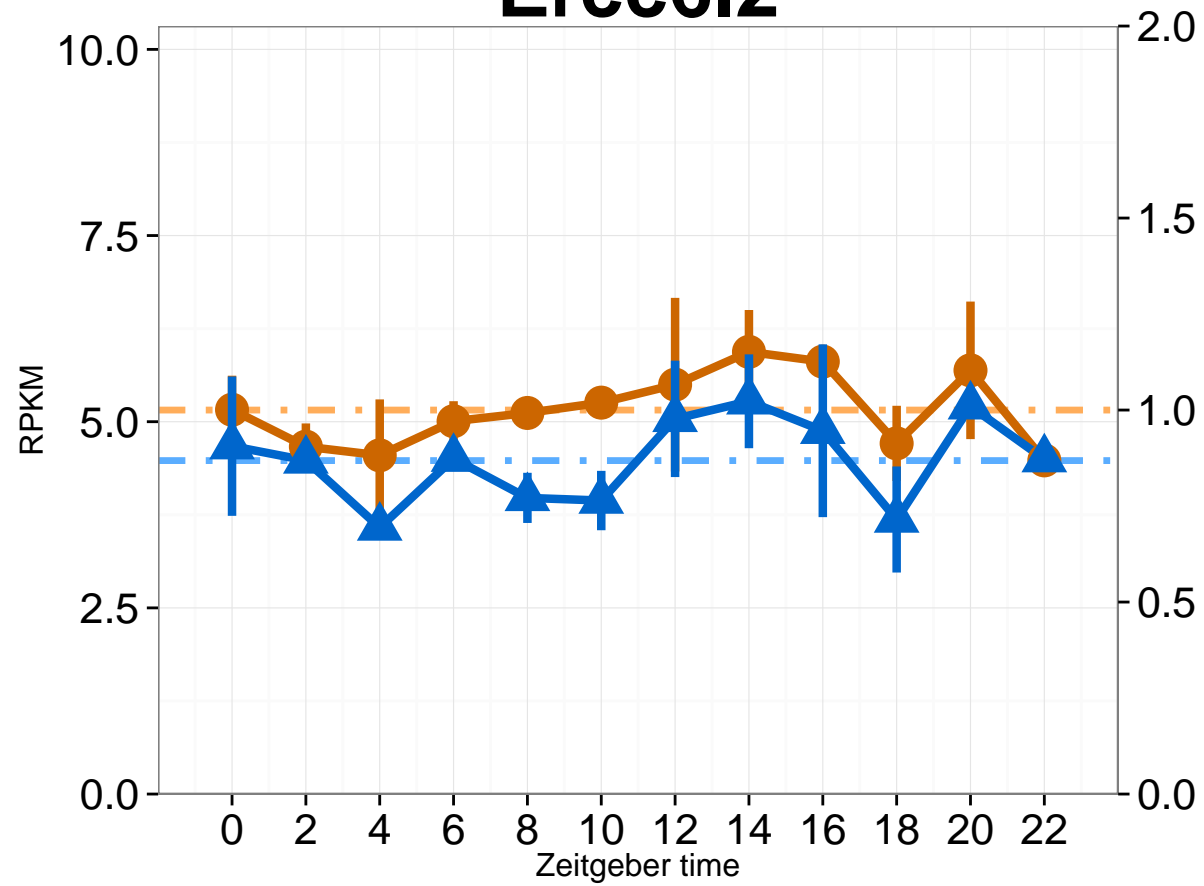

# Ercc6l2

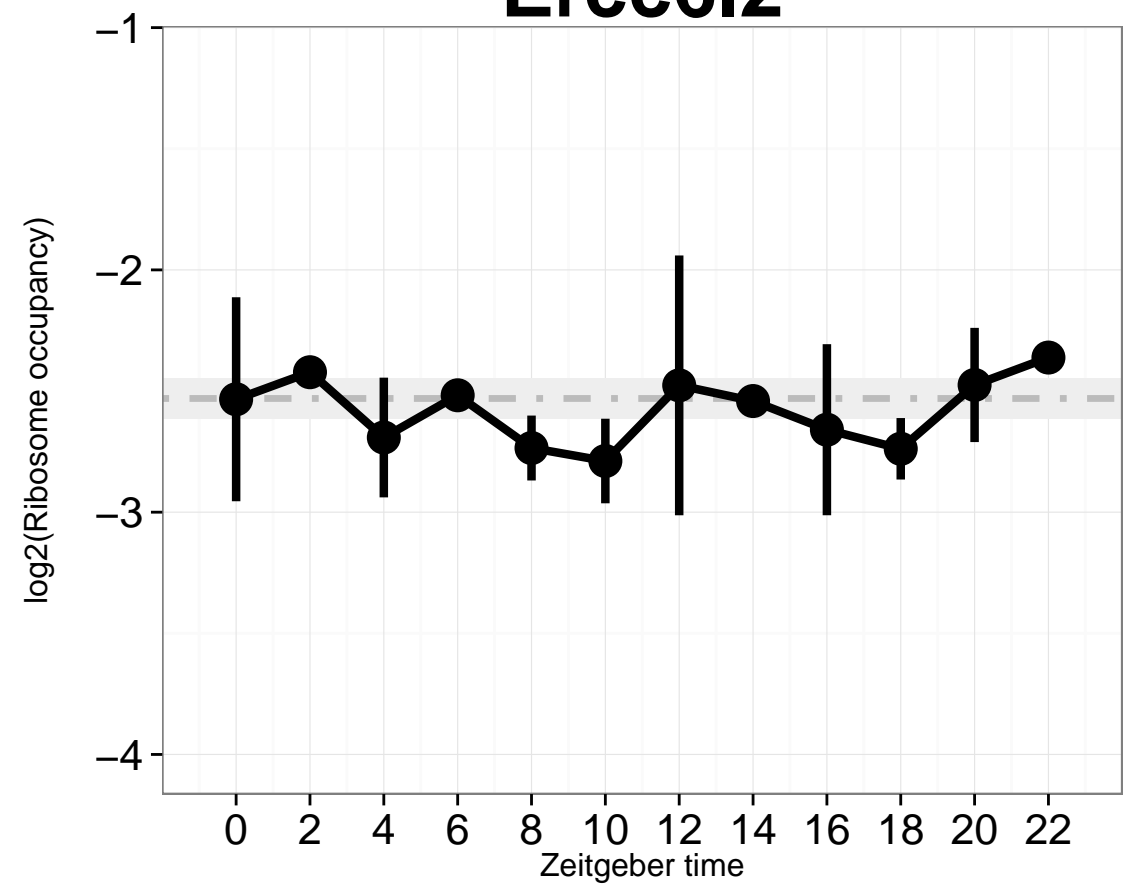

Supplement: SuppDataset_1.zip [file Ercc6l2_set_A.pdf › Supplemental Dataset 1/A-mRNA_nonrhyth_translation_nonrhyth/Ercc6l2_set_A.pdf]

# Ercc6l

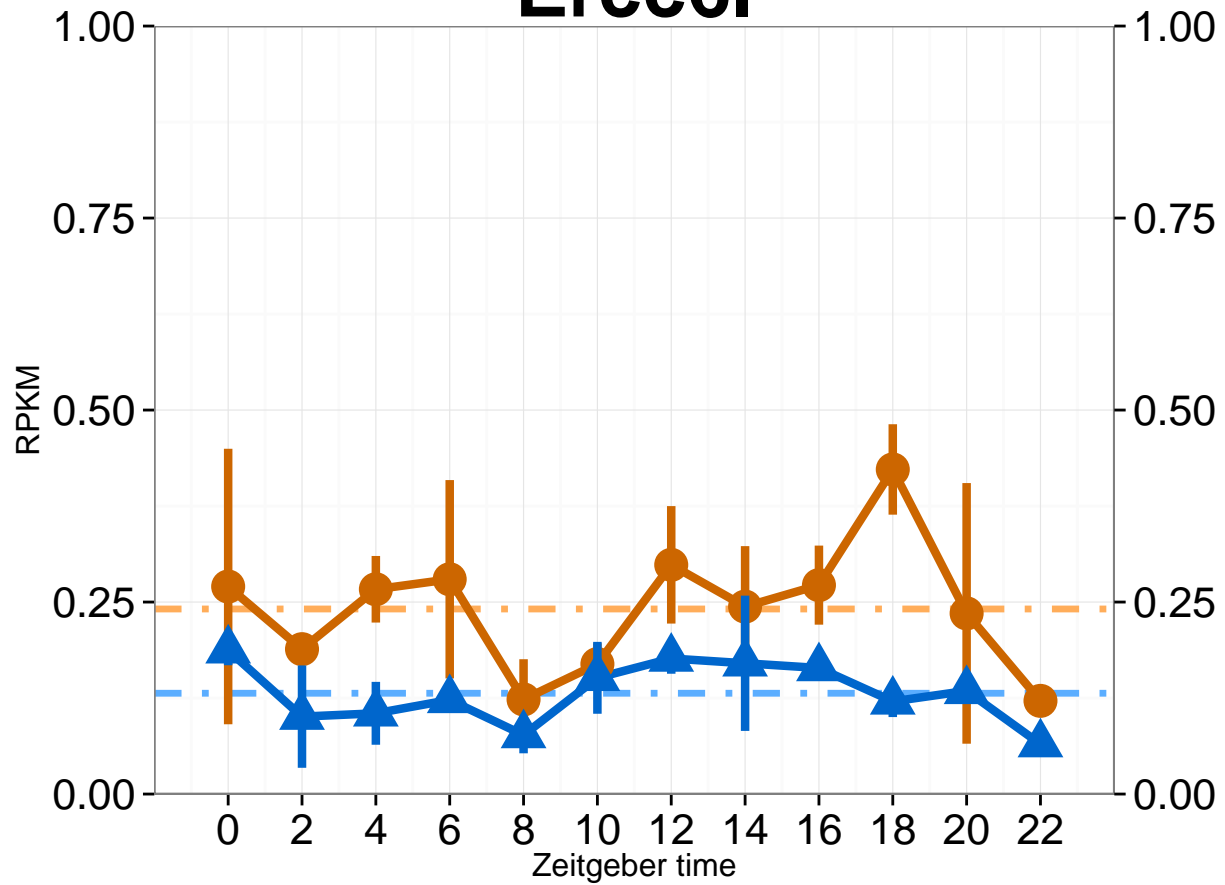

# Ercc6l

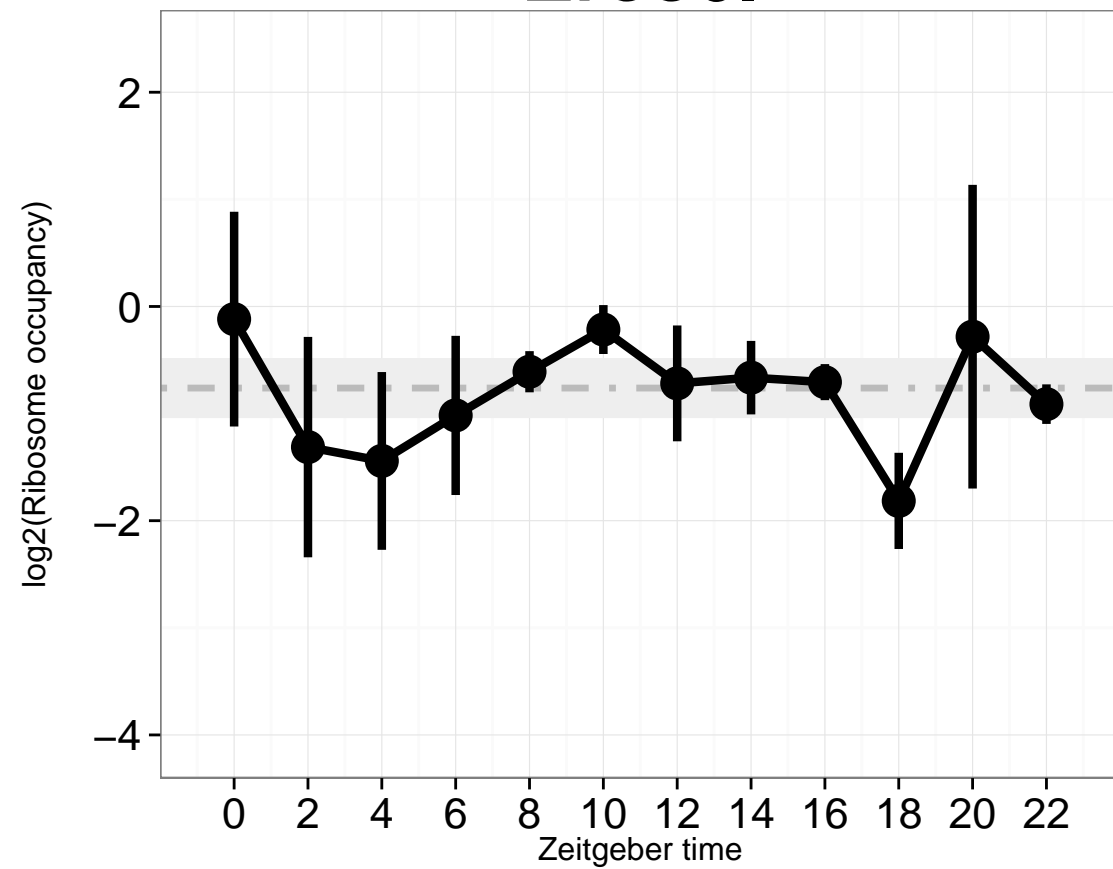

Supplement: SuppDataset_1.zip [file Ercc6l_set_A.pdf › Supplemental Dataset 1/A-mRNA_nonrhyth_translation_nonrhyth/Ercc6l_set_A.pdf]

# Ercc8

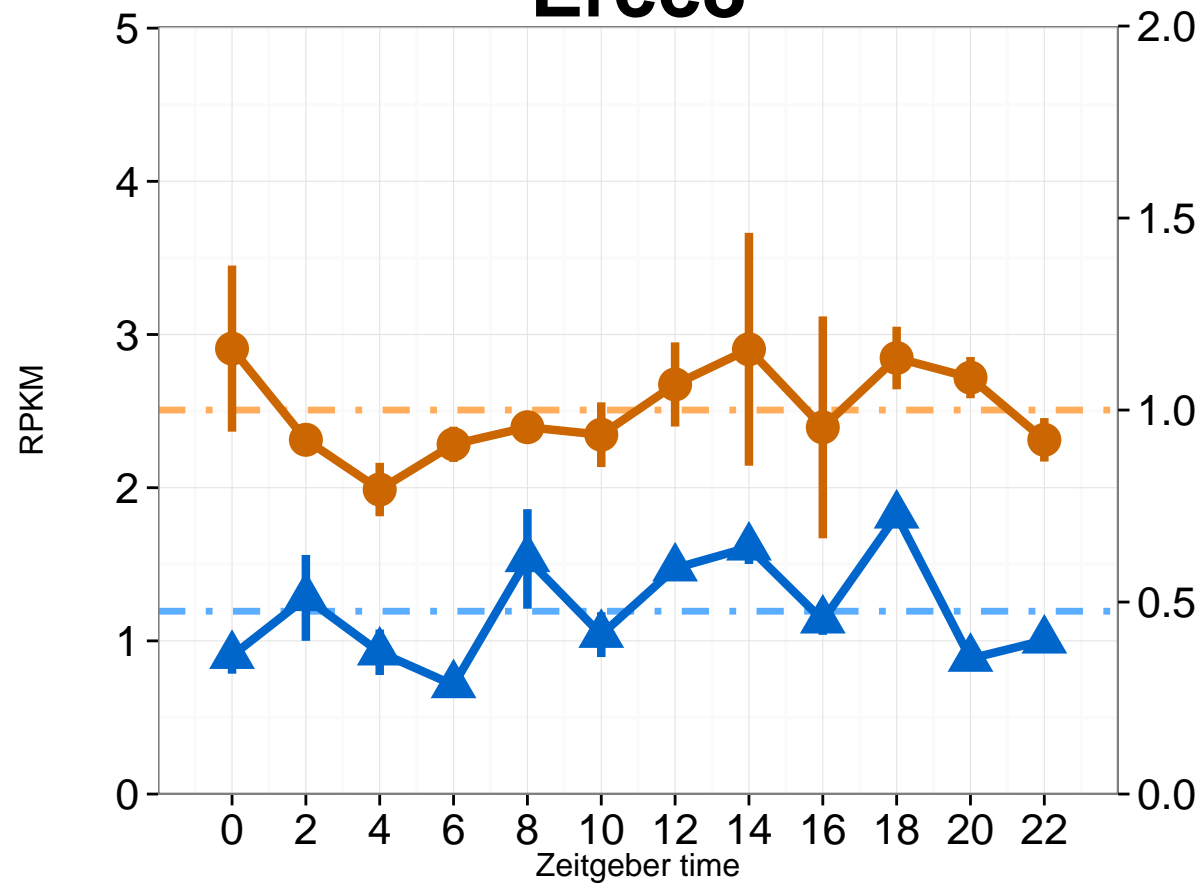

# Ercc8

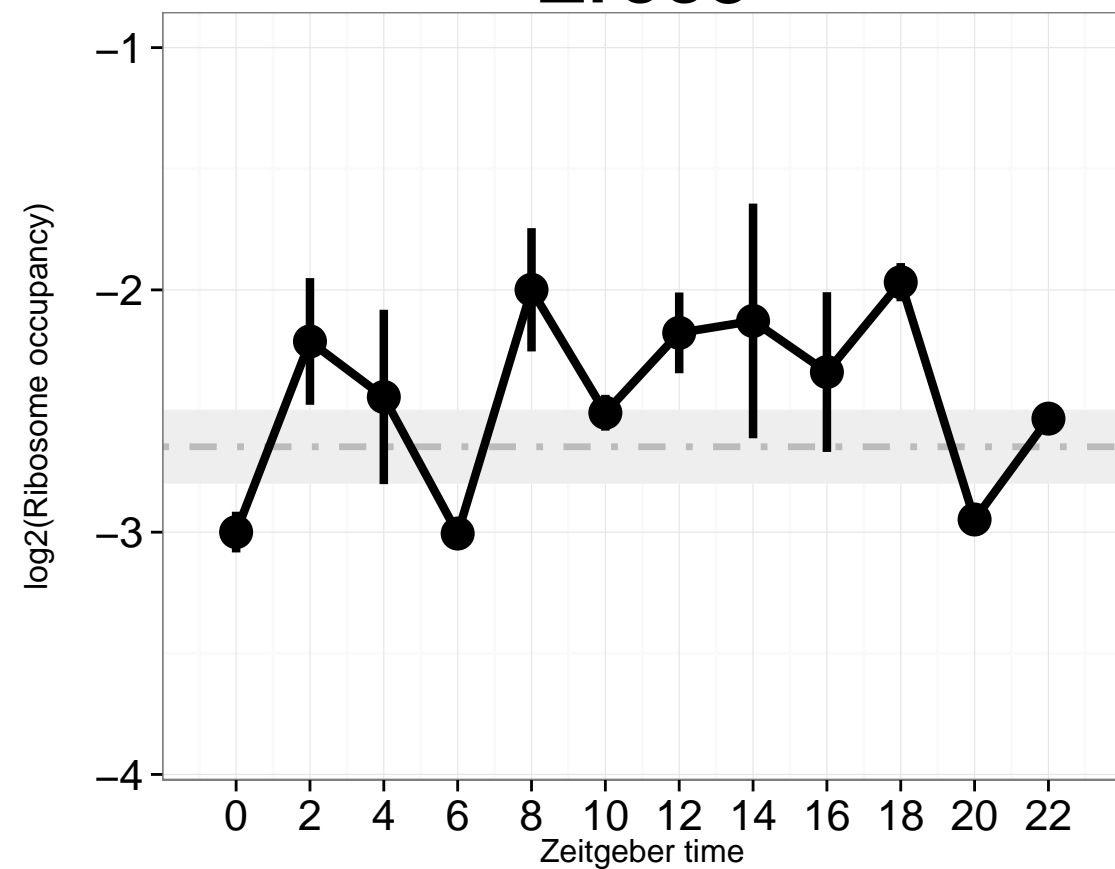

Supplement: SuppDataset_1.zip [file Ercc8_set_A.pdf › Supplemental Dataset 1/A-mRNA_nonrhyth_translation_nonrhyth/Ercc8_set_A.pdf]

# Erdr1

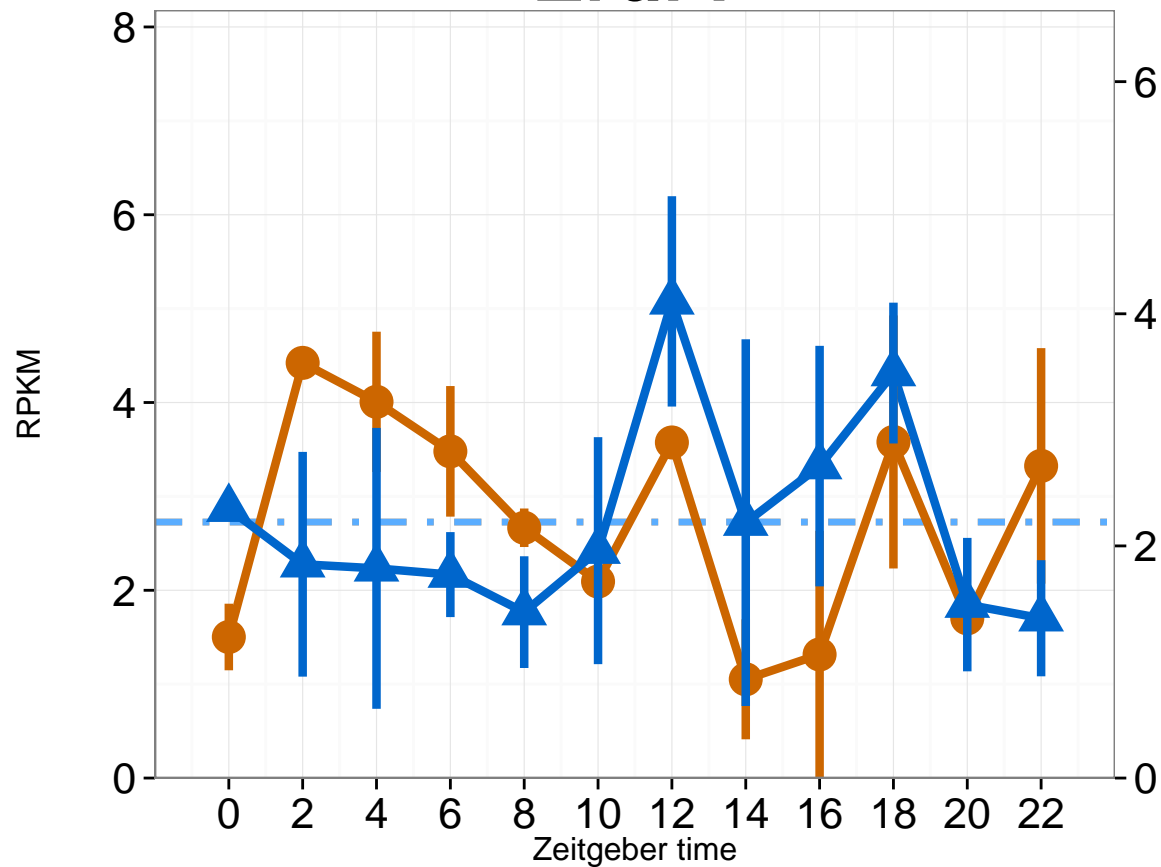

# Erdr1

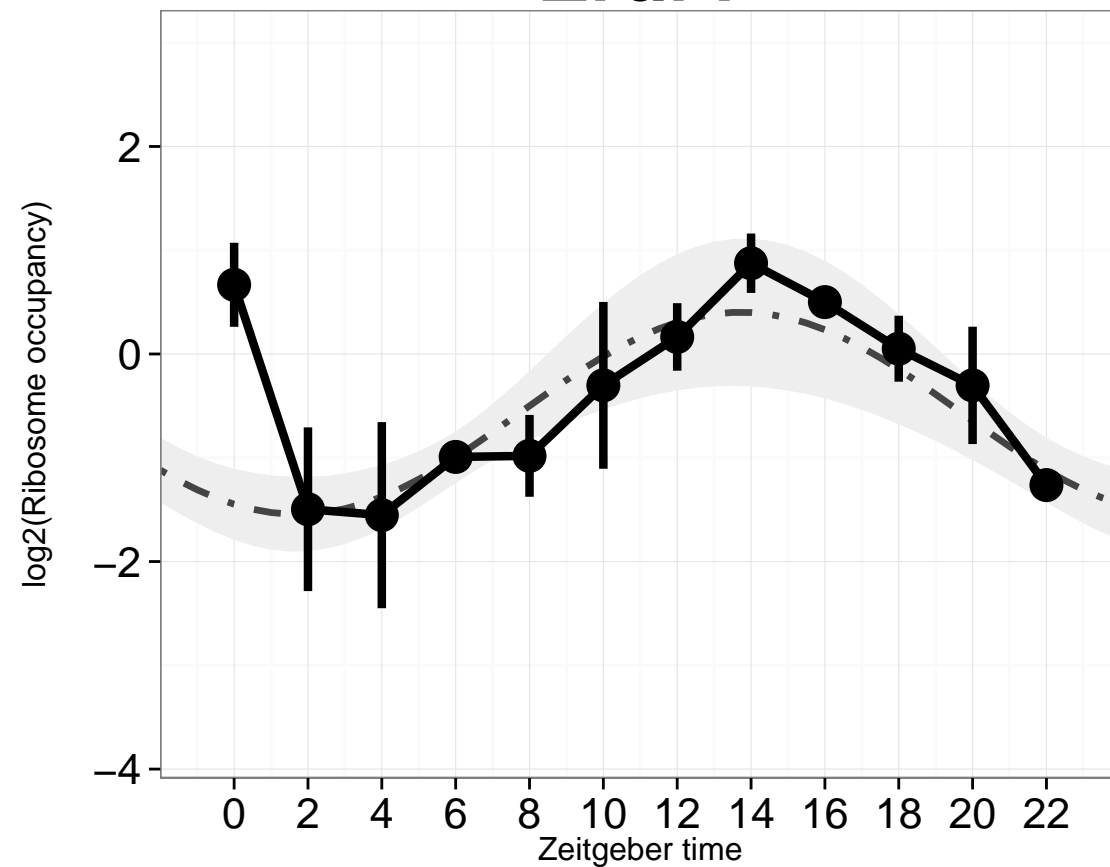

Supplement: SuppDataset_1.zip [file Erdr1_set_A.pdf › Supplemental Dataset 1/A-mRNA_nonrhyth_translation_nonrhyth/Erdr1_set_A.pdf]

## Erg

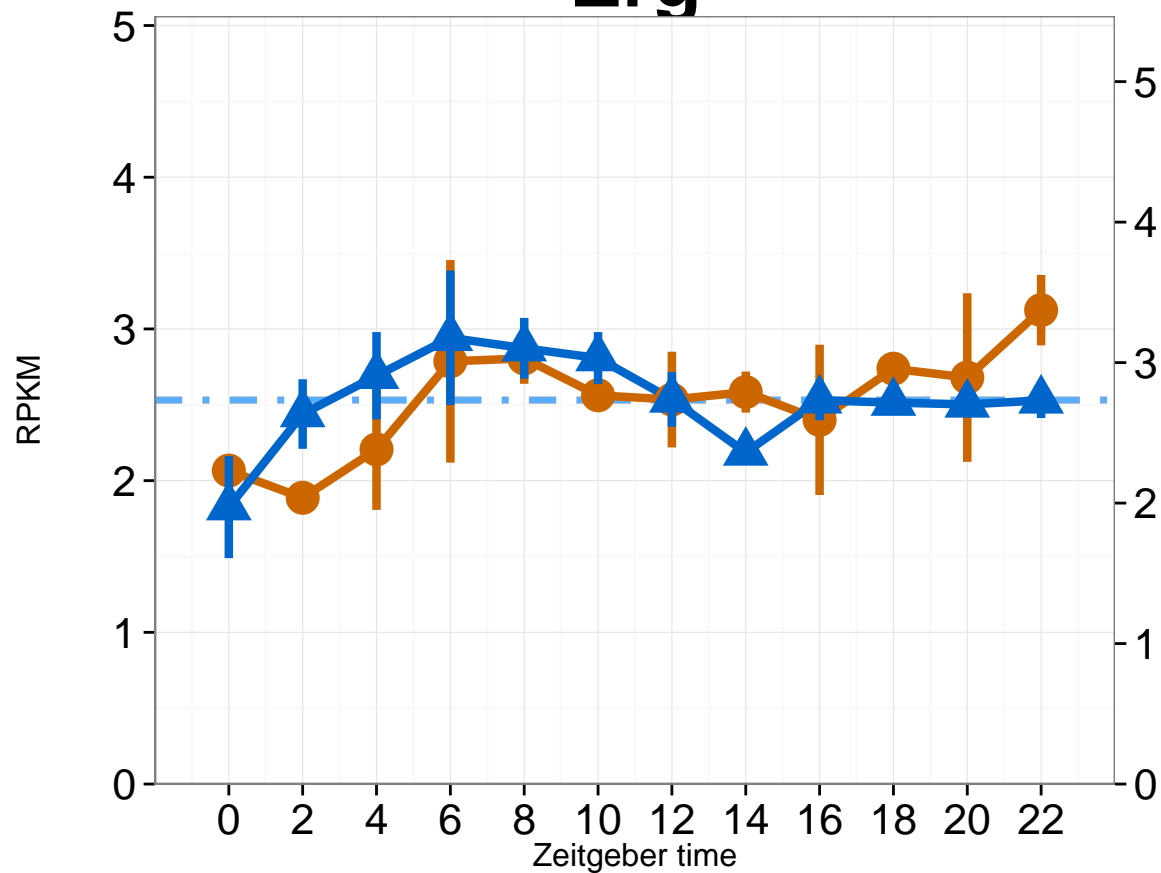

## Erg

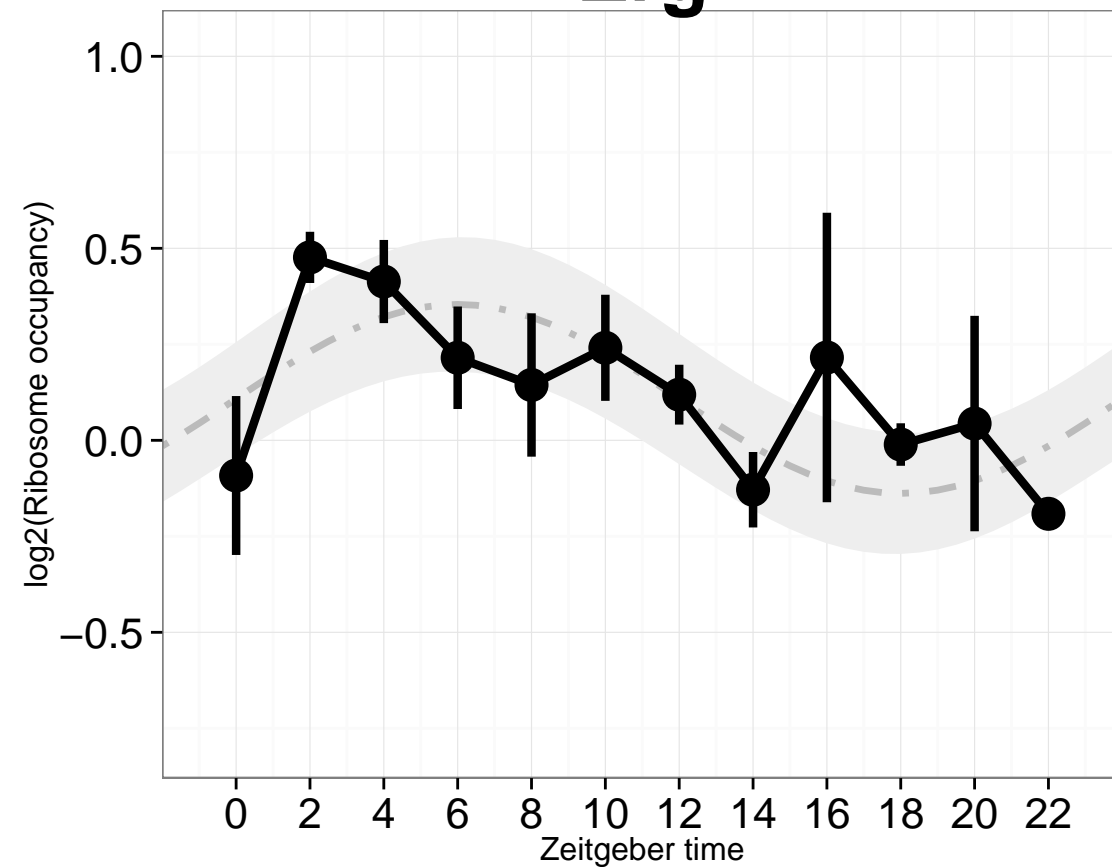

Supplement: SuppDataset_1.zip [file Erg_set_A.pdf › Supplemental Dataset 1/A-mRNA_nonrhyth_translation_nonrhyth/Erg_set_A.pdf]

## Ergic2

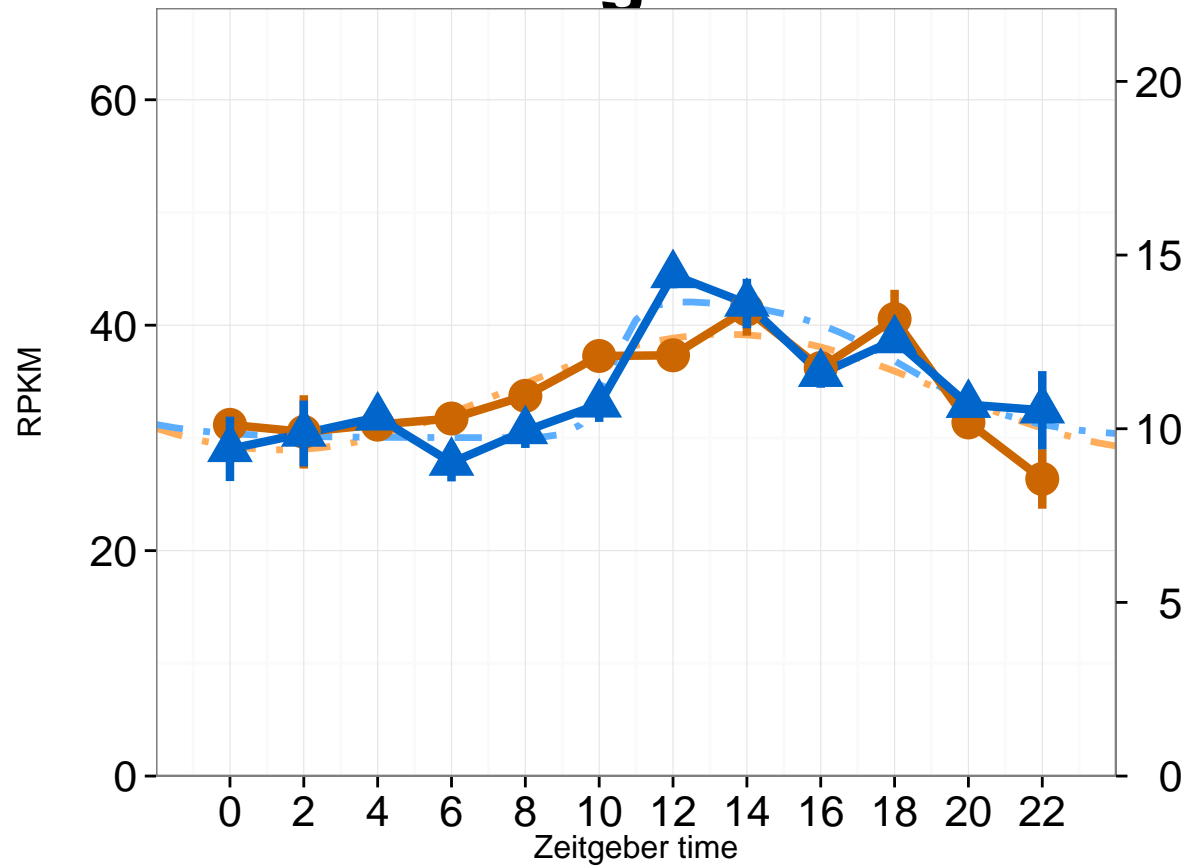

## Ergic2

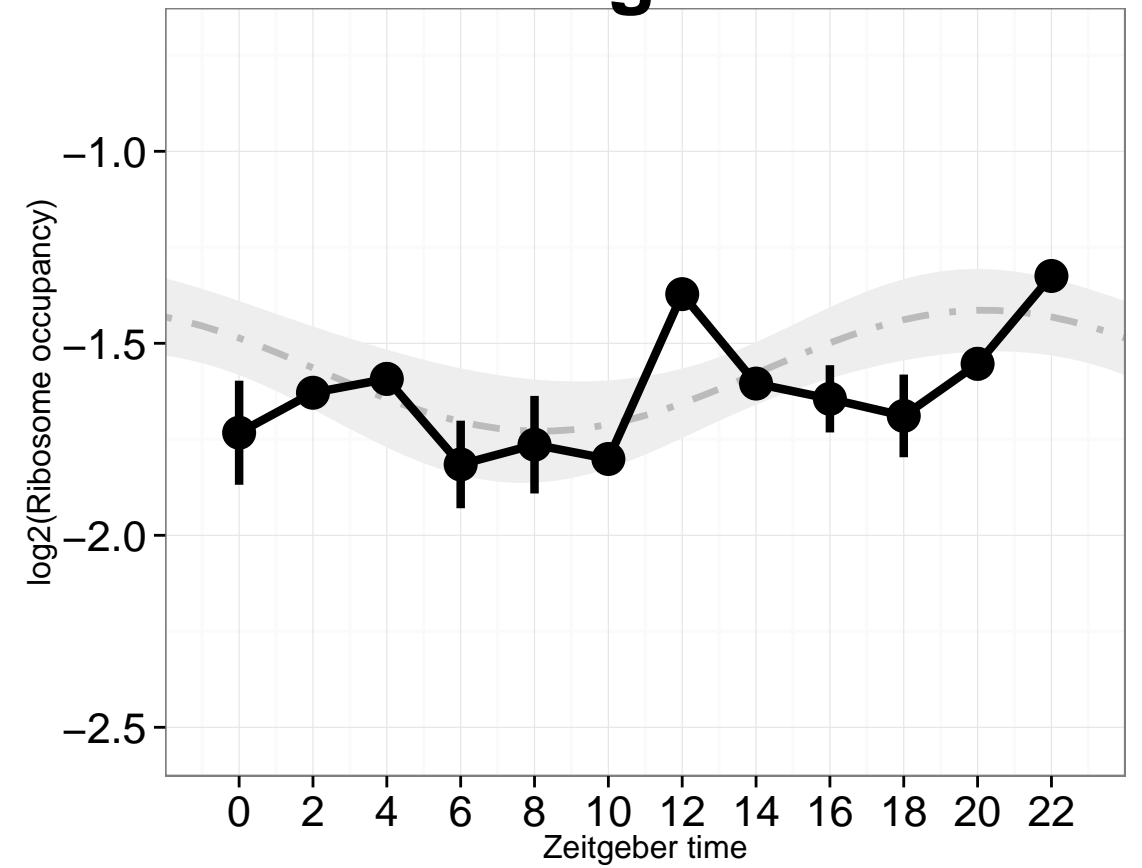

Supplement: SuppDataset_1.zip [file Ergic2_set_A.pdf › Supplemental Dataset 1/A-mRNA_nonrhyth_translation_nonrhyth/Ergic2_set_A.pdf]

## Ergic3

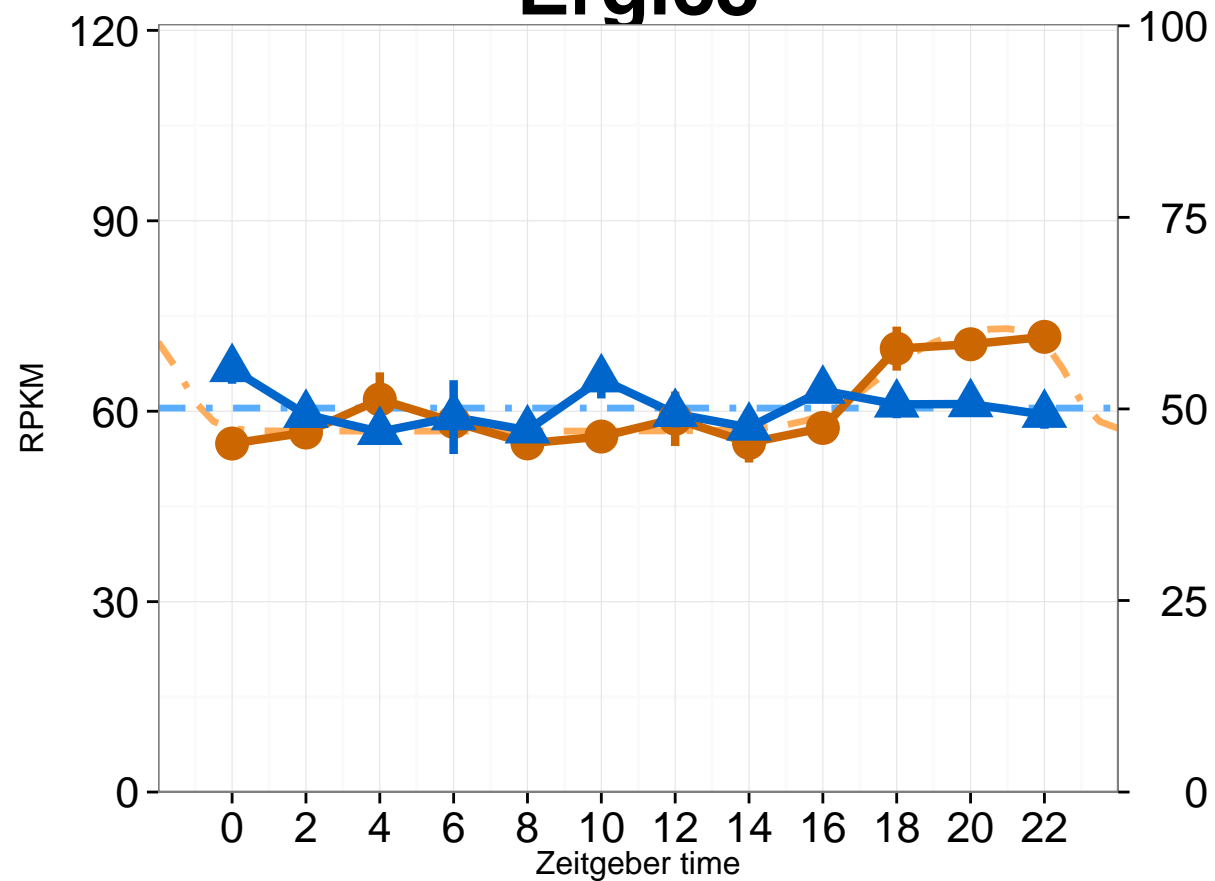

## Ergic3

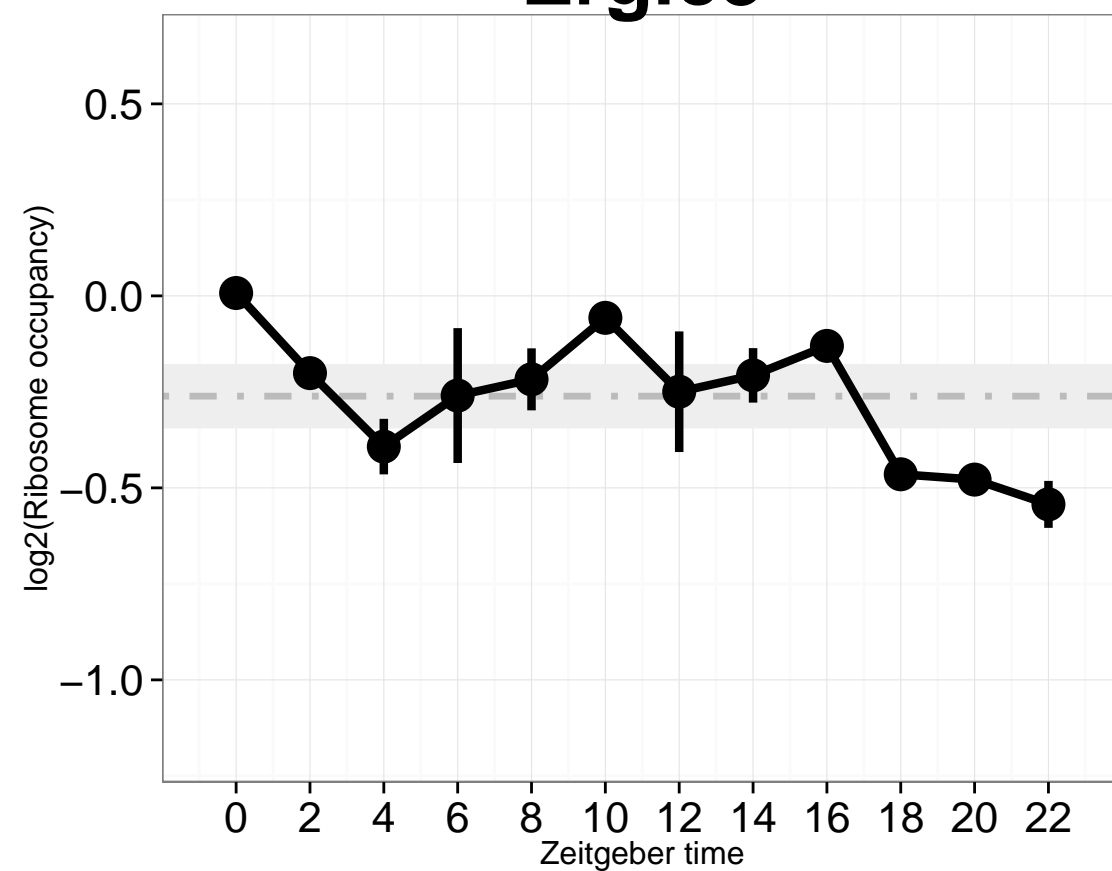

Supplement: SuppDataset_1.zip [file Ergic3_set_A.pdf › Supplemental Dataset 1/A-mRNA_nonrhyth_translation_nonrhyth/Ergic3_set_A.pdf]

# Erh

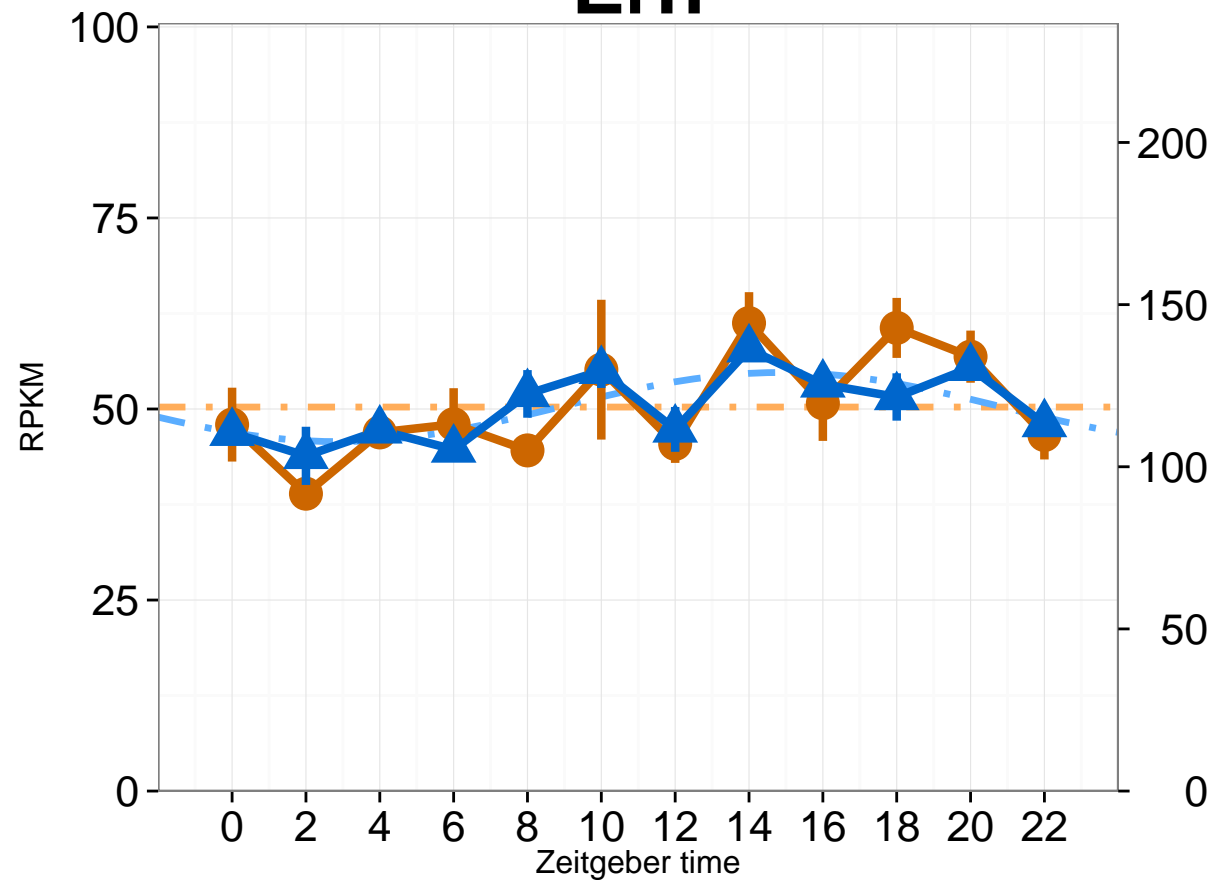

# Erh

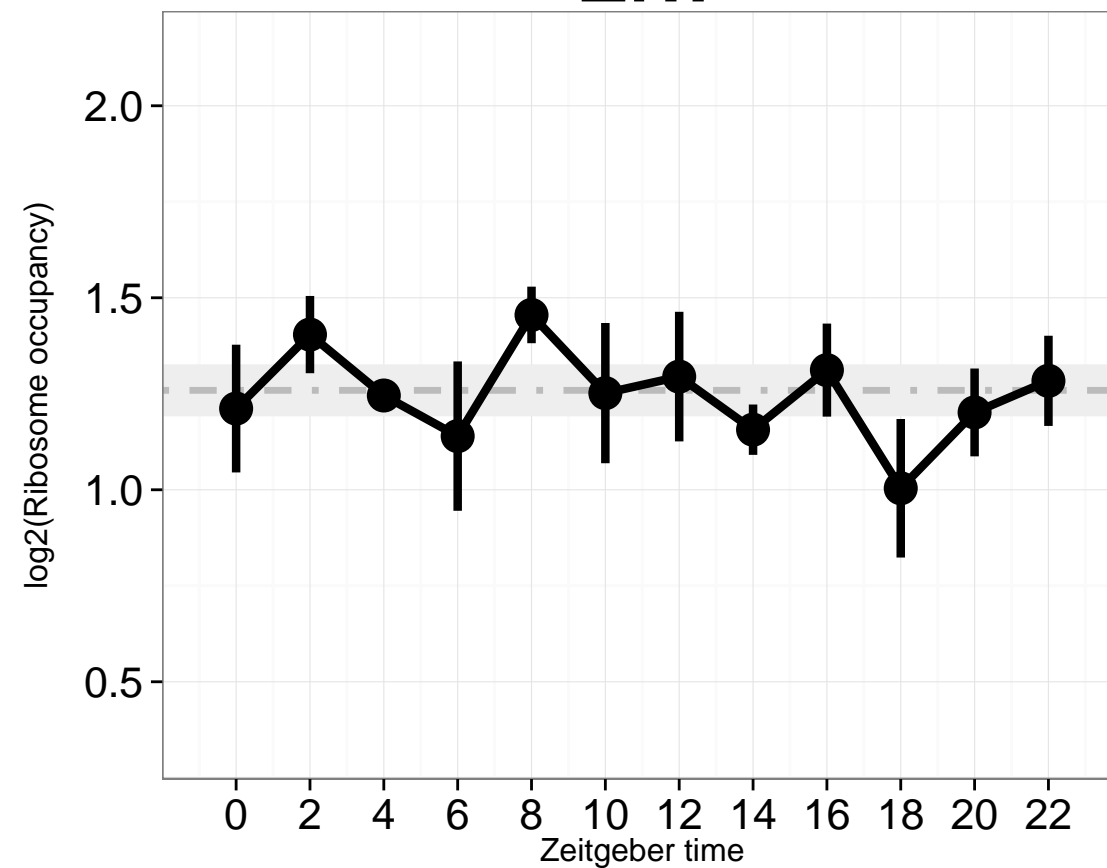

Supplement: SuppDataset_1.zip [file Erh_set_A.pdf › Supplemental Dataset 1/A-mRNA_nonrhyth_translation_nonrhyth/Erh_set_A.pdf]

## Eri1

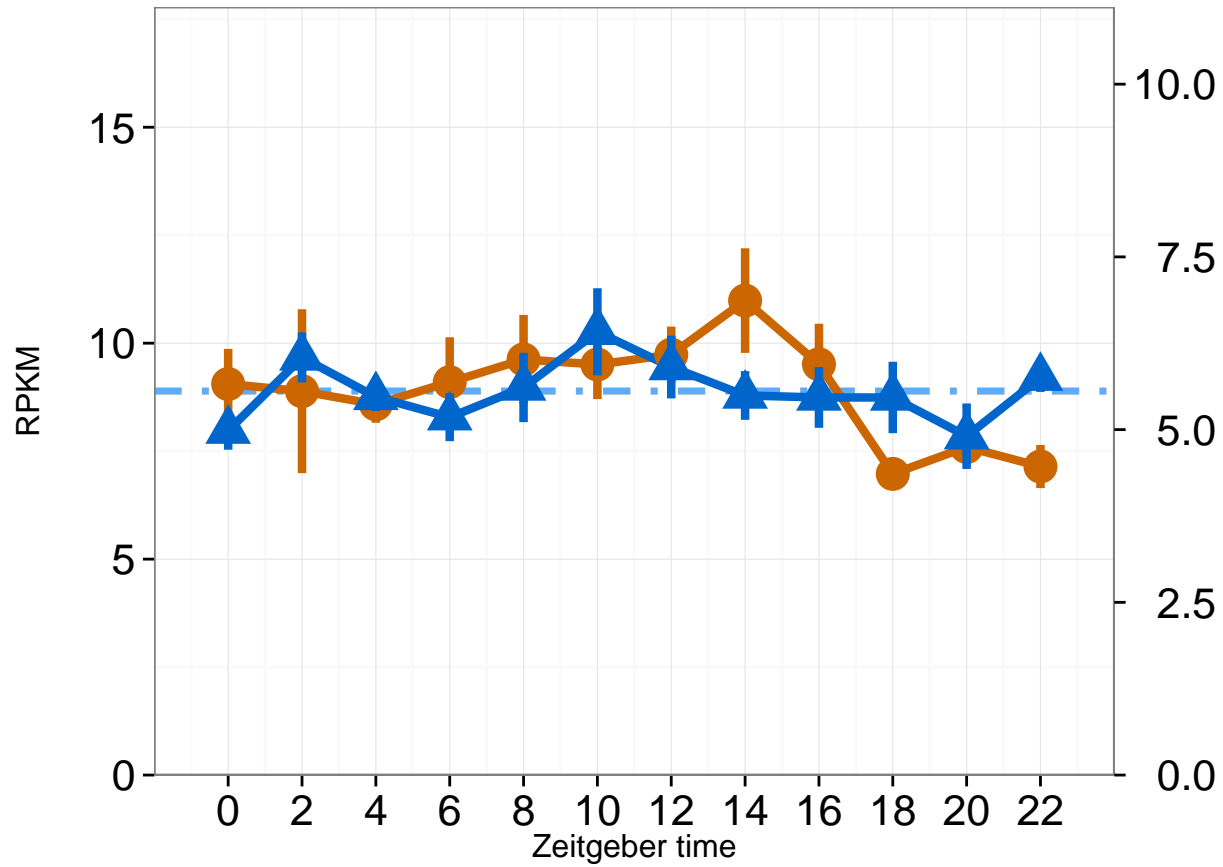

## Eri1

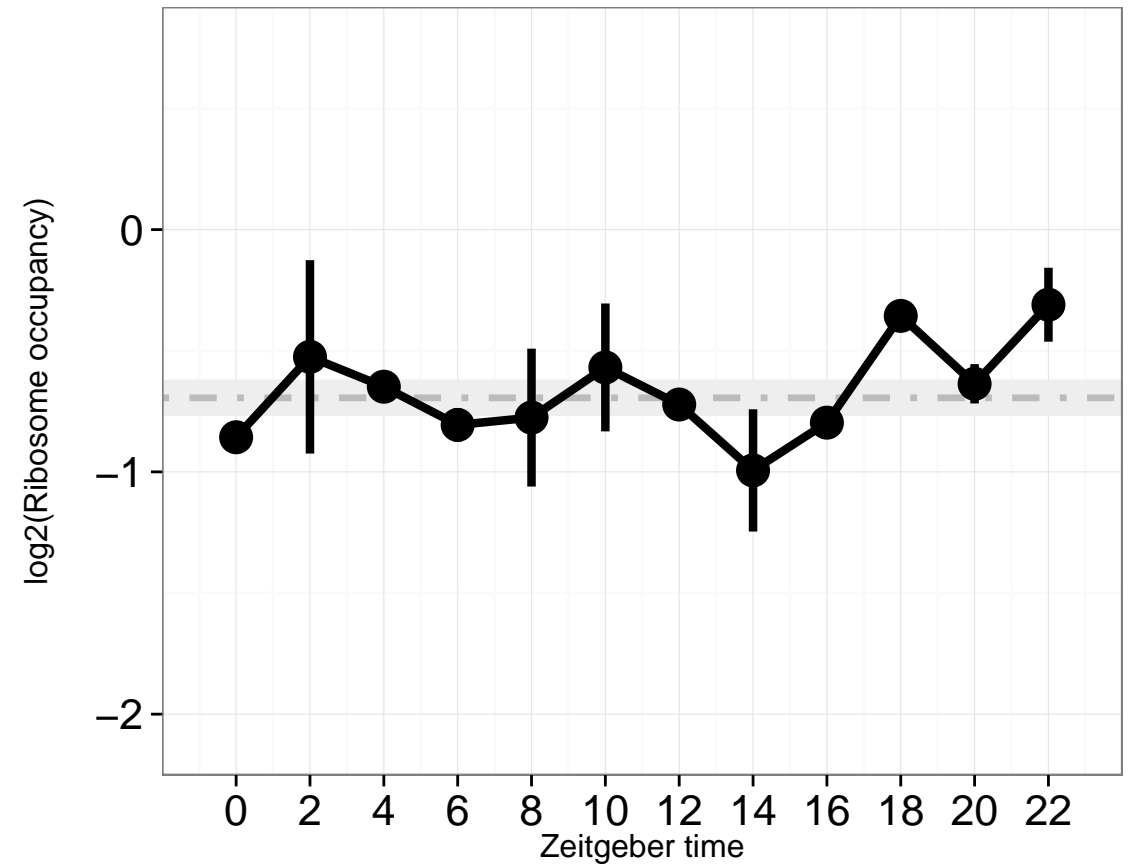

Supplement: SuppDataset_1.zip [file Eri1_set_A.pdf › Supplemental Dataset 1/A-mRNA_nonrhyth_translation_nonrhyth/Eri1_set_A.pdf]

## Eri2

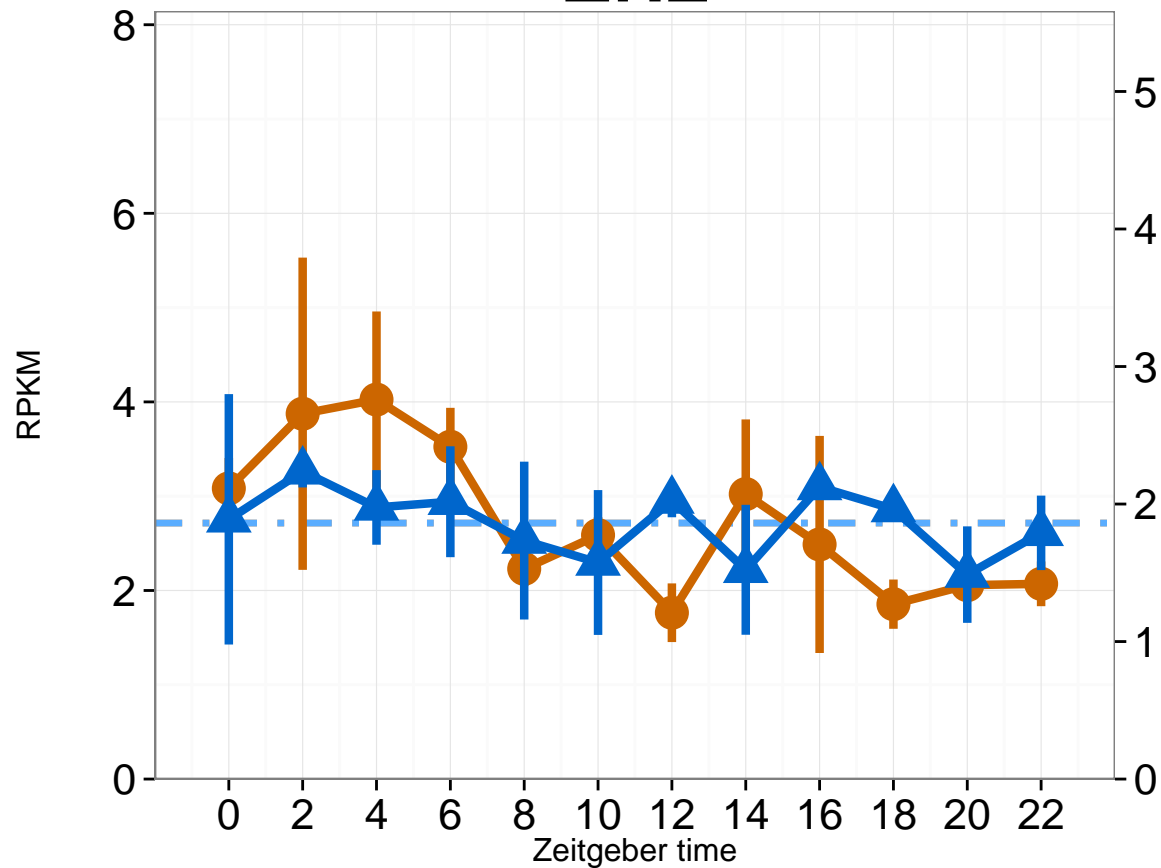

## Eri2

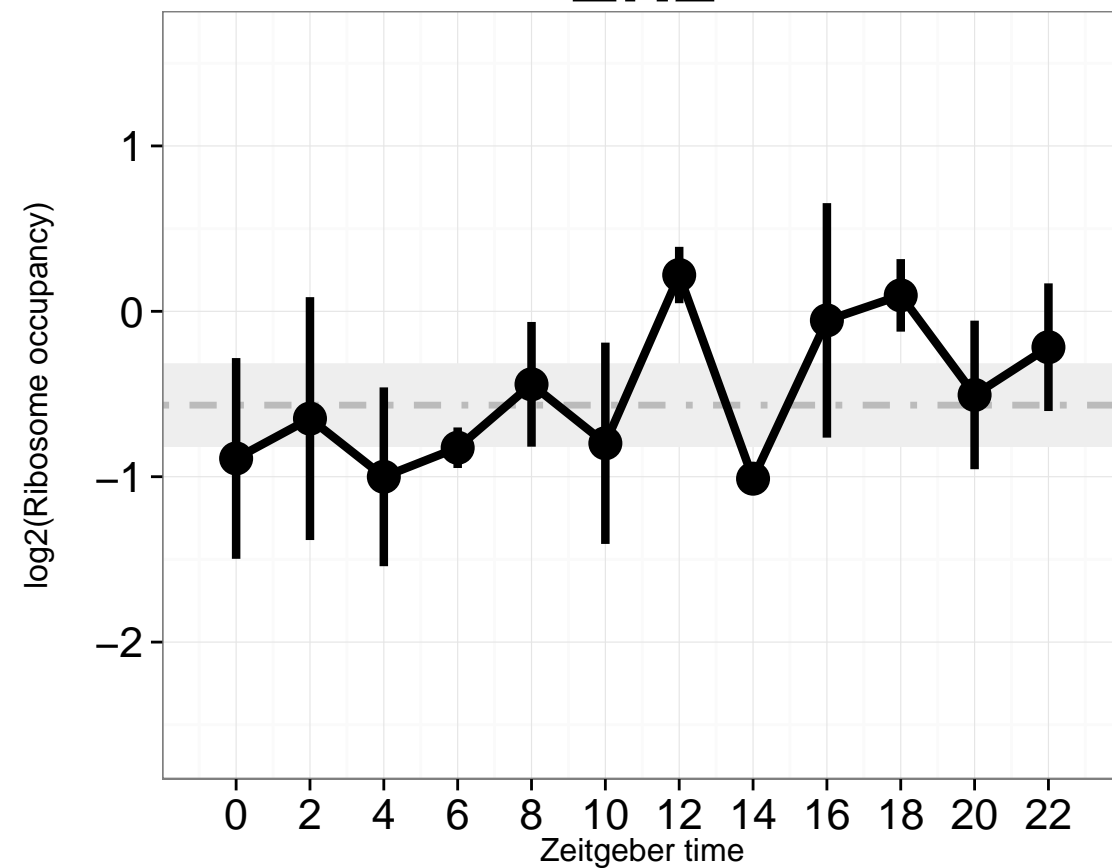

Supplement: SuppDataset_1.zip [file Eri2_set_A.pdf › Supplemental Dataset 1/A-mRNA_nonrhyth_translation_nonrhyth/Eri2_set_A.pdf]

## Eri3

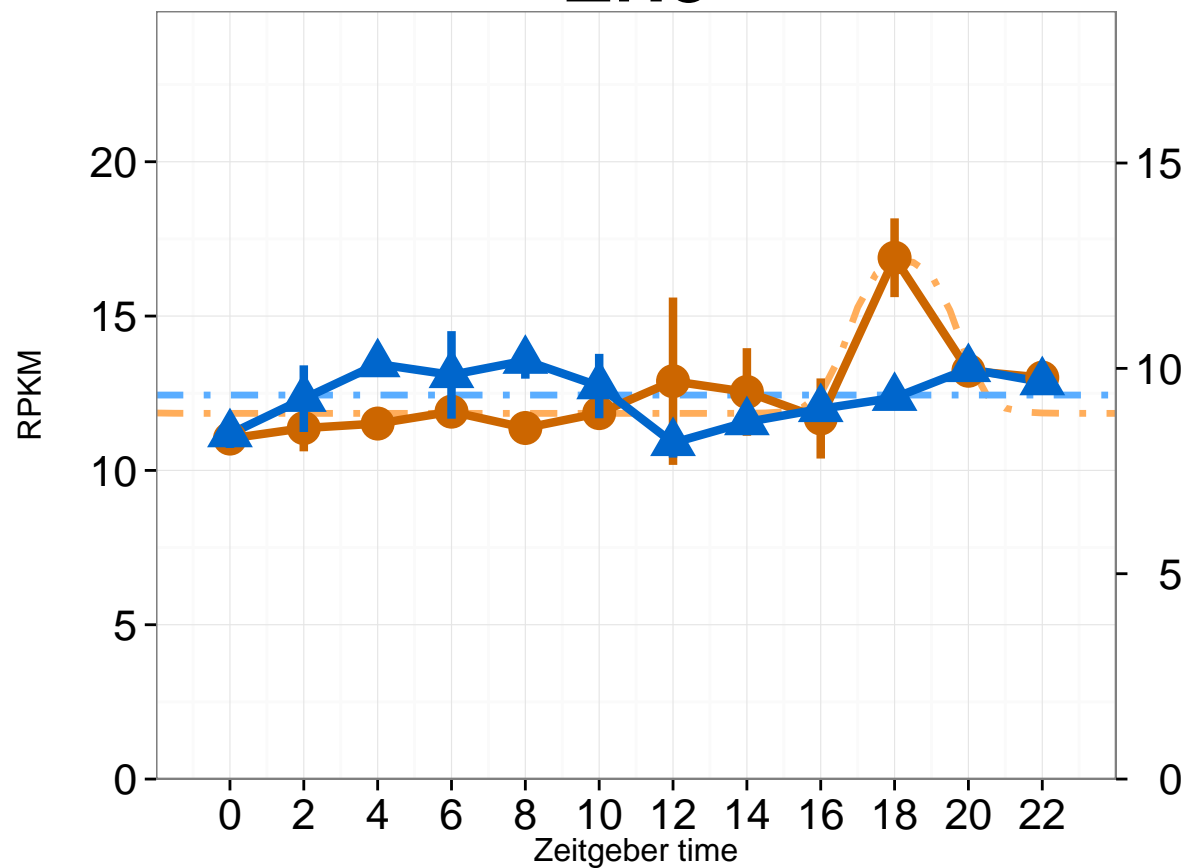

## Eri3

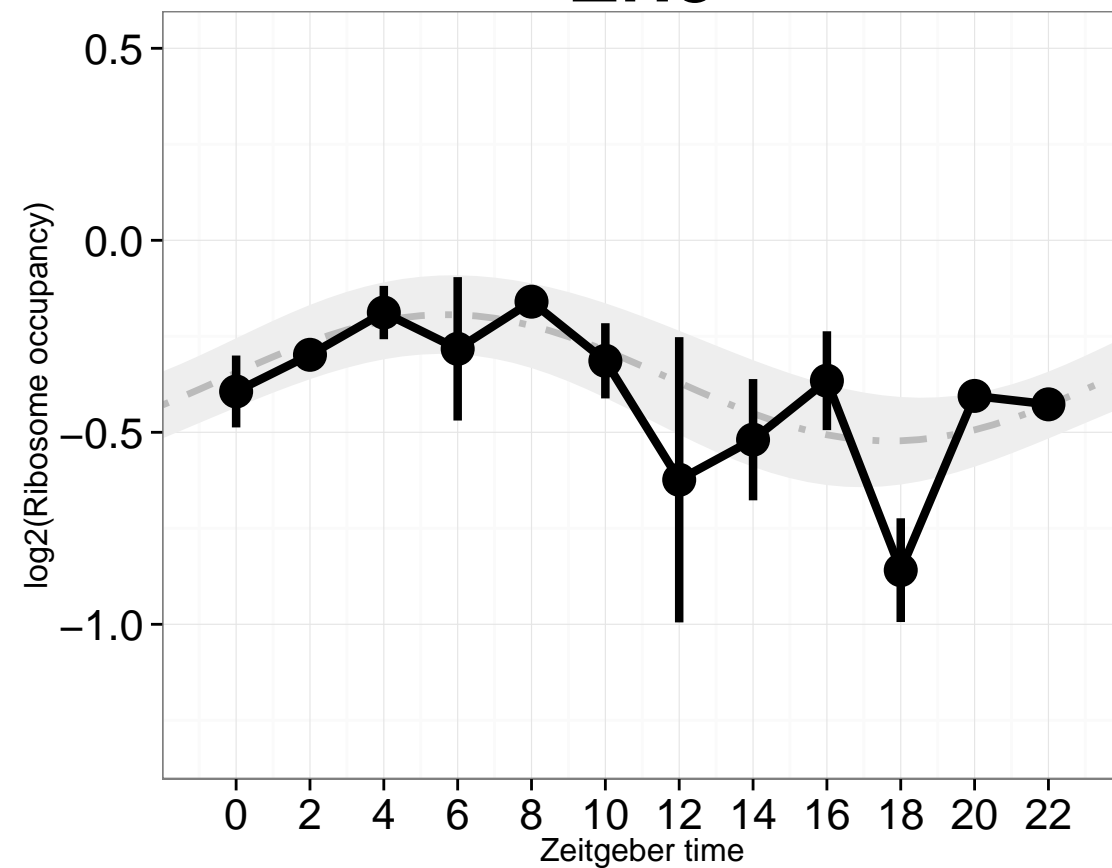

Supplement: SuppDataset_1.zip [file Eri3_set_A.pdf › Supplemental Dataset 1/A-mRNA_nonrhyth_translation_nonrhyth/Eri3_set_A.pdf]

# Erich1

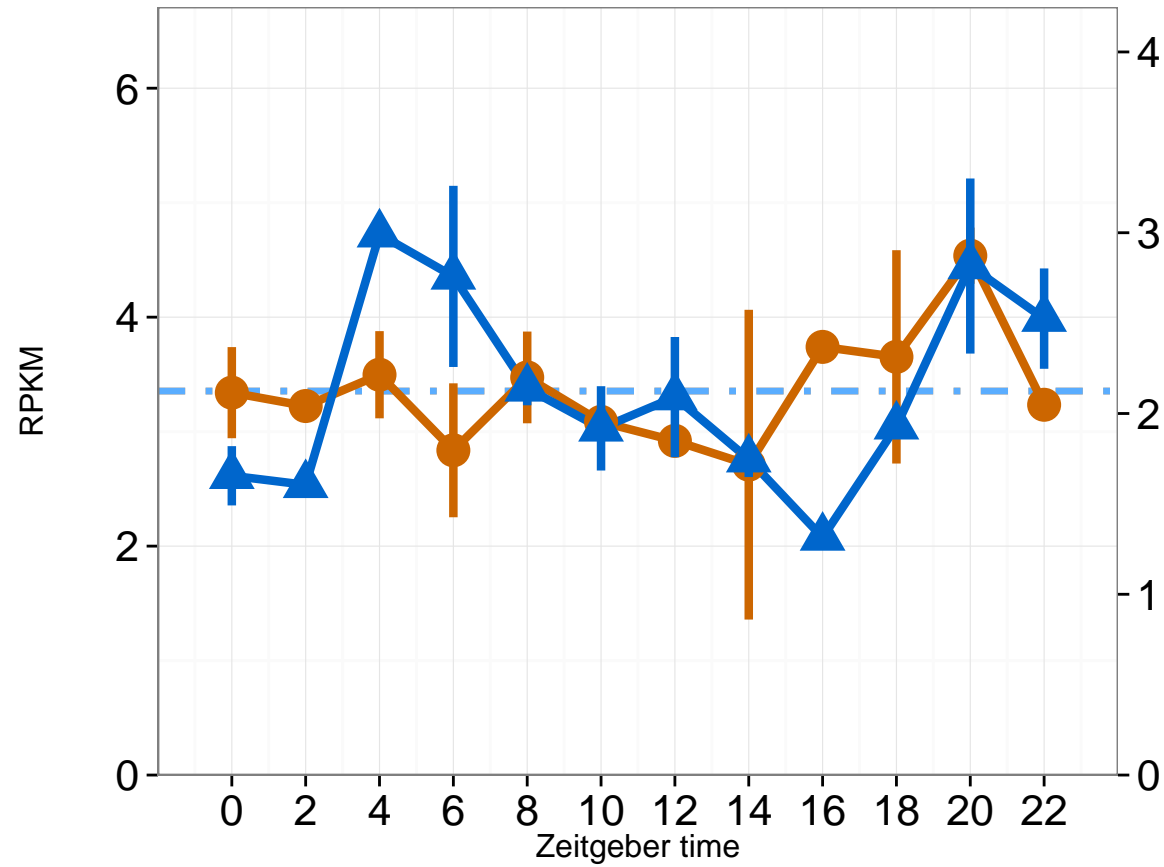

# Erich1

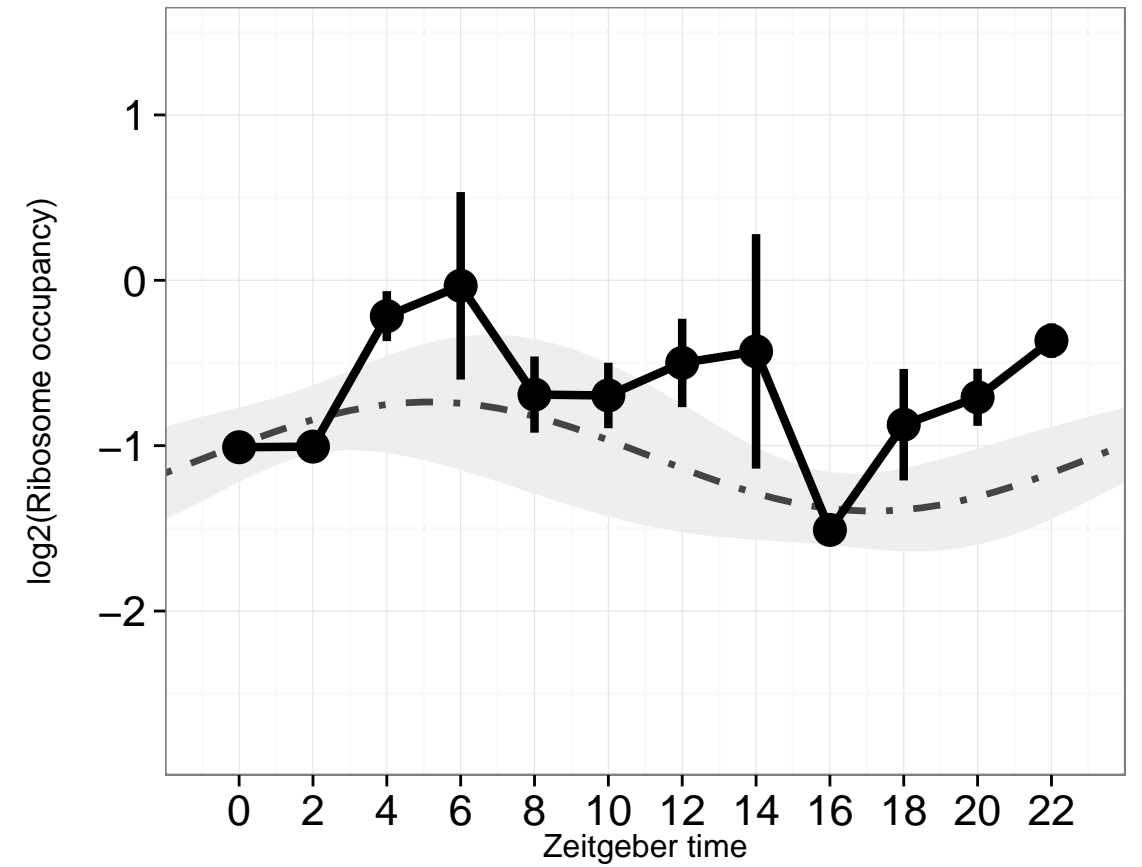

Supplement: SuppDataset_1.zip [file Erich1_set_A.pdf › Supplemental Dataset 1/A-mRNA_nonrhyth_translation_nonrhyth/Erich1_set_A.pdf]

## Erlin1

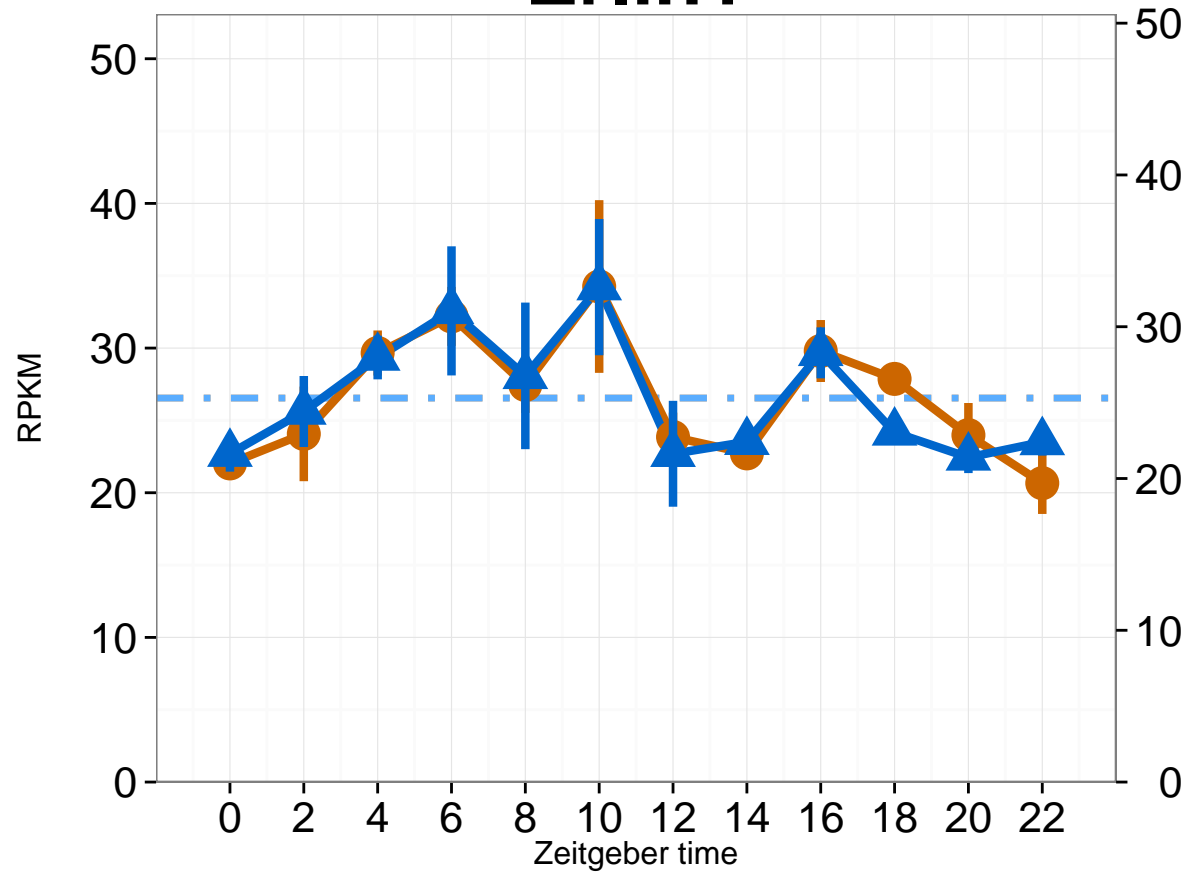

## Erlin1

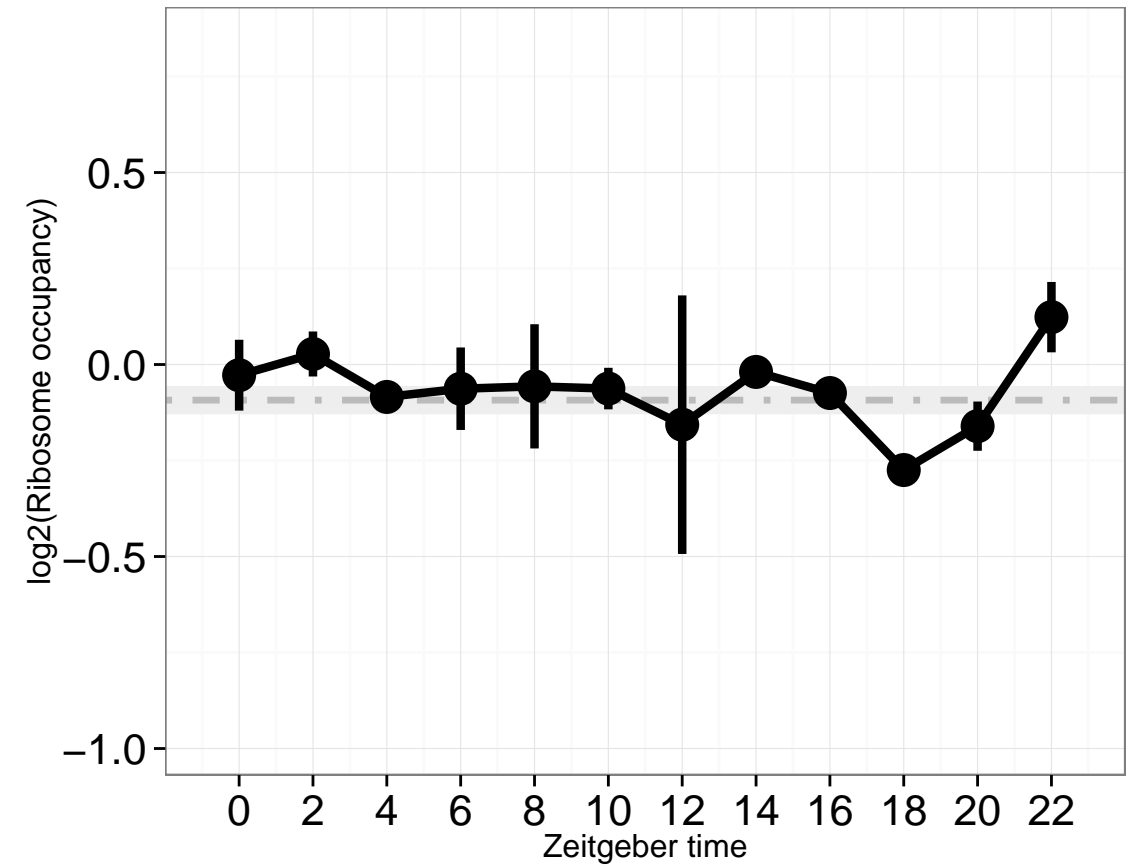

Supplement: SuppDataset_1.zip [file Erlin1_set_A.pdf › Supplemental Dataset 1/A-mRNA_nonrhyth_translation_nonrhyth/Erlin1_set_A.pdf]

## Erlin2

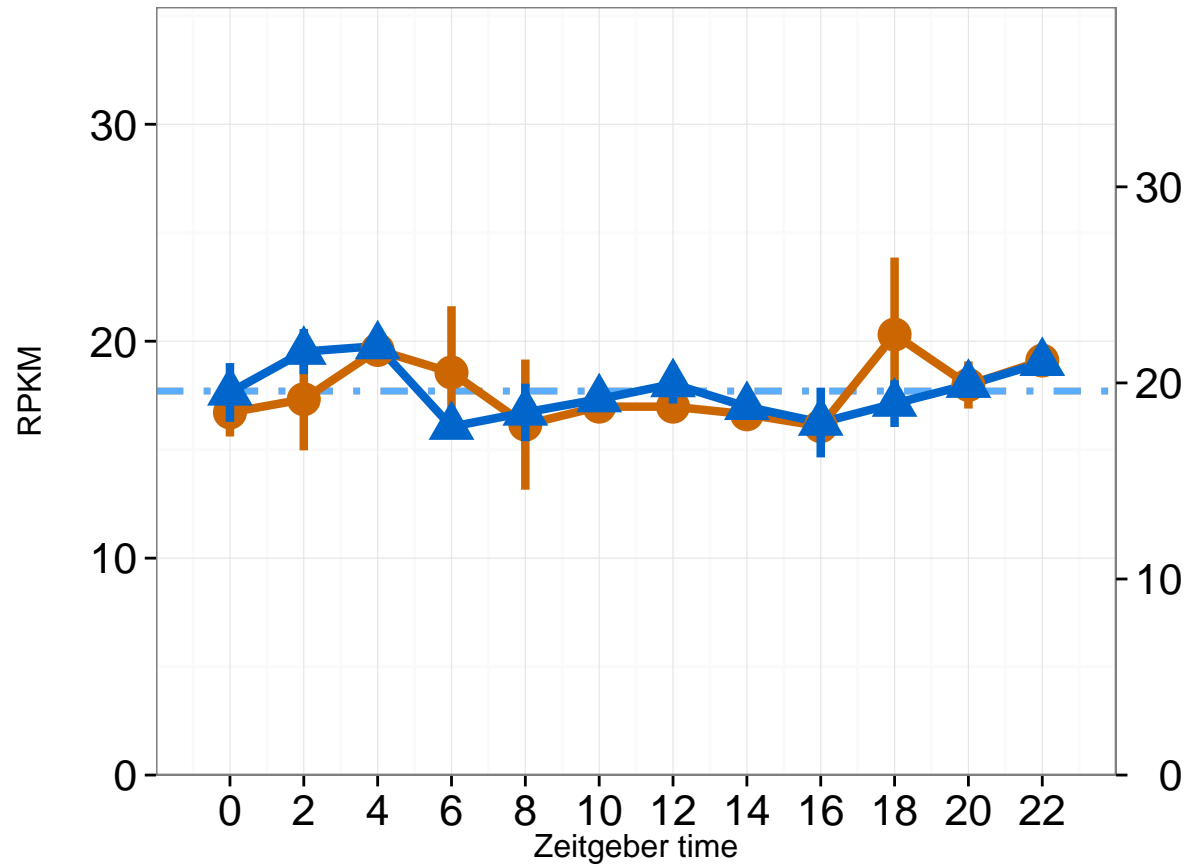

## Erlin2

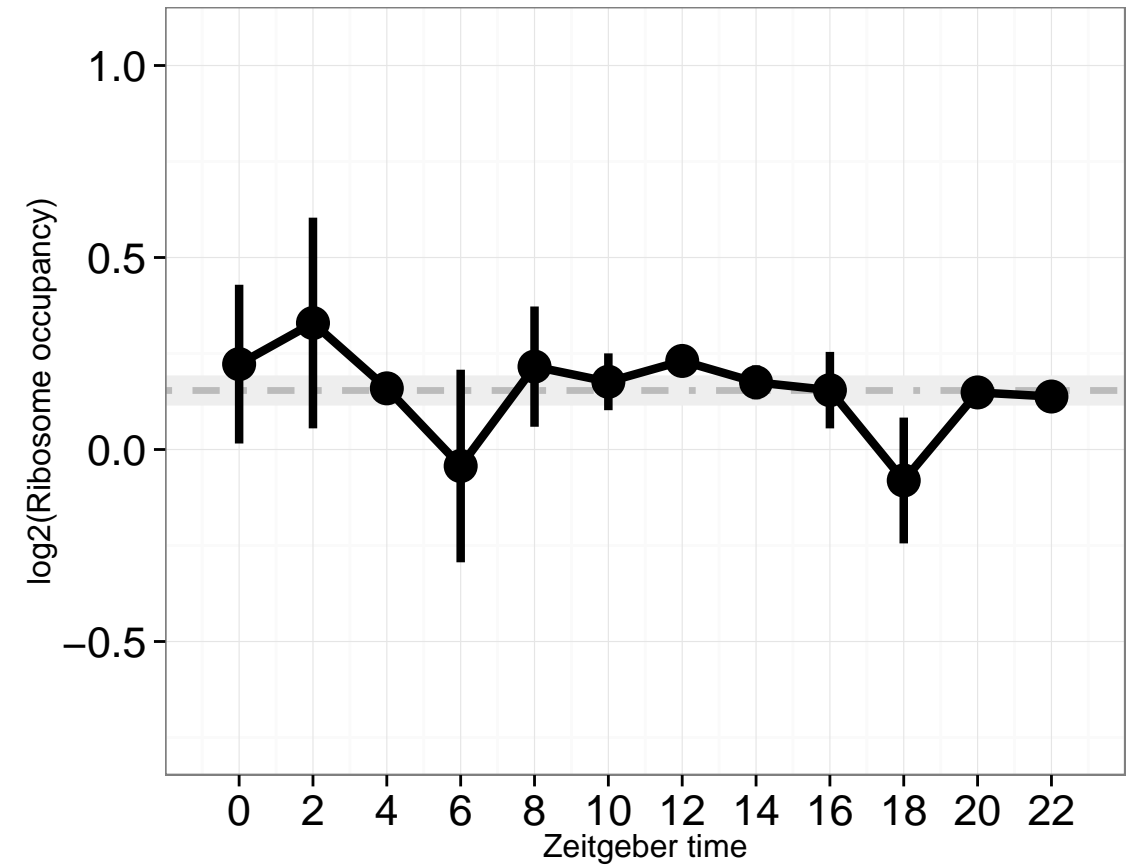

Supplement: SuppDataset_1.zip [file Erlin2_set_A.pdf › Supplemental Dataset 1/A-mRNA_nonrhyth_translation_nonrhyth/Erlin2_set_A.pdf]

## Ermard

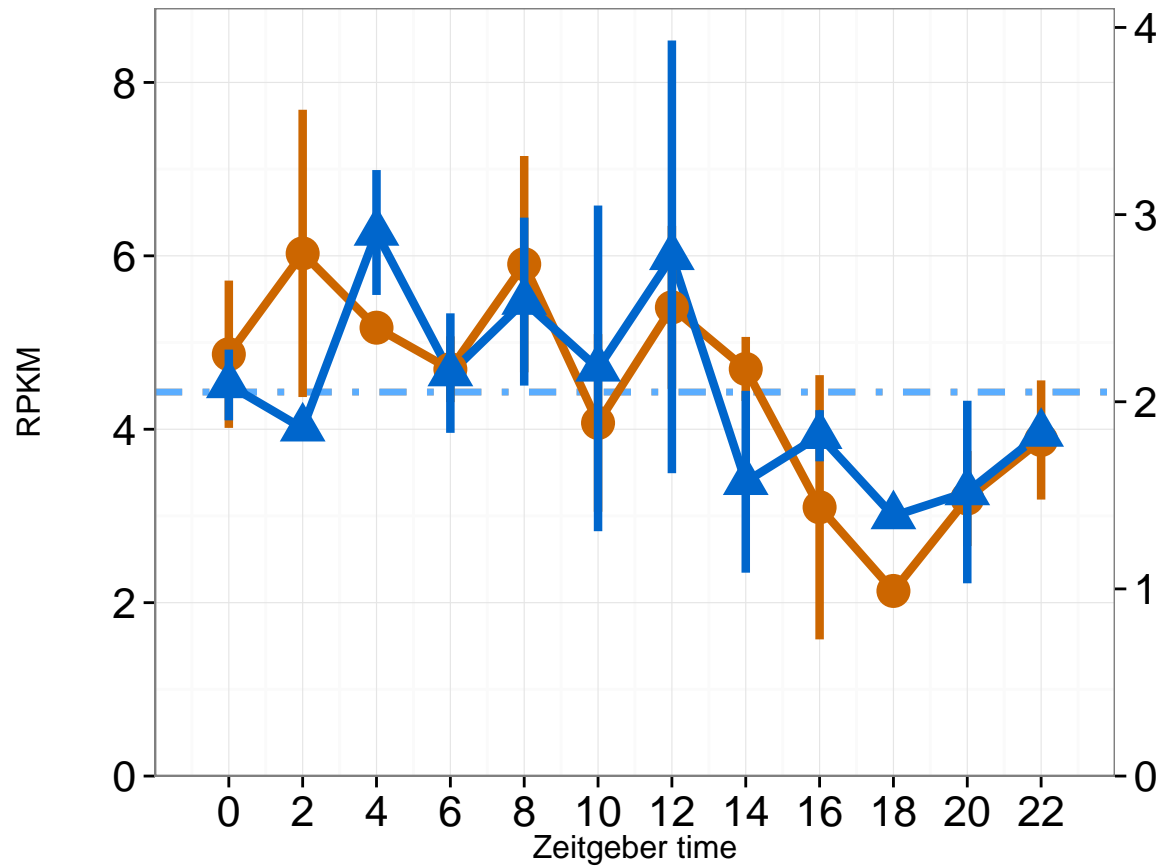

## Ermard

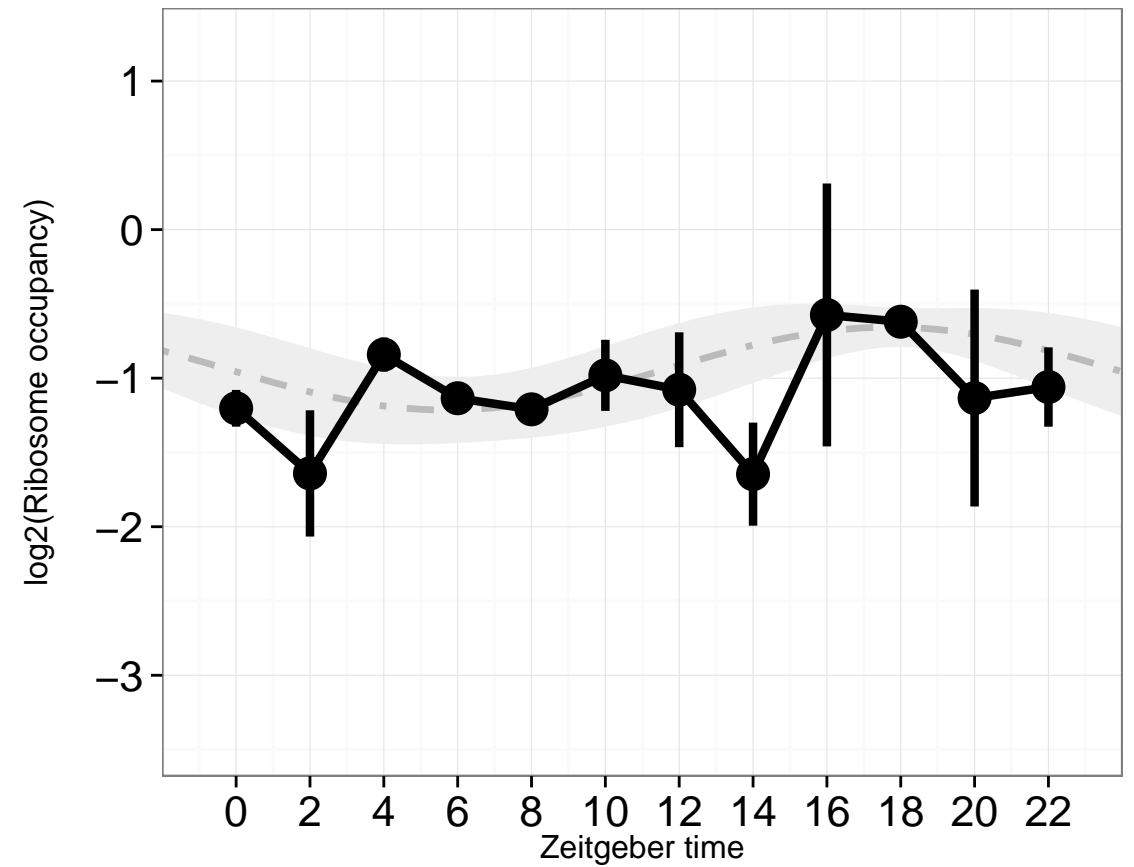

Supplement: SuppDataset_1.zip [file Ermard_set_A.pdf › Supplemental Dataset 1/A-mRNA_nonrhyth_translation_nonrhyth/Ermard_set_A.pdf]

## Ermp1

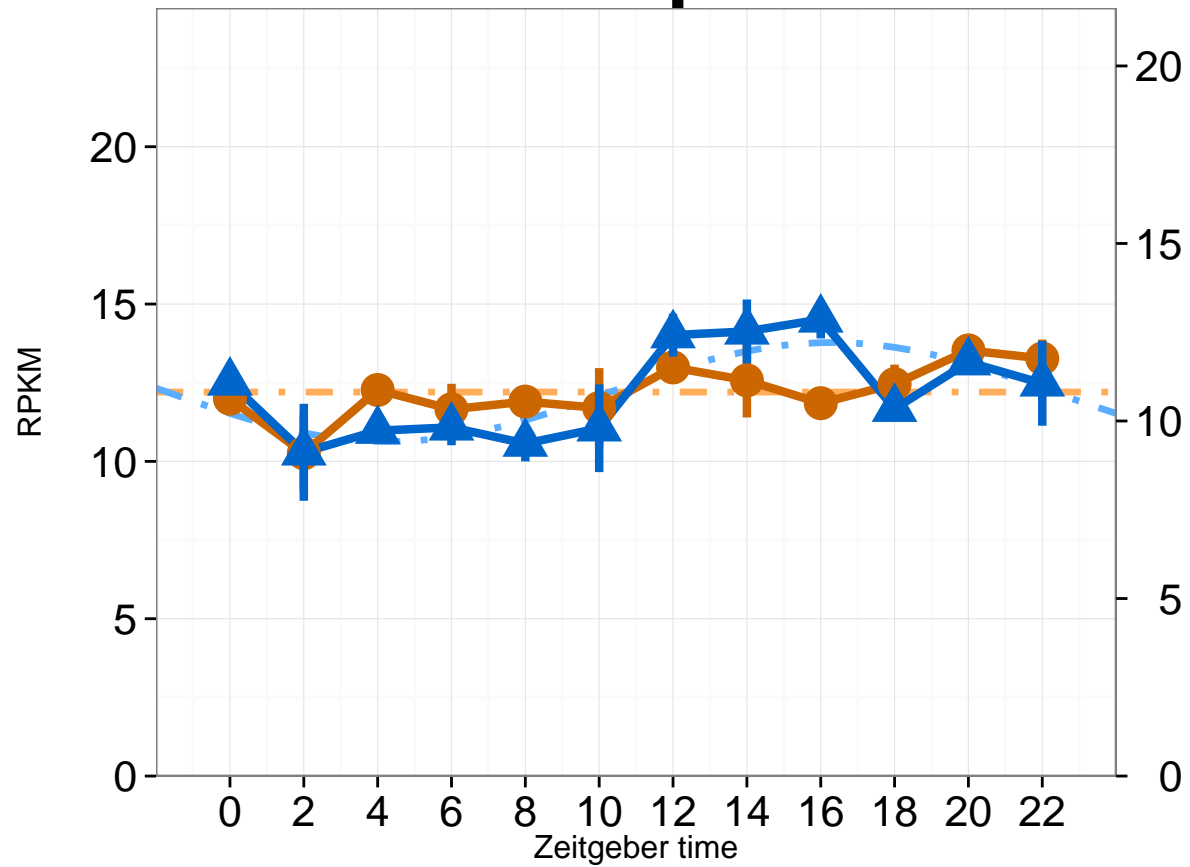

## Ermp1

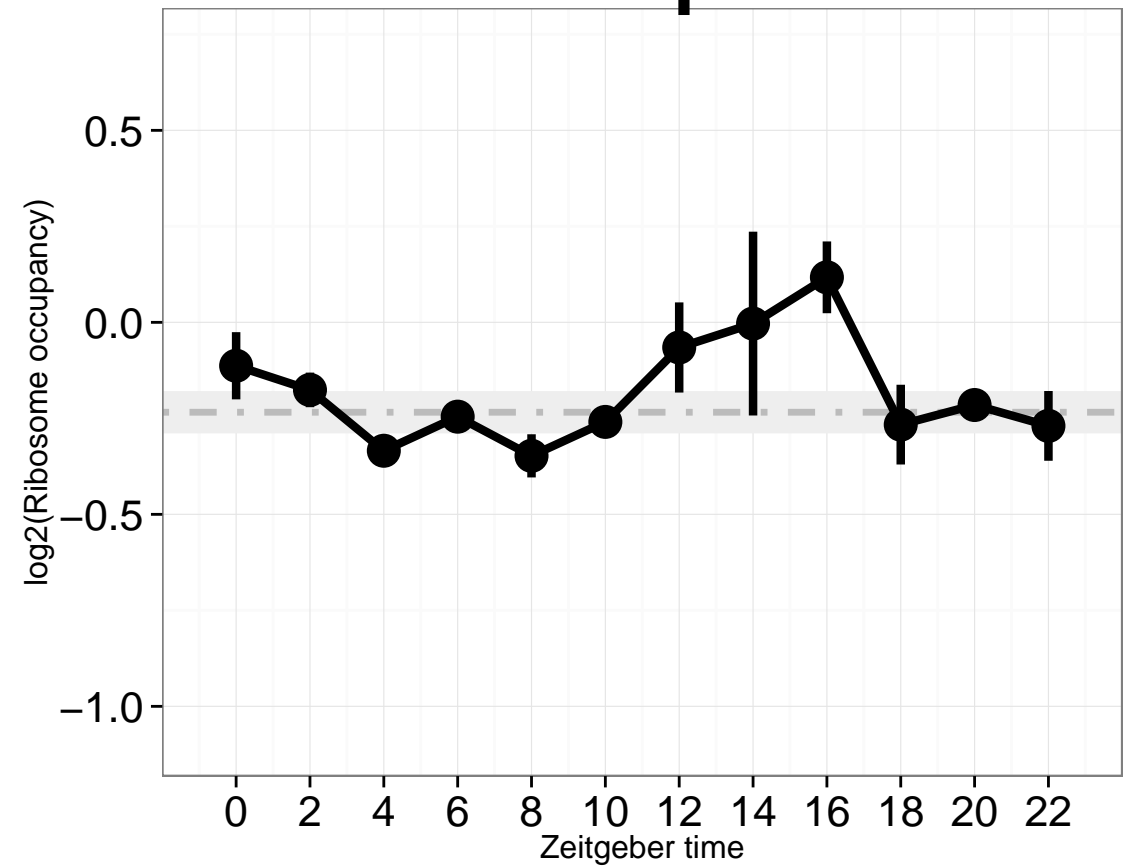

Supplement: SuppDataset_1.zip [file Ermp1_set_A.pdf › Supplemental Dataset 1/A-mRNA_nonrhyth_translation_nonrhyth/Ermp1_set_A.pdf]

## Ern1

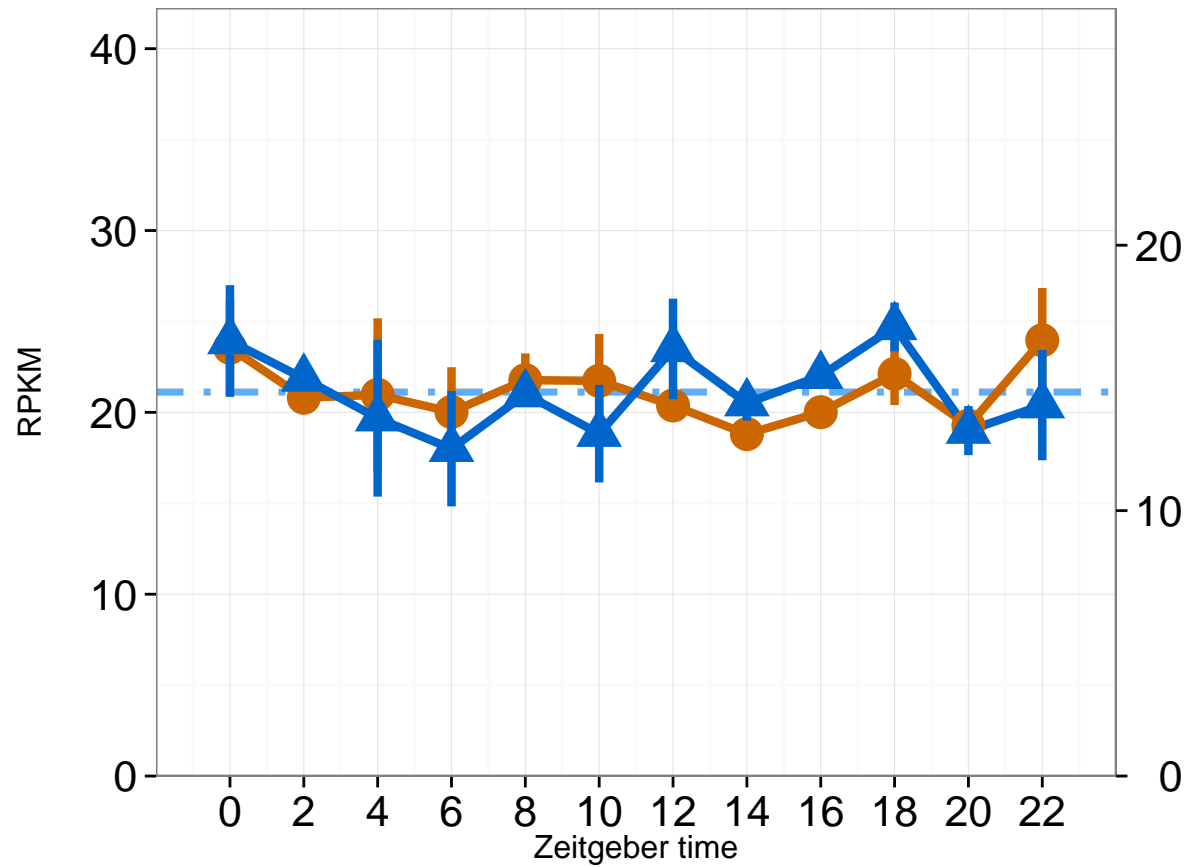

## Ern1

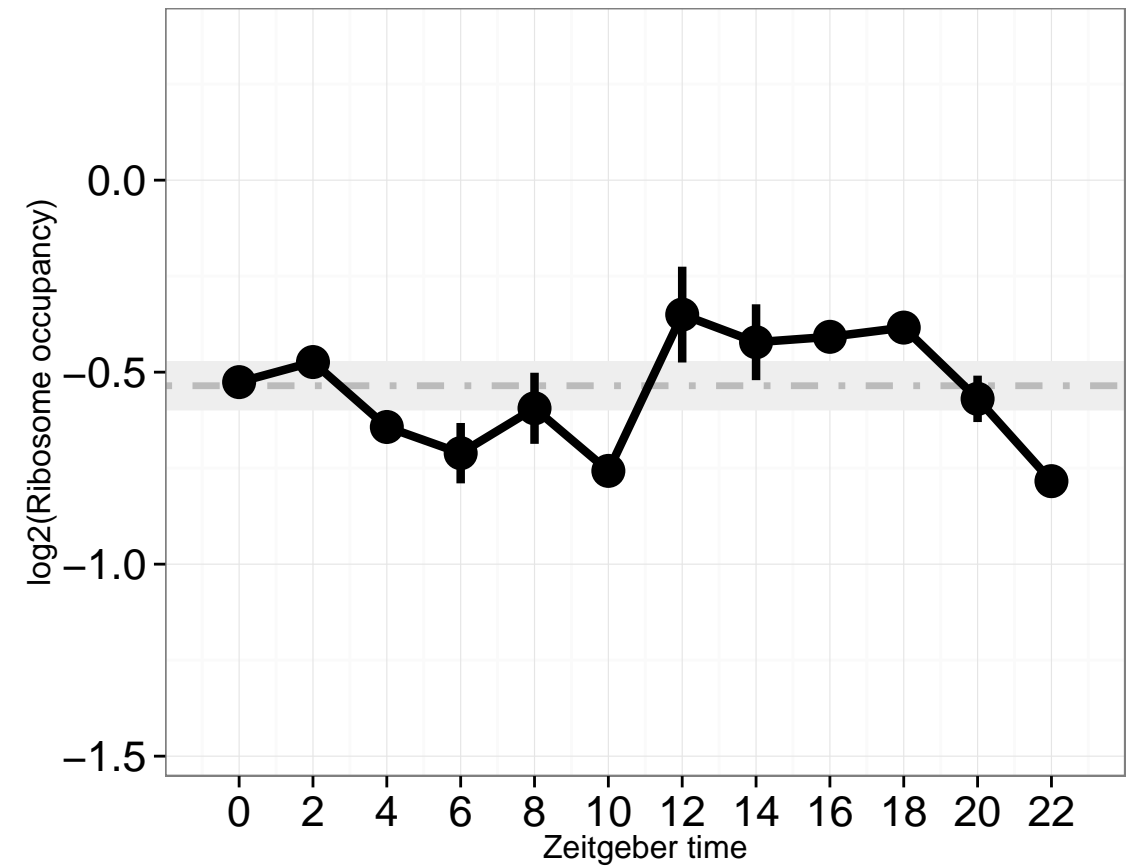

Supplement: SuppDataset_1.zip [file Ern1_set_A.pdf › Supplemental Dataset 1/A-mRNA_nonrhyth_translation_nonrhyth/Ern1_set_A.pdf]

## Ero1lb

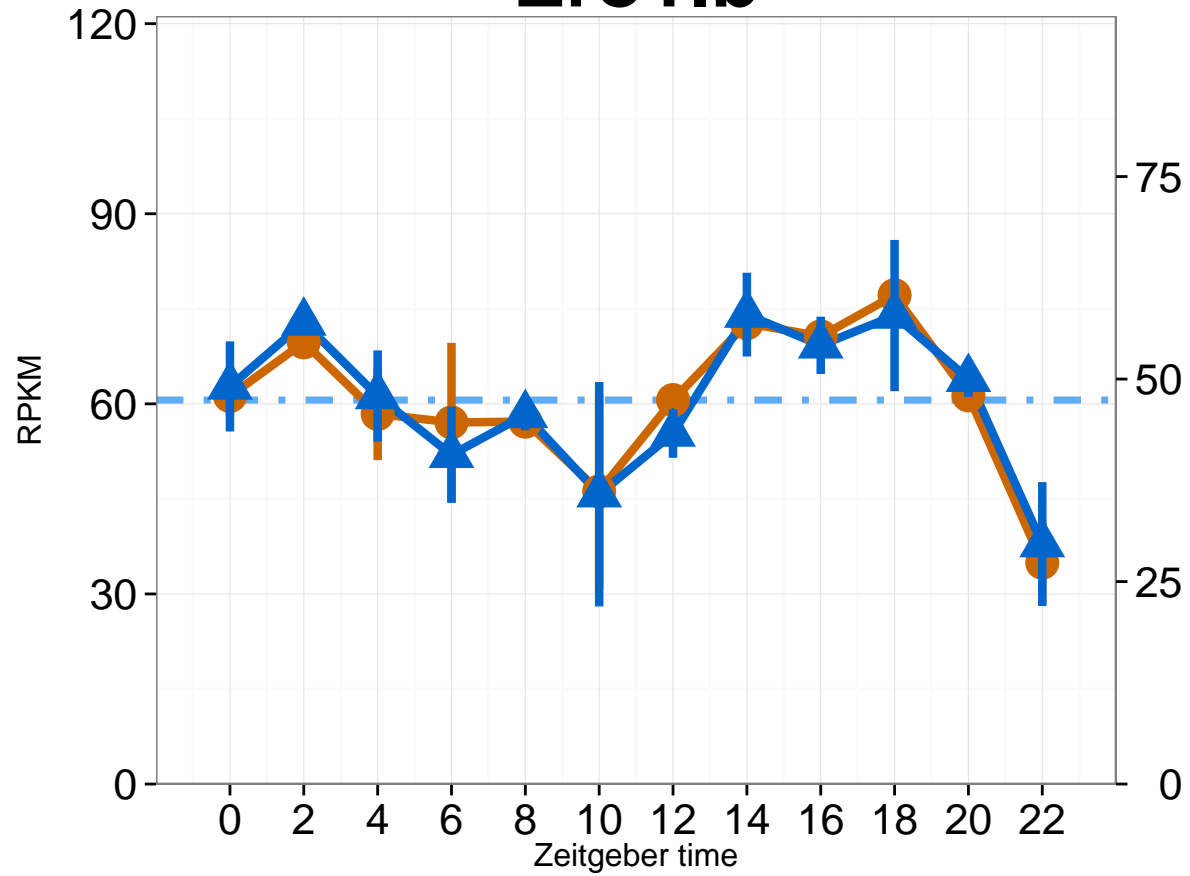

## Ero1lb

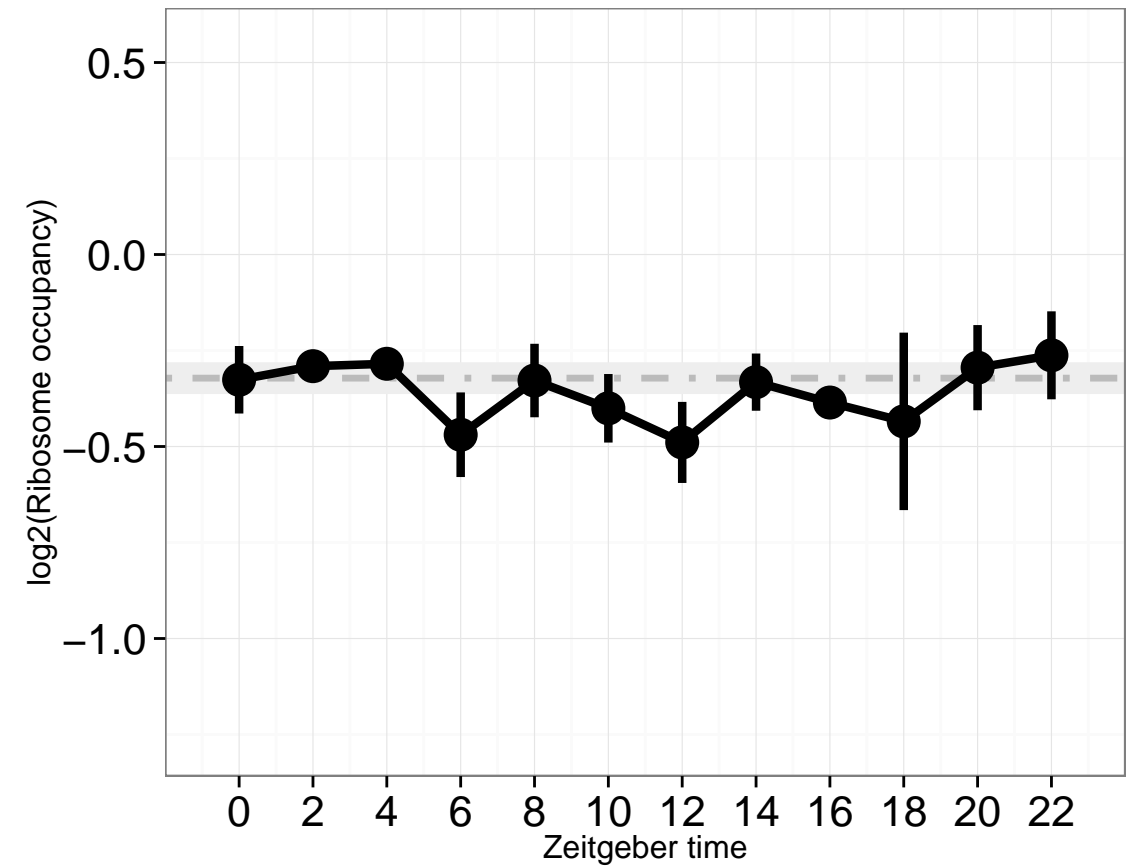

Supplement: SuppDataset_1.zip [file Ero1lb_set_A.pdf › Supplemental Dataset 1/A-mRNA_nonrhyth_translation_nonrhyth/Ero1lb_set_A.pdf]

# Erp29

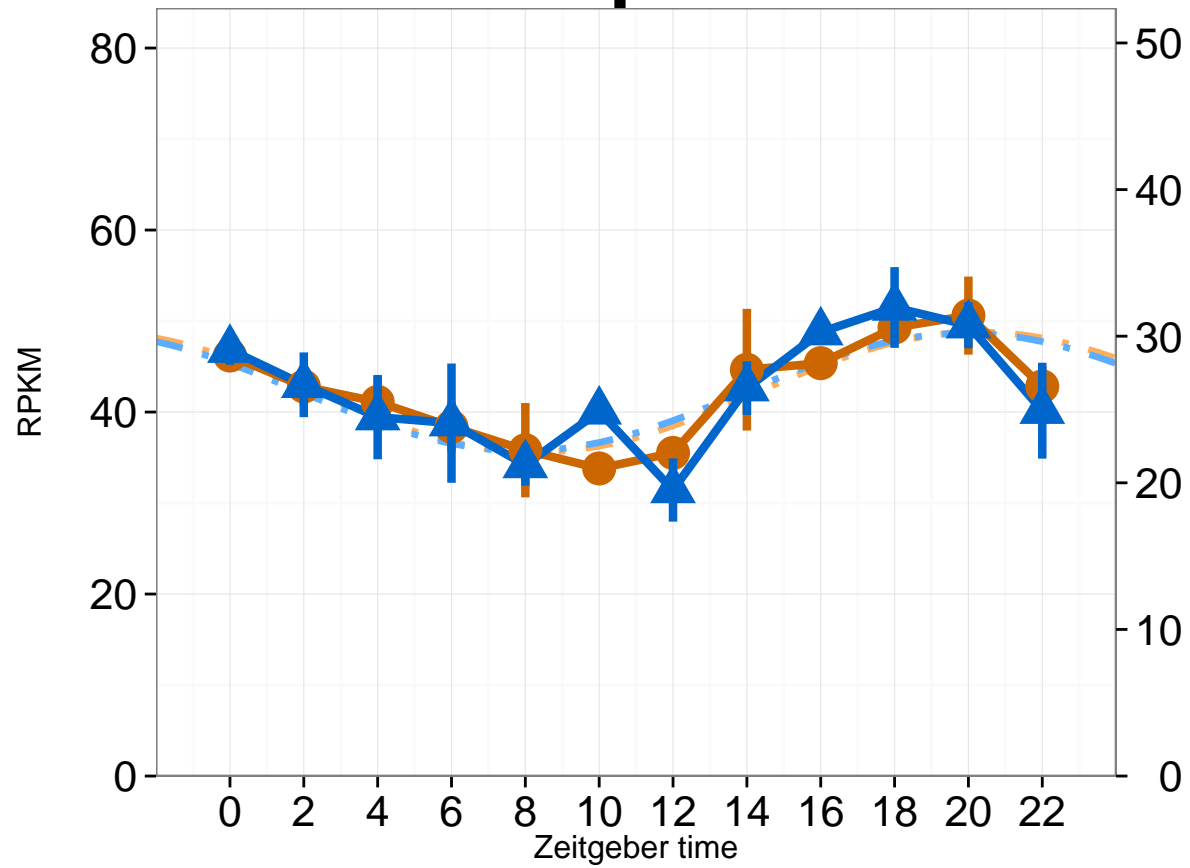

# Erp29

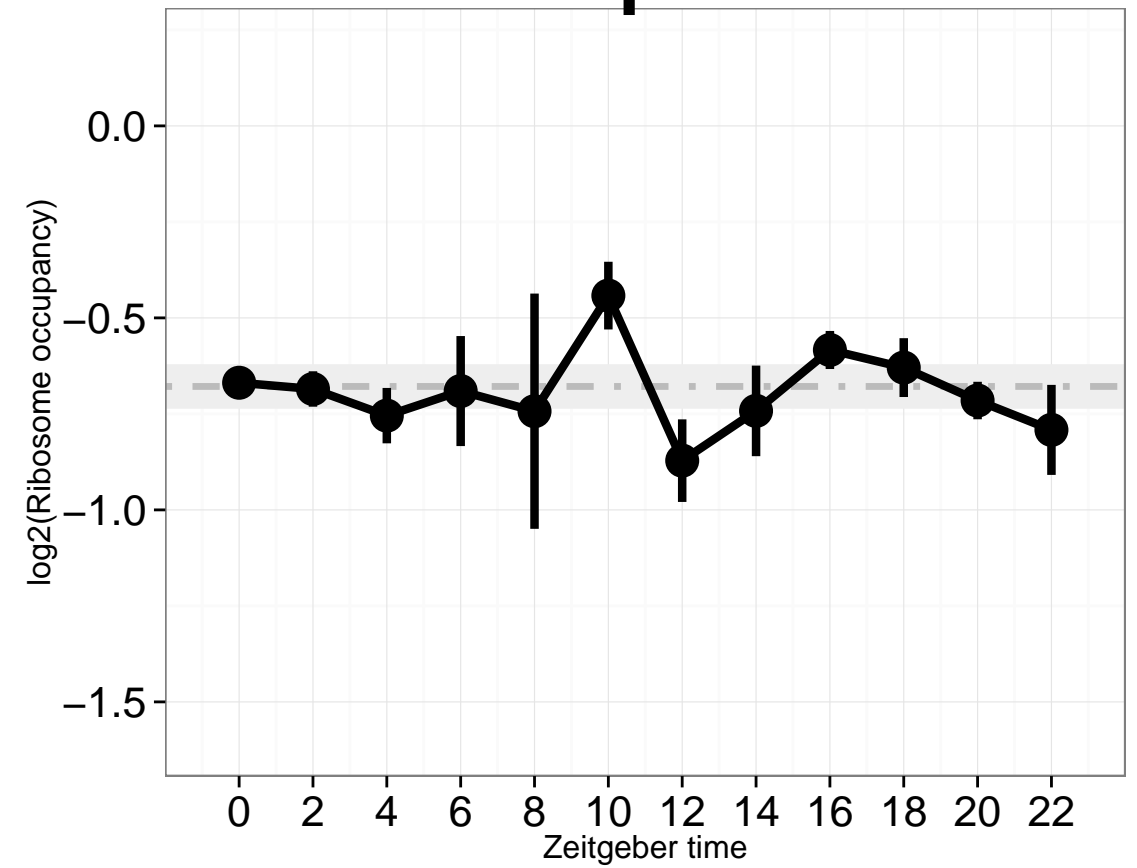

Supplement: SuppDataset_1.zip [file Erp29_set_A.pdf › Supplemental Dataset 1/A-mRNA_nonrhyth_translation_nonrhyth/Erp29_set_A.pdf]

## Esam

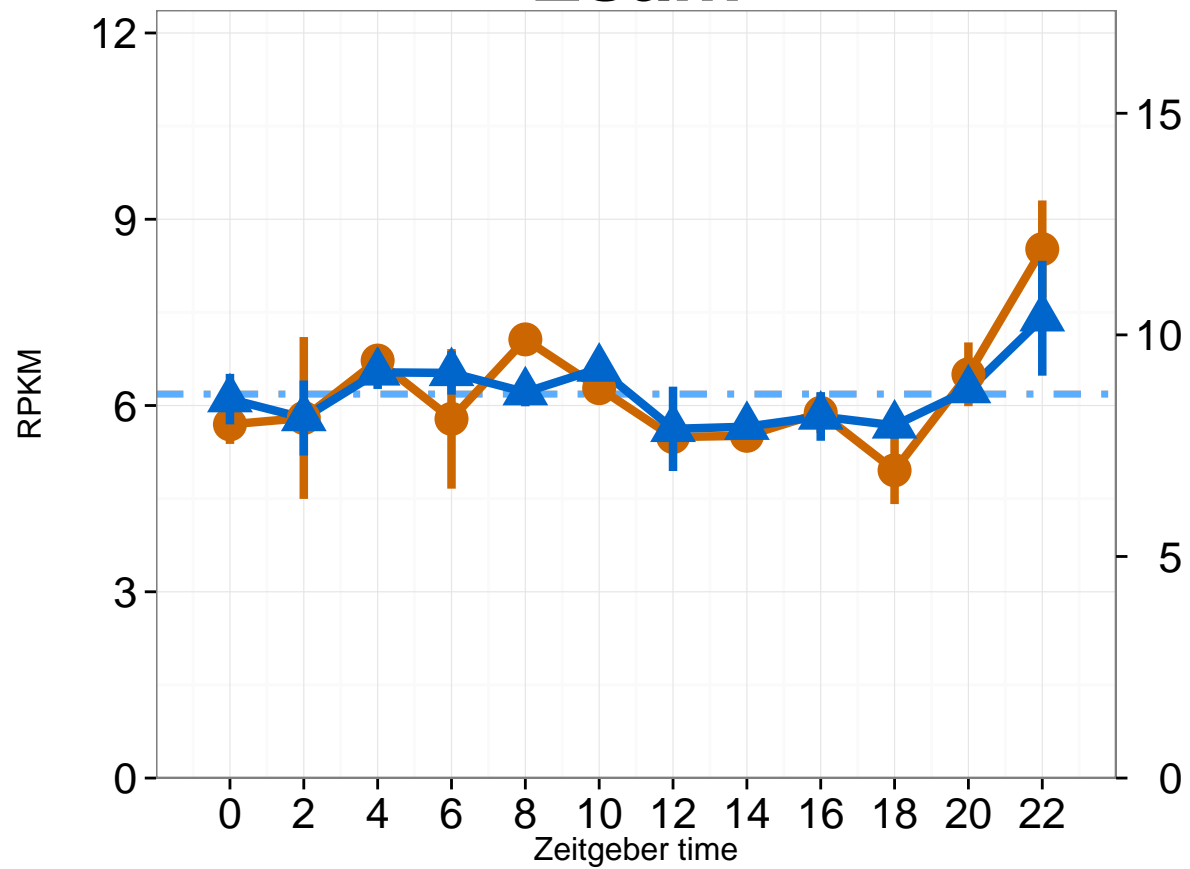

## Esam

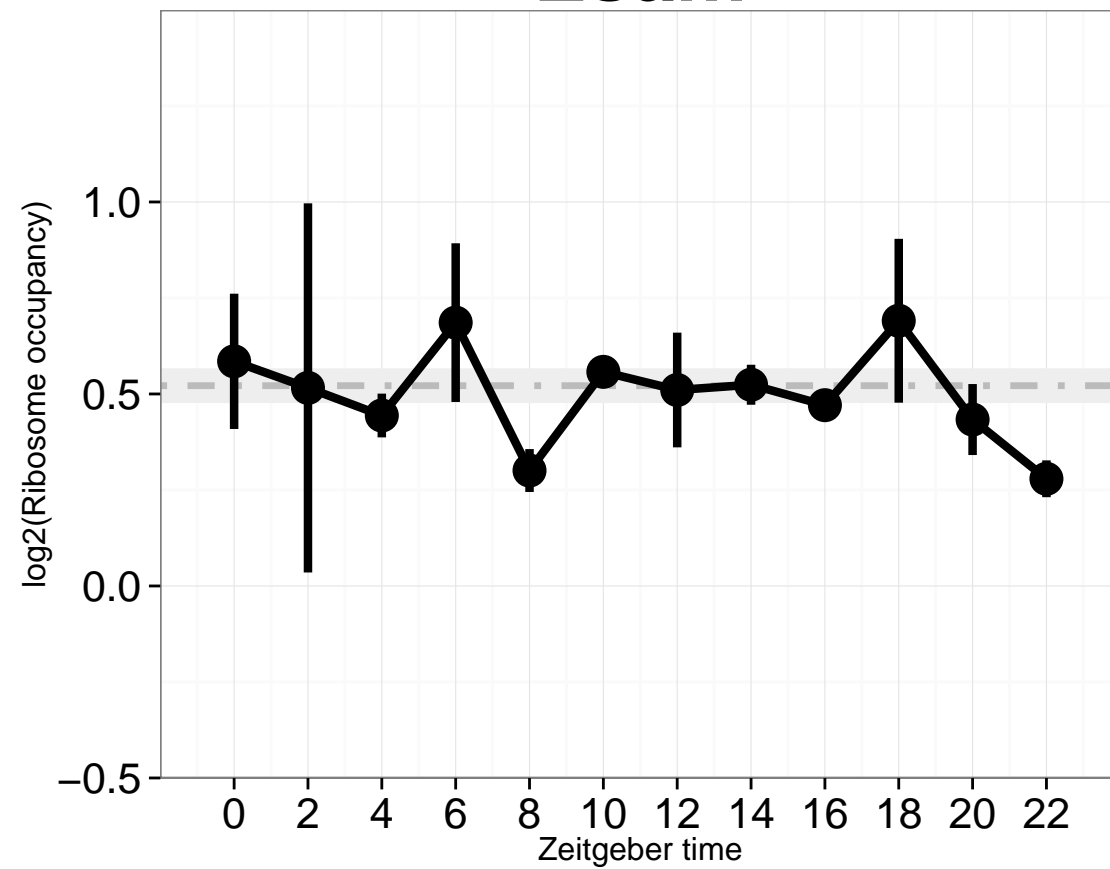

Supplement: SuppDataset_1.zip [file Esam_set_A.pdf › Supplemental Dataset 1/A-mRNA_nonrhyth_translation_nonrhyth/Esam_set_A.pdf]

# Esco1

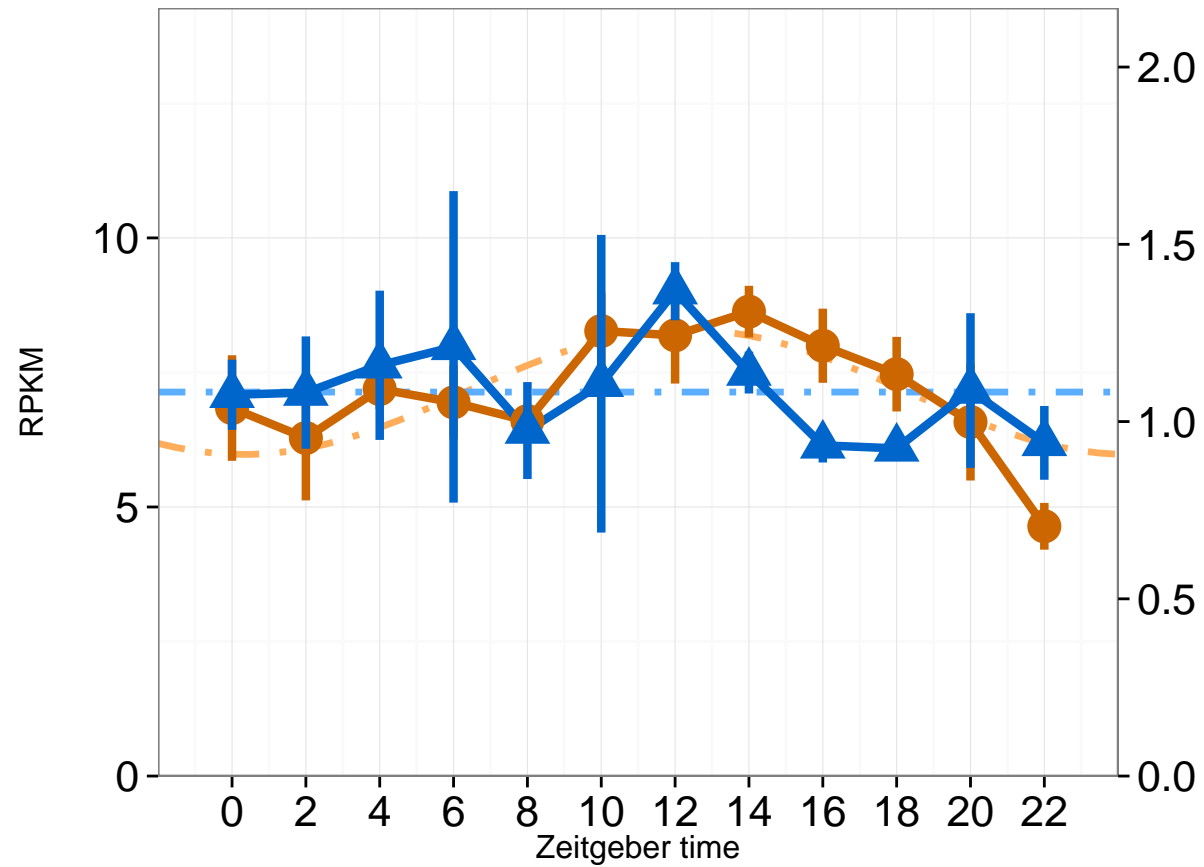

# Esco1

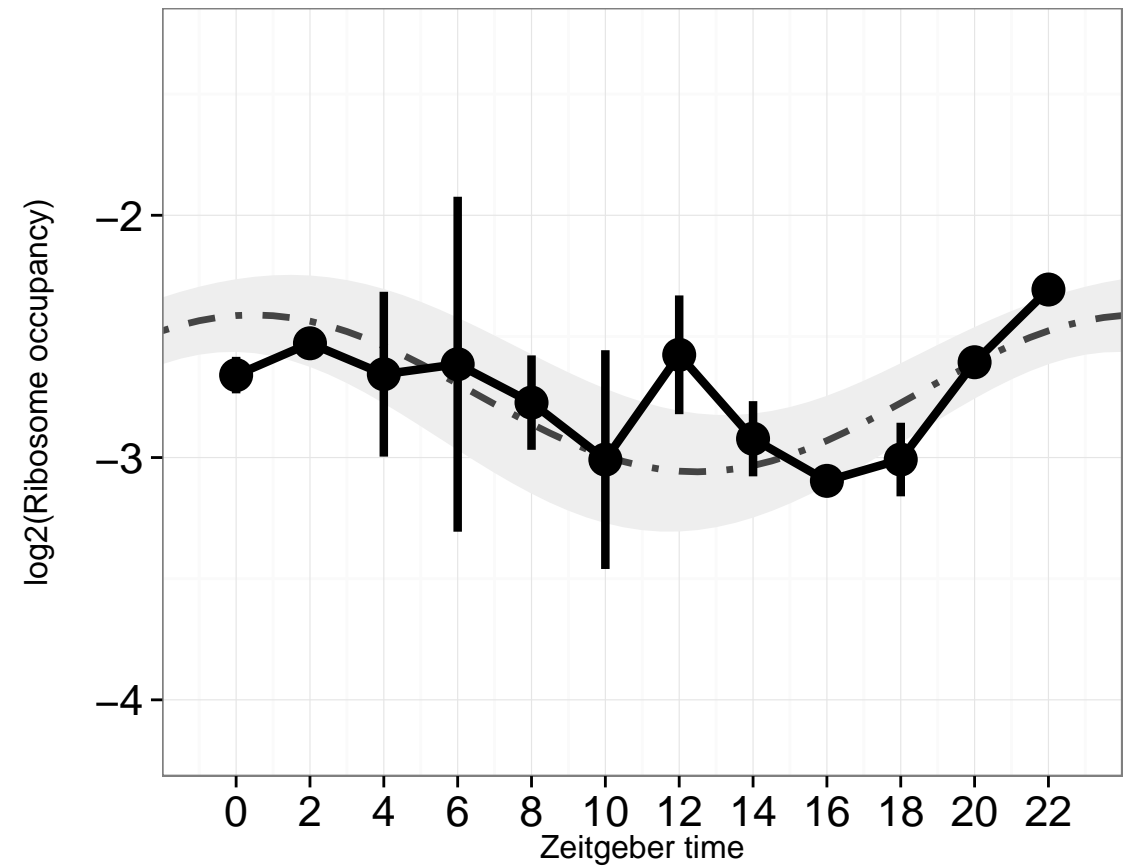

Supplement: SuppDataset_1.zip [file Esco1_set_A.pdf › Supplemental Dataset 1/A-mRNA_nonrhyth_translation_nonrhyth/Esco1_set_A.pdf]

## Esd

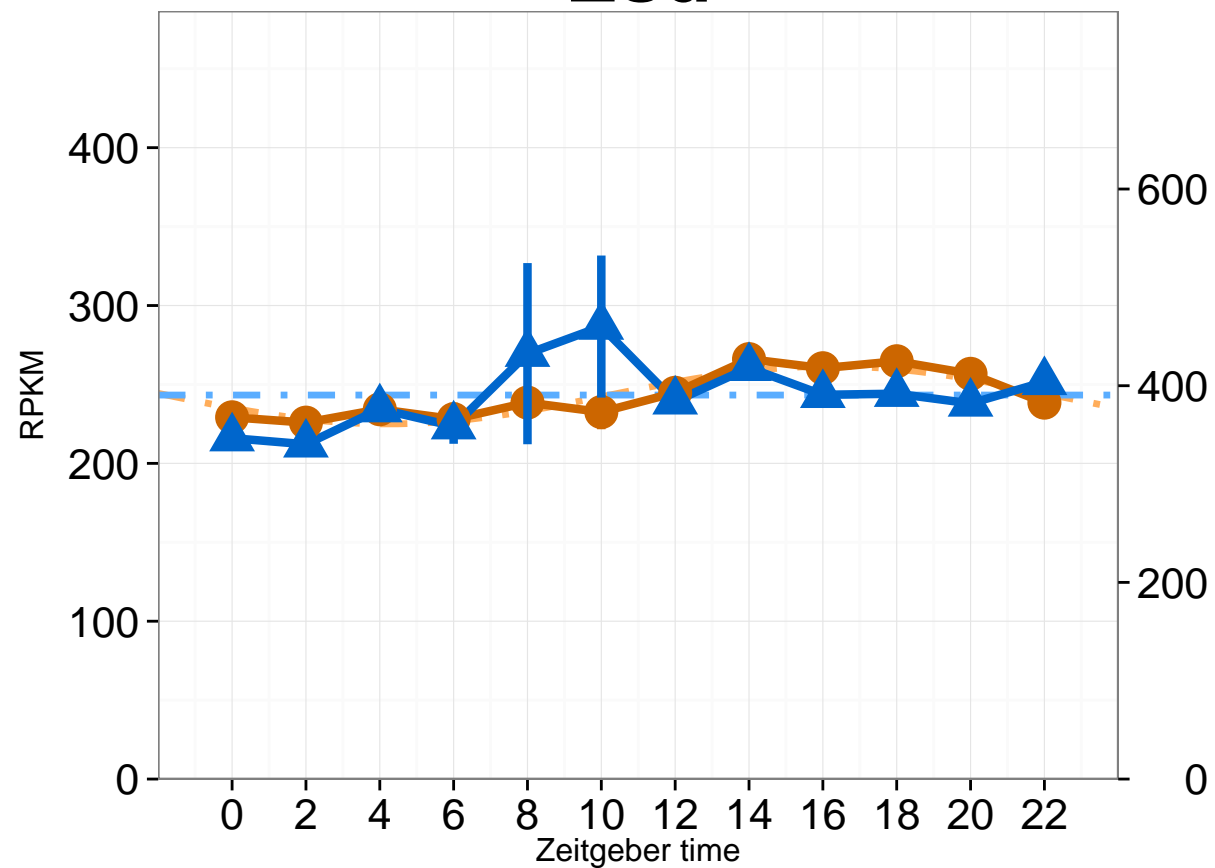

## Esd

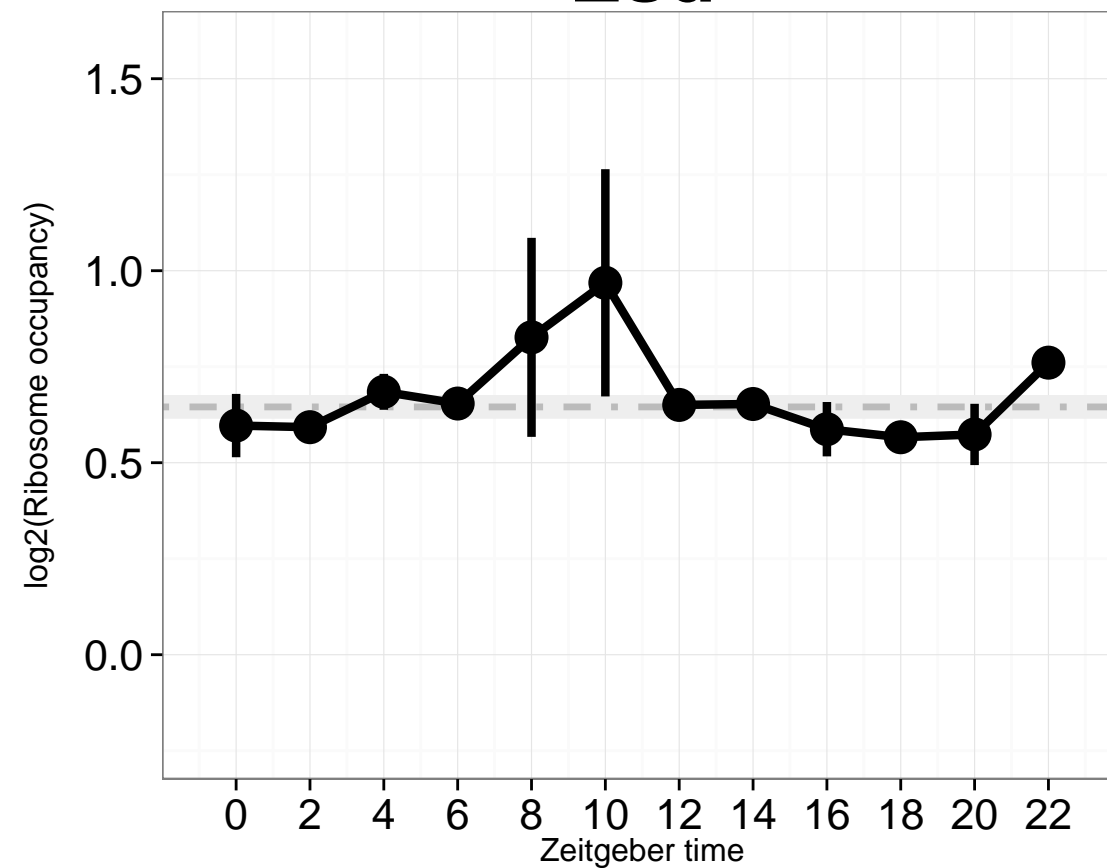

Supplement: SuppDataset_1.zip [file Esd_set_A.pdf › Supplemental Dataset 1/A-mRNA_nonrhyth_translation_nonrhyth/Esd_set_A.pdf]

## Esf1

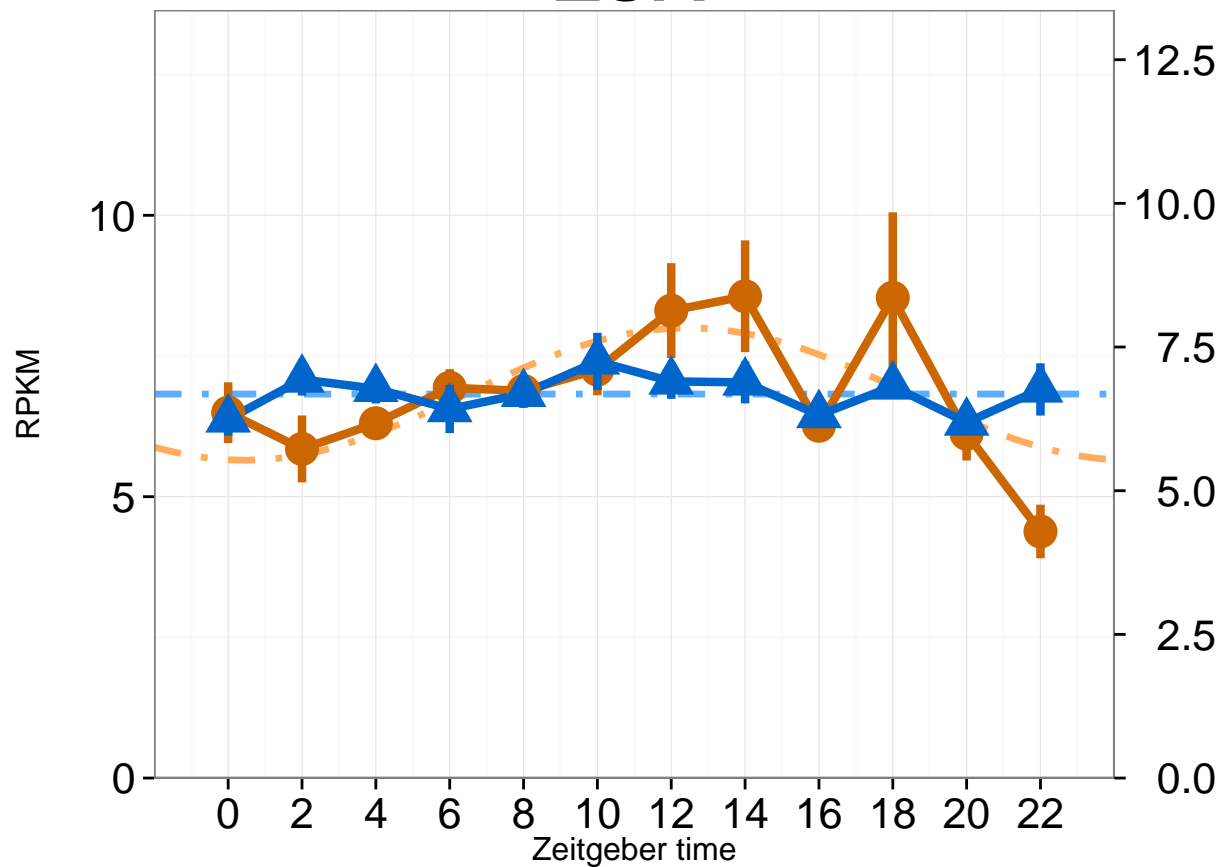

## Esf1

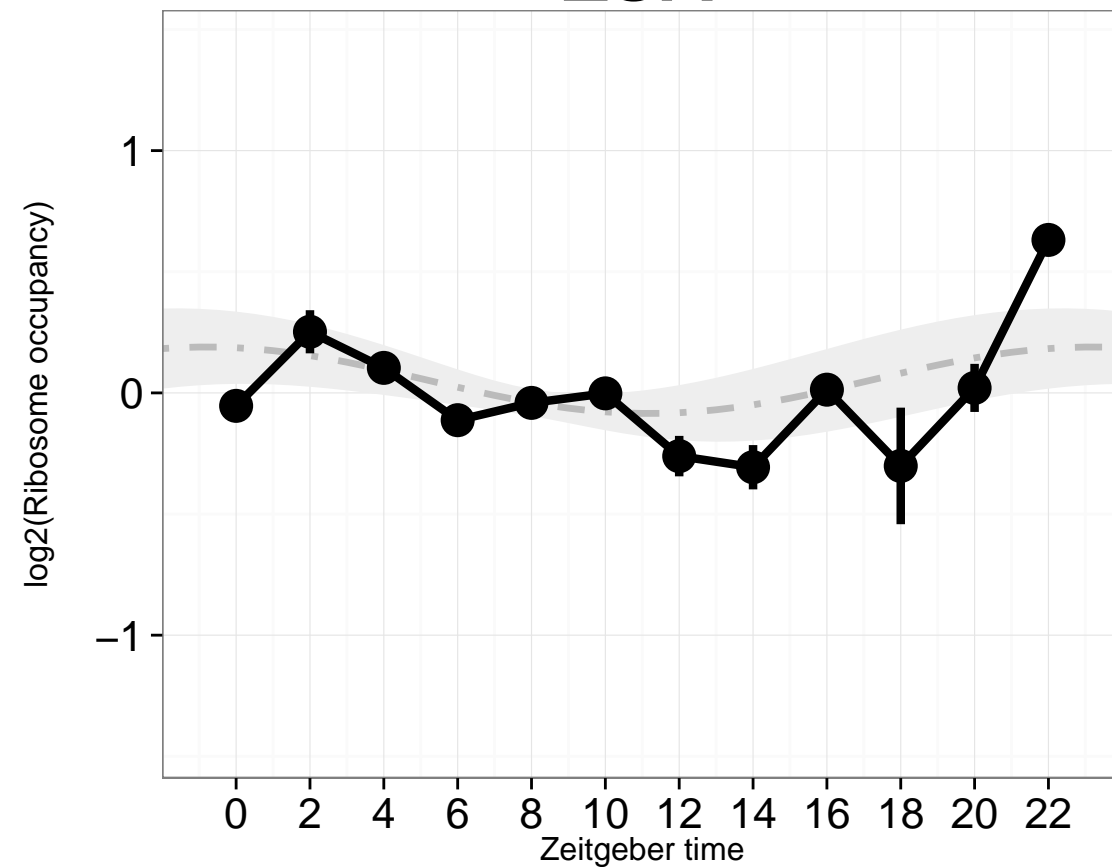

Supplement: SuppDataset_1.zip [file Esf1_set_A.pdf › Supplemental Dataset 1/A-mRNA_nonrhyth_translation_nonrhyth/Esf1_set_A.pdf]

# Esm1

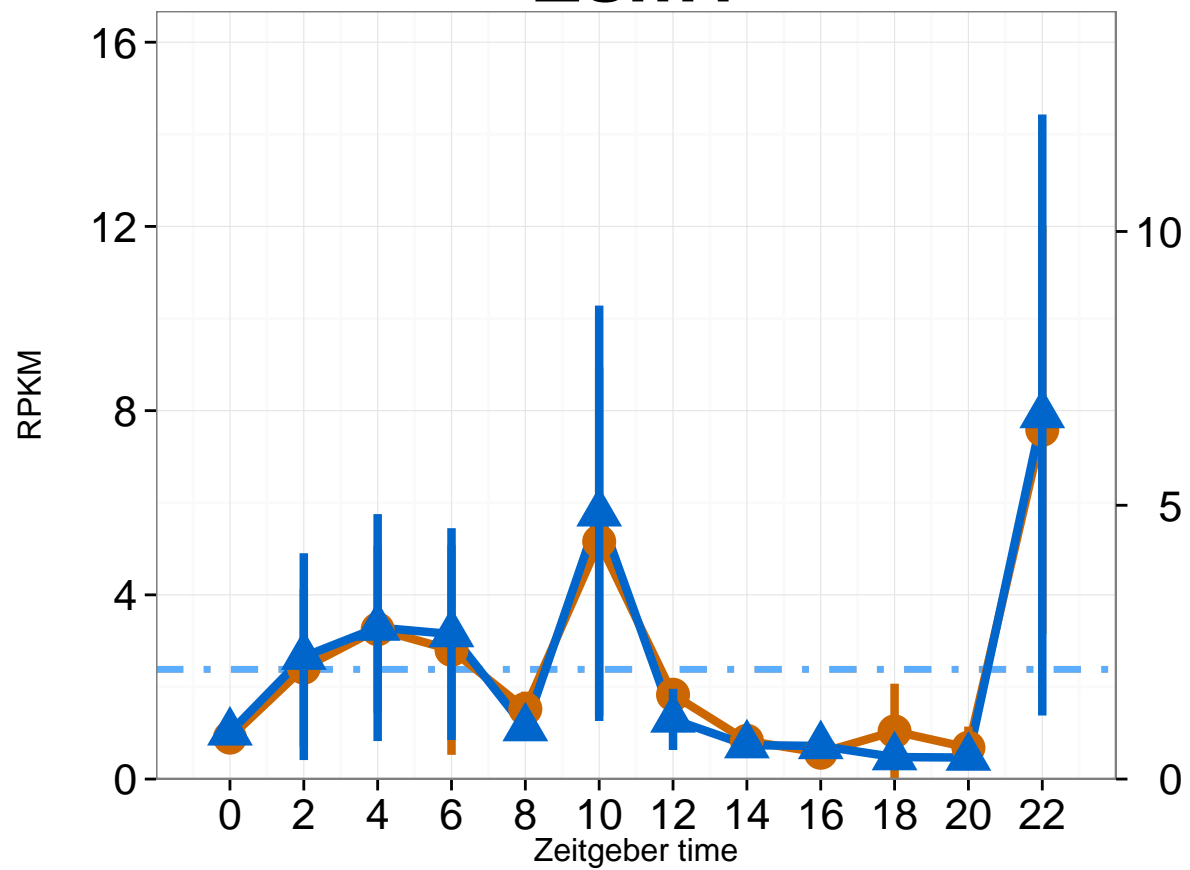

# Esm1

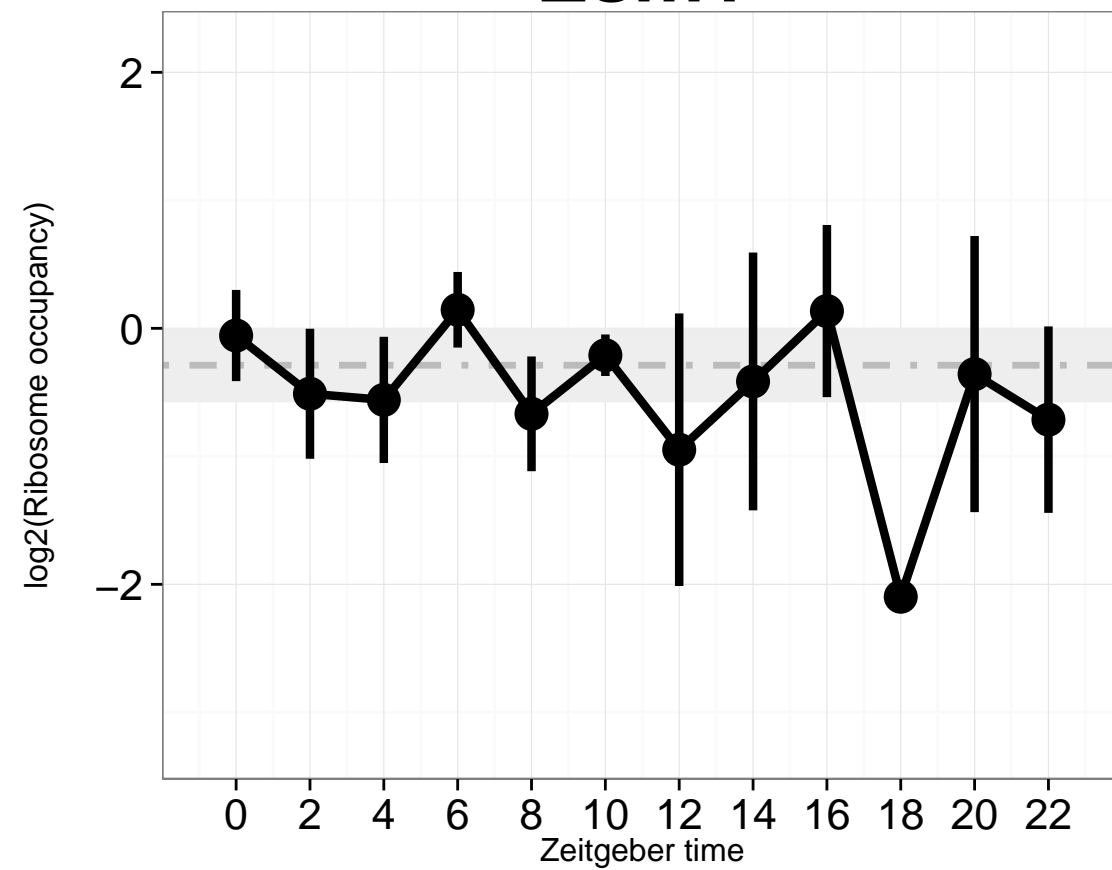

Supplement: SuppDataset_1.zip [file Esm1_set_A.pdf › Supplemental Dataset 1/A-mRNA_nonrhyth_translation_nonrhyth/Esm1_set_A.pdf]

## Esrp2

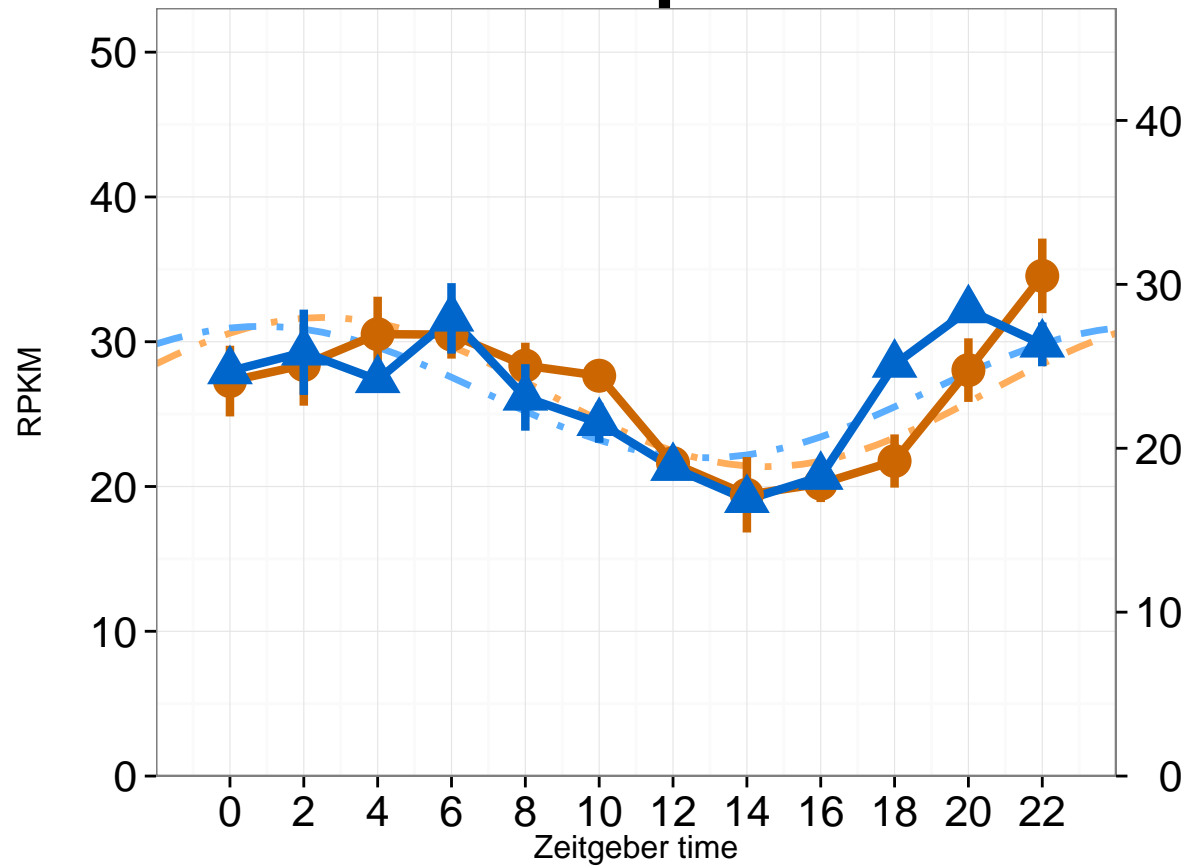

## Esrp2

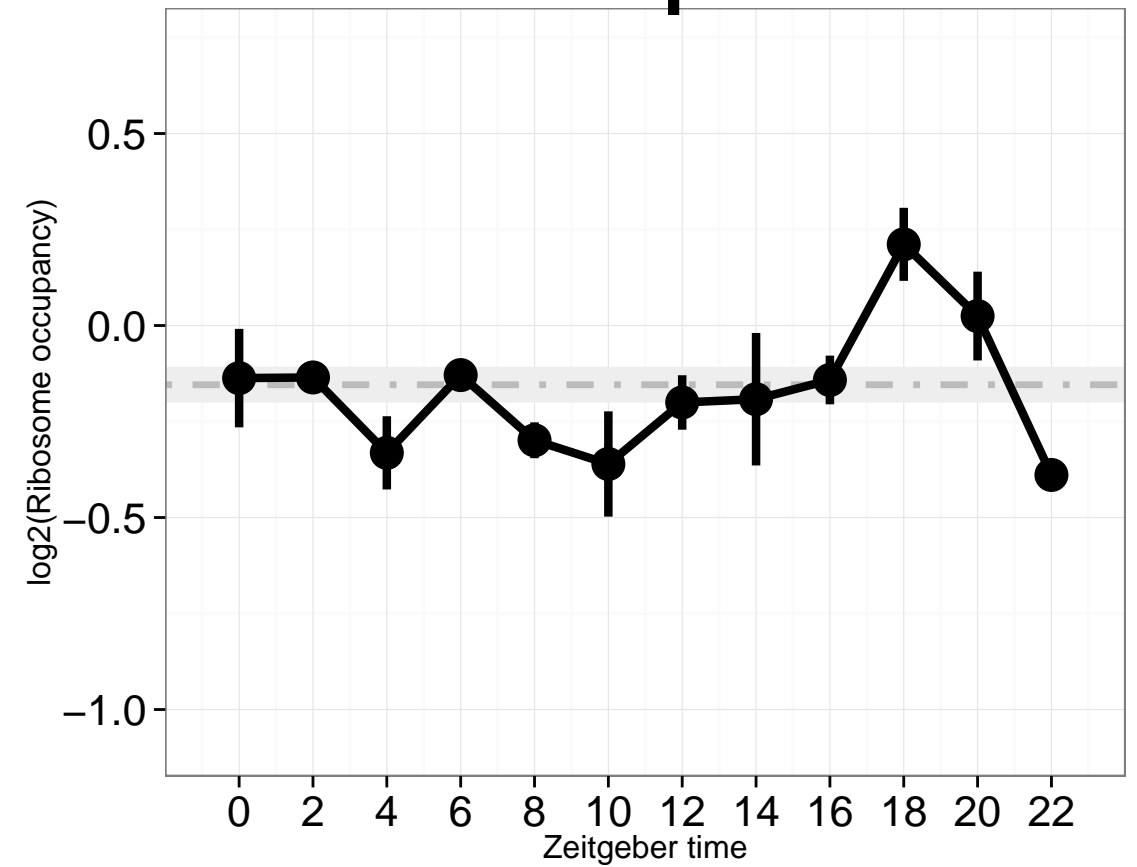

Supplement: SuppDataset_1.zip [file Esrp2_set_A.pdf › Supplemental Dataset 1/A-mRNA_nonrhyth_translation_nonrhyth/Esrp2_set_A.pdf]

## Esrrg TR

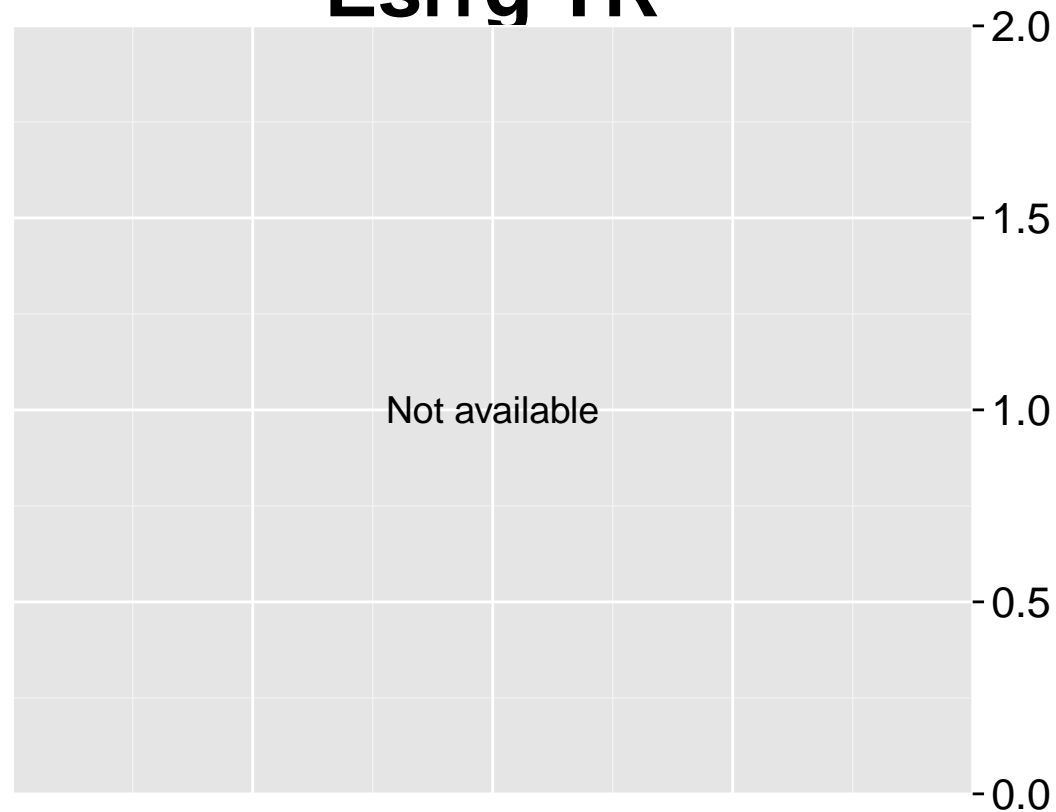

## Esrrg log2(Ribosome occupancy)

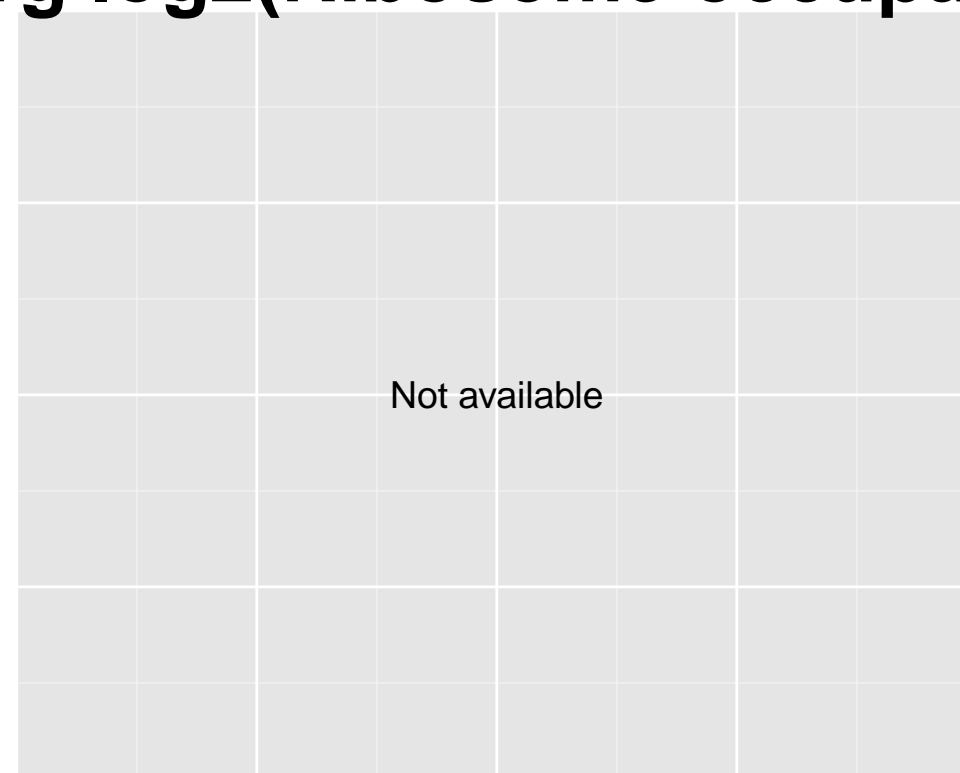

Supplement: SuppDataset_1.zip [file Esrrg_set_A.pdf › Supplemental Dataset 1/A-mRNA_nonrhyth_translation_nonrhyth/Esrrg_set_A.pdf]

## Esyt1

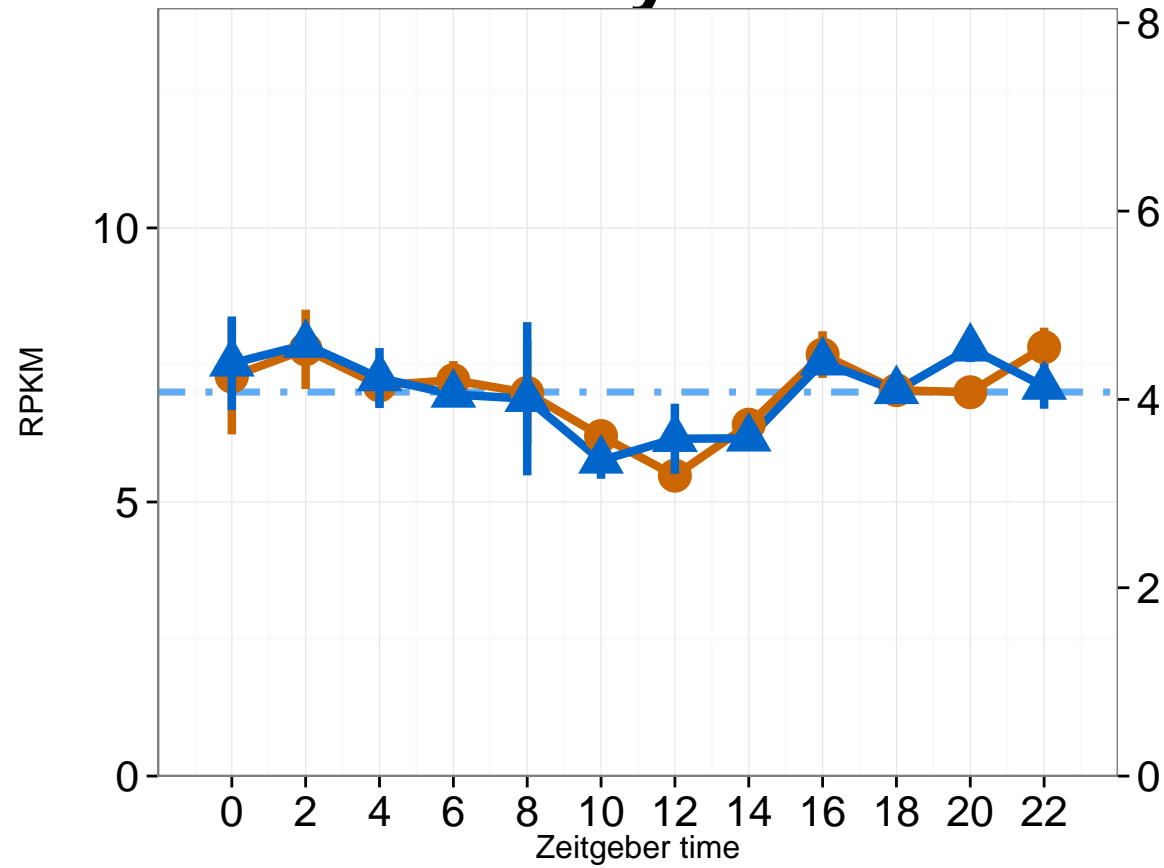

## Esyt1

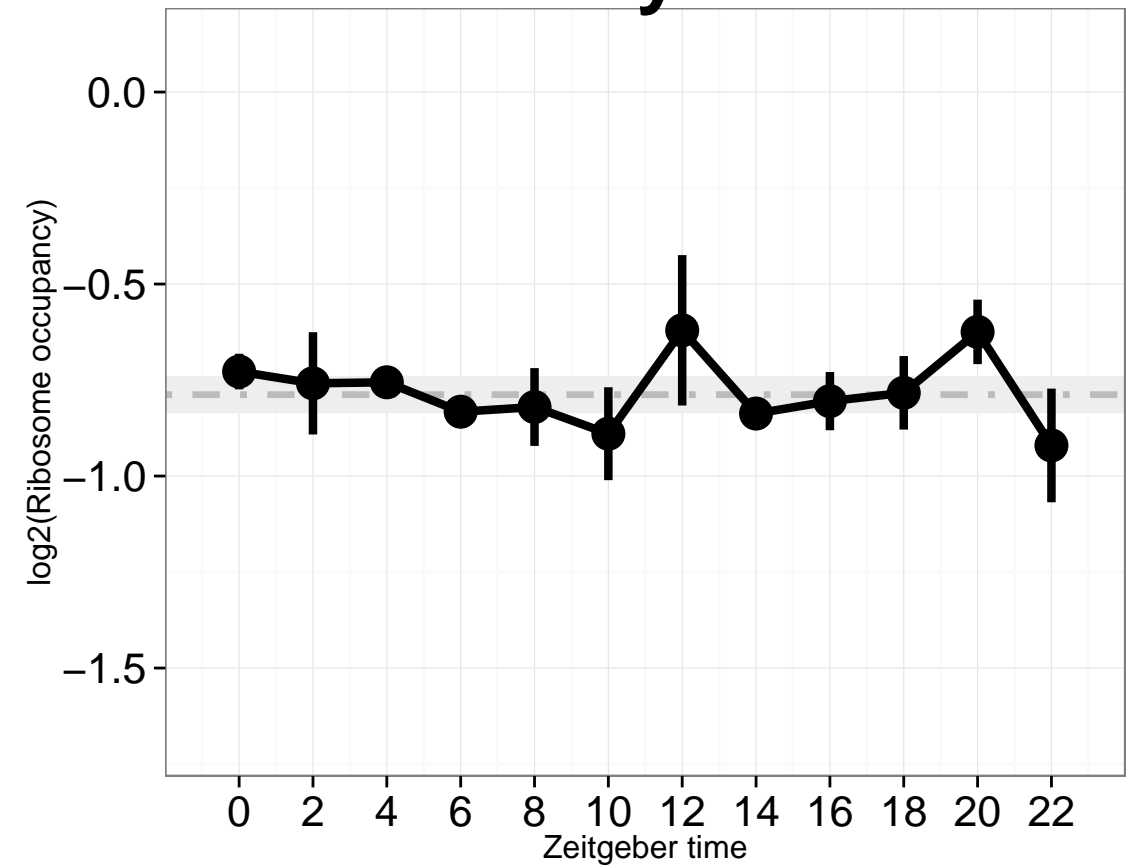

Supplement: SuppDataset_1.zip [file Esyt1_set_A.pdf › Supplemental Dataset 1/A-mRNA_nonrhyth_translation_nonrhyth/Esyt1_set_A.pdf]

## Esyt2

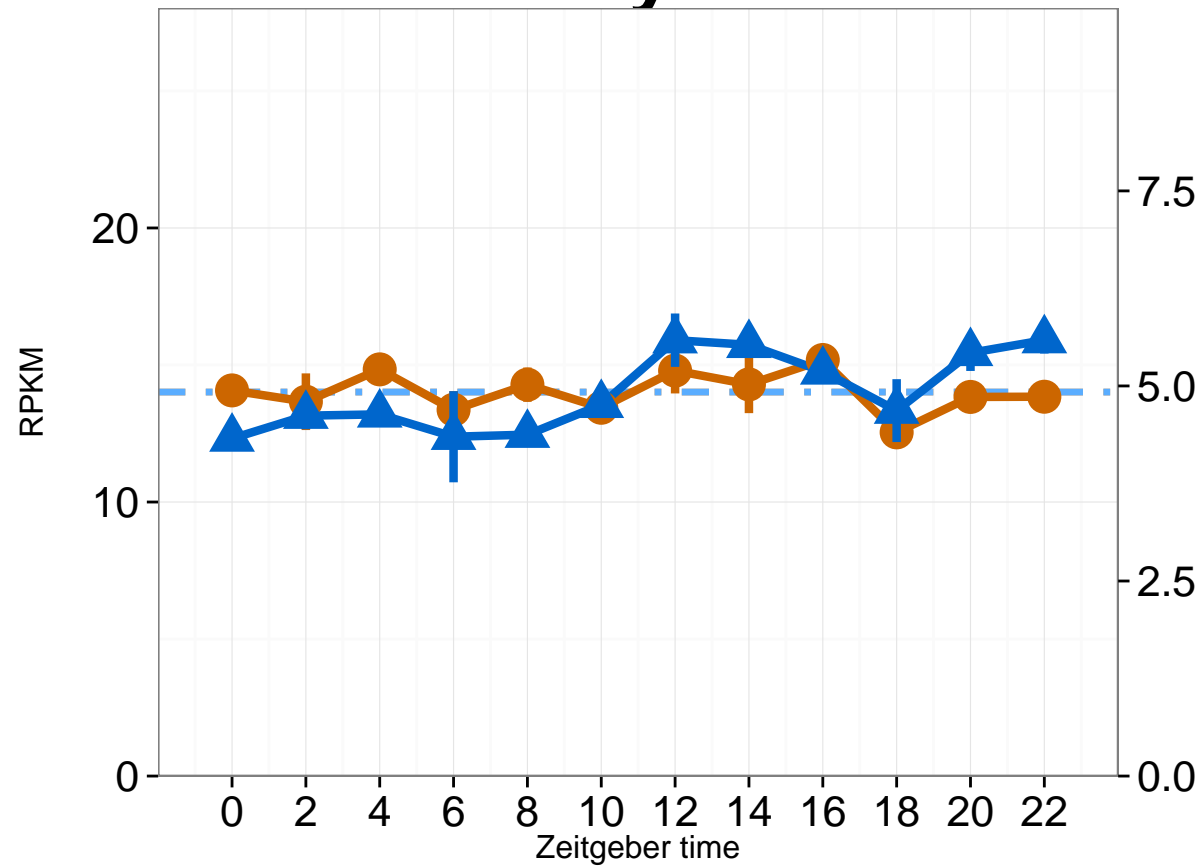

## Esyt2

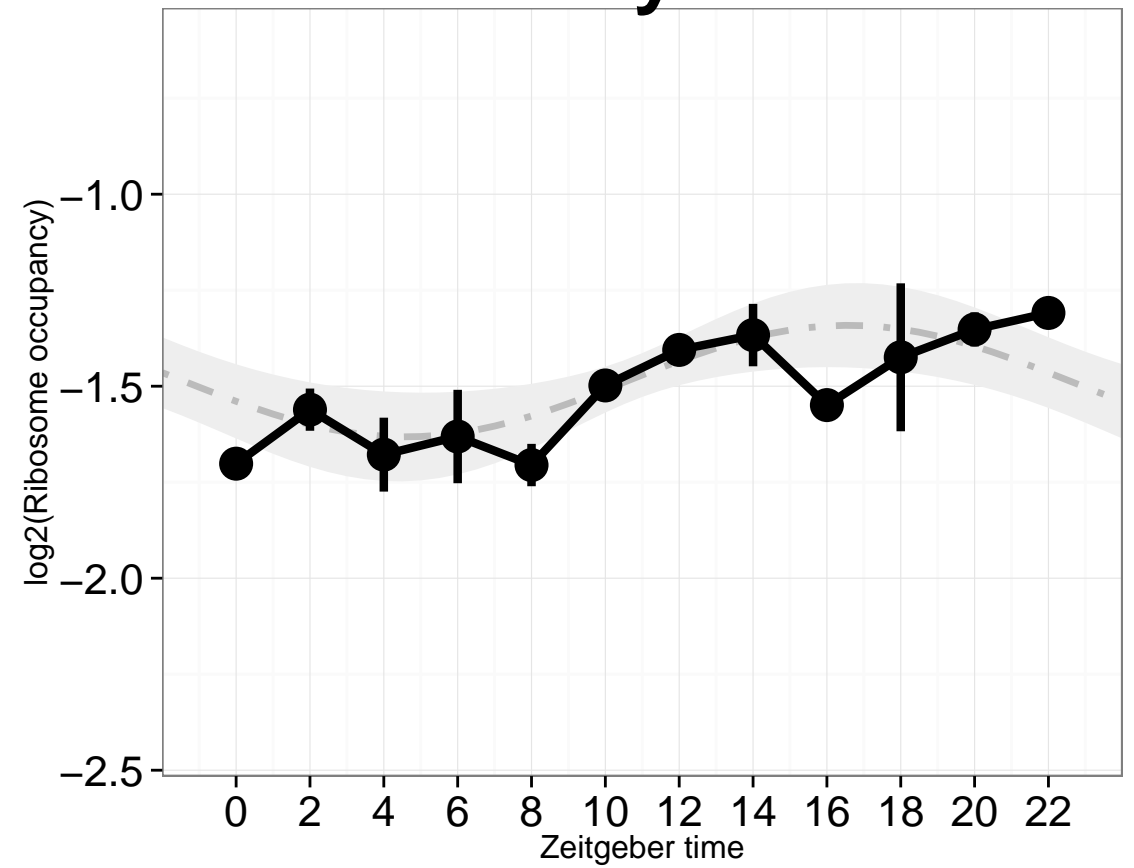

Supplement: SuppDataset_1.zip [file Esyt2_set_A.pdf › Supplemental Dataset 1/A-mRNA_nonrhyth_translation_nonrhyth/Esyt2_set_A.pdf]

# Etaa1

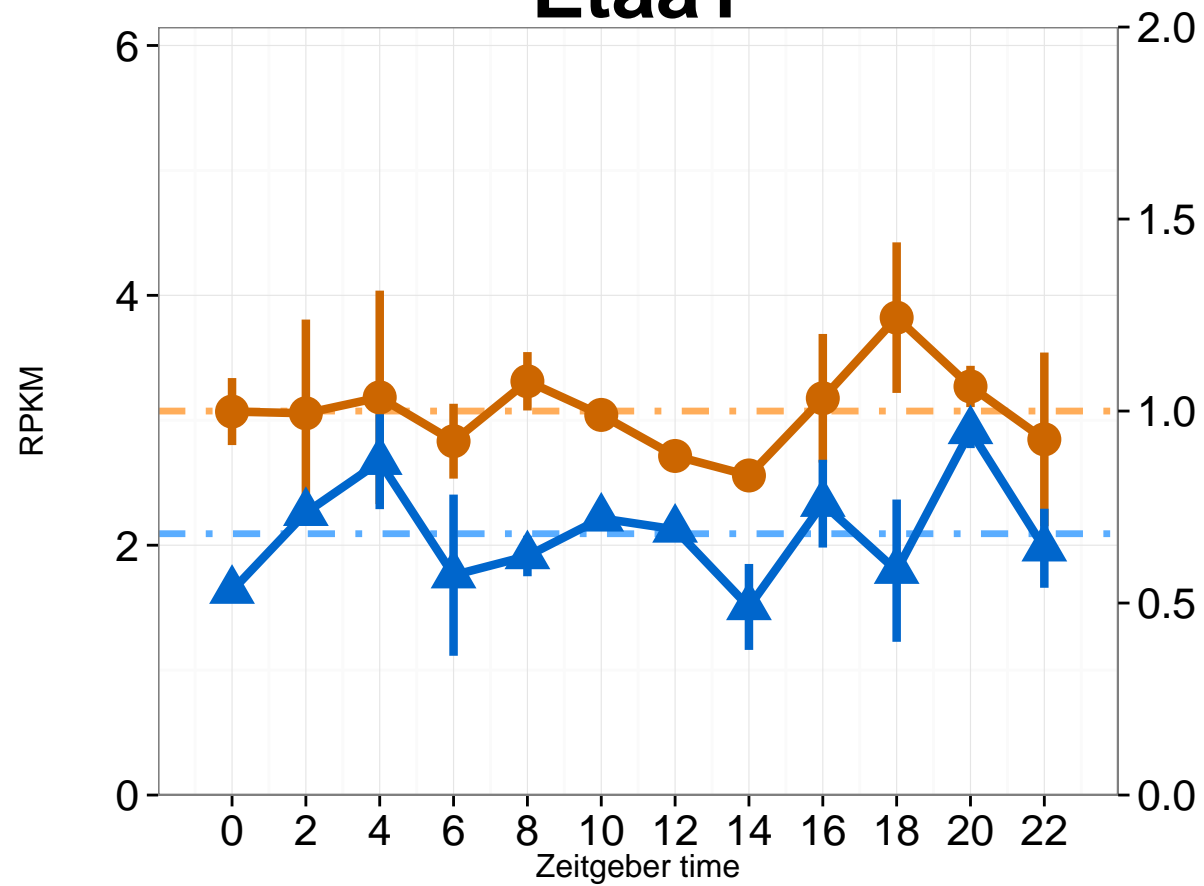

# Etaa1

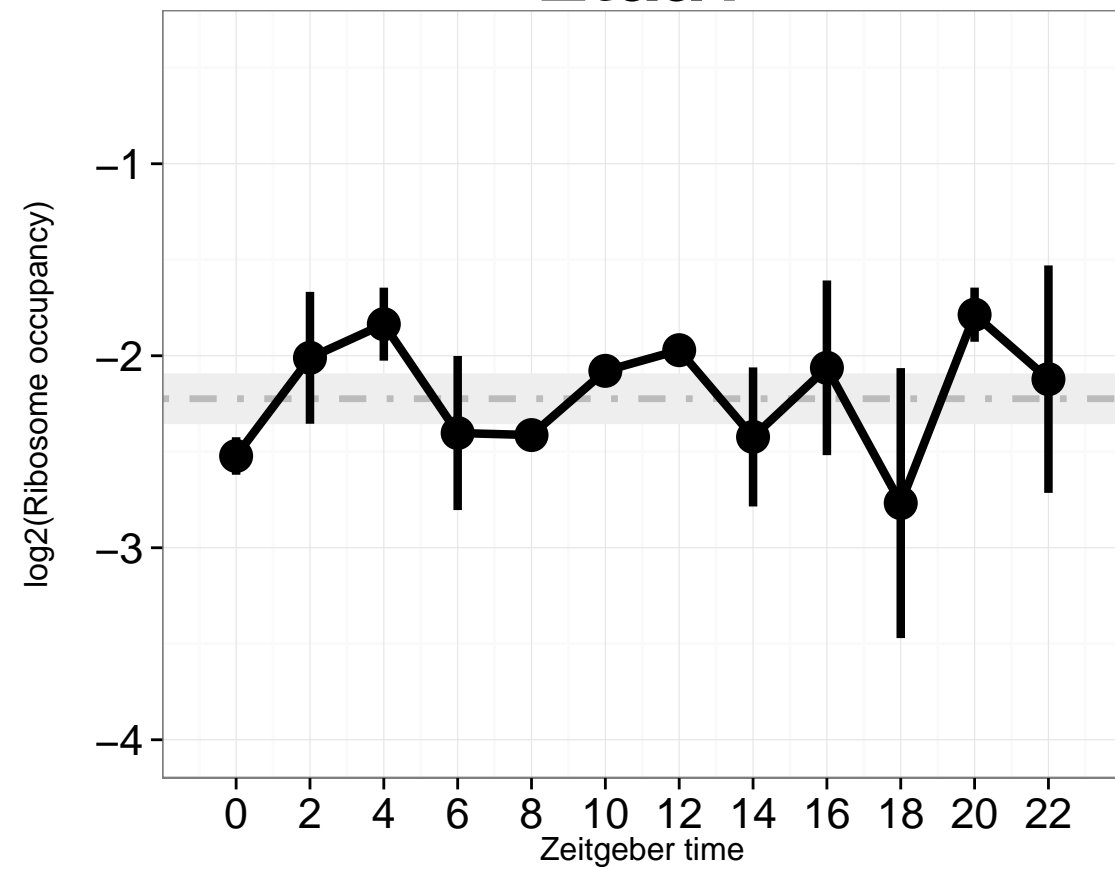

Supplement: SuppDataset_1.zip [file Etaa1_set_A.pdf › Supplemental Dataset 1/A-mRNA_nonrhyth_translation_nonrhyth/Etaa1_set_A.pdf]

## Etf1

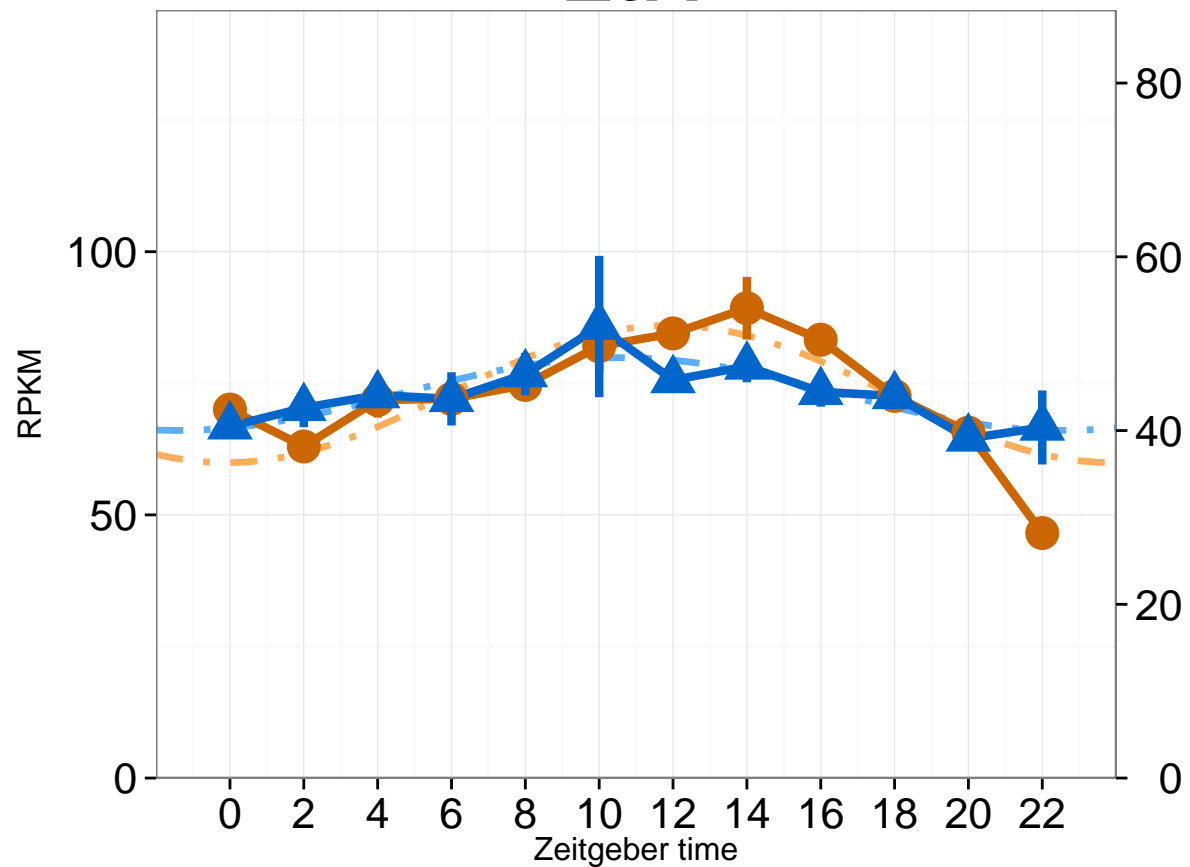

## Etf1

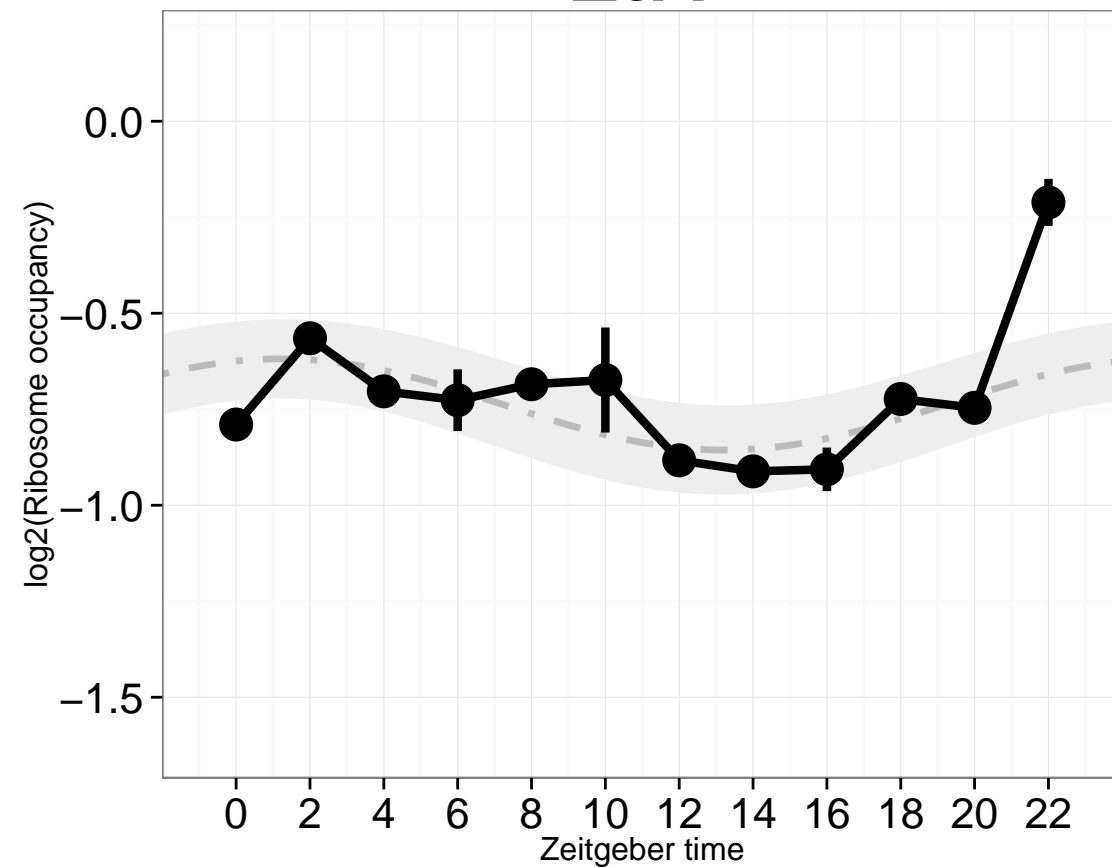

Supplement: SuppDataset_1.zip [file Etf1_set_A.pdf › Supplemental Dataset 1/A-mRNA_nonrhyth_translation_nonrhyth/Etf1_set_A.pdf]

## Etfa

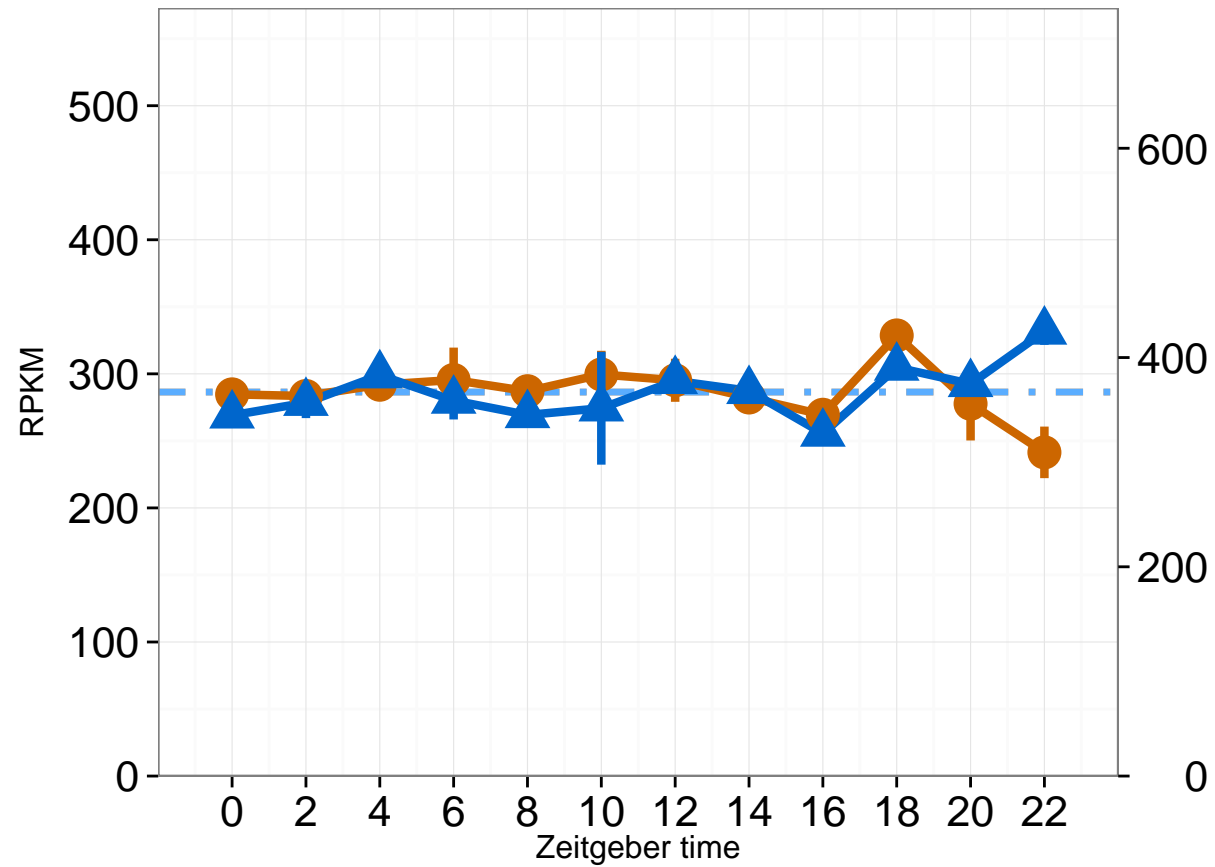

## Etfa

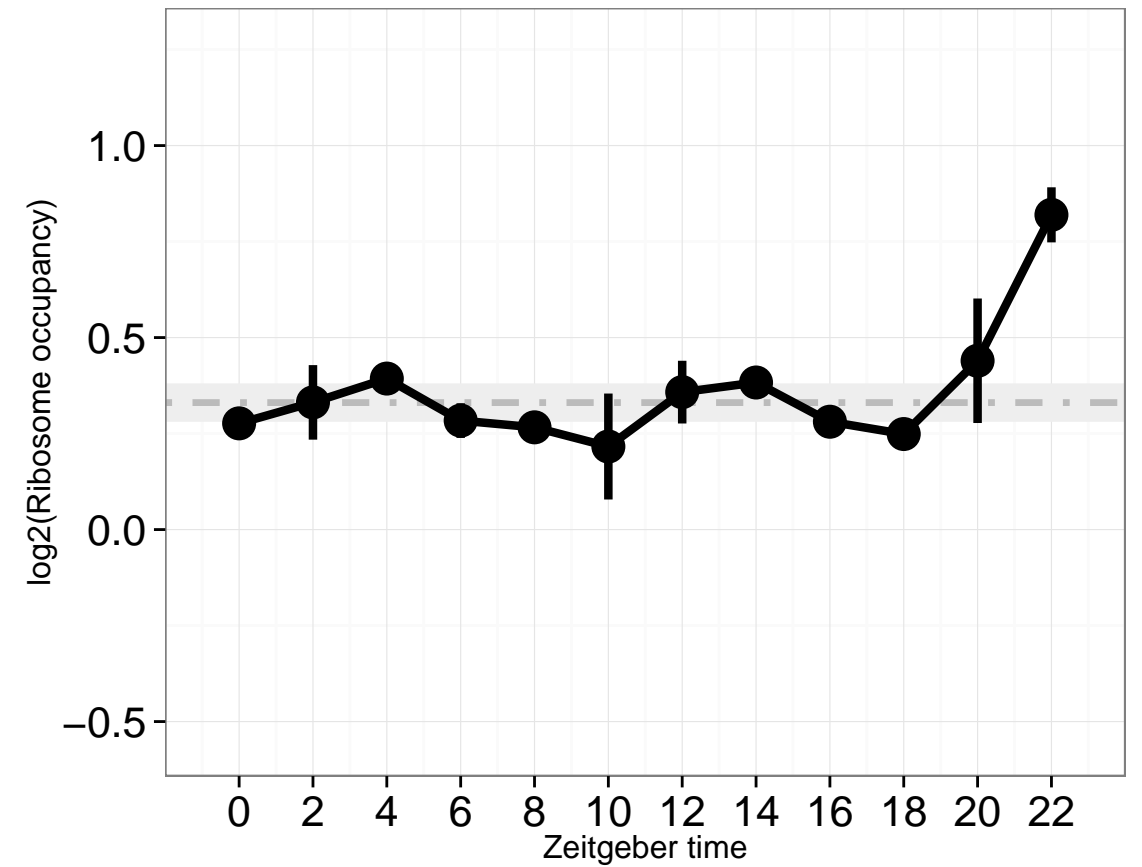

Supplement: SuppDataset_1.zip [file Etfa_set_A.pdf › Supplemental Dataset 1/A-mRNA_nonrhyth_translation_nonrhyth/Etfa_set_A.pdf]

## Etfb

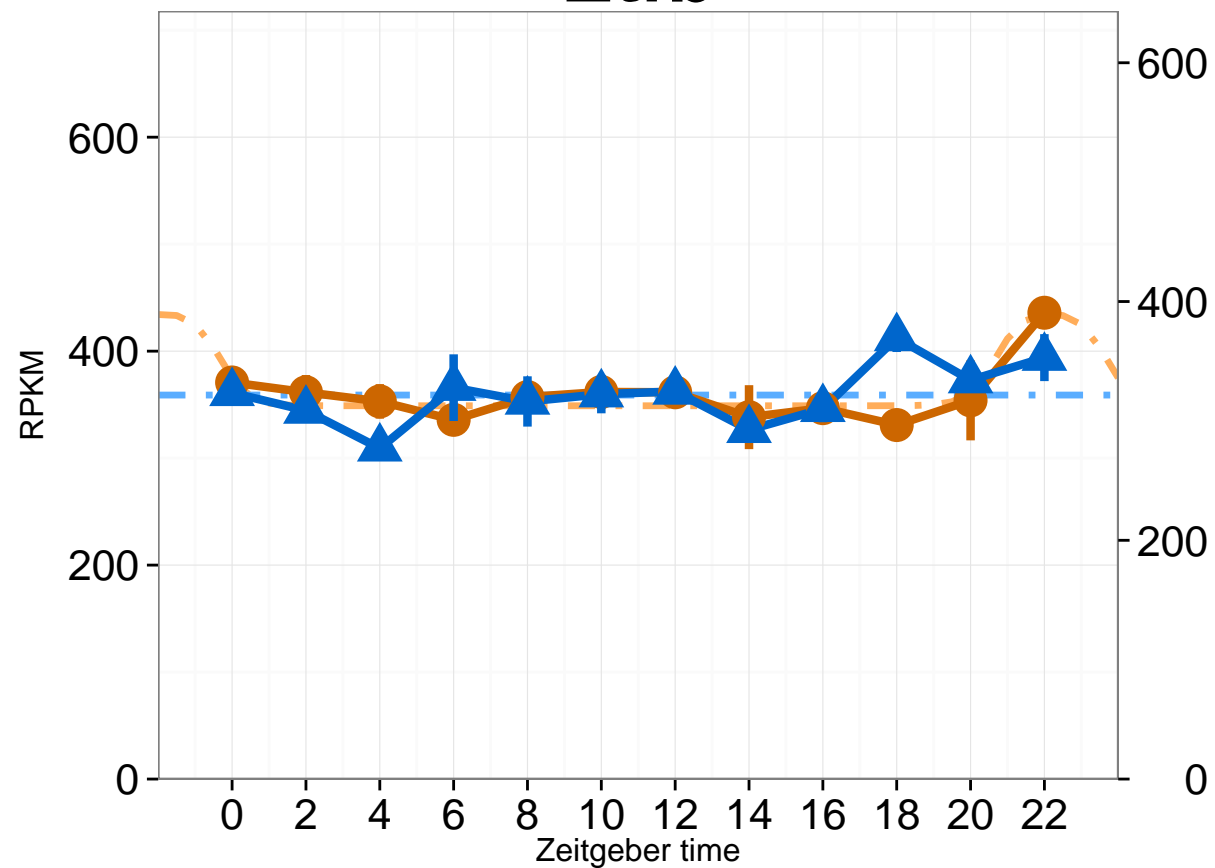

## Etfb

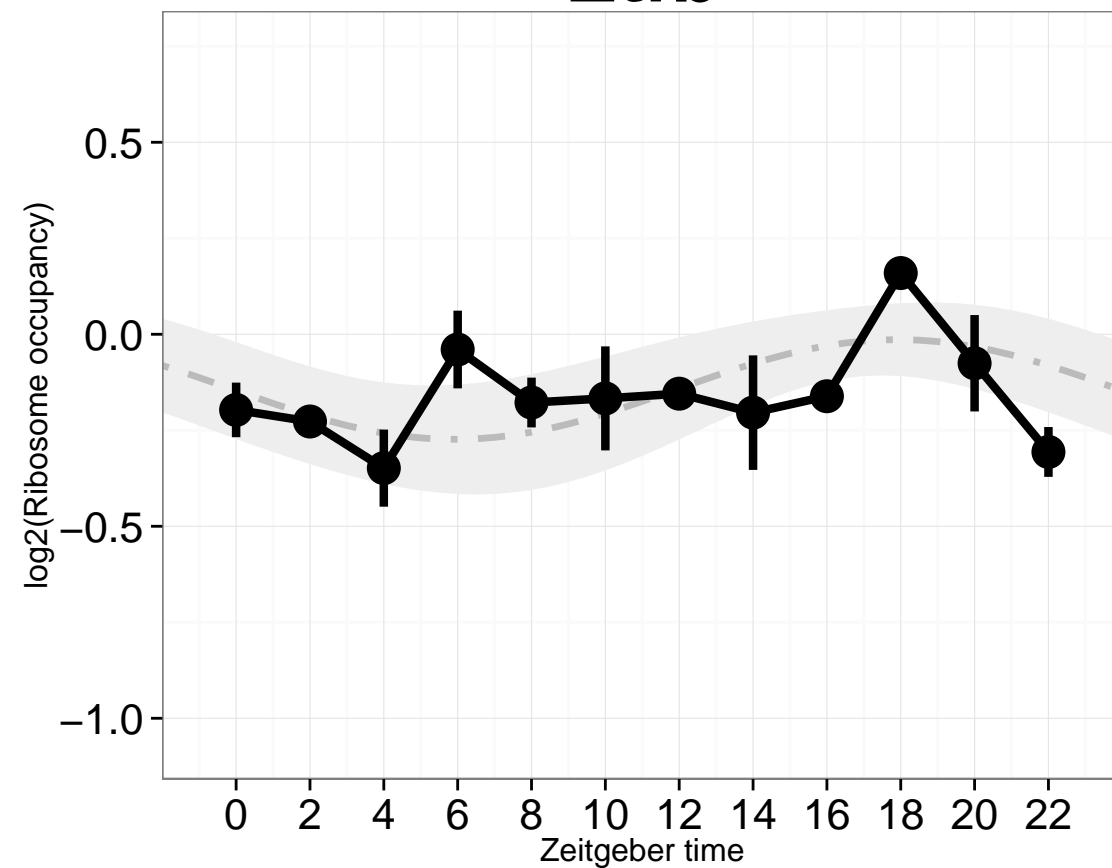

Supplement: SuppDataset_1.zip [file Etfb_set_A.pdf › Supplemental Dataset 1/A-mRNA_nonrhyth_translation_nonrhyth/Etfb_set_A.pdf]

## Etfdh

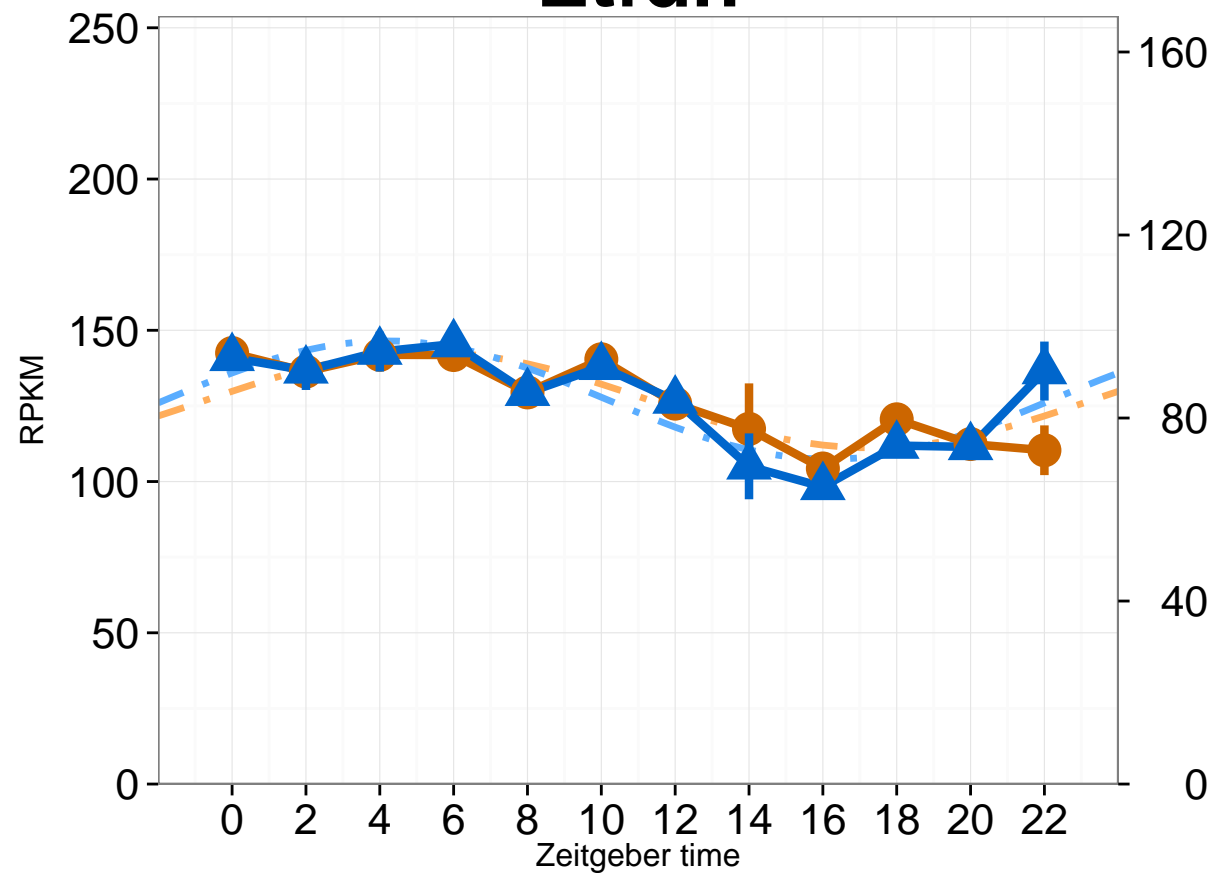

## Etfdh

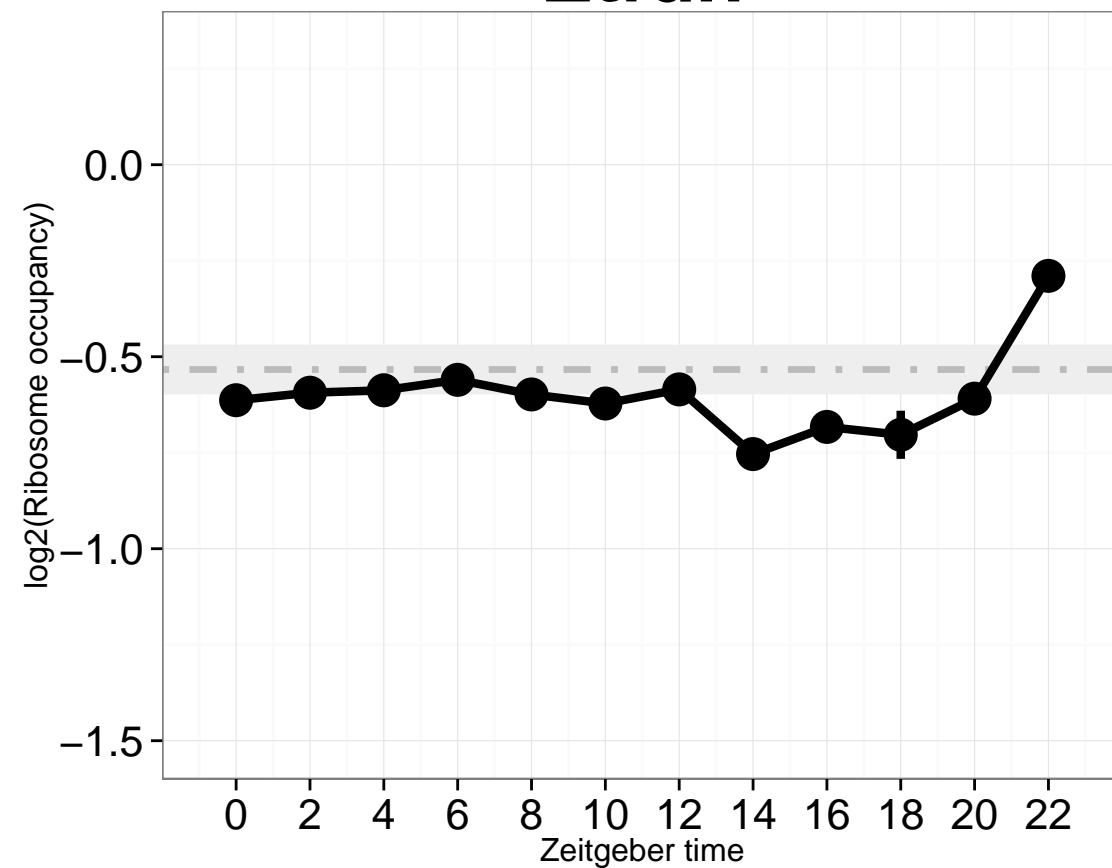

Supplement: SuppDataset_1.zip [file Etfdh_set_A.pdf › Supplemental Dataset 1/A-mRNA_nonrhyth_translation_nonrhyth/Etfdh_set_A.pdf]

# Etnk1

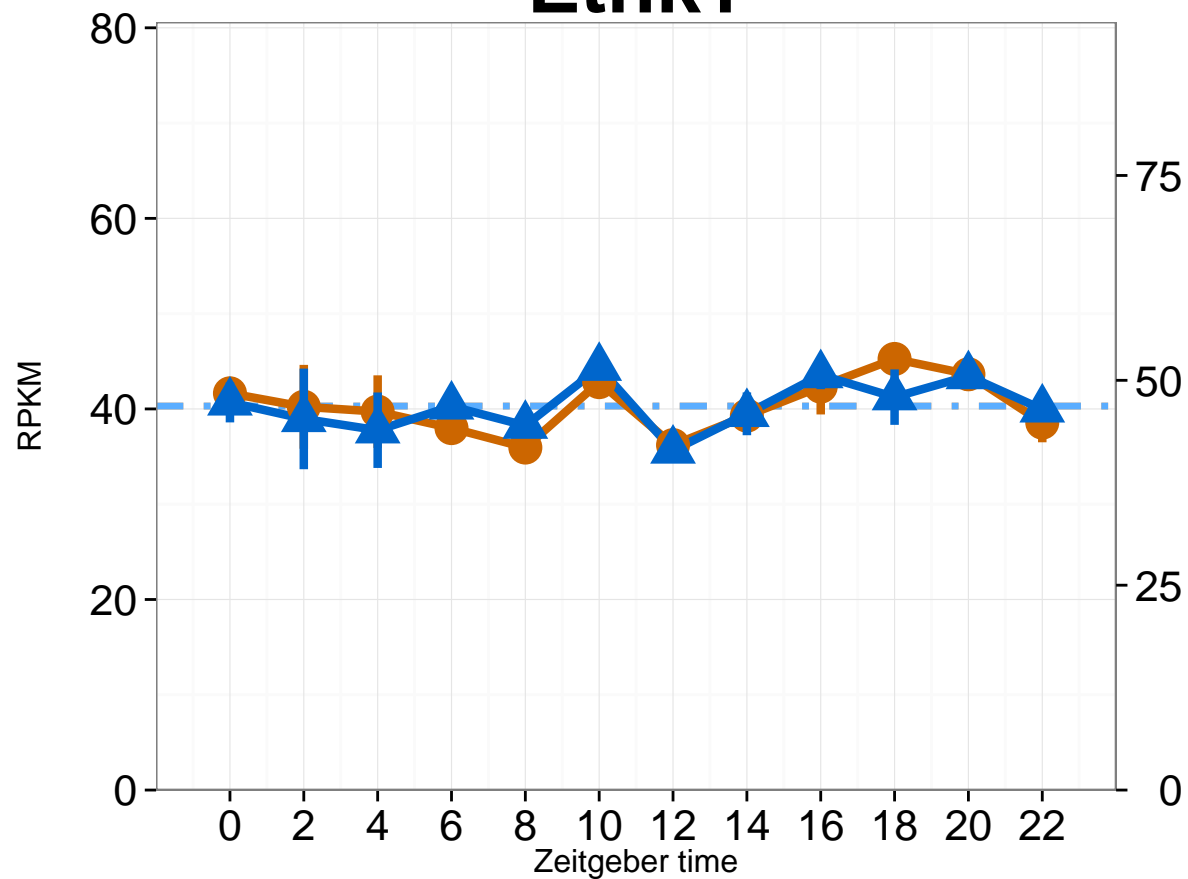

# Etnk1

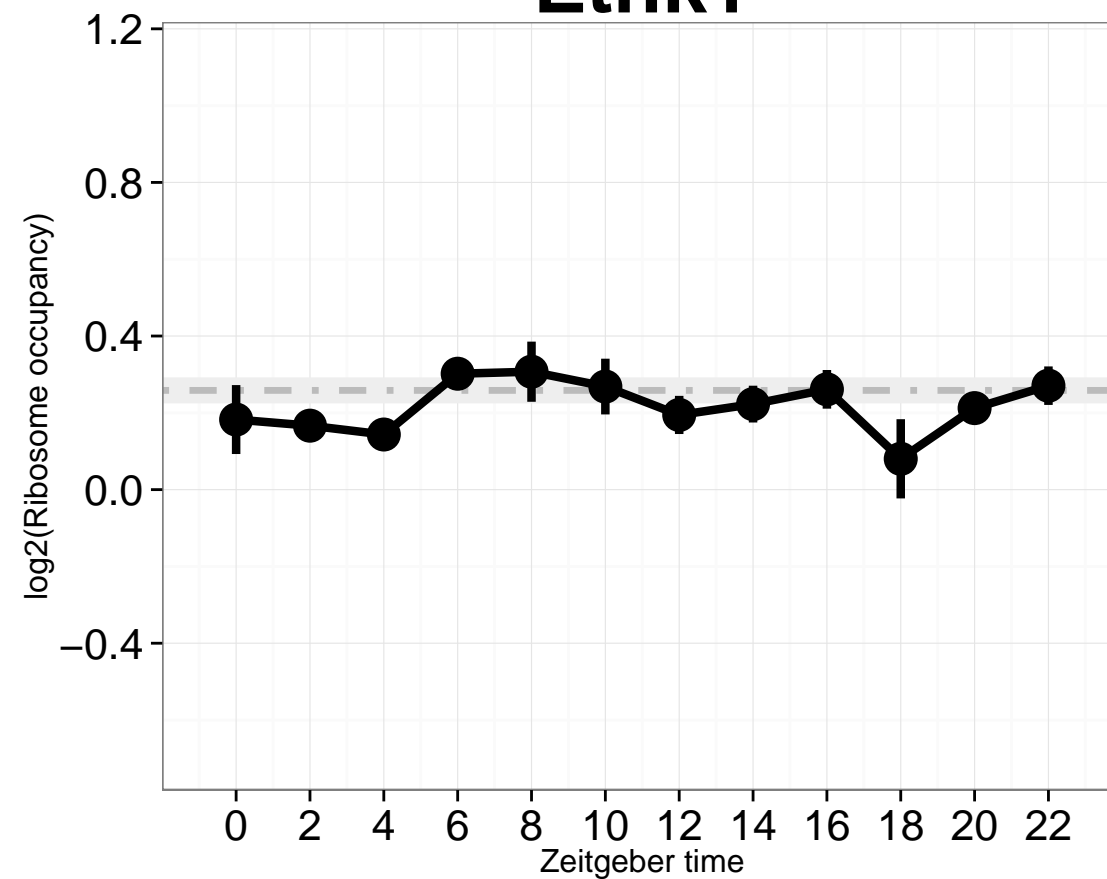

Supplement: SuppDataset_1.zip [file Etnk1_set_A.pdf › Supplemental Dataset 1/A-mRNA_nonrhyth_translation_nonrhyth/Etnk1_set_A.pdf]

## Etnppl

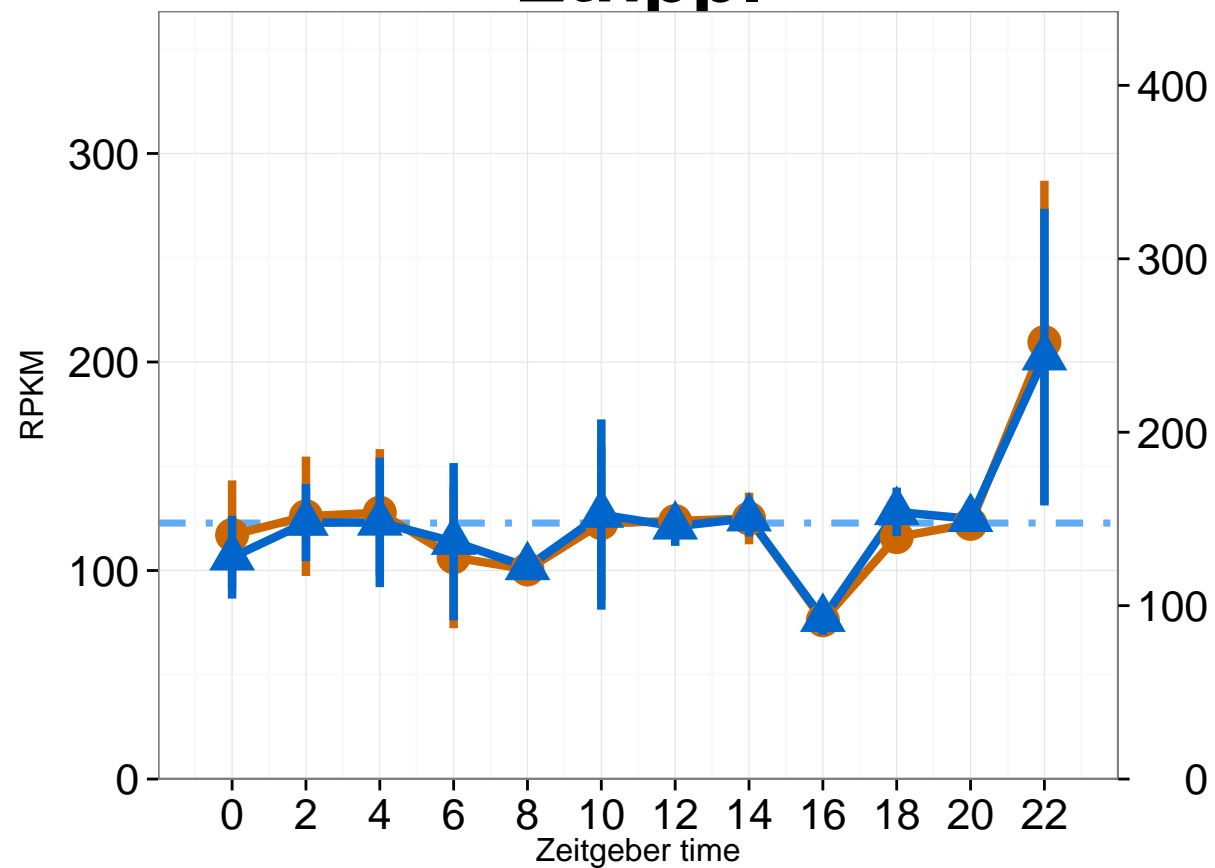

## Etnppl

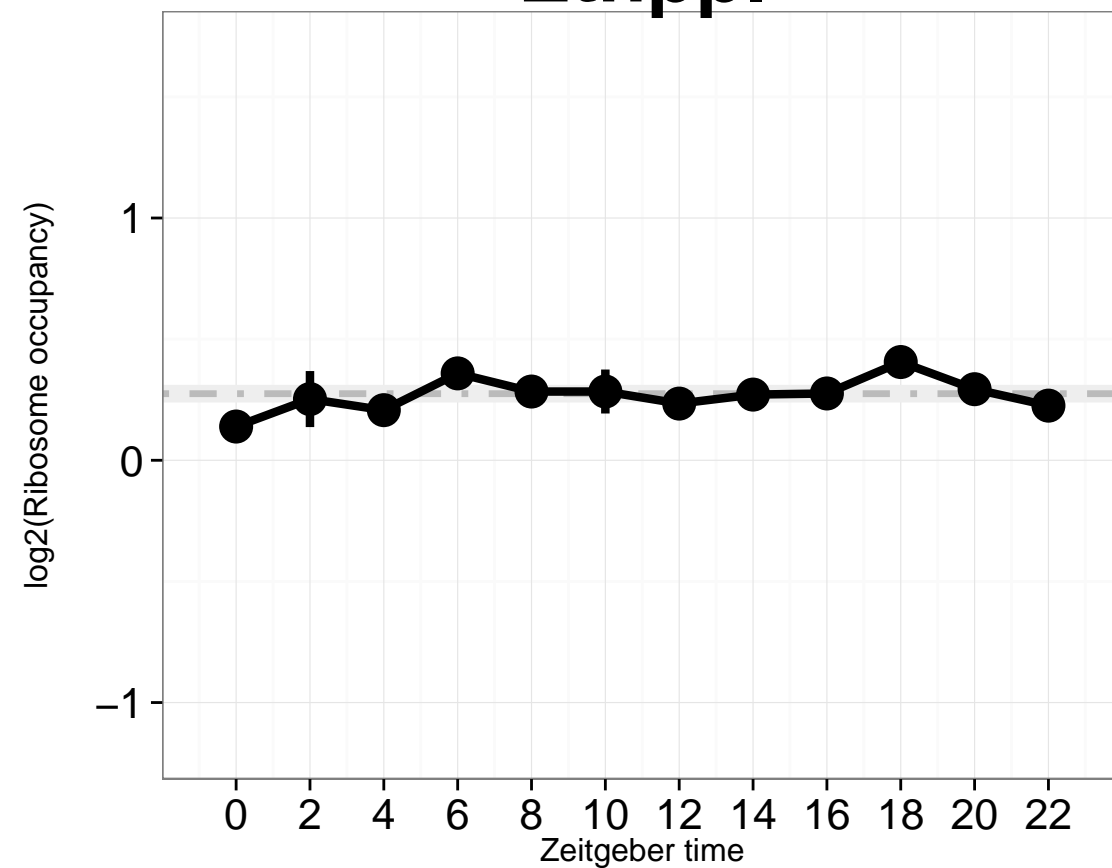

Supplement: SuppDataset_1.zip [file Etnppl_set_A.pdf › Supplemental Dataset 1/A-mRNA_nonrhyth_translation_nonrhyth/Etnppl_set_A.pdf]

## Ets1

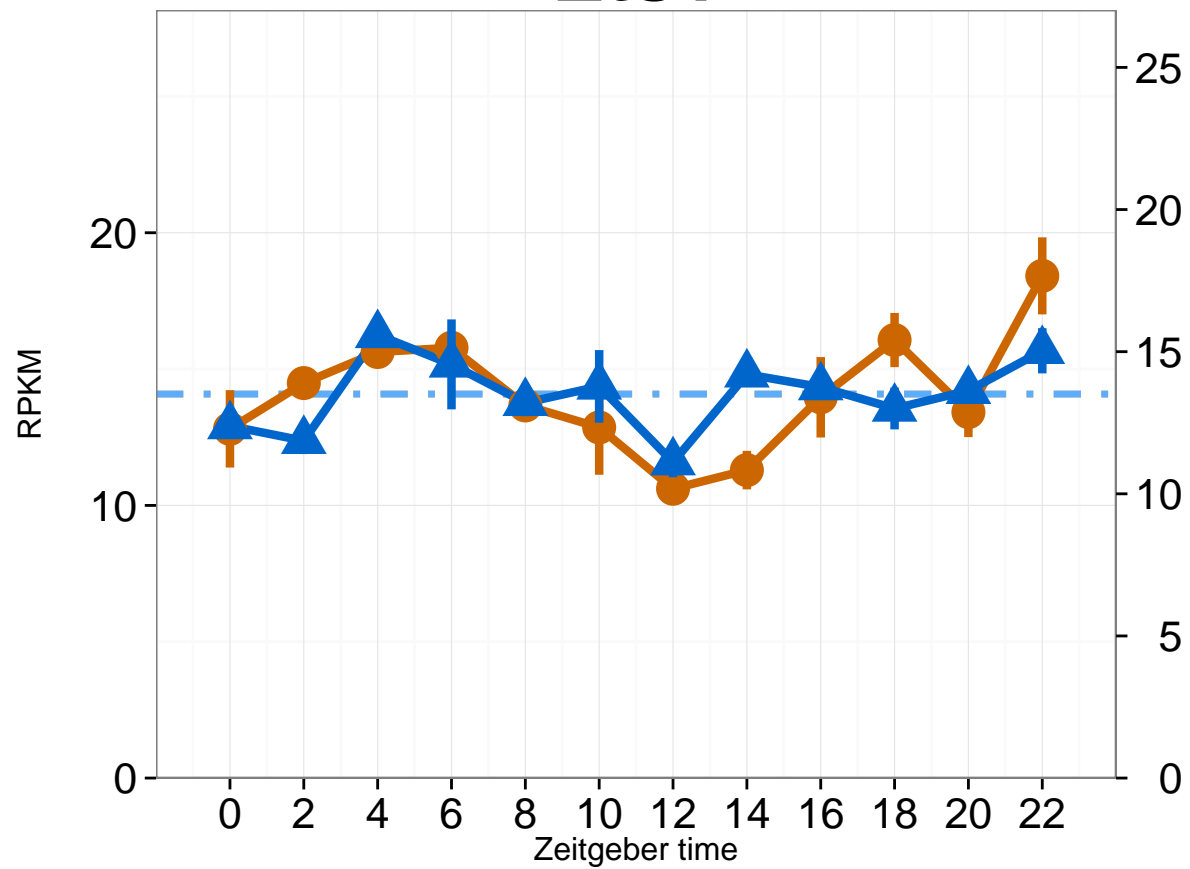

## Ets1

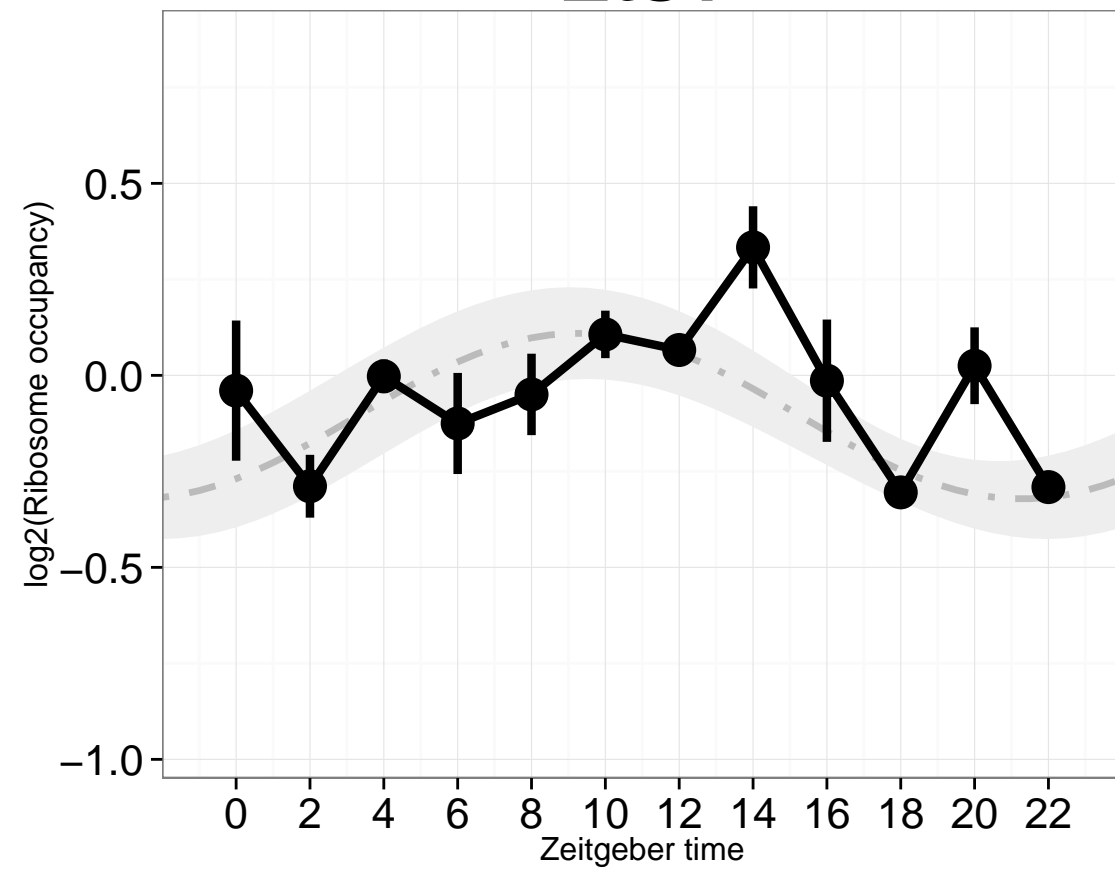

Supplement: SuppDataset_1.zip [file Ets1_set_A.pdf › Supplemental Dataset 1/A-mRNA_nonrhyth_translation_nonrhyth/Ets1_set_A.pdf]

## Ets2

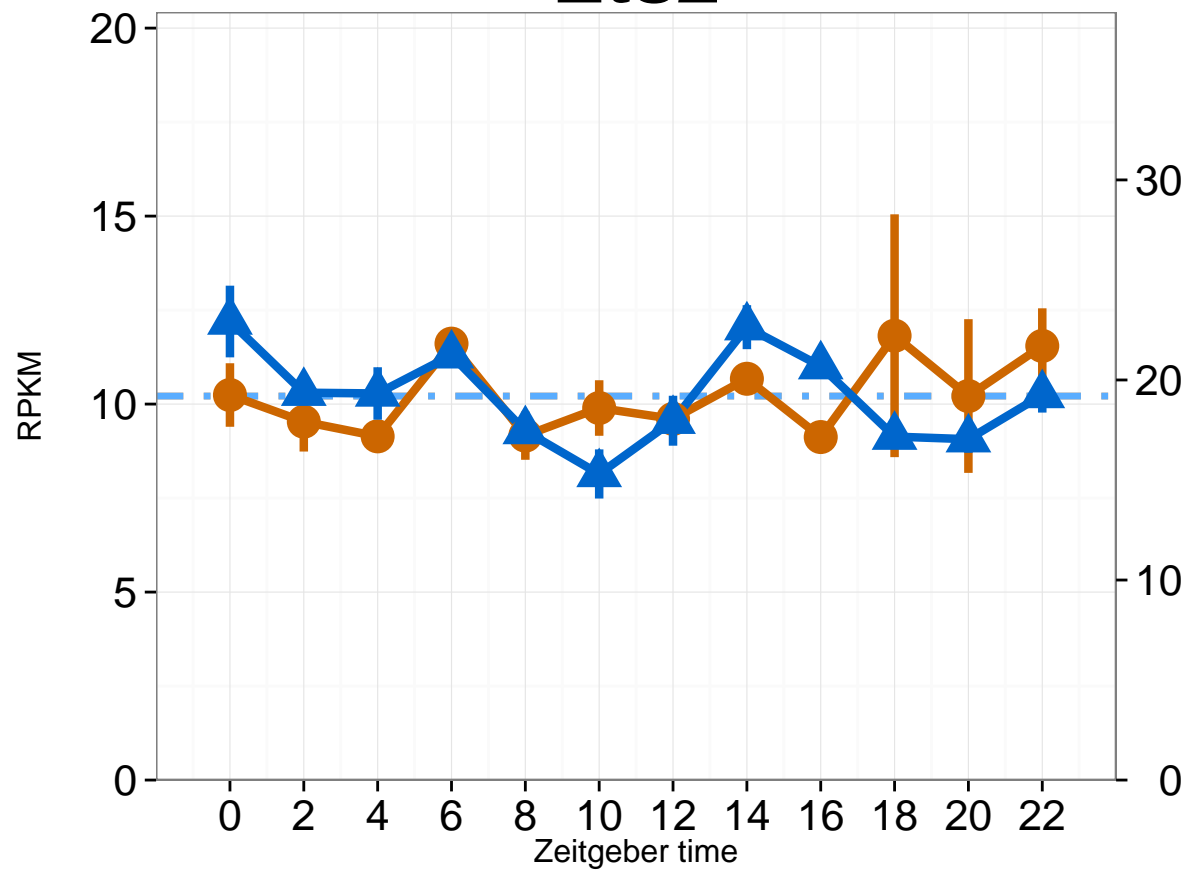

## Ets2

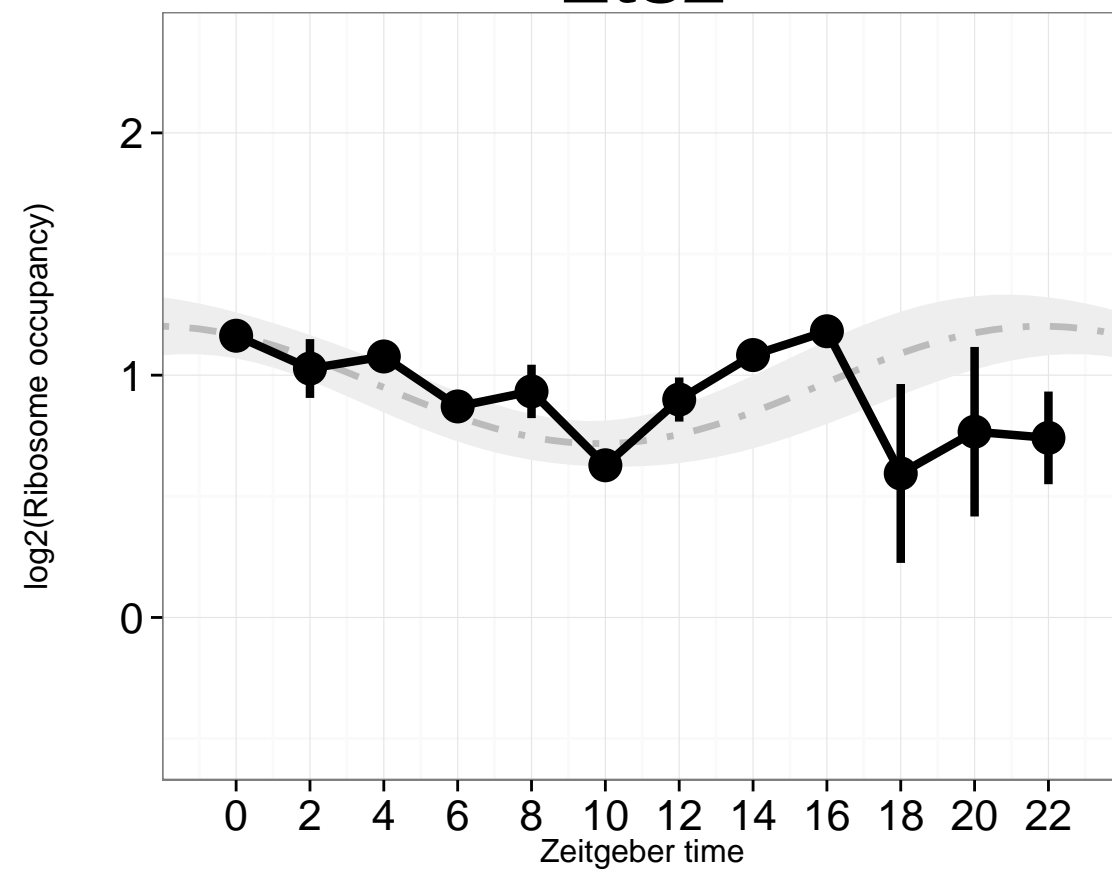

Supplement: SuppDataset_1.zip [file Ets2_set_A.pdf › Supplemental Dataset 1/A-mRNA_nonrhyth_translation_nonrhyth/Ets2_set_A.pdf]

# Etv1

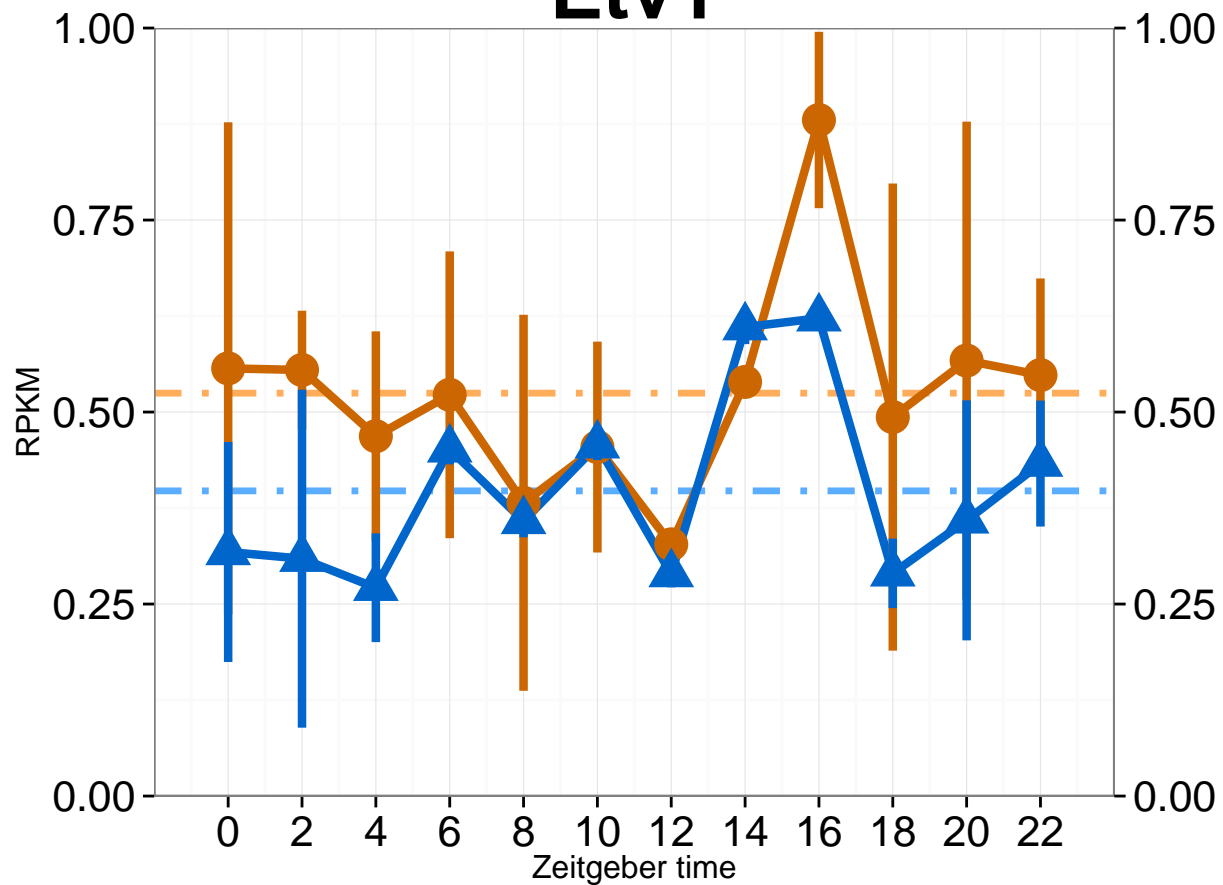

# Etv1

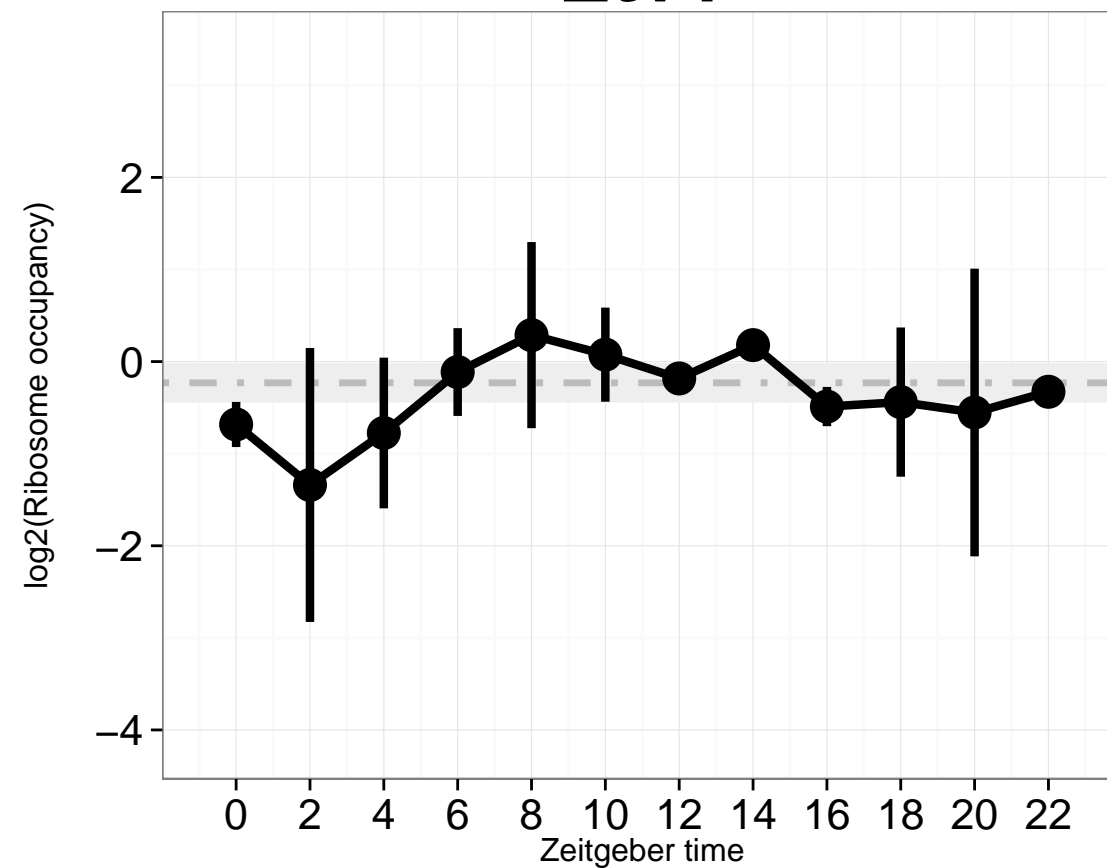

Supplement: SuppDataset_1.zip [file Etv1_set_A.pdf › Supplemental Dataset 1/A-mRNA_nonrhyth_translation_nonrhyth/Etv1_set_A.pdf]

## Etv3

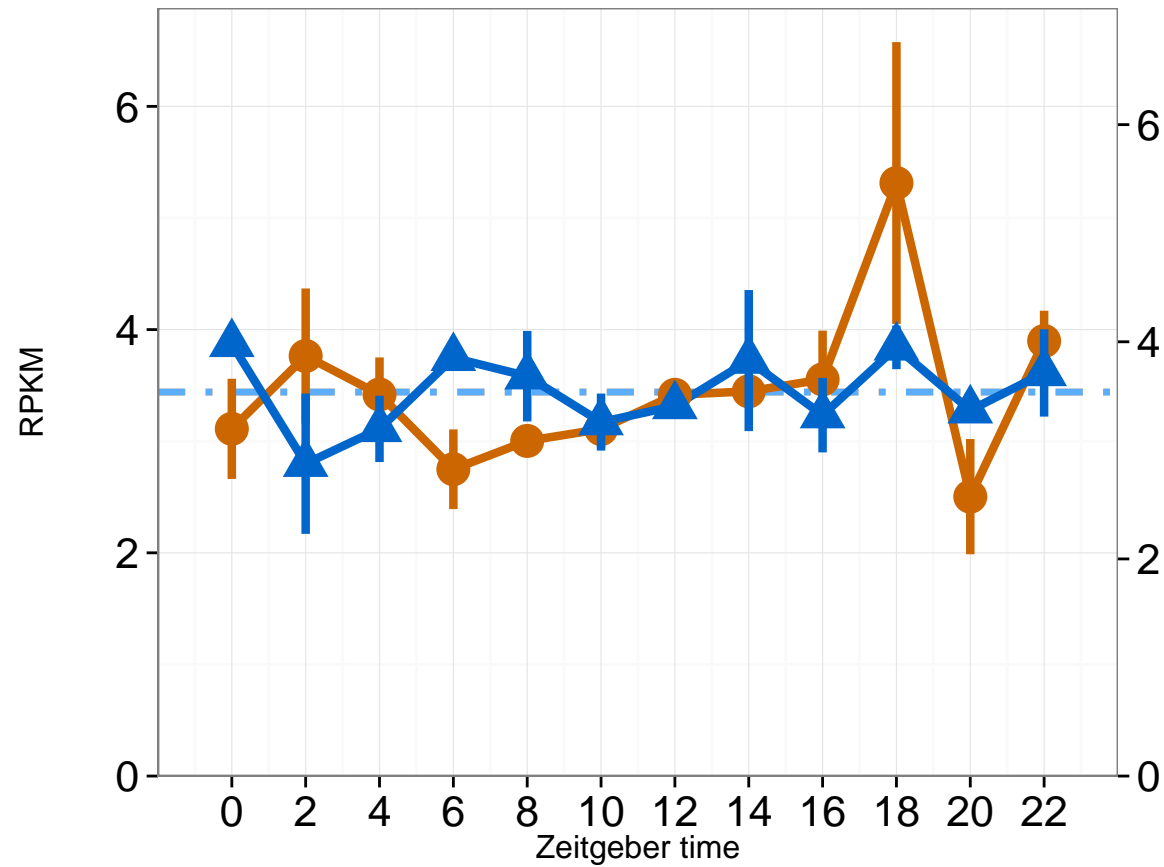

## Etv3

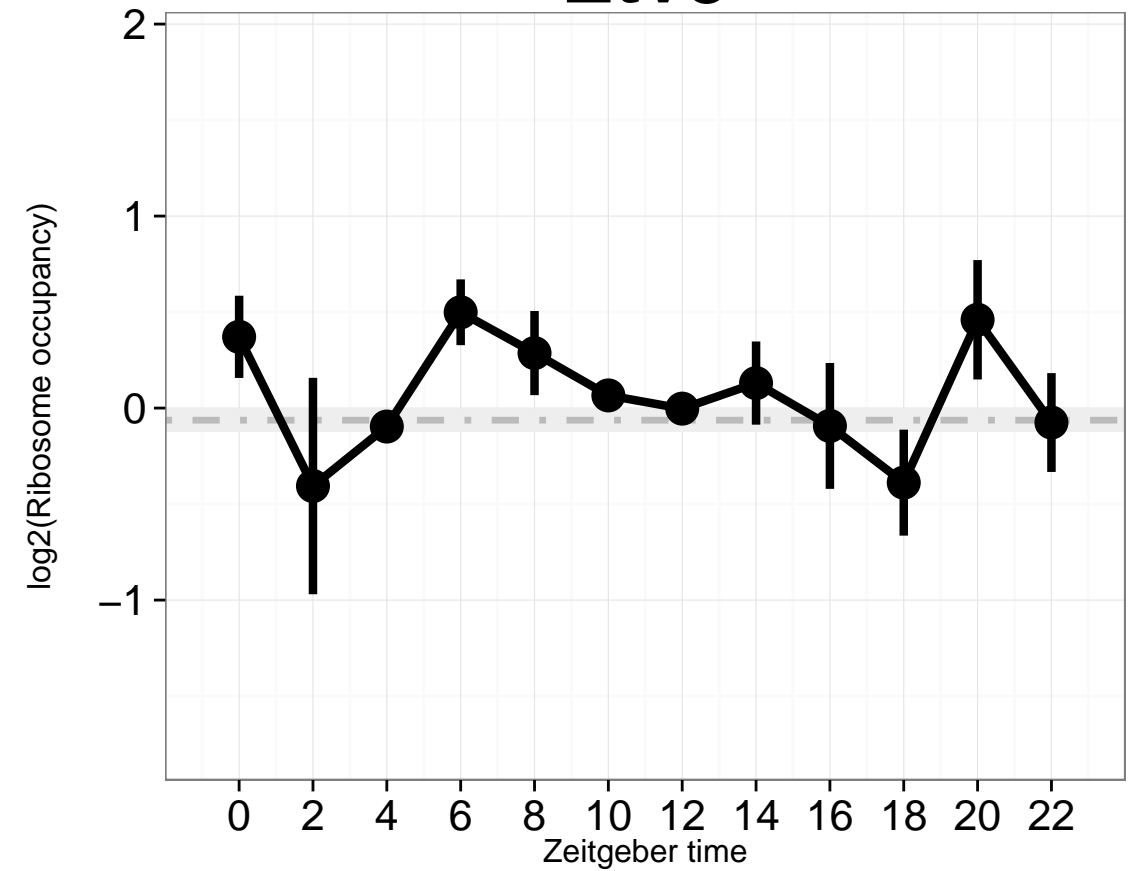

Supplement: SuppDataset_1.zip [file Etv3_set_A.pdf › Supplemental Dataset 1/A-mRNA_nonrhyth_translation_nonrhyth/Etv3_set_A.pdf]

## Etv5

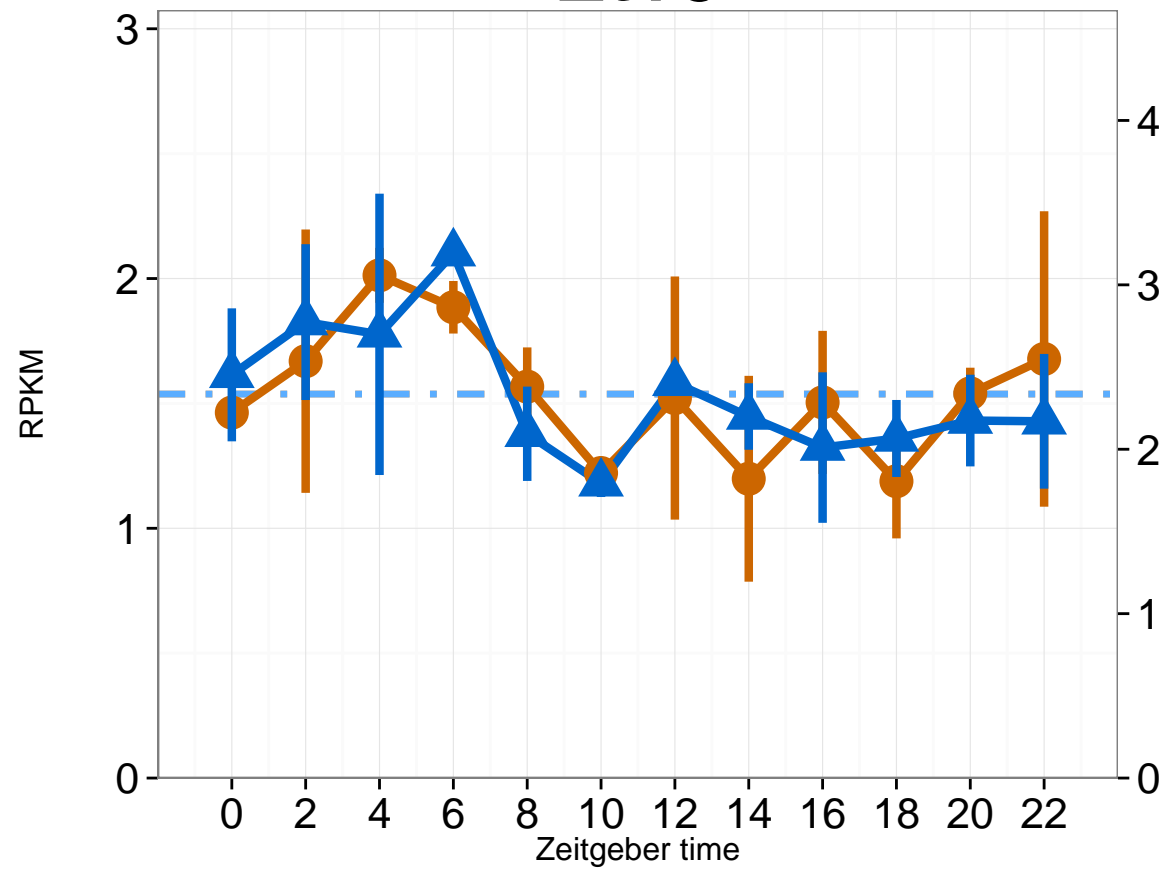

## Etv5

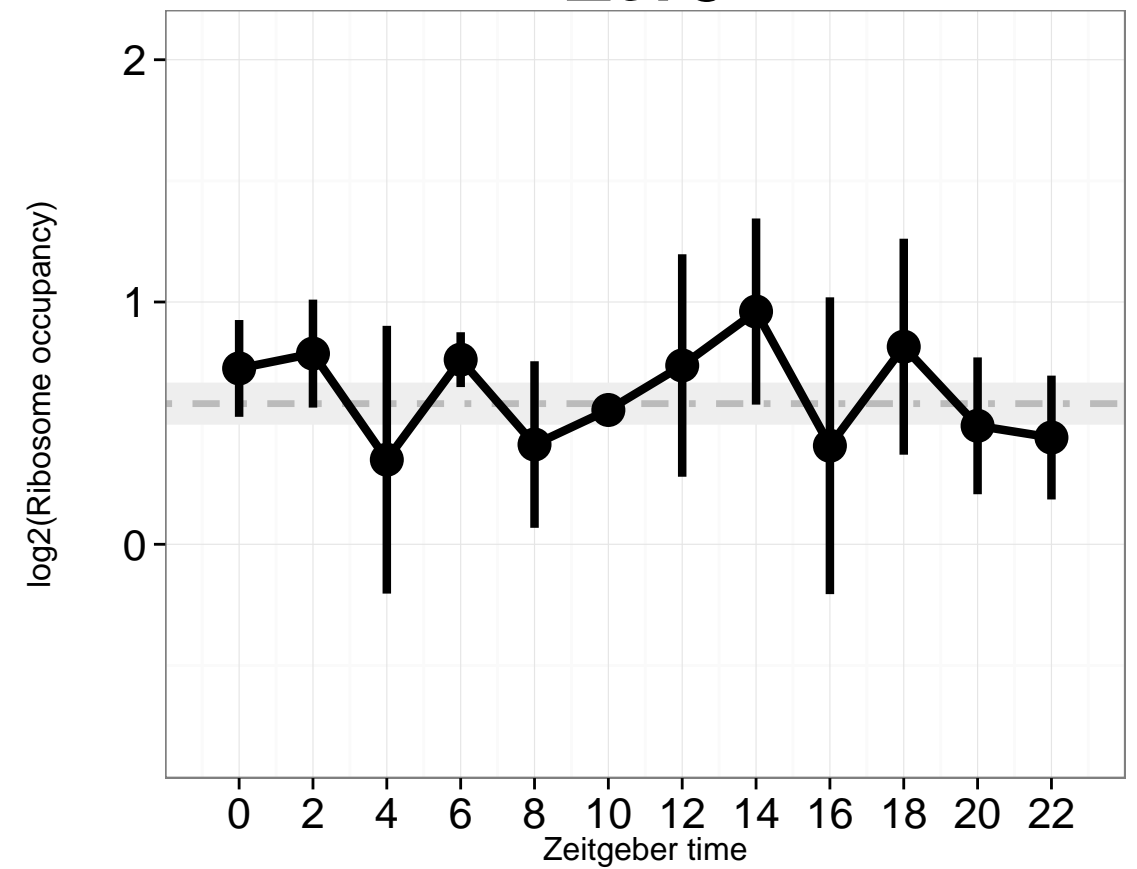

Supplement: SuppDataset_1.zip [file Etv5_set_A.pdf › Supplemental Dataset 1/A-mRNA_nonrhyth_translation_nonrhyth/Etv5_set_A.pdf]

# Etv6

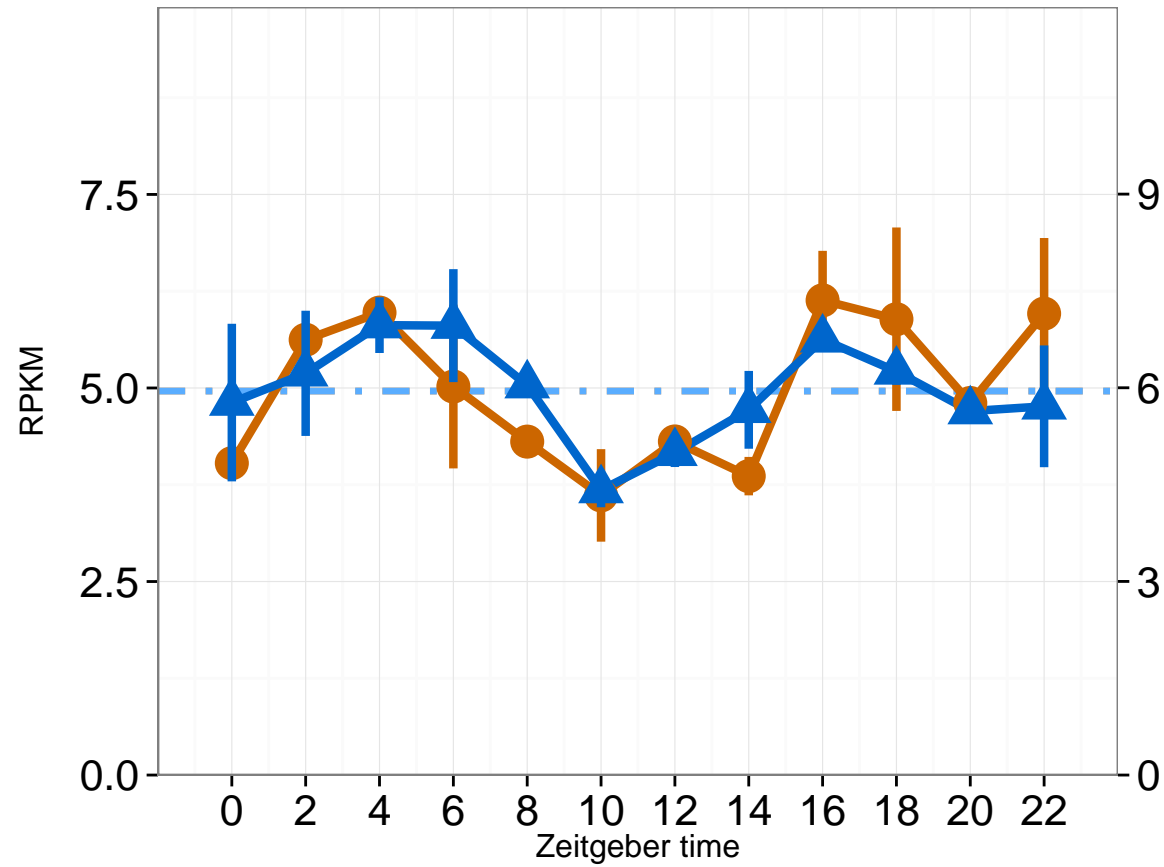

# Etv6

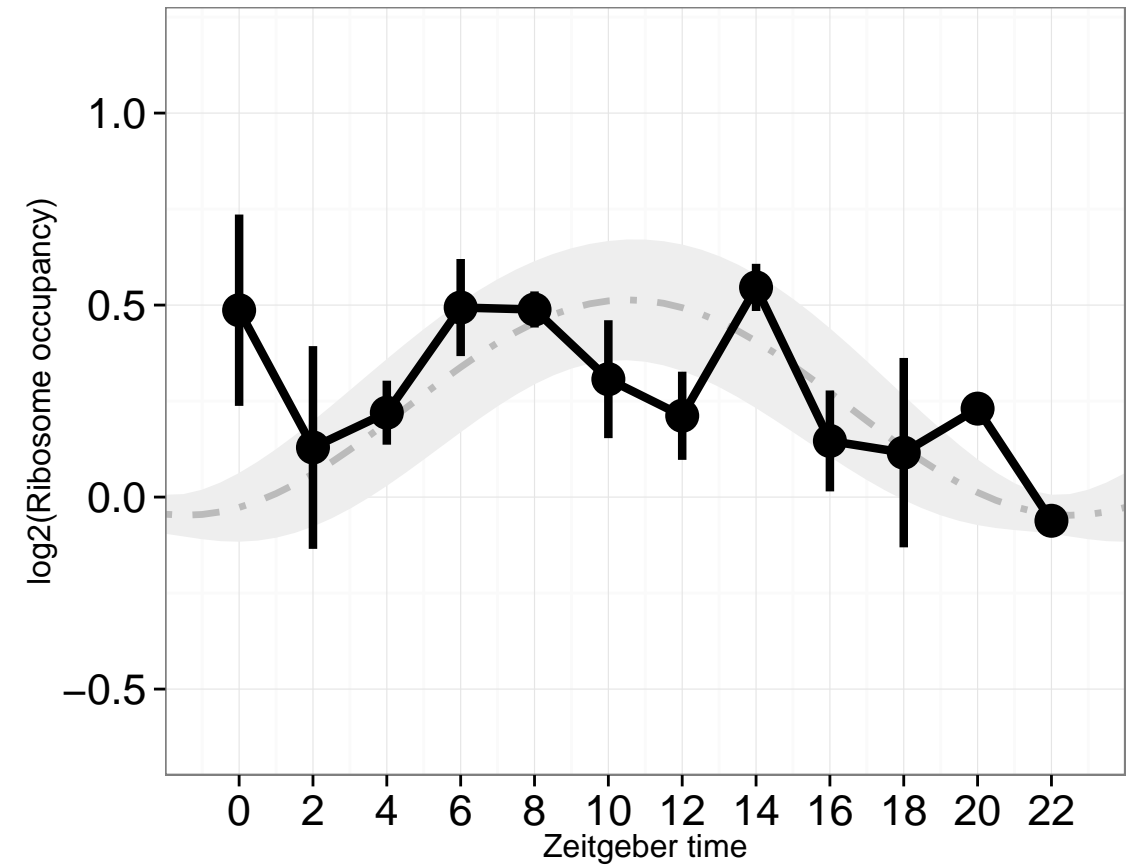

Supplement: SuppDataset_1.zip [file Etv6_set_A.pdf › Supplemental Dataset 1/A-mRNA_nonrhyth_translation_nonrhyth/Etv6_set_A.pdf]

# Eva1b

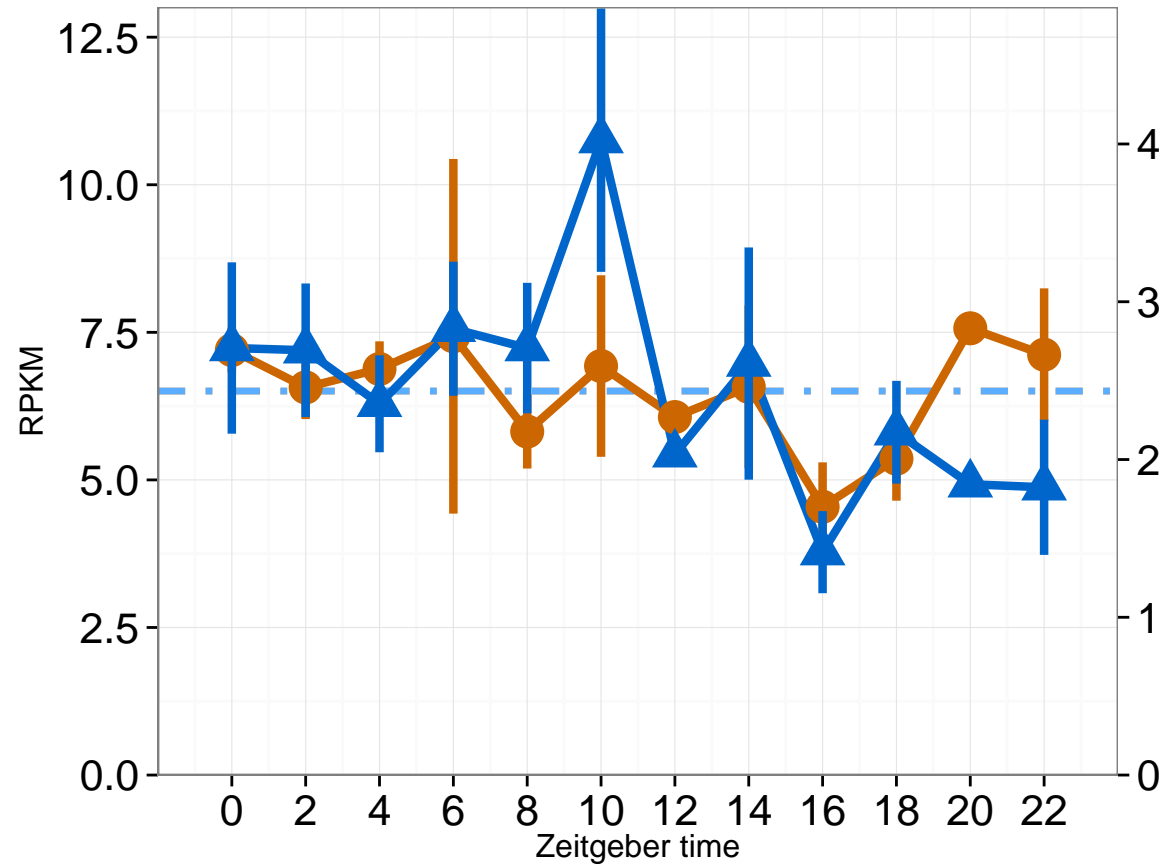

# Eva1b

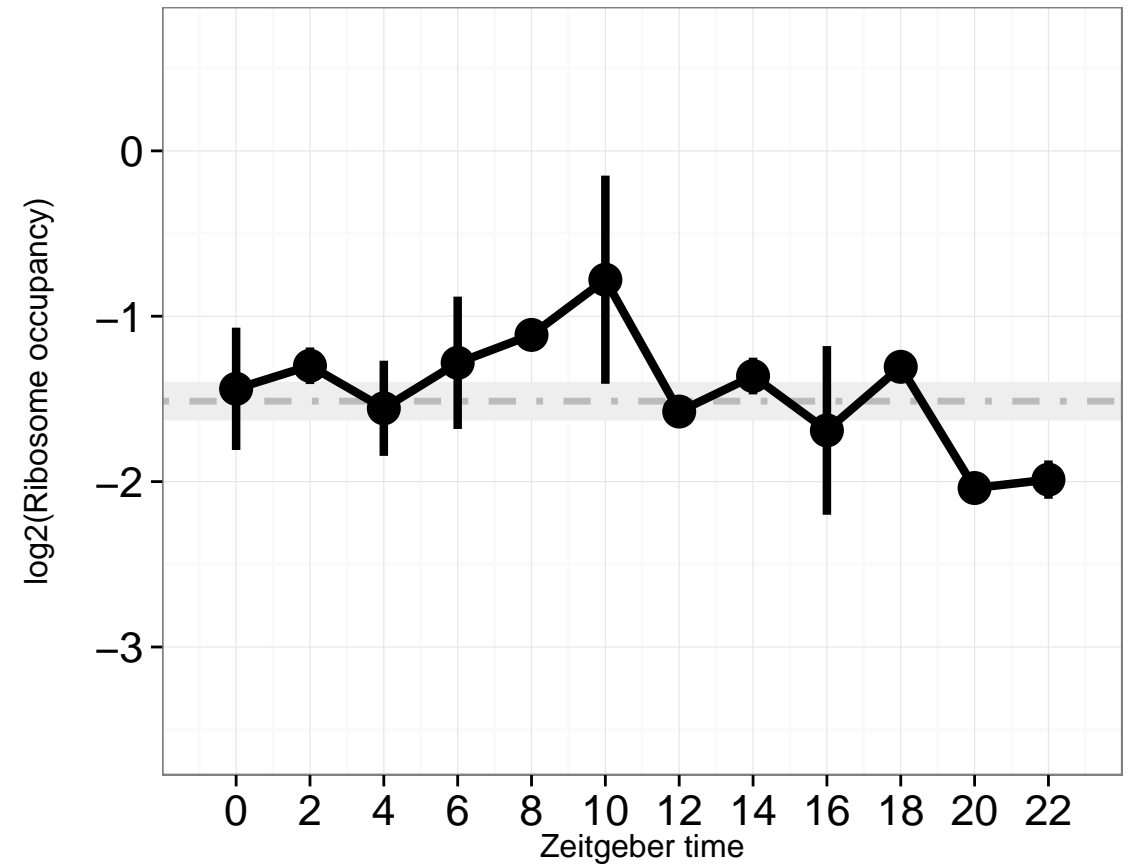

Supplement: SuppDataset_1.zip [file Eva1b_set_A.pdf › Supplemental Dataset 1/A-mRNA_nonrhyth_translation_nonrhyth/Eva1b_set_A.pdf]
