# Supplementary figures and images for: Ribosome profiling reveals the rhythmic liver translatome and circadian clock regulation by upstream open reading frames (part 26 of 113)
Source: HighWire-hosted journal article supplement (doi:10.1101/gr.195404.115), 2015-10-20

## Evc2

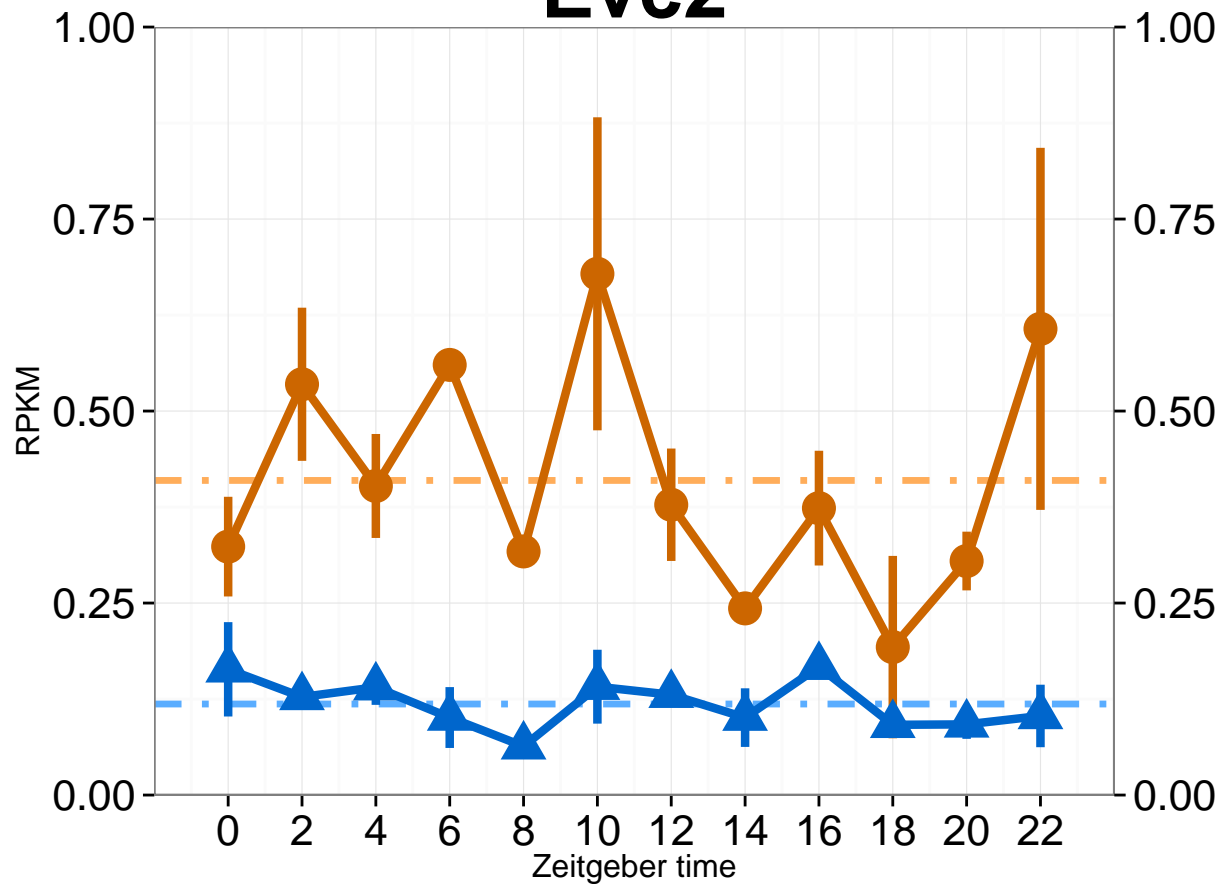

## Evc2

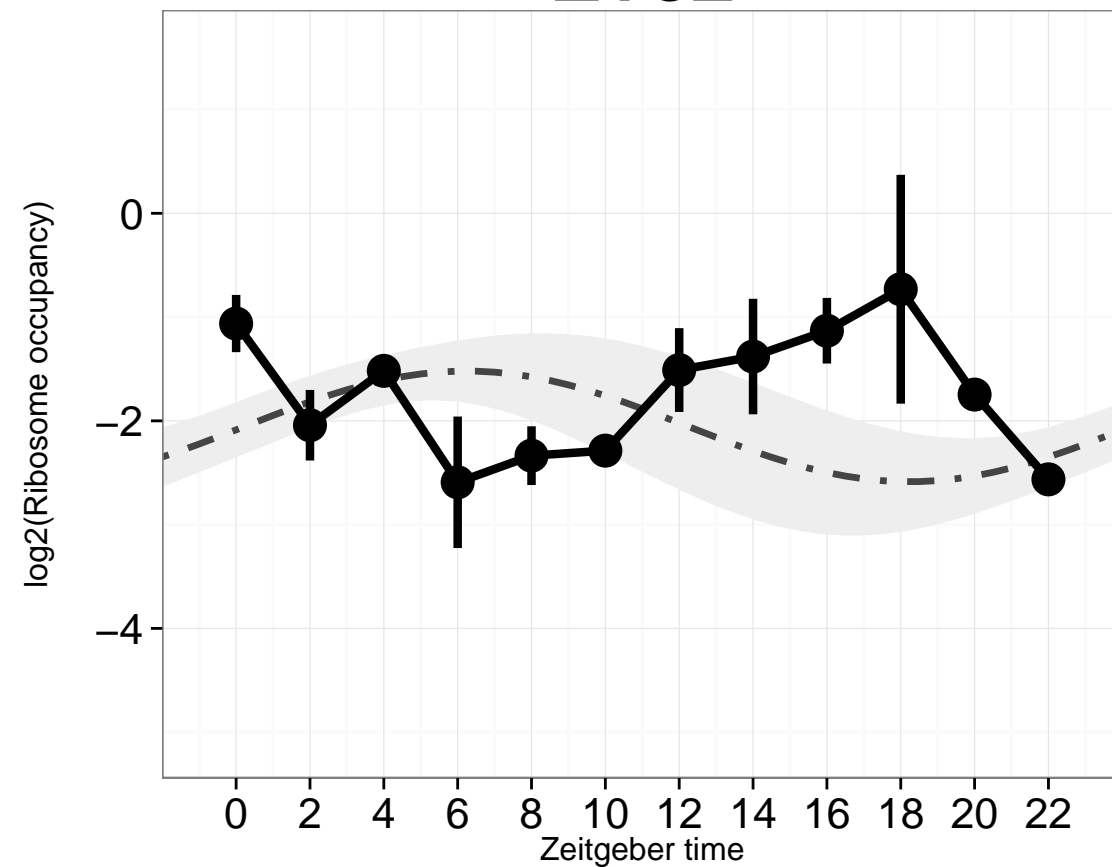

Supplement: SuppDataset_1.zip [file Evc2_set_A.pdf › Supplemental Dataset 1/A-mRNA_nonrhyth_translation_nonrhyth/Evc2_set_A.pdf]

## Evc

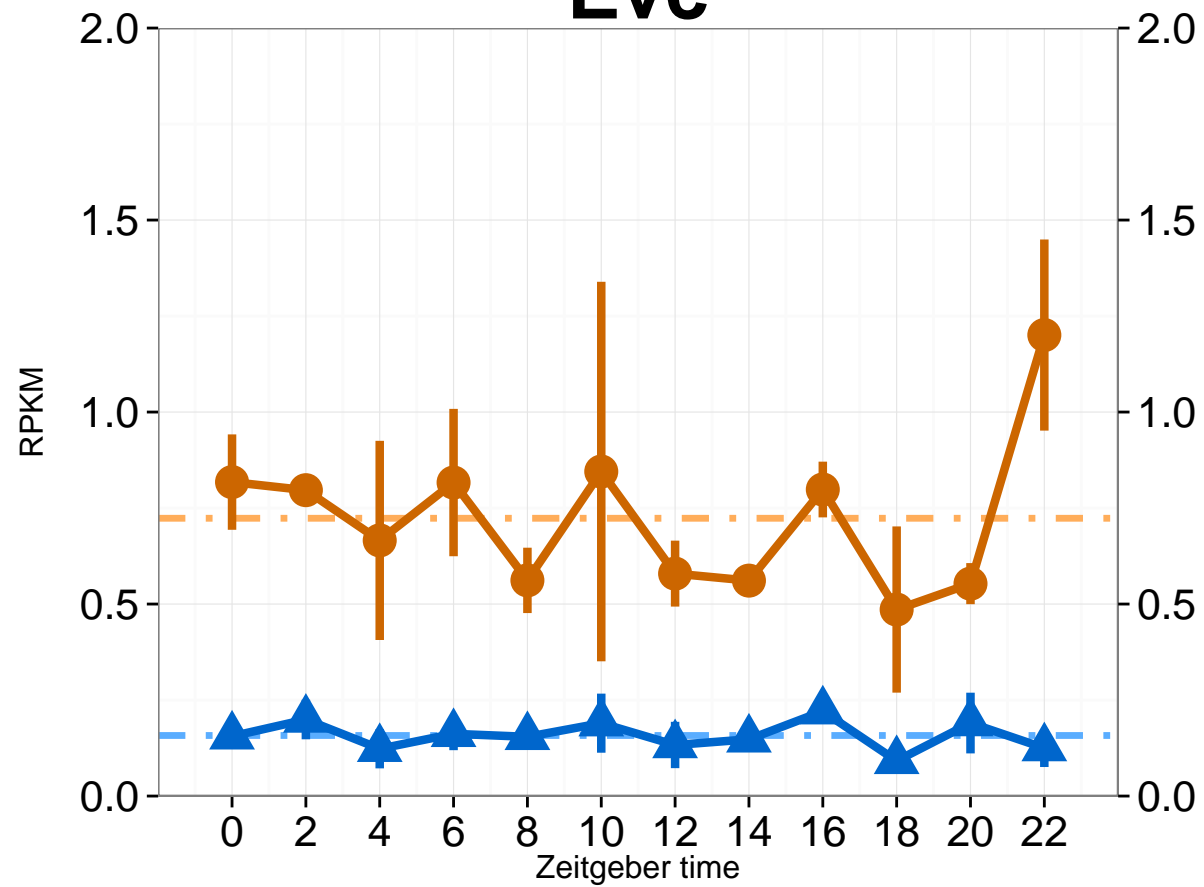

## Evc

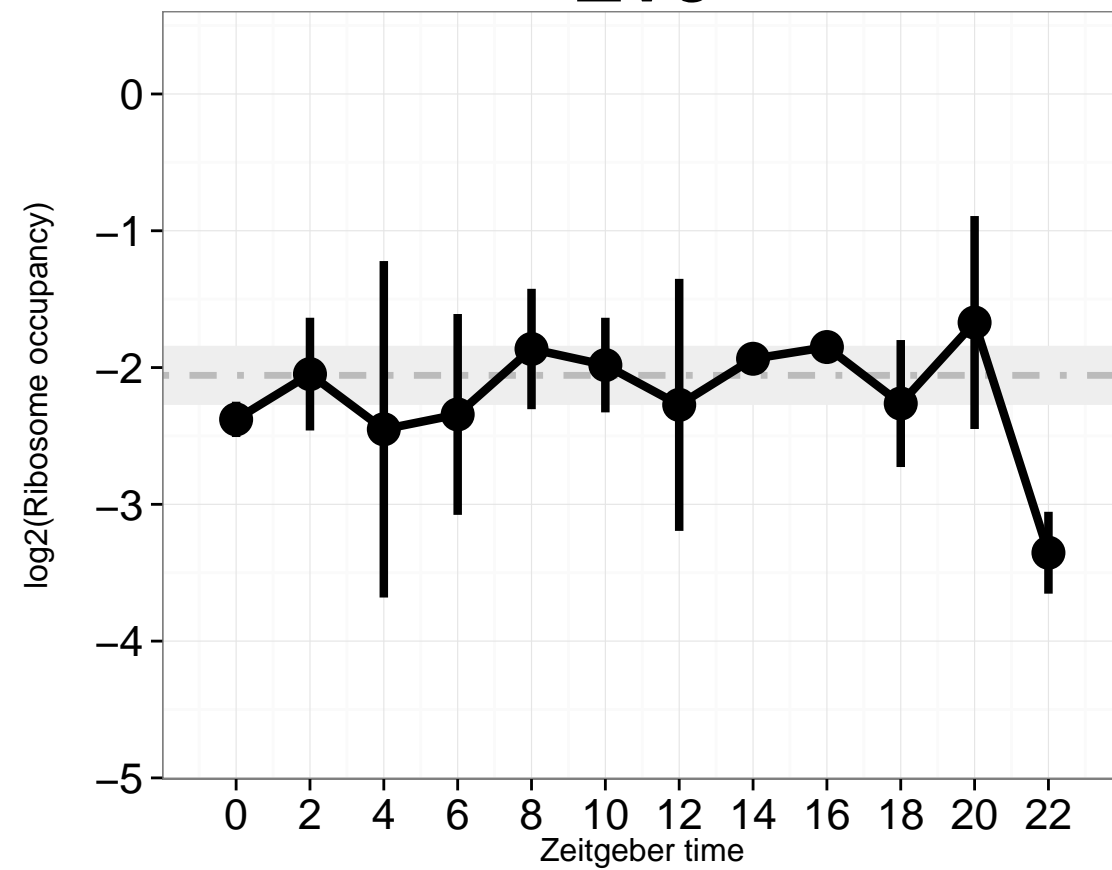

Supplement: SuppDataset_1.zip [file Evc_set_A.pdf › Supplemental Dataset 1/A-mRNA_nonrhyth_translation_nonrhyth/Evc_set_A.pdf]

# Evi2b

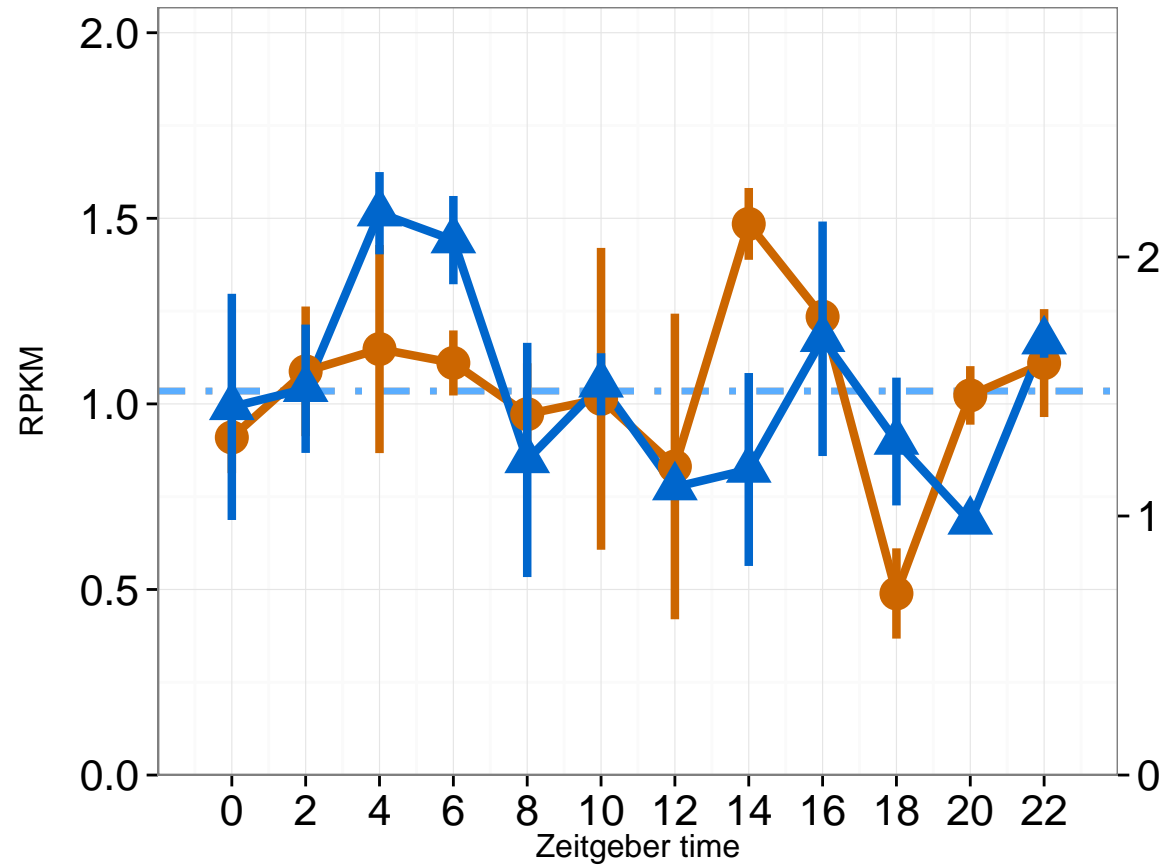

# Evi2b

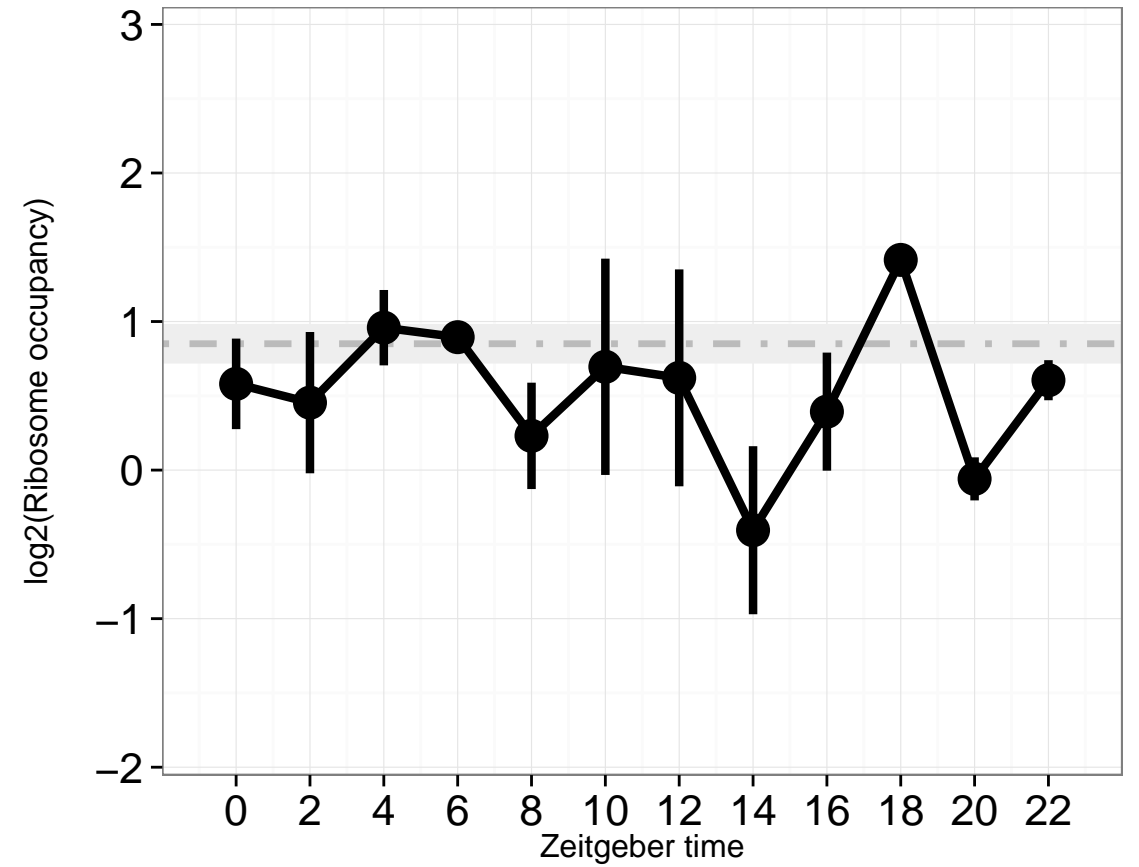

Supplement: SuppDataset_1.zip [file Evi2b_set_A.pdf › Supplemental Dataset 1/A-mRNA_nonrhyth_translation_nonrhyth/Evi2b_set_A.pdf]

## Evi5l

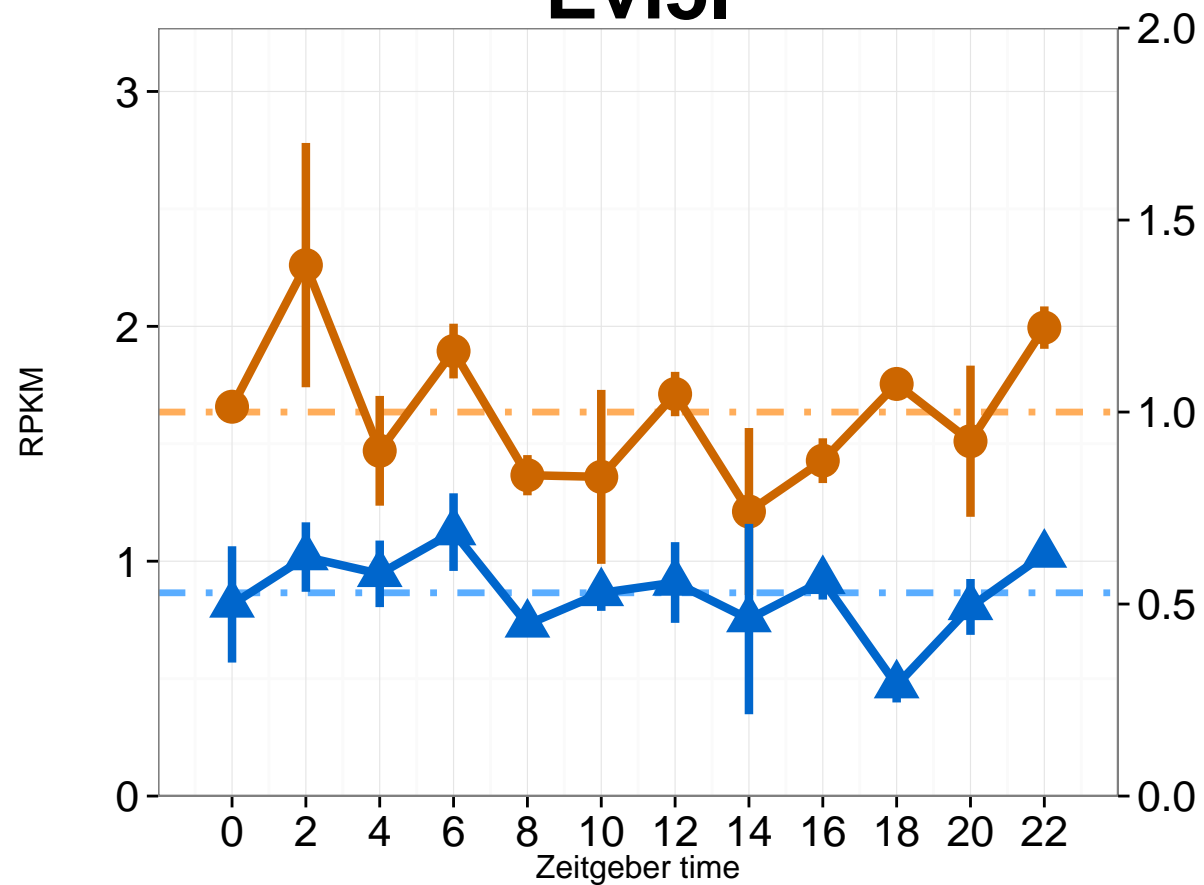

## Evi5l

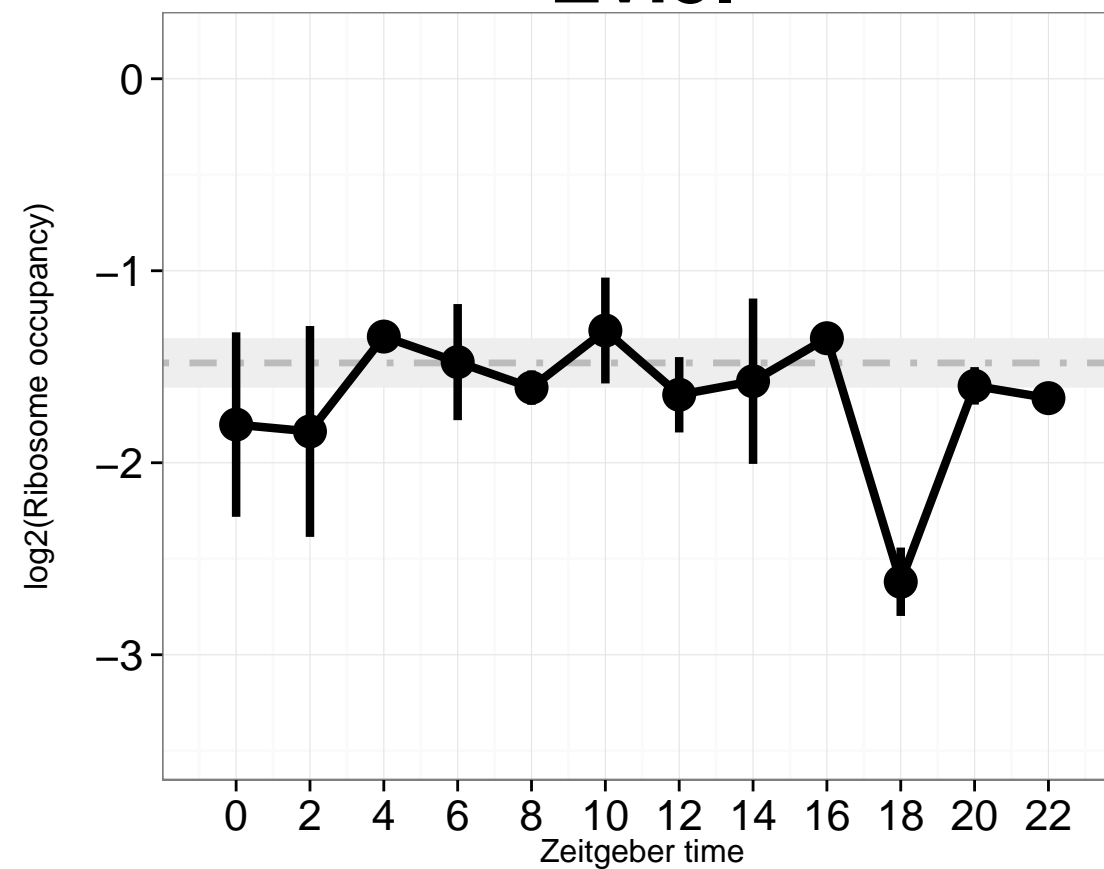

Supplement: SuppDataset_1.zip [file Evi5l_set_A.pdf › Supplemental Dataset 1/A-mRNA_nonrhyth_translation_nonrhyth/Evi5l_set_A.pdf]

## Evl

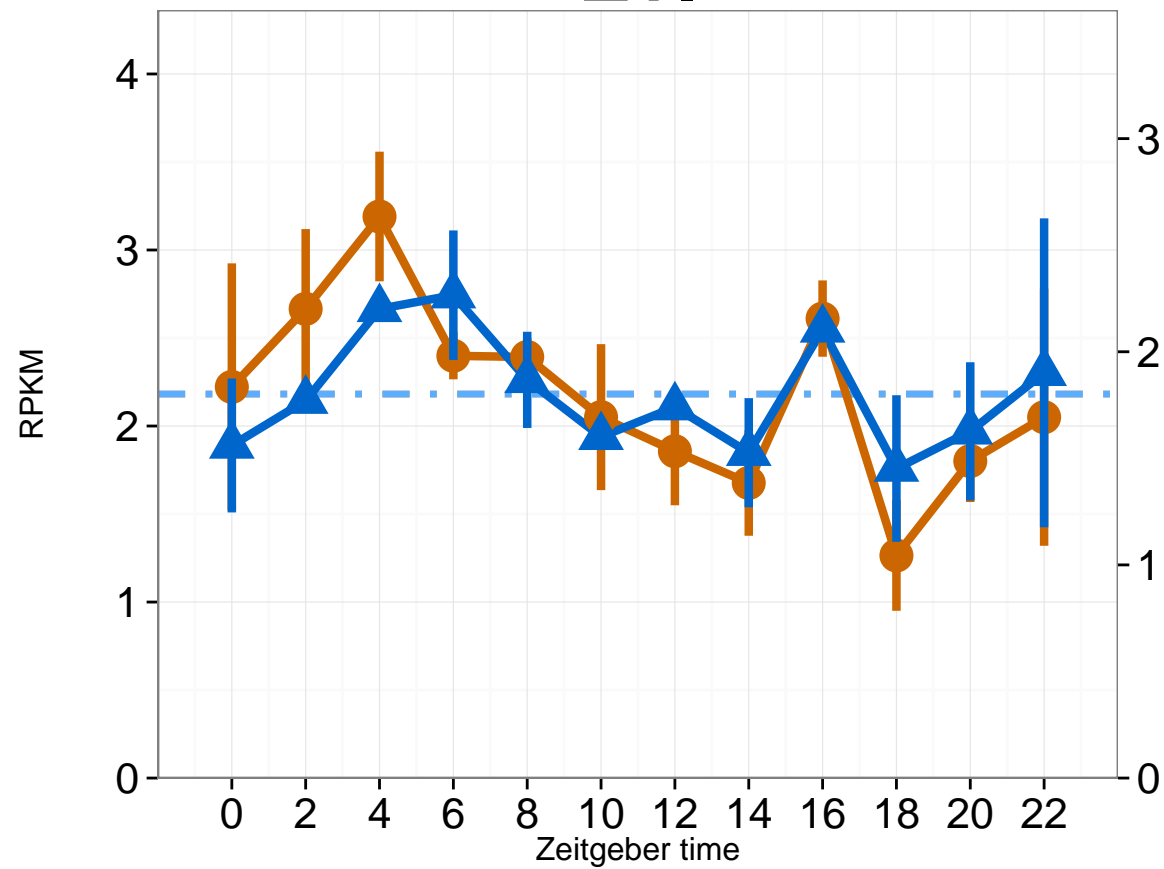

## Evl

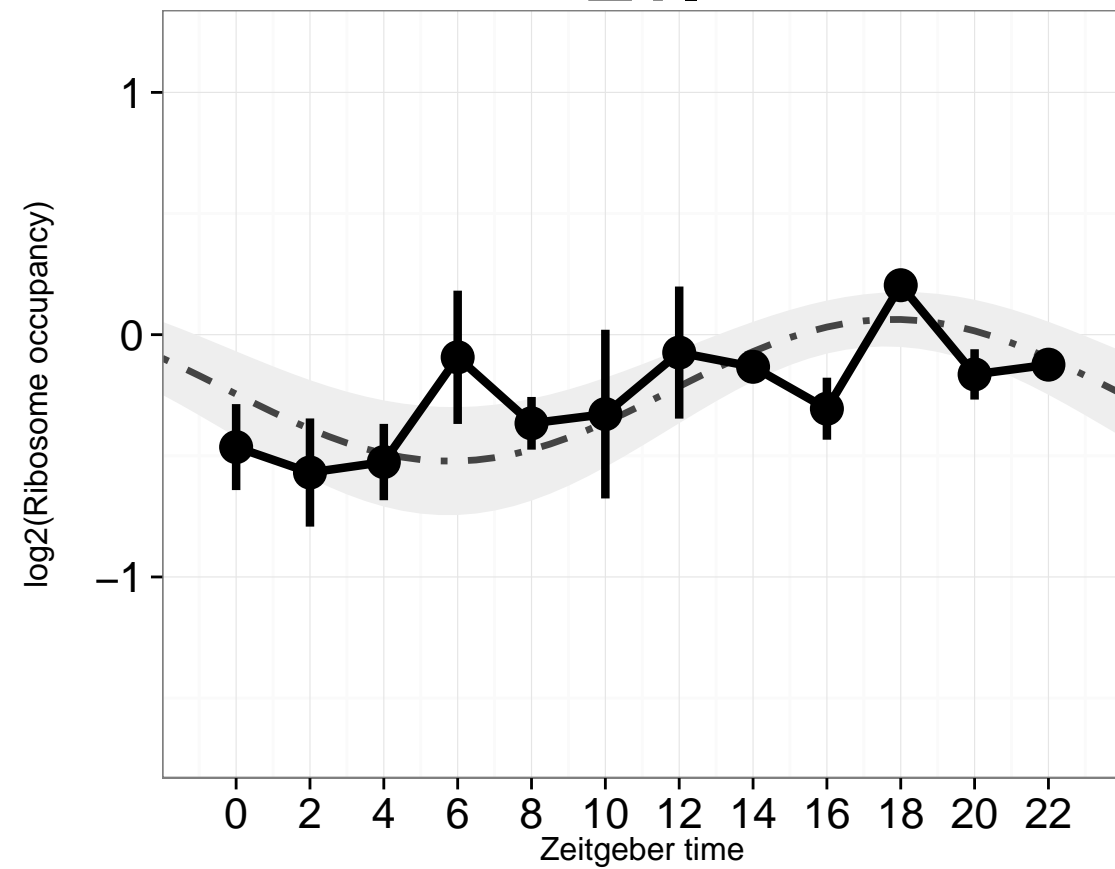

Supplement: SuppDataset_1.zip [file Evl_set_A.pdf › Supplemental Dataset 1/A-mRNA_nonrhyth_translation_nonrhyth/Evl_set_A.pdf]

## Ewsr1

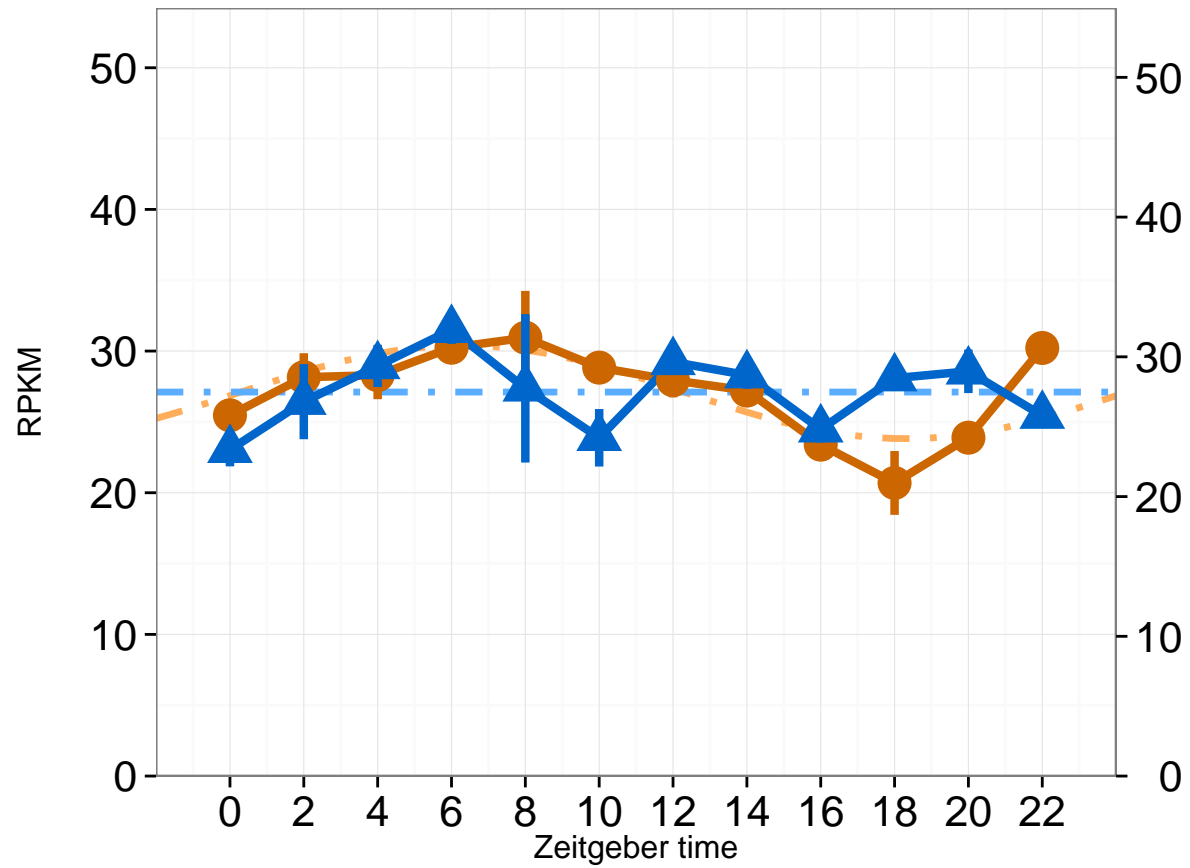

## Ewsr1

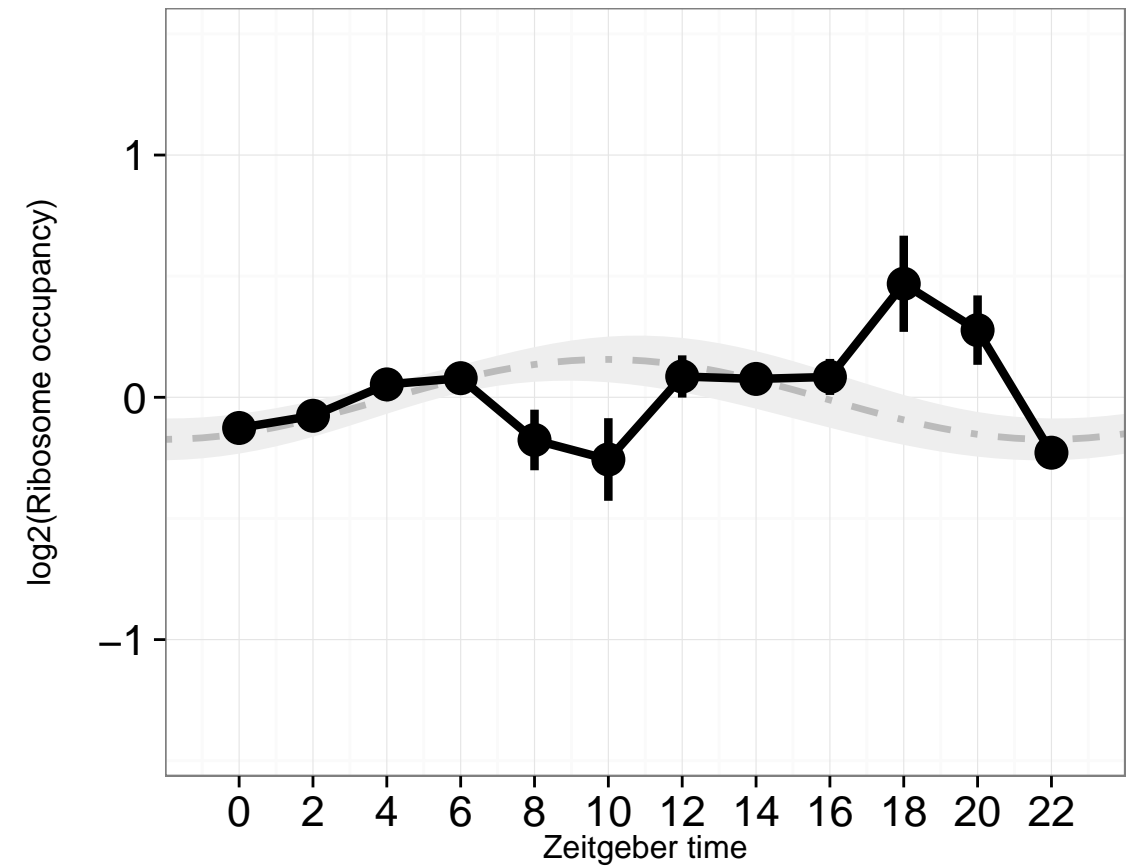

Supplement: SuppDataset_1.zip [file Ewsr1_set_A.pdf › Supplemental Dataset 1/A-mRNA_nonrhyth_translation_nonrhyth/Ewsr1_set_A.pdf]

## Exd2

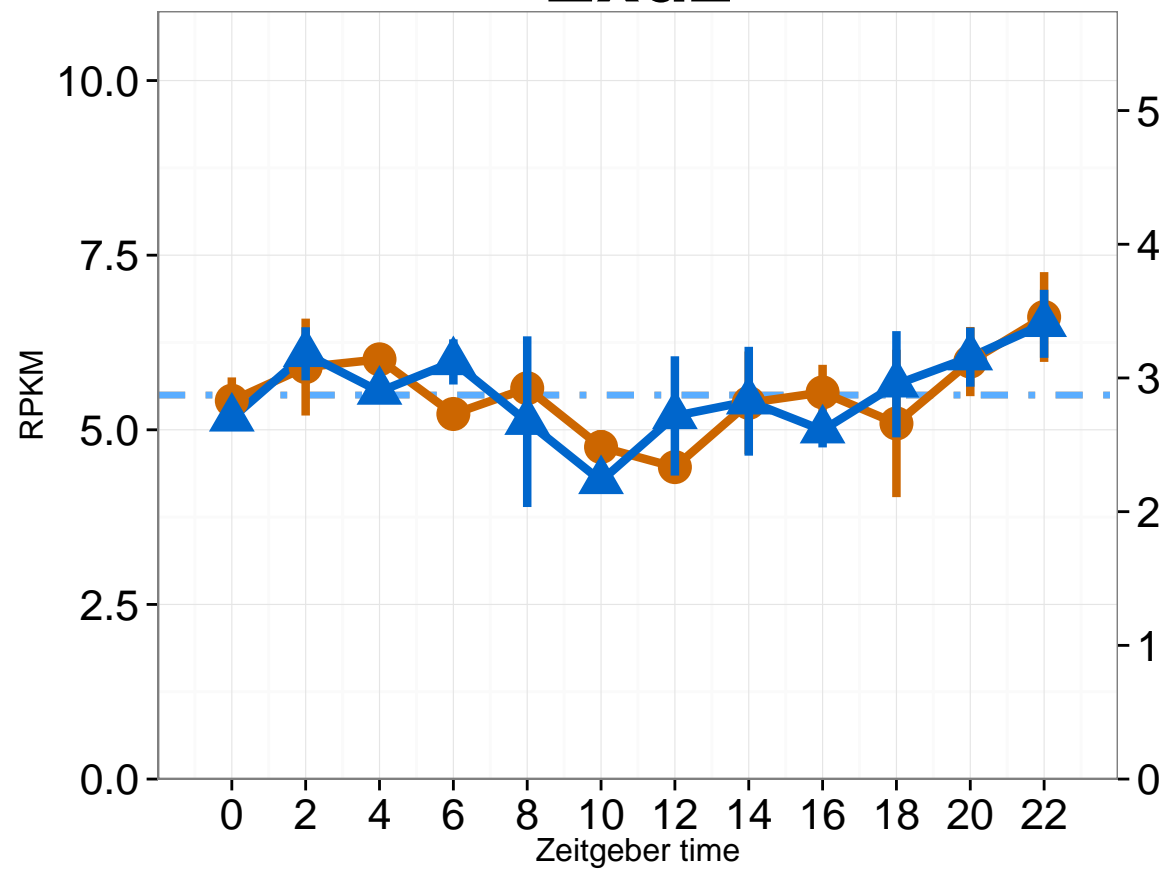

## Exd2

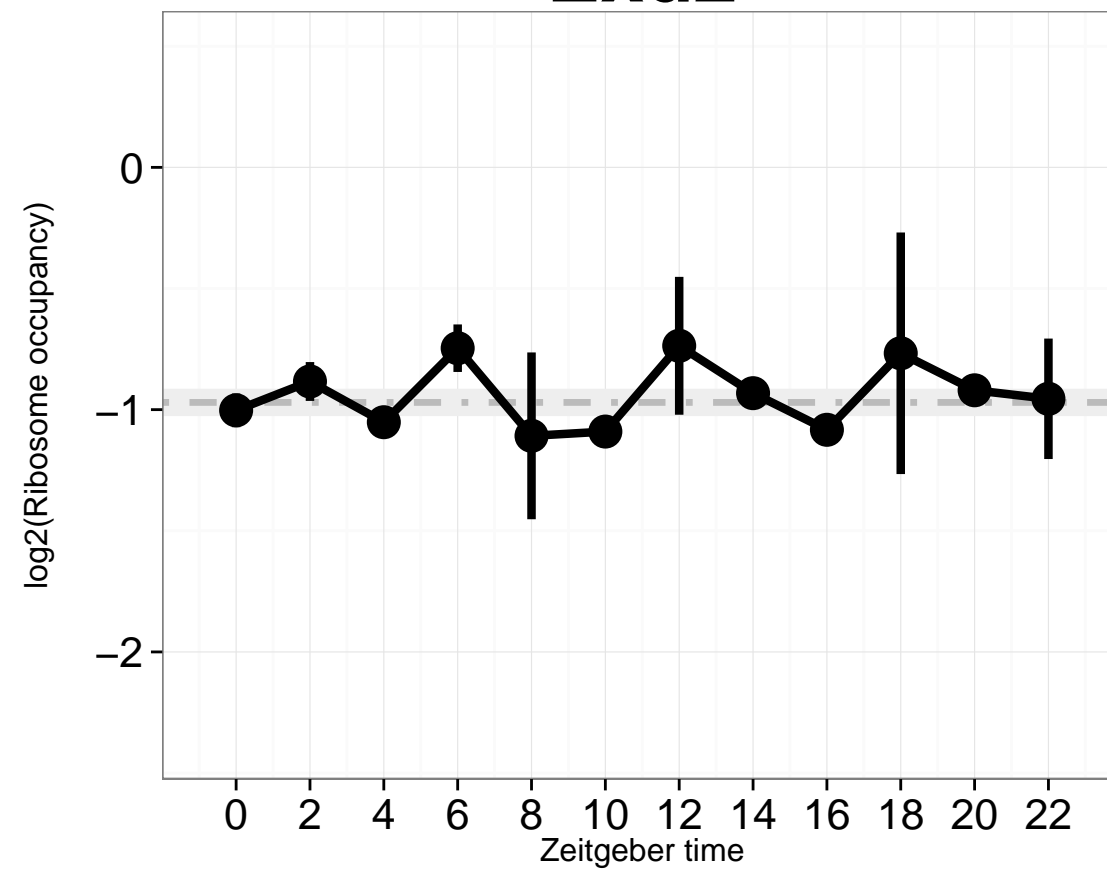

Supplement: SuppDataset_1.zip [file Exd2_set_A.pdf › Supplemental Dataset 1/A-mRNA_nonrhyth_translation_nonrhyth/Exd2_set_A.pdf]

## Exoc2

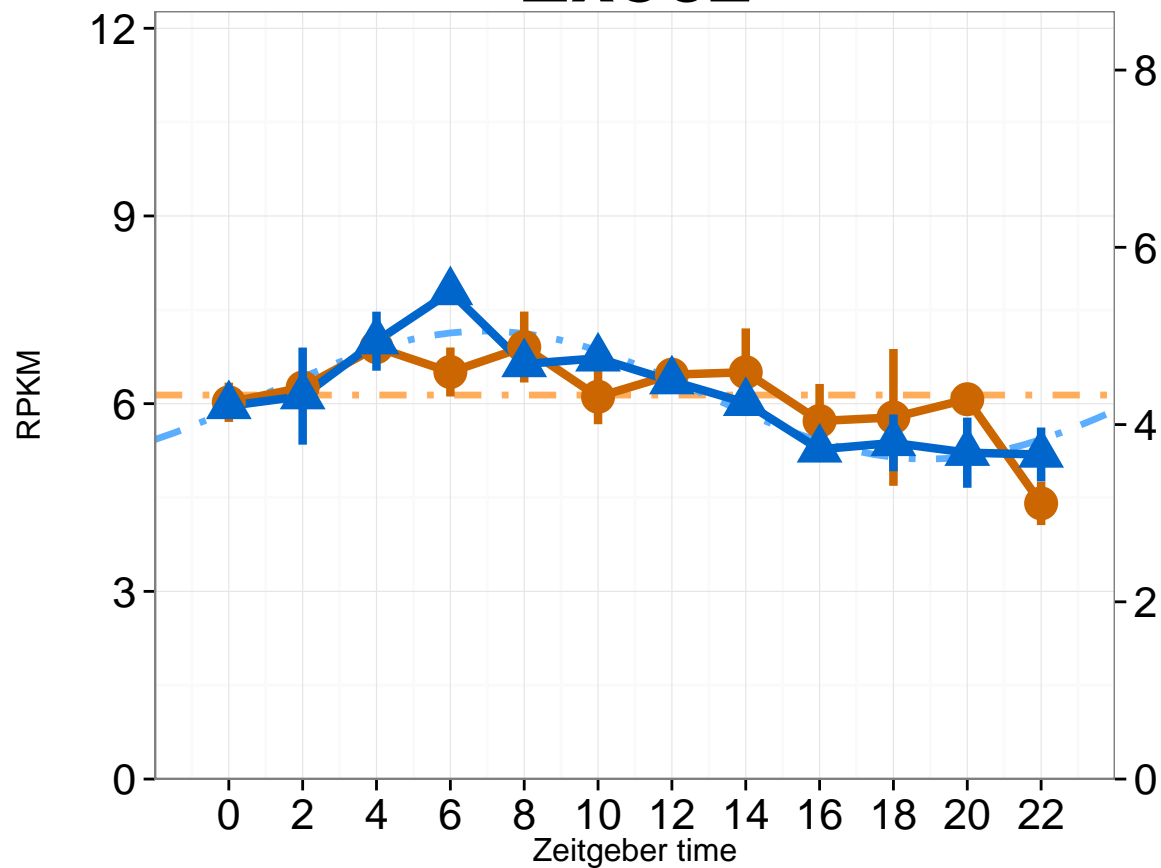

## Exoc2

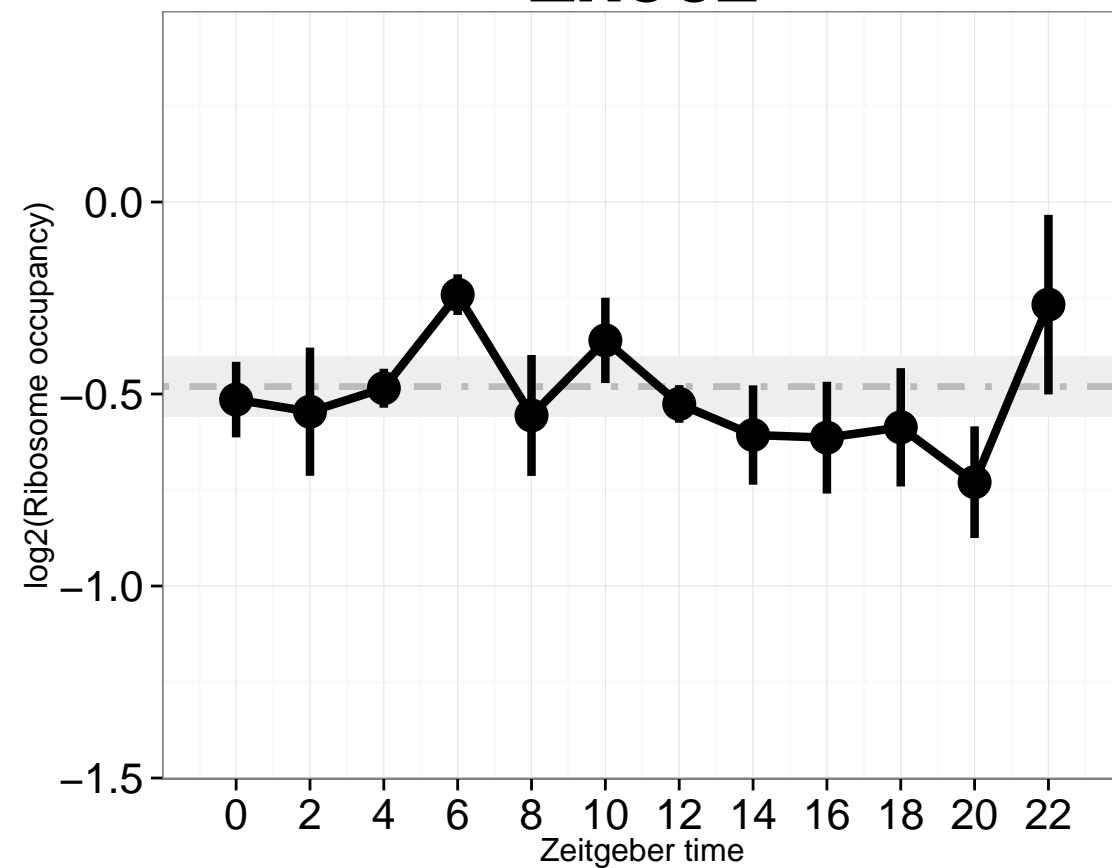

Supplement: SuppDataset_1.zip [file Exoc2_set_A.pdf › Supplemental Dataset 1/A-mRNA_nonrhyth_translation_nonrhyth/Exoc2_set_A.pdf]

## Exoc3

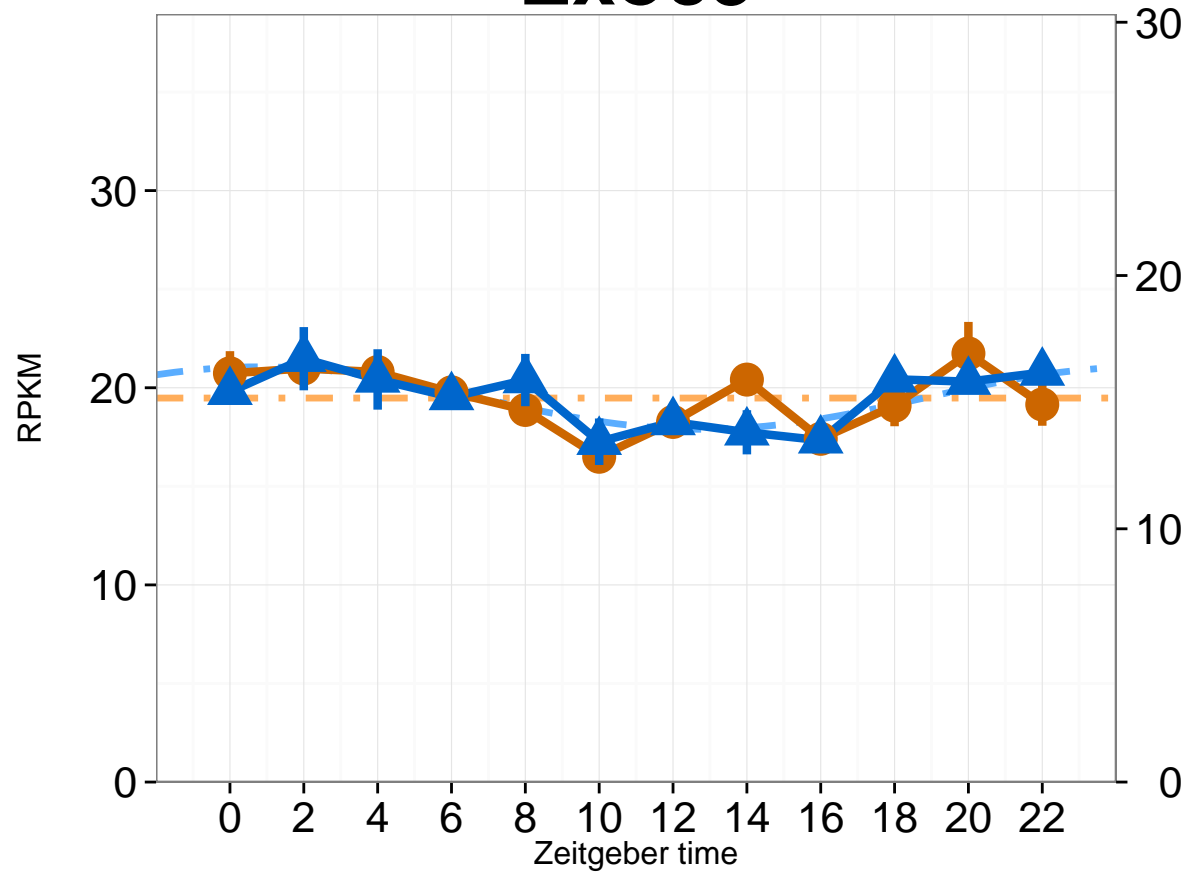

## Exoc3

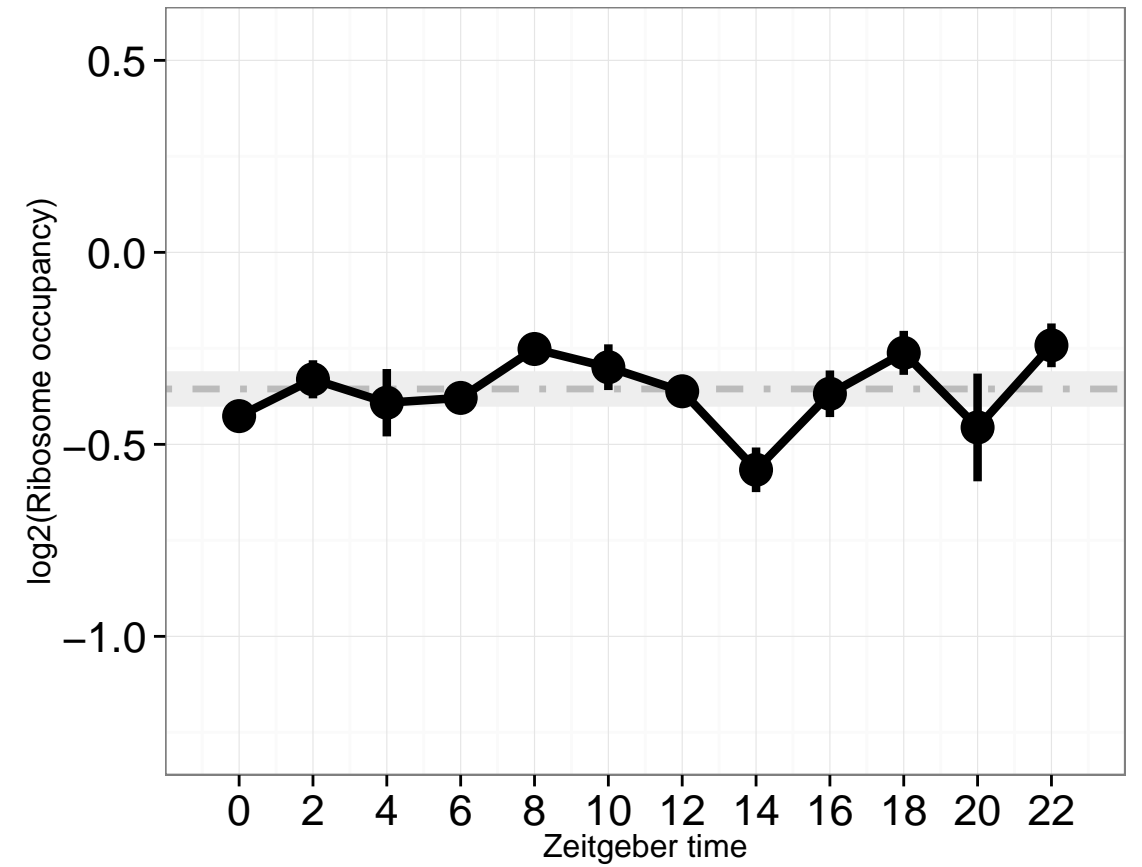

Supplement: SuppDataset_1.zip [file Exoc3_set_A.pdf › Supplemental Dataset 1/A-mRNA_nonrhyth_translation_nonrhyth/Exoc3_set_A.pdf]

## Exoc3l2

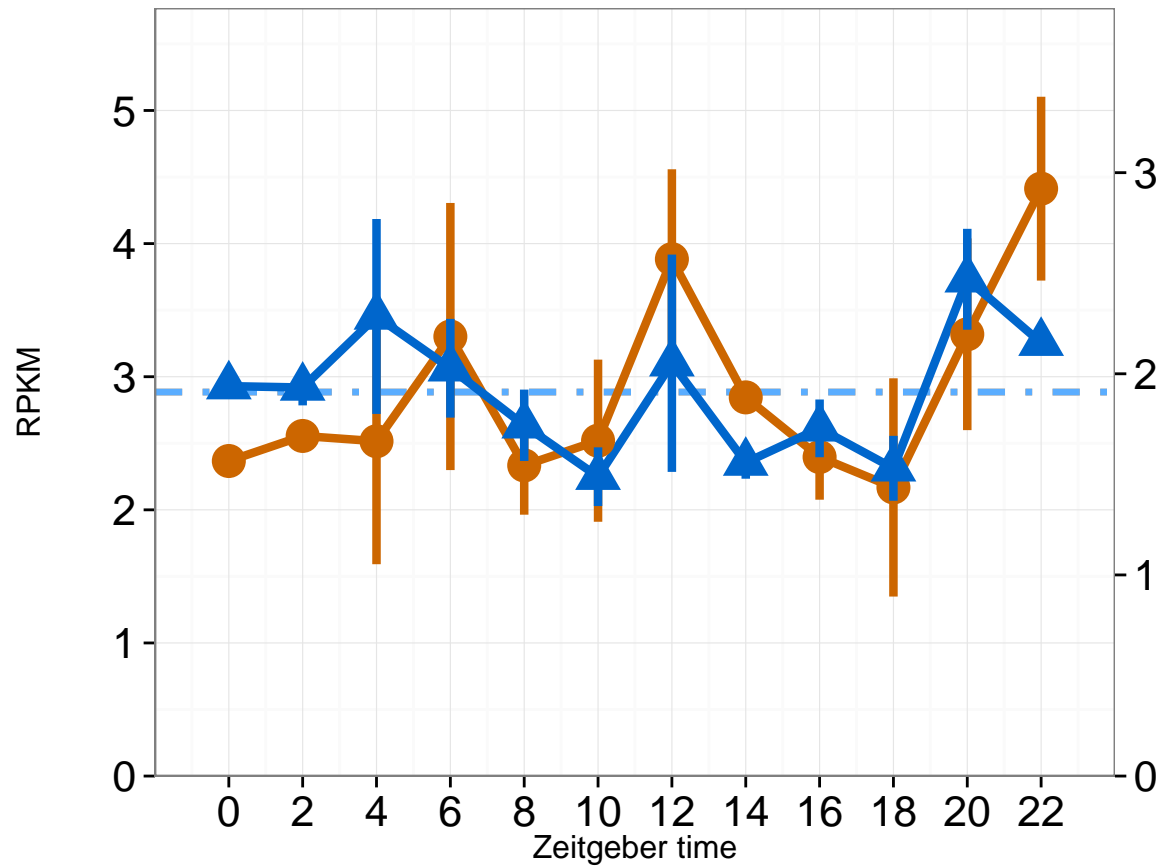

## Exoc3l2

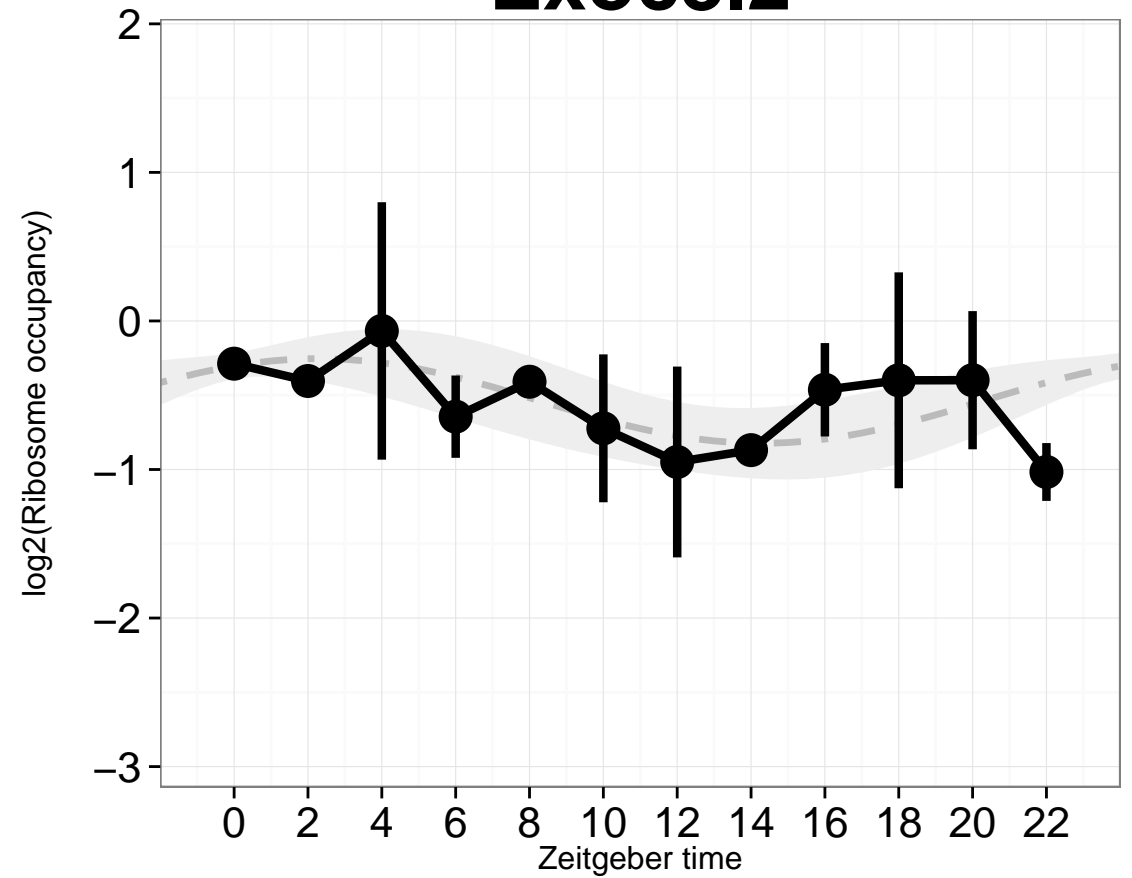

Supplement: SuppDataset_1.zip [file Exoc3l2_set_A.pdf › Supplemental Dataset 1/A-mRNA_nonrhyth_translation_nonrhyth/Exoc3l2_set_A.pdf]

## Exoc3l

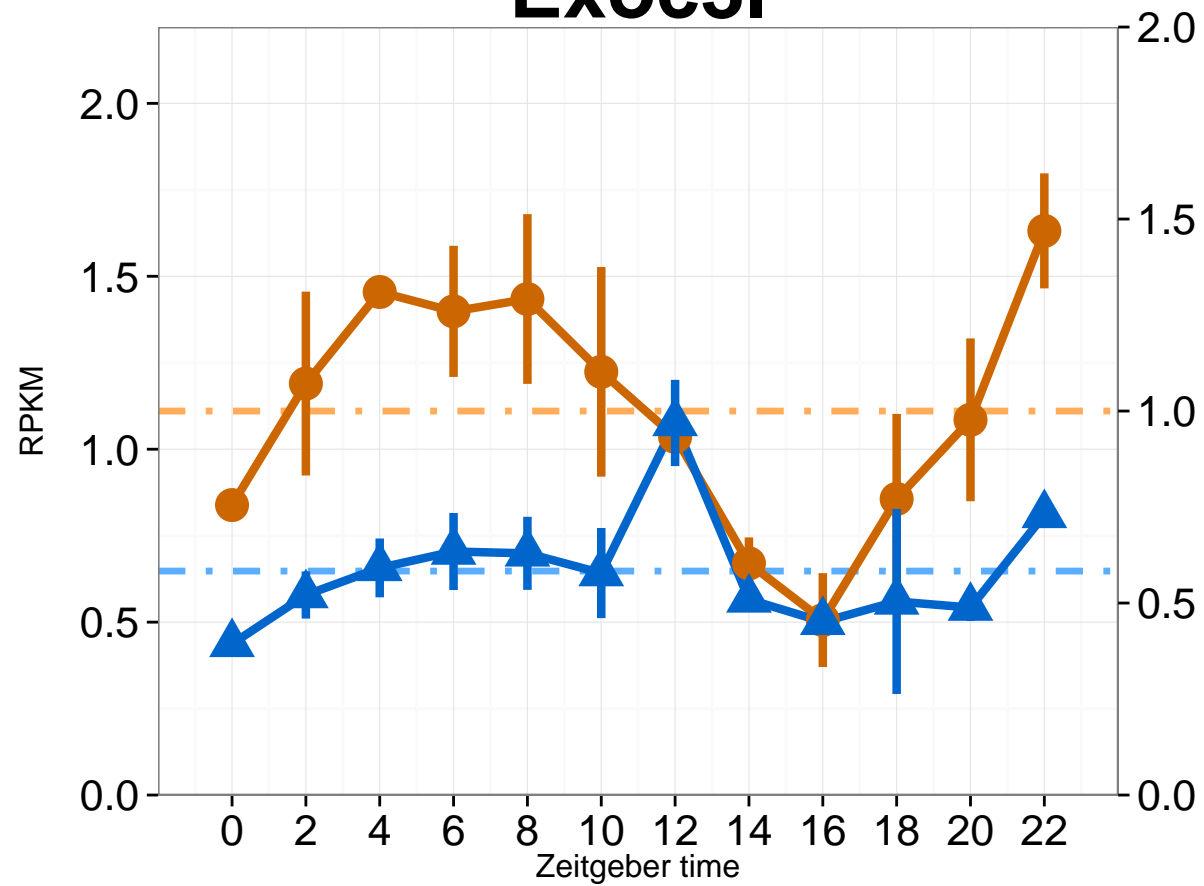

## Exoc3l

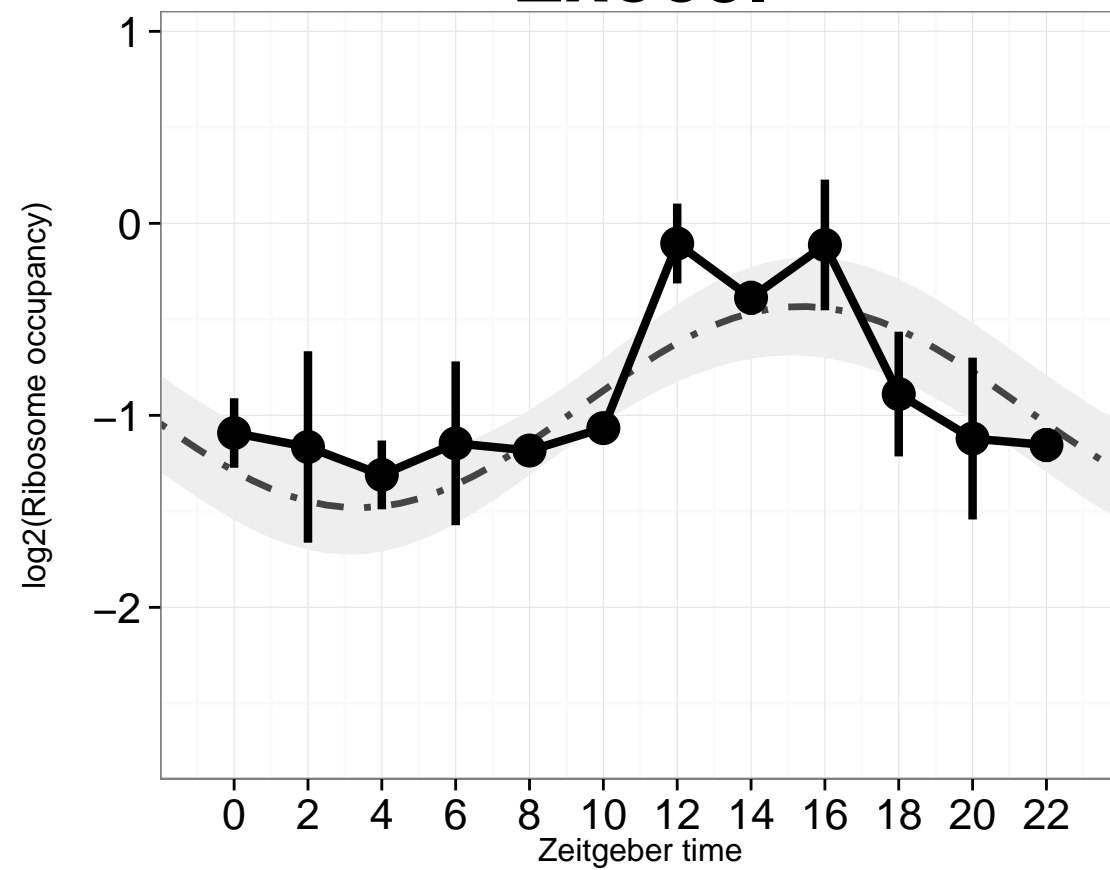

Supplement: SuppDataset_1.zip [file Exoc3l_set_A.pdf › Supplemental Dataset 1/A-mRNA_nonrhyth_translation_nonrhyth/Exoc3l_set_A.pdf]

## Exoc4

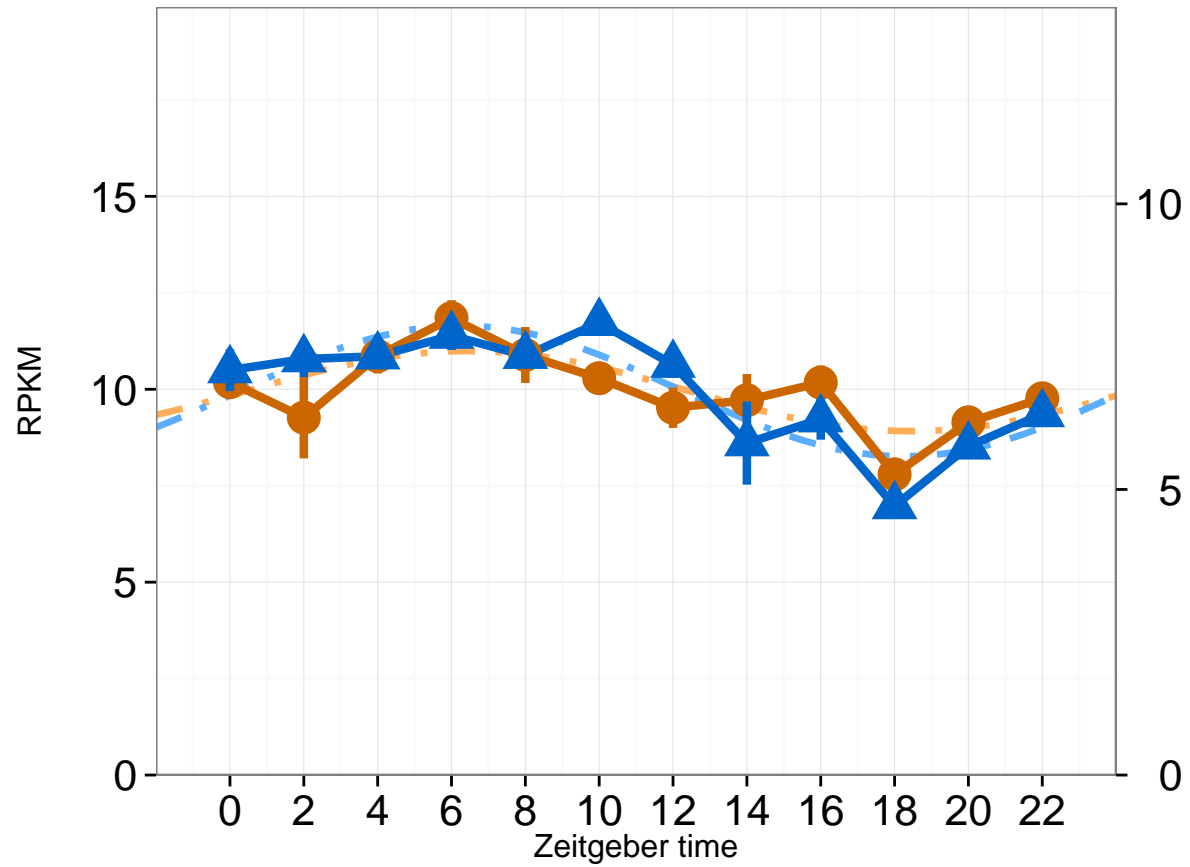

## Exoc4

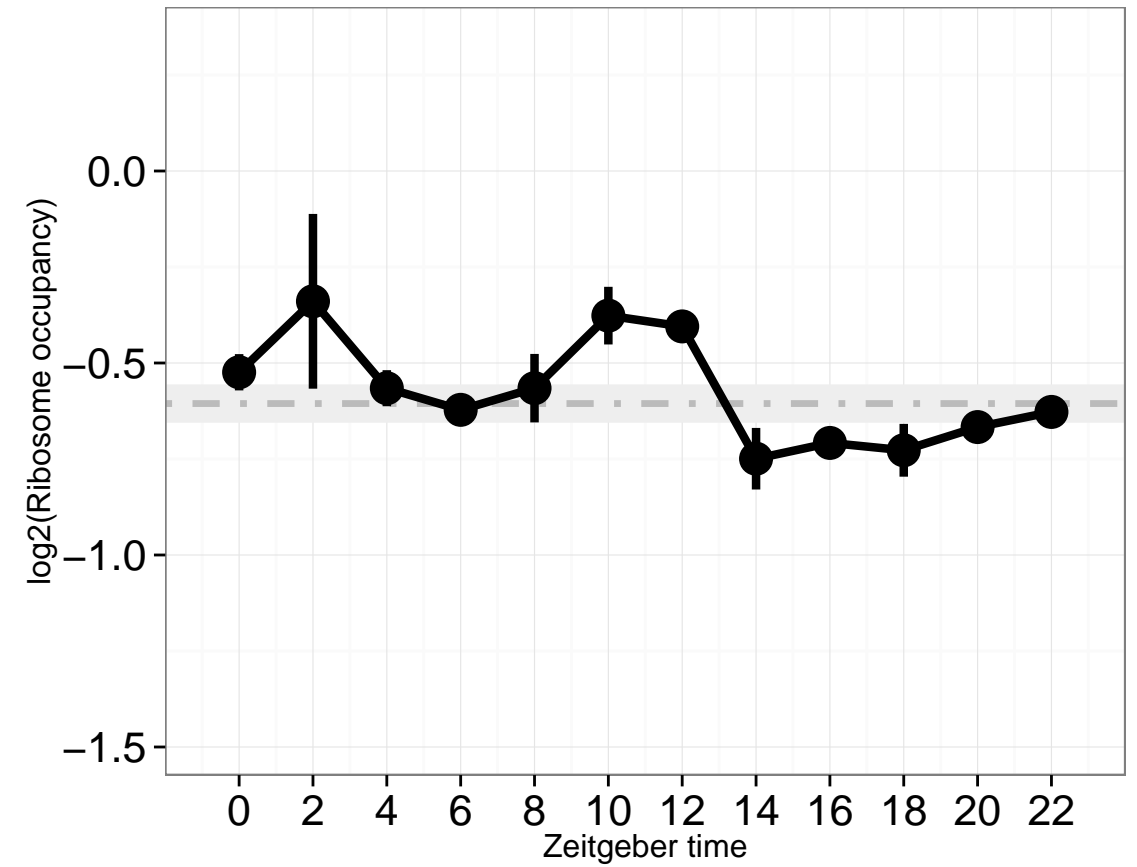

Supplement: SuppDataset_1.zip [file Exoc4_set_A.pdf › Supplemental Dataset 1/A-mRNA_nonrhyth_translation_nonrhyth/Exoc4_set_A.pdf]

## Exoc5

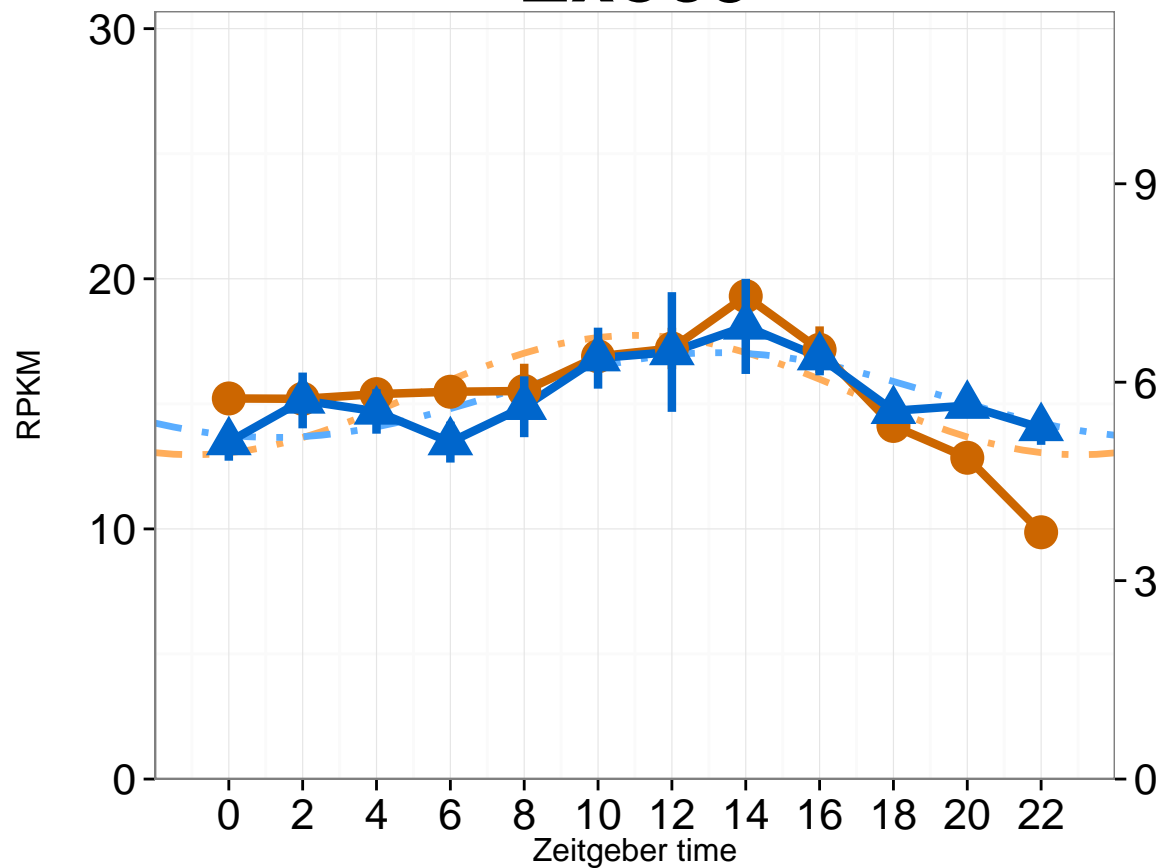

## Exoc5

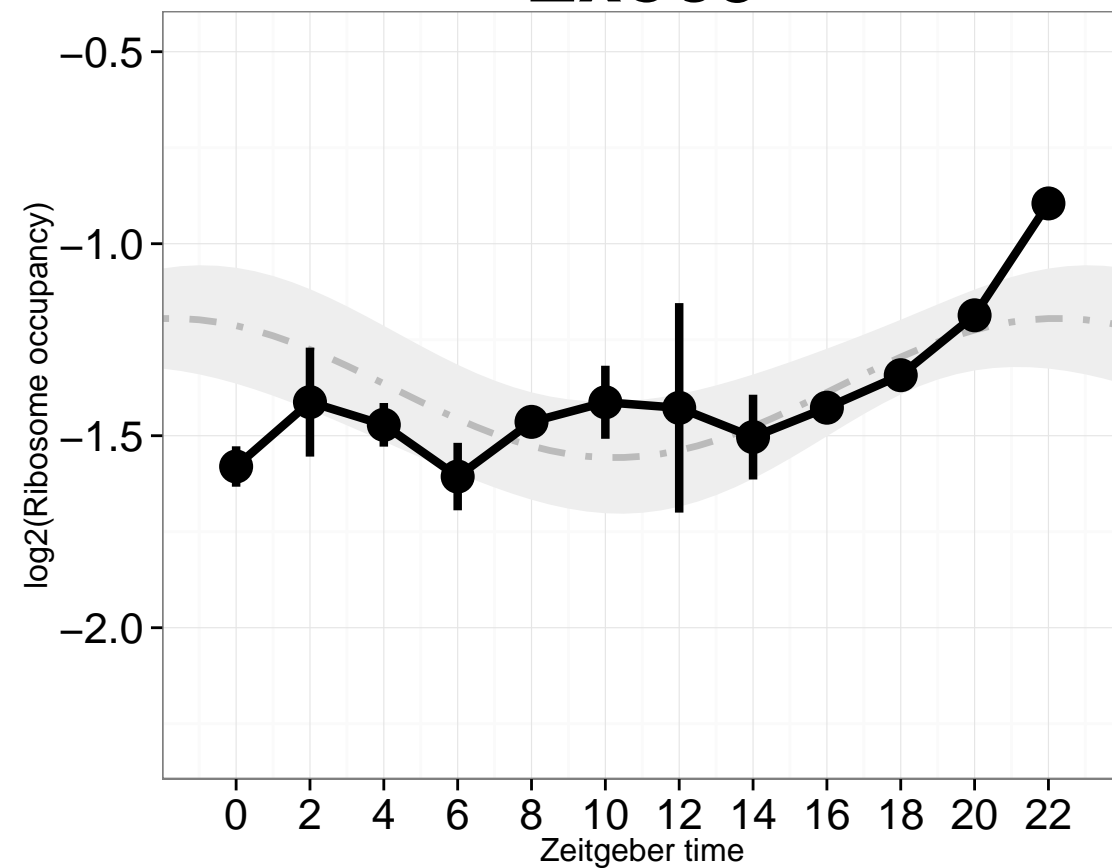

Supplement: SuppDataset_1.zip [file Exoc5_set_A.pdf › Supplemental Dataset 1/A-mRNA_nonrhyth_translation_nonrhyth/Exoc5_set_A.pdf]

## Exoc6

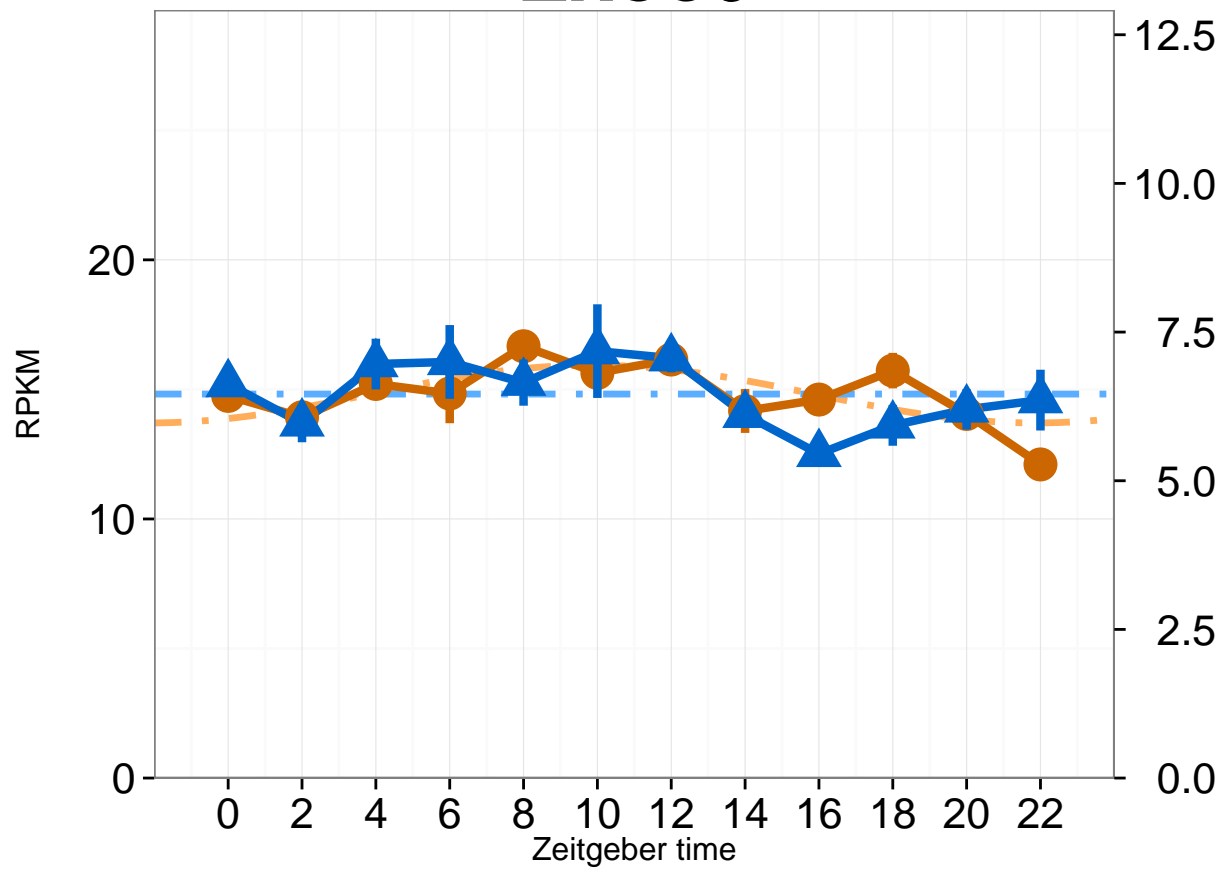

## Exoc6

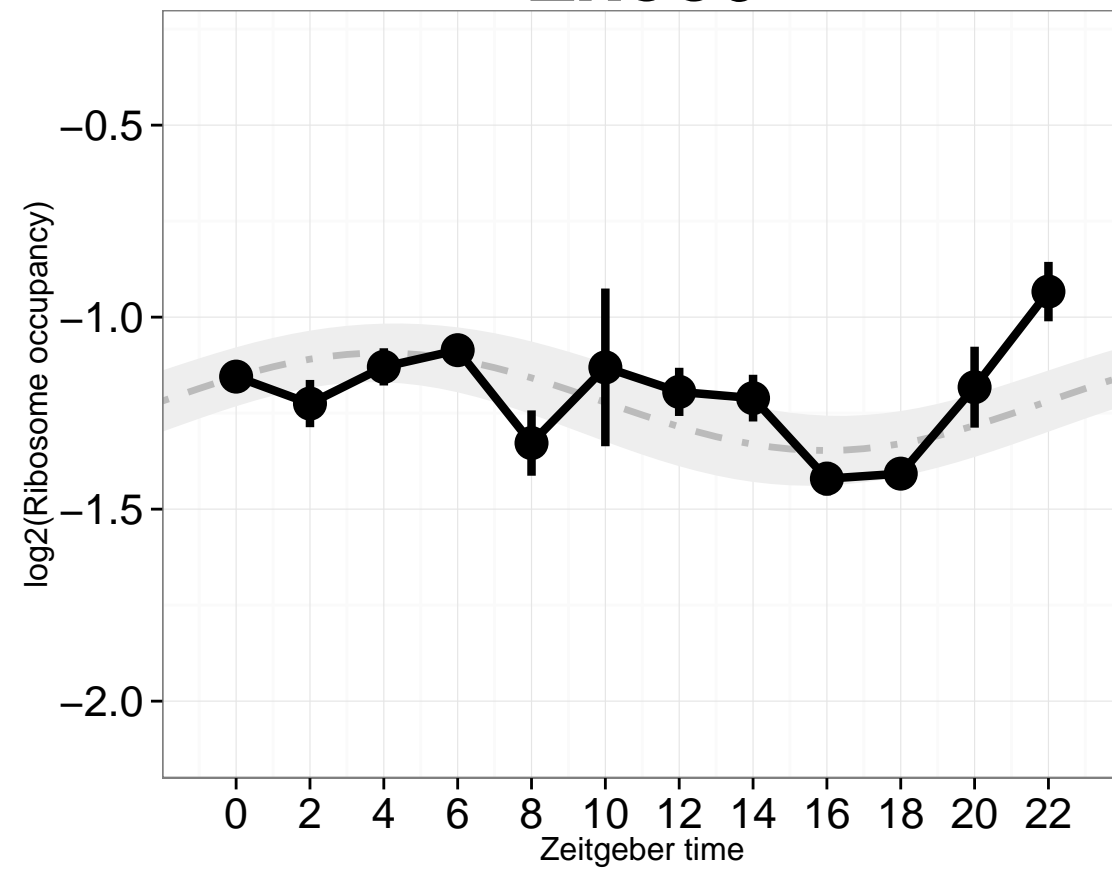

Supplement: SuppDataset_1.zip [file Exoc6_set_A.pdf › Supplemental Dataset 1/A-mRNA_nonrhyth_translation_nonrhyth/Exoc6_set_A.pdf]

## Exoc7

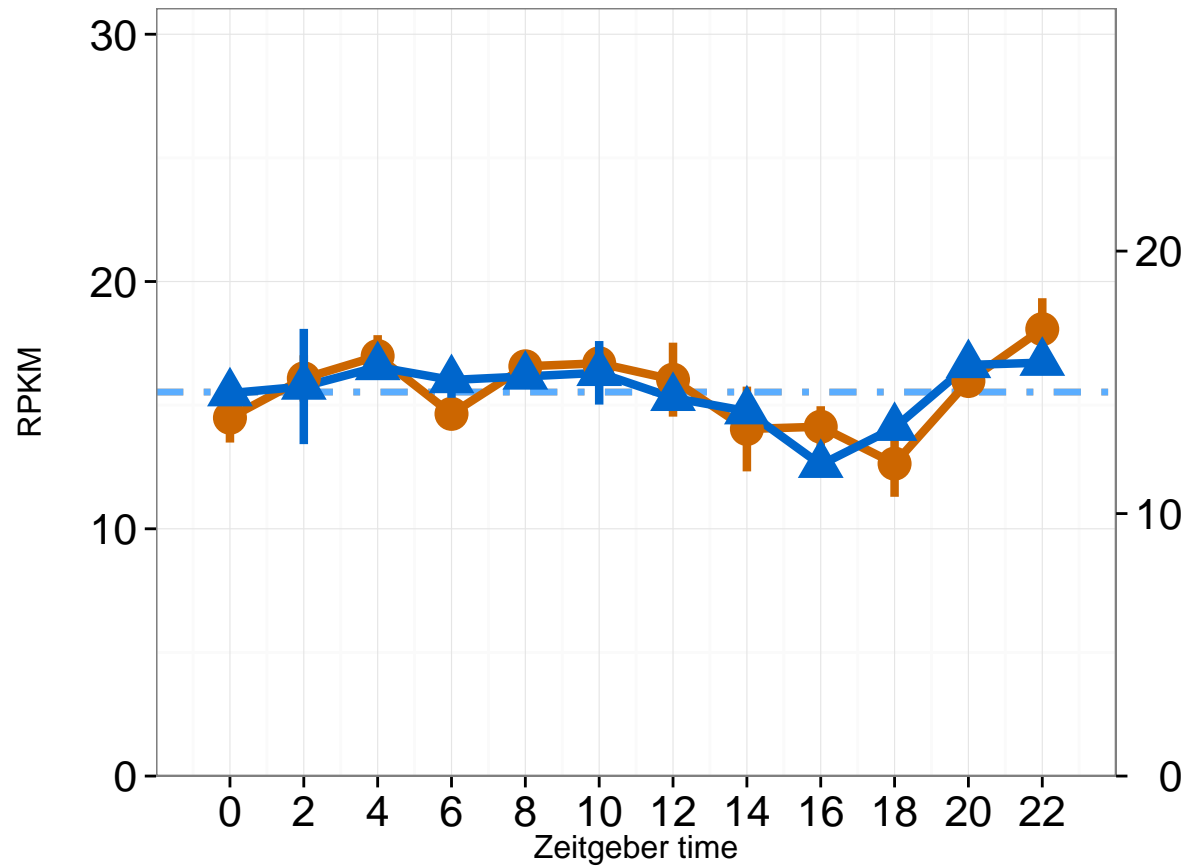

## Exoc7

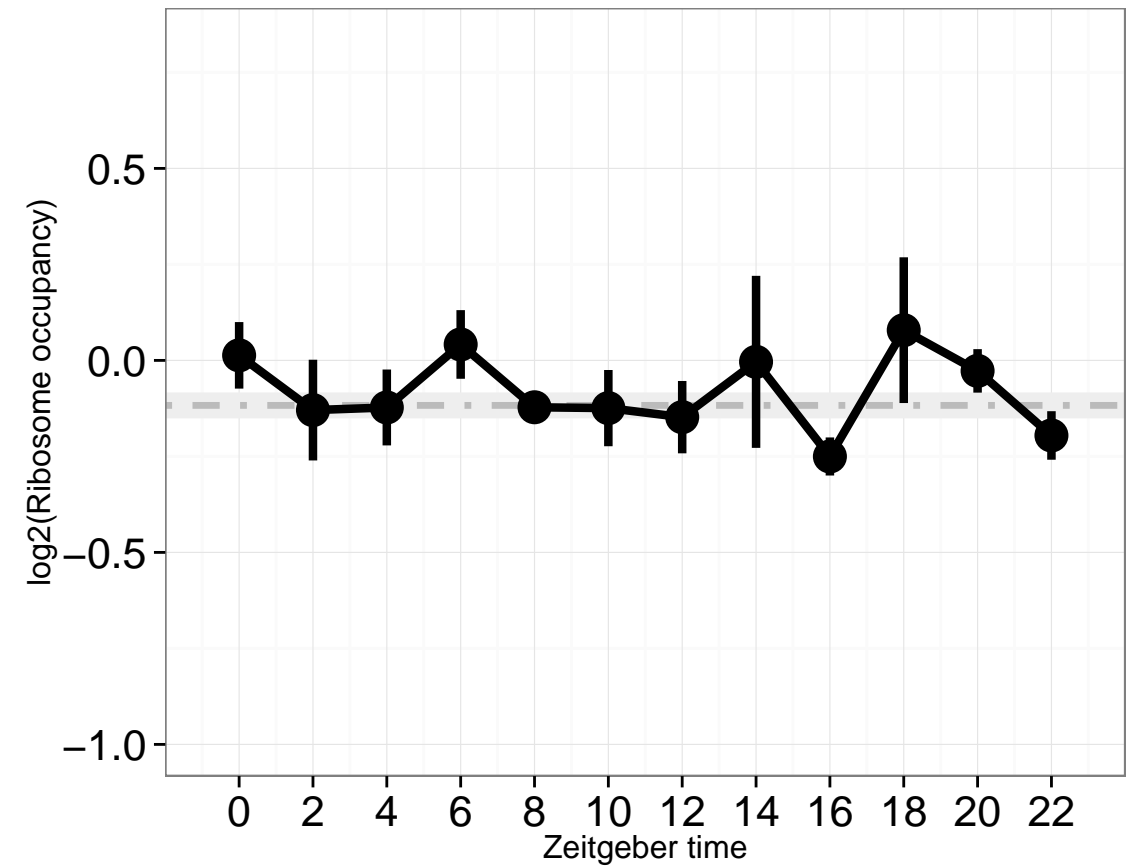

Supplement: SuppDataset_1.zip [file Exoc7_set_A.pdf › Supplemental Dataset 1/A-mRNA_nonrhyth_translation_nonrhyth/Exoc7_set_A.pdf]

## Exog

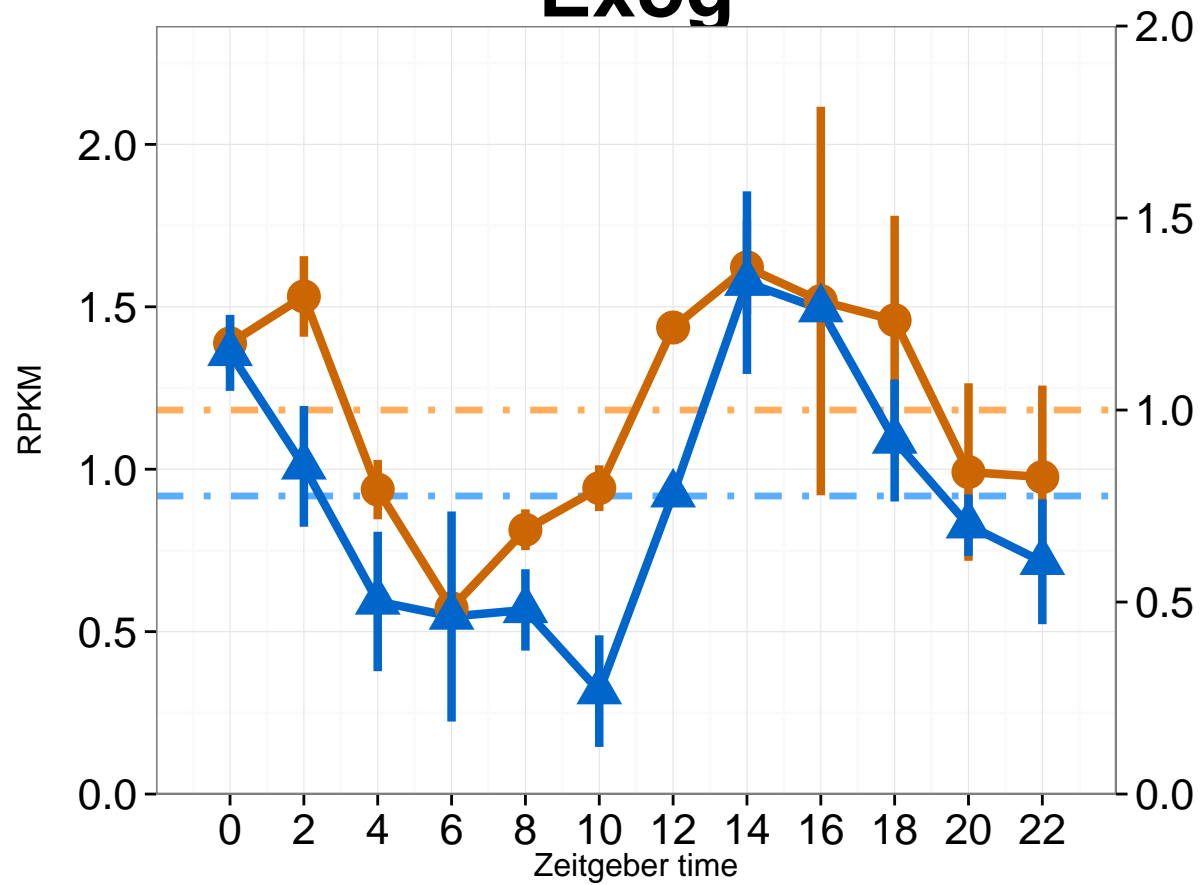

## Exog

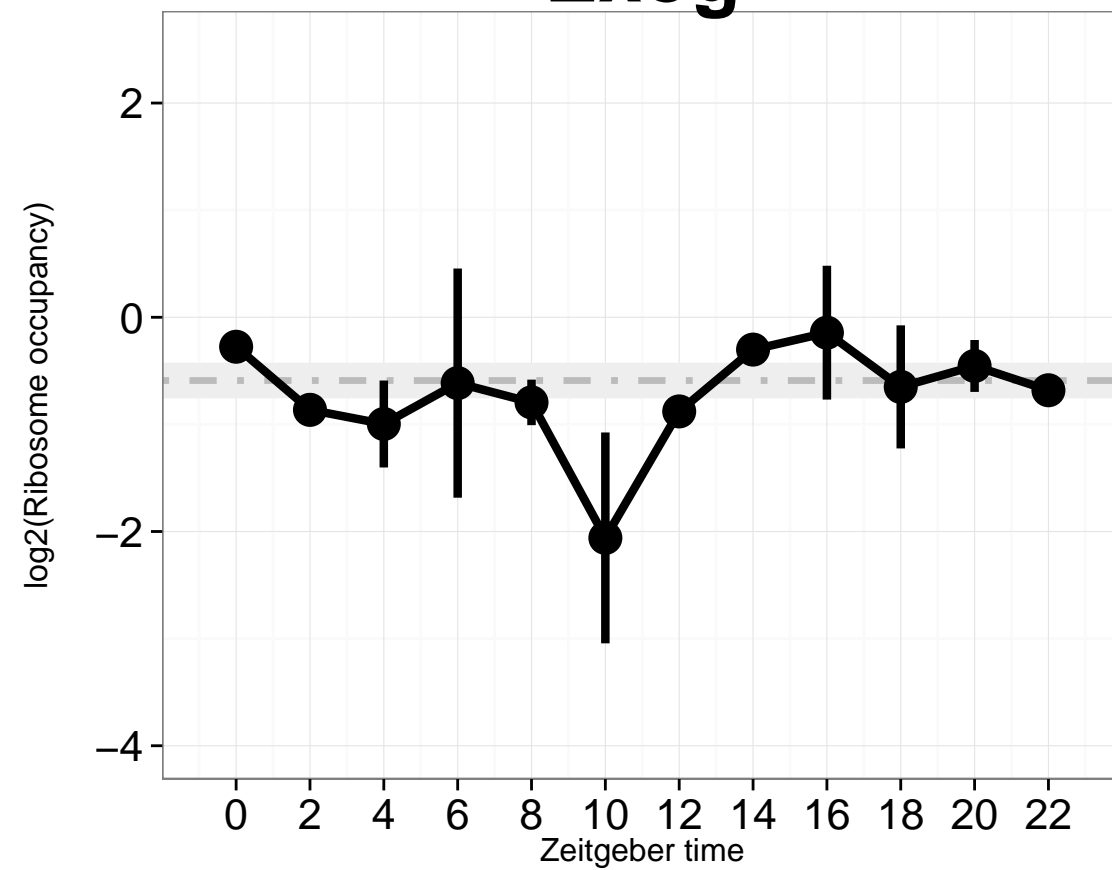

Supplement: SuppDataset_1.zip [file Exog_set_A.pdf › Supplemental Dataset 1/A-mRNA_nonrhyth_translation_nonrhyth/Exog_set_A.pdf]

## Exosc10

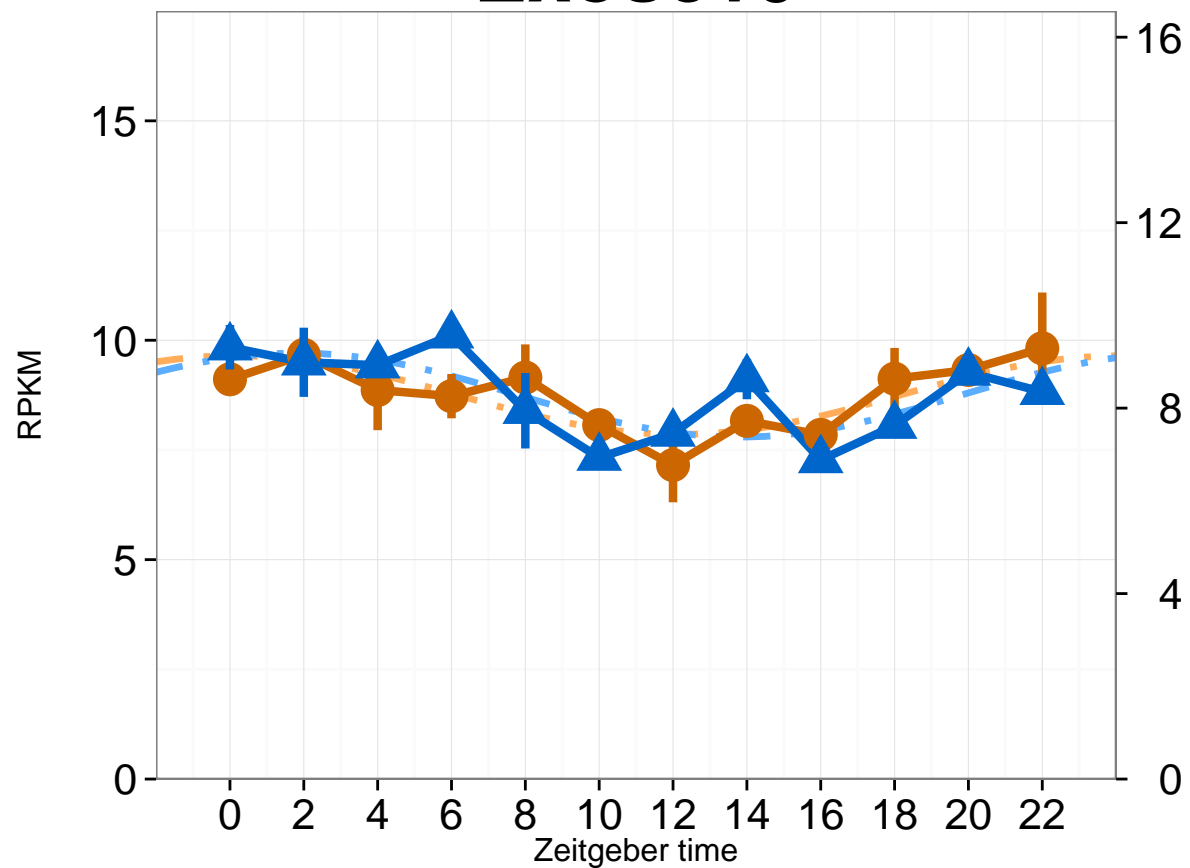

## Exosc10

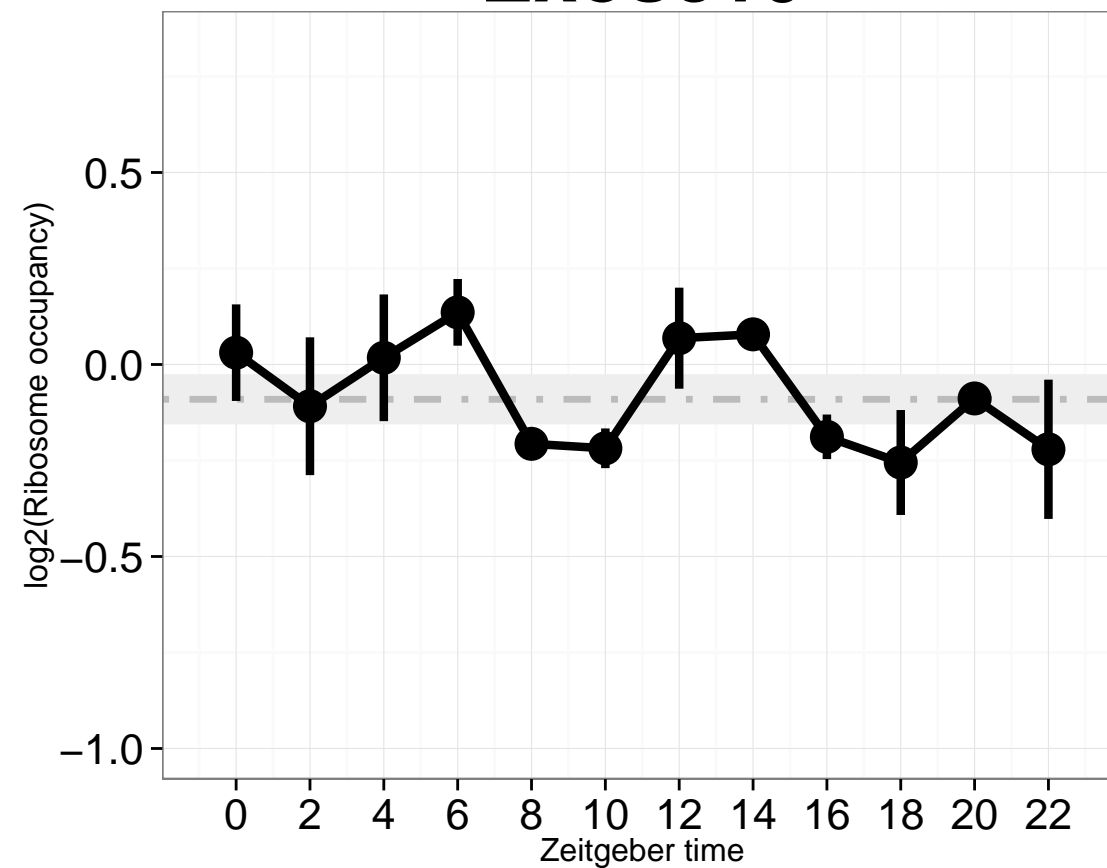

Supplement: SuppDataset_1.zip [file Exosc10_set_A.pdf › Supplemental Dataset 1/A-mRNA_nonrhyth_translation_nonrhyth/Exosc10_set_A.pdf]

## Exosc1

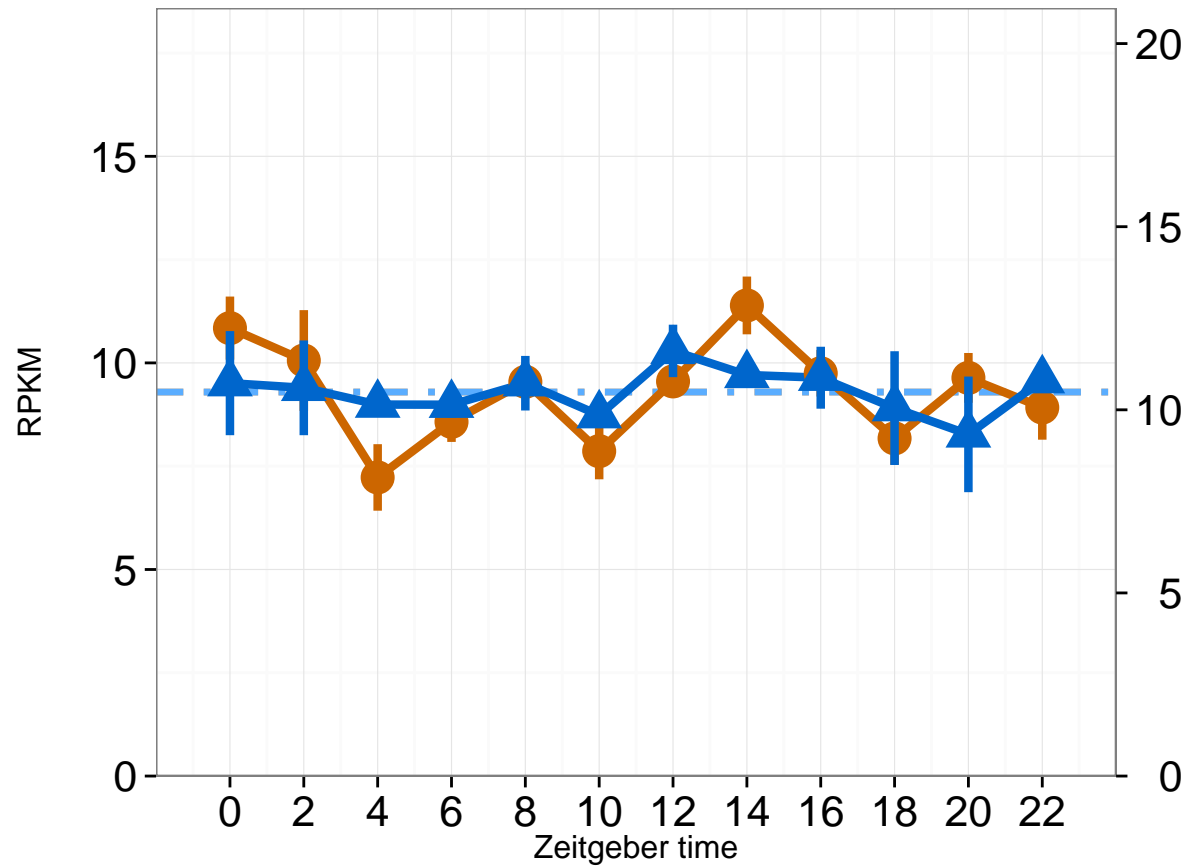

## Exosc1

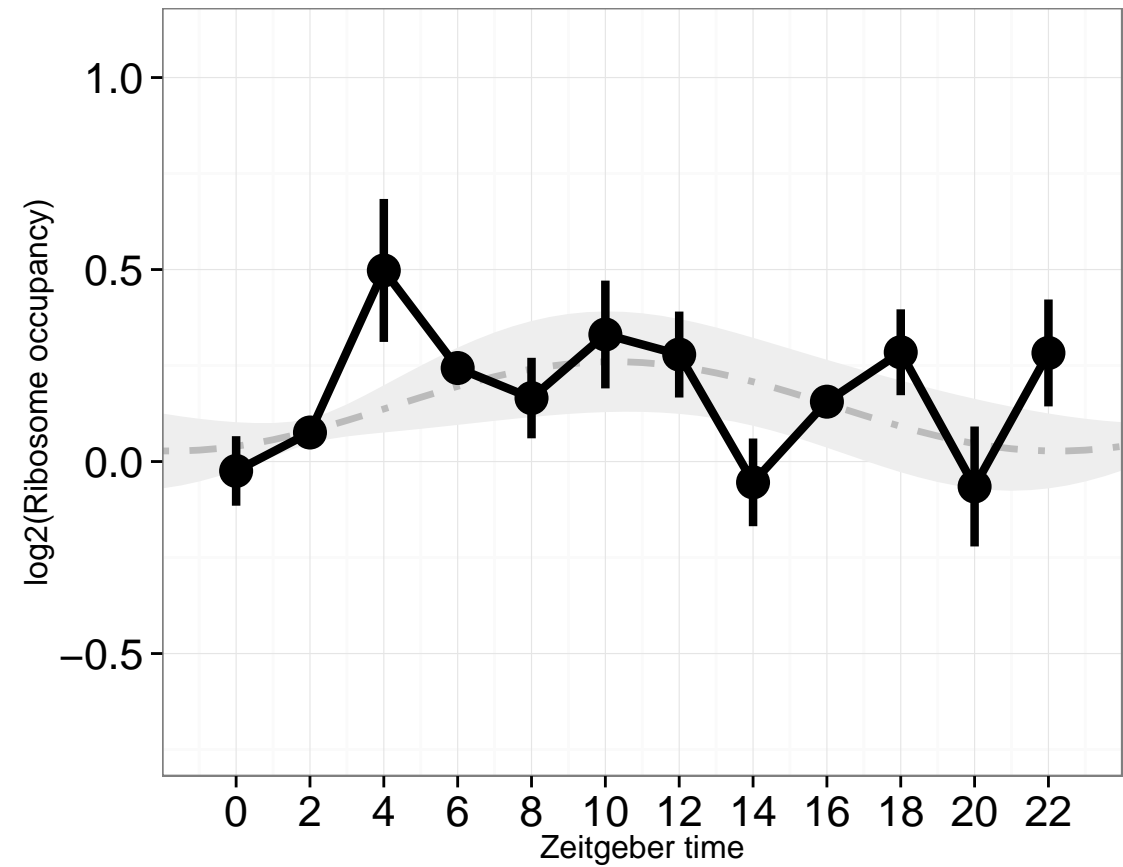

Supplement: SuppDataset_1.zip [file Exosc1_set_A.pdf › Supplemental Dataset 1/A-mRNA_nonrhyth_translation_nonrhyth/Exosc1_set_A.pdf]

## Exosc2

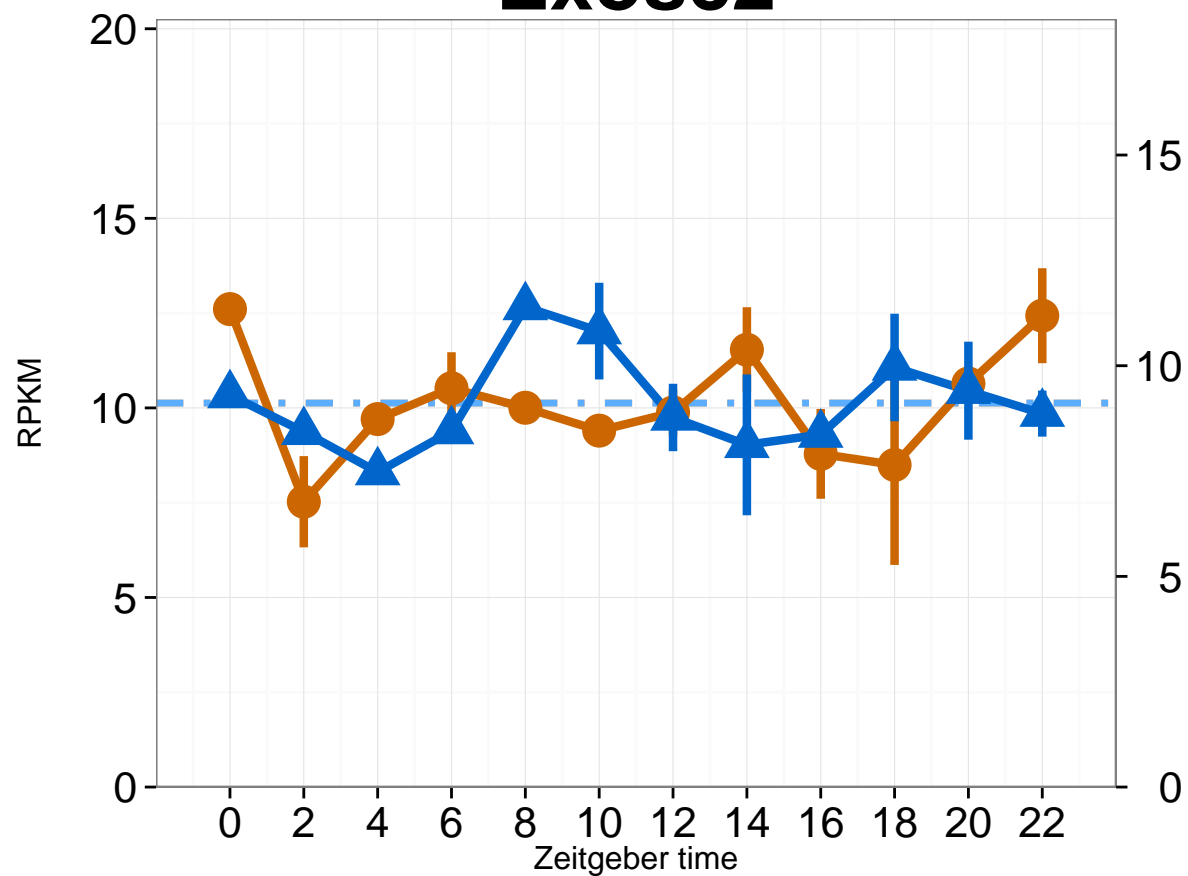

## Exosc2

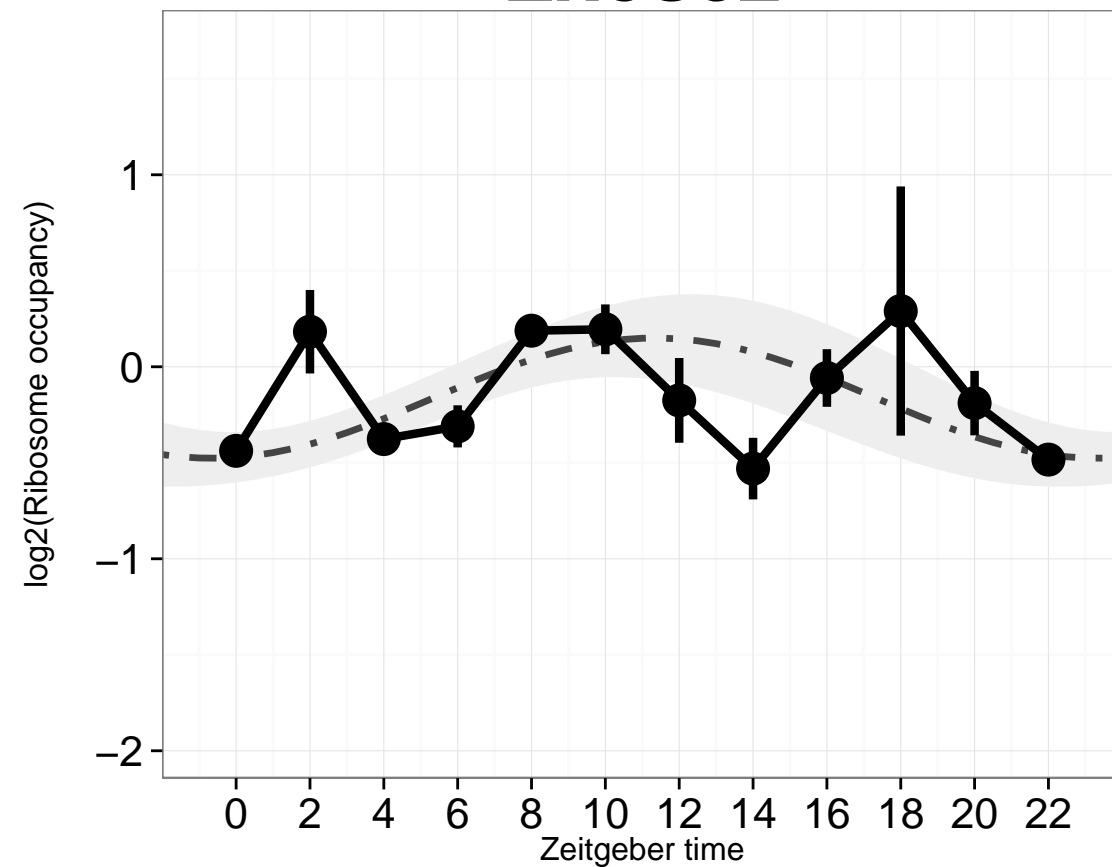

Supplement: SuppDataset_1.zip [file Exosc2_set_A.pdf › Supplemental Dataset 1/A-mRNA_nonrhyth_translation_nonrhyth/Exosc2_set_A.pdf]

## Exosc3

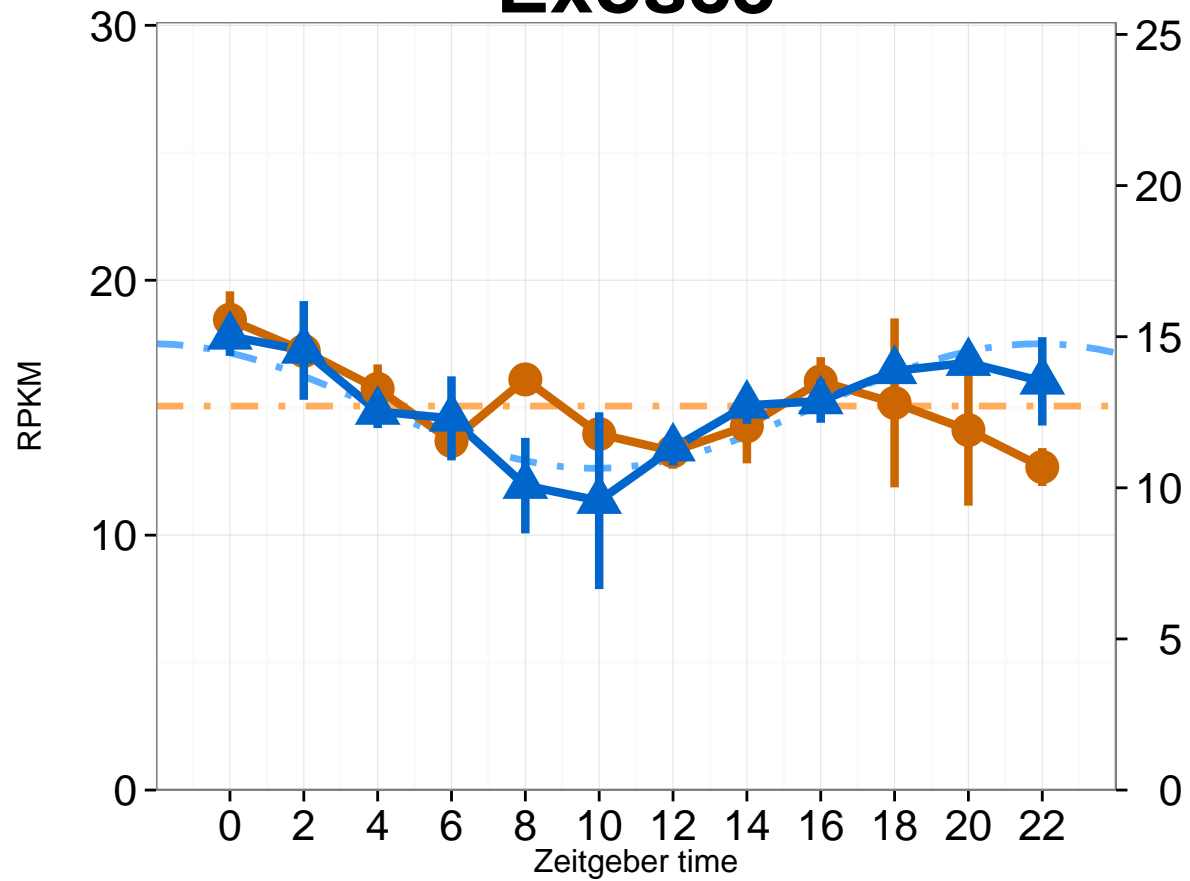

## Exosc3

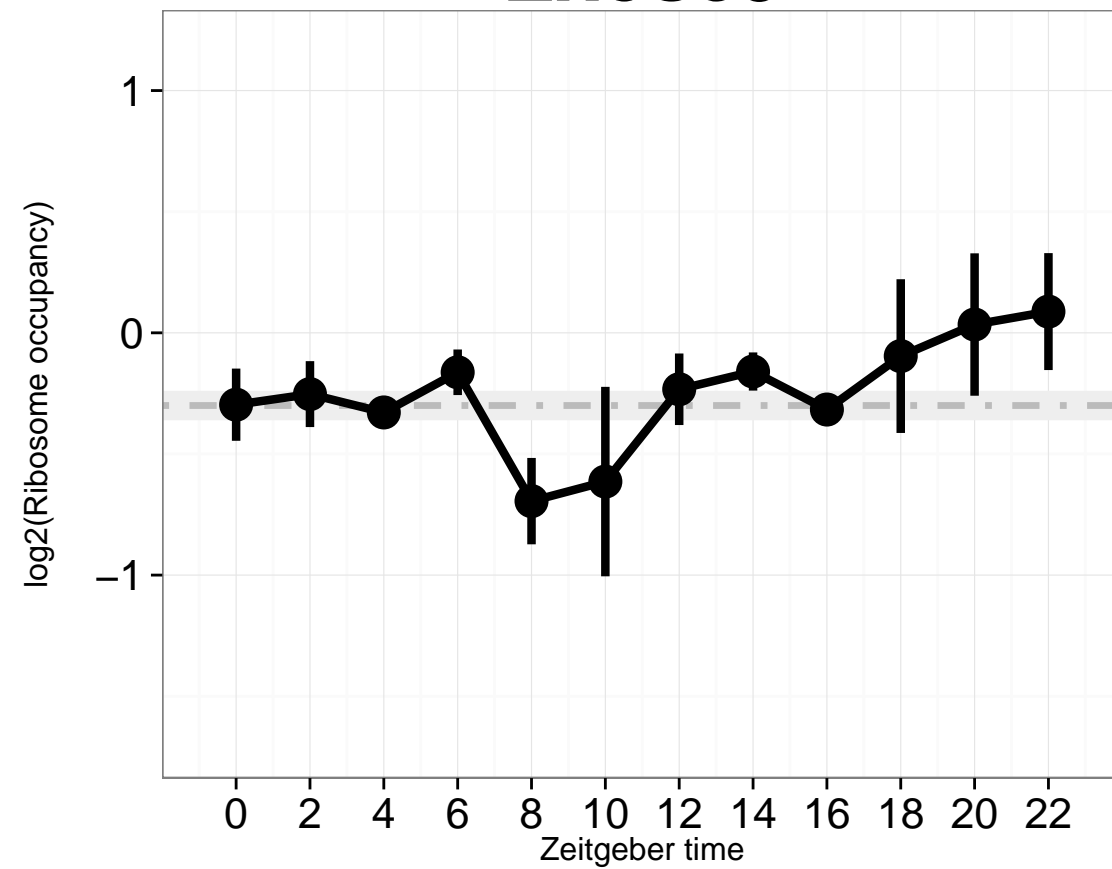

Supplement: SuppDataset_1.zip [file Exosc3_set_A.pdf › Supplemental Dataset 1/A-mRNA_nonrhyth_translation_nonrhyth/Exosc3_set_A.pdf]

## Exosc4

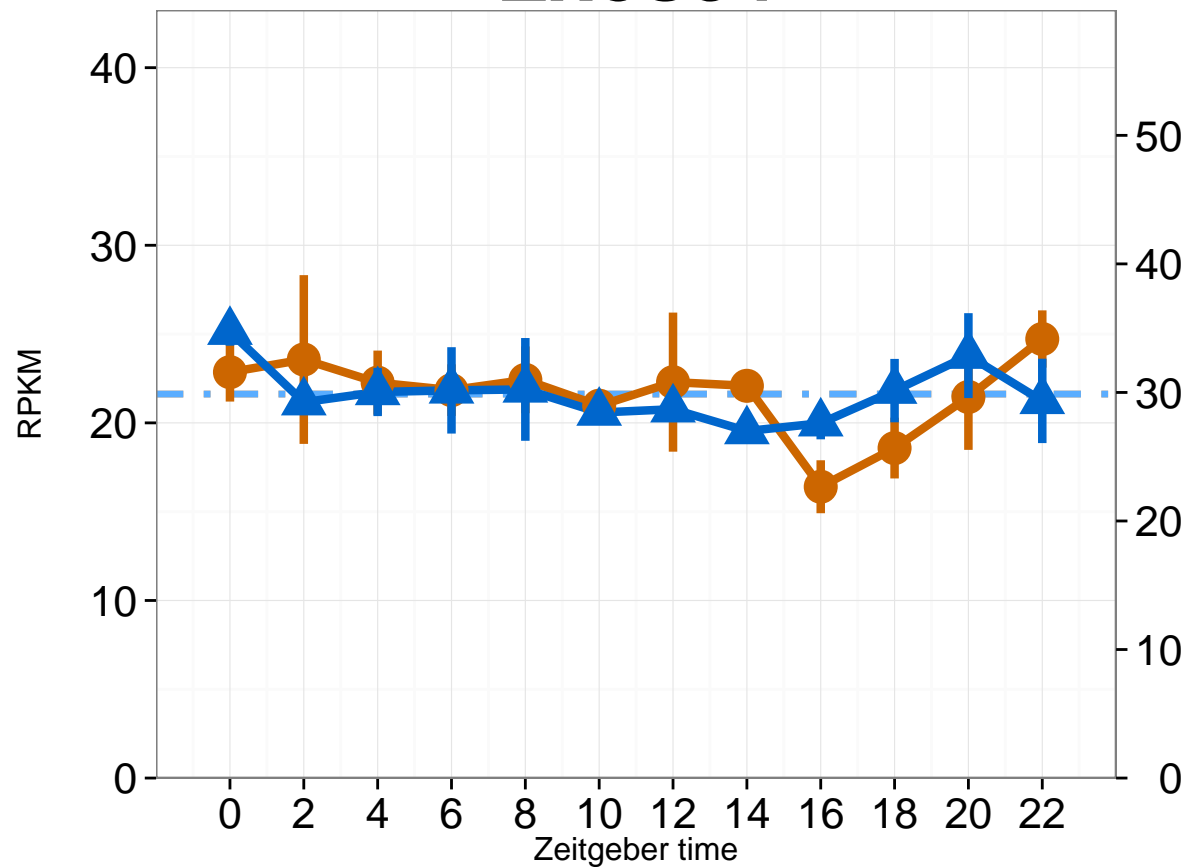

## Exosc4

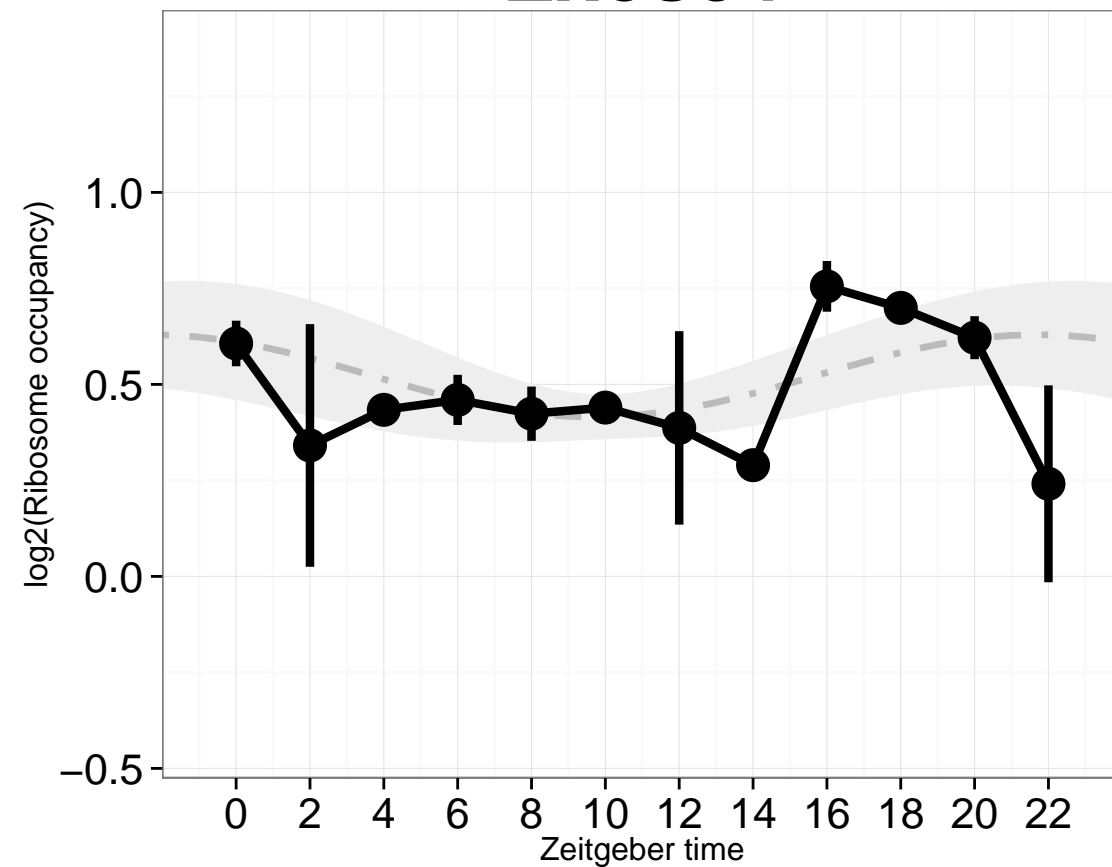

Supplement: SuppDataset_1.zip [file Exosc4_set_A.pdf › Supplemental Dataset 1/A-mRNA_nonrhyth_translation_nonrhyth/Exosc4_set_A.pdf]

## Exosc5

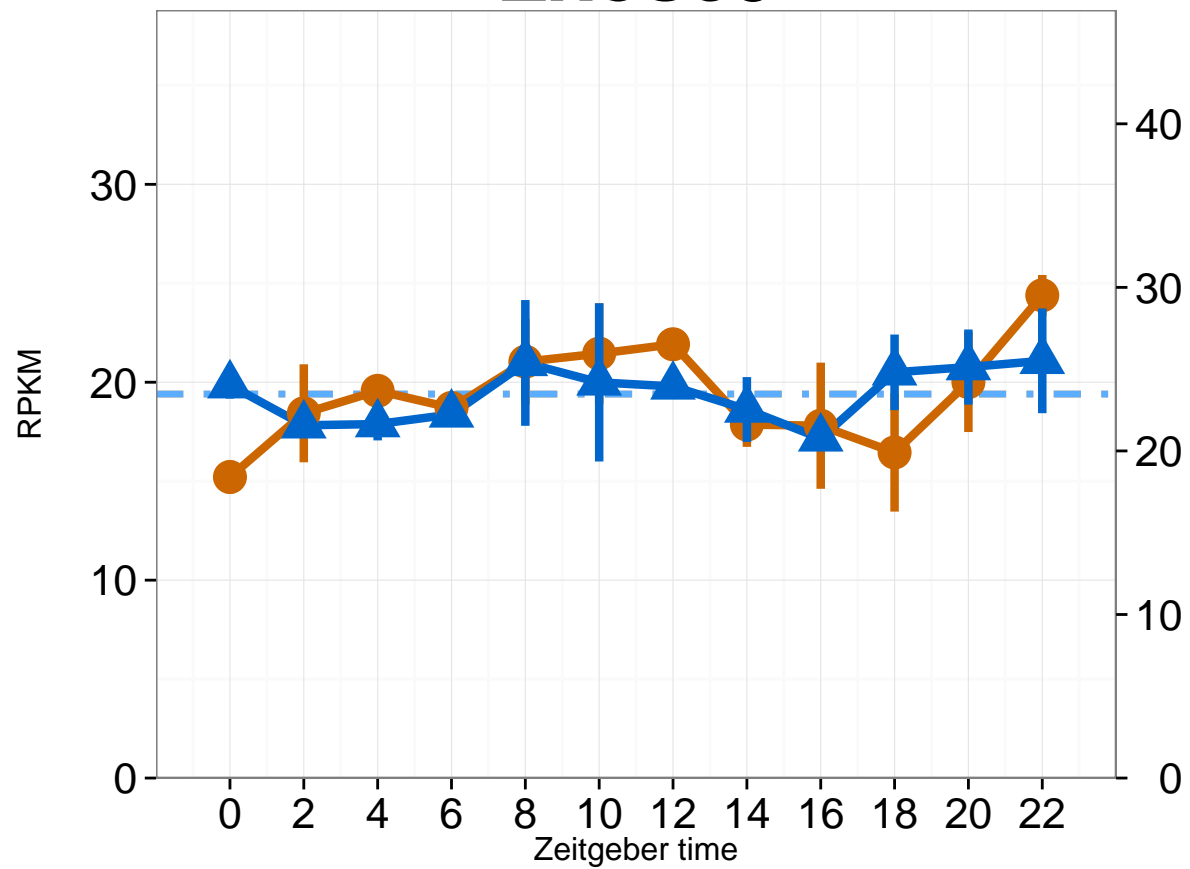

## Exosc5

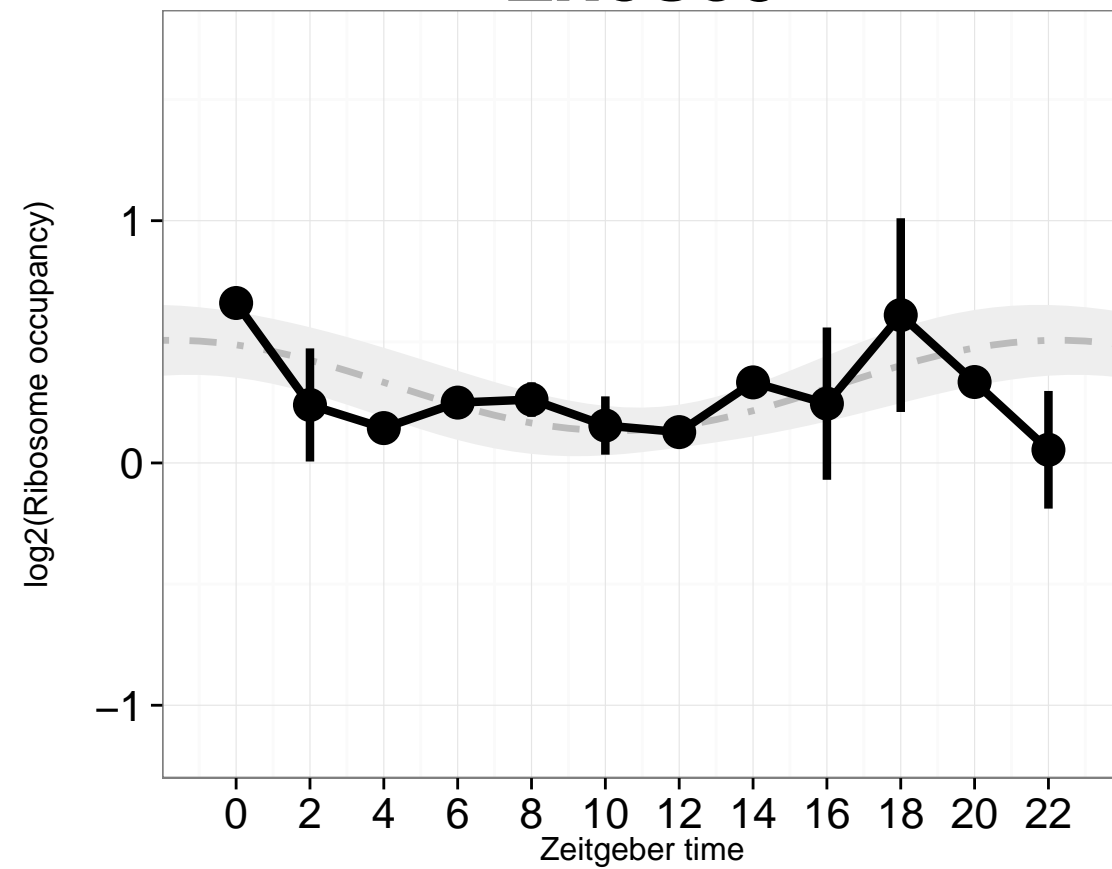

Supplement: SuppDataset_1.zip [file Exosc5_set_A.pdf › Supplemental Dataset 1/A-mRNA_nonrhyth_translation_nonrhyth/Exosc5_set_A.pdf]

## Exosc7

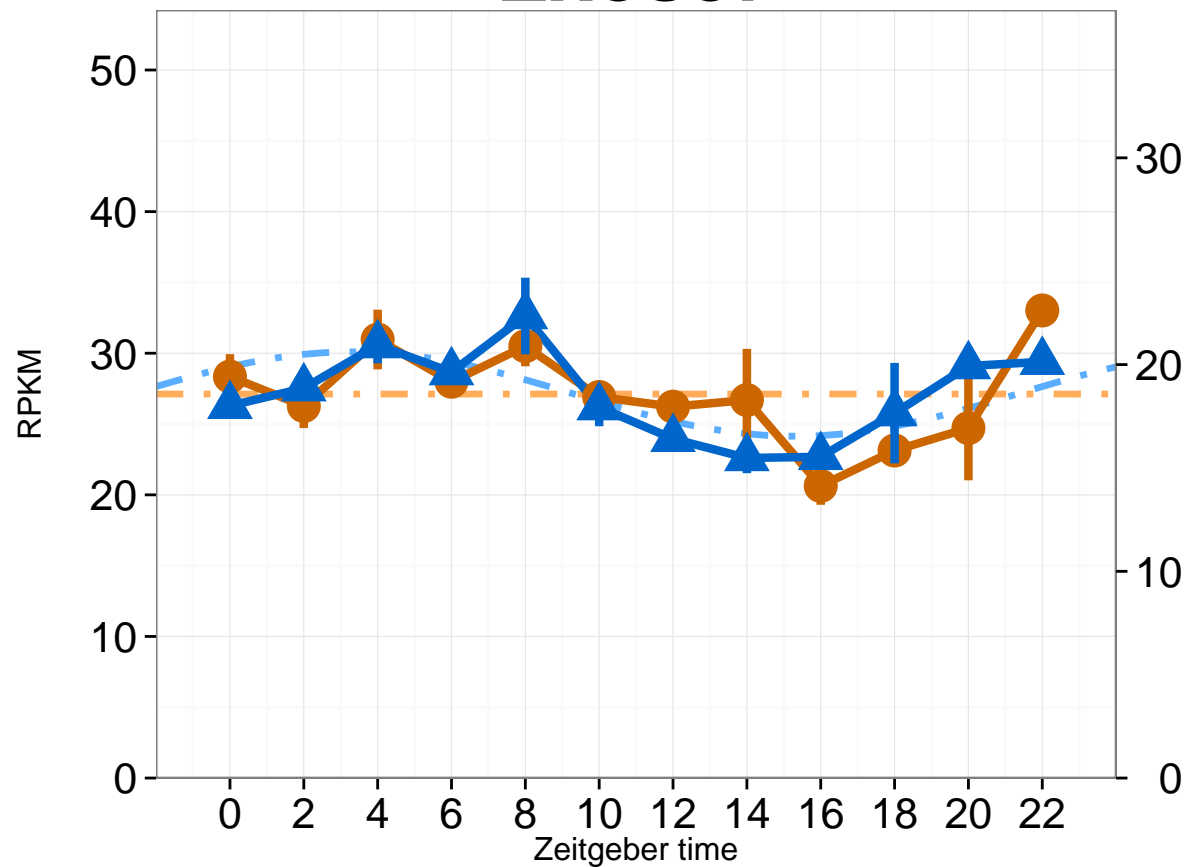

## Exosc7

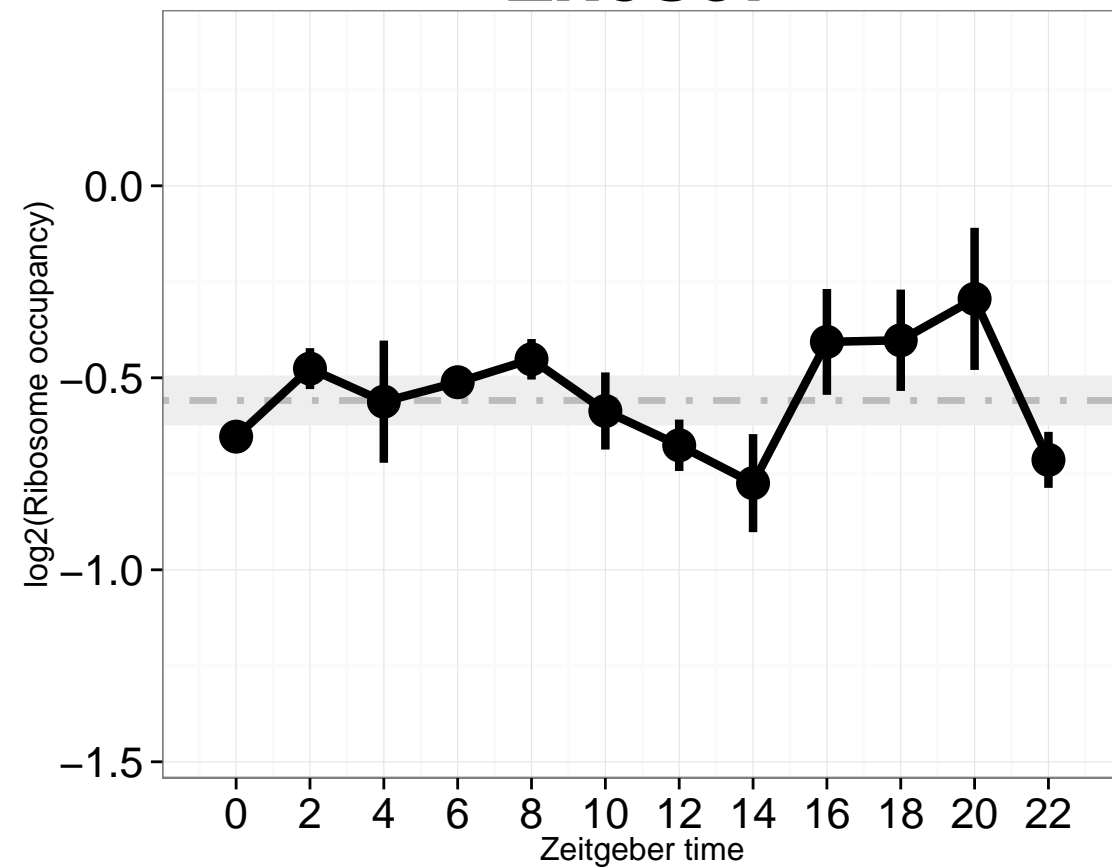

Supplement: SuppDataset_1.zip [file Exosc7_set_A.pdf › Supplemental Dataset 1/A-mRNA_nonrhyth_translation_nonrhyth/Exosc7_set_A.pdf]

## Exosc9

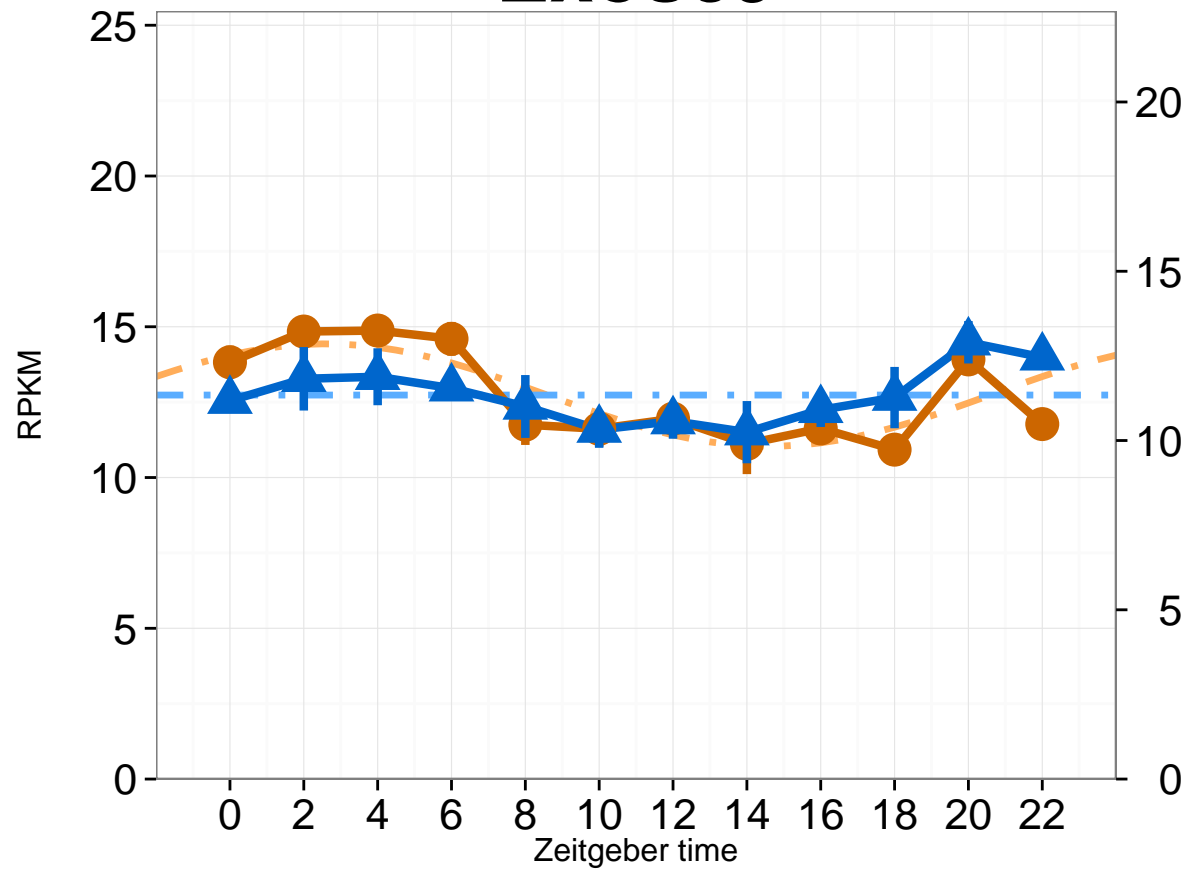

## Exosc9

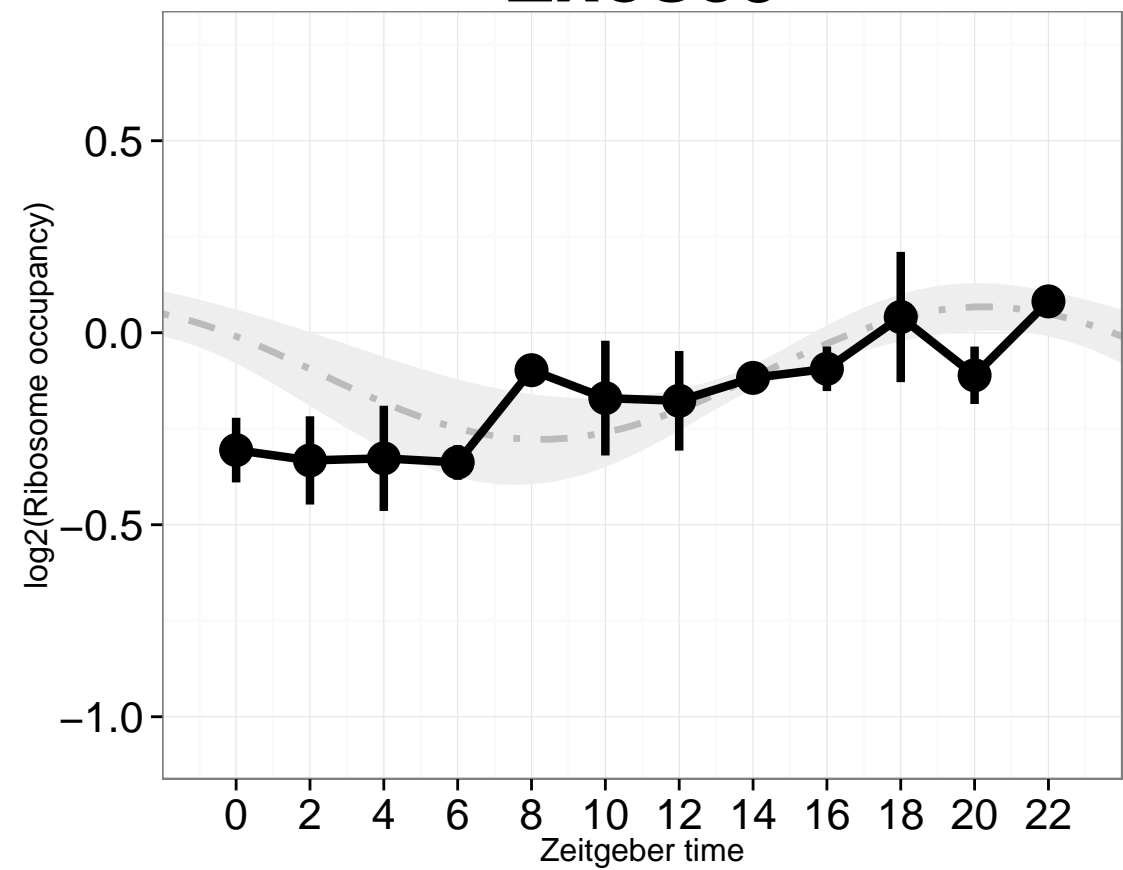

Supplement: SuppDataset_1.zip [file Exosc9_set_A.pdf › Supplemental Dataset 1/A-mRNA_nonrhyth_translation_nonrhyth/Exosc9_set_A.pdf]

# Exph5

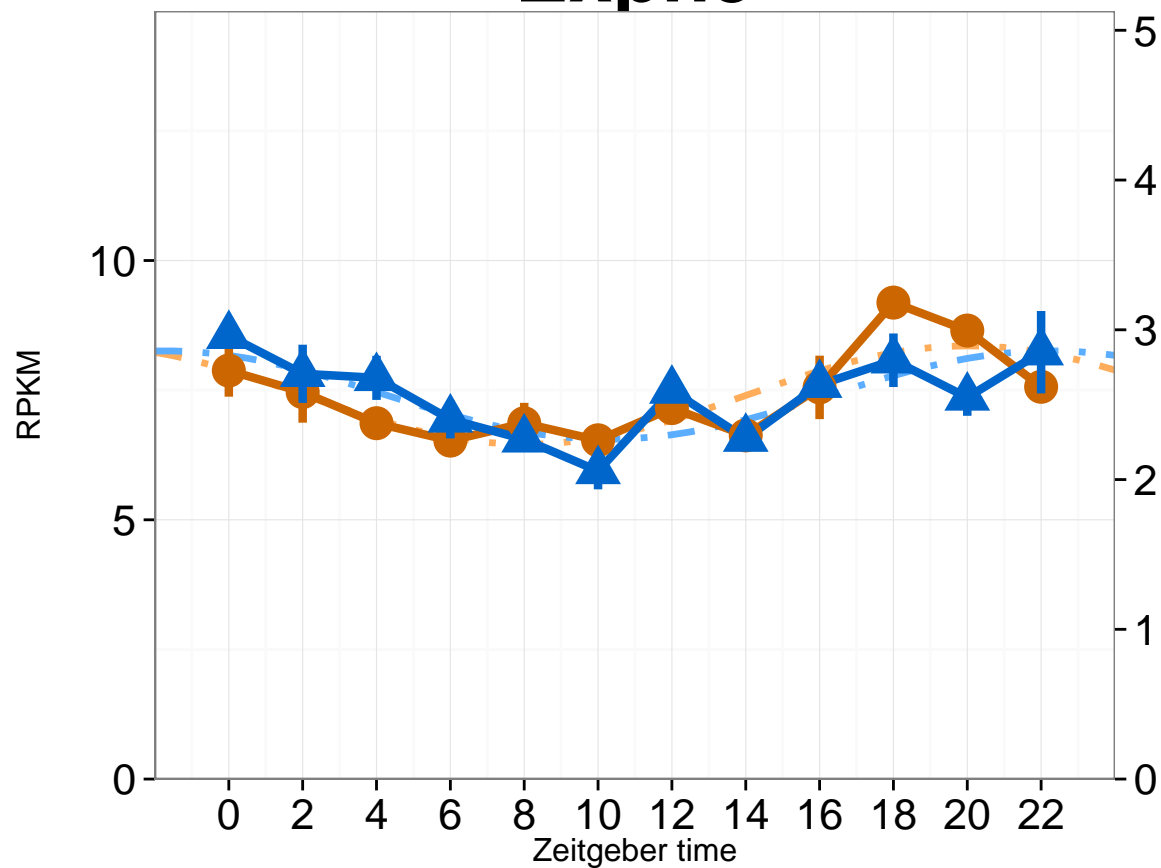

# Exph5

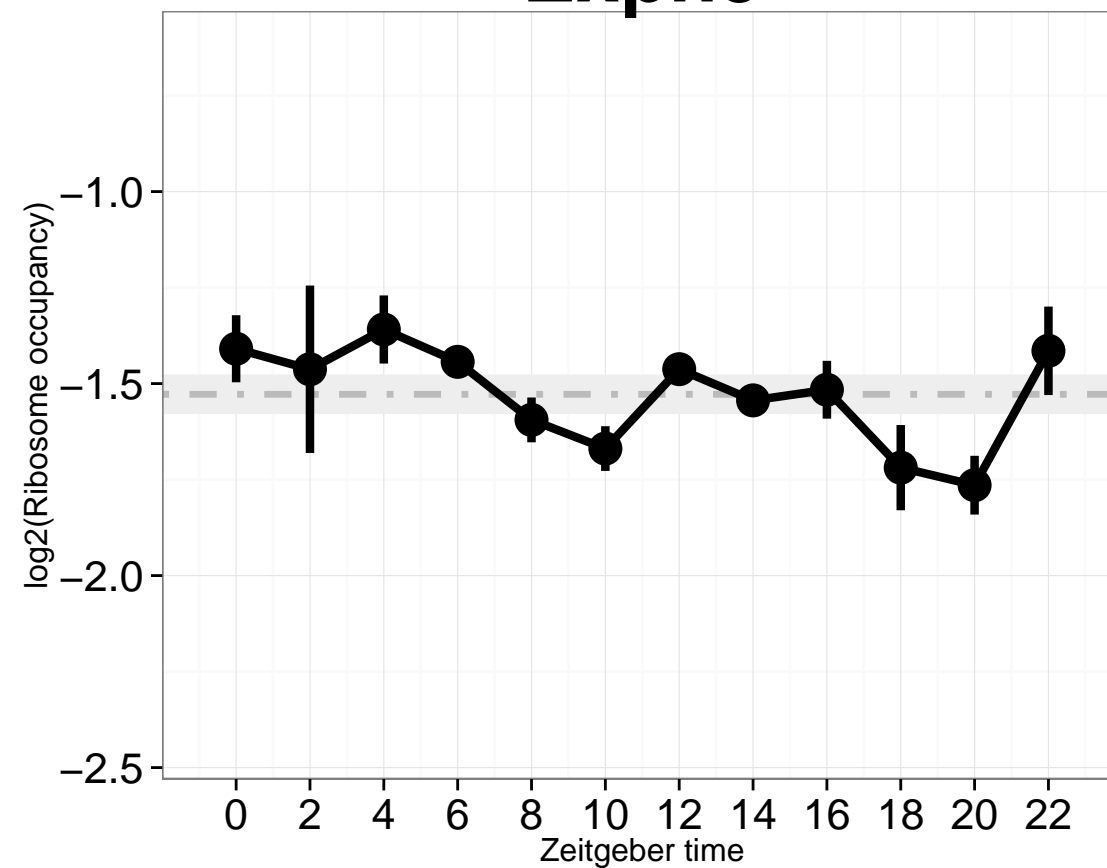

Supplement: SuppDataset_1.zip [file Exph5_set_A.pdf › Supplemental Dataset 1/A-mRNA_nonrhyth_translation_nonrhyth/Exph5_set_A.pdf]

# Ext1

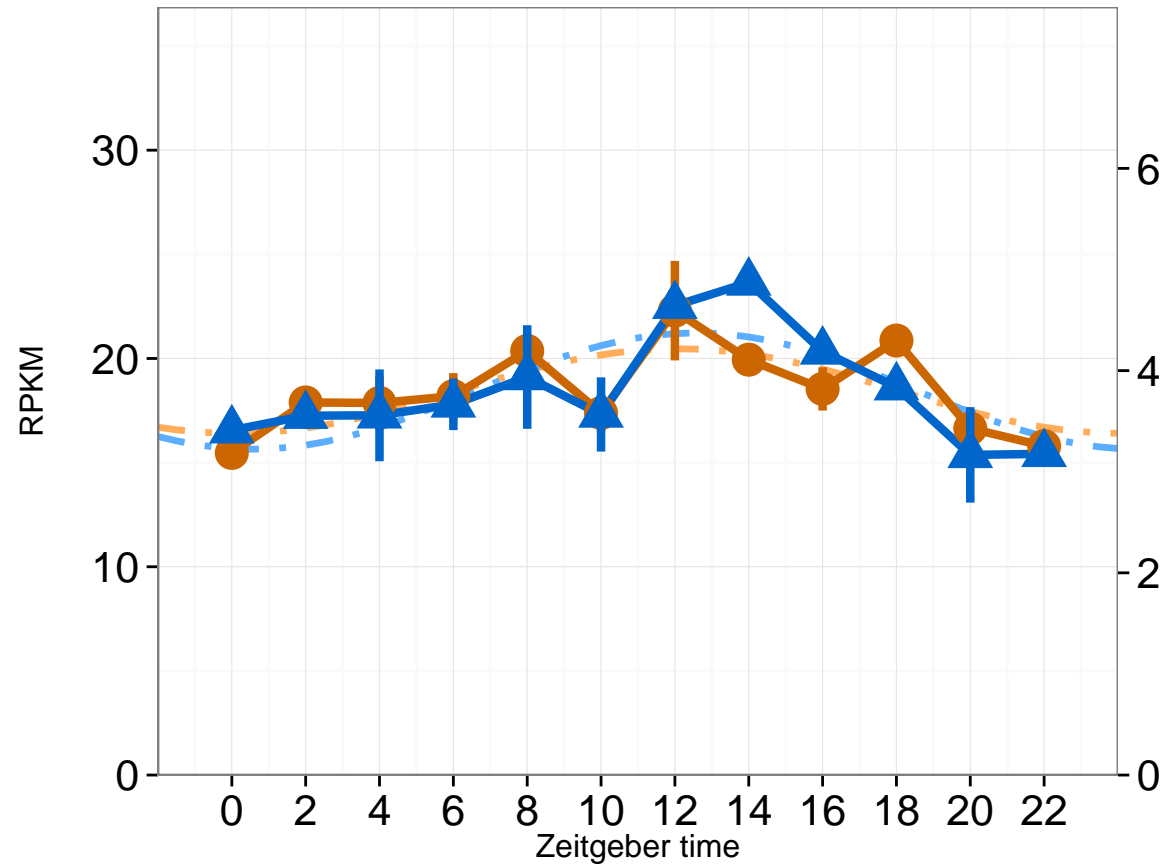

# Ext1

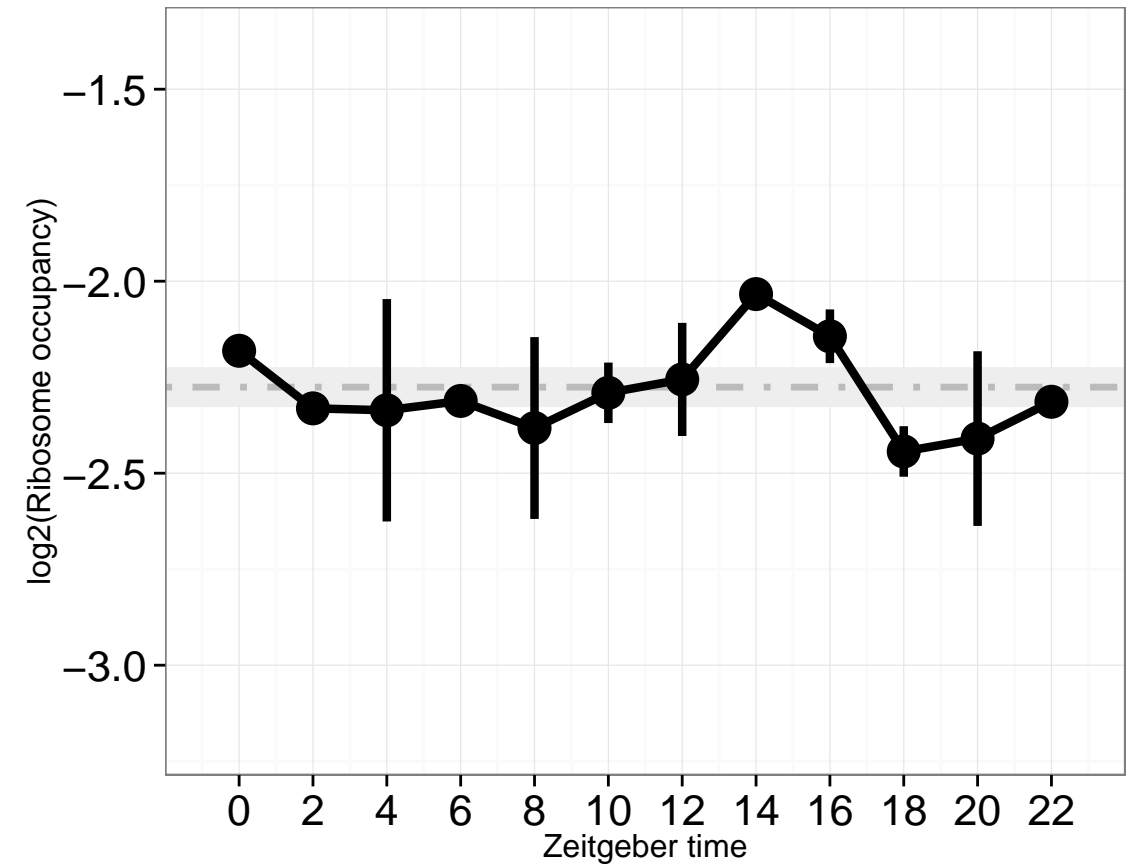

Supplement: SuppDataset_1.zip [file Ext1_set_A.pdf › Supplemental Dataset 1/A-mRNA_nonrhyth_translation_nonrhyth/Ext1_set_A.pdf]

## Ext2

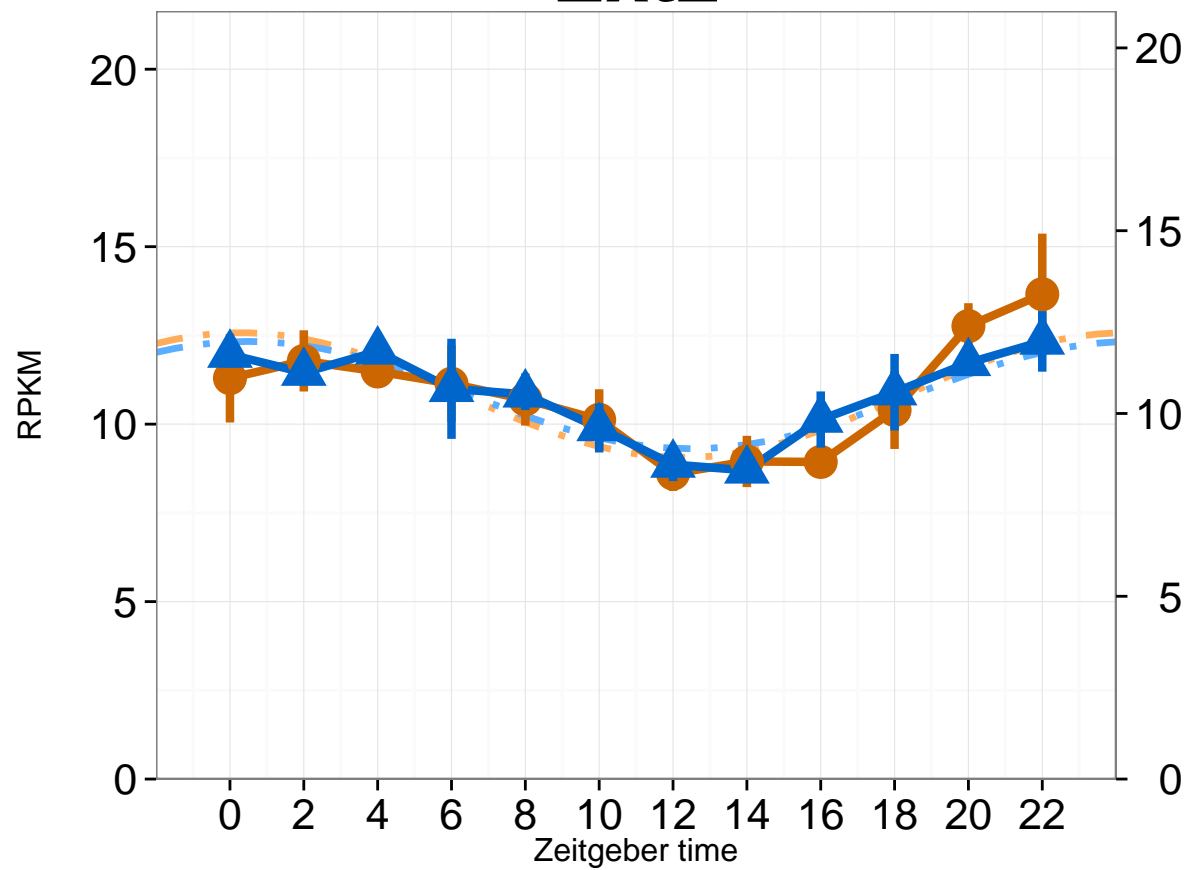

## Ext2

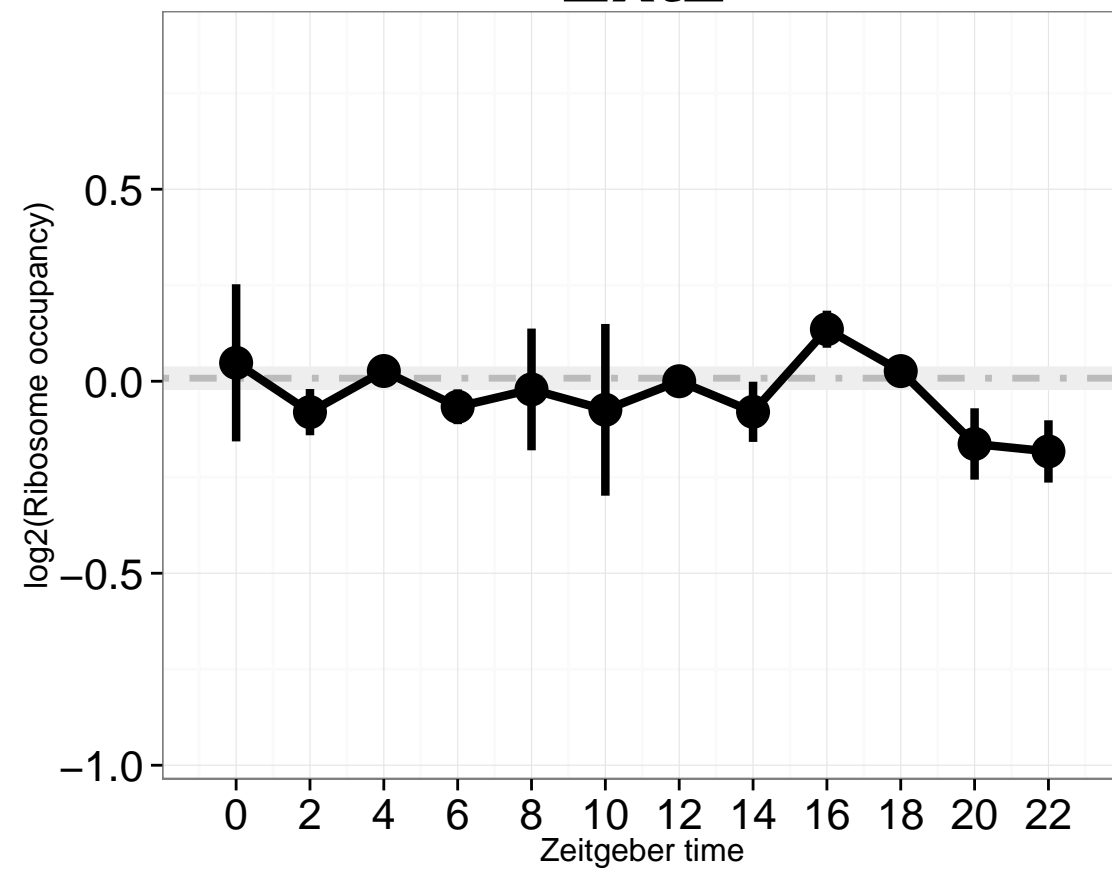

Supplement: SuppDataset_1.zip [file Ext2_set_A.pdf › Supplemental Dataset 1/A-mRNA_nonrhyth_translation_nonrhyth/Ext2_set_A.pdf]

# Extl1

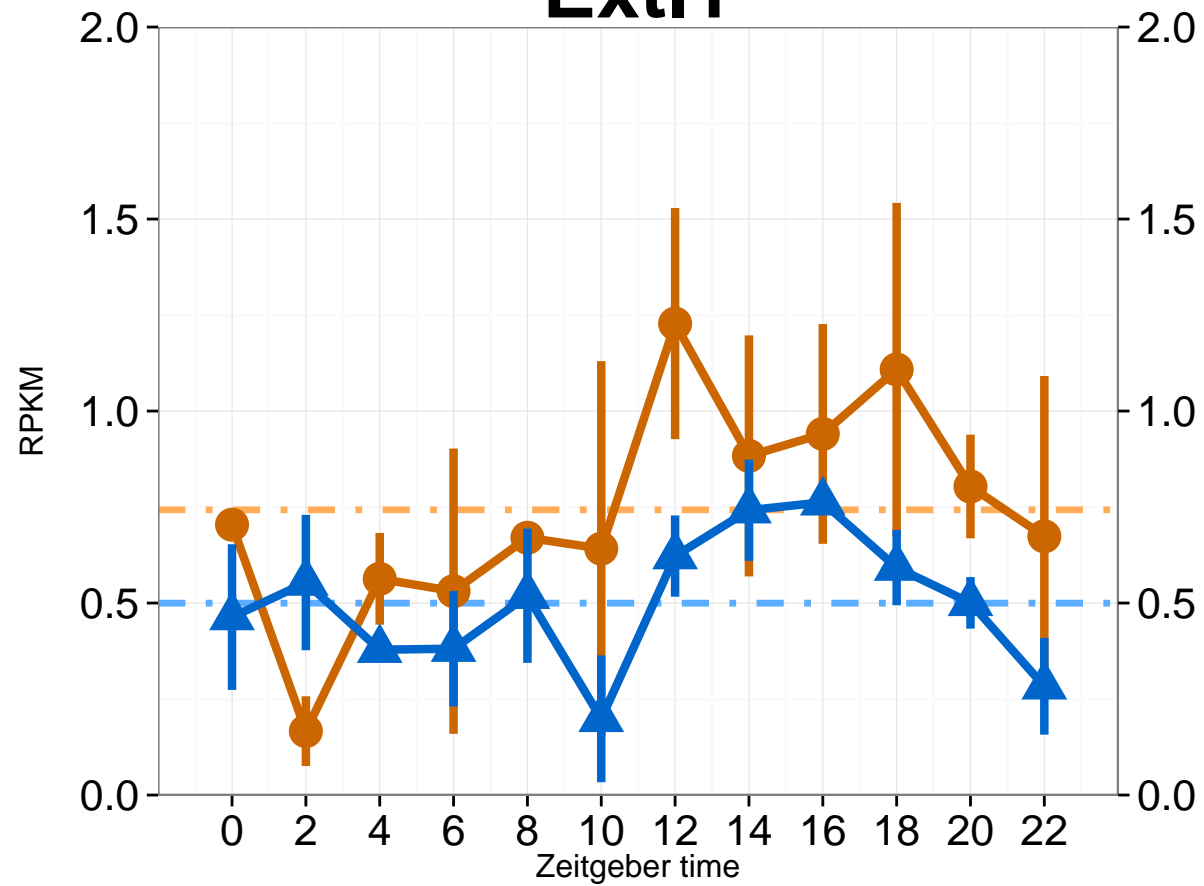

# Extl1

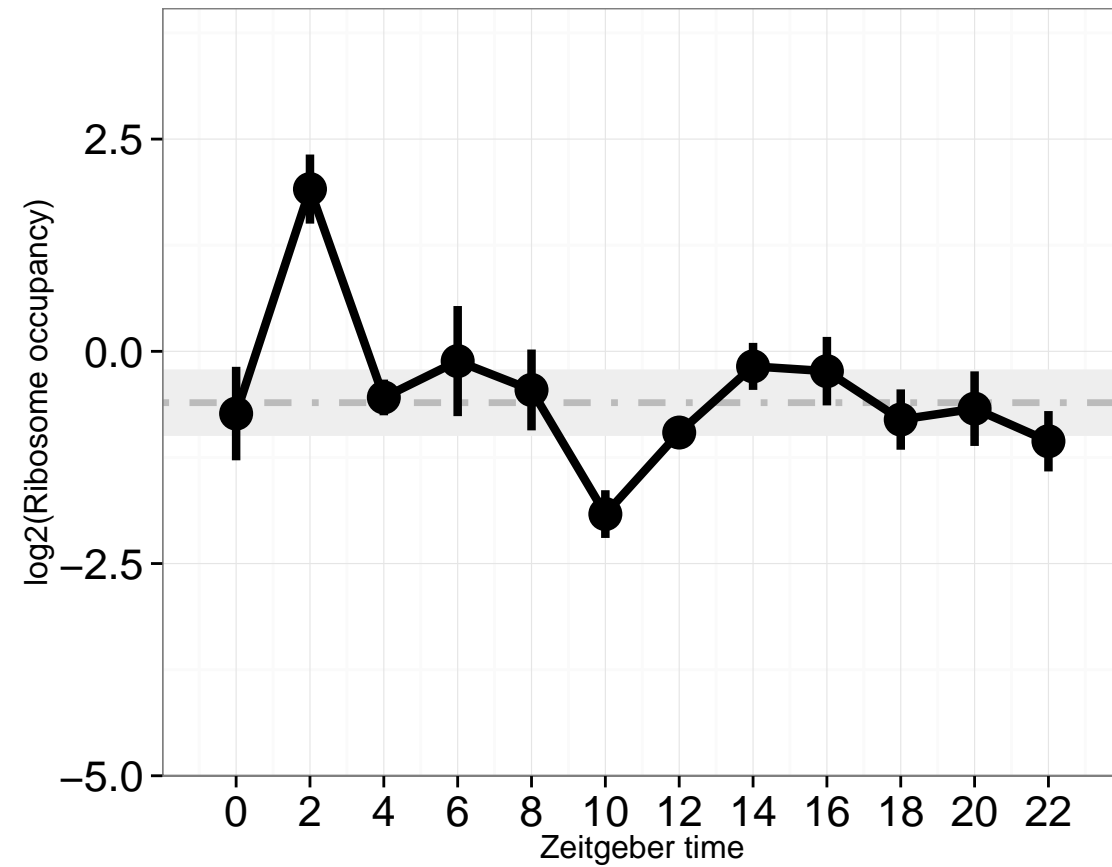

Supplement: SuppDataset_1.zip [file Extl1_set_A.pdf › Supplemental Dataset 1/A-mRNA_nonrhyth_translation_nonrhyth/Extl1_set_A.pdf]

# Extl2

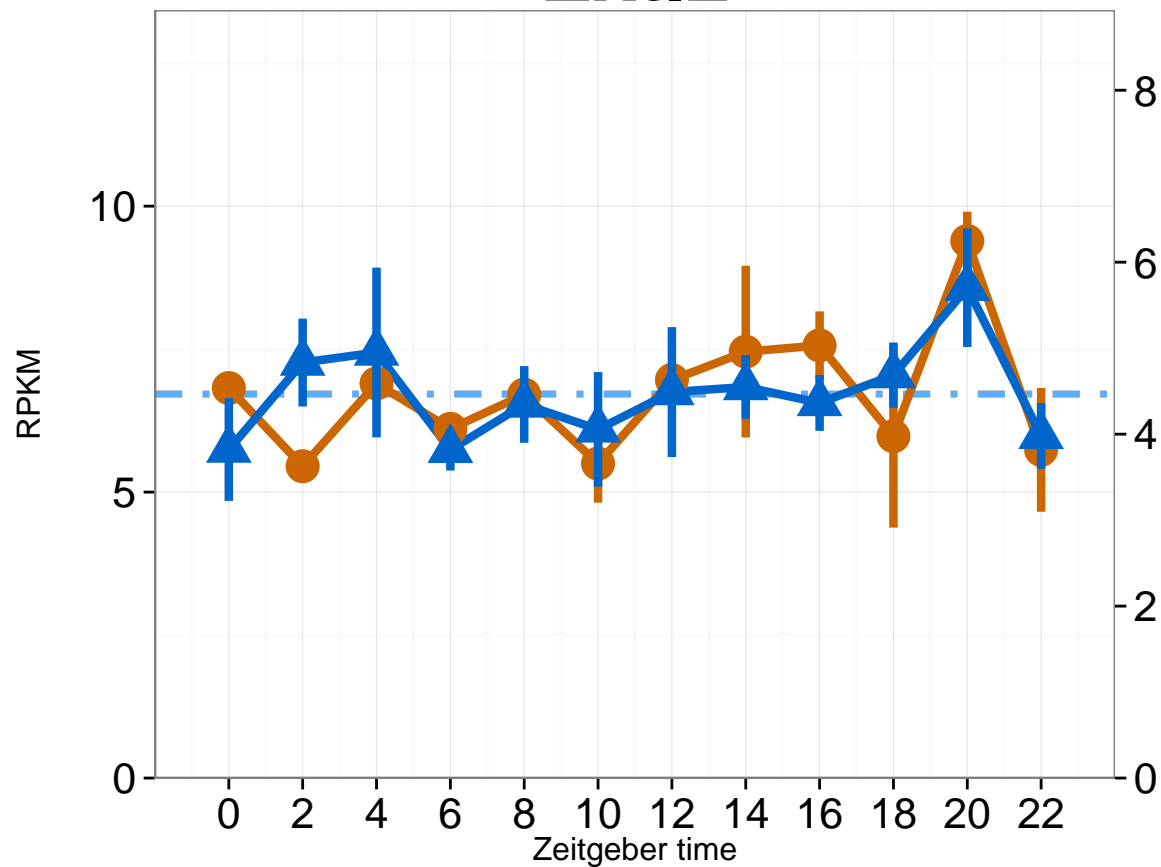

# Extl2

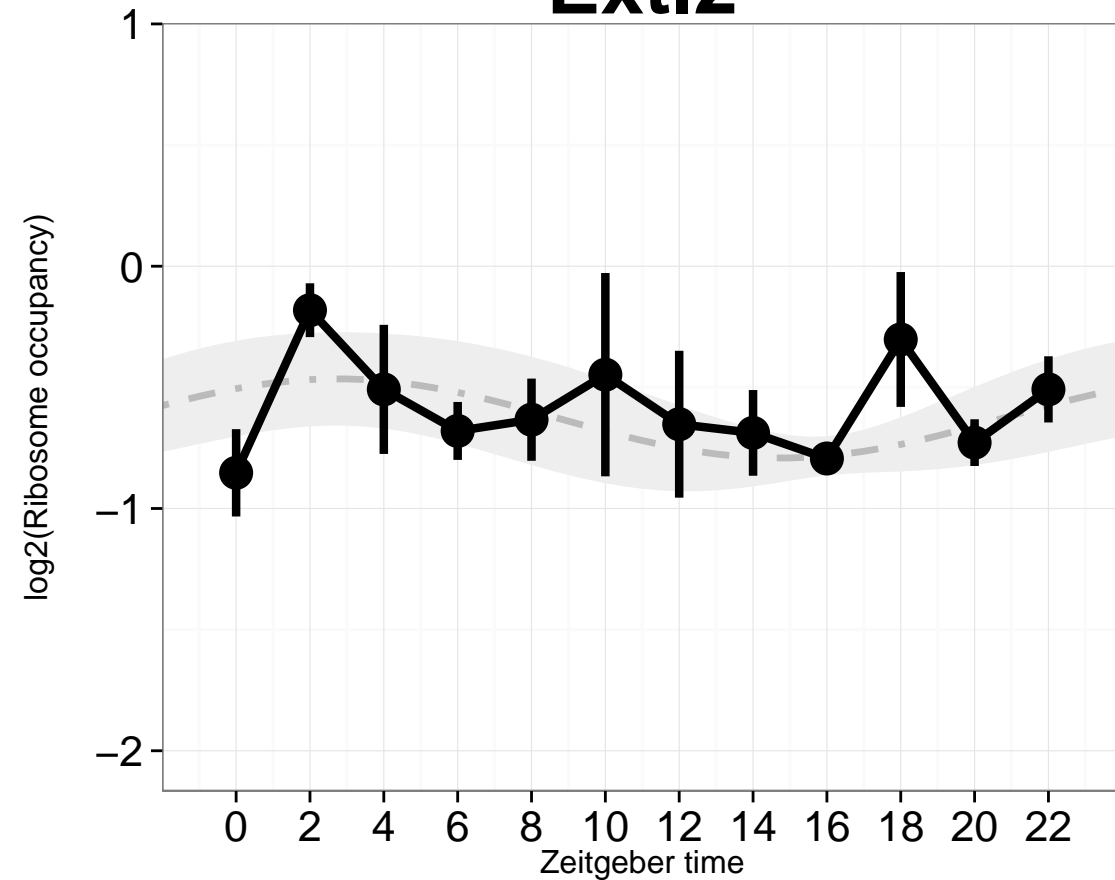

Supplement: SuppDataset_1.zip [file Extl2_set_A.pdf › Supplemental Dataset 1/A-mRNA_nonrhyth_translation_nonrhyth/Extl2_set_A.pdf]

# Extl3

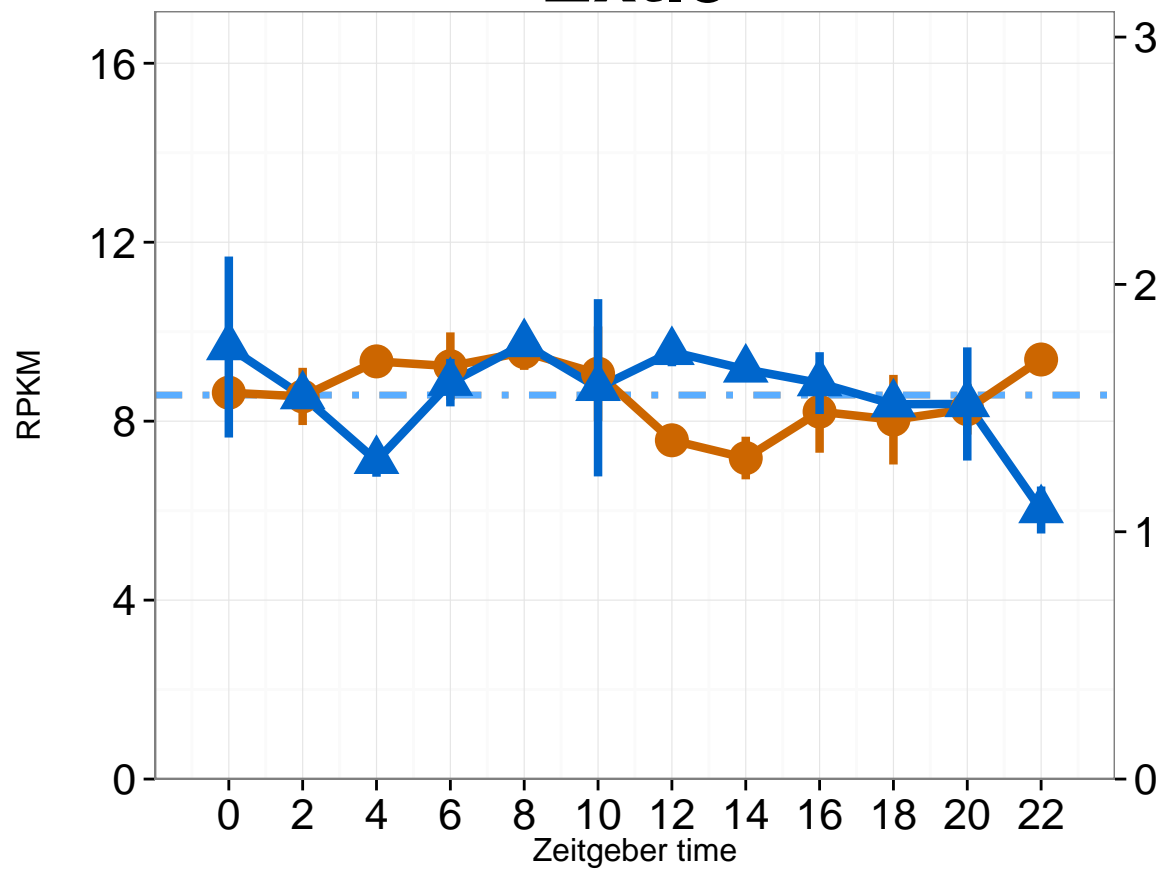

# Extl3

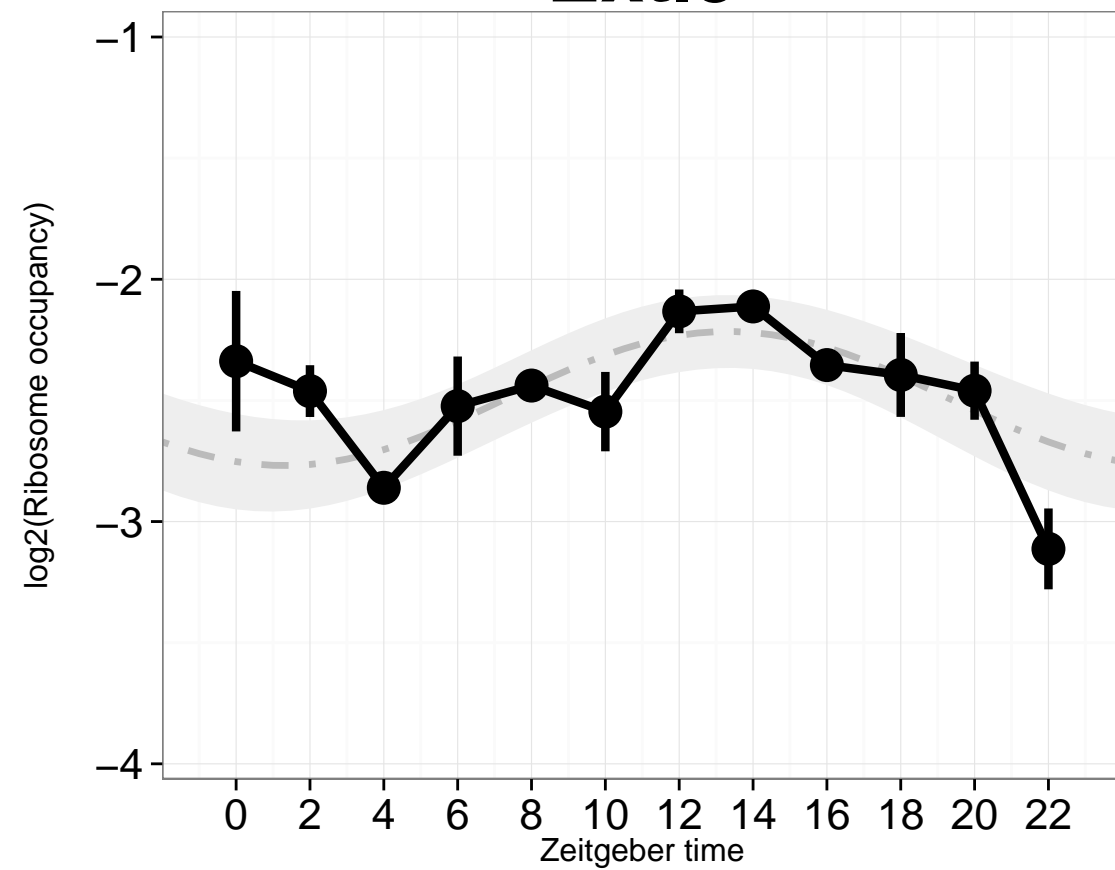

Supplement: SuppDataset_1.zip [file Extl3_set_A.pdf › Supplemental Dataset 1/A-mRNA_nonrhyth_translation_nonrhyth/Extl3_set_A.pdf]

## Eya3

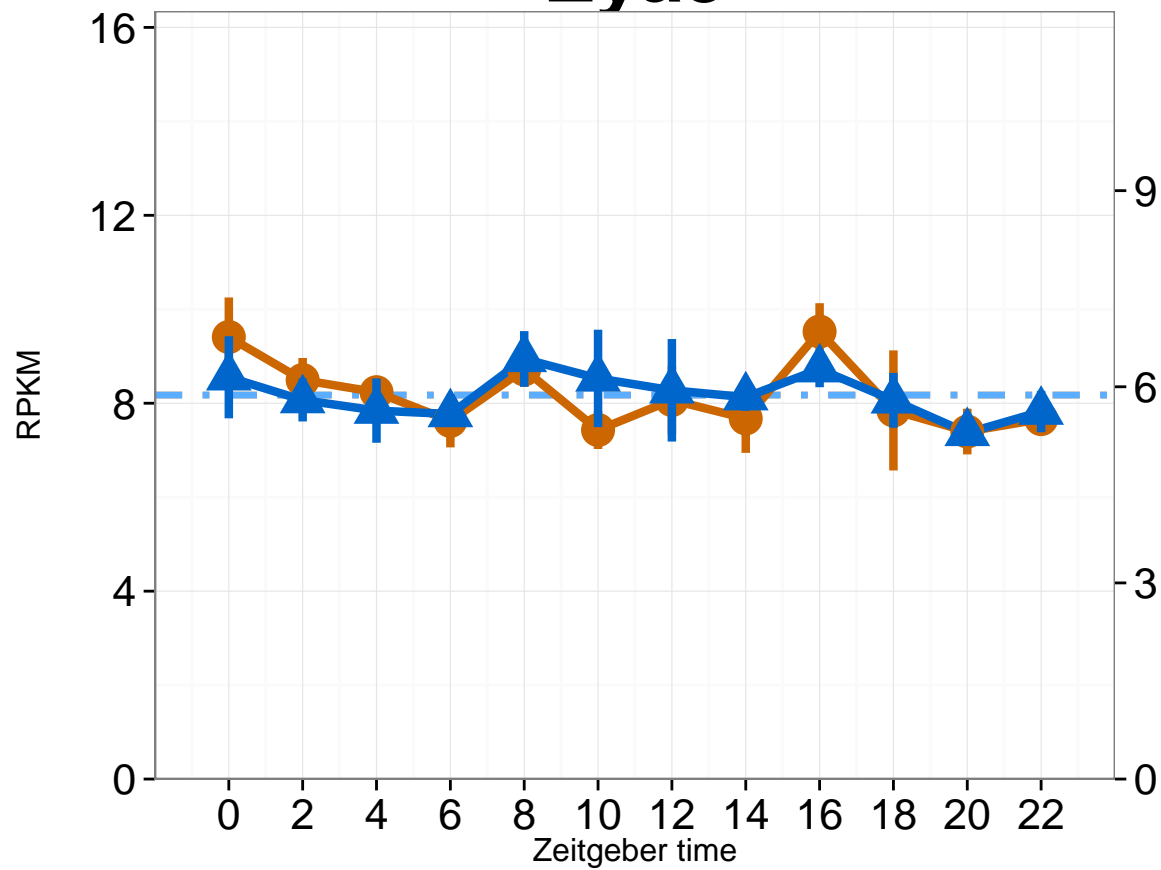

## Eya3

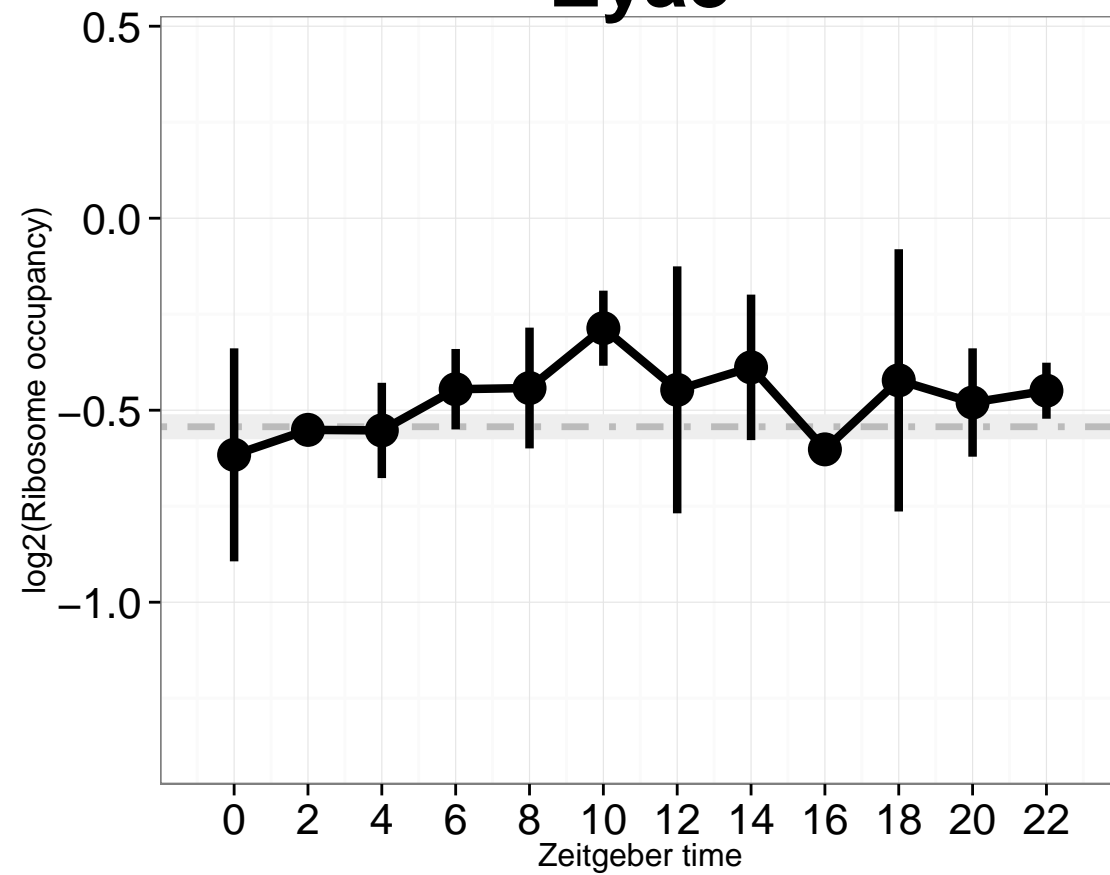

Supplement: SuppDataset_1.zip [file Eya3_set_A.pdf › Supplemental Dataset 1/A-mRNA_nonrhyth_translation_nonrhyth/Eya3_set_A.pdf]

# Ezh1

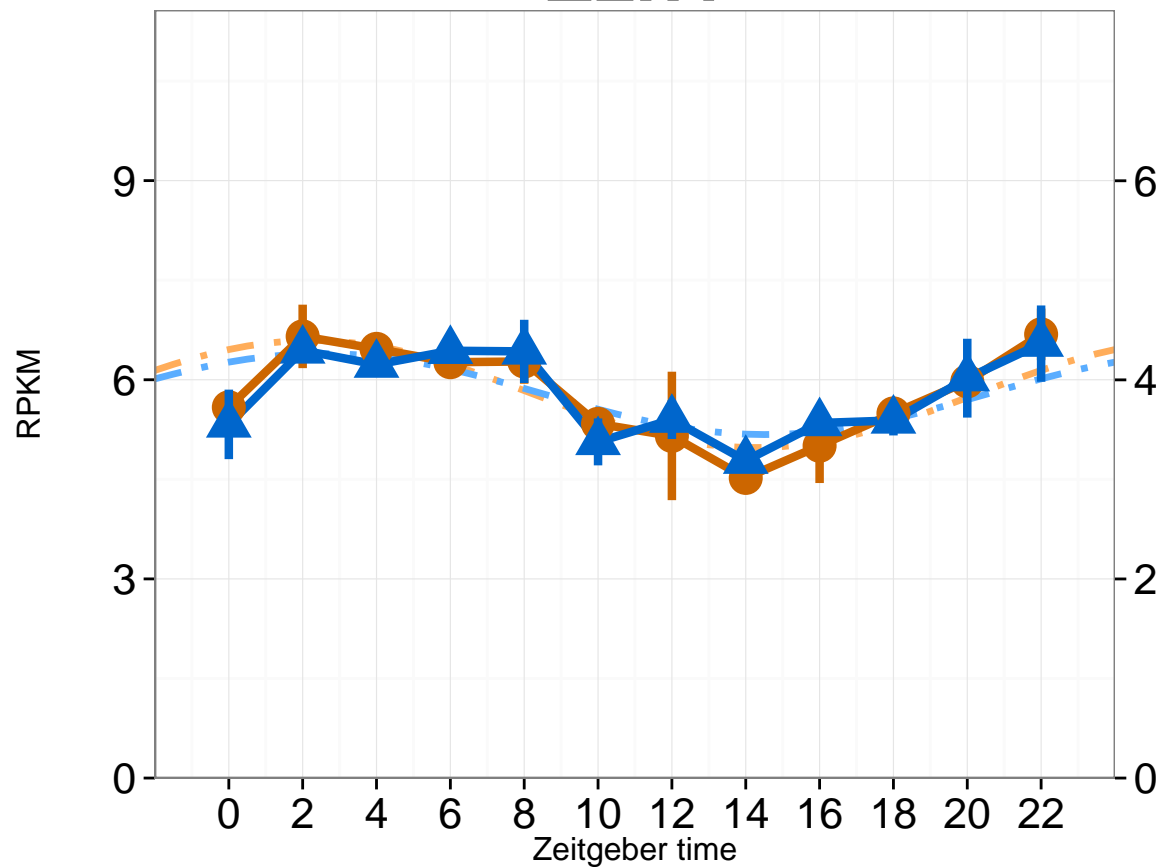

# Ezh1

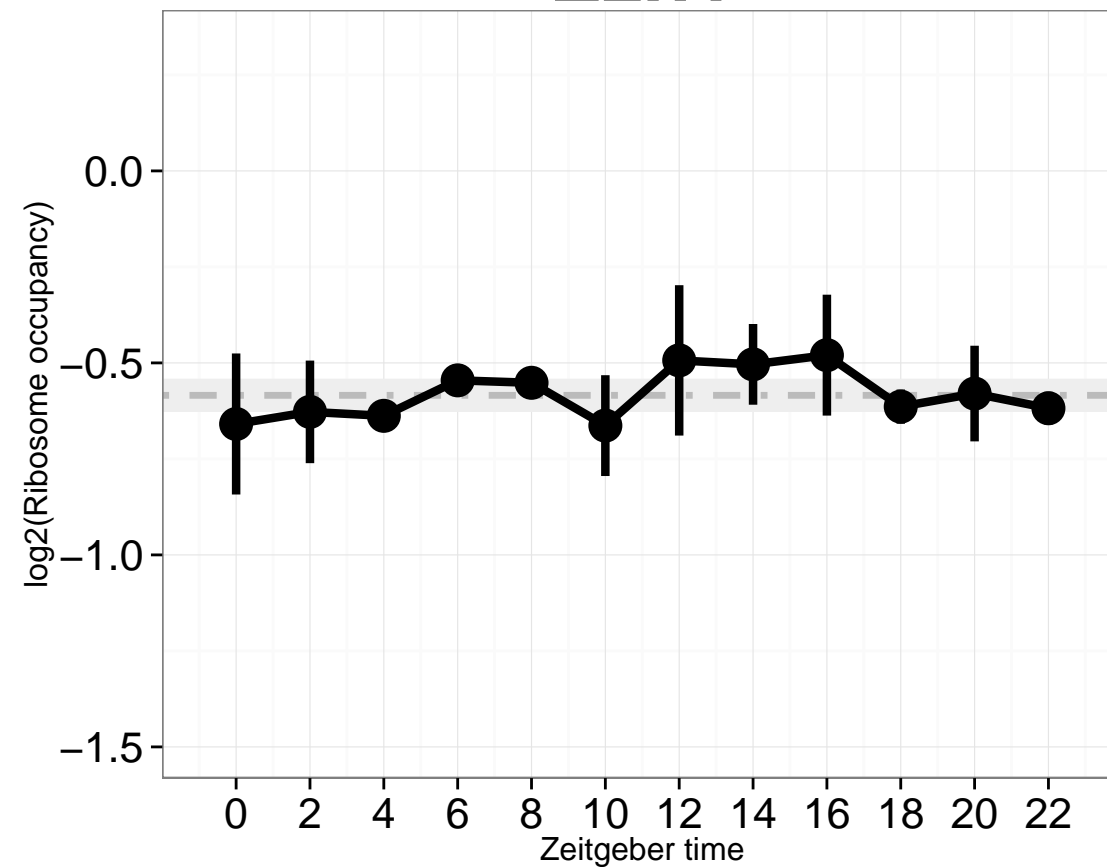

Supplement: SuppDataset_1.zip [file Ezh1_set_A.pdf › Supplemental Dataset 1/A-mRNA_nonrhyth_translation_nonrhyth/Ezh1_set_A.pdf]

## Ezh2

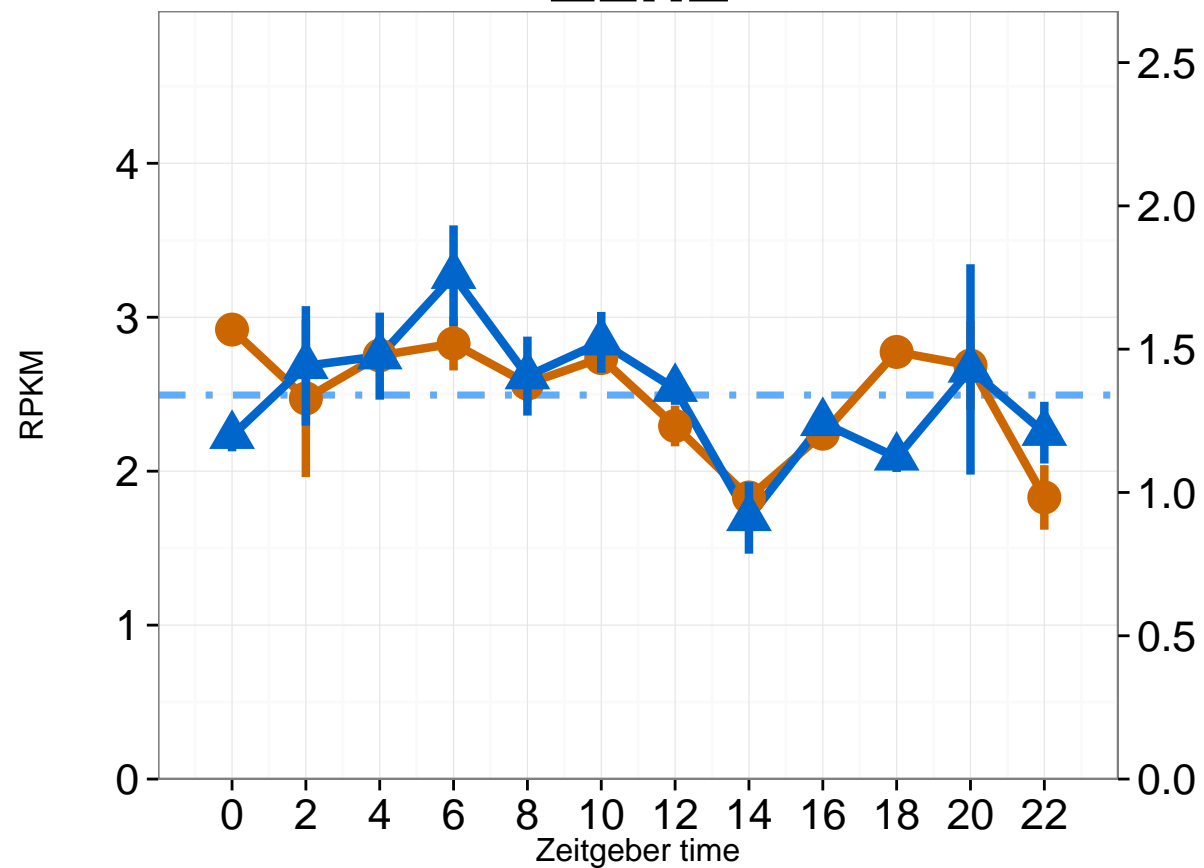

## Ezh2

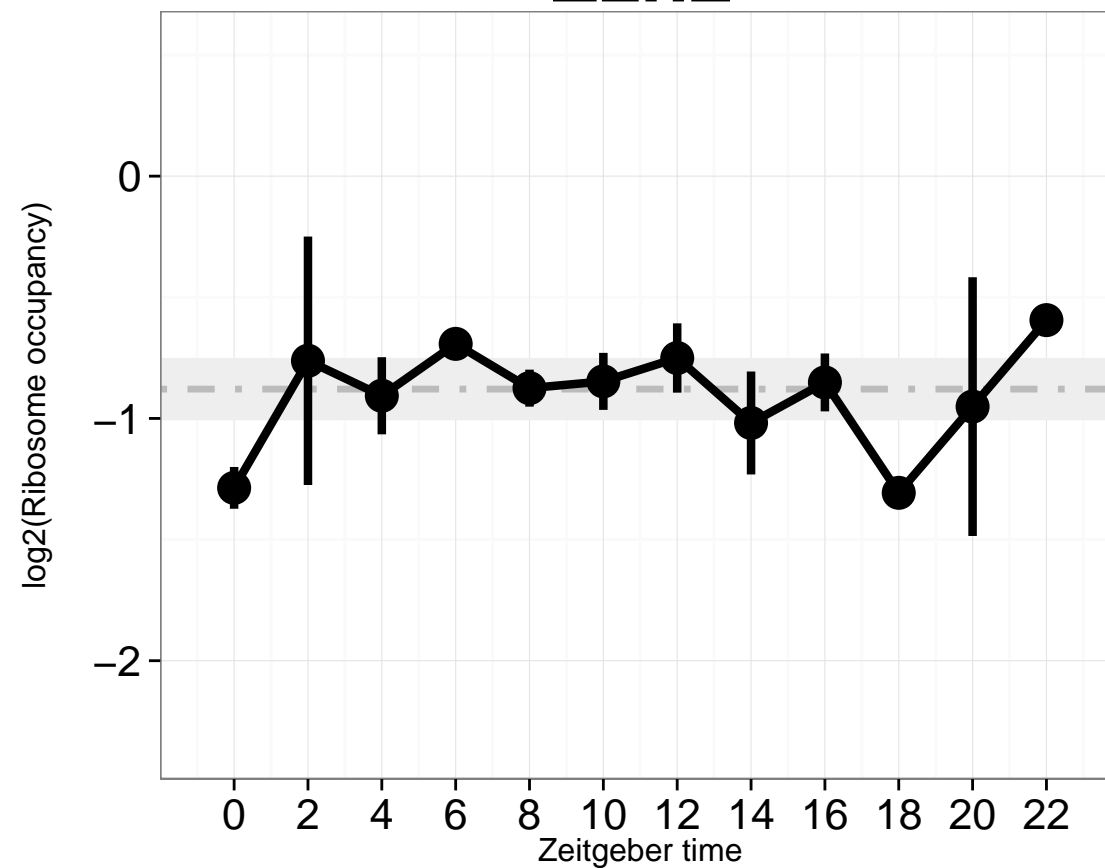

Supplement: SuppDataset_1.zip [file Ezh2_set_A.pdf › Supplemental Dataset 1/A-mRNA_nonrhyth_translation_nonrhyth/Ezh2_set_A.pdf]

## Ezr

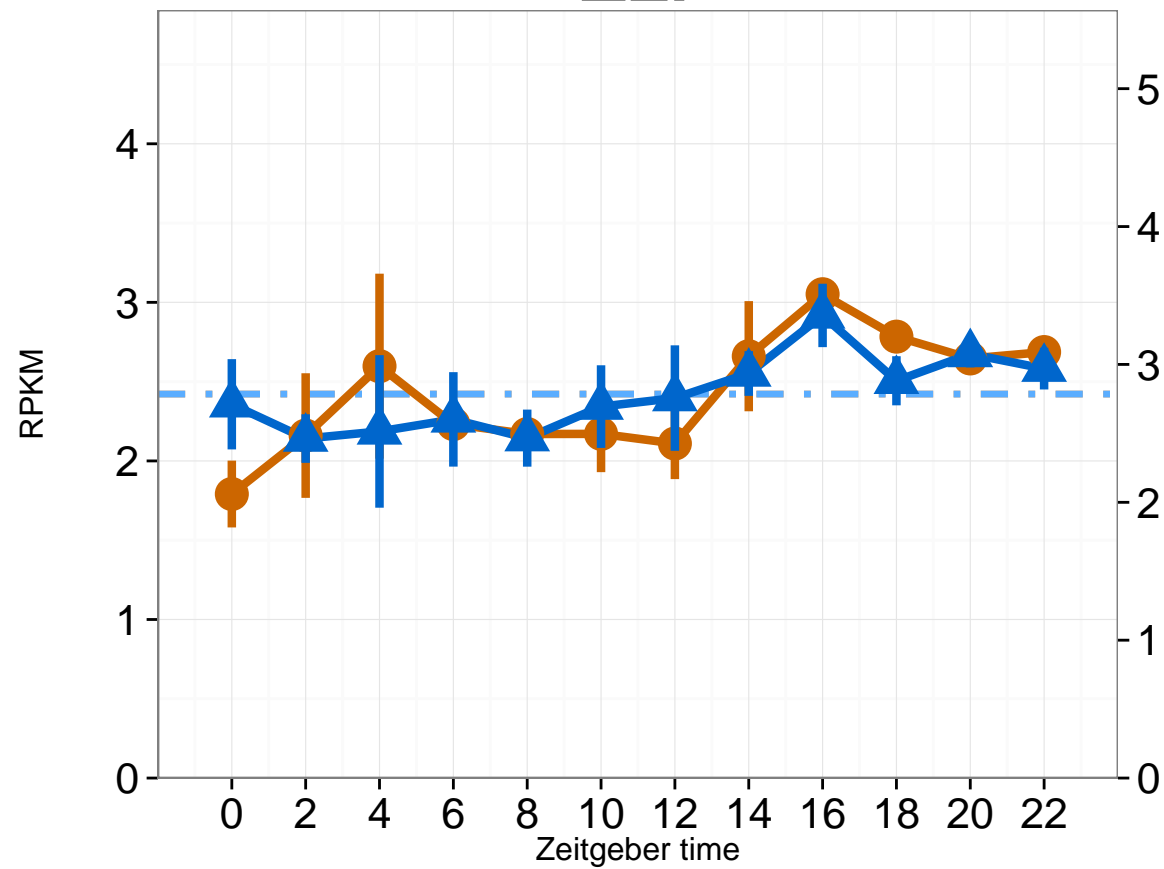

## Ezr

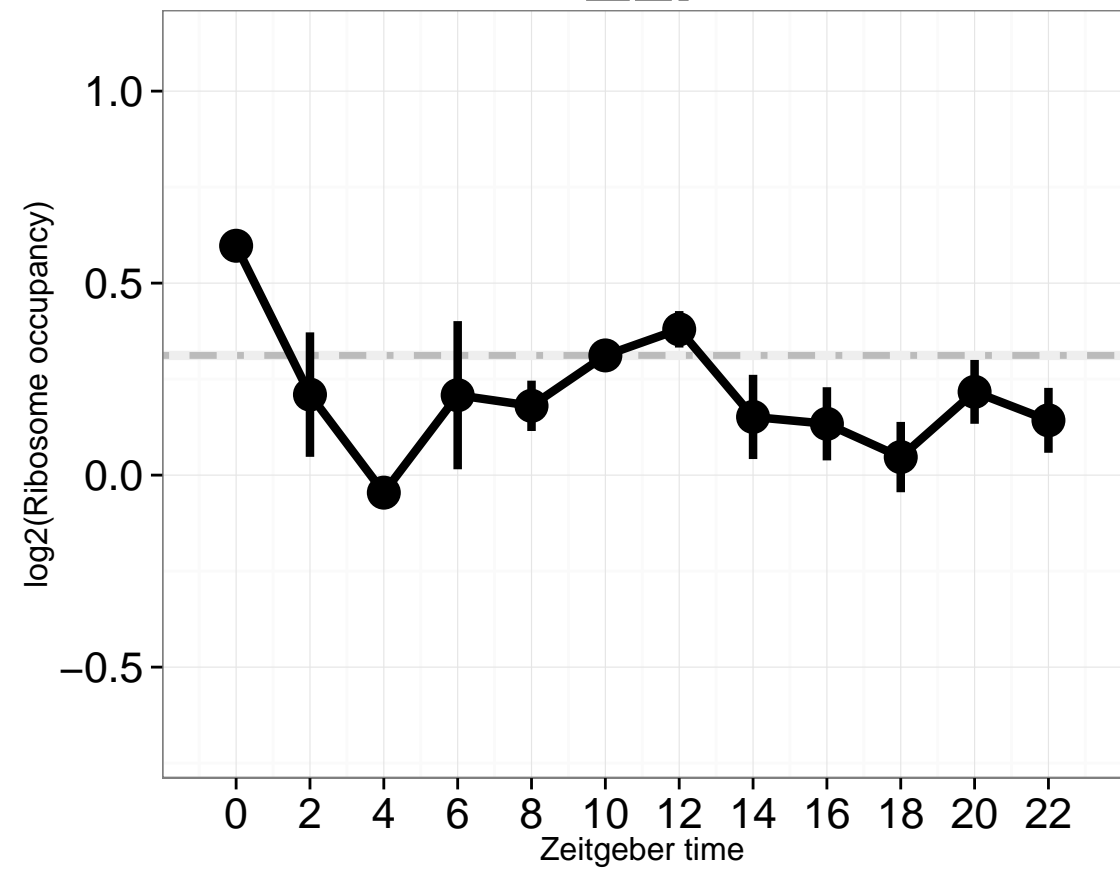

Supplement: SuppDataset_1.zip [file Ezr_set_A.pdf › Supplemental Dataset 1/A-mRNA_nonrhyth_translation_nonrhyth/Ezr_set_A.pdf]

# F10

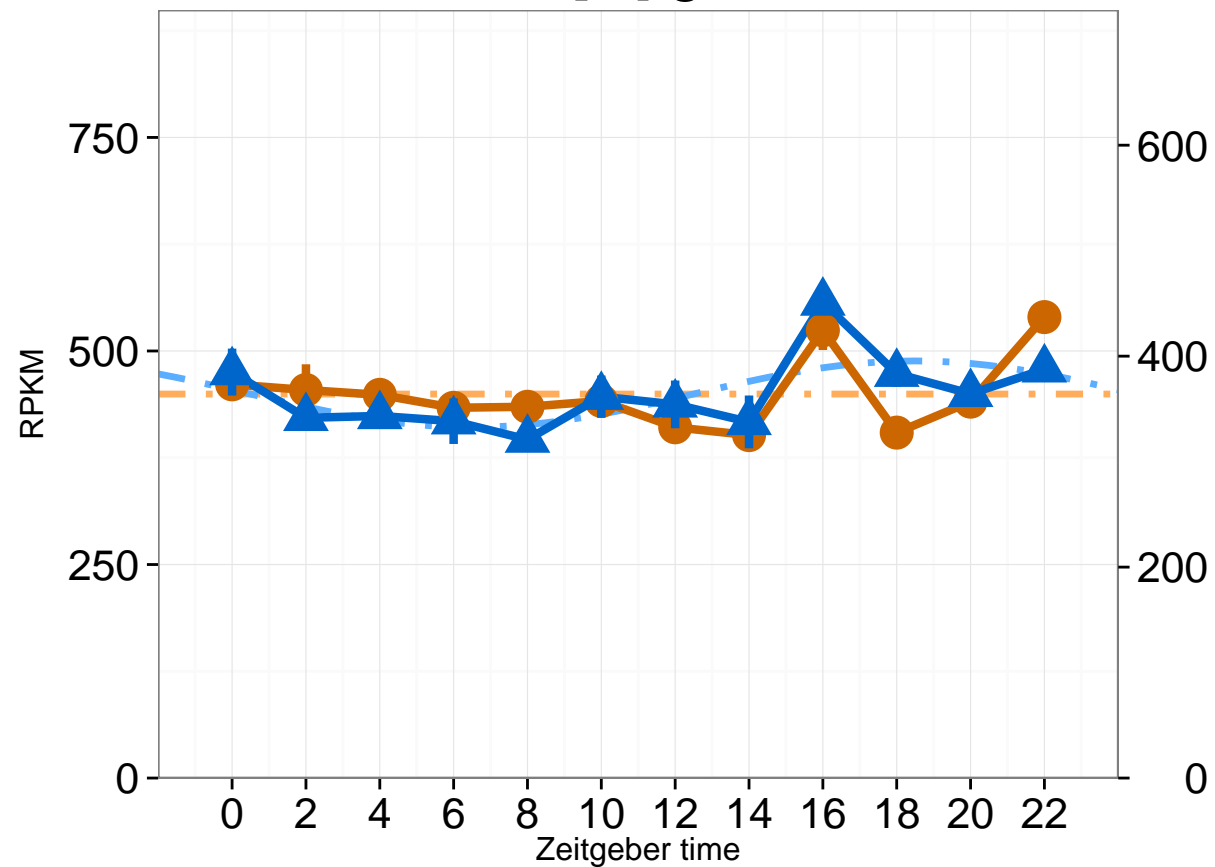

# F10

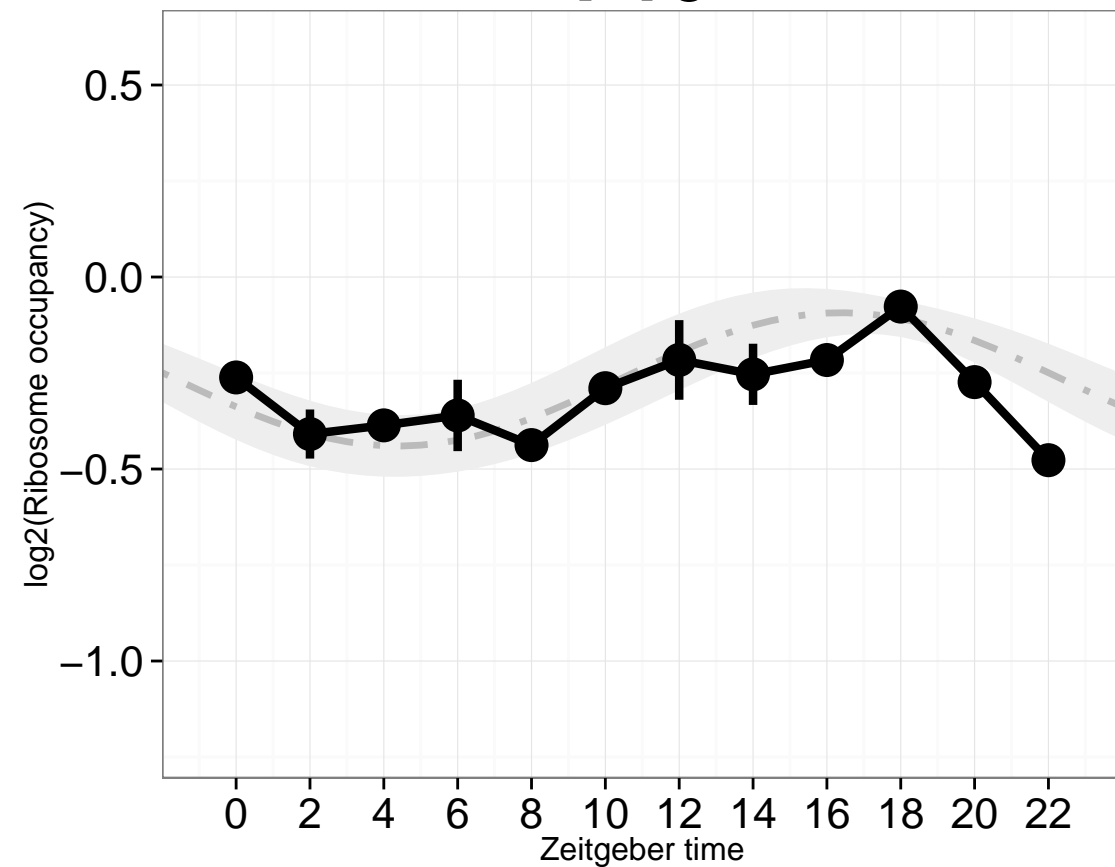

Supplement: SuppDataset_1.zip [file F10_set_A.pdf › Supplemental Dataset 1/A-mRNA_nonrhyth_translation_nonrhyth/F10_set_A.pdf]

# F11

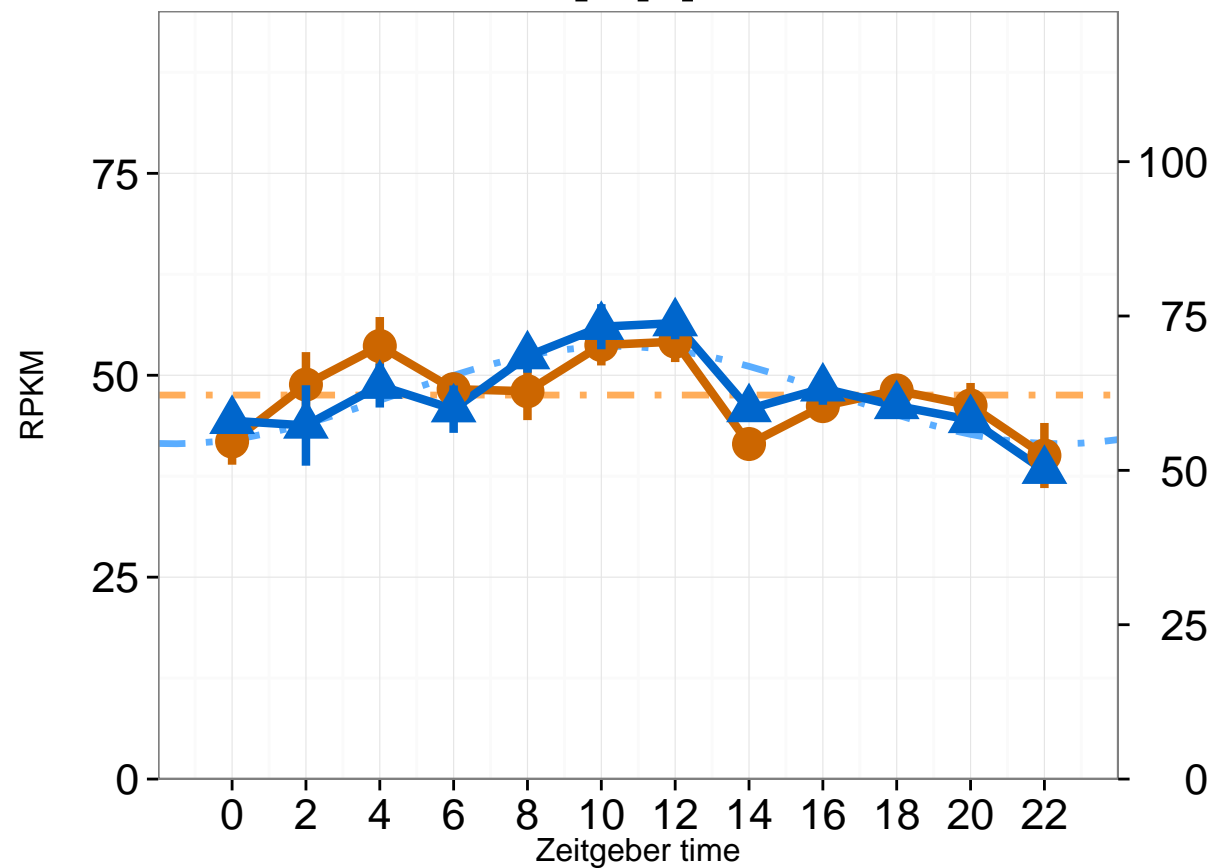

# F11

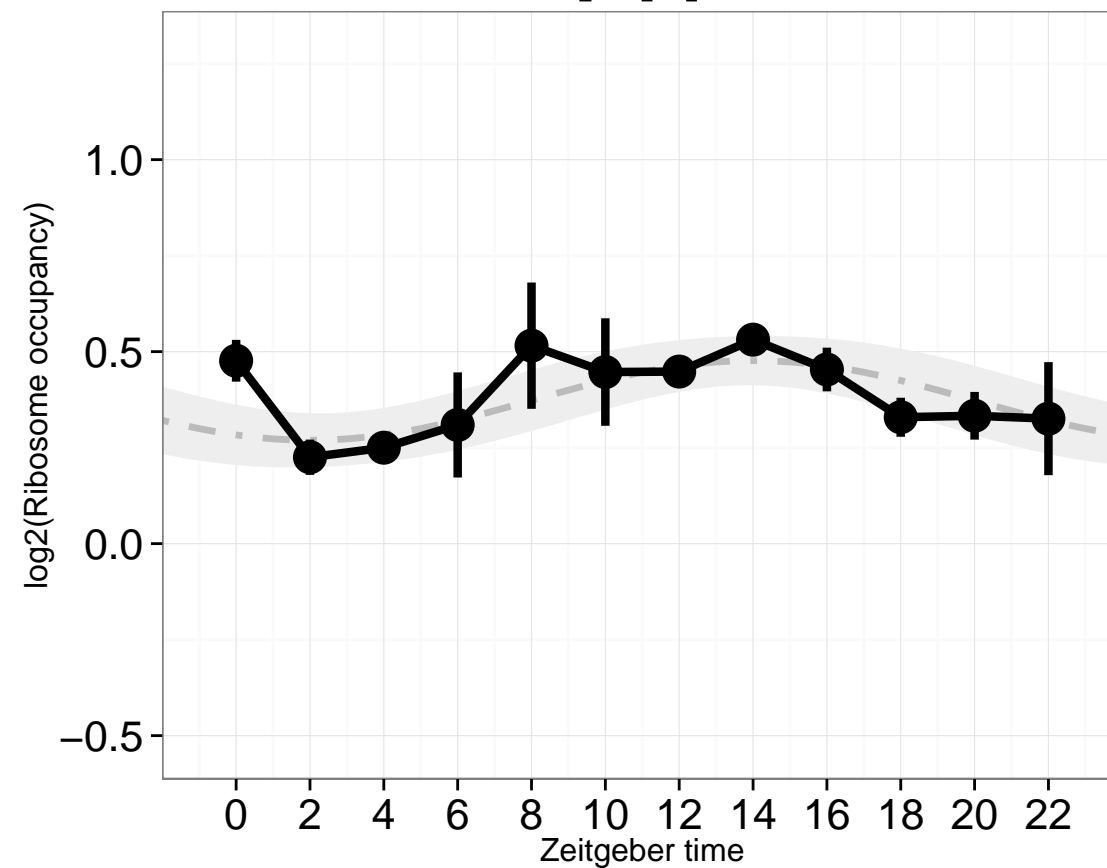

Supplement: SuppDataset_1.zip [file F11_set_A.pdf › Supplemental Dataset 1/A-mRNA_nonrhyth_translation_nonrhyth/F11_set_A.pdf]

# F11r

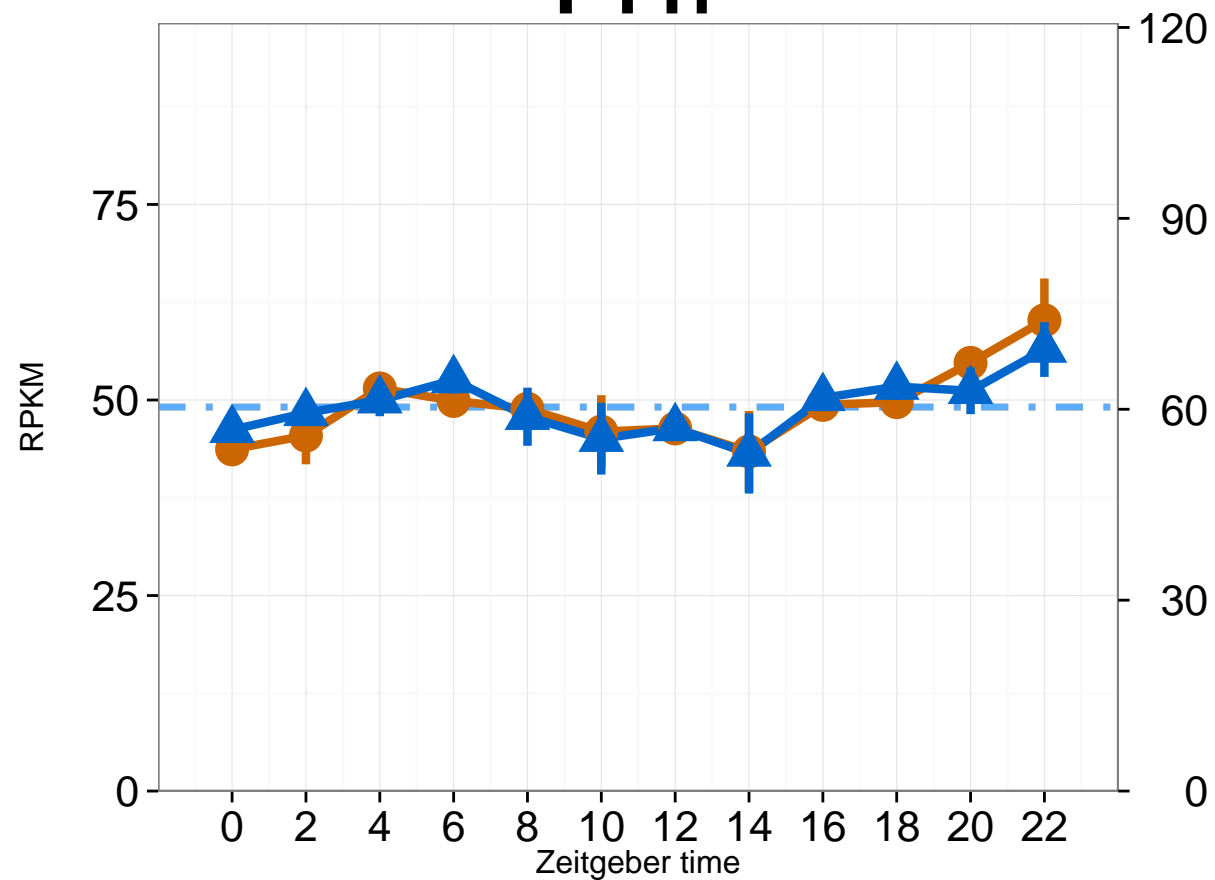

# F11r

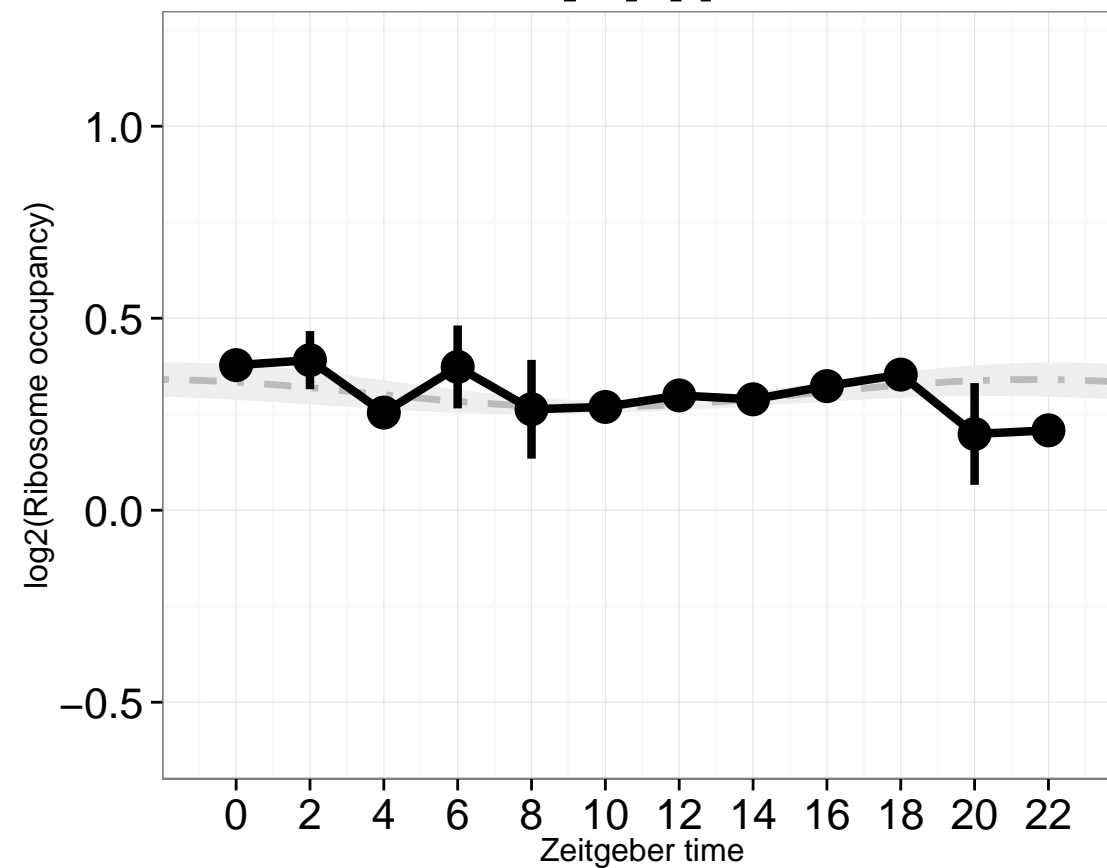

Supplement: SuppDataset_1.zip [file F11r_set_A.pdf › Supplemental Dataset 1/A-mRNA_nonrhyth_translation_nonrhyth/F11r_set_A.pdf]

# F12

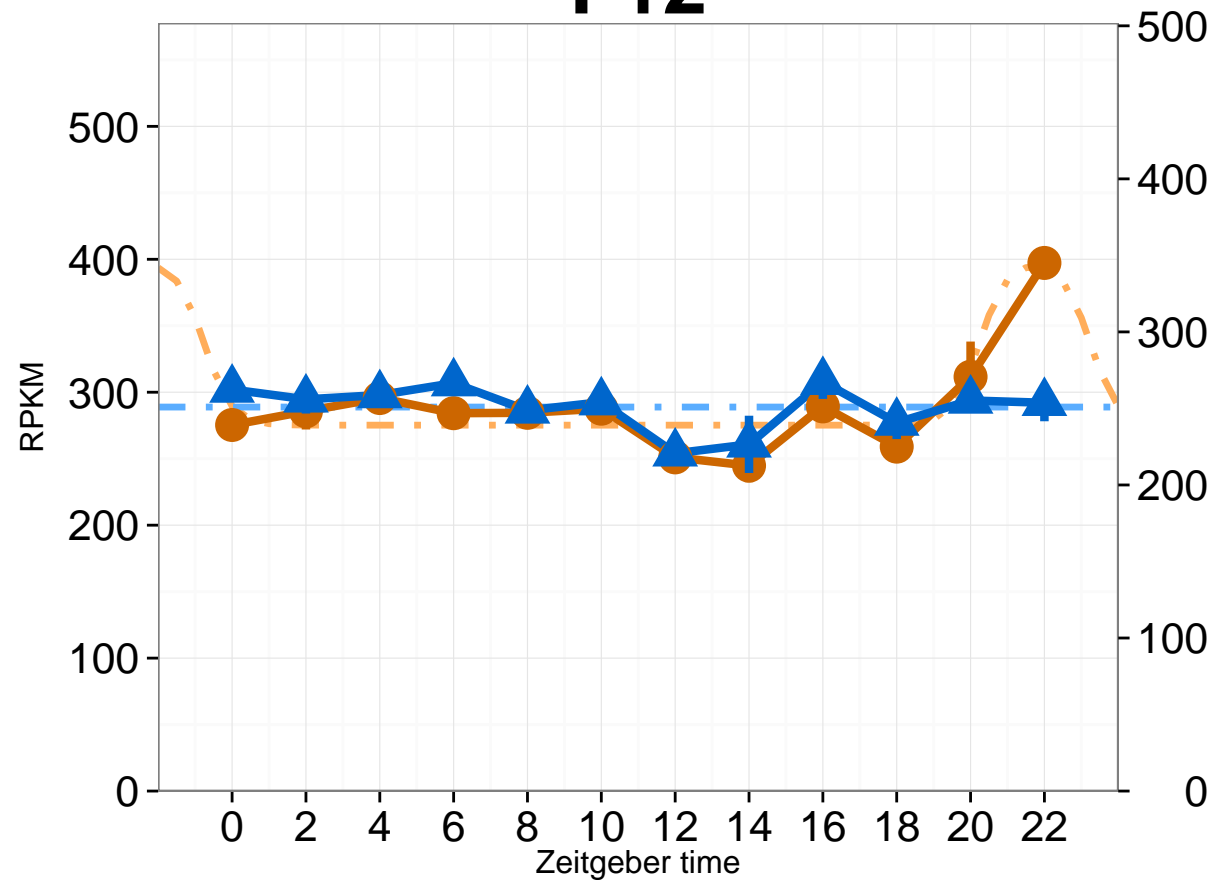

# F12

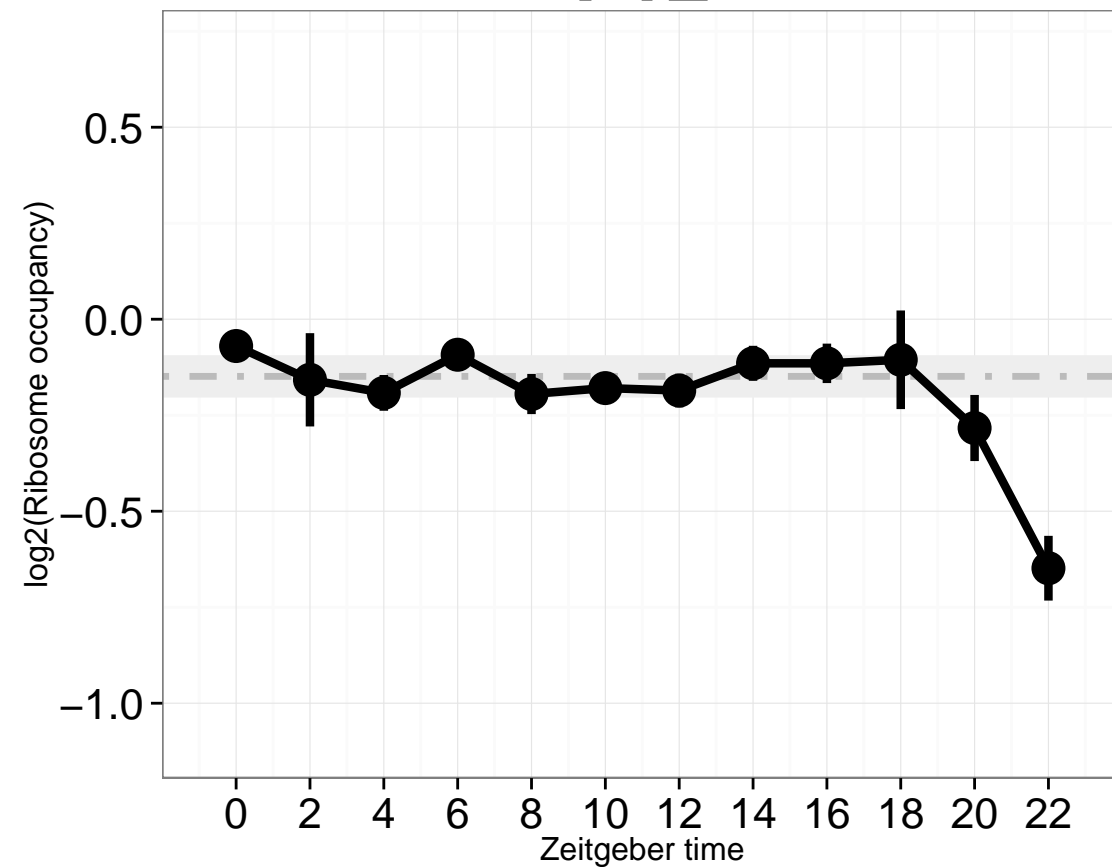

Supplement: SuppDataset_1.zip [file F12_set_A.pdf › Supplemental Dataset 1/A-mRNA_nonrhyth_translation_nonrhyth/F12_set_A.pdf]

# F13b

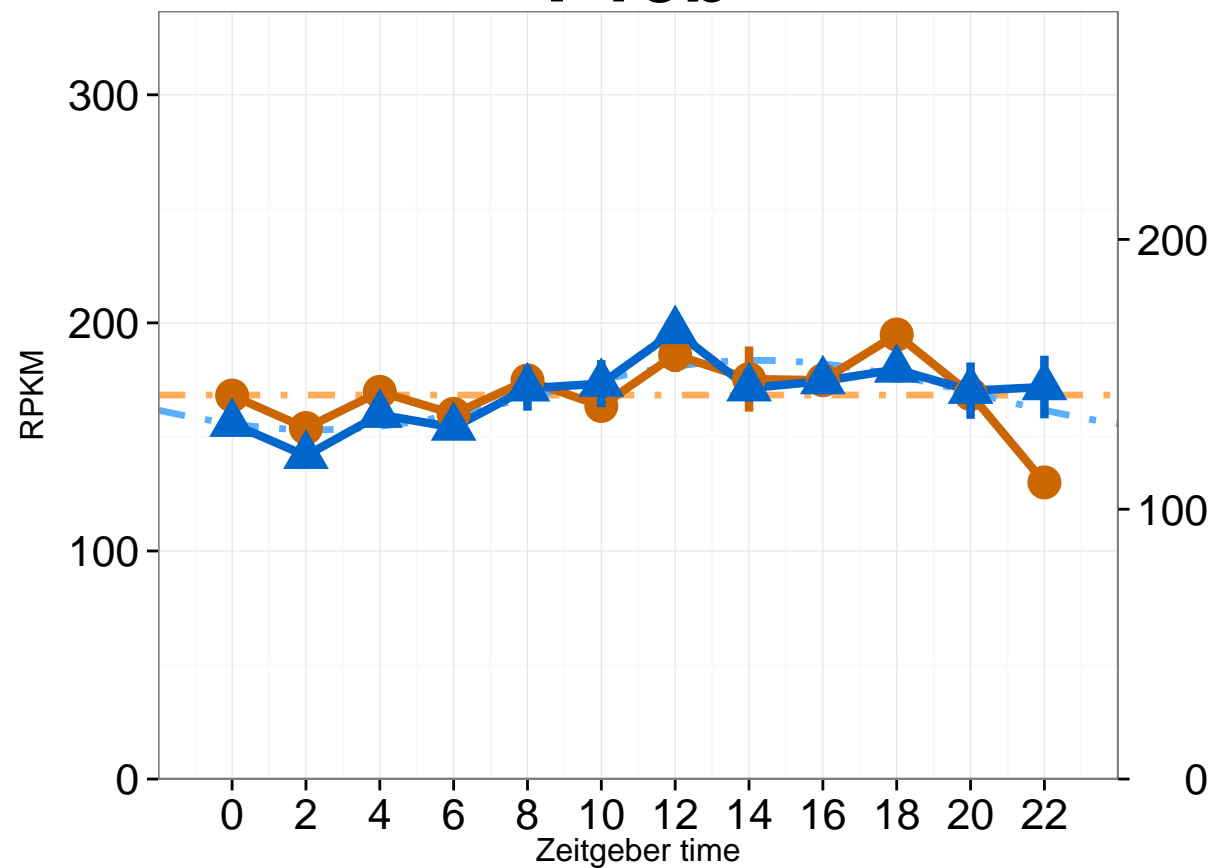

# F13b

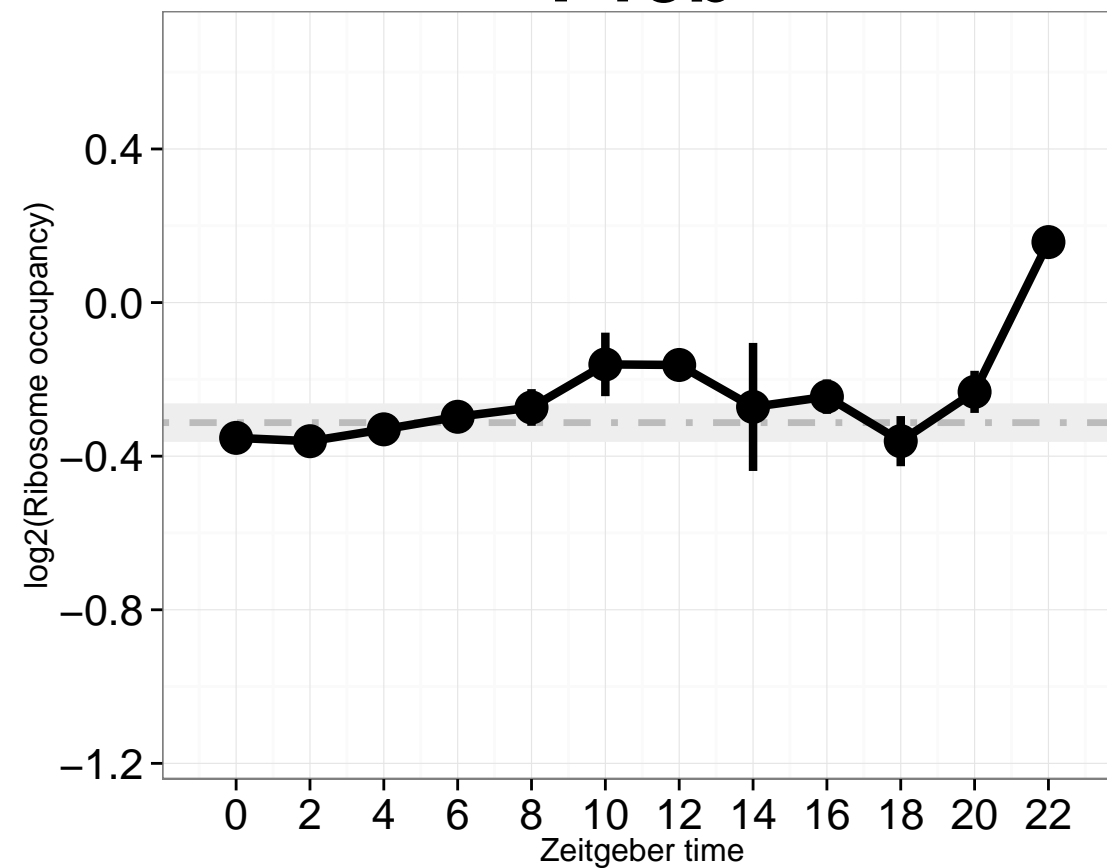

Supplement: SuppDataset_1.zip [file F13b_set_A.pdf › Supplemental Dataset 1/A-mRNA_nonrhyth_translation_nonrhyth/F13b_set_A.pdf]

# F2

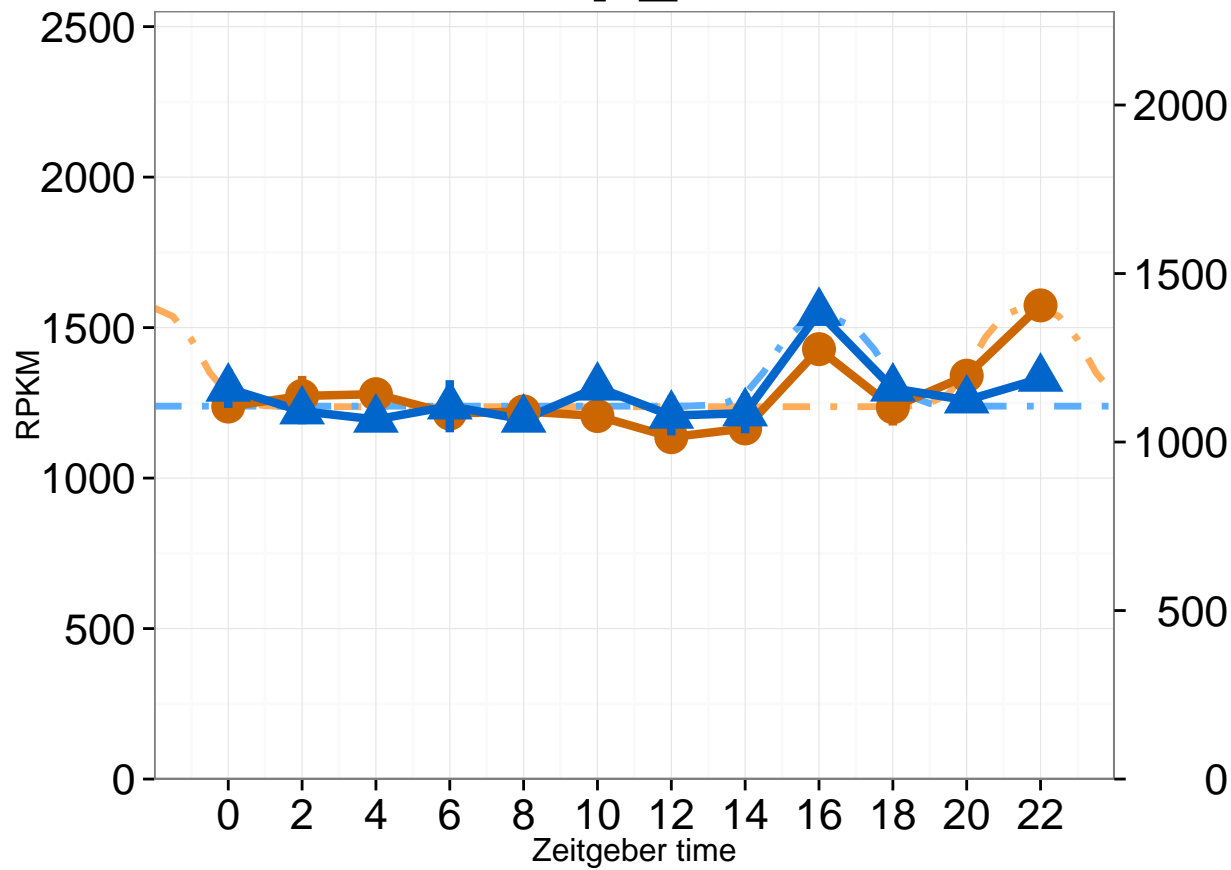

# F2

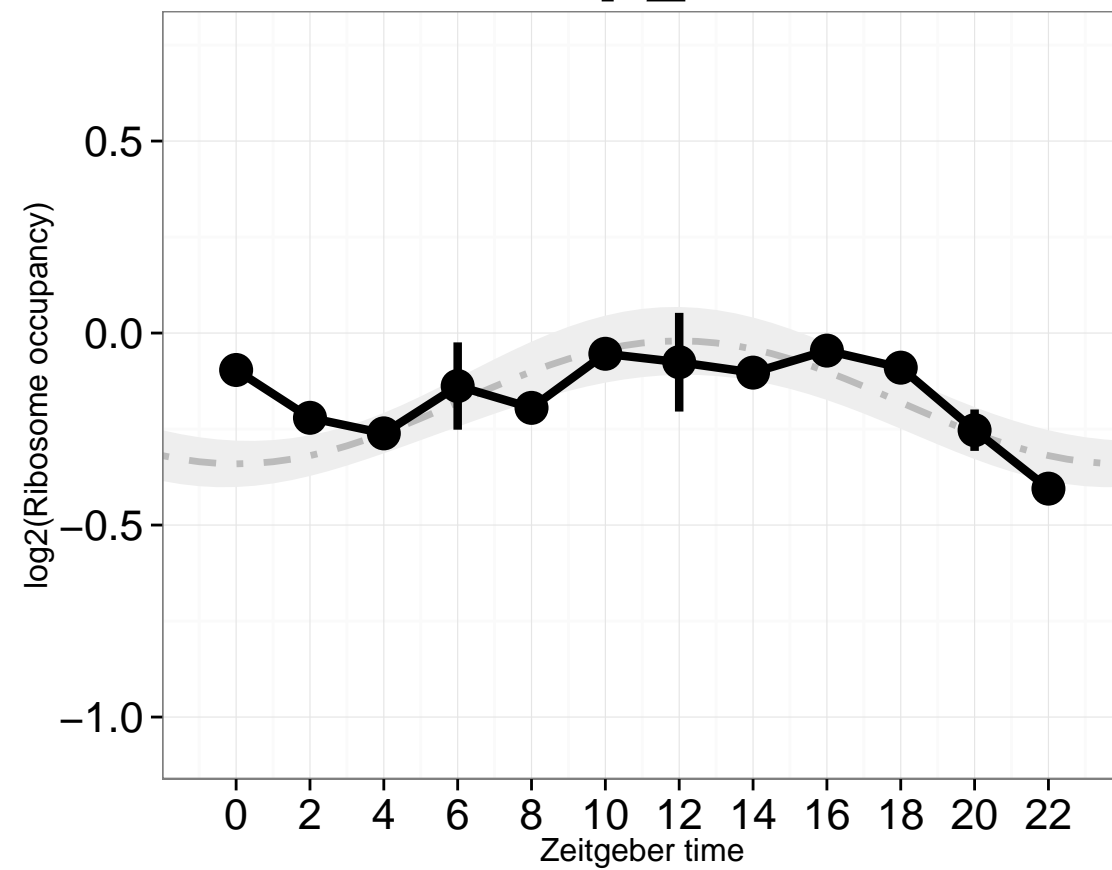

Supplement: SuppDataset_1.zip [file F2_set_A.pdf › Supplemental Dataset 1/A-mRNA_nonrhyth_translation_nonrhyth/F2_set_A.pdf]

# F2r

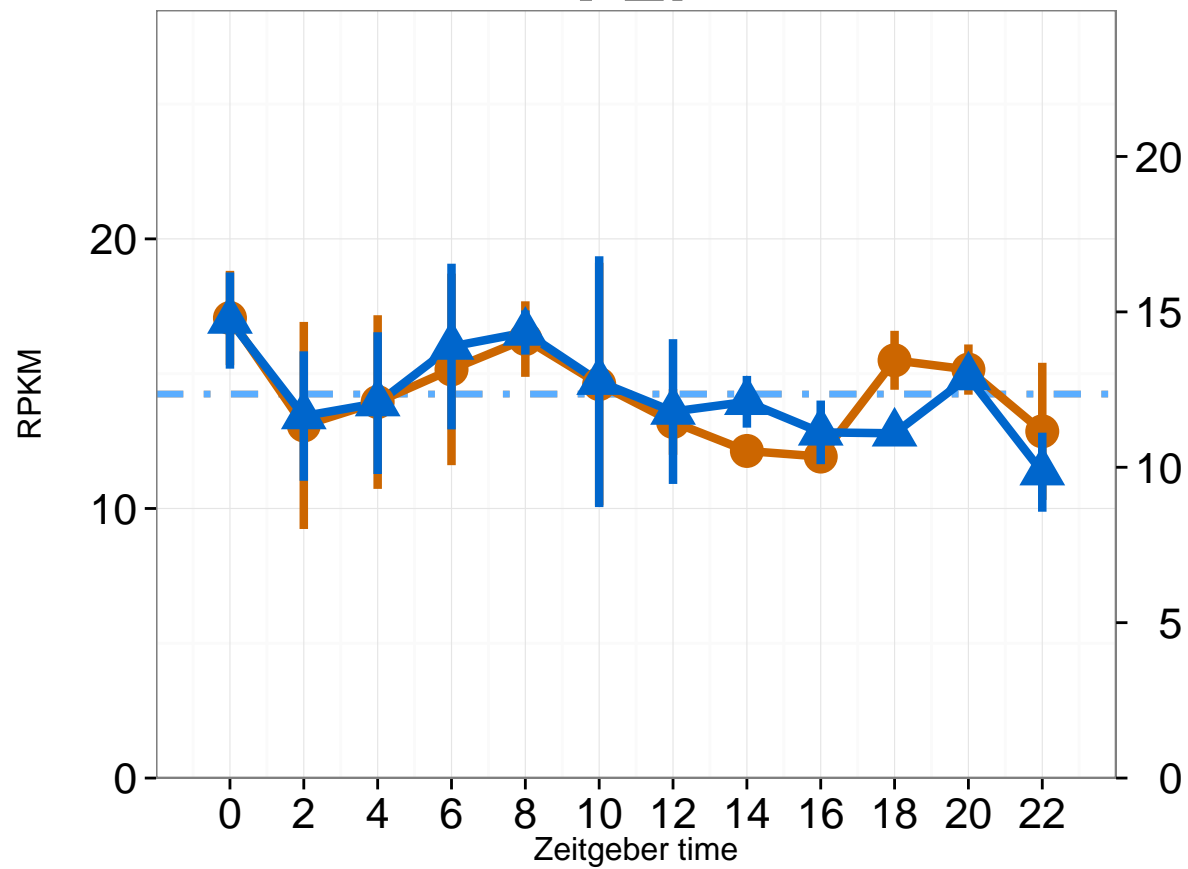

# F2r

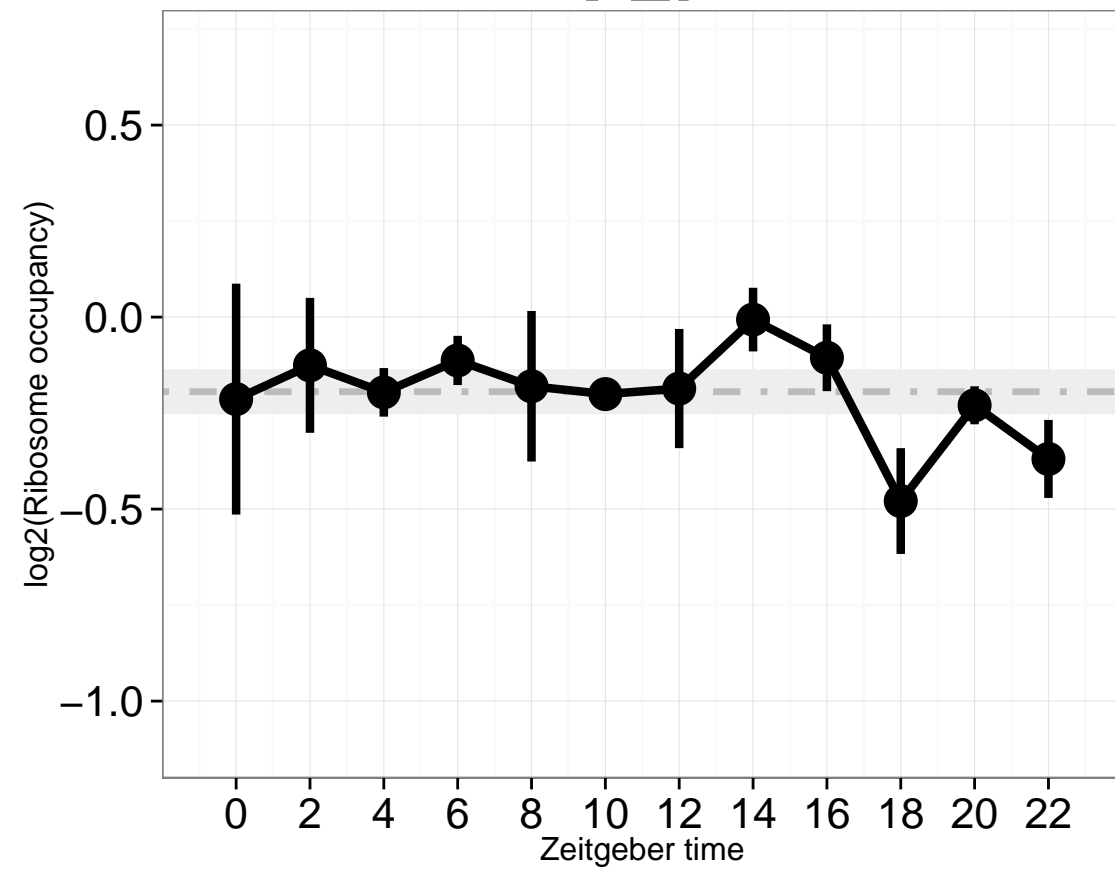

Supplement: SuppDataset_1.zip [file F2r_set_A.pdf › Supplemental Dataset 1/A-mRNA_nonrhyth_translation_nonrhyth/F2r_set_A.pdf]

# F5

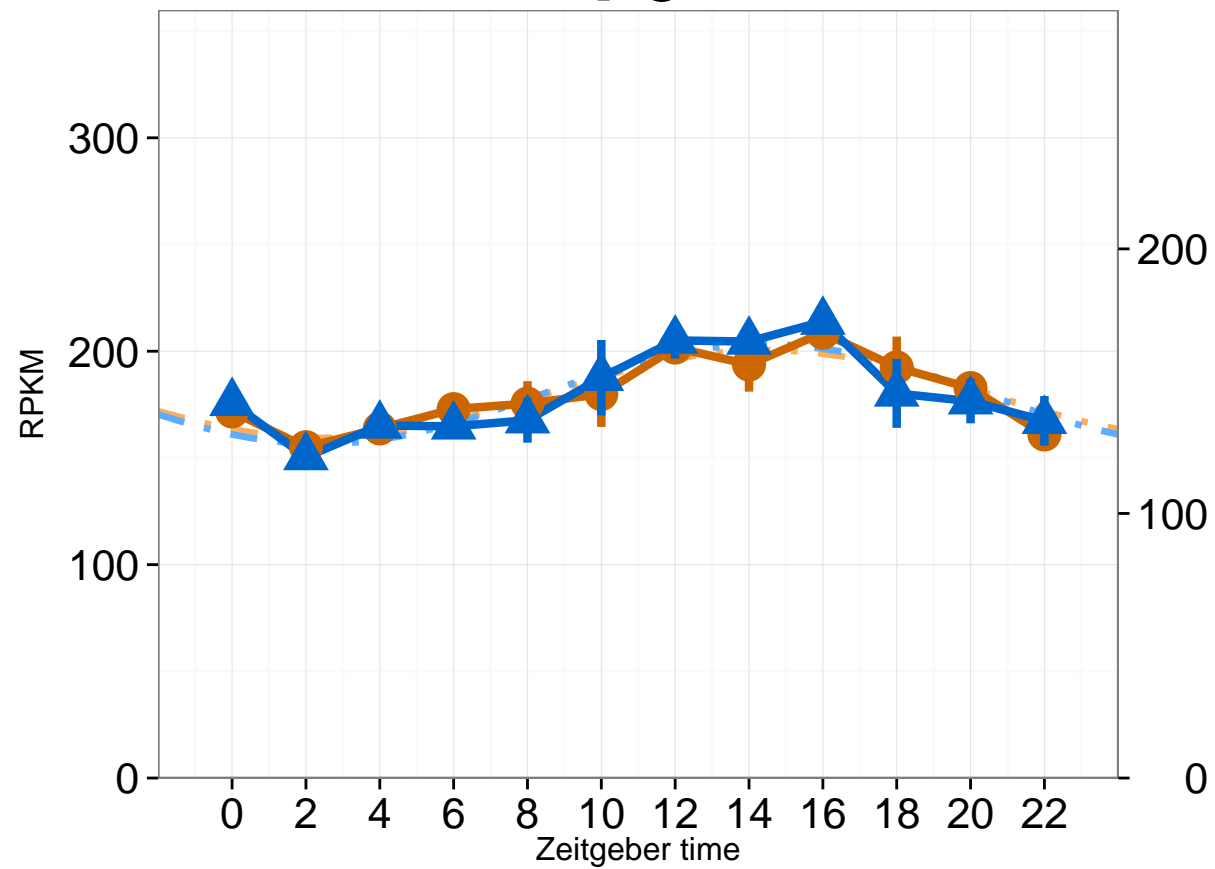

# F5

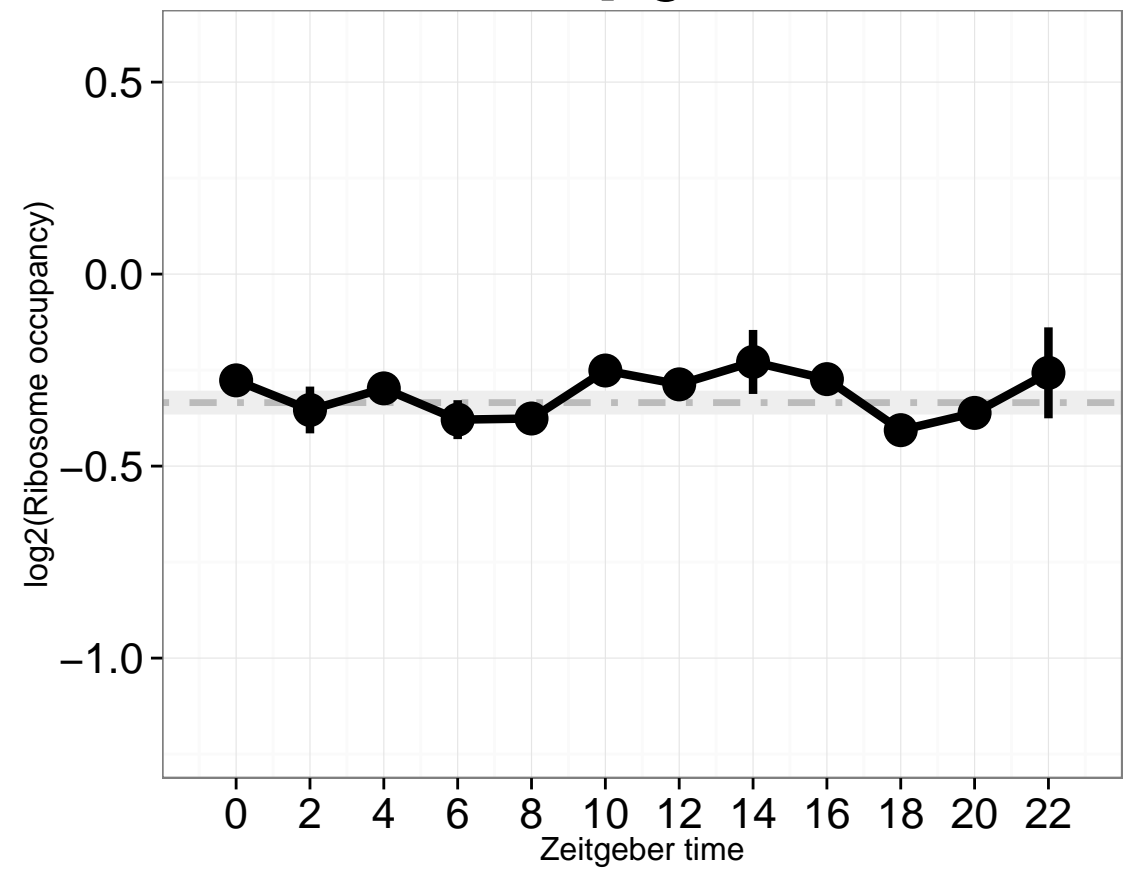

Supplement: SuppDataset_1.zip [file F5_set_A.pdf › Supplemental Dataset 1/A-mRNA_nonrhyth_translation_nonrhyth/F5_set_A.pdf]

# F7

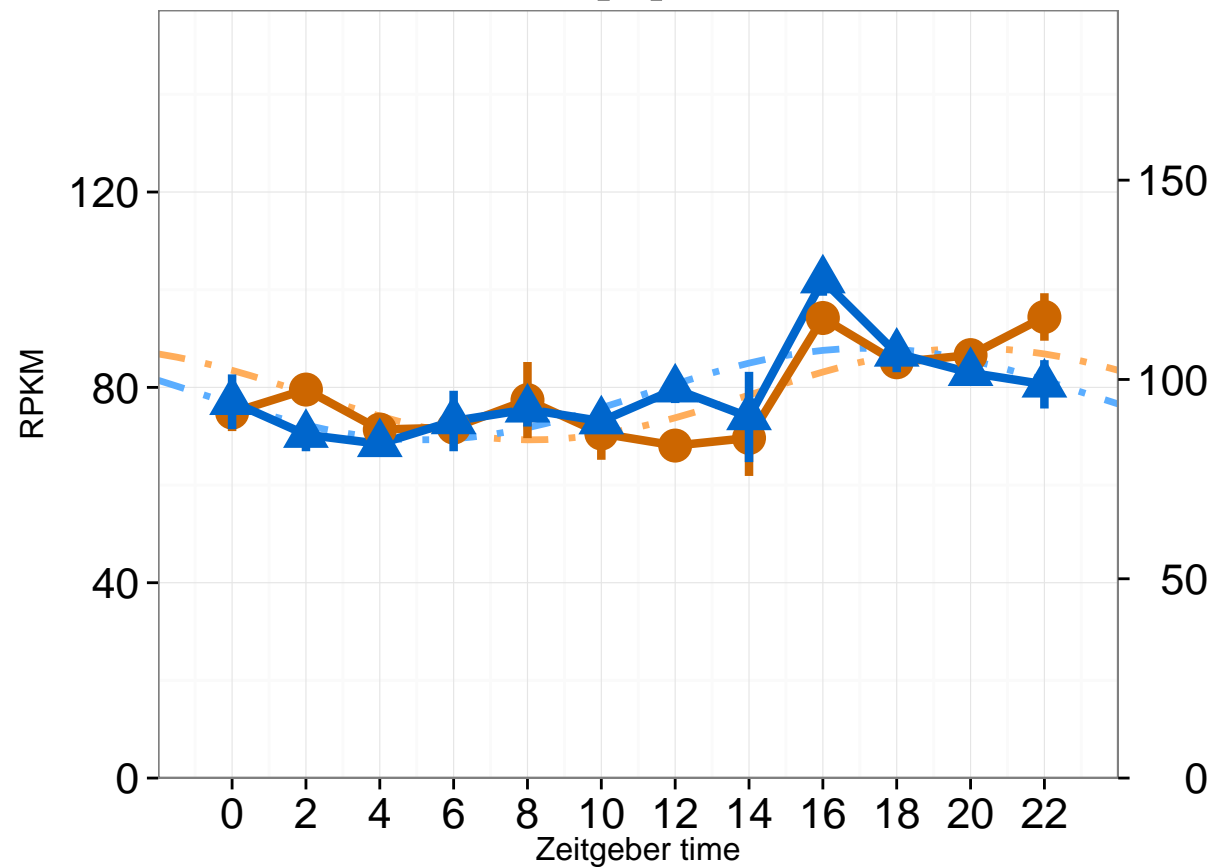

# F7

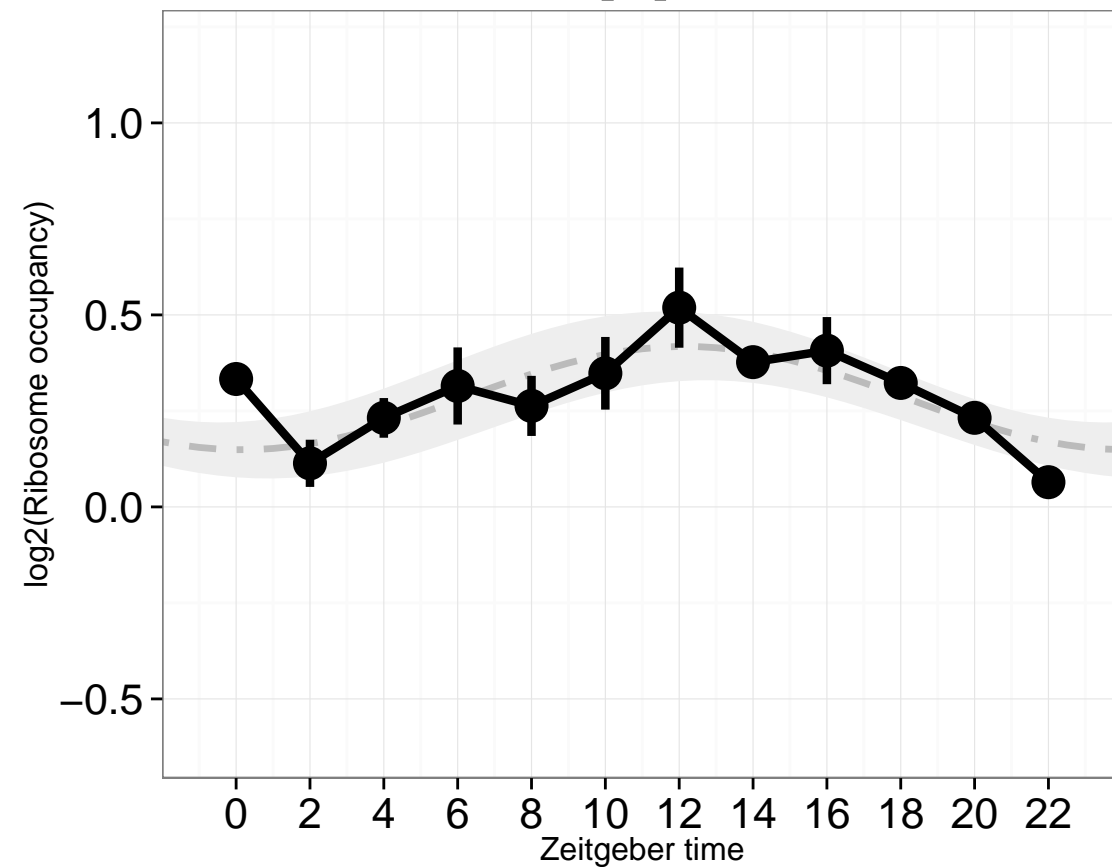

Supplement: SuppDataset_1.zip [file F7_set_A.pdf › Supplemental Dataset 1/A-mRNA_nonrhyth_translation_nonrhyth/F7_set_A.pdf]

# F830016B08Rik

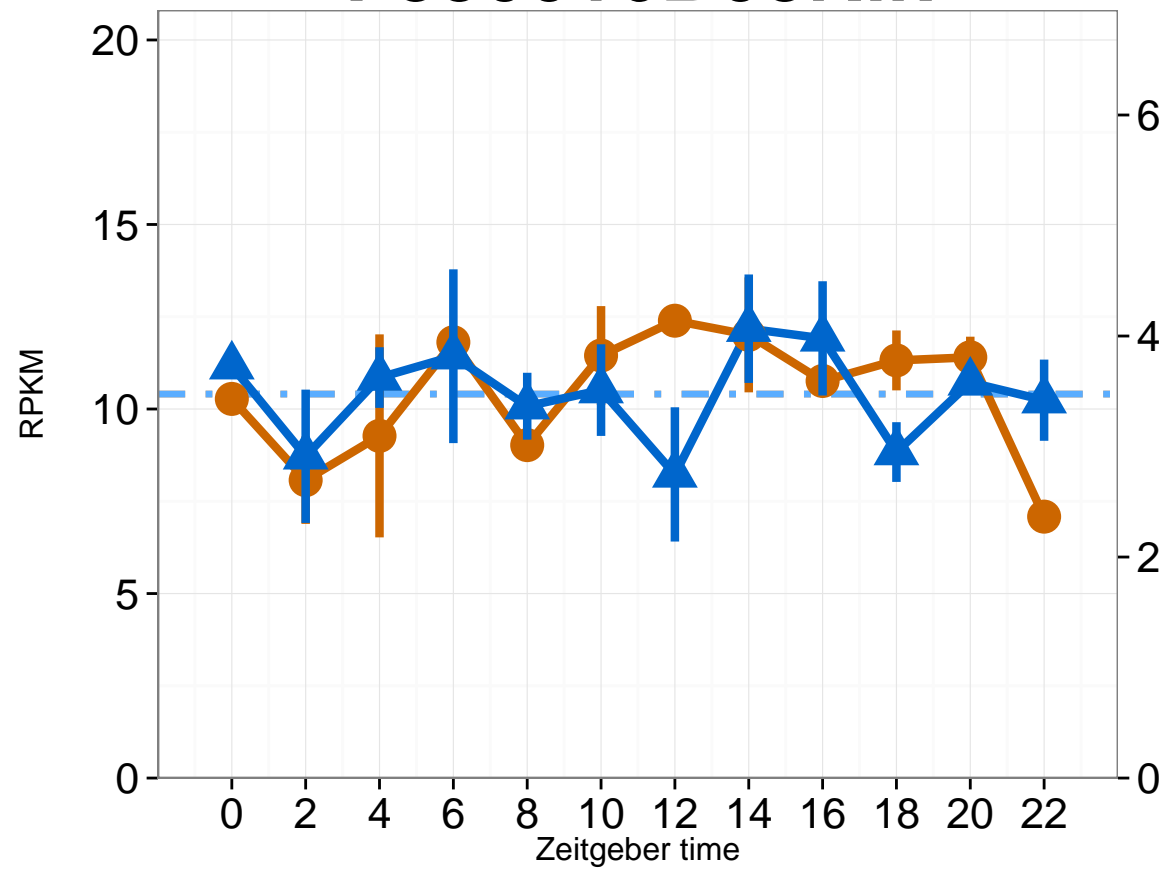

# F830016B08Rik

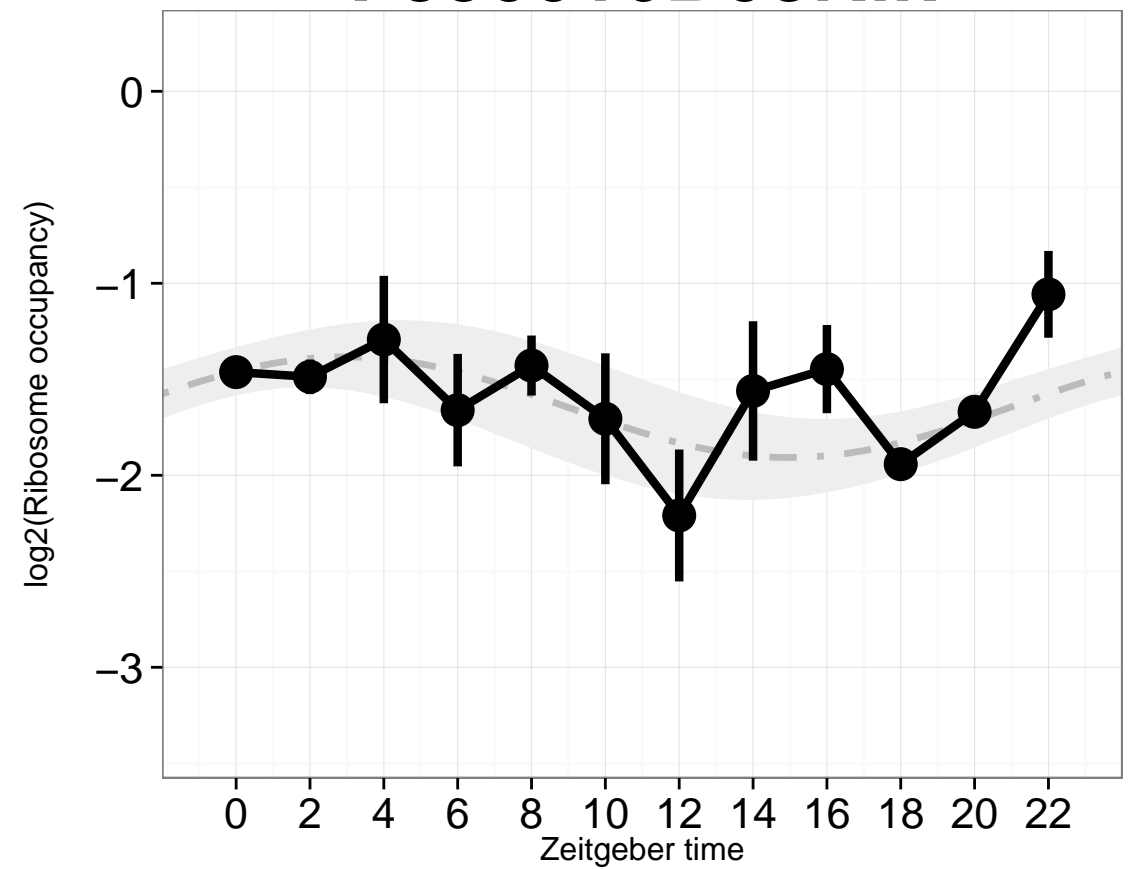

Supplement: SuppDataset_1.zip [file F830016B08Rik_set_A.pdf › Supplemental Dataset 1/A-mRNA_nonrhyth_translation_nonrhyth/F830016B08Rik_set_A.pdf]

# F8

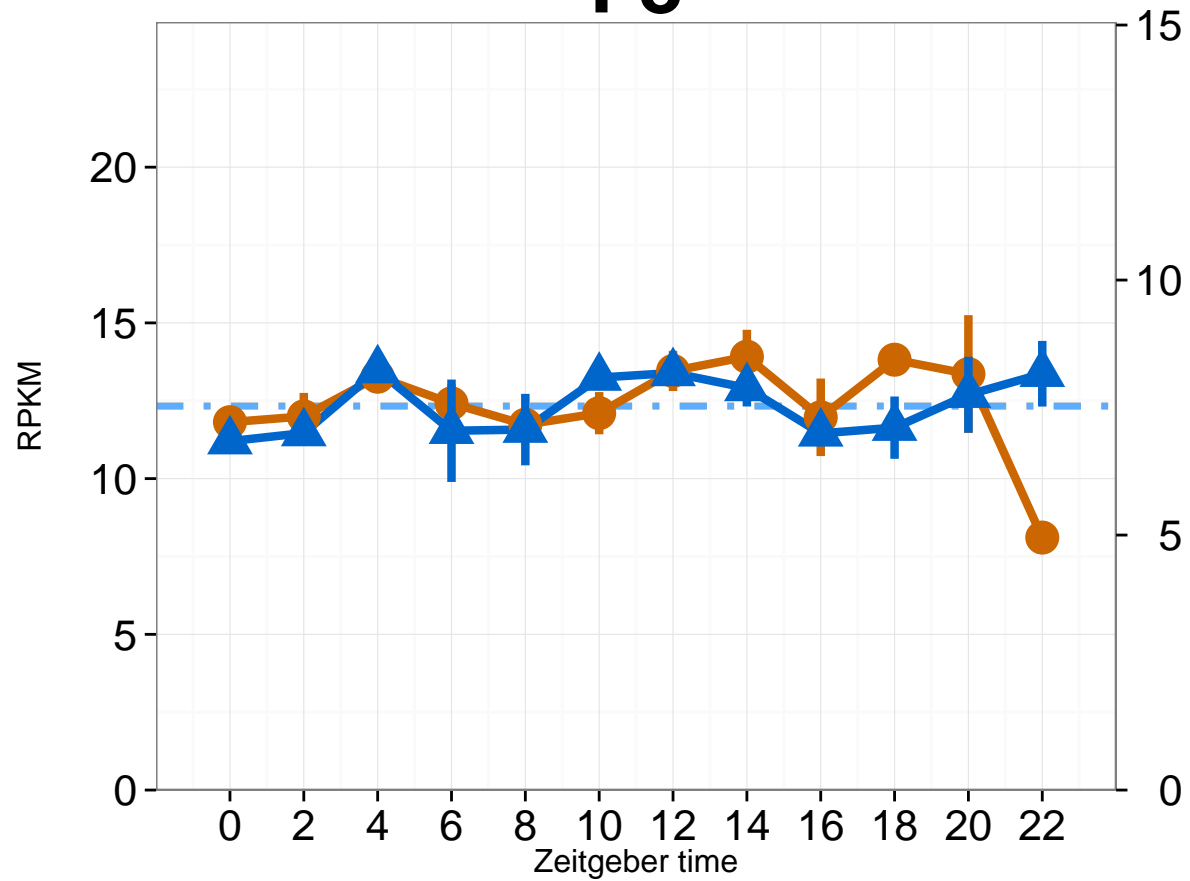

# F8

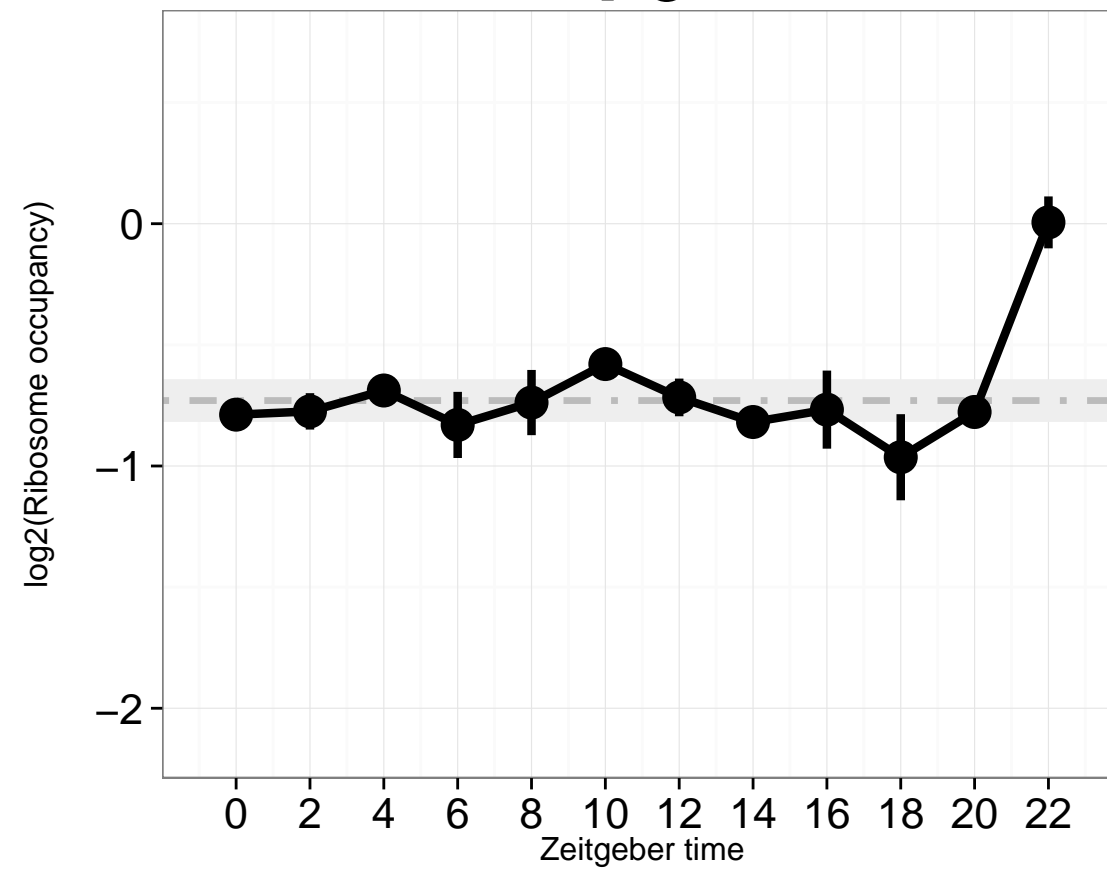

Supplement: SuppDataset_1.zip [file F8_set_A.pdf › Supplemental Dataset 1/A-mRNA_nonrhyth_translation_nonrhyth/F8_set_A.pdf]

# F8a

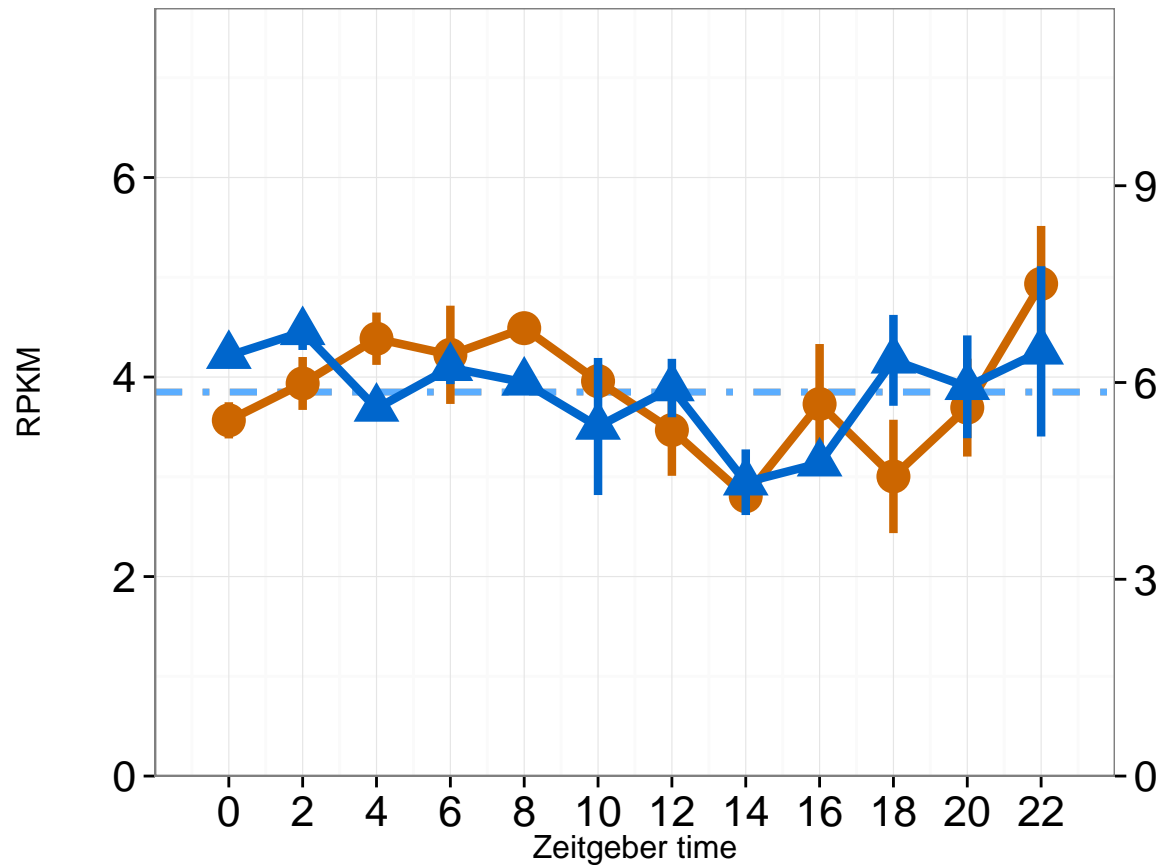

# F8a

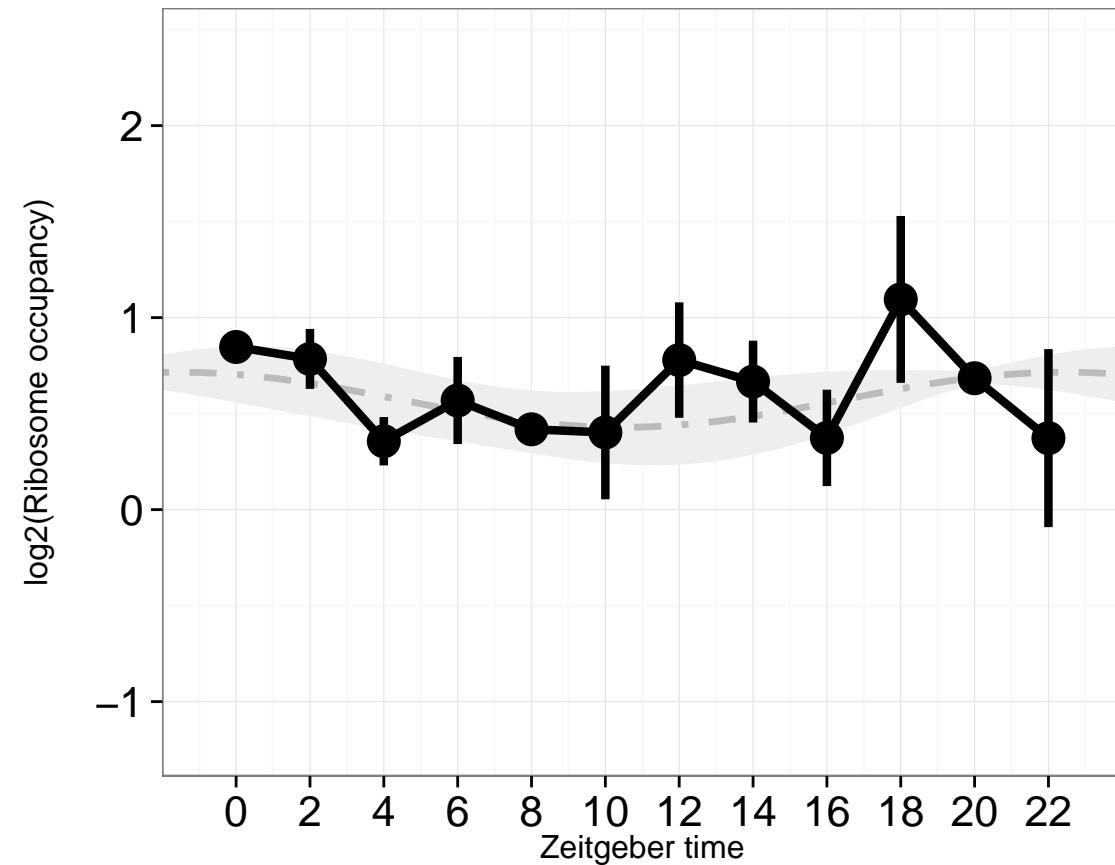

Supplement: SuppDataset_1.zip [file F8a_set_A.pdf › Supplemental Dataset 1/A-mRNA_nonrhyth_translation_nonrhyth/F8a_set_A.pdf]

# F9

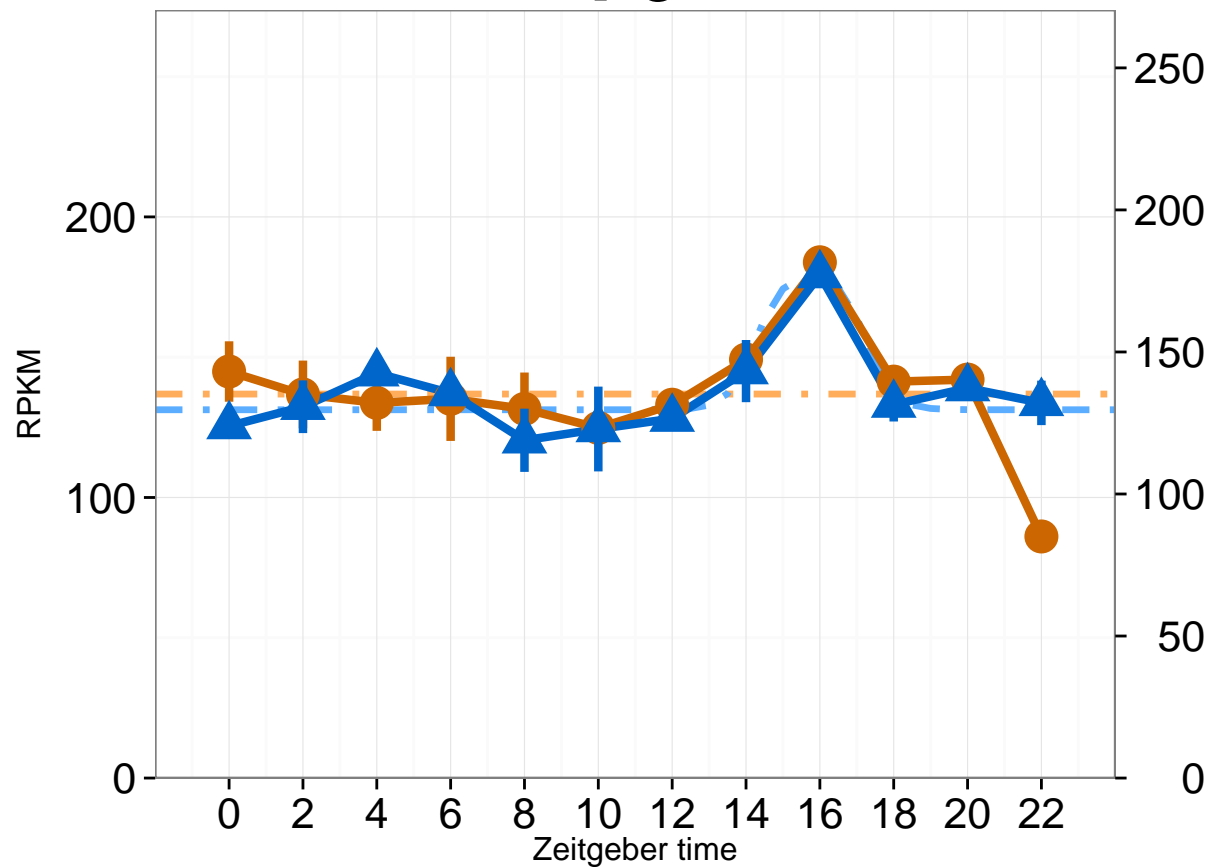

# F9

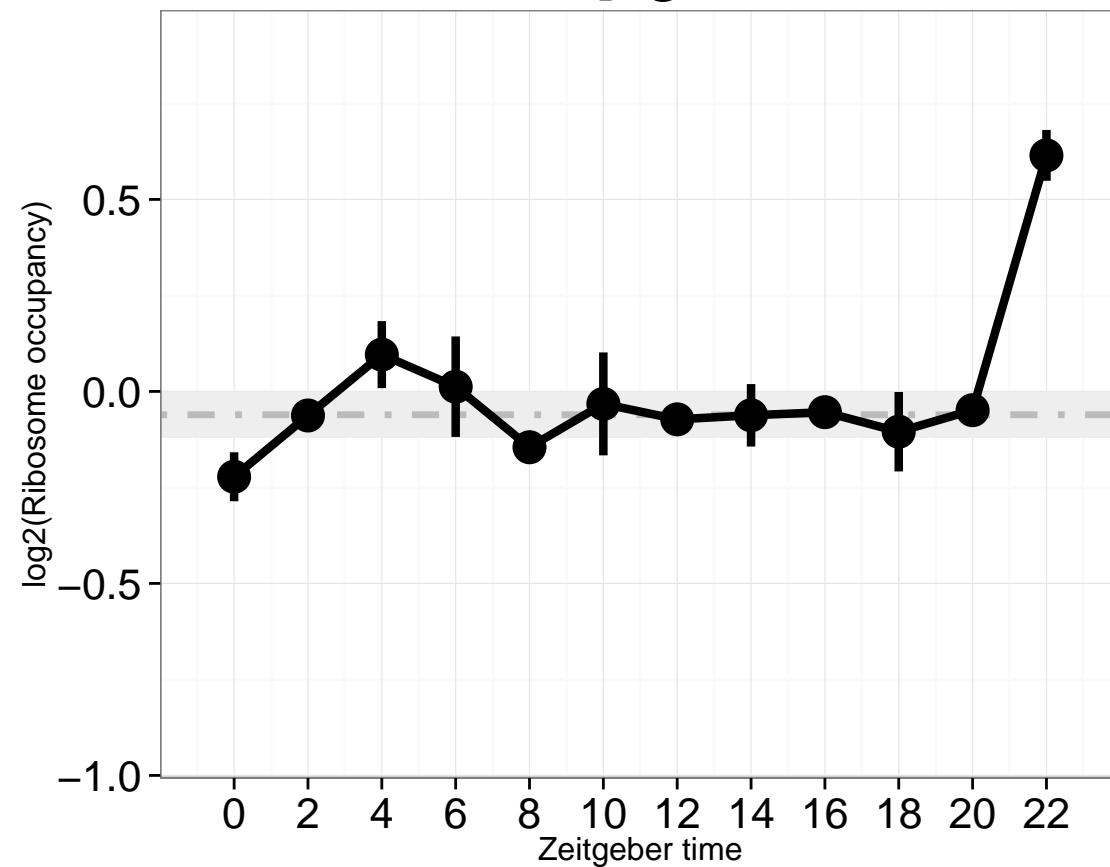

Supplement: SuppDataset_1.zip [file F9_set_A.pdf › Supplemental Dataset 1/A-mRNA_nonrhyth_translation_nonrhyth/F9_set_A.pdf]

## Faah

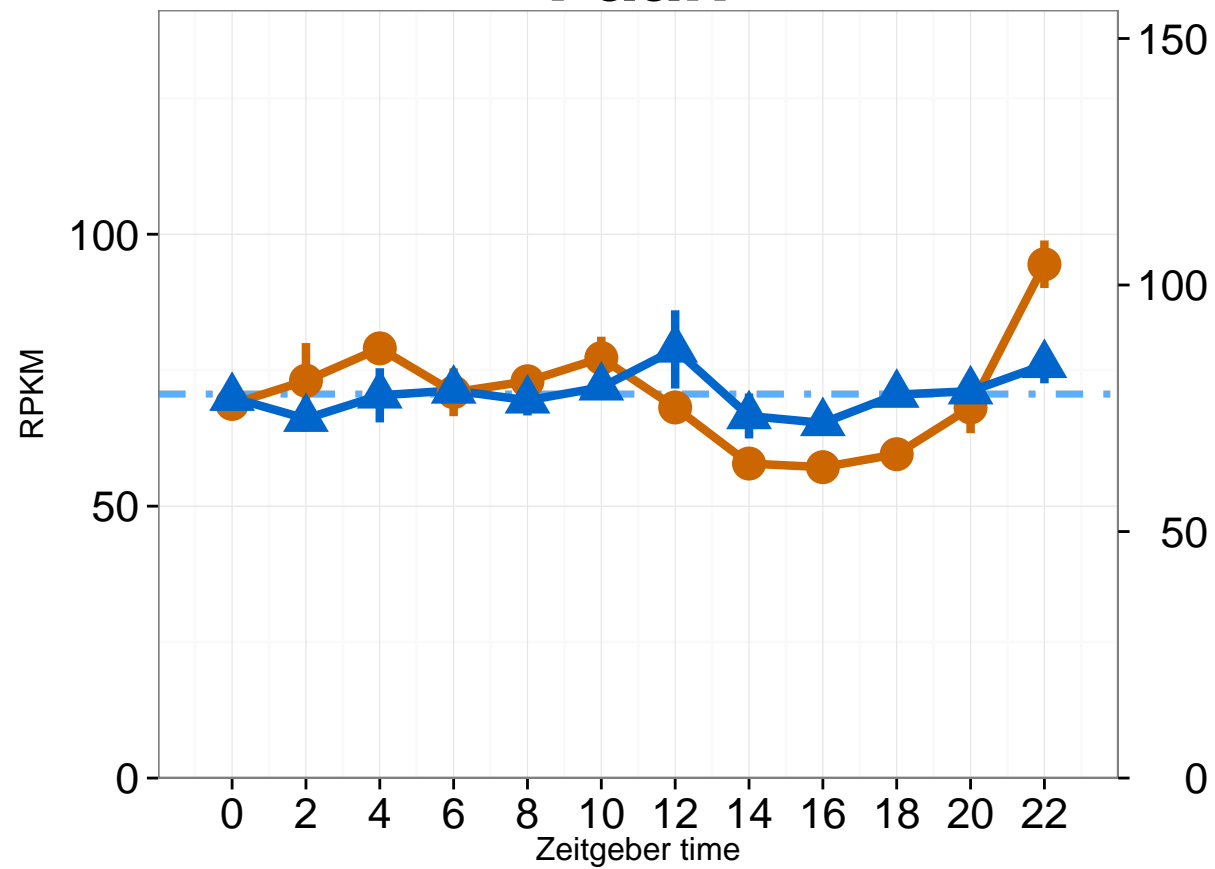

## Faah

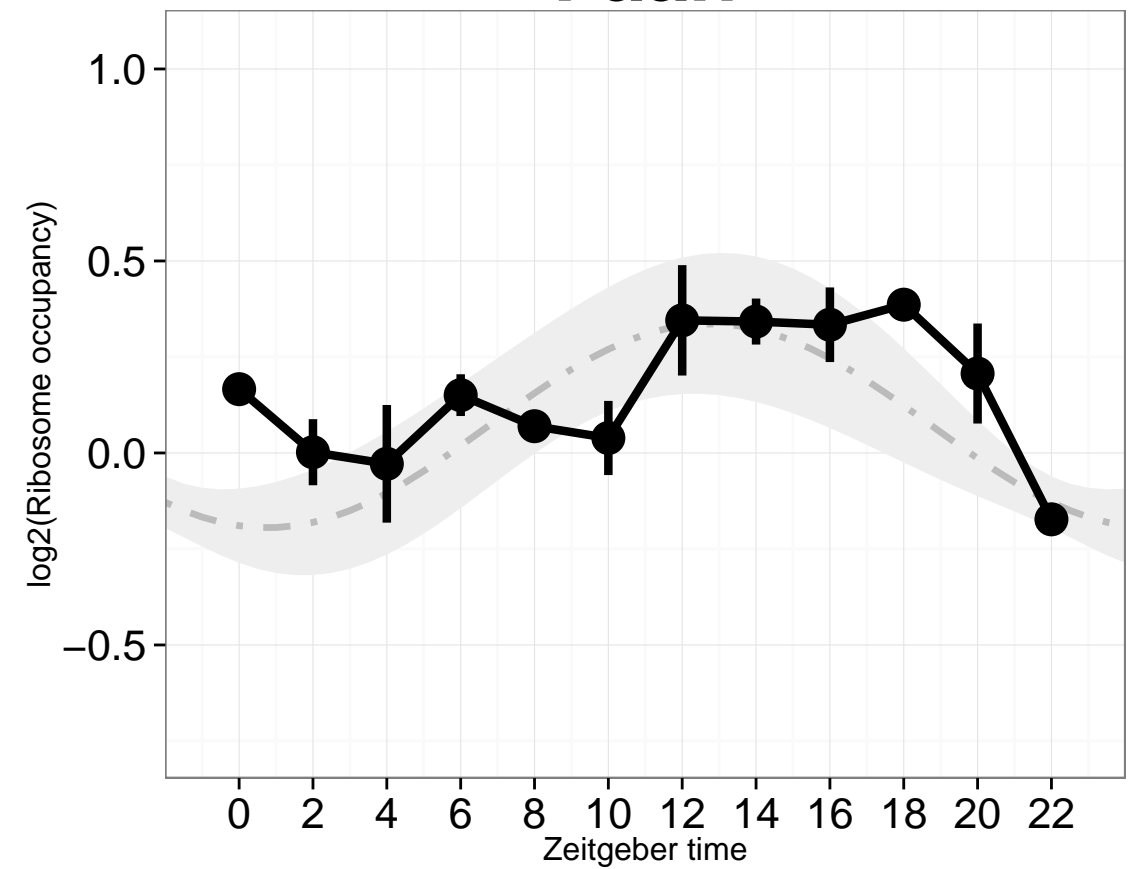

Supplement: SuppDataset_1.zip [file Faah_set_A.pdf › Supplemental Dataset 1/A-mRNA_nonrhyth_translation_nonrhyth/Faah_set_A.pdf]

# Fabp1

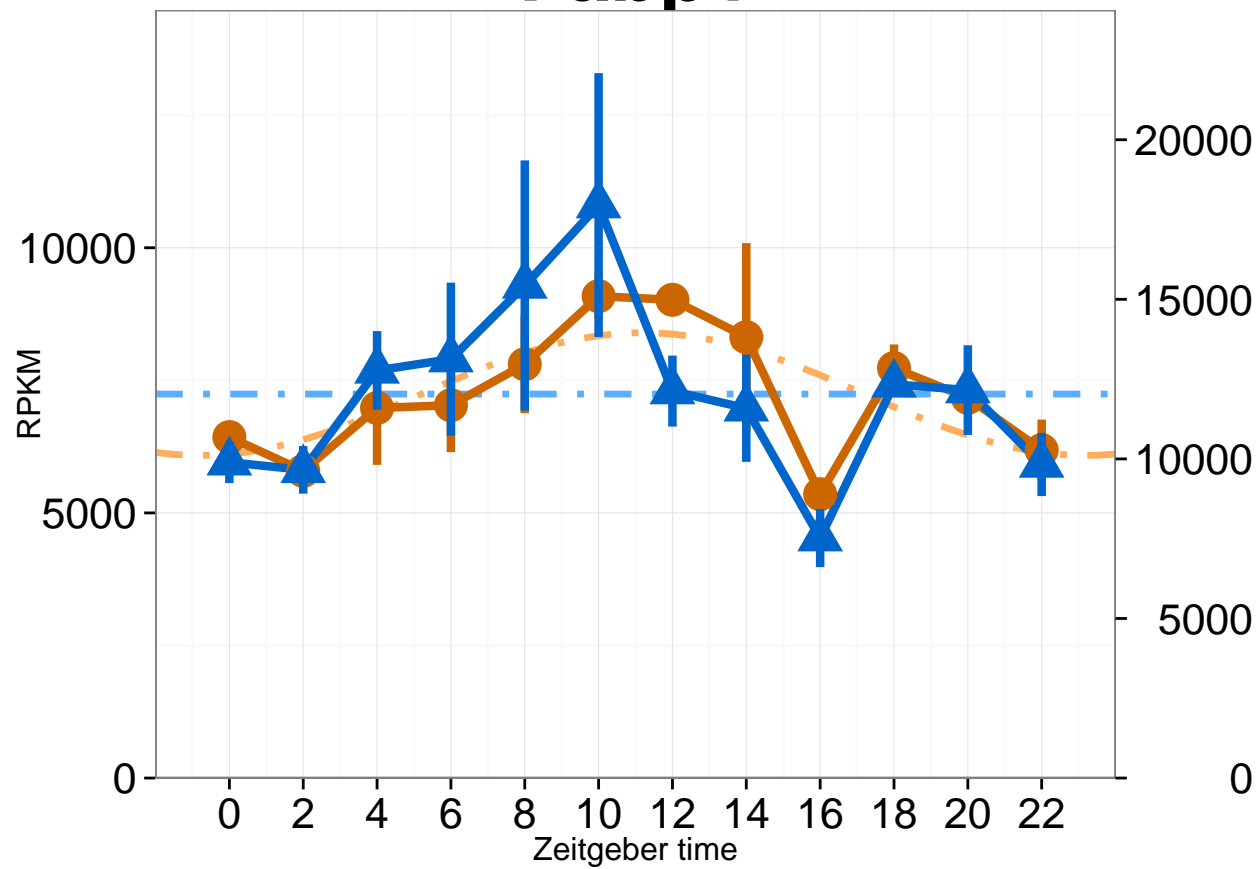

# Fabp1

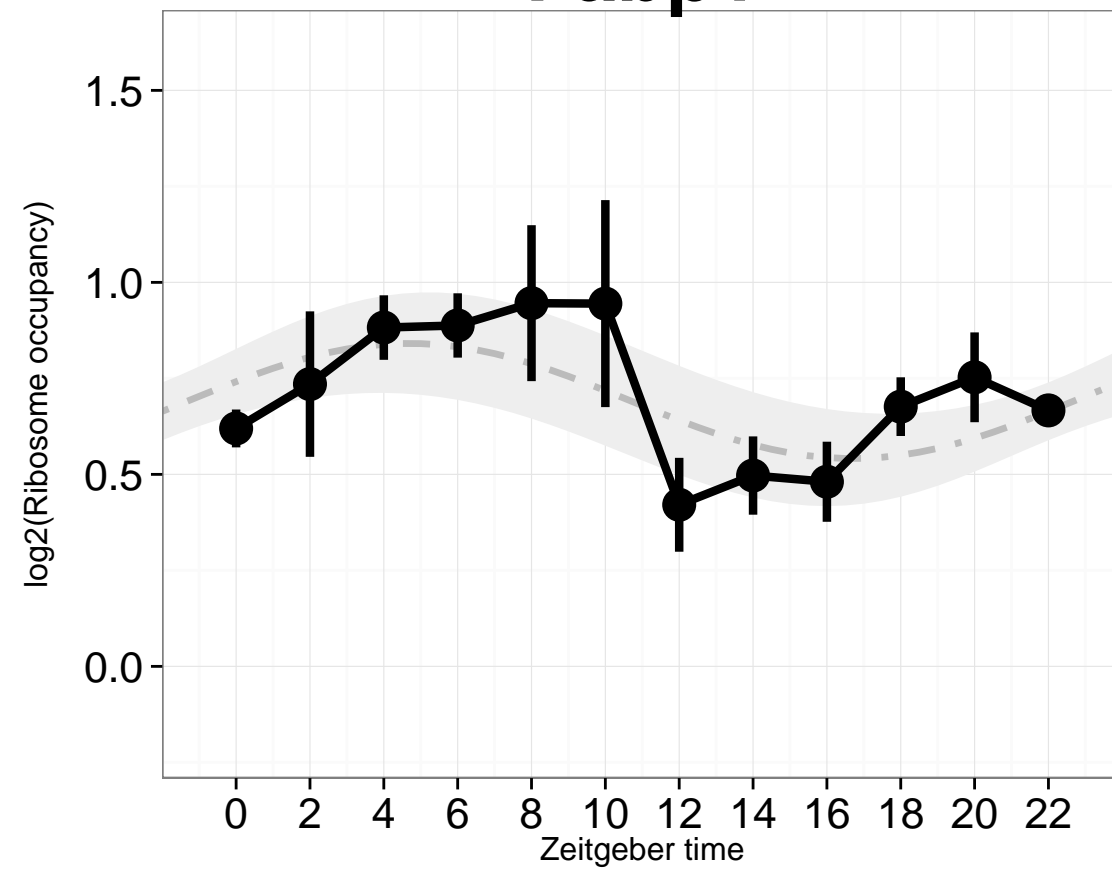

Supplement: SuppDataset_1.zip [file Fabp1_set_A.pdf › Supplemental Dataset 1/A-mRNA_nonrhyth_translation_nonrhyth/Fabp1_set_A.pdf]

# Fabp2

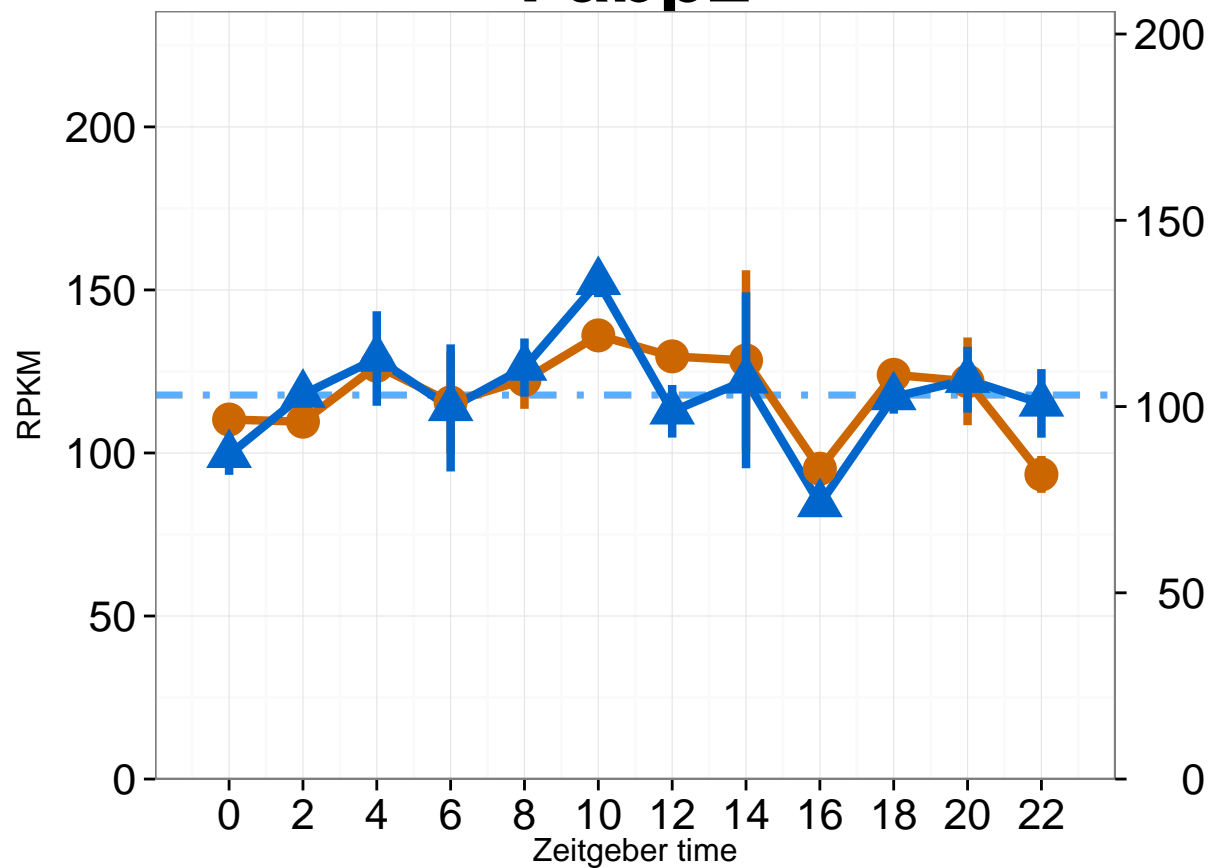

# Fabp2

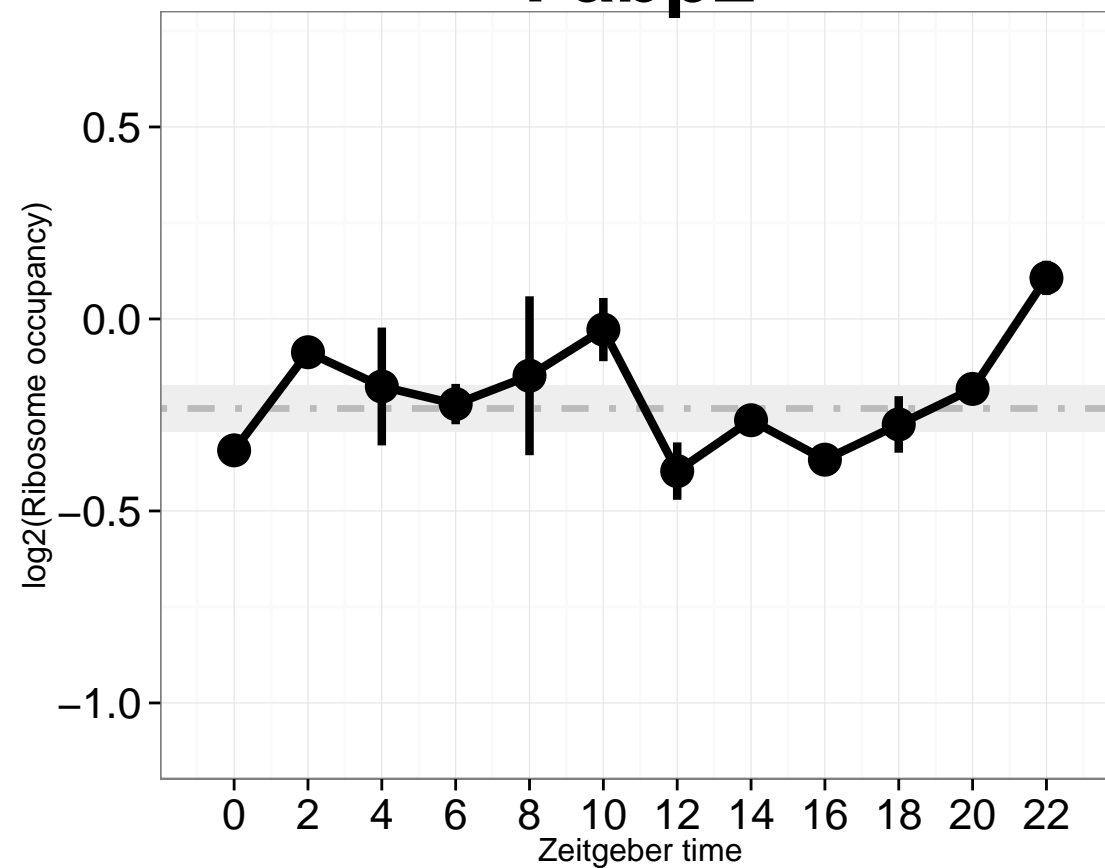

Supplement: SuppDataset_1.zip [file Fabp2_set_A.pdf › Supplemental Dataset 1/A-mRNA_nonrhyth_translation_nonrhyth/Fabp2_set_A.pdf]

## Fabp4

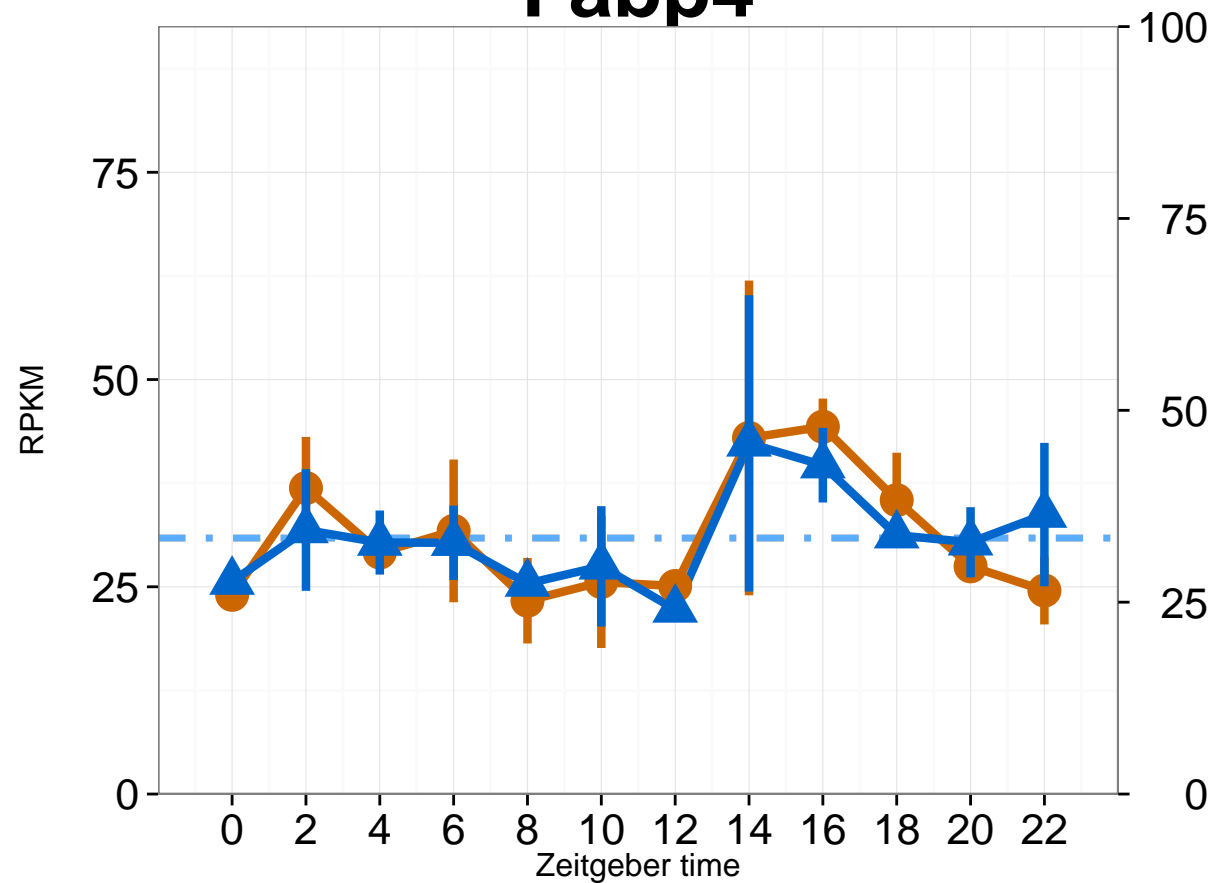

## Fabp4

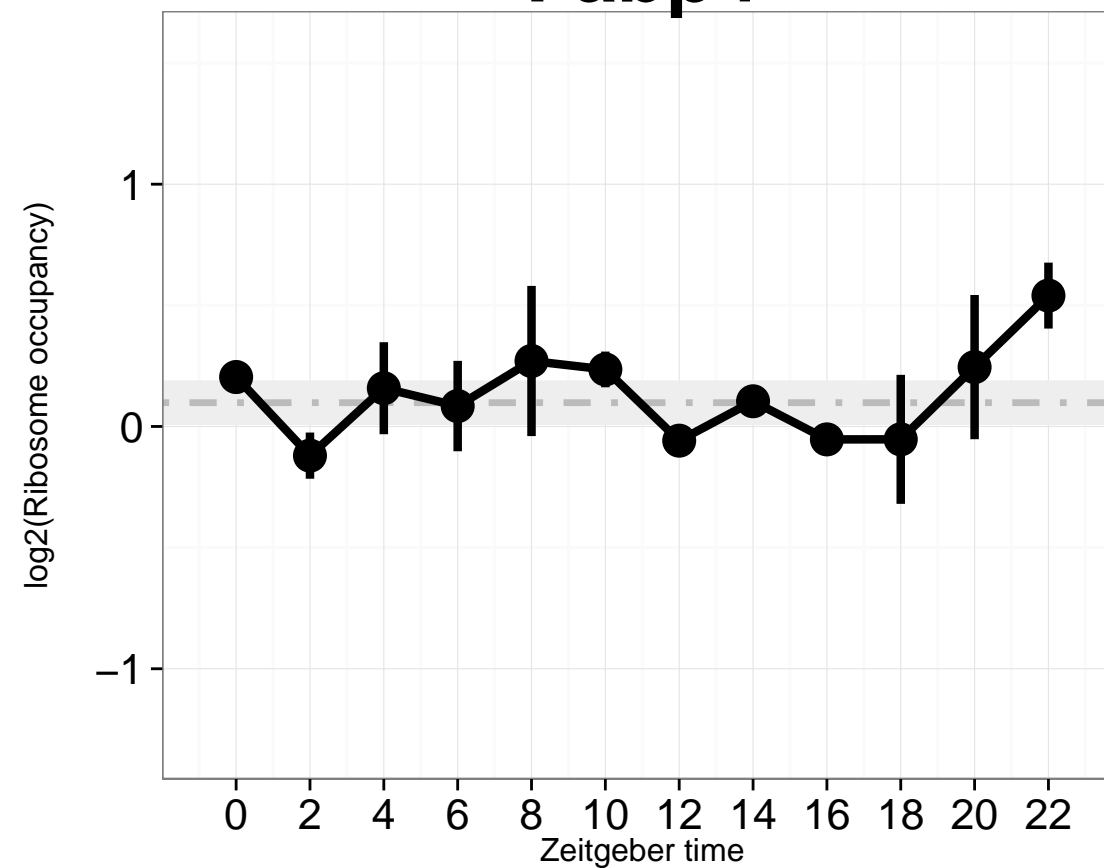

Supplement: SuppDataset_1.zip [file Fabp4_set_A.pdf › Supplemental Dataset 1/A-mRNA_nonrhyth_translation_nonrhyth/Fabp4_set_A.pdf]

## Fadd

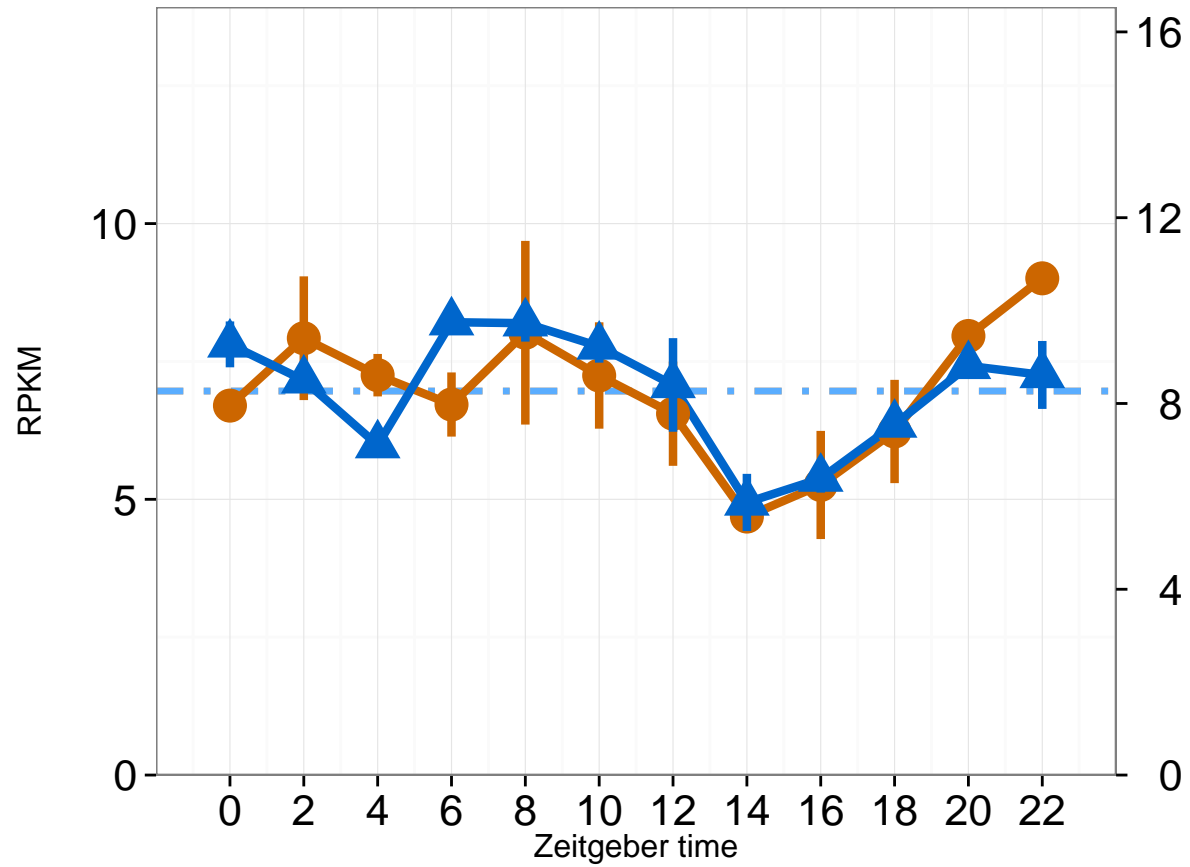

## Fadd

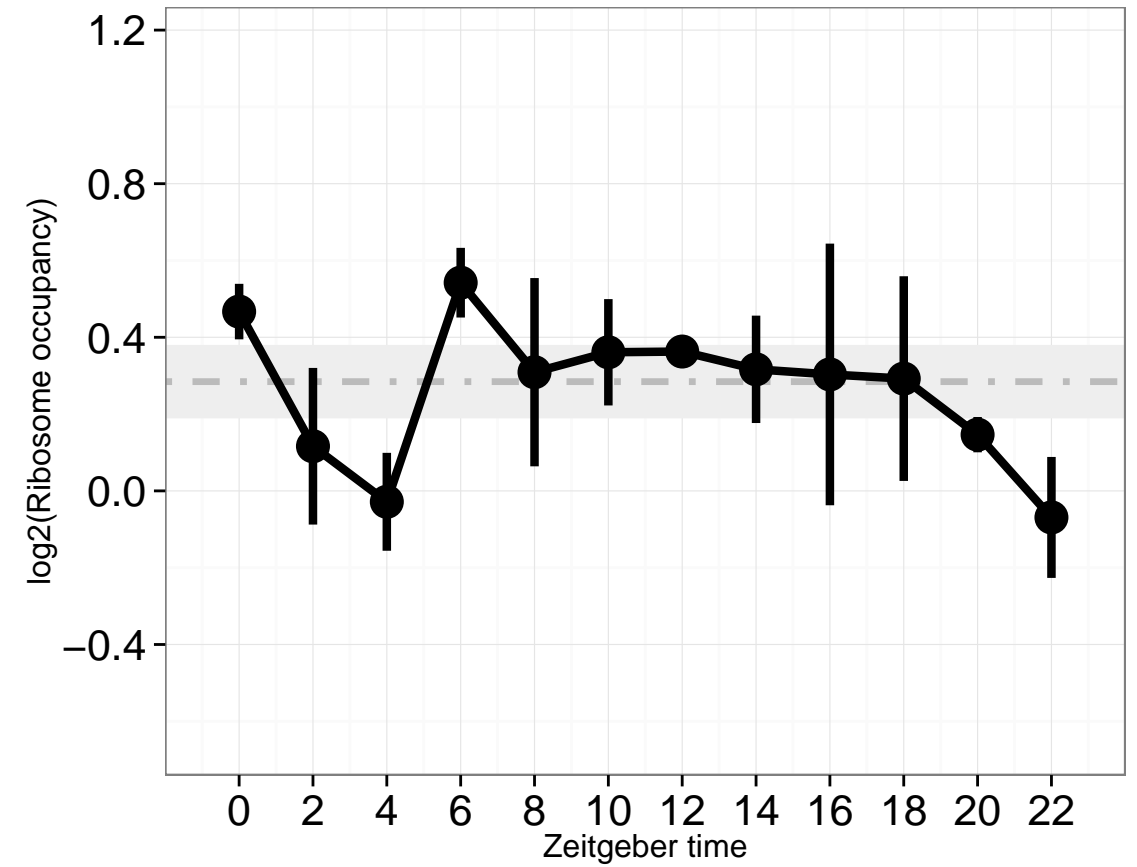

Supplement: SuppDataset_1.zip [file Fadd_set_A.pdf › Supplemental Dataset 1/A-mRNA_nonrhyth_translation_nonrhyth/Fadd_set_A.pdf]

## Fads6

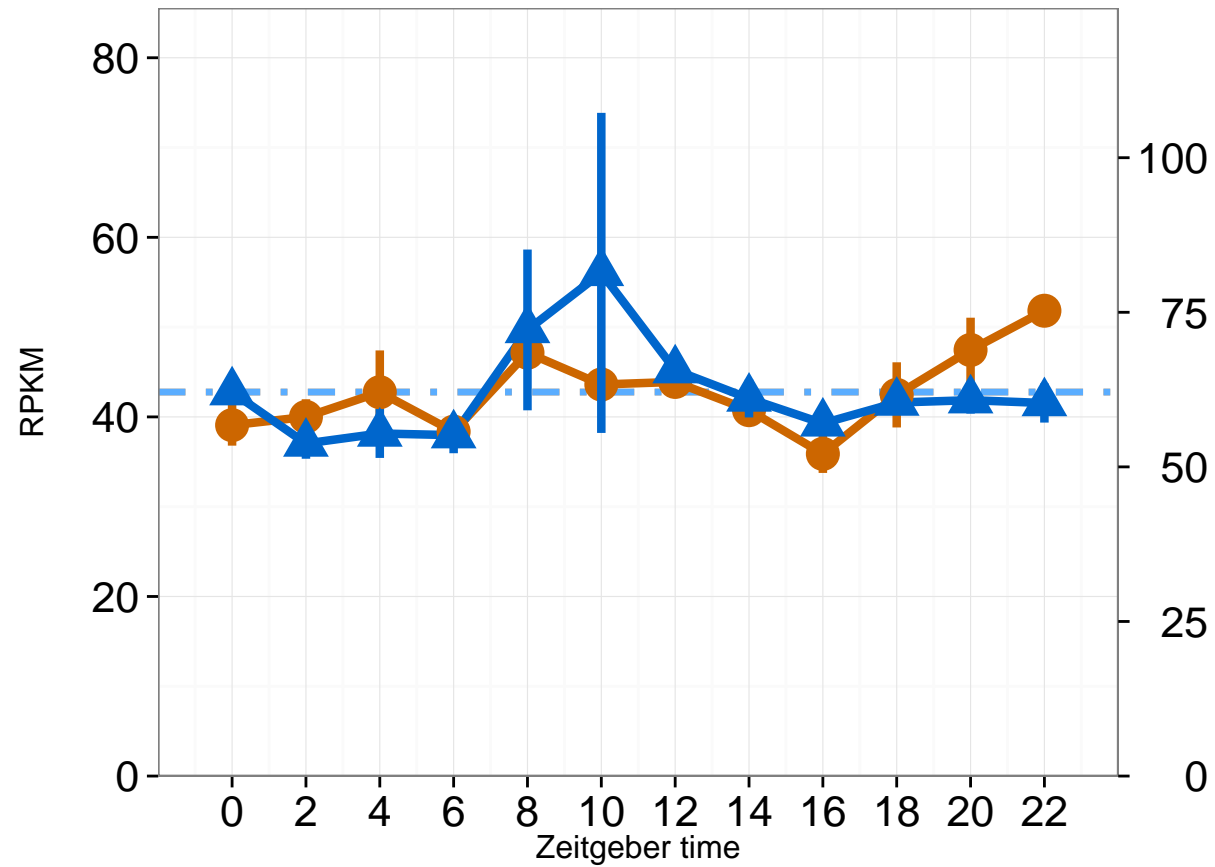

## Fads6

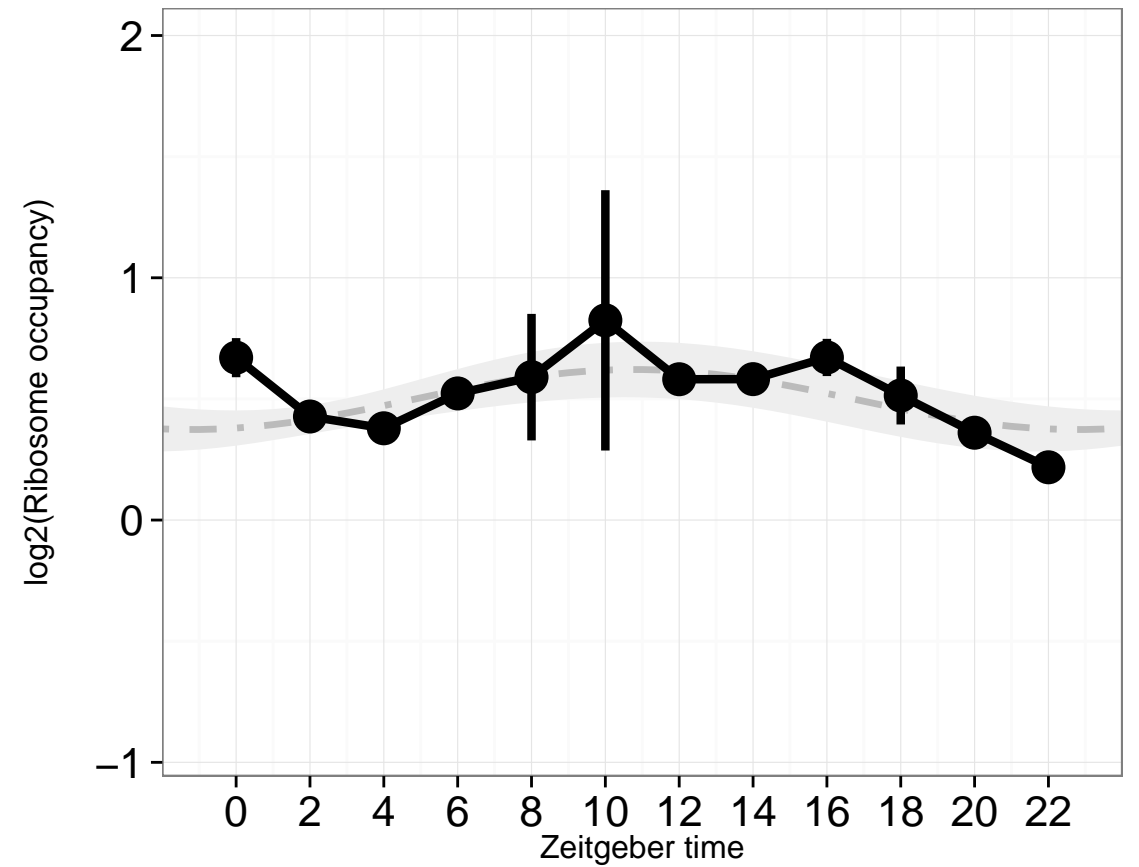

Supplement: SuppDataset_1.zip [file Fads6_set_A.pdf › Supplemental Dataset 1/A-mRNA_nonrhyth_translation_nonrhyth/Fads6_set_A.pdf]

## Faf1

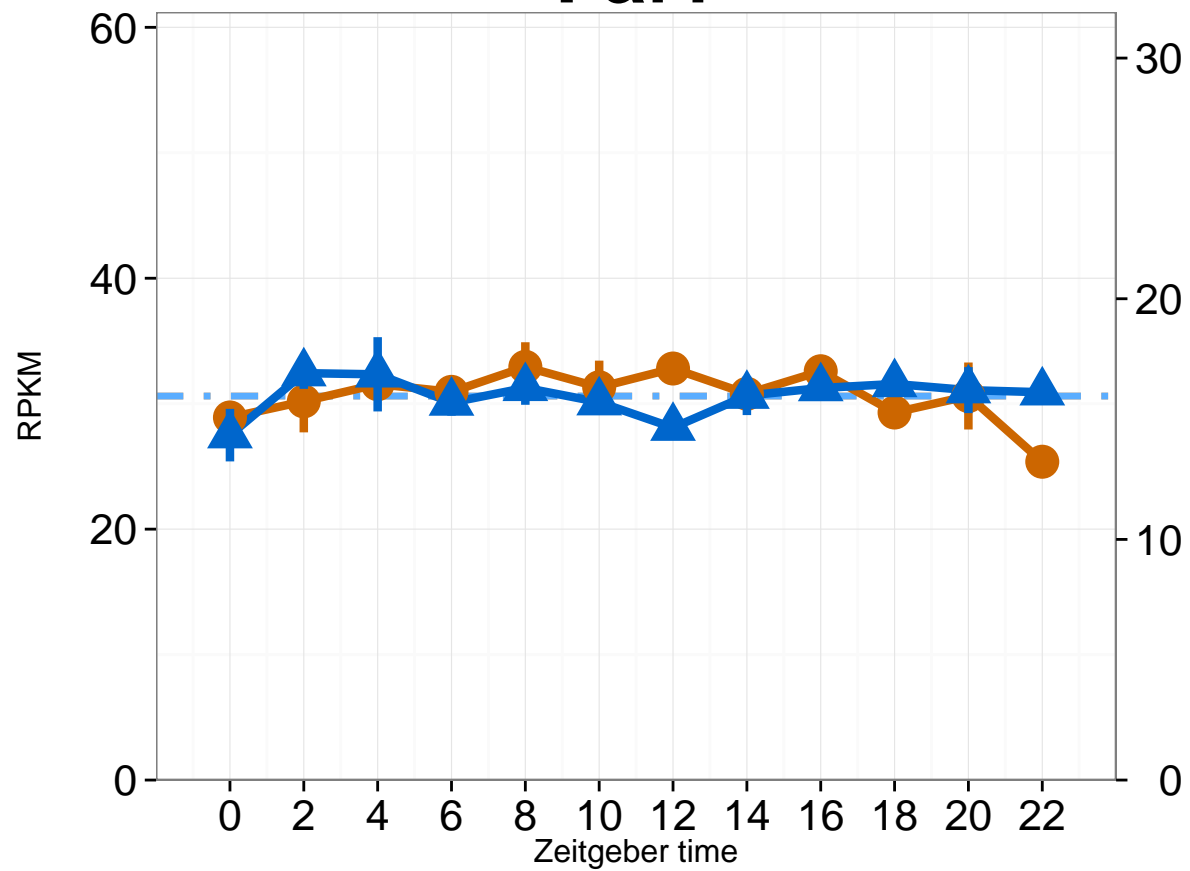

## Faf1

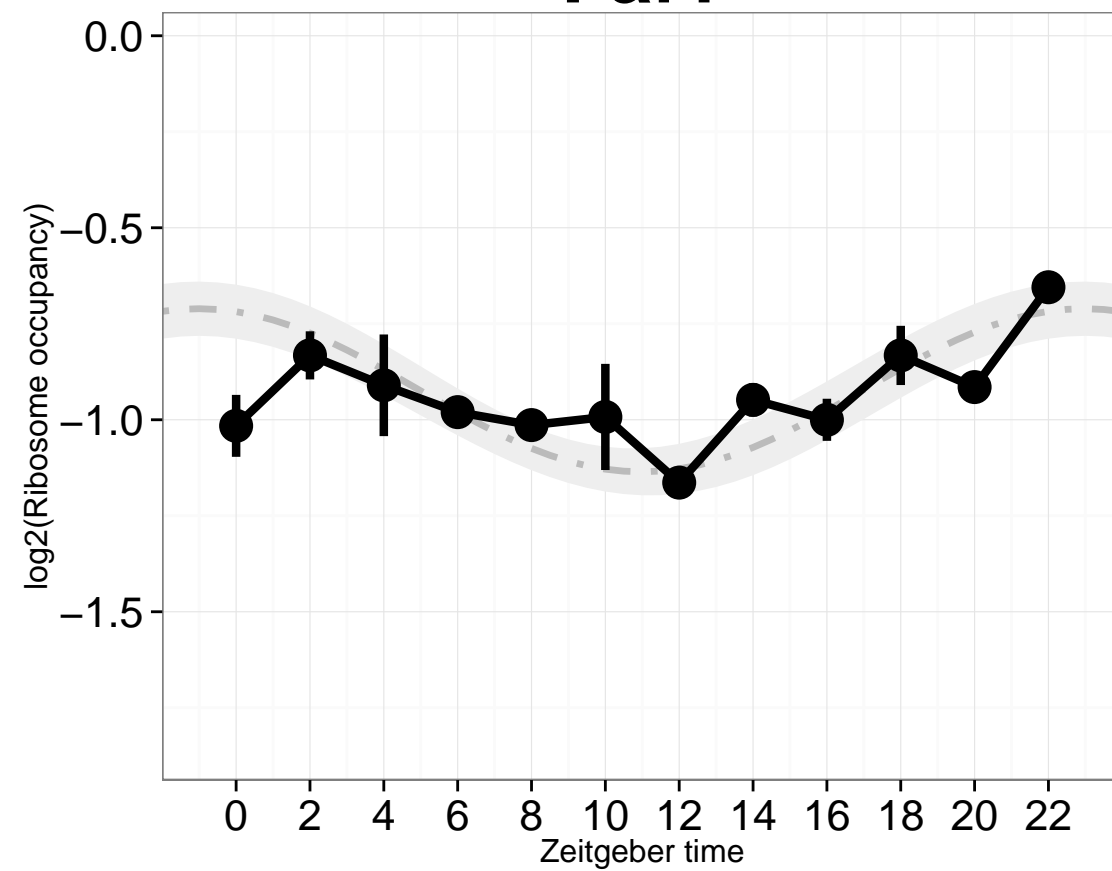

Supplement: SuppDataset_1.zip [file Faf1_set_A.pdf › Supplemental Dataset 1/A-mRNA_nonrhyth_translation_nonrhyth/Faf1_set_A.pdf]

## Faf2

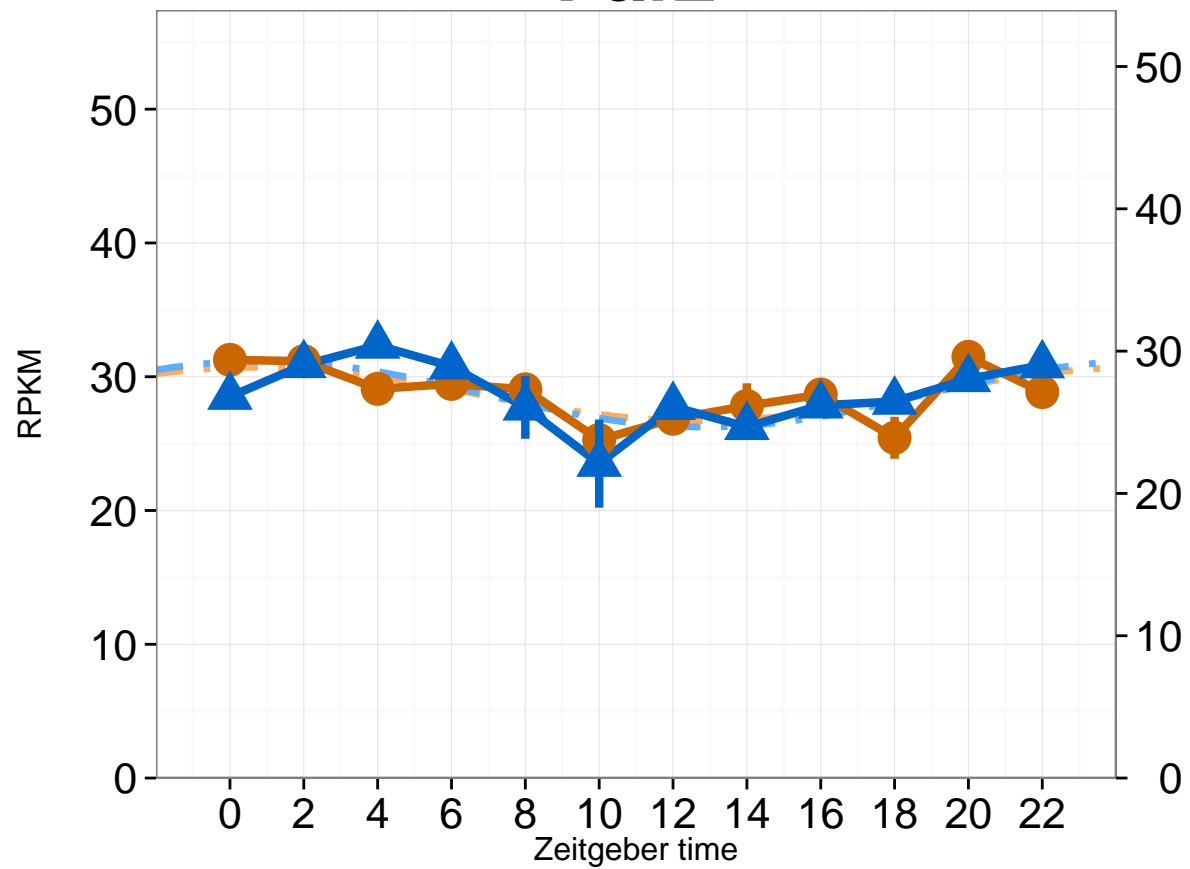

## Faf2

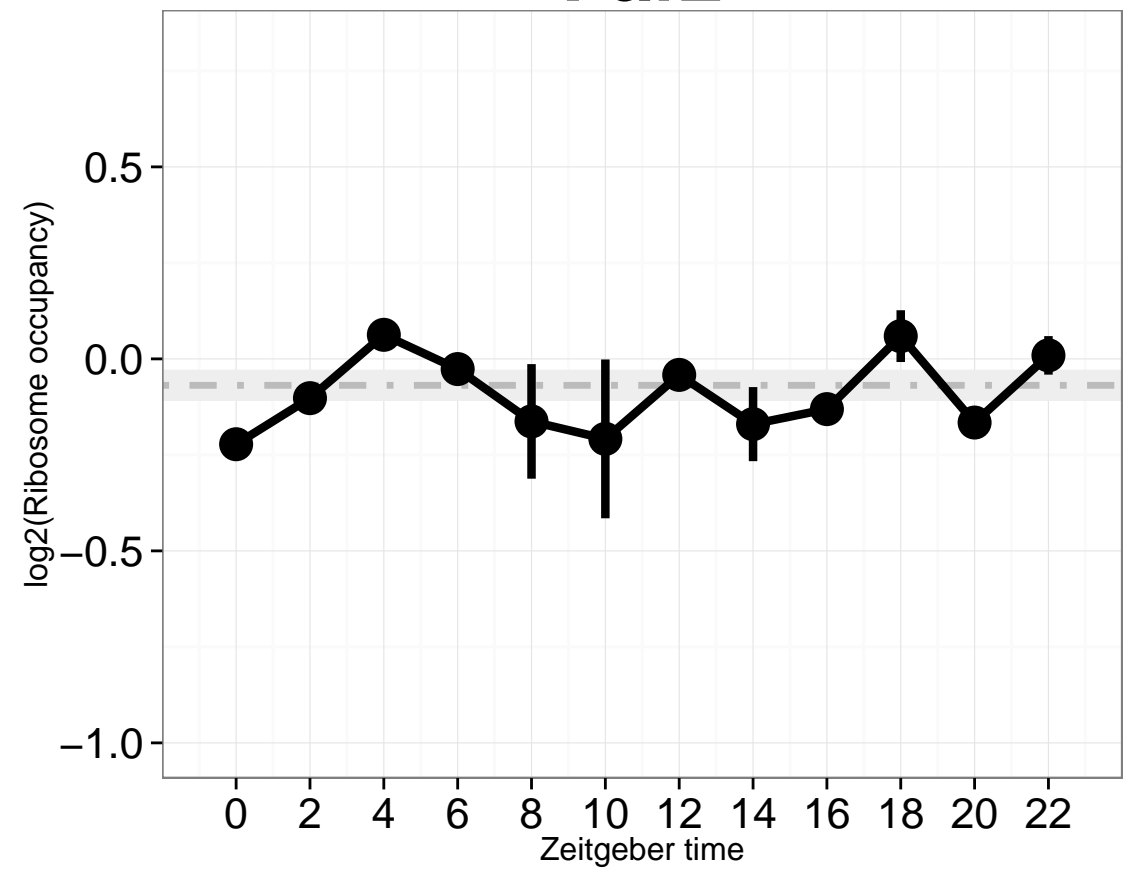

Supplement: SuppDataset_1.zip [file Faf2_set_A.pdf › Supplemental Dataset 1/A-mRNA_nonrhyth_translation_nonrhyth/Faf2_set_A.pdf]

## Fah

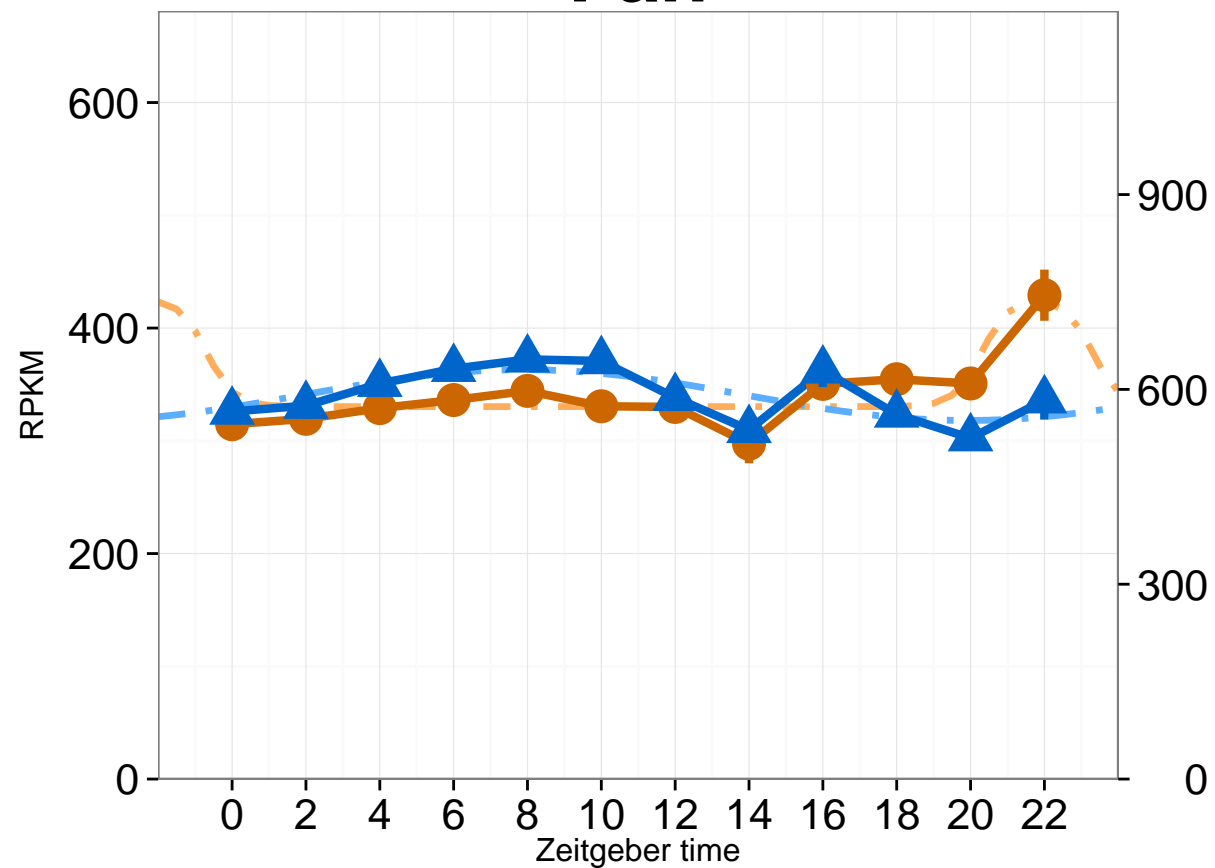

## Fah

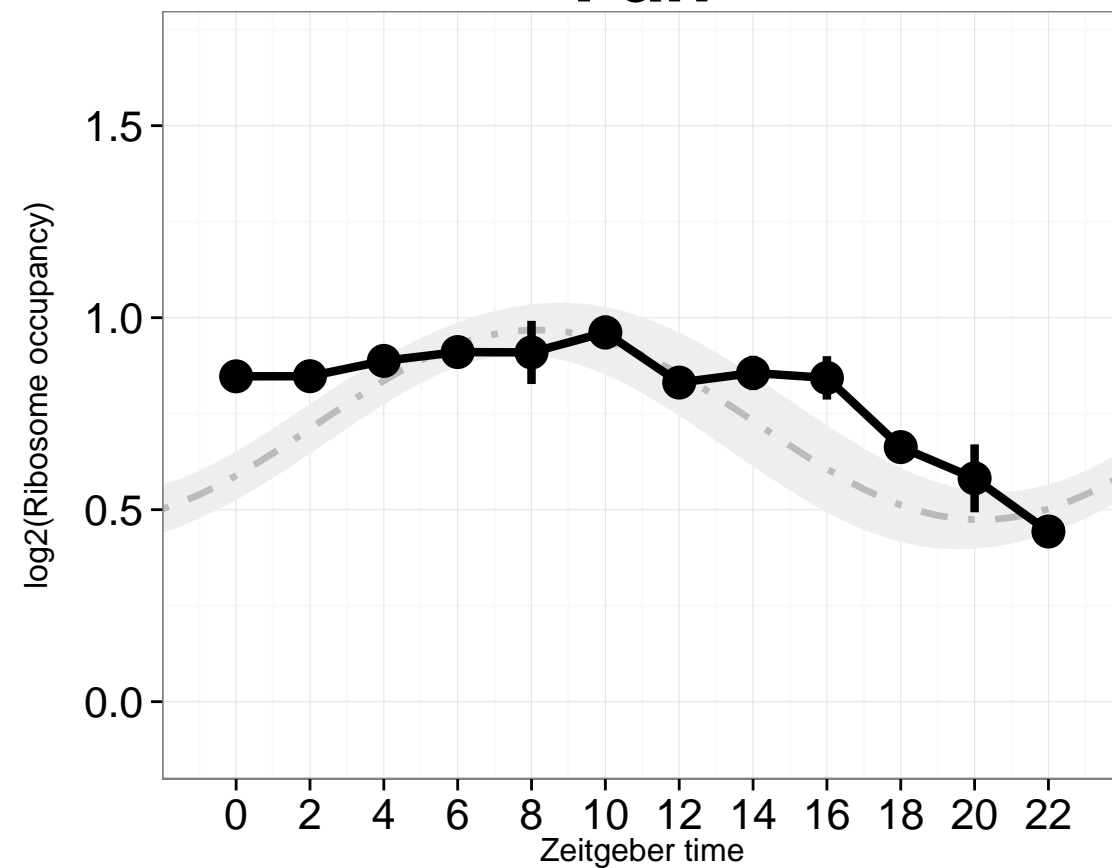

Supplement: SuppDataset_1.zip [file Fah_set_A.pdf › Supplemental Dataset 1/A-mRNA_nonrhyth_translation_nonrhyth/Fah_set_A.pdf]

## Fahd1

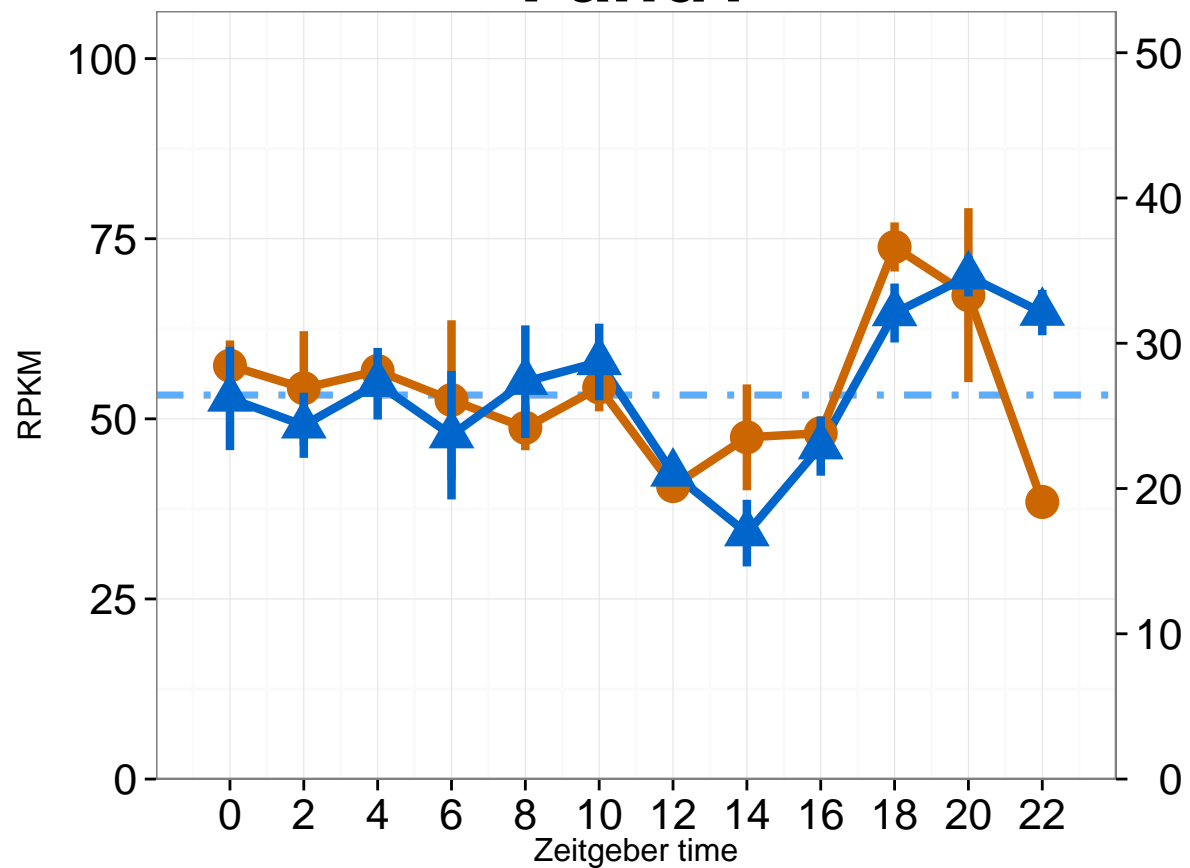

## Fahd1

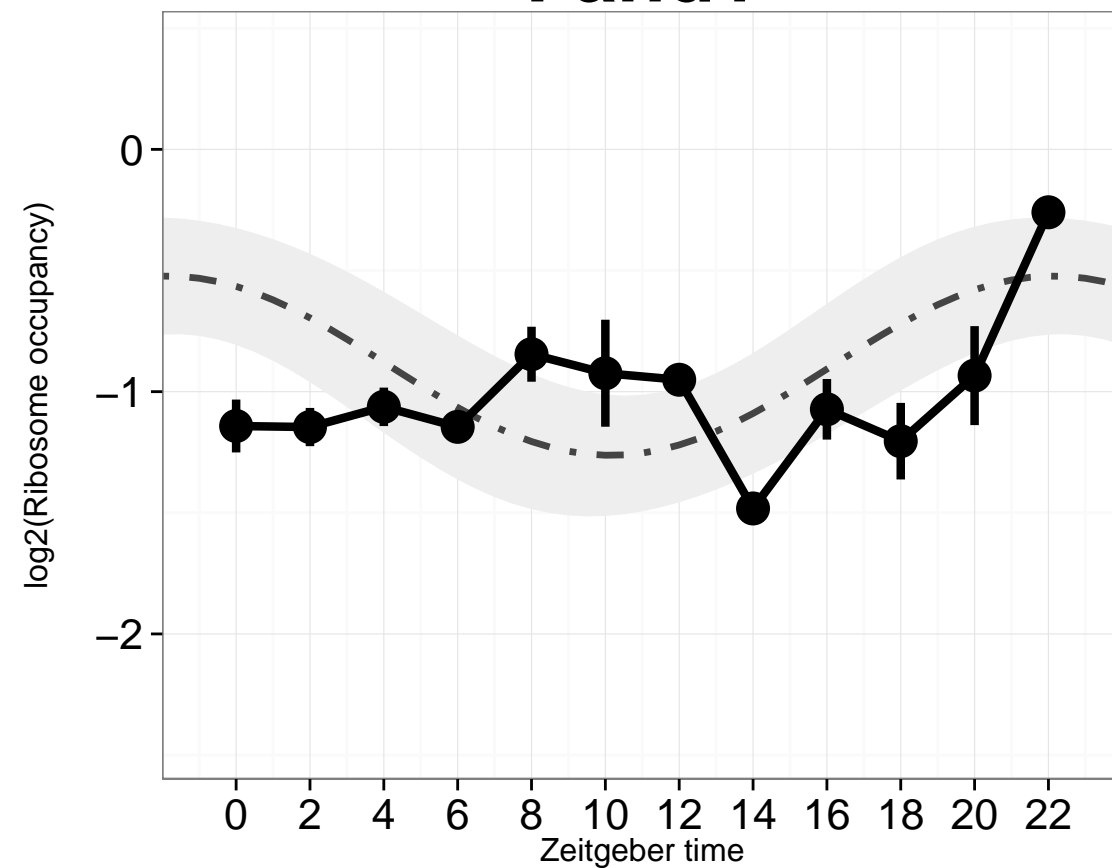

Supplement: SuppDataset_1.zip [file Fahd1_set_A.pdf › Supplemental Dataset 1/A-mRNA_nonrhyth_translation_nonrhyth/Fahd1_set_A.pdf]

# Fahd2a

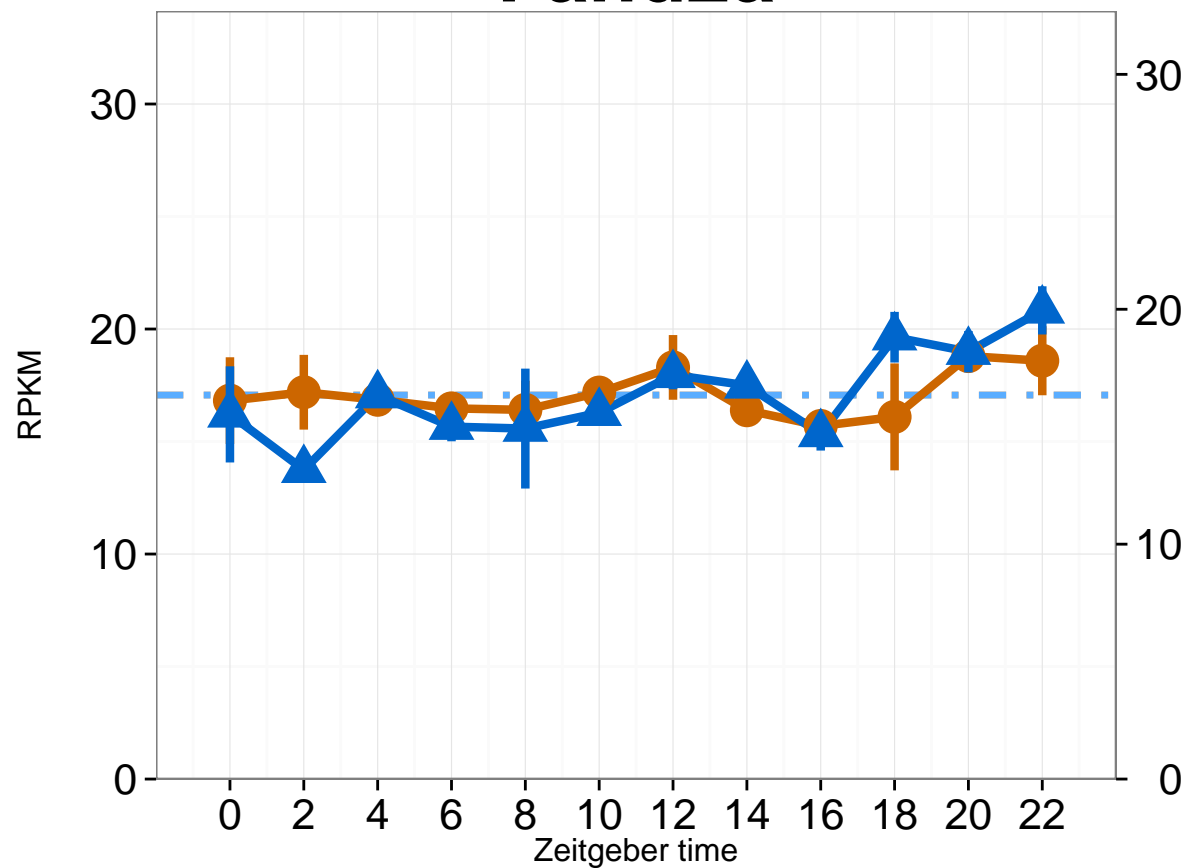

# Fahd2a

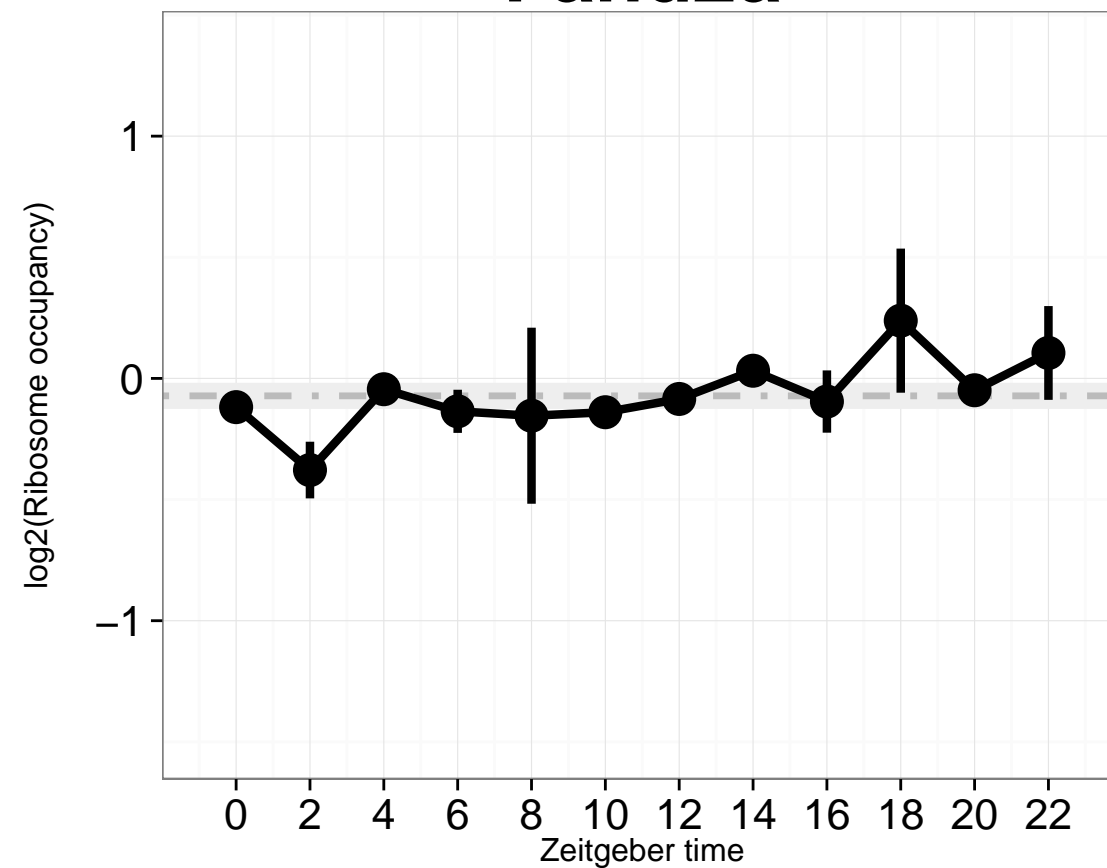

Supplement: SuppDataset_1.zip [file Fahd2a_set_A.pdf › Supplemental Dataset 1/A-mRNA_nonrhyth_translation_nonrhyth/Fahd2a_set_A.pdf]

## Faim

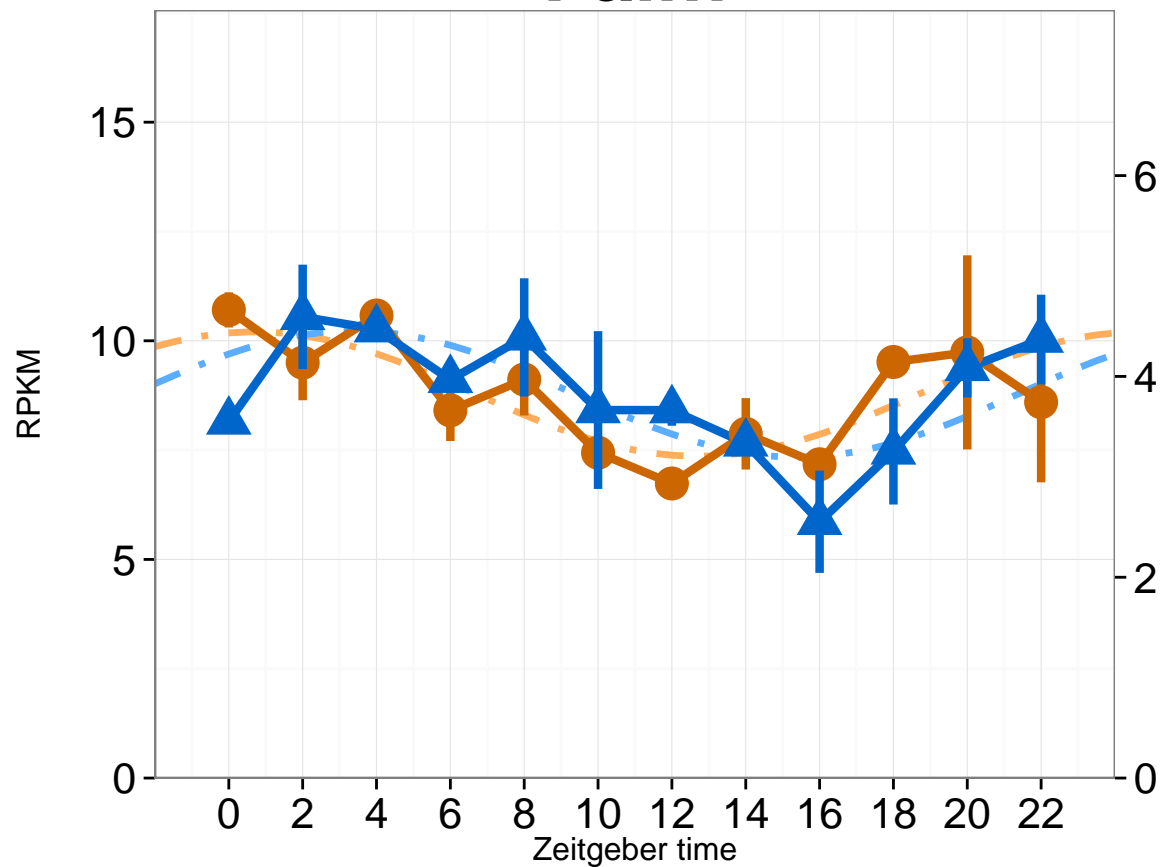

## Faim

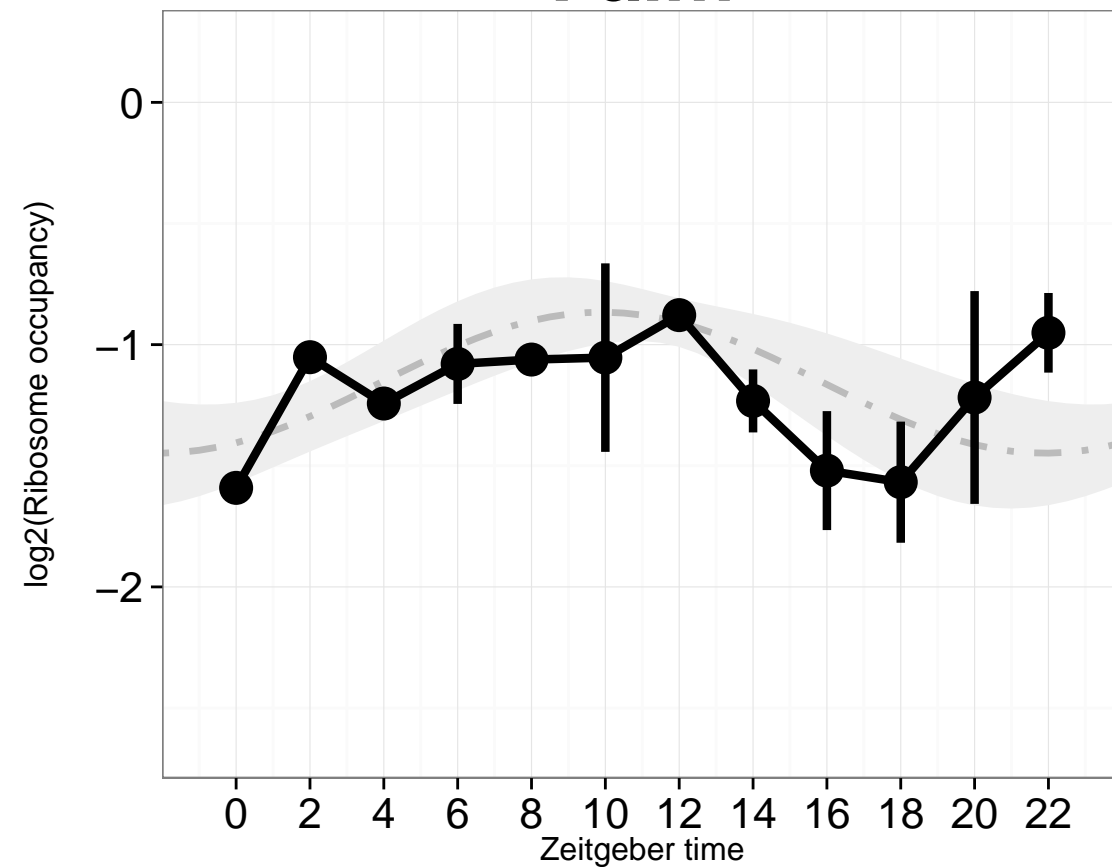

Supplement: SuppDataset_1.zip [file Faim_set_A.pdf › Supplemental Dataset 1/A-mRNA_nonrhyth_translation_nonrhyth/Faim_set_A.pdf]

## Fam102b

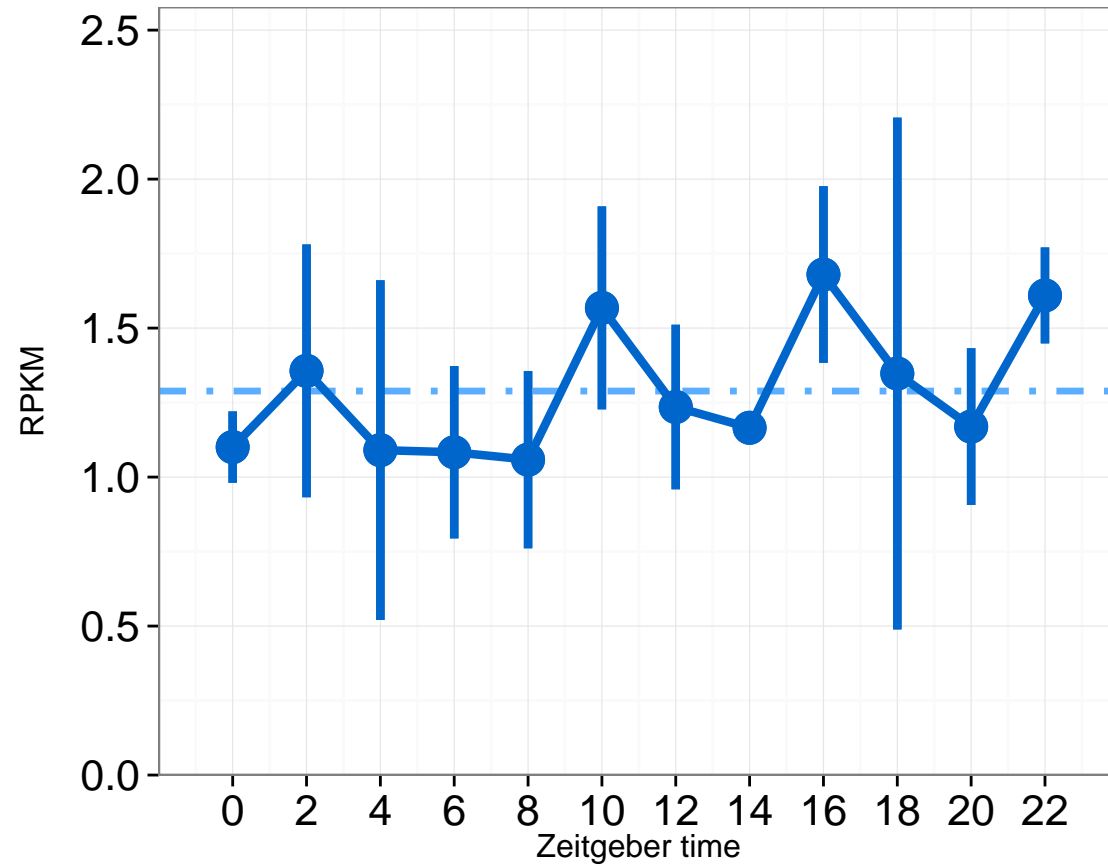

## Fam102b log2(Ribosome occupanc

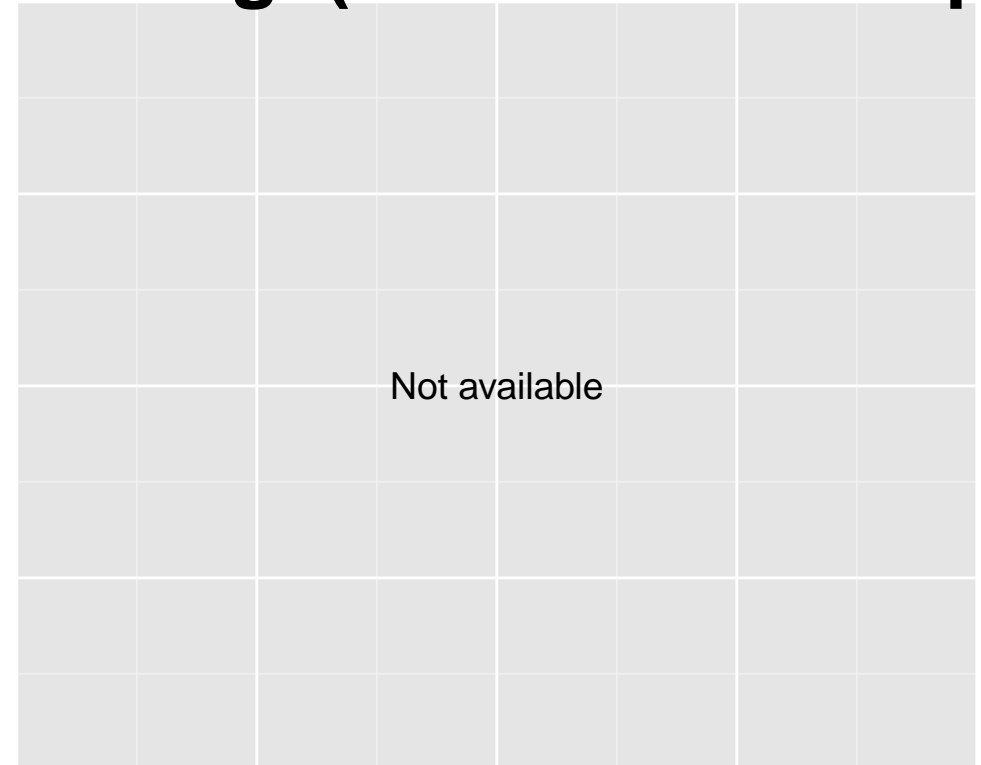

Supplement: SuppDataset_1.zip [file Fam102b_set_A.pdf › Supplemental Dataset 1/A-mRNA_nonrhyth_translation_nonrhyth/Fam102b_set_A.pdf]

# Fam103a1

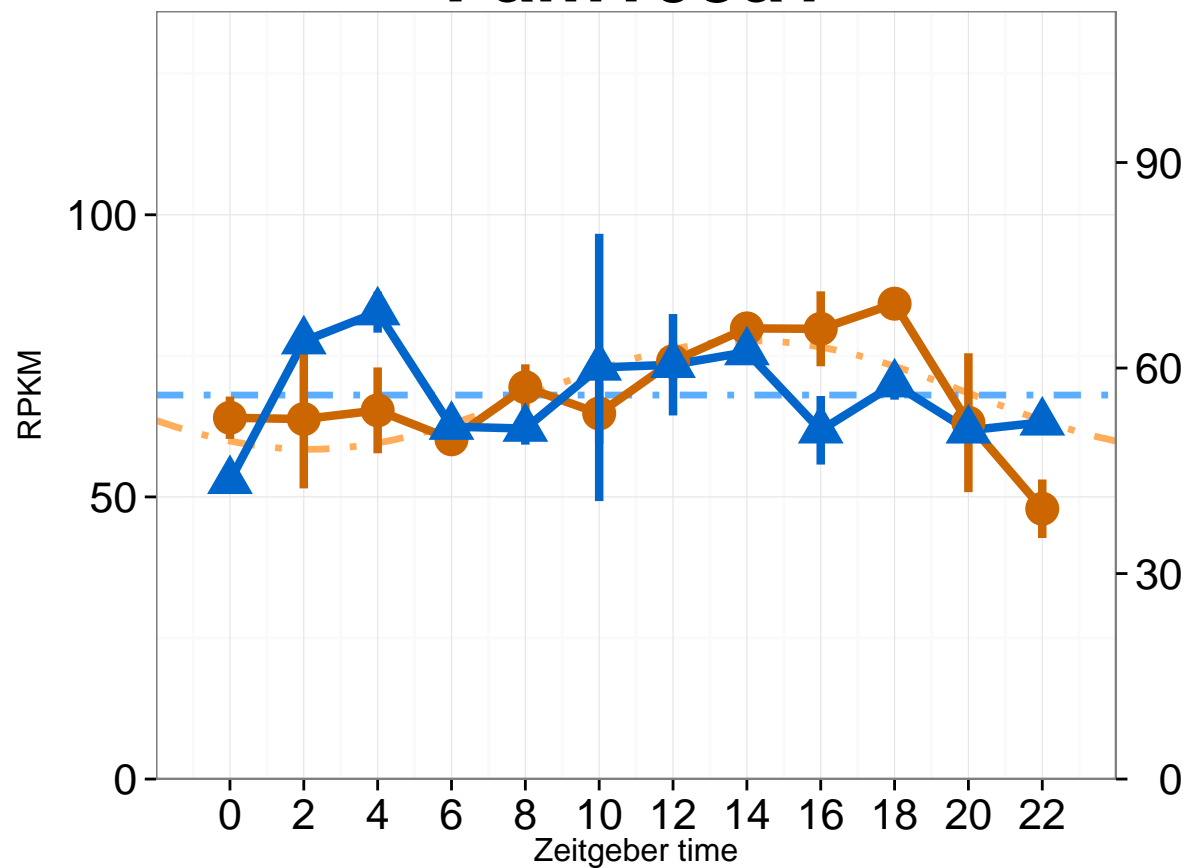

# Fam103a1

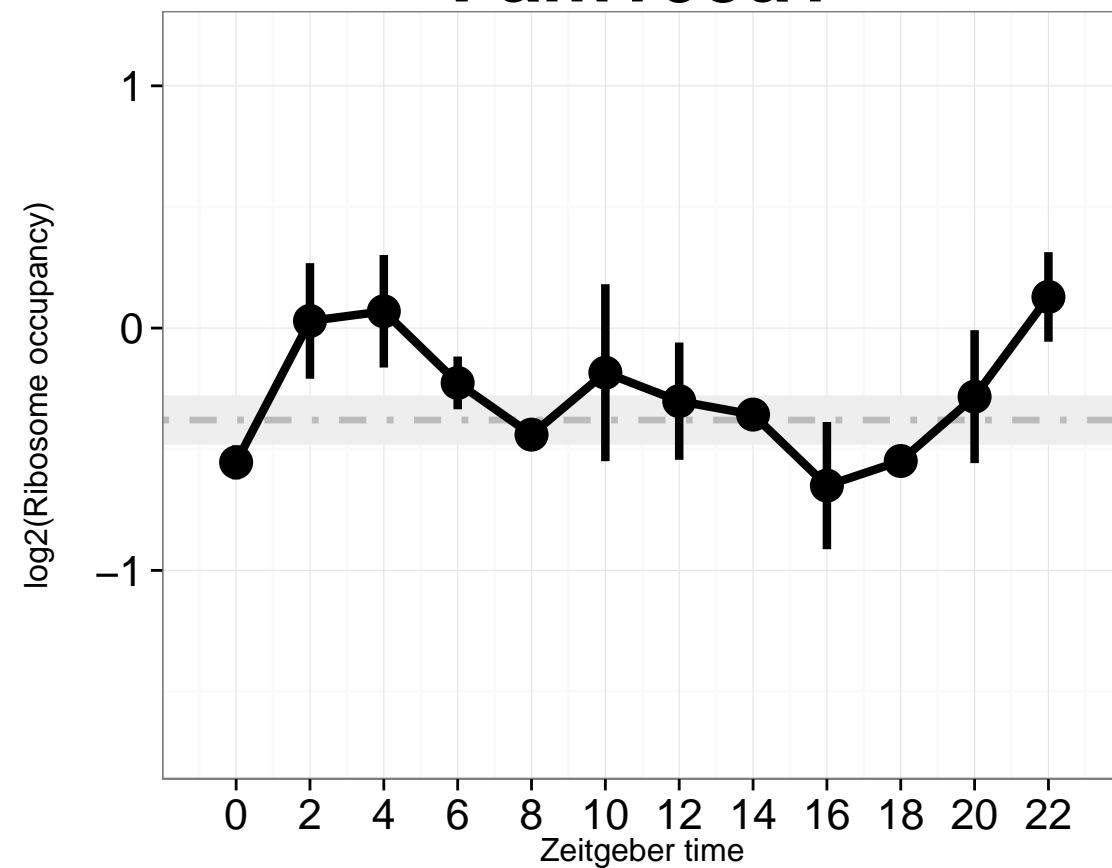

Supplement: SuppDataset_1.zip [file Fam103a1_set_A.pdf › Supplemental Dataset 1/A-mRNA_nonrhyth_translation_nonrhyth/Fam103a1_set_A.pdf]

# Fam104a

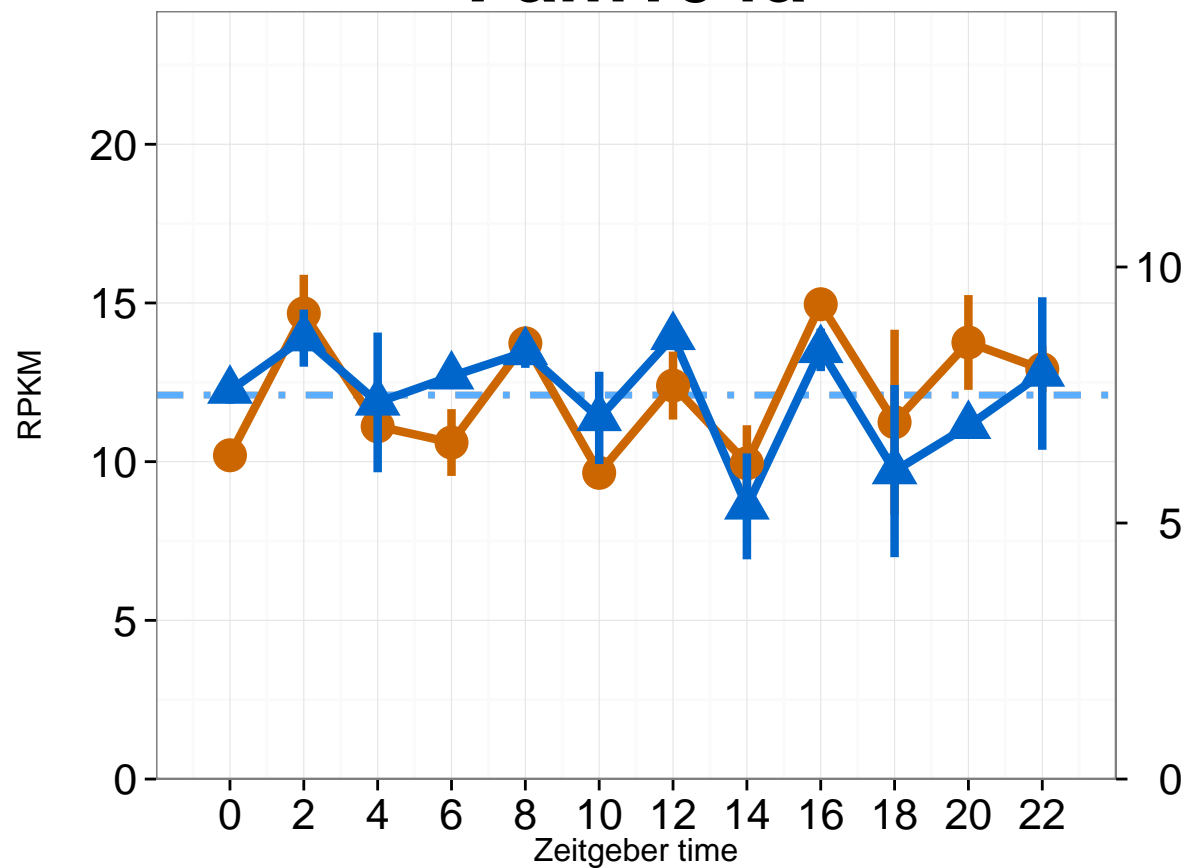

# Fam104a

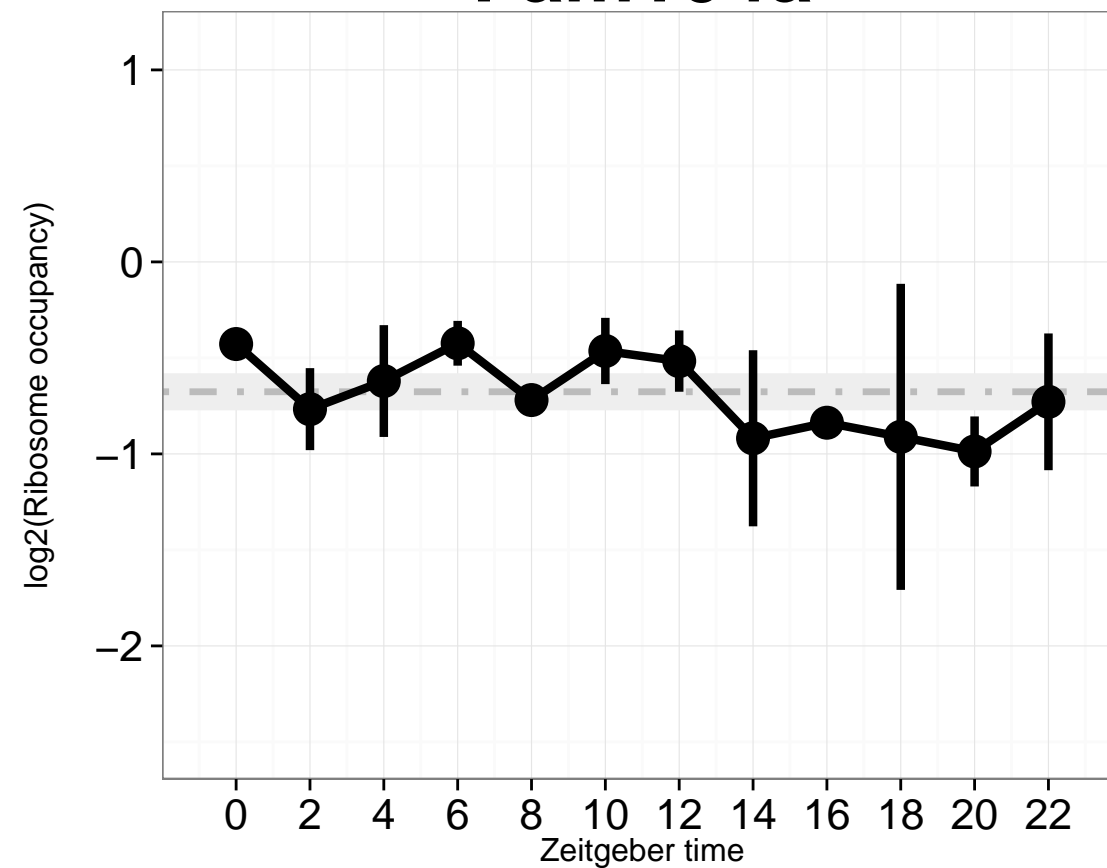

Supplement: SuppDataset_1.zip [file Fam104a_set_A.pdf › Supplemental Dataset 1/A-mRNA_nonrhyth_translation_nonrhyth/Fam104a_set_A.pdf]

# Fam105a

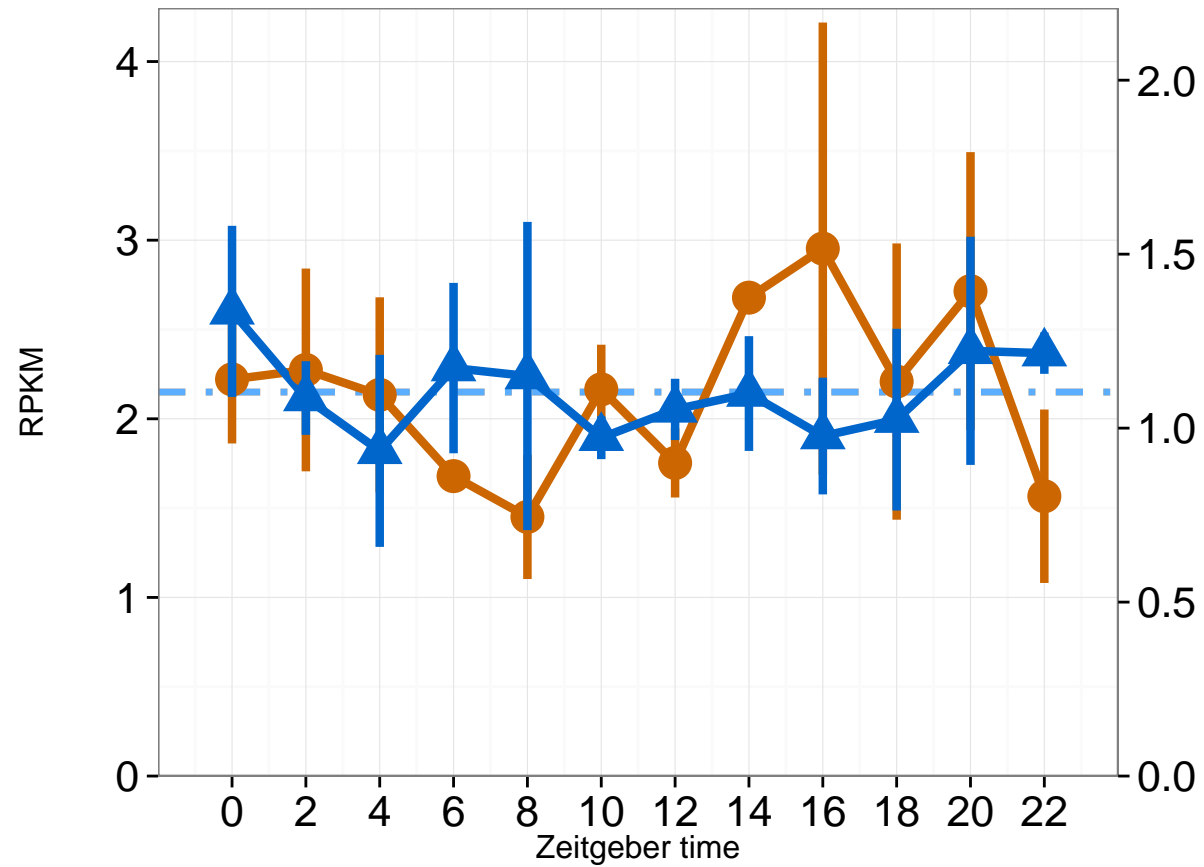

# Fam105a

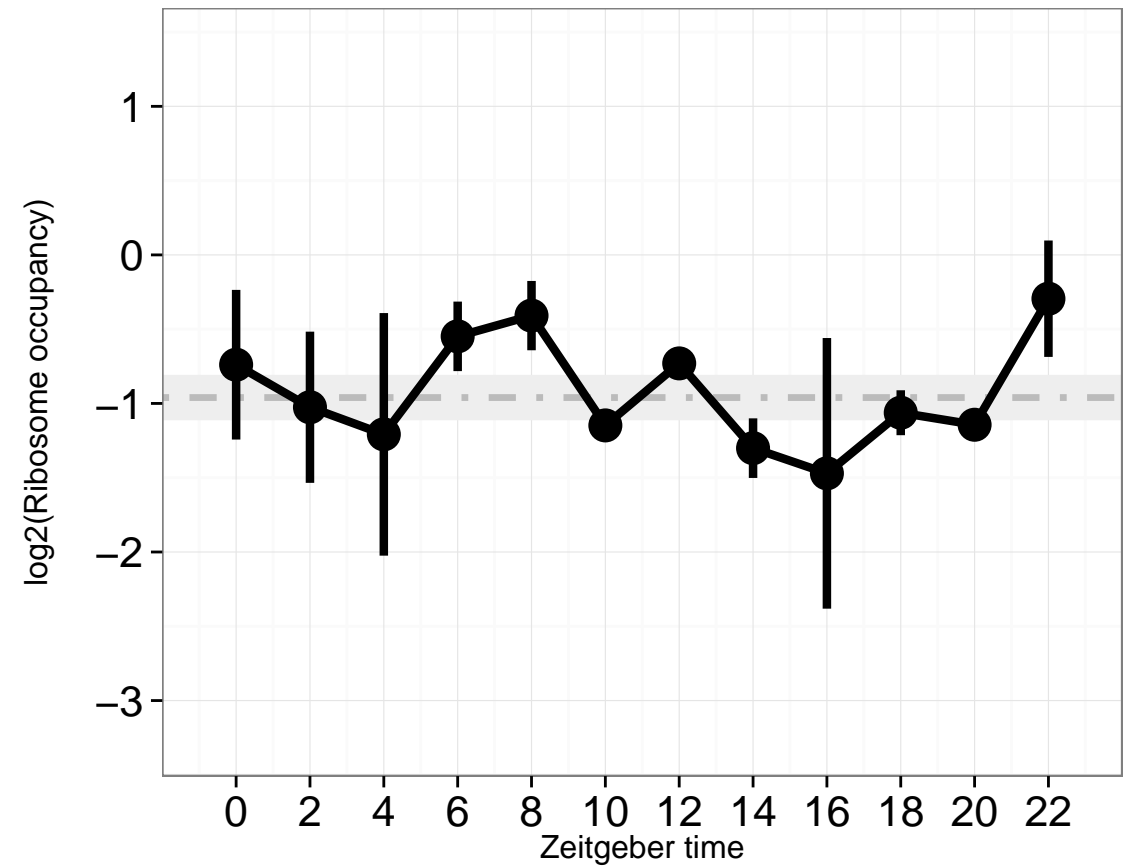

Supplement: SuppDataset_1.zip [file Fam105a_set_A.pdf › Supplemental Dataset 1/A-mRNA_nonrhyth_translation_nonrhyth/Fam105a_set_A.pdf]

# Fam105b

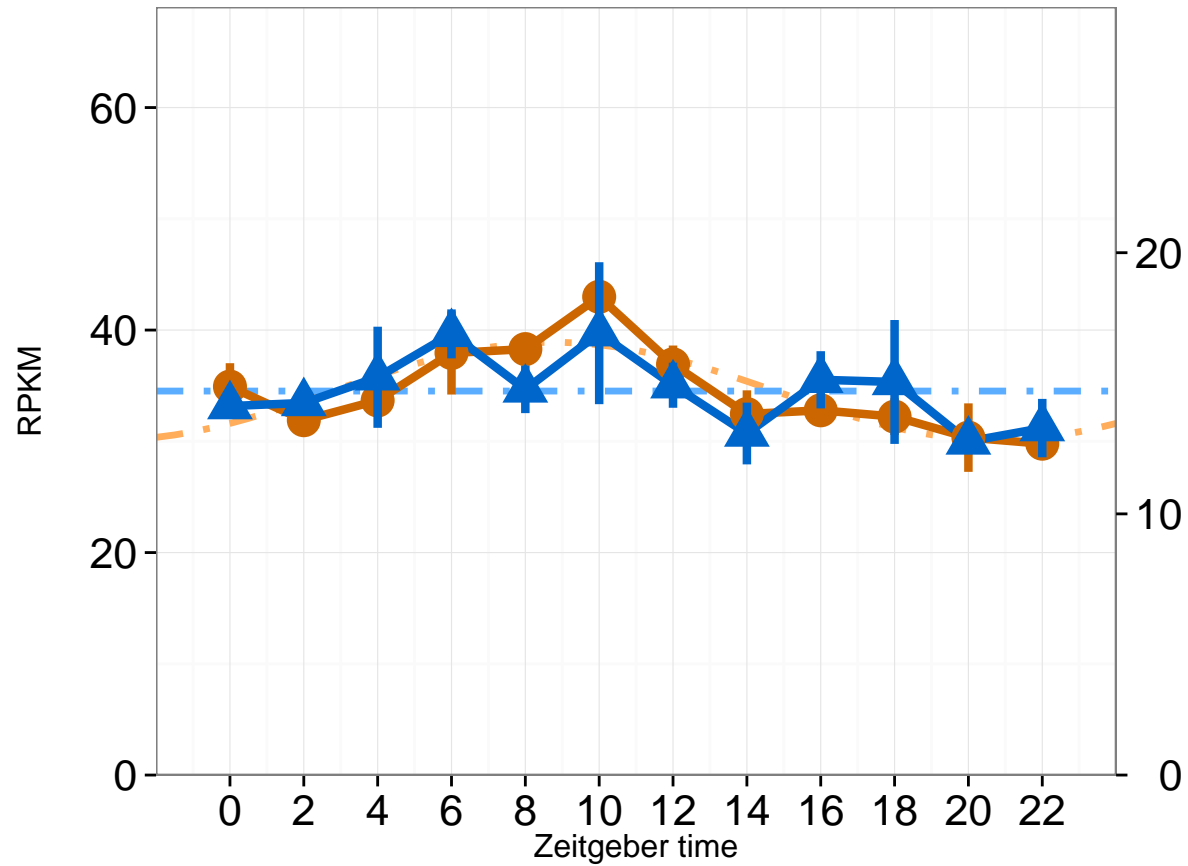

# Fam105b

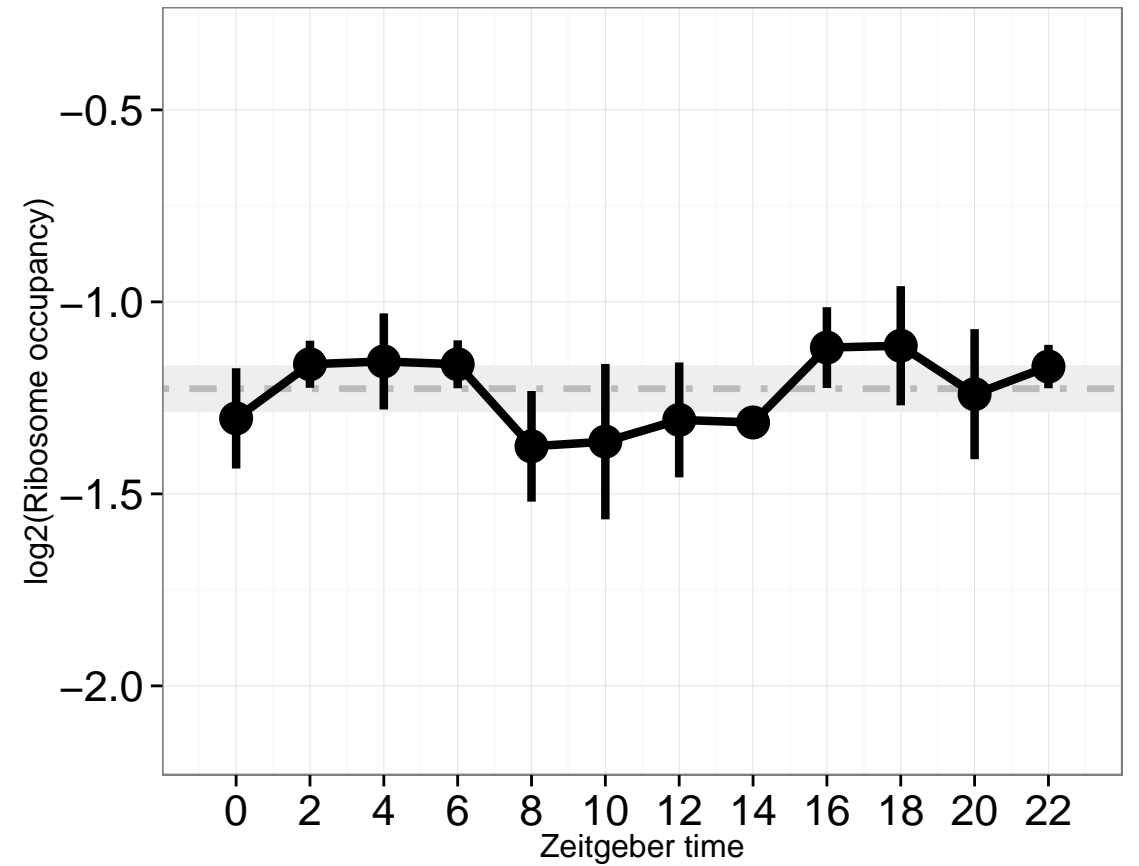

Supplement: SuppDataset_1.zip [file Fam105b_set_A.pdf › Supplemental Dataset 1/A-mRNA_nonrhyth_translation_nonrhyth/Fam105b_set_A.pdf]

# Fam107b

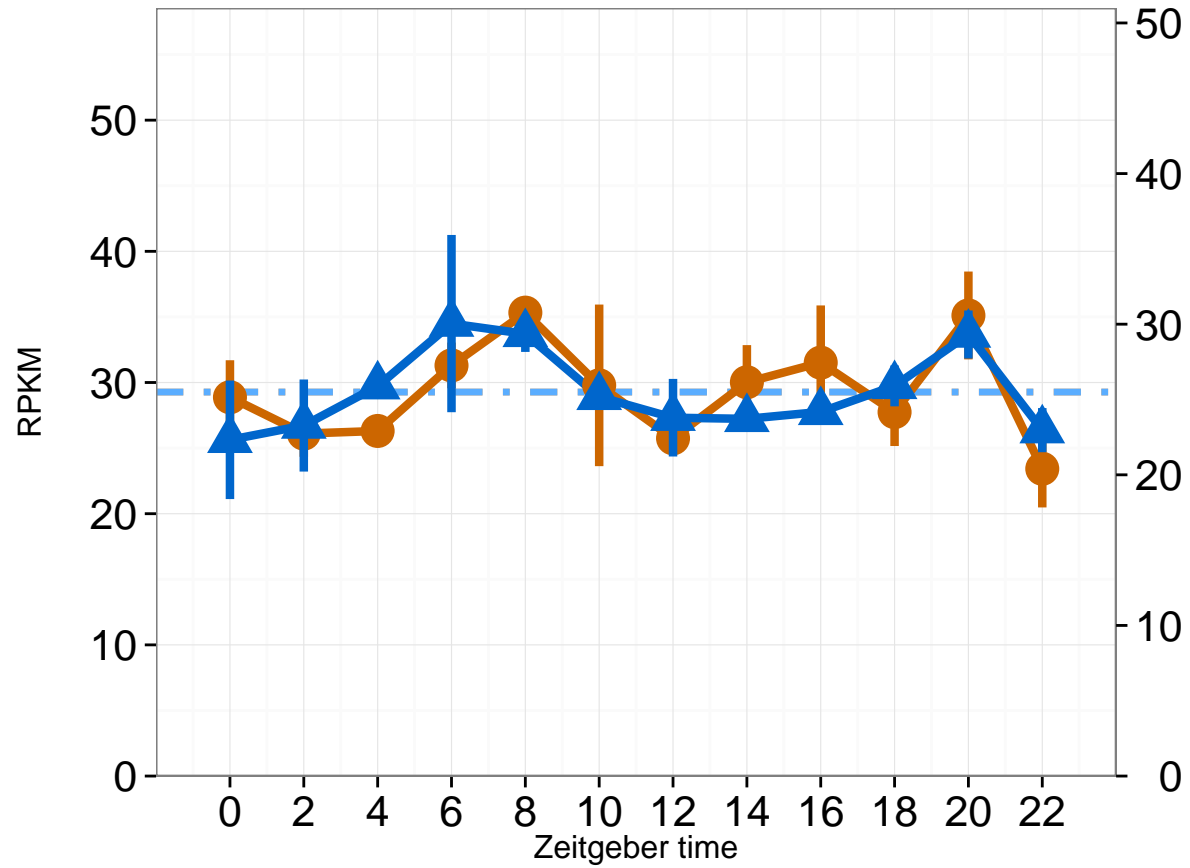

# Fam107b

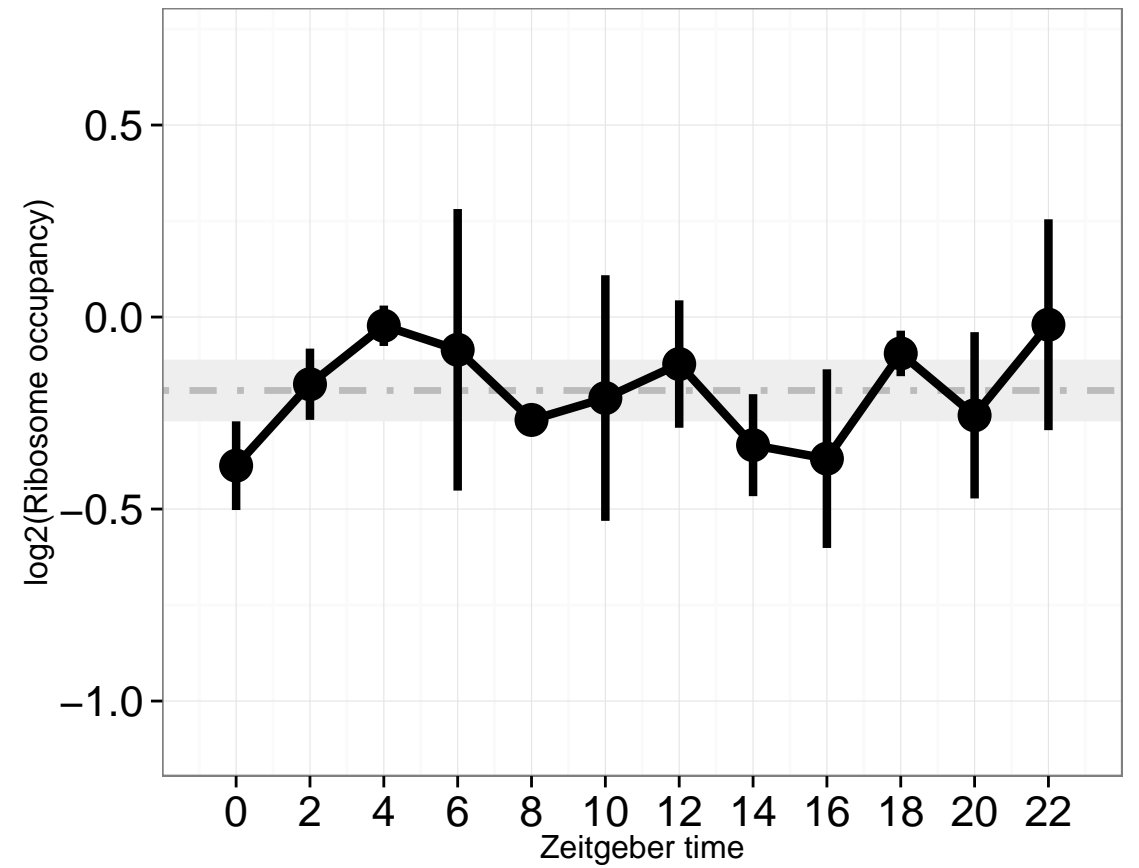

Supplement: SuppDataset_1.zip [file Fam107b_set_A.pdf › Supplemental Dataset 1/A-mRNA_nonrhyth_translation_nonrhyth/Fam107b_set_A.pdf]

# Fam109a

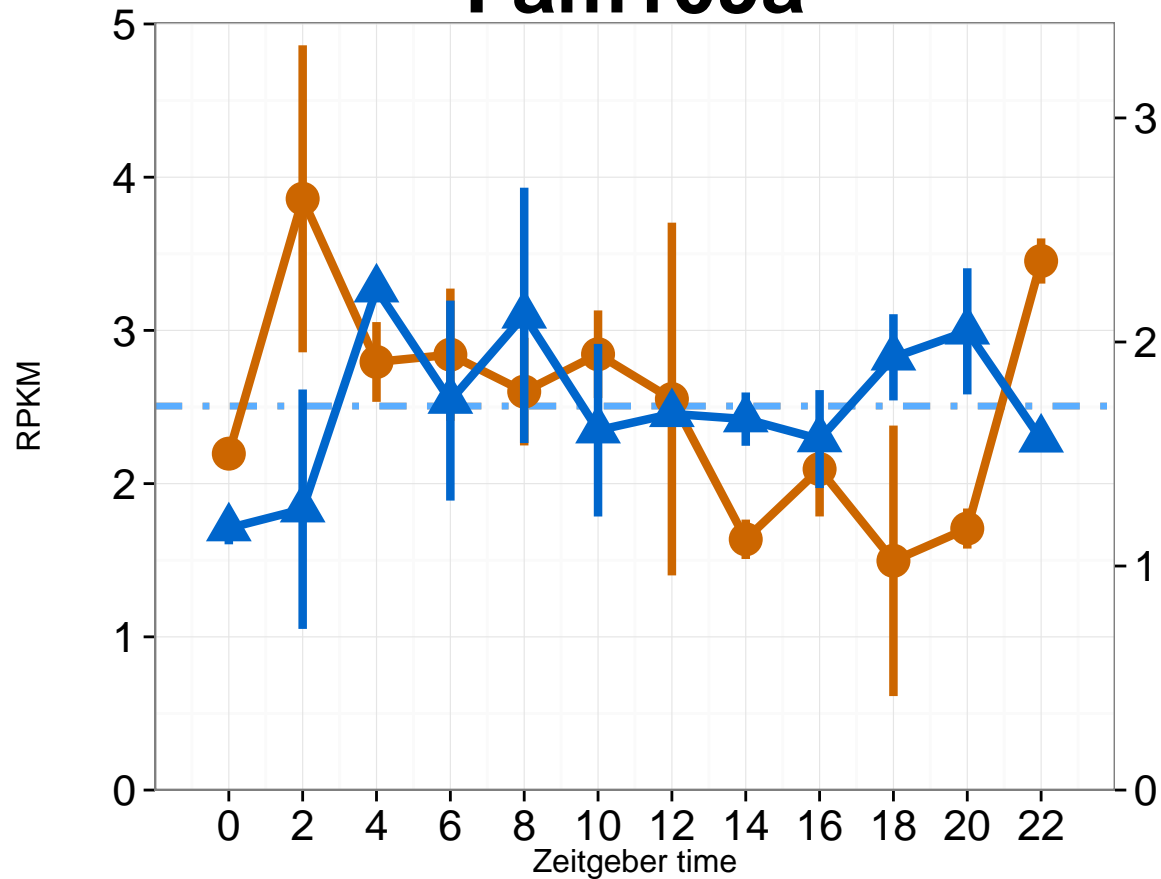

# Fam109a

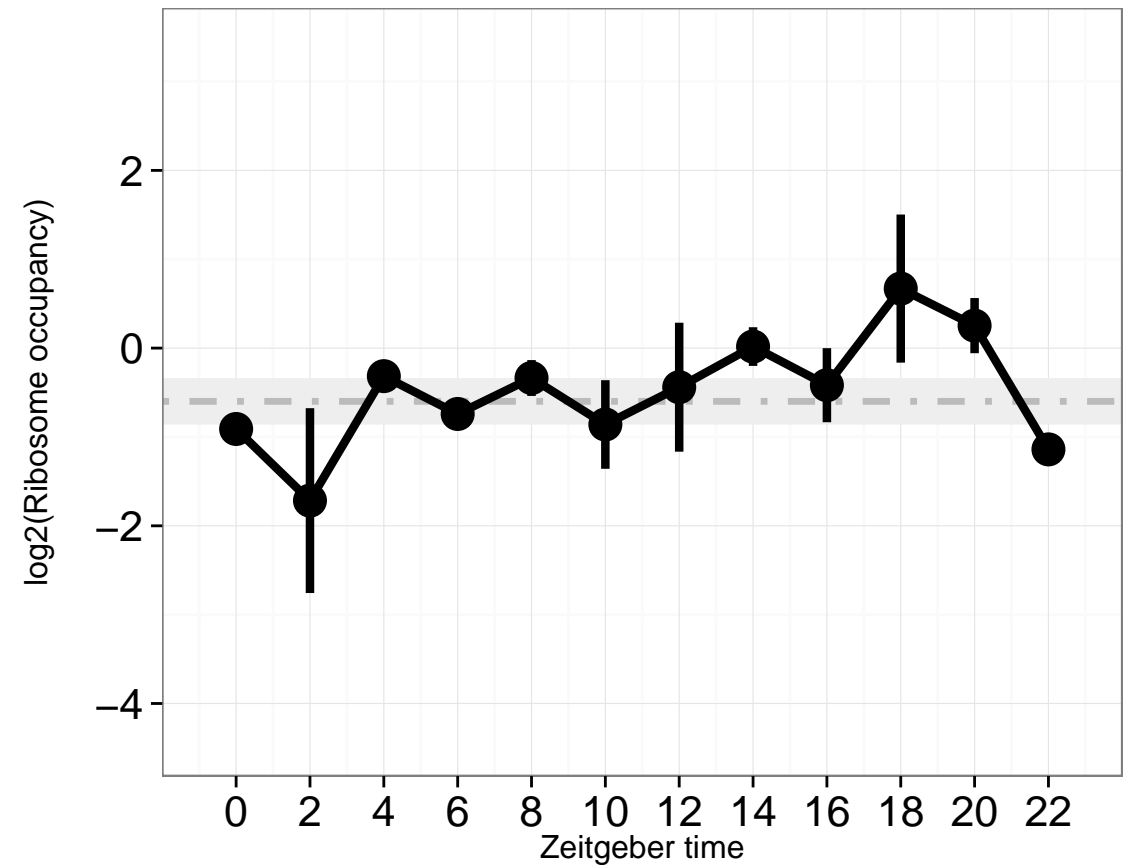

Supplement: SuppDataset_1.zip [file Fam109a_set_A.pdf › Supplemental Dataset 1/A-mRNA_nonrhyth_translation_nonrhyth/Fam109a_set_A.pdf]

# Fam110c

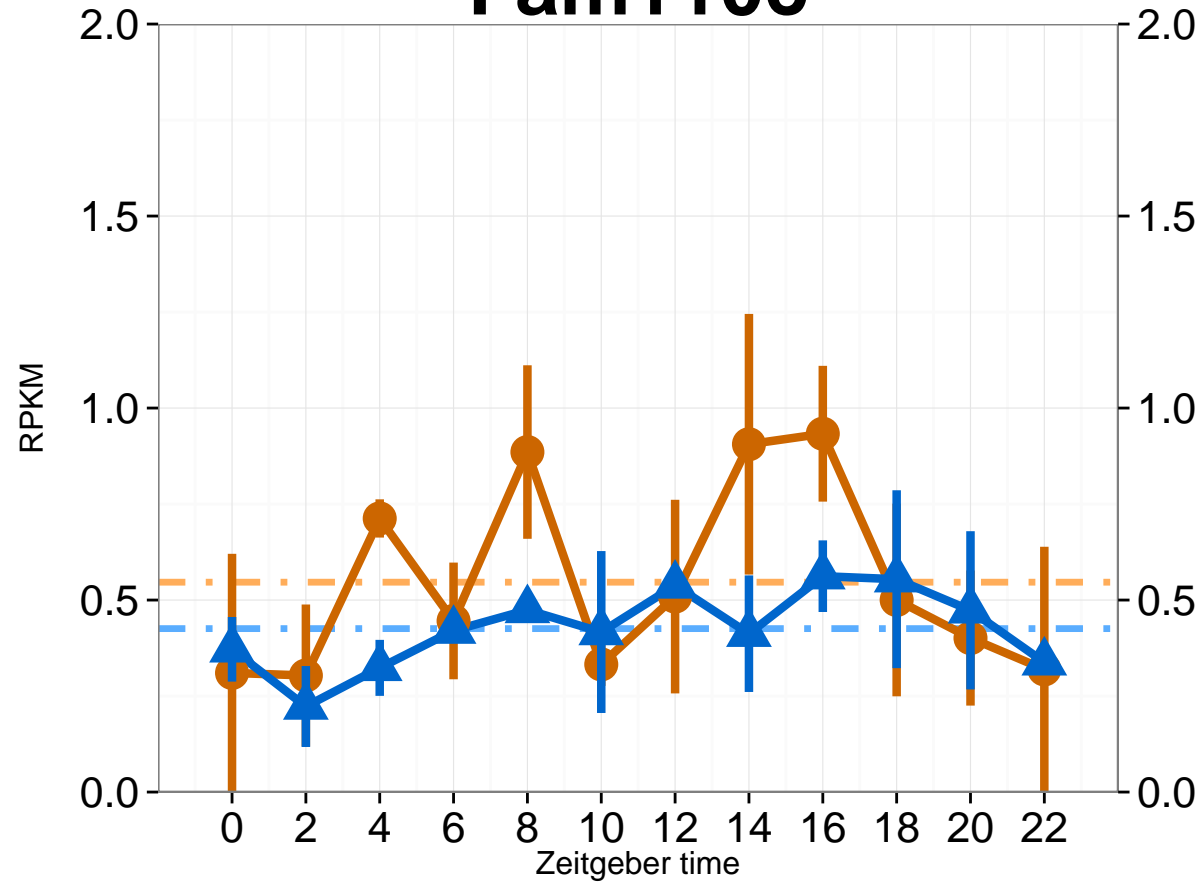

# Fam110c

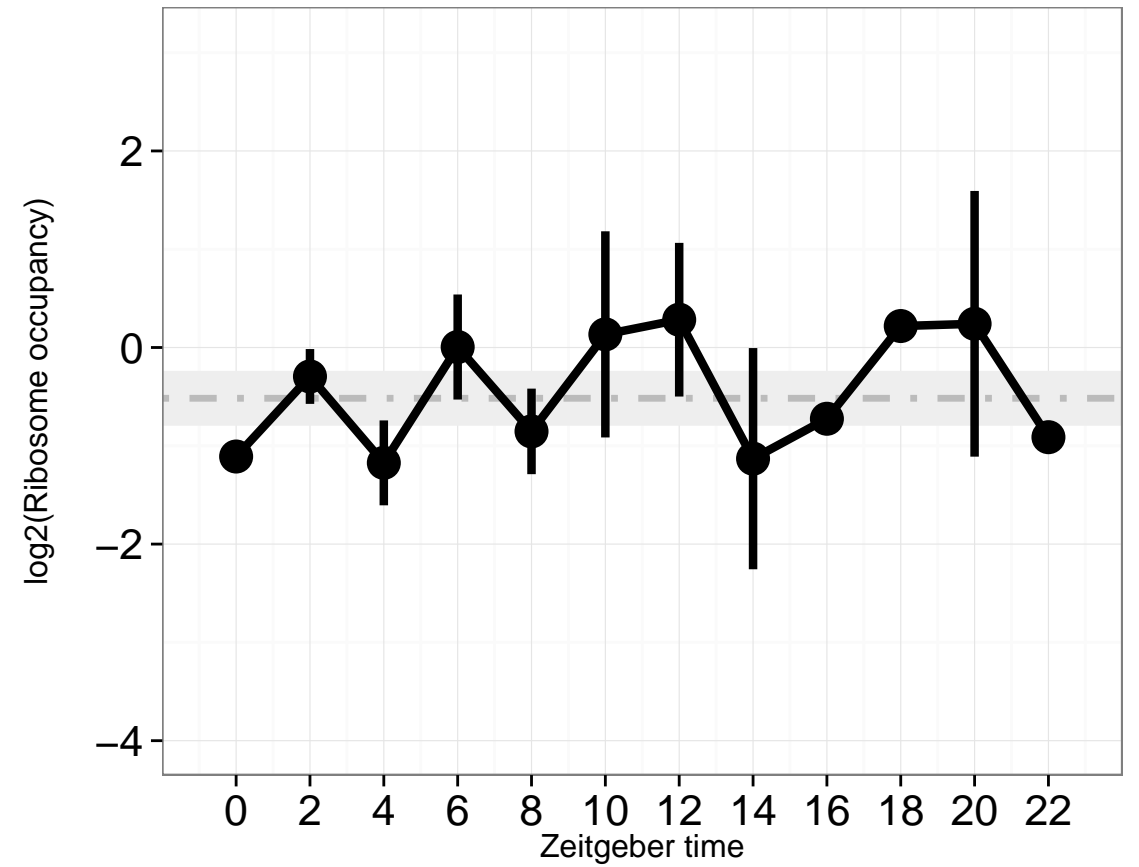

Supplement: SuppDataset_1.zip [file Fam110c_set_A.pdf › Supplemental Dataset 1/A-mRNA_nonrhyth_translation_nonrhyth/Fam110c_set_A.pdf]

# Fam114a1

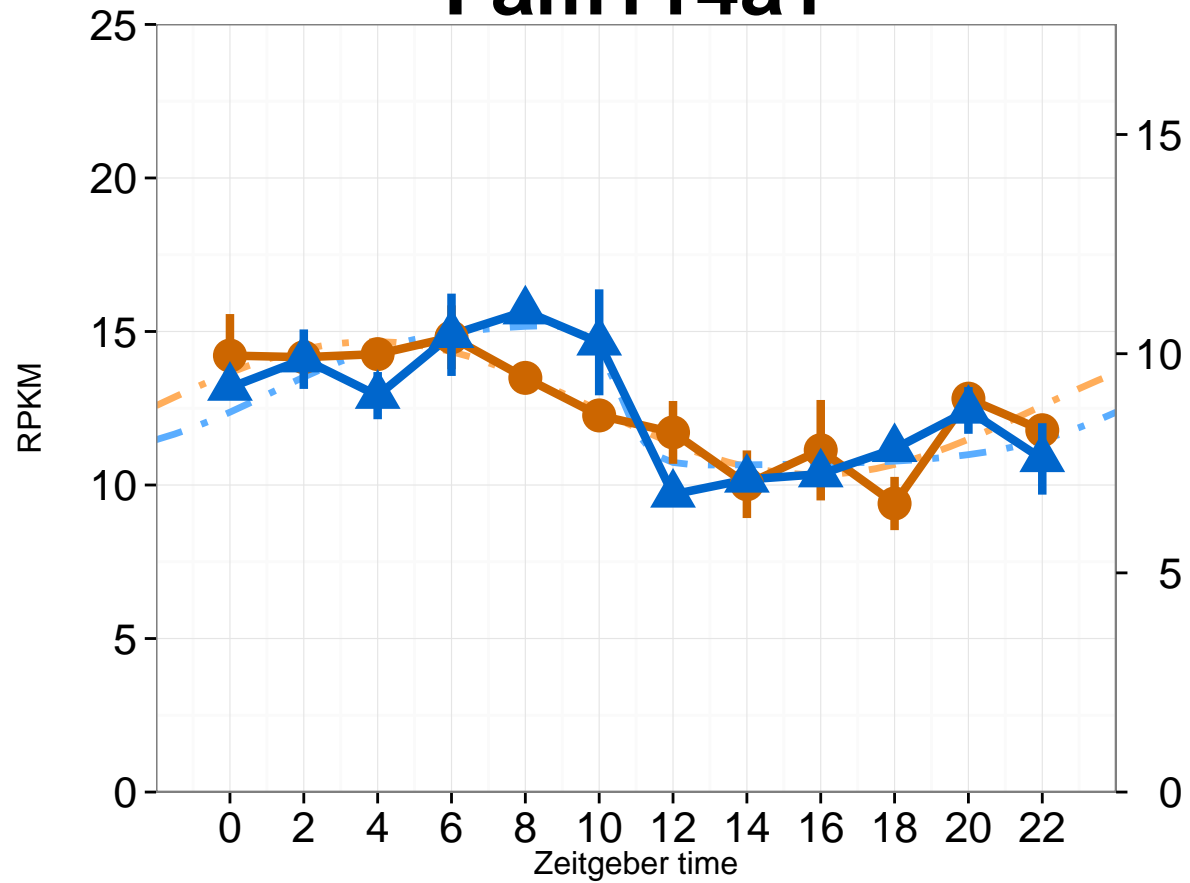

# Fam114a1

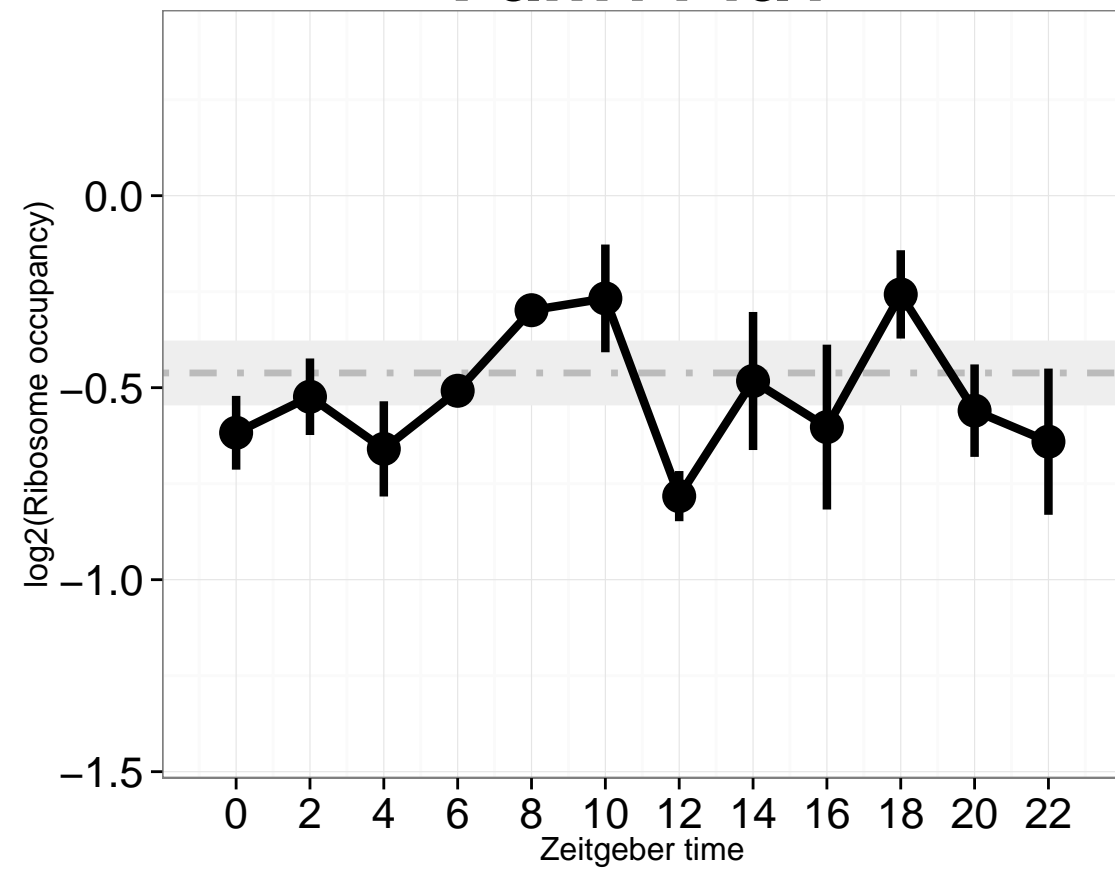

Supplement: SuppDataset_1.zip [file Fam114a1_set_A.pdf › Supplemental Dataset 1/A-mRNA_nonrhyth_translation_nonrhyth/Fam114a1_set_A.pdf]

# Fam114a2

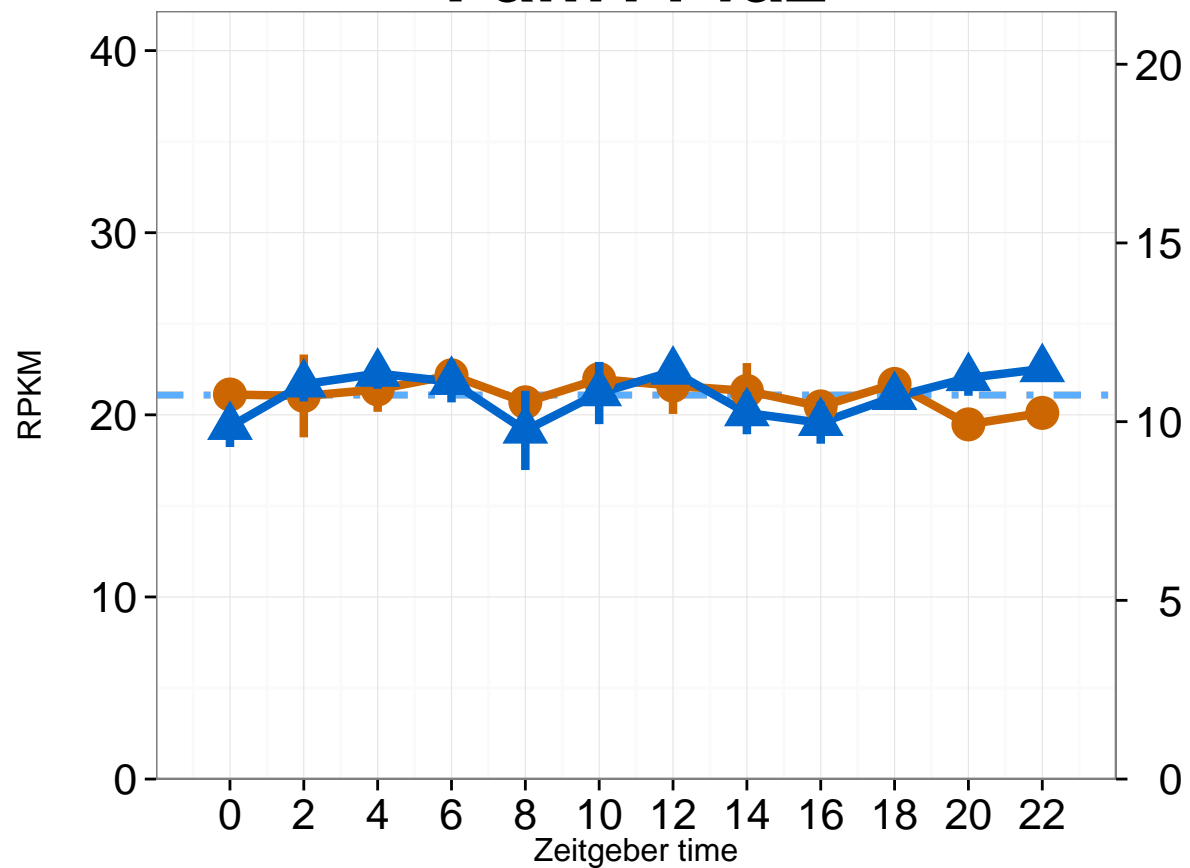

# Fam114a2

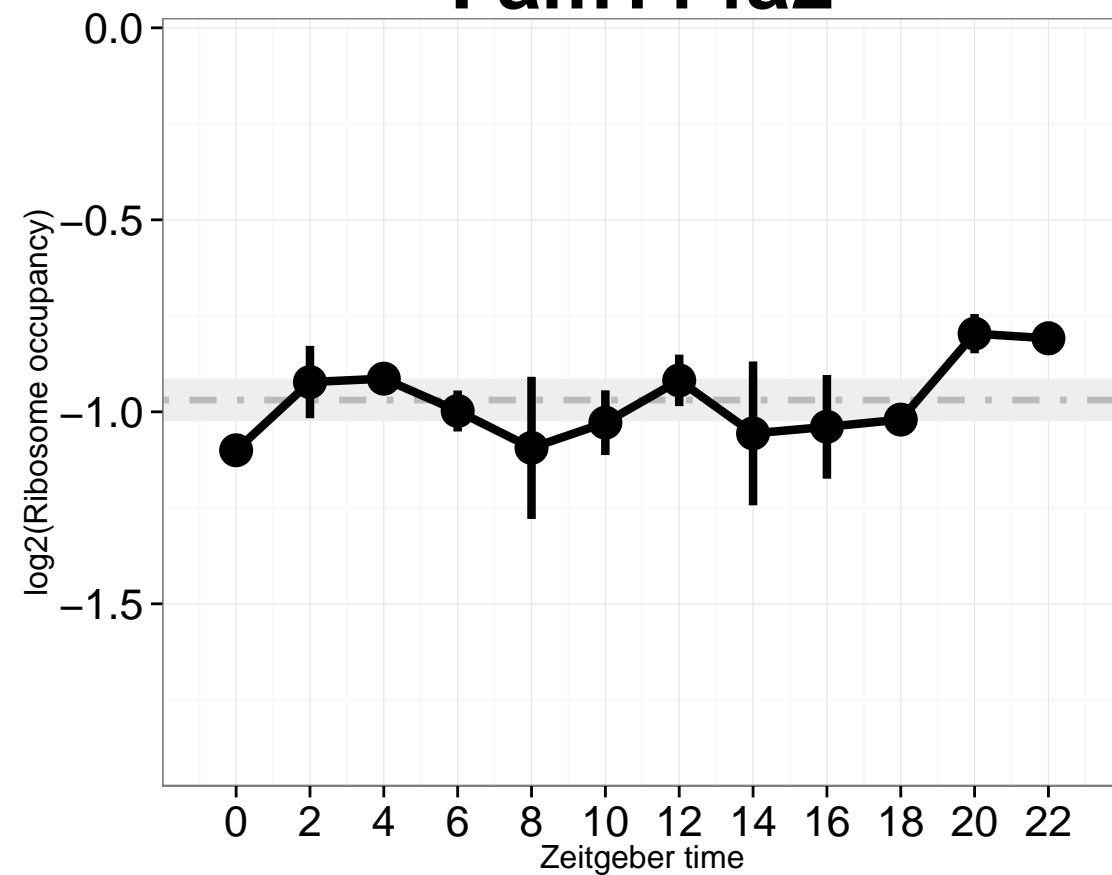

Supplement: SuppDataset_1.zip [file Fam114a2_set_A.pdf › Supplemental Dataset 1/A-mRNA_nonrhyth_translation_nonrhyth/Fam114a2_set_A.pdf]

# Fam115a

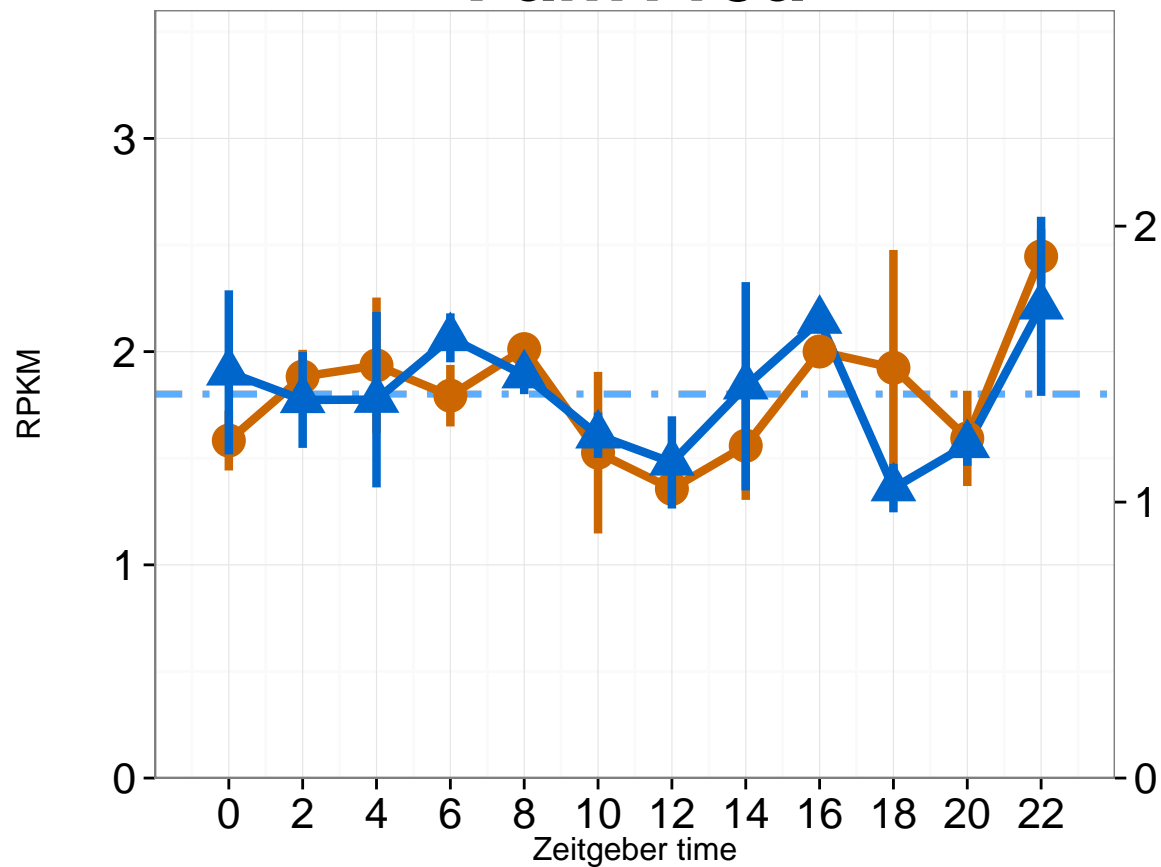

# Fam115a

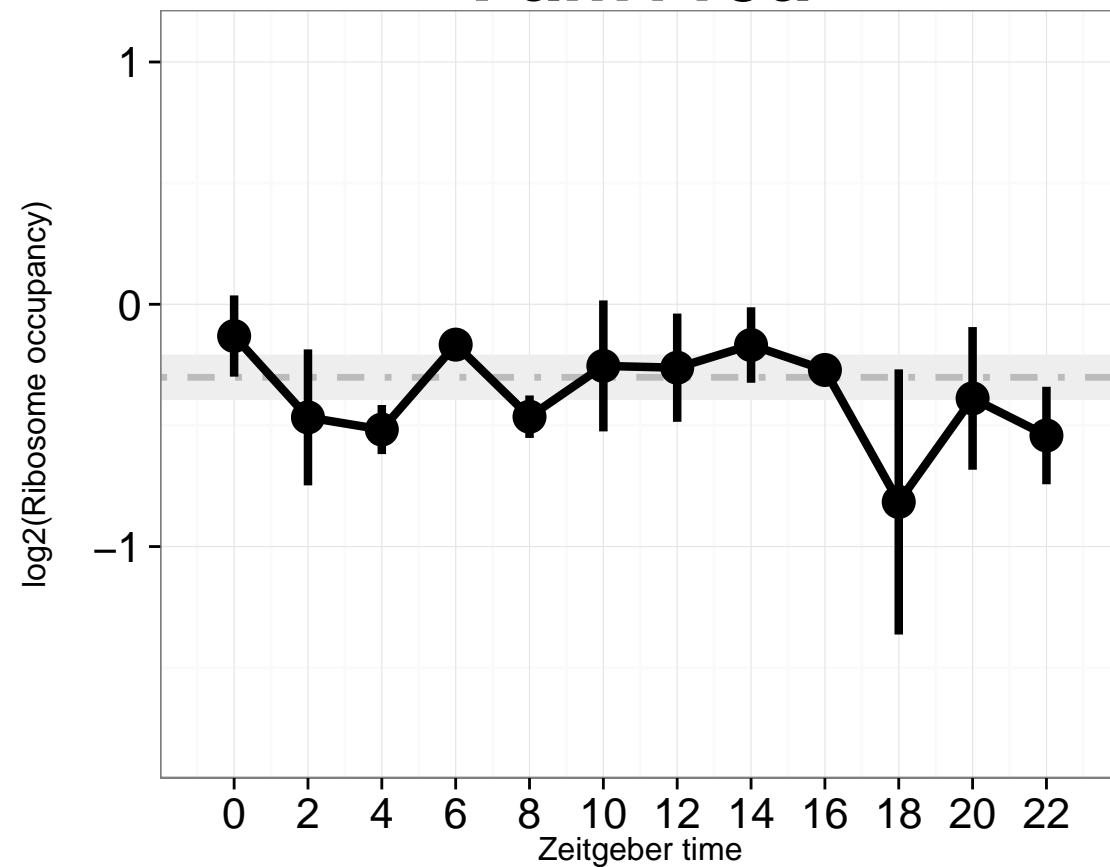

Supplement: SuppDataset_1.zip [file Fam115a_set_A.pdf › Supplemental Dataset 1/A-mRNA_nonrhyth_translation_nonrhyth/Fam115a_set_A.pdf]

# Fam115c

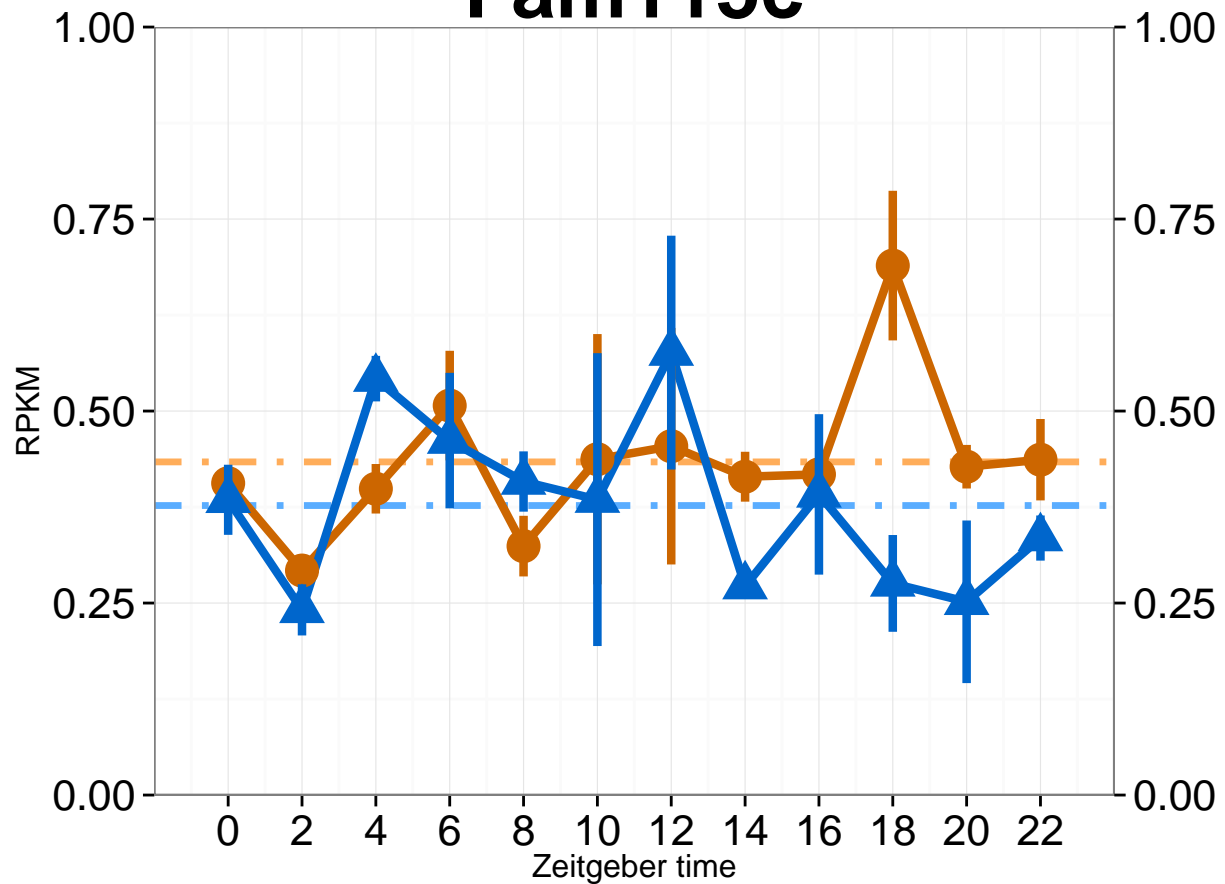

# Fam115c

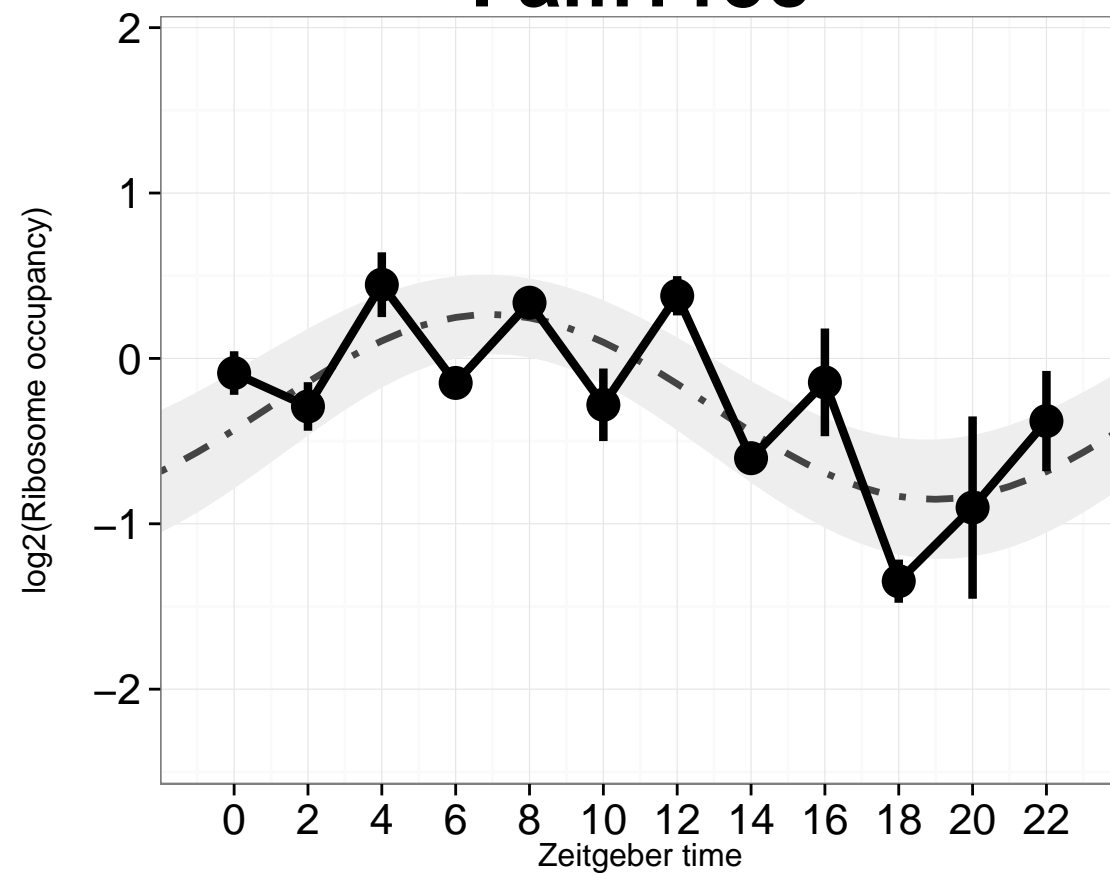

Supplement: SuppDataset_1.zip [file Fam115c_set_A.pdf › Supplemental Dataset 1/A-mRNA_nonrhyth_translation_nonrhyth/Fam115c_set_A.pdf]

# Fam117a

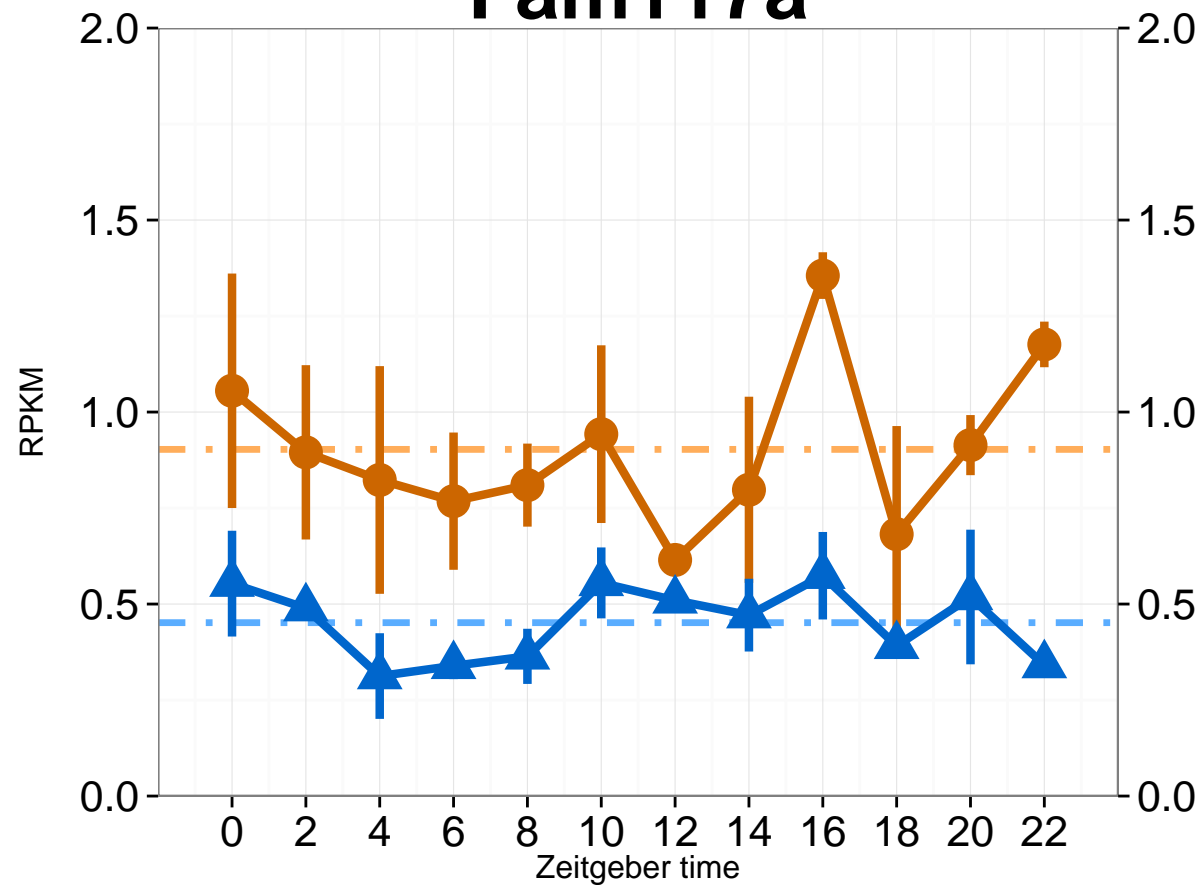

# Fam117a

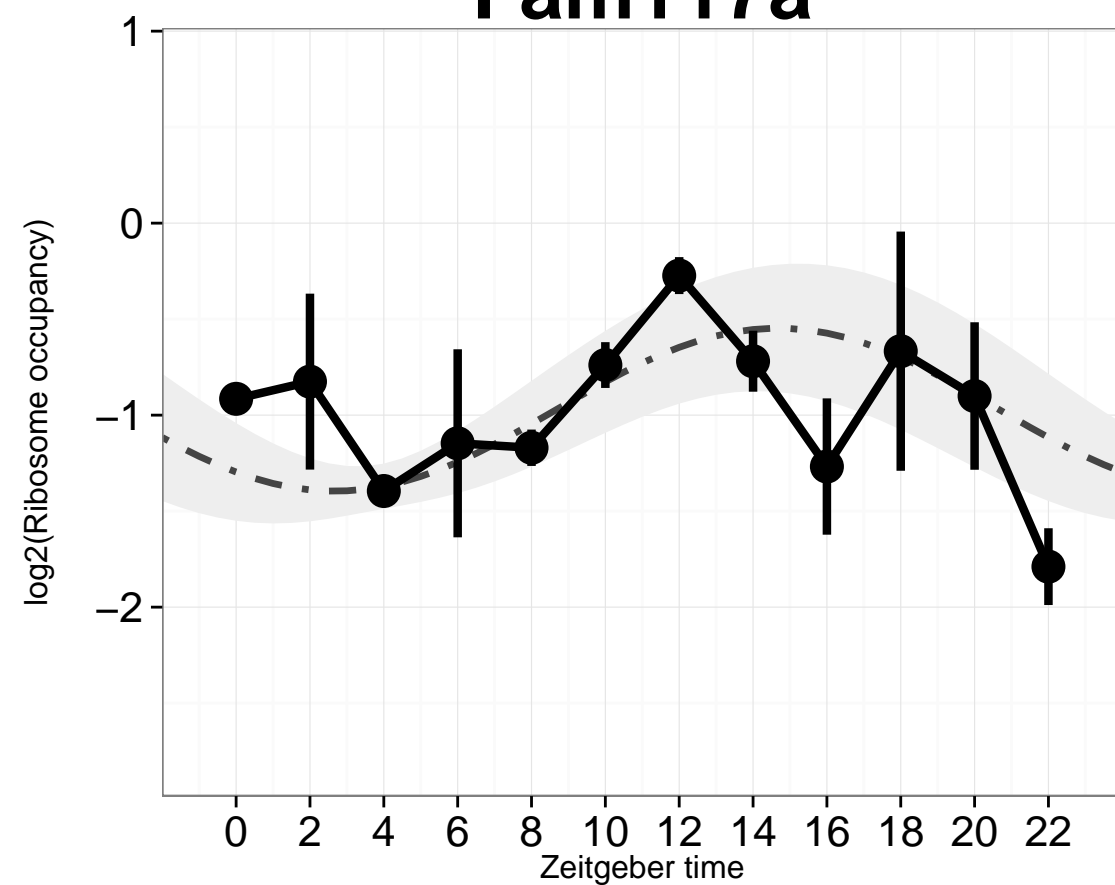

Supplement: SuppDataset_1.zip [file Fam117a_set_A.pdf › Supplemental Dataset 1/A-mRNA_nonrhyth_translation_nonrhyth/Fam117a_set_A.pdf]

# Fam117b

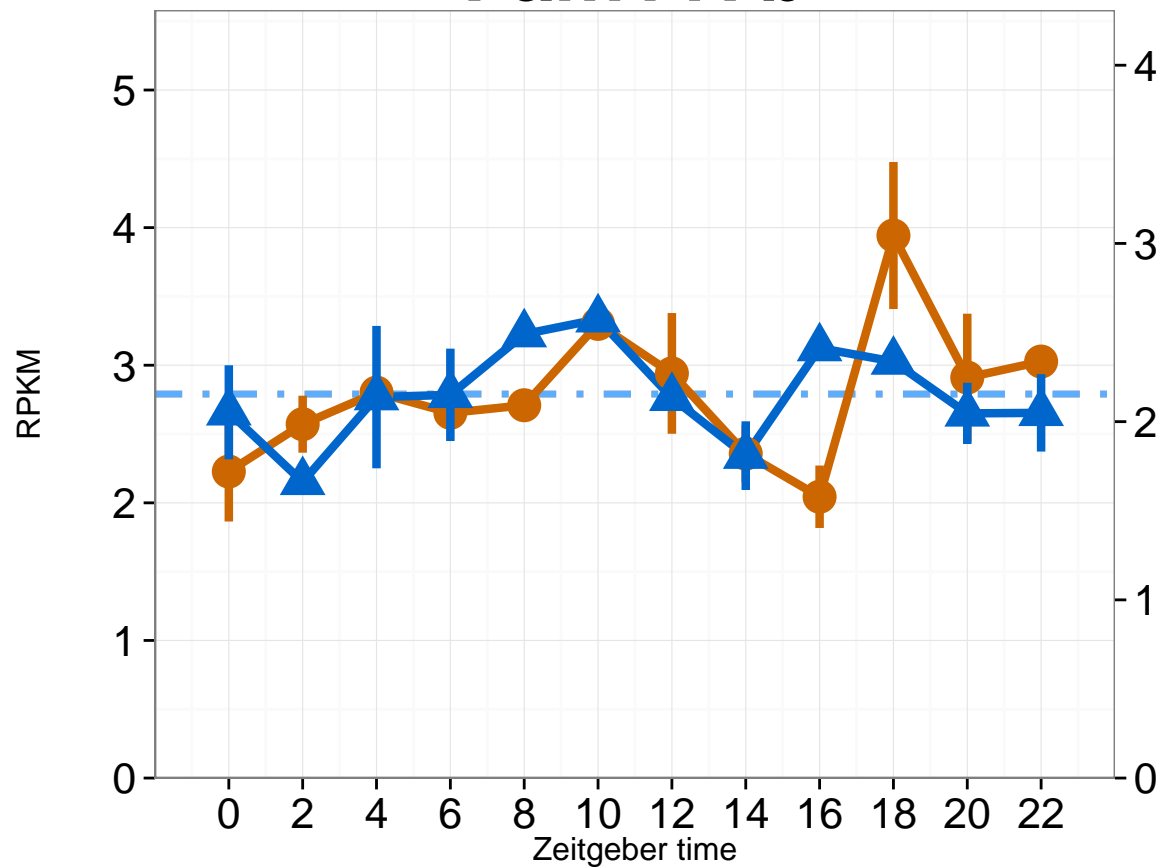

# Fam117b

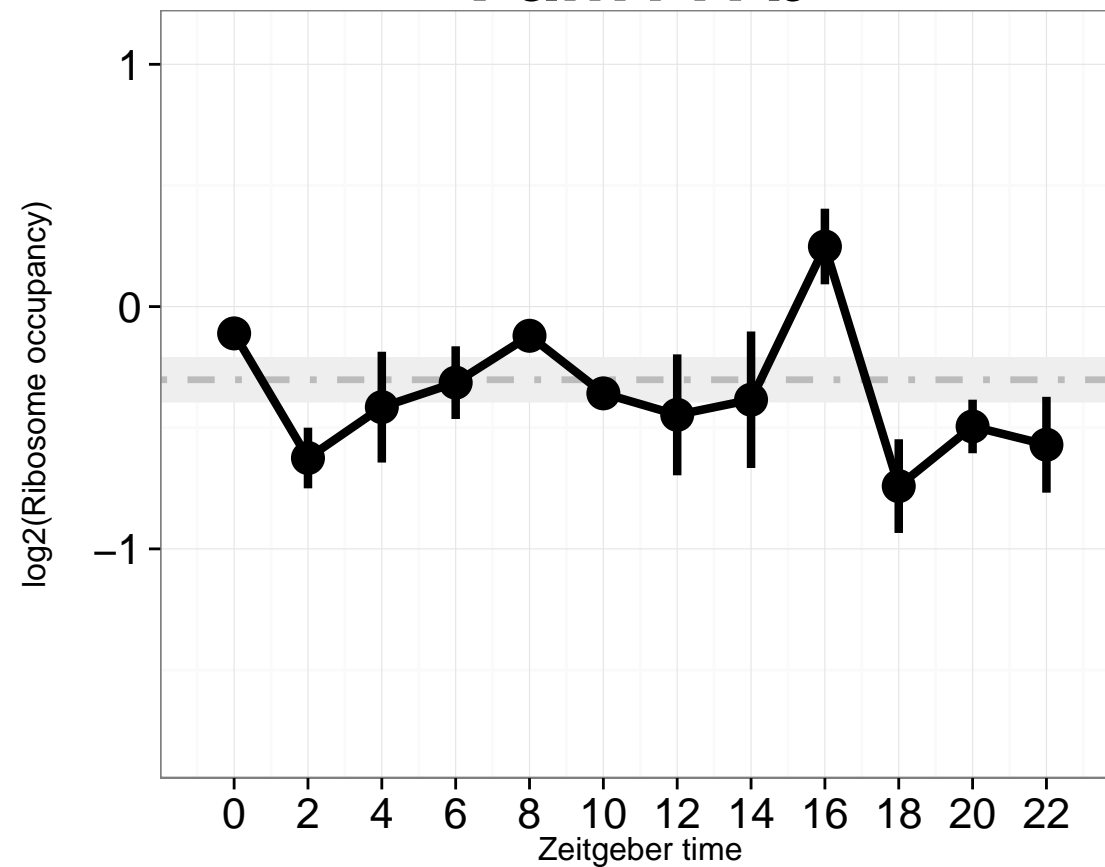

Supplement: SuppDataset_1.zip [file Fam117b_set_A.pdf › Supplemental Dataset 1/A-mRNA_nonrhyth_translation_nonrhyth/Fam117b_set_A.pdf]

# Fam118a

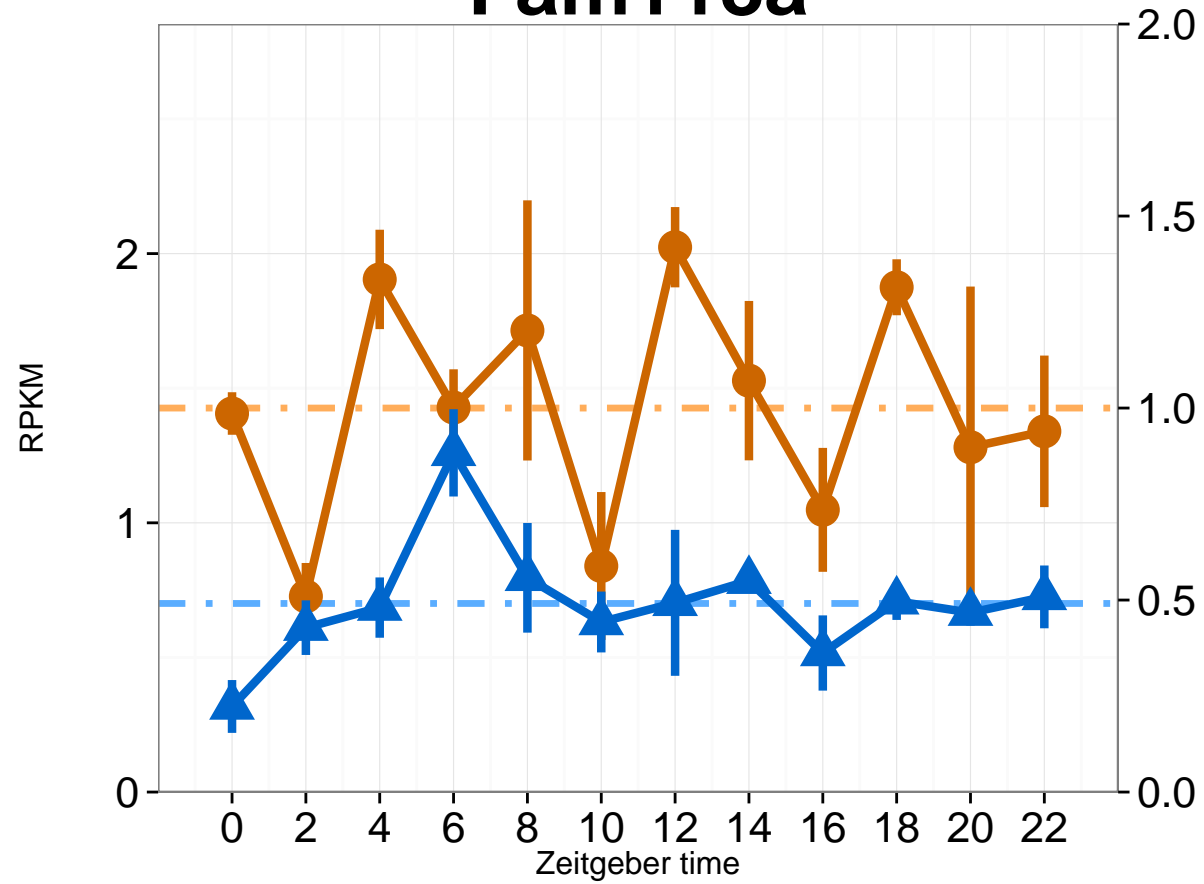

# Fam118a

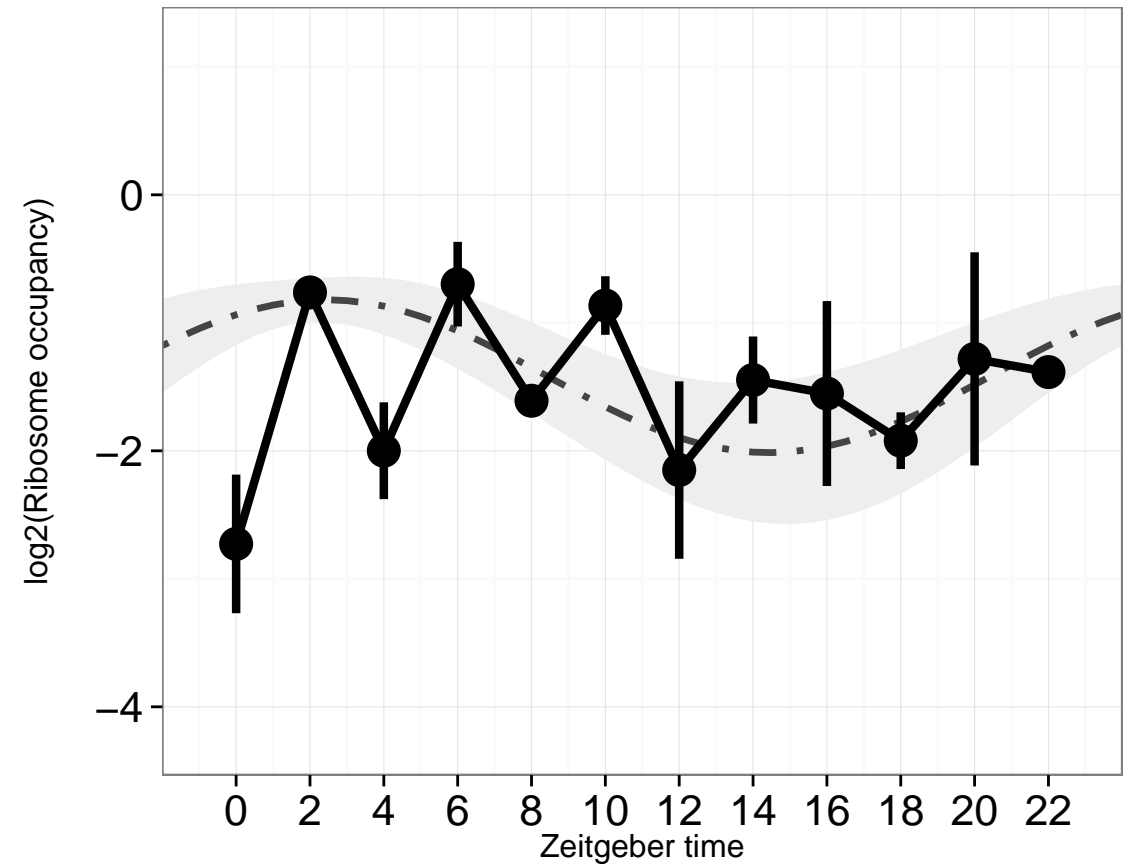

Supplement: SuppDataset_1.zip [file Fam118a_set_A.pdf › Supplemental Dataset 1/A-mRNA_nonrhyth_translation_nonrhyth/Fam118a_set_A.pdf]

# Fam118b

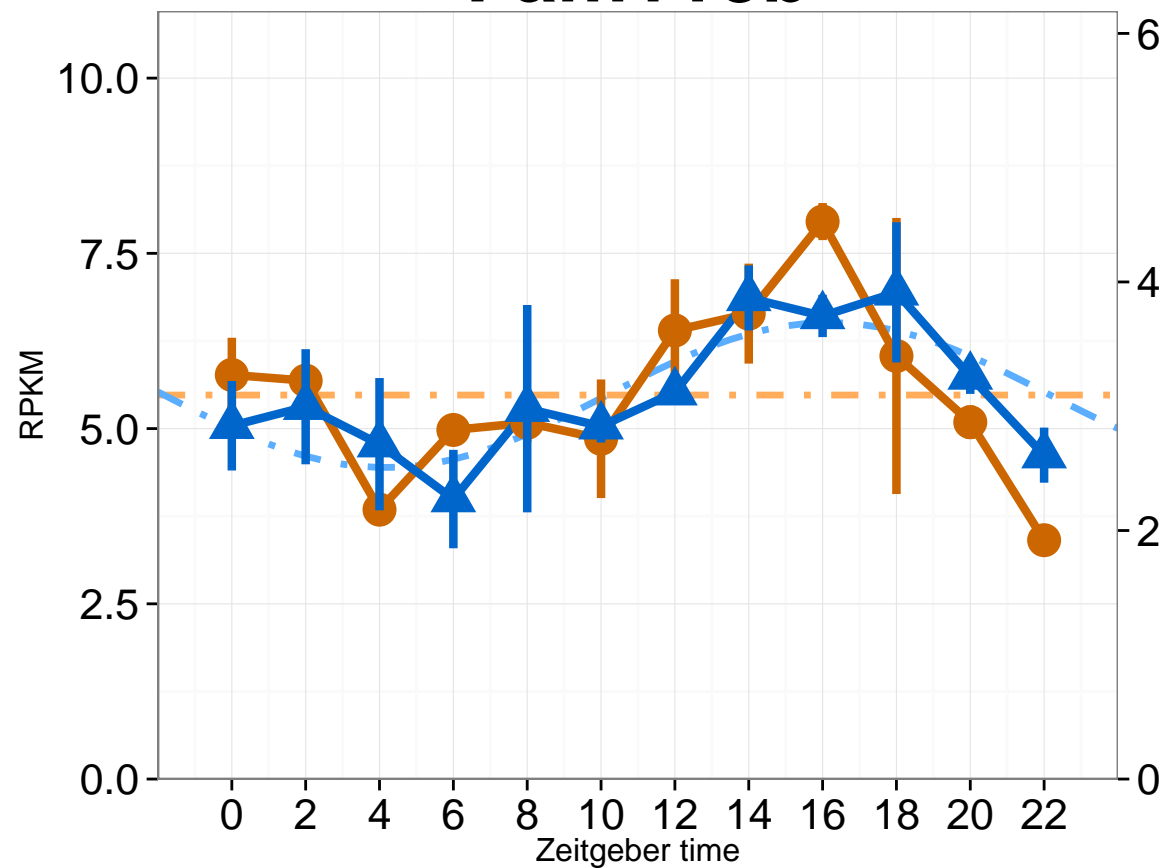

# Fam118b

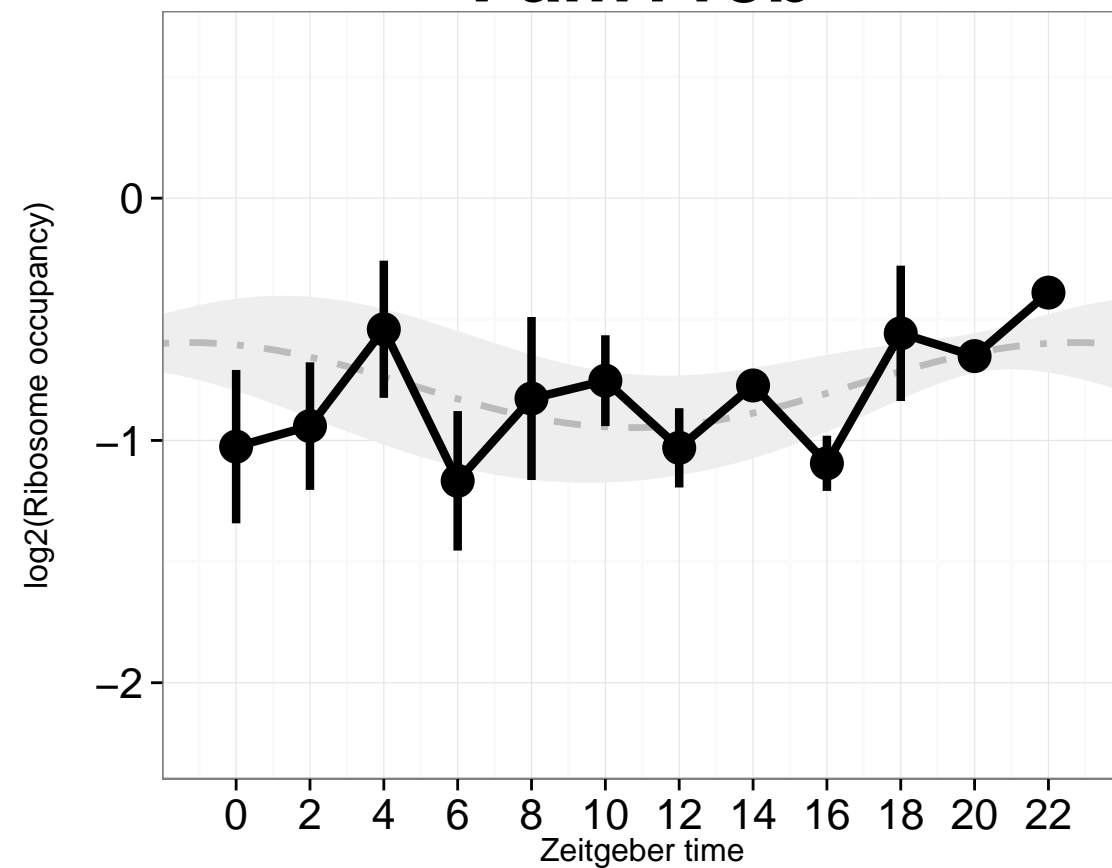

Supplement: SuppDataset_1.zip [file Fam118b_set_A.pdf › Supplemental Dataset 1/A-mRNA_nonrhyth_translation_nonrhyth/Fam118b_set_A.pdf]

# Fam120a

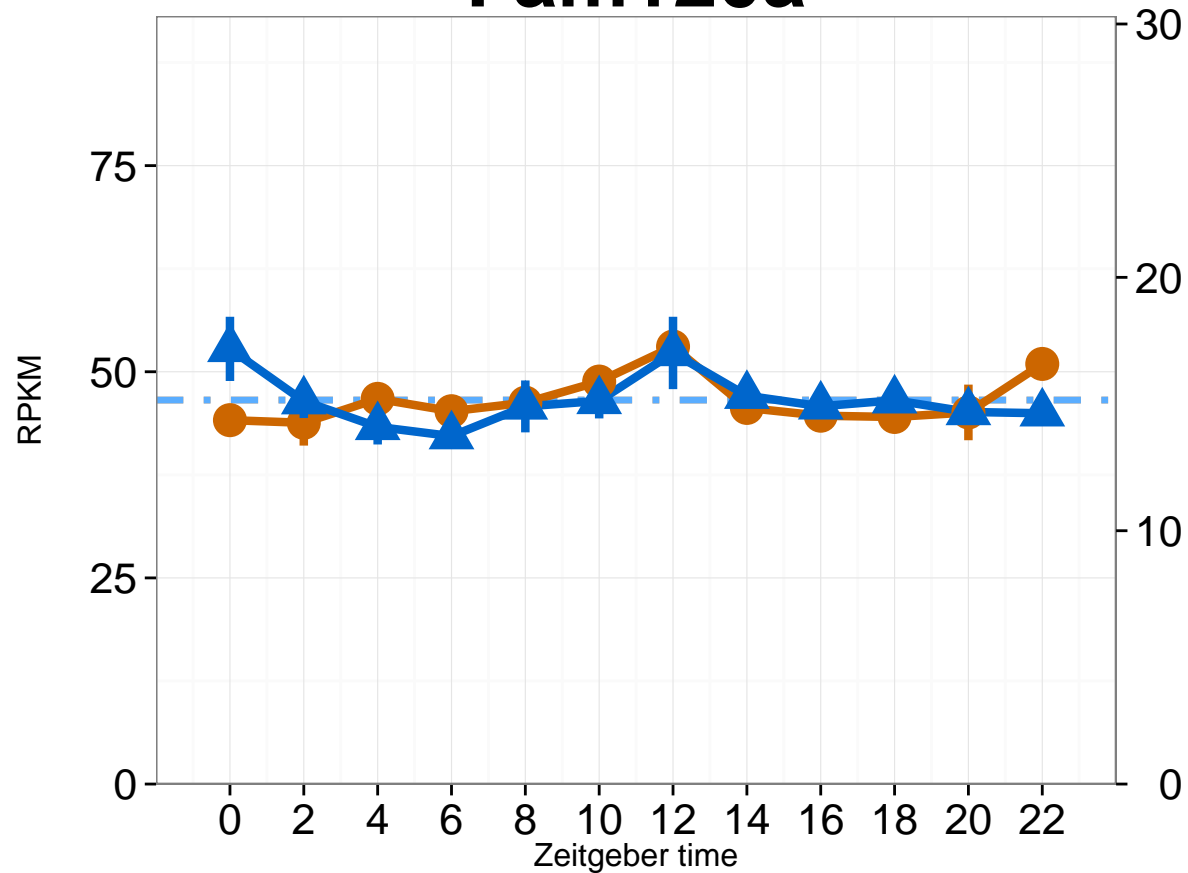

# Fam120a

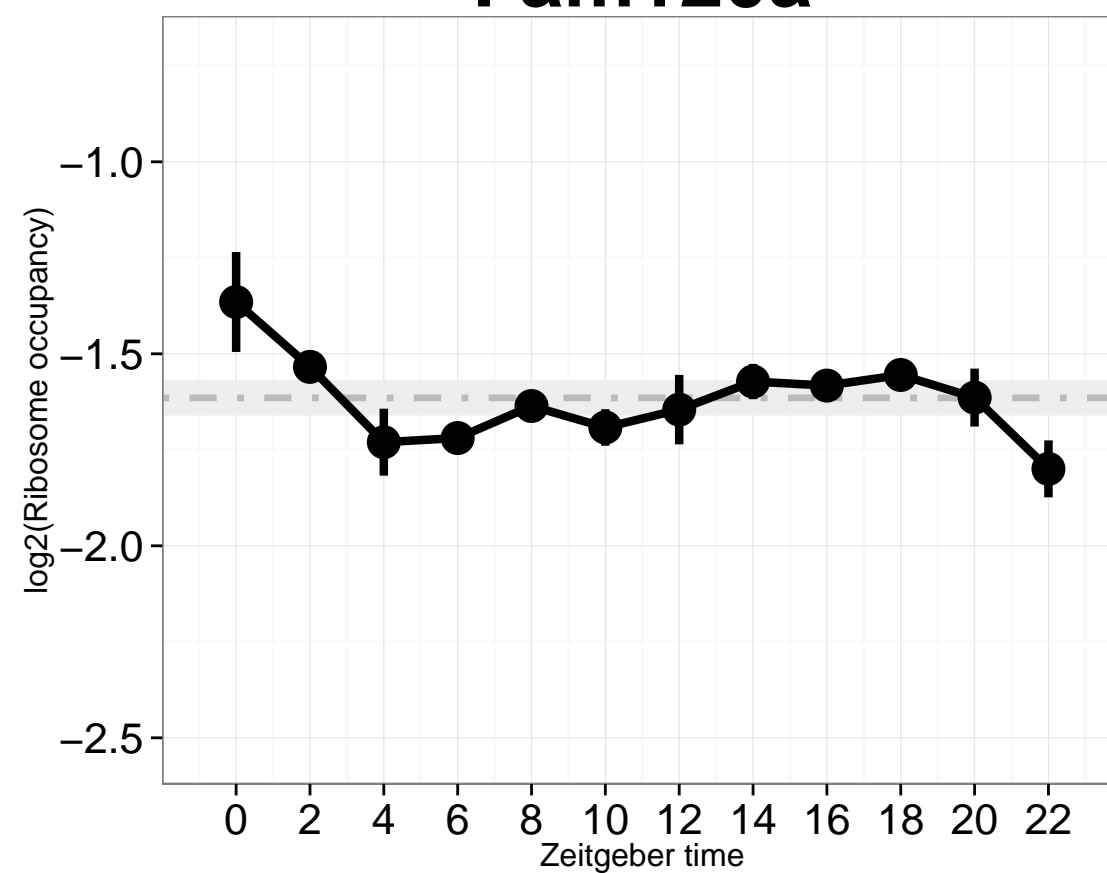

Supplement: SuppDataset_1.zip [file Fam120a_set_A.pdf › Supplemental Dataset 1/A-mRNA_nonrhyth_translation_nonrhyth/Fam120a_set_A.pdf]

# Fam120b

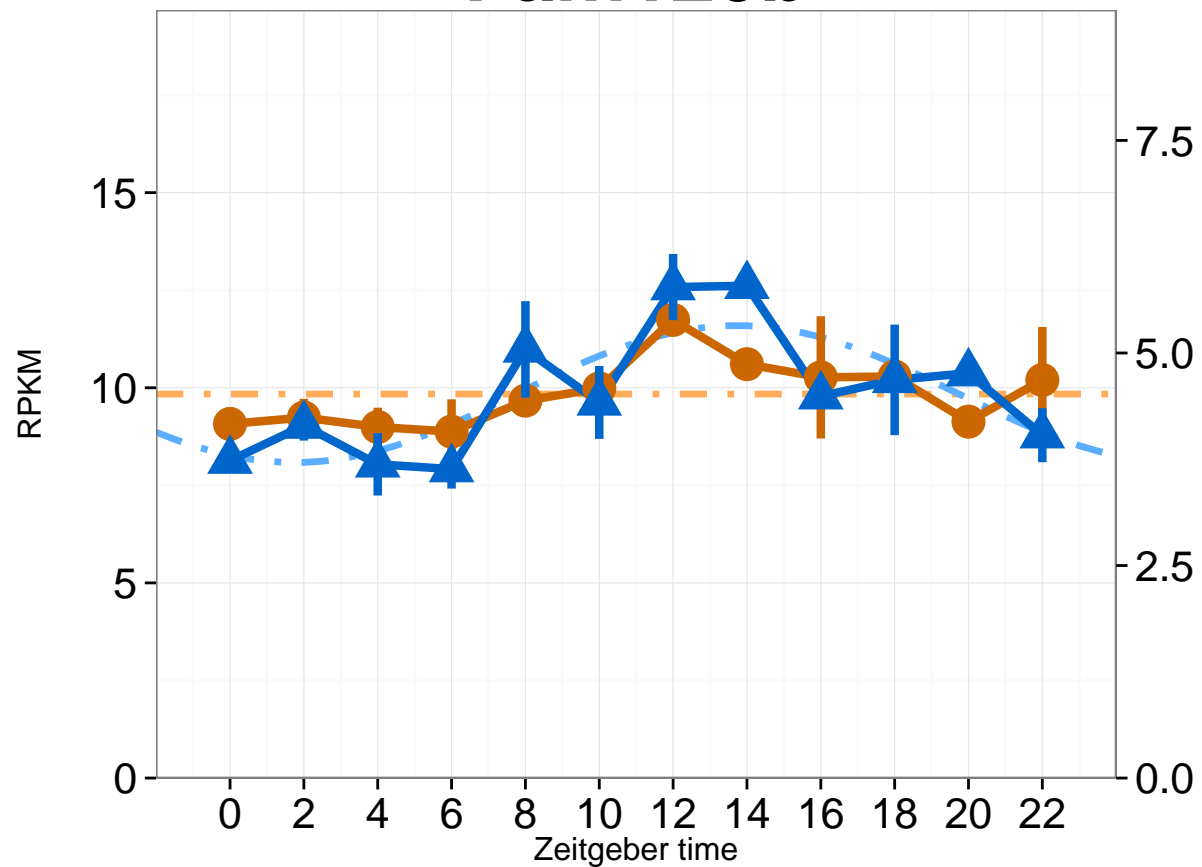

# Fam120b

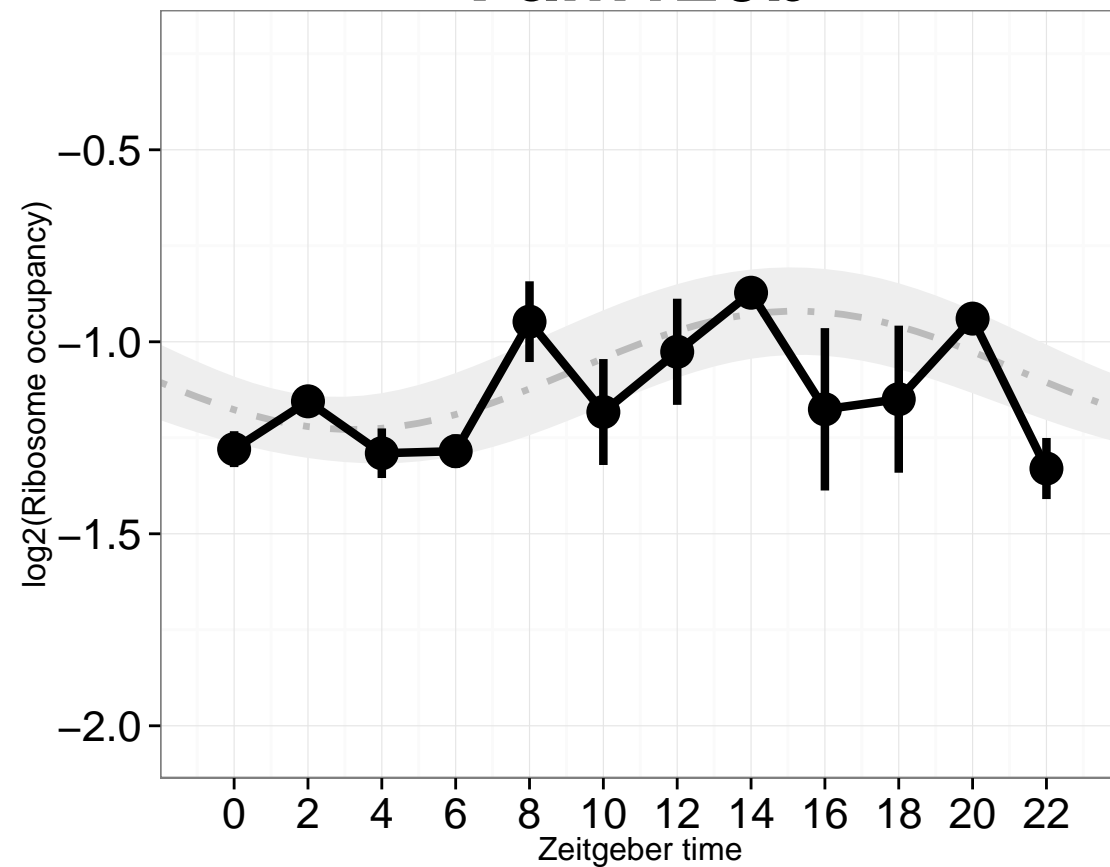

Supplement: SuppDataset_1.zip [file Fam120b_set_A.pdf › Supplemental Dataset 1/A-mRNA_nonrhyth_translation_nonrhyth/Fam120b_set_A.pdf]

# Fam122a

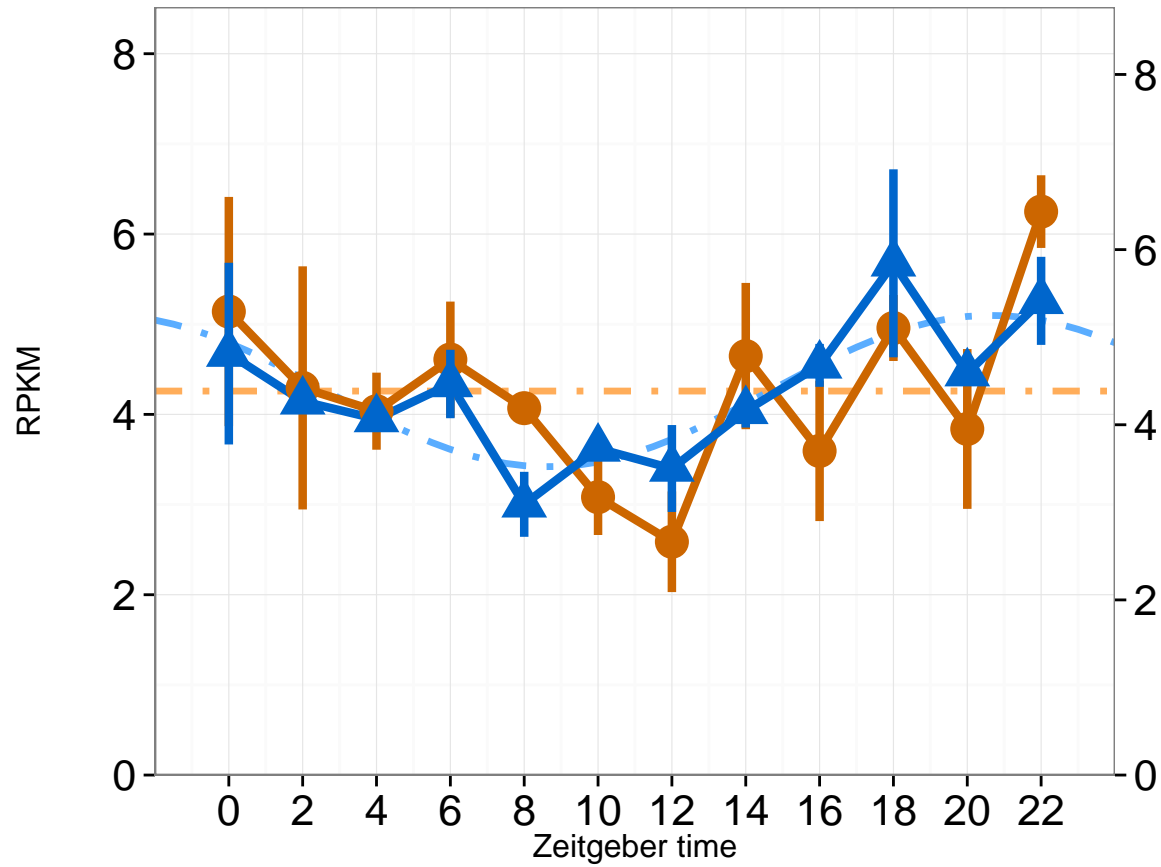

# Fam122a

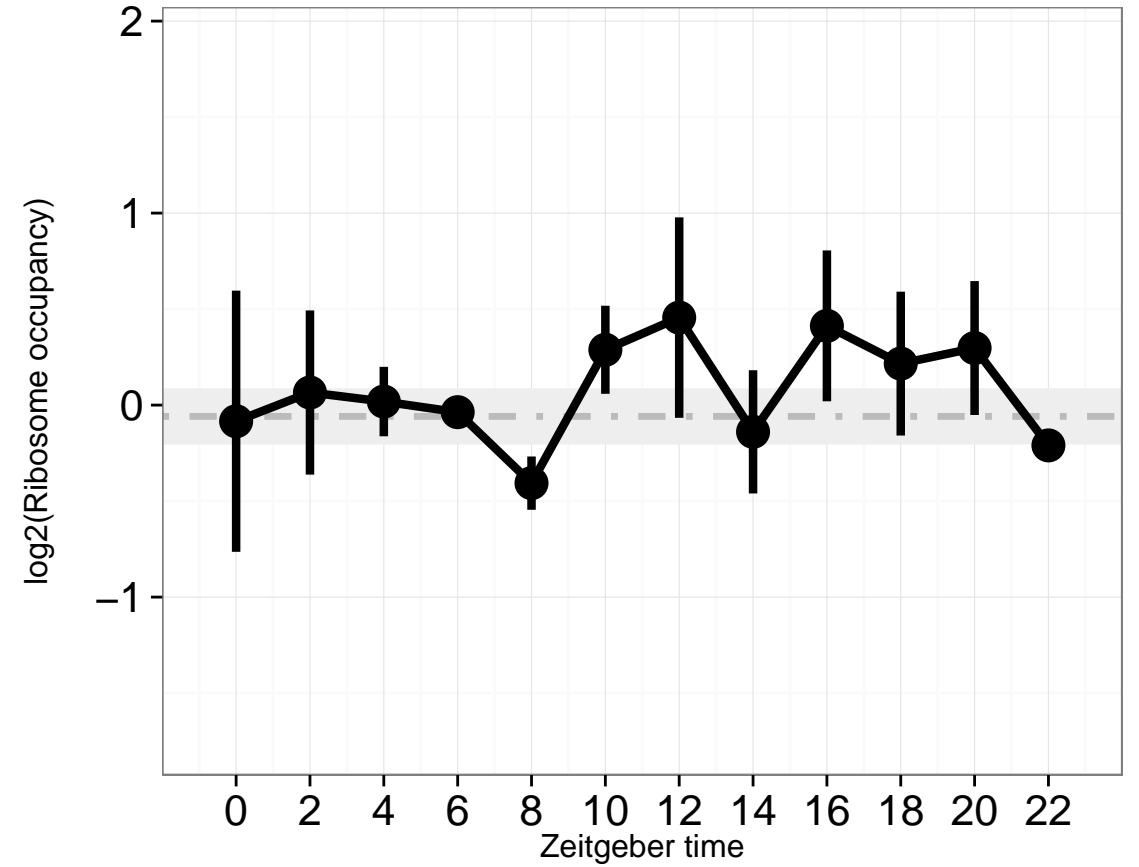

Supplement: SuppDataset_1.zip [file Fam122a_set_A.pdf › Supplemental Dataset 1/A-mRNA_nonrhyth_translation_nonrhyth/Fam122a_set_A.pdf]

# Fam129a

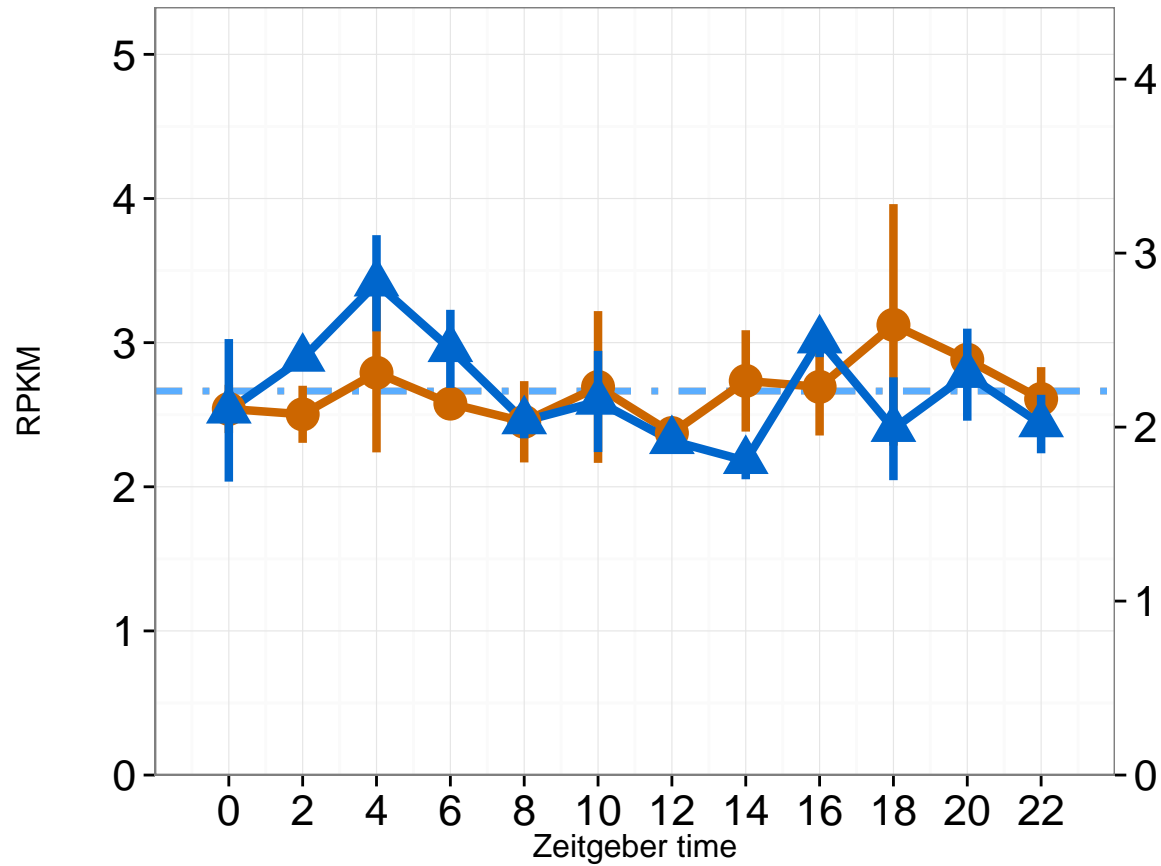

# Fam129a

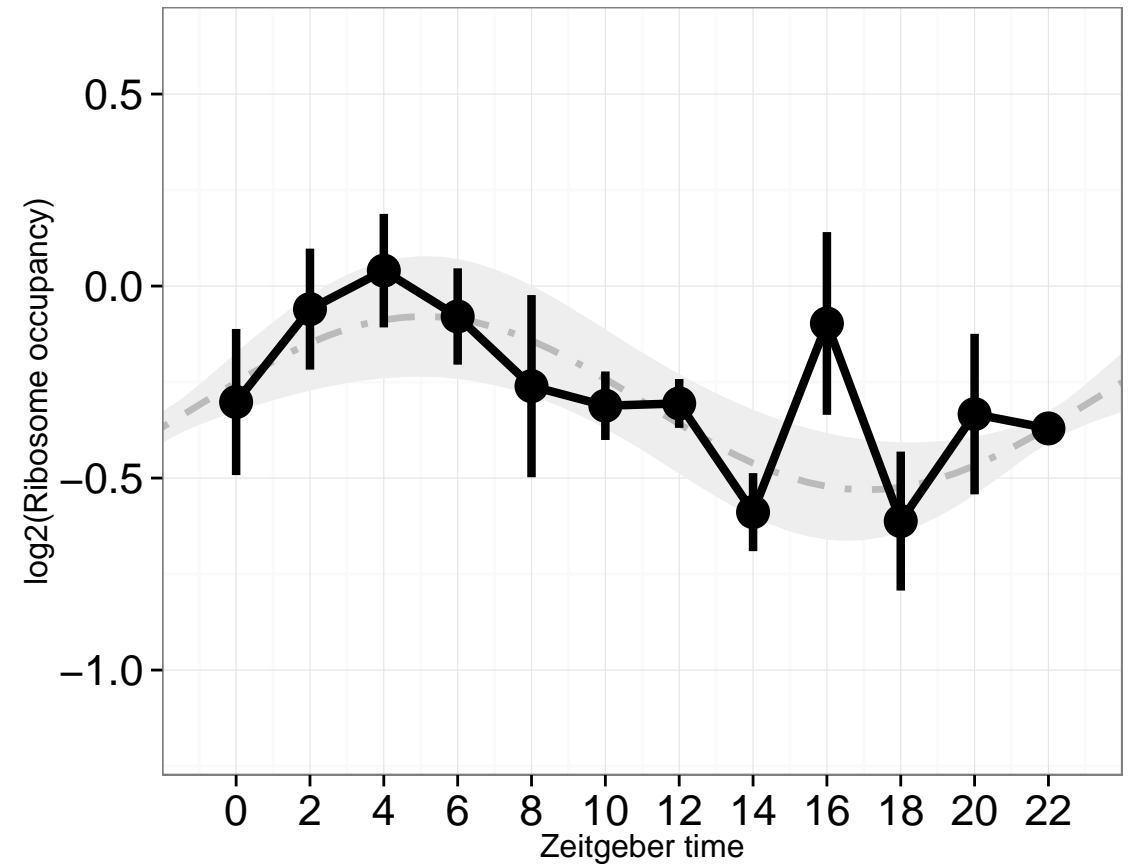

Supplement: SuppDataset_1.zip [file Fam129a_set_A.pdf › Supplemental Dataset 1/A-mRNA_nonrhyth_translation_nonrhyth/Fam129a_set_A.pdf]

# Fam131c

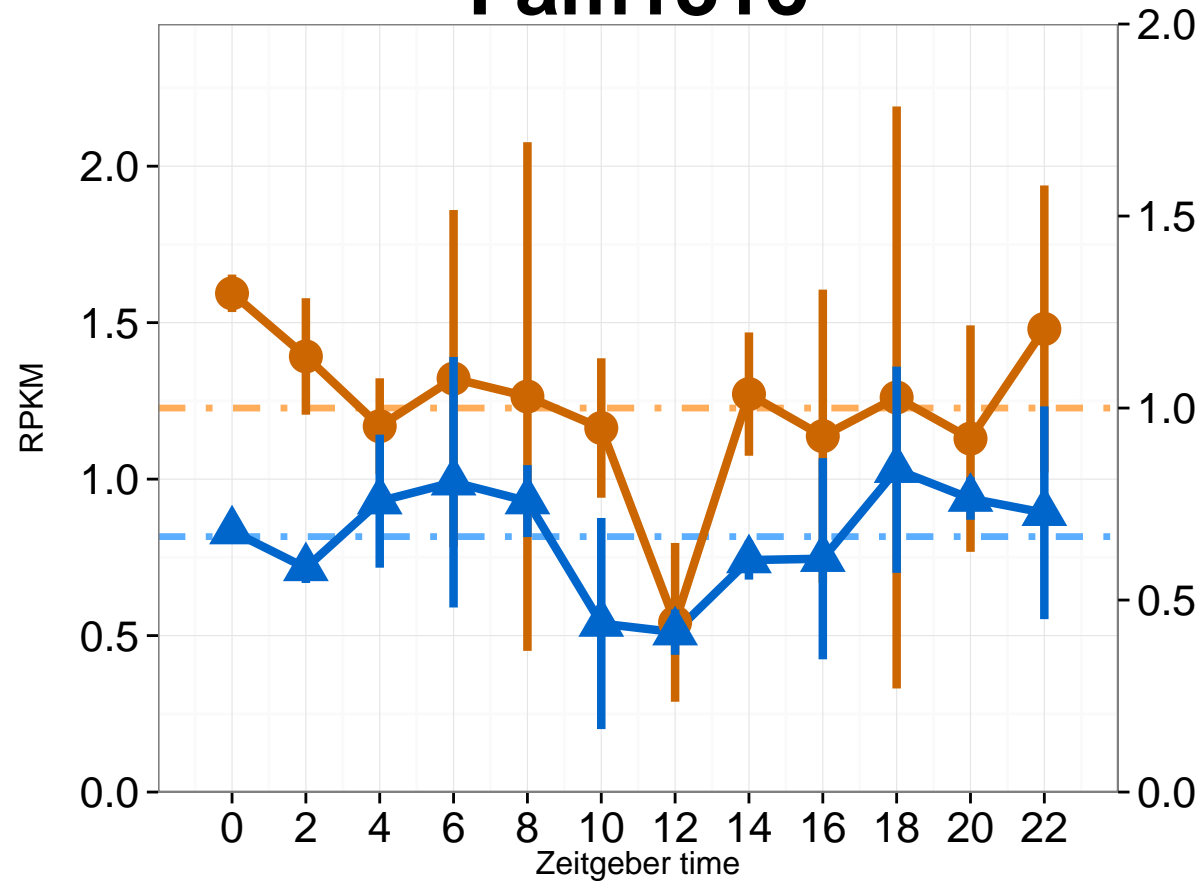

# Fam131c

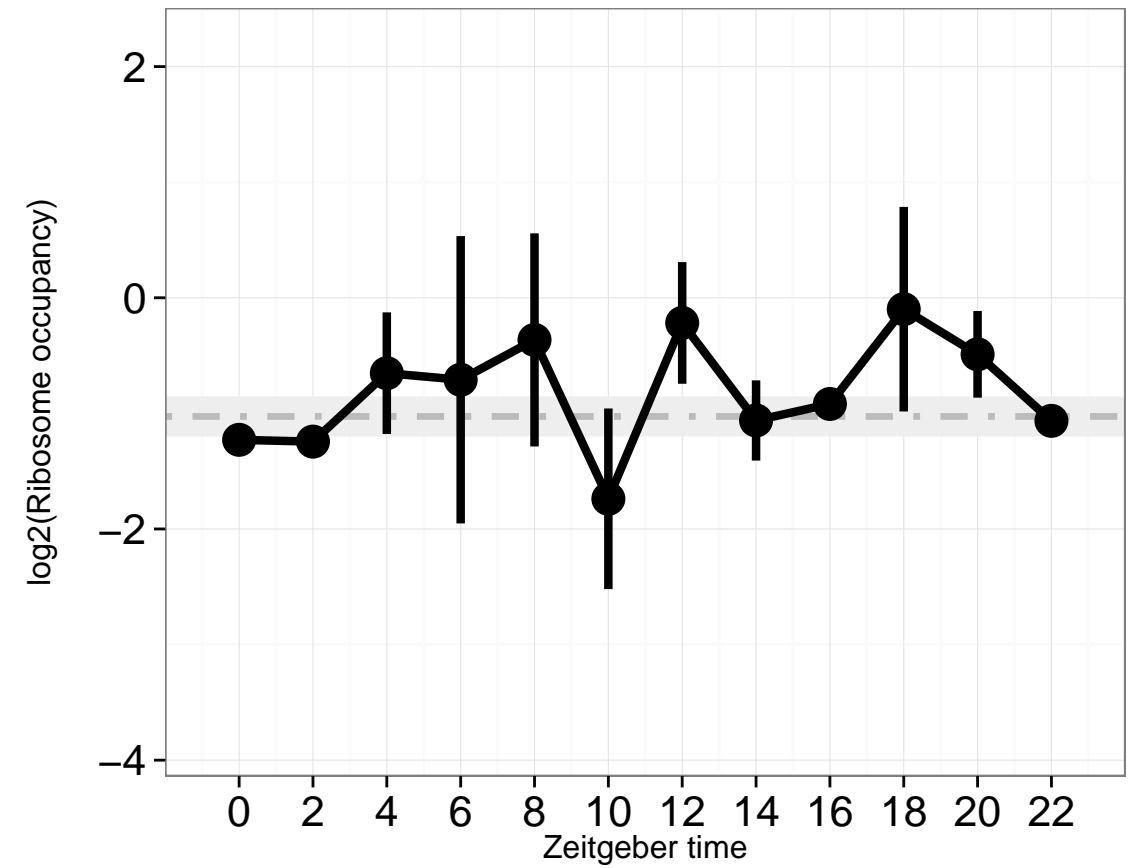

Supplement: SuppDataset_1.zip [file Fam131c_set_A.pdf › Supplemental Dataset 1/A-mRNA_nonrhyth_translation_nonrhyth/Fam131c_set_A.pdf]

**Fam132a**

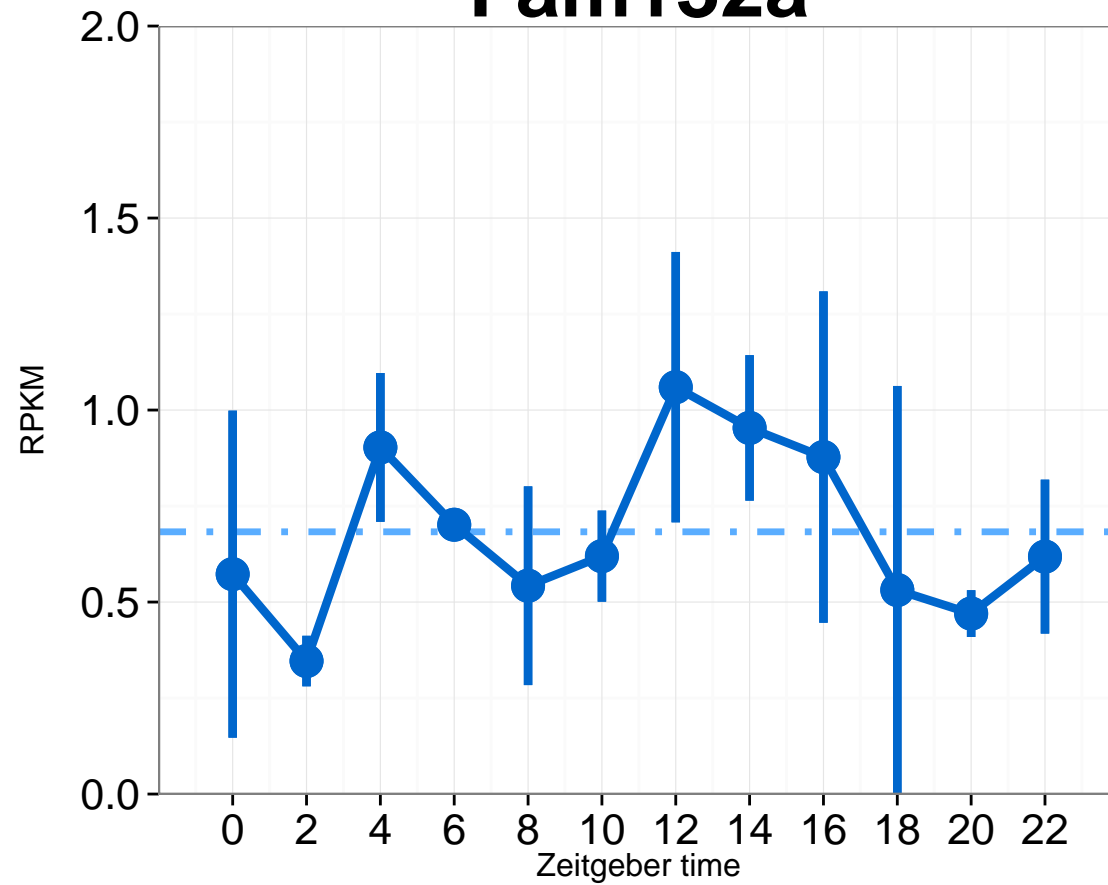

**Fam132a log2(Ribosome occupanc**

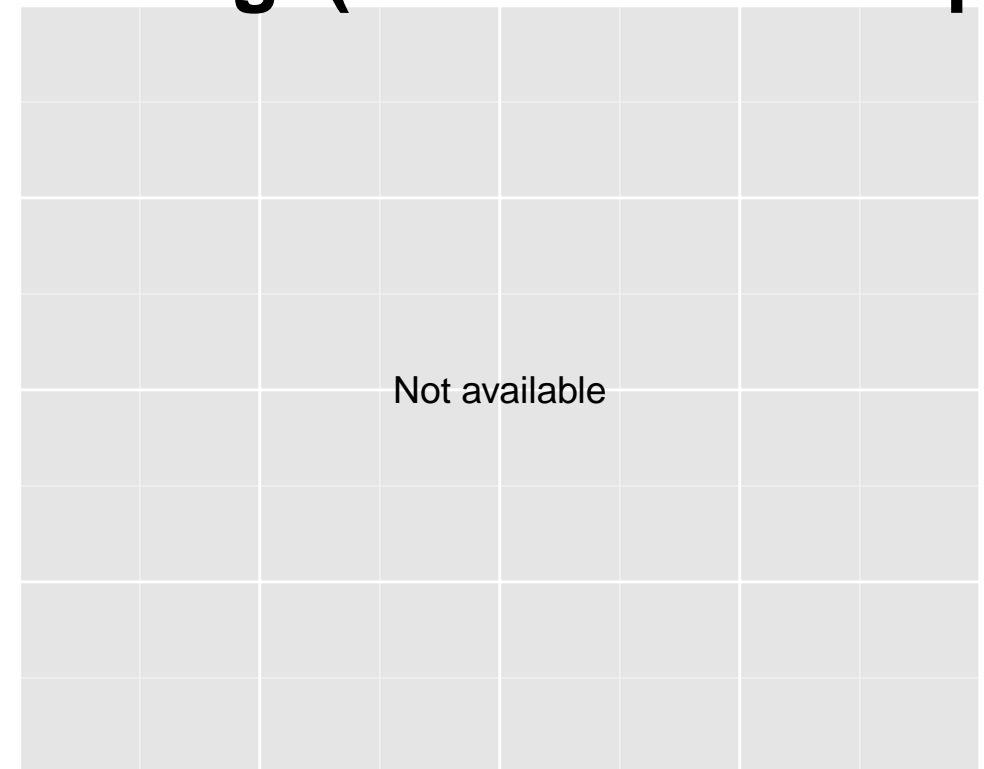

Supplement: SuppDataset_1.zip [file Fam132a_set_A.pdf › Supplemental Dataset 1/A-mRNA_nonrhyth_translation_nonrhyth/Fam132a_set_A.pdf]

# Fam133b

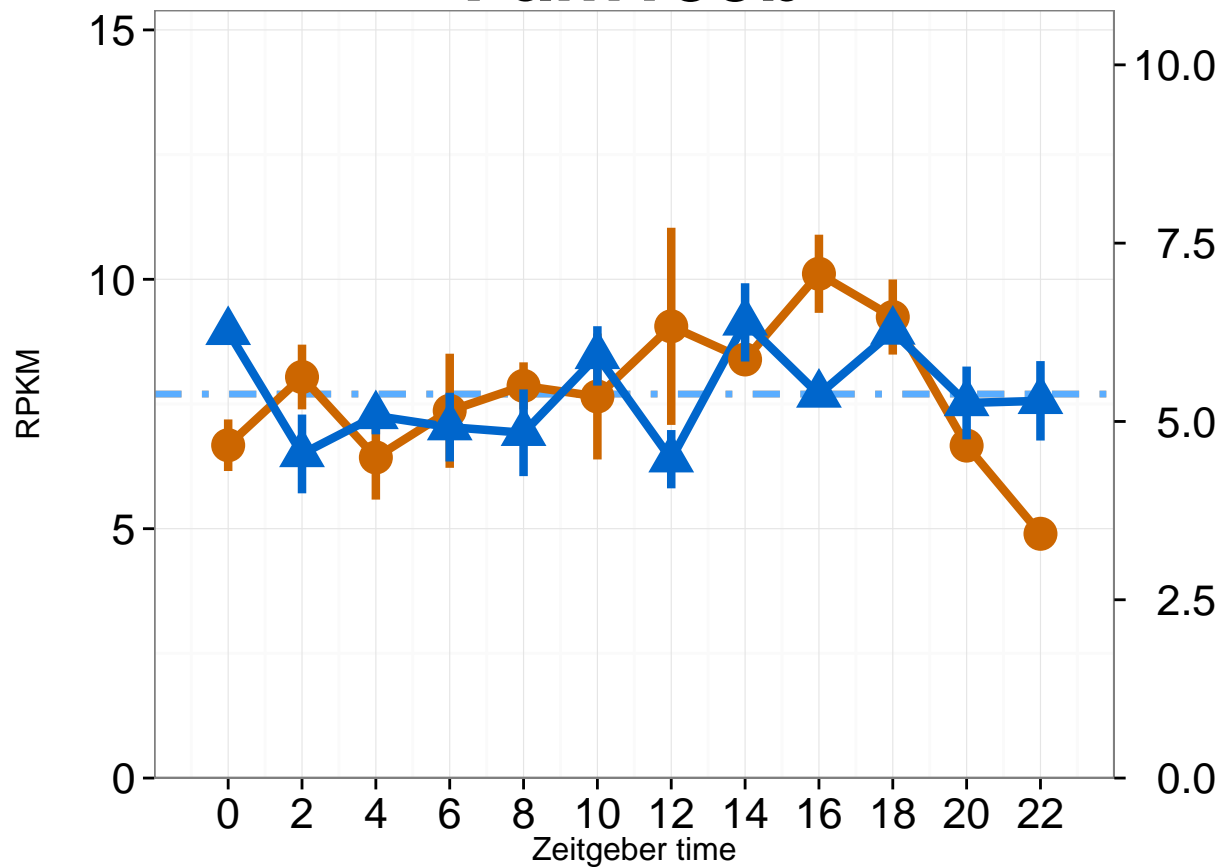

# Fam133b

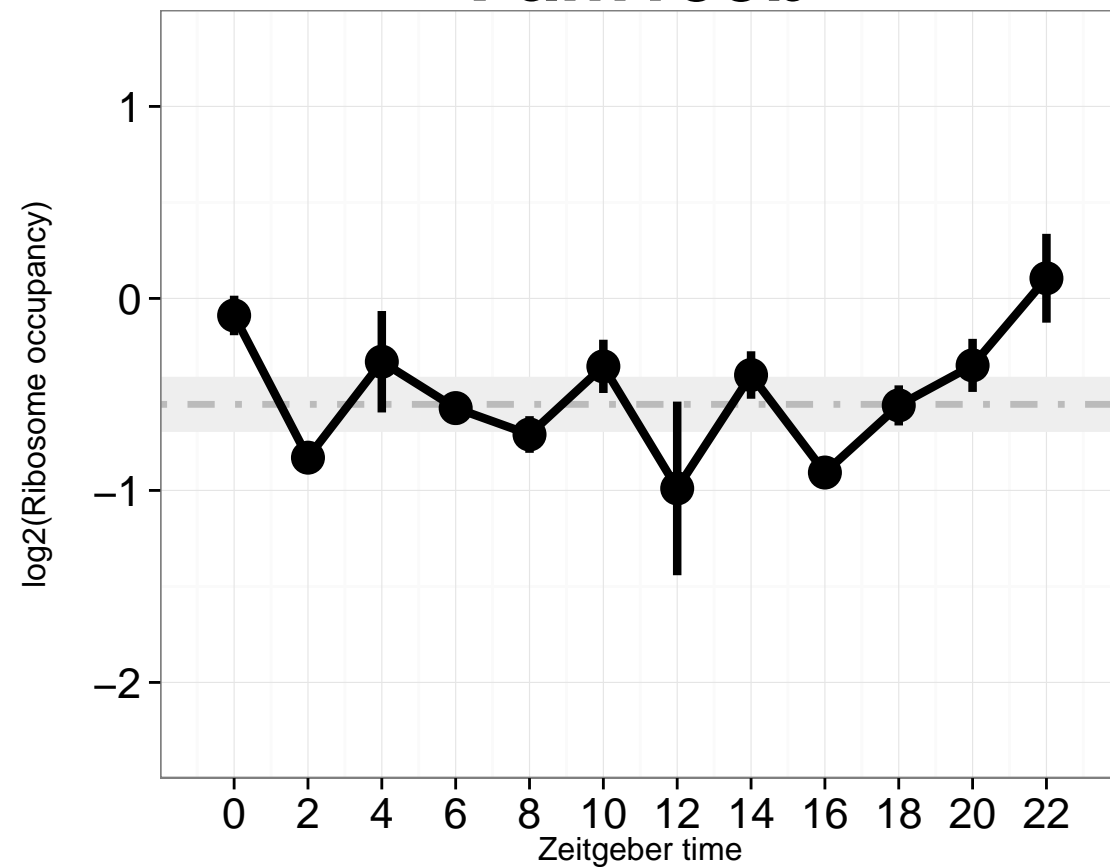

Supplement: SuppDataset_1.zip [file Fam133b_set_A.pdf › Supplemental Dataset 1/A-mRNA_nonrhyth_translation_nonrhyth/Fam133b_set_A.pdf]

# Fam134a

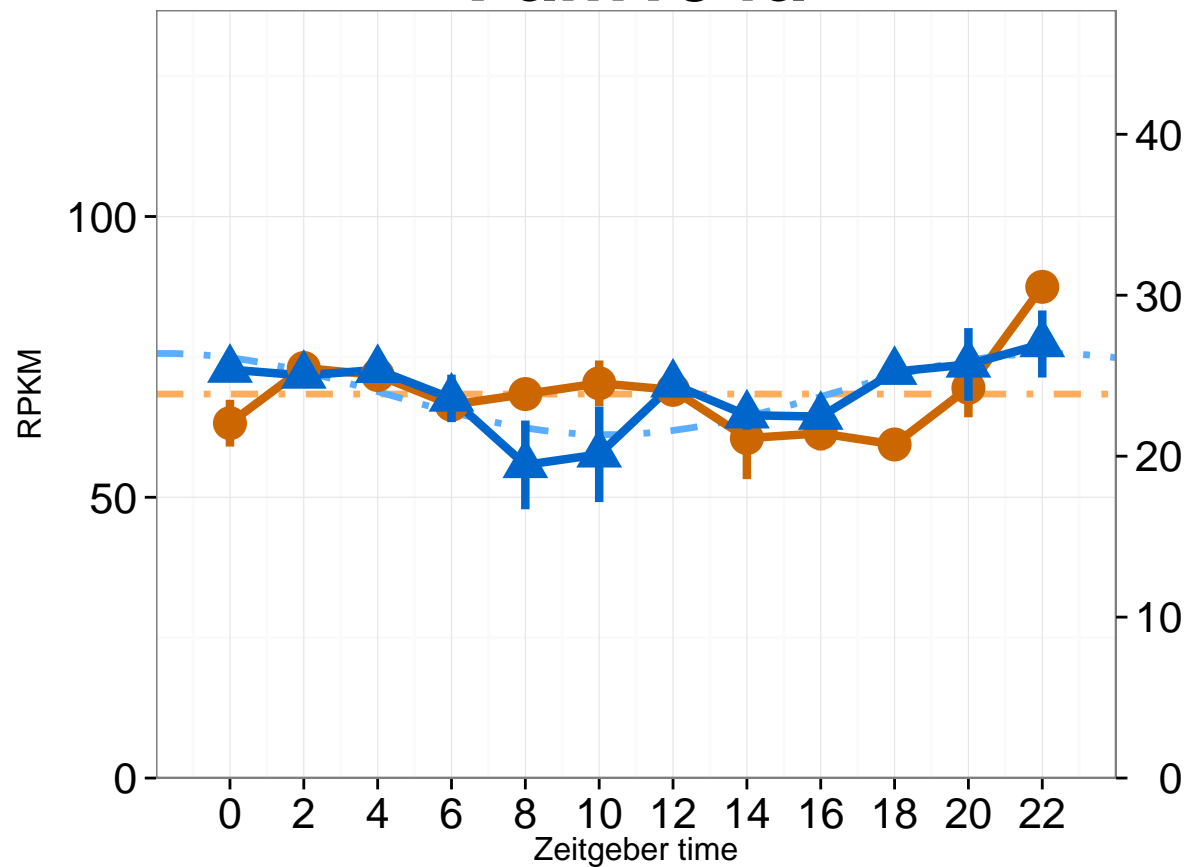

# Fam134a

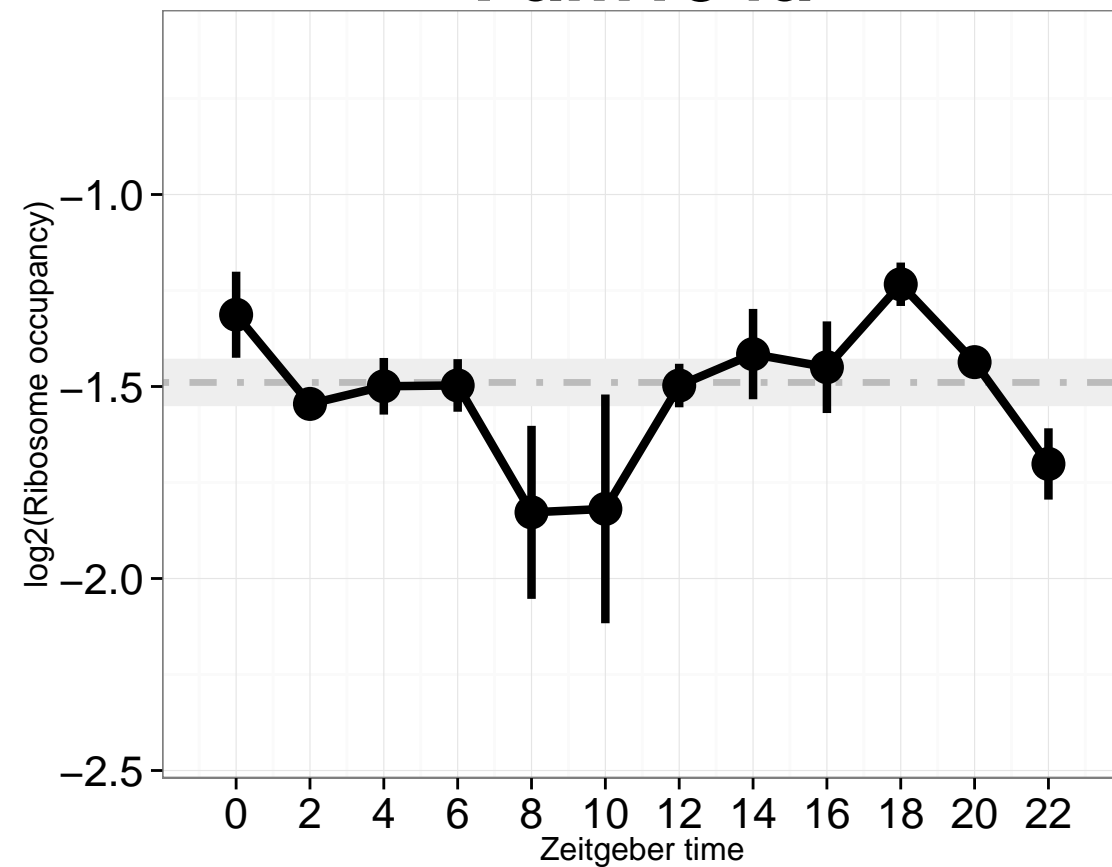

Supplement: SuppDataset_1.zip [file Fam134a_set_A.pdf › Supplemental Dataset 1/A-mRNA_nonrhyth_translation_nonrhyth/Fam134a_set_A.pdf]

# Fam134b

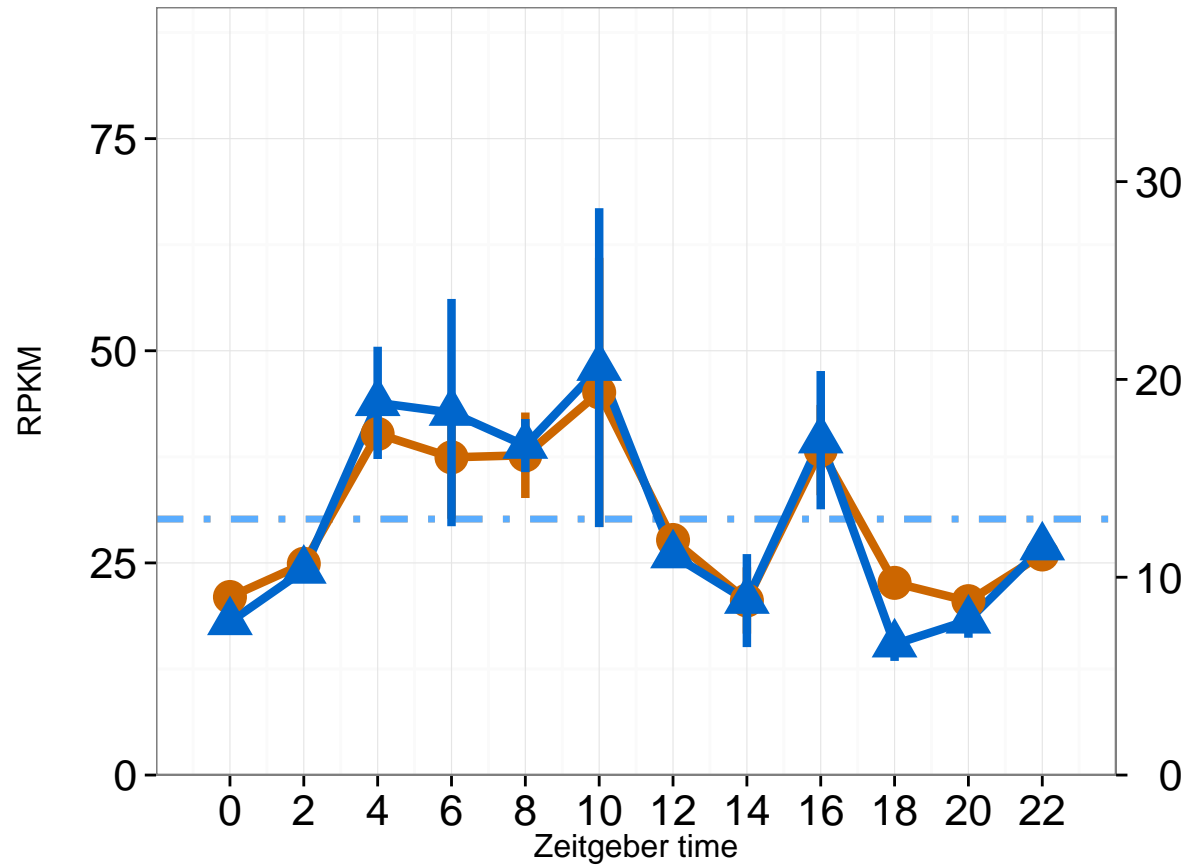

# Fam134b

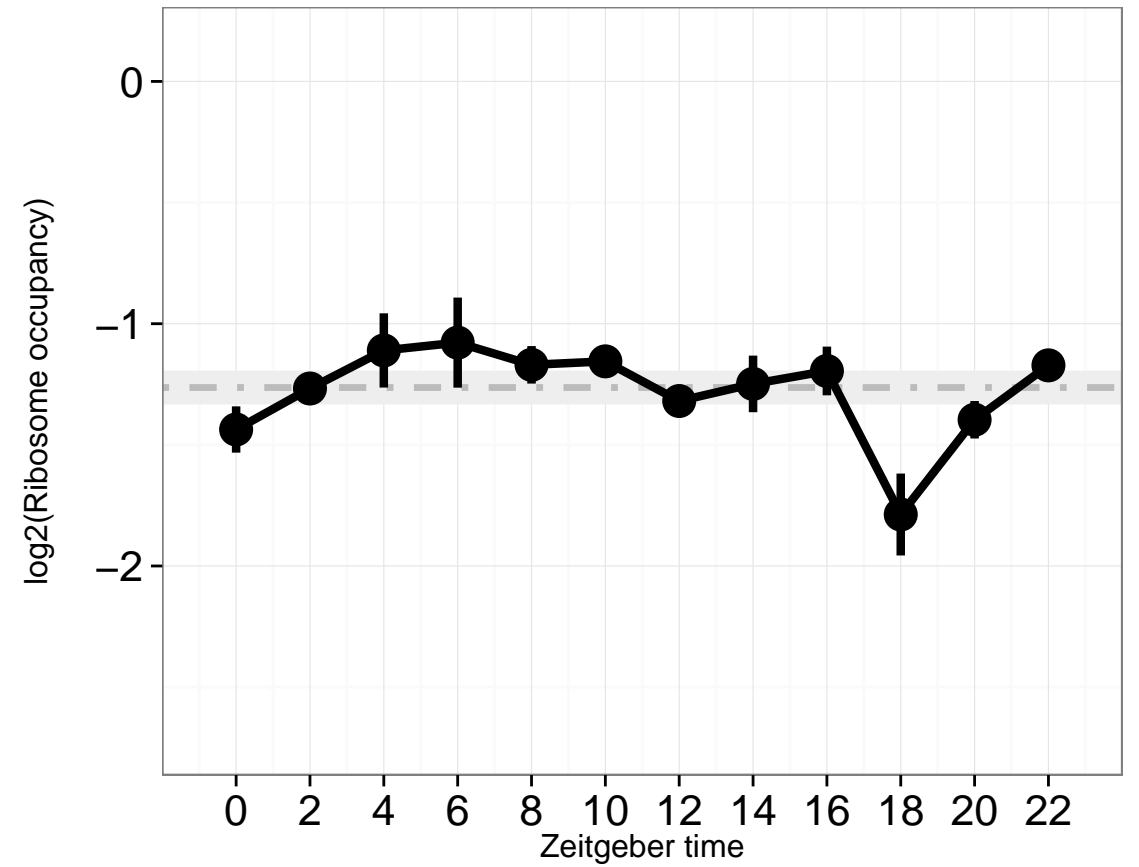

Supplement: SuppDataset_1.zip [file Fam134b_set_A.pdf › Supplemental Dataset 1/A-mRNA_nonrhyth_translation_nonrhyth/Fam134b_set_A.pdf]

# Fam134c

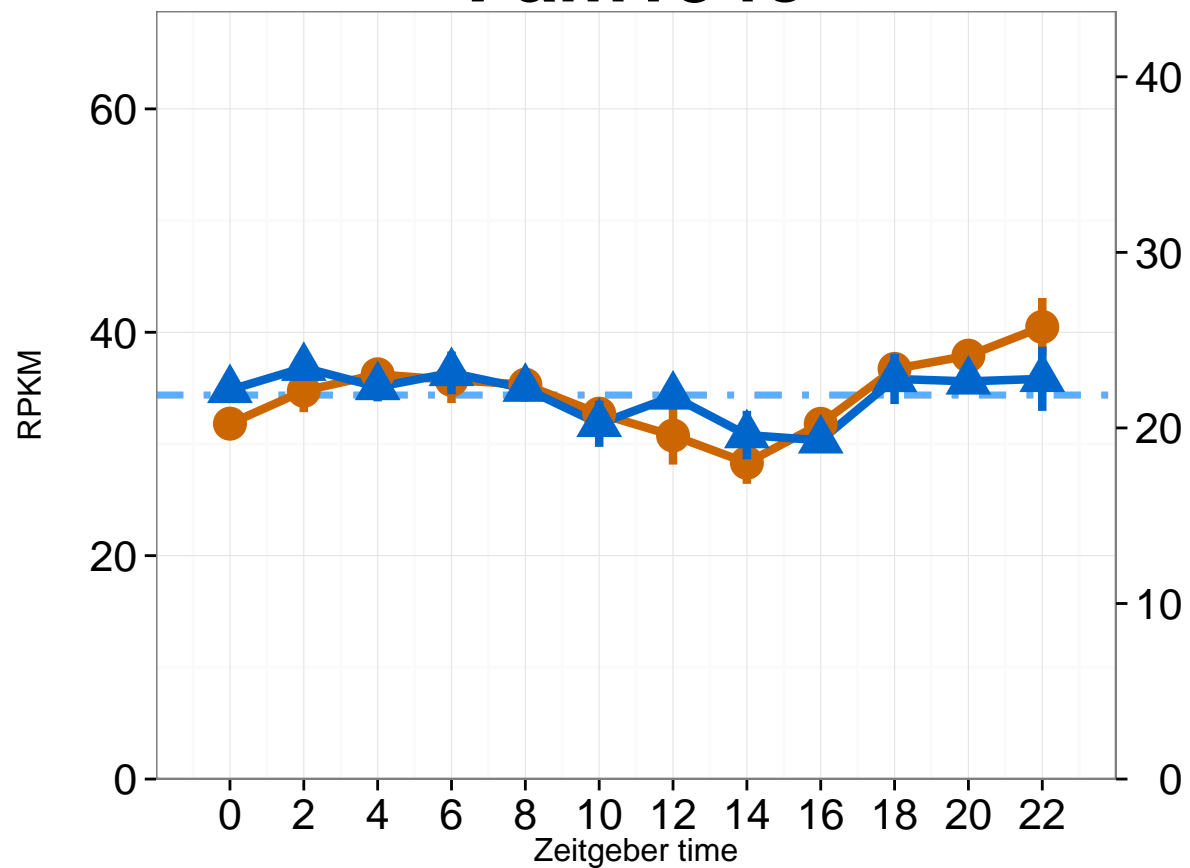

# Fam134c

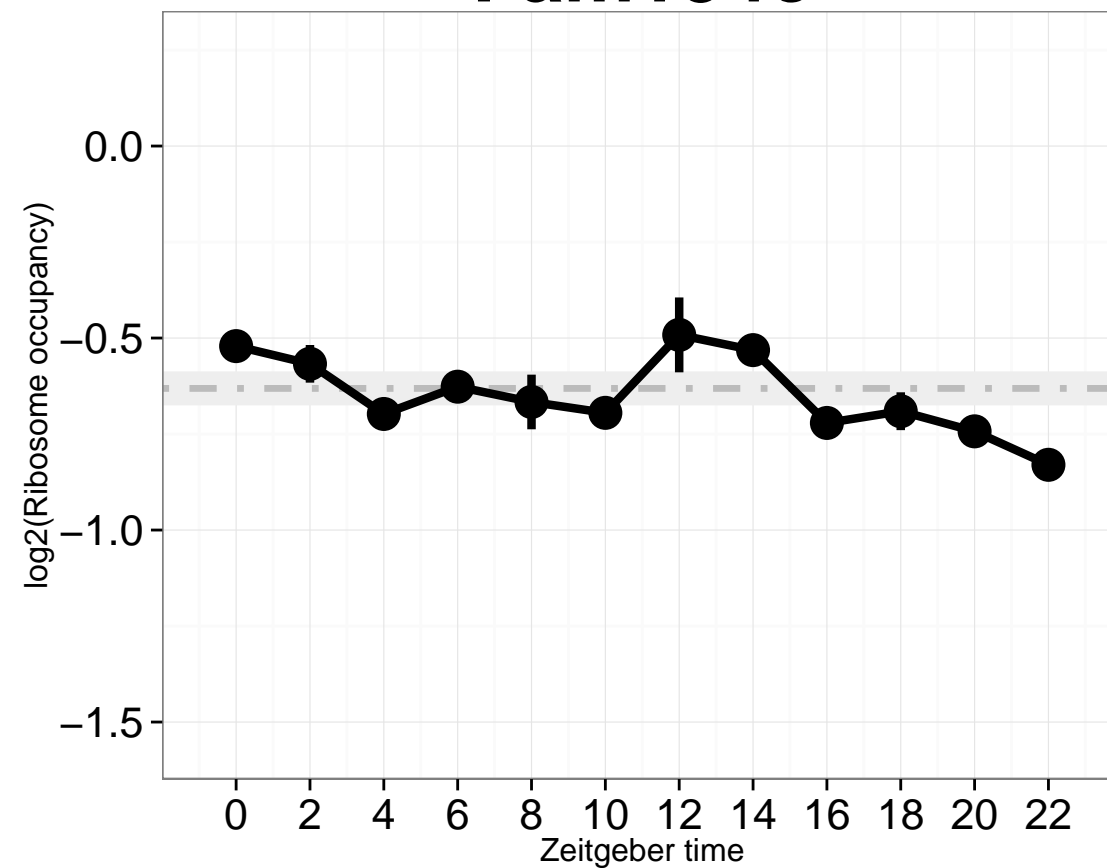

Supplement: SuppDataset_1.zip [file Fam134c_set_A.pdf › Supplemental Dataset 1/A-mRNA_nonrhyth_translation_nonrhyth/Fam134c_set_A.pdf]

# Fam135a

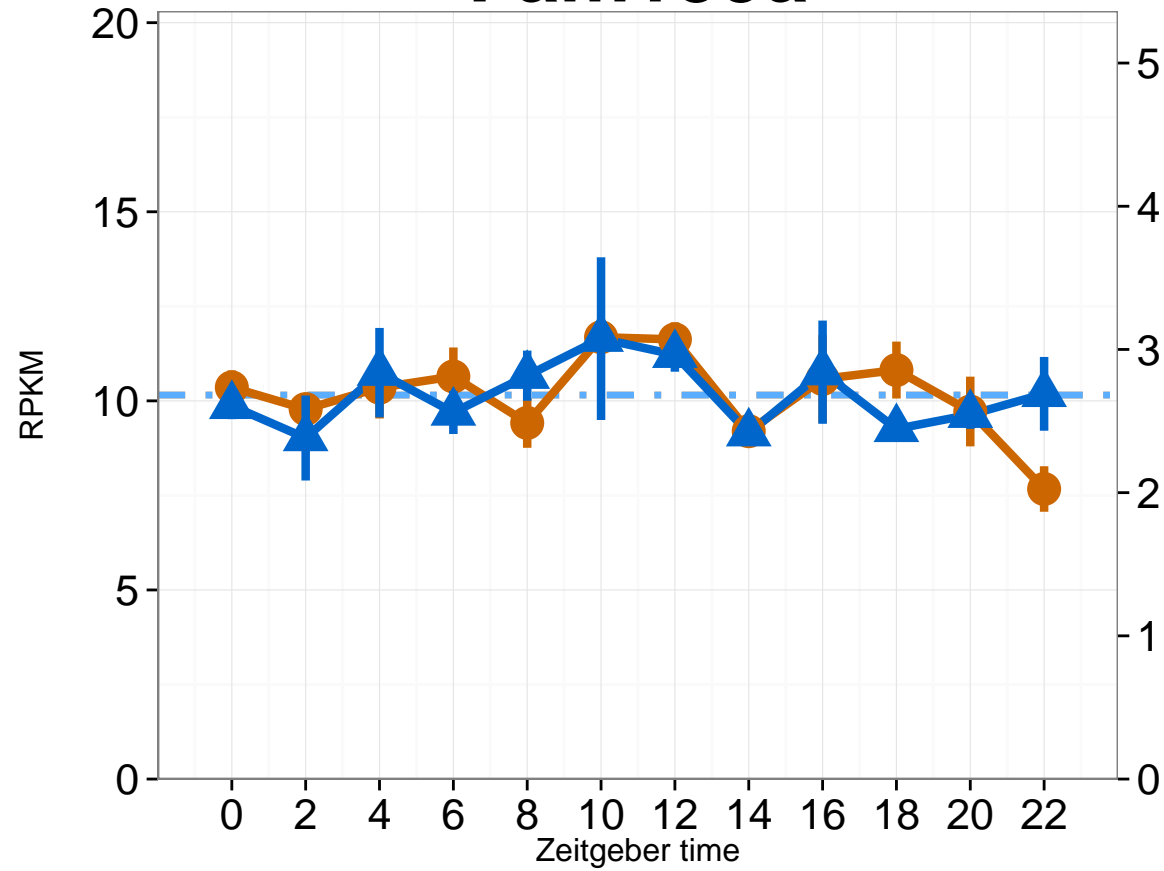

# Fam135a

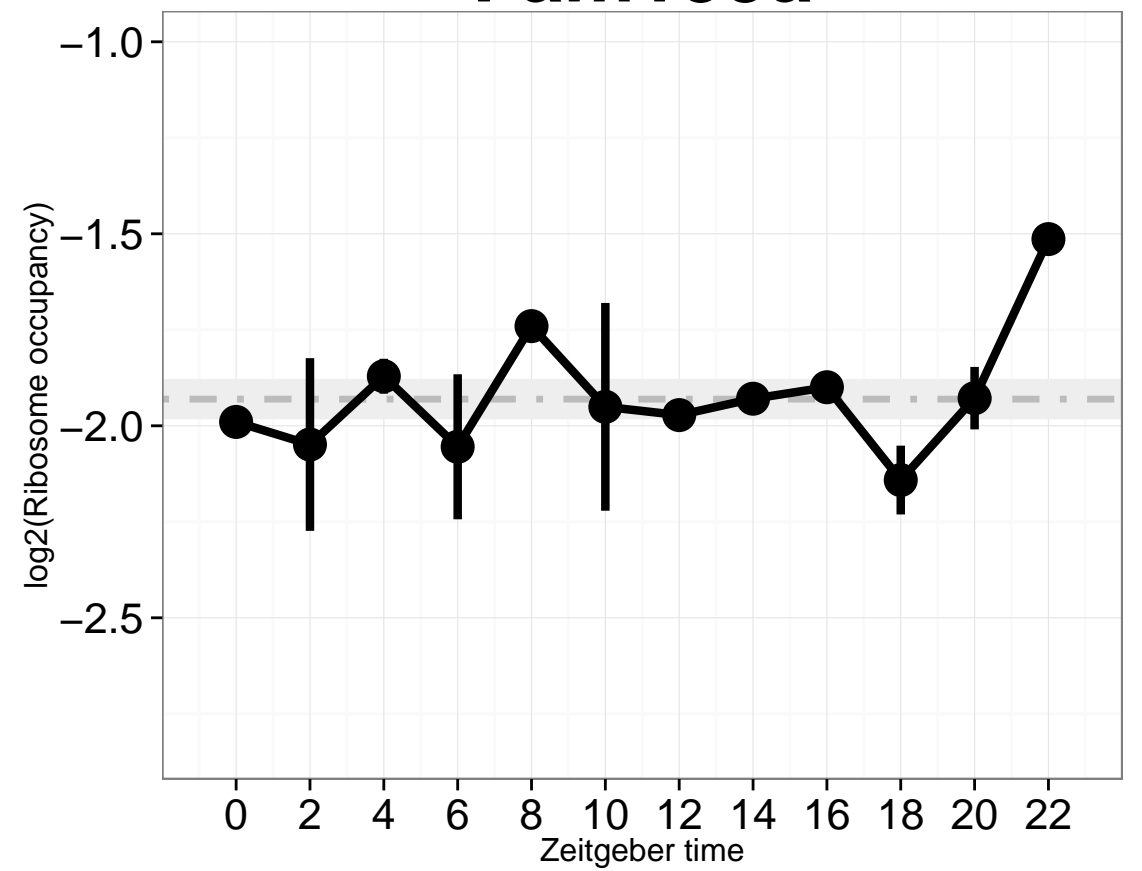

Supplement: SuppDataset_1.zip [file Fam135a_set_A.pdf › Supplemental Dataset 1/A-mRNA_nonrhyth_translation_nonrhyth/Fam135a_set_A.pdf]

# Fam136a

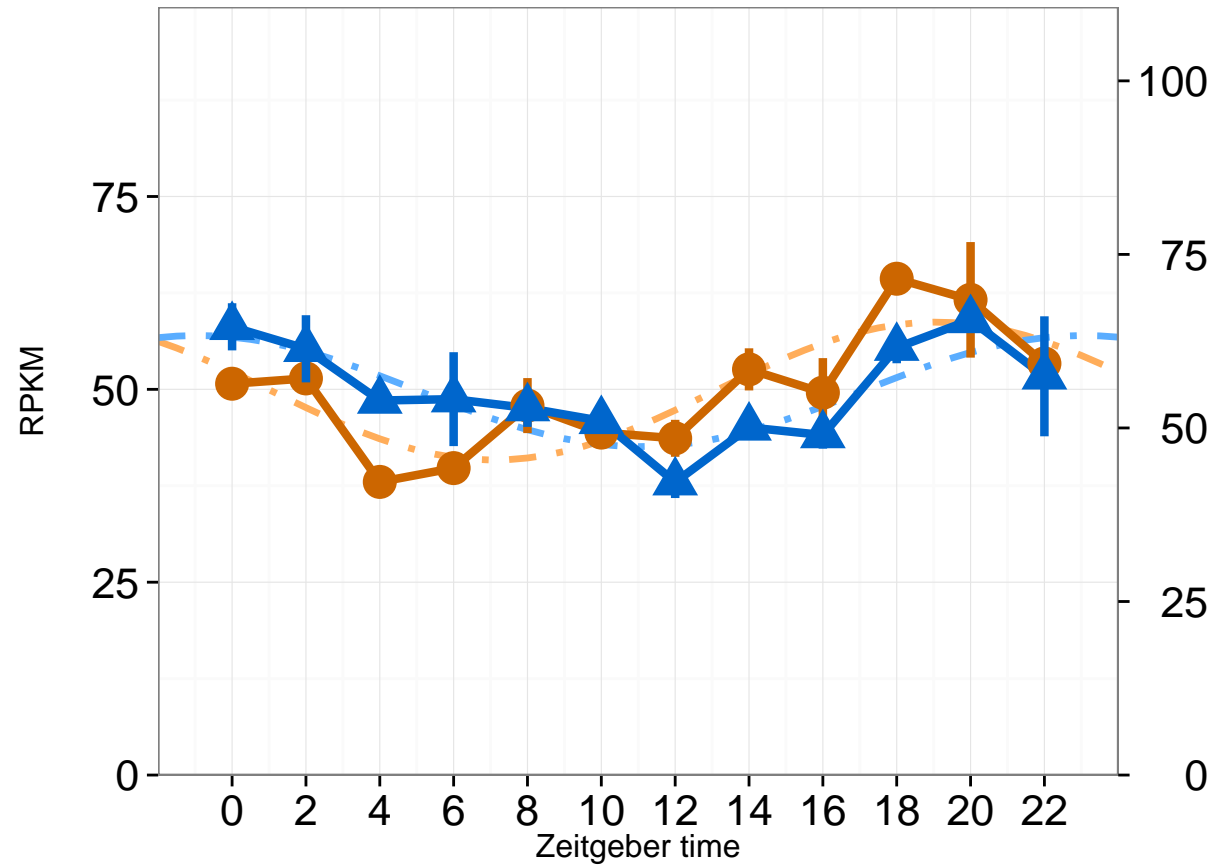

# Fam136a

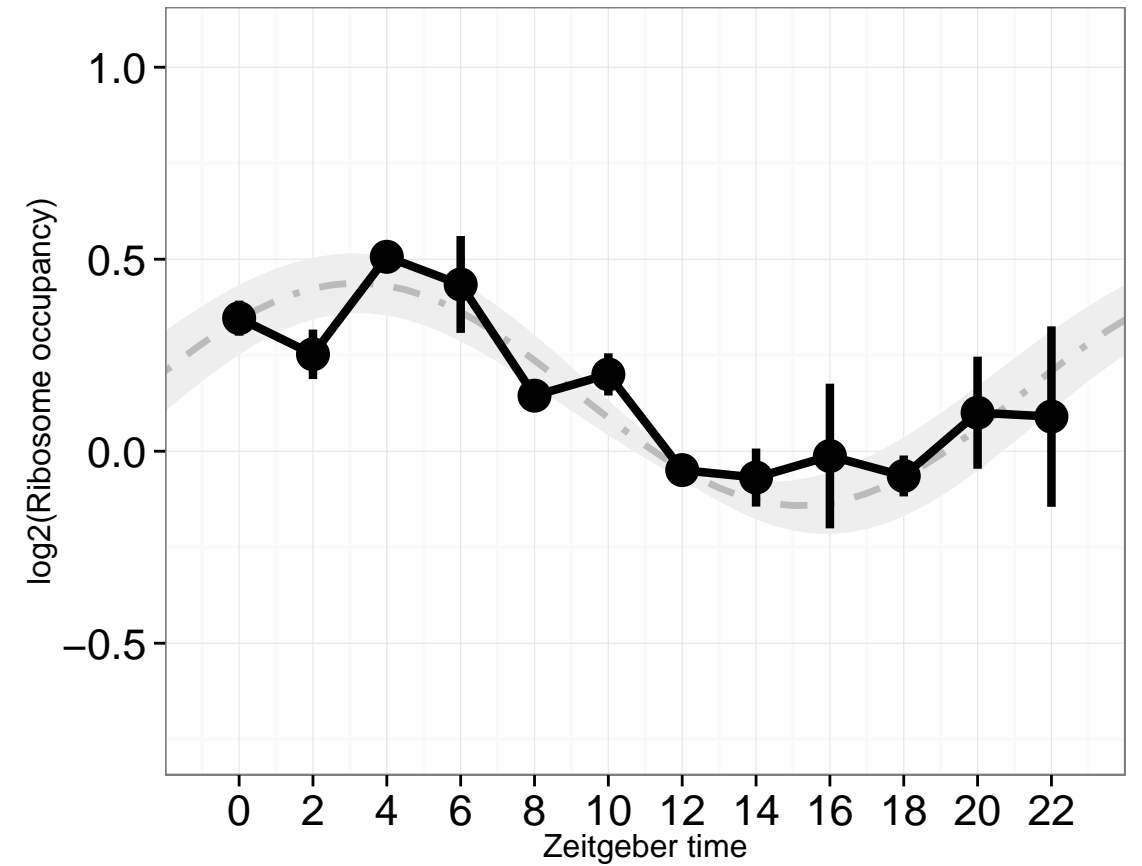

Supplement: SuppDataset_1.zip [file Fam136a_set_A.pdf › Supplemental Dataset 1/A-mRNA_nonrhyth_translation_nonrhyth/Fam136a_set_A.pdf]

# Fam13a

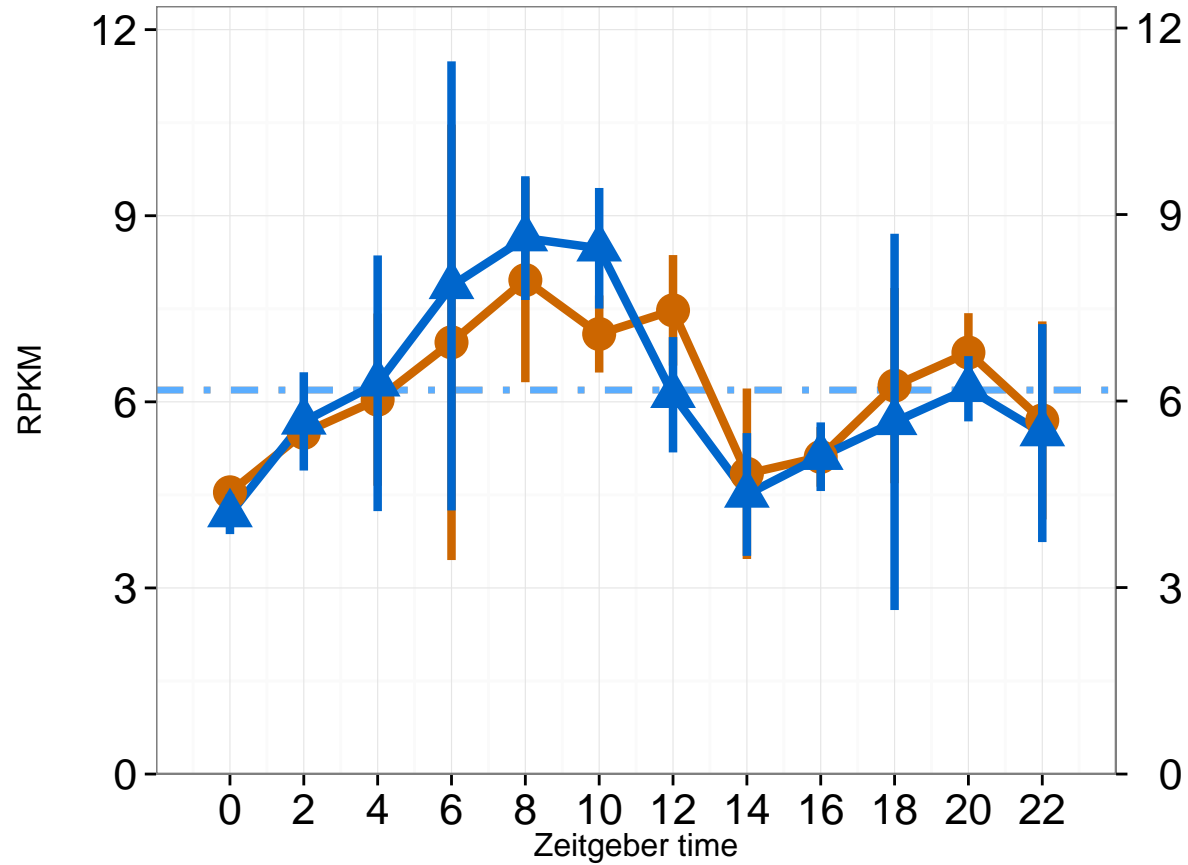

# Fam13a

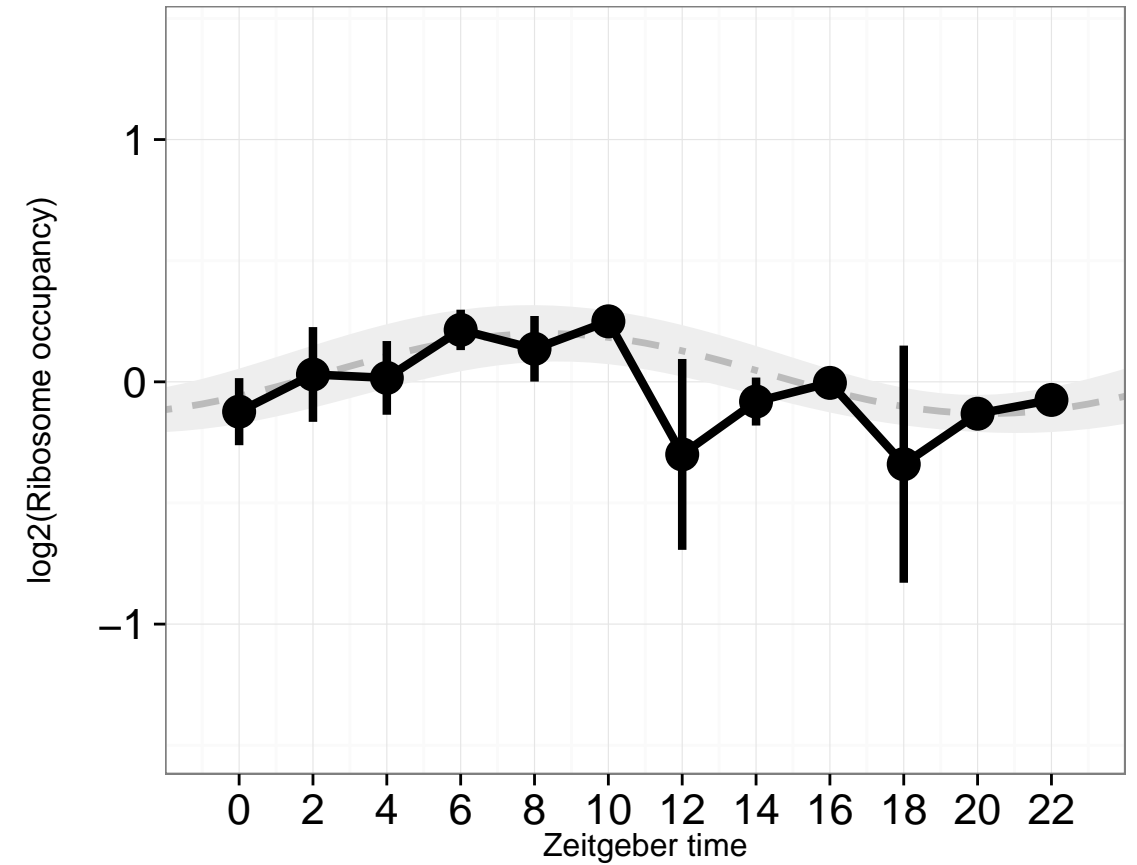

Supplement: SuppDataset_1.zip [file Fam13a_set_A.pdf › Supplemental Dataset 1/A-mRNA_nonrhyth_translation_nonrhyth/Fam13a_set_A.pdf]

# Fam13b

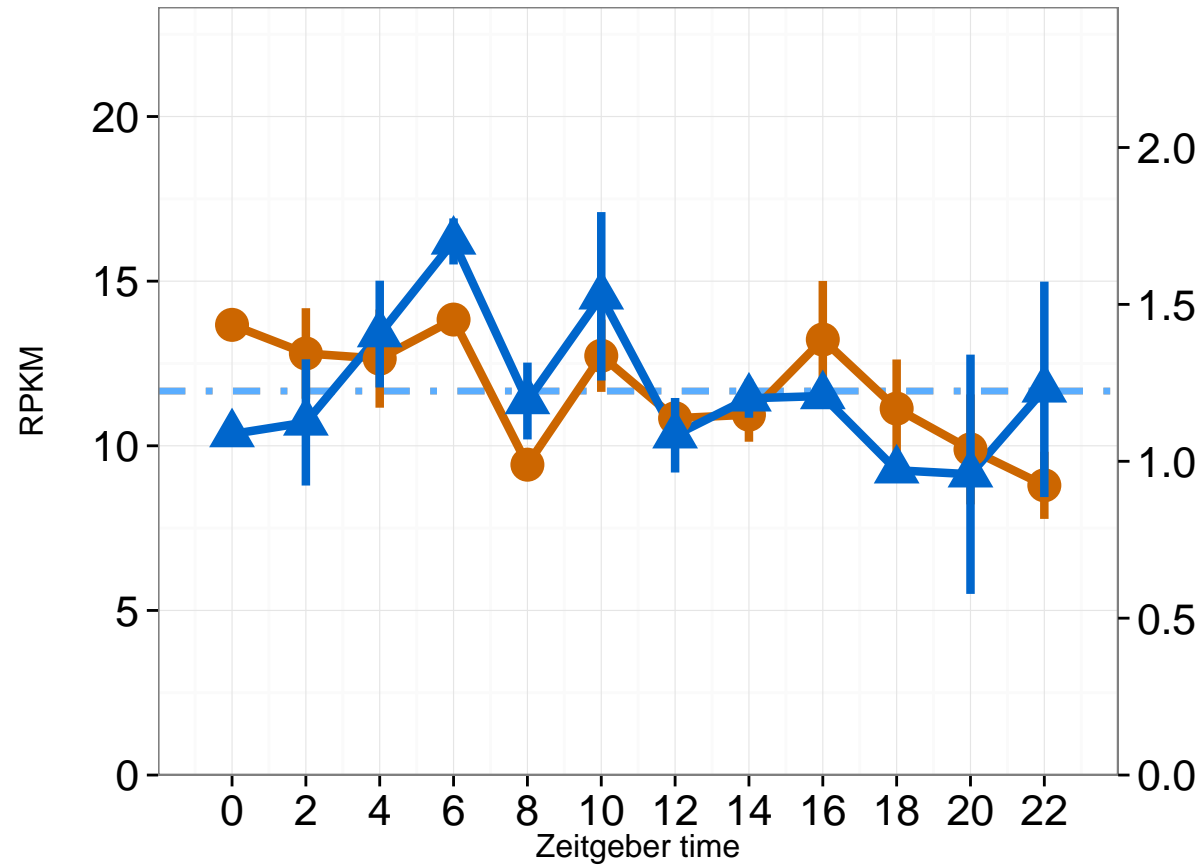

# Fam13b

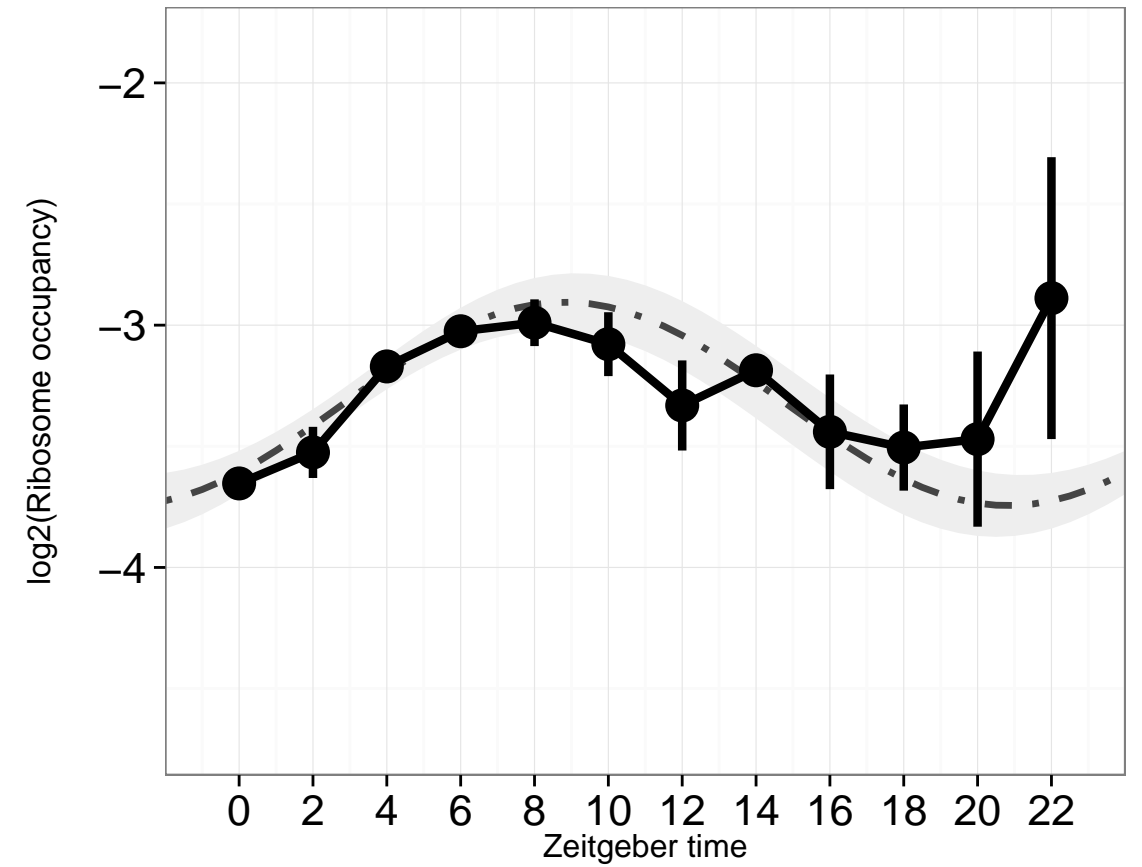

Supplement: SuppDataset_1.zip [file Fam13b_set_A.pdf › Supplemental Dataset 1/A-mRNA_nonrhyth_translation_nonrhyth/Fam13b_set_A.pdf]

# Fam149b

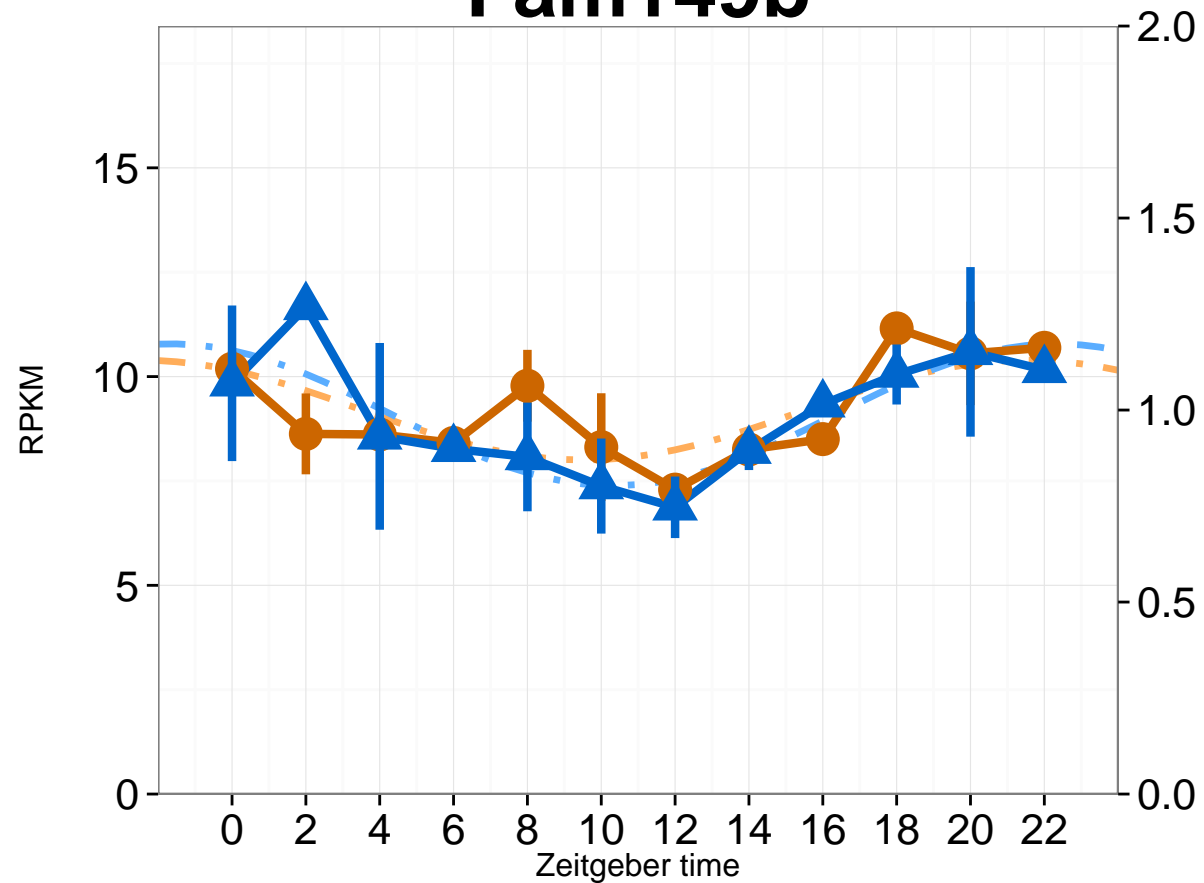

# Fam149b

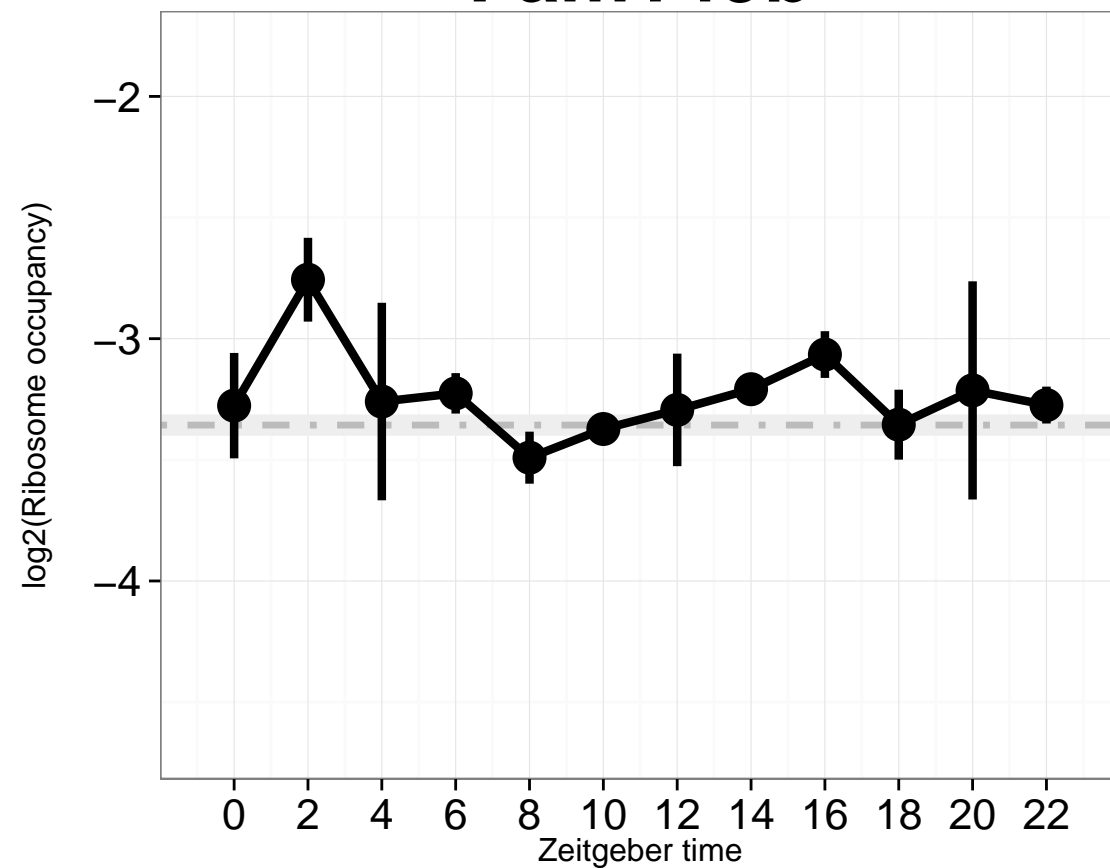

Supplement: SuppDataset_1.zip [file Fam149b_set_A.pdf › Supplemental Dataset 1/A-mRNA_nonrhyth_translation_nonrhyth/Fam149b_set_A.pdf]

# Fam160b1

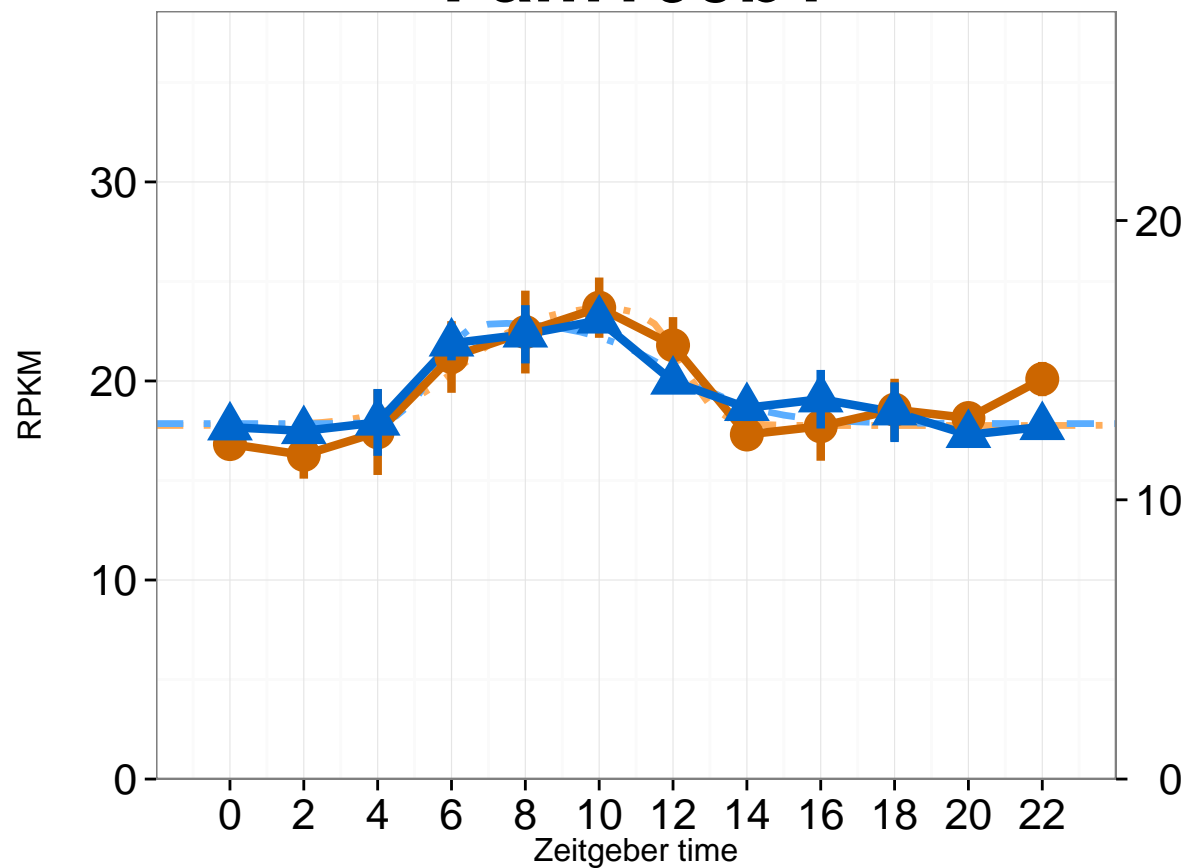

# Fam160b1

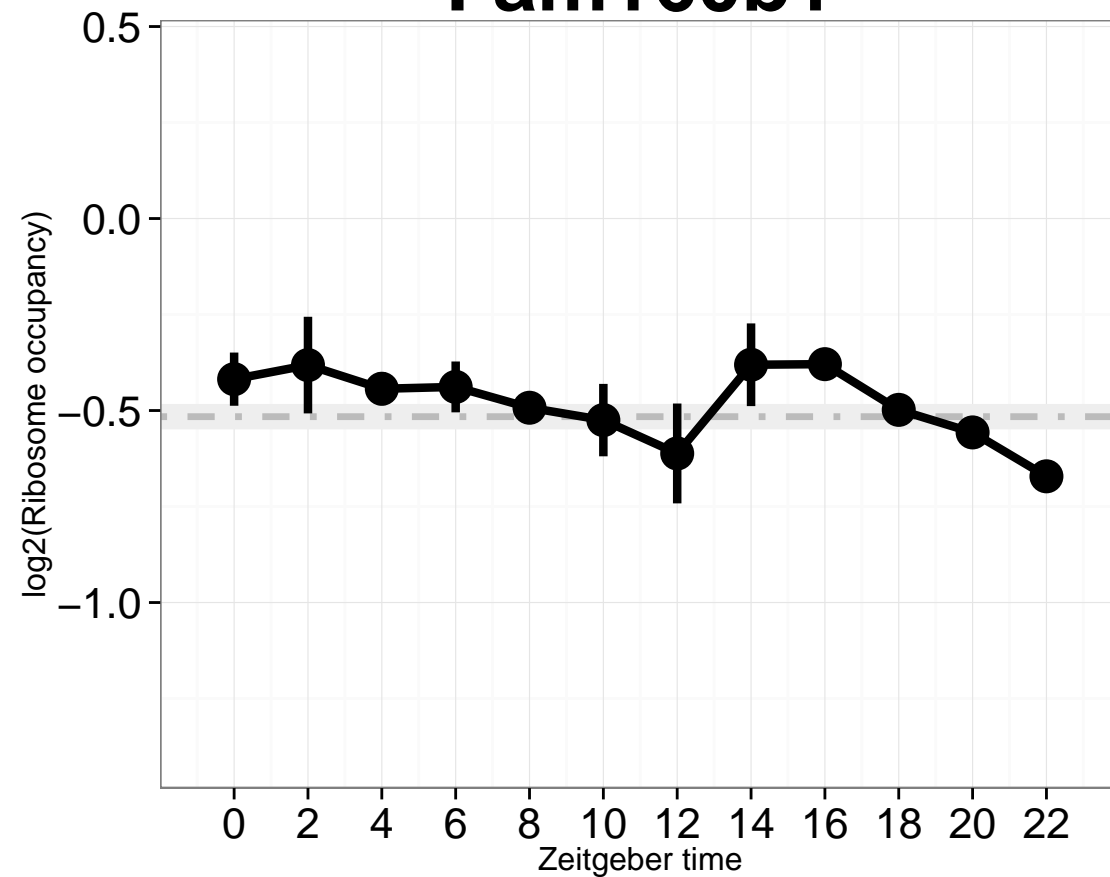

Supplement: SuppDataset_1.zip [file Fam160b1_set_A.pdf › Supplemental Dataset 1/A-mRNA_nonrhyth_translation_nonrhyth/Fam160b1_set_A.pdf]

# Fam160b2

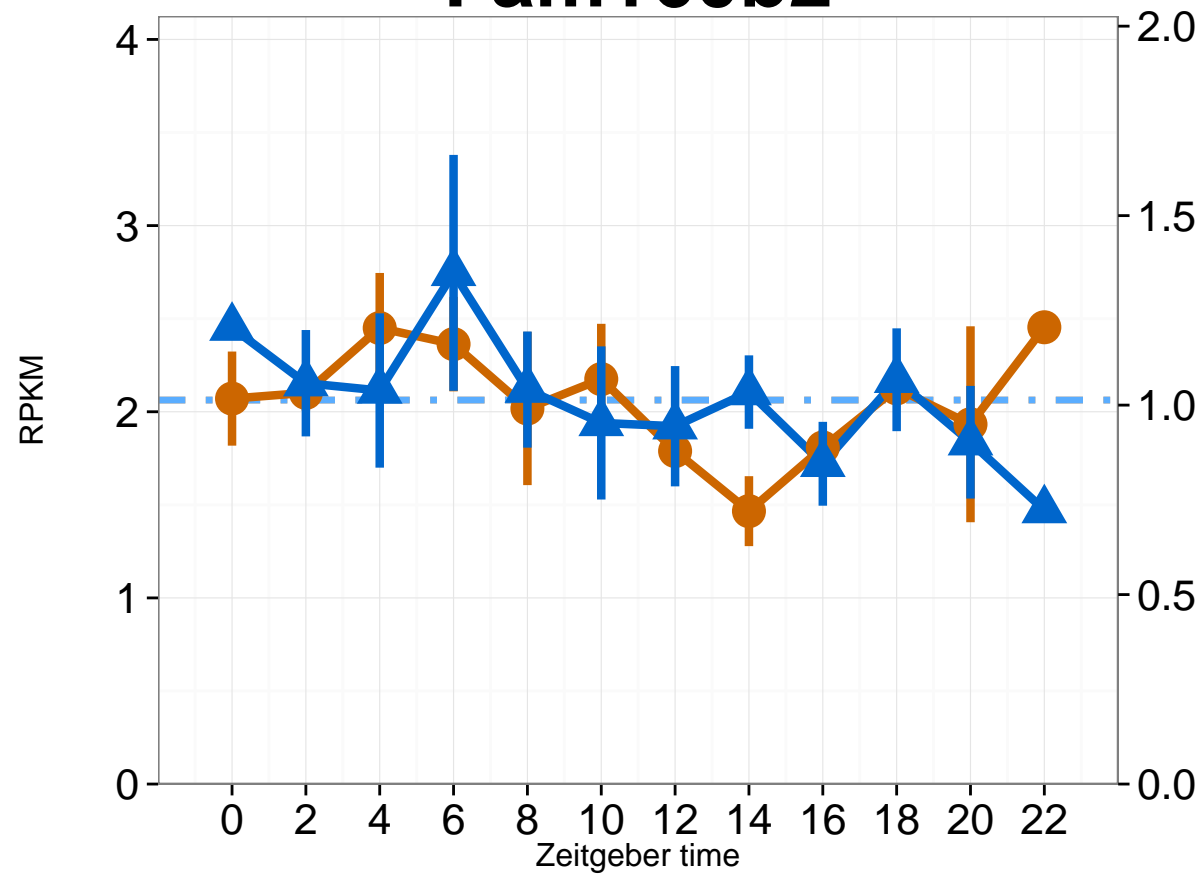

# Fam160b2

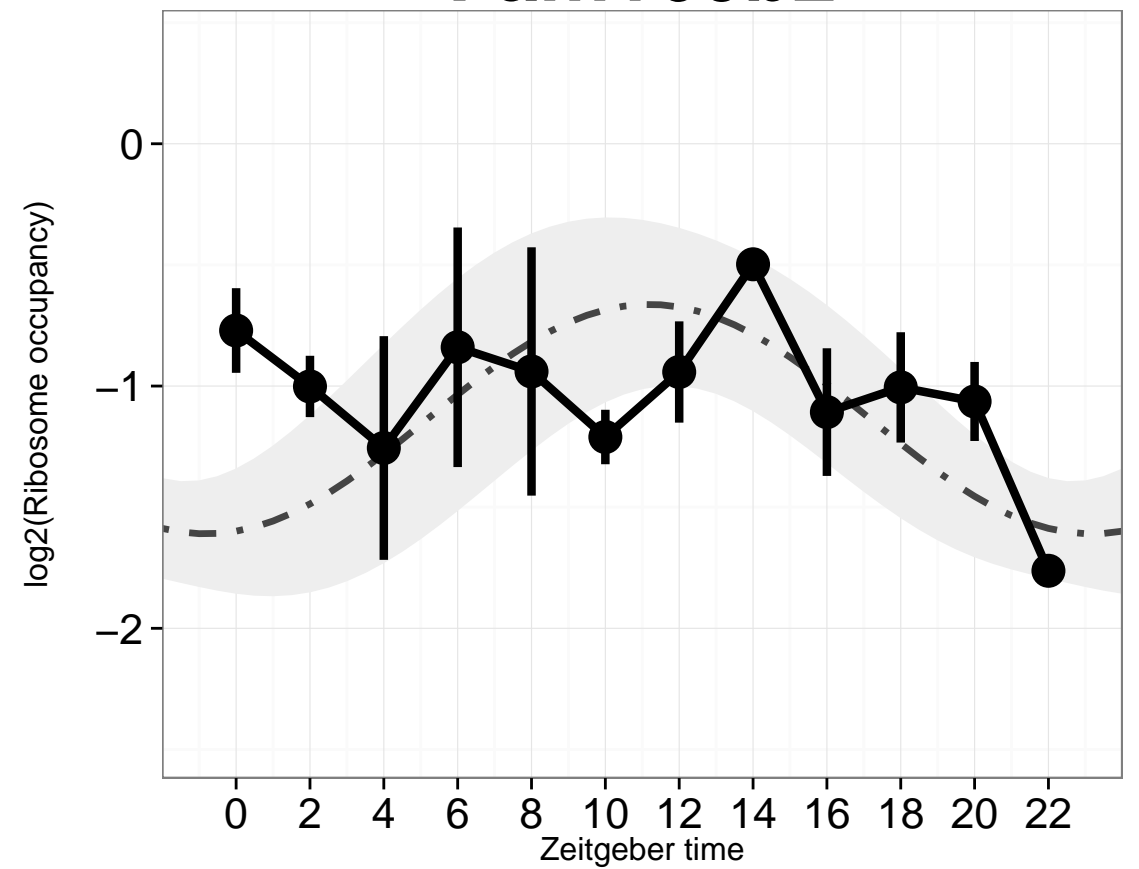

Supplement: SuppDataset_1.zip [file Fam160b2_set_A.pdf › Supplemental Dataset 1/A-mRNA_nonrhyth_translation_nonrhyth/Fam160b2_set_A.pdf]

# Fam162a

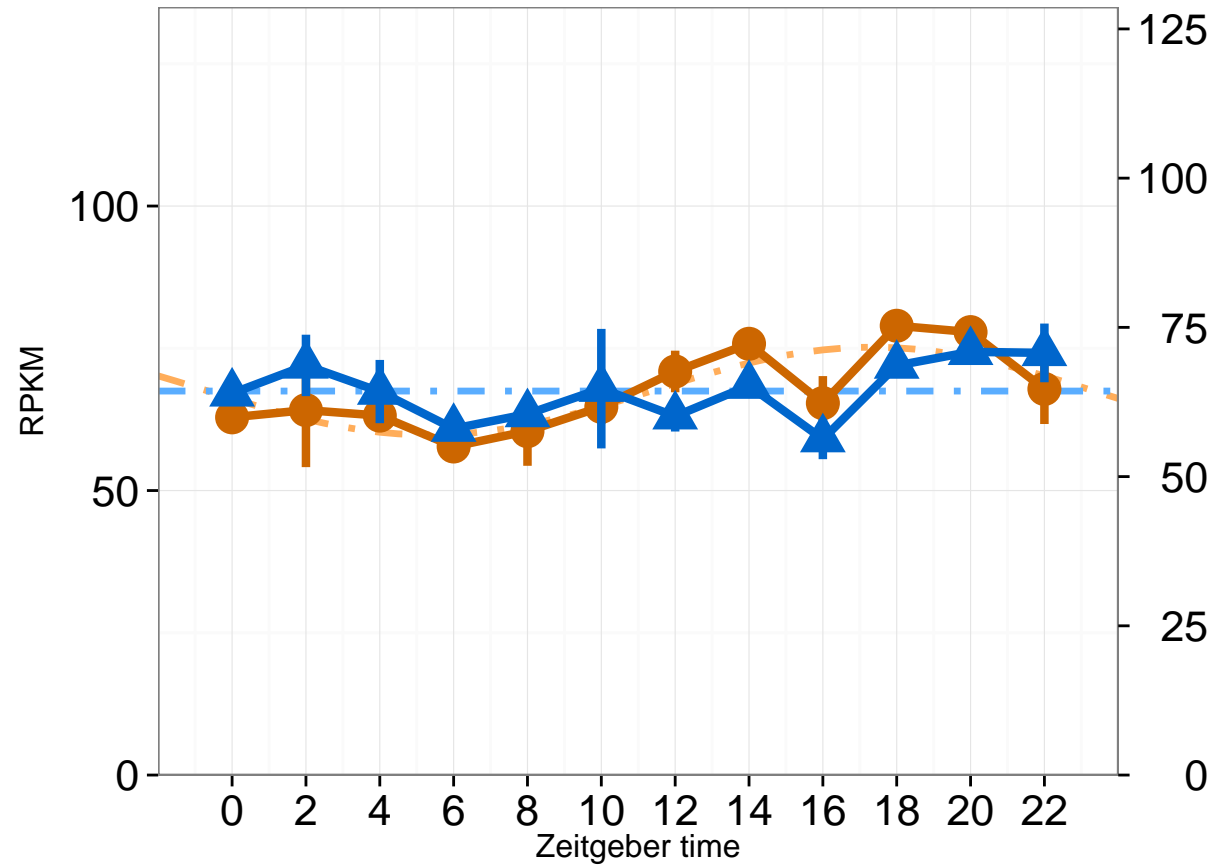

# Fam162a

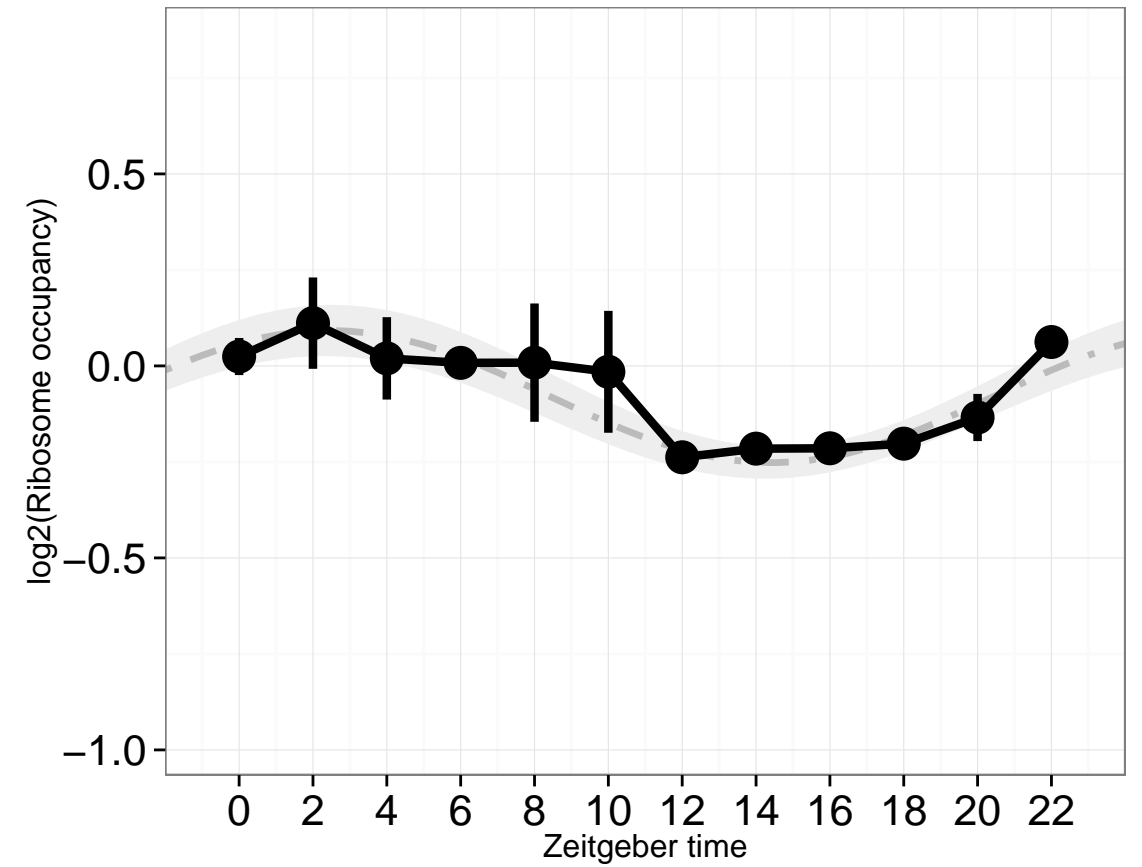

Supplement: SuppDataset_1.zip [file Fam162a_set_A.pdf › Supplemental Dataset 1/A-mRNA_nonrhyth_translation_nonrhyth/Fam162a_set_A.pdf]

# Fam168a

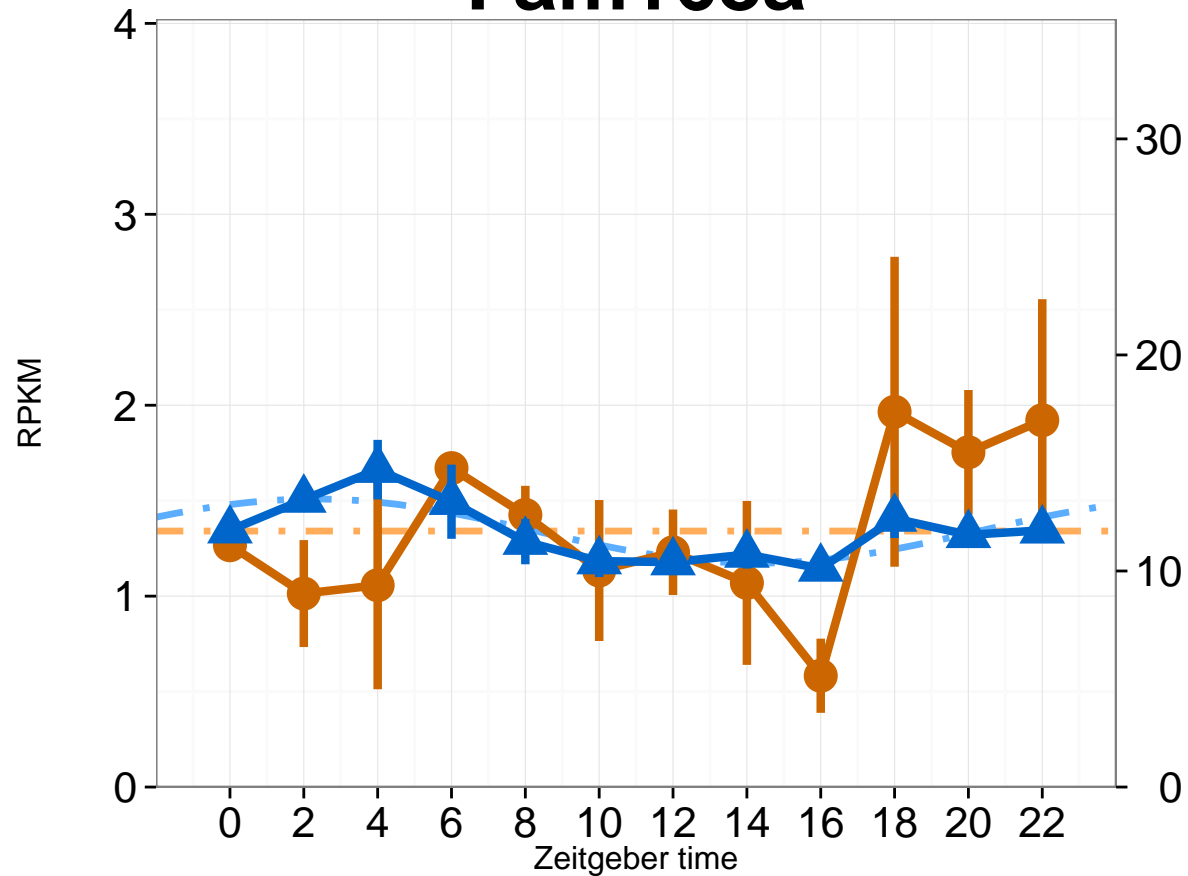

# Fam168a

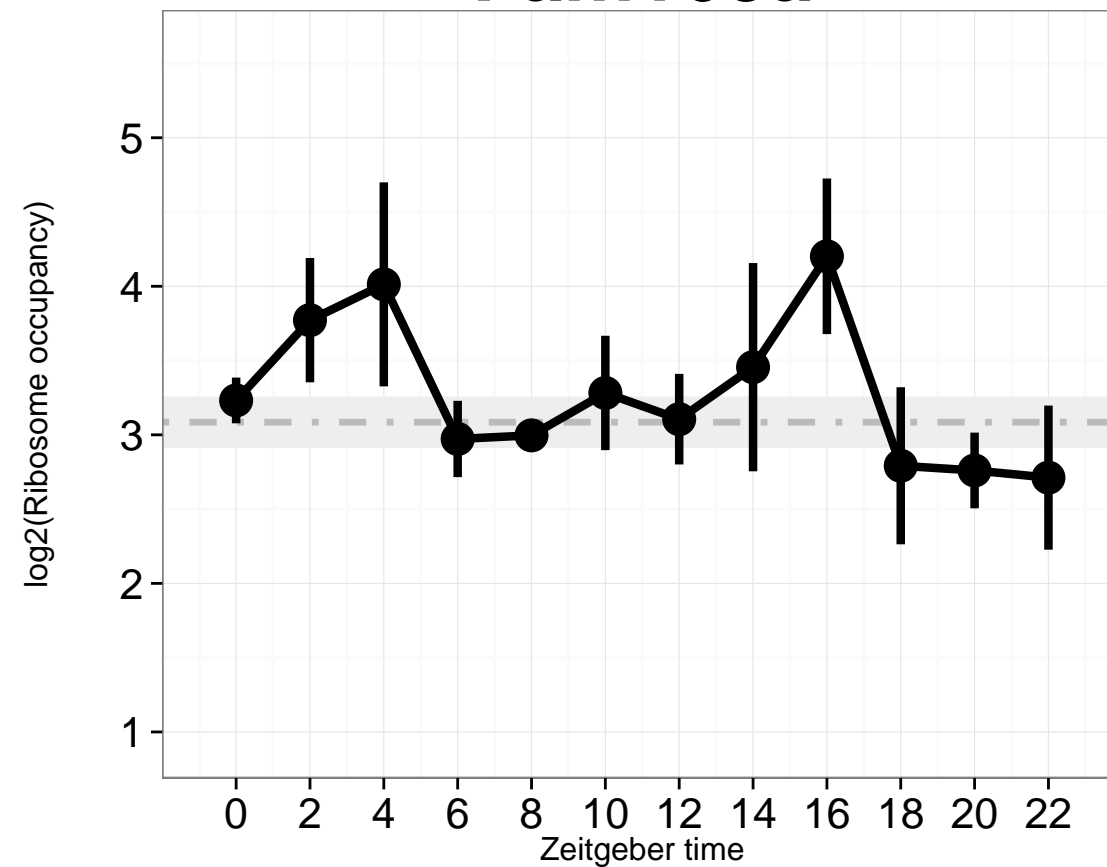

Supplement: SuppDataset_1.zip [file Fam168a_set_A.pdf › Supplemental Dataset 1/A-mRNA_nonrhyth_translation_nonrhyth/Fam168a_set_A.pdf]

# Fam168b

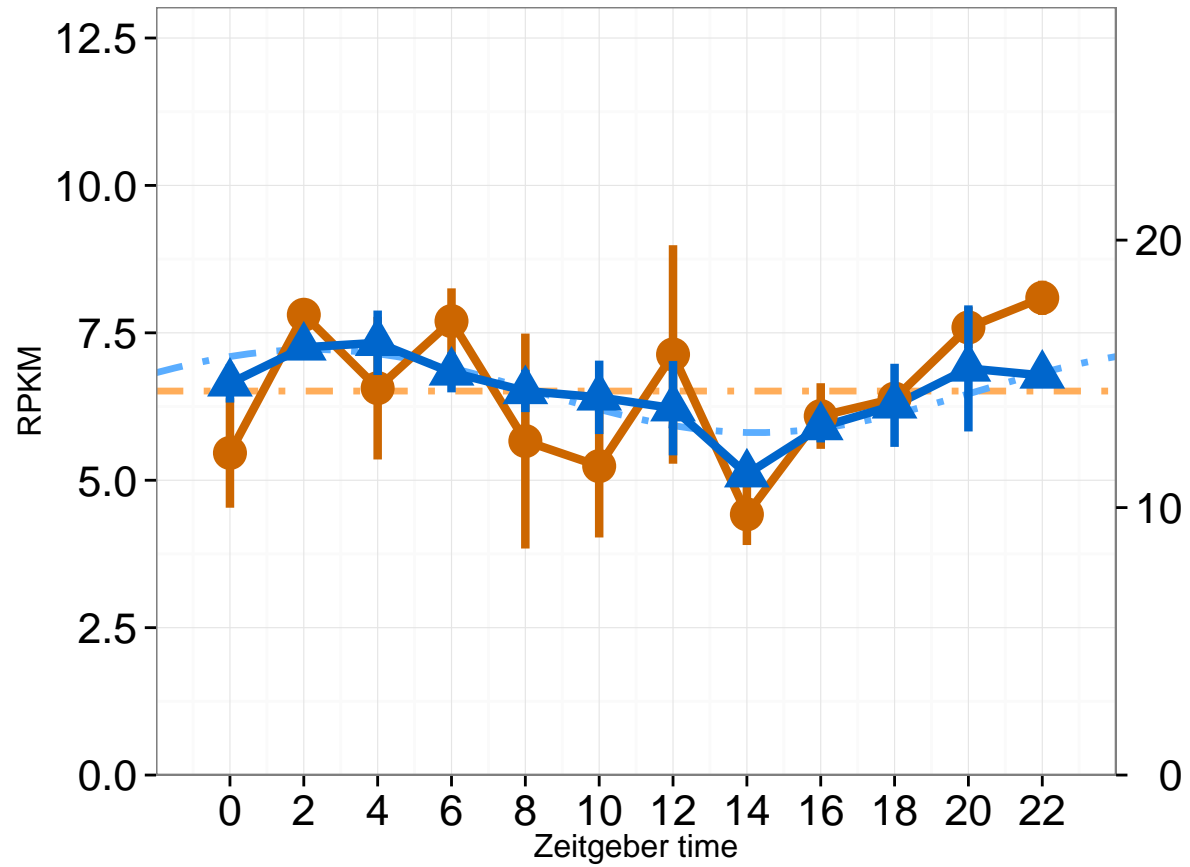

# Fam168b

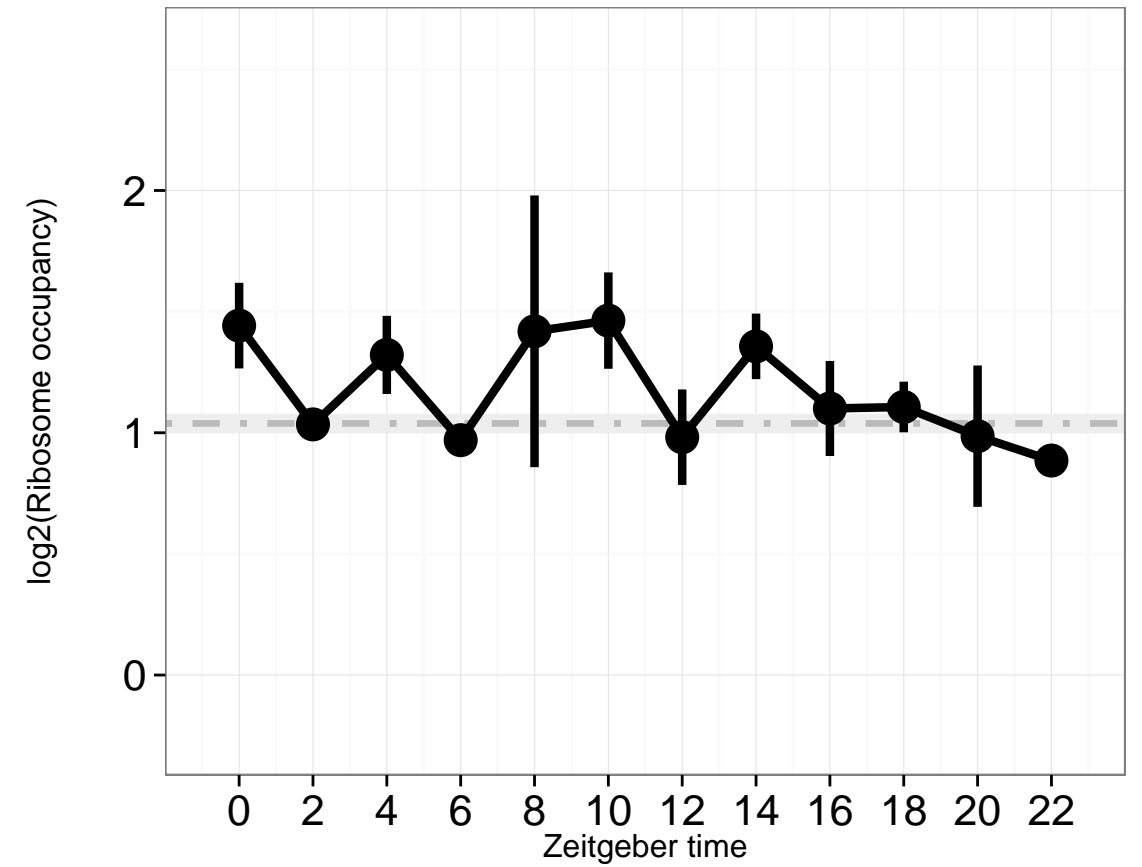

Supplement: SuppDataset_1.zip [file Fam168b_set_A.pdf › Supplemental Dataset 1/A-mRNA_nonrhyth_translation_nonrhyth/Fam168b_set_A.pdf]

# Fam171a2

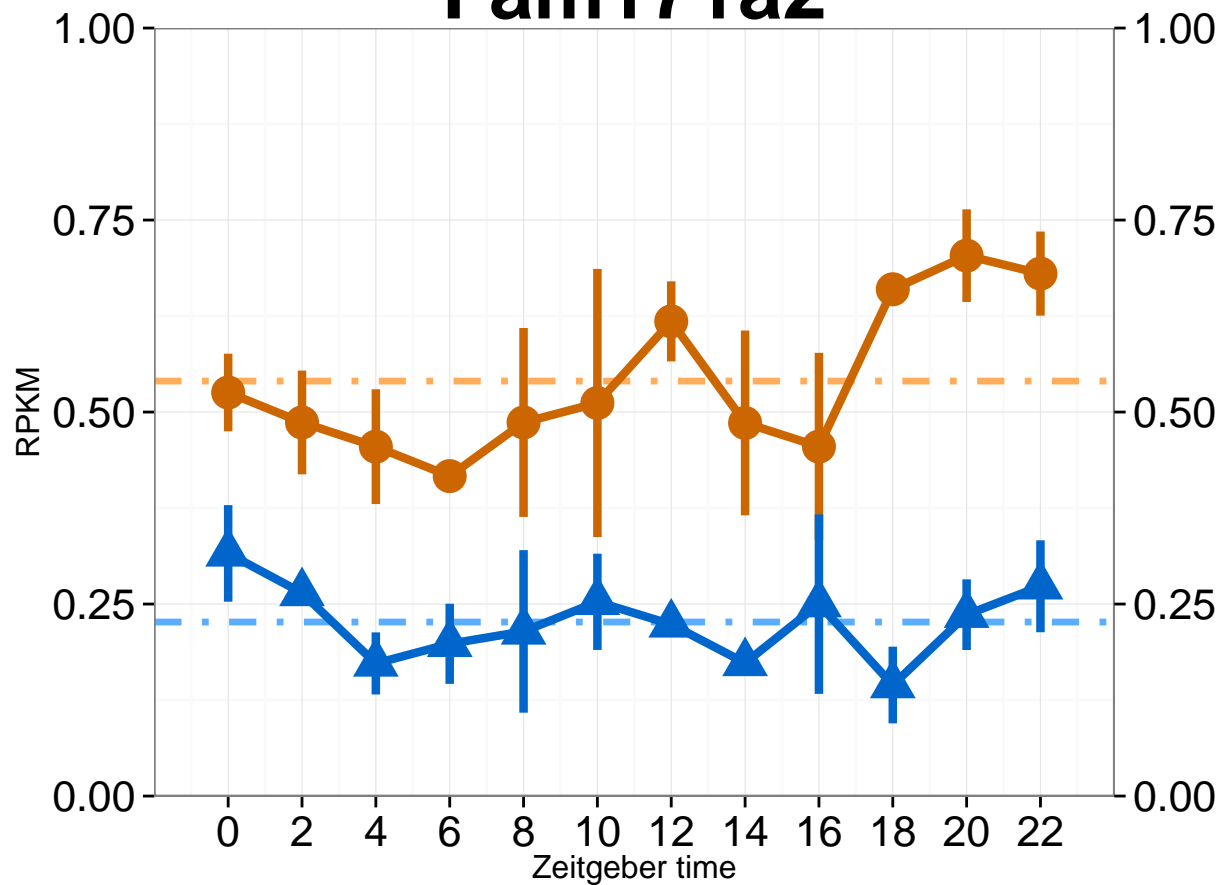

# Fam171a2

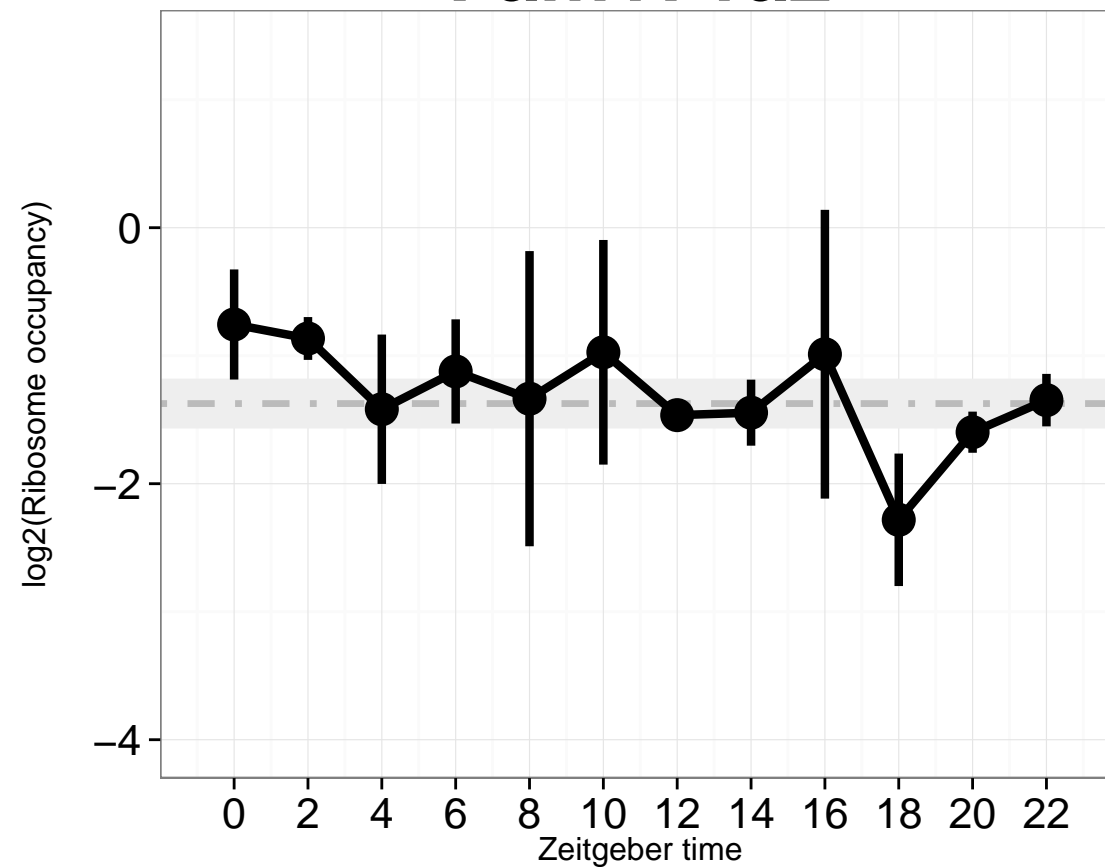

Supplement: SuppDataset_1.zip [file Fam171a2_set_A.pdf › Supplemental Dataset 1/A-mRNA_nonrhyth_translation_nonrhyth/Fam171a2_set_A.pdf]

## Fam171b

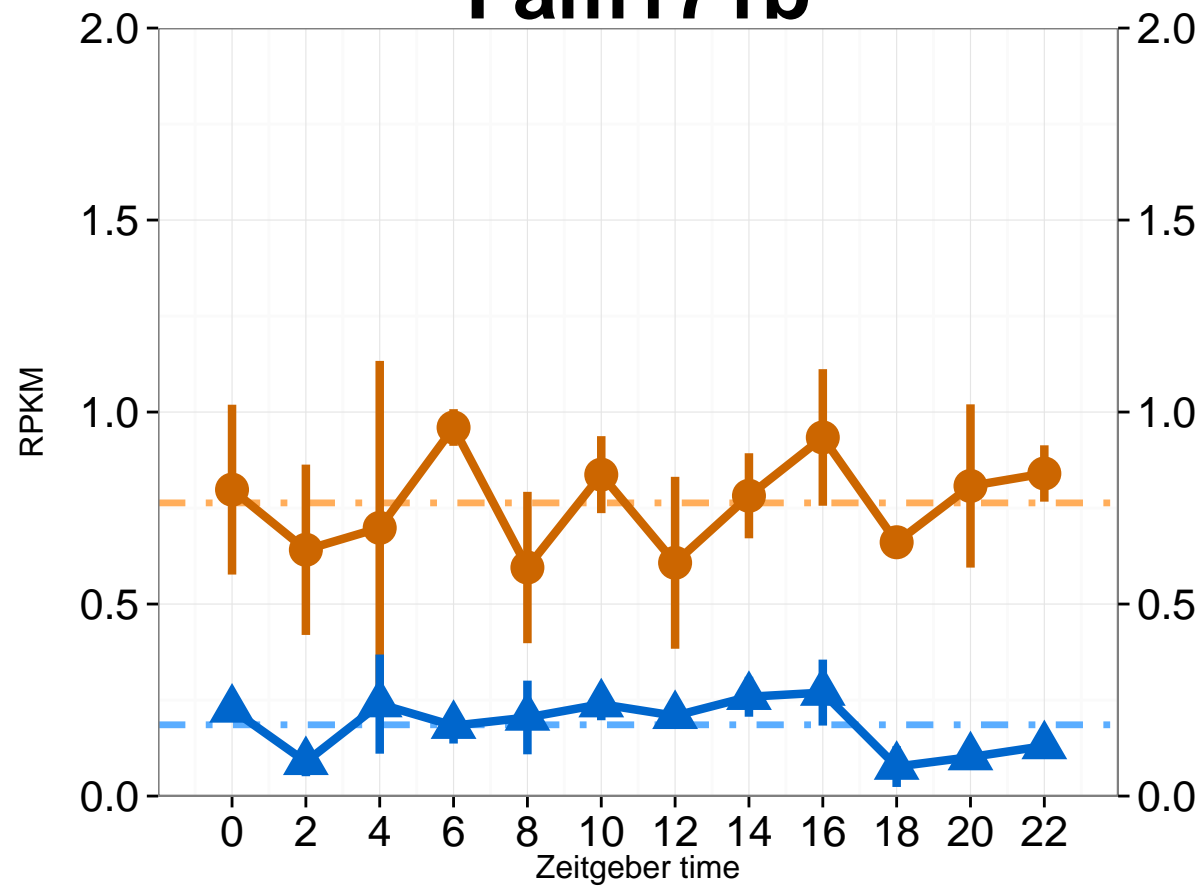

## Fam171b

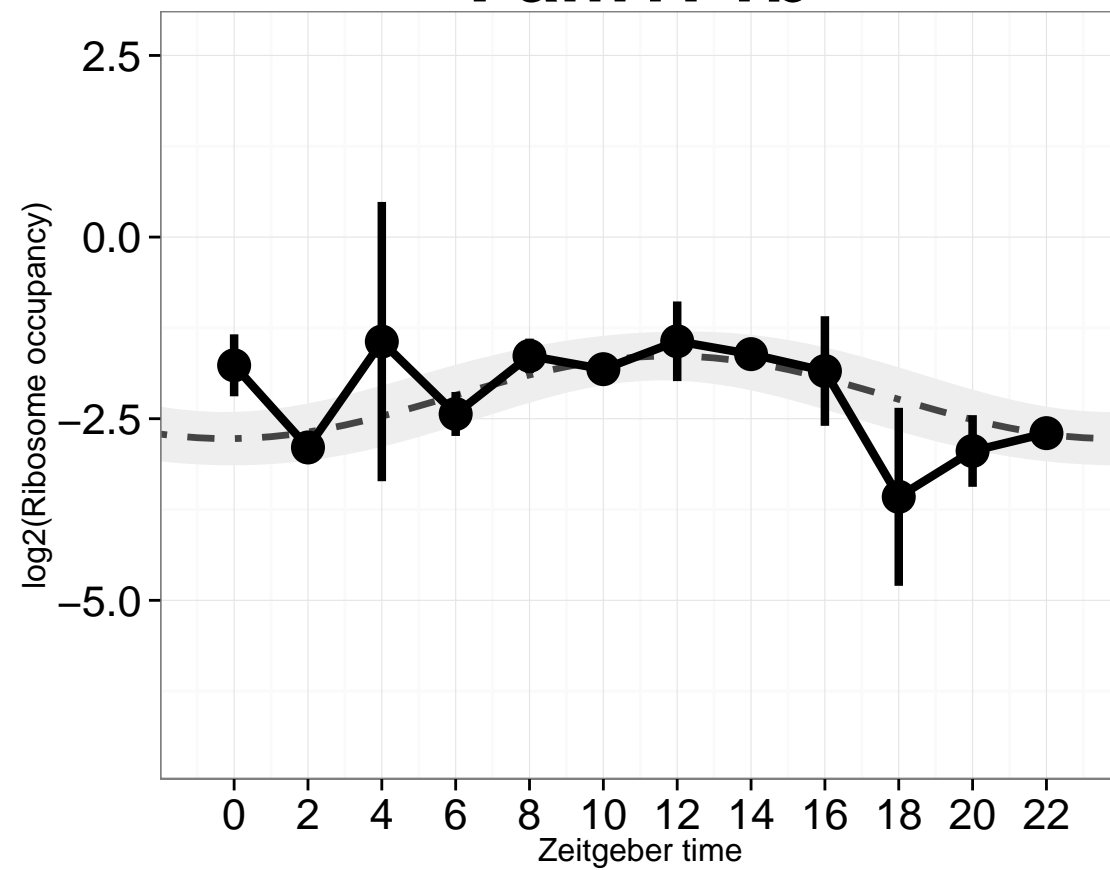

Supplement: SuppDataset_1.zip [file Fam171b_set_A.pdf › Supplemental Dataset 1/A-mRNA_nonrhyth_translation_nonrhyth/Fam171b_set_A.pdf]

# Fam173a

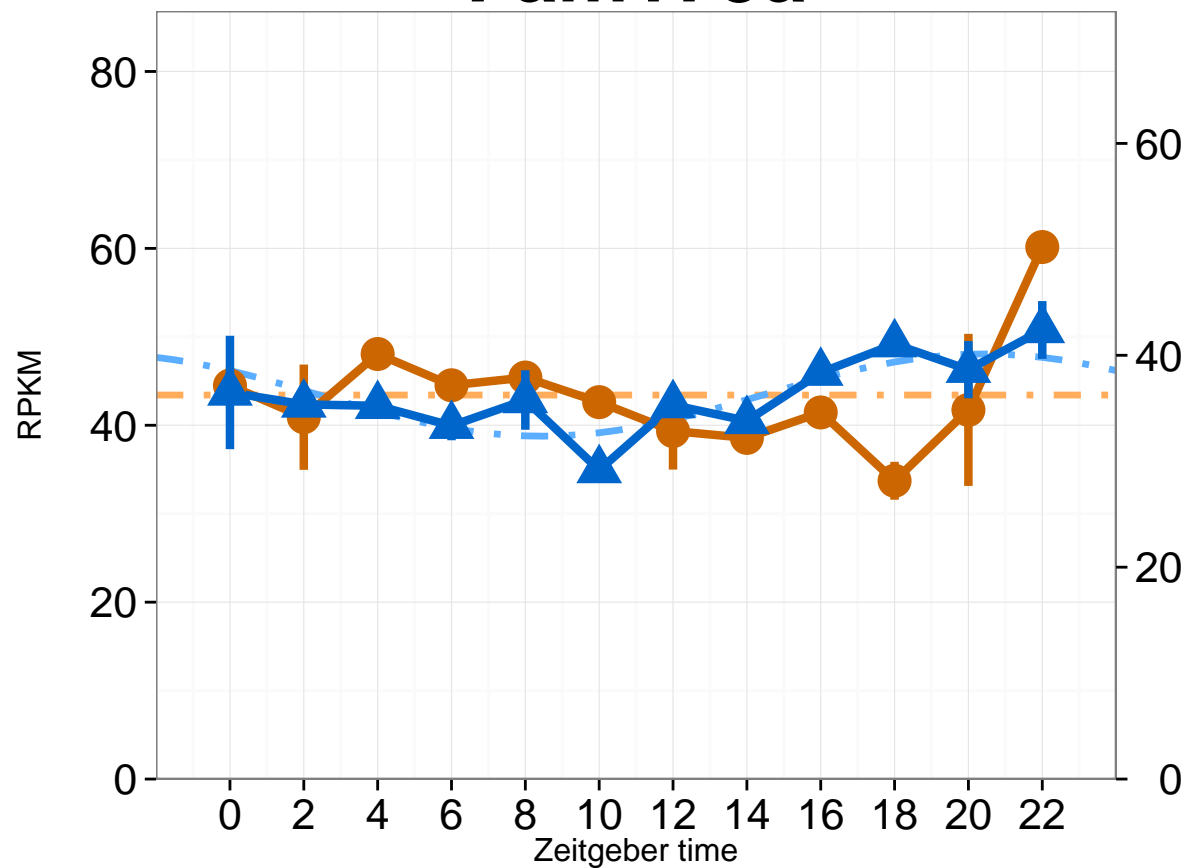

# Fam173a

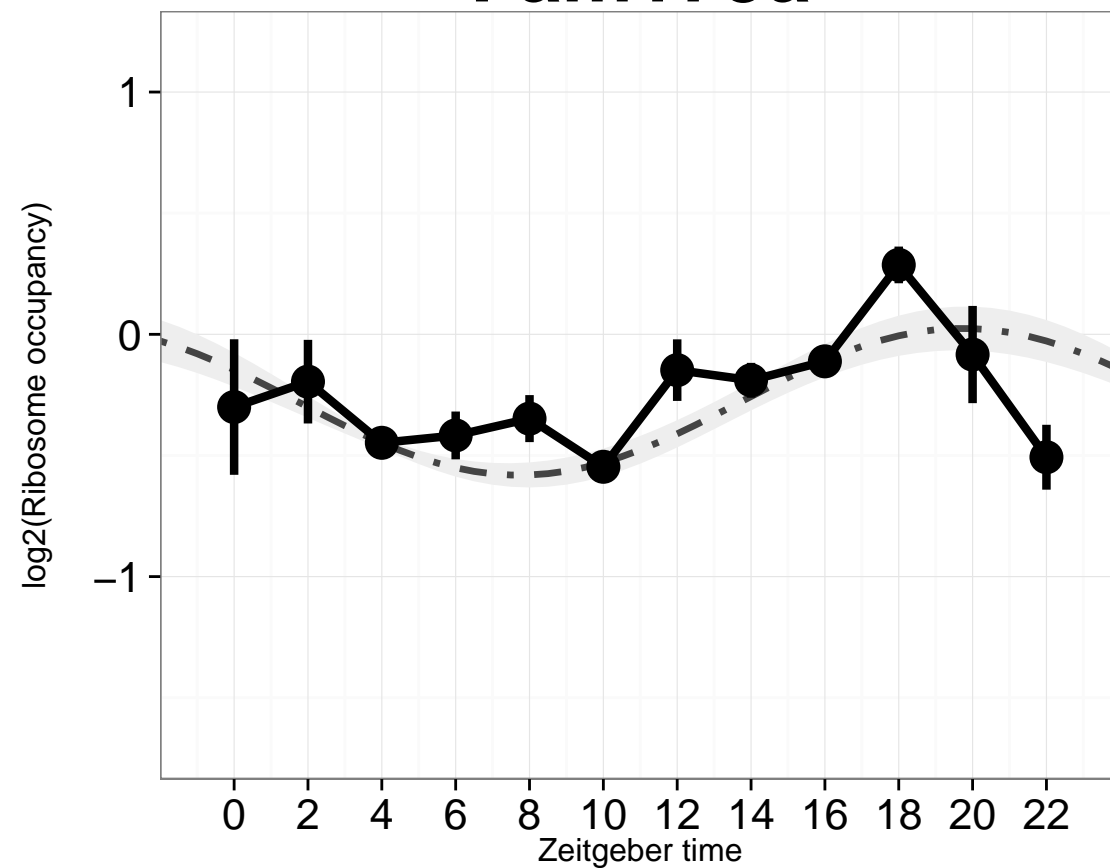

Supplement: SuppDataset_1.zip [file Fam173a_set_A.pdf › Supplemental Dataset 1/A-mRNA_nonrhyth_translation_nonrhyth/Fam173a_set_A.pdf]

# Fam173b

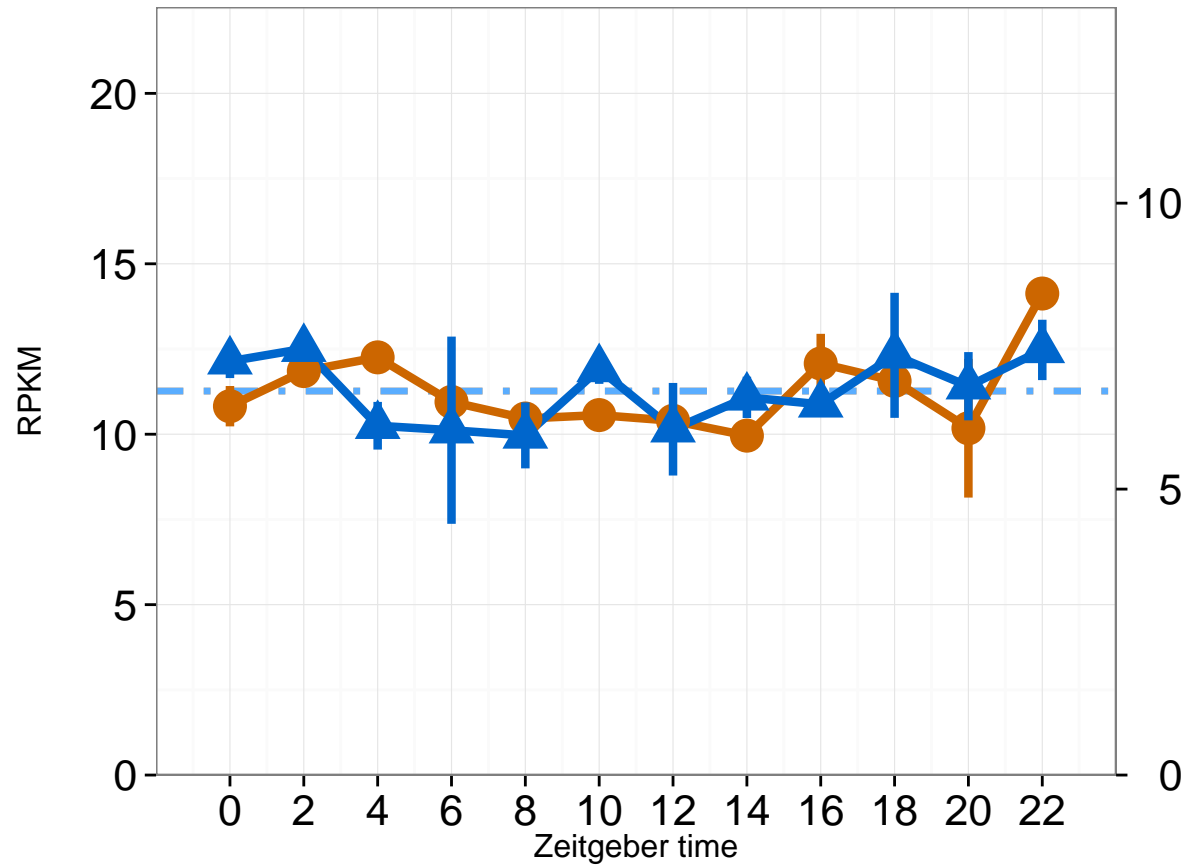

# Fam173b

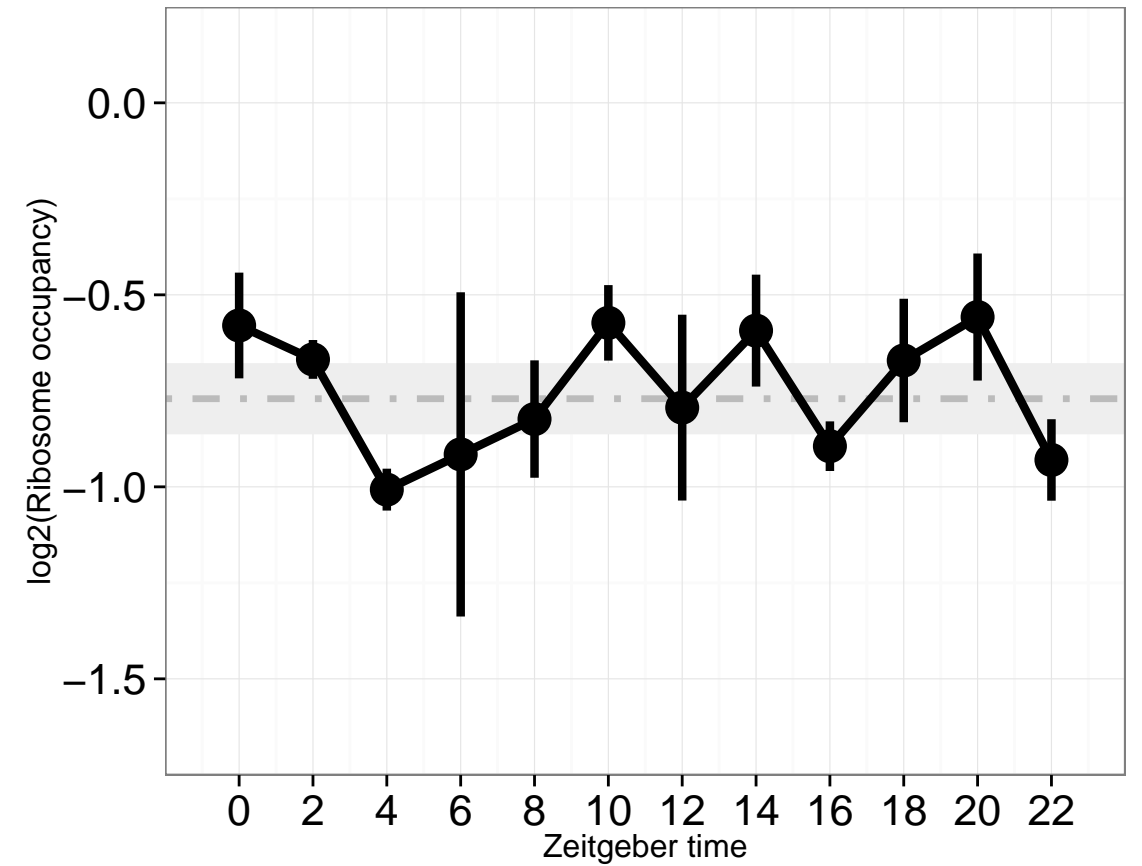

Supplement: SuppDataset_1.zip [file Fam173b_set_A.pdf › Supplemental Dataset 1/A-mRNA_nonrhyth_translation_nonrhyth/Fam173b_set_A.pdf]

# Fam174a

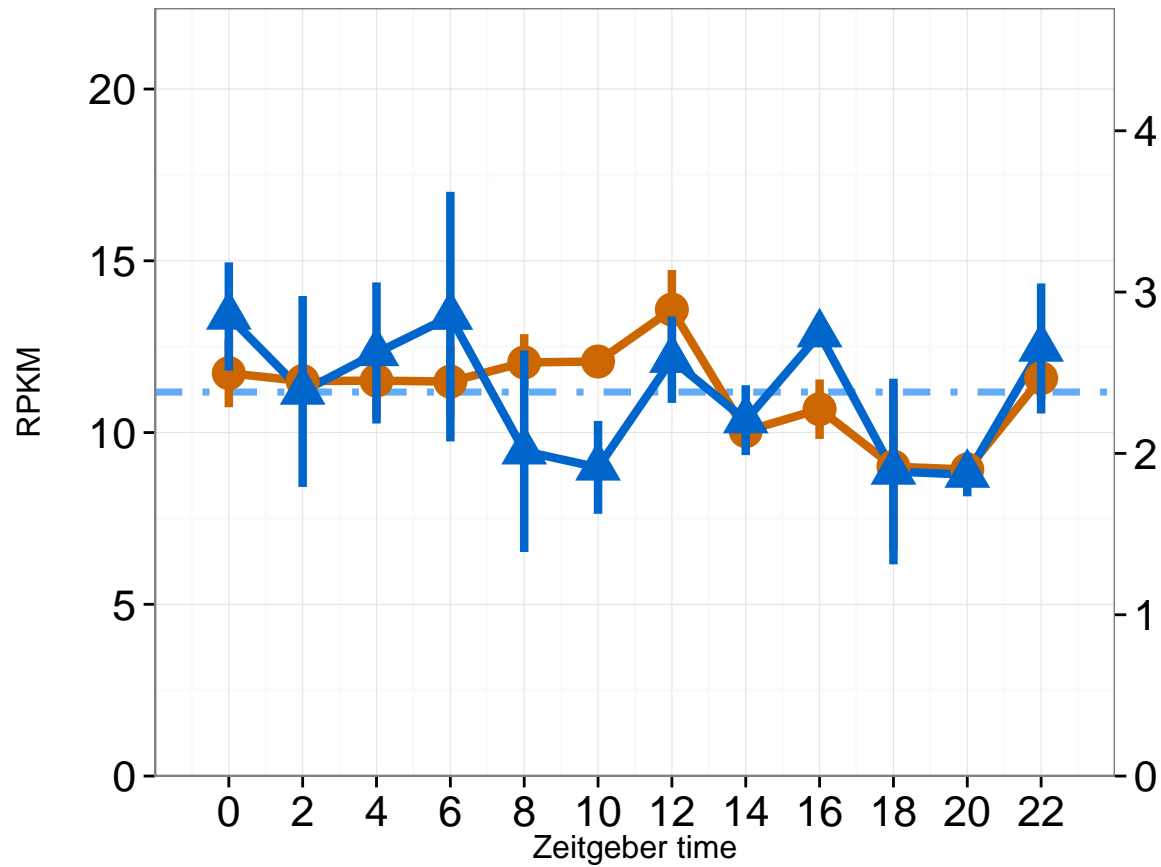

# Fam174a

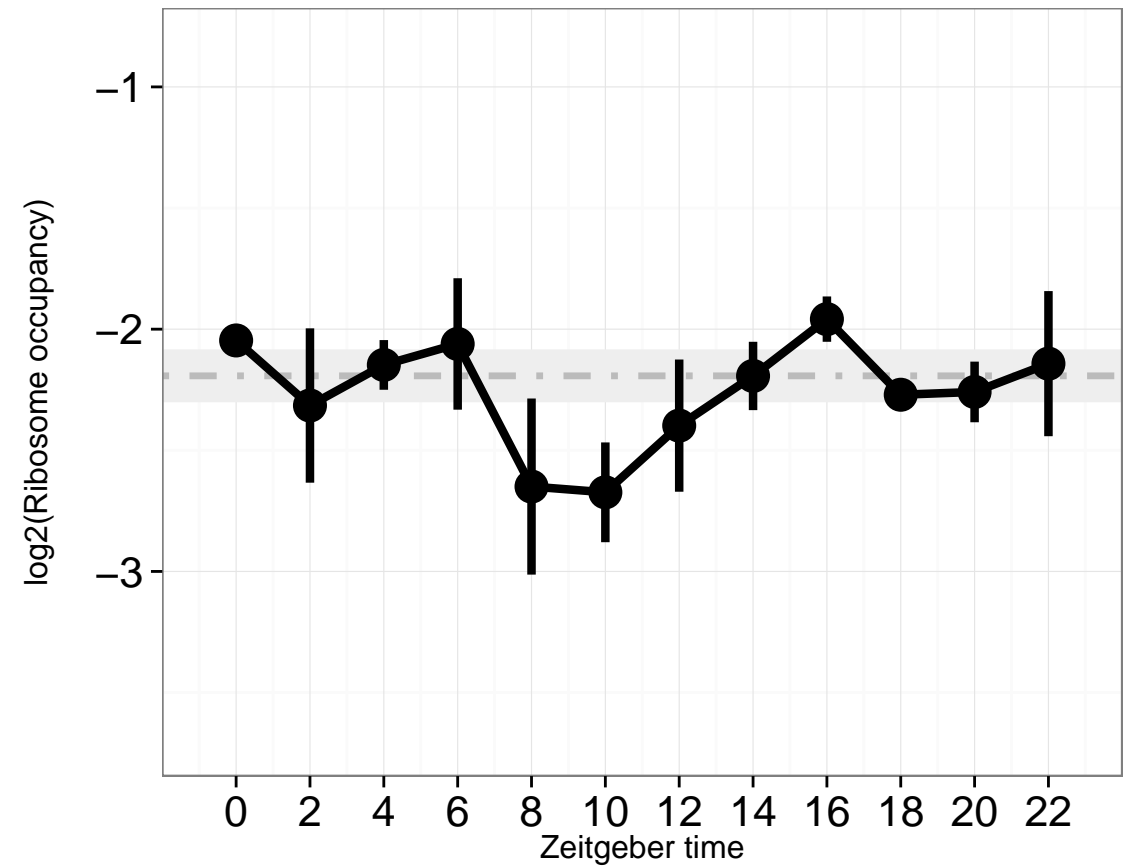

Supplement: SuppDataset_1.zip [file Fam174a_set_A.pdf › Supplemental Dataset 1/A-mRNA_nonrhyth_translation_nonrhyth/Fam174a_set_A.pdf]
