# Supplementary figures and images for: Ribosome profiling reveals the rhythmic liver translatome and circadian clock regulation by upstream open reading frames (part 27 of 113)
Source: HighWire-hosted journal article supplement (doi:10.1101/gr.195404.115), 2015-10-20

# Fam174b

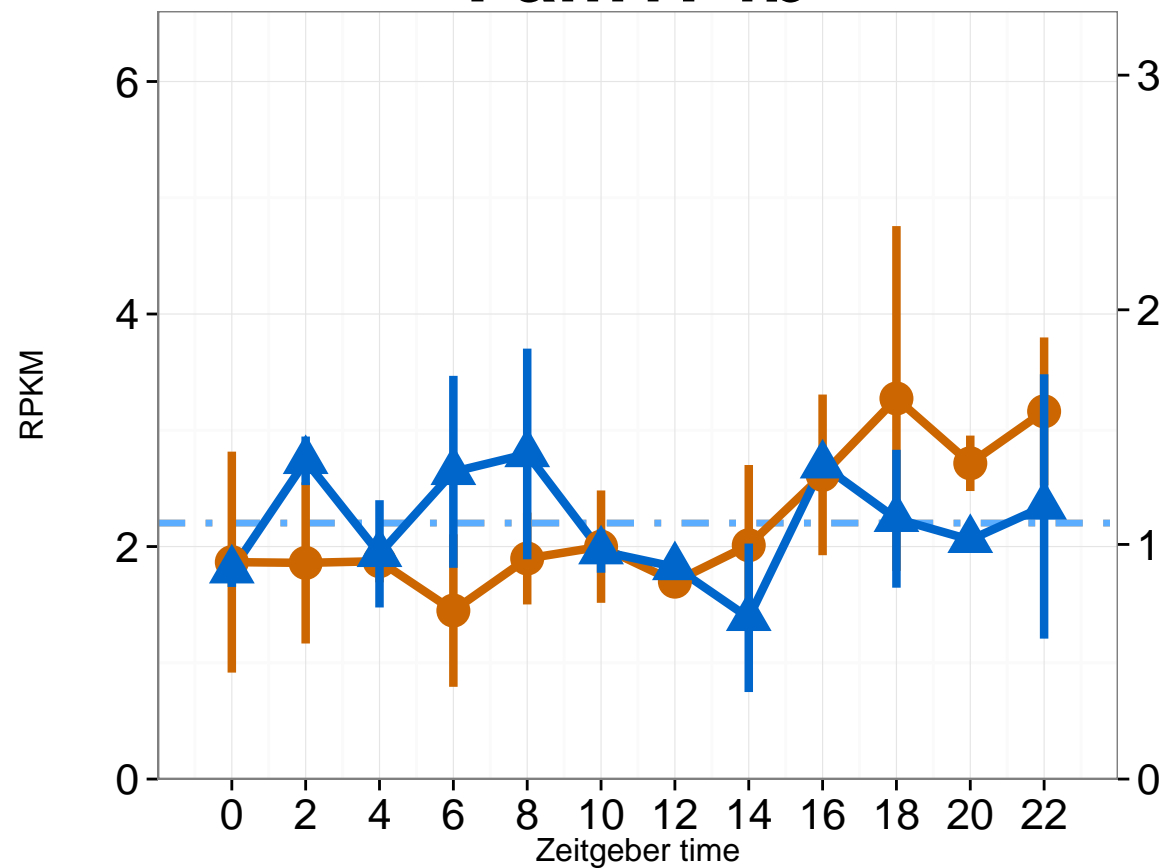

# Fam174b

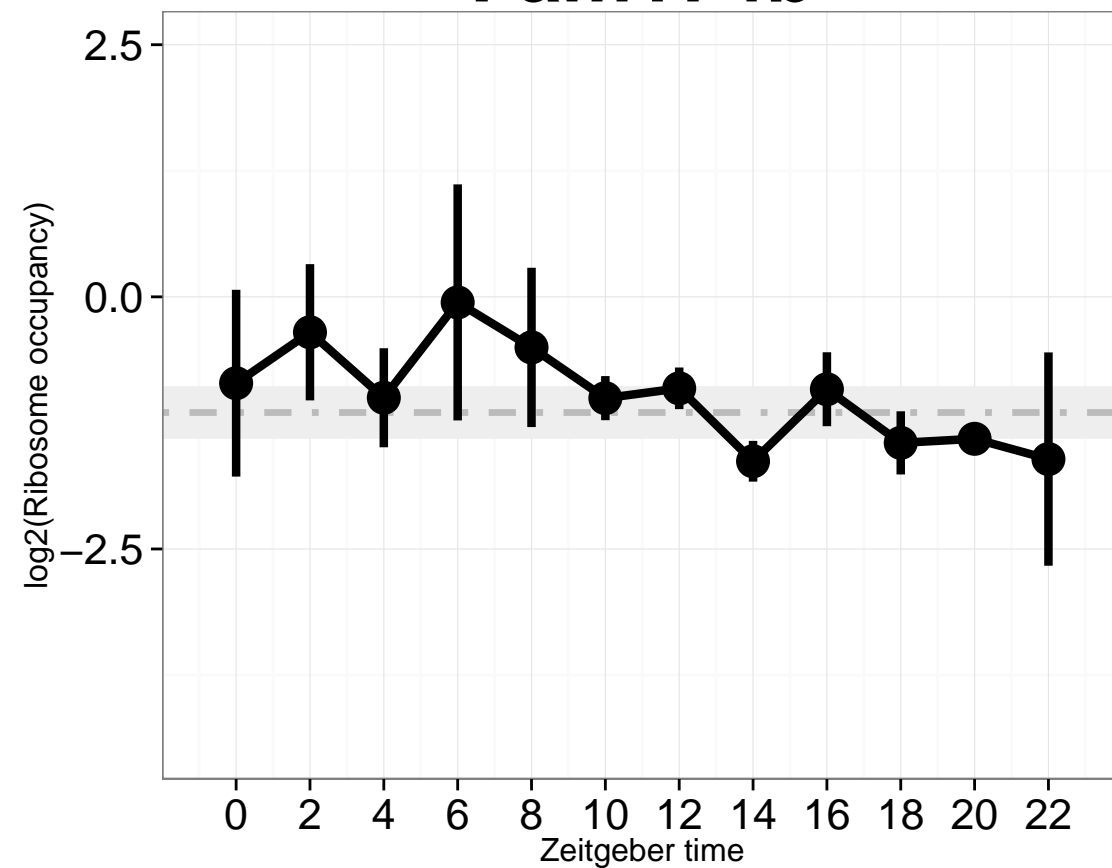

Supplement: SuppDataset_1.zip [file Fam174b_set_A.pdf › Supplemental Dataset 1/A-mRNA_nonrhyth_translation_nonrhyth/Fam174b_set_A.pdf]

# Fam175a

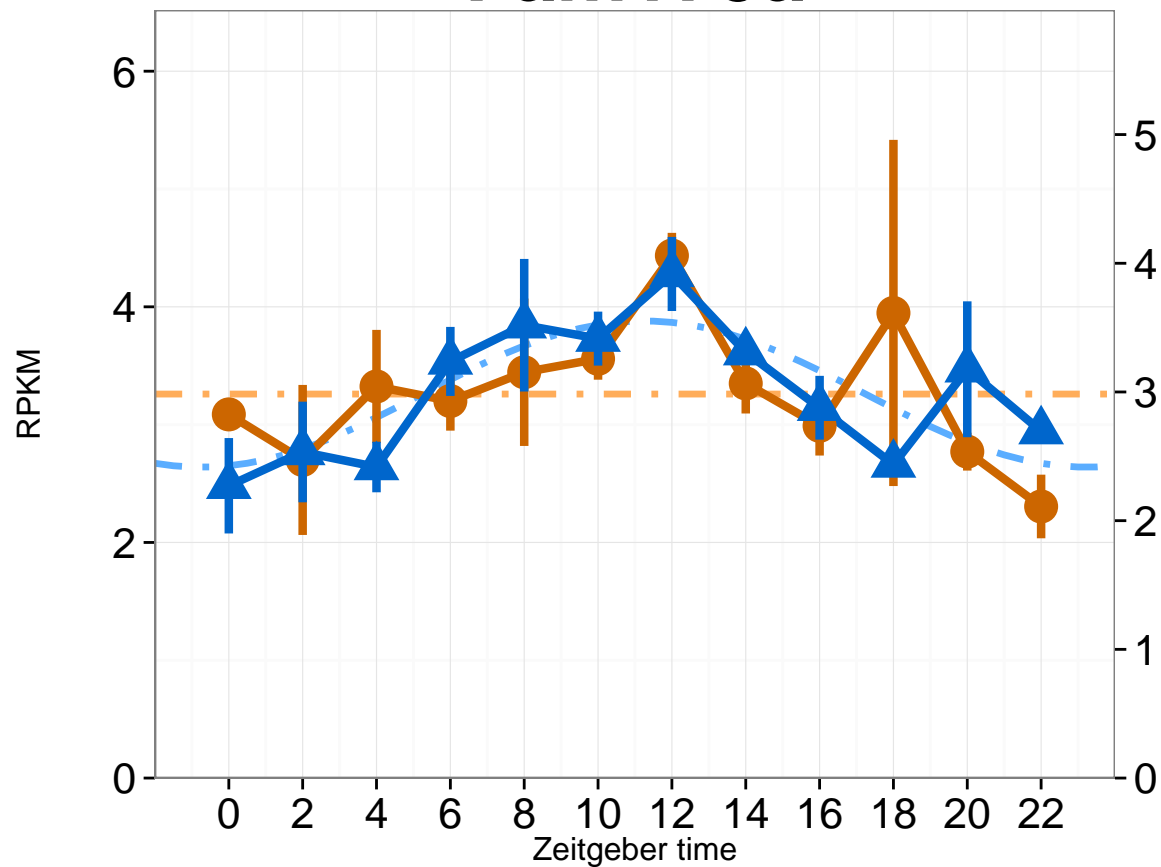

# Fam175a

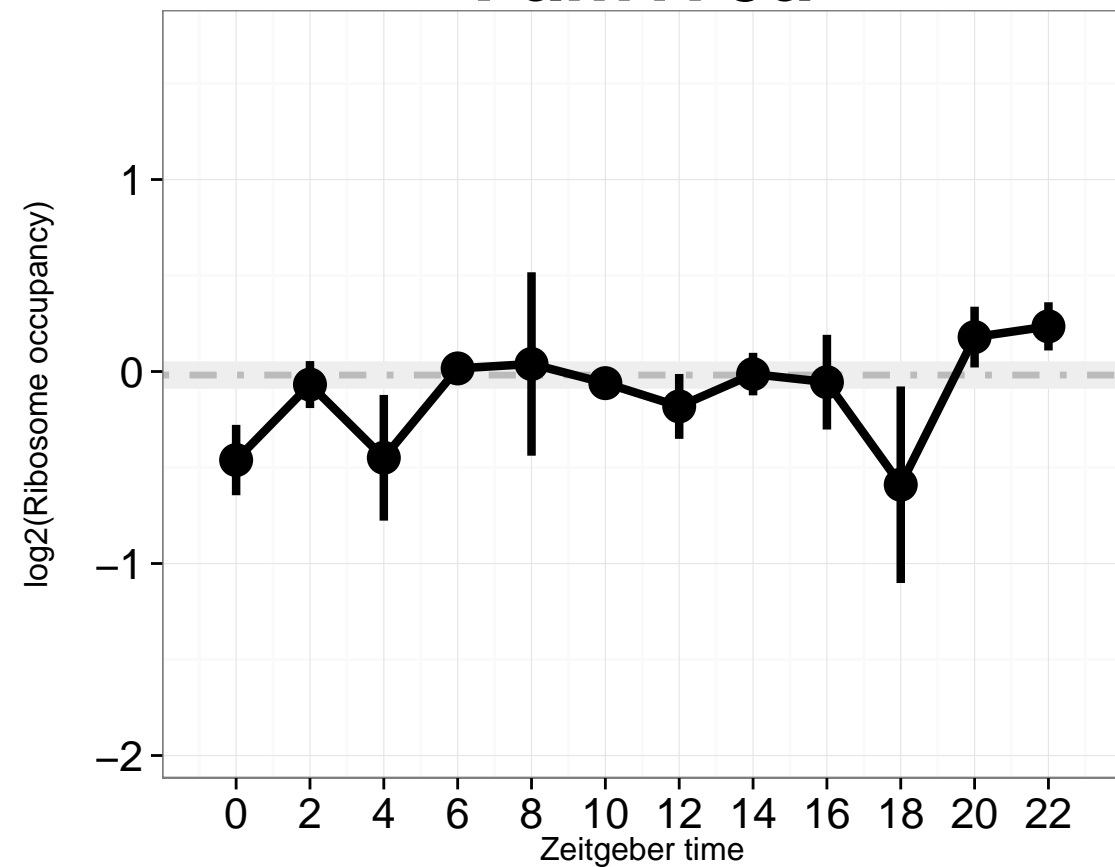

Supplement: SuppDataset_1.zip [file Fam175a_set_A.pdf › Supplemental Dataset 1/A-mRNA_nonrhyth_translation_nonrhyth/Fam175a_set_A.pdf]

## Fam175b

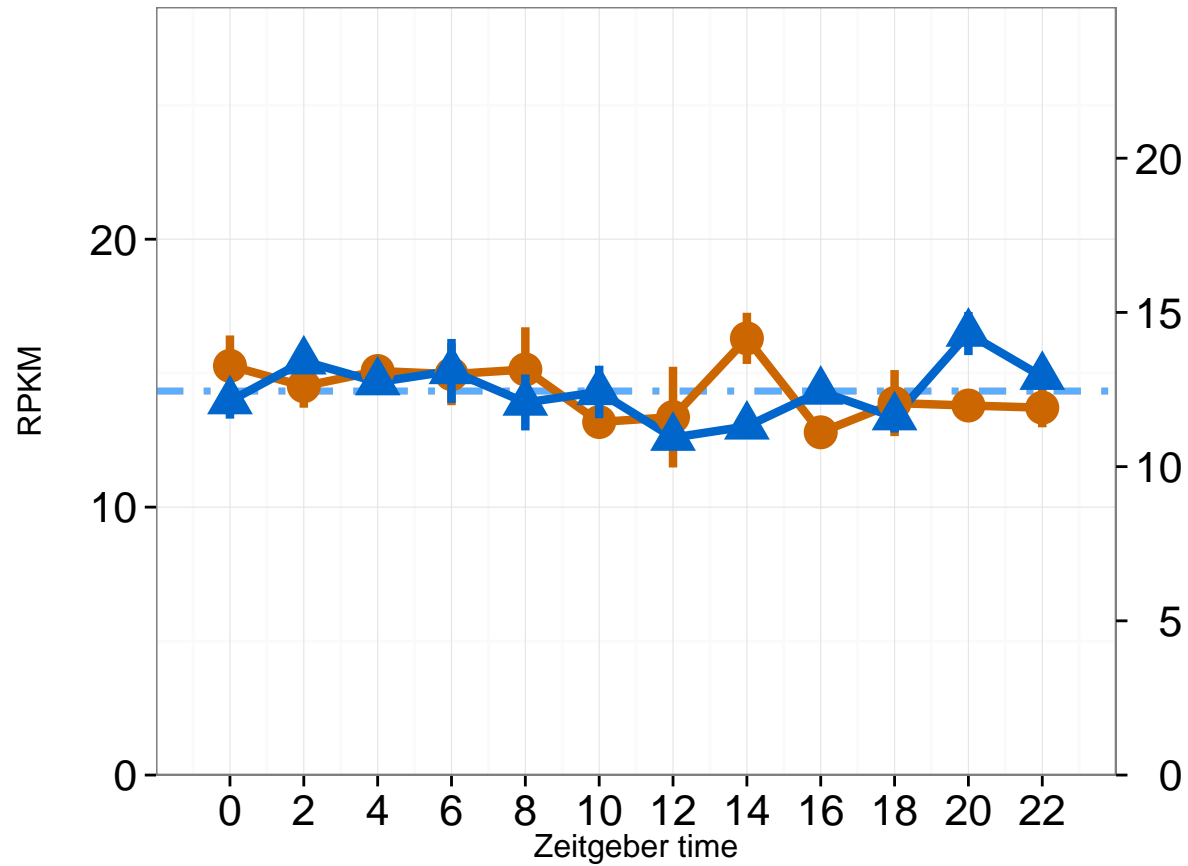

## Fam175b

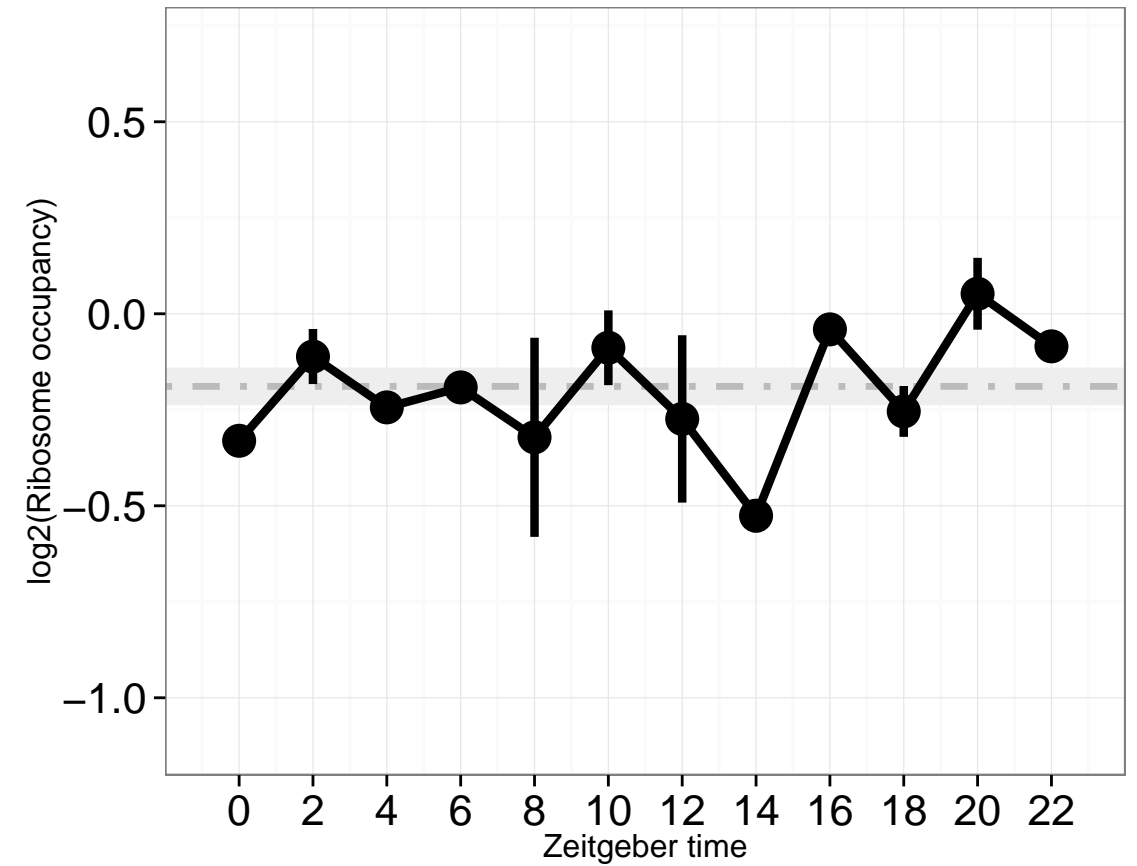

Supplement: SuppDataset_1.zip [file Fam175b_set_A.pdf › Supplemental Dataset 1/A-mRNA_nonrhyth_translation_nonrhyth/Fam175b_set_A.pdf]

# Fam177a

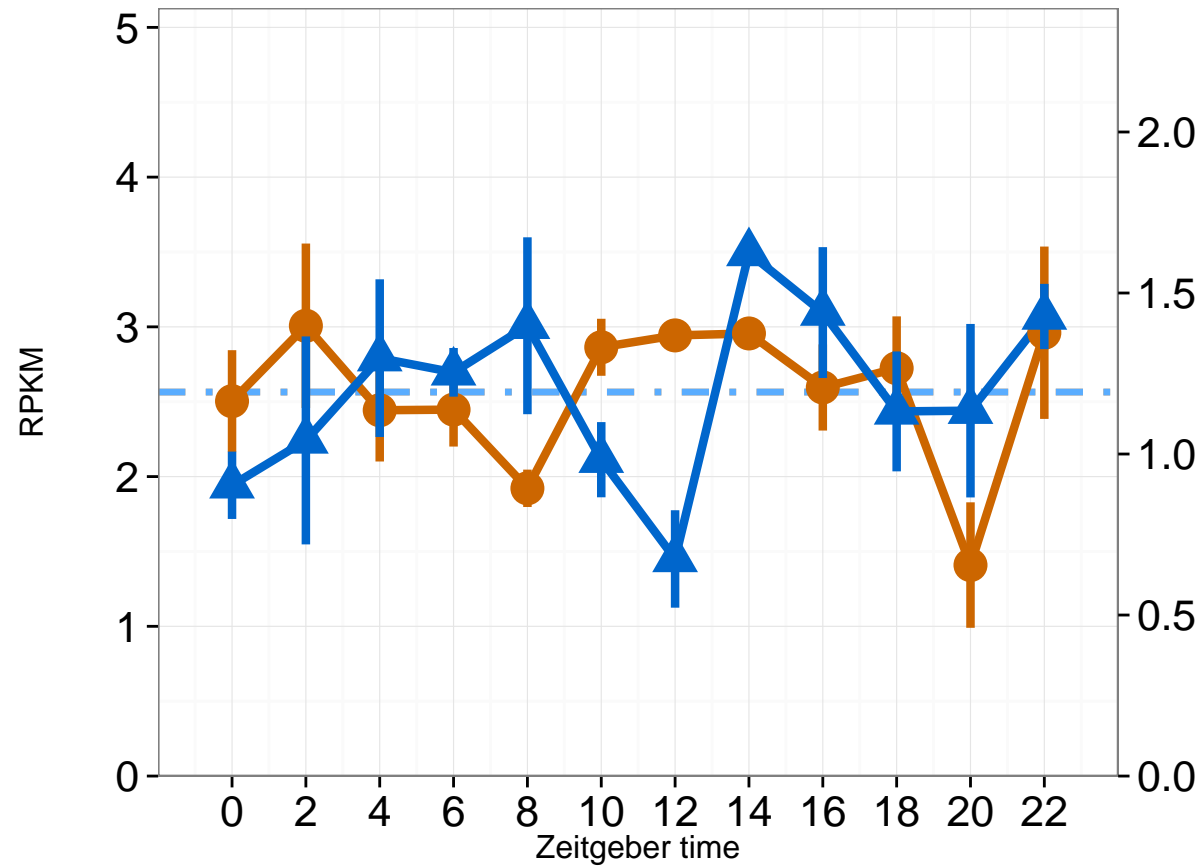

# Fam177a

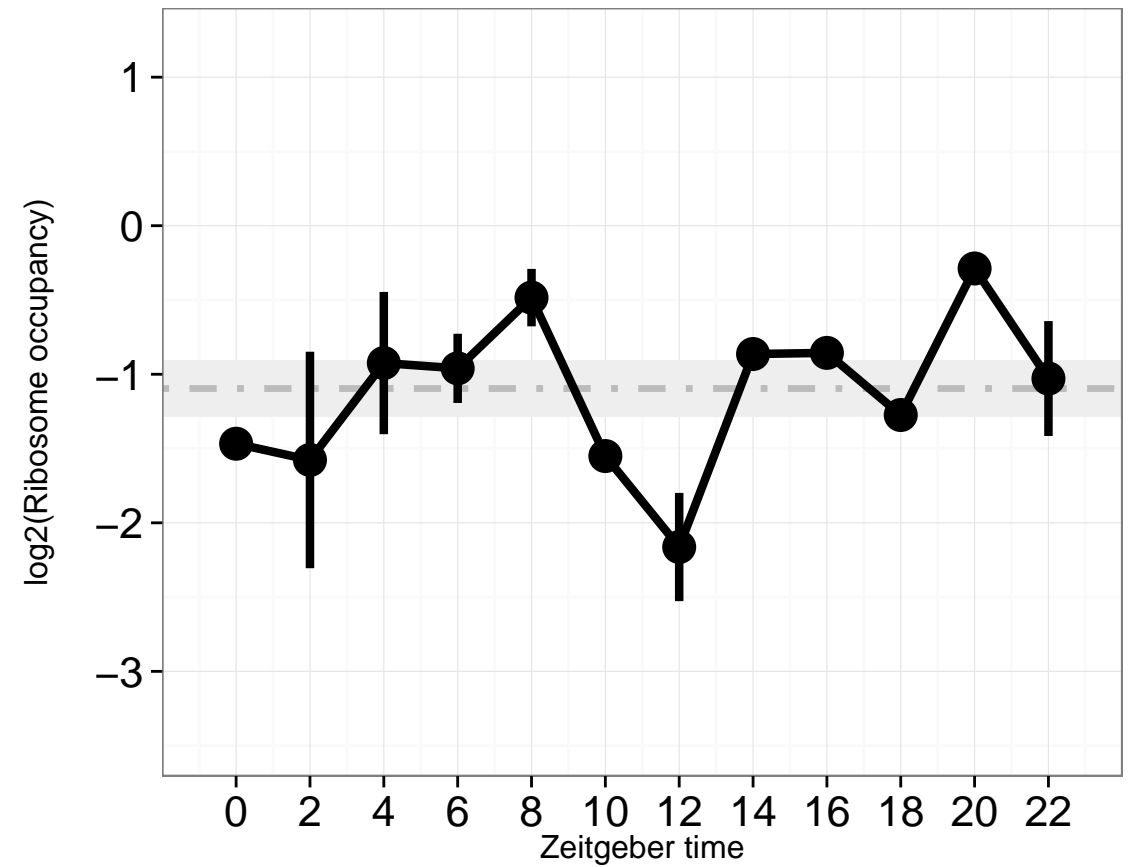

Supplement: SuppDataset_1.zip [file Fam177a_set_A.pdf › Supplemental Dataset 1/A-mRNA_nonrhyth_translation_nonrhyth/Fam177a_set_A.pdf]

# Fam178a

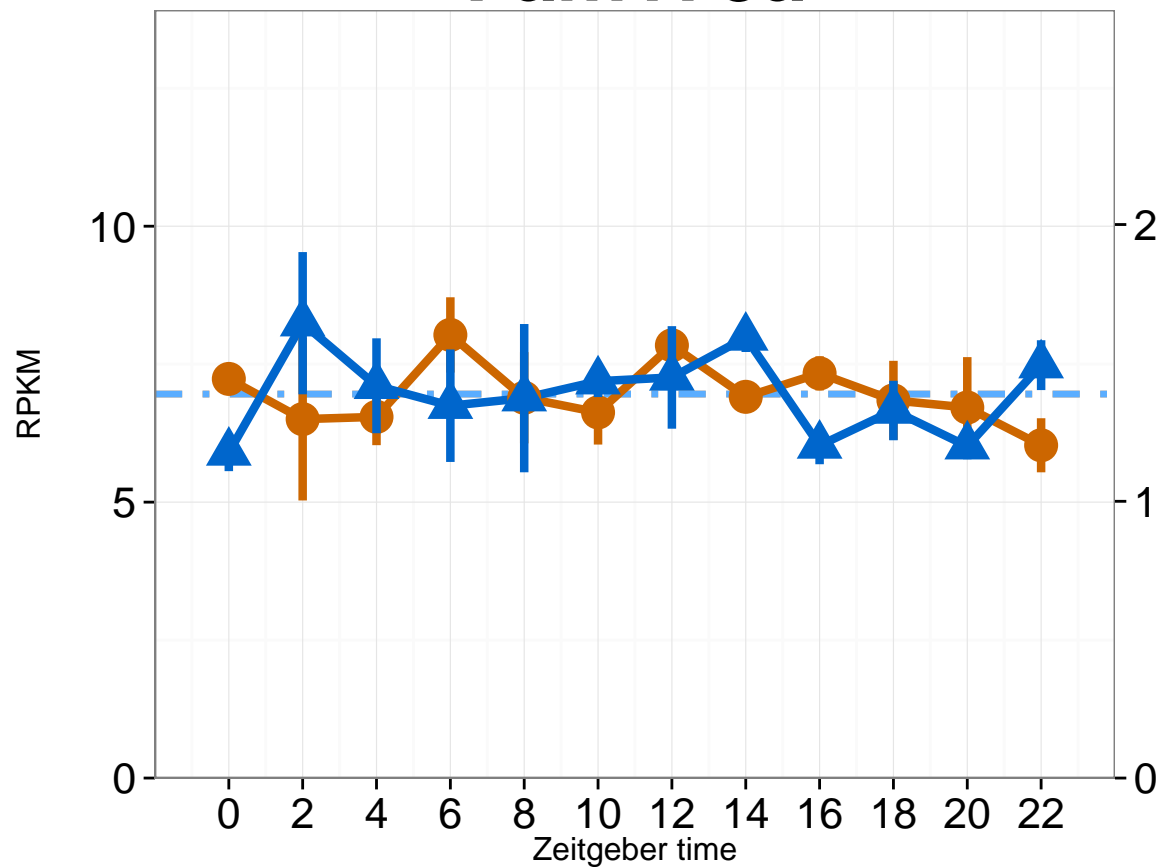

# Fam178a

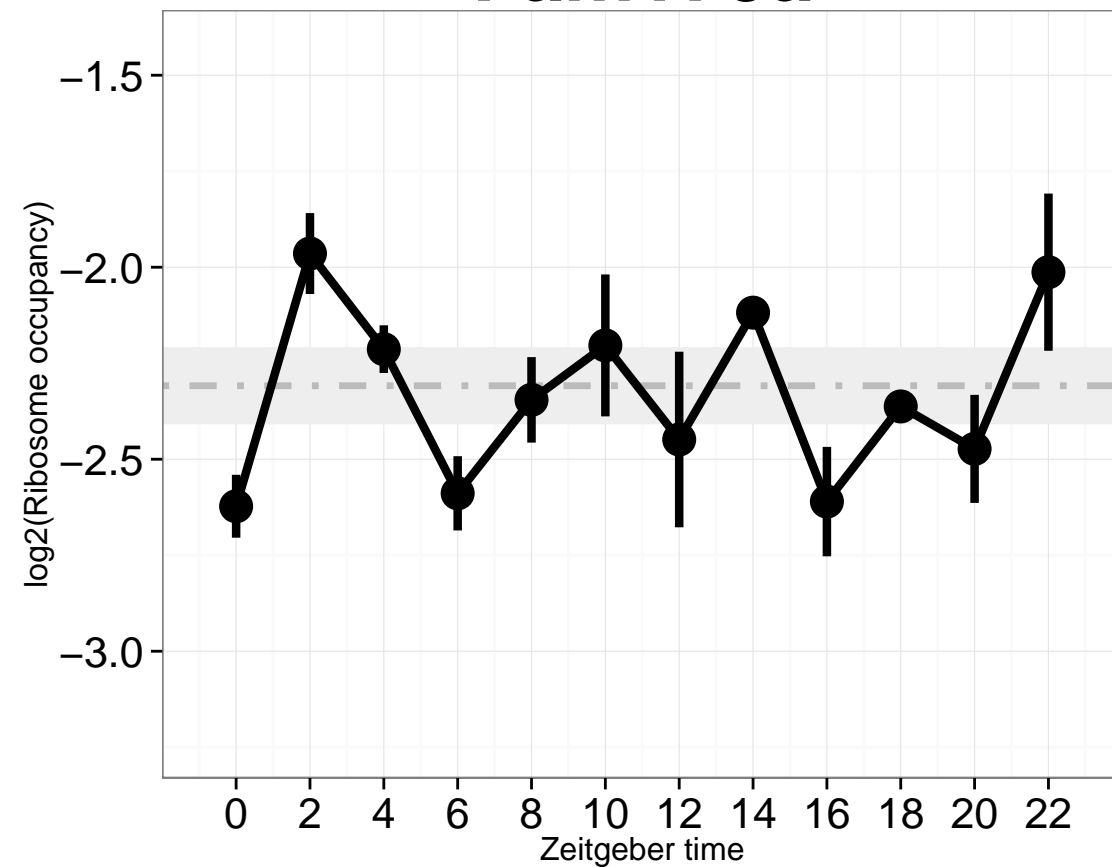

Supplement: SuppDataset_1.zip [file Fam178a_set_A.pdf › Supplemental Dataset 1/A-mRNA_nonrhyth_translation_nonrhyth/Fam178a_set_A.pdf]

# Fam179b

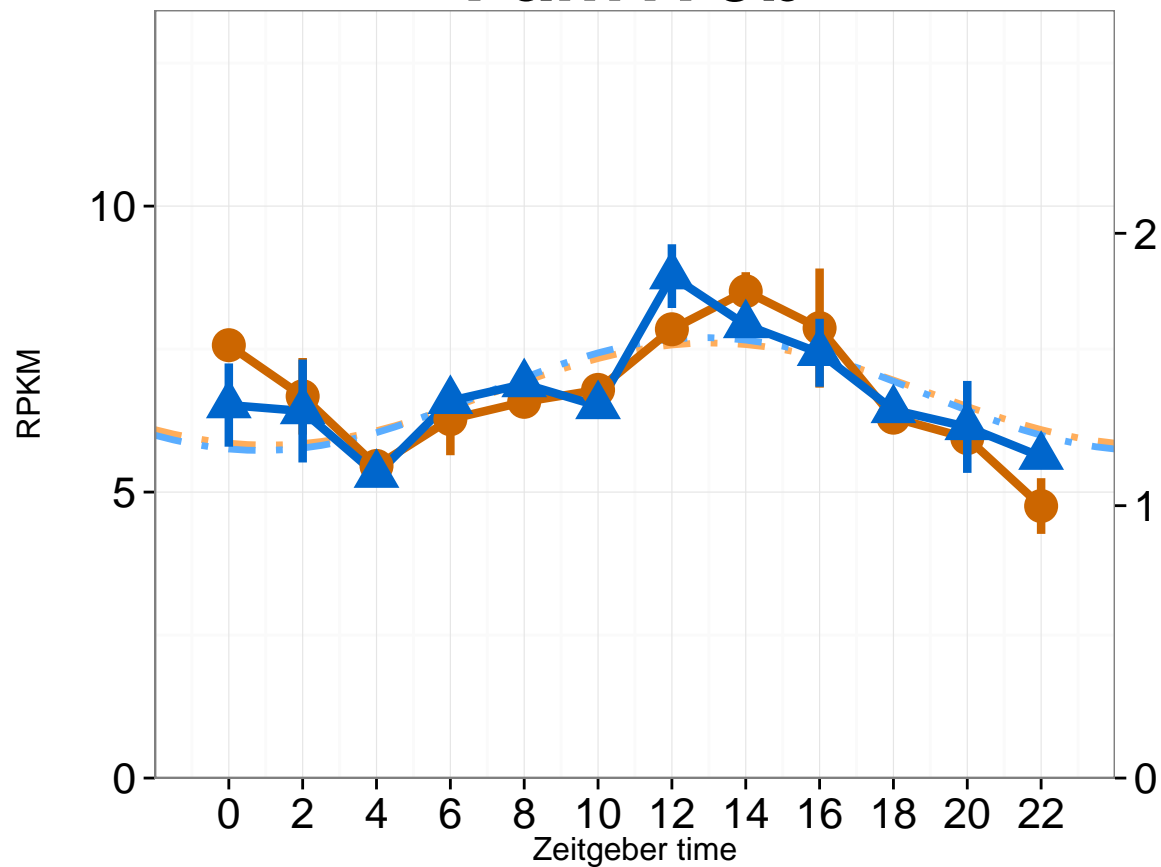

# Fam179b

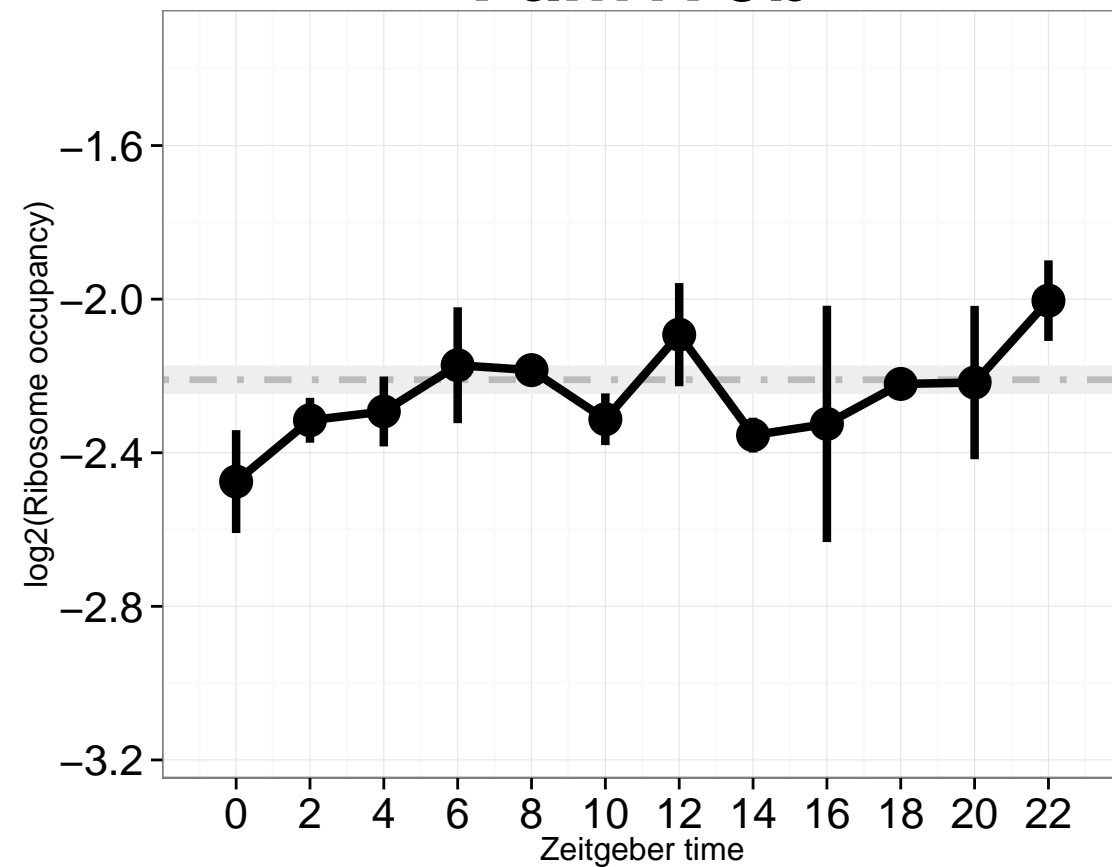

Supplement: SuppDataset_1.zip [file Fam179b_set_A.pdf › Supplemental Dataset 1/A-mRNA_nonrhyth_translation_nonrhyth/Fam179b_set_A.pdf]

# Fam185a

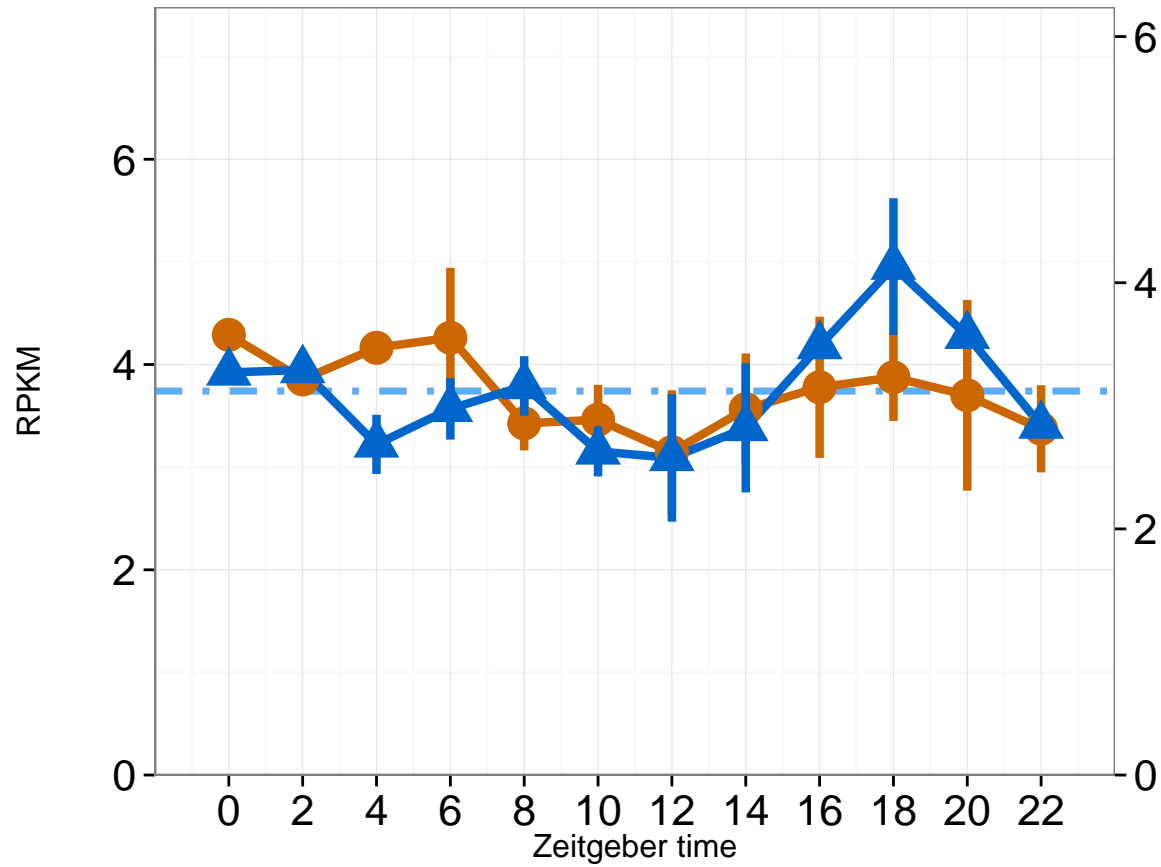

# Fam185a

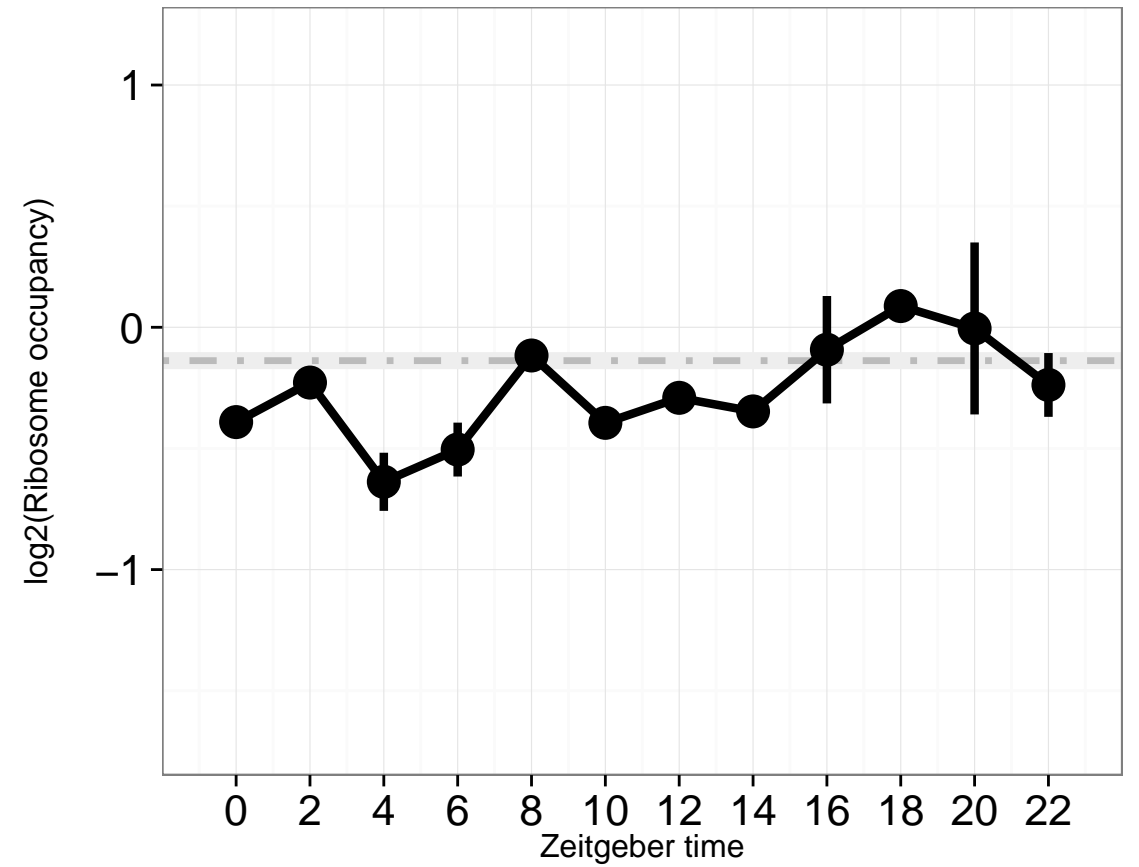

Supplement: SuppDataset_1.zip [file Fam185a_set_A.pdf › Supplemental Dataset 1/A-mRNA_nonrhyth_translation_nonrhyth/Fam185a_set_A.pdf]

# Fam188a

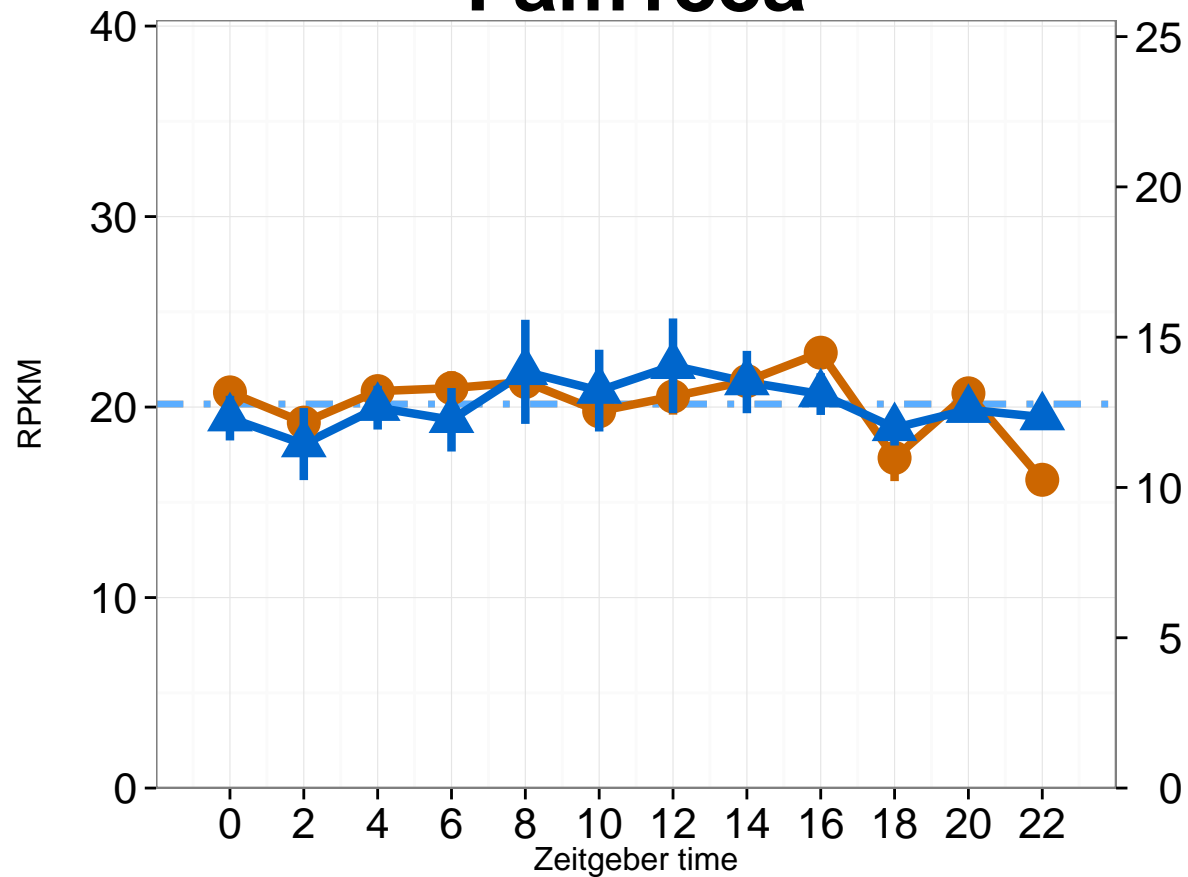

# Fam188a

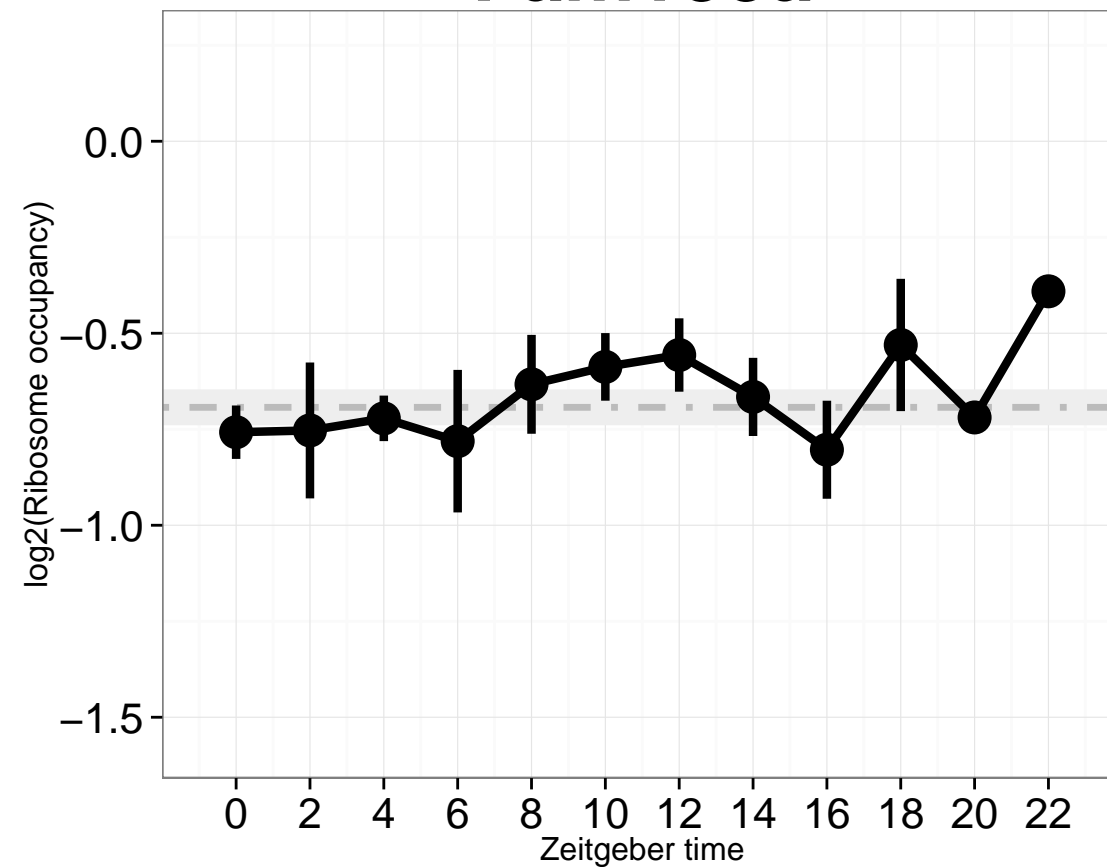

Supplement: SuppDataset_1.zip [file Fam188a_set_A.pdf › Supplemental Dataset 1/A-mRNA_nonrhyth_translation_nonrhyth/Fam188a_set_A.pdf]

# Fam188b

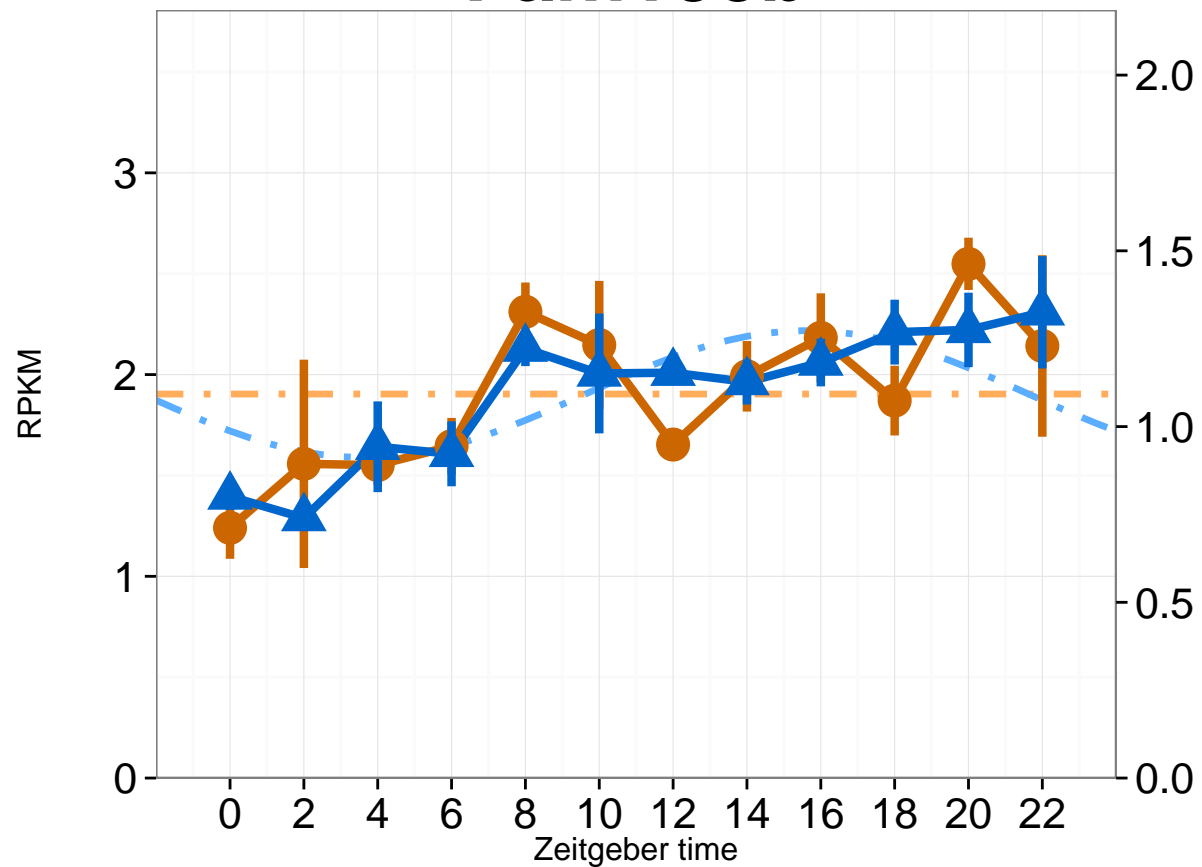

# Fam188b

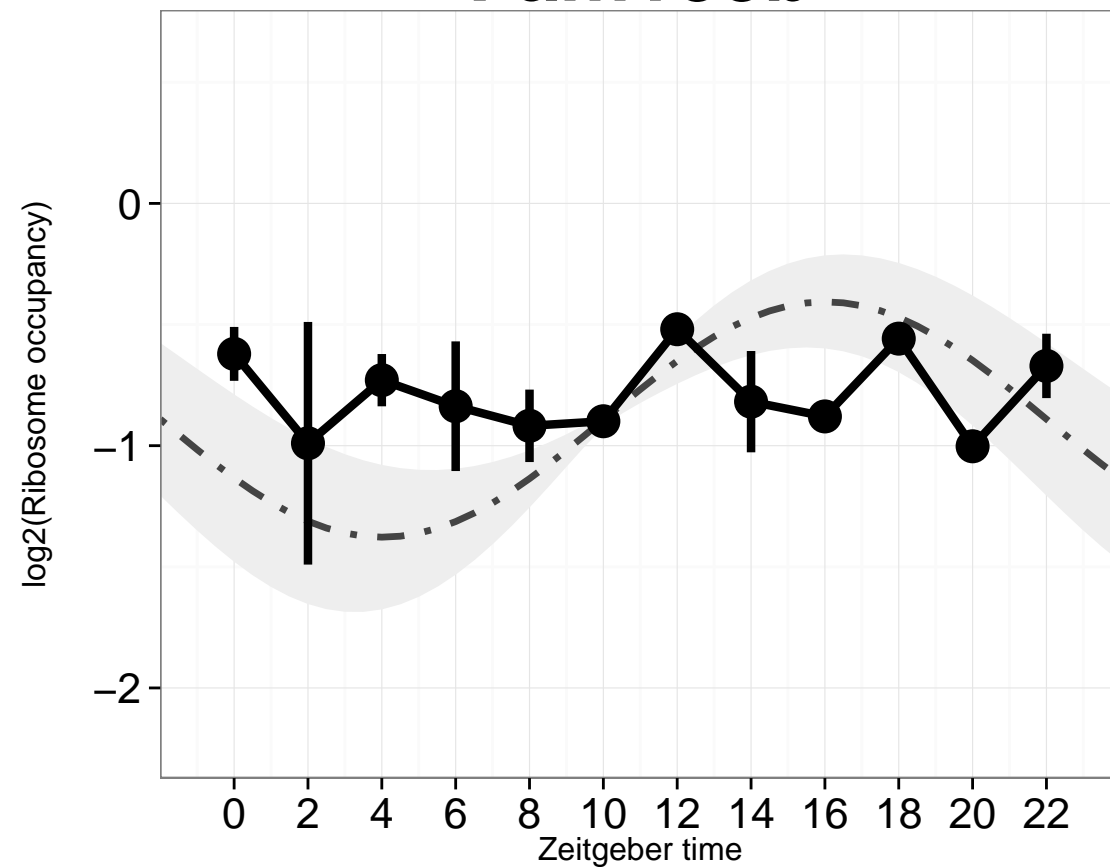

Supplement: SuppDataset_1.zip [file Fam188b_set_A.pdf › Supplemental Dataset 1/A-mRNA_nonrhyth_translation_nonrhyth/Fam188b_set_A.pdf]

# Fam189a2

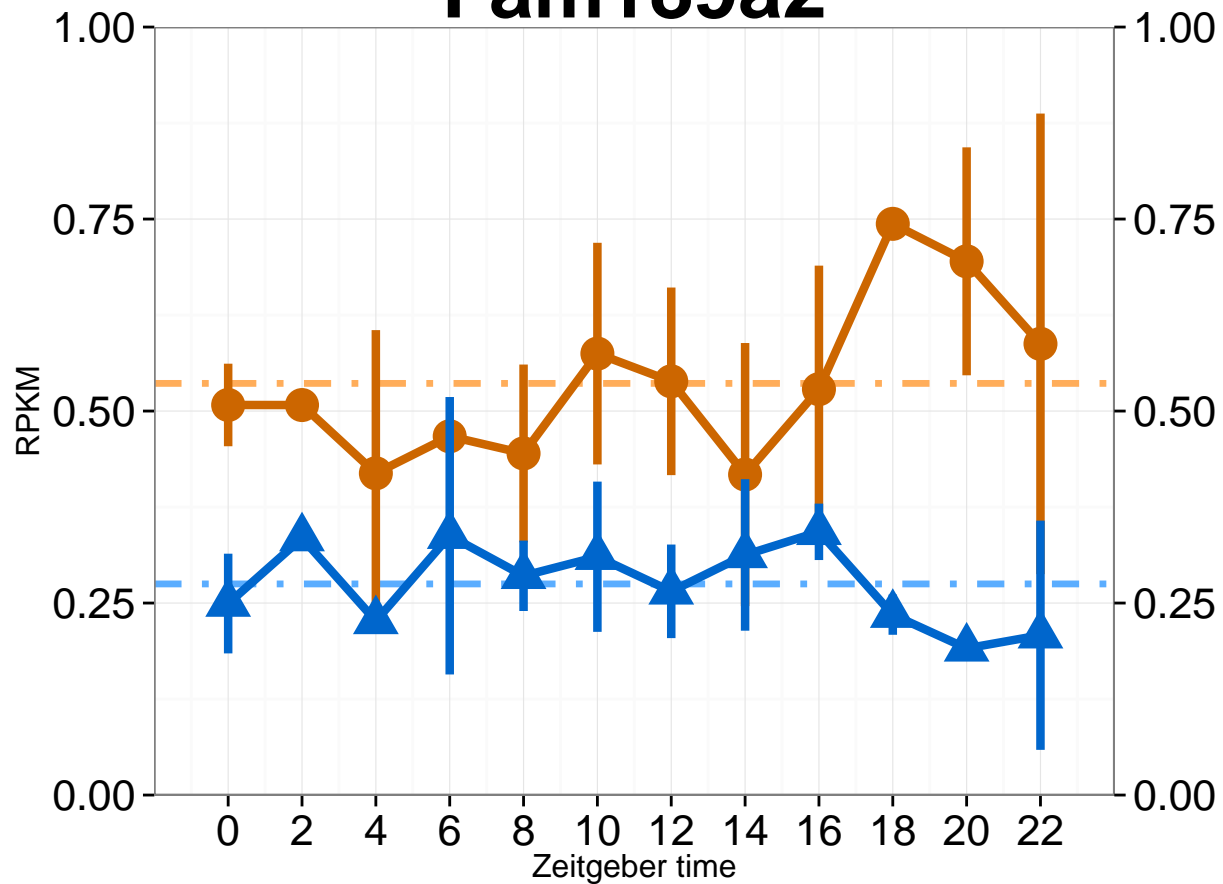

# Fam189a2

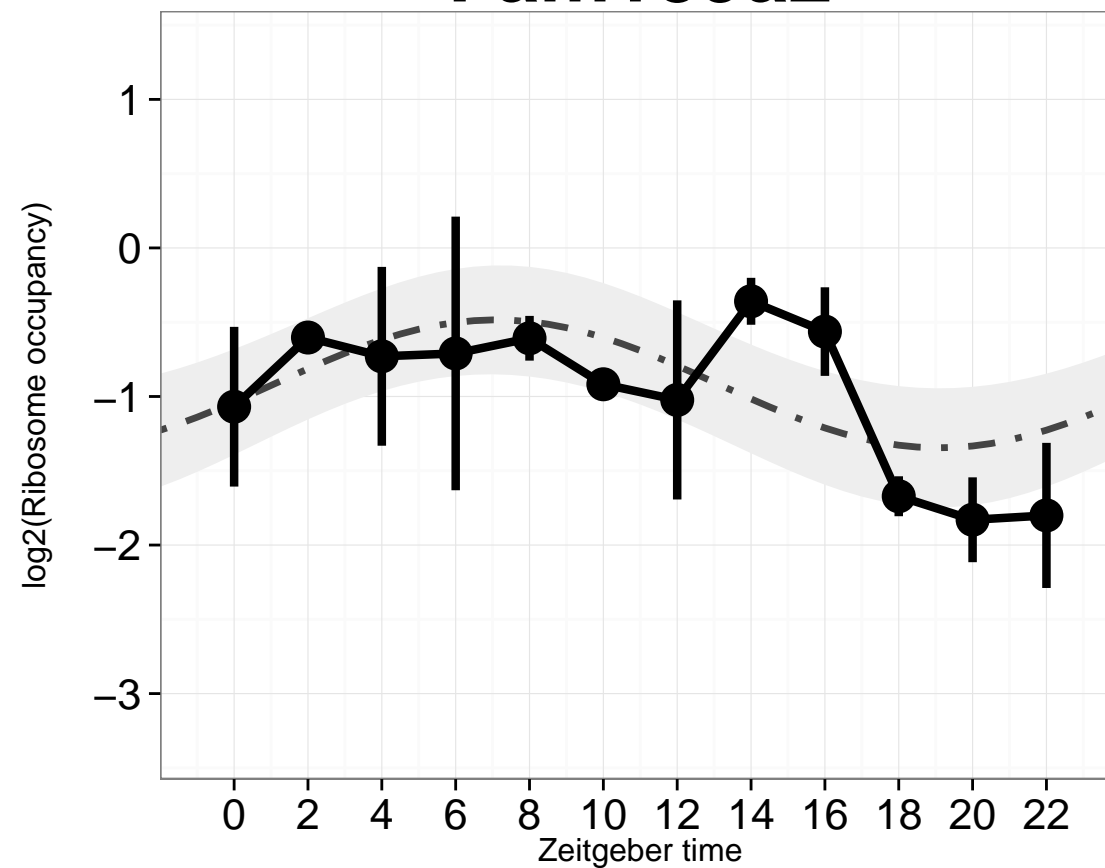

Supplement: SuppDataset_1.zip [file Fam189a2_set_A.pdf › Supplemental Dataset 1/A-mRNA_nonrhyth_translation_nonrhyth/Fam189a2_set_A.pdf]

# Fam192a

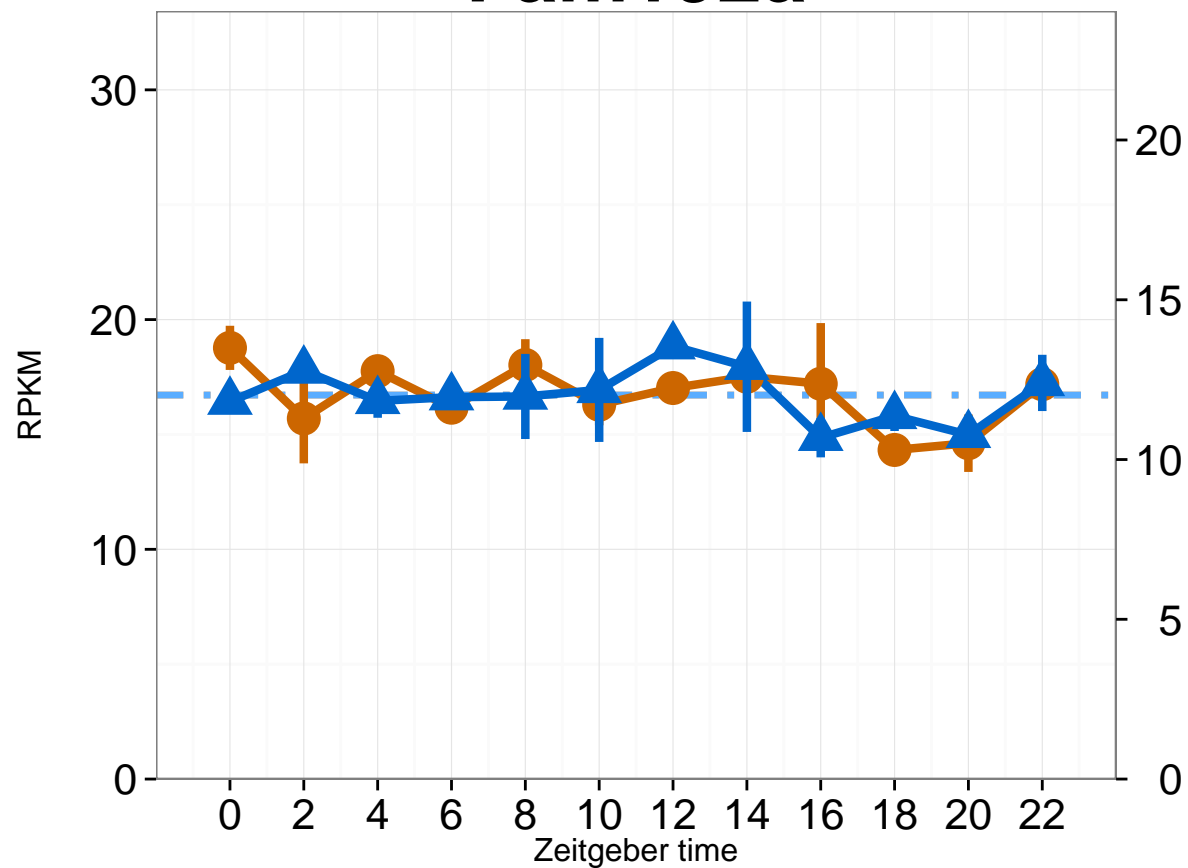

# Fam192a

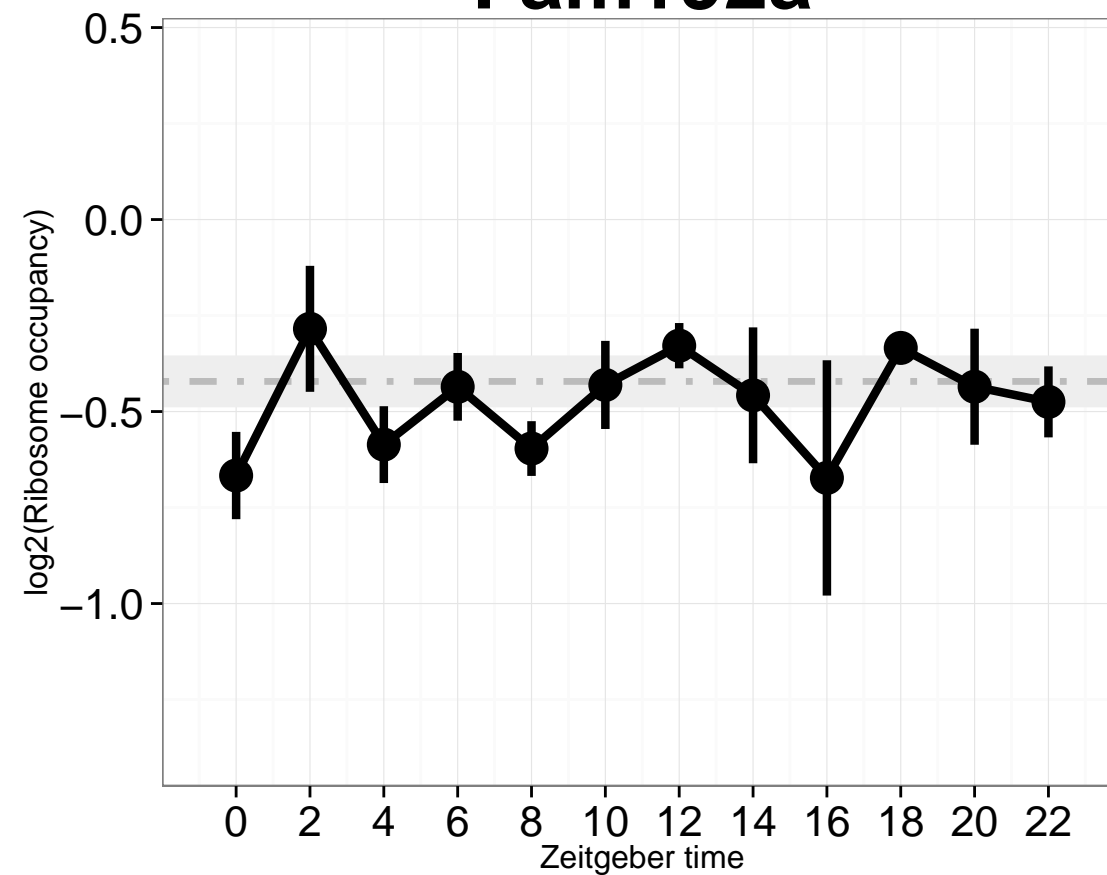

Supplement: SuppDataset_1.zip [file Fam192a_set_A.pdf › Supplemental Dataset 1/A-mRNA_nonrhyth_translation_nonrhyth/Fam192a_set_A.pdf]

# Fam193a

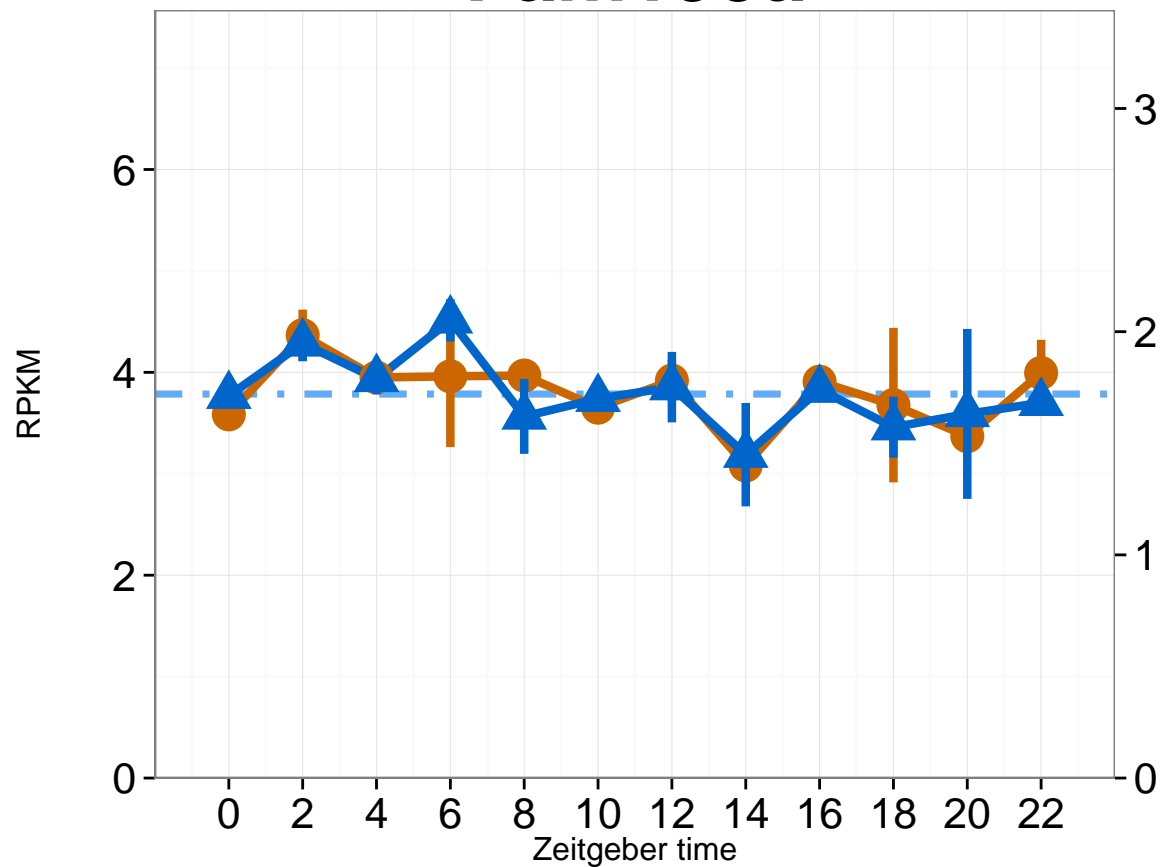

# Fam193a

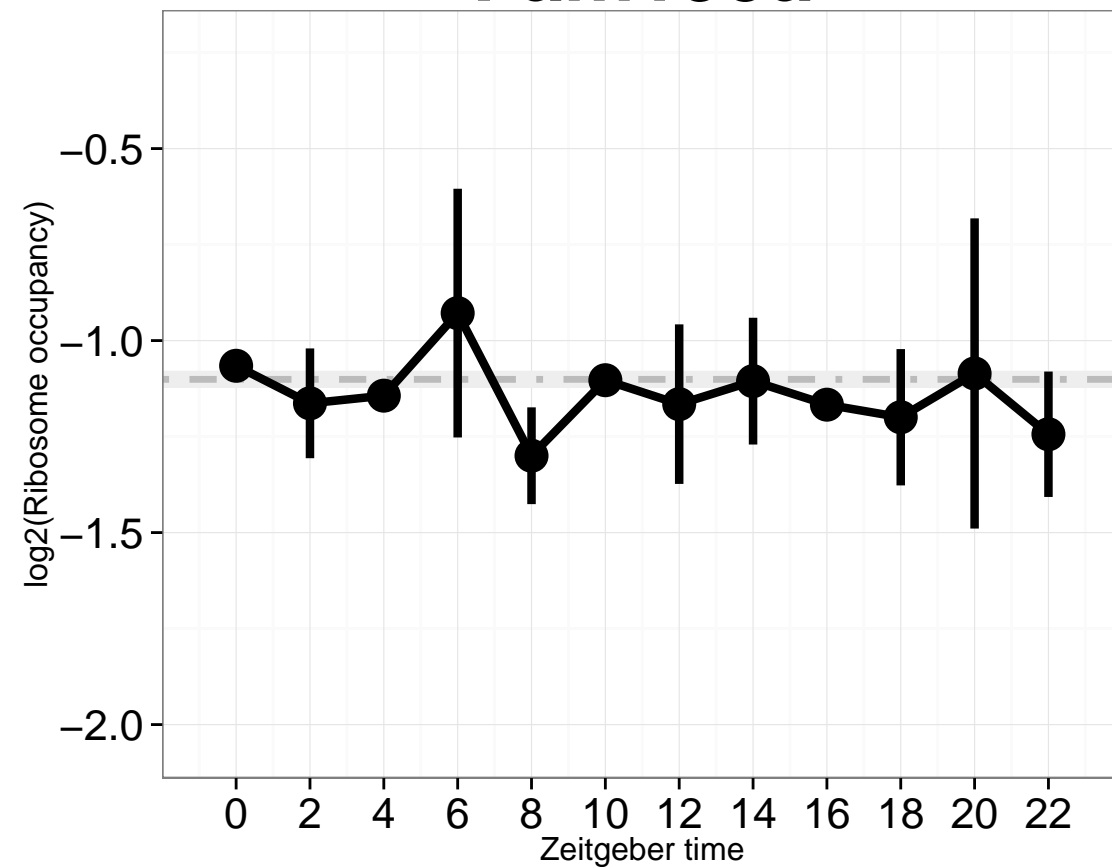

Supplement: SuppDataset_1.zip [file Fam193a_set_A.pdf › Supplemental Dataset 1/A-mRNA_nonrhyth_translation_nonrhyth/Fam193a_set_A.pdf]

# Fam193b

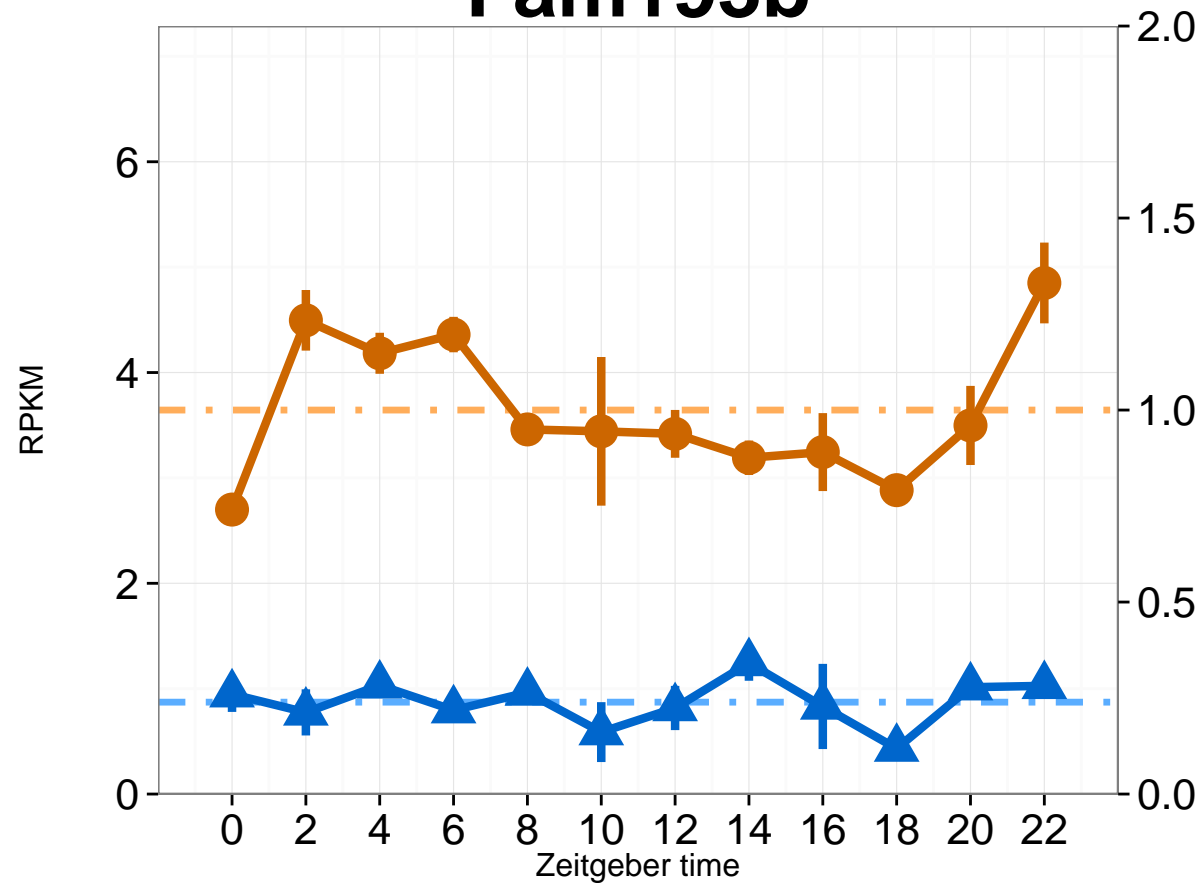

# Fam193b

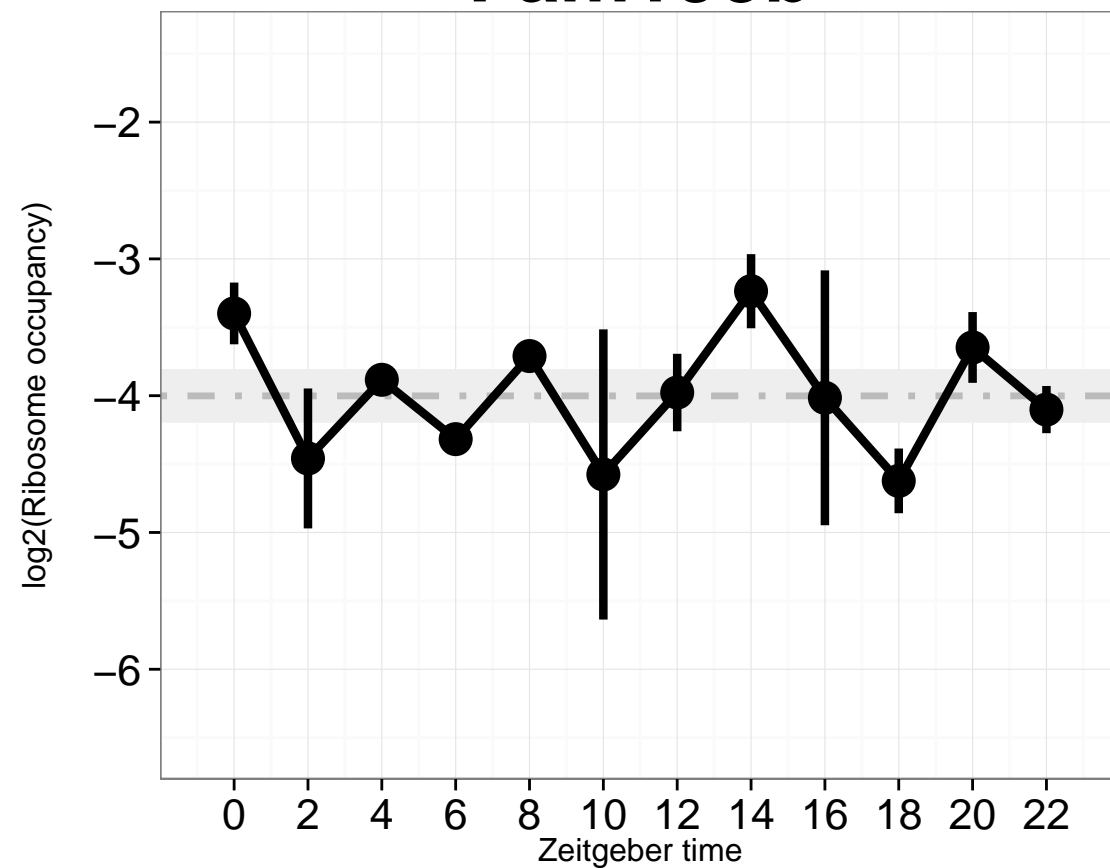

Supplement: SuppDataset_1.zip [file Fam193b_set_A.pdf › Supplemental Dataset 1/A-mRNA_nonrhyth_translation_nonrhyth/Fam193b_set_A.pdf]

# Fam199x

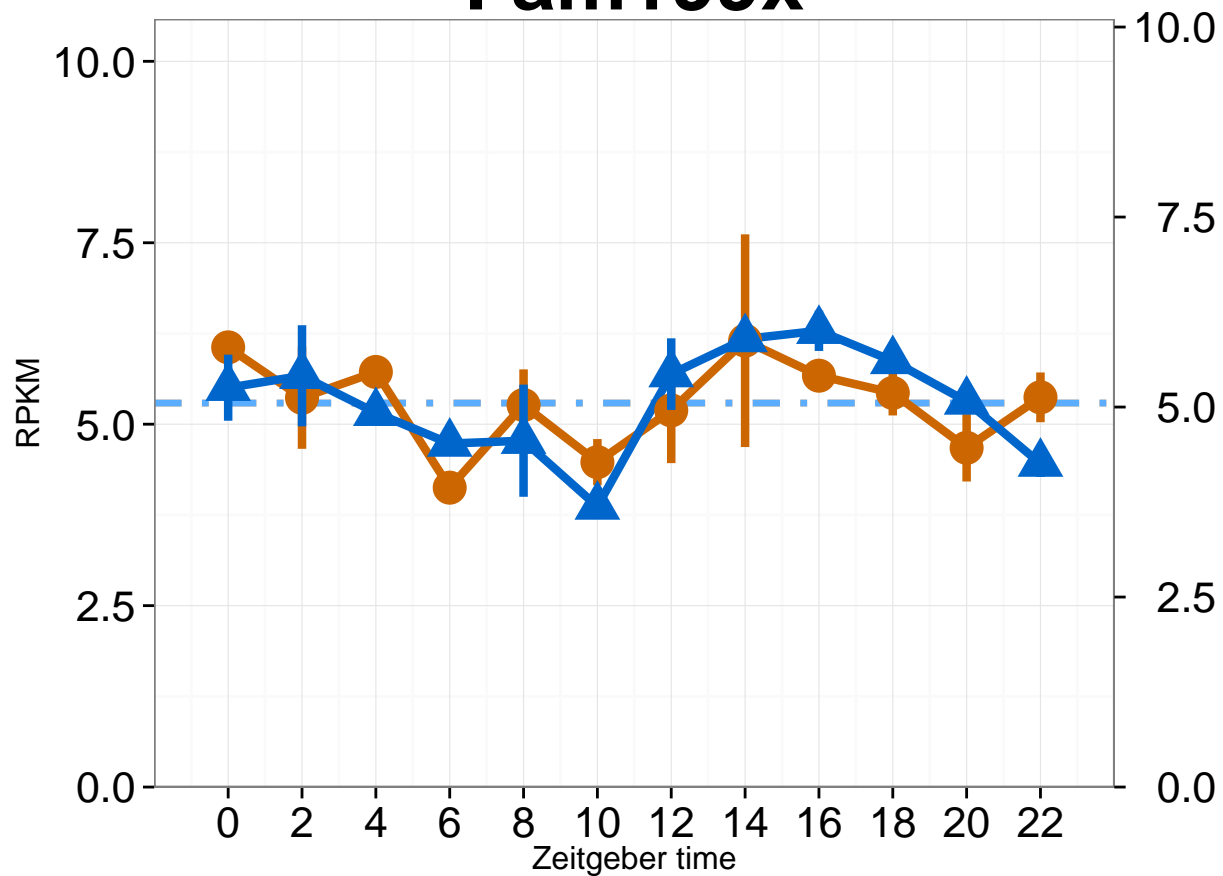

# Fam199x

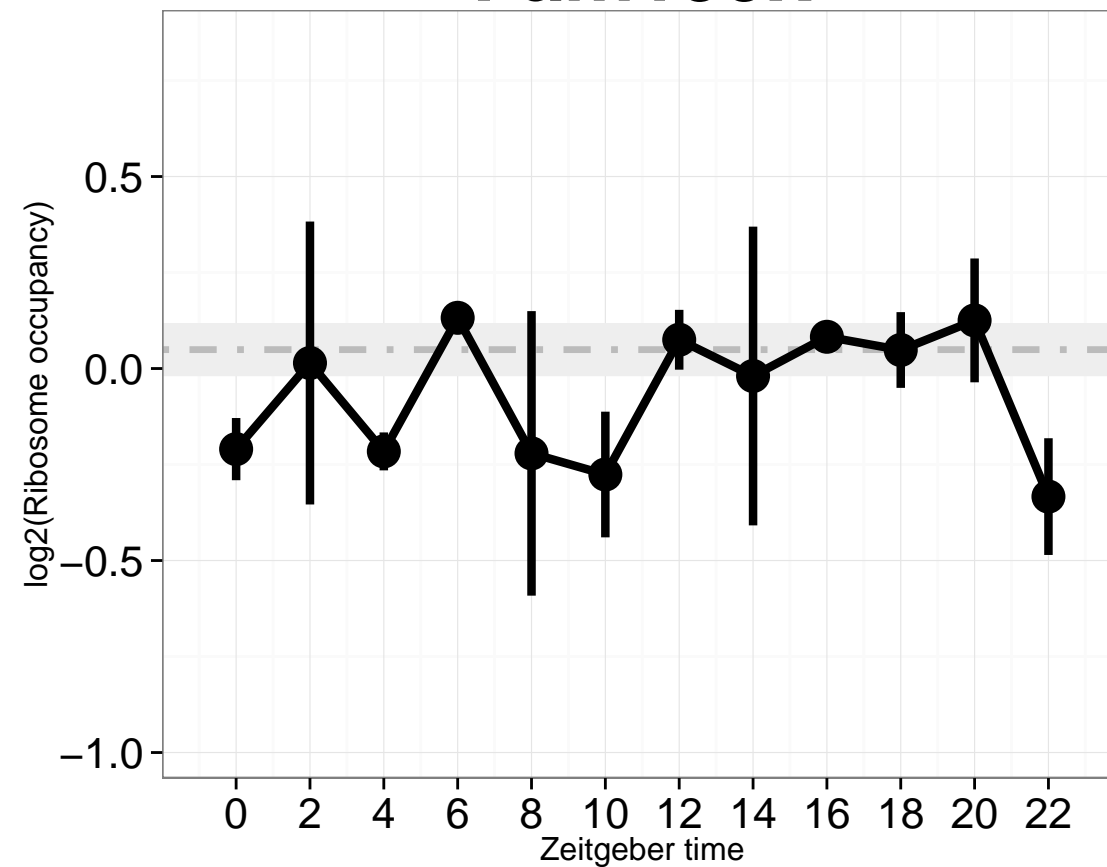

Supplement: SuppDataset_1.zip [file Fam199x_set_A.pdf › Supplemental Dataset 1/A-mRNA_nonrhyth_translation_nonrhyth/Fam199x_set_A.pdf]

# Fam203a

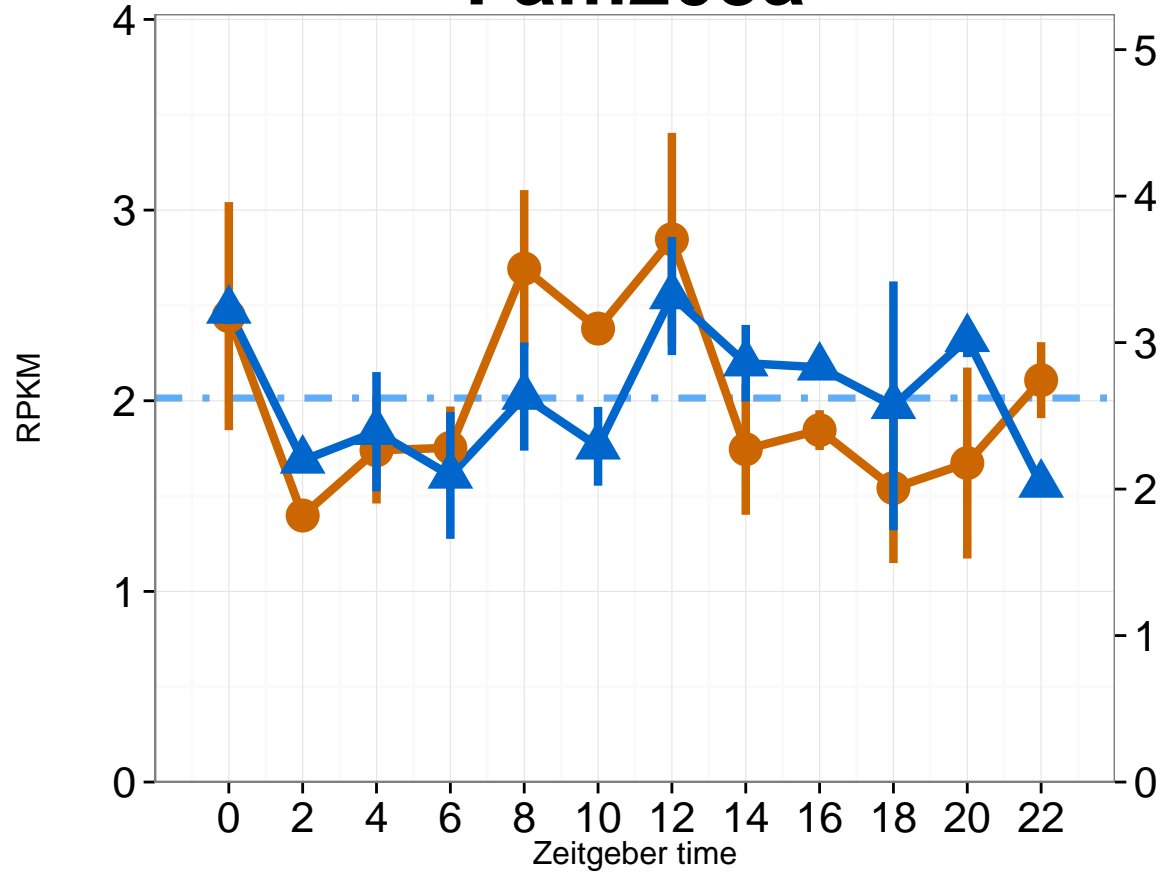

# Fam203a

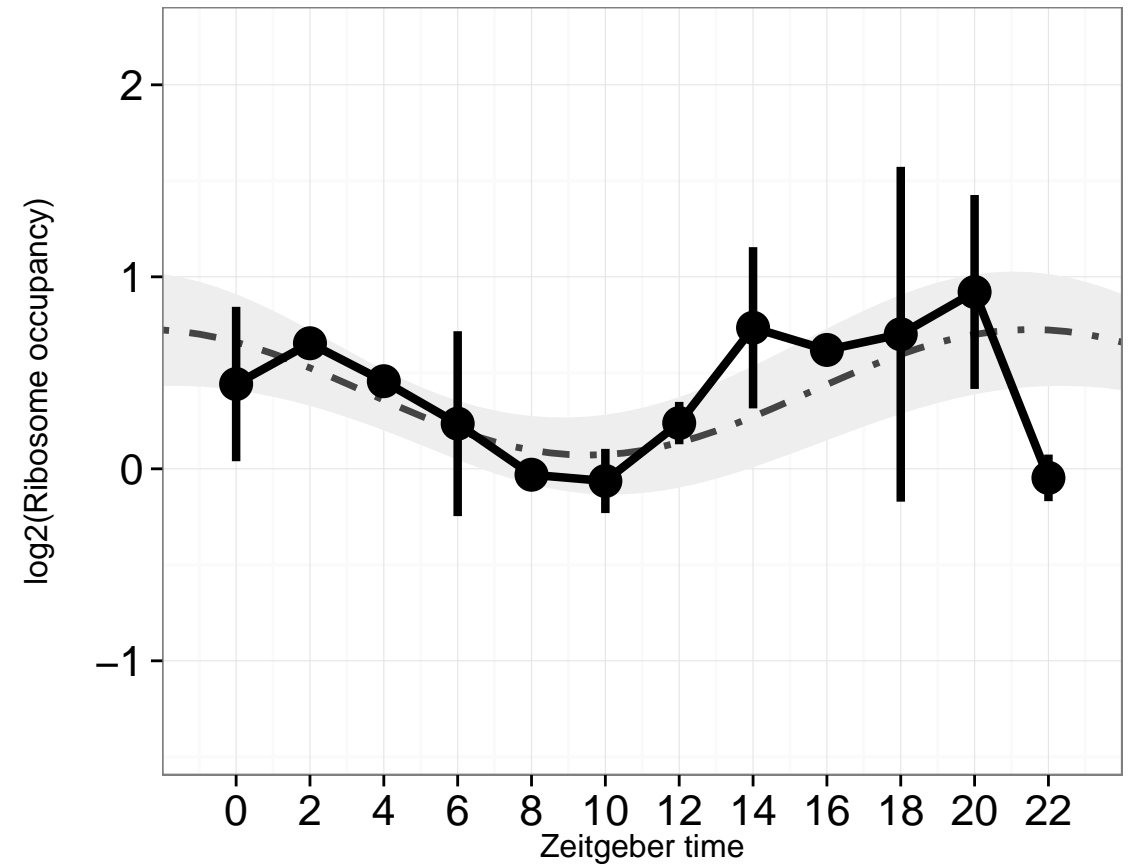

Supplement: SuppDataset_1.zip [file Fam203a_set_A.pdf › Supplemental Dataset 1/A-mRNA_nonrhyth_translation_nonrhyth/Fam203a_set_A.pdf]

# Fam207a

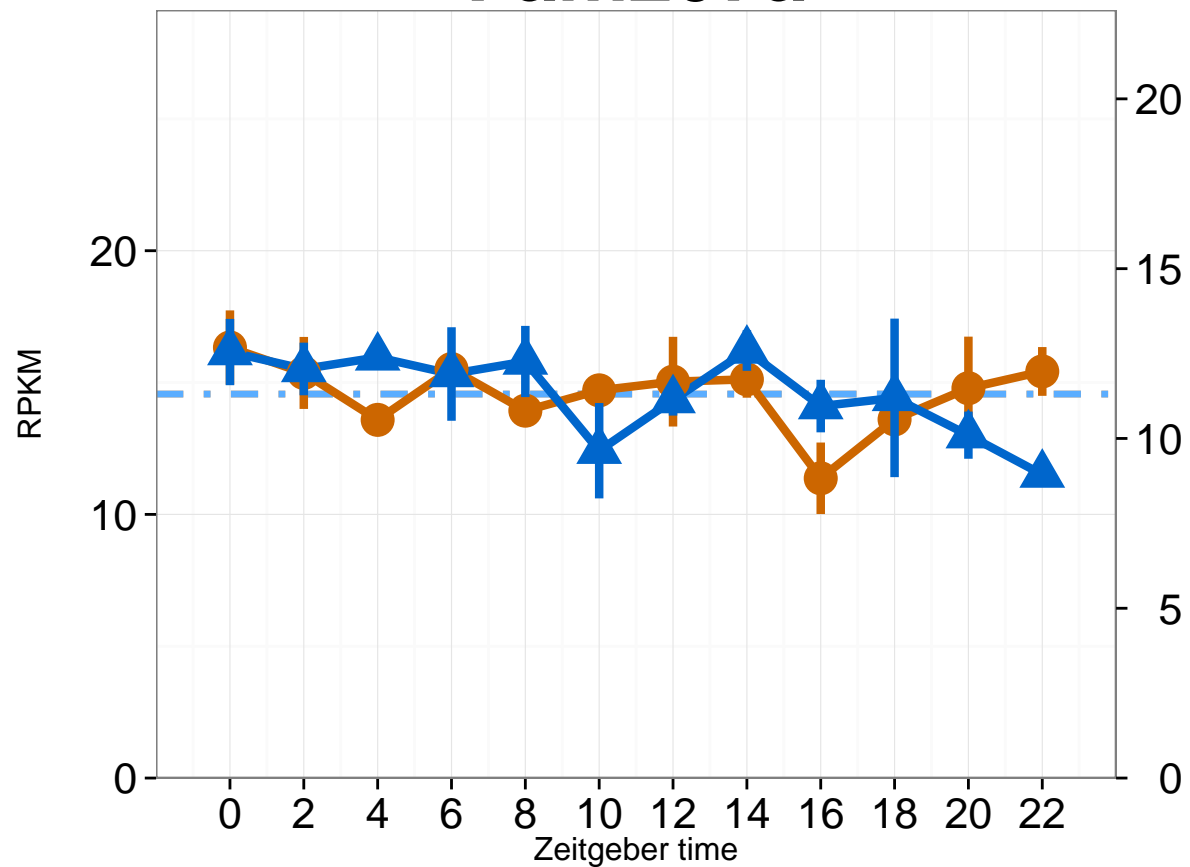

# Fam207a

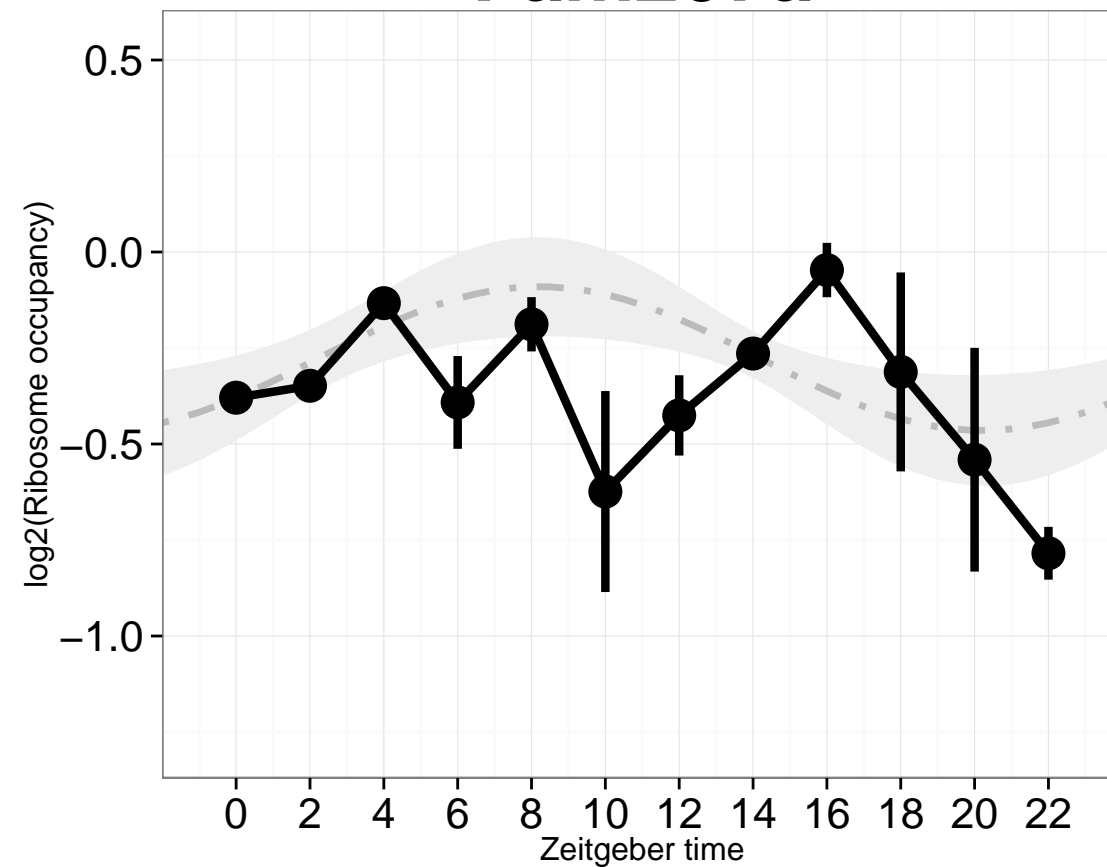

Supplement: SuppDataset_1.zip [file Fam207a_set_A.pdf › Supplemental Dataset 1/A-mRNA_nonrhyth_translation_nonrhyth/Fam207a_set_A.pdf]

# Fam20b

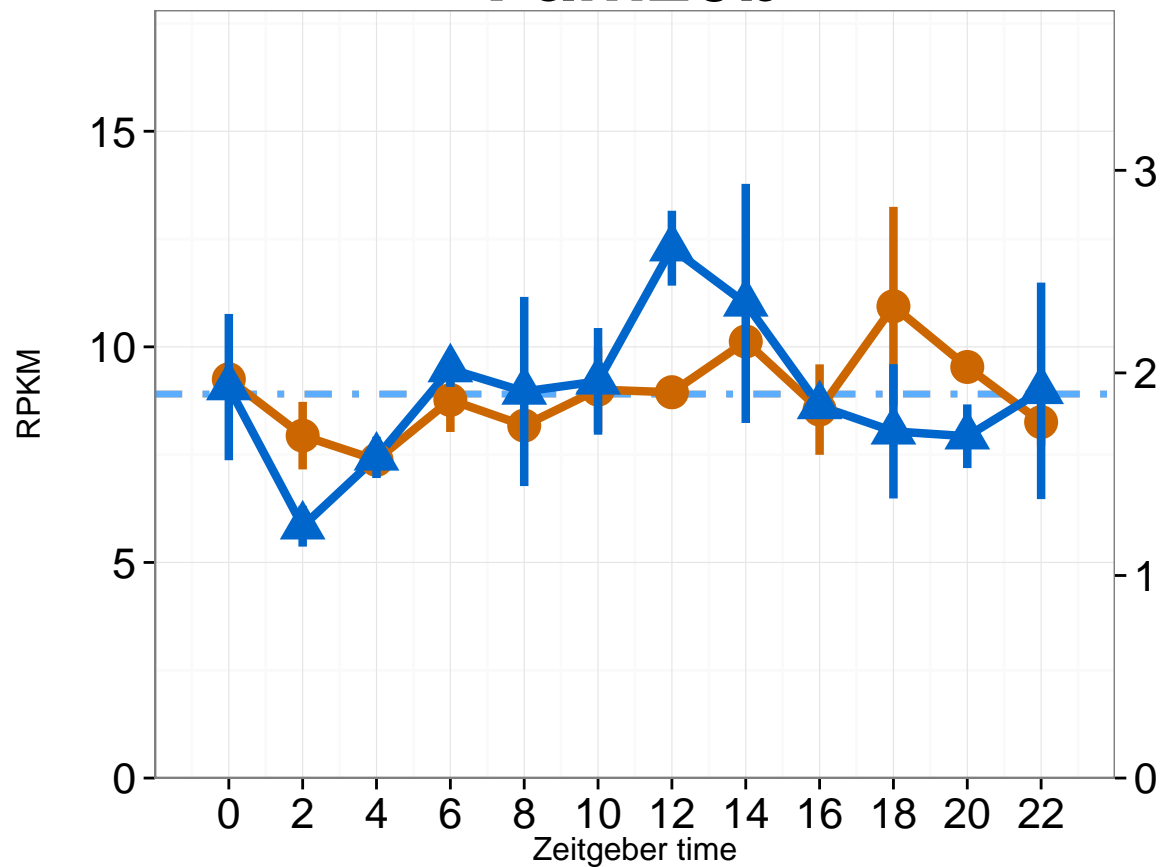

# Fam20b

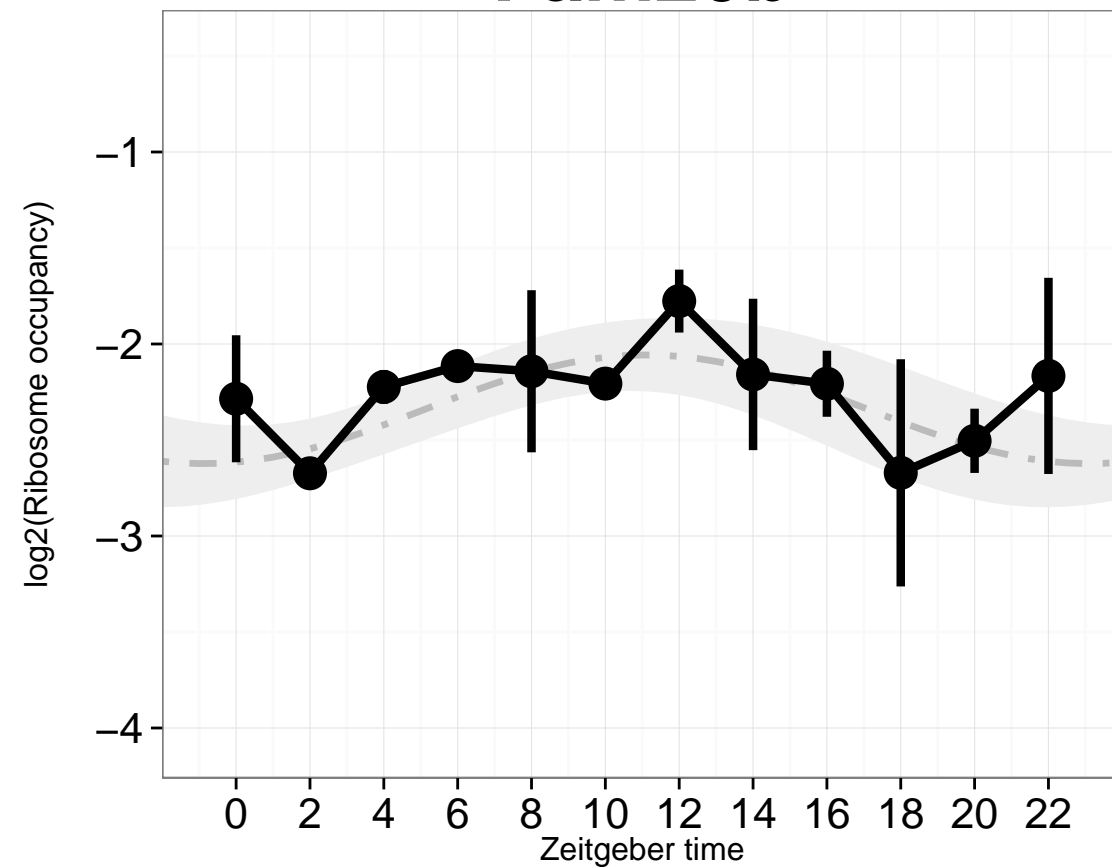

Supplement: SuppDataset_1.zip [file Fam20b_set_A.pdf › Supplemental Dataset 1/A-mRNA_nonrhyth_translation_nonrhyth/Fam20b_set_A.pdf]

# Fam20c

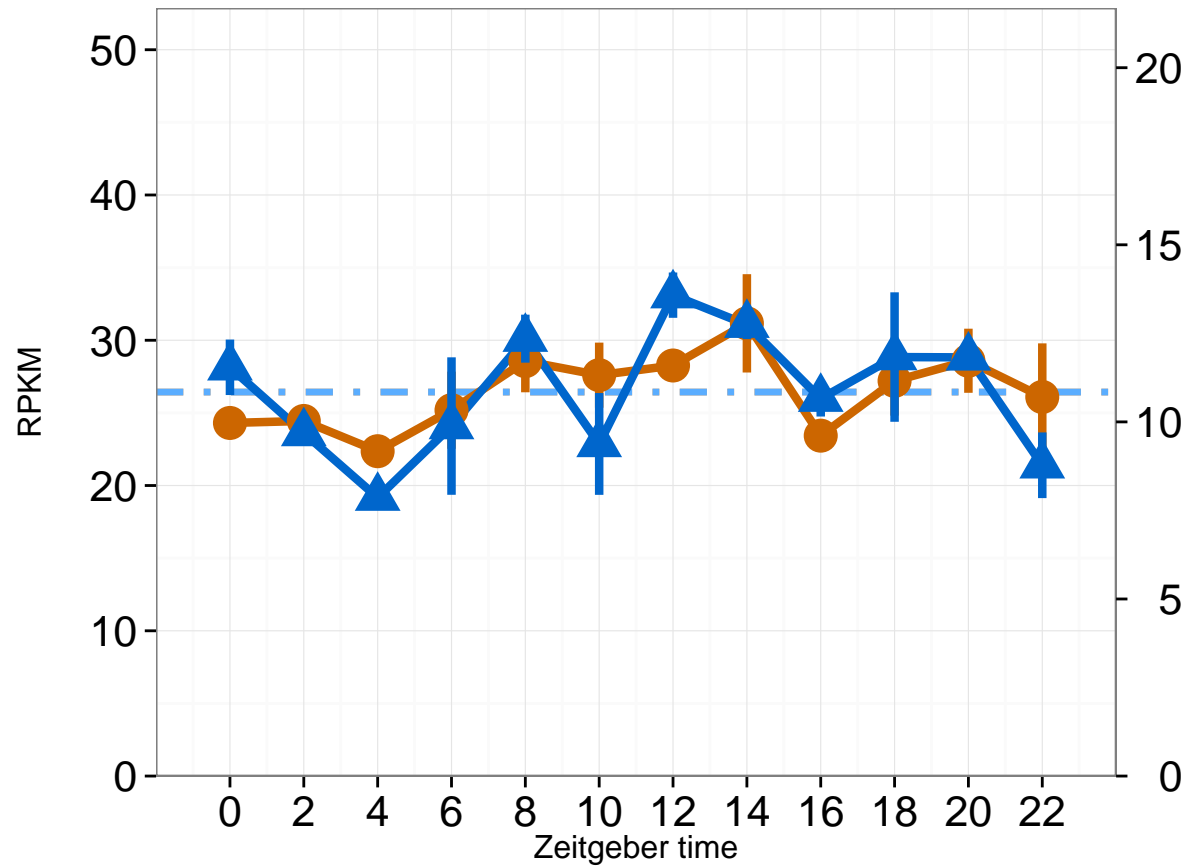

# Fam20c

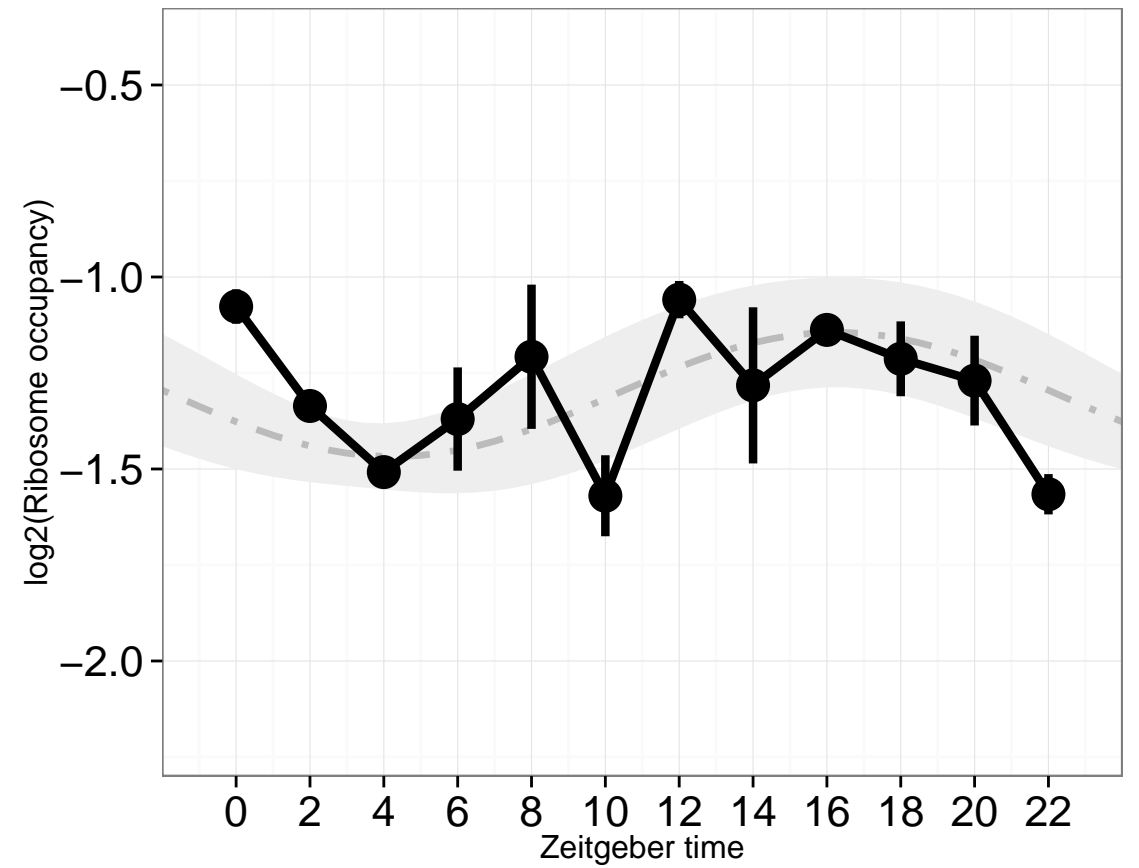

Supplement: SuppDataset_1.zip [file Fam20c_set_A.pdf › Supplemental Dataset 1/A-mRNA_nonrhyth_translation_nonrhyth/Fam20c_set_A.pdf]

# Fam210a

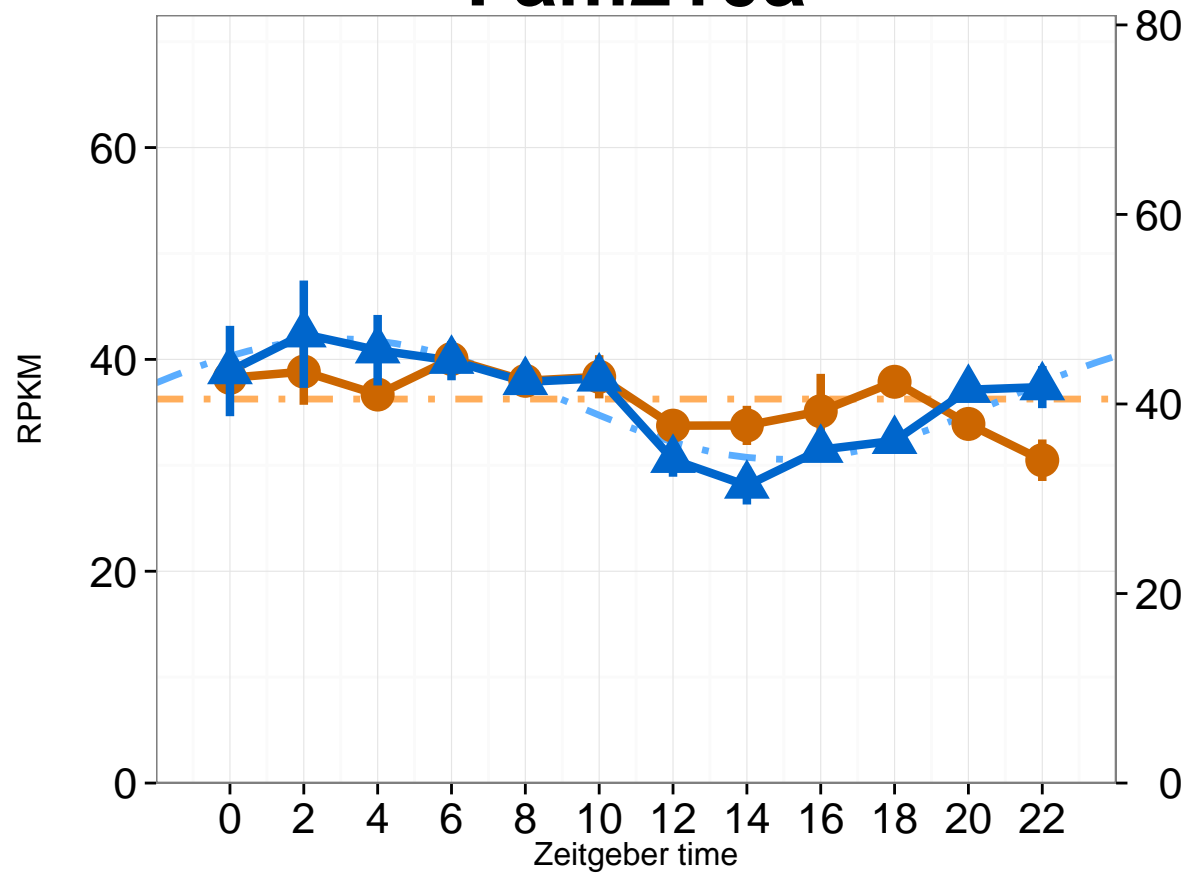

# Fam210a

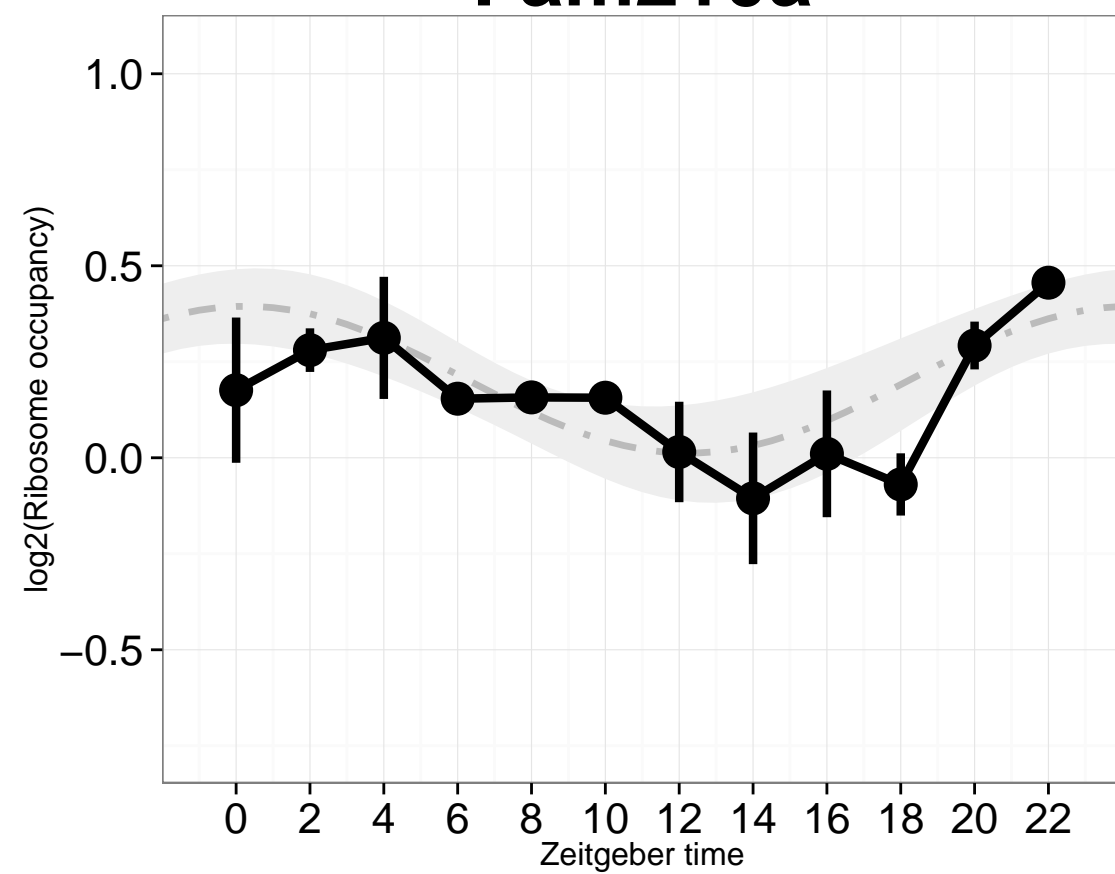

Supplement: SuppDataset_1.zip [file Fam210a_set_A.pdf › Supplemental Dataset 1/A-mRNA_nonrhyth_translation_nonrhyth/Fam210a_set_A.pdf]

# Fam210b

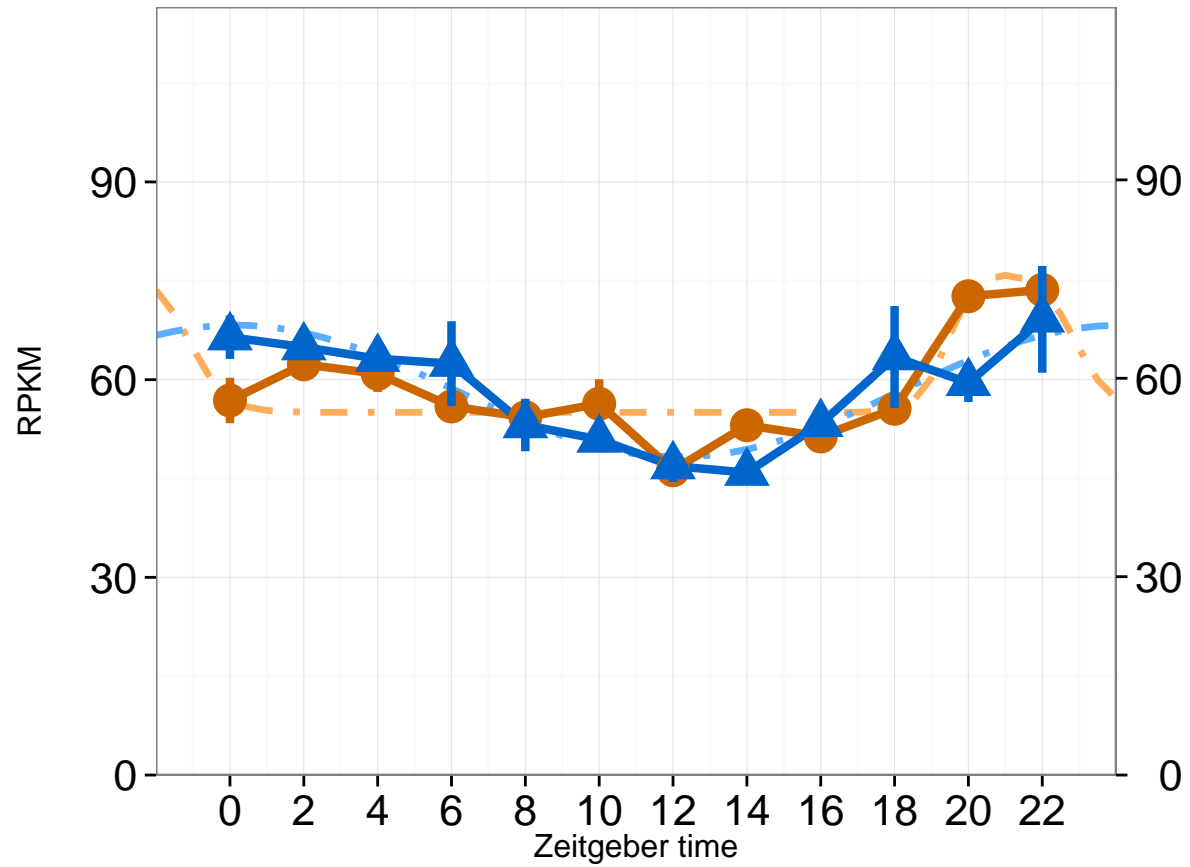

# Fam210b

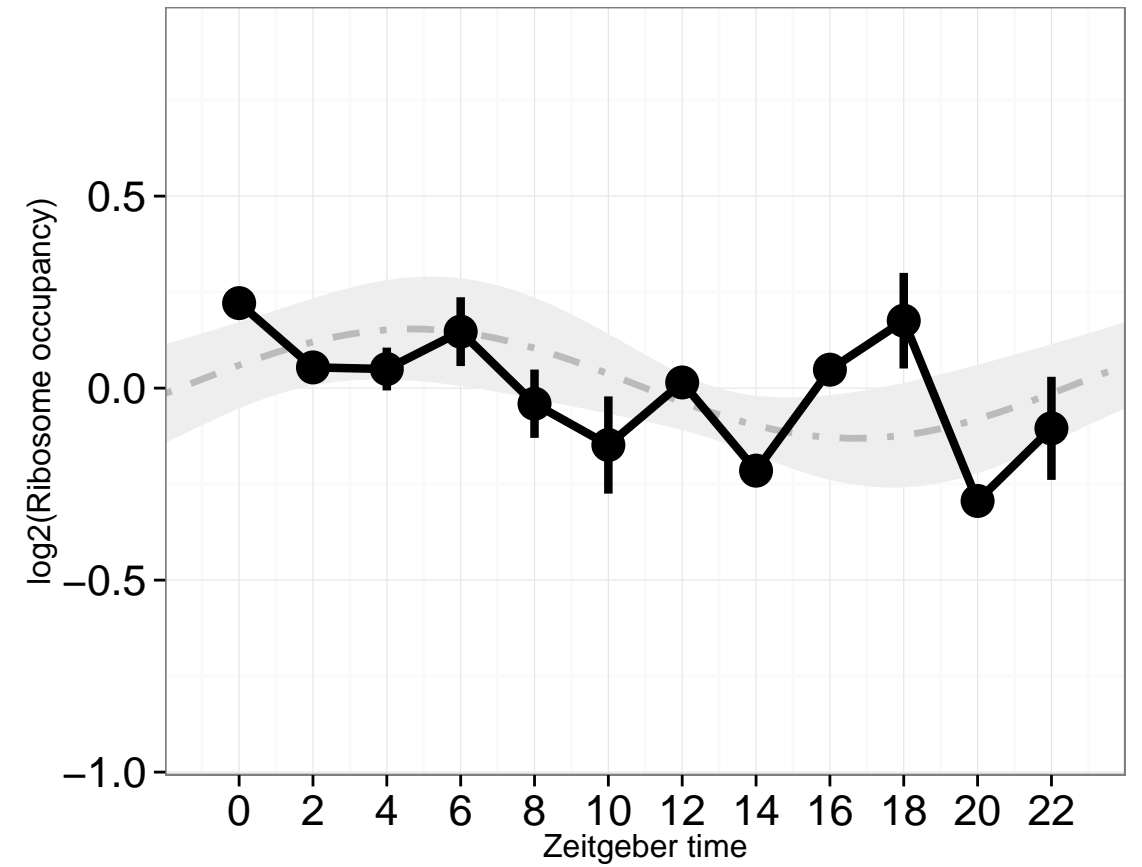

Supplement: SuppDataset_1.zip [file Fam210b_set_A.pdf › Supplemental Dataset 1/A-mRNA_nonrhyth_translation_nonrhyth/Fam210b_set_A.pdf]

# Fam213a

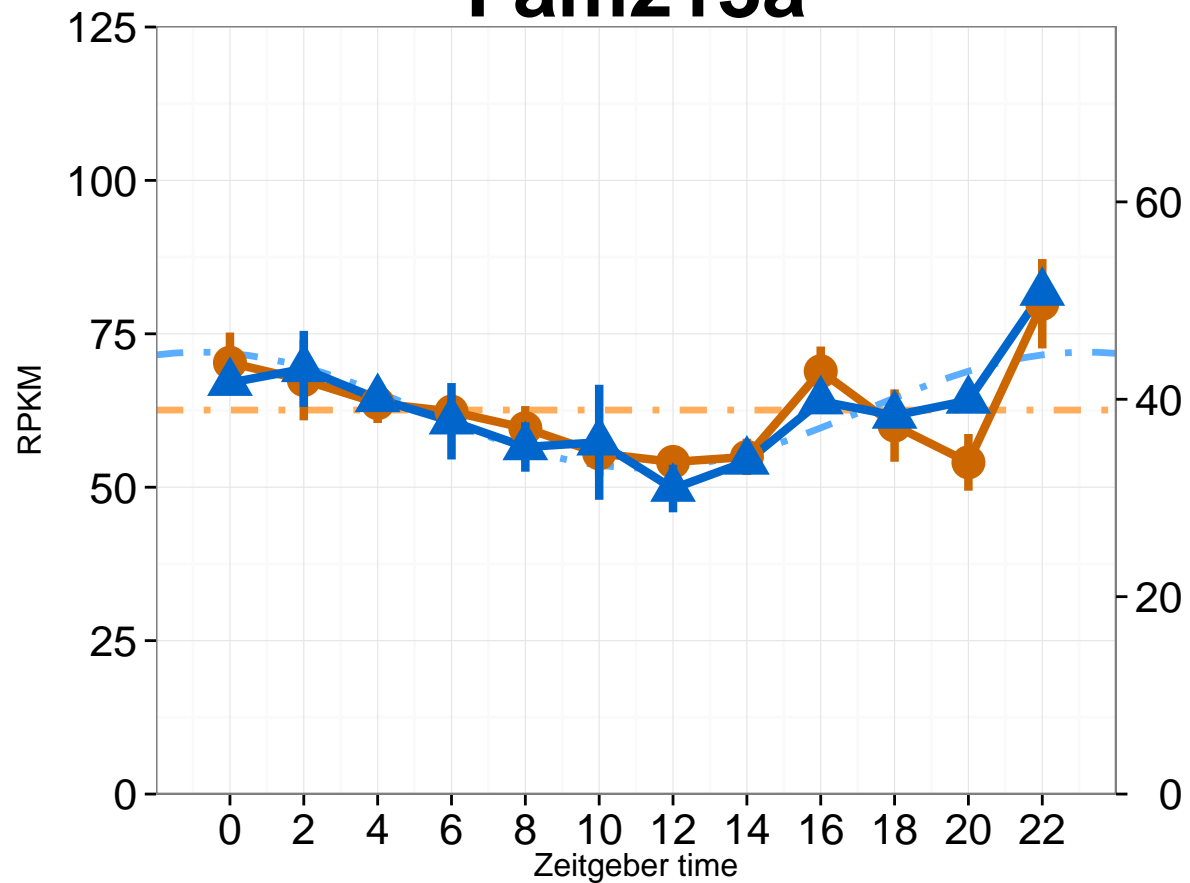

# Fam213a

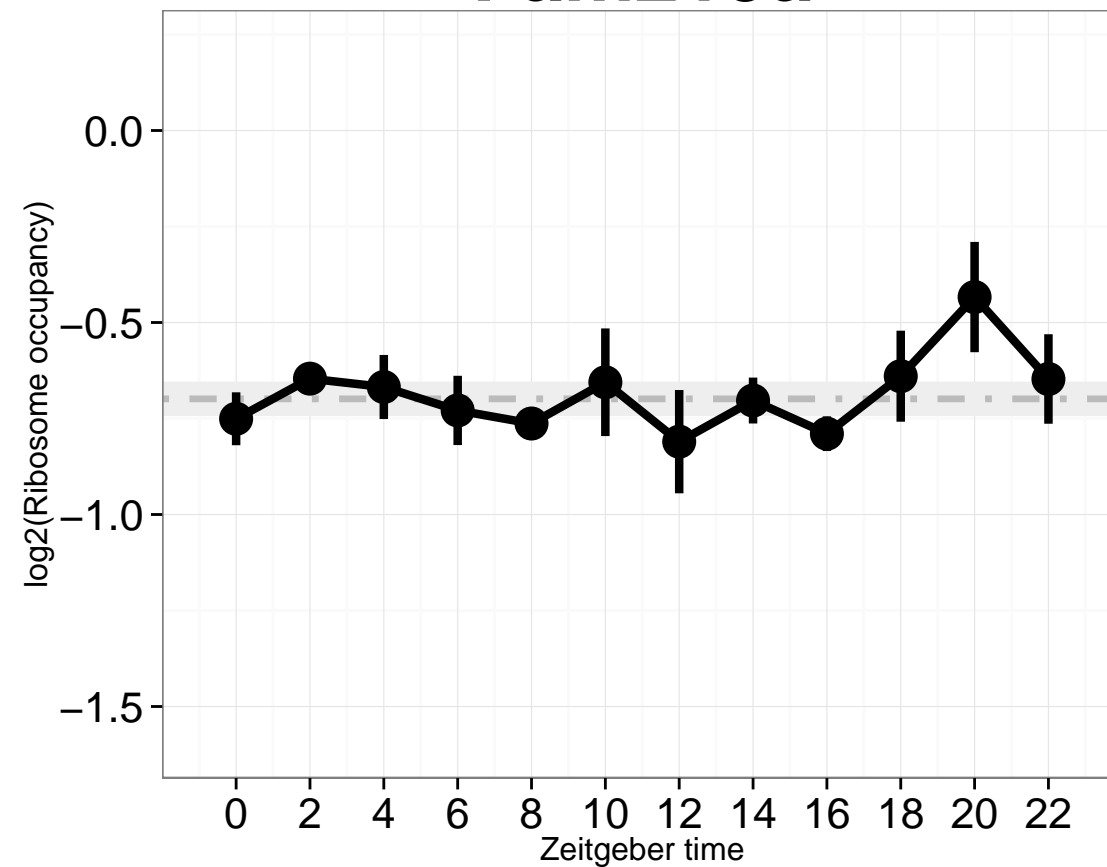

Supplement: SuppDataset_1.zip [file Fam213a_set_A.pdf › Supplemental Dataset 1/A-mRNA_nonrhyth_translation_nonrhyth/Fam213a_set_A.pdf]

# Fam214b

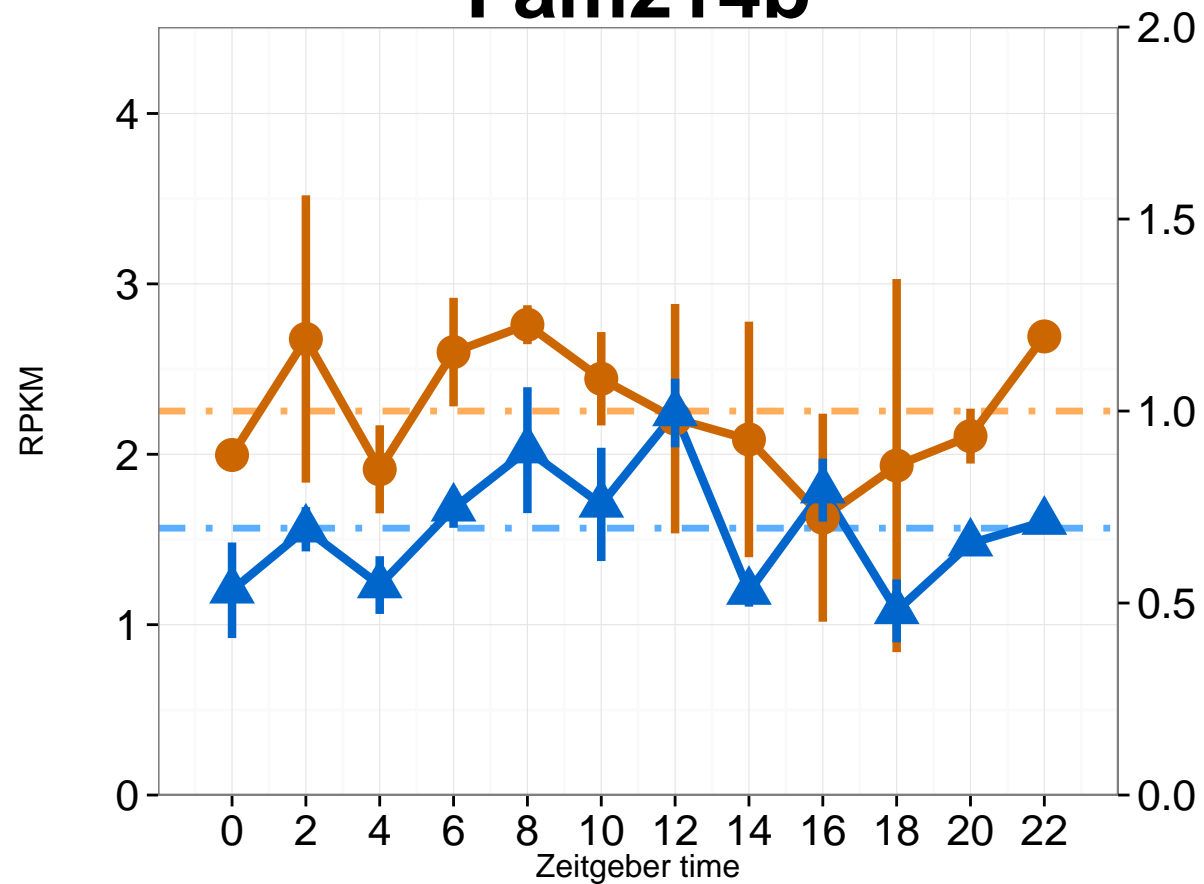

# Fam214b

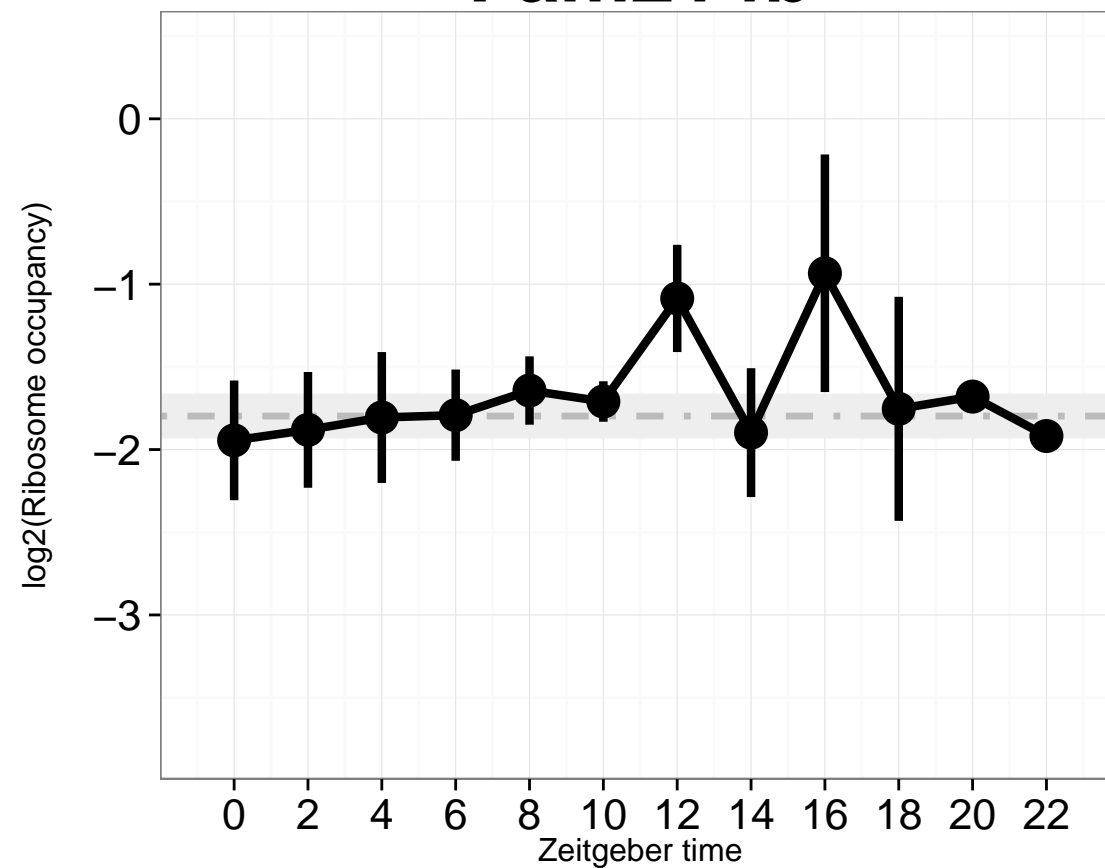

Supplement: SuppDataset_1.zip [file Fam214b_set_A.pdf › Supplemental Dataset 1/A-mRNA_nonrhyth_translation_nonrhyth/Fam214b_set_A.pdf]

# Fam216a

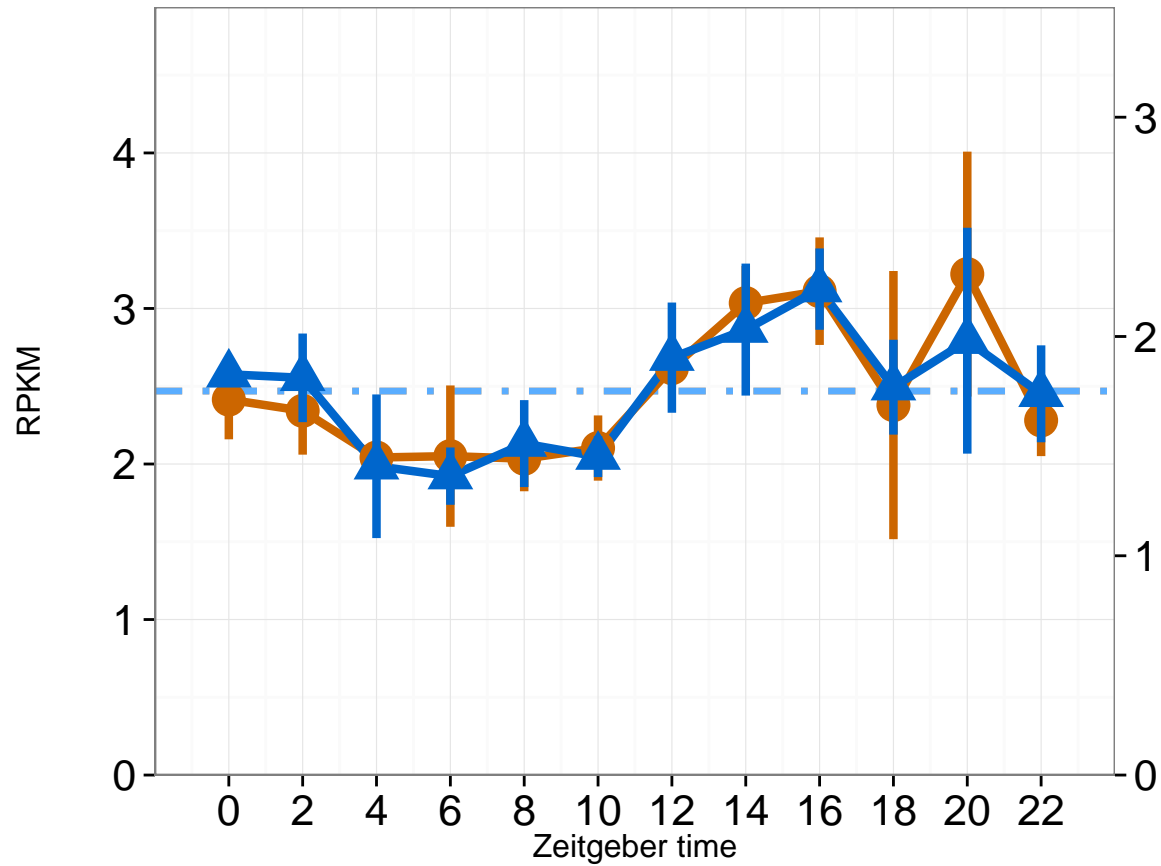

# Fam216a

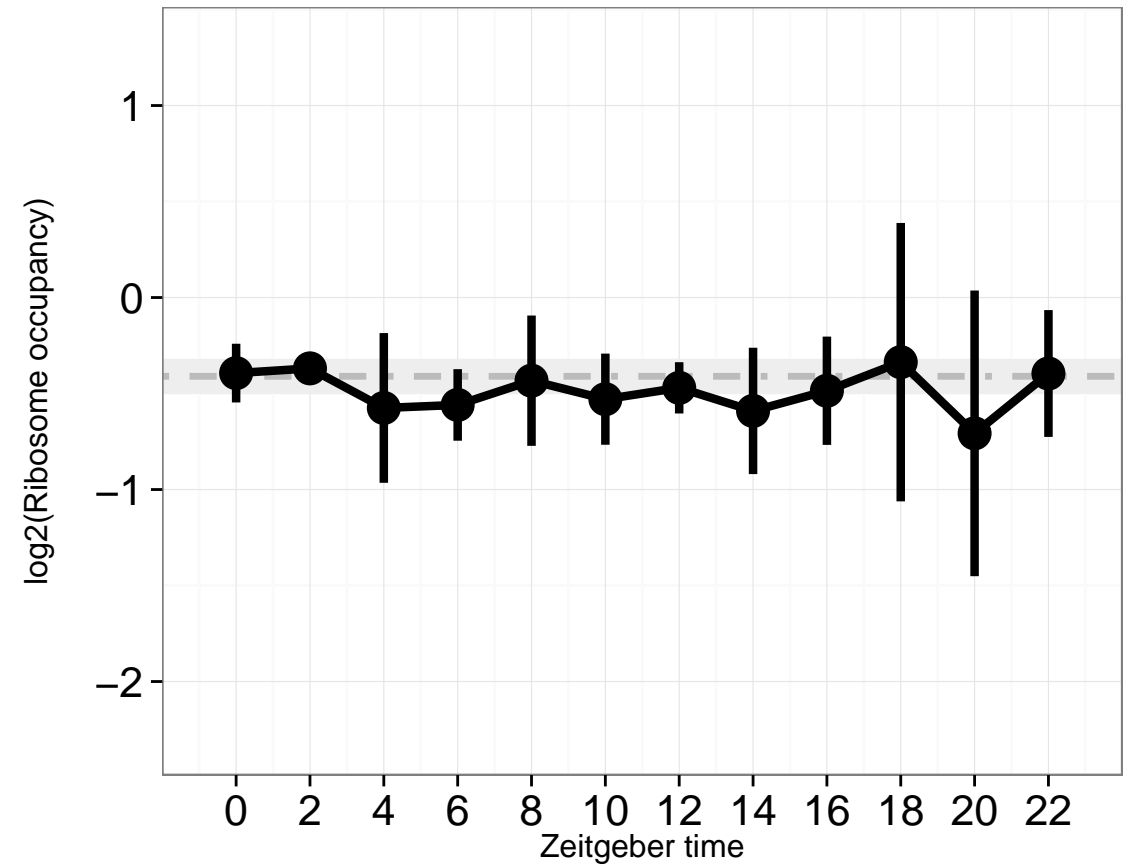

Supplement: SuppDataset_1.zip [file Fam216a_set_A.pdf › Supplemental Dataset 1/A-mRNA_nonrhyth_translation_nonrhyth/Fam216a_set_A.pdf]

# Fam219a

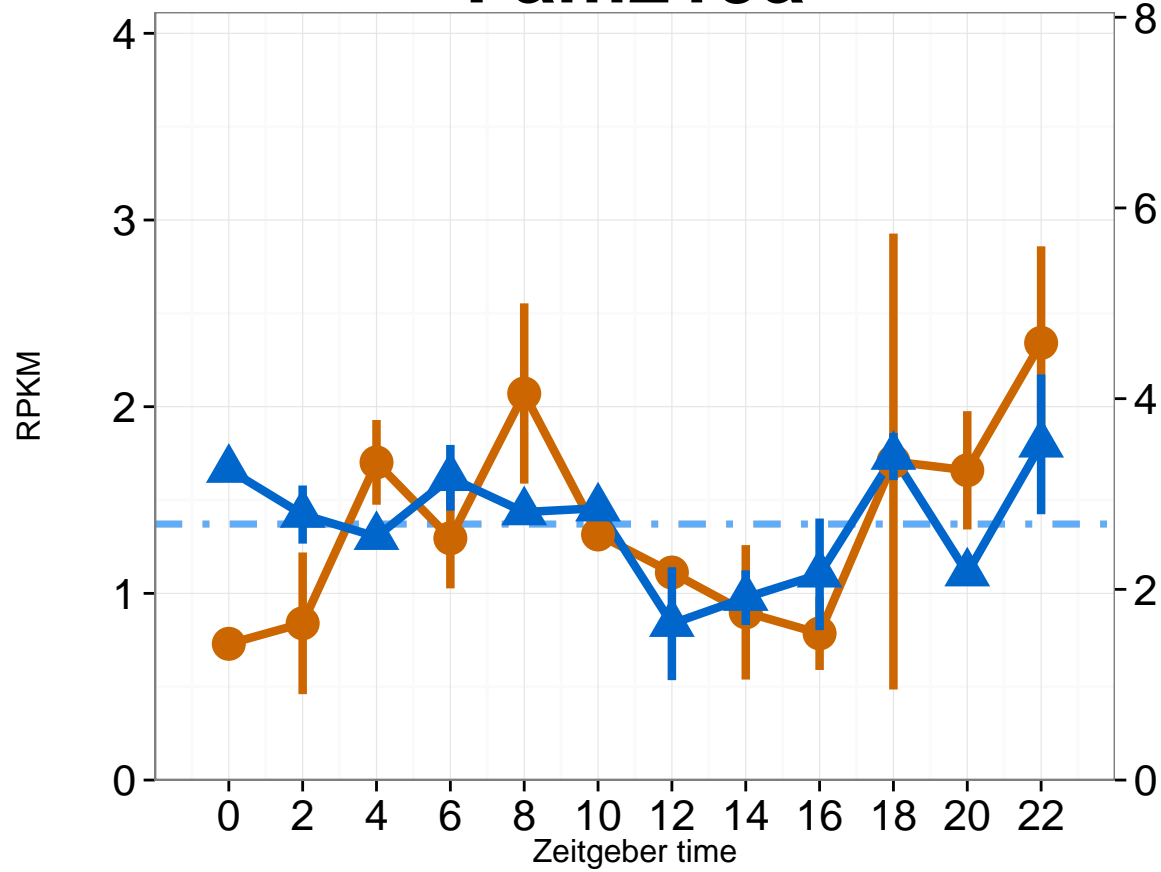

# Fam219a

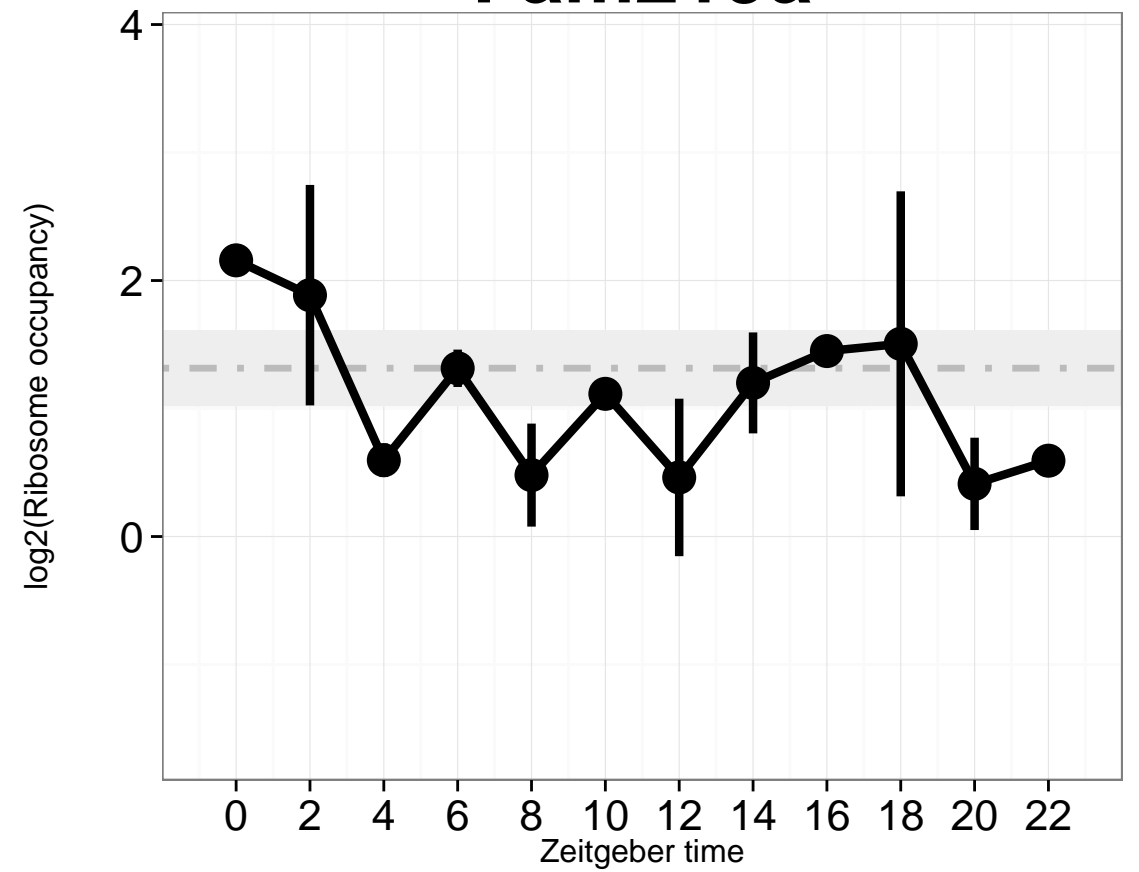

Supplement: SuppDataset_1.zip [file Fam219a_set_A.pdf › Supplemental Dataset 1/A-mRNA_nonrhyth_translation_nonrhyth/Fam219a_set_A.pdf]

# Fam219b

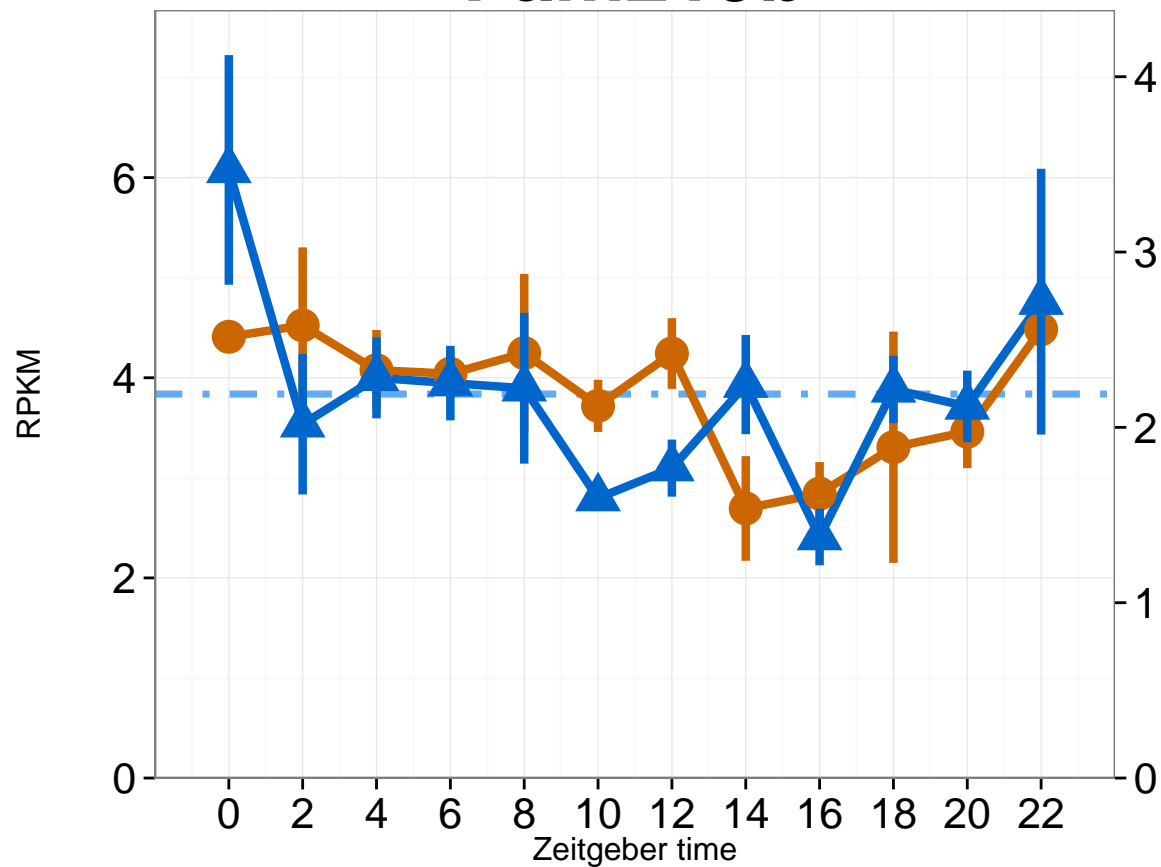

# Fam219b

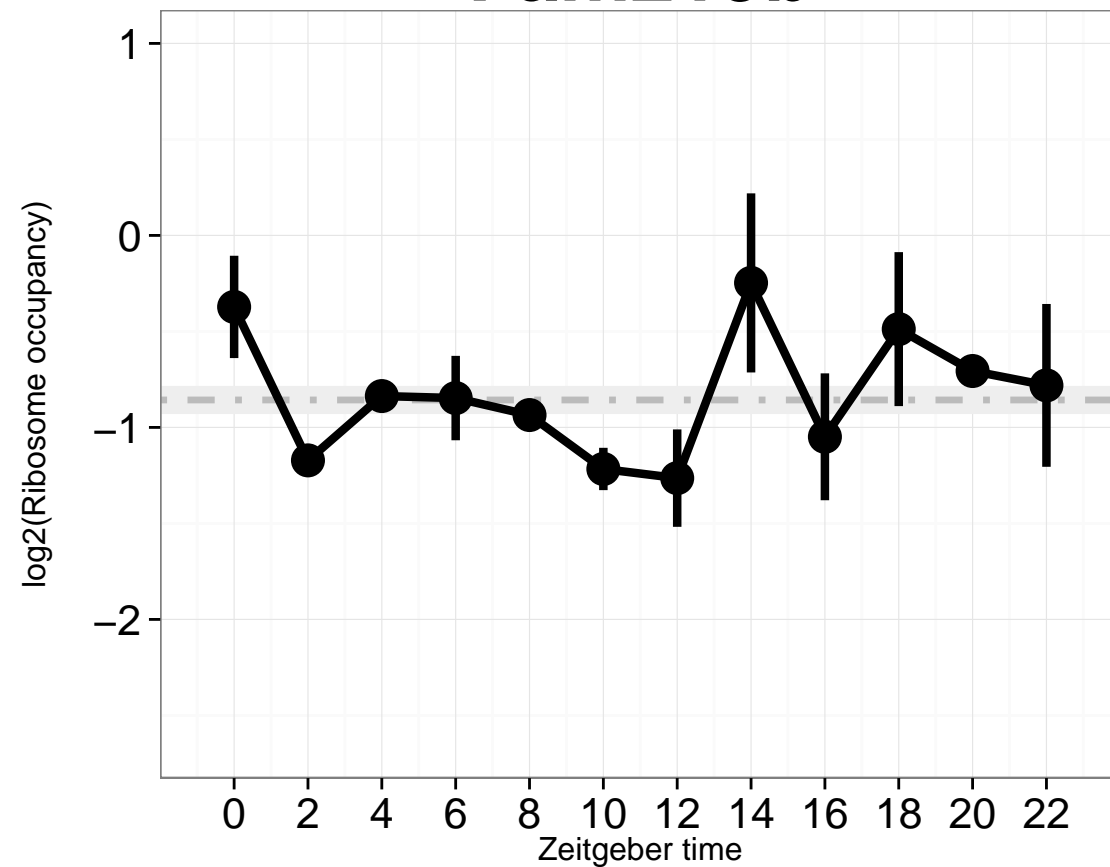

Supplement: SuppDataset_1.zip [file Fam219b_set_A.pdf › Supplemental Dataset 1/A-mRNA_nonrhyth_translation_nonrhyth/Fam219b_set_A.pdf]

## Fam21

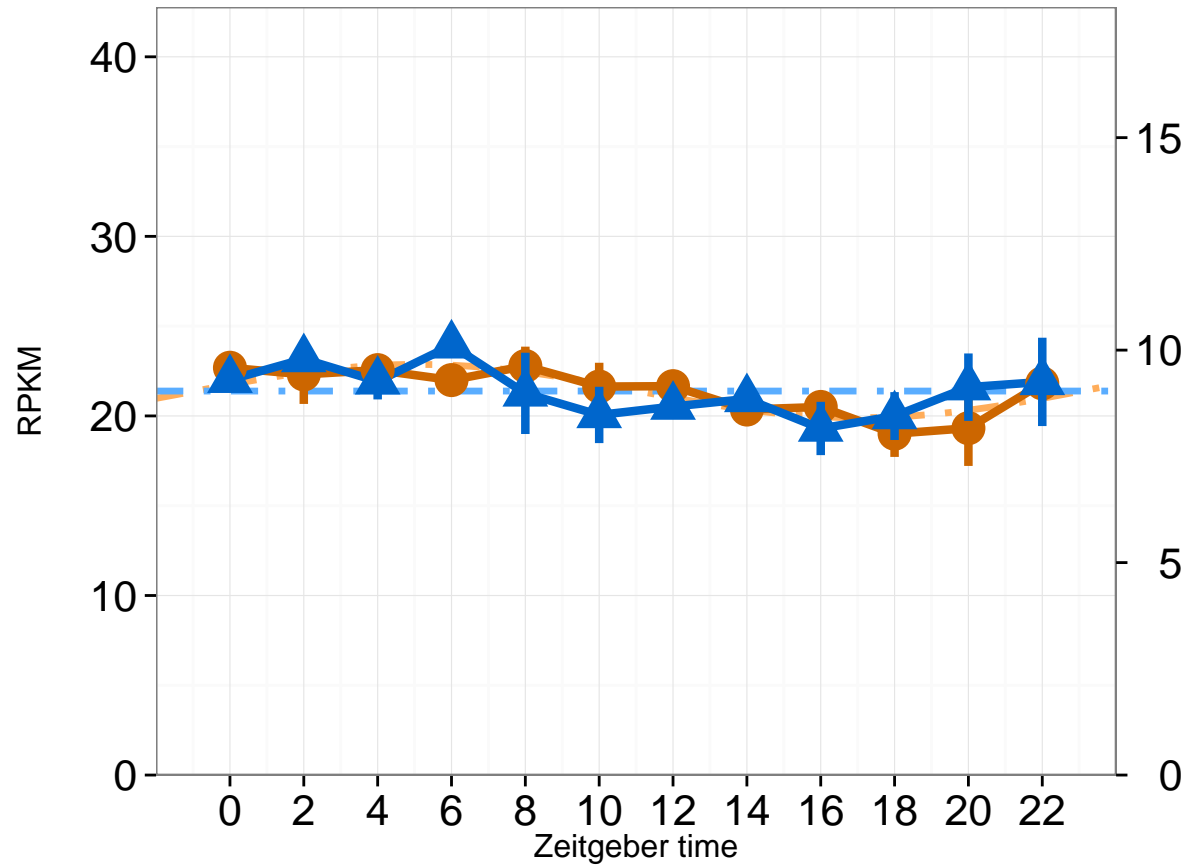

## Fam21

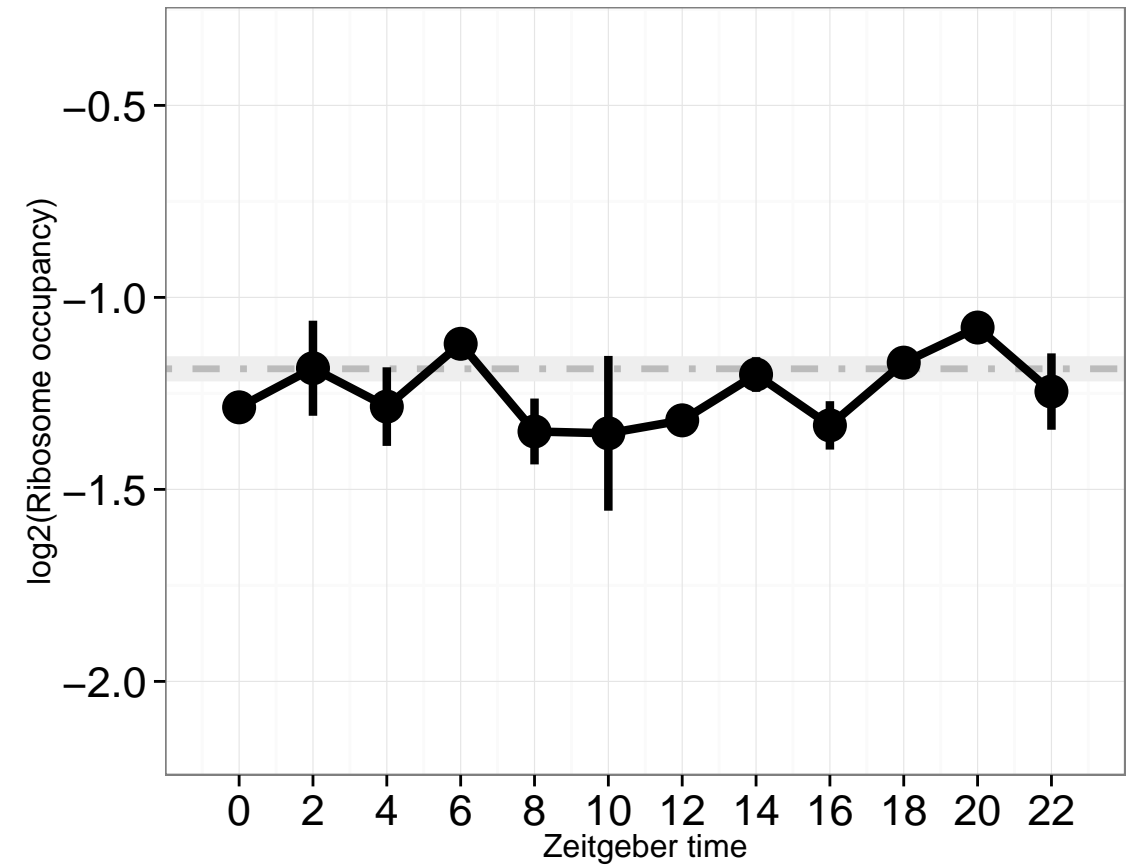

Supplement: SuppDataset_1.zip [file Fam21_set_A.pdf › Supplemental Dataset 1/A-mRNA_nonrhyth_translation_nonrhyth/Fam21_set_A.pdf]

# Fam25c

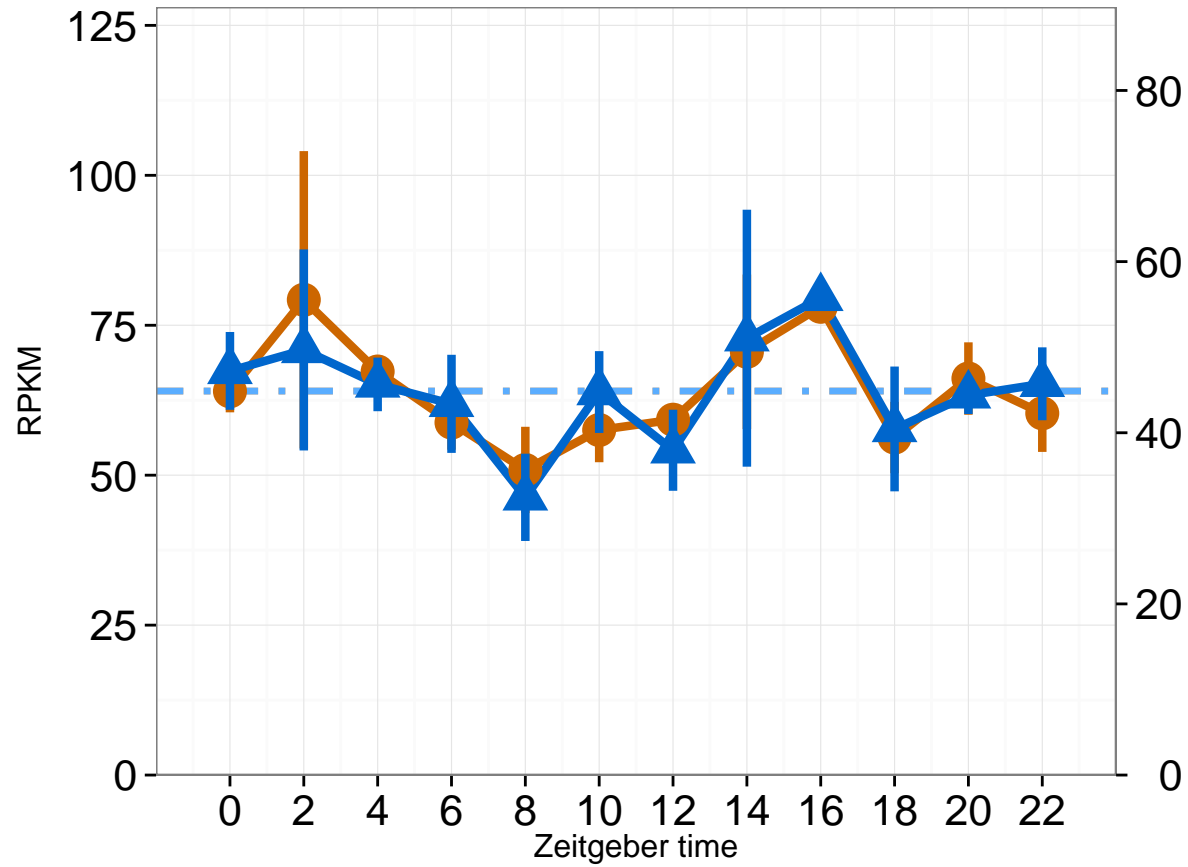

# Fam25c

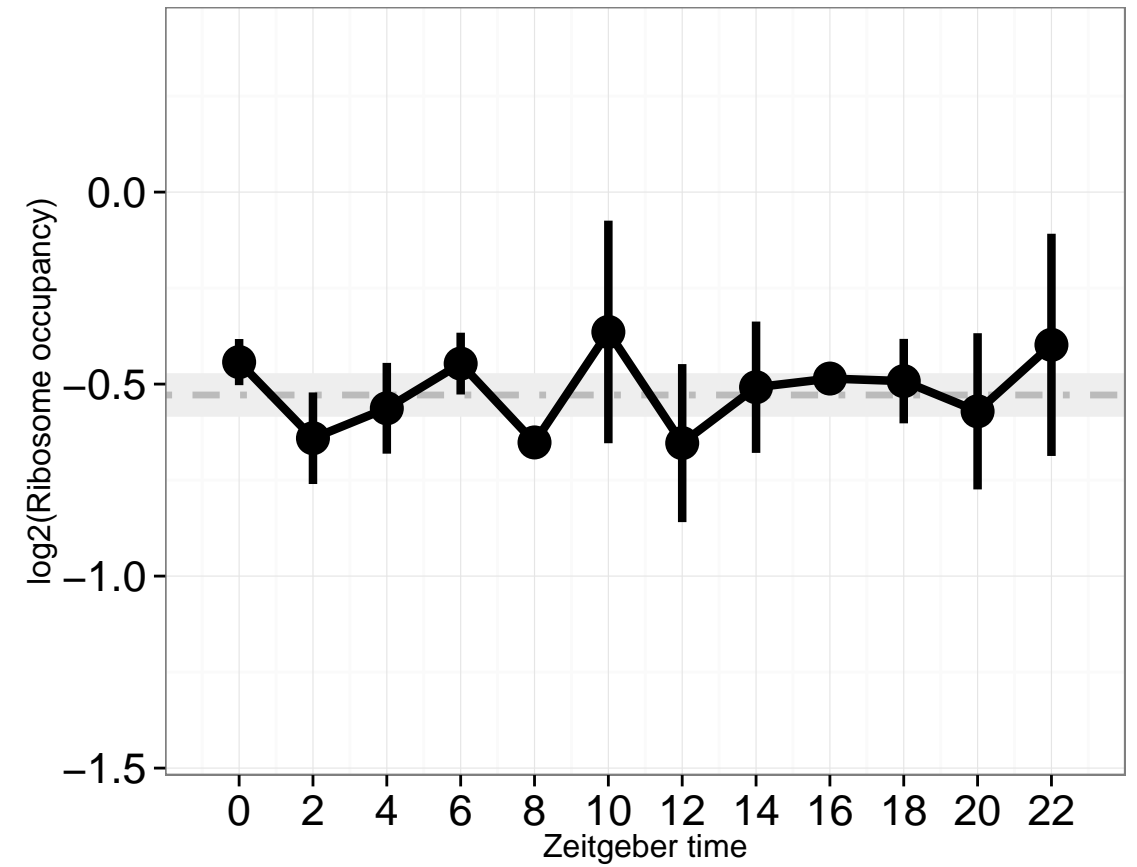

Supplement: SuppDataset_1.zip [file Fam25c_set_A.pdf › Supplemental Dataset 1/A-mRNA_nonrhyth_translation_nonrhyth/Fam25c_set_A.pdf]

**Fam26e TR**

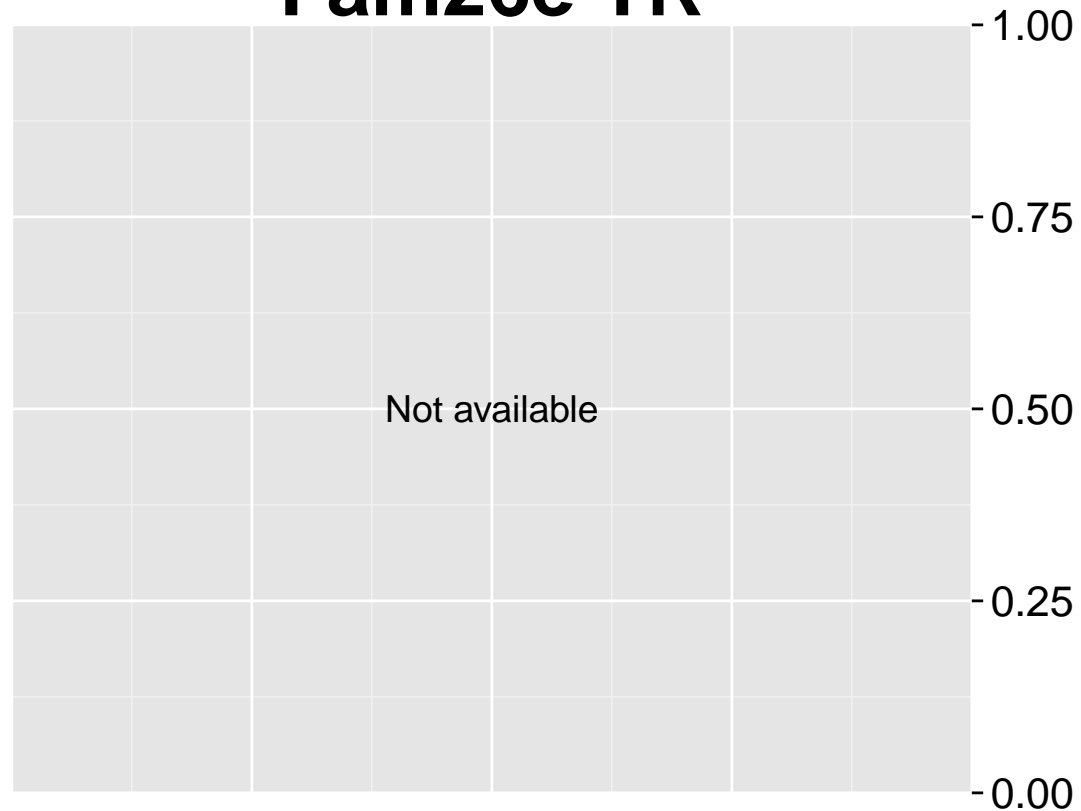

**Fam26e log2(Ribosome occupancy**

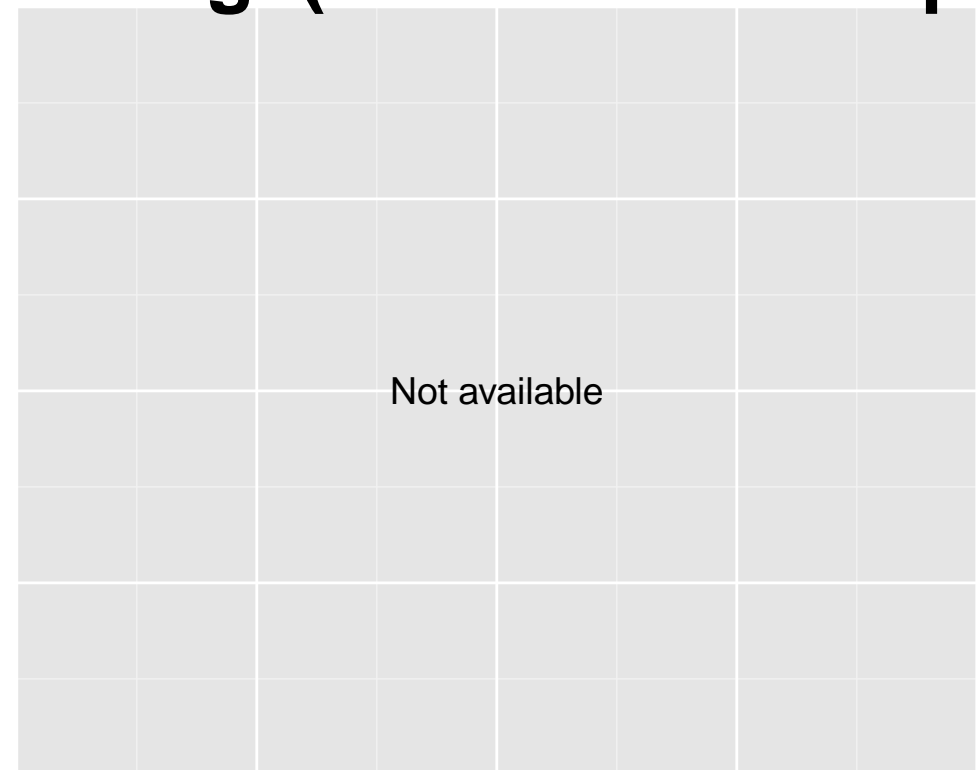

Supplement: SuppDataset_1.zip [file Fam26e_set_A.pdf › Supplemental Dataset 1/A-mRNA_nonrhyth_translation_nonrhyth/Fam26e_set_A.pdf]

# Fam32a

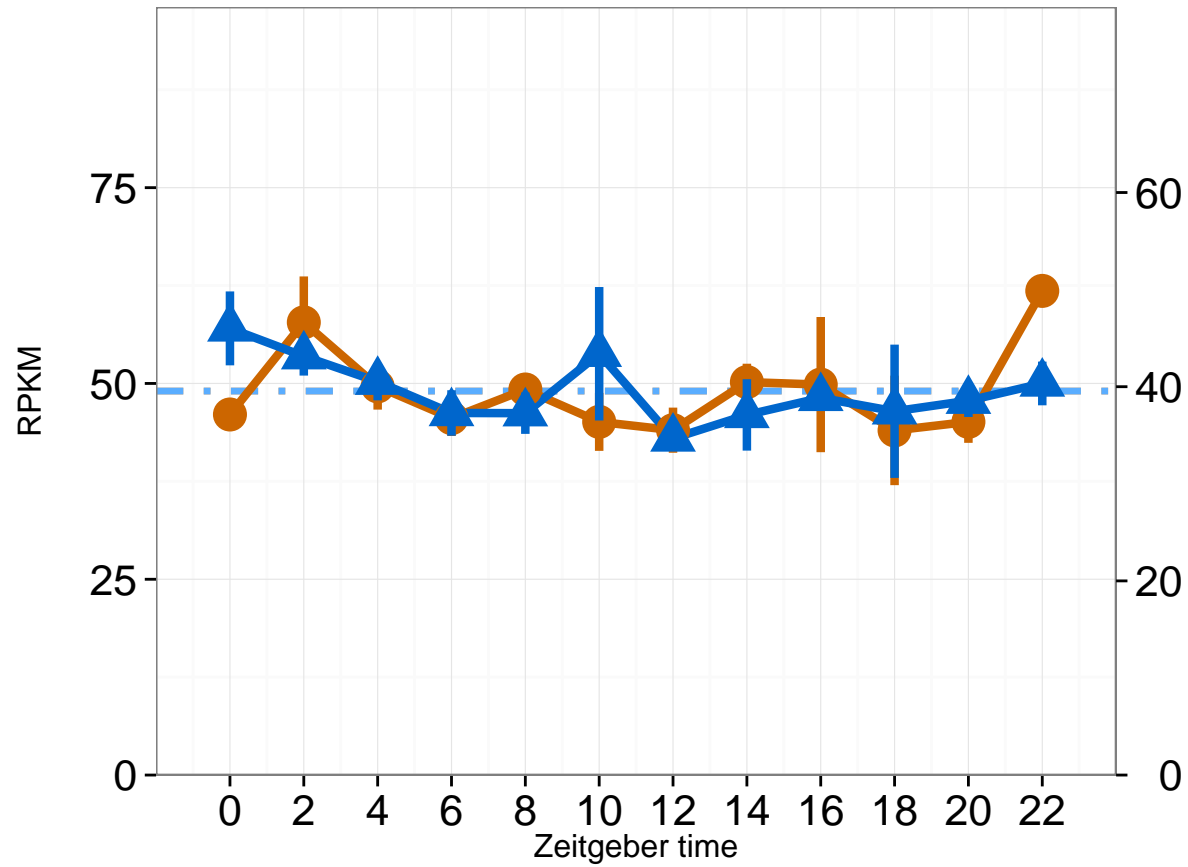

# Fam32a

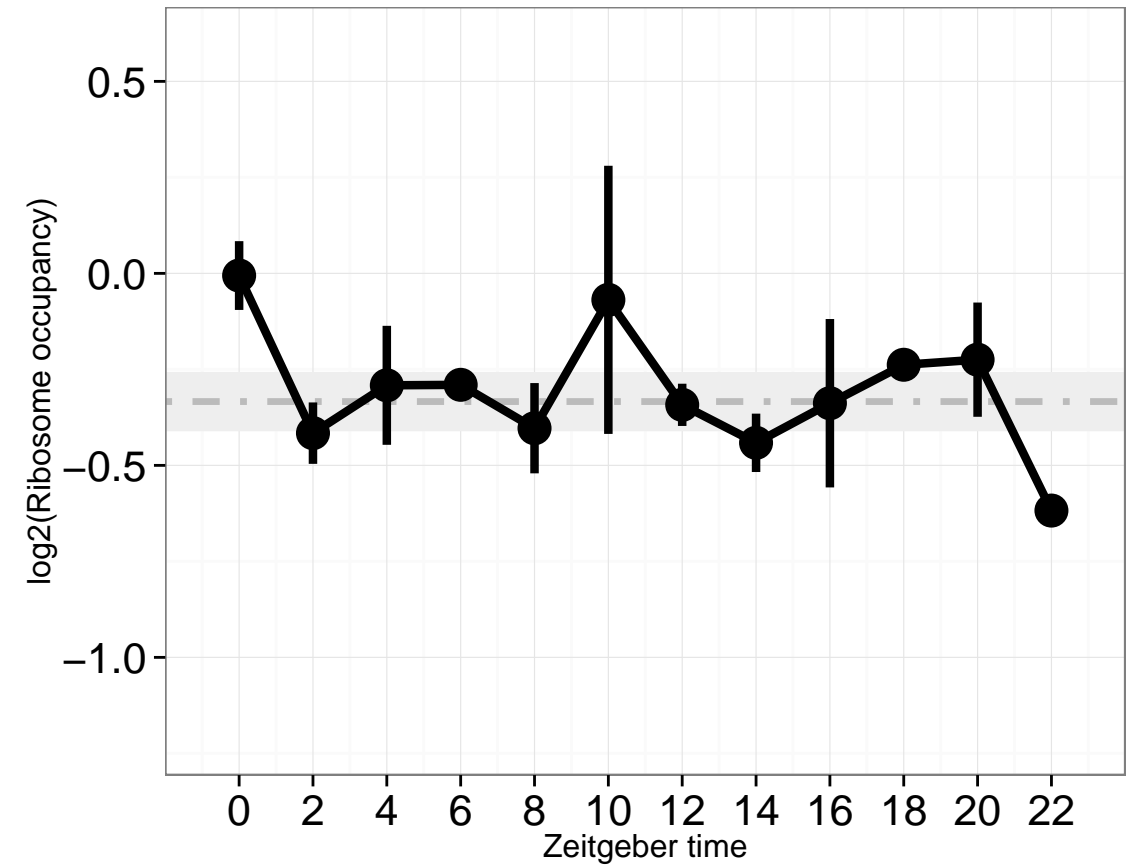

Supplement: SuppDataset_1.zip [file Fam32a_set_A.pdf › Supplemental Dataset 1/A-mRNA_nonrhyth_translation_nonrhyth/Fam32a_set_A.pdf]

# Fam3a

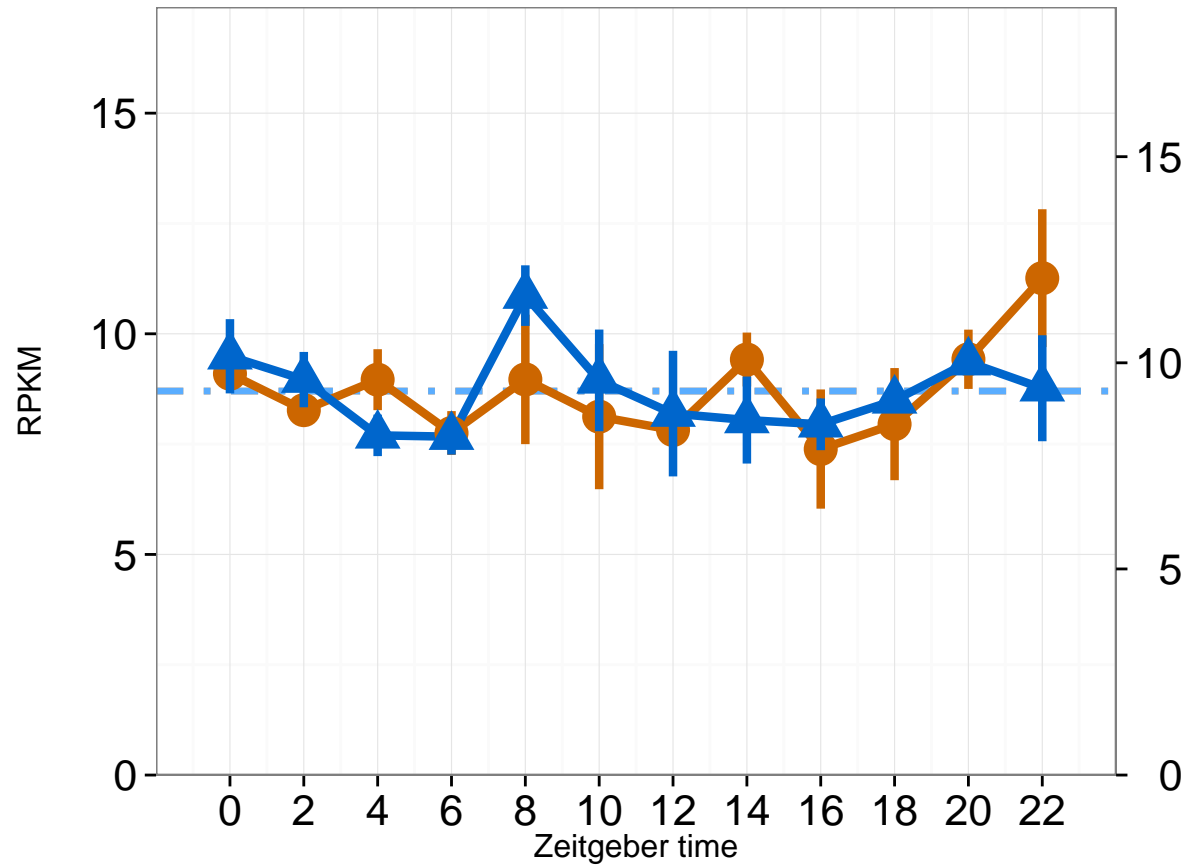

# Fam3a

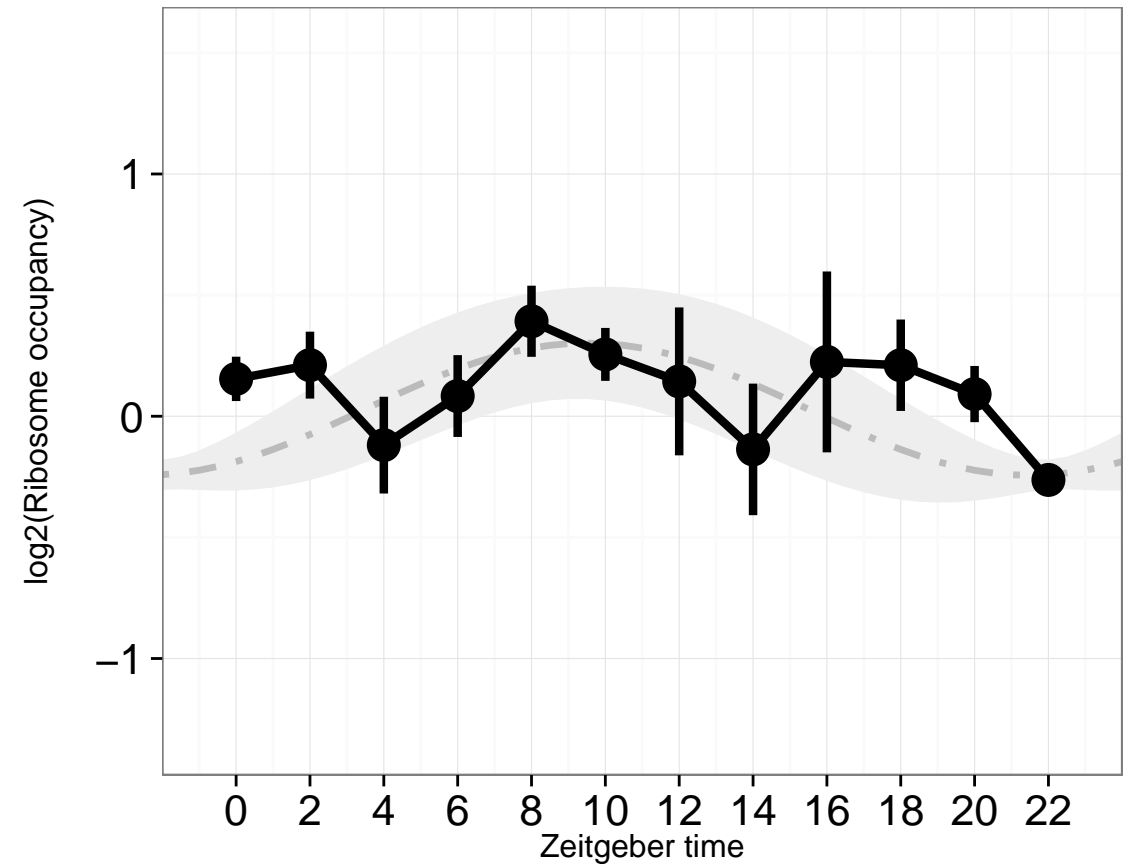

Supplement: SuppDataset_1.zip [file Fam3a_set_A.pdf › Supplemental Dataset 1/A-mRNA_nonrhyth_translation_nonrhyth/Fam3a_set_A.pdf]

## Fam3c

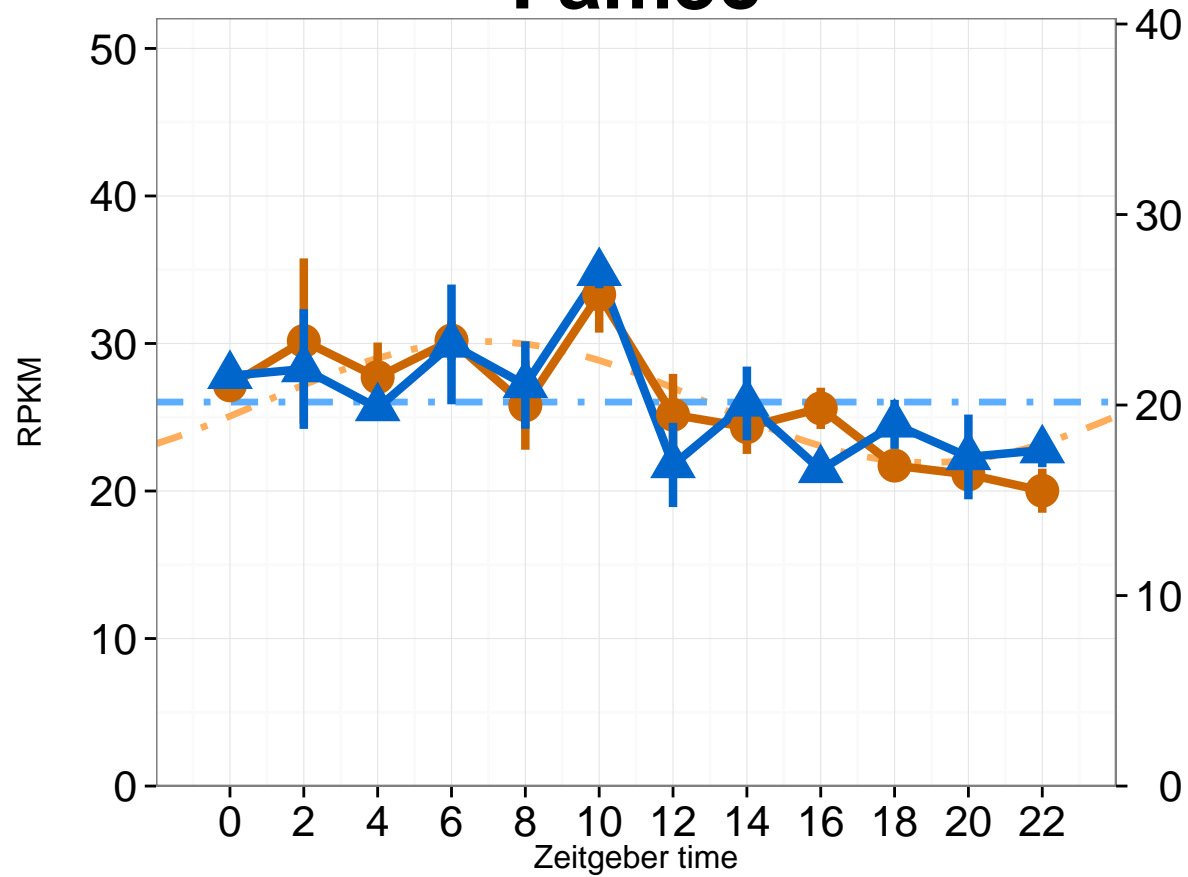

## Fam3c

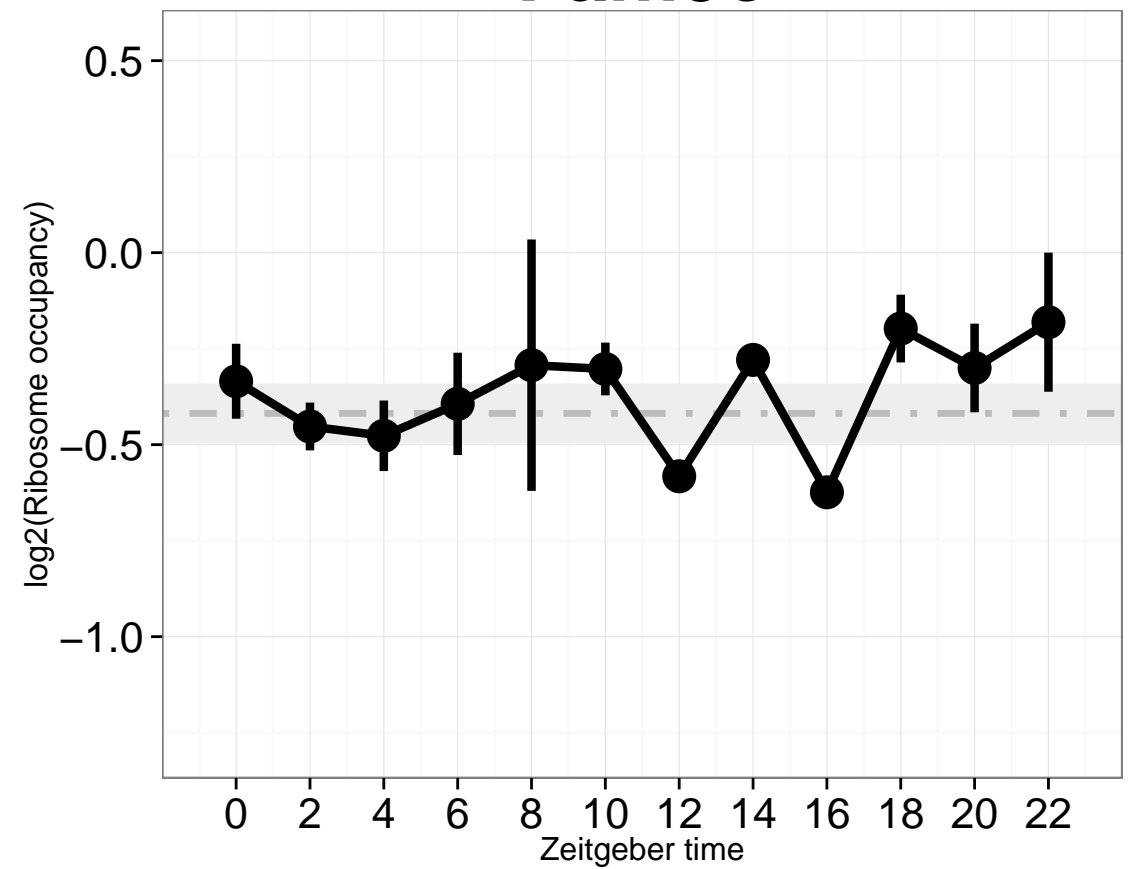

Supplement: SuppDataset_1.zip [file Fam3c_set_A.pdf › Supplemental Dataset 1/A-mRNA_nonrhyth_translation_nonrhyth/Fam3c_set_A.pdf]

**Fam43a**

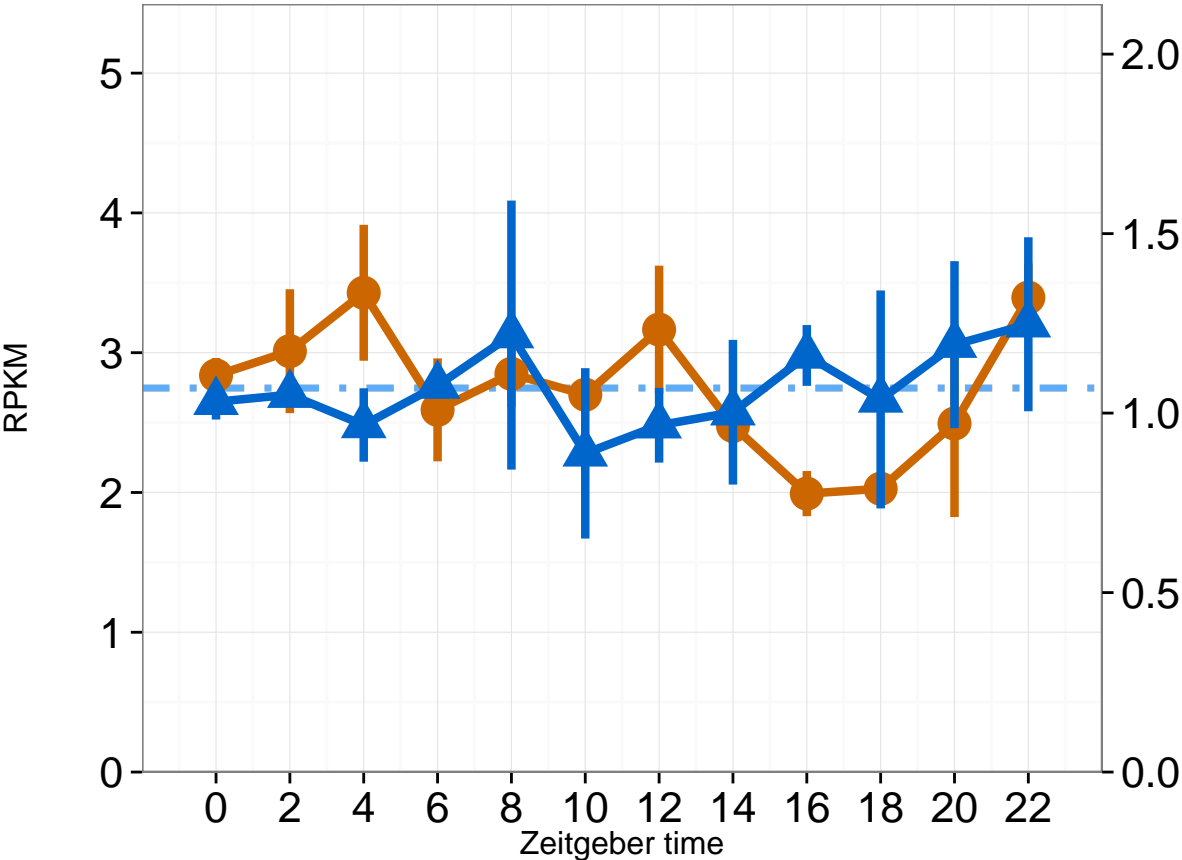

**Fam43a**

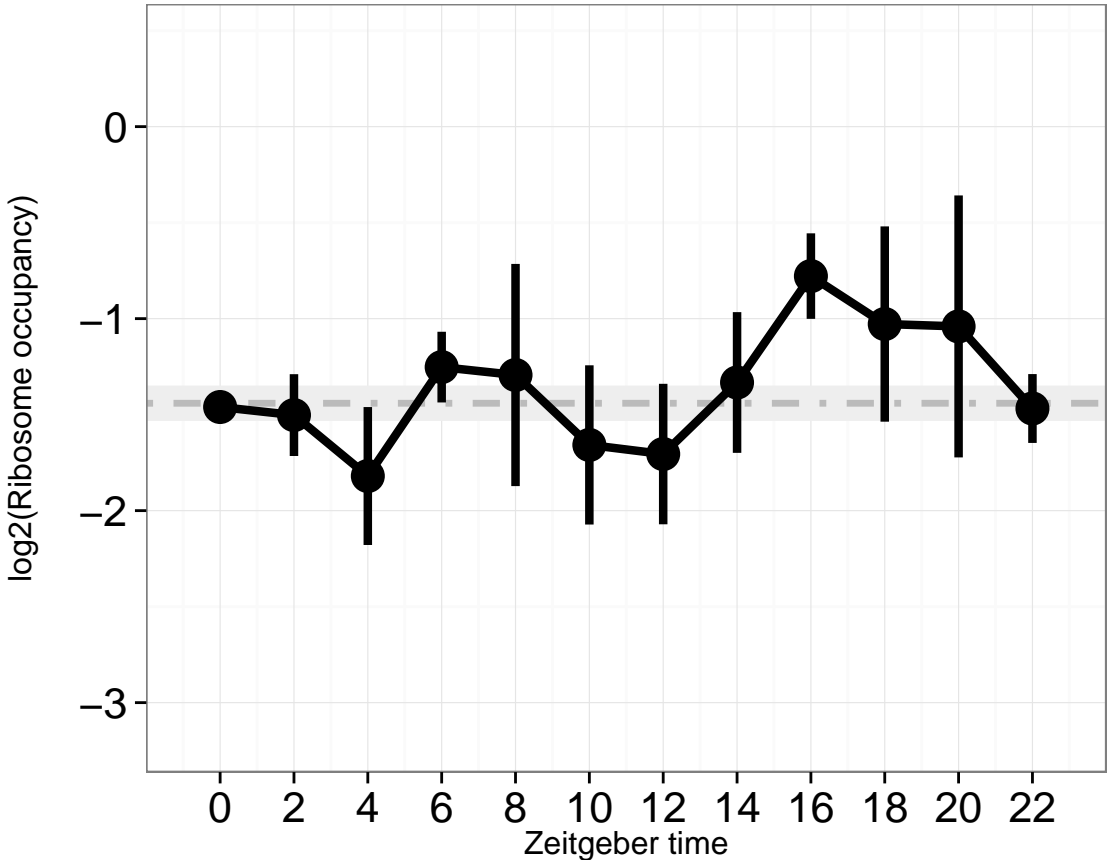

Supplement: SuppDataset_1.zip [file Fam43a_set_A.pdf › Supplemental Dataset 1/A-mRNA_nonrhyth_translation_nonrhyth/Fam43a_set_A.pdf]

# Fam45a

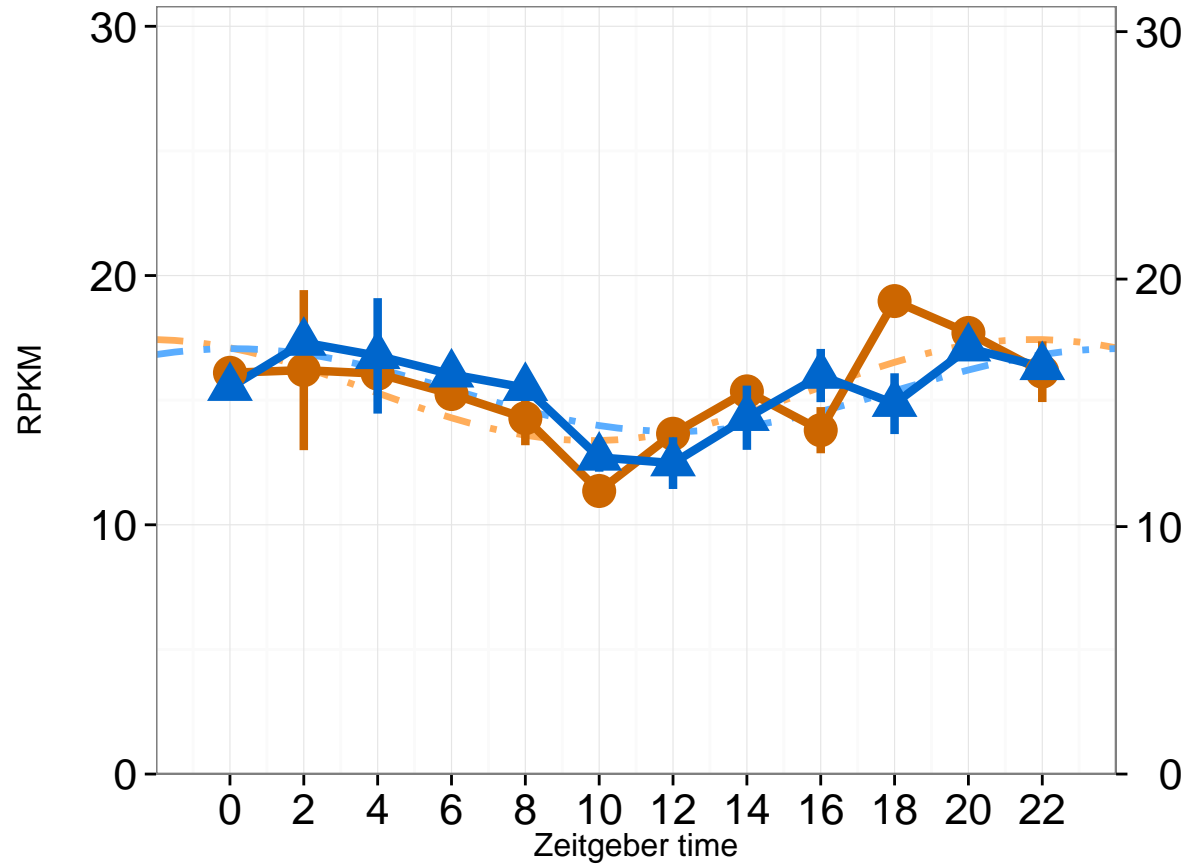

# Fam45a

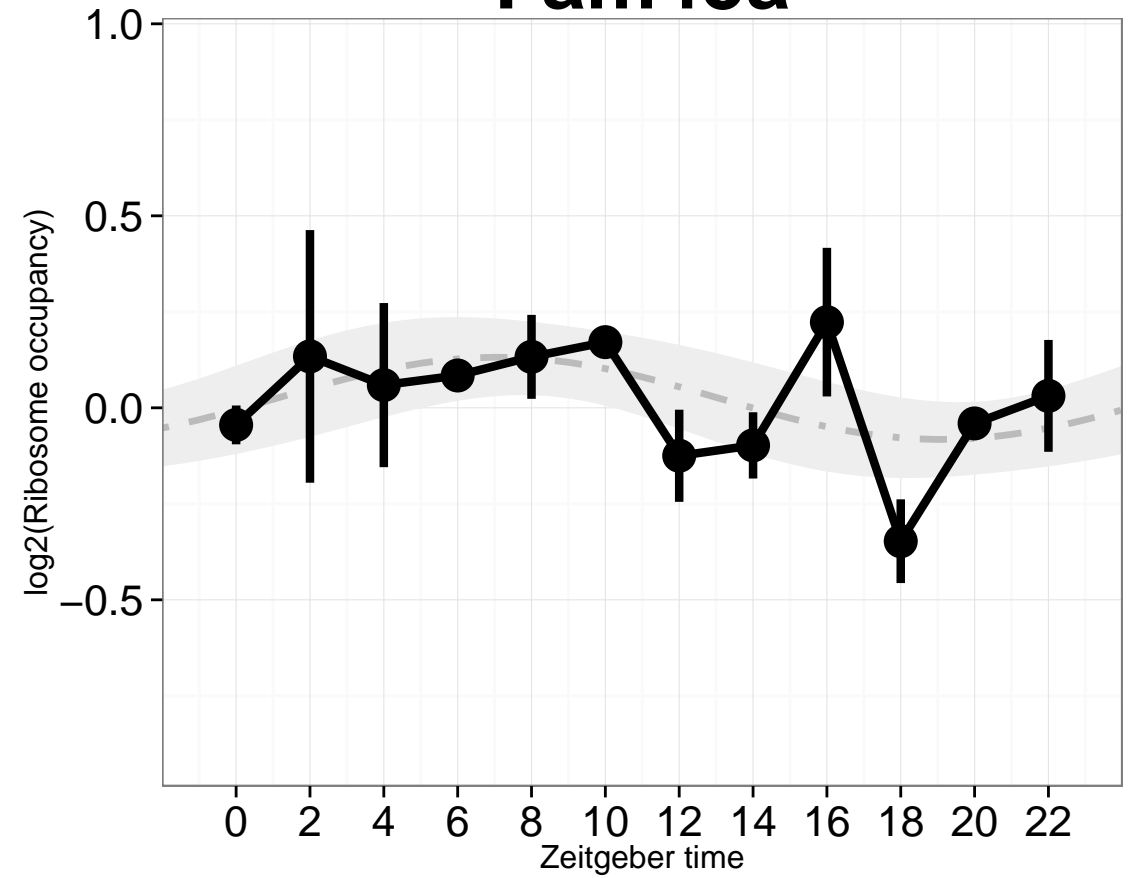

Supplement: SuppDataset_1.zip [file Fam45a_set_A.pdf › Supplemental Dataset 1/A-mRNA_nonrhyth_translation_nonrhyth/Fam45a_set_A.pdf]

# Fam46c

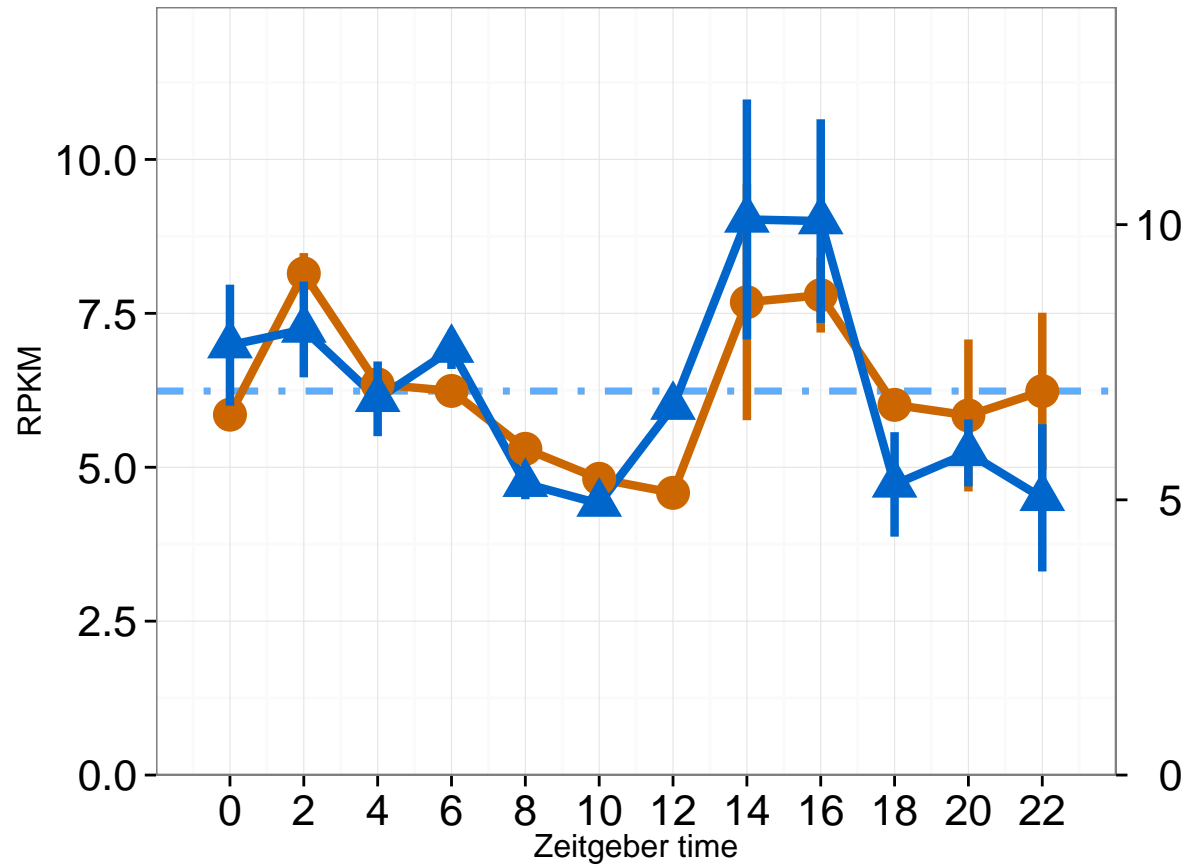

# Fam46c

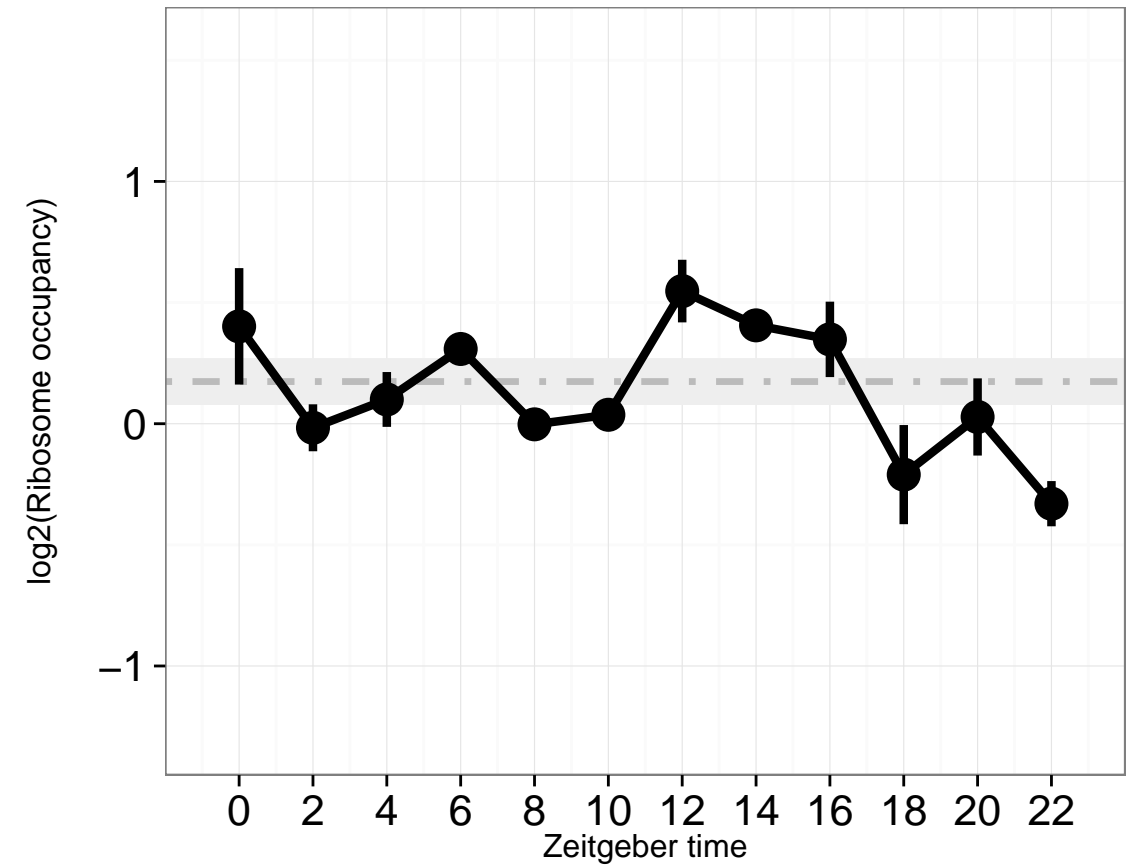

Supplement: SuppDataset_1.zip [file Fam46c_set_A.pdf › Supplemental Dataset 1/A-mRNA_nonrhyth_translation_nonrhyth/Fam46c_set_A.pdf]

# Fam49a

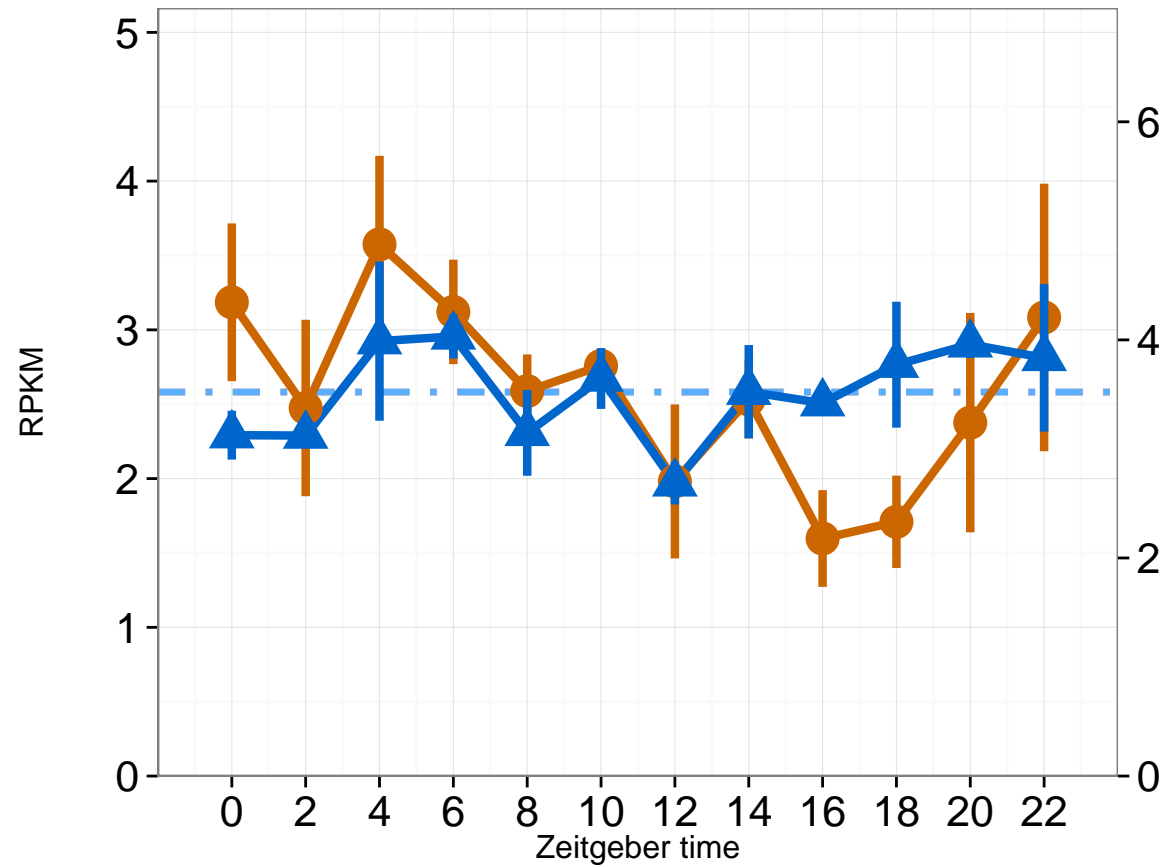

# Fam49a

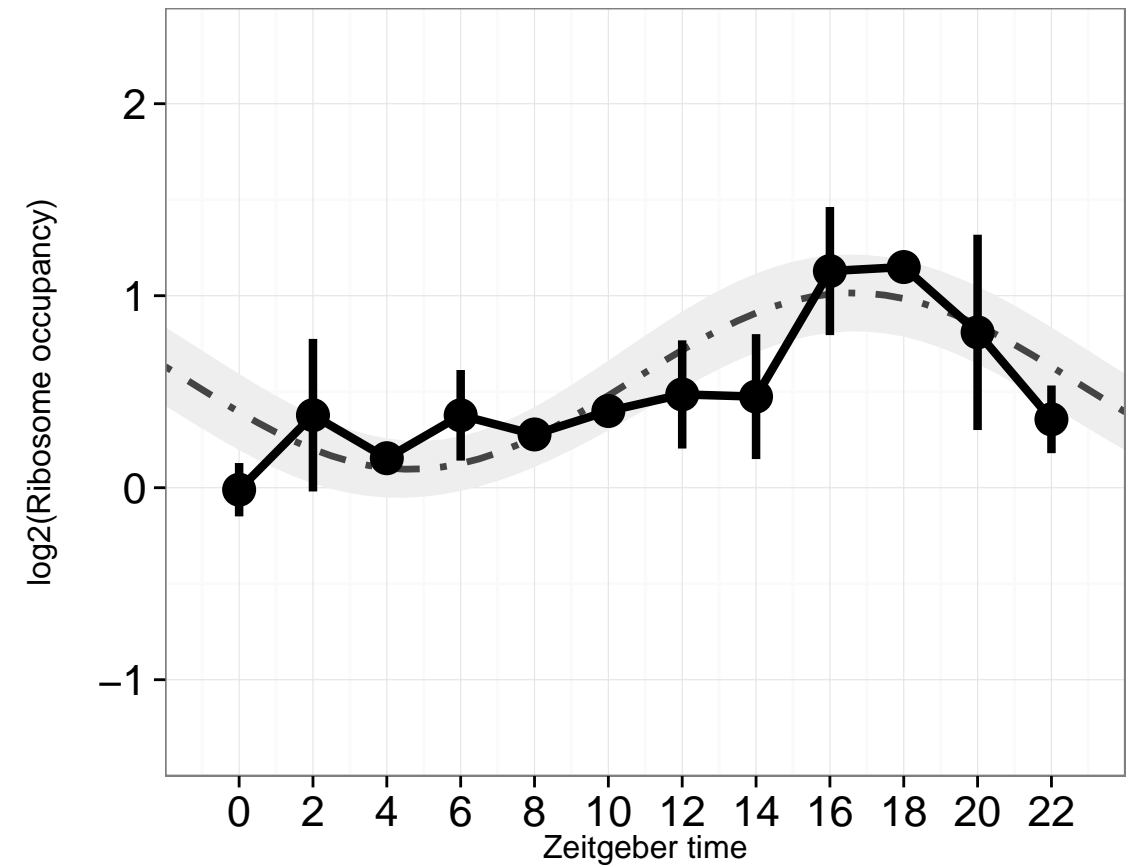

Supplement: SuppDataset_1.zip [file Fam49a_set_A.pdf › Supplemental Dataset 1/A-mRNA_nonrhyth_translation_nonrhyth/Fam49a_set_A.pdf]

# Fam49b

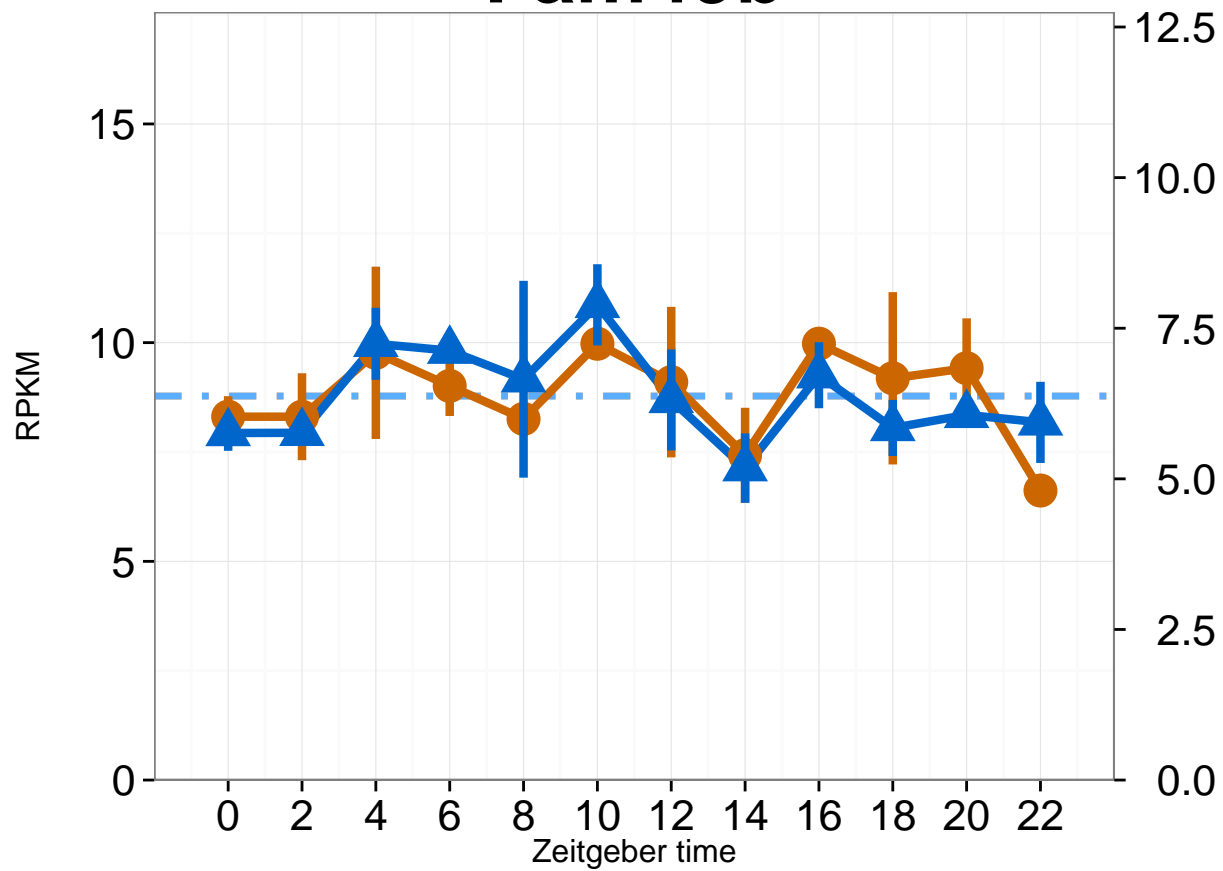

# Fam49b

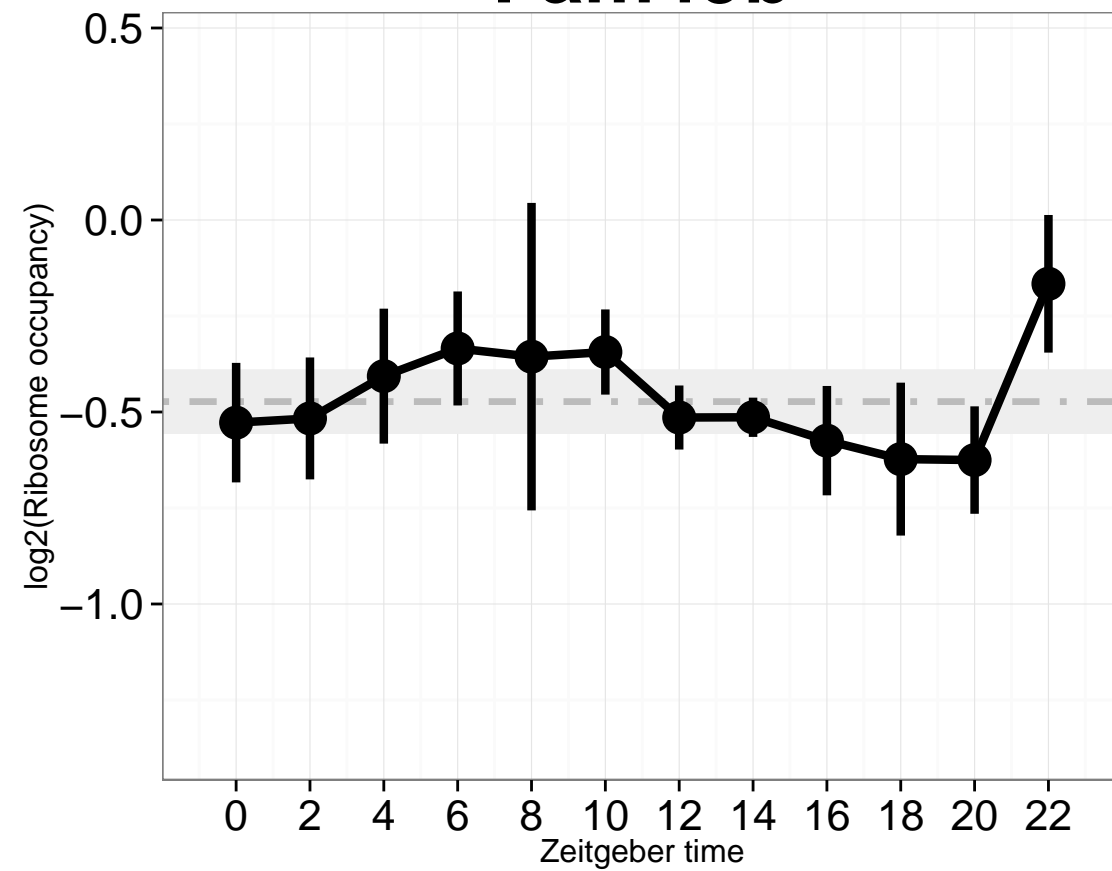

Supplement: SuppDataset_1.zip [file Fam49b_set_A.pdf › Supplemental Dataset 1/A-mRNA_nonrhyth_translation_nonrhyth/Fam49b_set_A.pdf]

# Fam50a

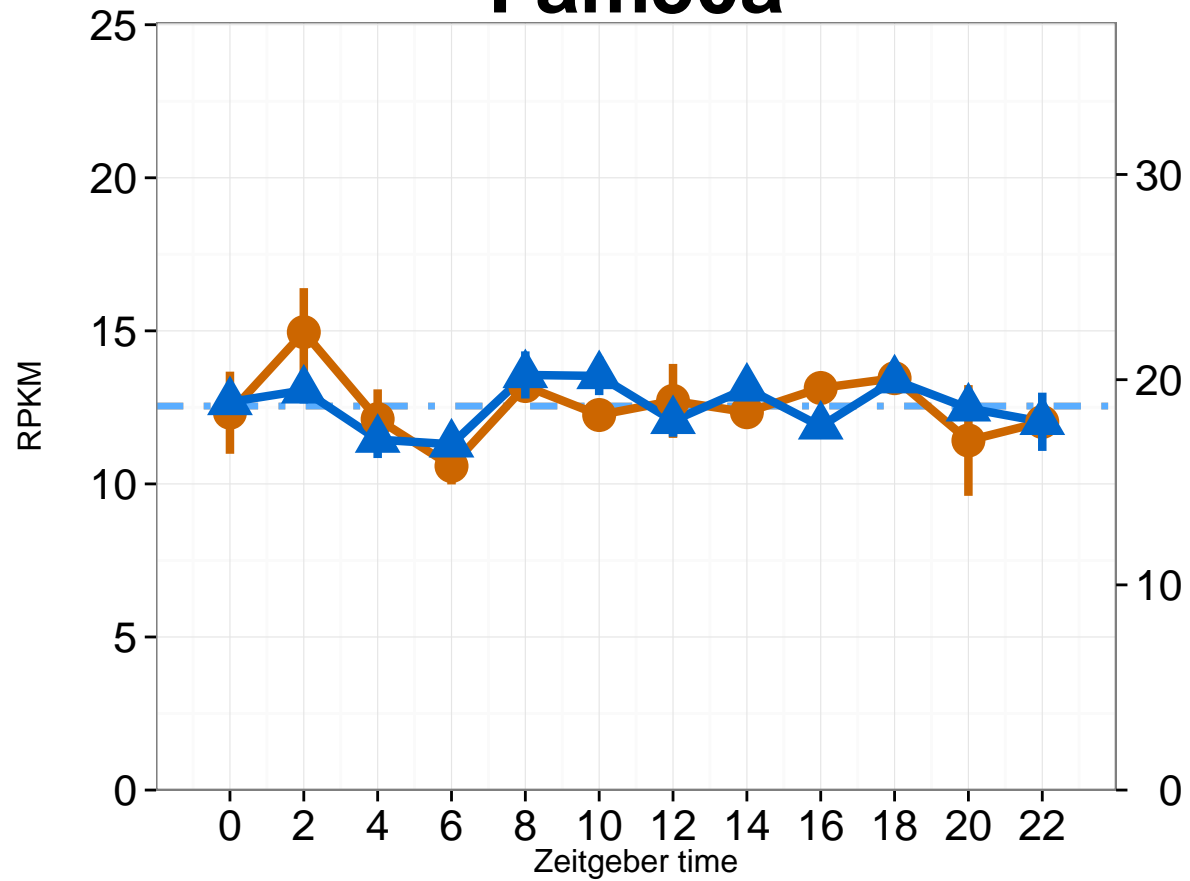

# Fam50a

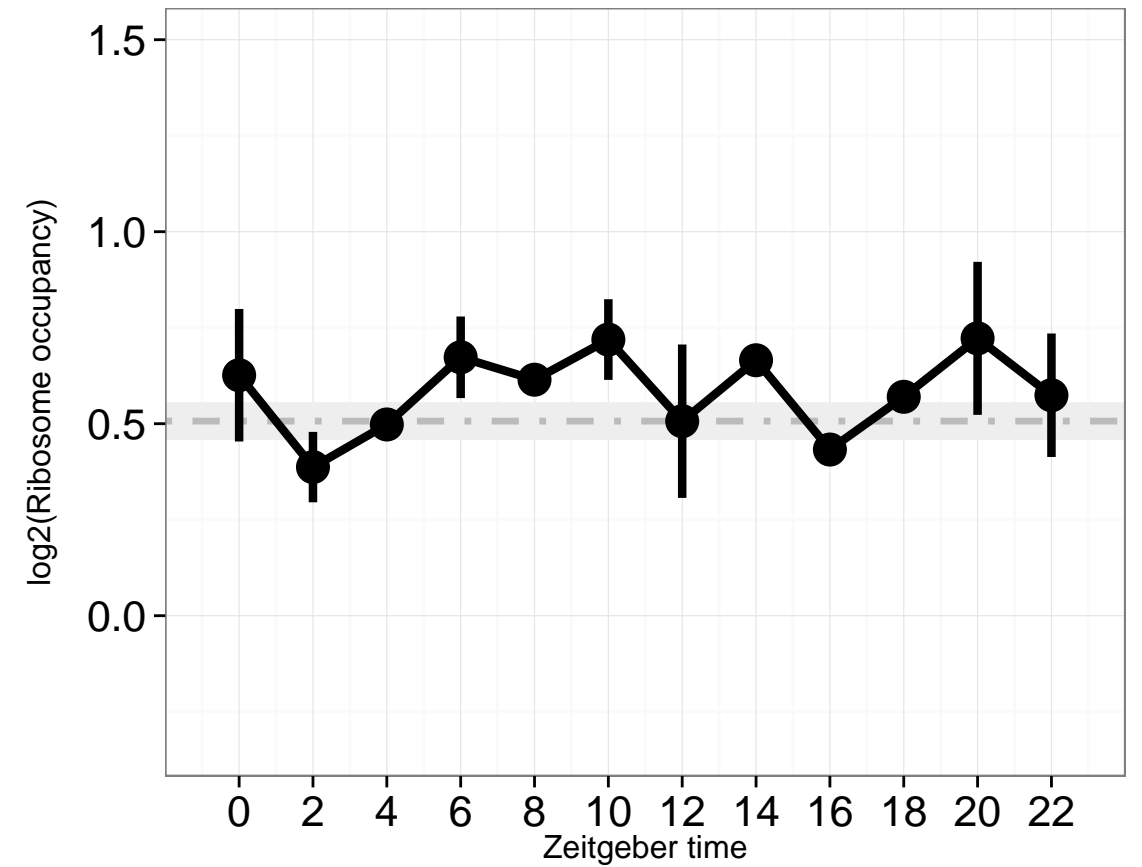

Supplement: SuppDataset_1.zip [file Fam50a_set_A.pdf › Supplemental Dataset 1/A-mRNA_nonrhyth_translation_nonrhyth/Fam50a_set_A.pdf]

# Fam53a

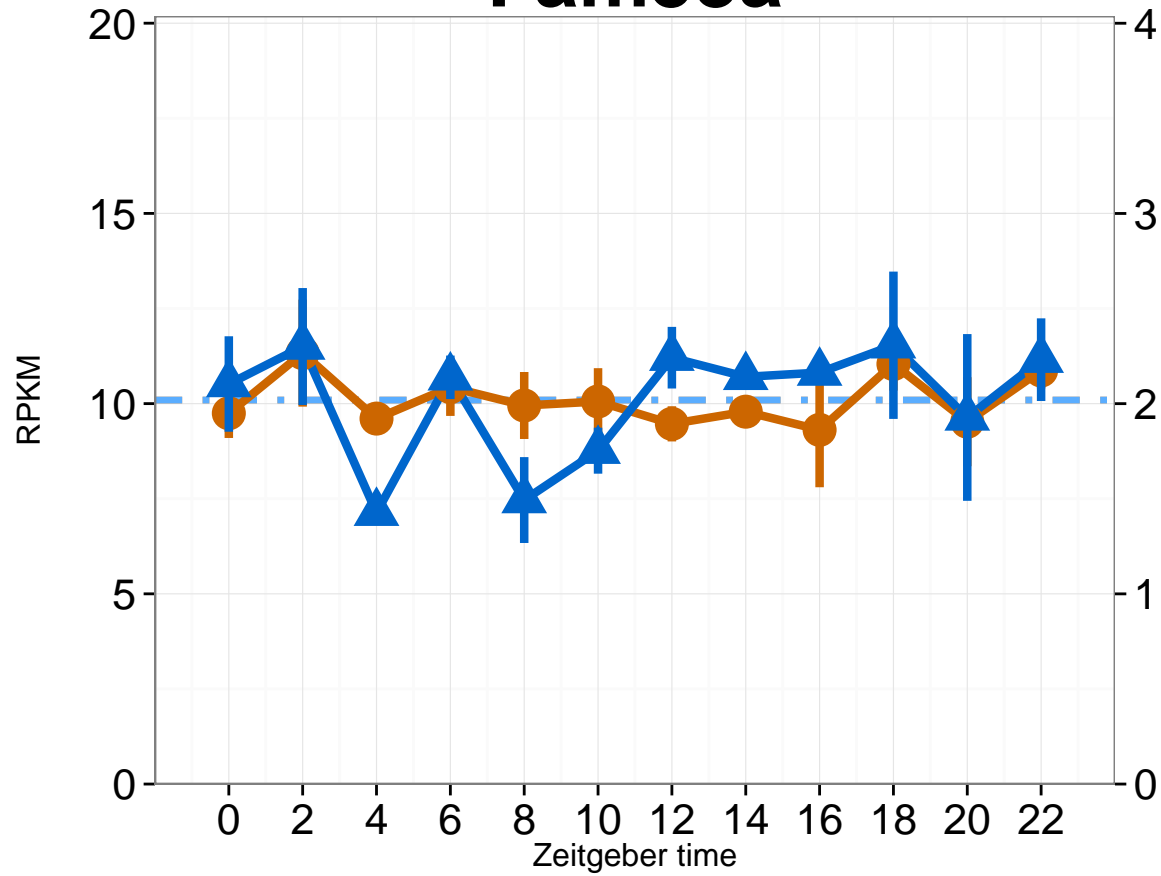

# Fam53a

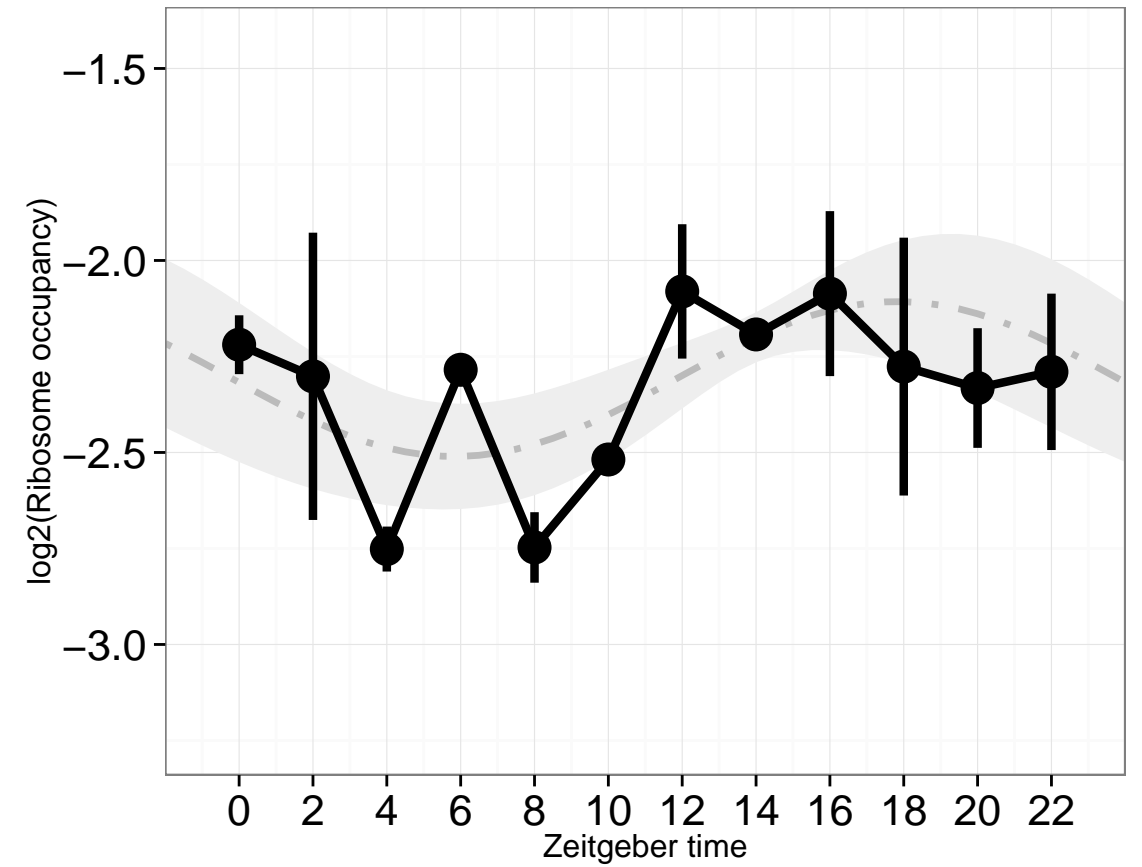

Supplement: SuppDataset_1.zip [file Fam53a_set_A.pdf › Supplemental Dataset 1/A-mRNA_nonrhyth_translation_nonrhyth/Fam53a_set_A.pdf]

# Fam53c

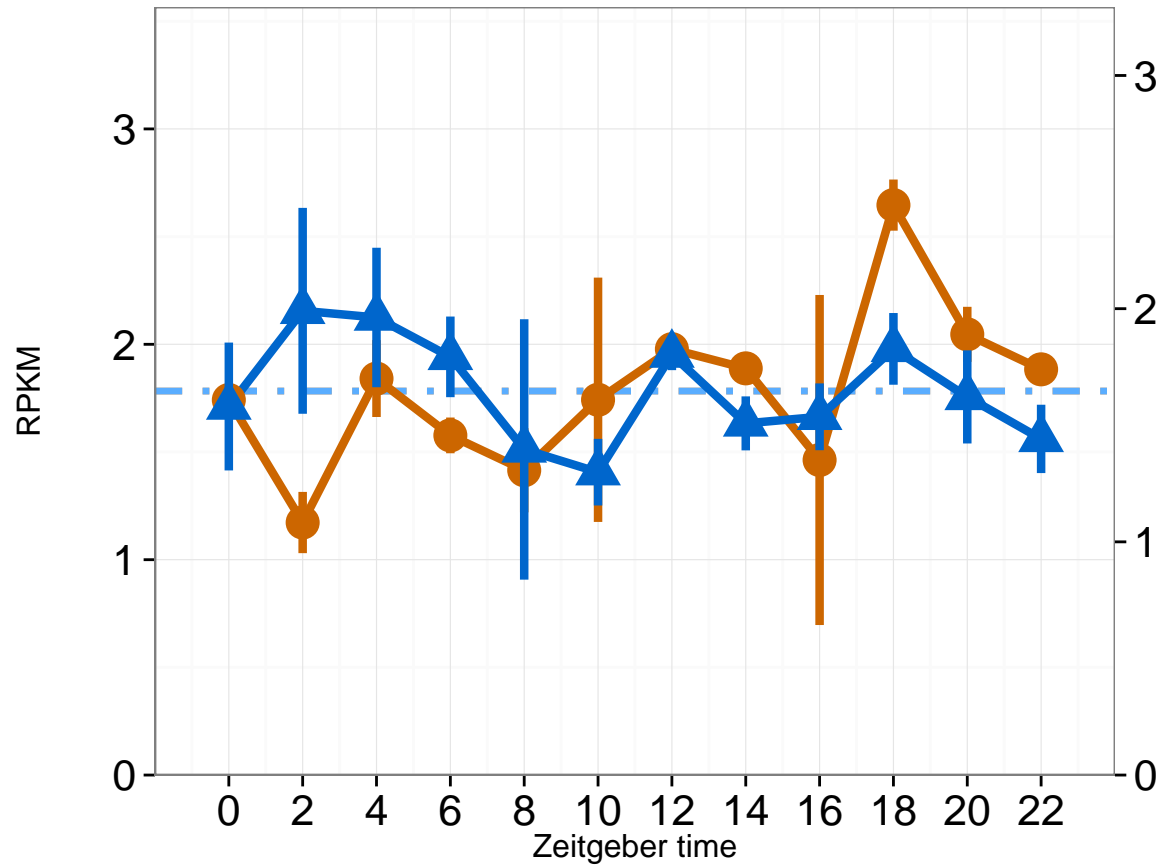

# Fam53c

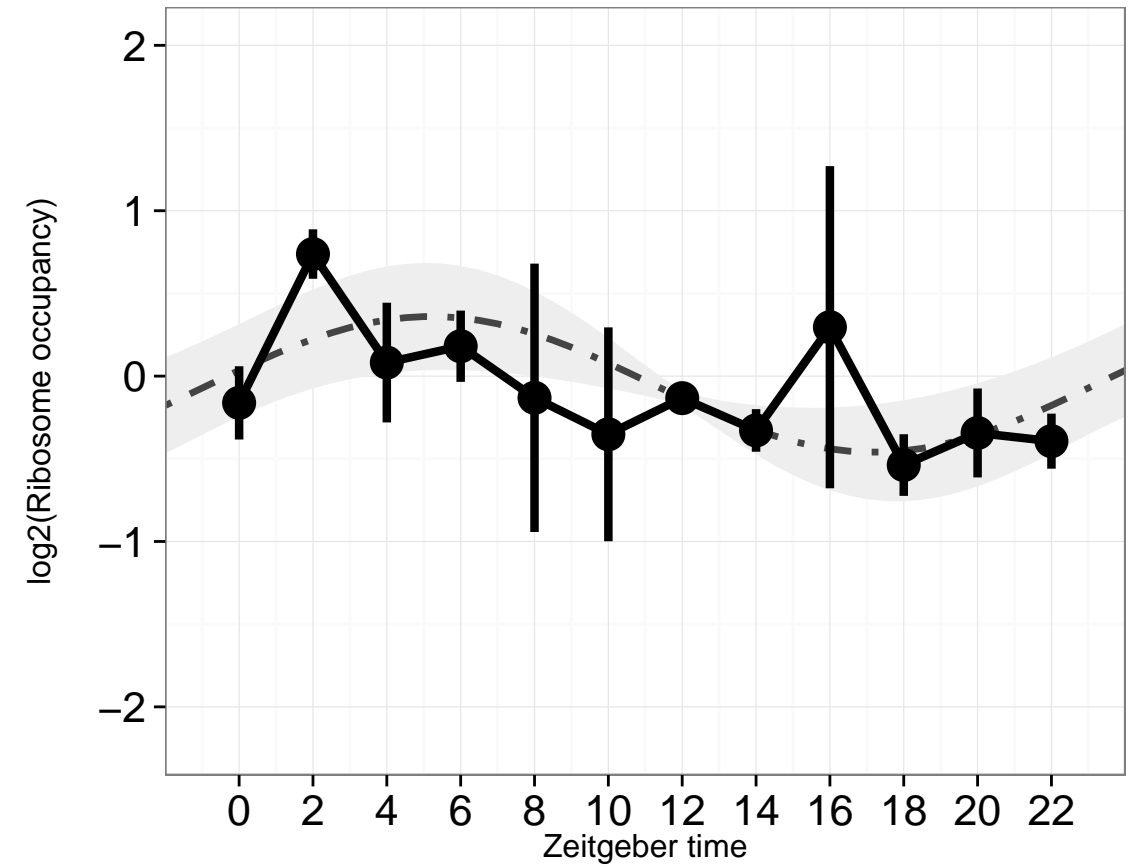

Supplement: SuppDataset_1.zip [file Fam53c_set_A.pdf › Supplemental Dataset 1/A-mRNA_nonrhyth_translation_nonrhyth/Fam53c_set_A.pdf]

# Fam58b

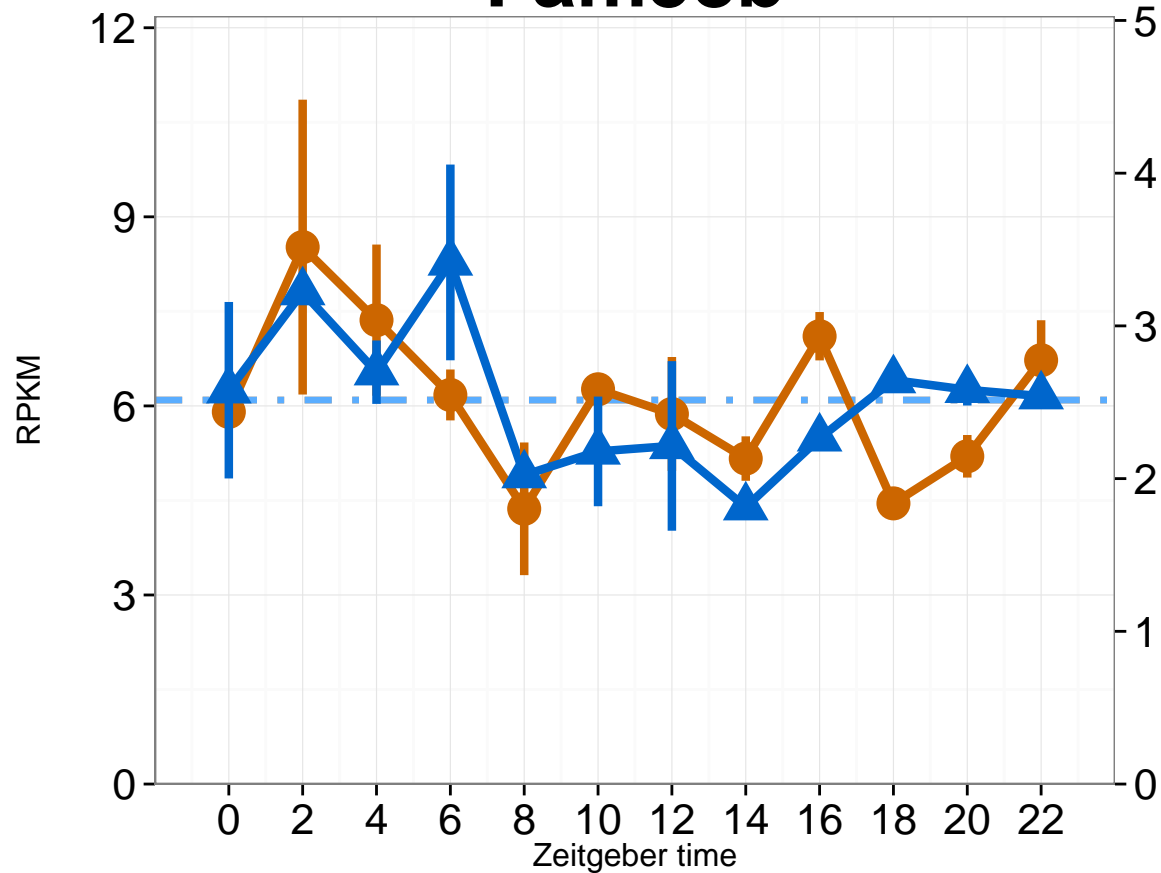

# Fam58b

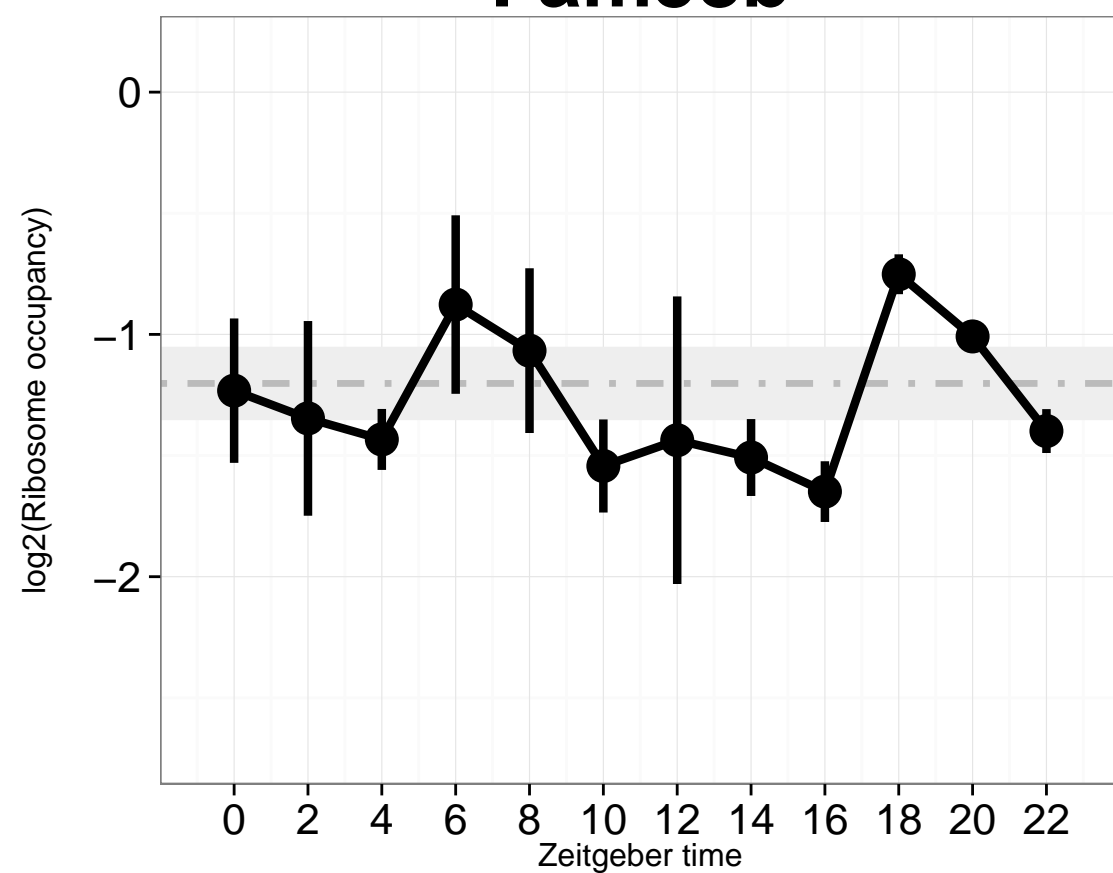

Supplement: SuppDataset_1.zip [file Fam58b_set_A.pdf › Supplemental Dataset 1/A-mRNA_nonrhyth_translation_nonrhyth/Fam58b_set_A.pdf]

# Fam60a

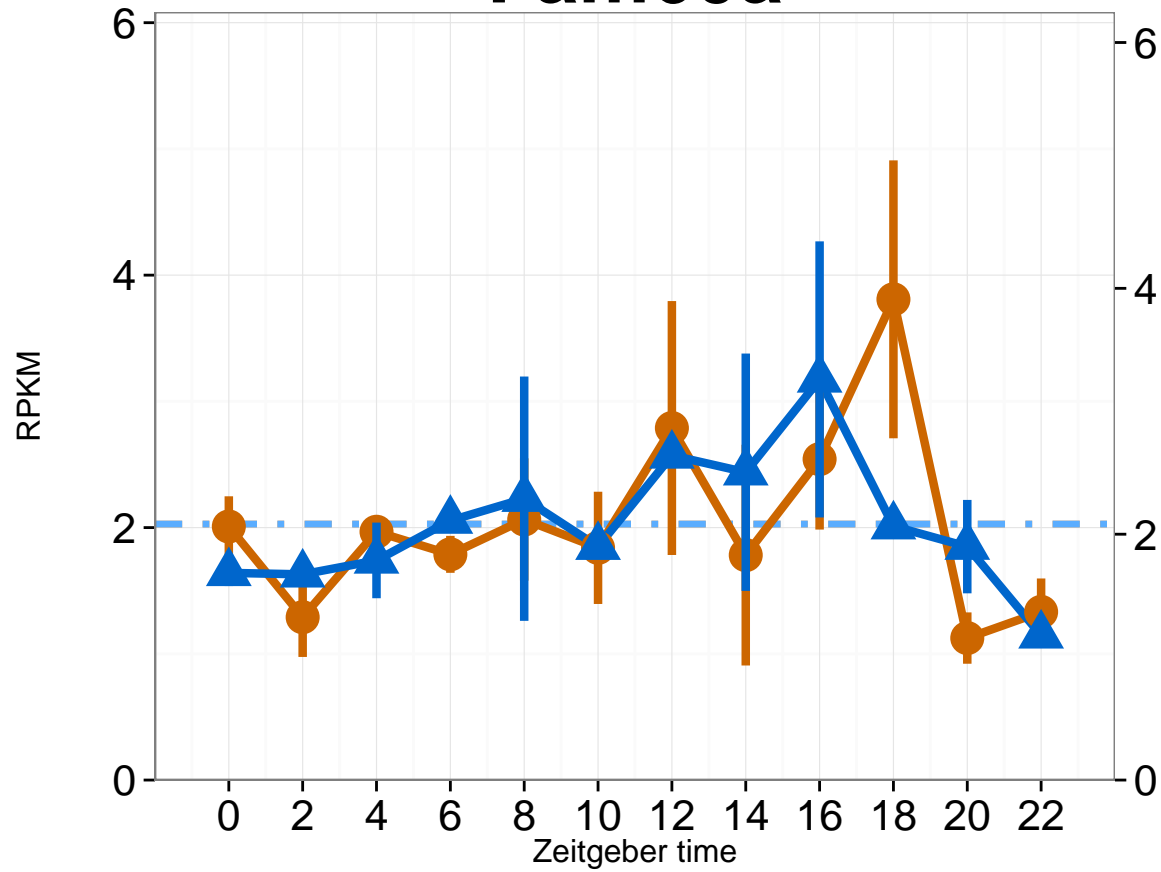

# Fam60a

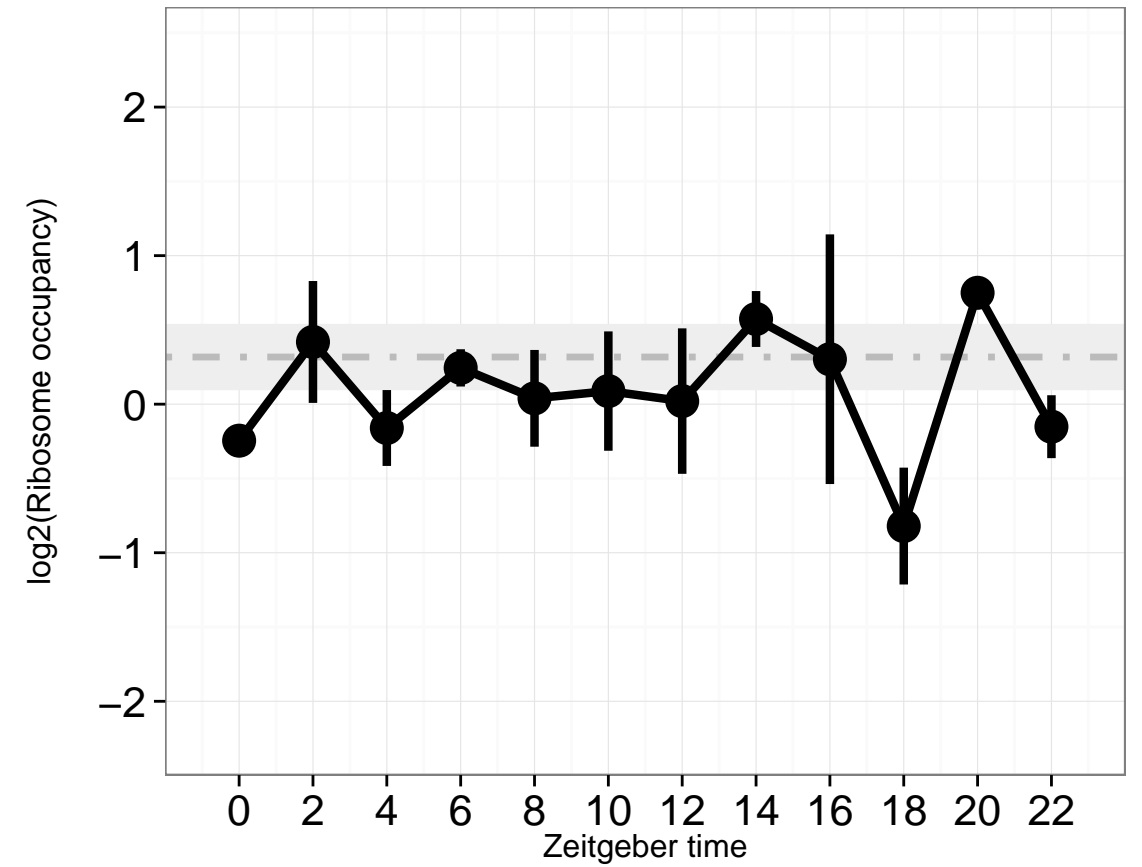

Supplement: SuppDataset_1.zip [file Fam60a_set_A.pdf › Supplemental Dataset 1/A-mRNA_nonrhyth_translation_nonrhyth/Fam60a_set_A.pdf]

# Fam63b

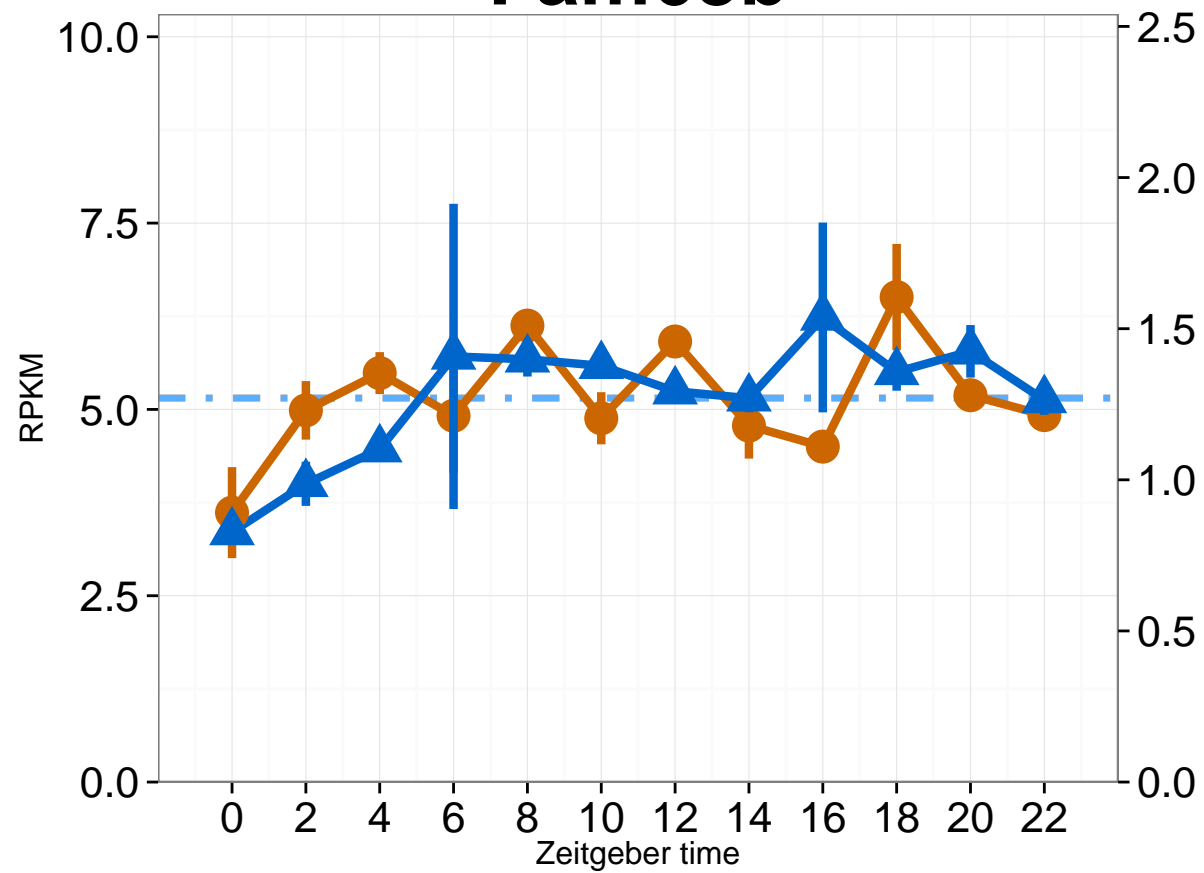

# Fam63b

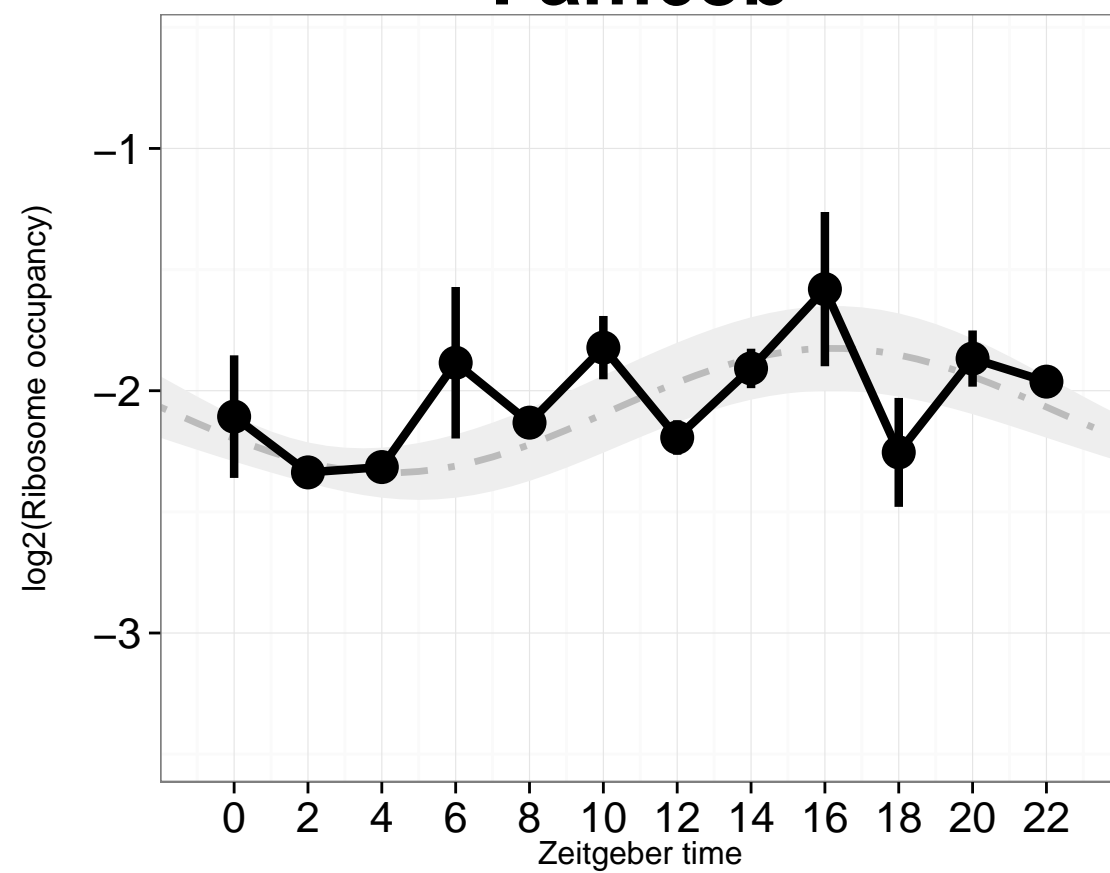

Supplement: SuppDataset_1.zip [file Fam63b_set_A.pdf › Supplemental Dataset 1/A-mRNA_nonrhyth_translation_nonrhyth/Fam63b_set_A.pdf]

# Fam65a

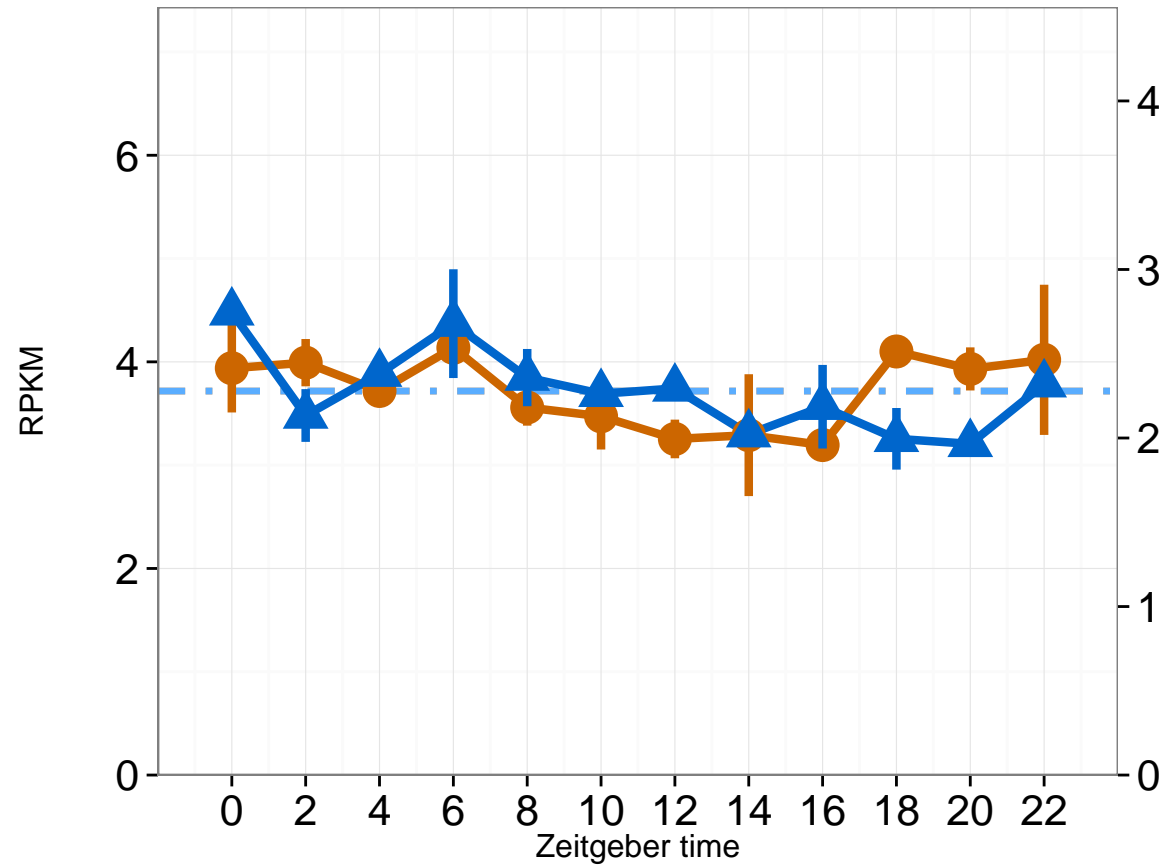

# Fam65a

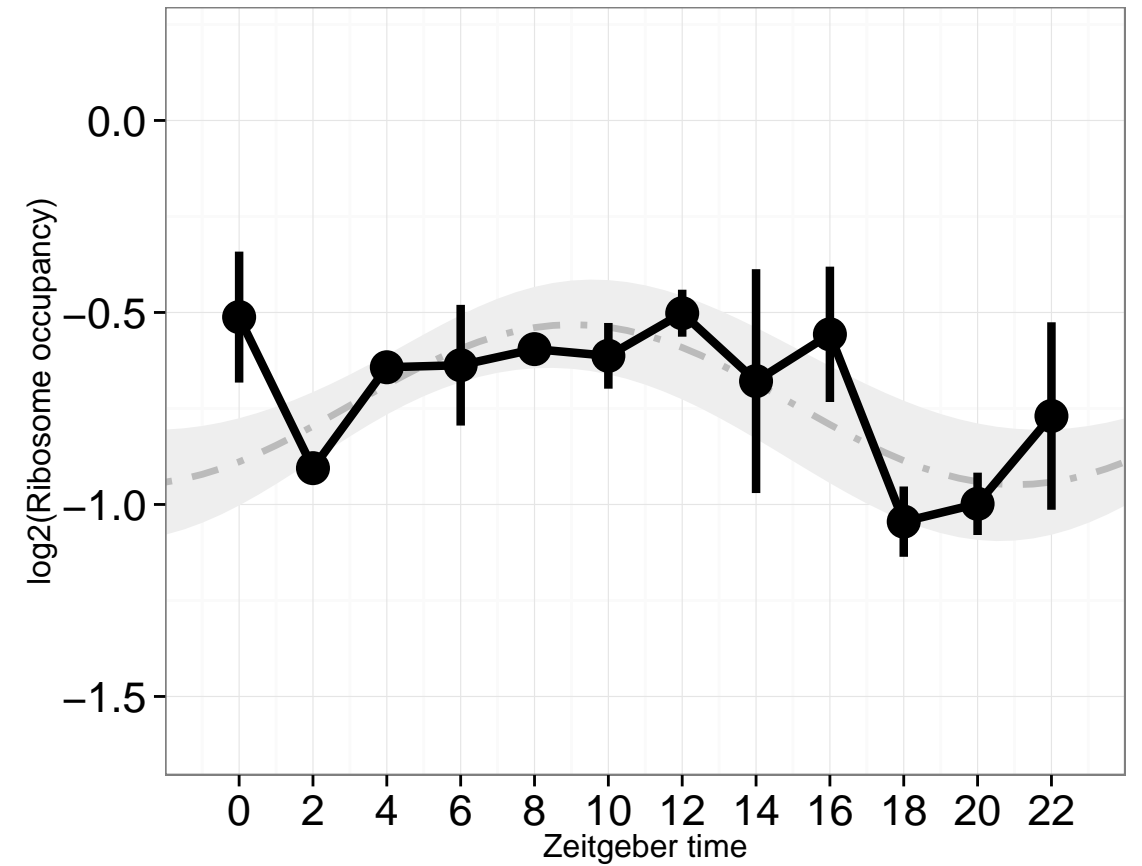

Supplement: SuppDataset_1.zip [file Fam65a_set_A.pdf › Supplemental Dataset 1/A-mRNA_nonrhyth_translation_nonrhyth/Fam65a_set_A.pdf]

# Fam69a

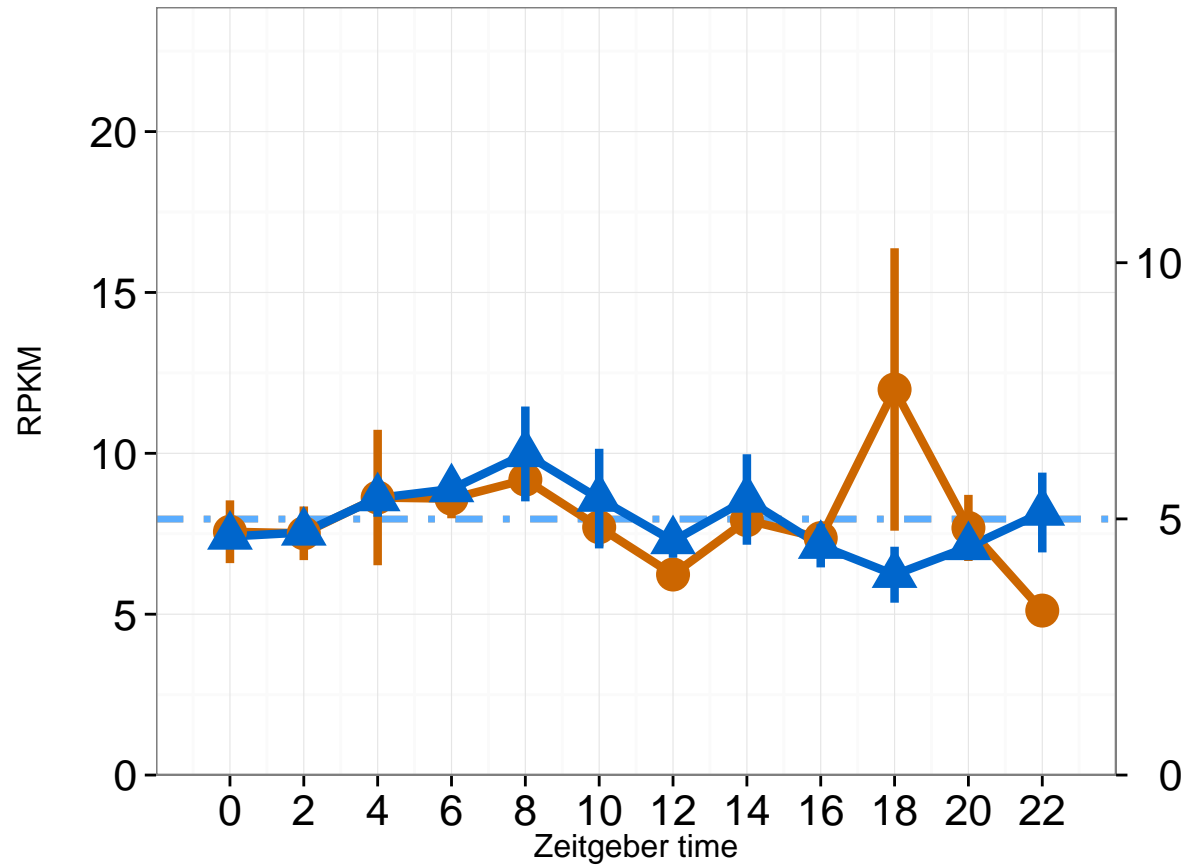

# Fam69a

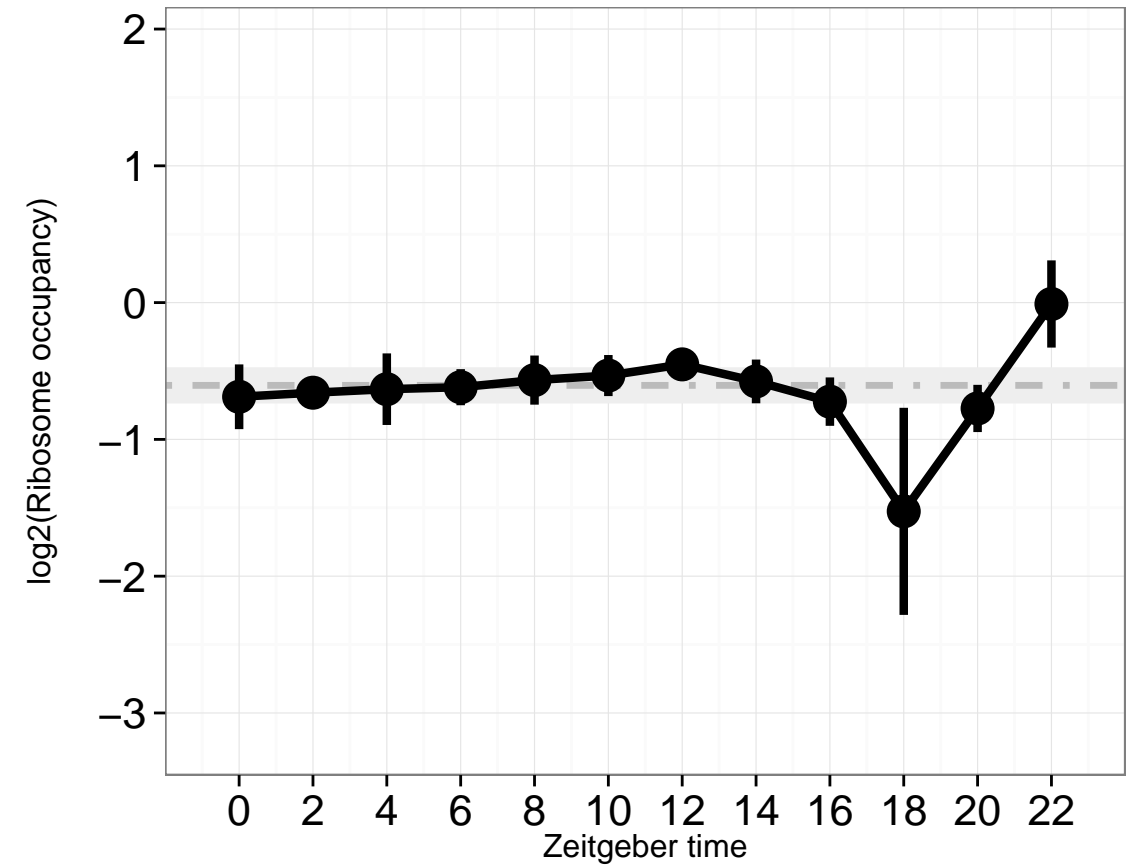

Supplement: SuppDataset_1.zip [file Fam69a_set_A.pdf › Supplemental Dataset 1/A-mRNA_nonrhyth_translation_nonrhyth/Fam69a_set_A.pdf]

**Fam72a TR**

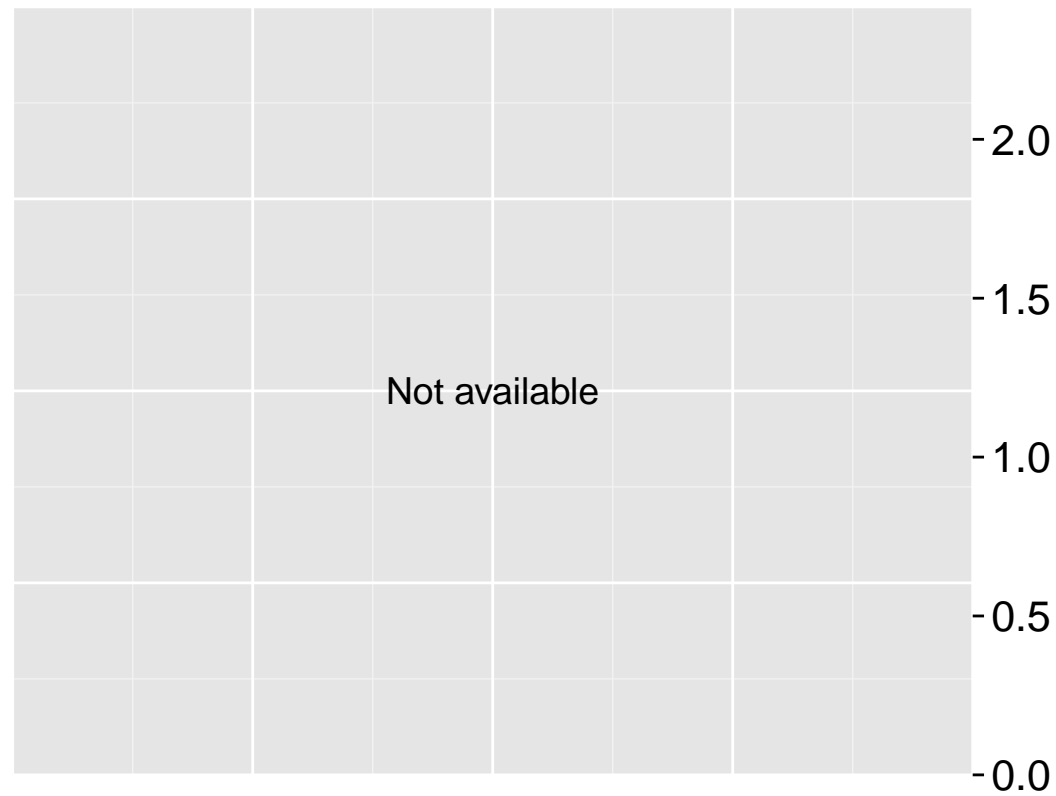

**Fam72a log2(Ribosome occupancy**

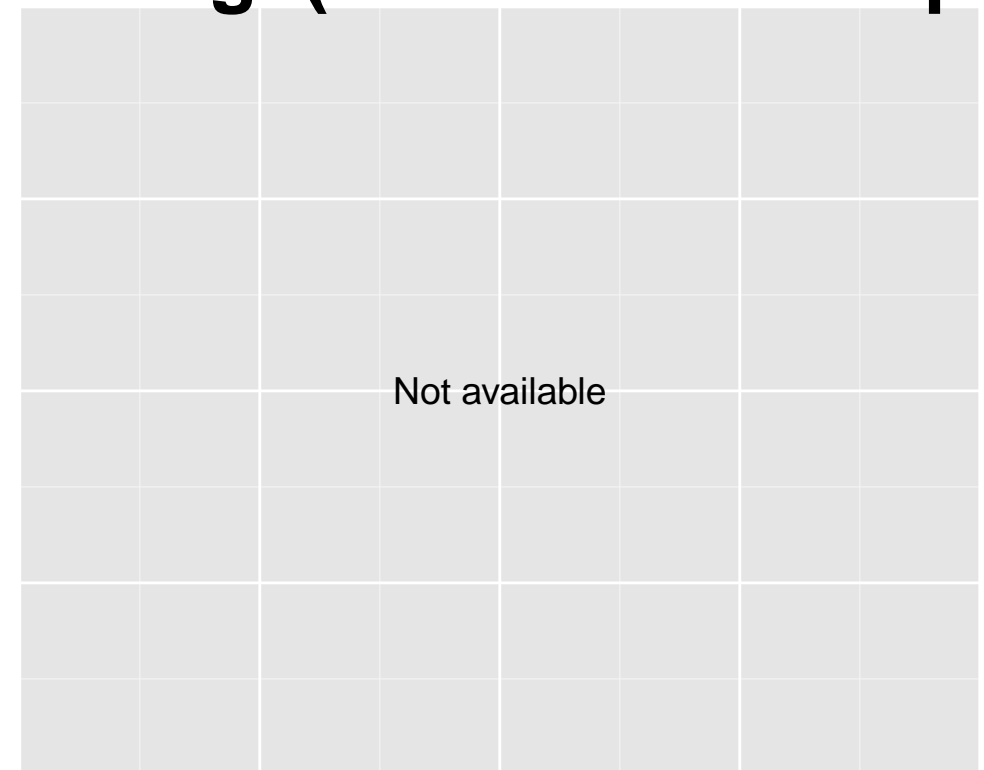

Supplement: SuppDataset_1.zip [file Fam72a_set_A.pdf › Supplemental Dataset 1/A-mRNA_nonrhyth_translation_nonrhyth/Fam72a_set_A.pdf]

# Fam73a

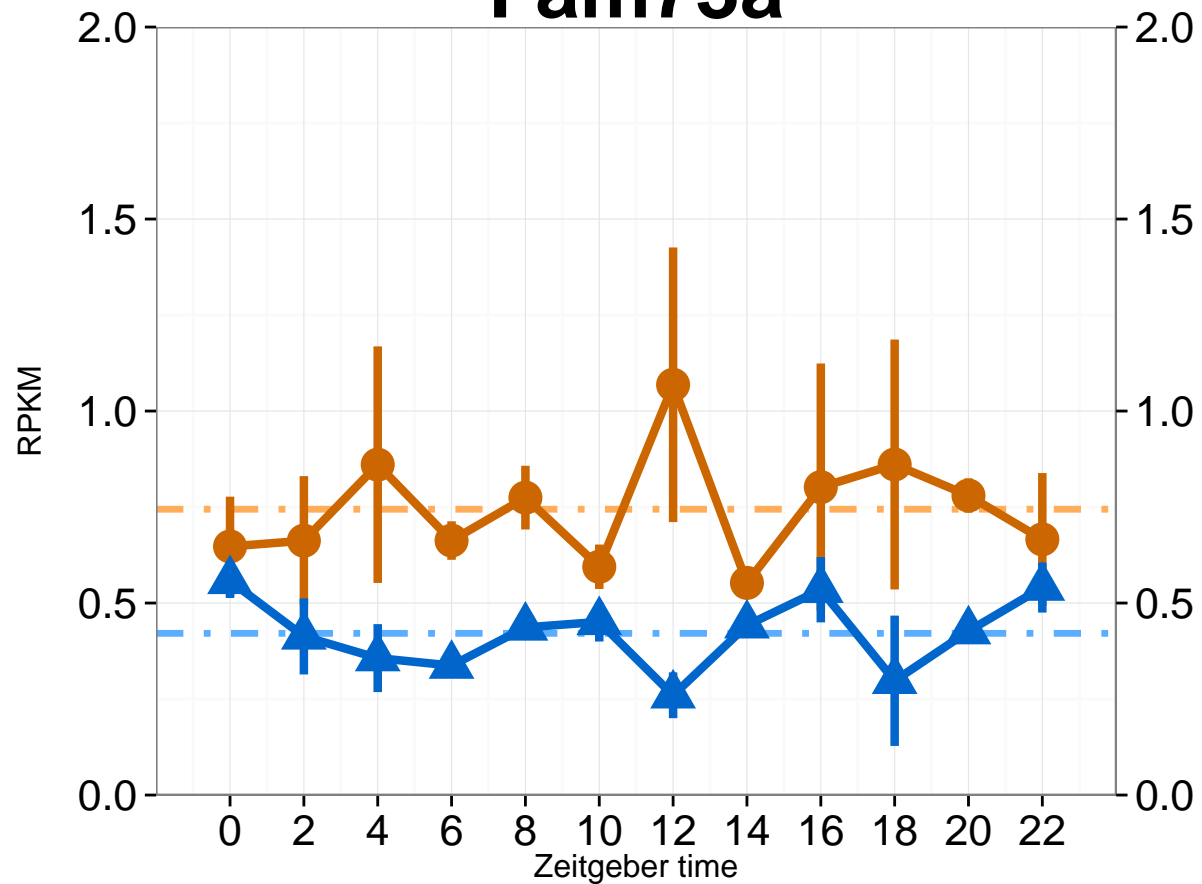

# Fam73a

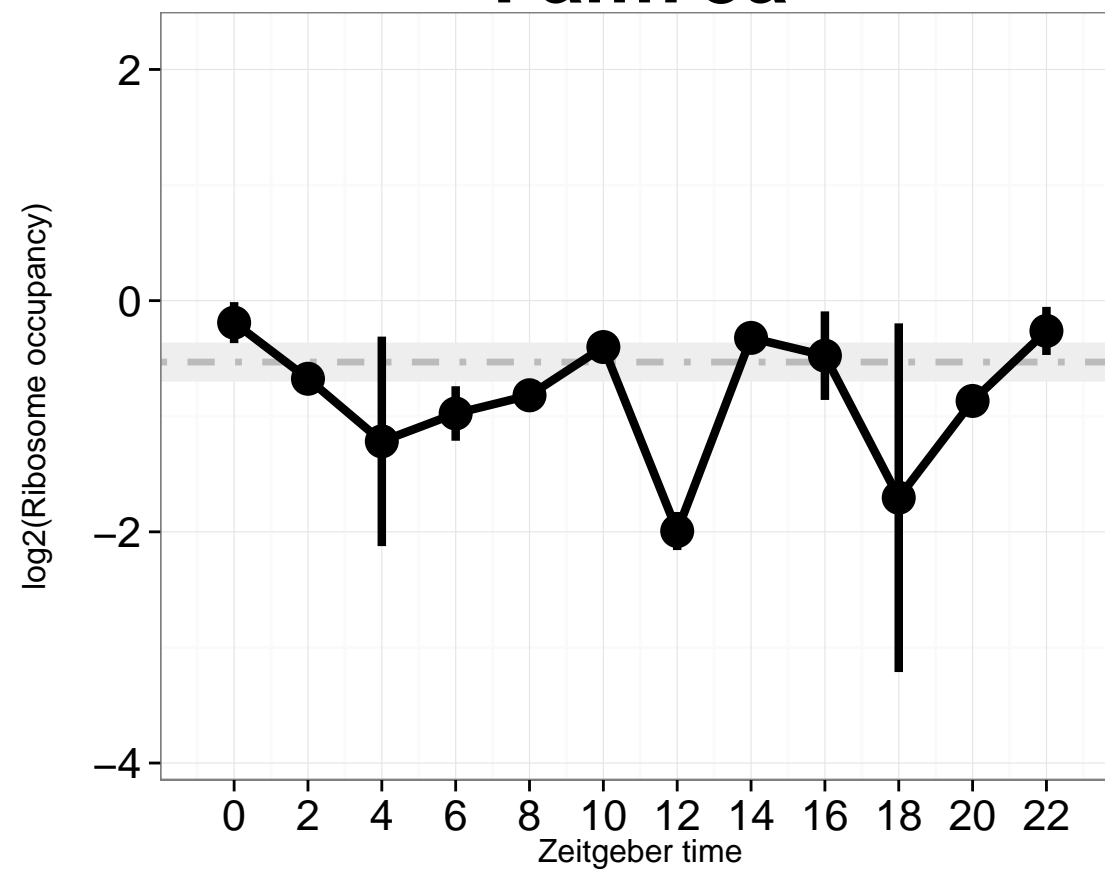

Supplement: SuppDataset_1.zip [file Fam73a_set_A.pdf › Supplemental Dataset 1/A-mRNA_nonrhyth_translation_nonrhyth/Fam73a_set_A.pdf]

# Fam73b

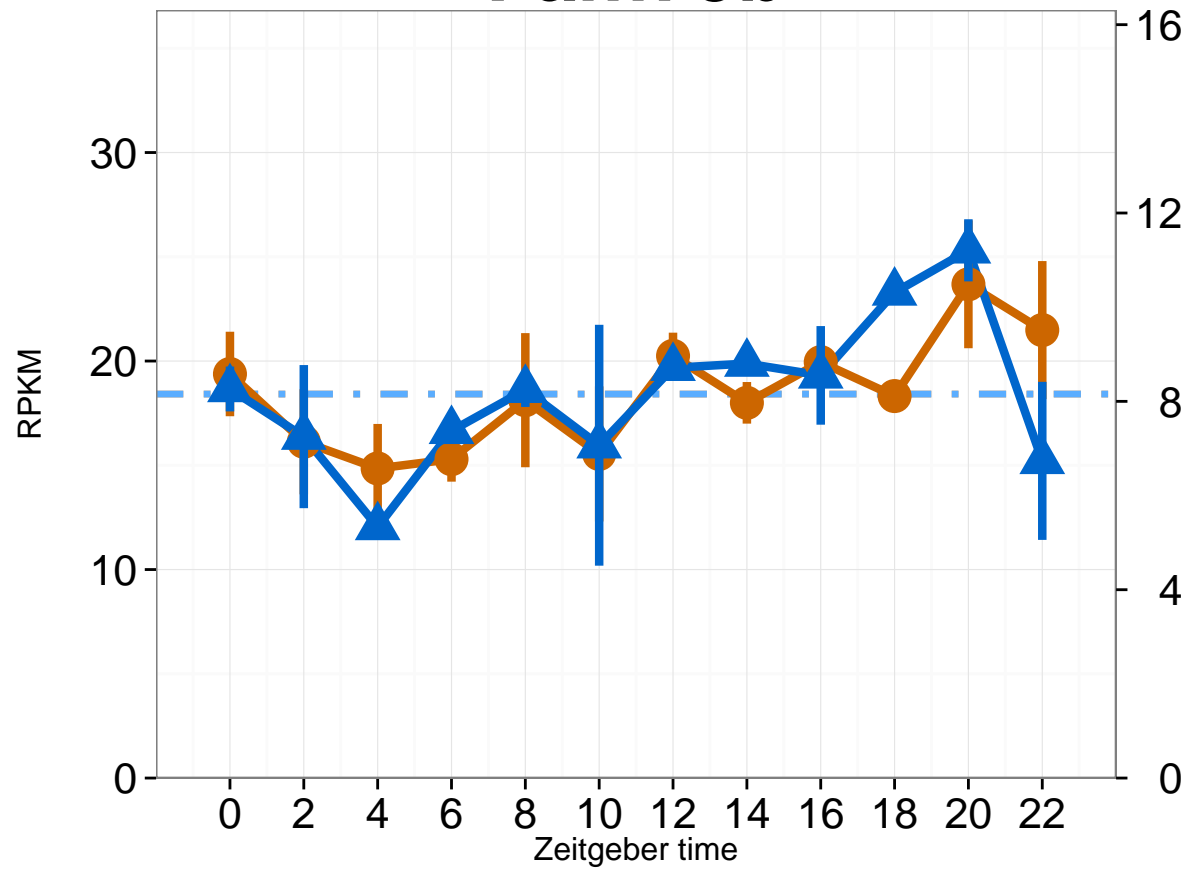

# Fam73b

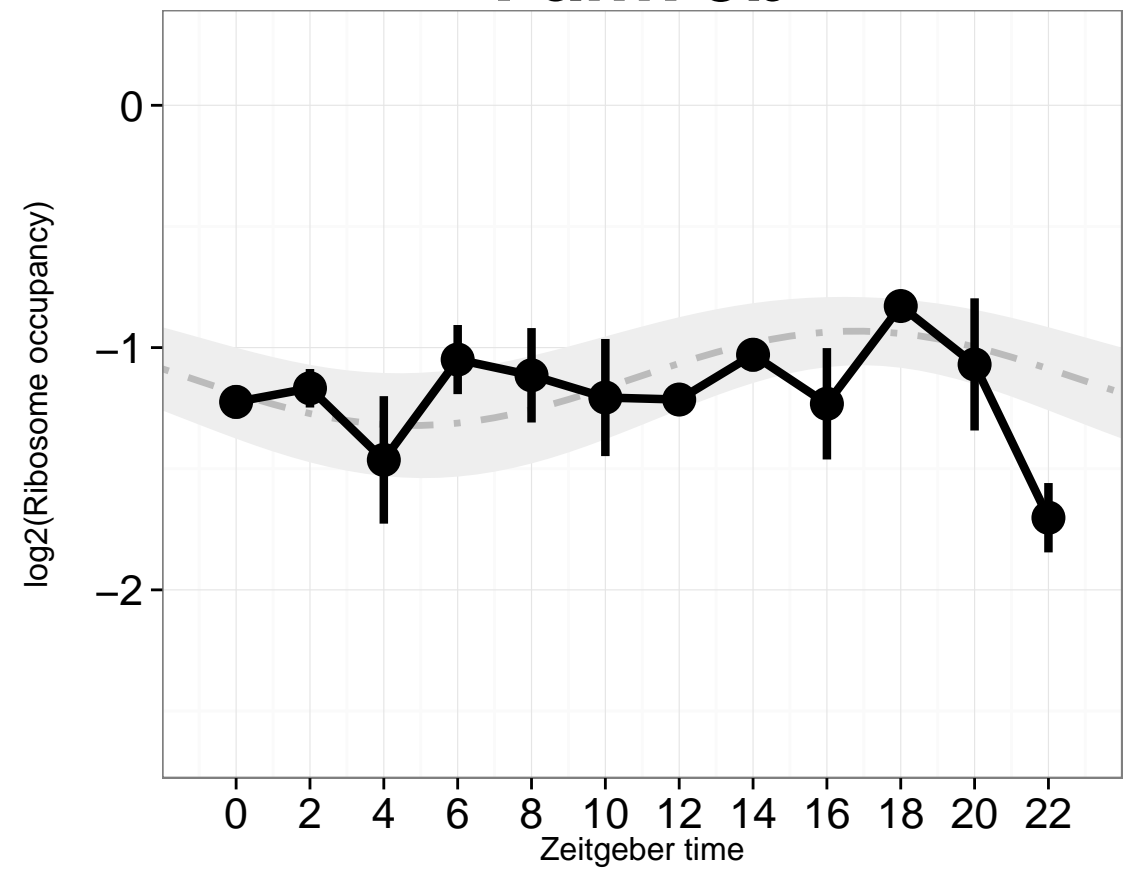

Supplement: SuppDataset_1.zip [file Fam73b_set_A.pdf › Supplemental Dataset 1/A-mRNA_nonrhyth_translation_nonrhyth/Fam73b_set_A.pdf]

**Fam83g**

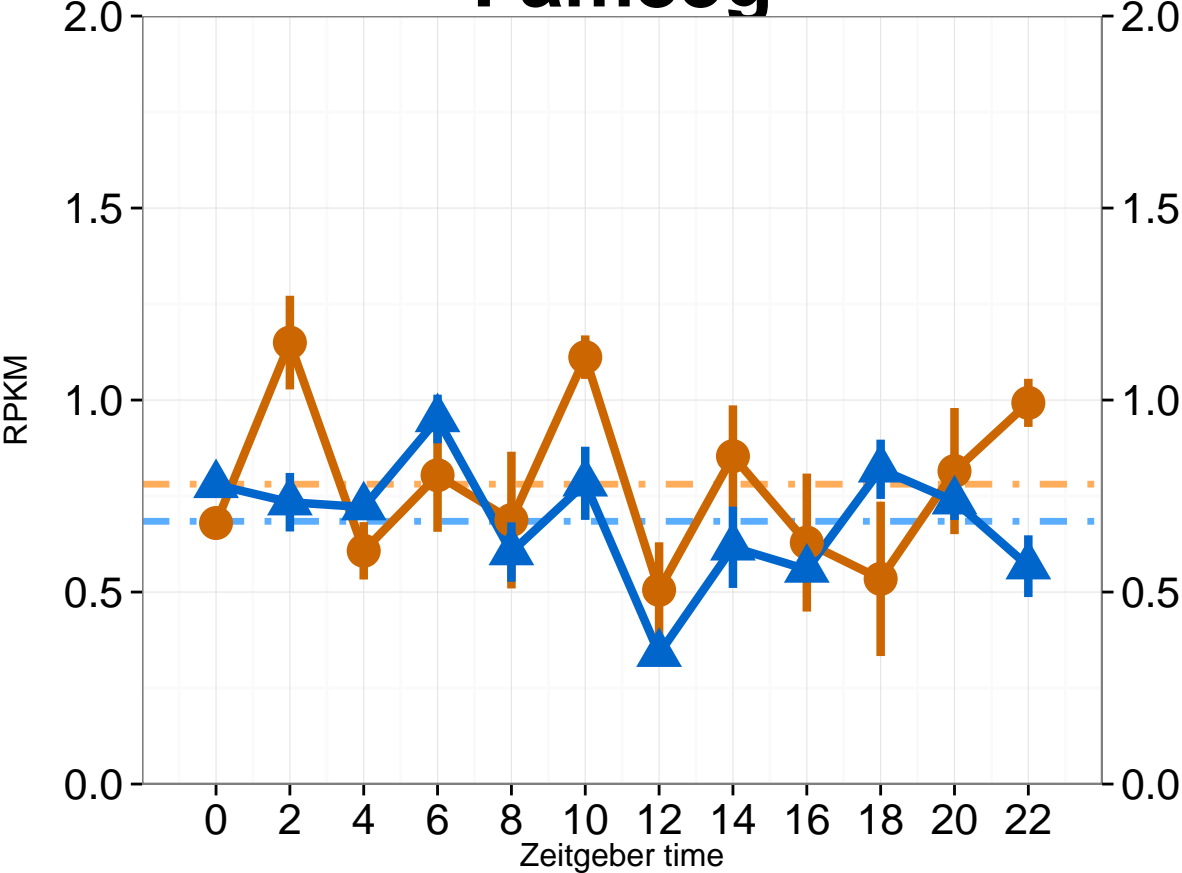

**Fam83g**

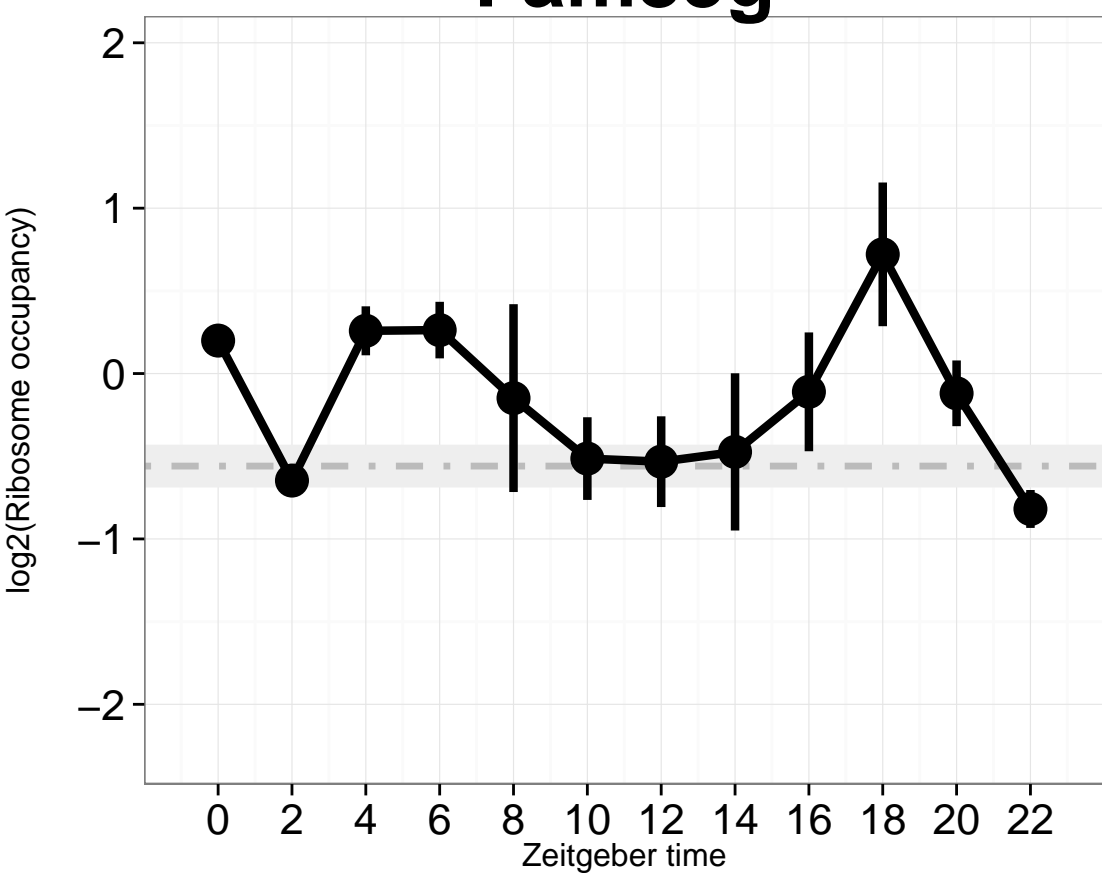

Supplement: SuppDataset_1.zip [file Fam83g_set_A.pdf › Supplemental Dataset 1/A-mRNA_nonrhyth_translation_nonrhyth/Fam83g_set_A.pdf]

# Fam84b

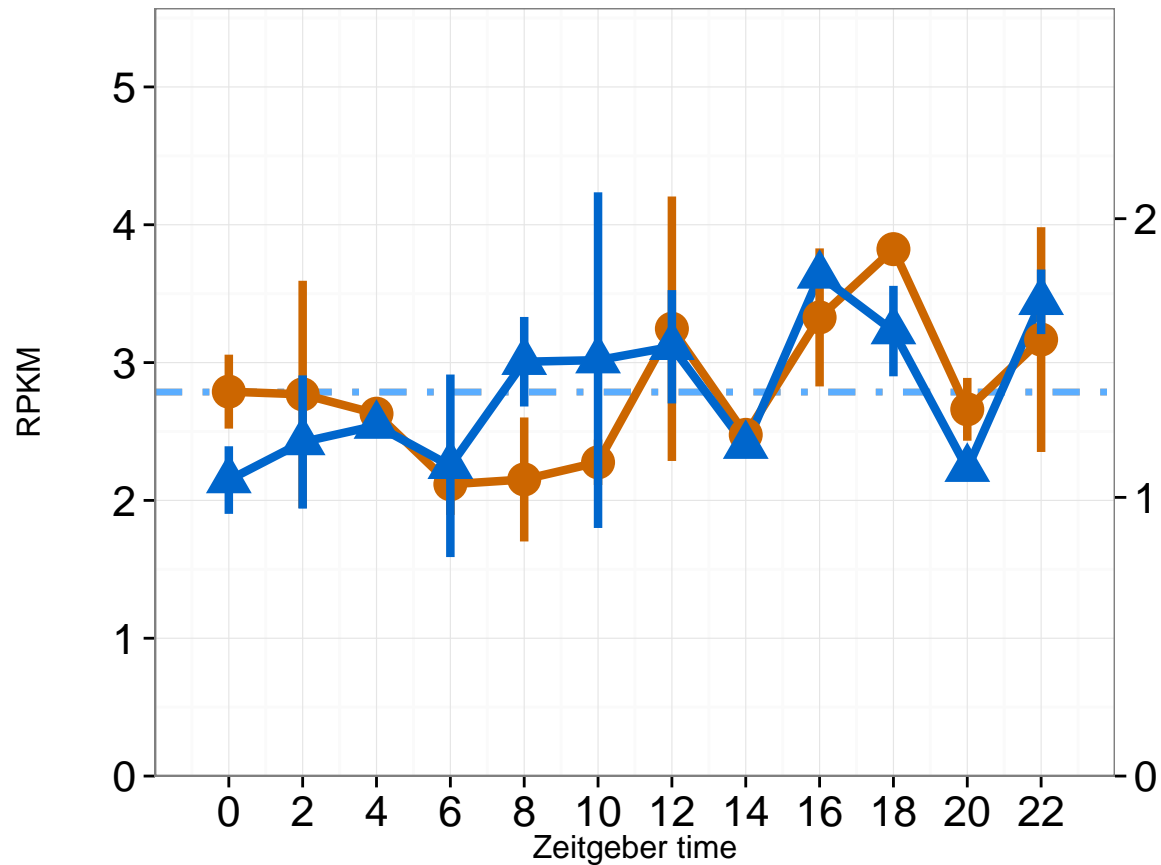

# Fam84b

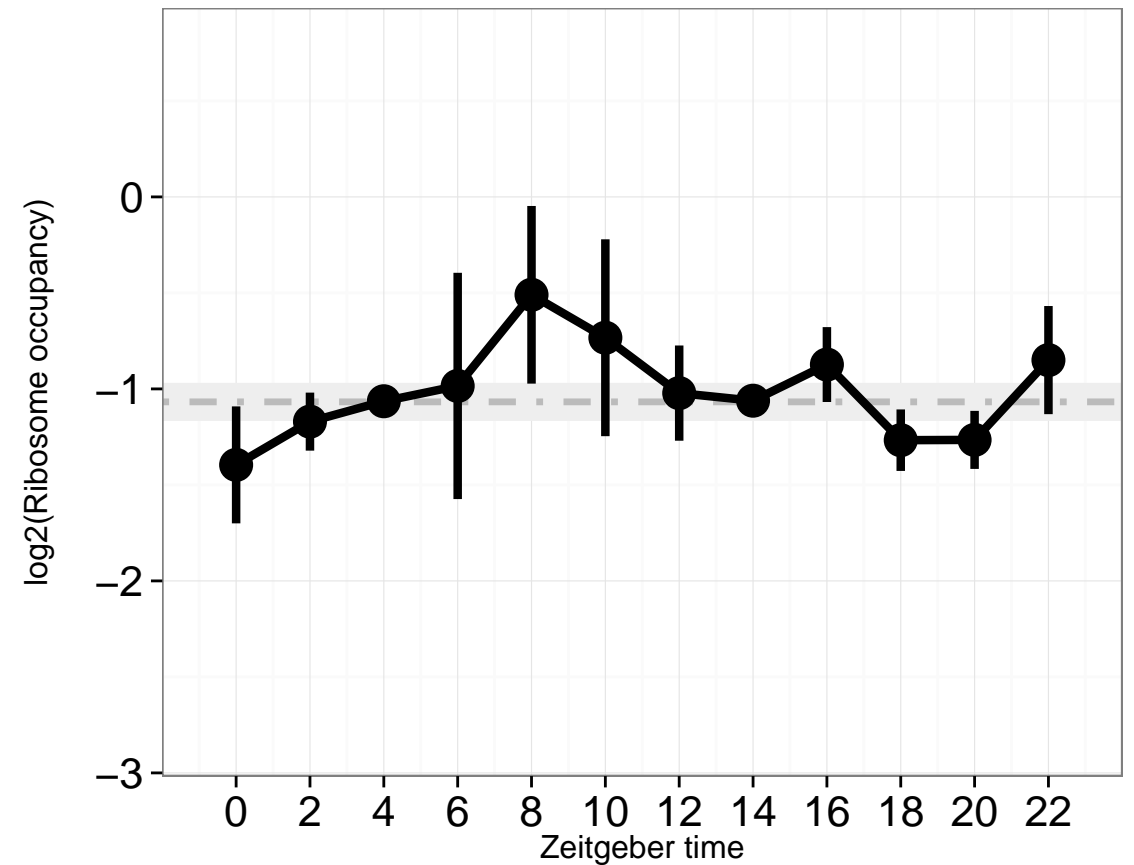

Supplement: SuppDataset_1.zip [file Fam84b_set_A.pdf › Supplemental Dataset 1/A-mRNA_nonrhyth_translation_nonrhyth/Fam84b_set_A.pdf]

## Fam86

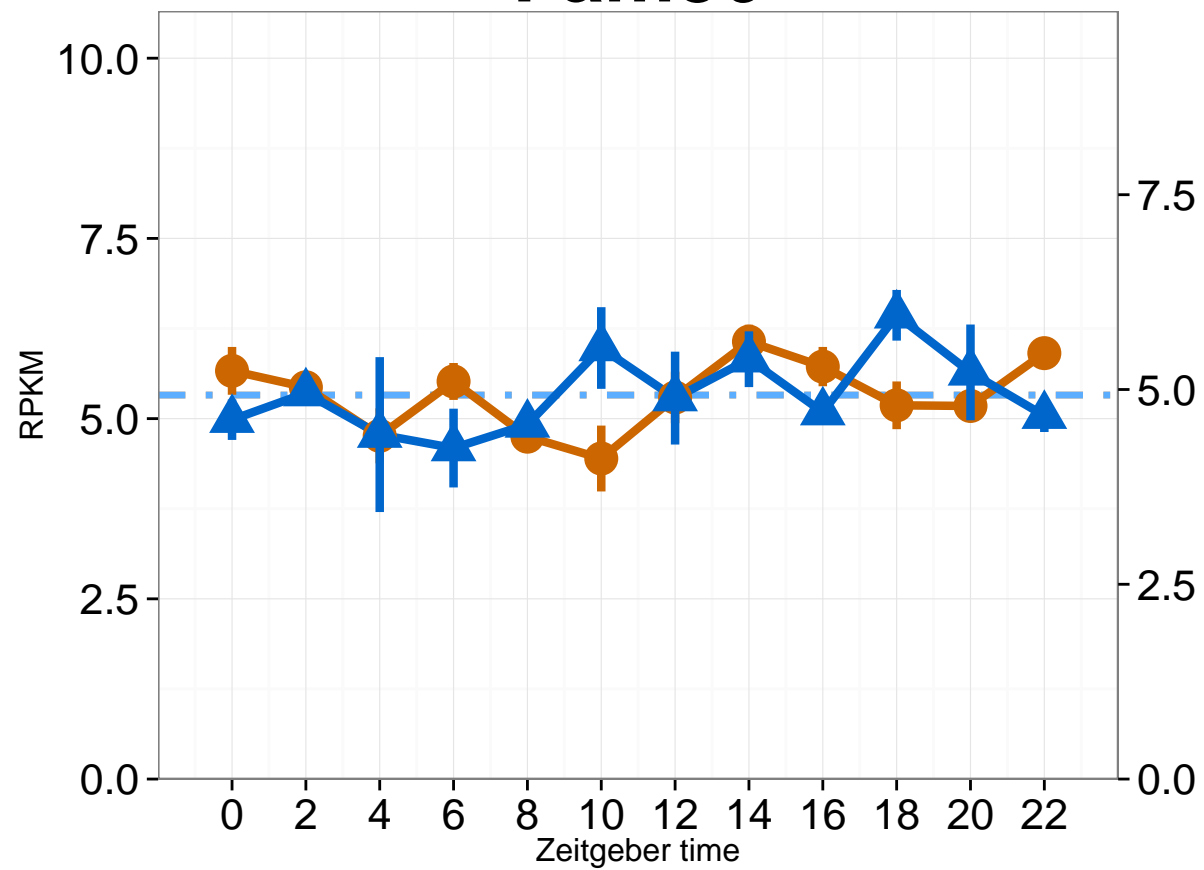

## Fam86

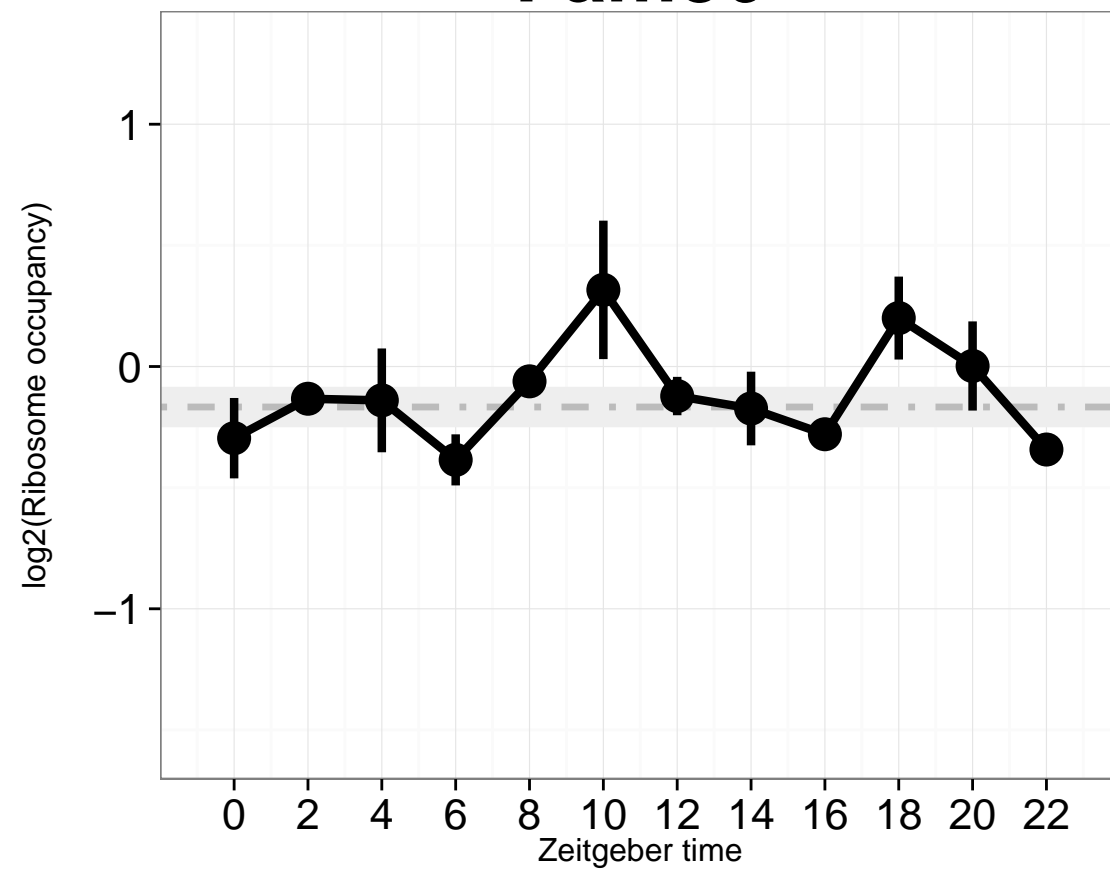

Supplement: SuppDataset_1.zip [file Fam86_set_A.pdf › Supplemental Dataset 1/A-mRNA_nonrhyth_translation_nonrhyth/Fam86_set_A.pdf]

# Fam92a

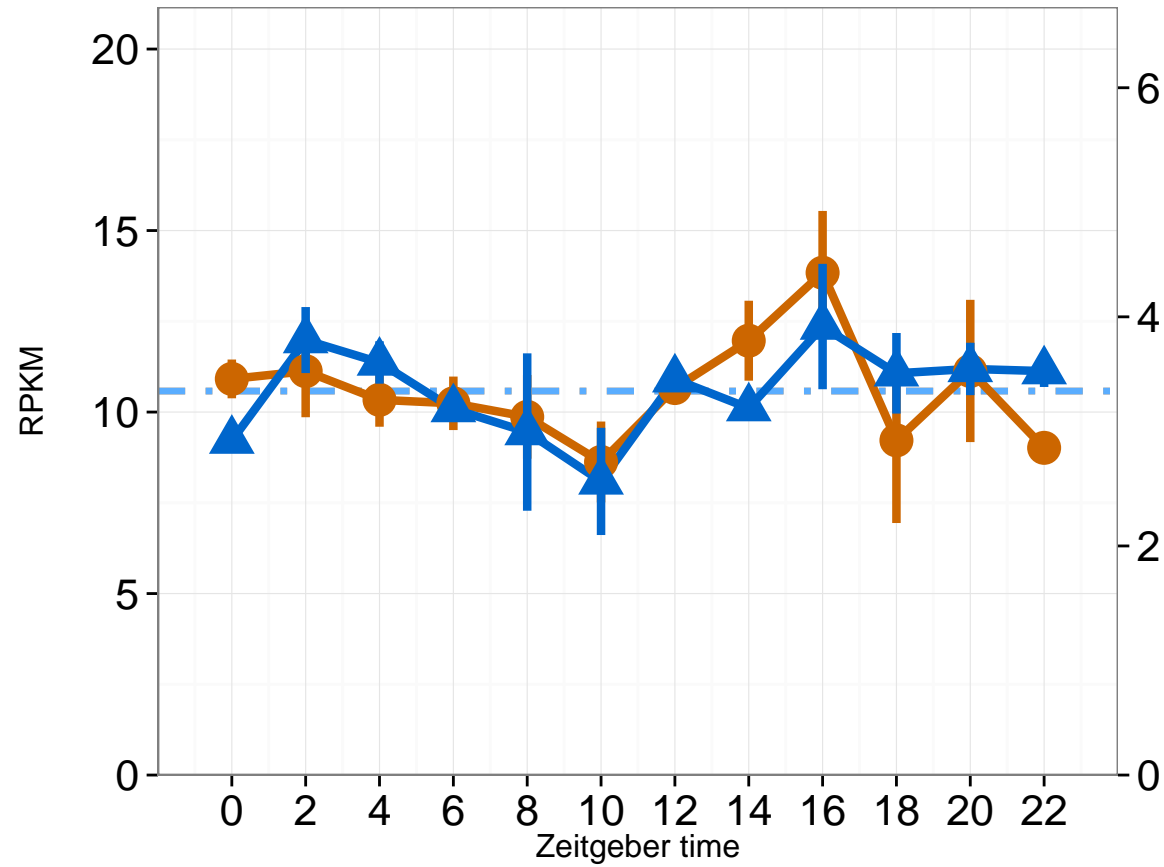

# Fam92a

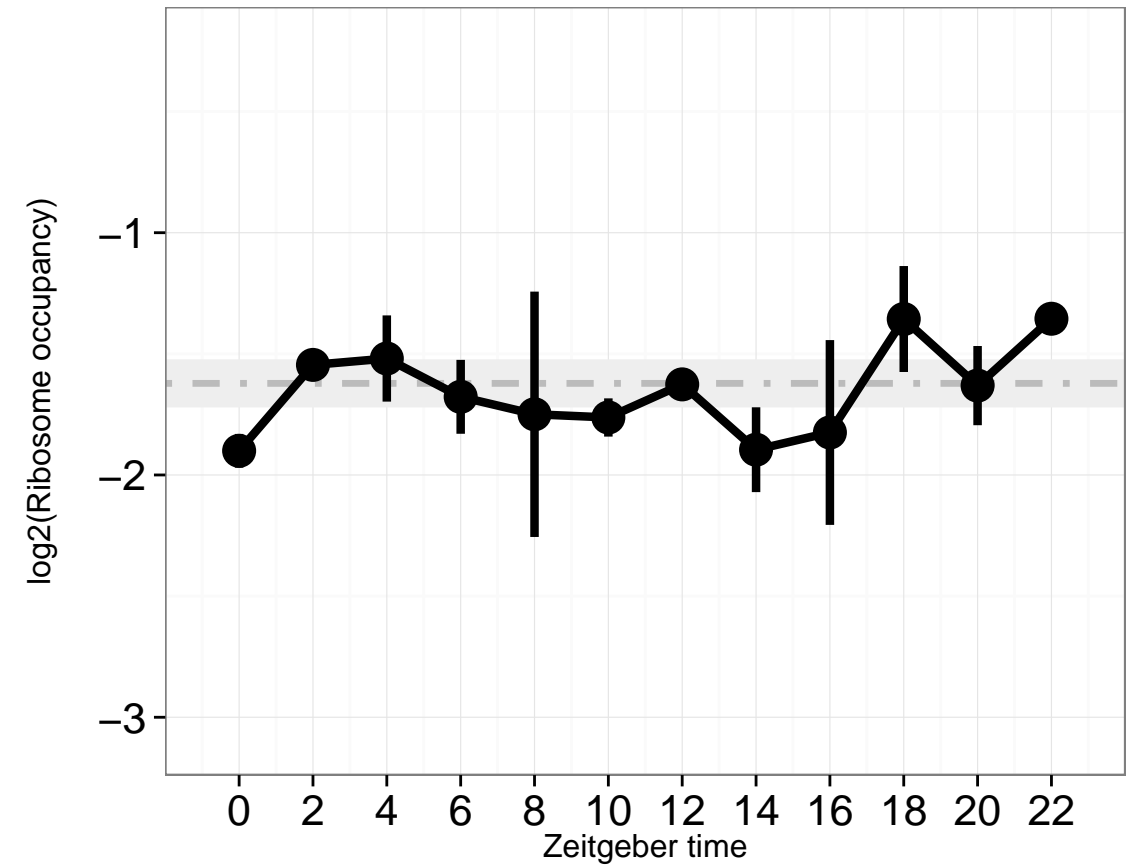

Supplement: SuppDataset_1.zip [file Fam92a_set_A.pdf › Supplemental Dataset 1/A-mRNA_nonrhyth_translation_nonrhyth/Fam92a_set_A.pdf]

# Fam96a

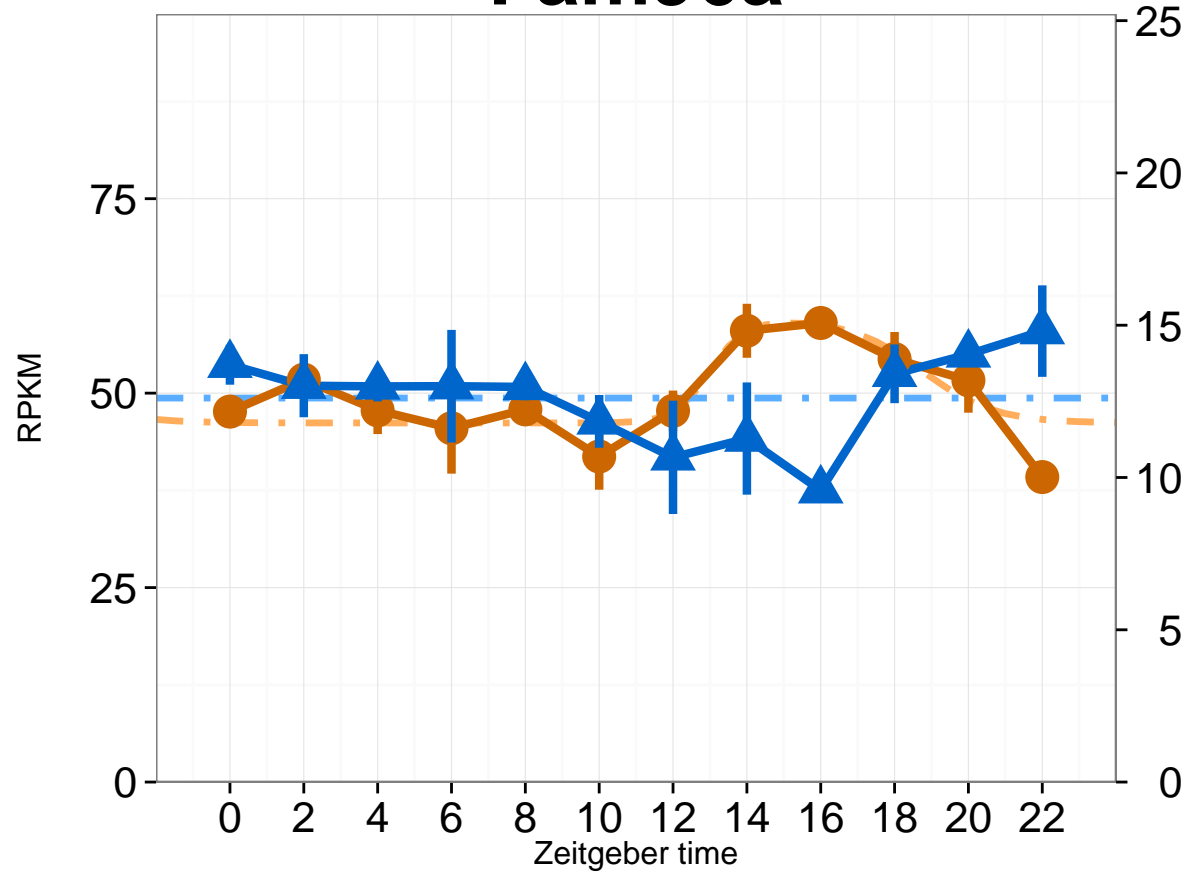

# Fam96a

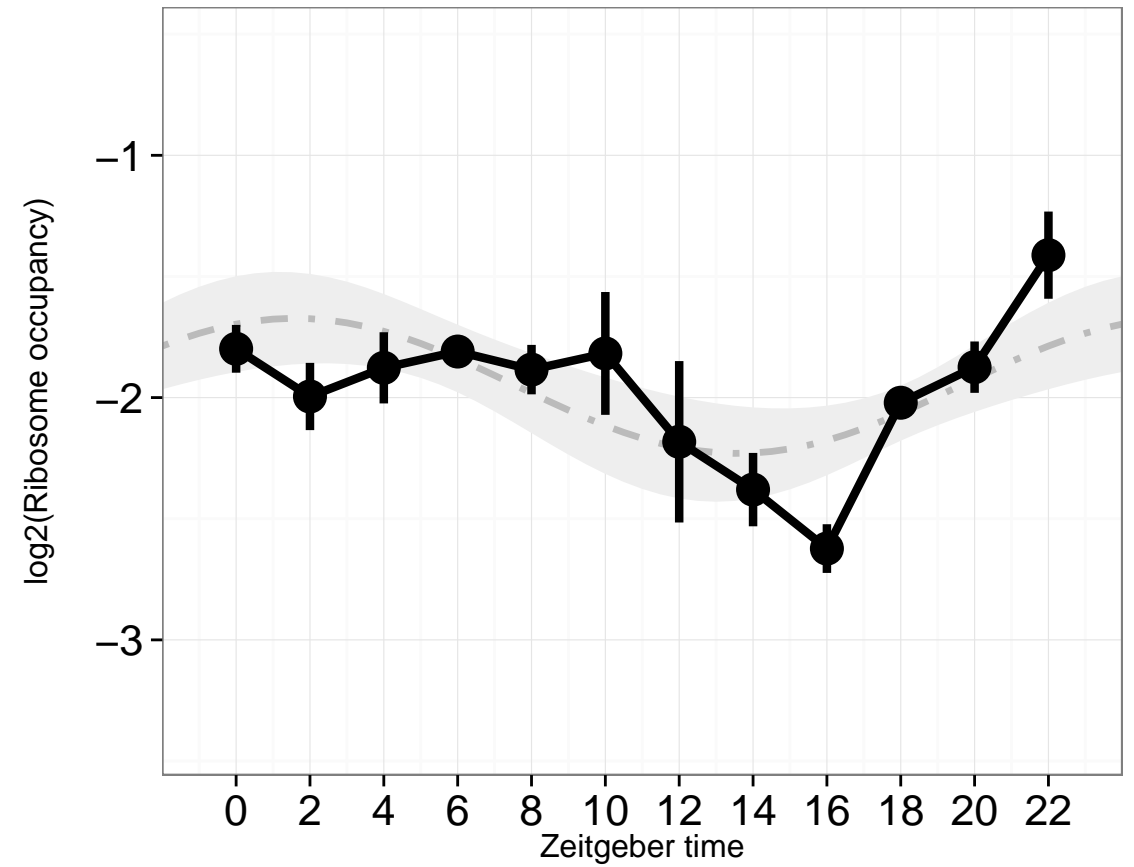

Supplement: SuppDataset_1.zip [file Fam96a_set_A.pdf › Supplemental Dataset 1/A-mRNA_nonrhyth_translation_nonrhyth/Fam96a_set_A.pdf]

# Fam96b

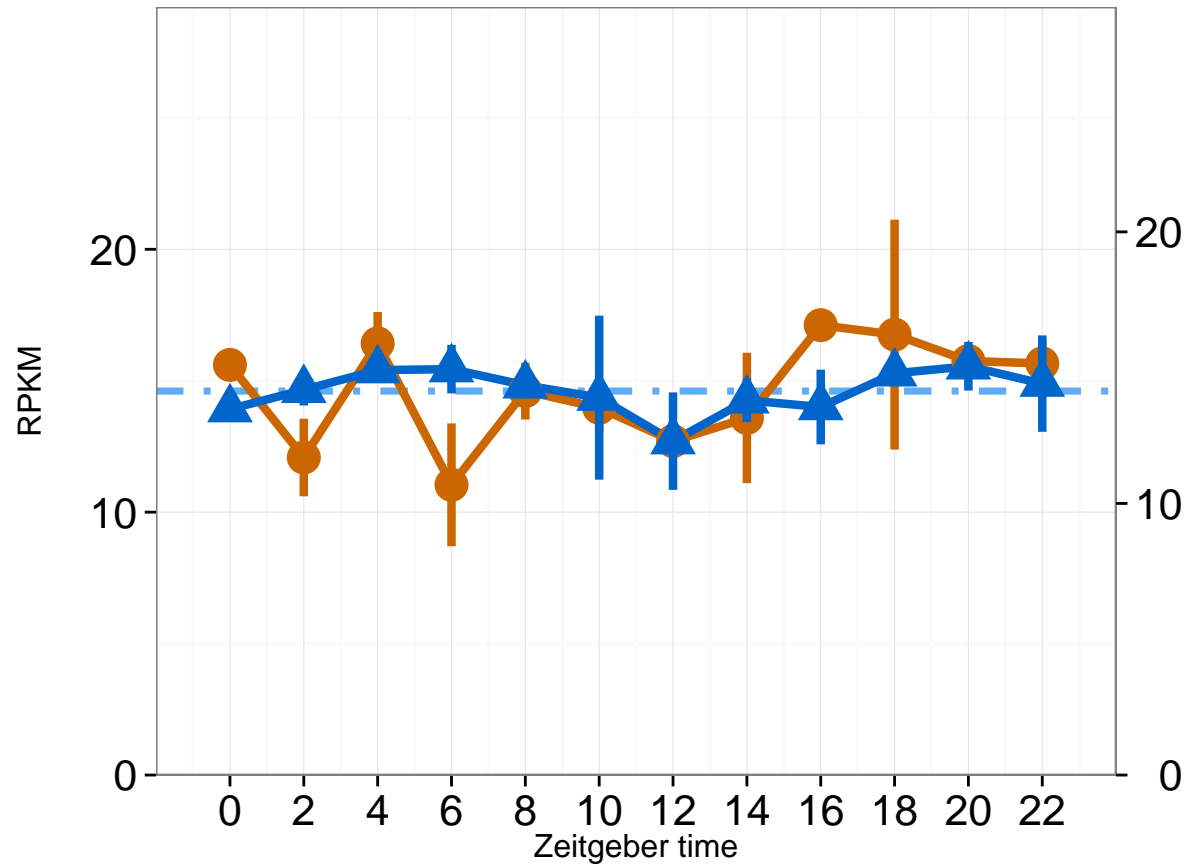

# Fam96b

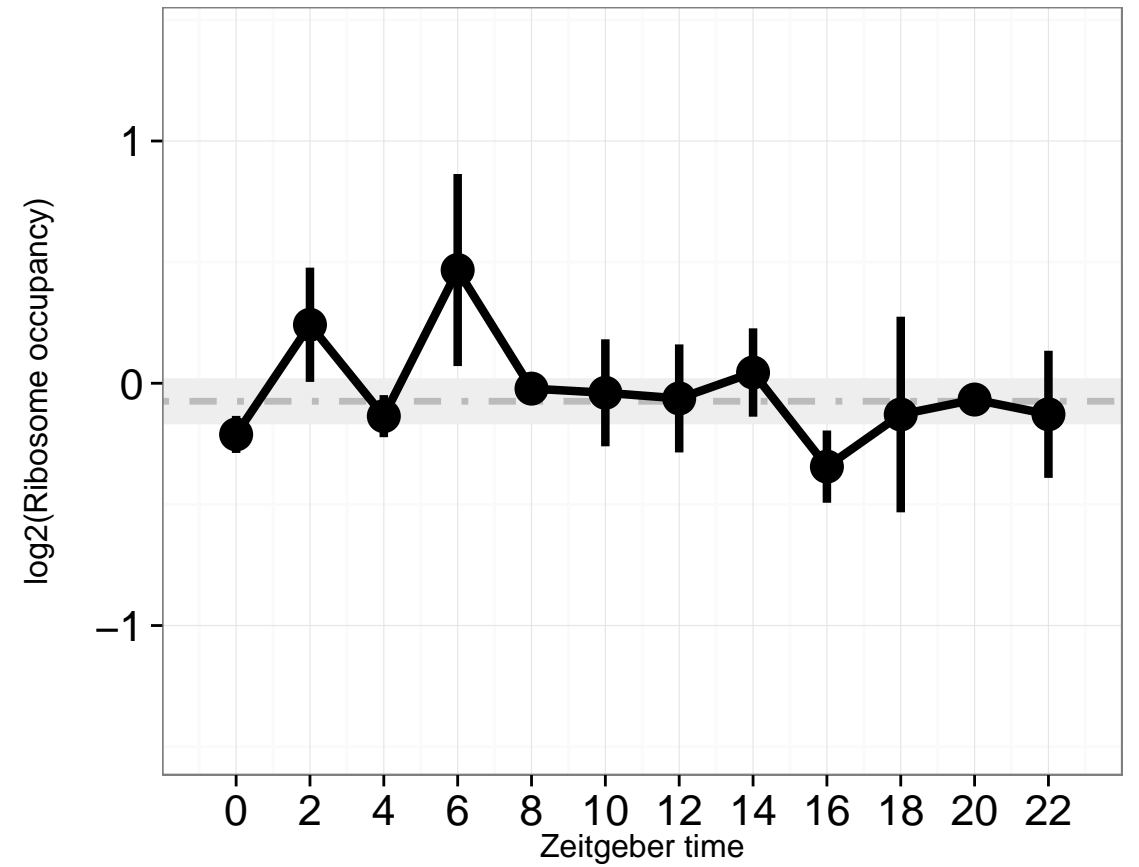

Supplement: SuppDataset_1.zip [file Fam96b_set_A.pdf › Supplemental Dataset 1/A-mRNA_nonrhyth_translation_nonrhyth/Fam96b_set_A.pdf]

# Fam98a

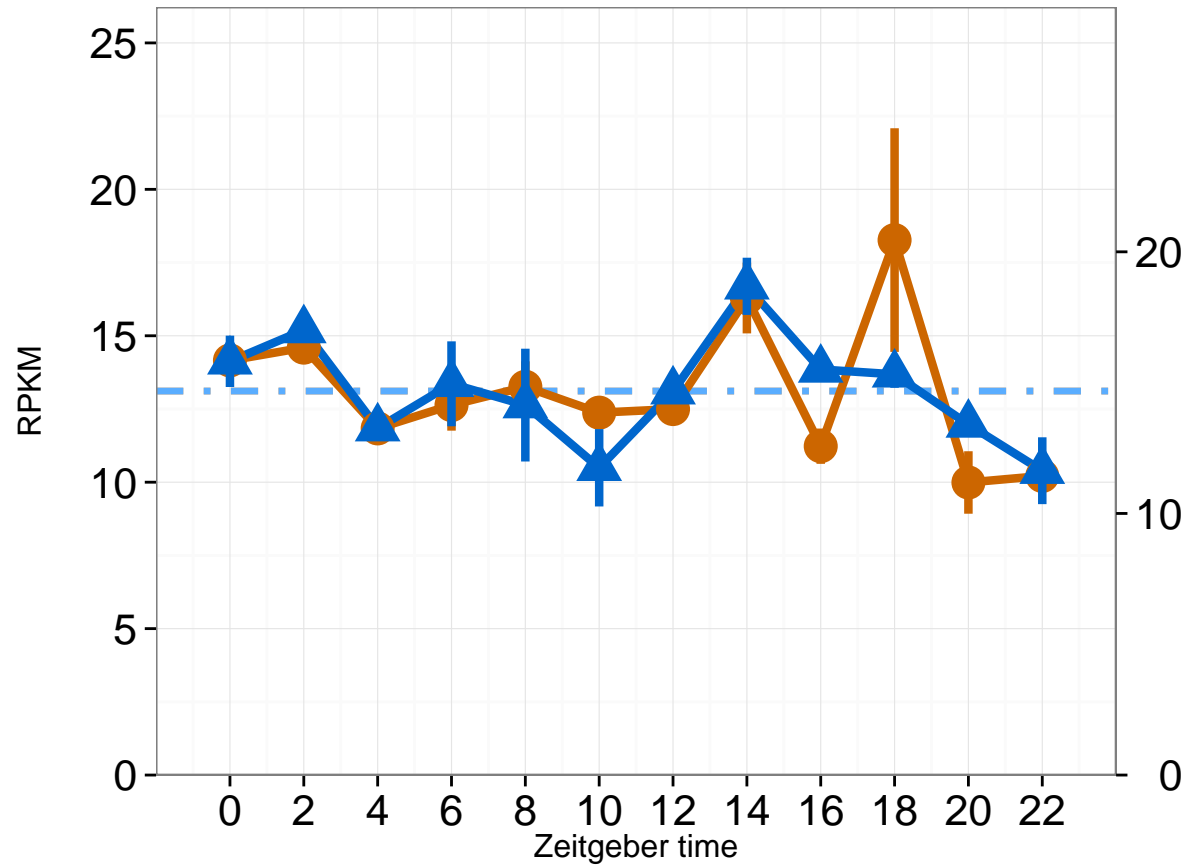

# Fam98a

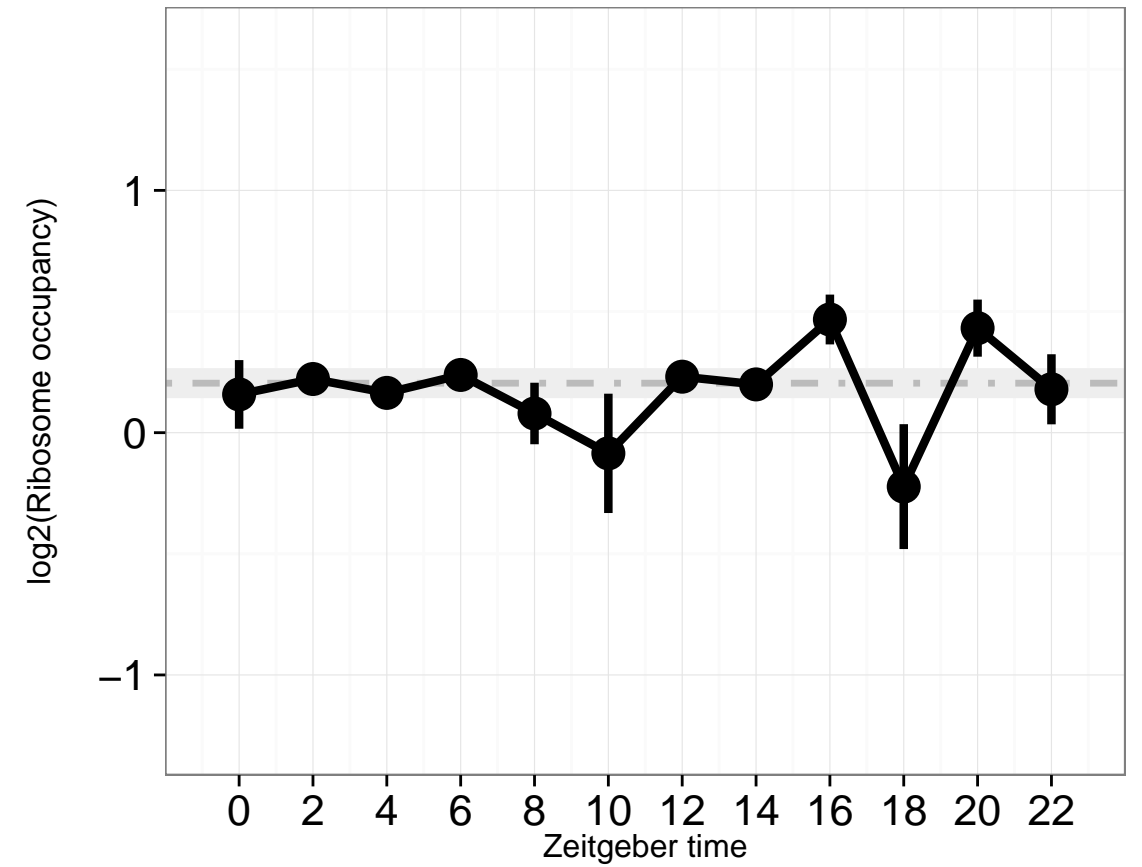

Supplement: SuppDataset_1.zip [file Fam98a_set_A.pdf › Supplemental Dataset 1/A-mRNA_nonrhyth_translation_nonrhyth/Fam98a_set_A.pdf]

# Fam98b

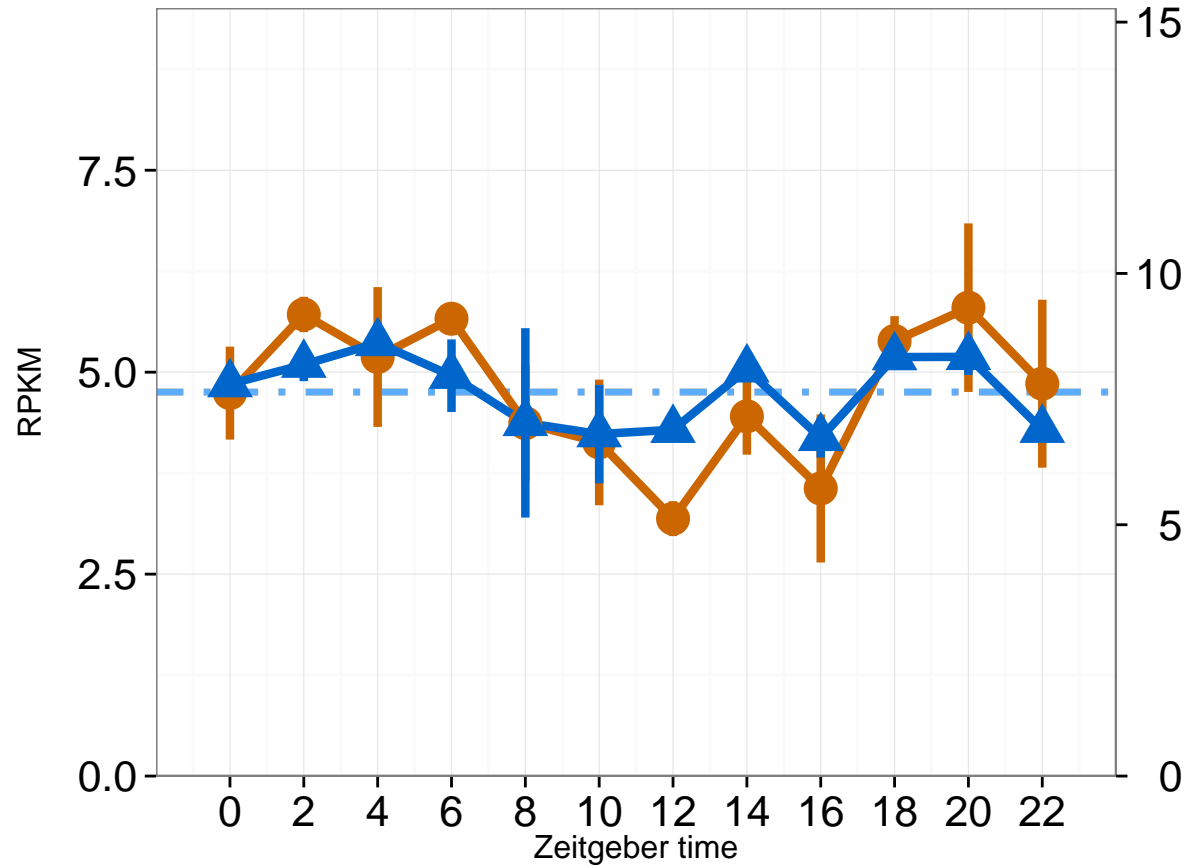

# Fam98b

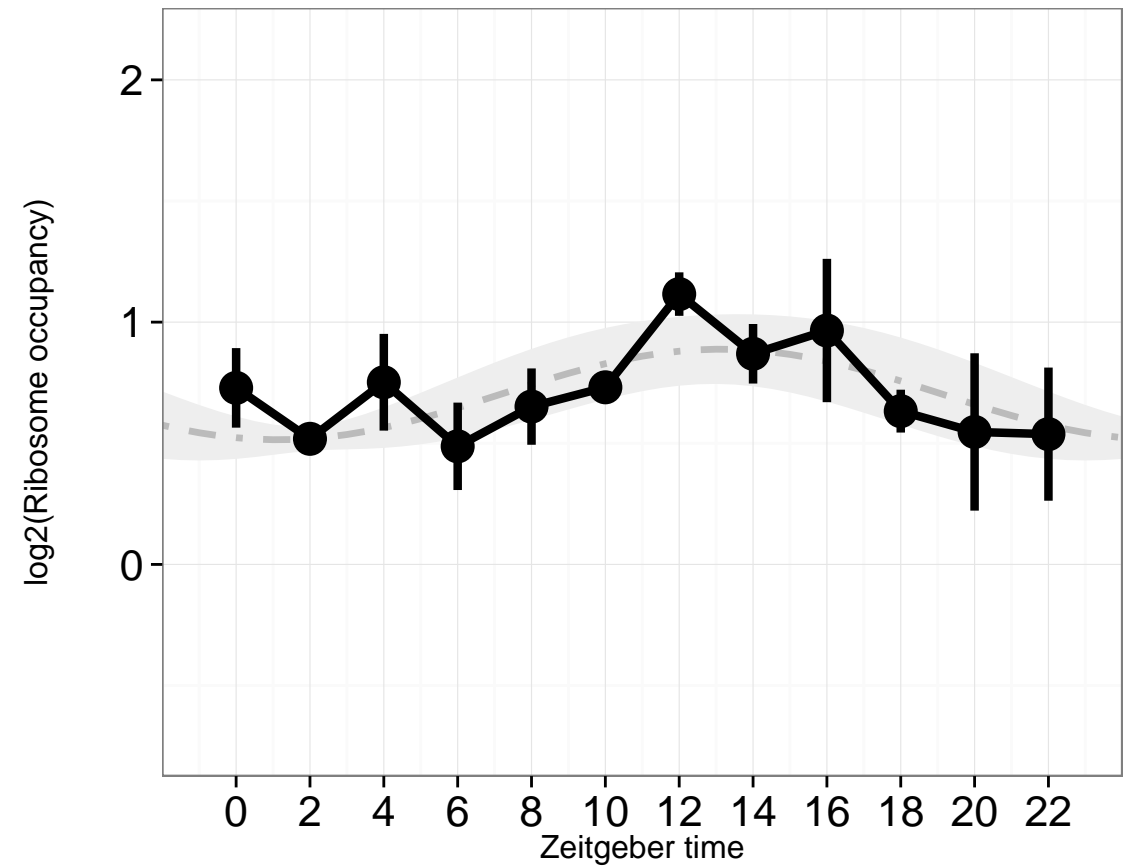

Supplement: SuppDataset_1.zip [file Fam98b_set_A.pdf › Supplemental Dataset 1/A-mRNA_nonrhyth_translation_nonrhyth/Fam98b_set_A.pdf]

# Fam98c

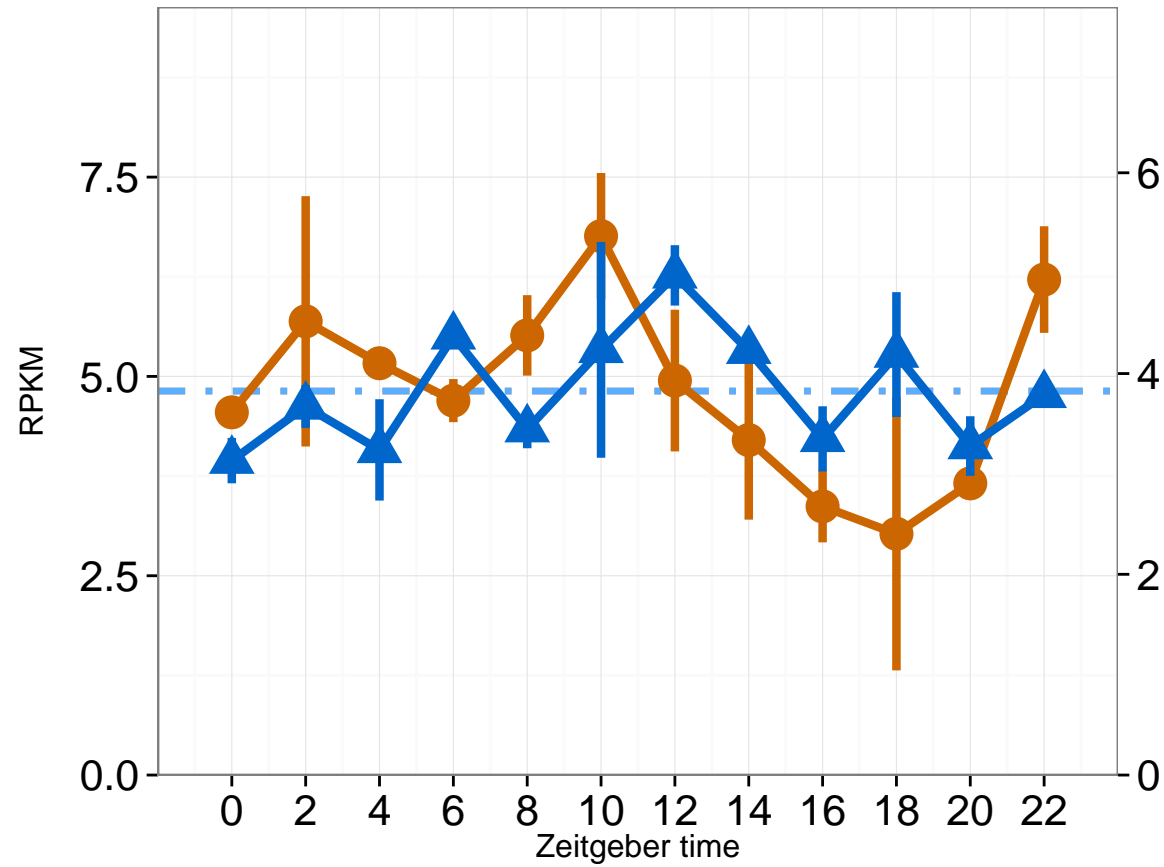

# Fam98c

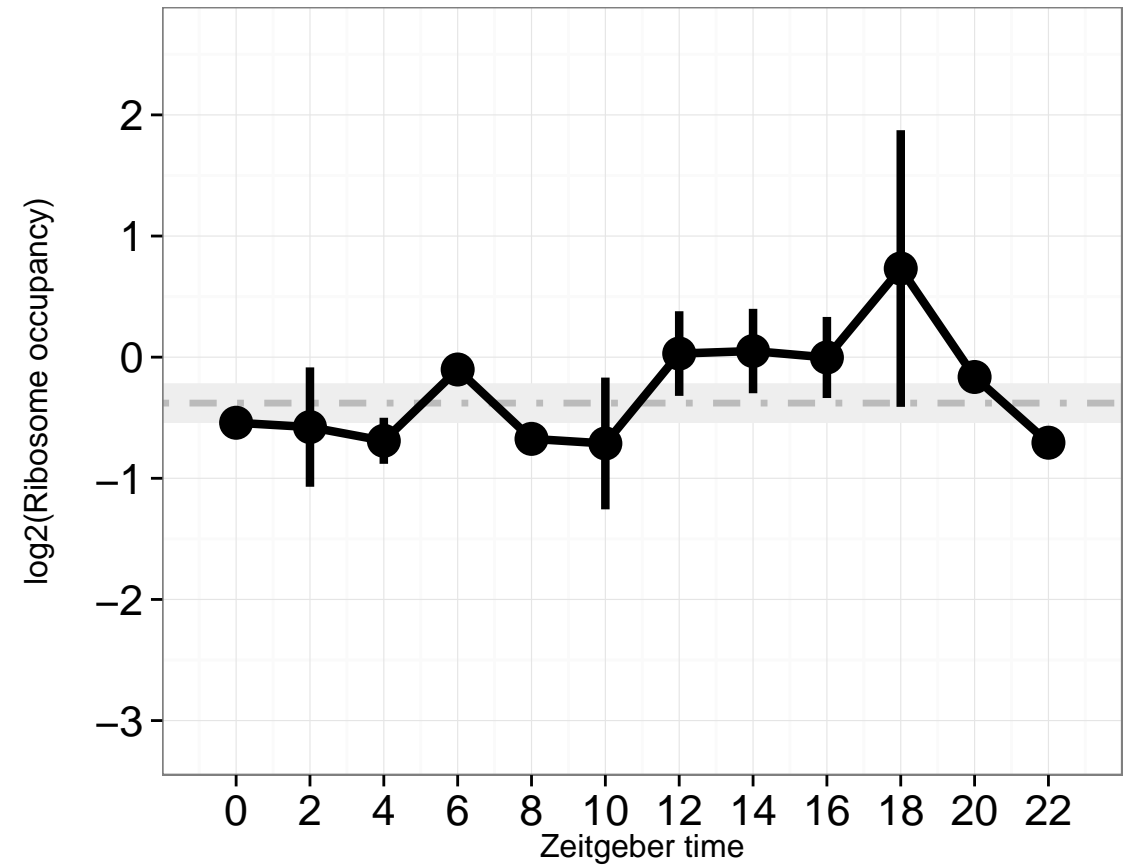

Supplement: SuppDataset_1.zip [file Fam98c_set_A.pdf › Supplemental Dataset 1/A-mRNA_nonrhyth_translation_nonrhyth/Fam98c_set_A.pdf]

## Fan1

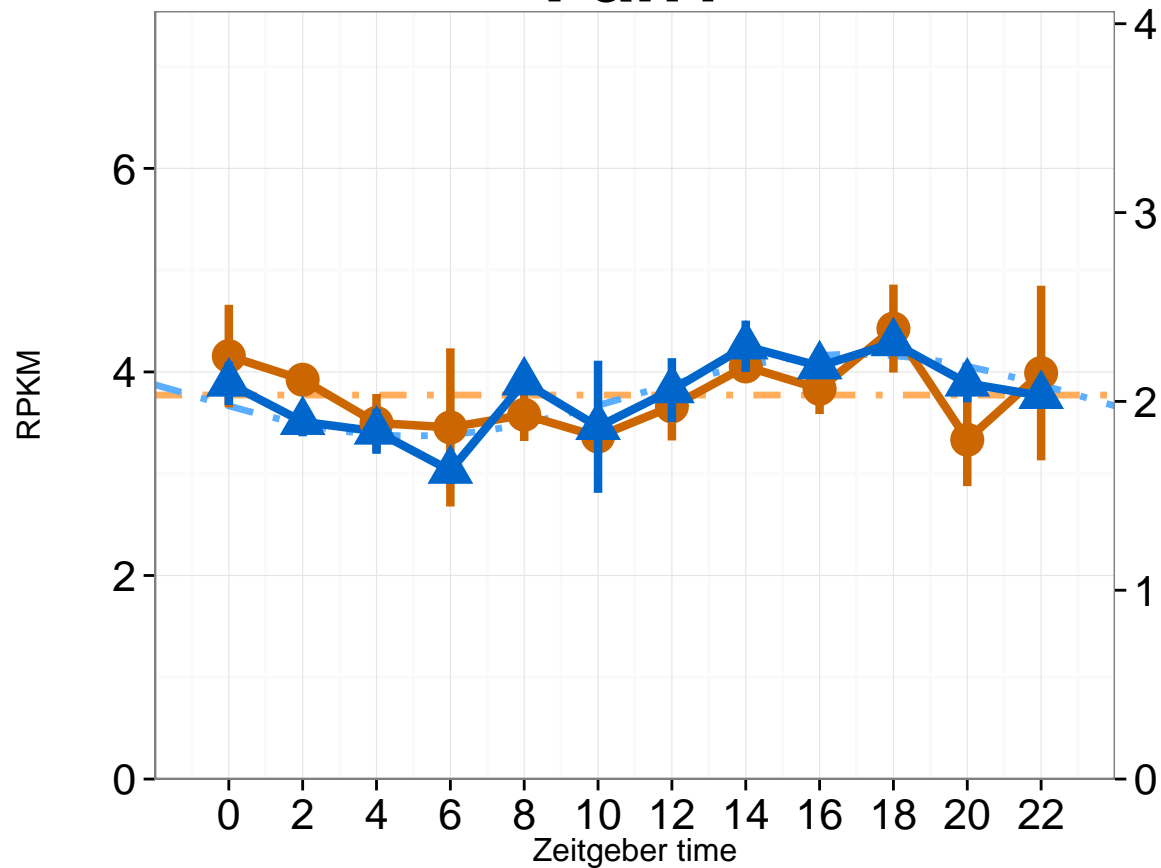

## Fan1

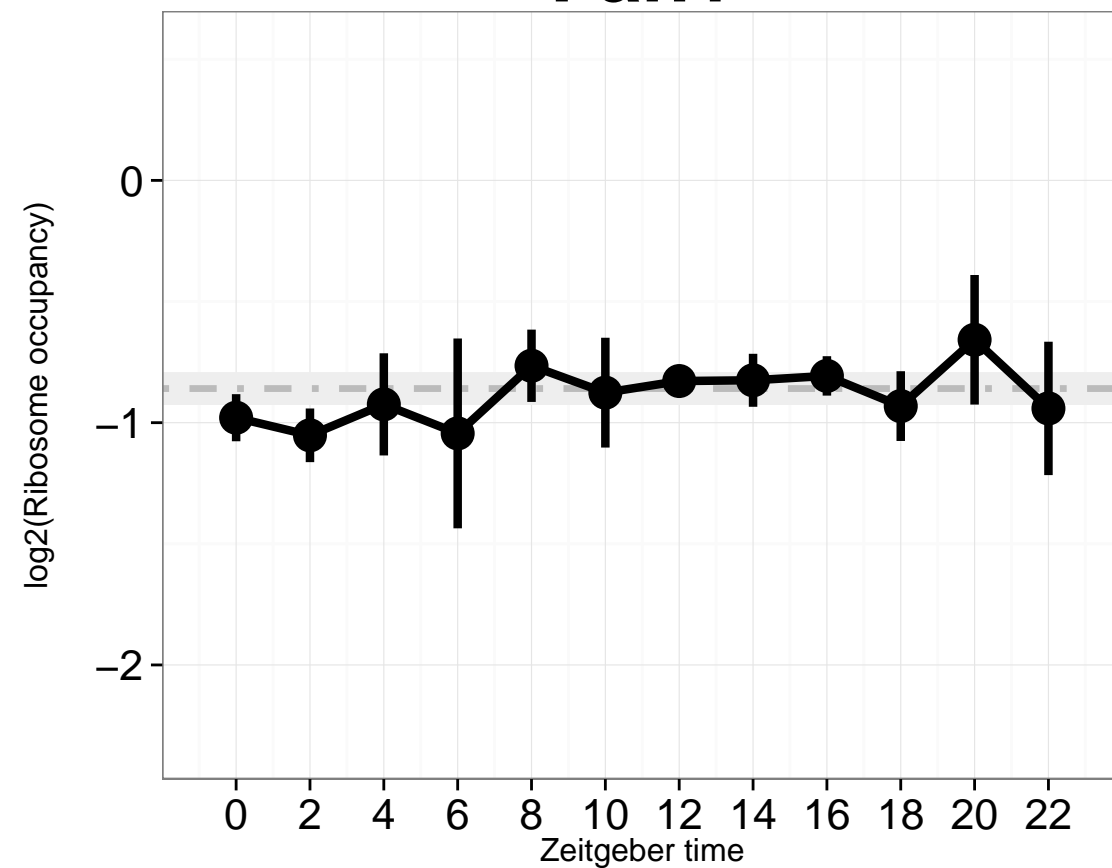

Supplement: SuppDataset_1.zip [file Fan1_set_A.pdf › Supplemental Dataset 1/A-mRNA_nonrhyth_translation_nonrhyth/Fan1_set_A.pdf]

## Fancc

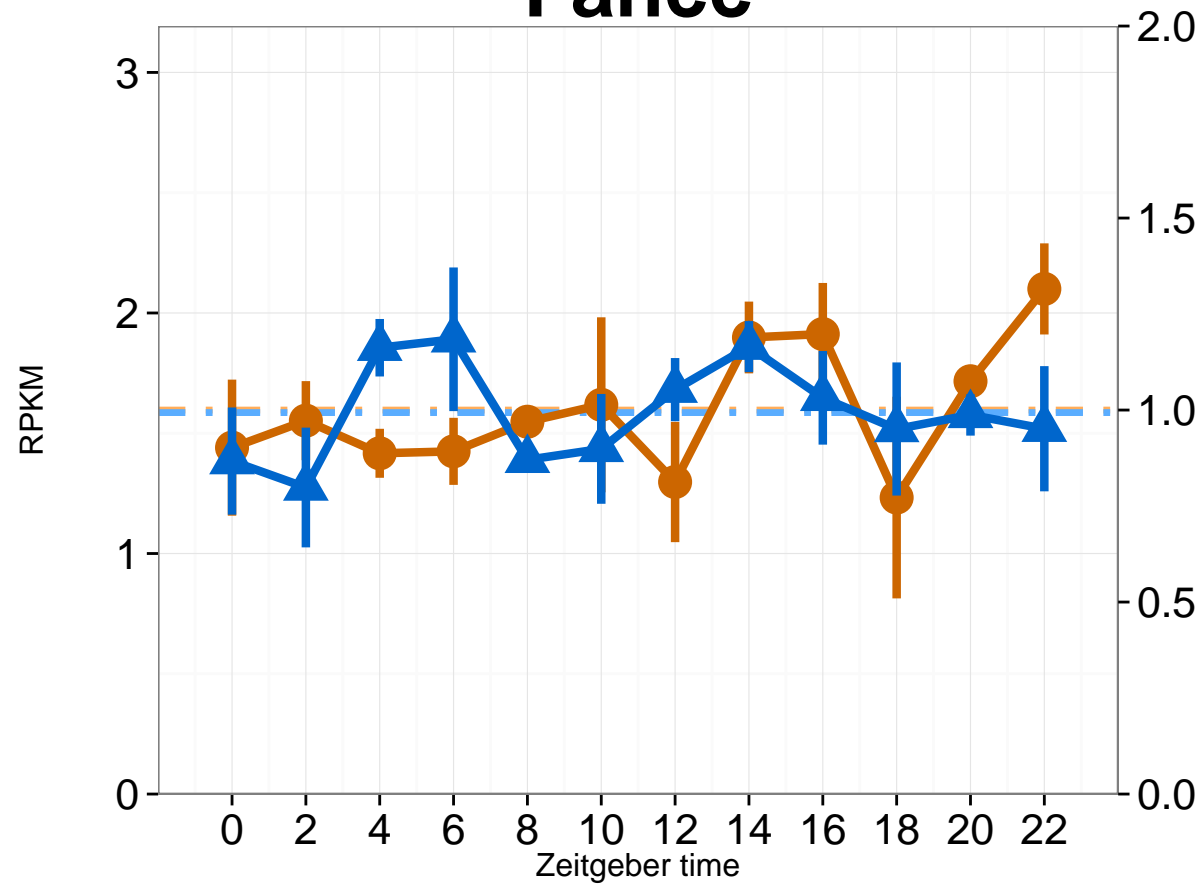

## Fancc

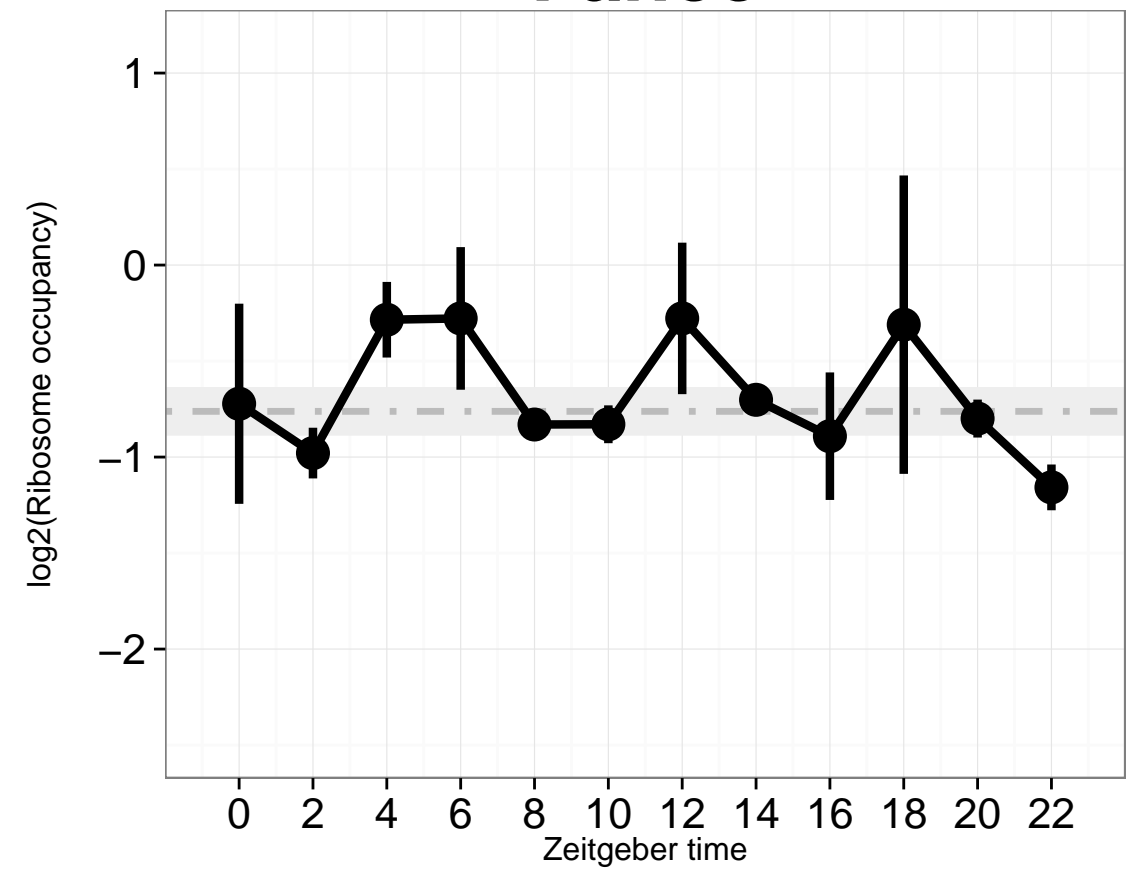

Supplement: SuppDataset_1.zip [file Fancc_set_A.pdf › Supplemental Dataset 1/A-mRNA_nonrhyth_translation_nonrhyth/Fancc_set_A.pdf]

# Fancf

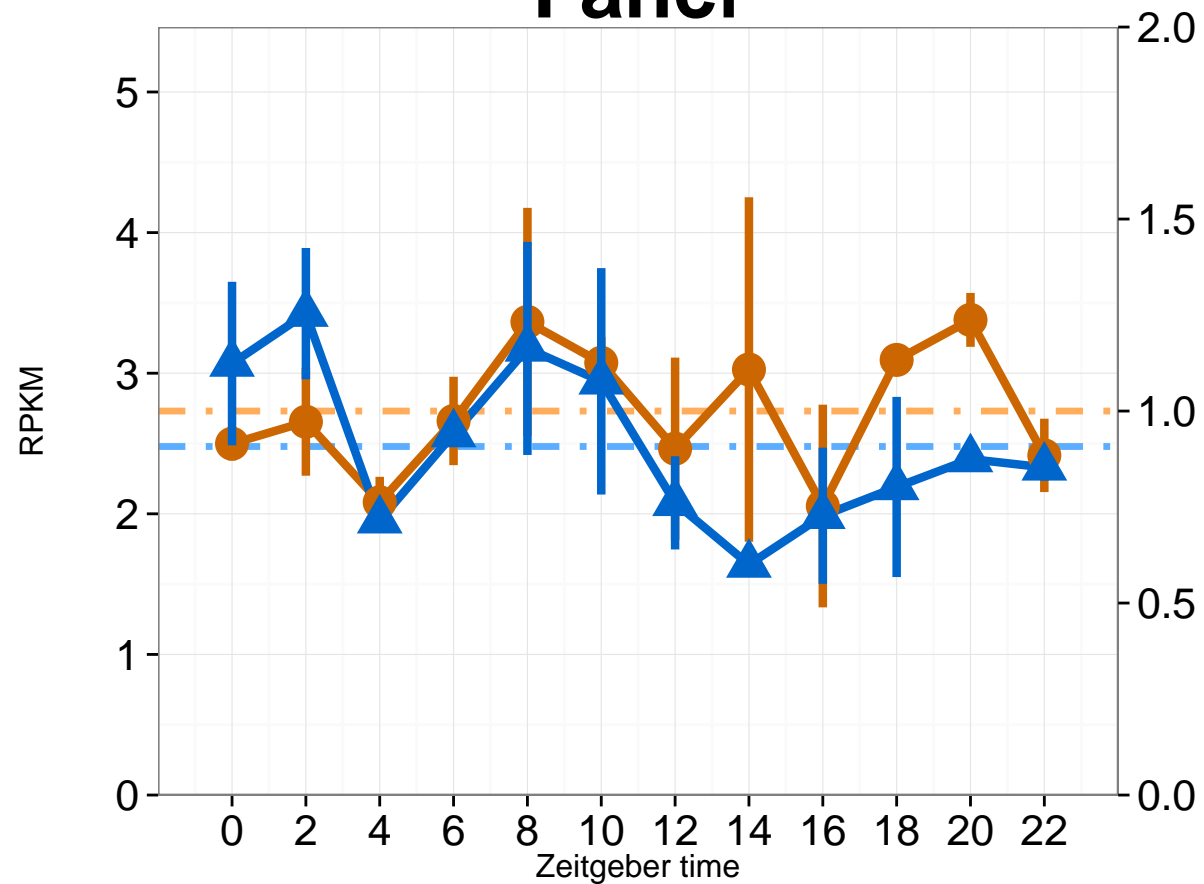

# Fancf

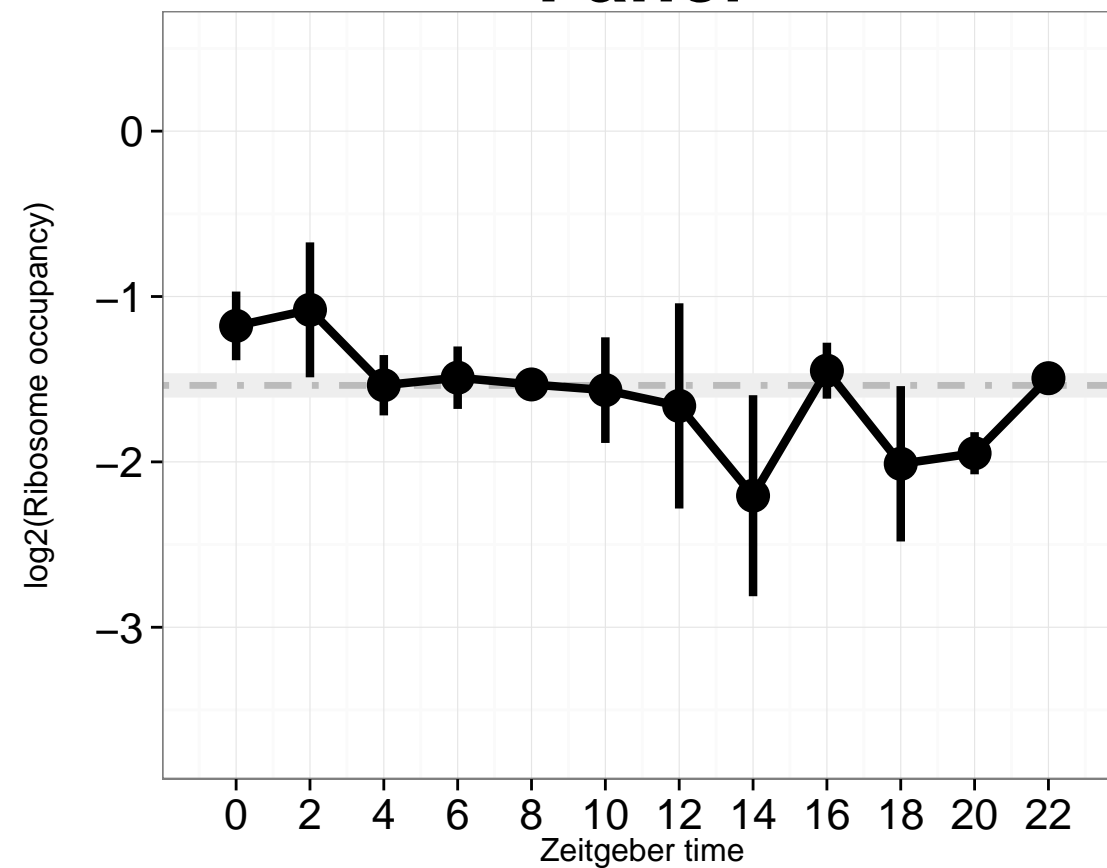

Supplement: SuppDataset_1.zip [file Fancf_set_A.pdf › Supplemental Dataset 1/A-mRNA_nonrhyth_translation_nonrhyth/Fancf_set_A.pdf]

## Fancm

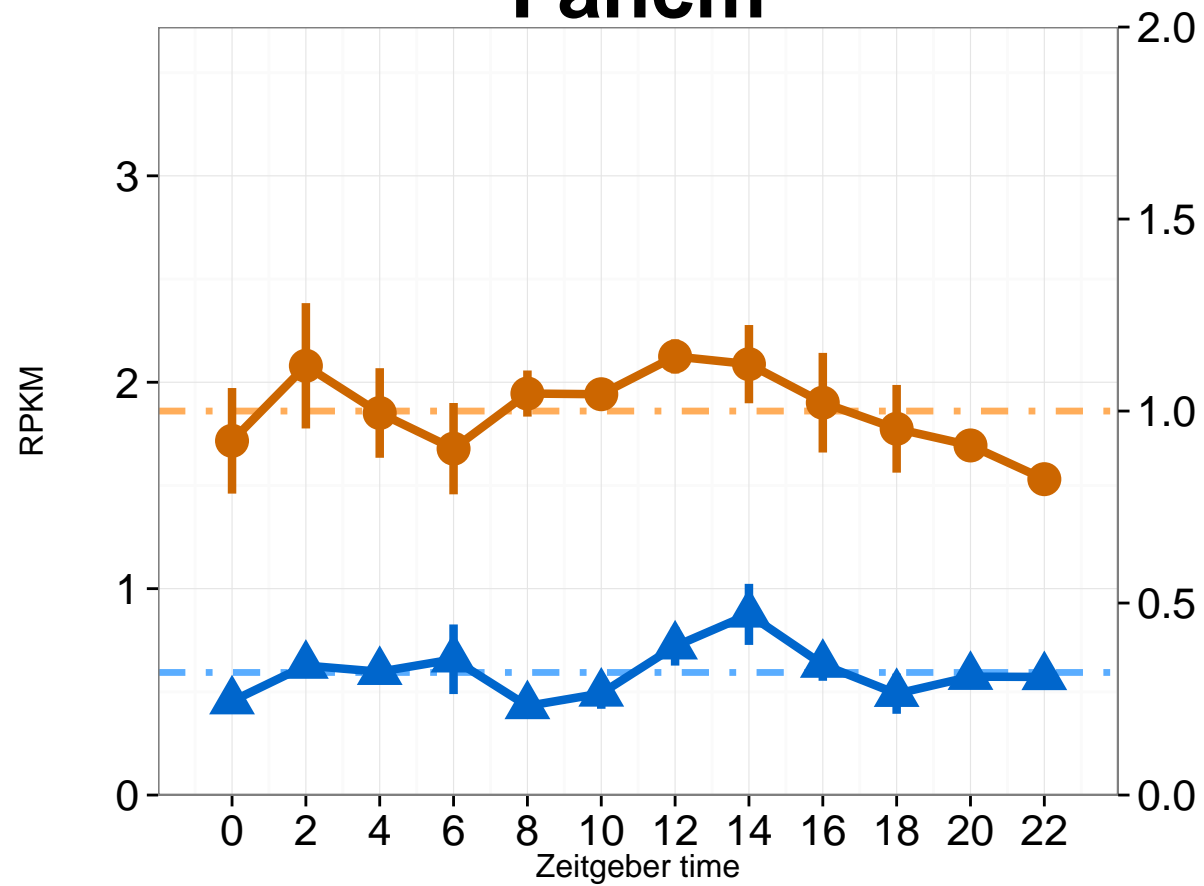

## Fancm

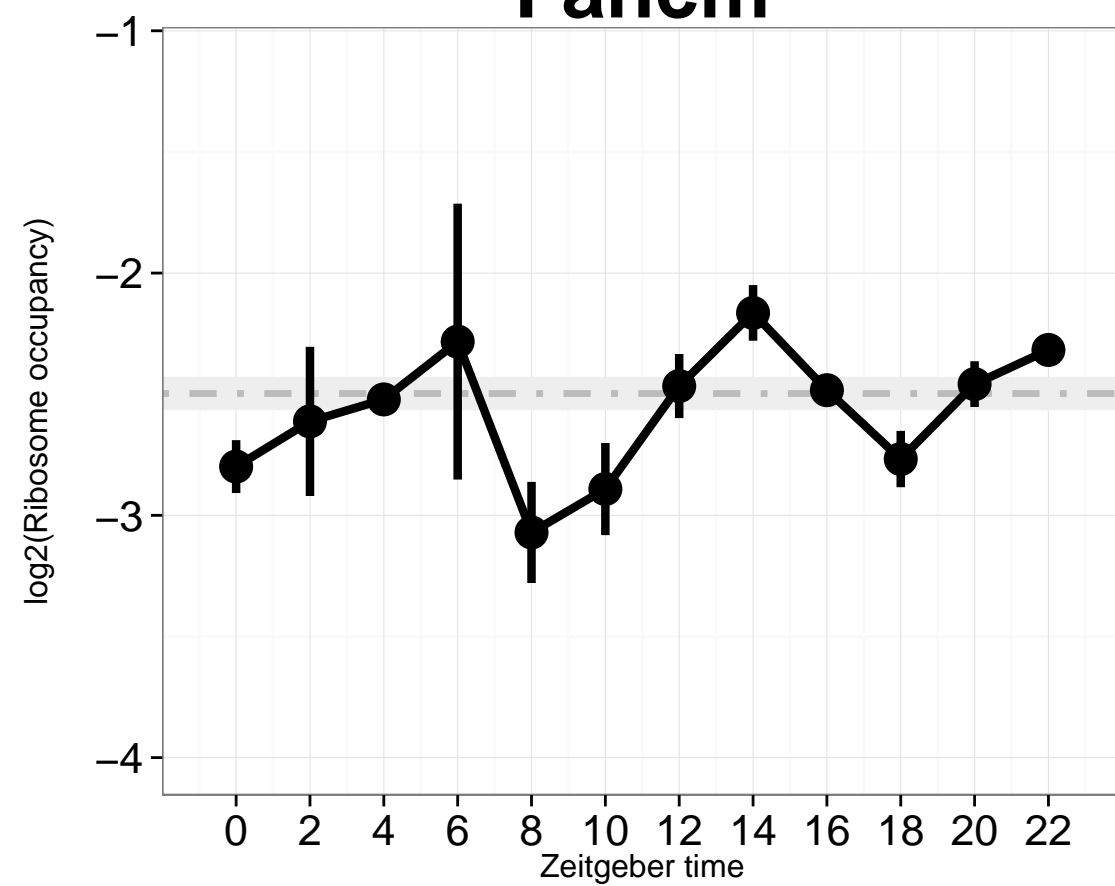

Supplement: SuppDataset_1.zip [file Fancm_set_A.pdf › Supplemental Dataset 1/A-mRNA_nonrhyth_translation_nonrhyth/Fancm_set_A.pdf]

# Farp1

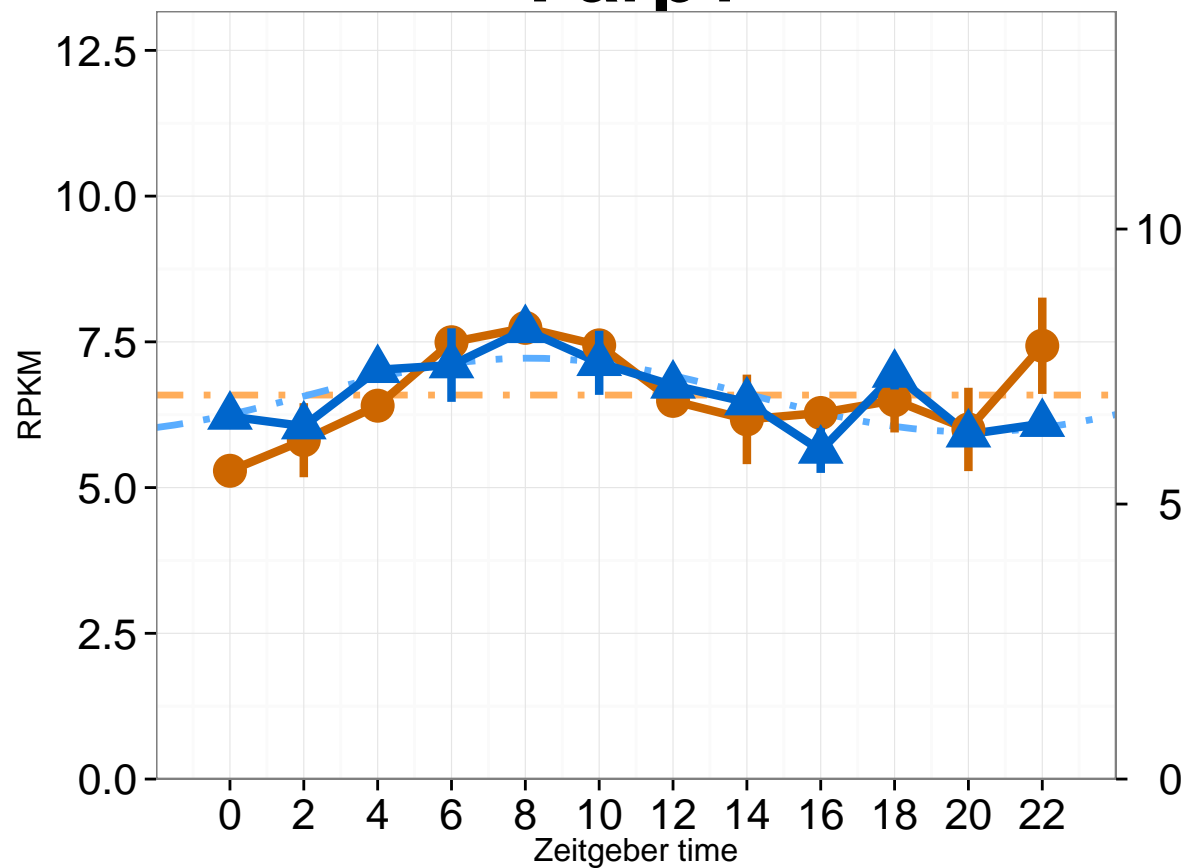

# Farp1

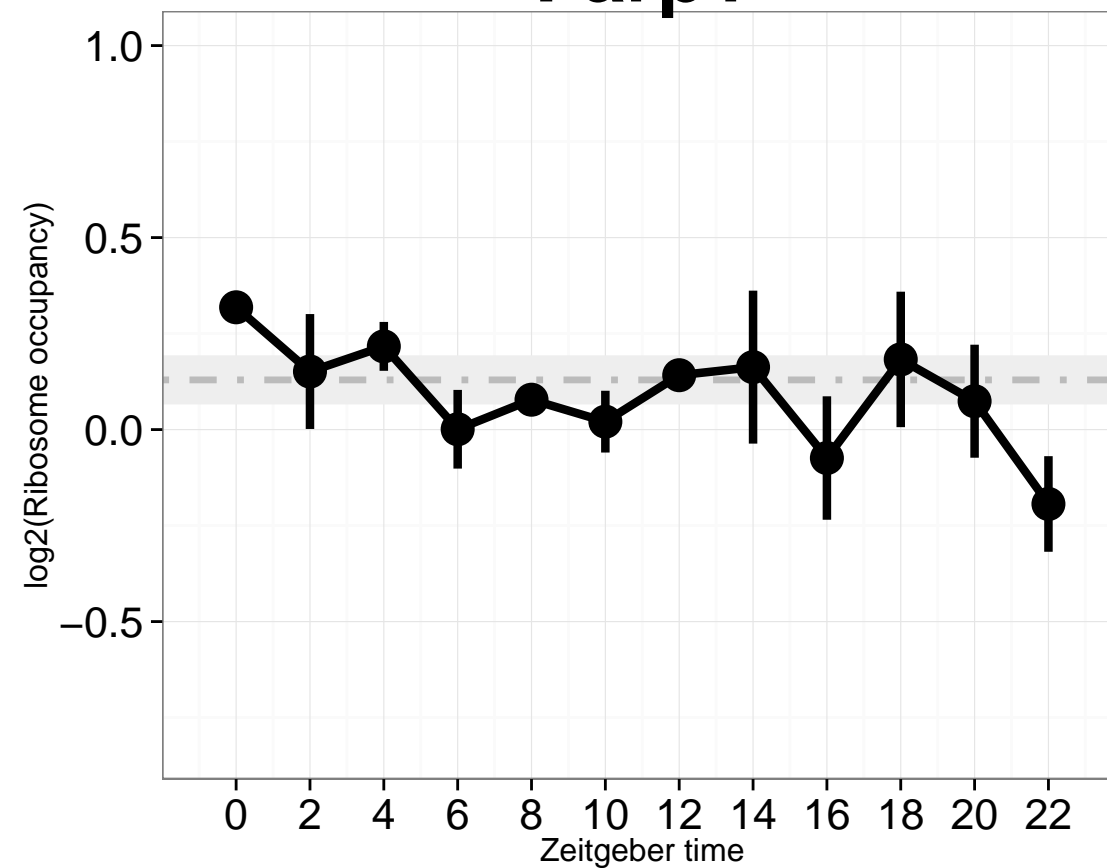

Supplement: SuppDataset_1.zip [file Farp1_set_A.pdf › Supplemental Dataset 1/A-mRNA_nonrhyth_translation_nonrhyth/Farp1_set_A.pdf]

# Farp2

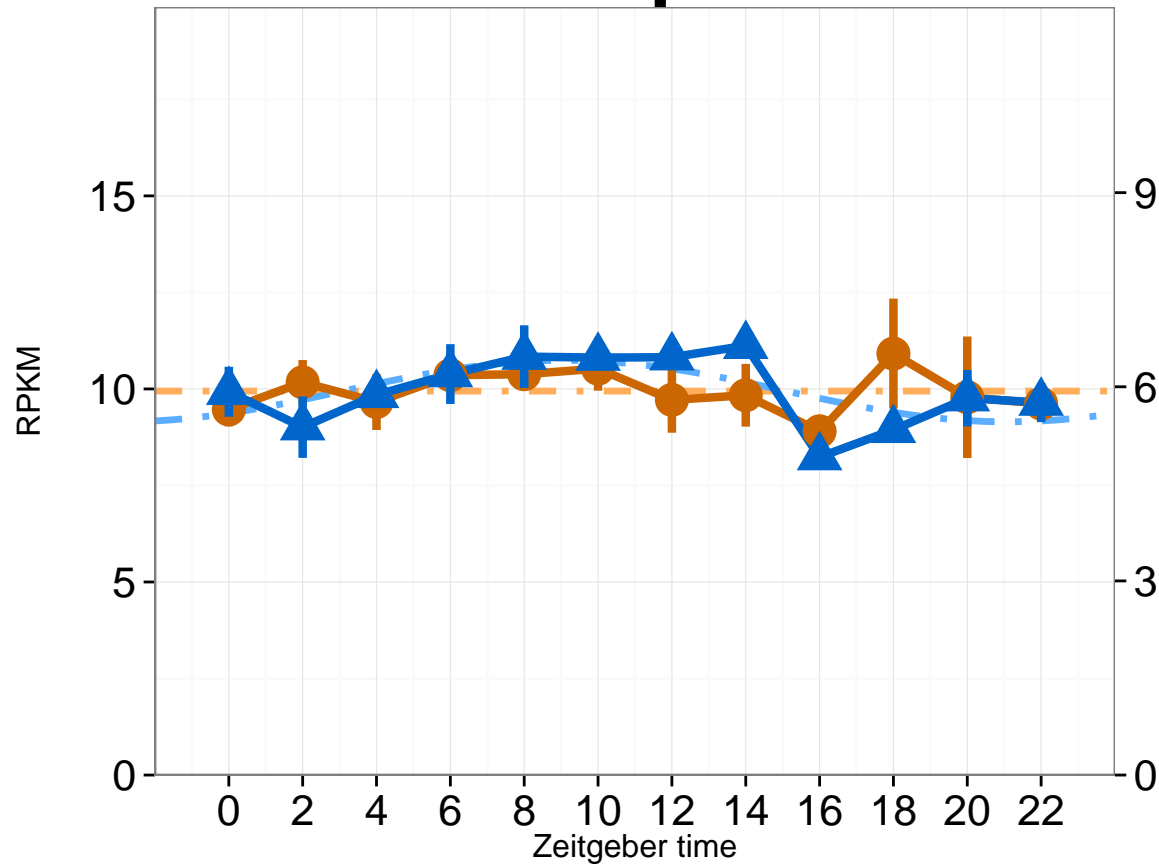

# Farp2

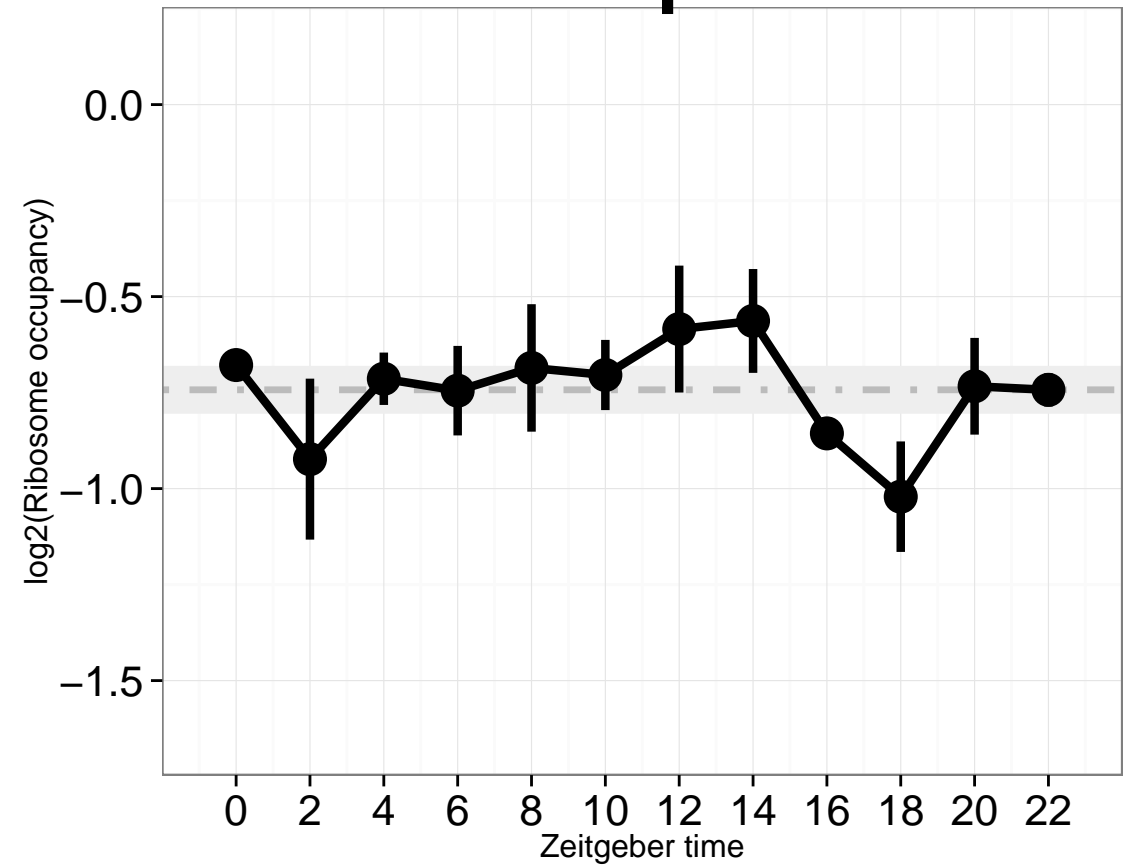

Supplement: SuppDataset_1.zip [file Farp2_set_A.pdf › Supplemental Dataset 1/A-mRNA_nonrhyth_translation_nonrhyth/Farp2_set_A.pdf]

## Fars2

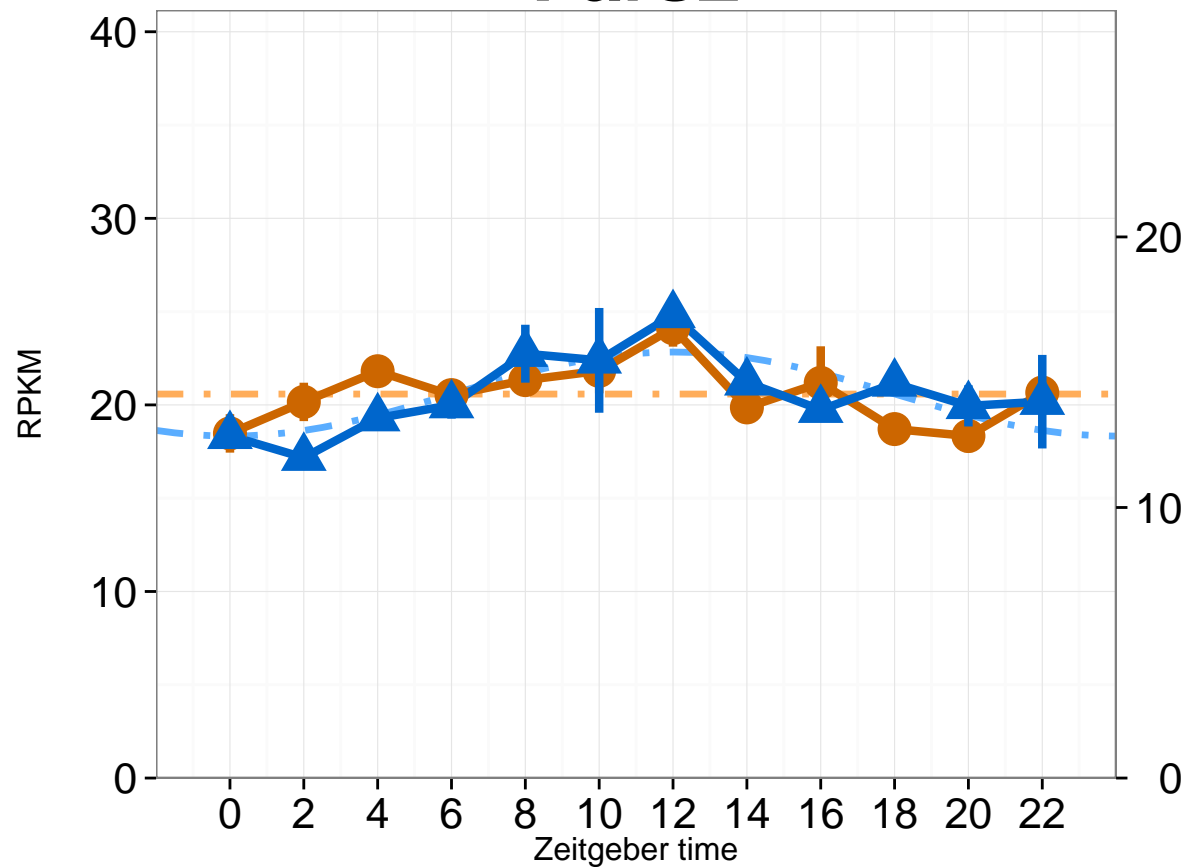

## Fars2

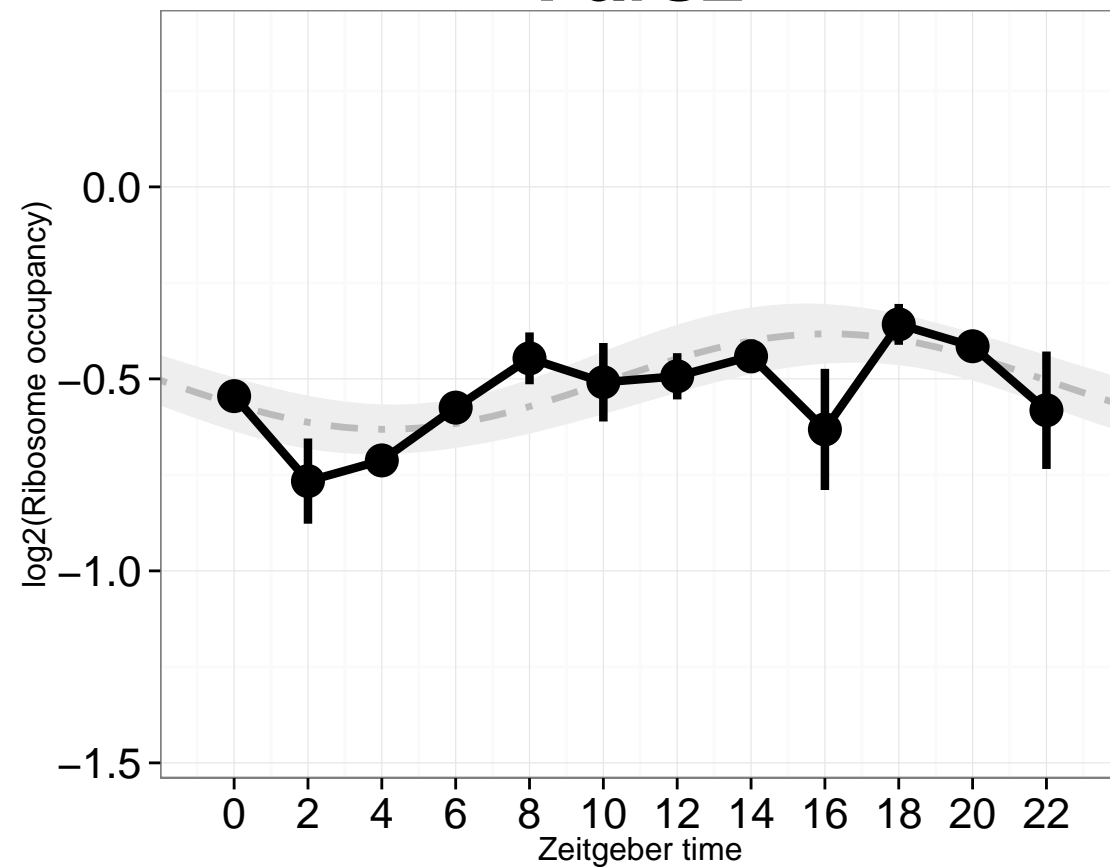

Supplement: SuppDataset_1.zip [file Fars2_set_A.pdf › Supplemental Dataset 1/A-mRNA_nonrhyth_translation_nonrhyth/Fars2_set_A.pdf]

## Farsa

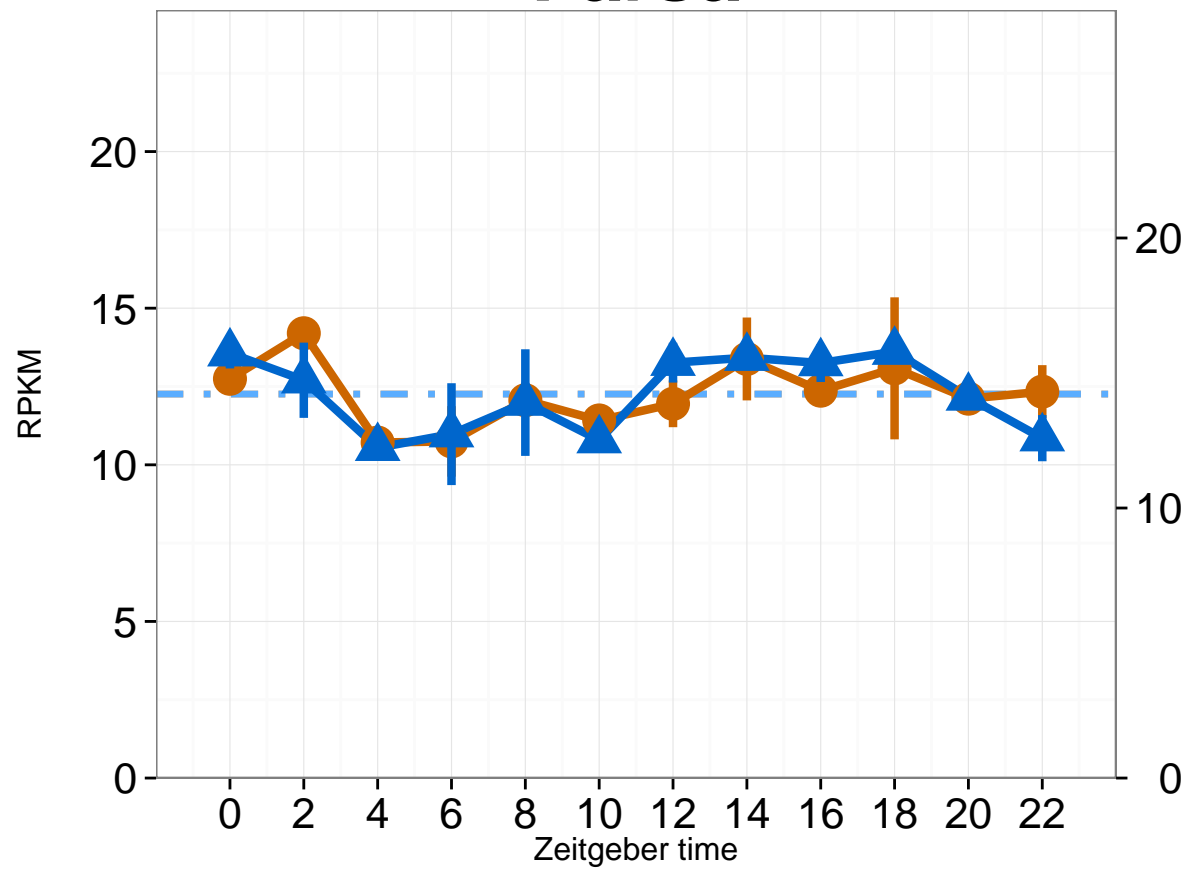

## Farsa

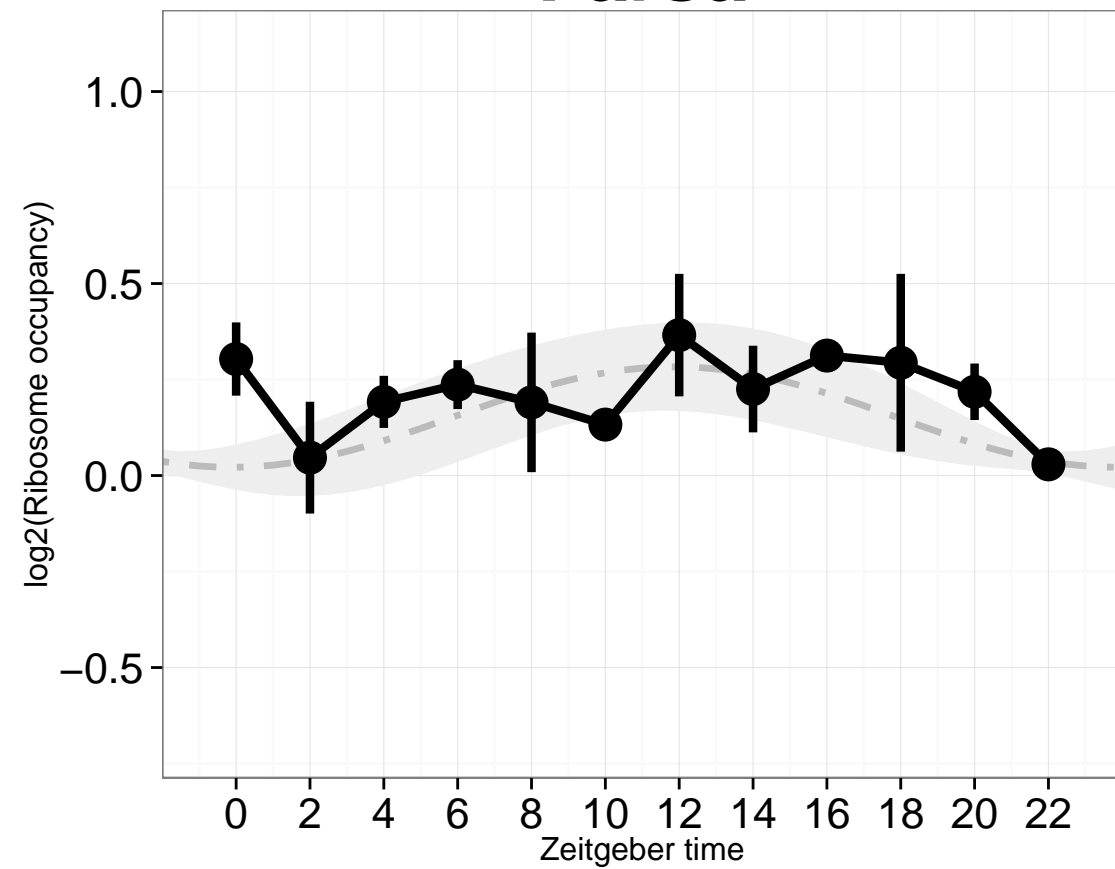

Supplement: SuppDataset_1.zip [file Farsa_set_A.pdf › Supplemental Dataset 1/A-mRNA_nonrhyth_translation_nonrhyth/Farsa_set_A.pdf]

## Farsb

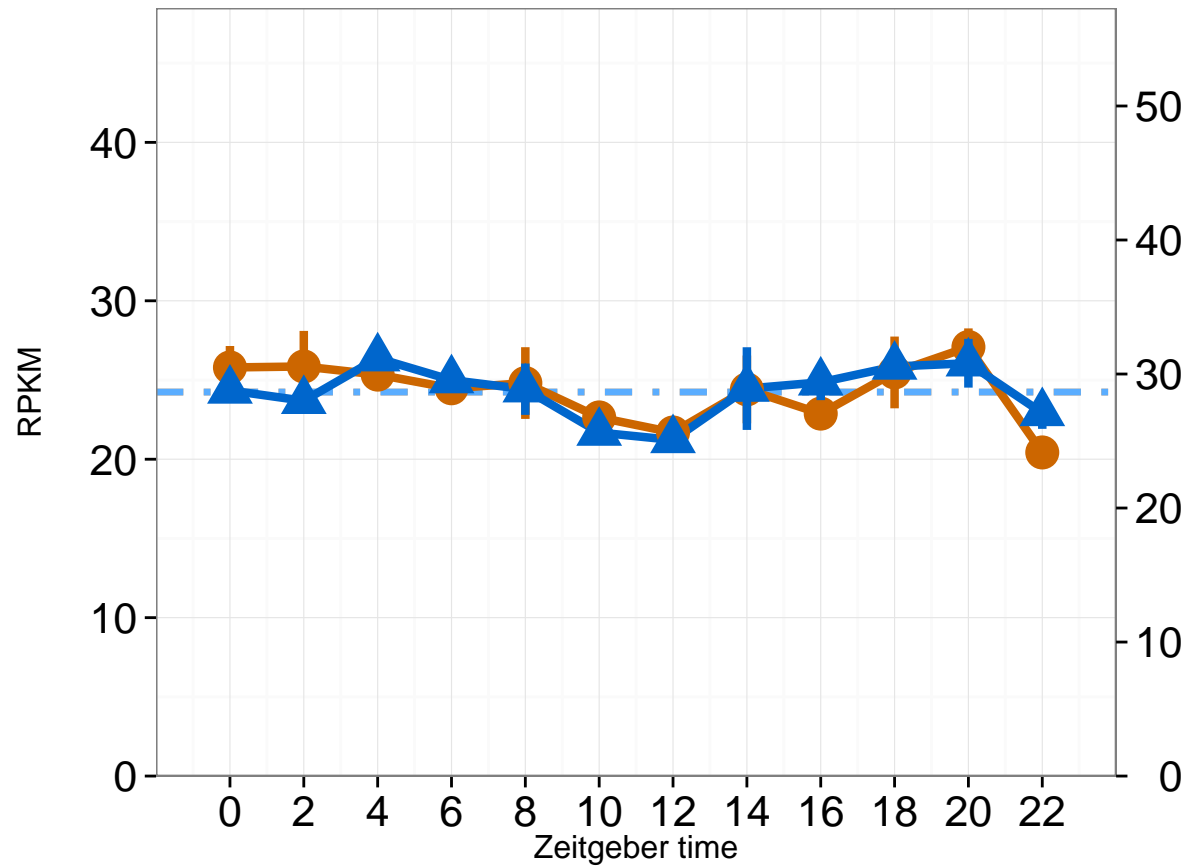

## Farsb

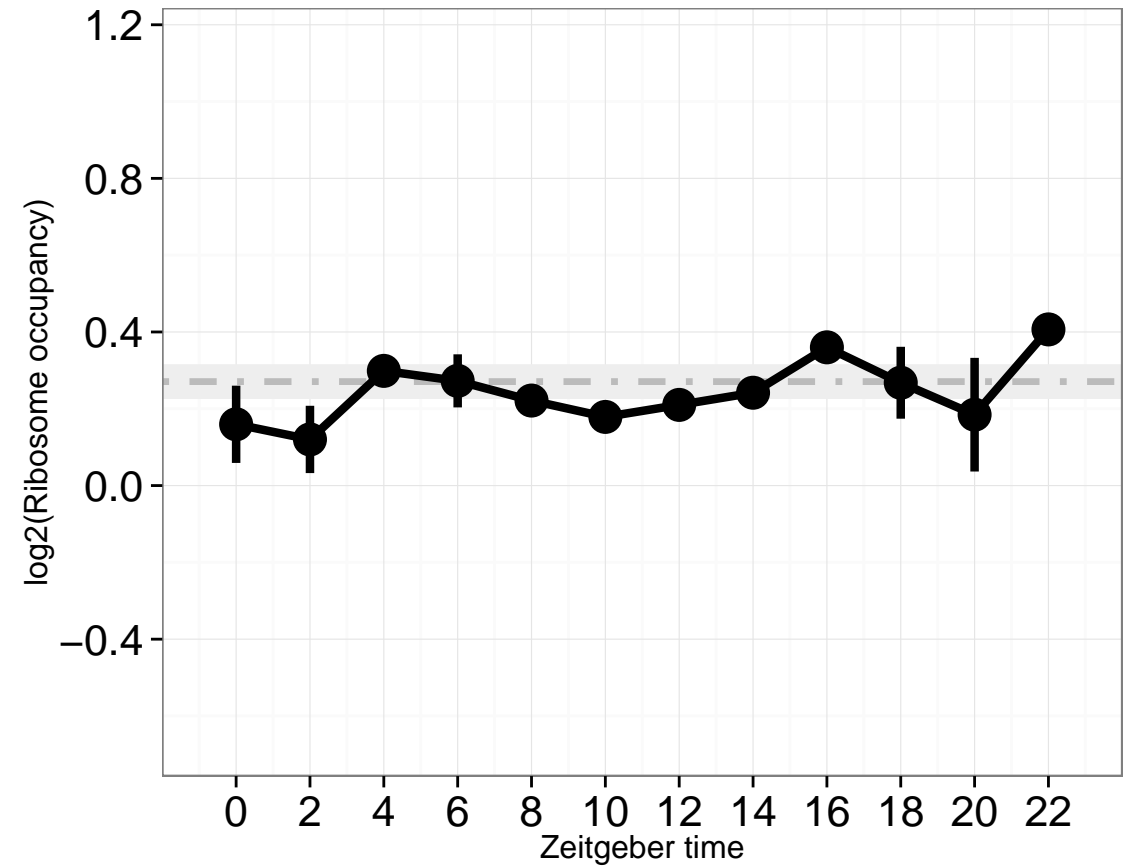

Supplement: SuppDataset_1.zip [file Farsb_set_A.pdf › Supplemental Dataset 1/A-mRNA_nonrhyth_translation_nonrhyth/Farsb_set_A.pdf]

## Fastk

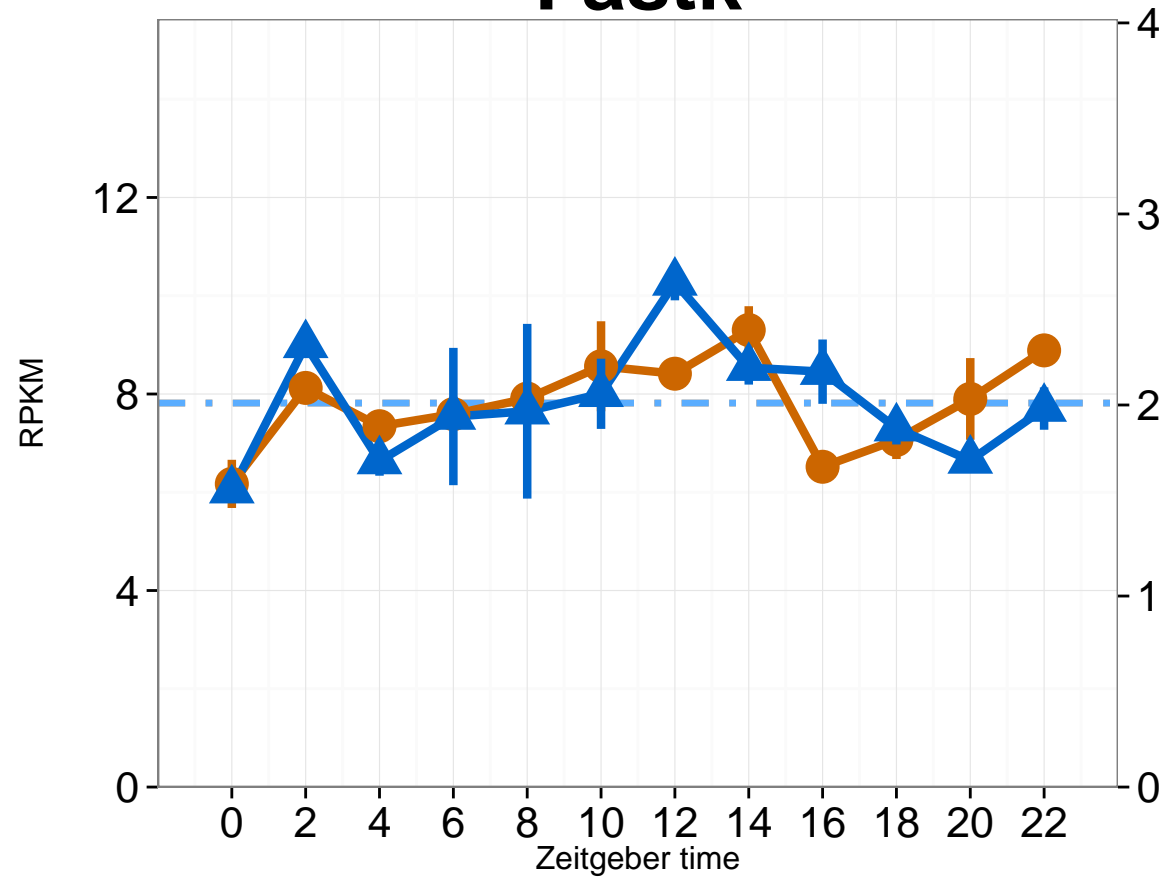

## Fastk

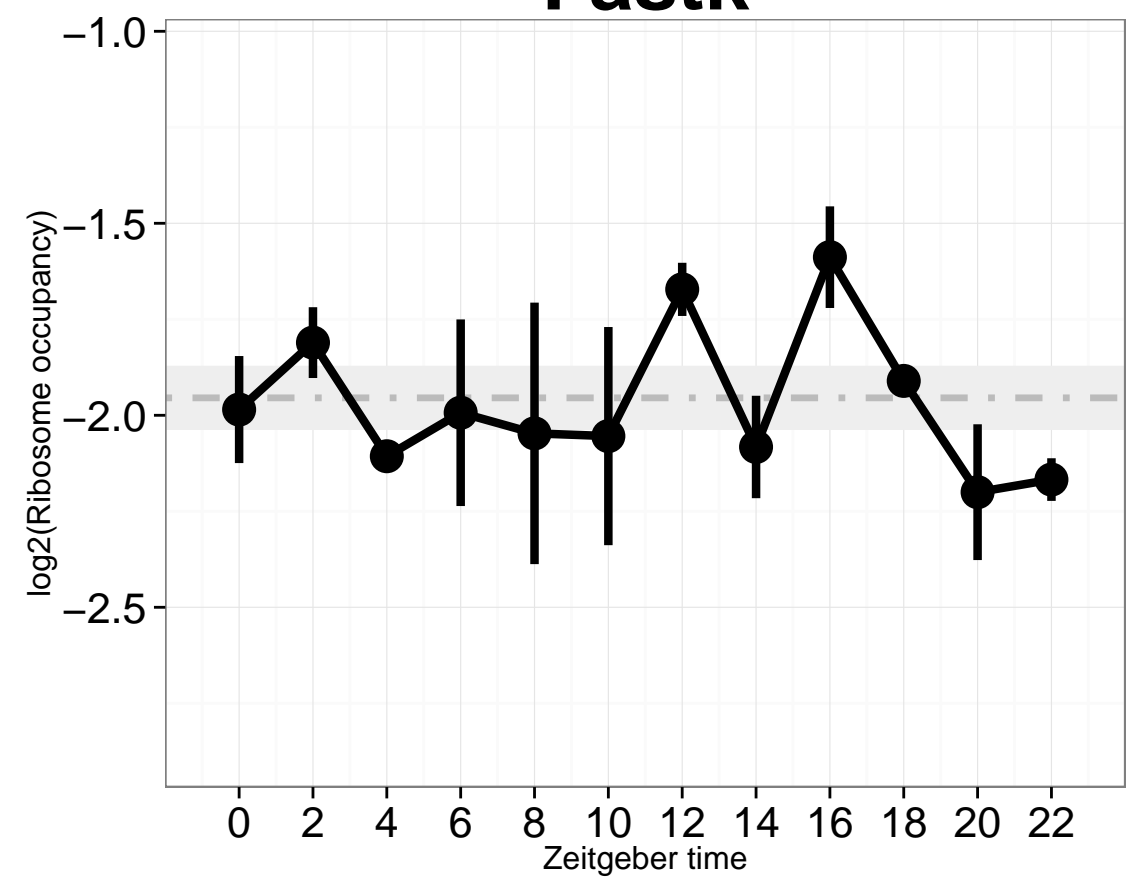

Supplement: SuppDataset_1.zip [file Fastk_set_A.pdf › Supplemental Dataset 1/A-mRNA_nonrhyth_translation_nonrhyth/Fastk_set_A.pdf]

# Fastkd1

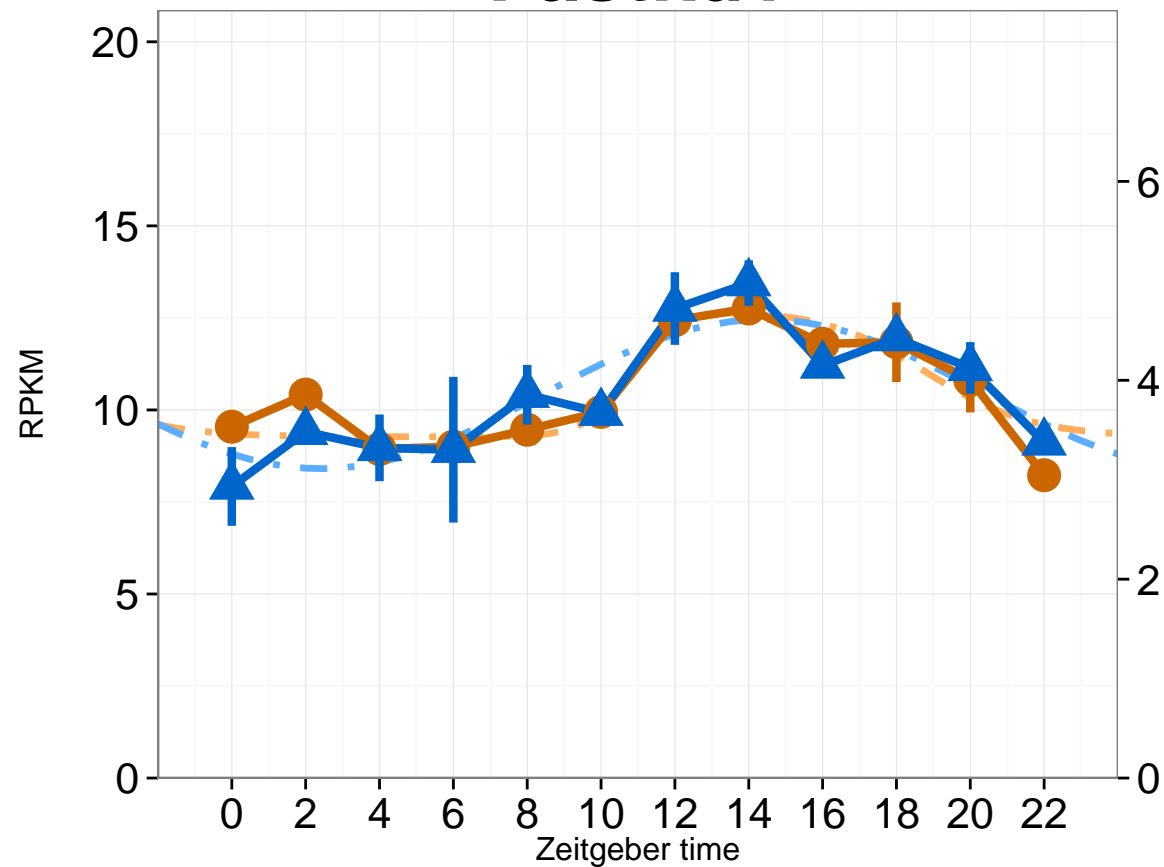

# Fastkd1

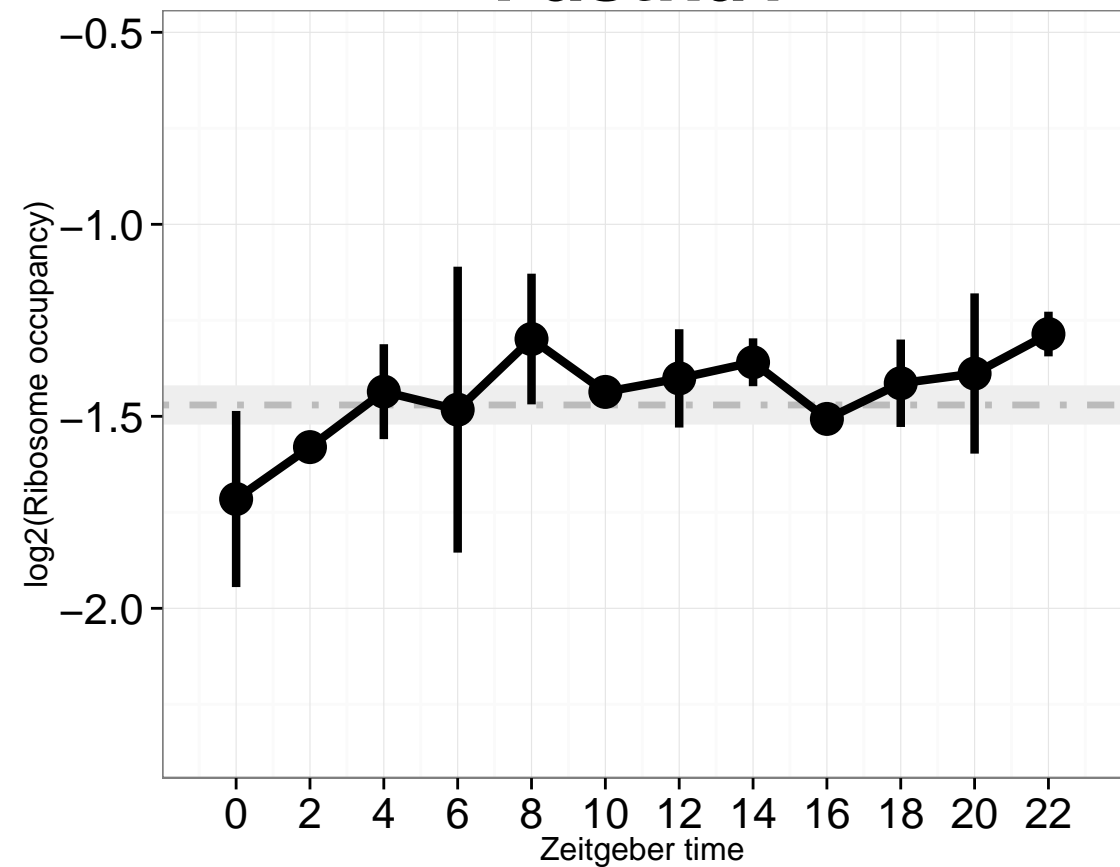

Supplement: SuppDataset_1.zip [file Fastkd1_set_A.pdf › Supplemental Dataset 1/A-mRNA_nonrhyth_translation_nonrhyth/Fastkd1_set_A.pdf]

# Fastkd2

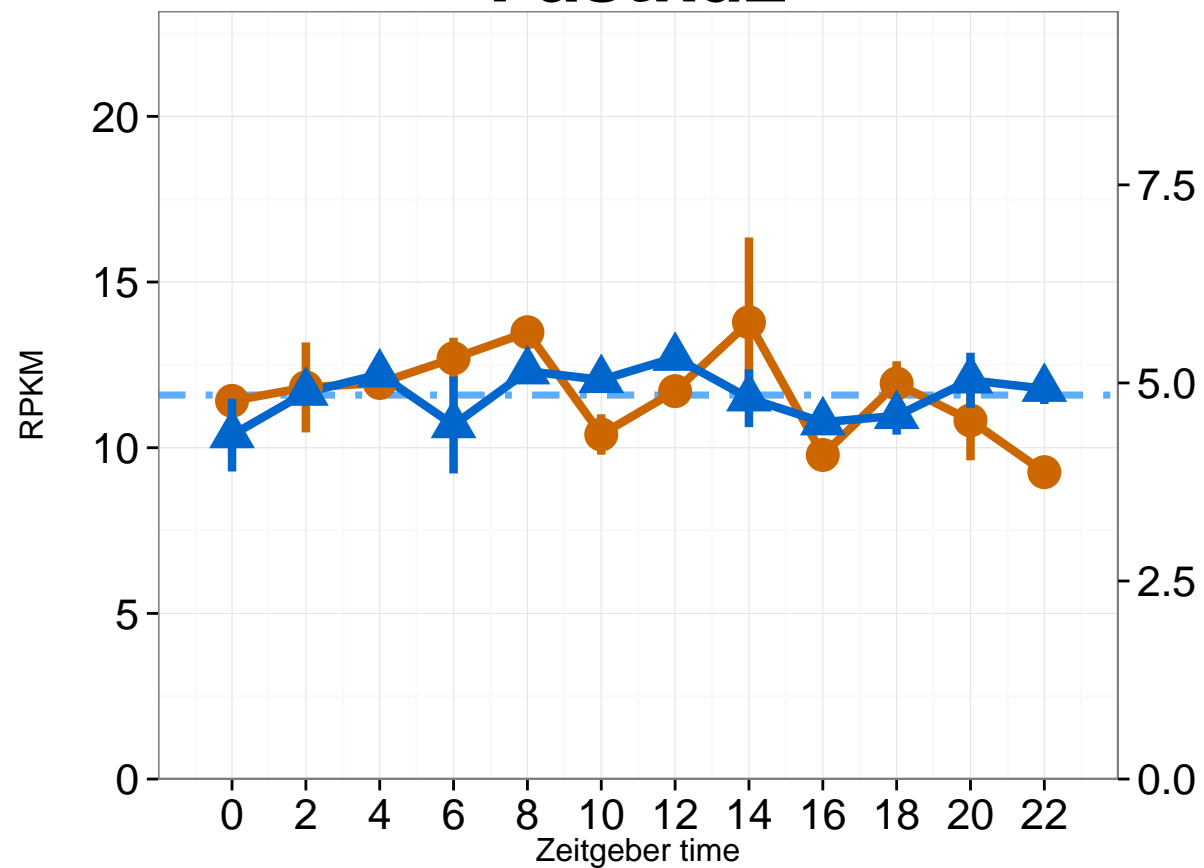

# Fastkd2

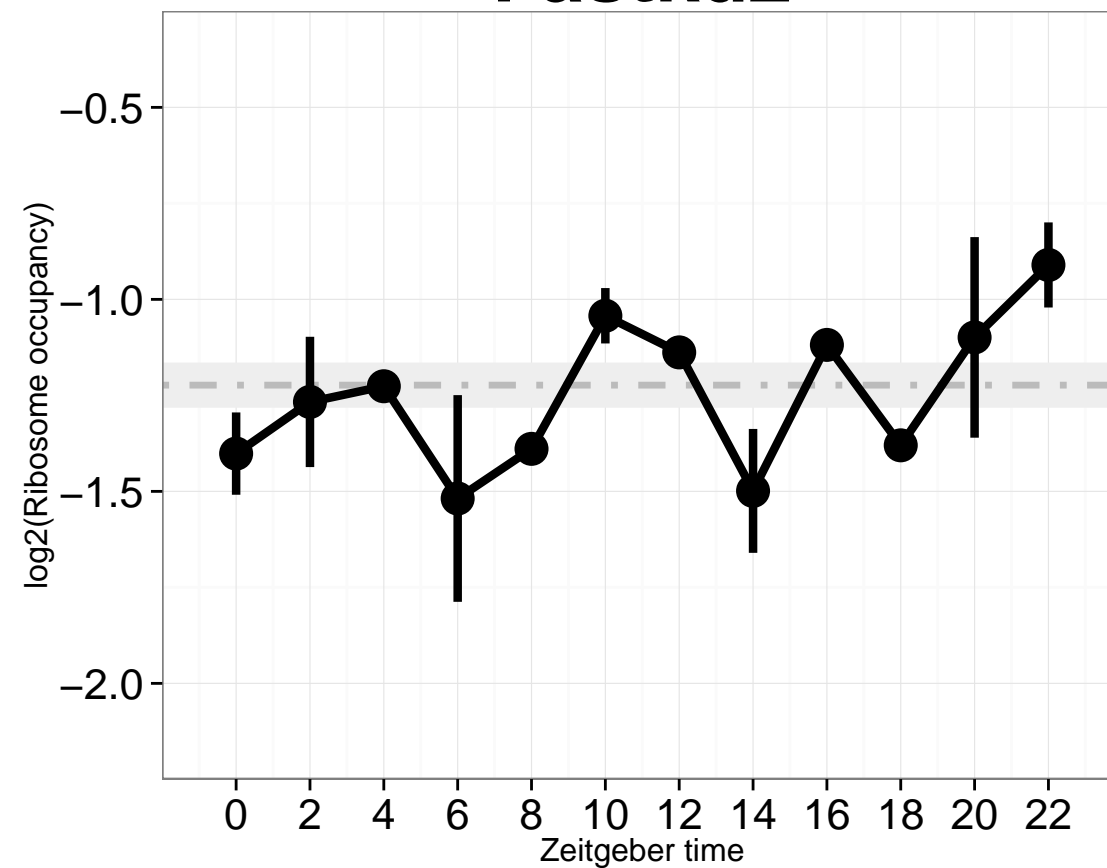

Supplement: SuppDataset_1.zip [file Fastkd2_set_A.pdf › Supplemental Dataset 1/A-mRNA_nonrhyth_translation_nonrhyth/Fastkd2_set_A.pdf]

# Fastkd3

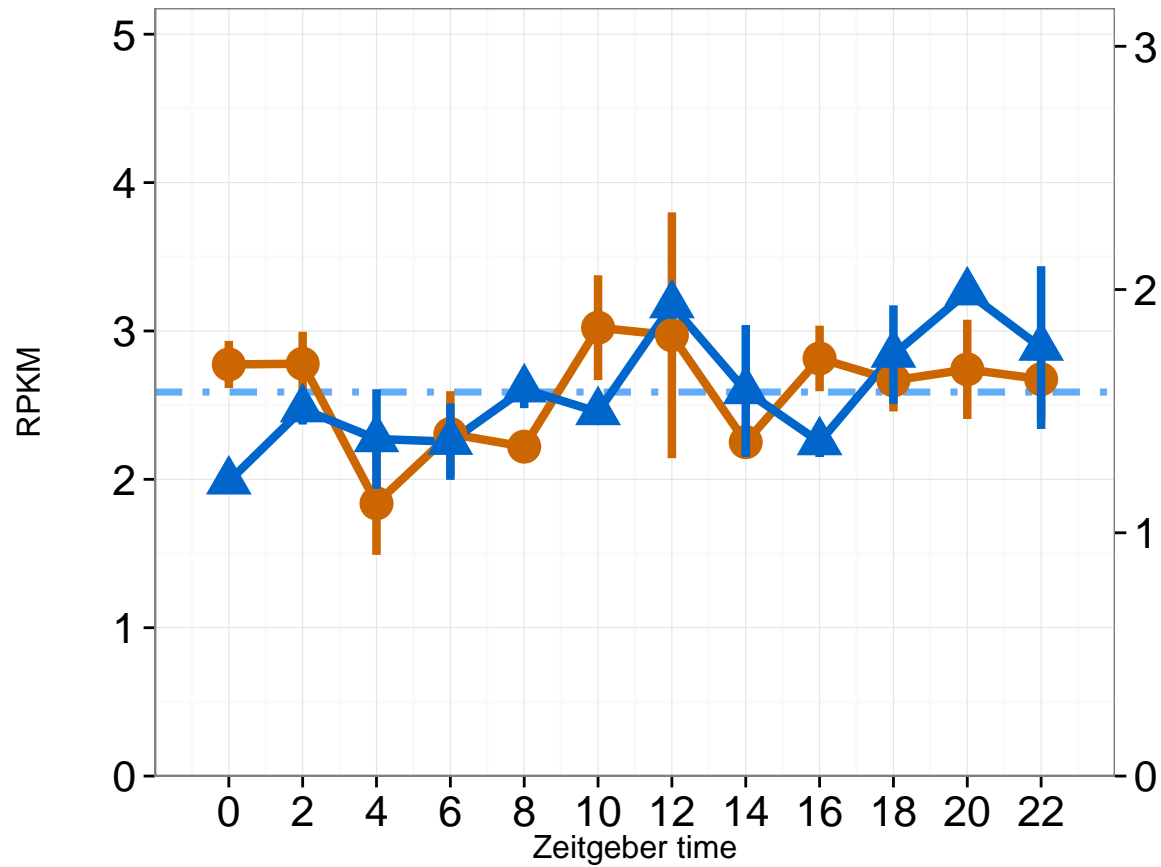

# Fastkd3

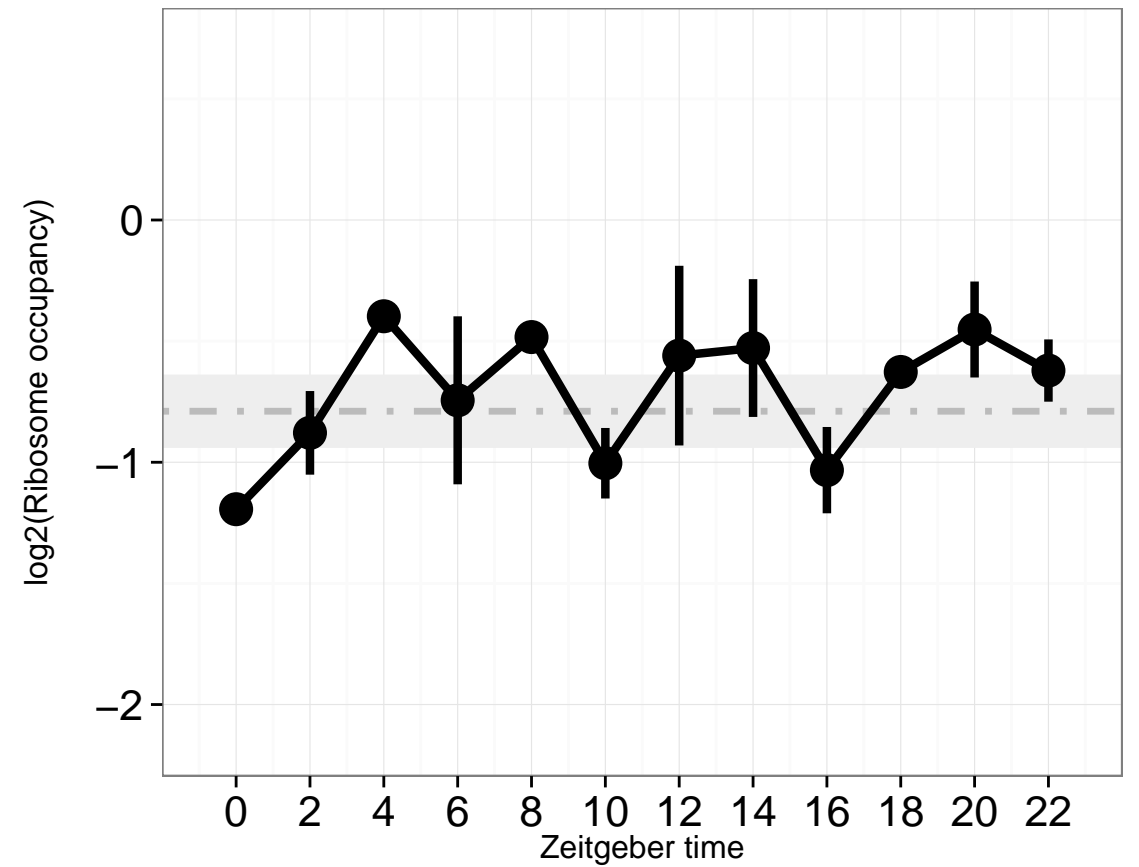

Supplement: SuppDataset_1.zip [file Fastkd3_set_A.pdf › Supplemental Dataset 1/A-mRNA_nonrhyth_translation_nonrhyth/Fastkd3_set_A.pdf]

## Fat1

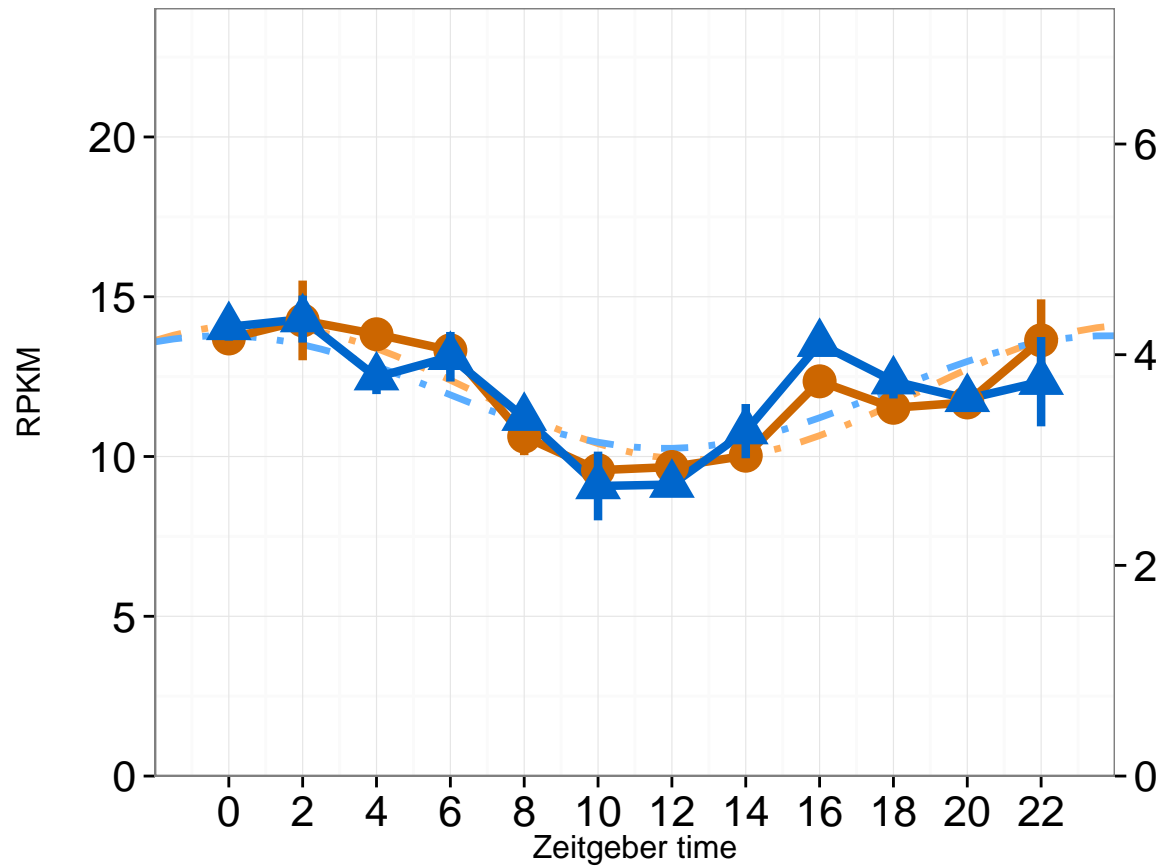

## Fat1

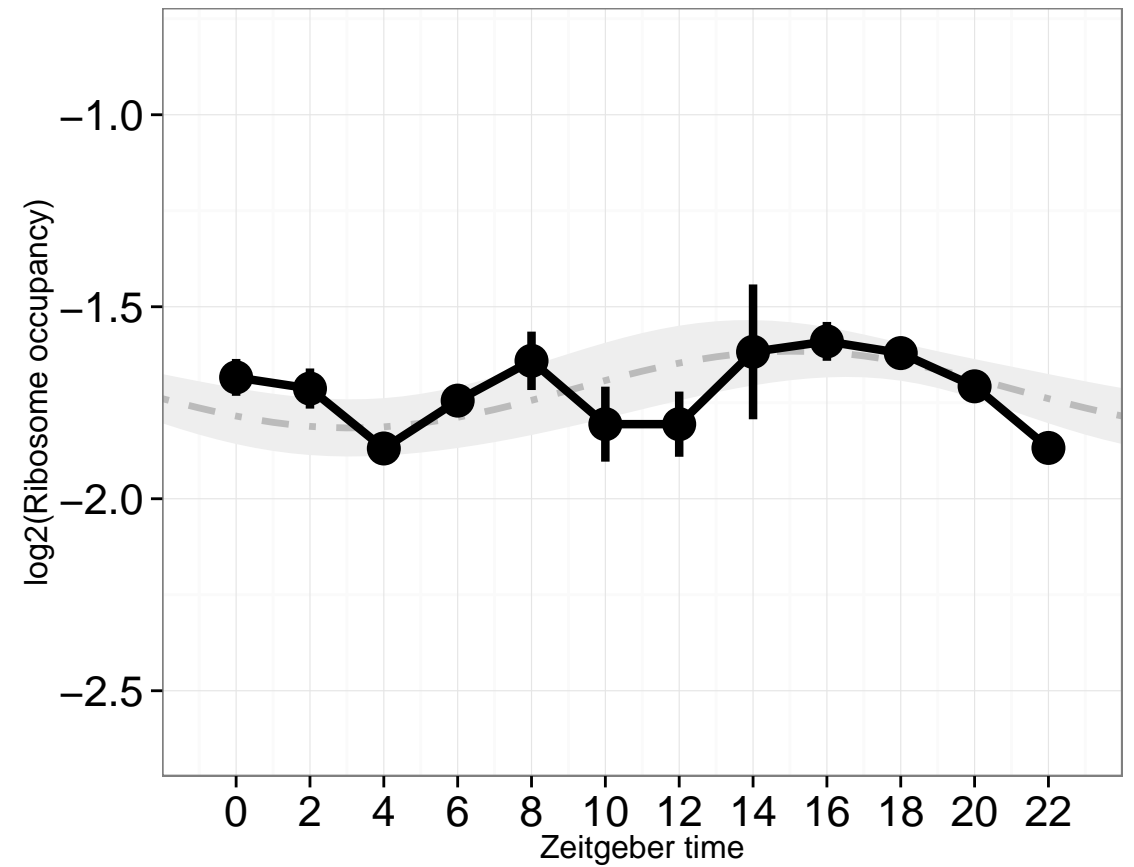

Supplement: SuppDataset_1.zip [file Fat1_set_A.pdf › Supplemental Dataset 1/A-mRNA_nonrhyth_translation_nonrhyth/Fat1_set_A.pdf]

## Fat4

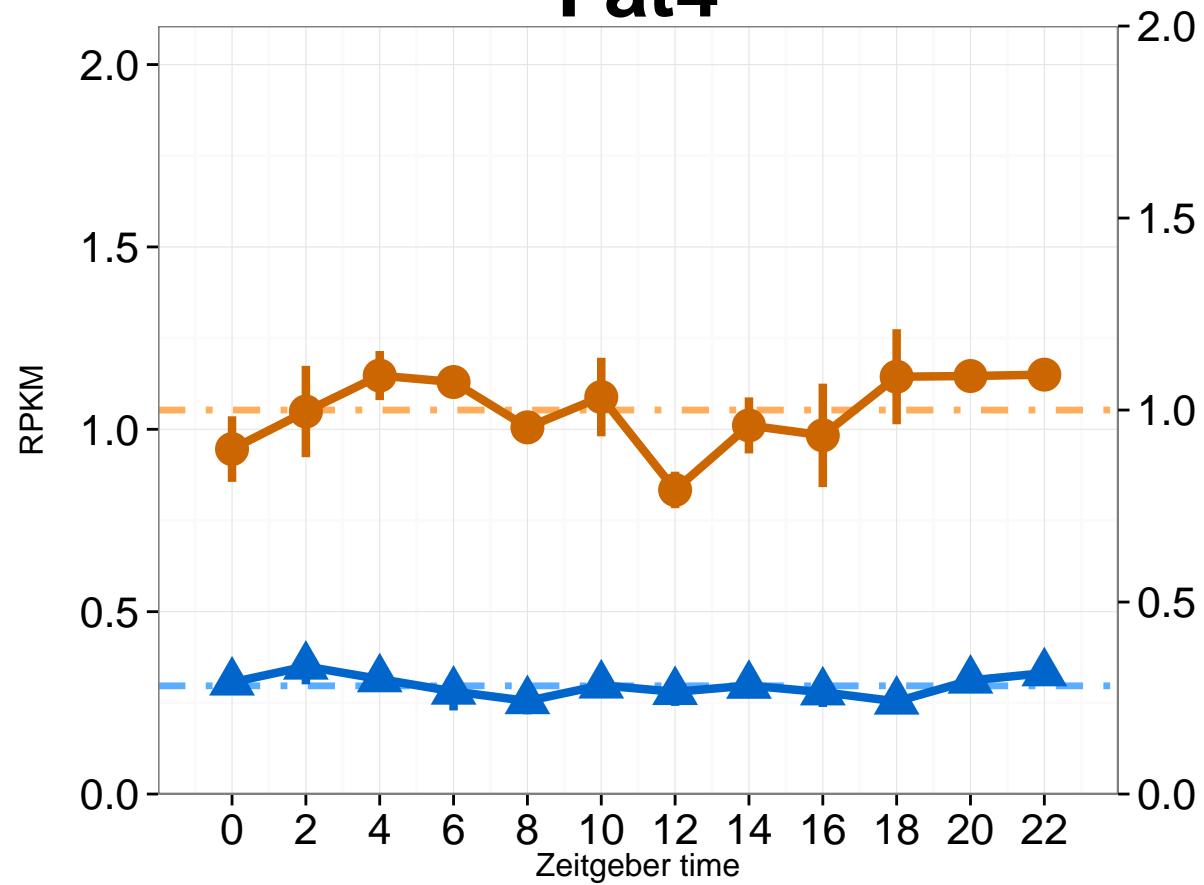

## Fat4

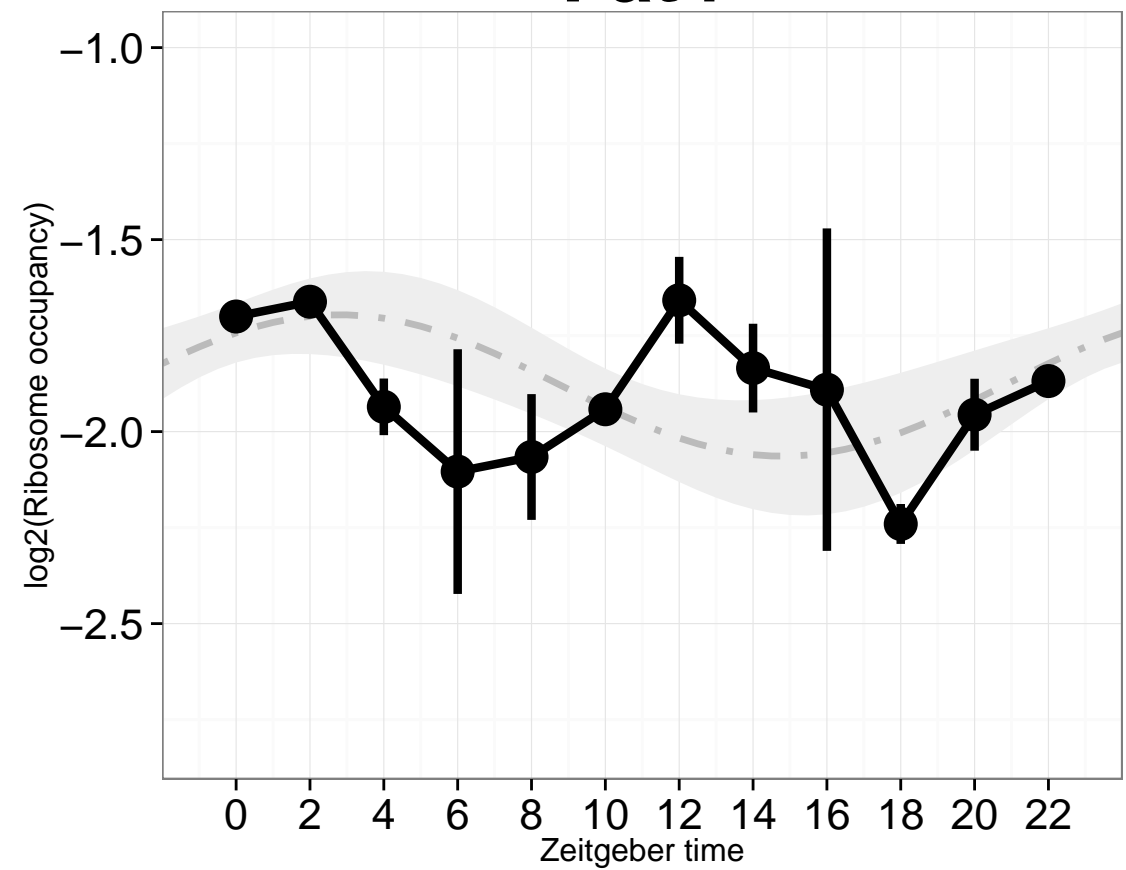

Supplement: SuppDataset_1.zip [file Fat4_set_A.pdf › Supplemental Dataset 1/A-mRNA_nonrhyth_translation_nonrhyth/Fat4_set_A.pdf]

# Fau

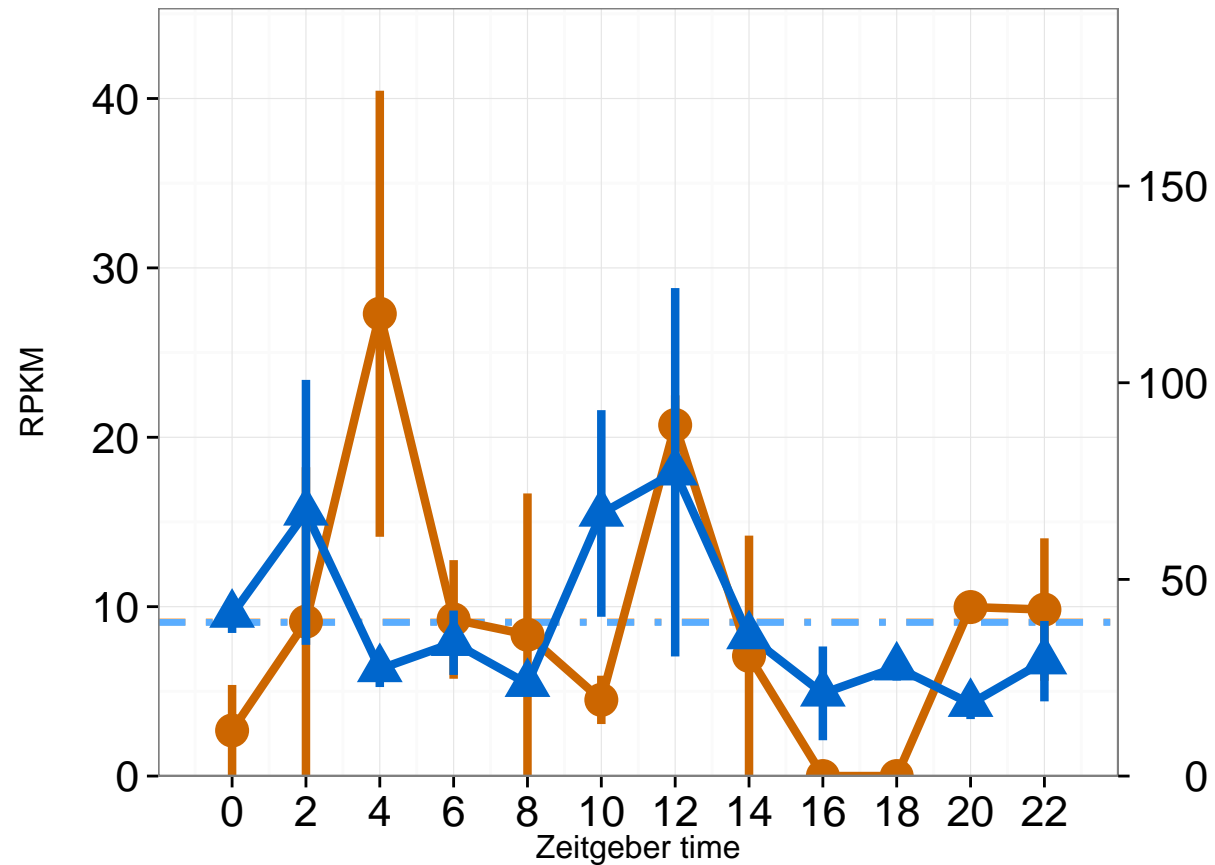

# Fau

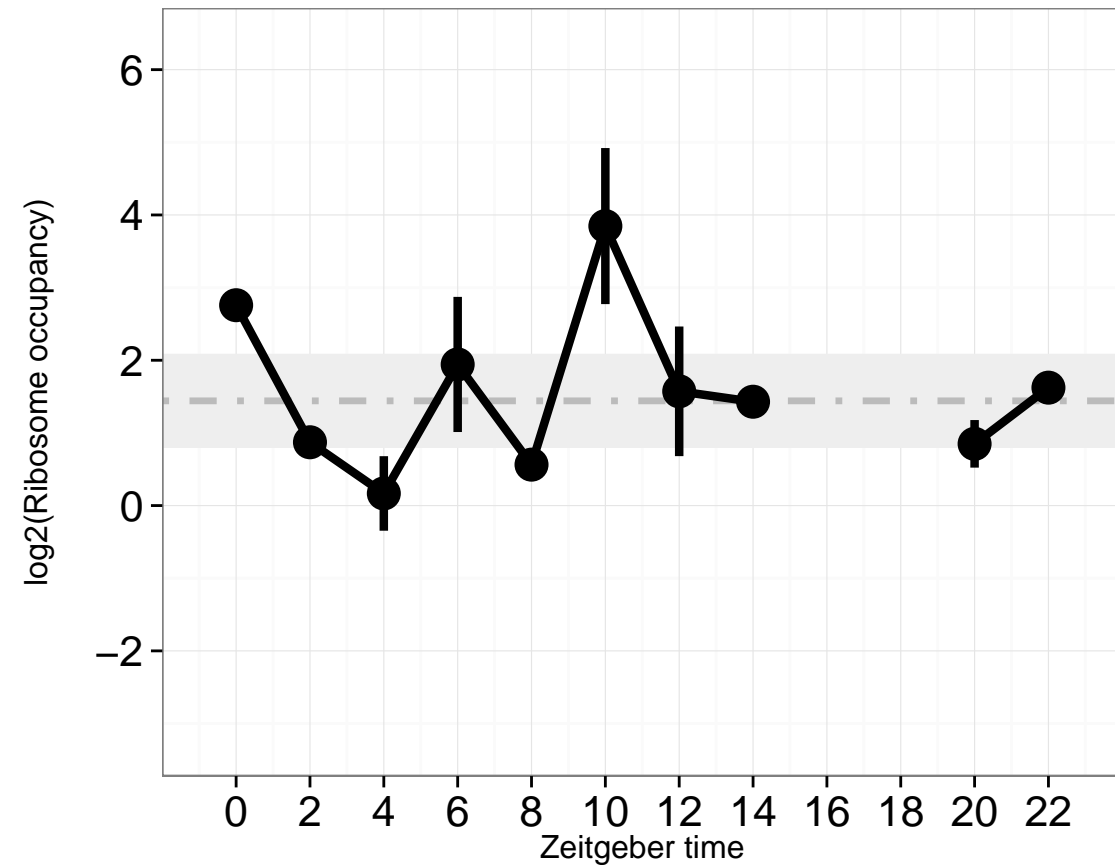

Supplement: SuppDataset_1.zip [file Fau_set_A.pdf › Supplemental Dataset 1/A-mRNA_nonrhyth_translation_nonrhyth/Fau_set_A.pdf]

# Fbf1

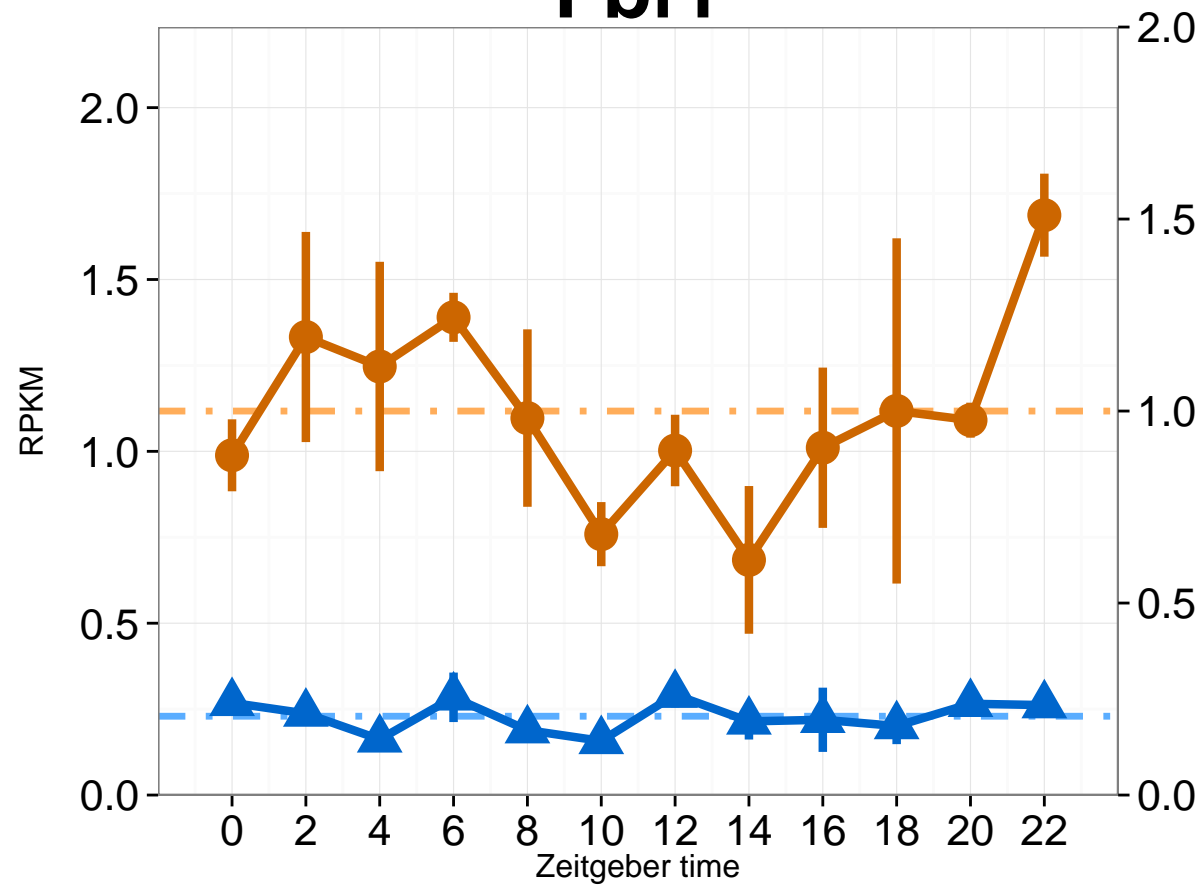

# Fbf1

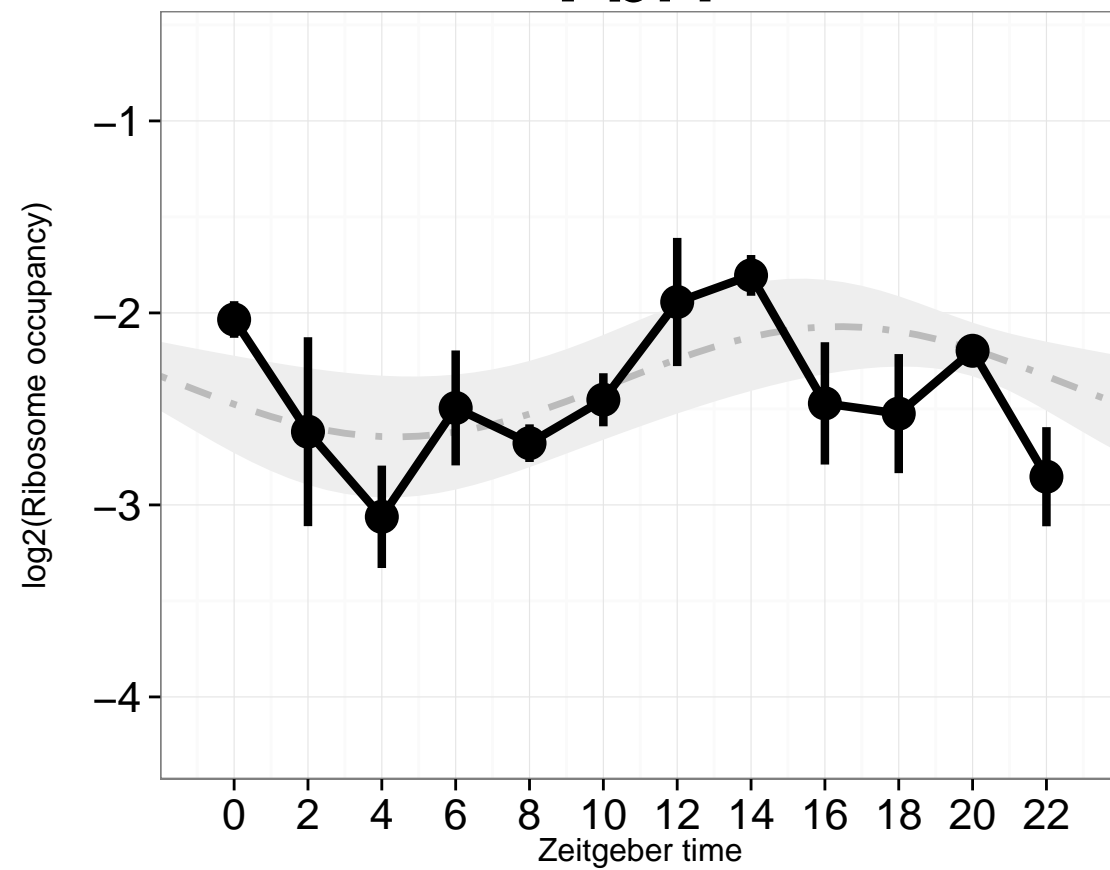

Supplement: SuppDataset_1.zip [file Fbf1_set_A.pdf › Supplemental Dataset 1/A-mRNA_nonrhyth_translation_nonrhyth/Fbf1_set_A.pdf]

## Fbl

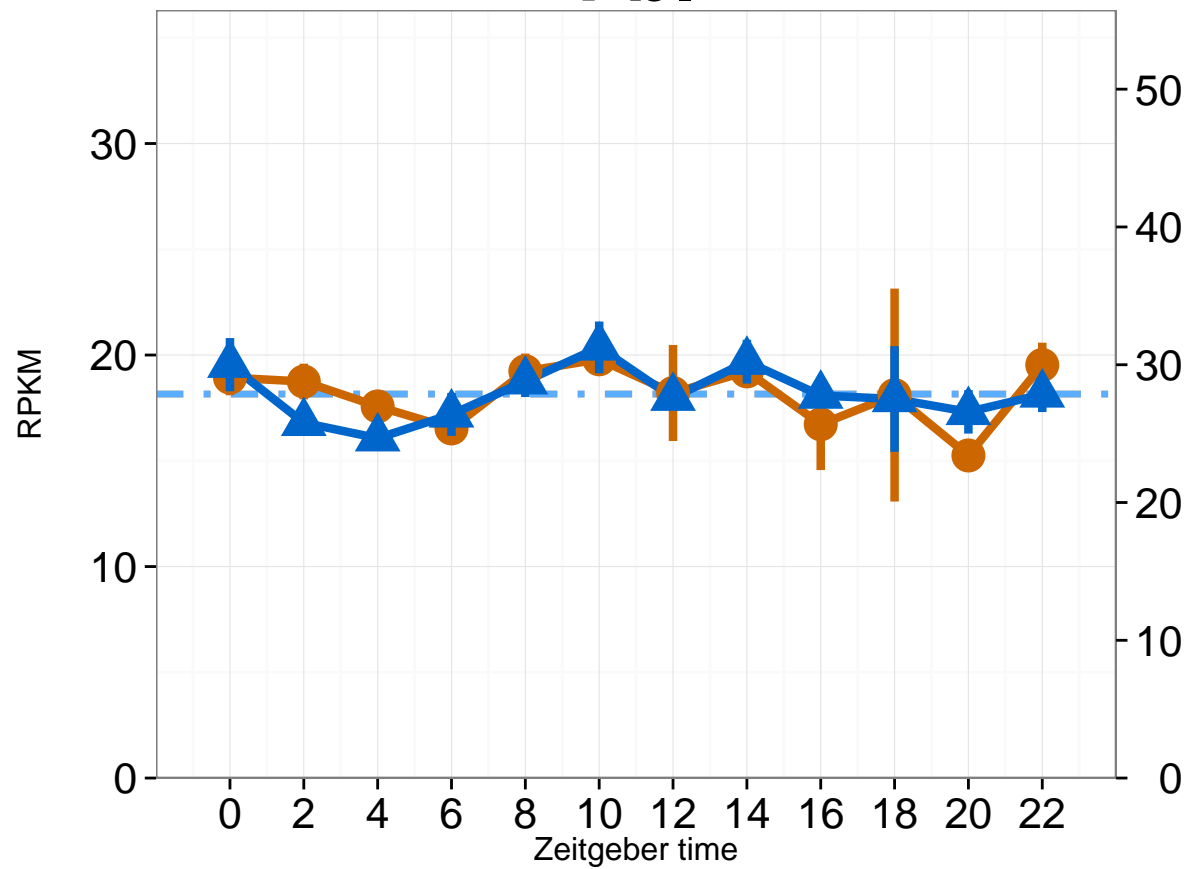

## Fbl

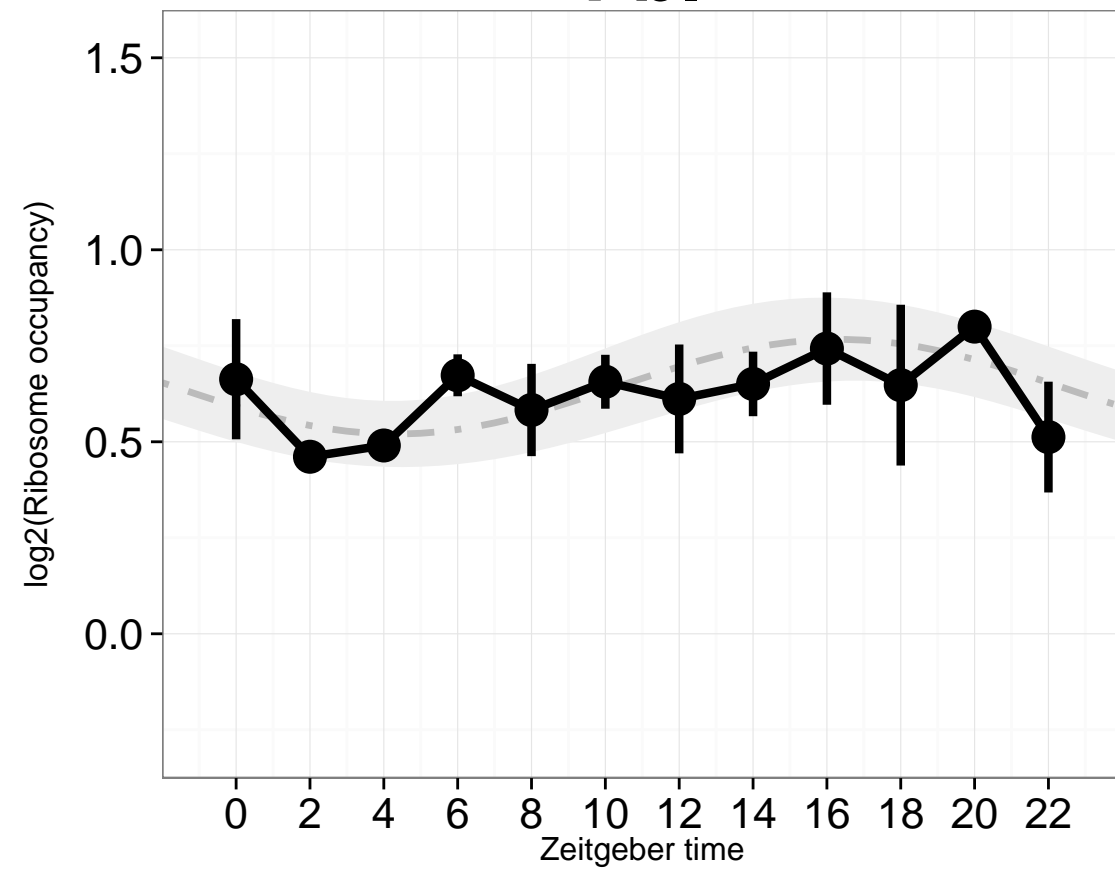

Supplement: SuppDataset_1.zip [file Fbl_set_A.pdf › Supplemental Dataset 1/A-mRNA_nonrhyth_translation_nonrhyth/Fbl_set_A.pdf]

**Fblim1 TR**

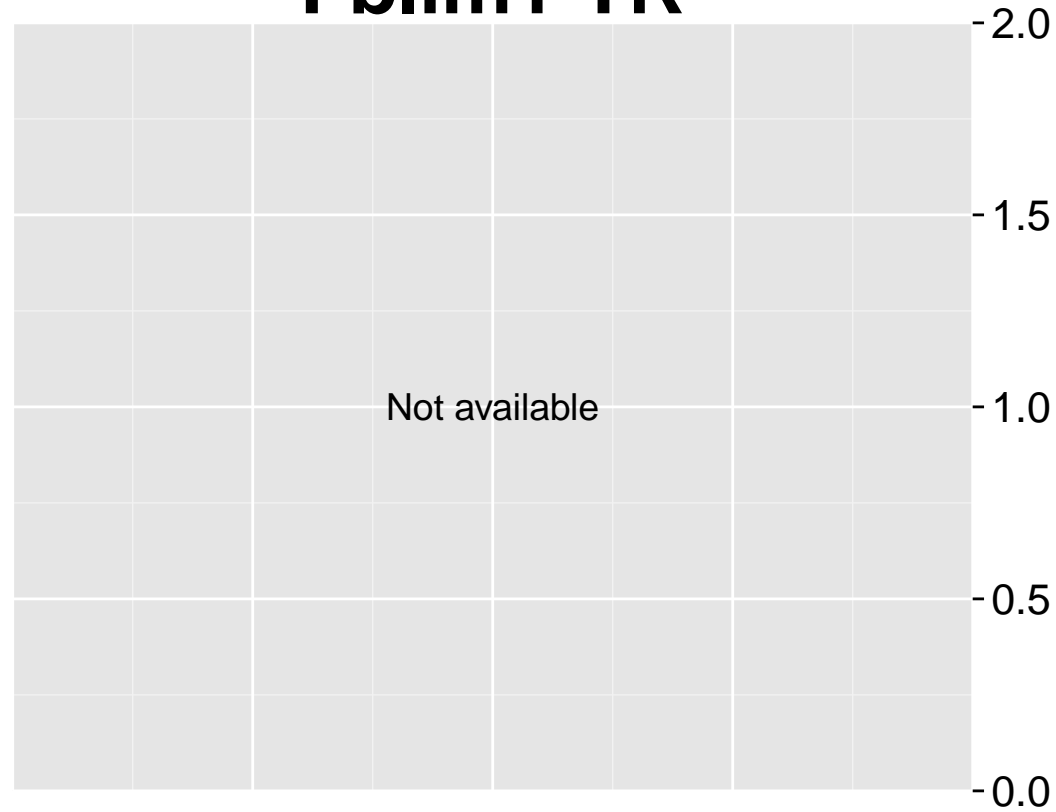

**Fblim1 log2(Ribosome occupancy**

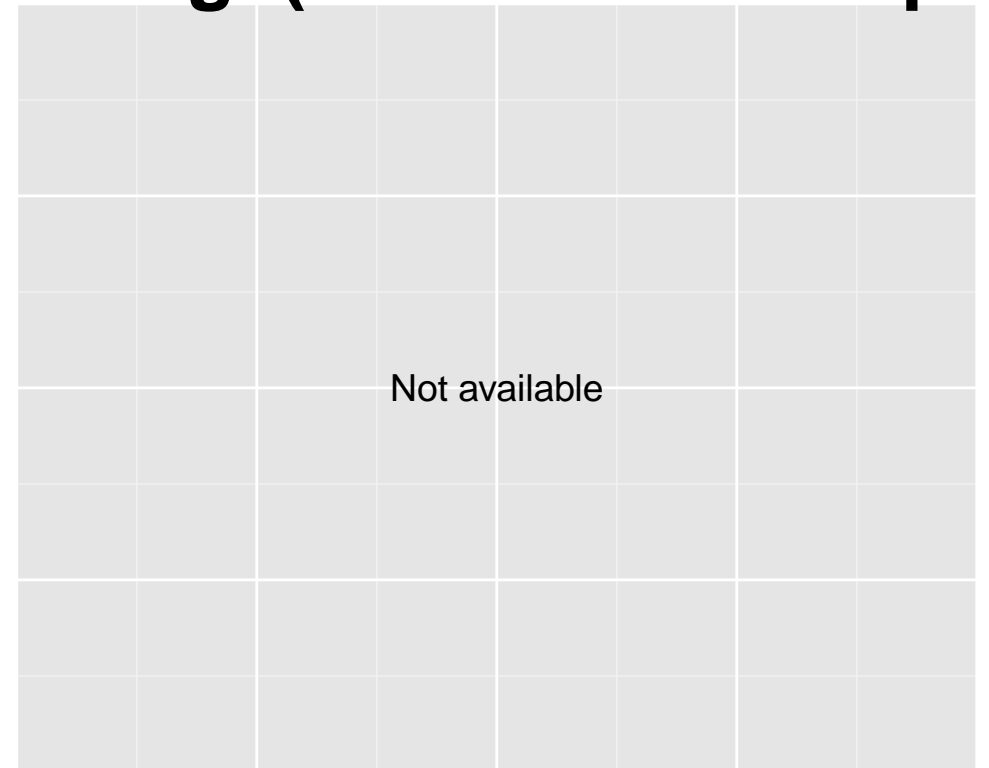

Supplement: SuppDataset_1.zip [file Fblim1_set_A.pdf › Supplemental Dataset 1/A-mRNA_nonrhyth_translation_nonrhyth/Fblim1_set_A.pdf]

# Fbln1

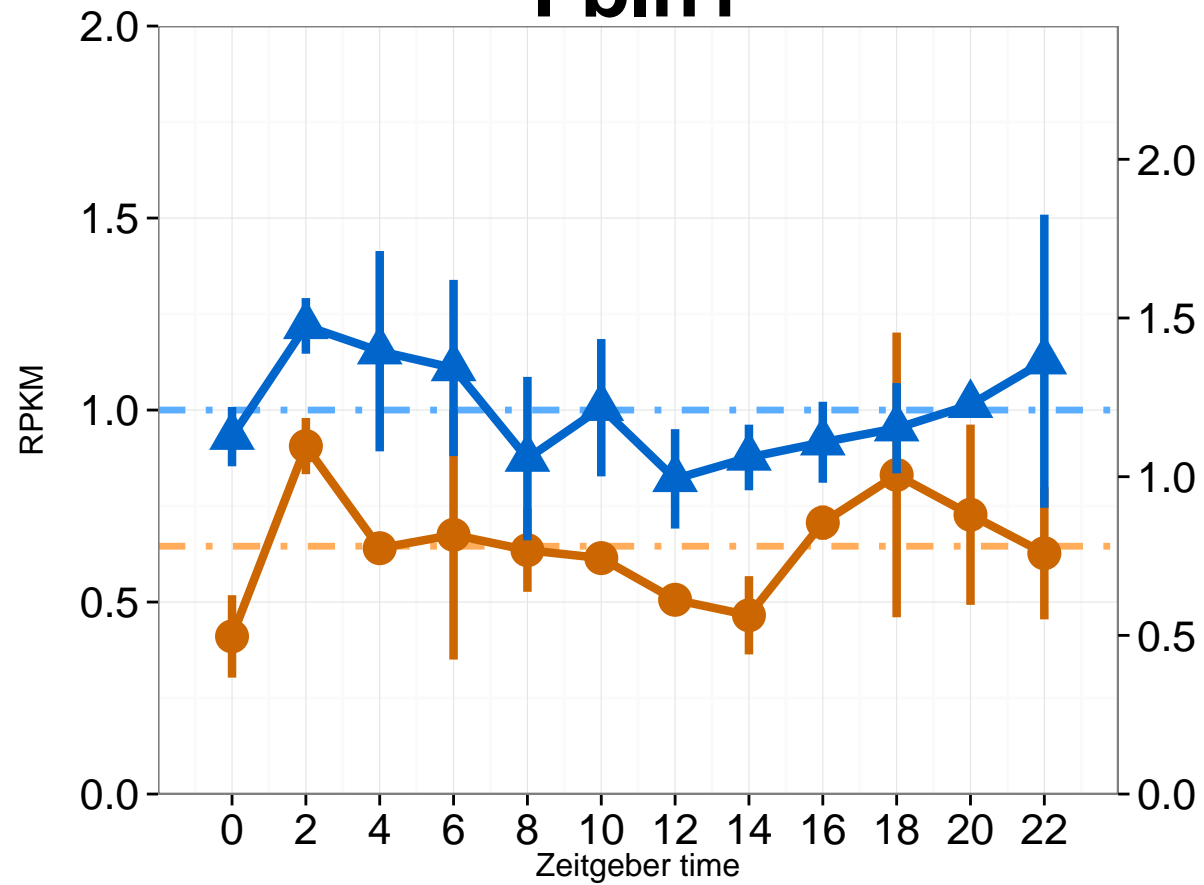

# Fbln1

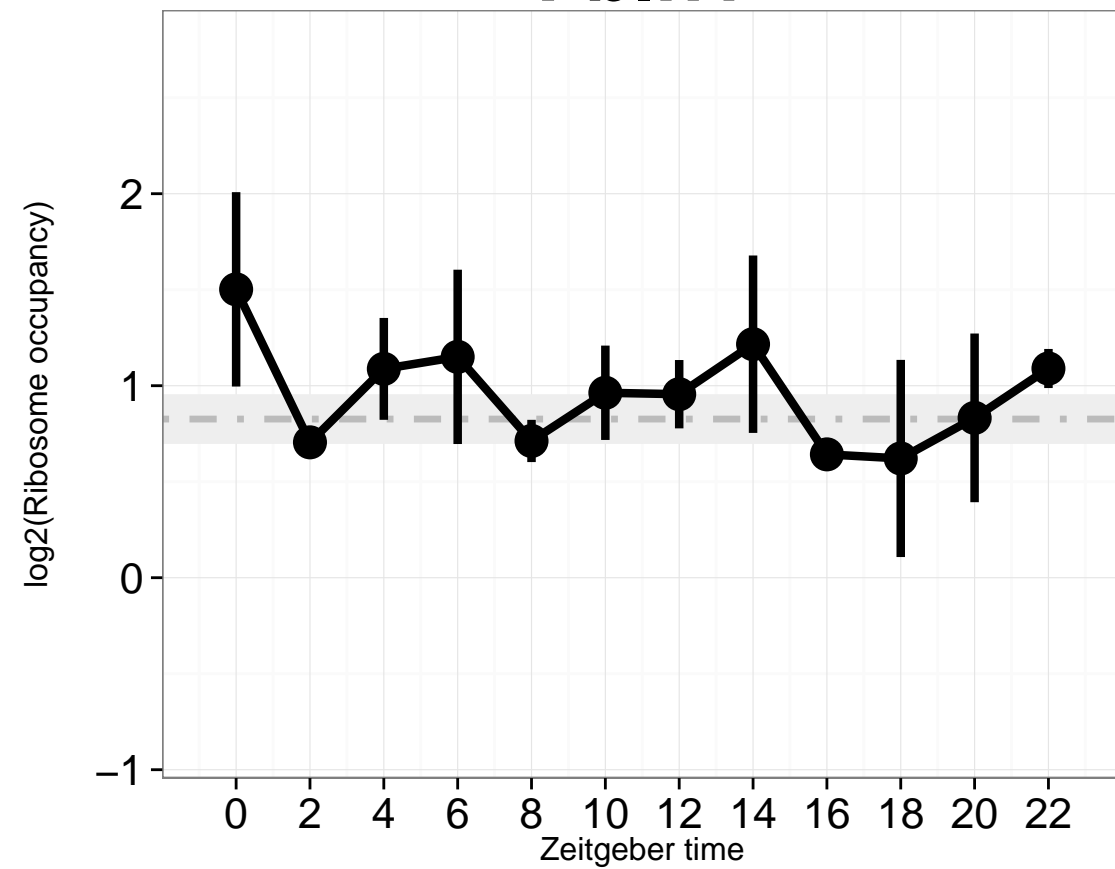

Supplement: SuppDataset_1.zip [file Fbln1_set_A.pdf › Supplemental Dataset 1/A-mRNA_nonrhyth_translation_nonrhyth/Fbln1_set_A.pdf]

## Fbln2

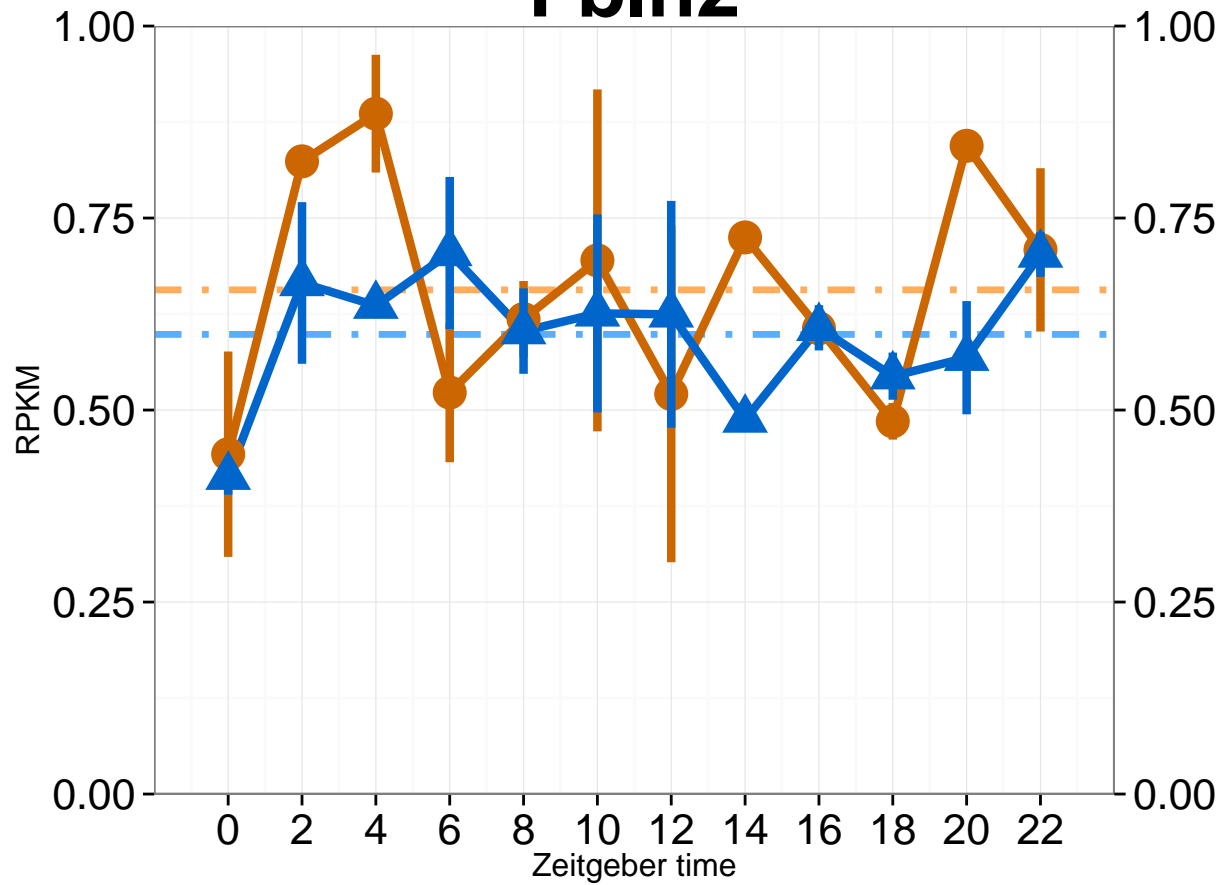

## Fbln2

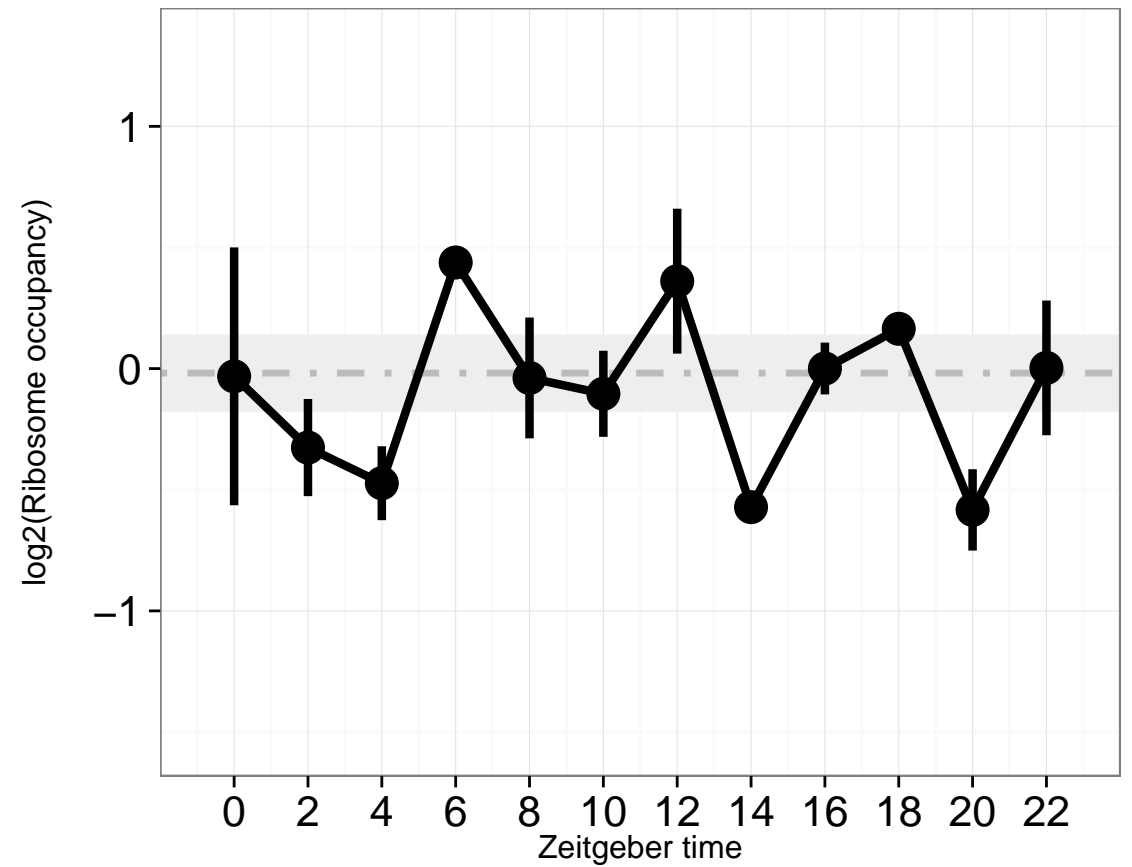

Supplement: SuppDataset_1.zip [file Fbln2_set_A.pdf › Supplemental Dataset 1/A-mRNA_nonrhyth_translation_nonrhyth/Fbln2_set_A.pdf]

# Fbln5

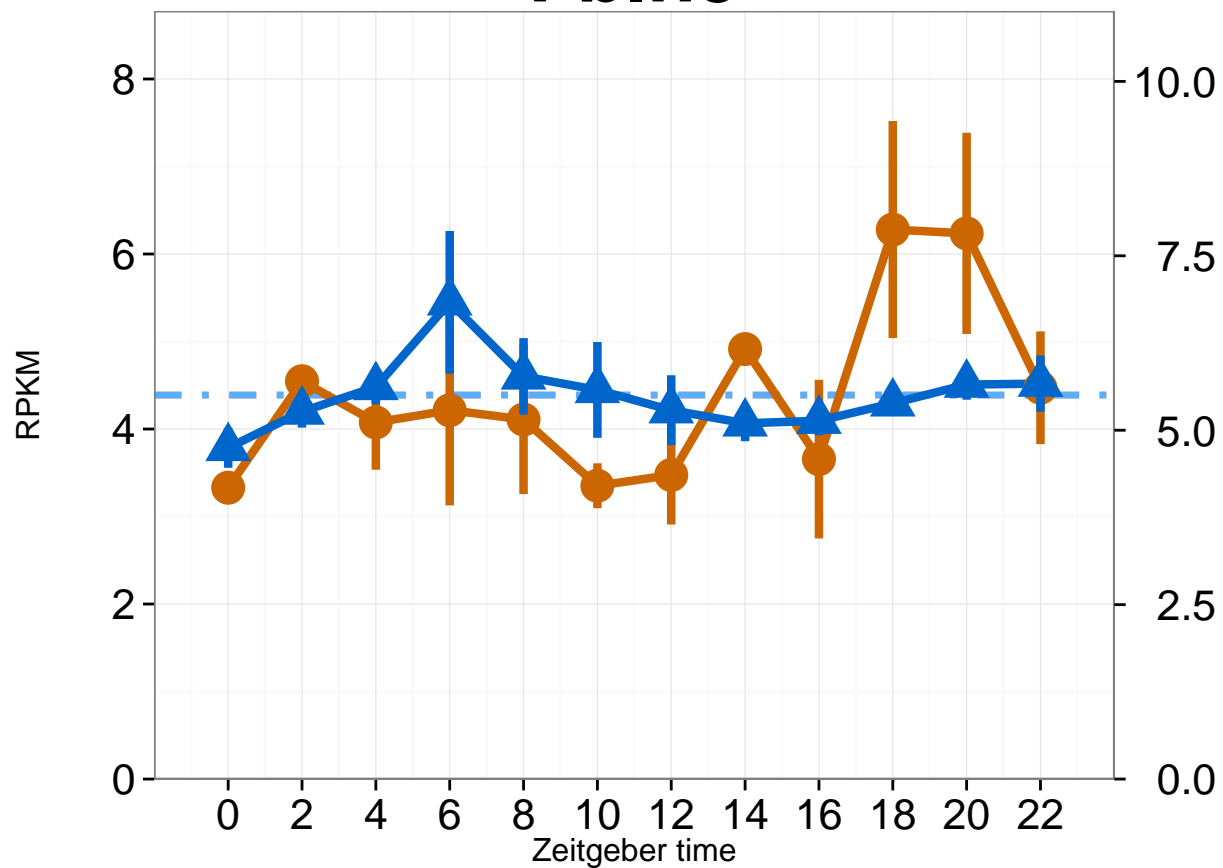

# Fbln5

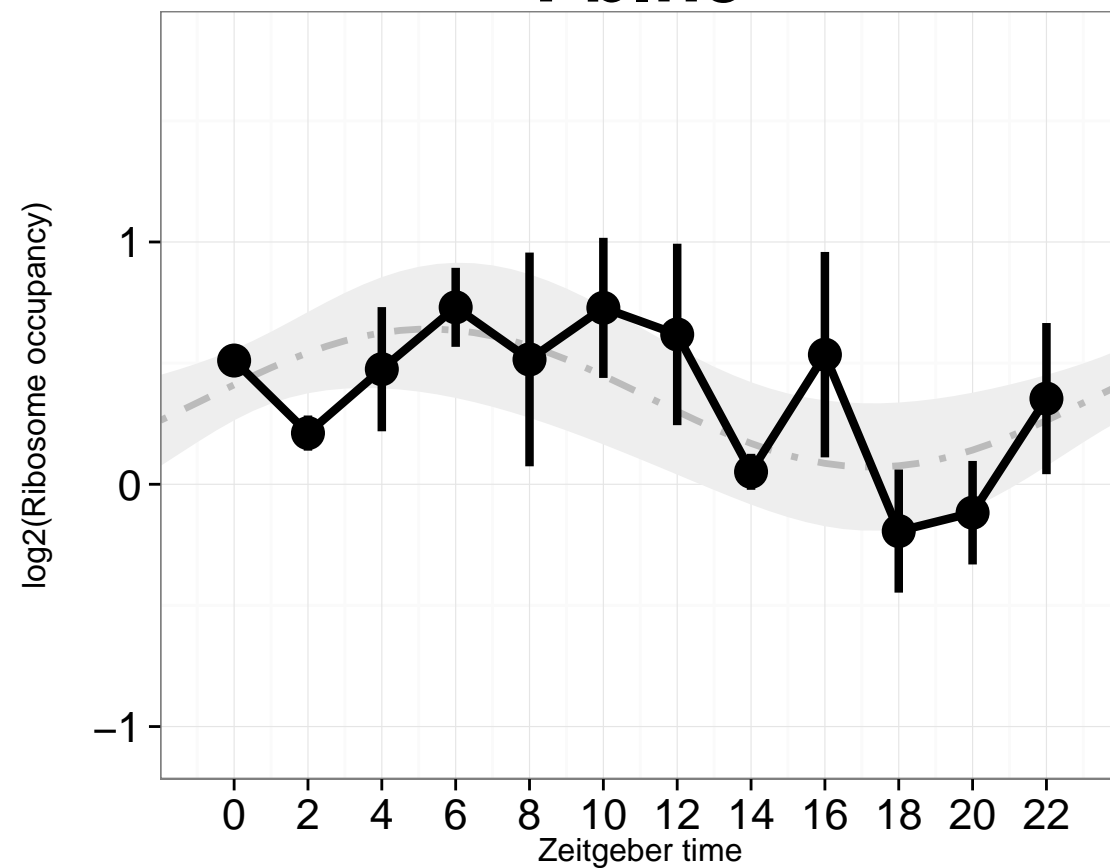

Supplement: SuppDataset_1.zip [file Fbln5_set_A.pdf › Supplemental Dataset 1/A-mRNA_nonrhyth_translation_nonrhyth/Fbln5_set_A.pdf]

## Fbp1

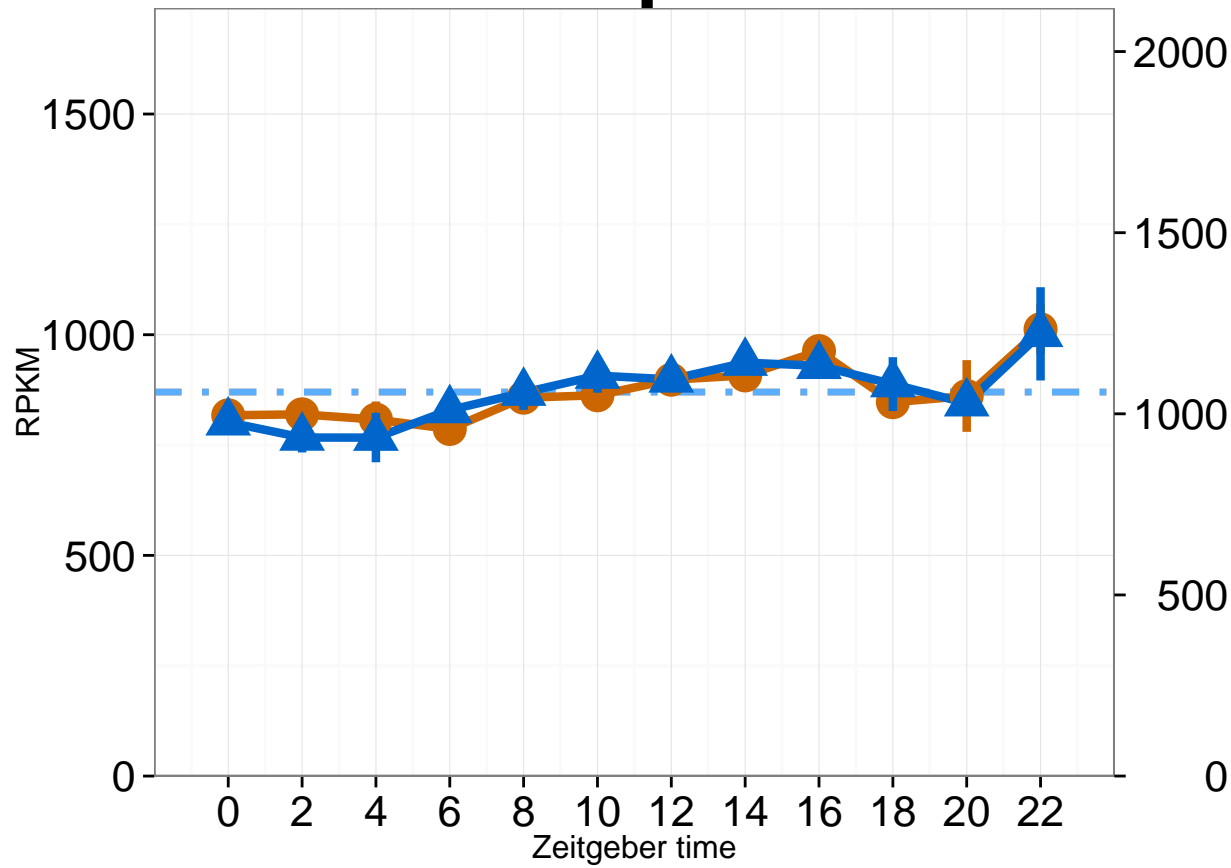

## Fbp1

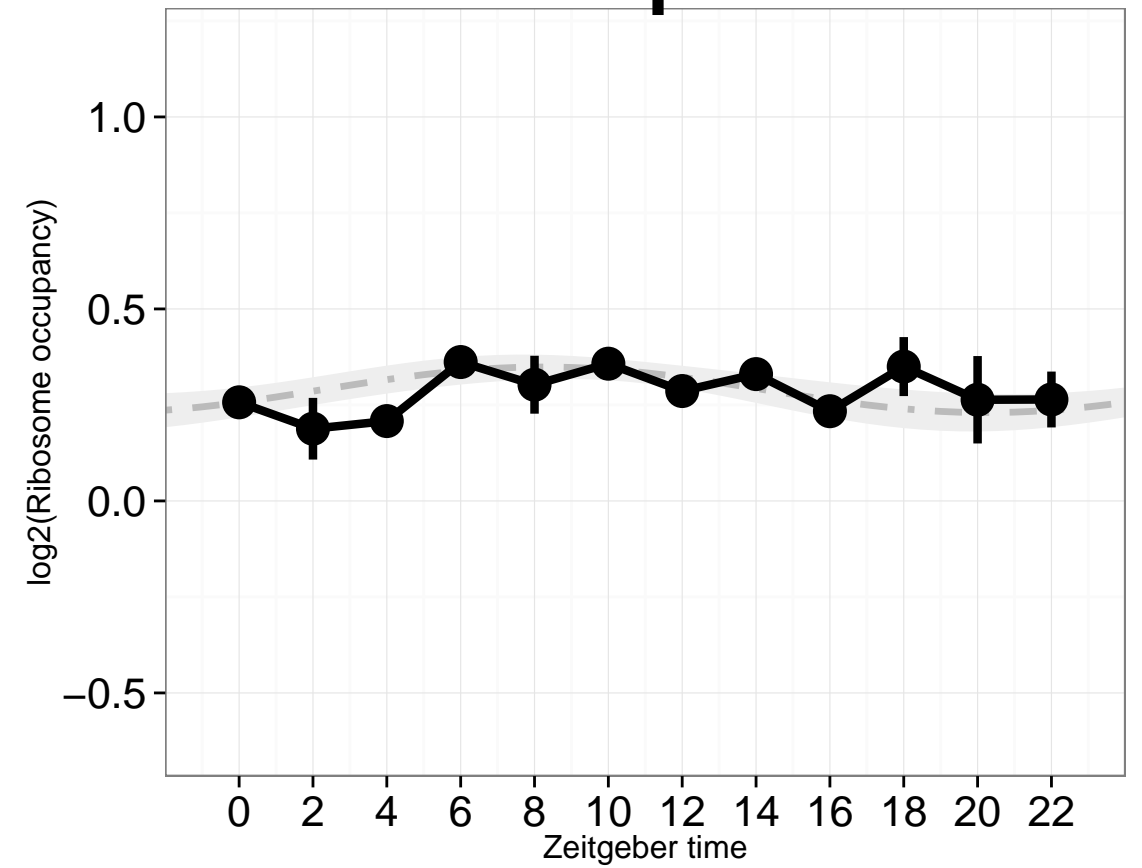

Supplement: SuppDataset_1.zip [file Fbp1_set_A.pdf › Supplemental Dataset 1/A-mRNA_nonrhyth_translation_nonrhyth/Fbp1_set_A.pdf]

## Fbrs

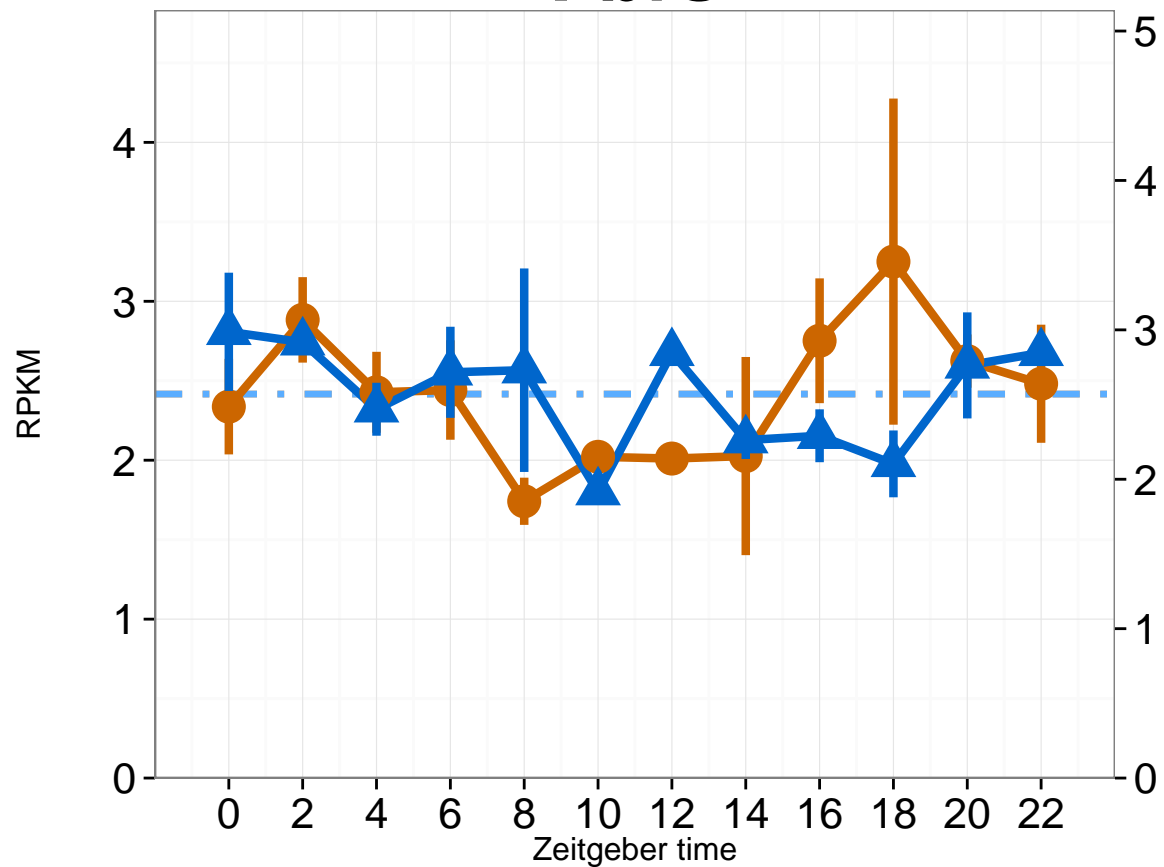

## Fbrs

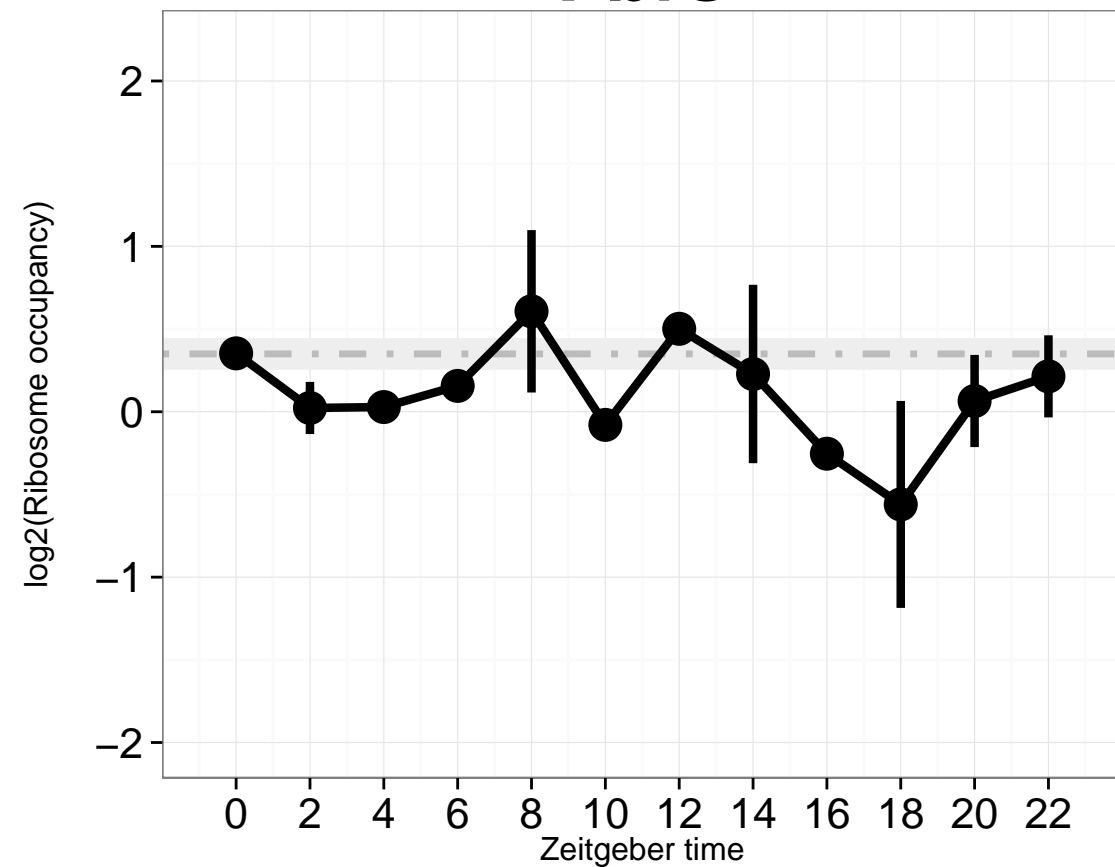

Supplement: SuppDataset_1.zip [file Fbrs_set_A.pdf › Supplemental Dataset 1/A-mRNA_nonrhyth_translation_nonrhyth/Fbrs_set_A.pdf]

# Fbrsl1

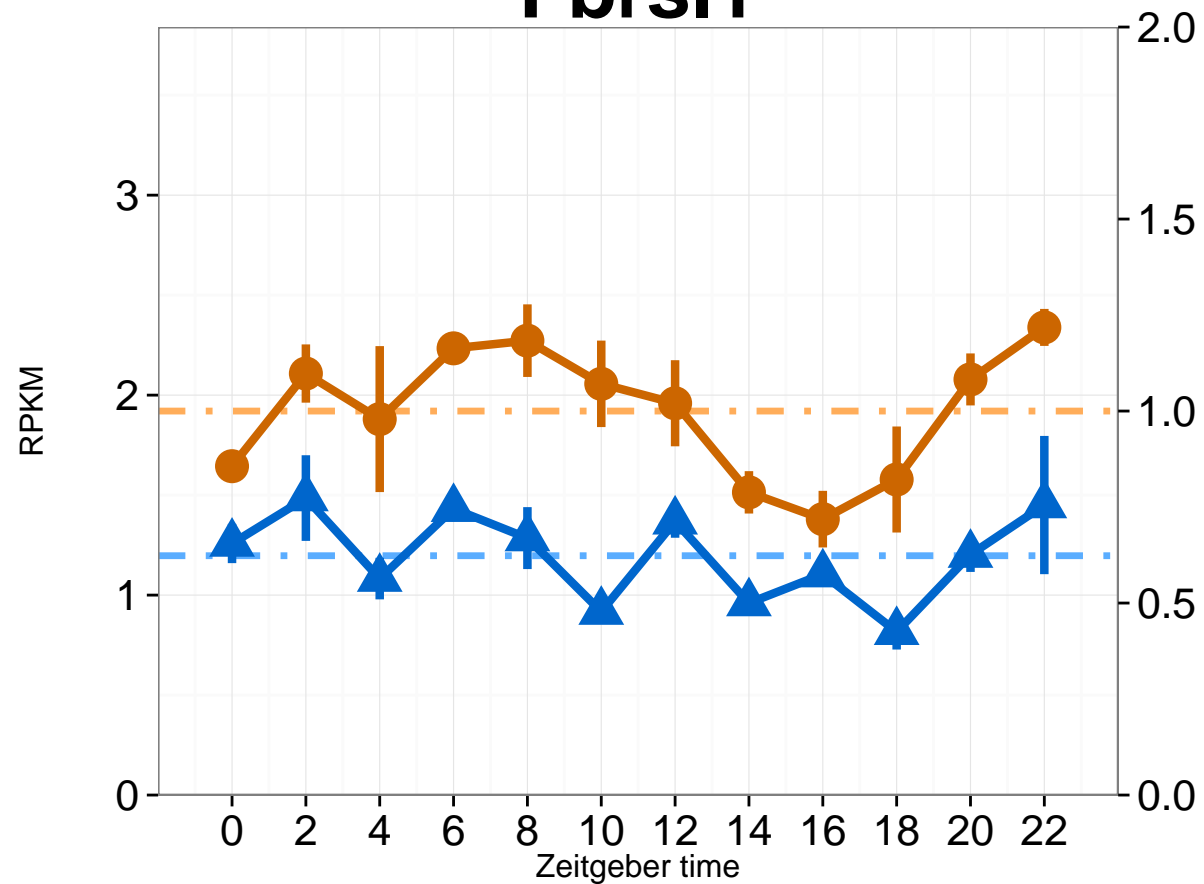

# Fbrsl1

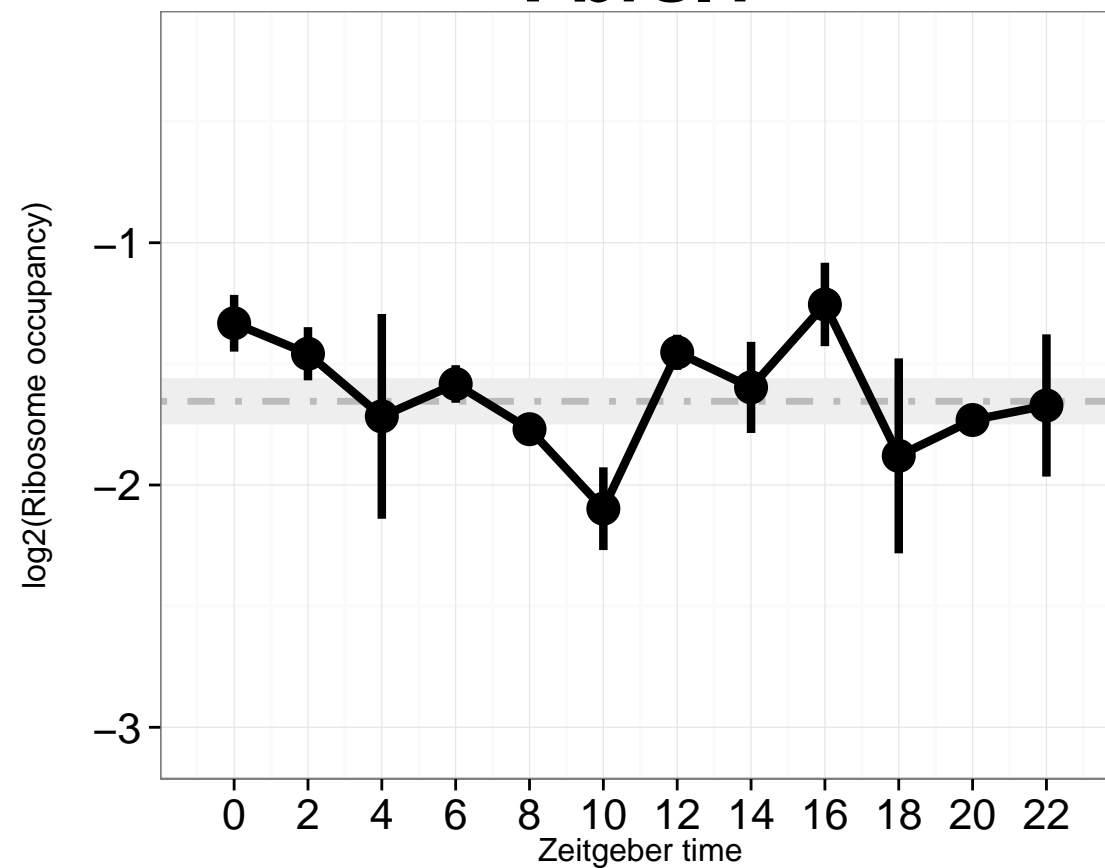

Supplement: SuppDataset_1.zip [file Fbrsl1_set_A.pdf › Supplemental Dataset 1/A-mRNA_nonrhyth_translation_nonrhyth/Fbrsl1_set_A.pdf]

## Fbxl12

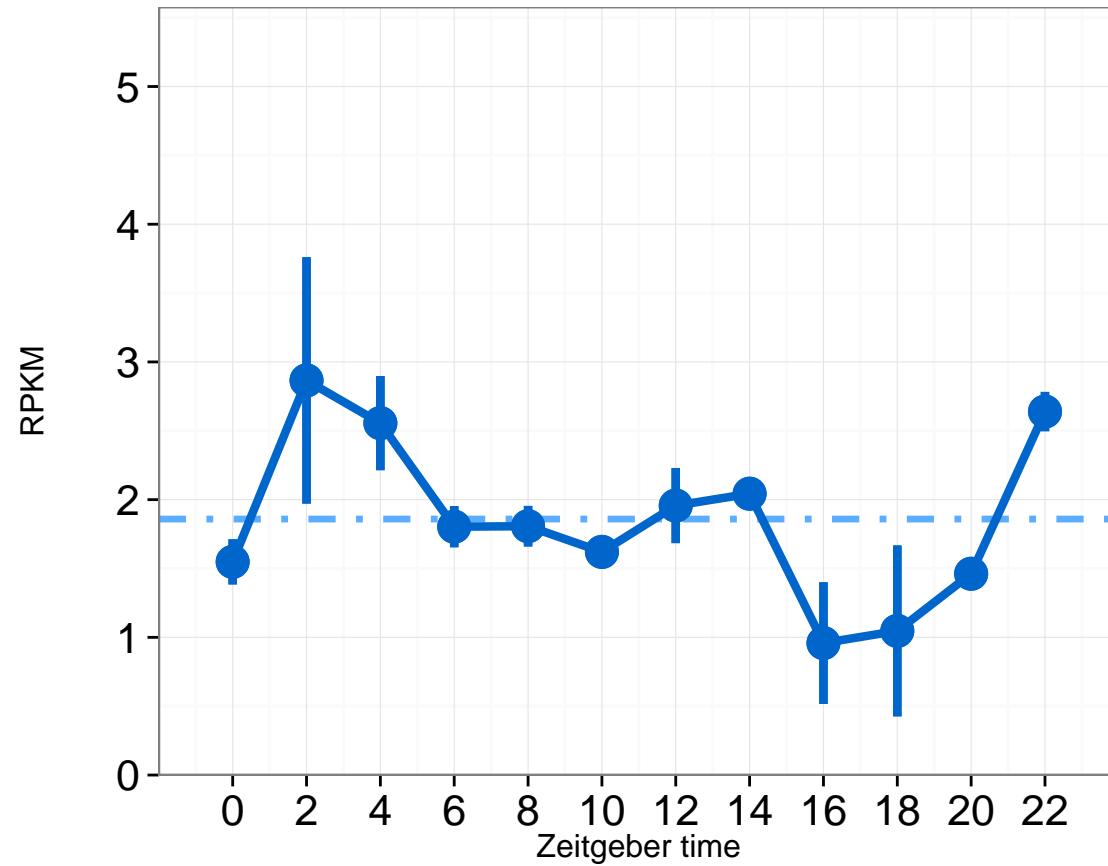

## Fbxl12 log2(Ribosome occupancy

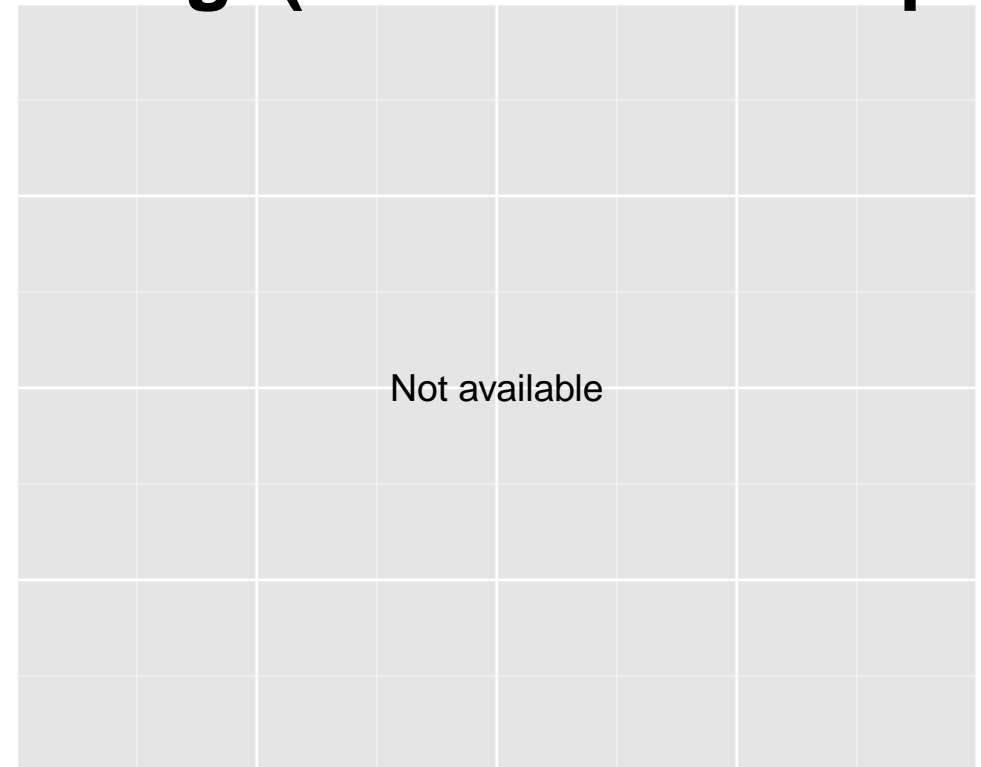

Supplement: SuppDataset_1.zip [file Fbxl12_set_A.pdf › Supplemental Dataset 1/A-mRNA_nonrhyth_translation_nonrhyth/Fbxl12_set_A.pdf]

# Fbxl14

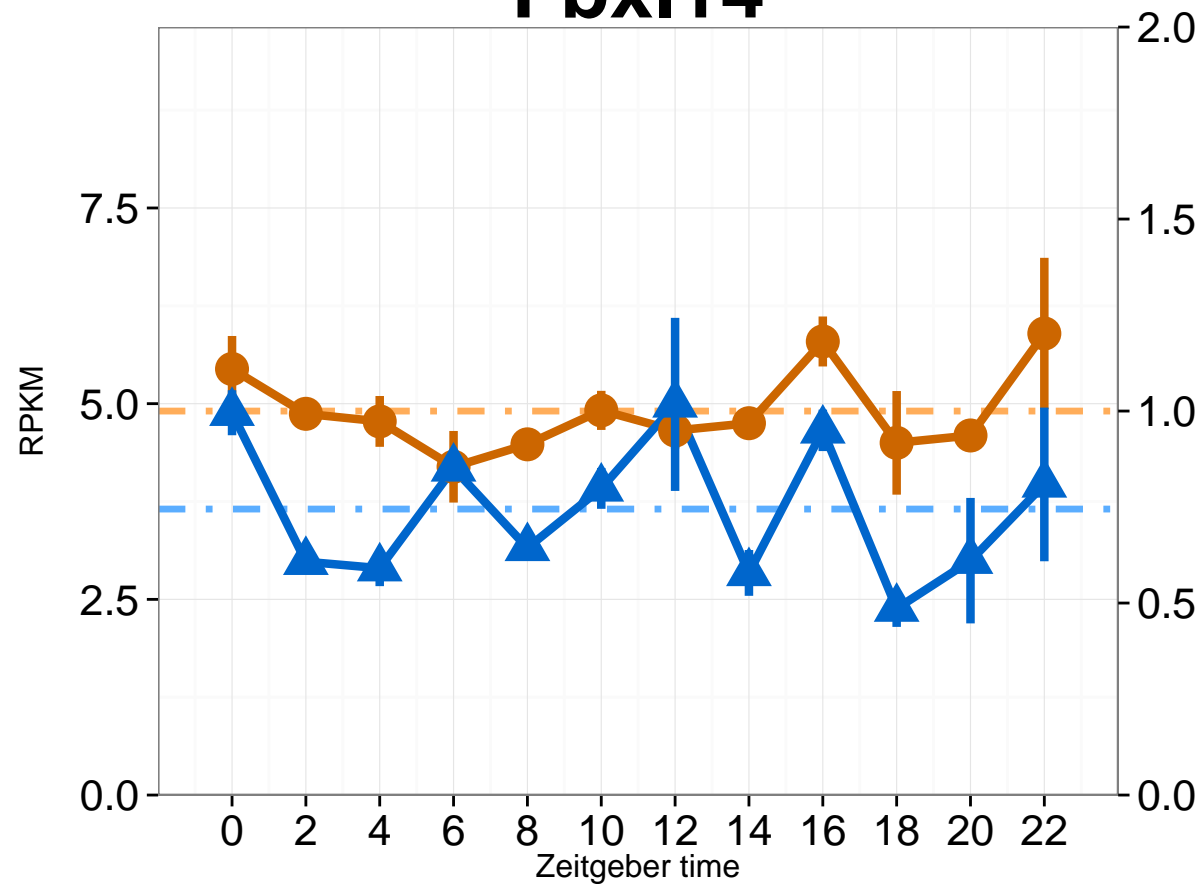

# Fbxl14

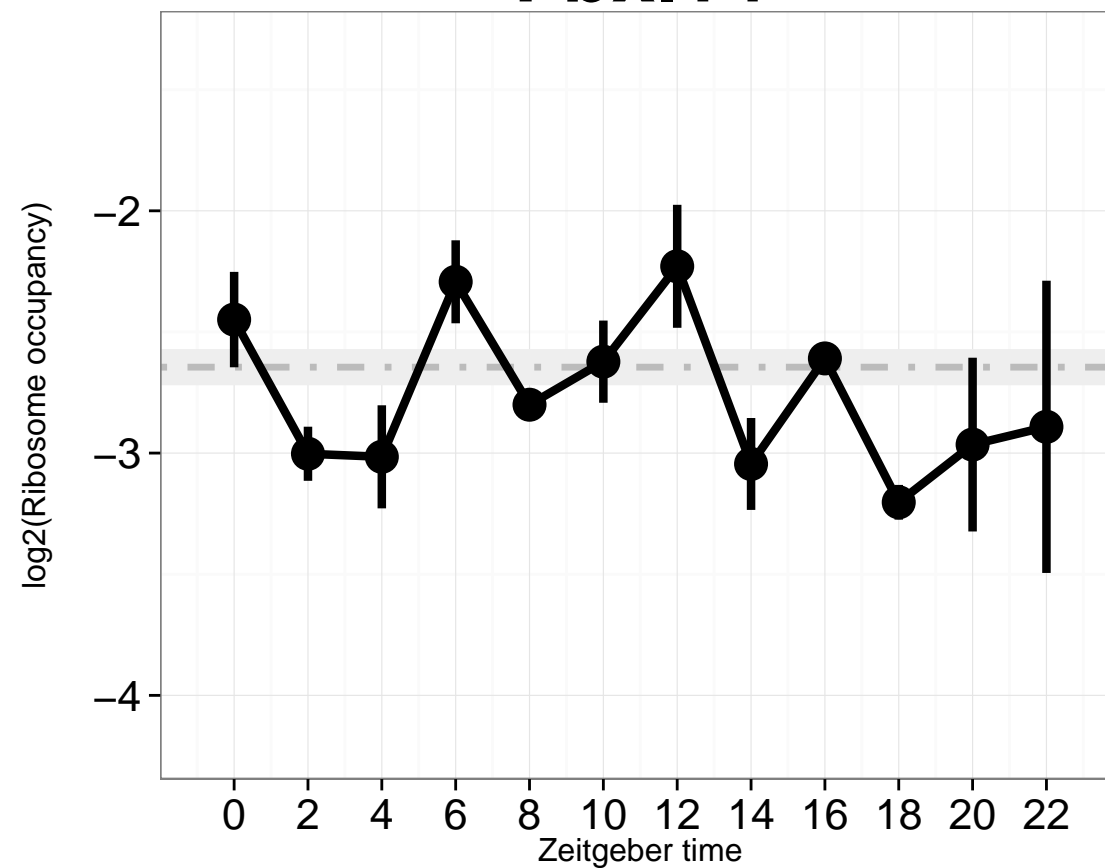

Supplement: SuppDataset_1.zip [file Fbxl14_set_A.pdf › Supplemental Dataset 1/A-mRNA_nonrhyth_translation_nonrhyth/Fbxl14_set_A.pdf]

# Fbxl21

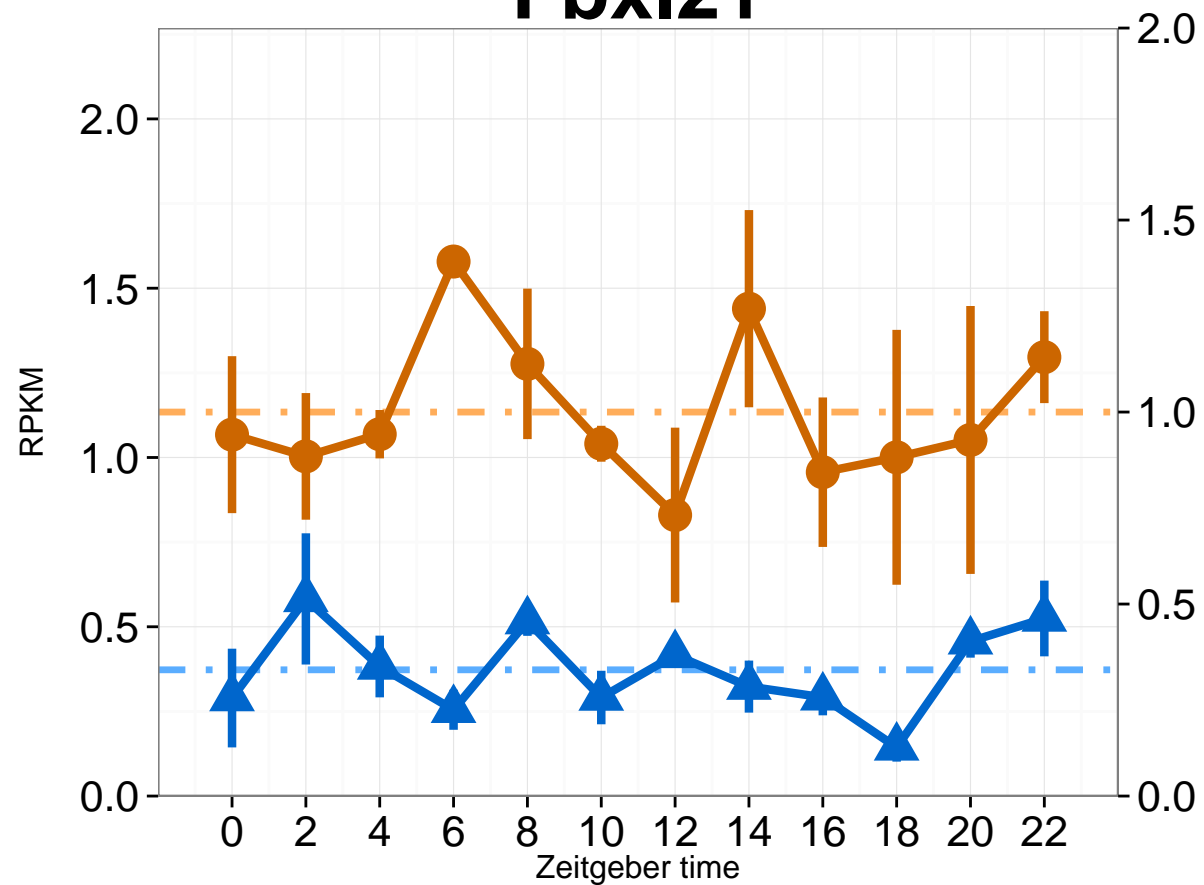

# Fbxl21

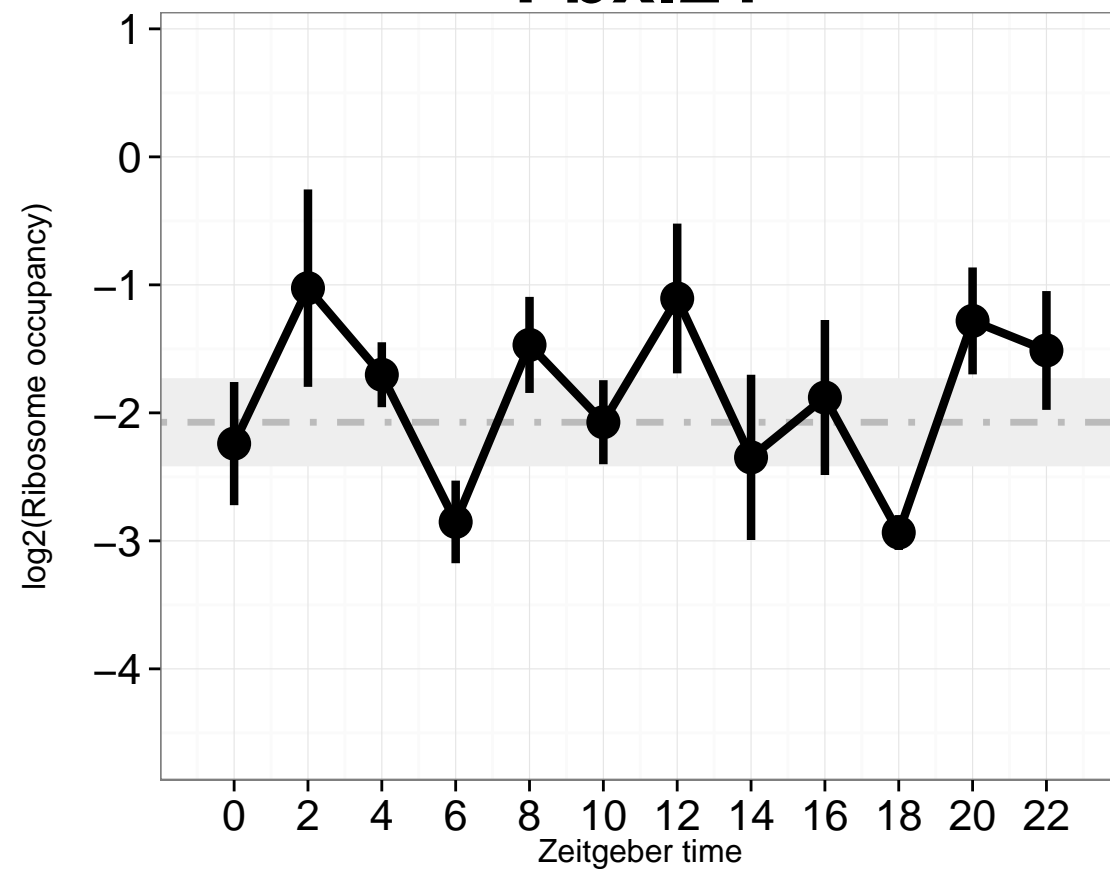

Supplement: SuppDataset_1.zip [file Fbxl21_set_A.pdf › Supplemental Dataset 1/A-mRNA_nonrhyth_translation_nonrhyth/Fbxl21_set_A.pdf]

## Fbxl3

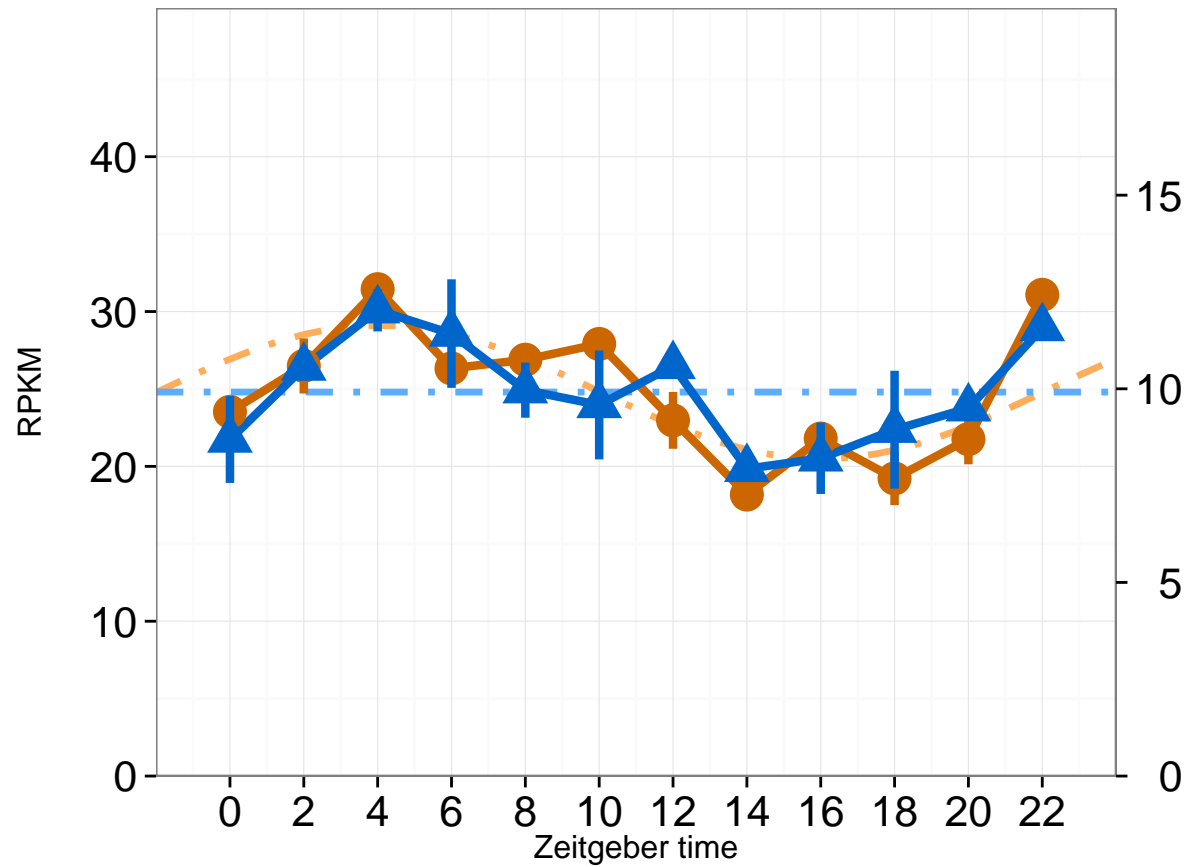

## Fbxl3

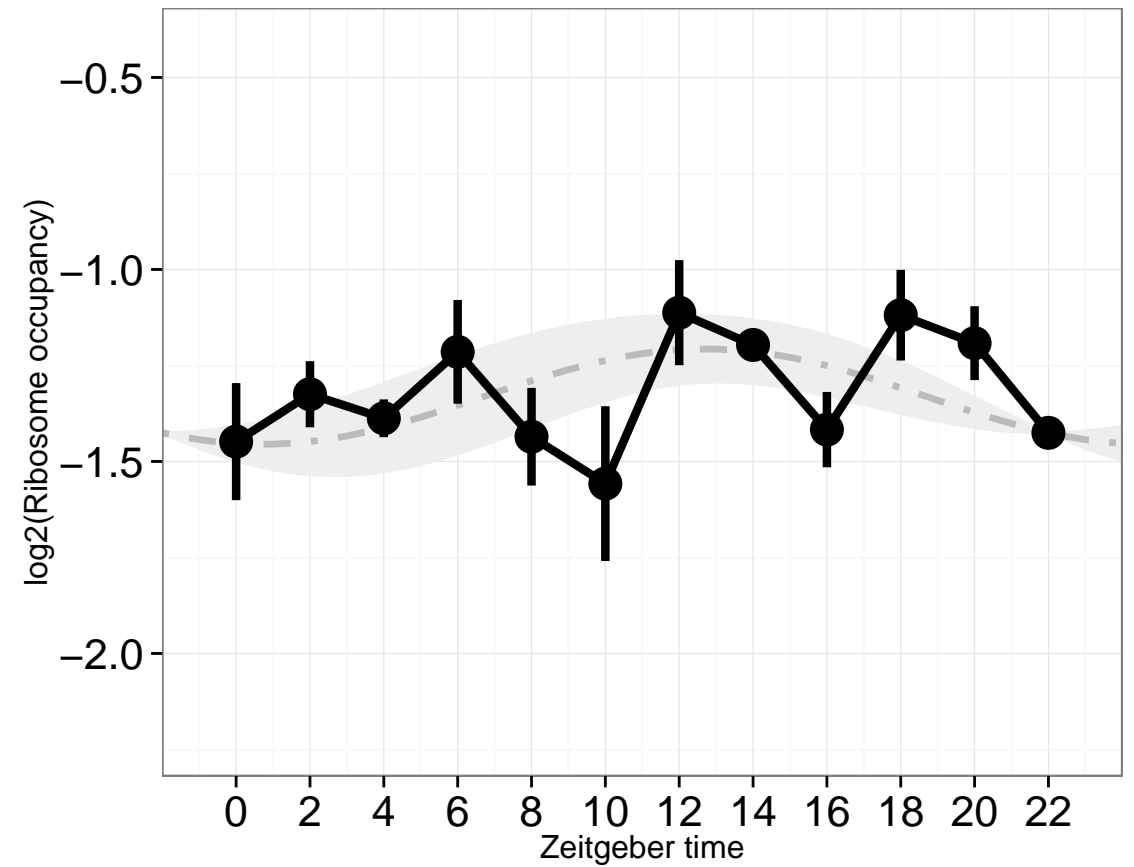

Supplement: SuppDataset_1.zip [file Fbxl3_set_A.pdf › Supplemental Dataset 1/A-mRNA_nonrhyth_translation_nonrhyth/Fbxl3_set_A.pdf]

## Fbxl4

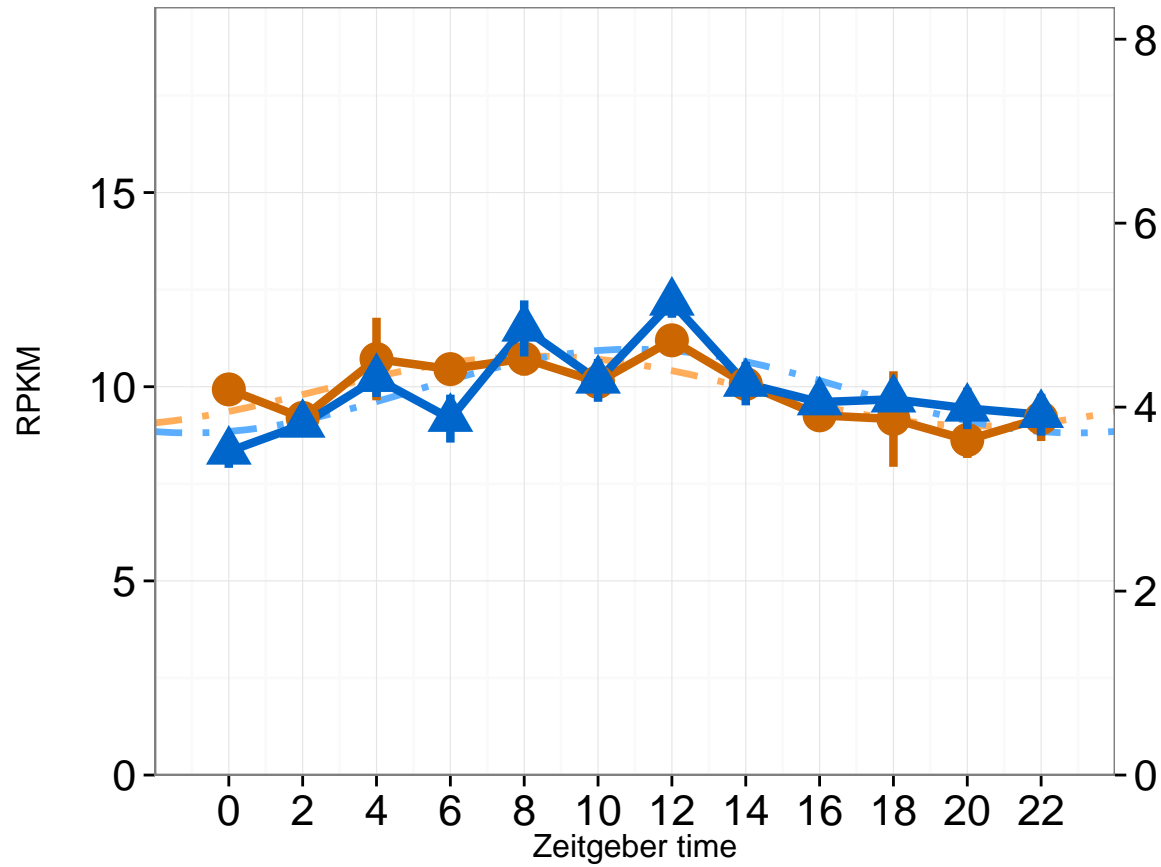

## Fbxl4

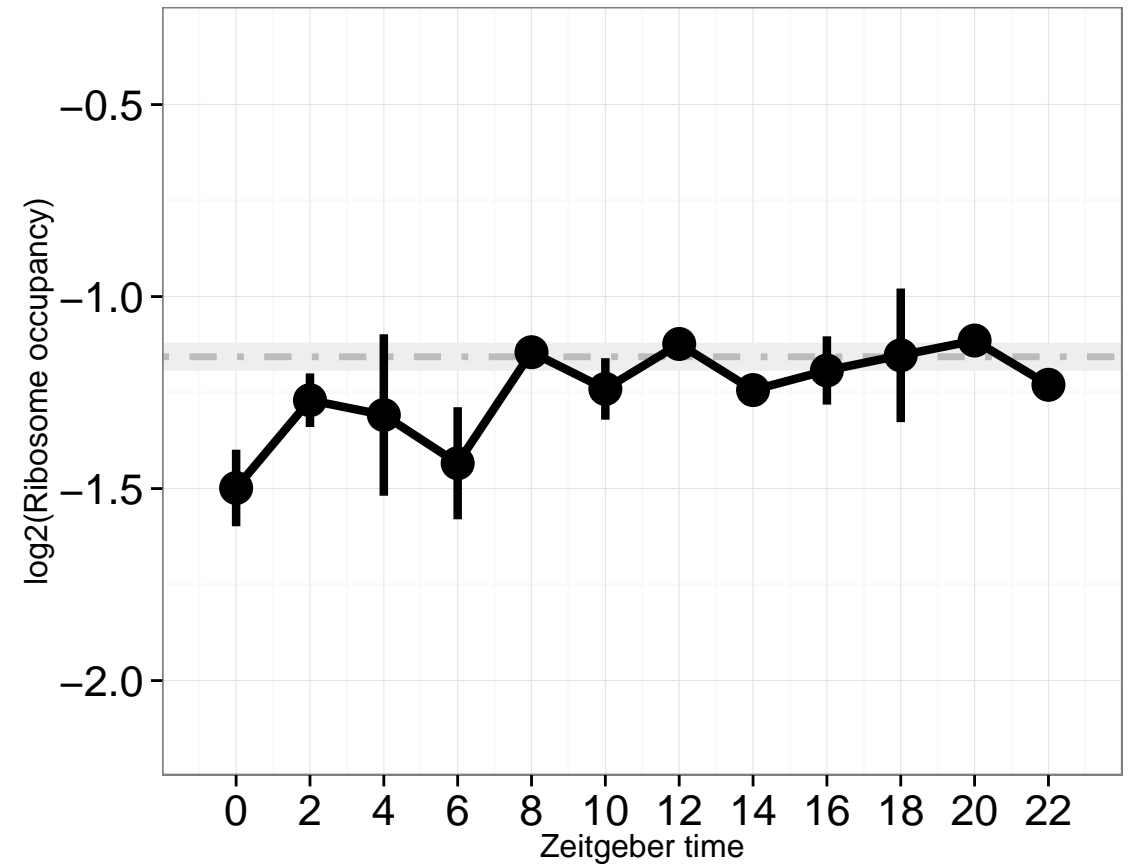

Supplement: SuppDataset_1.zip [file Fbxl4_set_A.pdf › Supplemental Dataset 1/A-mRNA_nonrhyth_translation_nonrhyth/Fbxl4_set_A.pdf]

## Fbxl5

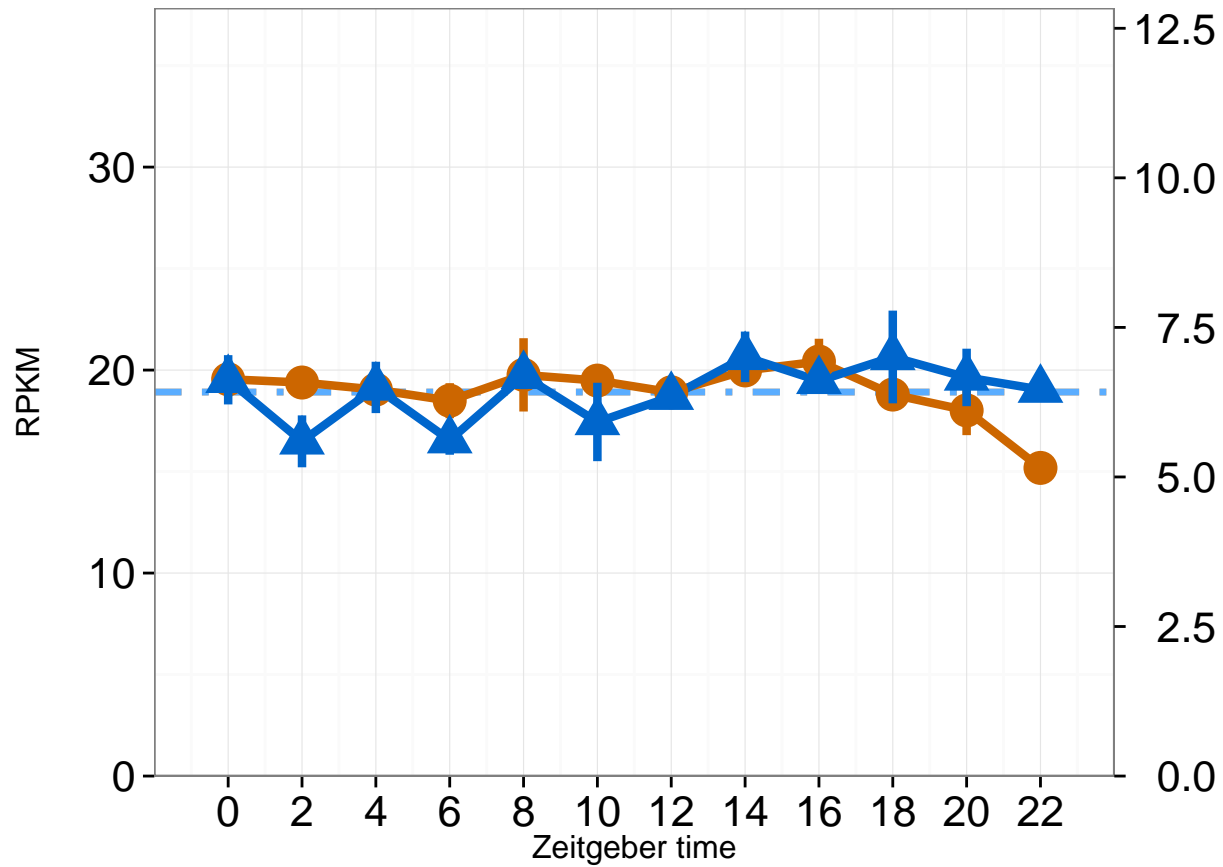

## Fbxl5

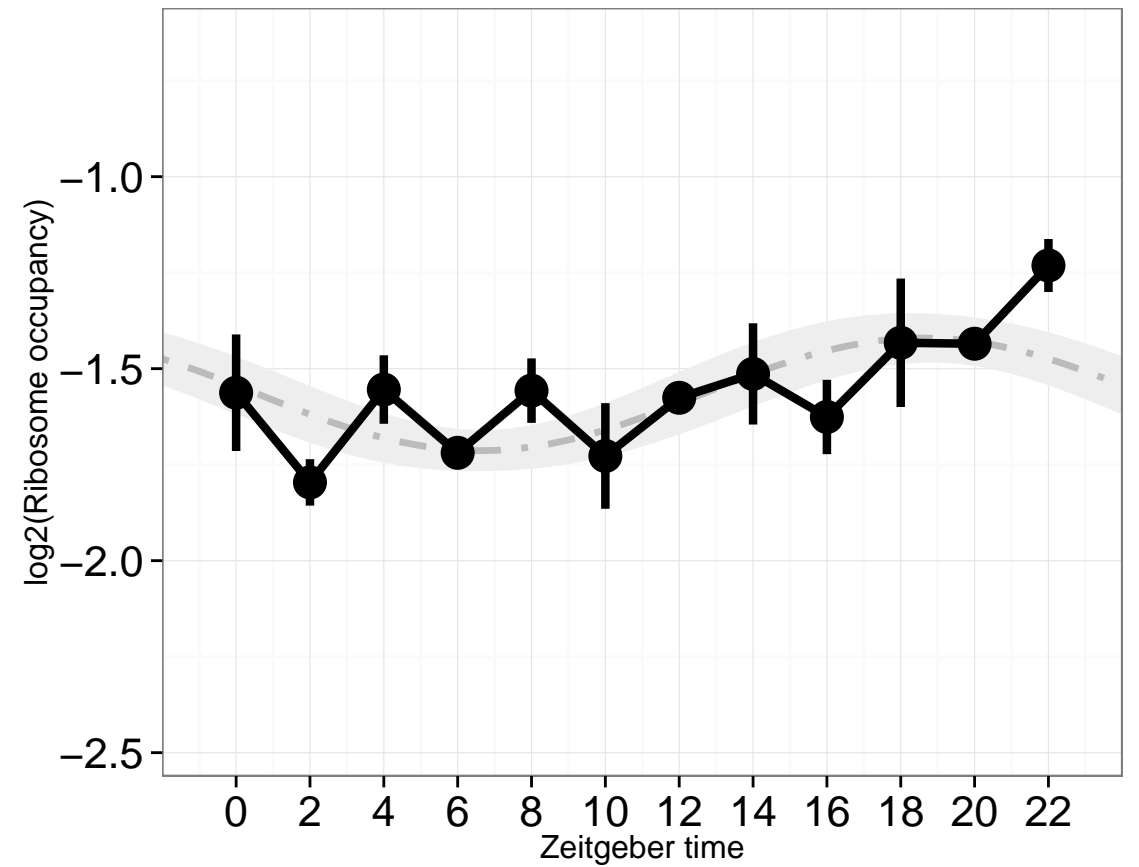

Supplement: SuppDataset_1.zip [file Fbxl5_set_A.pdf › Supplemental Dataset 1/A-mRNA_nonrhyth_translation_nonrhyth/Fbxl5_set_A.pdf]

## Fbxl6

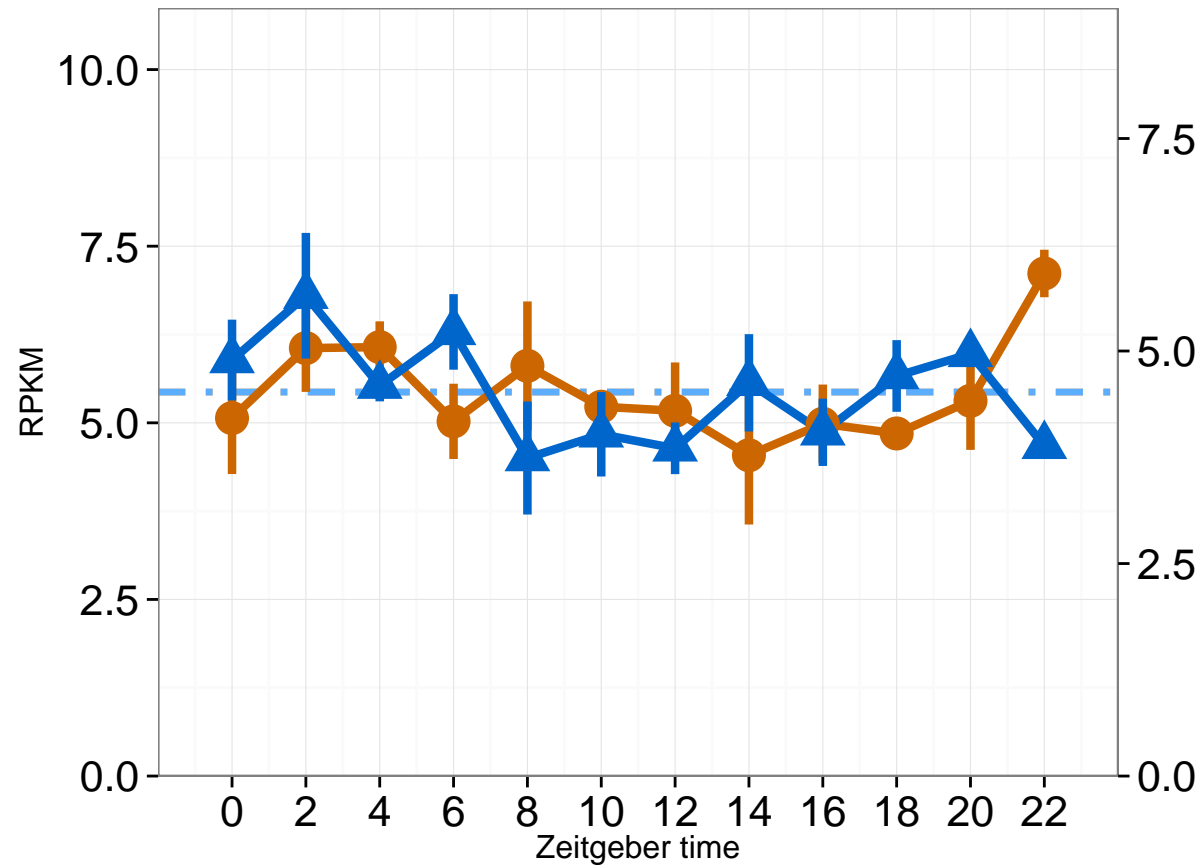

## Fbxl6

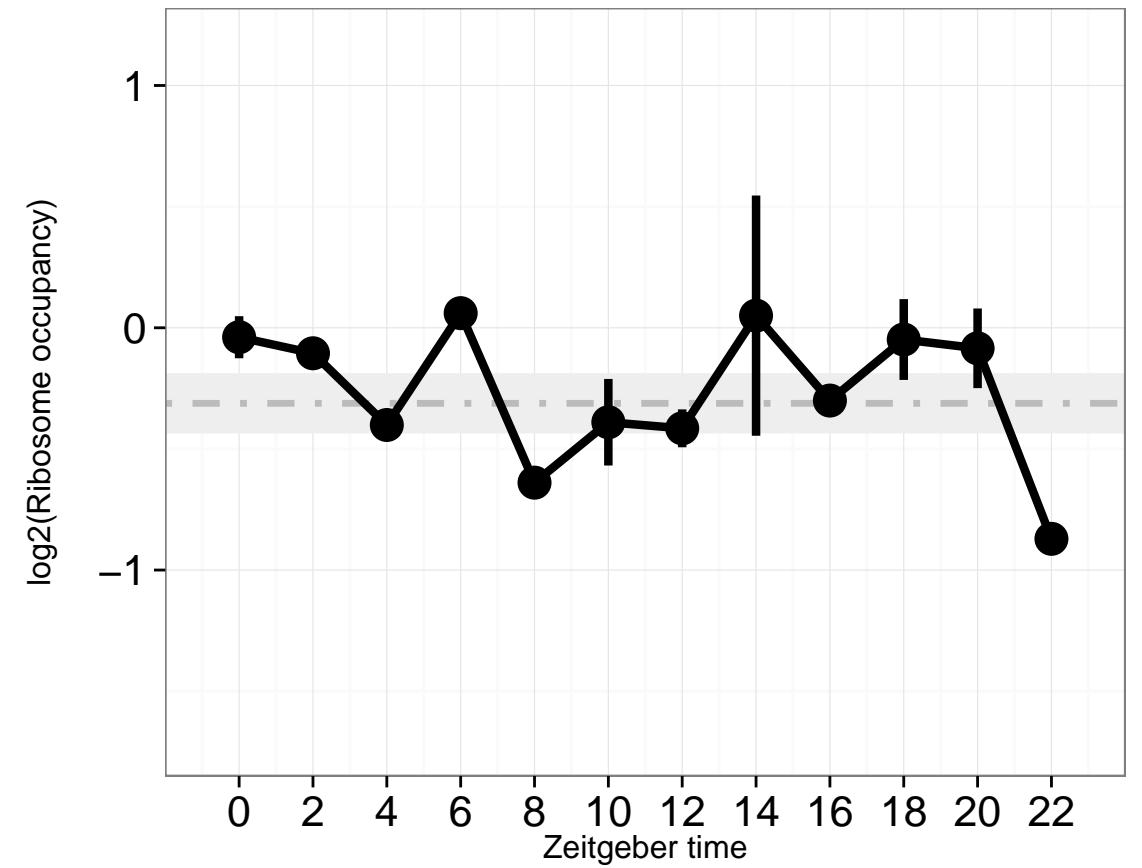

Supplement: SuppDataset_1.zip [file Fbxl6_set_A.pdf › Supplemental Dataset 1/A-mRNA_nonrhyth_translation_nonrhyth/Fbxl6_set_A.pdf]

# Fbxl8

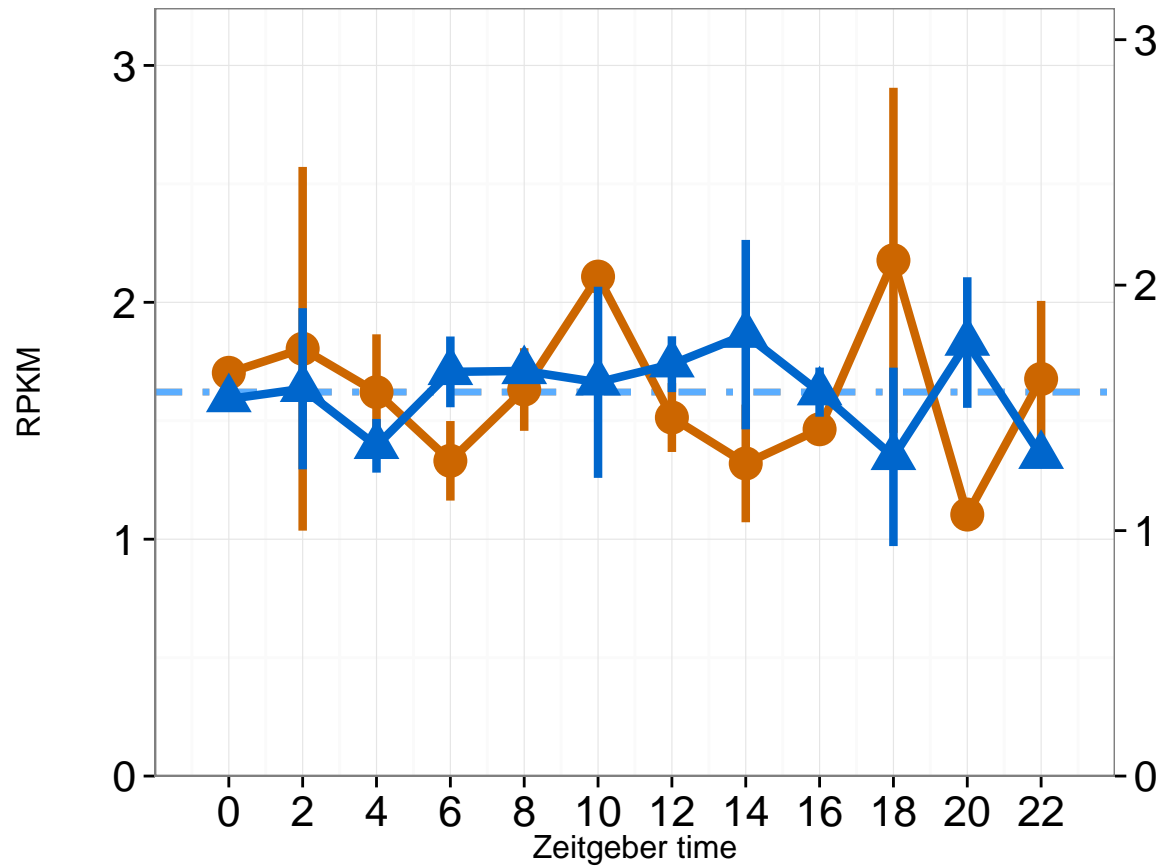

# Fbxl8

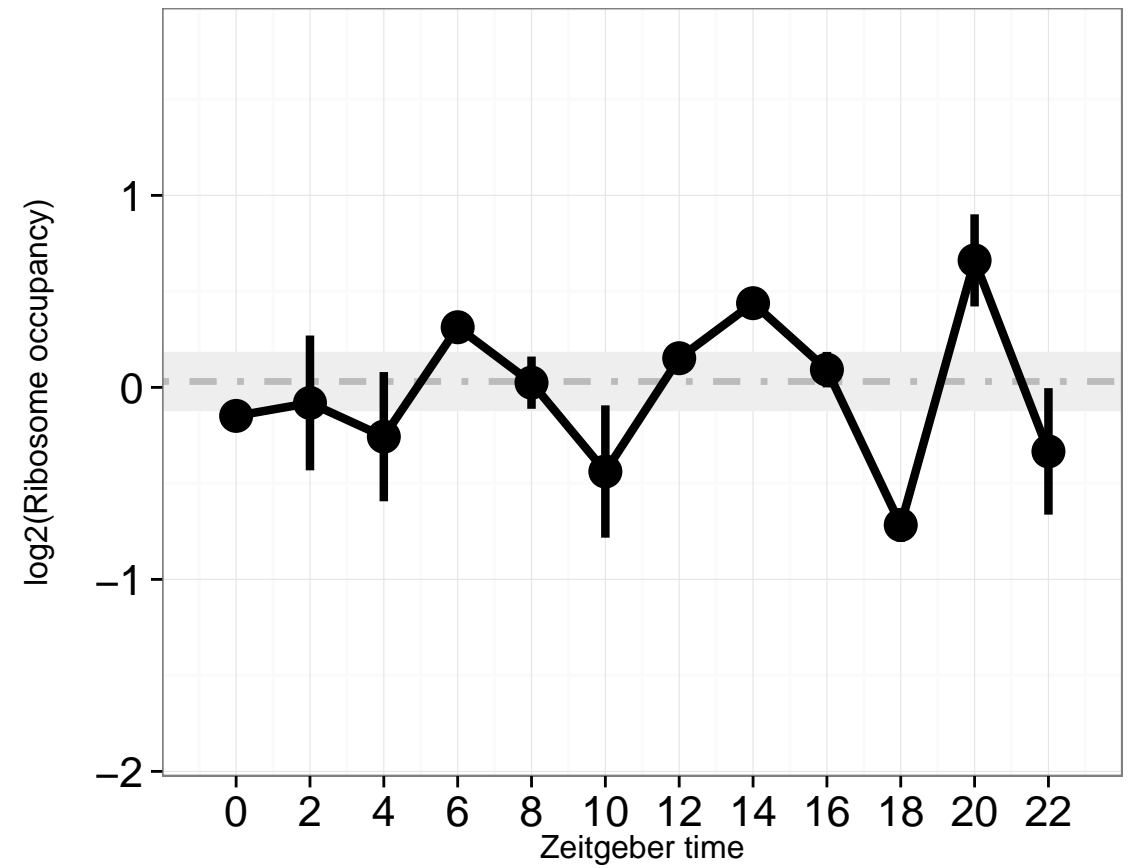

Supplement: SuppDataset_1.zip [file Fbxl8_set_A.pdf › Supplemental Dataset 1/A-mRNA_nonrhyth_translation_nonrhyth/Fbxl8_set_A.pdf]

## Fbxo11

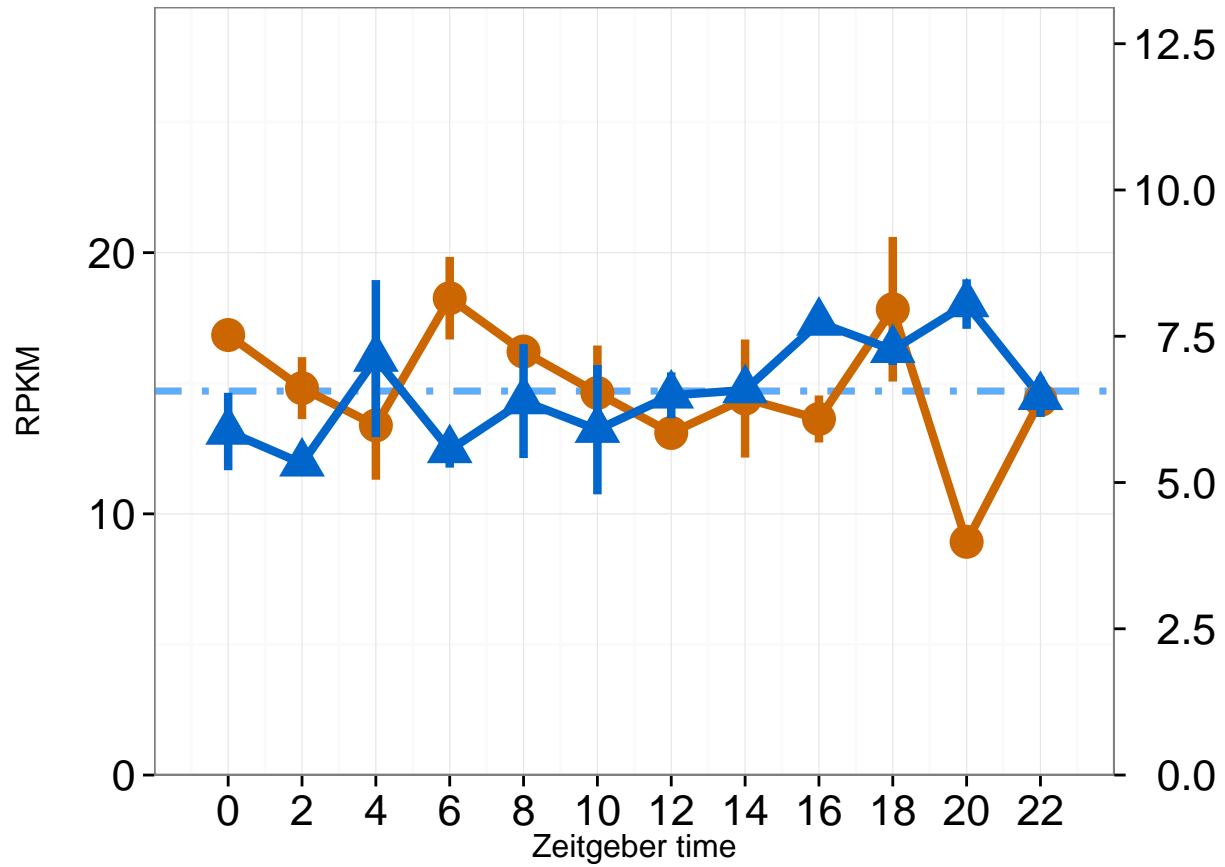

## Fbxo11

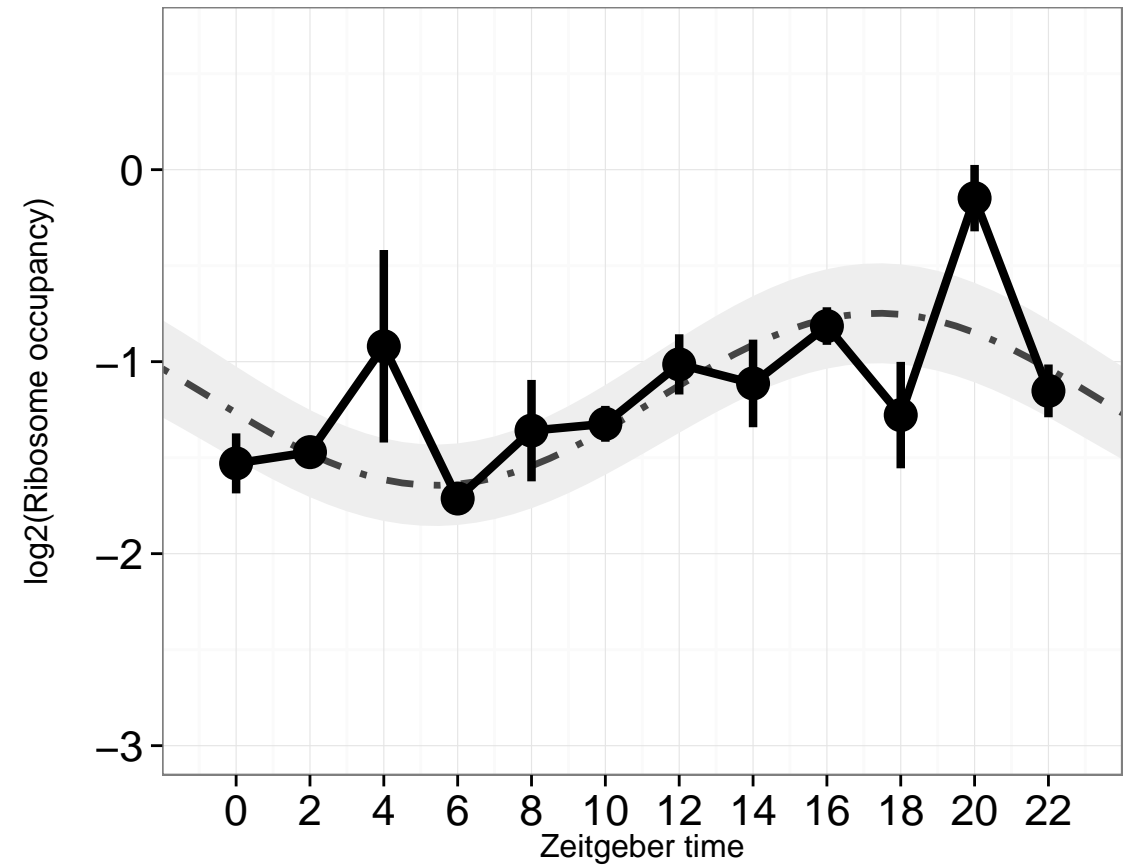

Supplement: SuppDataset_1.zip [file Fbxo11_set_A.pdf › Supplemental Dataset 1/A-mRNA_nonrhyth_translation_nonrhyth/Fbxo11_set_A.pdf]

## Fbxo18

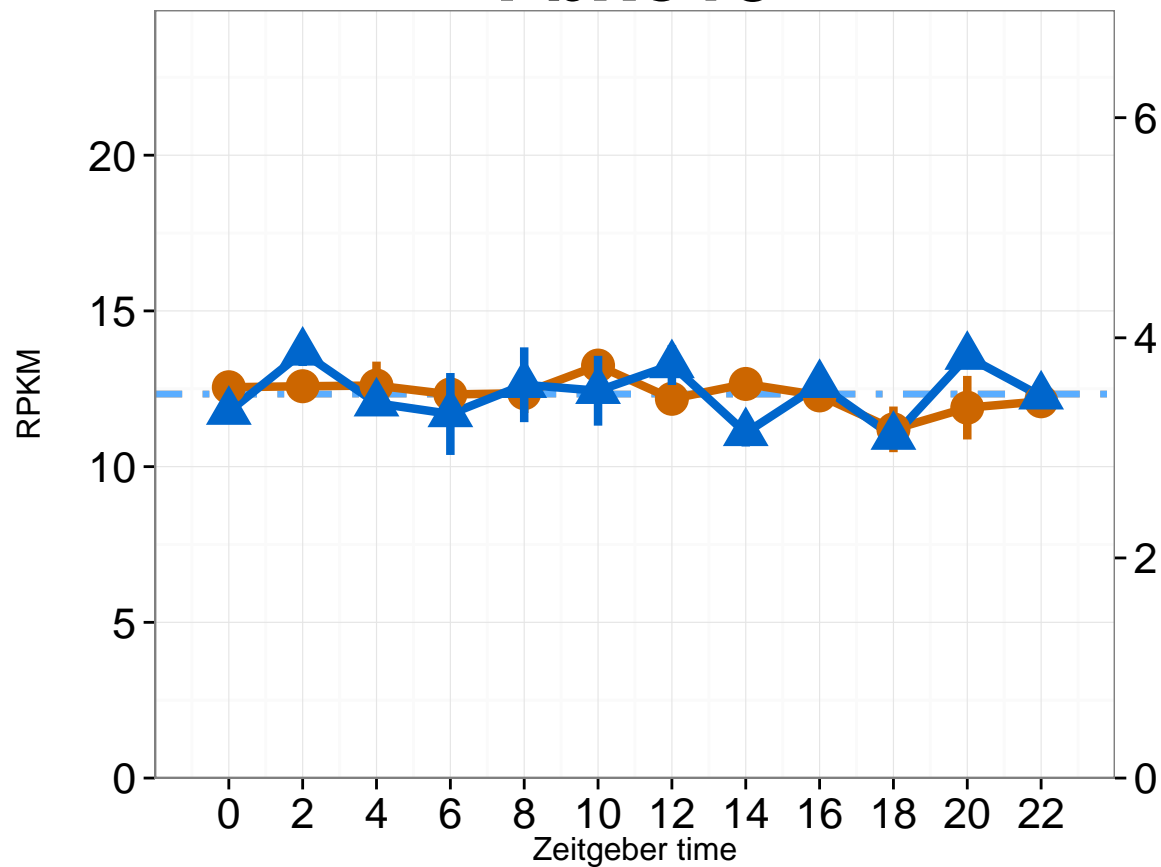

## Fbxo18

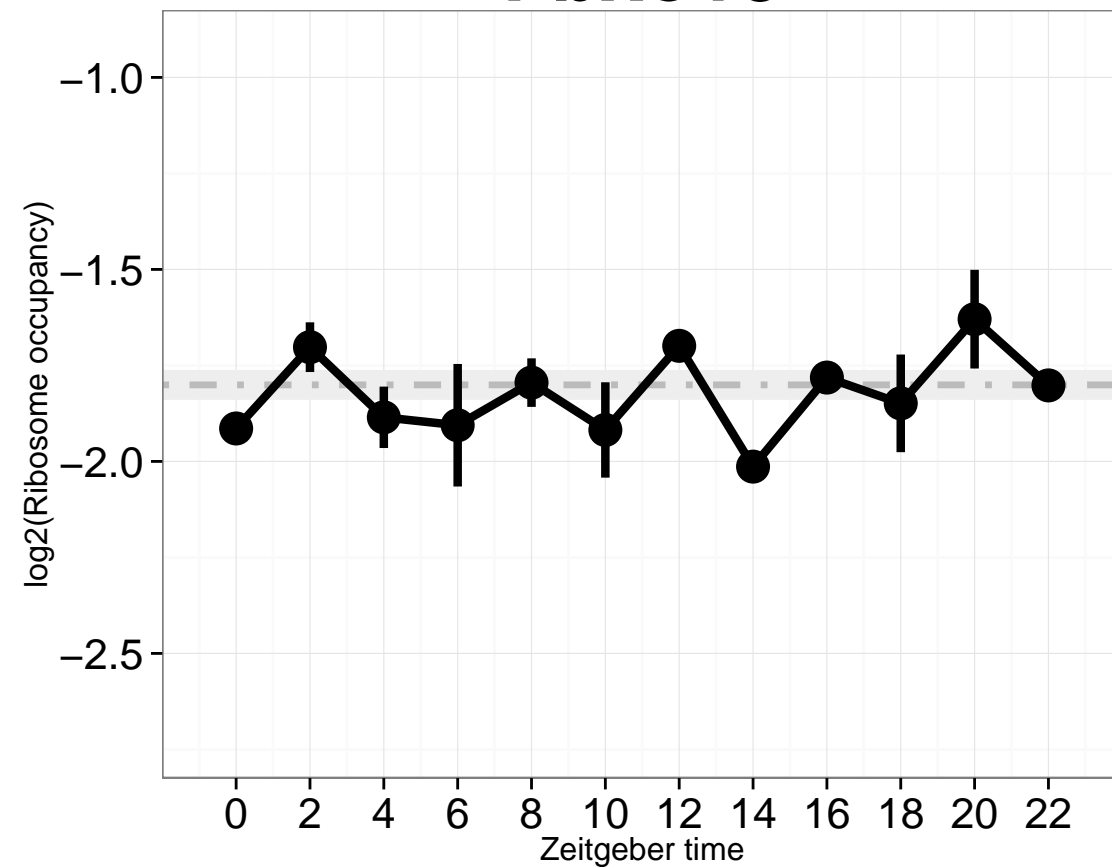

Supplement: SuppDataset_1.zip [file Fbxo18_set_A.pdf › Supplemental Dataset 1/A-mRNA_nonrhyth_translation_nonrhyth/Fbxo18_set_A.pdf]

## Fbxo22

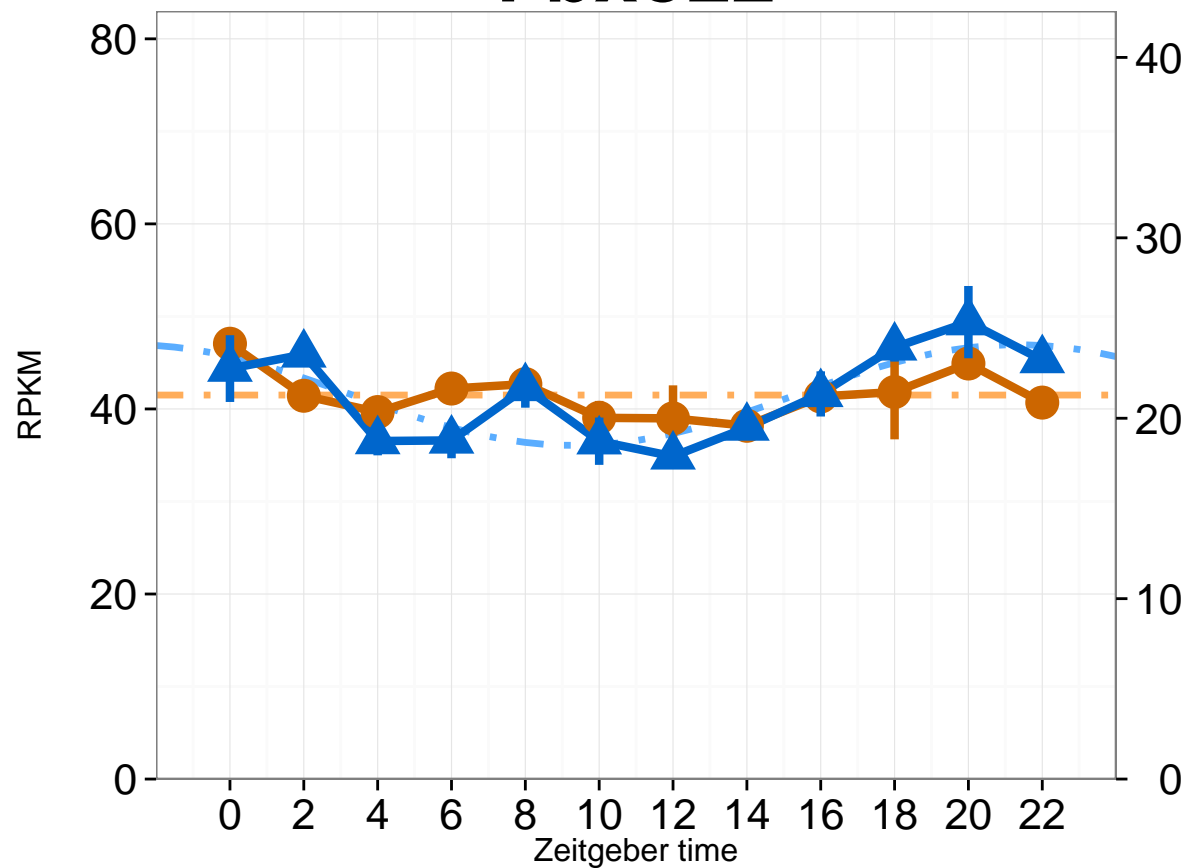

## Fbxo22

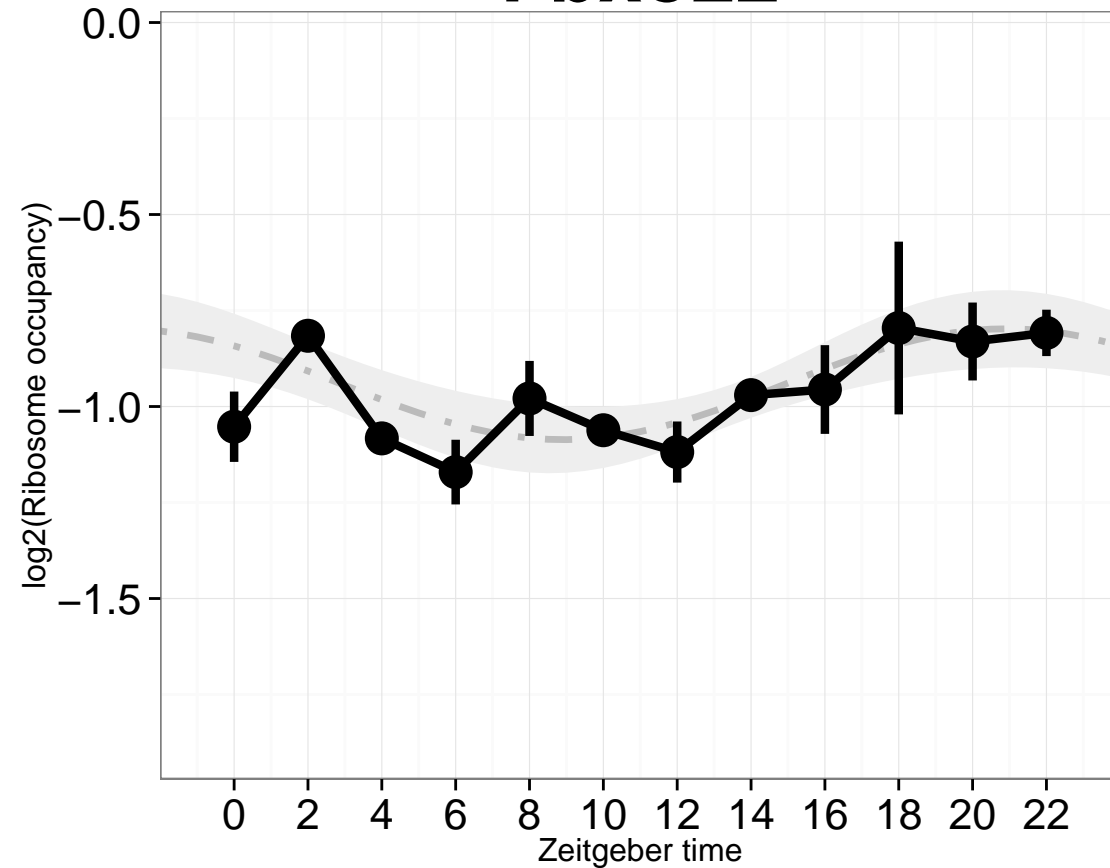

Supplement: SuppDataset_1.zip [file Fbxo22_set_A.pdf › Supplemental Dataset 1/A-mRNA_nonrhyth_translation_nonrhyth/Fbxo22_set_A.pdf]

## Fbxo25

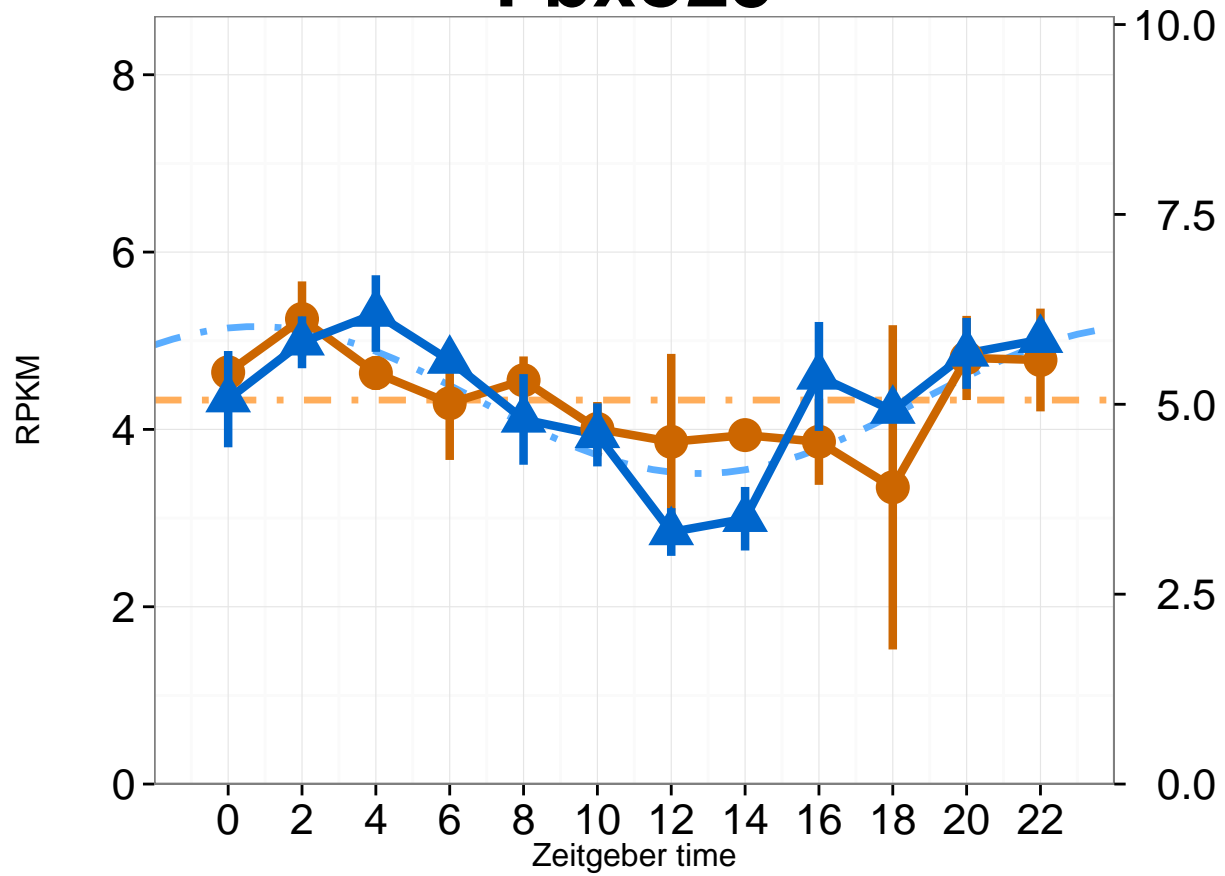

## Fbxo25

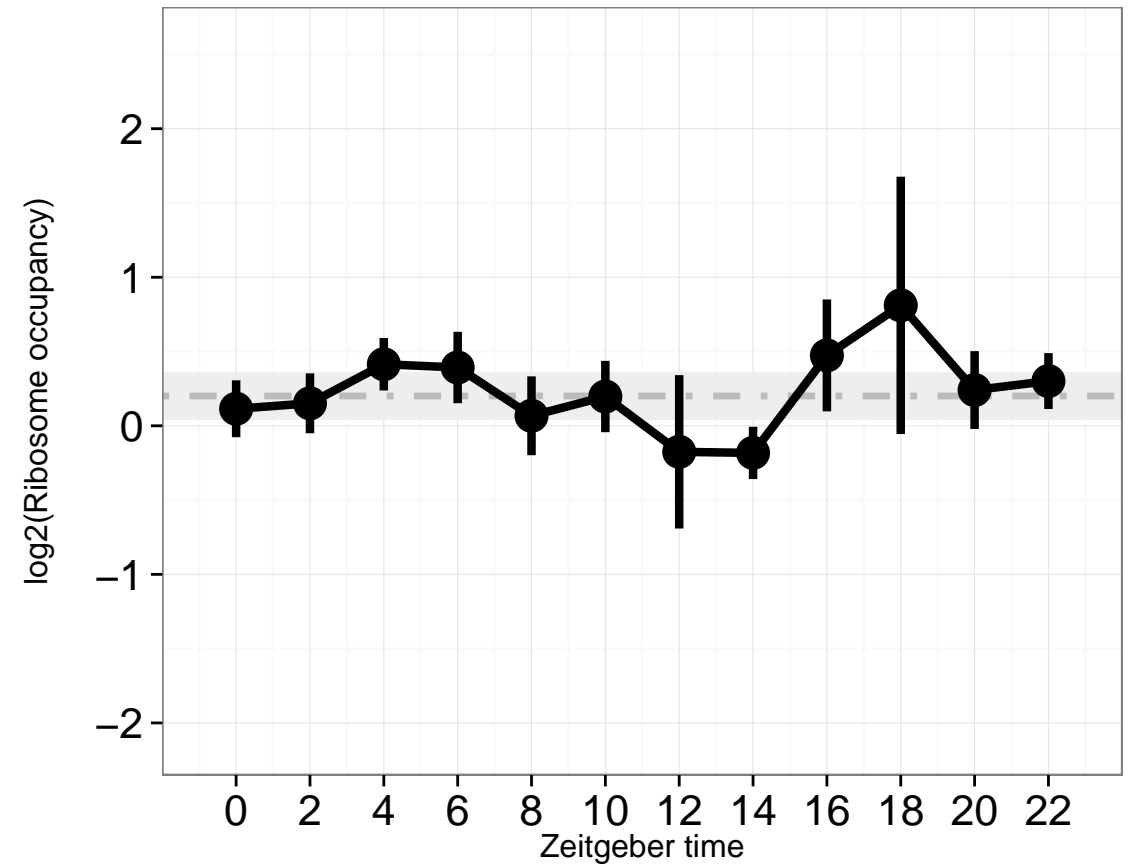

Supplement: SuppDataset_1.zip [file Fbxo25_set_A.pdf › Supplemental Dataset 1/A-mRNA_nonrhyth_translation_nonrhyth/Fbxo25_set_A.pdf]

## Fbxo28

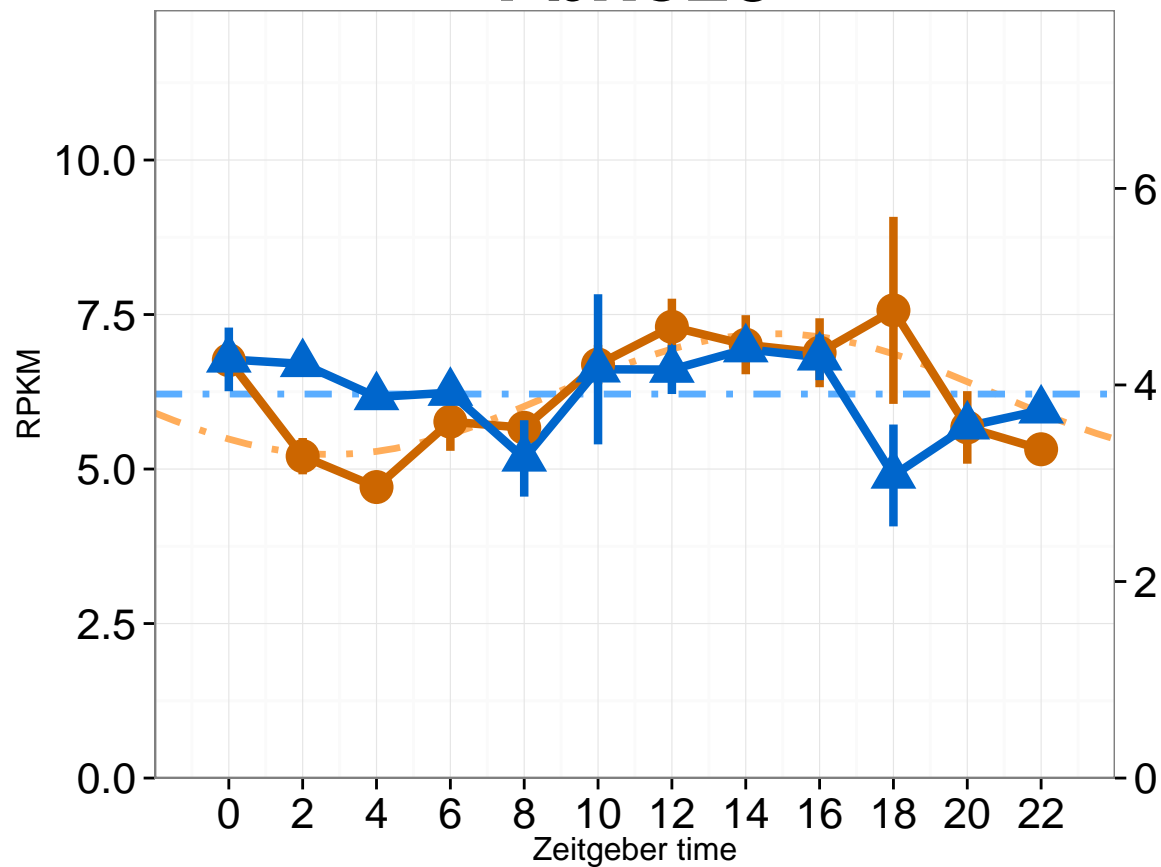

## Fbxo28

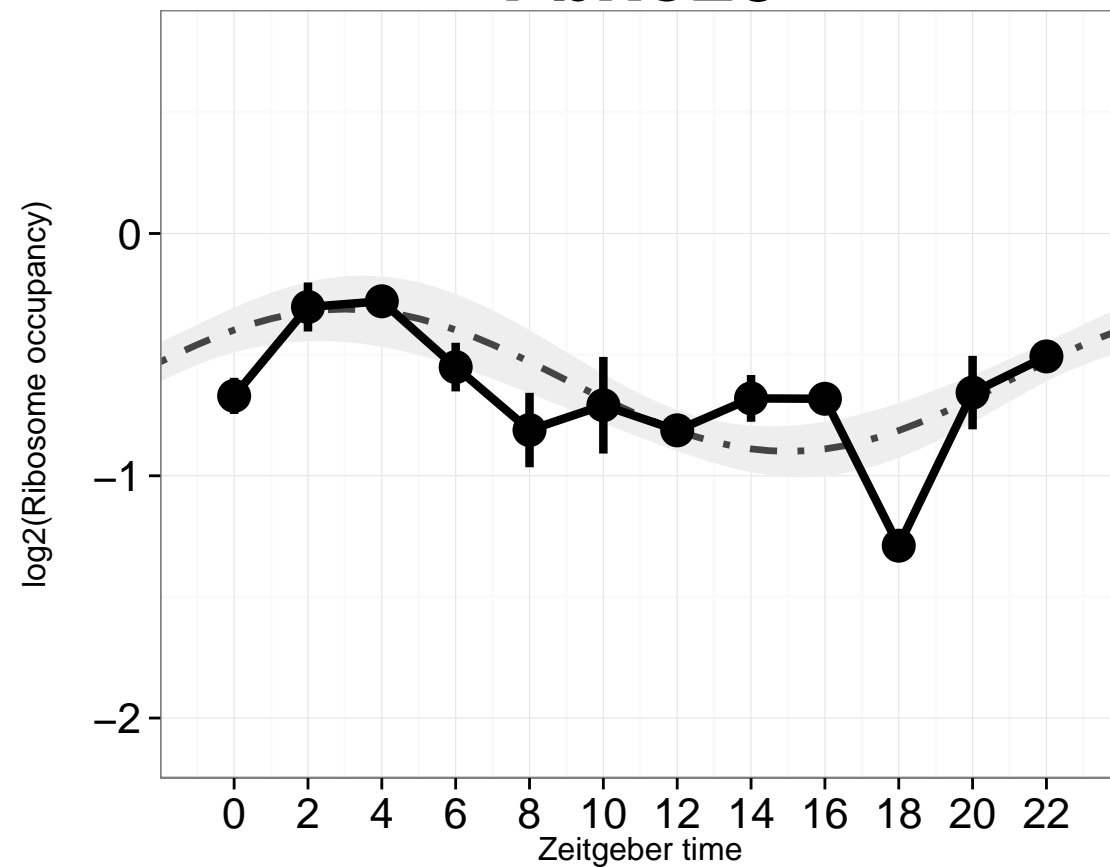

Supplement: SuppDataset_1.zip [file Fbxo28_set_A.pdf › Supplemental Dataset 1/A-mRNA_nonrhyth_translation_nonrhyth/Fbxo28_set_A.pdf]

## Fbxo30

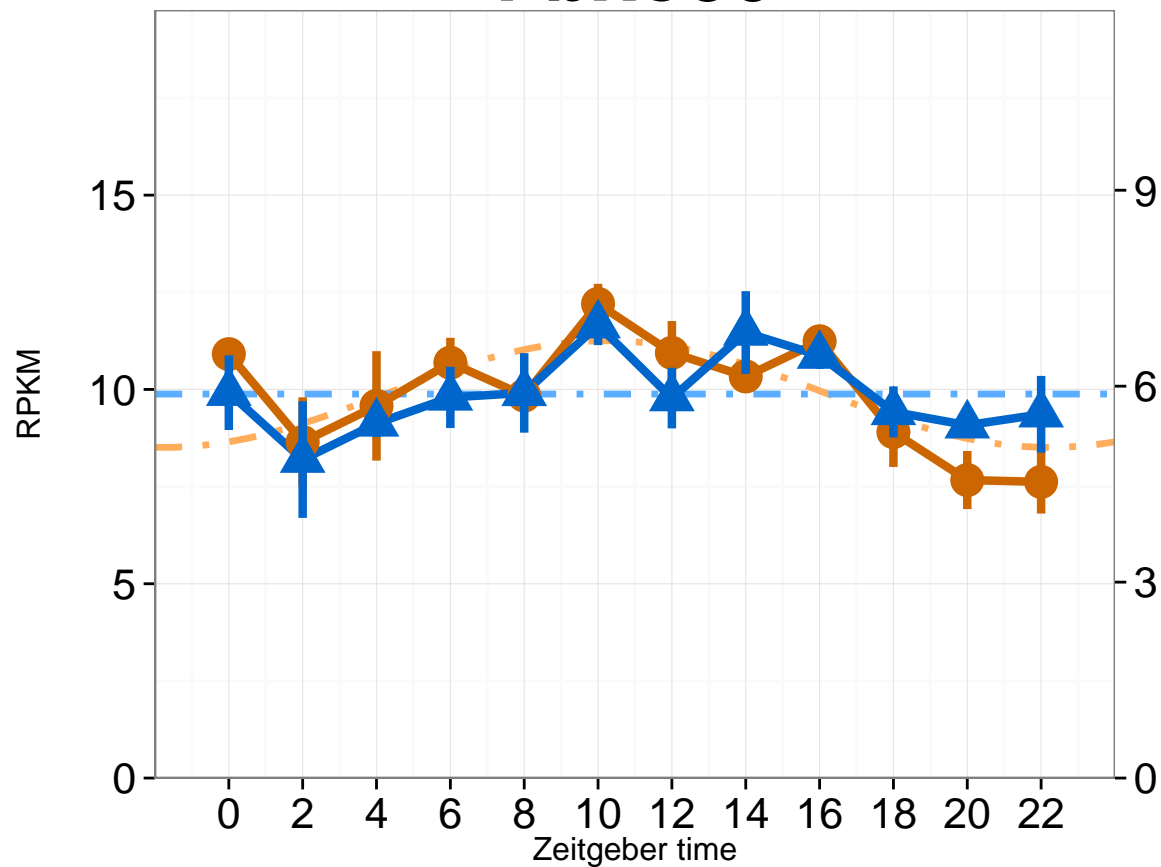

## Fbxo30

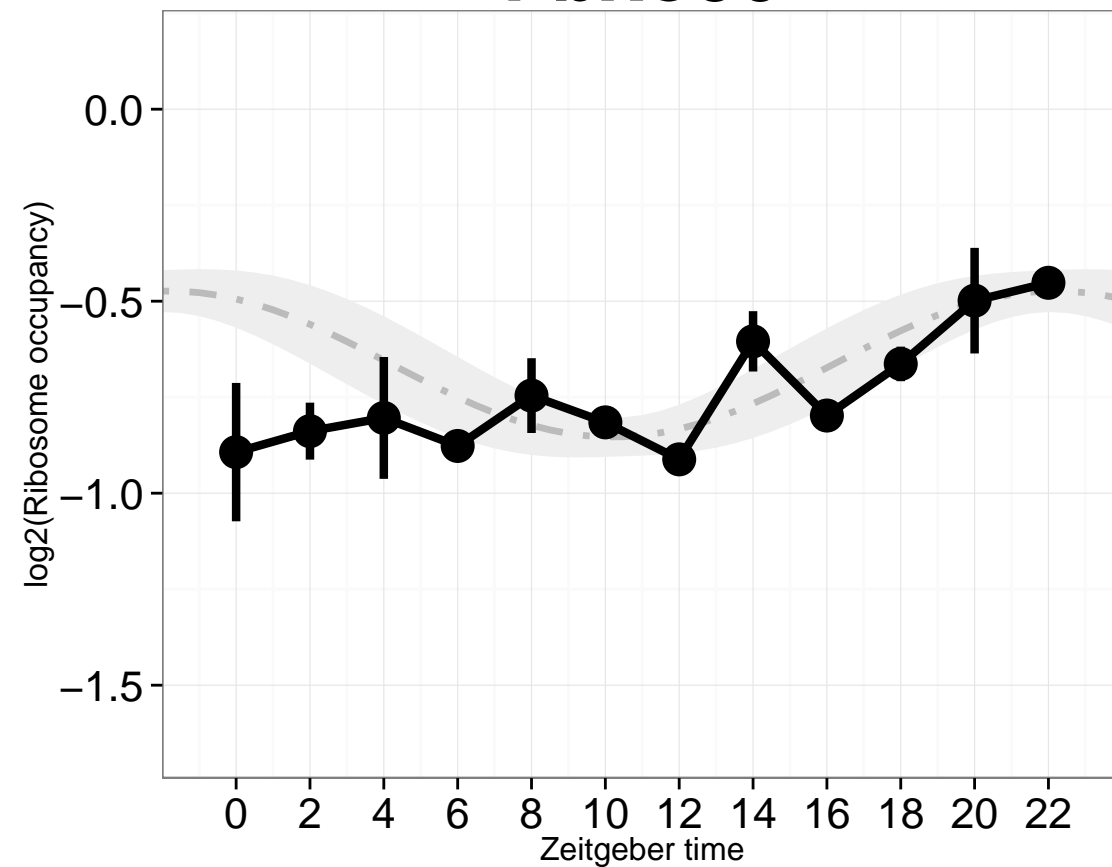

Supplement: SuppDataset_1.zip [file Fbxo30_set_A.pdf › Supplemental Dataset 1/A-mRNA_nonrhyth_translation_nonrhyth/Fbxo30_set_A.pdf]

## Fbxo38

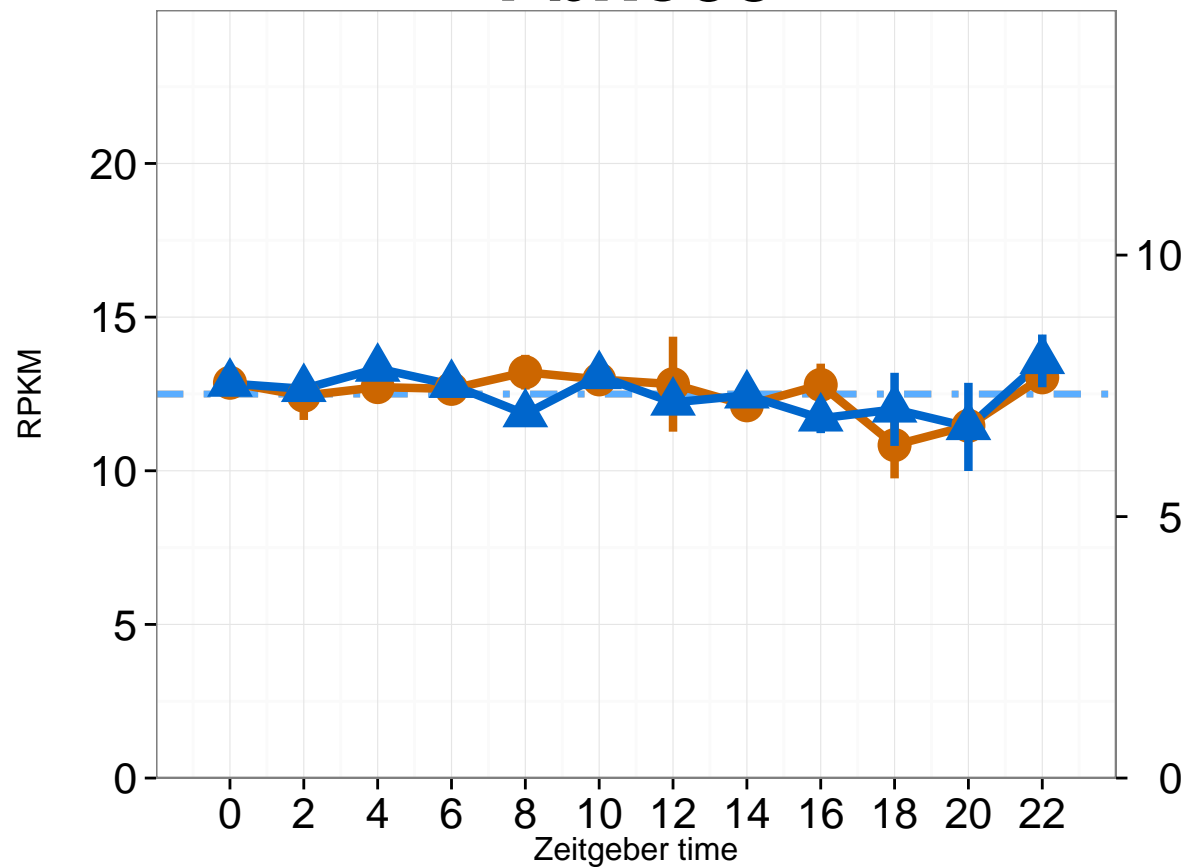

## Fbxo38

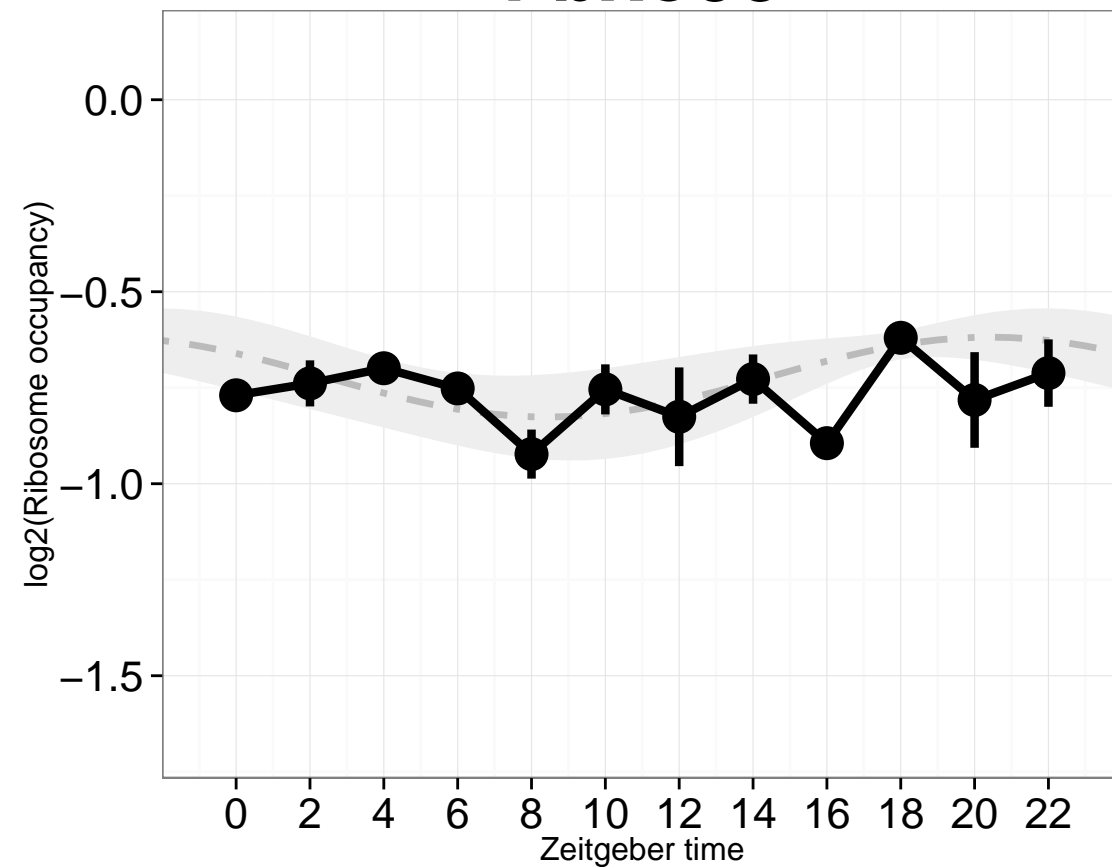

Supplement: SuppDataset_1.zip [file Fbxo38_set_A.pdf › Supplemental Dataset 1/A-mRNA_nonrhyth_translation_nonrhyth/Fbxo38_set_A.pdf]

## Fbxo3

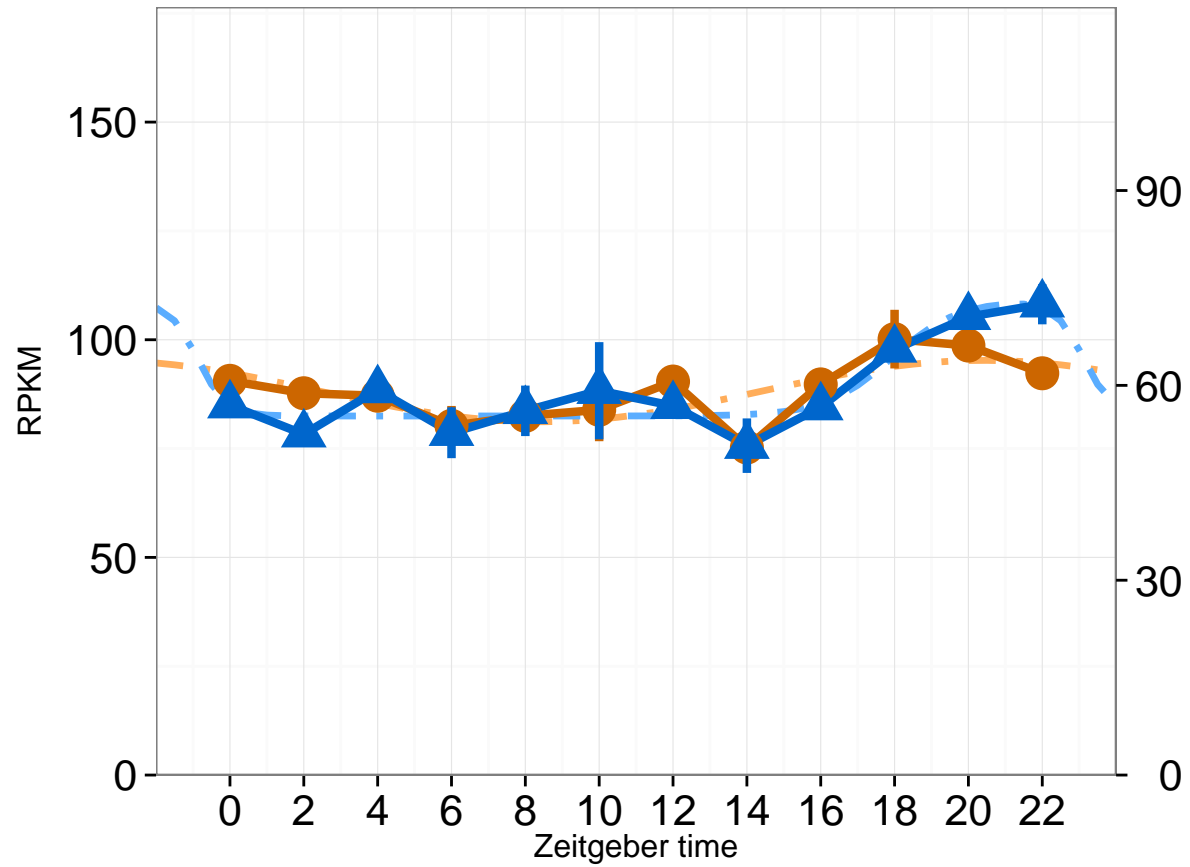

## Fbxo3

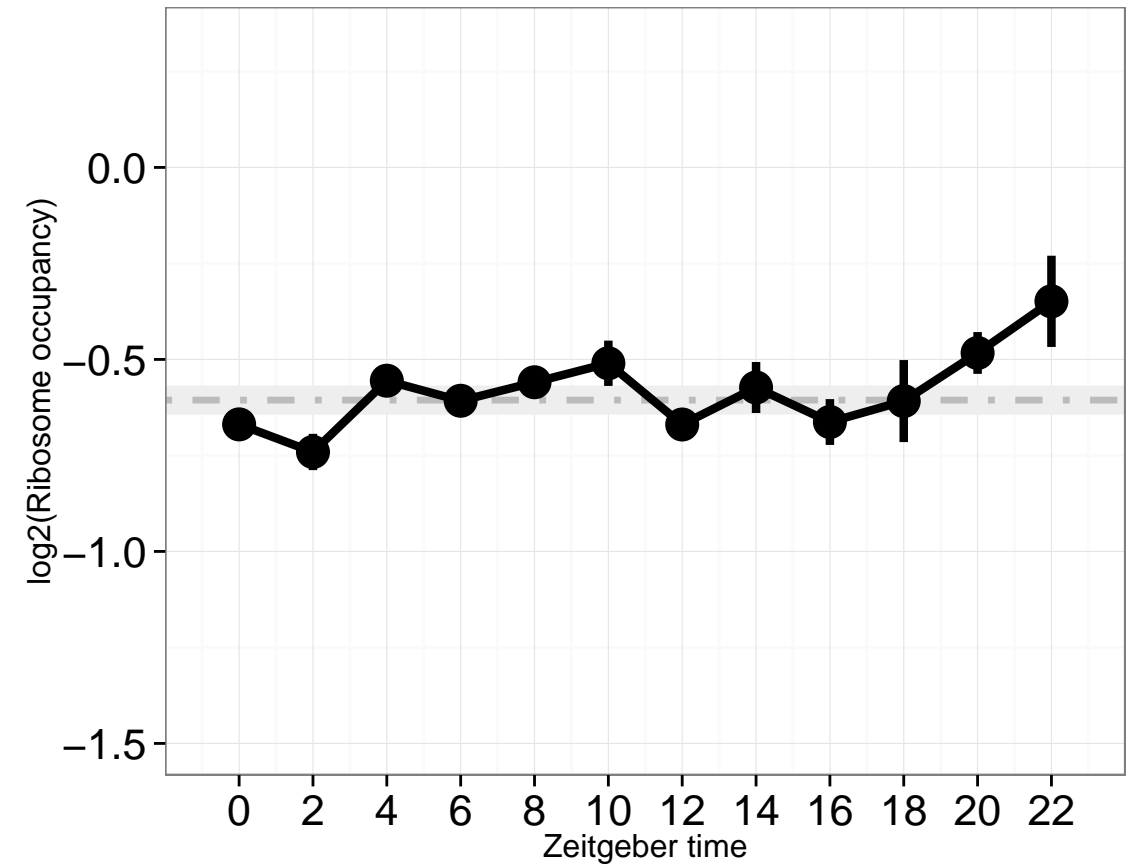

Supplement: SuppDataset_1.zip [file Fbxo3_set_A.pdf › Supplemental Dataset 1/A-mRNA_nonrhyth_translation_nonrhyth/Fbxo3_set_A.pdf]

## Fbxo42

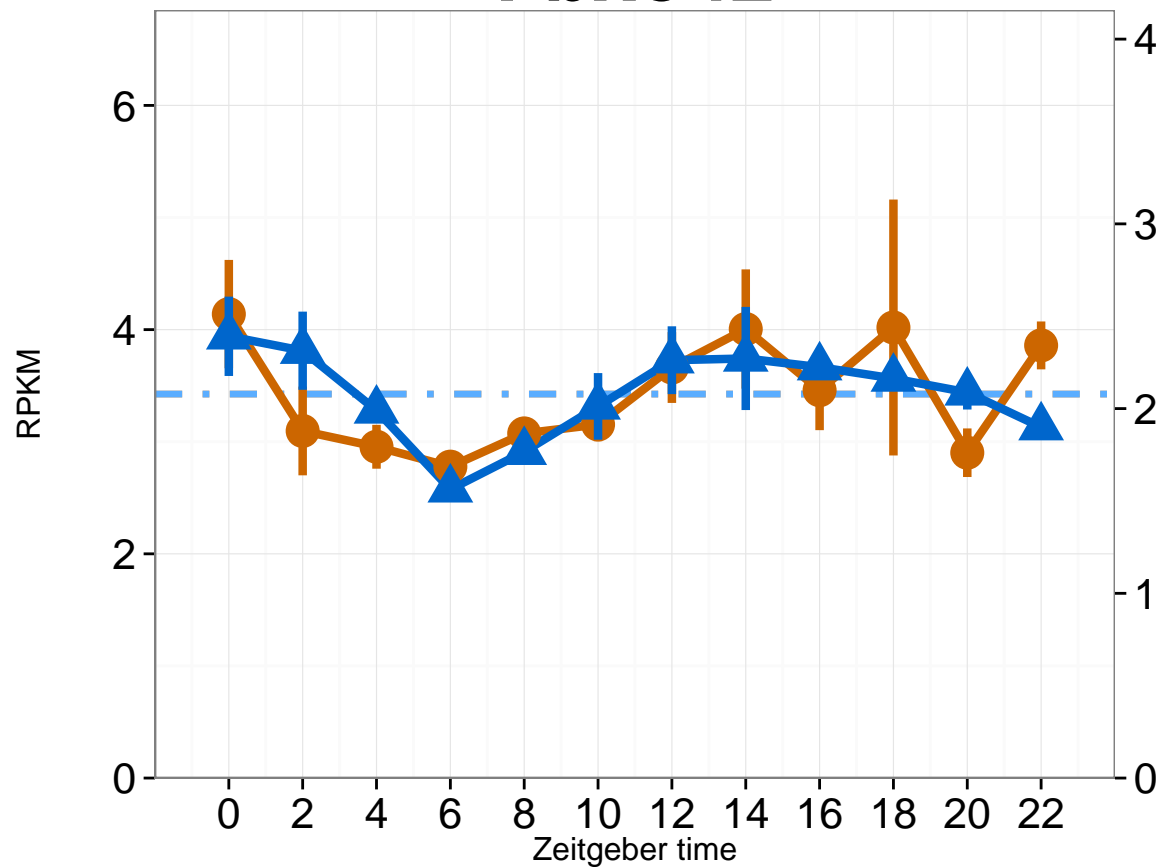

## Fbxo42

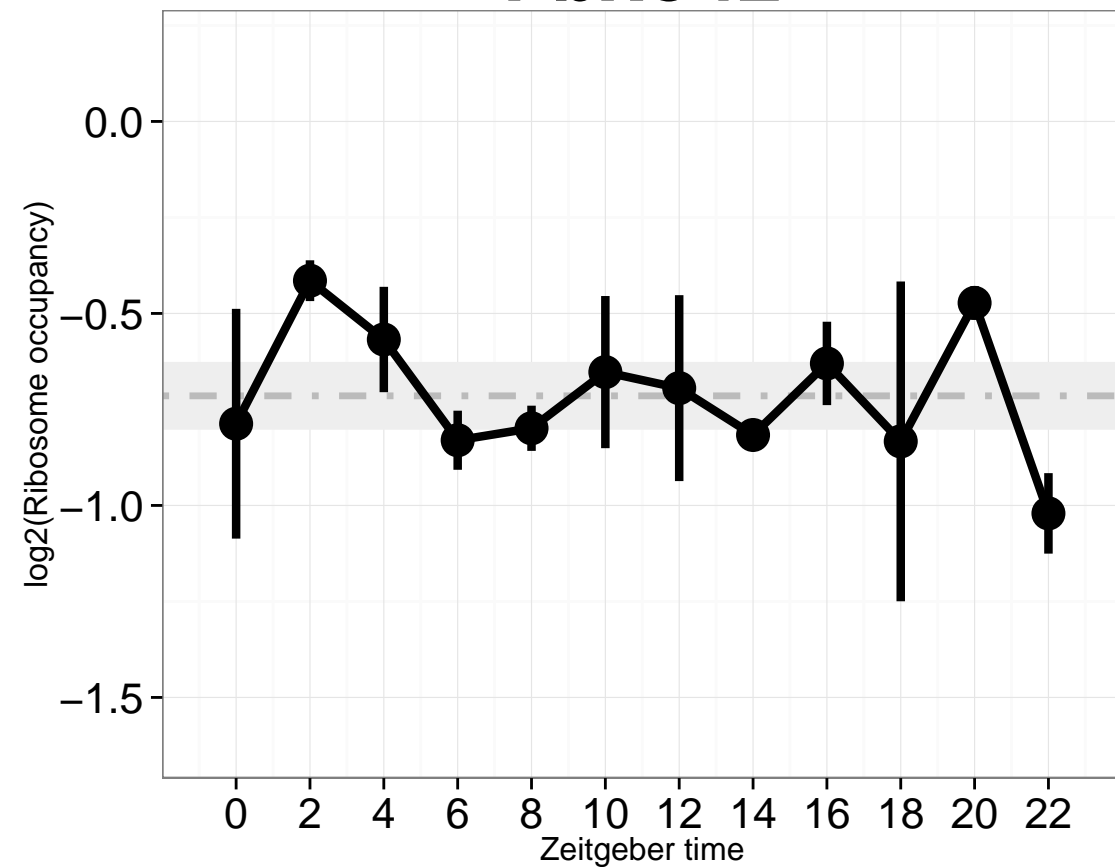

Supplement: SuppDataset_1.zip [file Fbxo42_set_A.pdf › Supplemental Dataset 1/A-mRNA_nonrhyth_translation_nonrhyth/Fbxo42_set_A.pdf]

## Fbxo45

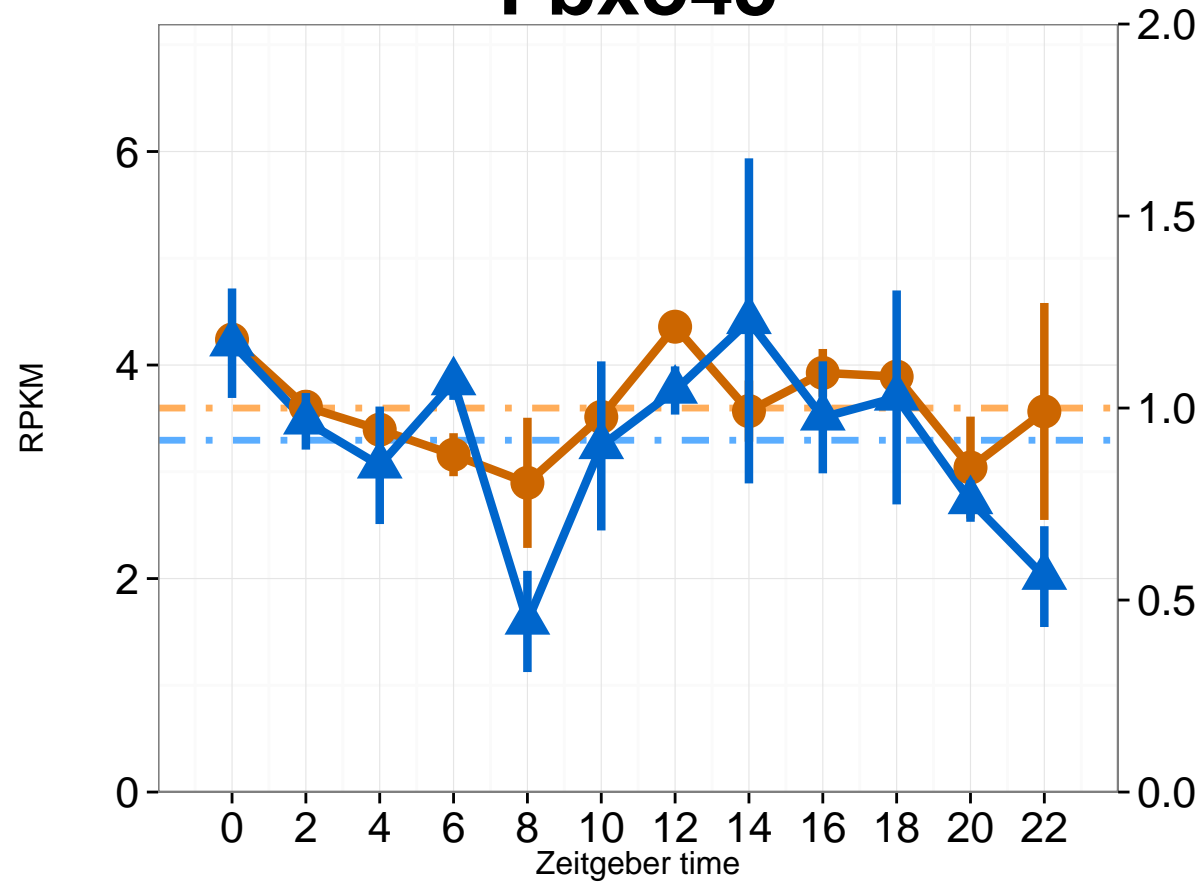

## Fbxo45

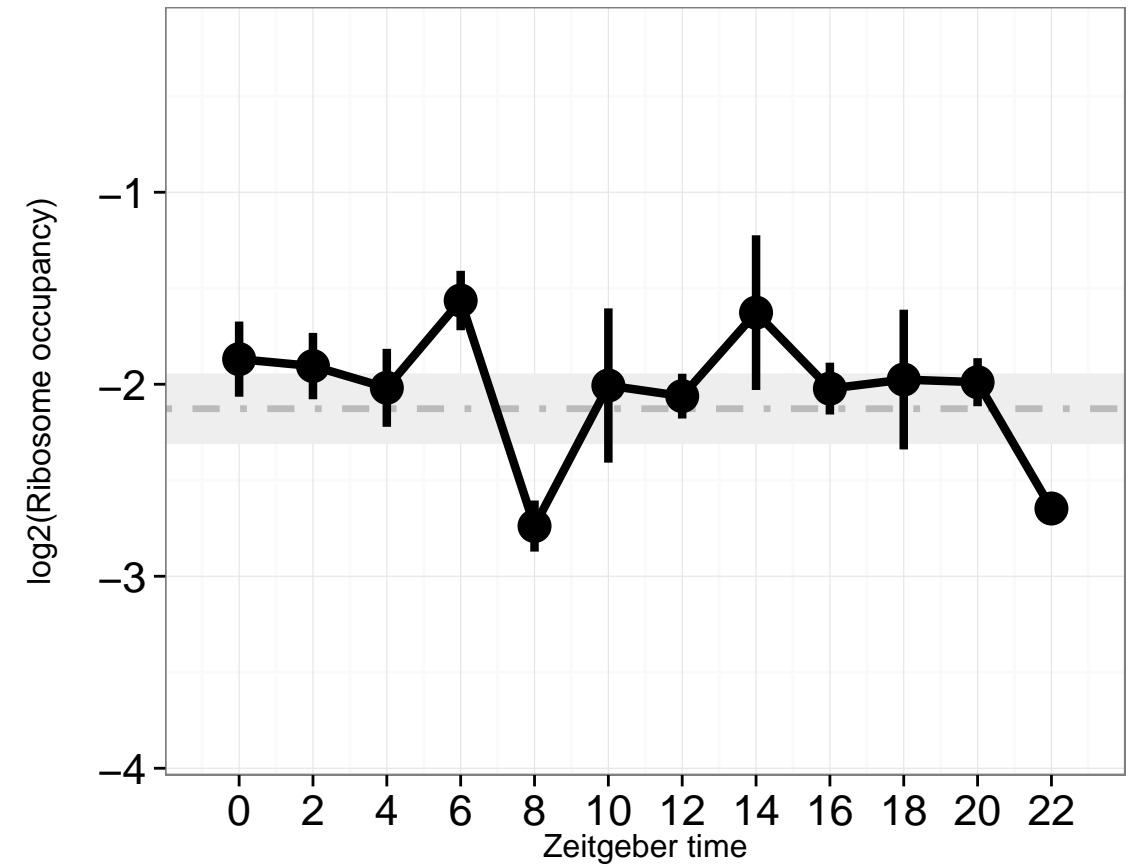

Supplement: SuppDataset_1.zip [file Fbxo45_set_A.pdf › Supplemental Dataset 1/A-mRNA_nonrhyth_translation_nonrhyth/Fbxo45_set_A.pdf]

# Fbxo46

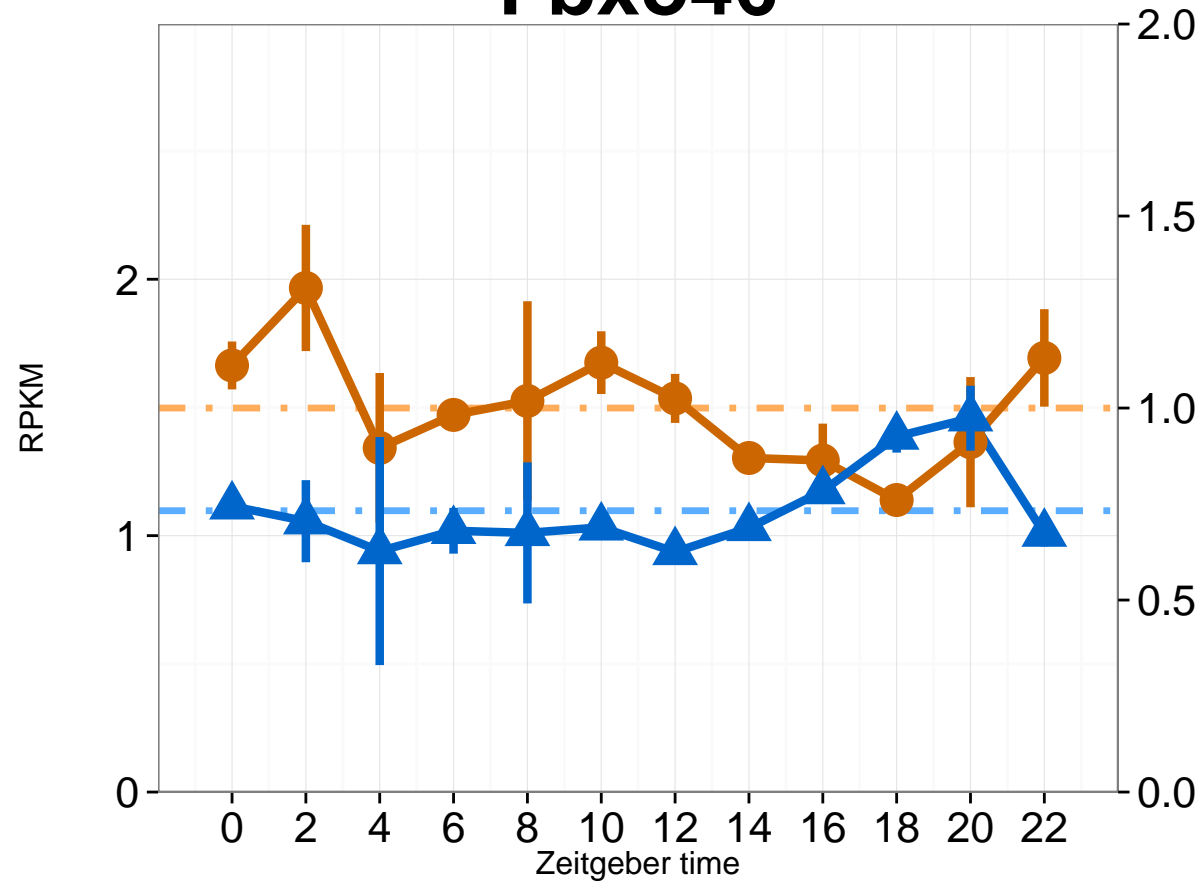

# Fbxo46

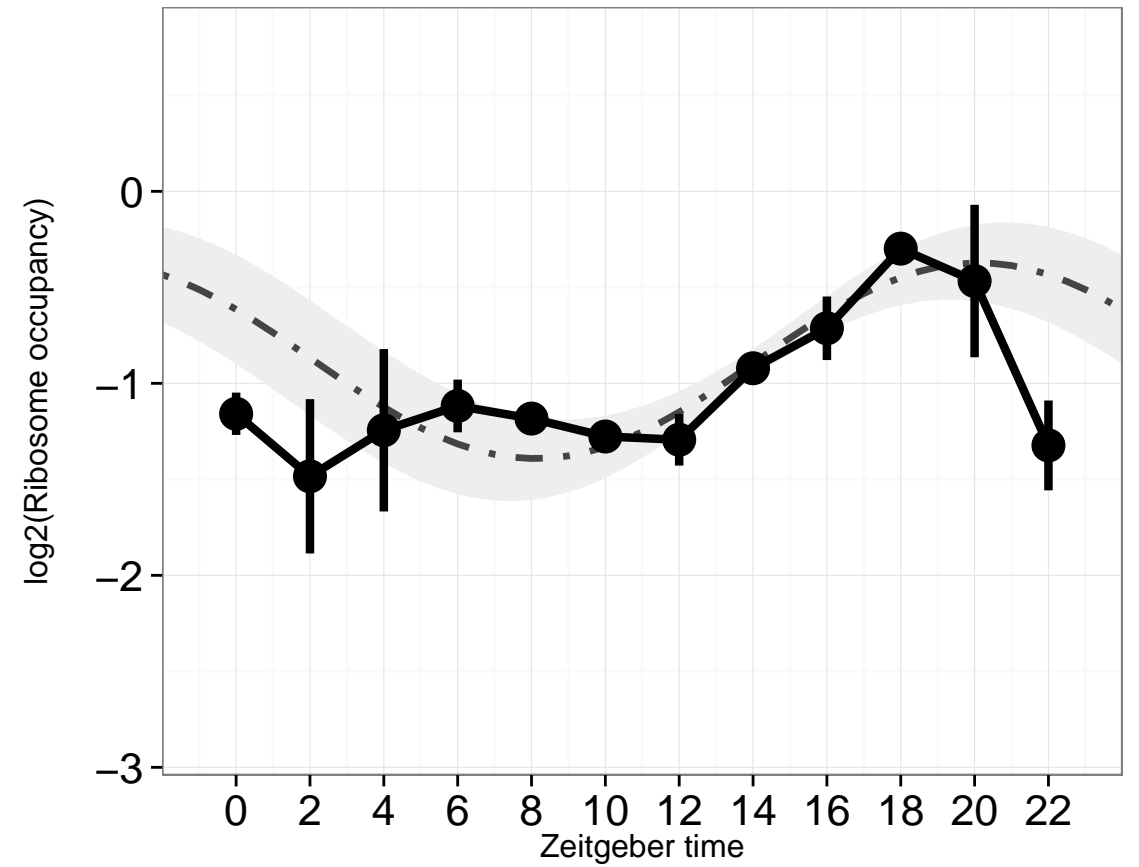

Supplement: SuppDataset_1.zip [file Fbxo46_set_A.pdf › Supplemental Dataset 1/A-mRNA_nonrhyth_translation_nonrhyth/Fbxo46_set_A.pdf]
