# Supplementary figures and images for: Ribosome profiling reveals the rhythmic liver translatome and circadian clock regulation by upstream open reading frames (part 28 of 113)
Source: HighWire-hosted journal article supplement (doi:10.1101/gr.195404.115), 2015-10-20

## Fbxo47

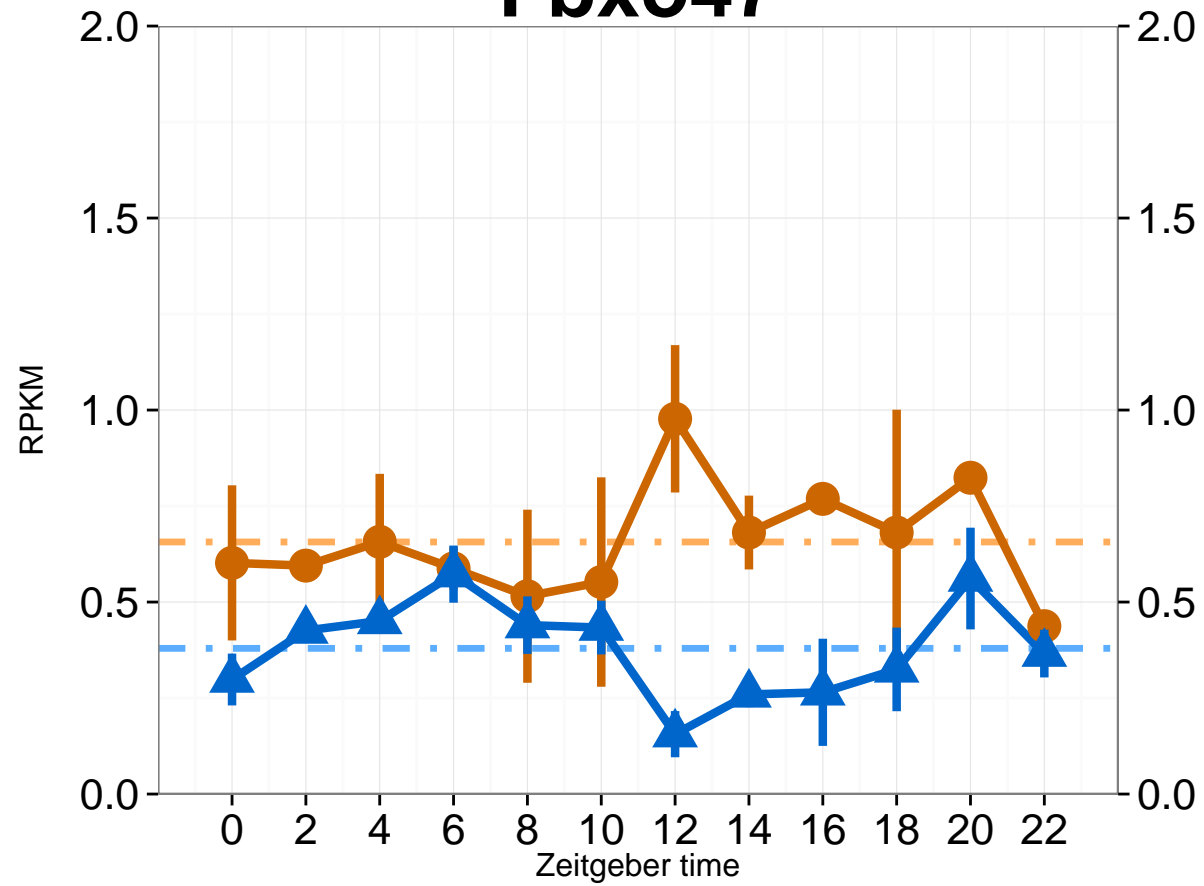

## Fbxo47

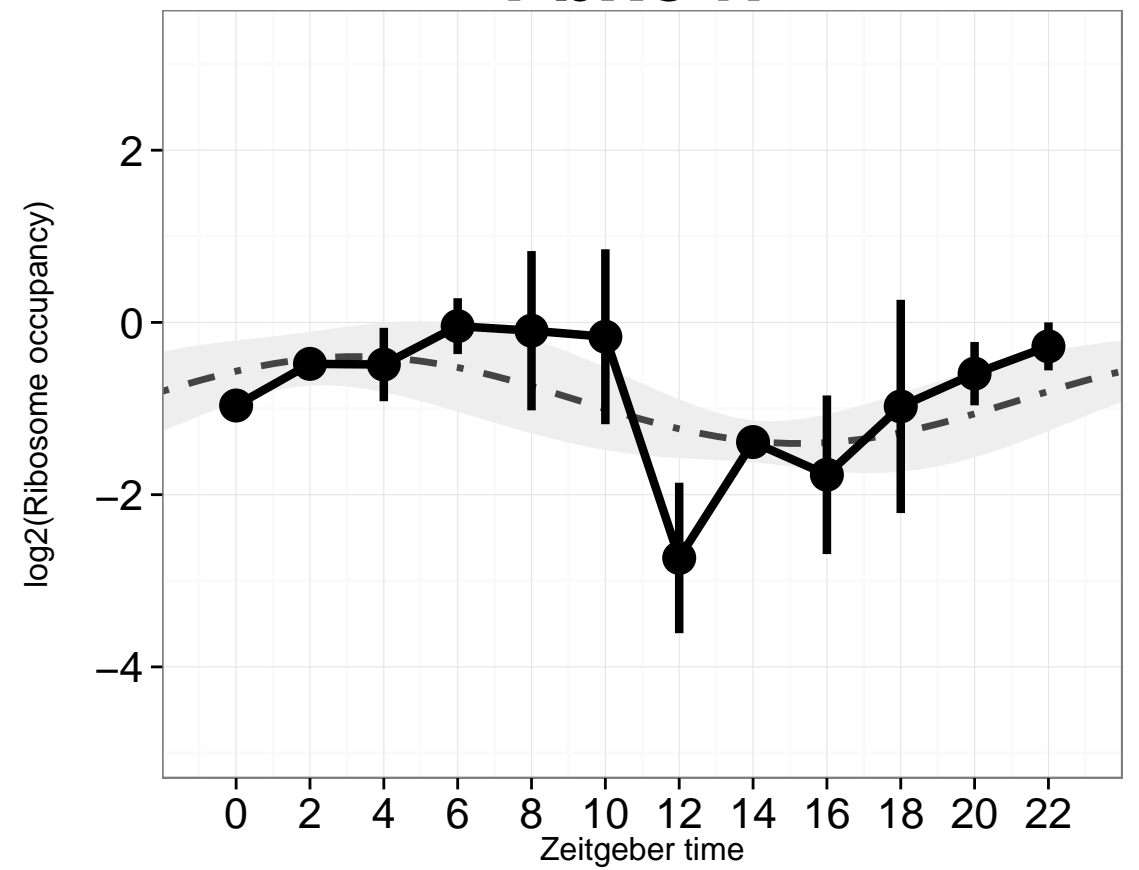

Supplement: SuppDataset_1.zip [file Fbxo47_set_A.pdf › Supplemental Dataset 1/A-mRNA_nonrhyth_translation_nonrhyth/Fbxo47_set_A.pdf]

## Fbxo4

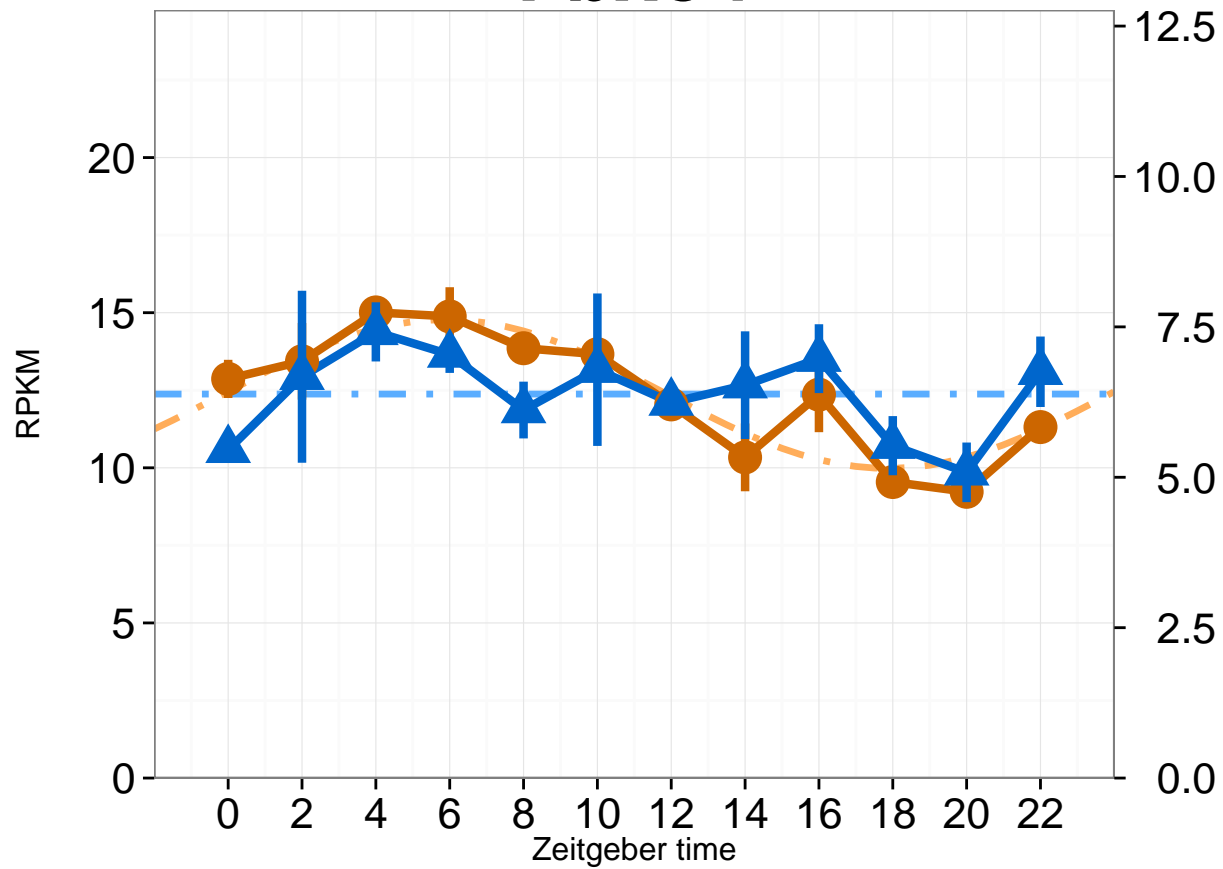

## Fbxo4

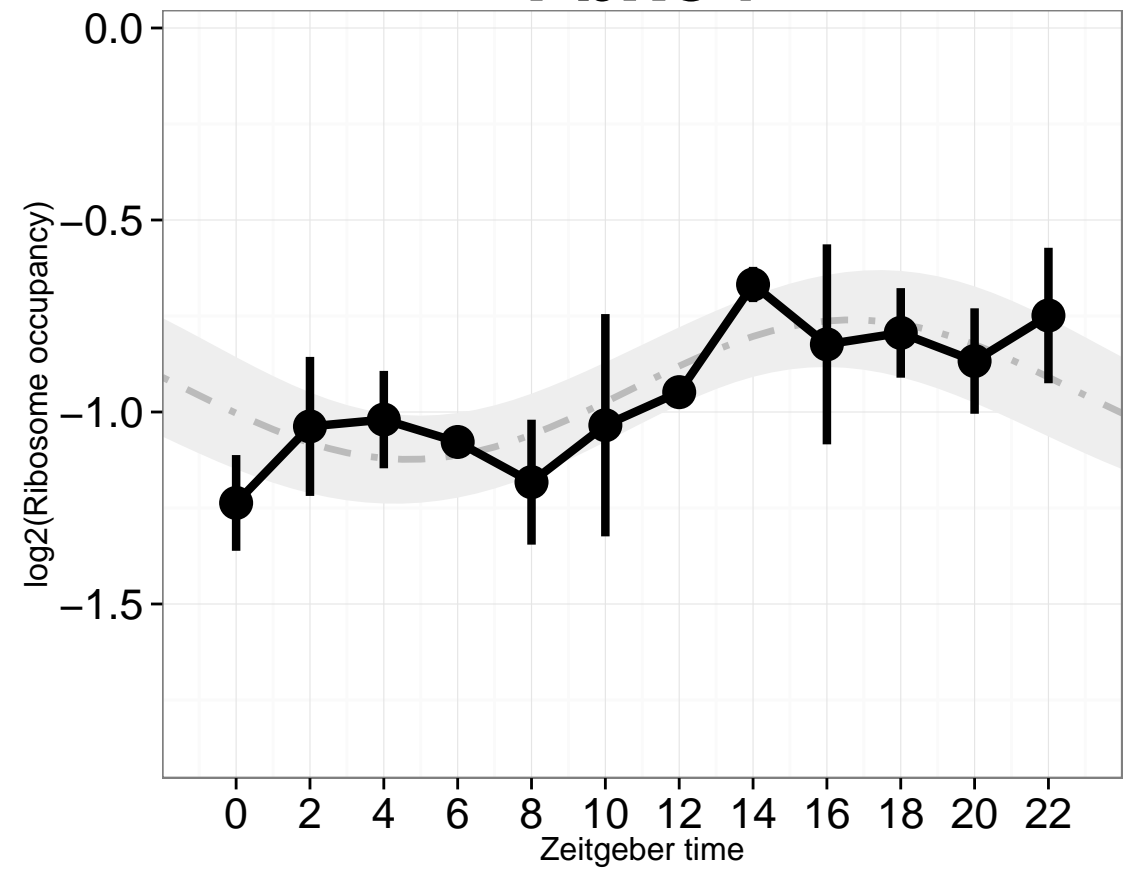

Supplement: SuppDataset_1.zip [file Fbxo4_set_A.pdf › Supplemental Dataset 1/A-mRNA_nonrhyth_translation_nonrhyth/Fbxo4_set_A.pdf]

## Fbxo5

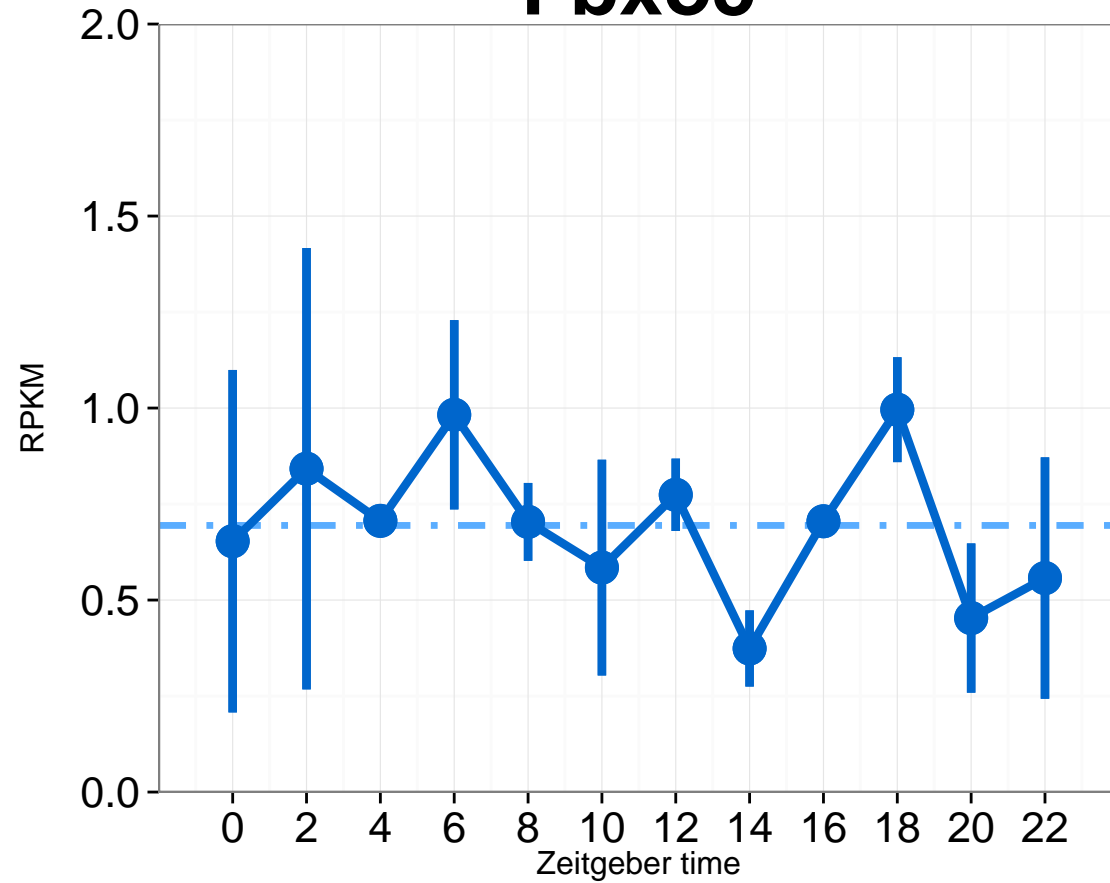

## Fbxo5 log2(Ribosome occupancy

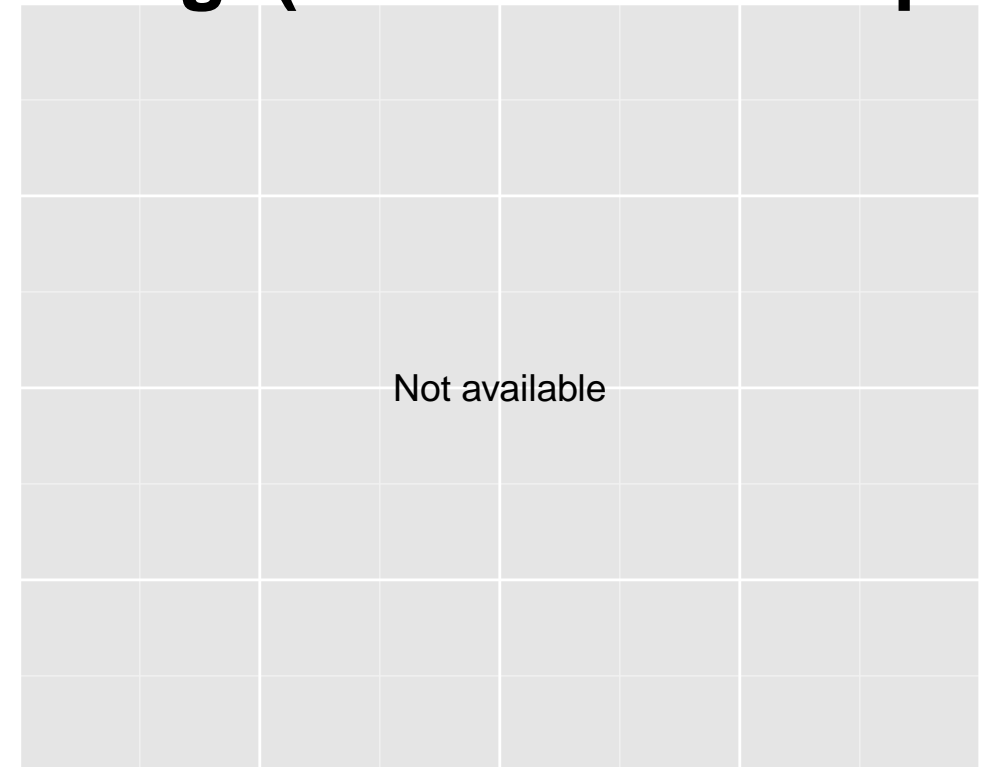

Supplement: SuppDataset_1.zip [file Fbxo5_set_A.pdf › Supplemental Dataset 1/A-mRNA_nonrhyth_translation_nonrhyth/Fbxo5_set_A.pdf]

## Fbxo7

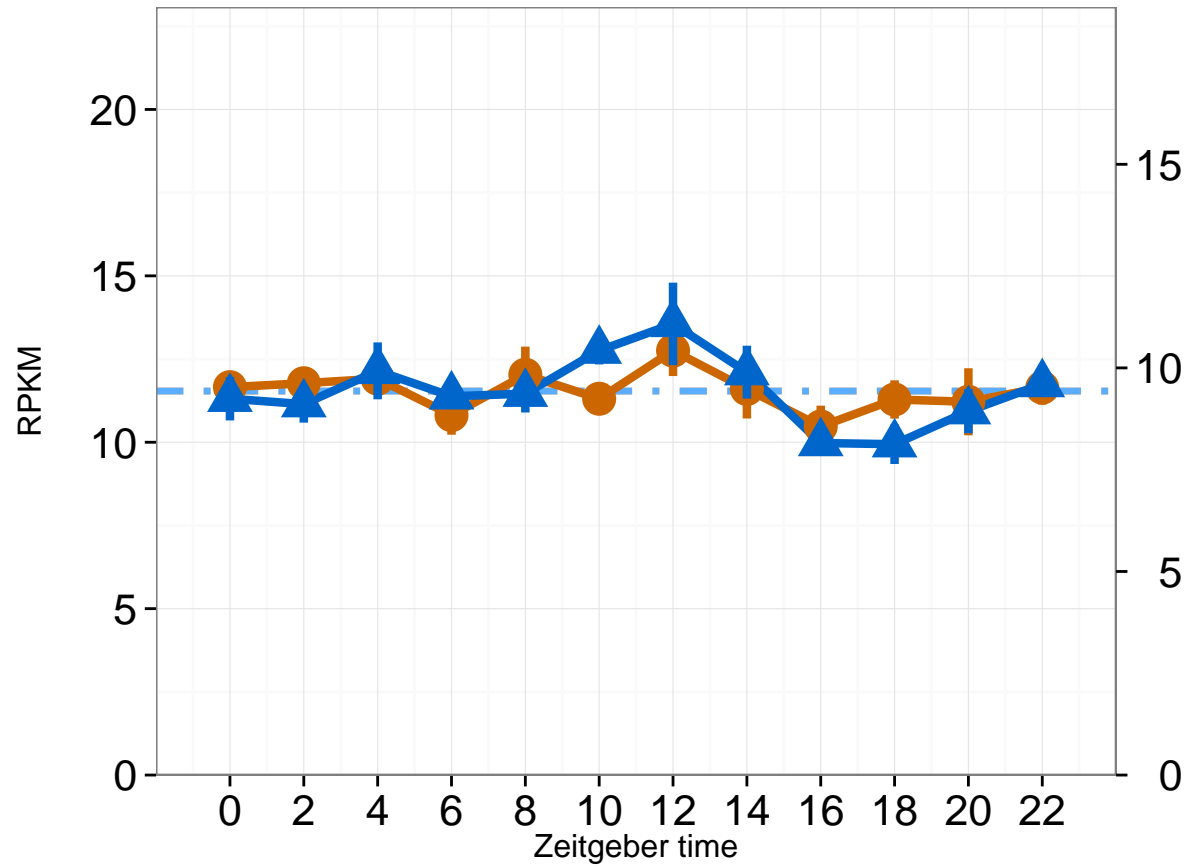

## Fbxo7

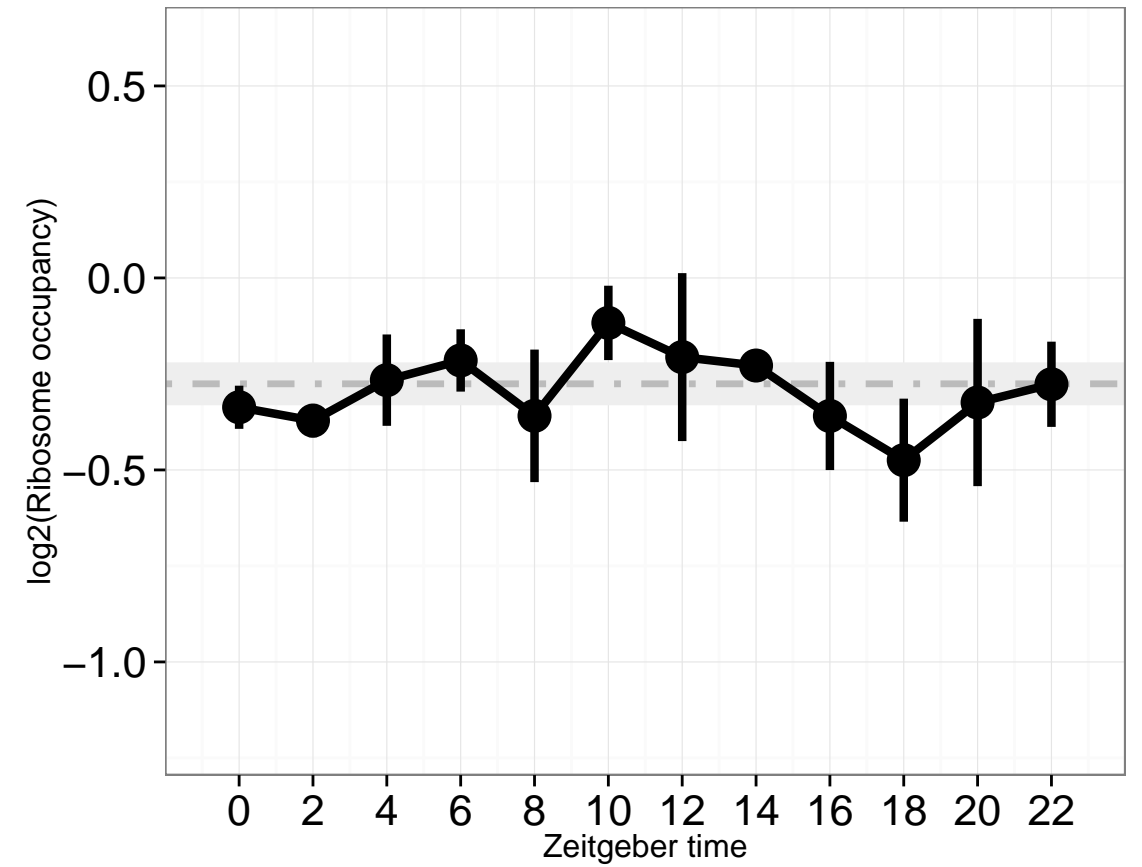

Supplement: SuppDataset_1.zip [file Fbxo7_set_A.pdf › Supplemental Dataset 1/A-mRNA_nonrhyth_translation_nonrhyth/Fbxo7_set_A.pdf]

## Fbxo8

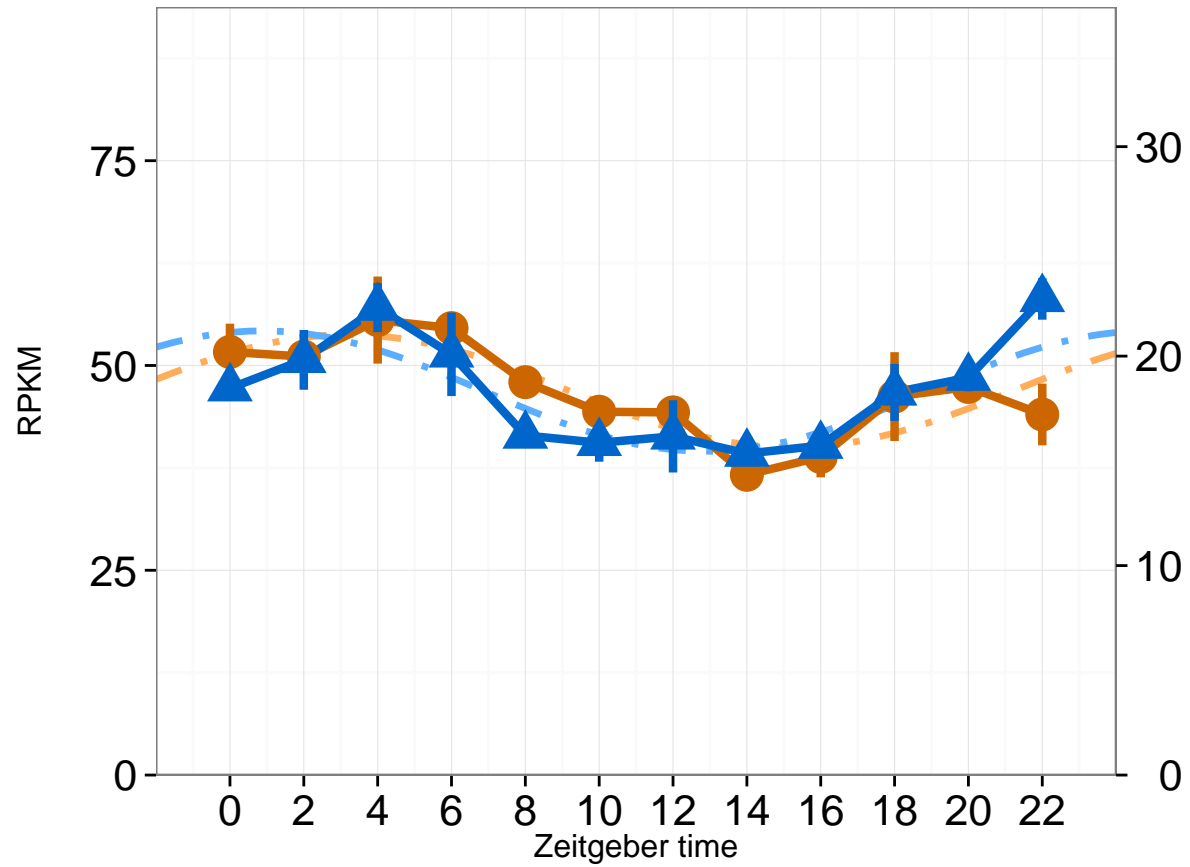

## Fbxo8

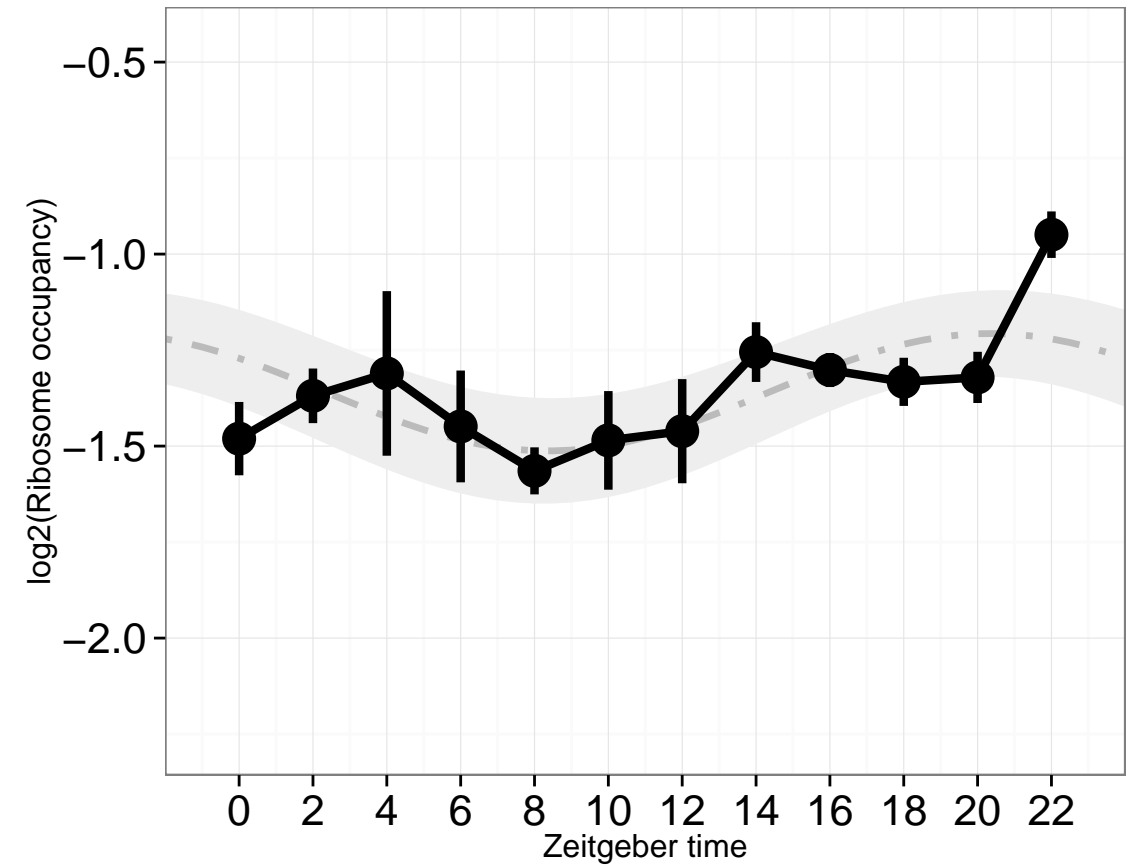

Supplement: SuppDataset_1.zip [file Fbxo8_set_A.pdf › Supplemental Dataset 1/A-mRNA_nonrhyth_translation_nonrhyth/Fbxo8_set_A.pdf]

## Fbxo9

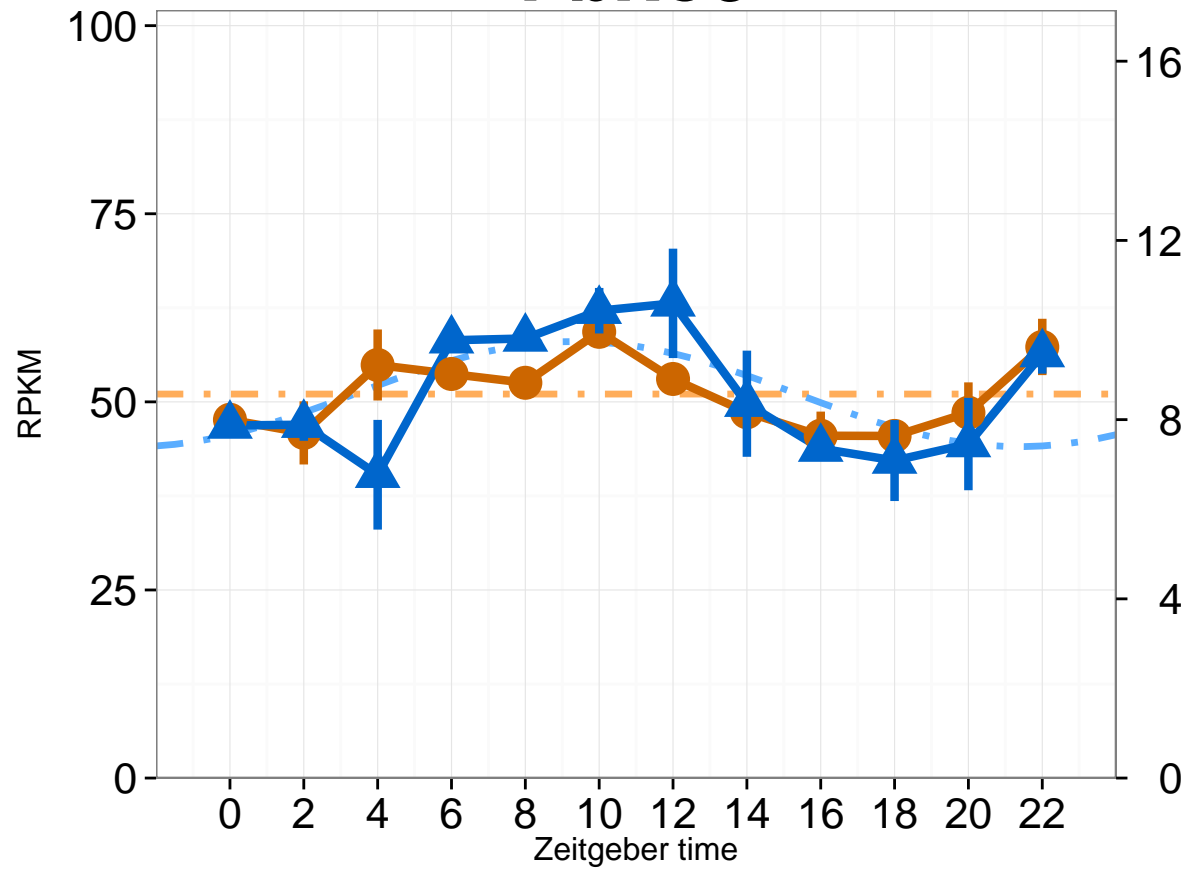

## Fbxo9

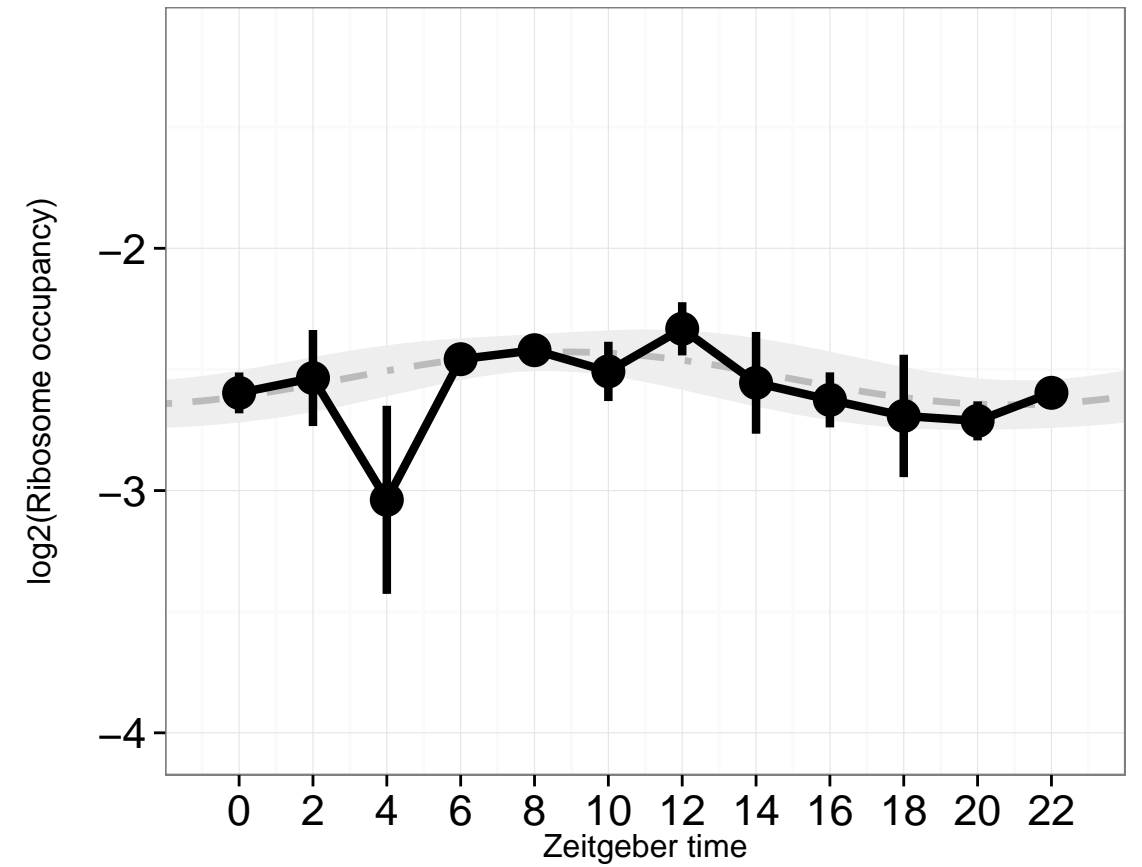

Supplement: SuppDataset_1.zip [file Fbxo9_set_A.pdf › Supplemental Dataset 1/A-mRNA_nonrhyth_translation_nonrhyth/Fbxo9_set_A.pdf]

## Fbxw11

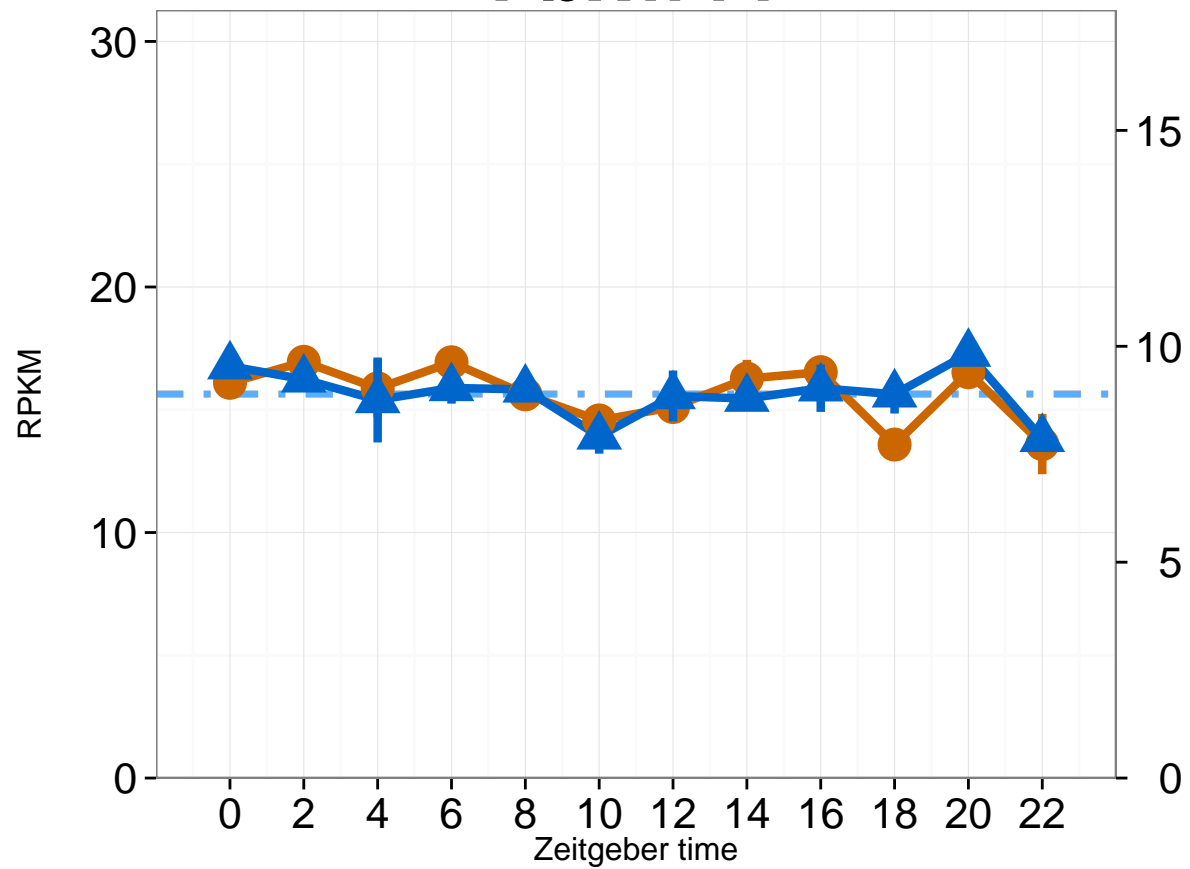

## Fbxw11

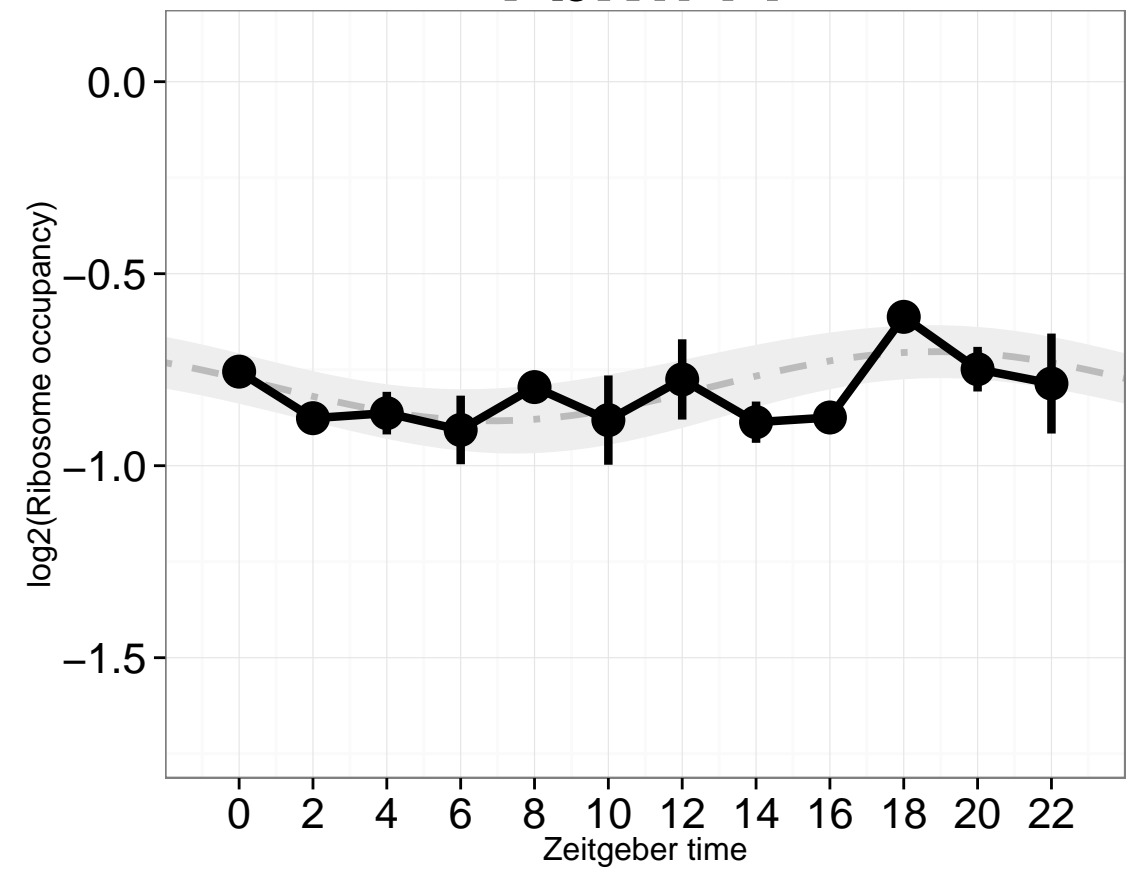

Supplement: SuppDataset_1.zip [file Fbxw11_set_A.pdf › Supplemental Dataset 1/A-mRNA_nonrhyth_translation_nonrhyth/Fbxw11_set_A.pdf]

## Fbxw2

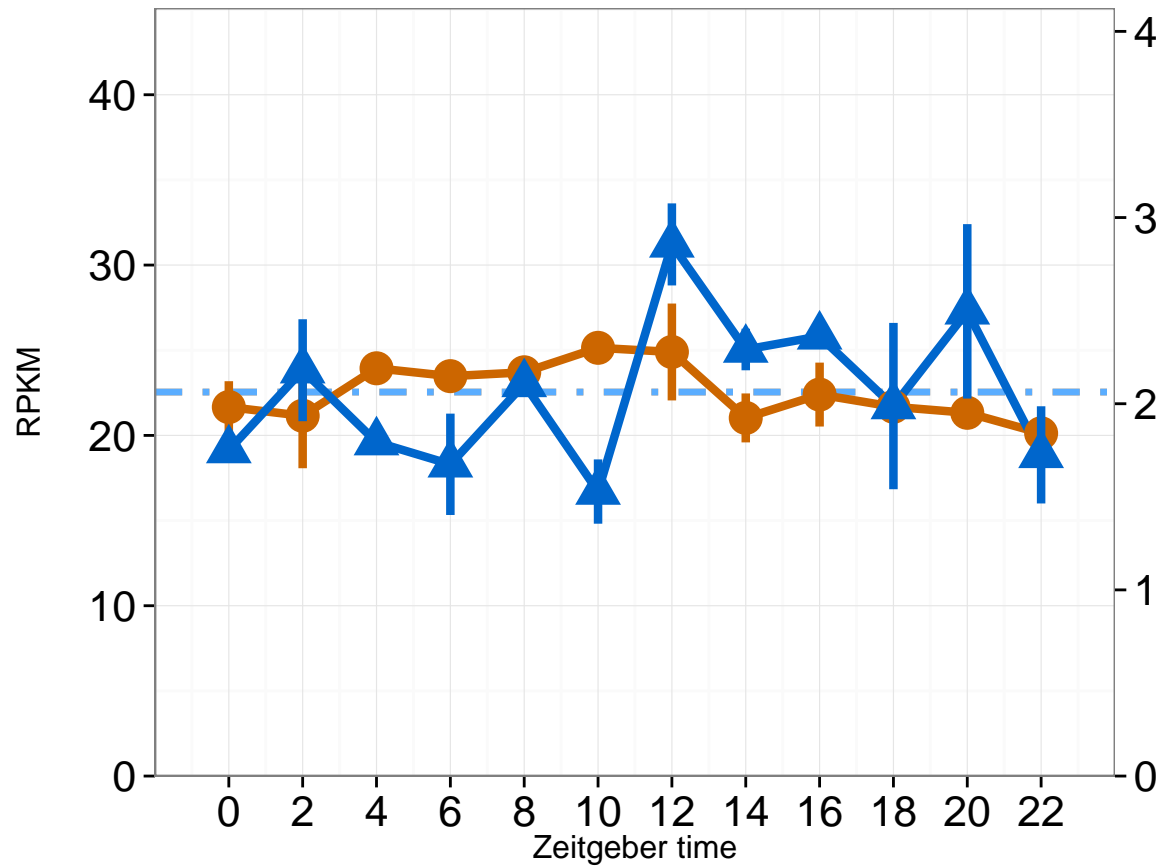

## Fbxw2

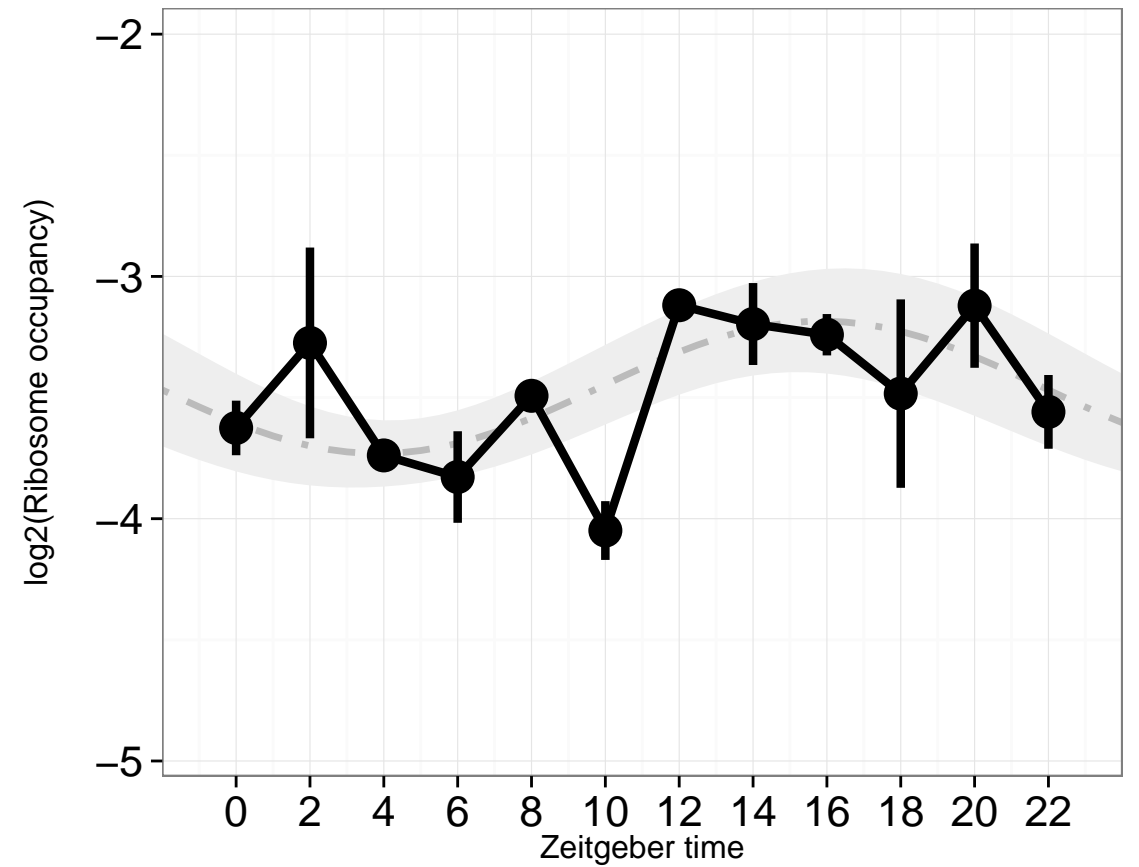

Supplement: SuppDataset_1.zip [file Fbxw2_set_A.pdf › Supplemental Dataset 1/A-mRNA_nonrhyth_translation_nonrhyth/Fbxw2_set_A.pdf]

# Fbxw4

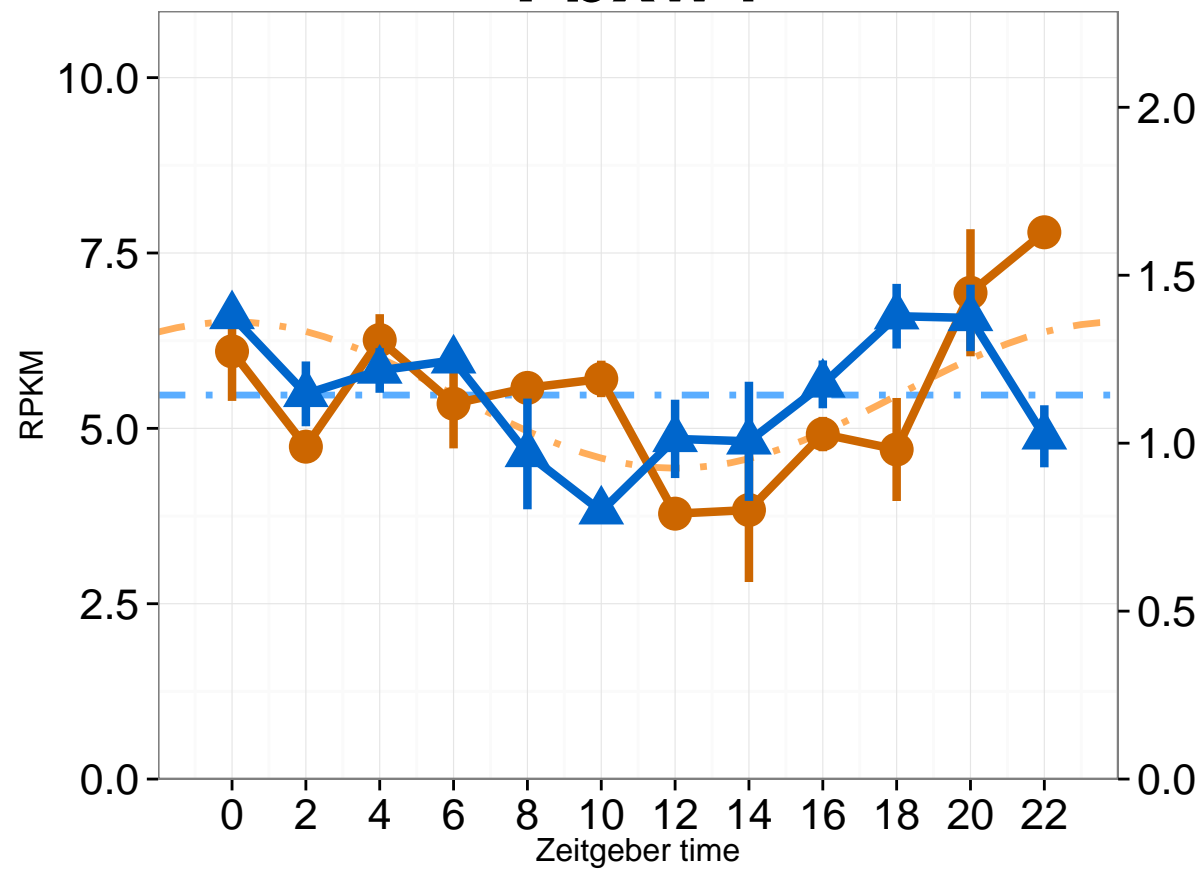

# Fbxw4

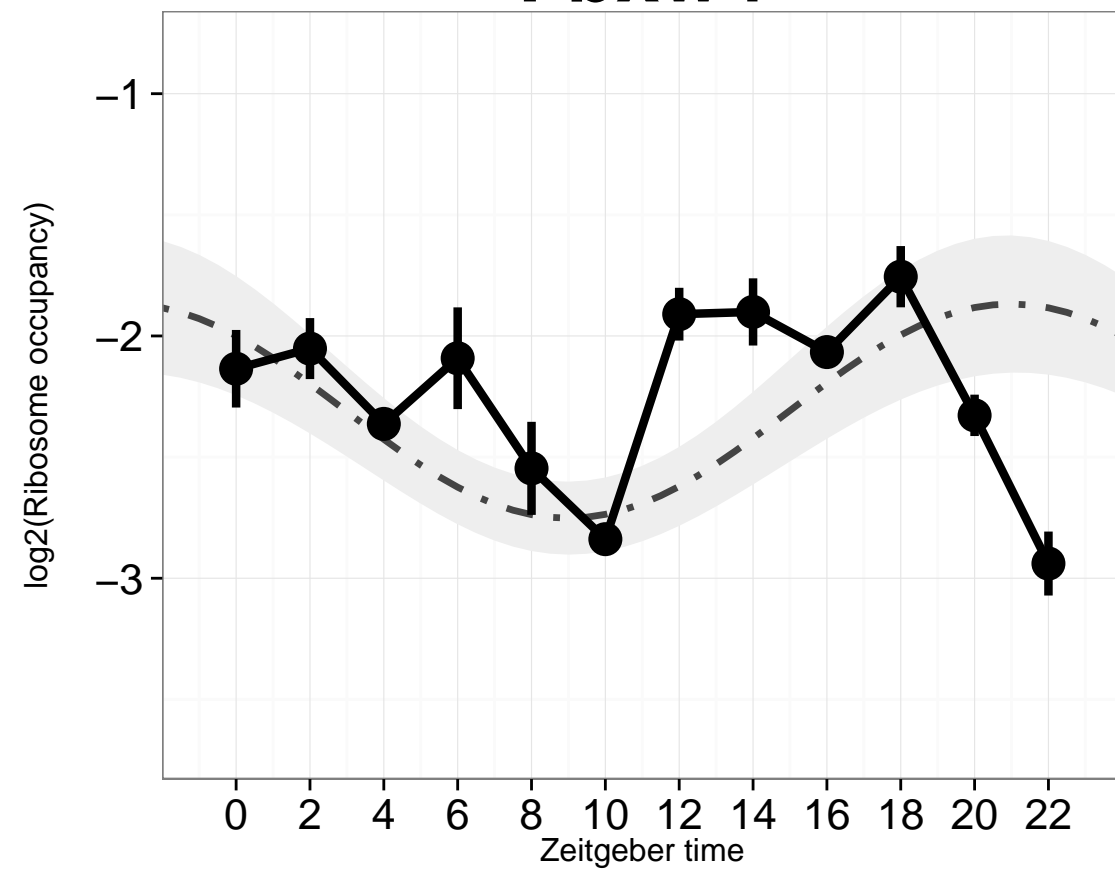

Supplement: SuppDataset_1.zip [file Fbxw4_set_A.pdf › Supplemental Dataset 1/A-mRNA_nonrhyth_translation_nonrhyth/Fbxw4_set_A.pdf]

## Fbxw5

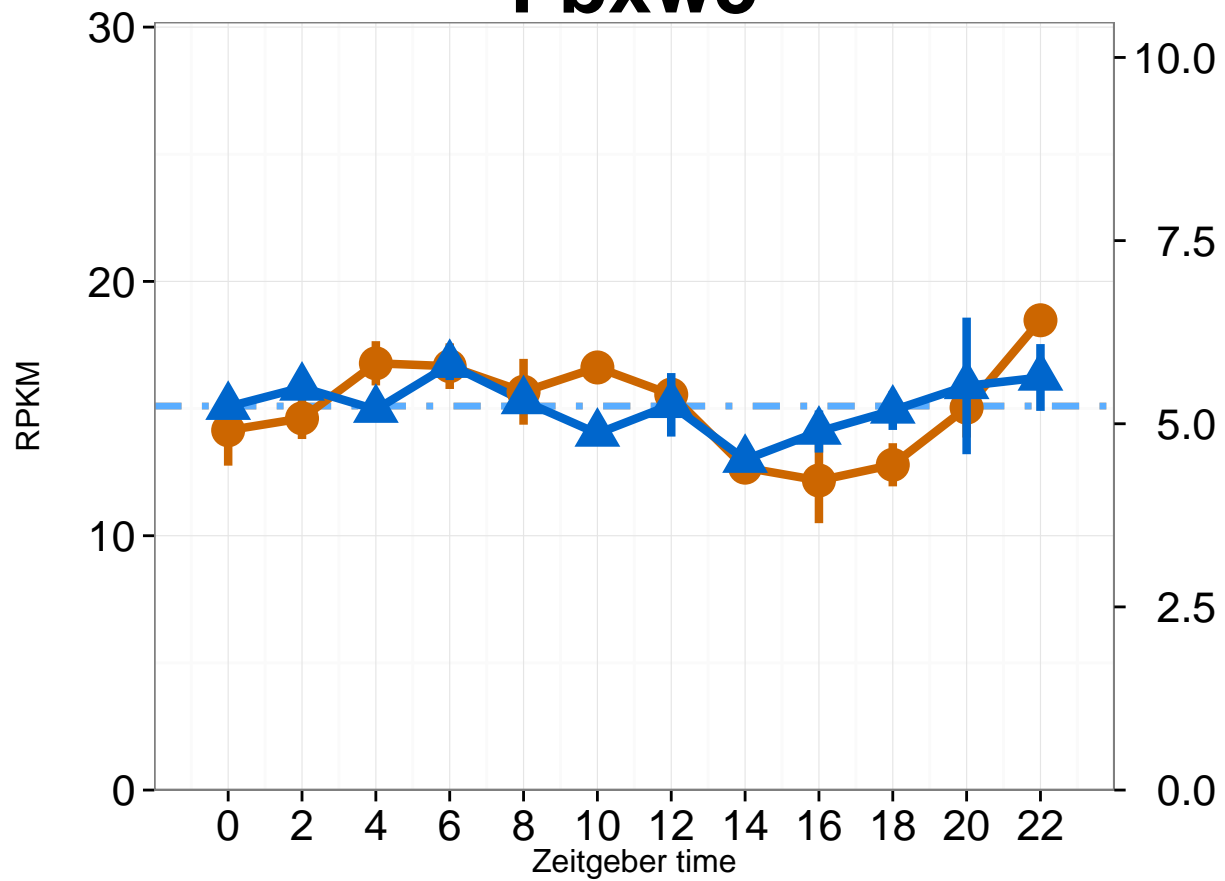

## Fbxw5

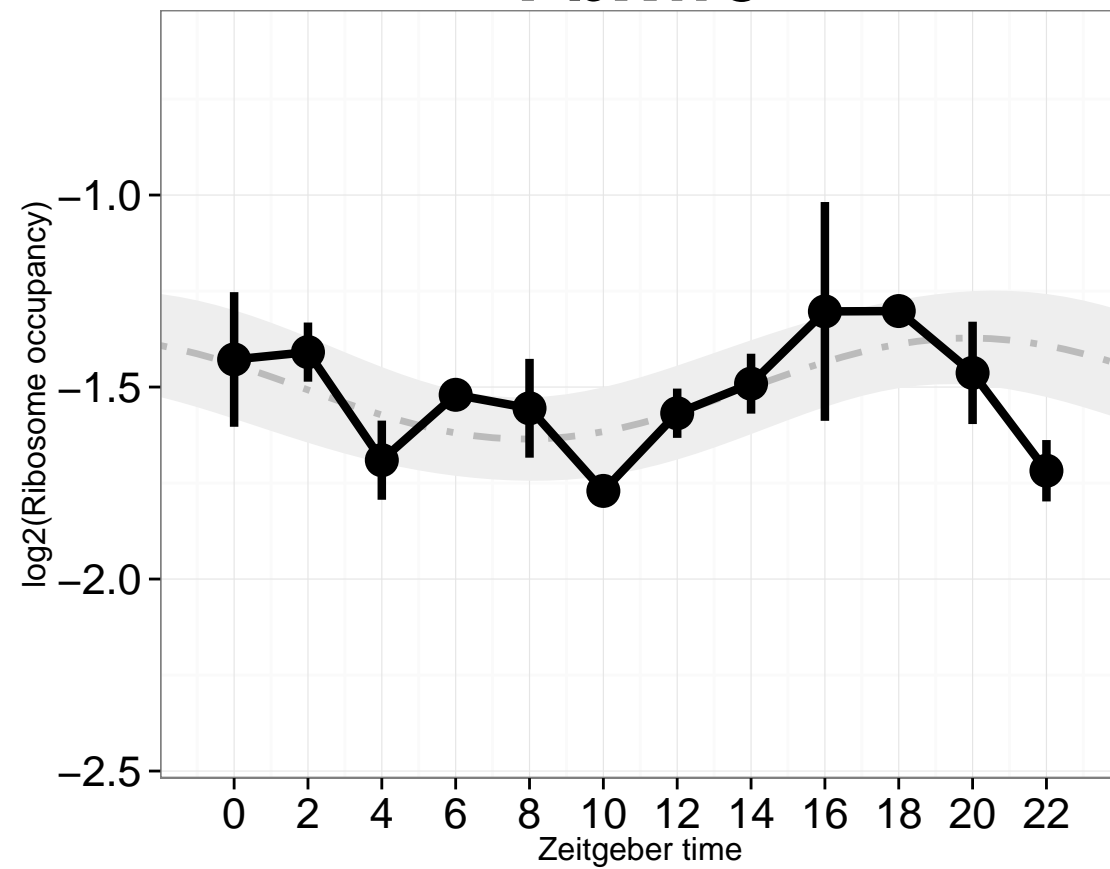

Supplement: SuppDataset_1.zip [file Fbxw5_set_A.pdf › Supplemental Dataset 1/A-mRNA_nonrhyth_translation_nonrhyth/Fbxw5_set_A.pdf]

## Fbxw8

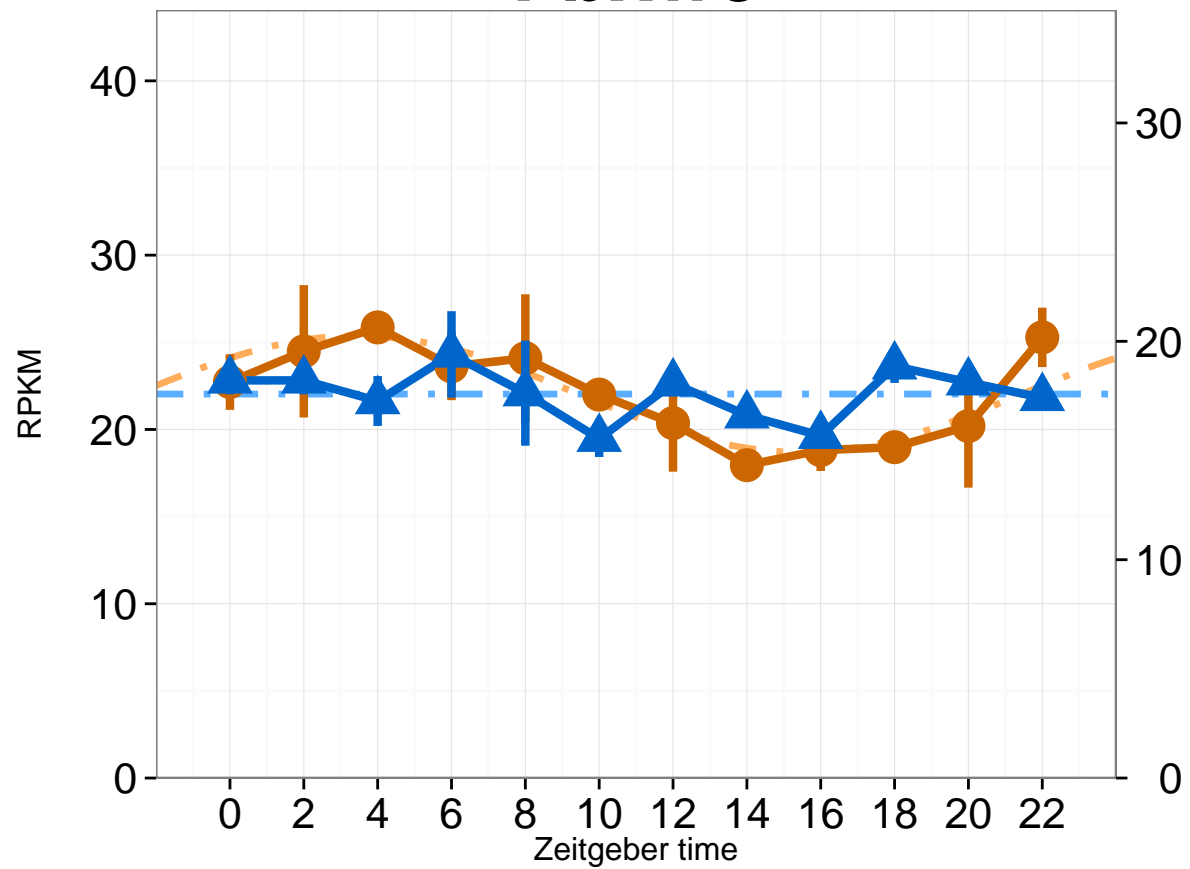

## Fbxw8

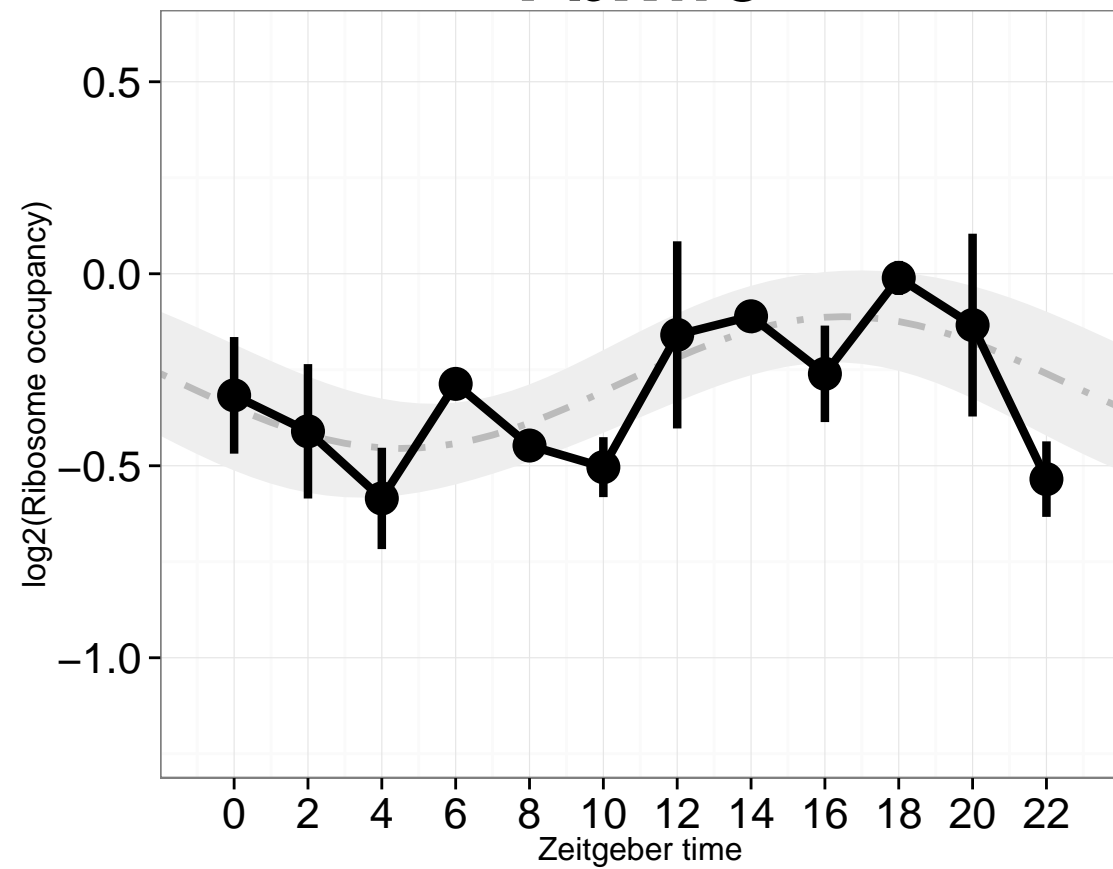

Supplement: SuppDataset_1.zip [file Fbxw8_set_A.pdf › Supplemental Dataset 1/A-mRNA_nonrhyth_translation_nonrhyth/Fbxw8_set_A.pdf]

## Fbxw9

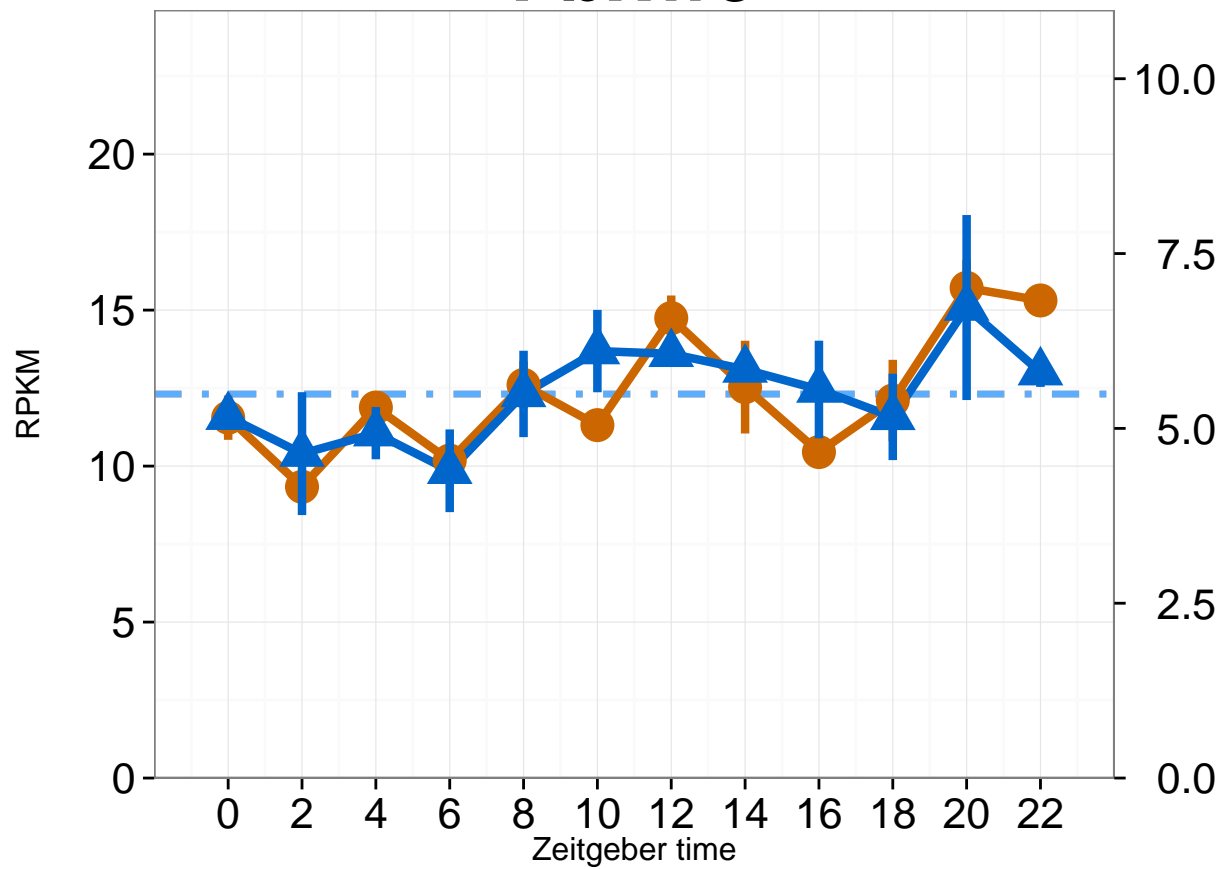

## Fbxw9

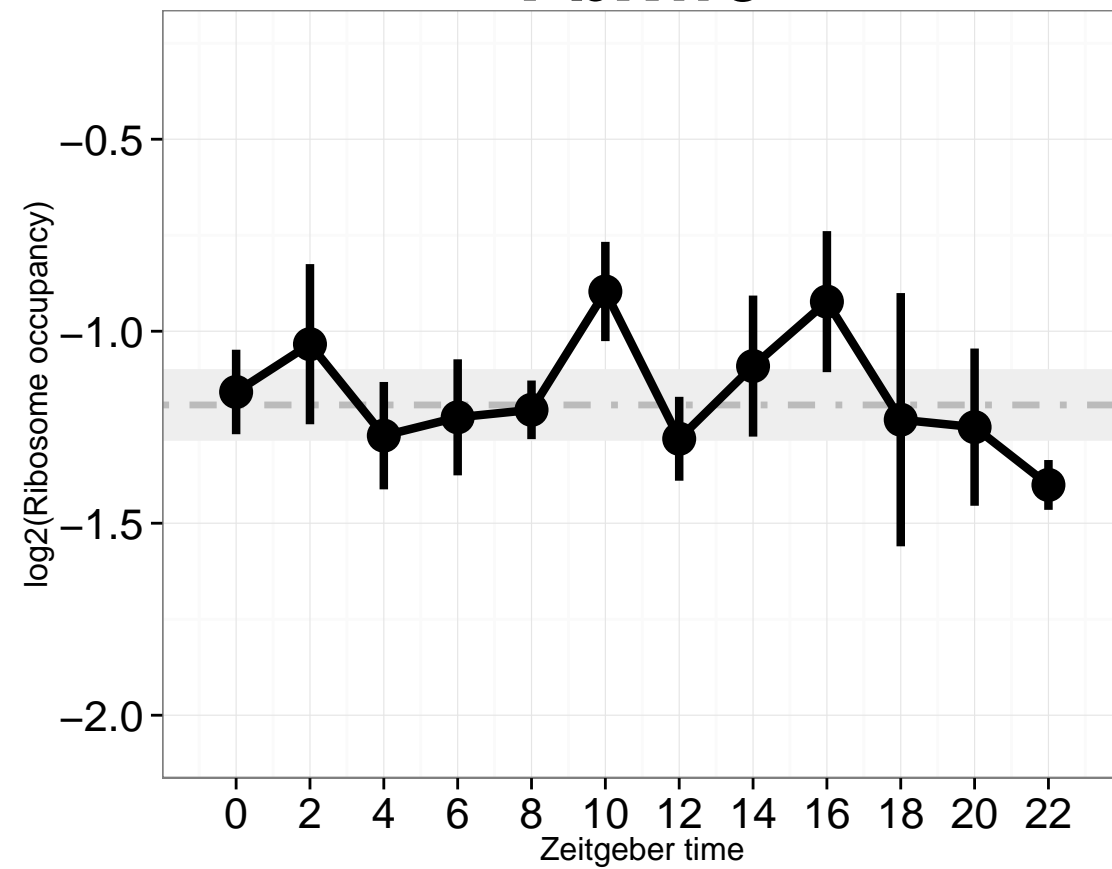

Supplement: SuppDataset_1.zip [file Fbxw9_set_A.pdf › Supplemental Dataset 1/A-mRNA_nonrhyth_translation_nonrhyth/Fbxw9_set_A.pdf]

## Fcer1g

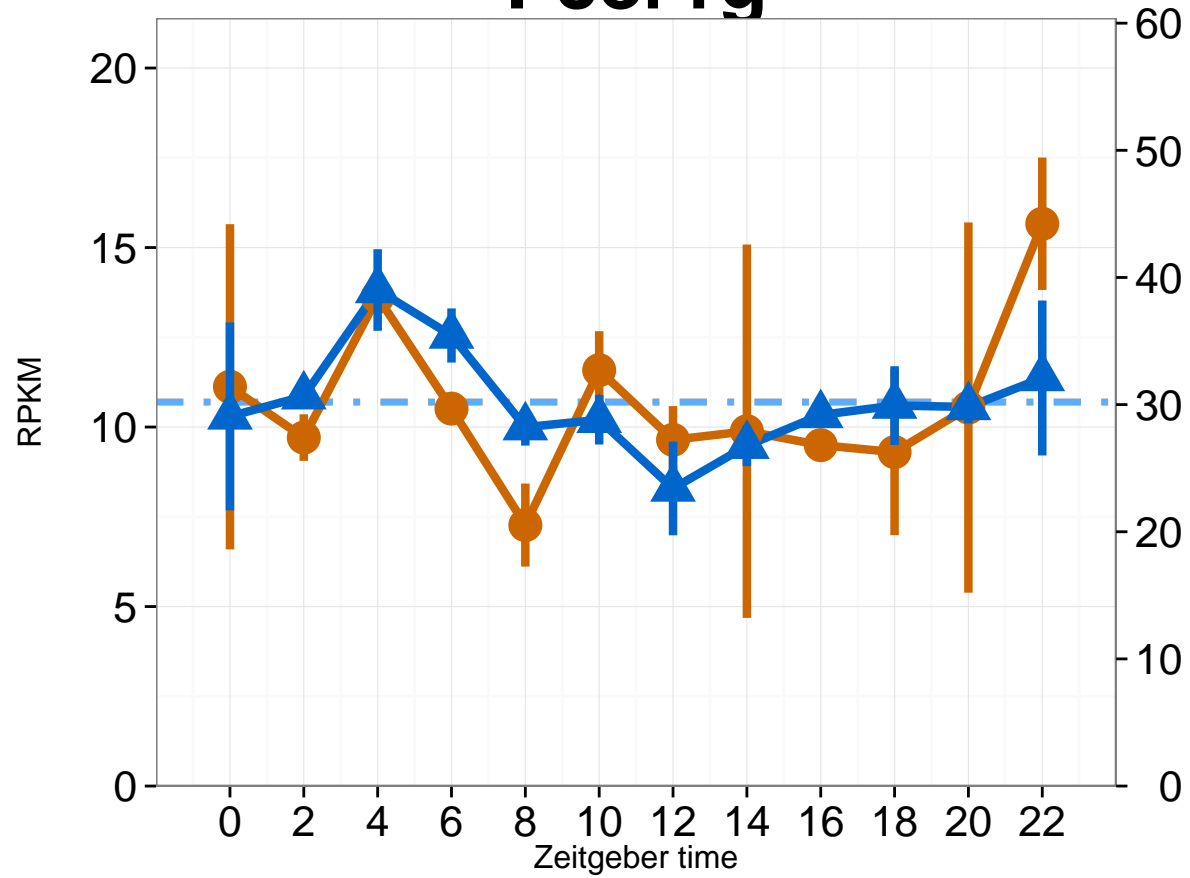

## Fcer1g

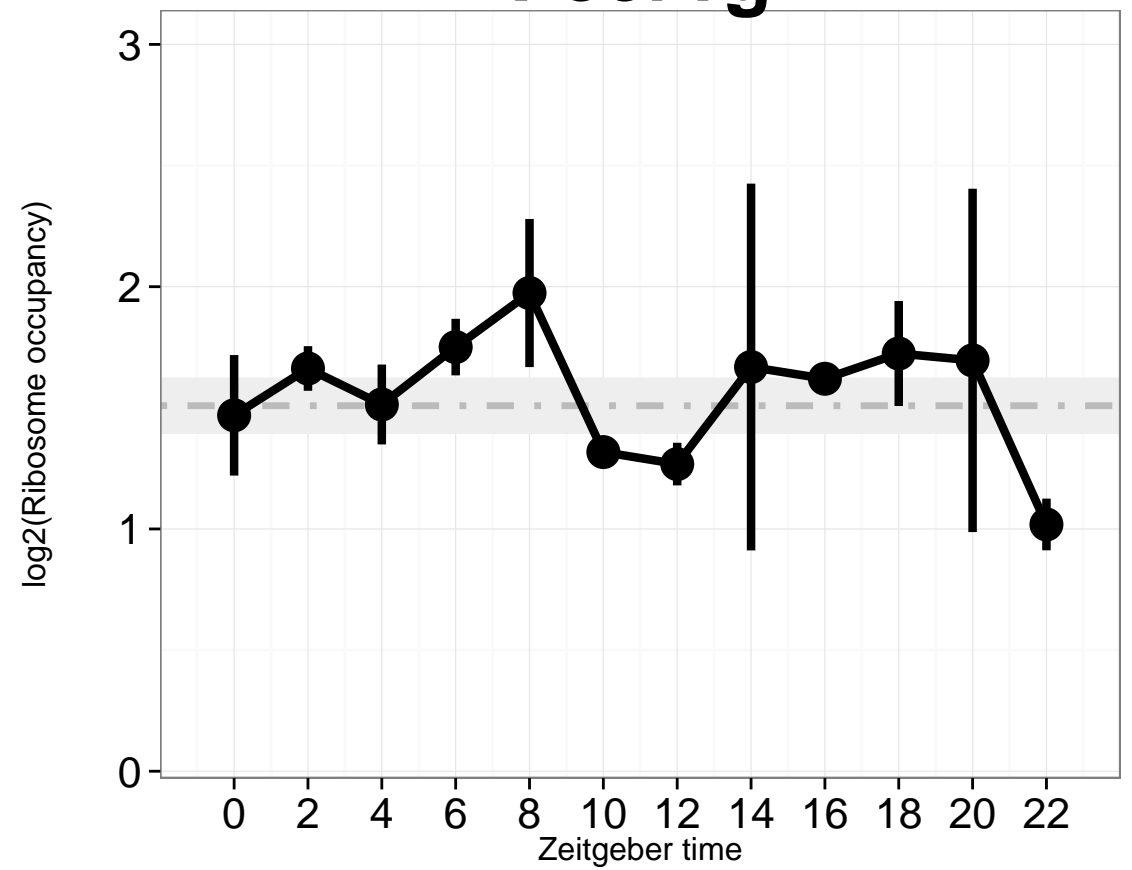

Supplement: SuppDataset_1.zip [file Fcer1g_set_A.pdf › Supplemental Dataset 1/A-mRNA_nonrhyth_translation_nonrhyth/Fcer1g_set_A.pdf]

## Fcf1

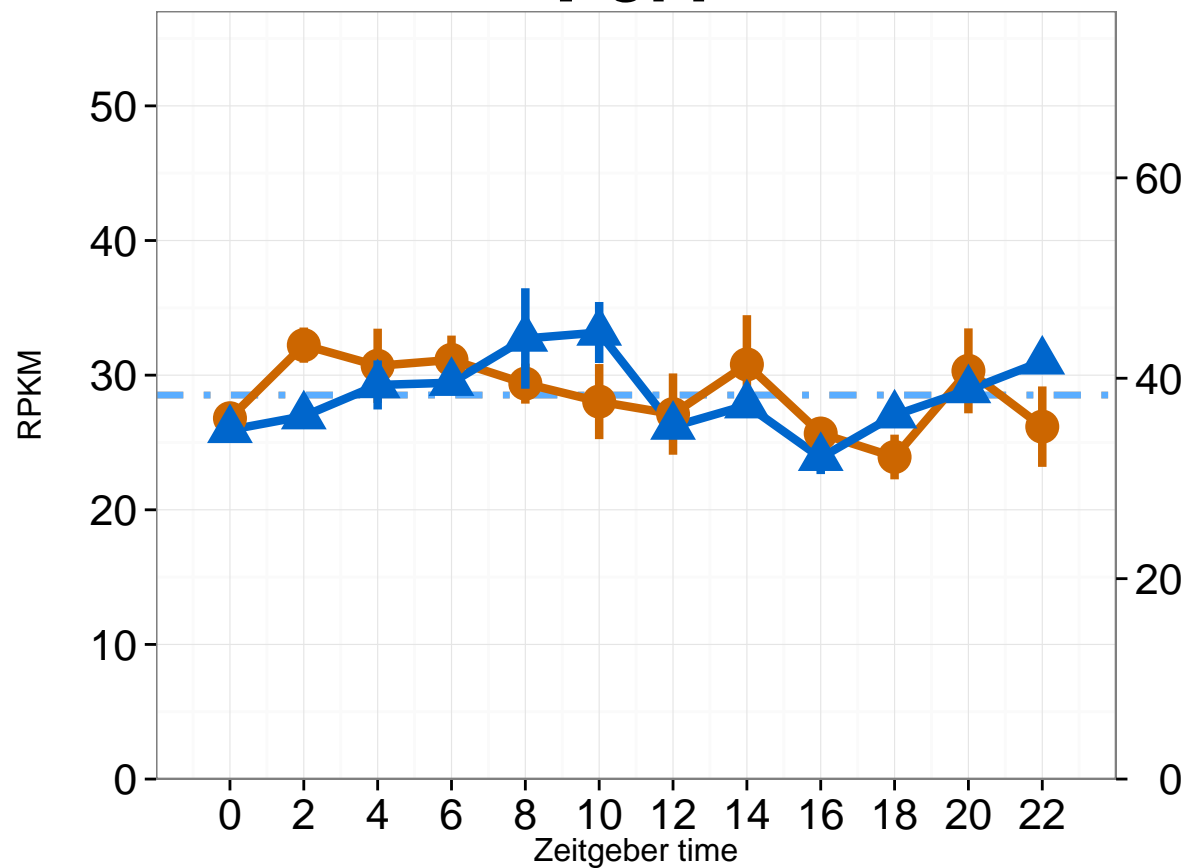

## Fcf1

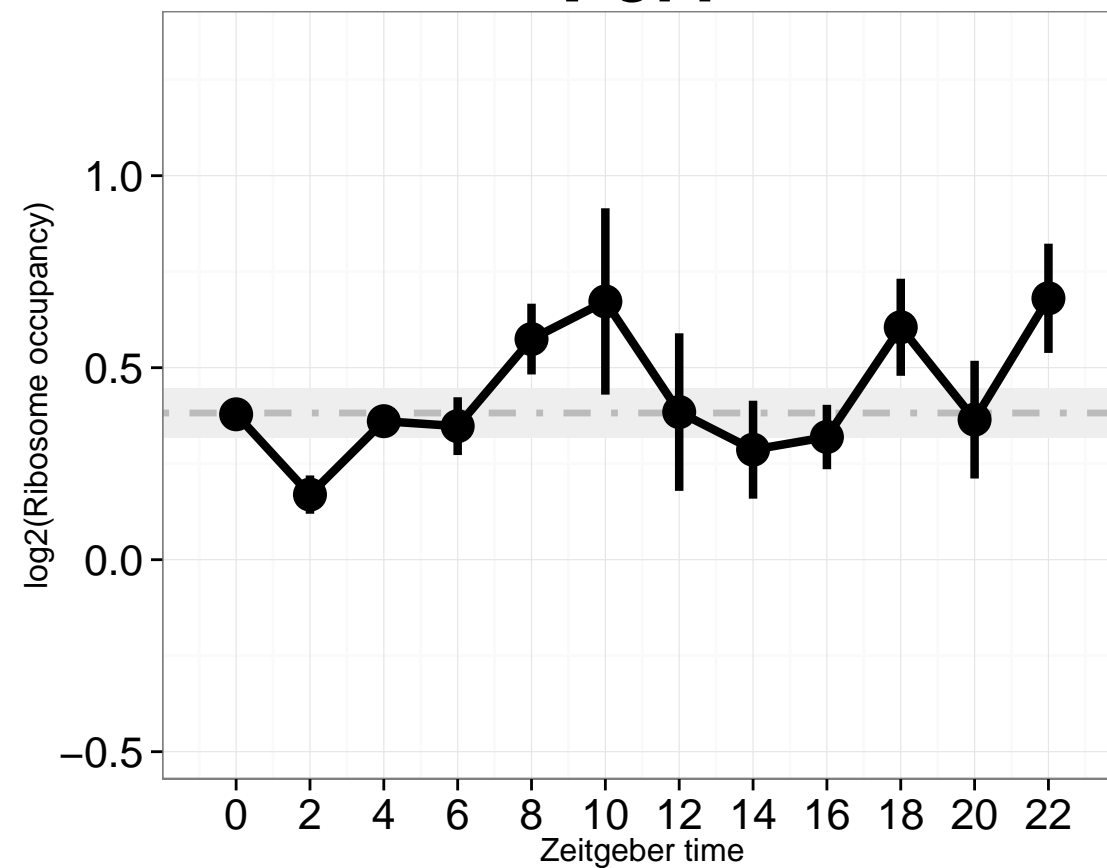

Supplement: SuppDataset_1.zip [file Fcf1_set_A.pdf › Supplemental Dataset 1/A-mRNA_nonrhyth_translation_nonrhyth/Fcf1_set_A.pdf]

# Fcgr1

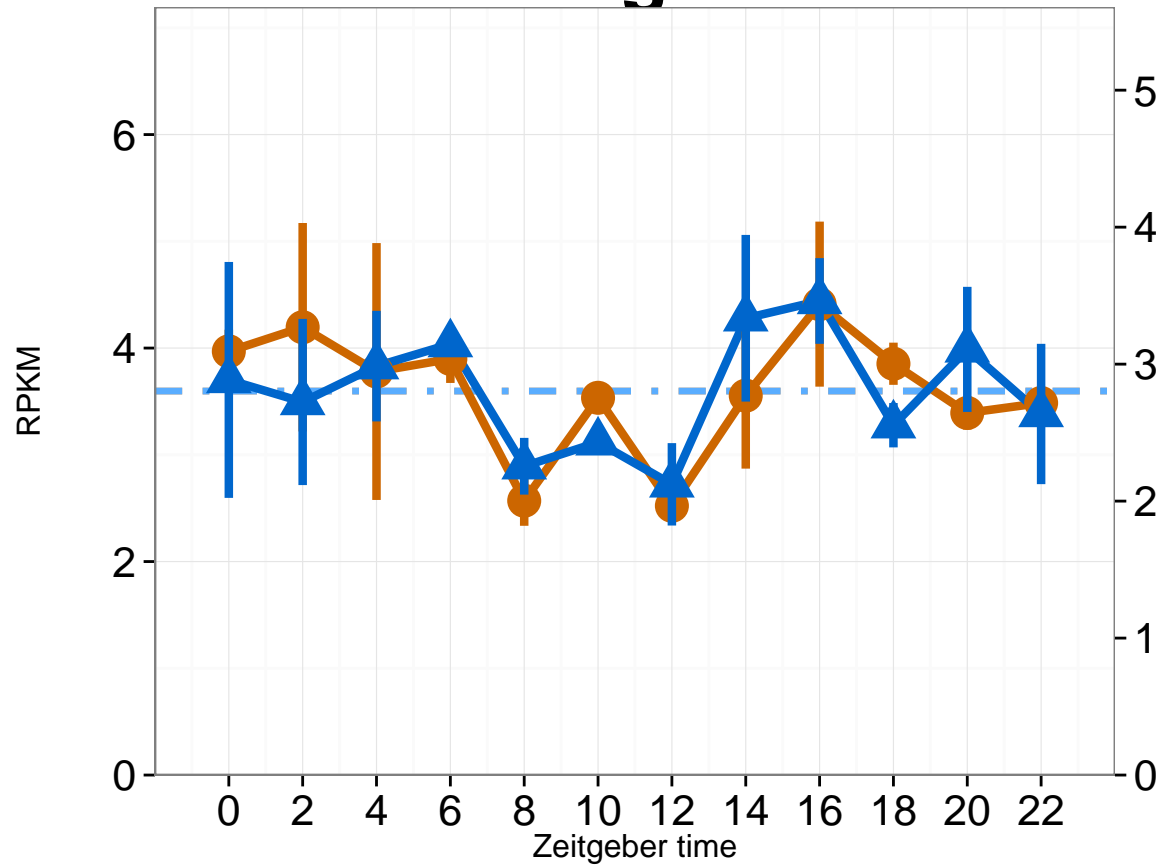

# Fcgr1

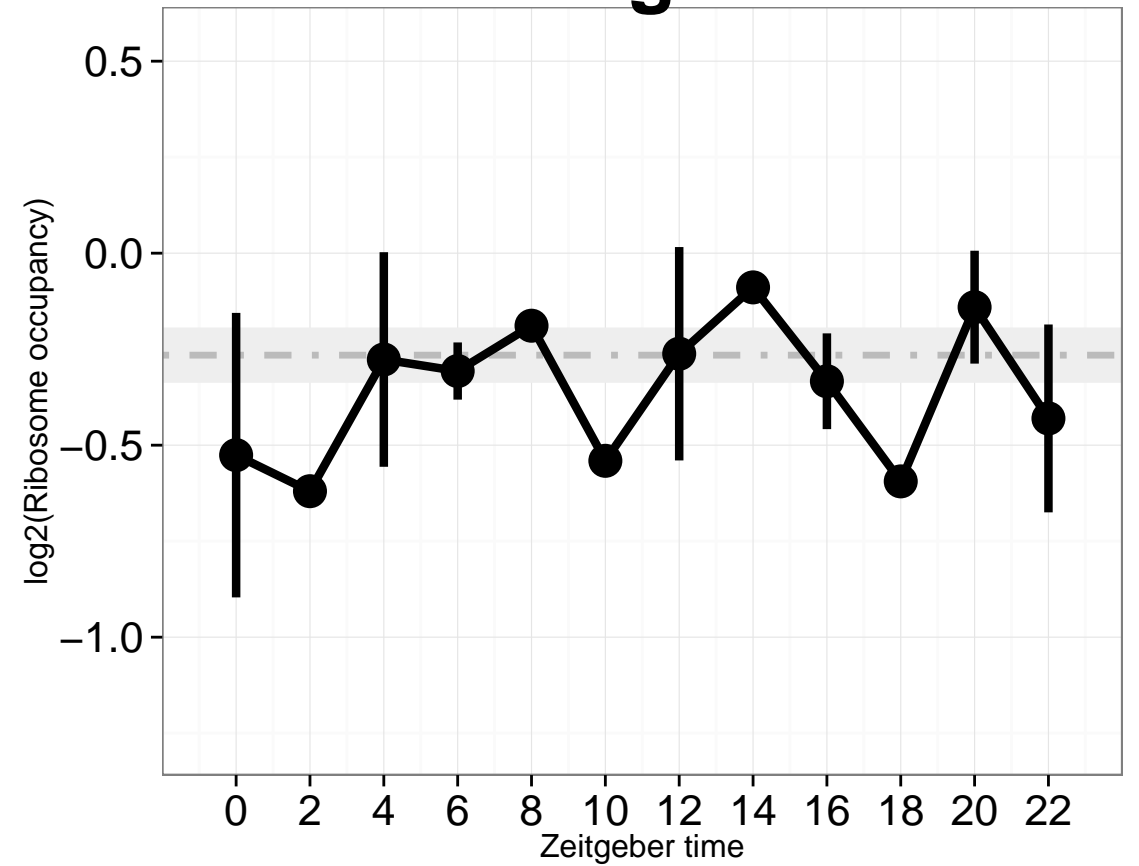

Supplement: SuppDataset_1.zip [file Fcgr1_set_A.pdf › Supplemental Dataset 1/A-mRNA_nonrhyth_translation_nonrhyth/Fcgr1_set_A.pdf]

## Fcgr2b

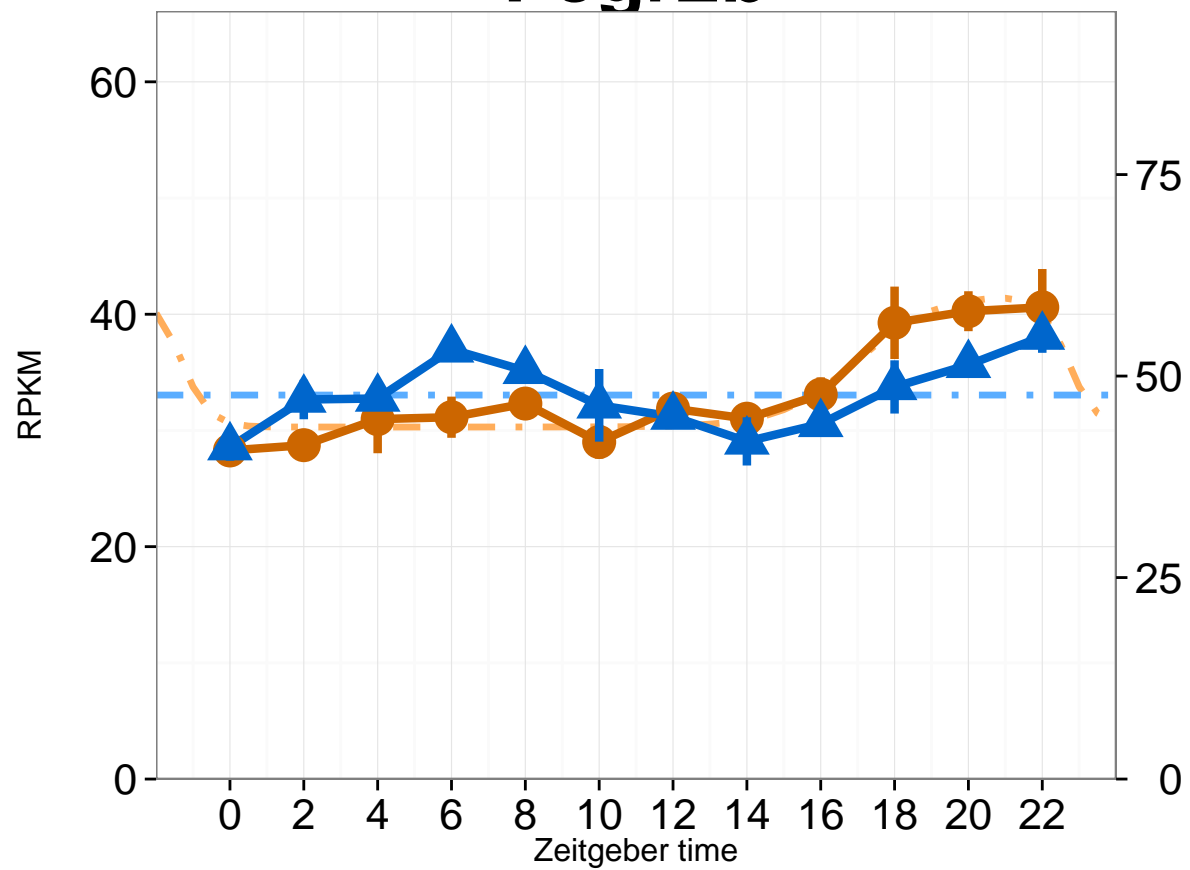

## Fcgr2b

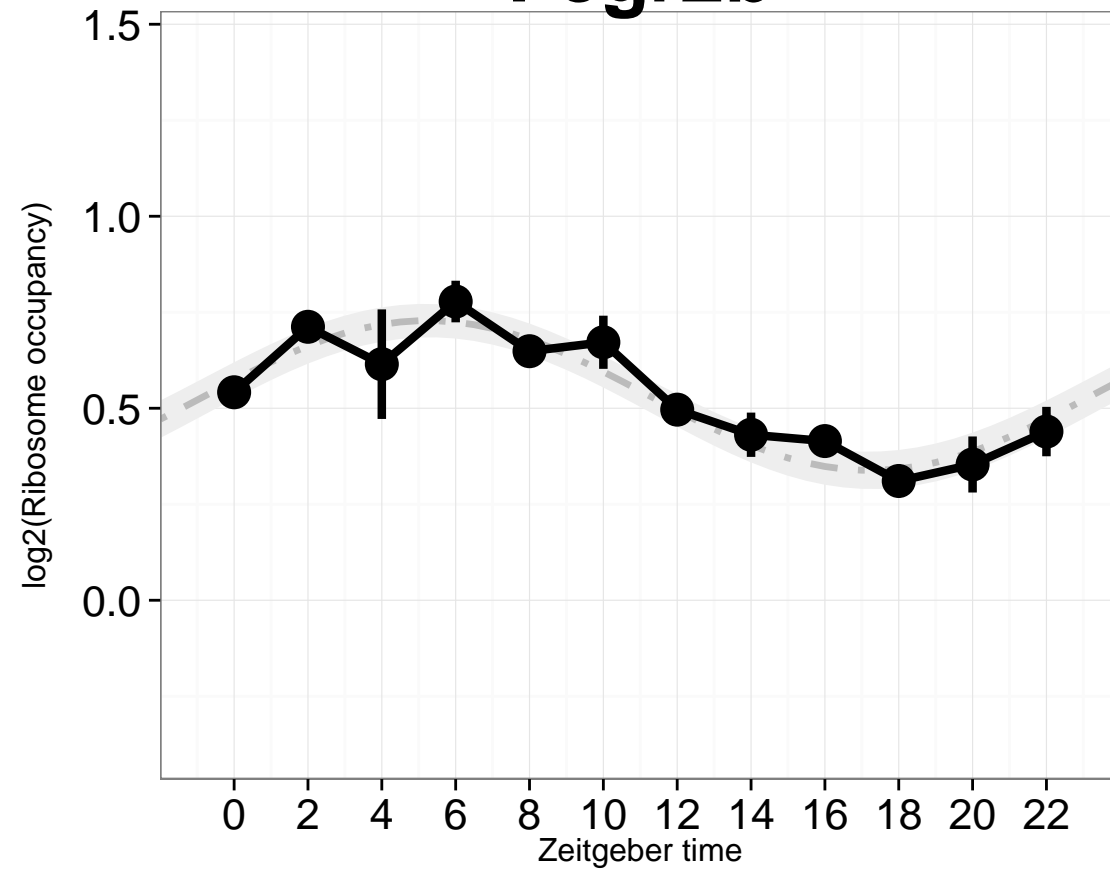

Supplement: SuppDataset_1.zip [file Fcgr2b_set_A.pdf › Supplemental Dataset 1/A-mRNA_nonrhyth_translation_nonrhyth/Fcgr2b_set_A.pdf]

## Fcgr4

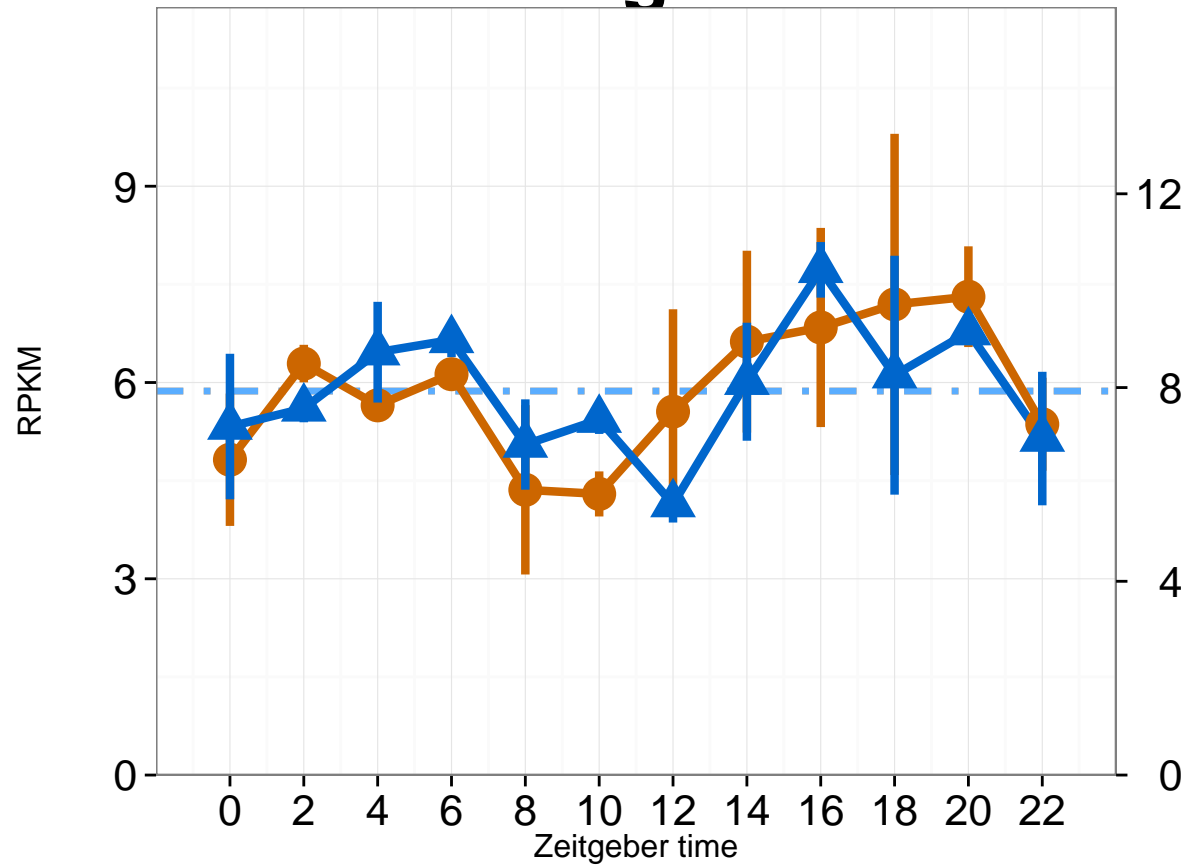

## Fcgr4

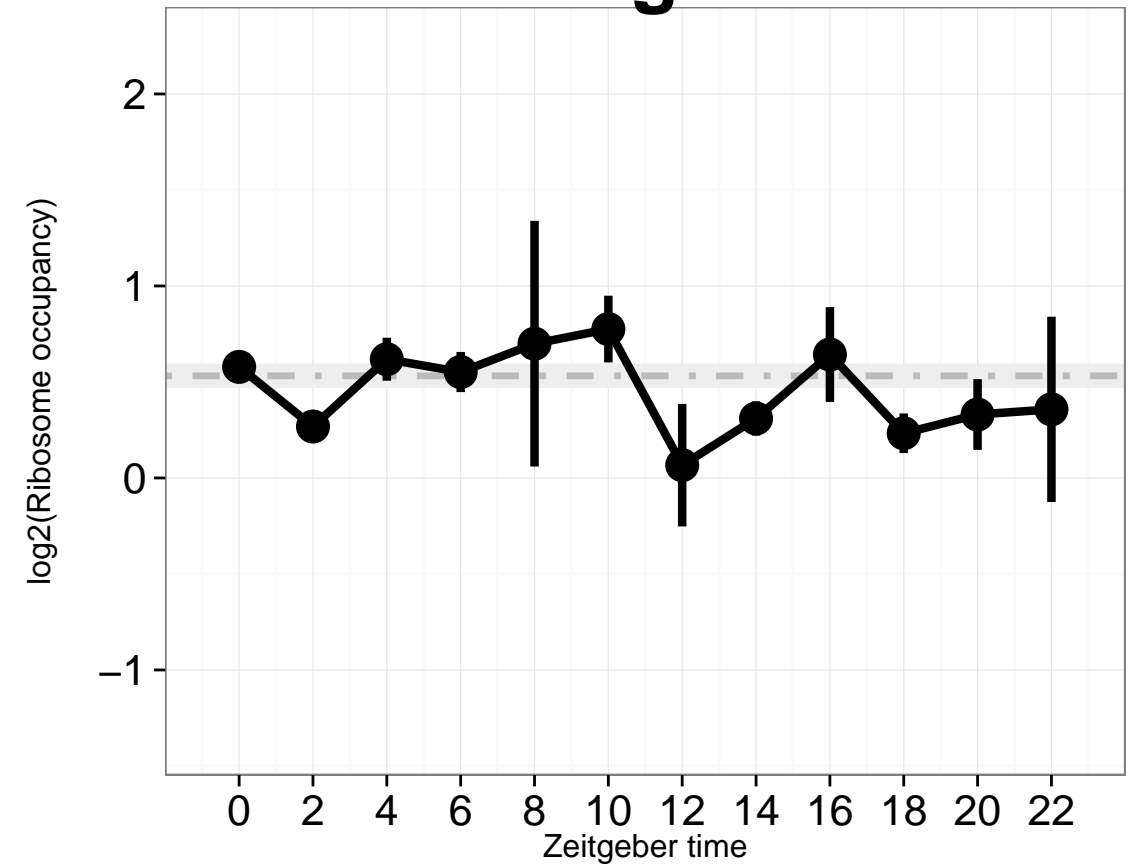

Supplement: SuppDataset_1.zip [file Fcgr4_set_A.pdf › Supplemental Dataset 1/A-mRNA_nonrhyth_translation_nonrhyth/Fcgr4_set_A.pdf]

## Fcgrt

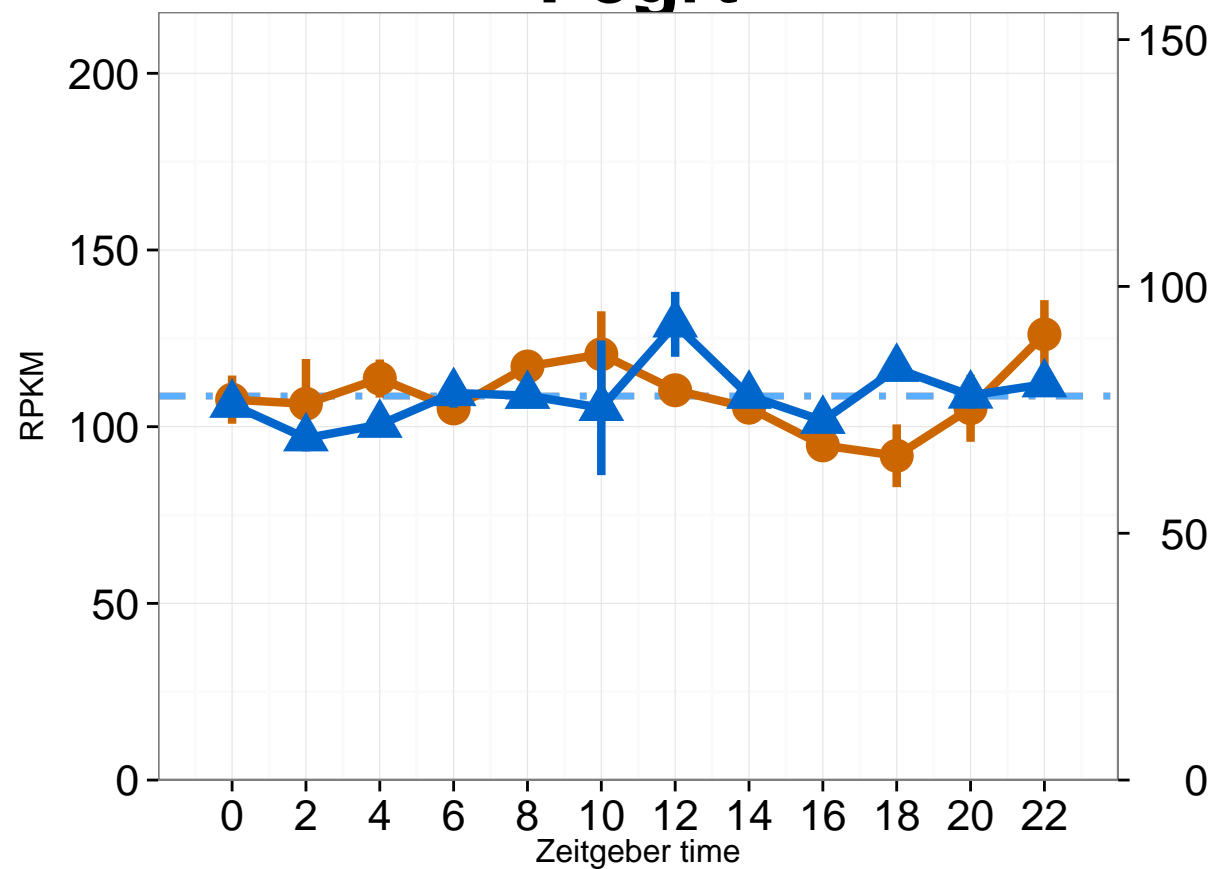

## Fcgrt

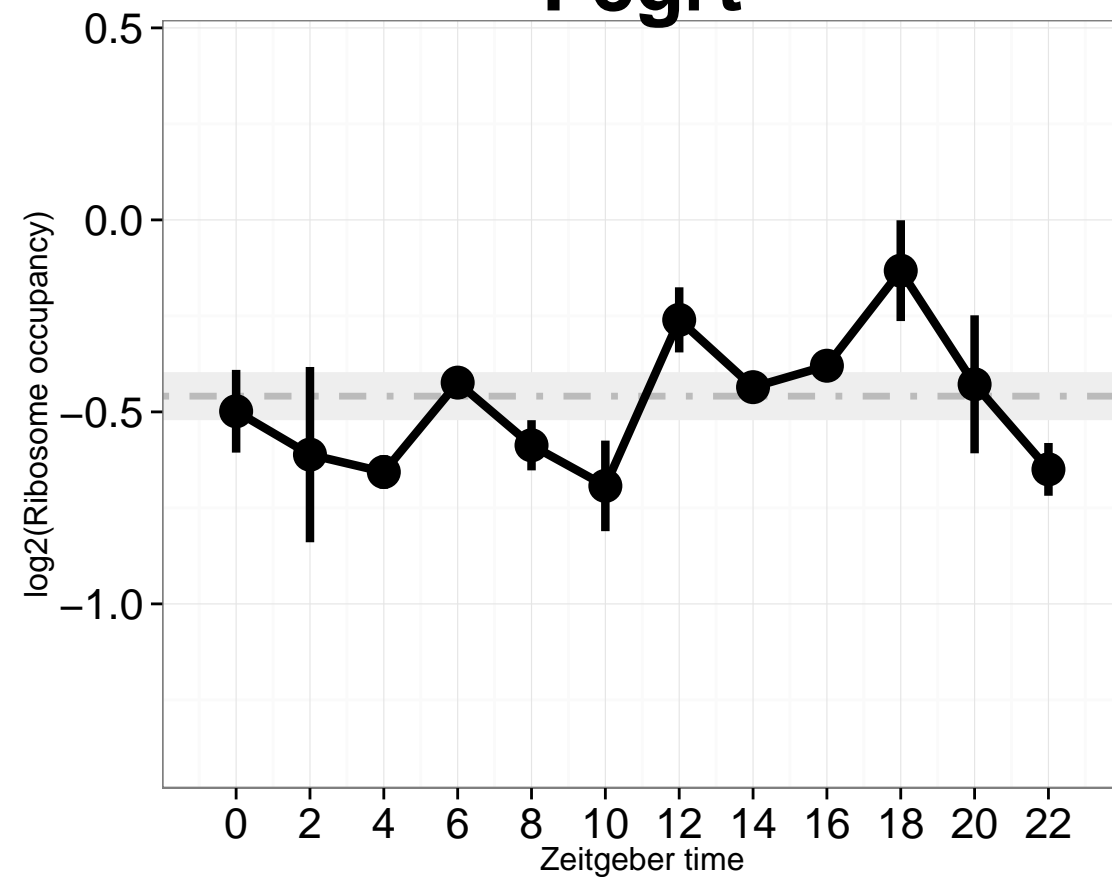

Supplement: SuppDataset_1.zip [file Fcgrt_set_A.pdf › Supplemental Dataset 1/A-mRNA_nonrhyth_translation_nonrhyth/Fcgrt_set_A.pdf]

## Fcho2

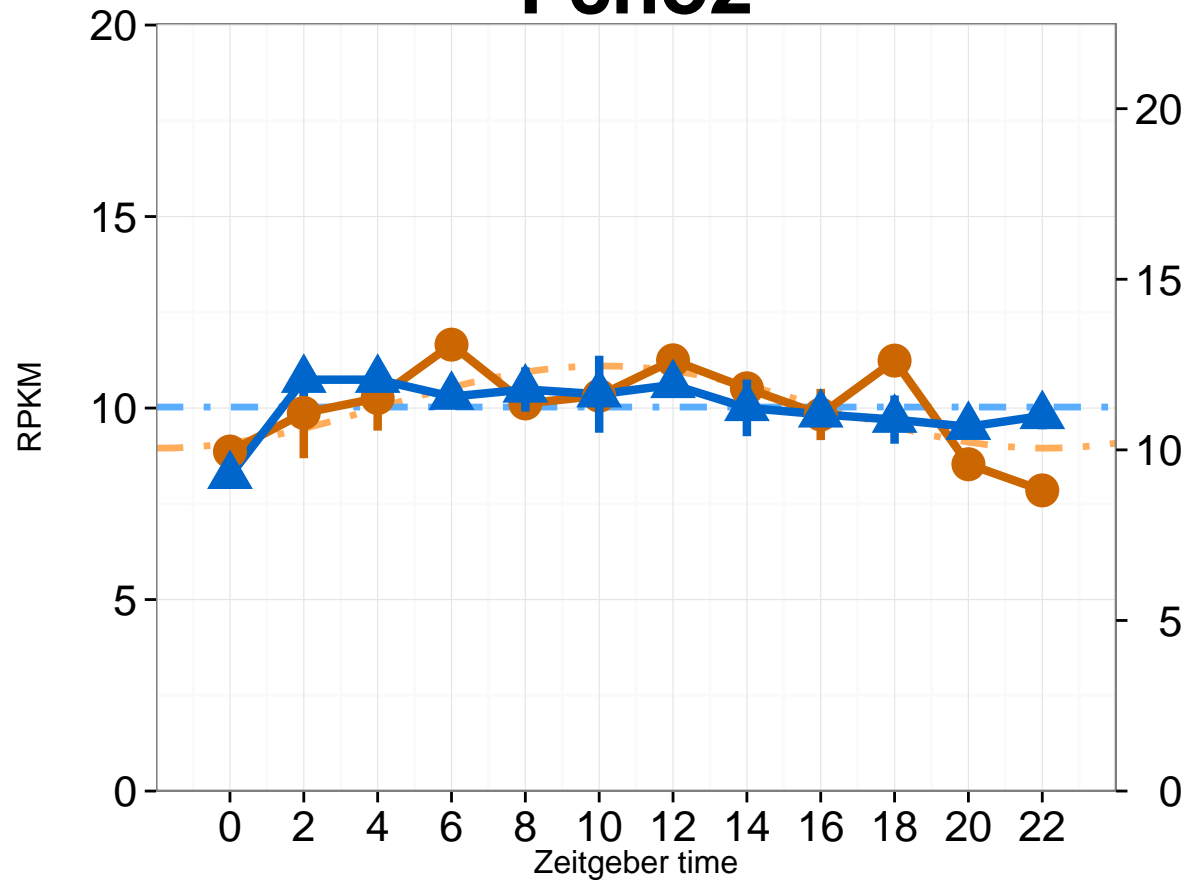

## Fcho2

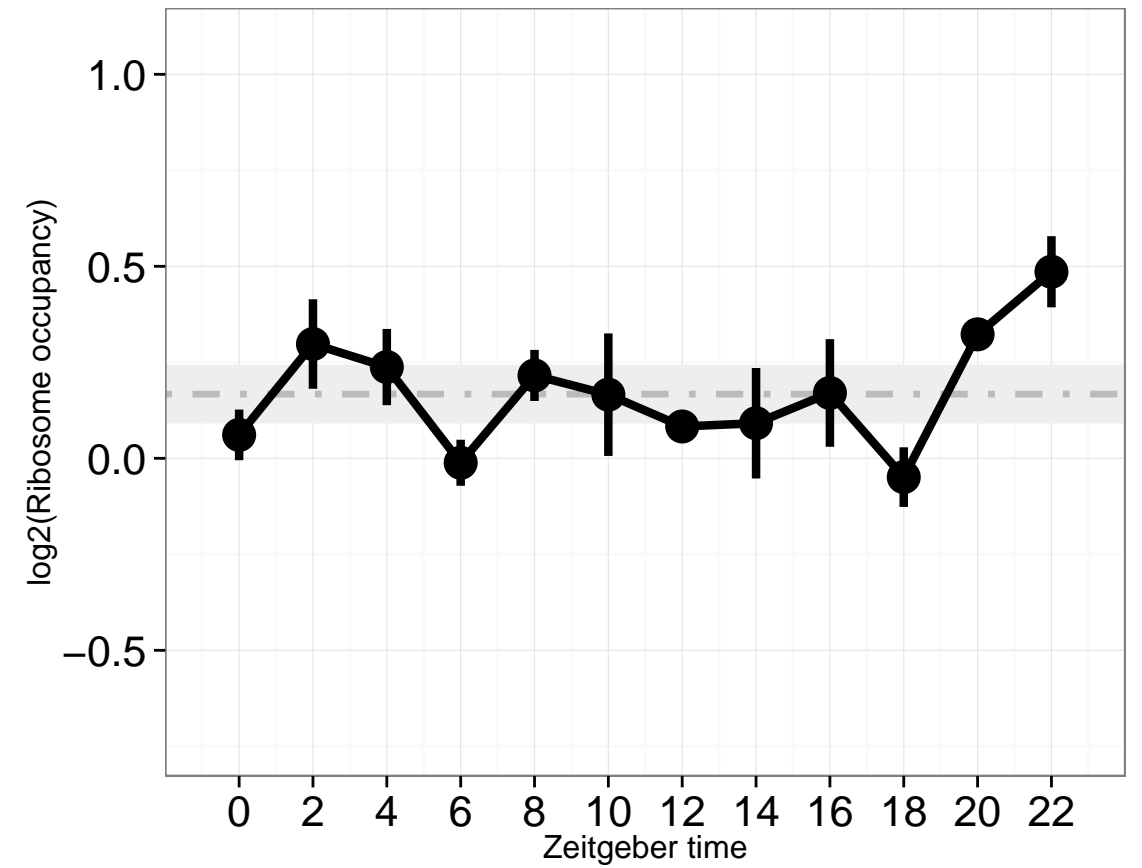

Supplement: SuppDataset_1.zip [file Fcho2_set_A.pdf › Supplemental Dataset 1/A-mRNA_nonrhyth_translation_nonrhyth/Fcho2_set_A.pdf]

## Fchsd2

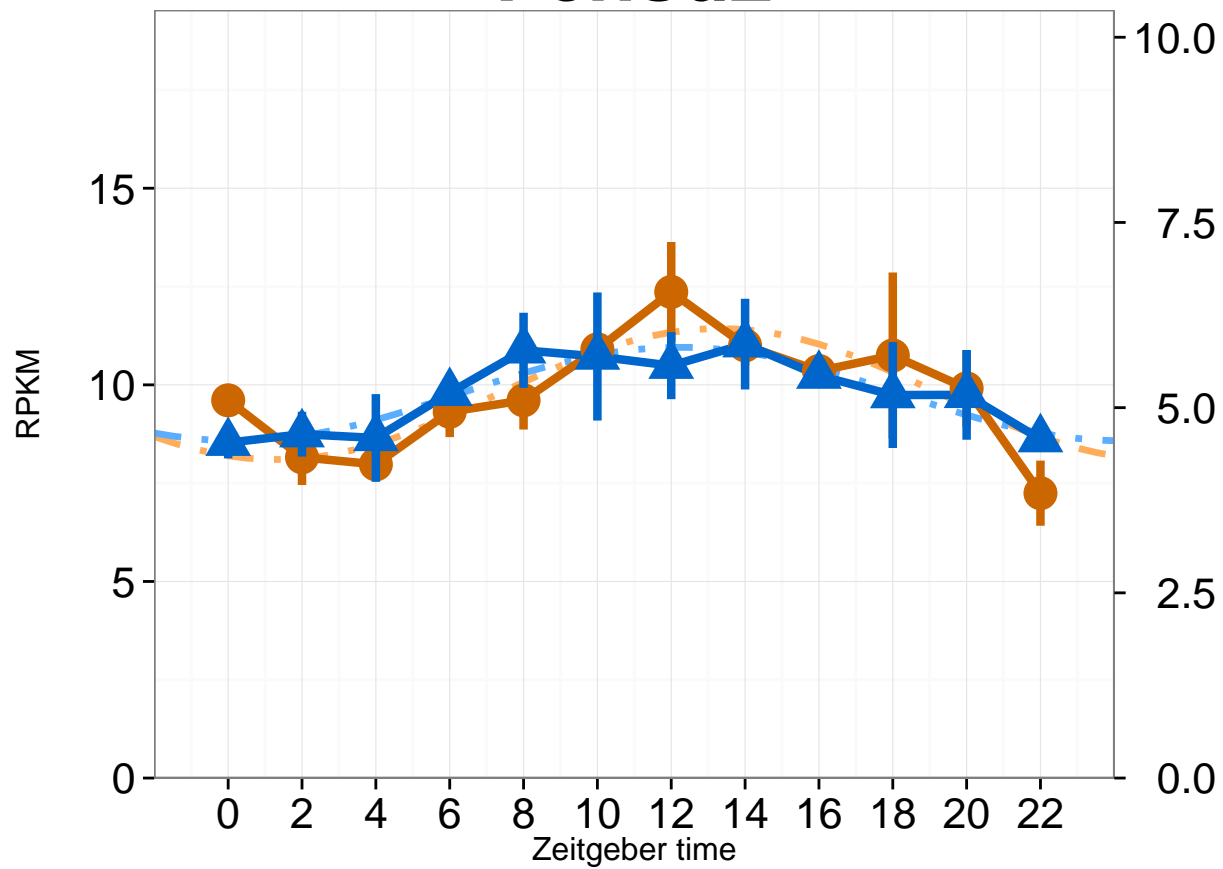

## Fchsd2

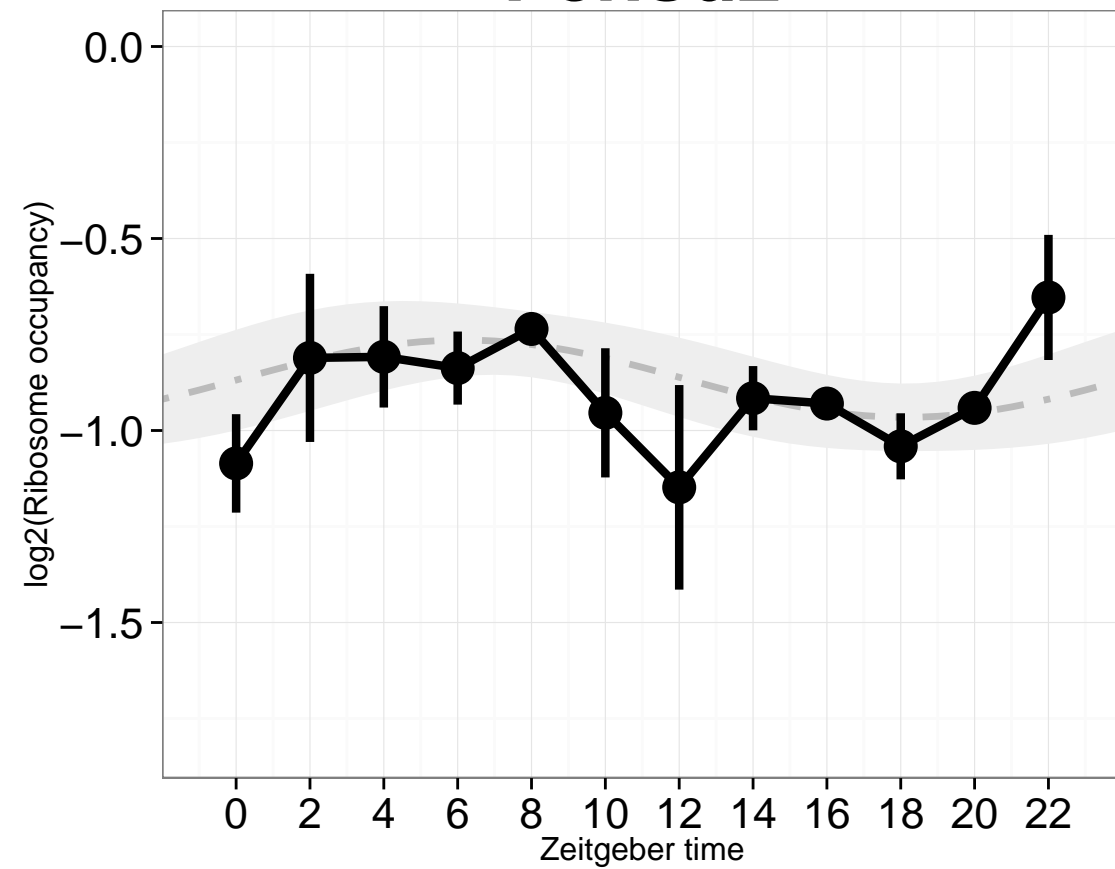

Supplement: SuppDataset_1.zip [file Fchsd2_set_A.pdf › Supplemental Dataset 1/A-mRNA_nonrhyth_translation_nonrhyth/Fchsd2_set_A.pdf]

# Fcna

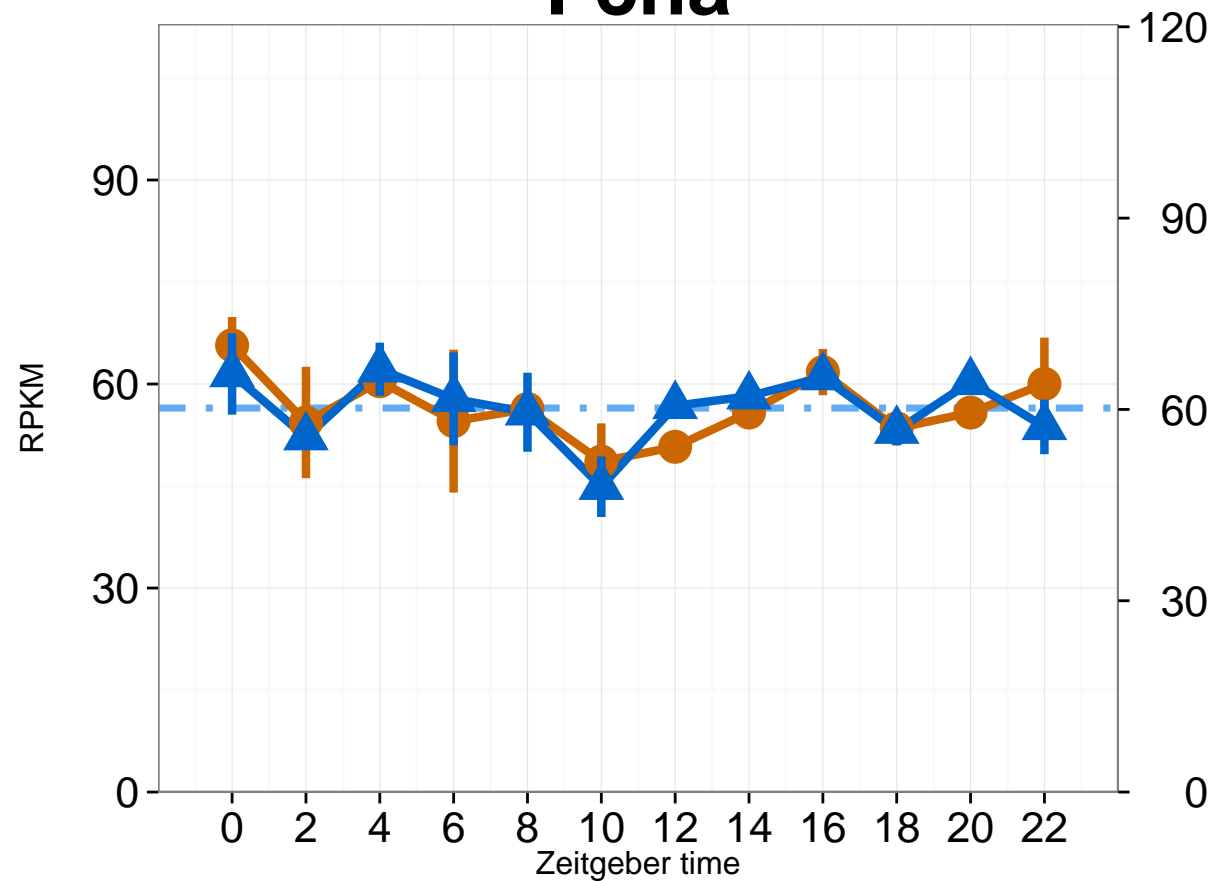

# Fcna

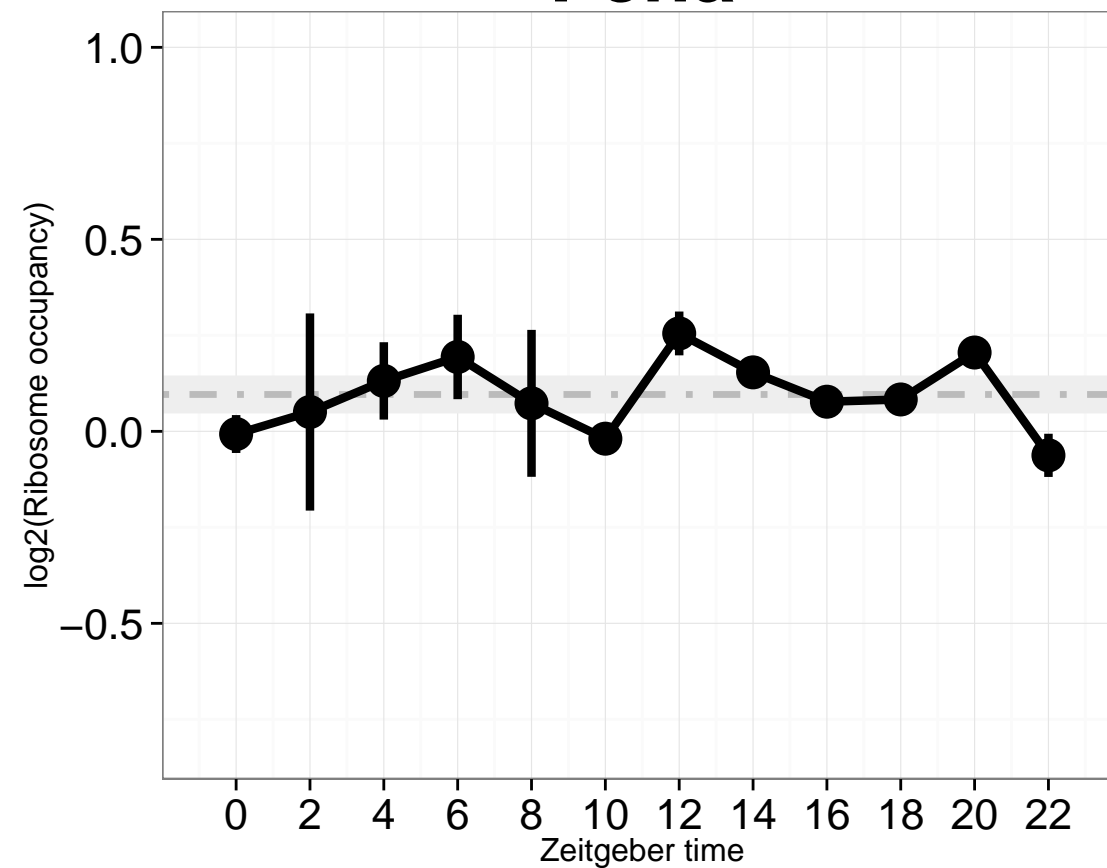

Supplement: SuppDataset_1.zip [file Fcna_set_A.pdf › Supplemental Dataset 1/A-mRNA_nonrhyth_translation_nonrhyth/Fcna_set_A.pdf]

# Fdft1

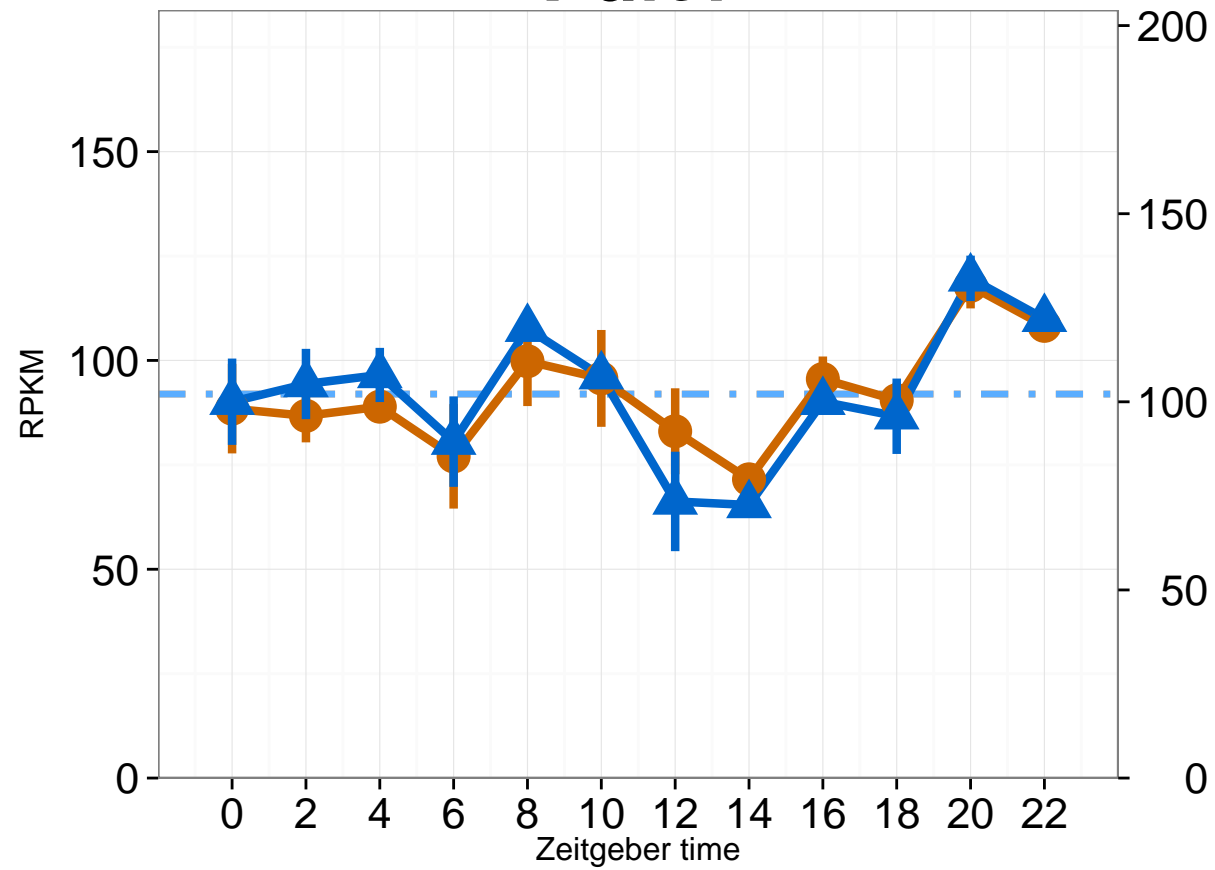

# Fdft1

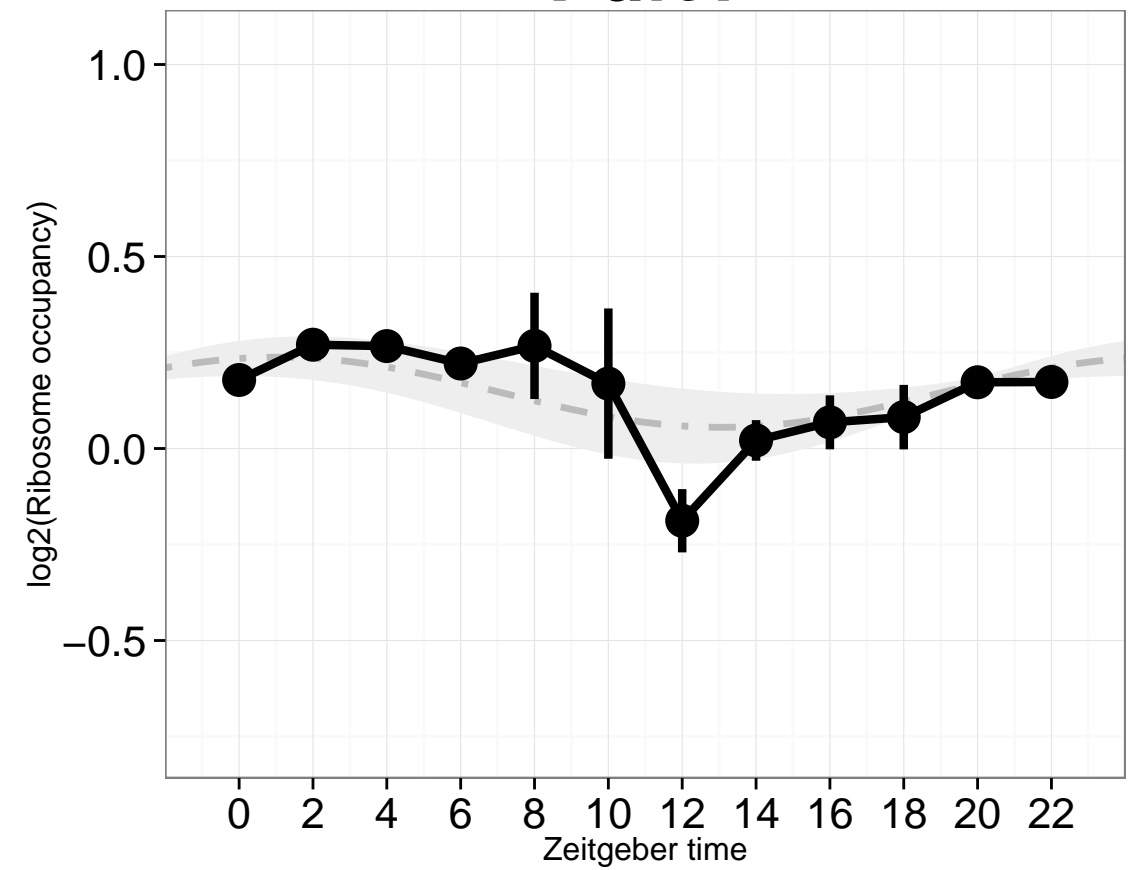

Supplement: SuppDataset_1.zip [file Fdft1_set_A.pdf › Supplemental Dataset 1/A-mRNA_nonrhyth_translation_nonrhyth/Fdft1_set_A.pdf]

# Fdx1

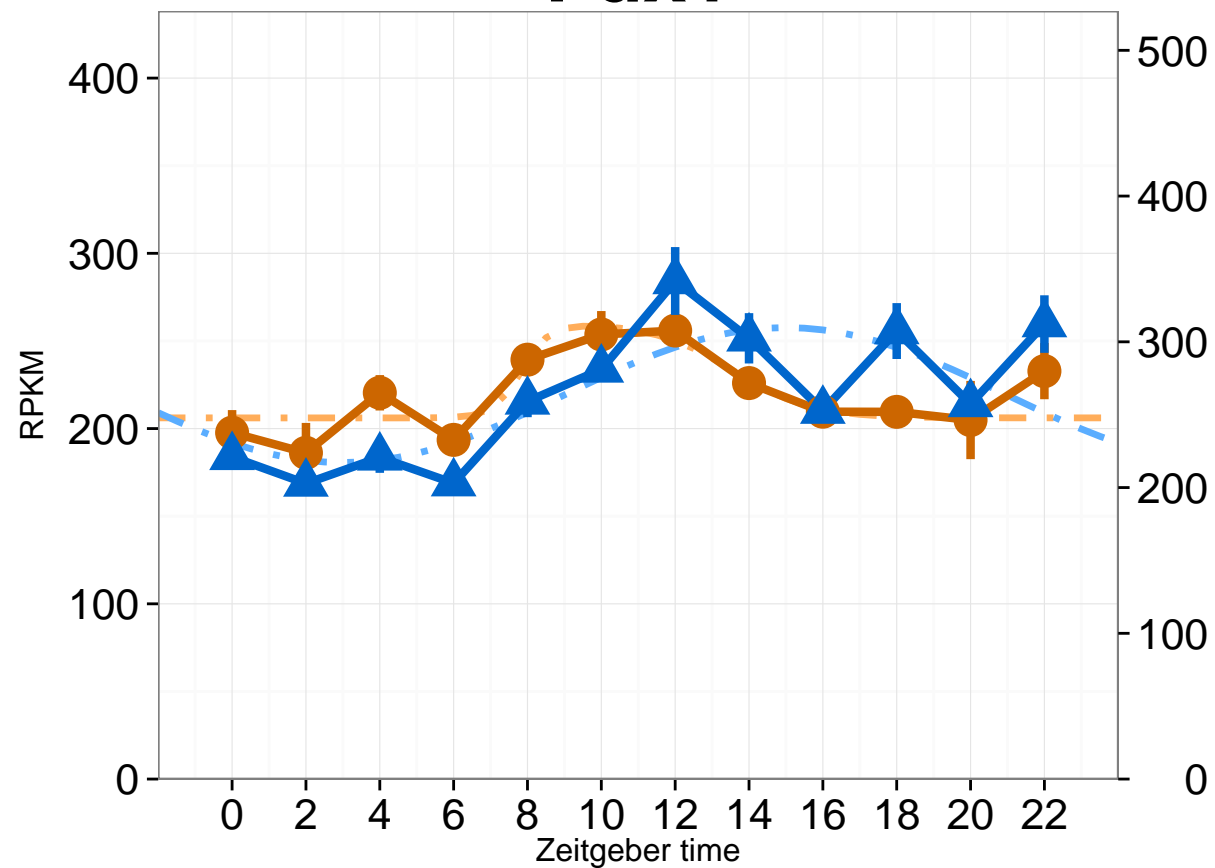

# Fdx1

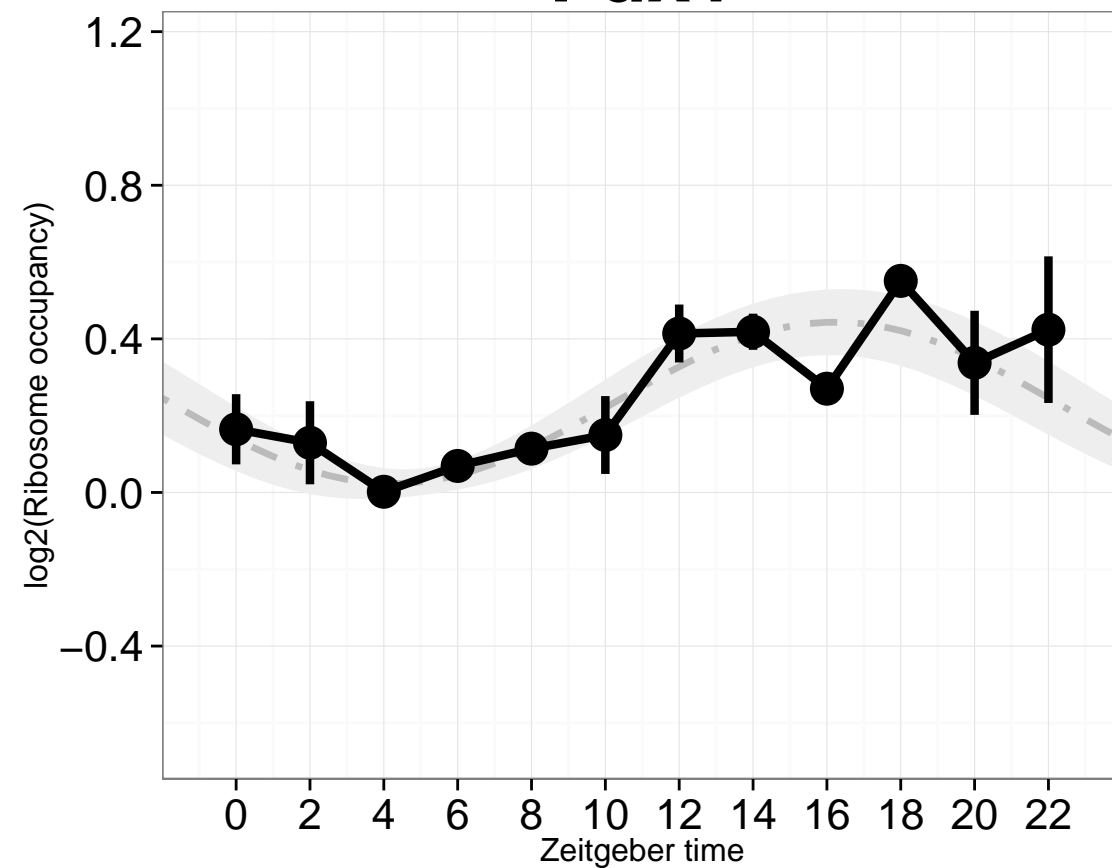

Supplement: SuppDataset_1.zip [file Fdx1_set_A.pdf › Supplemental Dataset 1/A-mRNA_nonrhyth_translation_nonrhyth/Fdx1_set_A.pdf]

## Fdx1l

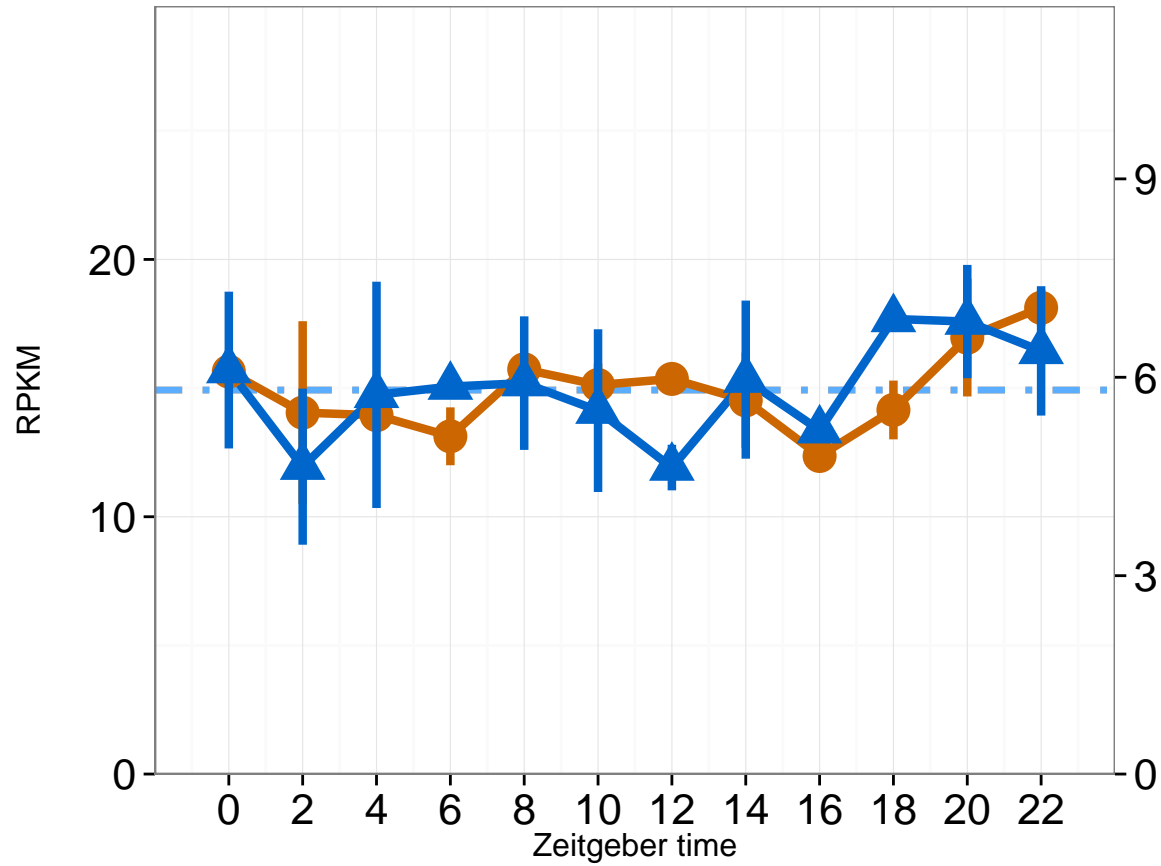

## Fdx1l

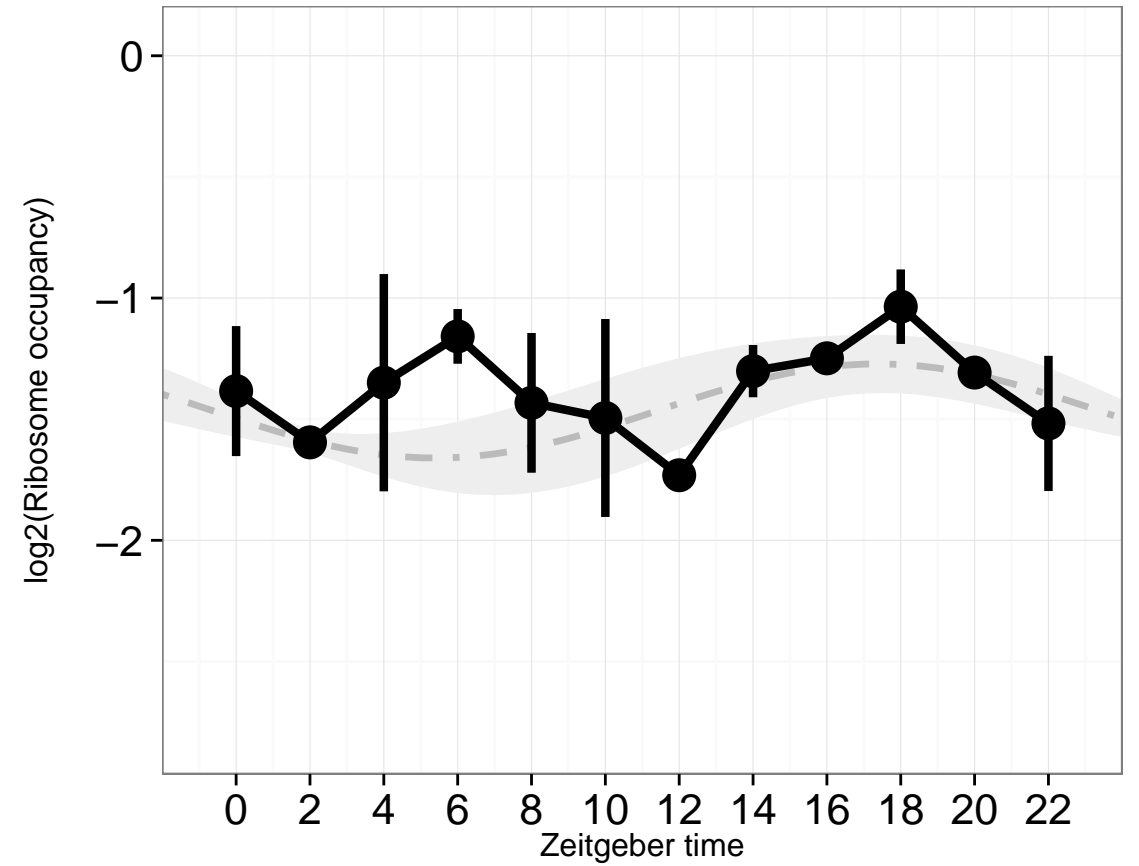

Supplement: SuppDataset_1.zip [file Fdx1l_set_A.pdf › Supplemental Dataset 1/A-mRNA_nonrhyth_translation_nonrhyth/Fdx1l_set_A.pdf]

# Fdxacb1

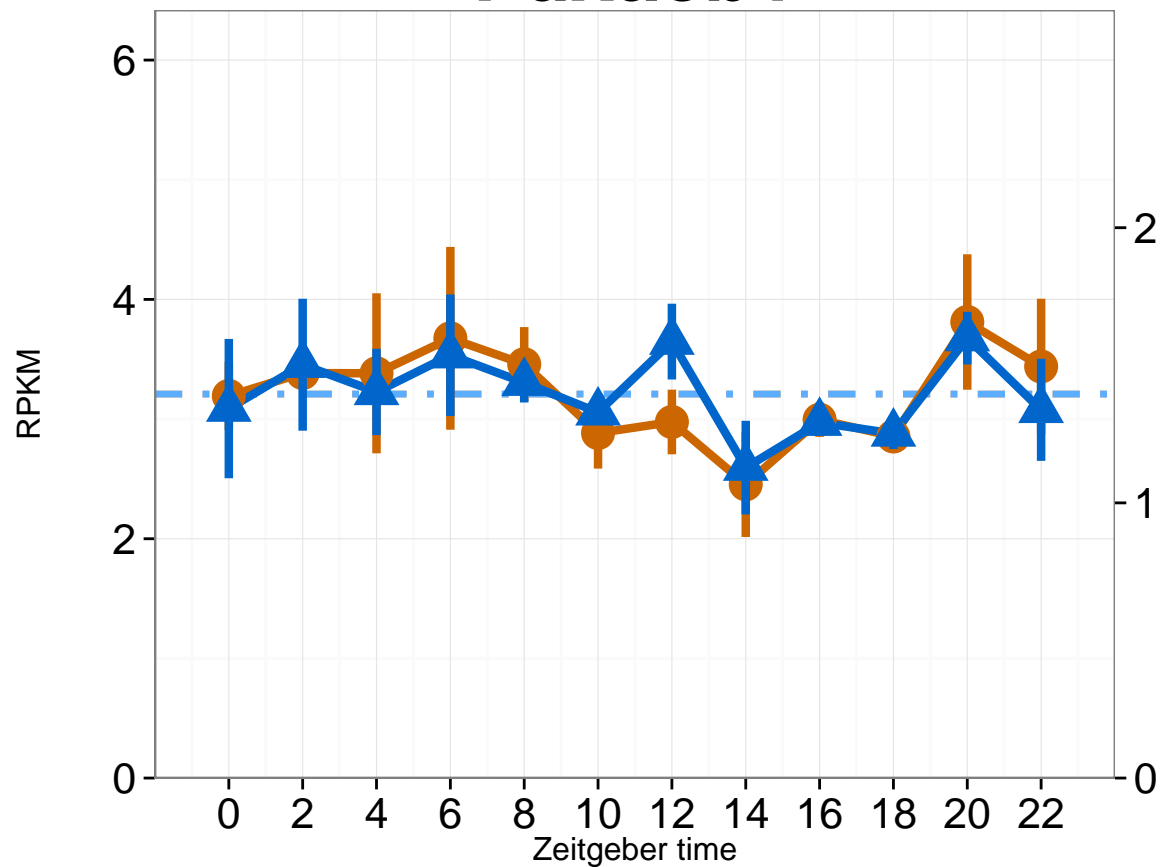

# Fdxacb1

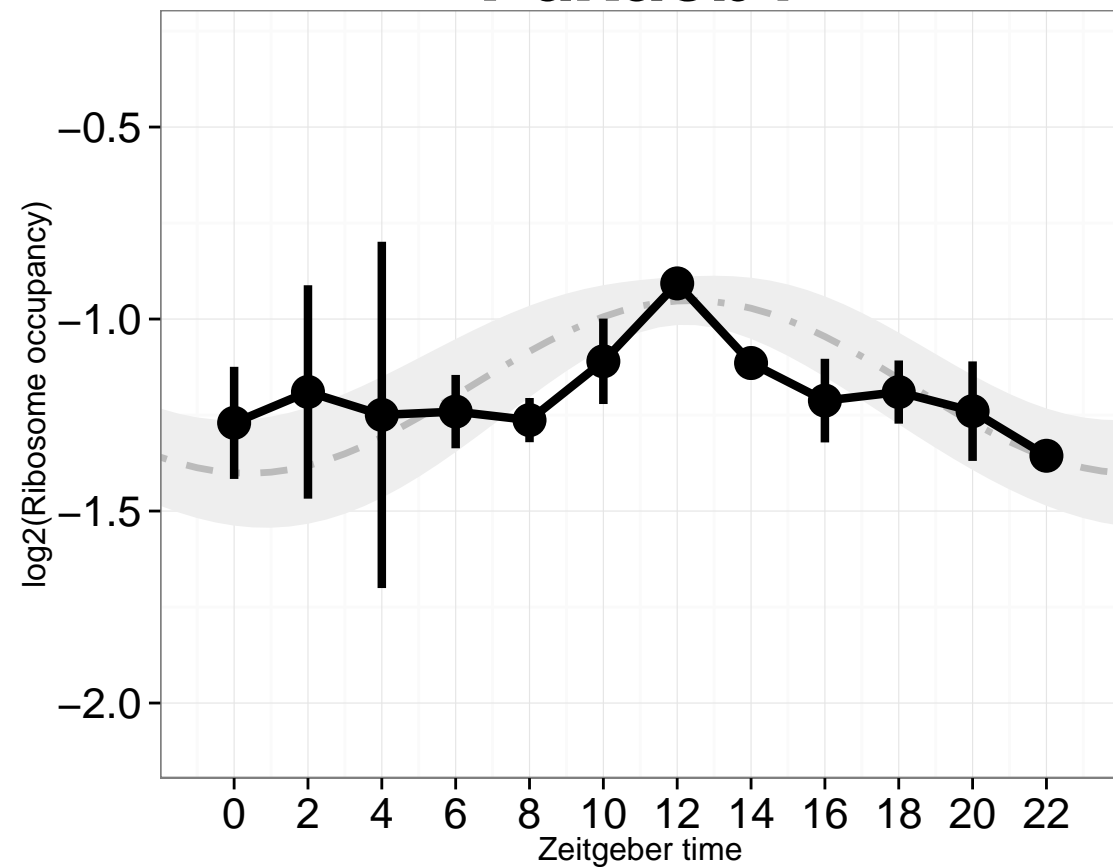

Supplement: SuppDataset_1.zip [file Fdxacb1_set_A.pdf › Supplemental Dataset 1/A-mRNA_nonrhyth_translation_nonrhyth/Fdxacb1_set_A.pdf]

## Fech

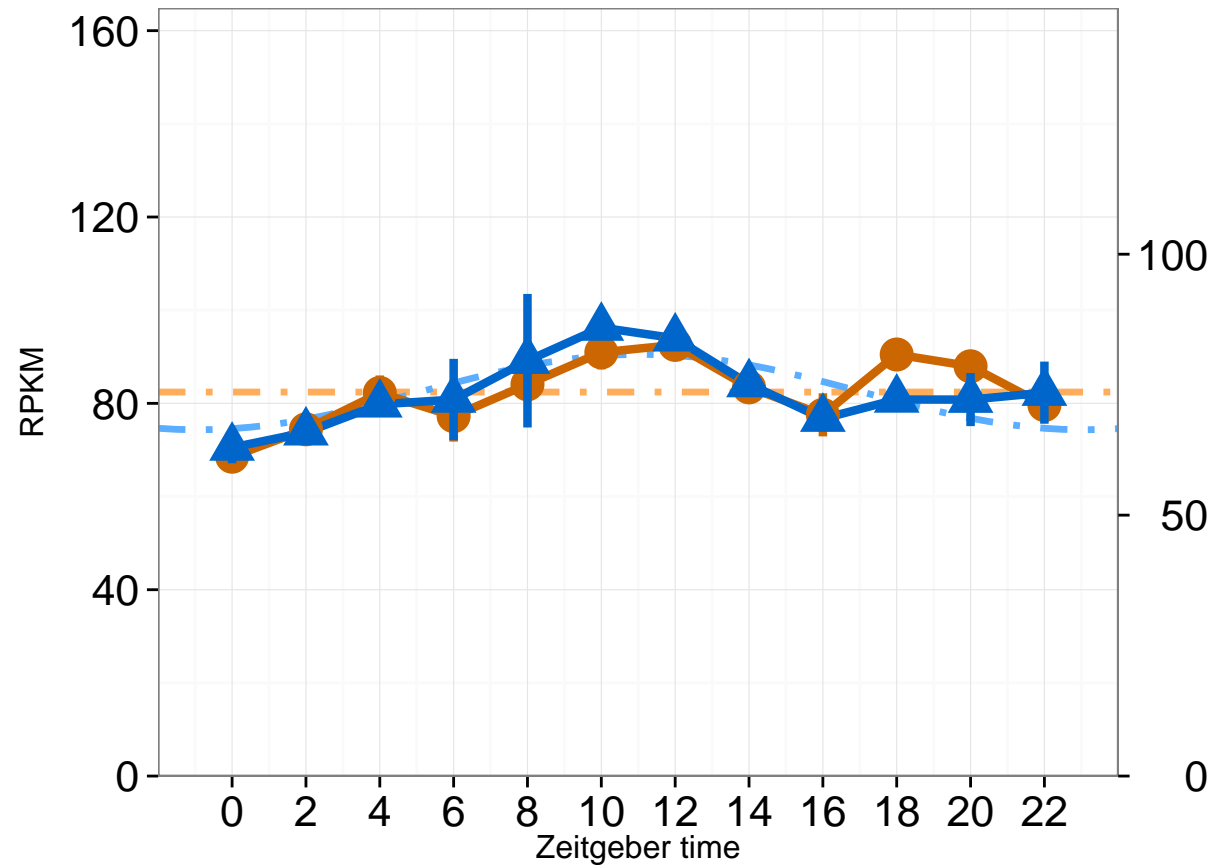

## Fech

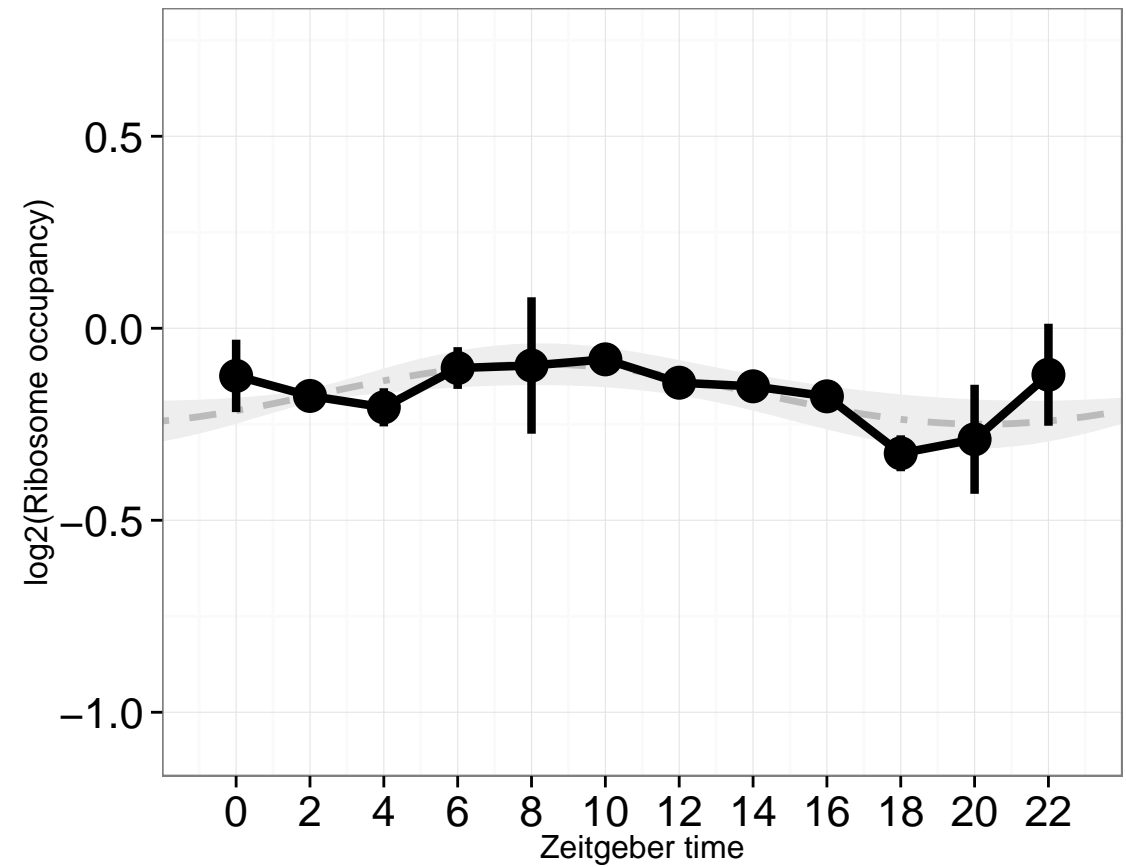

Supplement: SuppDataset_1.zip [file Fech_set_A.pdf › Supplemental Dataset 1/A-mRNA_nonrhyth_translation_nonrhyth/Fech_set_A.pdf]

# Fem1a

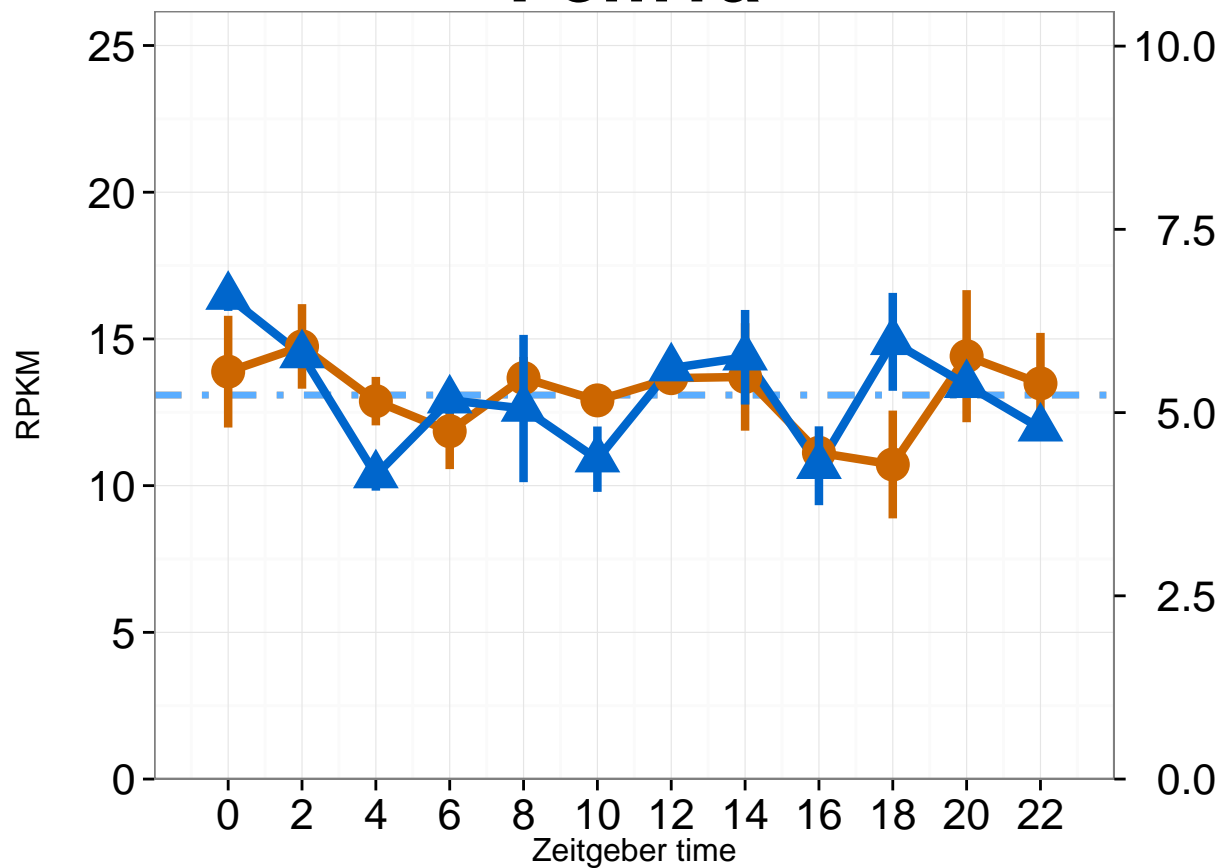

# Fem1a

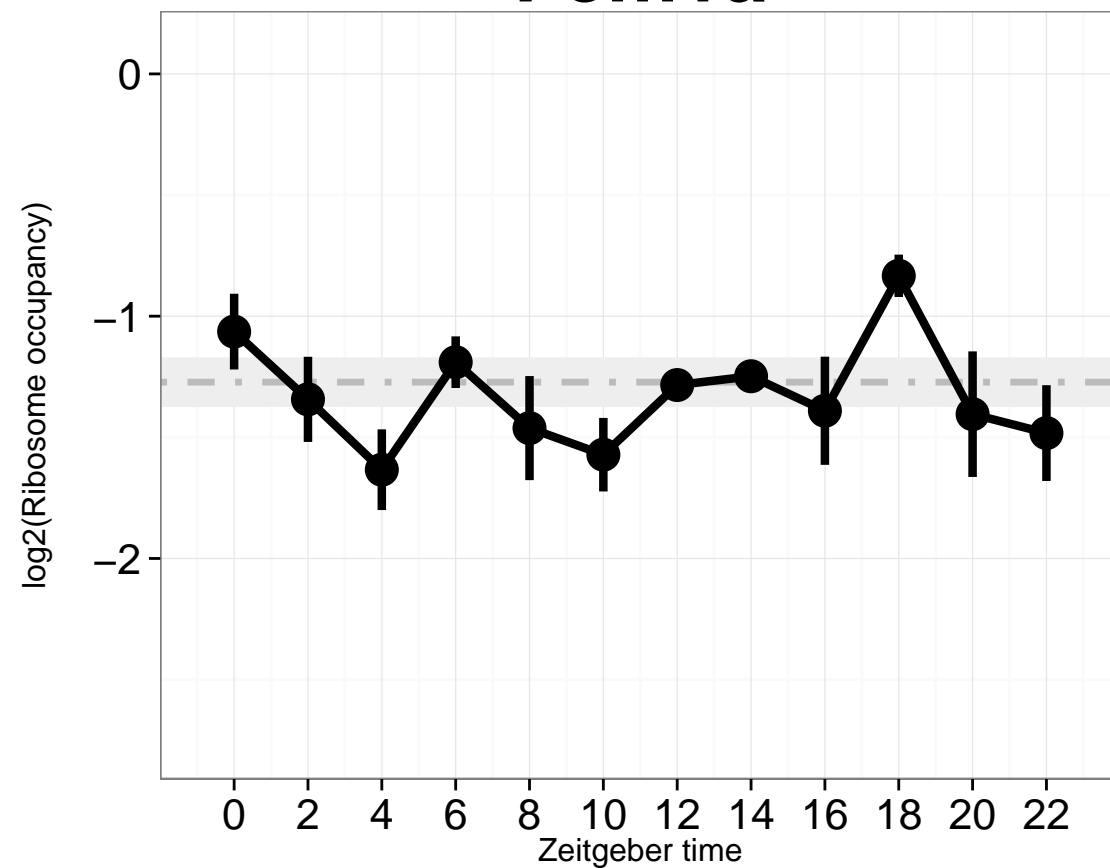

Supplement: SuppDataset_1.zip [file Fem1a_set_A.pdf › Supplemental Dataset 1/A-mRNA_nonrhyth_translation_nonrhyth/Fem1a_set_A.pdf]

# Fem1b

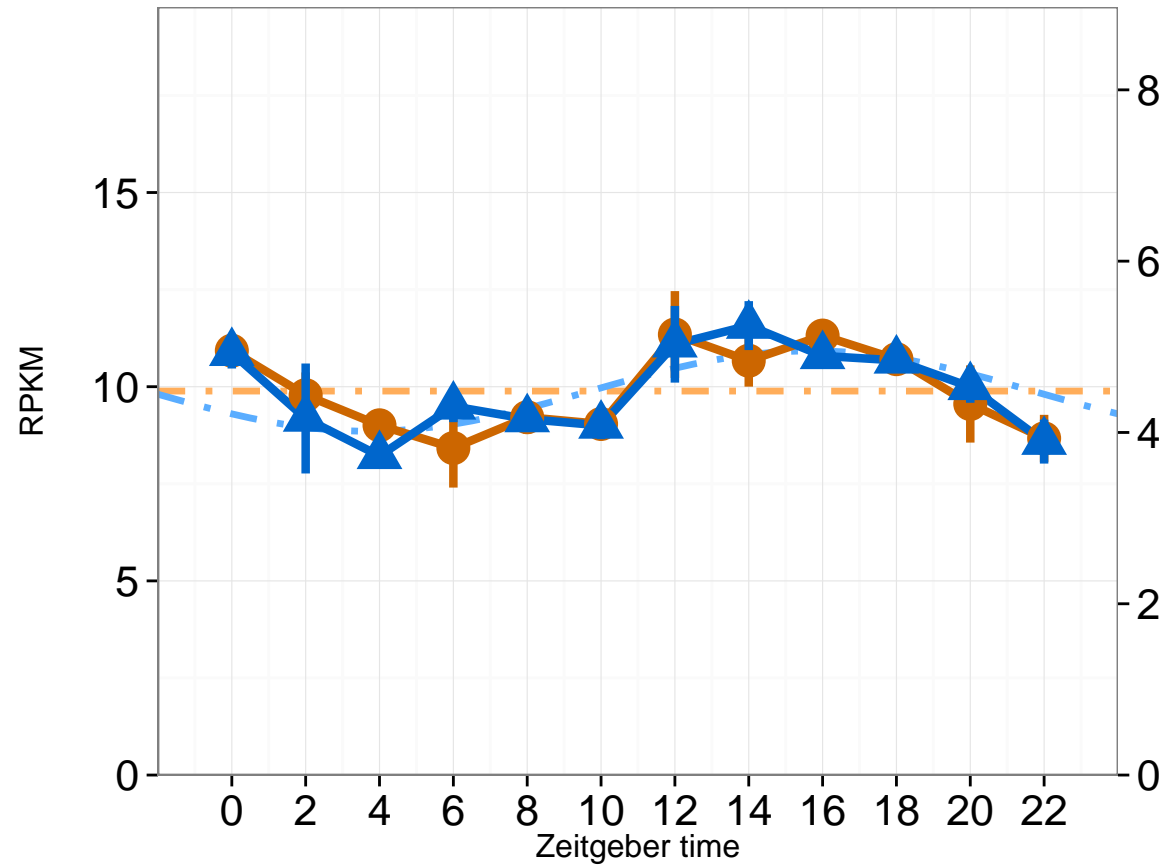

# Fem1b

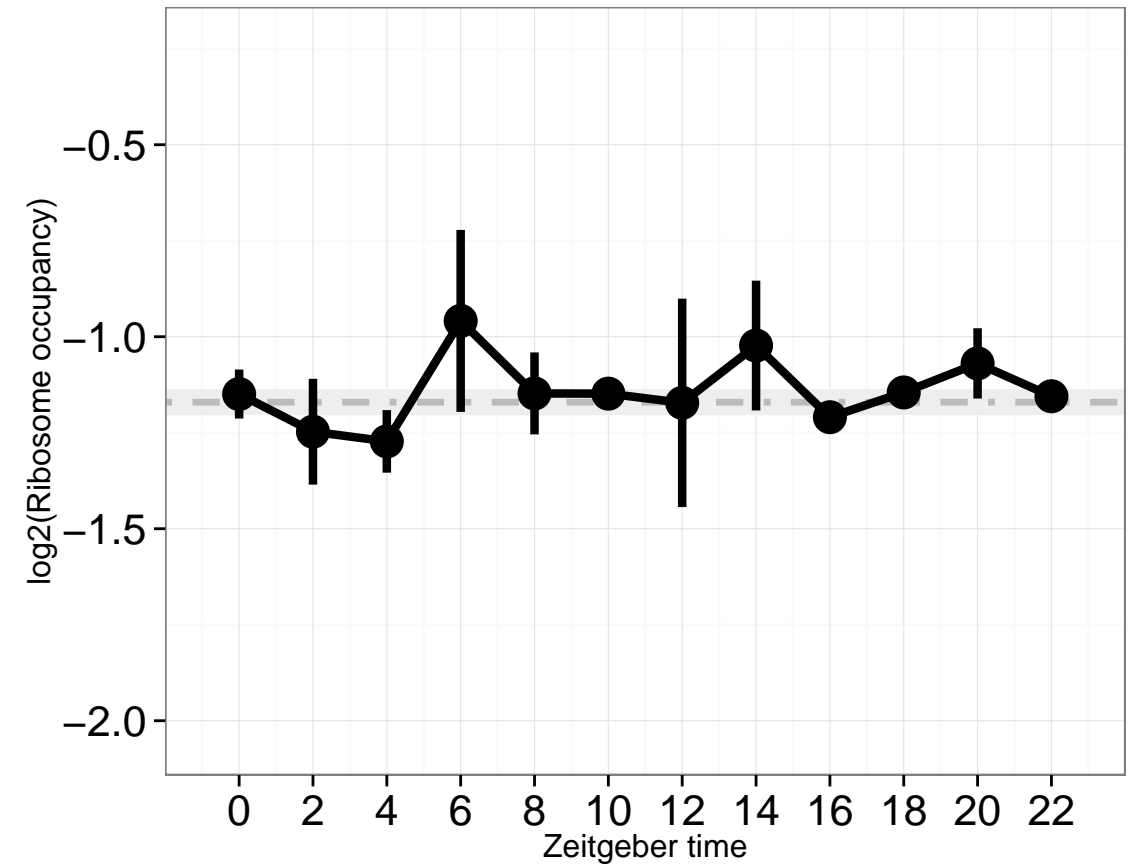

Supplement: SuppDataset_1.zip [file Fem1b_set_A.pdf › Supplemental Dataset 1/A-mRNA_nonrhyth_translation_nonrhyth/Fem1b_set_A.pdf]

# Fem1c

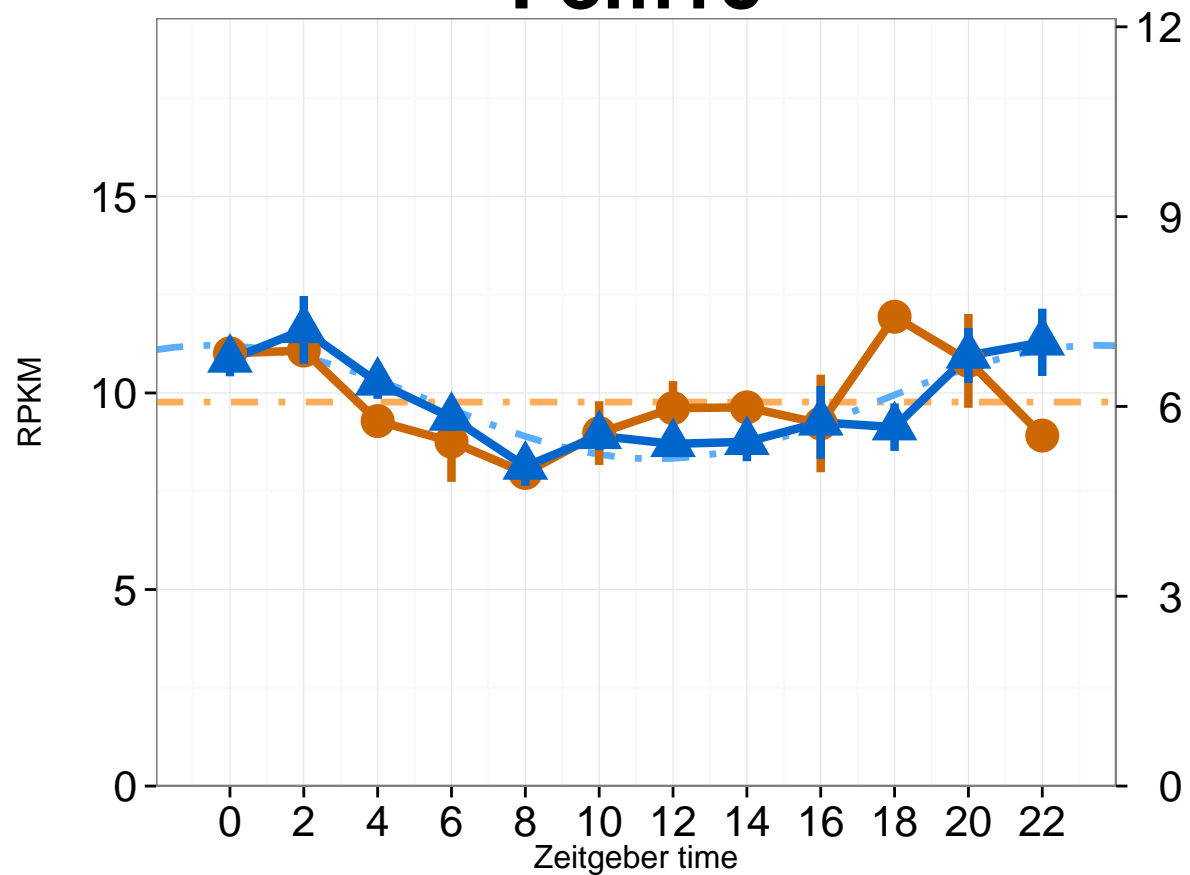

# Fem1c

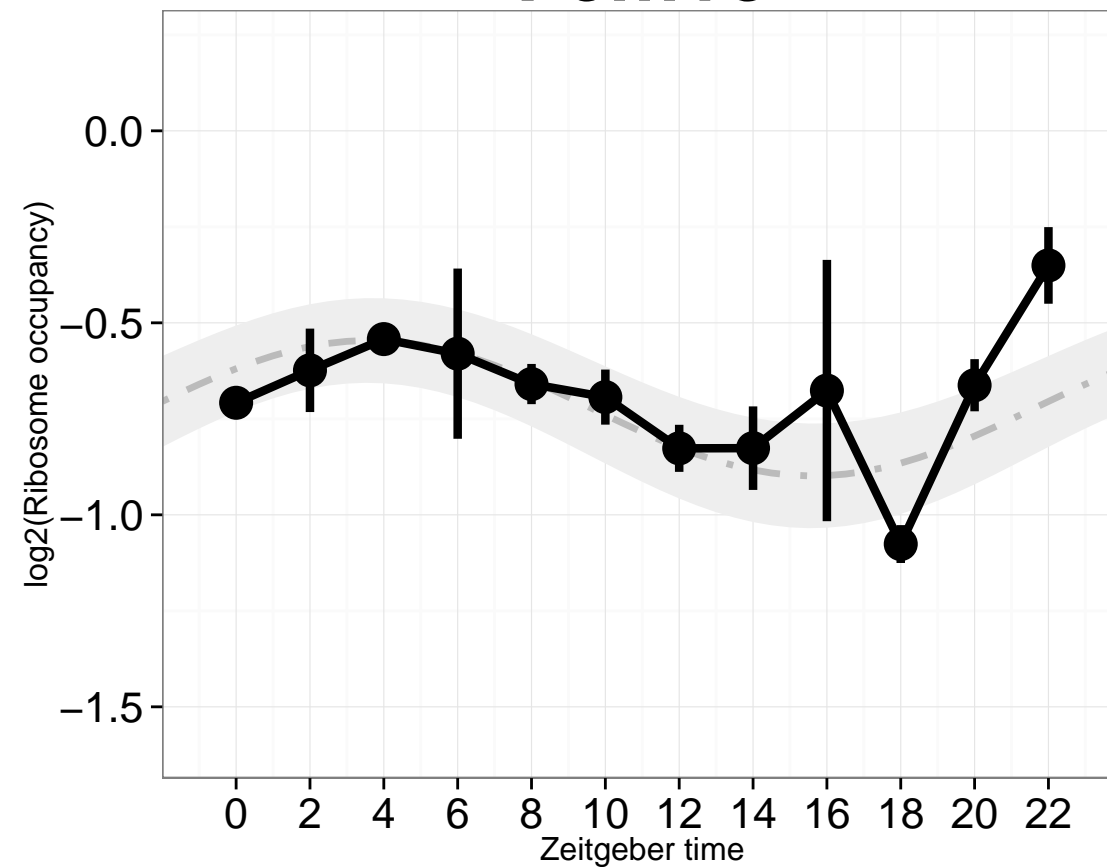

Supplement: SuppDataset_1.zip [file Fem1c_set_A.pdf › Supplemental Dataset 1/A-mRNA_nonrhyth_translation_nonrhyth/Fem1c_set_A.pdf]

## Fen1

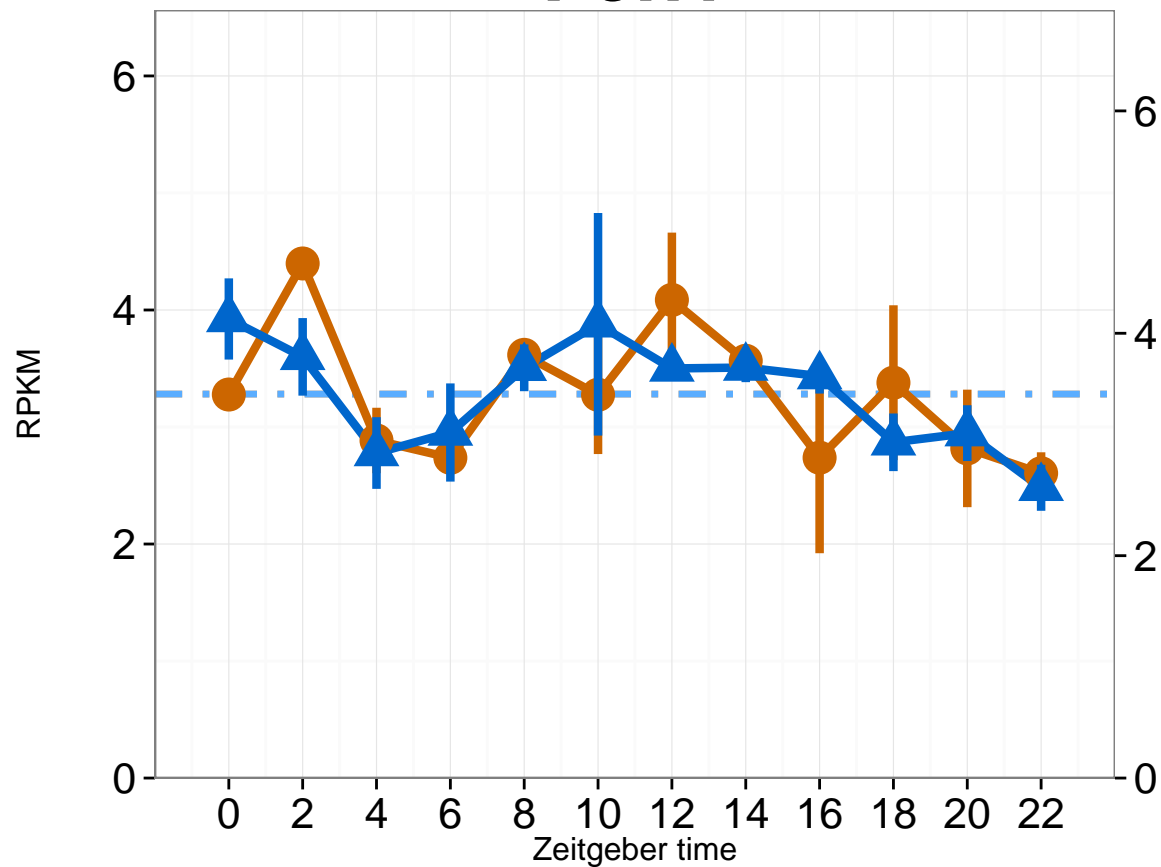

## Fen1

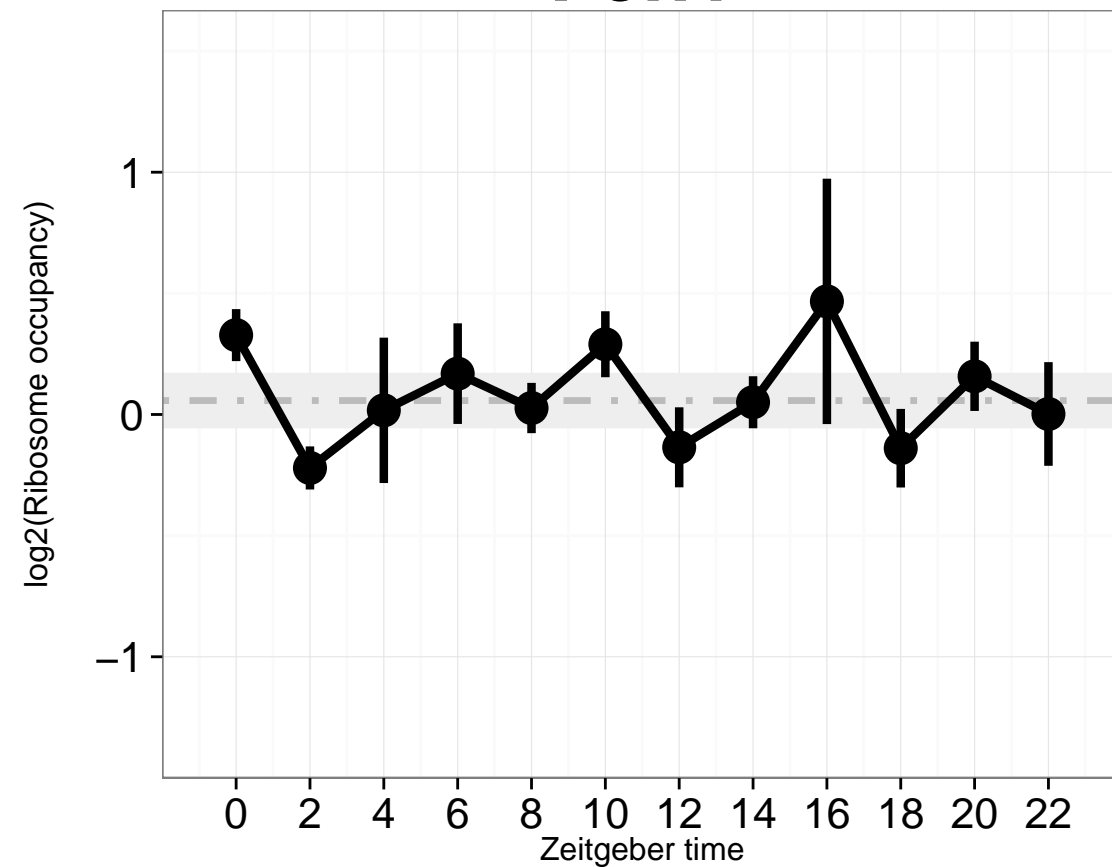

Supplement: SuppDataset_1.zip [file Fen1_set_A.pdf › Supplemental Dataset 1/A-mRNA_nonrhyth_translation_nonrhyth/Fen1_set_A.pdf]

## Fer

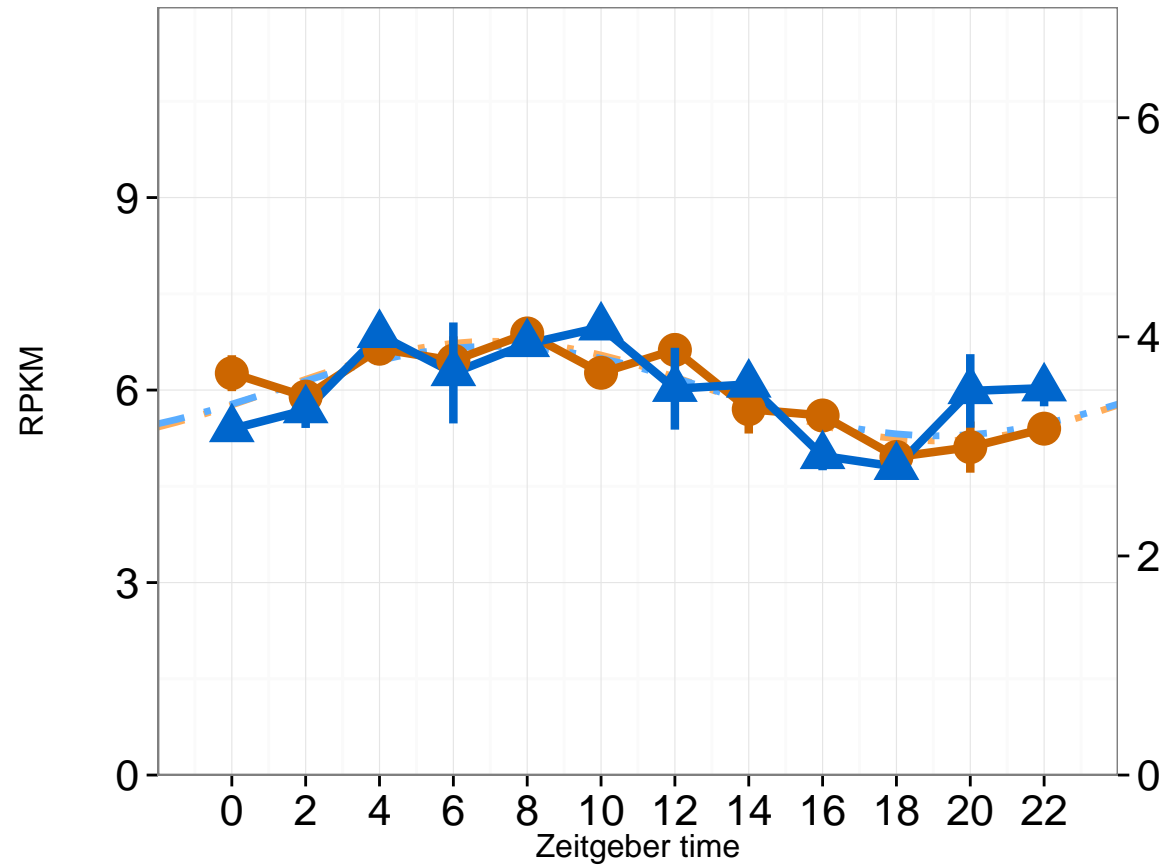

## Fer

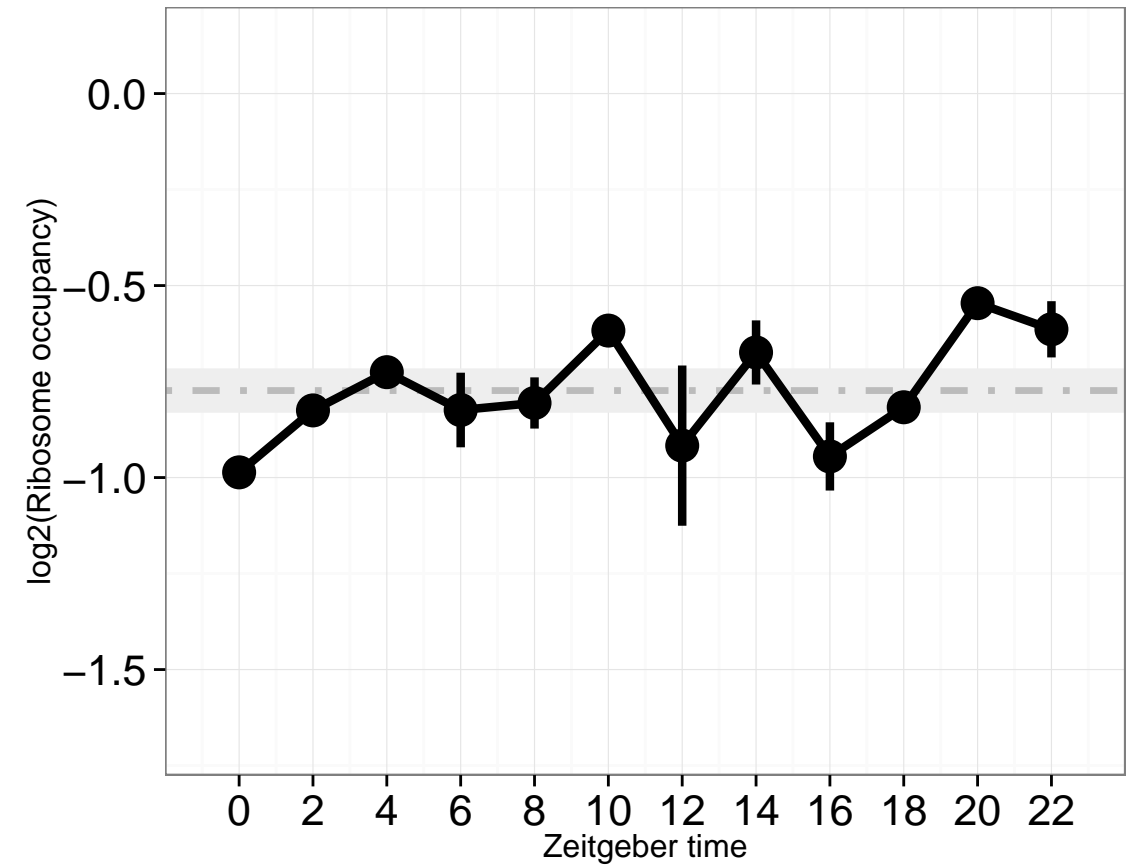

Supplement: SuppDataset_1.zip [file Fer_set_A.pdf › Supplemental Dataset 1/A-mRNA_nonrhyth_translation_nonrhyth/Fer_set_A.pdf]

## Fermt3

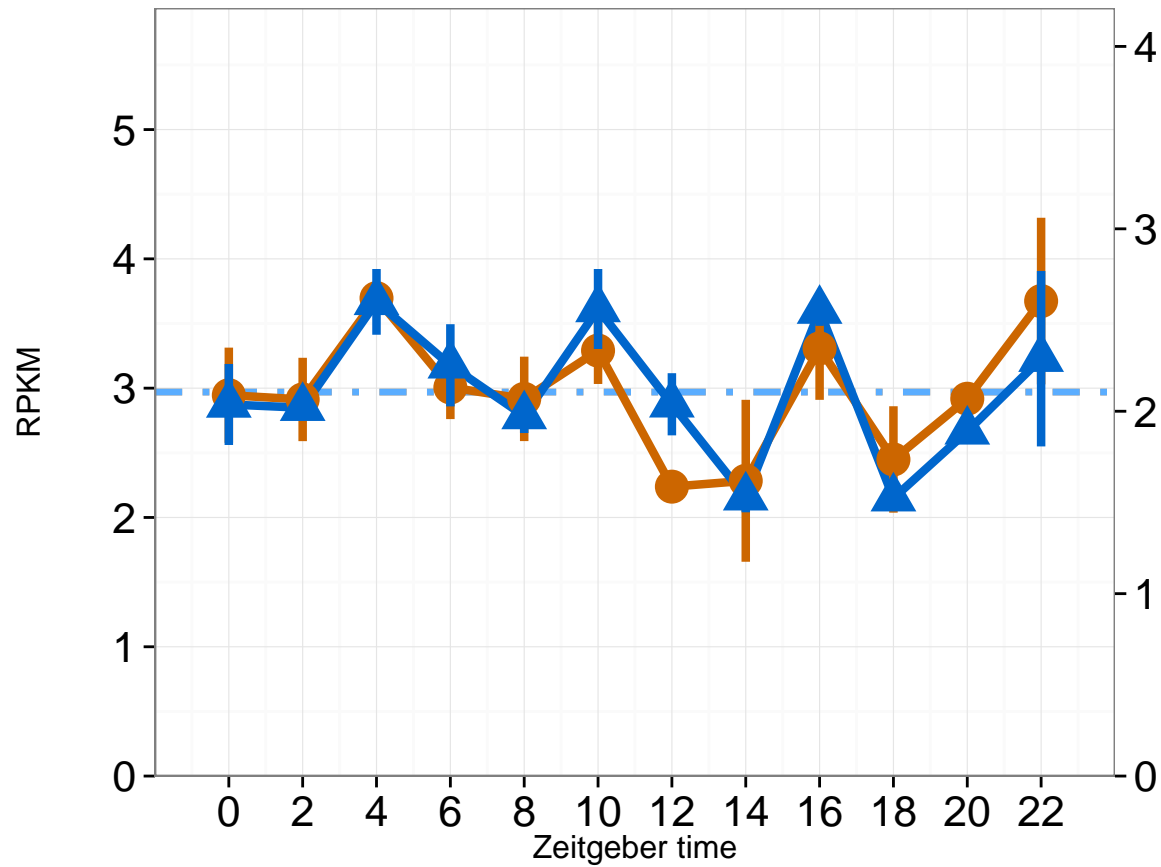

## Fermt3

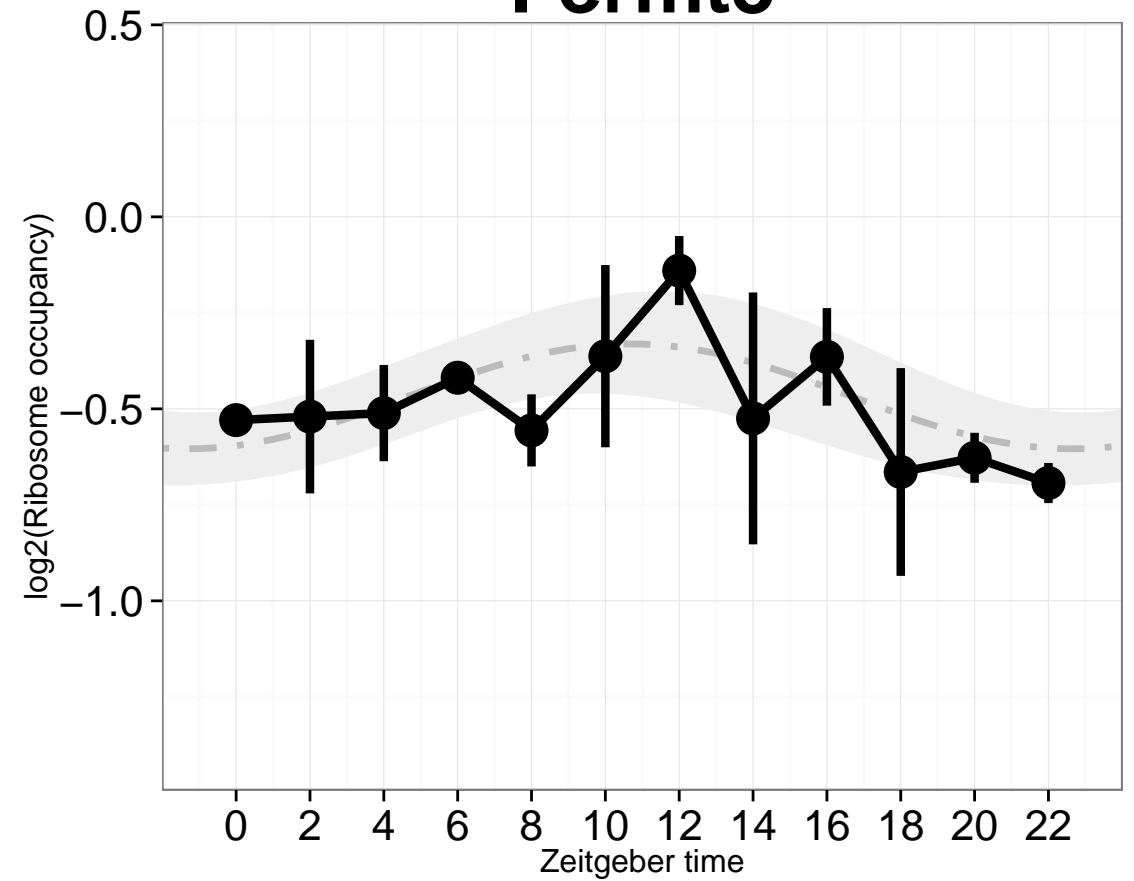

Supplement: SuppDataset_1.zip [file Fermt3_set_A.pdf › Supplemental Dataset 1/A-mRNA_nonrhyth_translation_nonrhyth/Fermt3_set_A.pdf]

## Fes

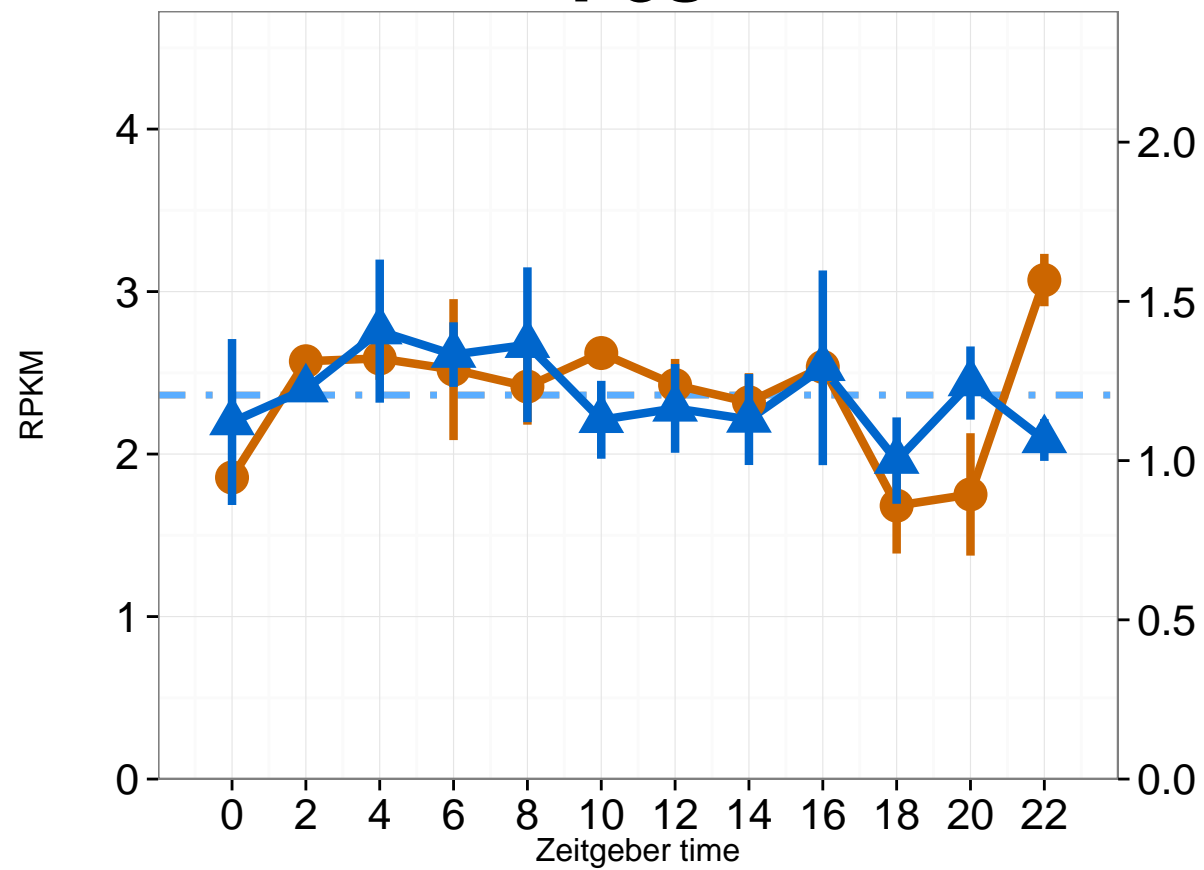

## Fes

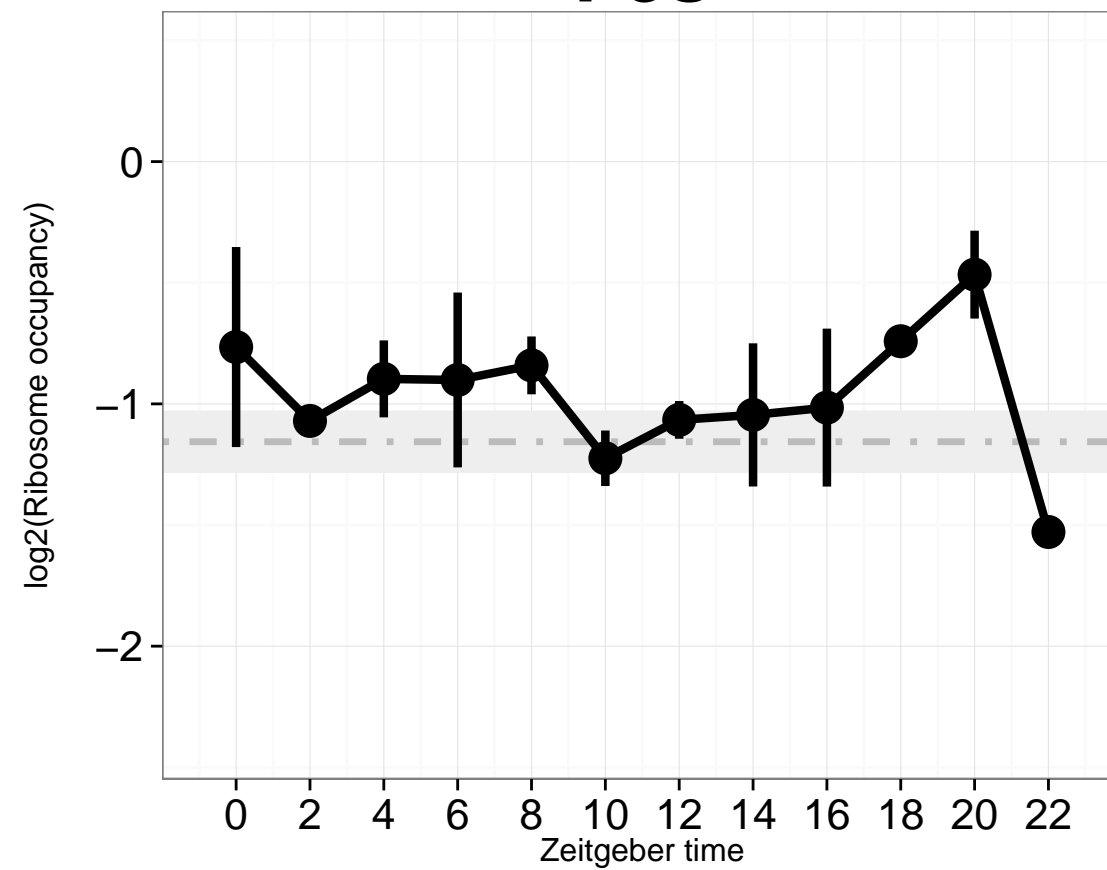

Supplement: SuppDataset_1.zip [file Fes_set_A.pdf › Supplemental Dataset 1/A-mRNA_nonrhyth_translation_nonrhyth/Fes_set_A.pdf]

## Fez2

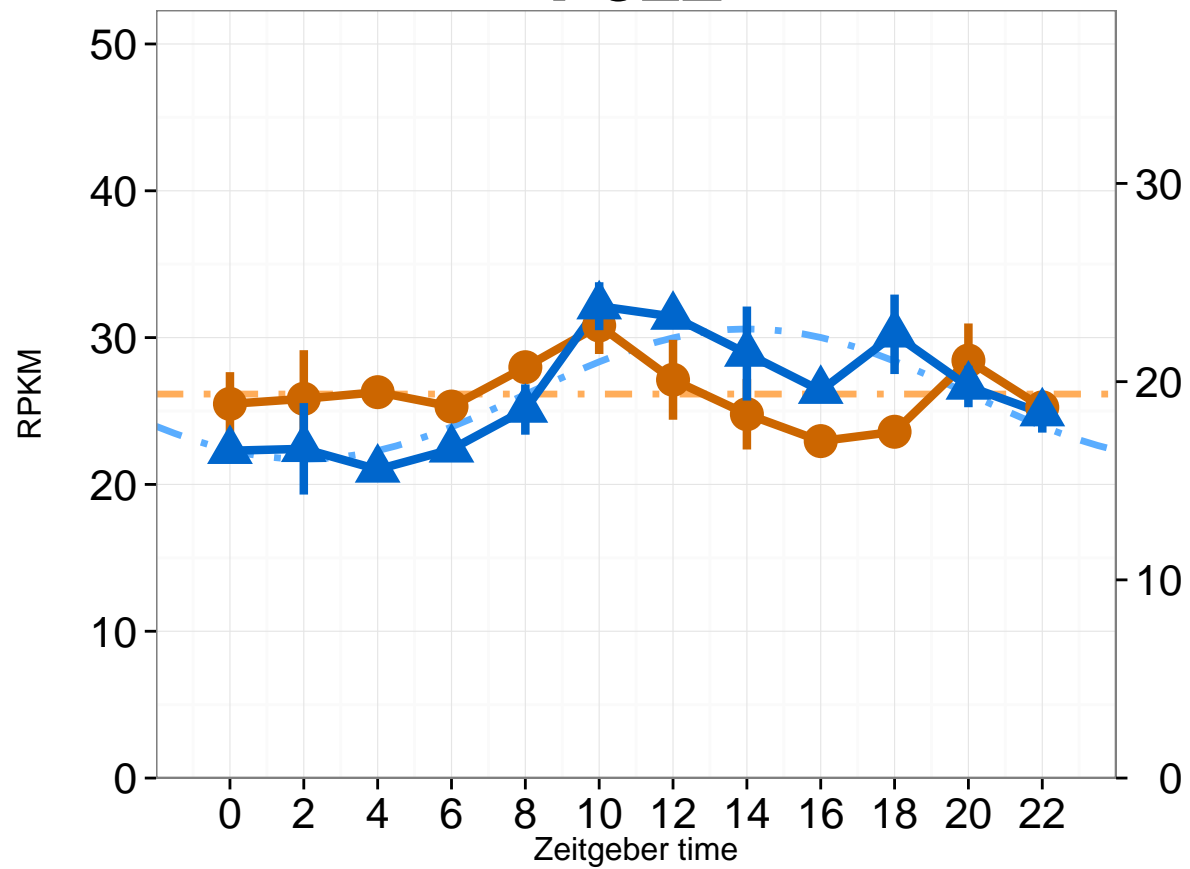

## Fez2

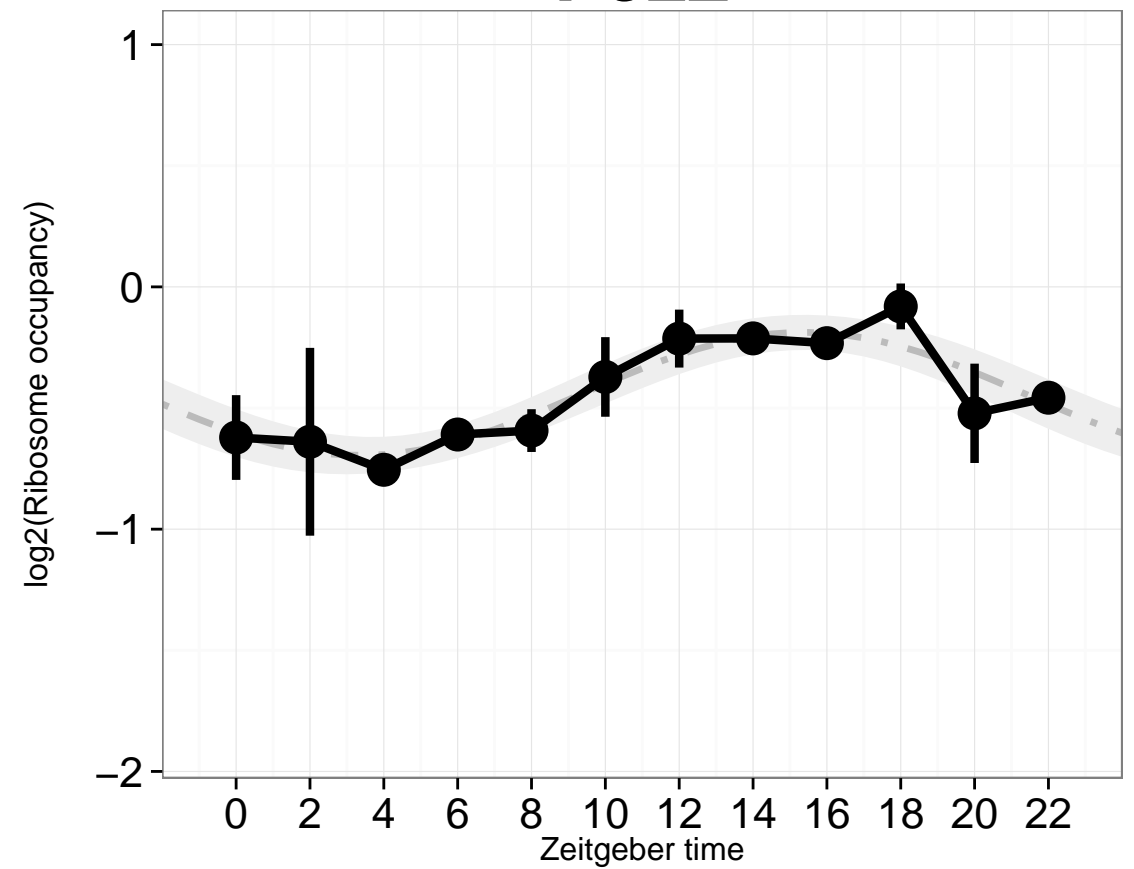

Supplement: SuppDataset_1.zip [file Fez2_set_A.pdf › Supplemental Dataset 1/A-mRNA_nonrhyth_translation_nonrhyth/Fez2_set_A.pdf]

## Fga

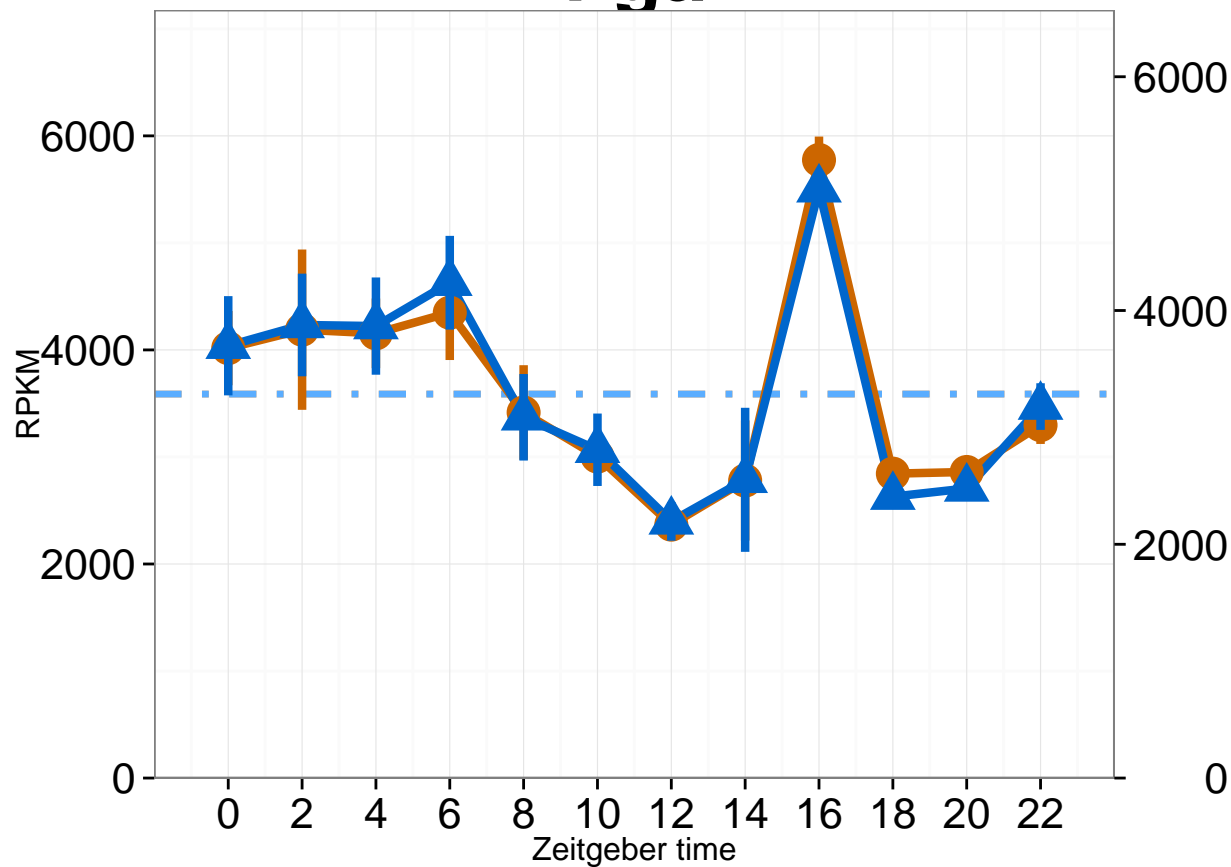

## Fga

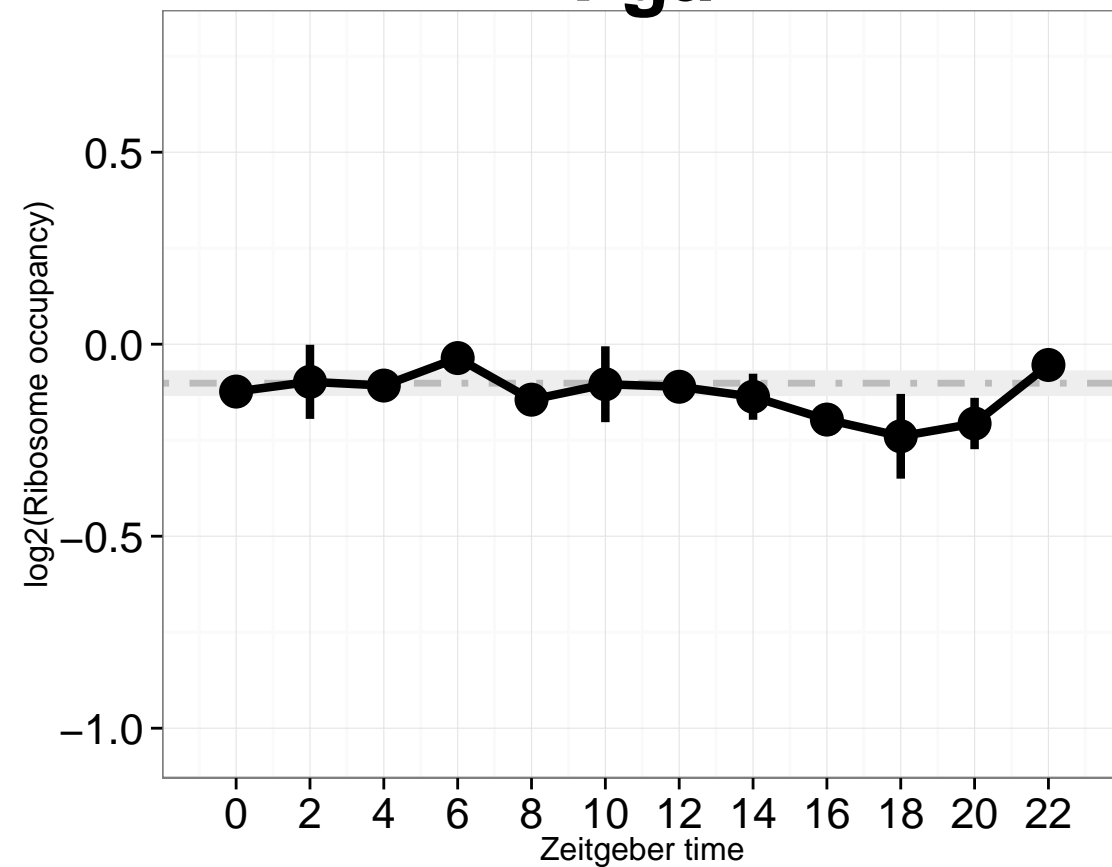

Supplement: SuppDataset_1.zip [file Fga_set_A.pdf › Supplemental Dataset 1/A-mRNA_nonrhyth_translation_nonrhyth/Fga_set_A.pdf]

## Fgb

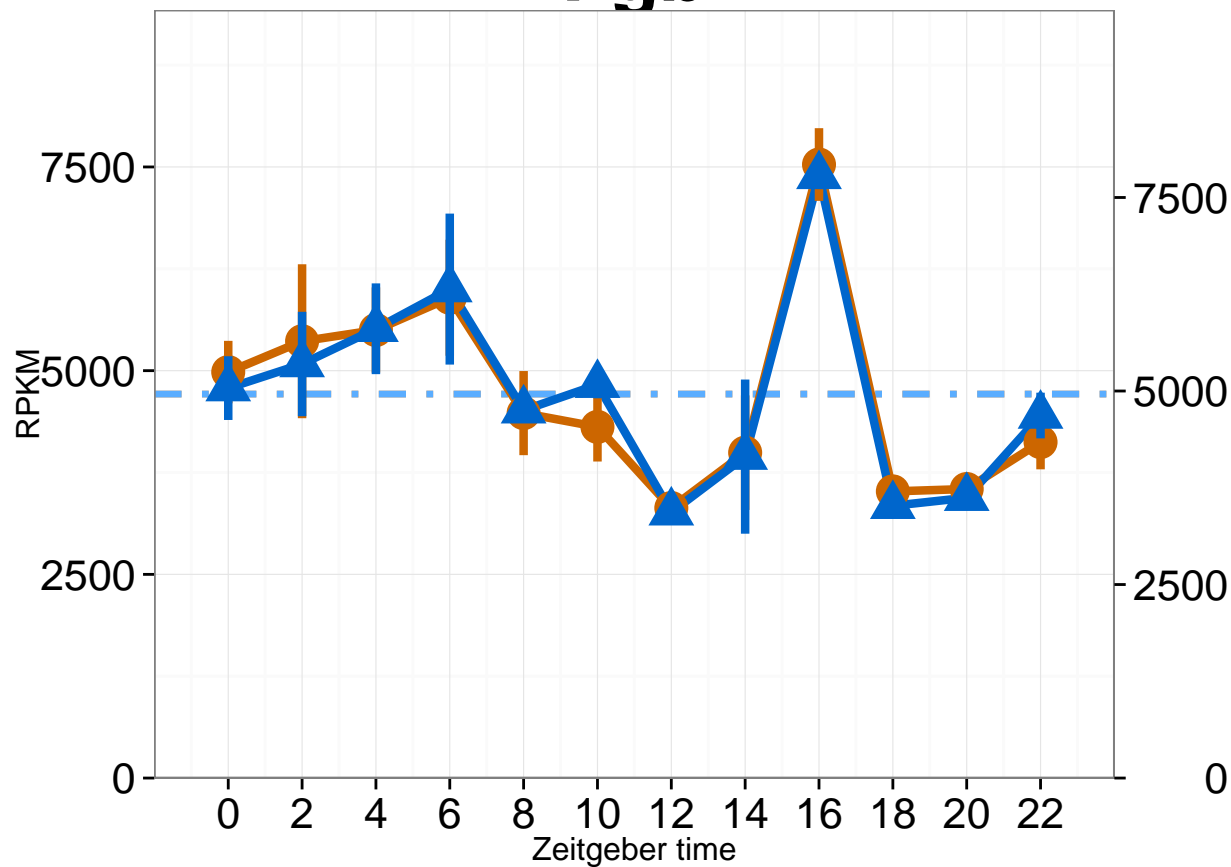

## Fgb

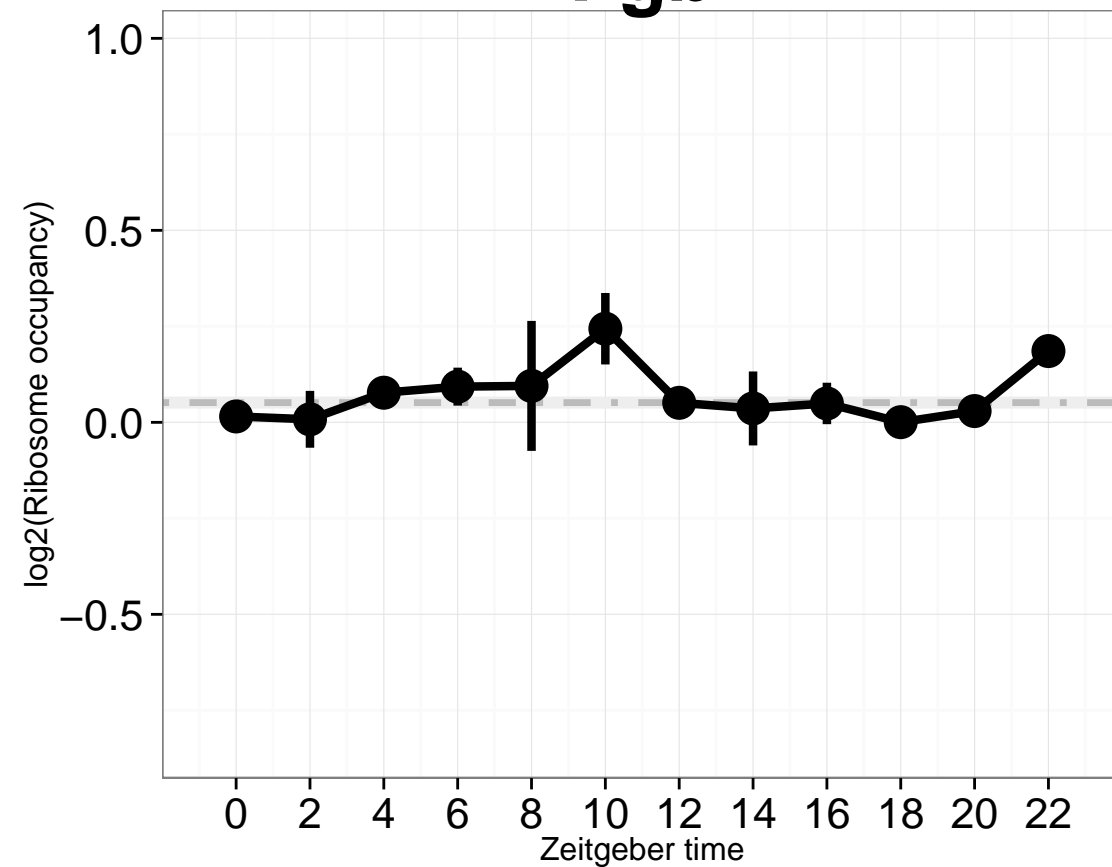

Supplement: SuppDataset_1.zip [file Fgb_set_A.pdf › Supplemental Dataset 1/A-mRNA_nonrhyth_translation_nonrhyth/Fgb_set_A.pdf]

# Fgd2

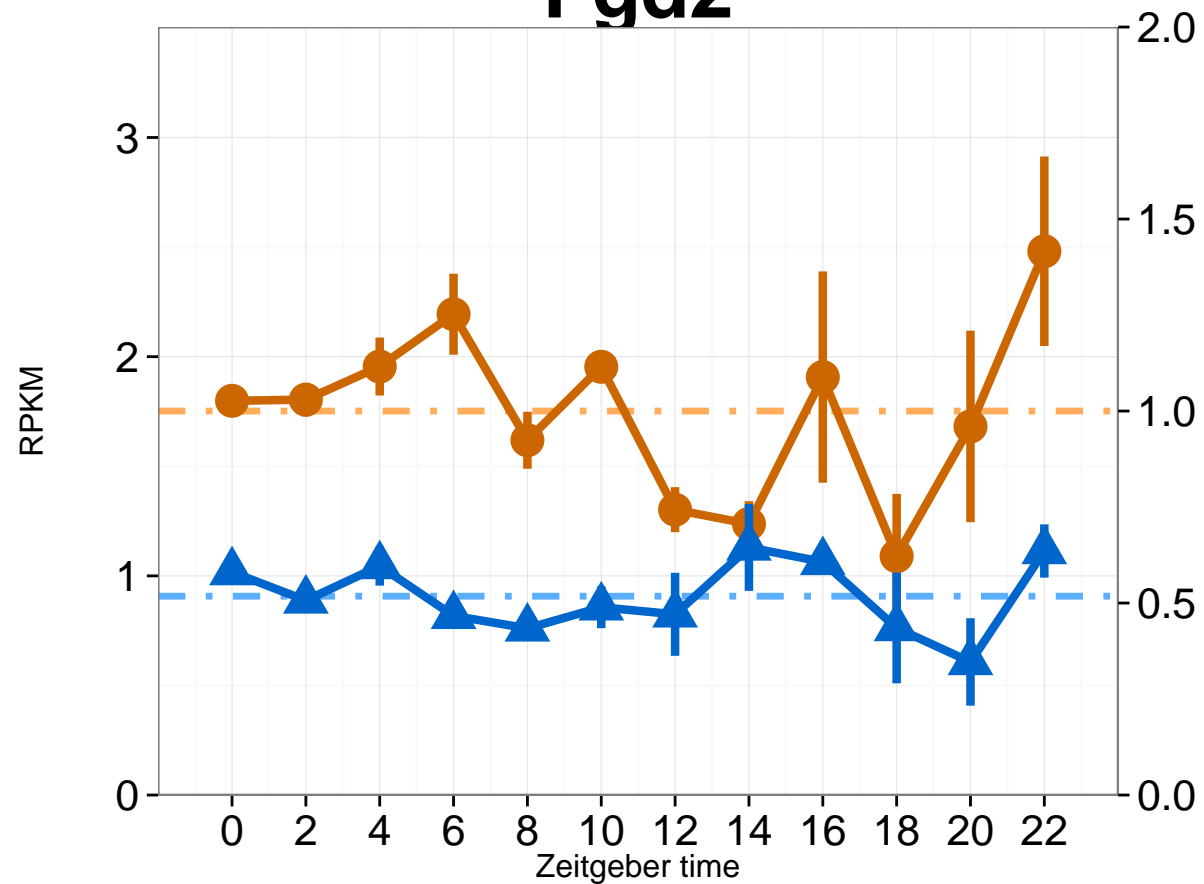

# Fgd2

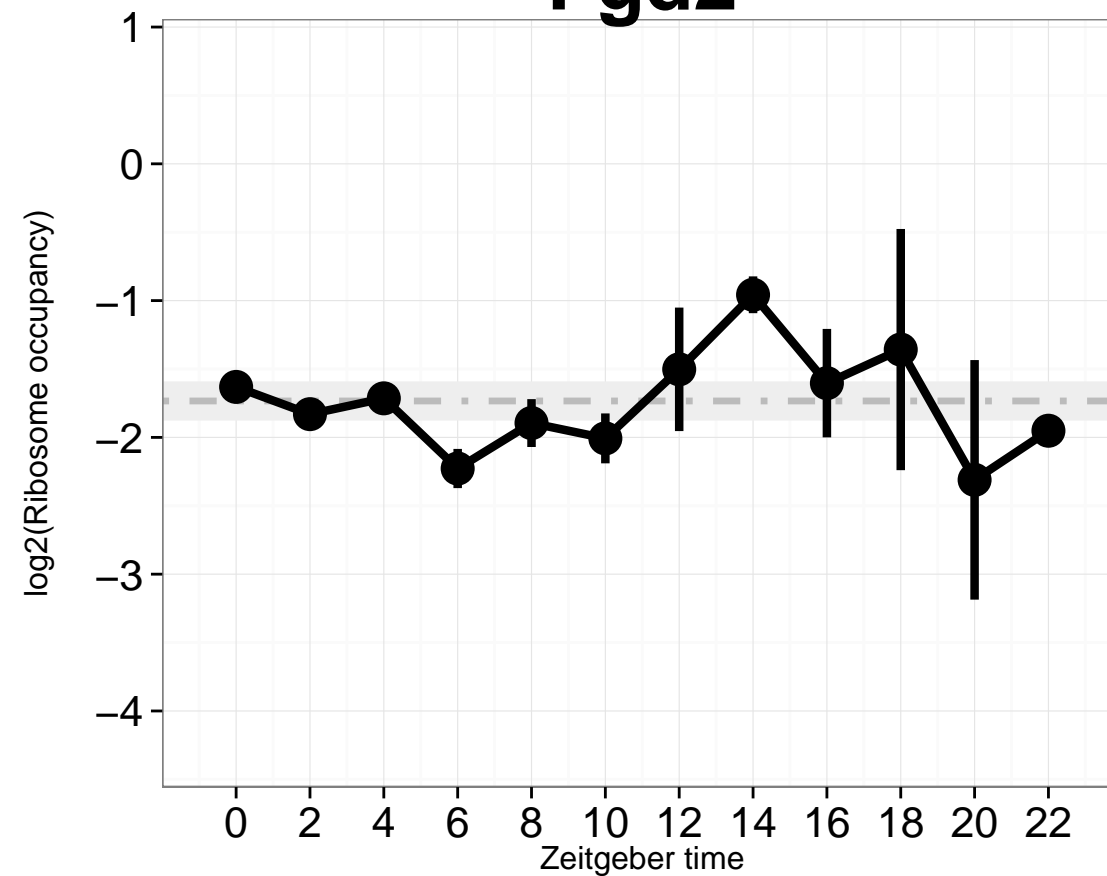

Supplement: SuppDataset_1.zip [file Fgd2_set_A.pdf › Supplemental Dataset 1/A-mRNA_nonrhyth_translation_nonrhyth/Fgd2_set_A.pdf]

# Fgd4

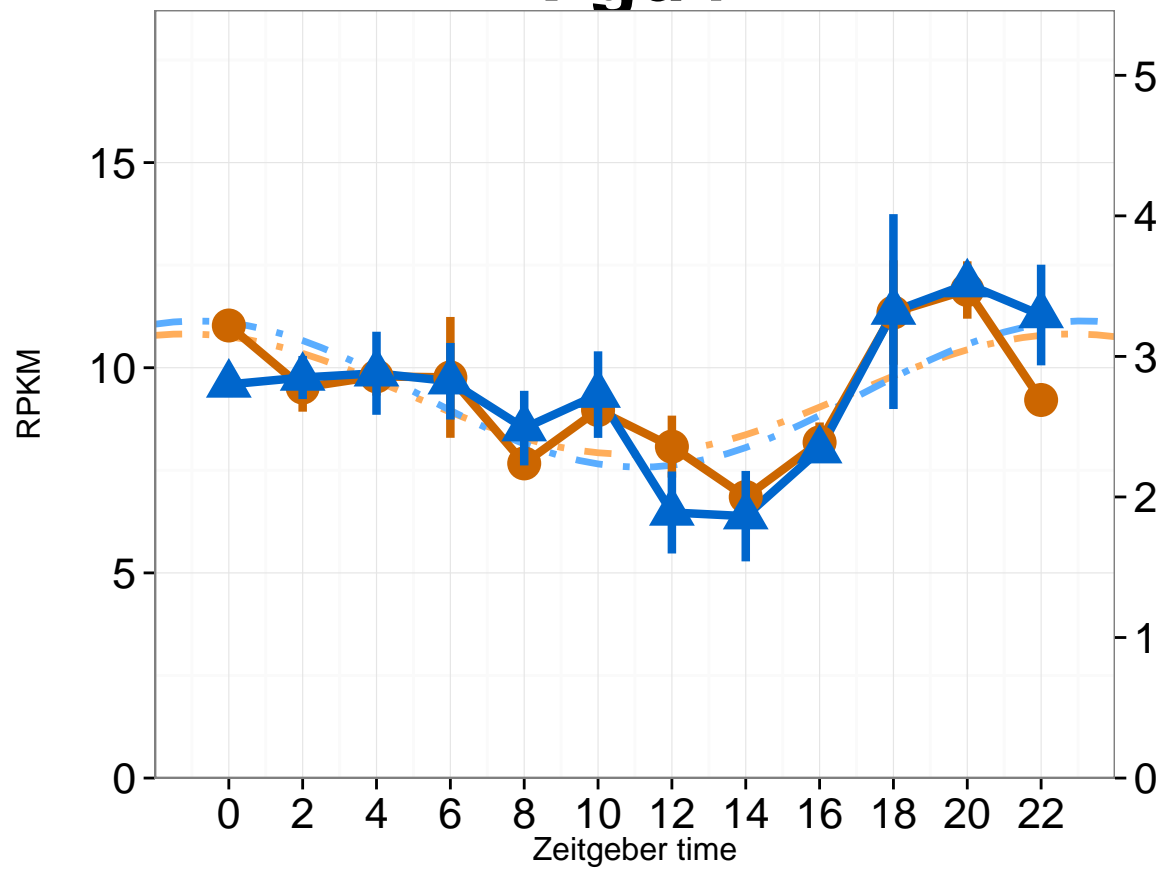

# Fgd4

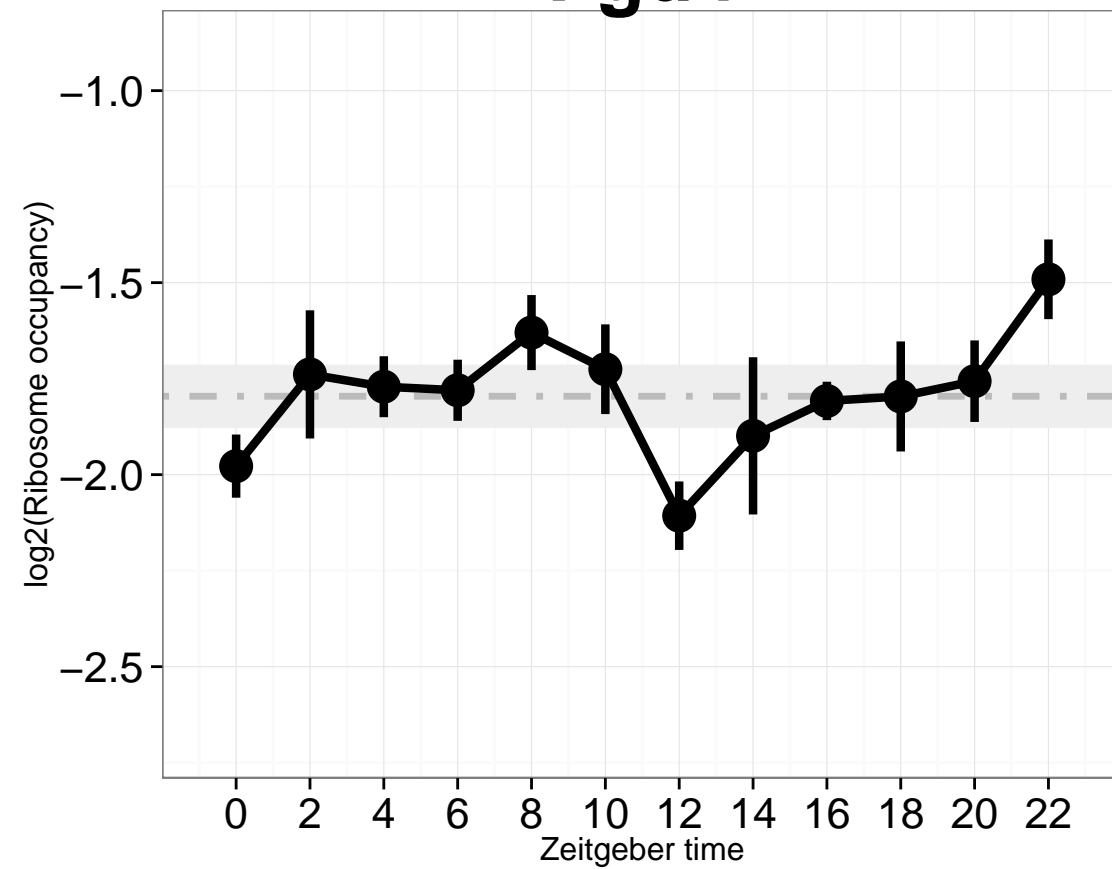

Supplement: SuppDataset_1.zip [file Fgd4_set_A.pdf › Supplemental Dataset 1/A-mRNA_nonrhyth_translation_nonrhyth/Fgd4_set_A.pdf]

# Fgd6

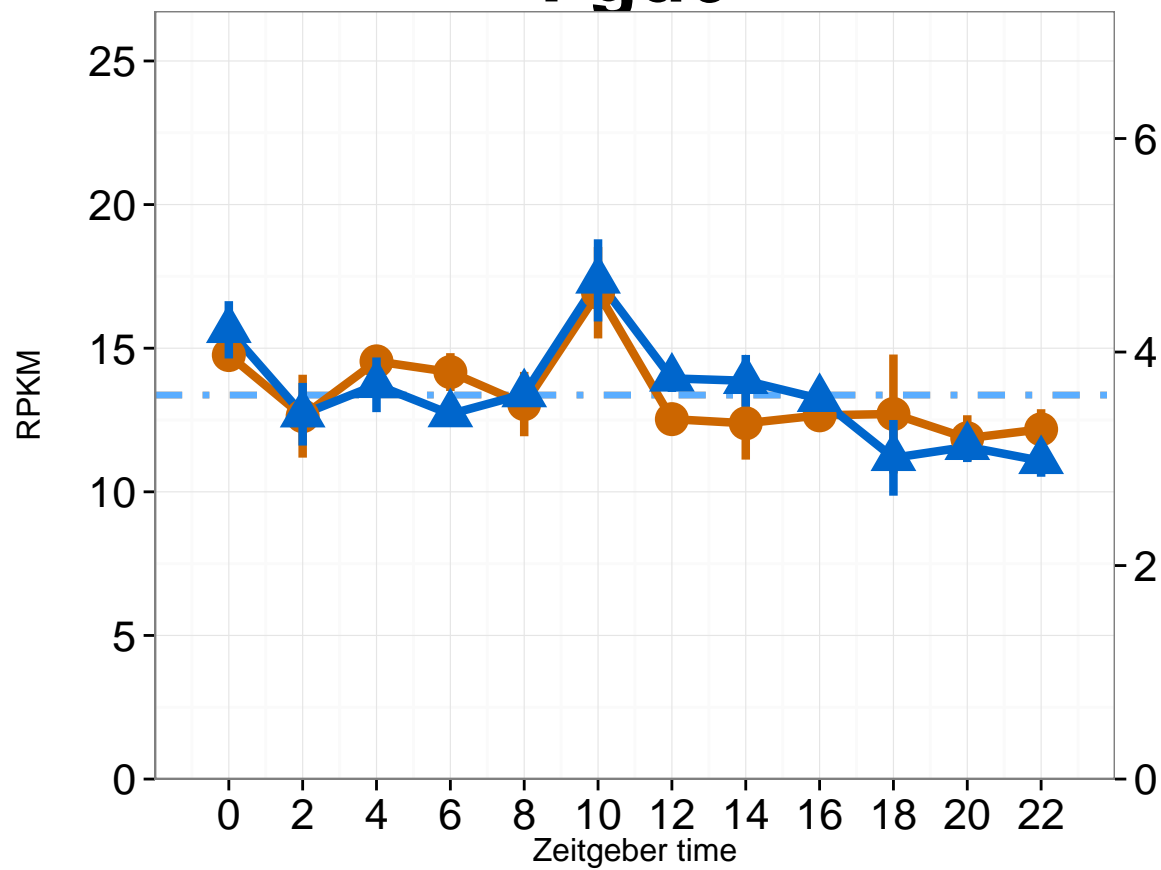

# Fgd6

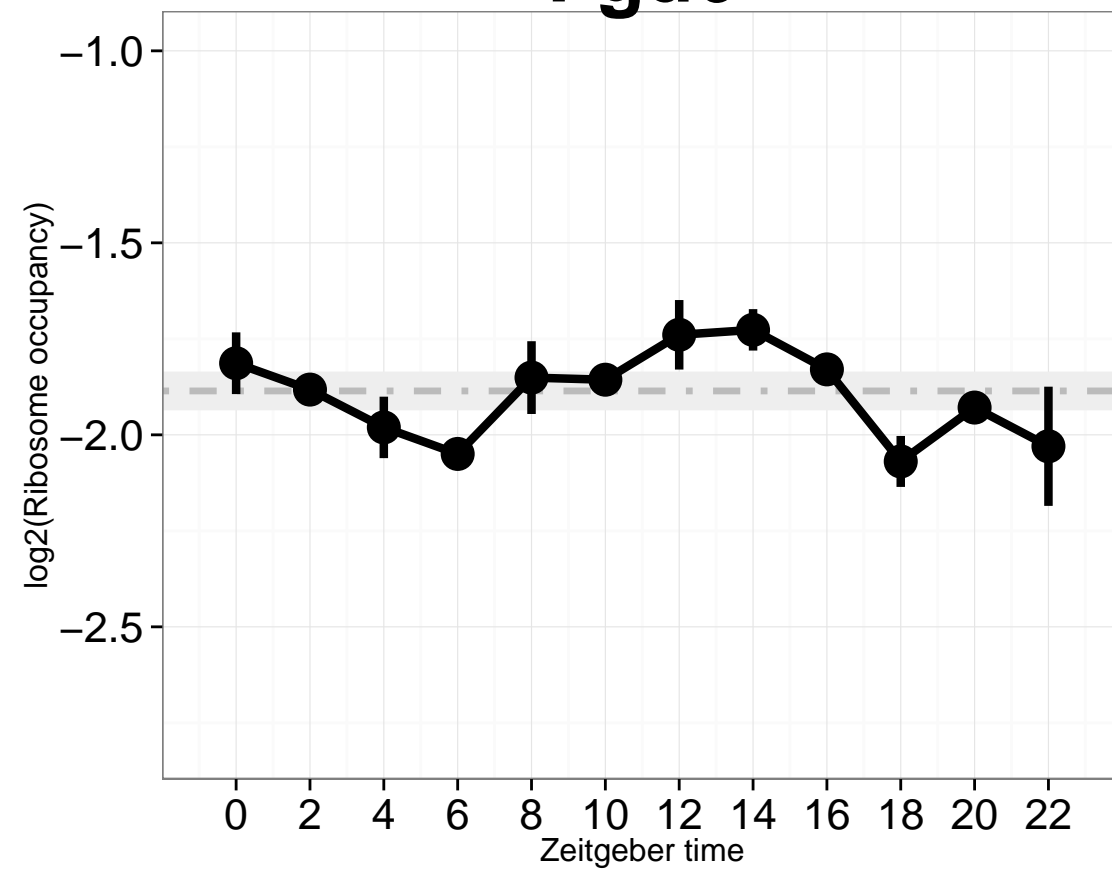

Supplement: SuppDataset_1.zip [file Fgd6_set_A.pdf › Supplemental Dataset 1/A-mRNA_nonrhyth_translation_nonrhyth/Fgd6_set_A.pdf]

# Fgfr1op2

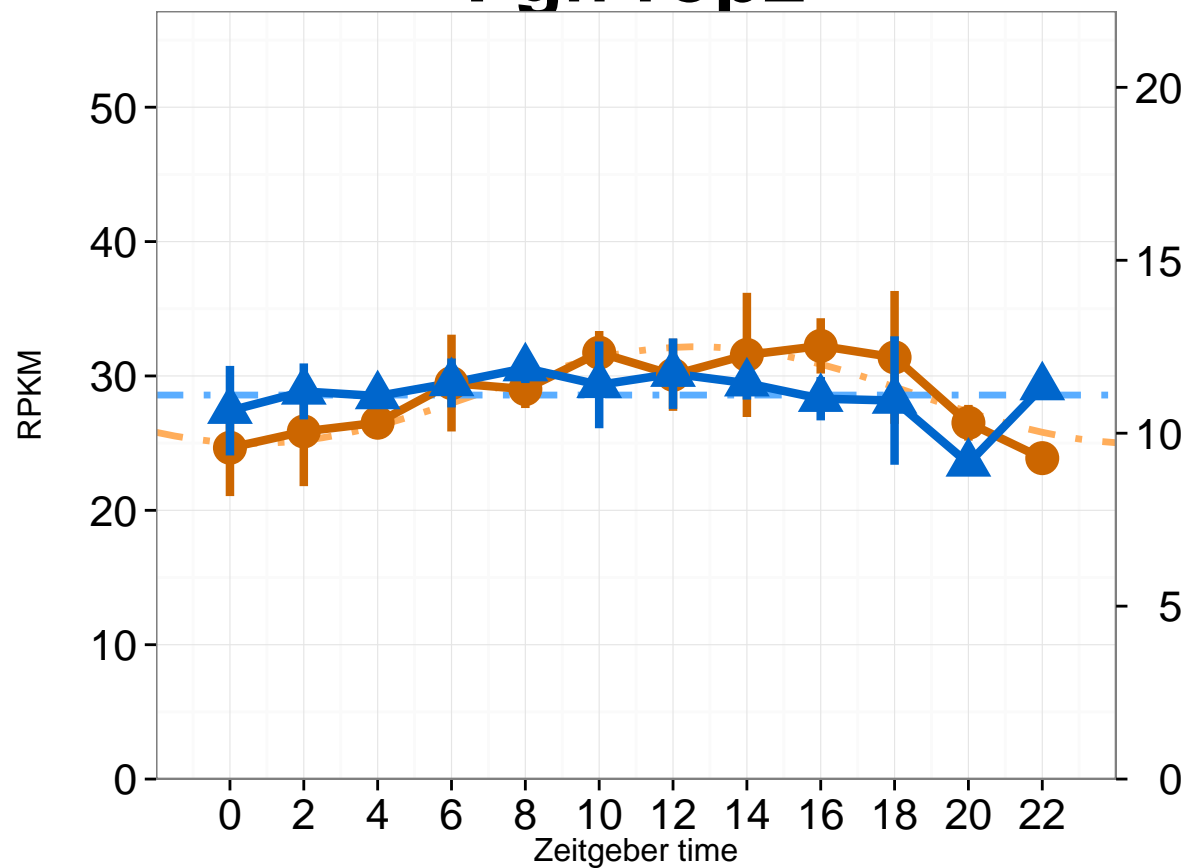

# Fgfr1op2

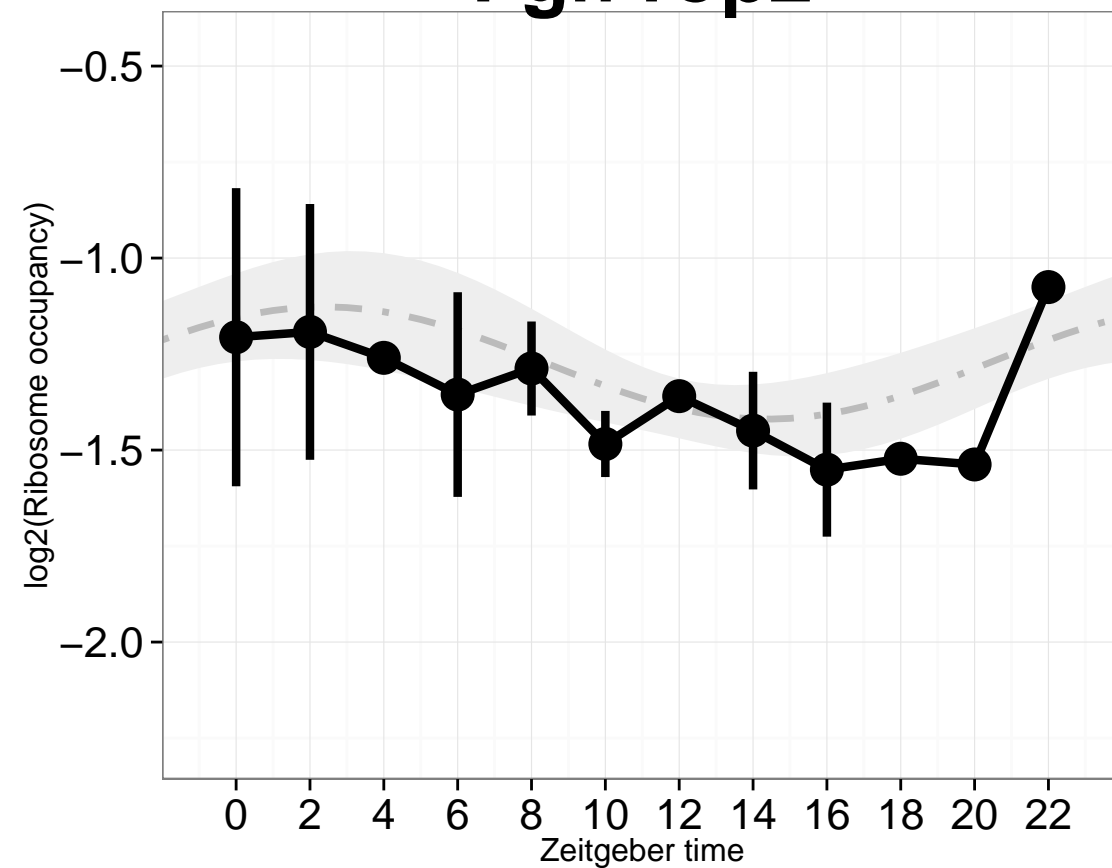

Supplement: SuppDataset_1.zip [file Fgfr1op2_set_A.pdf › Supplemental Dataset 1/A-mRNA_nonrhyth_translation_nonrhyth/Fgfr1op2_set_A.pdf]

# Fgfr1op

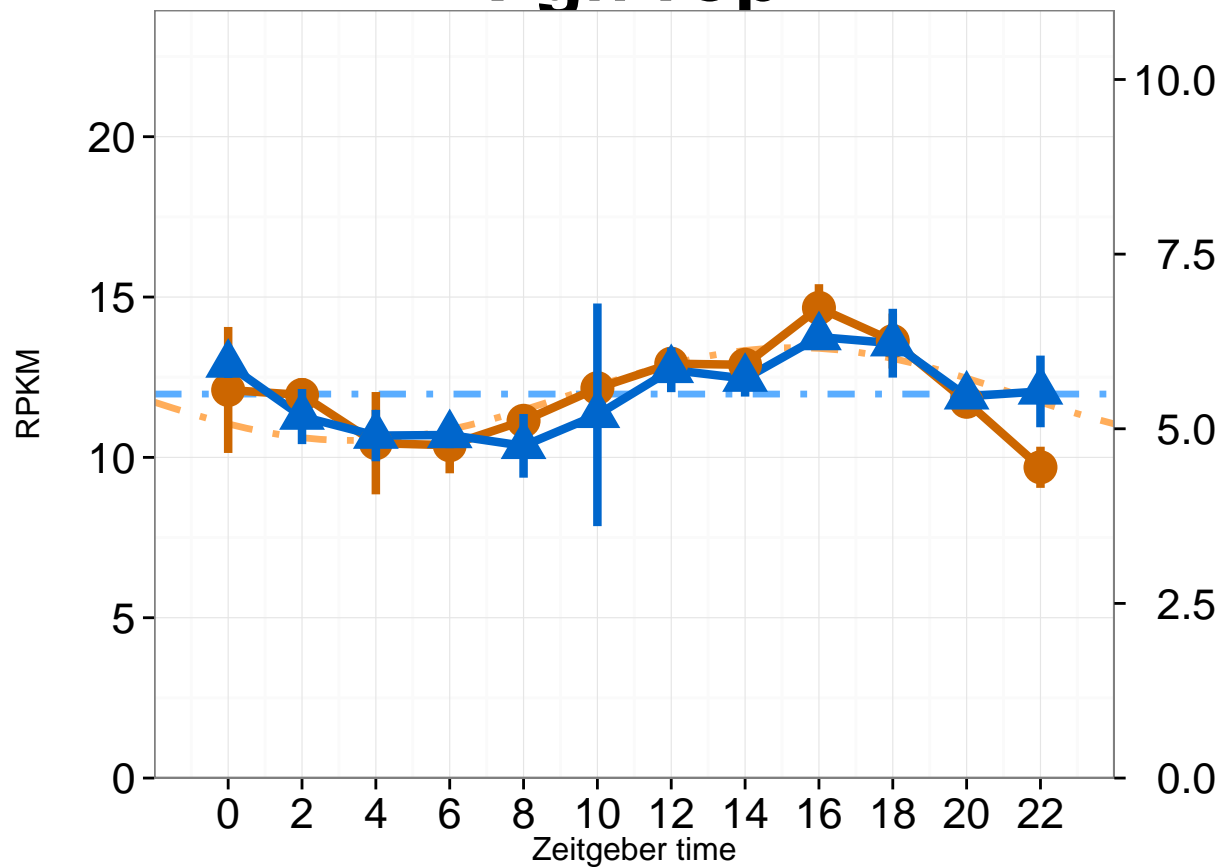

# Fgfr1op

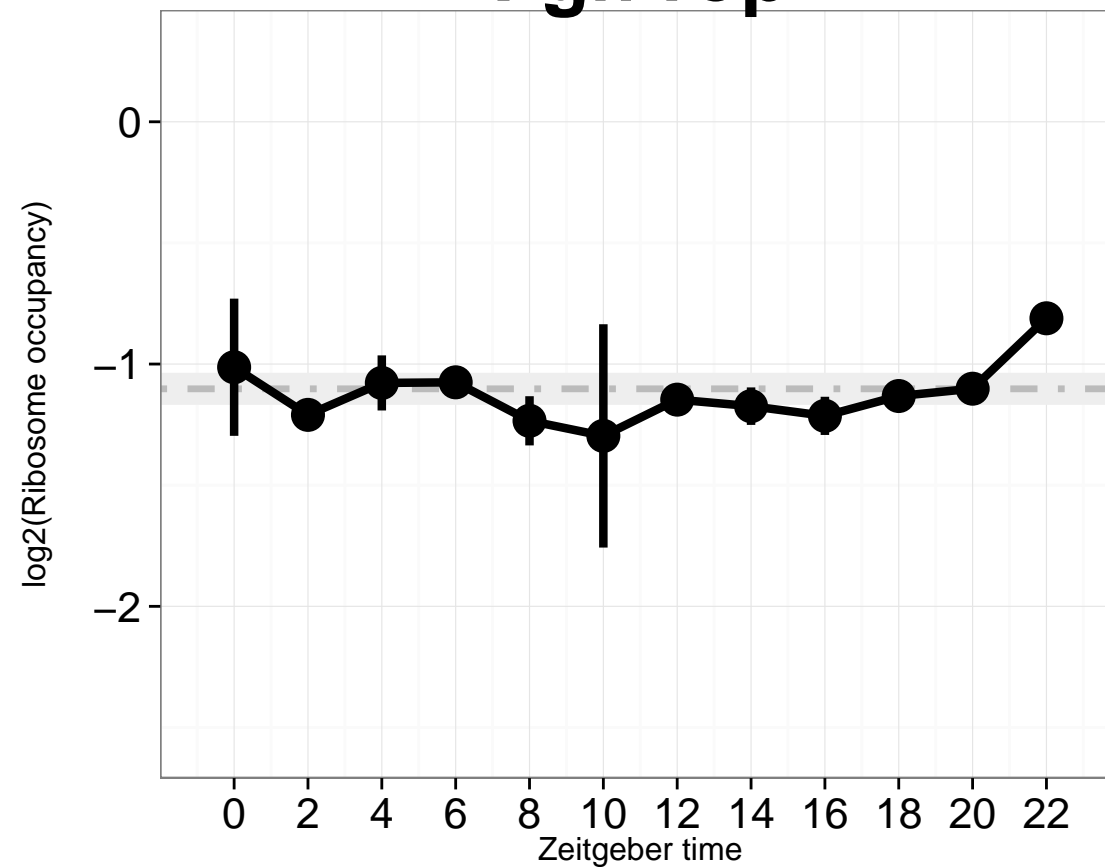

Supplement: SuppDataset_1.zip [file Fgfr1op_set_A.pdf › Supplemental Dataset 1/A-mRNA_nonrhyth_translation_nonrhyth/Fgfr1op_set_A.pdf]

# Fgfr3

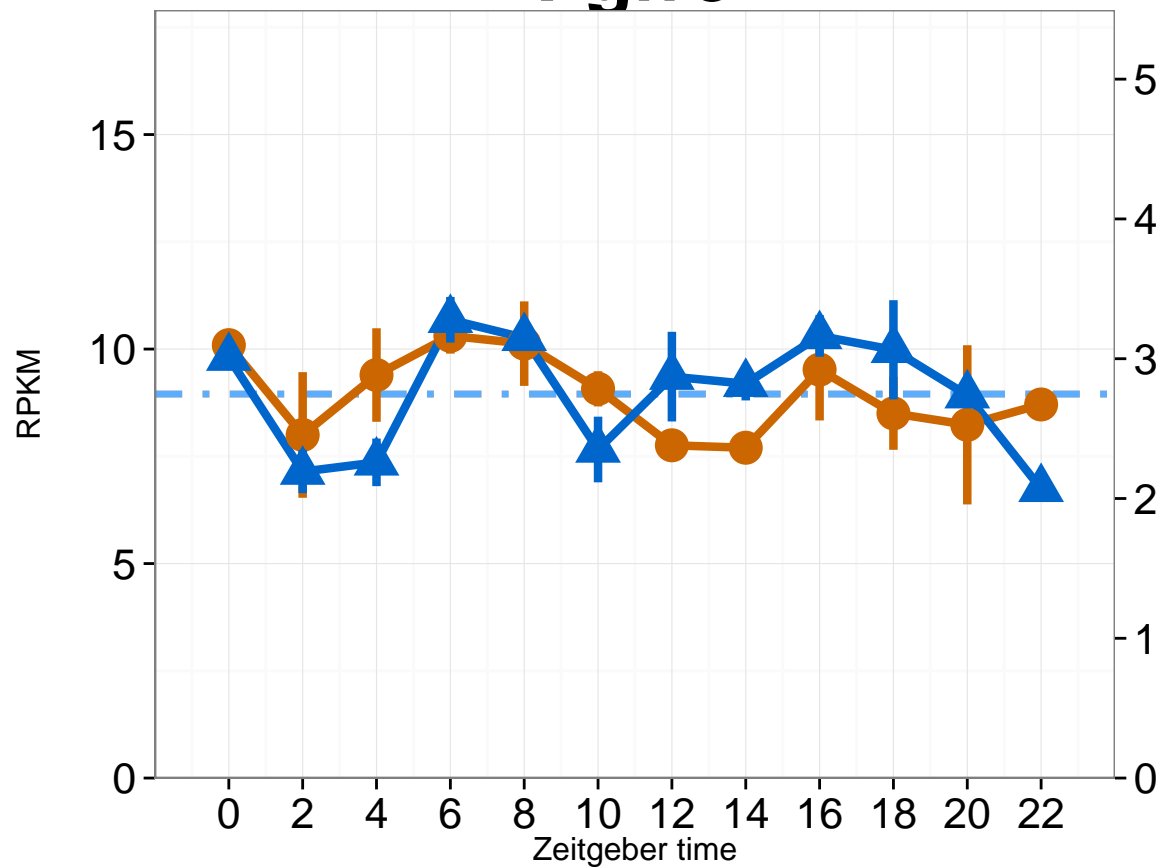

# Fgfr3

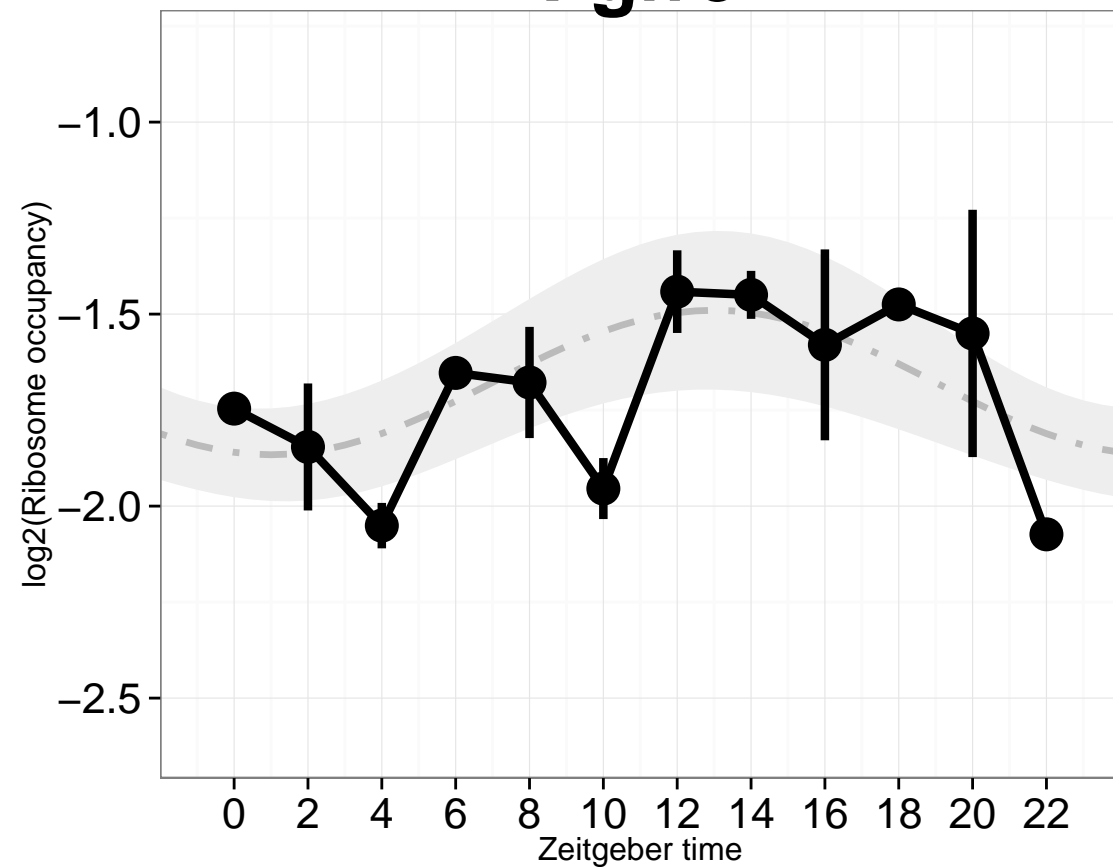

Supplement: SuppDataset_1.zip [file Fgfr3_set_A.pdf › Supplemental Dataset 1/A-mRNA_nonrhyth_translation_nonrhyth/Fgfr3_set_A.pdf]

## Fgfr4

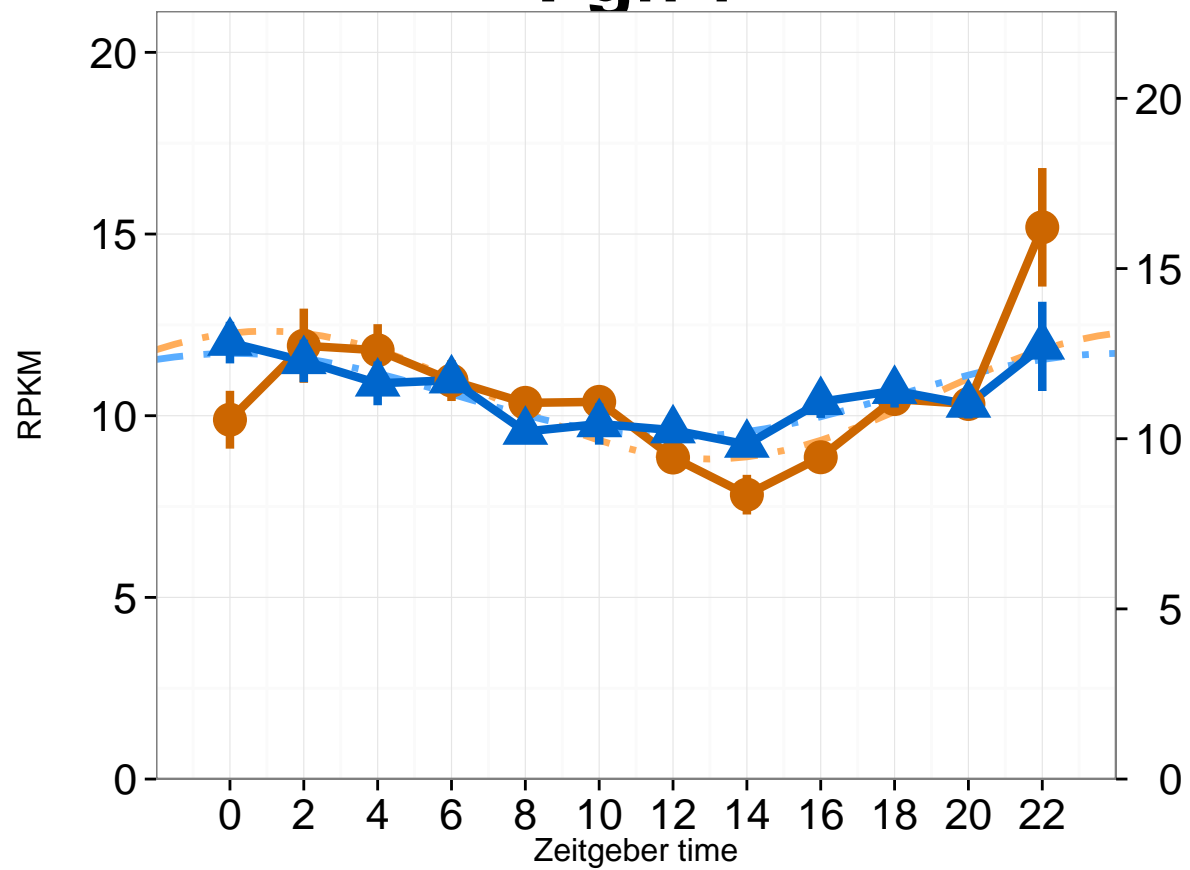

## Fgfr4

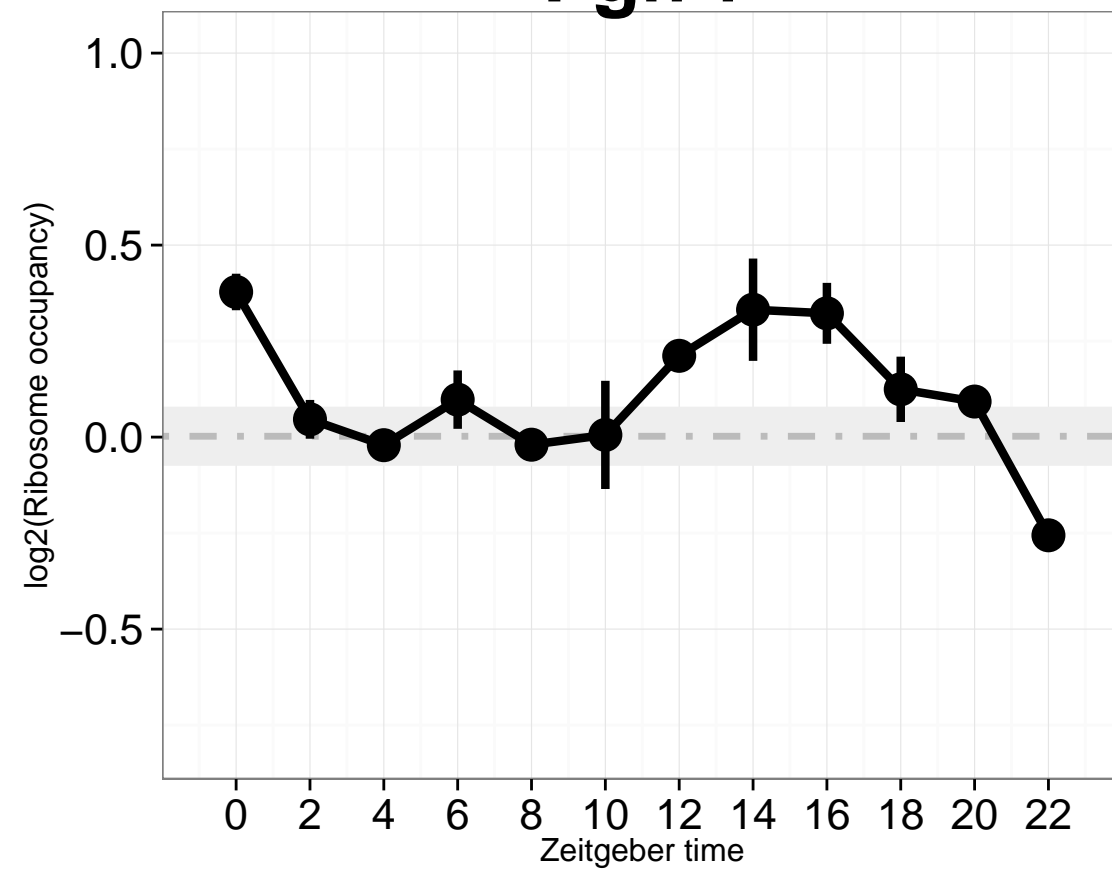

Supplement: SuppDataset_1.zip [file Fgfr4_set_A.pdf › Supplemental Dataset 1/A-mRNA_nonrhyth_translation_nonrhyth/Fgfr4_set_A.pdf]

## Fgg

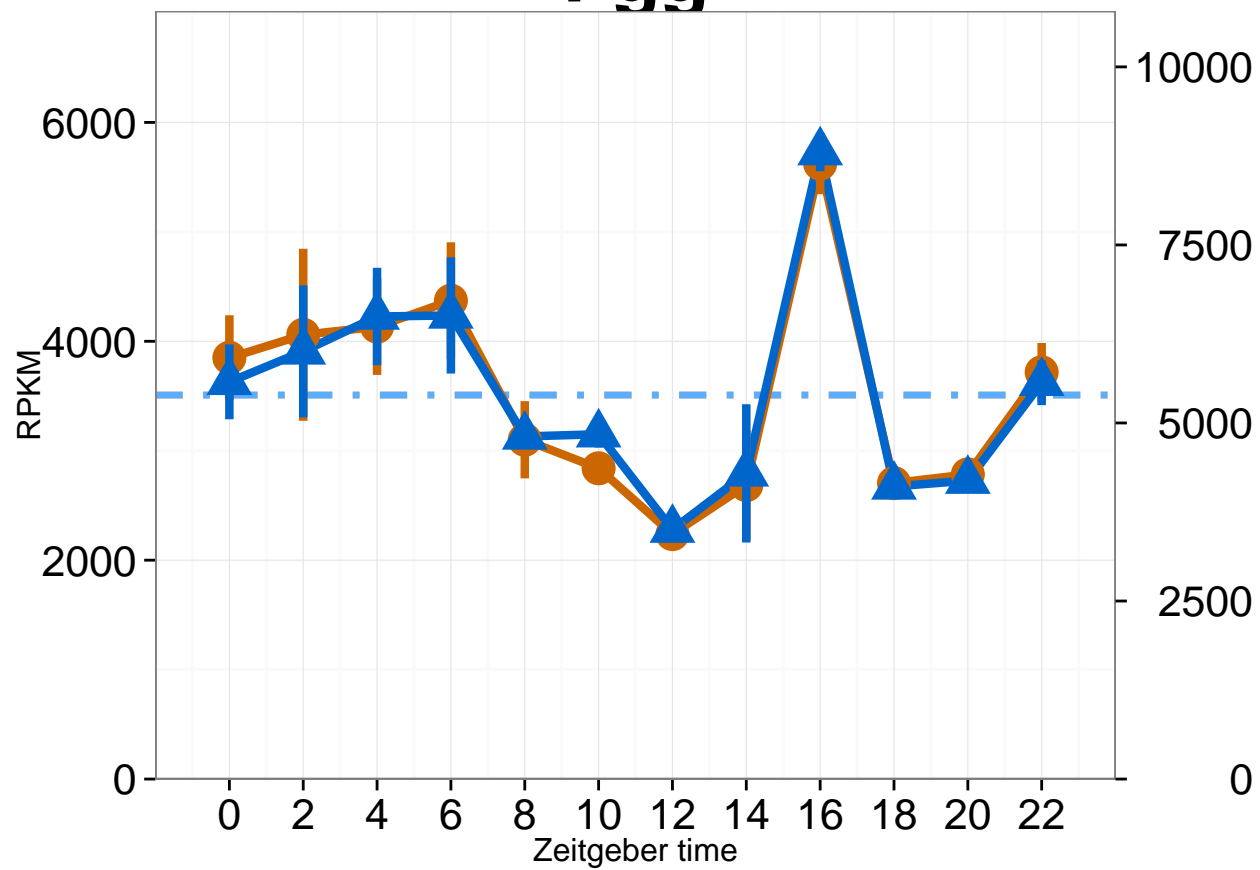

## Fgg

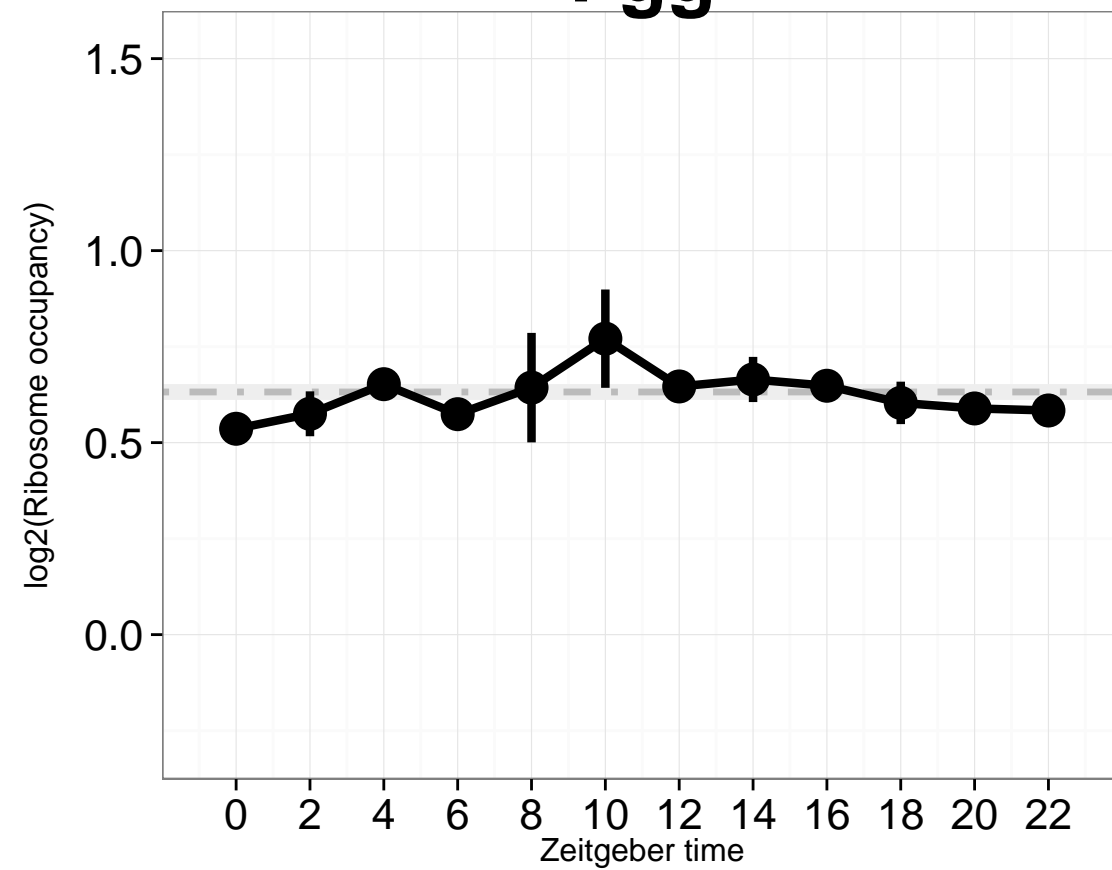

Supplement: SuppDataset_1.zip [file Fgg_set_A.pdf › Supplemental Dataset 1/A-mRNA_nonrhyth_translation_nonrhyth/Fgg_set_A.pdf]

## Fggy

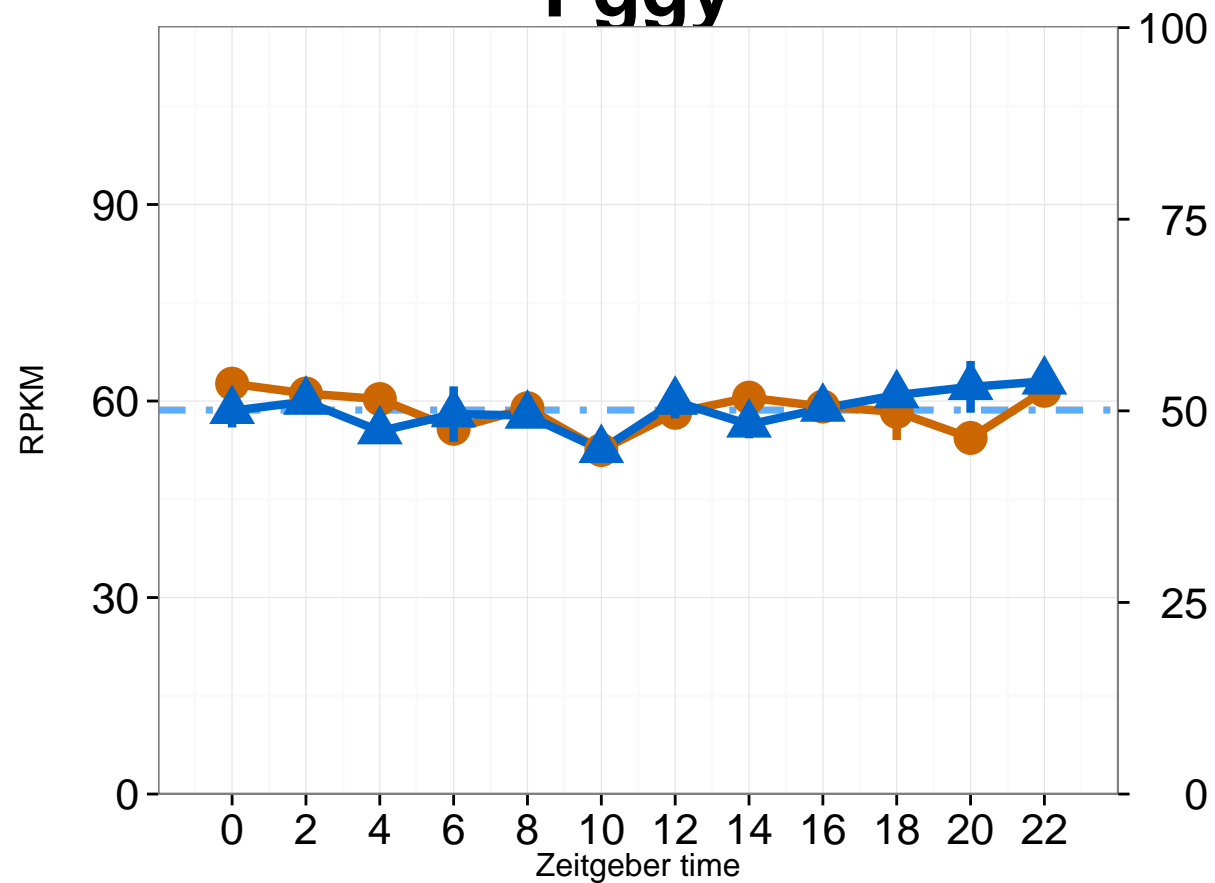

## Fggy

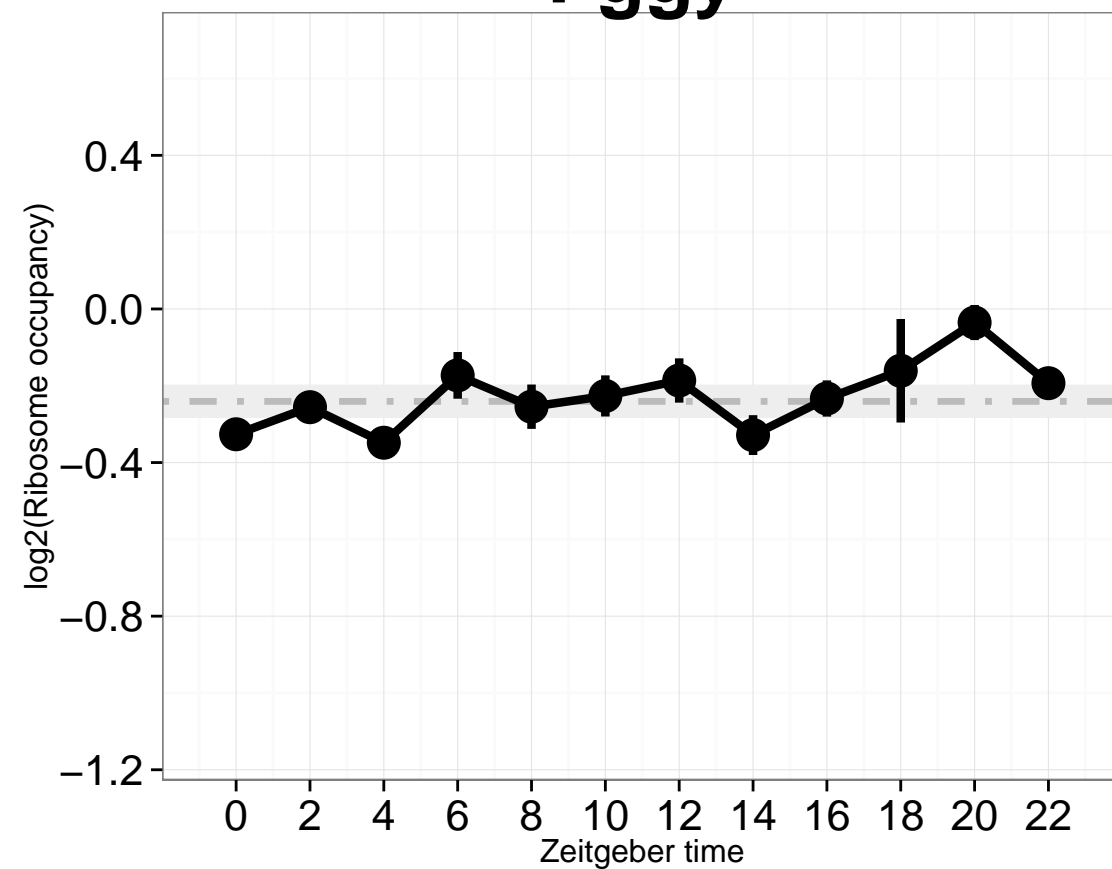

Supplement: SuppDataset_1.zip [file Fggy_set_A.pdf › Supplemental Dataset 1/A-mRNA_nonrhyth_translation_nonrhyth/Fggy_set_A.pdf]

## Fgl2

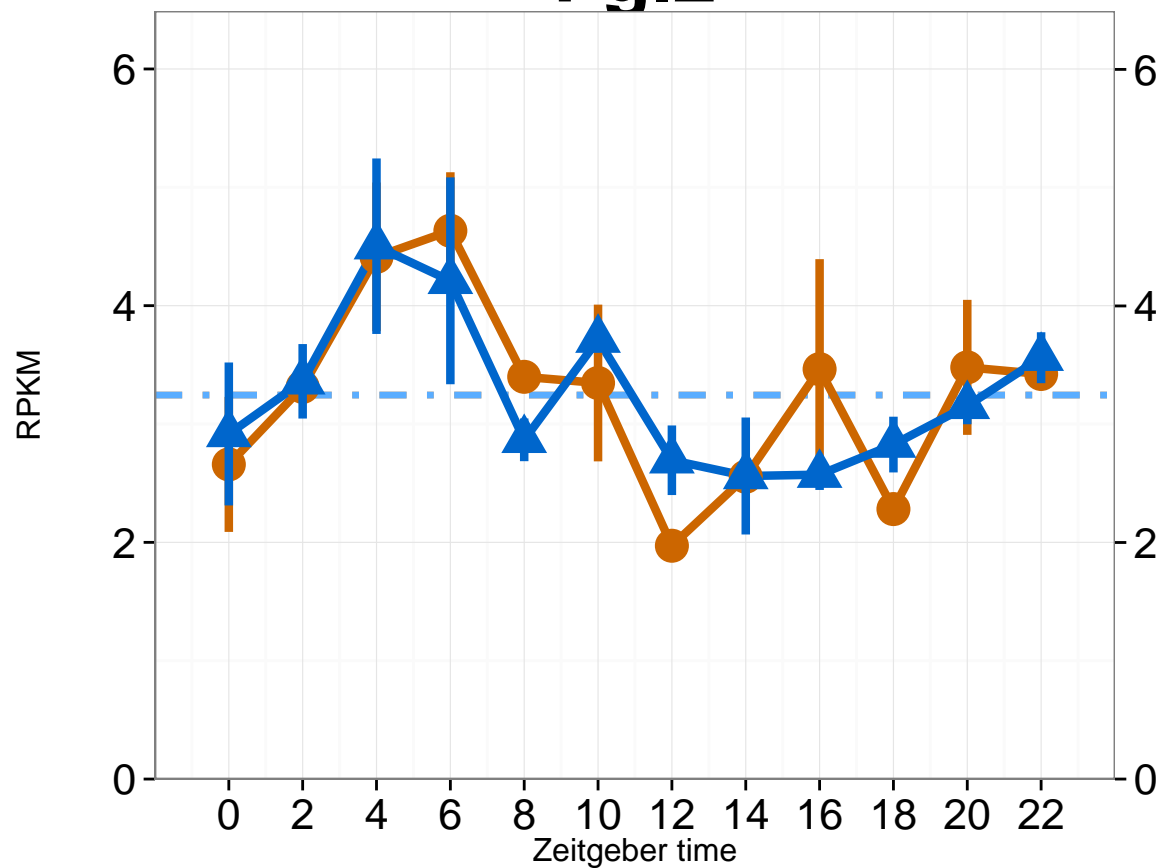

## Fgl2

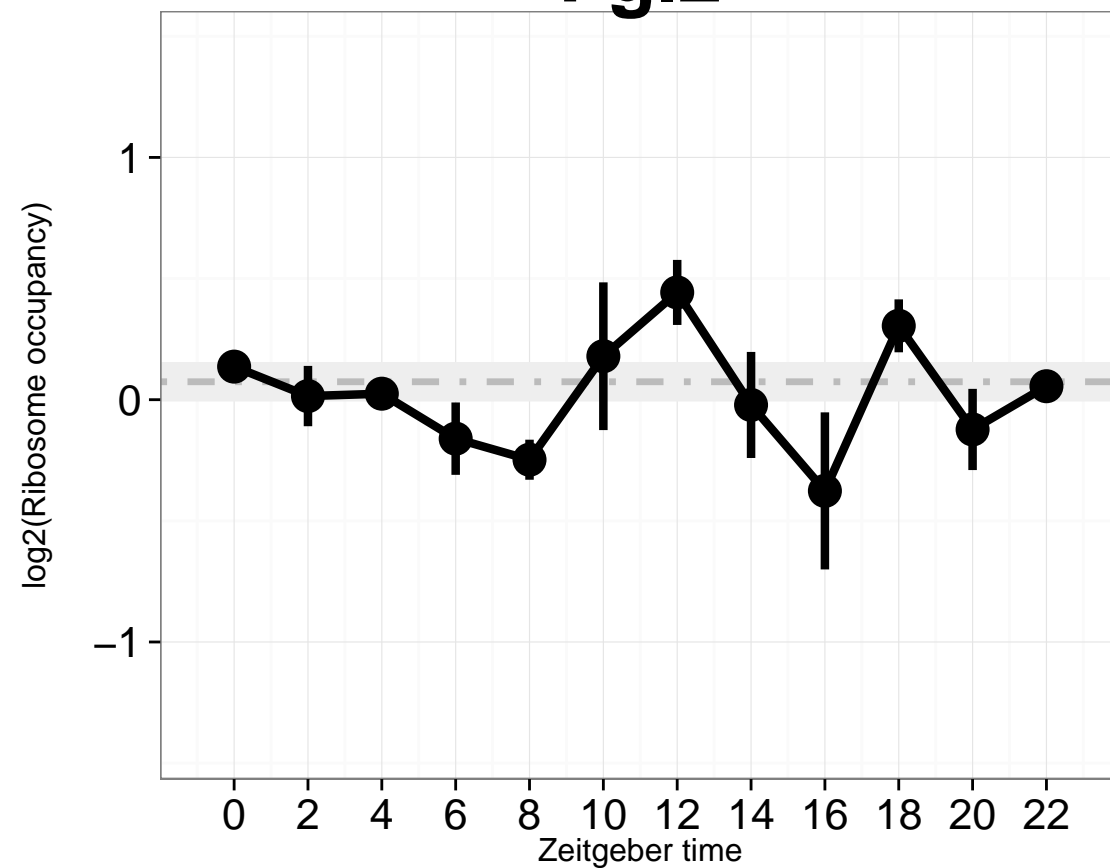

Supplement: SuppDataset_1.zip [file Fgl2_set_A.pdf › Supplemental Dataset 1/A-mRNA_nonrhyth_translation_nonrhyth/Fgl2_set_A.pdf]

## Fgr

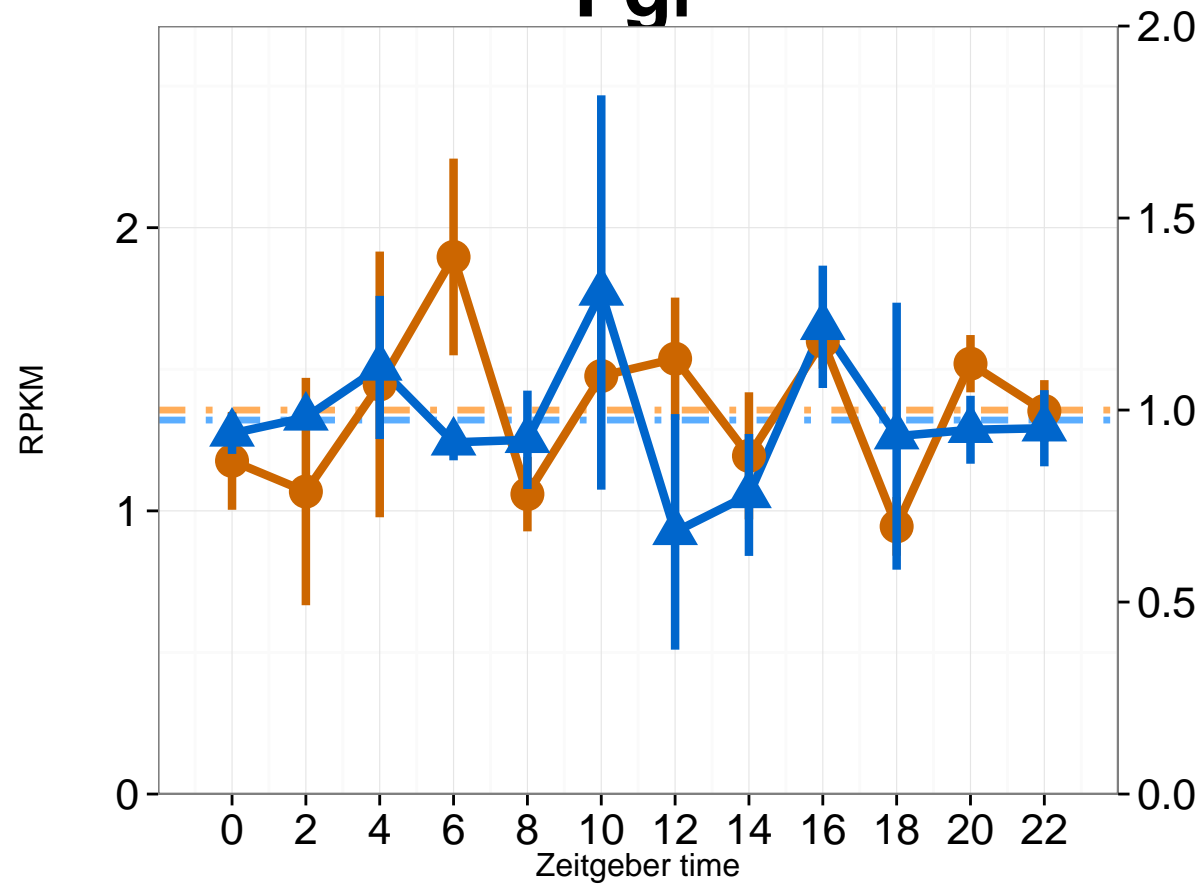

## Fgr

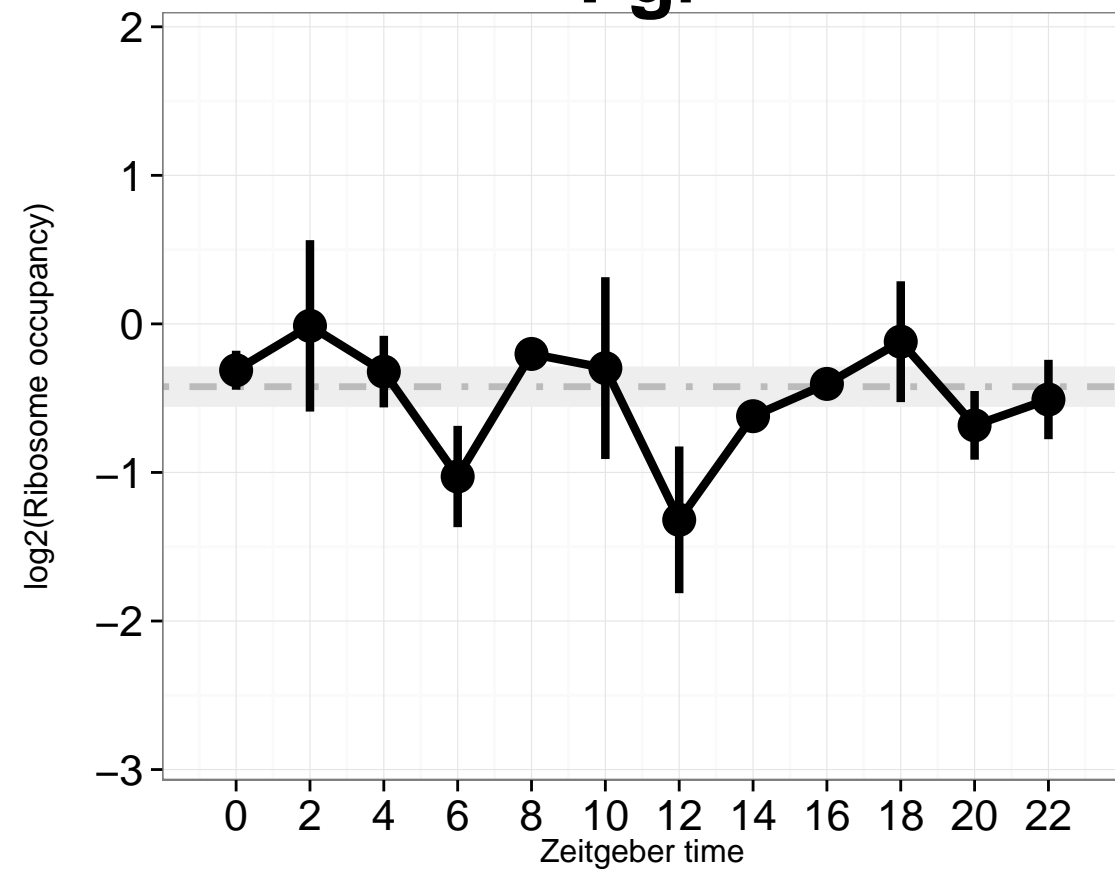

Supplement: SuppDataset_1.zip [file Fgr_set_A.pdf › Supplemental Dataset 1/A-mRNA_nonrhyth_translation_nonrhyth/Fgr_set_A.pdf]

# Fh1

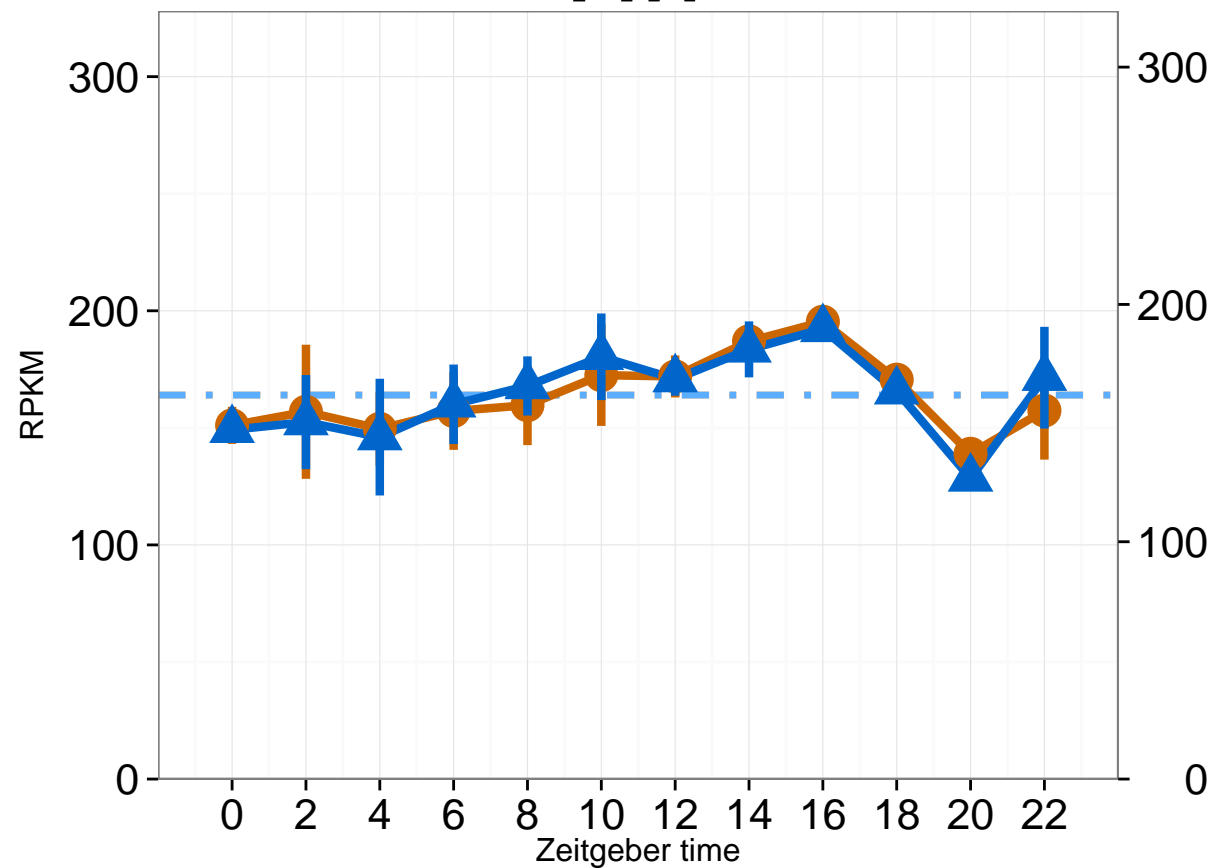

# Fh1

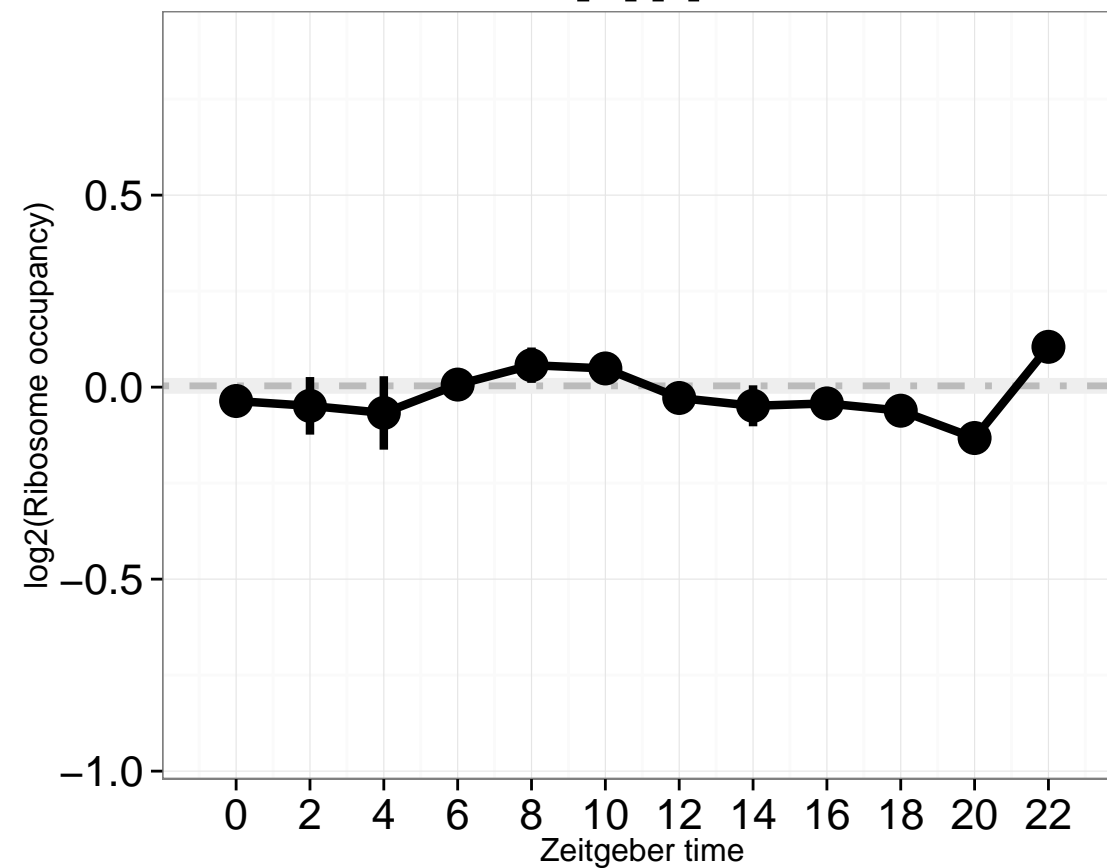

Supplement: SuppDataset_1.zip [file Fh1_set_A.pdf › Supplemental Dataset 1/A-mRNA_nonrhyth_translation_nonrhyth/Fh1_set_A.pdf]

## Fhit

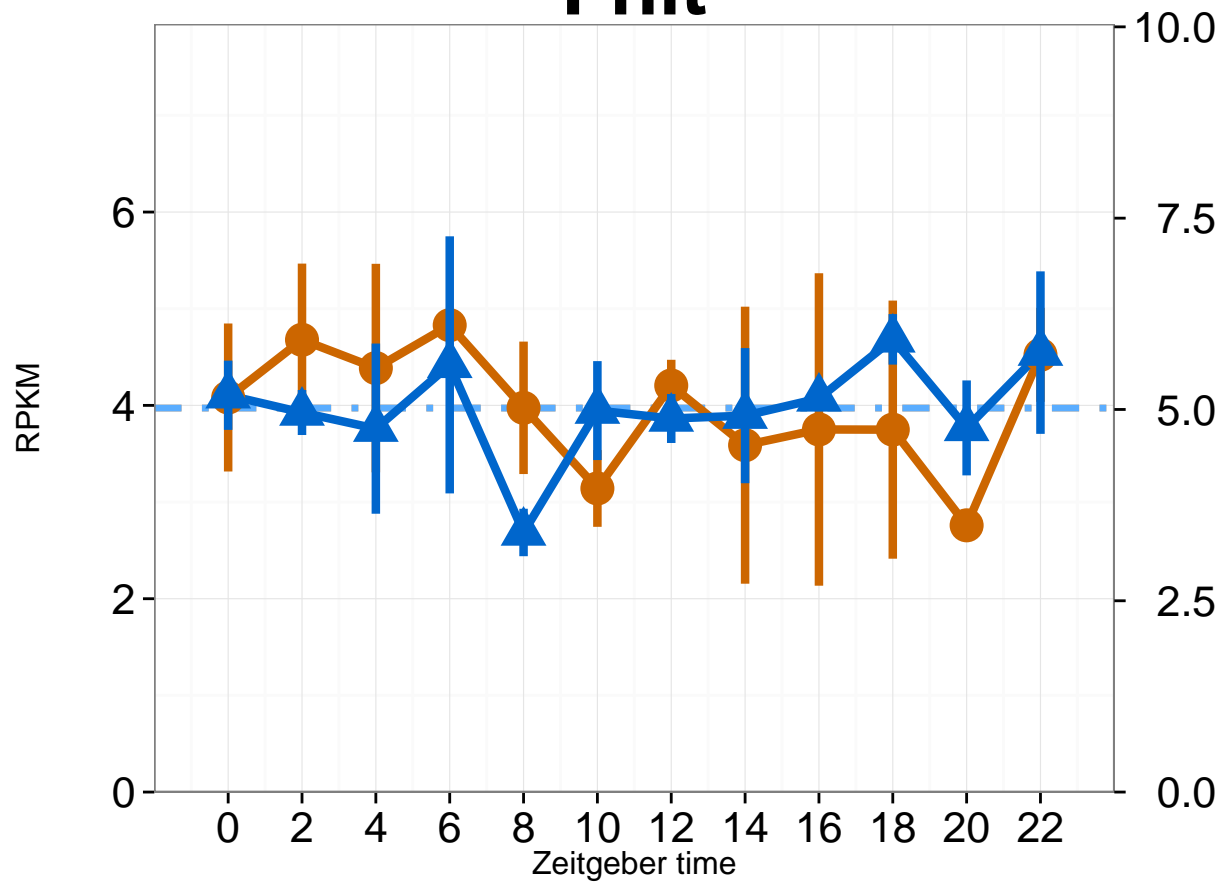

## Fhit

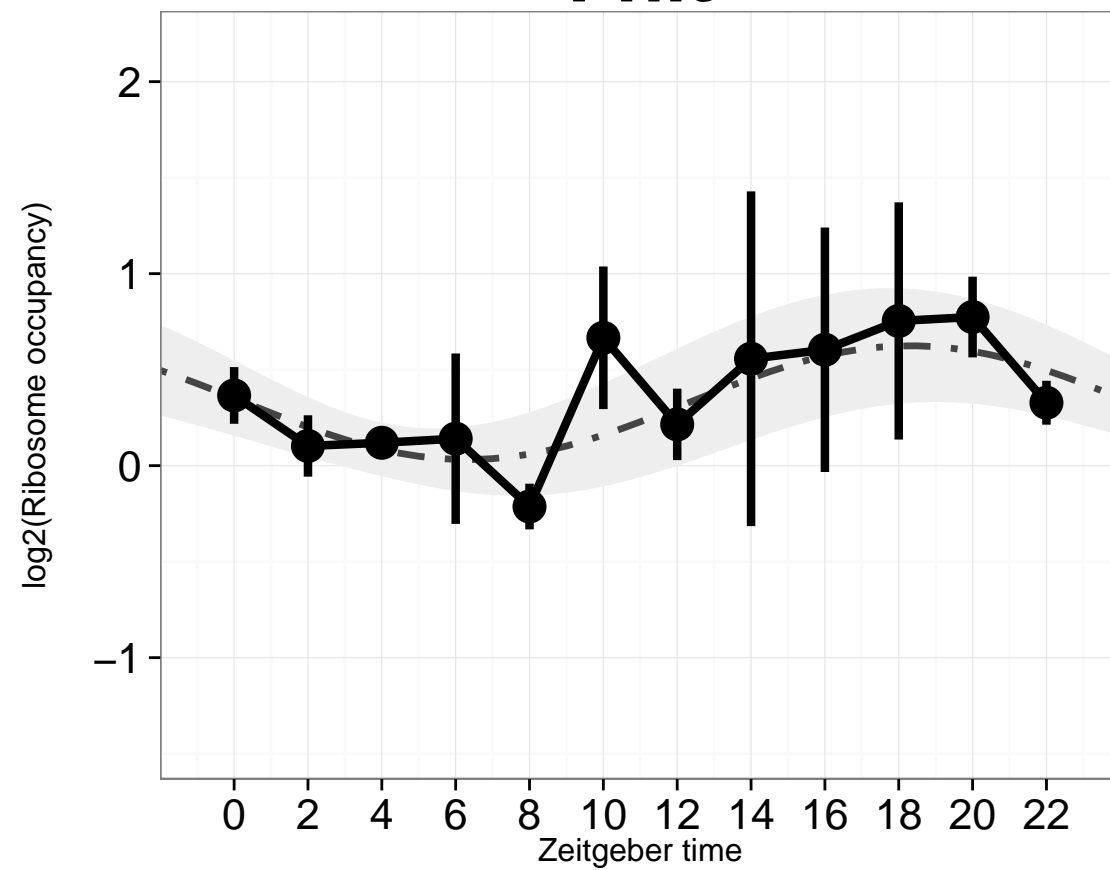

Supplement: SuppDataset_1.zip [file Fhit_set_A.pdf › Supplemental Dataset 1/A-mRNA_nonrhyth_translation_nonrhyth/Fhit_set_A.pdf]

## Fhod1

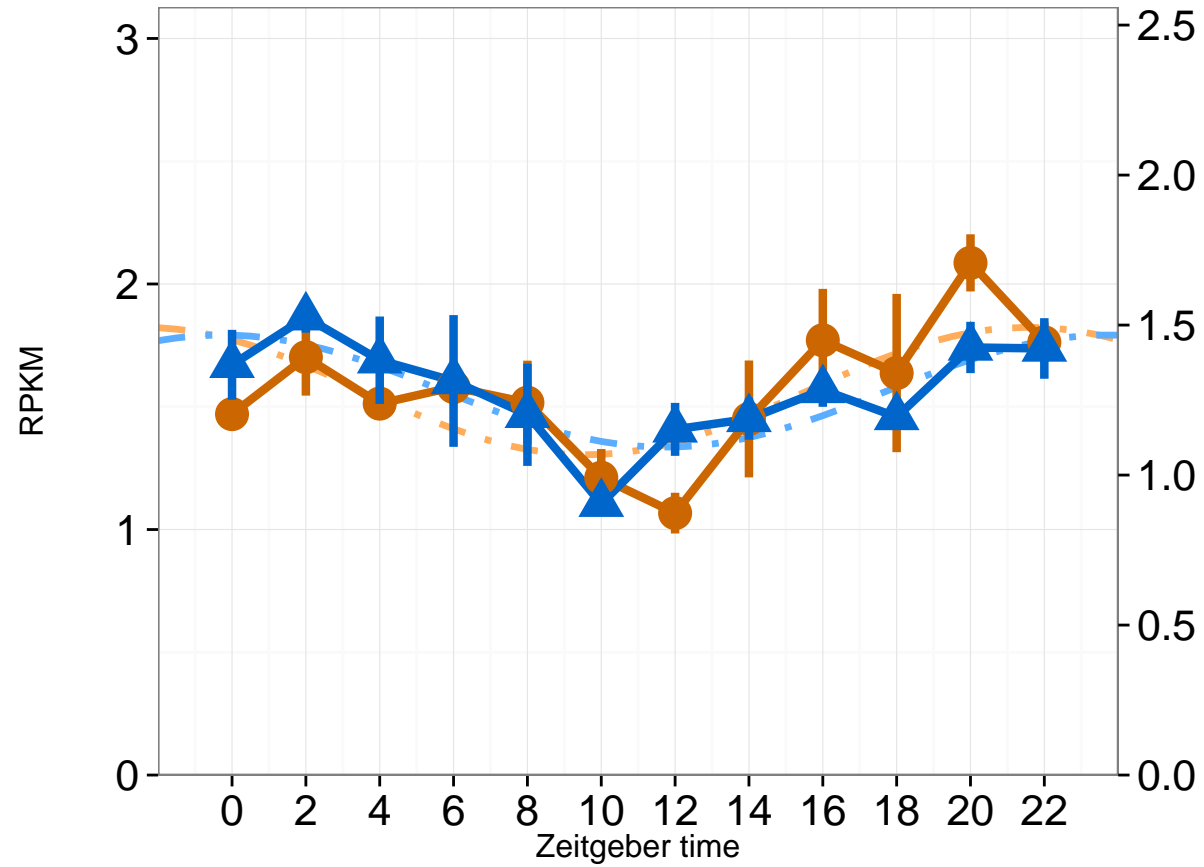

## Fhod1

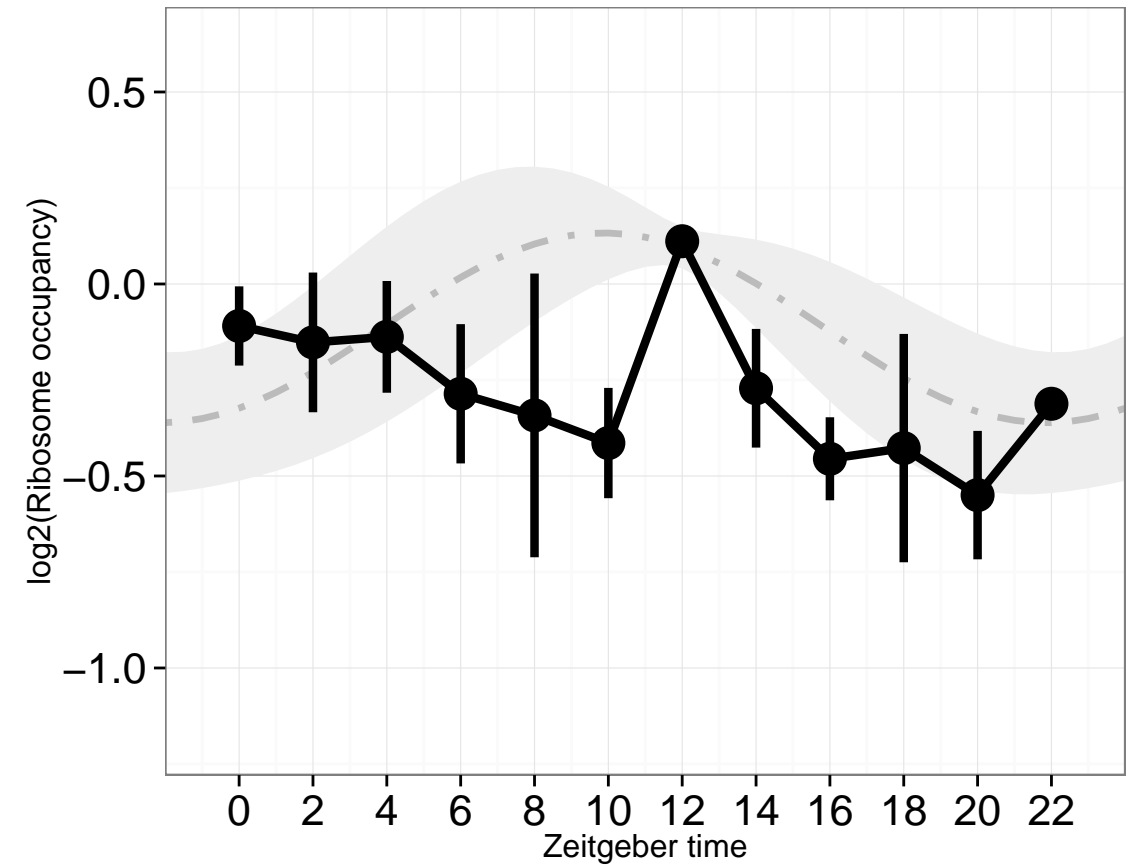

Supplement: SuppDataset_1.zip [file Fhod1_set_A.pdf › Supplemental Dataset 1/A-mRNA_nonrhyth_translation_nonrhyth/Fhod1_set_A.pdf]

# Fig4

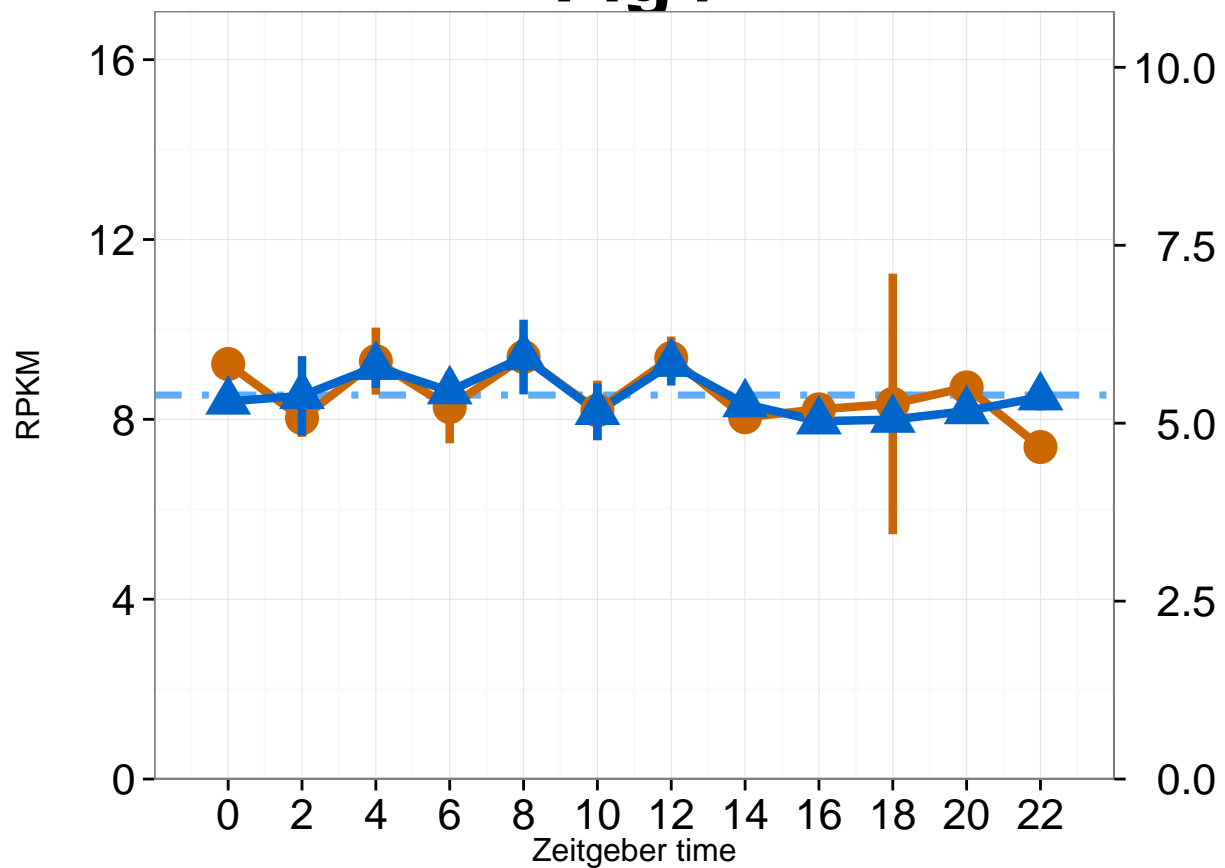

# Fig4

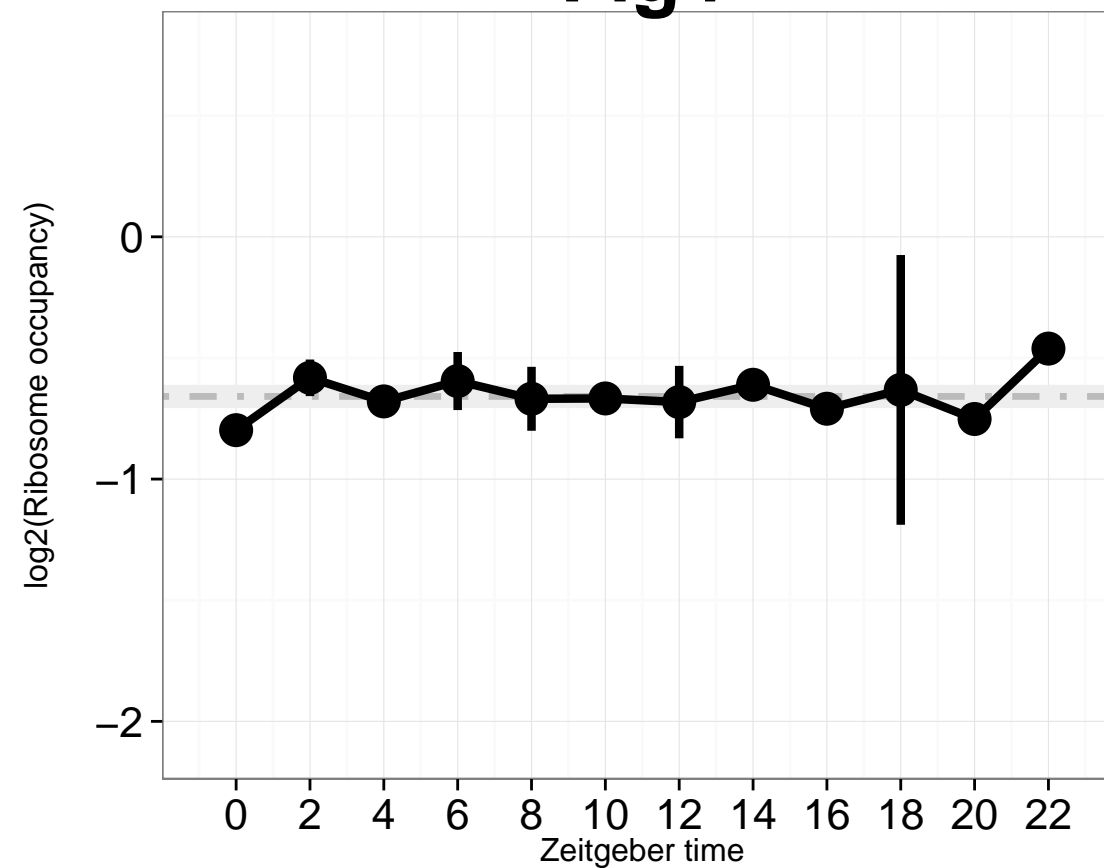

Supplement: SuppDataset_1.zip [file Fig4_set_A.pdf › Supplemental Dataset 1/A-mRNA_nonrhyth_translation_nonrhyth/Fig4_set_A.pdf]

# Fign

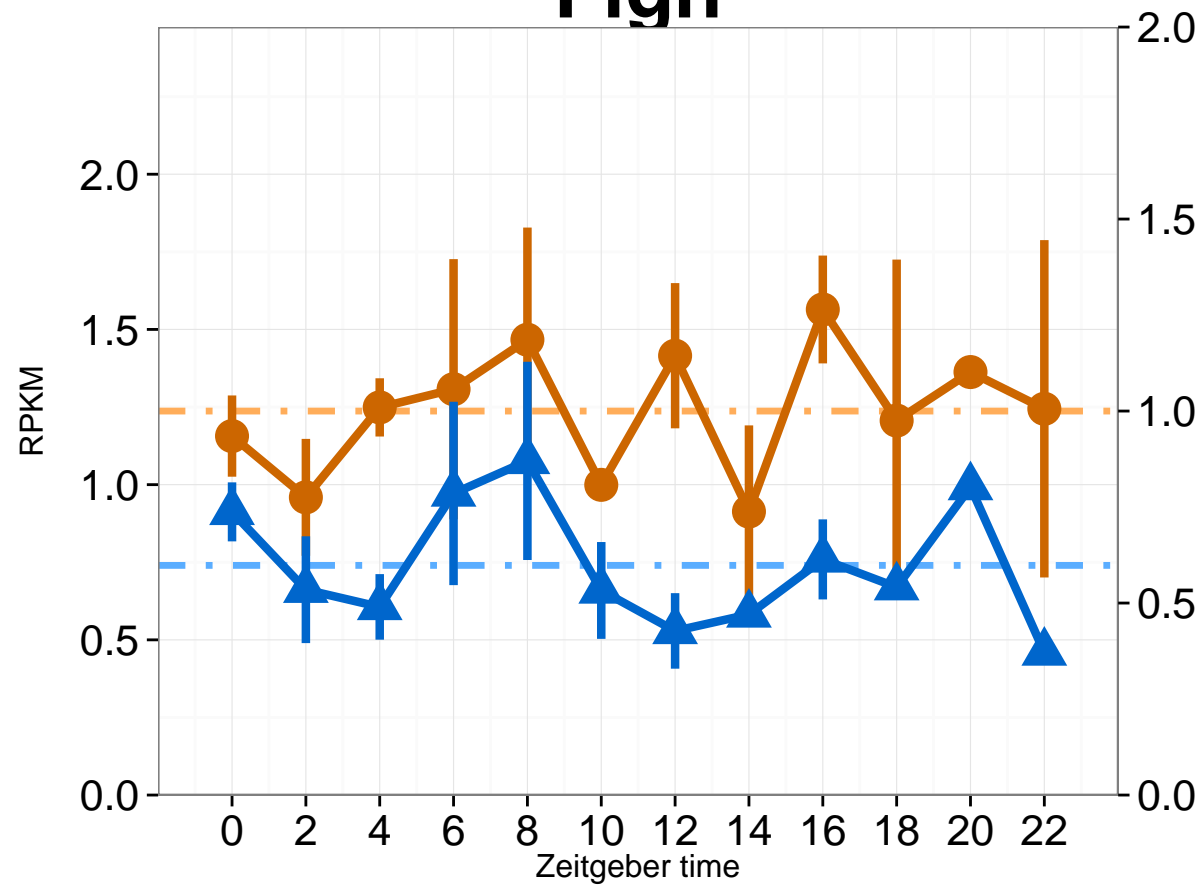

# Fign

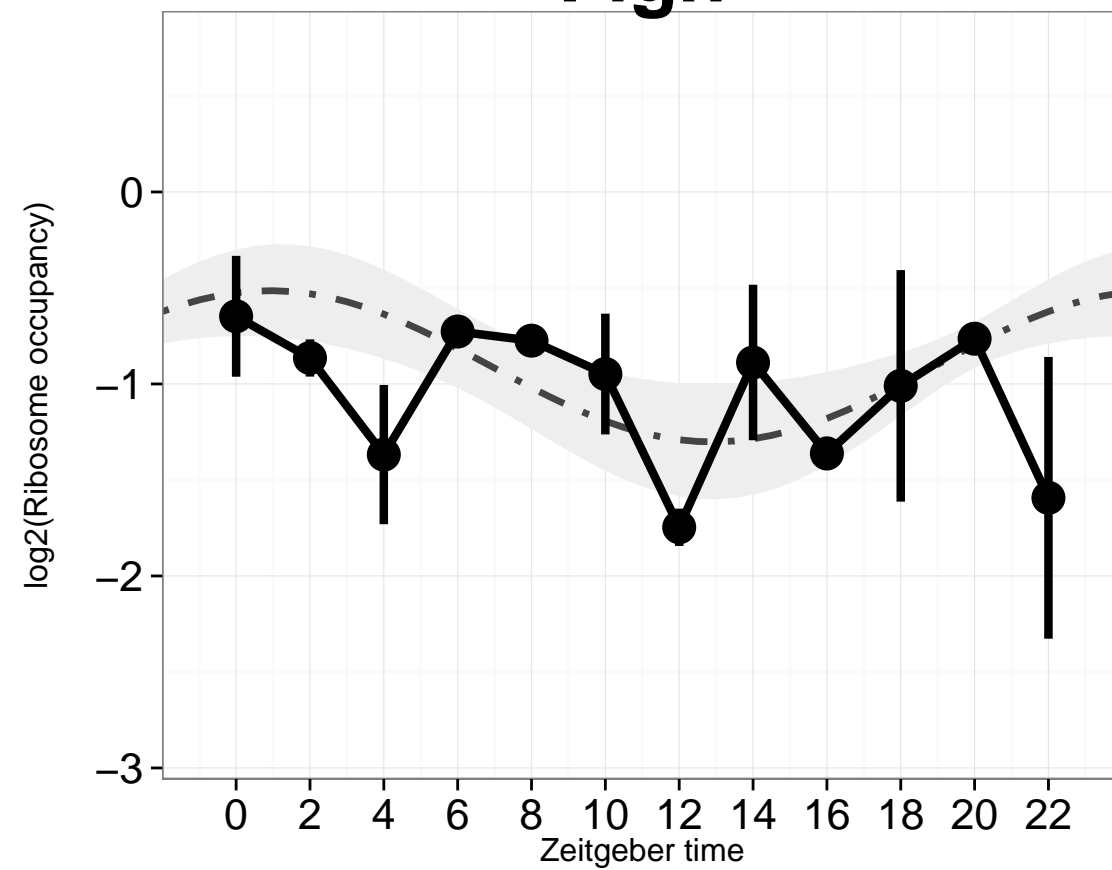

Supplement: SuppDataset_1.zip [file Fign_set_A.pdf › Supplemental Dataset 1/A-mRNA_nonrhyth_translation_nonrhyth/Fign_set_A.pdf]

# Filip1

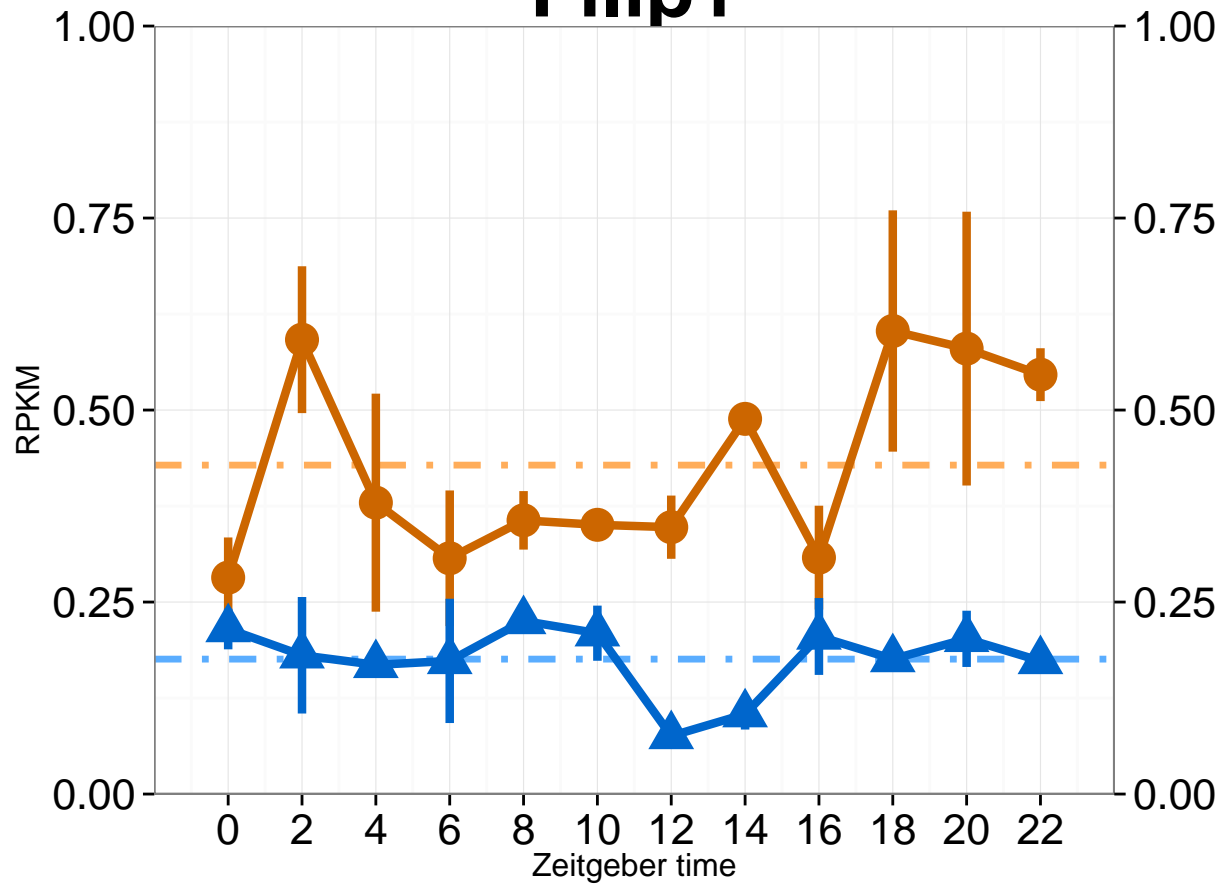

# Filip1

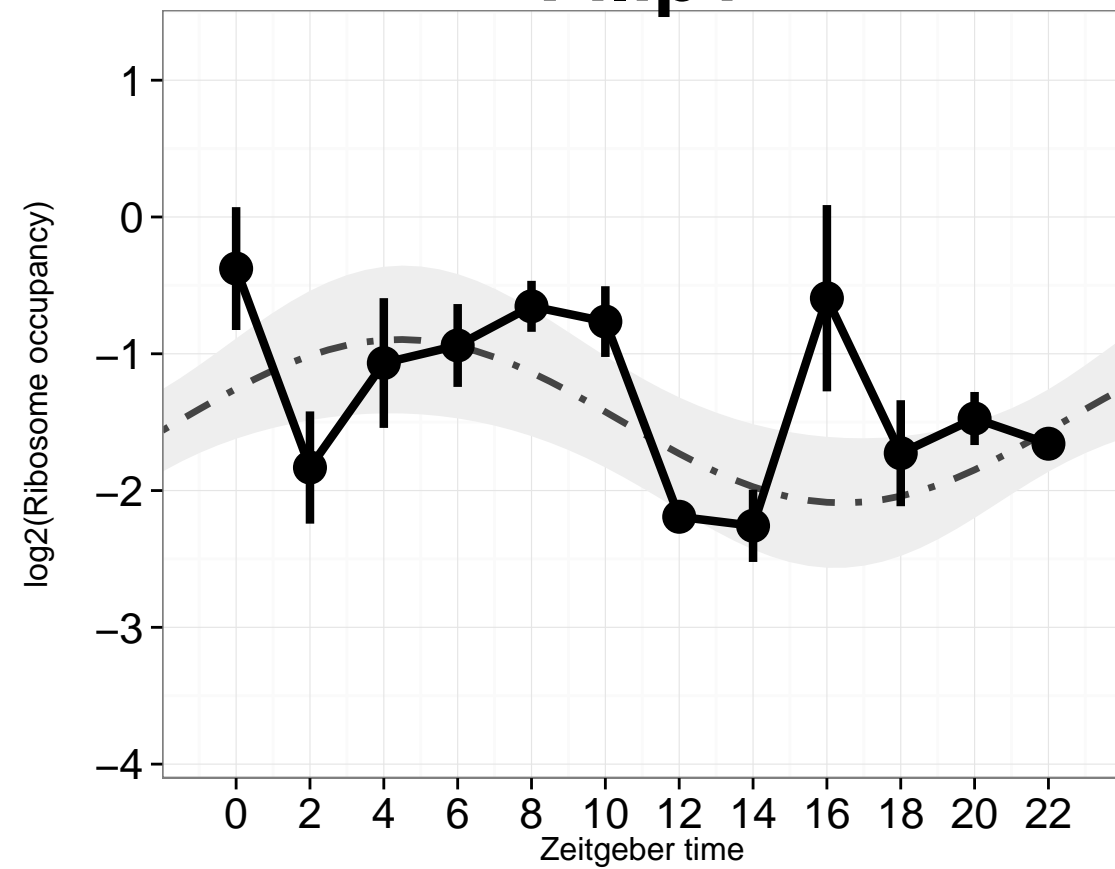

Supplement: SuppDataset_1.zip [file Filip1_set_A.pdf › Supplemental Dataset 1/A-mRNA_nonrhyth_translation_nonrhyth/Filip1_set_A.pdf]

## Filip1l

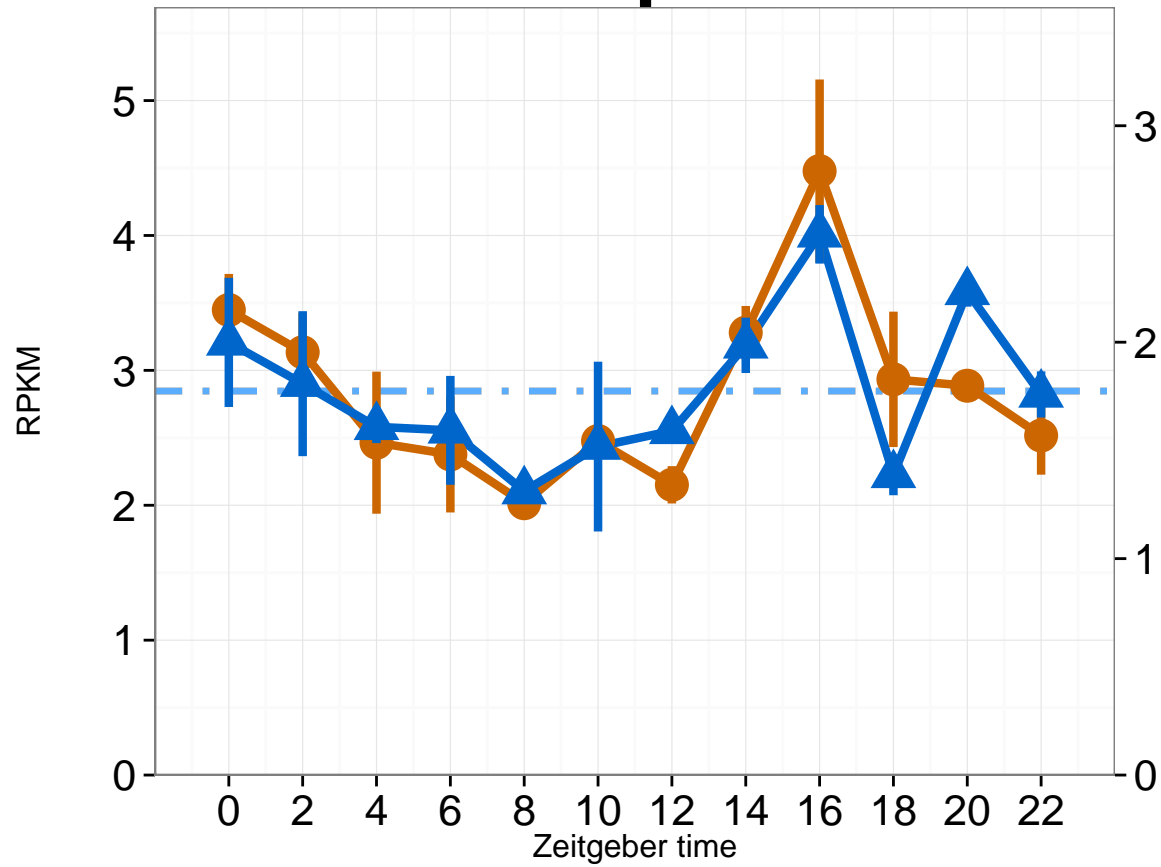

## Filip1l

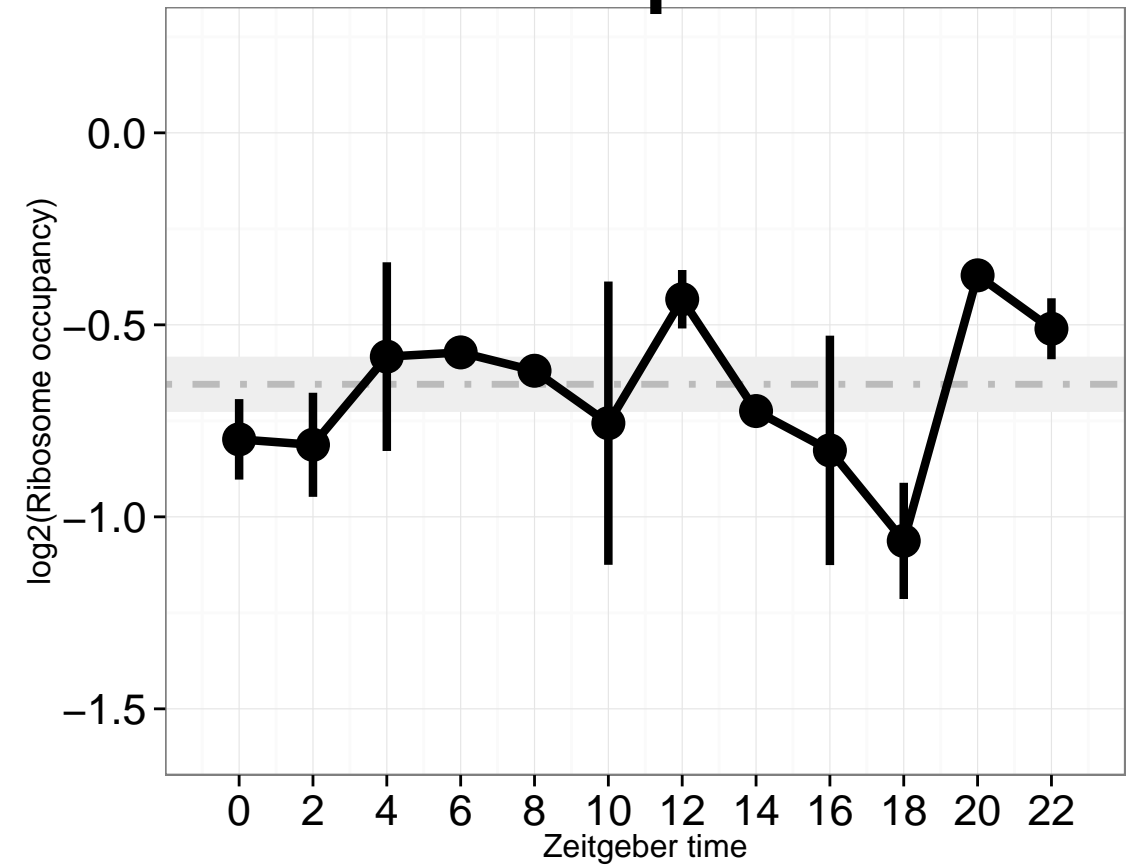

Supplement: SuppDataset_1.zip [file Filip1l_set_A.pdf › Supplemental Dataset 1/A-mRNA_nonrhyth_translation_nonrhyth/Filip1l_set_A.pdf]

# Fip1l1

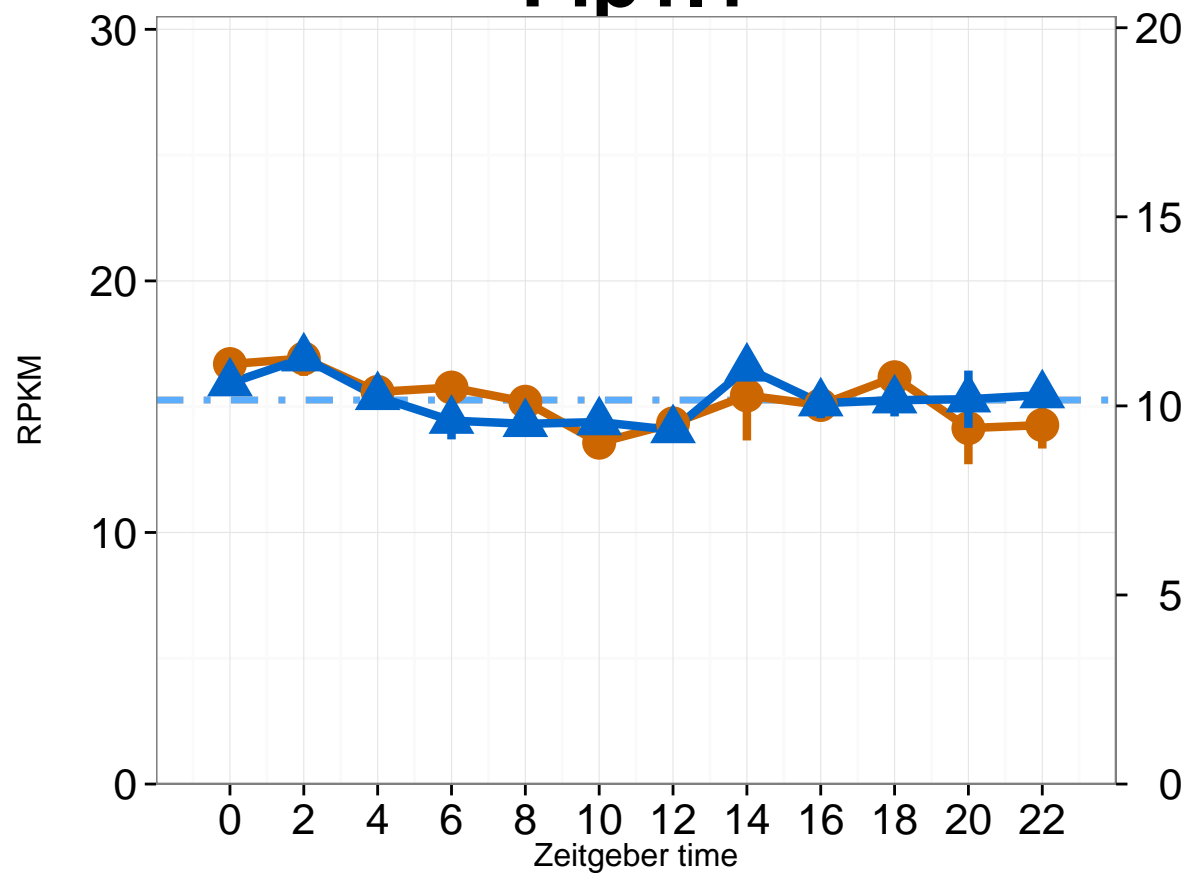

# Fip1l1

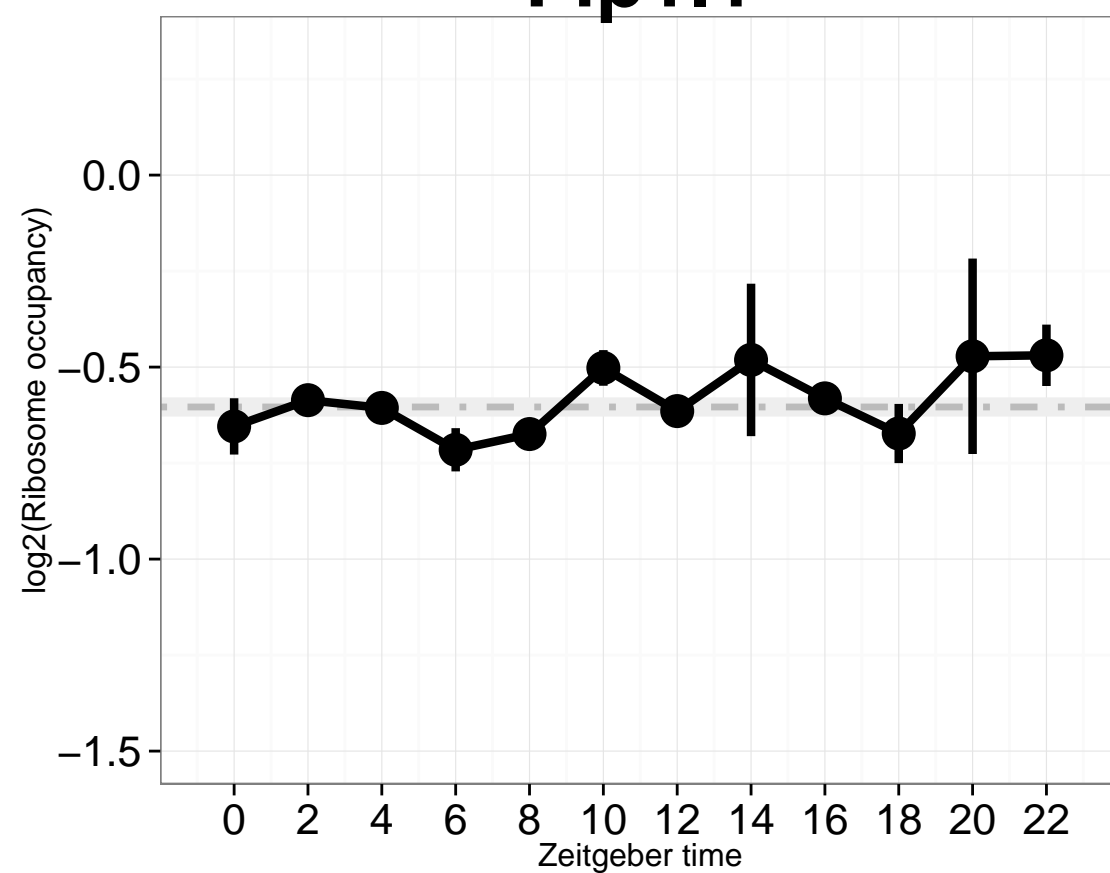

Supplement: SuppDataset_1.zip [file Fip1l1_set_A.pdf › Supplemental Dataset 1/A-mRNA_nonrhyth_translation_nonrhyth/Fip1l1_set_A.pdf]

## Fis1

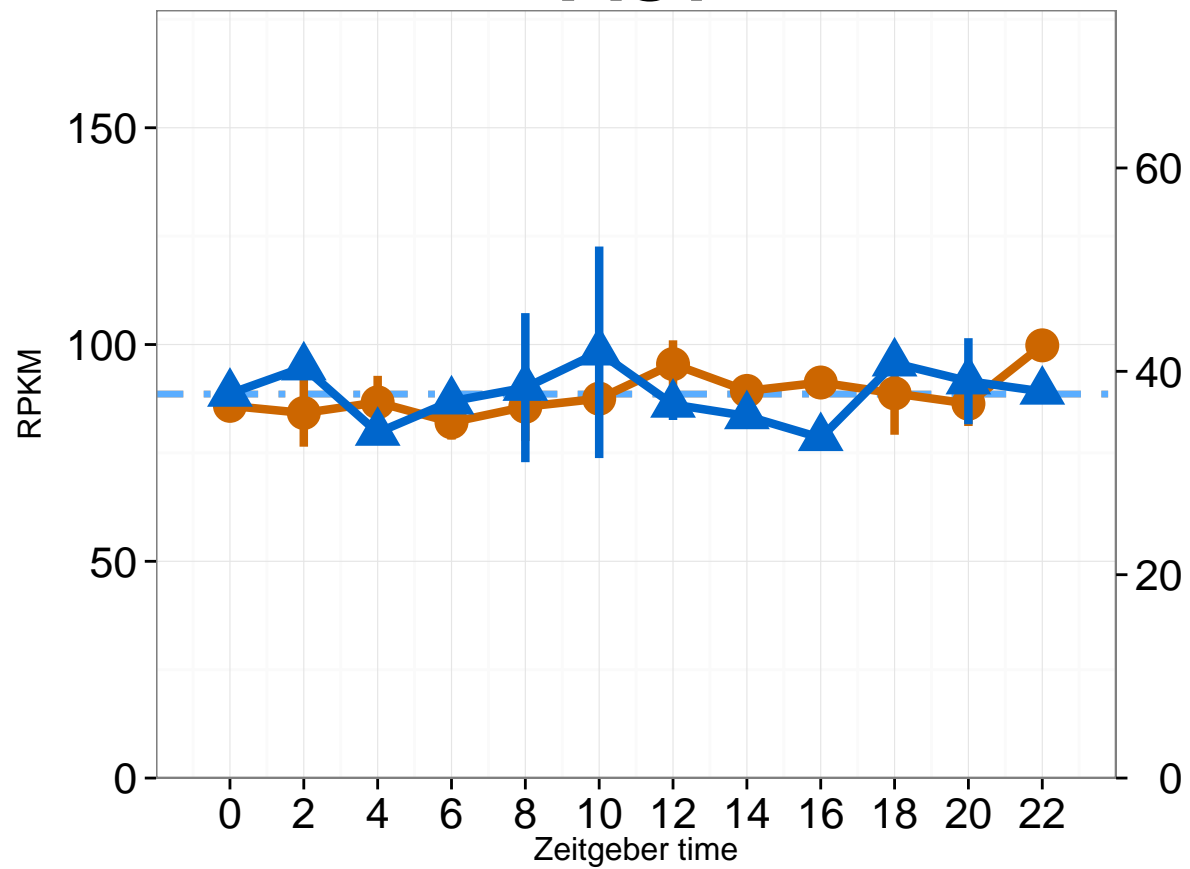

## Fis1

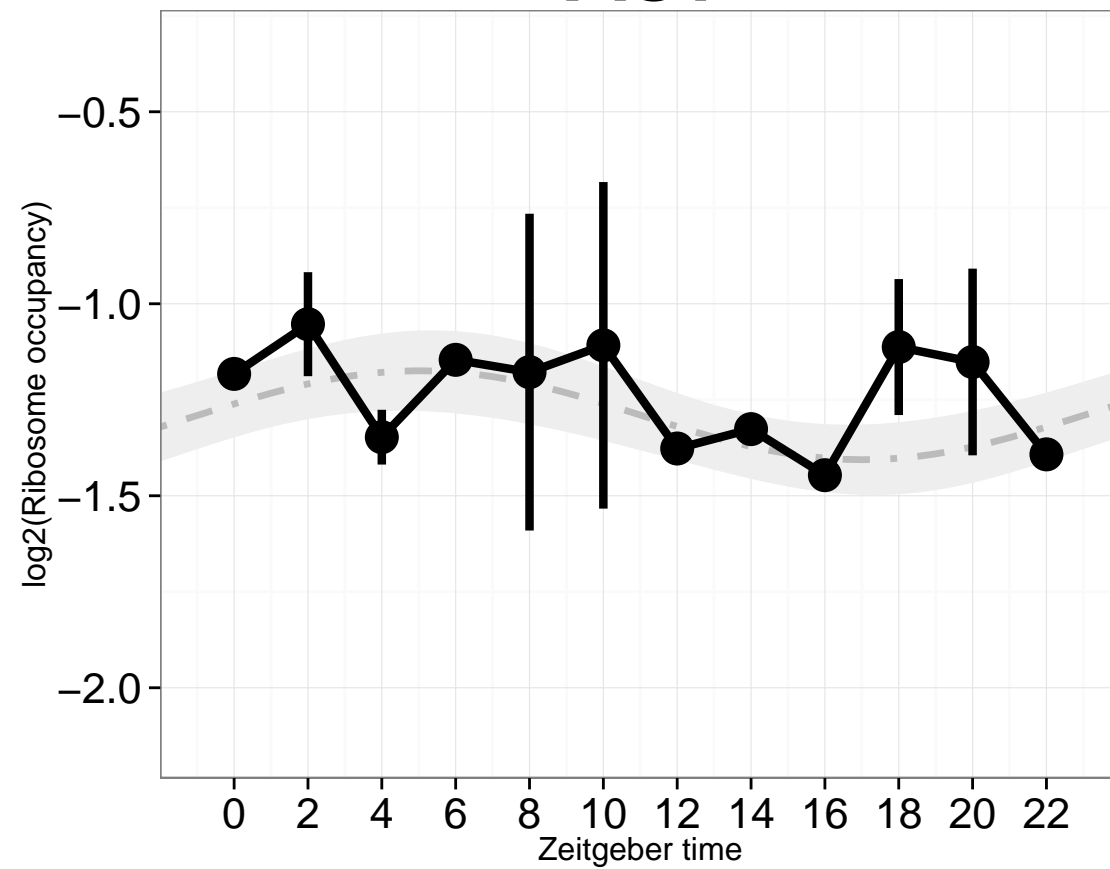

Supplement: SuppDataset_1.zip [file Fis1_set_A.pdf › Supplemental Dataset 1/A-mRNA_nonrhyth_translation_nonrhyth/Fis1_set_A.pdf]

# Fitm1

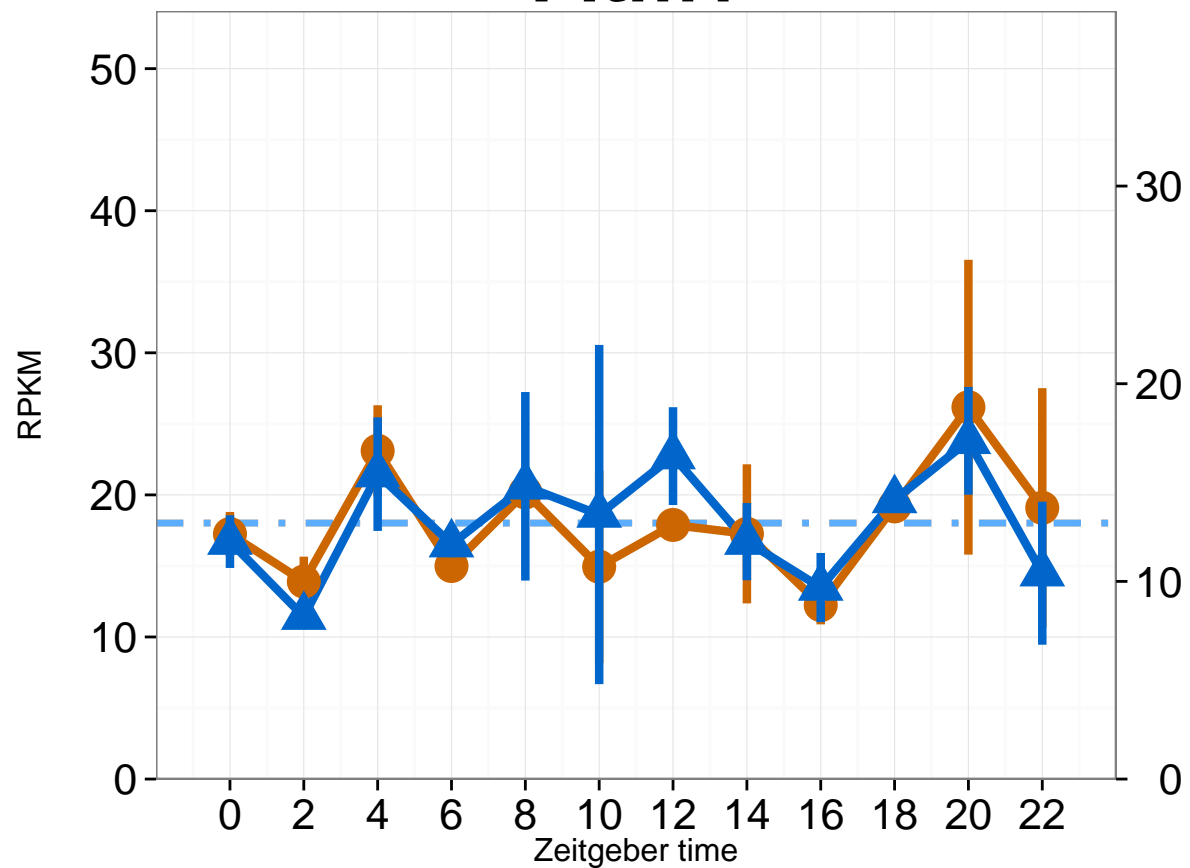

# Fitm1

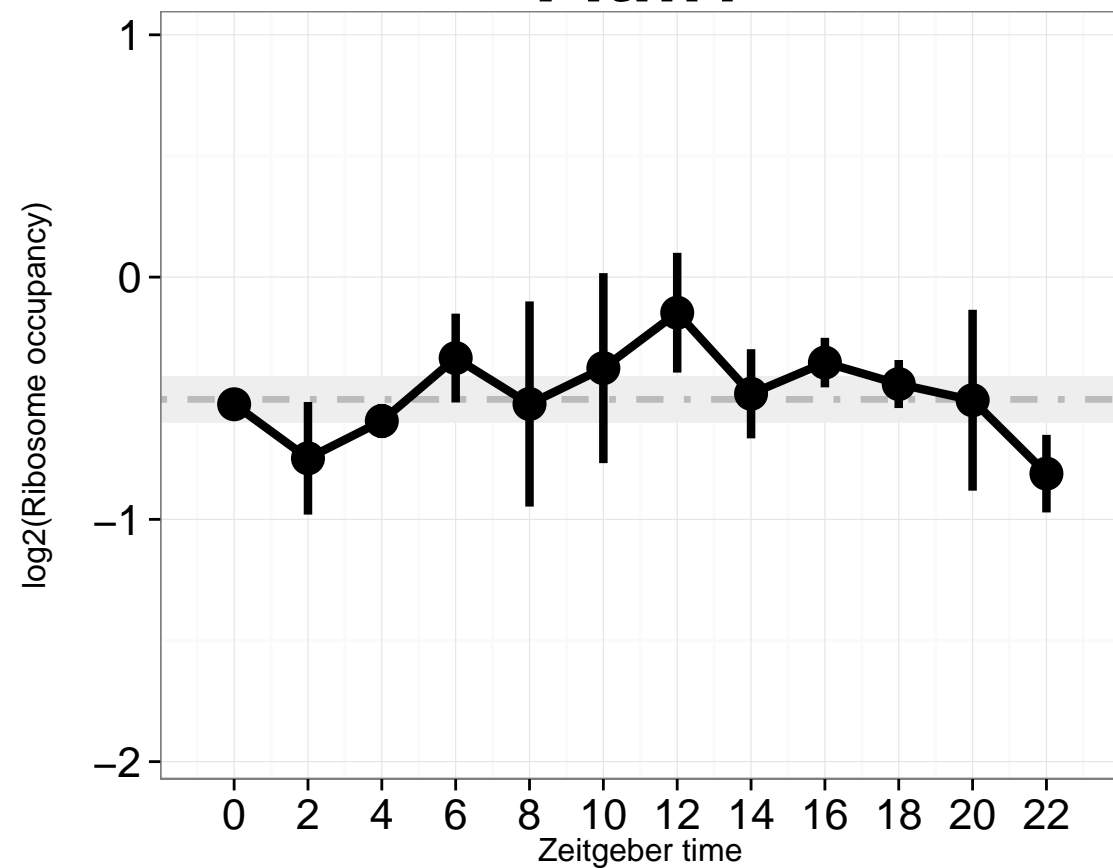

Supplement: SuppDataset_1.zip [file Fitm1_set_A.pdf › Supplemental Dataset 1/A-mRNA_nonrhyth_translation_nonrhyth/Fitm1_set_A.pdf]

# Fitm2

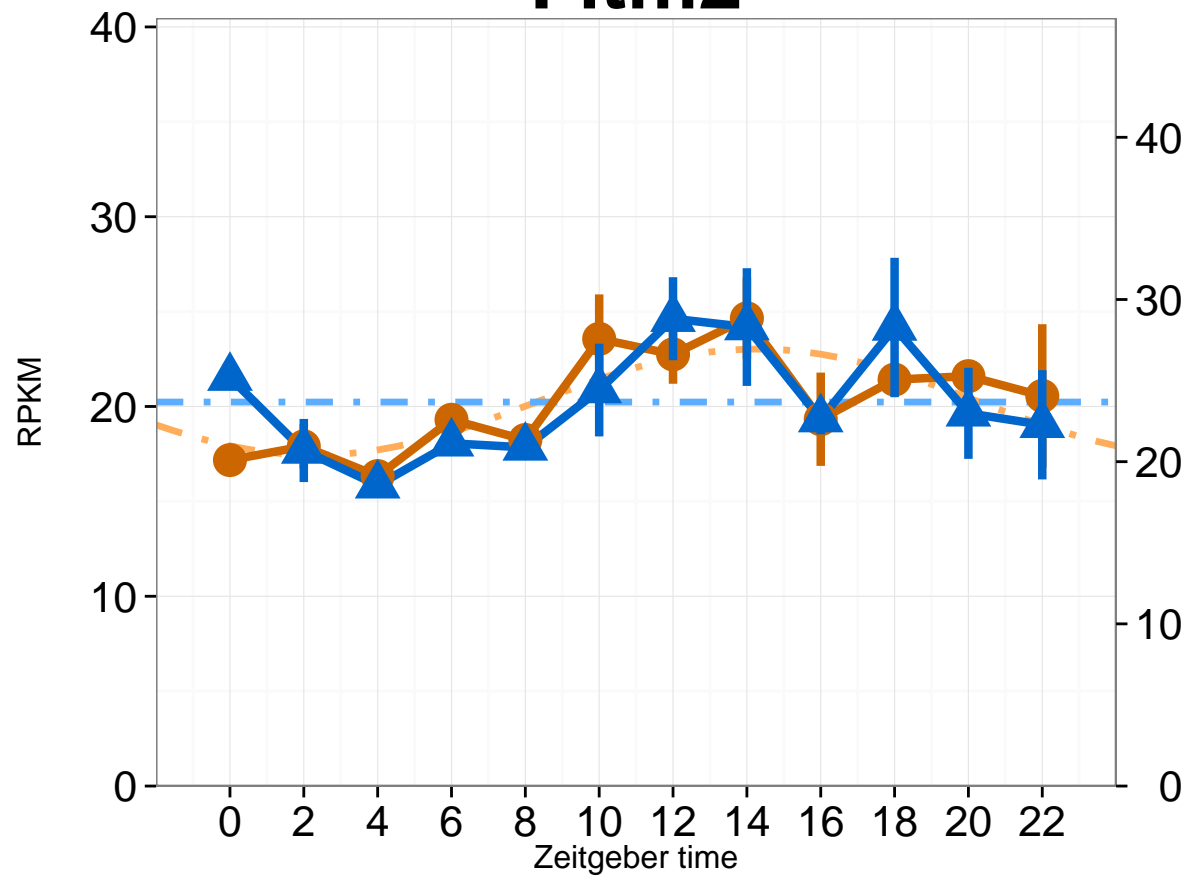

# Fitm2

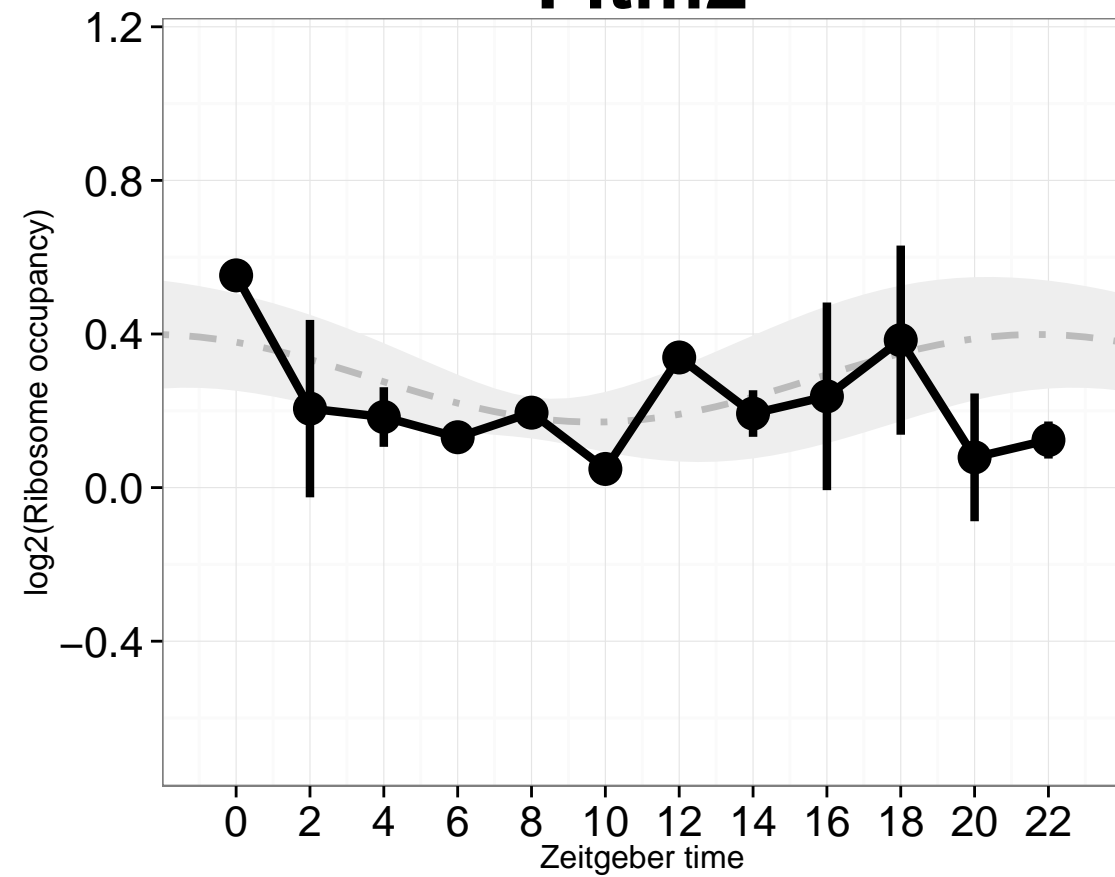

Supplement: SuppDataset_1.zip [file Fitm2_set_A.pdf › Supplemental Dataset 1/A-mRNA_nonrhyth_translation_nonrhyth/Fitm2_set_A.pdf]

# Fkbp10

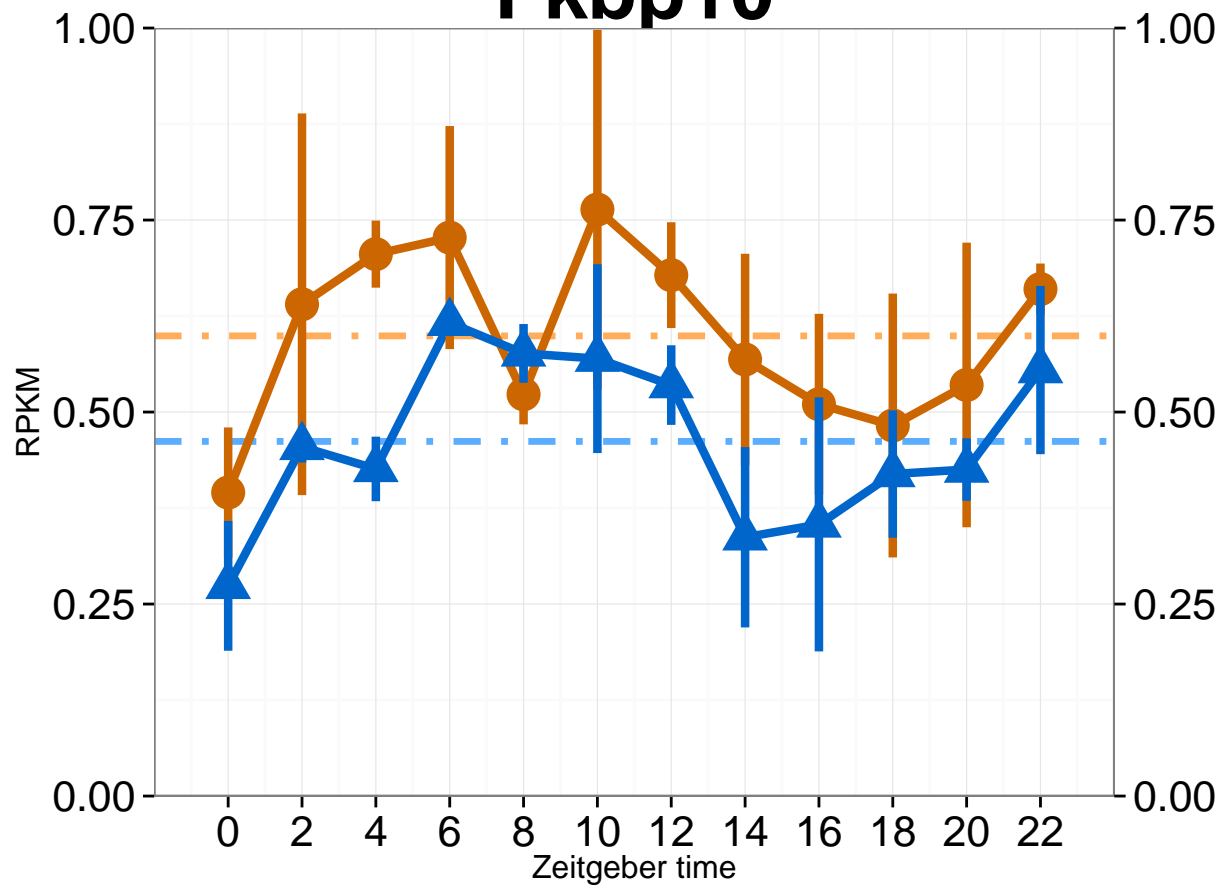

# Fkbp10

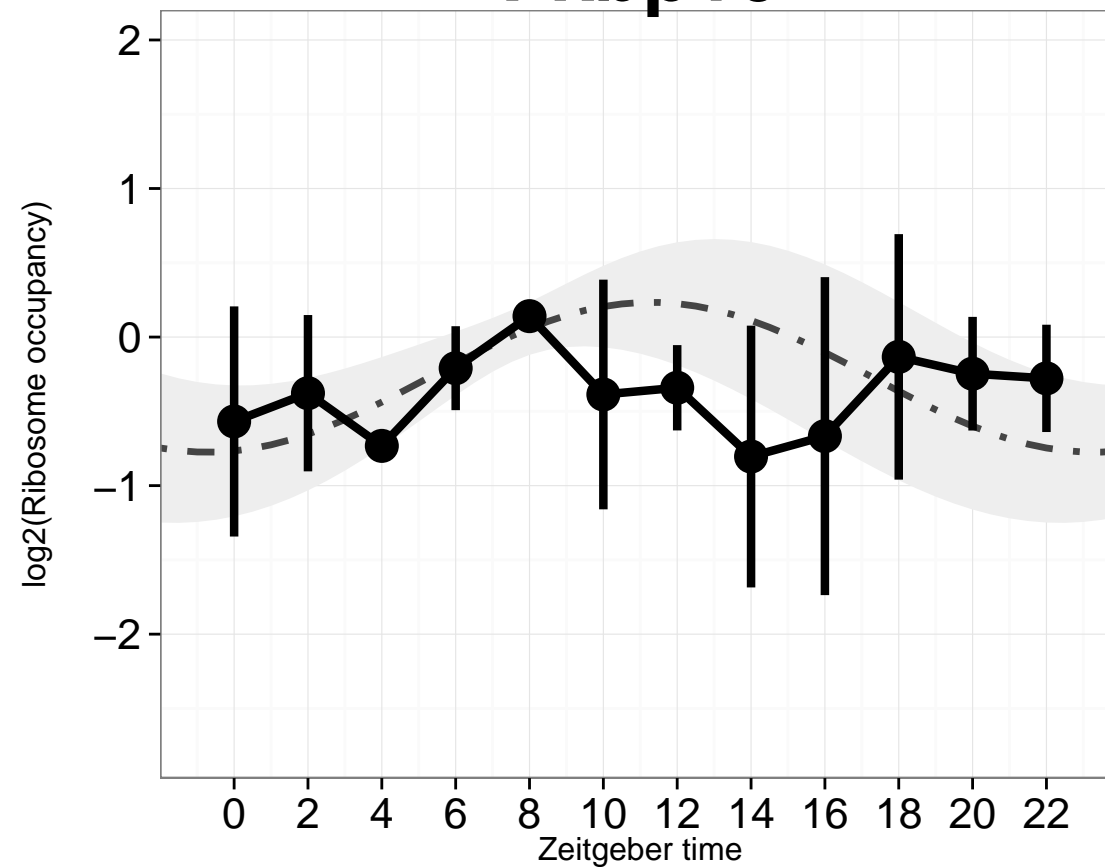

Supplement: SuppDataset_1.zip [file Fkbp10_set_A.pdf › Supplemental Dataset 1/A-mRNA_nonrhyth_translation_nonrhyth/Fkbp10_set_A.pdf]

## Fkbp15

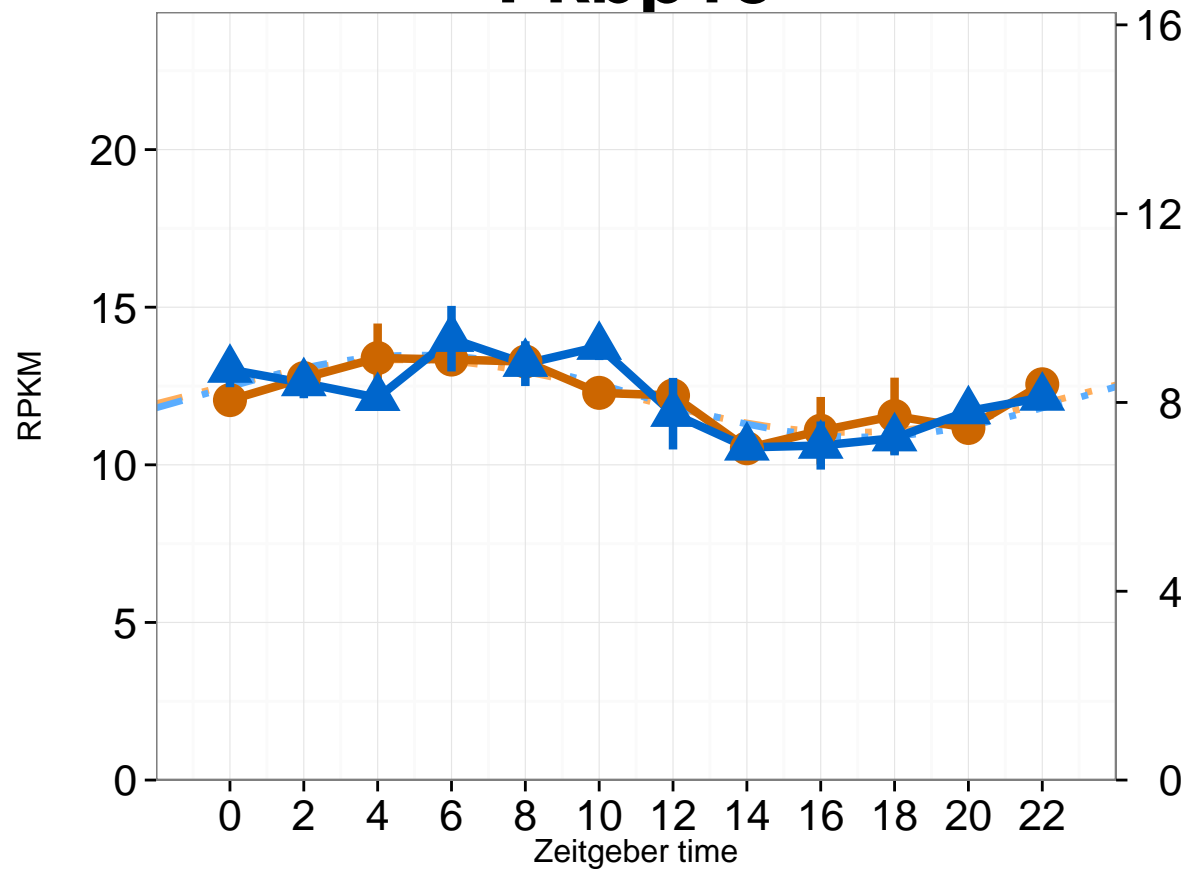

## Fkbp15

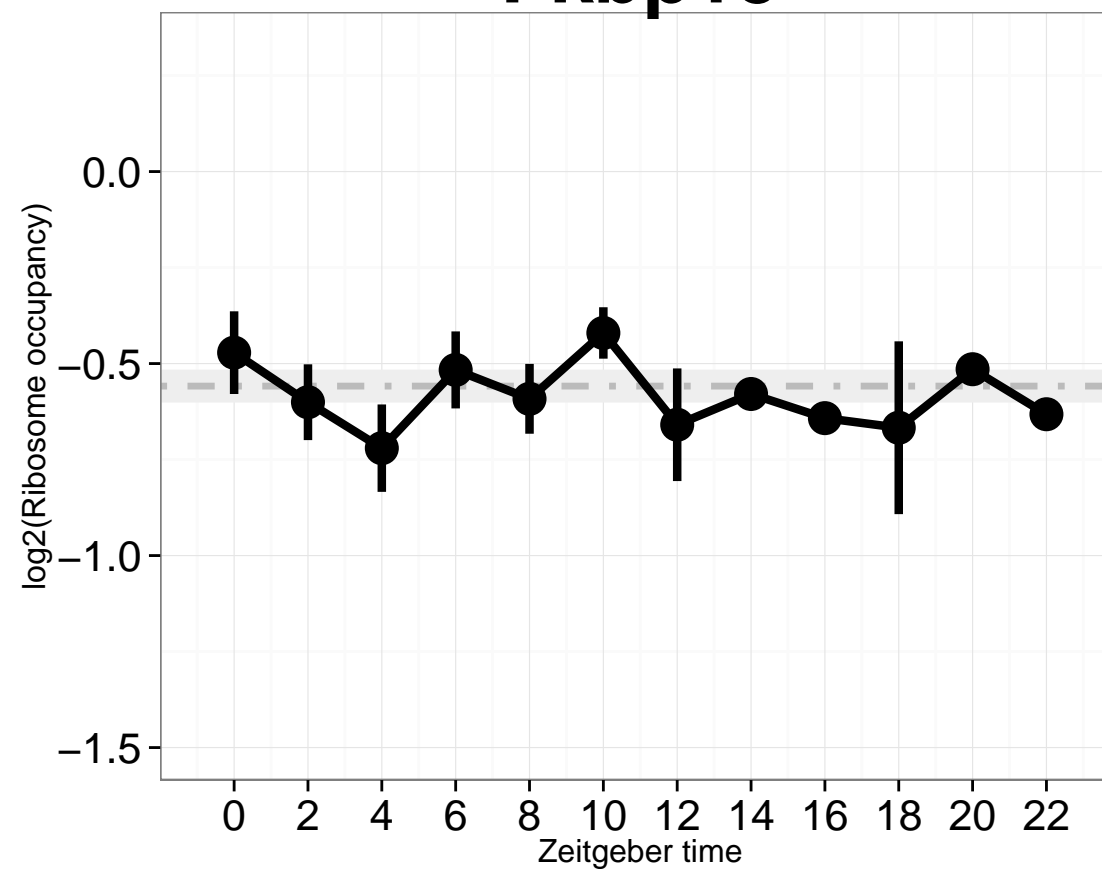

Supplement: SuppDataset_1.zip [file Fkbp15_set_A.pdf › Supplemental Dataset 1/A-mRNA_nonrhyth_translation_nonrhyth/Fkbp15_set_A.pdf]

# Fkbp1a

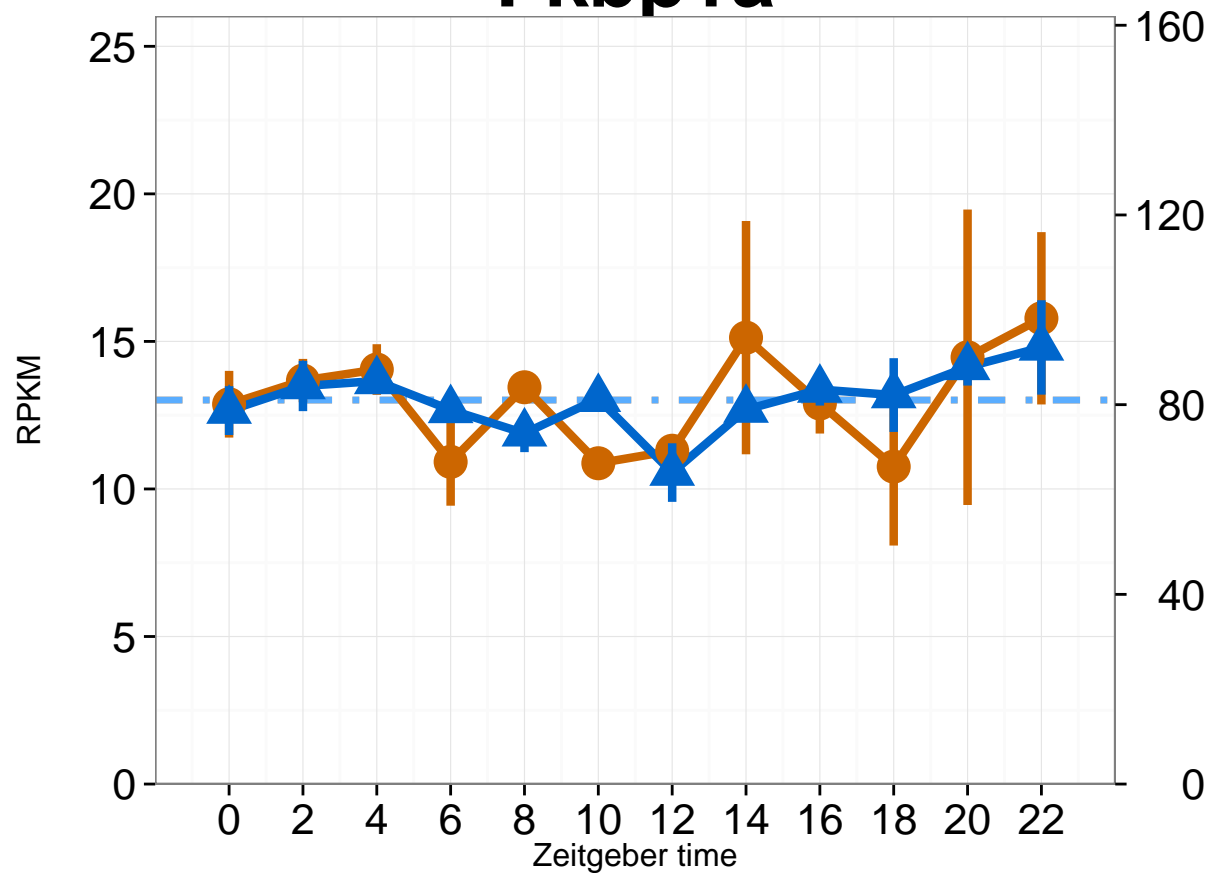

# Fkbp1a

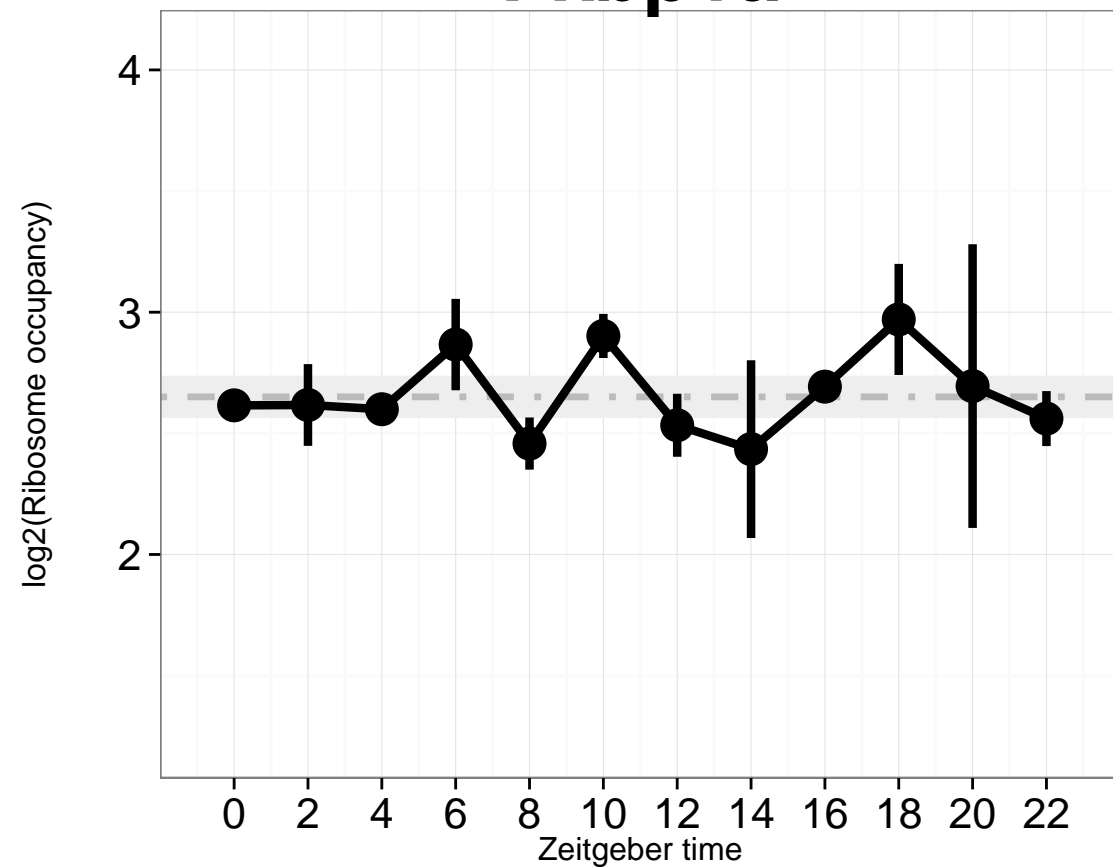

Supplement: SuppDataset_1.zip [file Fkbp1a_set_A.pdf › Supplemental Dataset 1/A-mRNA_nonrhyth_translation_nonrhyth/Fkbp1a_set_A.pdf]

## Fkbp2

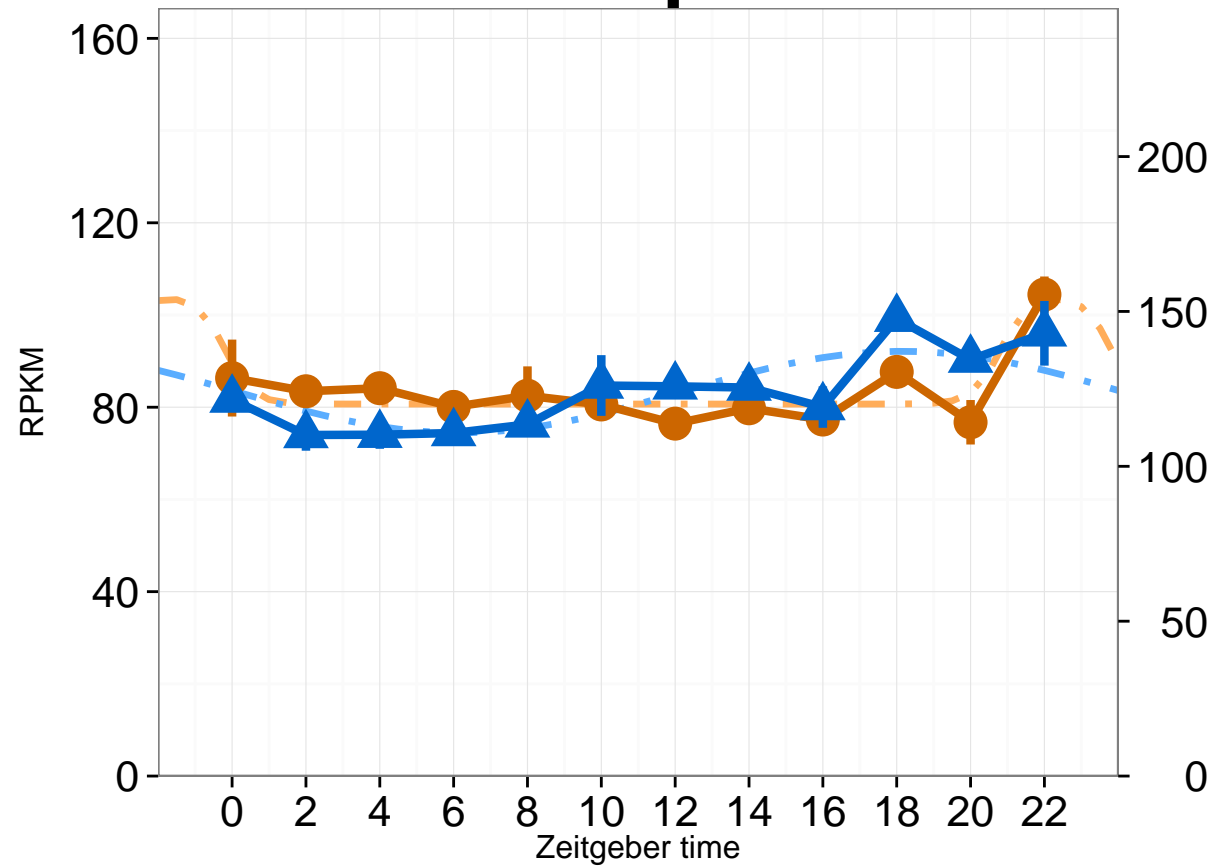

## Fkbp2

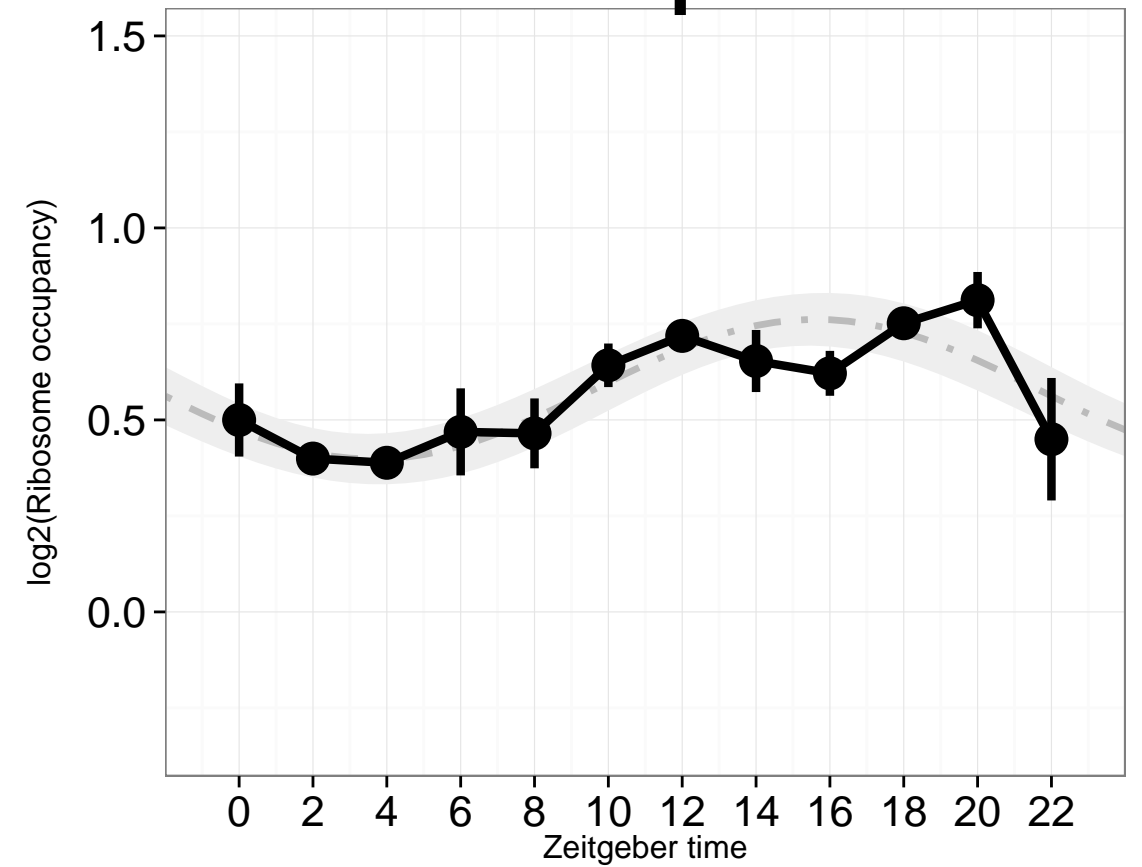

Supplement: SuppDataset_1.zip [file Fkbp2_set_A.pdf › Supplemental Dataset 1/A-mRNA_nonrhyth_translation_nonrhyth/Fkbp2_set_A.pdf]

# Fkbp3

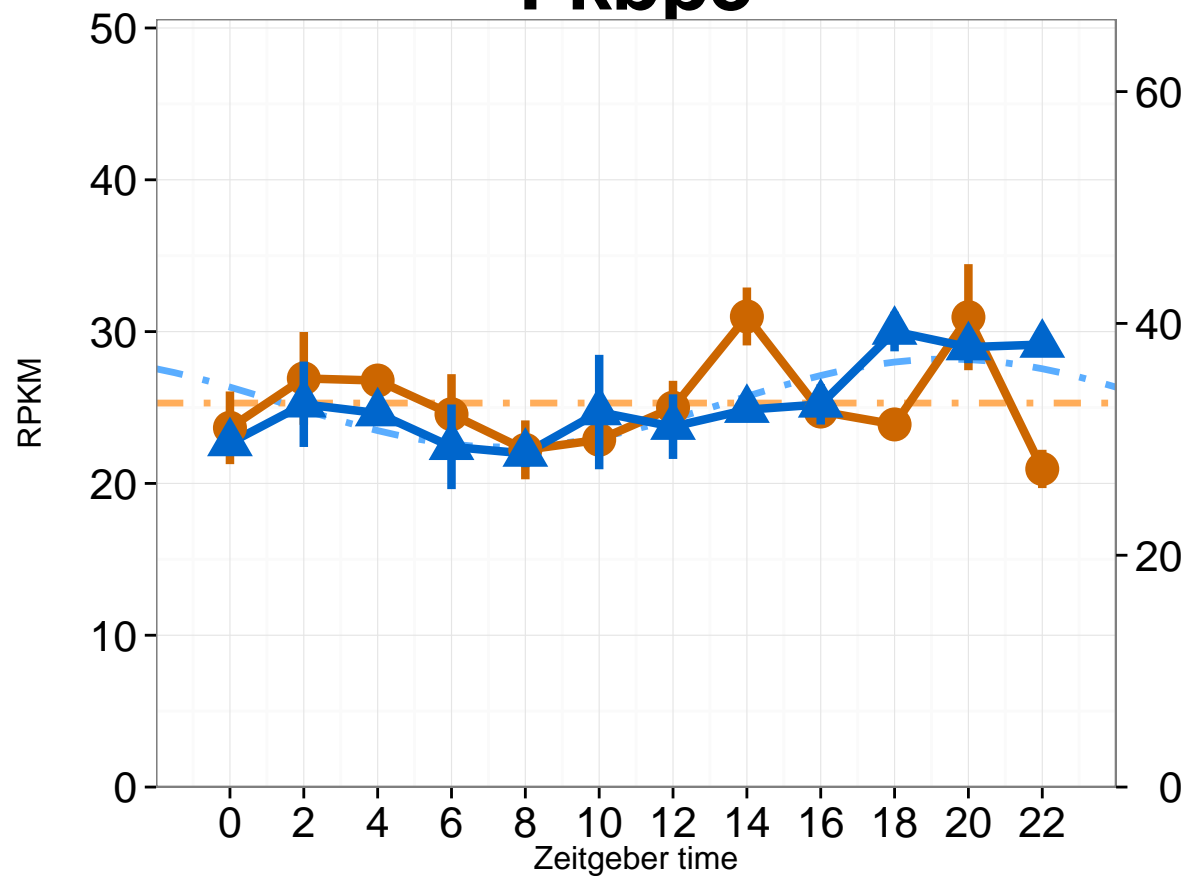

# Fkbp3

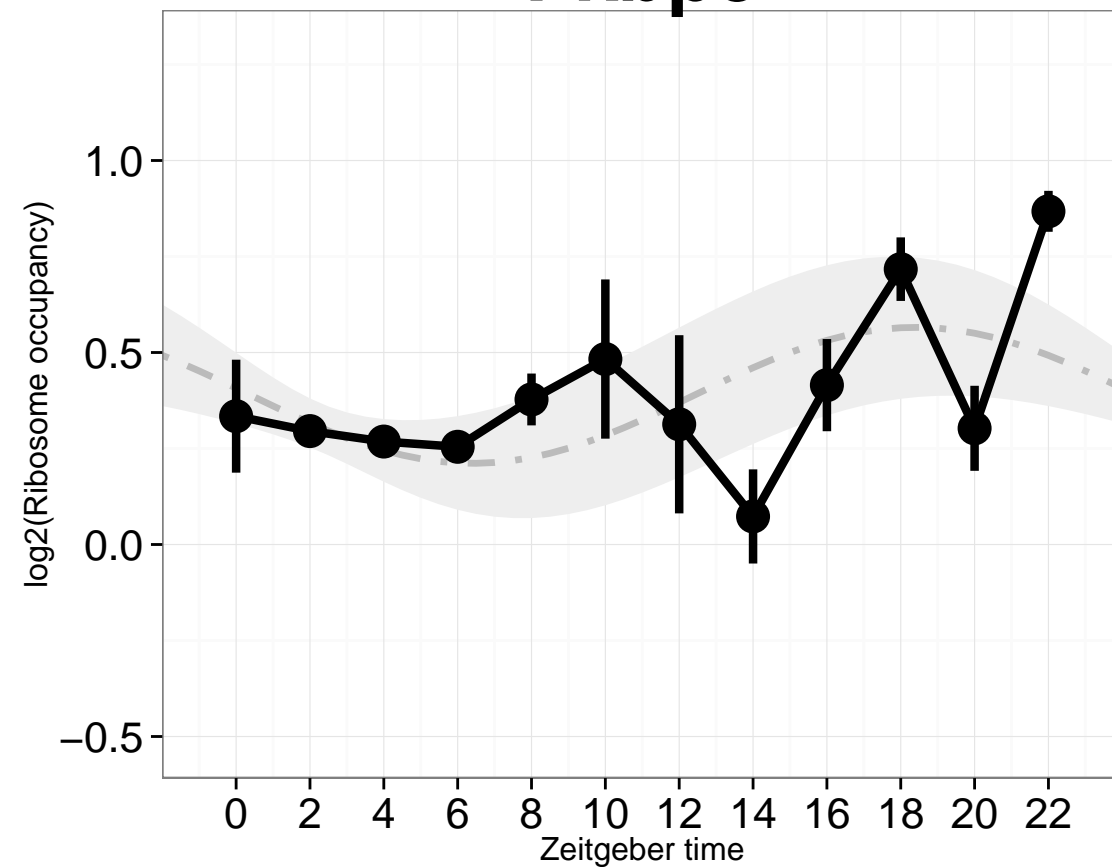

Supplement: SuppDataset_1.zip [file Fkbp3_set_A.pdf › Supplemental Dataset 1/A-mRNA_nonrhyth_translation_nonrhyth/Fkbp3_set_A.pdf]

## Fkbp7

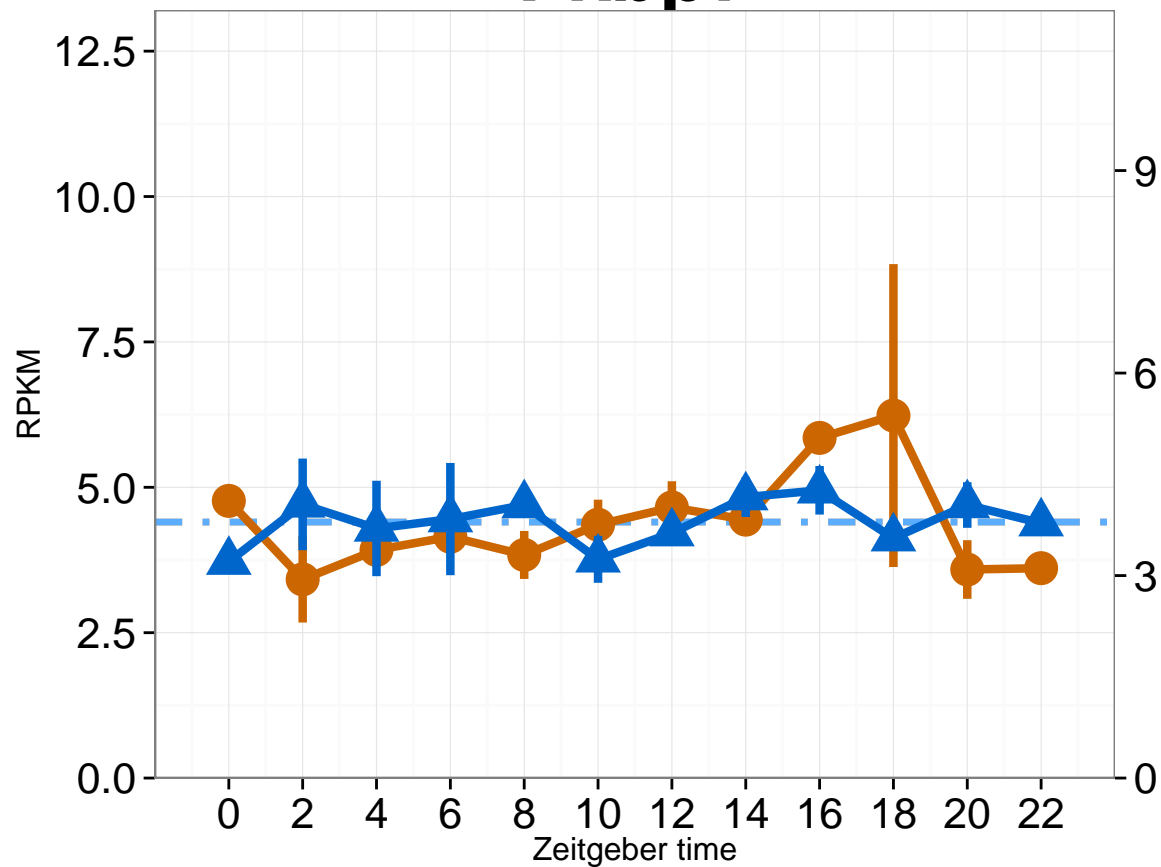

## Fkbp7

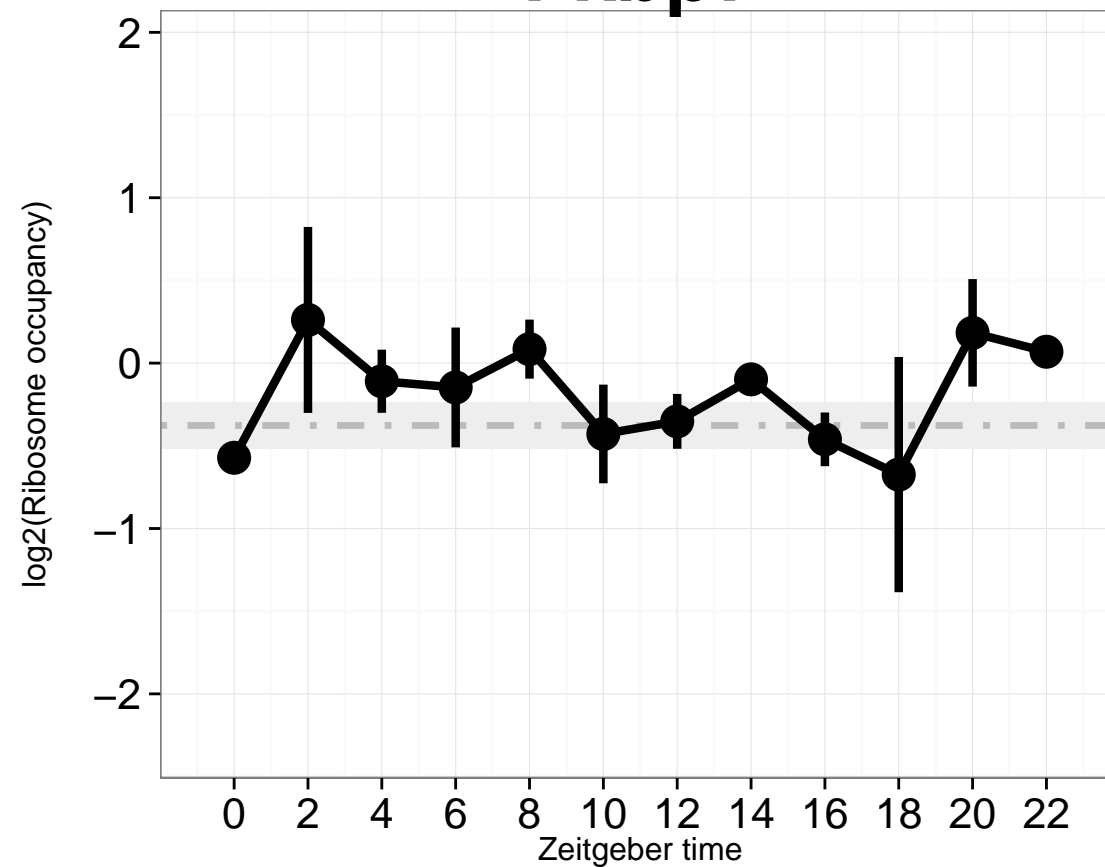

Supplement: SuppDataset_1.zip [file Fkbp7_set_A.pdf › Supplemental Dataset 1/A-mRNA_nonrhyth_translation_nonrhyth/Fkbp7_set_A.pdf]

## Fkbp8

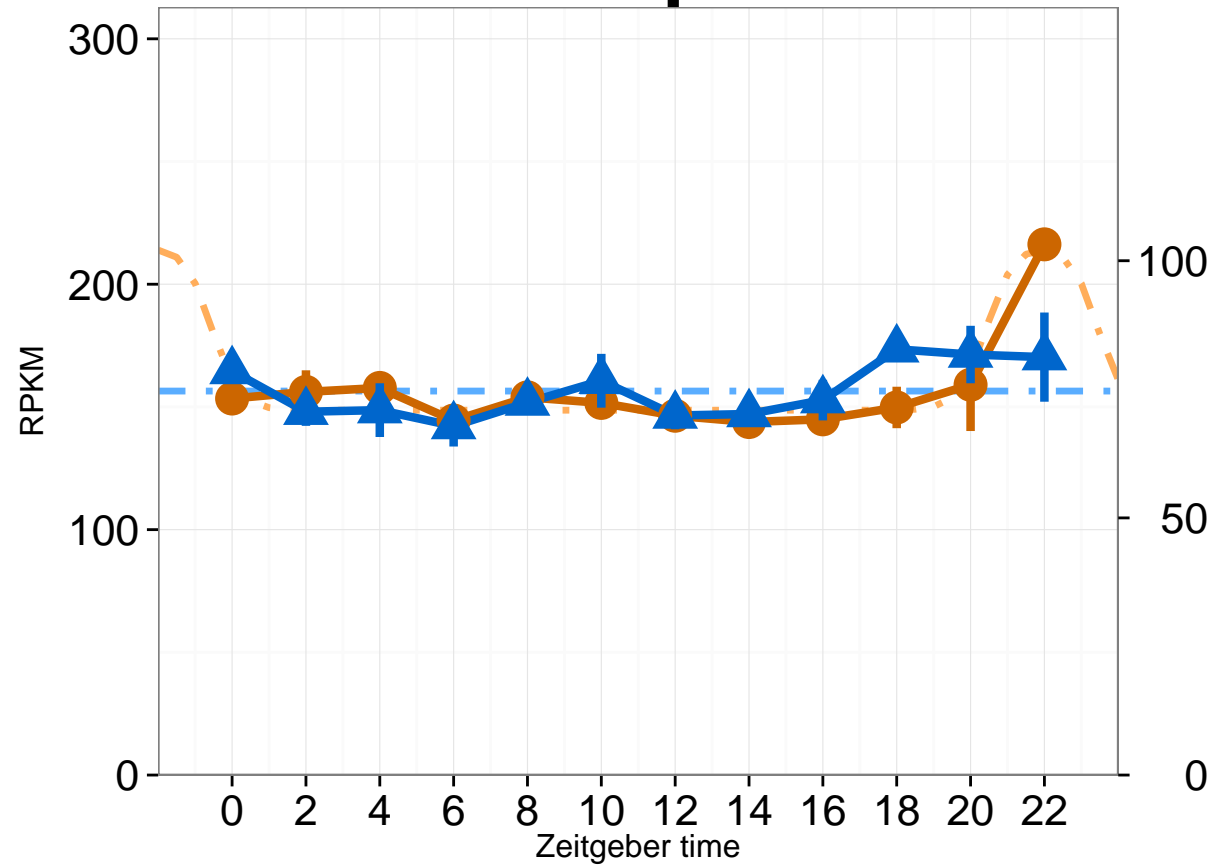

## Fkbp8

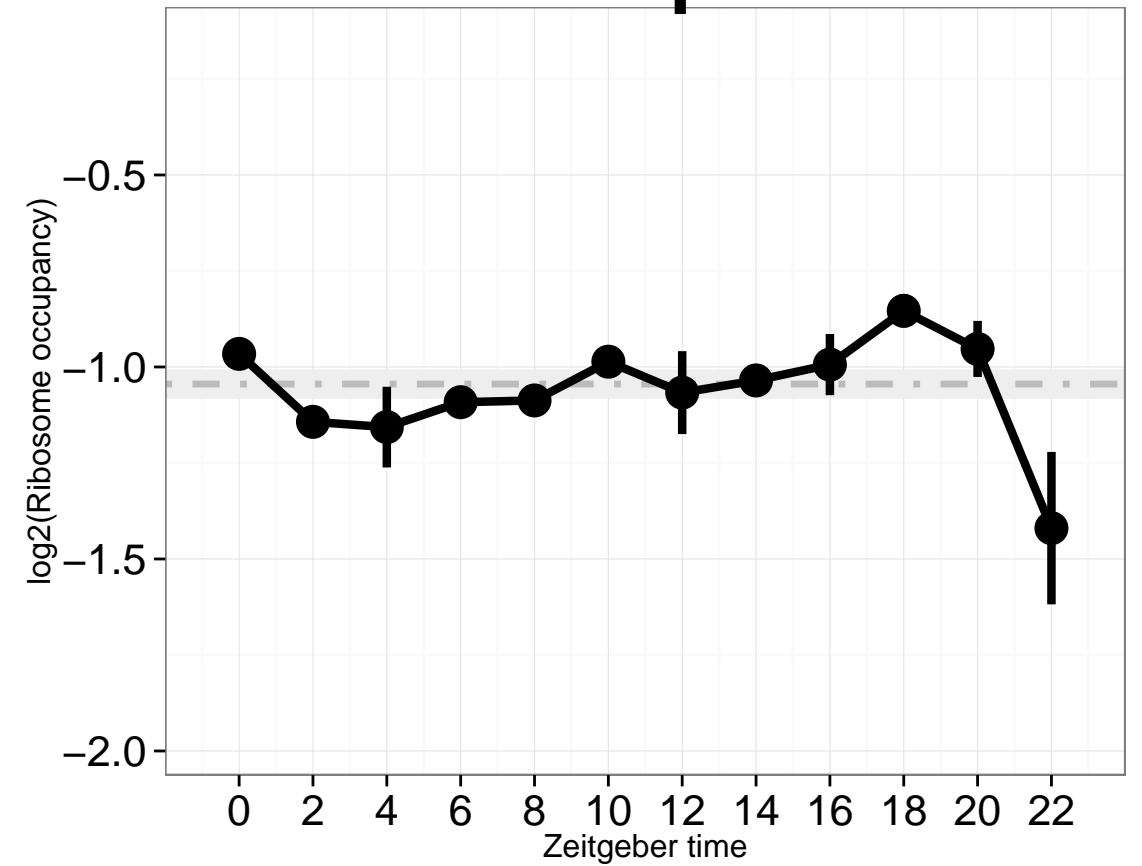

Supplement: SuppDataset_1.zip [file Fkbp8_set_A.pdf › Supplemental Dataset 1/A-mRNA_nonrhyth_translation_nonrhyth/Fkbp8_set_A.pdf]

# Fkbp9

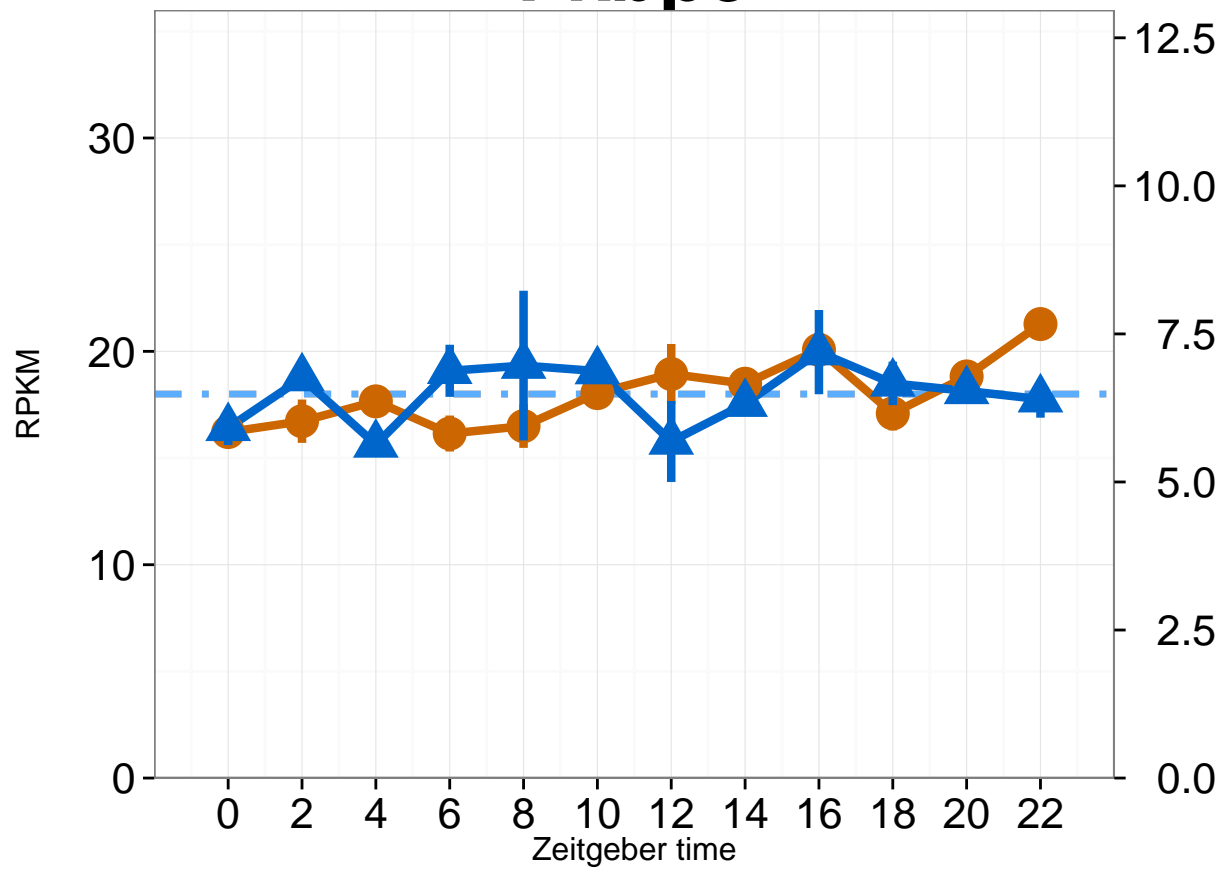

# Fkbp9

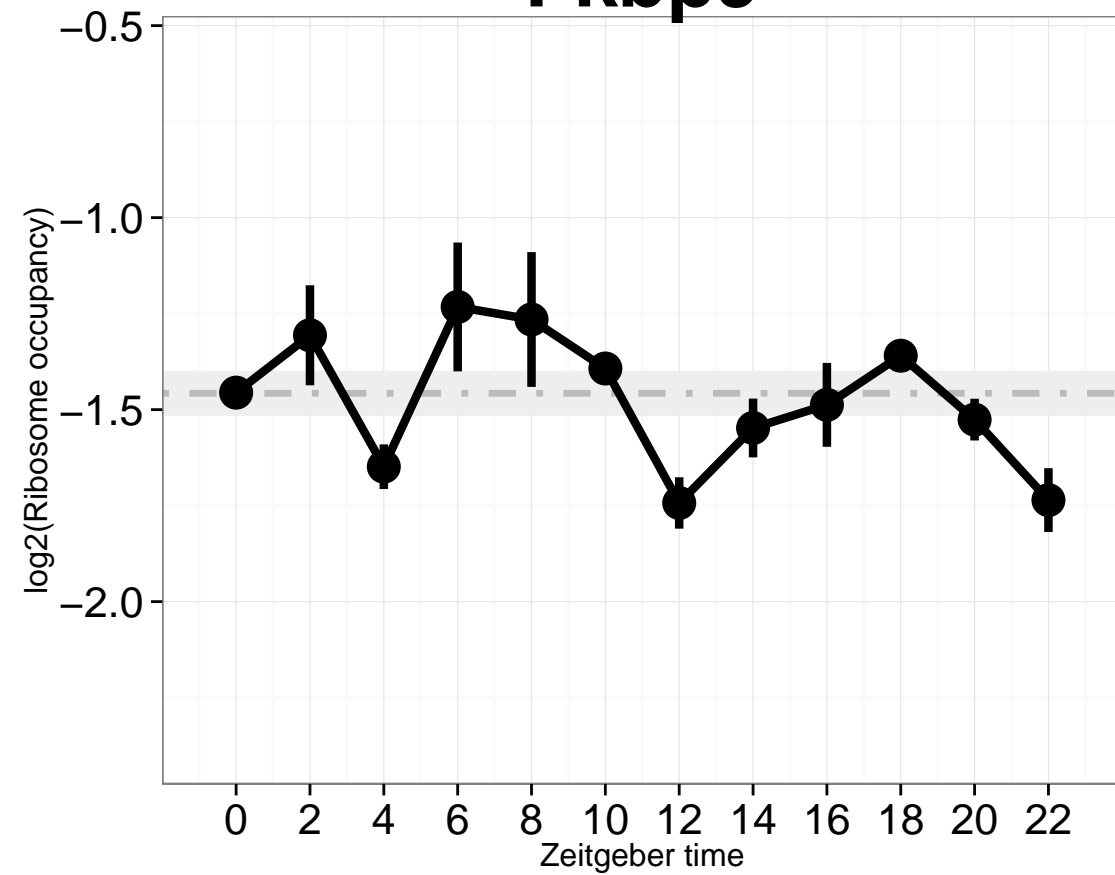

Supplement: SuppDataset_1.zip [file Fkbp9_set_A.pdf › Supplemental Dataset 1/A-mRNA_nonrhyth_translation_nonrhyth/Fkbp9_set_A.pdf]

## Fkbpl

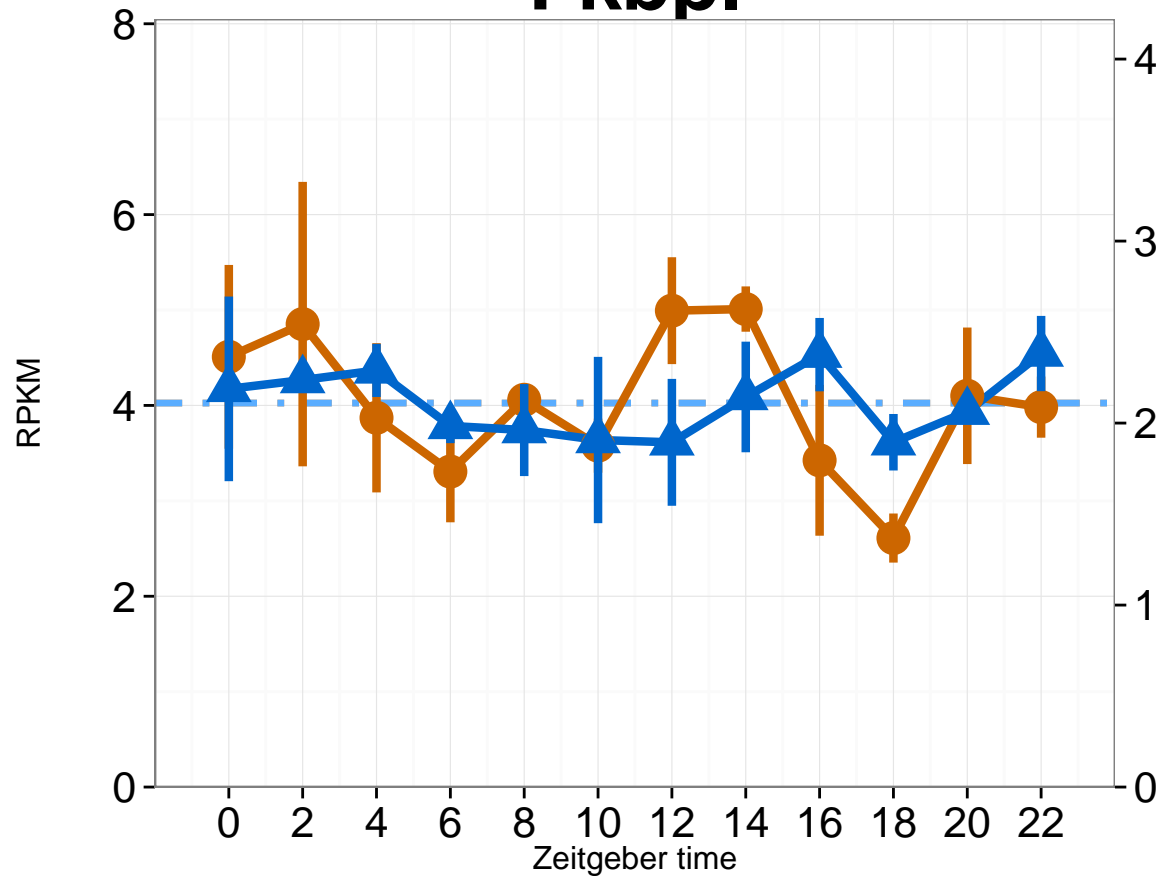

## Fkbpl

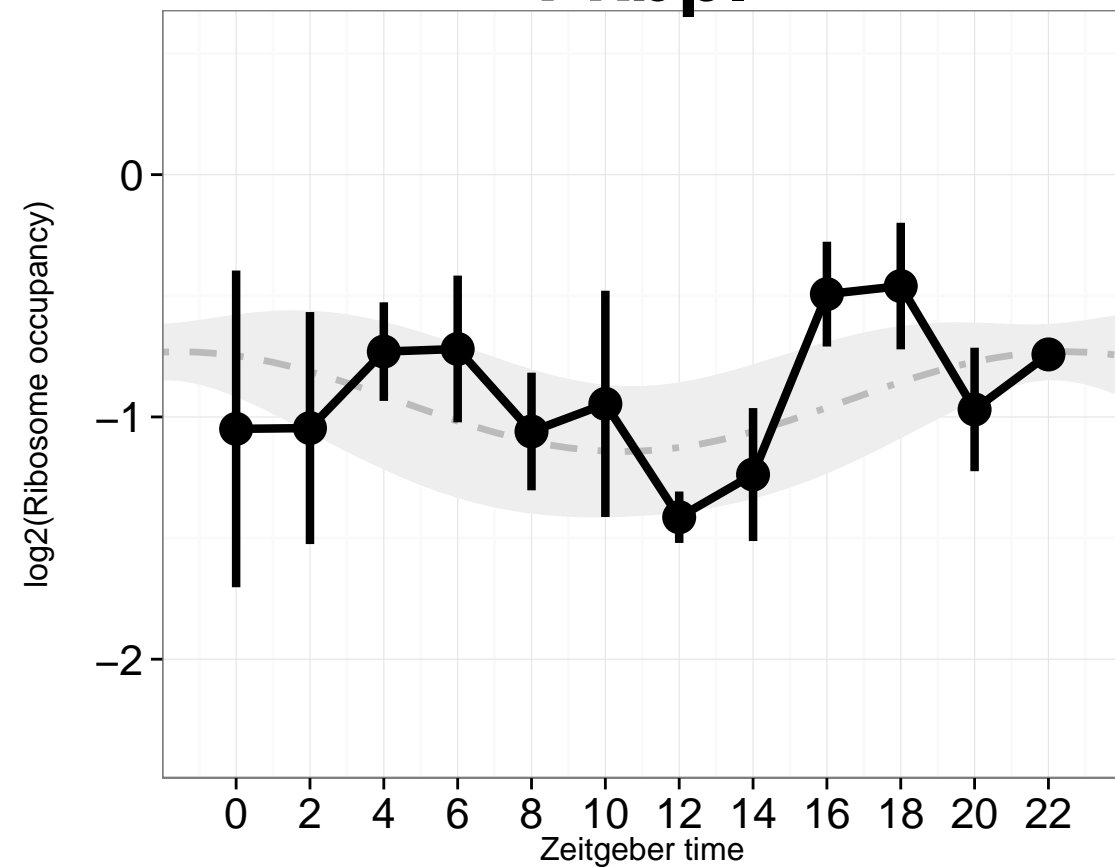

Supplement: SuppDataset_1.zip [file Fkbpl_set_A.pdf › Supplemental Dataset 1/A-mRNA_nonrhyth_translation_nonrhyth/Fkbpl_set_A.pdf]

## Fkrp

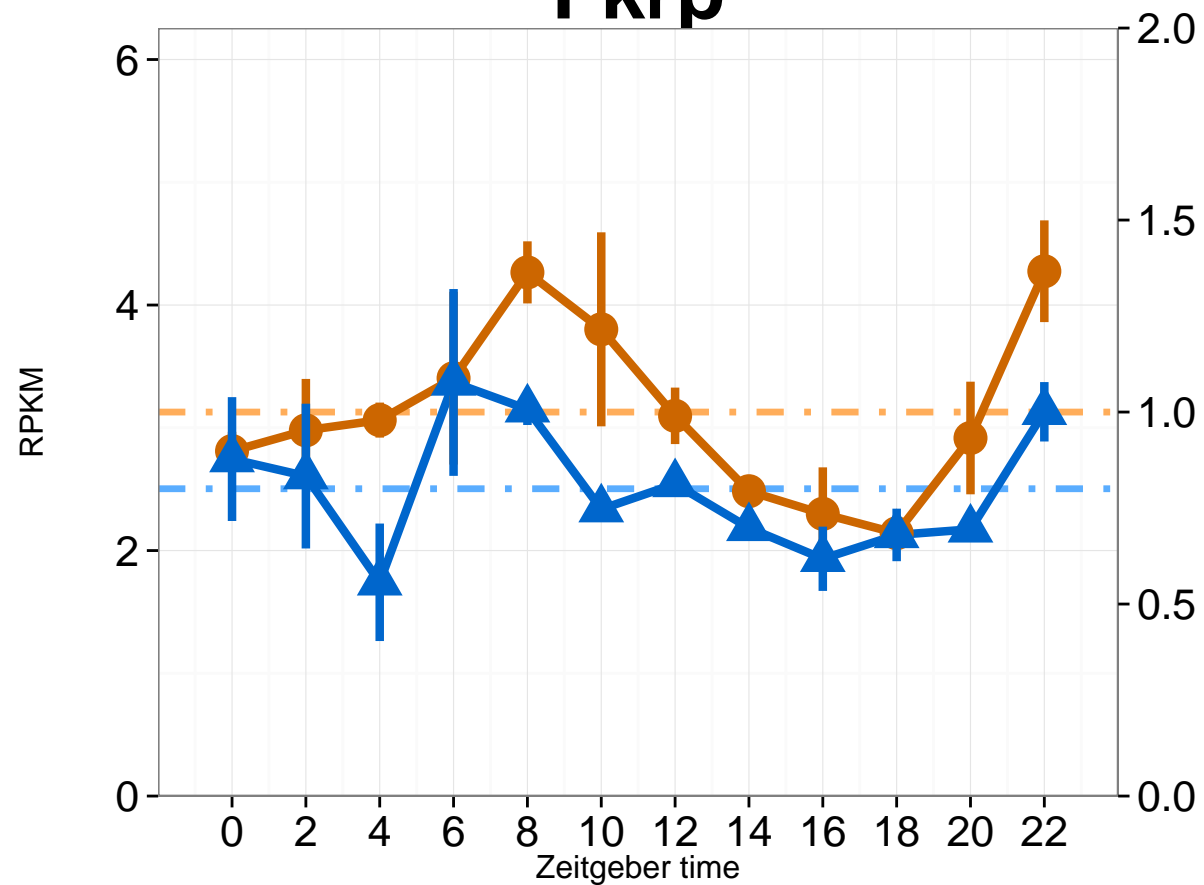

## Fkrp

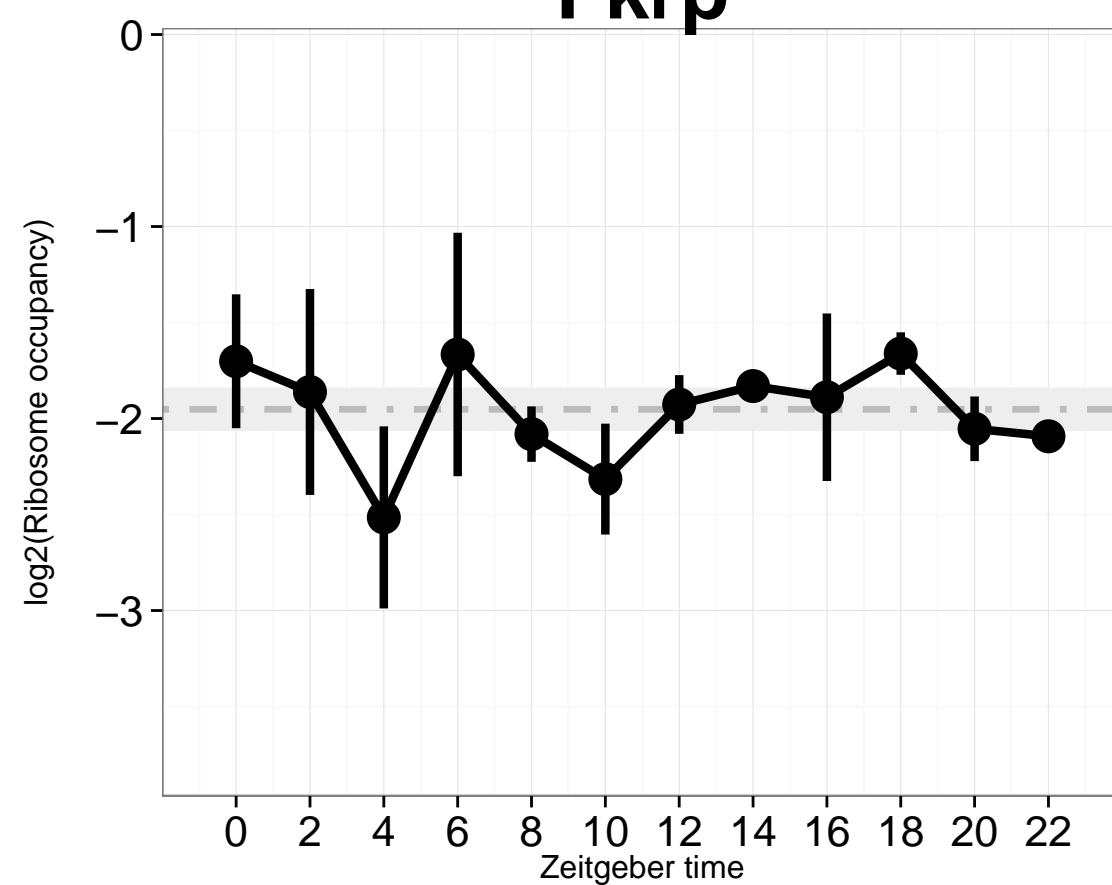

Supplement: SuppDataset_1.zip [file Fkrp_set_A.pdf › Supplemental Dataset 1/A-mRNA_nonrhyth_translation_nonrhyth/Fkrp_set_A.pdf]

## Fktn

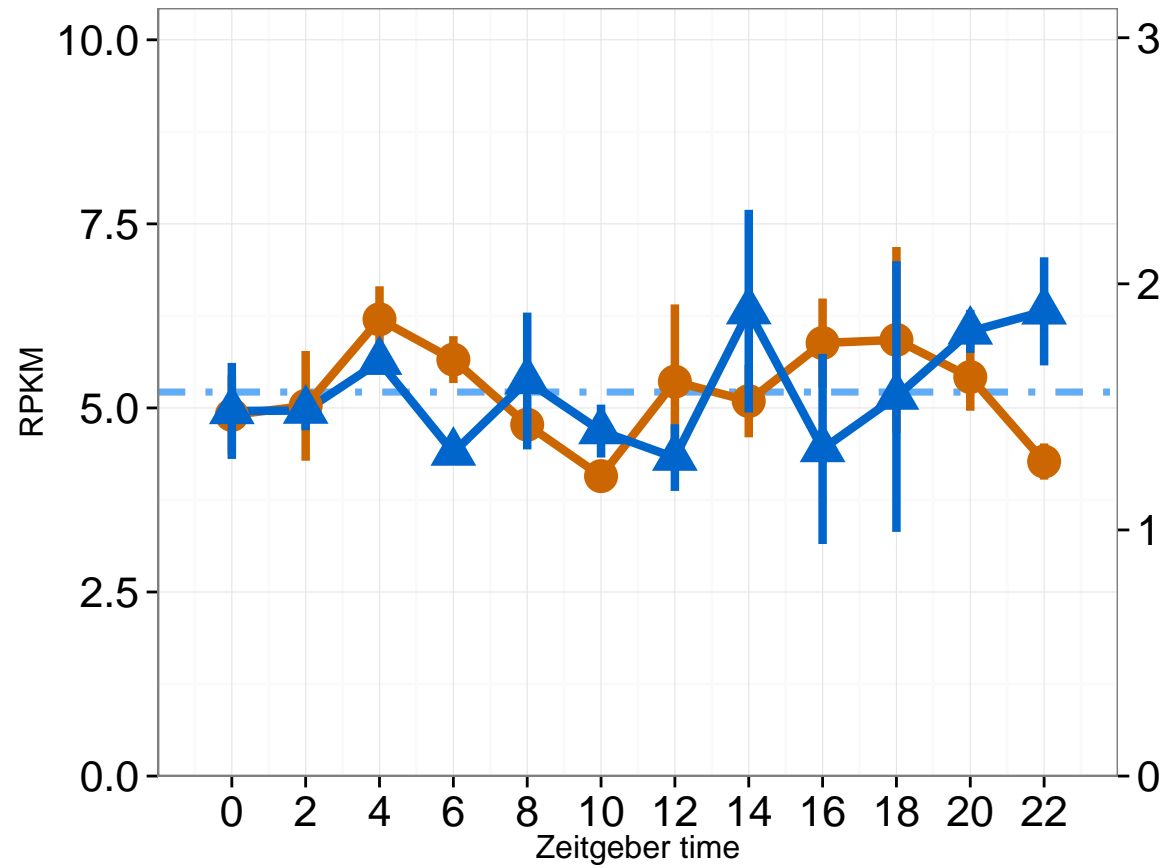

## Fktn

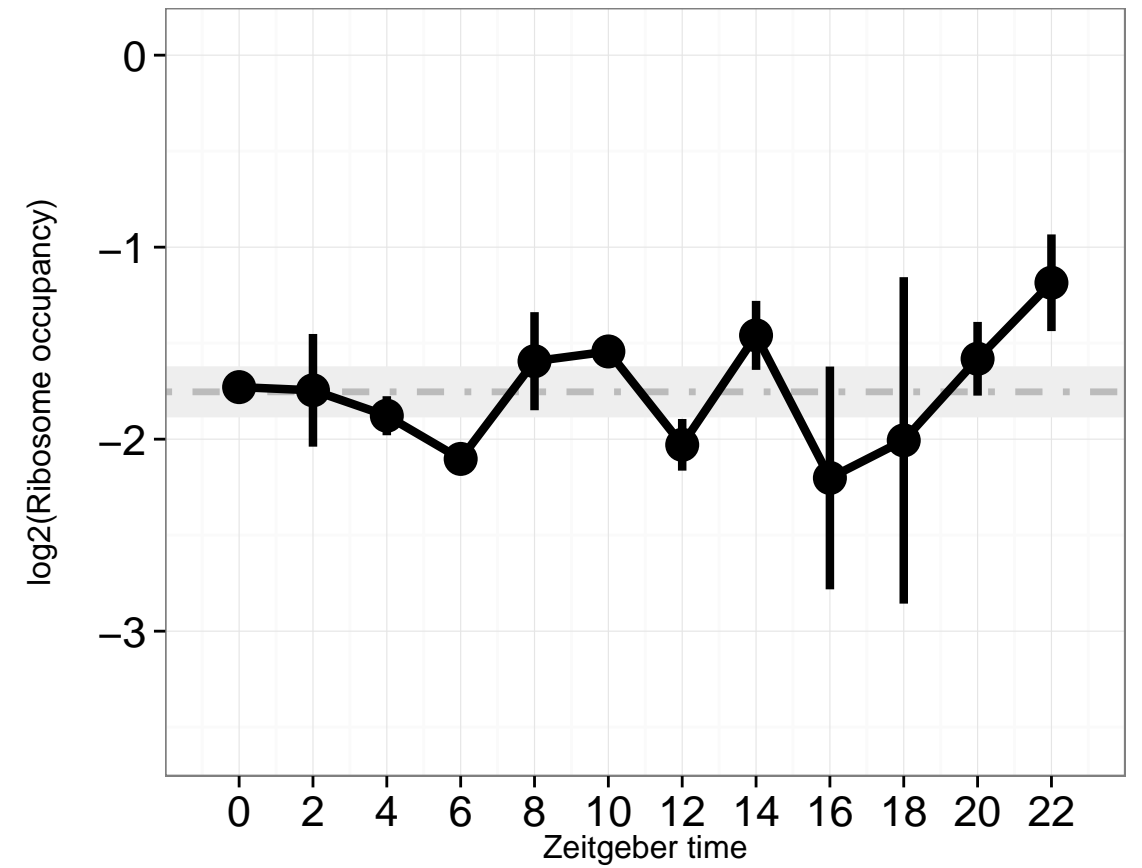

Supplement: SuppDataset_1.zip [file Fktn_set_A.pdf › Supplemental Dataset 1/A-mRNA_nonrhyth_translation_nonrhyth/Fktn_set_A.pdf]

## Flad1

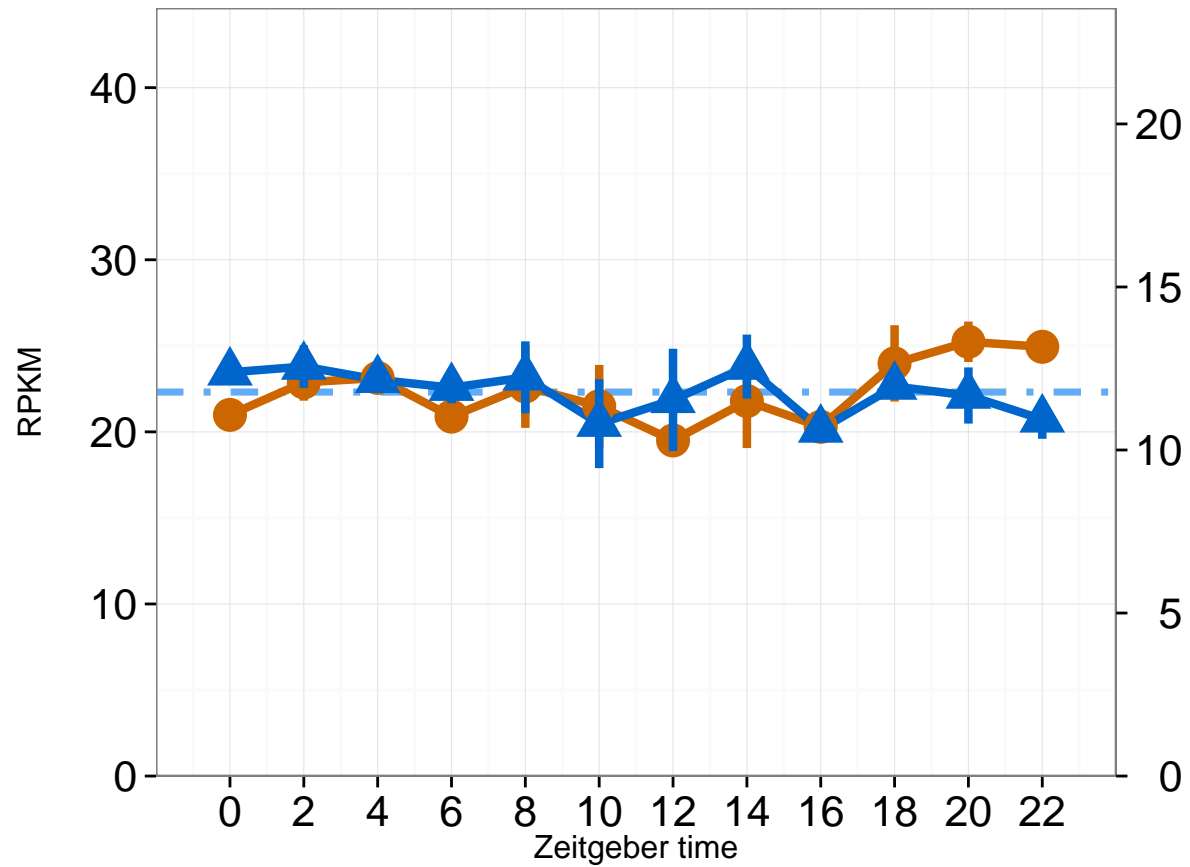

## Flad1

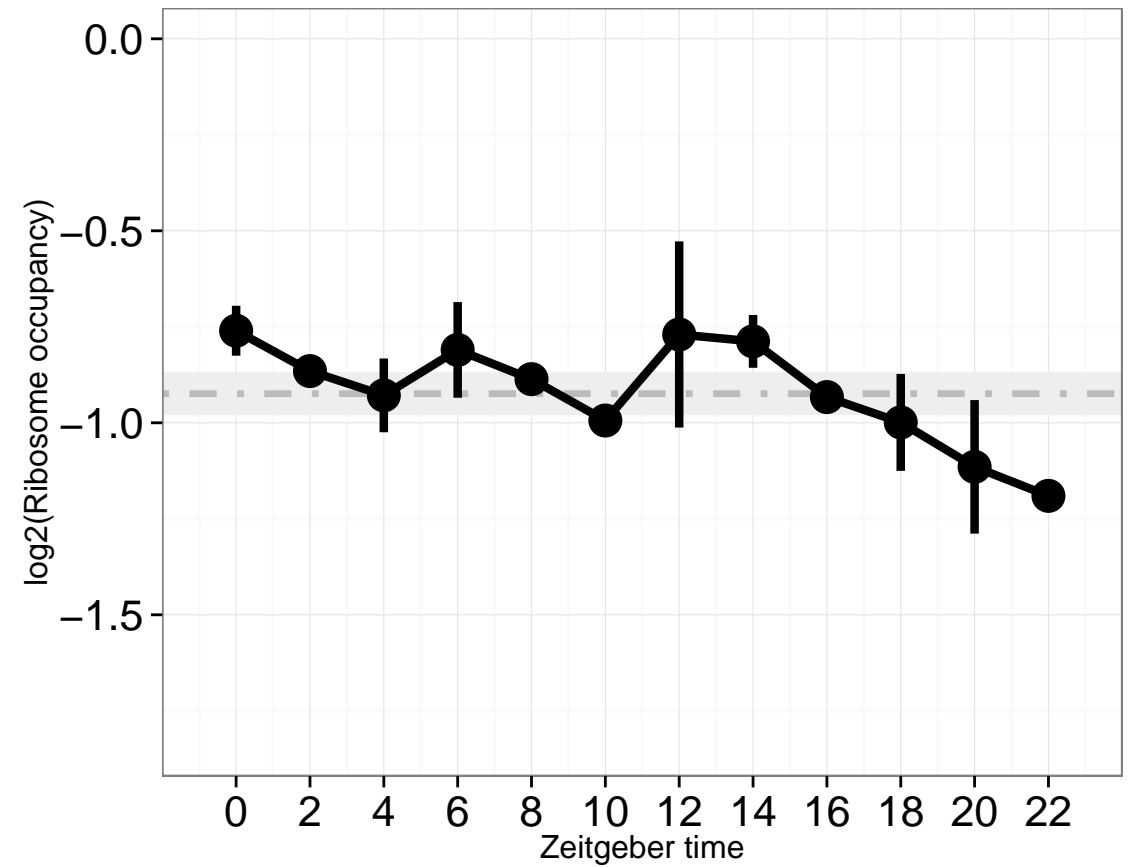

Supplement: SuppDataset_1.zip [file Flad1_set_A.pdf › Supplemental Dataset 1/A-mRNA_nonrhyth_translation_nonrhyth/Flad1_set_A.pdf]

## Fli1

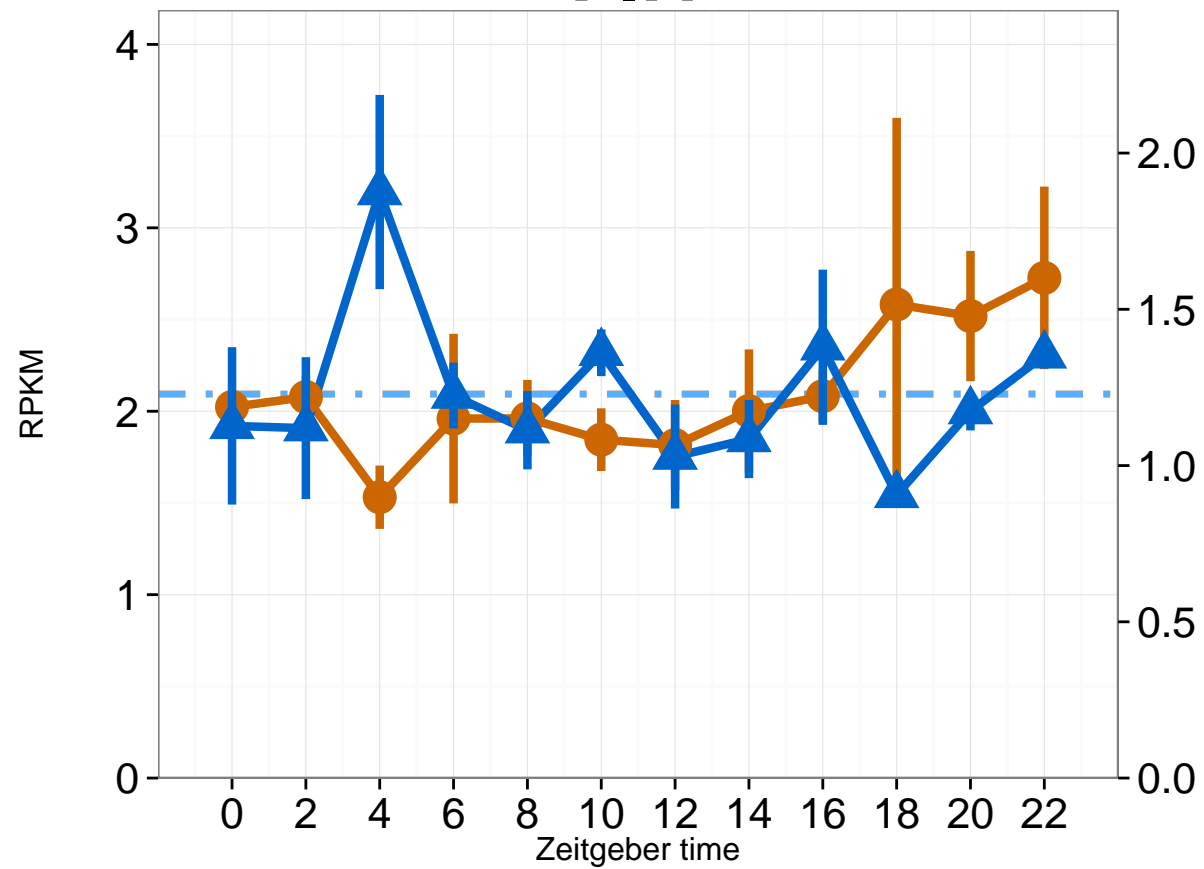

## Fli1

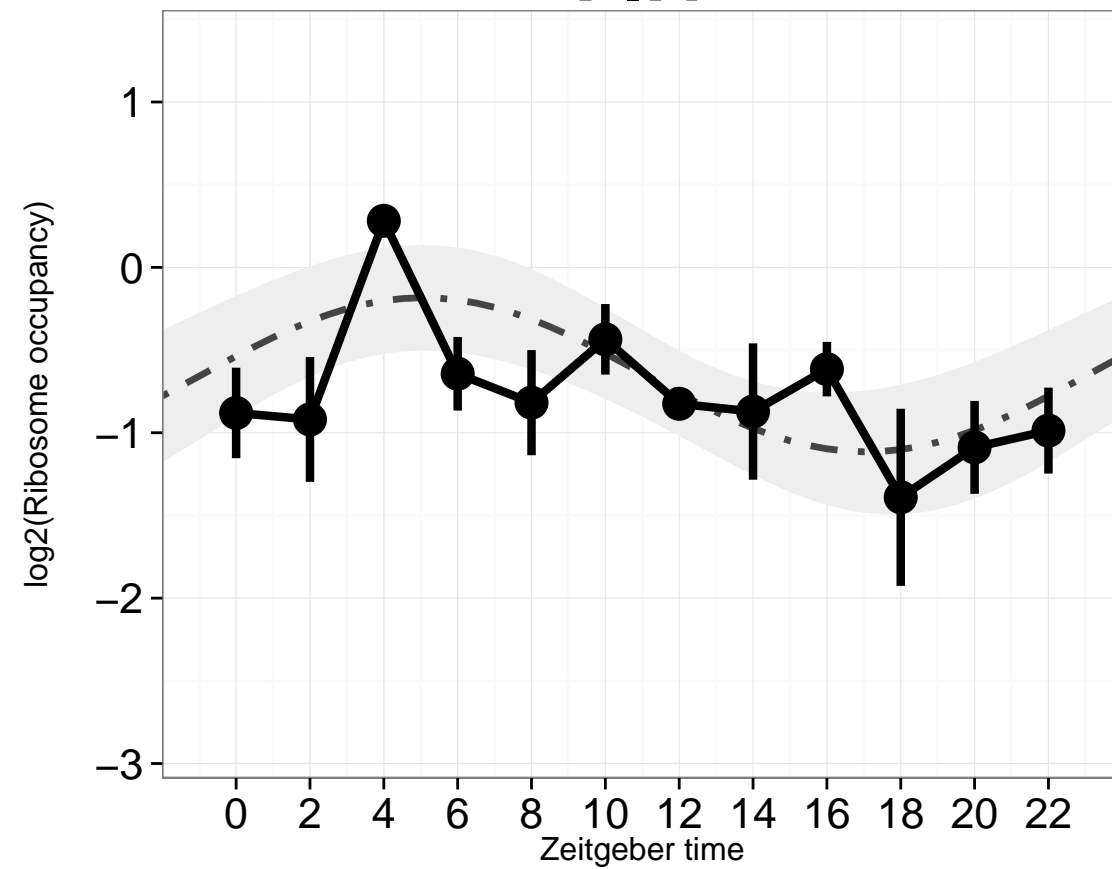

Supplement: SuppDataset_1.zip [file Fli1_set_A.pdf › Supplemental Dataset 1/A-mRNA_nonrhyth_translation_nonrhyth/Fli1_set_A.pdf]

## Flii

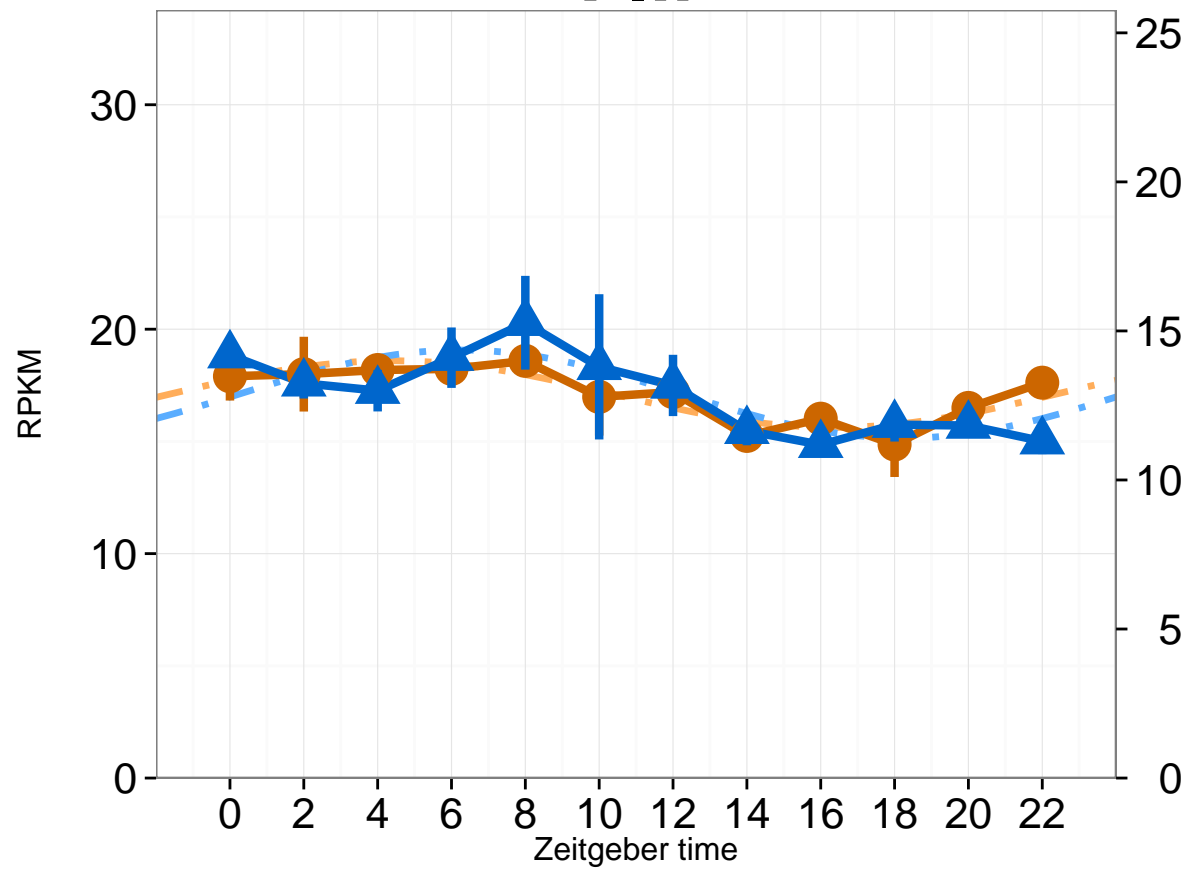

## Flii

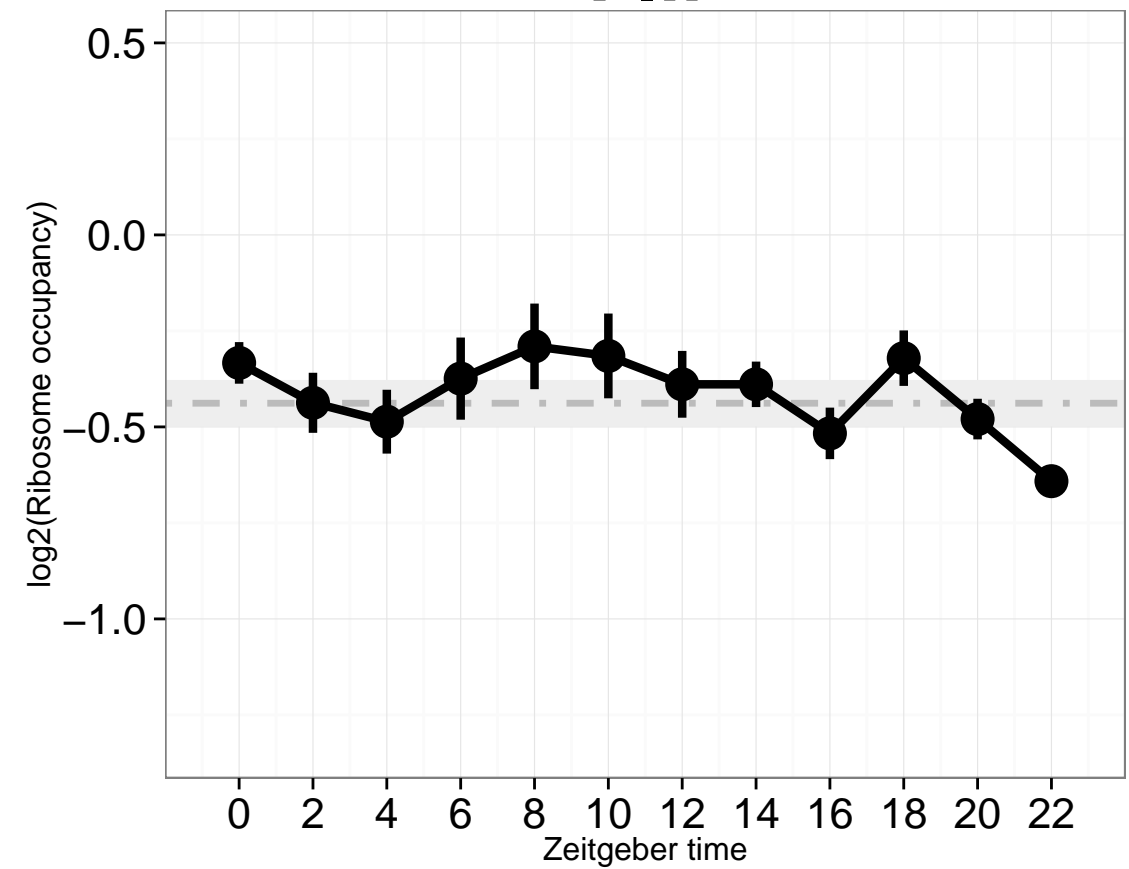

Supplement: SuppDataset_1.zip [file Flii_set_A.pdf › Supplemental Dataset 1/A-mRNA_nonrhyth_translation_nonrhyth/Flii_set_A.pdf]

## Flna

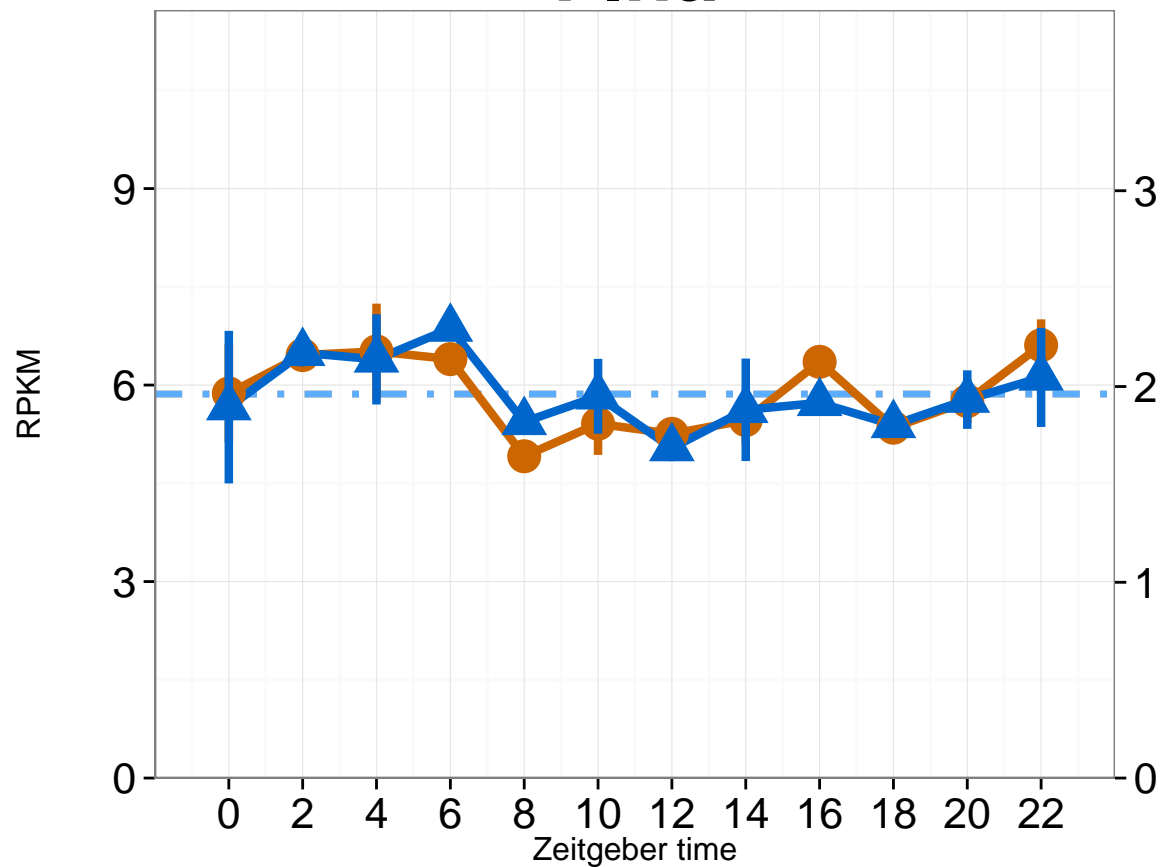

## Flna

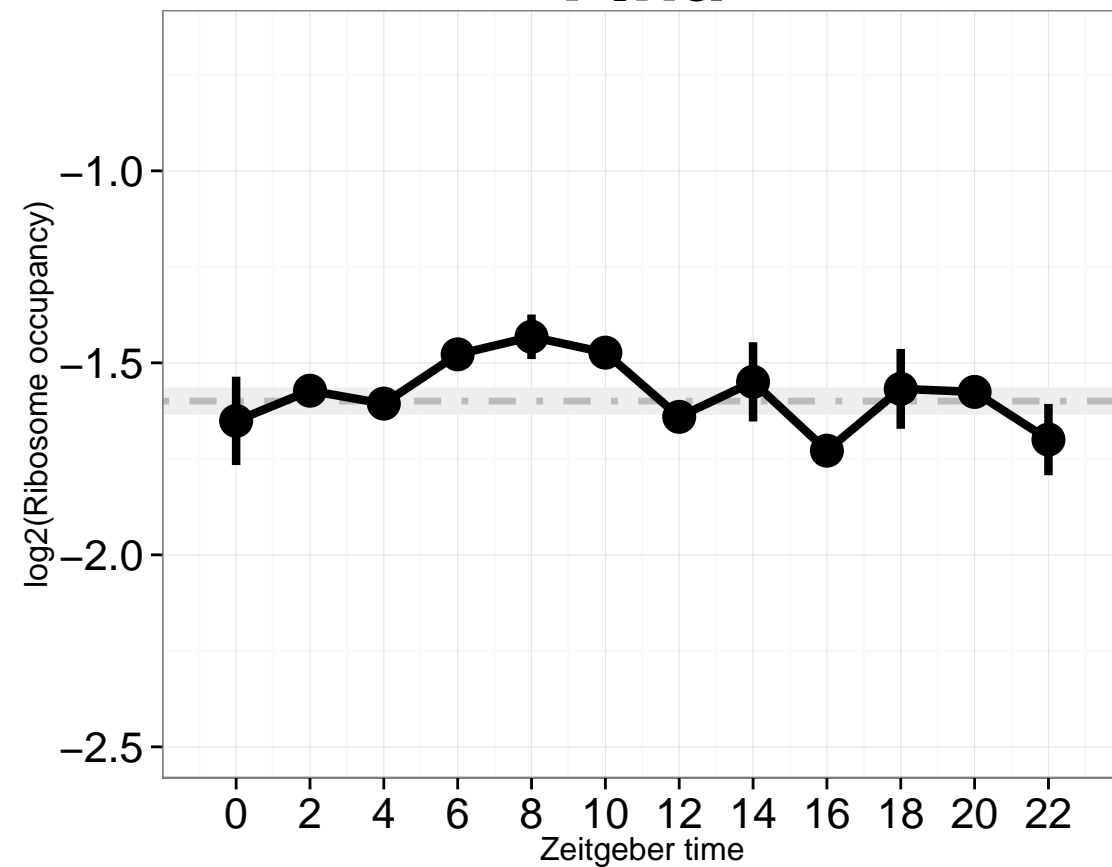

Supplement: SuppDataset_1.zip [file Flna_set_A.pdf › Supplemental Dataset 1/A-mRNA_nonrhyth_translation_nonrhyth/Flna_set_A.pdf]

## Flnb

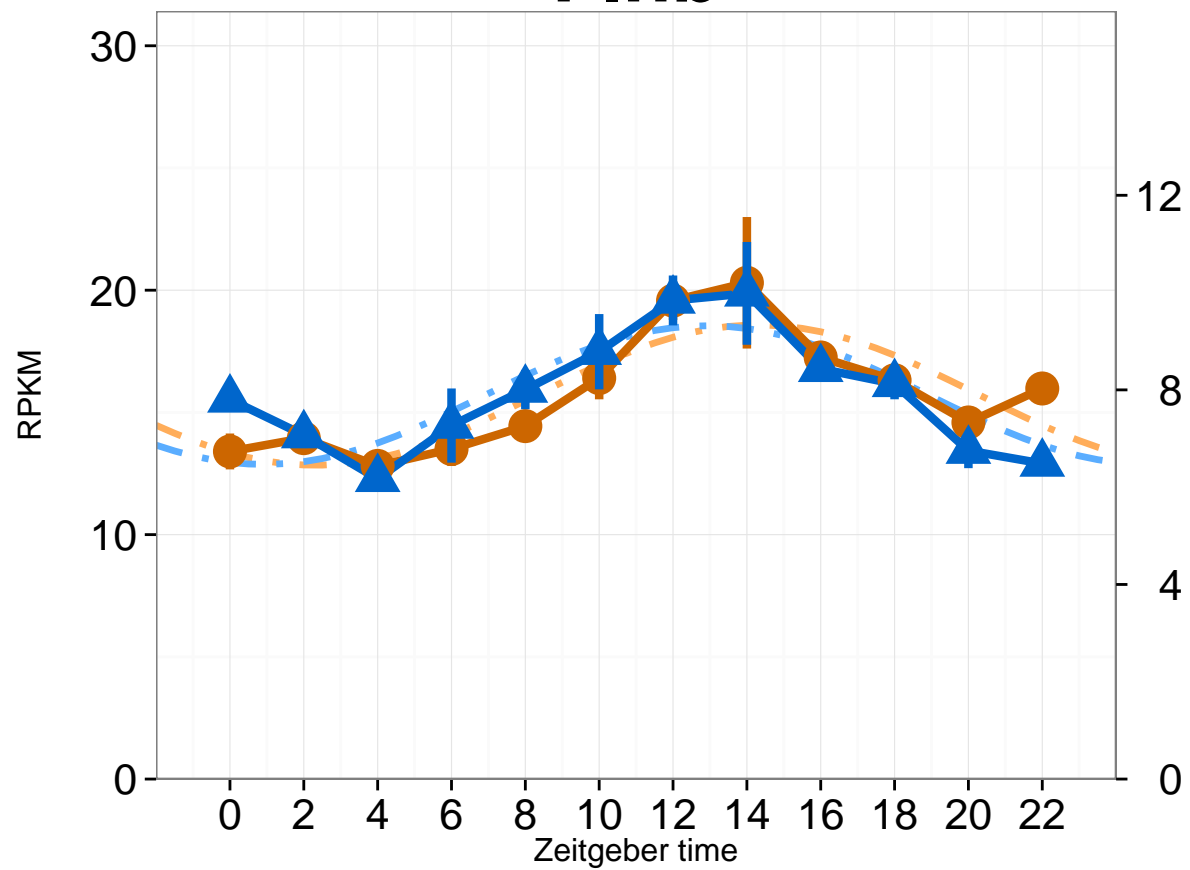

## Flnb

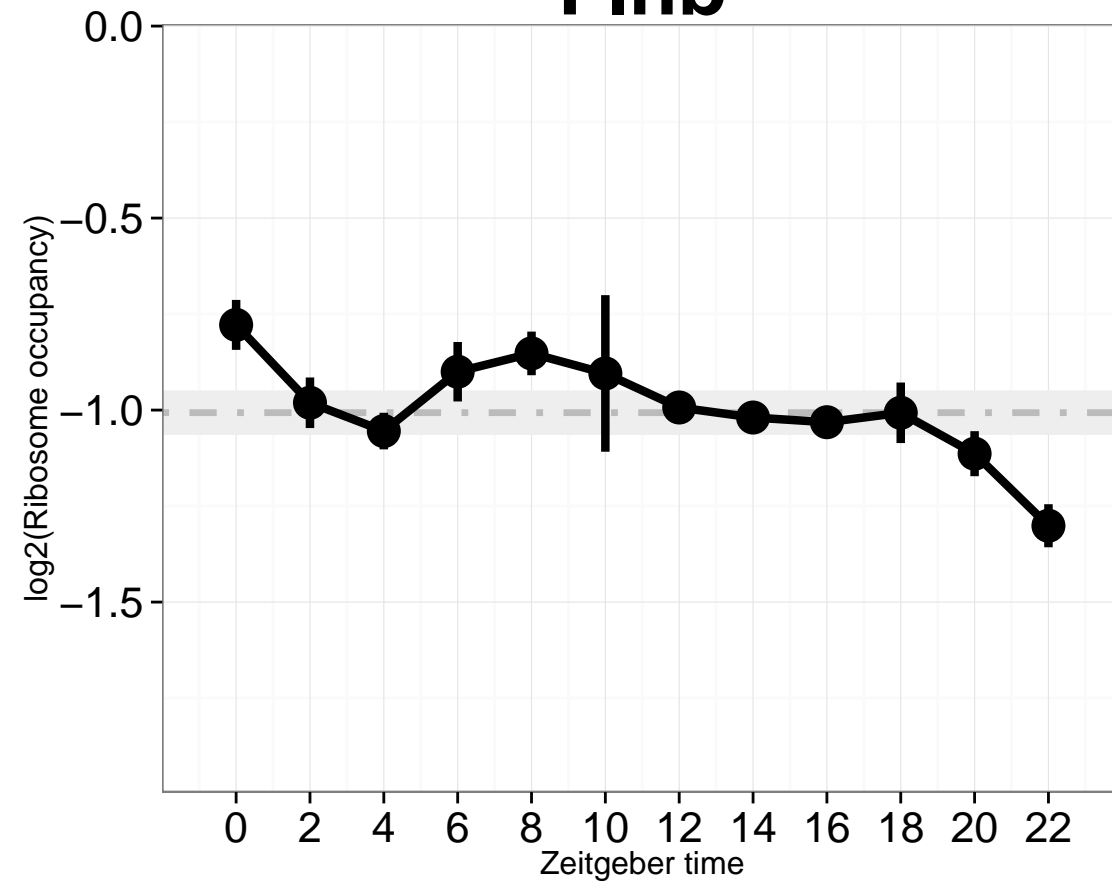

Supplement: SuppDataset_1.zip [file Flnb_set_A.pdf › Supplemental Dataset 1/A-mRNA_nonrhyth_translation_nonrhyth/Flnb_set_A.pdf]

# Flot2

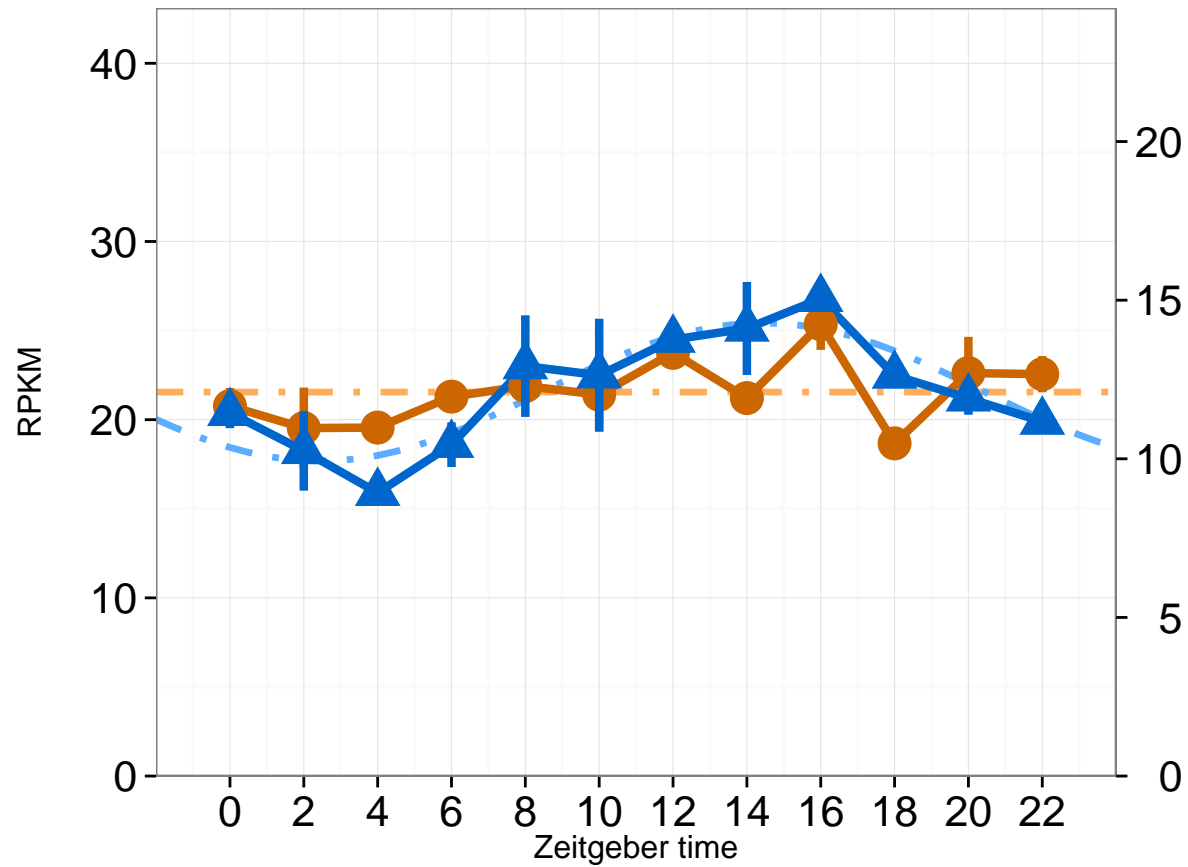

# Flot2

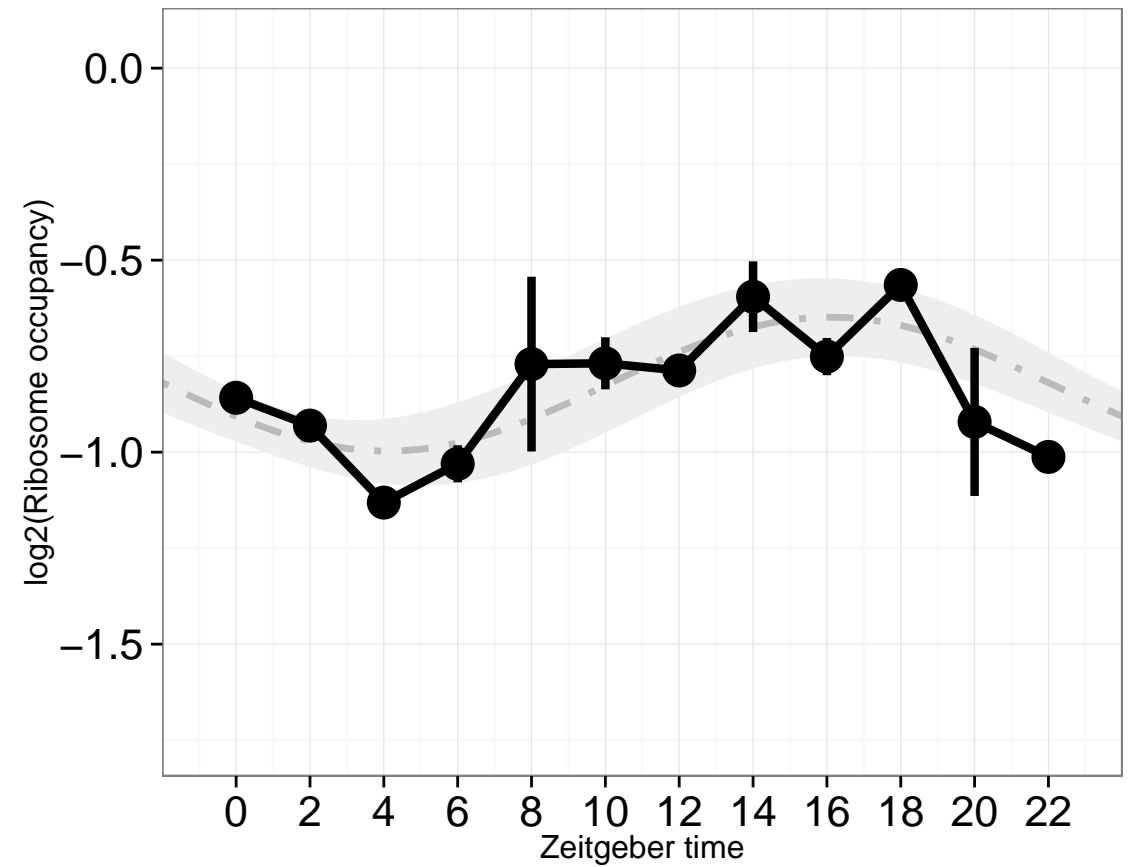

Supplement: SuppDataset_1.zip [file Flot2_set_A.pdf › Supplemental Dataset 1/A-mRNA_nonrhyth_translation_nonrhyth/Flot2_set_A.pdf]

## Flt1

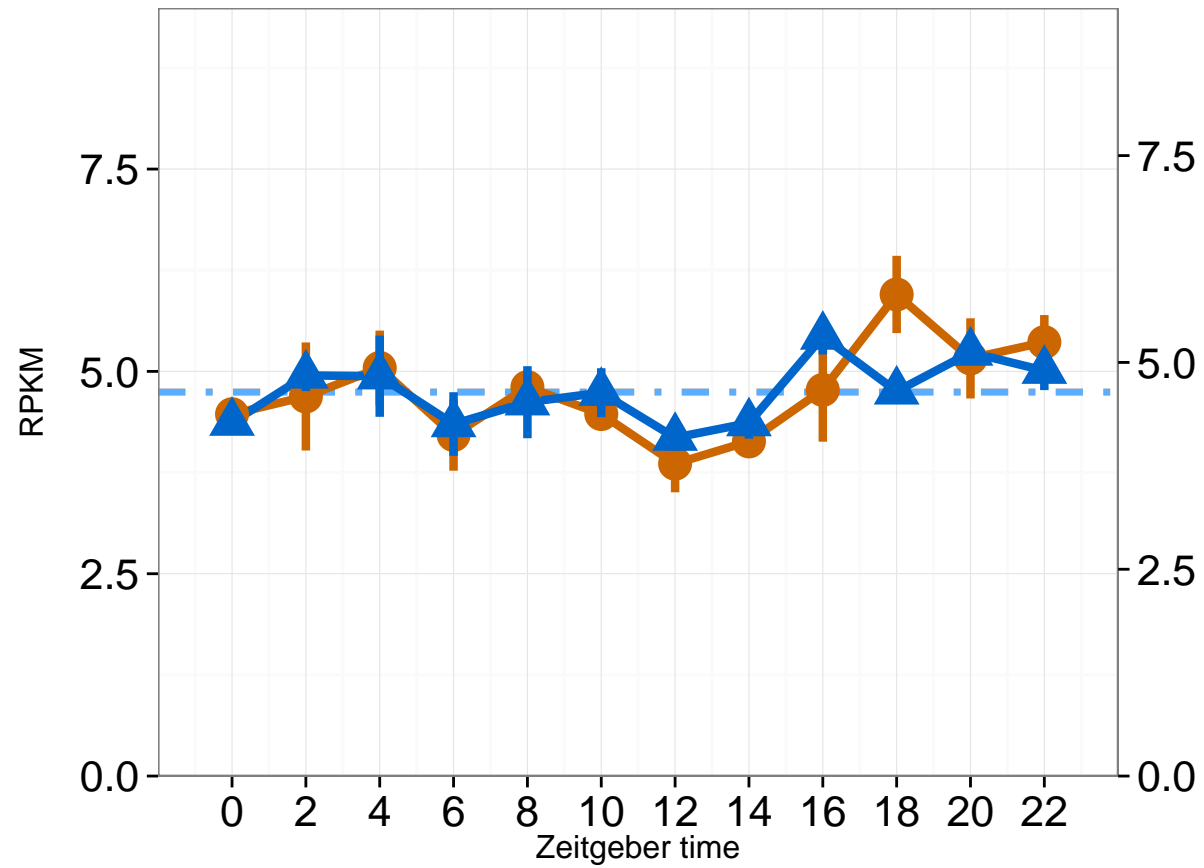

## Flt1

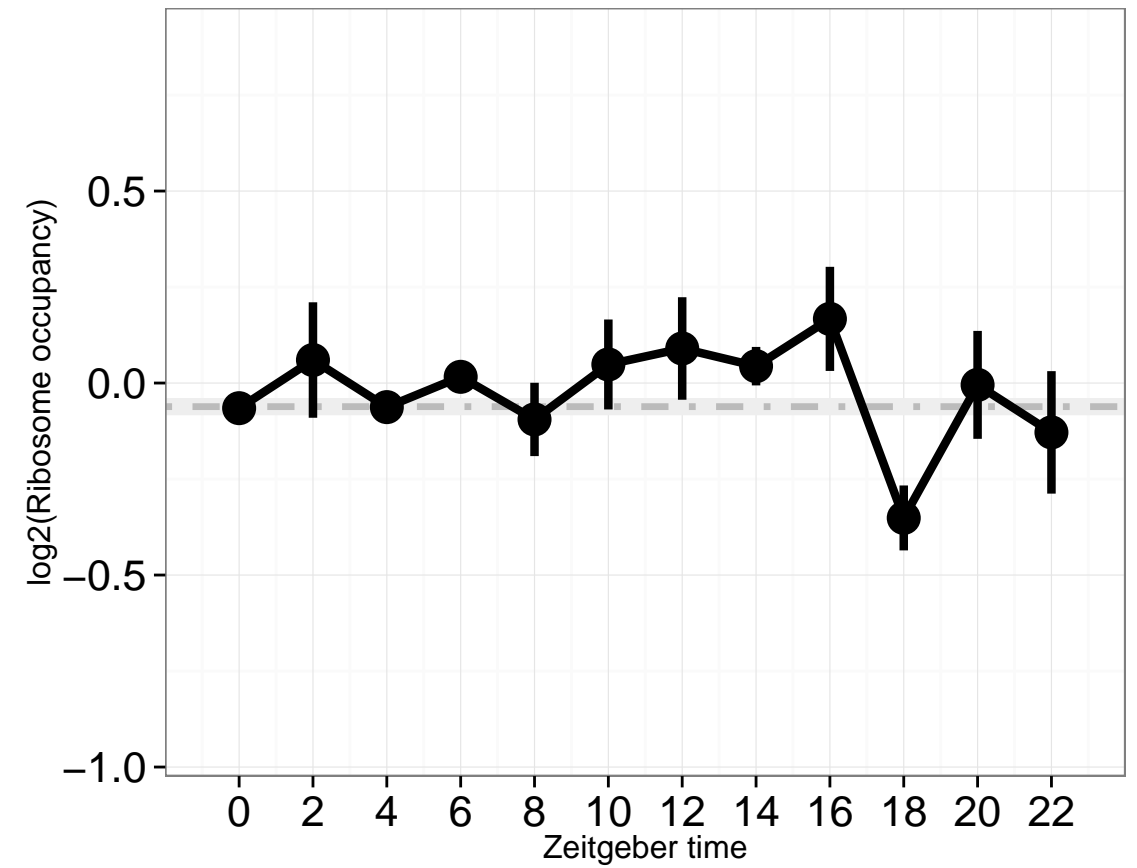

Supplement: SuppDataset_1.zip [file Flt1_set_A.pdf › Supplemental Dataset 1/A-mRNA_nonrhyth_translation_nonrhyth/Flt1_set_A.pdf]

## Flt3l

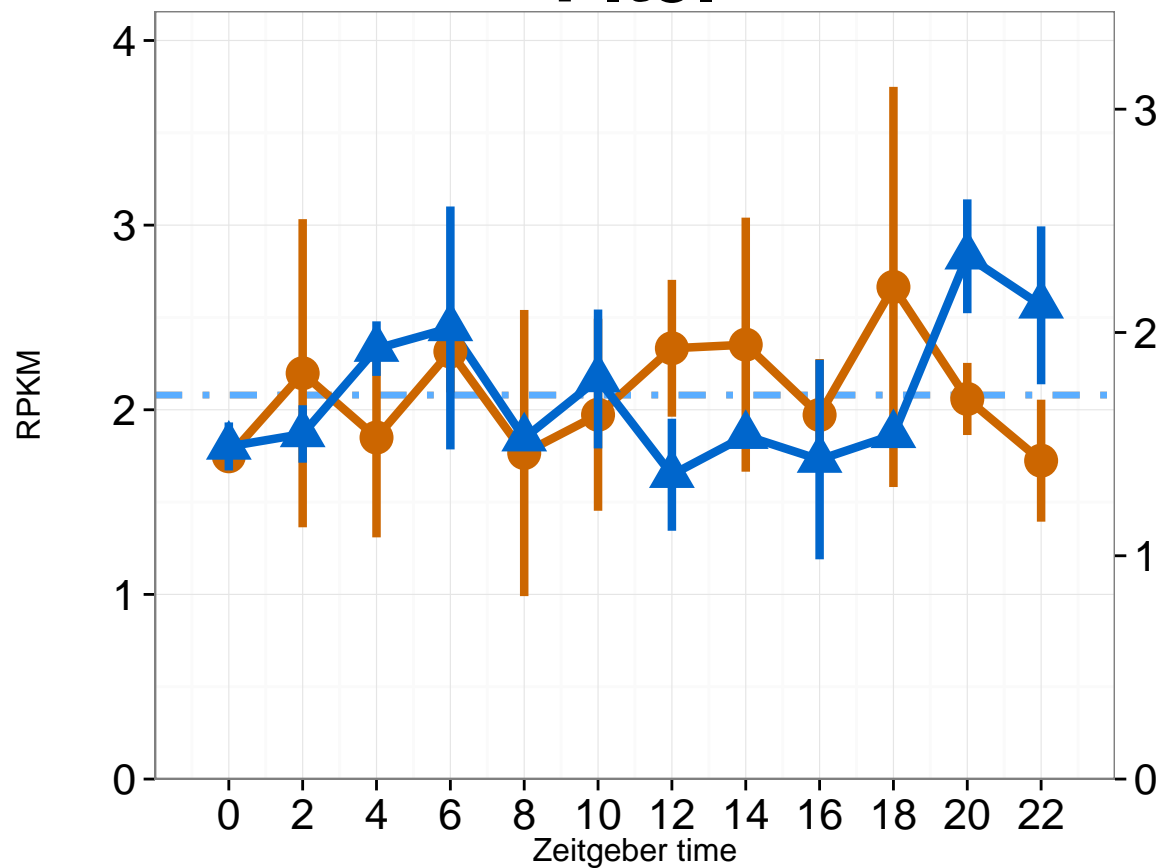

## Flt3l

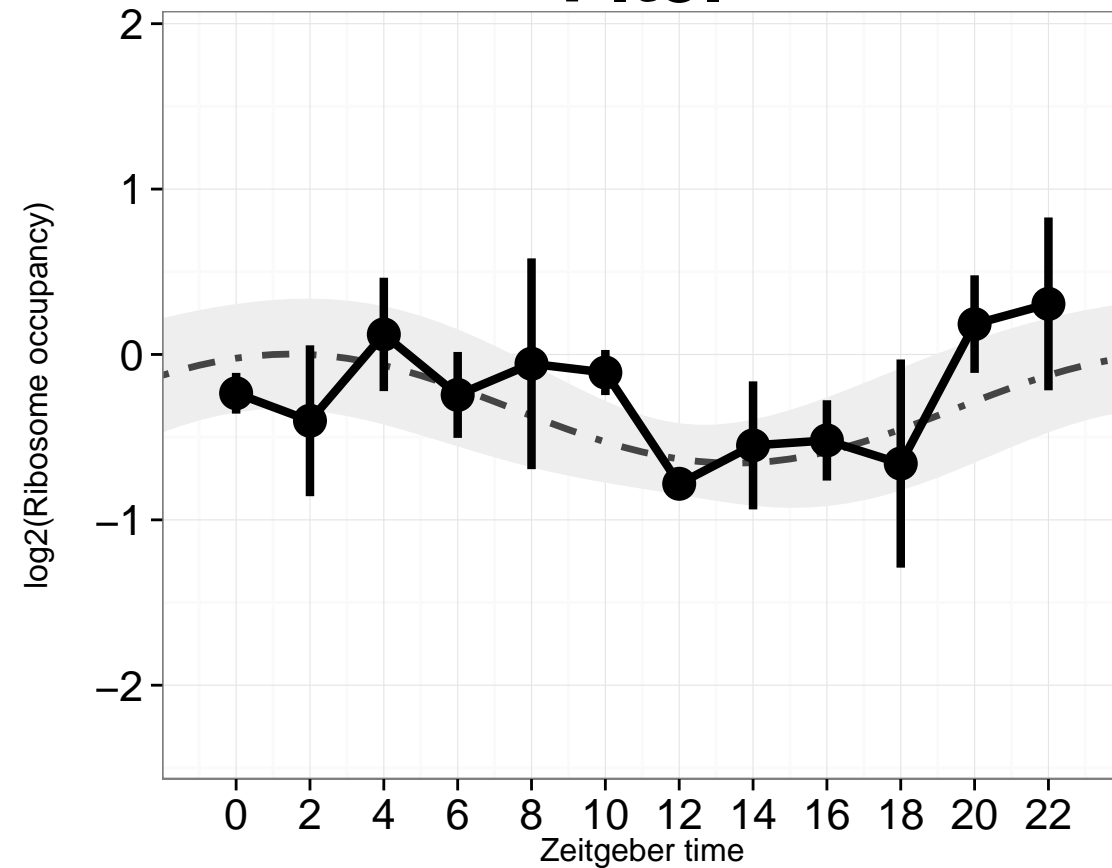

Supplement: SuppDataset_1.zip [file Flt3l_set_A.pdf › Supplemental Dataset 1/A-mRNA_nonrhyth_translation_nonrhyth/Flt3l_set_A.pdf]

## Flt4

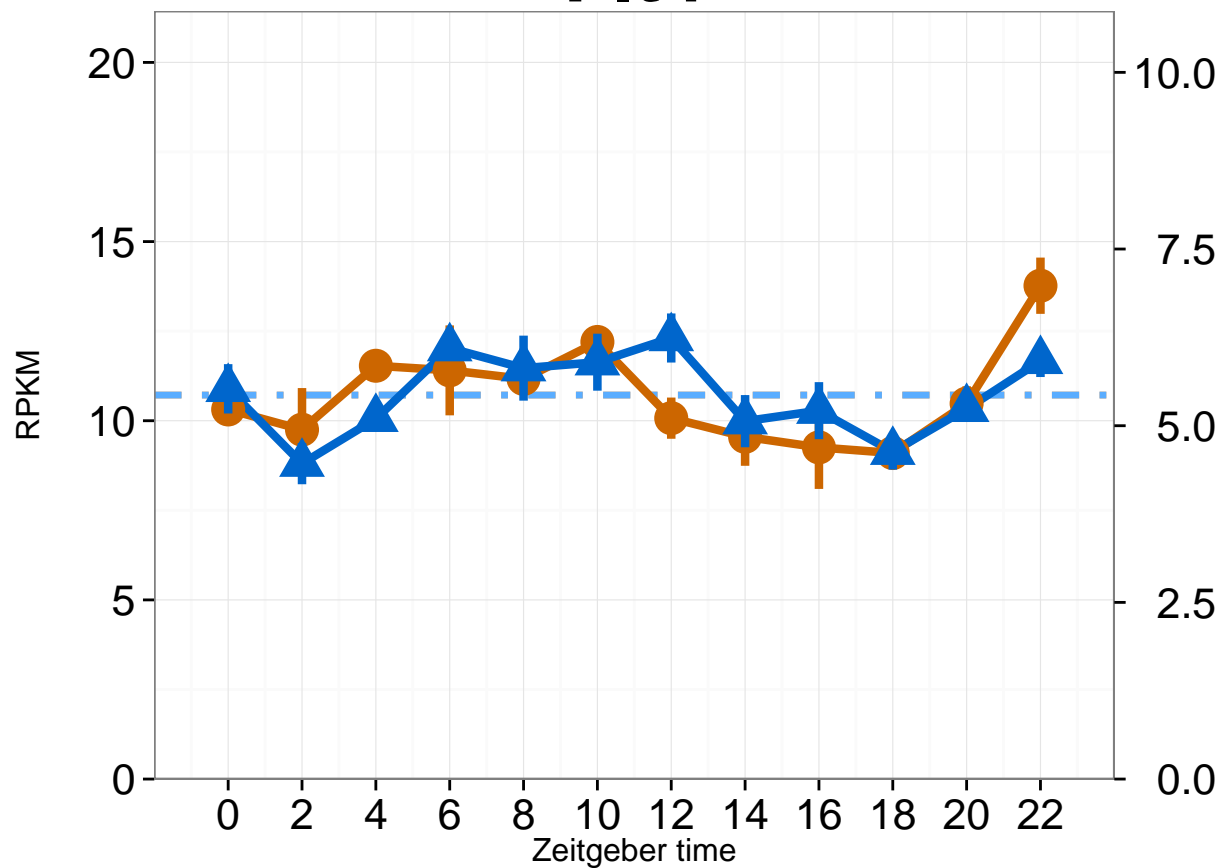

## Flt4

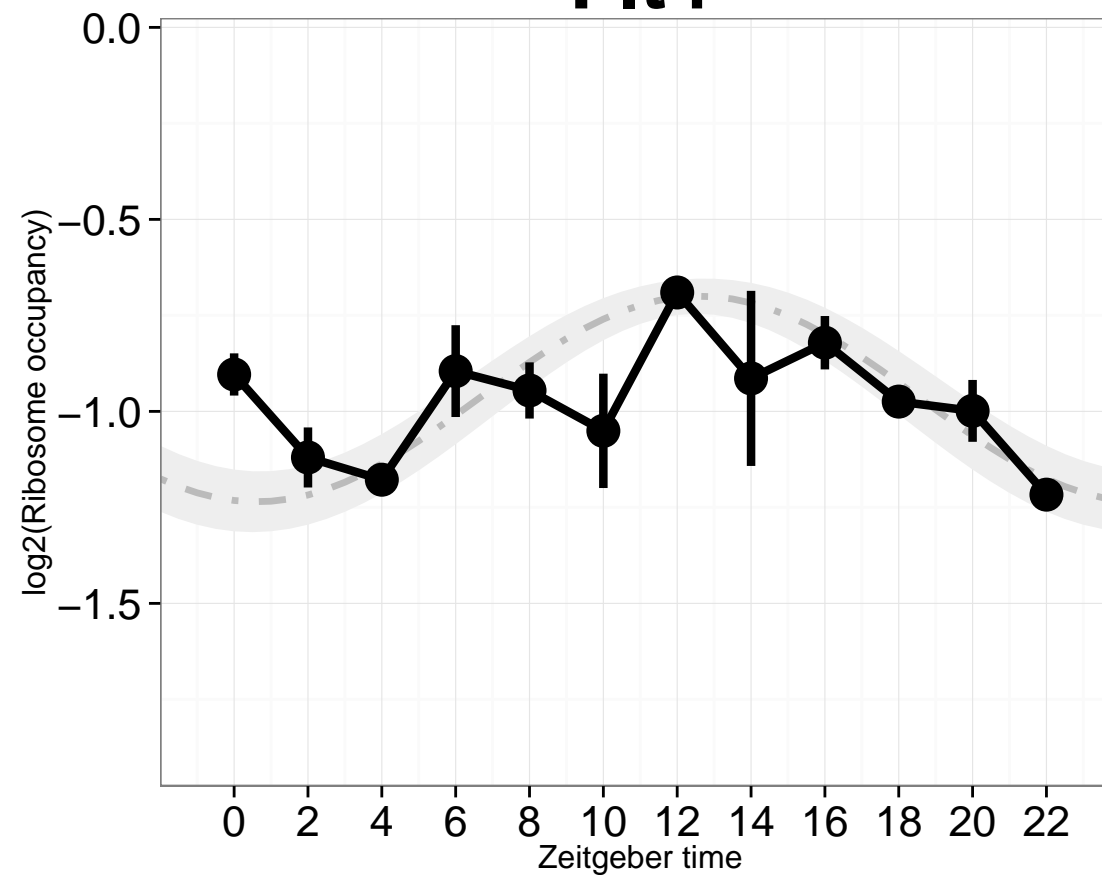

Supplement: SuppDataset_1.zip [file Flt4_set_A.pdf › Supplemental Dataset 1/A-mRNA_nonrhyth_translation_nonrhyth/Flt4_set_A.pdf]

# Flywch1

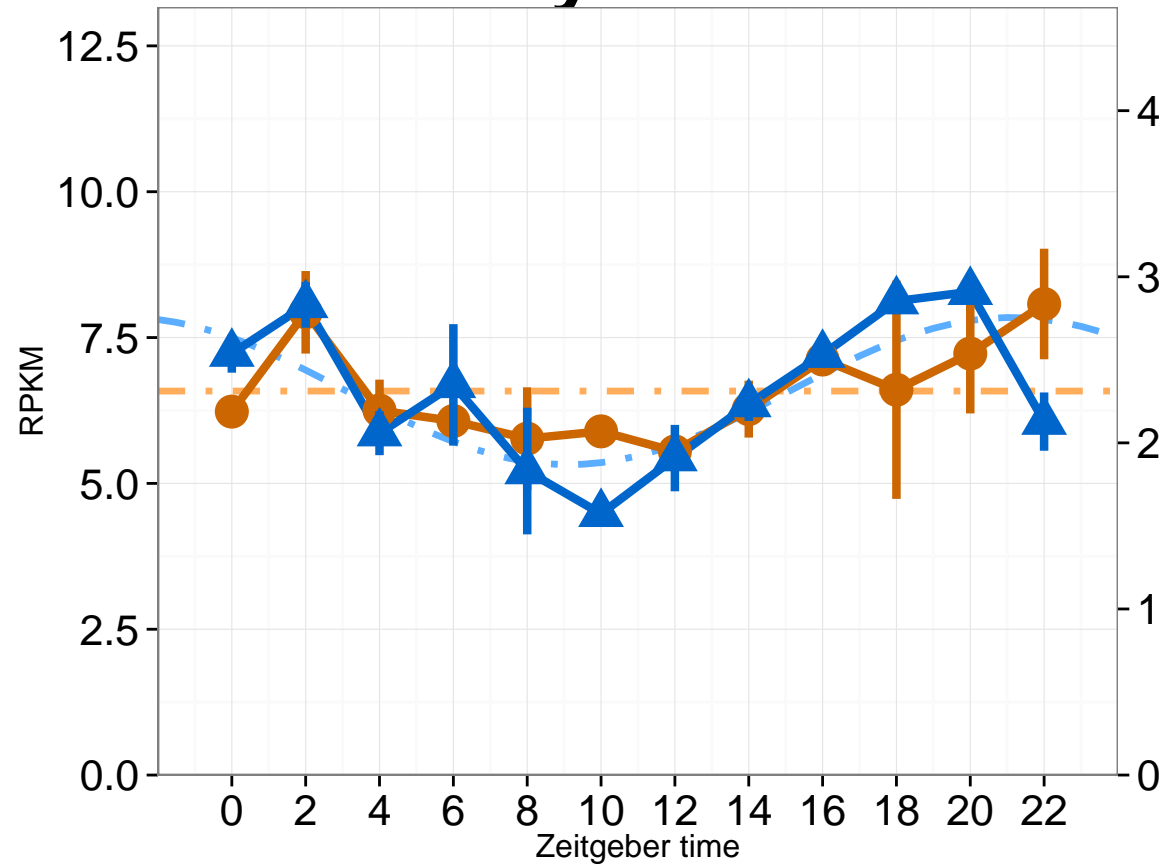

# Flywch1

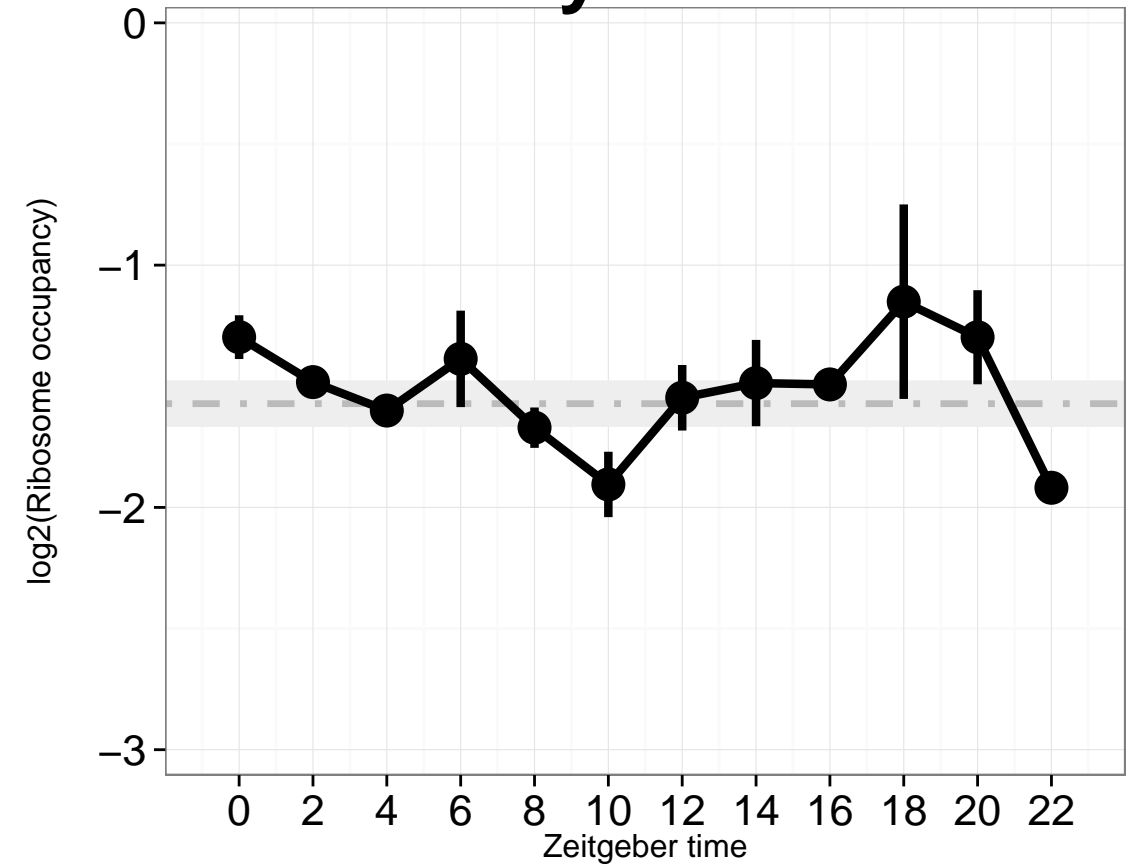

Supplement: SuppDataset_1.zip [file Flywch1_set_A.pdf › Supplemental Dataset 1/A-mRNA_nonrhyth_translation_nonrhyth/Flywch1_set_A.pdf]

# Fmn1

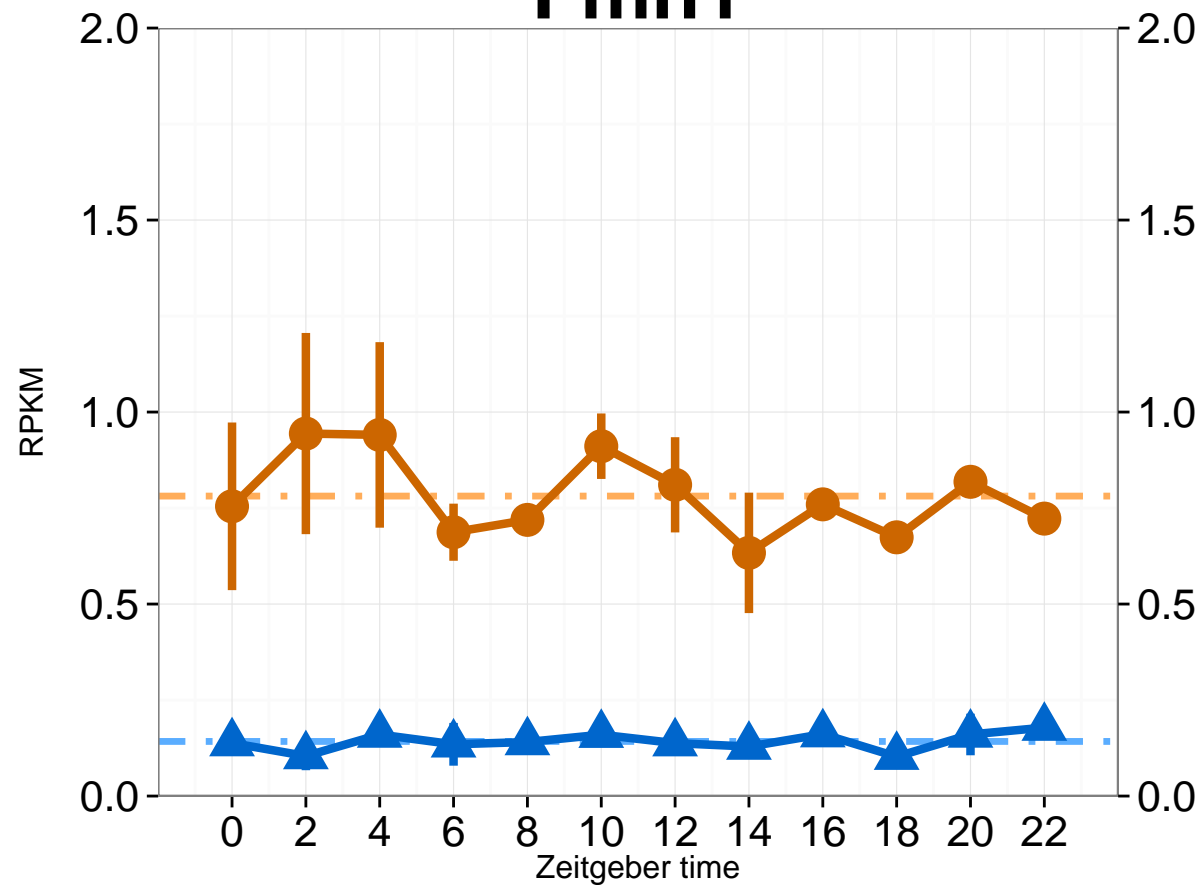

# Fmn1

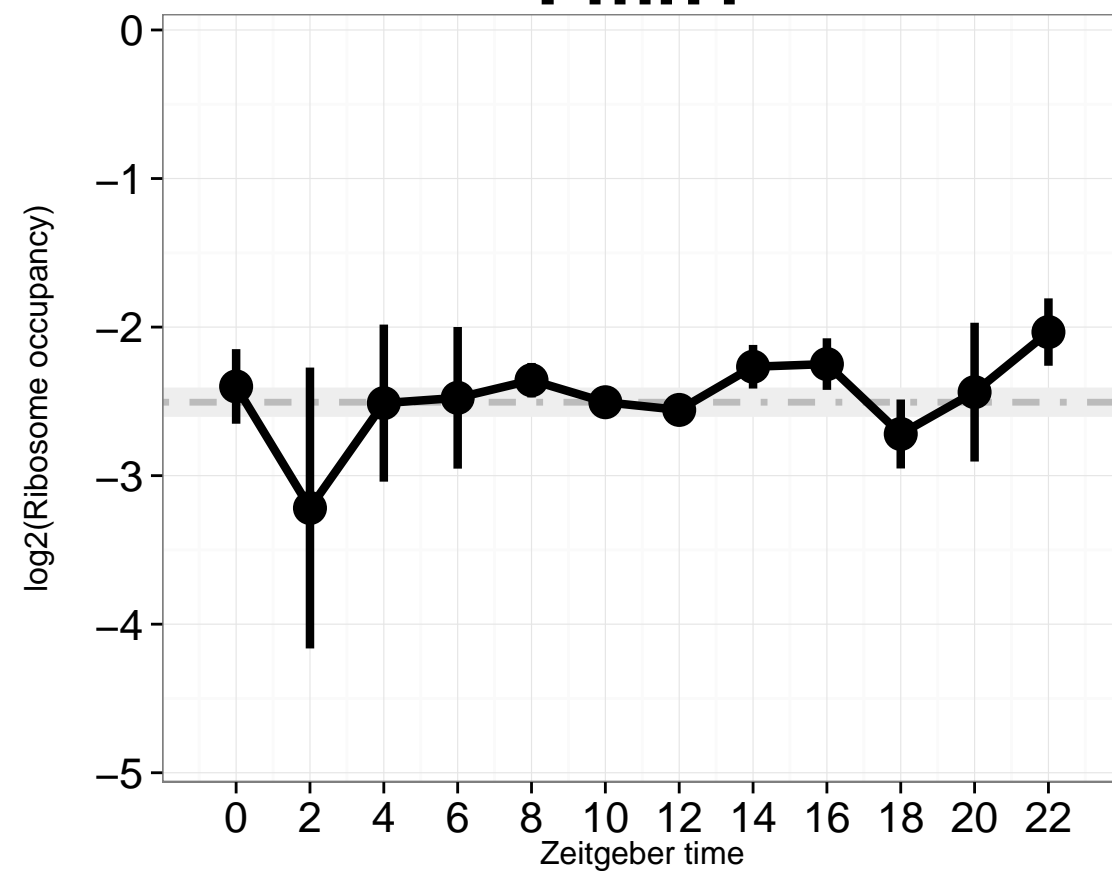

Supplement: SuppDataset_1.zip [file Fmn1_set_A.pdf › Supplemental Dataset 1/A-mRNA_nonrhyth_translation_nonrhyth/Fmn1_set_A.pdf]

## Fmnl1

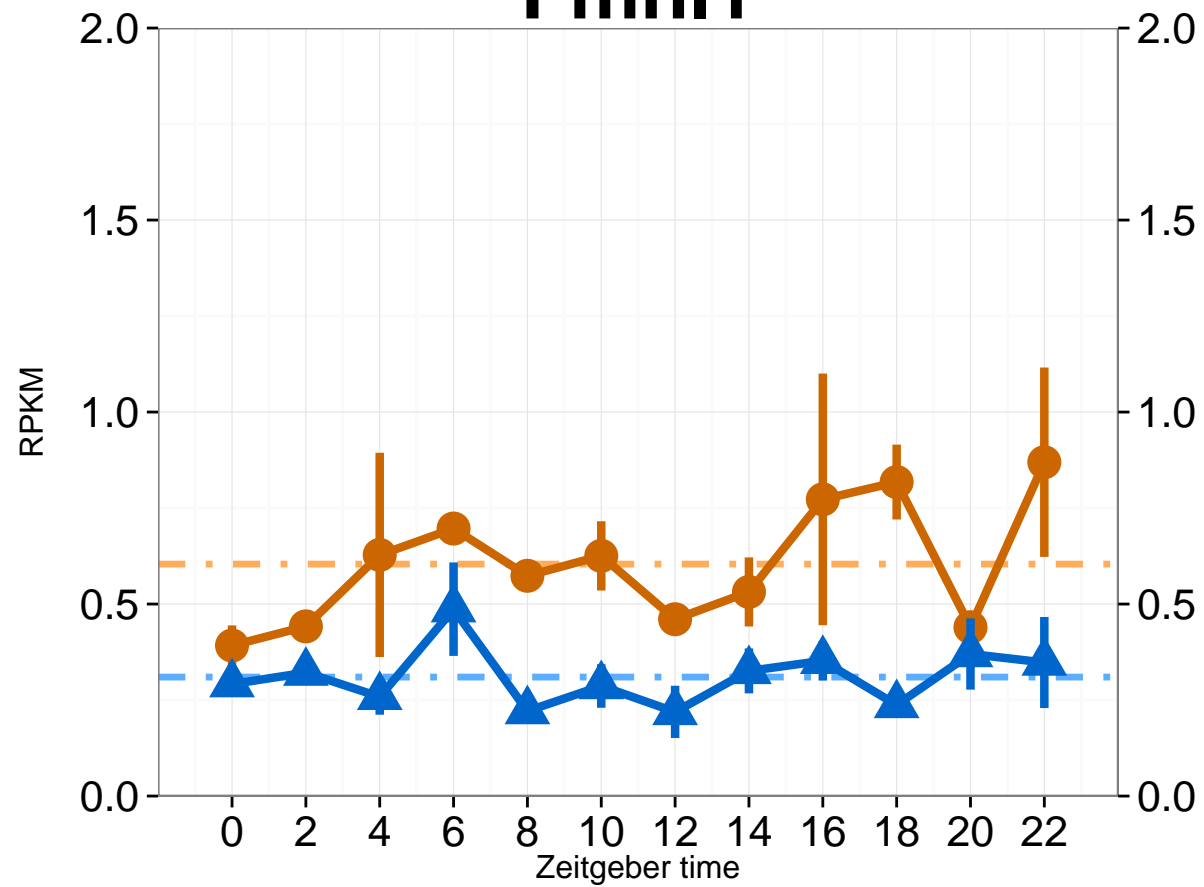

## Fmnl1

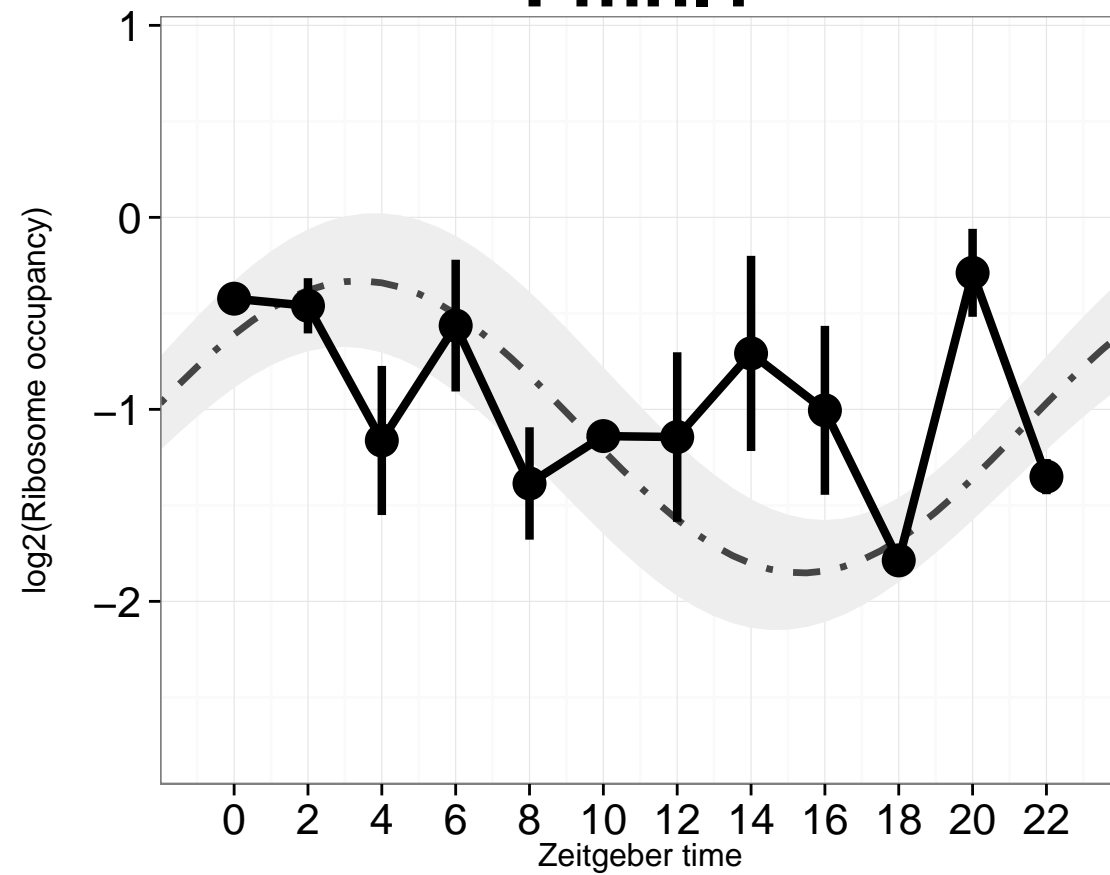

Supplement: SuppDataset_1.zip [file Fmnl1_set_A.pdf › Supplemental Dataset 1/A-mRNA_nonrhyth_translation_nonrhyth/Fmnl1_set_A.pdf]

## Fmnl2

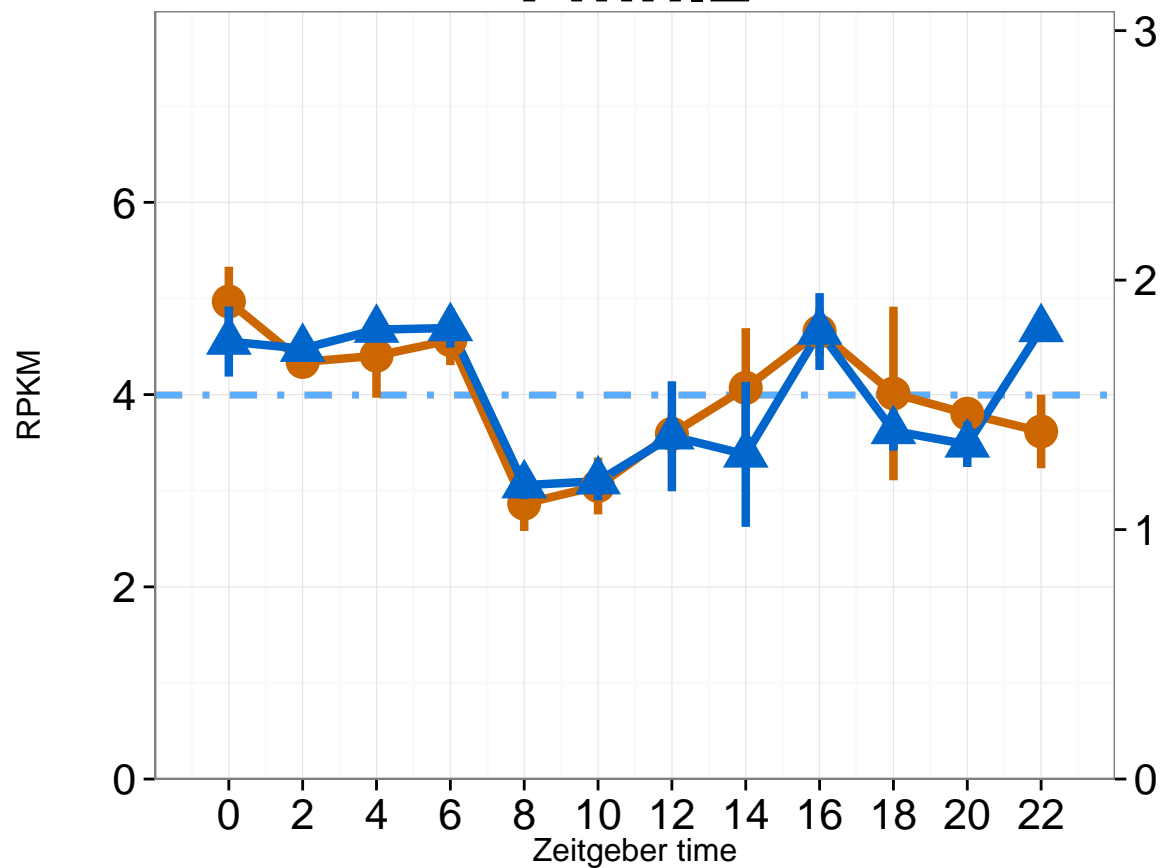

## Fmnl2

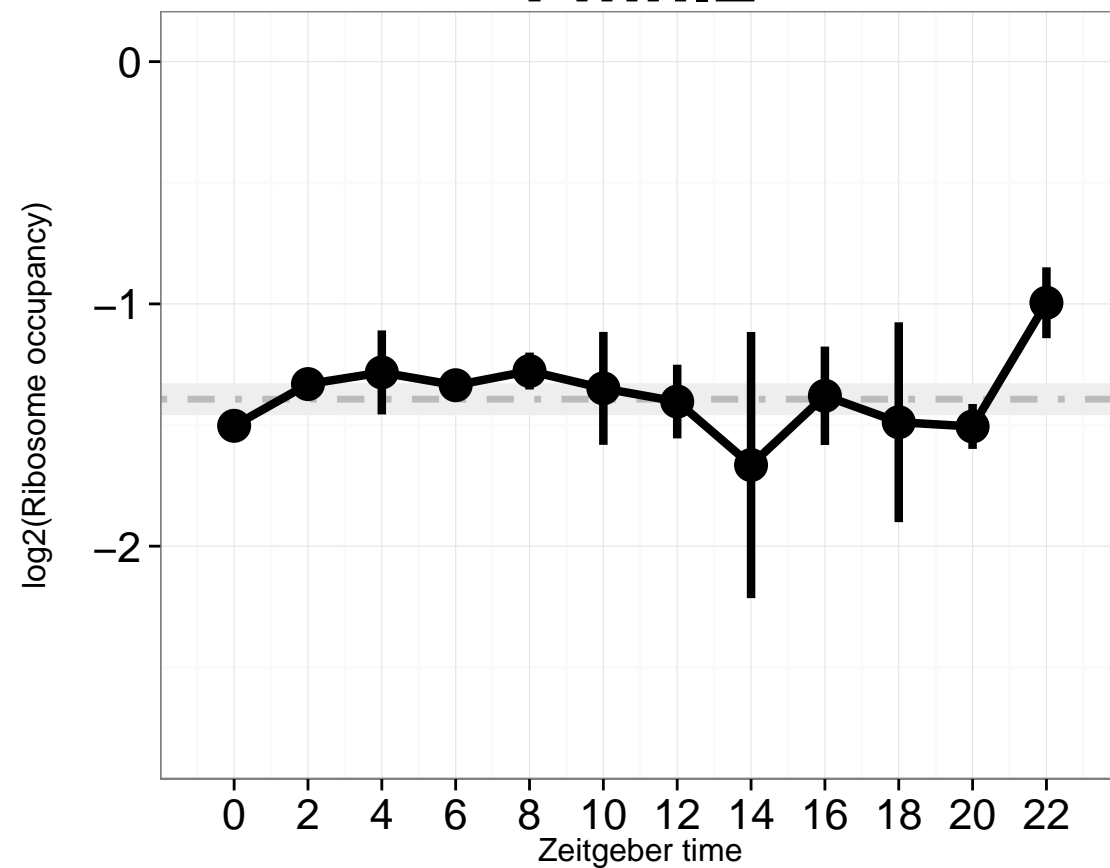

Supplement: SuppDataset_1.zip [file Fmnl2_set_A.pdf › Supplemental Dataset 1/A-mRNA_nonrhyth_translation_nonrhyth/Fmnl2_set_A.pdf]

## Fmnl3

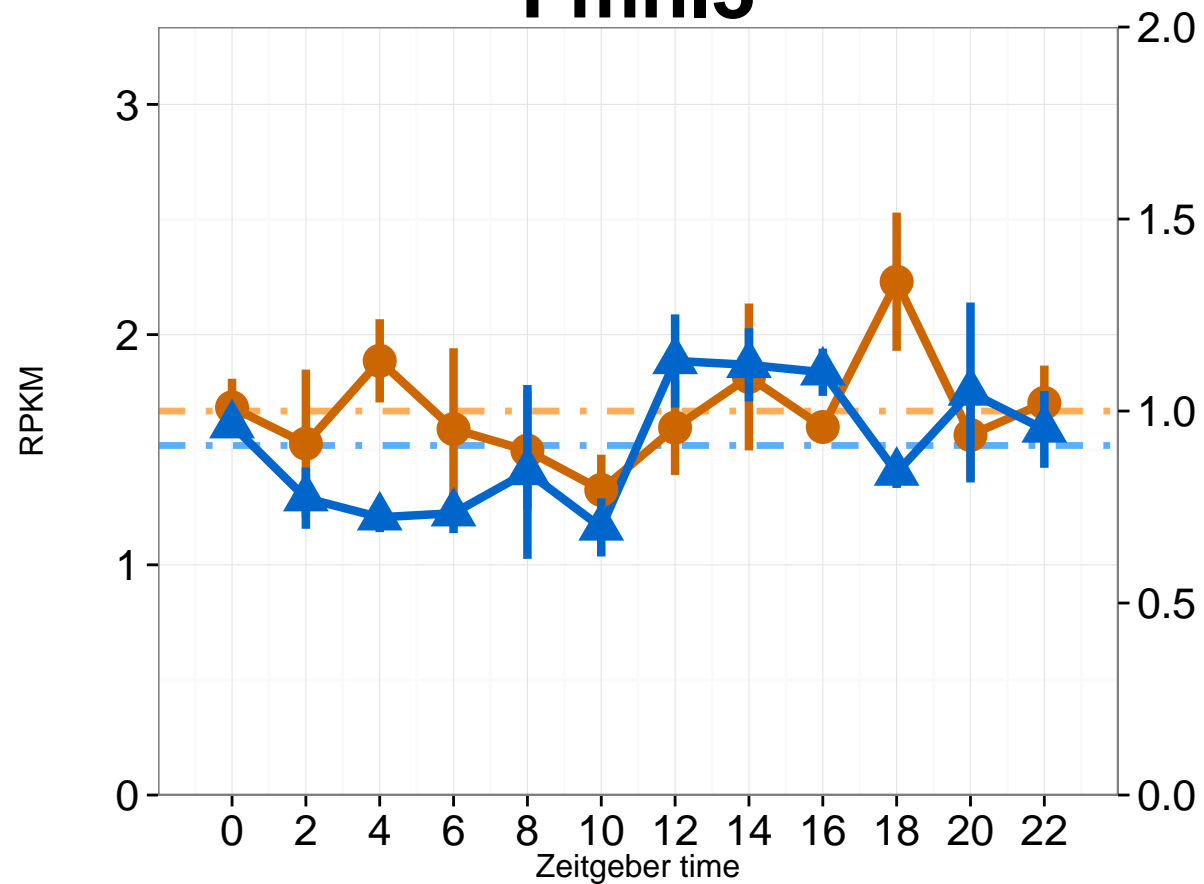

## Fmnl3

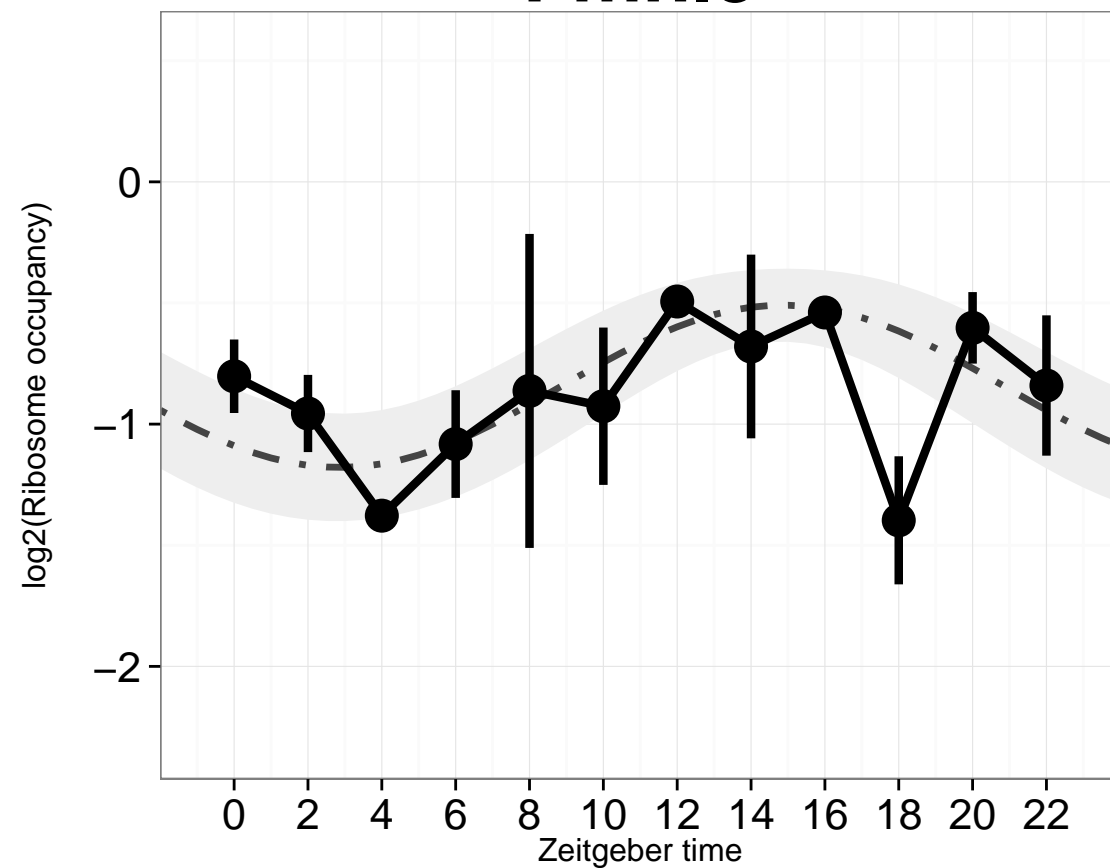

Supplement: SuppDataset_1.zip [file Fmnl3_set_A.pdf › Supplemental Dataset 1/A-mRNA_nonrhyth_translation_nonrhyth/Fmnl3_set_A.pdf]

# Fmo4

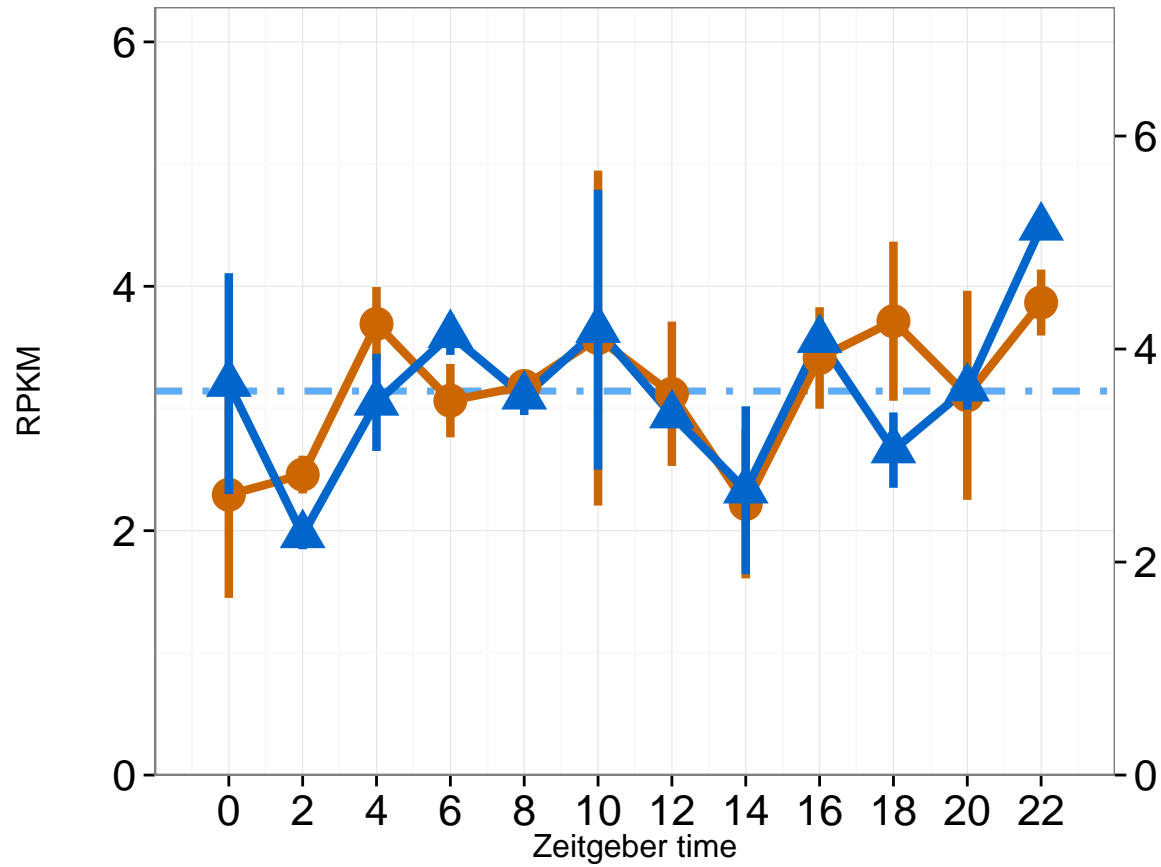

# Fmo4

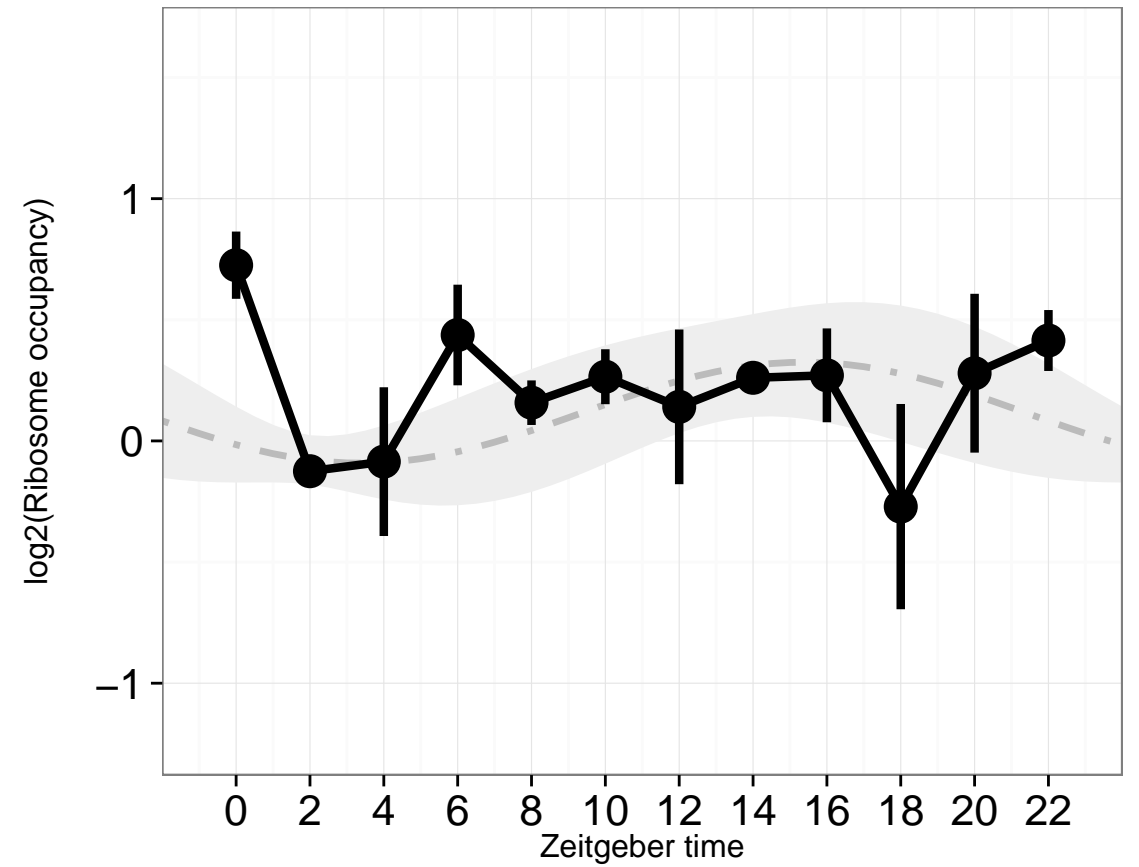

Supplement: SuppDataset_1.zip [file Fmo4_set_A.pdf › Supplemental Dataset 1/A-mRNA_nonrhyth_translation_nonrhyth/Fmo4_set_A.pdf]

# Fmr1

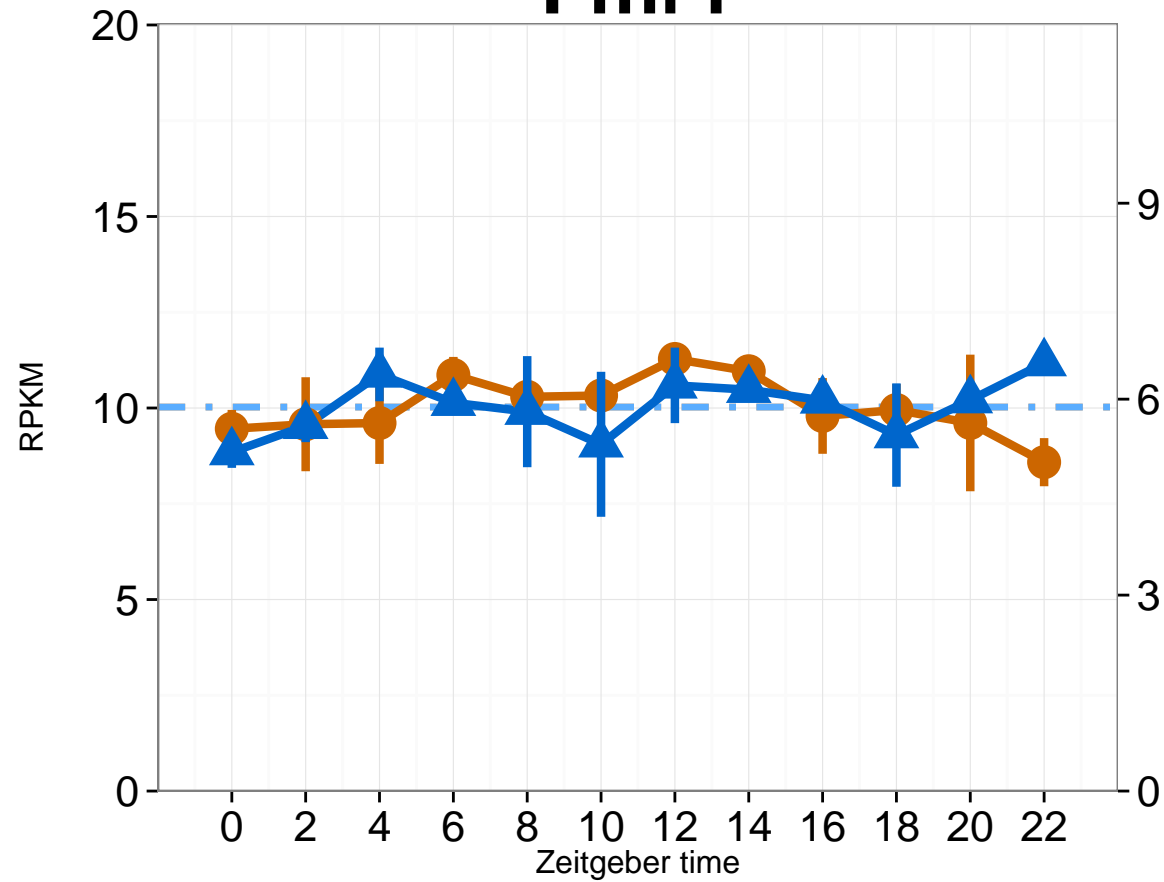

# Fmr1

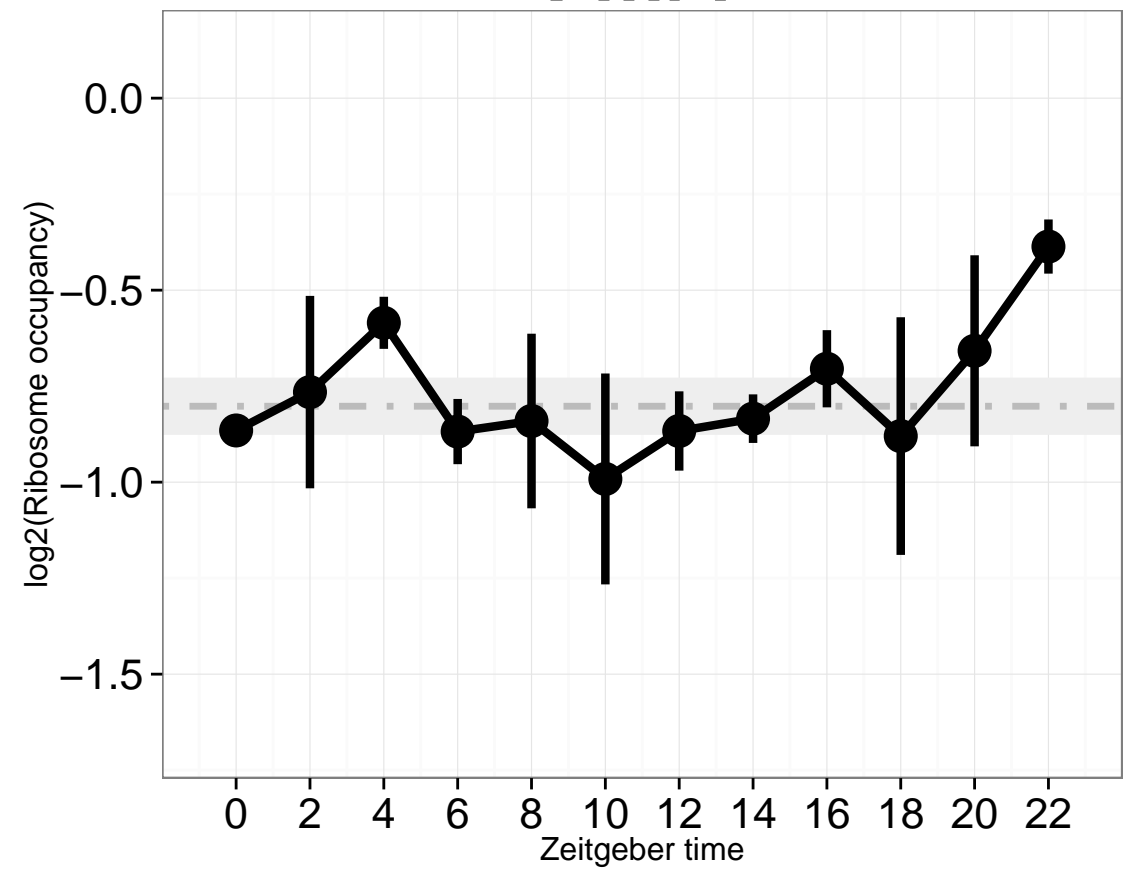

Supplement: SuppDataset_1.zip [file Fmr1_set_A.pdf › Supplemental Dataset 1/A-mRNA_nonrhyth_translation_nonrhyth/Fmr1_set_A.pdf]

## Fn3k

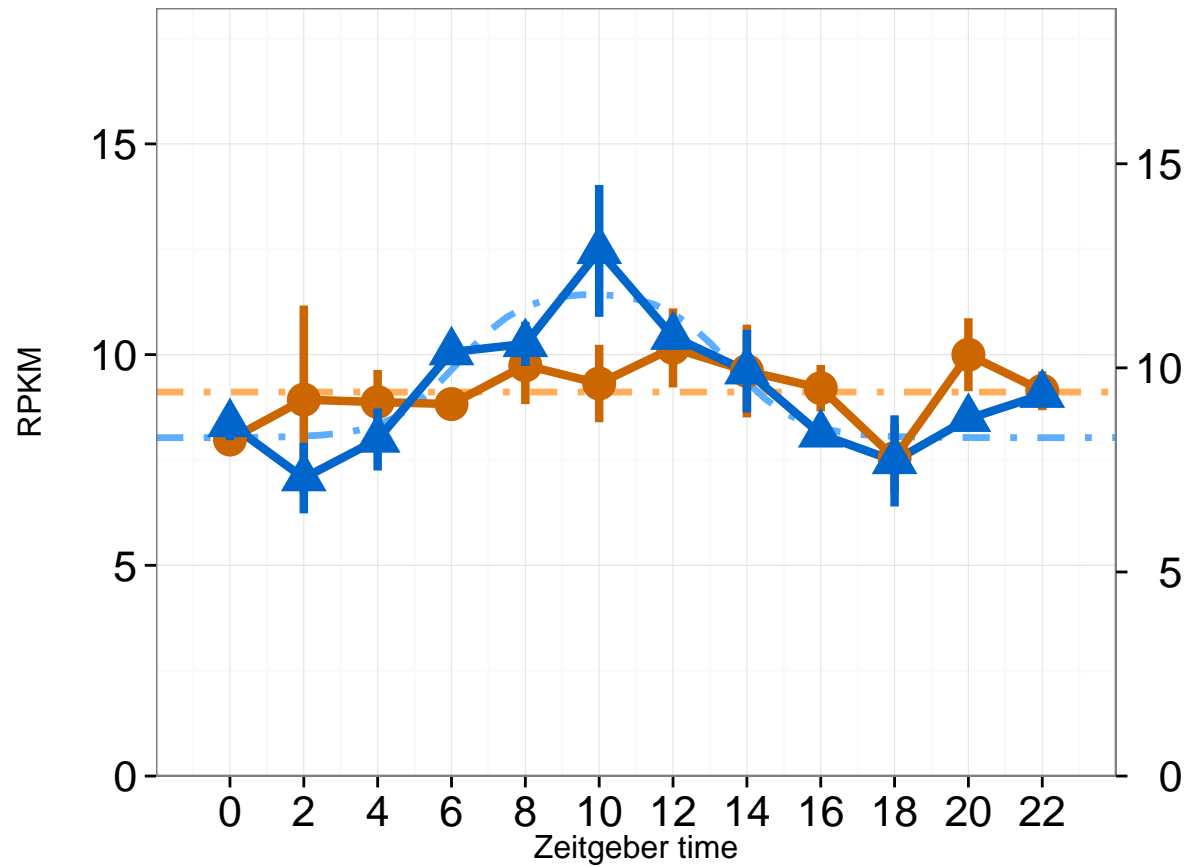

## Fn3k

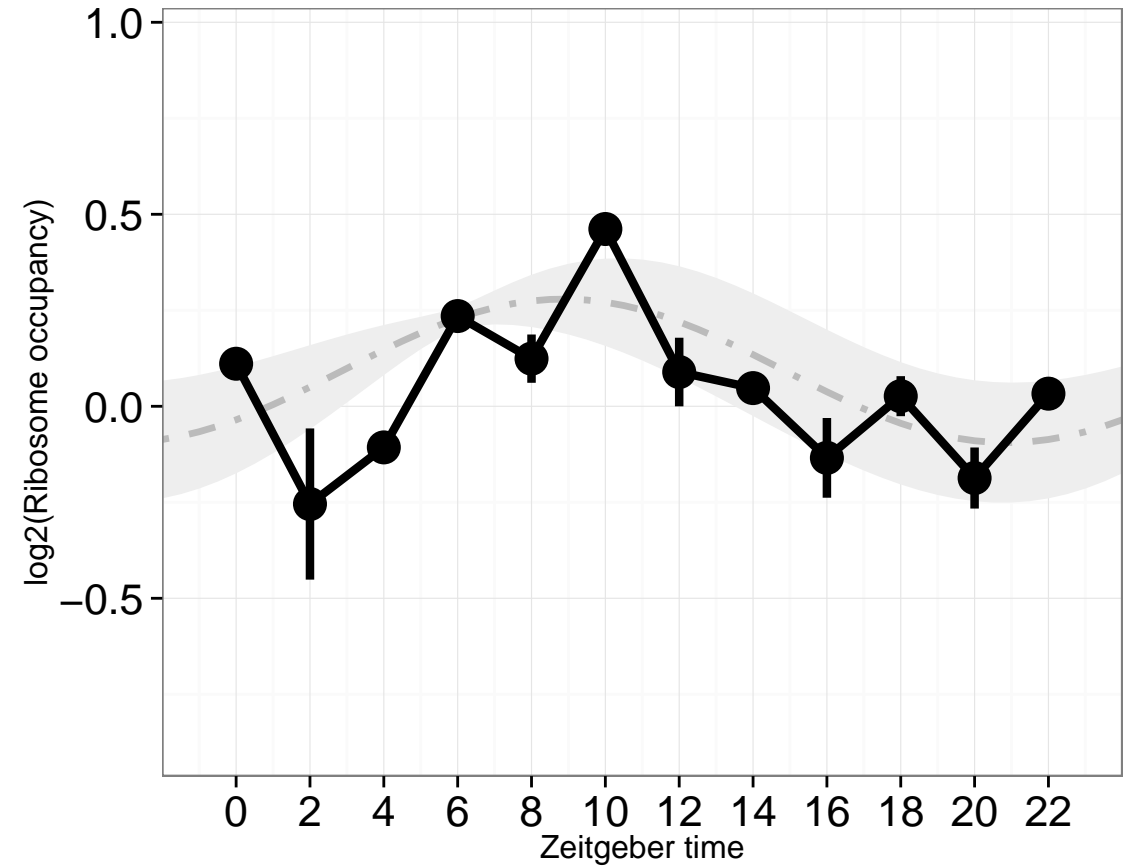

Supplement: SuppDataset_1.zip [file Fn3k_set_A.pdf › Supplemental Dataset 1/A-mRNA_nonrhyth_translation_nonrhyth/Fn3k_set_A.pdf]

# Fn3krp

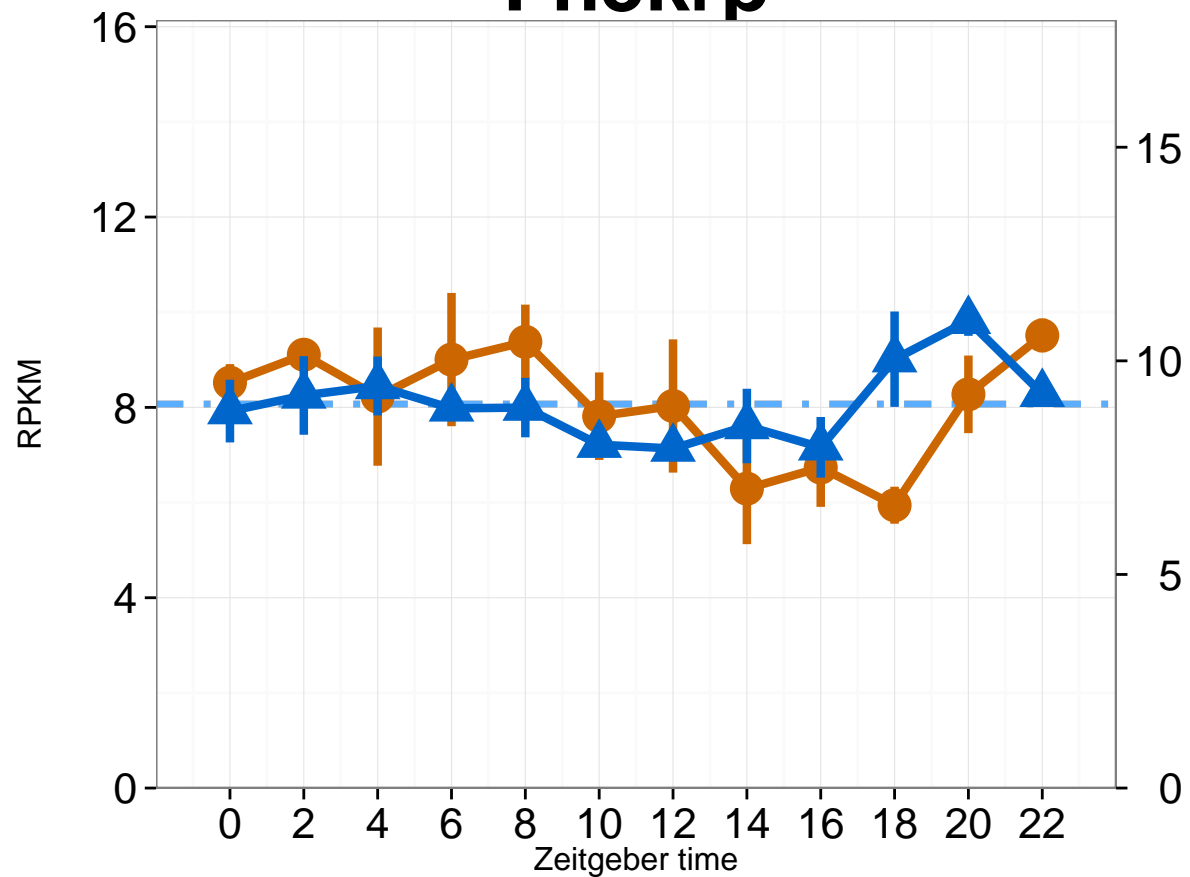

# Fn3krp

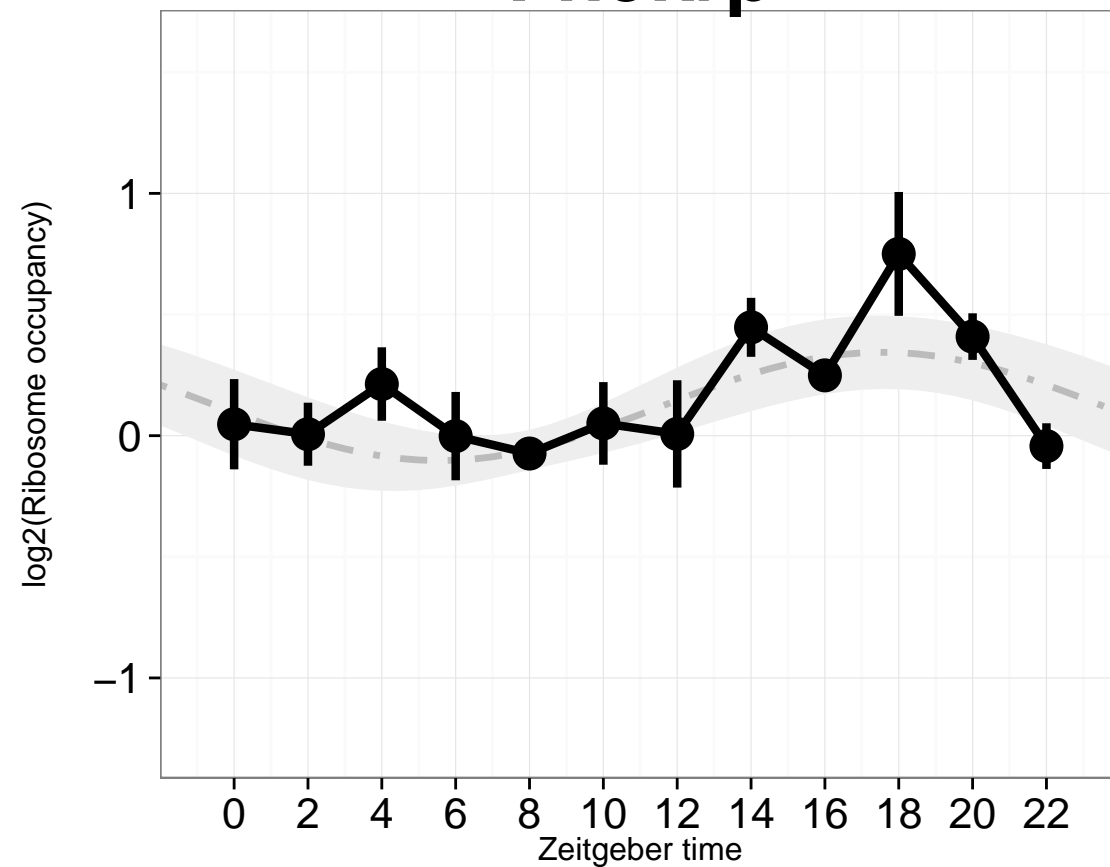

Supplement: SuppDataset_1.zip [file Fn3krp_set_A.pdf › Supplemental Dataset 1/A-mRNA_nonrhyth_translation_nonrhyth/Fn3krp_set_A.pdf]

# Fnbp1

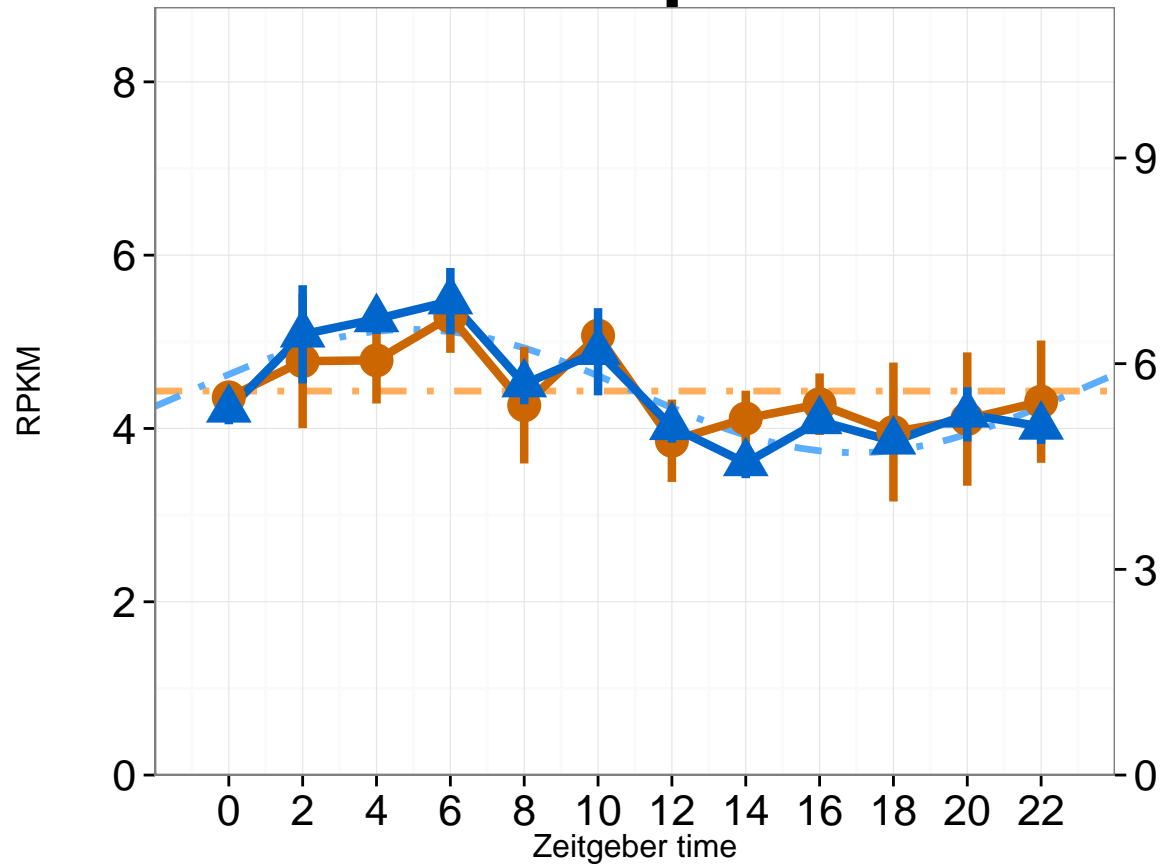

# Fnbp1

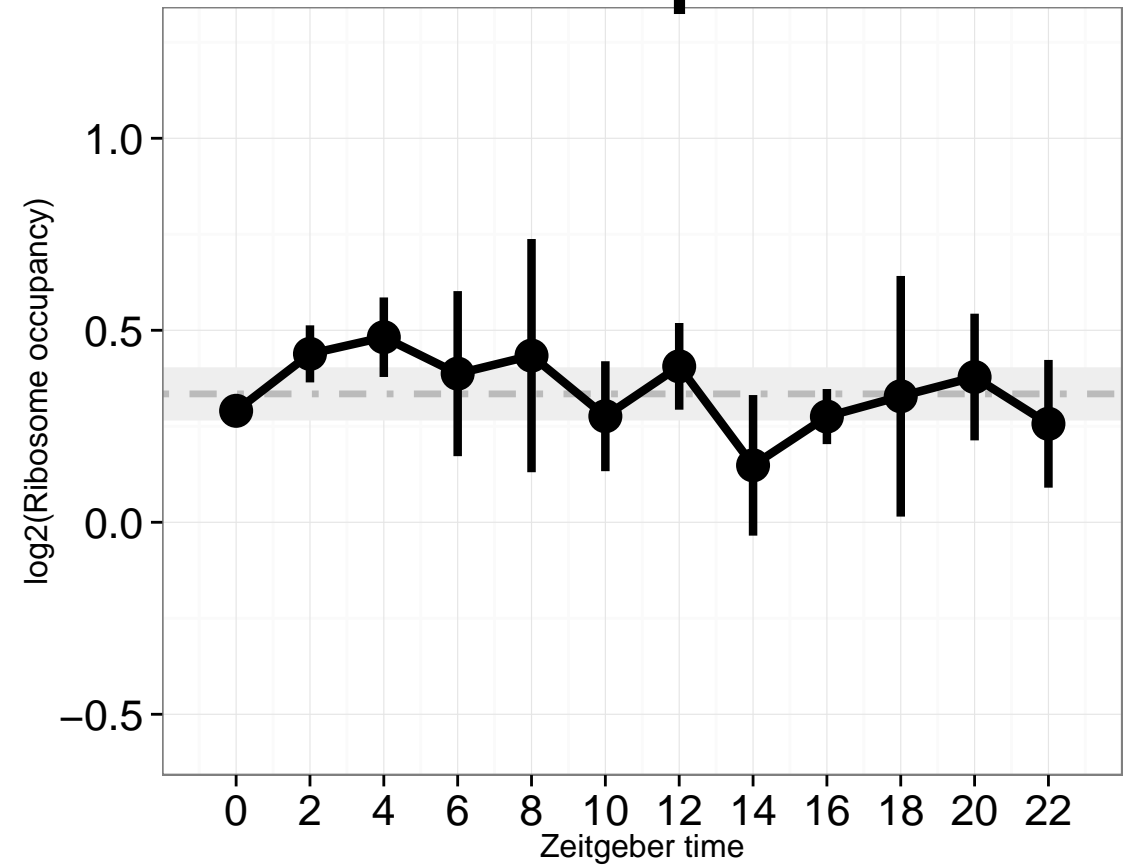

Supplement: SuppDataset_1.zip [file Fnbp1_set_A.pdf › Supplemental Dataset 1/A-mRNA_nonrhyth_translation_nonrhyth/Fnbp1_set_A.pdf]

# Fnbp1l

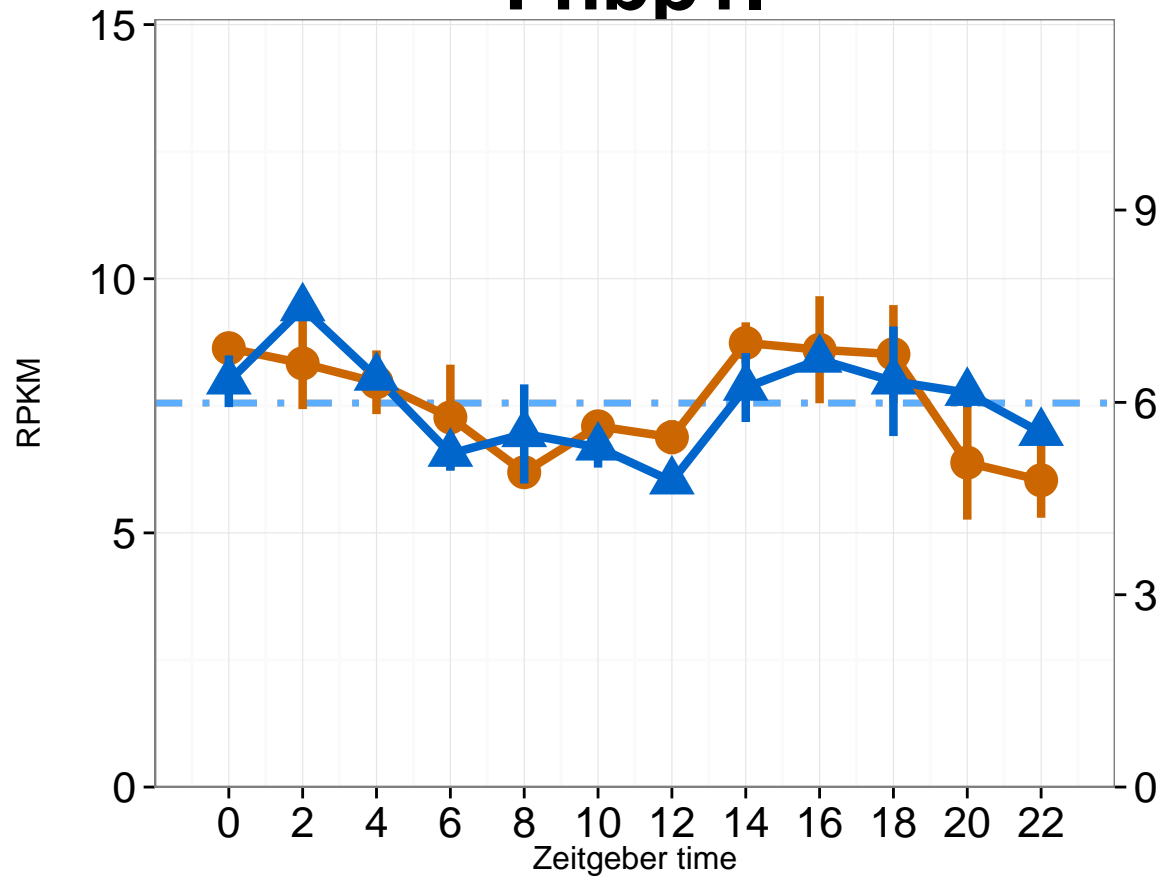

# Fnbp1l

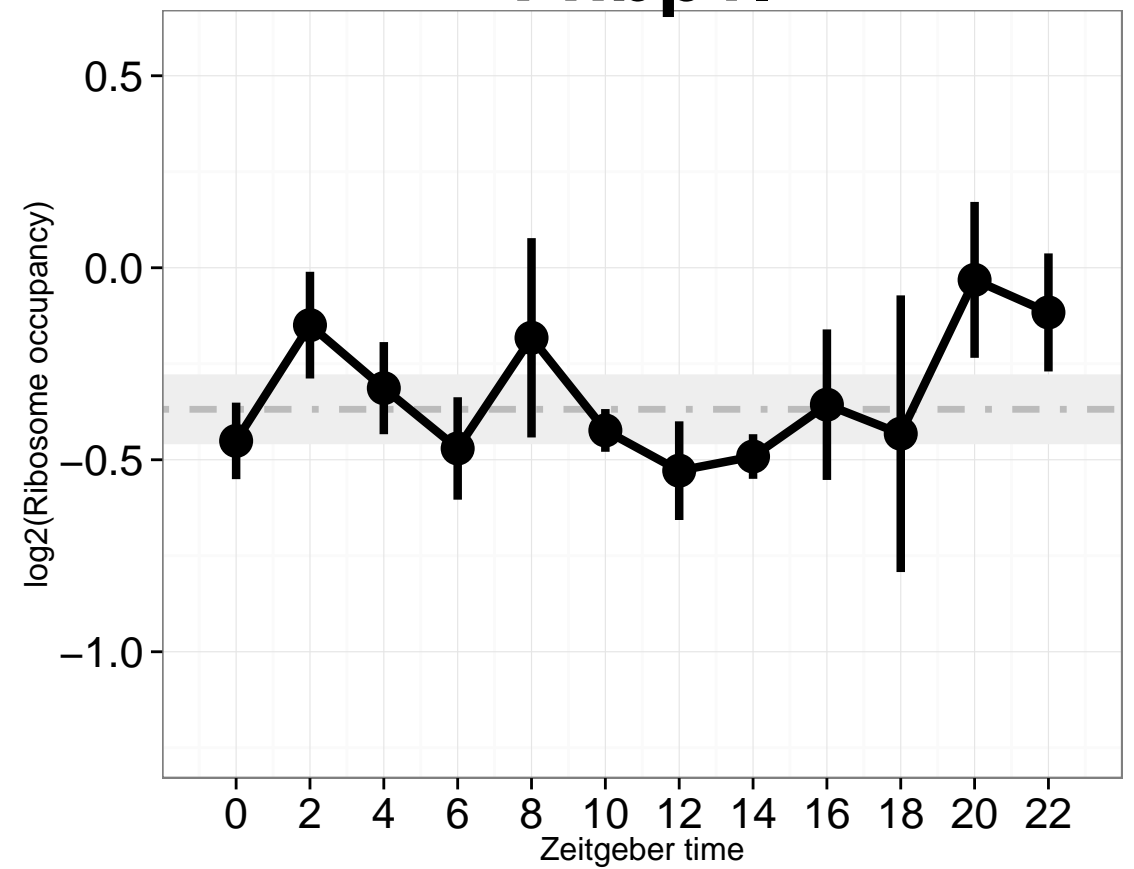

Supplement: SuppDataset_1.zip [file Fnbp1l_set_A.pdf › Supplemental Dataset 1/A-mRNA_nonrhyth_translation_nonrhyth/Fnbp1l_set_A.pdf]

## Fnbp4

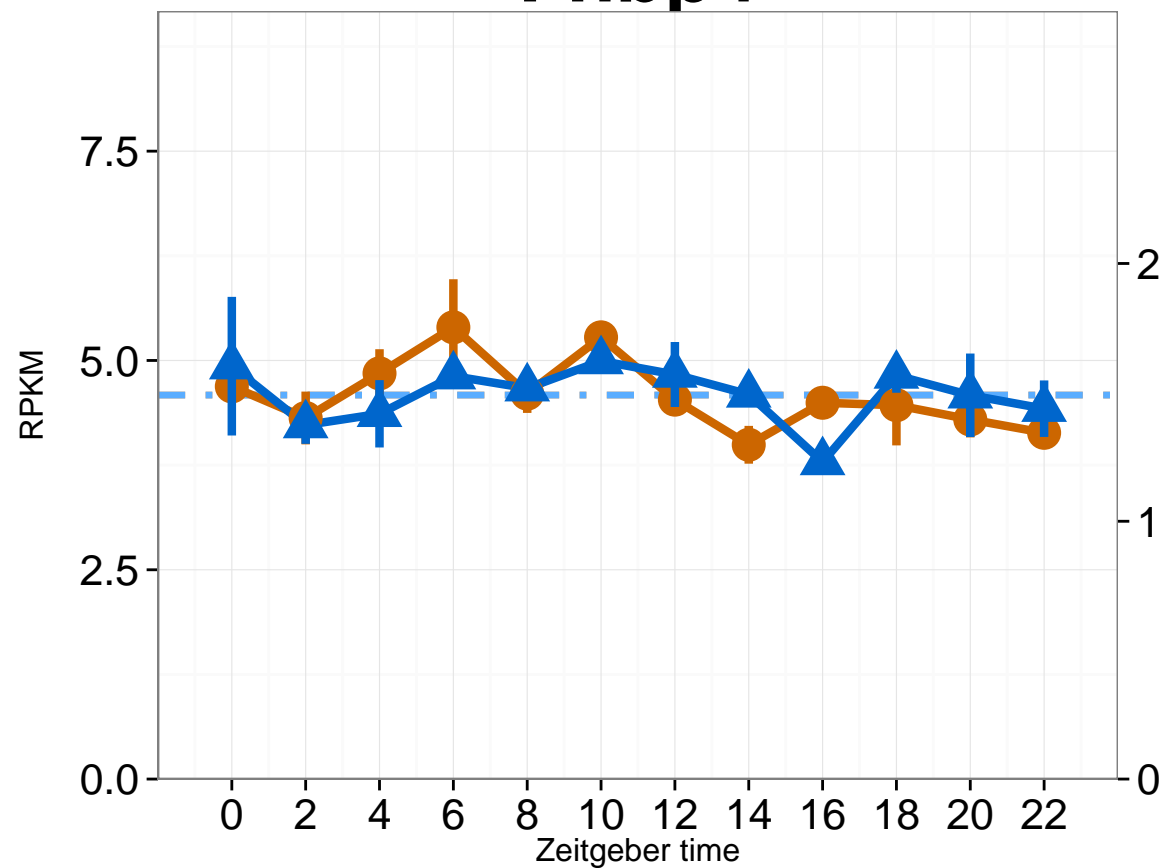

## Fnbp4

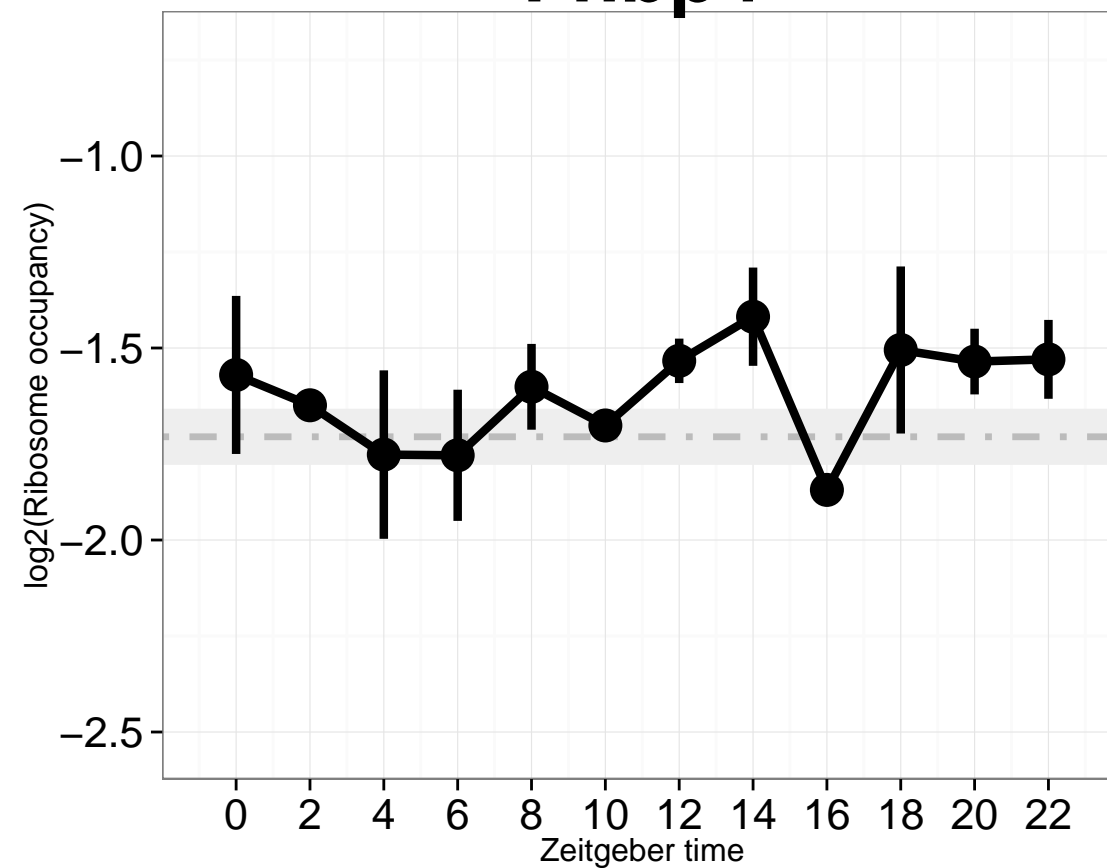

Supplement: SuppDataset_1.zip [file Fnbp4_set_A.pdf › Supplemental Dataset 1/A-mRNA_nonrhyth_translation_nonrhyth/Fnbp4_set_A.pdf]

## Fndc3a

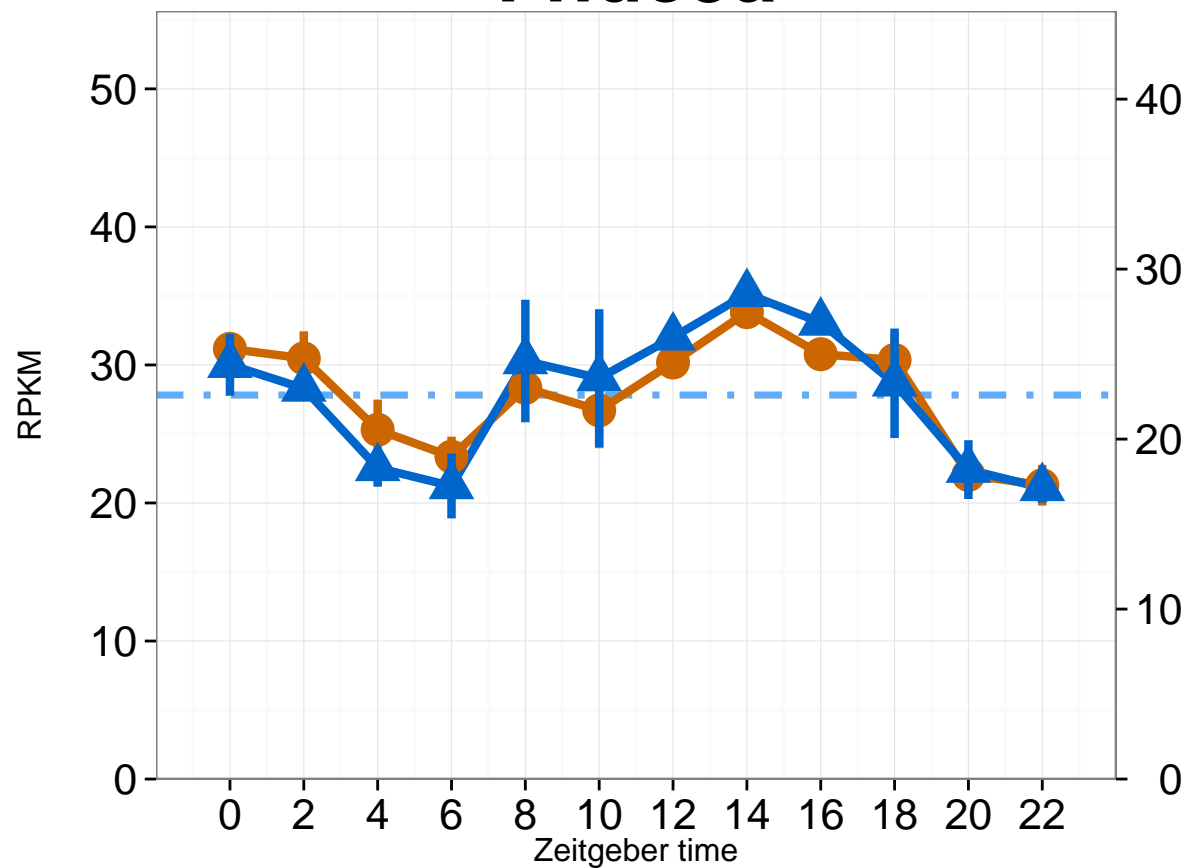

## Fndc3a

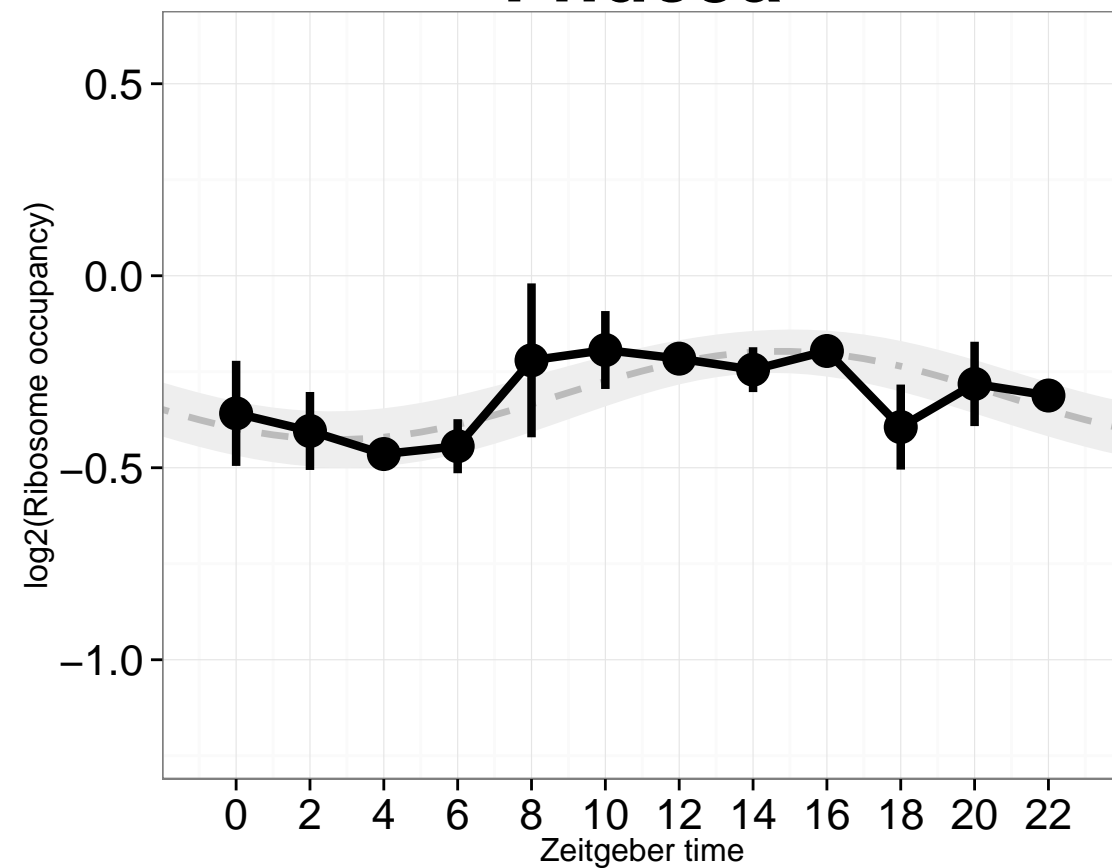

Supplement: SuppDataset_1.zip [file Fndc3a_set_A.pdf › Supplemental Dataset 1/A-mRNA_nonrhyth_translation_nonrhyth/Fndc3a_set_A.pdf]

# Fndc4

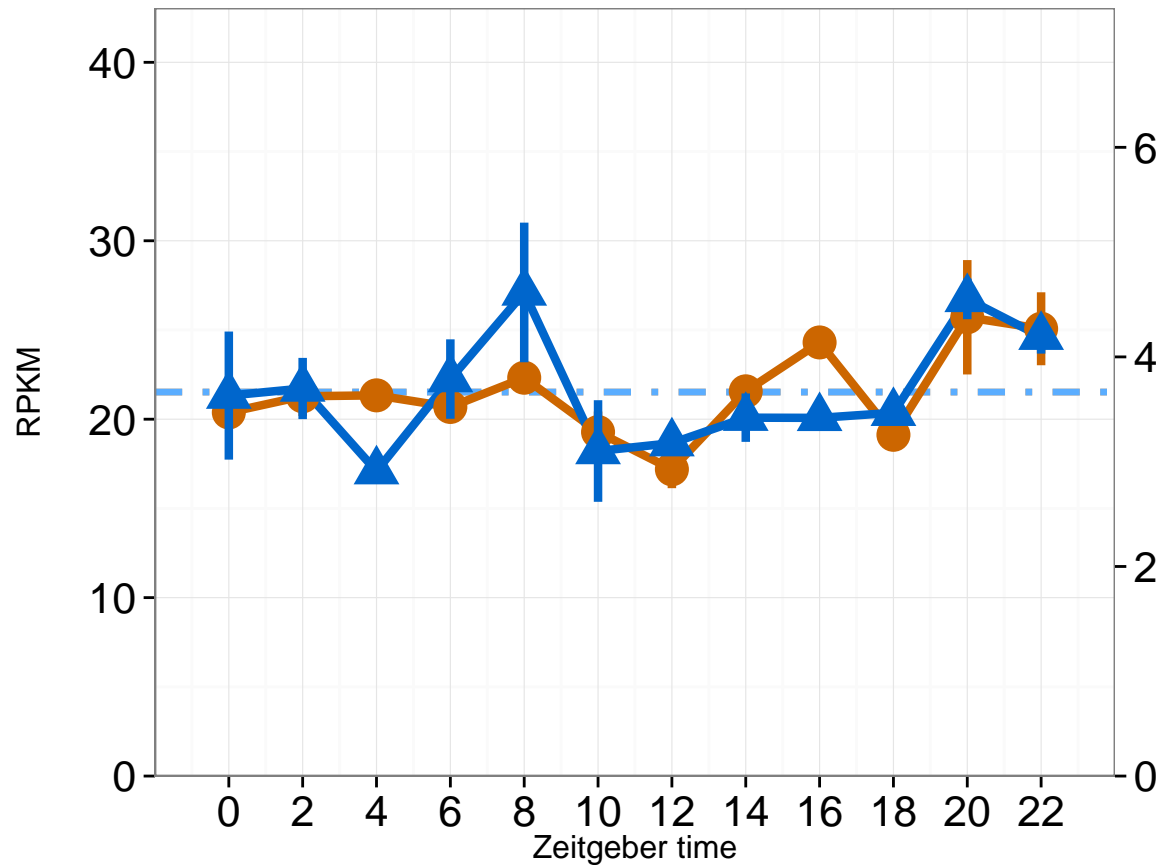

# Fndc4

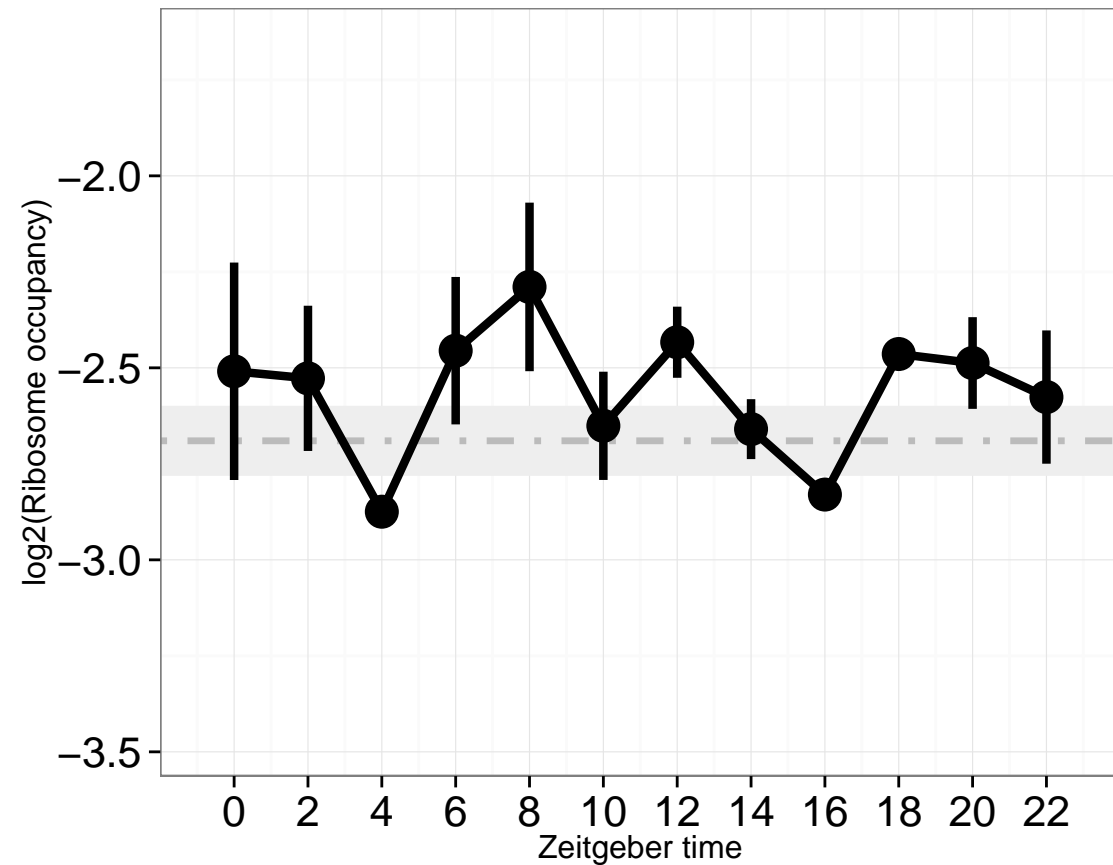

Supplement: SuppDataset_1.zip [file Fndc4_set_A.pdf › Supplemental Dataset 1/A-mRNA_nonrhyth_translation_nonrhyth/Fndc4_set_A.pdf]

## Fnta

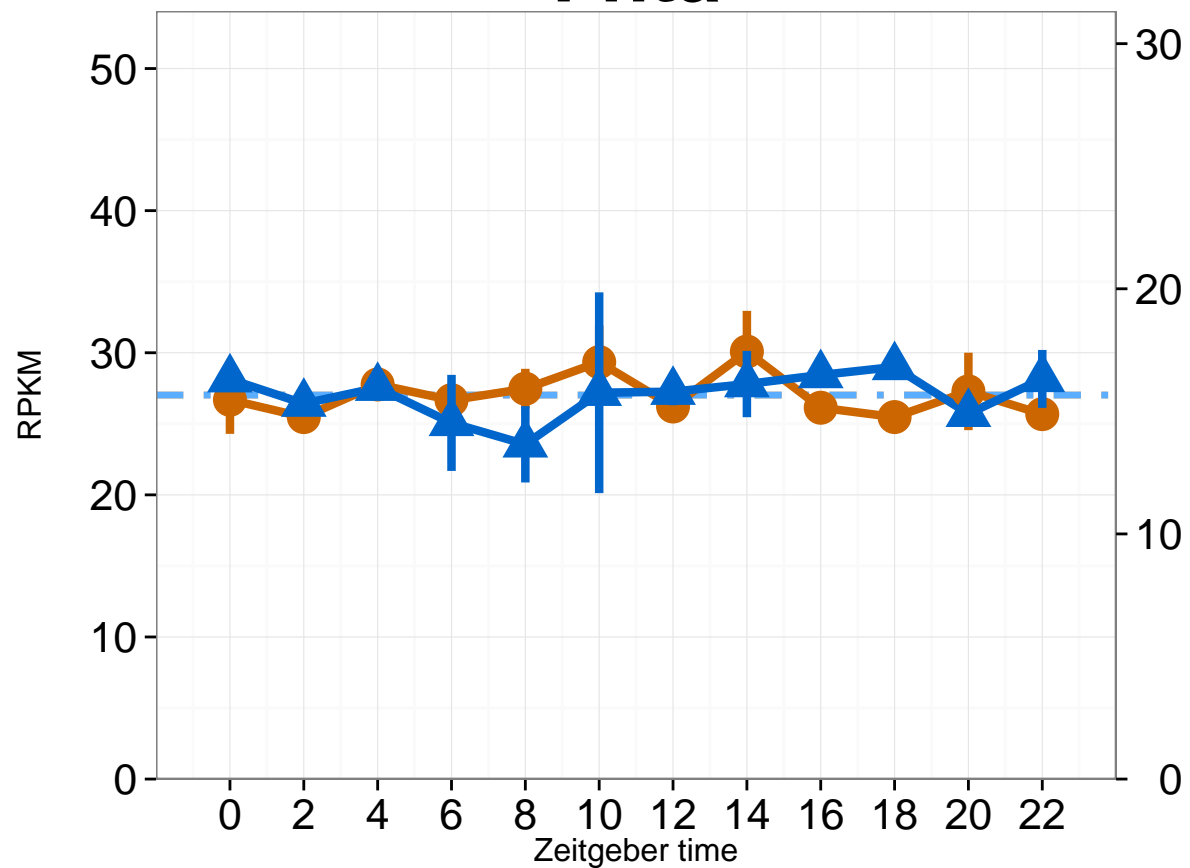

## Fnta

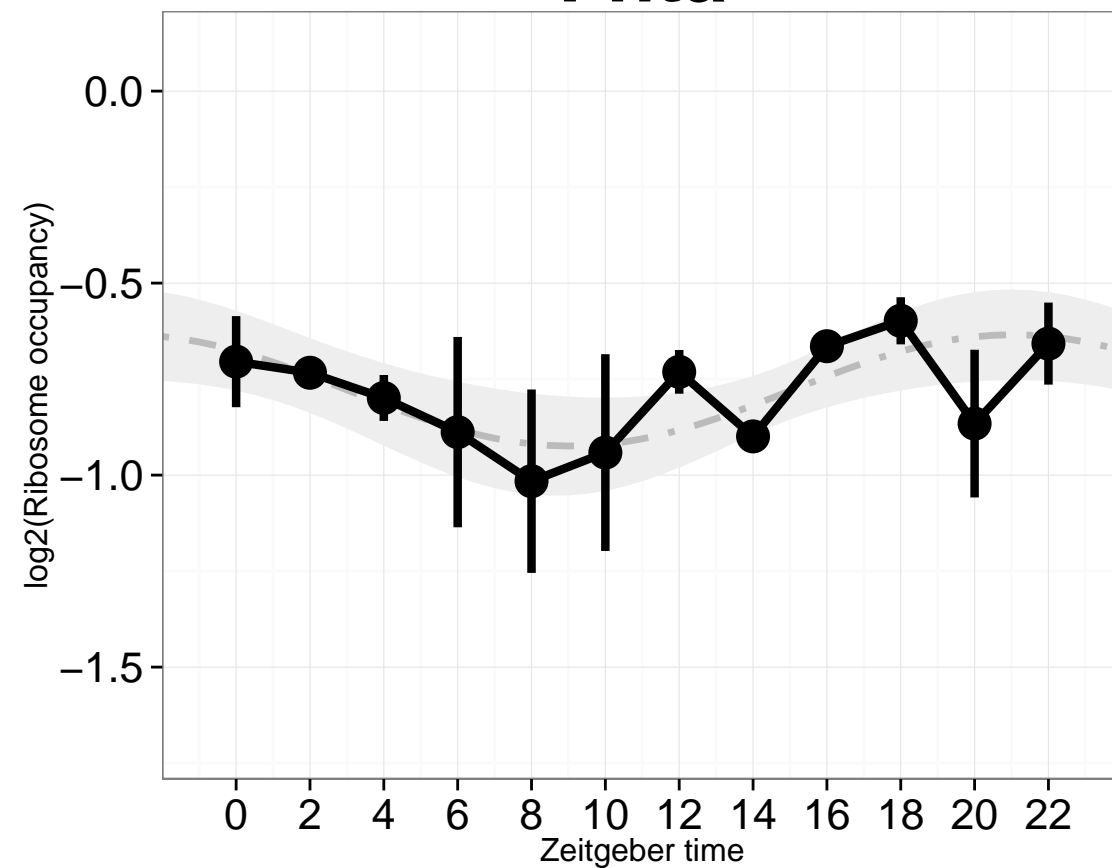

Supplement: SuppDataset_1.zip [file Fnta_set_A.pdf › Supplemental Dataset 1/A-mRNA_nonrhyth_translation_nonrhyth/Fnta_set_A.pdf]

## Focad

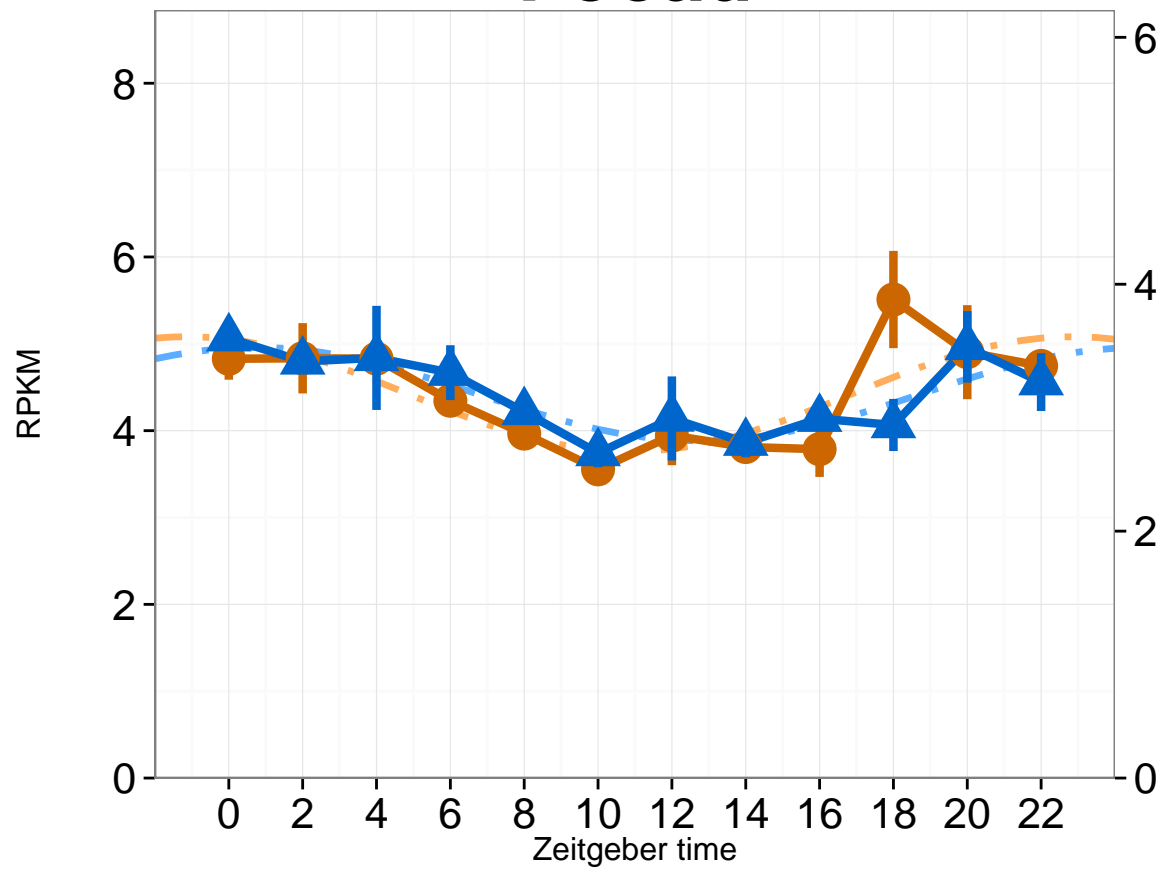

## Focad

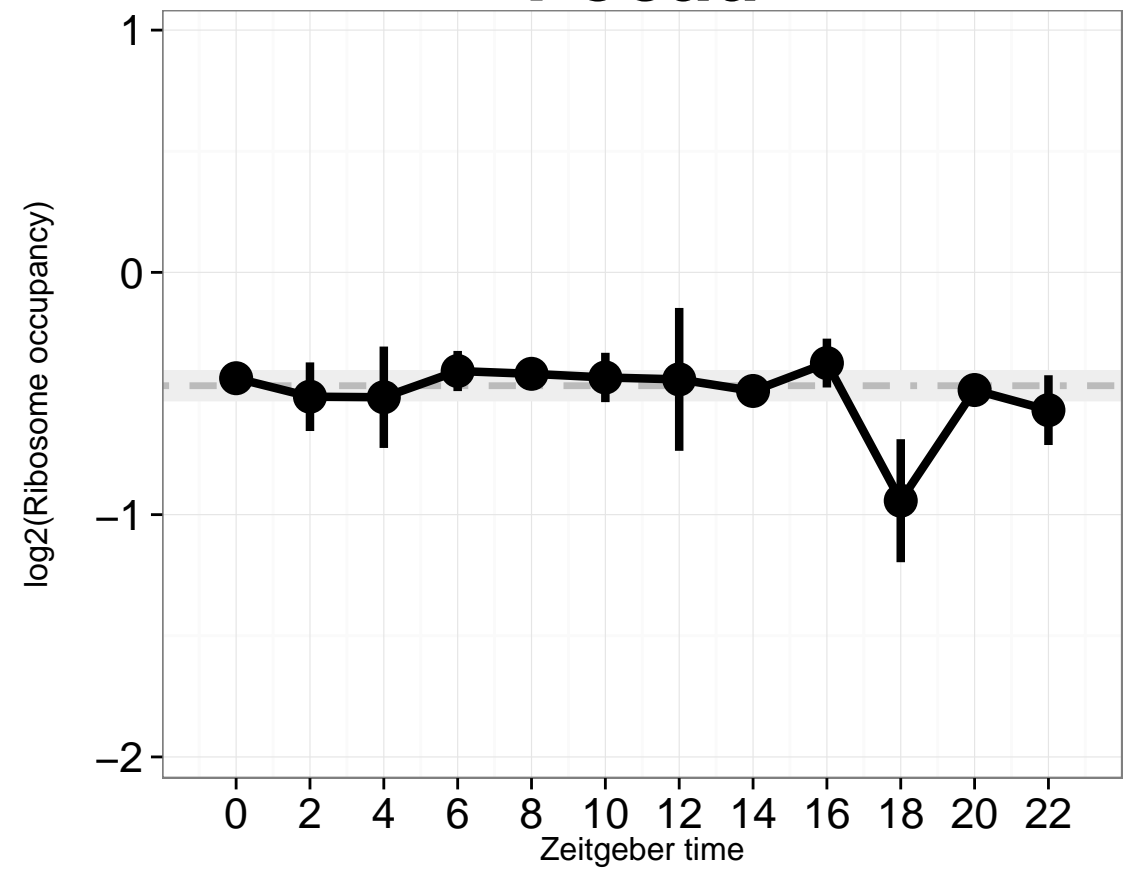

Supplement: SuppDataset_1.zip [file Focad_set_A.pdf › Supplemental Dataset 1/A-mRNA_nonrhyth_translation_nonrhyth/Focad_set_A.pdf]

## Folr2

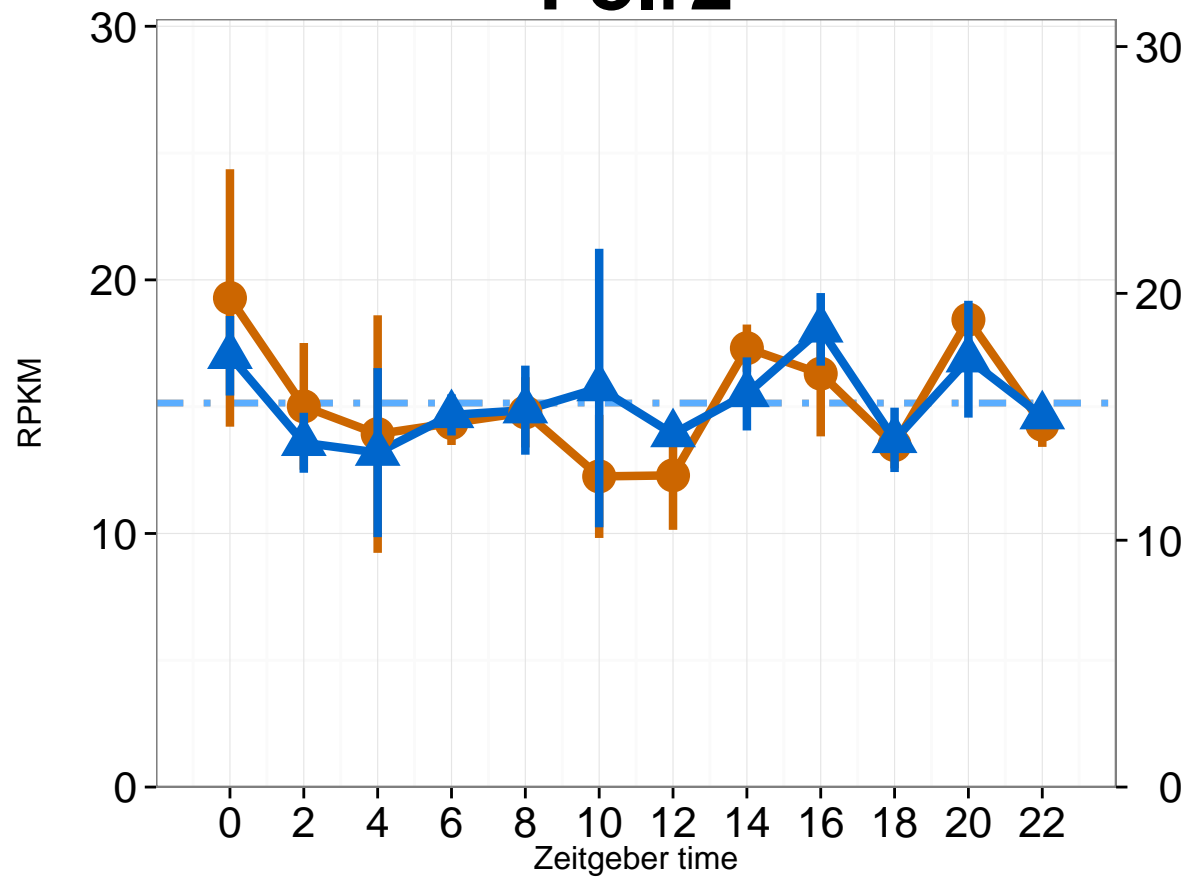

## Folr2

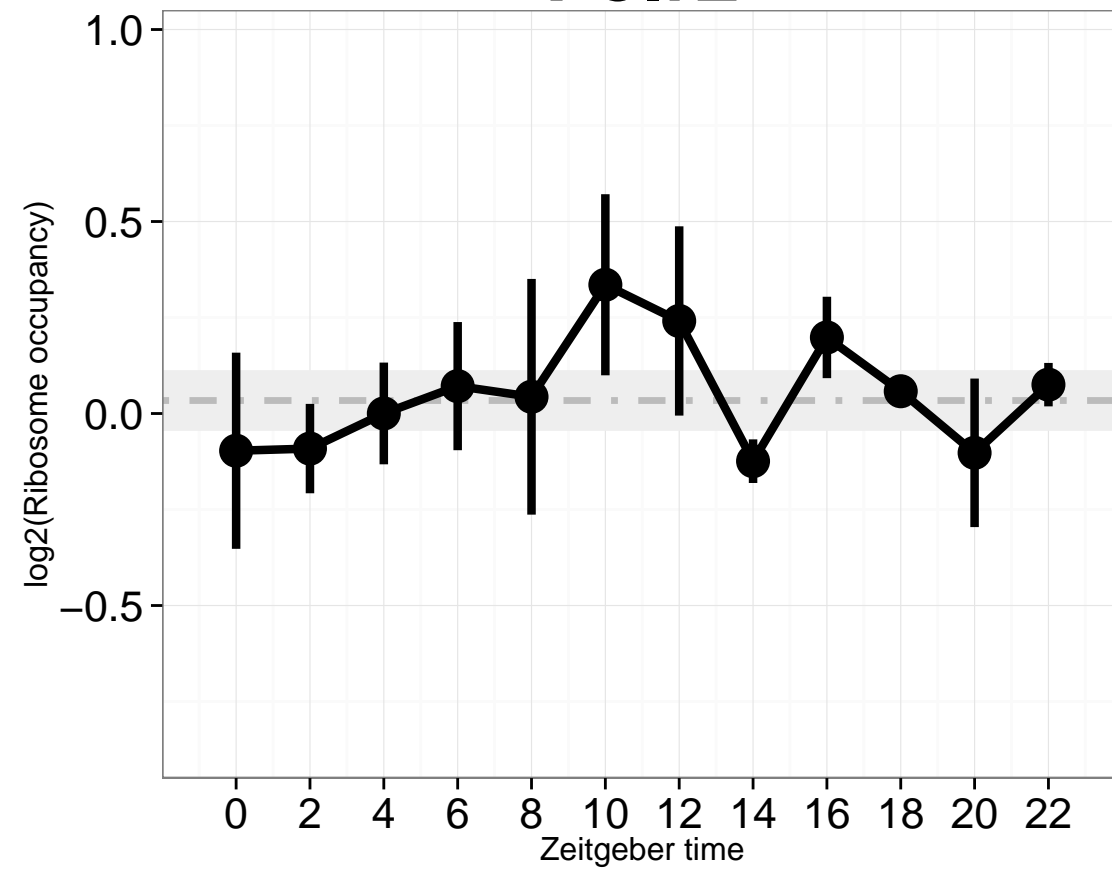

Supplement: SuppDataset_1.zip [file Folr2_set_A.pdf › Supplemental Dataset 1/A-mRNA_nonrhyth_translation_nonrhyth/Folr2_set_A.pdf]

## Fos

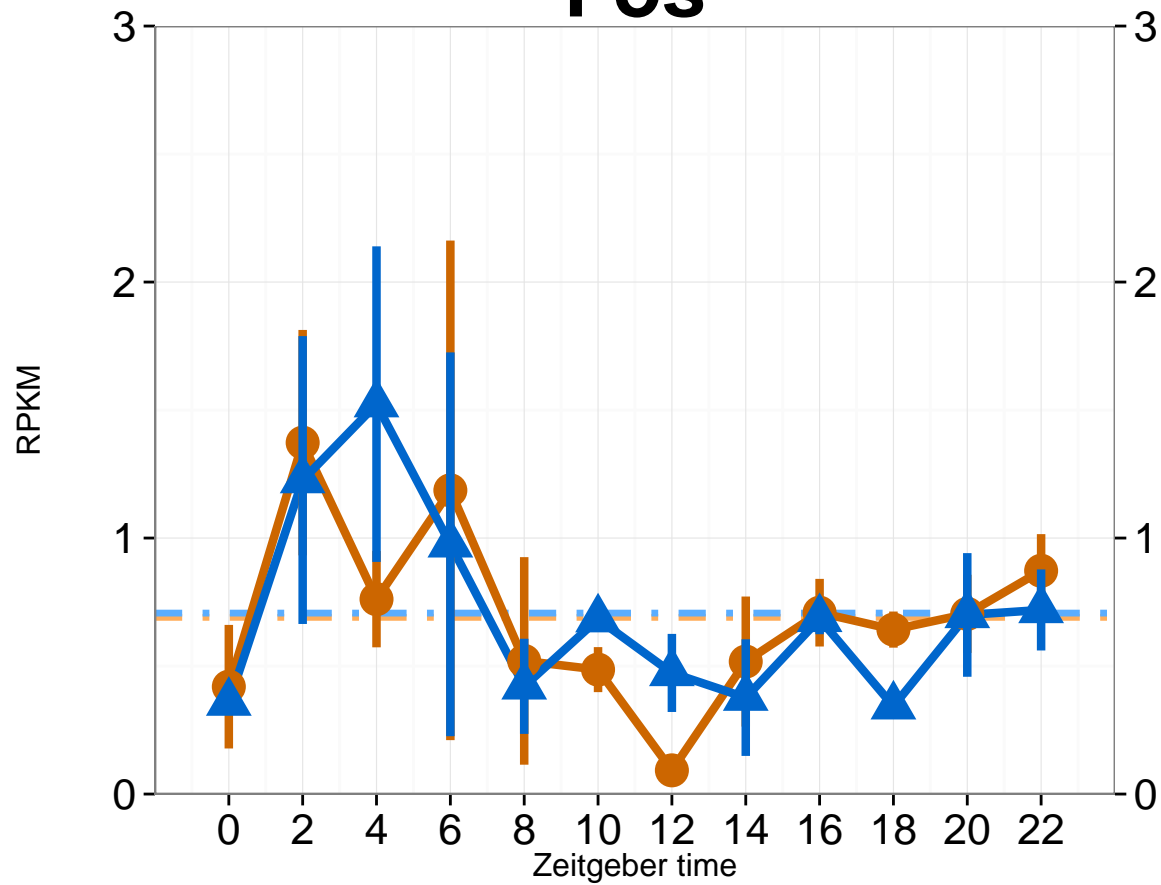

## Fos

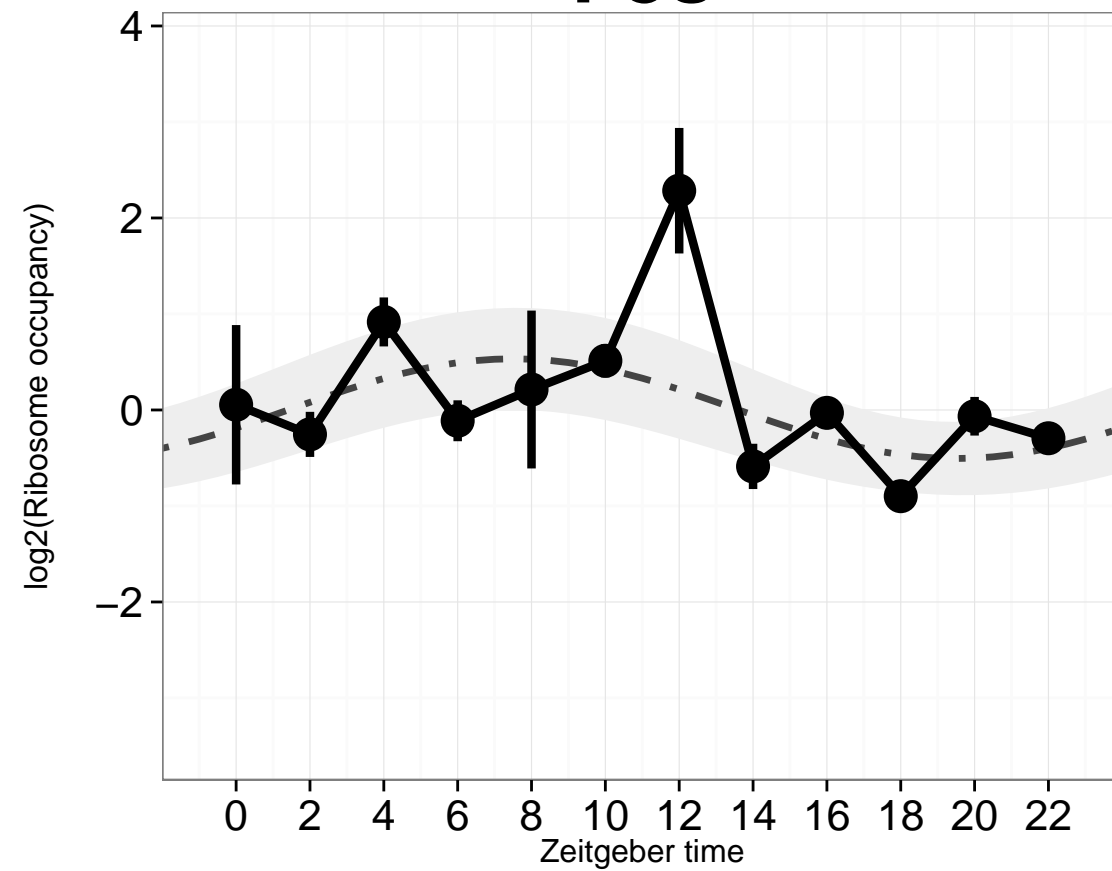

Supplement: SuppDataset_1.zip [file Fos_set_A.pdf › Supplemental Dataset 1/A-mRNA_nonrhyth_translation_nonrhyth/Fos_set_A.pdf]

## Fosl2

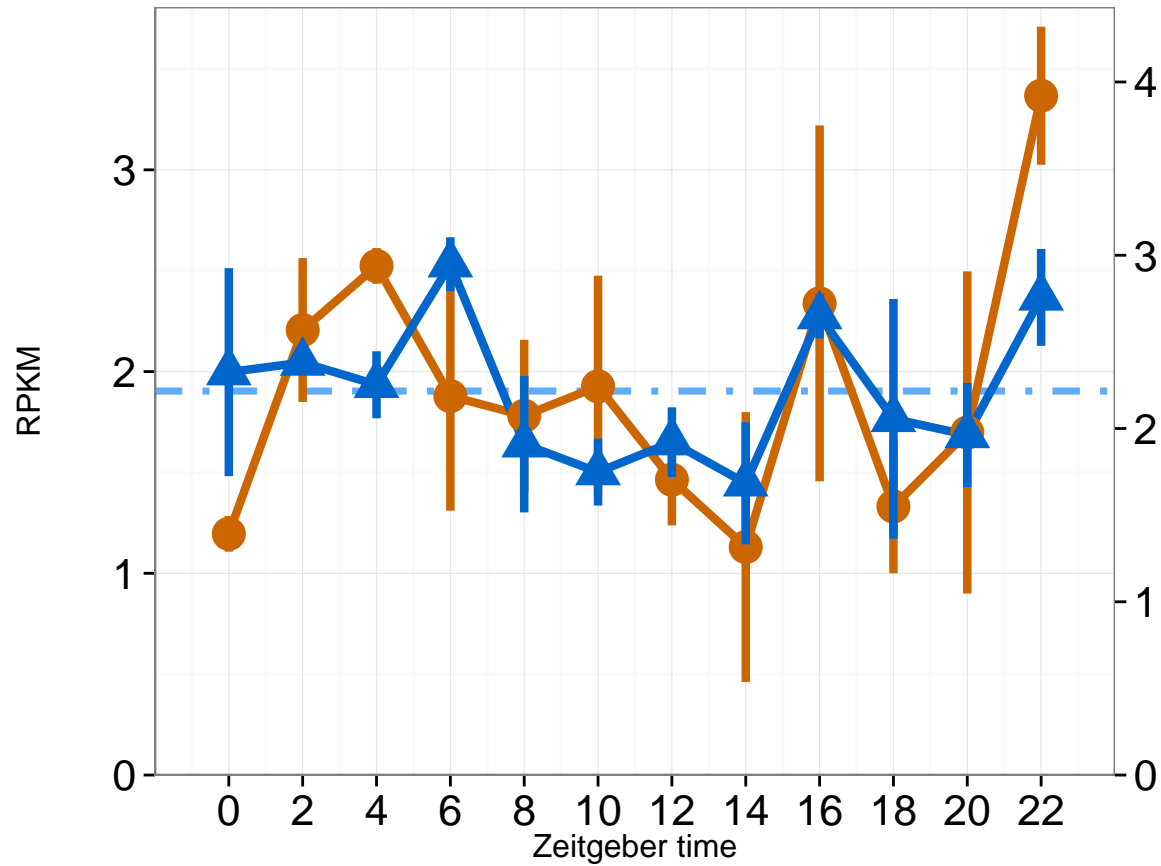

## Fosl2

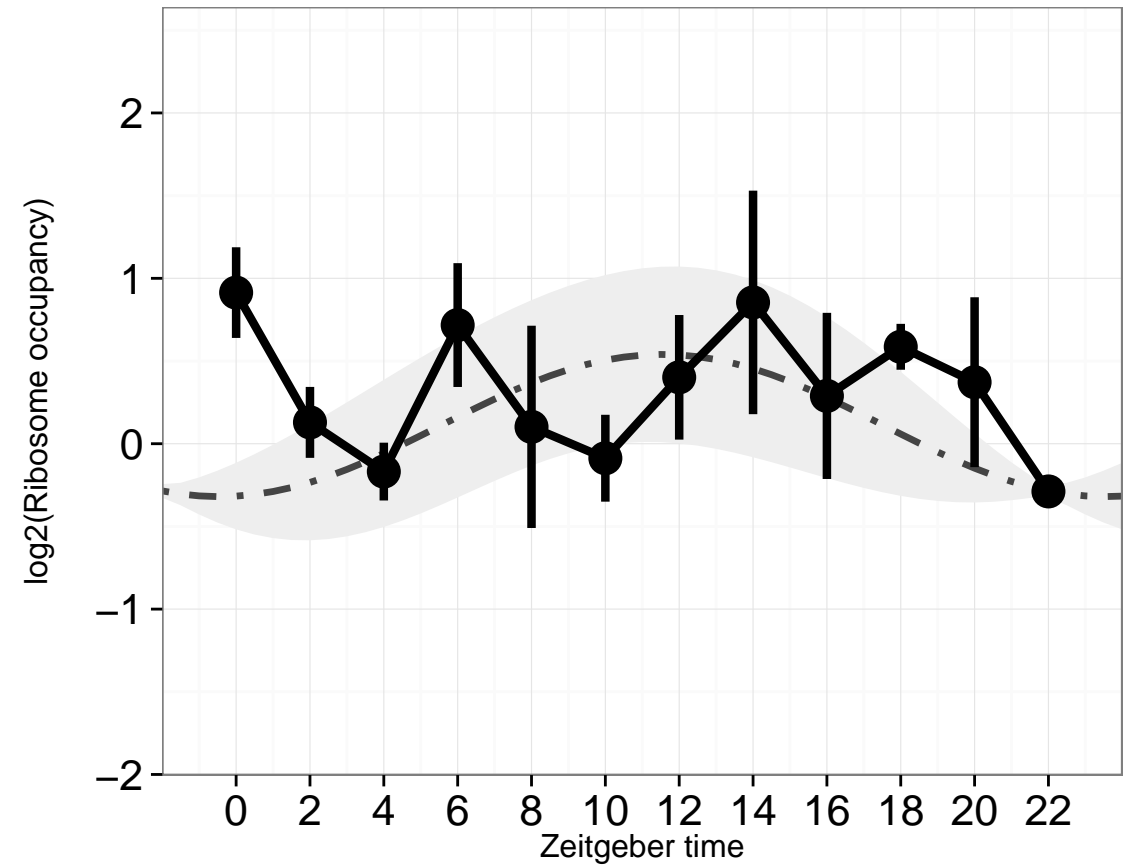

Supplement: SuppDataset_1.zip [file Fosl2_set_A.pdf › Supplemental Dataset 1/A-mRNA_nonrhyth_translation_nonrhyth/Fosl2_set_A.pdf]

# Foxa1

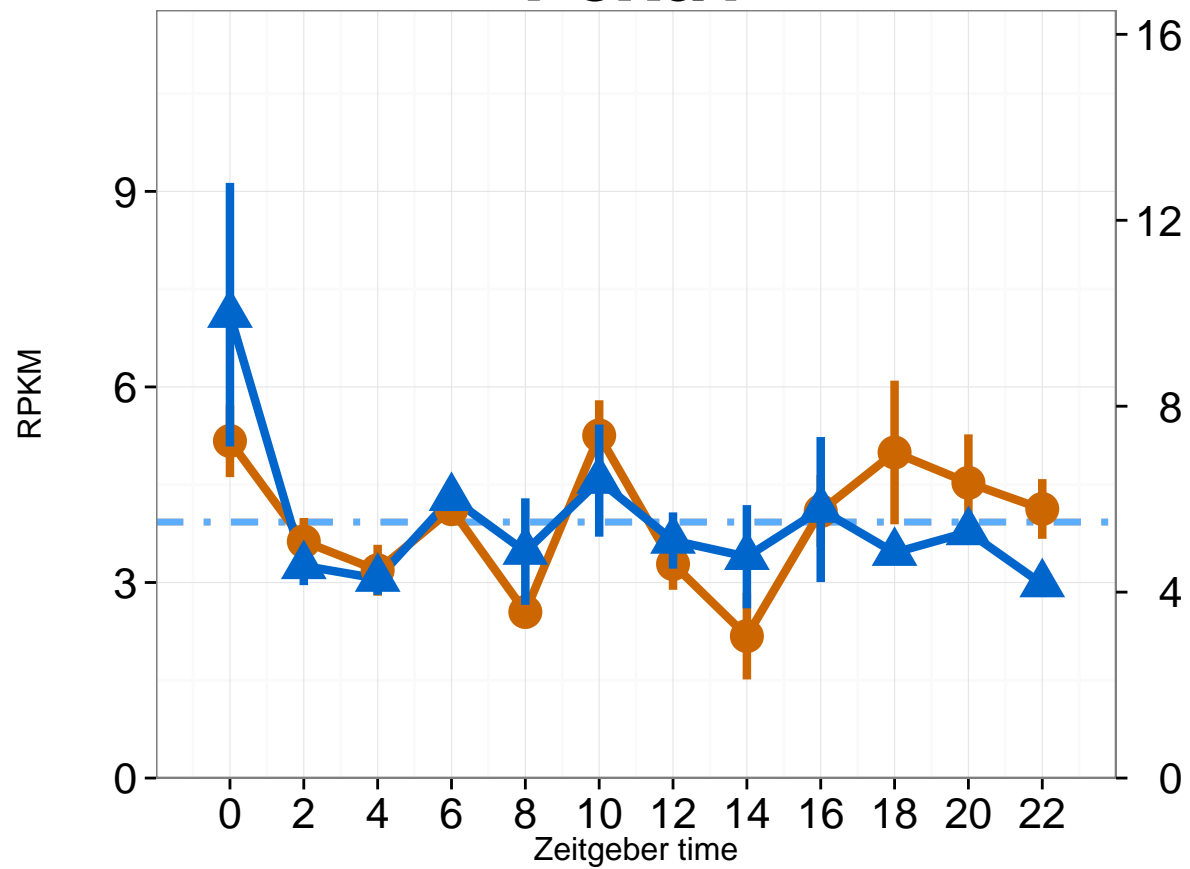

# Foxa1

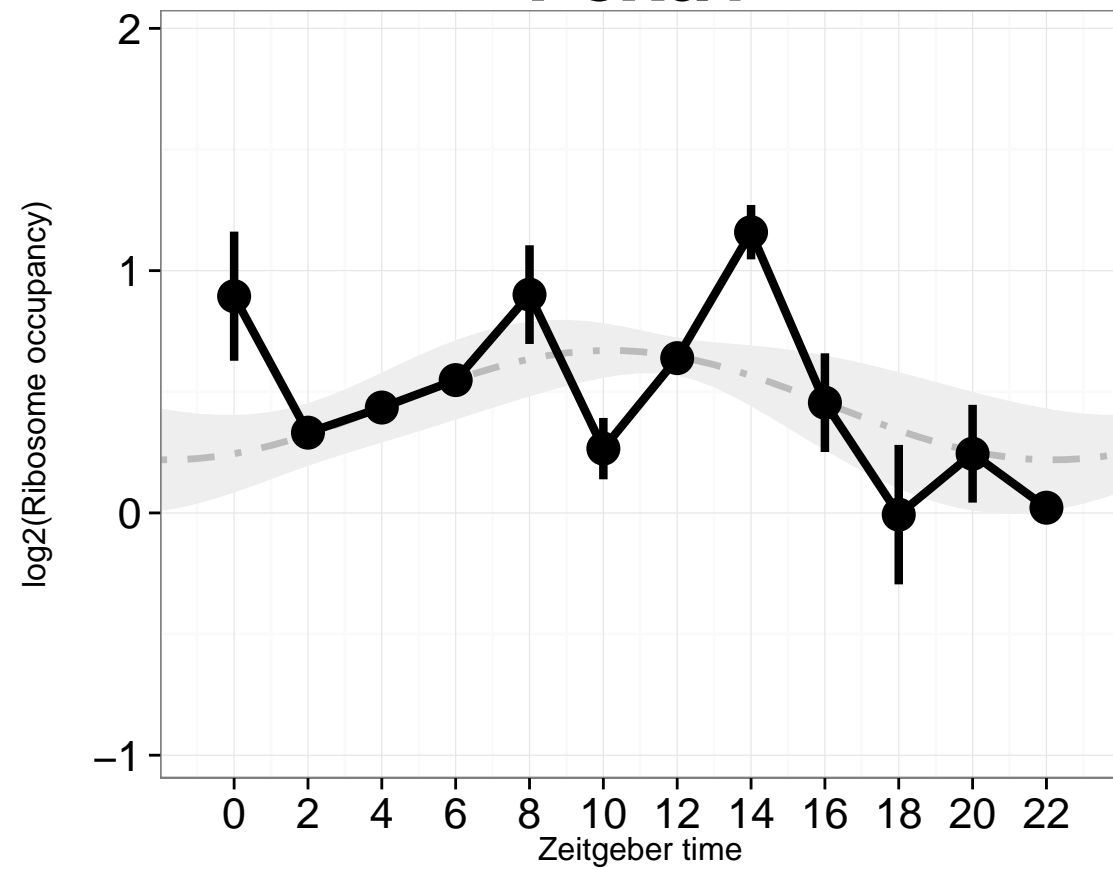

Supplement: SuppDataset_1.zip [file Foxa1_set_A.pdf › Supplemental Dataset 1/A-mRNA_nonrhyth_translation_nonrhyth/Foxa1_set_A.pdf]

## Foxa2

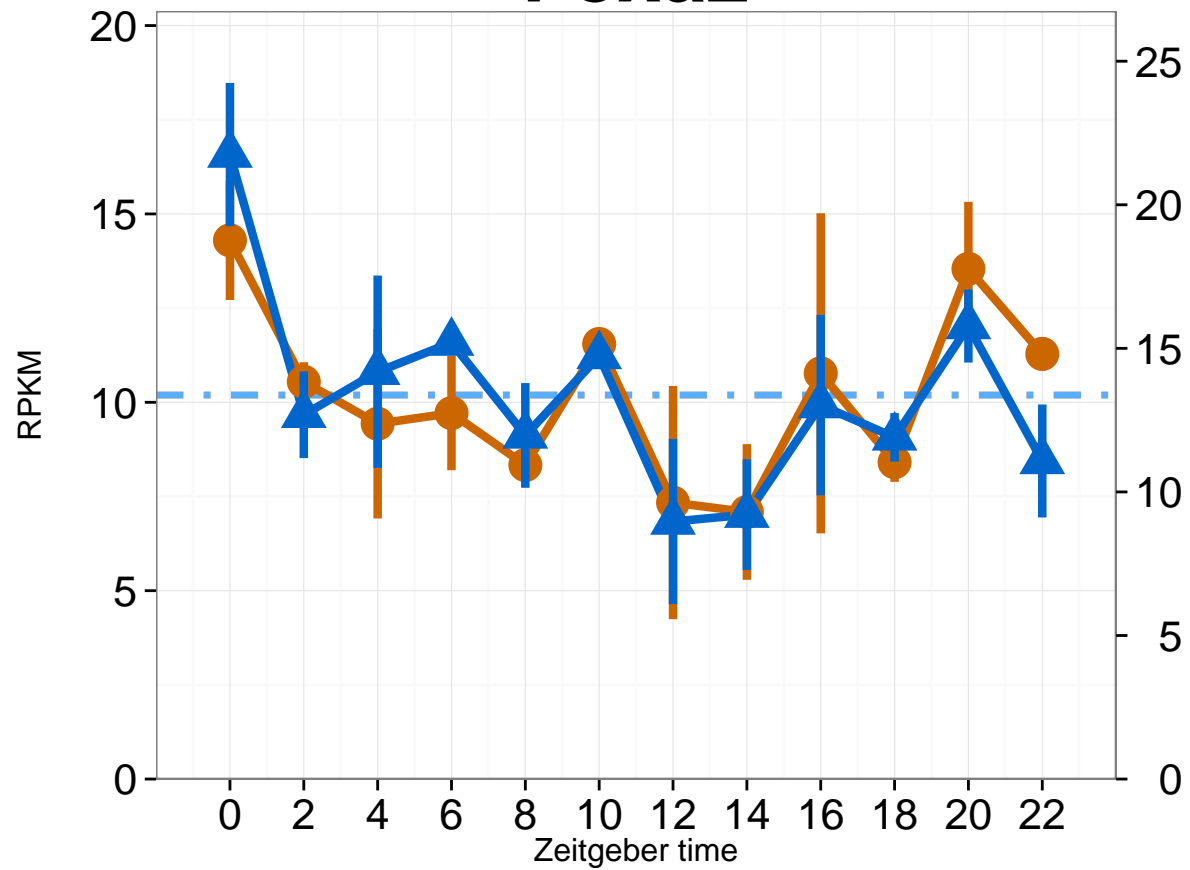

## Foxa2

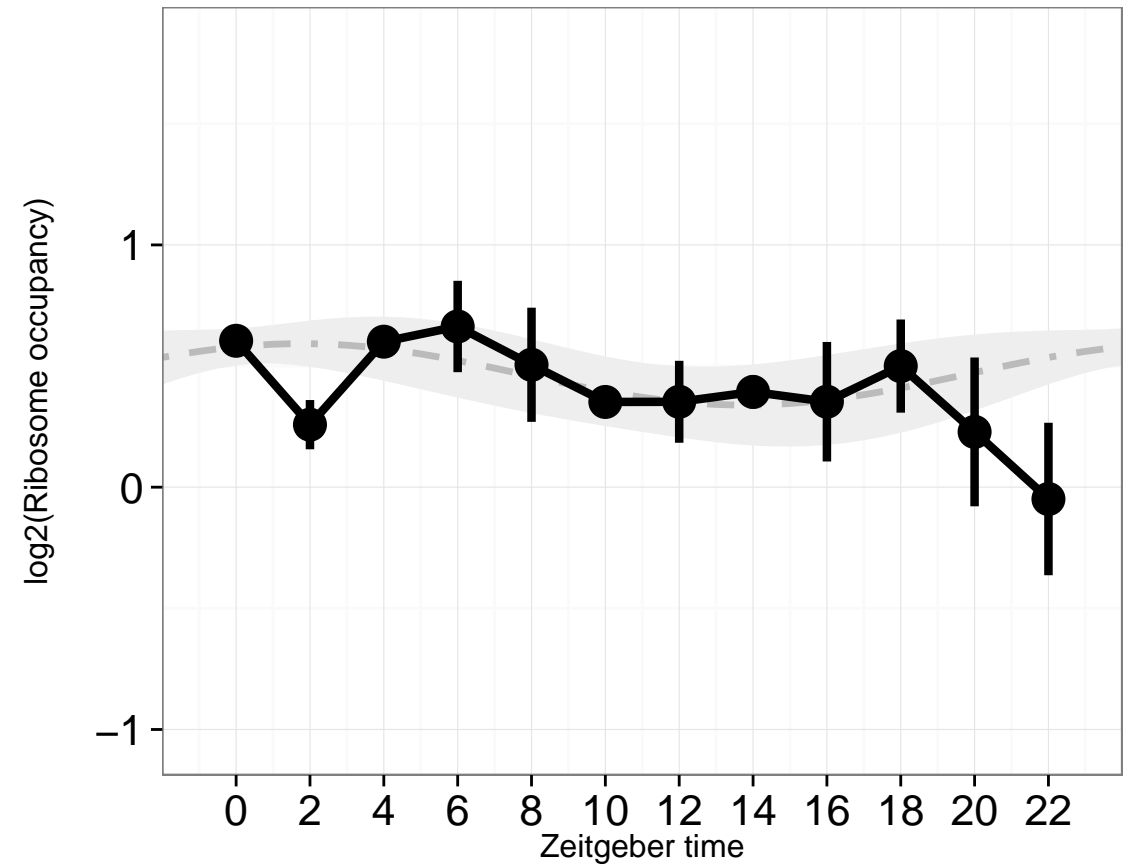

Supplement: SuppDataset_1.zip [file Foxa2_set_A.pdf › Supplemental Dataset 1/A-mRNA_nonrhyth_translation_nonrhyth/Foxa2_set_A.pdf]

## Foxj2

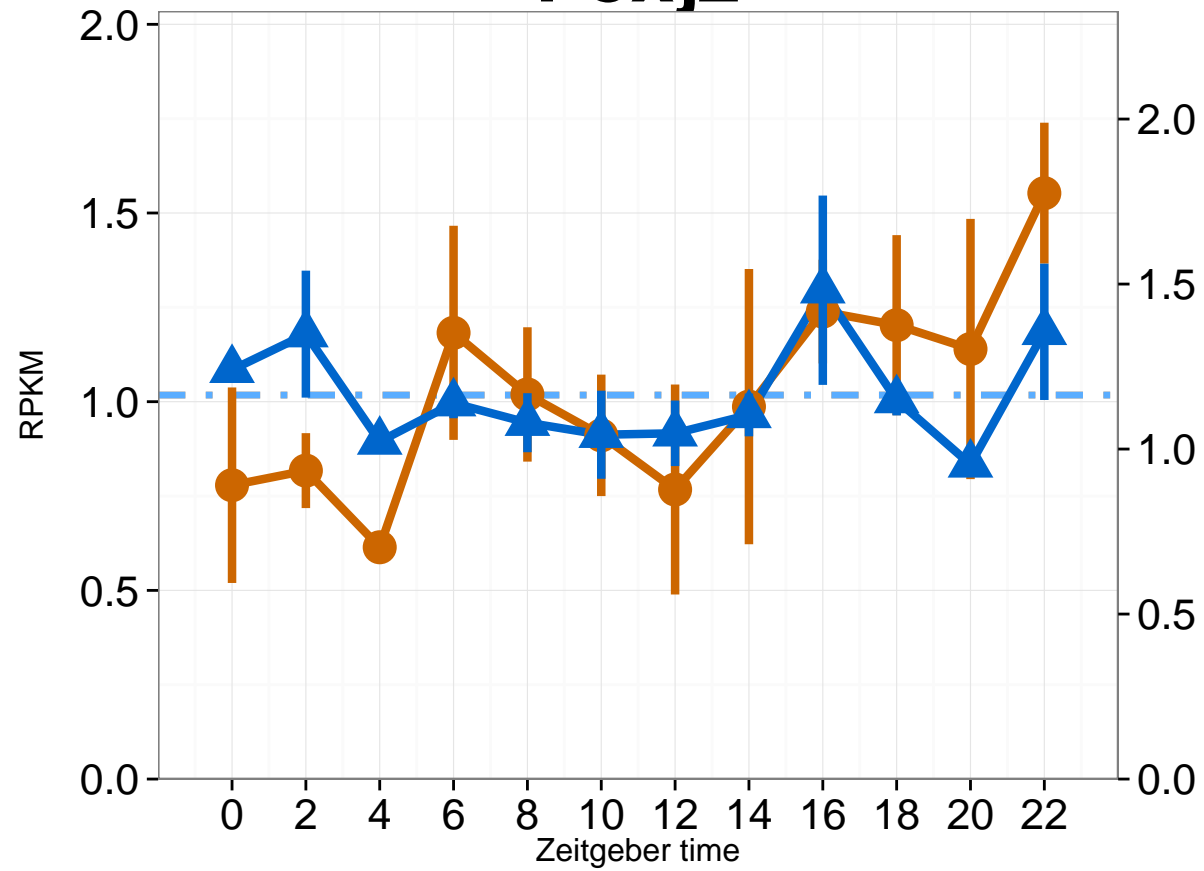

## Foxj2

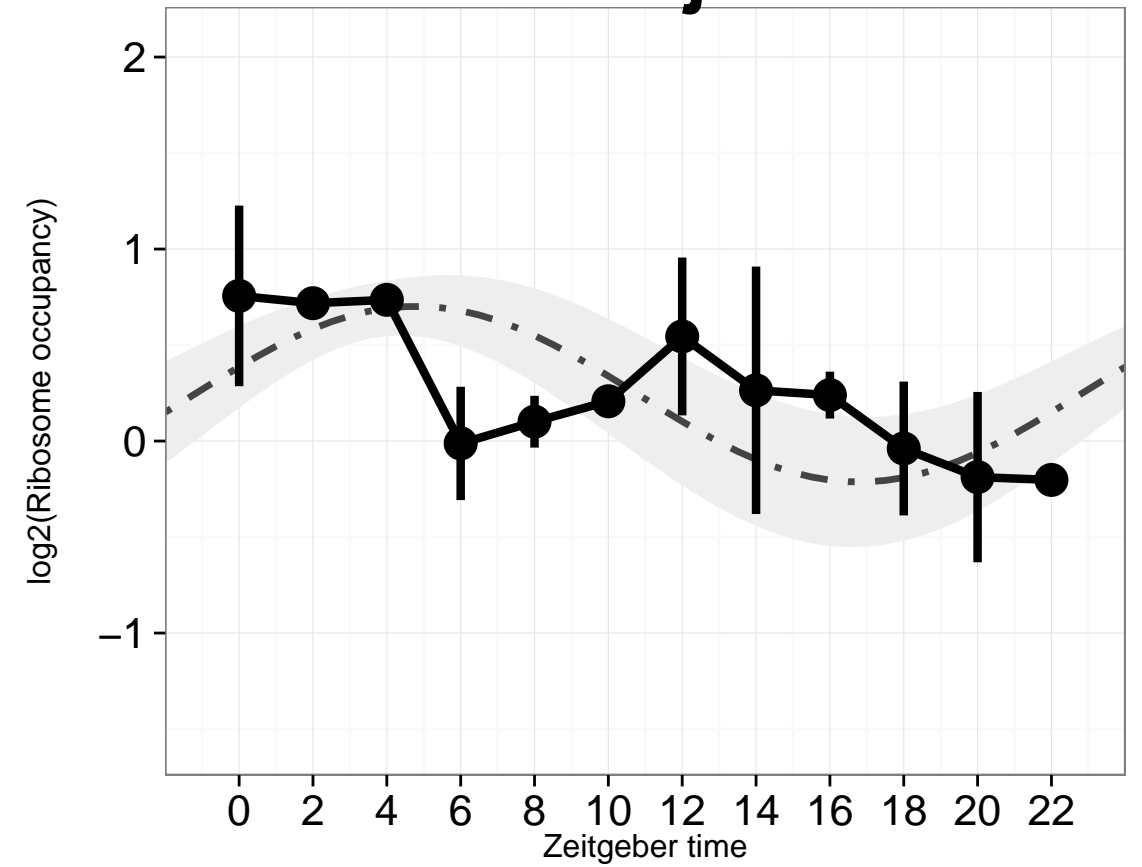

Supplement: SuppDataset_1.zip [file Foxj2_set_A.pdf › Supplemental Dataset 1/A-mRNA_nonrhyth_translation_nonrhyth/Foxj2_set_A.pdf]
