# Supplementary figures and images for: Ribosome profiling reveals the rhythmic liver translatome and circadian clock regulation by upstream open reading frames (part 29 of 113)
Source: HighWire-hosted journal article supplement (doi:10.1101/gr.195404.115), 2015-10-20

## Foxj3

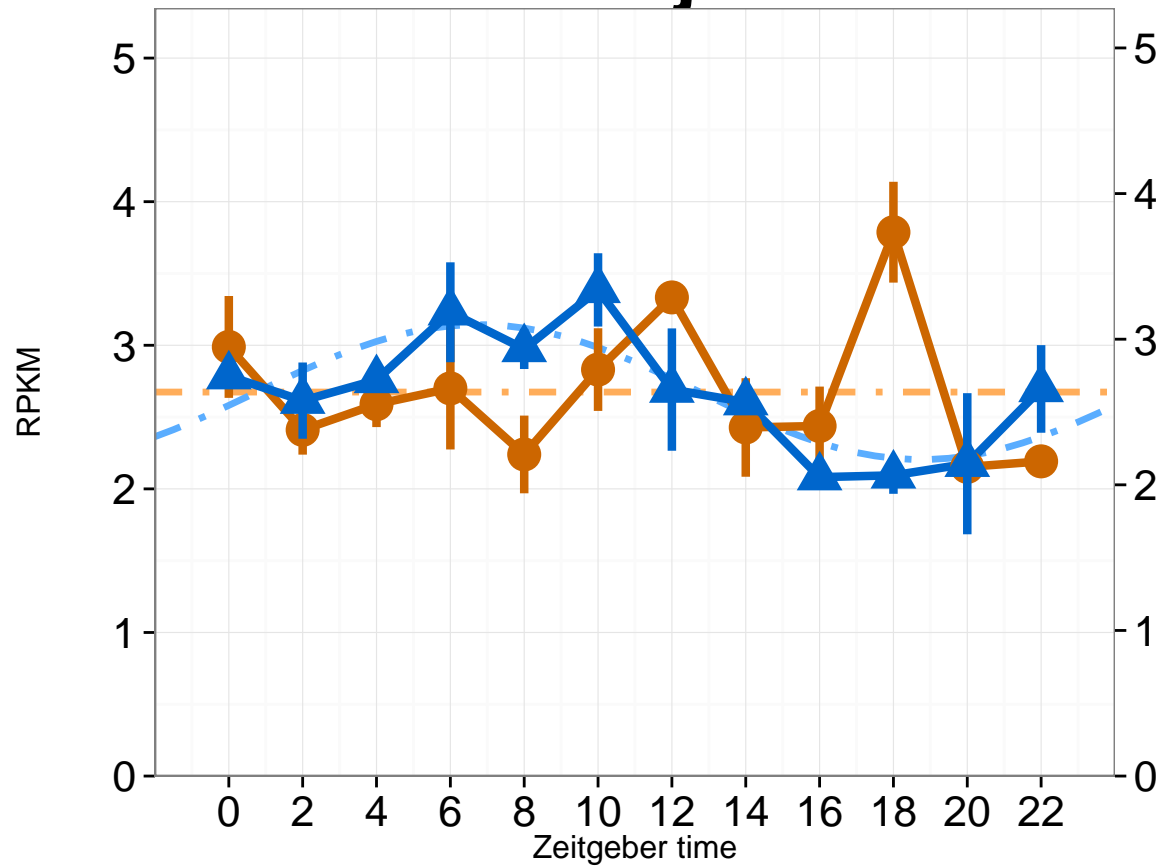

## Foxj3

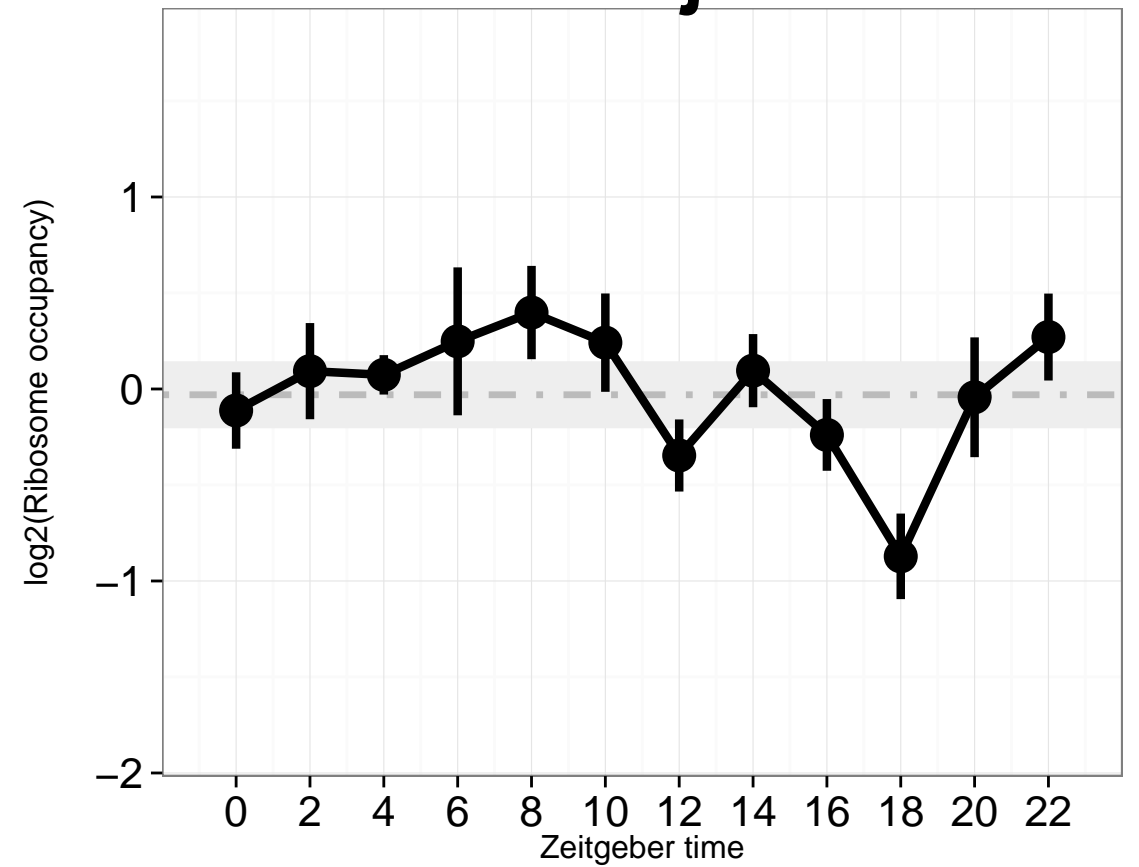

Supplement: SuppDataset_1.zip [file Foxj3_set_A.pdf › Supplemental Dataset 1/A-mRNA_nonrhyth_translation_nonrhyth/Foxj3_set_A.pdf]

## Foxk1

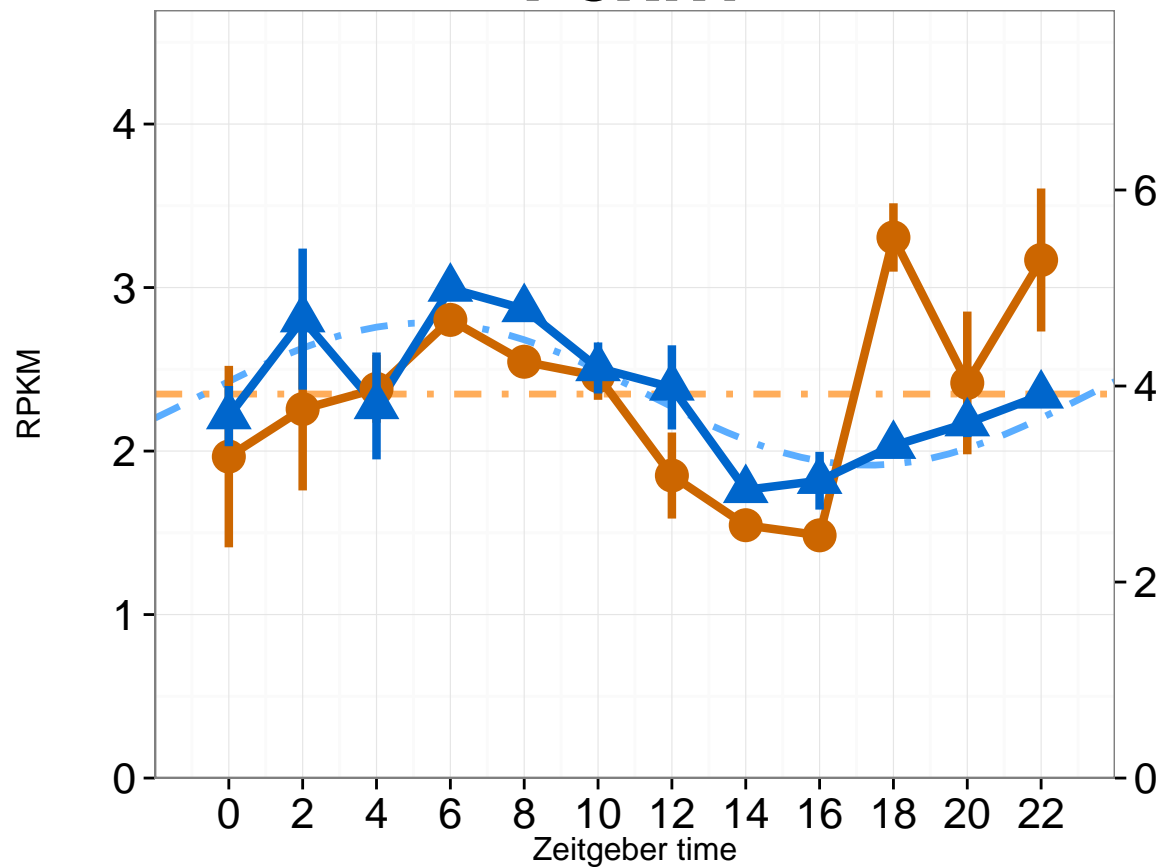

## Foxk1

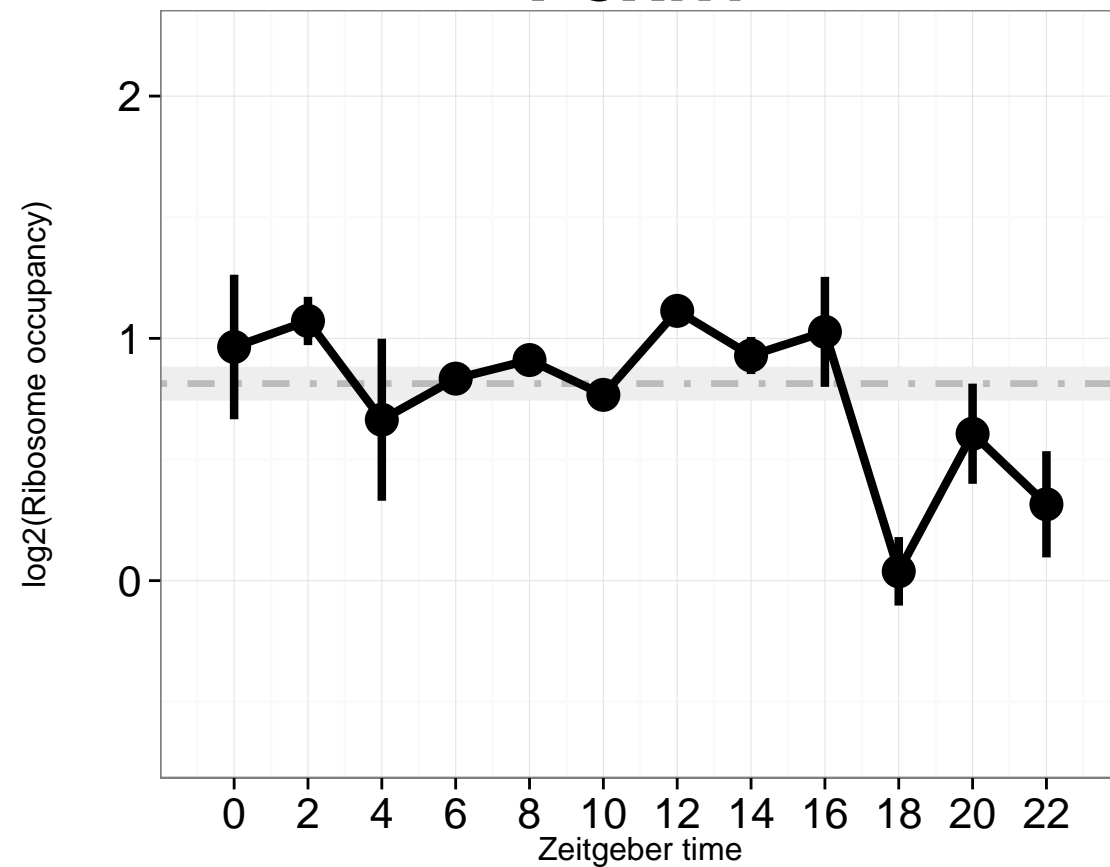

Supplement: SuppDataset_1.zip [file Foxk1_set_A.pdf › Supplemental Dataset 1/A-mRNA_nonrhyth_translation_nonrhyth/Foxk1_set_A.pdf]

## Foxk2

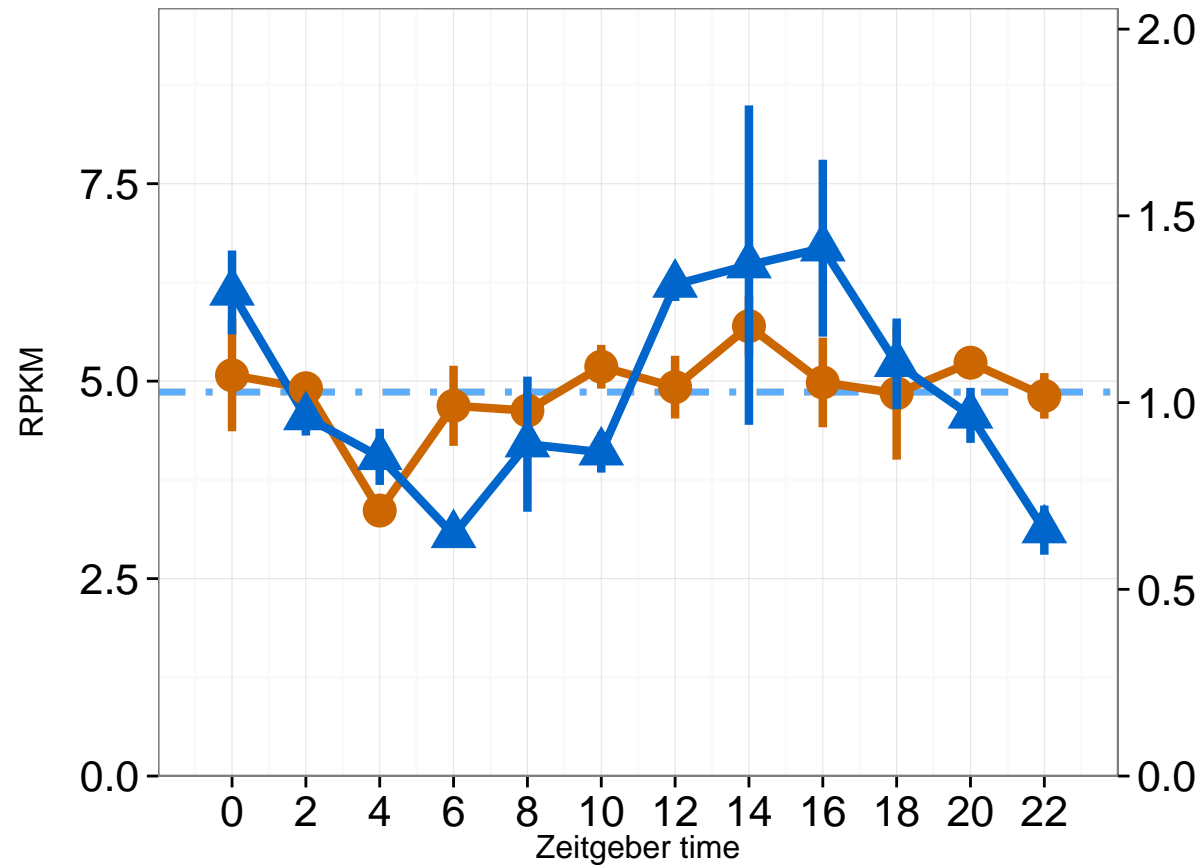

## Foxk2

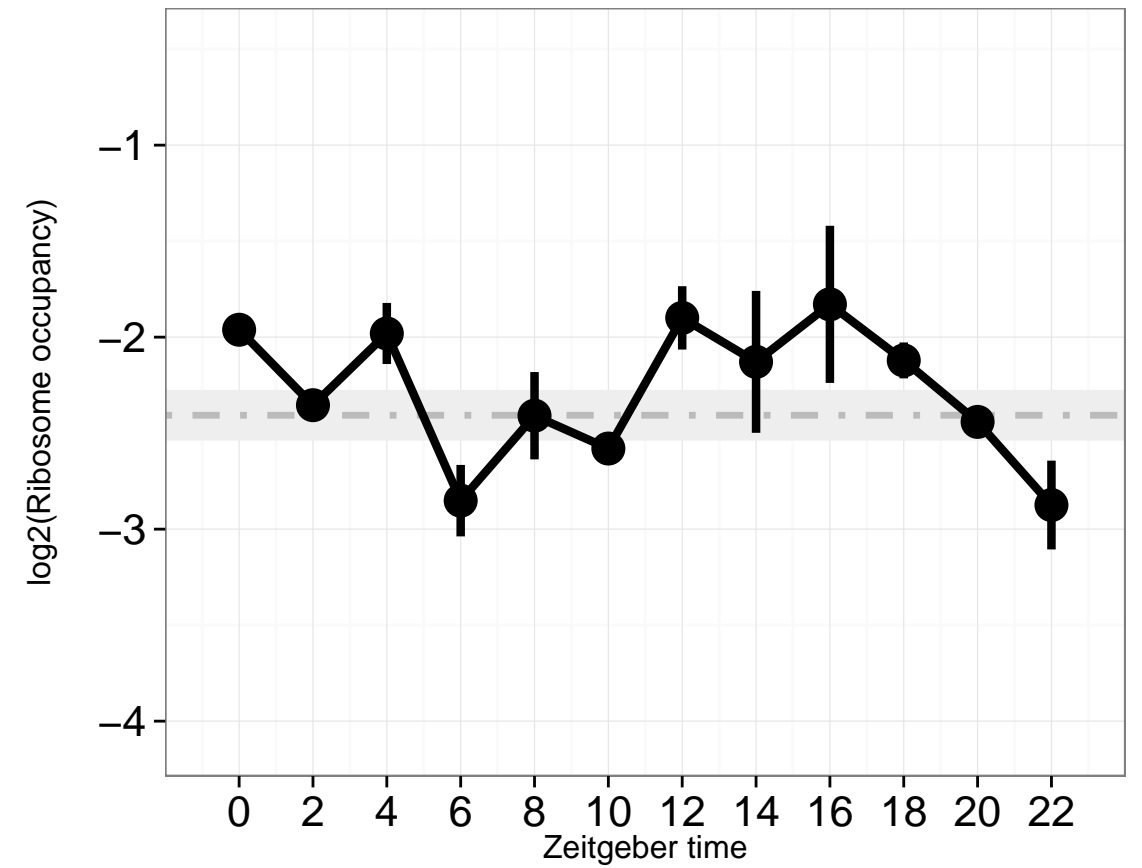

Supplement: SuppDataset_1.zip [file Foxk2_set_A.pdf › Supplemental Dataset 1/A-mRNA_nonrhyth_translation_nonrhyth/Foxk2_set_A.pdf]

## Foxn2

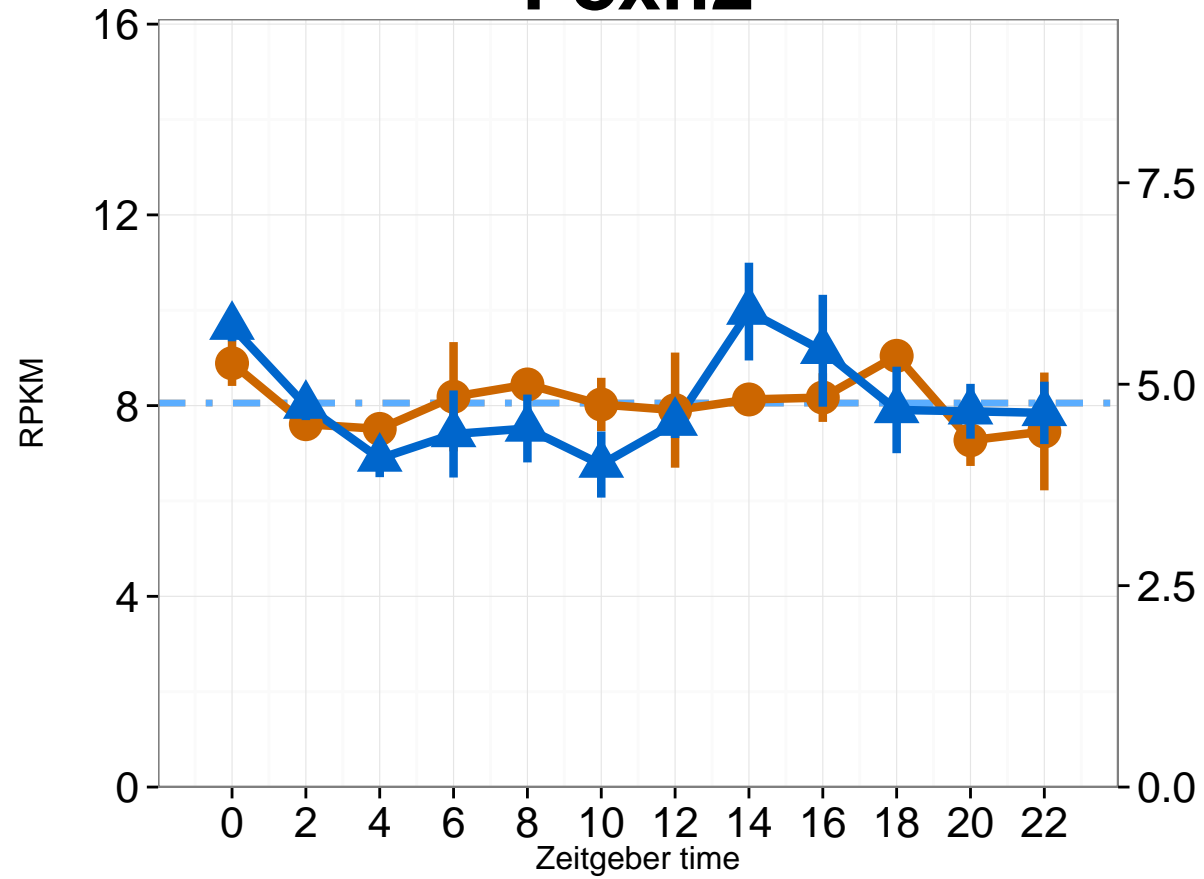

## Foxn2

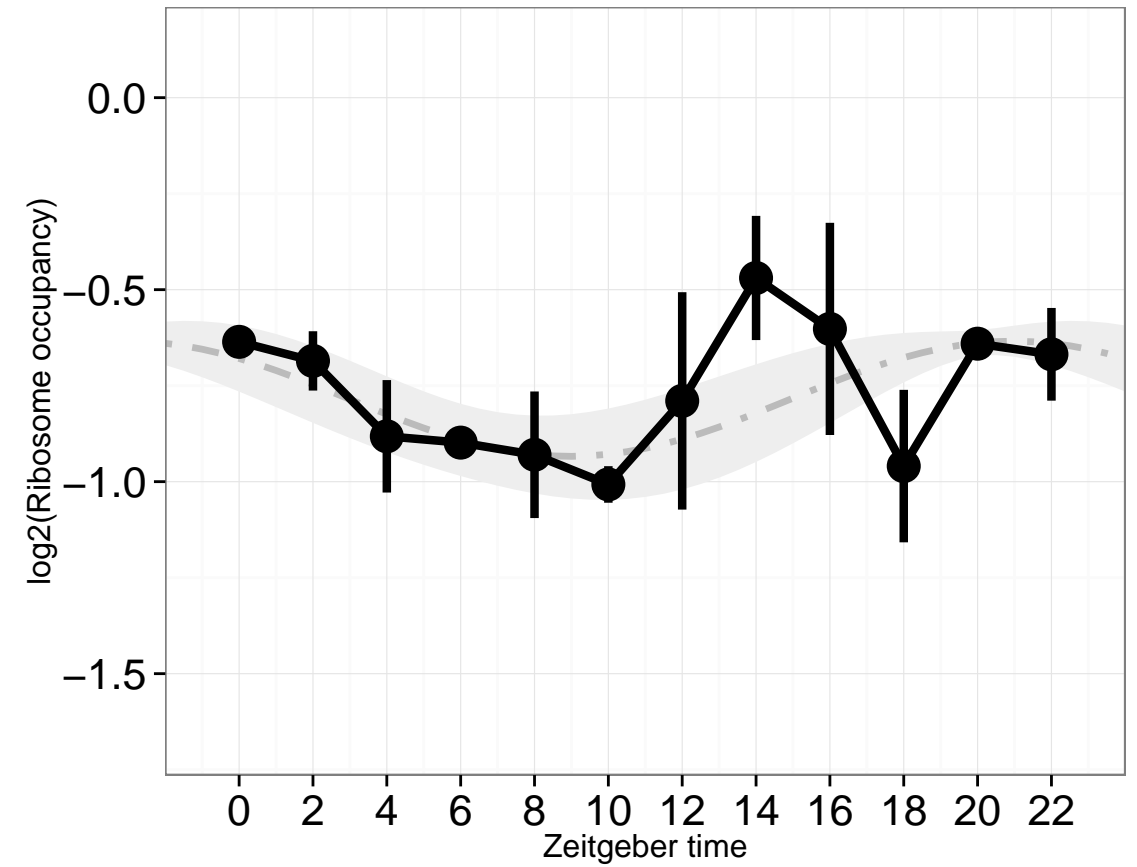

Supplement: SuppDataset_1.zip [file Foxn2_set_A.pdf › Supplemental Dataset 1/A-mRNA_nonrhyth_translation_nonrhyth/Foxn2_set_A.pdf]

## Foxn3

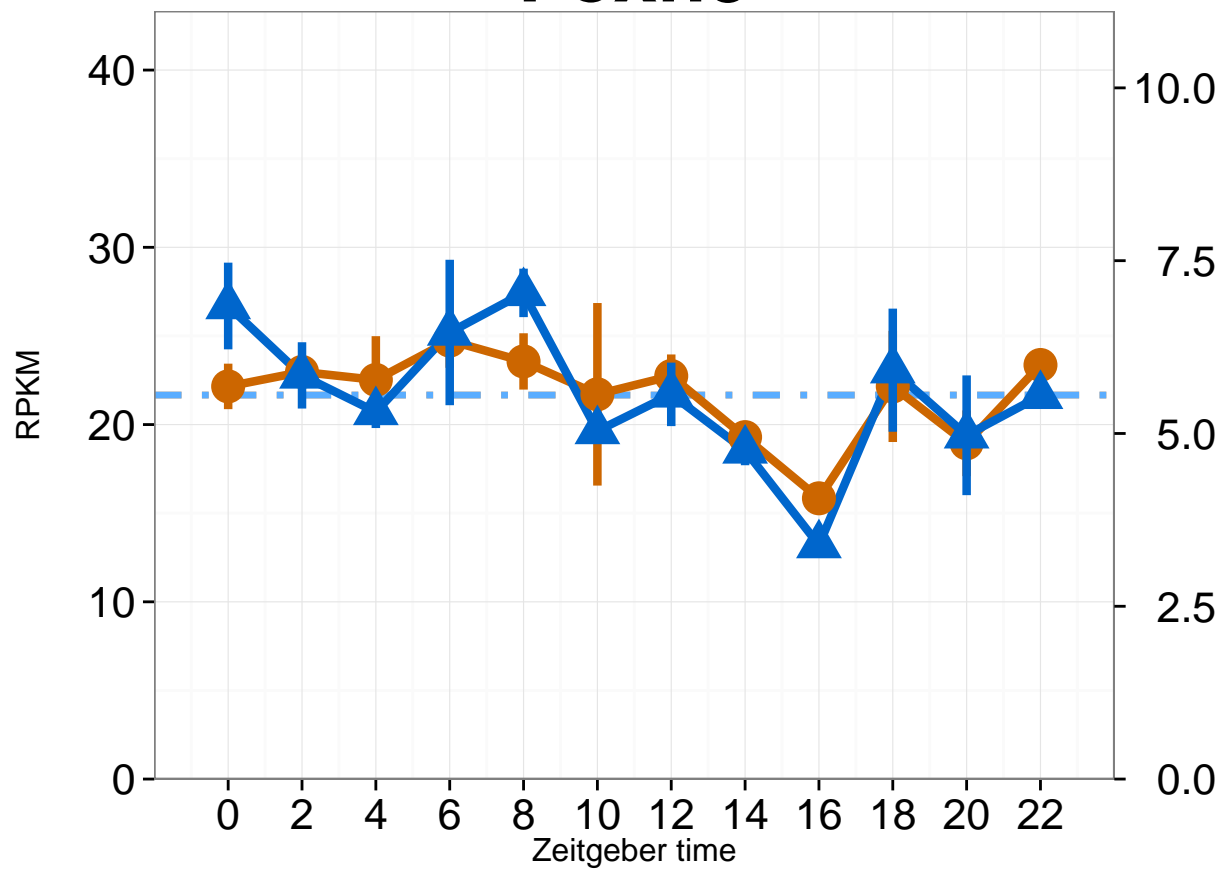

## Foxn3

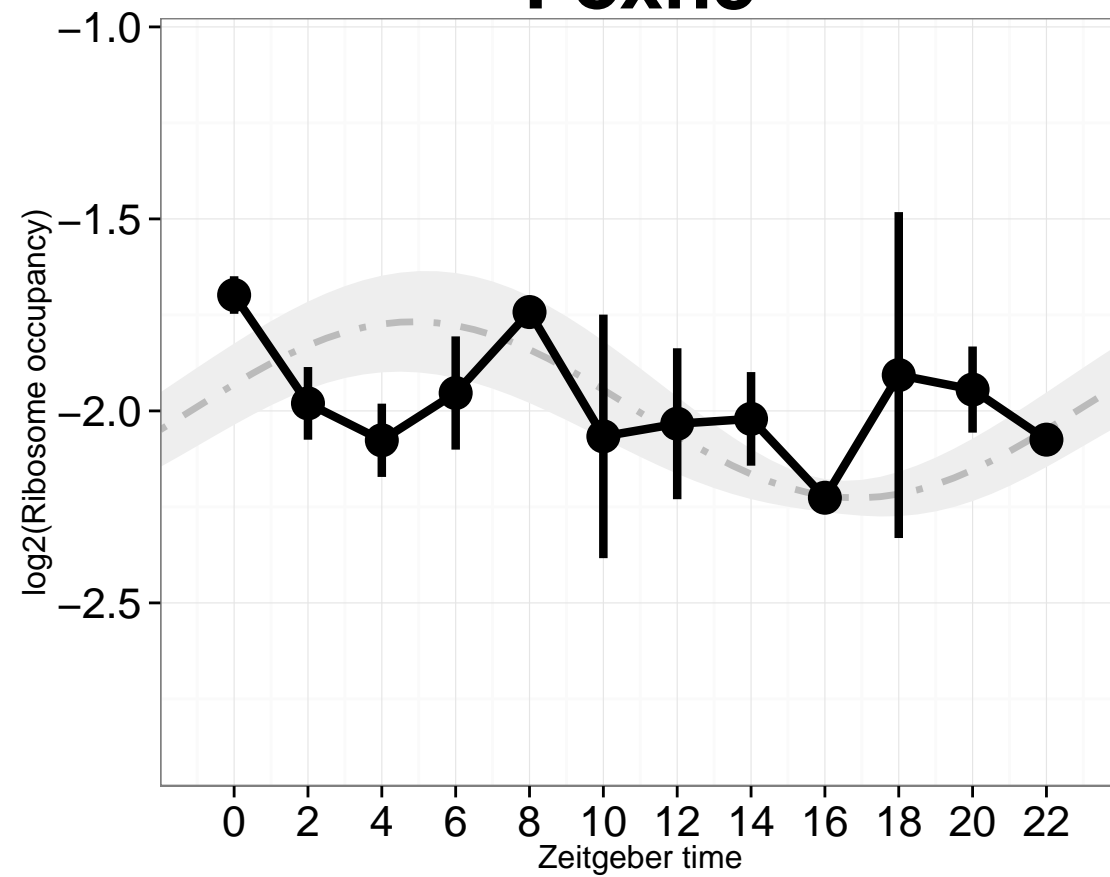

Supplement: SuppDataset_1.zip [file Foxn3_set_A.pdf › Supplemental Dataset 1/A-mRNA_nonrhyth_translation_nonrhyth/Foxn3_set_A.pdf]

## Foxo1

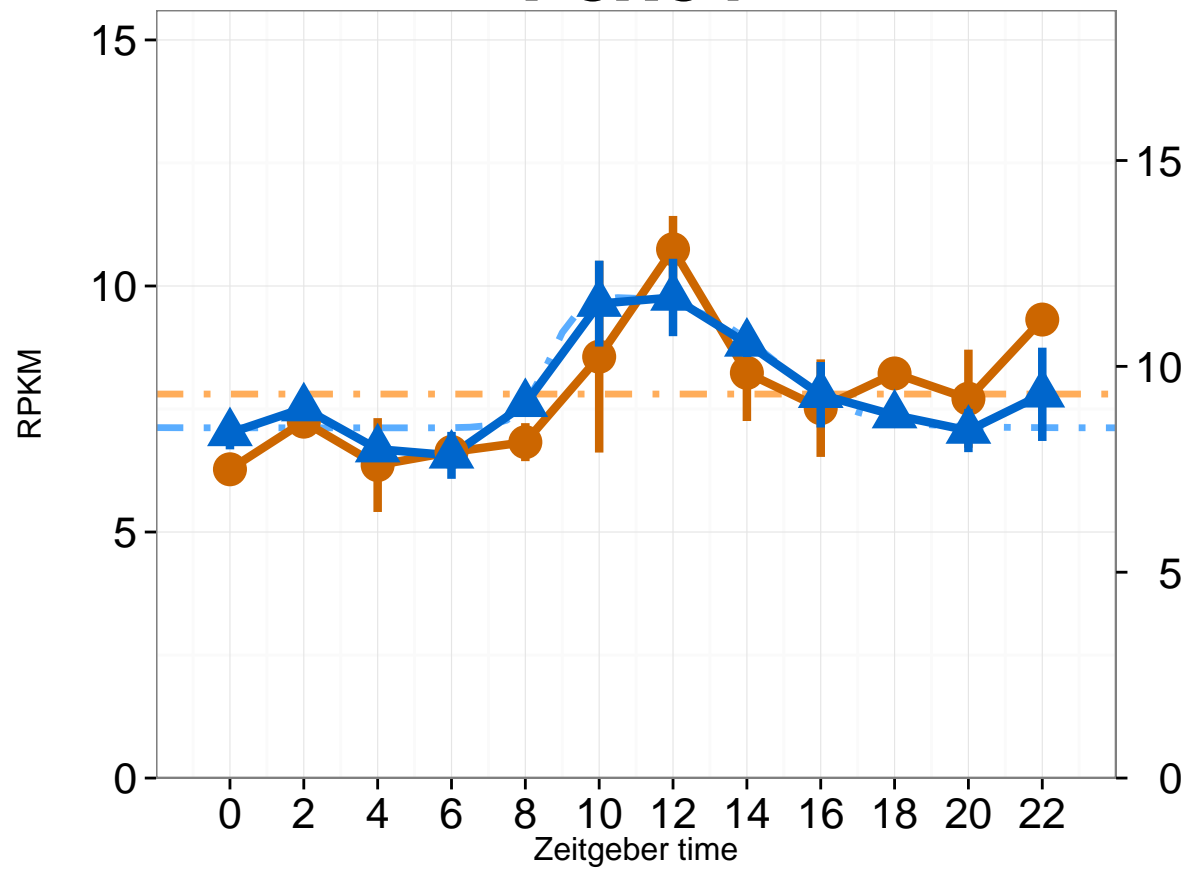

## Foxo1

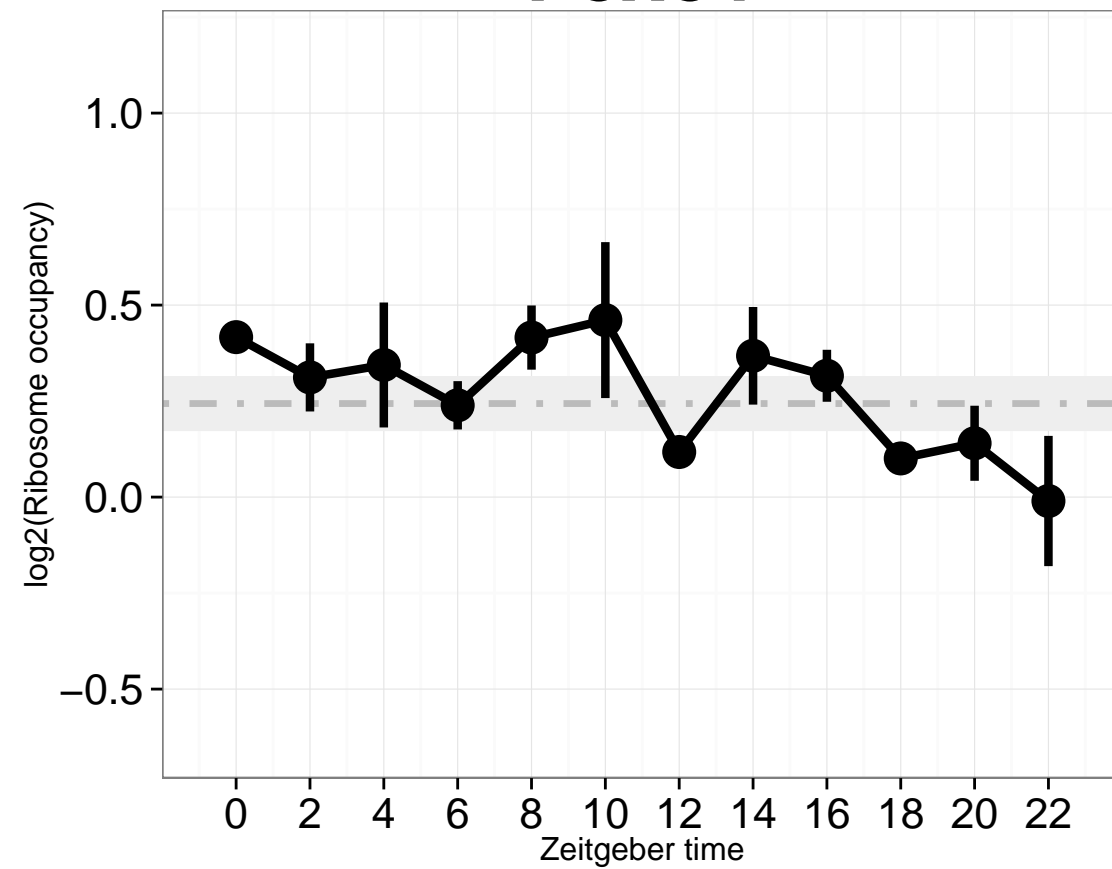

Supplement: SuppDataset_1.zip [file Foxo1_set_A.pdf › Supplemental Dataset 1/A-mRNA_nonrhyth_translation_nonrhyth/Foxo1_set_A.pdf]

## Foxo3

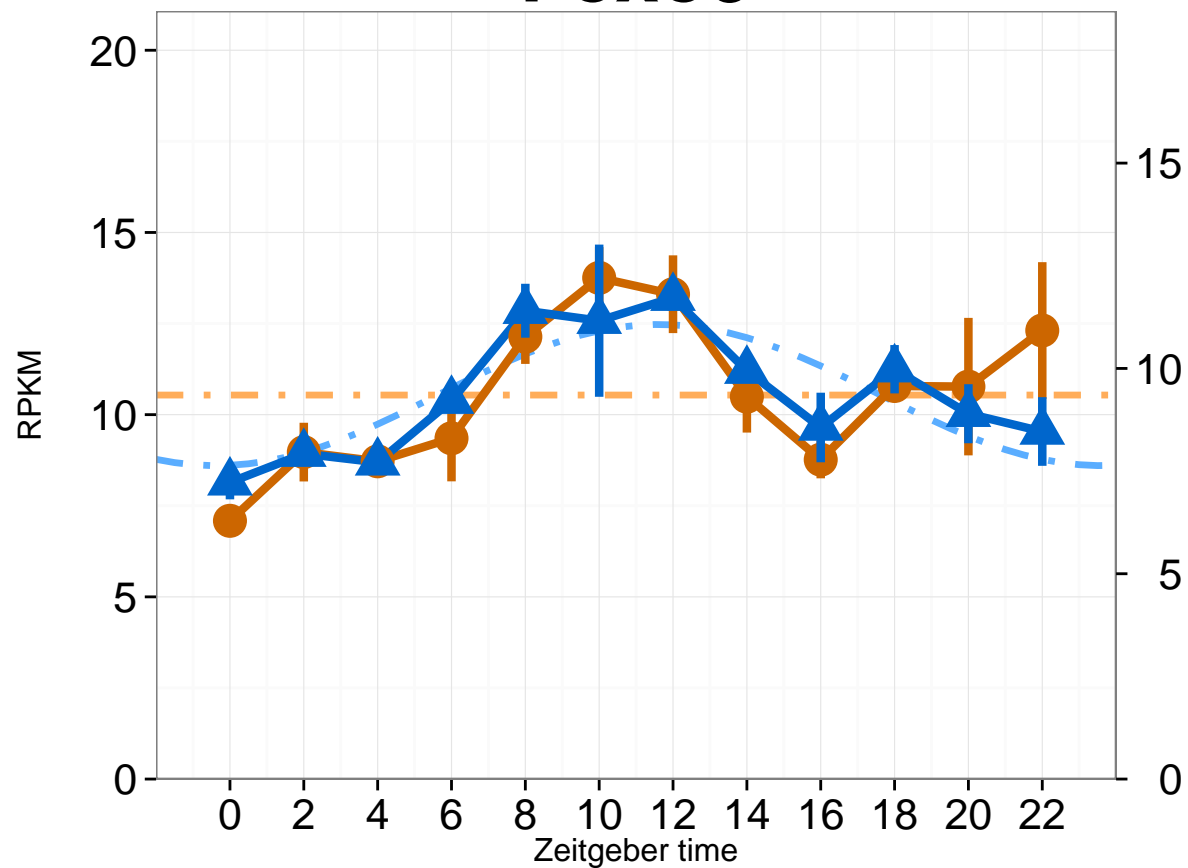

## Foxo3

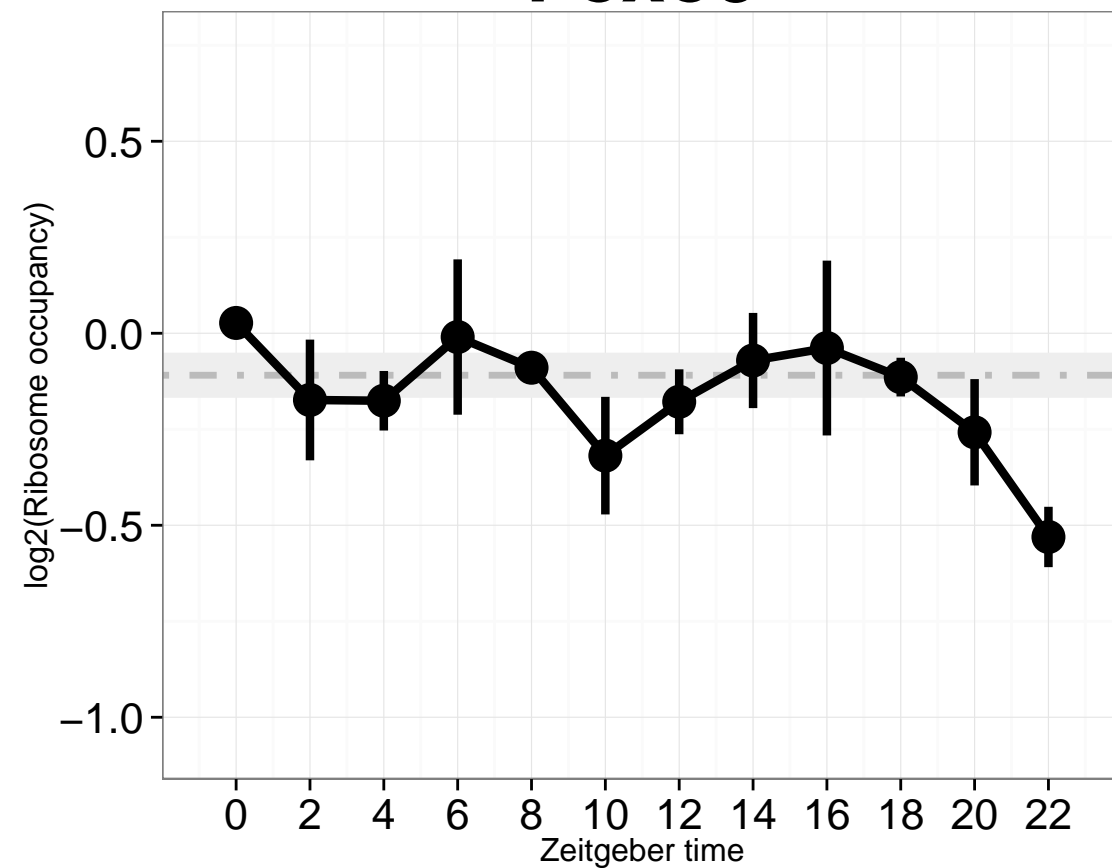

Supplement: SuppDataset_1.zip [file Foxo3_set_A.pdf › Supplemental Dataset 1/A-mRNA_nonrhyth_translation_nonrhyth/Foxo3_set_A.pdf]

## Foxo4

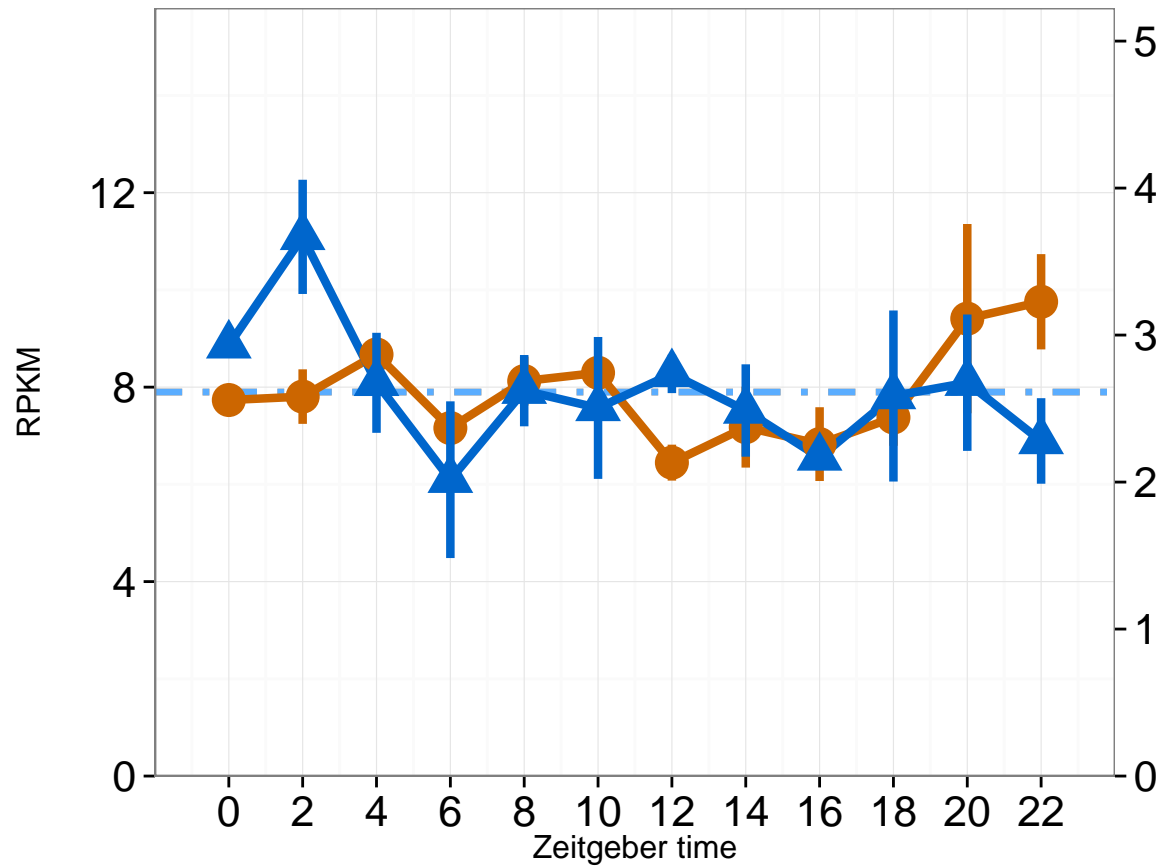

## Foxo4

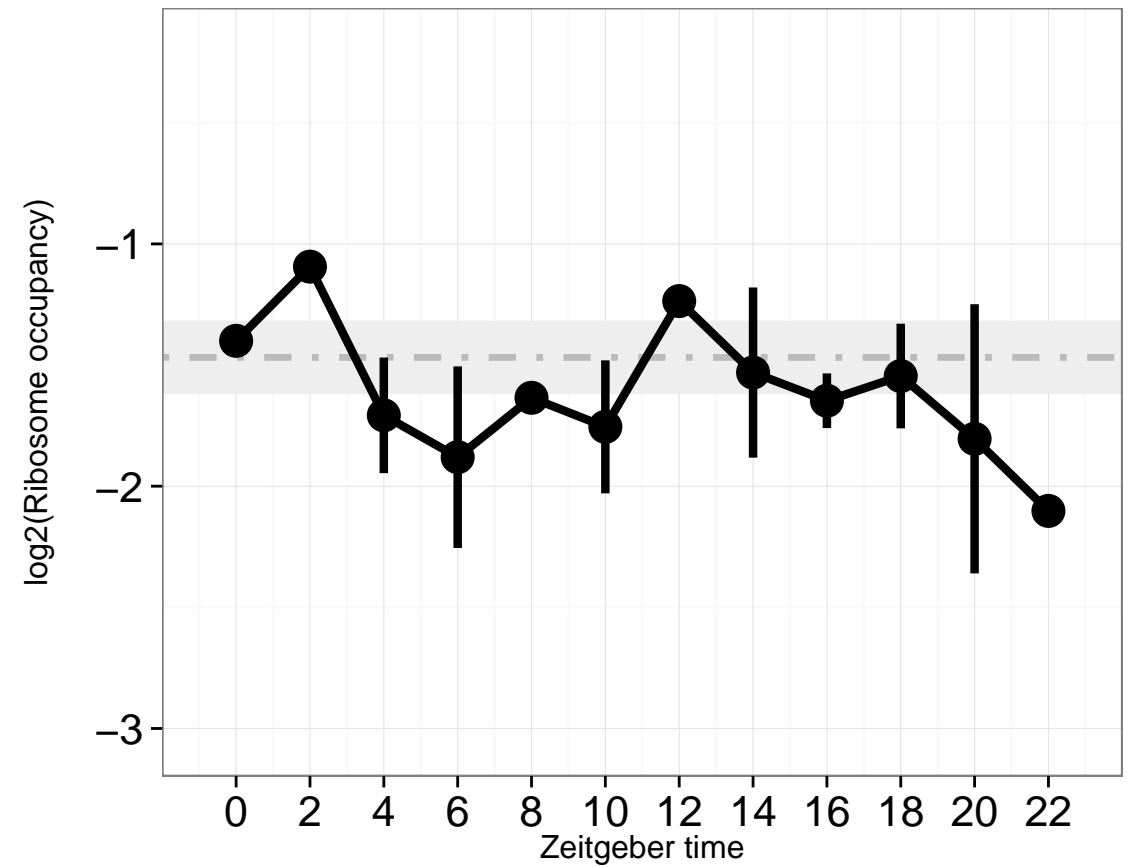

Supplement: SuppDataset_1.zip [file Foxo4_set_A.pdf › Supplemental Dataset 1/A-mRNA_nonrhyth_translation_nonrhyth/Foxo4_set_A.pdf]

## Foxp2

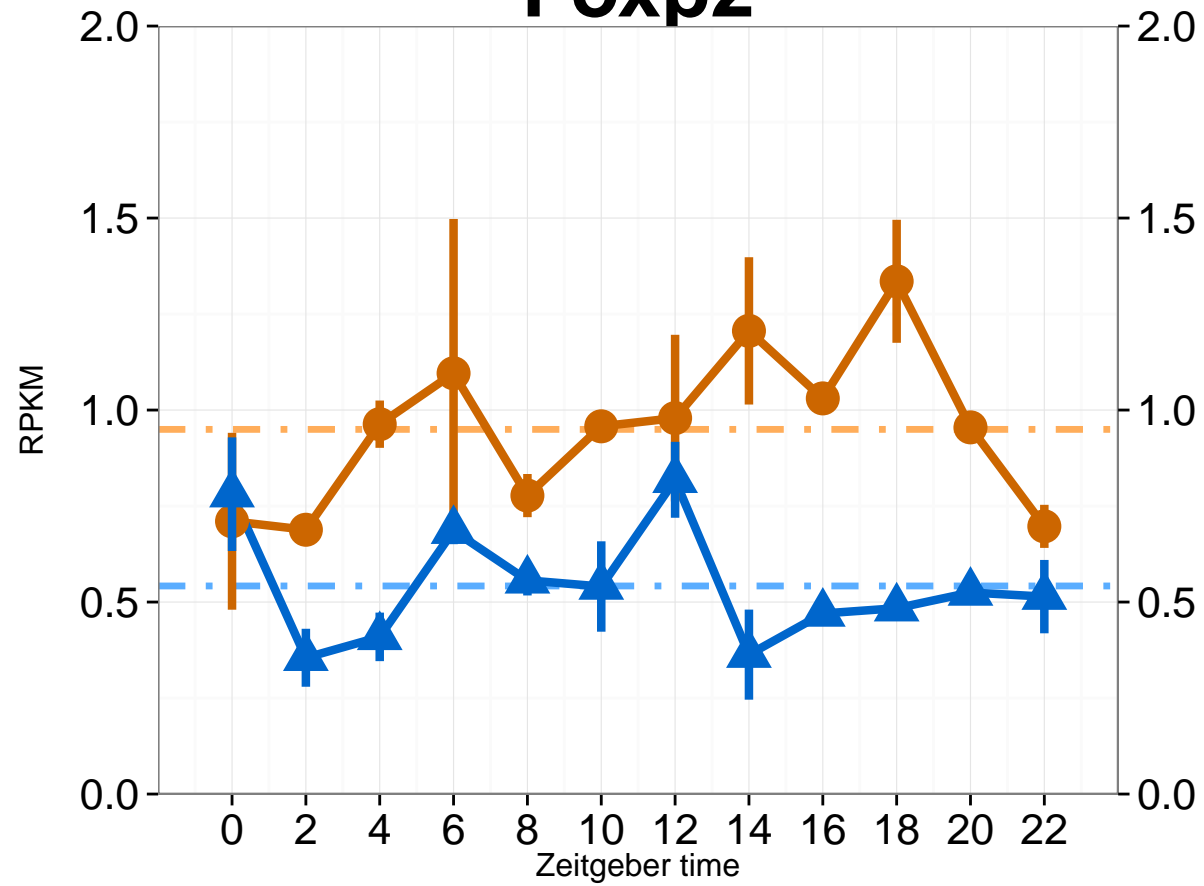

## Foxp2

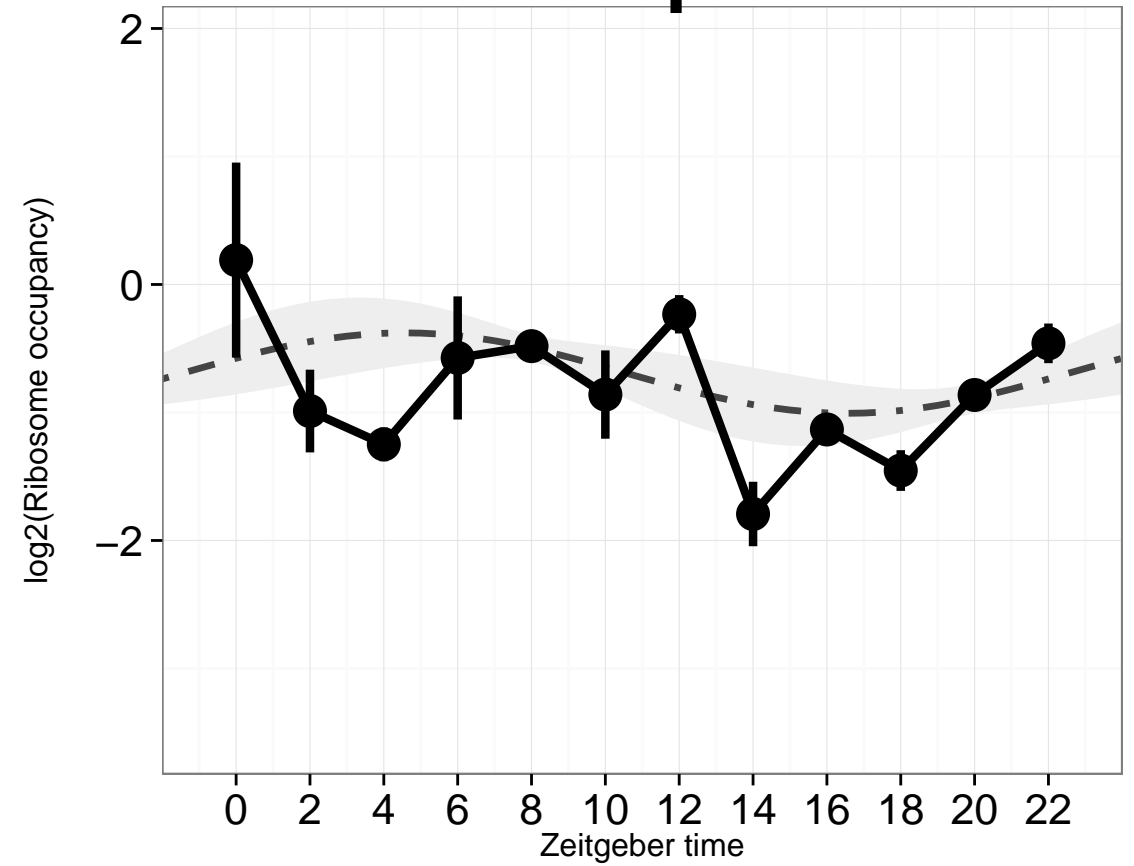

Supplement: SuppDataset_1.zip [file Foxp2_set_A.pdf › Supplemental Dataset 1/A-mRNA_nonrhyth_translation_nonrhyth/Foxp2_set_A.pdf]

## Foxp4

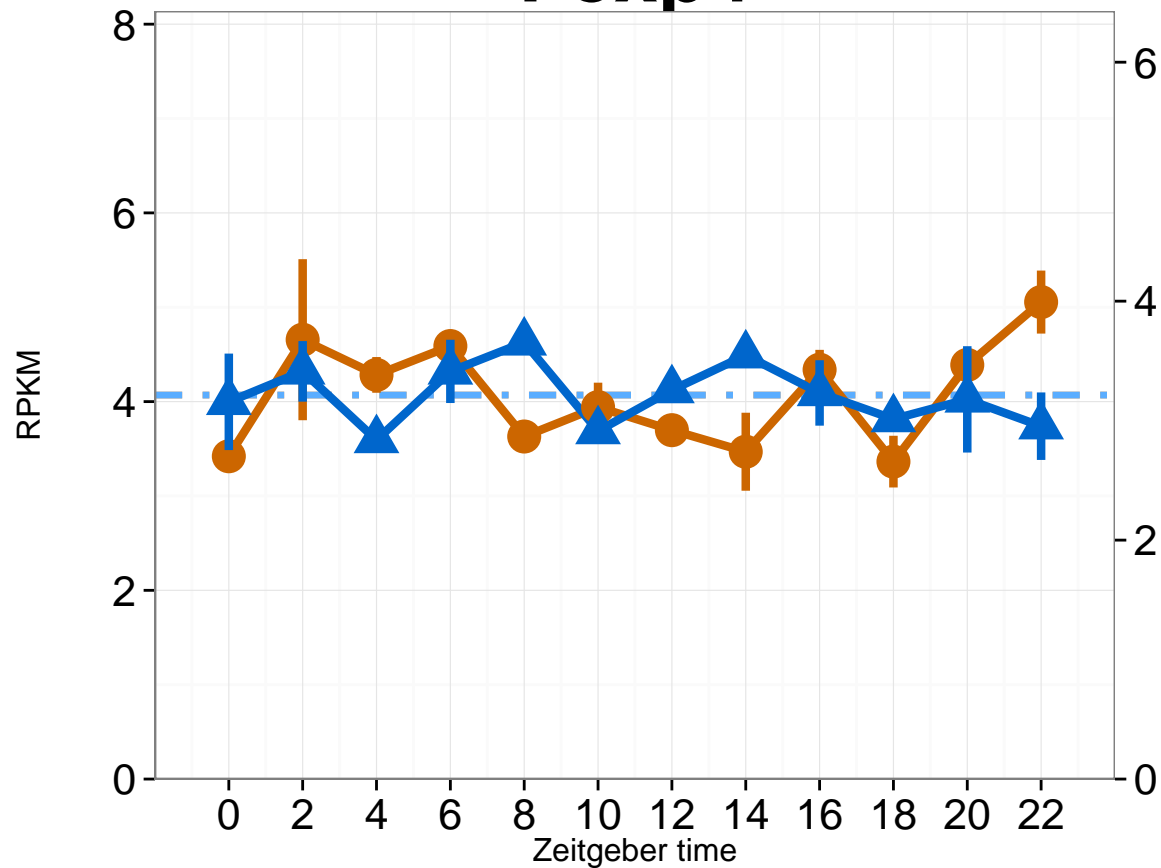

## Foxp4

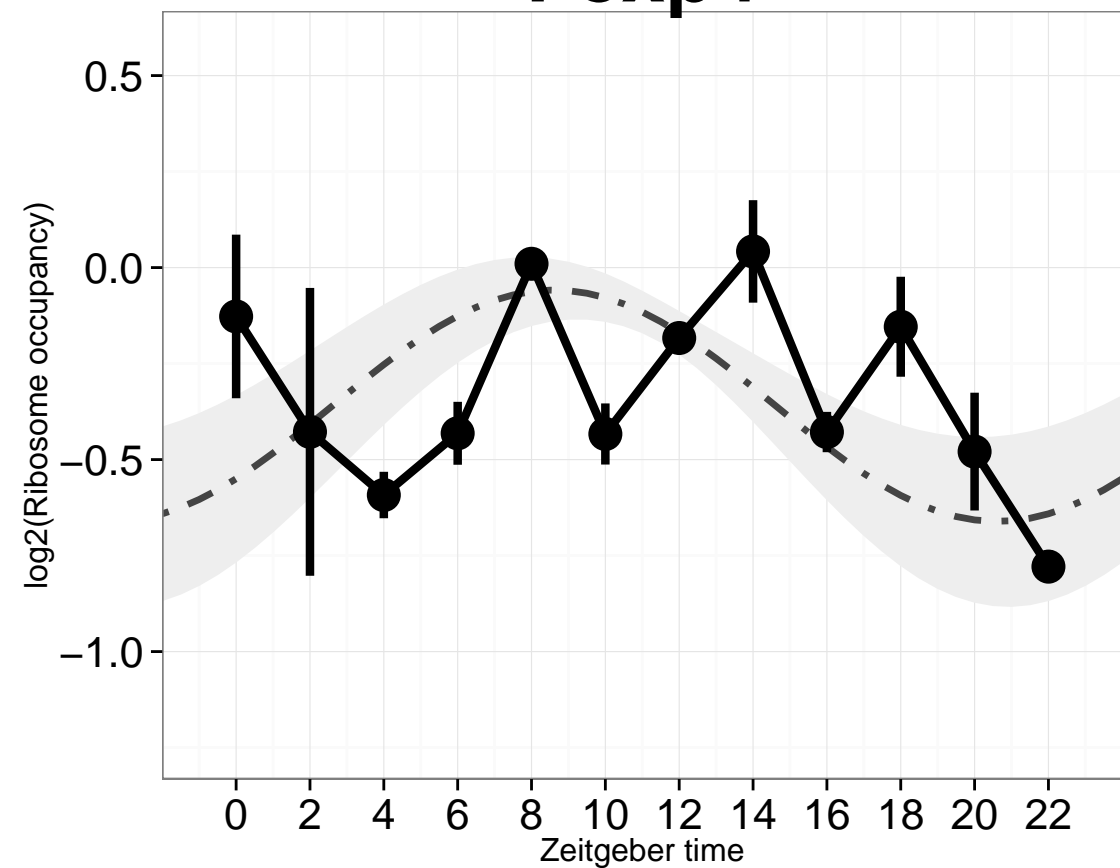

Supplement: SuppDataset_1.zip [file Foxp4_set_A.pdf › Supplemental Dataset 1/A-mRNA_nonrhyth_translation_nonrhyth/Foxp4_set_A.pdf]

# Foxq1

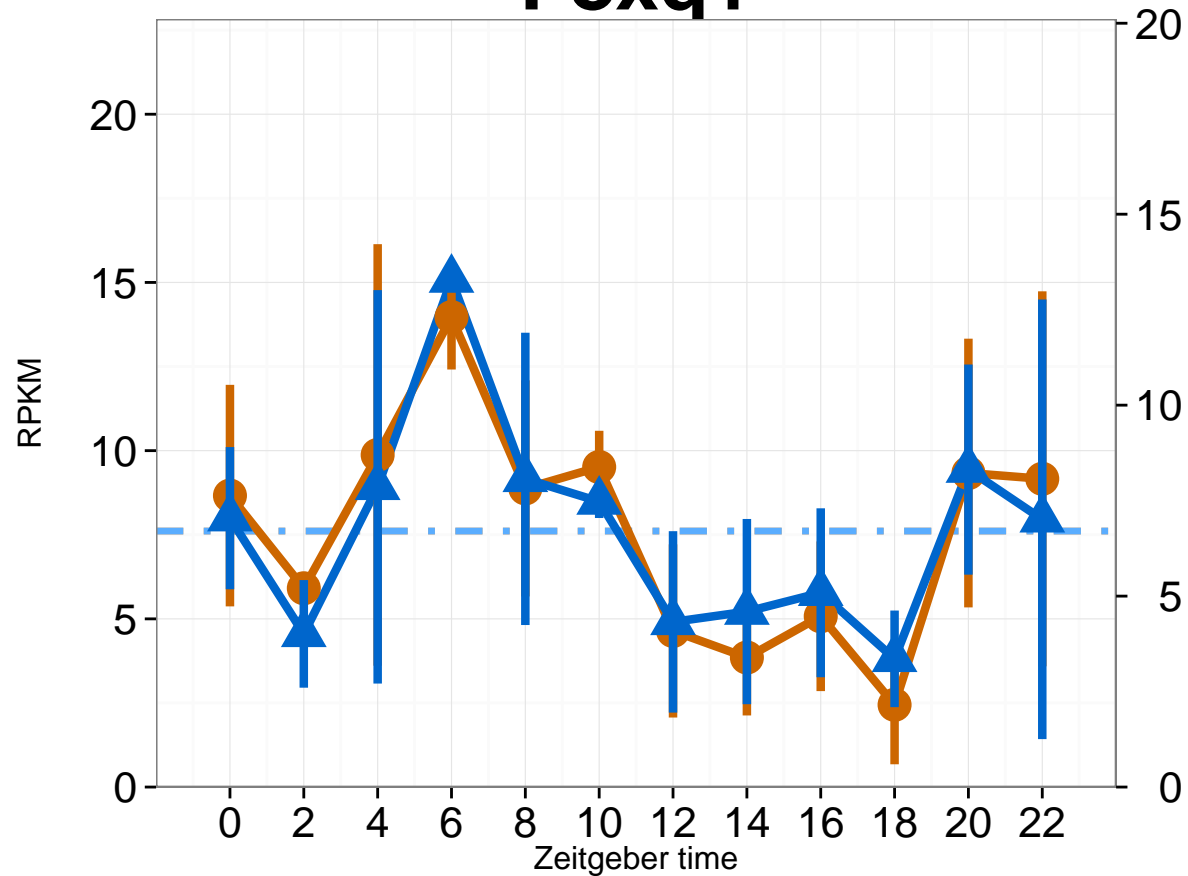

# Foxq1

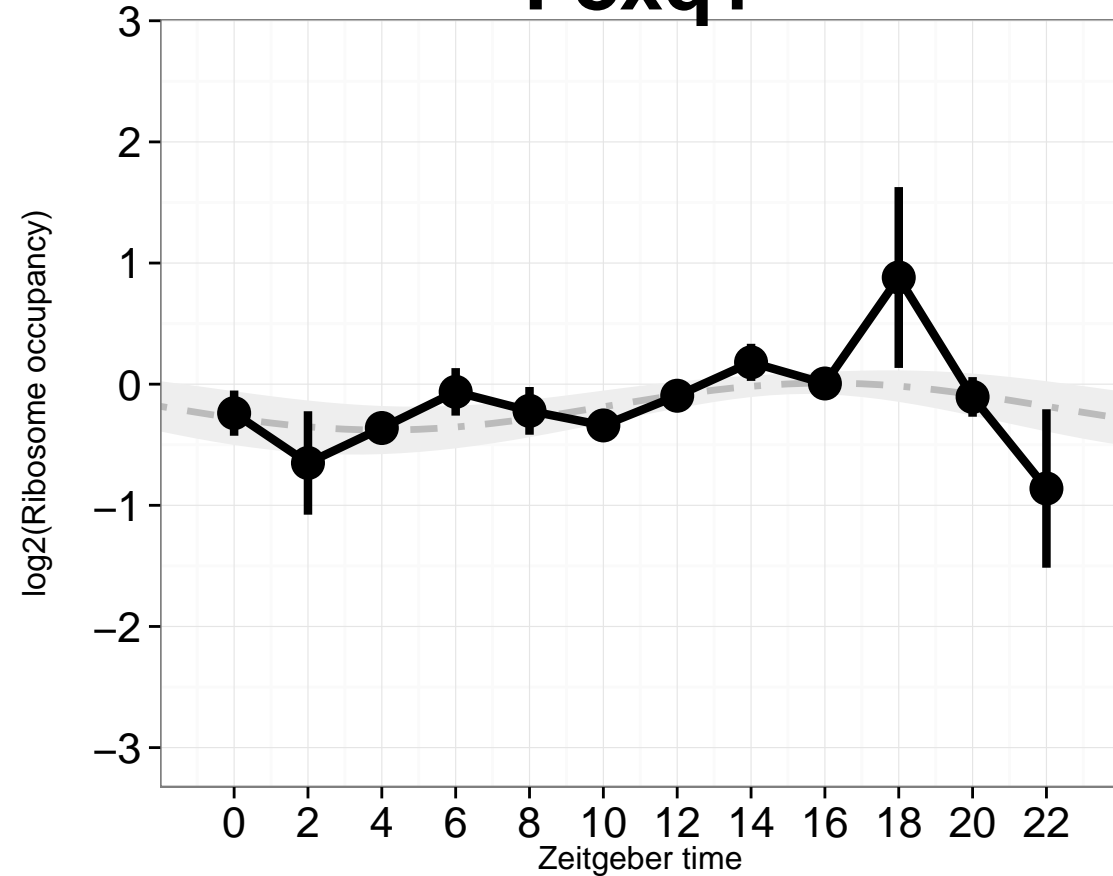

Supplement: SuppDataset_1.zip [file Foxq1_set_A.pdf › Supplemental Dataset 1/A-mRNA_nonrhyth_translation_nonrhyth/Foxq1_set_A.pdf]

# Foxred1

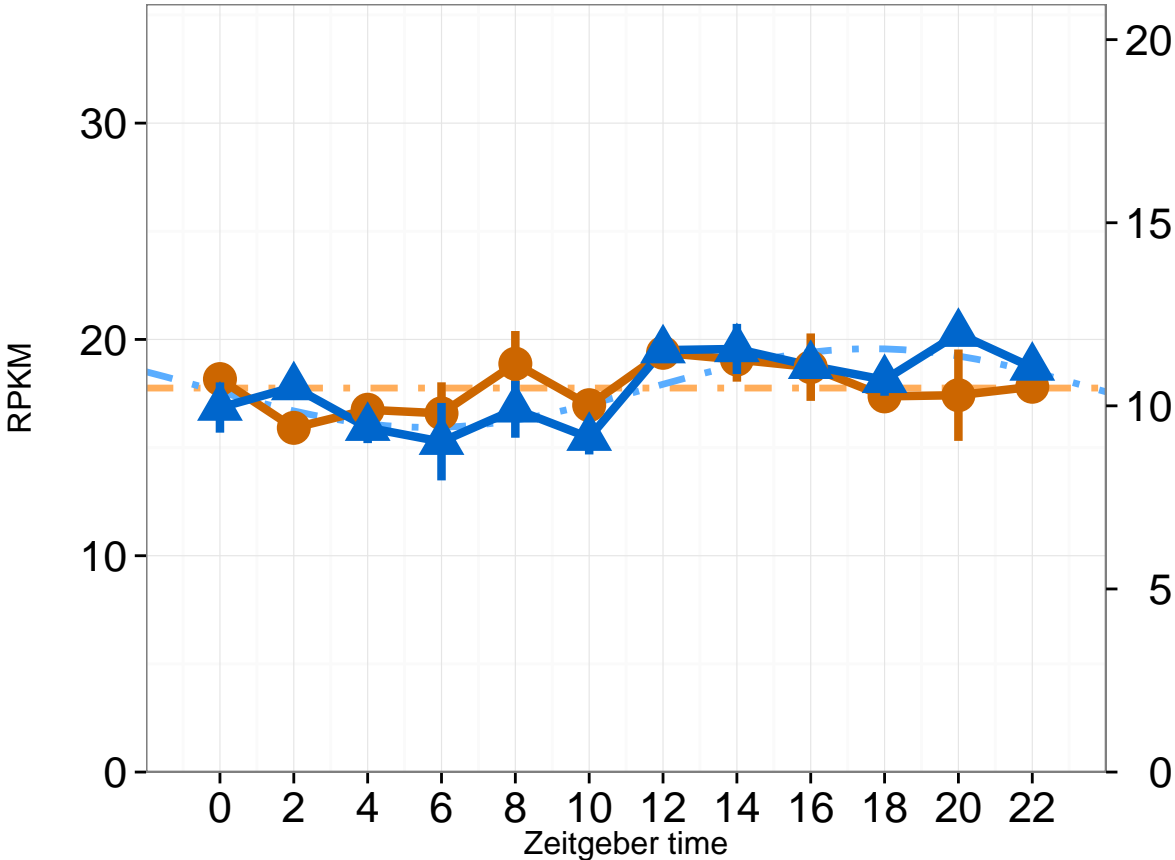

# Foxred1

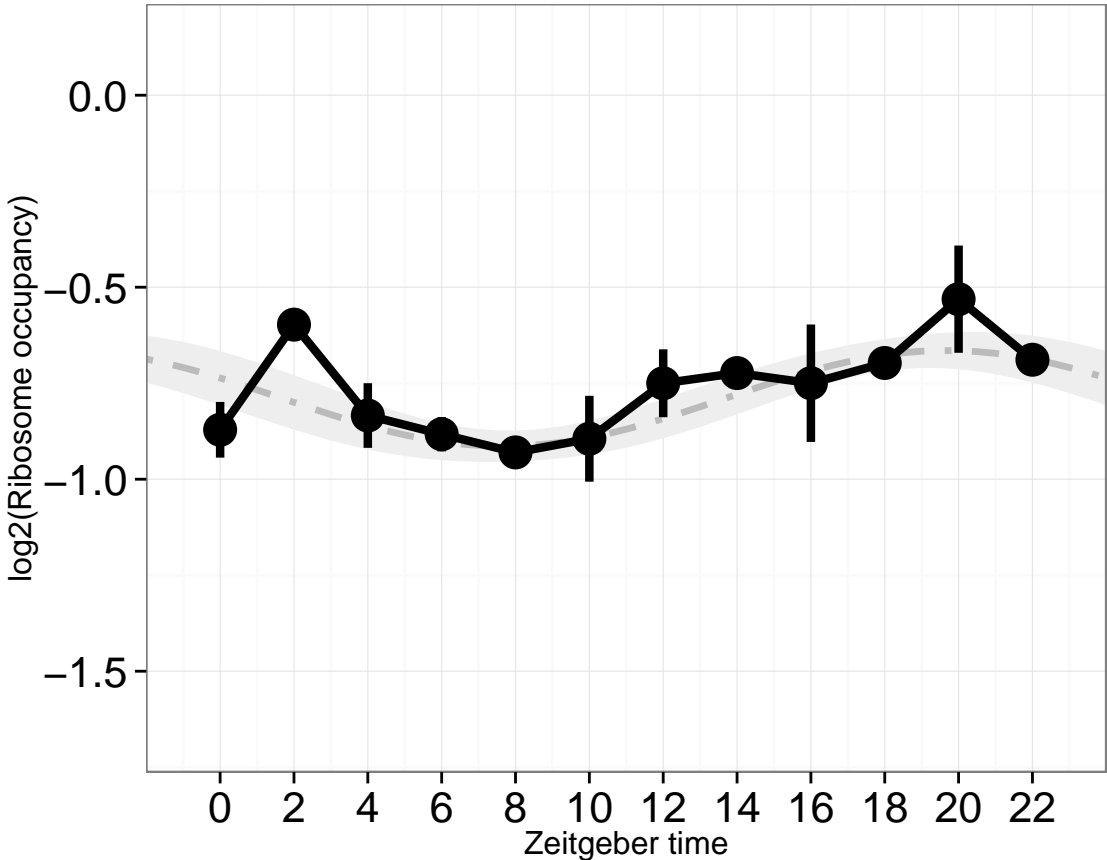

Supplement: SuppDataset_1.zip [file Foxred1_set_A.pdf › Supplemental Dataset 1/A-mRNA_nonrhyth_translation_nonrhyth/Foxred1_set_A.pdf]

## Fpgt

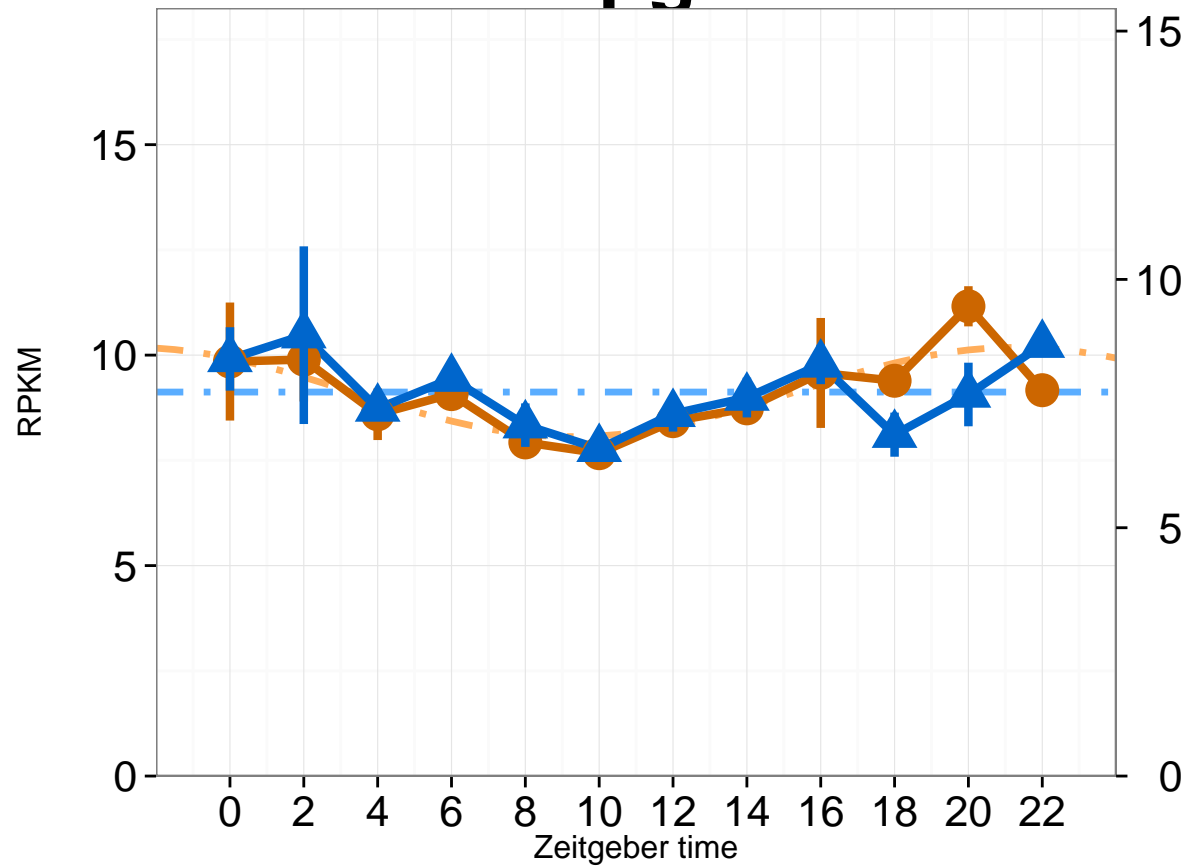

## Fpgt

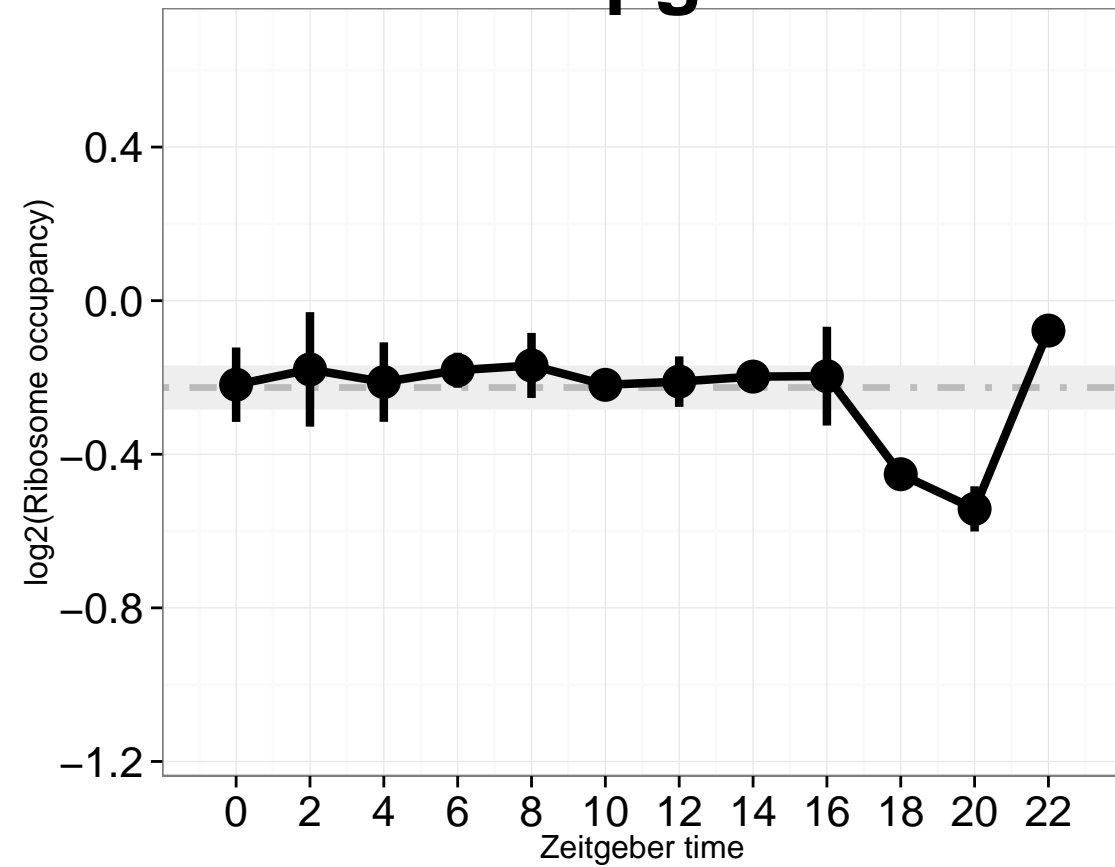

Supplement: SuppDataset_1.zip [file Fpgt_set_A.pdf › Supplemental Dataset 1/A-mRNA_nonrhyth_translation_nonrhyth/Fpgt_set_A.pdf]

# Fpr1

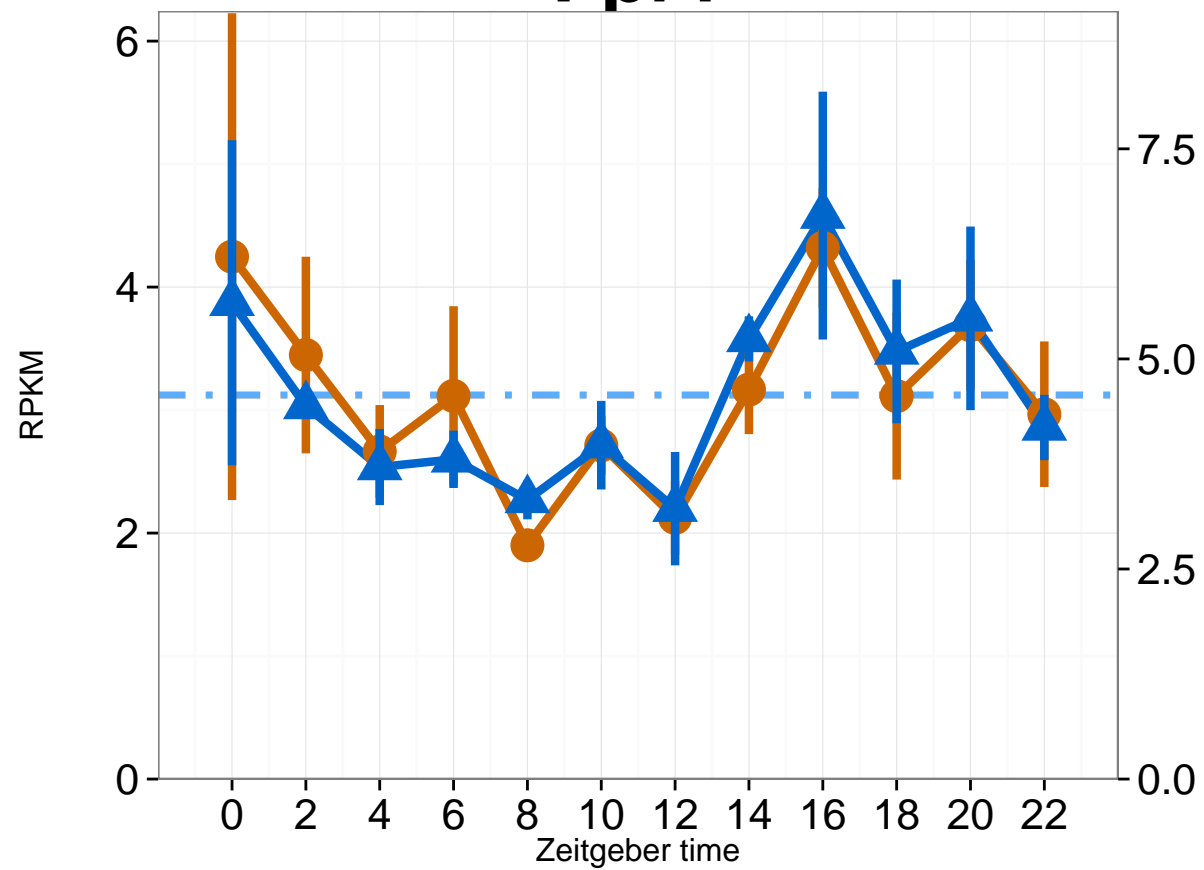

# Fpr1

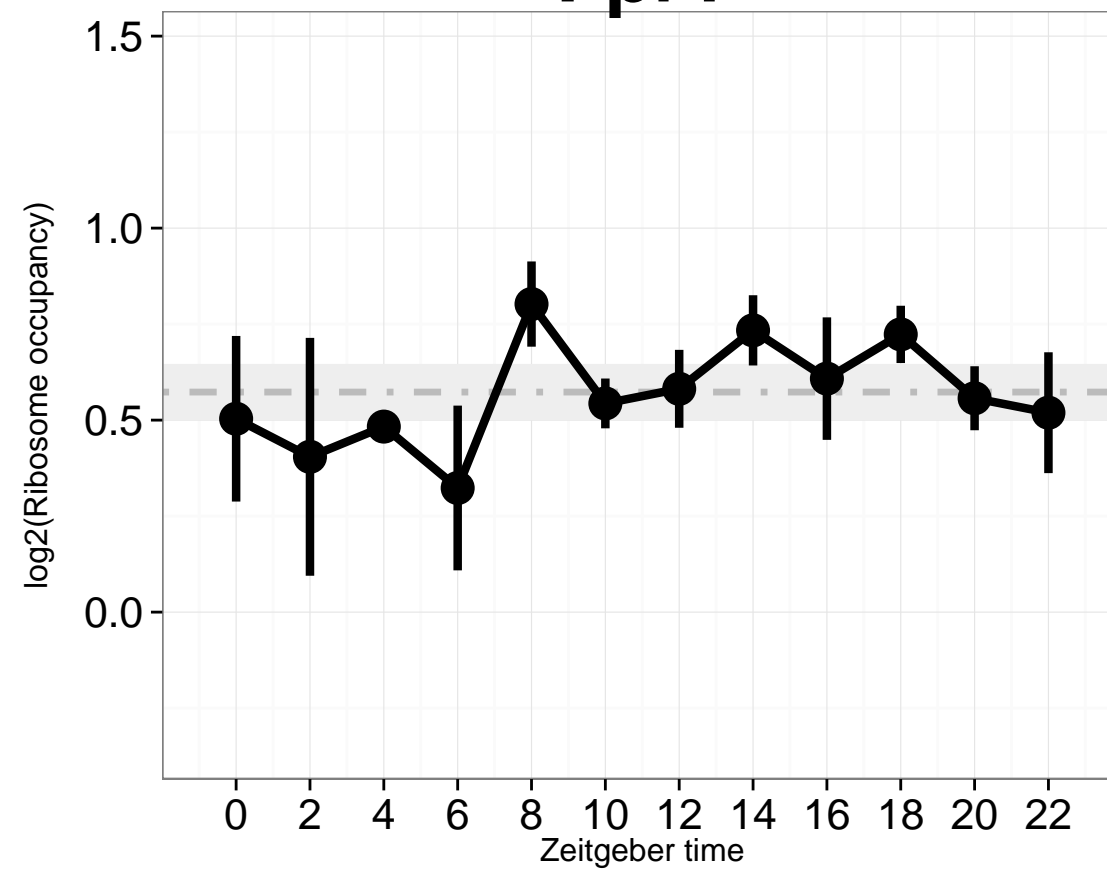

Supplement: SuppDataset_1.zip [file Fpr1_set_A.pdf › Supplemental Dataset 1/A-mRNA_nonrhyth_translation_nonrhyth/Fpr1_set_A.pdf]

# Fpr2

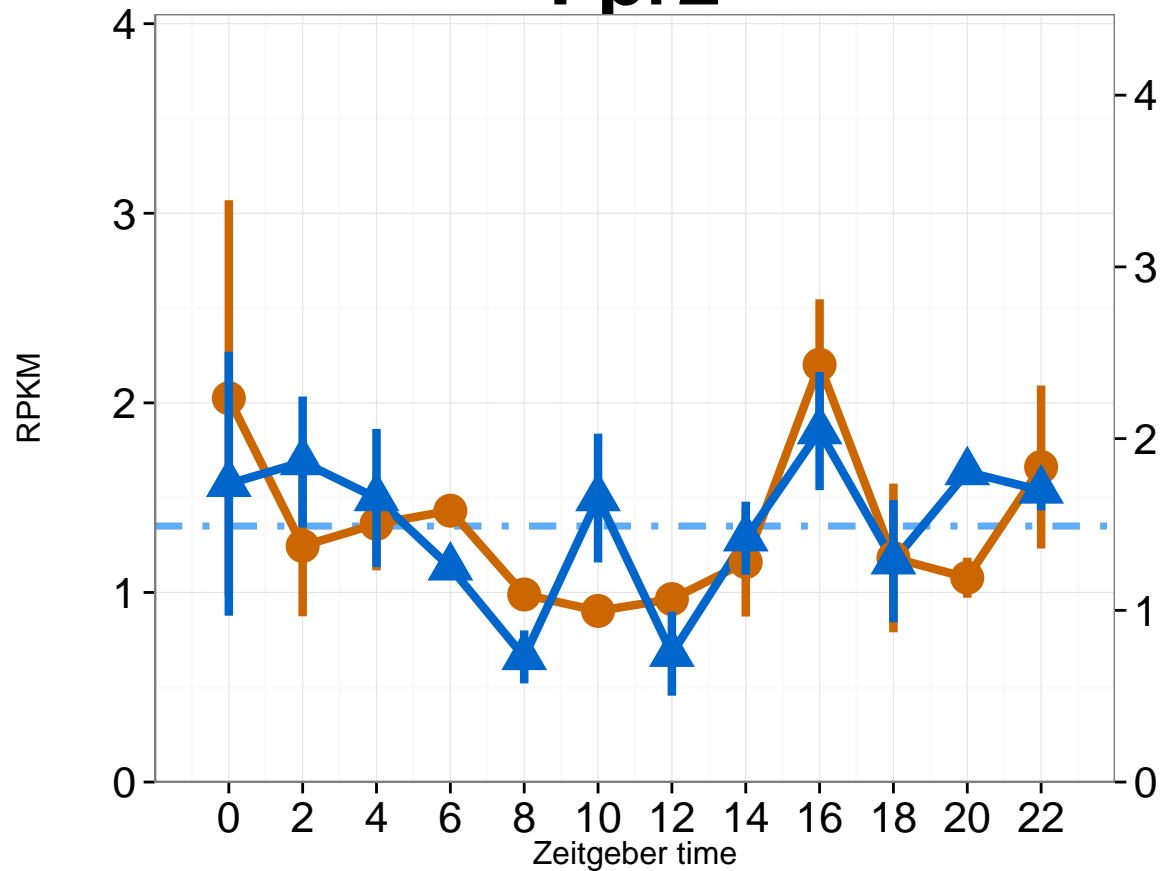

# Fpr2

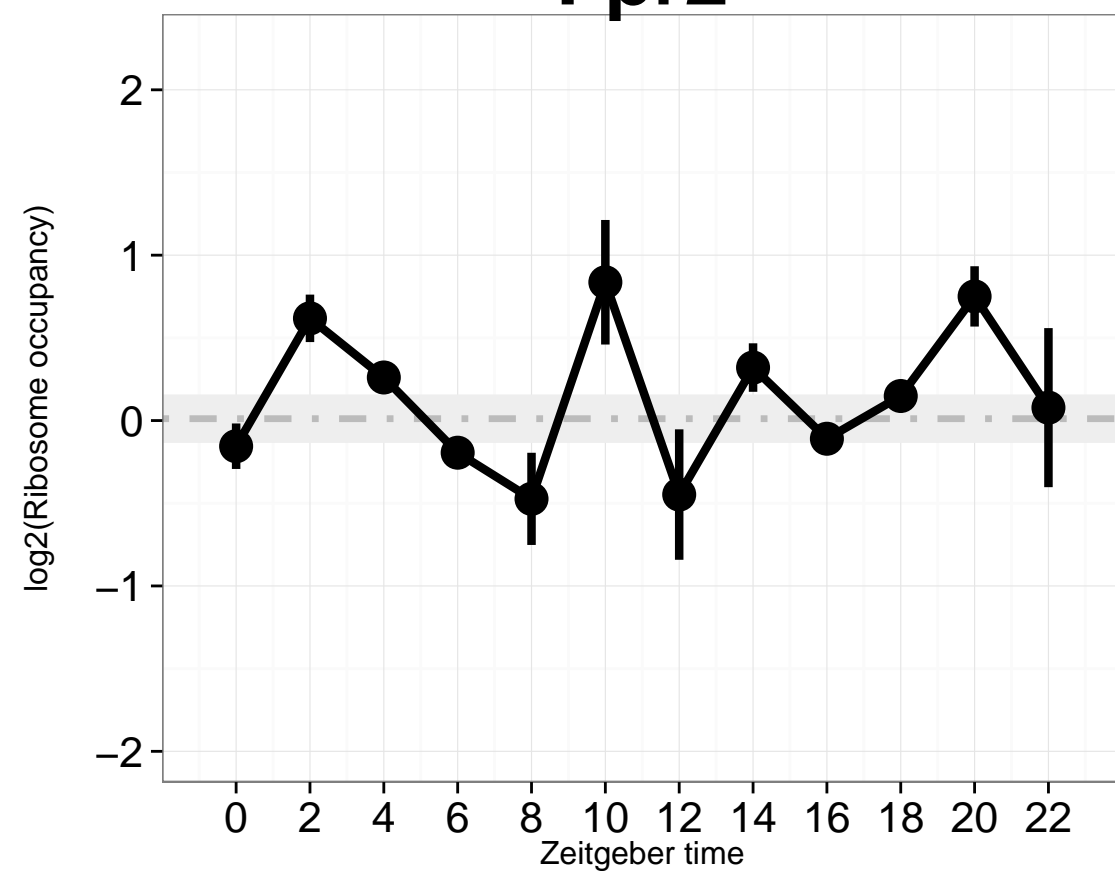

Supplement: SuppDataset_1.zip [file Fpr2_set_A.pdf › Supplemental Dataset 1/A-mRNA_nonrhyth_translation_nonrhyth/Fpr2_set_A.pdf]

# Fra10ac1

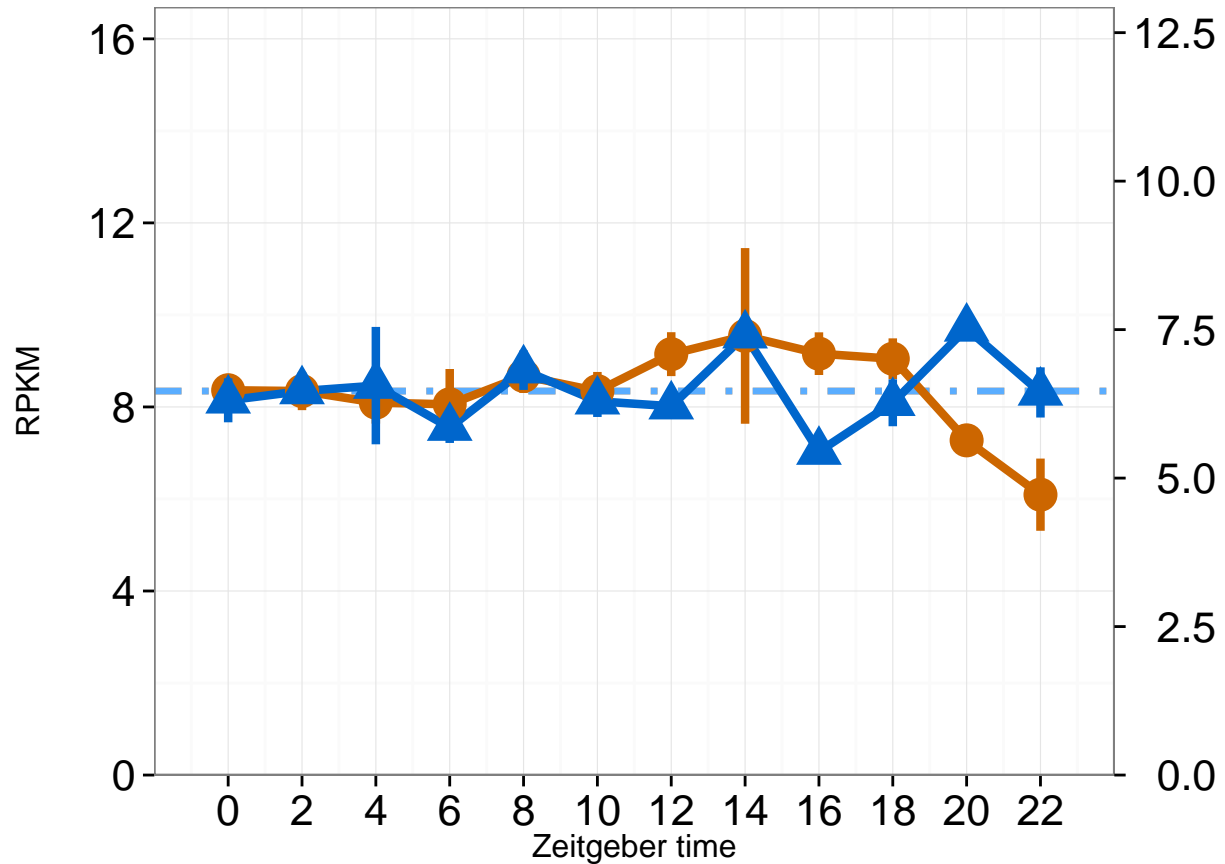

# Fra10ac1

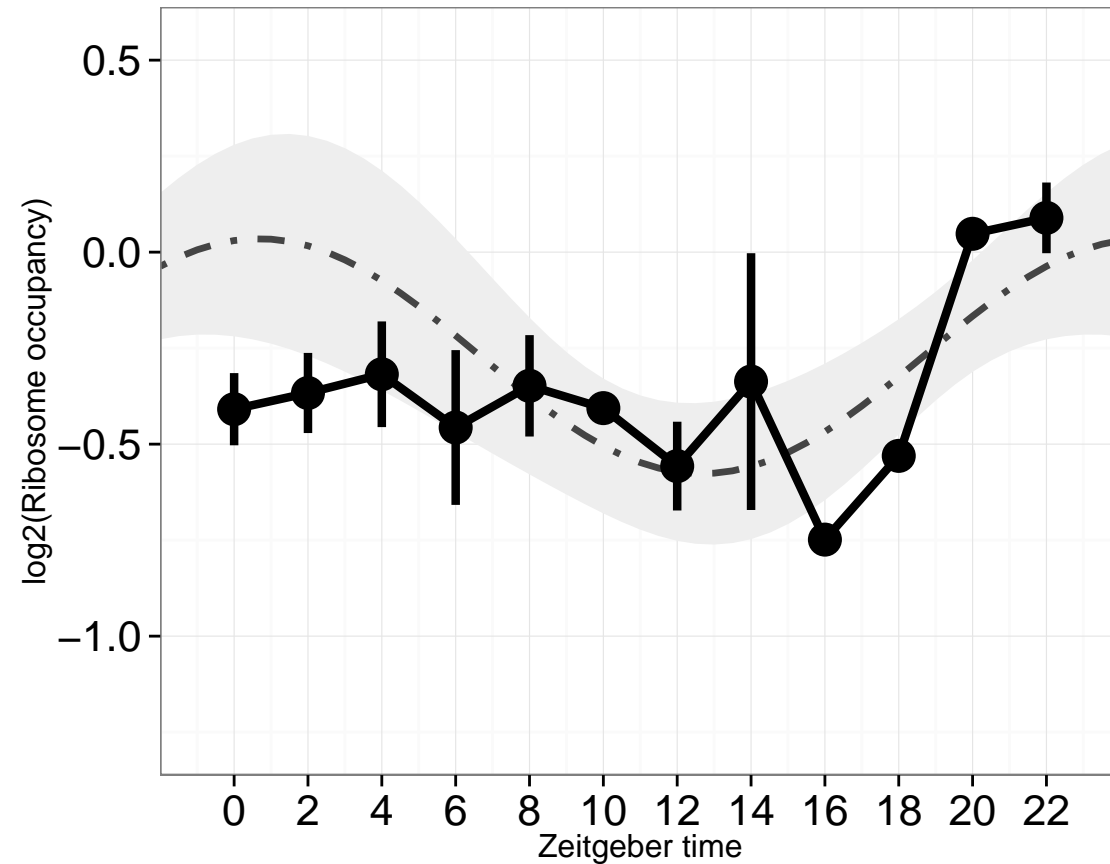

Supplement: SuppDataset_1.zip [file Fra10ac1_set_A.pdf › Supplemental Dataset 1/A-mRNA_nonrhyth_translation_nonrhyth/Fra10ac1_set_A.pdf]

## Frat2

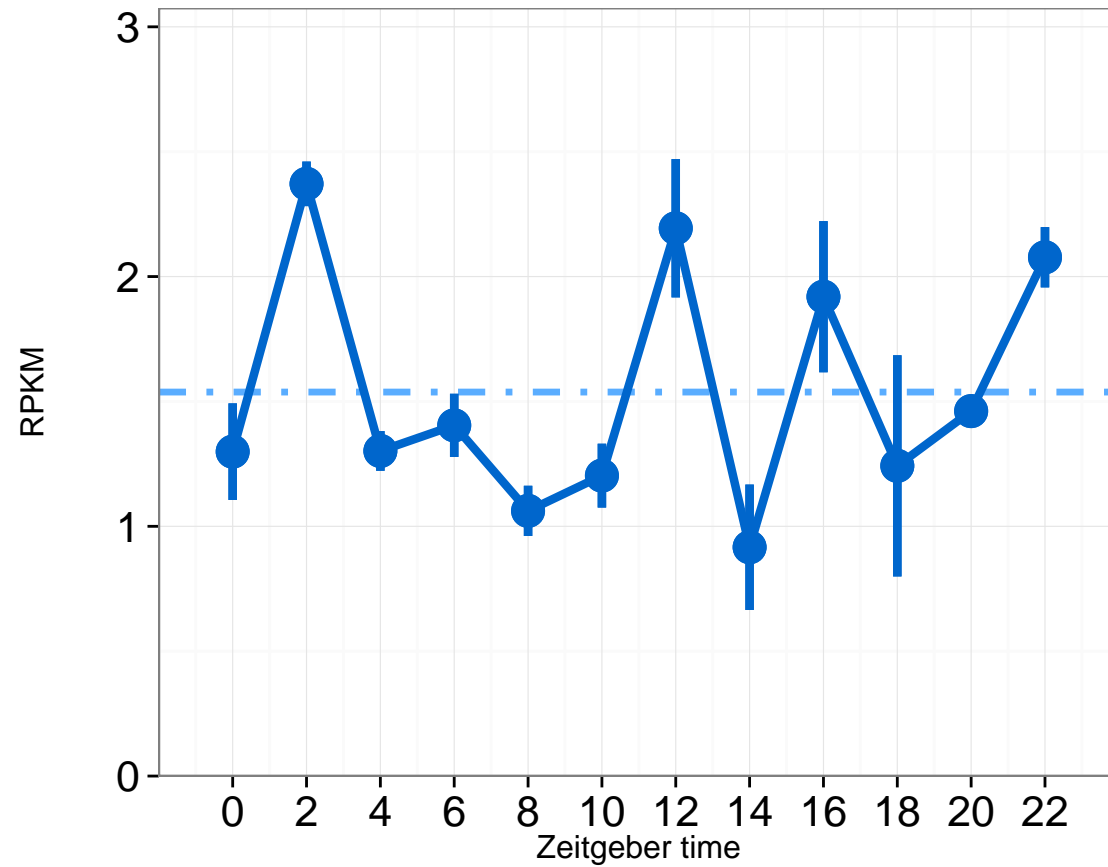

## Frat2 log2(Ribosome occupancy)

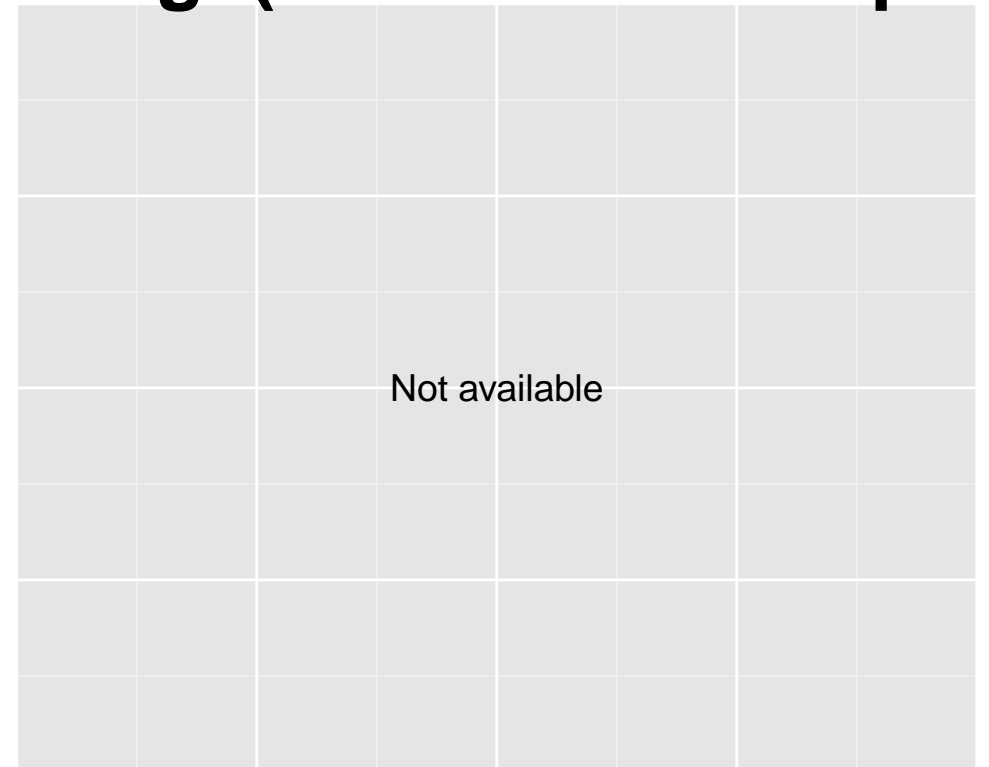

Supplement: SuppDataset_1.zip [file Frat2_set_A.pdf › Supplemental Dataset 1/A-mRNA_nonrhyth_translation_nonrhyth/Frat2_set_A.pdf]

# Frem1

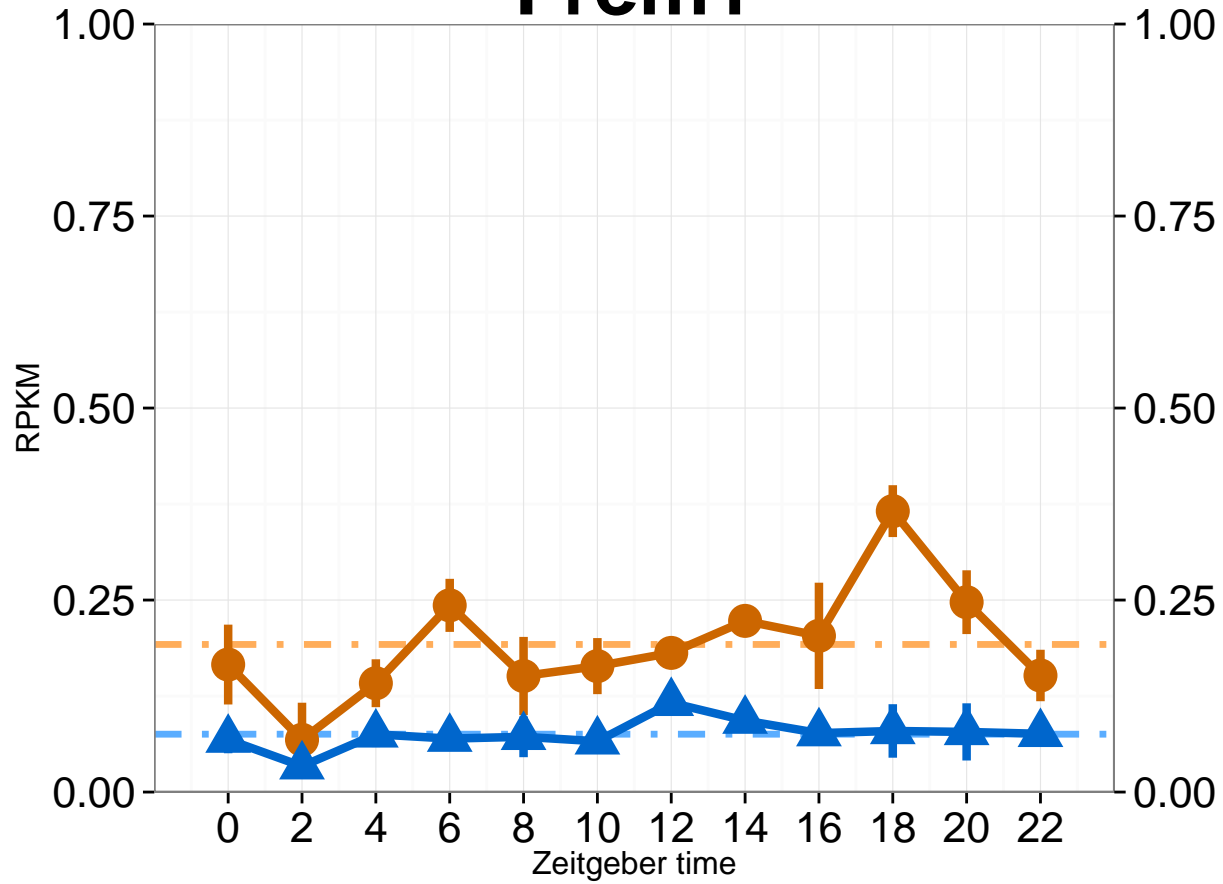

# Frem1

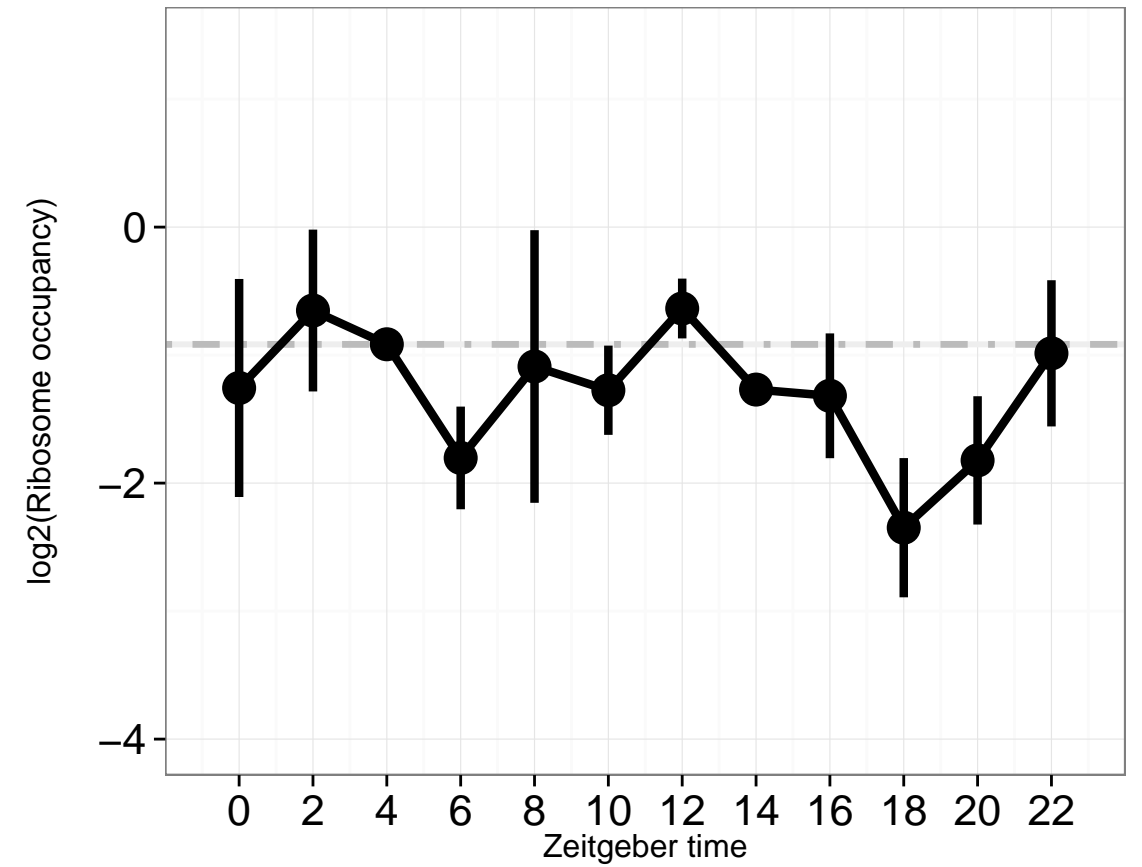

Supplement: SuppDataset_1.zip [file Frem1_set_A.pdf › Supplemental Dataset 1/A-mRNA_nonrhyth_translation_nonrhyth/Frem1_set_A.pdf]

# Frg1

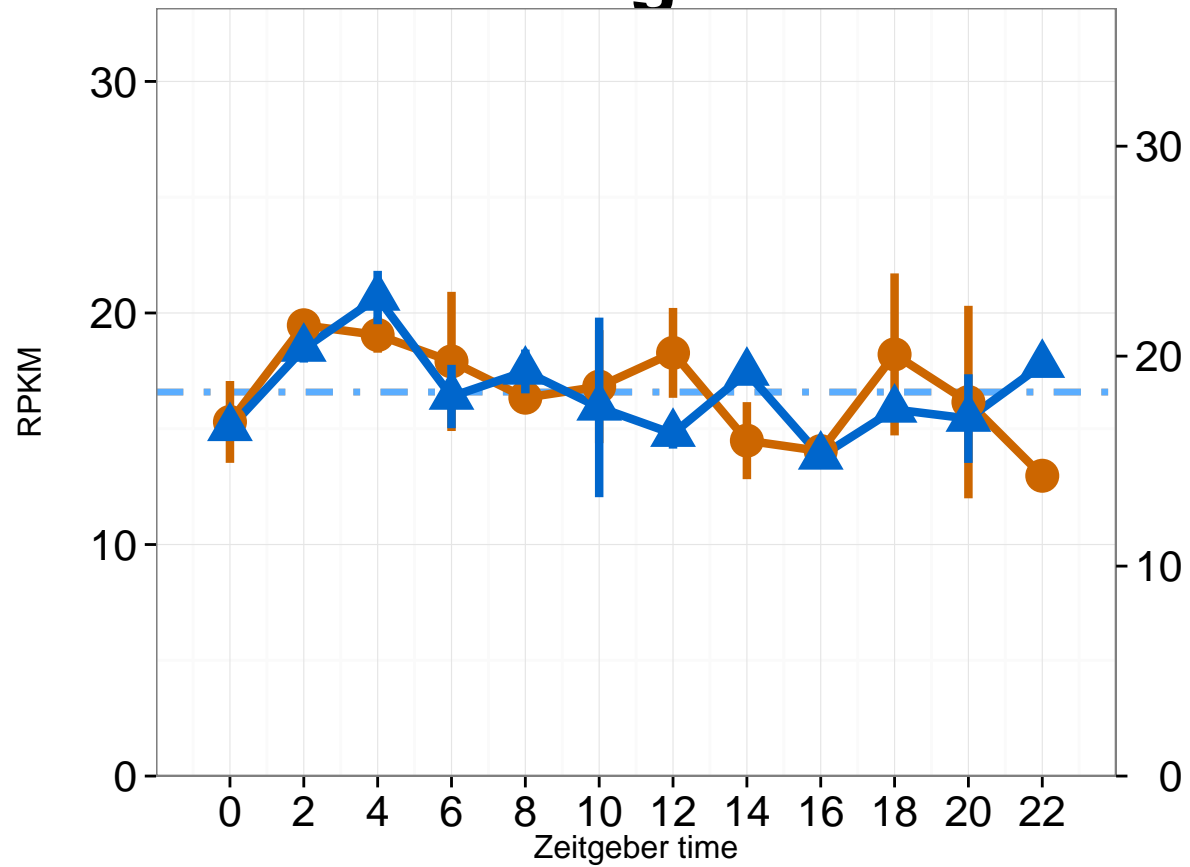

# Frg1

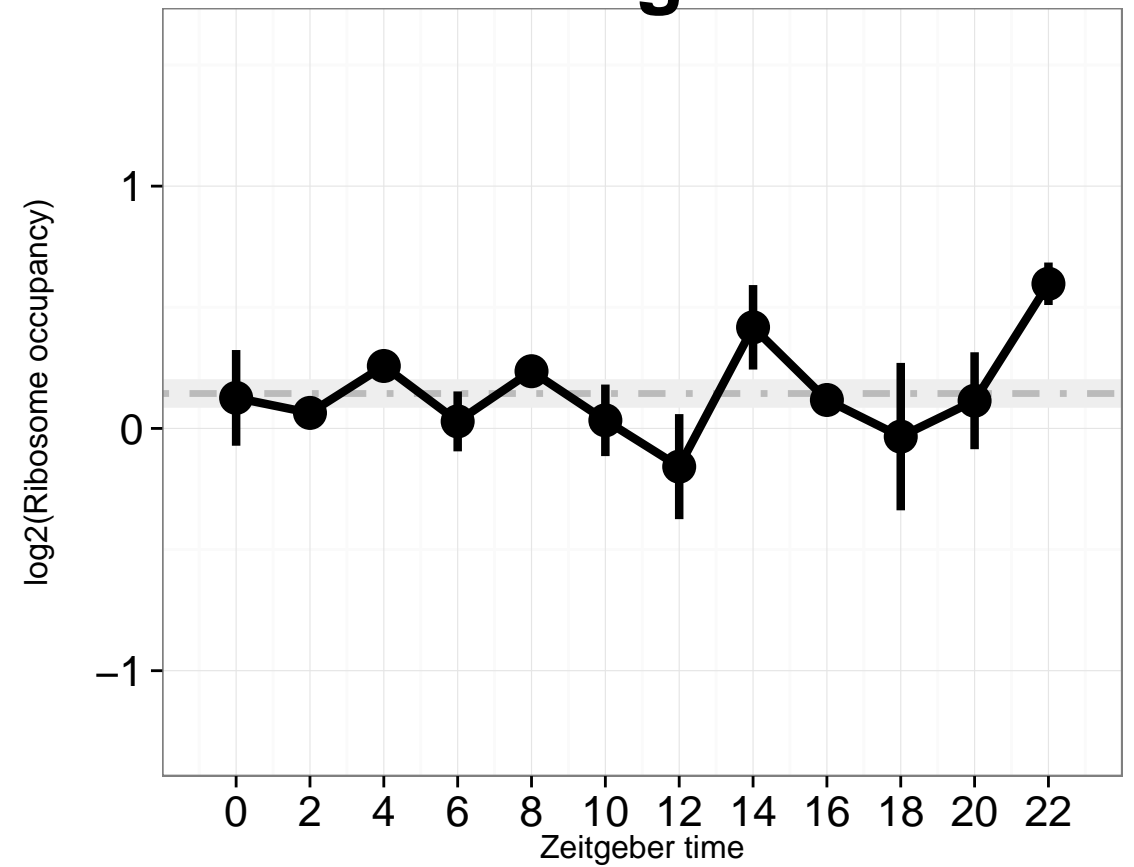

Supplement: SuppDataset_1.zip [file Frg1_set_A.pdf › Supplemental Dataset 1/A-mRNA_nonrhyth_translation_nonrhyth/Frg1_set_A.pdf]

## Frk

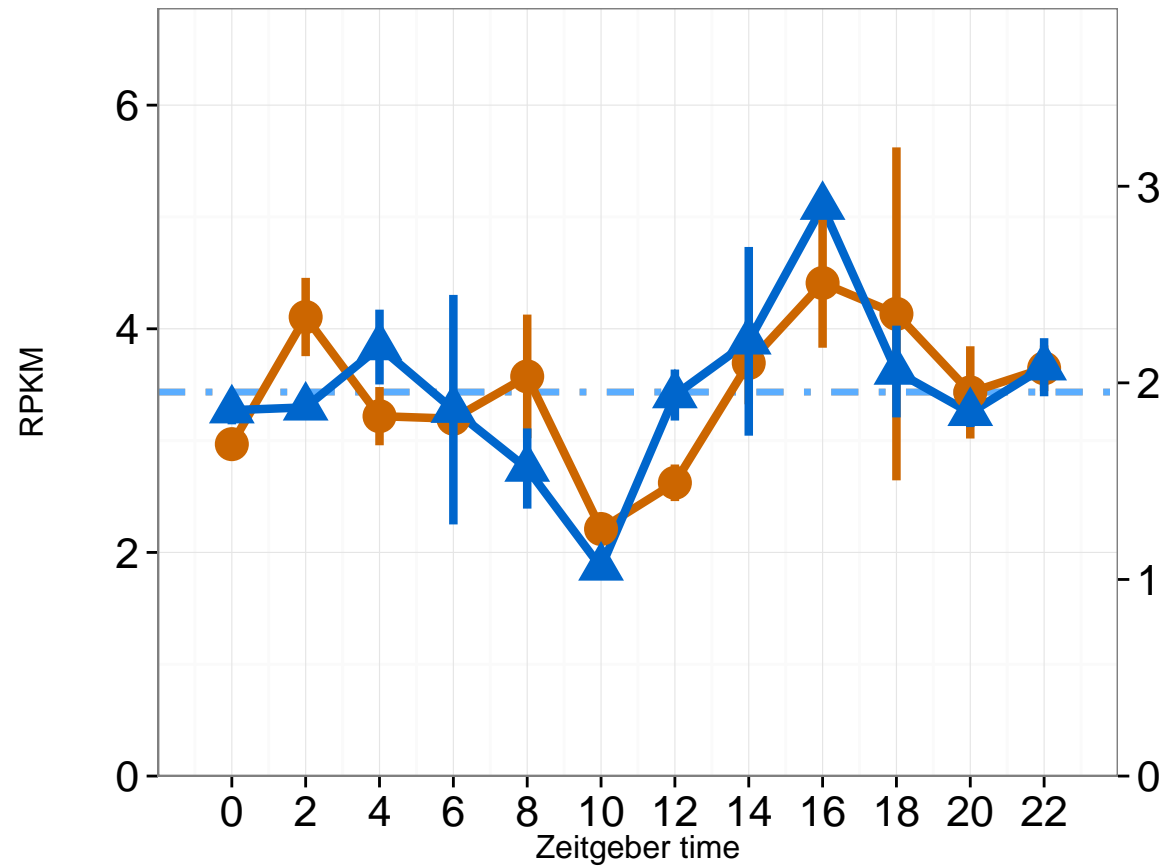

## Frk

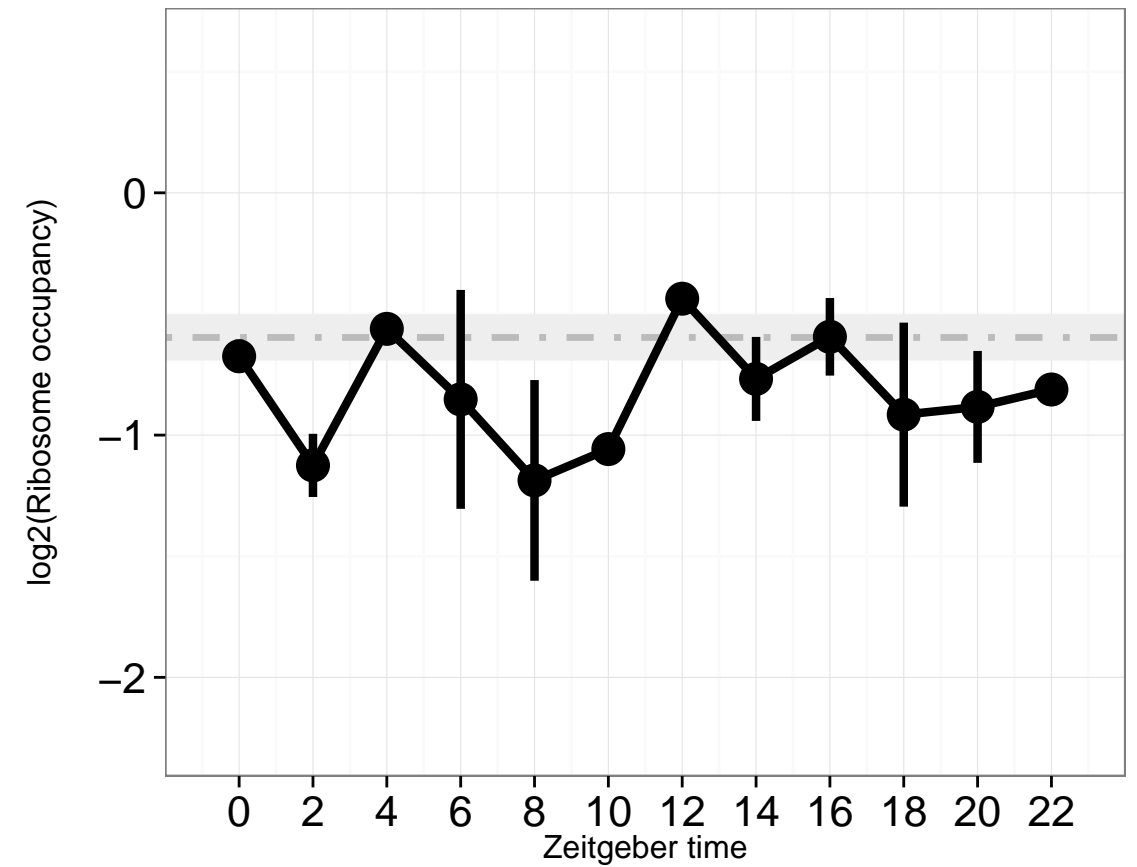

Supplement: SuppDataset_1.zip [file Frk_set_A.pdf › Supplemental Dataset 1/A-mRNA_nonrhyth_translation_nonrhyth/Frk_set_A.pdf]

# Frmd4a

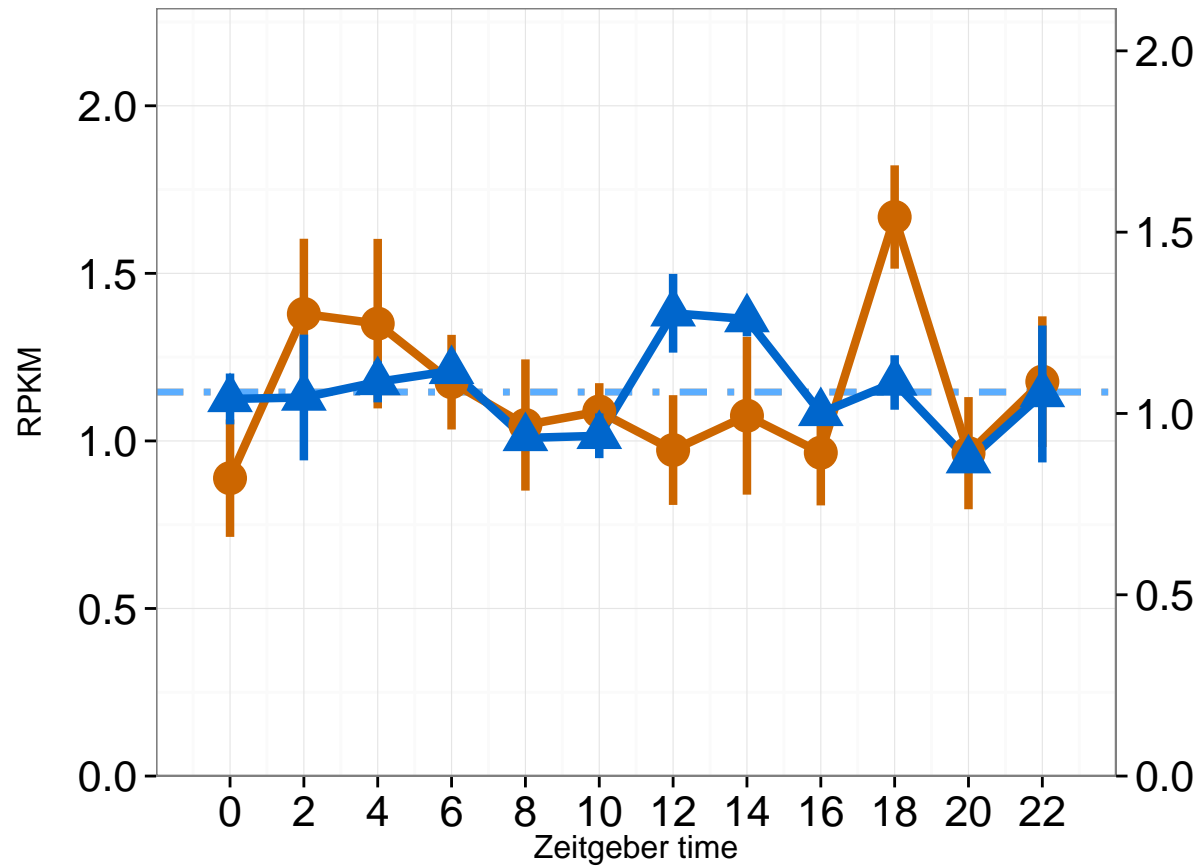

# Frmd4a

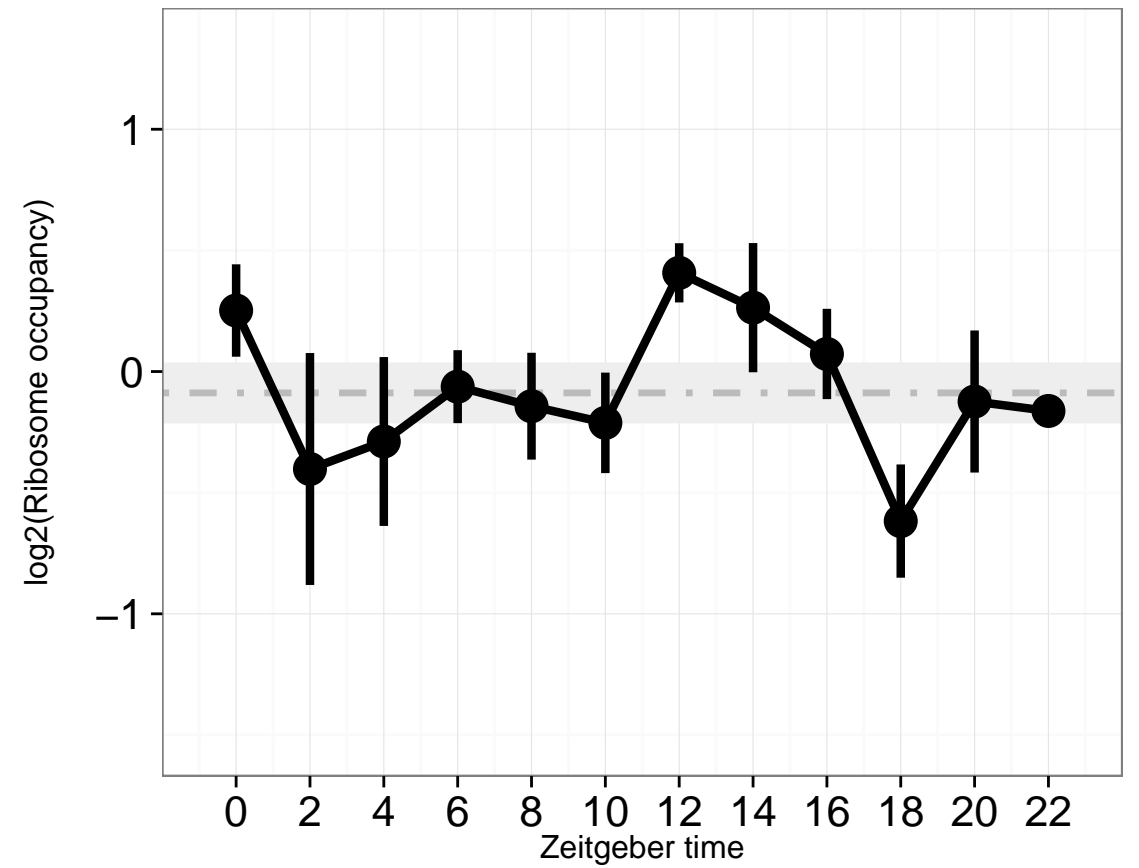

Supplement: SuppDataset_1.zip [file Frmd4a_set_A.pdf › Supplemental Dataset 1/A-mRNA_nonrhyth_translation_nonrhyth/Frmd4a_set_A.pdf]

# Frmd4b

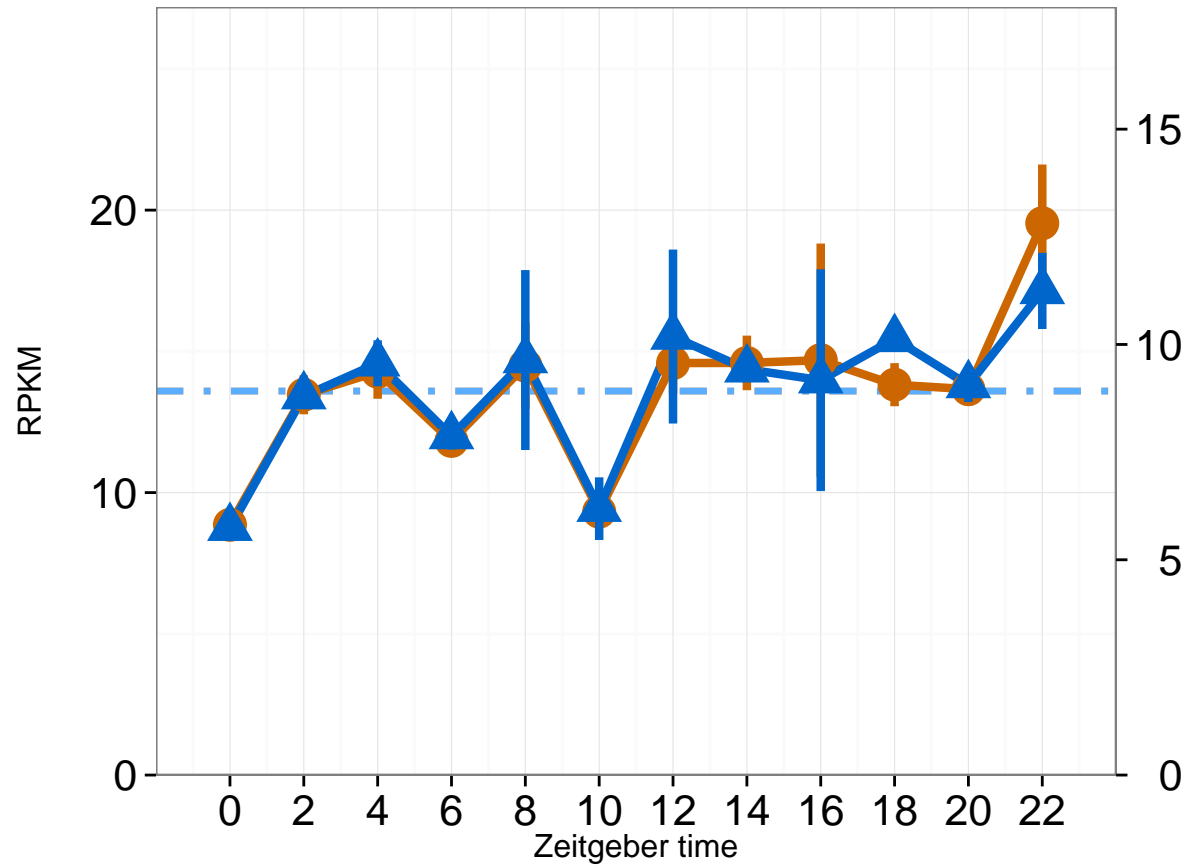

# Frmd4b

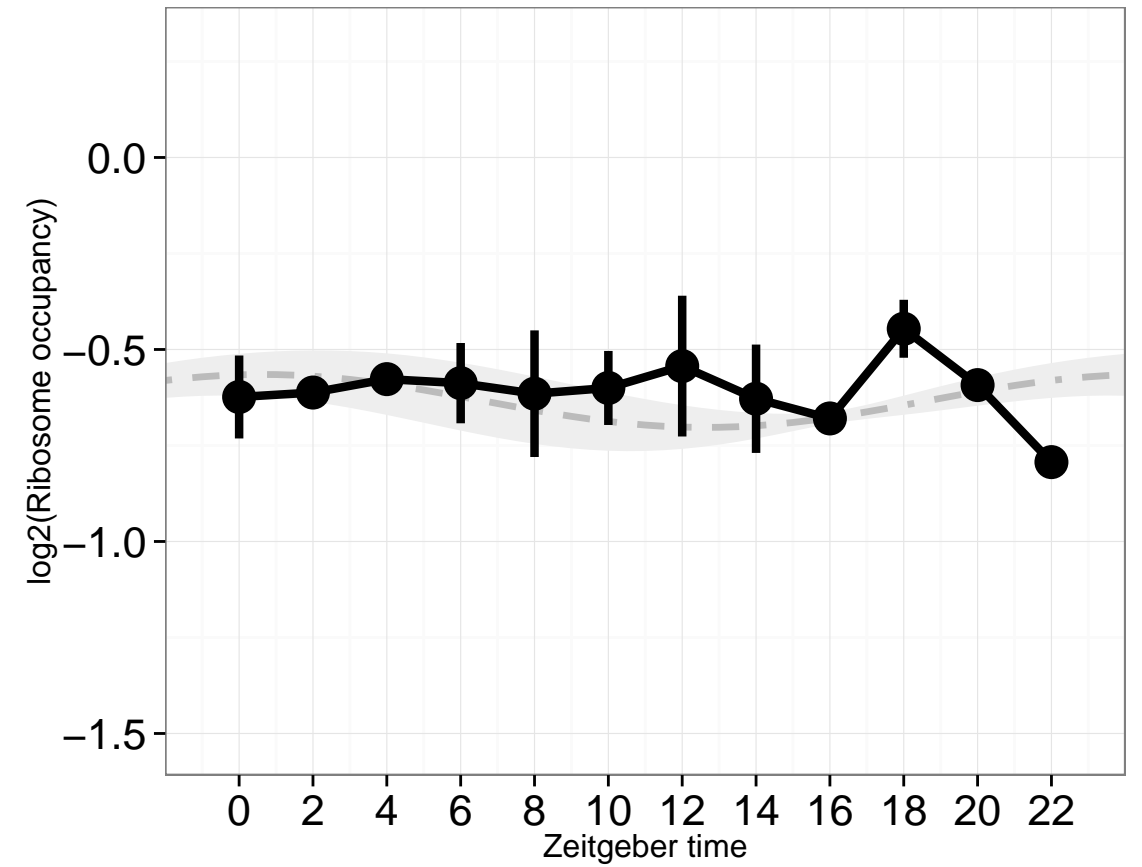

Supplement: SuppDataset_1.zip [file Frmd4b_set_A.pdf › Supplemental Dataset 1/A-mRNA_nonrhyth_translation_nonrhyth/Frmd4b_set_A.pdf]

# Frmd6

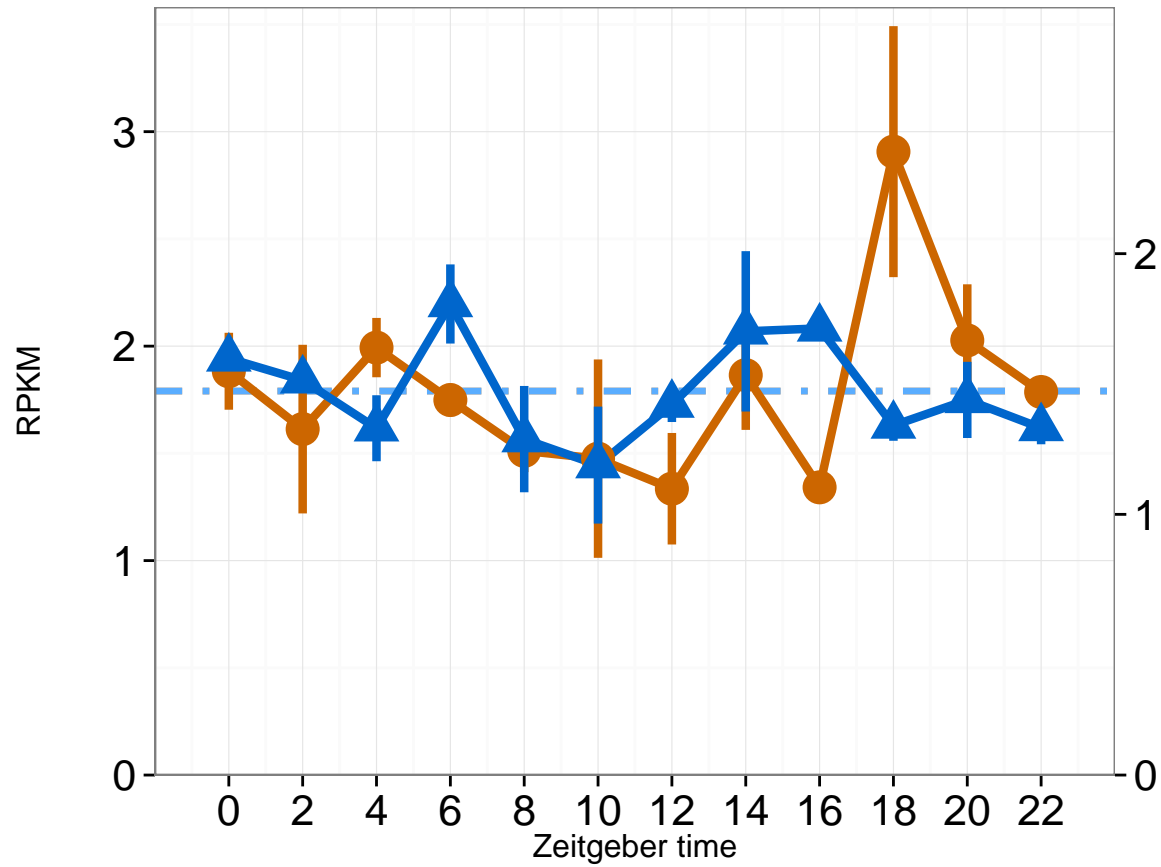

# Frmd6

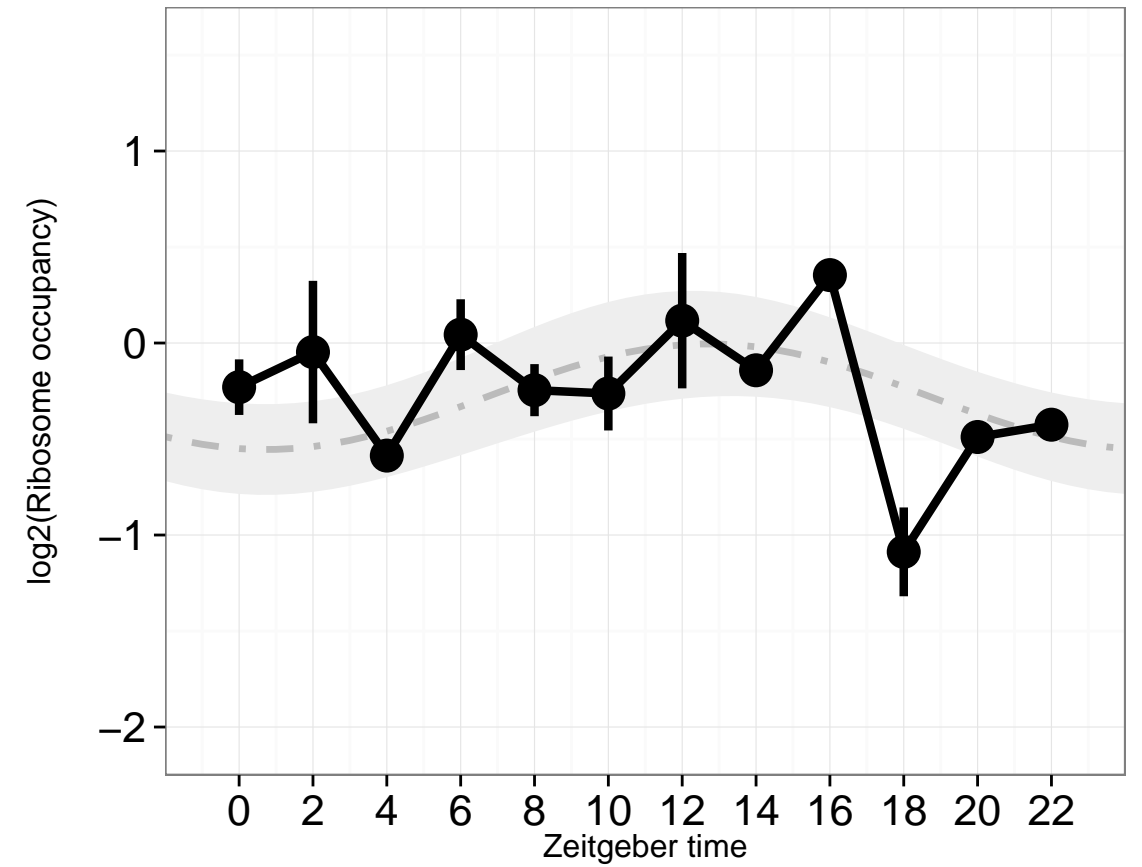

Supplement: SuppDataset_1.zip [file Frmd6_set_A.pdf › Supplemental Dataset 1/A-mRNA_nonrhyth_translation_nonrhyth/Frmd6_set_A.pdf]

## Frmd8

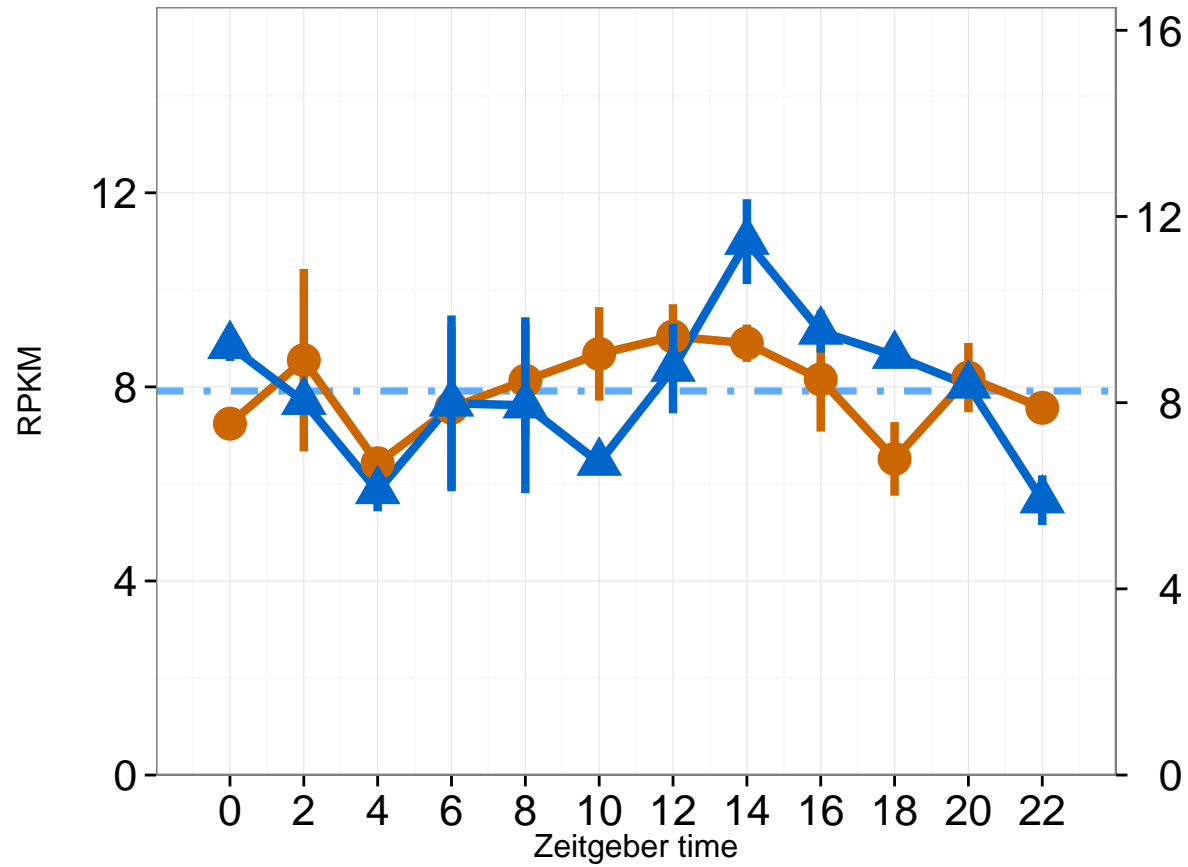

## Frmd8

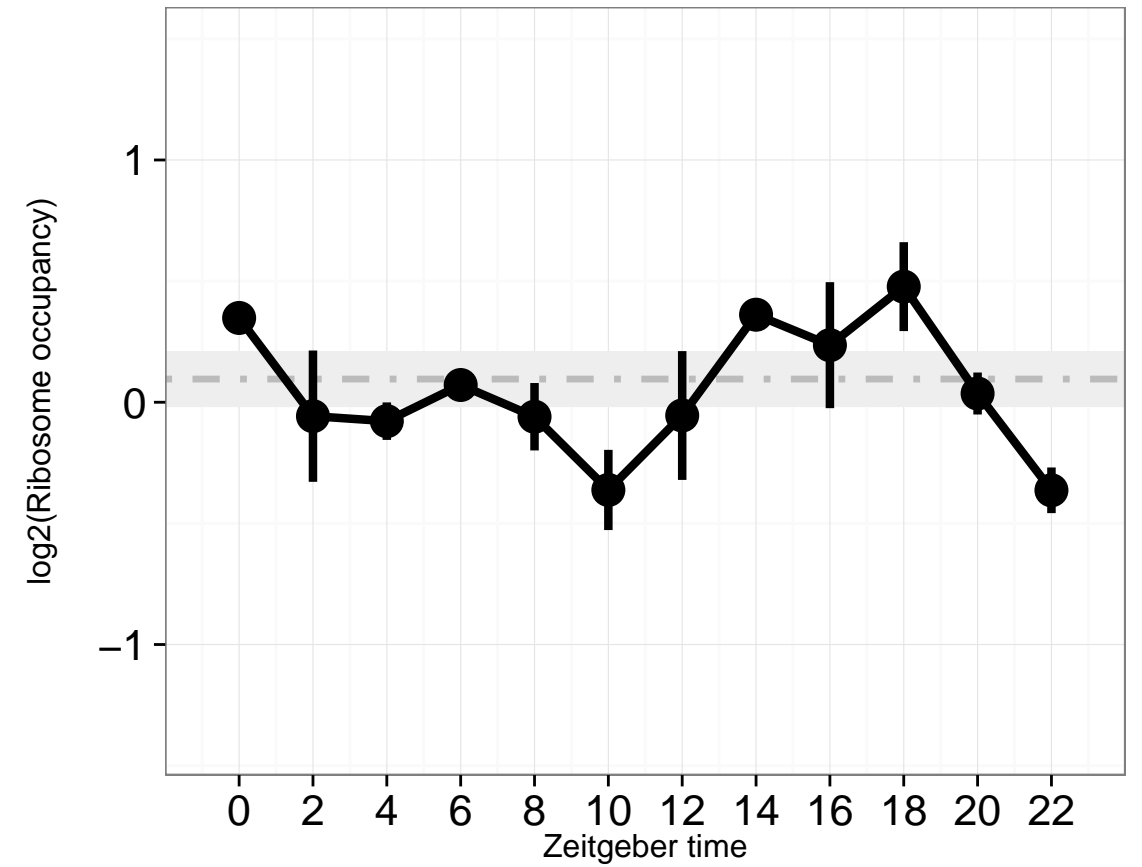

Supplement: SuppDataset_1.zip [file Frmd8_set_A.pdf › Supplemental Dataset 1/A-mRNA_nonrhyth_translation_nonrhyth/Frmd8_set_A.pdf]

# Frrs1

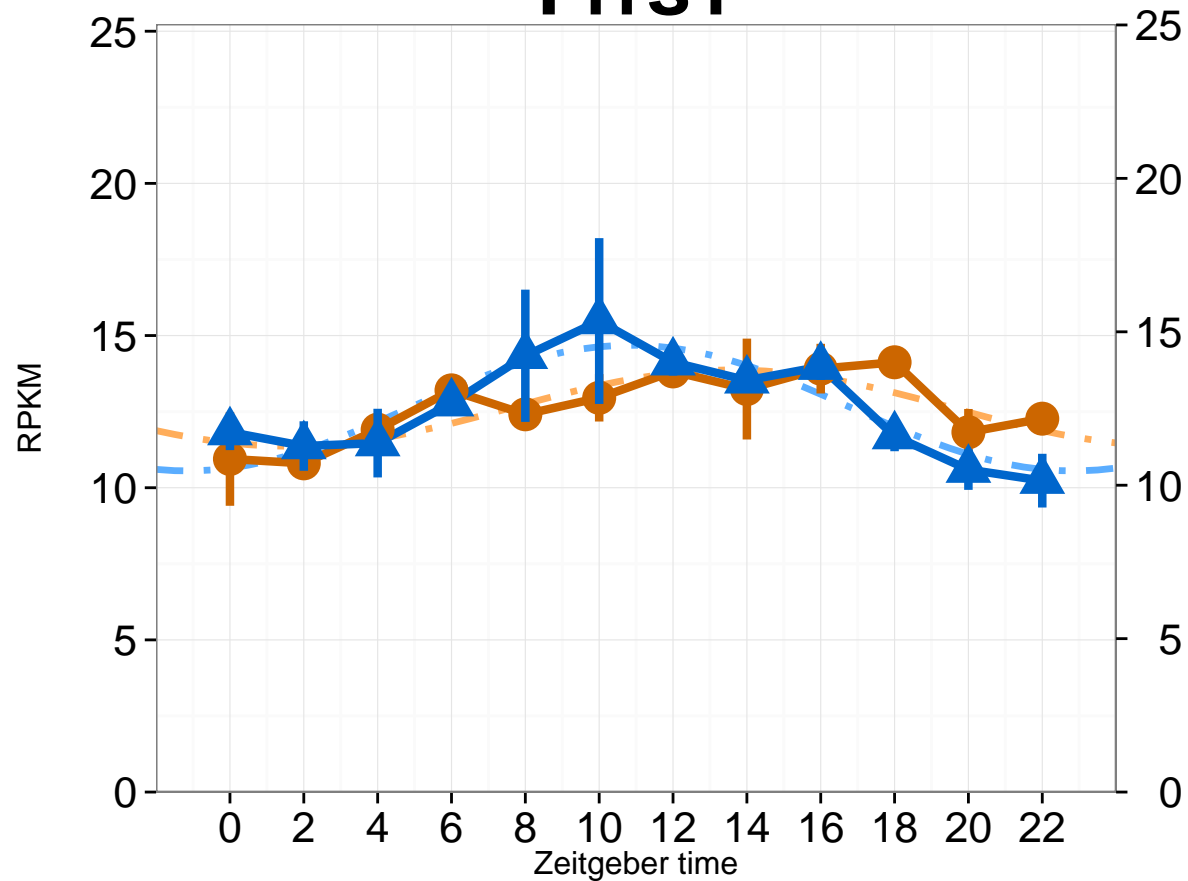

# Frrs1

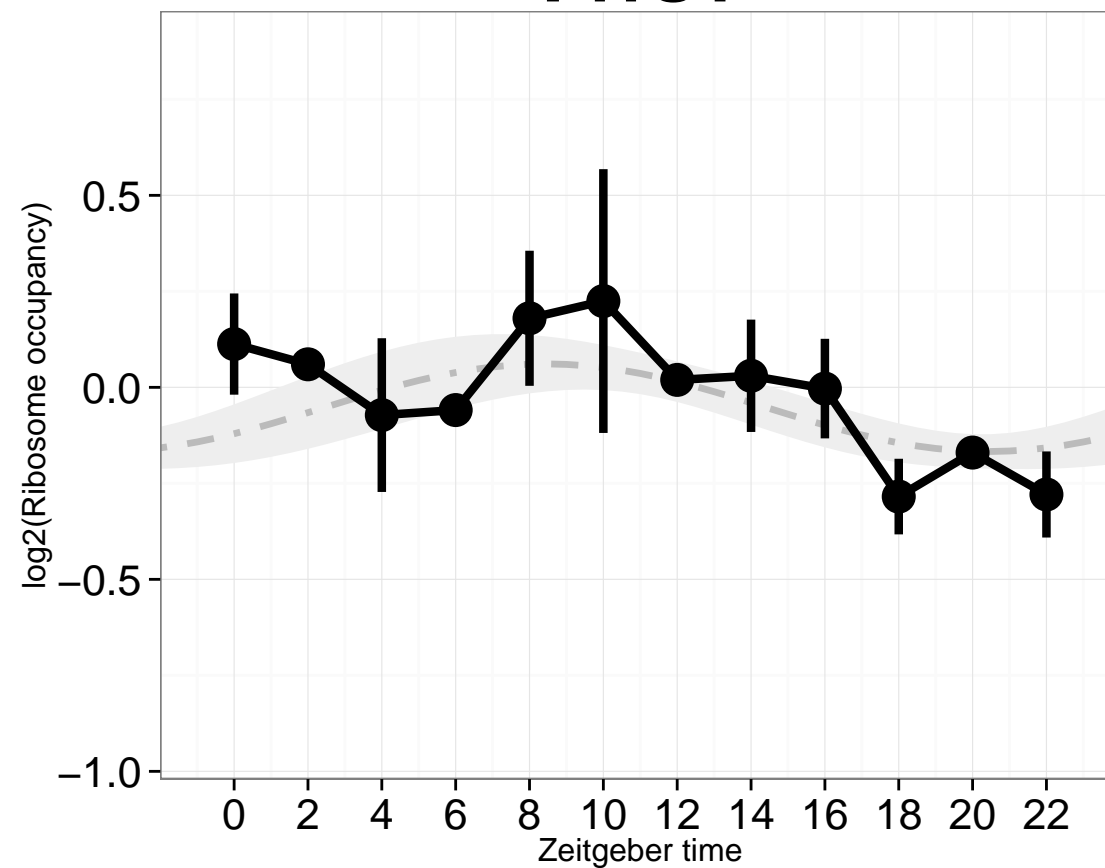

Supplement: SuppDataset_1.zip [file Frrs1_set_A.pdf › Supplemental Dataset 1/A-mRNA_nonrhyth_translation_nonrhyth/Frrs1_set_A.pdf]

## Frs2

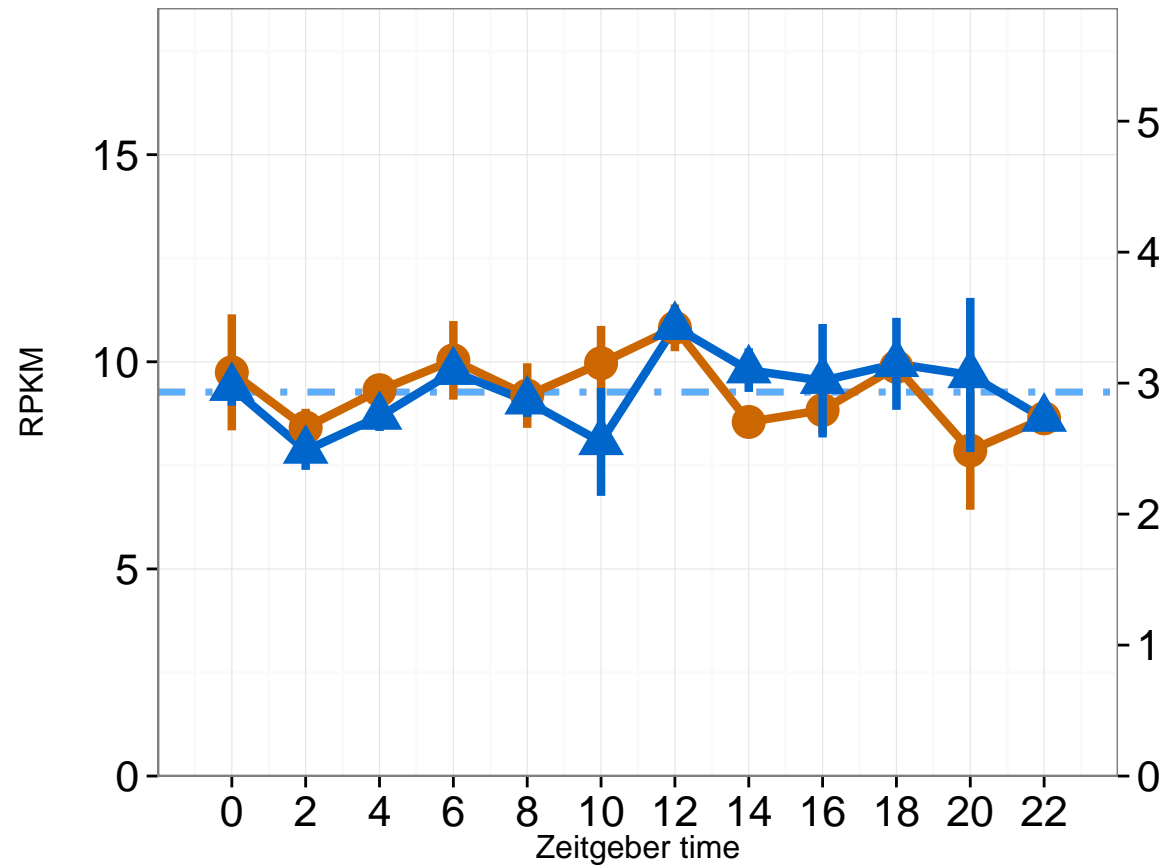

## Frs2

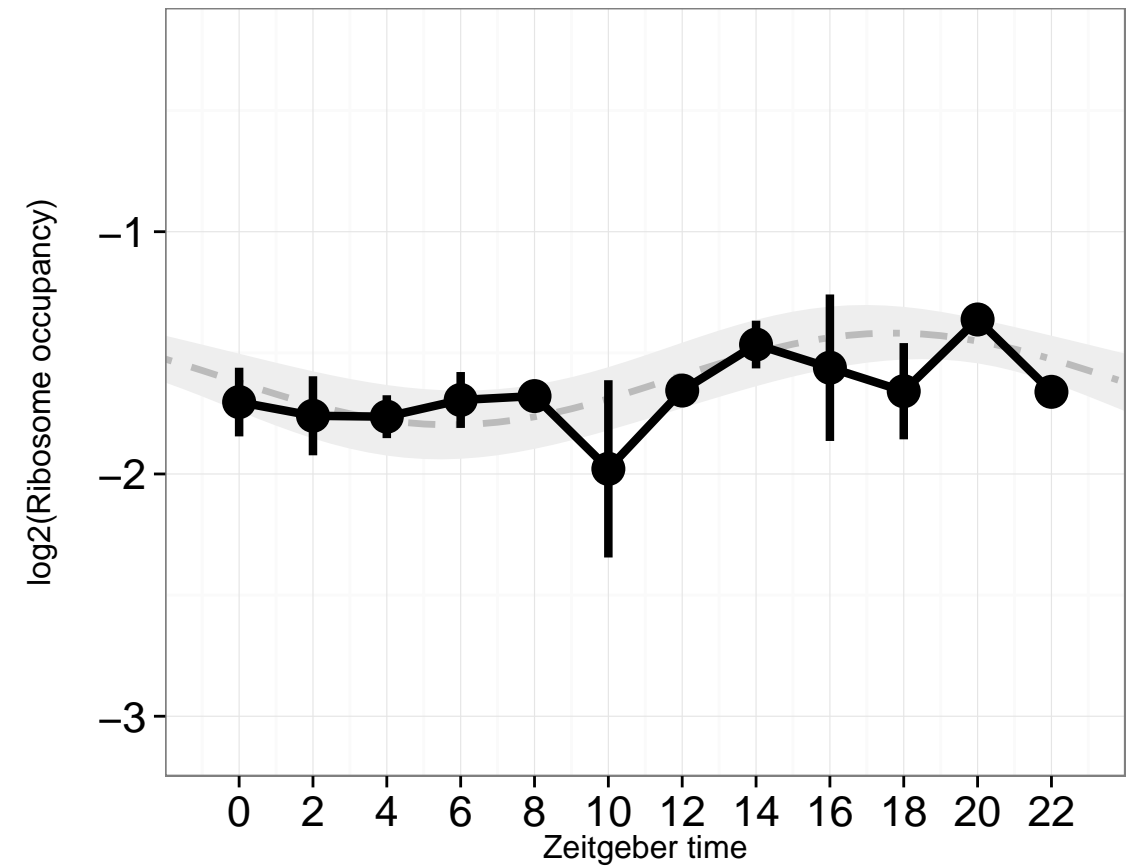

Supplement: SuppDataset_1.zip [file Frs2_set_A.pdf › Supplemental Dataset 1/A-mRNA_nonrhyth_translation_nonrhyth/Frs2_set_A.pdf]

## Frs3

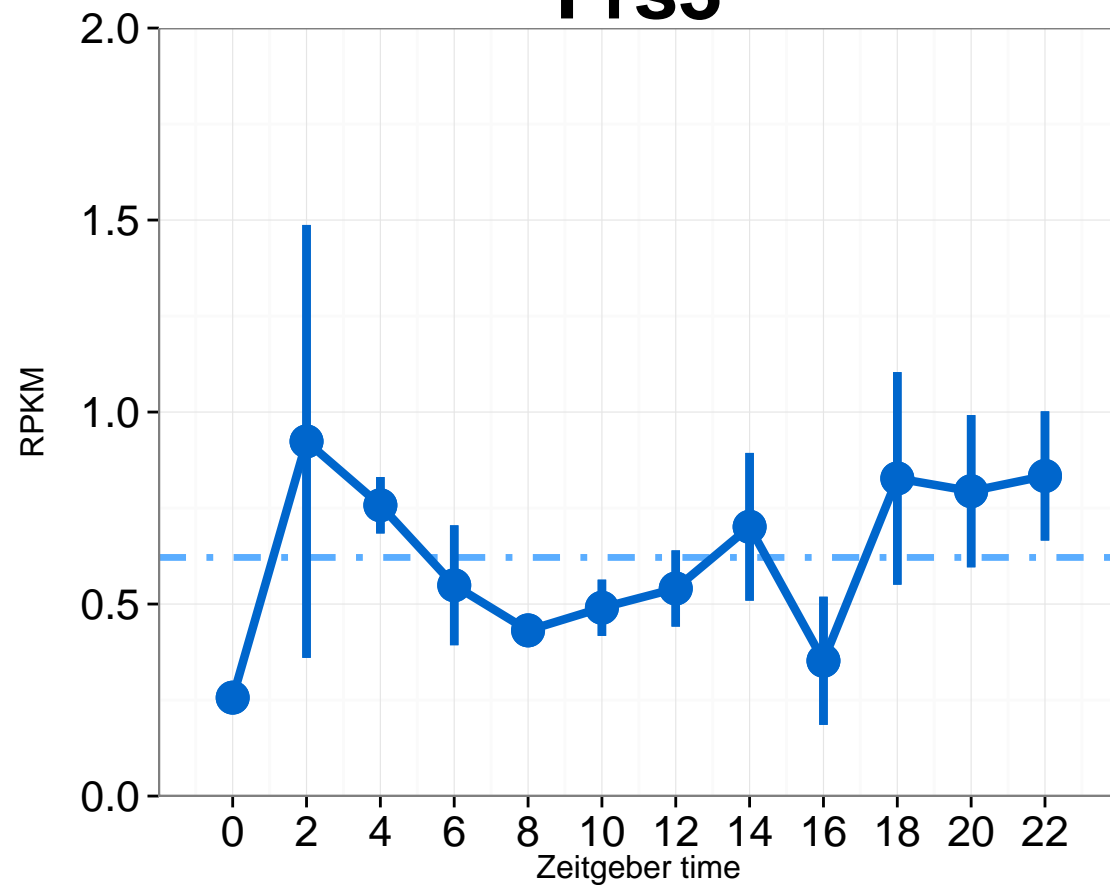

## Frs3 log2(Ribosome occupancy)

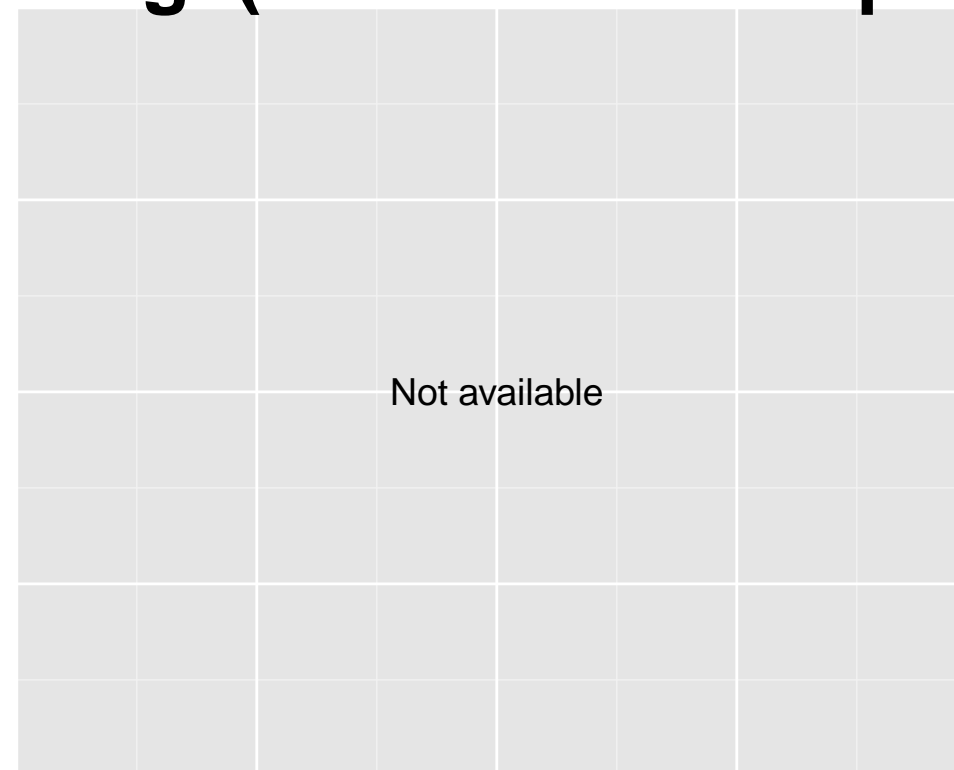

Supplement: SuppDataset_1.zip [file Frs3_set_A.pdf › Supplemental Dataset 1/A-mRNA_nonrhyth_translation_nonrhyth/Frs3_set_A.pdf]

## Fry

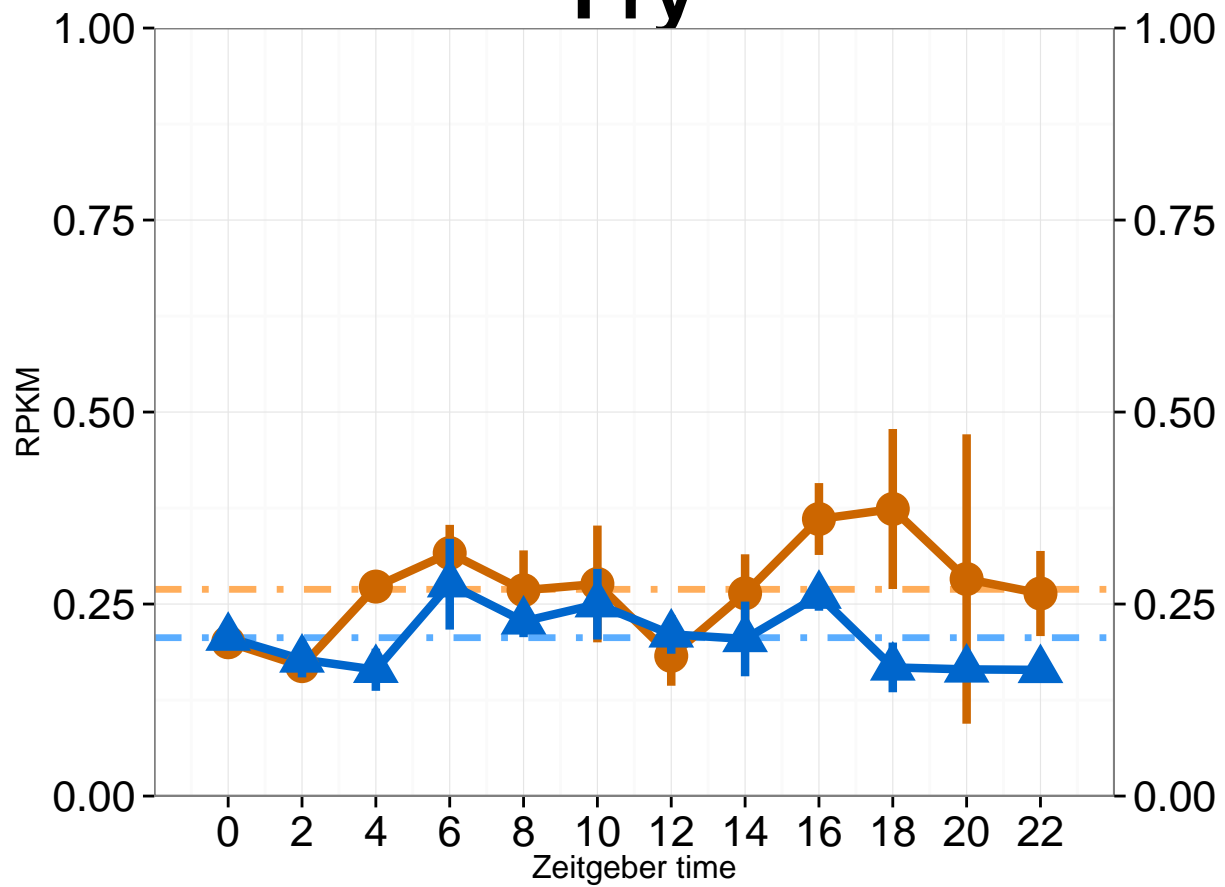

## Fry

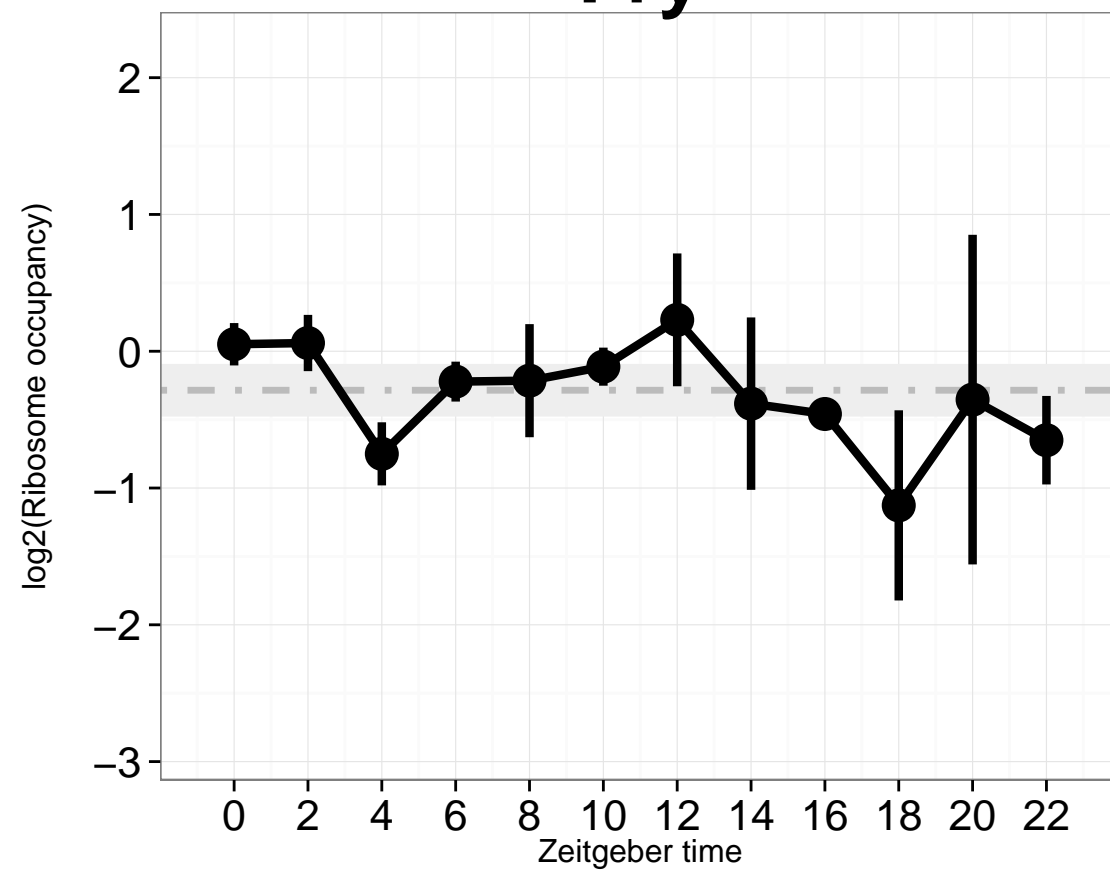

Supplement: SuppDataset_1.zip [file Fry_set_A.pdf › Supplemental Dataset 1/A-mRNA_nonrhyth_translation_nonrhyth/Fry_set_A.pdf]

## Fryl

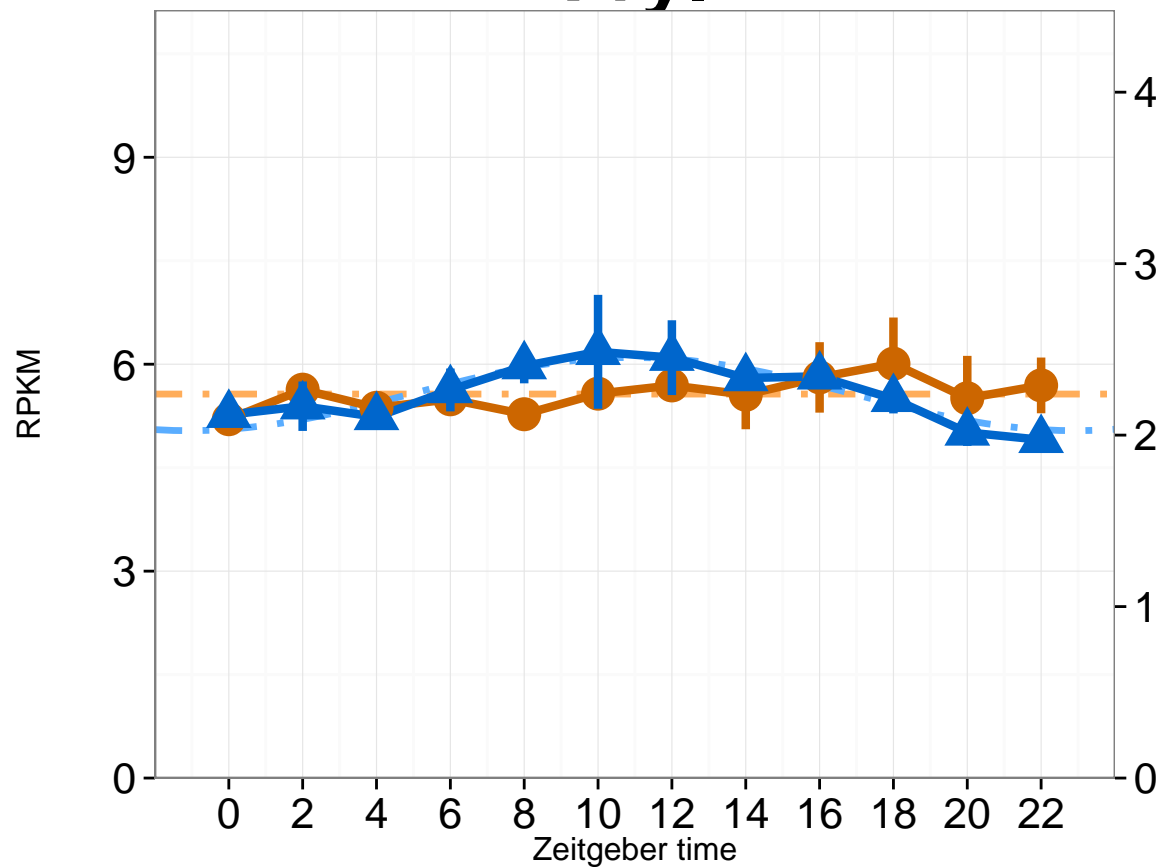

## Fryl

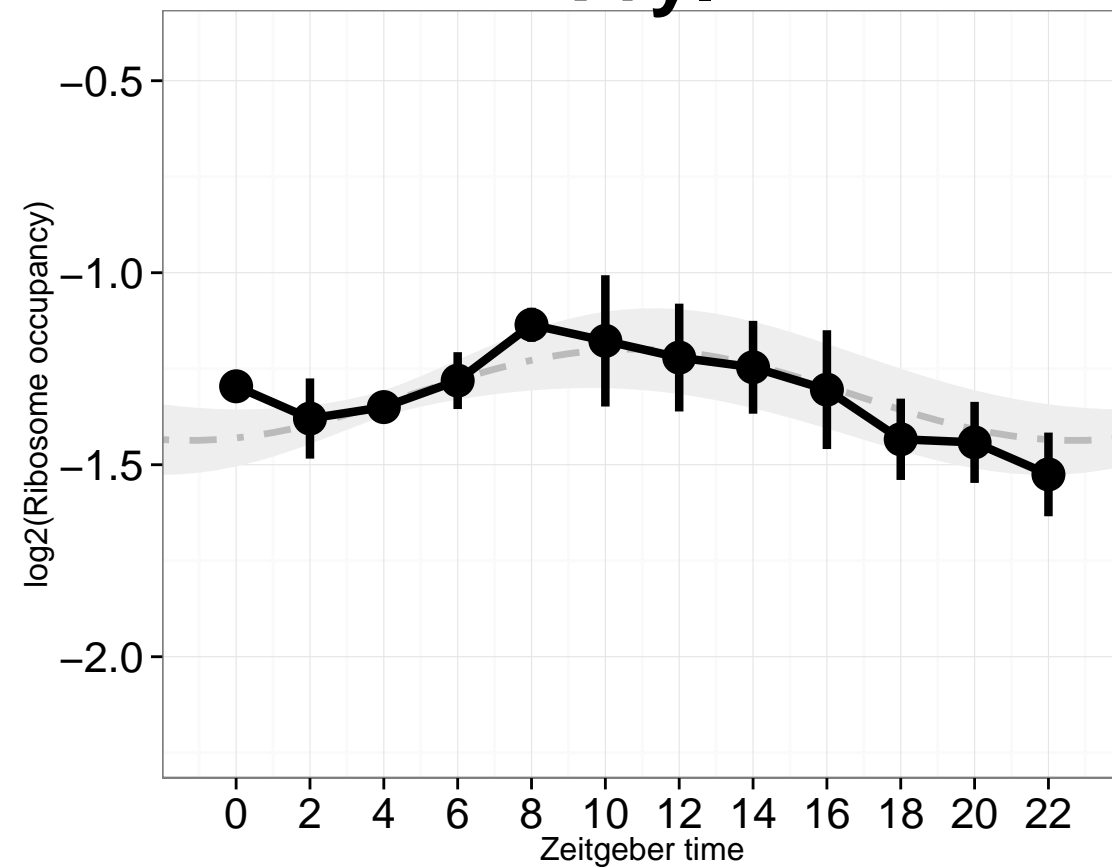

Supplement: SuppDataset_1.zip [file Fryl_set_A.pdf › Supplemental Dataset 1/A-mRNA_nonrhyth_translation_nonrhyth/Fryl_set_A.pdf]

# Fscn1

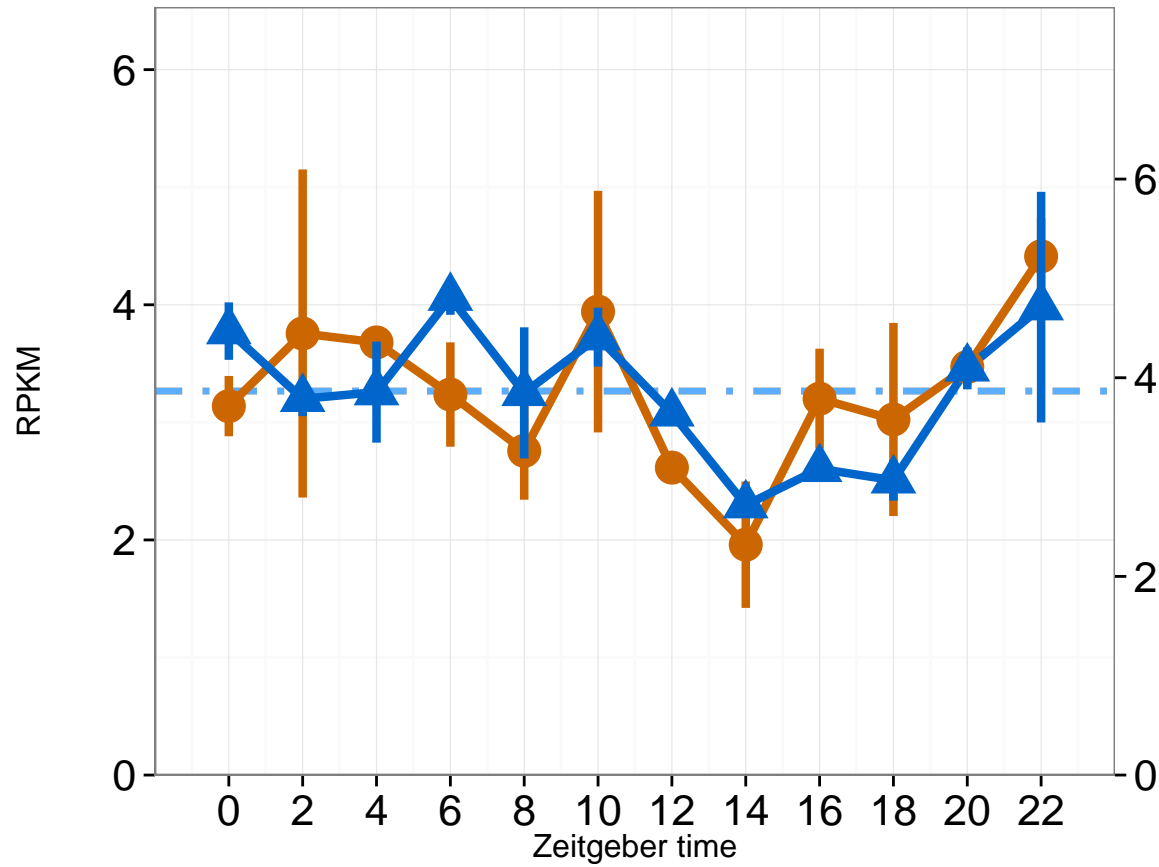

# Fscn1

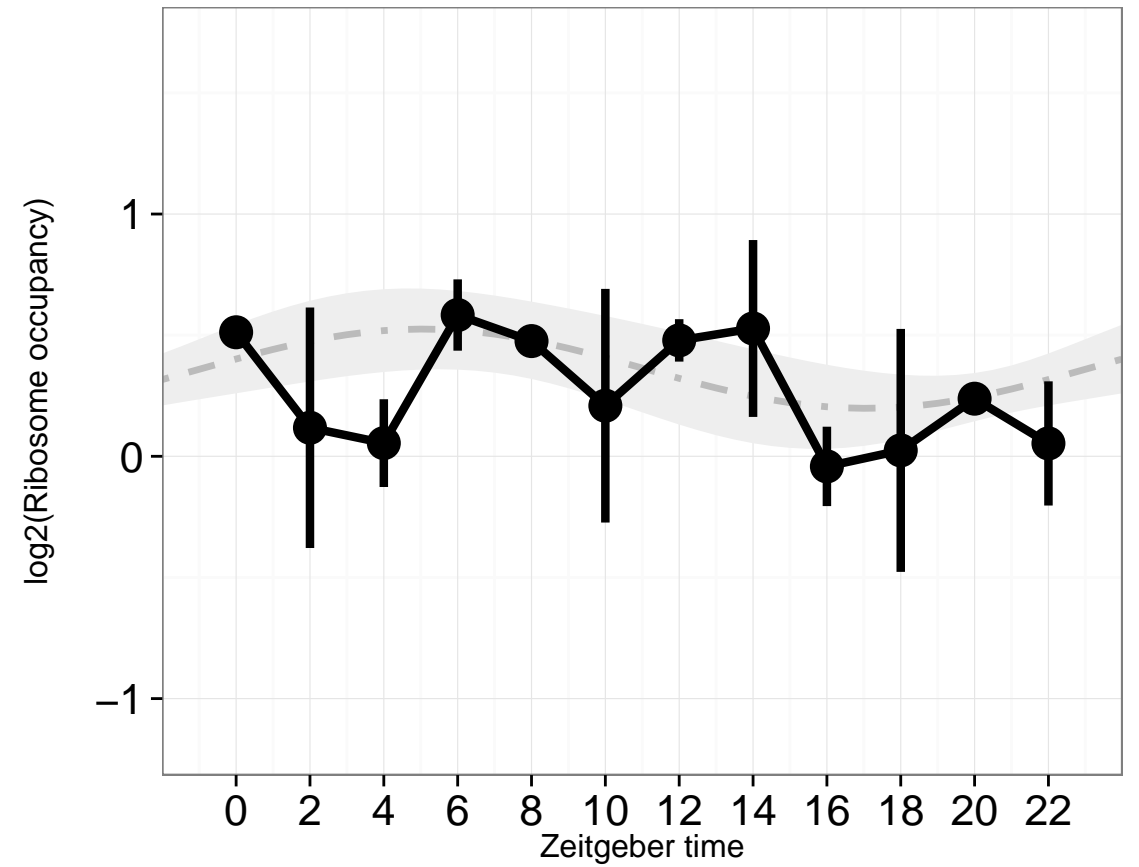

Supplement: SuppDataset_1.zip [file Fscn1_set_A.pdf › Supplemental Dataset 1/A-mRNA_nonrhyth_translation_nonrhyth/Fscn1_set_A.pdf]

## Fst

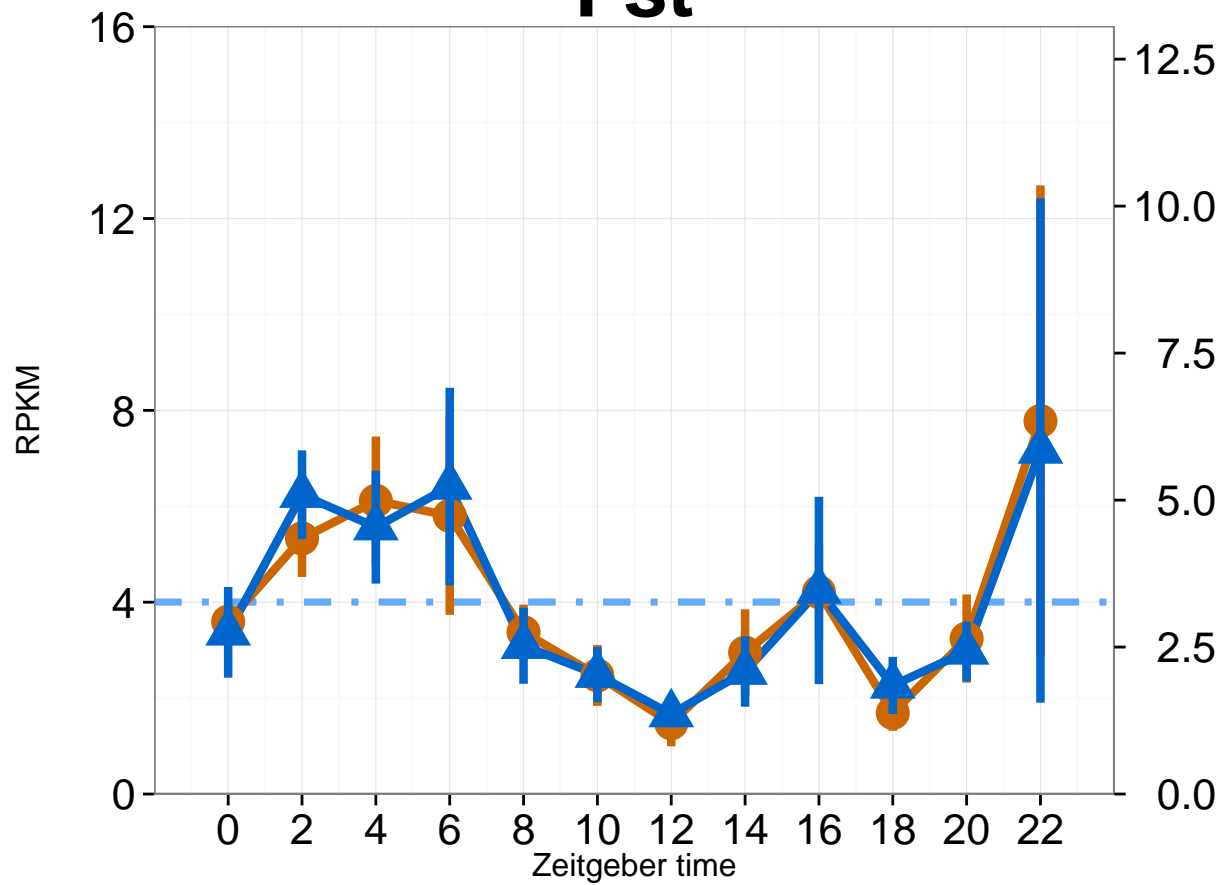

## Fst

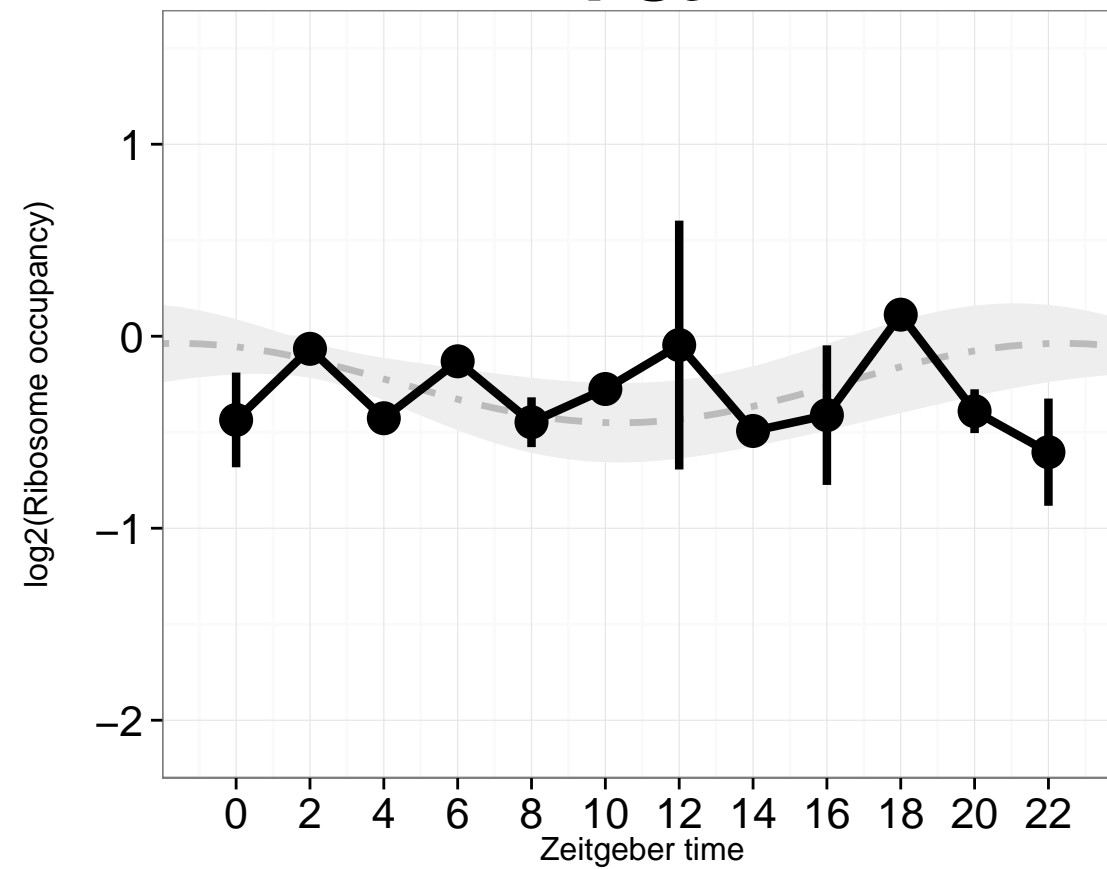

Supplement: SuppDataset_1.zip [file Fst_set_A.pdf › Supplemental Dataset 1/A-mRNA_nonrhyth_translation_nonrhyth/Fst_set_A.pdf]

## FstI1

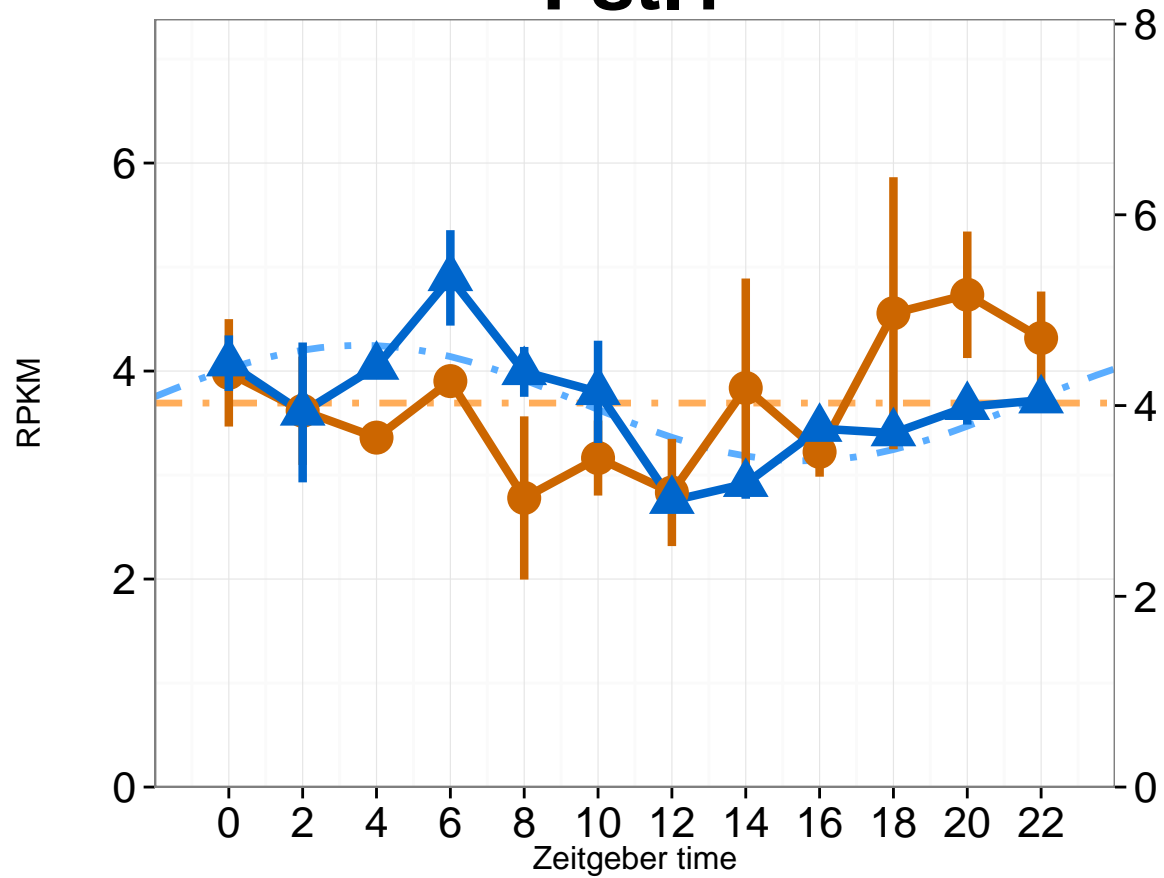

## FstI1

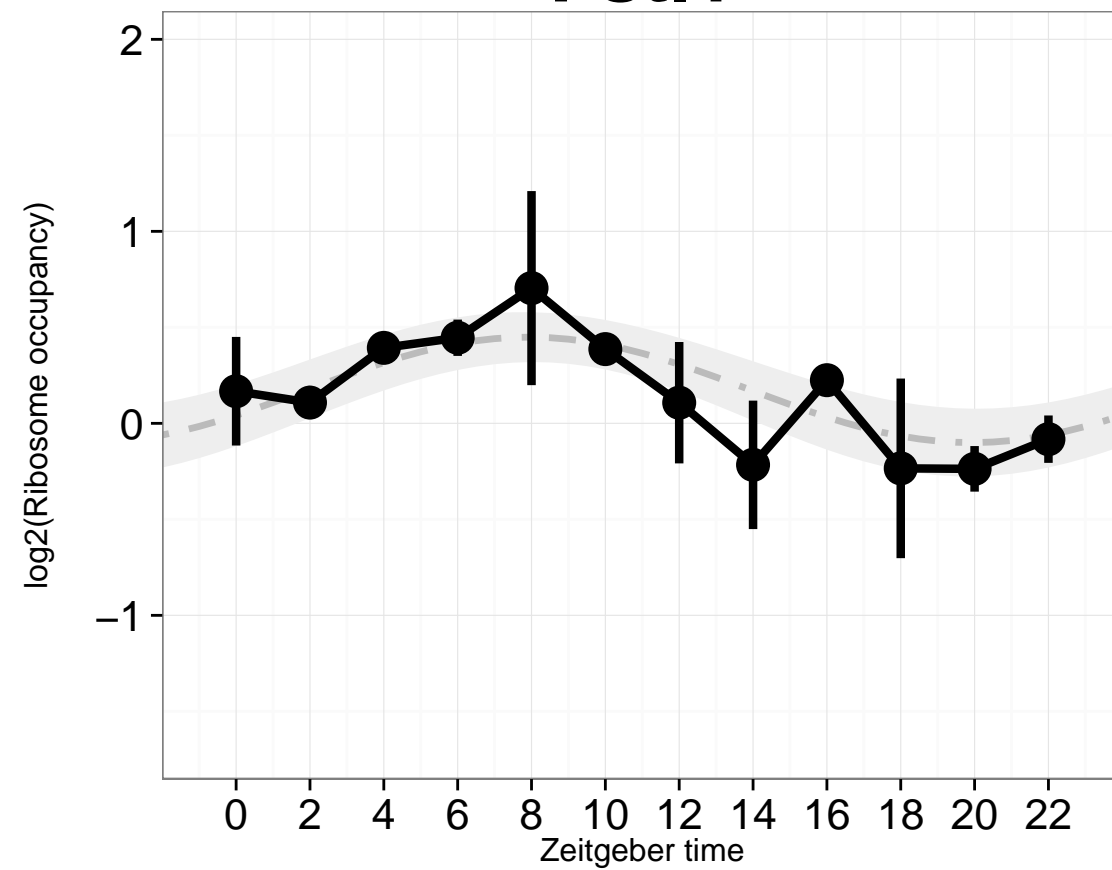

Supplement: SuppDataset_1.zip [file Fstl1_set_A.pdf › Supplemental Dataset 1/A-mRNA_nonrhyth_translation_nonrhyth/Fstl1_set_A.pdf]

## Ftcd

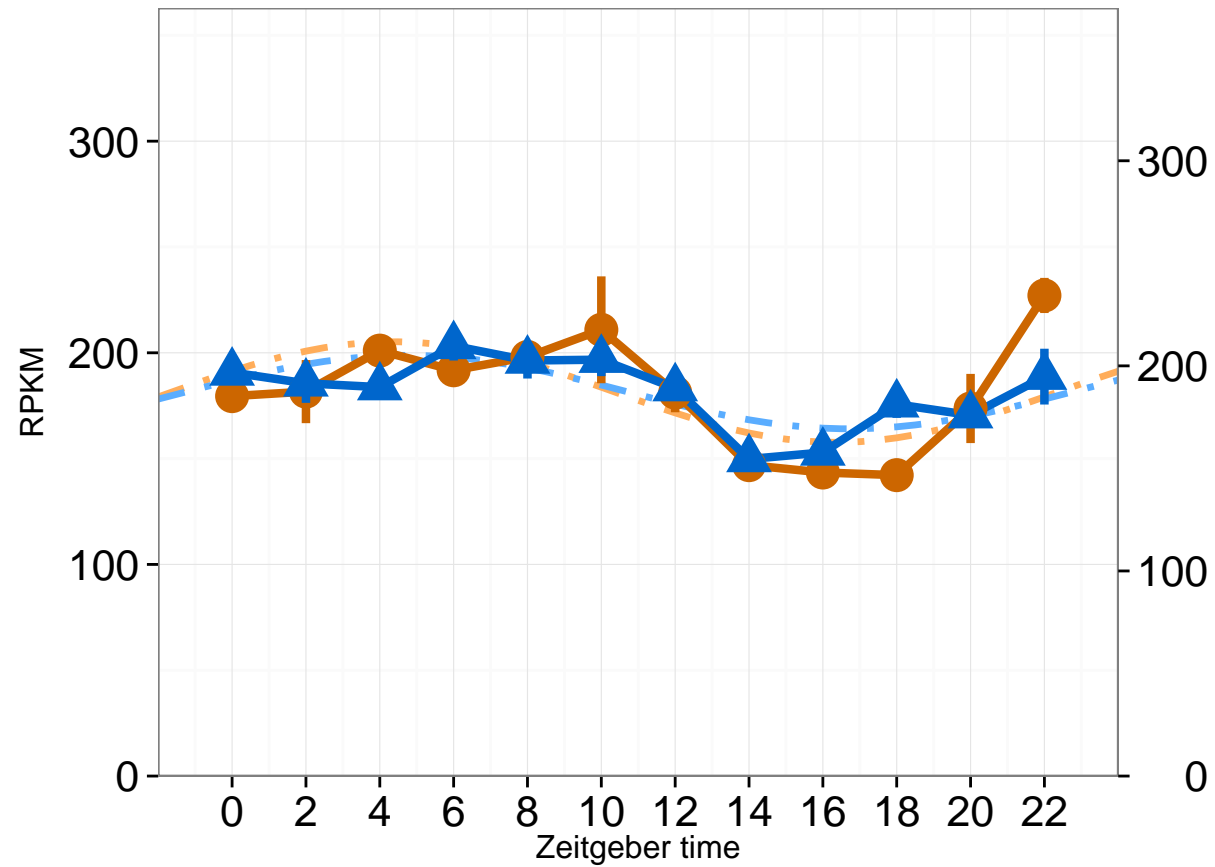

## Ftcd

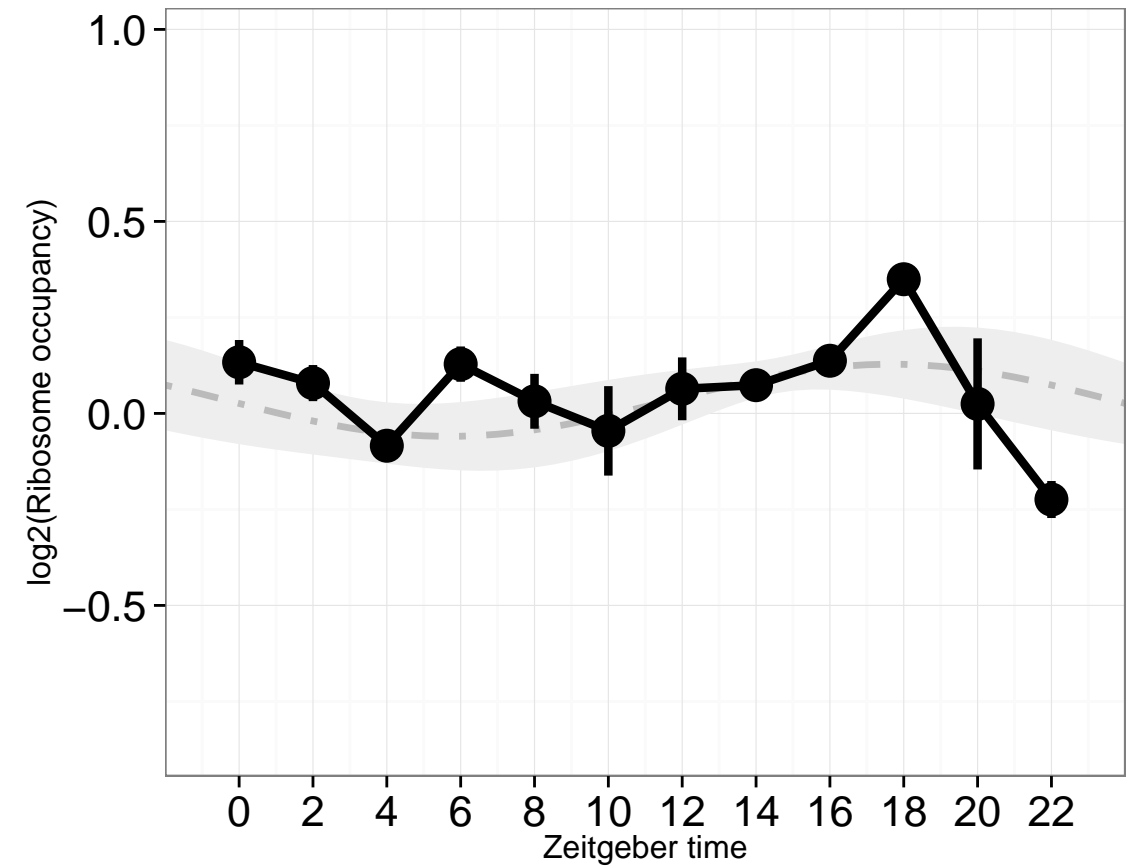

Supplement: SuppDataset_1.zip [file Ftcd_set_A.pdf › Supplemental Dataset 1/A-mRNA_nonrhyth_translation_nonrhyth/Ftcd_set_A.pdf]

## Fto

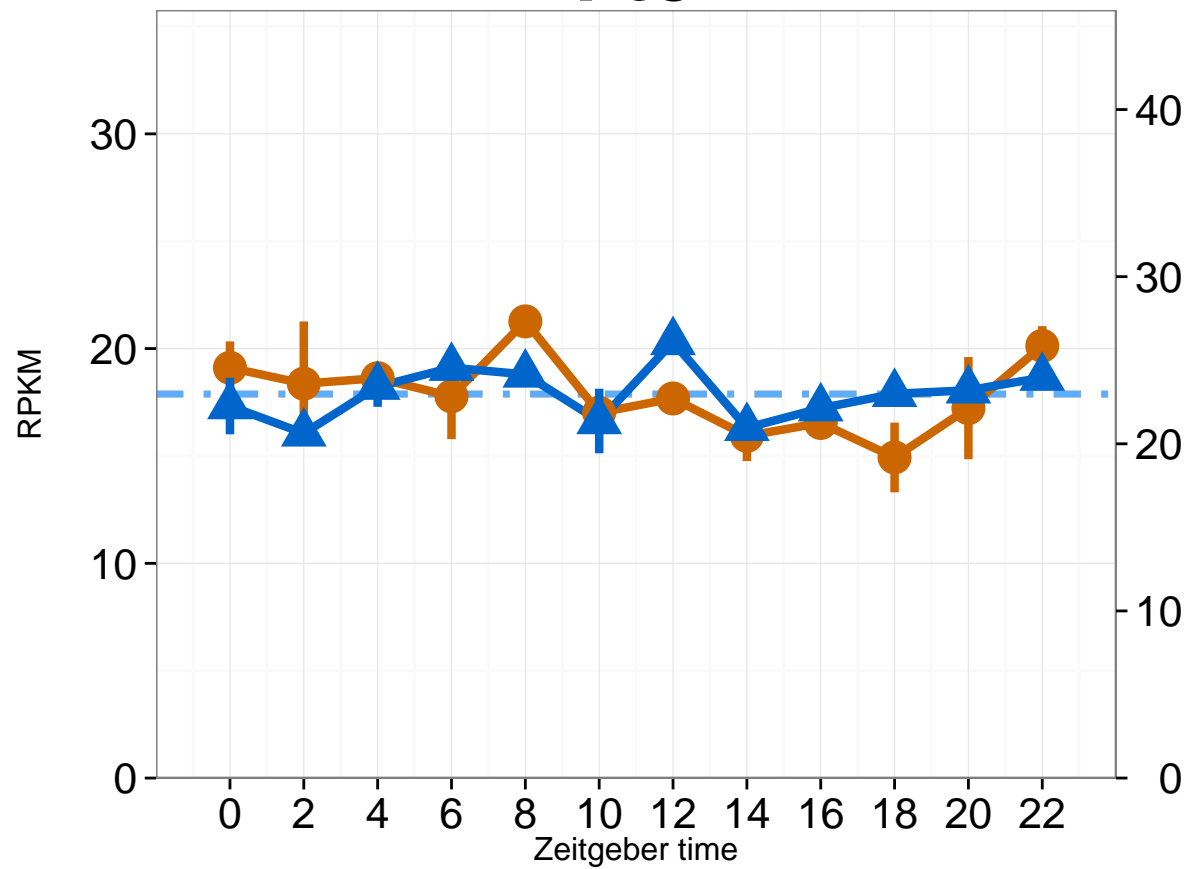

## Fto

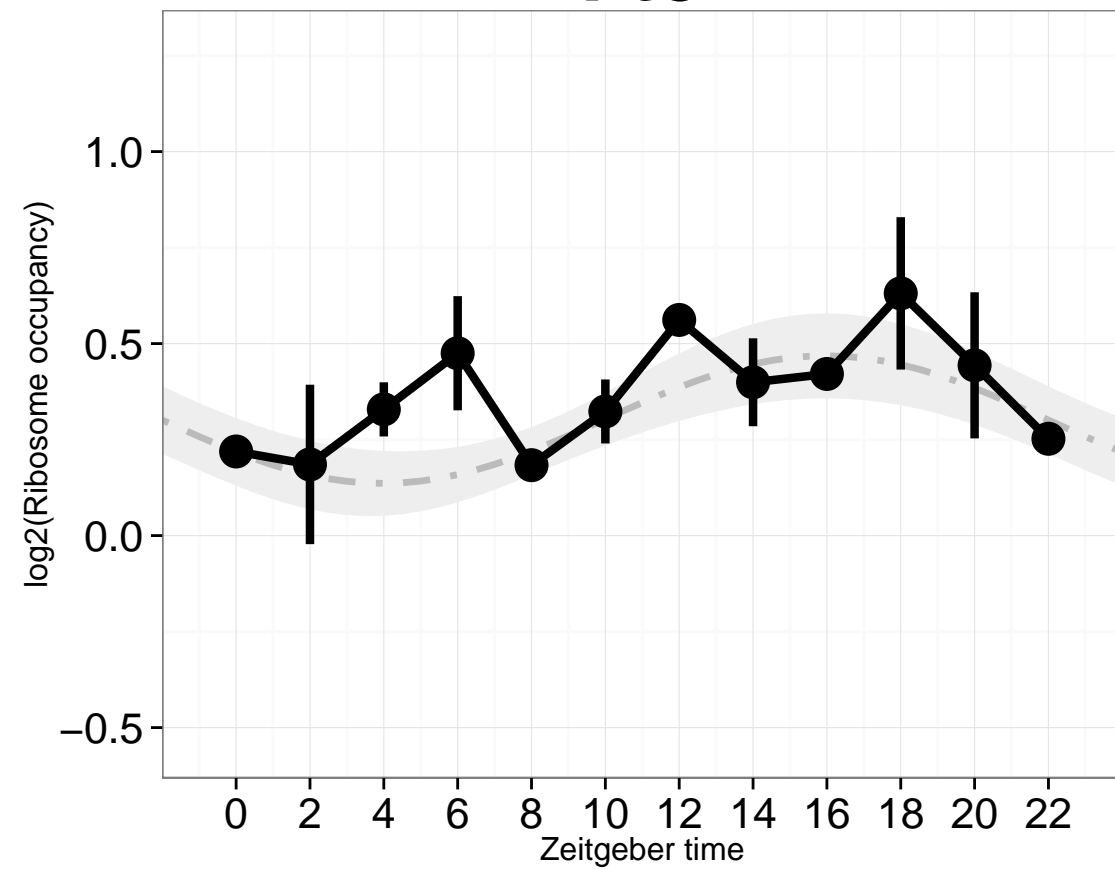

Supplement: SuppDataset_1.zip [file Fto_set_A.pdf › Supplemental Dataset 1/A-mRNA_nonrhyth_translation_nonrhyth/Fto_set_A.pdf]

# Ftsj3

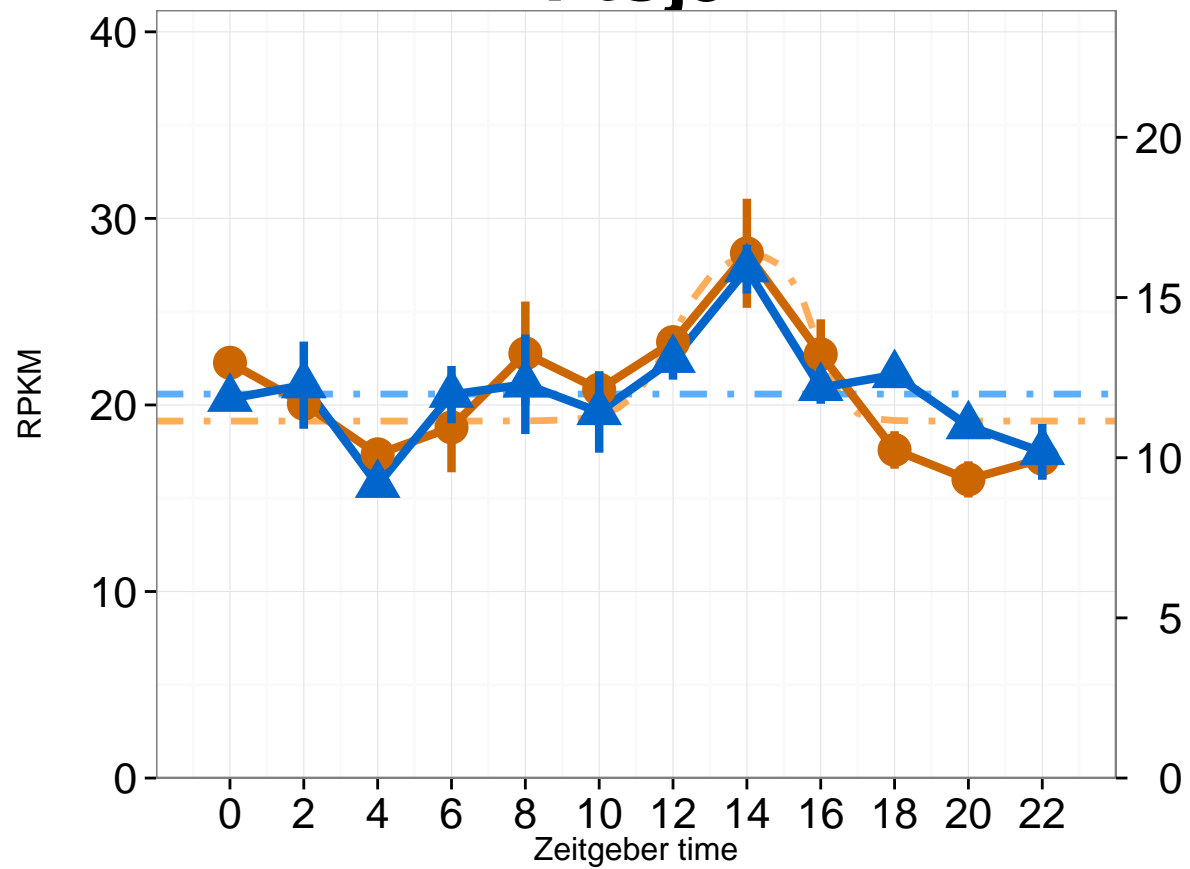

# Ftsj3

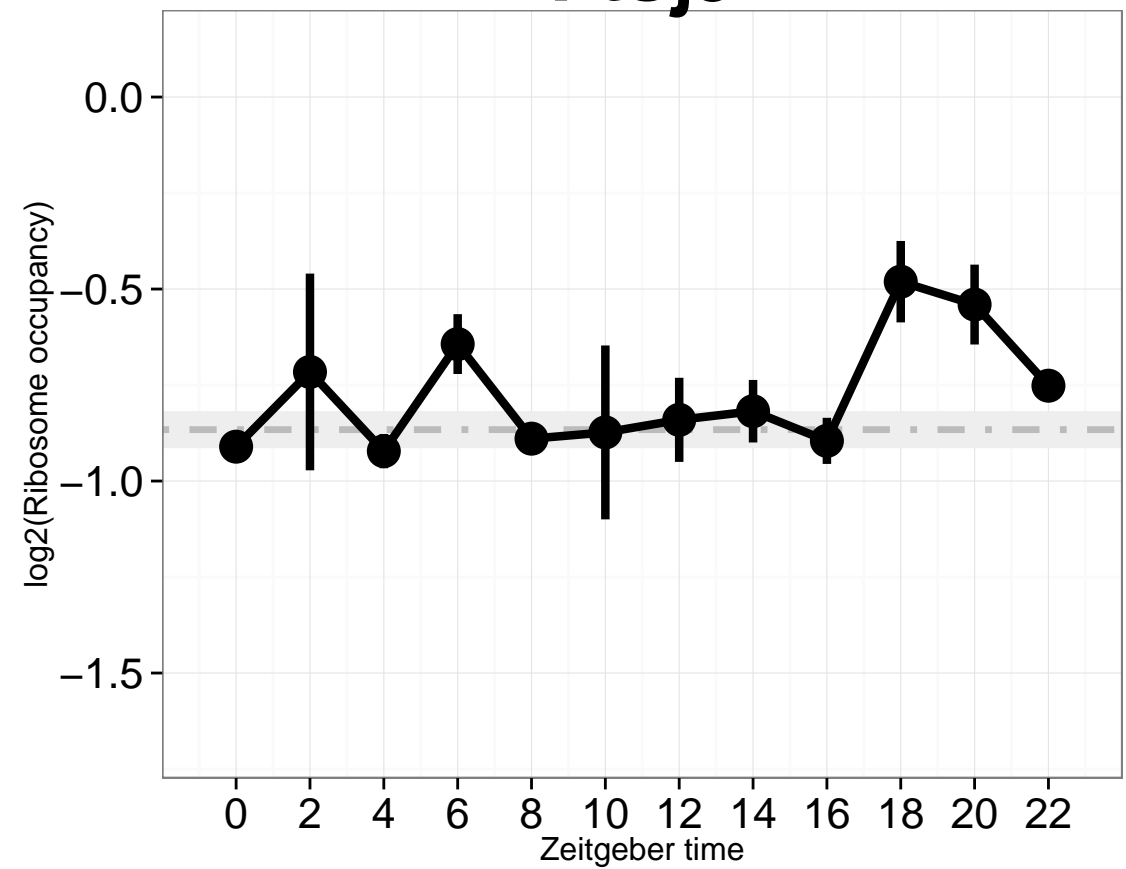

Supplement: SuppDataset_1.zip [file Ftsj3_set_A.pdf › Supplemental Dataset 1/A-mRNA_nonrhyth_translation_nonrhyth/Ftsj3_set_A.pdf]

# Fubp1

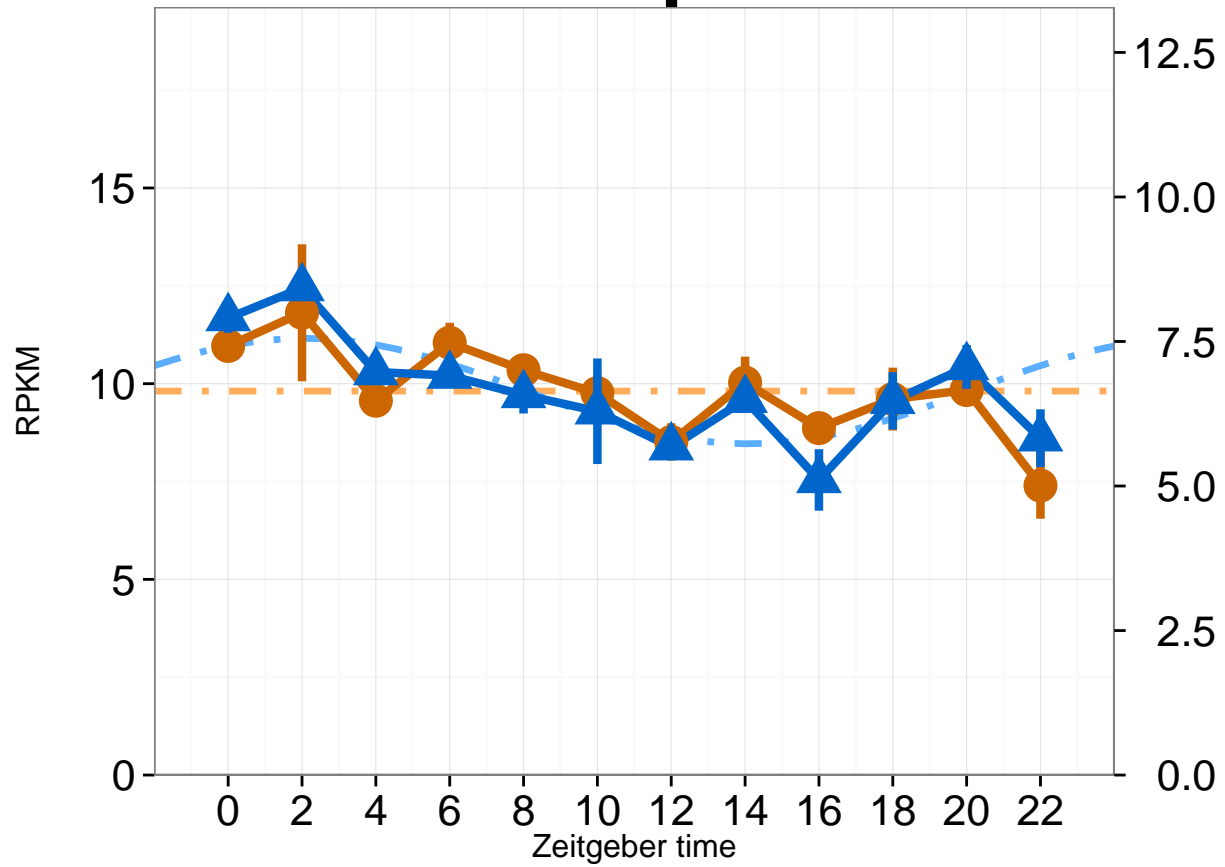

# Fubp1

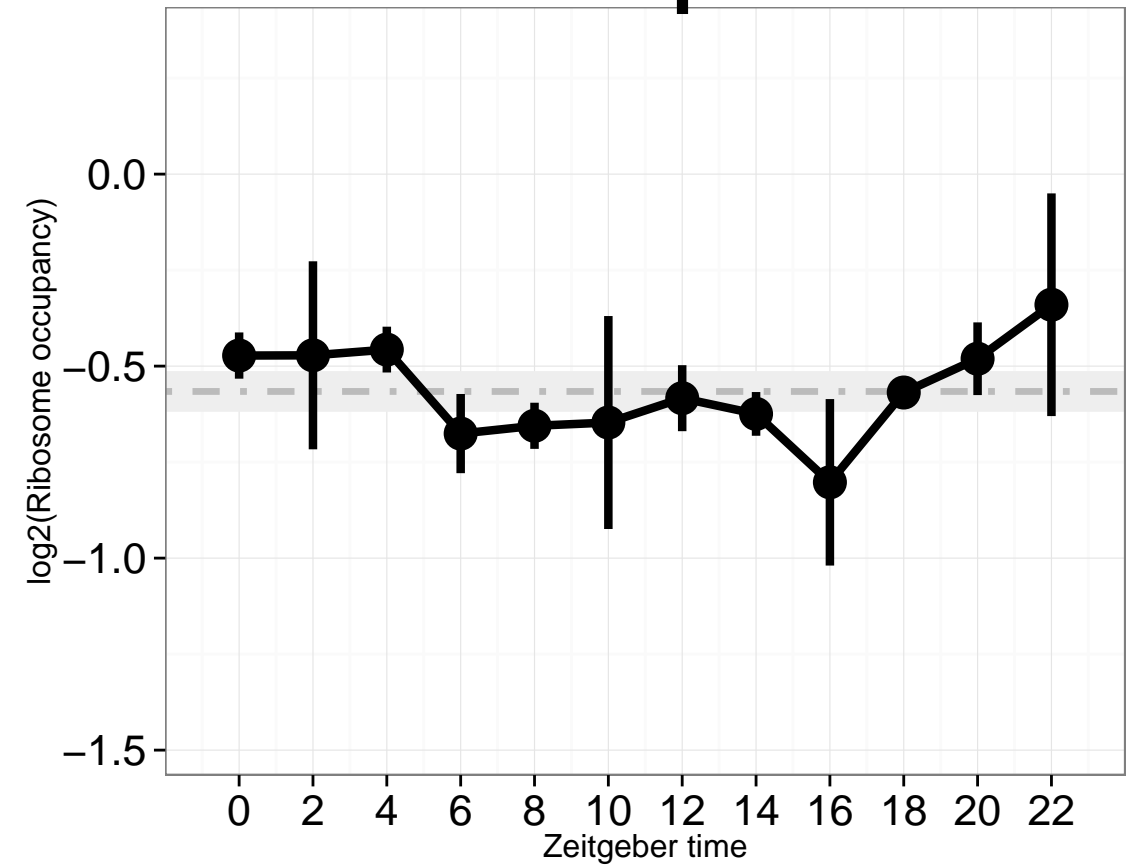

Supplement: SuppDataset_1.zip [file Fubp1_set_A.pdf › Supplemental Dataset 1/A-mRNA_nonrhyth_translation_nonrhyth/Fubp1_set_A.pdf]

# Fubp3

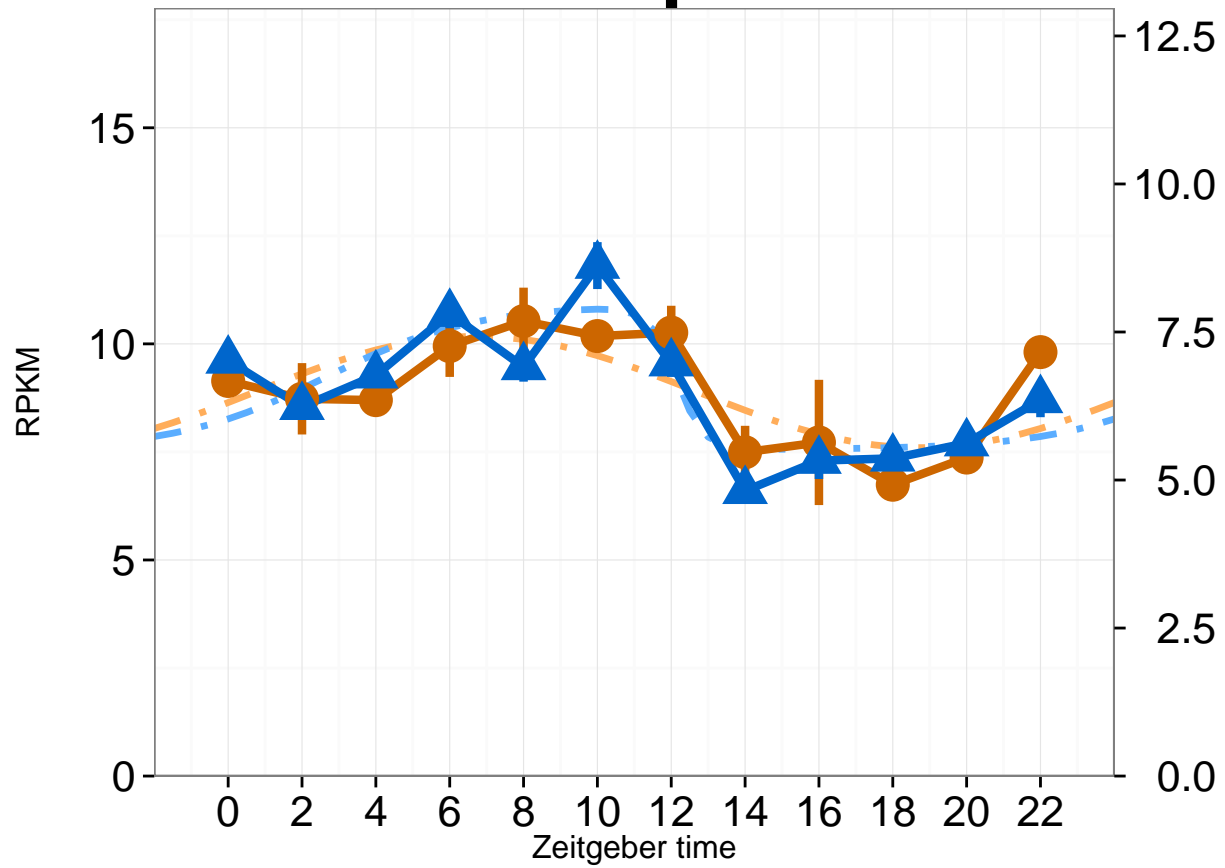

# Fubp3

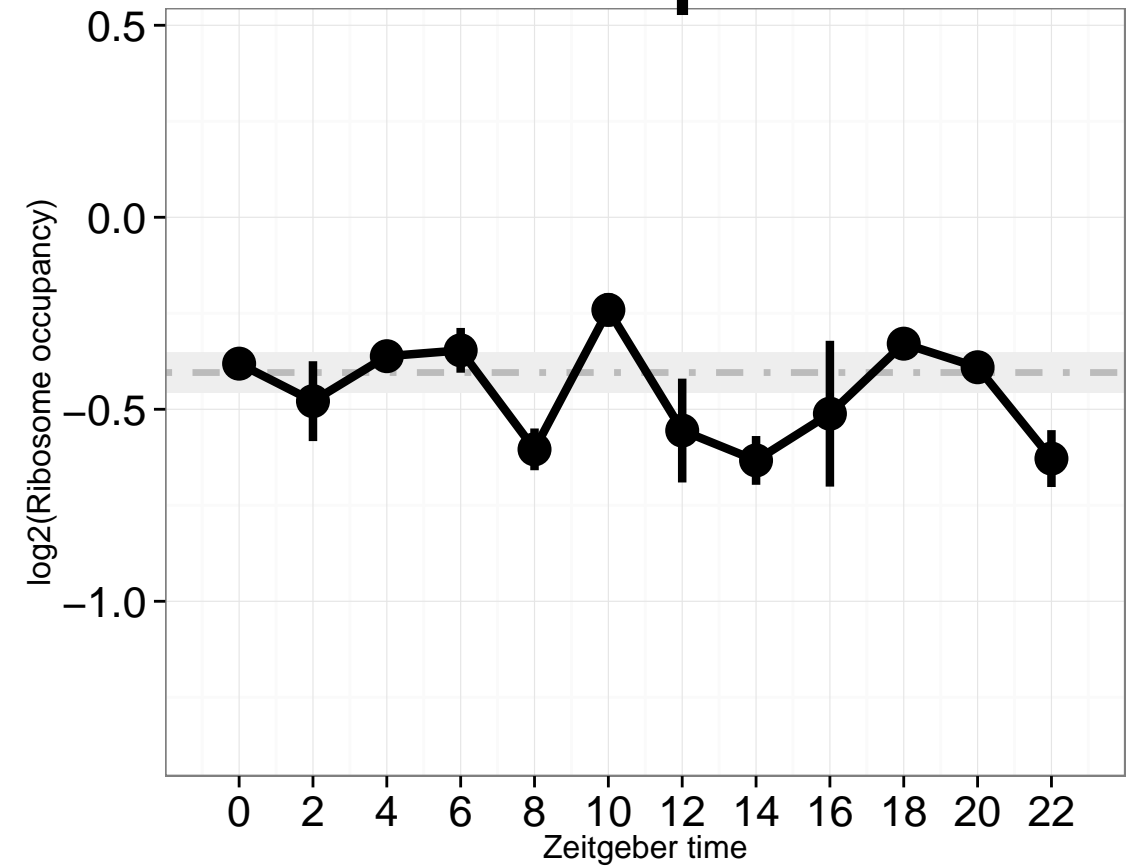

Supplement: SuppDataset_1.zip [file Fubp3_set_A.pdf › Supplemental Dataset 1/A-mRNA_nonrhyth_translation_nonrhyth/Fubp3_set_A.pdf]

# Fuca1

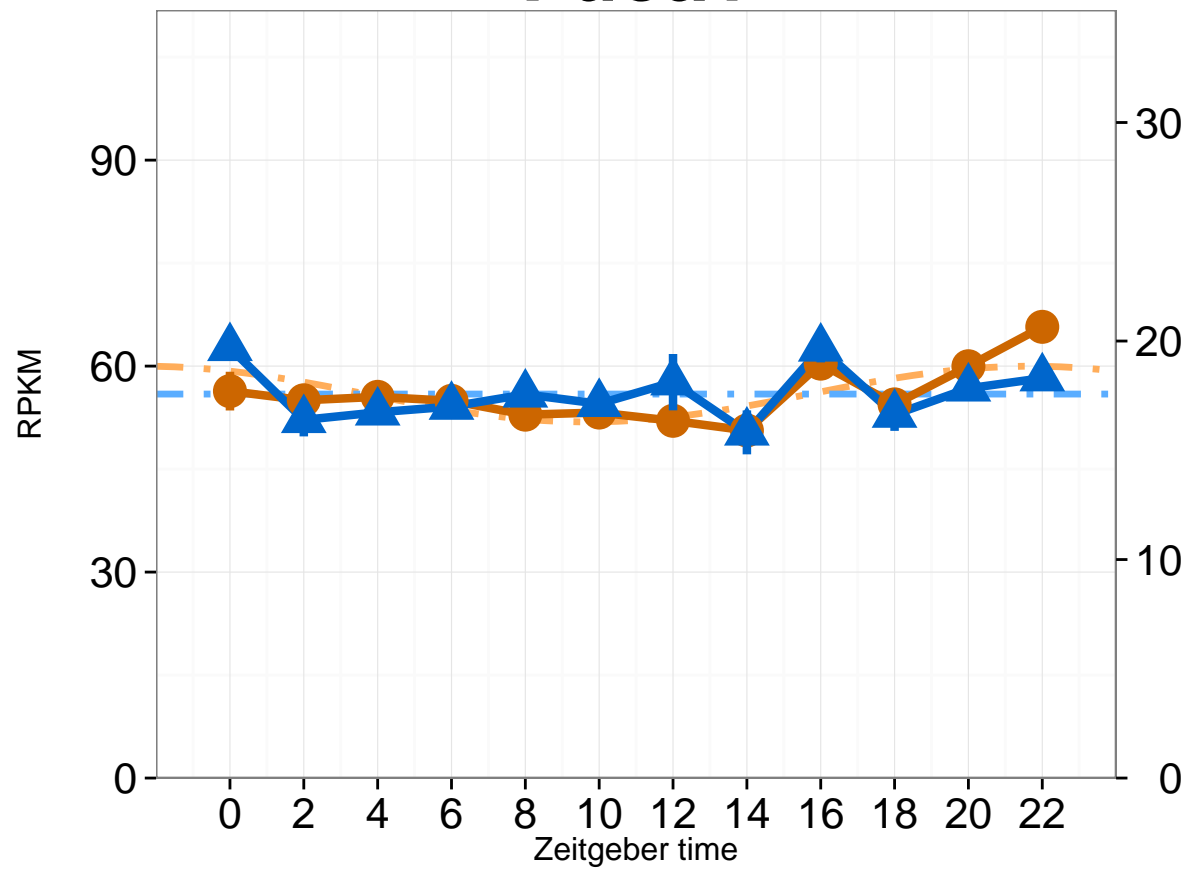

# Fuca1

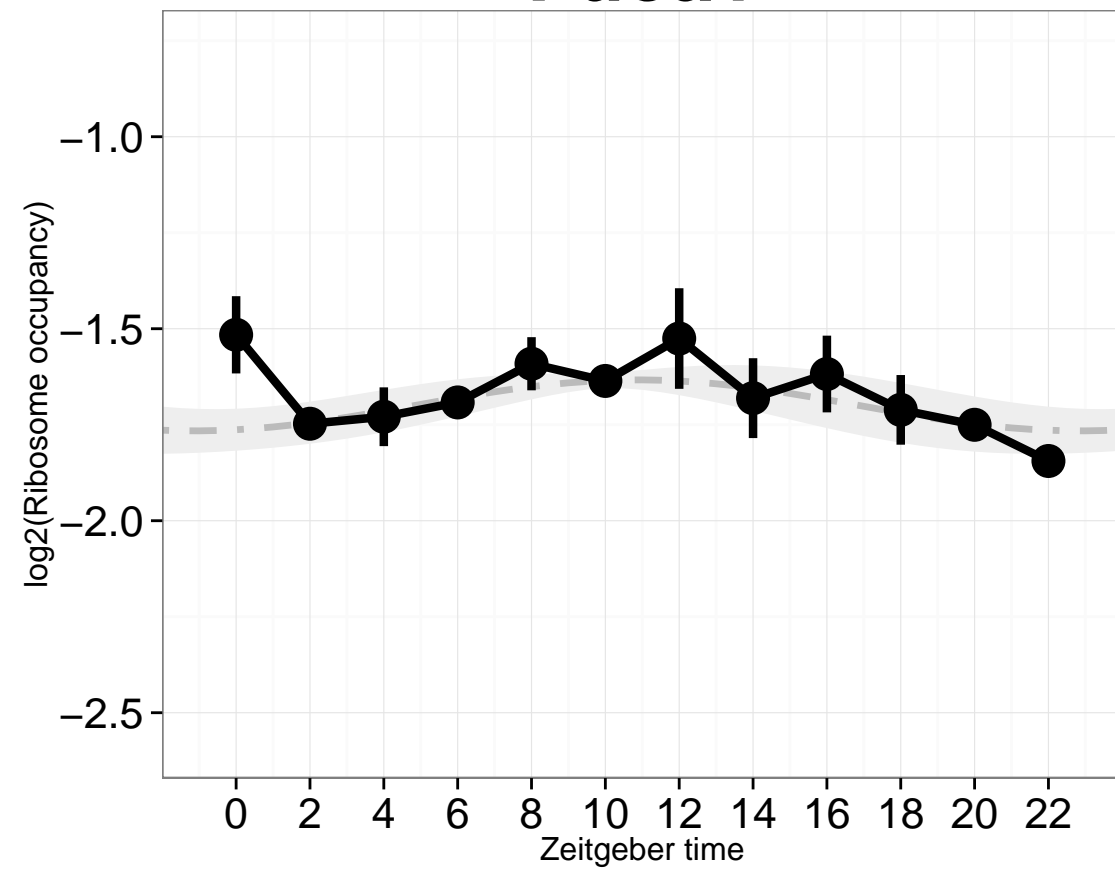

Supplement: SuppDataset_1.zip [file Fuca1_set_A.pdf › Supplemental Dataset 1/A-mRNA_nonrhyth_translation_nonrhyth/Fuca1_set_A.pdf]

# Fuca2

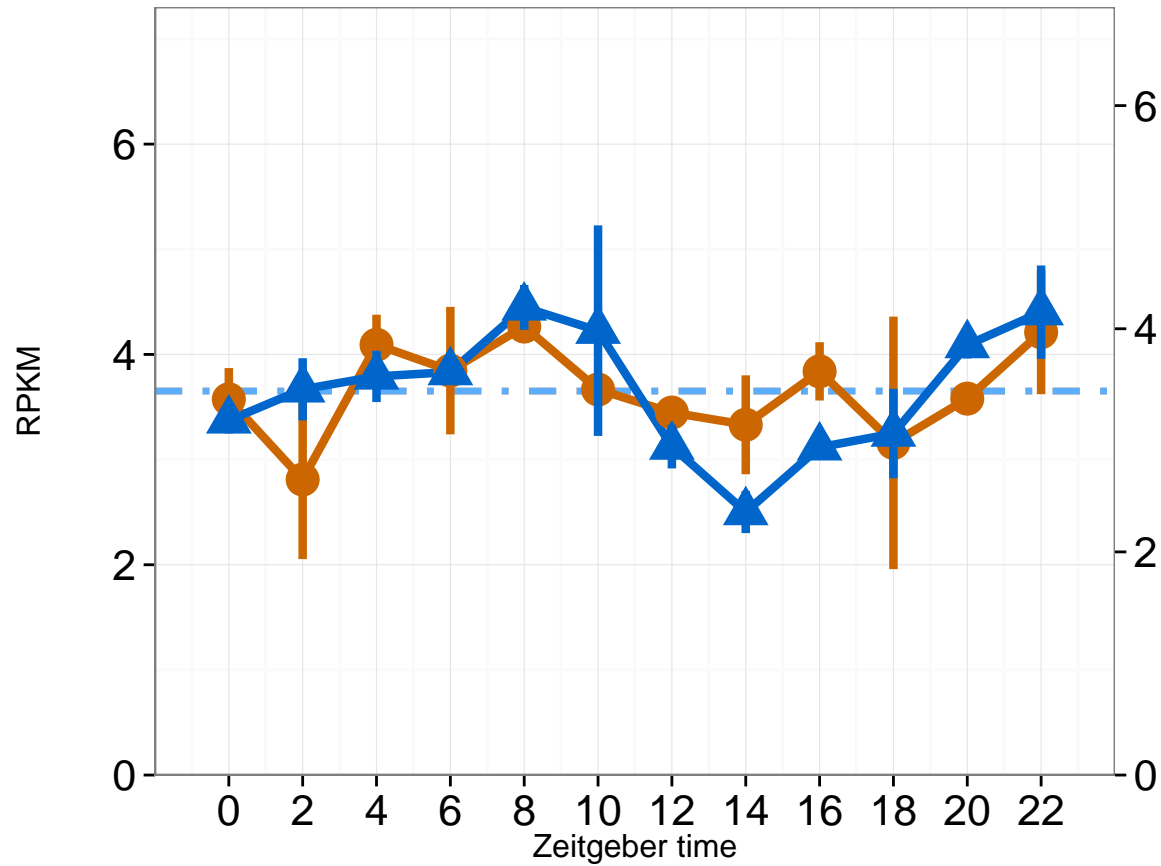

# Fuca2

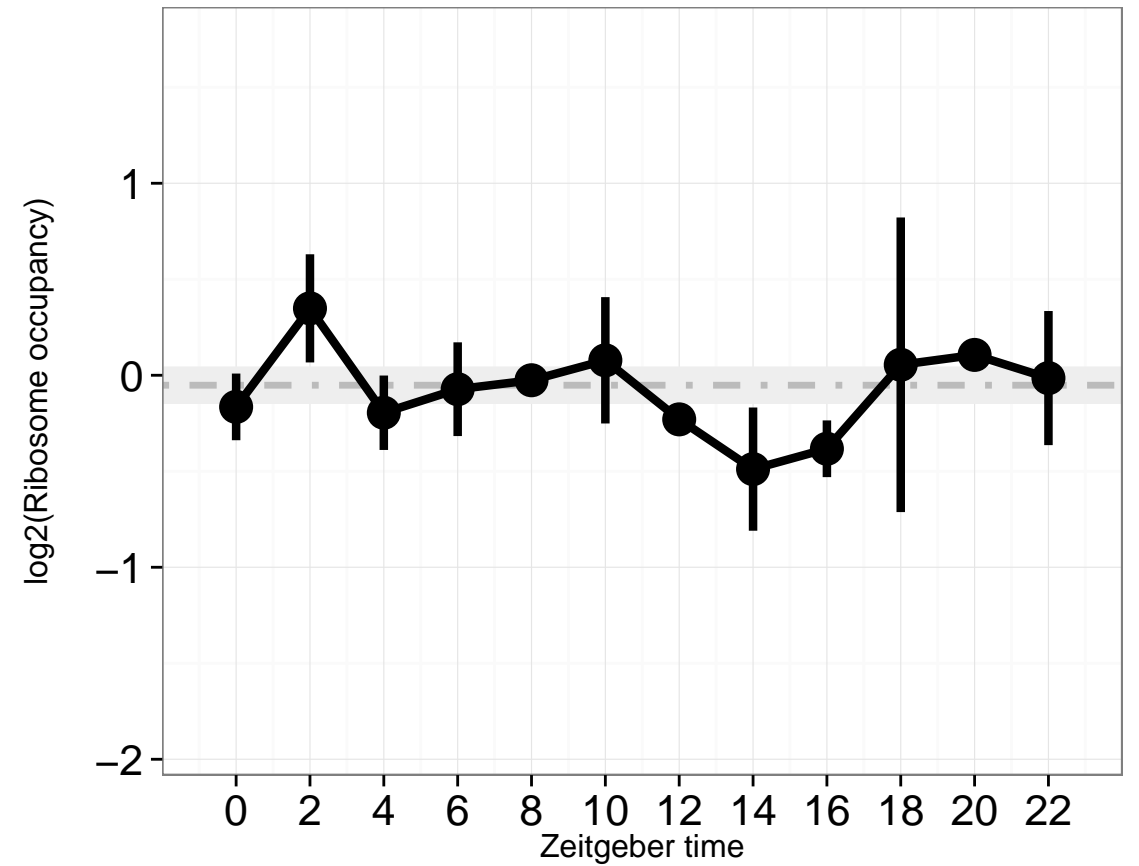

Supplement: SuppDataset_1.zip [file Fuca2_set_A.pdf › Supplemental Dataset 1/A-mRNA_nonrhyth_translation_nonrhyth/Fuca2_set_A.pdf]

## Fuk

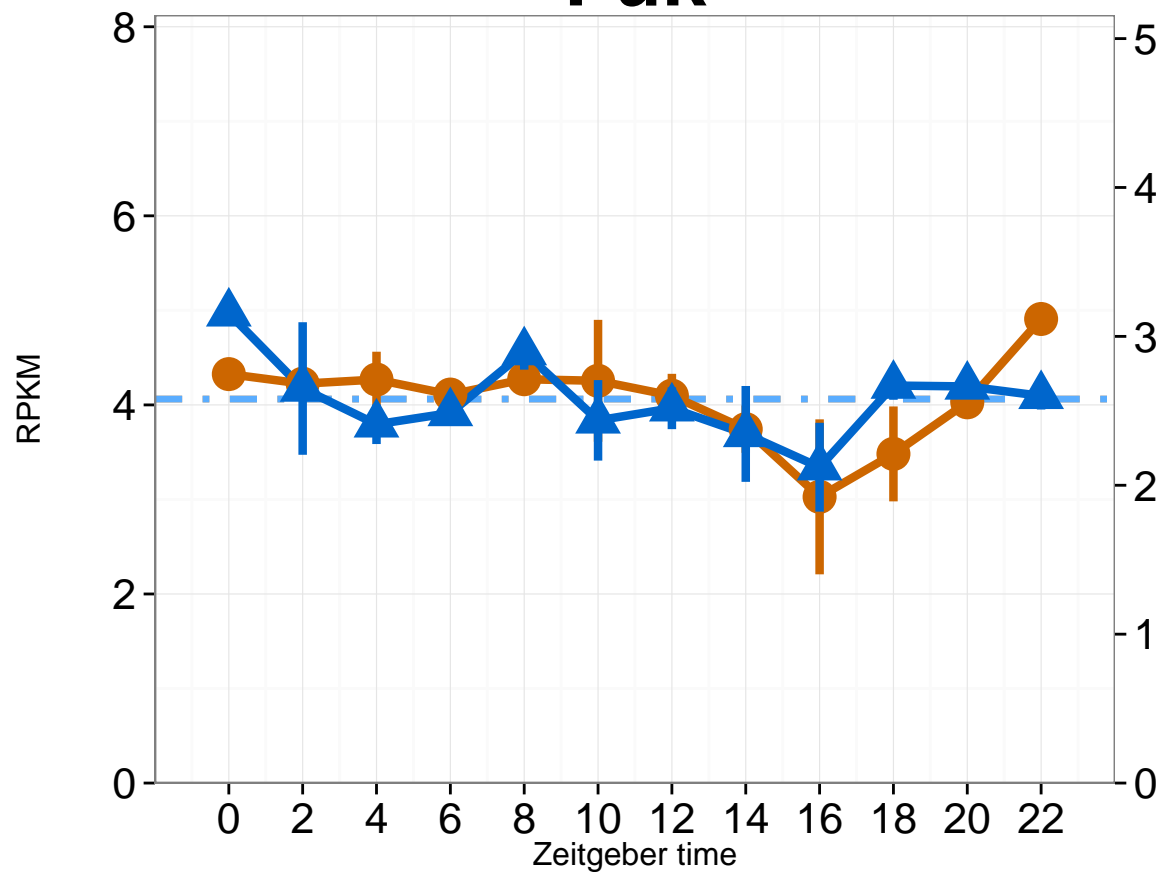

## Fuk

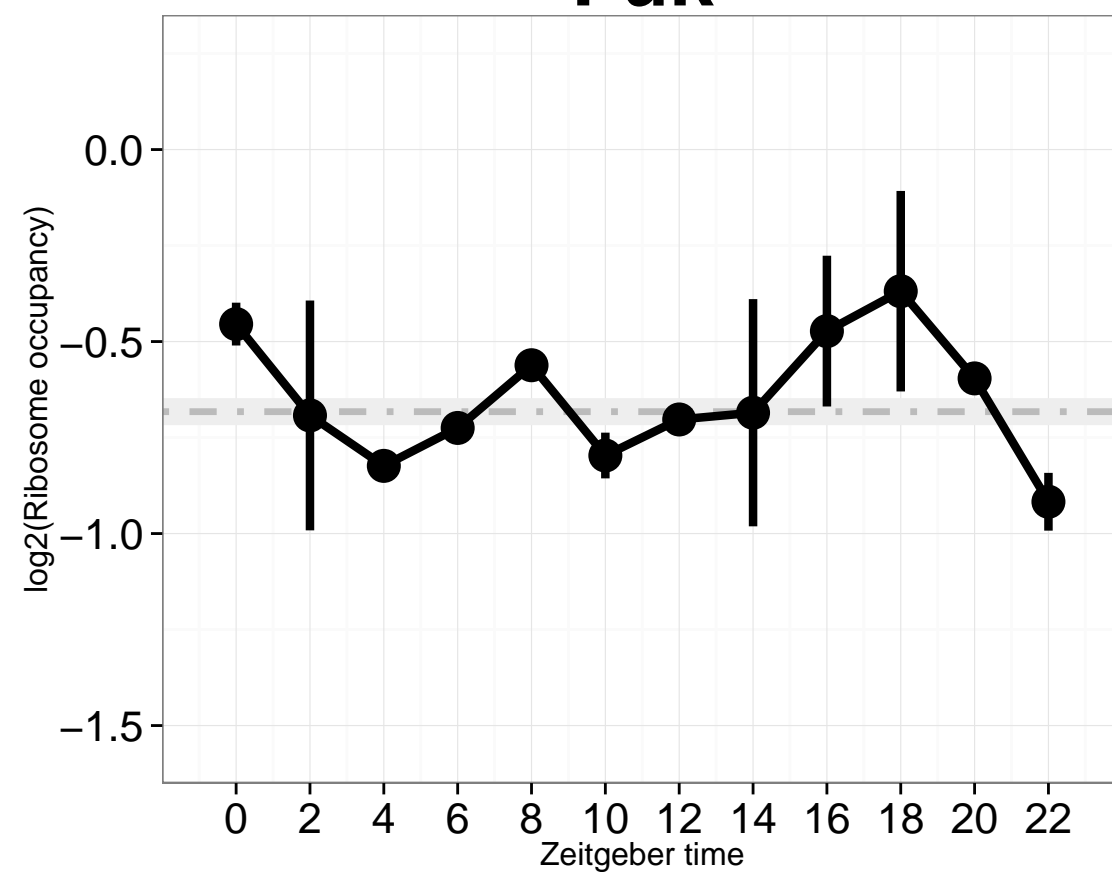

Supplement: SuppDataset_1.zip [file Fuk_set_A.pdf › Supplemental Dataset 1/A-mRNA_nonrhyth_translation_nonrhyth/Fuk_set_A.pdf]

# Fundc1

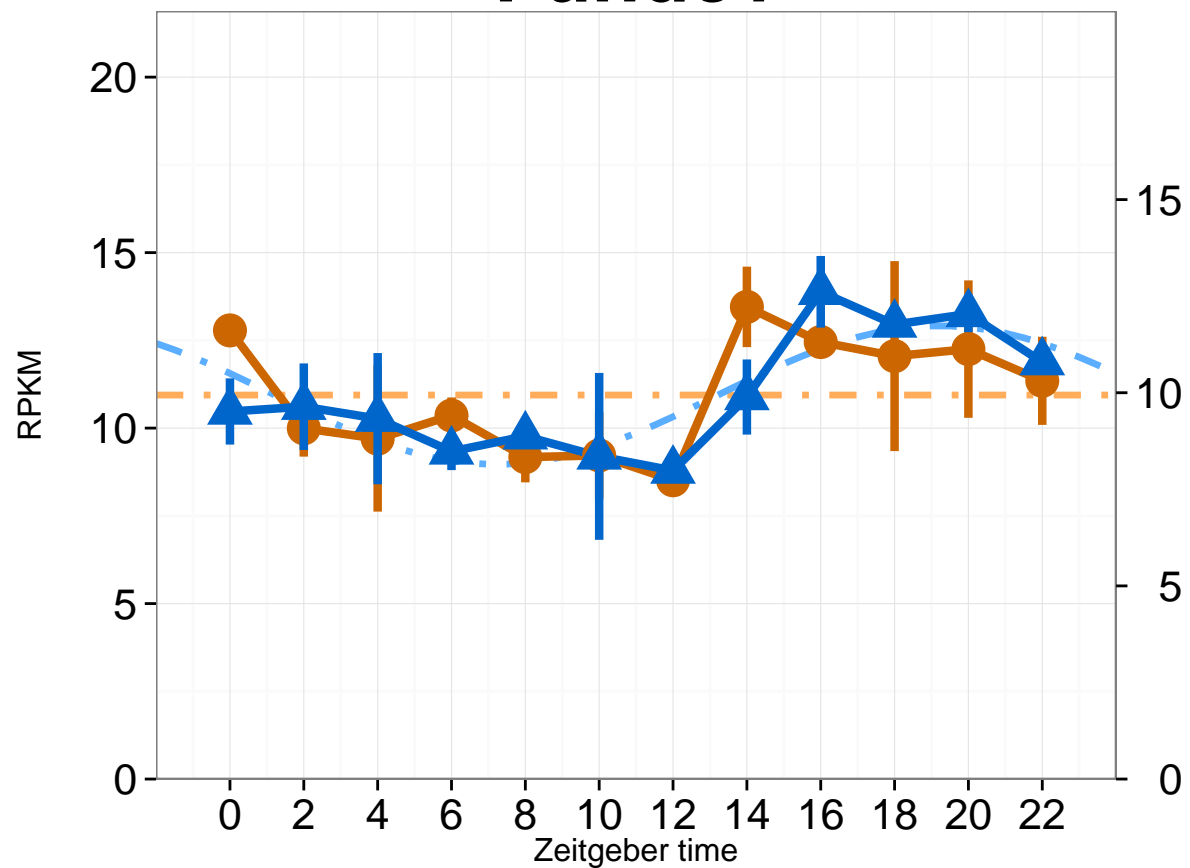

# Fundc1

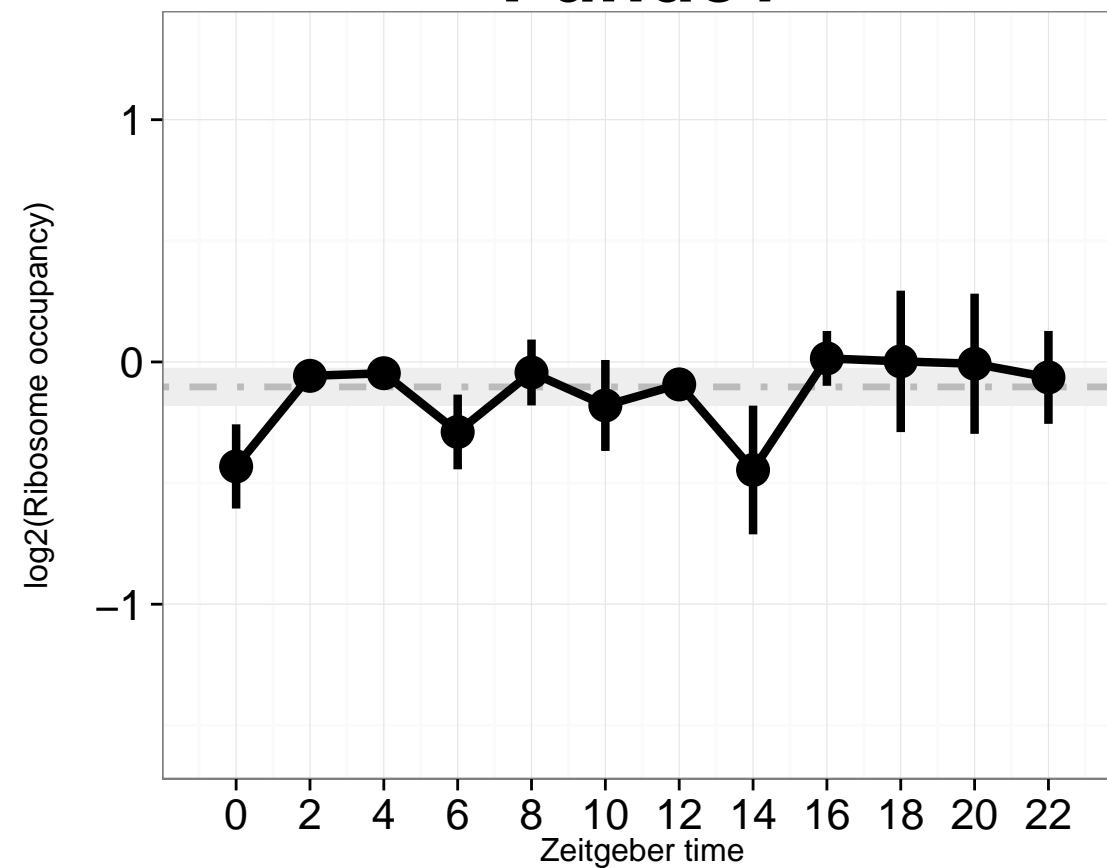

Supplement: SuppDataset_1.zip [file Fundc1_set_A.pdf › Supplemental Dataset 1/A-mRNA_nonrhyth_translation_nonrhyth/Fundc1_set_A.pdf]

## Fuom

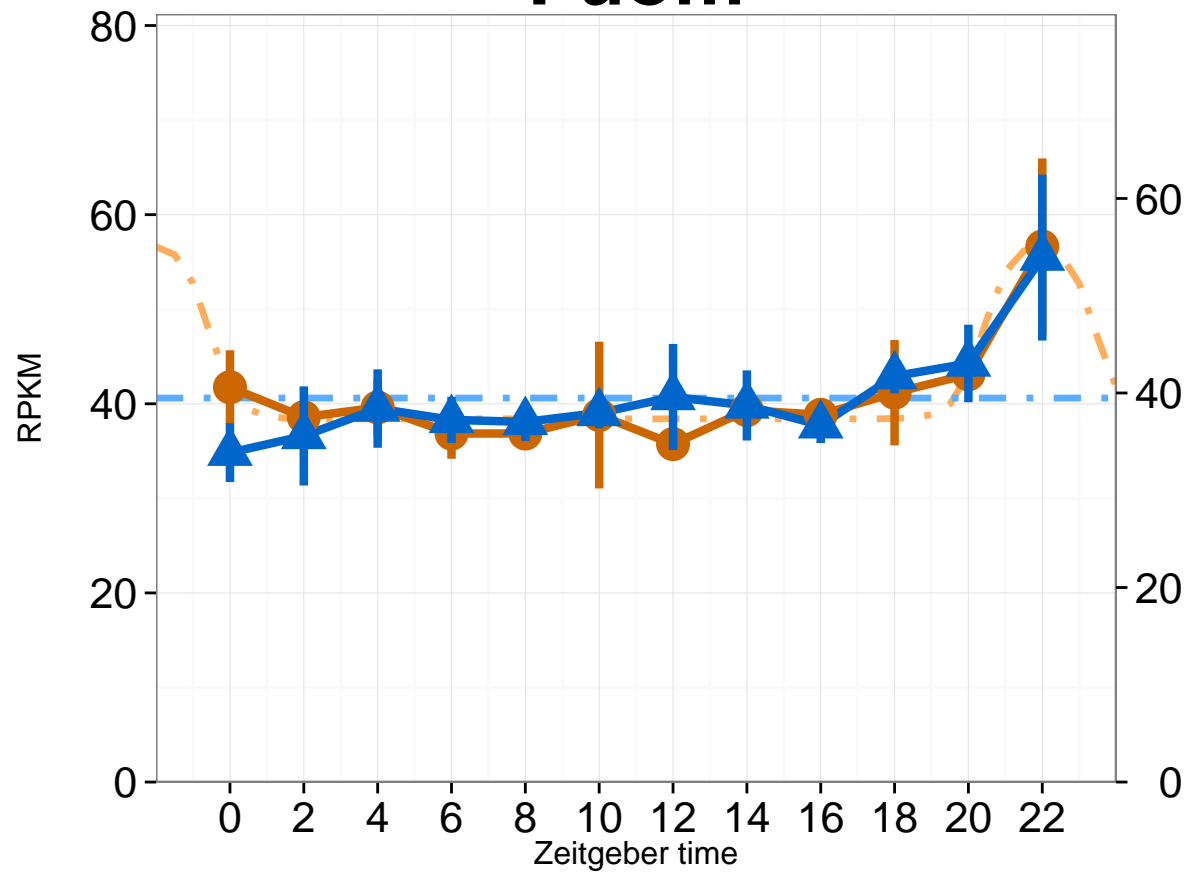

## Fuom

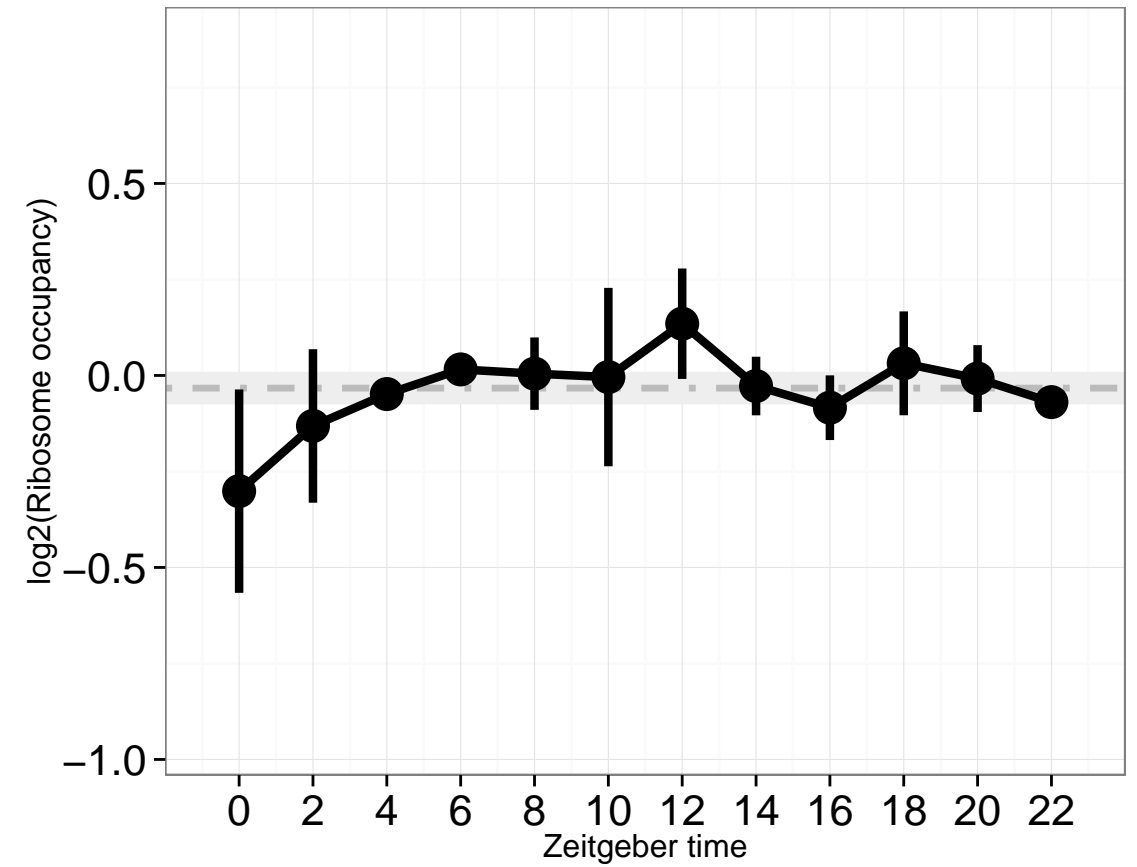

Supplement: SuppDataset_1.zip [file Fuom_set_A.pdf › Supplemental Dataset 1/A-mRNA_nonrhyth_translation_nonrhyth/Fuom_set_A.pdf]

## Furin

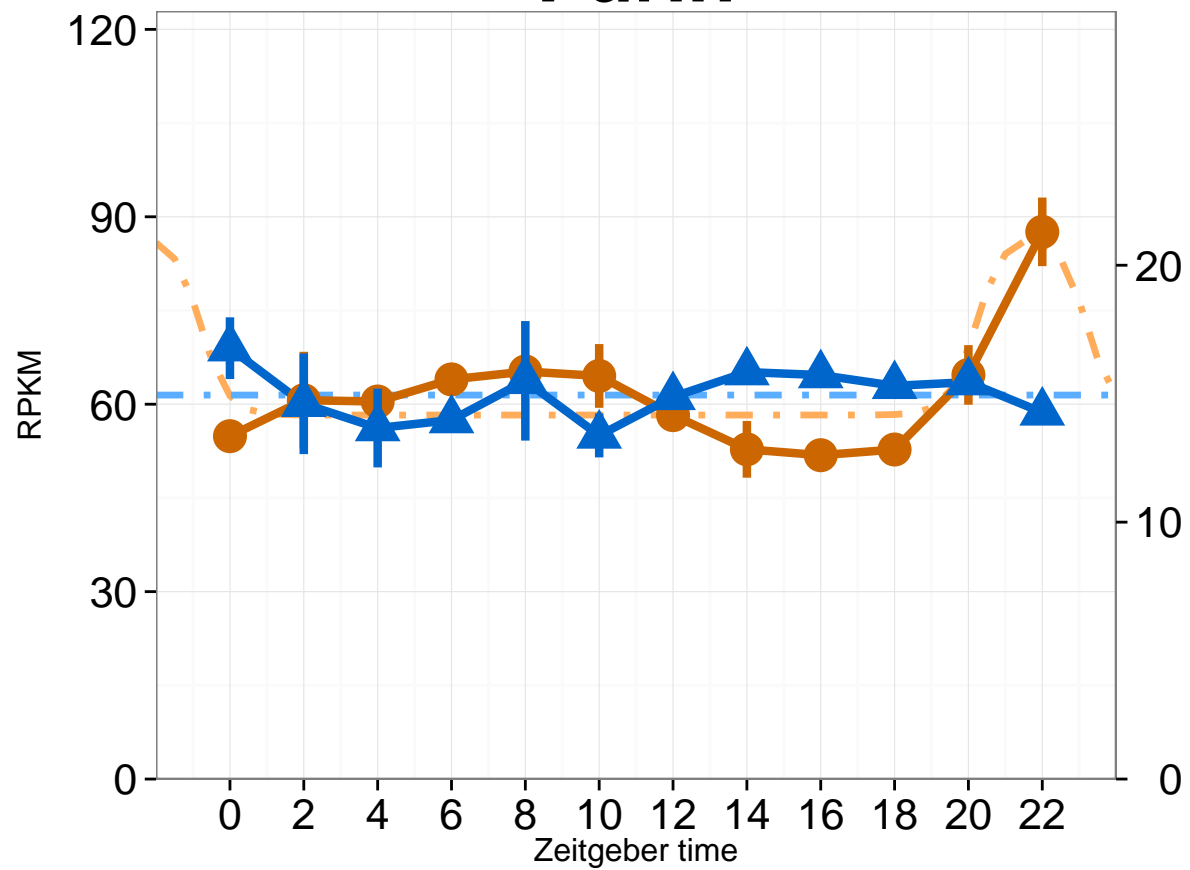

## Furin

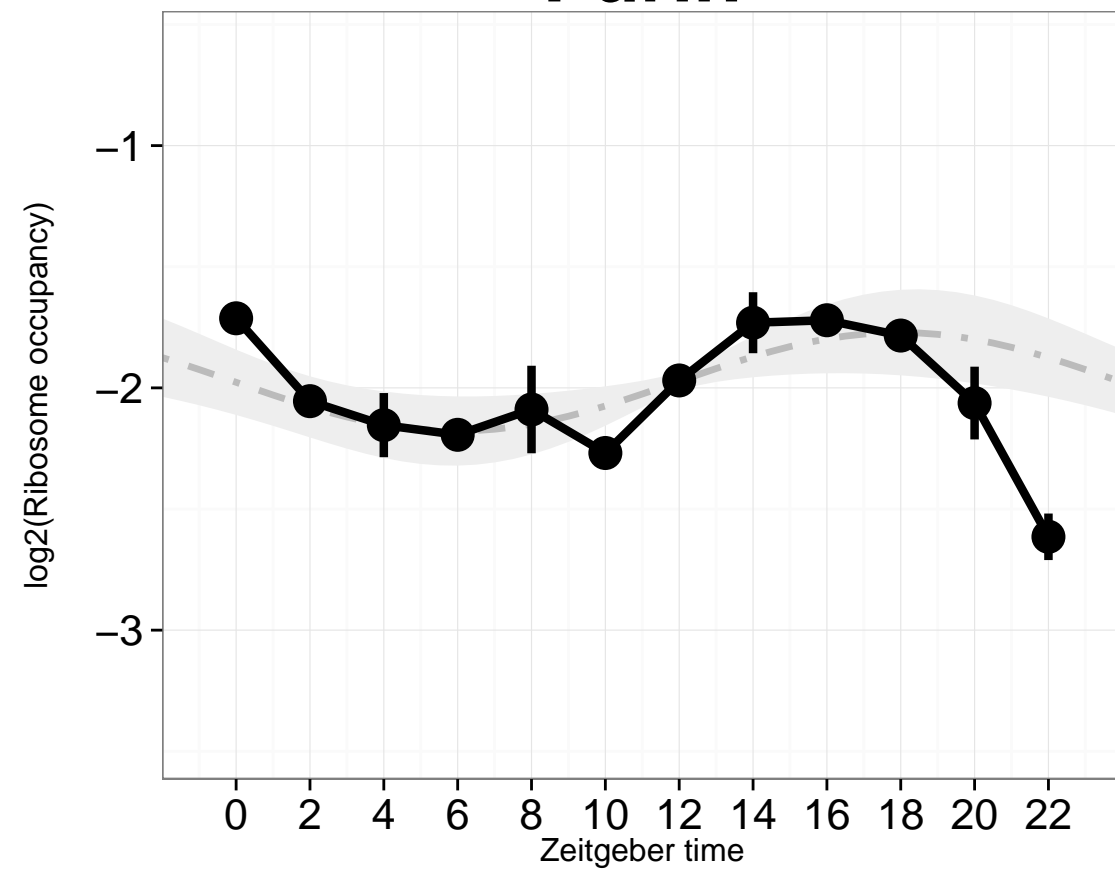

Supplement: SuppDataset_1.zip [file Furin_set_A.pdf › Supplemental Dataset 1/A-mRNA_nonrhyth_translation_nonrhyth/Furin_set_A.pdf]

## Fut10

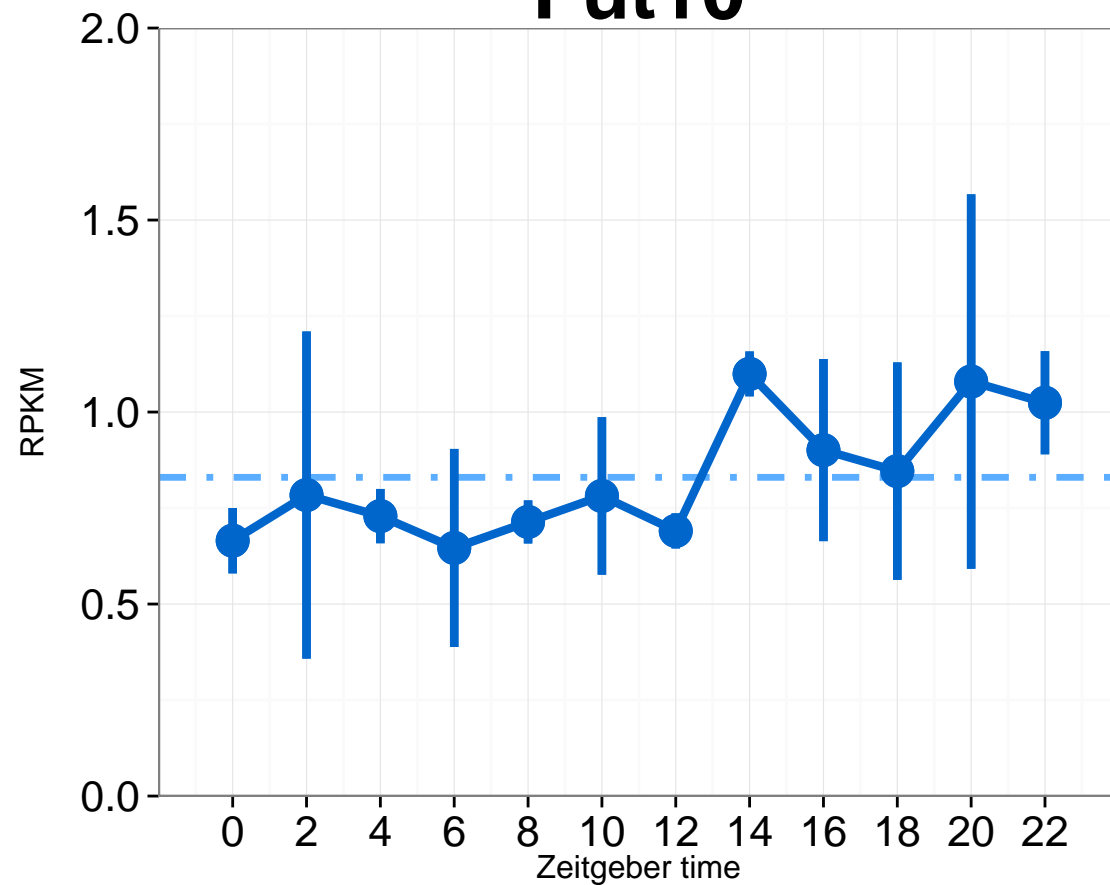

## Fut10 log2(Ribosome occupancy)

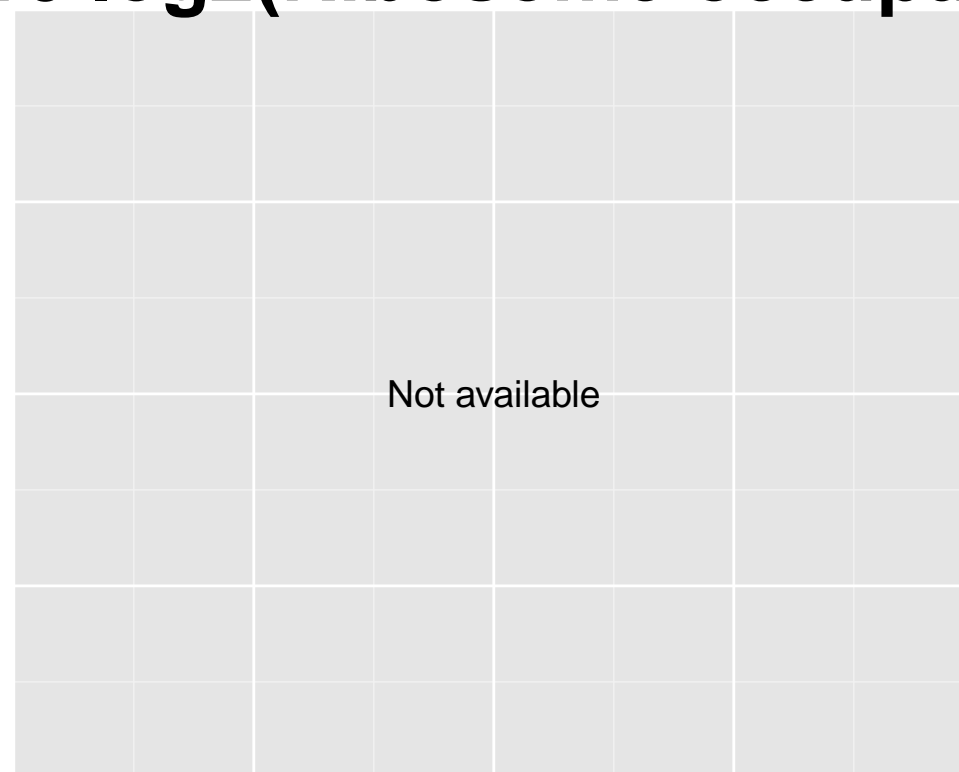

Supplement: SuppDataset_1.zip [file Fut10_set_A.pdf › Supplemental Dataset 1/A-mRNA_nonrhyth_translation_nonrhyth/Fut10_set_A.pdf]

# Fut11

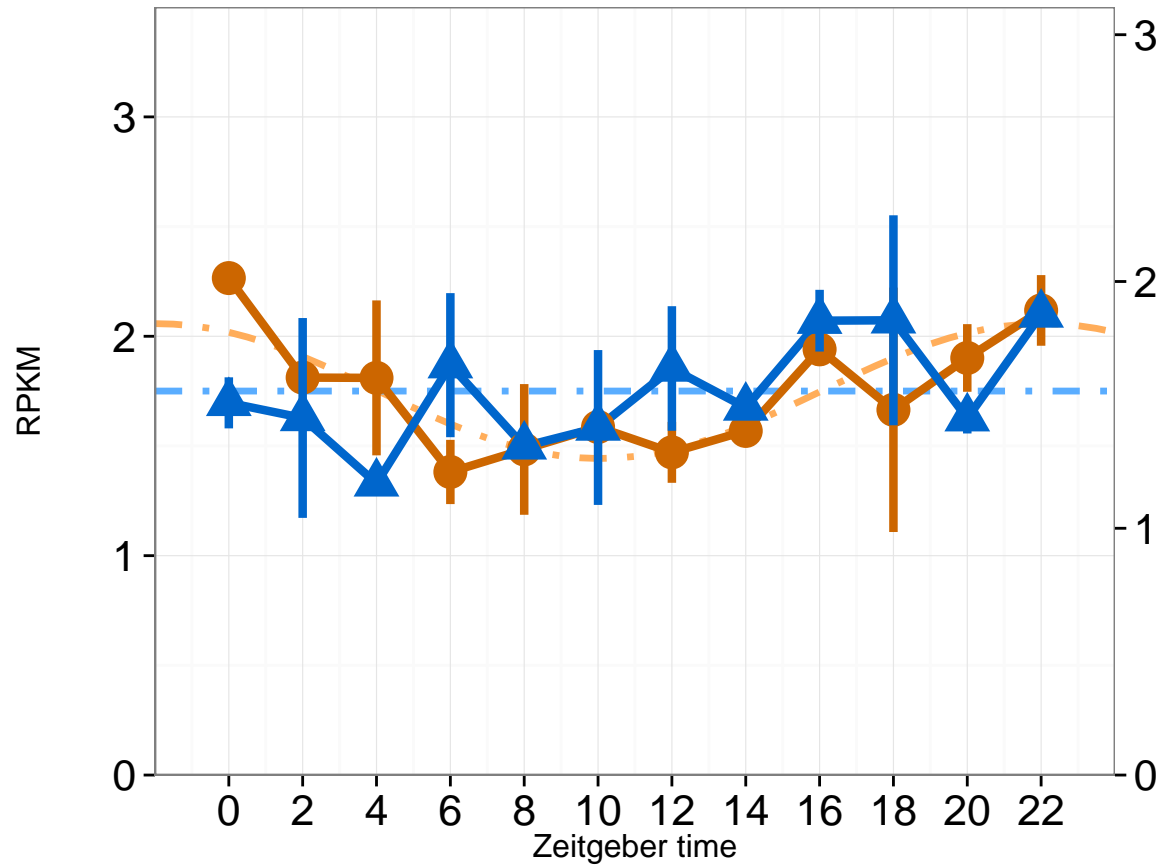

# Fut11

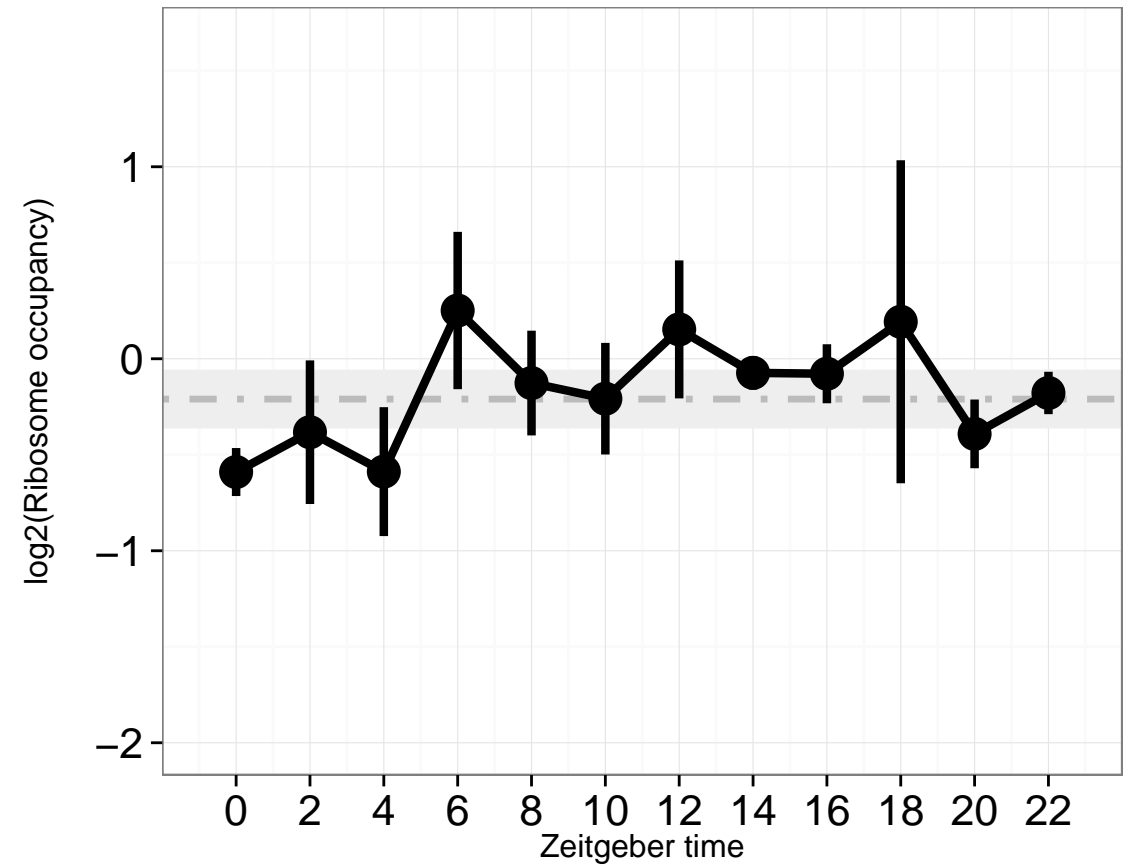

Supplement: SuppDataset_1.zip [file Fut11_set_A.pdf › Supplemental Dataset 1/A-mRNA_nonrhyth_translation_nonrhyth/Fut11_set_A.pdf]

# Fut8

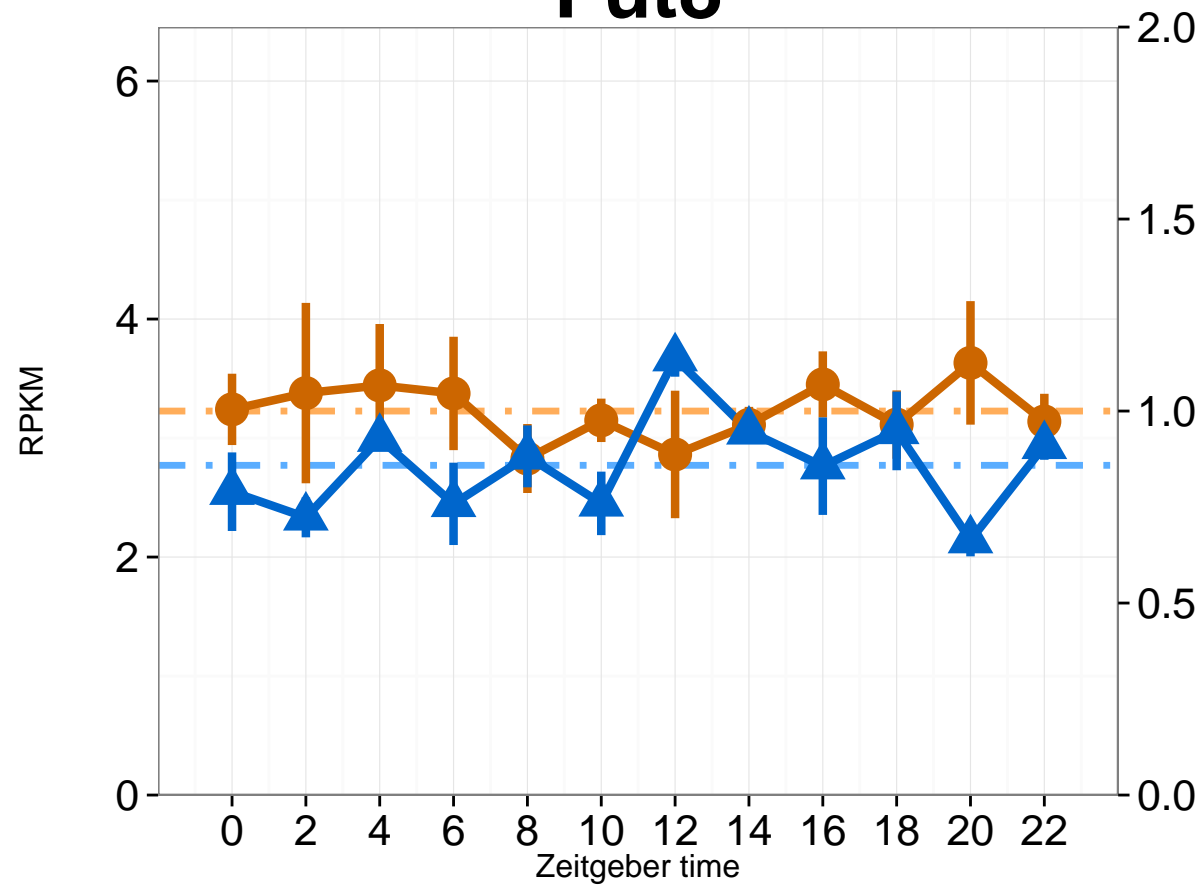

# Fut8

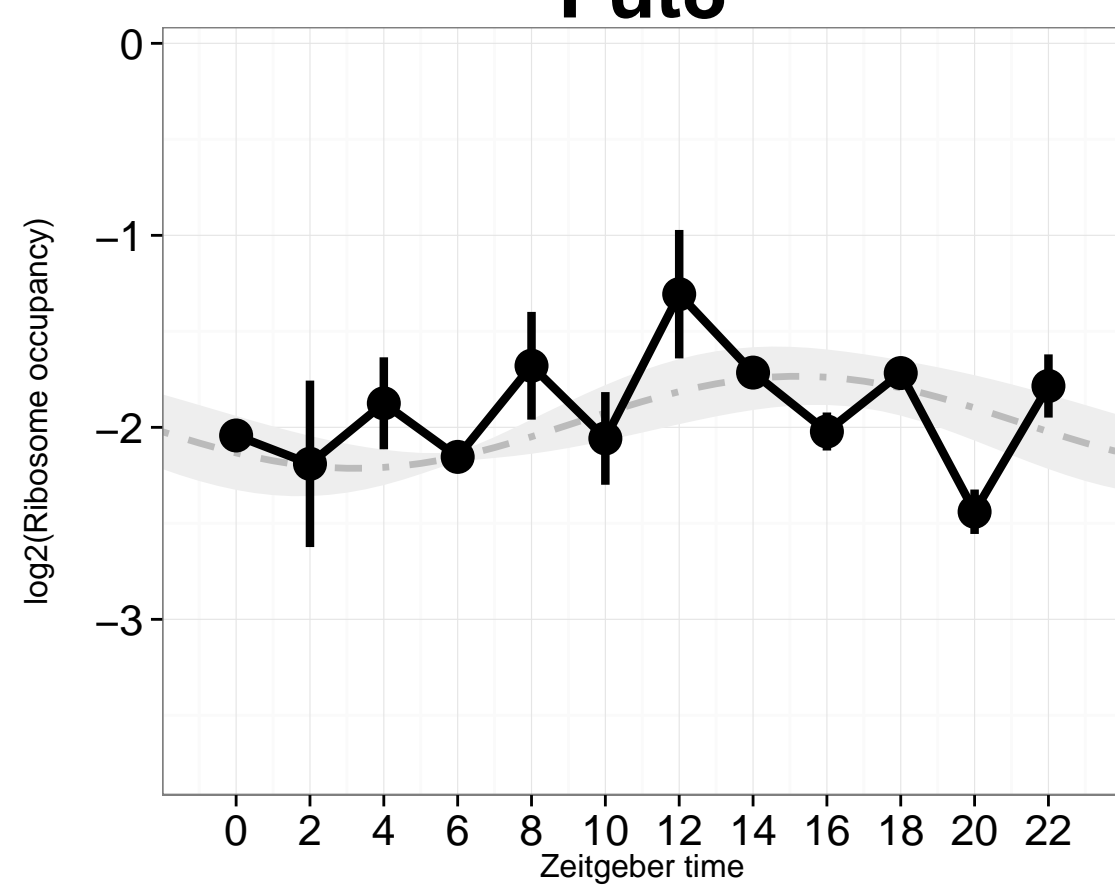

Supplement: SuppDataset_1.zip [file Fut8_set_A.pdf › Supplemental Dataset 1/A-mRNA_nonrhyth_translation_nonrhyth/Fut8_set_A.pdf]

## Fuz

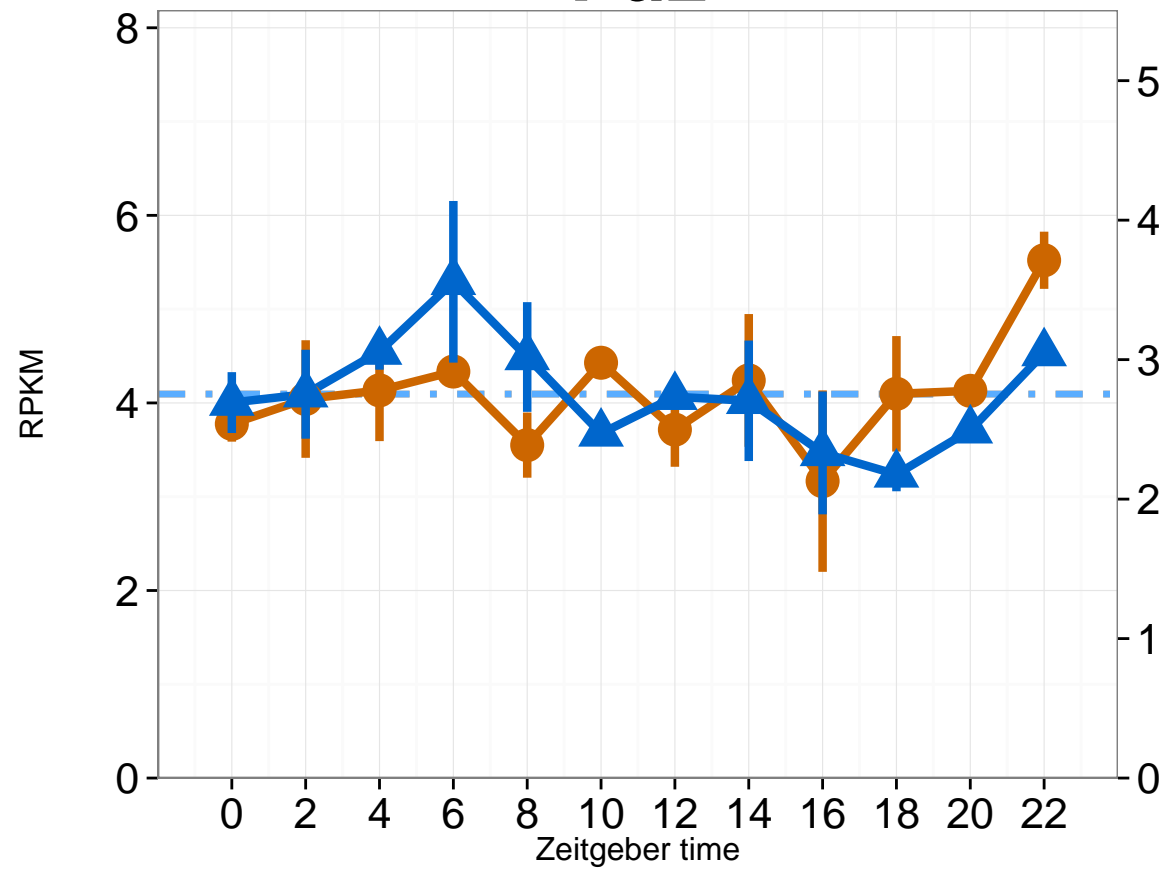

## Fuz

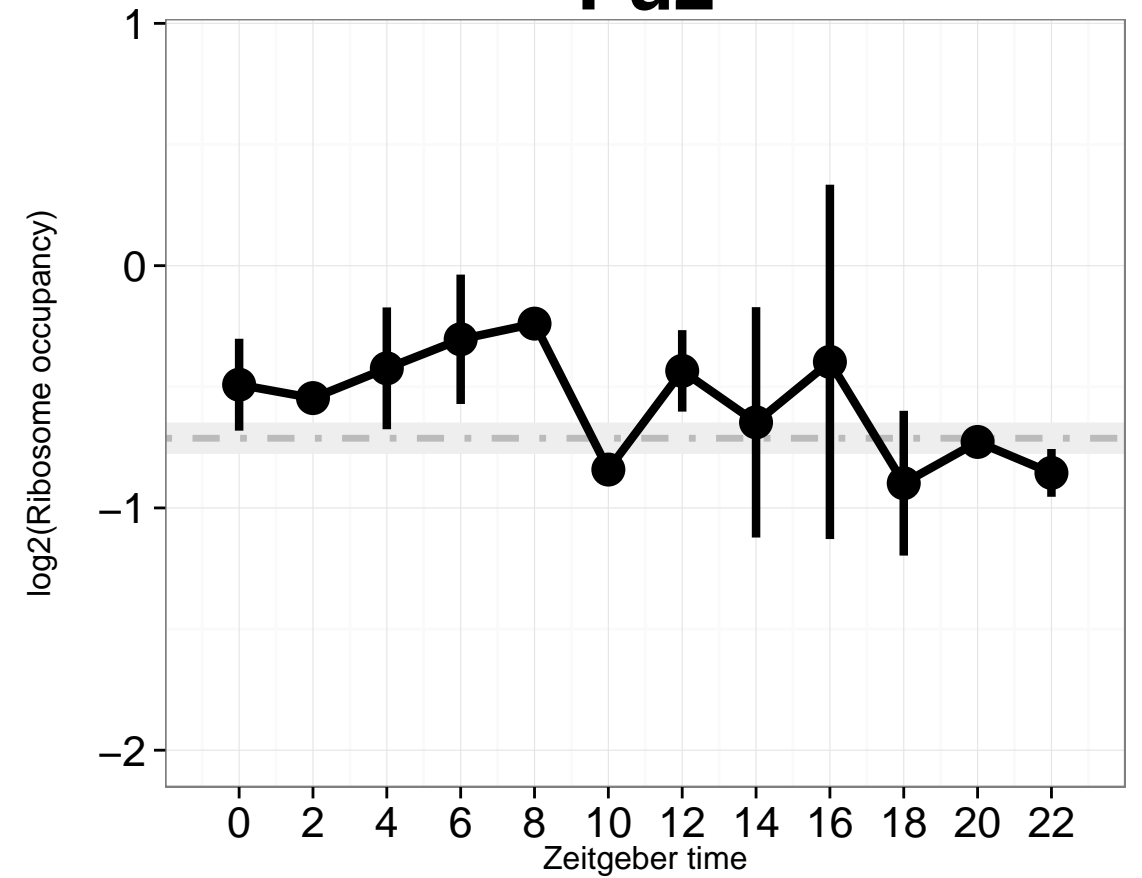

Supplement: SuppDataset_1.zip [file Fuz_set_A.pdf › Supplemental Dataset 1/A-mRNA_nonrhyth_translation_nonrhyth/Fuz_set_A.pdf]

## Fxn

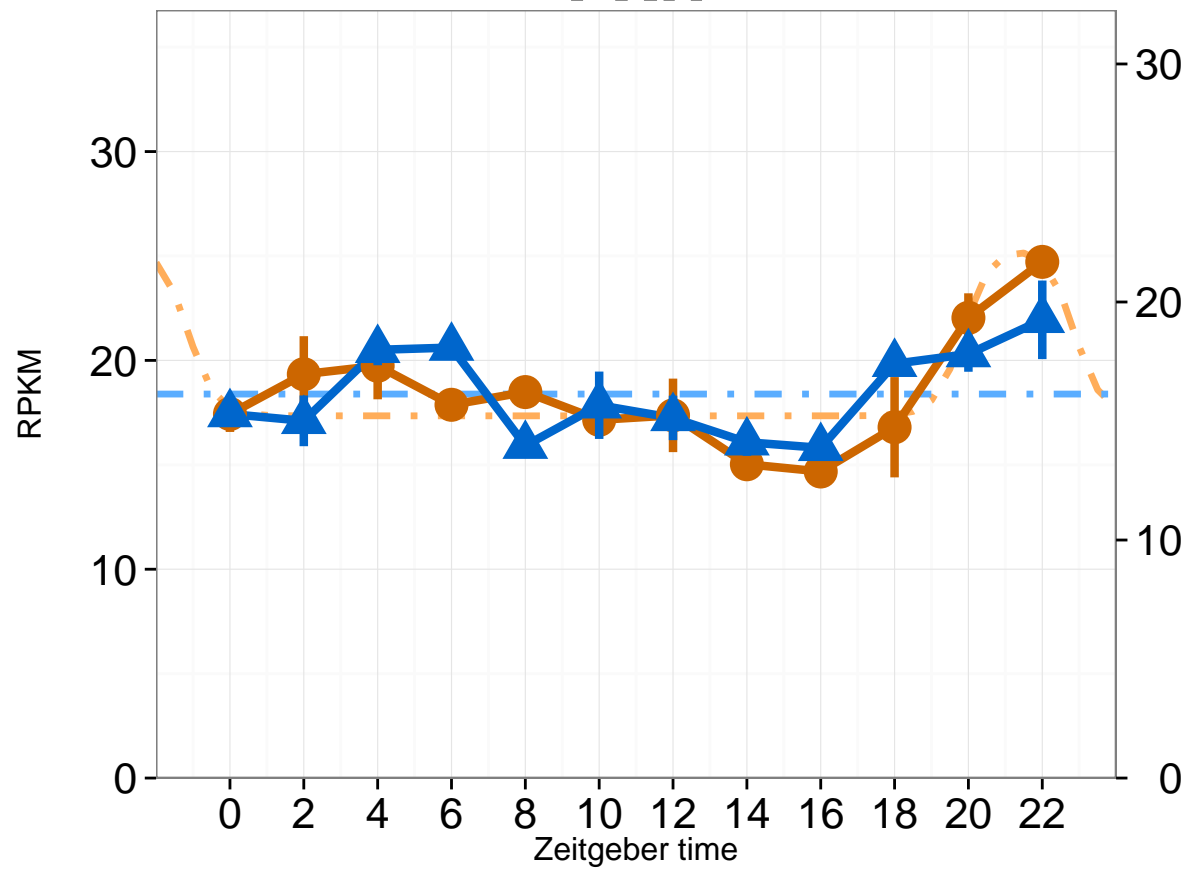

## Fxn

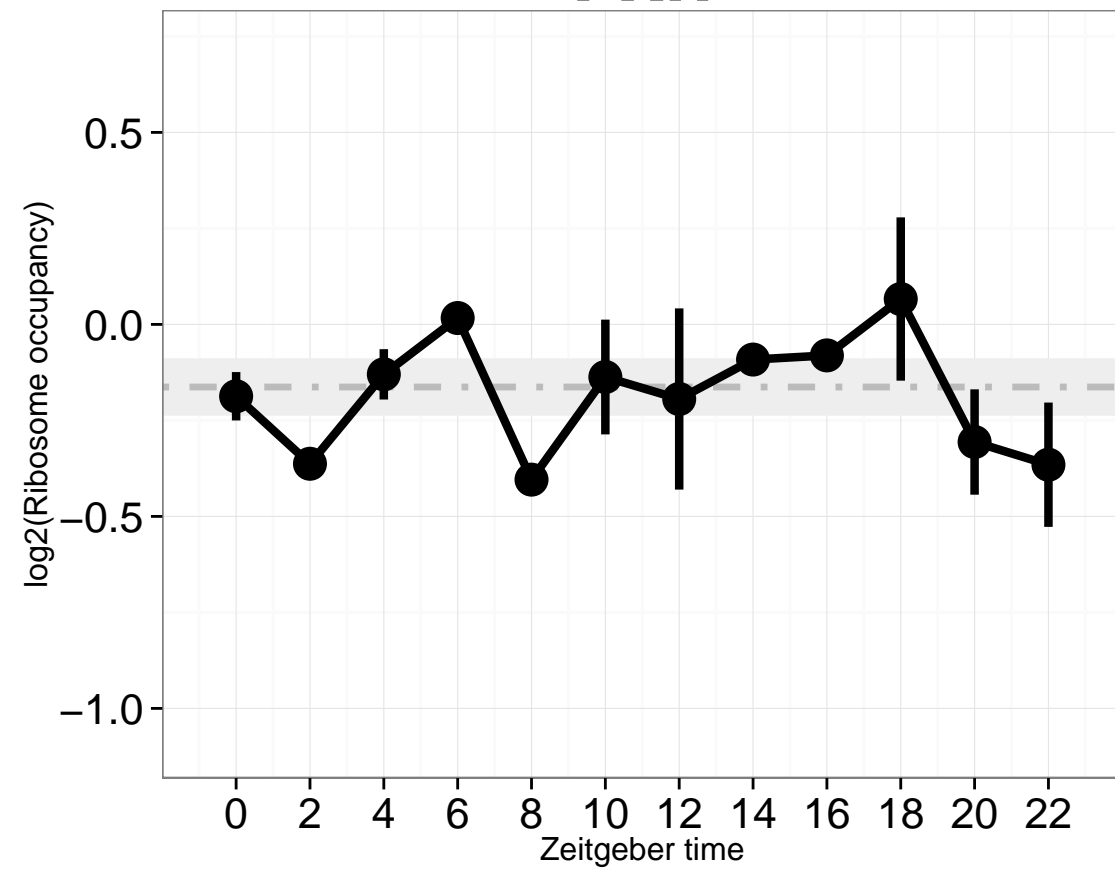

Supplement: SuppDataset_1.zip [file Fxn_set_A.pdf › Supplemental Dataset 1/A-mRNA_nonrhyth_translation_nonrhyth/Fxn_set_A.pdf]

## Fxr1

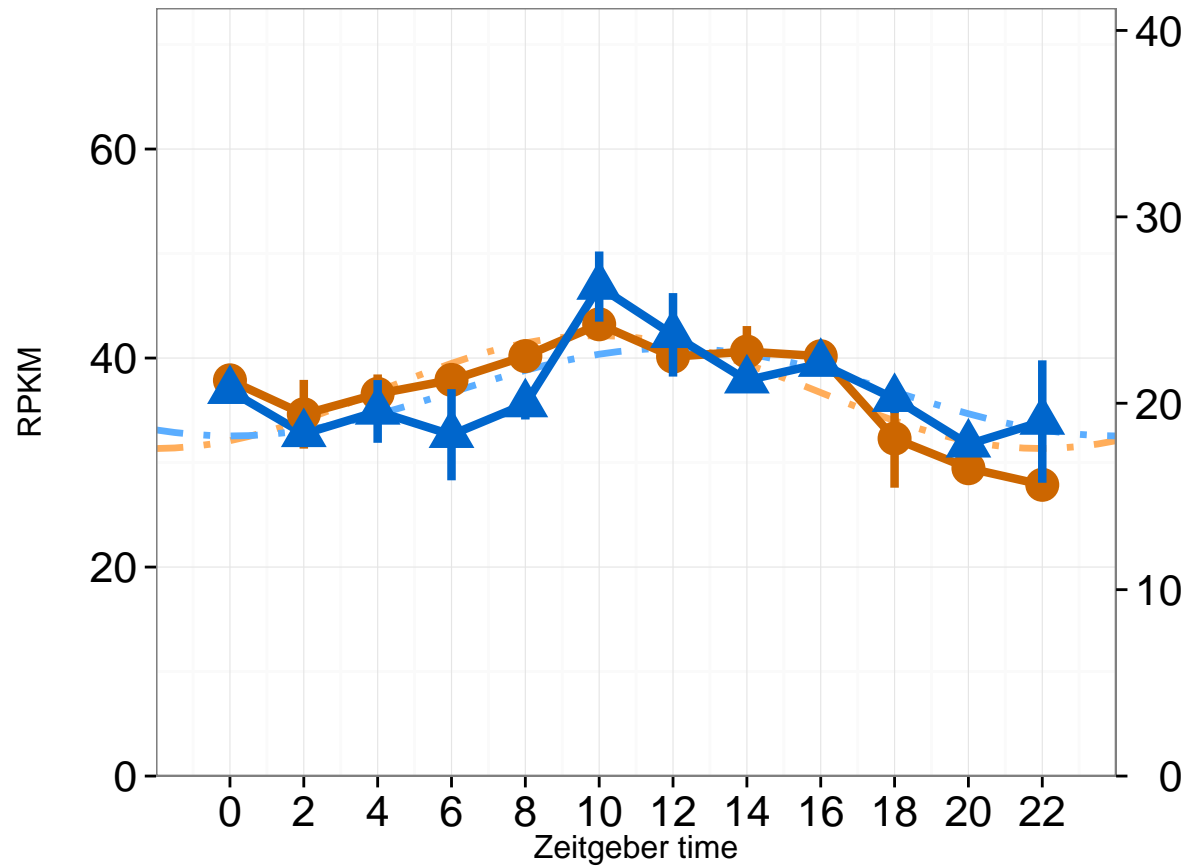

## Fxr1

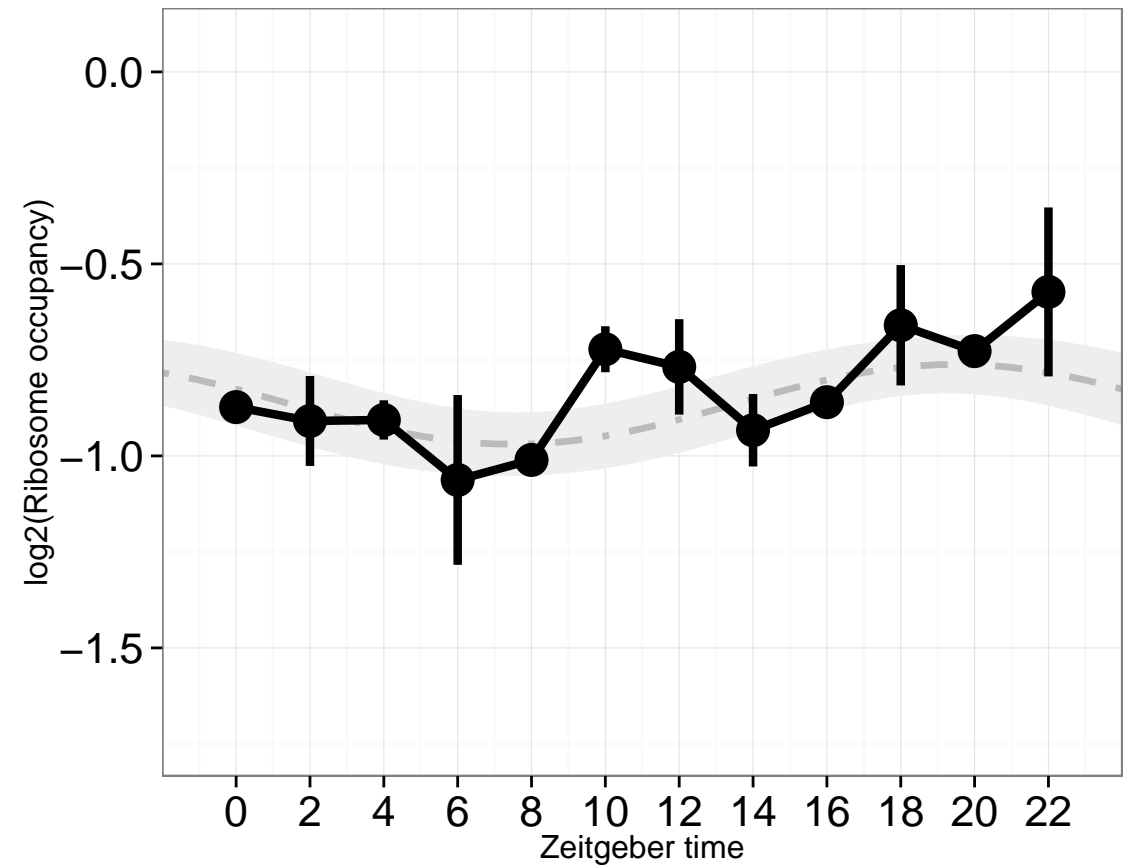

Supplement: SuppDataset_1.zip [file Fxr1_set_A.pdf › Supplemental Dataset 1/A-mRNA_nonrhyth_translation_nonrhyth/Fxr1_set_A.pdf]

## Fxr2

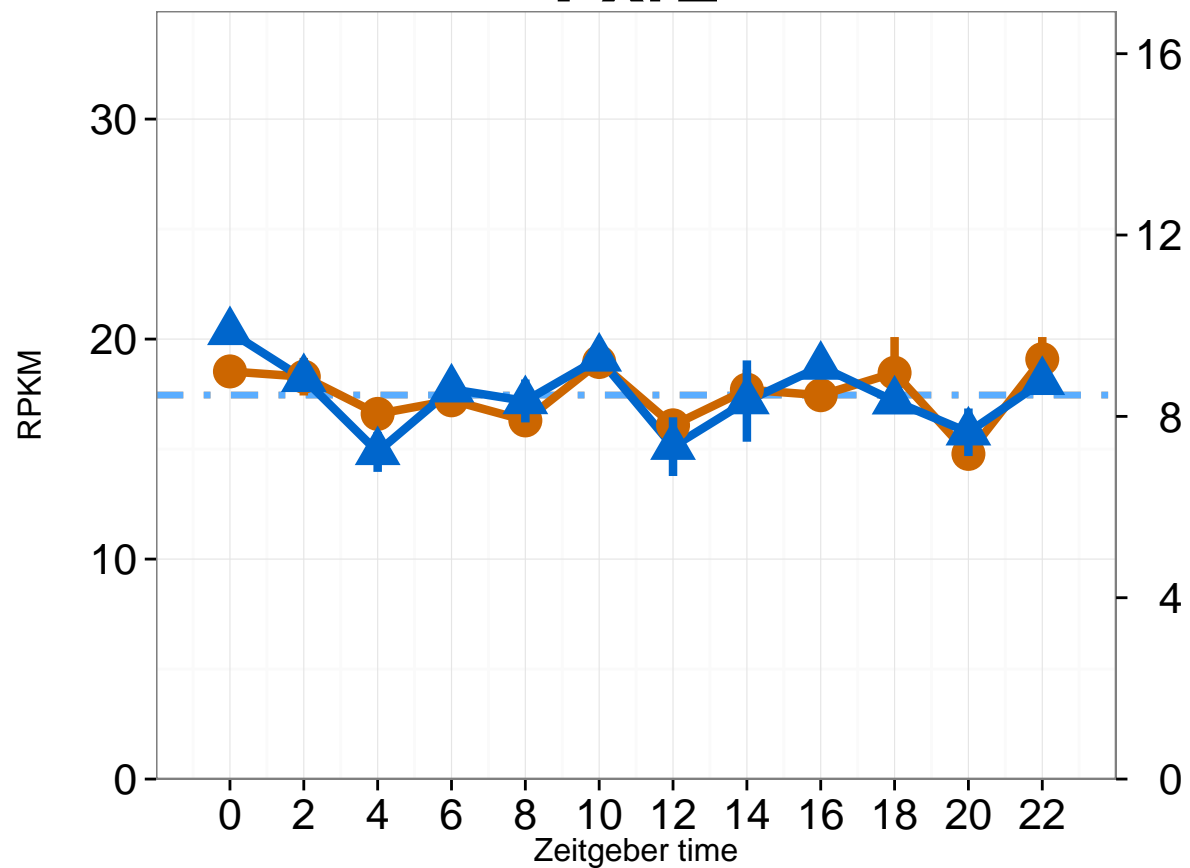

## Fxr2

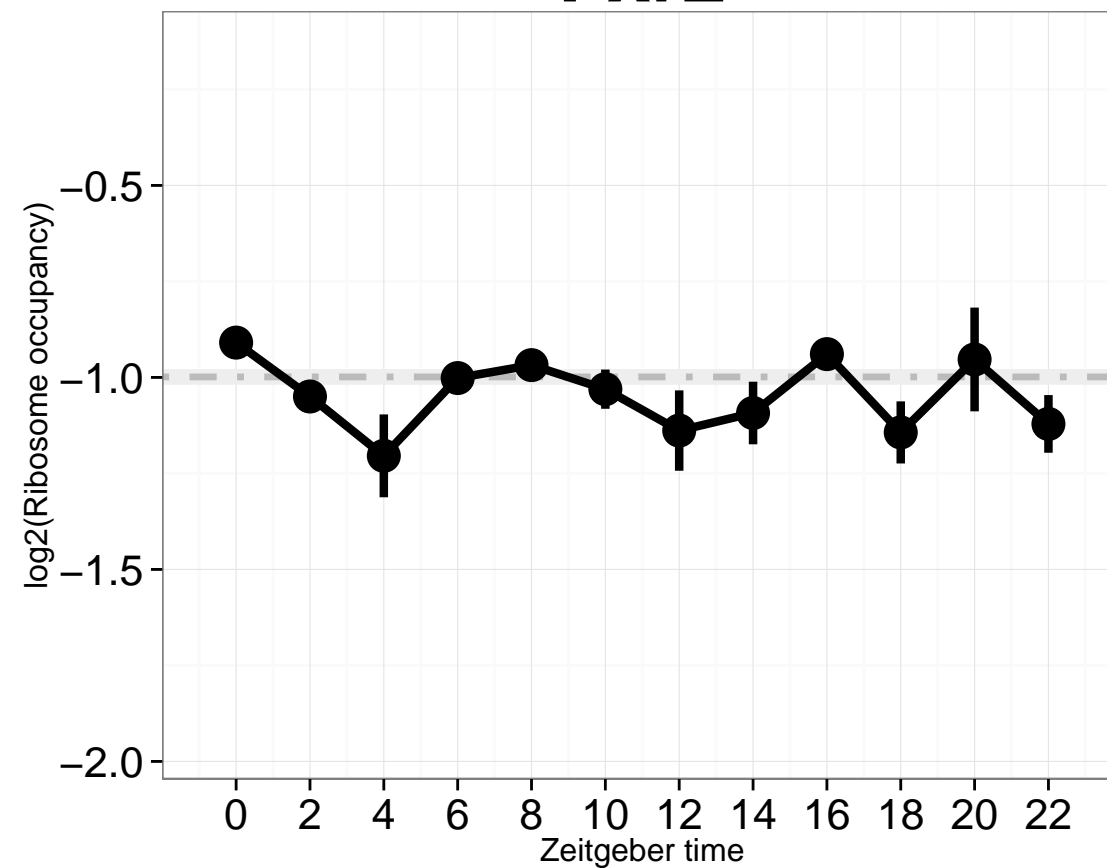

Supplement: SuppDataset_1.zip [file Fxr2_set_A.pdf › Supplemental Dataset 1/A-mRNA_nonrhyth_translation_nonrhyth/Fxr2_set_A.pdf]

# Fxyd5

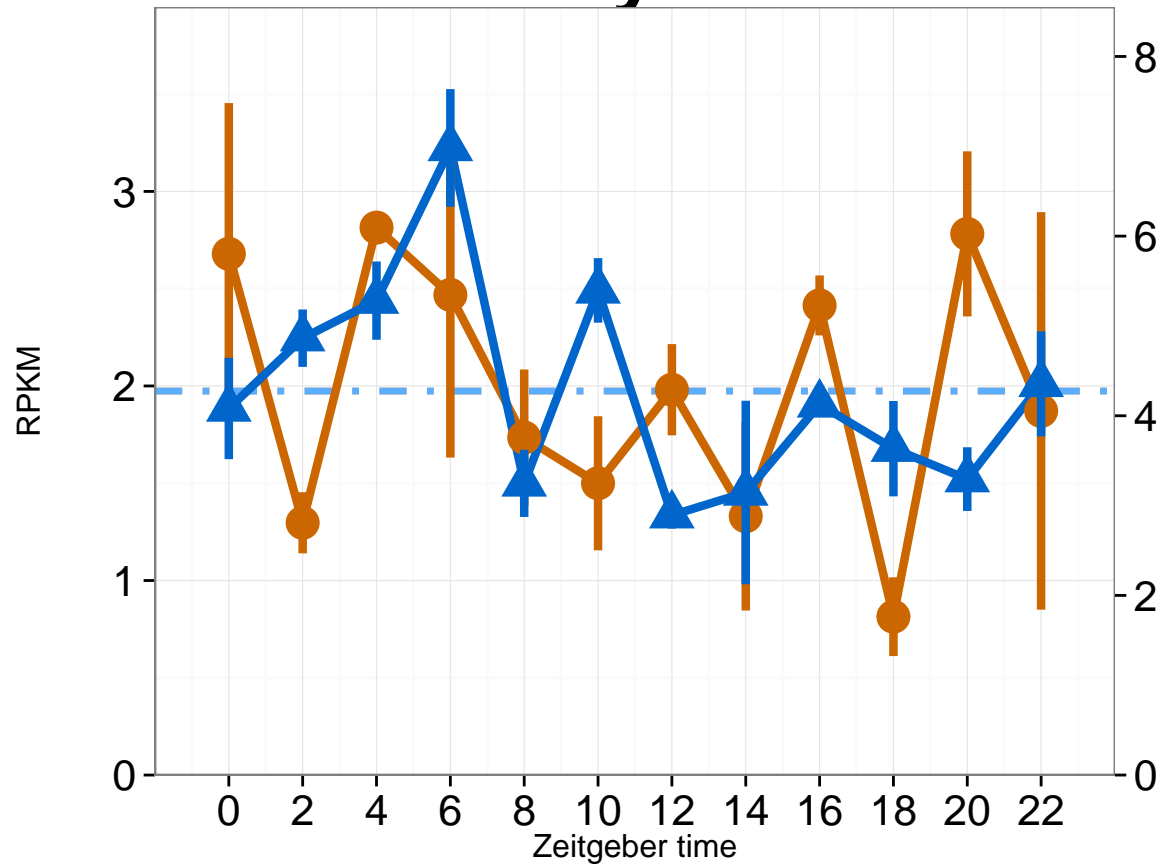

# Fxyd5

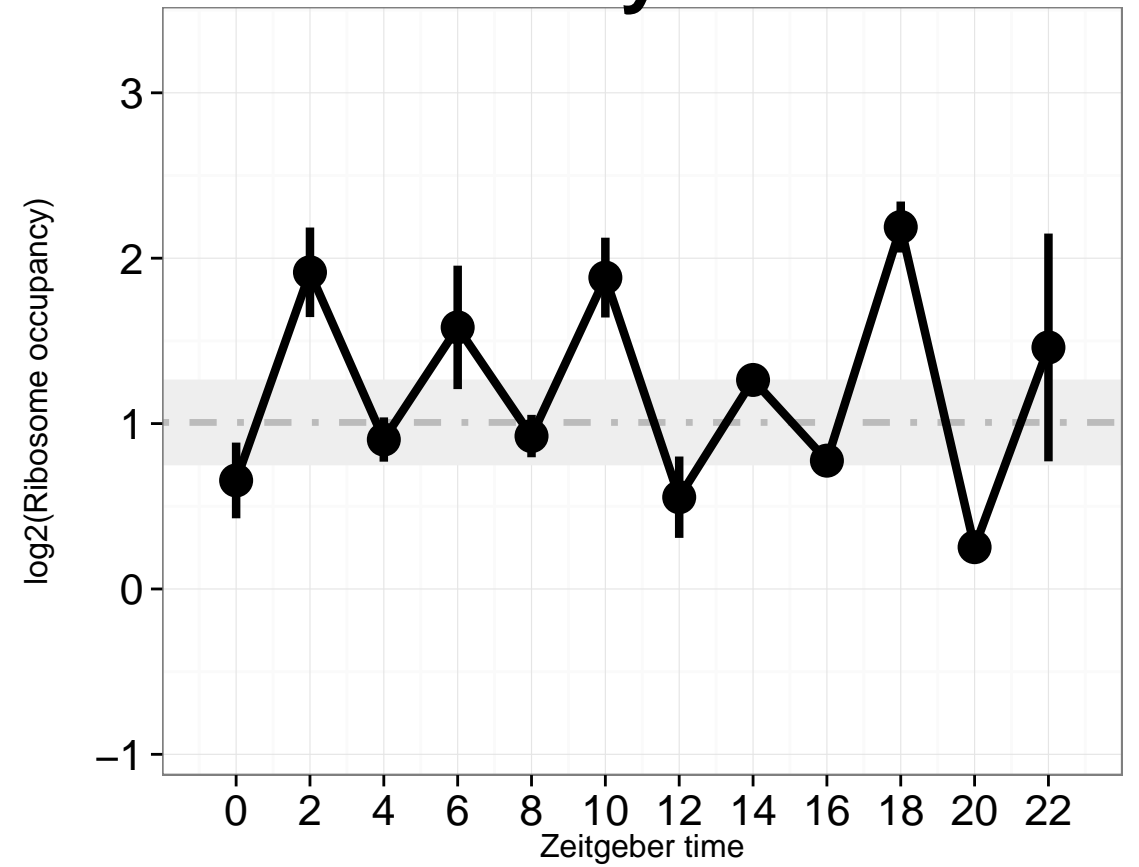

Supplement: SuppDataset_1.zip [file Fxyd5_set_A.pdf › Supplemental Dataset 1/A-mRNA_nonrhyth_translation_nonrhyth/Fxyd5_set_A.pdf]

## Fyb

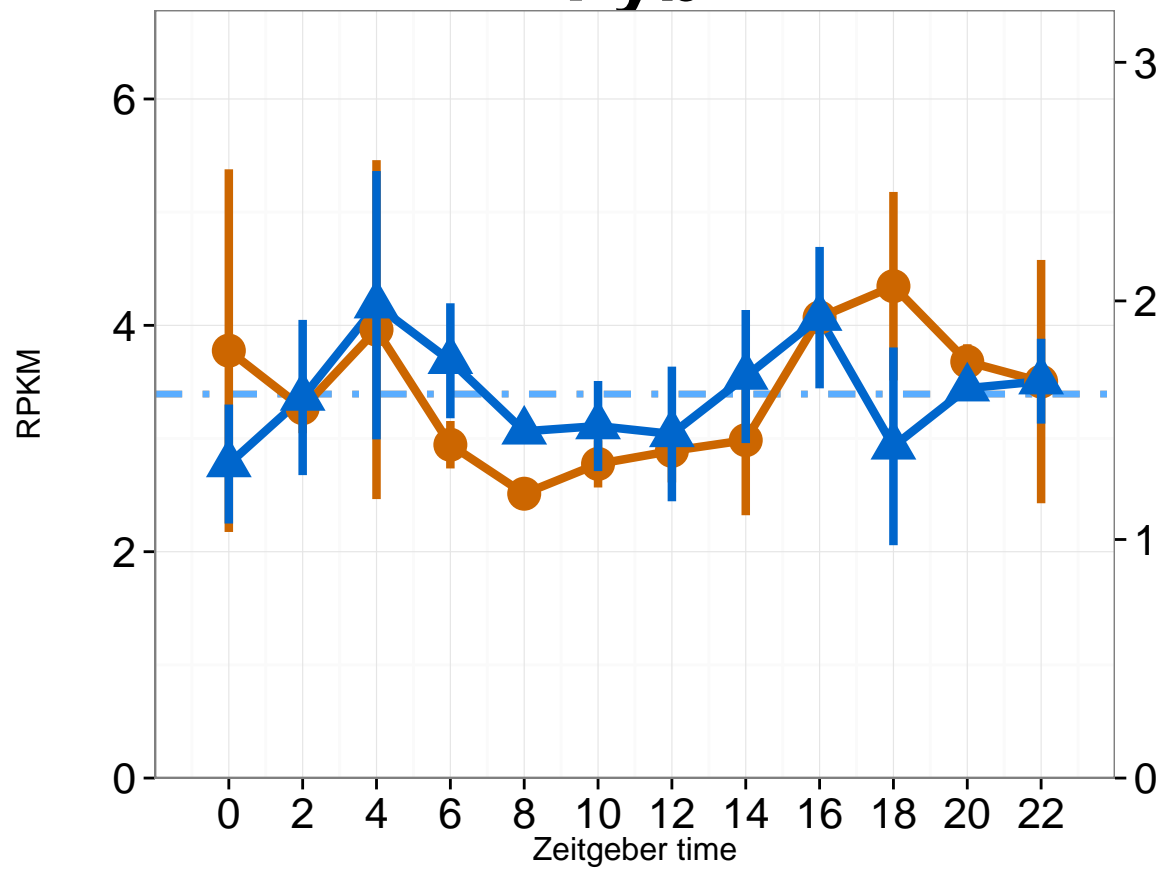

## Fyb

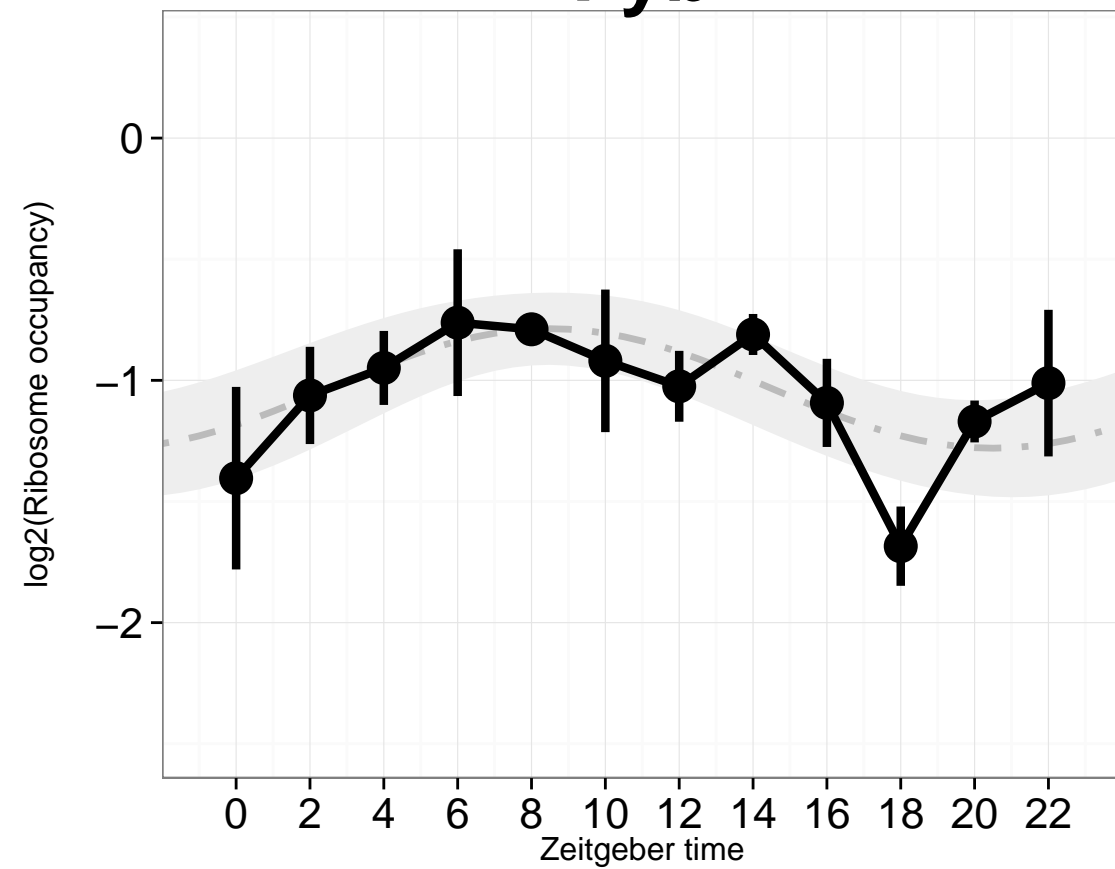

Supplement: SuppDataset_1.zip [file Fyb_set_A.pdf › Supplemental Dataset 1/A-mRNA_nonrhyth_translation_nonrhyth/Fyb_set_A.pdf]

# Fyco1

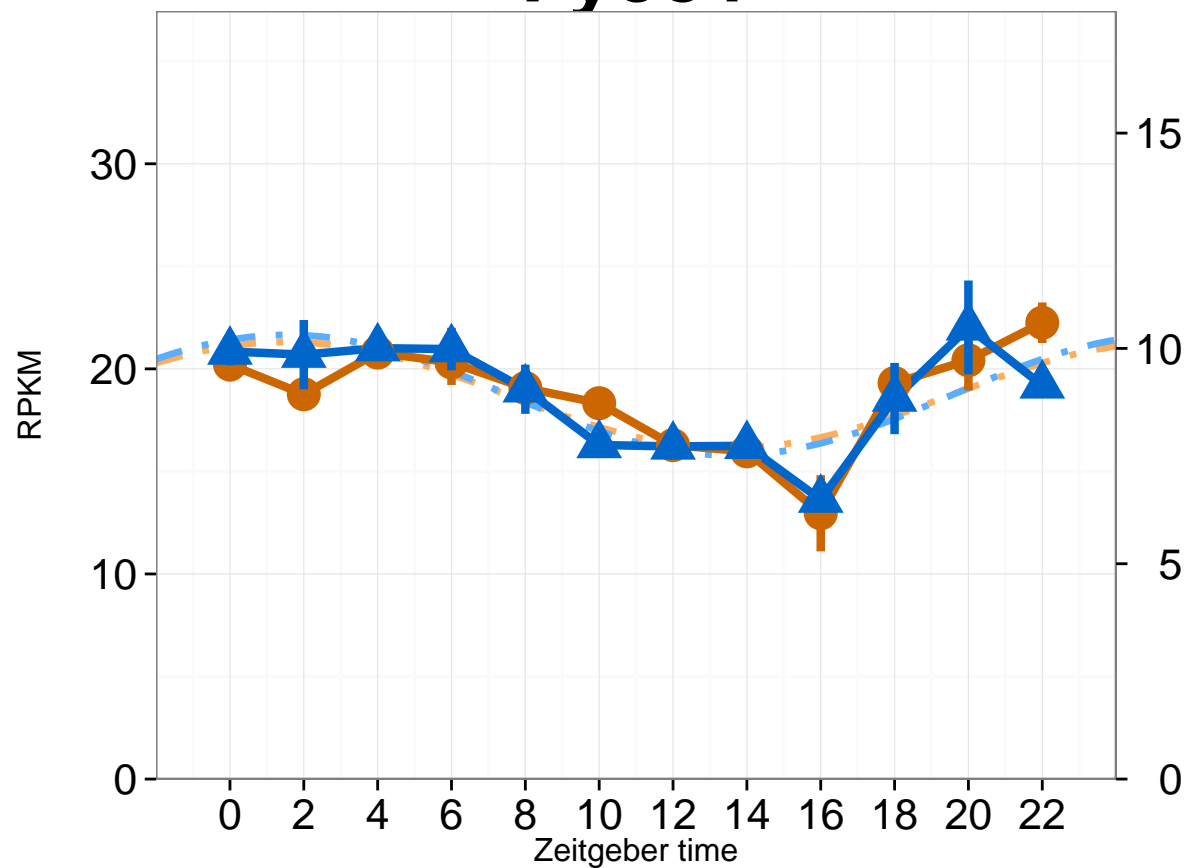

# Fyco1

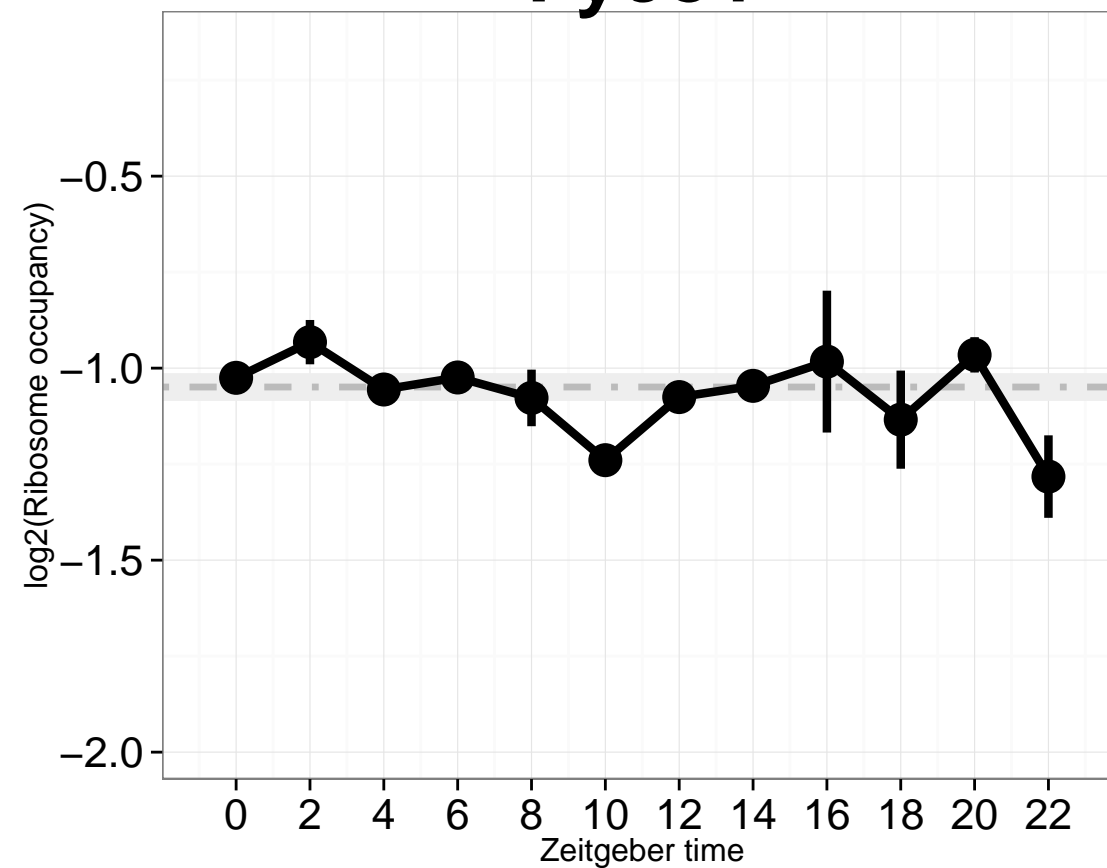

Supplement: SuppDataset_1.zip [file Fyco1_set_A.pdf › Supplemental Dataset 1/A-mRNA_nonrhyth_translation_nonrhyth/Fyco1_set_A.pdf]

# Fyn

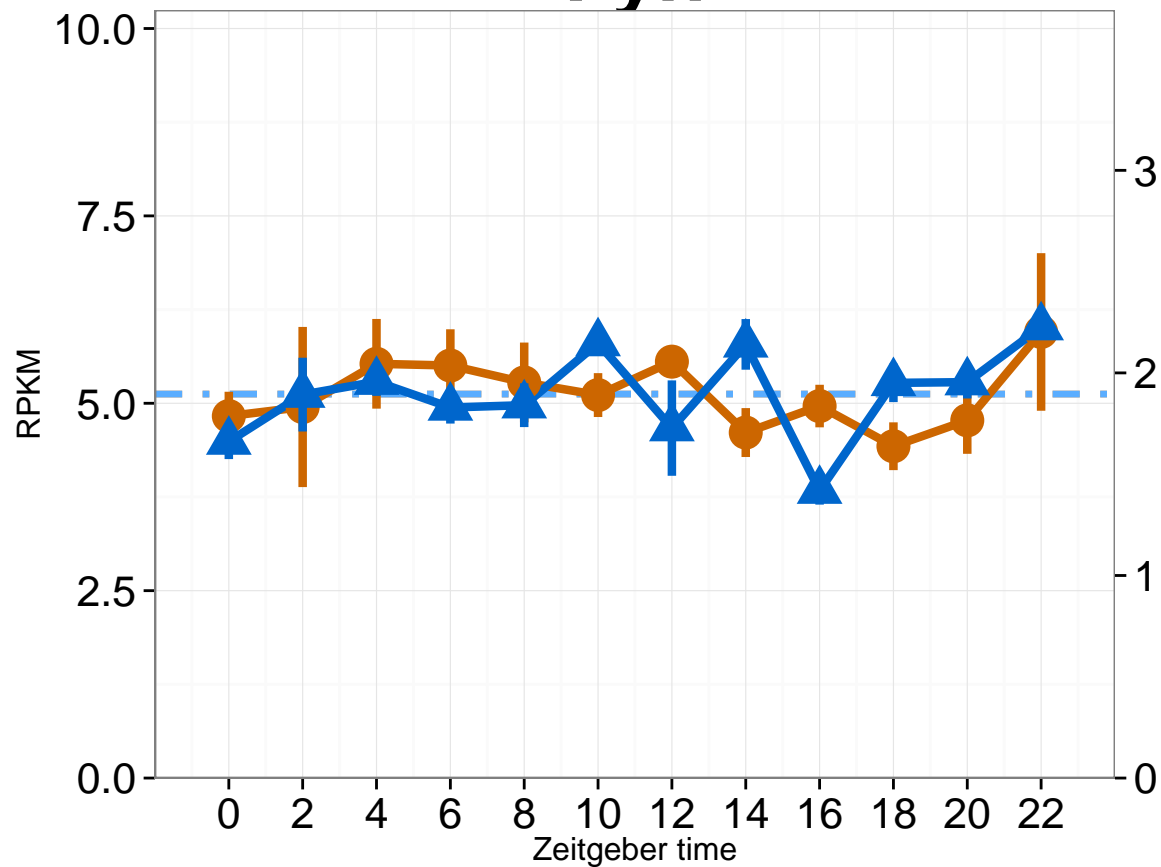

# Fyn

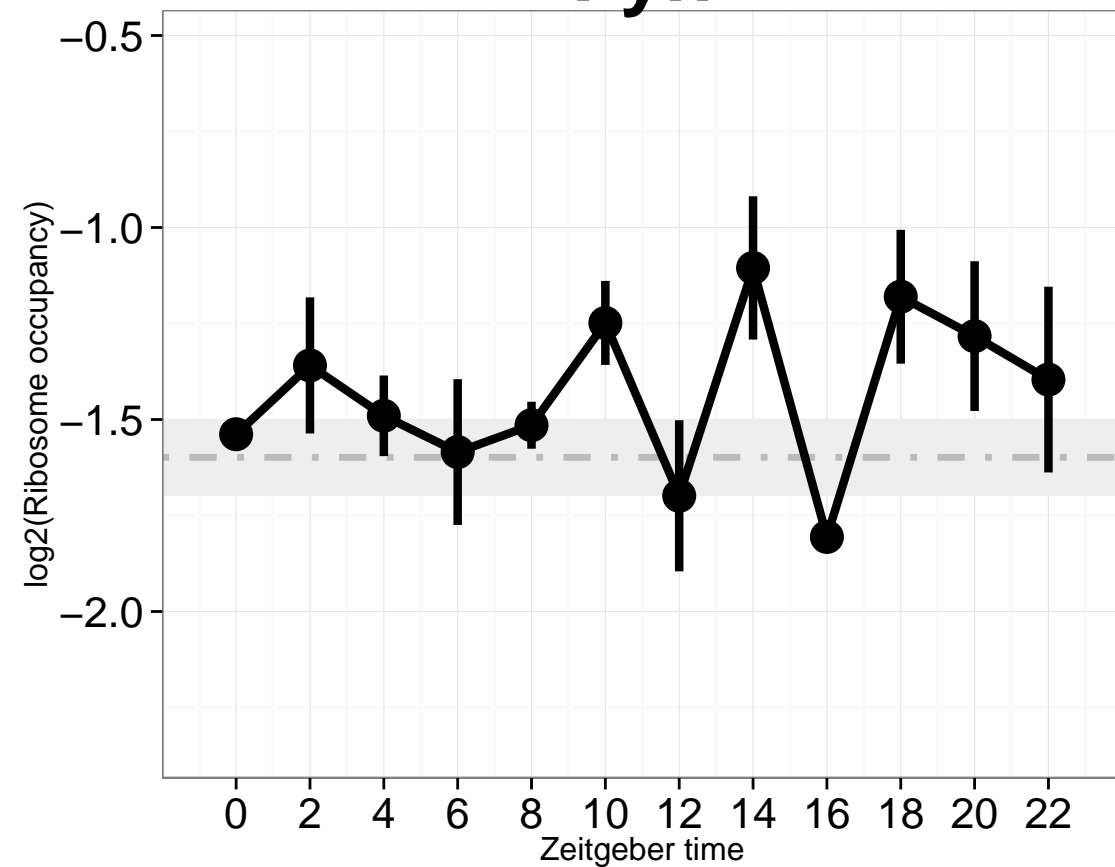

Supplement: SuppDataset_1.zip [file Fyn_set_A.pdf › Supplemental Dataset 1/A-mRNA_nonrhyth_translation_nonrhyth/Fyn_set_A.pdf]

# Fyttd1

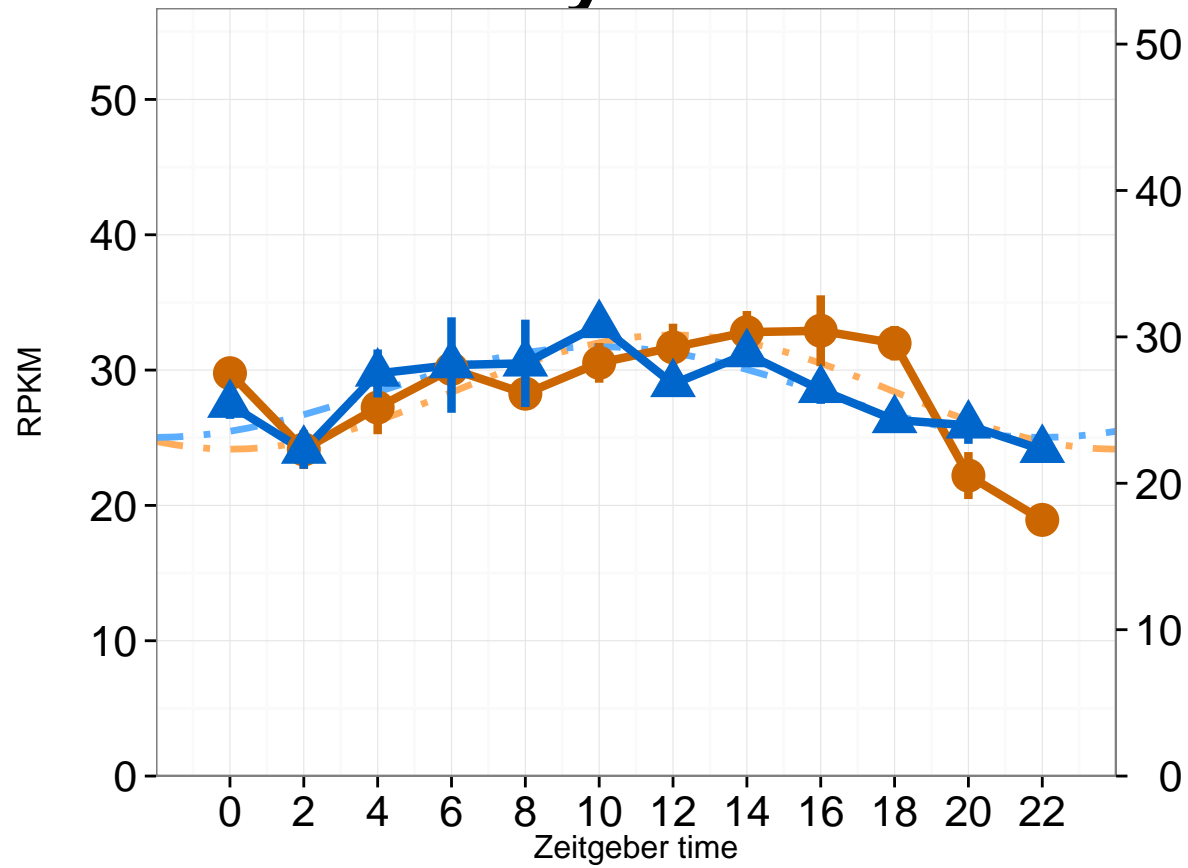

# Fyttd1

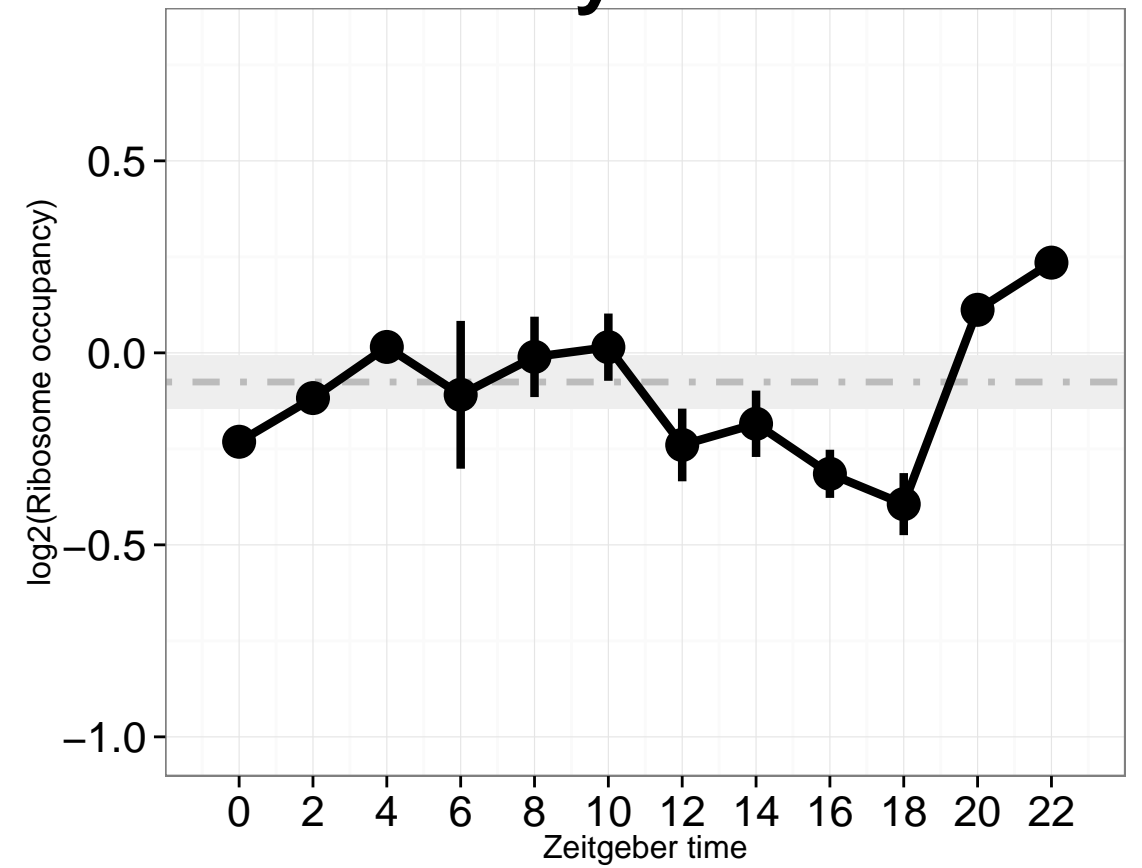

Supplement: SuppDataset_1.zip [file Fyttd1_set_A.pdf › Supplemental Dataset 1/A-mRNA_nonrhyth_translation_nonrhyth/Fyttd1_set_A.pdf]

## Fzd1

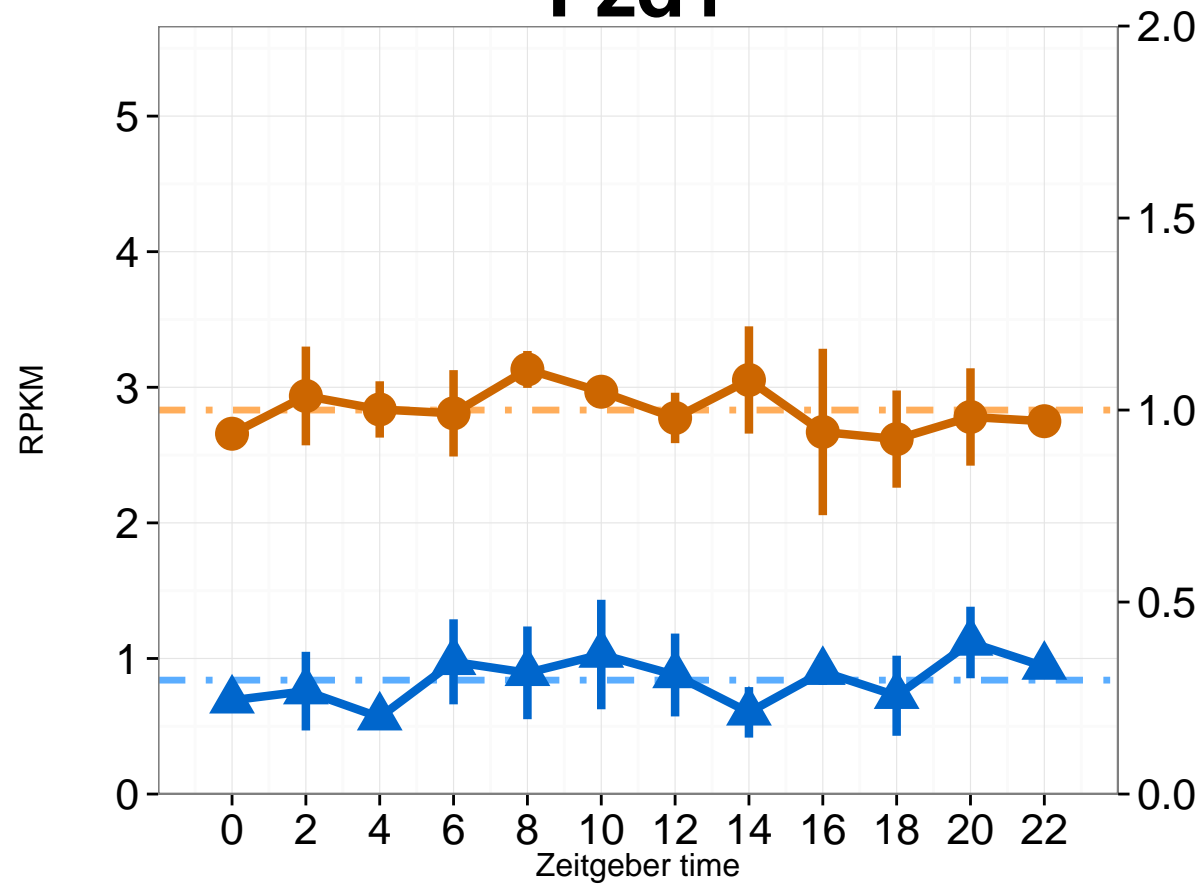

## Fzd1

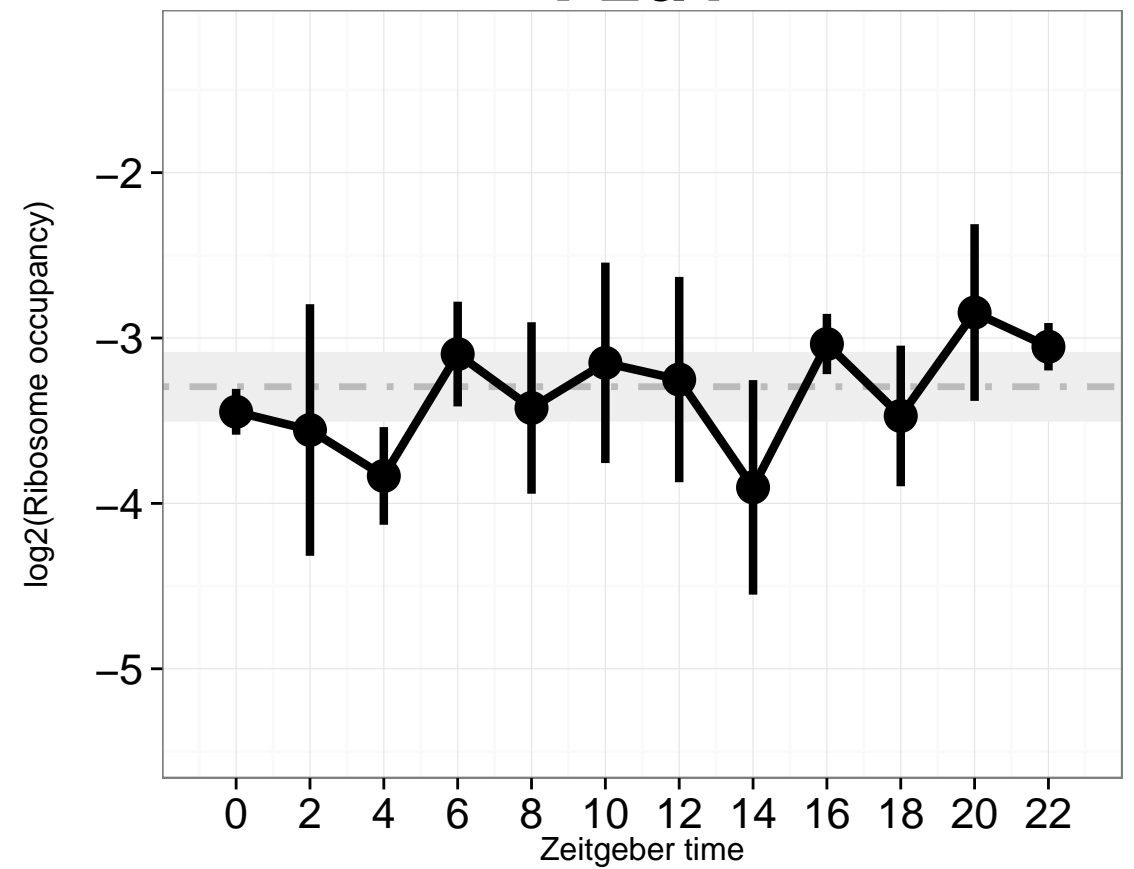

Supplement: SuppDataset_1.zip [file Fzd1_set_A.pdf › Supplemental Dataset 1/A-mRNA_nonrhyth_translation_nonrhyth/Fzd1_set_A.pdf]

## Fzd5

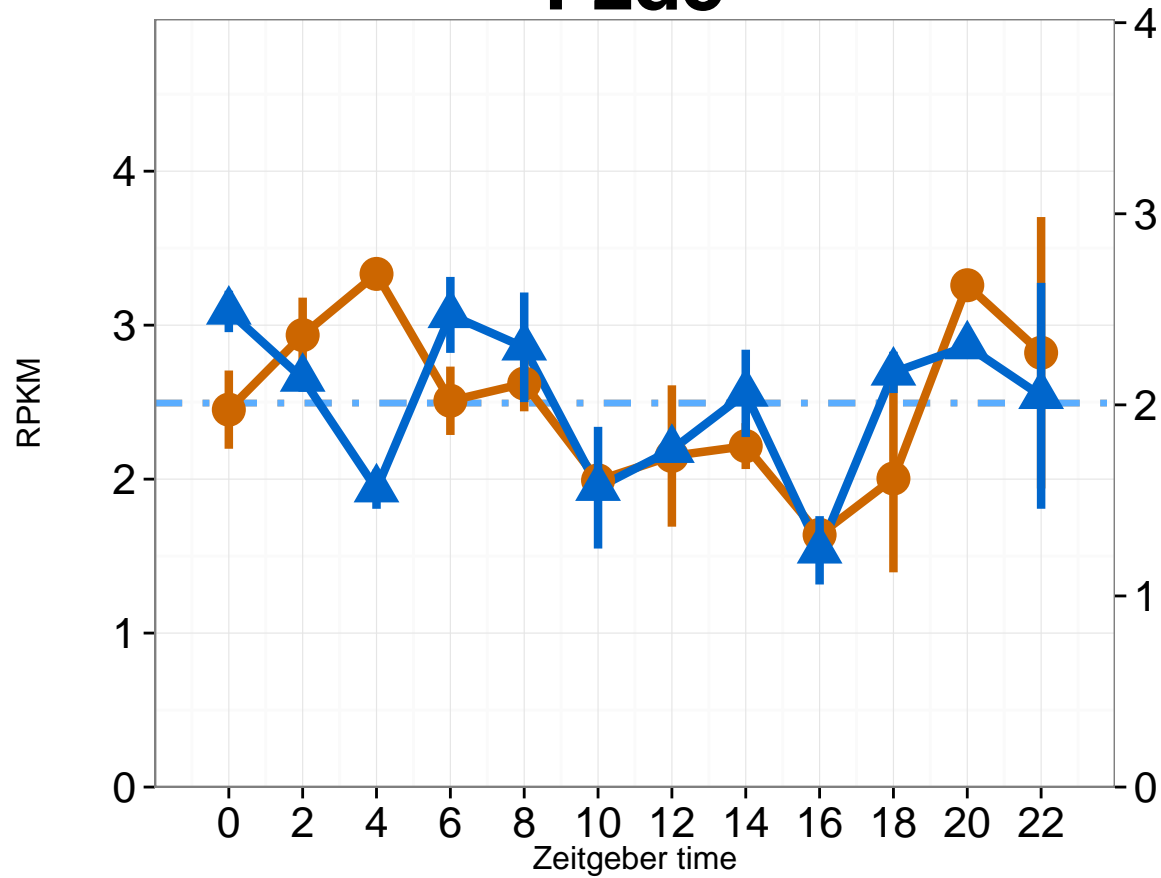

## Fzd5

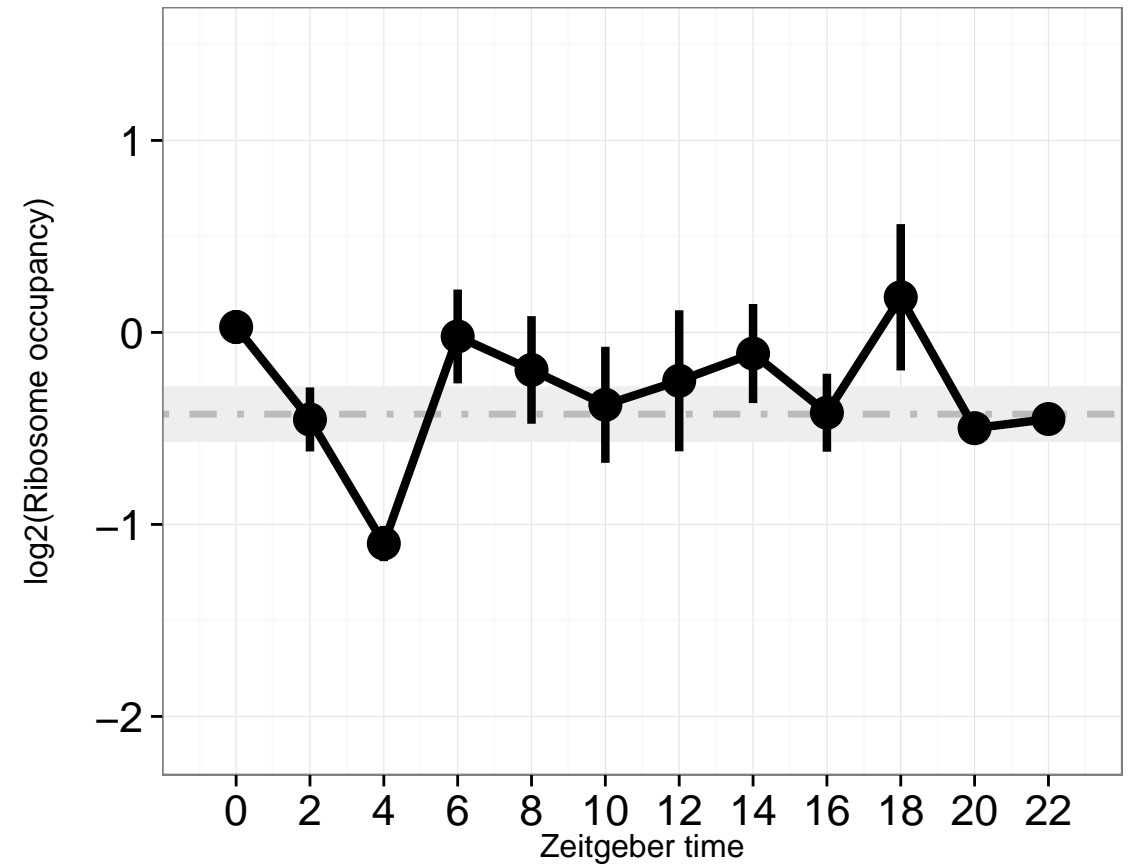

Supplement: SuppDataset_1.zip [file Fzd5_set_A.pdf › Supplemental Dataset 1/A-mRNA_nonrhyth_translation_nonrhyth/Fzd5_set_A.pdf]

# Fzd7

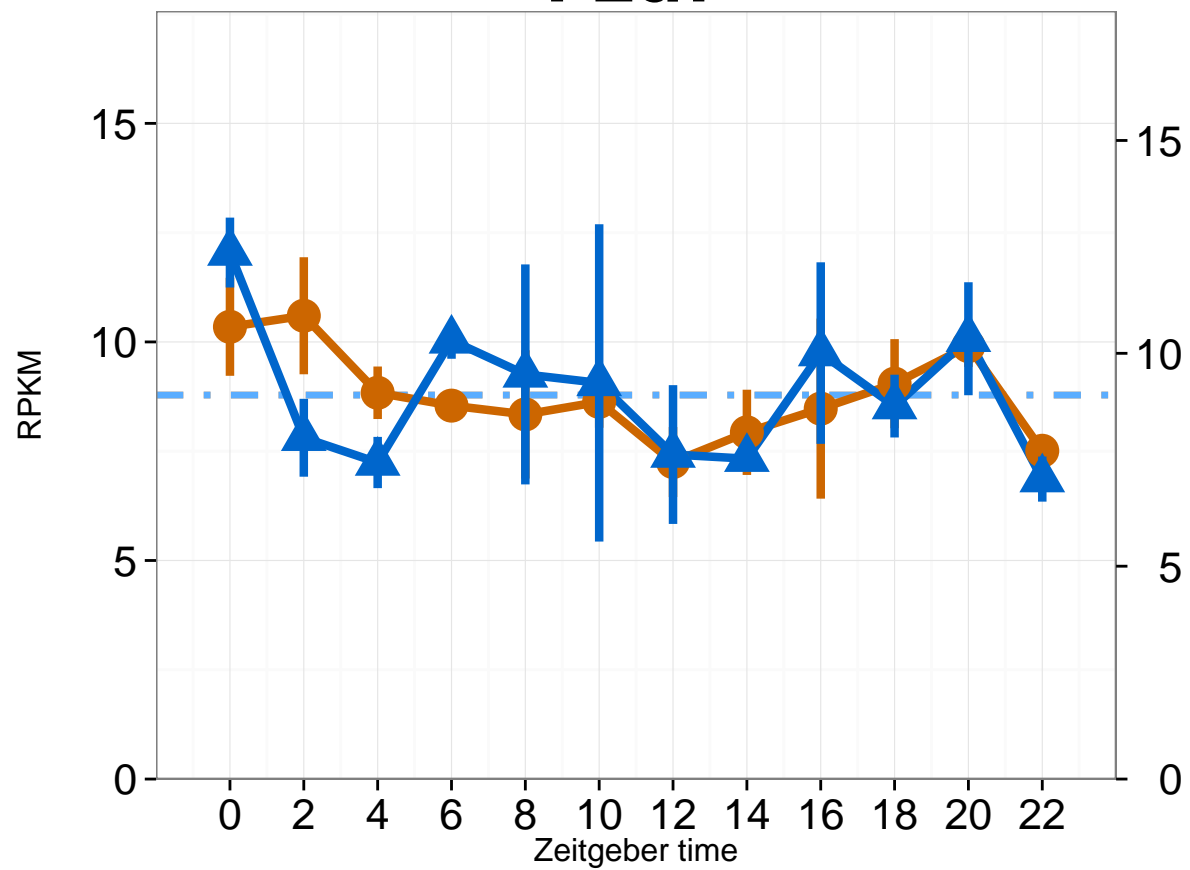

# Fzd7

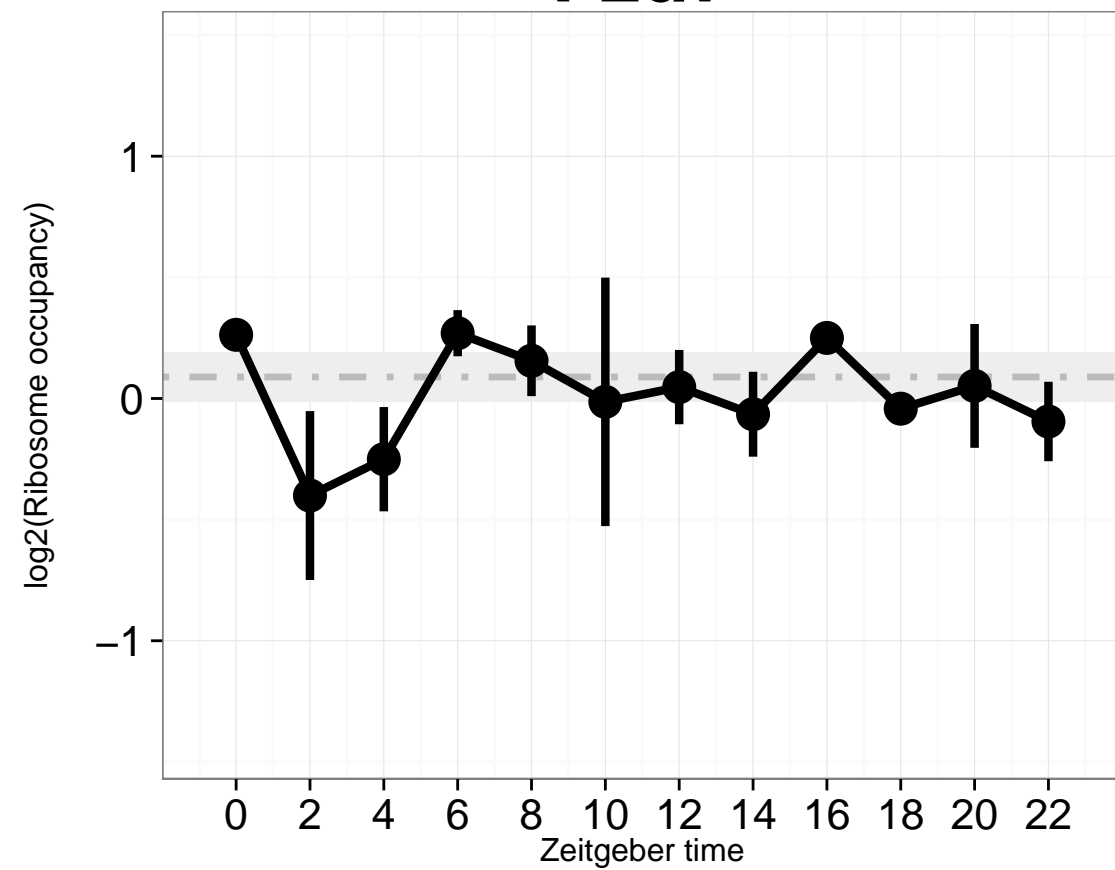

Supplement: SuppDataset_1.zip [file Fzd7_set_A.pdf › Supplemental Dataset 1/A-mRNA_nonrhyth_translation_nonrhyth/Fzd7_set_A.pdf]

# Fzd8

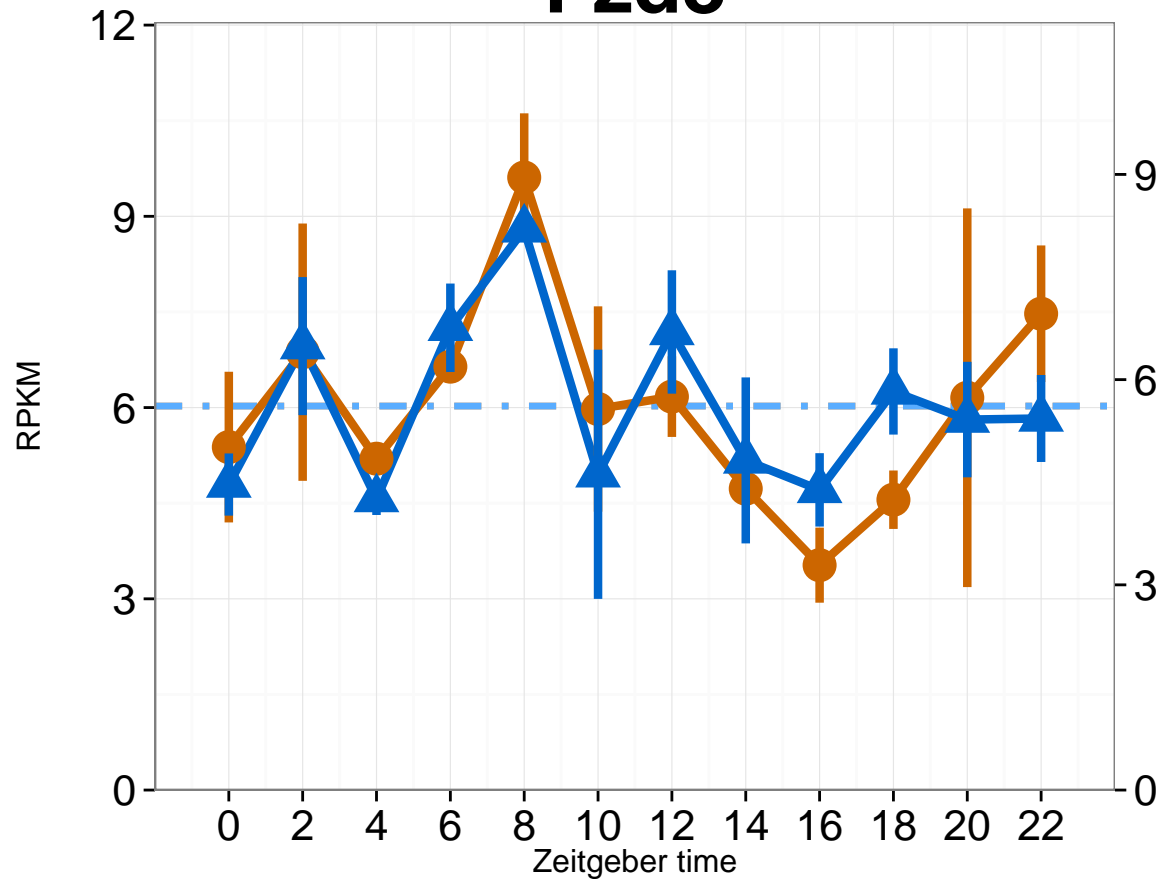

# Fzd8

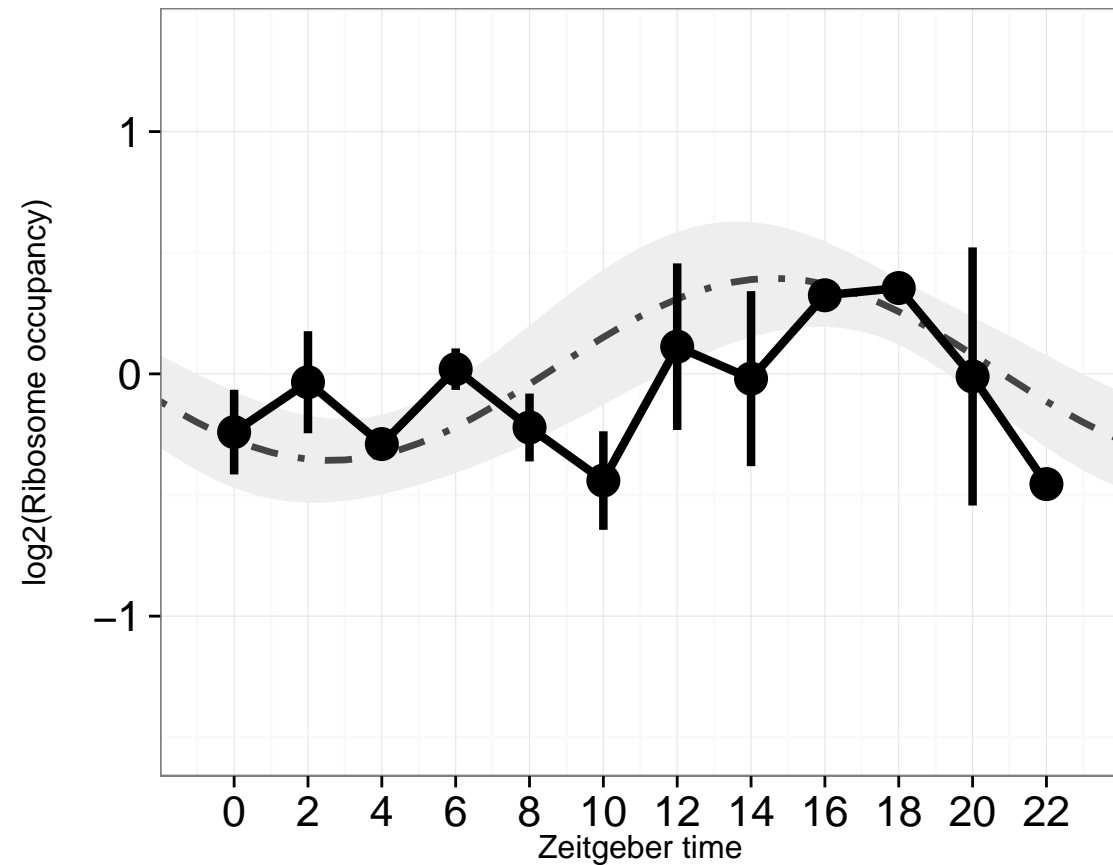

Supplement: SuppDataset_1.zip [file Fzd8_set_A.pdf › Supplemental Dataset 1/A-mRNA_nonrhyth_translation_nonrhyth/Fzd8_set_A.pdf]

## Fzr1

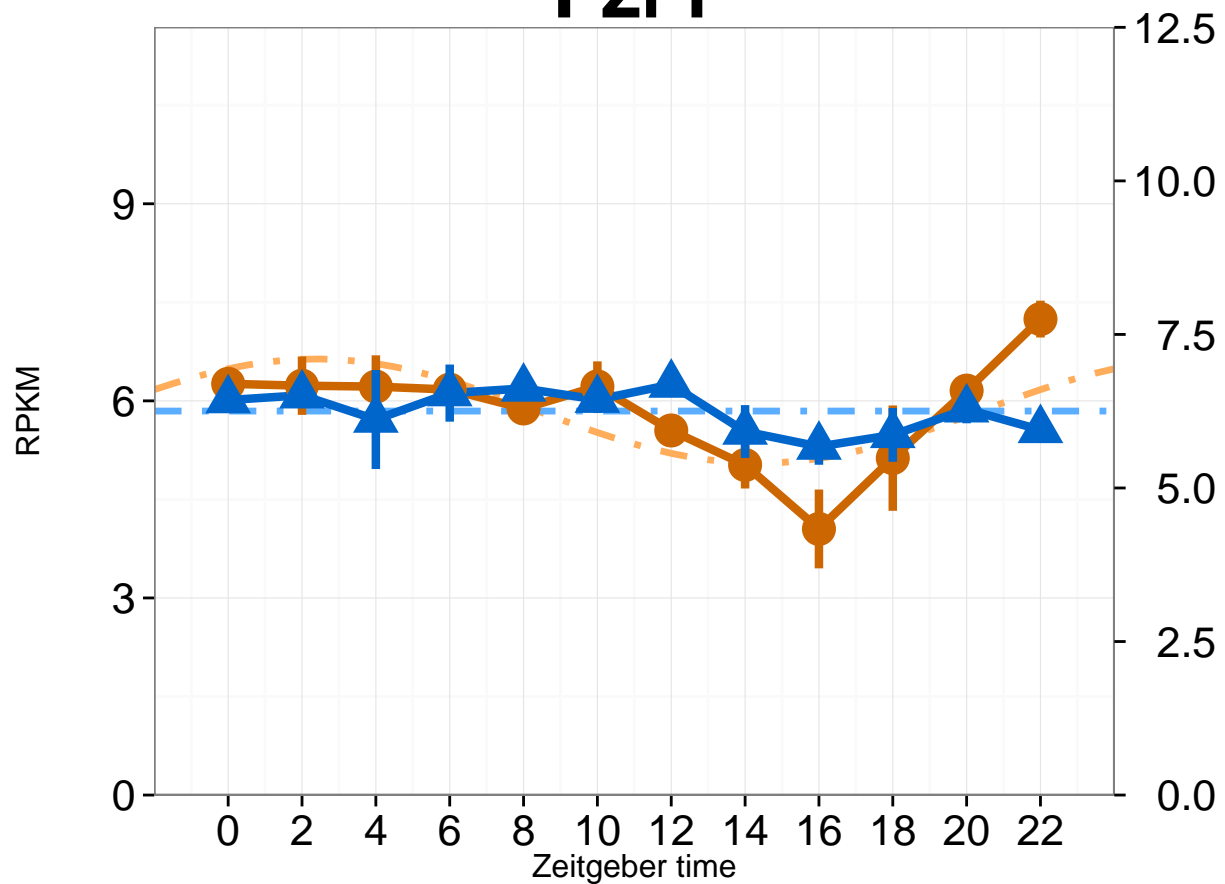

## Fzr1

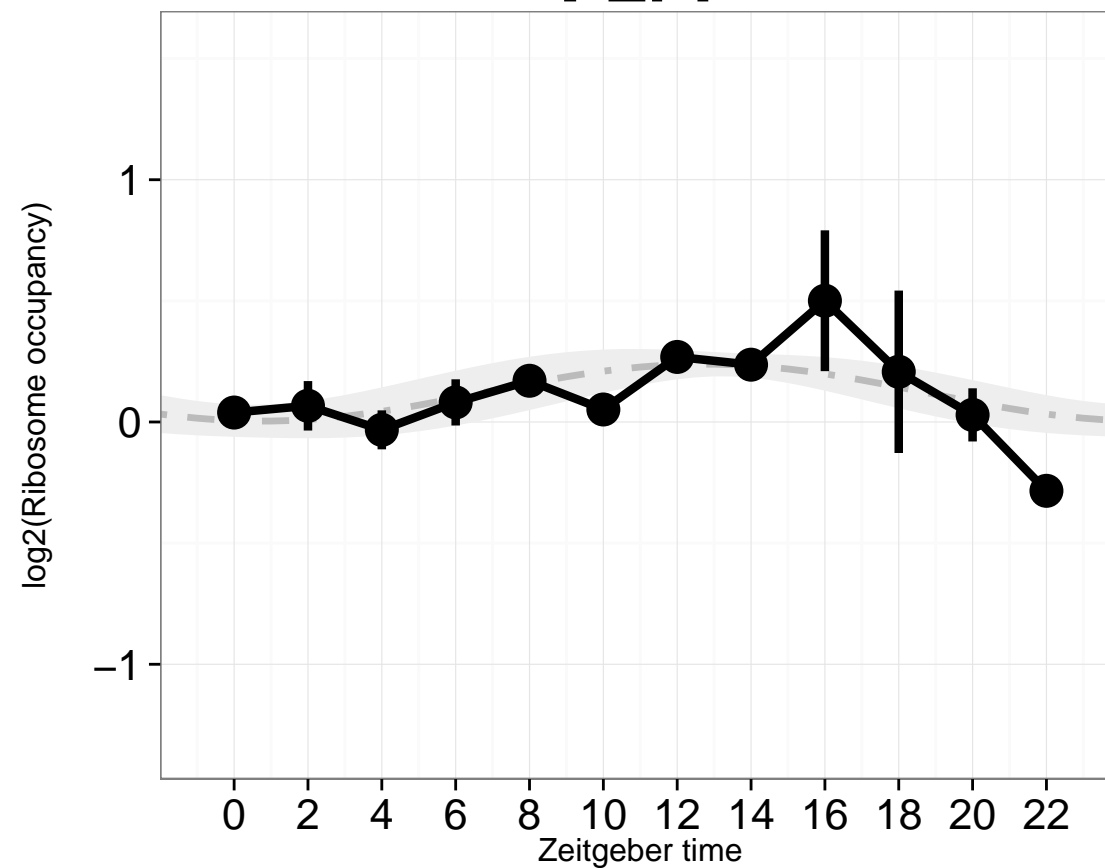

Supplement: SuppDataset_1.zip [file Fzr1_set_A.pdf › Supplemental Dataset 1/A-mRNA_nonrhyth_translation_nonrhyth/Fzr1_set_A.pdf]

## G3bp1

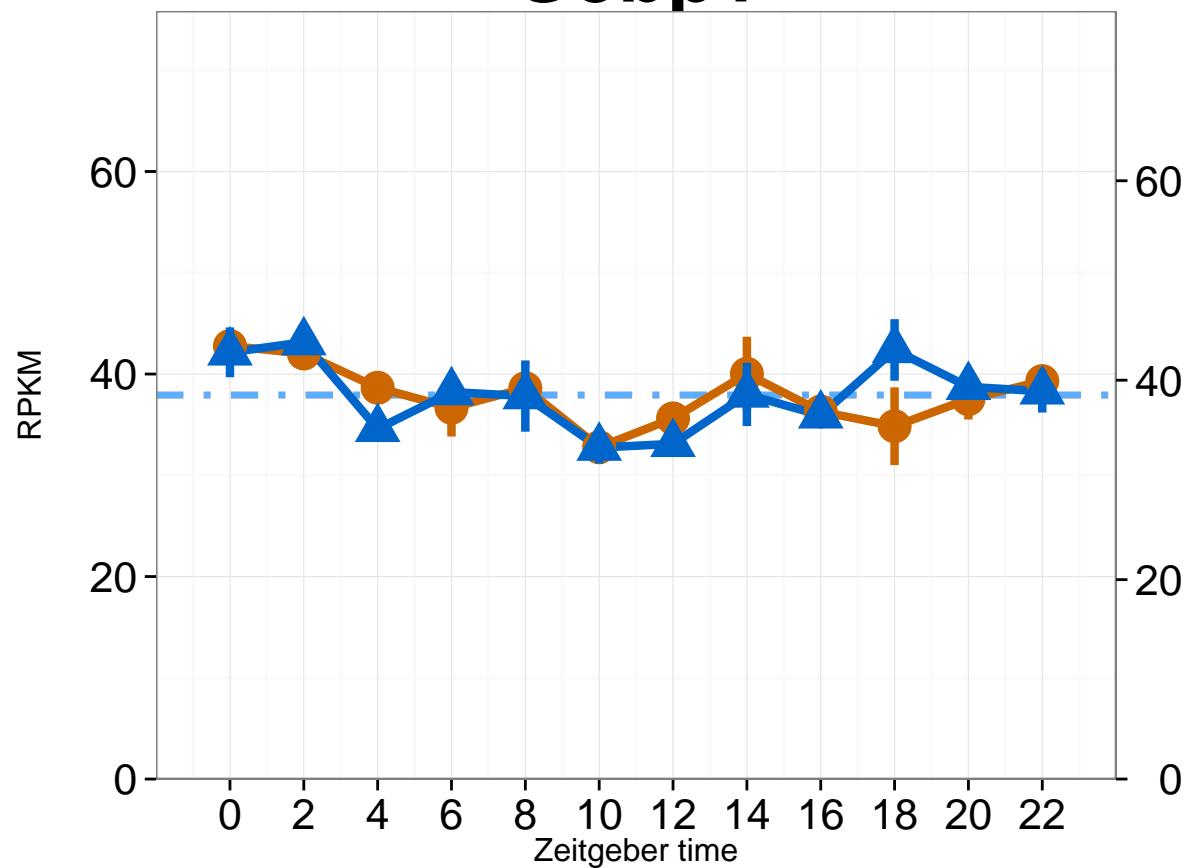

## G3bp1

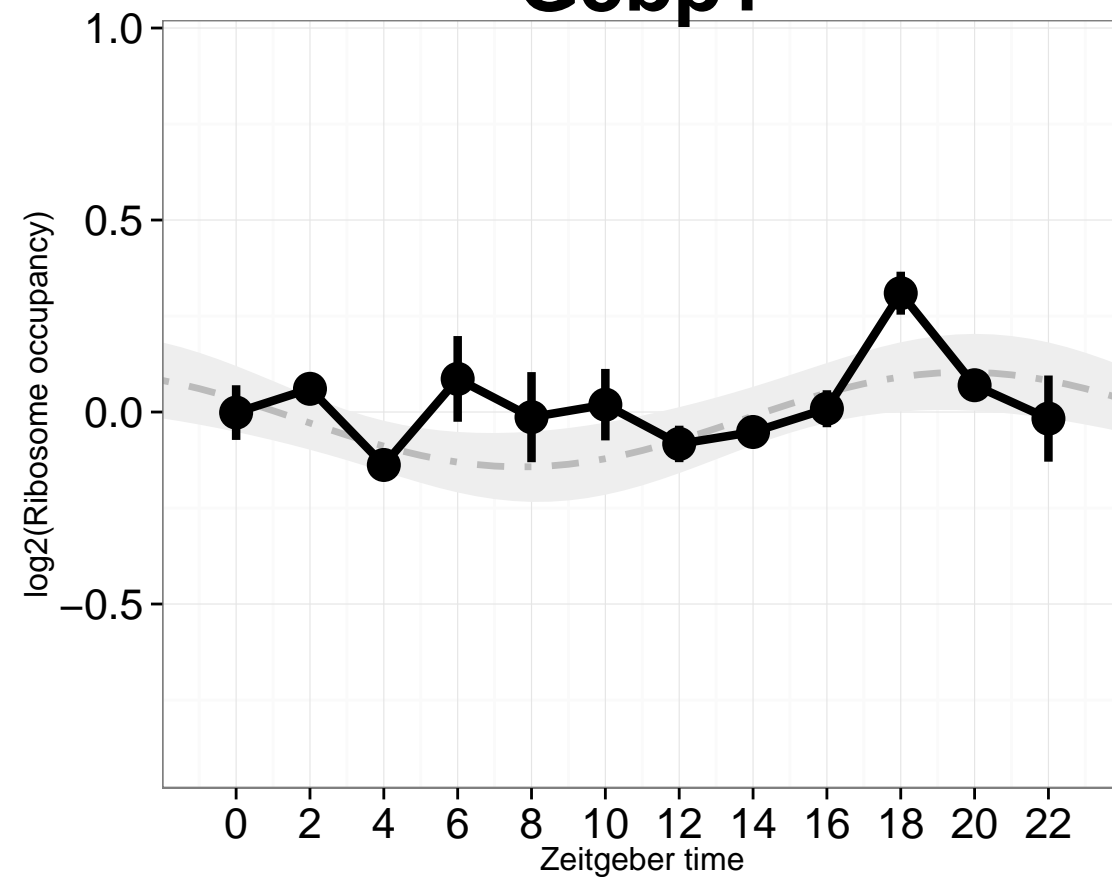

Supplement: SuppDataset_1.zip [file G3bp1_set_A.pdf › Supplemental Dataset 1/A-mRNA_nonrhyth_translation_nonrhyth/G3bp1_set_A.pdf]

## G3bp2

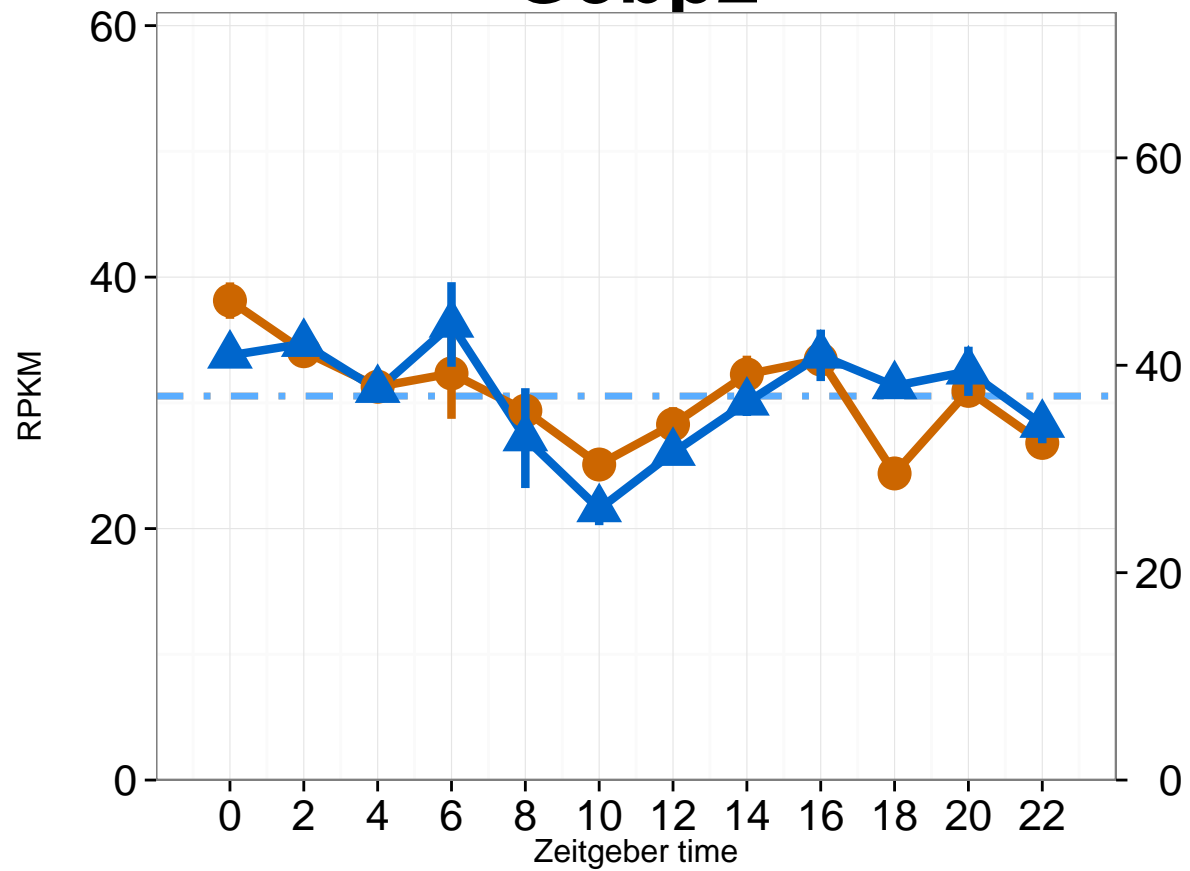

## G3bp2

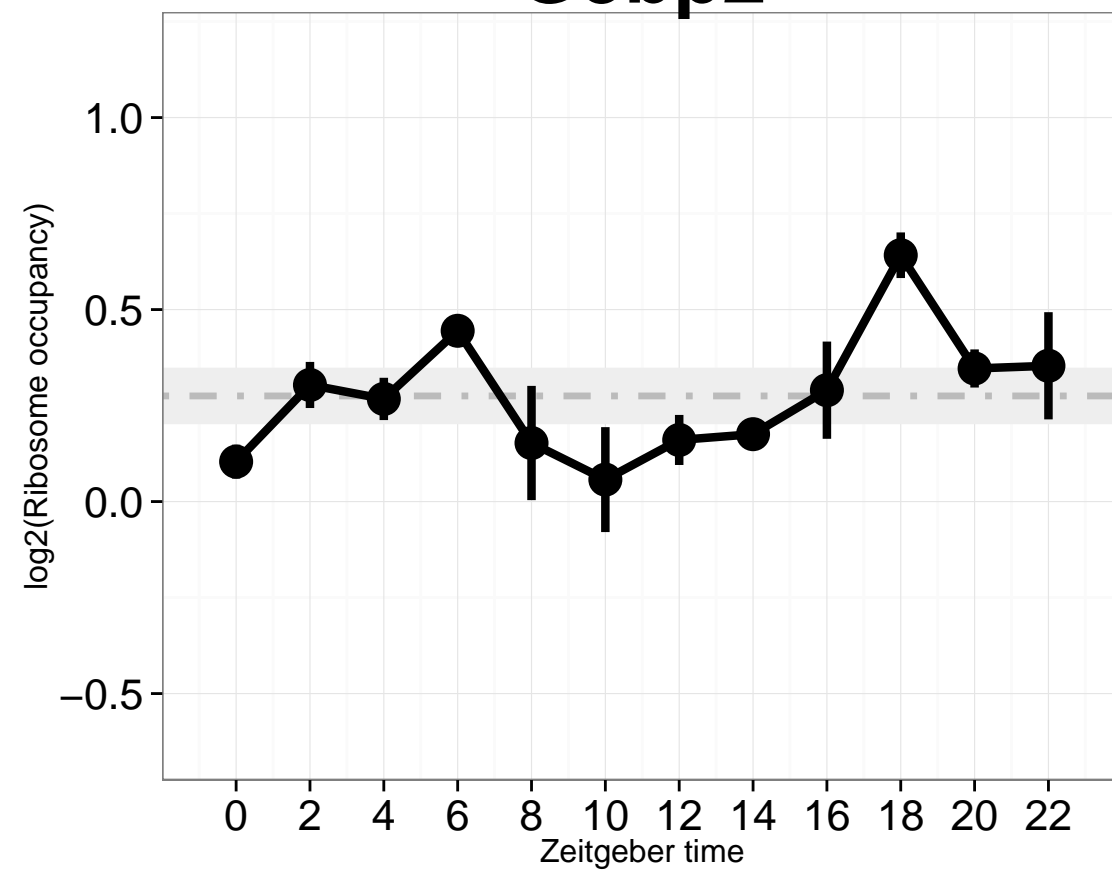

Supplement: SuppDataset_1.zip [file G3bp2_set_A.pdf › Supplemental Dataset 1/A-mRNA_nonrhyth_translation_nonrhyth/G3bp2_set_A.pdf]

# G6pc3

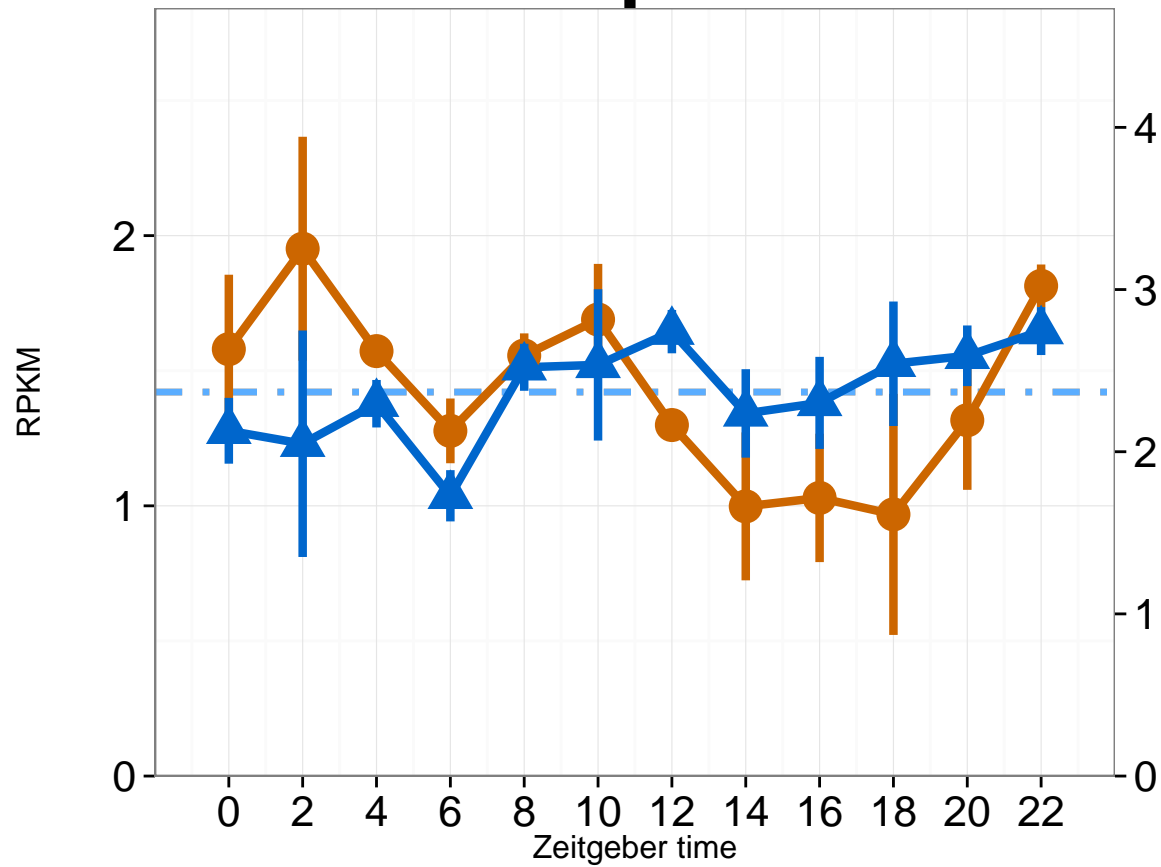

# G6pc3

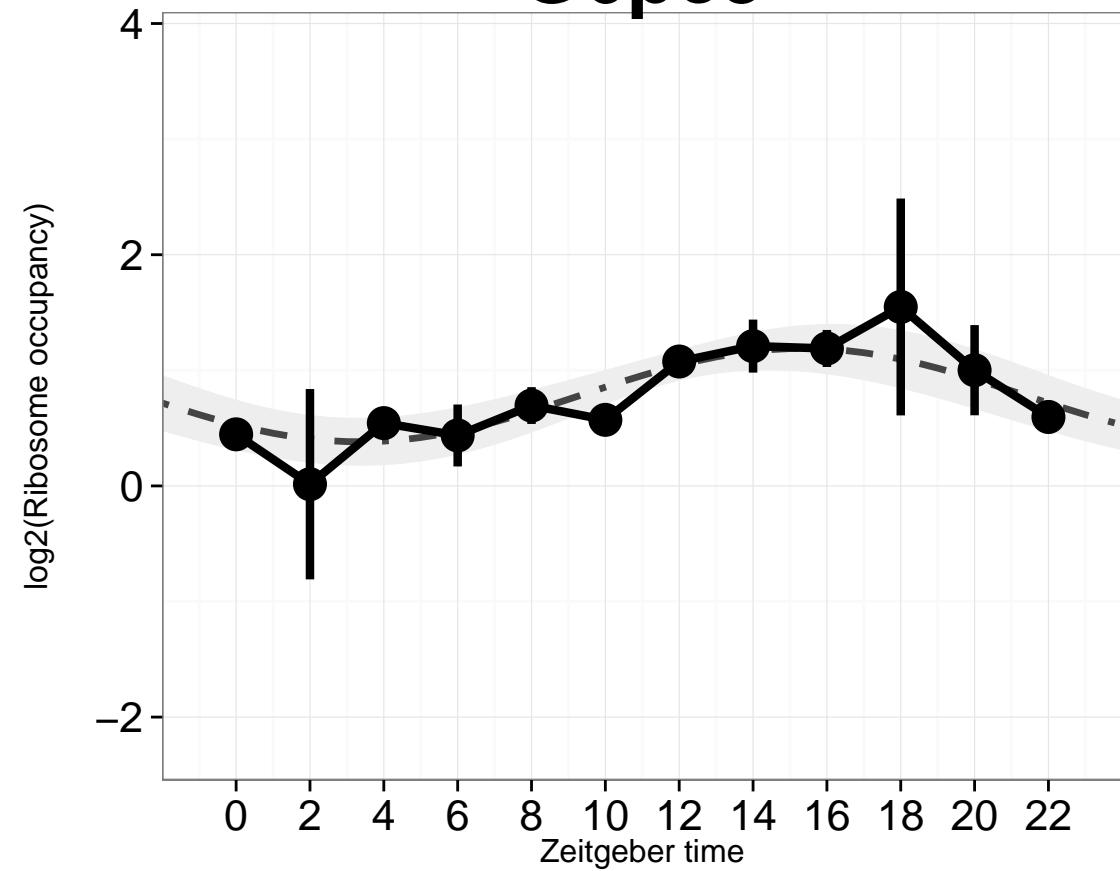

Supplement: SuppDataset_1.zip [file G6pc3_set_A.pdf › Supplemental Dataset 1/A-mRNA_nonrhyth_translation_nonrhyth/G6pc3_set_A.pdf]

# G6pc

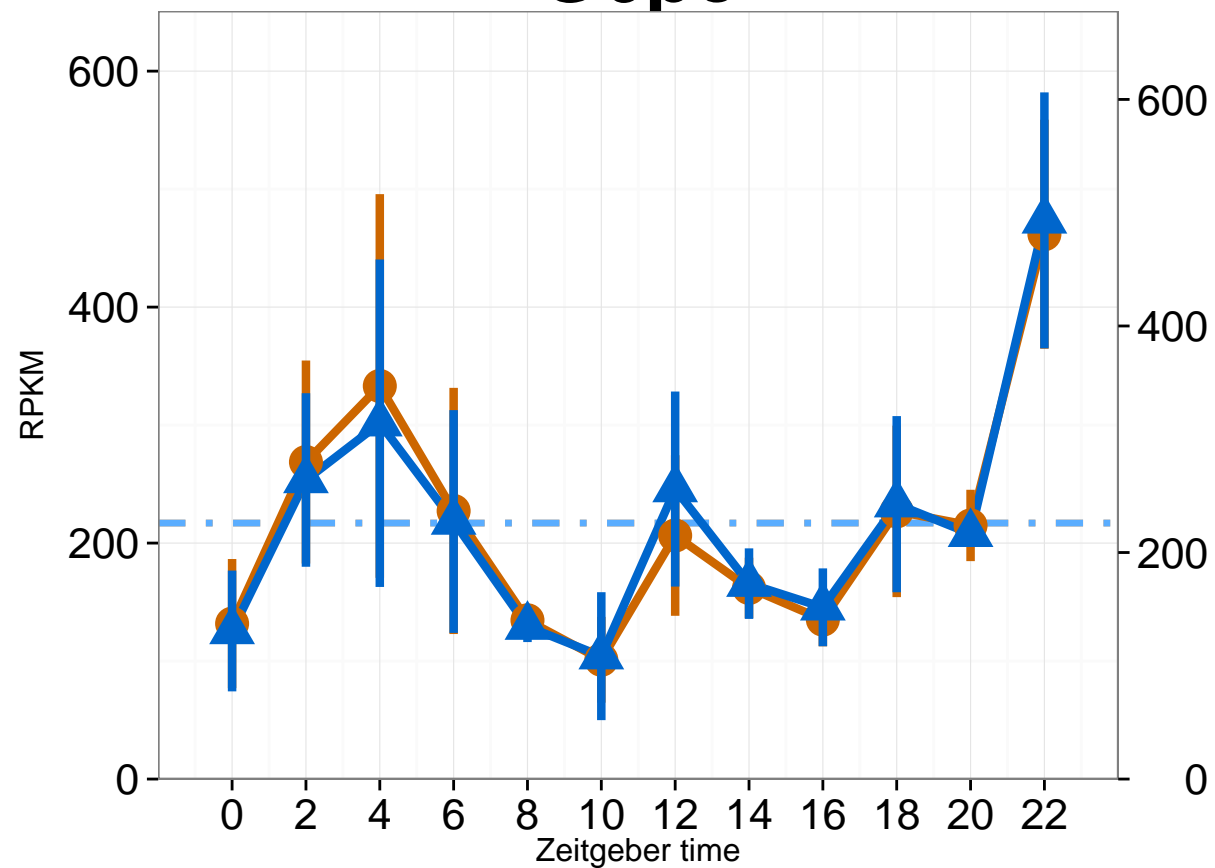

# G6pc

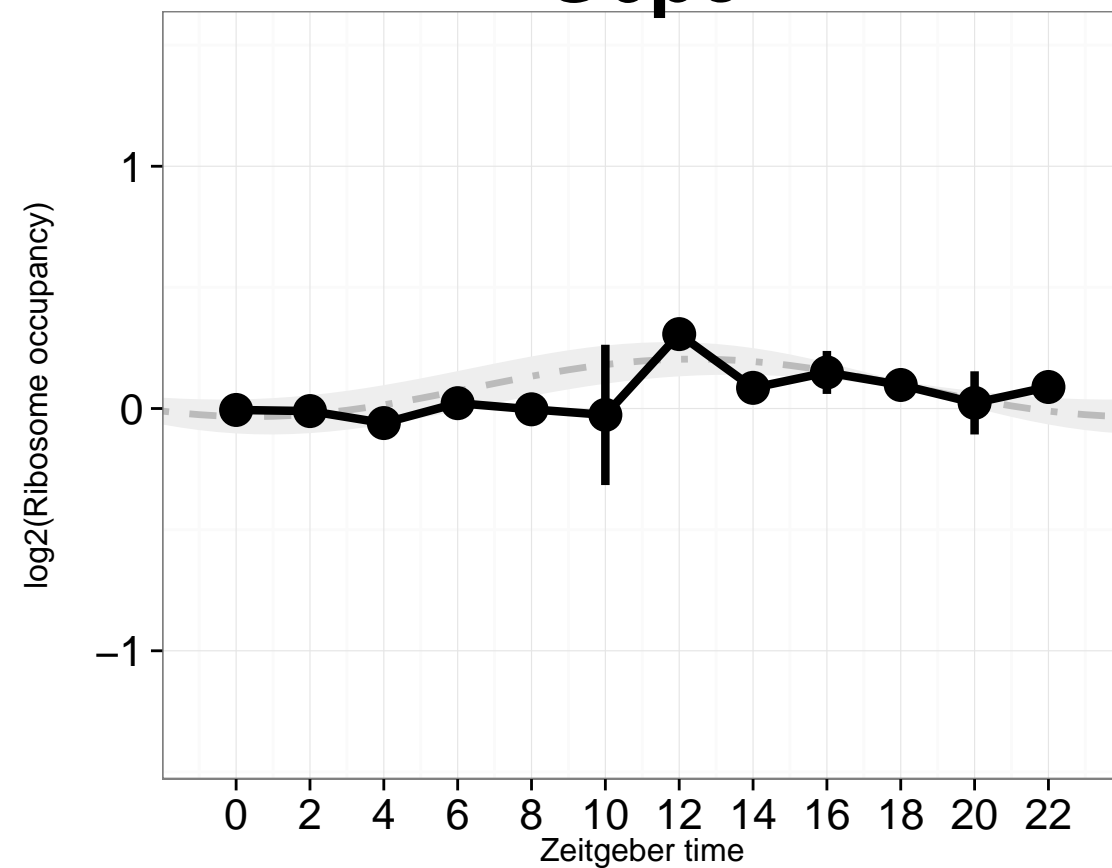

Supplement: SuppDataset_1.zip [file G6pc_set_A.pdf › Supplemental Dataset 1/A-mRNA_nonrhyth_translation_nonrhyth/G6pc_set_A.pdf]

## Gaa

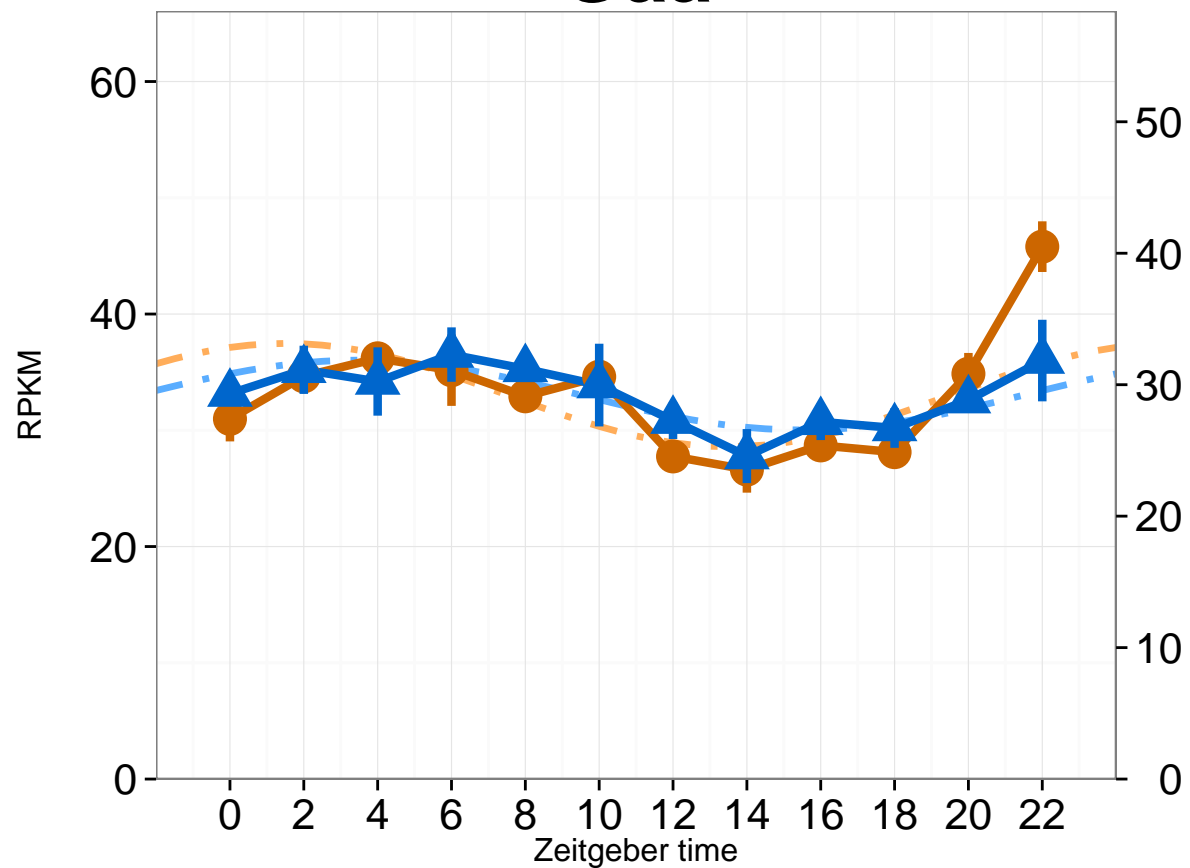

## Gaa

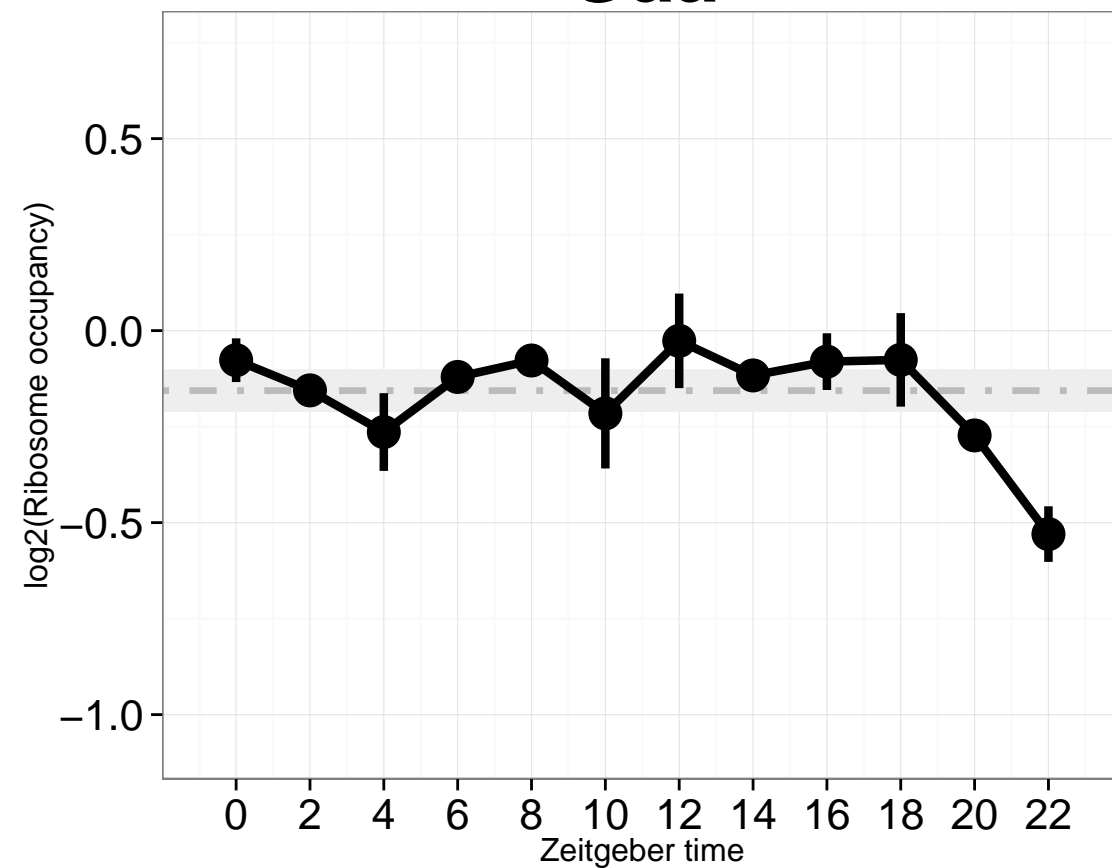

Supplement: SuppDataset_1.zip [file Gaa_set_A.pdf › Supplemental Dataset 1/A-mRNA_nonrhyth_translation_nonrhyth/Gaa_set_A.pdf]

# Gab1

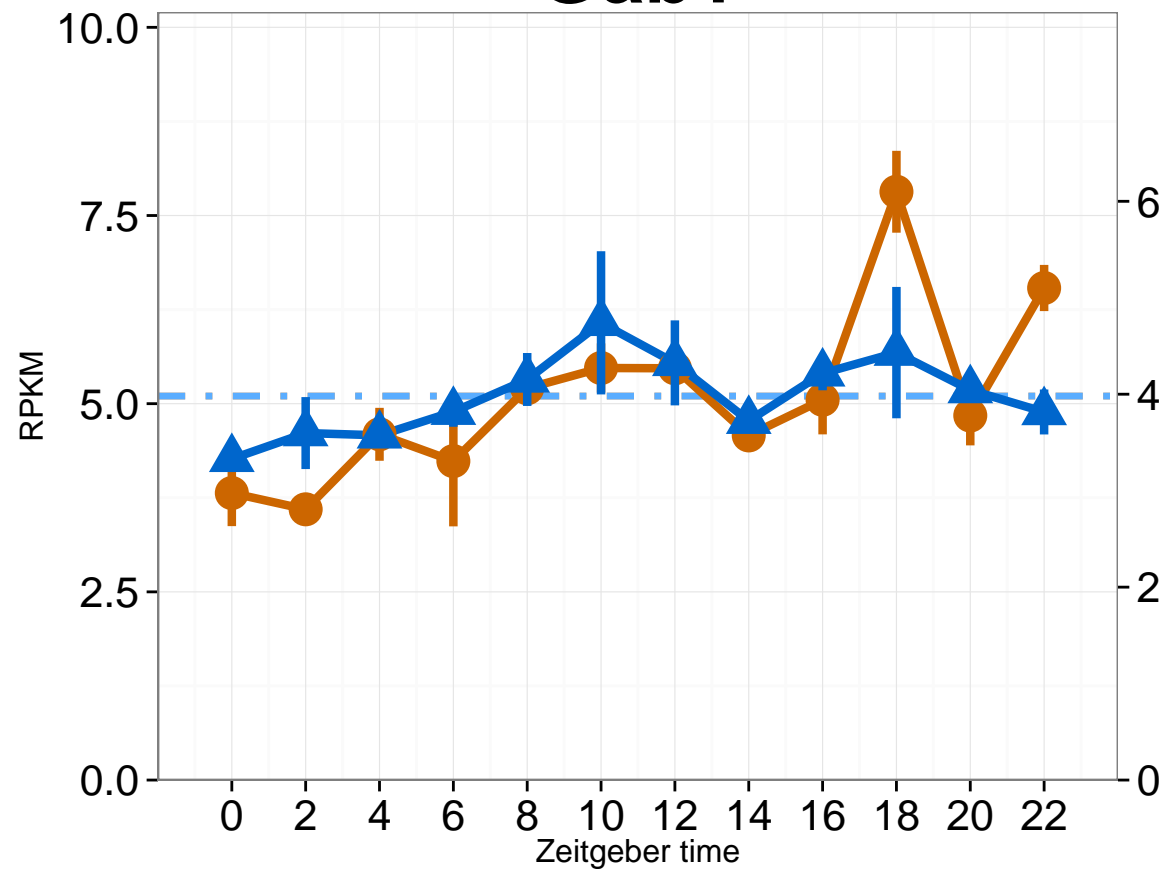

# Gab1

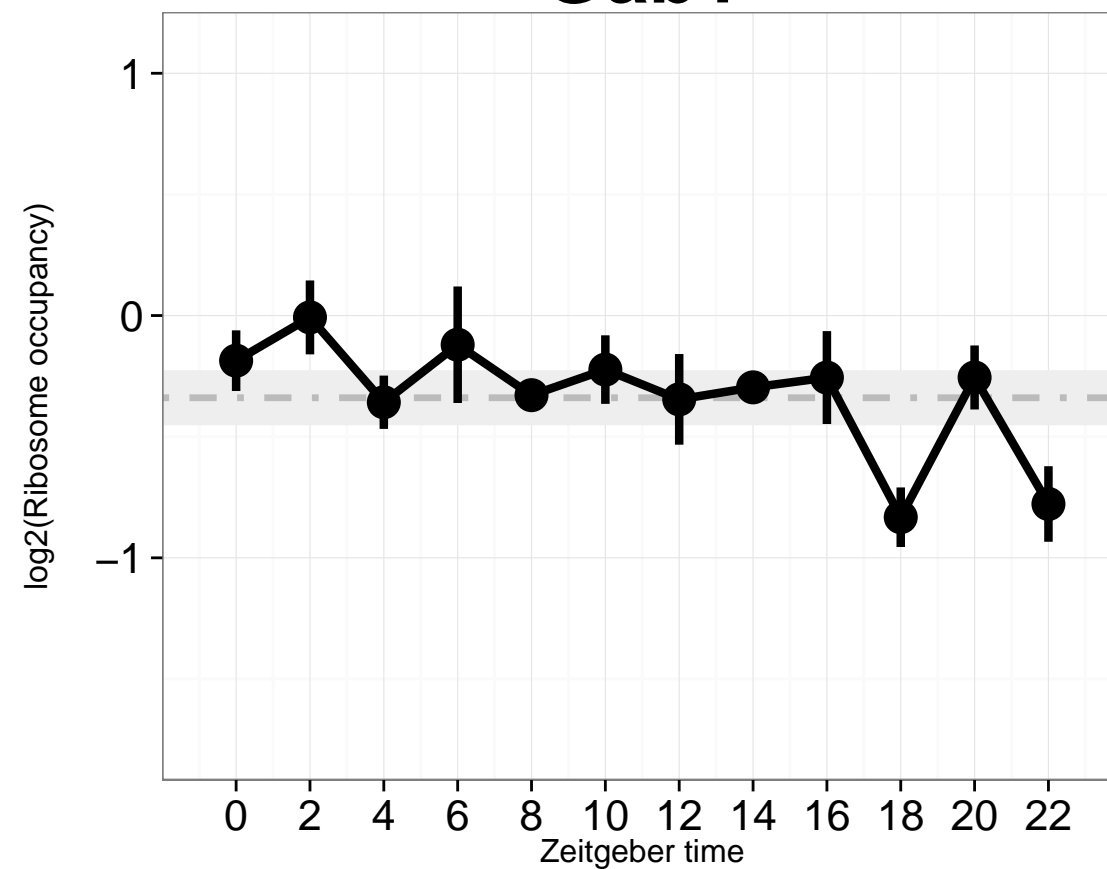

Supplement: SuppDataset_1.zip [file Gab1_set_A.pdf › Supplemental Dataset 1/A-mRNA_nonrhyth_translation_nonrhyth/Gab1_set_A.pdf]

## Gab2

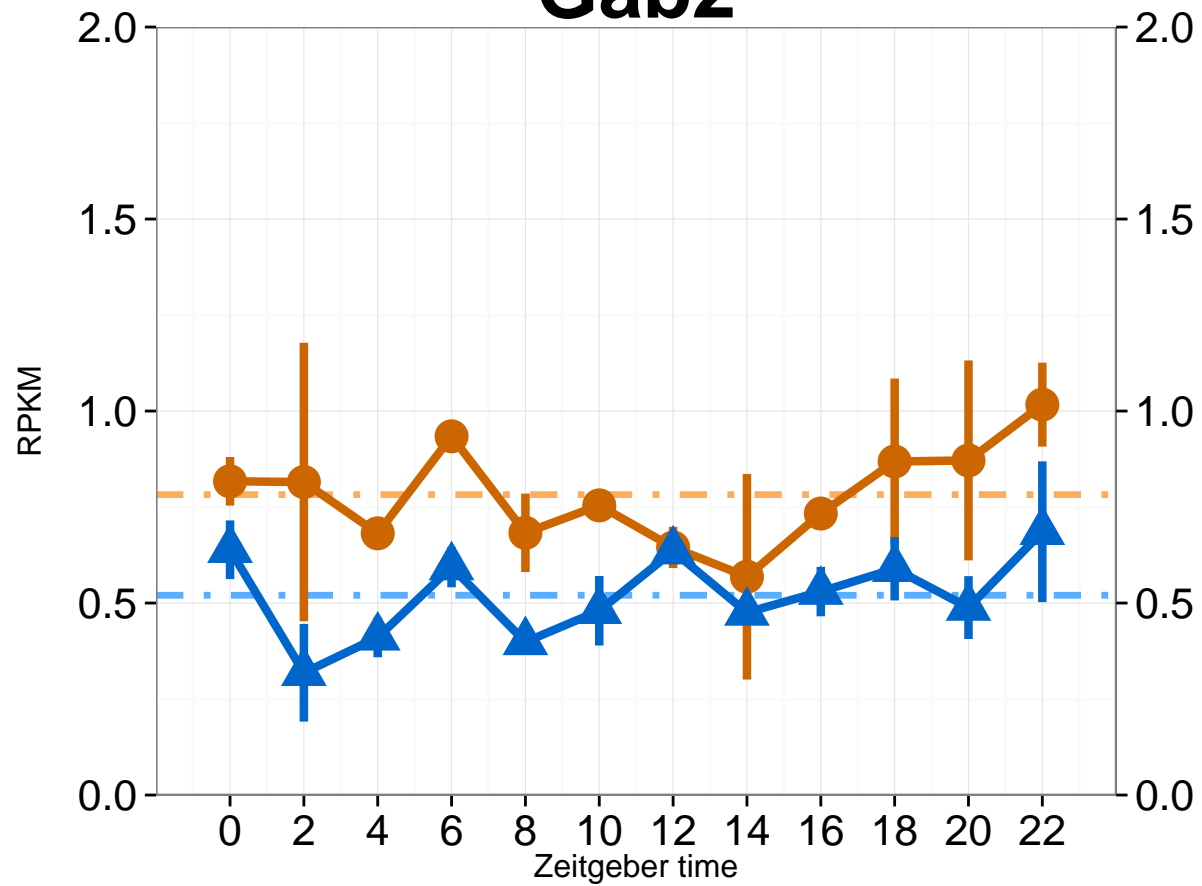

## Gab2

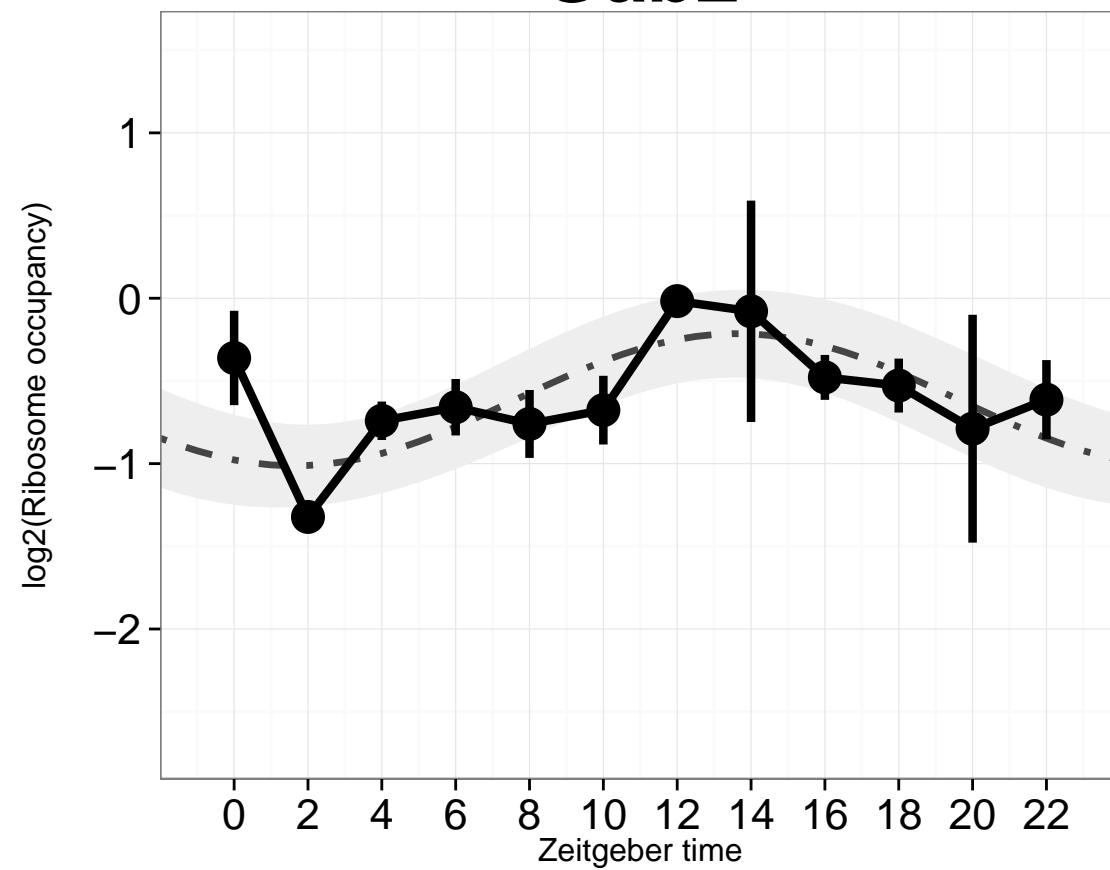

Supplement: SuppDataset_1.zip [file Gab2_set_A.pdf › Supplemental Dataset 1/A-mRNA_nonrhyth_translation_nonrhyth/Gab2_set_A.pdf]

## Gabarap

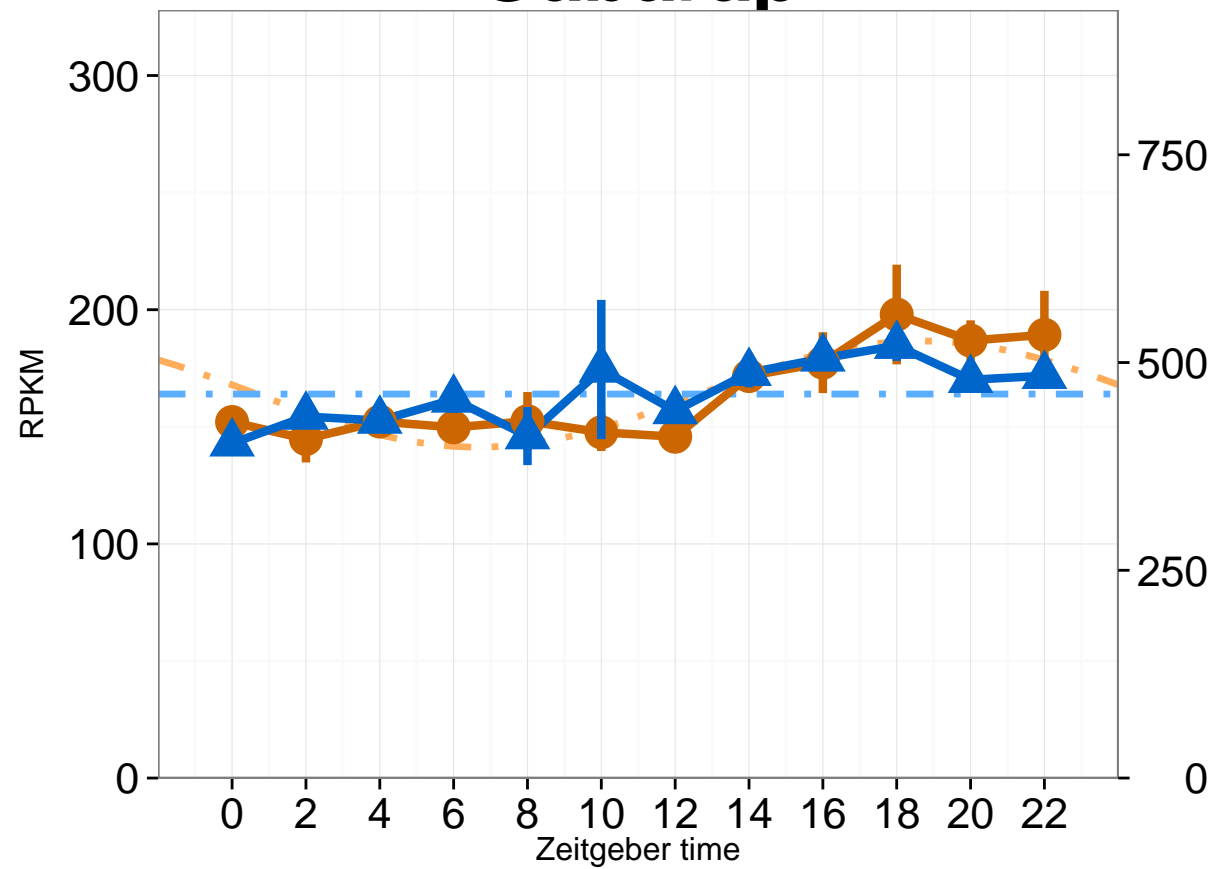

## Gabarap

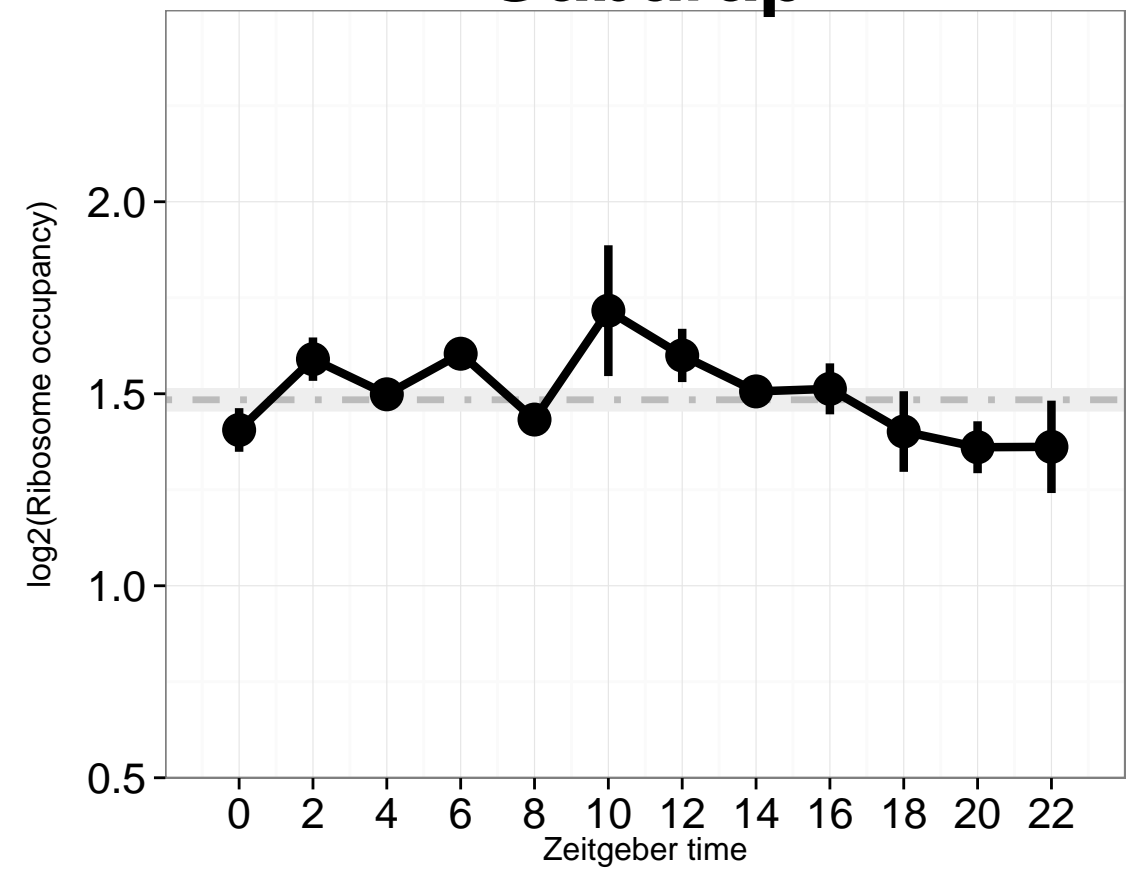

Supplement: SuppDataset_1.zip [file Gabarap_set_A.pdf › Supplemental Dataset 1/A-mRNA_nonrhyth_translation_nonrhyth/Gabarap_set_A.pdf]

## Gabarapl2

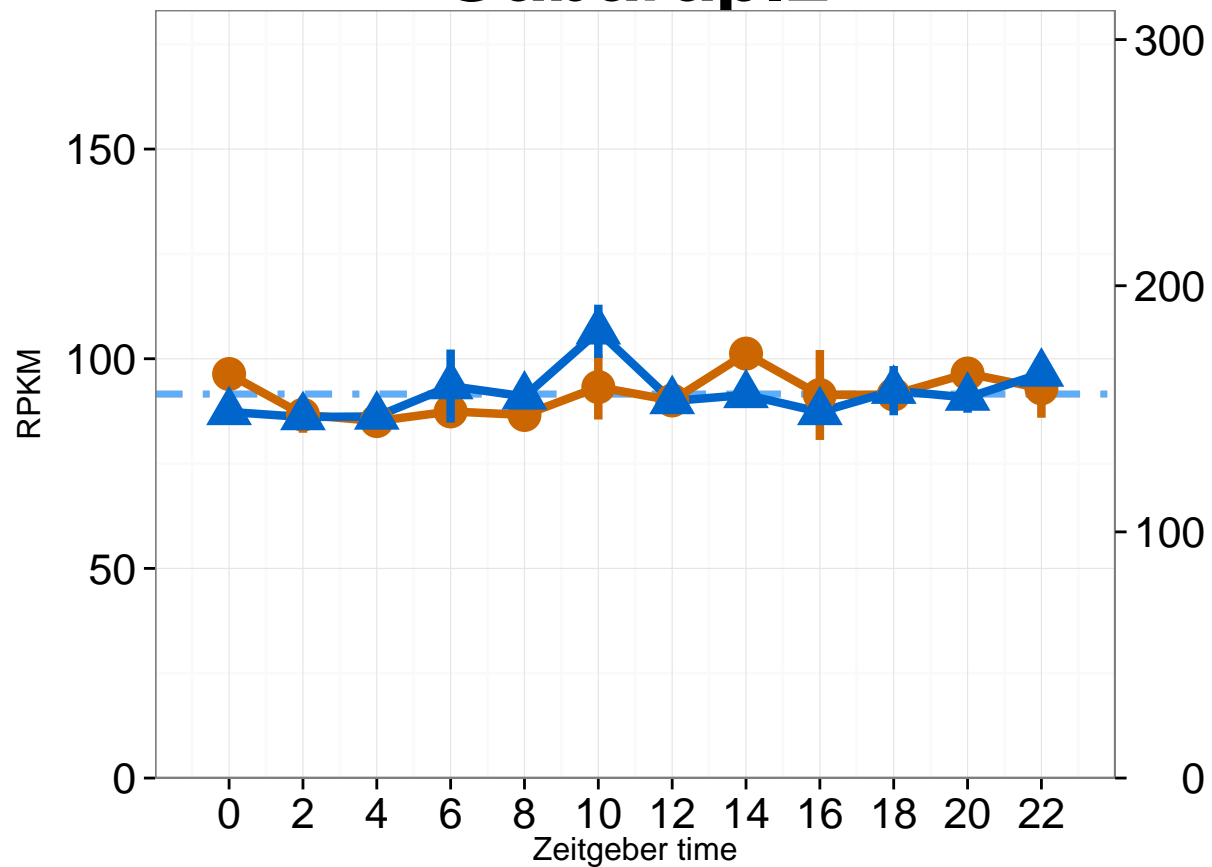

## Gabarapl2

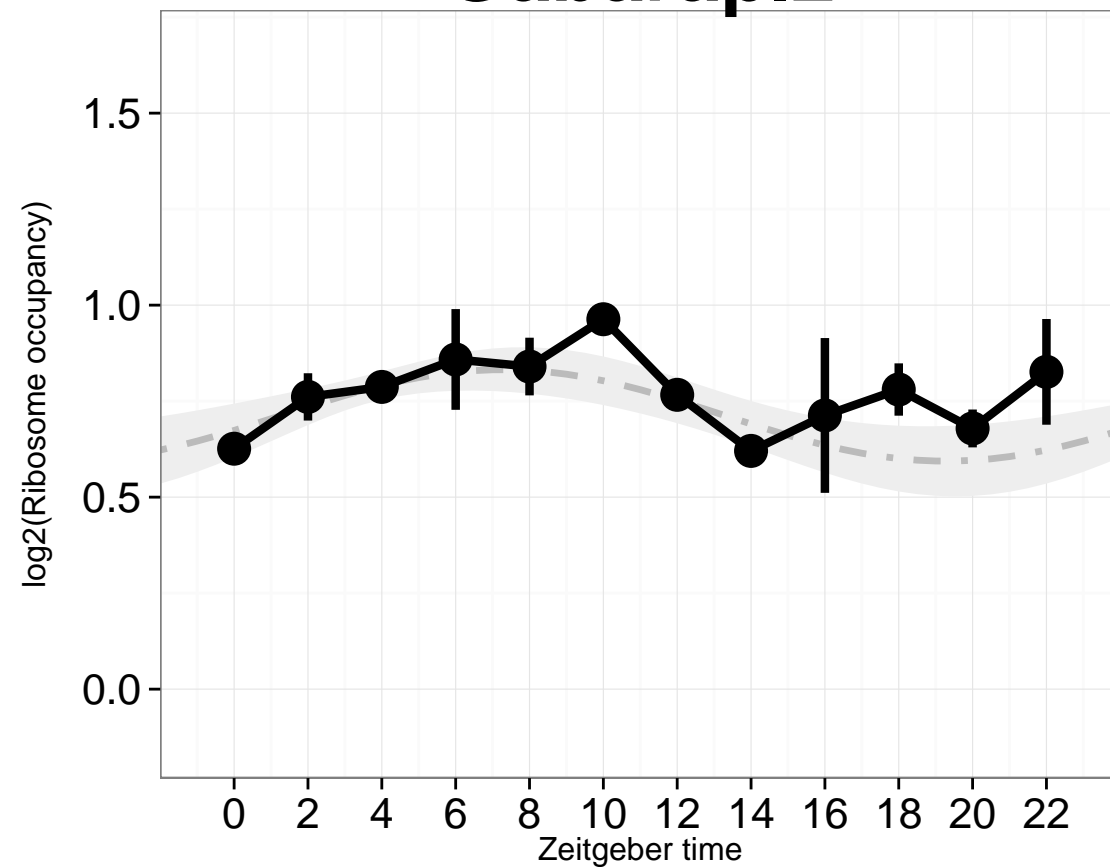

Supplement: SuppDataset_1.zip [file Gabarapl2_set_A.pdf › Supplemental Dataset 1/A-mRNA_nonrhyth_translation_nonrhyth/Gabarapl2_set_A.pdf]

## Gabbr2

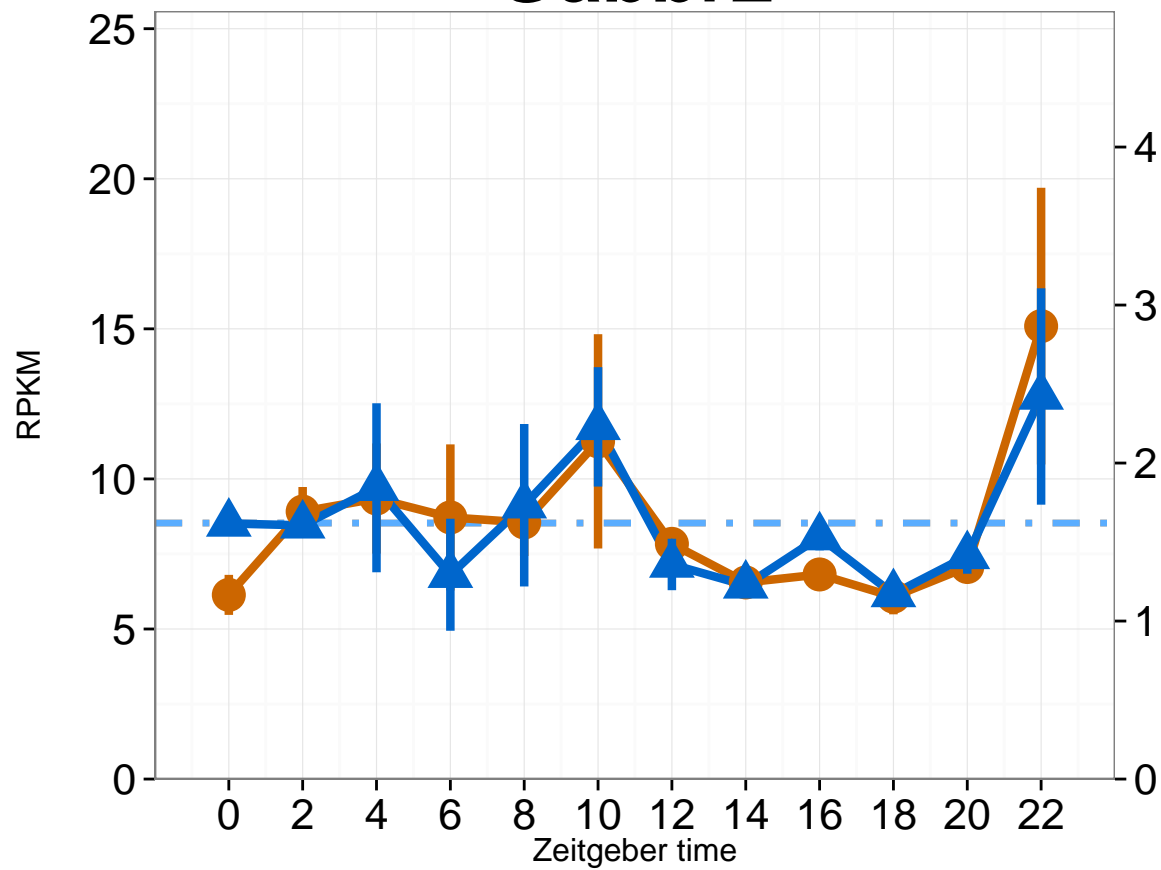

## Gabbr2

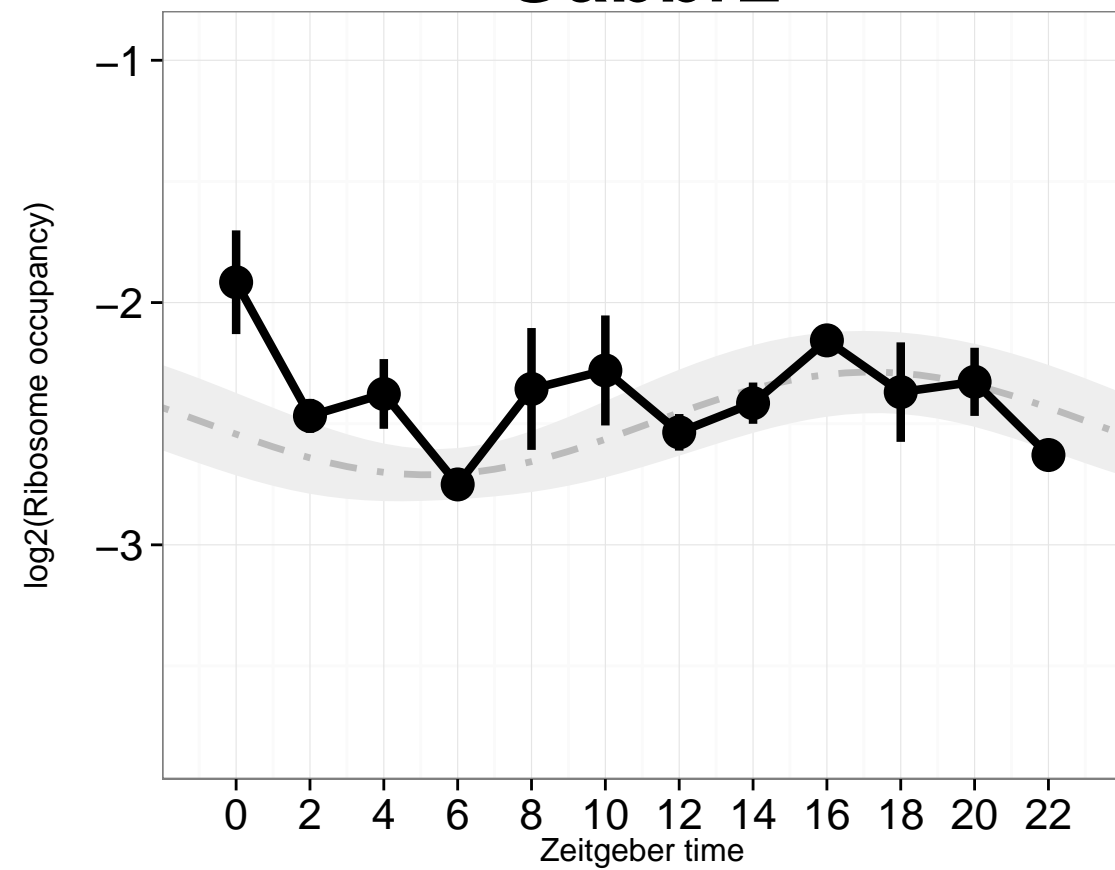

Supplement: SuppDataset_1.zip [file Gabbr2_set_A.pdf › Supplemental Dataset 1/A-mRNA_nonrhyth_translation_nonrhyth/Gabbr2_set_A.pdf]

## Gabpa

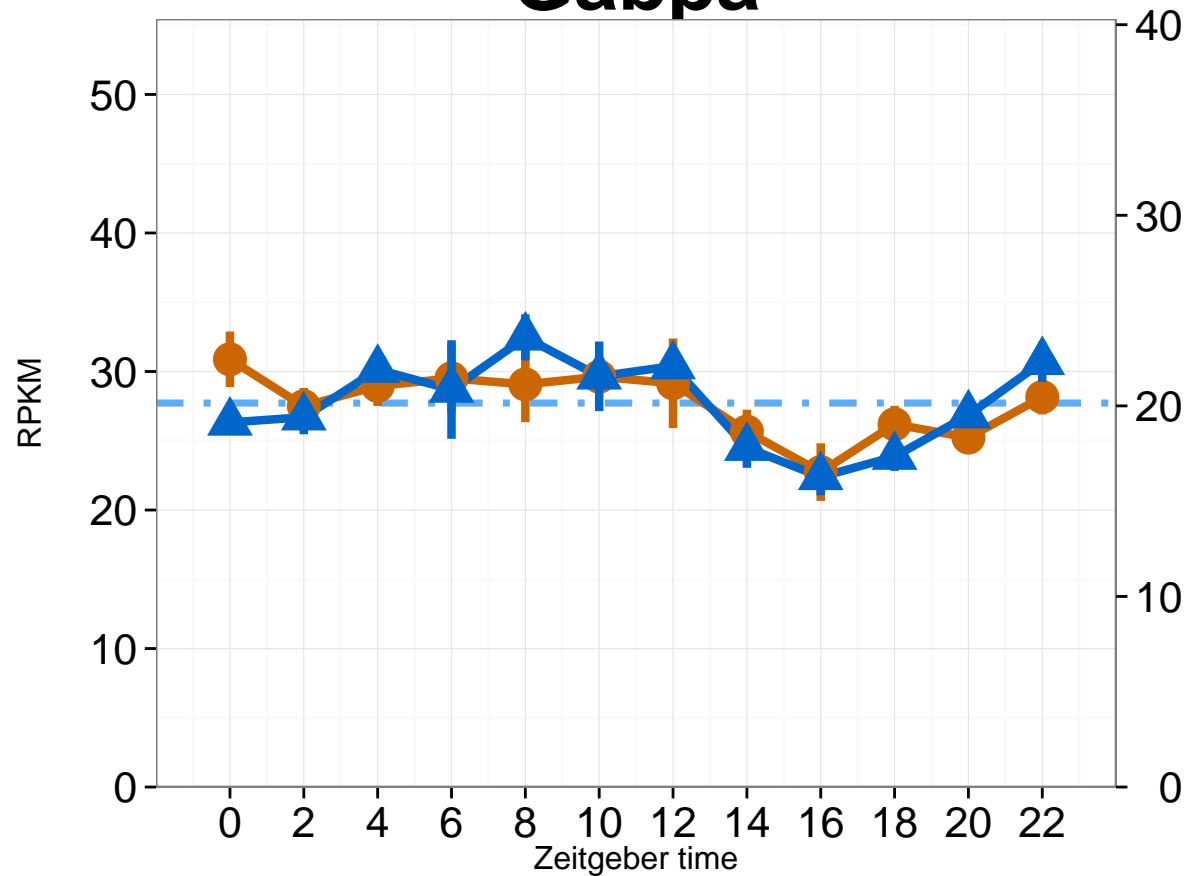

## Gabpa

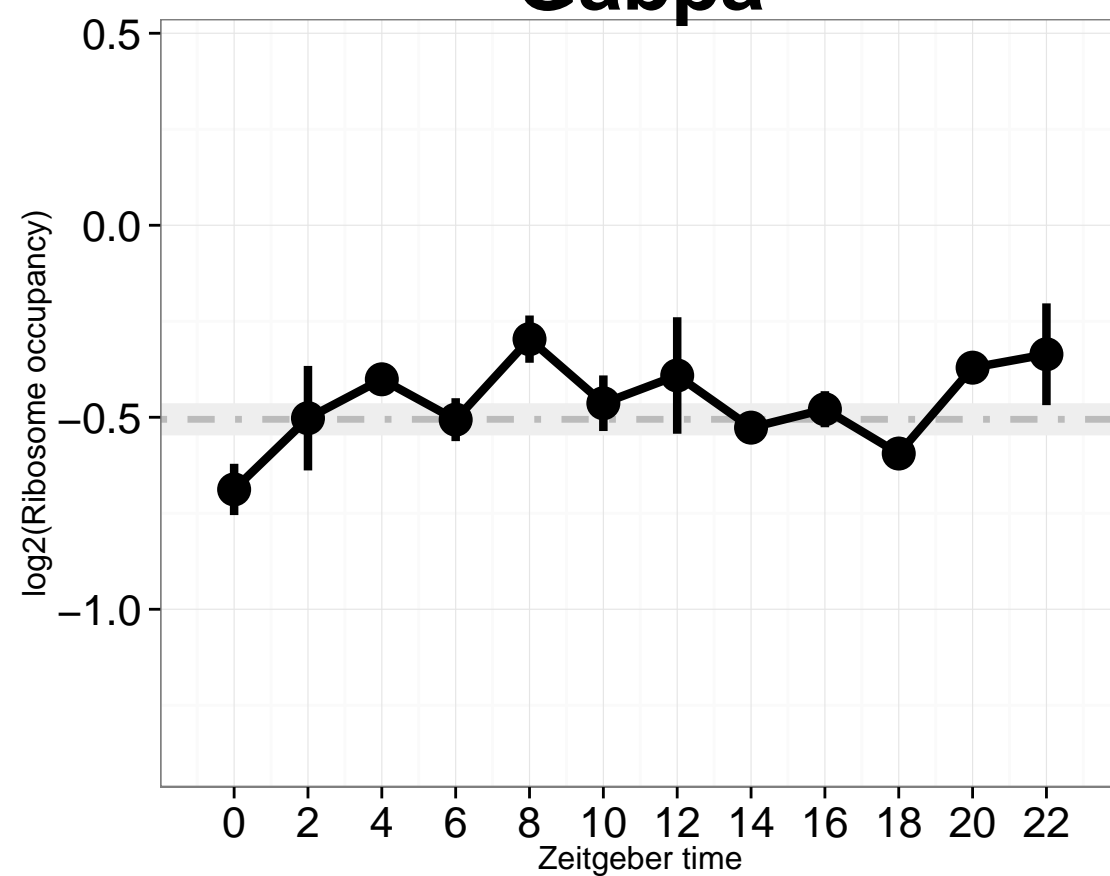

Supplement: SuppDataset_1.zip [file Gabpa_set_A.pdf › Supplemental Dataset 1/A-mRNA_nonrhyth_translation_nonrhyth/Gabpa_set_A.pdf]

## Gabpb2

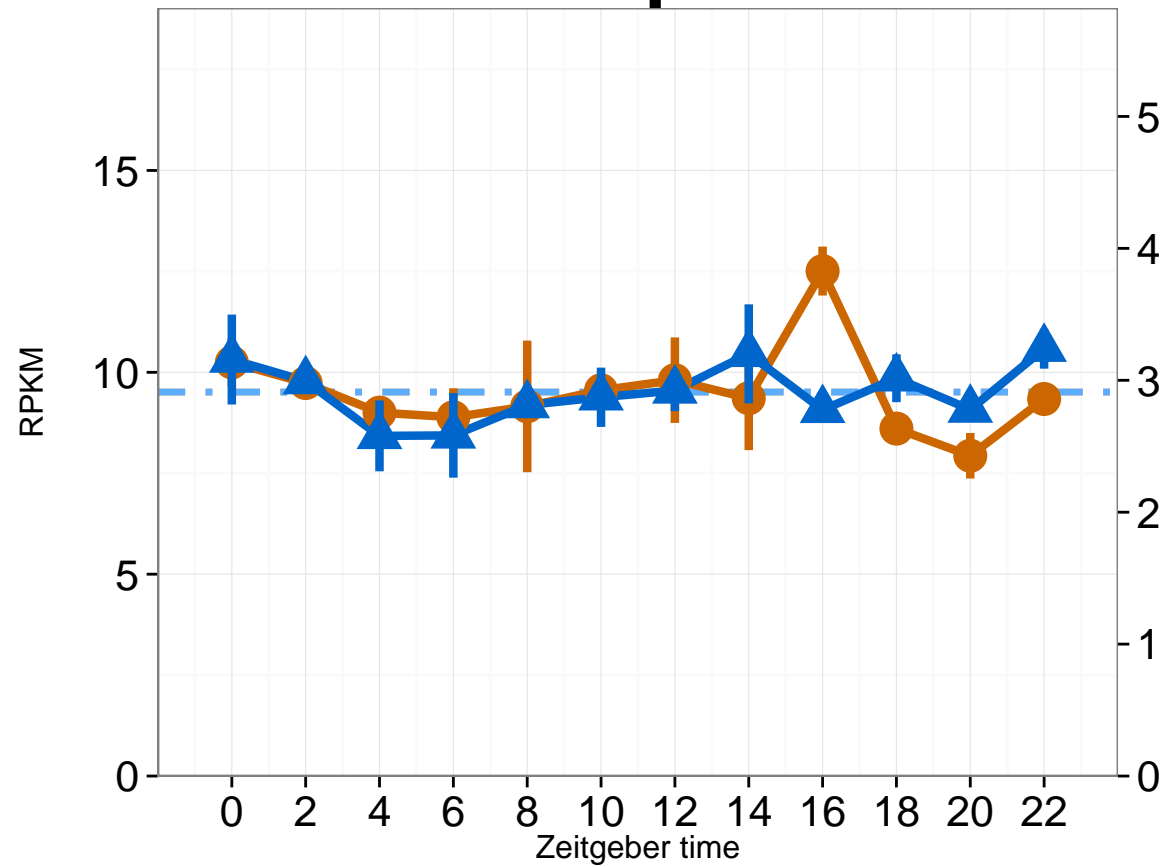

## Gabpb2

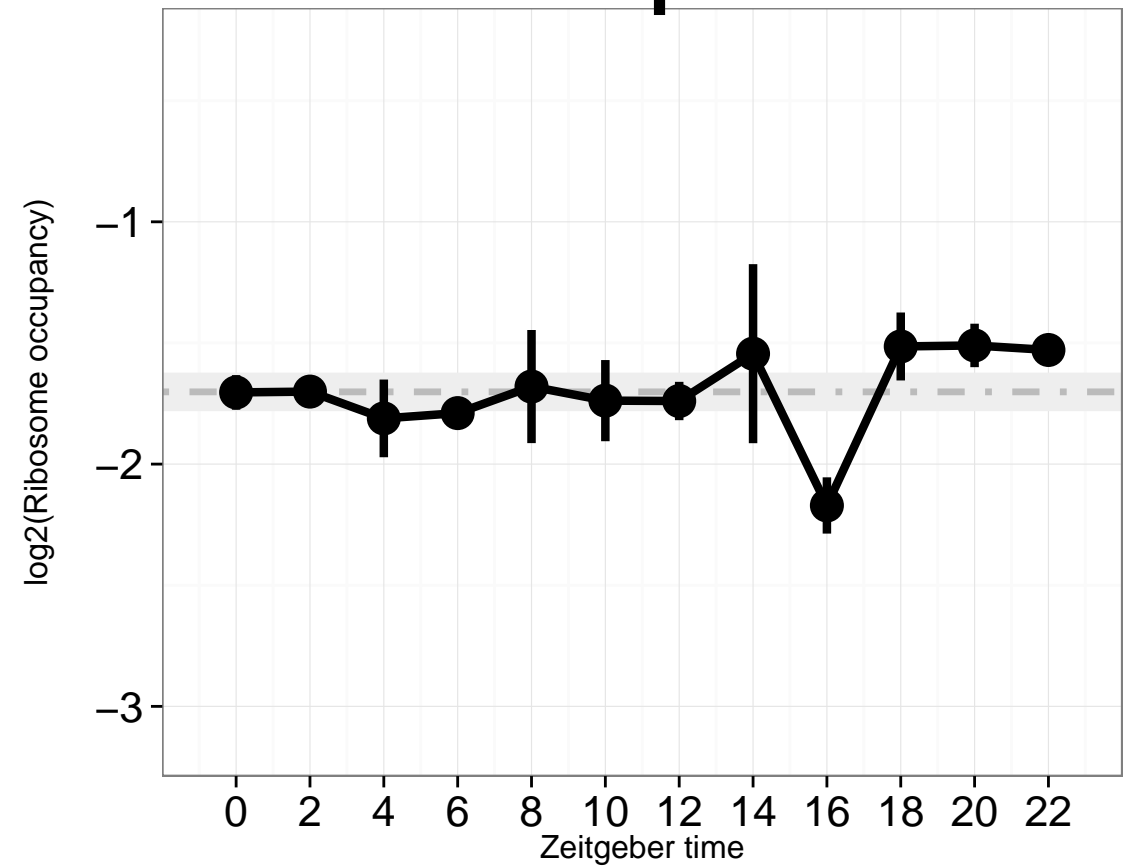

Supplement: SuppDataset_1.zip [file Gabpb2_set_A.pdf › Supplemental Dataset 1/A-mRNA_nonrhyth_translation_nonrhyth/Gabpb2_set_A.pdf]

# Gabra3

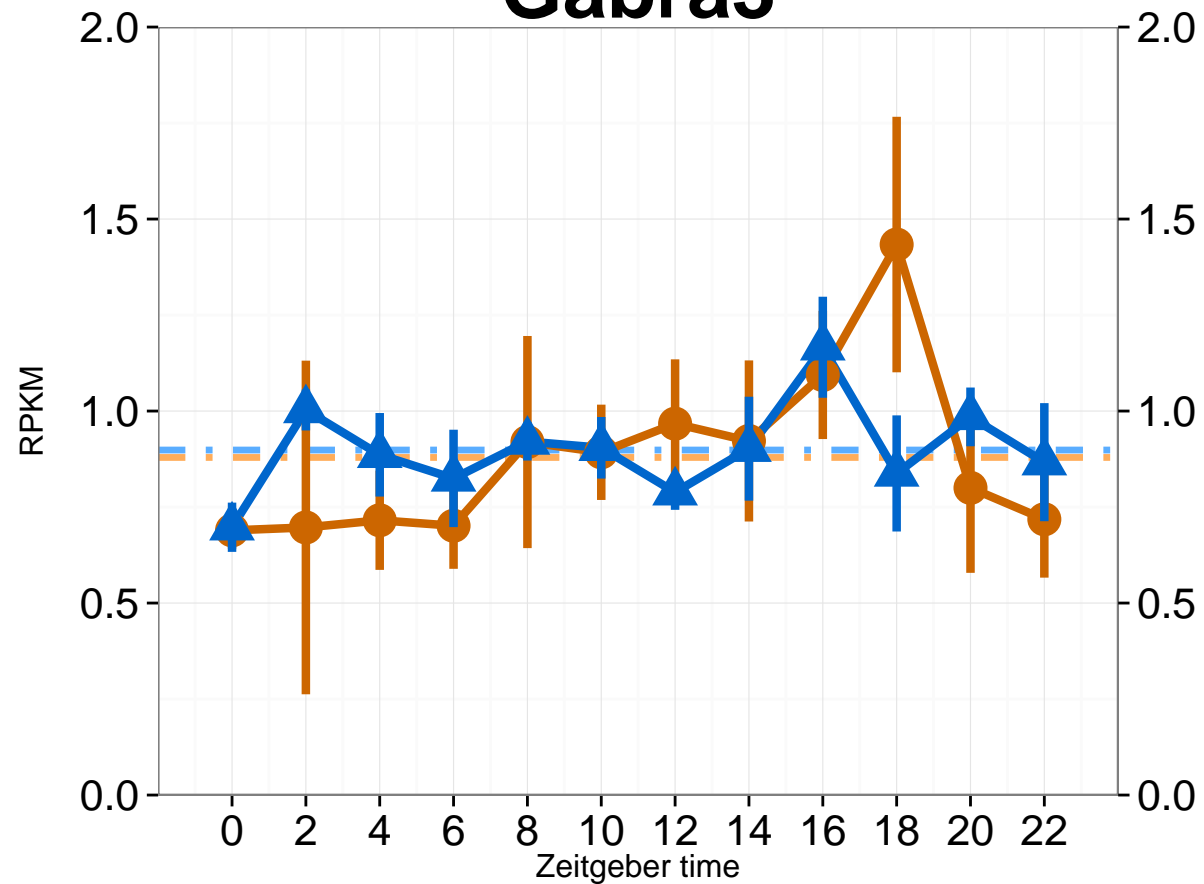

# Gabra3

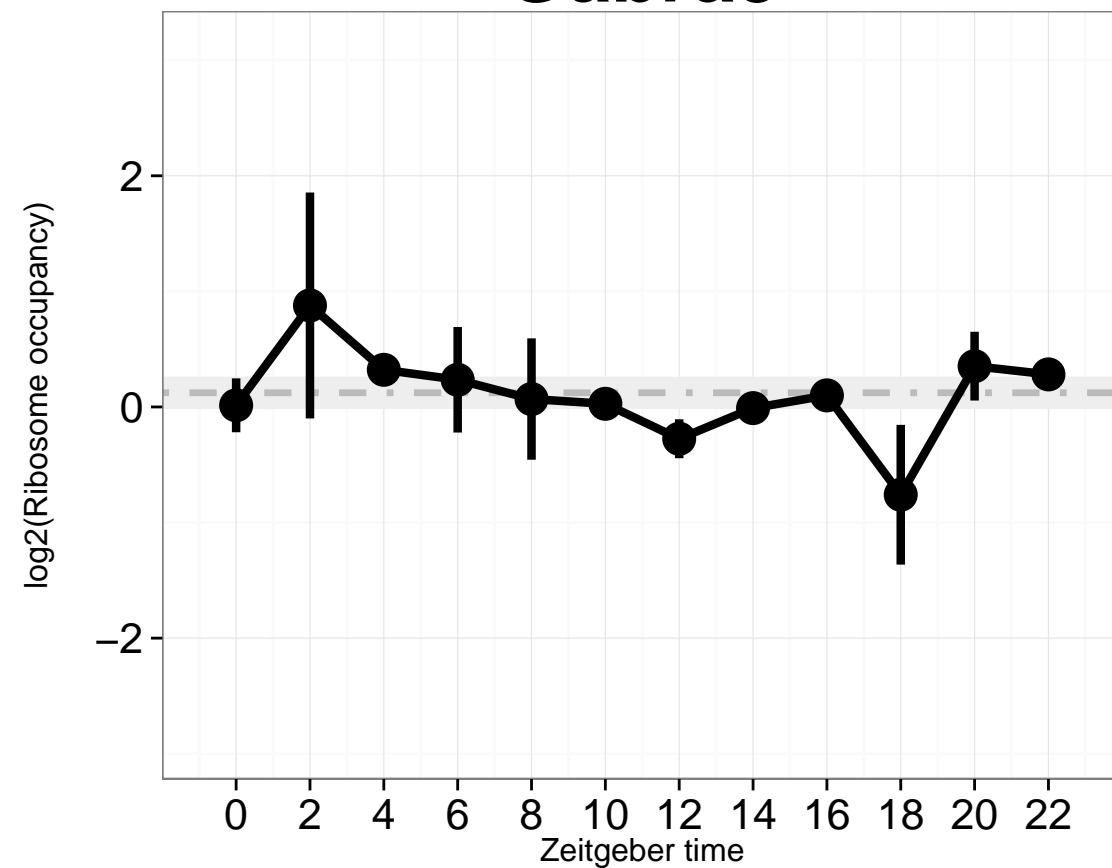

Supplement: SuppDataset_1.zip [file Gabra3_set_A.pdf › Supplemental Dataset 1/A-mRNA_nonrhyth_translation_nonrhyth/Gabra3_set_A.pdf]

# Gabrb3

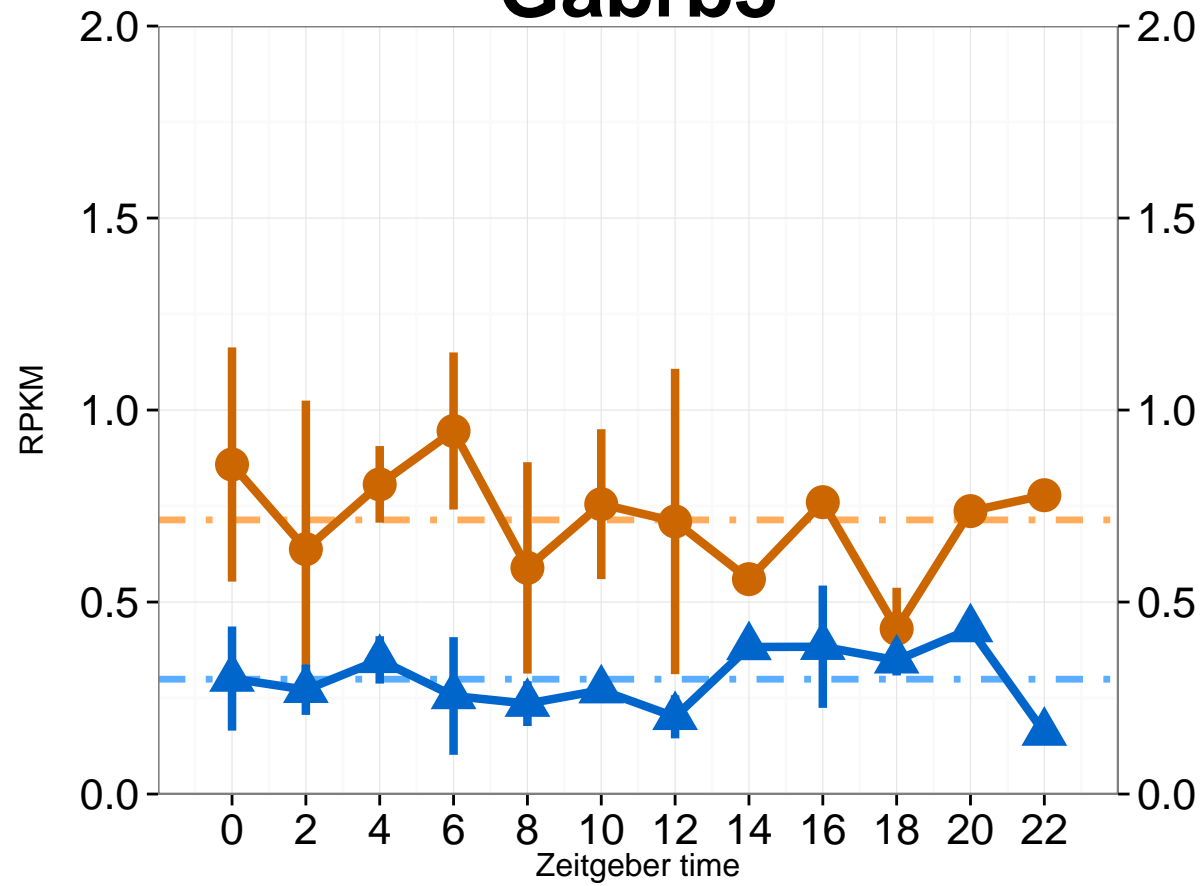

# Gabrb3

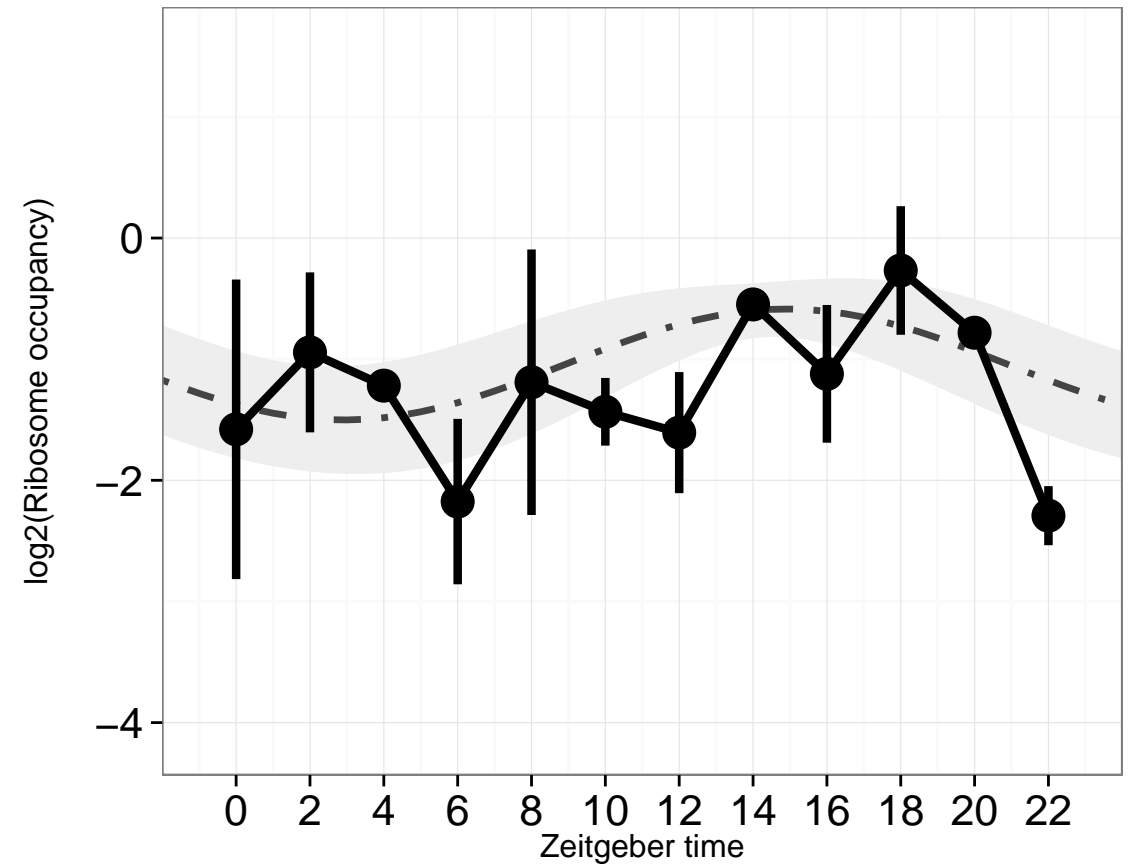

Supplement: SuppDataset_1.zip [file Gabrb3_set_A.pdf › Supplemental Dataset 1/A-mRNA_nonrhyth_translation_nonrhyth/Gabrb3_set_A.pdf]

## Gadd45g

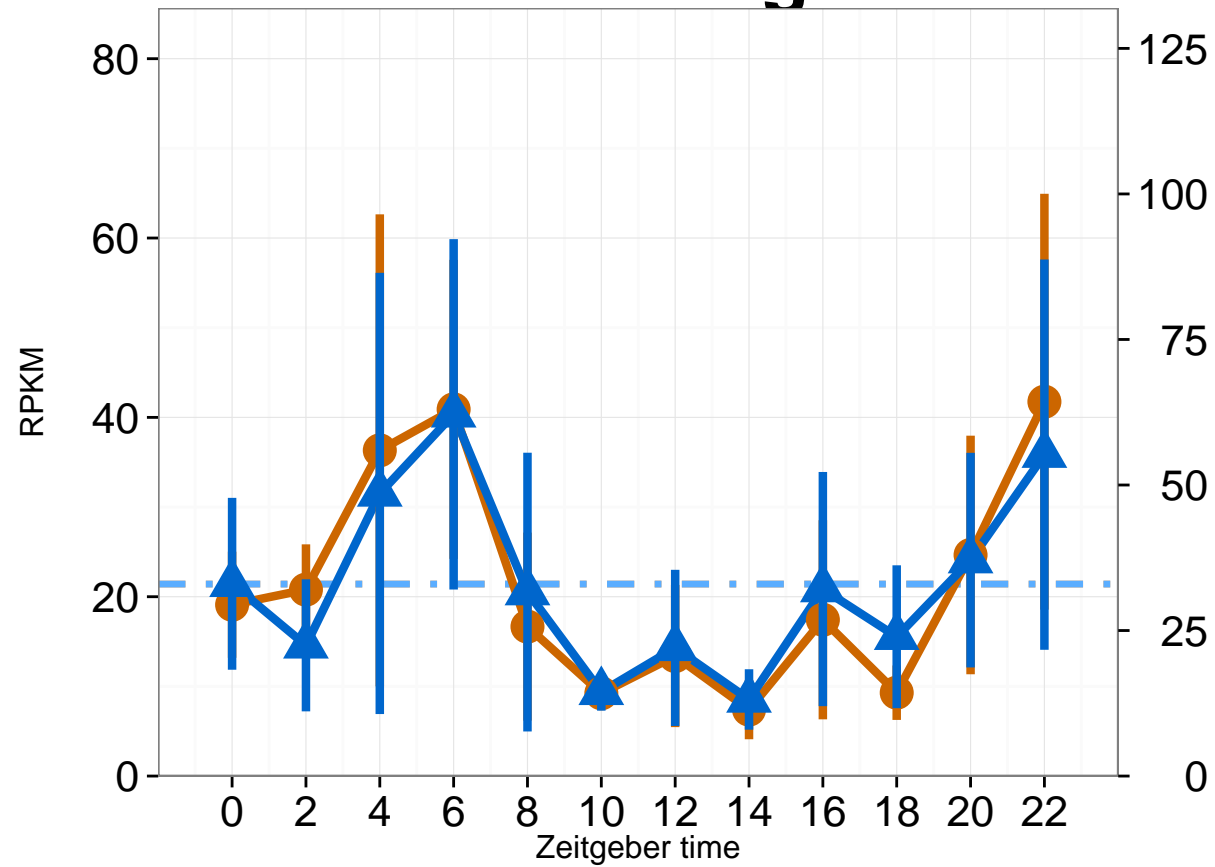

## Gadd45g

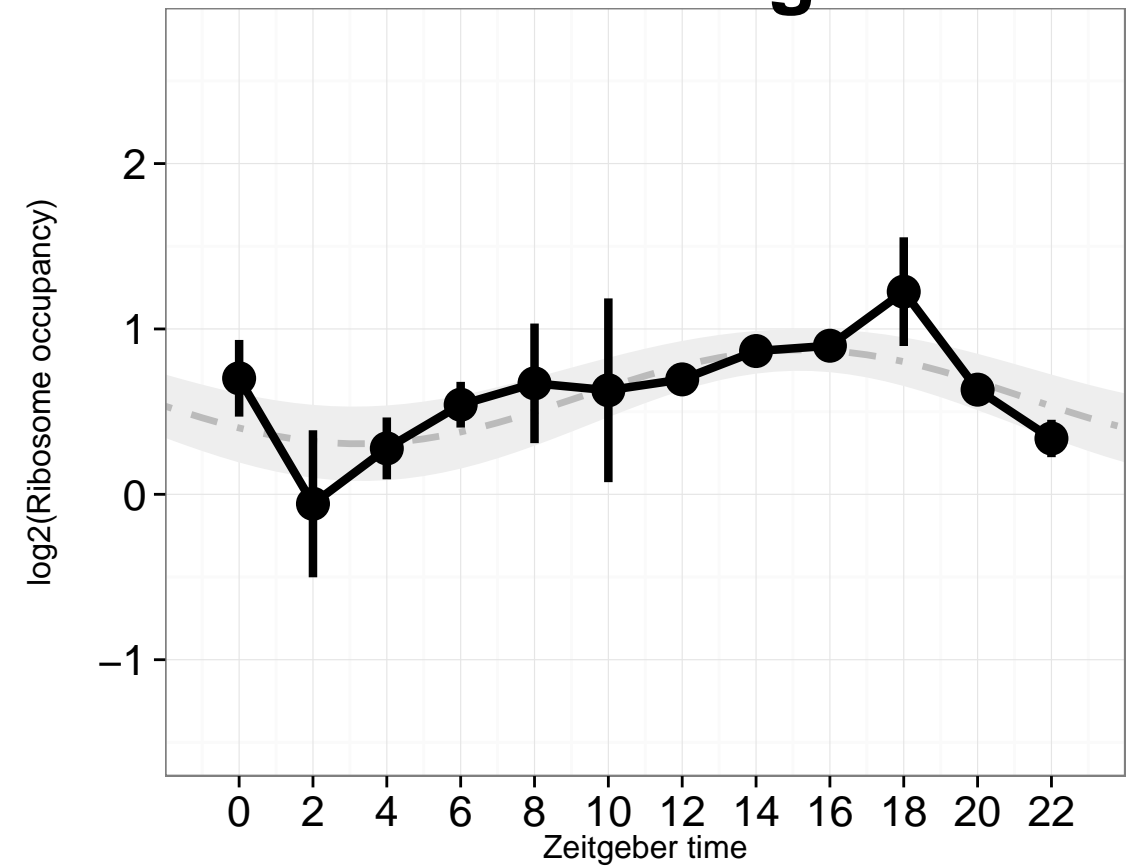

Supplement: SuppDataset_1.zip [file Gadd45g_set_A.pdf › Supplemental Dataset 1/A-mRNA_nonrhyth_translation_nonrhyth/Gadd45g_set_A.pdf]

# Gadd45gip1

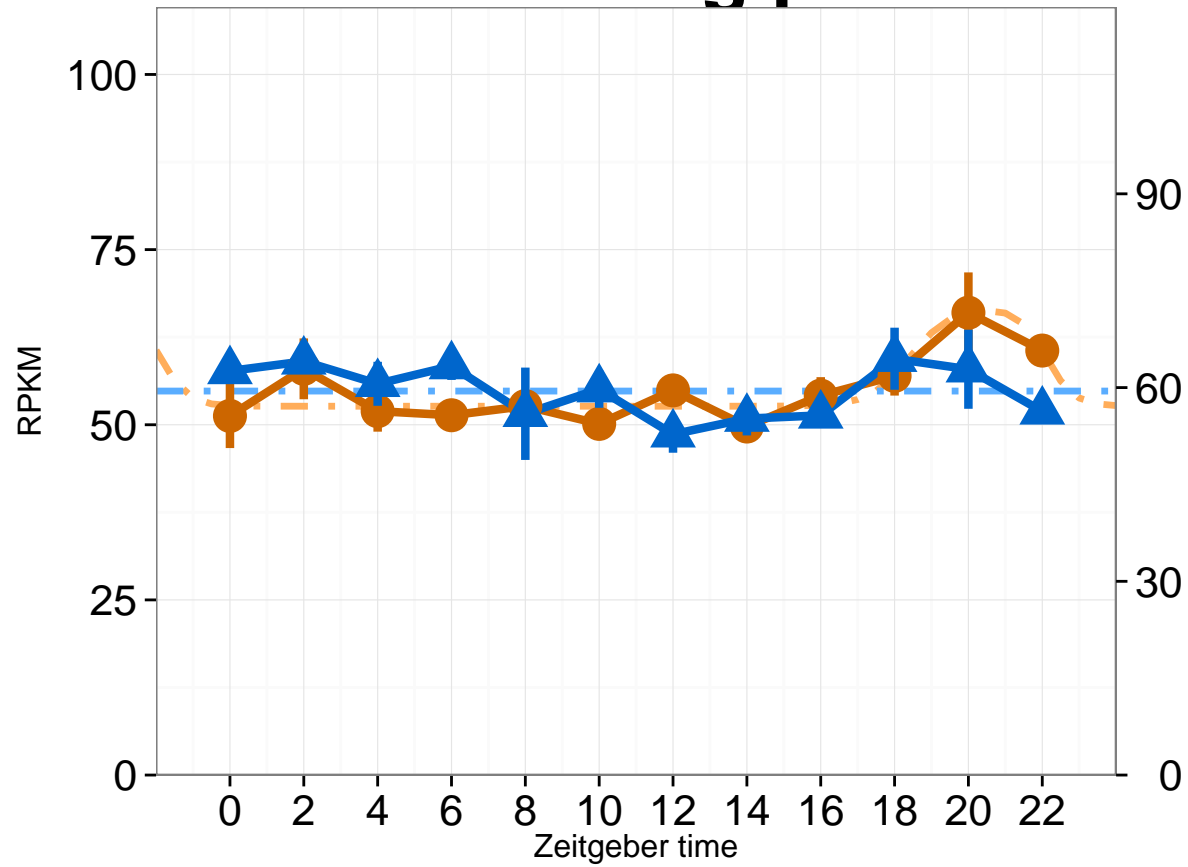

# Gadd45gip1

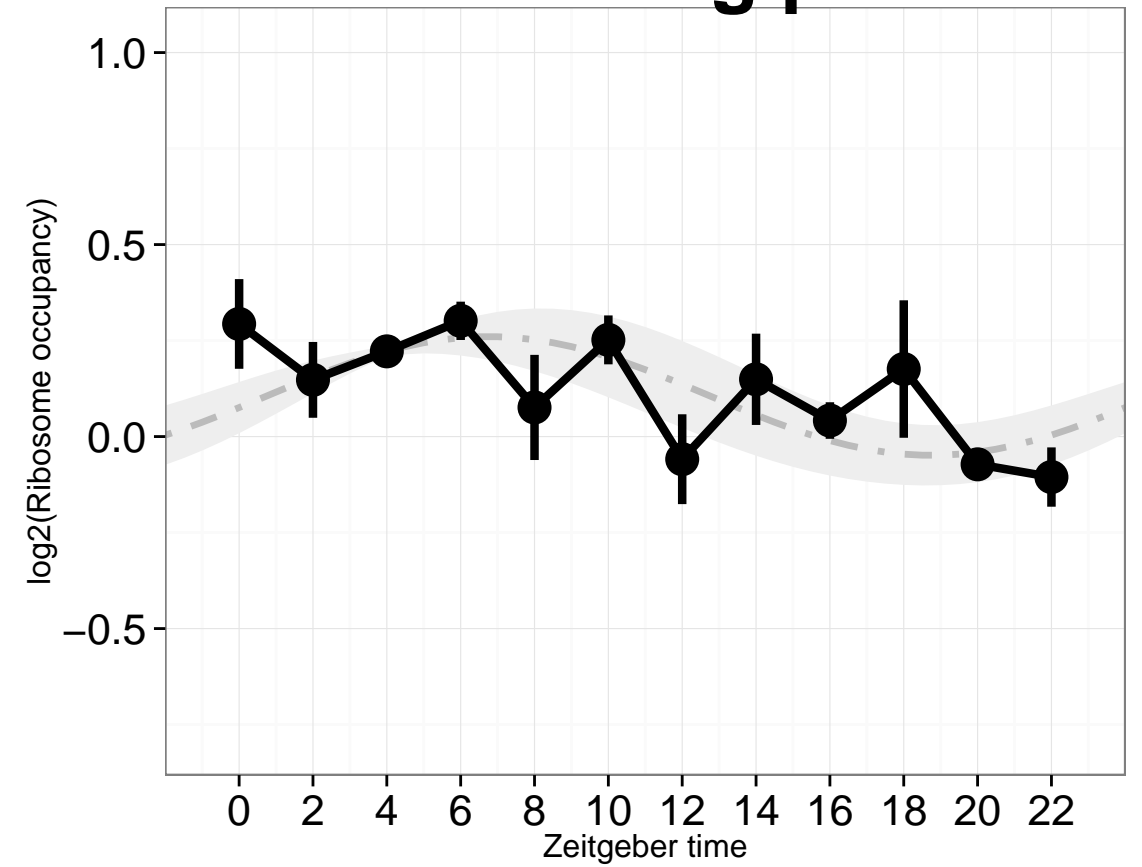

Supplement: SuppDataset_1.zip [file Gadd45gip1_set_A.pdf › Supplemental Dataset 1/A-mRNA_nonrhyth_translation_nonrhyth/Gadd45gip1_set_A.pdf]

## Gak

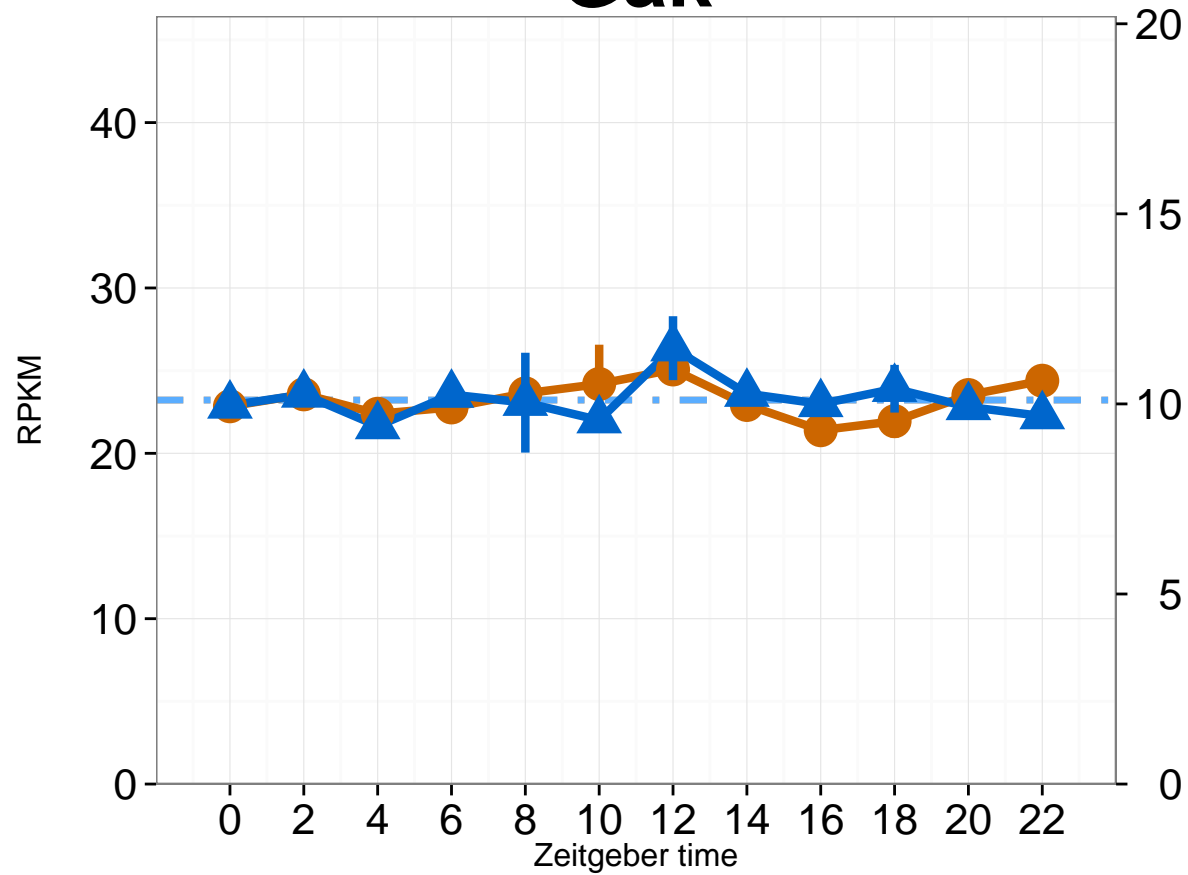

## Gak

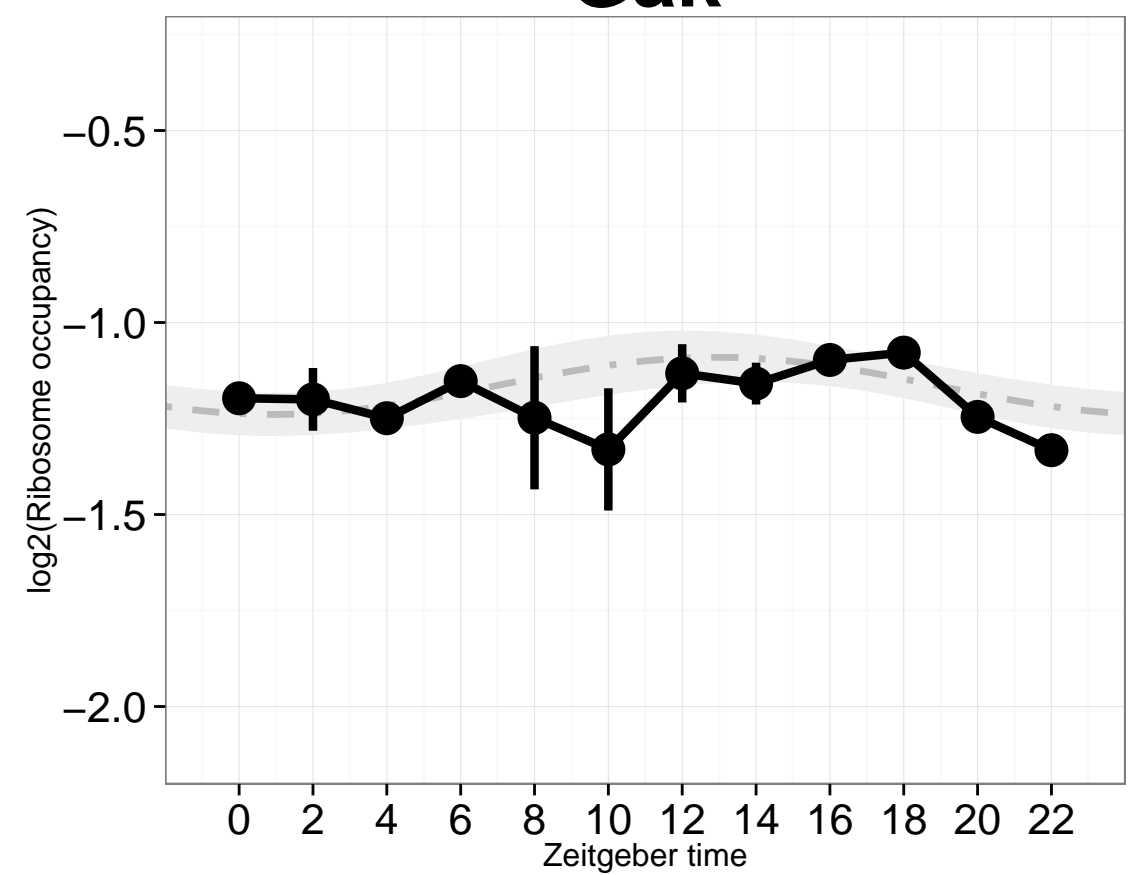

Supplement: SuppDataset_1.zip [file Gak_set_A.pdf › Supplemental Dataset 1/A-mRNA_nonrhyth_translation_nonrhyth/Gak_set_A.pdf]

## Galc

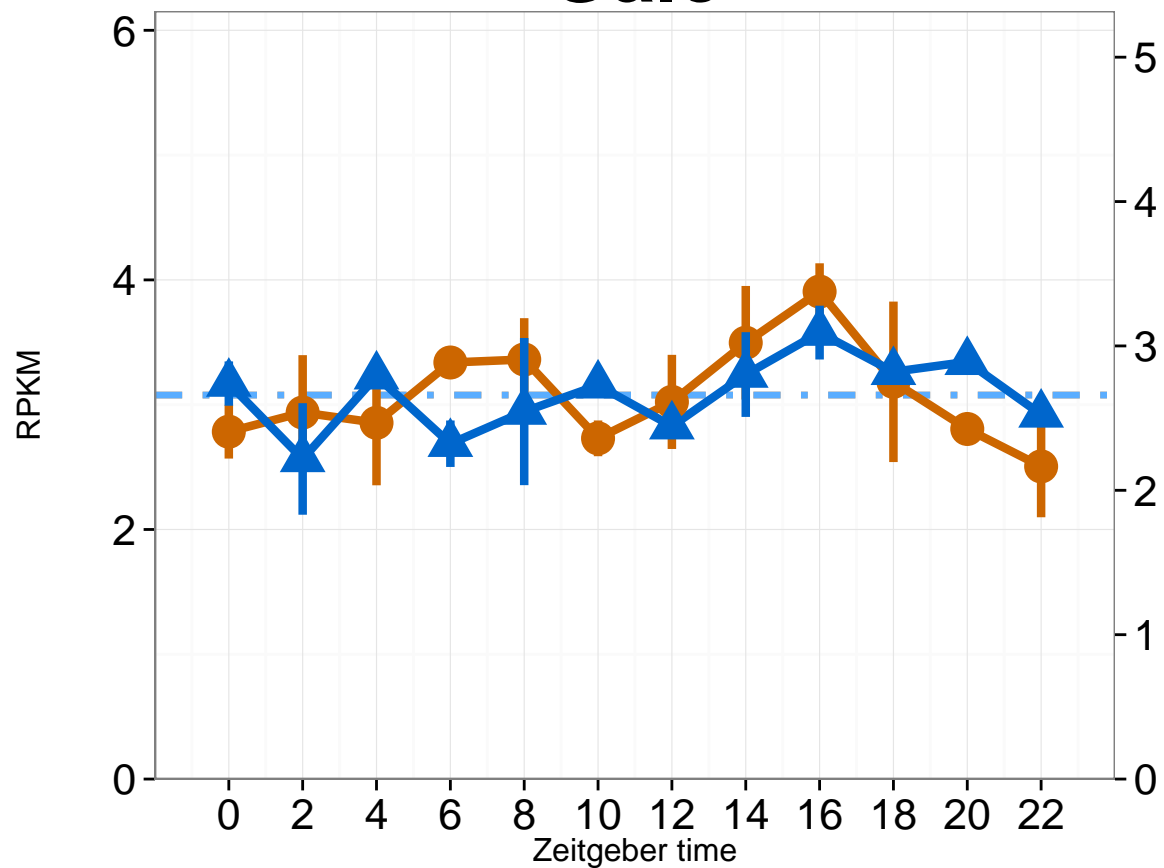

## Galc

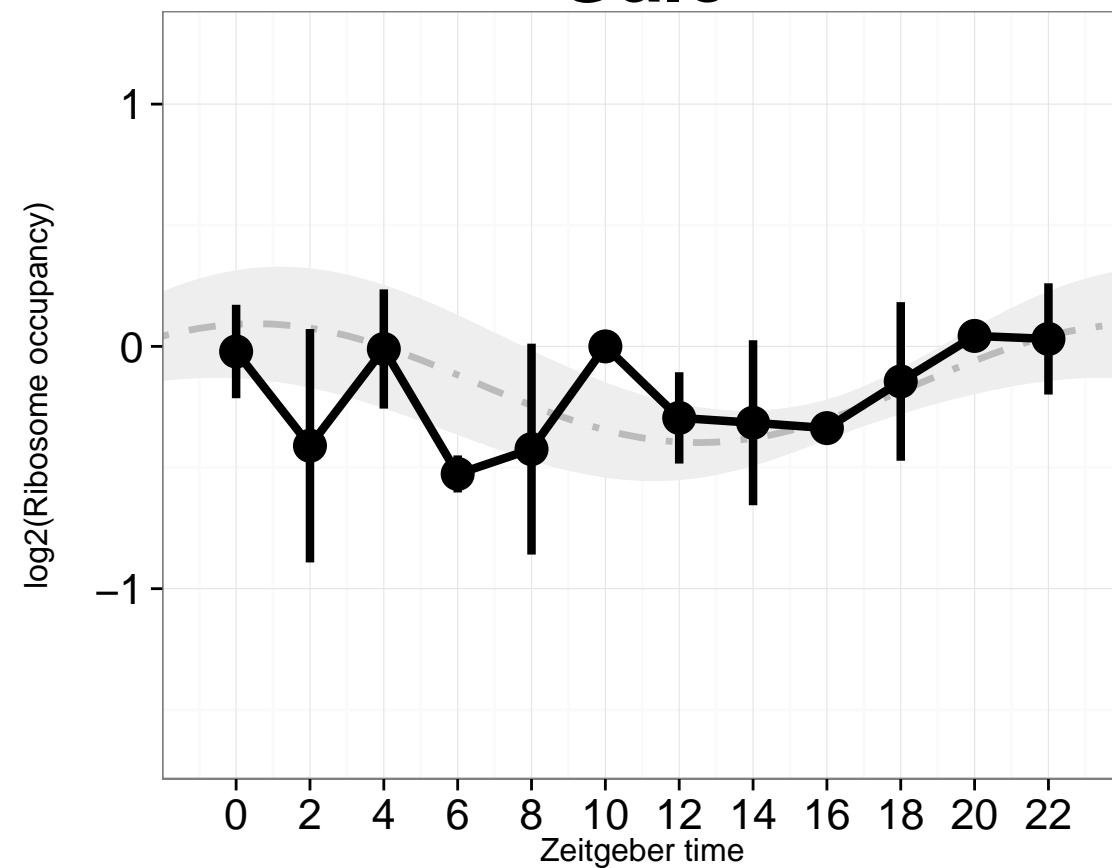

Supplement: SuppDataset_1.zip [file Galc_set_A.pdf › Supplemental Dataset 1/A-mRNA_nonrhyth_translation_nonrhyth/Galc_set_A.pdf]

## Galk1

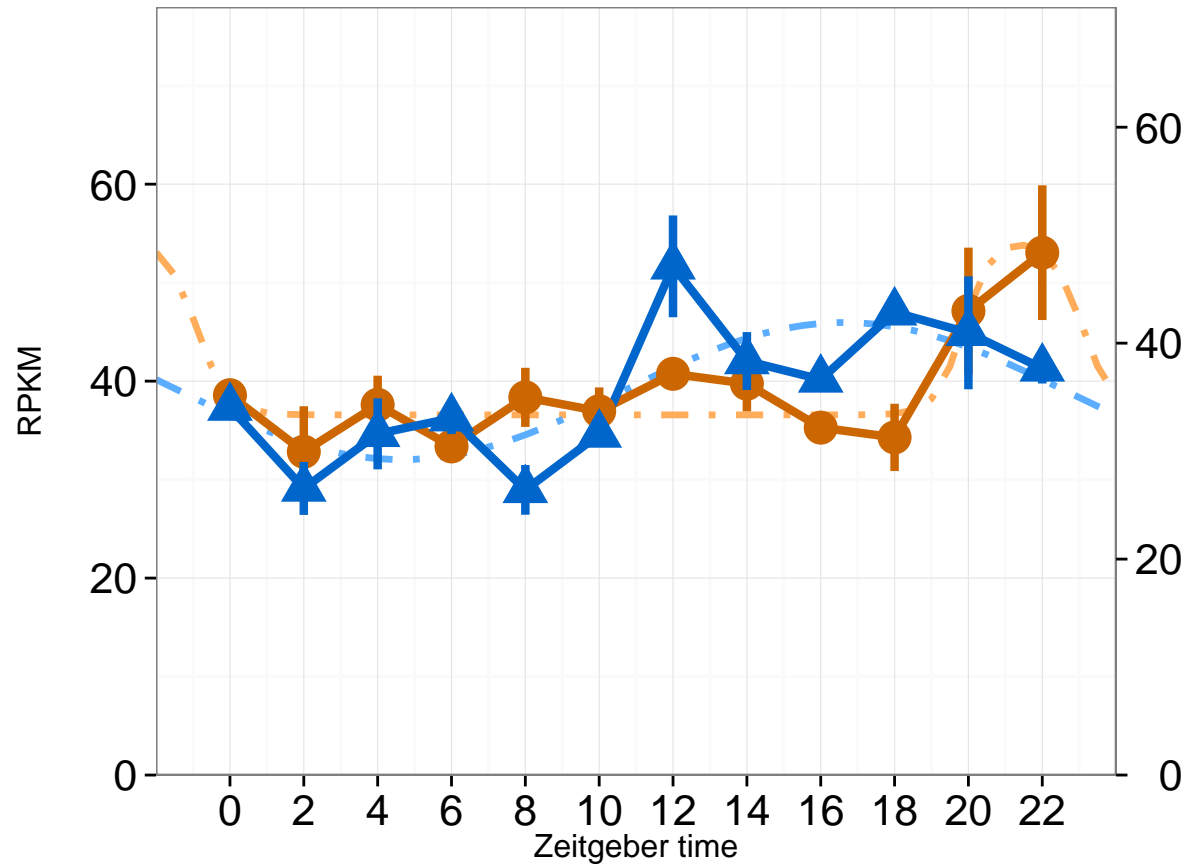

## Galk1

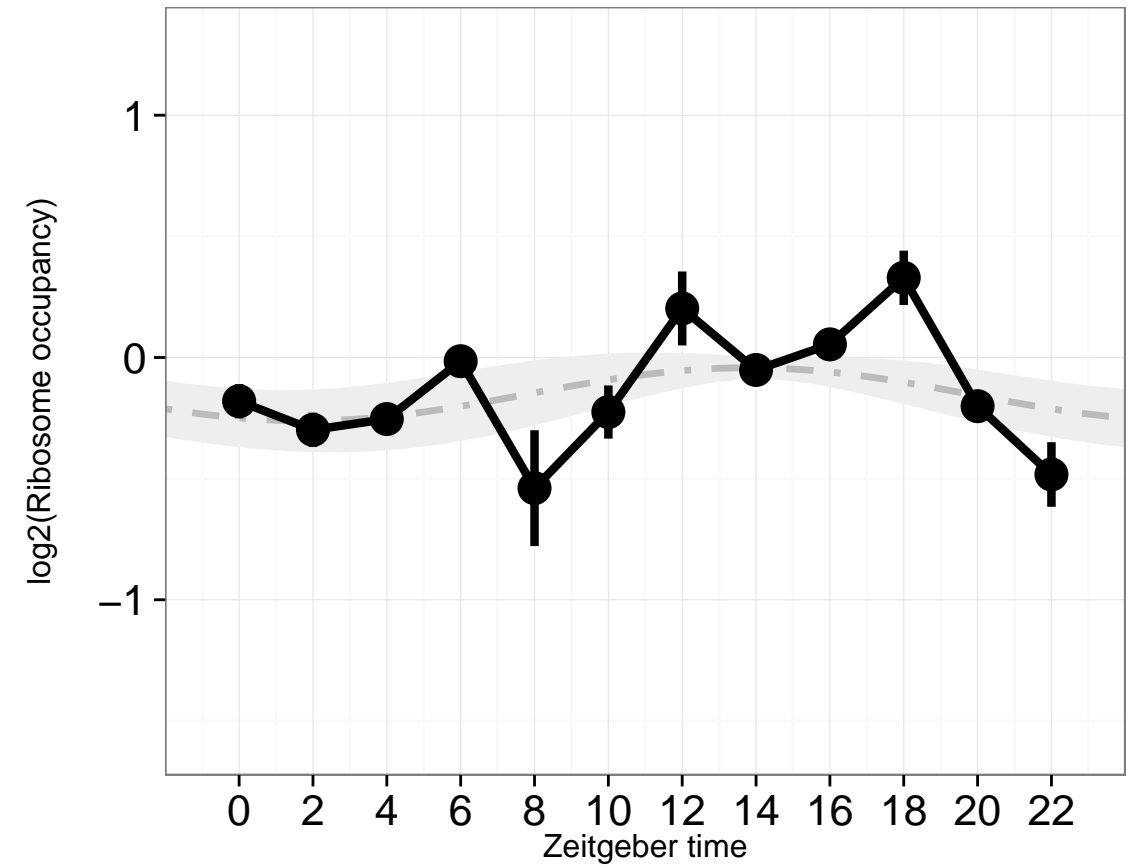

Supplement: SuppDataset_1.zip [file Galk1_set_A.pdf › Supplemental Dataset 1/A-mRNA_nonrhyth_translation_nonrhyth/Galk1_set_A.pdf]

## Galk2

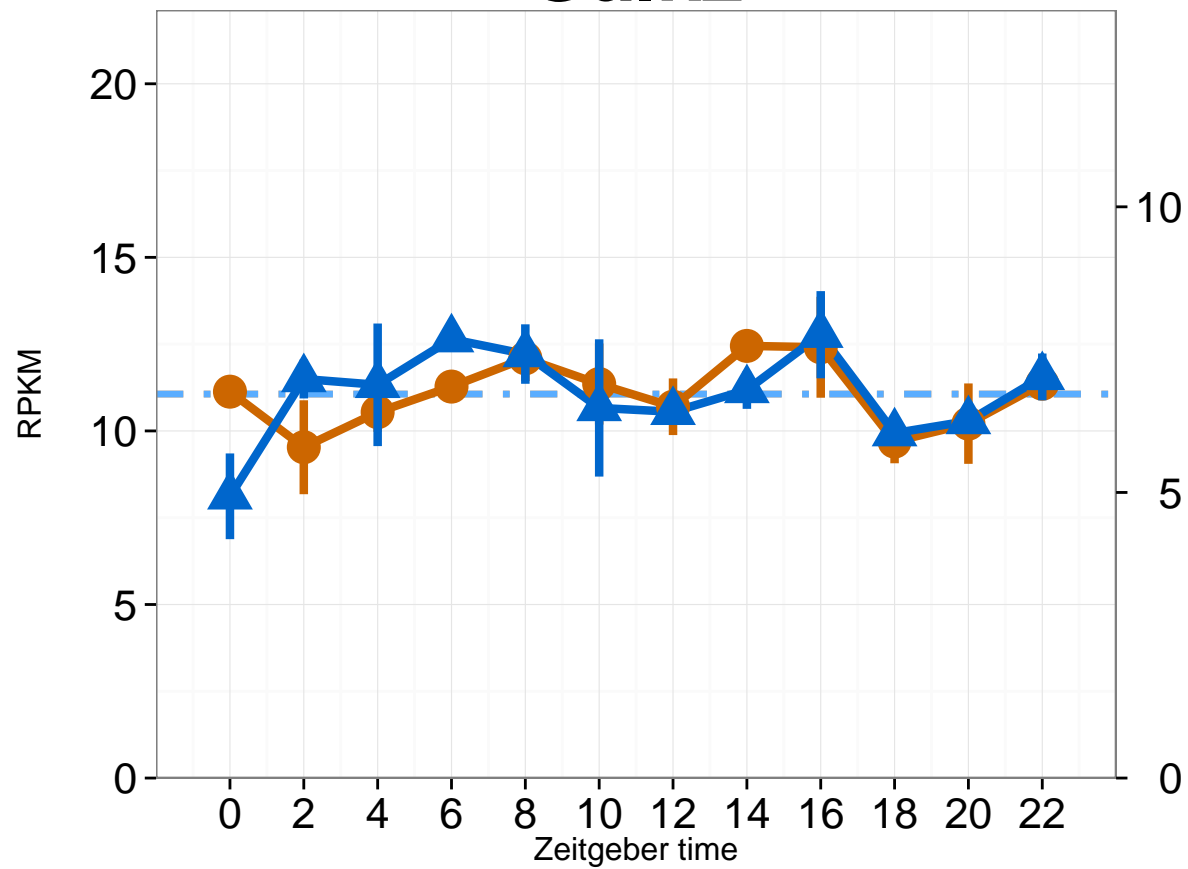

## Galk2

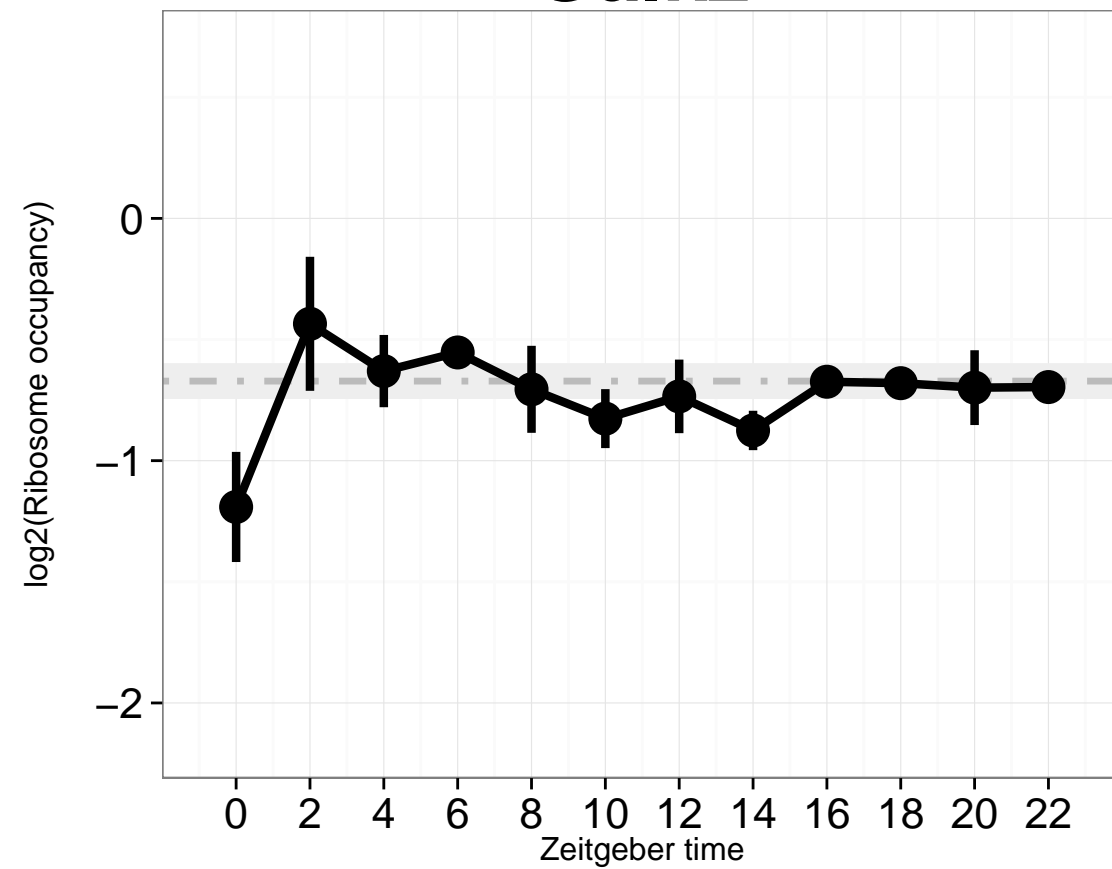

Supplement: SuppDataset_1.zip [file Galk2_set_A.pdf › Supplemental Dataset 1/A-mRNA_nonrhyth_translation_nonrhyth/Galk2_set_A.pdf]

## Galm

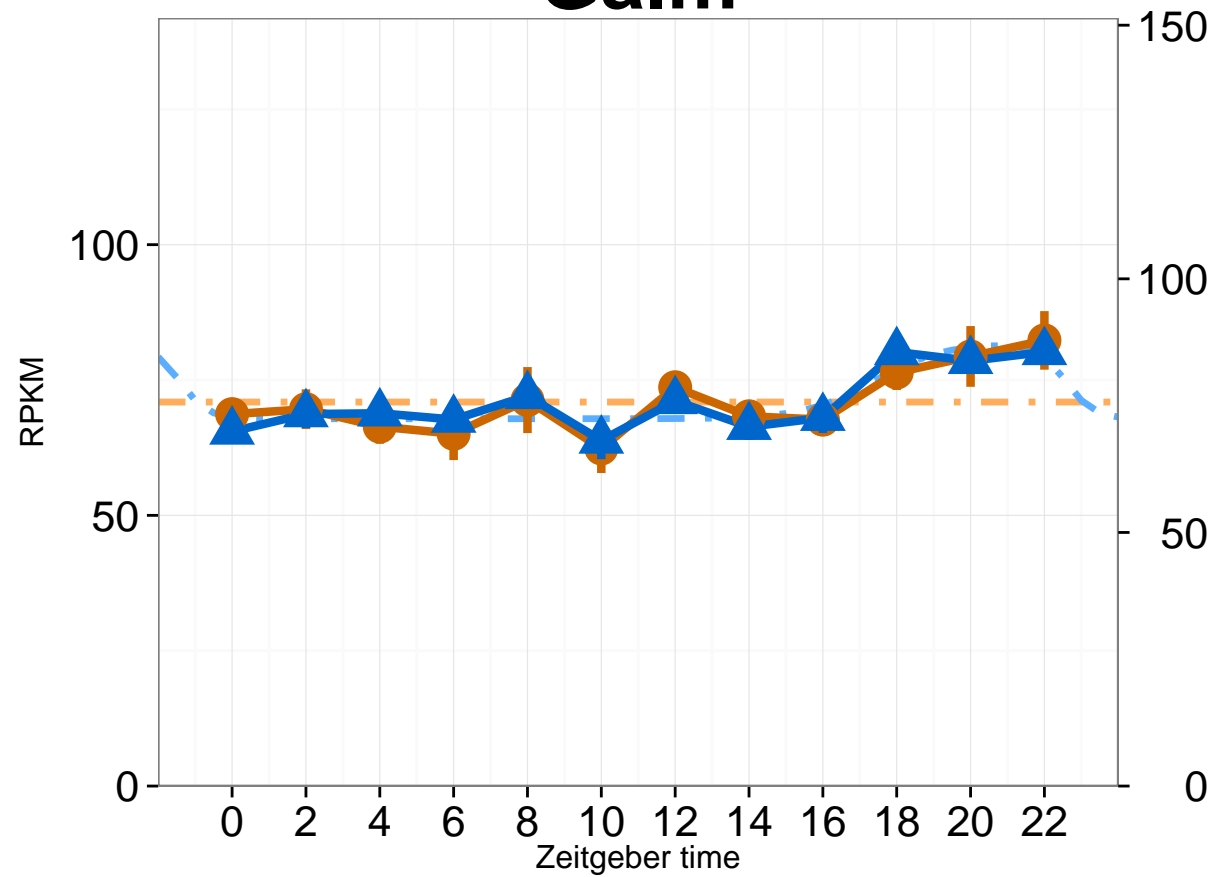

## Galm

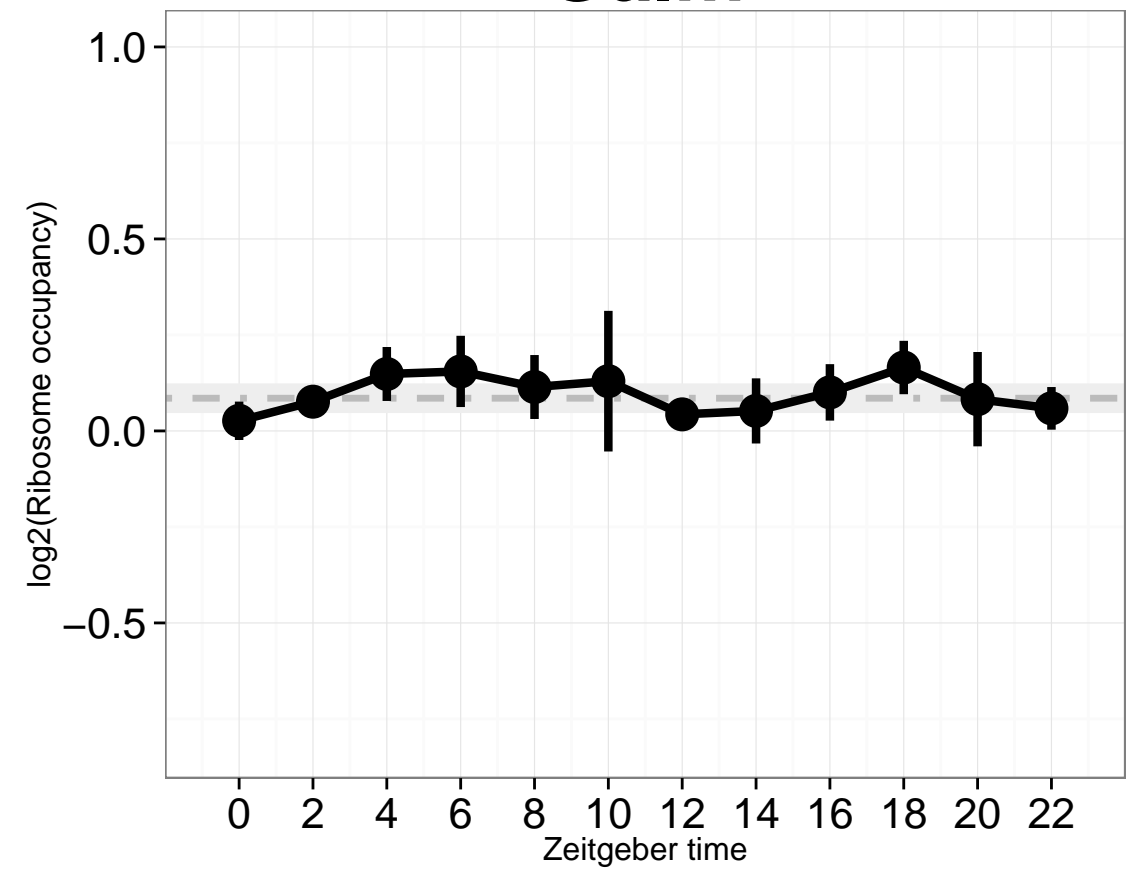

Supplement: SuppDataset_1.zip [file Galm_set_A.pdf › Supplemental Dataset 1/A-mRNA_nonrhyth_translation_nonrhyth/Galm_set_A.pdf]

## Galnt15

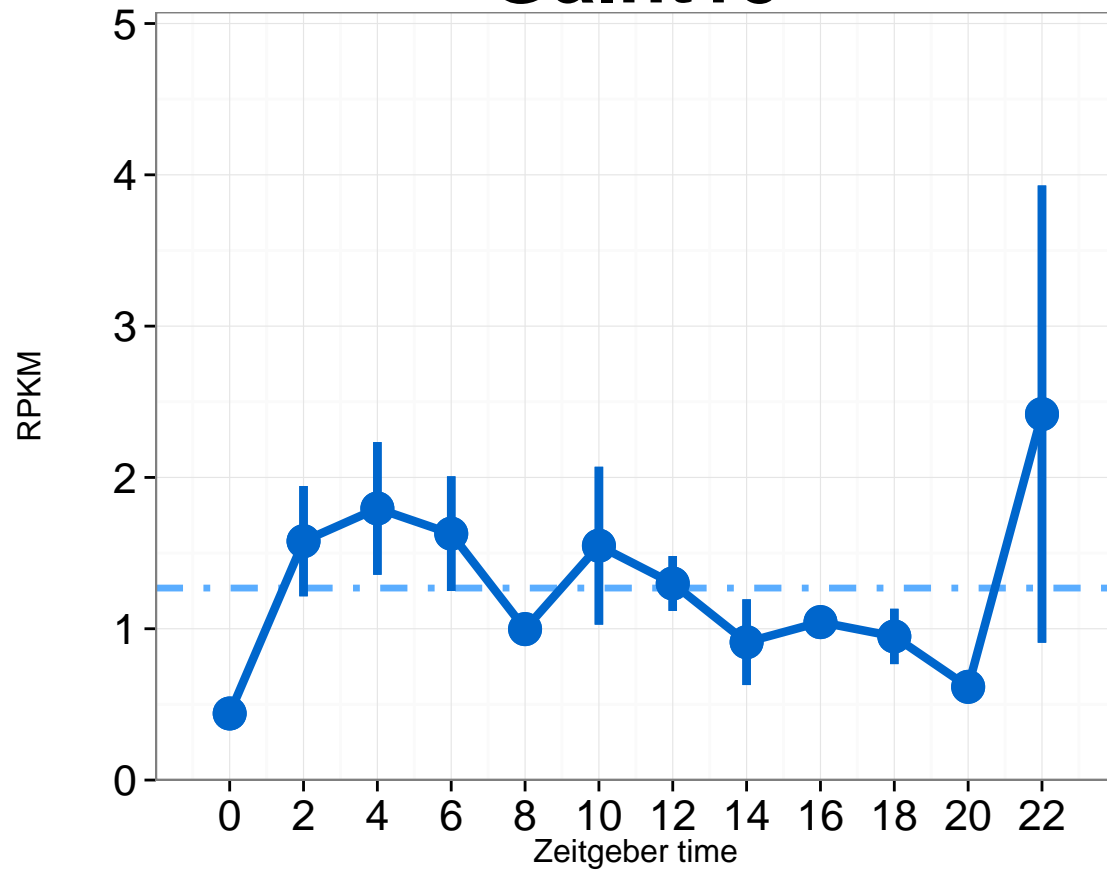

## Galnt15 log2(Ribosome occupancy)

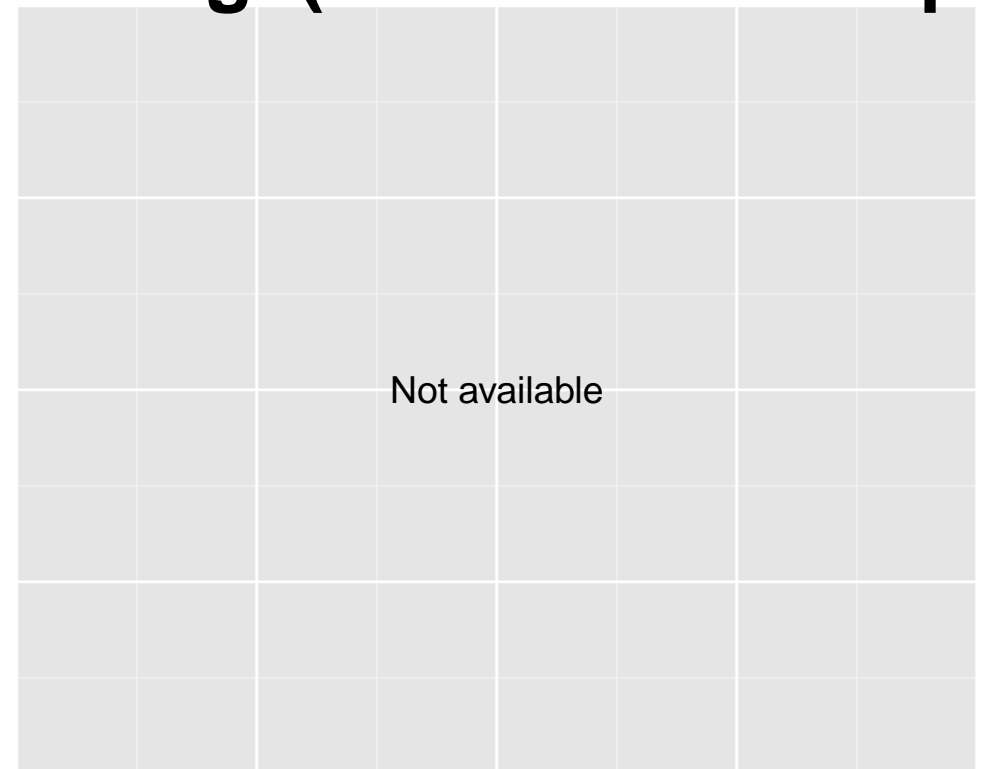

Supplement: SuppDataset_1.zip [file Galnt15_set_A.pdf › Supplemental Dataset 1/A-mRNA_nonrhyth_translation_nonrhyth/Galnt15_set_A.pdf]

## Galnt1

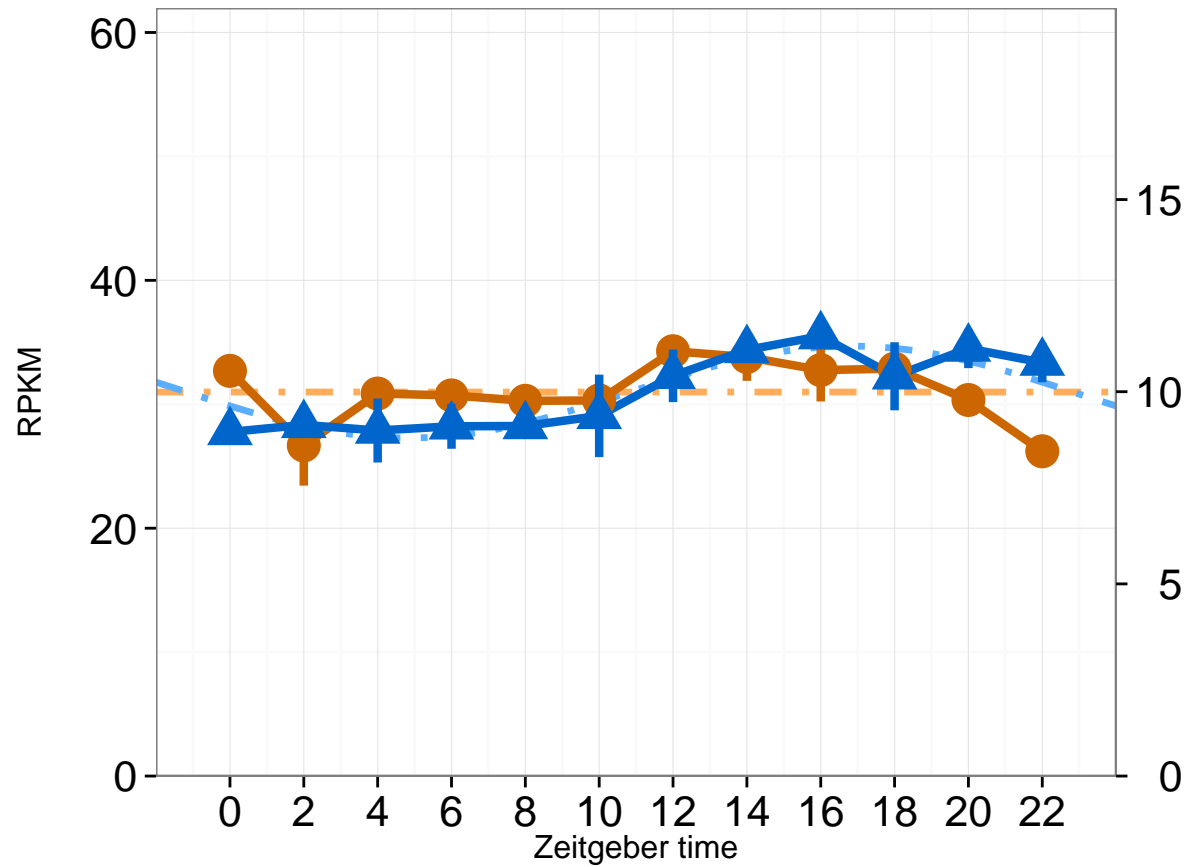

## Galnt1

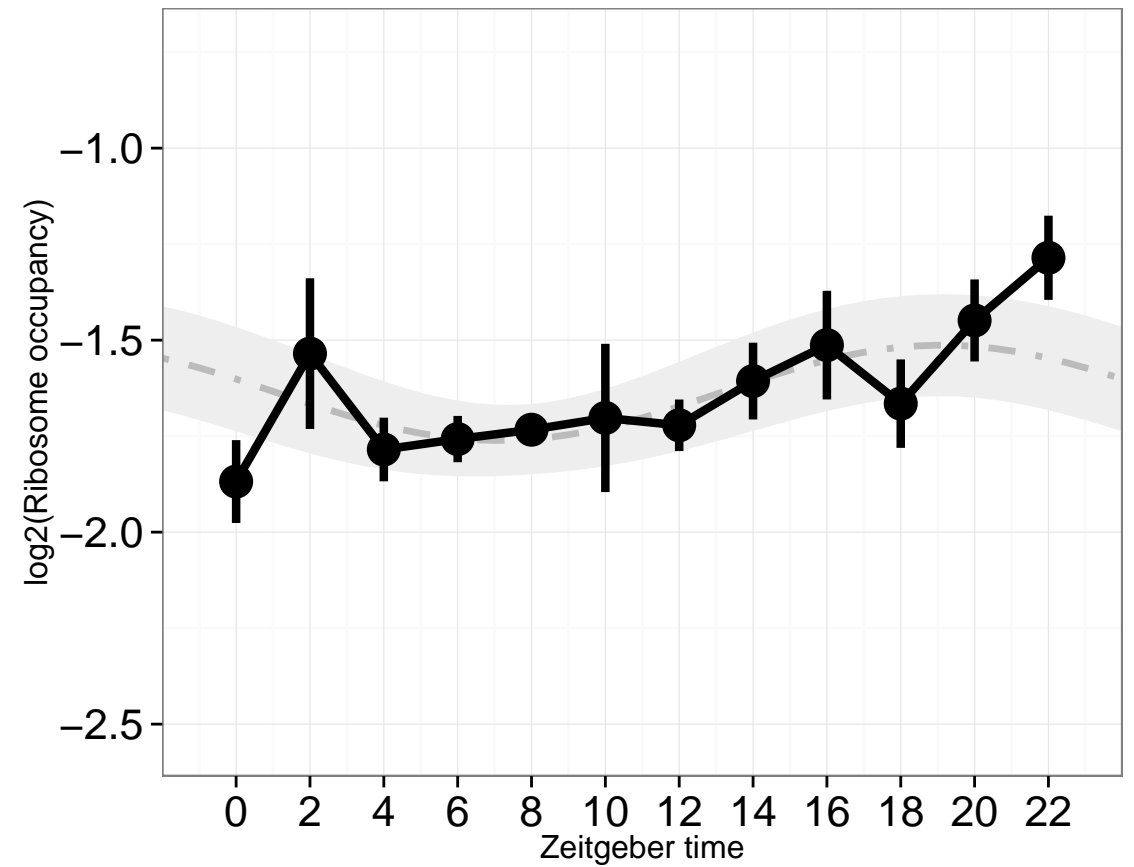

Supplement: SuppDataset_1.zip [file Galnt1_set_A.pdf › Supplemental Dataset 1/A-mRNA_nonrhyth_translation_nonrhyth/Galnt1_set_A.pdf]

## Galnt4

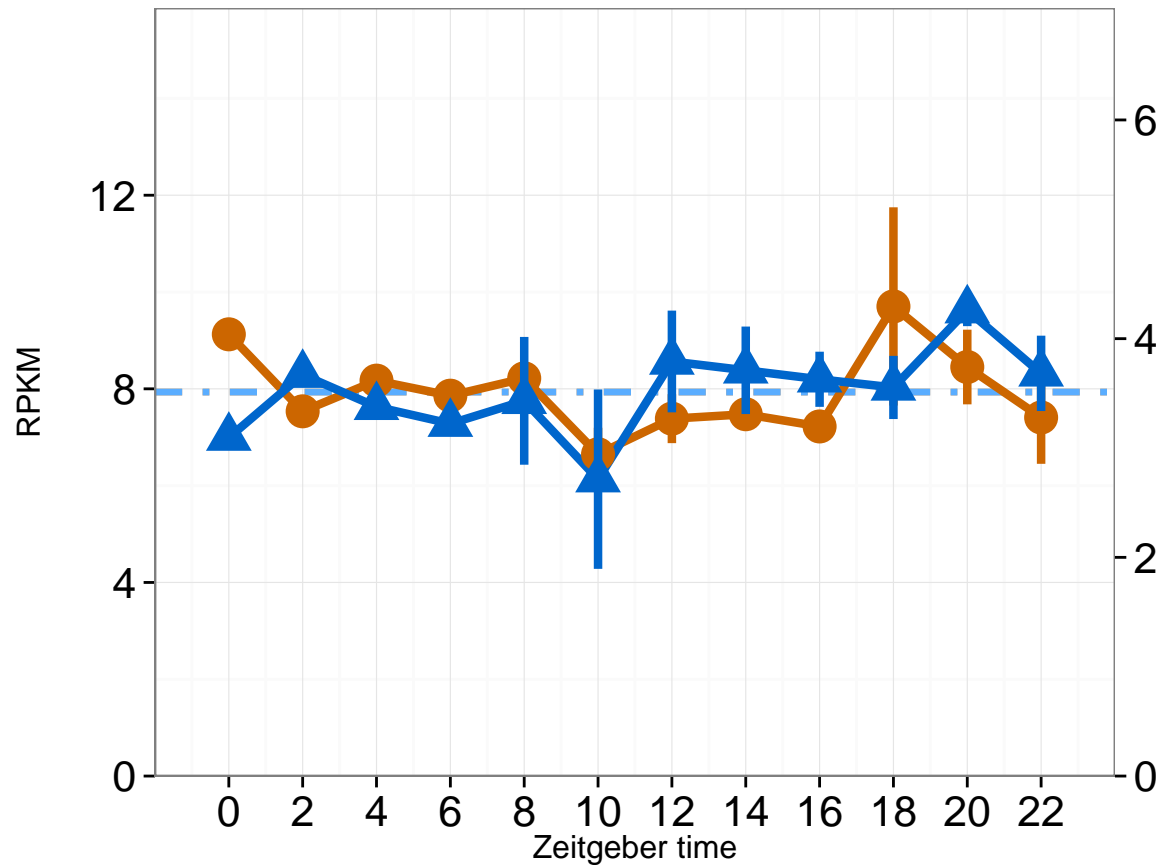

## Galnt4

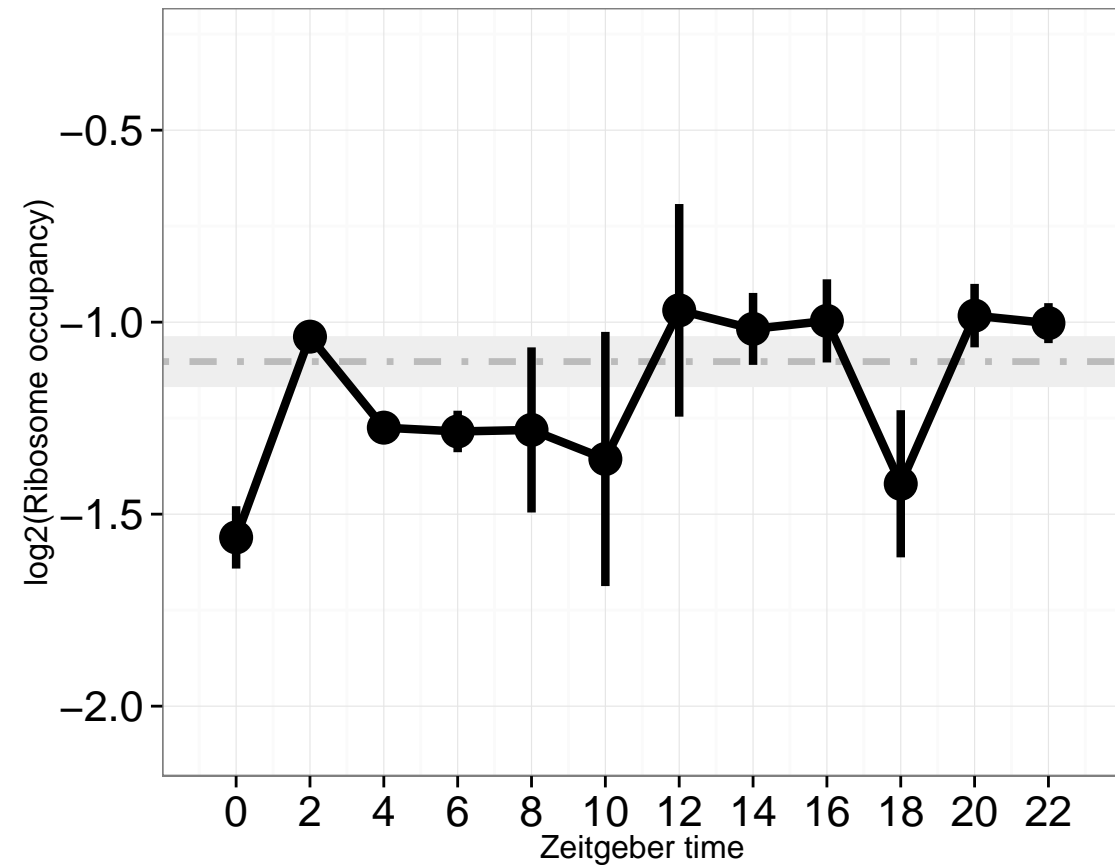

Supplement: SuppDataset_1.zip [file Galnt4_set_A.pdf › Supplemental Dataset 1/A-mRNA_nonrhyth_translation_nonrhyth/Galnt4_set_A.pdf]

# Galnt7

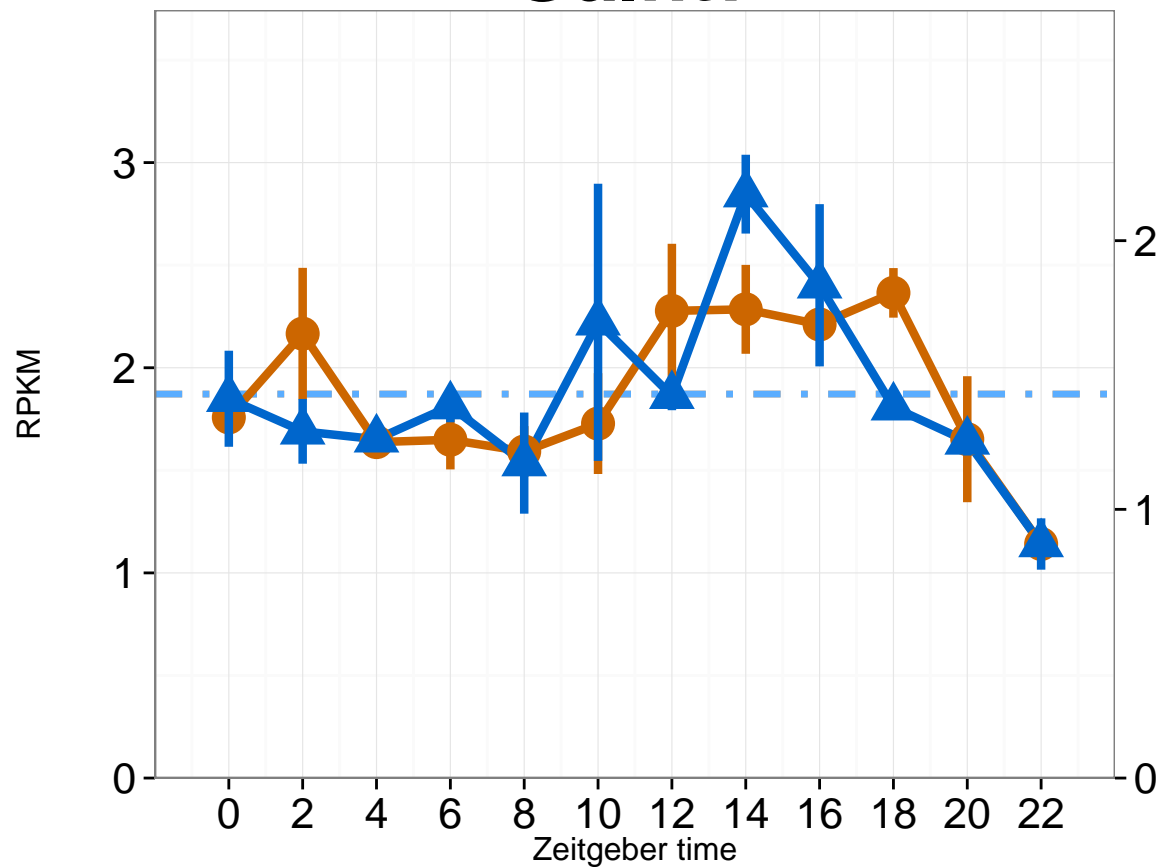

# Galnt7

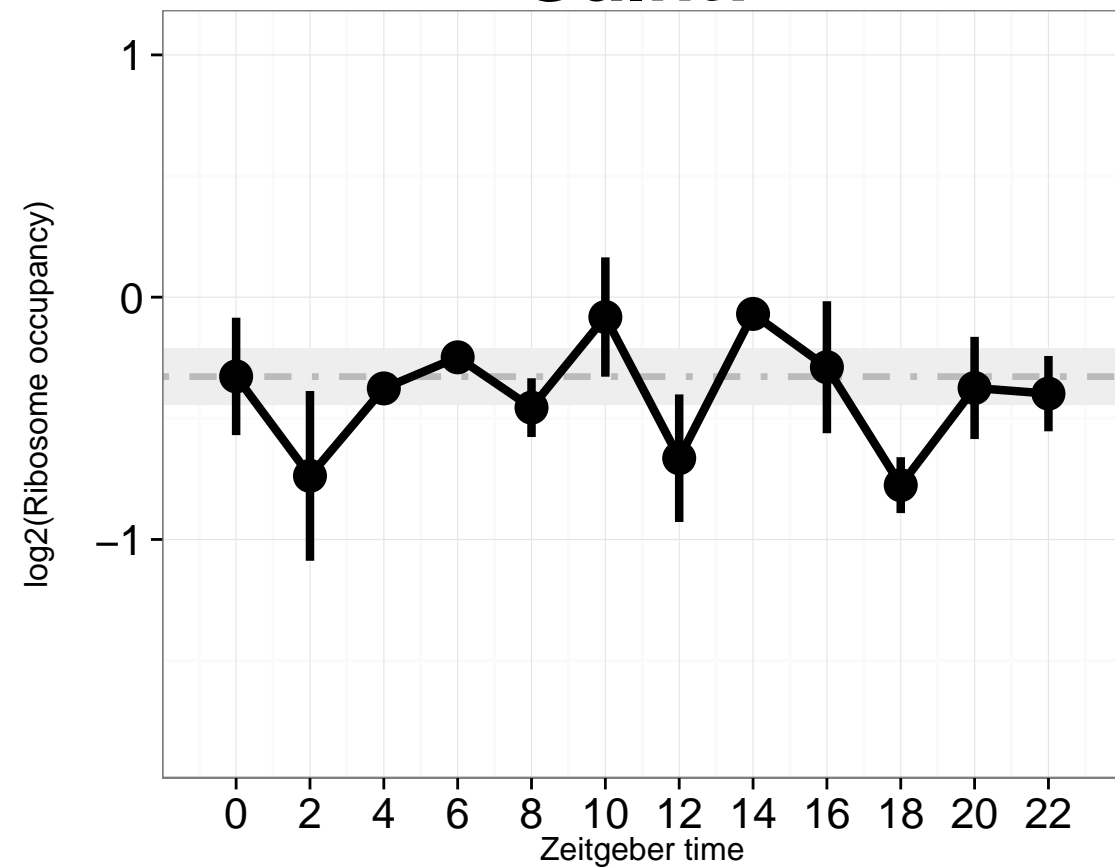

Supplement: SuppDataset_1.zip [file Galnt7_set_A.pdf › Supplemental Dataset 1/A-mRNA_nonrhyth_translation_nonrhyth/Galnt7_set_A.pdf]

# Gamt

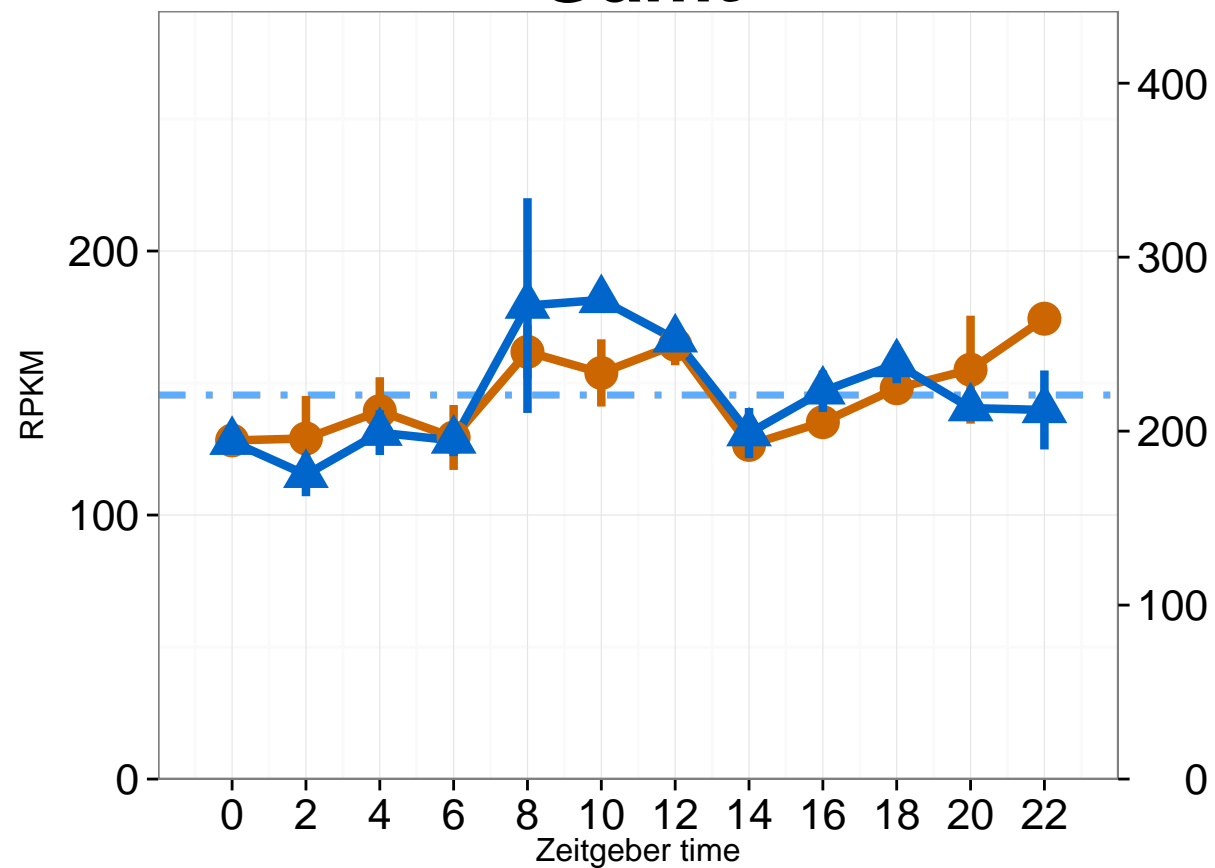

# Gamt

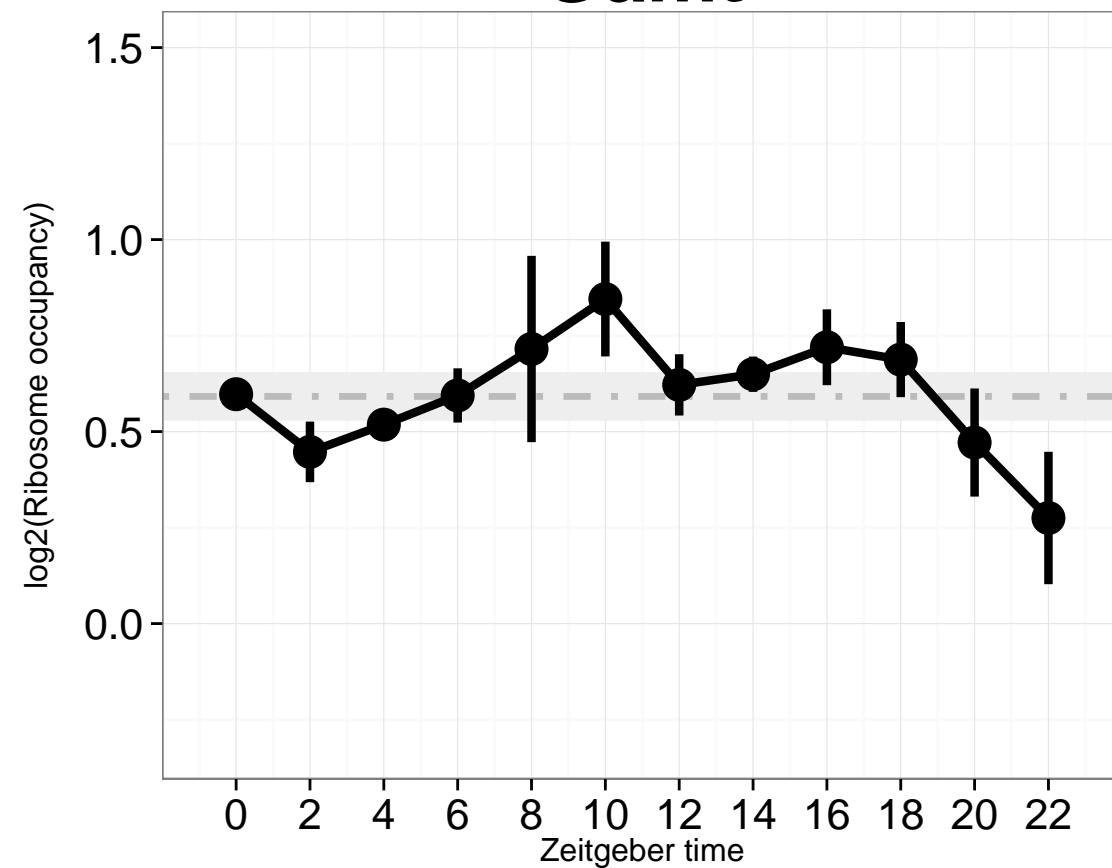

Supplement: SuppDataset_1.zip [file Gamt_set_A.pdf › Supplemental Dataset 1/A-mRNA_nonrhyth_translation_nonrhyth/Gamt_set_A.pdf]

## Ganab

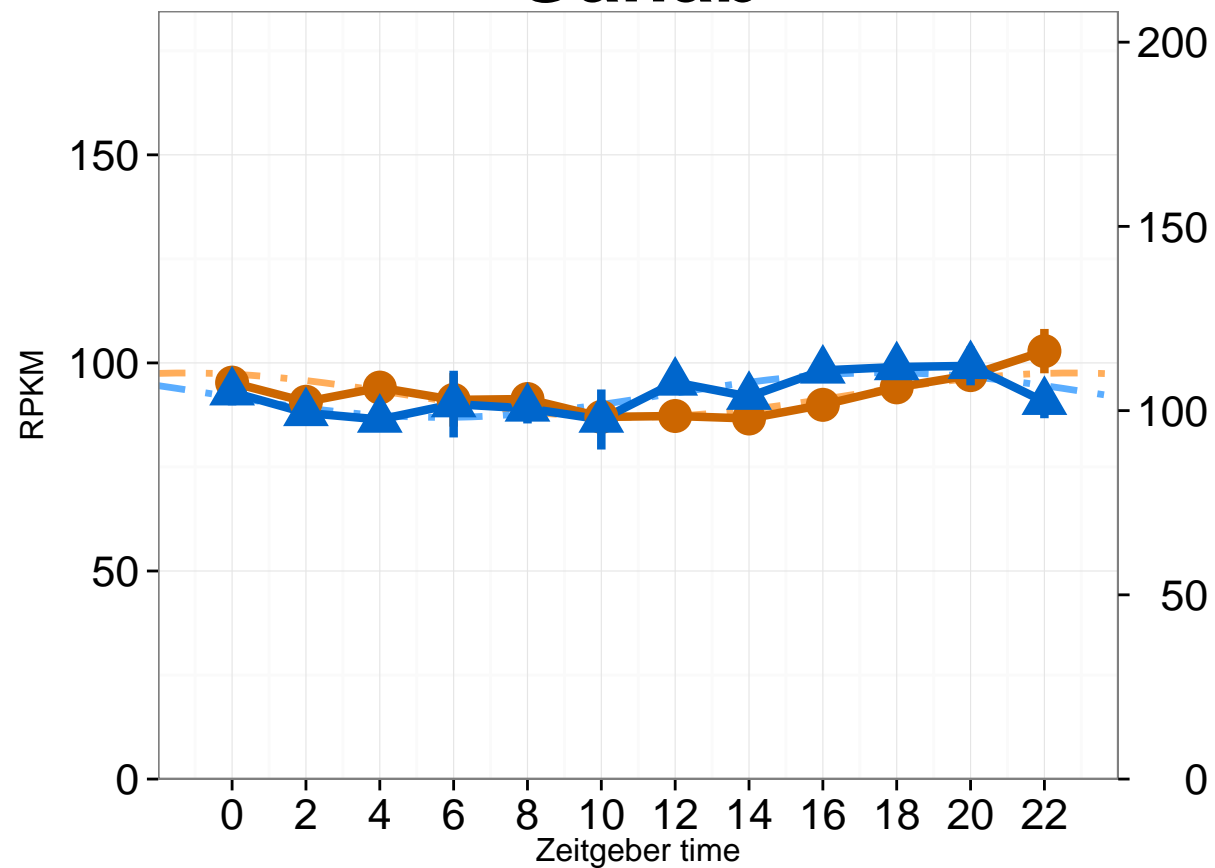

## Ganab

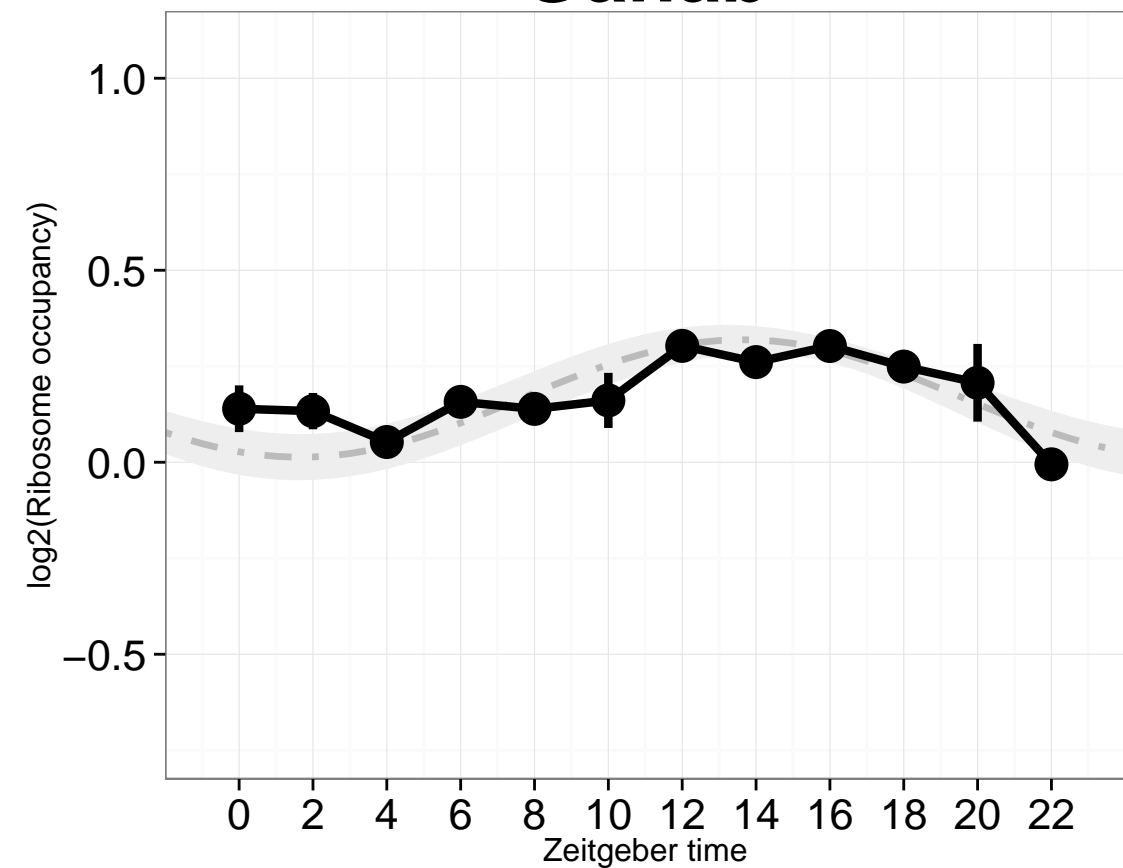

Supplement: SuppDataset_1.zip [file Ganab_set_A.pdf › Supplemental Dataset 1/A-mRNA_nonrhyth_translation_nonrhyth/Ganab_set_A.pdf]

## Ganc

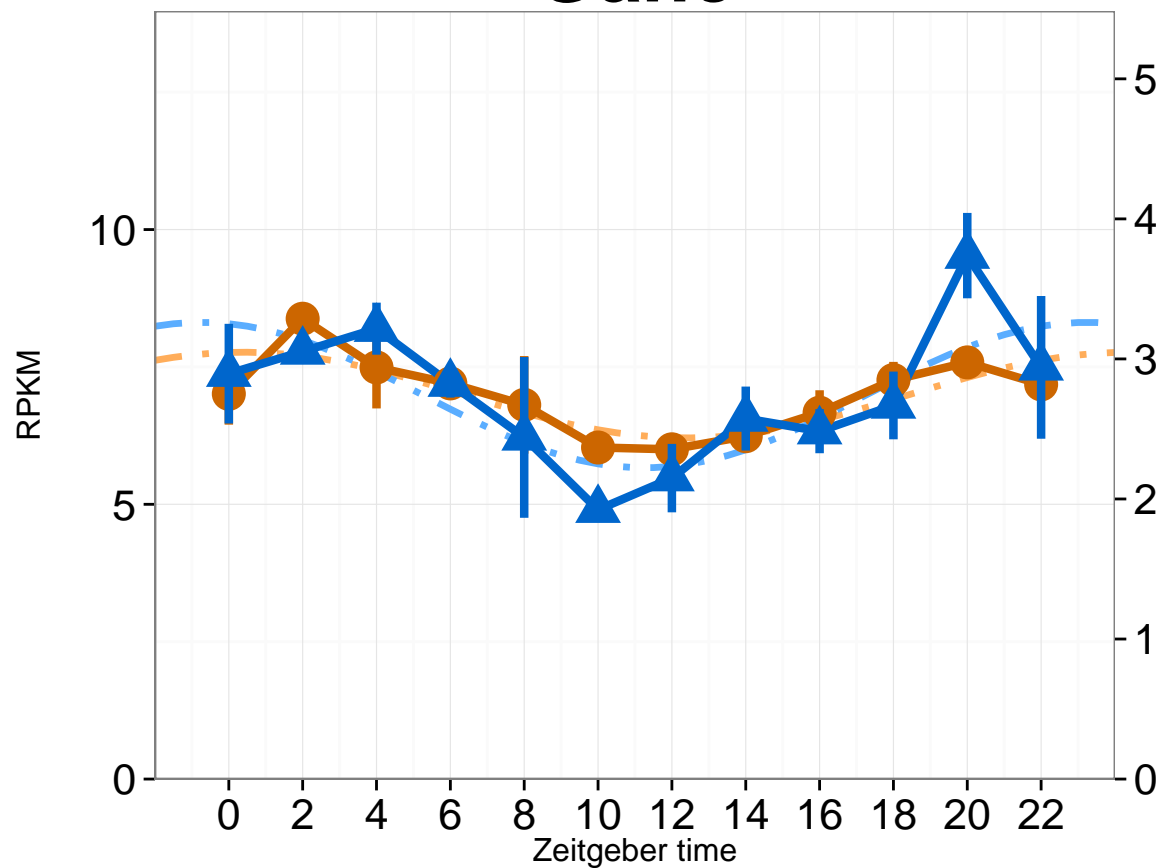

## Ganc

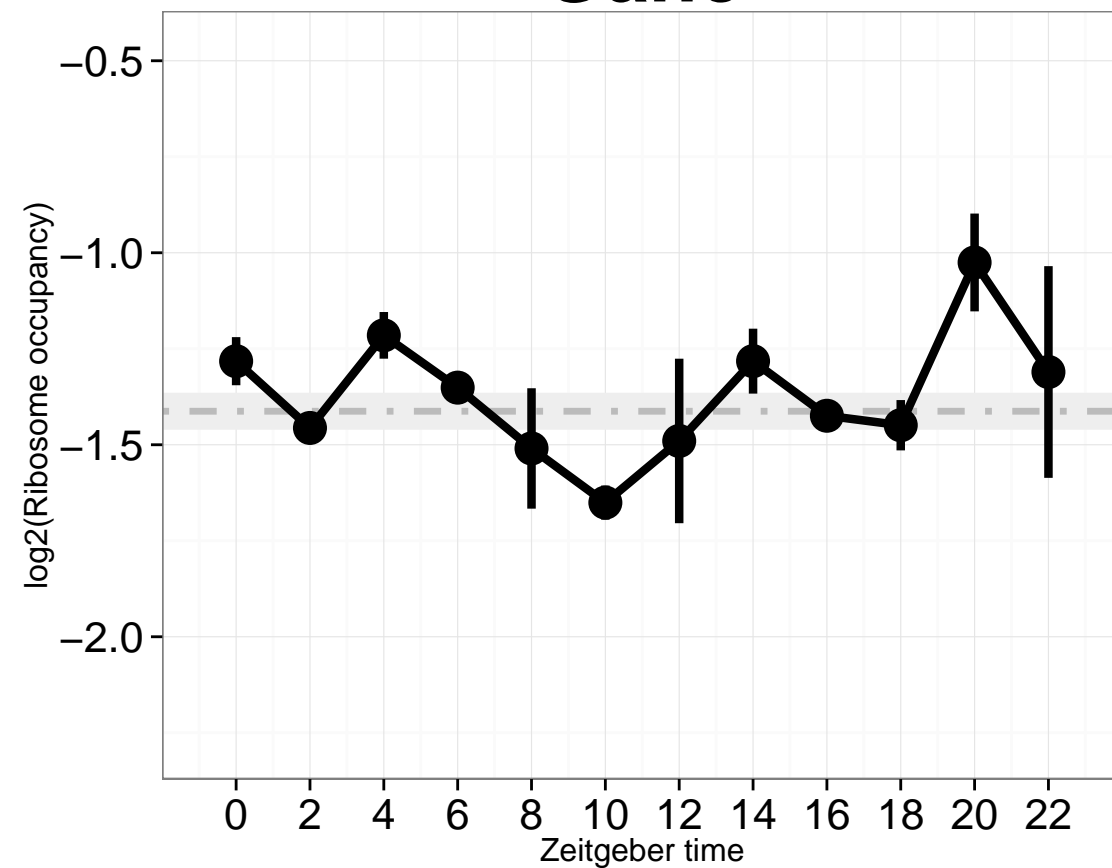

Supplement: SuppDataset_1.zip [file Ganc_set_A.pdf › Supplemental Dataset 1/A-mRNA_nonrhyth_translation_nonrhyth/Ganc_set_A.pdf]

## Gapdh

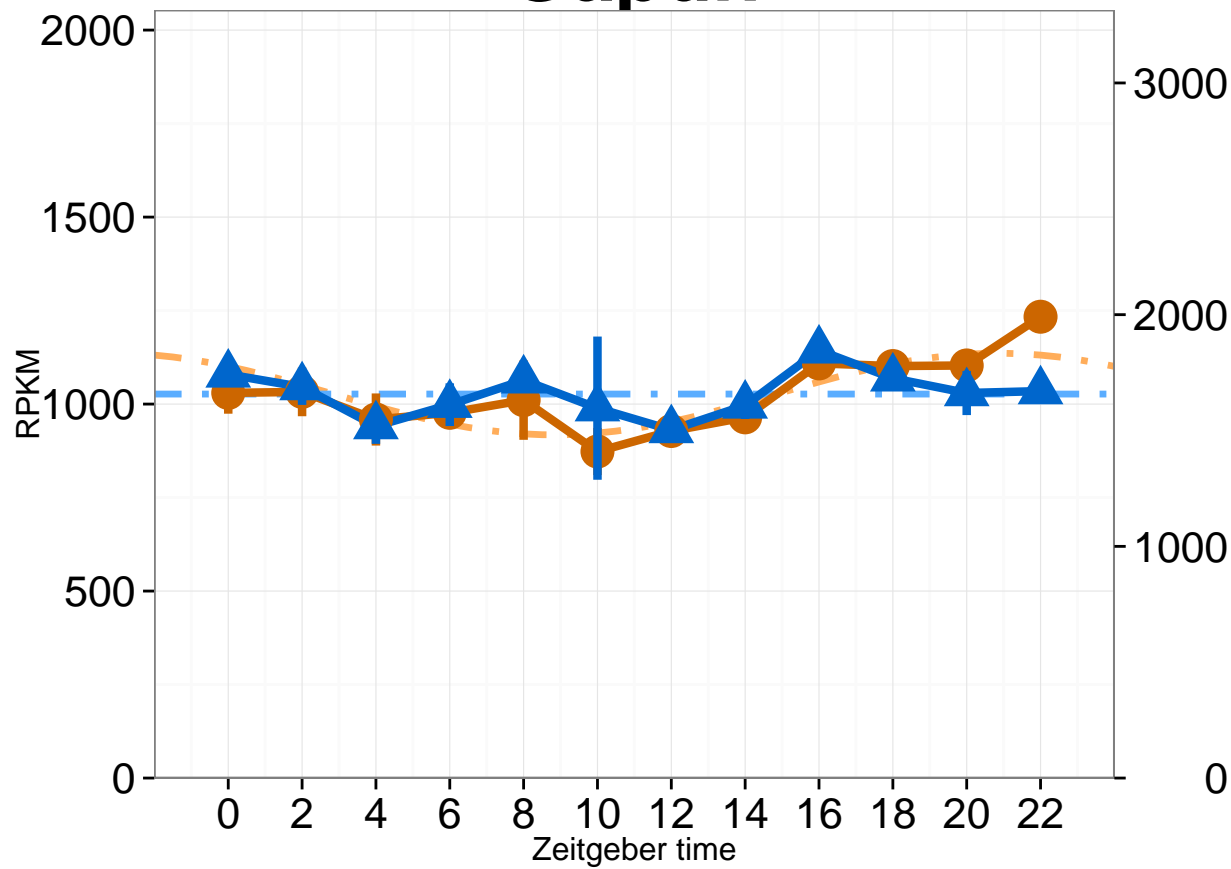

## Gapdh

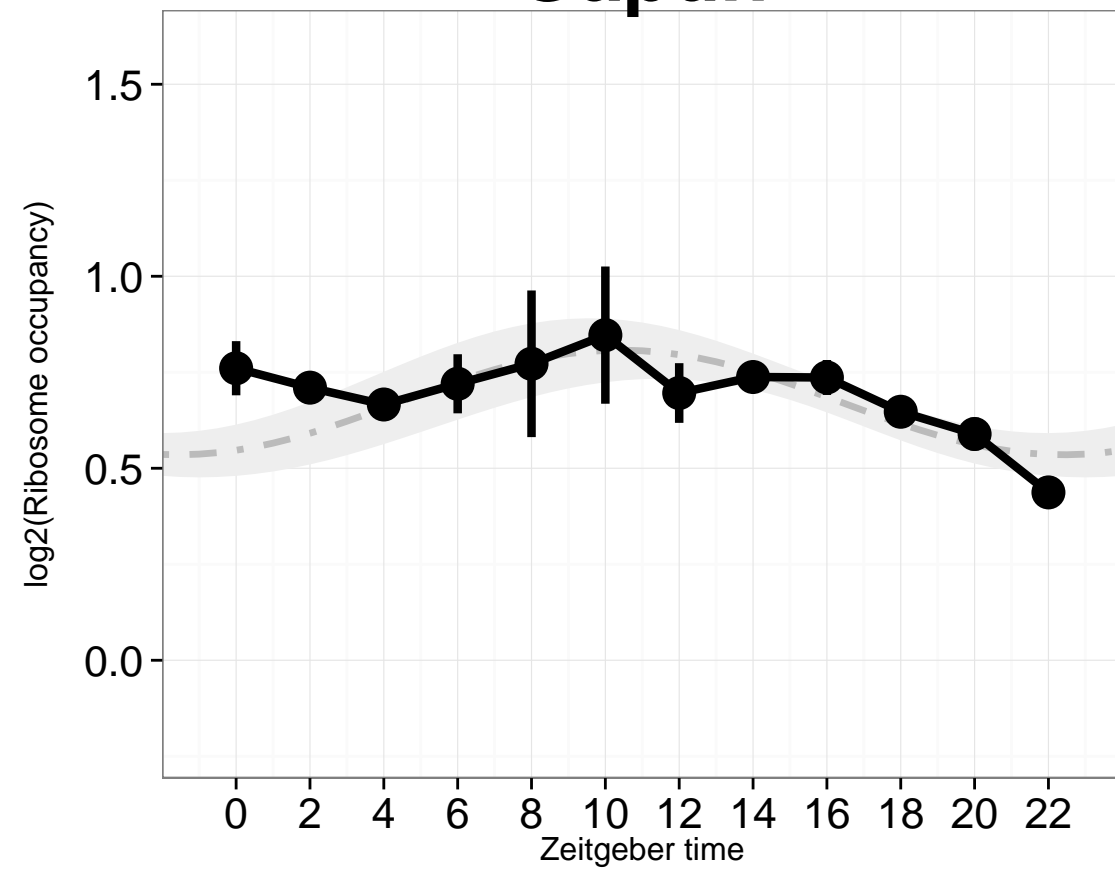

Supplement: SuppDataset_1.zip [file Gapdh_set_A.pdf › Supplemental Dataset 1/A-mRNA_nonrhyth_translation_nonrhyth/Gapdh_set_A.pdf]

# Gapvd1

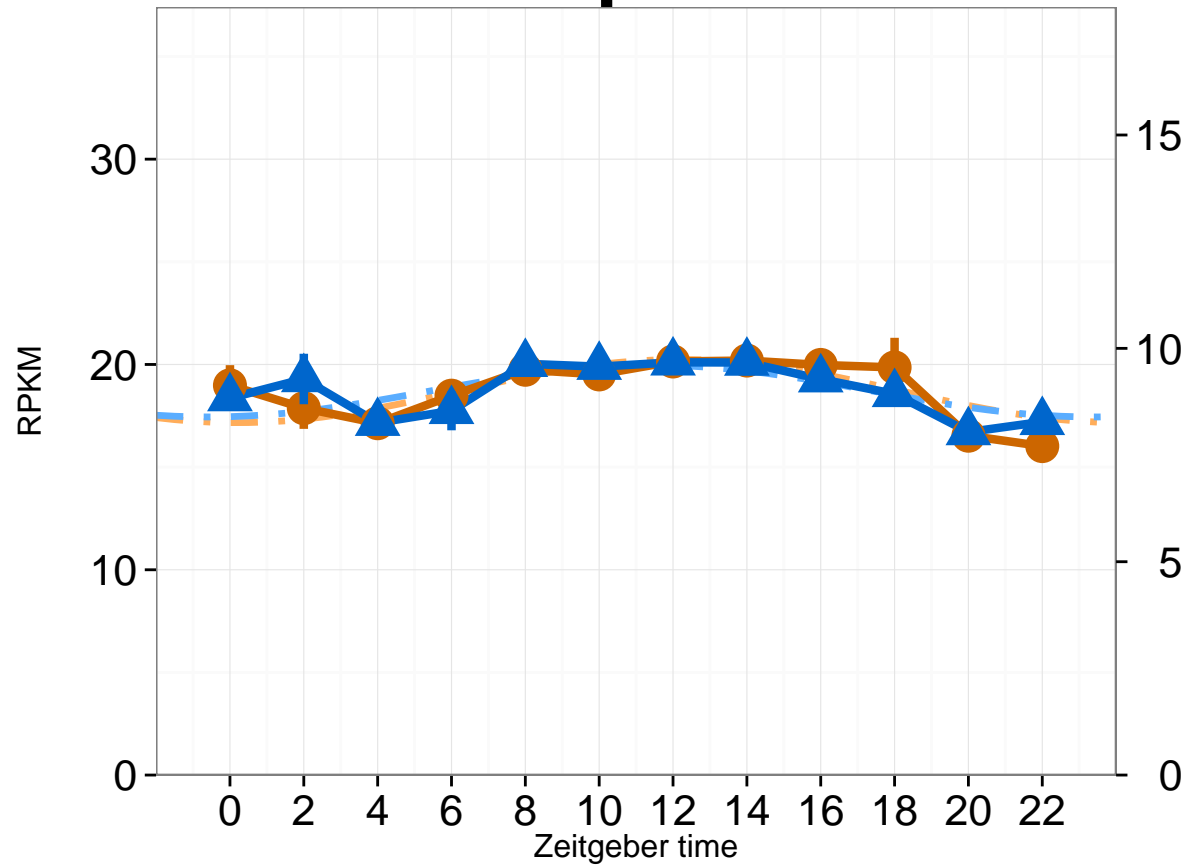

# Gapvd1

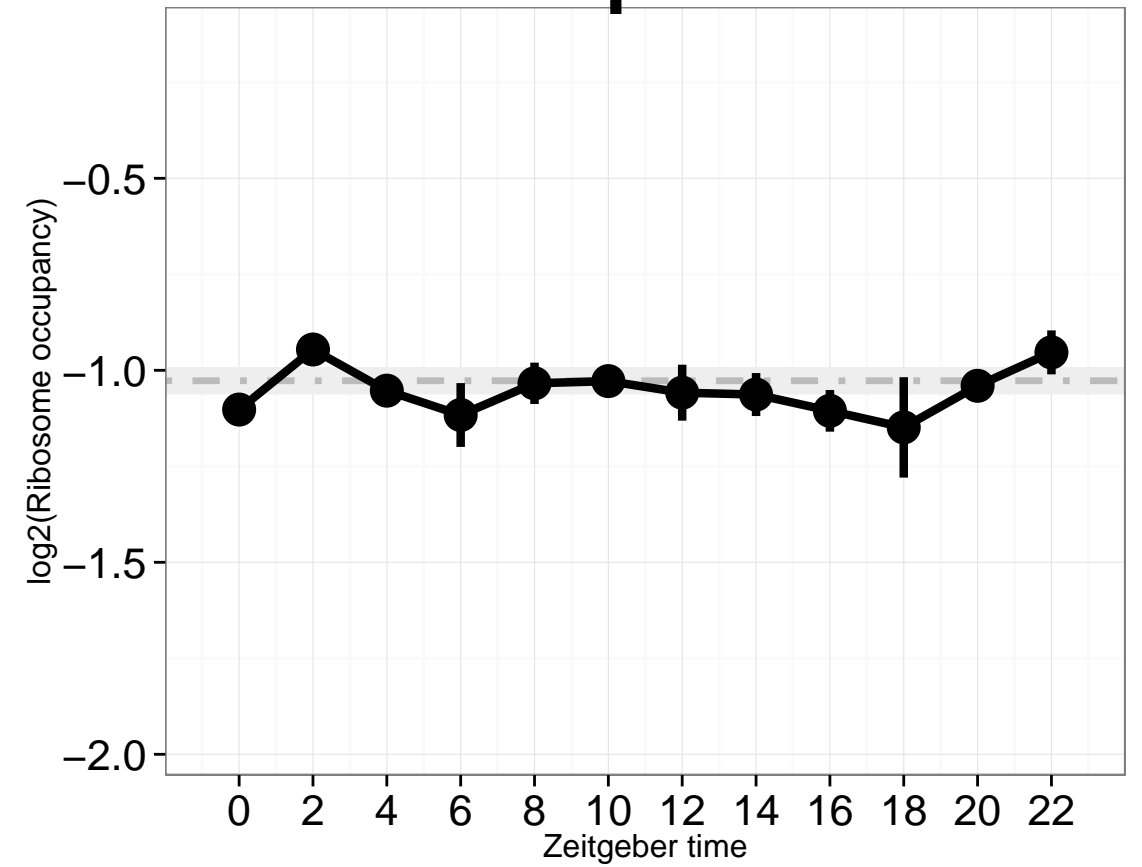

Supplement: SuppDataset_1.zip [file Gapvd1_set_A.pdf › Supplemental Dataset 1/A-mRNA_nonrhyth_translation_nonrhyth/Gapvd1_set_A.pdf]

## Gar1

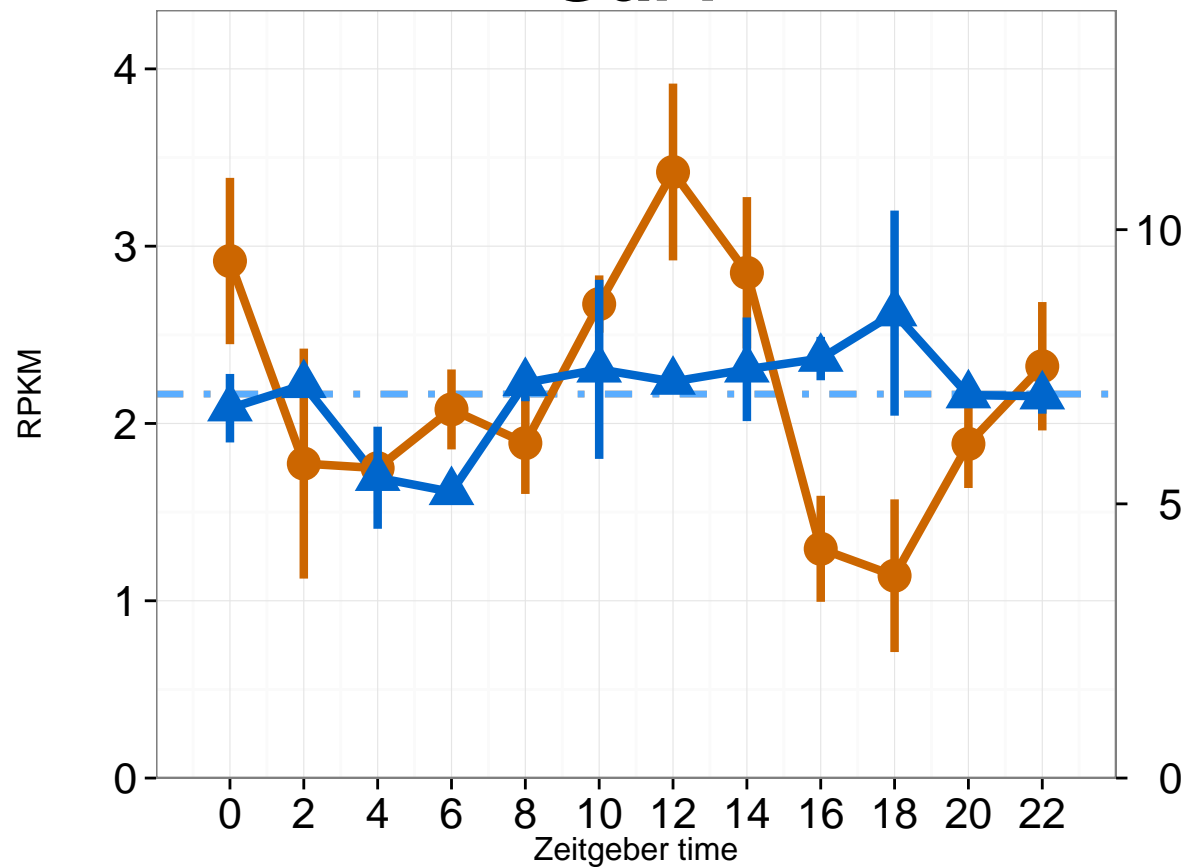

## Gar1

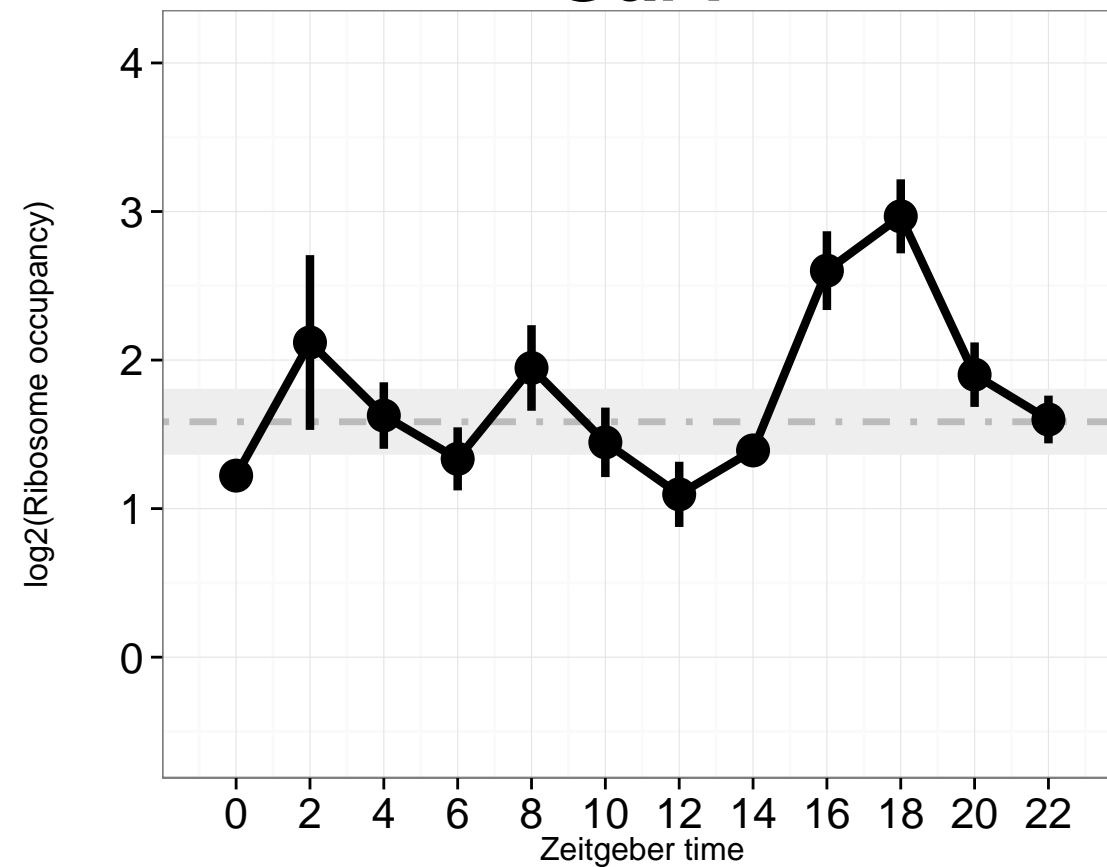

Supplement: SuppDataset_1.zip [file Gar1_set_A.pdf › Supplemental Dataset 1/A-mRNA_nonrhyth_translation_nonrhyth/Gar1_set_A.pdf]

## Garem

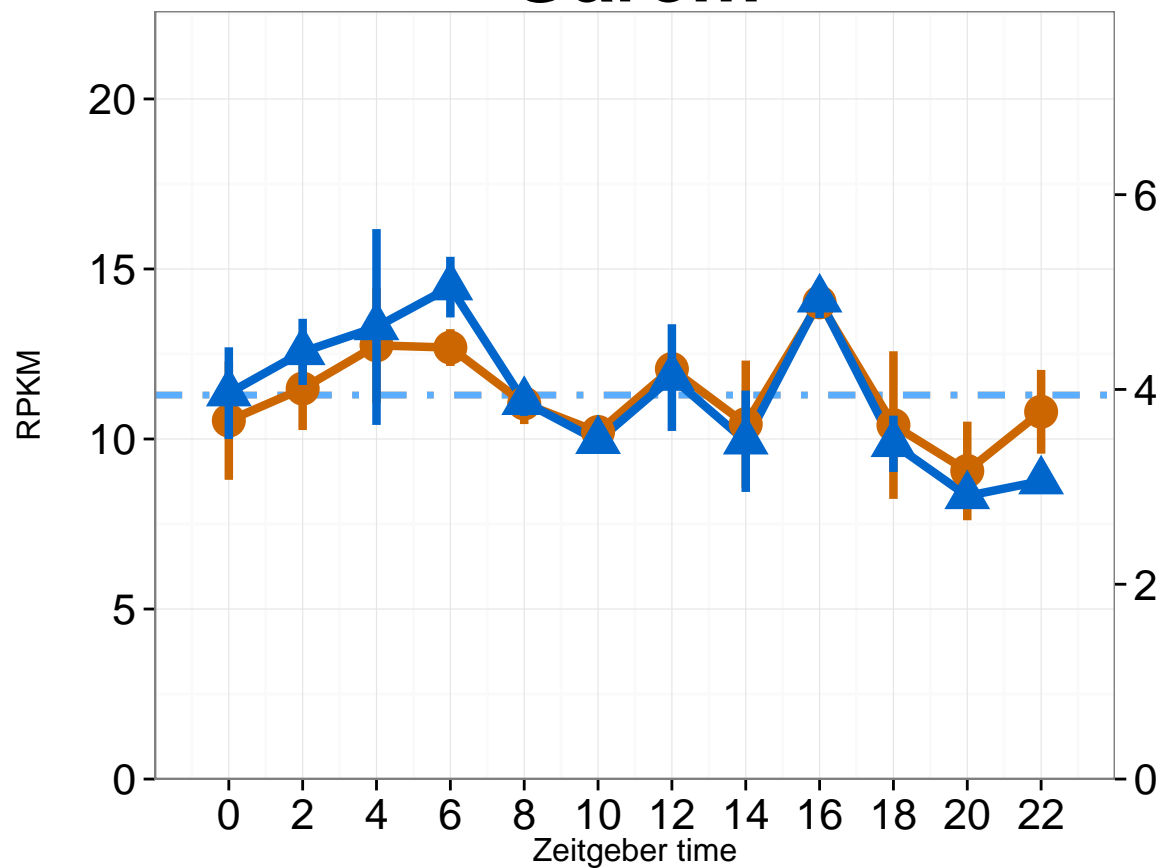

## Garem

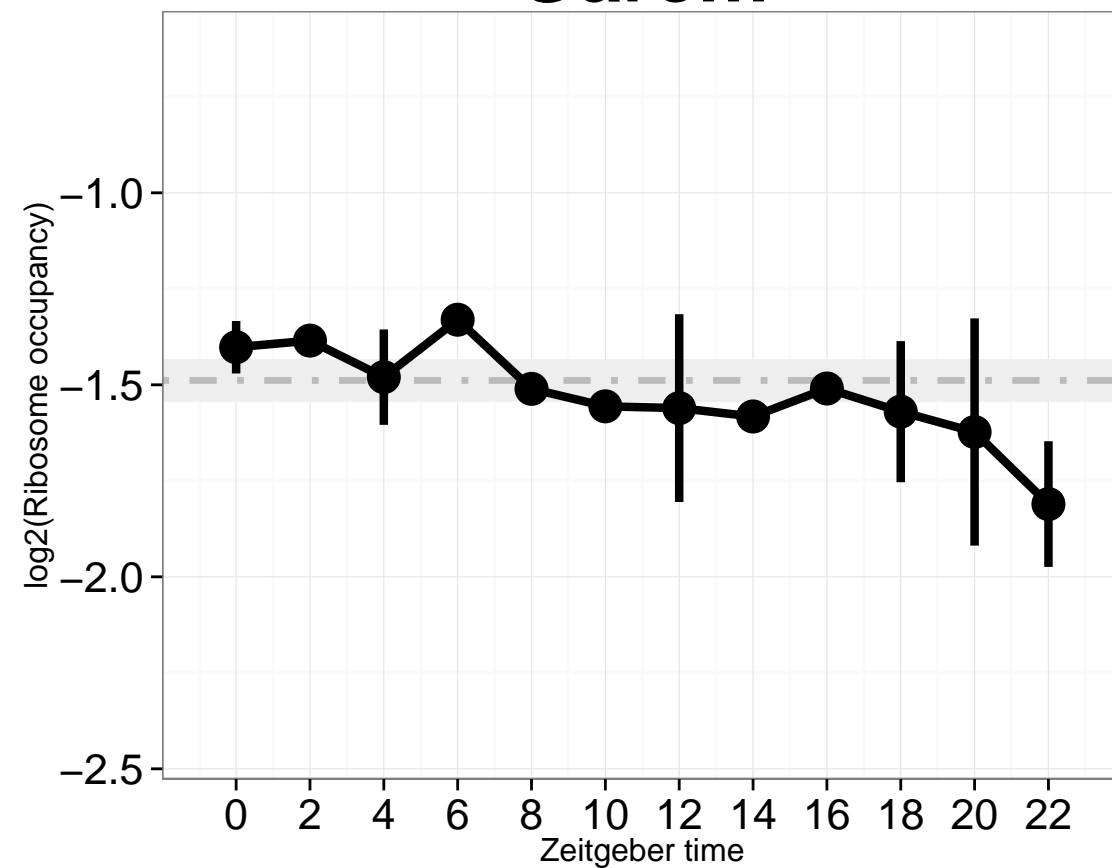

Supplement: SuppDataset_1.zip [file Garem_set_A.pdf › Supplemental Dataset 1/A-mRNA_nonrhyth_translation_nonrhyth/Garem_set_A.pdf]

## Gars

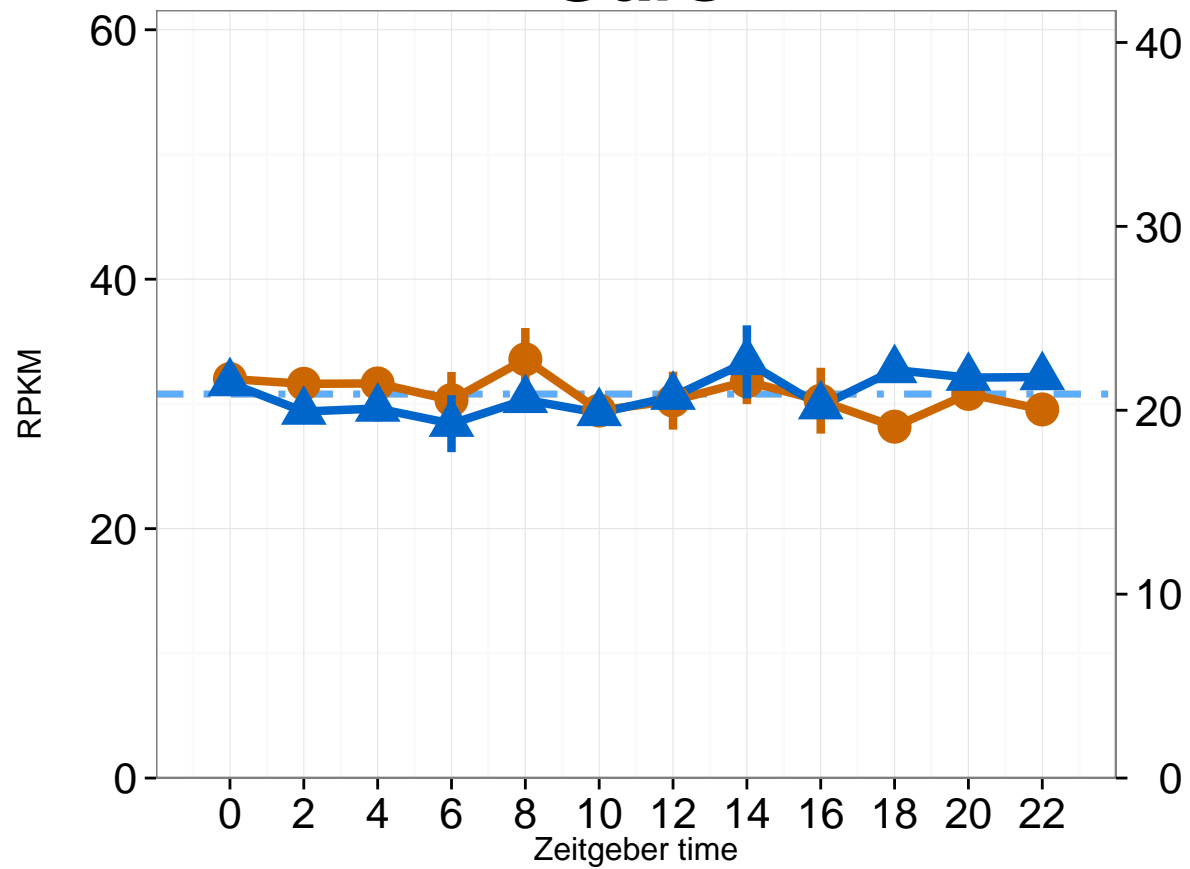

## Gars

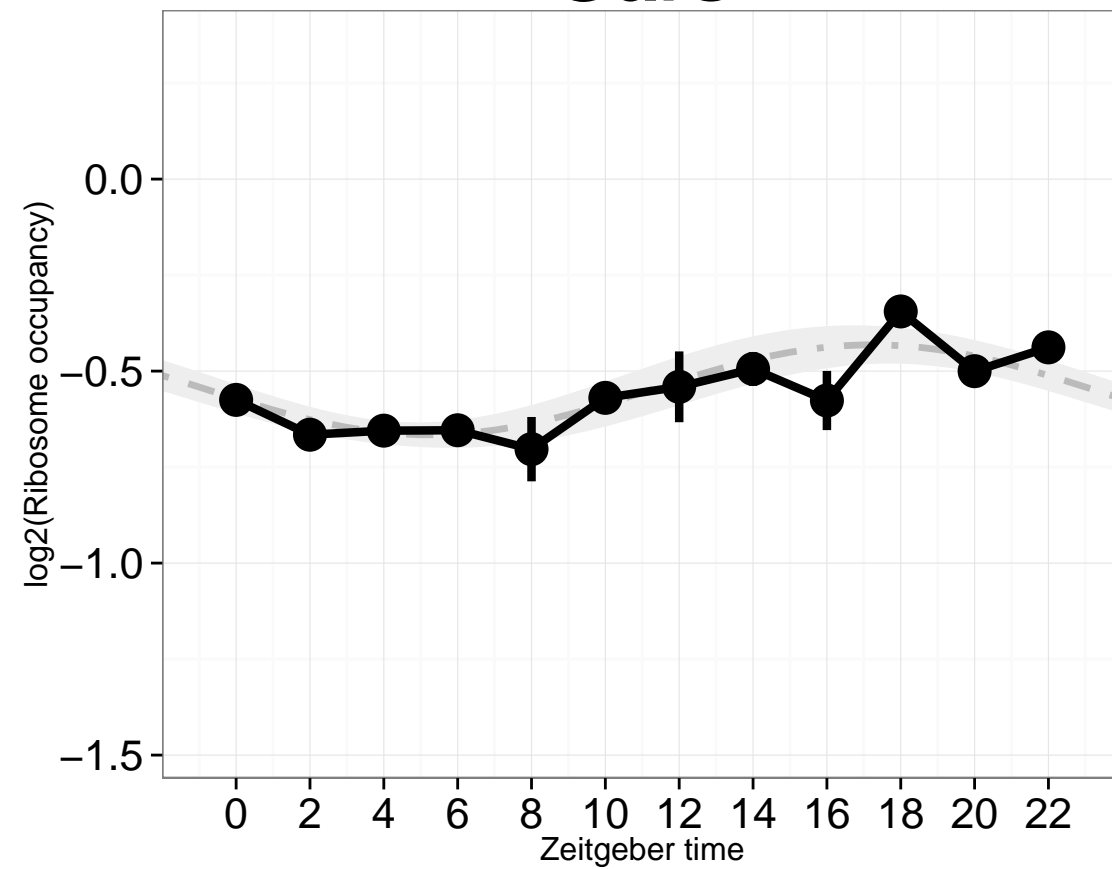

Supplement: SuppDataset_1.zip [file Gars_set_A.pdf › Supplemental Dataset 1/A-mRNA_nonrhyth_translation_nonrhyth/Gars_set_A.pdf]

## Gart

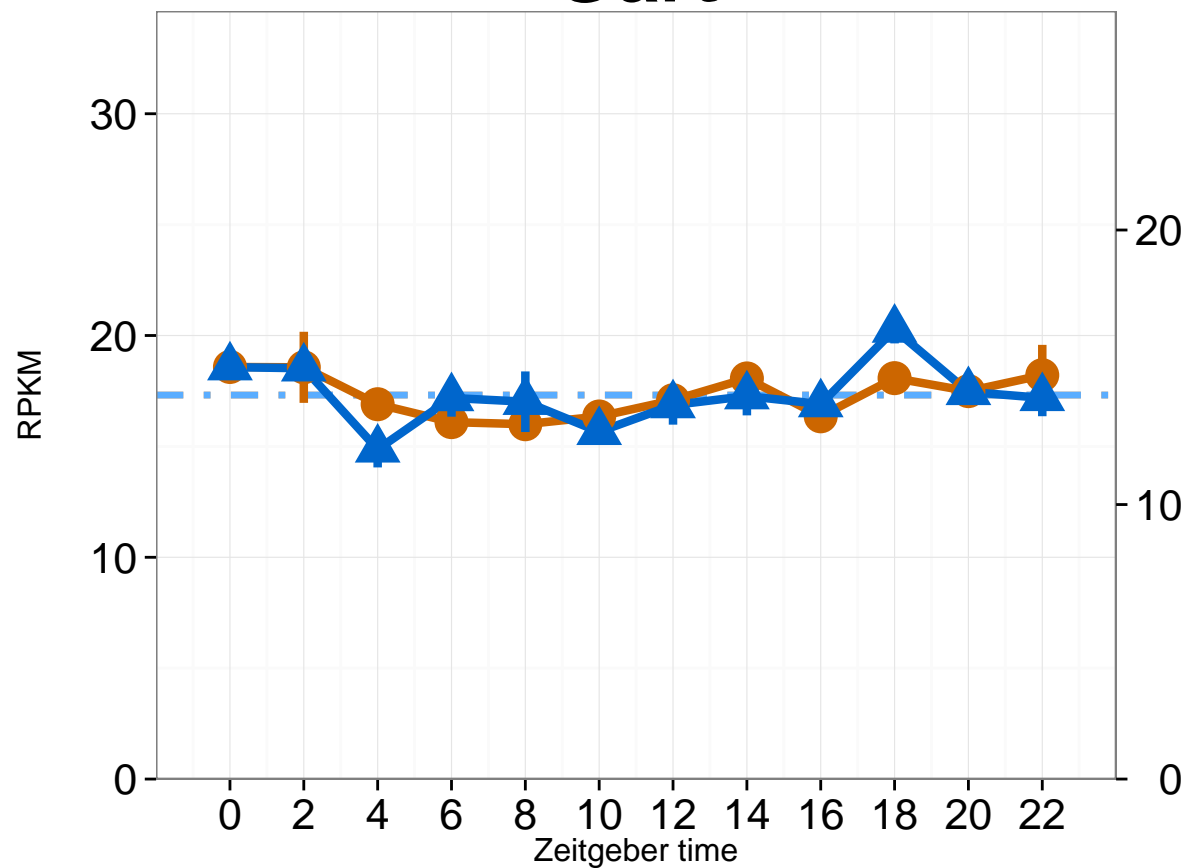

## Gart

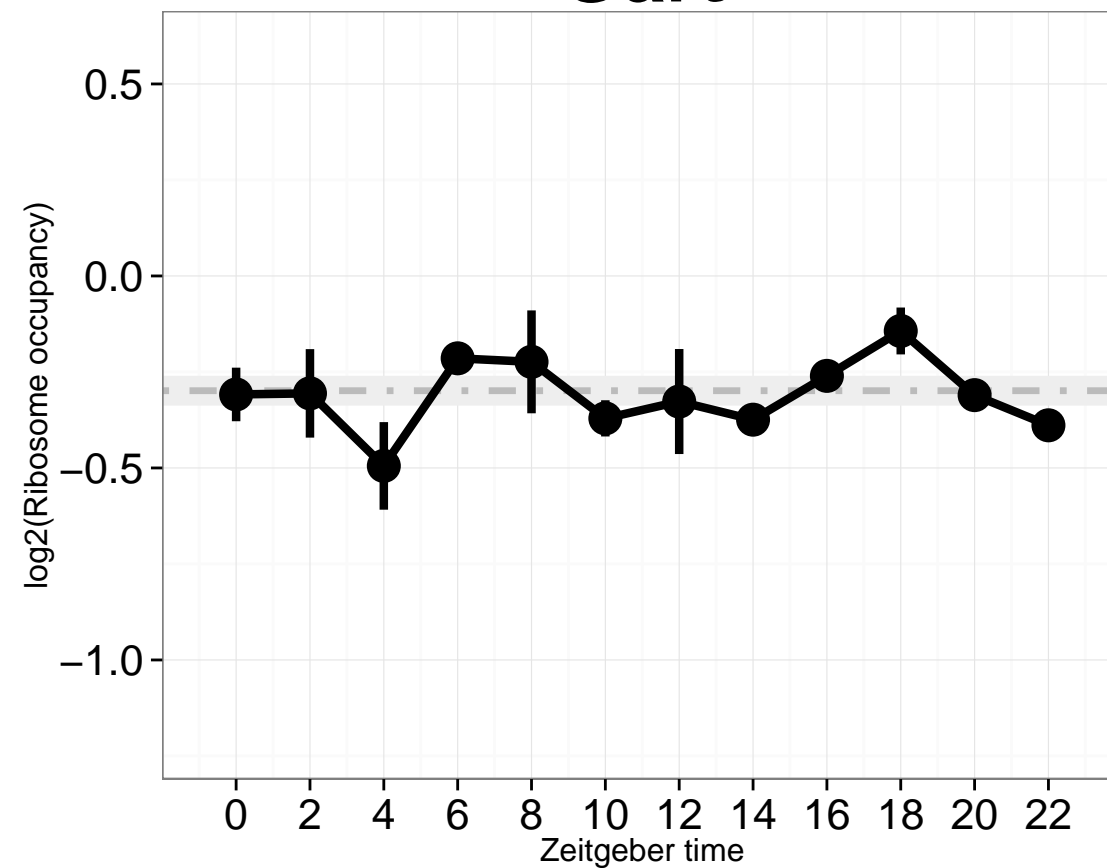

Supplement: SuppDataset_1.zip [file Gart_set_A.pdf › Supplemental Dataset 1/A-mRNA_nonrhyth_translation_nonrhyth/Gart_set_A.pdf]

## Gas2

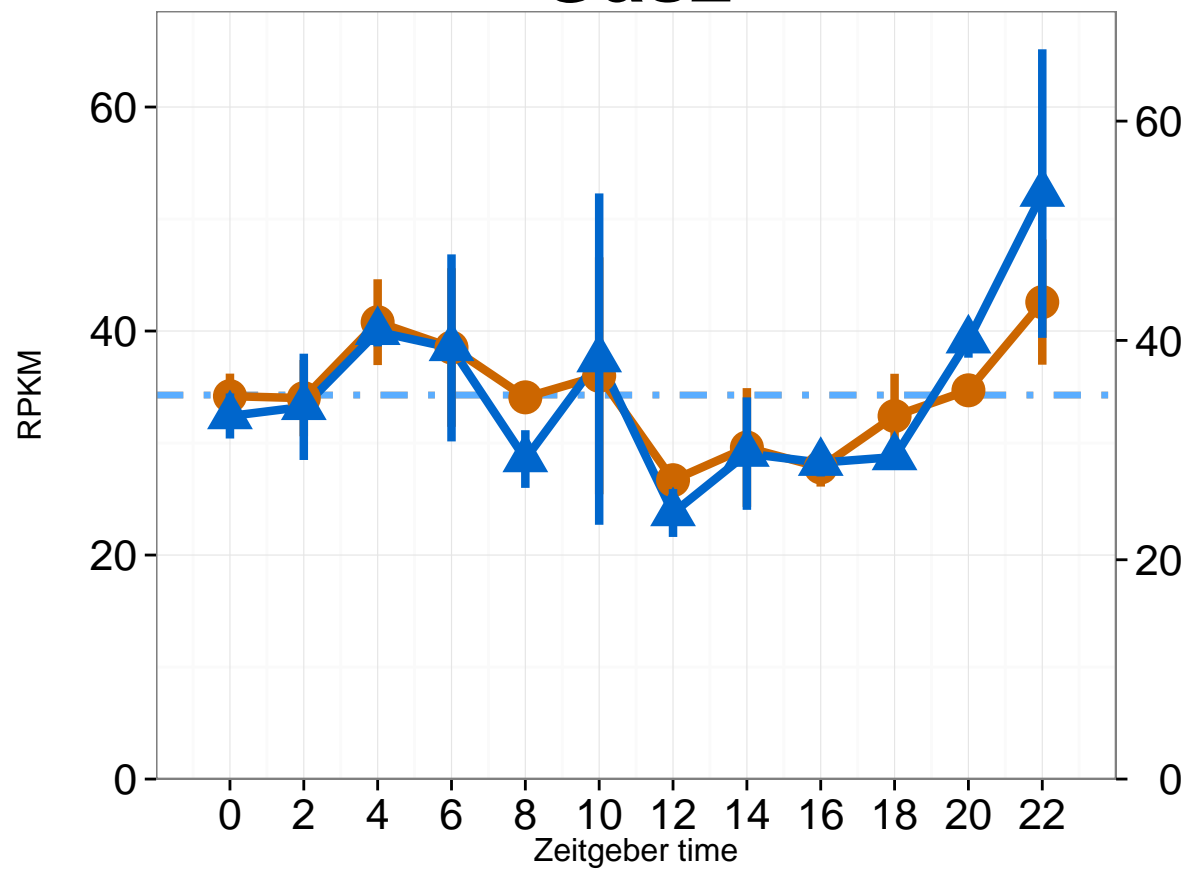

## Gas2

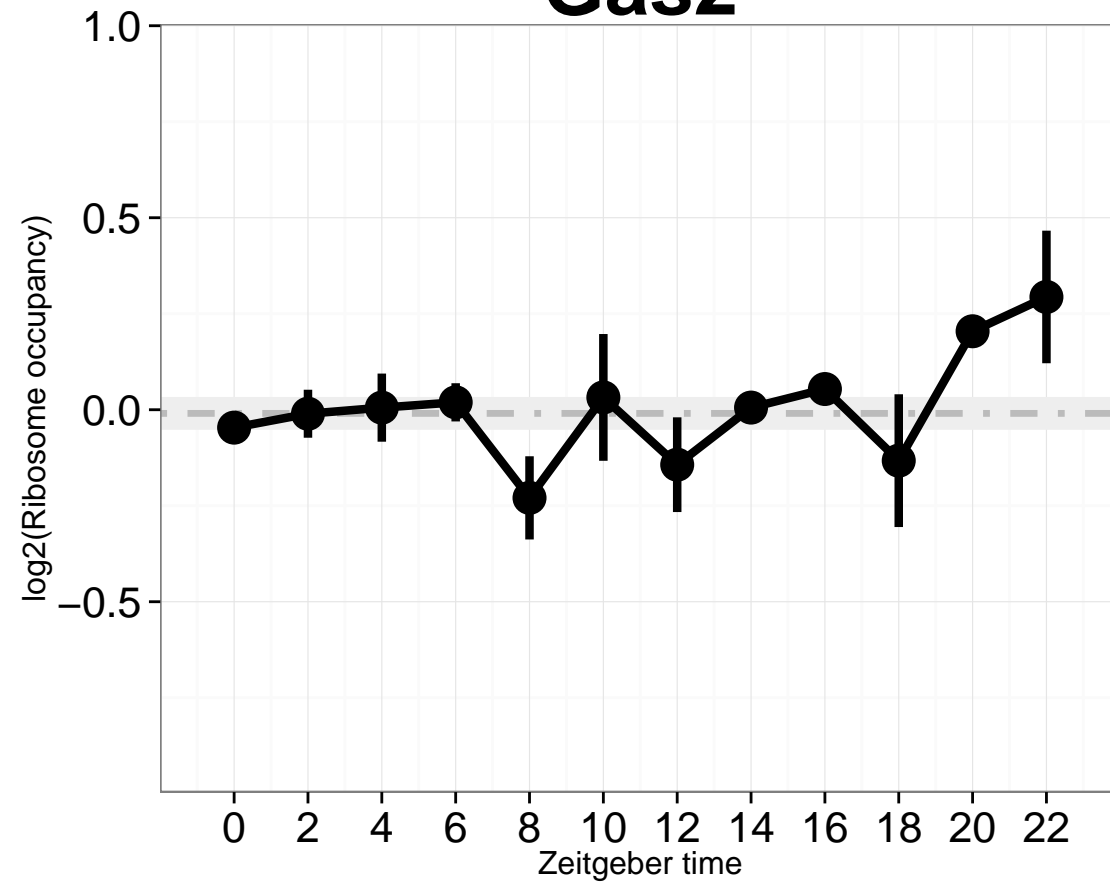

Supplement: SuppDataset_1.zip [file Gas2_set_A.pdf › Supplemental Dataset 1/A-mRNA_nonrhyth_translation_nonrhyth/Gas2_set_A.pdf]

## Gas2l1

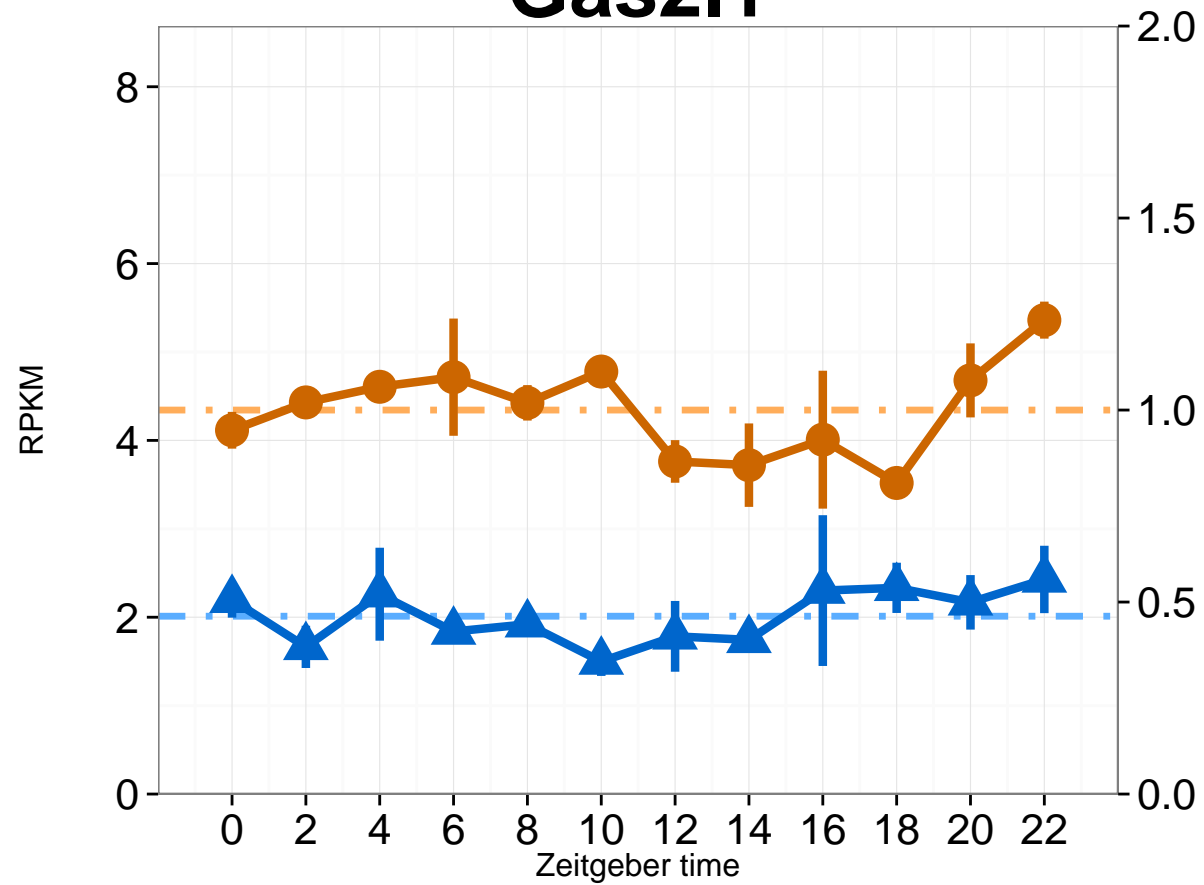

## Gas2l1

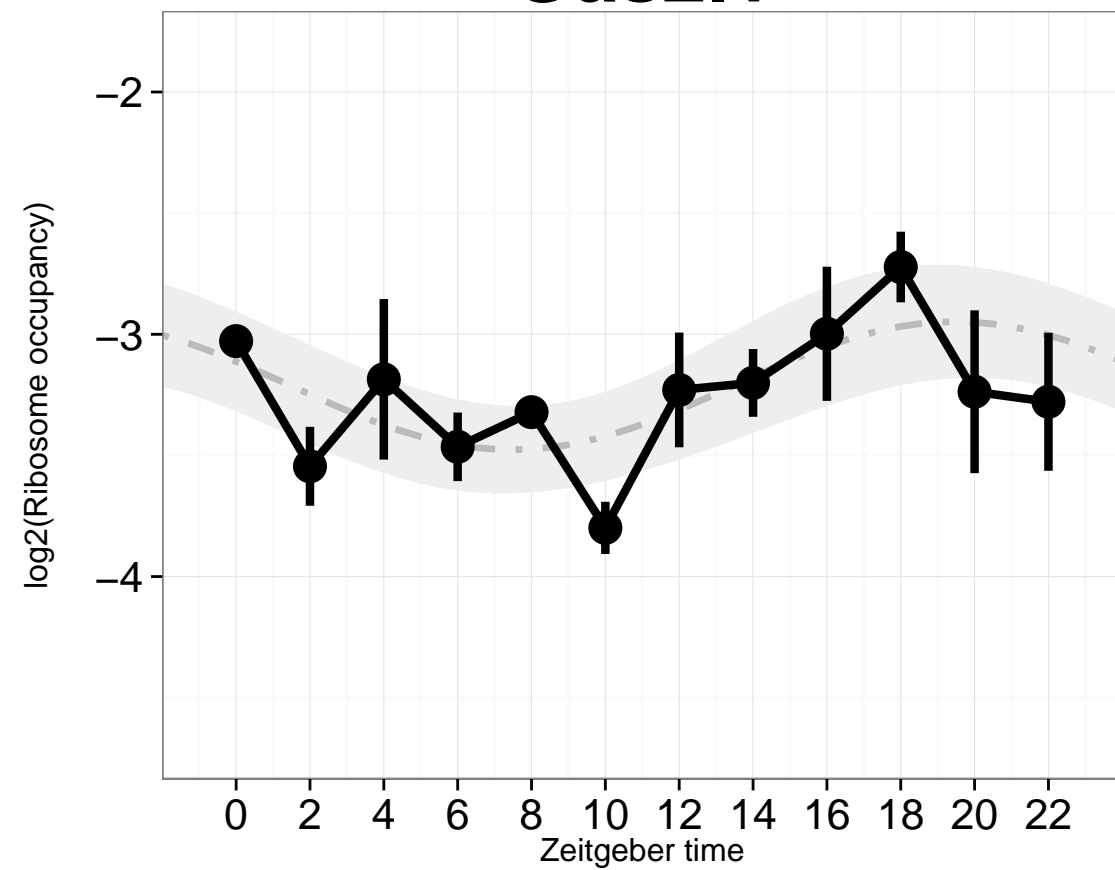

Supplement: SuppDataset_1.zip [file Gas2l1_set_A.pdf › Supplemental Dataset 1/A-mRNA_nonrhyth_translation_nonrhyth/Gas2l1_set_A.pdf]

# Gata6

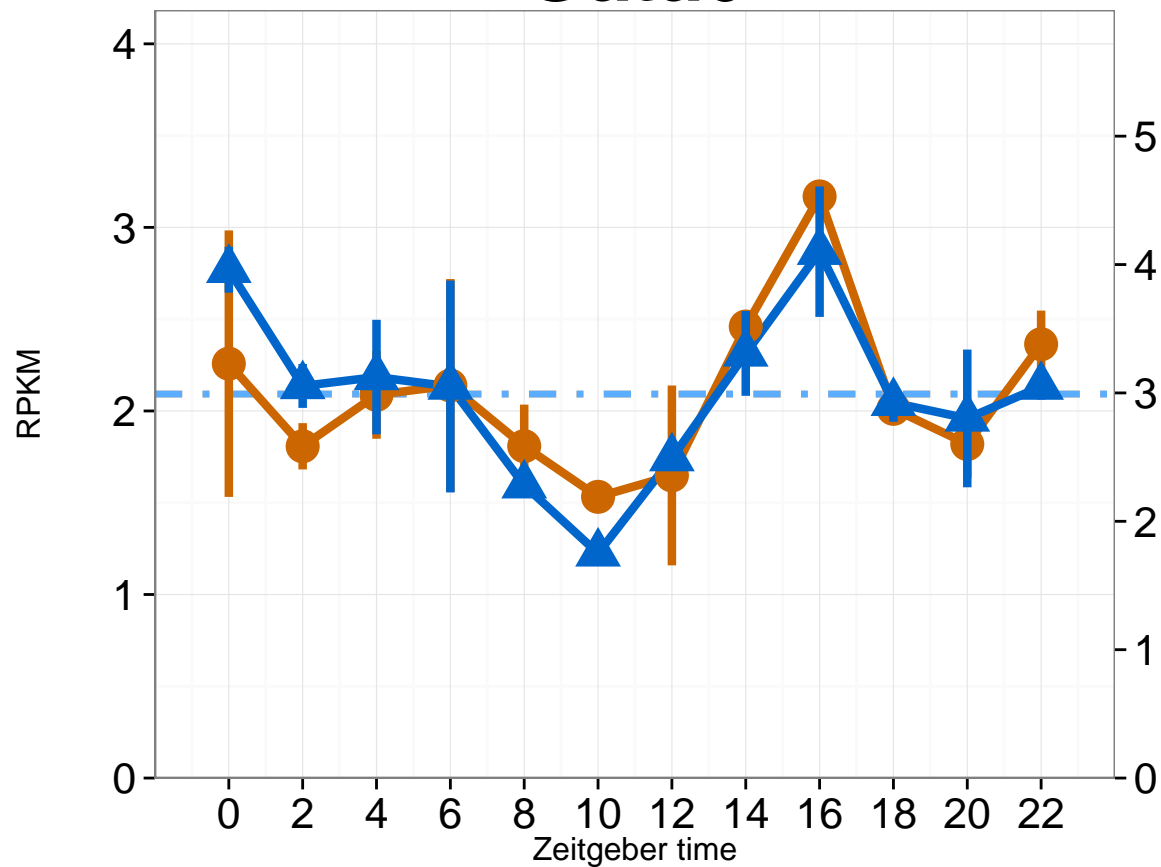

# Gata6

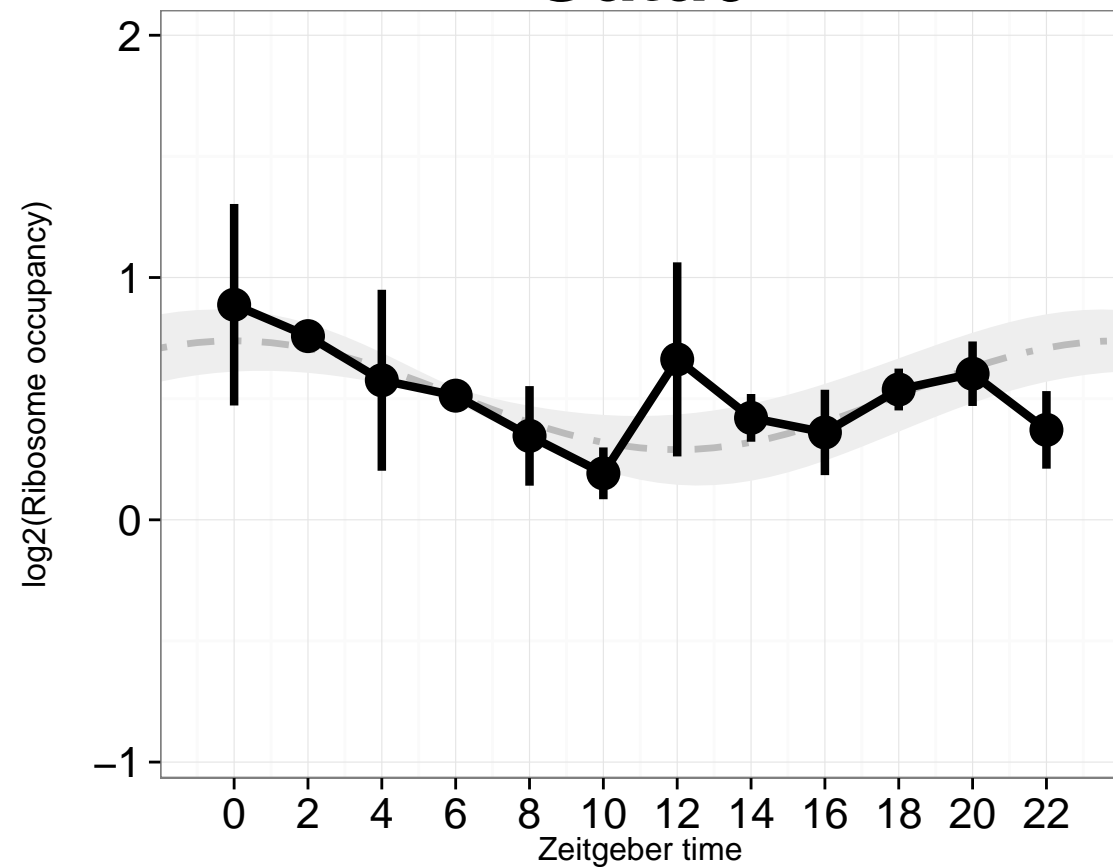

Supplement: SuppDataset_1.zip [file Gata6_set_A.pdf › Supplemental Dataset 1/A-mRNA_nonrhyth_translation_nonrhyth/Gata6_set_A.pdf]

# Gatad1

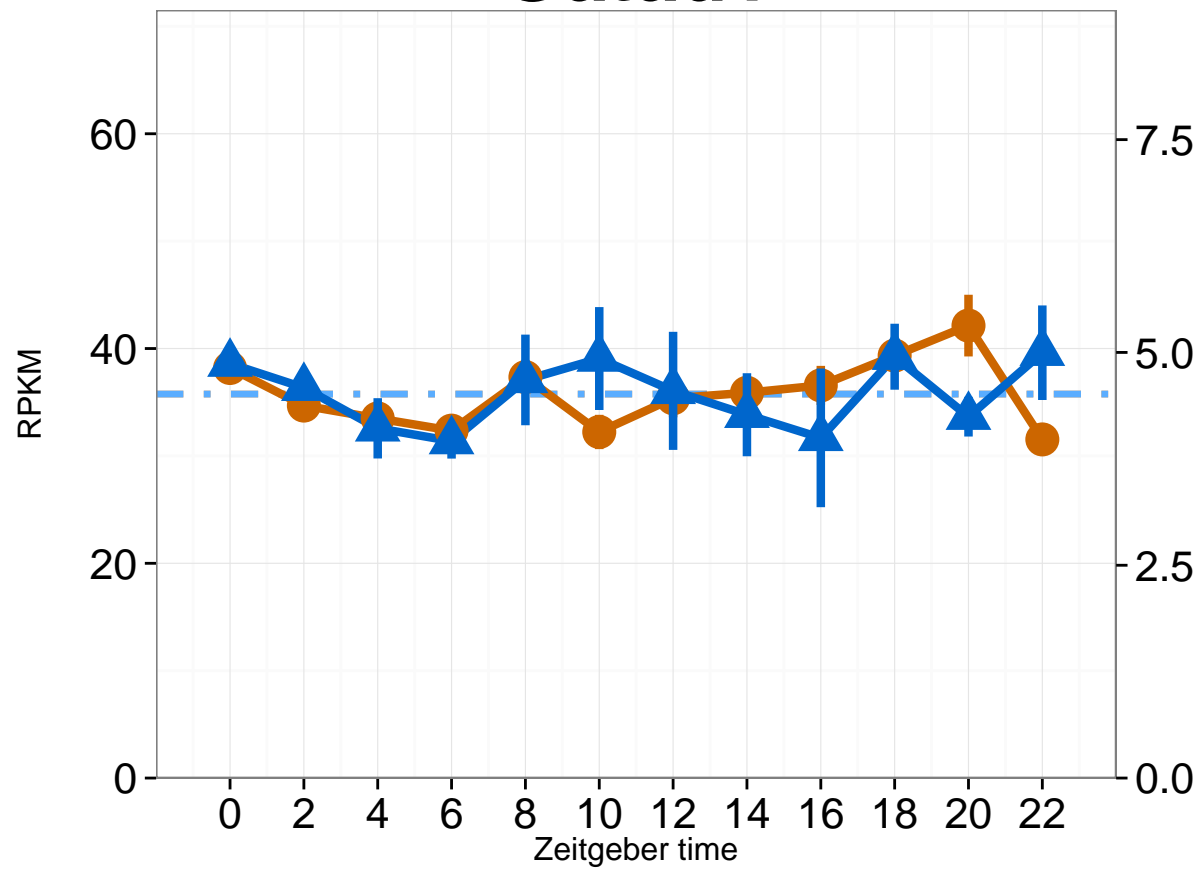

# Gatad1

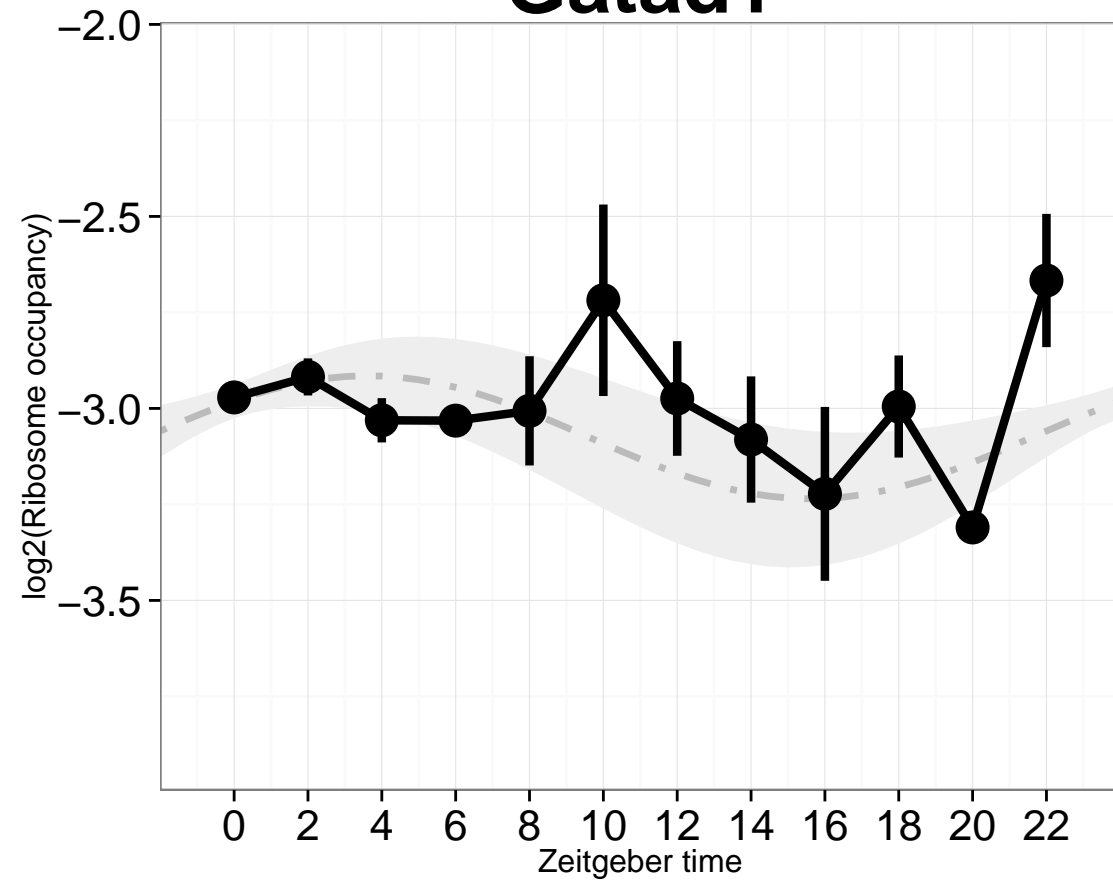

Supplement: SuppDataset_1.zip [file Gatad1_set_A.pdf › Supplemental Dataset 1/A-mRNA_nonrhyth_translation_nonrhyth/Gatad1_set_A.pdf]

# Gatad2a

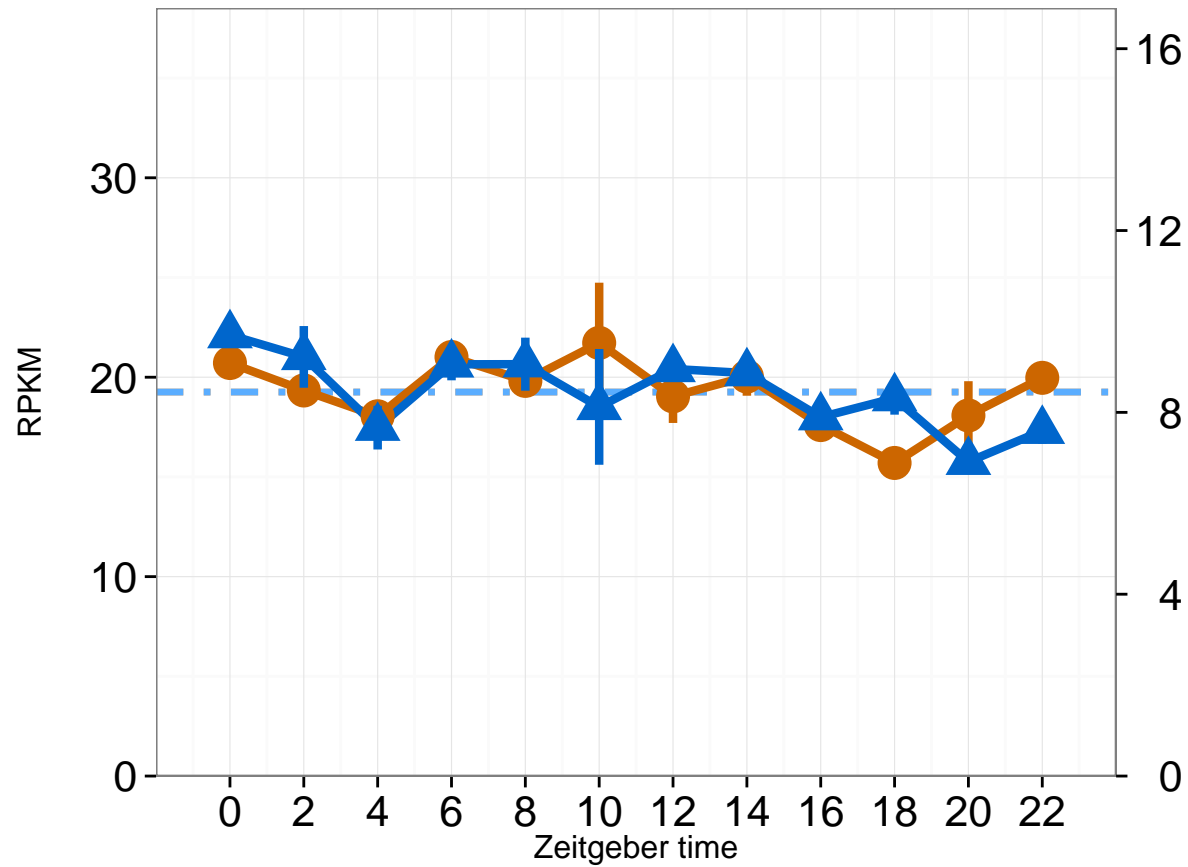

# Gatad2a

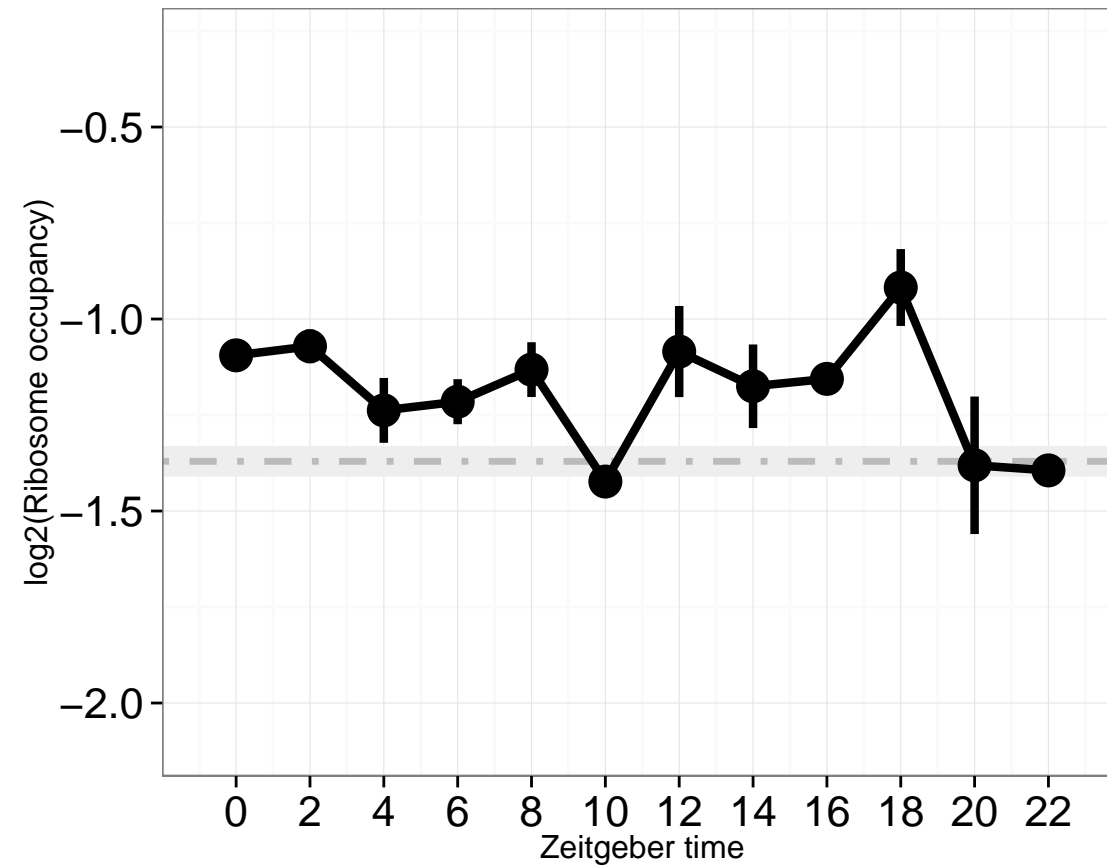

Supplement: SuppDataset_1.zip [file Gatad2a_set_A.pdf › Supplemental Dataset 1/A-mRNA_nonrhyth_translation_nonrhyth/Gatad2a_set_A.pdf]

# Gatad2b

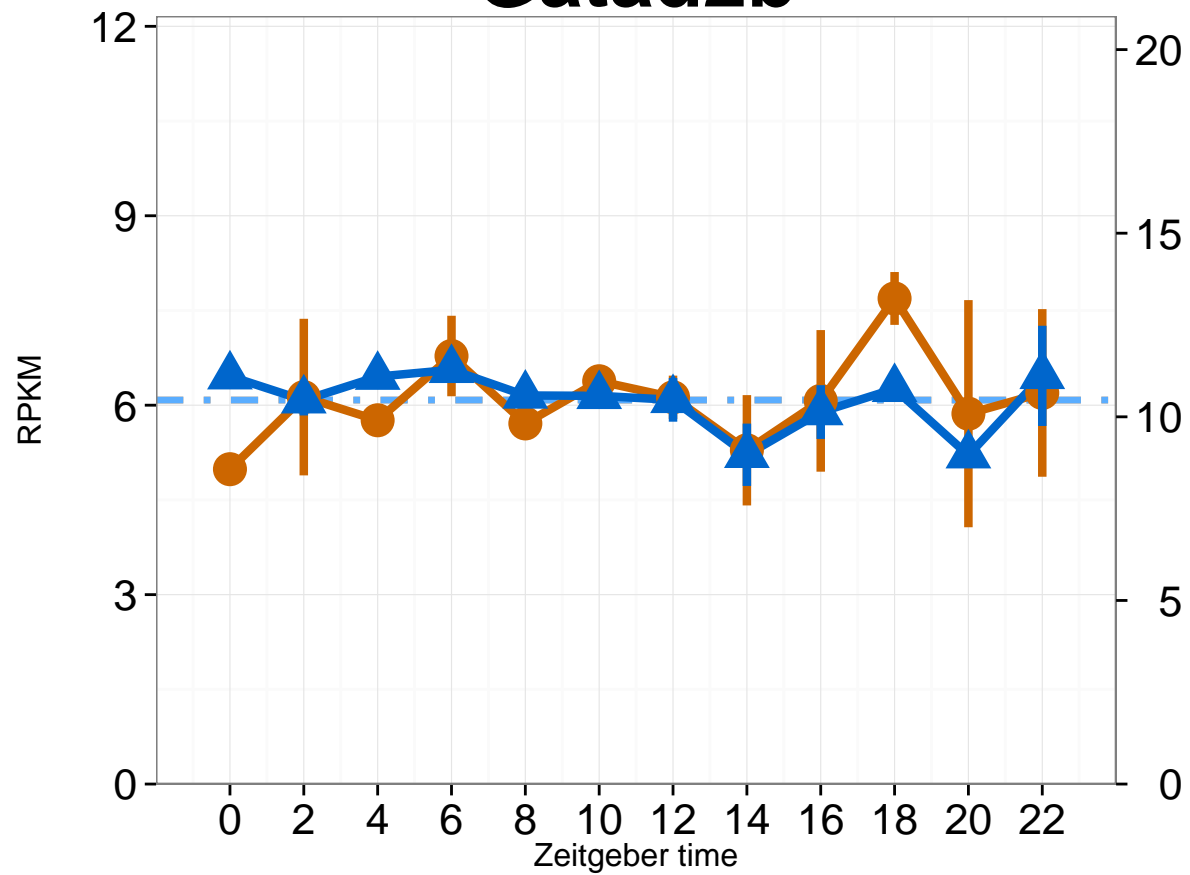

# Gatad2b

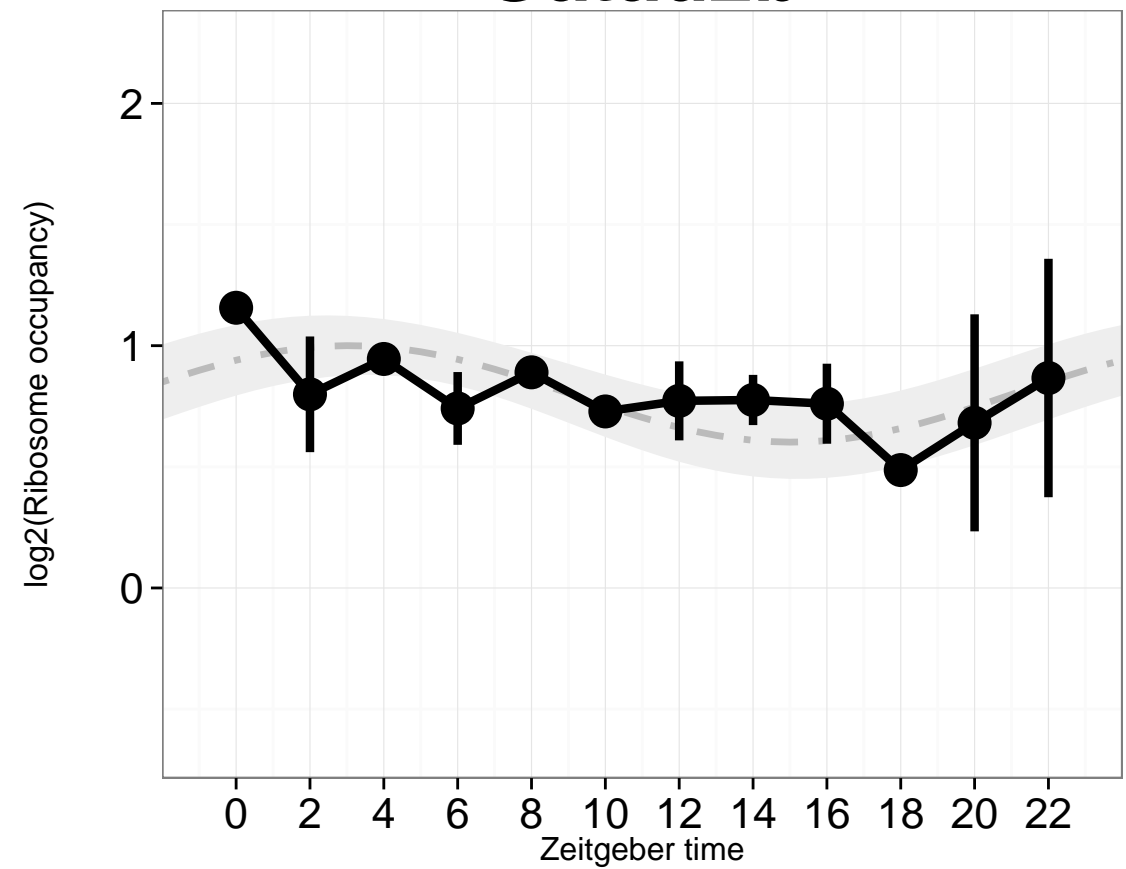

Supplement: SuppDataset_1.zip [file Gatad2b_set_A.pdf › Supplemental Dataset 1/A-mRNA_nonrhyth_translation_nonrhyth/Gatad2b_set_A.pdf]
