# Supplementary figures and images for: Ribosome profiling reveals the rhythmic liver translatome and circadian clock regulation by upstream open reading frames (part 30 of 113)
Source: HighWire-hosted journal article supplement (doi:10.1101/gr.195404.115), 2015-10-20

## Gatc

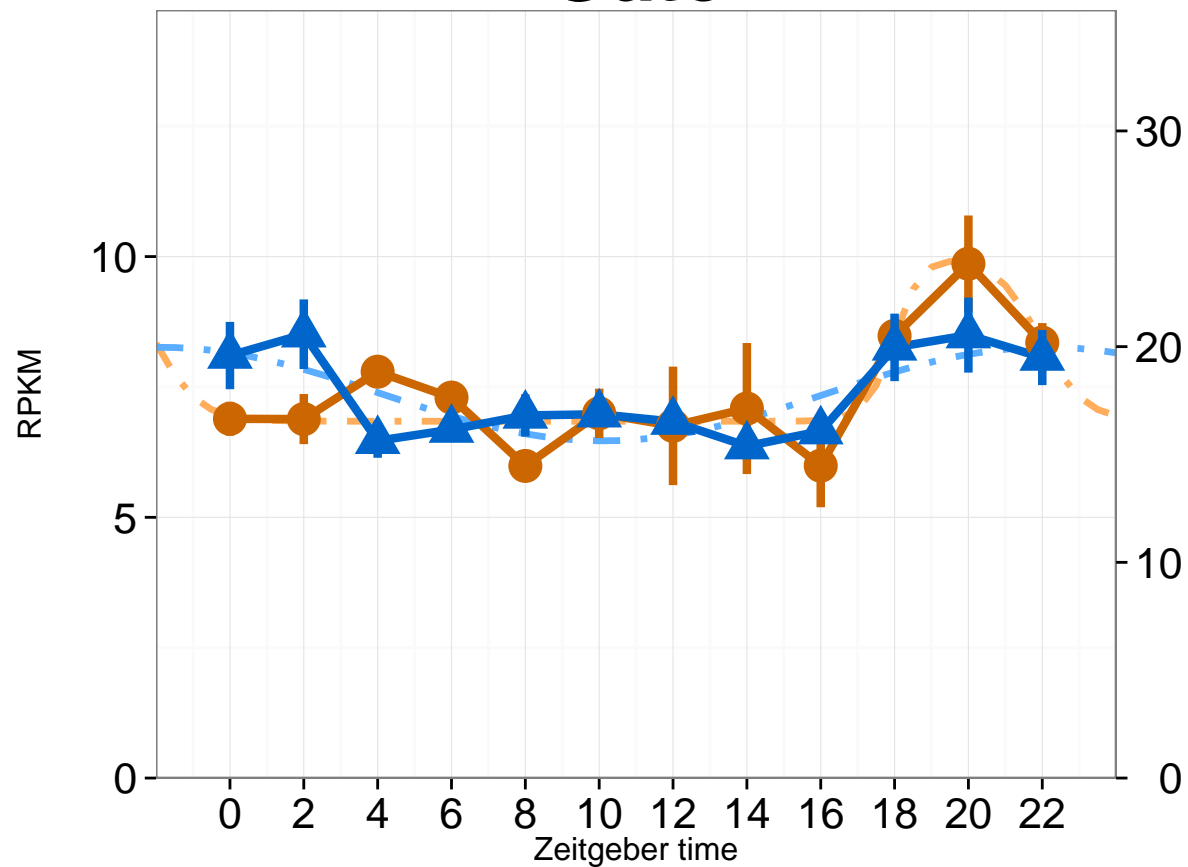

## Gatc

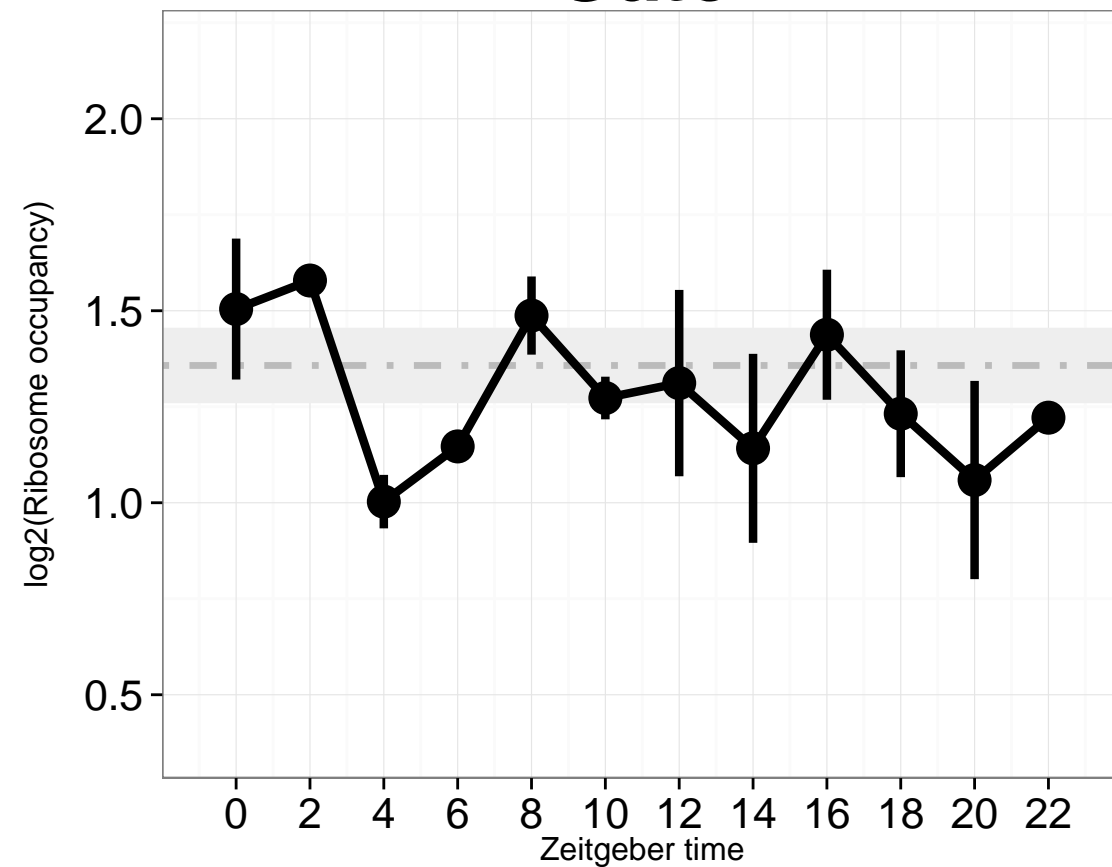

Supplement: SuppDataset_1.zip [file Gatc_set_A.pdf › Supplemental Dataset 1/A-mRNA_nonrhyth_translation_nonrhyth/Gatc_set_A.pdf]

## Gatm

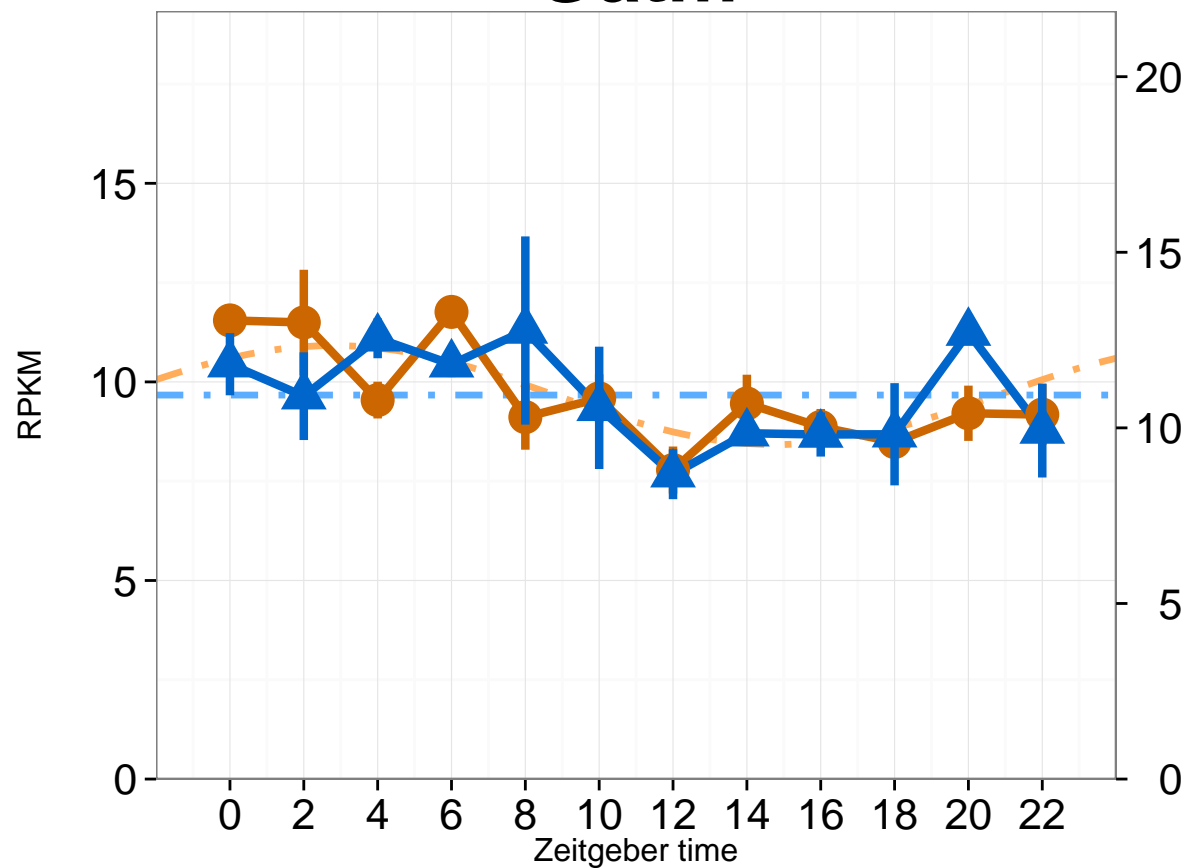

## Gatm

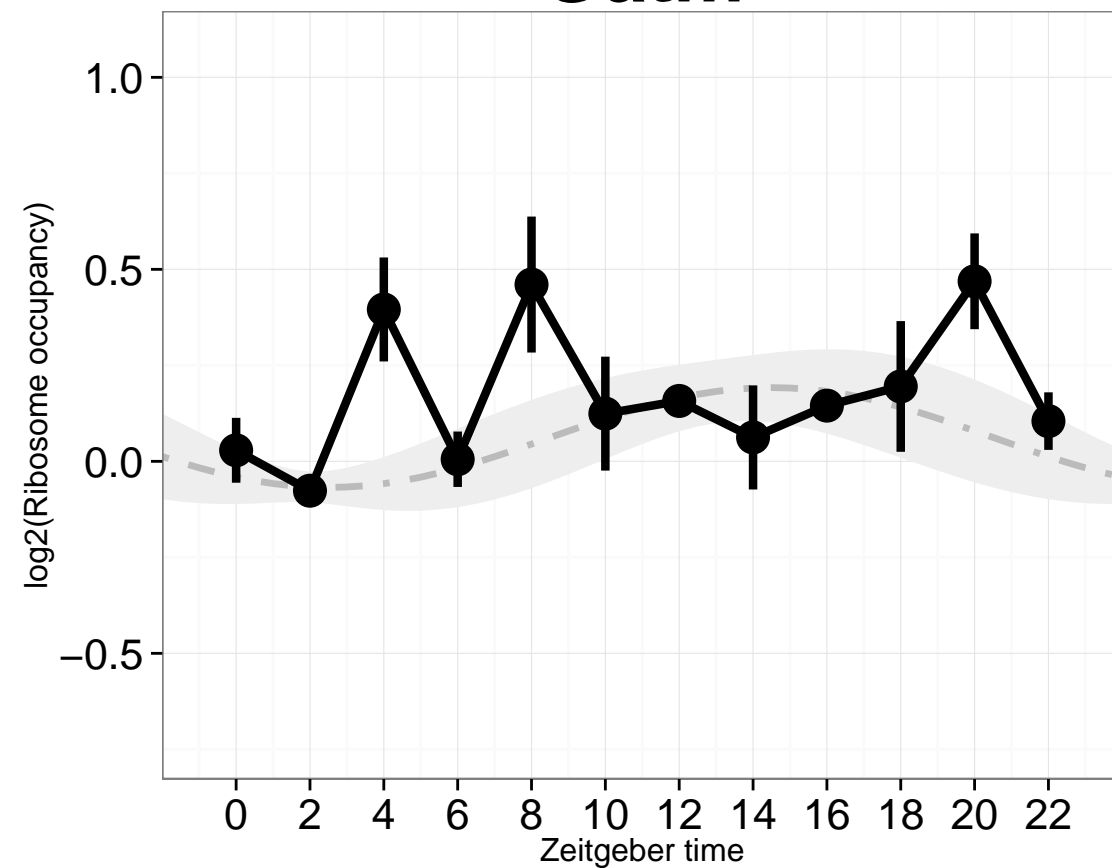

Supplement: SuppDataset_1.zip [file Gatm_set_A.pdf › Supplemental Dataset 1/A-mRNA_nonrhyth_translation_nonrhyth/Gatm_set_A.pdf]

**Gatsl2 TR**

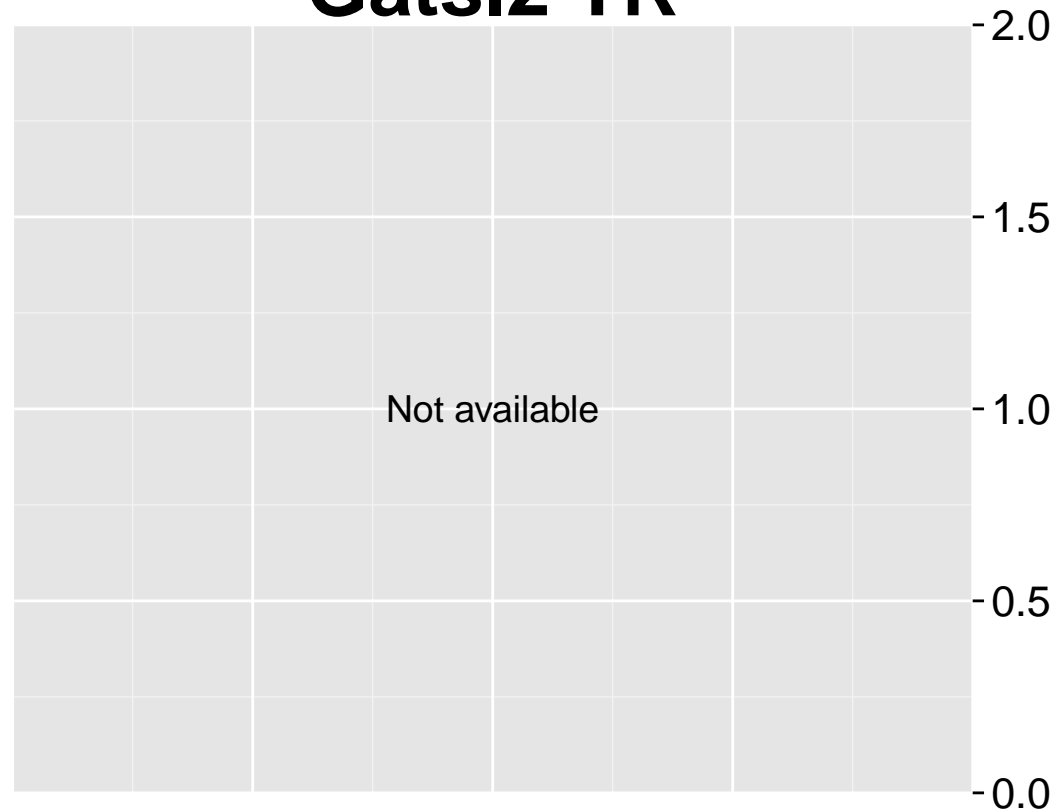

**Gatsl2 log2(Ribosome occupancy**

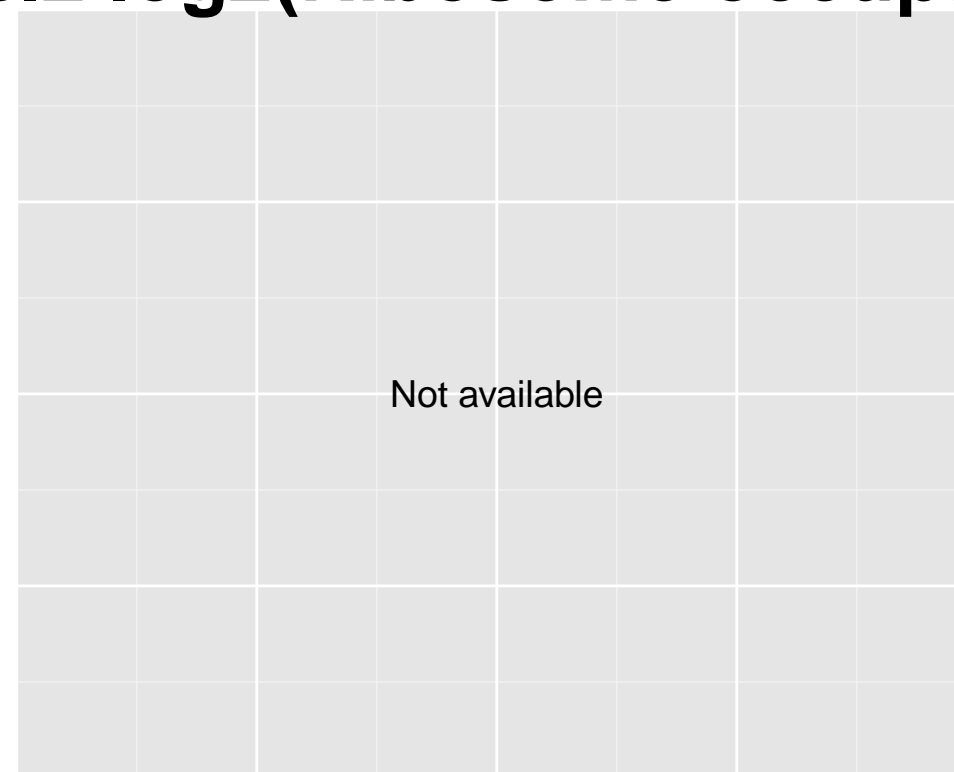

Supplement: SuppDataset_1.zip [file Gatsl2_set_A.pdf › Supplemental Dataset 1/A-mRNA_nonrhyth_translation_nonrhyth/Gatsl2_set_A.pdf]

## Gba

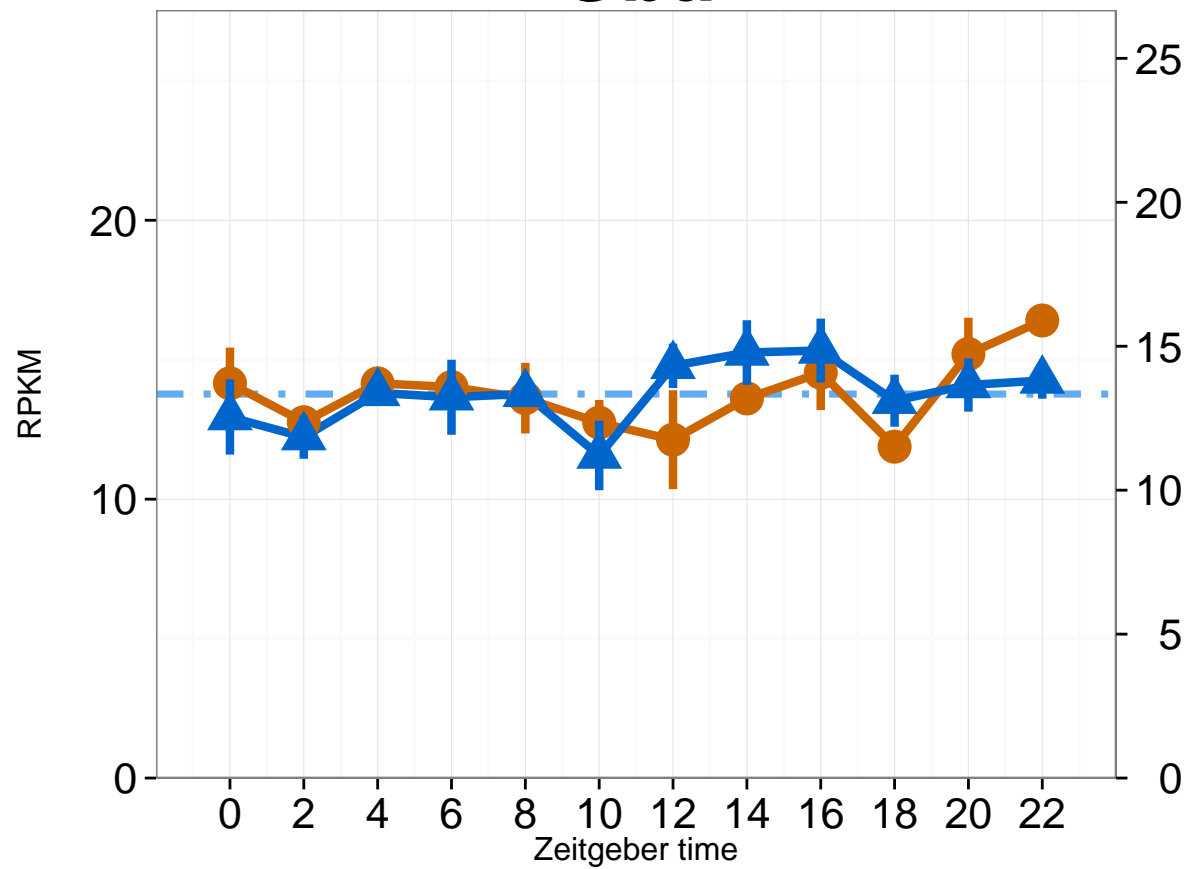

## Gba

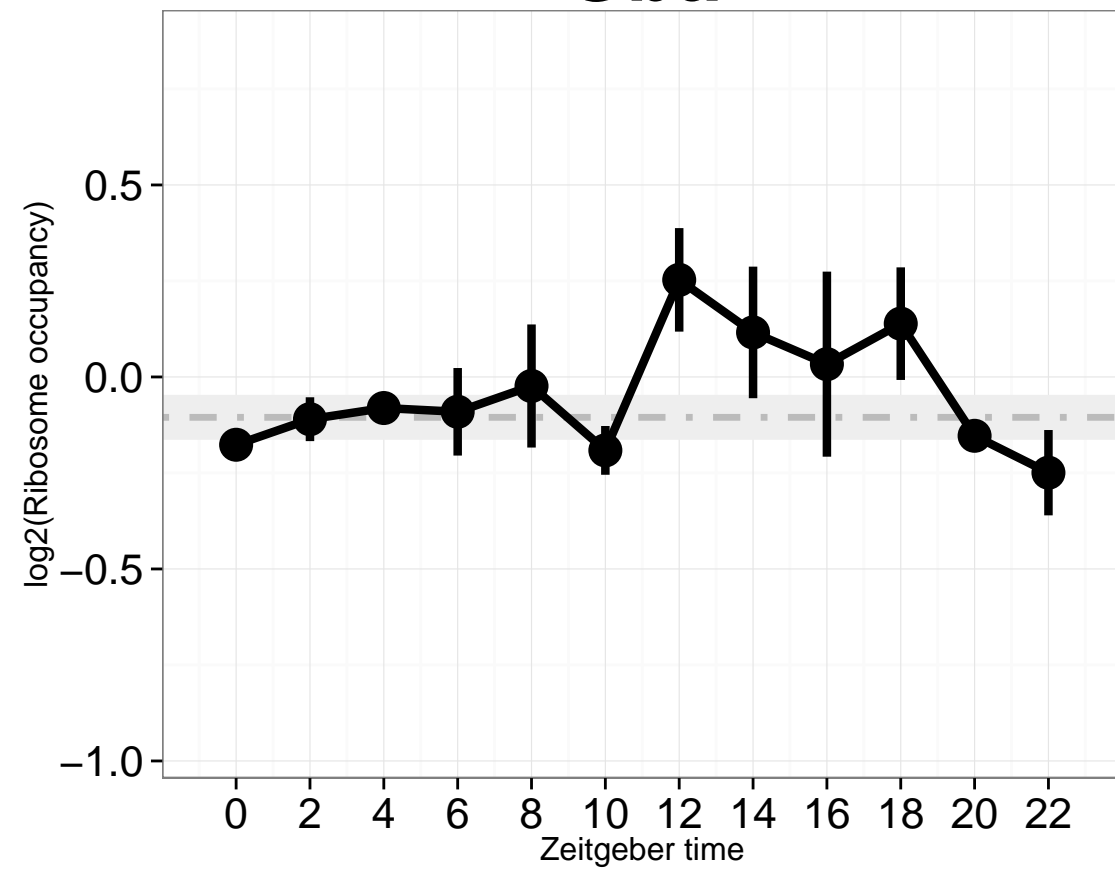

Supplement: SuppDataset_1.zip [file Gba_set_A.pdf › Supplemental Dataset 1/A-mRNA_nonrhyth_translation_nonrhyth/Gba_set_A.pdf]

## Gbas

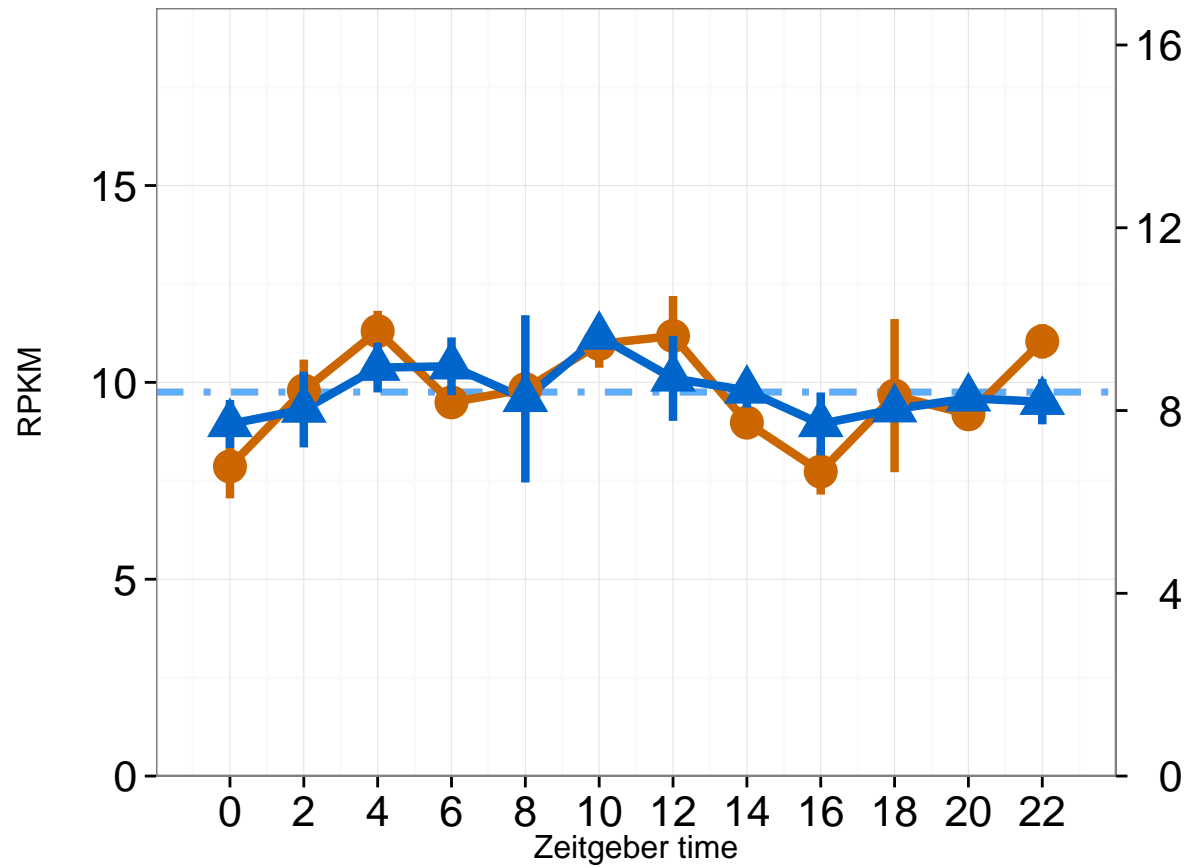

## Gbas

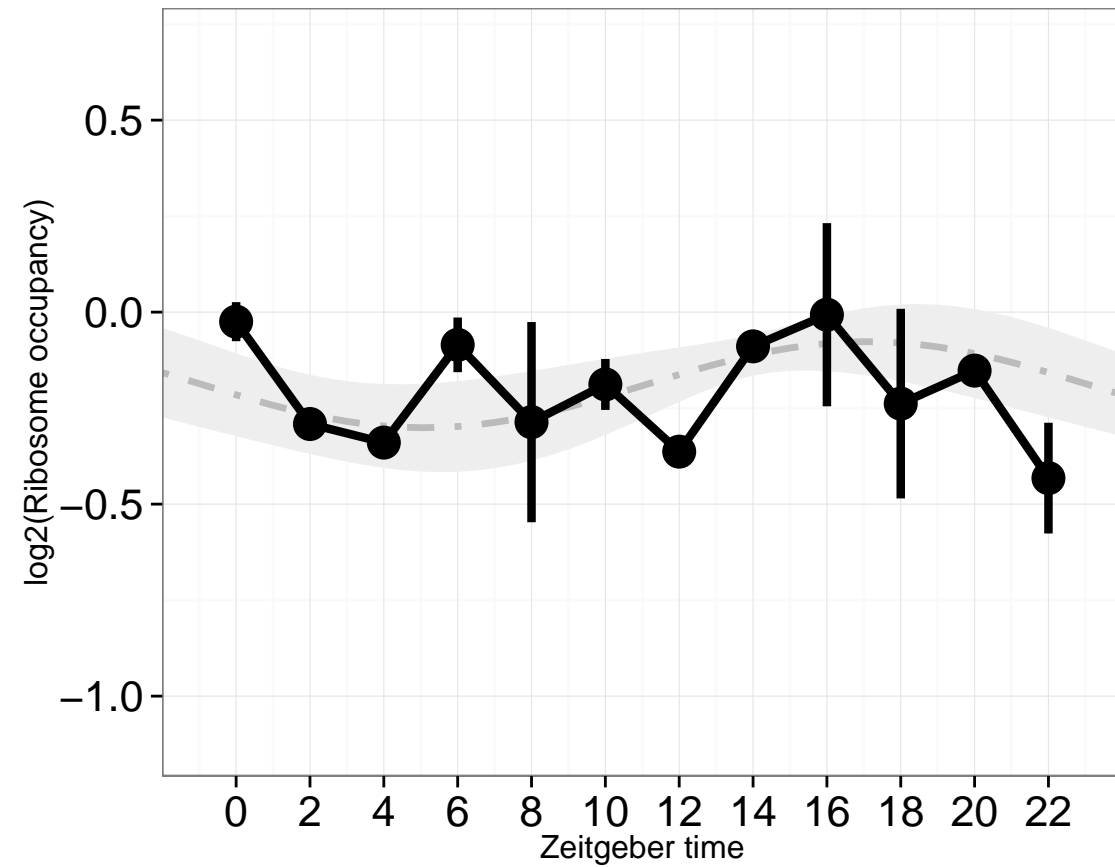

Supplement: SuppDataset_1.zip [file Gbas_set_A.pdf › Supplemental Dataset 1/A-mRNA_nonrhyth_translation_nonrhyth/Gbas_set_A.pdf]

## Gbf1

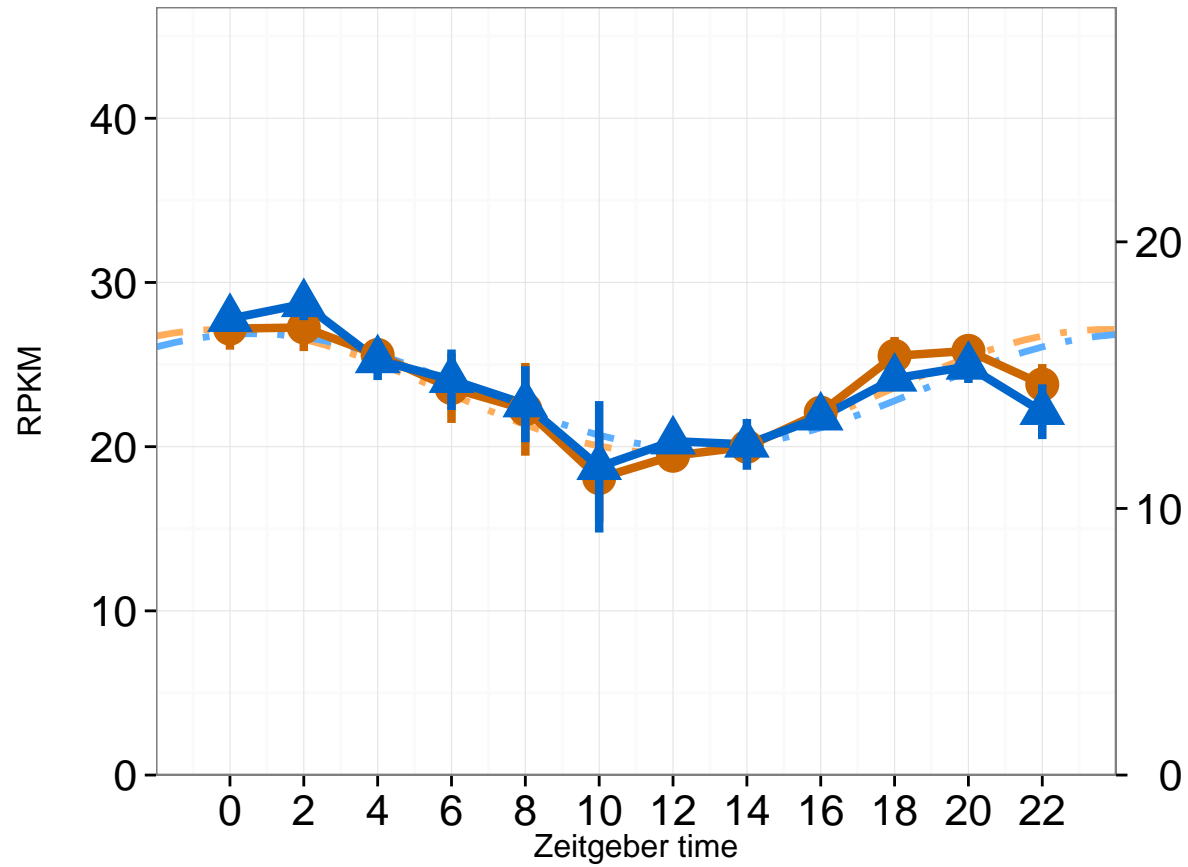

## Gbf1

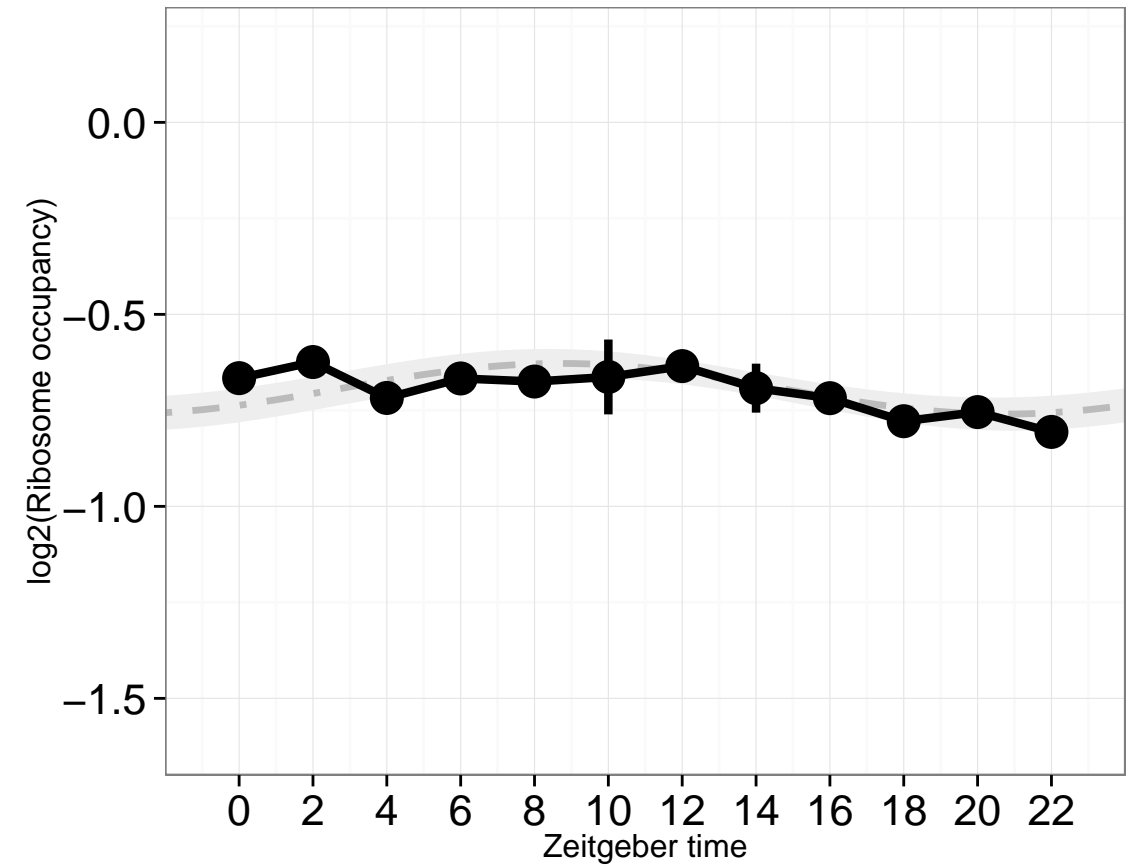

Supplement: SuppDataset_1.zip [file Gbf1_set_A.pdf › Supplemental Dataset 1/A-mRNA_nonrhyth_translation_nonrhyth/Gbf1_set_A.pdf]

# Gbgt1

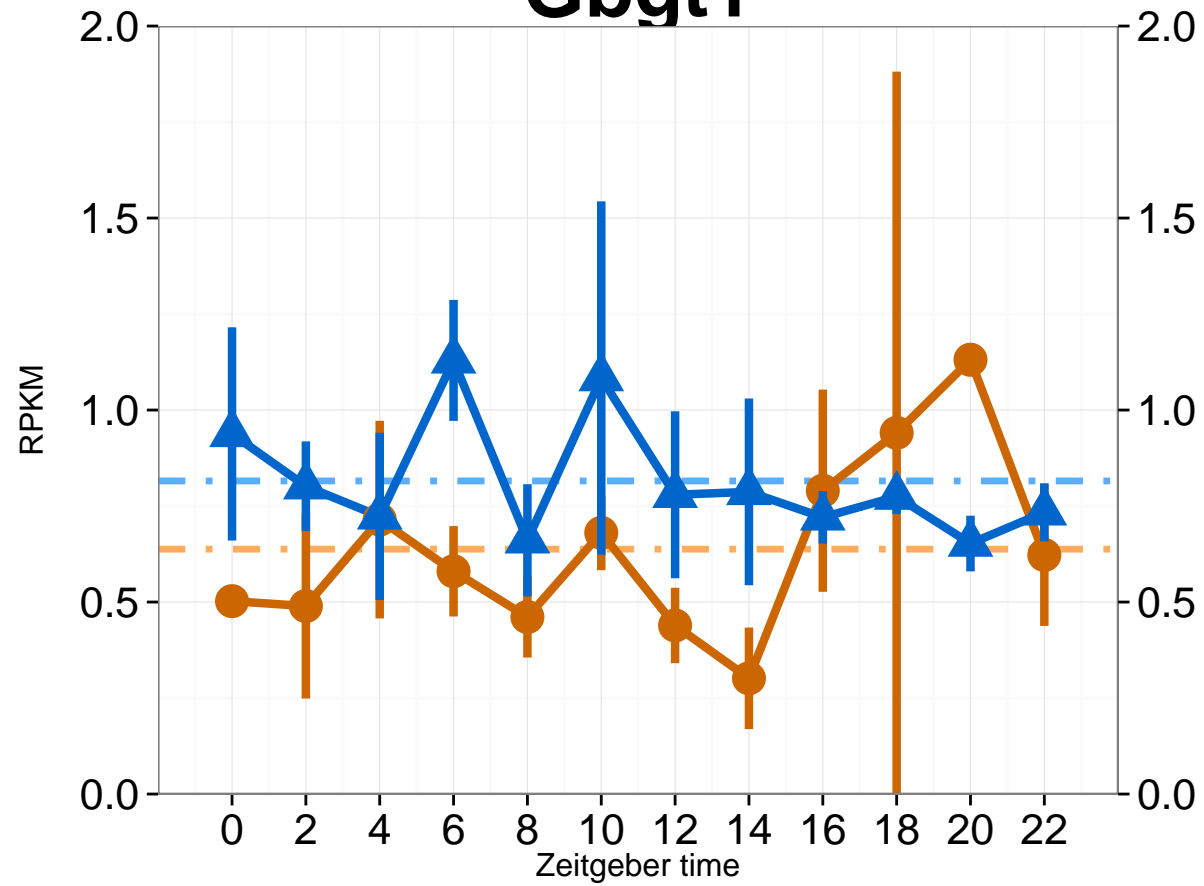

# Gbgt1

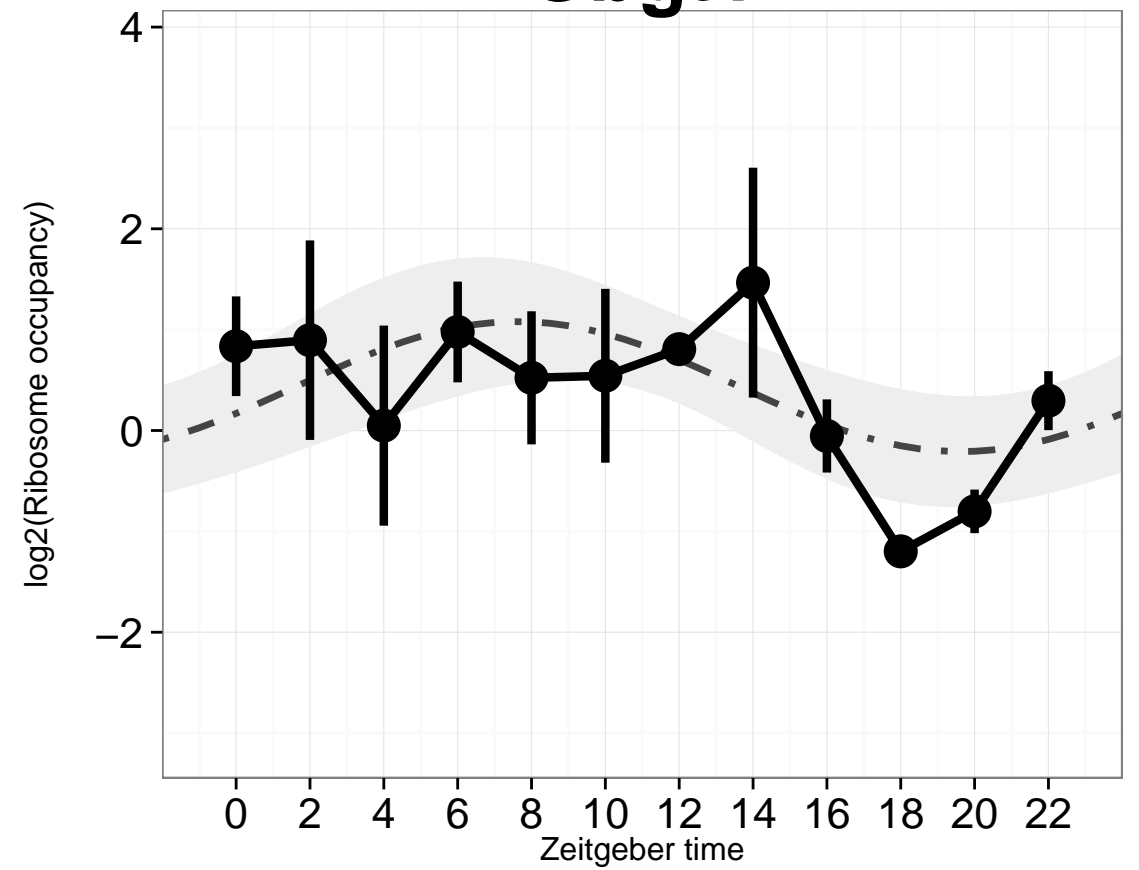

Supplement: SuppDataset_1.zip [file Gbgt1_set_A.pdf › Supplemental Dataset 1/A-mRNA_nonrhyth_translation_nonrhyth/Gbgt1_set_A.pdf]

# Gbp2

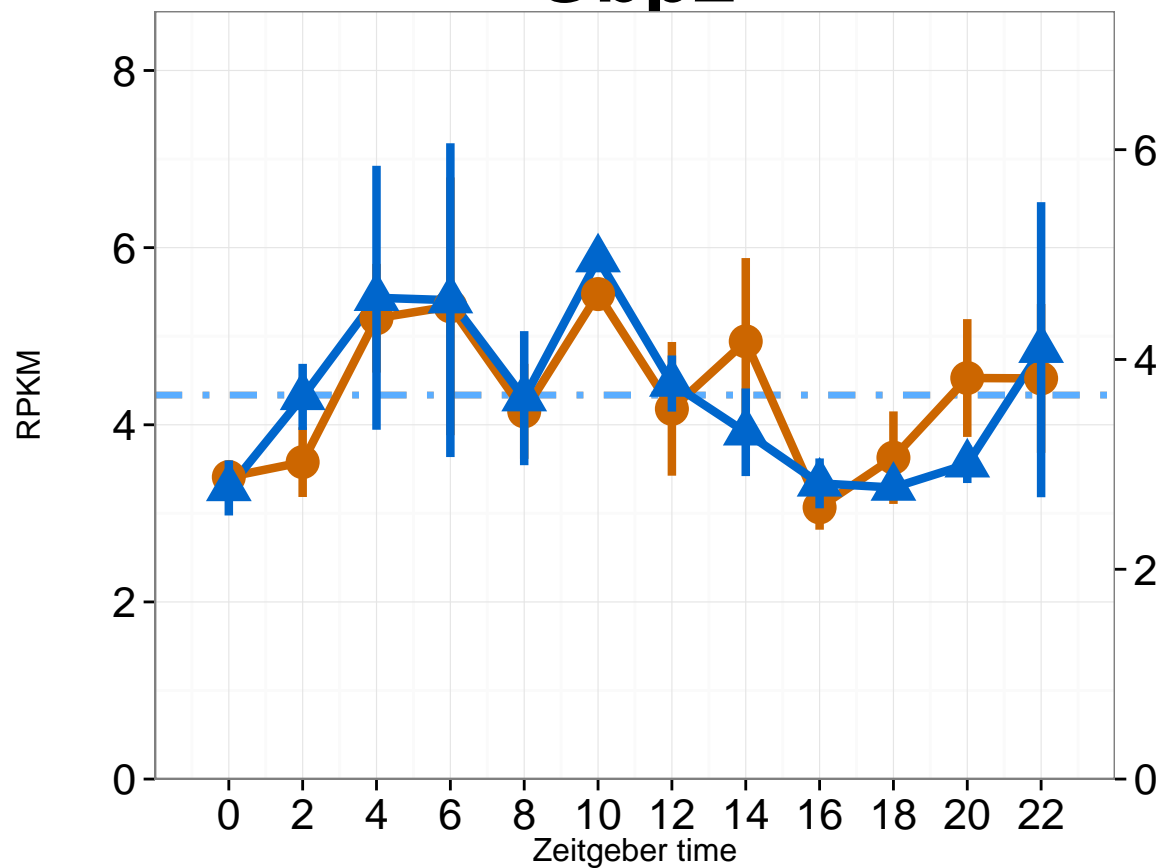

# Gbp2

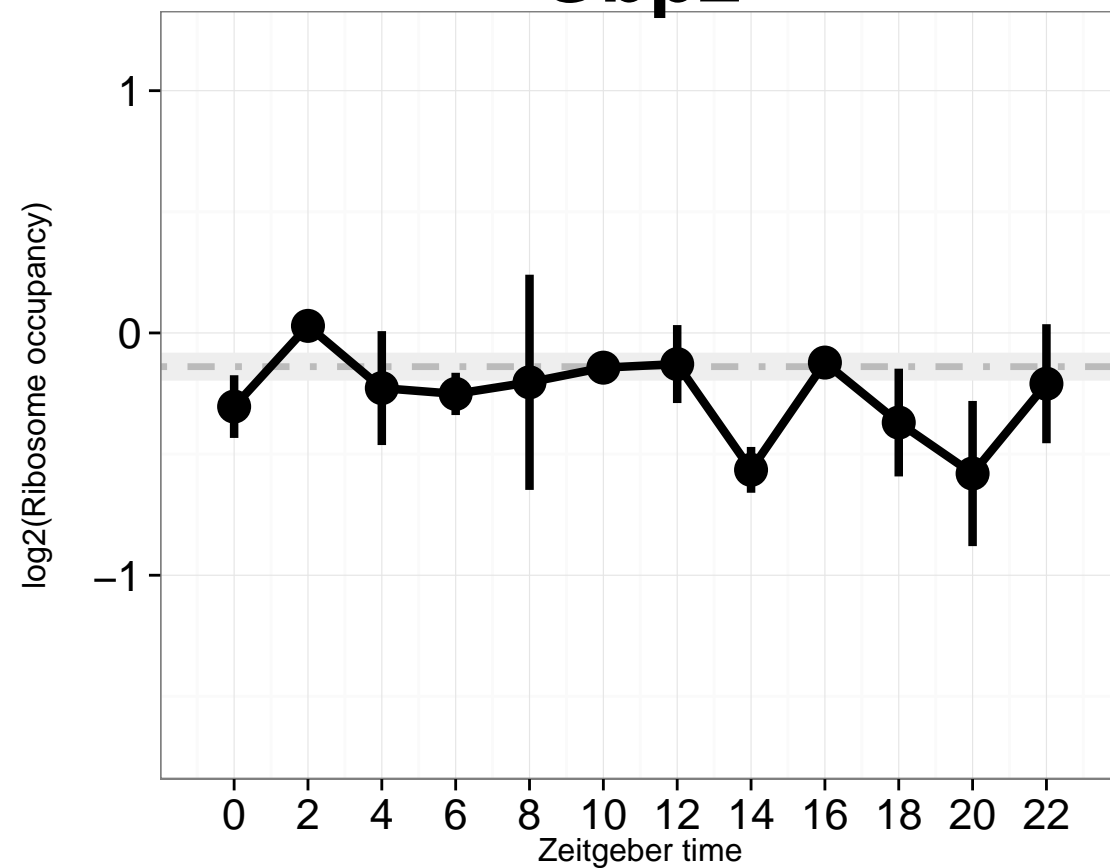

Supplement: SuppDataset_1.zip [file Gbp2_set_A.pdf › Supplemental Dataset 1/A-mRNA_nonrhyth_translation_nonrhyth/Gbp2_set_A.pdf]

# Gbp2b

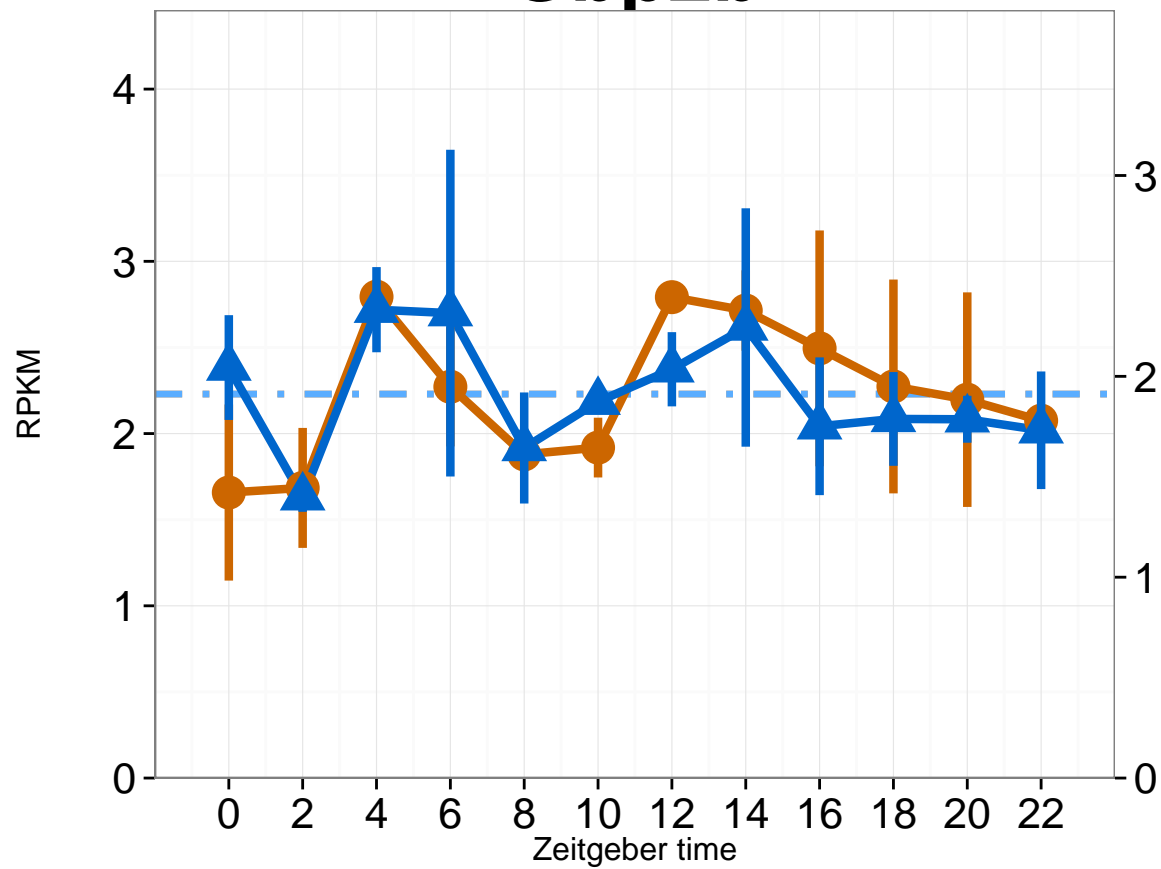

# Gbp2b

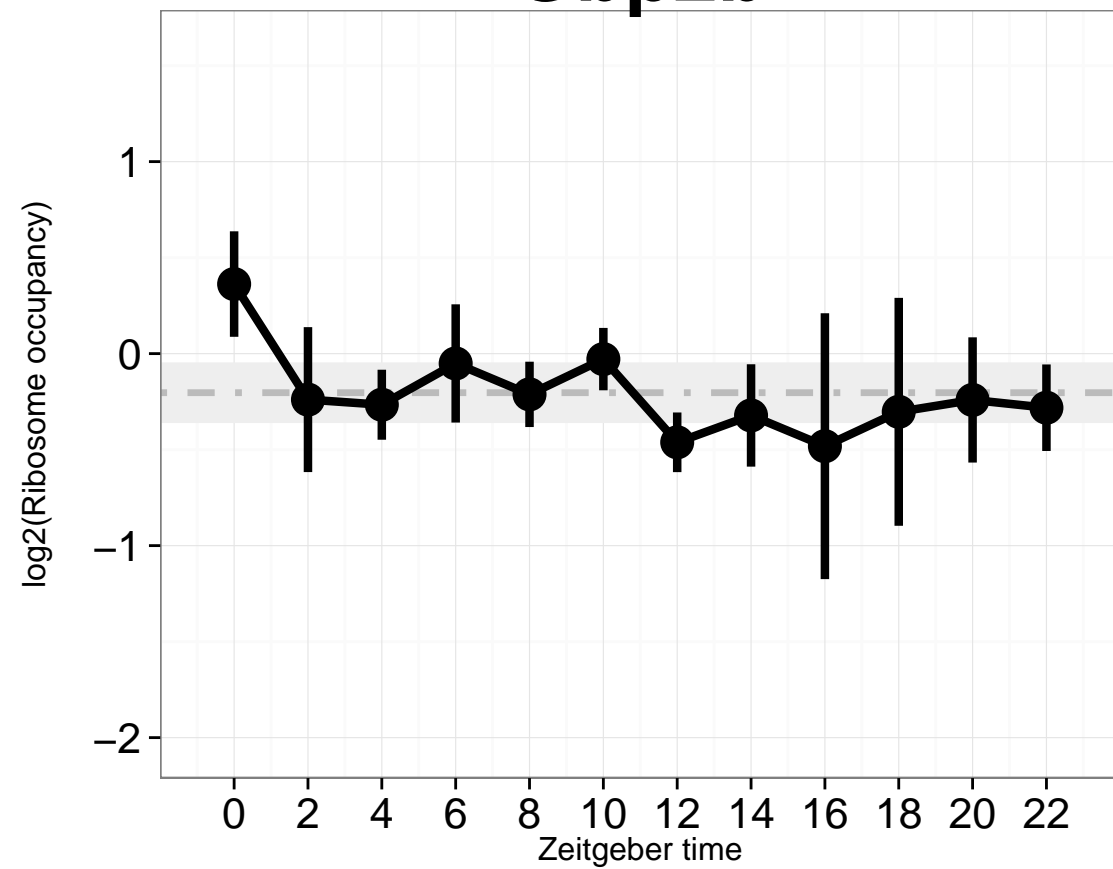

Supplement: SuppDataset_1.zip [file Gbp2b_set_A.pdf › Supplemental Dataset 1/A-mRNA_nonrhyth_translation_nonrhyth/Gbp2b_set_A.pdf]

# Gbp4

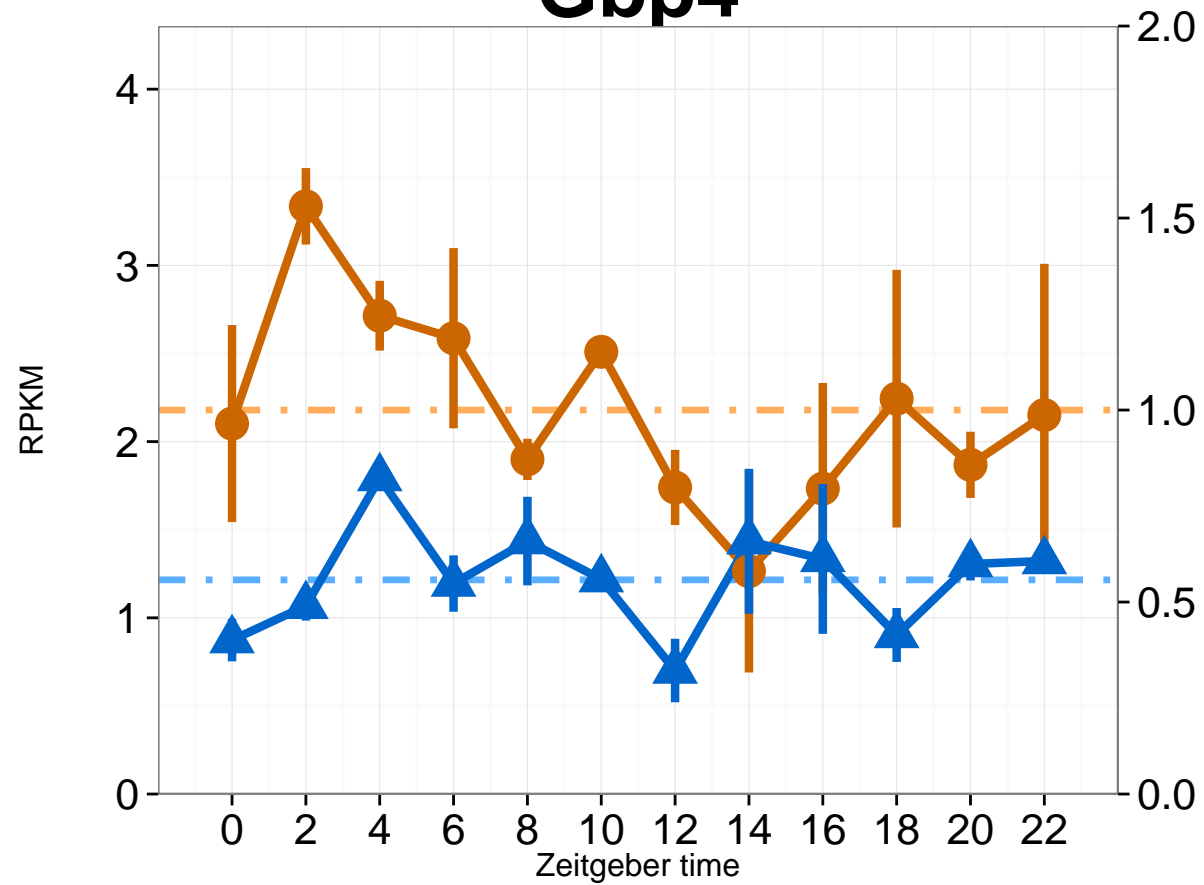

# Gbp4

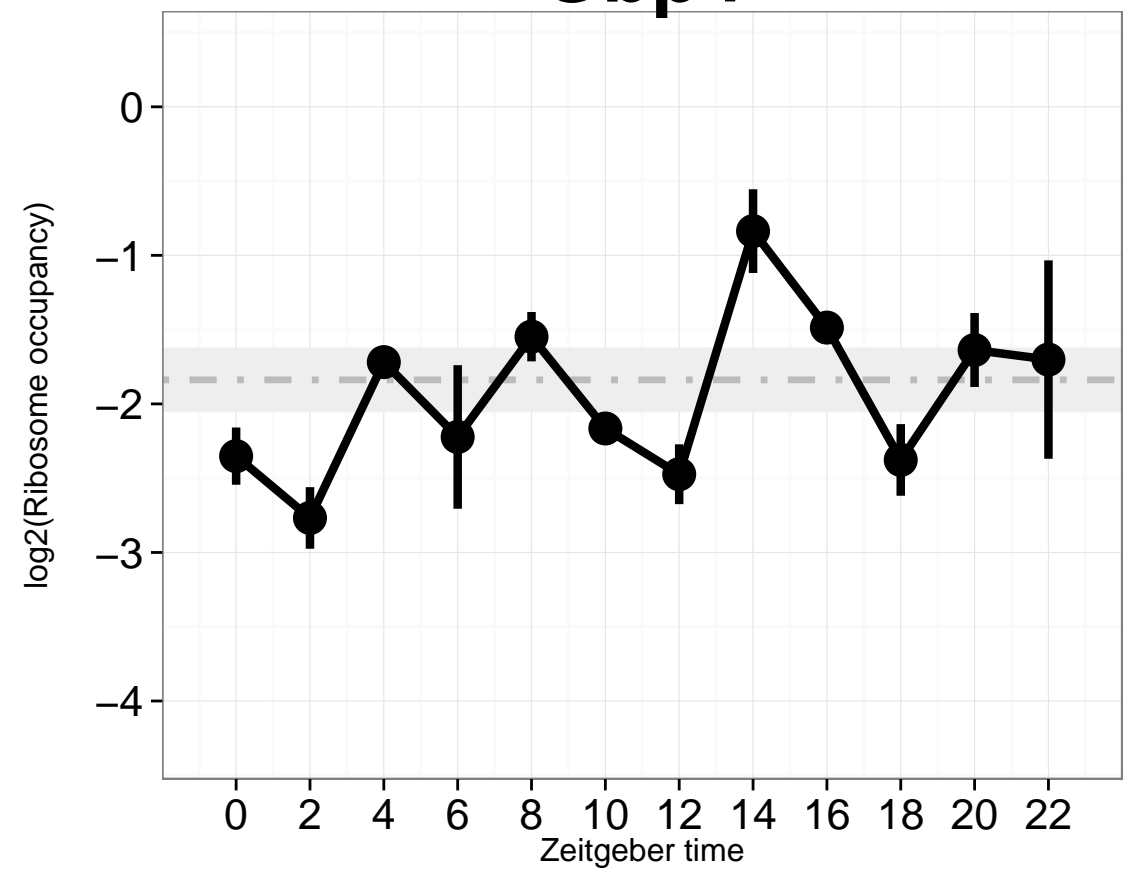

Supplement: SuppDataset_1.zip [file Gbp4_set_A.pdf › Supplemental Dataset 1/A-mRNA_nonrhyth_translation_nonrhyth/Gbp4_set_A.pdf]

## Gbp5

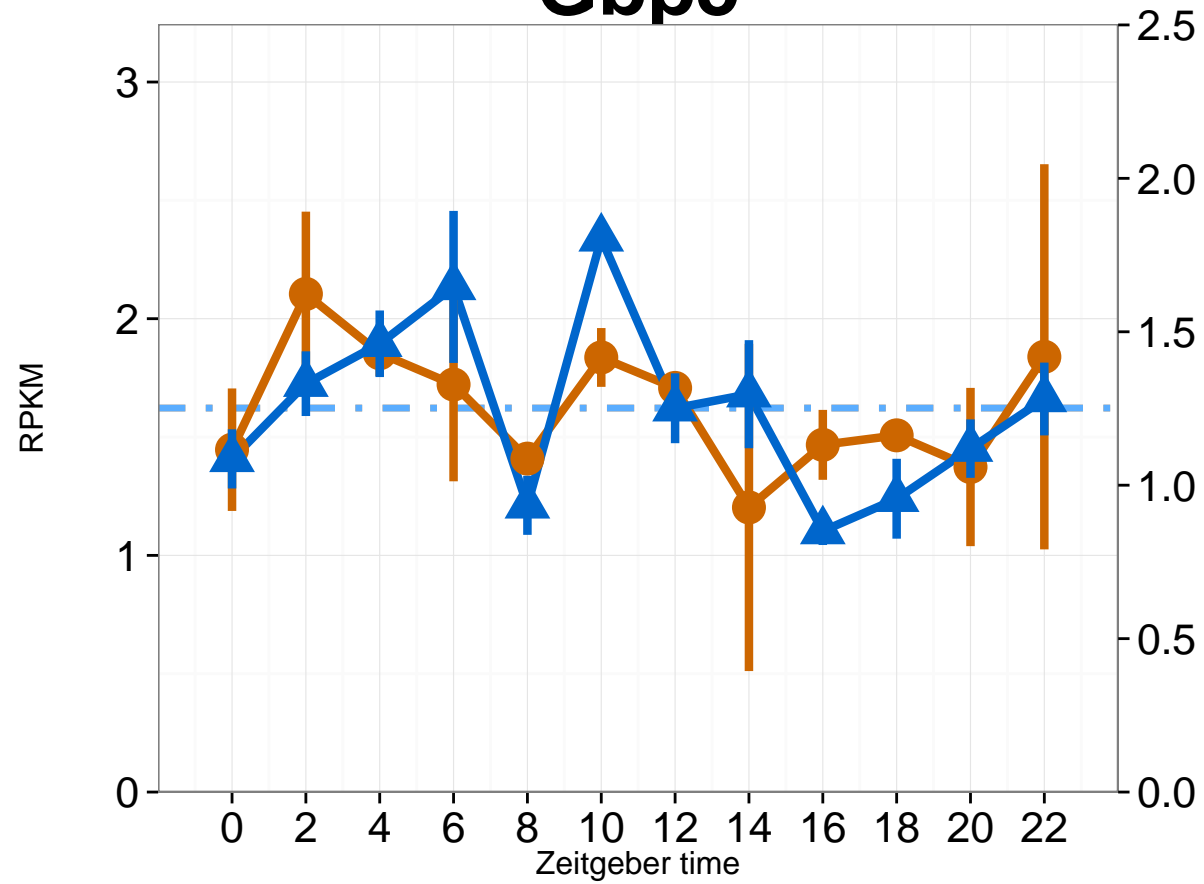

## Gbp5

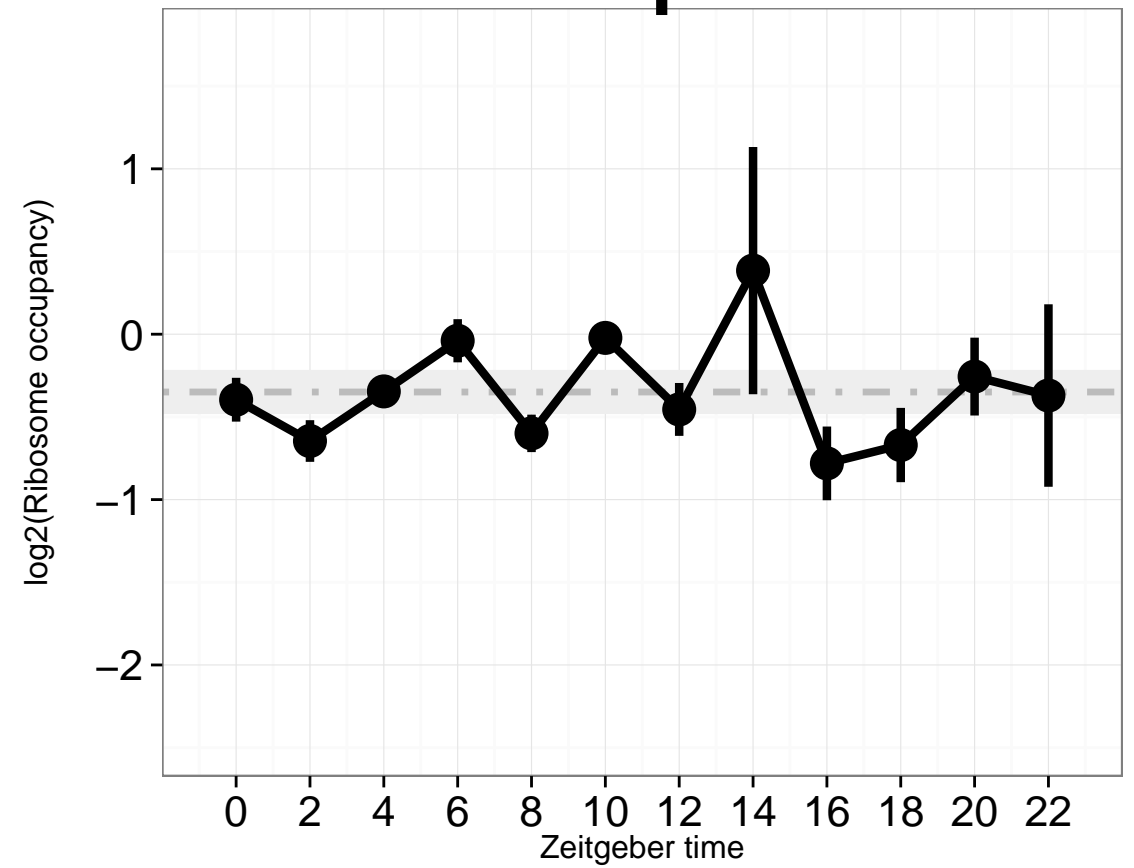

Supplement: SuppDataset_1.zip [file Gbp5_set_A.pdf › Supplemental Dataset 1/A-mRNA_nonrhyth_translation_nonrhyth/Gbp5_set_A.pdf]

# Gbp7

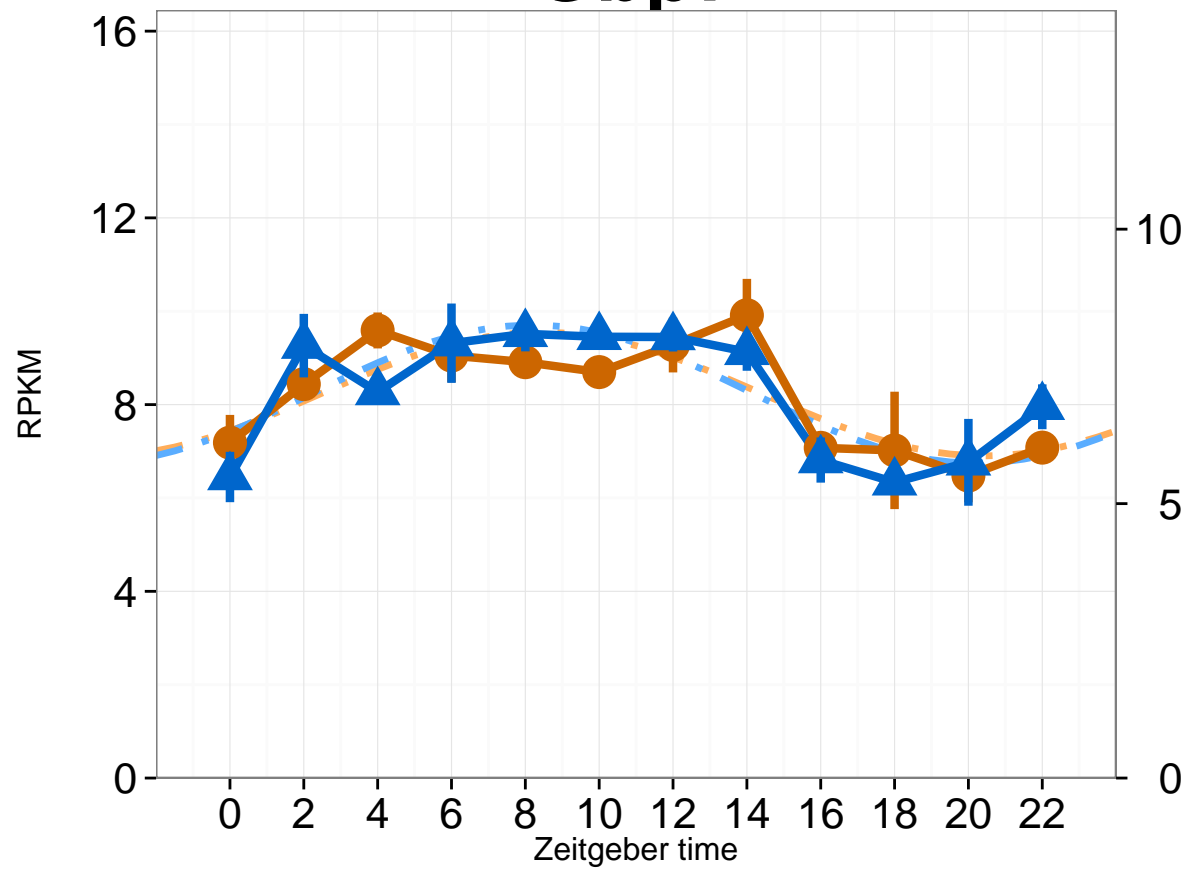

# Gbp7

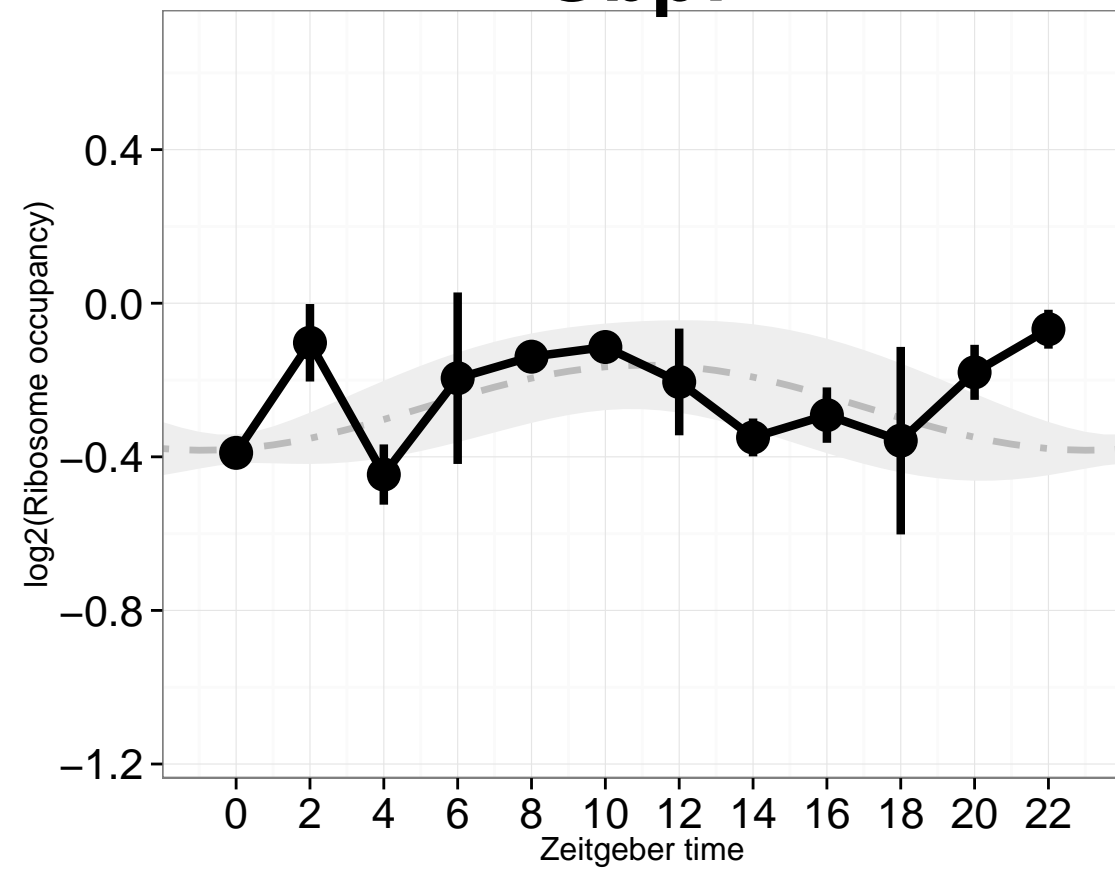

Supplement: SuppDataset_1.zip [file Gbp7_set_A.pdf › Supplemental Dataset 1/A-mRNA_nonrhyth_translation_nonrhyth/Gbp7_set_A.pdf]

**Gc**

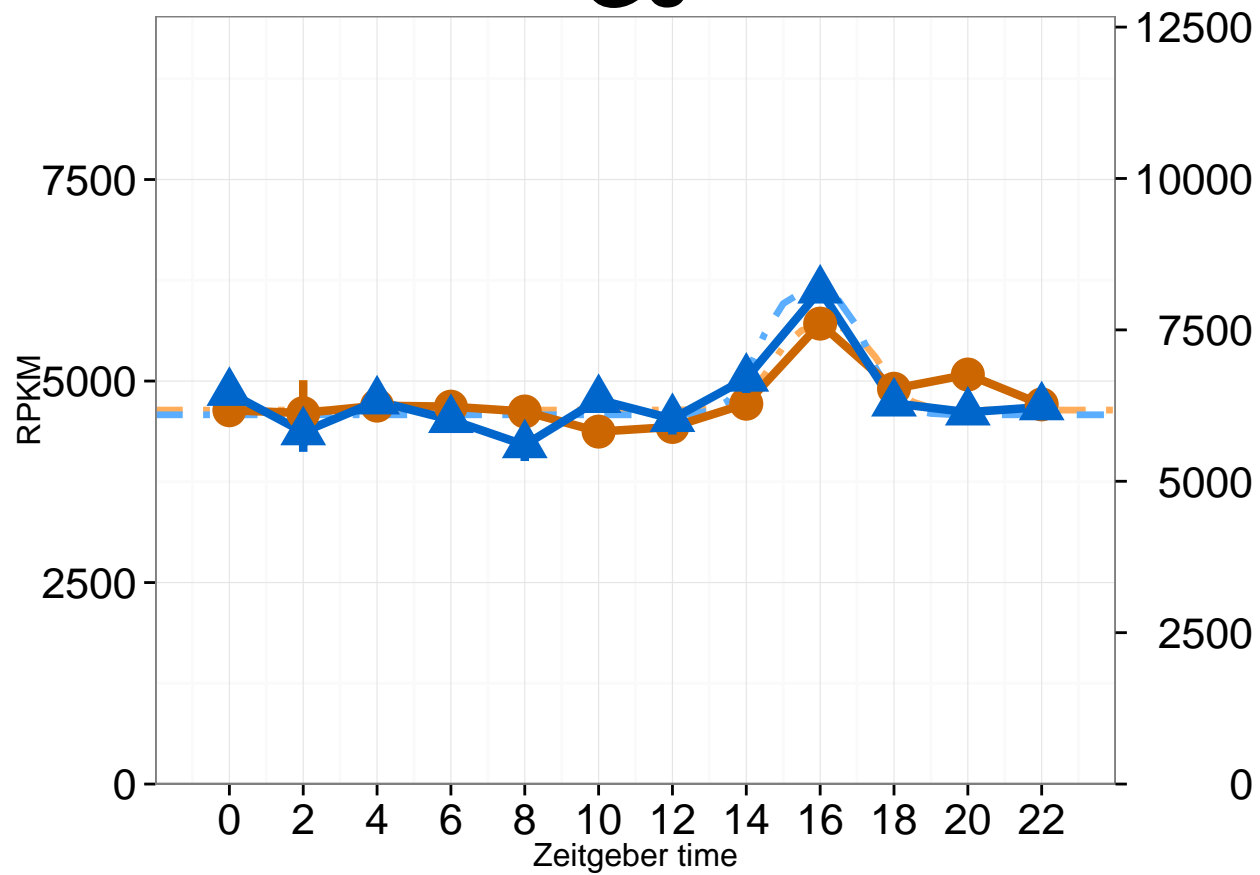

**Gc**

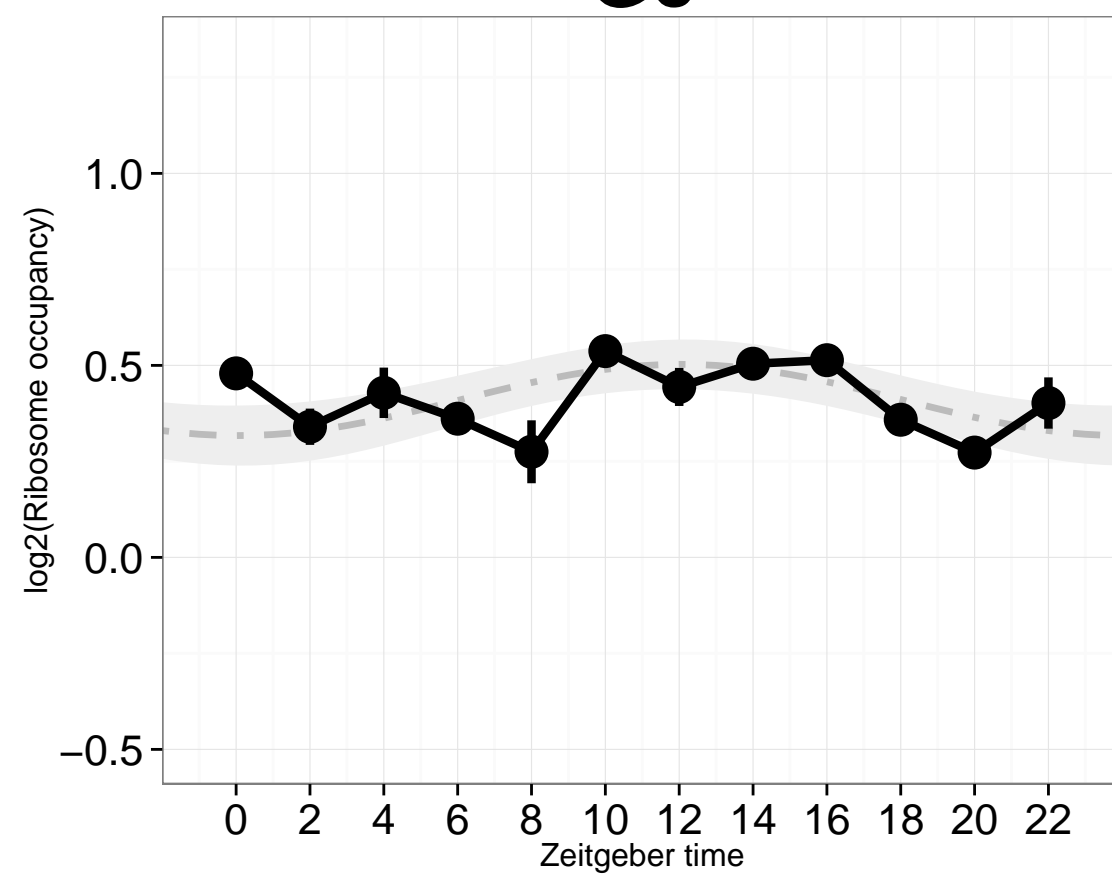

Supplement: SuppDataset_1.zip [file Gc_set_A.pdf › Supplemental Dataset 1/A-mRNA_nonrhyth_translation_nonrhyth/Gc_set_A.pdf]

## Gca

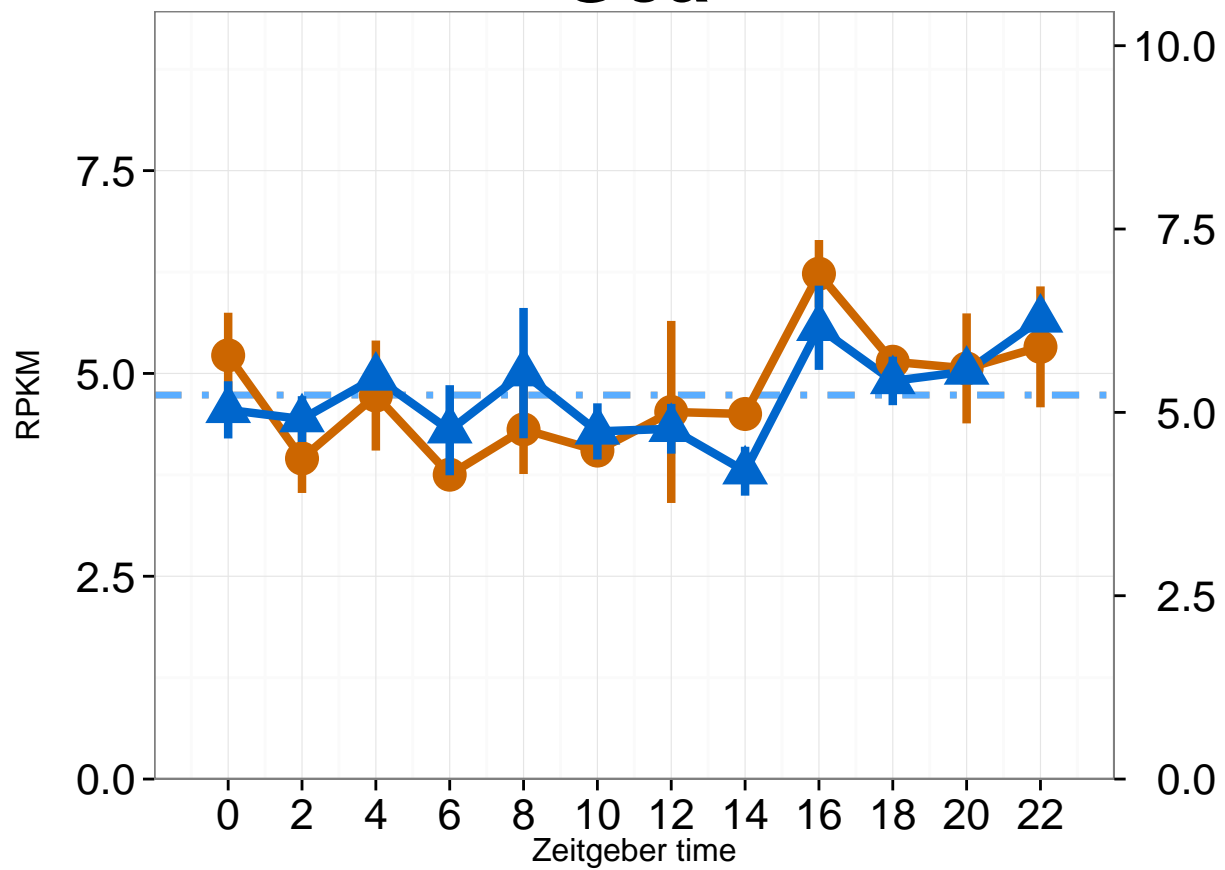

## Gca

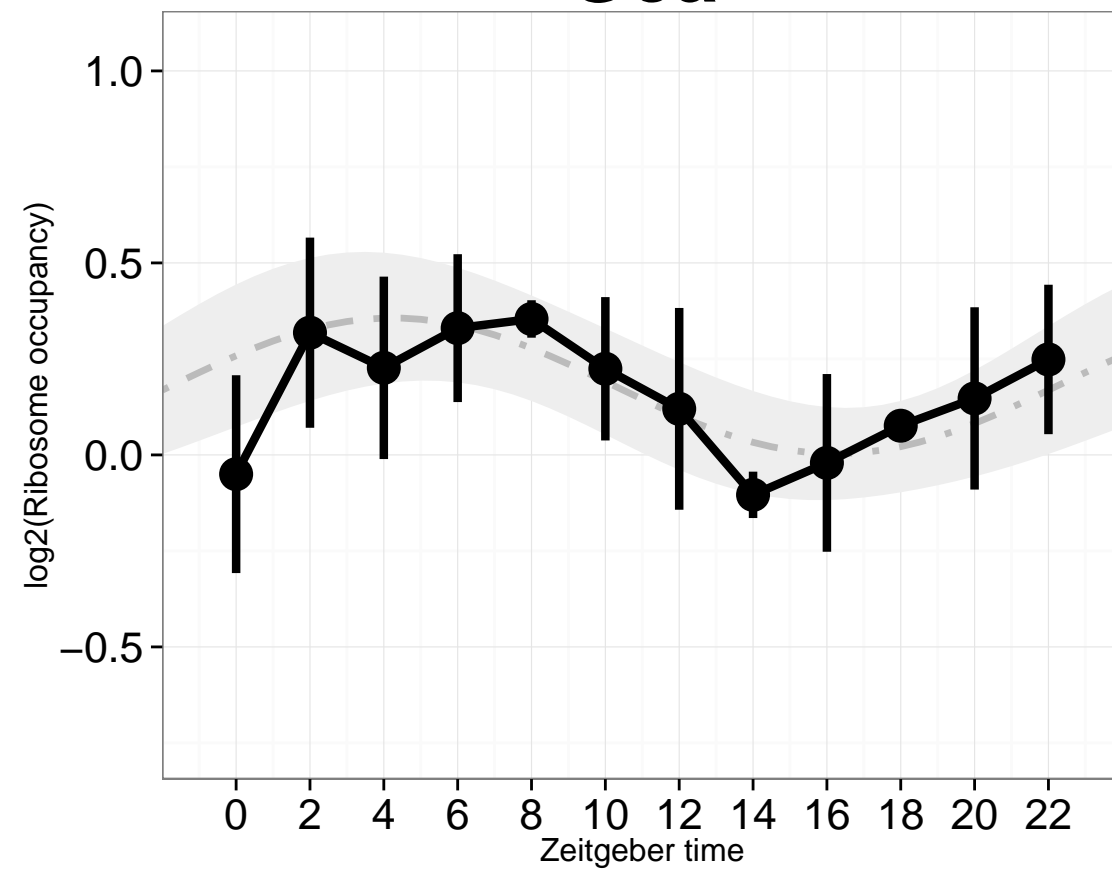

Supplement: SuppDataset_1.zip [file Gca_set_A.pdf › Supplemental Dataset 1/A-mRNA_nonrhyth_translation_nonrhyth/Gca_set_A.pdf]

## Gcc2

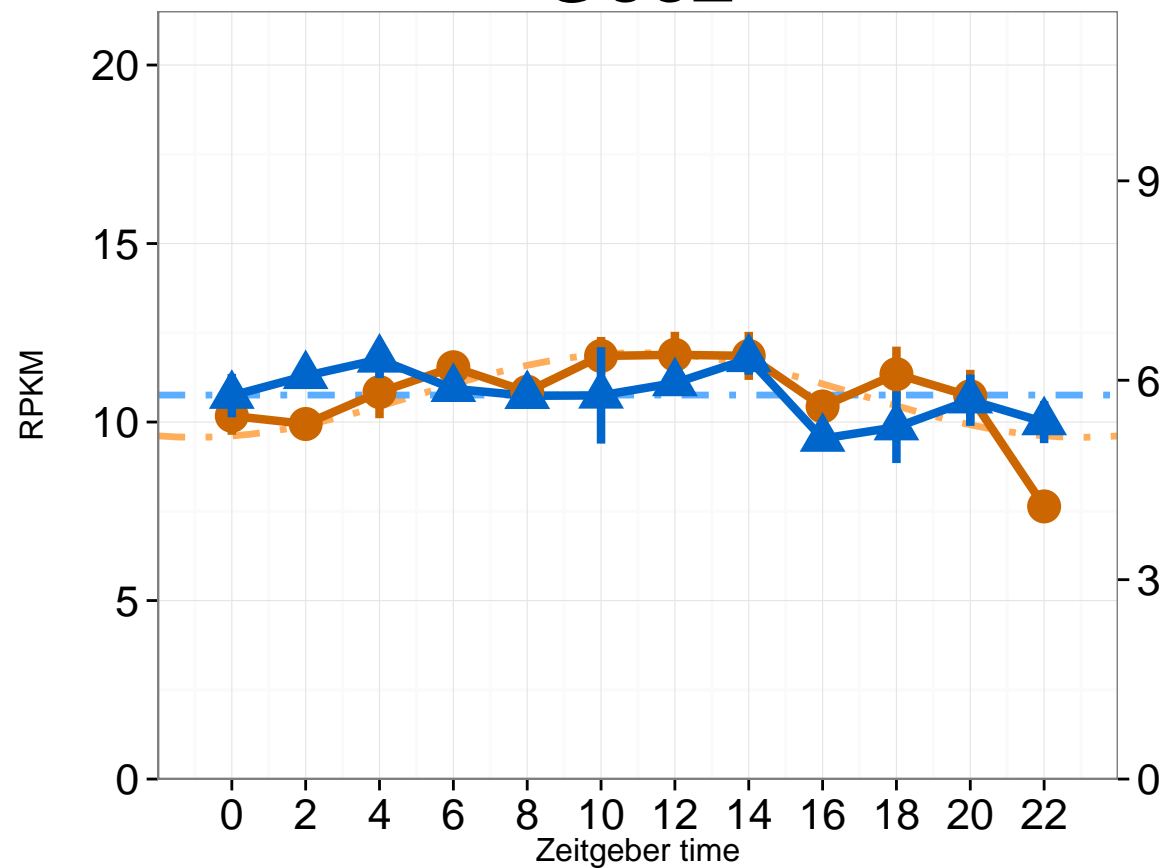

## Gcc2

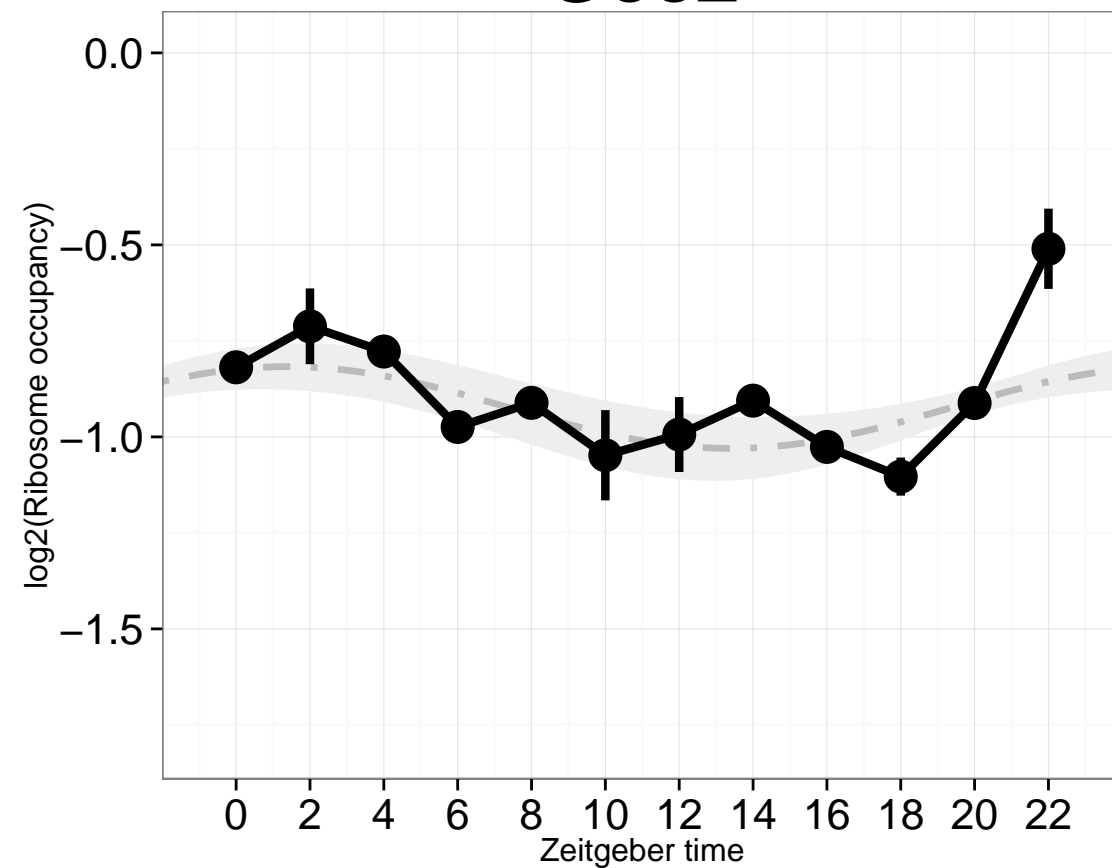

Supplement: SuppDataset_1.zip [file Gcc2_set_A.pdf › Supplemental Dataset 1/A-mRNA_nonrhyth_translation_nonrhyth/Gcc2_set_A.pdf]

## Gcdh

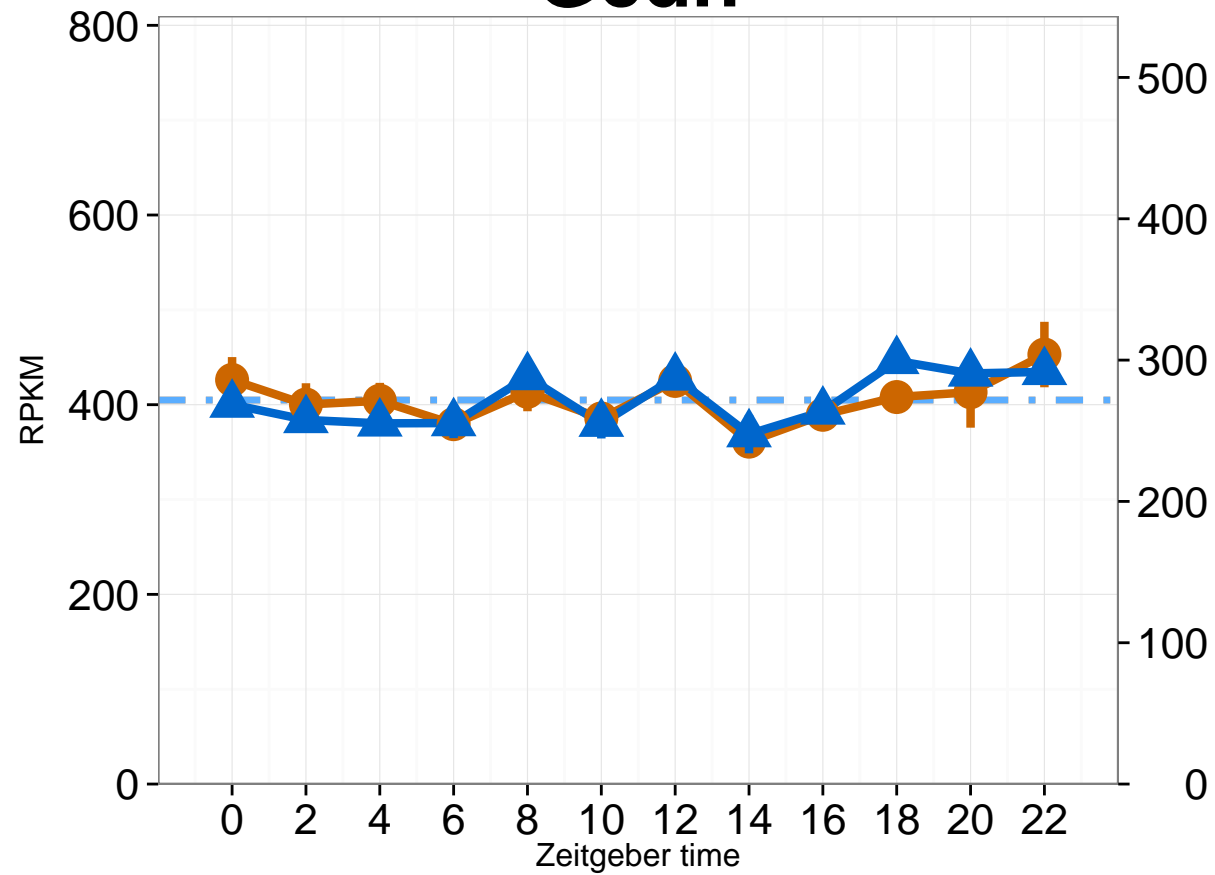

## Gcdh

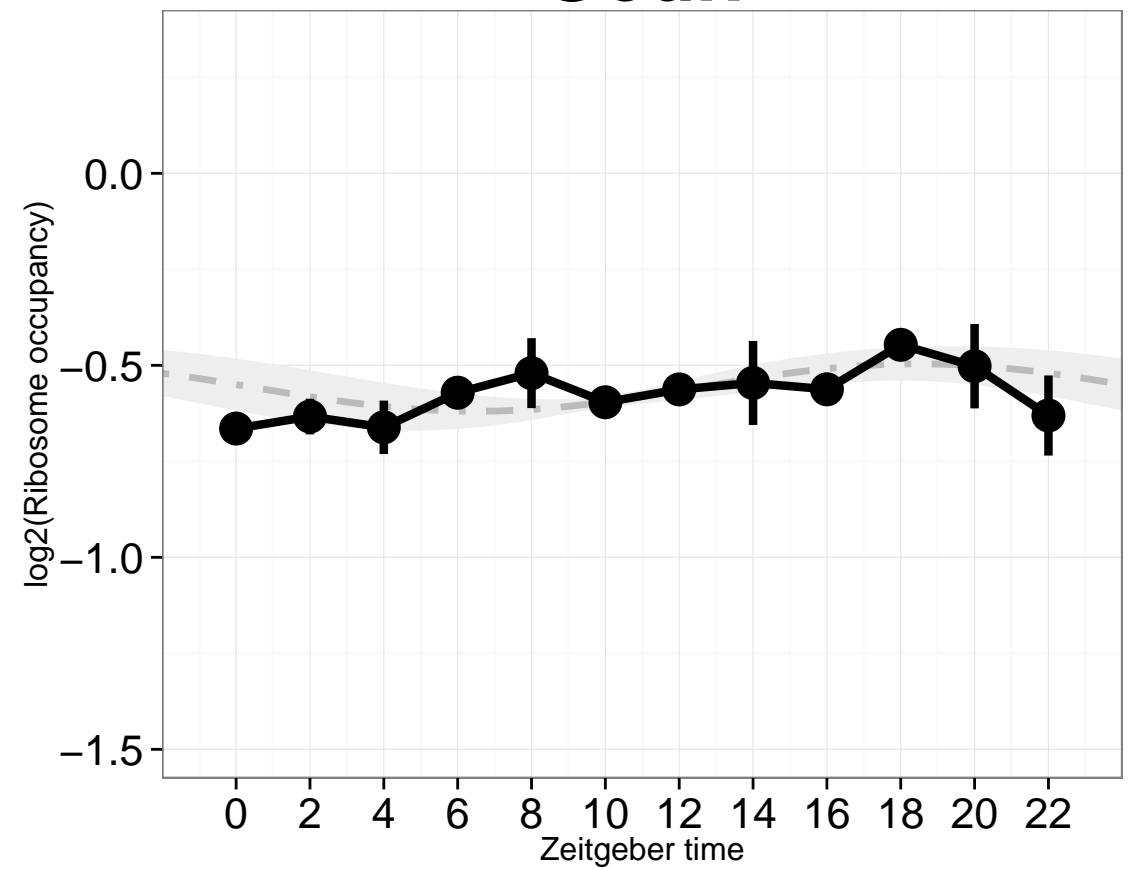

Supplement: SuppDataset_1.zip [file Gcdh_set_A.pdf › Supplemental Dataset 1/A-mRNA_nonrhyth_translation_nonrhyth/Gcdh_set_A.pdf]

## Gcfc2

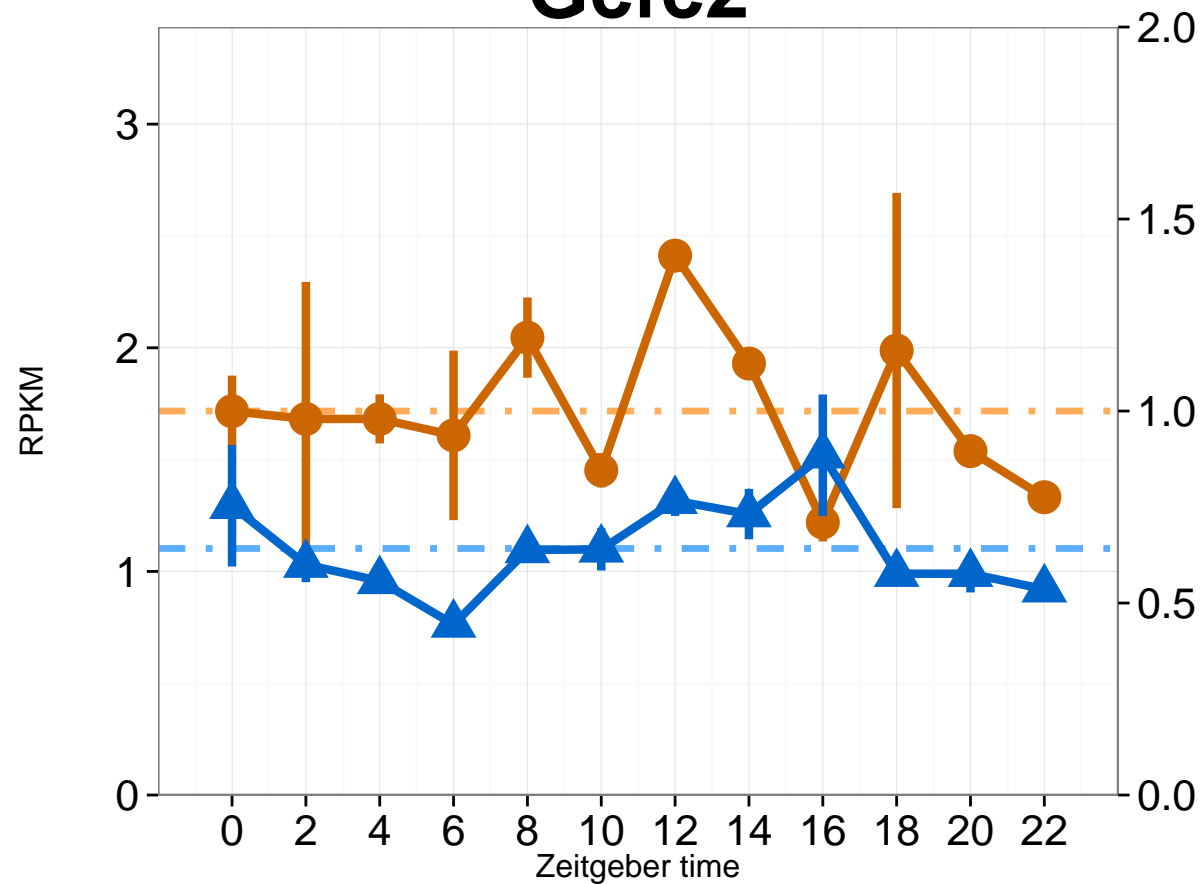

## Gcfc2

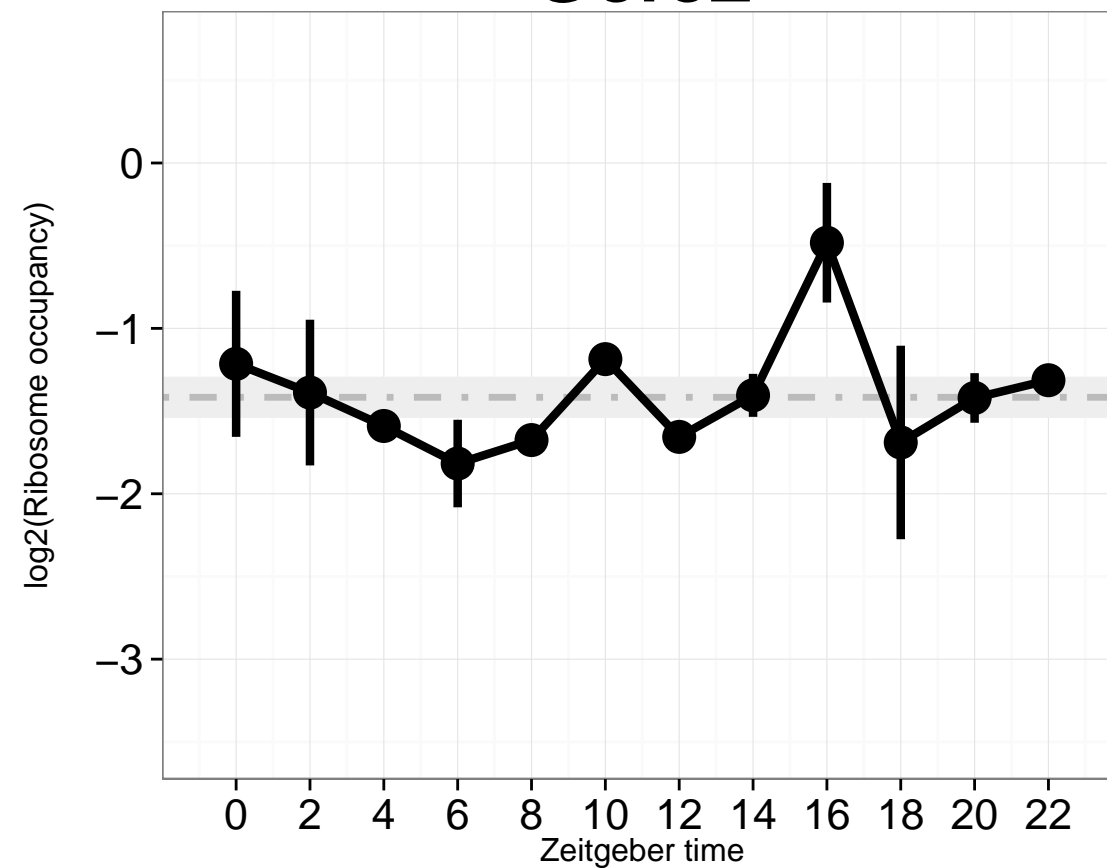

Supplement: SuppDataset_1.zip [file Gcfc2_set_A.pdf › Supplemental Dataset 1/A-mRNA_nonrhyth_translation_nonrhyth/Gcfc2_set_A.pdf]

# Gcgr

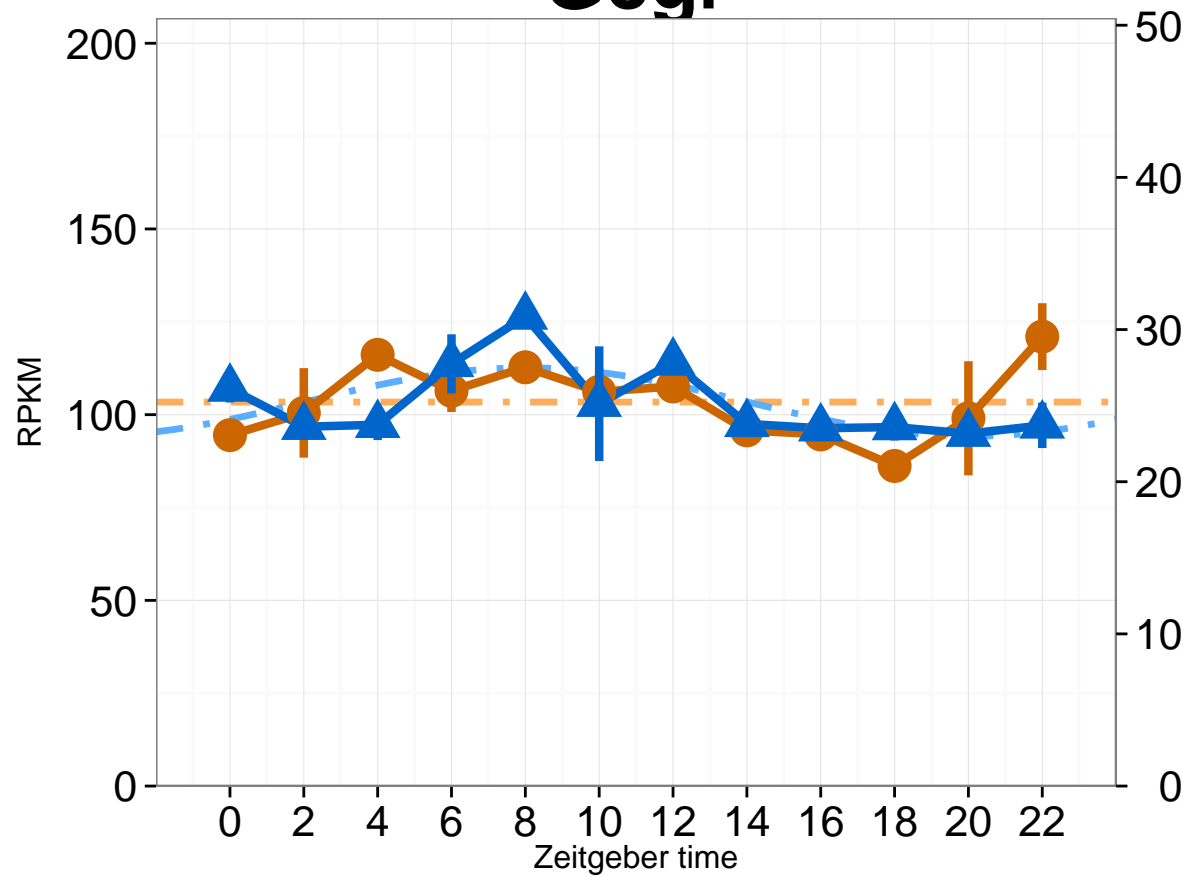

# Gcgr

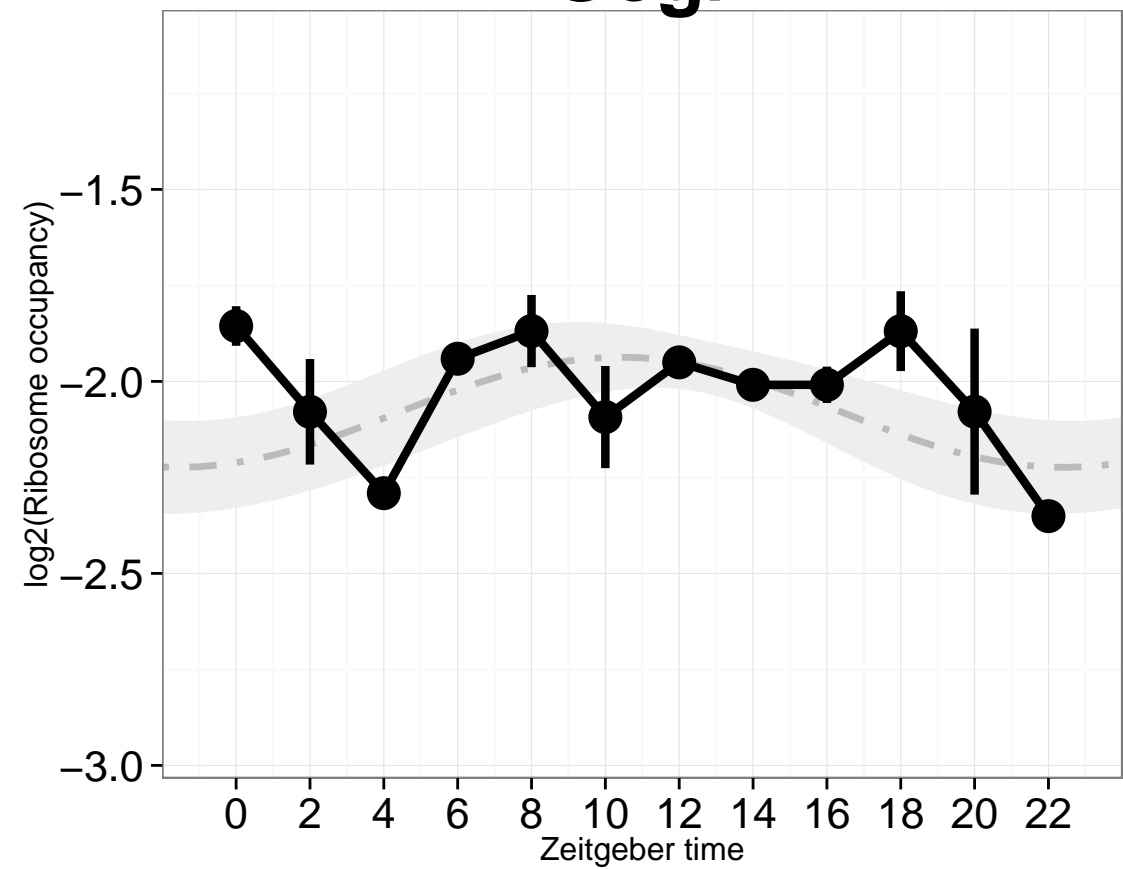

Supplement: SuppDataset_1.zip [file Gcgr_set_A.pdf › Supplemental Dataset 1/A-mRNA_nonrhyth_translation_nonrhyth/Gcgr_set_A.pdf]

## Gckr

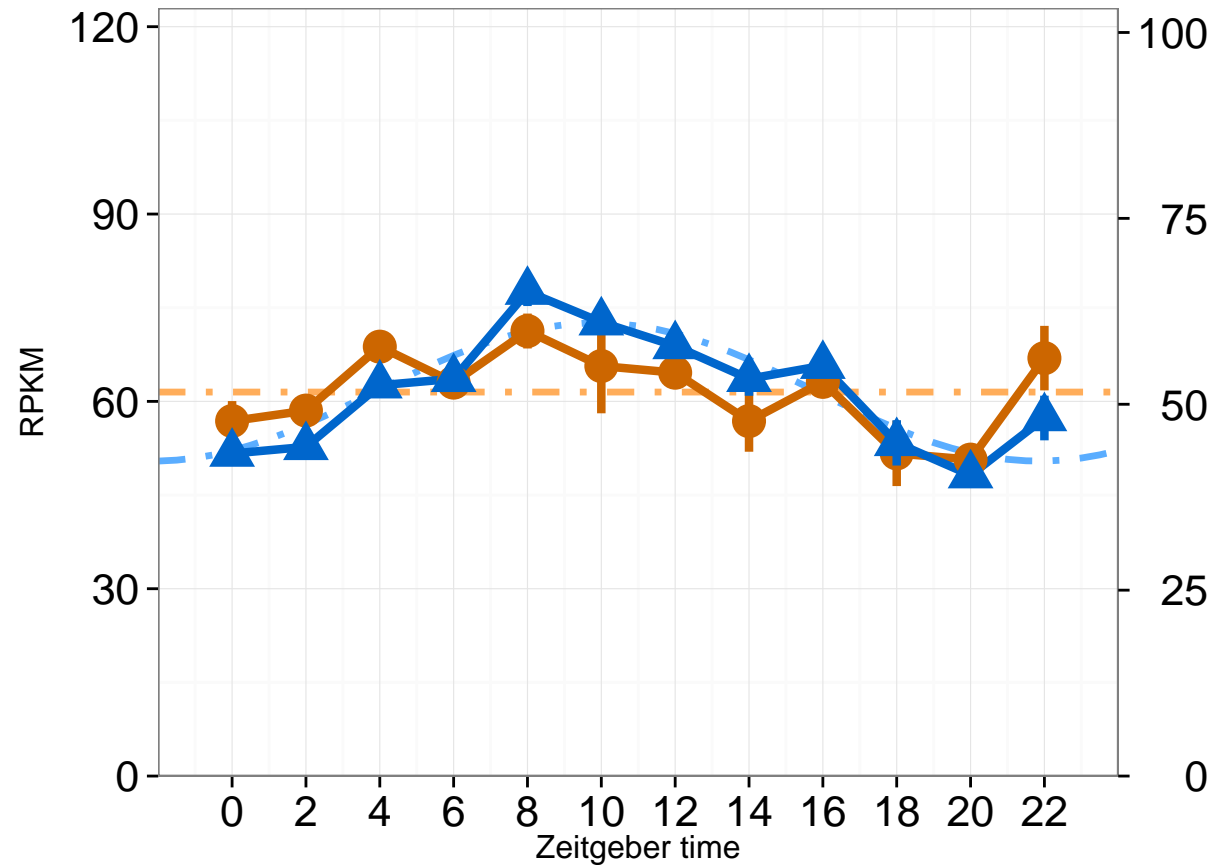

## Gckr

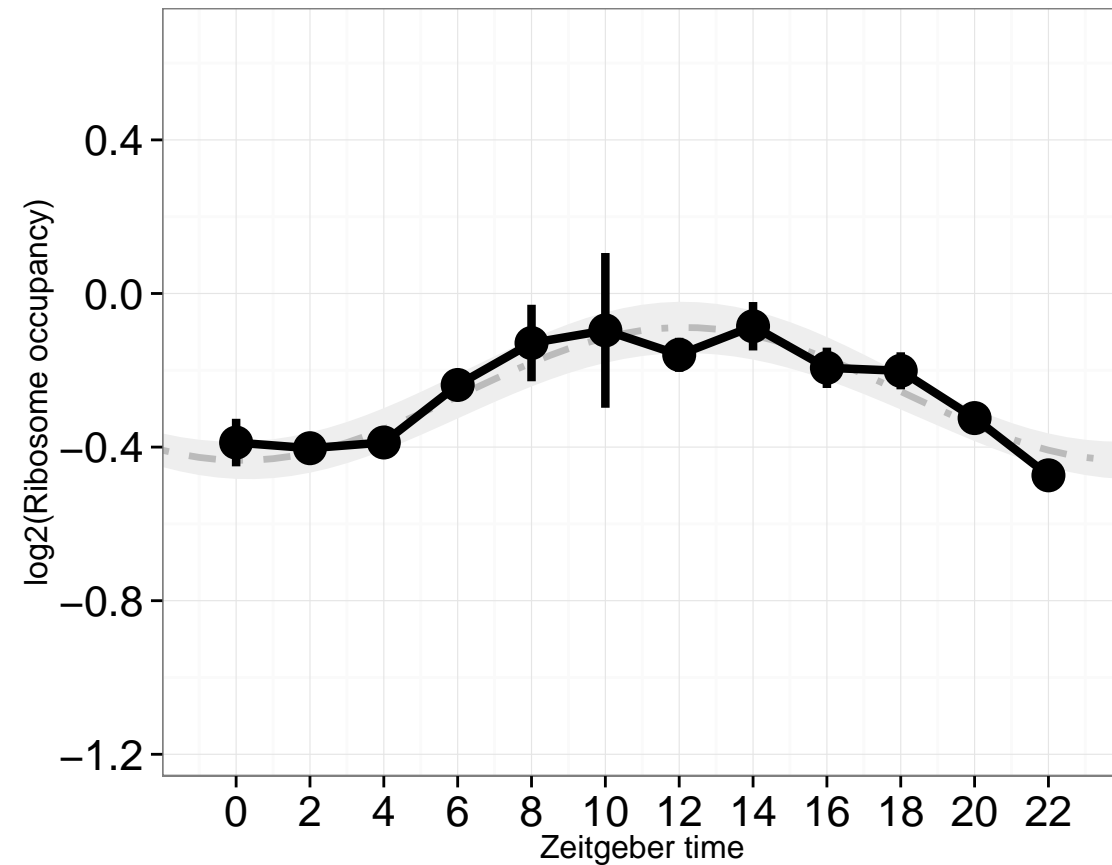

Supplement: SuppDataset_1.zip [file Gckr_set_A.pdf › Supplemental Dataset 1/A-mRNA_nonrhyth_translation_nonrhyth/Gckr_set_A.pdf]

## Gclm

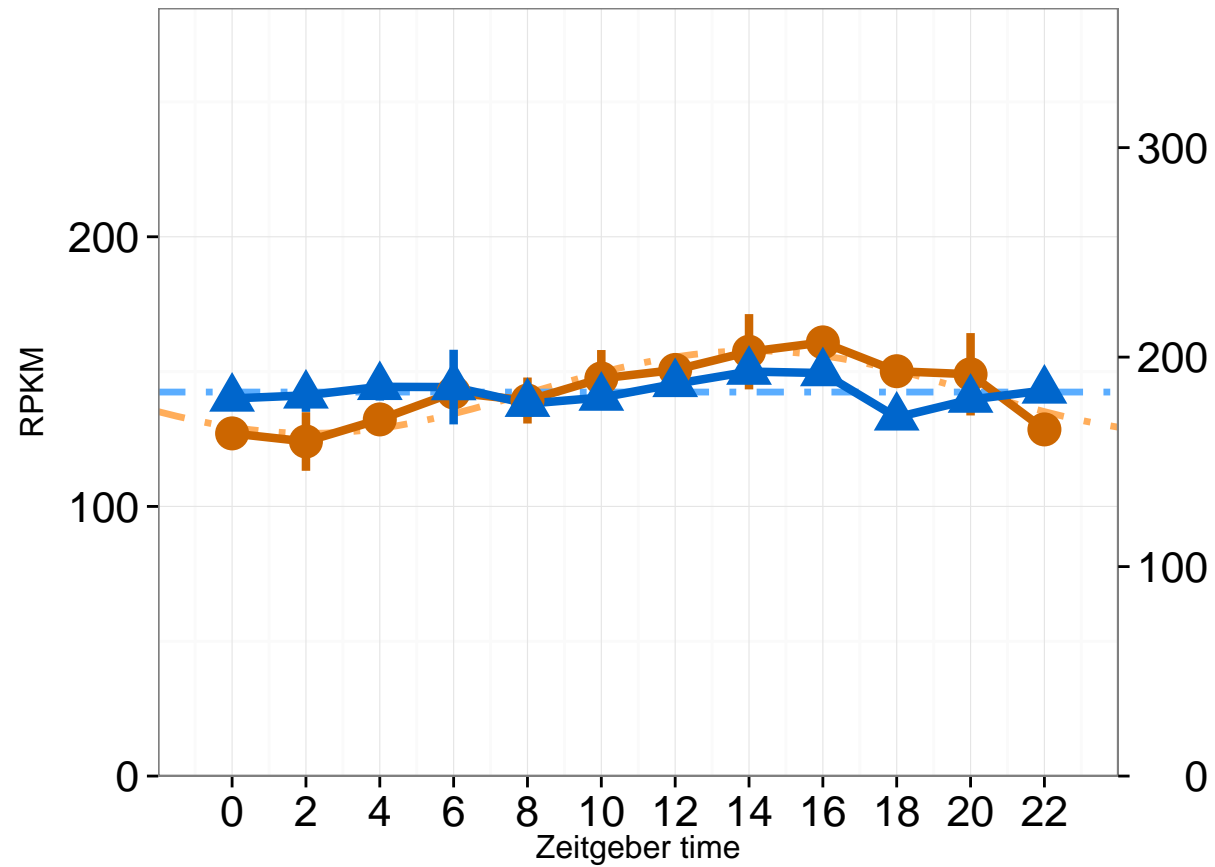

## Gclm

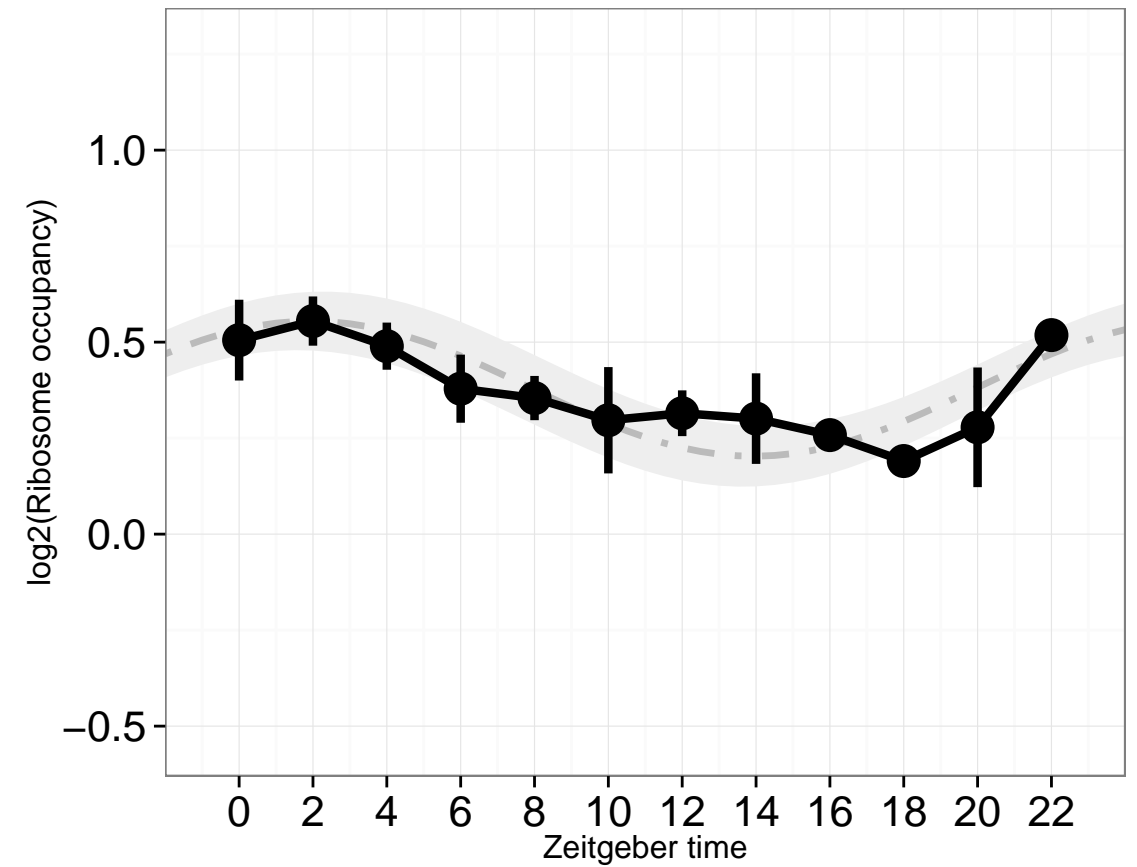

Supplement: SuppDataset_1.zip [file Gclm_set_A.pdf › Supplemental Dataset 1/A-mRNA_nonrhyth_translation_nonrhyth/Gclm_set_A.pdf]

## Gcn1l1

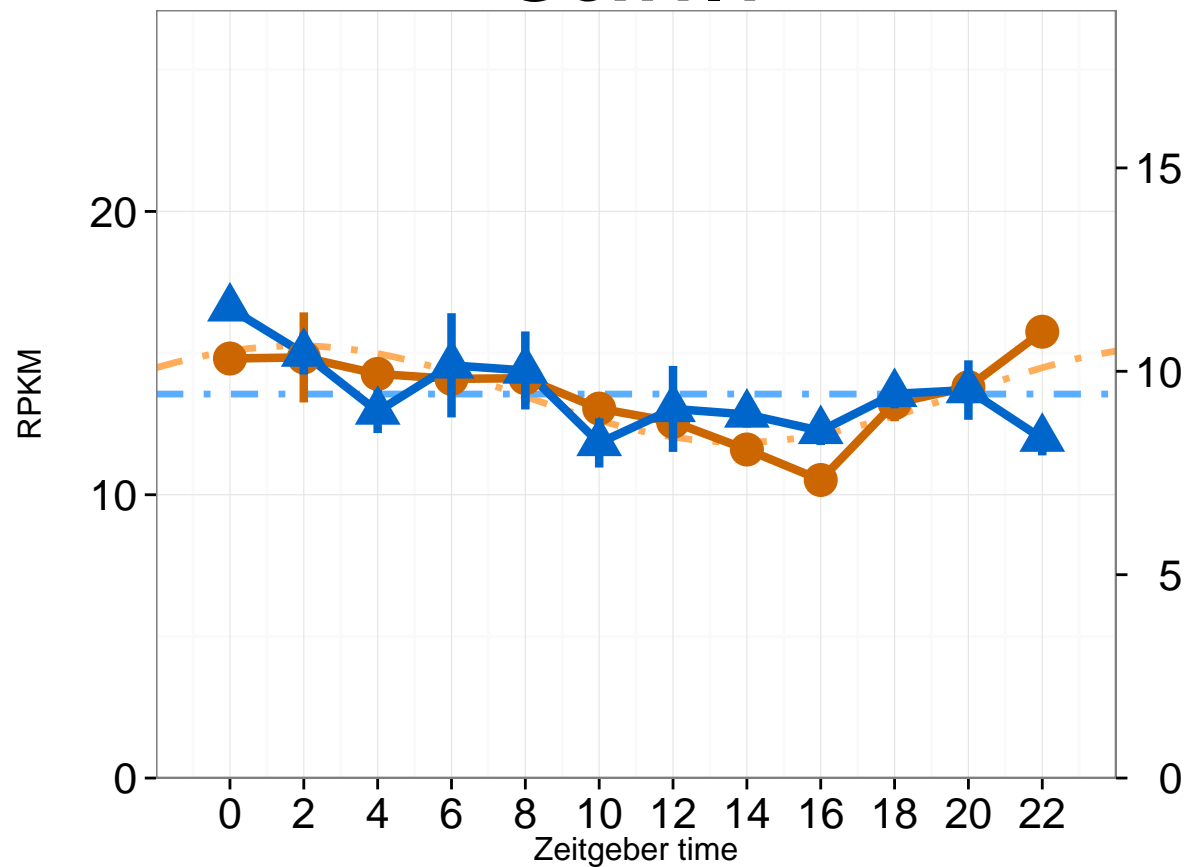

## Gcn1l1

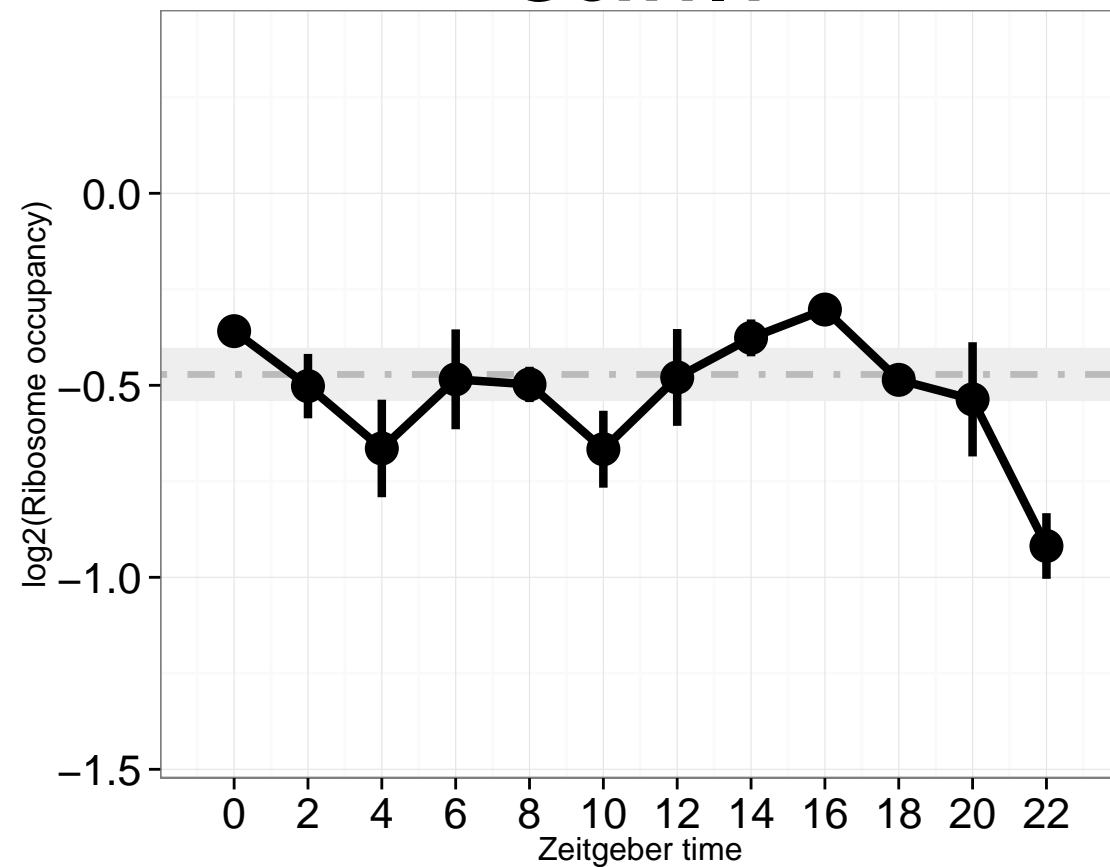

Supplement: SuppDataset_1.zip [file Gcn1l1_set_A.pdf › Supplemental Dataset 1/A-mRNA_nonrhyth_translation_nonrhyth/Gcn1l1_set_A.pdf]

## Gcnt4

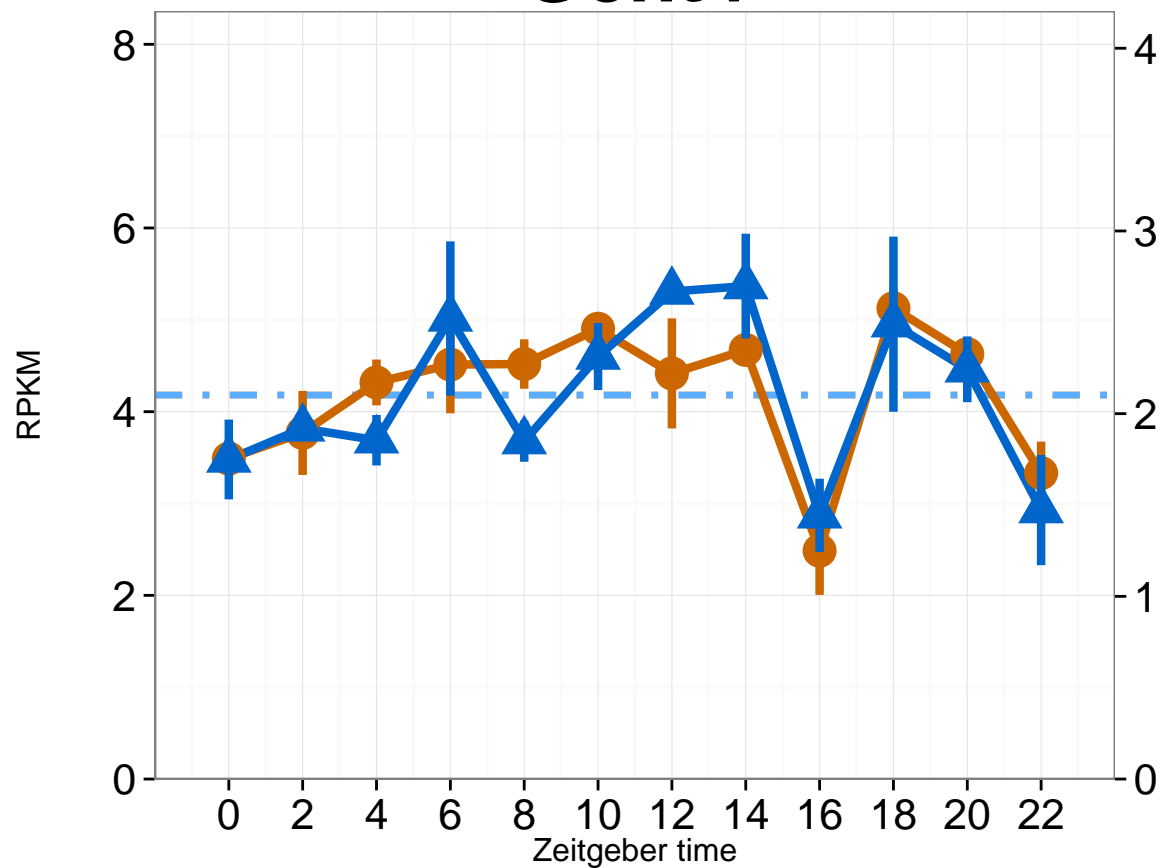

## Gcnt4

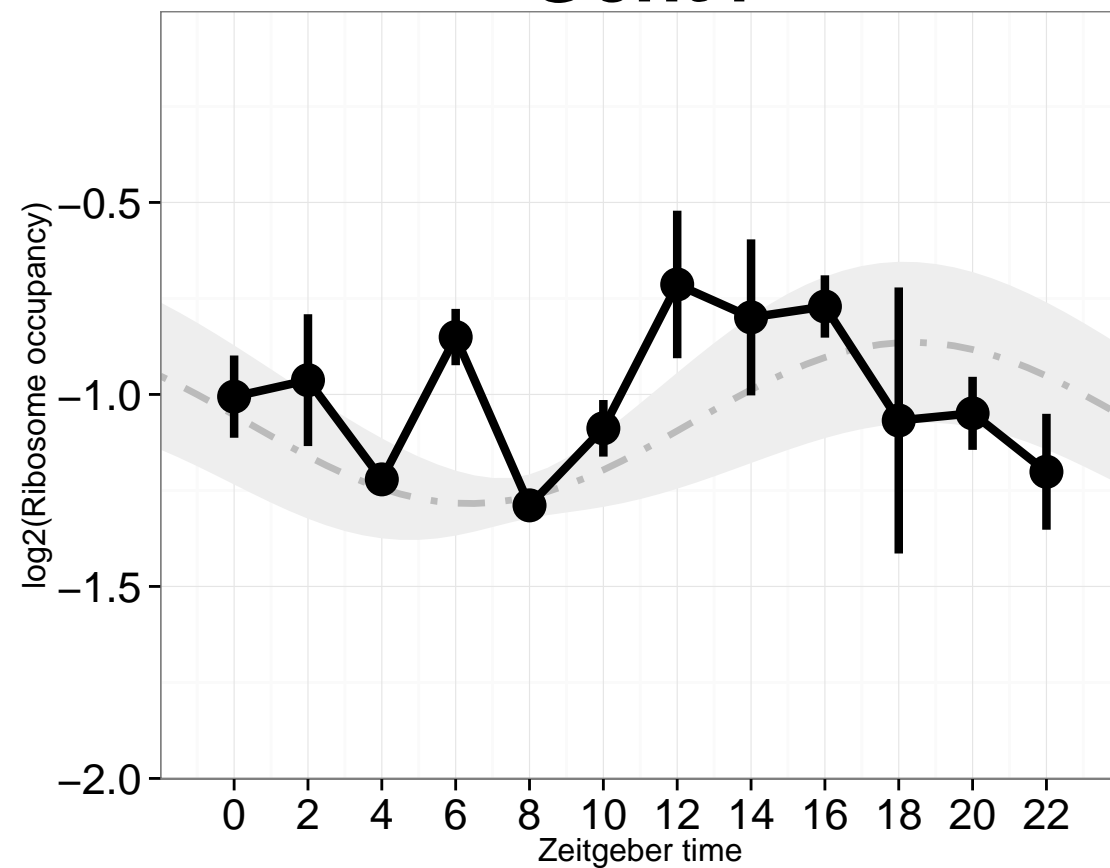

Supplement: SuppDataset_1.zip [file Gcnt4_set_A.pdf › Supplemental Dataset 1/A-mRNA_nonrhyth_translation_nonrhyth/Gcnt4_set_A.pdf]

## Gcsh

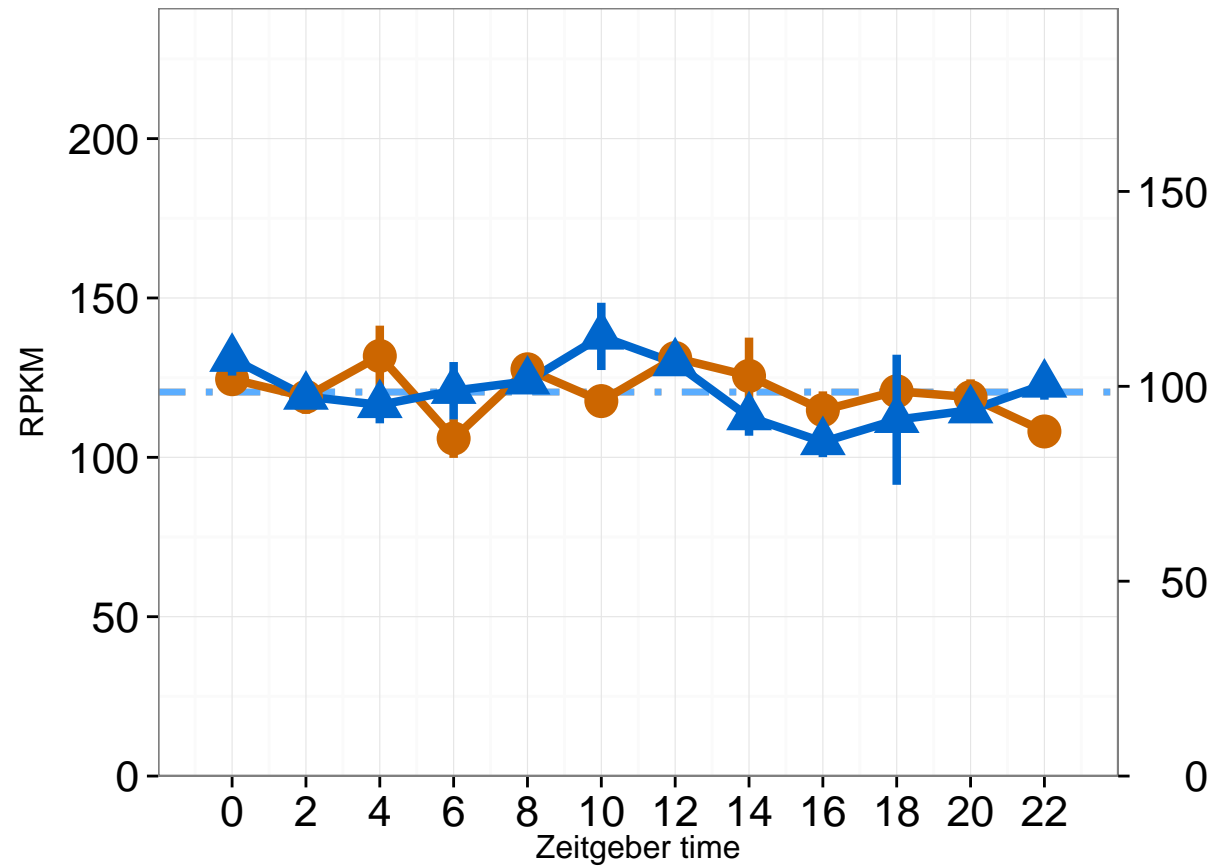

## Gcsh

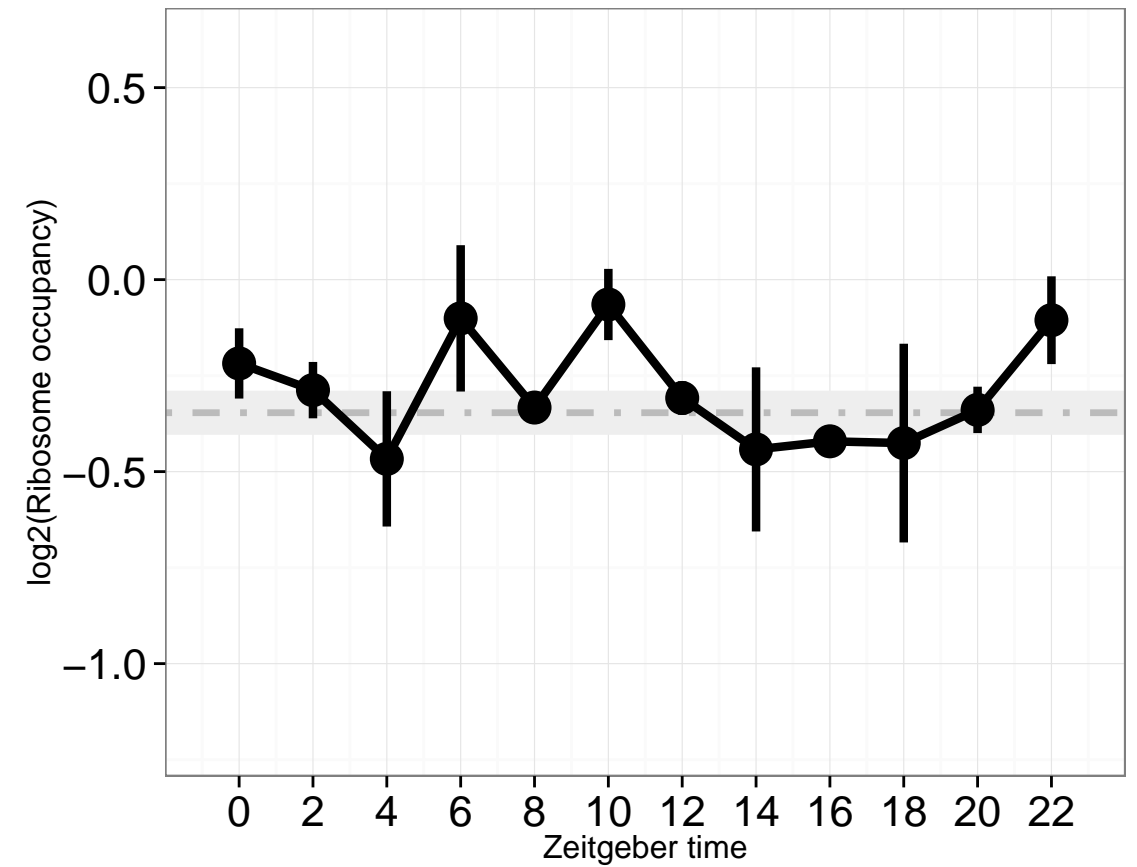

Supplement: SuppDataset_1.zip [file Gcsh_set_A.pdf › Supplemental Dataset 1/A-mRNA_nonrhyth_translation_nonrhyth/Gcsh_set_A.pdf]

## Gdap2

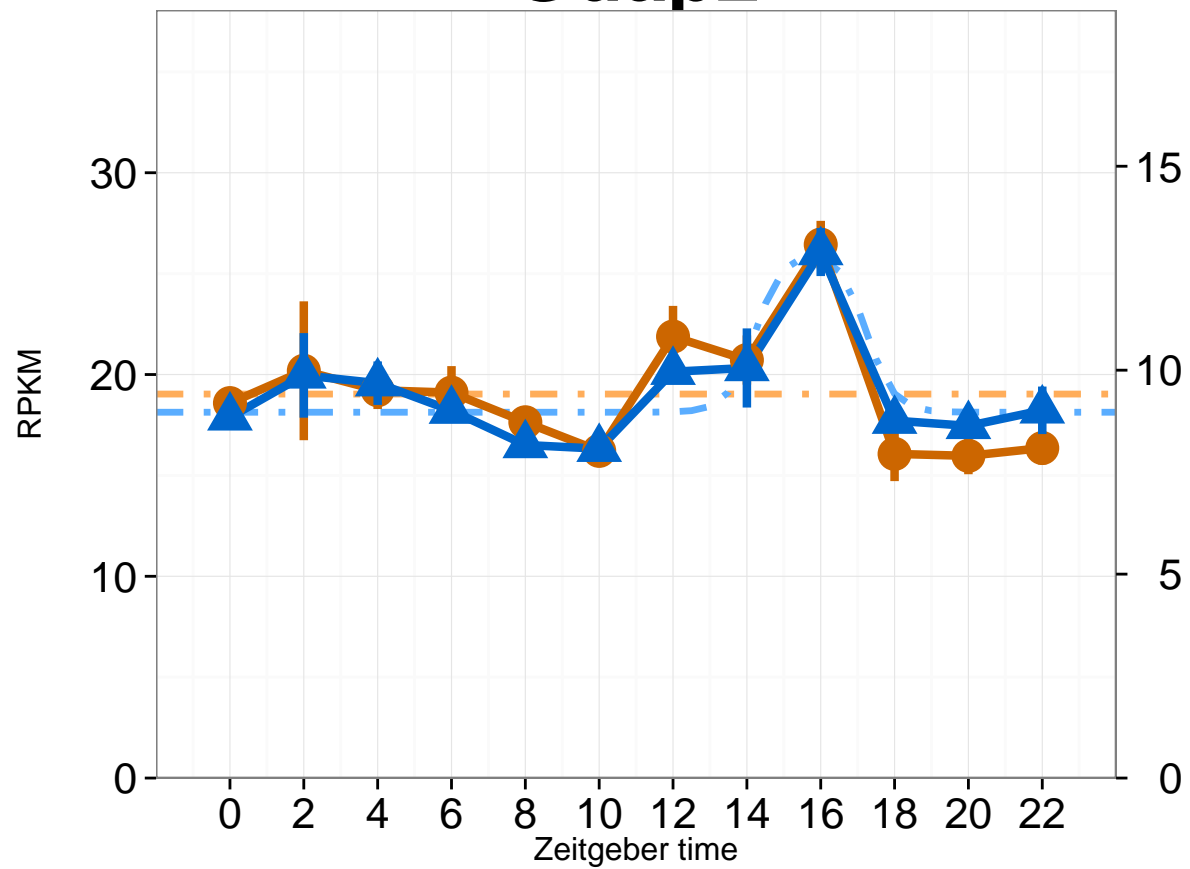

## Gdap2

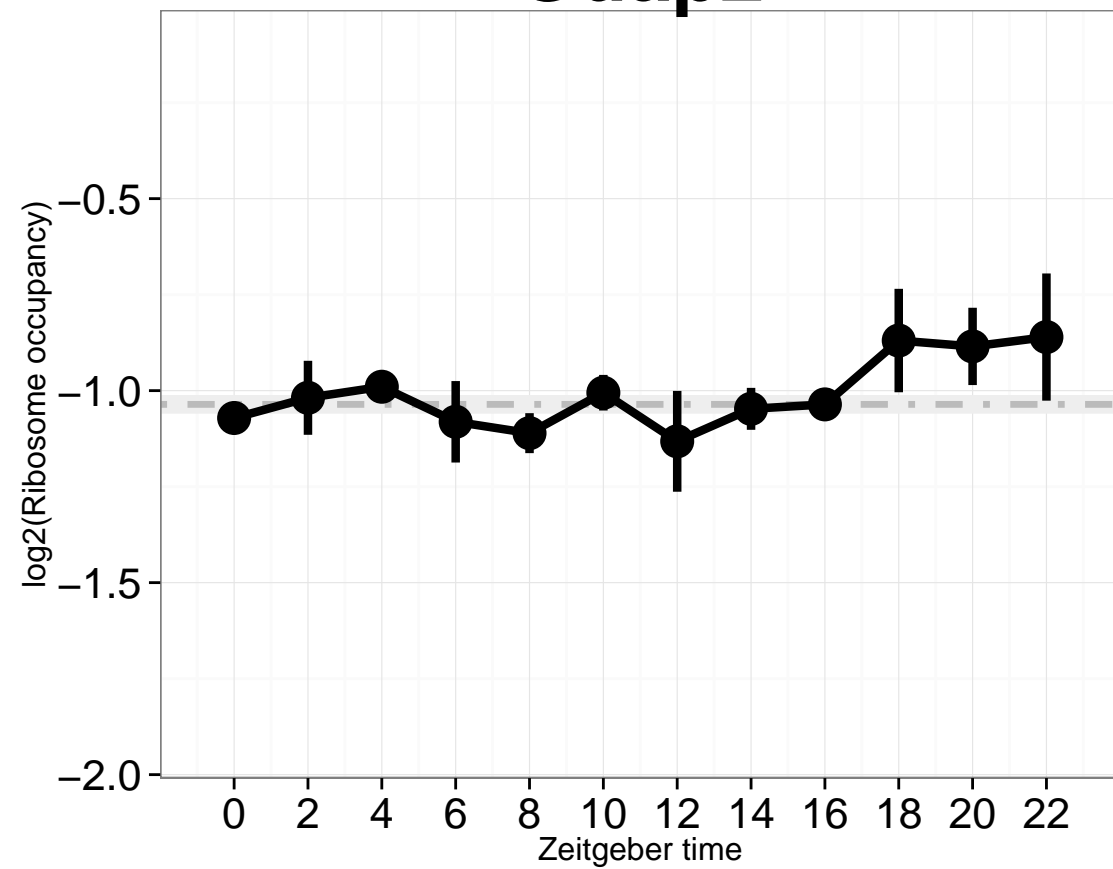

Supplement: SuppDataset_1.zip [file Gdap2_set_A.pdf › Supplemental Dataset 1/A-mRNA_nonrhyth_translation_nonrhyth/Gdap2_set_A.pdf]

# Gdf15

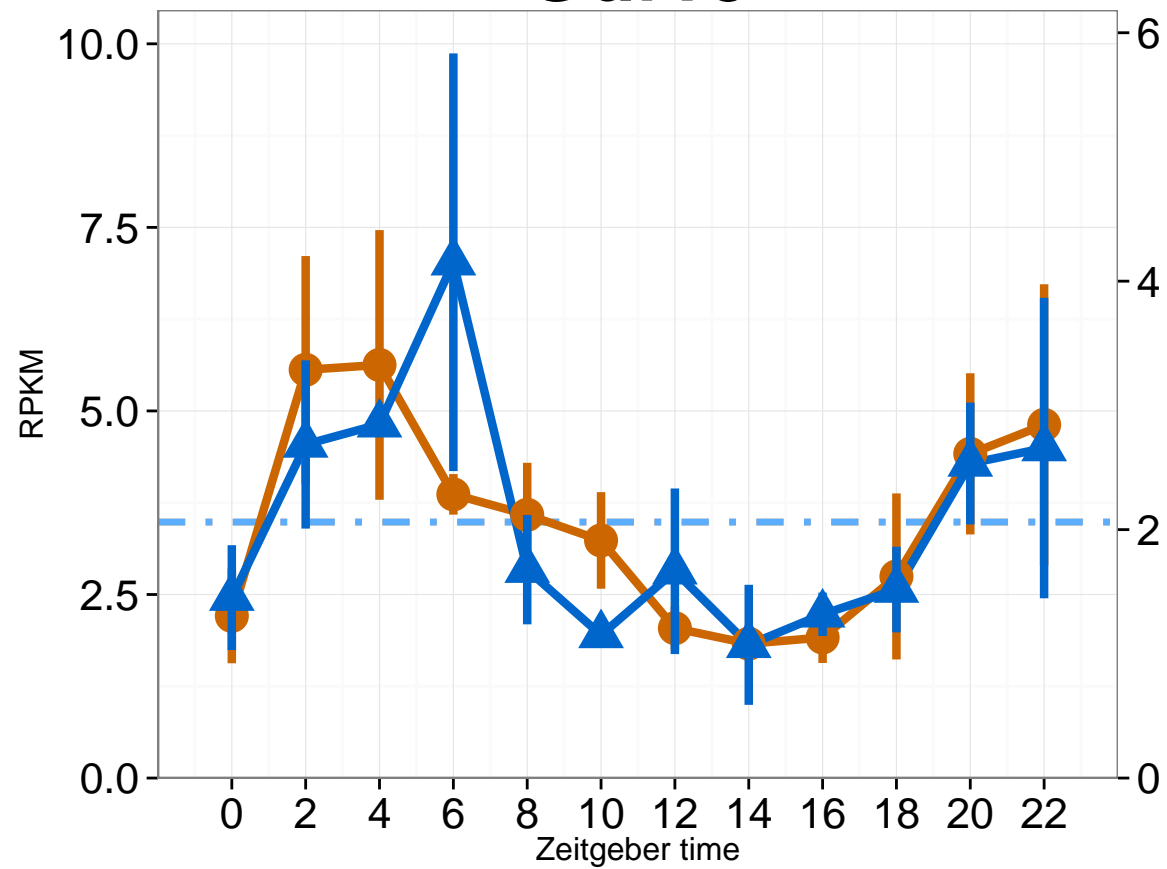

# Gdf15

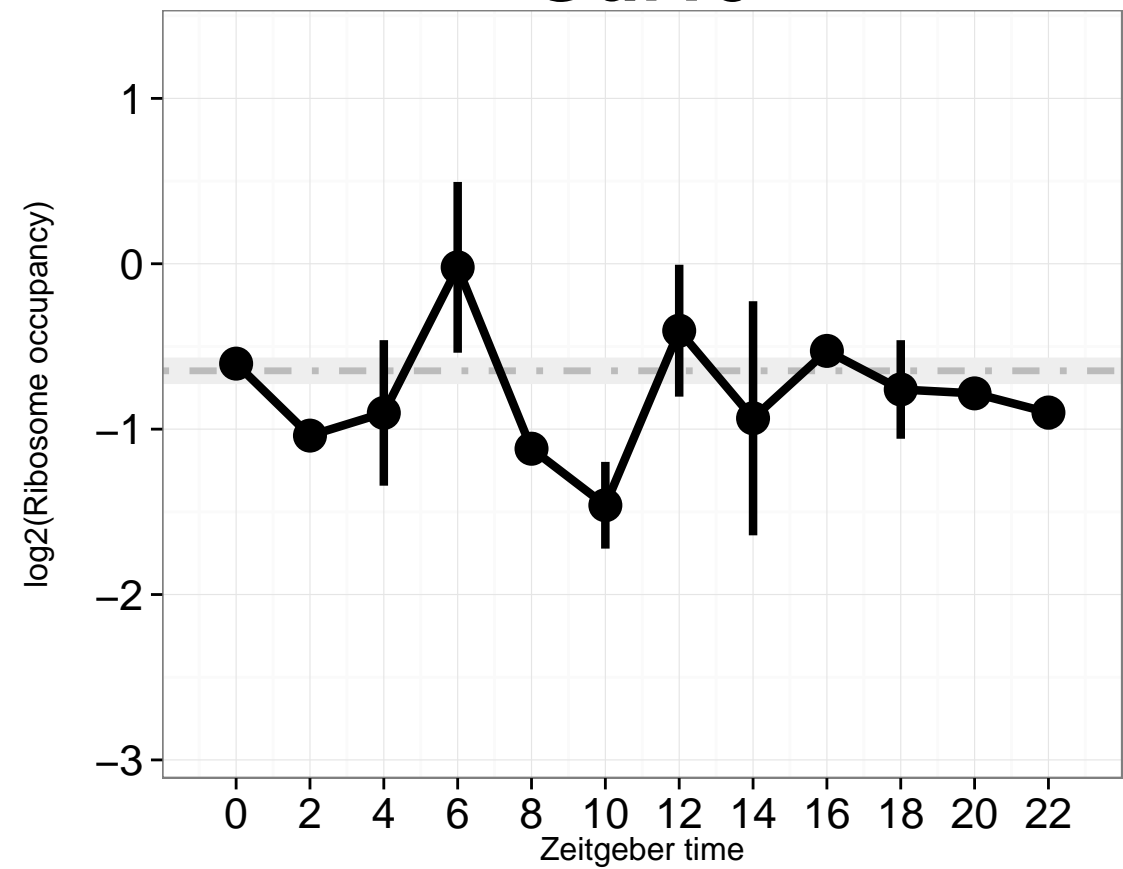

Supplement: SuppDataset_1.zip [file Gdf15_set_A.pdf › Supplemental Dataset 1/A-mRNA_nonrhyth_translation_nonrhyth/Gdf15_set_A.pdf]

**Gdf6 TR**

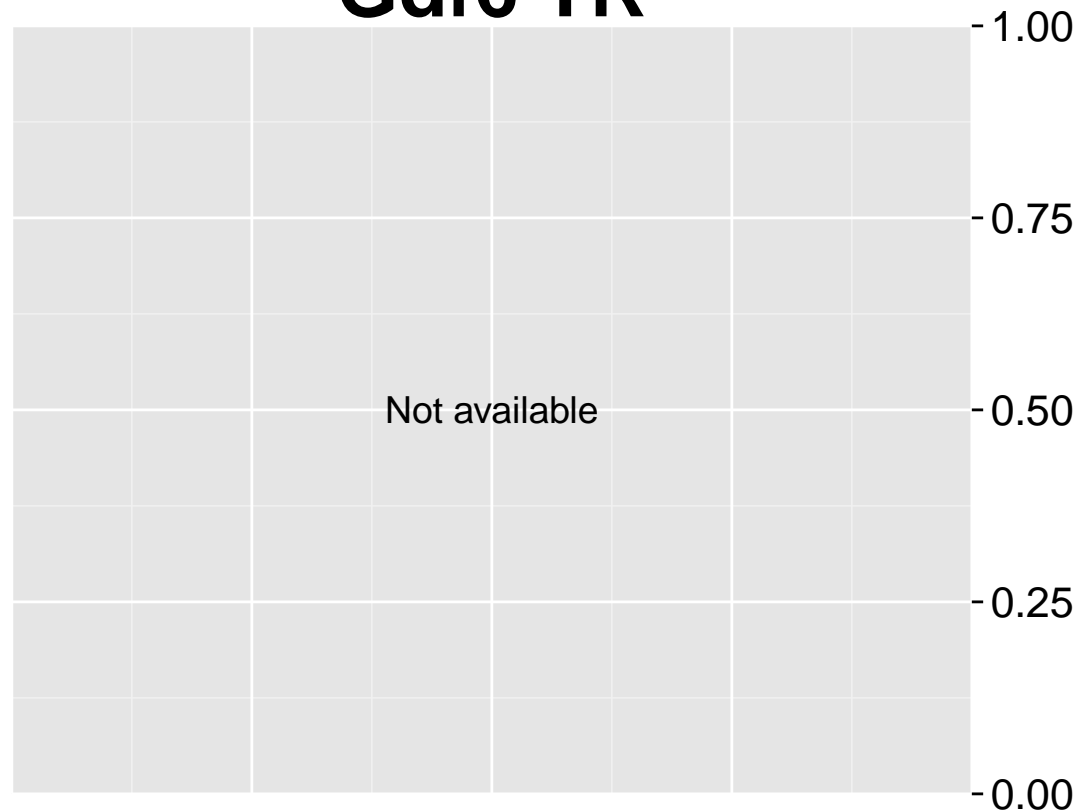

**Gdf6 log2(Ribosome occupancy)**

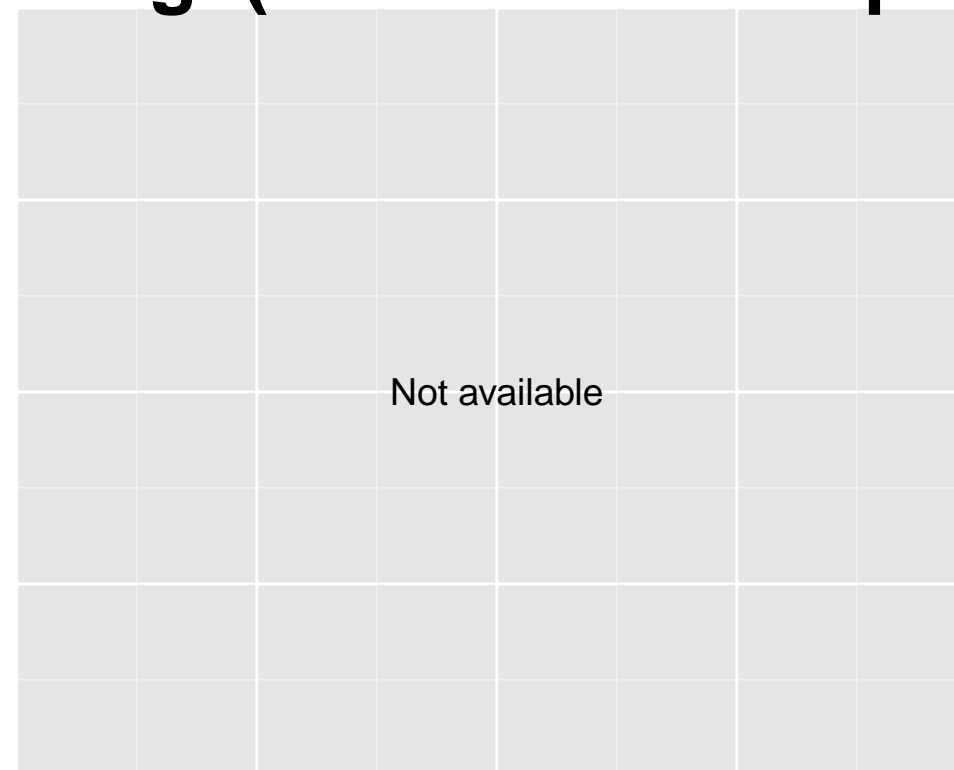

Supplement: SuppDataset_1.zip [file Gdf6_set_A.pdf › Supplemental Dataset 1/A-mRNA_nonrhyth_translation_nonrhyth/Gdf6_set_A.pdf]

## Gdi1

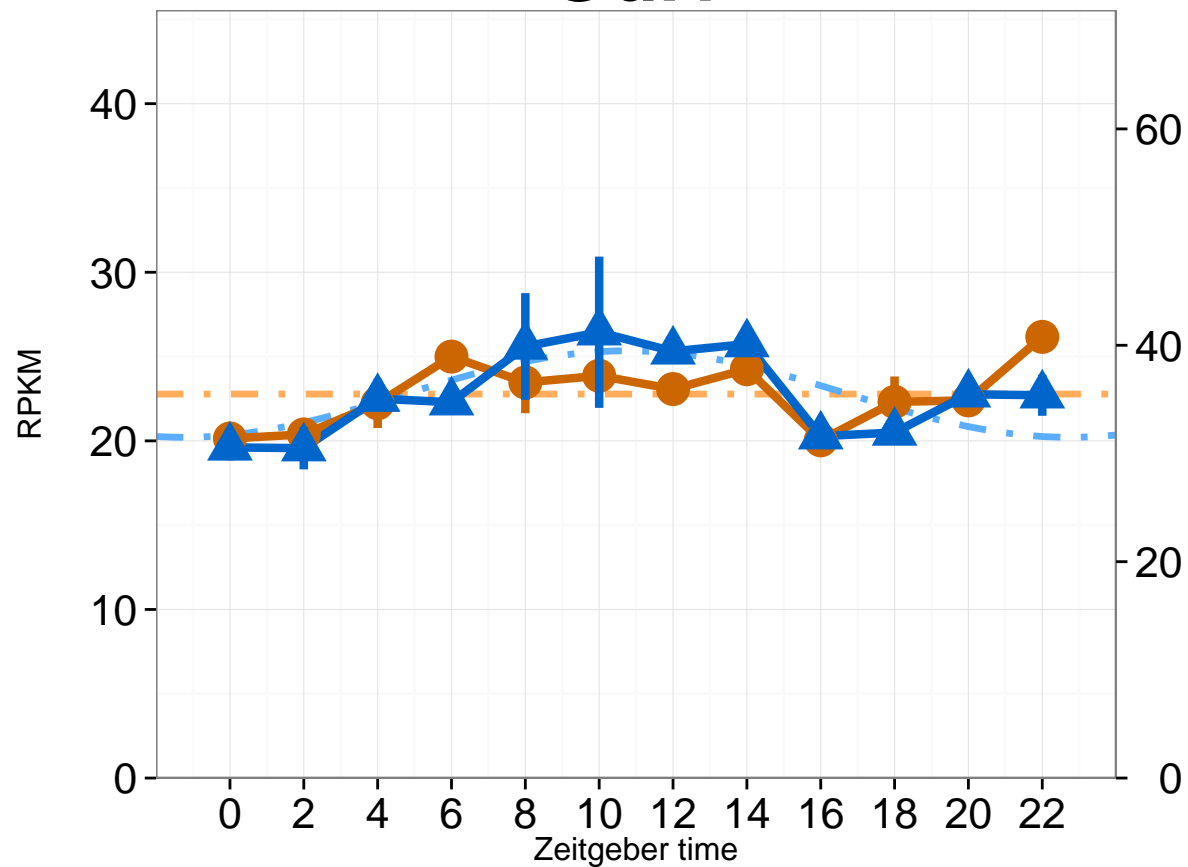

## Gdi1

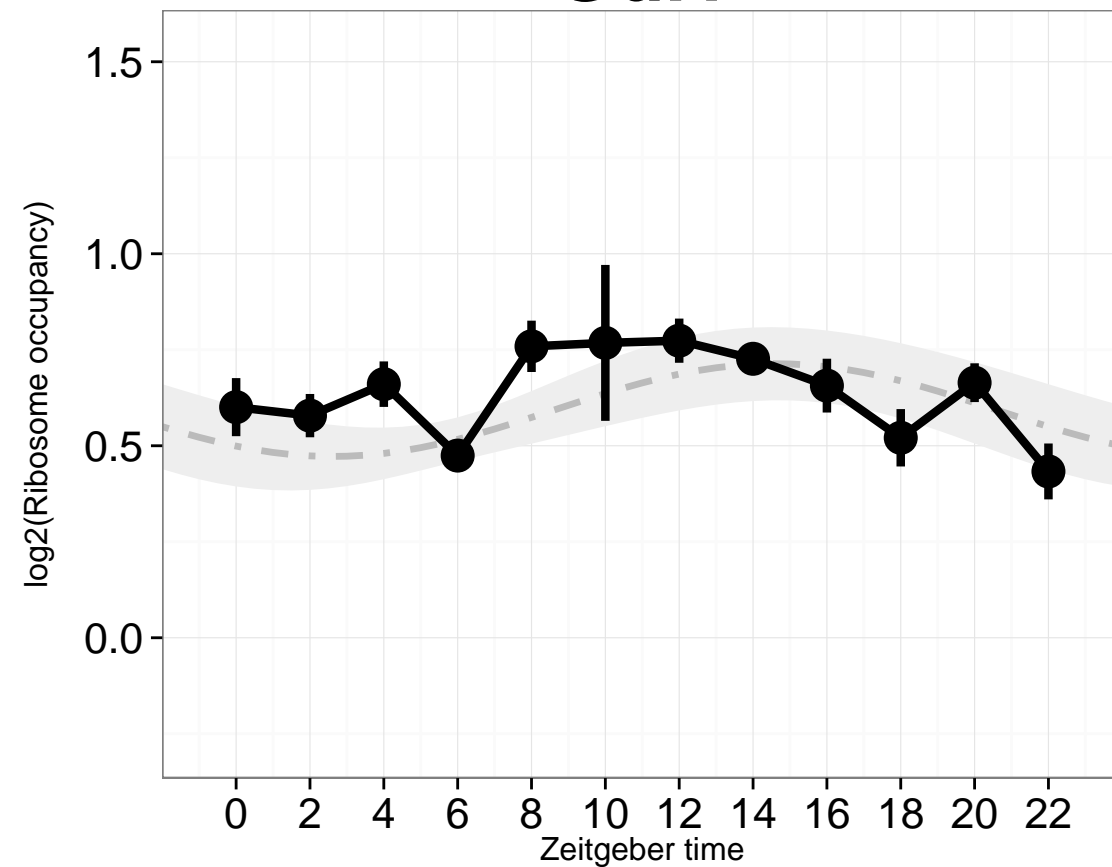

Supplement: SuppDataset_1.zip [file Gdi1_set_A.pdf › Supplemental Dataset 1/A-mRNA_nonrhyth_translation_nonrhyth/Gdi1_set_A.pdf]

## Gdi2

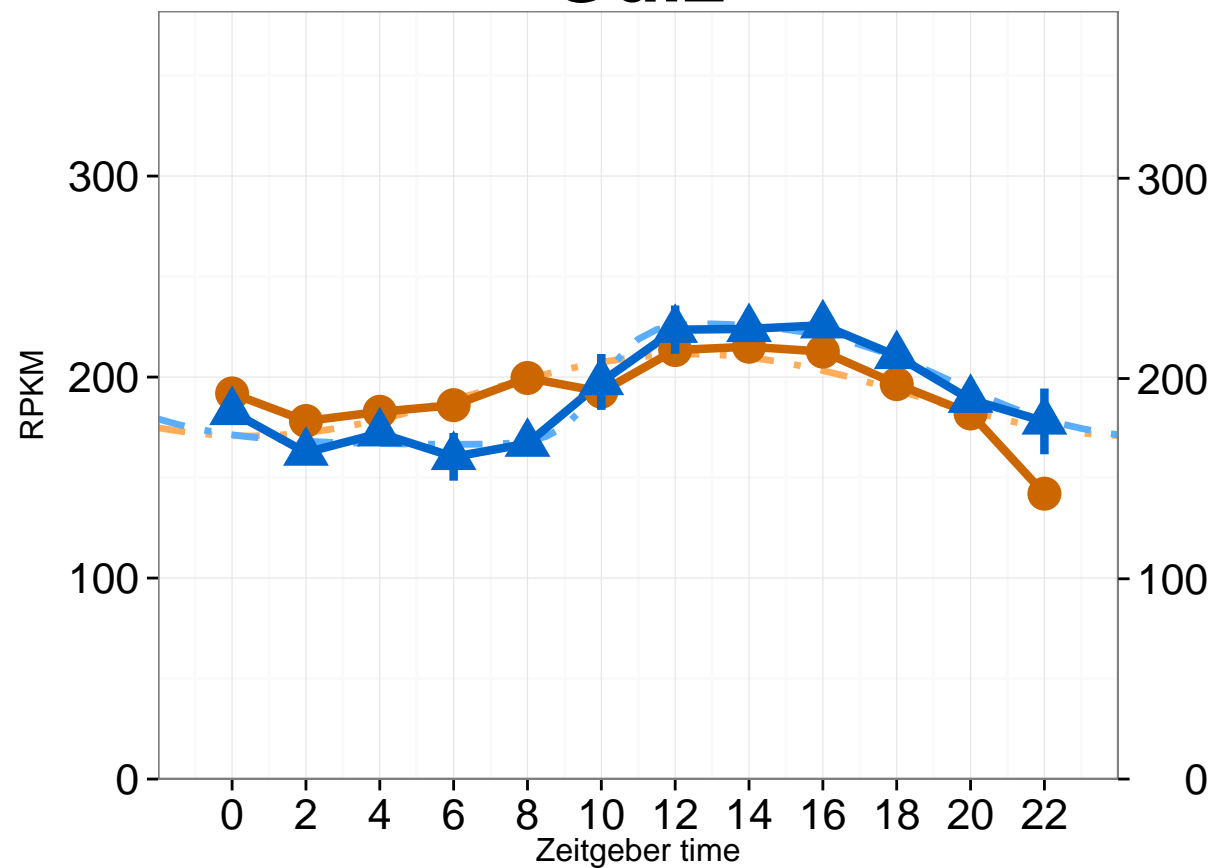

## Gdi2

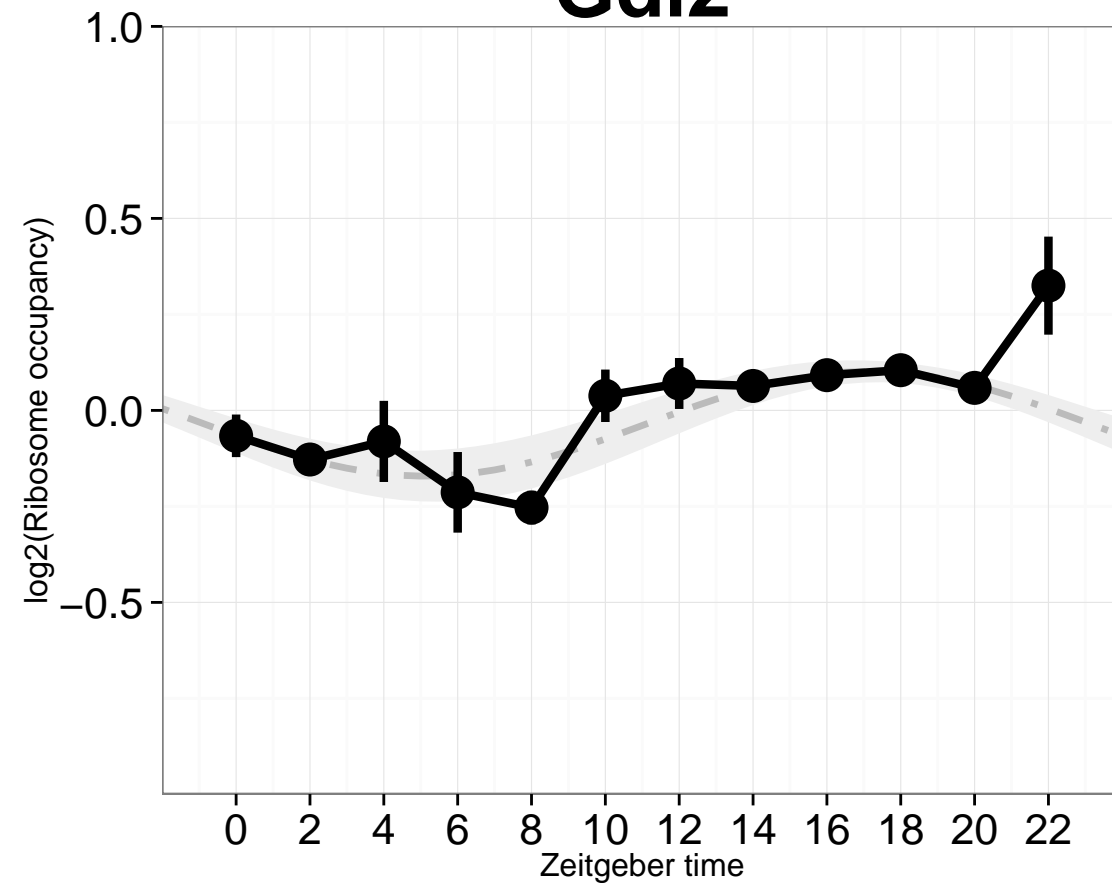

Supplement: SuppDataset_1.zip [file Gdi2_set_A.pdf › Supplemental Dataset 1/A-mRNA_nonrhyth_translation_nonrhyth/Gdi2_set_A.pdf]

## Gdpd1

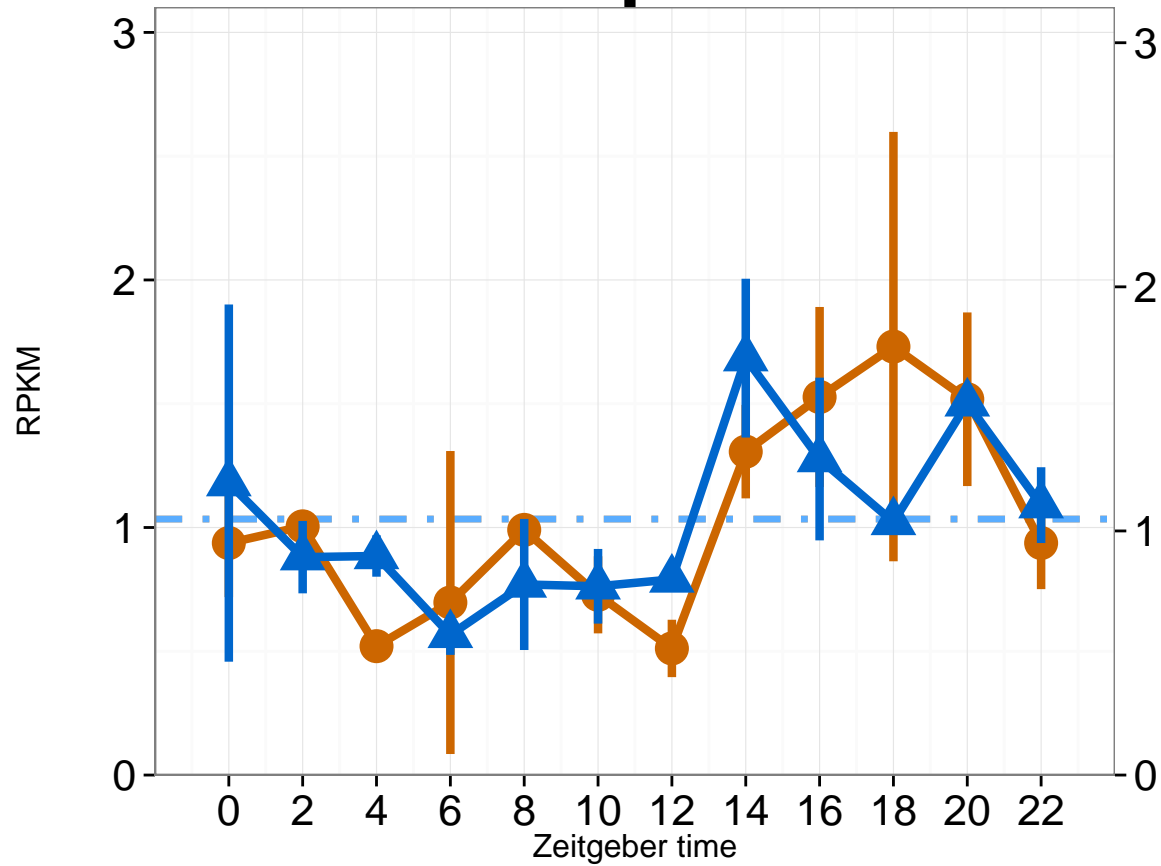

## Gdpd1

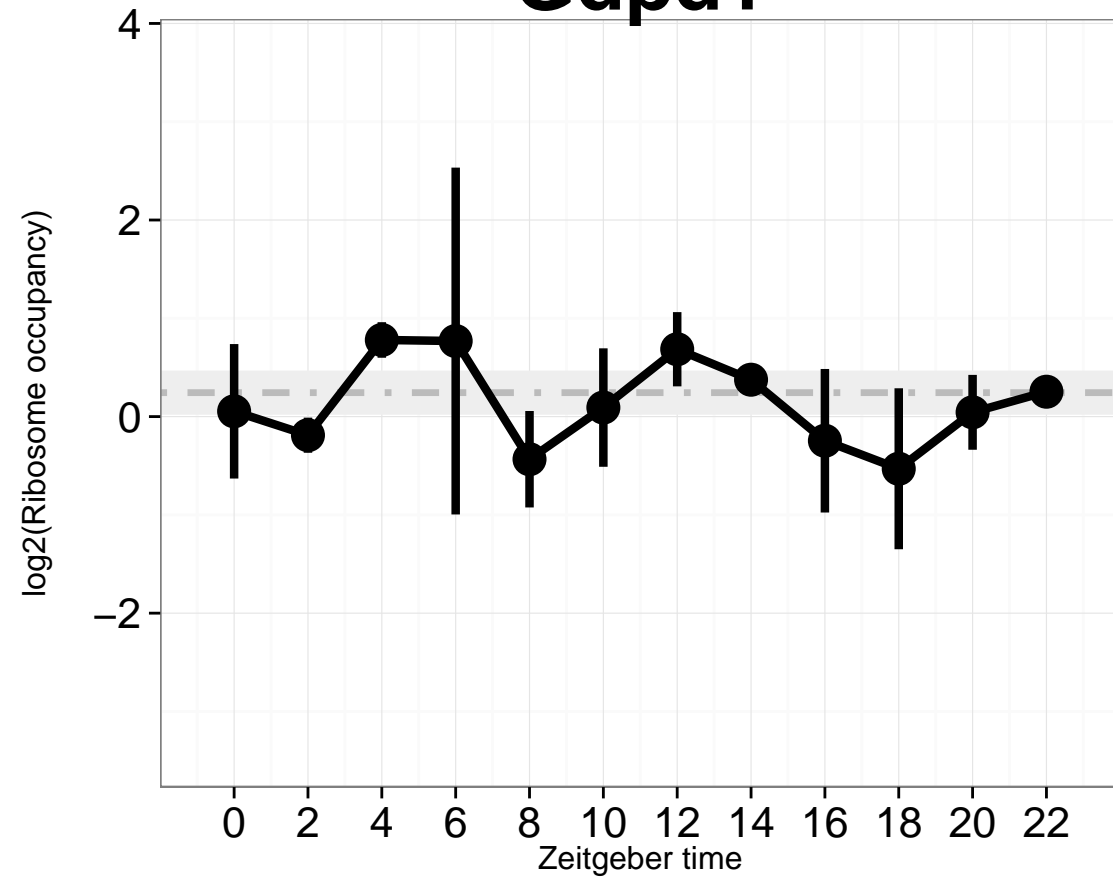

Supplement: SuppDataset_1.zip [file Gdpd1_set_A.pdf › Supplemental Dataset 1/A-mRNA_nonrhyth_translation_nonrhyth/Gdpd1_set_A.pdf]

# Gdpgp1

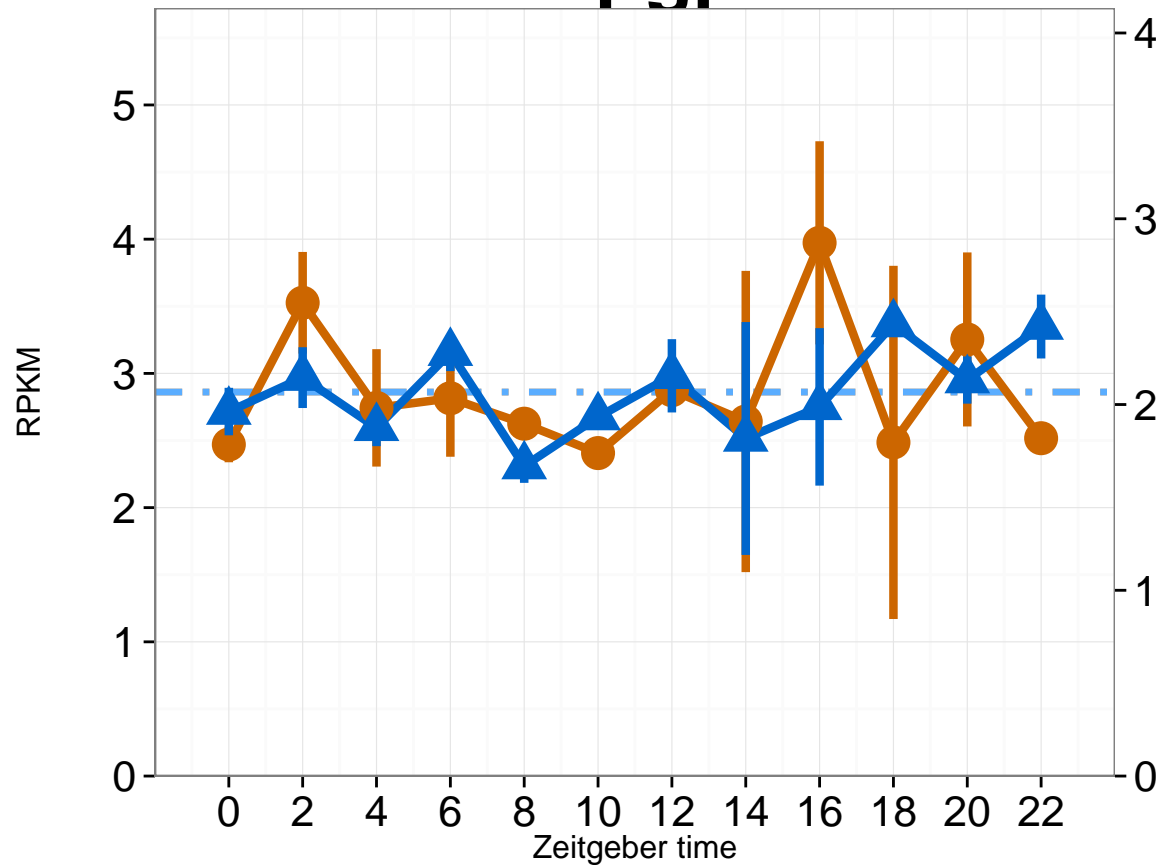

# Gdpgp1

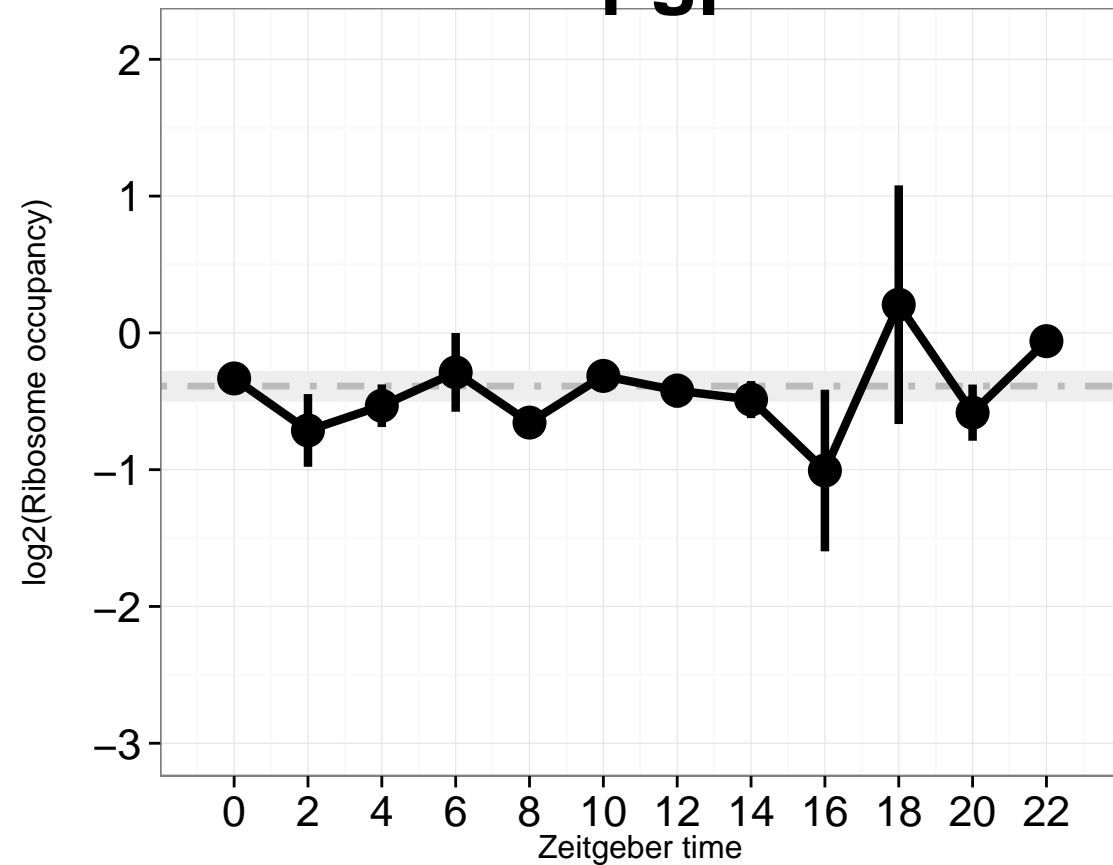

Supplement: SuppDataset_1.zip [file Gdpgp1_set_A.pdf › Supplemental Dataset 1/A-mRNA_nonrhyth_translation_nonrhyth/Gdpgp1_set_A.pdf]

## Gem

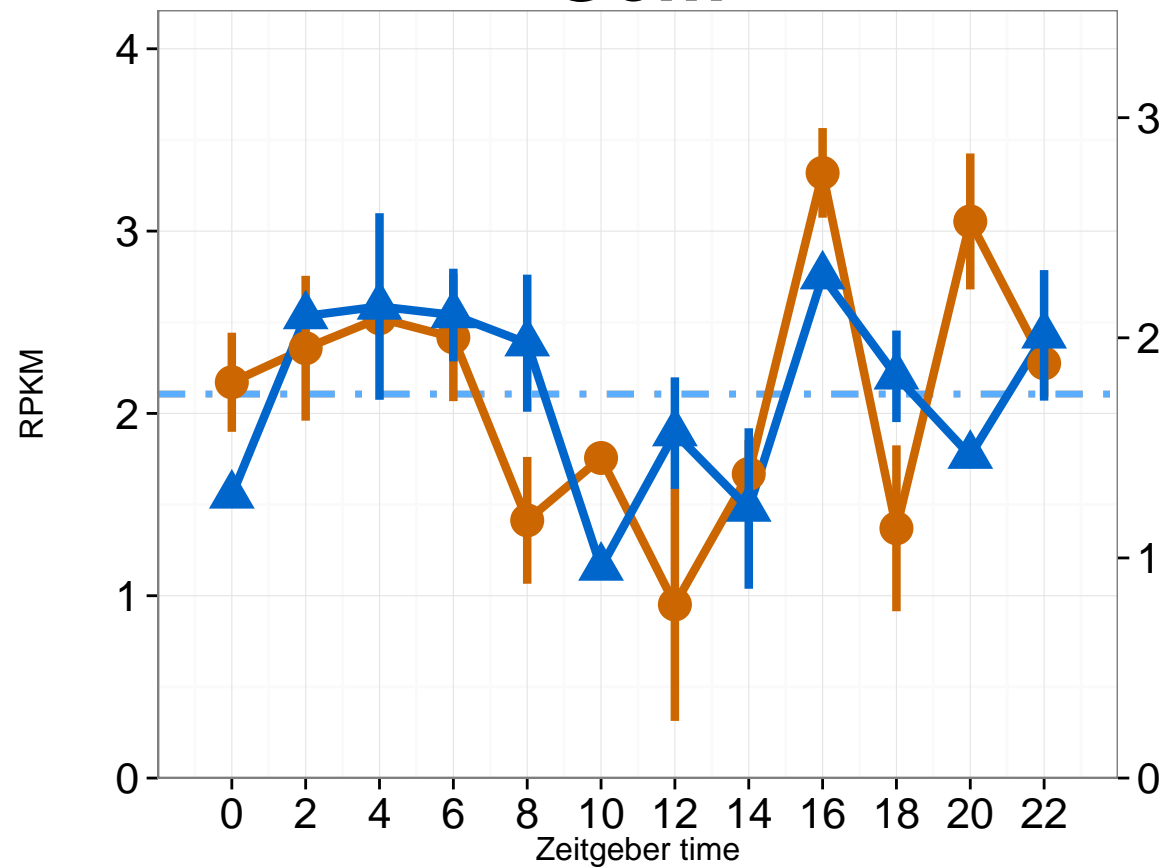

## Gem

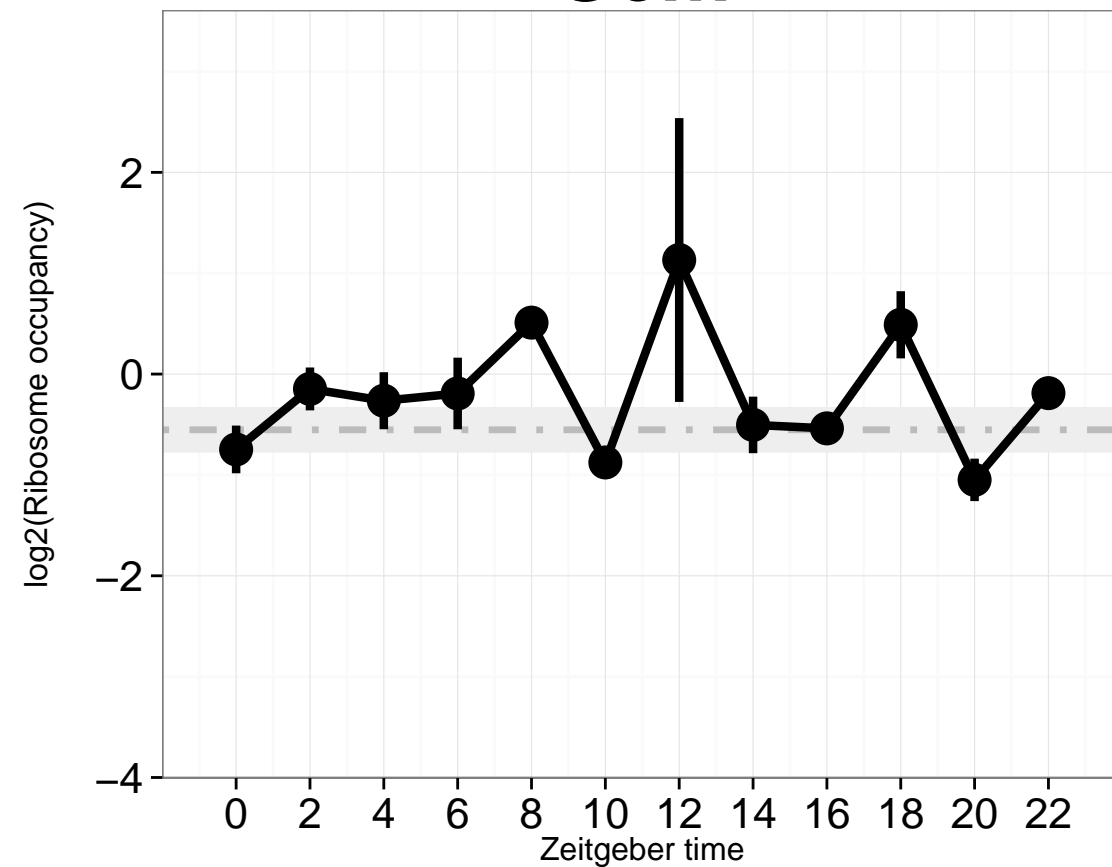

Supplement: SuppDataset_1.zip [file Gem_set_A.pdf › Supplemental Dataset 1/A-mRNA_nonrhyth_translation_nonrhyth/Gem_set_A.pdf]

## Gemin2

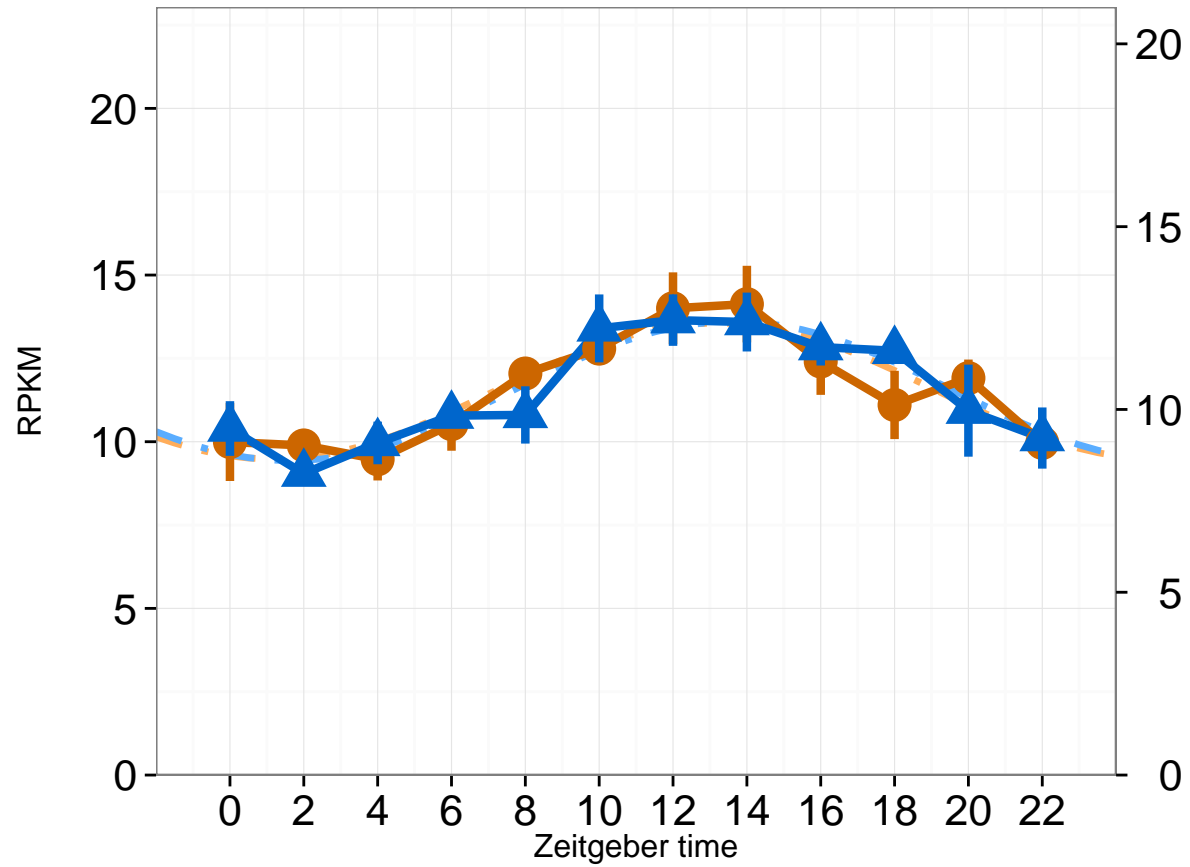

## Gemin2

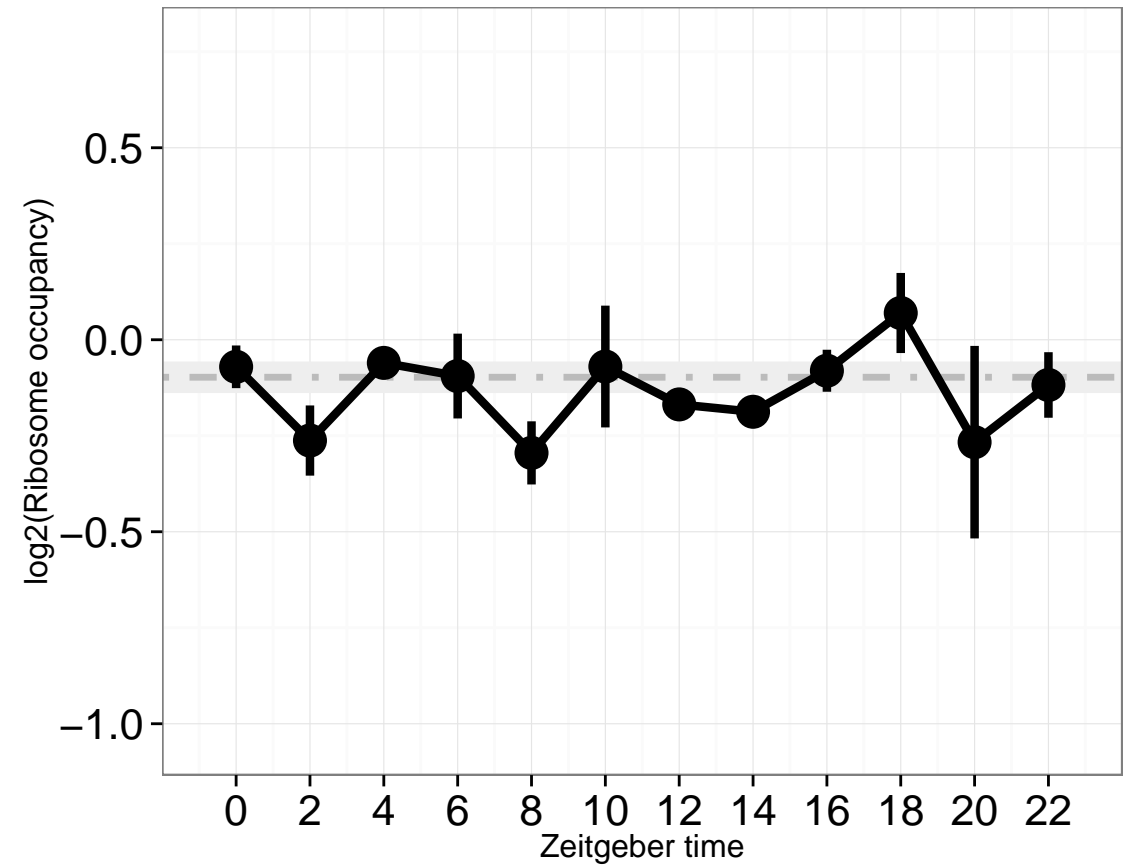

Supplement: SuppDataset_1.zip [file Gemin2_set_A.pdf › Supplemental Dataset 1/A-mRNA_nonrhyth_translation_nonrhyth/Gemin2_set_A.pdf]

# Gemin4

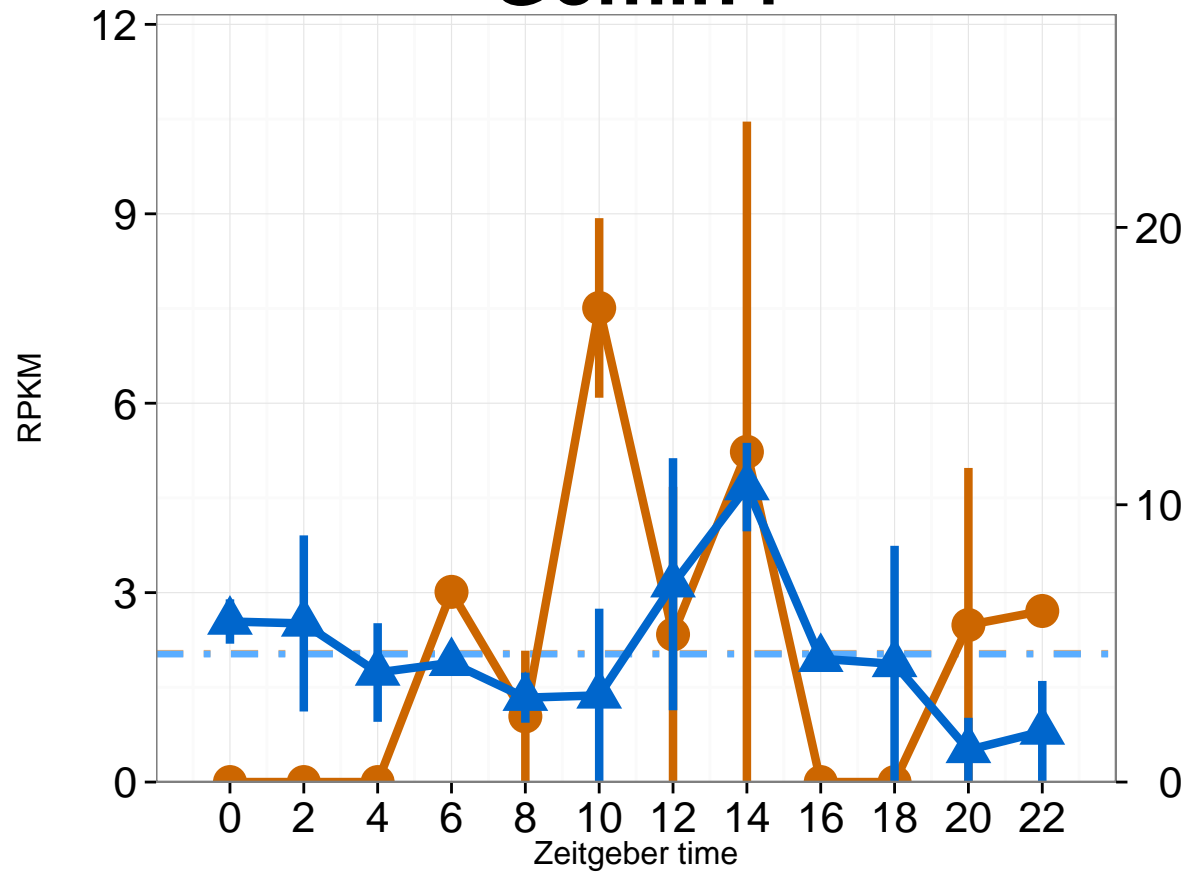

# Gemin4

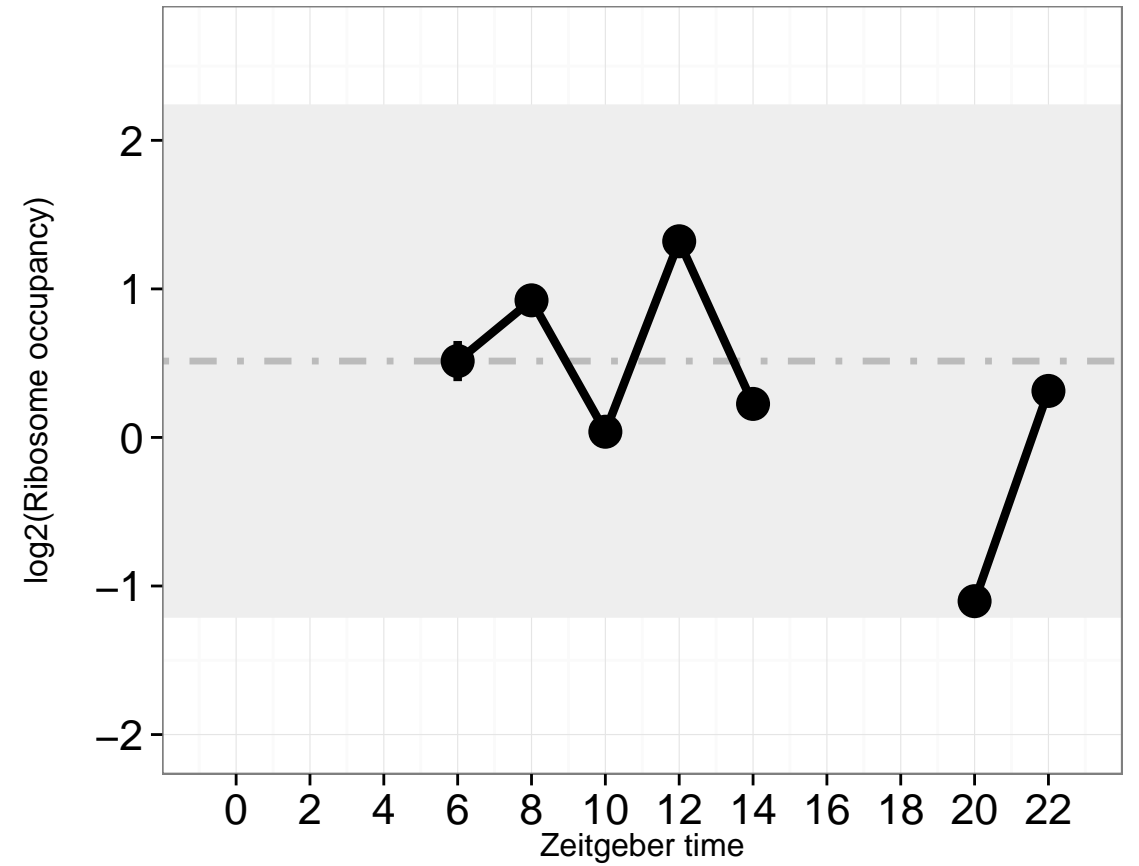

Supplement: SuppDataset_1.zip [file Gemin4_set_A.pdf › Supplemental Dataset 1/A-mRNA_nonrhyth_translation_nonrhyth/Gemin4_set_A.pdf]

## Gemin5

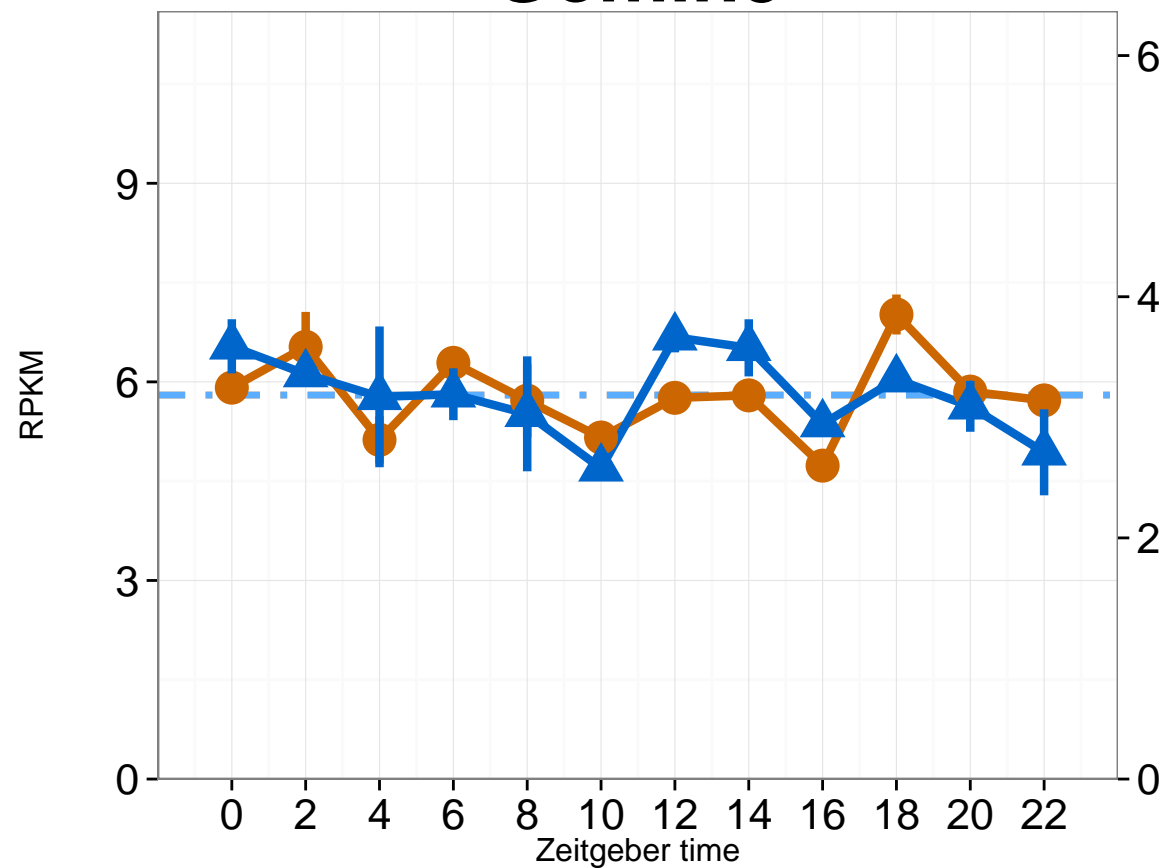

## Gemin5

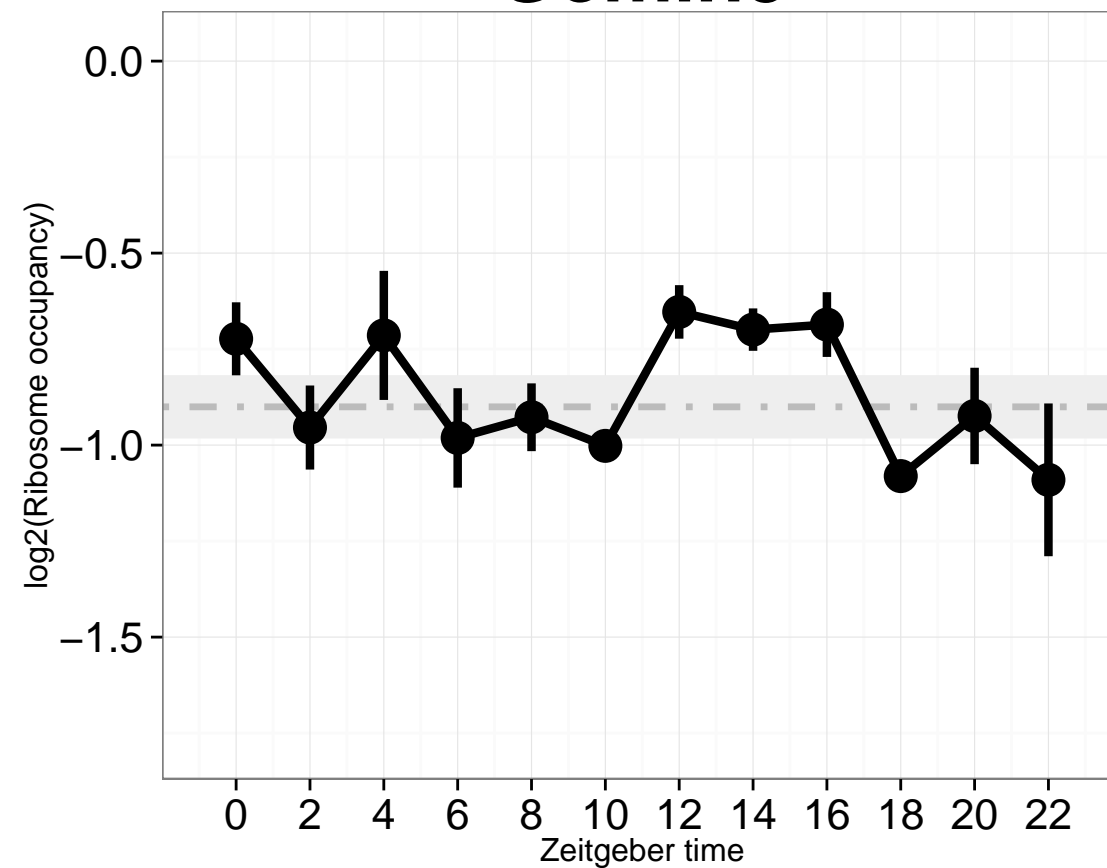

Supplement: SuppDataset_1.zip [file Gemin5_set_A.pdf › Supplemental Dataset 1/A-mRNA_nonrhyth_translation_nonrhyth/Gemin5_set_A.pdf]

## Gemin8

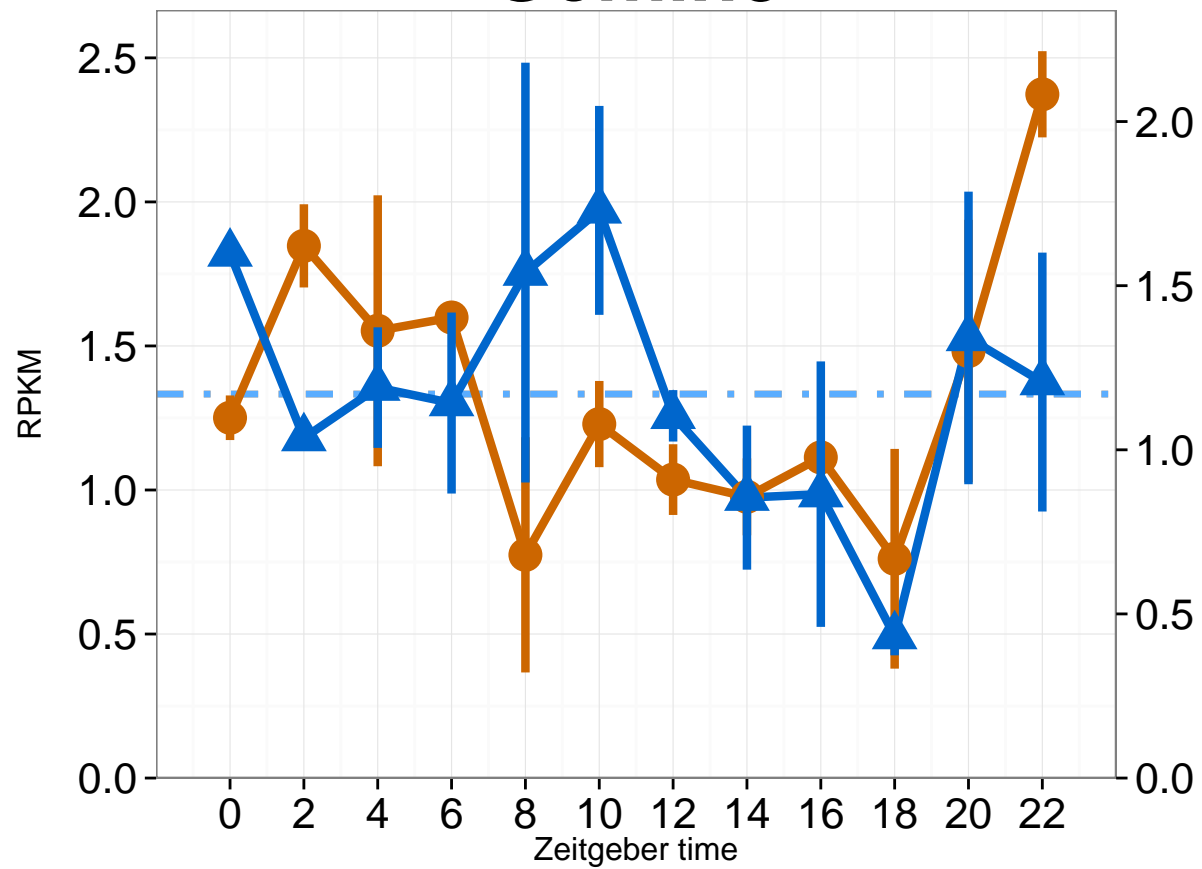

## Gemin8

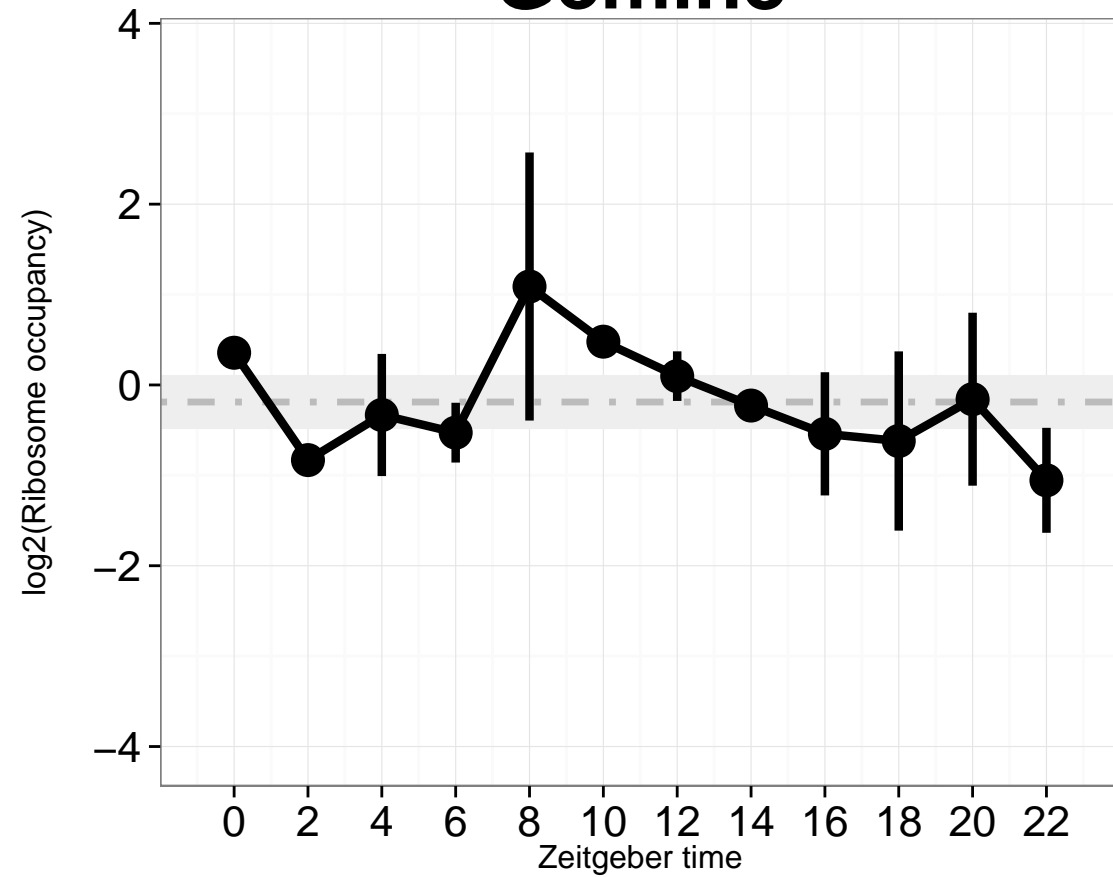

Supplement: SuppDataset_1.zip [file Gemin8_set_A.pdf › Supplemental Dataset 1/A-mRNA_nonrhyth_translation_nonrhyth/Gemin8_set_A.pdf]

# Gen1

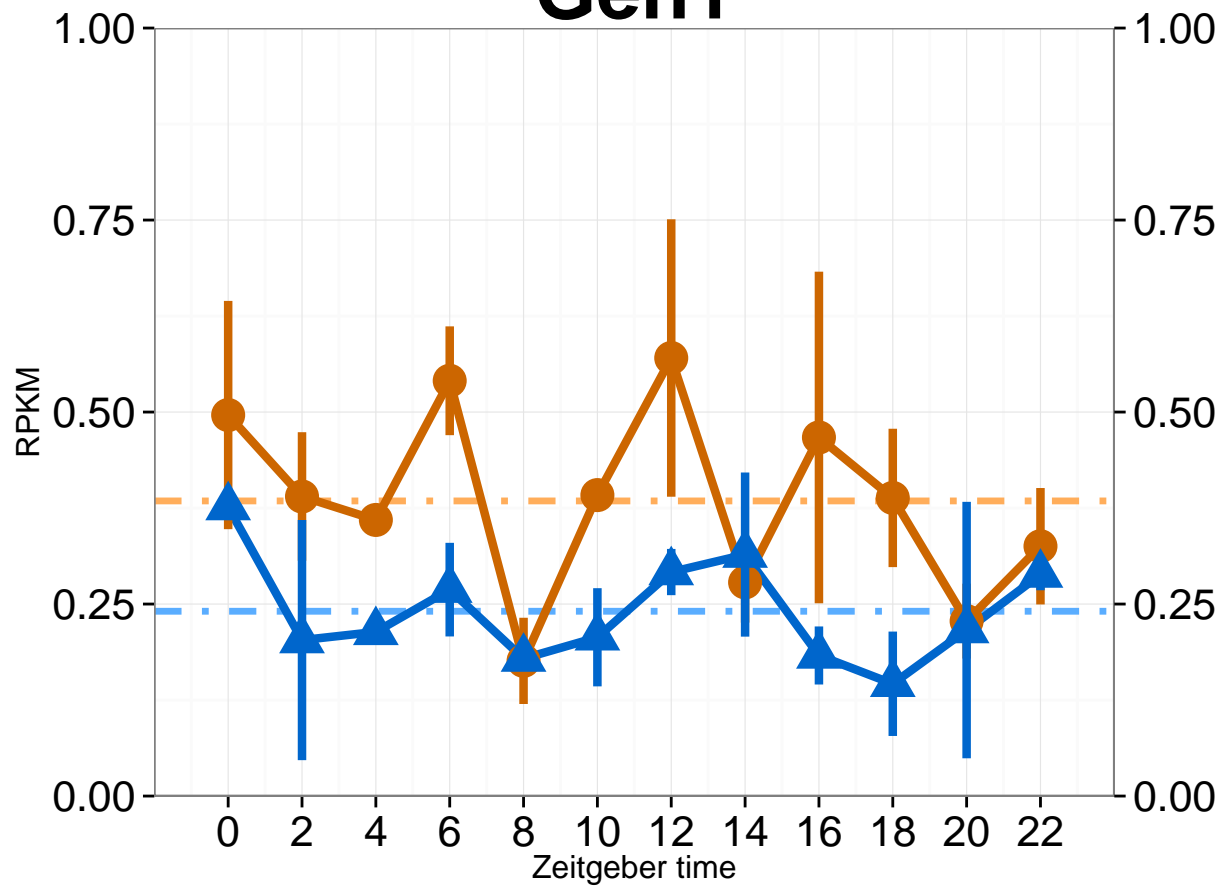

# Gen1

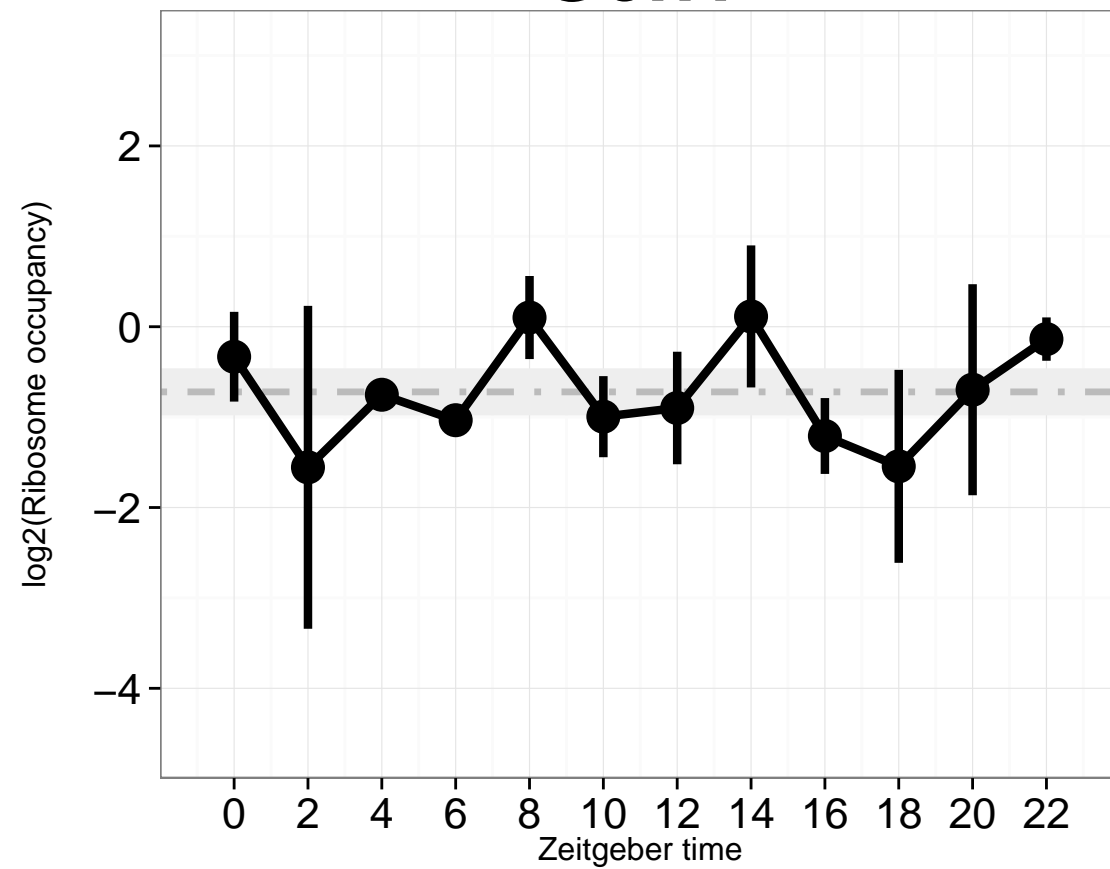

Supplement: SuppDataset_1.zip [file Gen1_set_A.pdf › Supplemental Dataset 1/A-mRNA_nonrhyth_translation_nonrhyth/Gen1_set_A.pdf]

## Get4

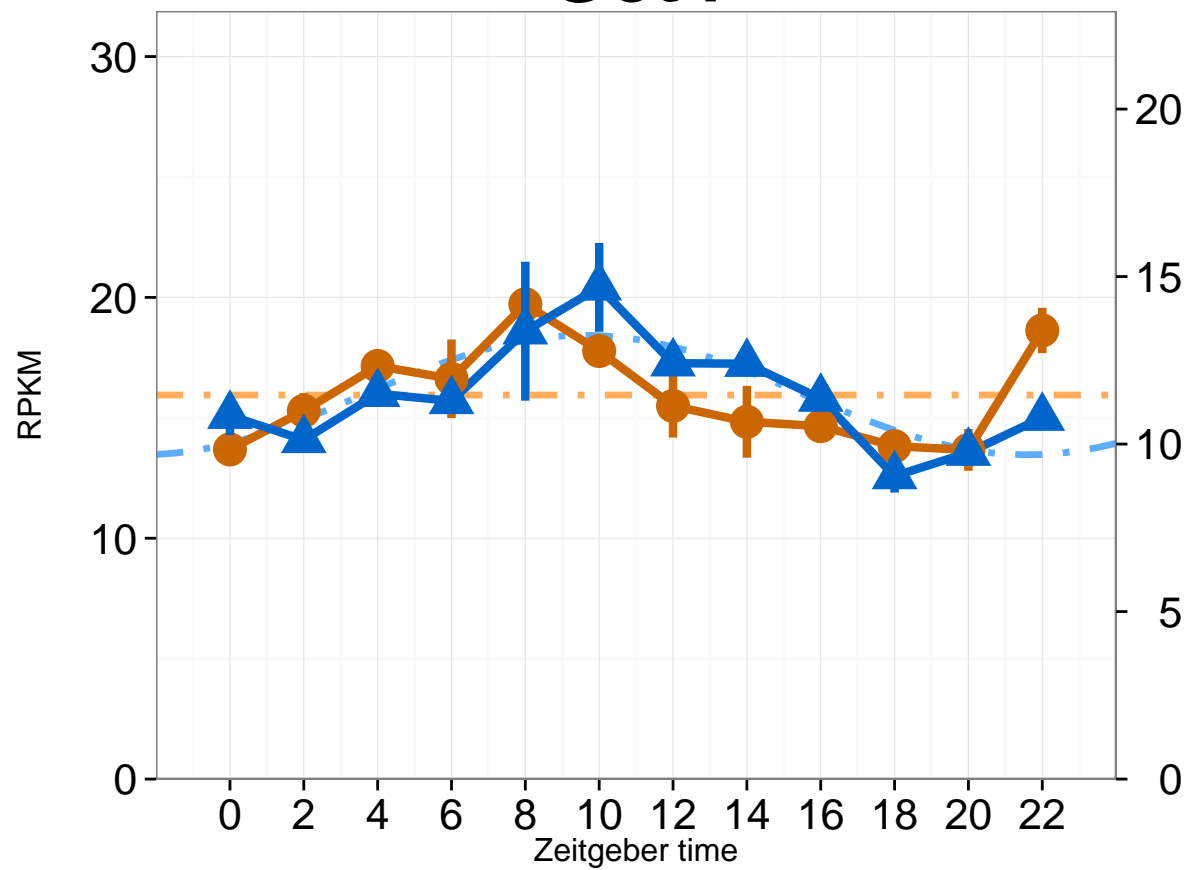

## Get4

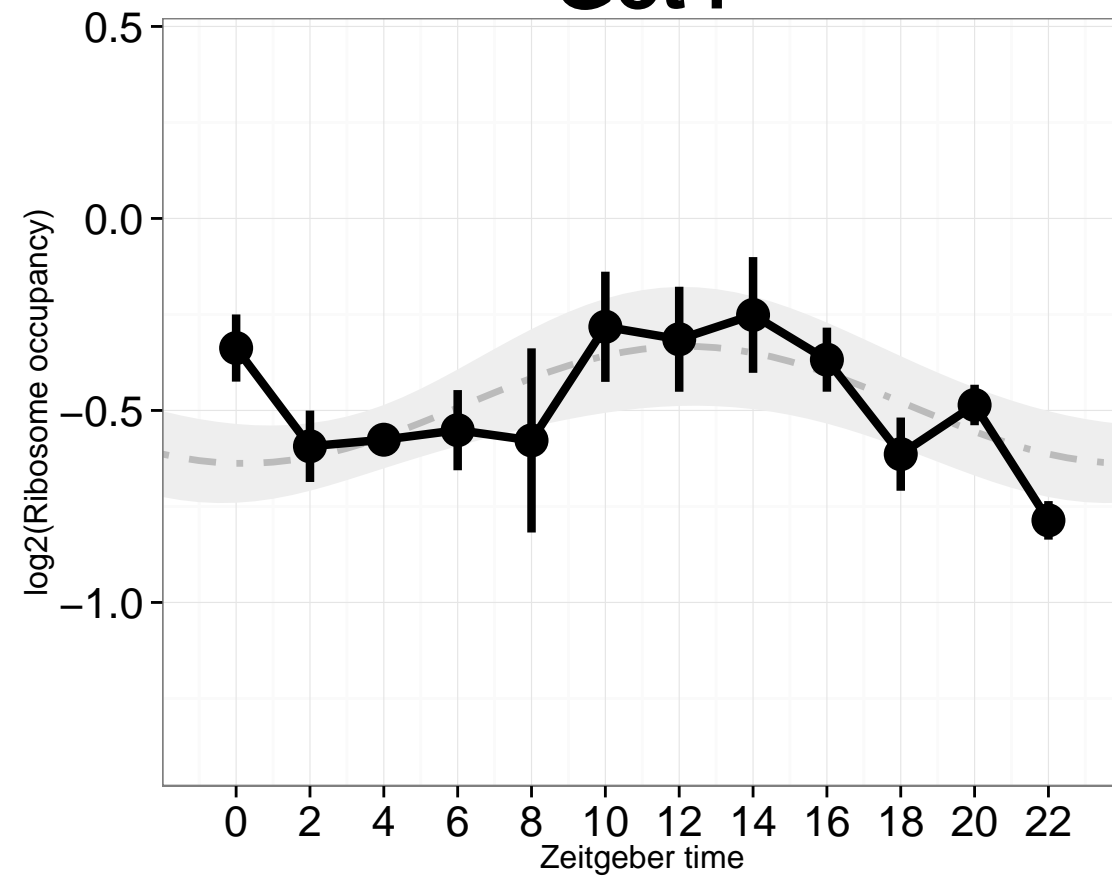

Supplement: SuppDataset_1.zip [file Get4_set_A.pdf › Supplemental Dataset 1/A-mRNA_nonrhyth_translation_nonrhyth/Get4_set_A.pdf]

## Gfer

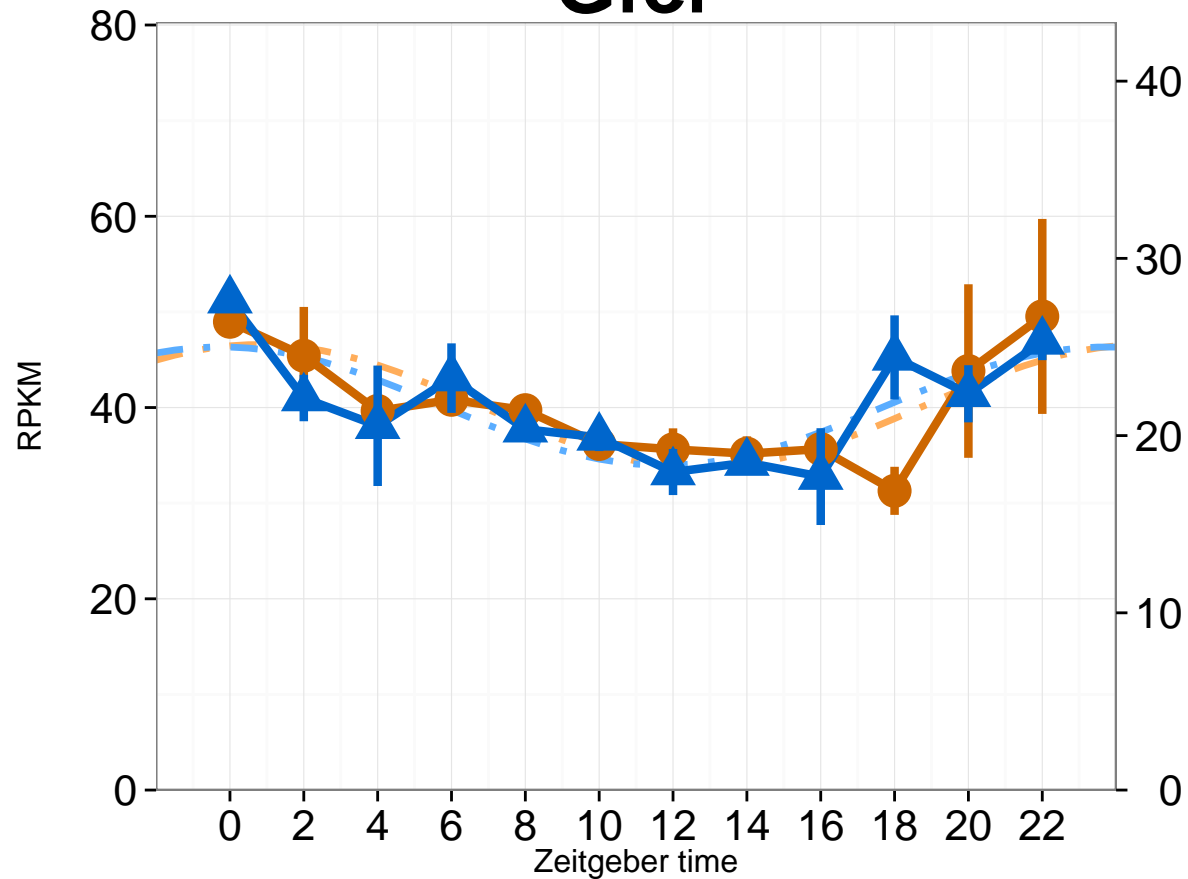

## Gfer

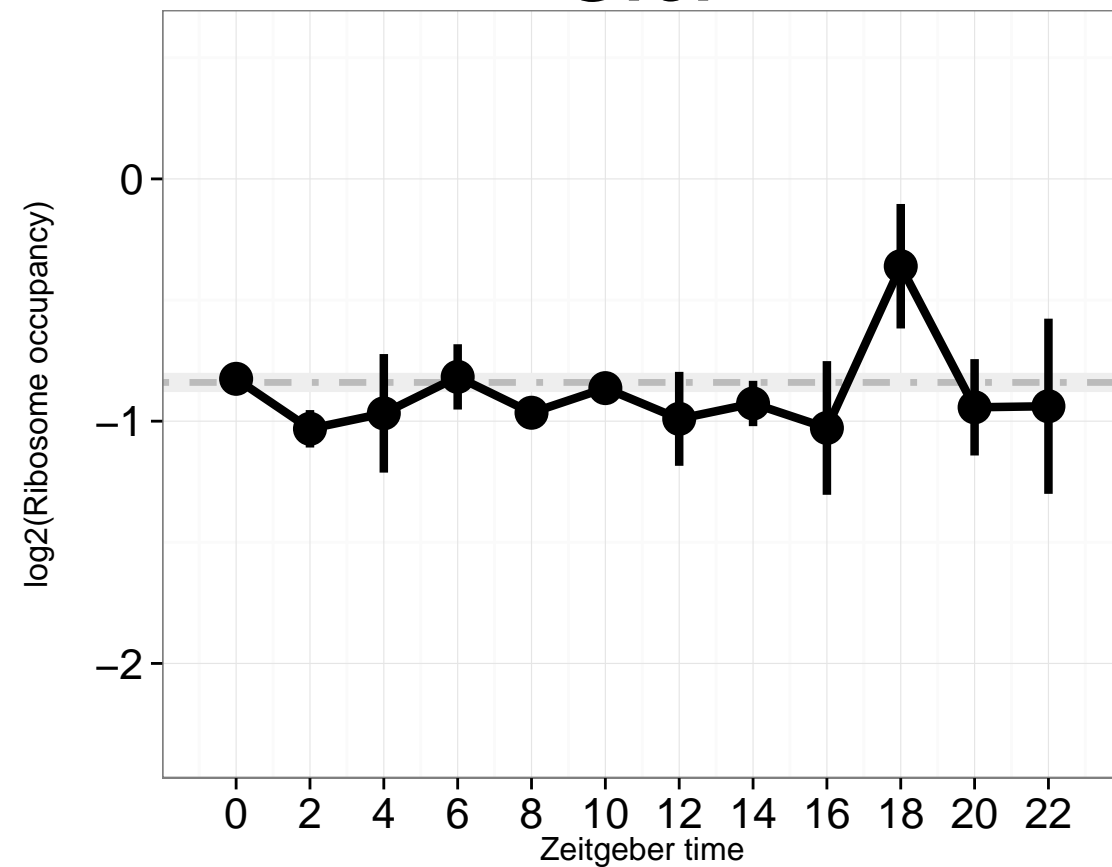

Supplement: SuppDataset_1.zip [file Gfer_set_A.pdf › Supplemental Dataset 1/A-mRNA_nonrhyth_translation_nonrhyth/Gfer_set_A.pdf]

## Gfm1

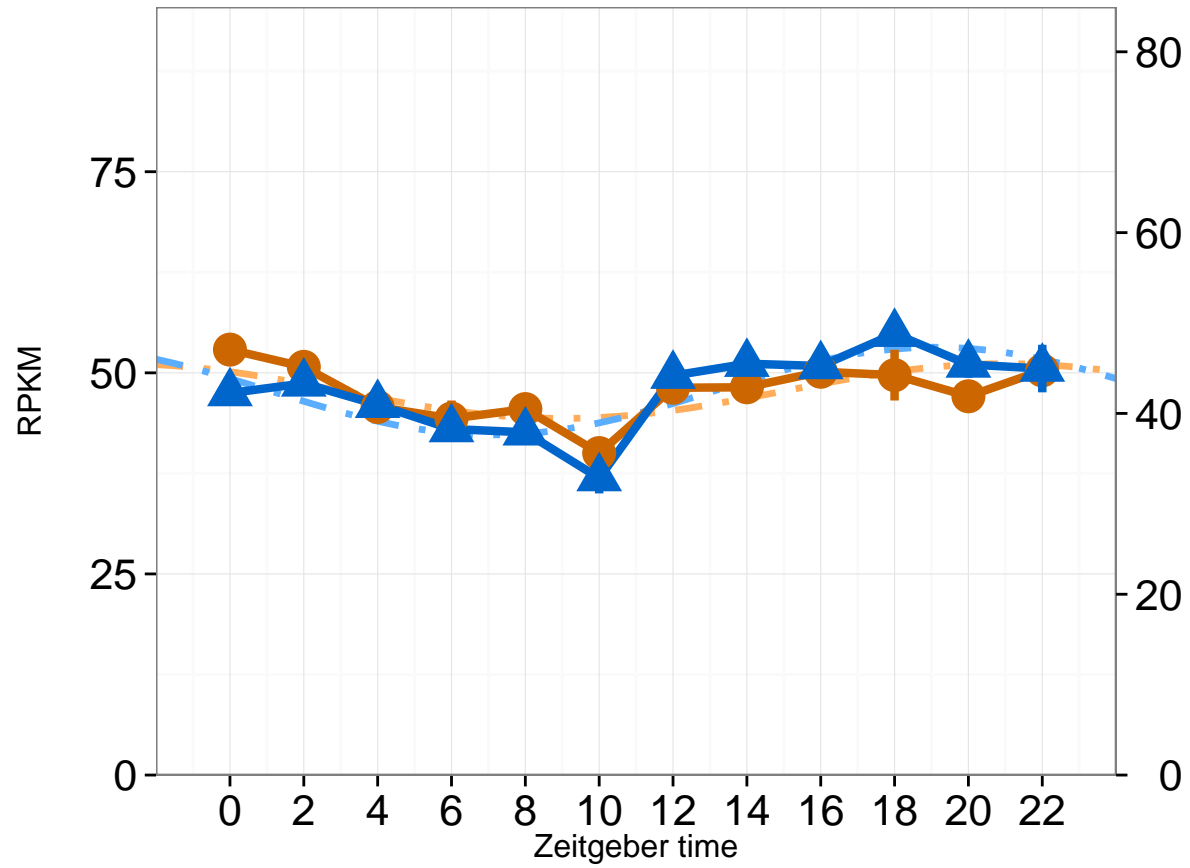

## Gfm1

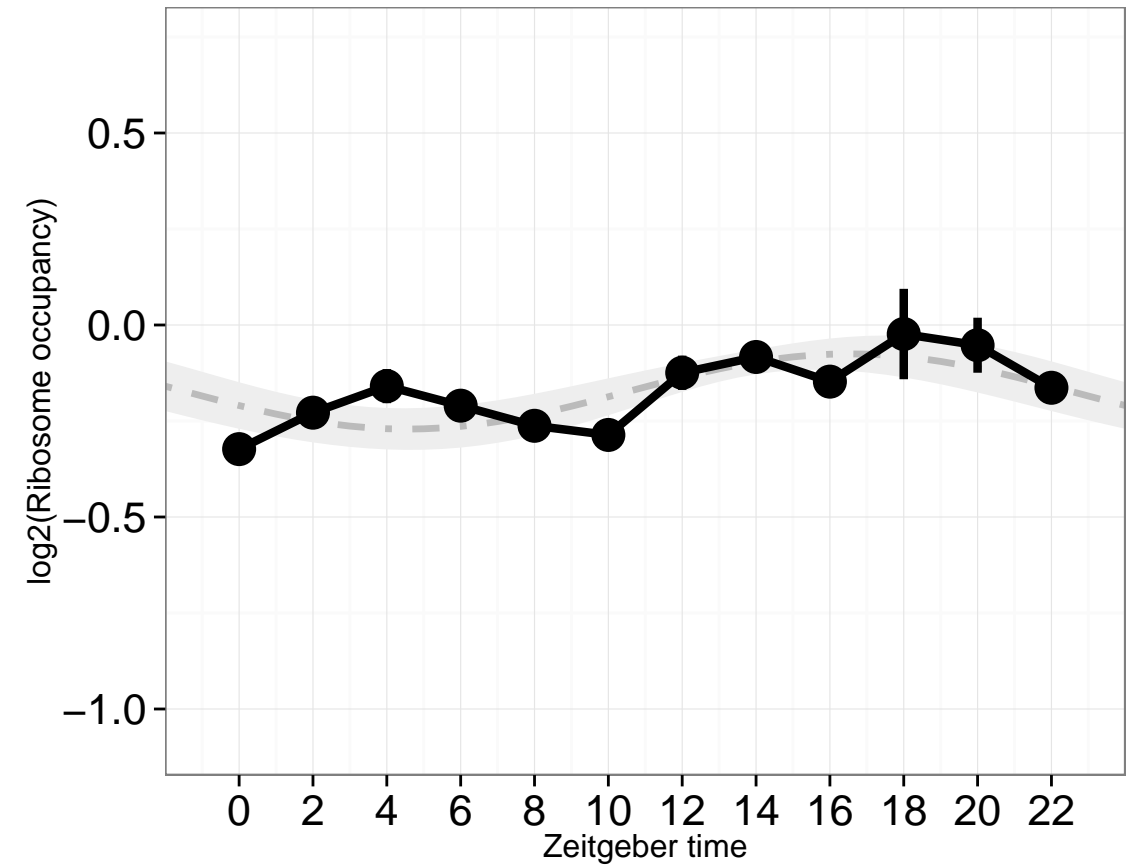

Supplement: SuppDataset_1.zip [file Gfm1_set_A.pdf › Supplemental Dataset 1/A-mRNA_nonrhyth_translation_nonrhyth/Gfm1_set_A.pdf]

## Gfm2

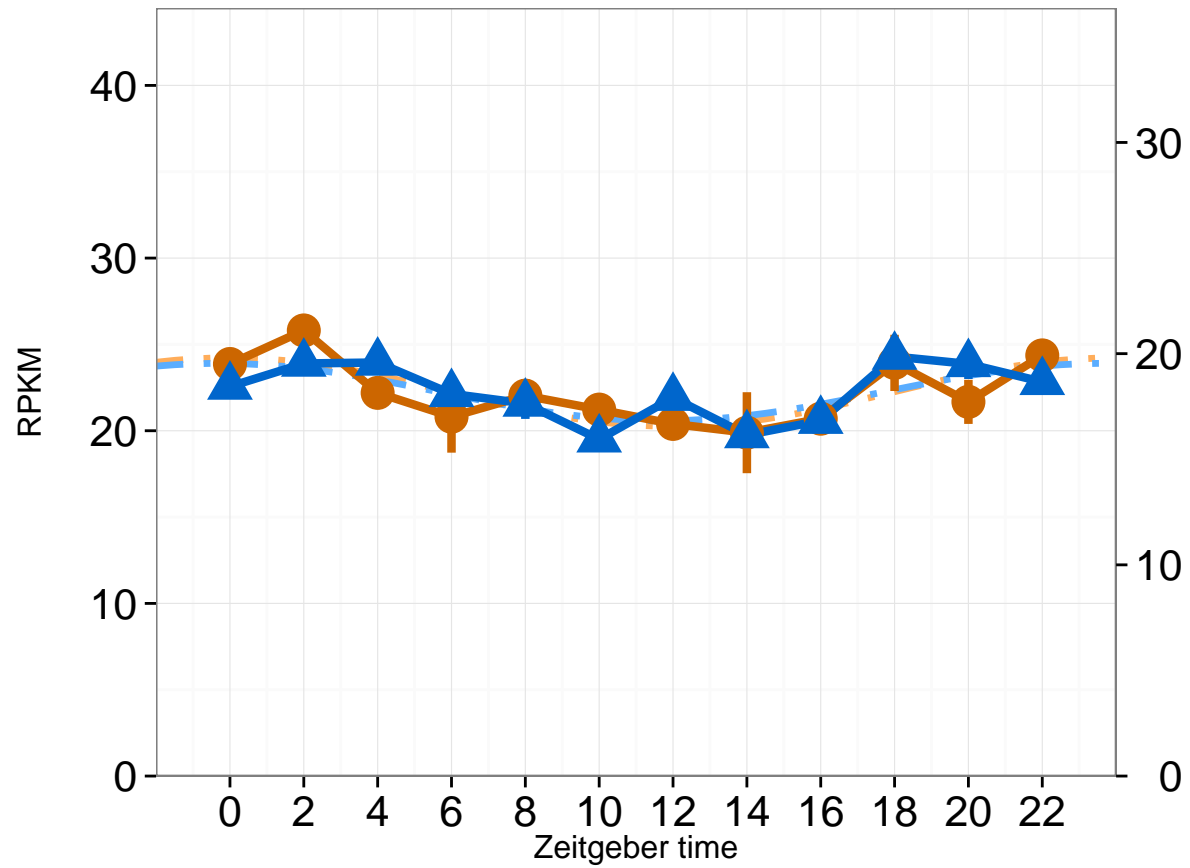

## Gfm2

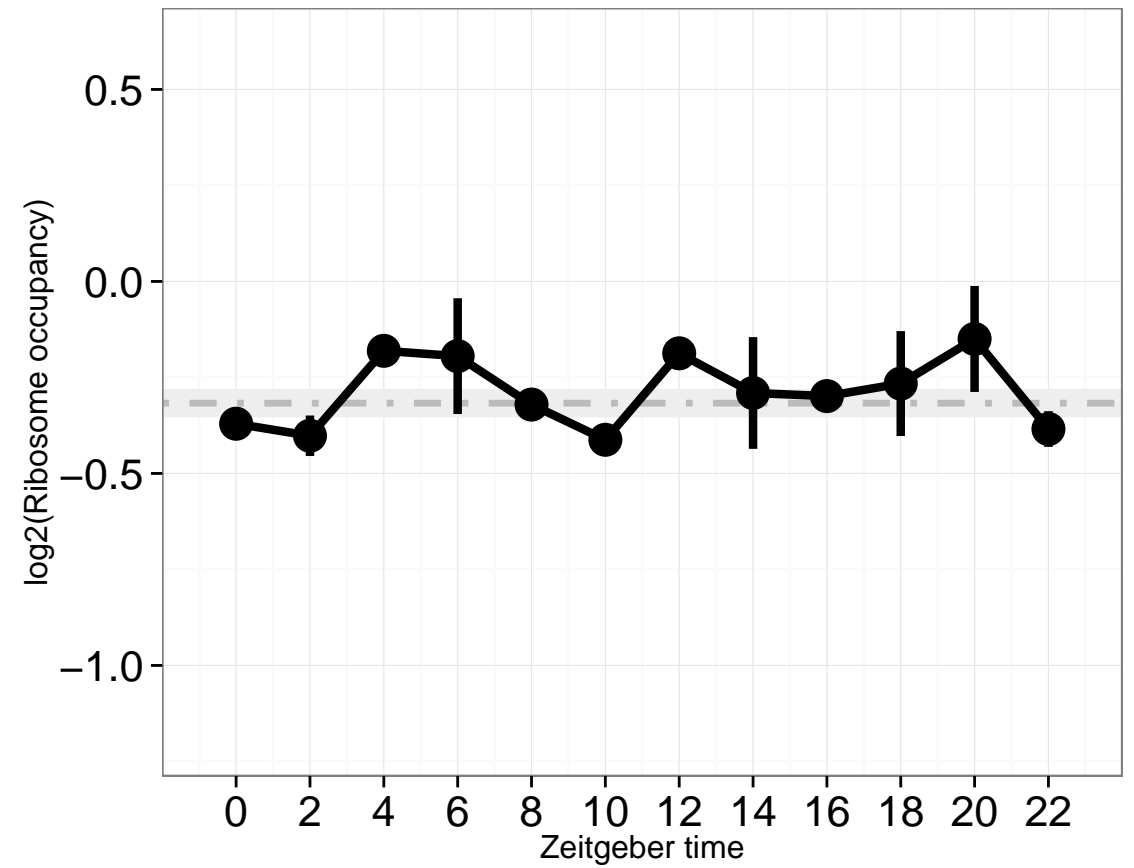

Supplement: SuppDataset_1.zip [file Gfm2_set_A.pdf › Supplemental Dataset 1/A-mRNA_nonrhyth_translation_nonrhyth/Gfm2_set_A.pdf]

# Gfpt1

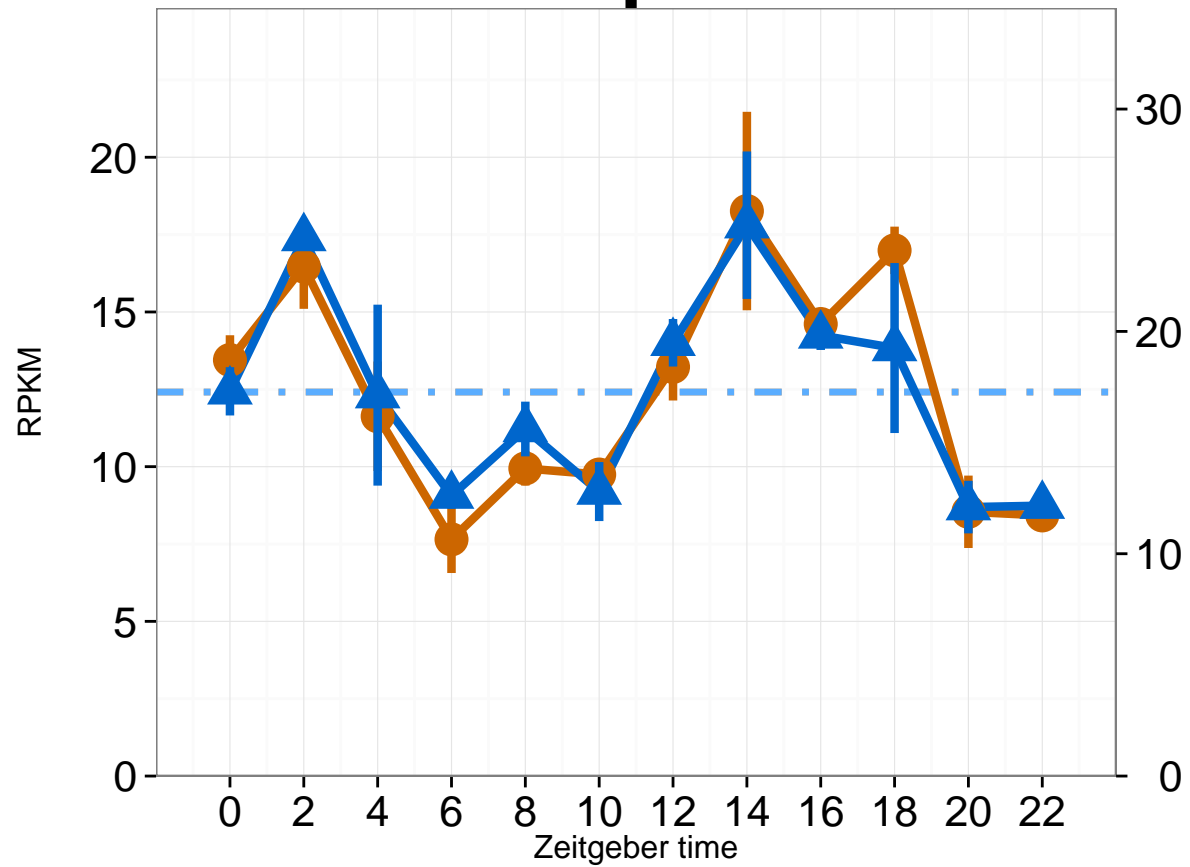

# Gfpt1

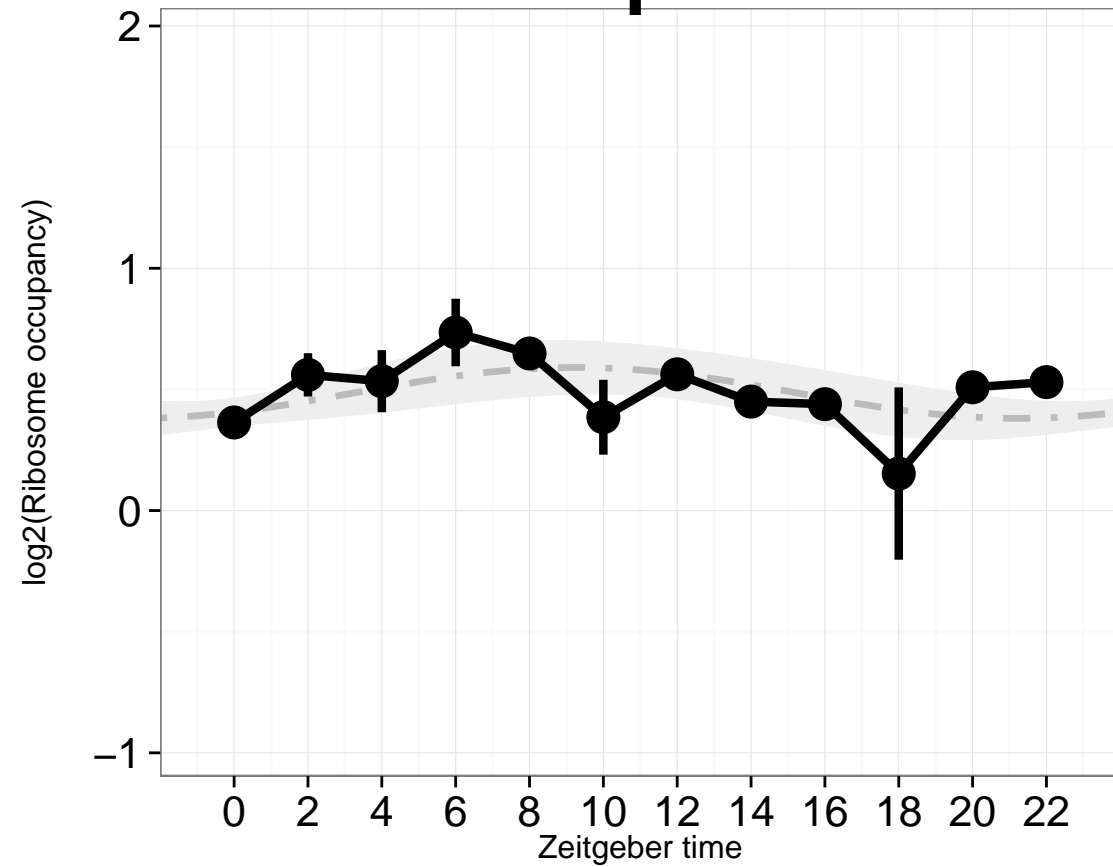

Supplement: SuppDataset_1.zip [file Gfpt1_set_A.pdf › Supplemental Dataset 1/A-mRNA_nonrhyth_translation_nonrhyth/Gfpt1_set_A.pdf]

**Gfra2 TR**

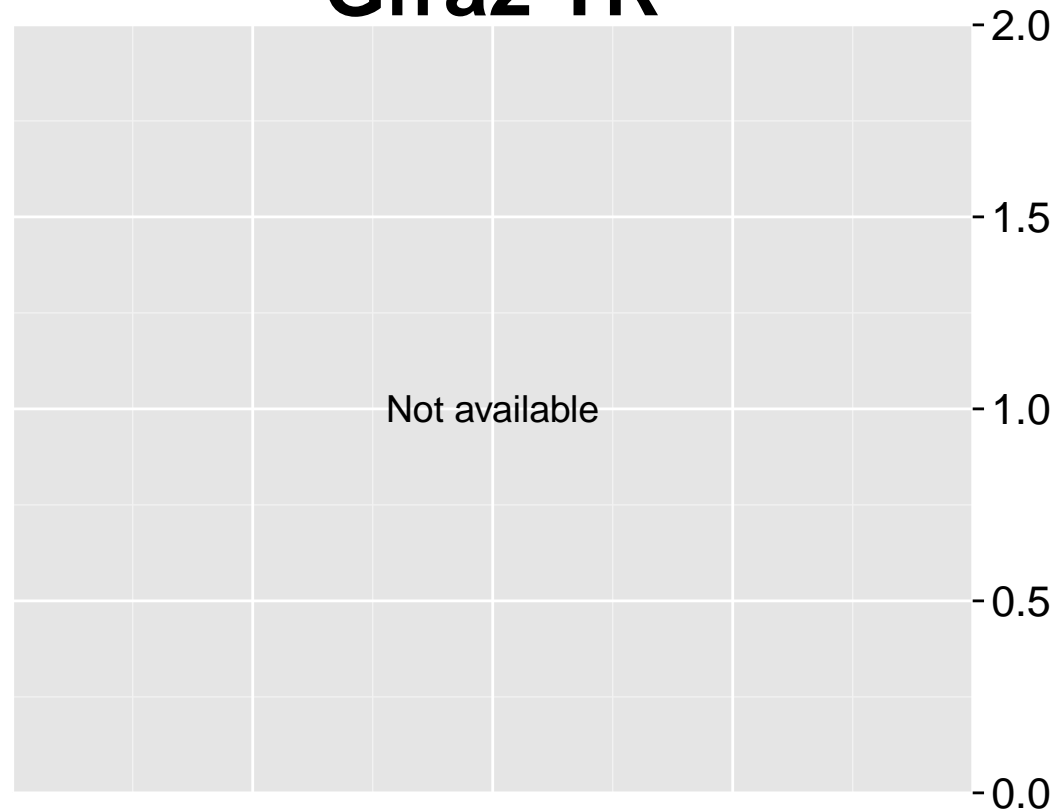

**Gfra2 log2(Ribosome occupancy)**

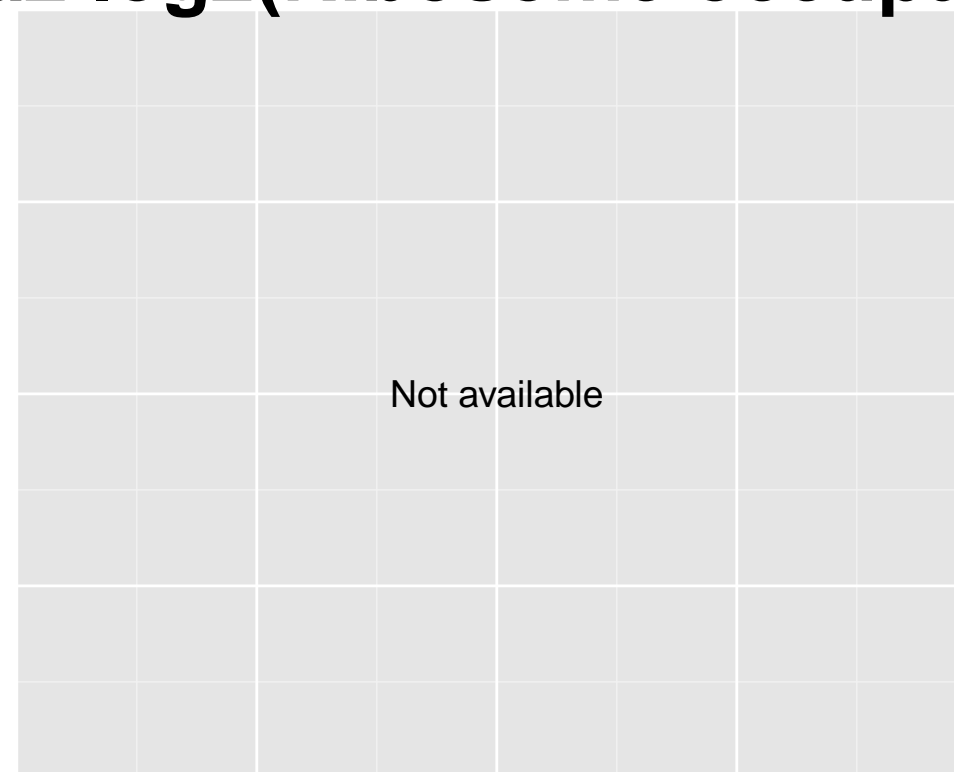

Supplement: SuppDataset_1.zip [file Gfra2_set_A.pdf › Supplemental Dataset 1/A-mRNA_nonrhyth_translation_nonrhyth/Gfra2_set_A.pdf]

# Gga1

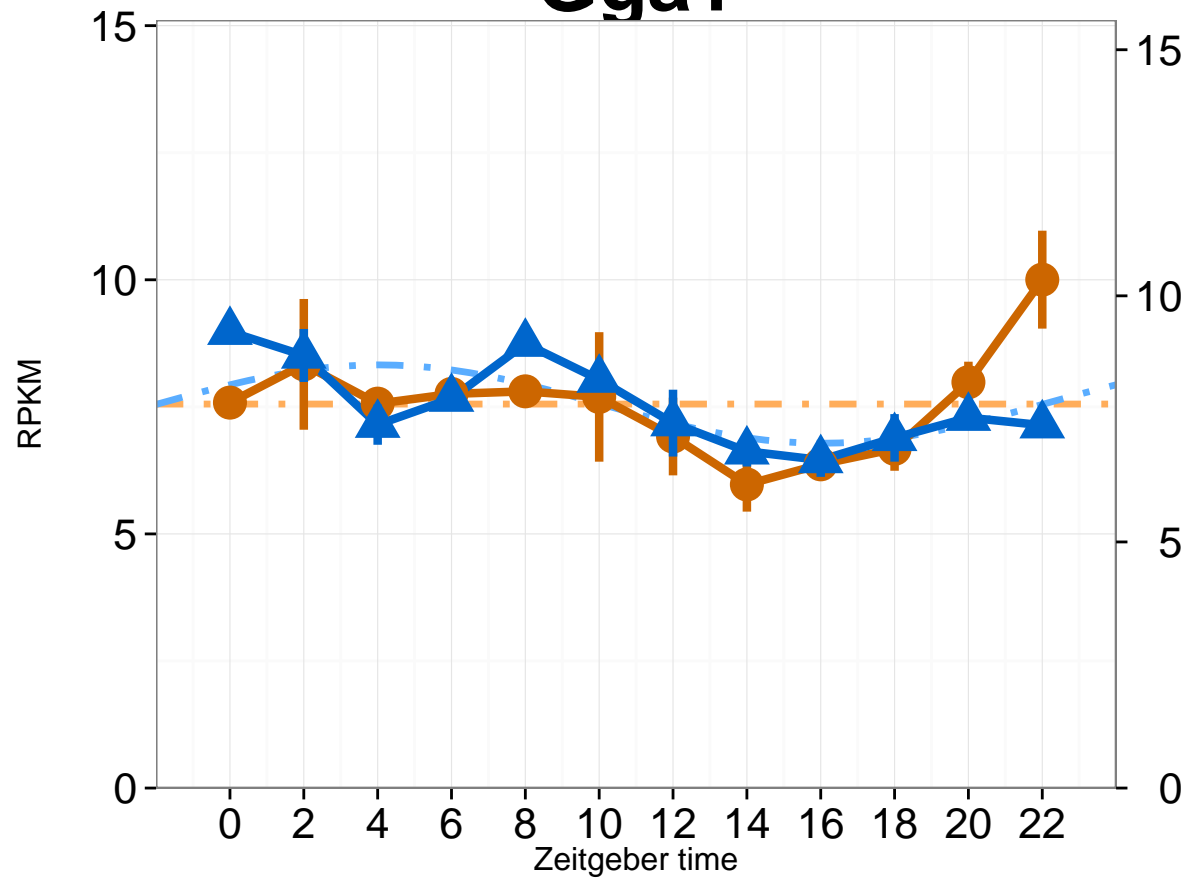

# Gga1

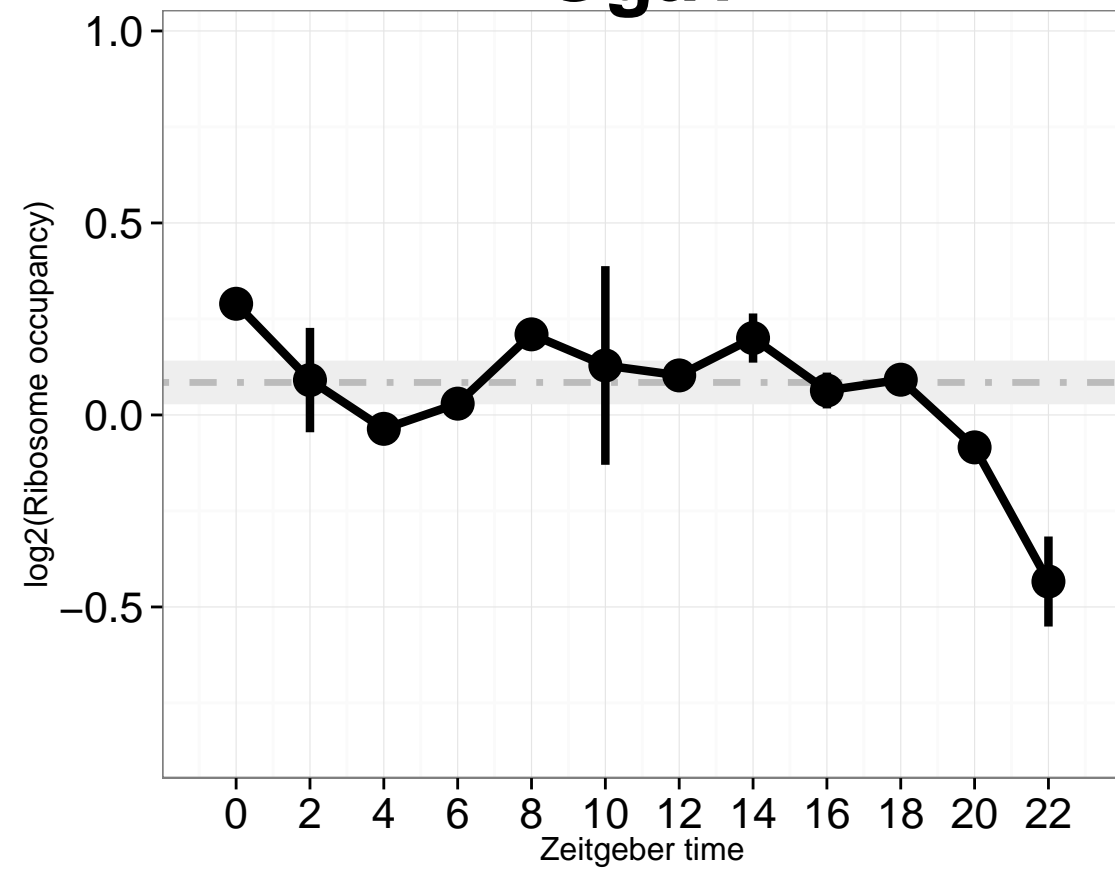

Supplement: SuppDataset_1.zip [file Gga1_set_A.pdf › Supplemental Dataset 1/A-mRNA_nonrhyth_translation_nonrhyth/Gga1_set_A.pdf]

## Gga3

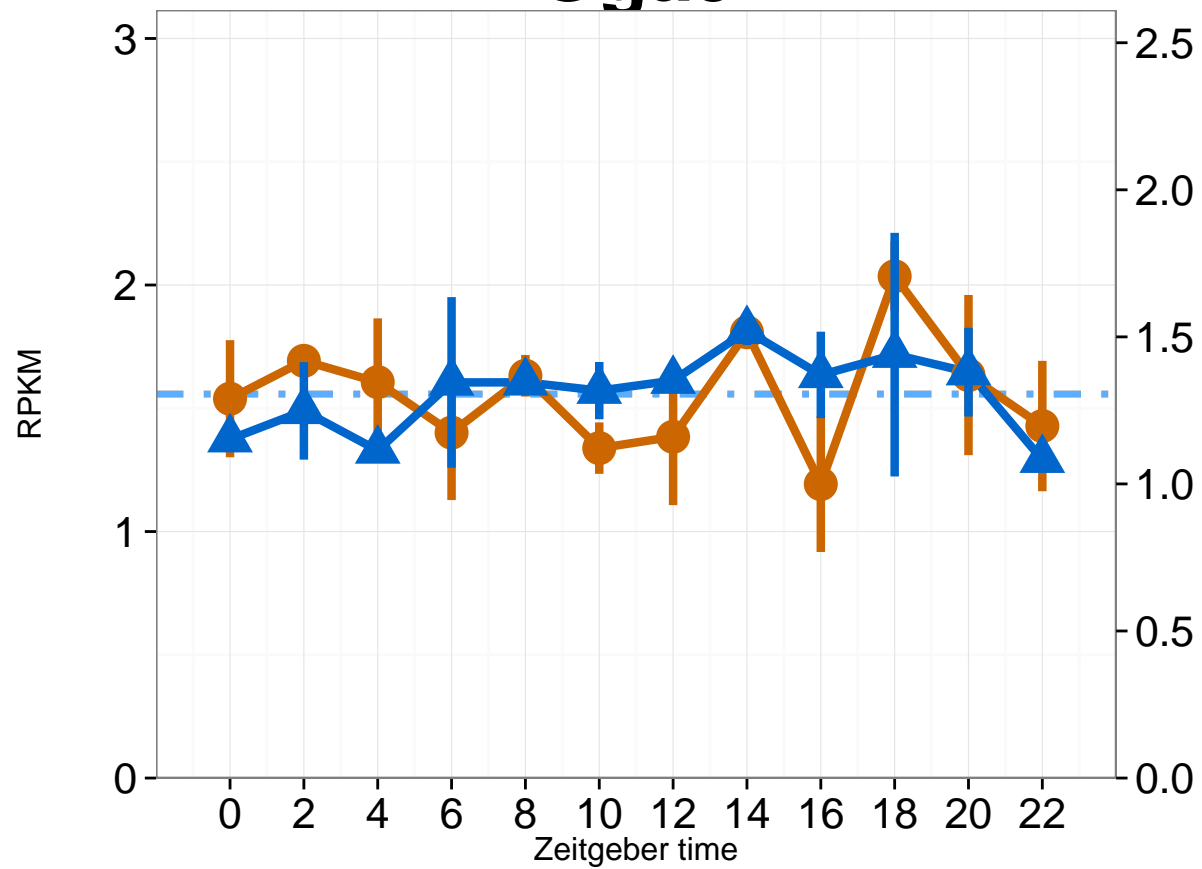

## Gga3

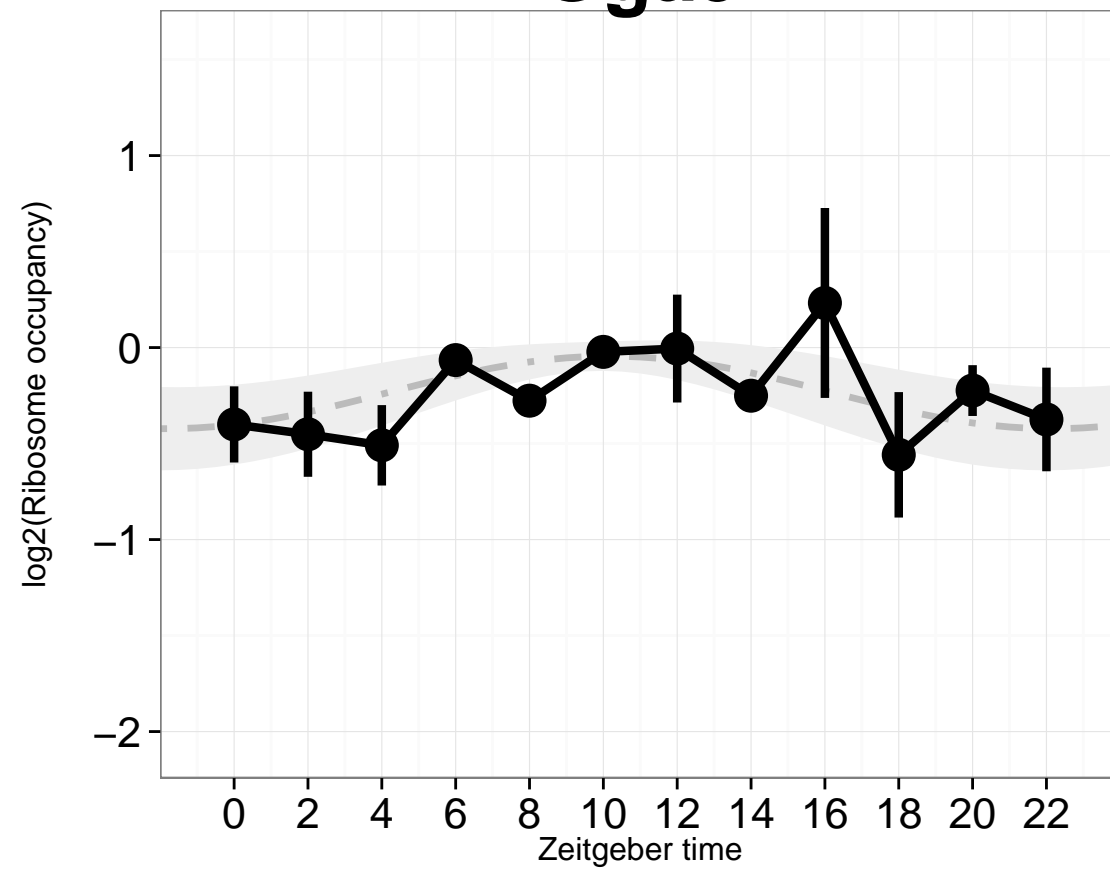

Supplement: SuppDataset_1.zip [file Gga3_set_A.pdf › Supplemental Dataset 1/A-mRNA_nonrhyth_translation_nonrhyth/Gga3_set_A.pdf]

## Ggcx

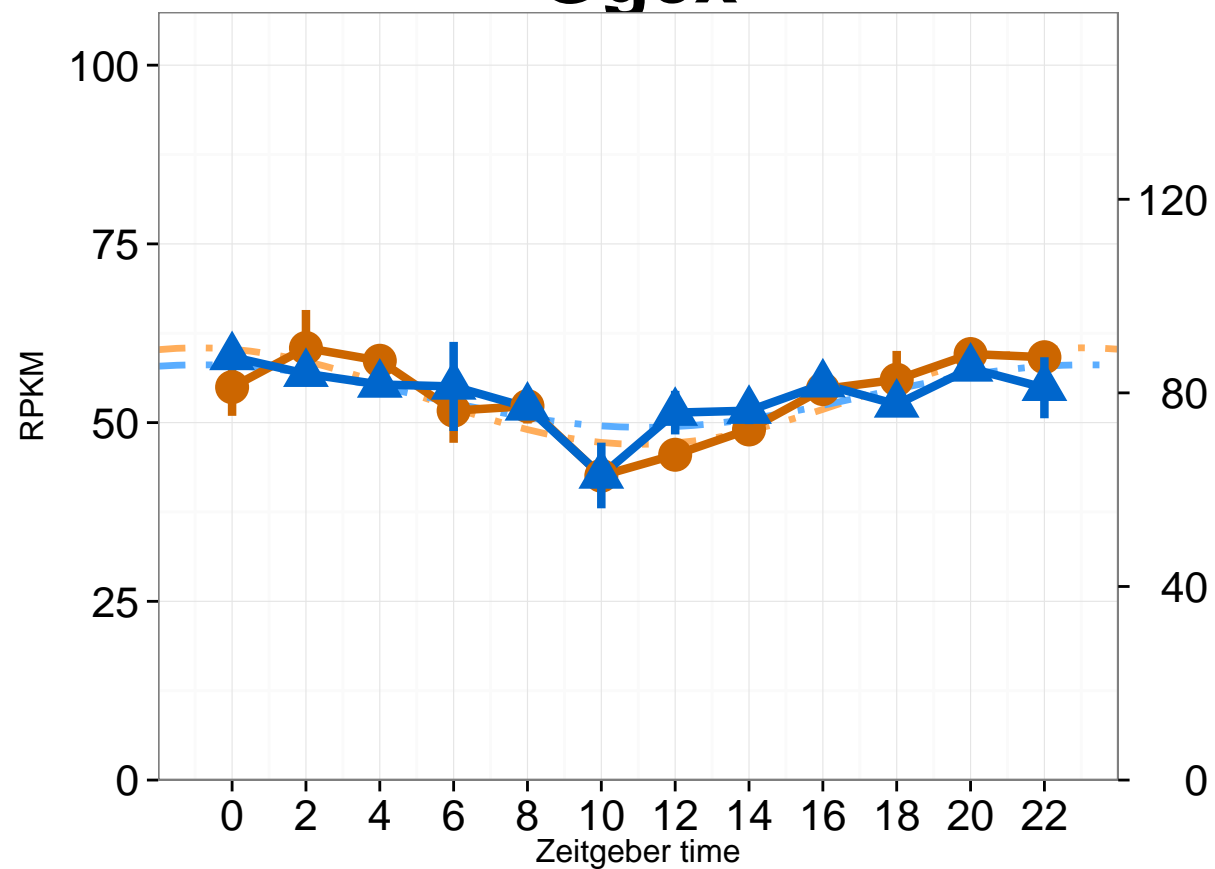

## Ggcx

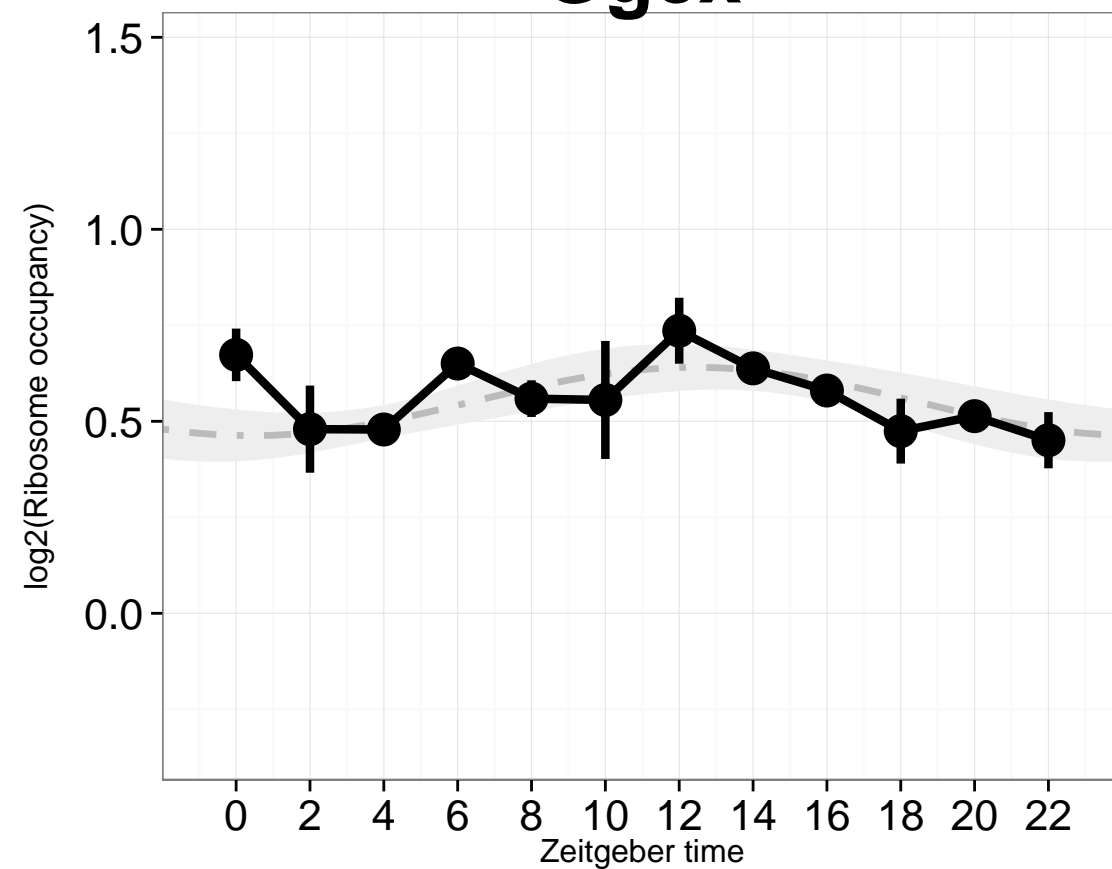

Supplement: SuppDataset_1.zip [file Ggcx_set_A.pdf › Supplemental Dataset 1/A-mRNA_nonrhyth_translation_nonrhyth/Ggcx_set_A.pdf]

## Ggh

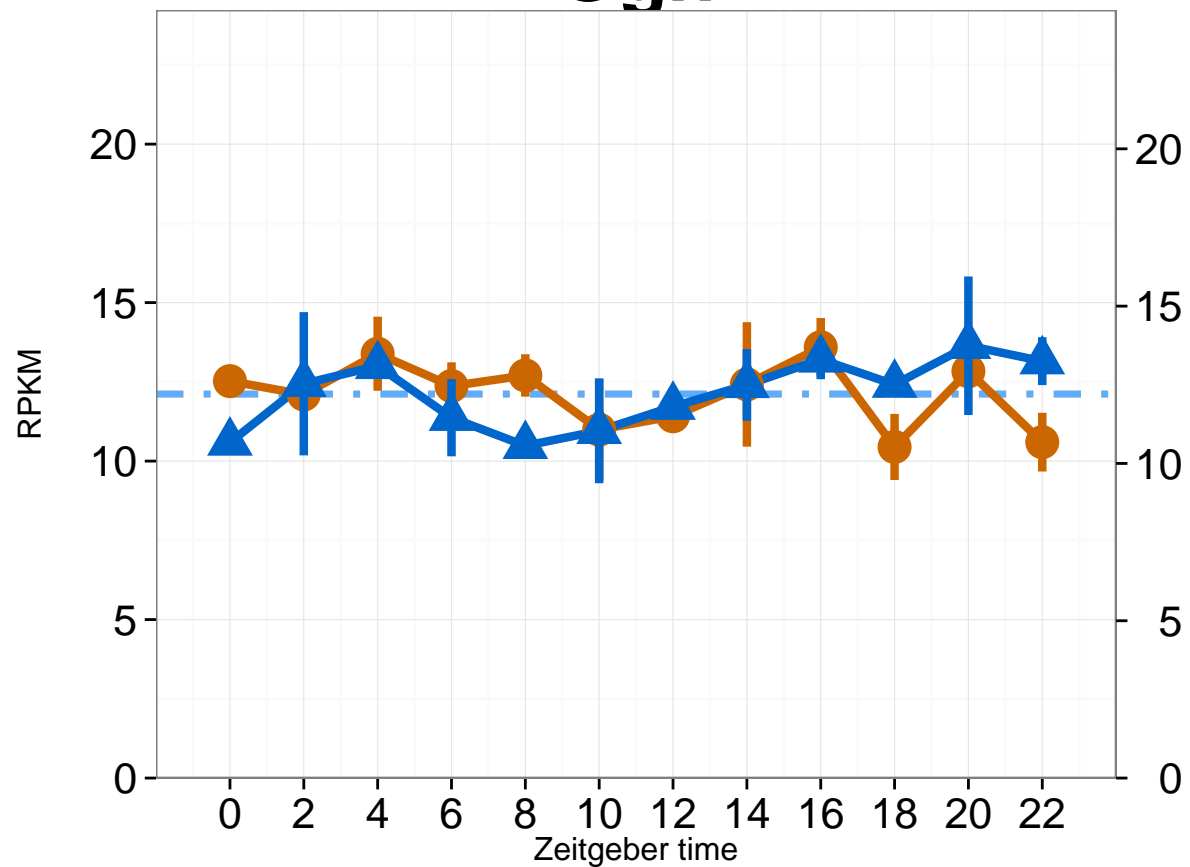

## Ggh

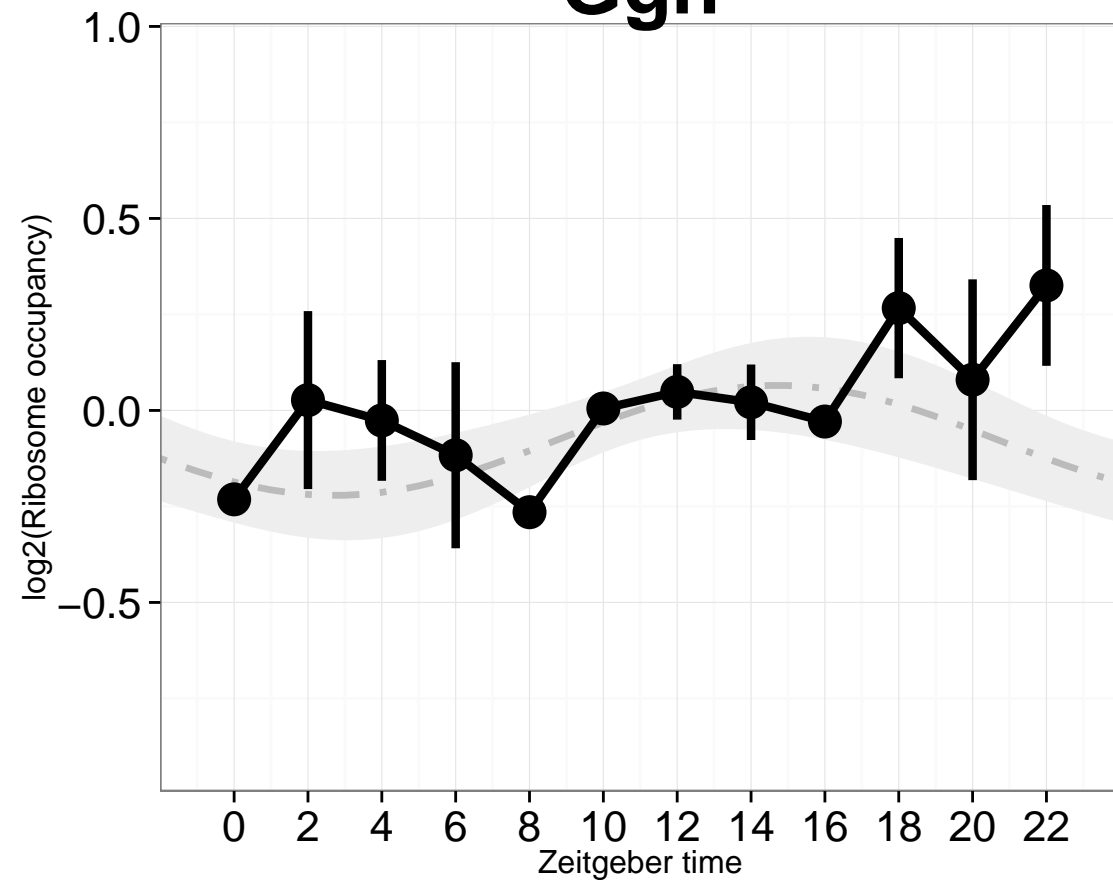

Supplement: SuppDataset_1.zip [file Ggh_set_A.pdf › Supplemental Dataset 1/A-mRNA_nonrhyth_translation_nonrhyth/Ggh_set_A.pdf]

## Ggnbp1

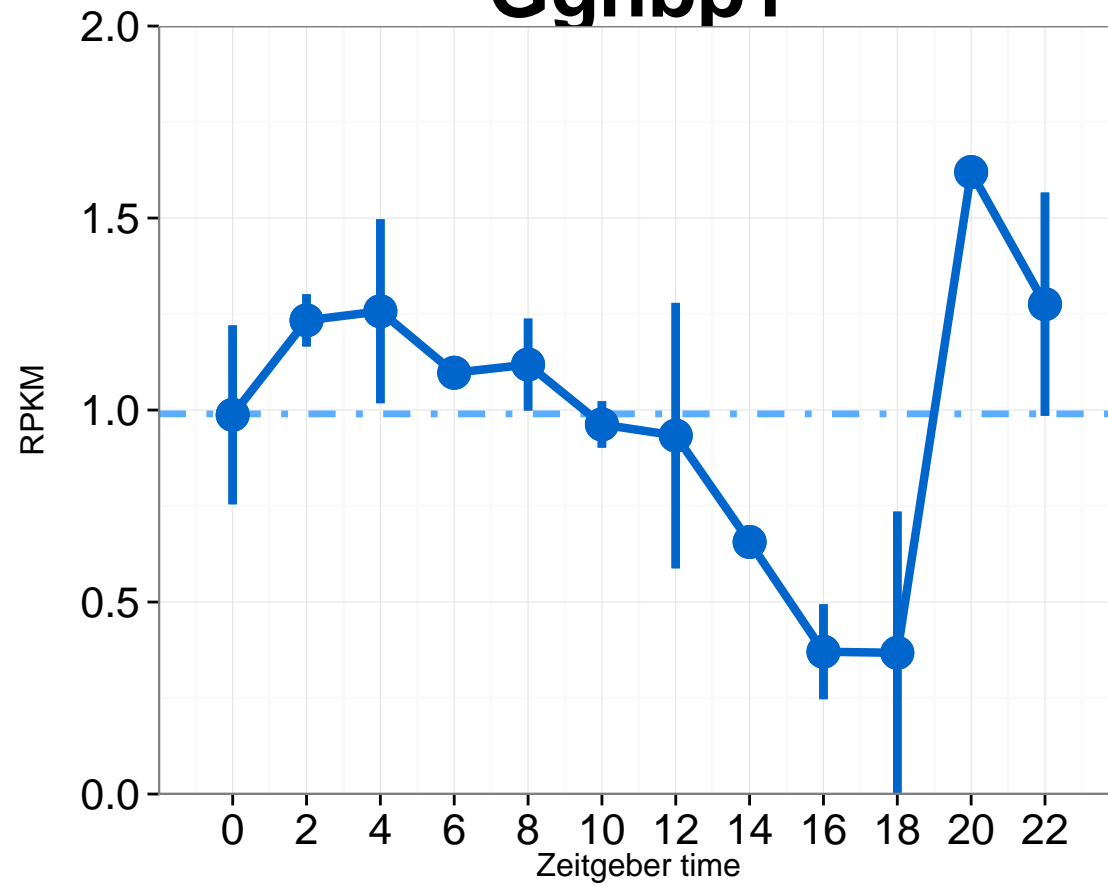

## Ggnbp1 log2(Ribosome occupancy)

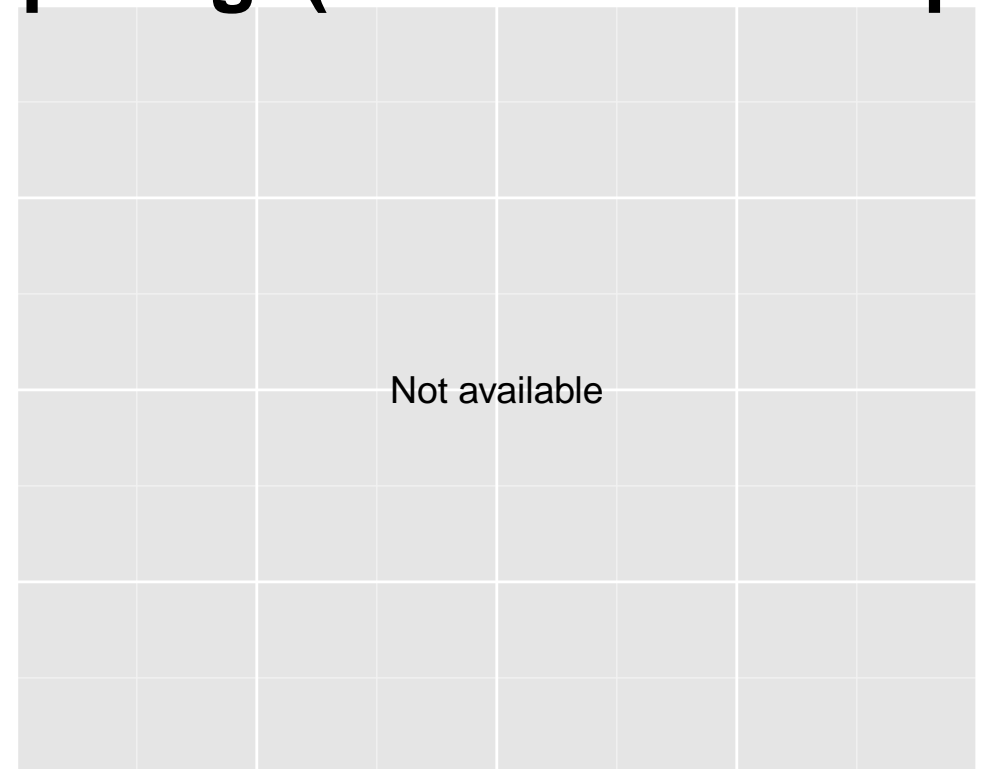

Supplement: SuppDataset_1.zip [file Ggnbp1_set_A.pdf › Supplemental Dataset 1/A-mRNA_nonrhyth_translation_nonrhyth/Ggnbp1_set_A.pdf]

# Ggnbp2

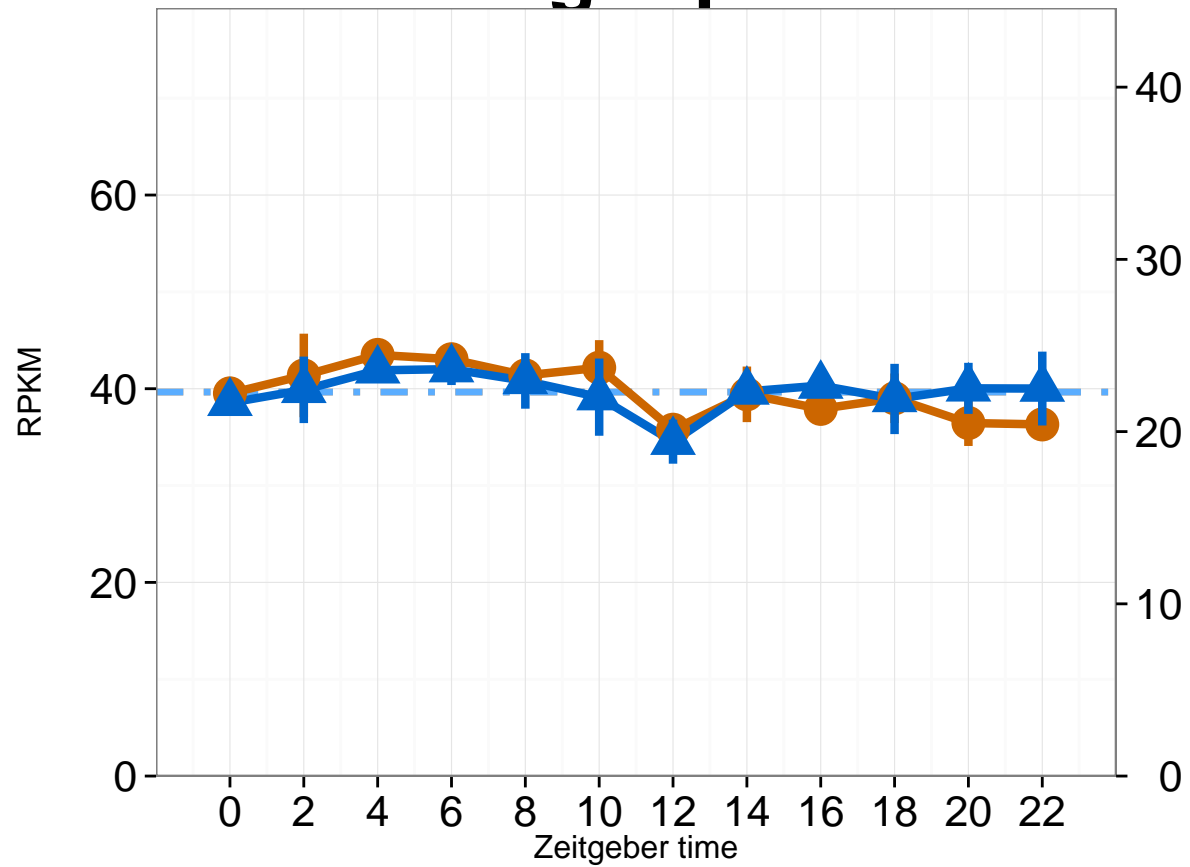

# Ggnbp2

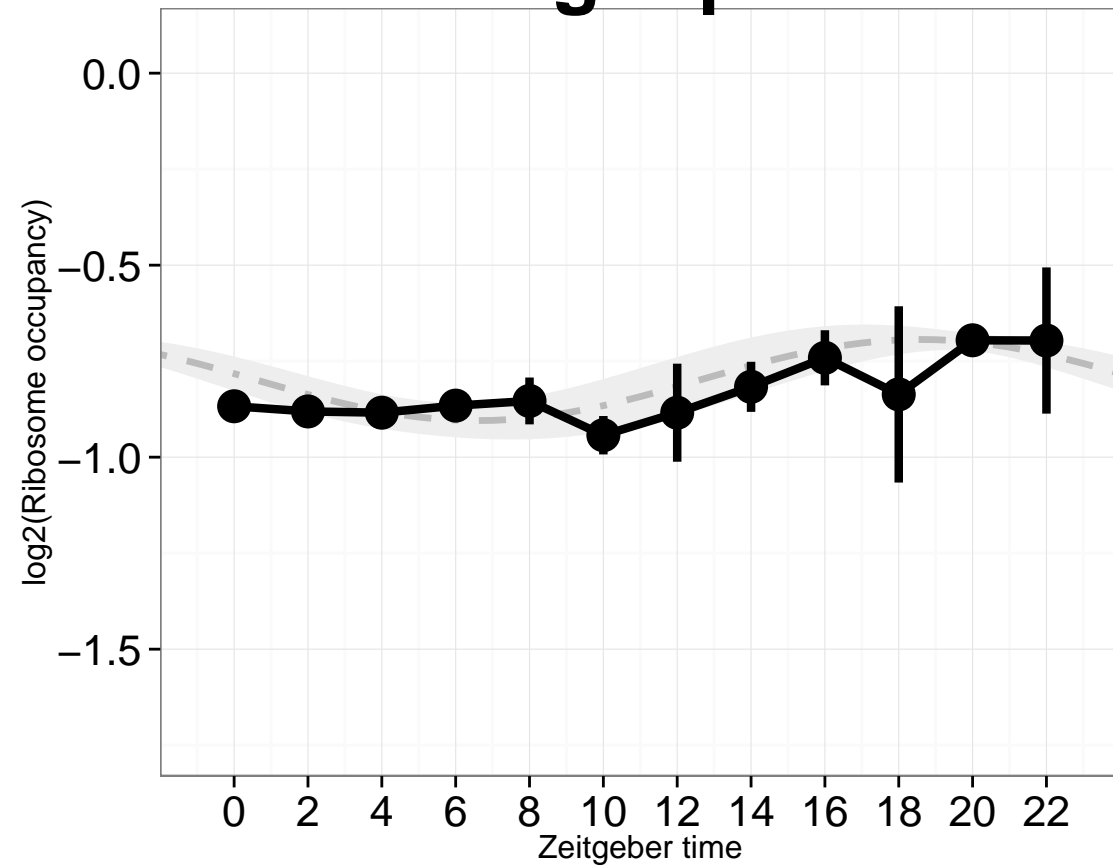

Supplement: SuppDataset_1.zip [file Ggnbp2_set_A.pdf › Supplemental Dataset 1/A-mRNA_nonrhyth_translation_nonrhyth/Ggnbp2_set_A.pdf]

# Ggta1

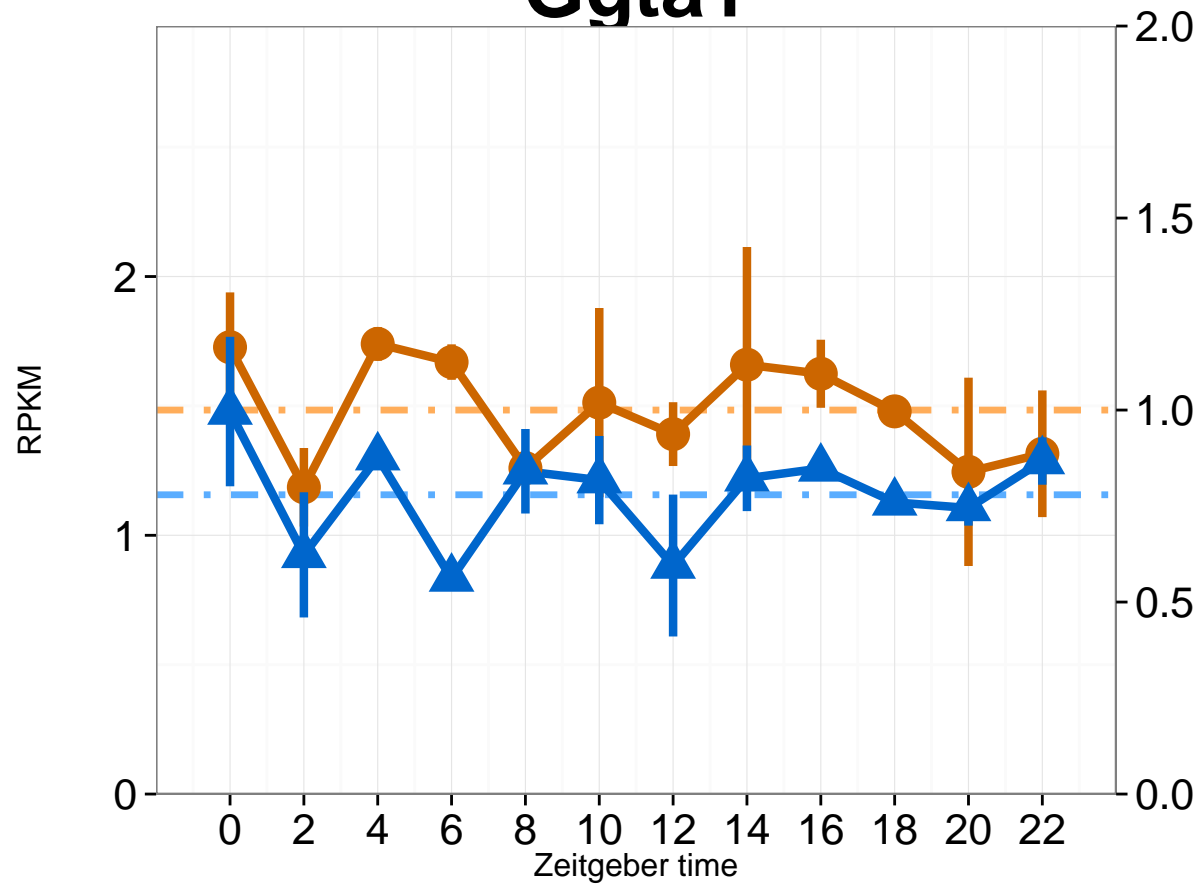

# Ggta1

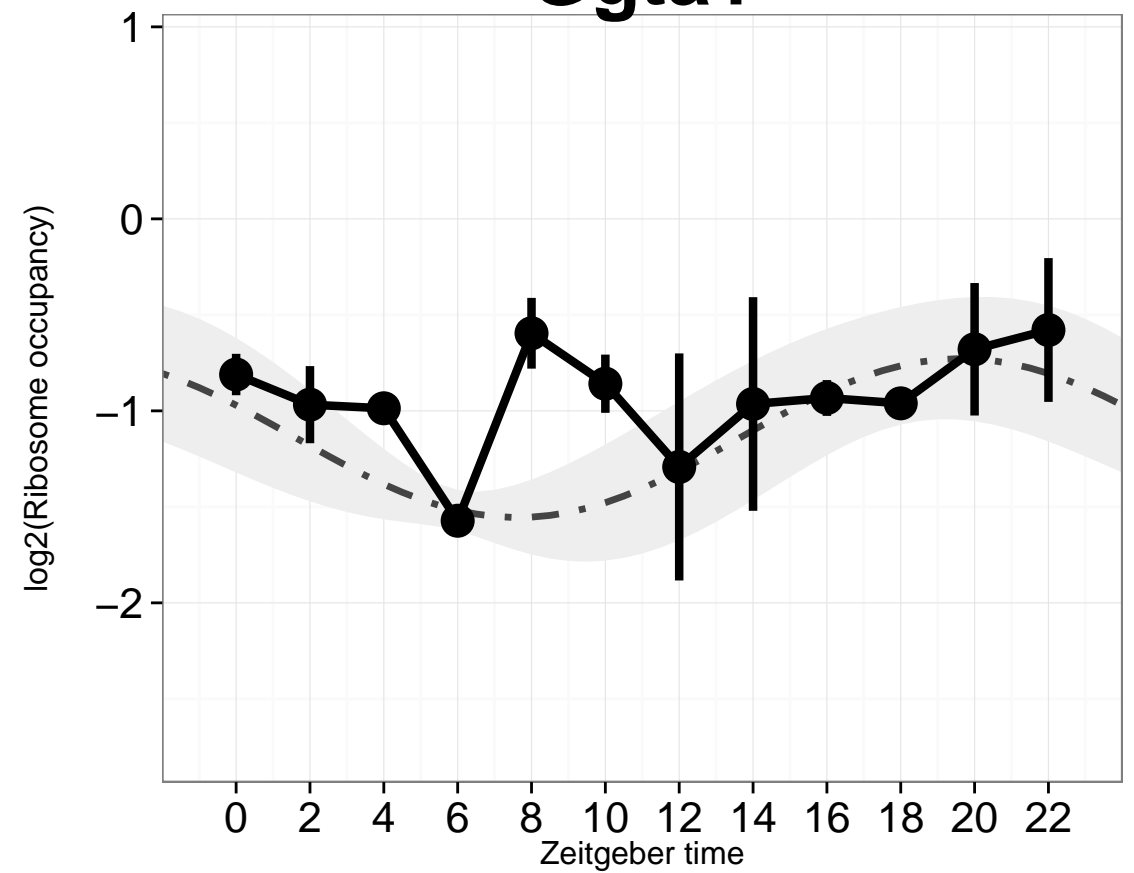

Supplement: SuppDataset_1.zip [file Ggta1_set_A.pdf › Supplemental Dataset 1/A-mRNA_nonrhyth_translation_nonrhyth/Ggta1_set_A.pdf]

## Ghdc

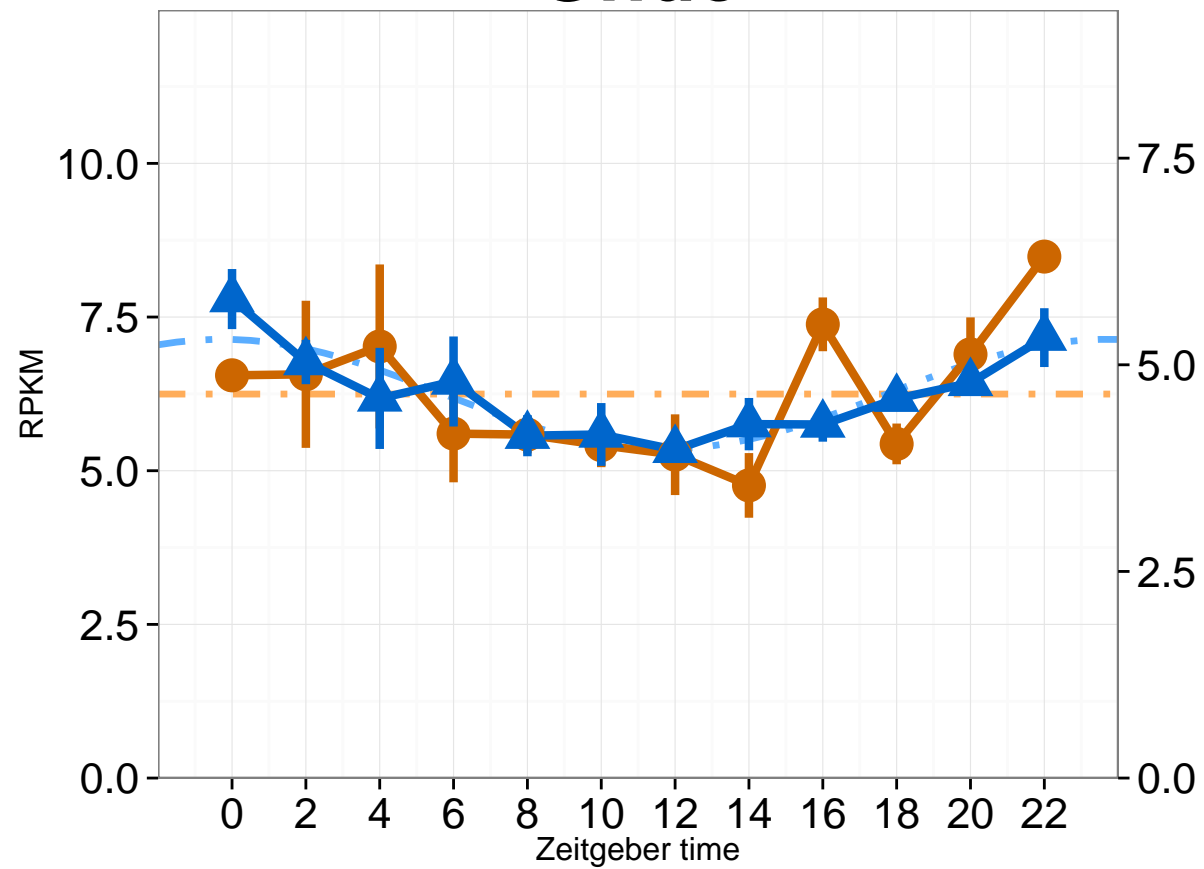

## Ghdc

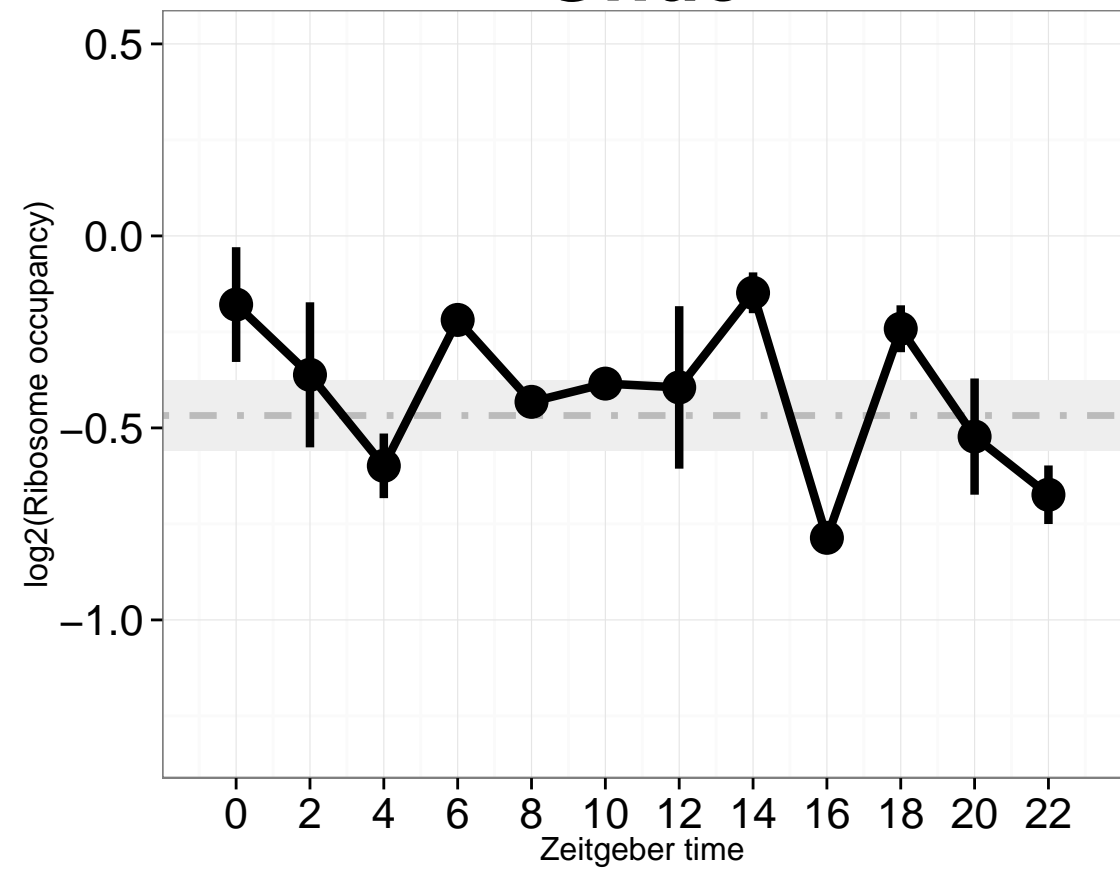

Supplement: SuppDataset_1.zip [file Ghdc_set_A.pdf › Supplemental Dataset 1/A-mRNA_nonrhyth_translation_nonrhyth/Ghdc_set_A.pdf]

## Ghitm

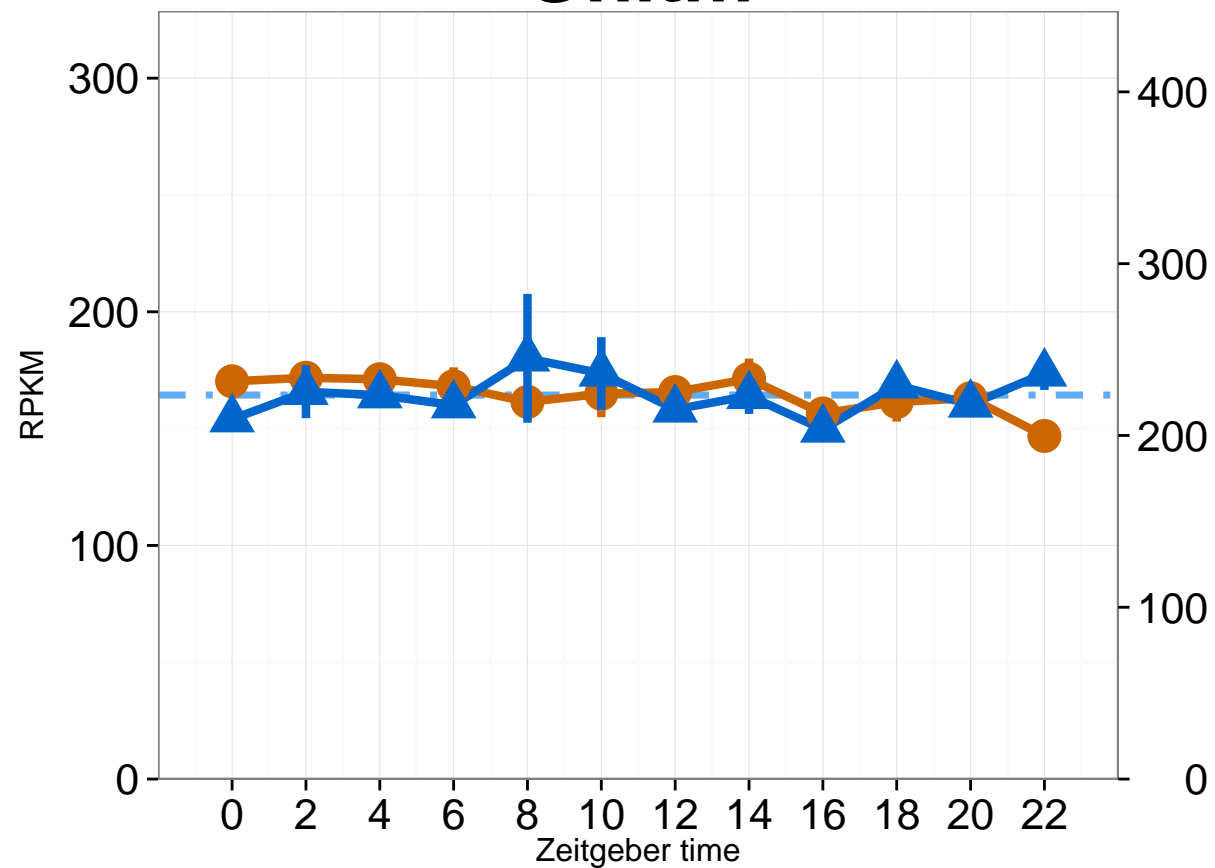

## Ghitm

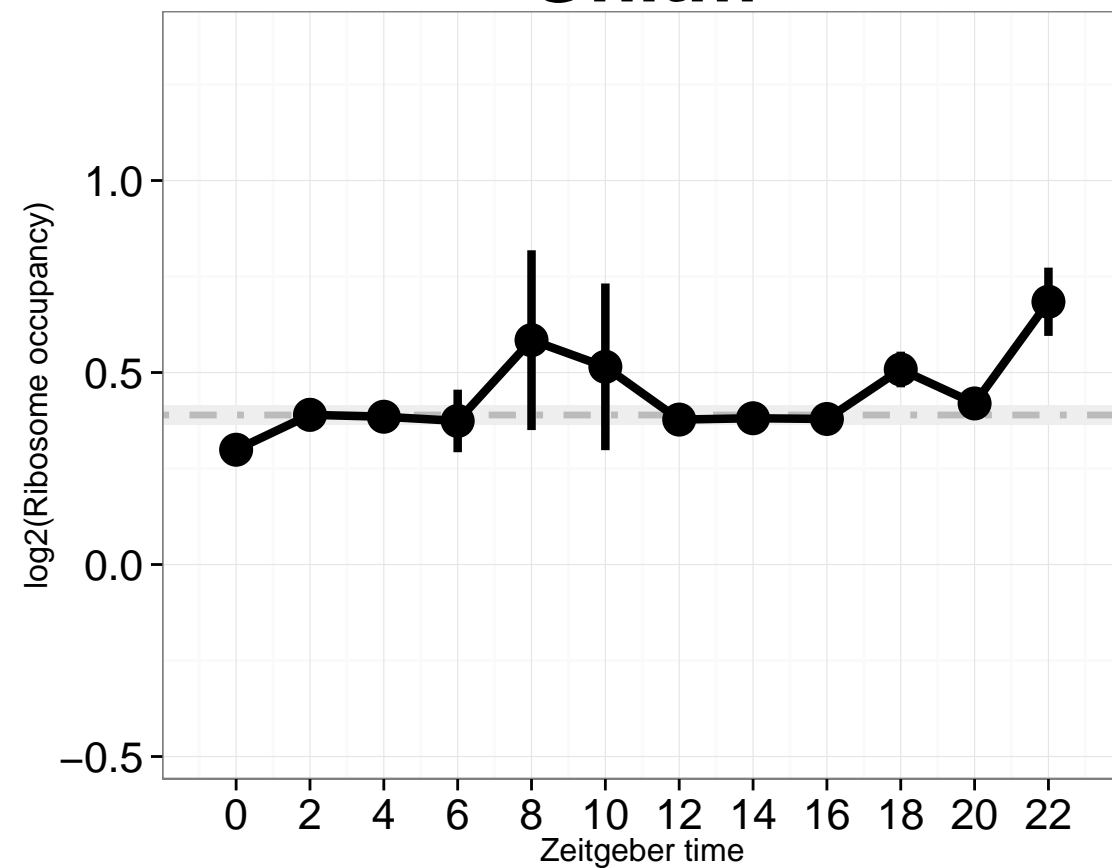

Supplement: SuppDataset_1.zip [file Ghitm_set_A.pdf › Supplemental Dataset 1/A-mRNA_nonrhyth_translation_nonrhyth/Ghitm_set_A.pdf]

## Ghr

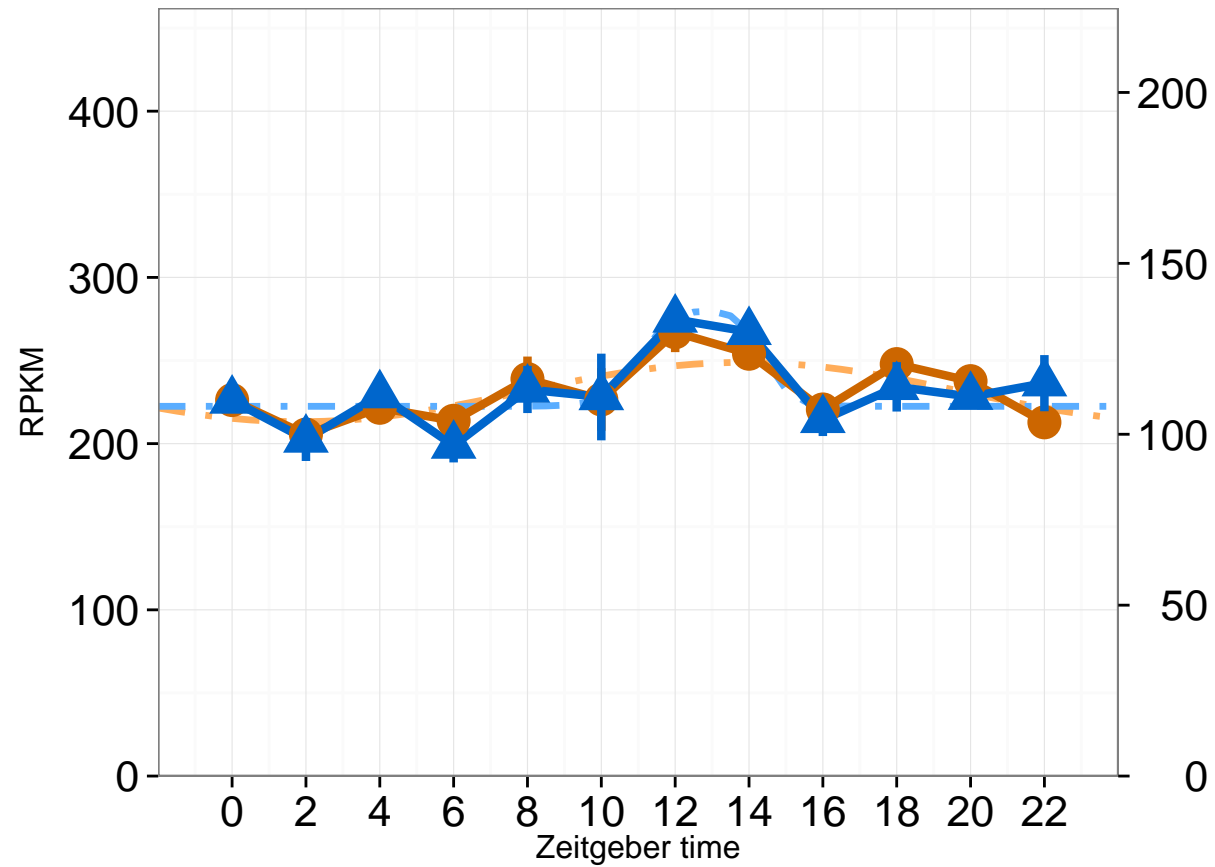

## Ghr

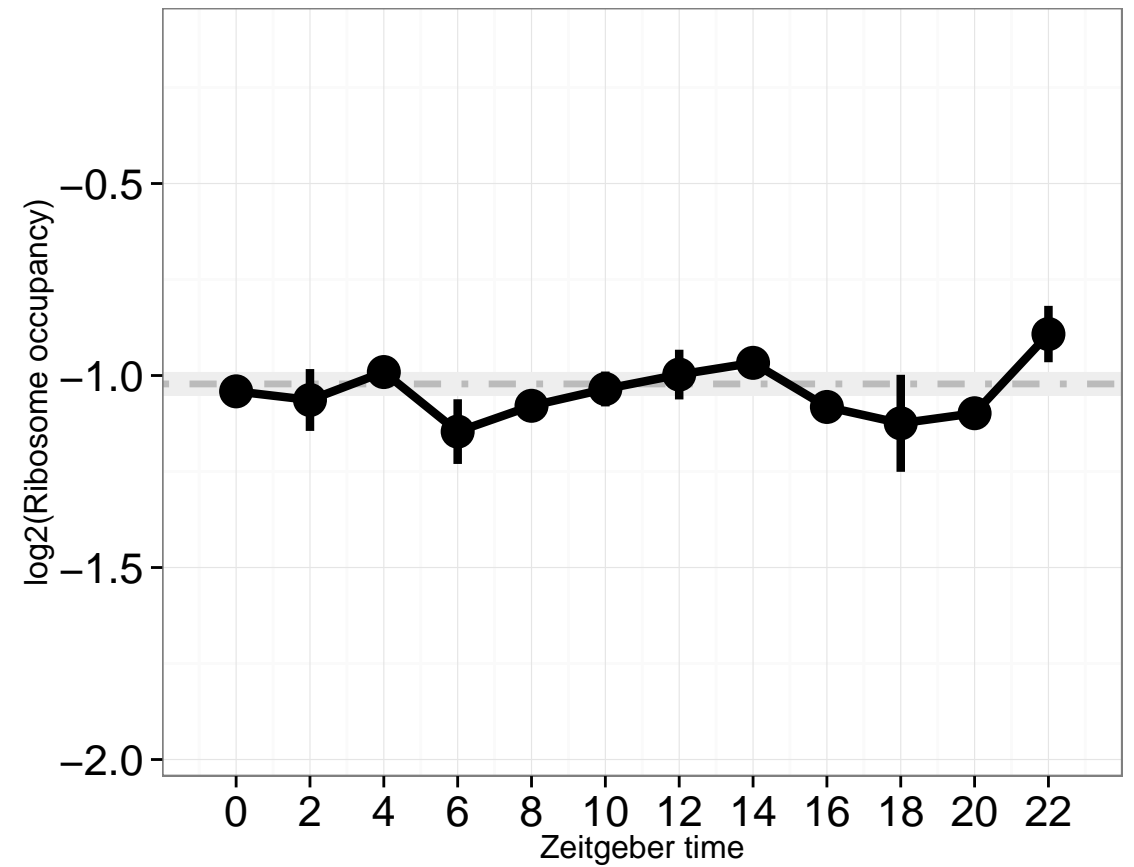

Supplement: SuppDataset_1.zip [file Ghr_set_A.pdf › Supplemental Dataset 1/A-mRNA_nonrhyth_translation_nonrhyth/Ghr_set_A.pdf]

## Gid4

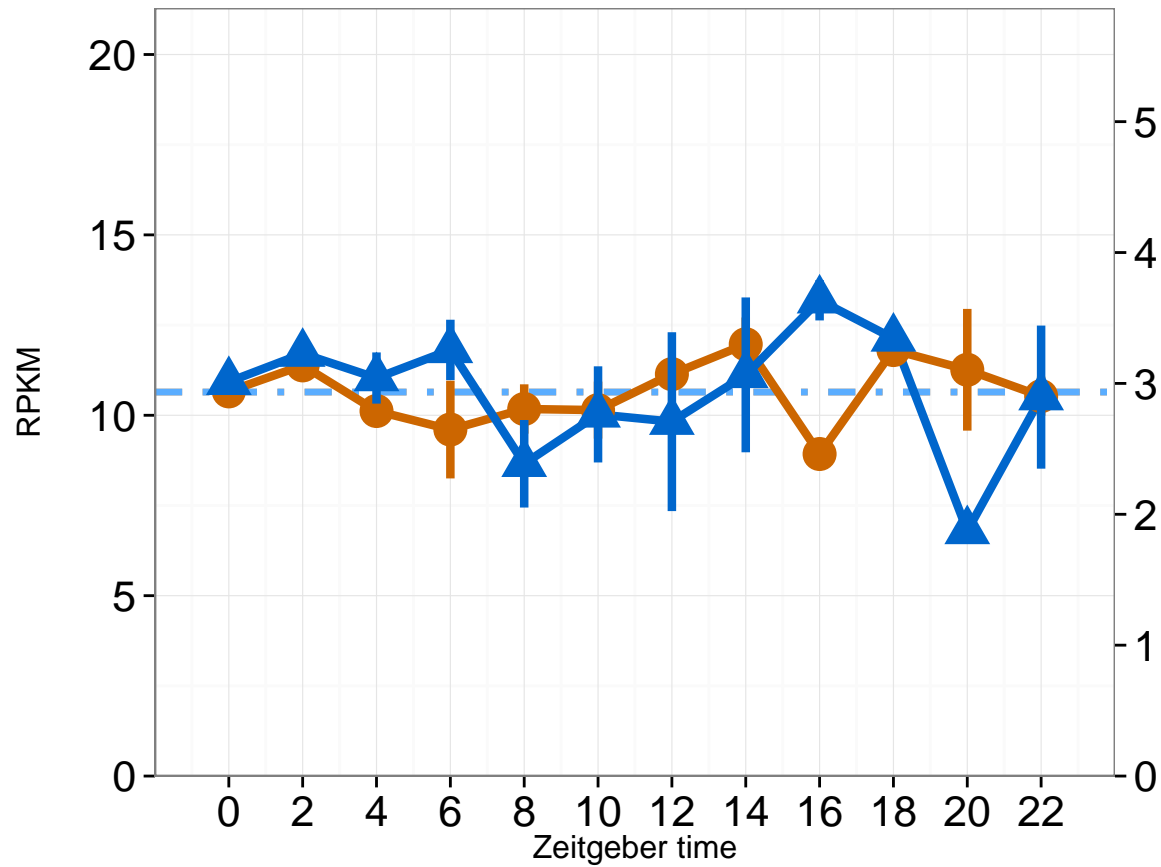

## Gid4

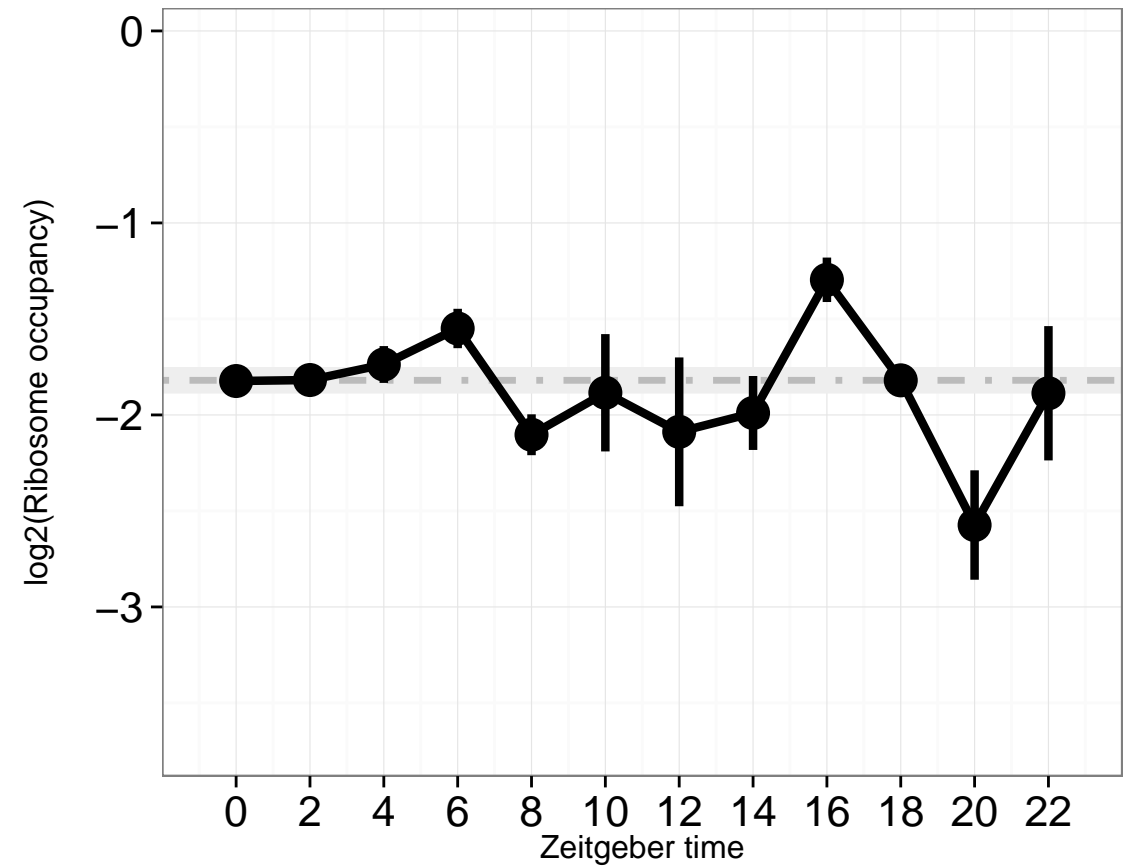

Supplement: SuppDataset_1.zip [file Gid4_set_A.pdf › Supplemental Dataset 1/A-mRNA_nonrhyth_translation_nonrhyth/Gid4_set_A.pdf]

## Gid8

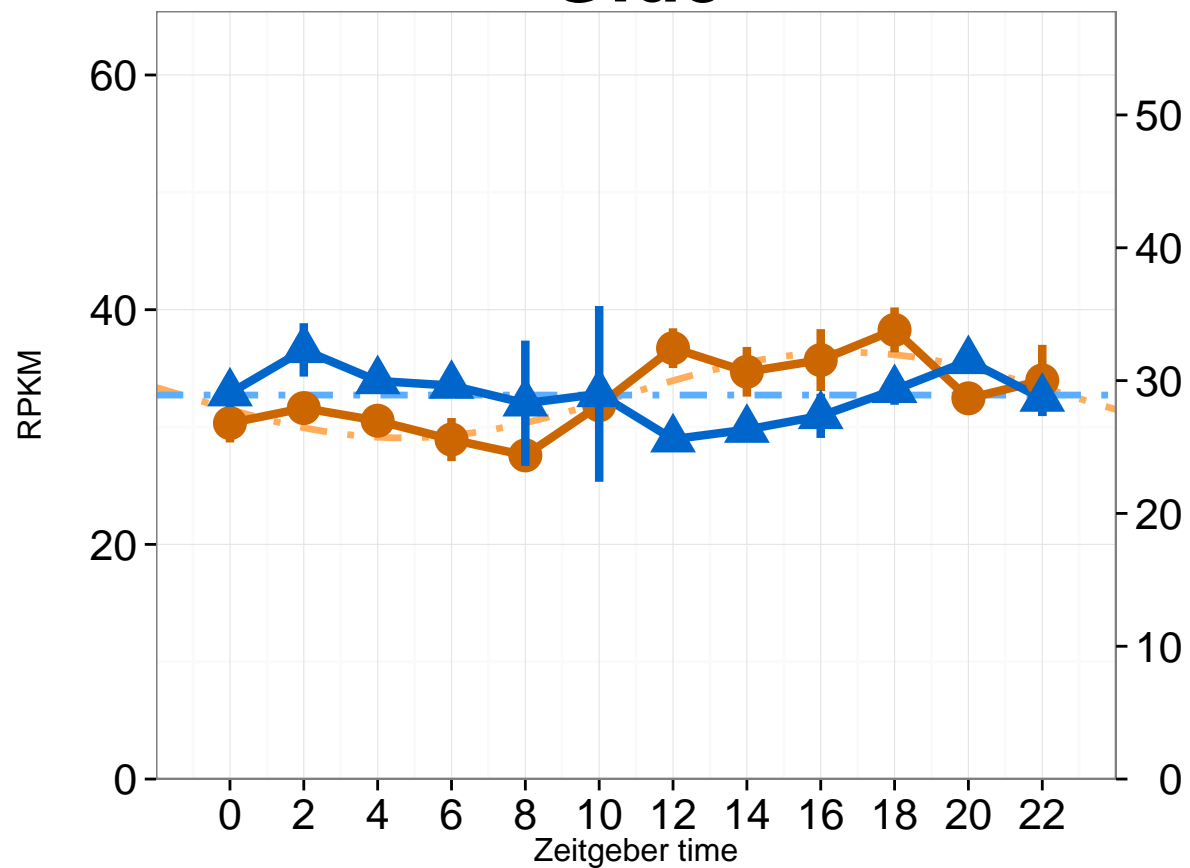

## Gid8

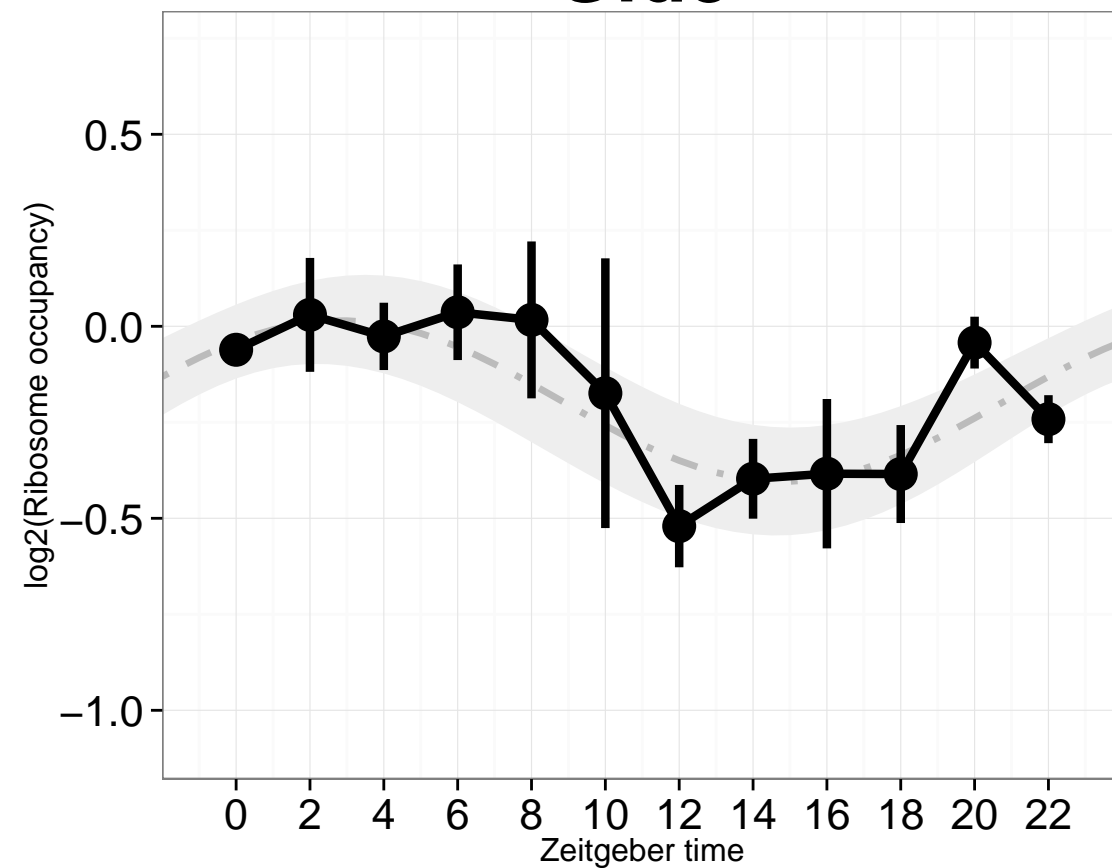

Supplement: SuppDataset_1.zip [file Gid8_set_A.pdf › Supplemental Dataset 1/A-mRNA_nonrhyth_translation_nonrhyth/Gid8_set_A.pdf]

## Gigyf2

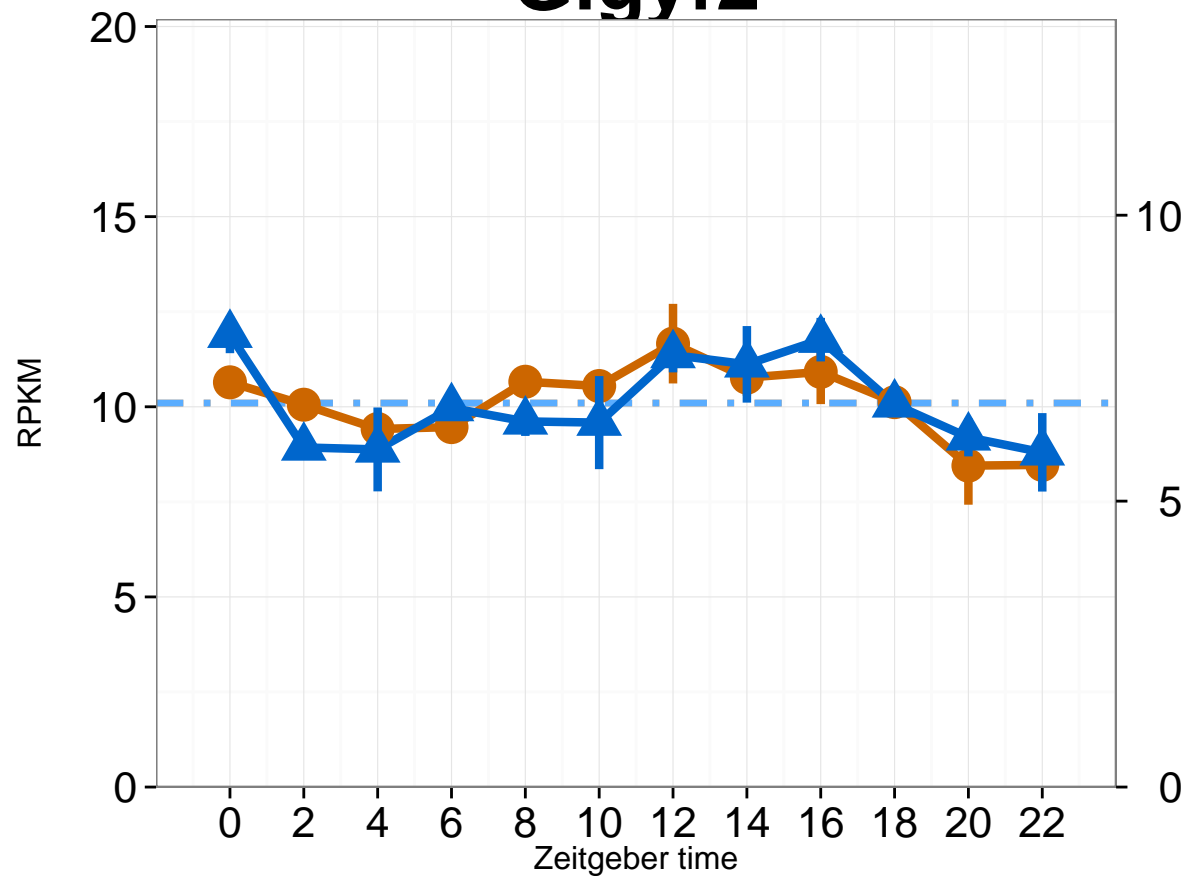

## Gigyf2

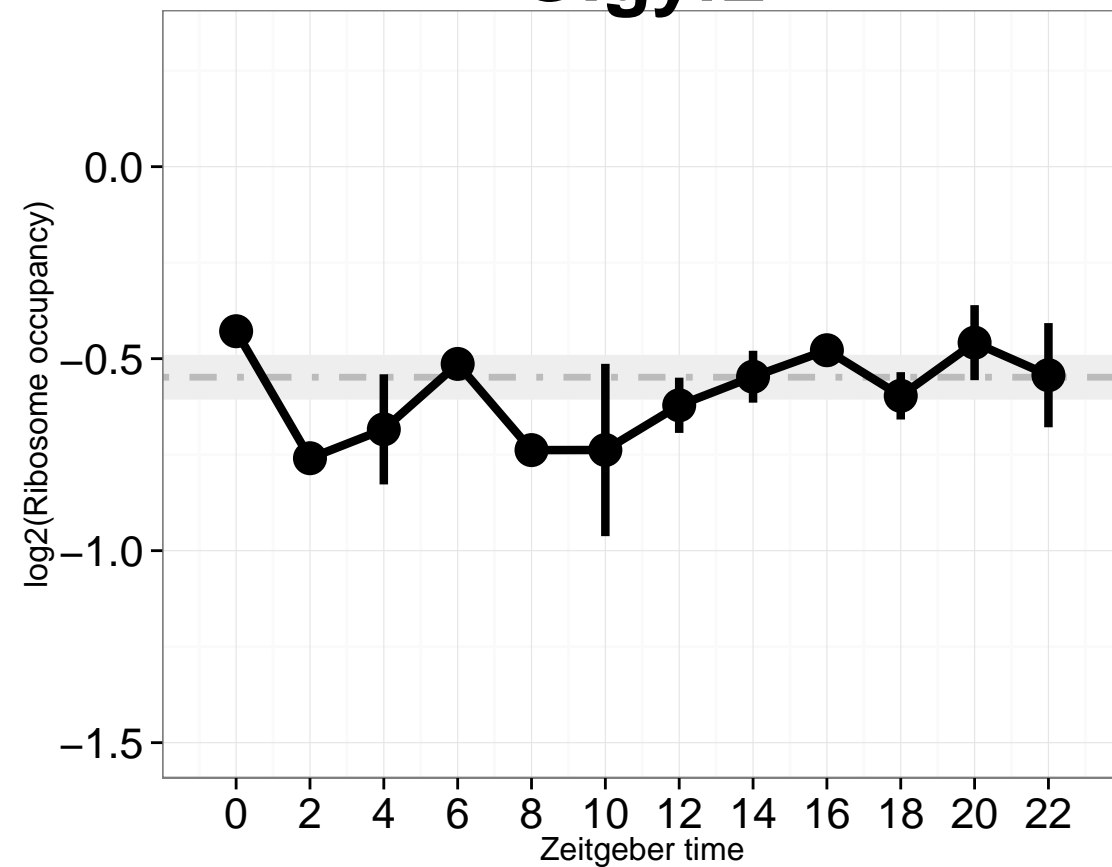

Supplement: SuppDataset_1.zip [file Gigyf2_set_A.pdf › Supplemental Dataset 1/A-mRNA_nonrhyth_translation_nonrhyth/Gigyf2_set_A.pdf]

## Gimap3

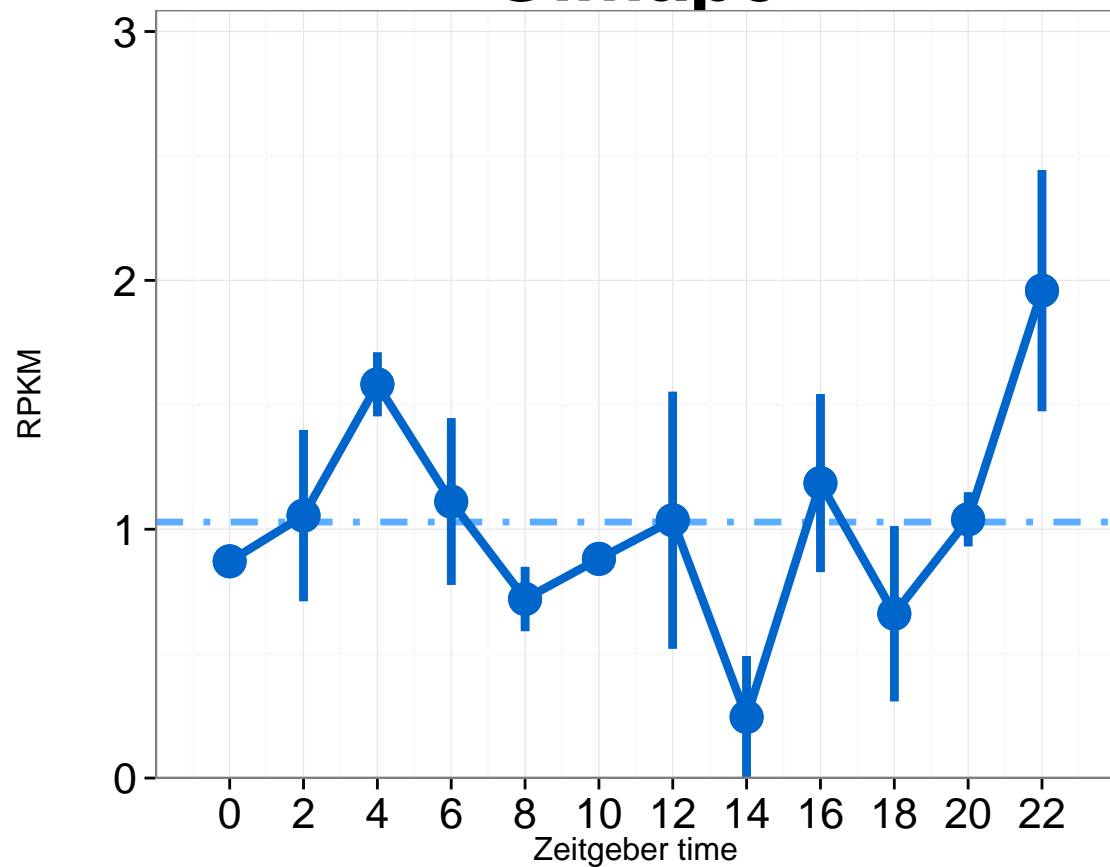

## Gimap3 log2(Ribosome occupancy)

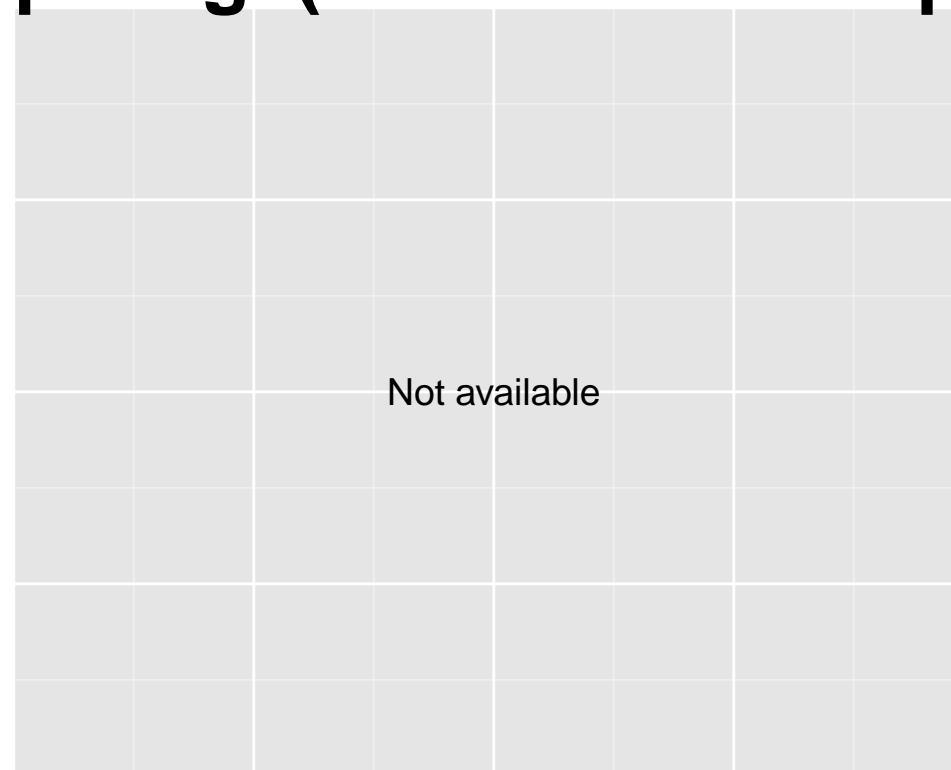

Supplement: SuppDataset_1.zip [file Gimap3_set_A.pdf › Supplemental Dataset 1/A-mRNA_nonrhyth_translation_nonrhyth/Gimap3_set_A.pdf]

## Gimap5

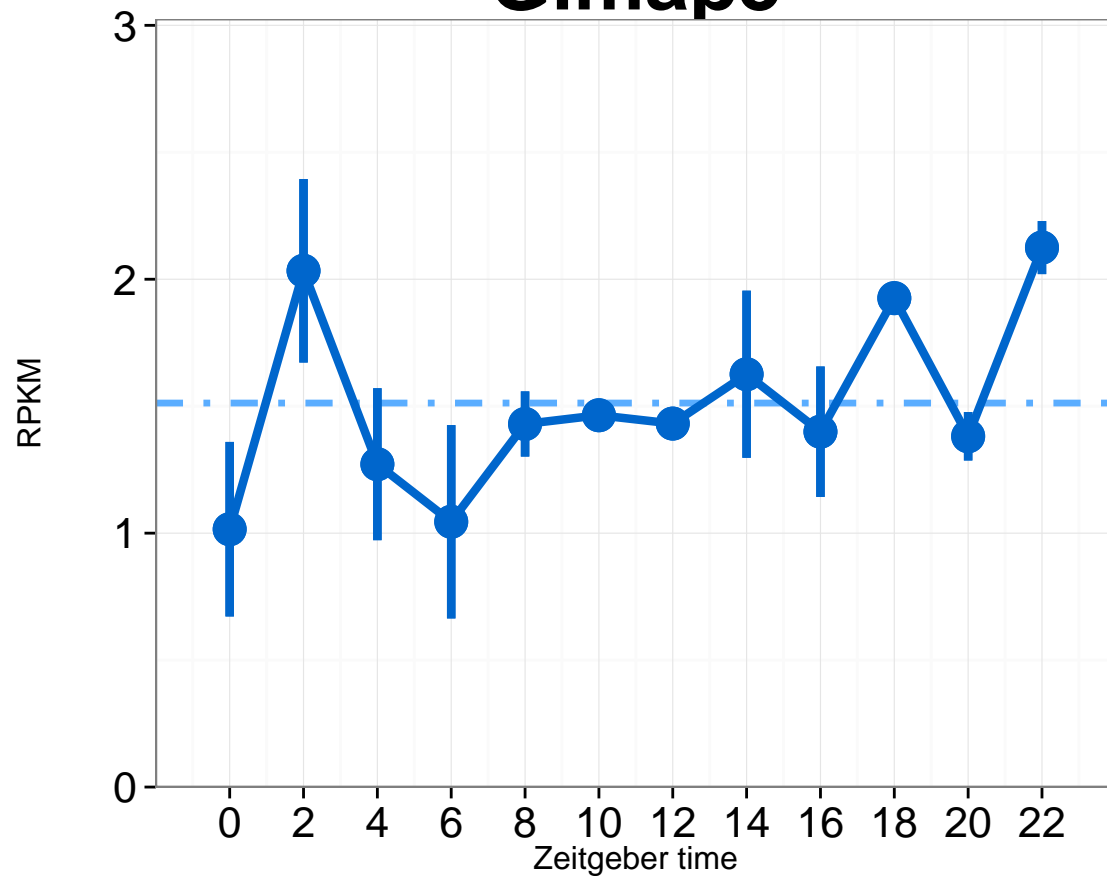

## Gimap5 log2(Ribosome occupancy)

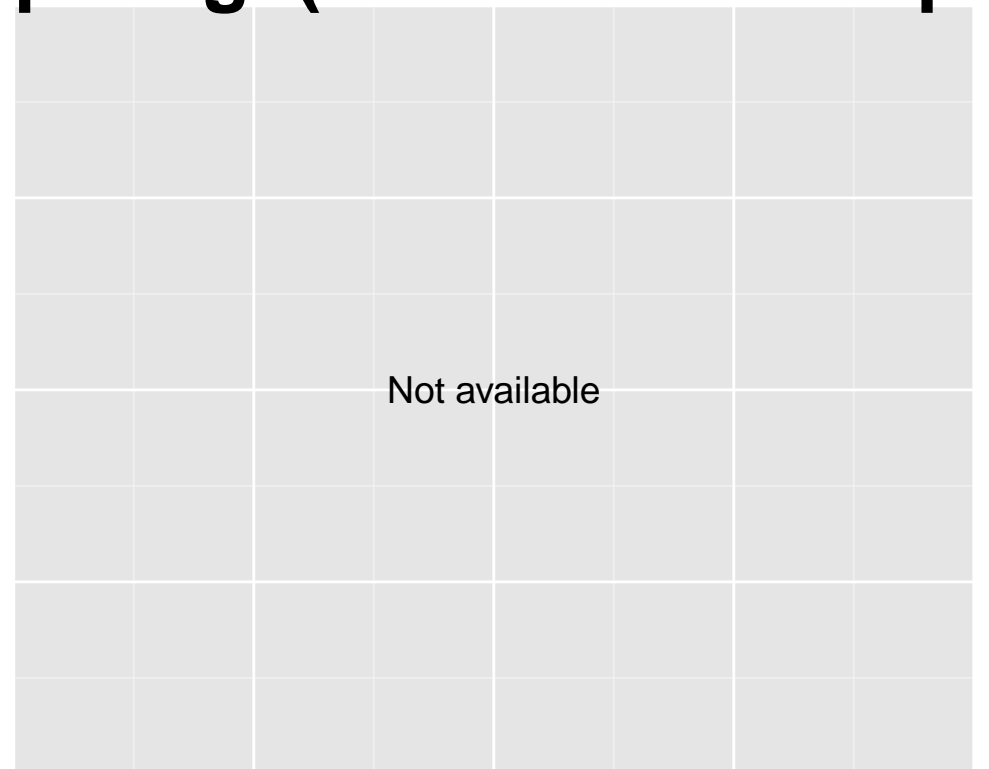

Supplement: SuppDataset_1.zip [file Gimap5_set_A.pdf › Supplemental Dataset 1/A-mRNA_nonrhyth_translation_nonrhyth/Gimap5_set_A.pdf]

# Gimap6

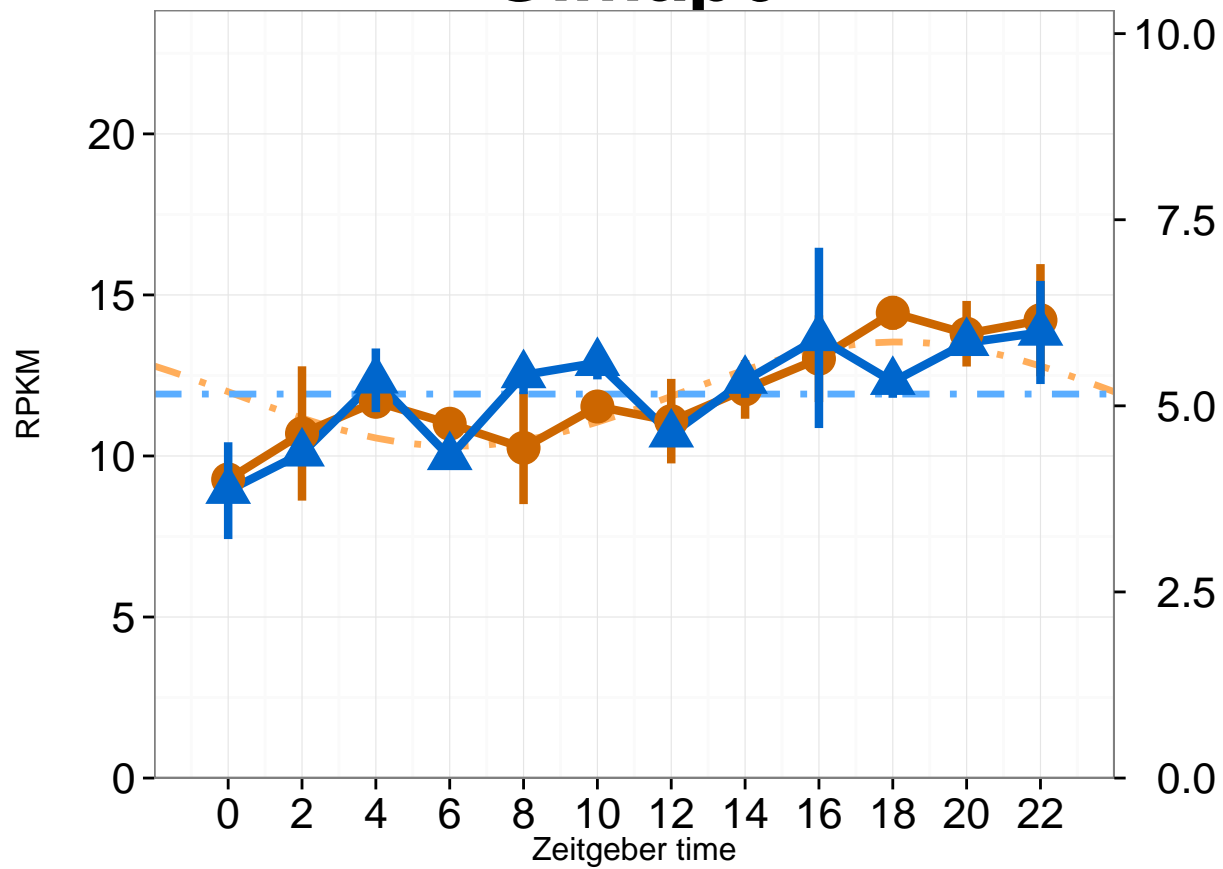

# Gimap6

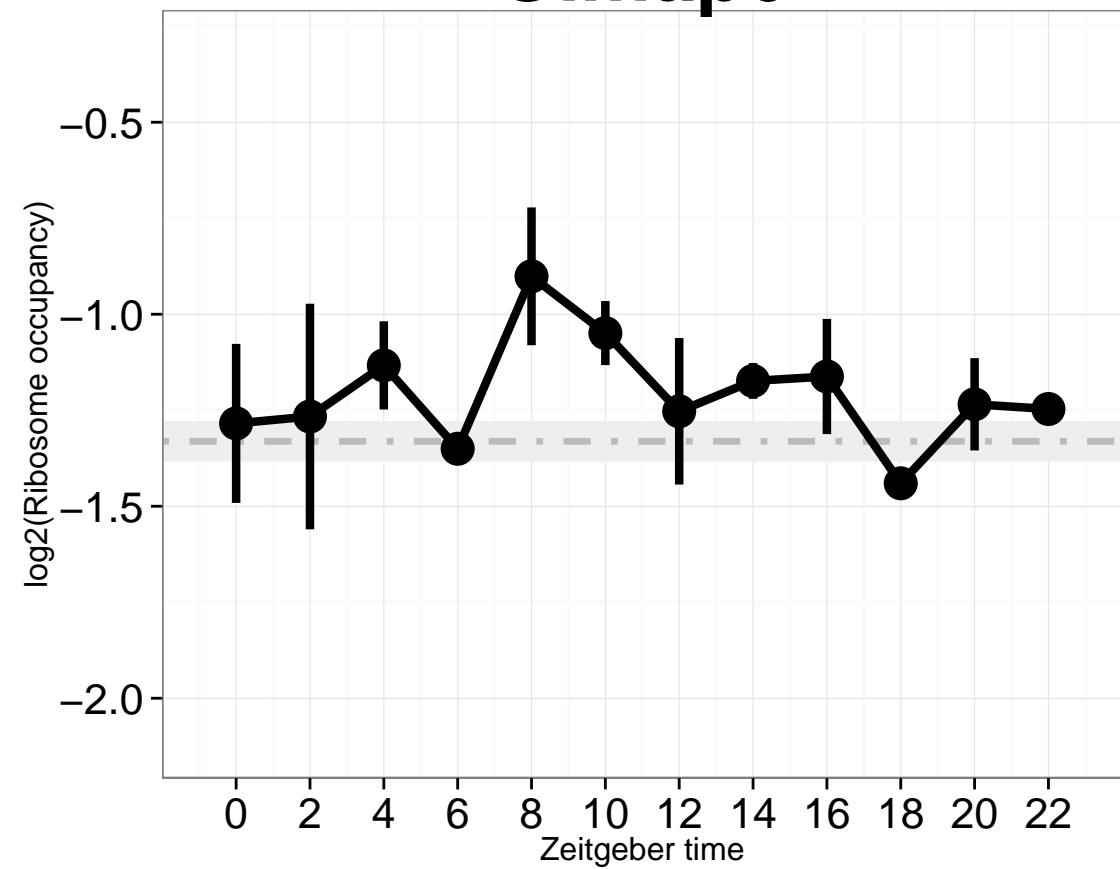

Supplement: SuppDataset_1.zip [file Gimap6_set_A.pdf › Supplemental Dataset 1/A-mRNA_nonrhyth_translation_nonrhyth/Gimap6_set_A.pdf]

## Gin1

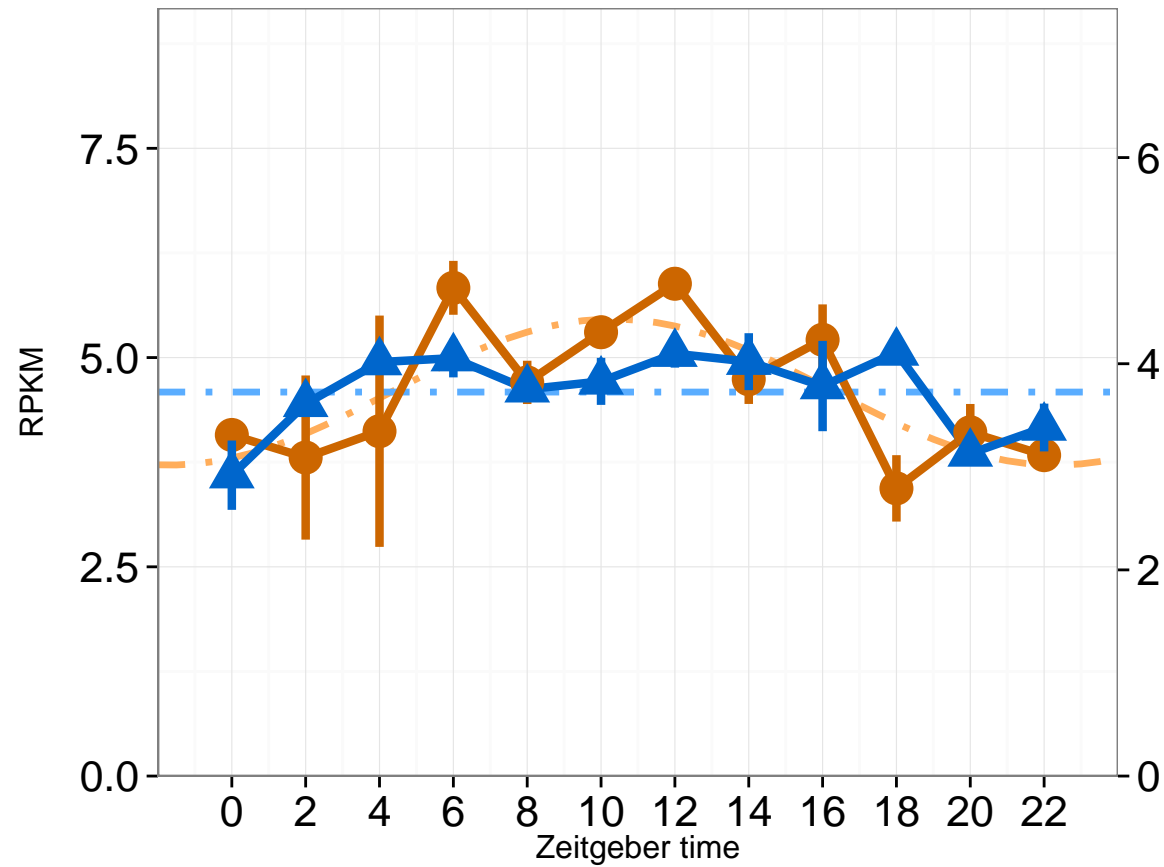

## Gin1

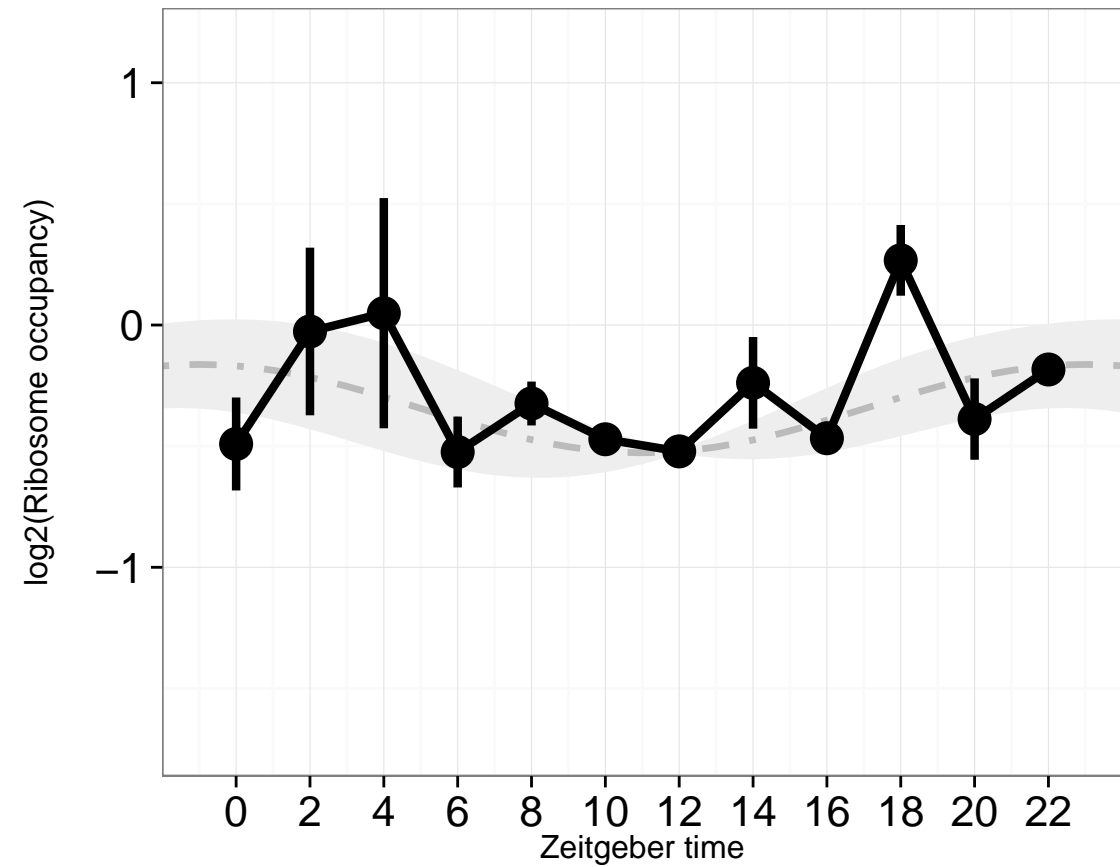

Supplement: SuppDataset_1.zip [file Gin1_set_A.pdf › Supplemental Dataset 1/A-mRNA_nonrhyth_translation_nonrhyth/Gin1_set_A.pdf]

## Ginm1

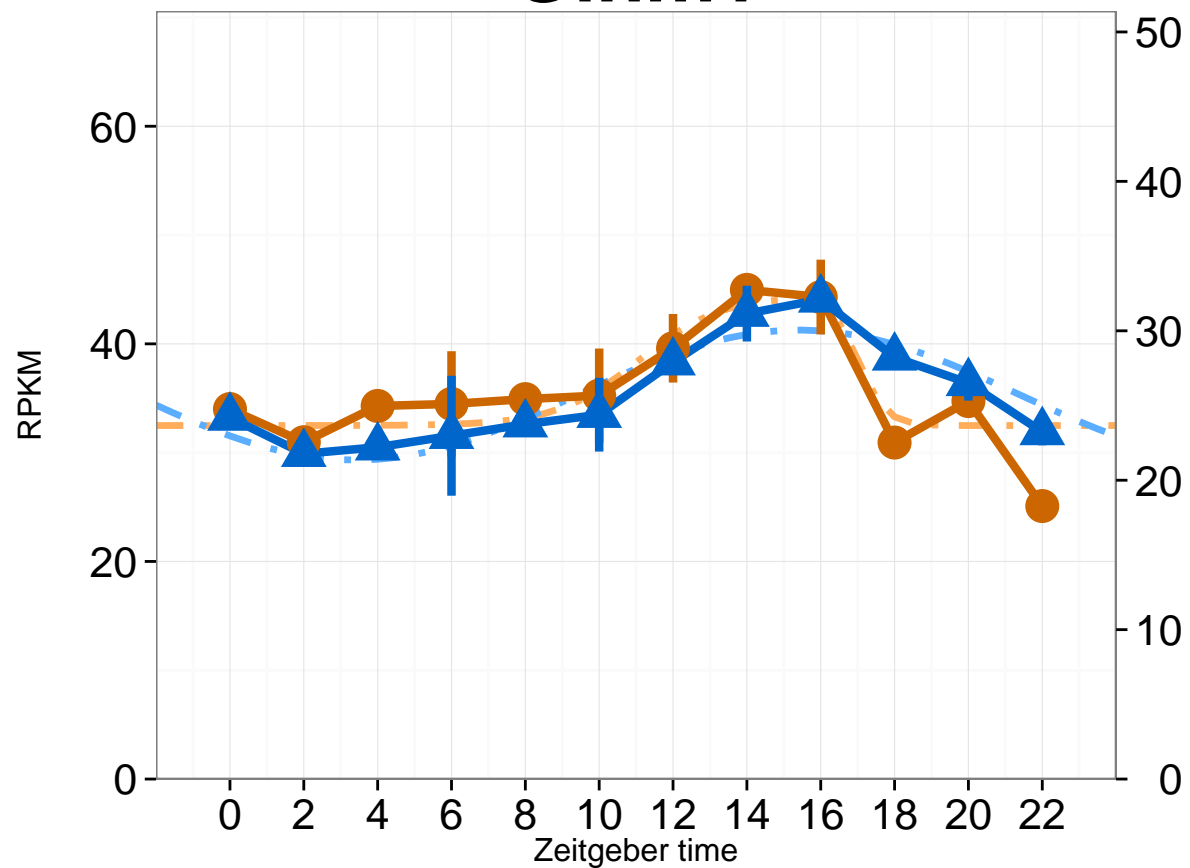

## Ginm1

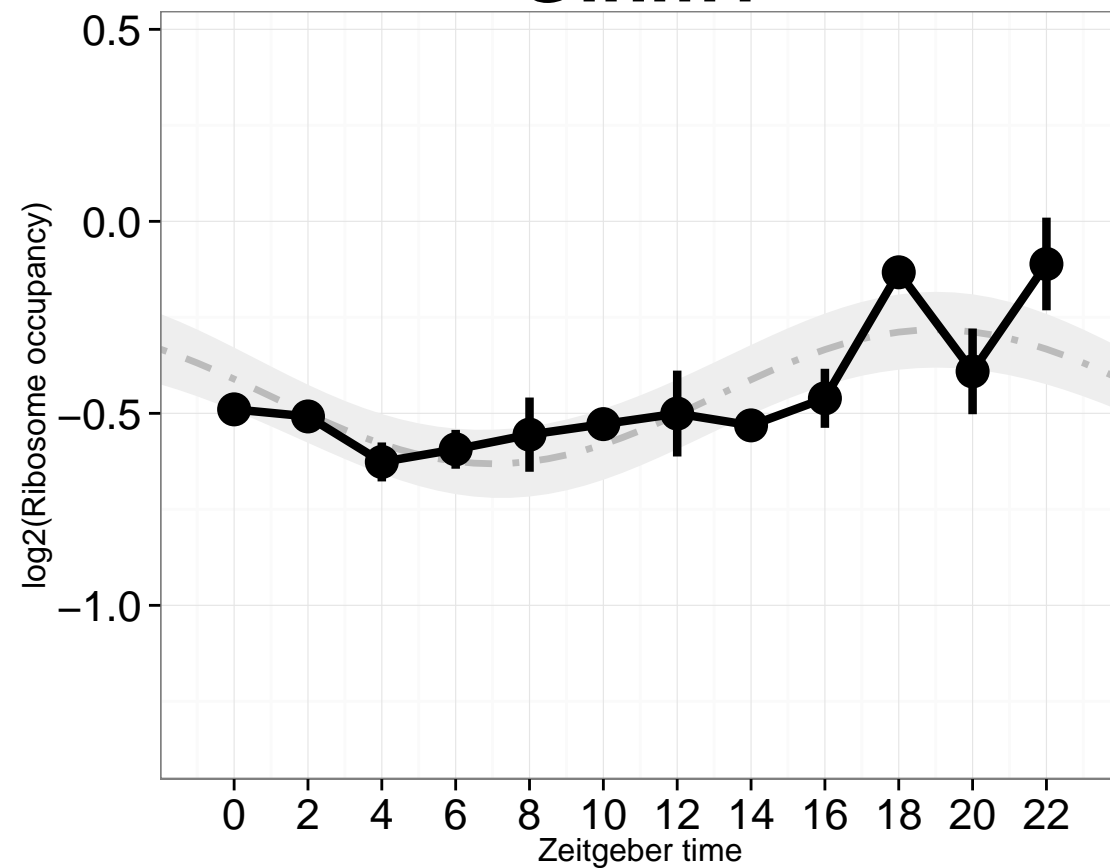

Supplement: SuppDataset_1.zip [file Ginm1_set_A.pdf › Supplemental Dataset 1/A-mRNA_nonrhyth_translation_nonrhyth/Ginm1_set_A.pdf]

## Gins1

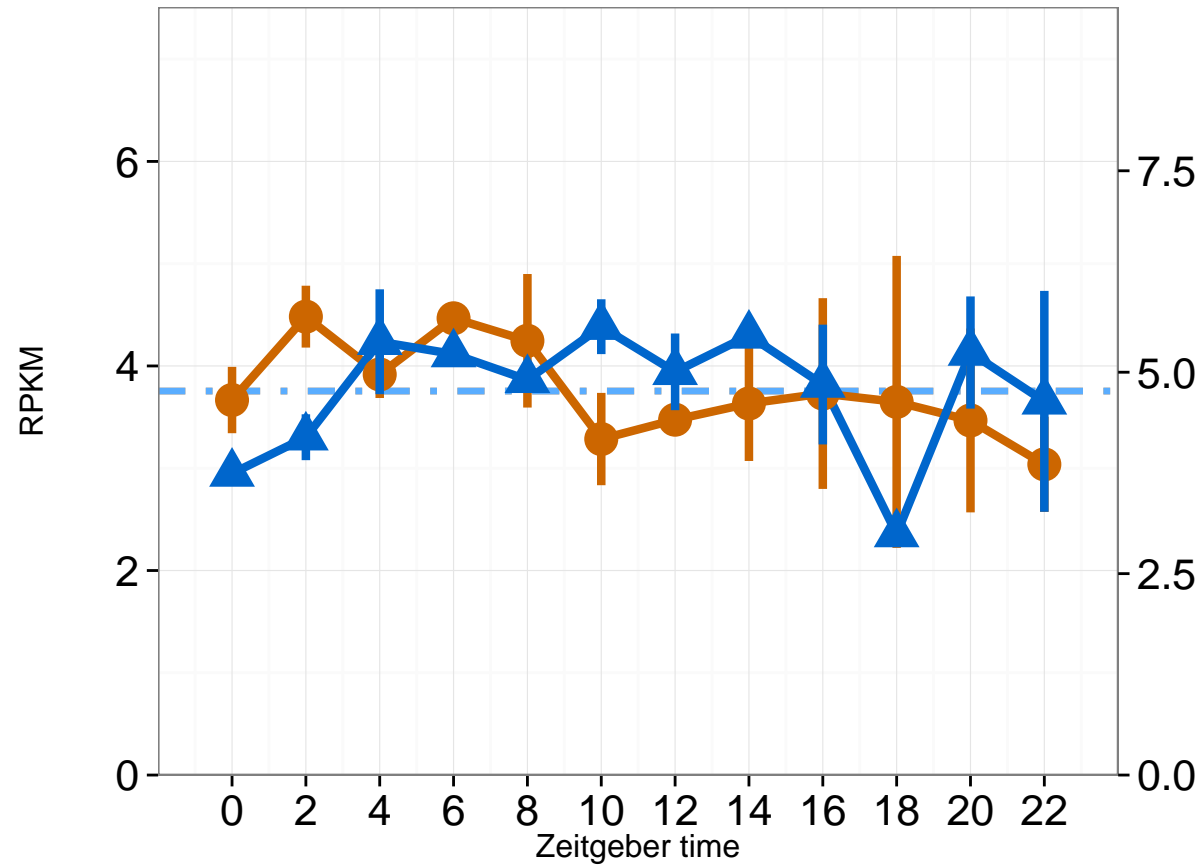

## Gins1

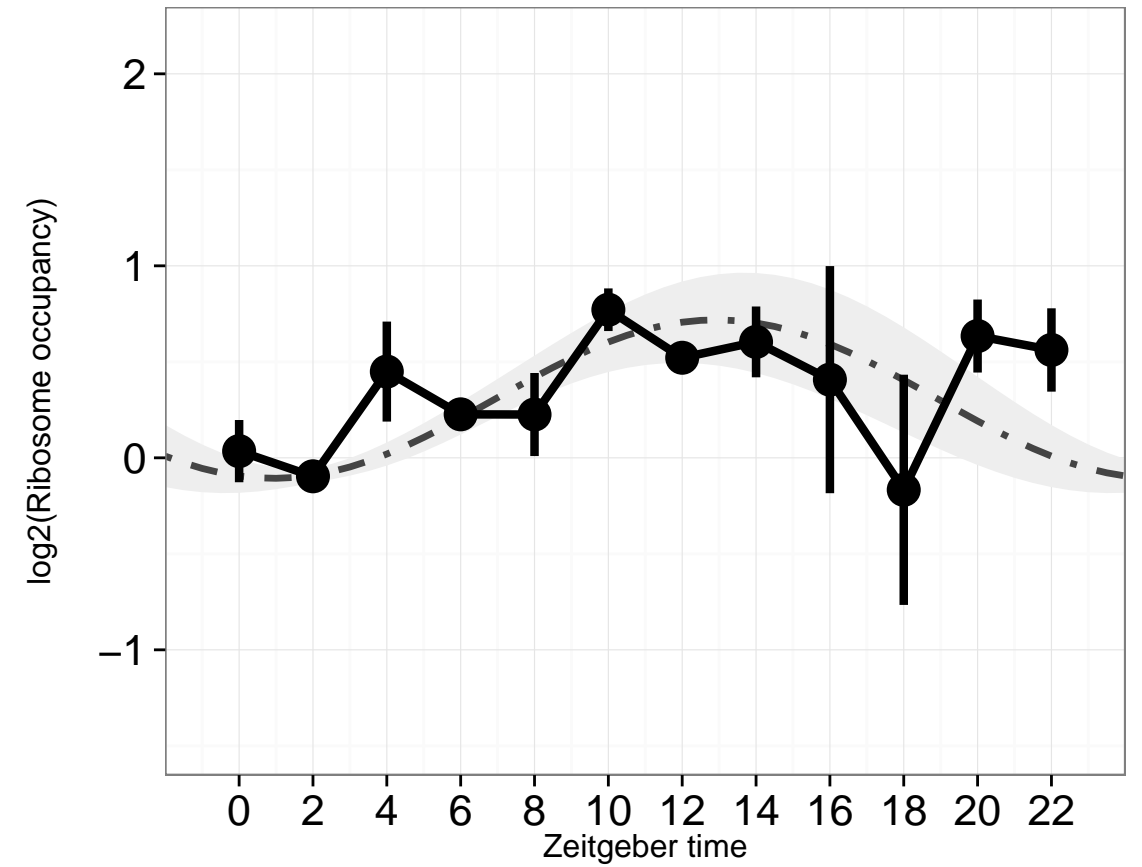

Supplement: SuppDataset_1.zip [file Gins1_set_A.pdf › Supplemental Dataset 1/A-mRNA_nonrhyth_translation_nonrhyth/Gins1_set_A.pdf]

## Gins4

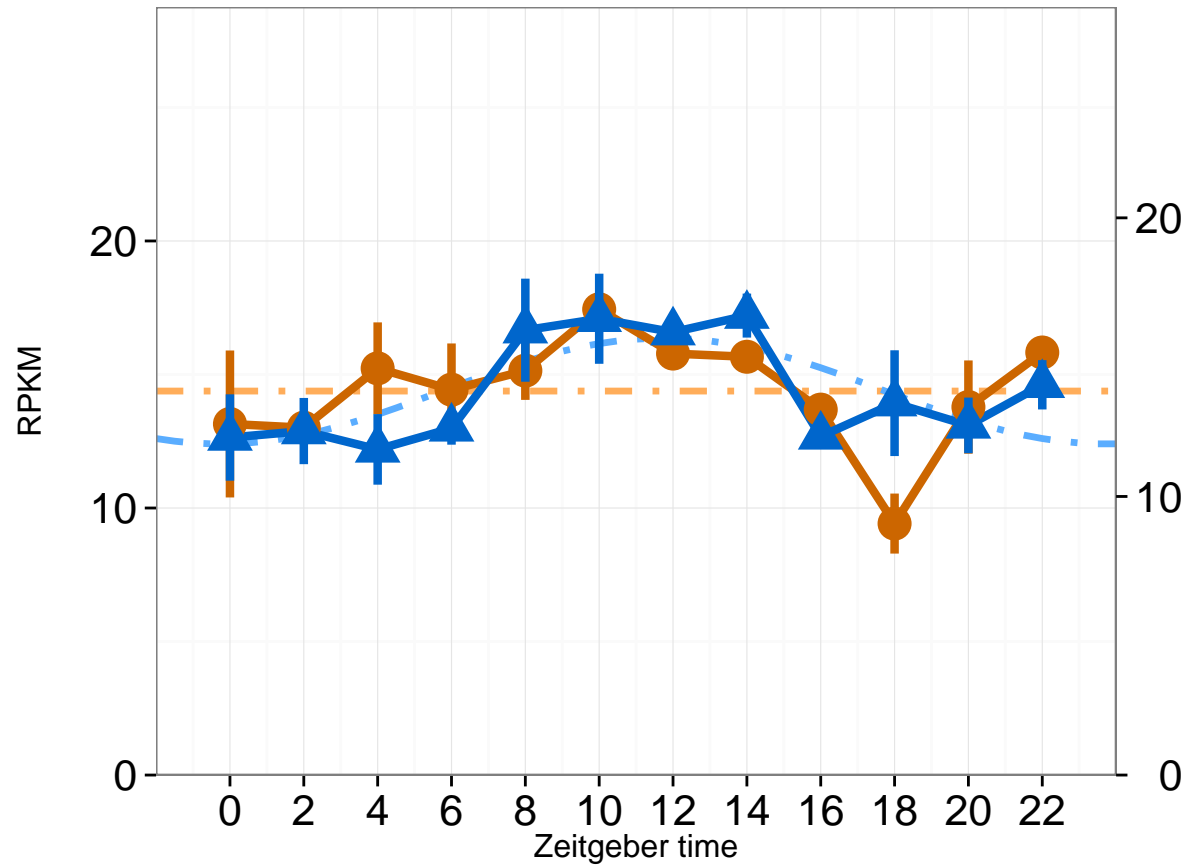

## Gins4

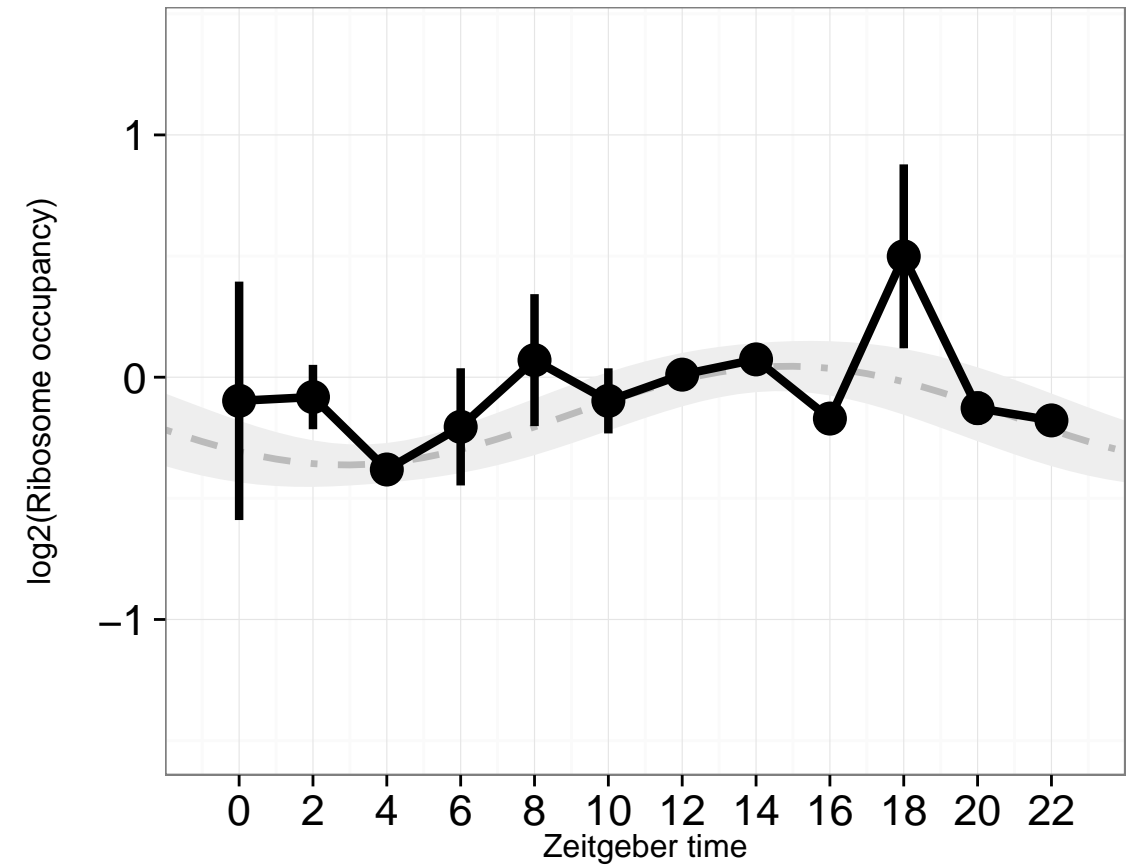

Supplement: SuppDataset_1.zip [file Gins4_set_A.pdf › Supplemental Dataset 1/A-mRNA_nonrhyth_translation_nonrhyth/Gins4_set_A.pdf]

# Gipc1

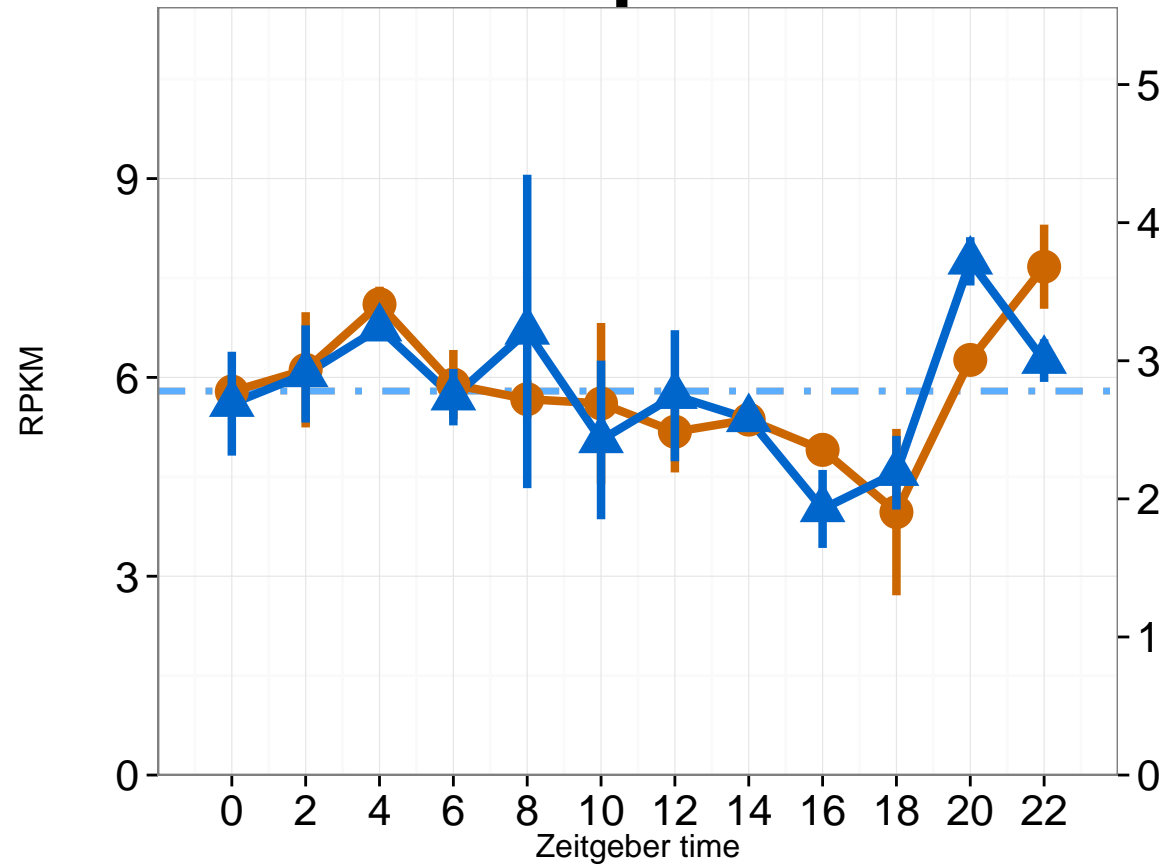

# Gipc1

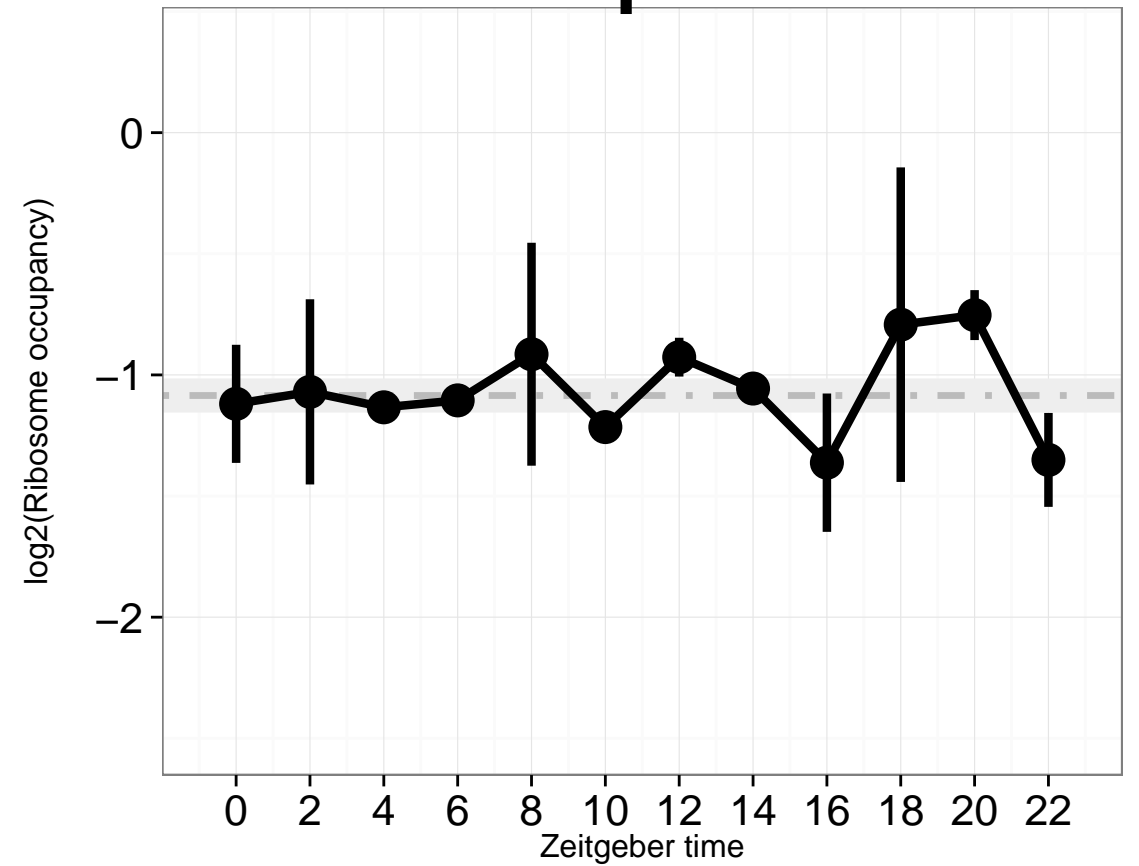

Supplement: SuppDataset_1.zip [file Gipc1_set_A.pdf › Supplemental Dataset 1/A-mRNA_nonrhyth_translation_nonrhyth/Gipc1_set_A.pdf]

## Git1

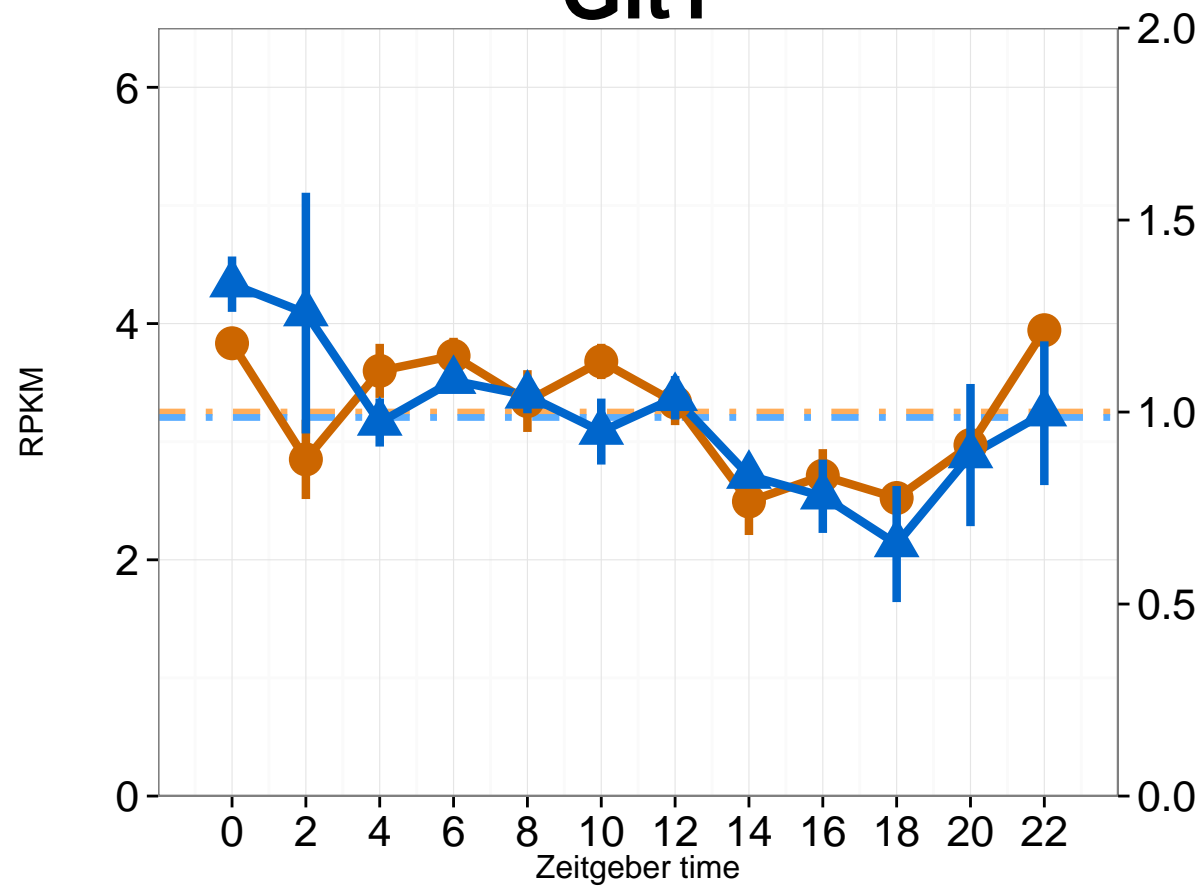

## Git1

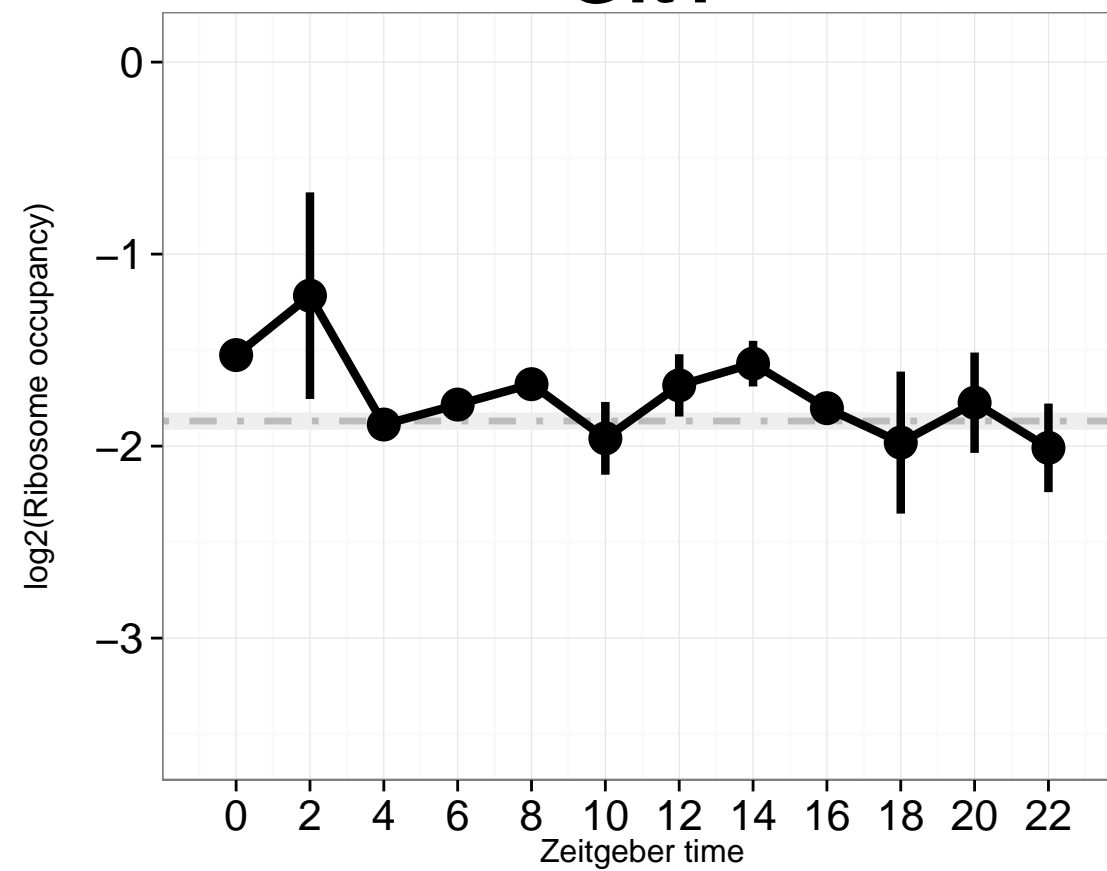

Supplement: SuppDataset_1.zip [file Git1_set_A.pdf › Supplemental Dataset 1/A-mRNA_nonrhyth_translation_nonrhyth/Git1_set_A.pdf]

## Git2

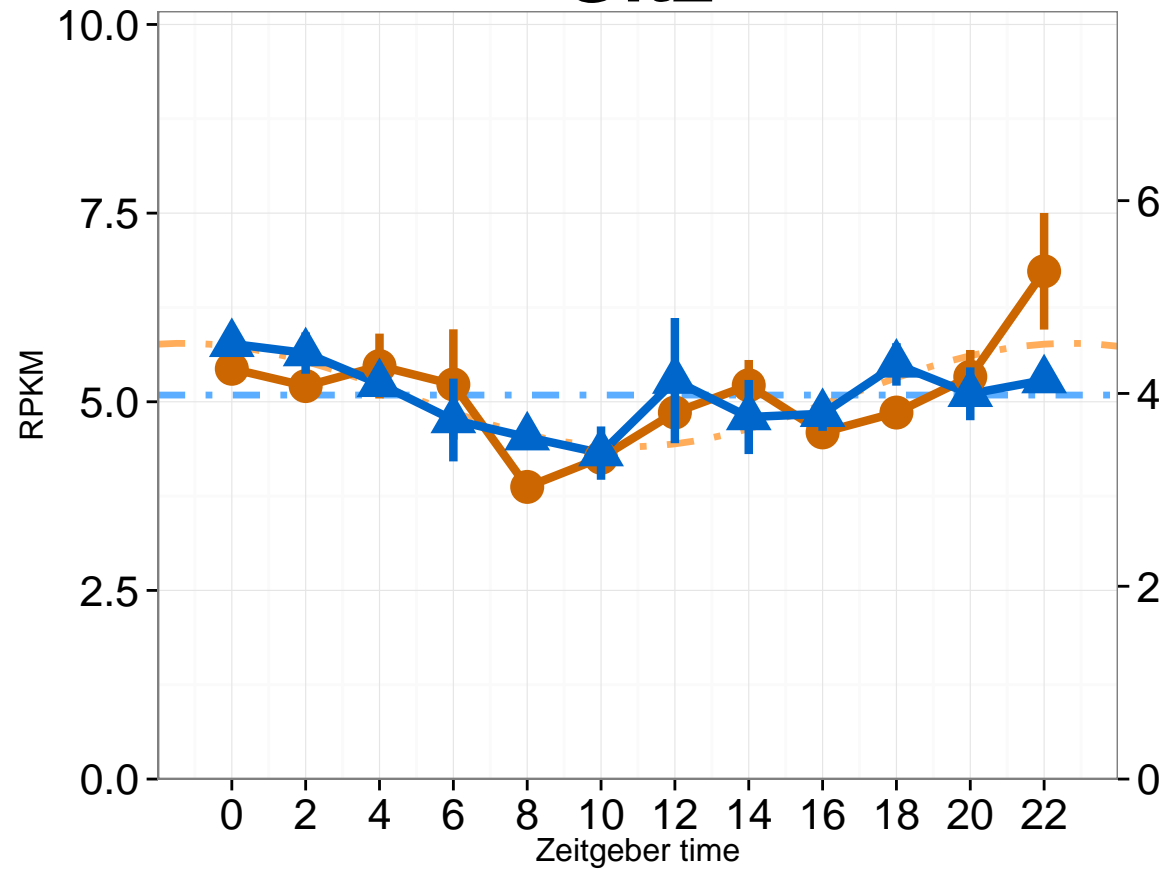

## Git2

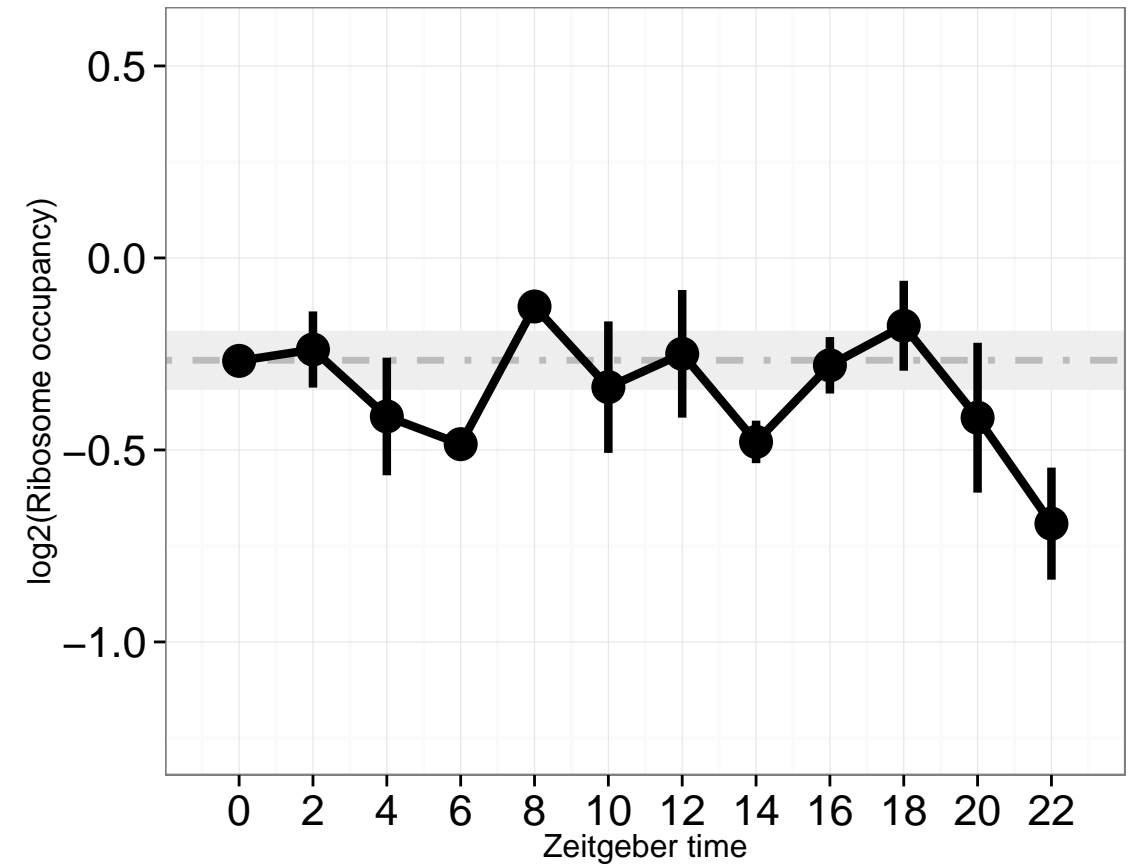

Supplement: SuppDataset_1.zip [file Git2_set_A.pdf › Supplemental Dataset 1/A-mRNA_nonrhyth_translation_nonrhyth/Git2_set_A.pdf]

# Gja1

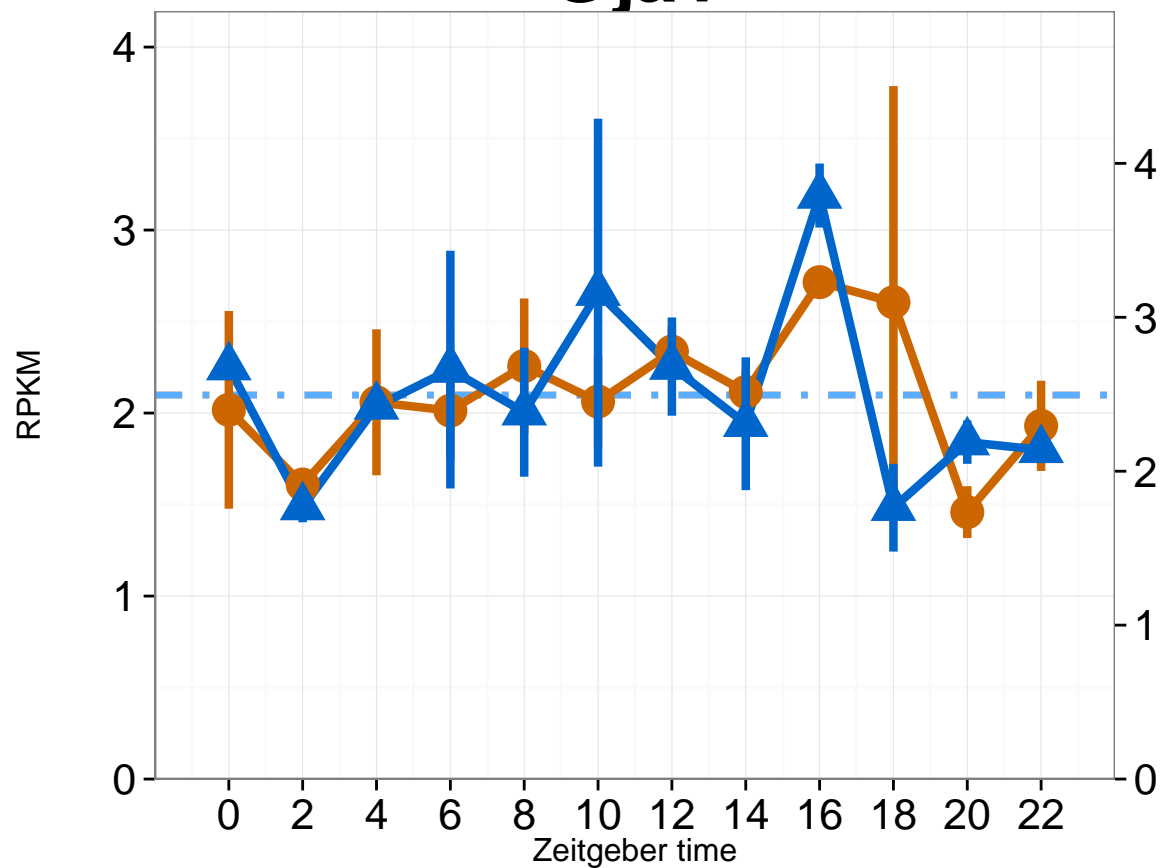

# Gja1

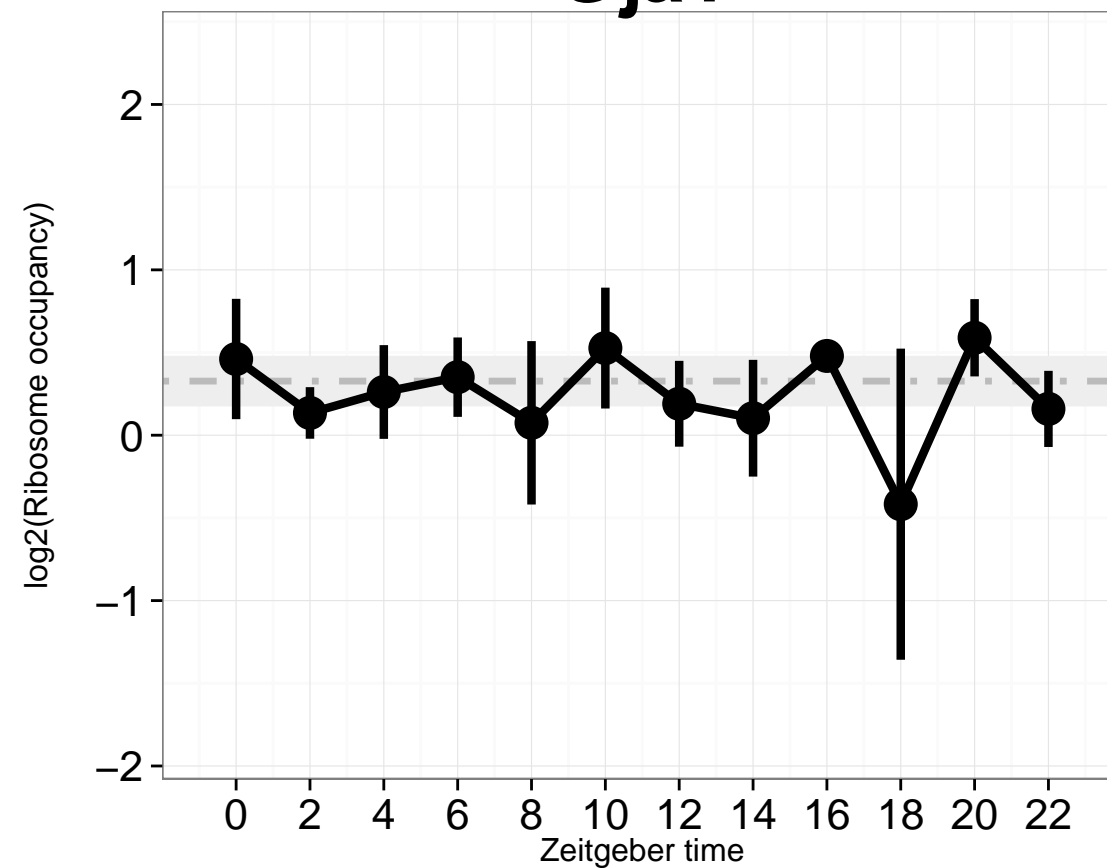

Supplement: SuppDataset_1.zip [file Gja1_set_A.pdf › Supplemental Dataset 1/A-mRNA_nonrhyth_translation_nonrhyth/Gja1_set_A.pdf]

# Gjb1

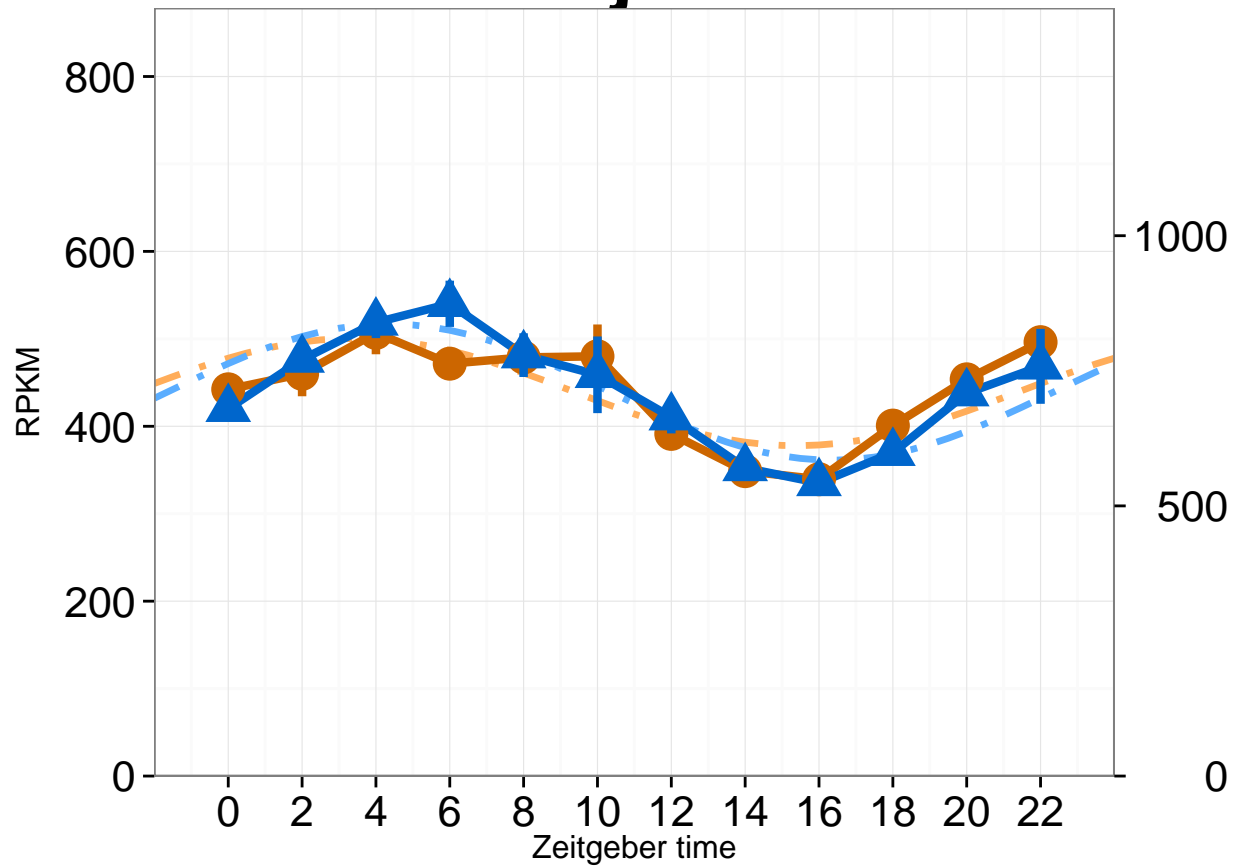

# Gjb1

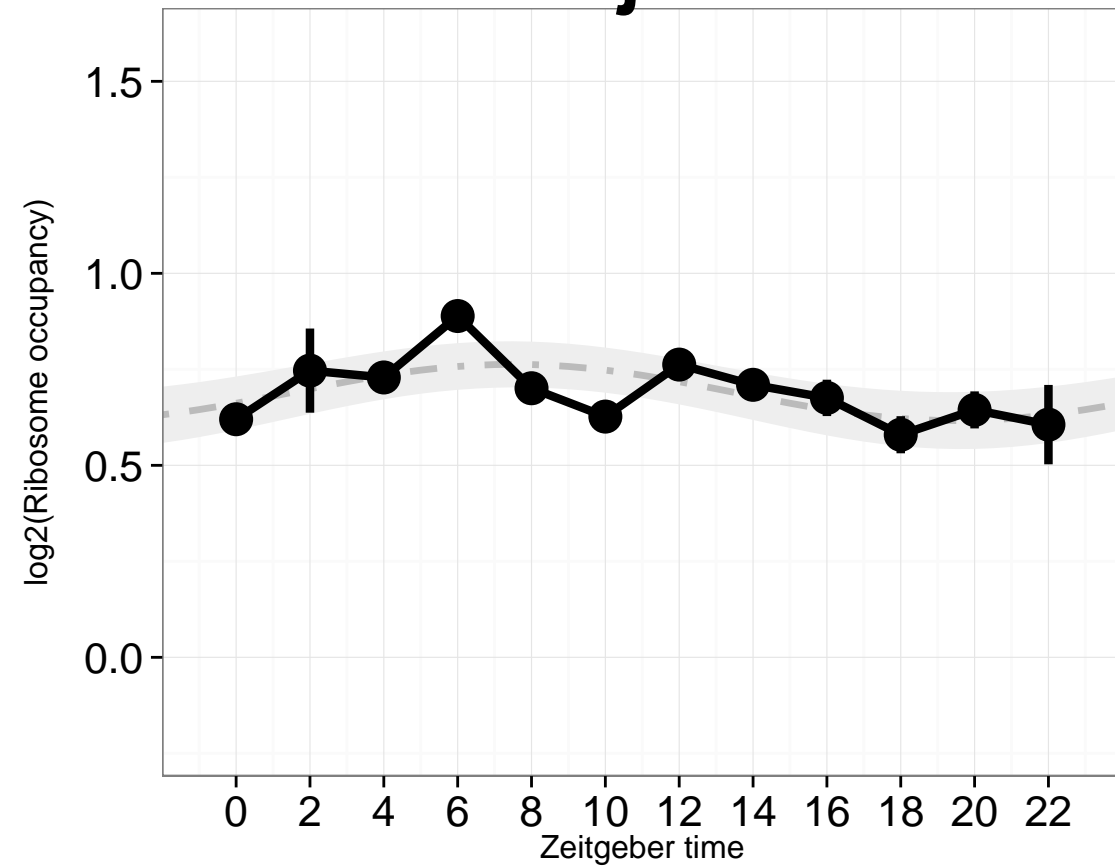

Supplement: SuppDataset_1.zip [file Gjb1_set_A.pdf › Supplemental Dataset 1/A-mRNA_nonrhyth_translation_nonrhyth/Gjb1_set_A.pdf]

## Gjb2

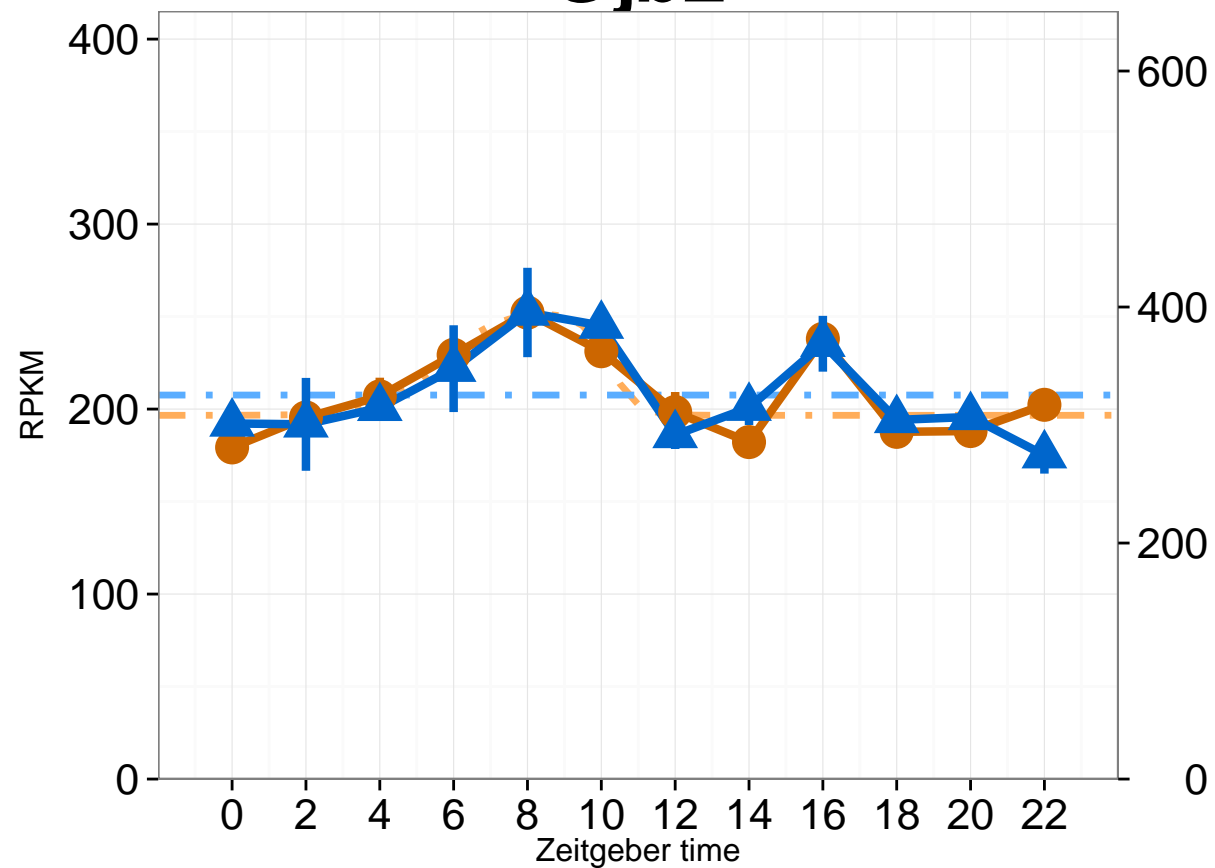

## Gjb2

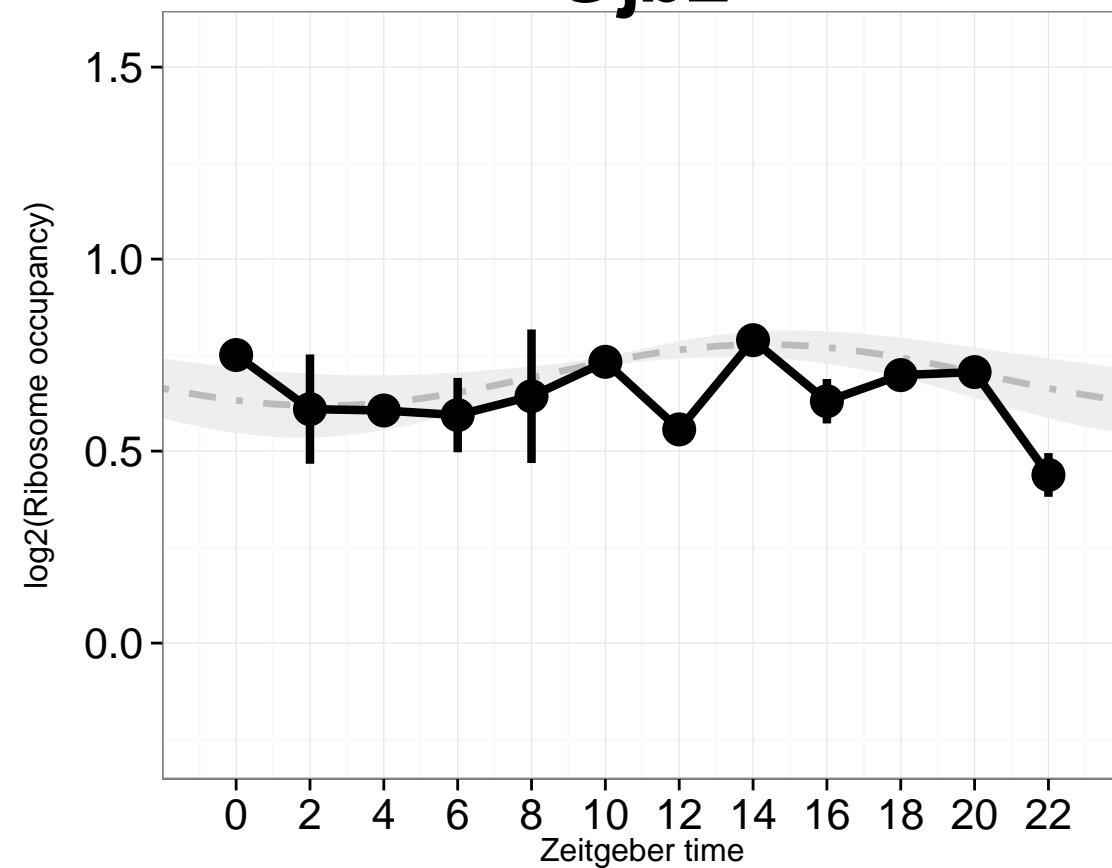

Supplement: SuppDataset_1.zip [file Gjb2_set_A.pdf › Supplemental Dataset 1/A-mRNA_nonrhyth_translation_nonrhyth/Gjb2_set_A.pdf]

## Glb1

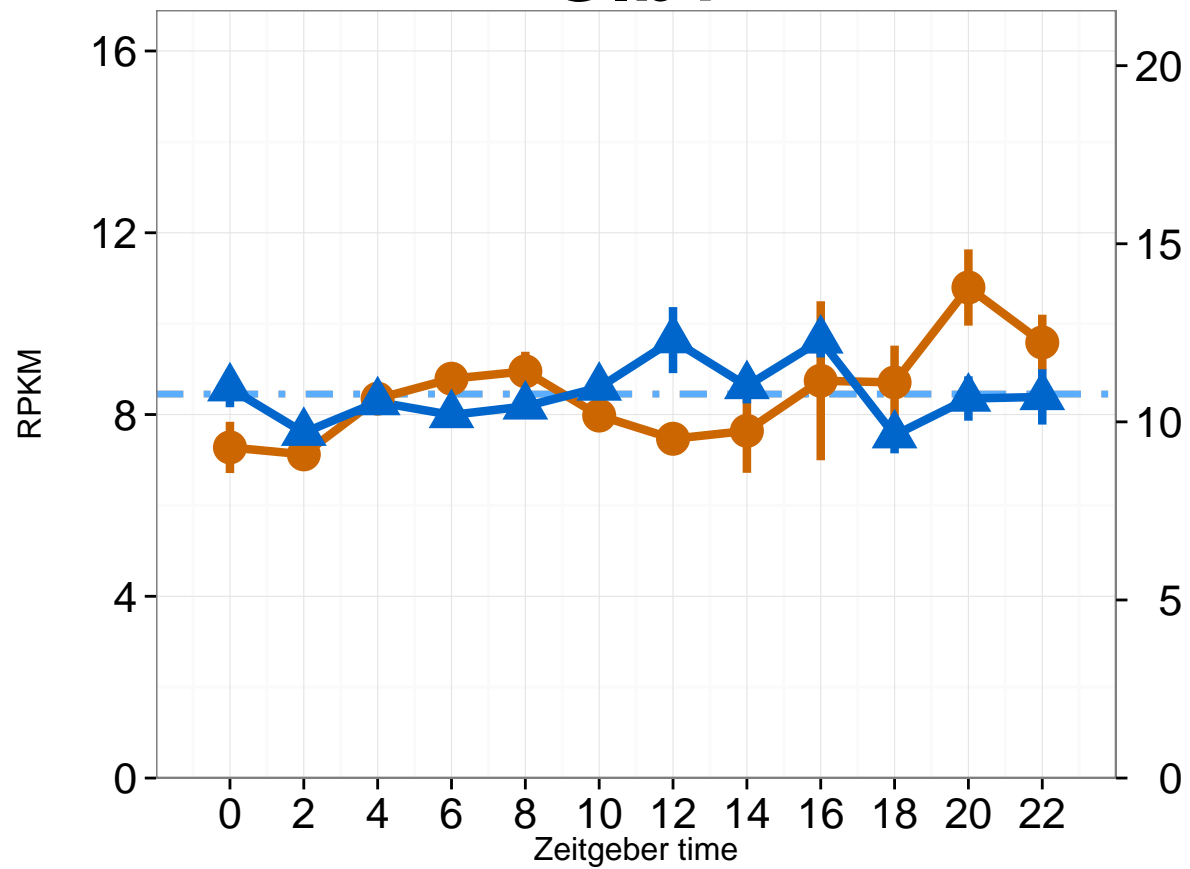

## Glb1

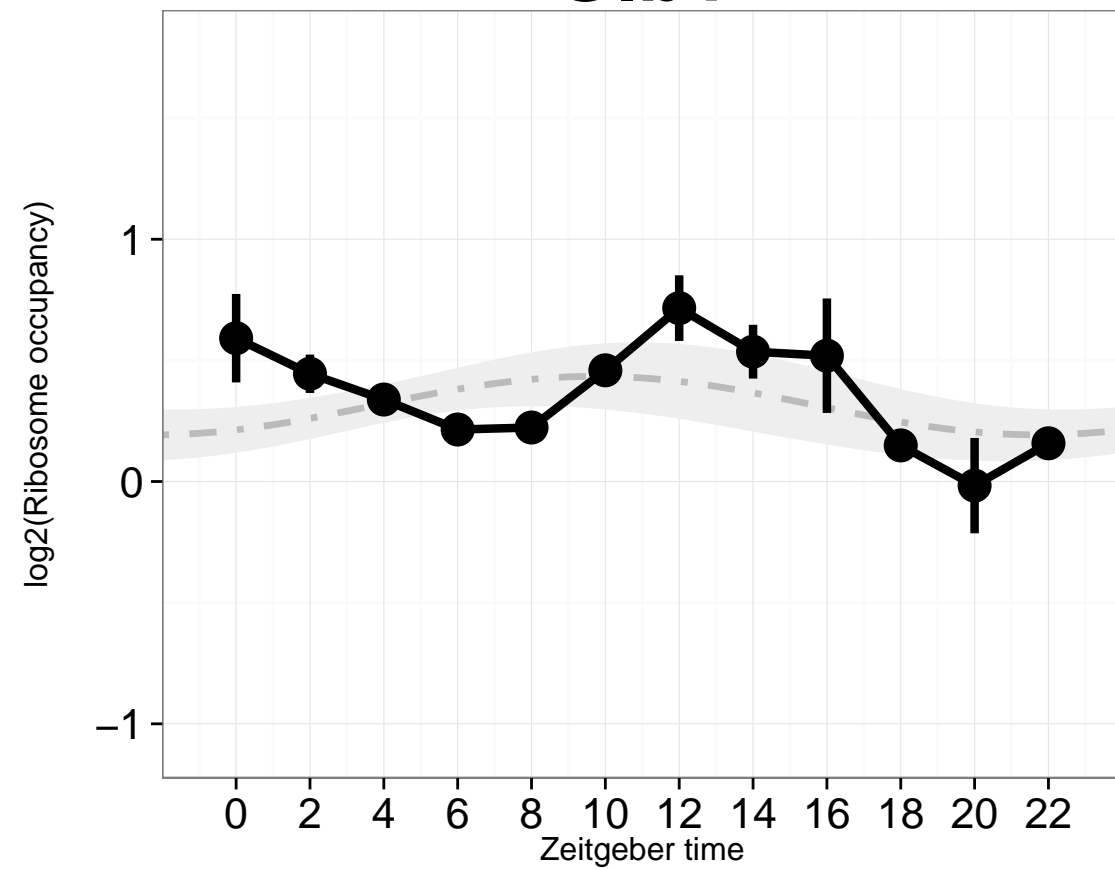

Supplement: SuppDataset_1.zip [file Glb1_set_A.pdf › Supplemental Dataset 1/A-mRNA_nonrhyth_translation_nonrhyth/Glb1_set_A.pdf]

## Glb1l

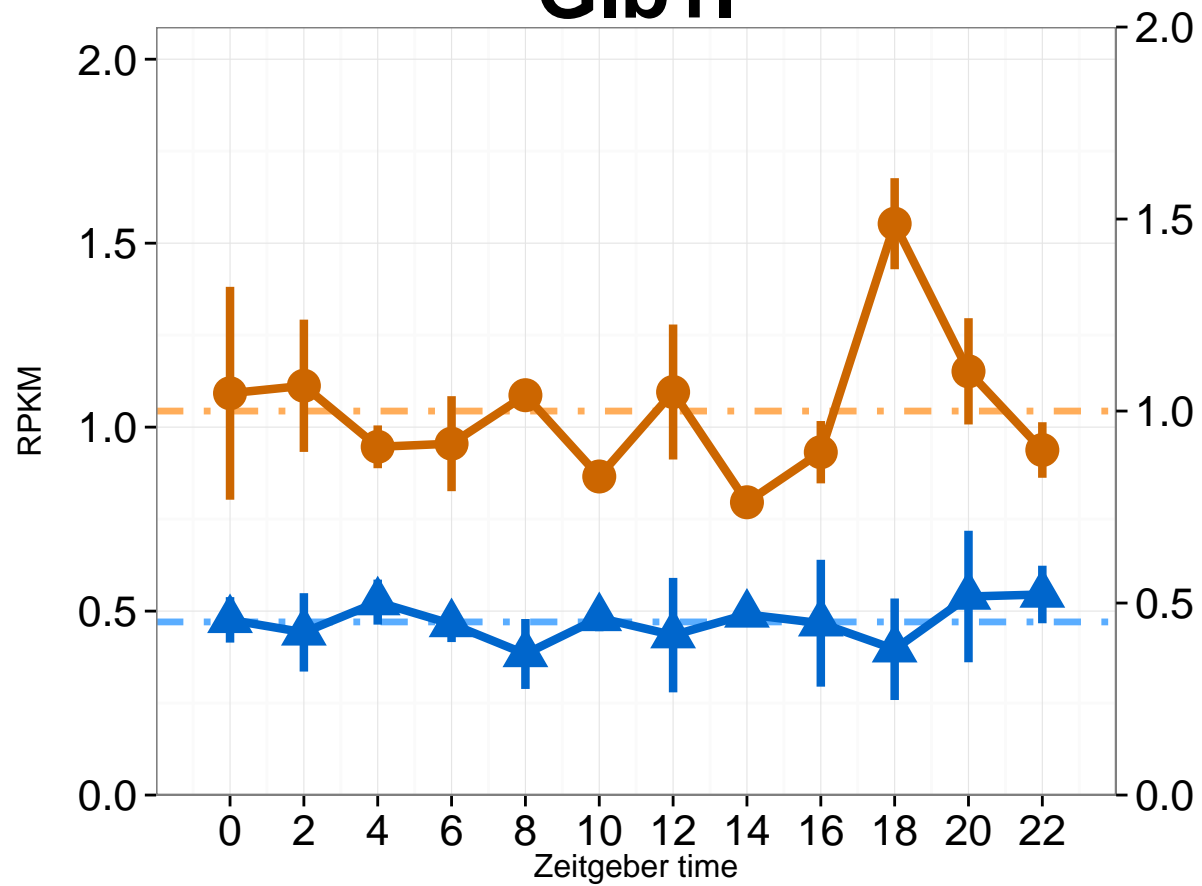

## Glb1l

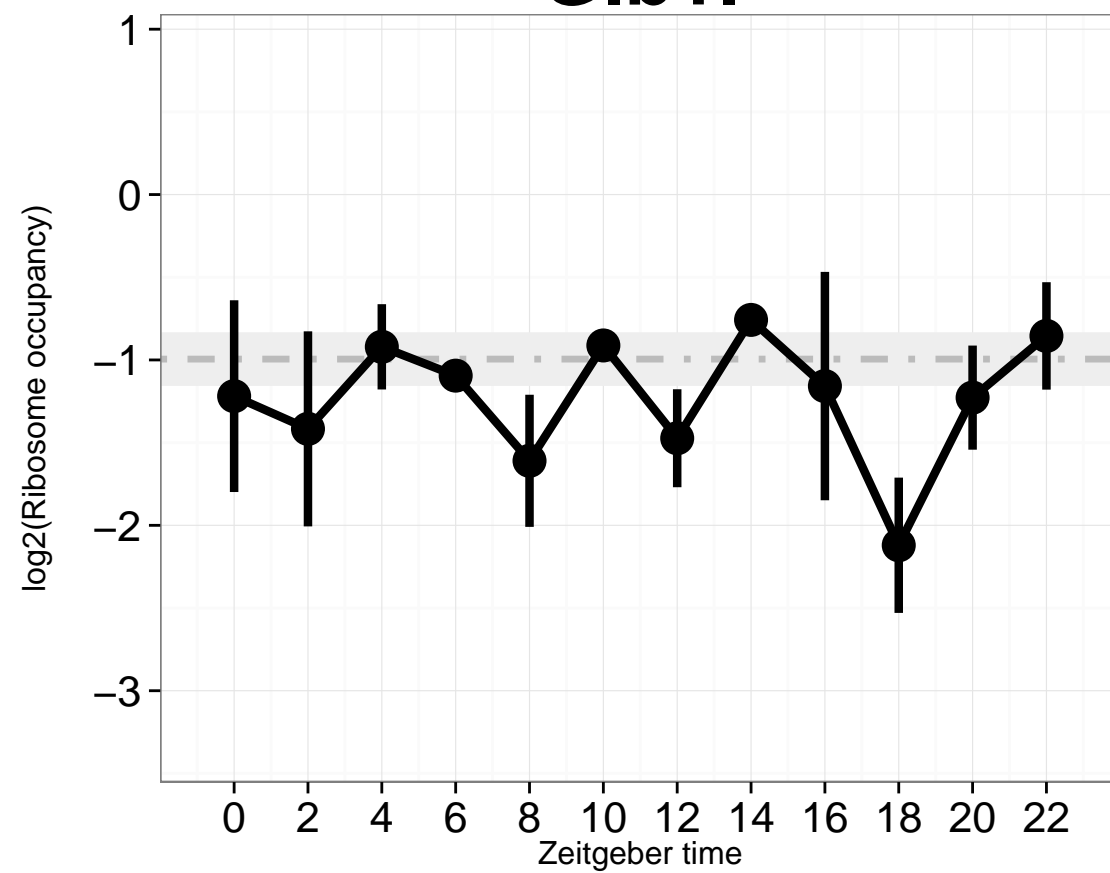

Supplement: SuppDataset_1.zip [file Glb1l_set_A.pdf › Supplemental Dataset 1/A-mRNA_nonrhyth_translation_nonrhyth/Glb1l_set_A.pdf]

## Glce

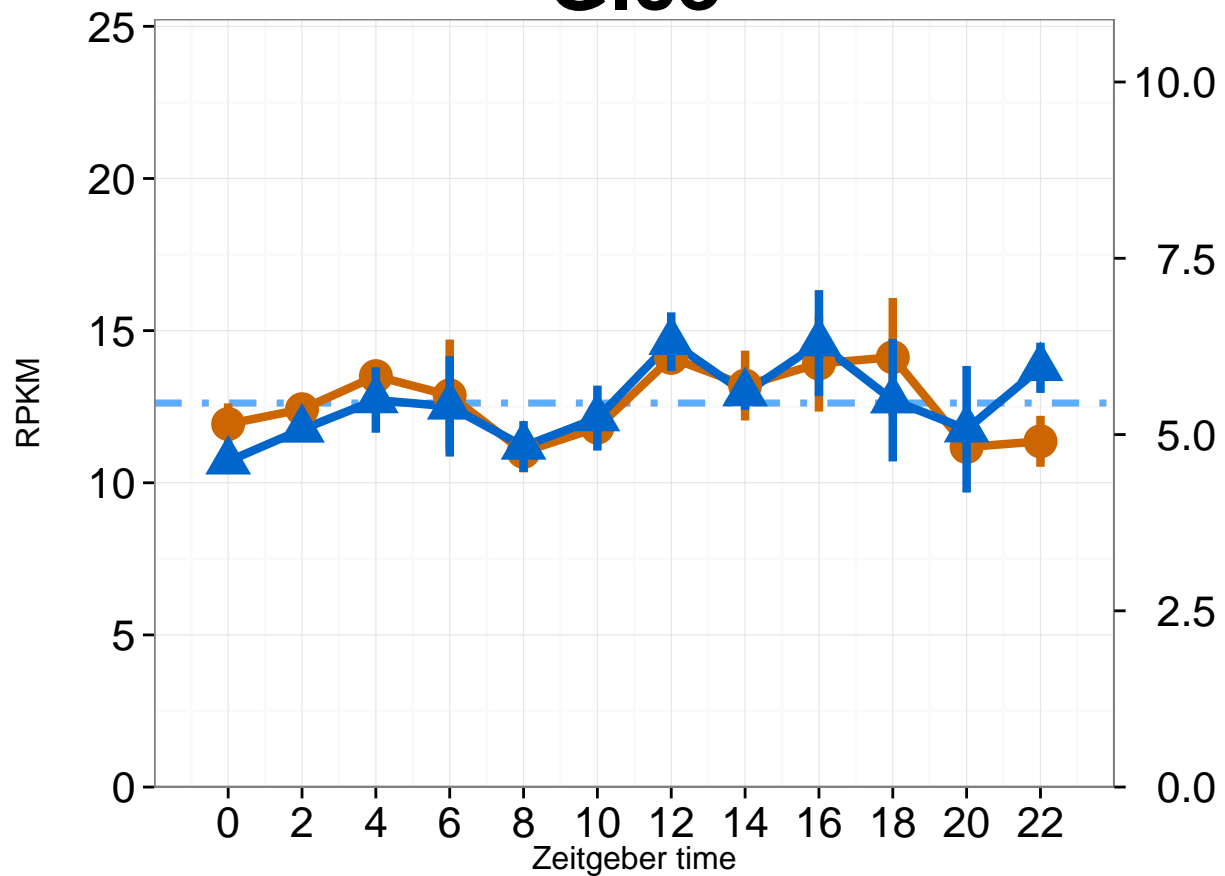

## Glce

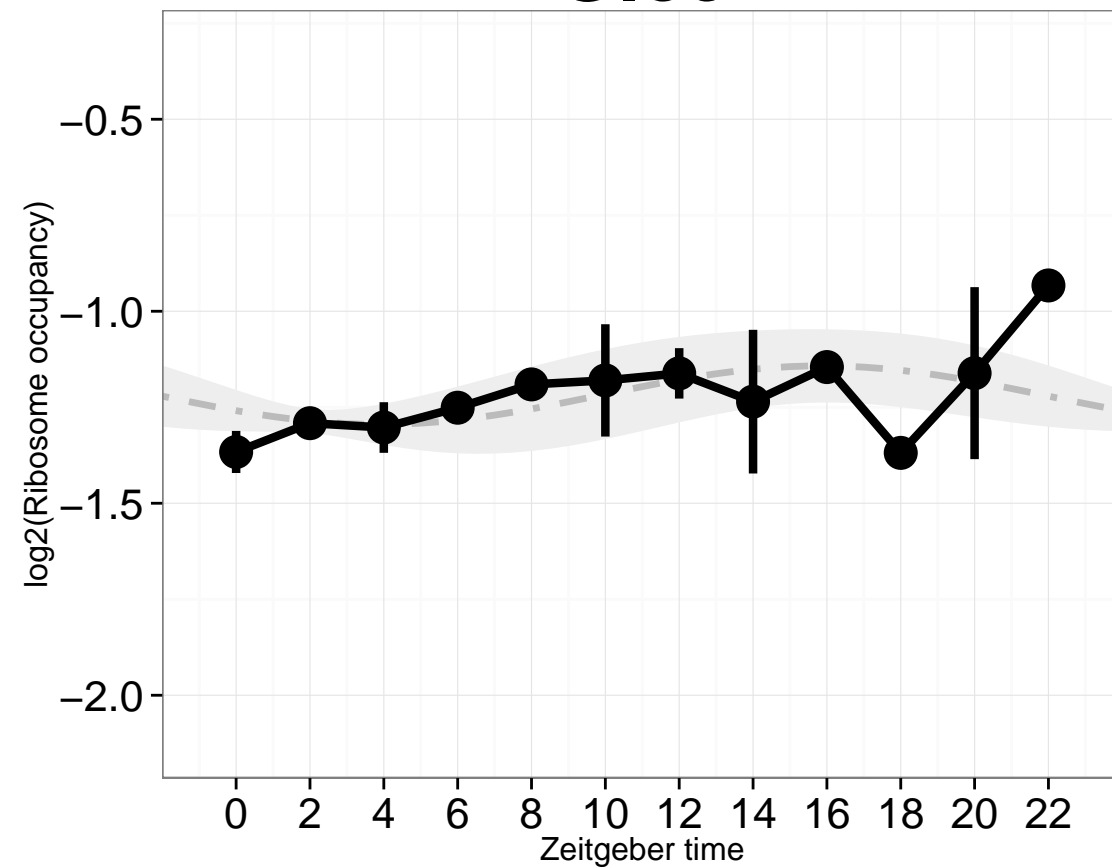

Supplement: SuppDataset_1.zip [file Glce_set_A.pdf › Supplemental Dataset 1/A-mRNA_nonrhyth_translation_nonrhyth/Glce_set_A.pdf]

# Gle1

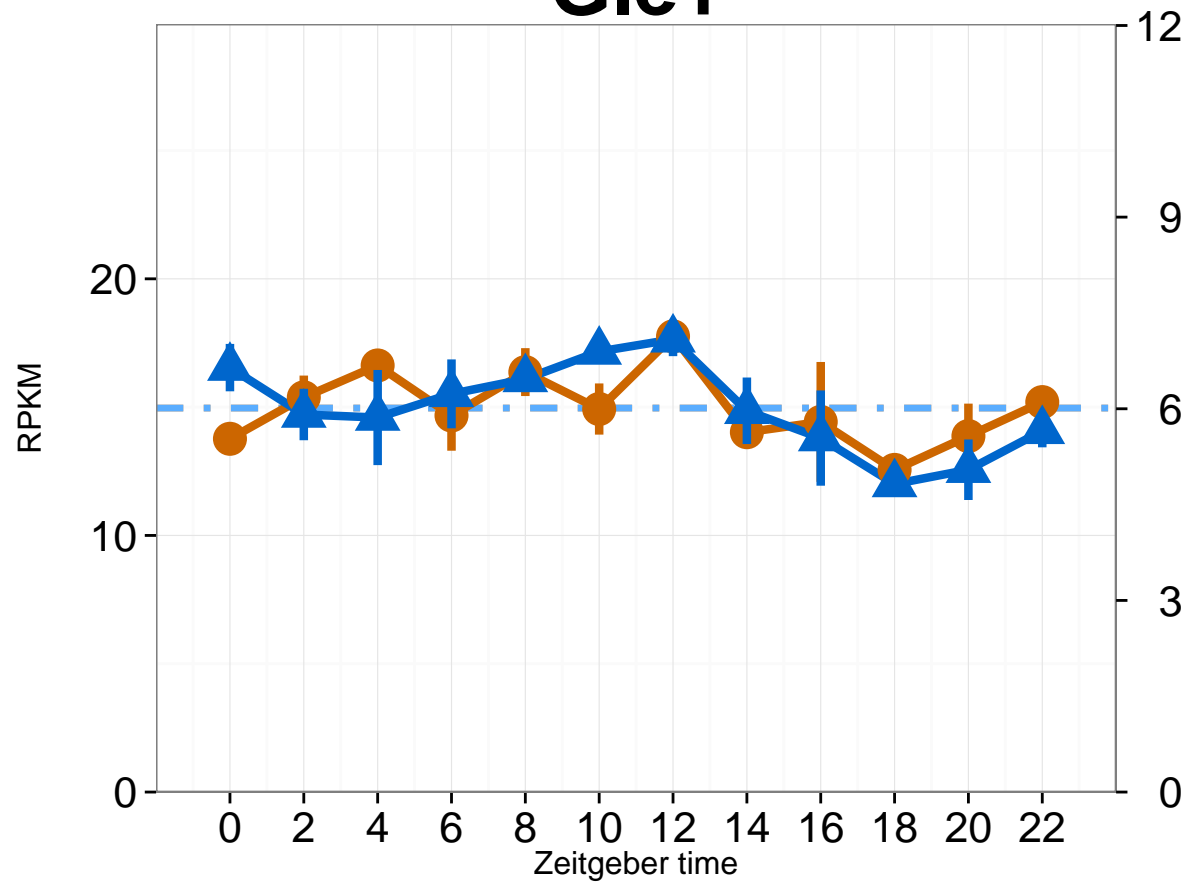

# Gle1

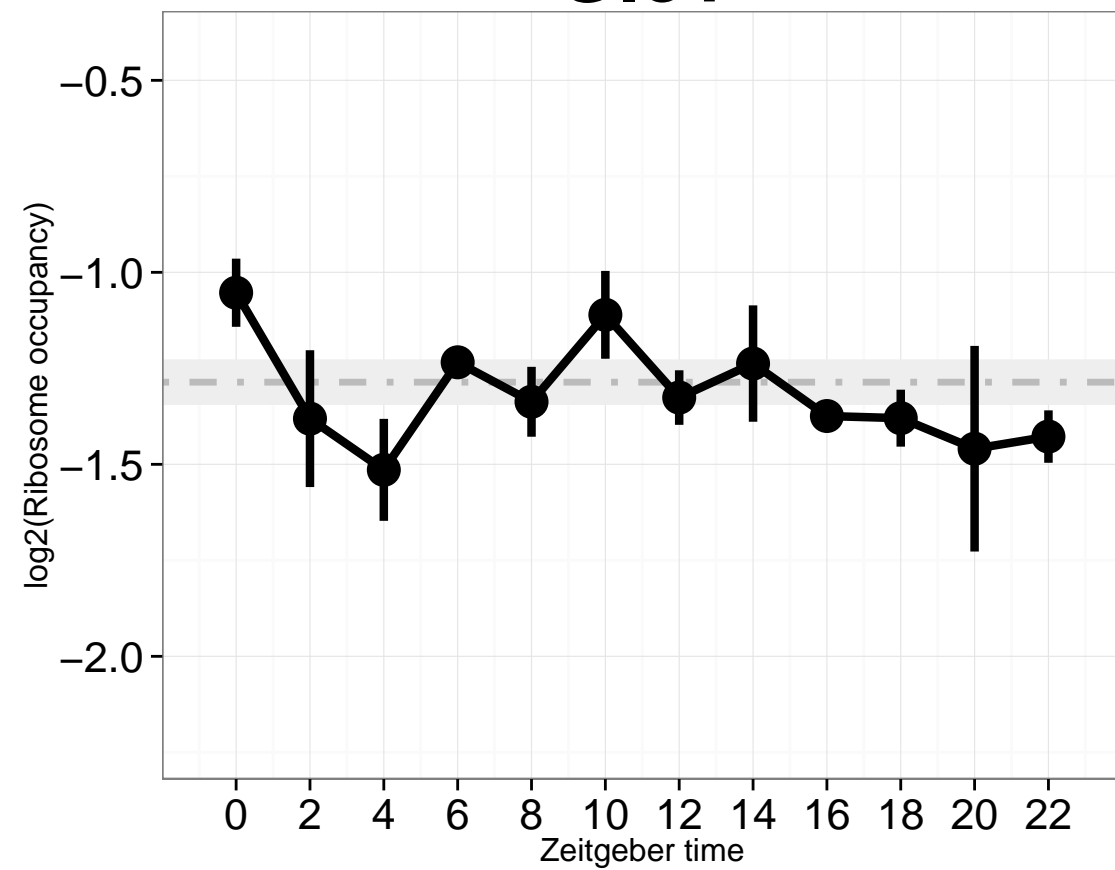

Supplement: SuppDataset_1.zip [file Gle1_set_A.pdf › Supplemental Dataset 1/A-mRNA_nonrhyth_translation_nonrhyth/Gle1_set_A.pdf]

## Glg1

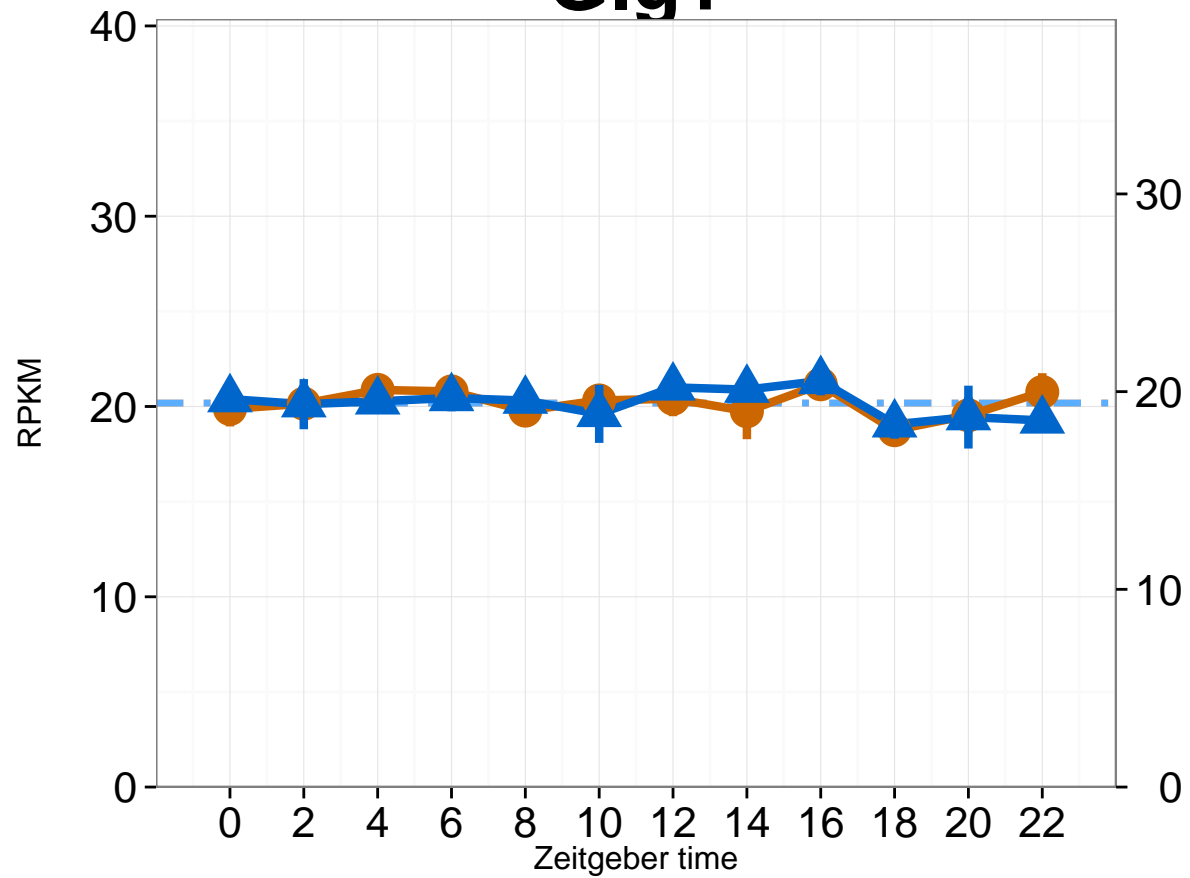

## Glg1

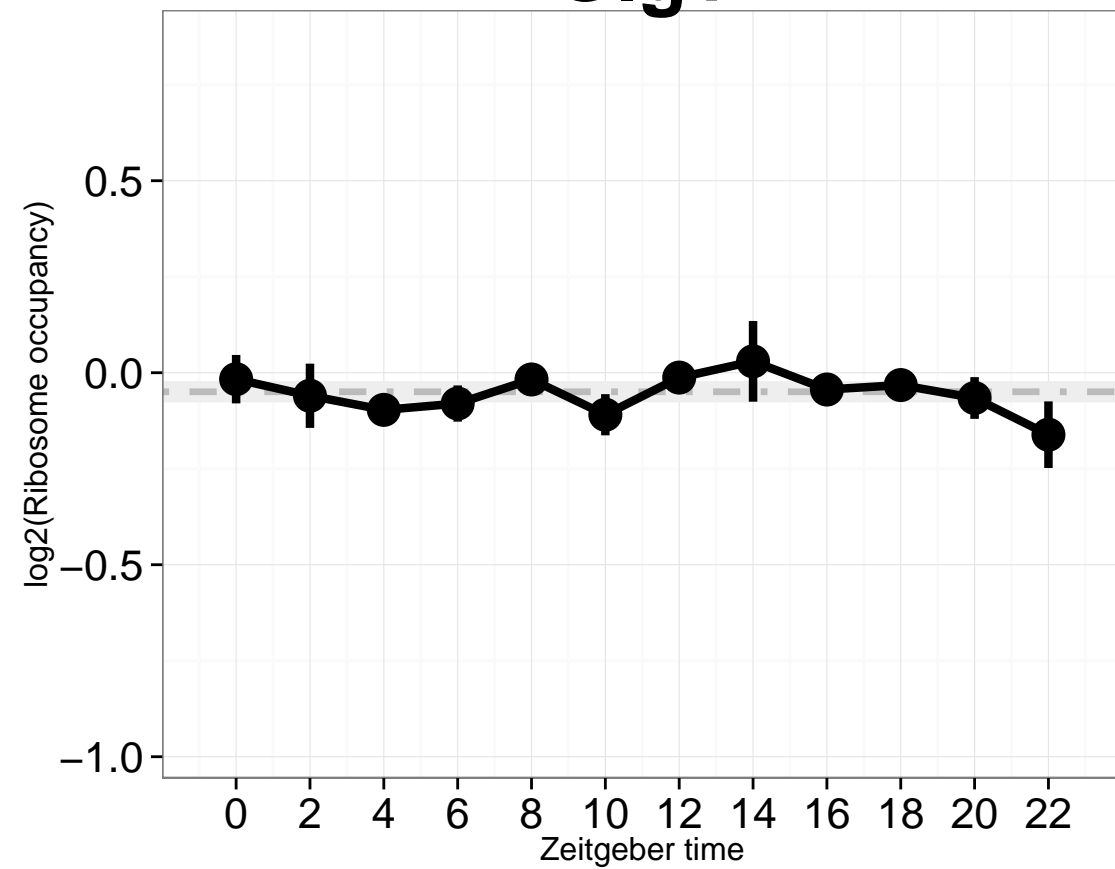

Supplement: SuppDataset_1.zip [file Glg1_set_A.pdf › Supplemental Dataset 1/A-mRNA_nonrhyth_translation_nonrhyth/Glg1_set_A.pdf]

## Glmn

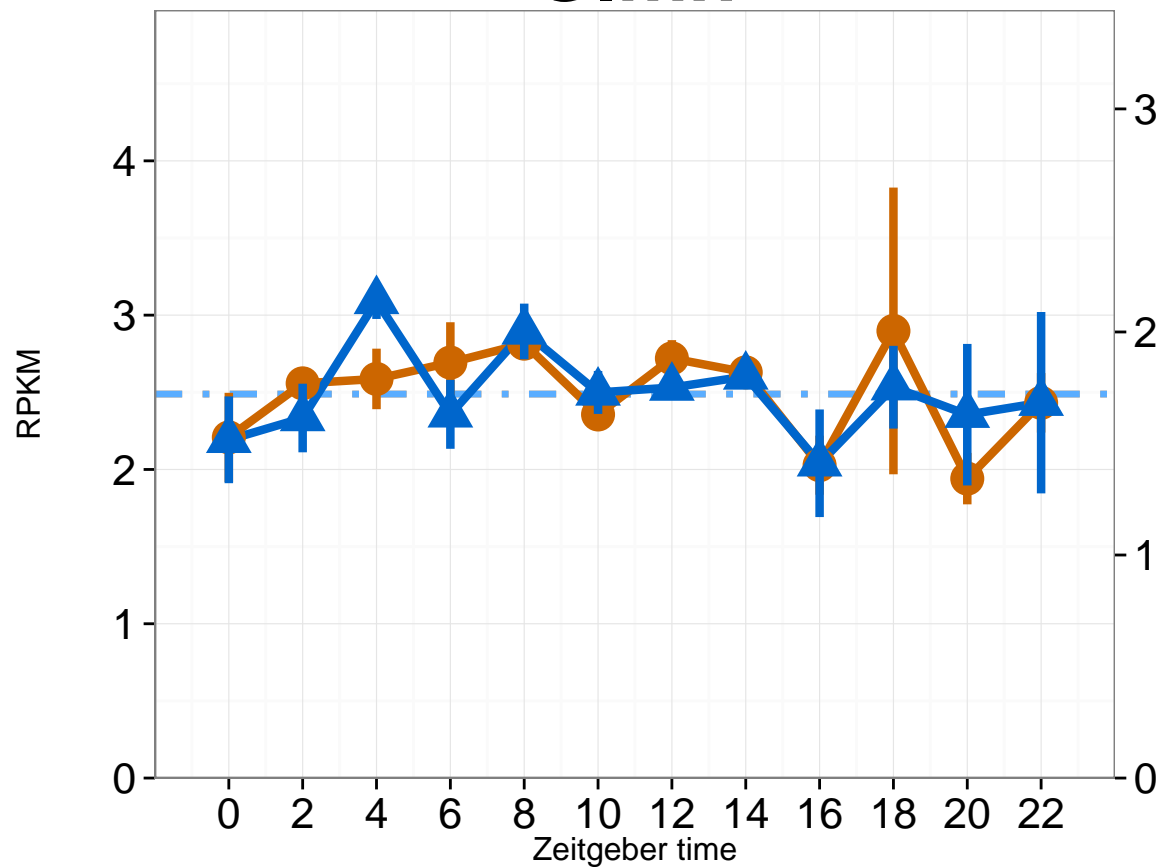

## Glmn

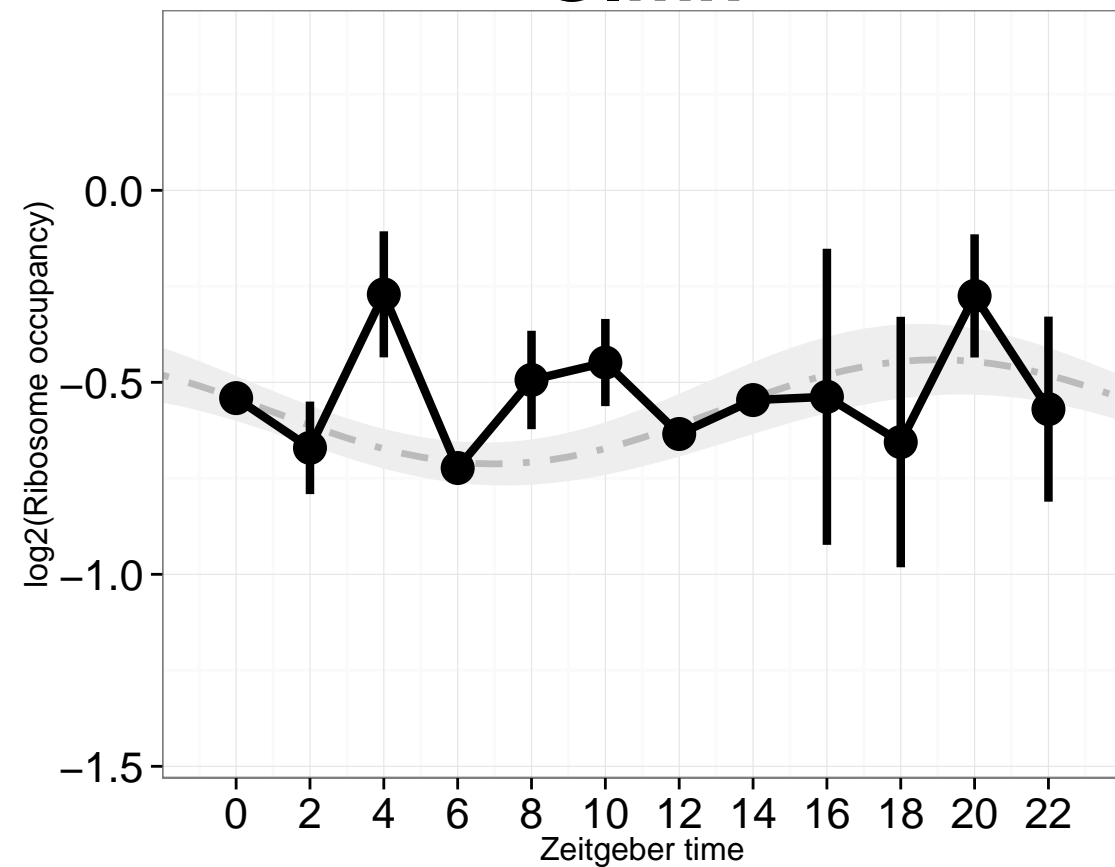

Supplement: SuppDataset_1.zip [file Glmn_set_A.pdf › Supplemental Dataset 1/A-mRNA_nonrhyth_translation_nonrhyth/Glmn_set_A.pdf]

## Glod4

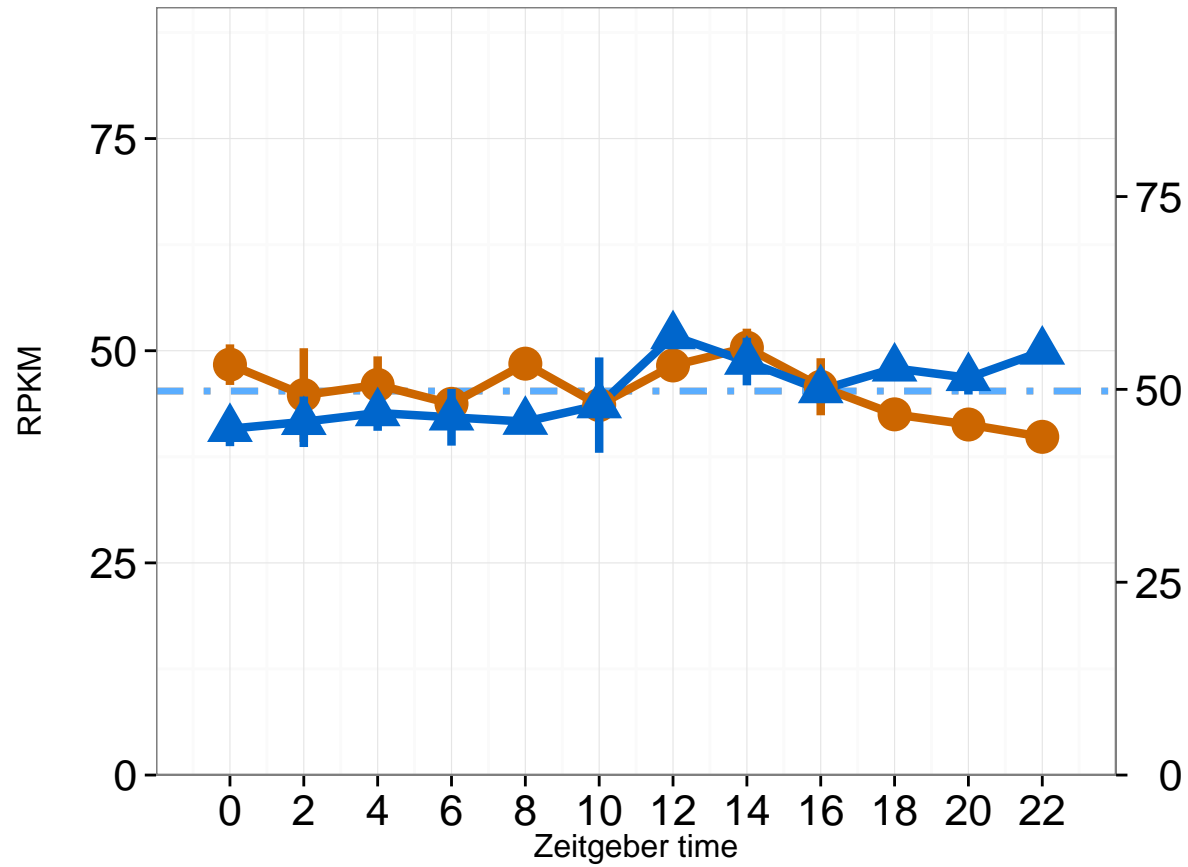

## Glod4

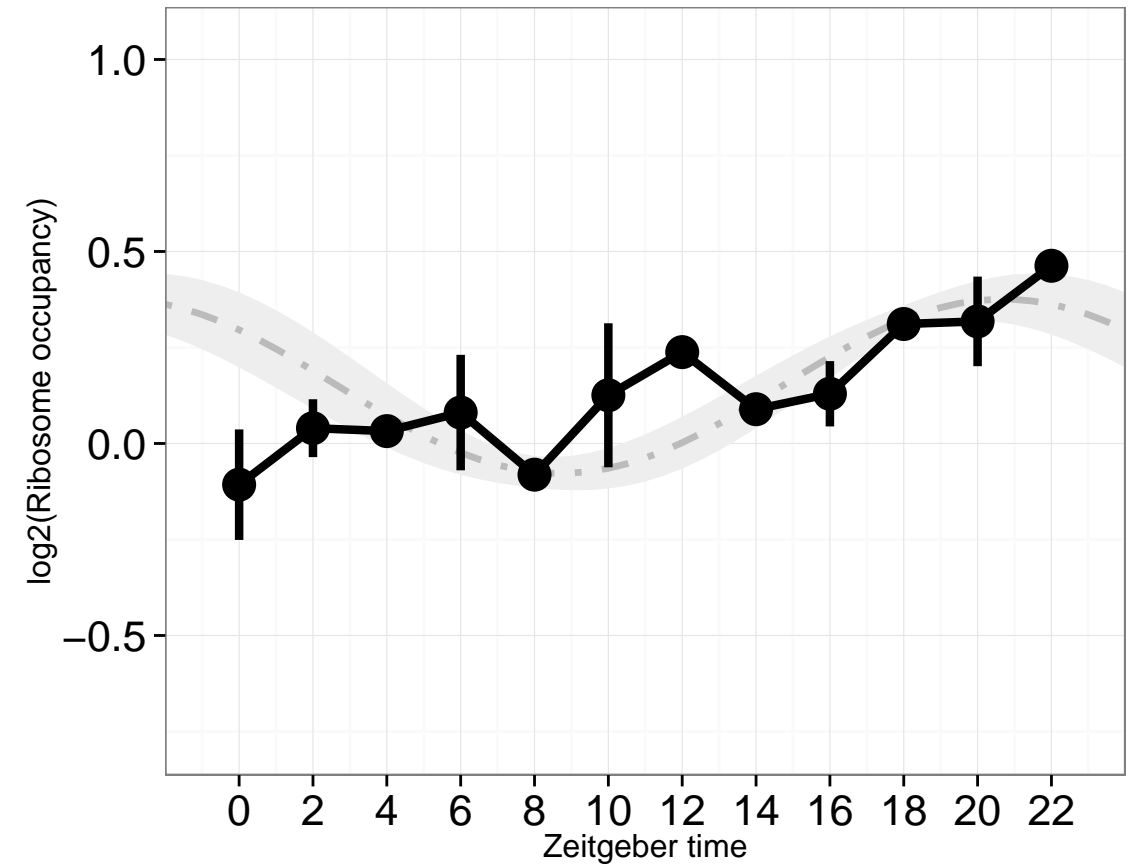

Supplement: SuppDataset_1.zip [file Glod4_set_A.pdf › Supplemental Dataset 1/A-mRNA_nonrhyth_translation_nonrhyth/Glod4_set_A.pdf]

## Glxr2

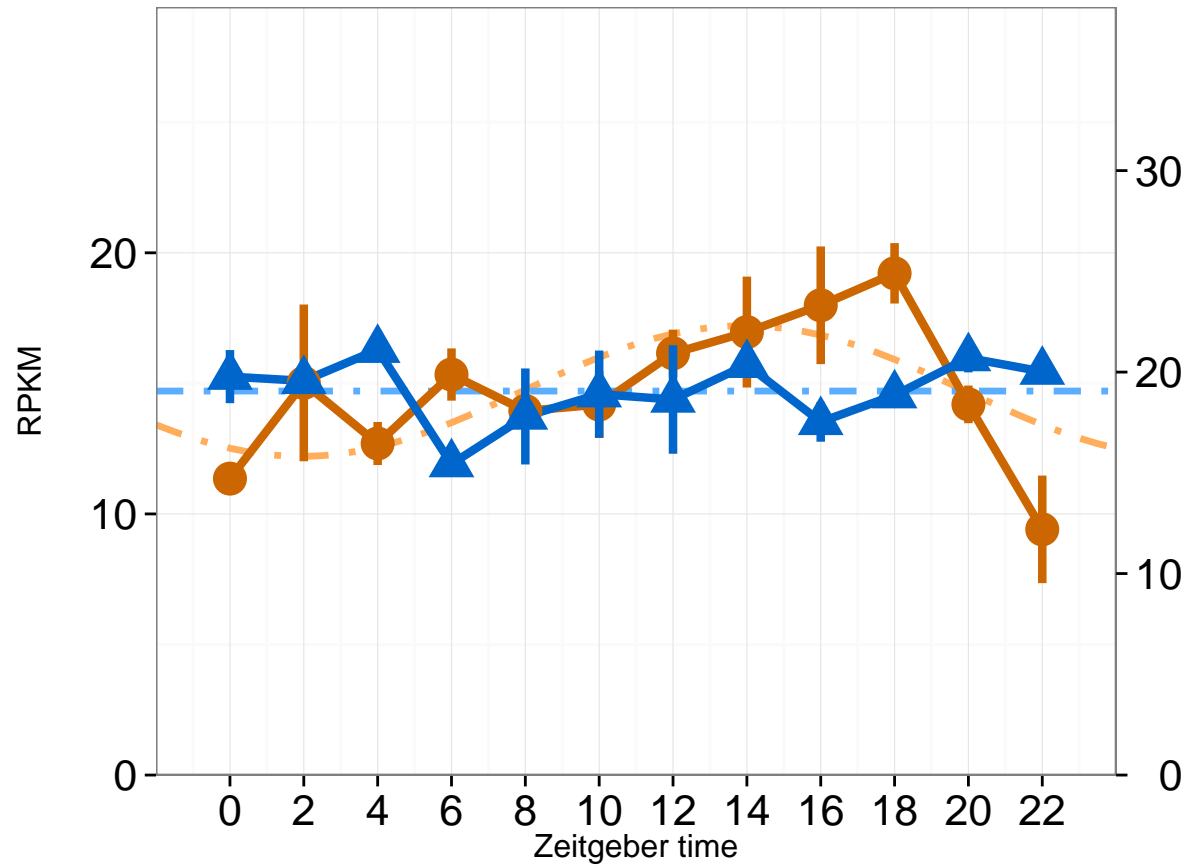

## Glxr2

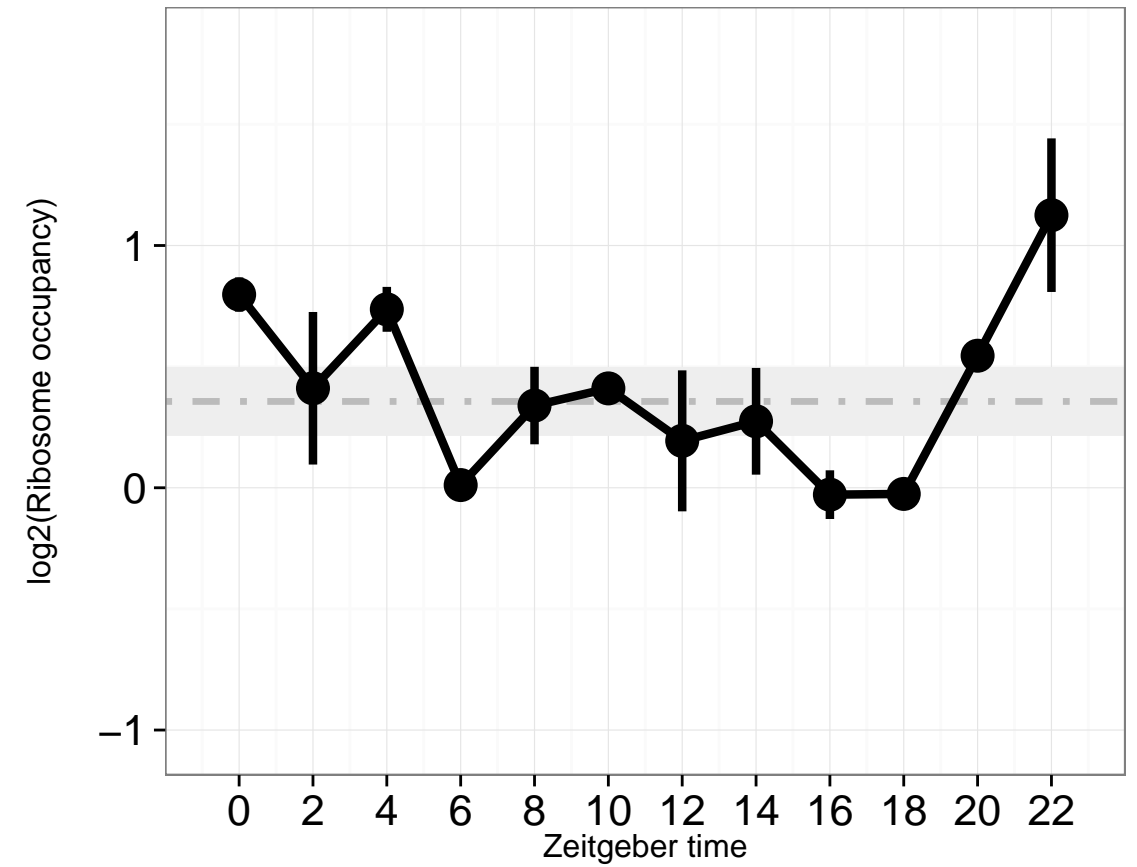

Supplement: SuppDataset_1.zip [file Glrx2_set_A.pdf › Supplemental Dataset 1/A-mRNA_nonrhyth_translation_nonrhyth/Glrx2_set_A.pdf]

## Glrx3

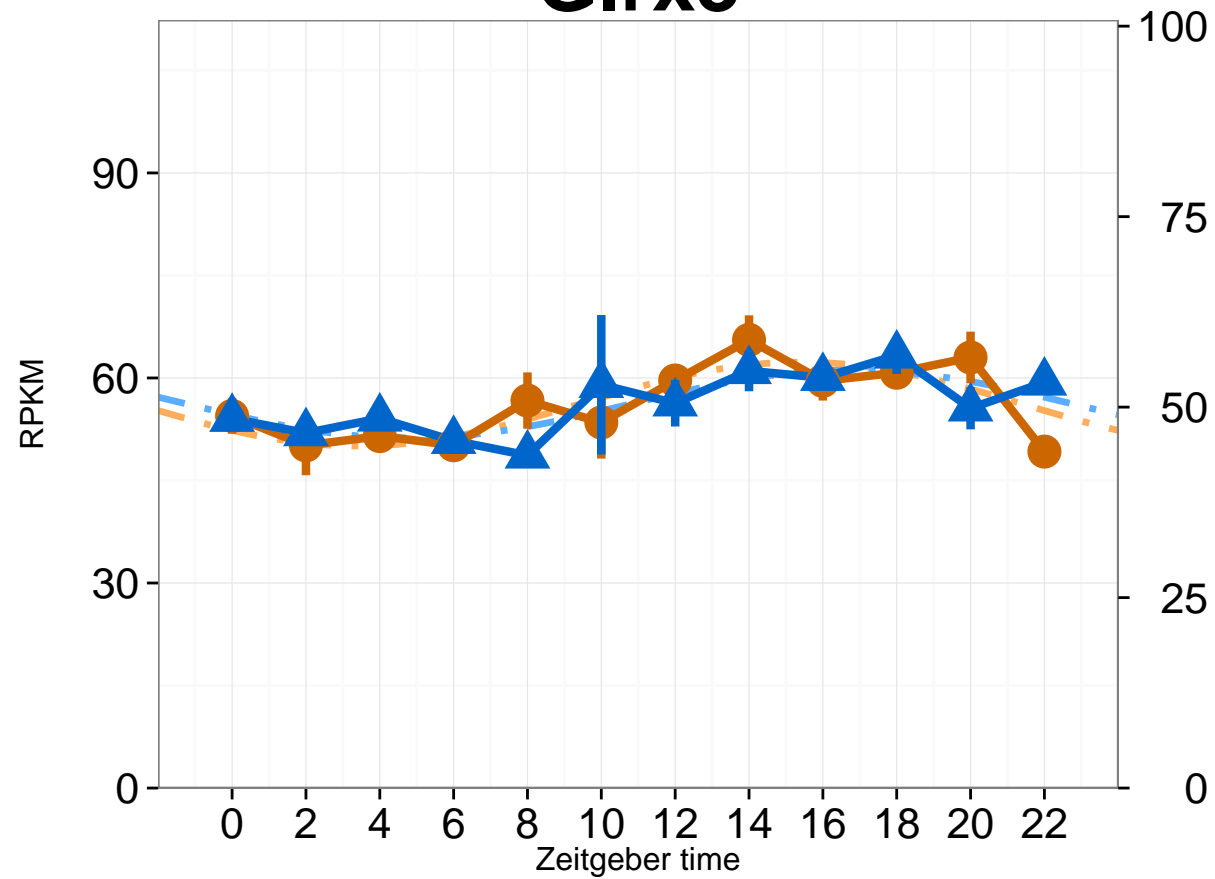

## Glrx3

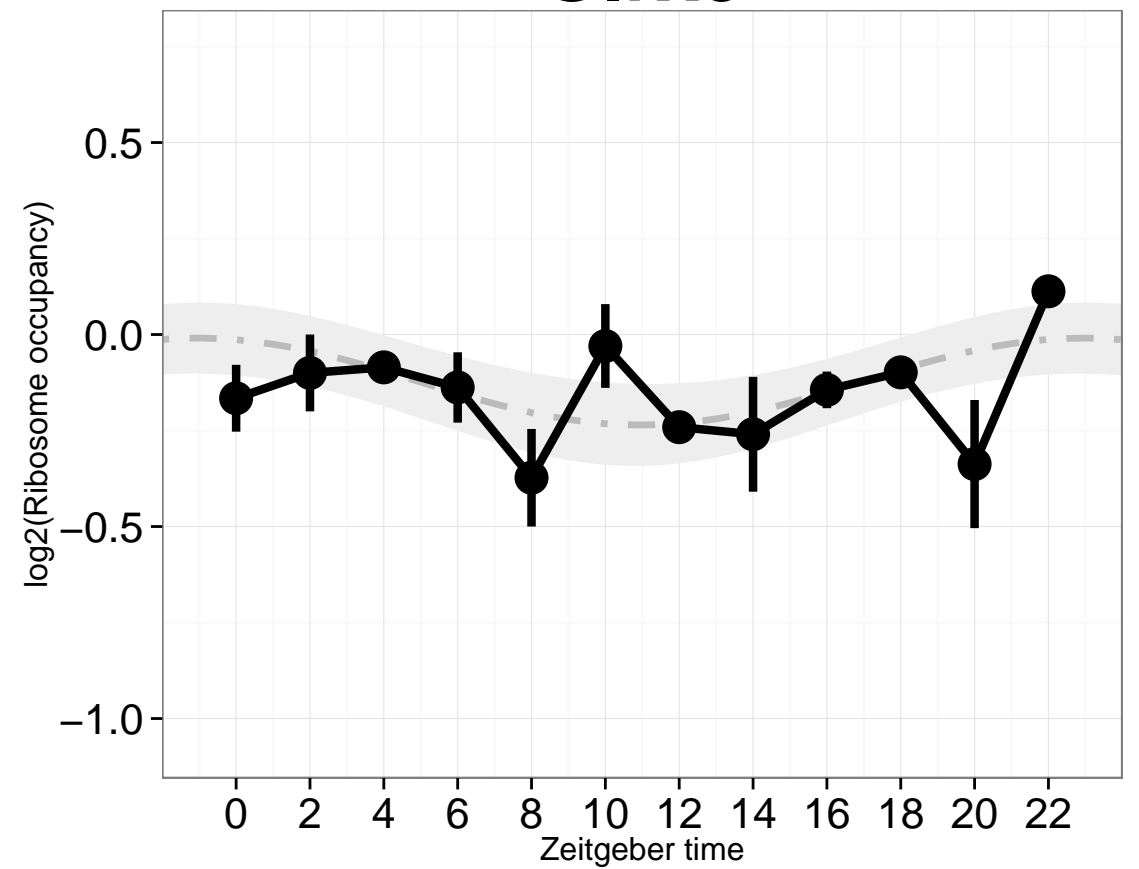

Supplement: SuppDataset_1.zip [file Glrx3_set_A.pdf › Supplemental Dataset 1/A-mRNA_nonrhyth_translation_nonrhyth/Glrx3_set_A.pdf]

## Gls2

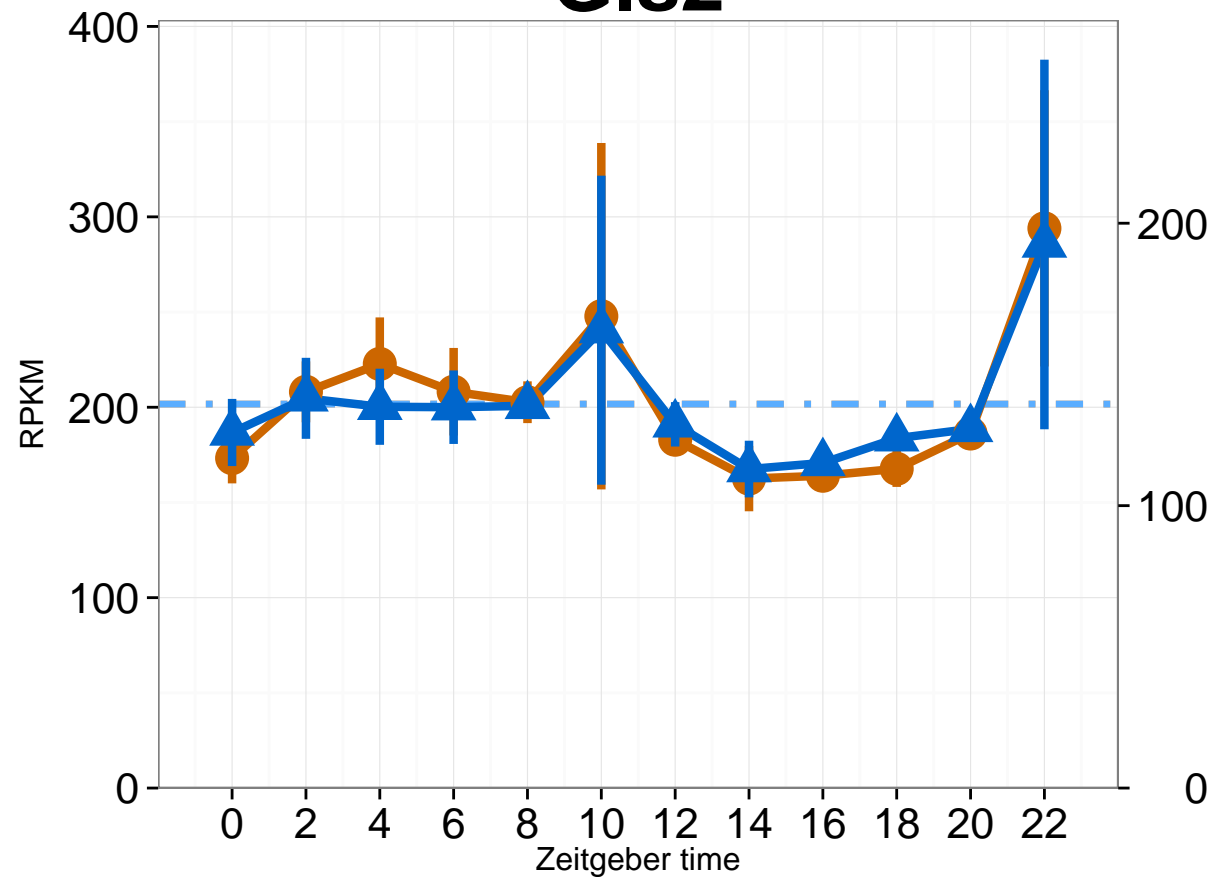

## Gls2

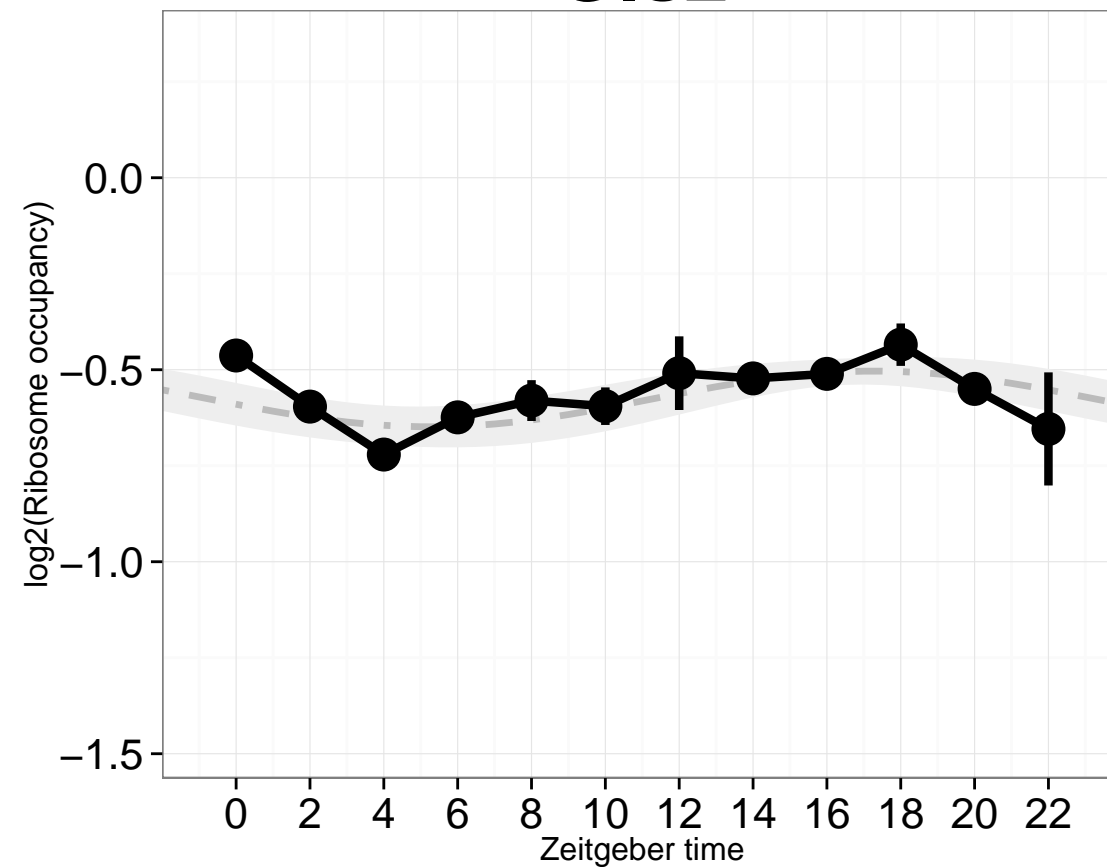

Supplement: SuppDataset_1.zip [file Gls2_set_A.pdf › Supplemental Dataset 1/A-mRNA_nonrhyth_translation_nonrhyth/Gls2_set_A.pdf]

# Glt28d2

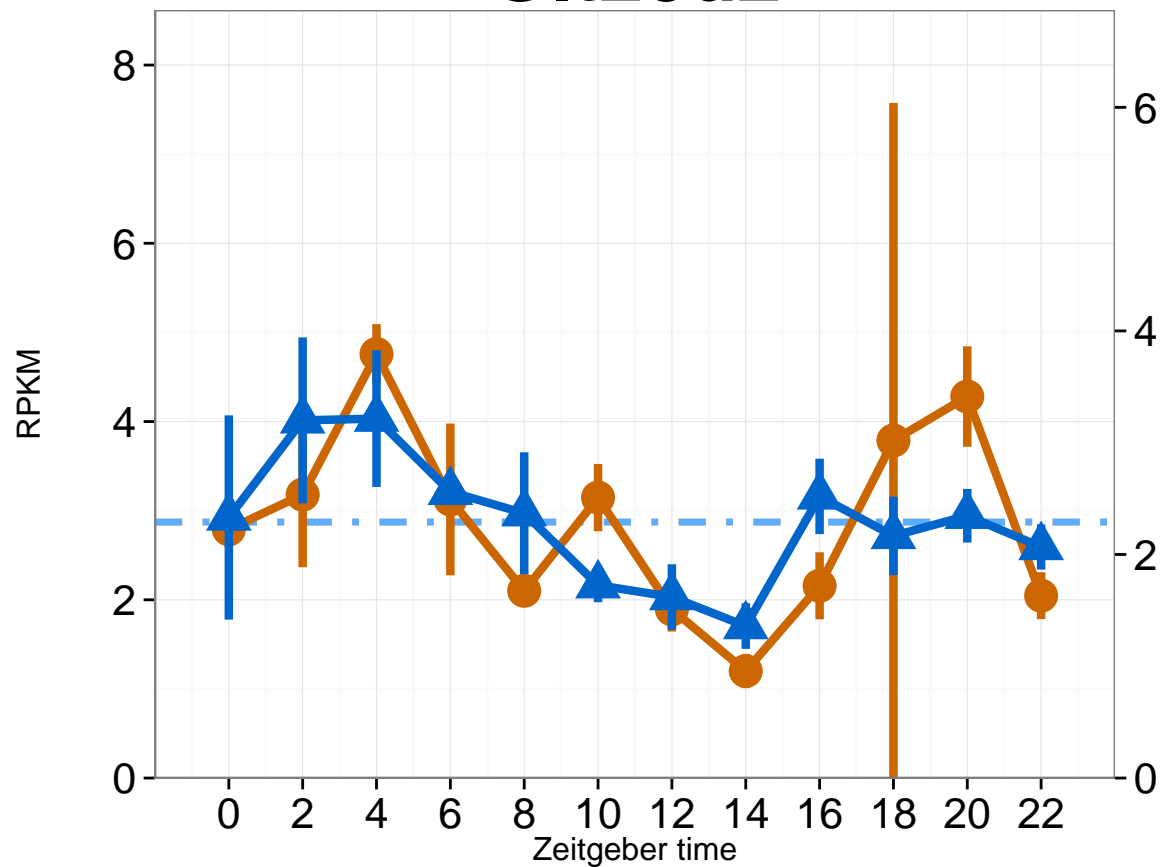

# Glt28d2

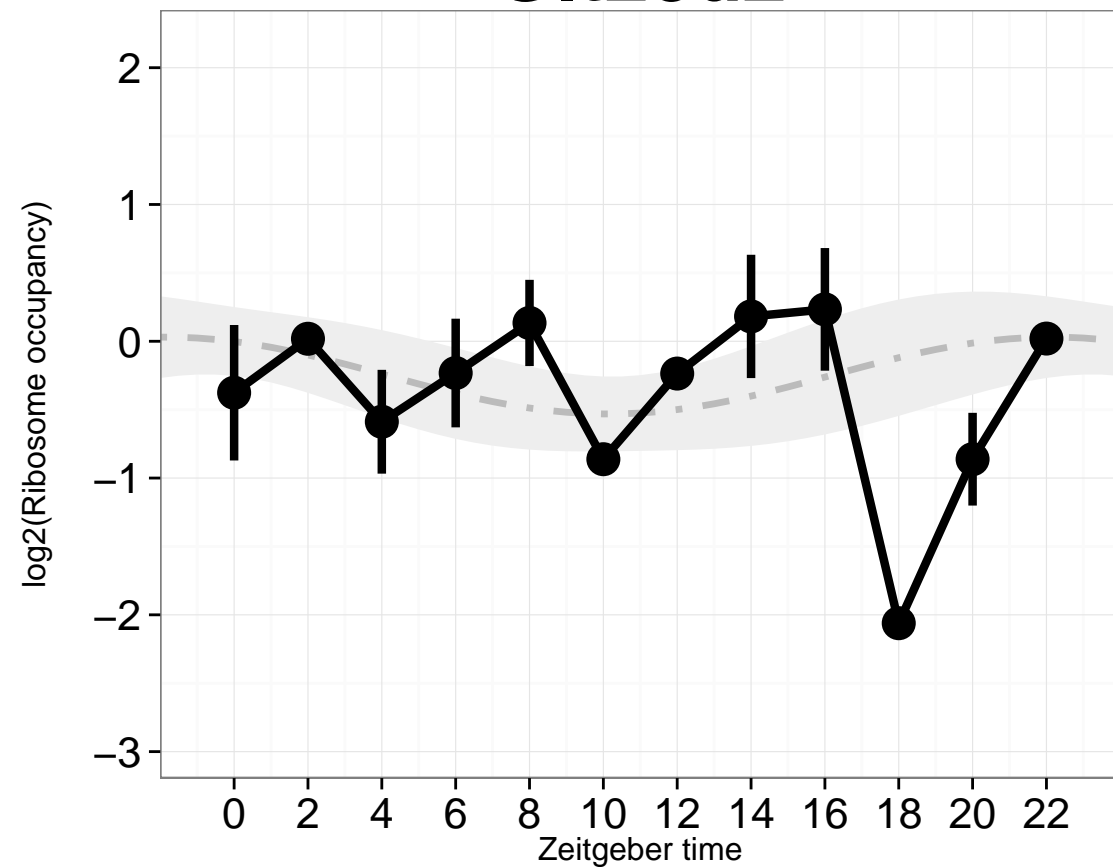

Supplement: SuppDataset_1.zip [file Glt28d2_set_A.pdf › Supplemental Dataset 1/A-mRNA_nonrhyth_translation_nonrhyth/Glt28d2_set_A.pdf]

# Glt8d1

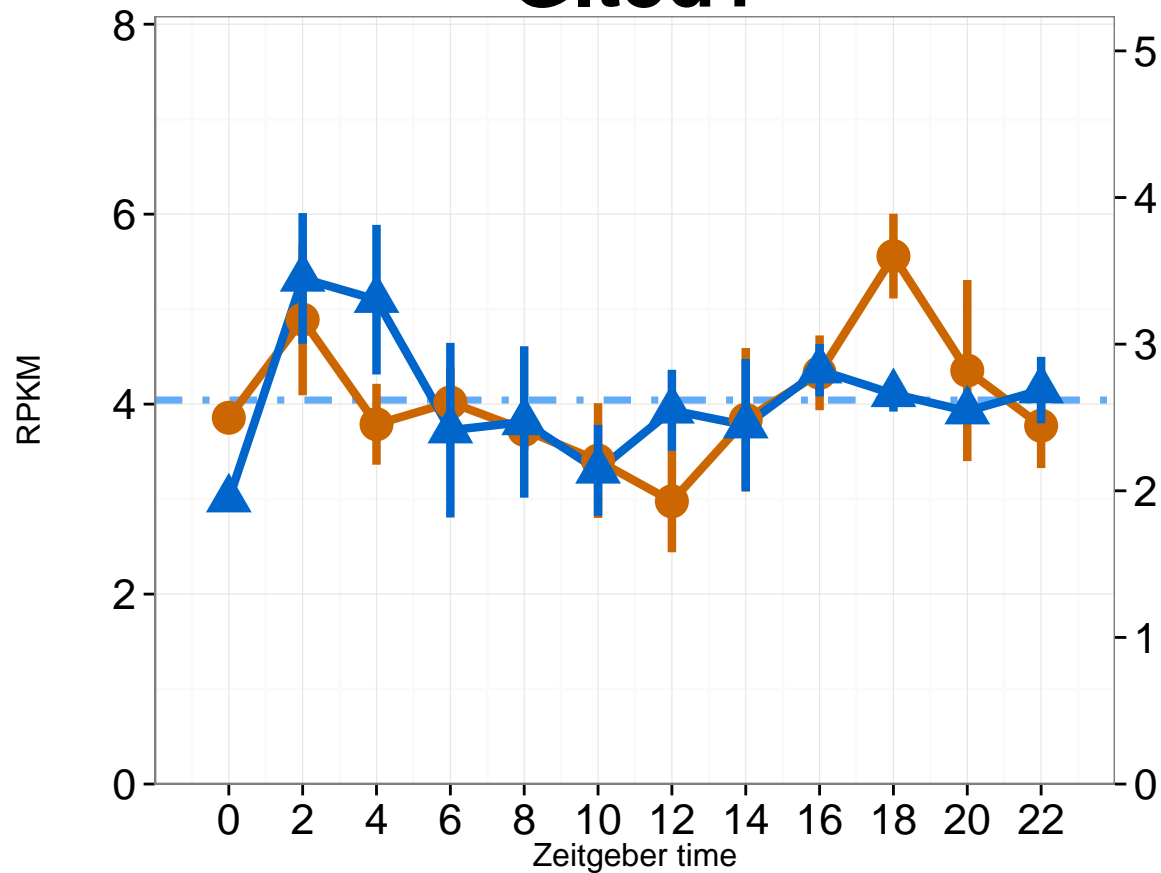

# Glt8d1

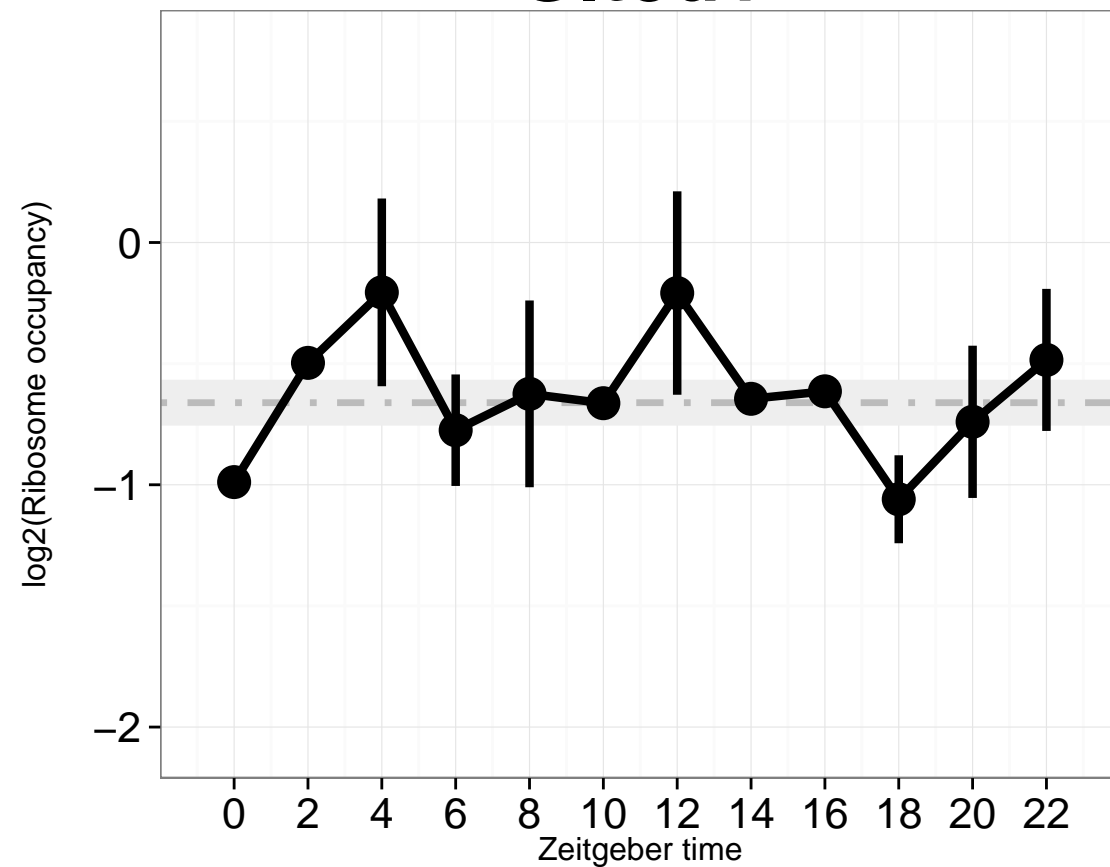

Supplement: SuppDataset_1.zip [file Glt8d1_set_A.pdf › Supplemental Dataset 1/A-mRNA_nonrhyth_translation_nonrhyth/Glt8d1_set_A.pdf]

## GltP

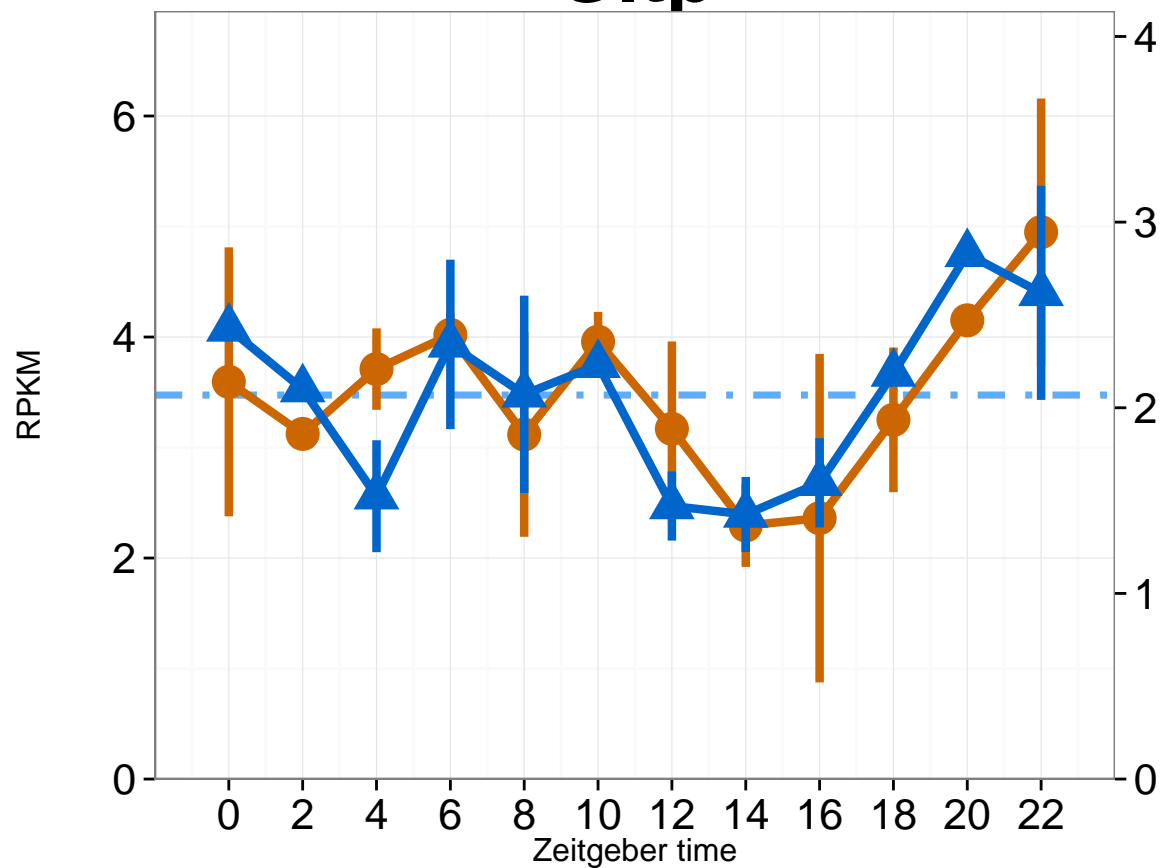

## GltP

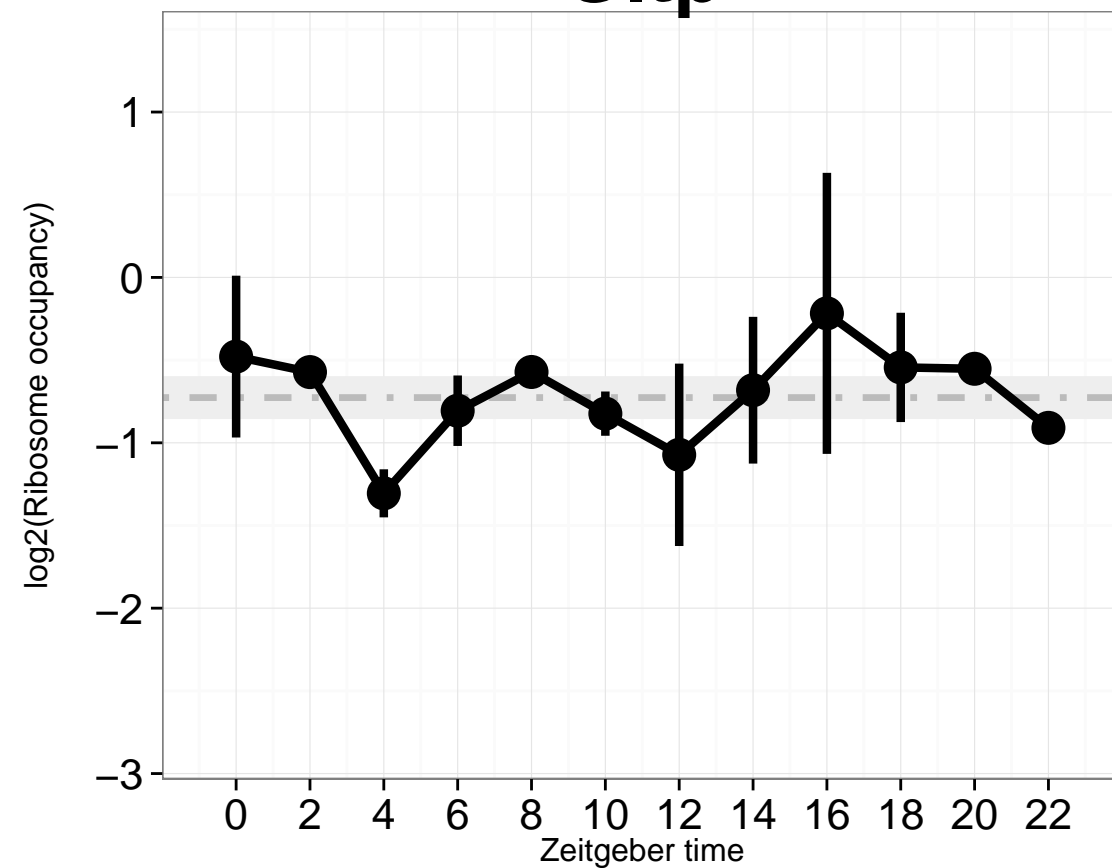

Supplement: SuppDataset_1.zip [file Gltp_set_A.pdf › Supplemental Dataset 1/A-mRNA_nonrhyth_translation_nonrhyth/Gltp_set_A.pdf]

## Gltpd2

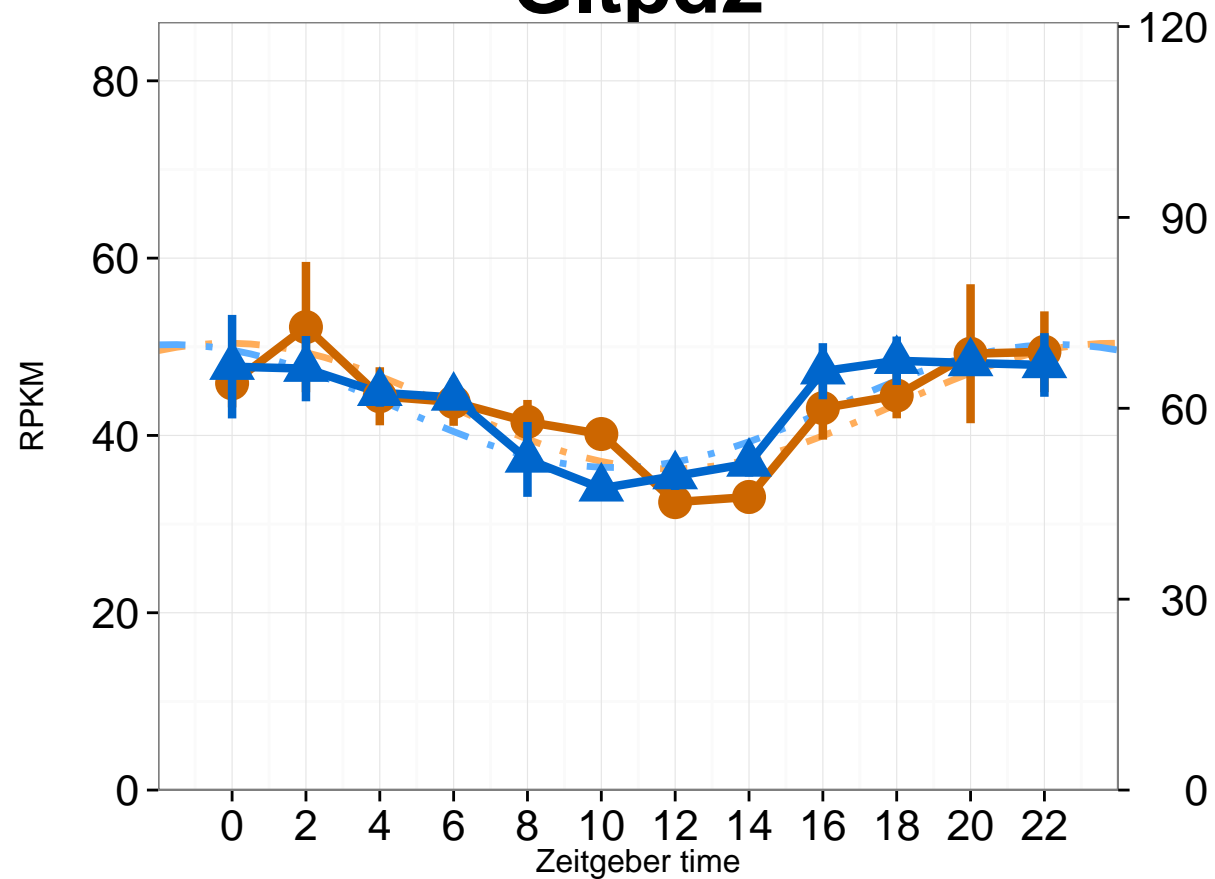

## Gltpd2

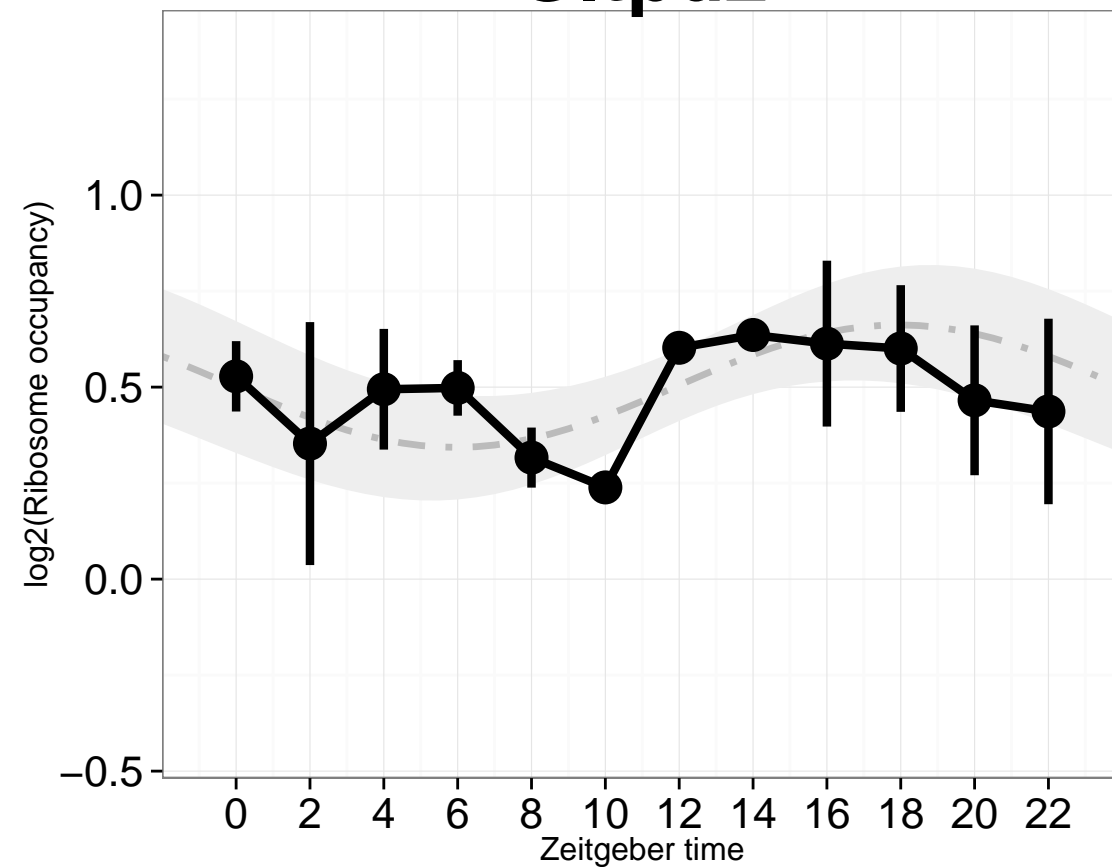

Supplement: SuppDataset_1.zip [file Gltpd2_set_A.pdf › Supplemental Dataset 1/A-mRNA_nonrhyth_translation_nonrhyth/Gltpd2_set_A.pdf]

# Gltscr1

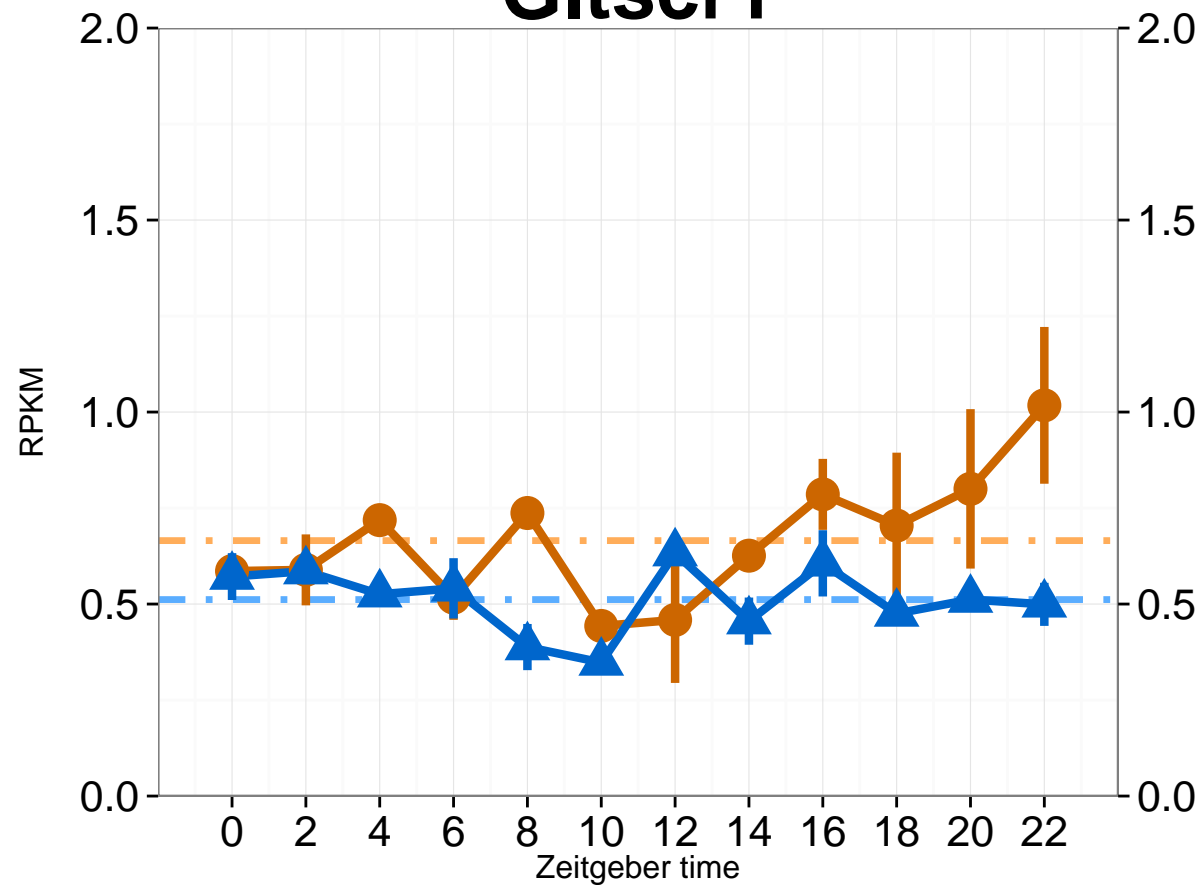

# Gltscr1

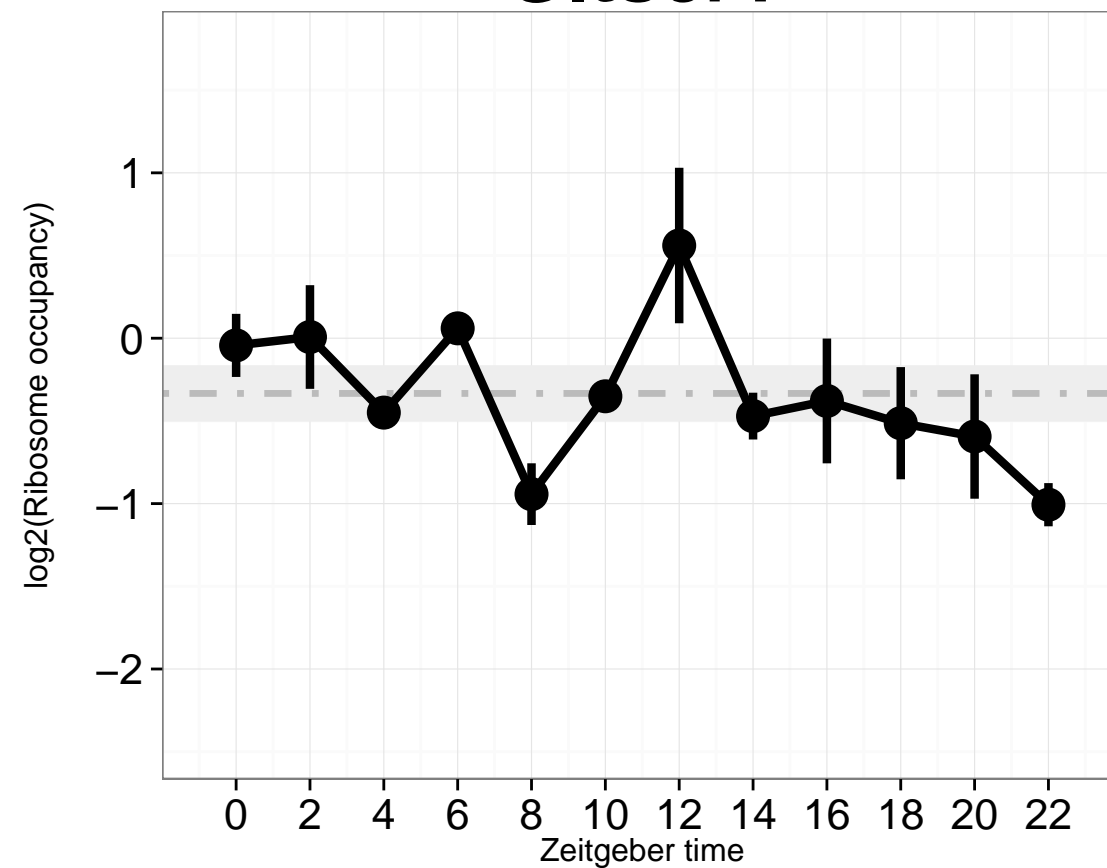

Supplement: SuppDataset_1.zip [file Gltscr1_set_A.pdf › Supplemental Dataset 1/A-mRNA_nonrhyth_translation_nonrhyth/Gltscr1_set_A.pdf]

**Gltscr1l**

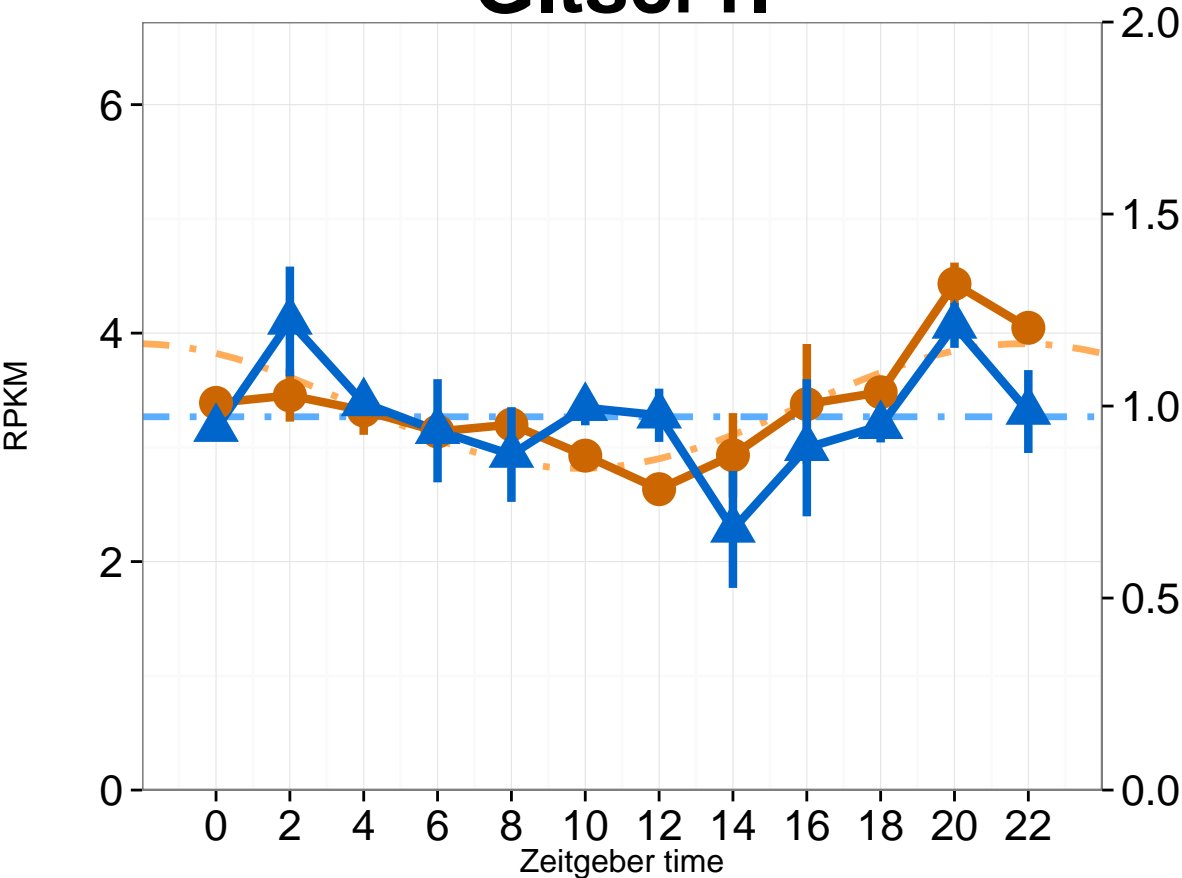

**Gltscr1l**

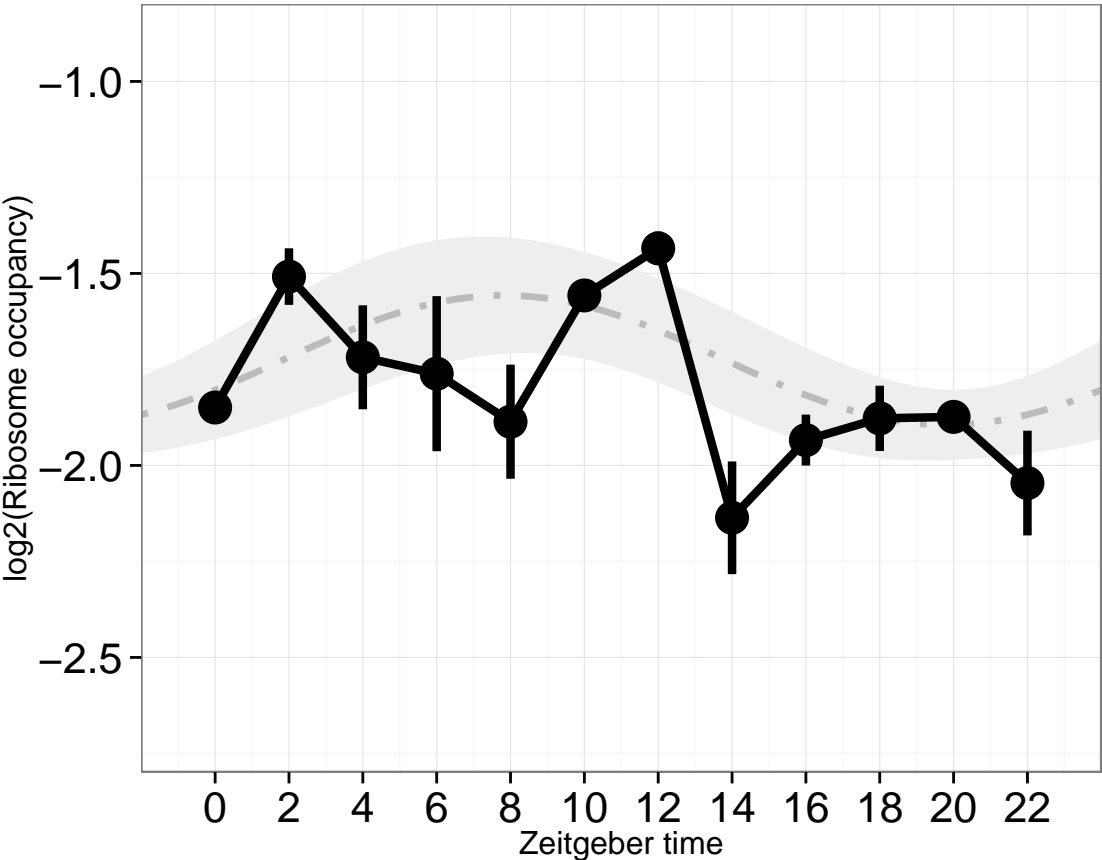

Supplement: SuppDataset_1.zip [file Gltscr1l_set_A.pdf › Supplemental Dataset 1/A-mRNA_nonrhyth_translation_nonrhyth/Gltscr1l_set_A.pdf]

## Glud1

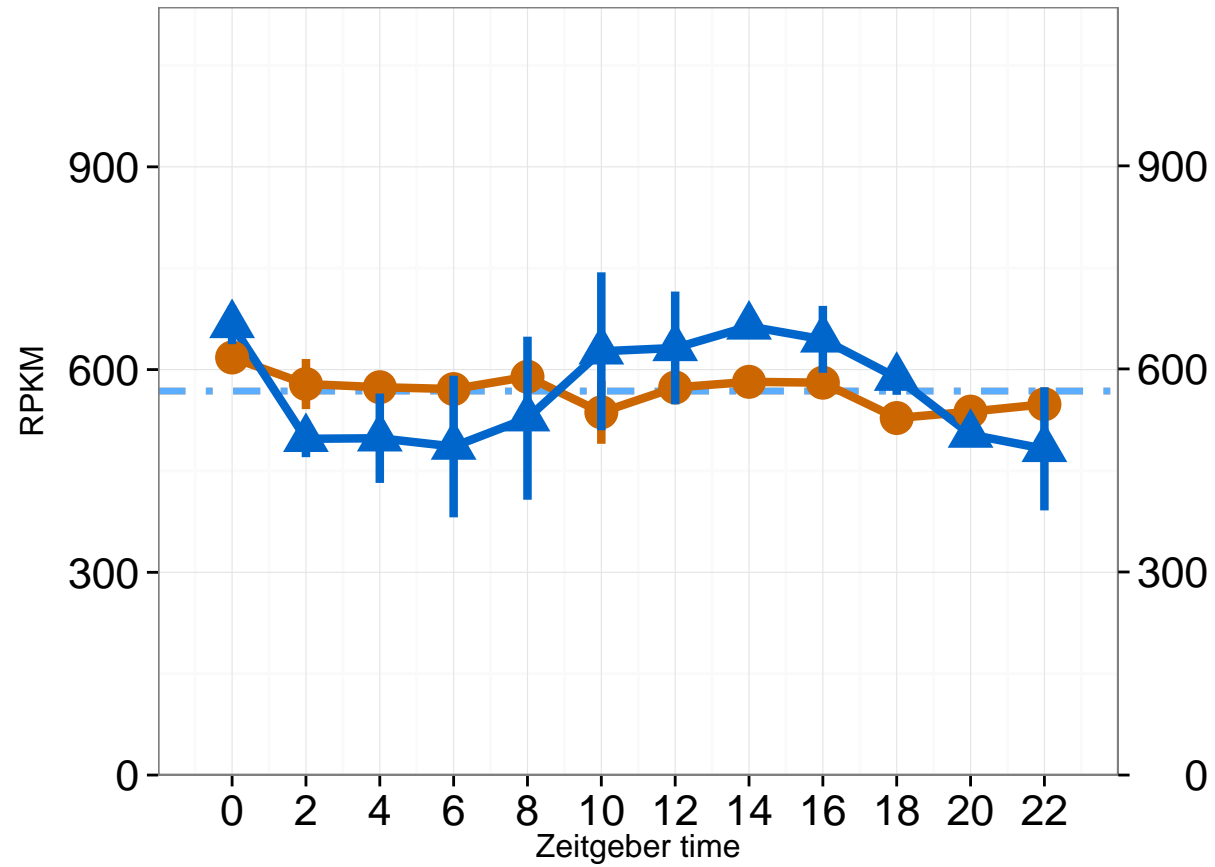

## Glud1

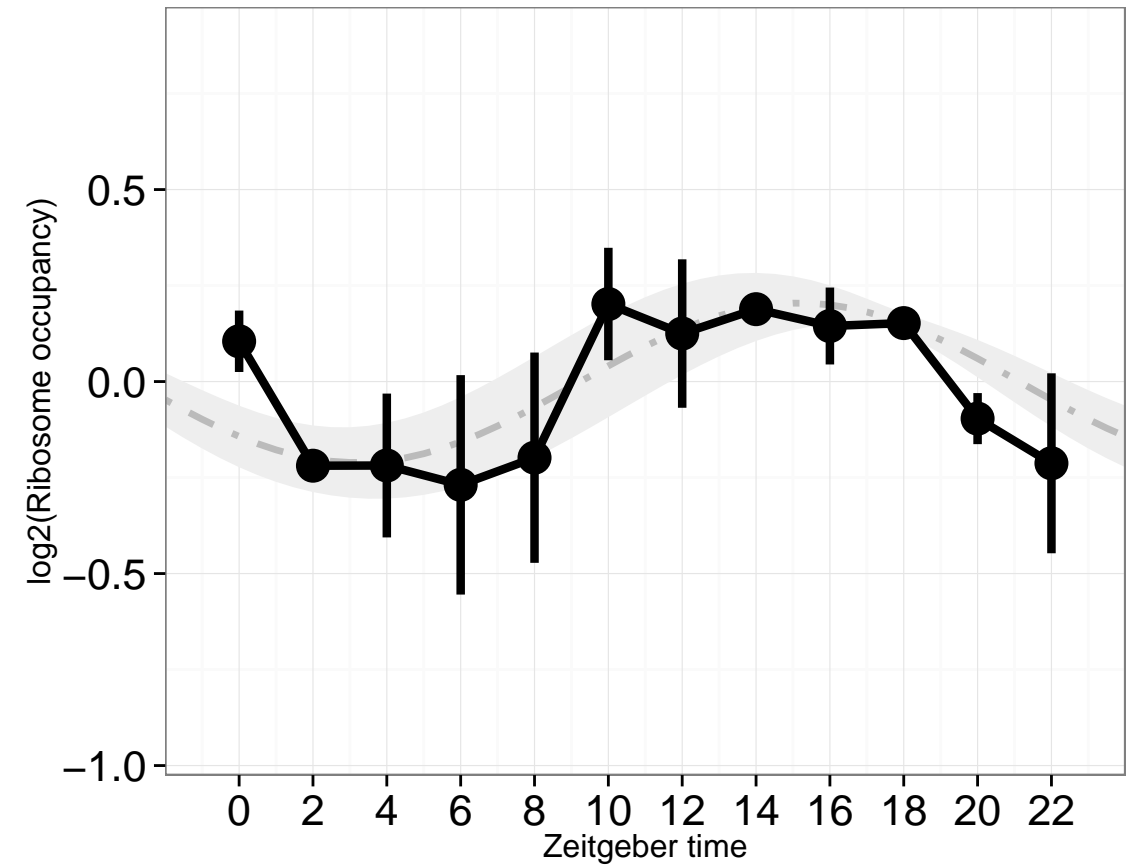

Supplement: SuppDataset_1.zip [file Glud1_set_A.pdf › Supplemental Dataset 1/A-mRNA_nonrhyth_translation_nonrhyth/Glud1_set_A.pdf]

## Glul

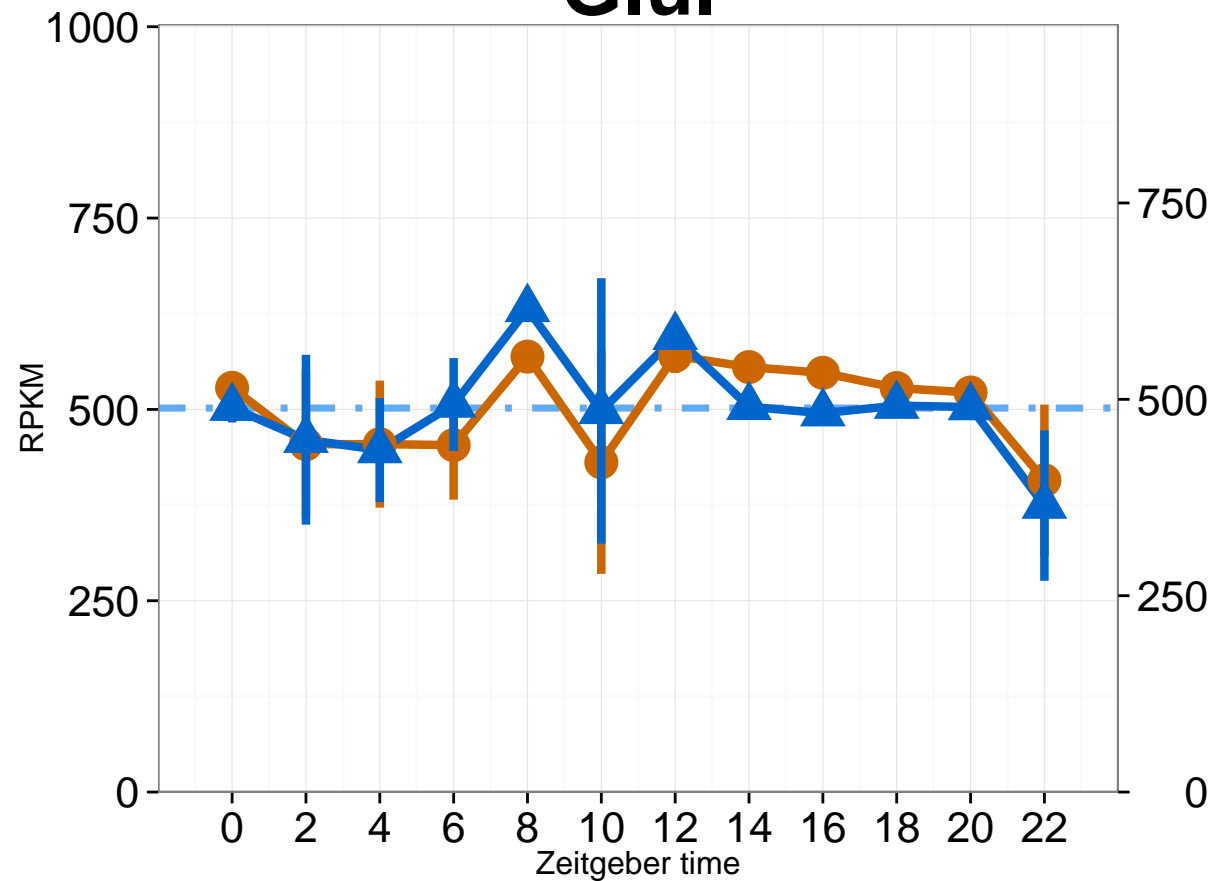

## Glul

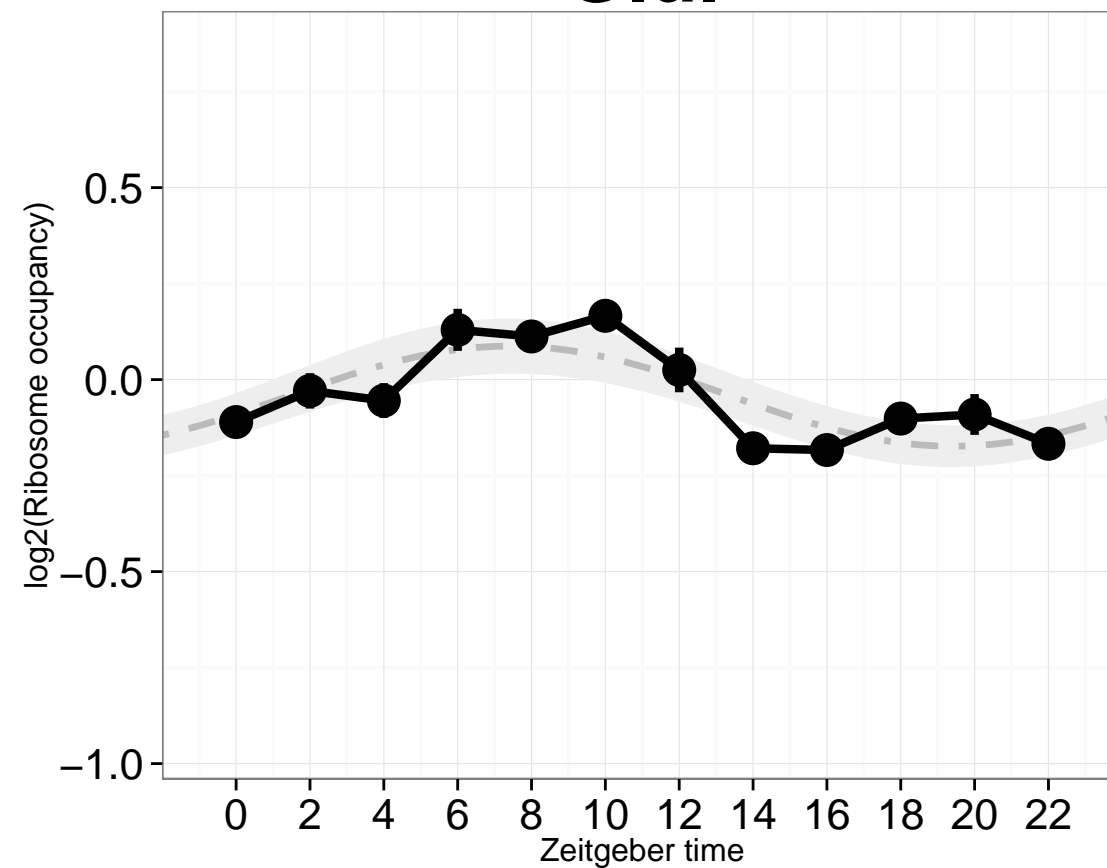

Supplement: SuppDataset_1.zip [file Glul_set_A.pdf › Supplemental Dataset 1/A-mRNA_nonrhyth_translation_nonrhyth/Glul_set_A.pdf]

## Glyat

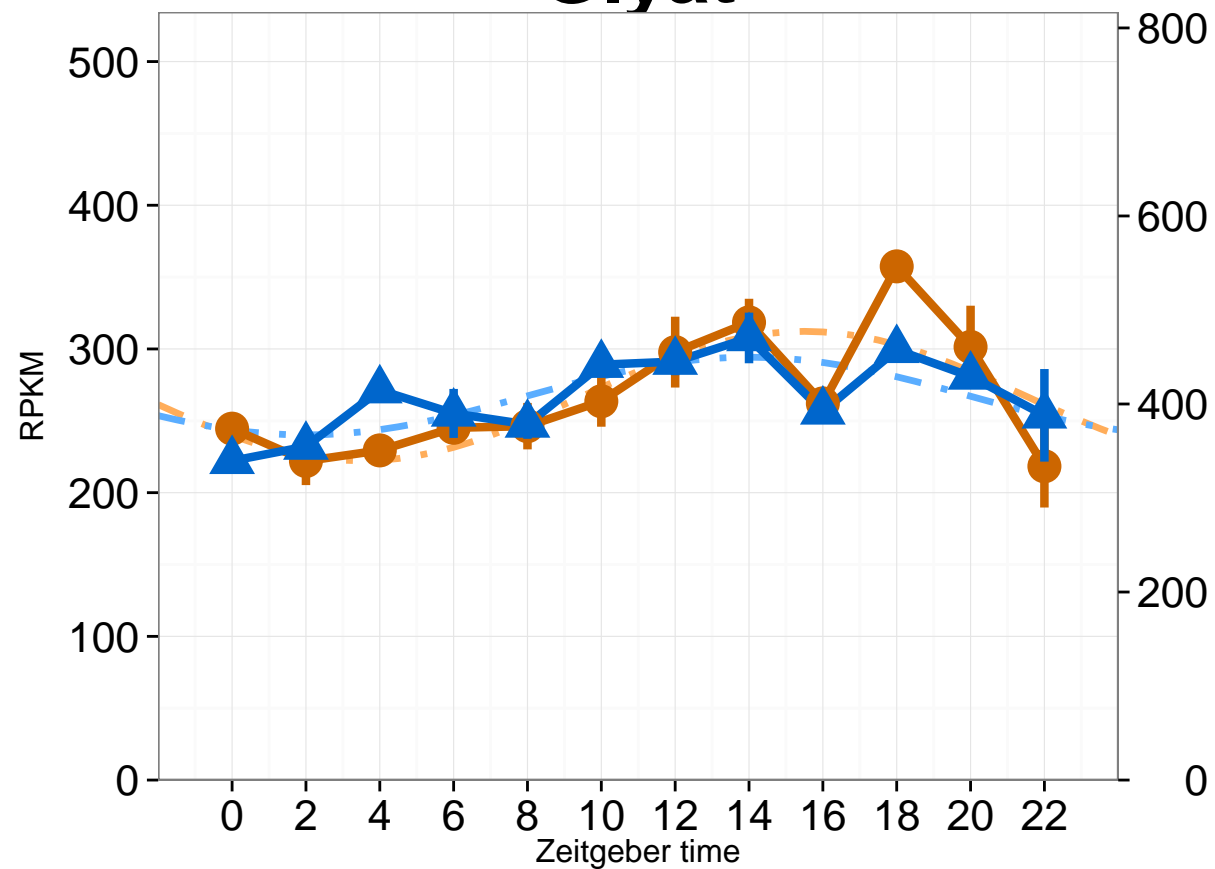

## Glyat

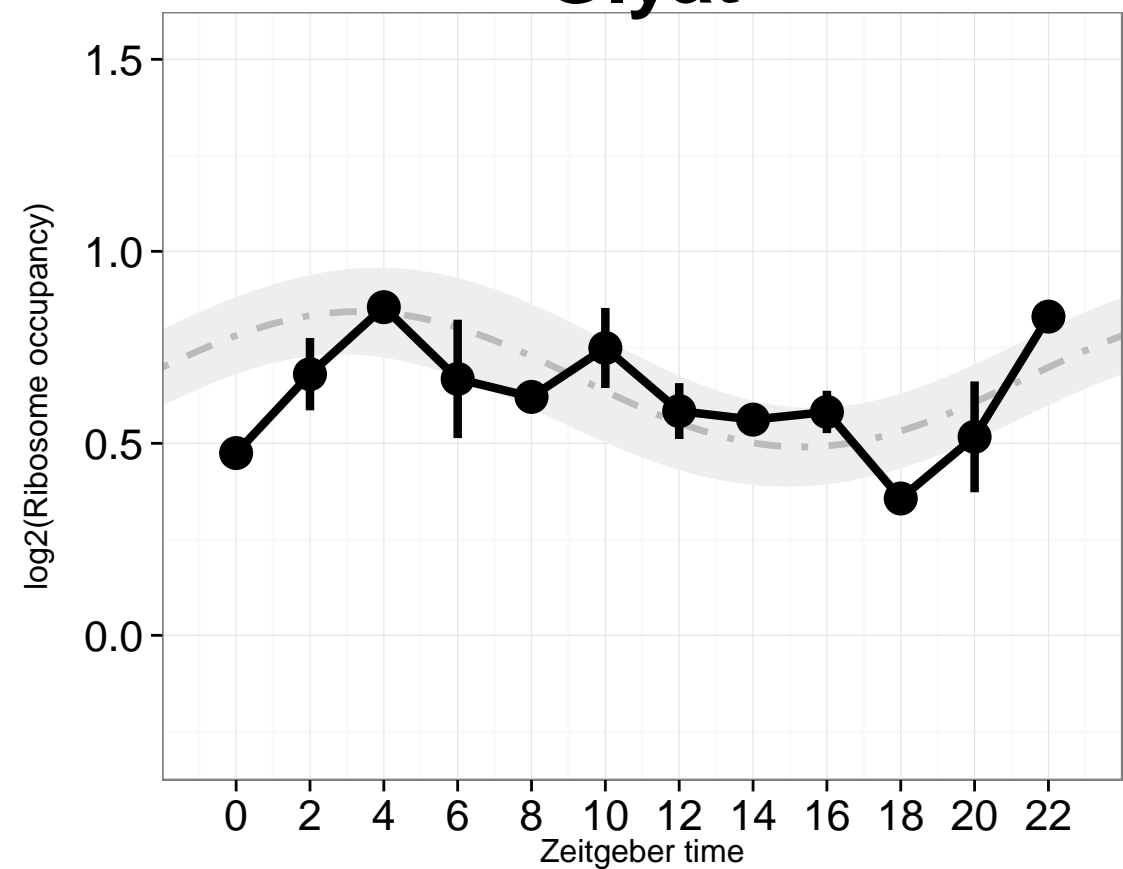

Supplement: SuppDataset_1.zip [file Glyat_set_A.pdf › Supplemental Dataset 1/A-mRNA_nonrhyth_translation_nonrhyth/Glyat_set_A.pdf]

## Glyctk

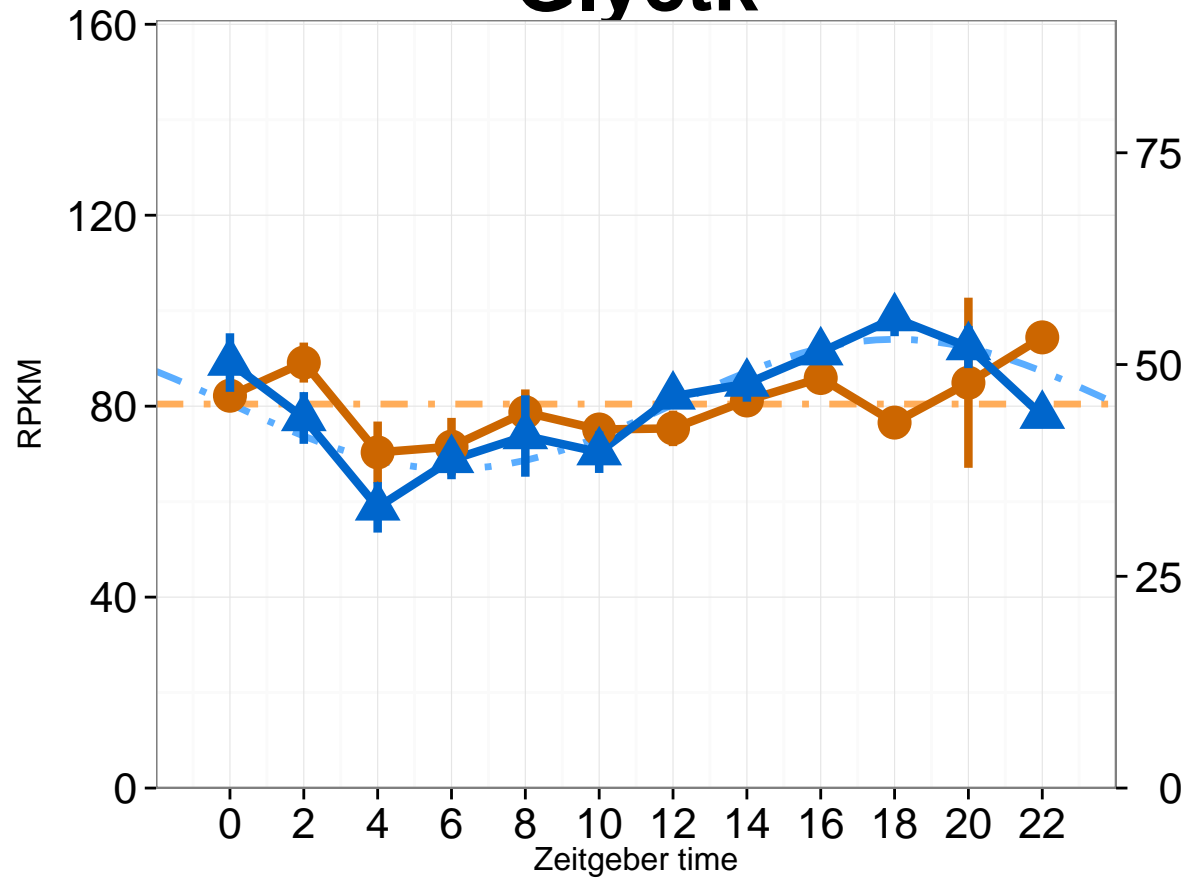

## Glyctk

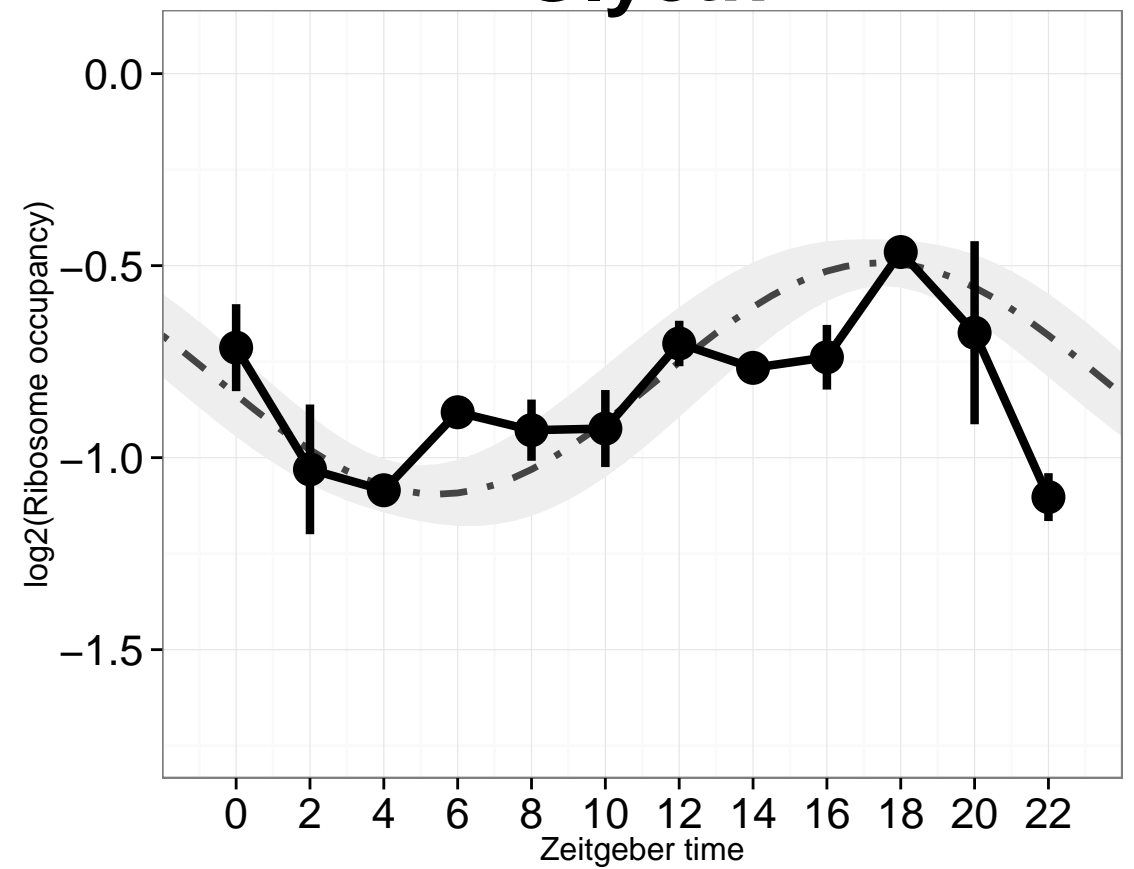

Supplement: SuppDataset_1.zip [file Glyctk_set_A.pdf › Supplemental Dataset 1/A-mRNA_nonrhyth_translation_nonrhyth/Glyctk_set_A.pdf]

## Glyr1

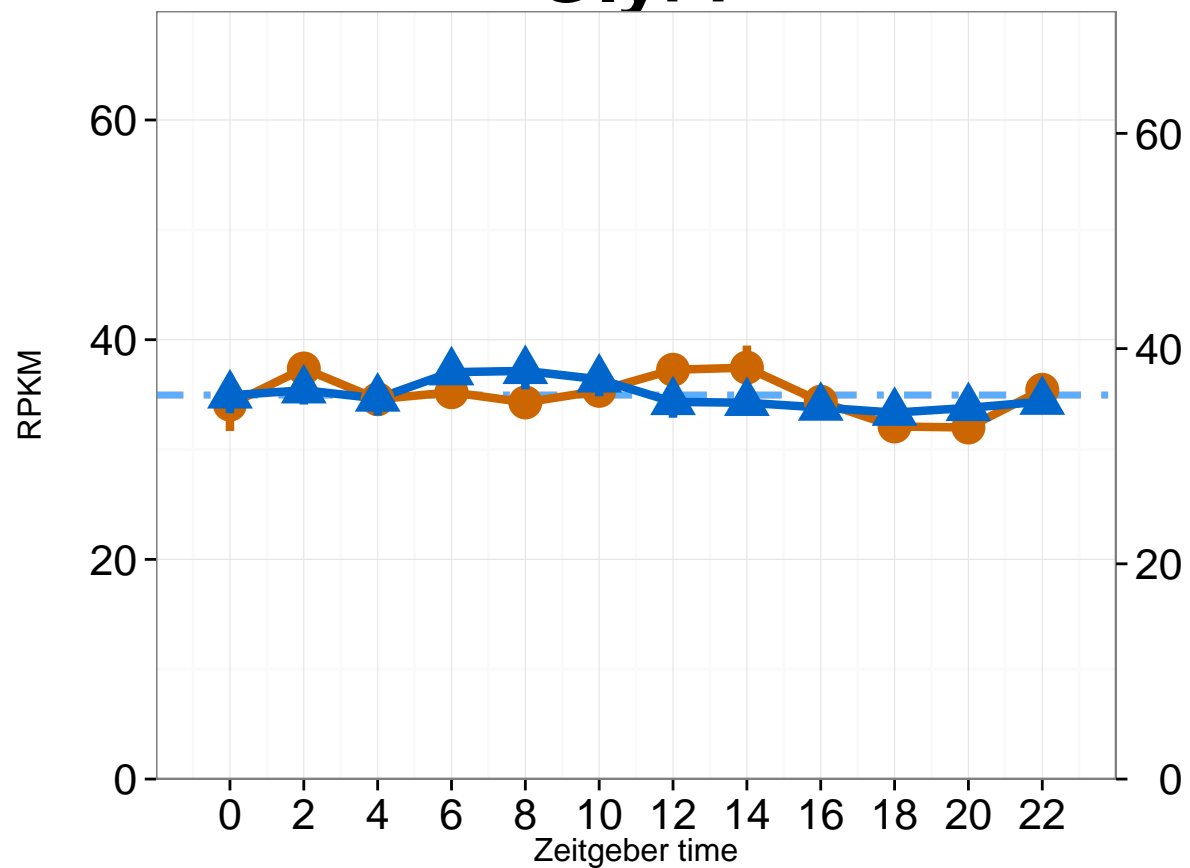

## Glyr1

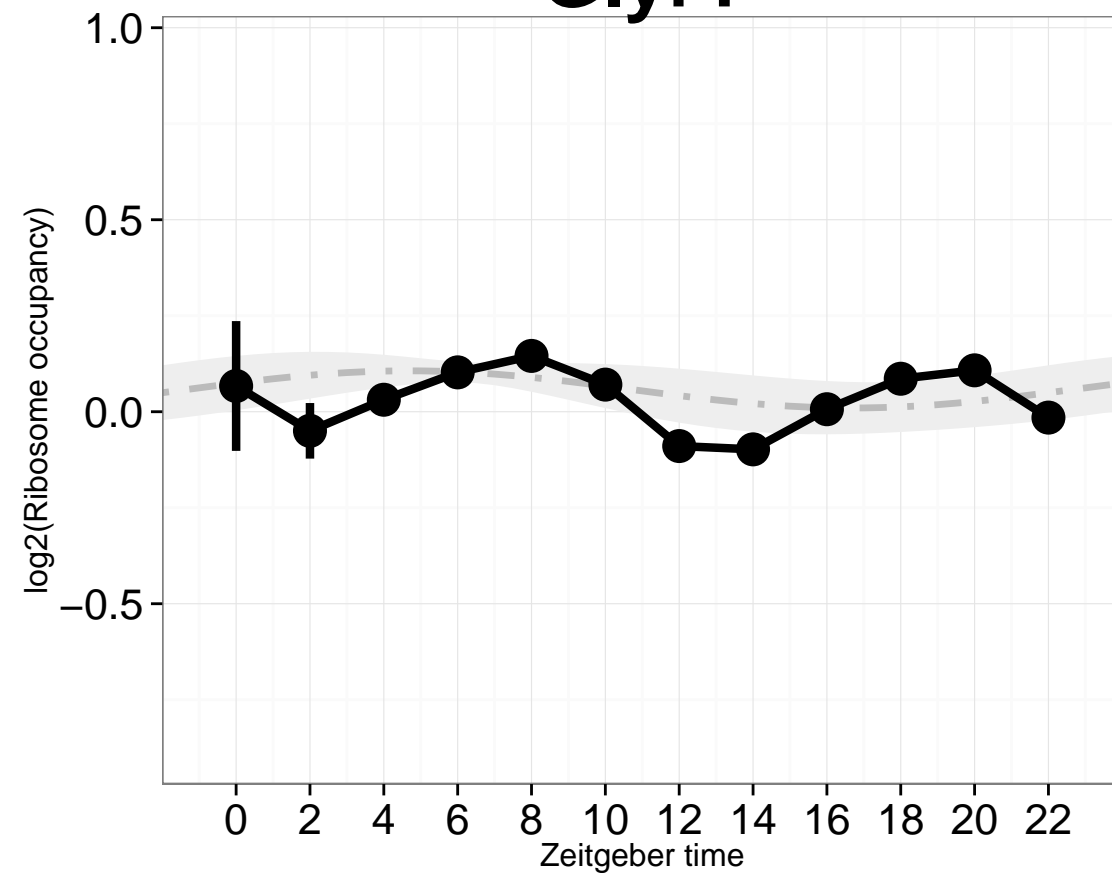

Supplement: SuppDataset_1.zip [file Glyr1_set_A.pdf › Supplemental Dataset 1/A-mRNA_nonrhyth_translation_nonrhyth/Glyr1_set_A.pdf]

# Gm10033

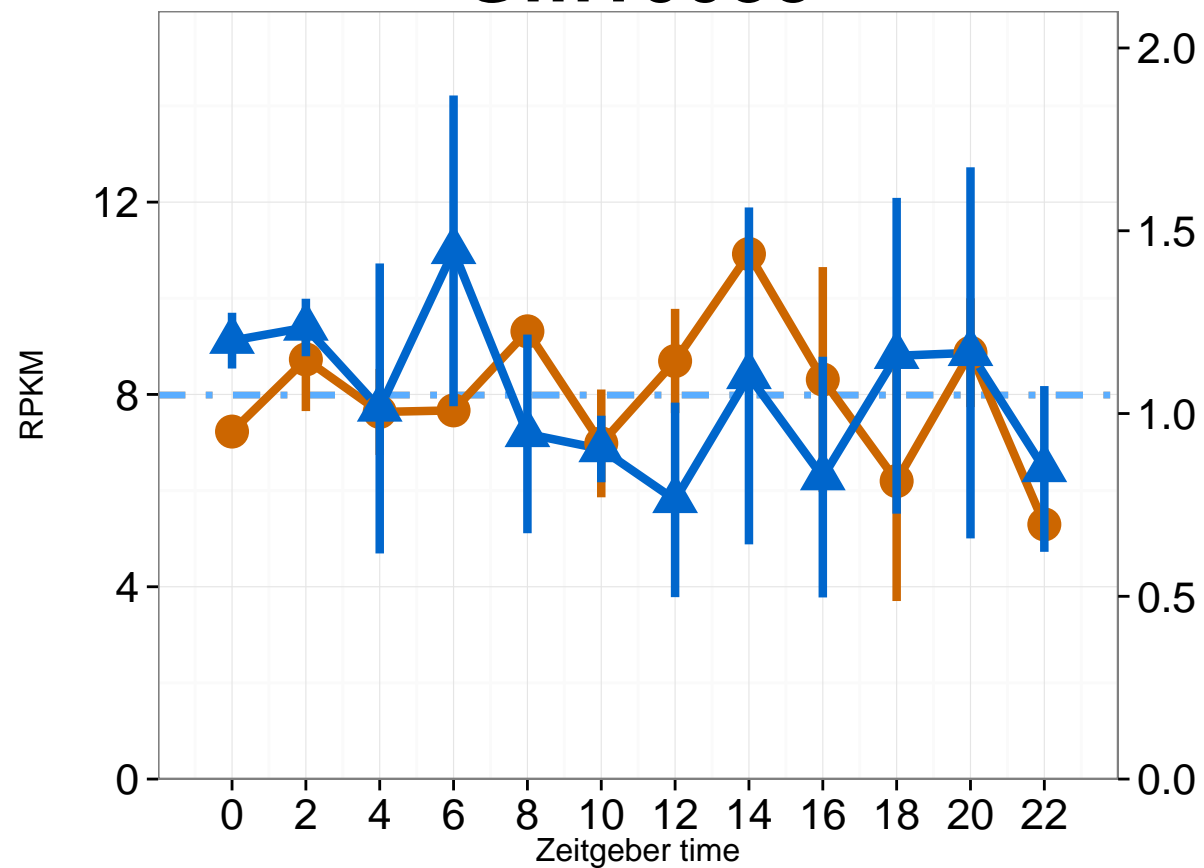

# Gm10033

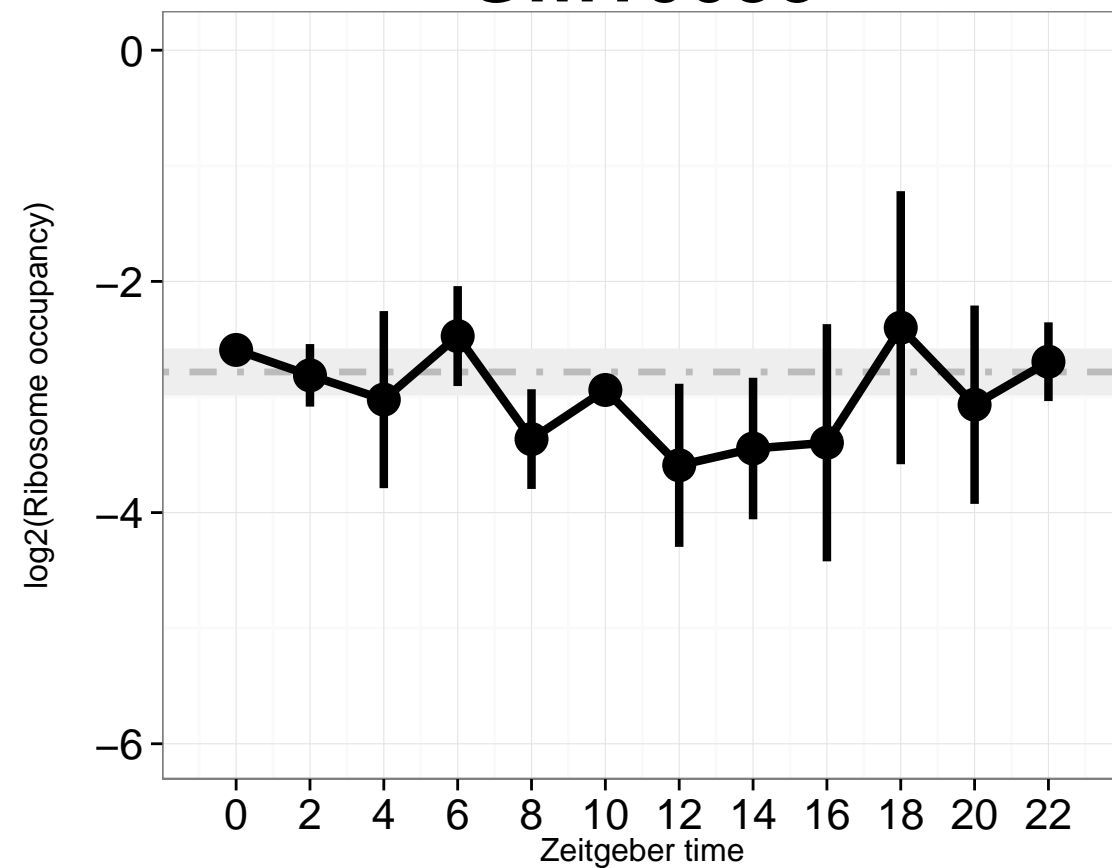

Supplement: SuppDataset_1.zip [file Gm10033_set_A.pdf › Supplemental Dataset 1/A-mRNA_nonrhyth_translation_nonrhyth/Gm10033_set_A.pdf]

## Gm10134

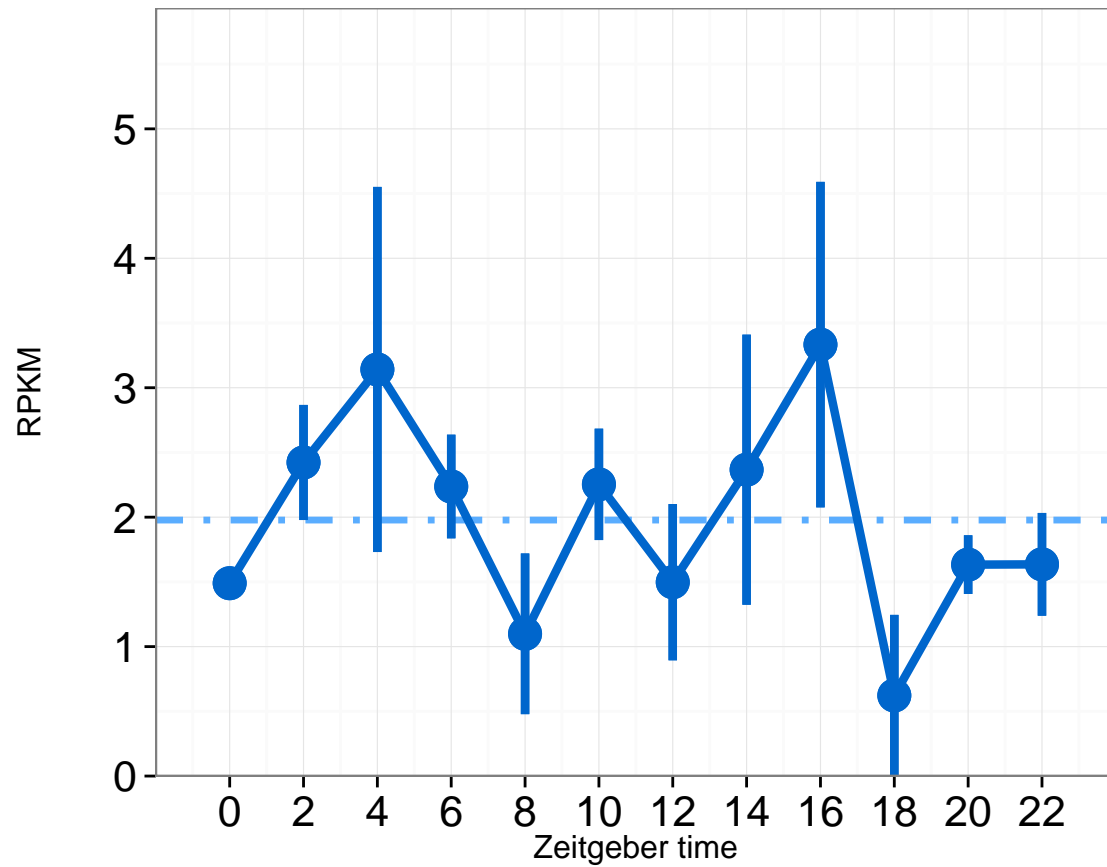

## Gm10134 log2(Ribosome occupanc

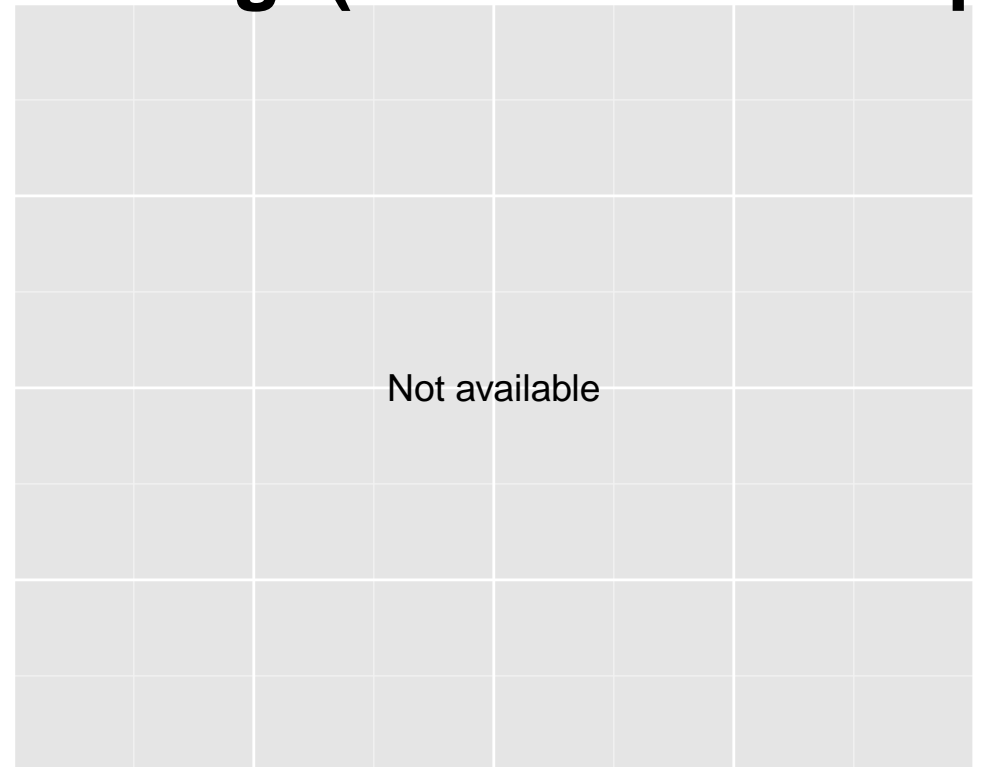

Supplement: SuppDataset_1.zip [file Gm10134_set_A.pdf › Supplemental Dataset 1/A-mRNA_nonrhyth_translation_nonrhyth/Gm10134_set_A.pdf]

## Gm10203

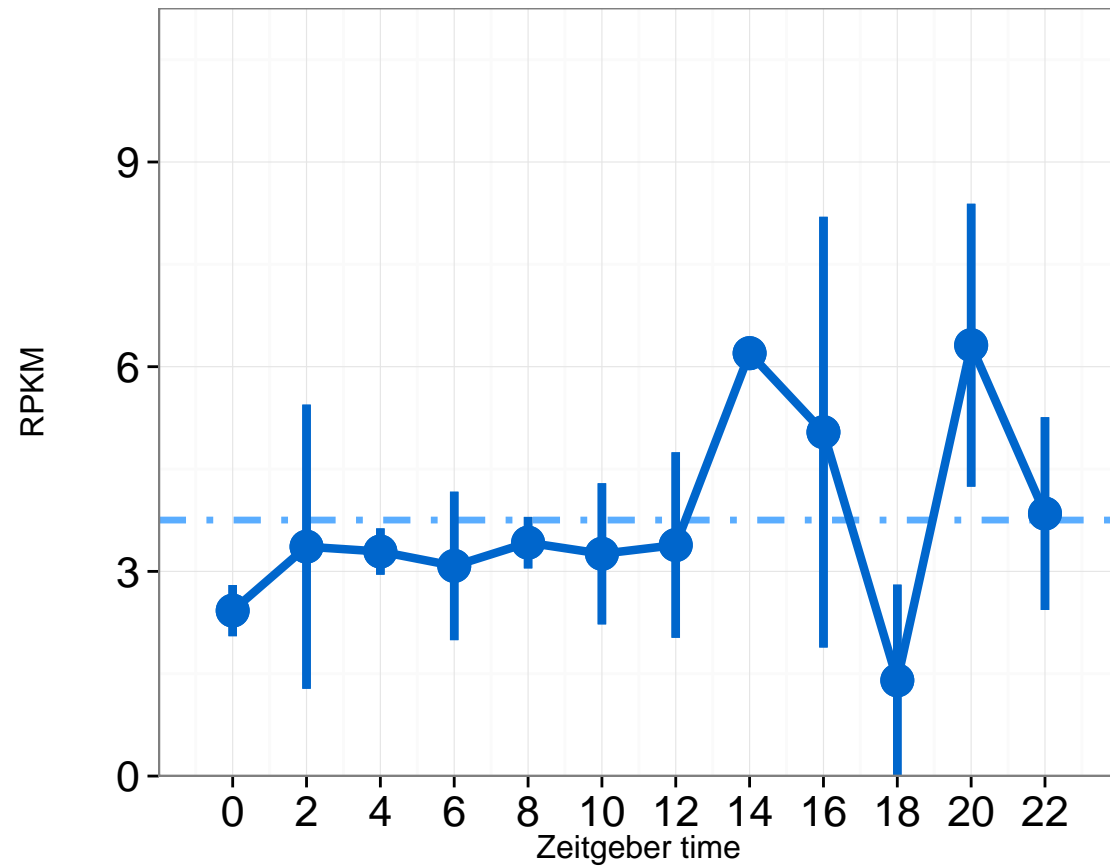

## Gm10203 log<sub>2</sub>(Ribosome occupancy)

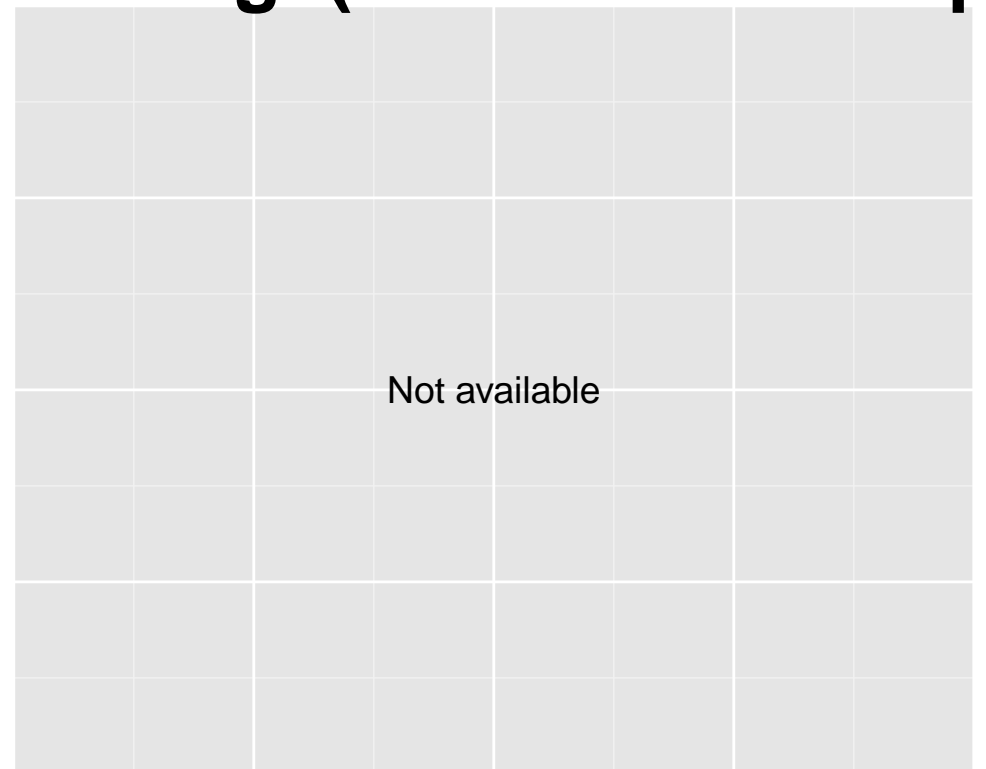

Supplement: SuppDataset_1.zip [file Gm10203_set_A.pdf › Supplemental Dataset 1/A-mRNA_nonrhyth_translation_nonrhyth/Gm10203_set_A.pdf]

## Gm10217

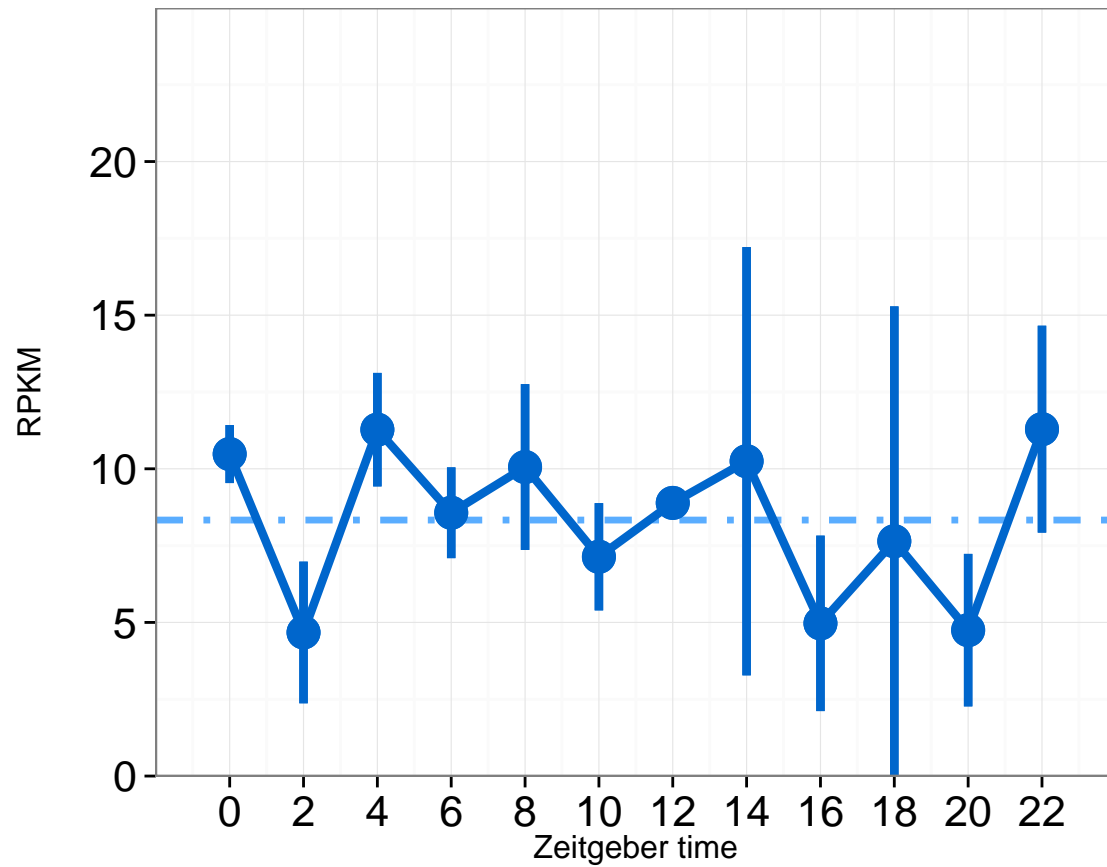

## Gm10217 log2(Ribosome occupanc

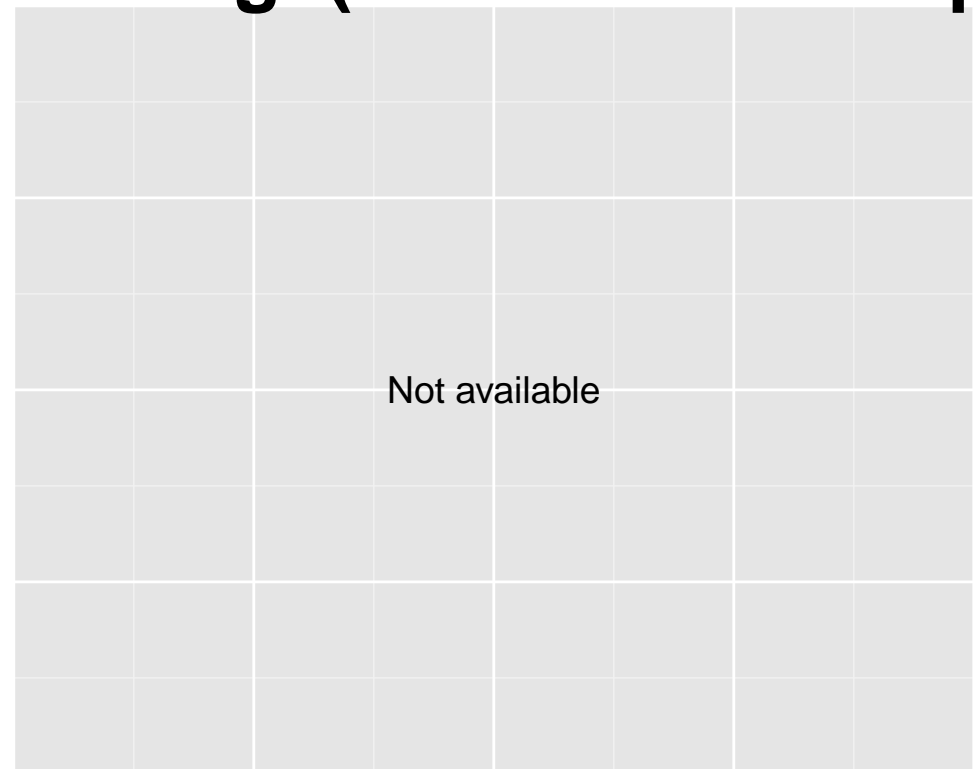

Supplement: SuppDataset_1.zip [file Gm10217_set_A.pdf › Supplemental Dataset 1/A-mRNA_nonrhyth_translation_nonrhyth/Gm10217_set_A.pdf]

# Gm10311

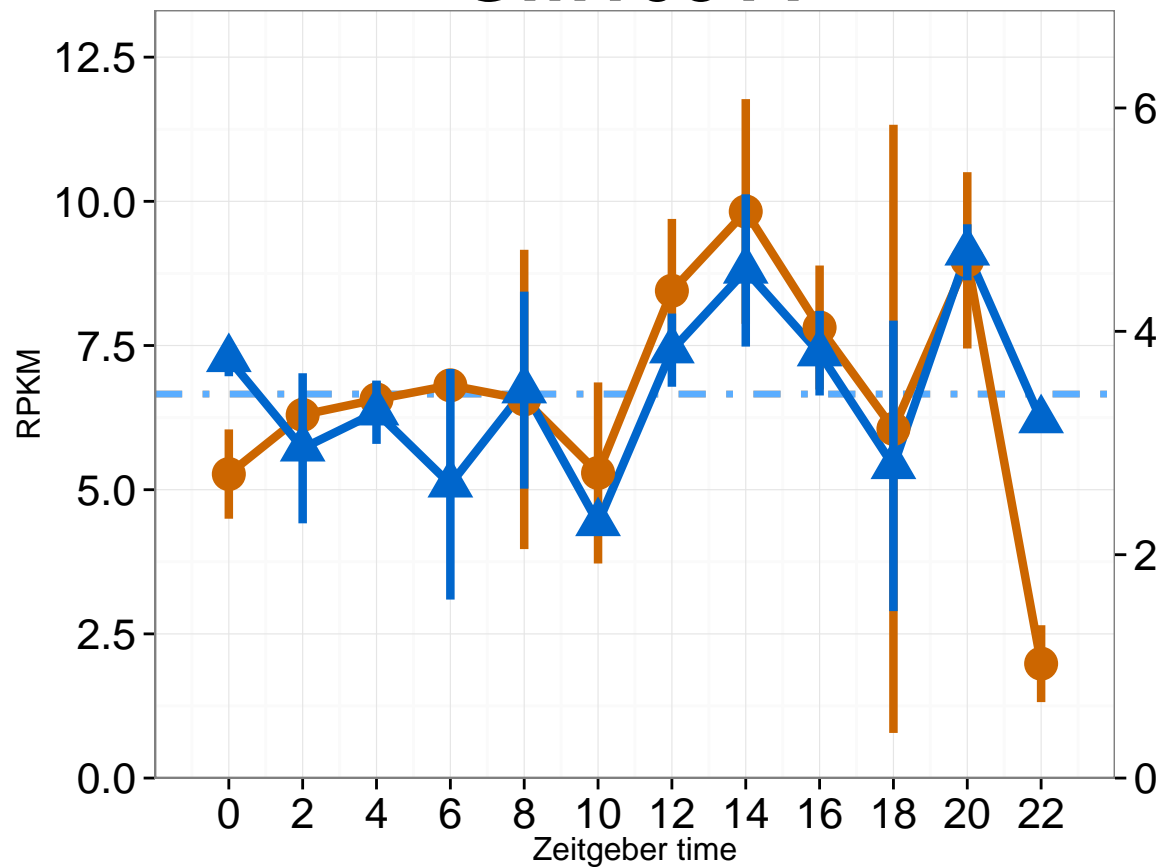

# Gm10311

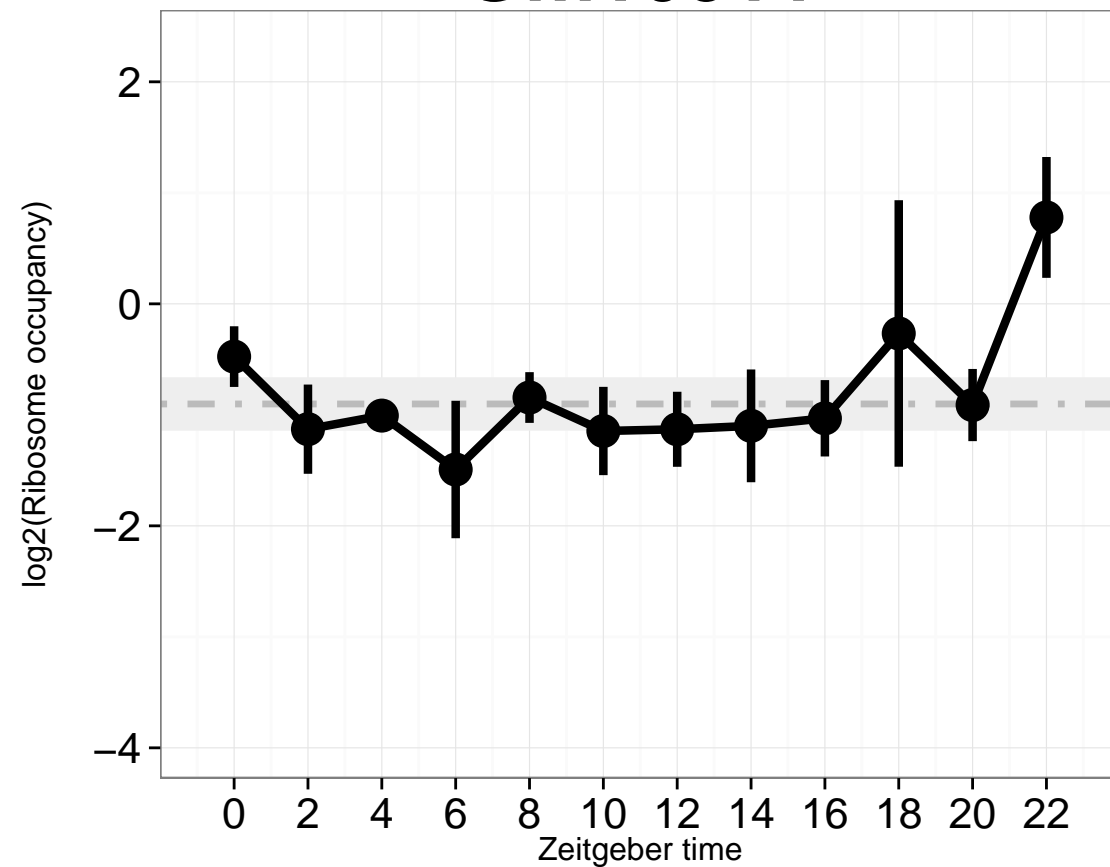

Supplement: SuppDataset_1.zip [file Gm10311_set_A.pdf › Supplemental Dataset 1/A-mRNA_nonrhyth_translation_nonrhyth/Gm10311_set_A.pdf]

# Gm10576

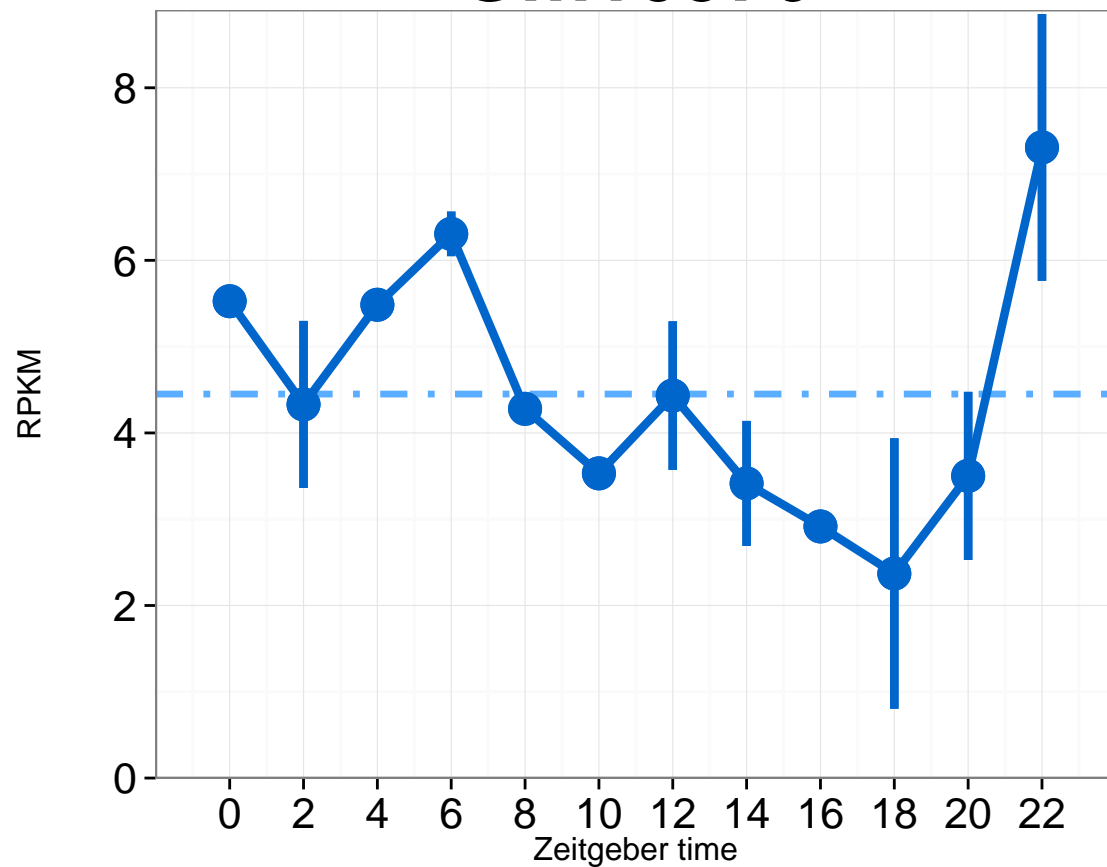

# Gm10576 log2(Ribosome occupancy)

Supplement: SuppDataset_1.zip [file Gm10576_set_A.pdf › Supplemental Dataset 1/A-mRNA_nonrhyth_translation_nonrhyth/Gm10576_set_A.pdf]

## Gm10762

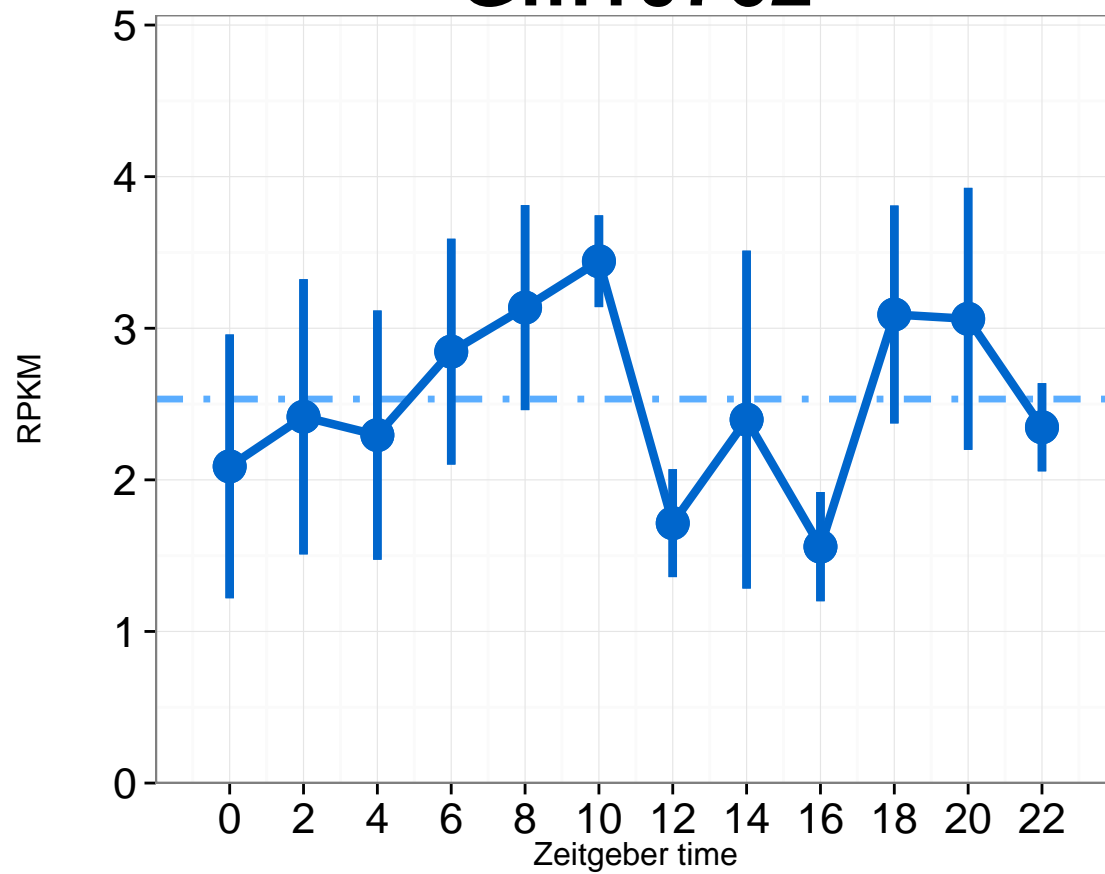

## Gm10762 log2(Ribosome occupanc

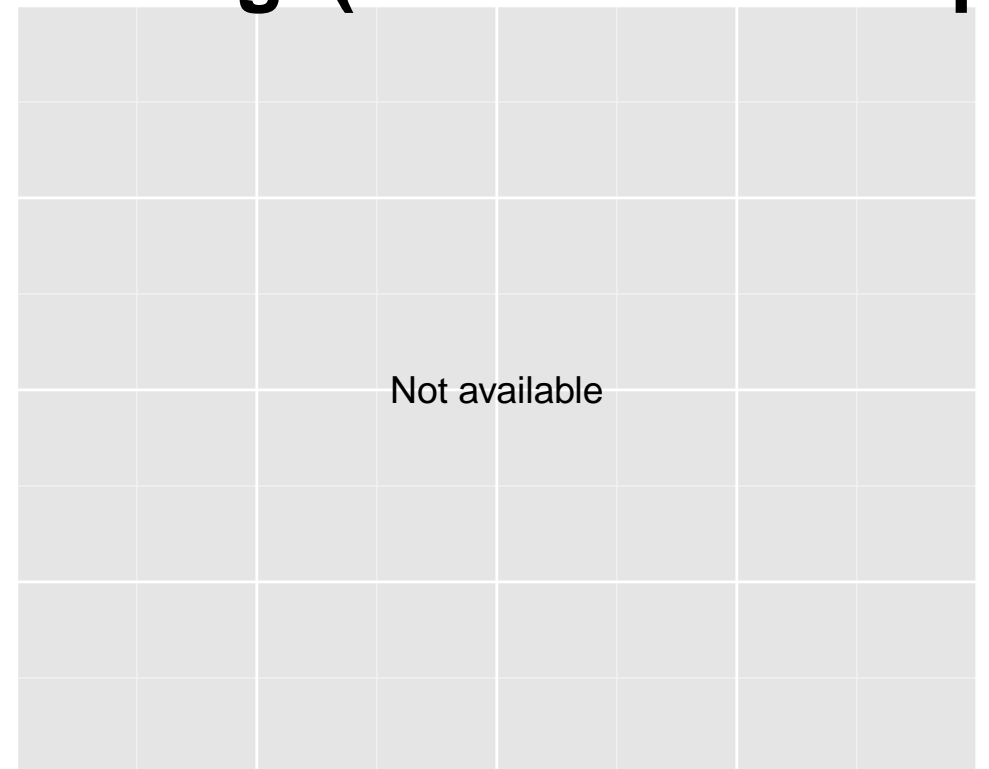

Supplement: SuppDataset_1.zip [file Gm10762_set_A.pdf › Supplemental Dataset 1/A-mRNA_nonrhyth_translation_nonrhyth/Gm10762_set_A.pdf]

## Gm10974

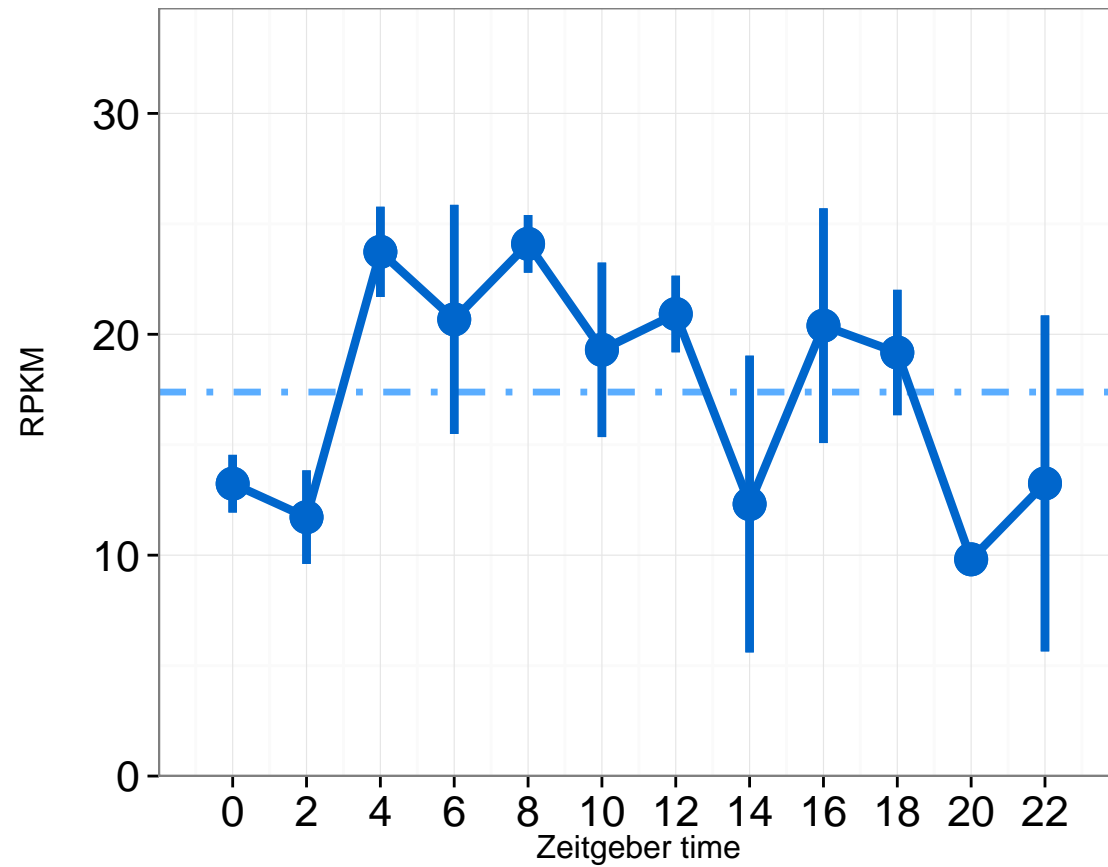

## Gm10974 log2(Ribosome occupanc

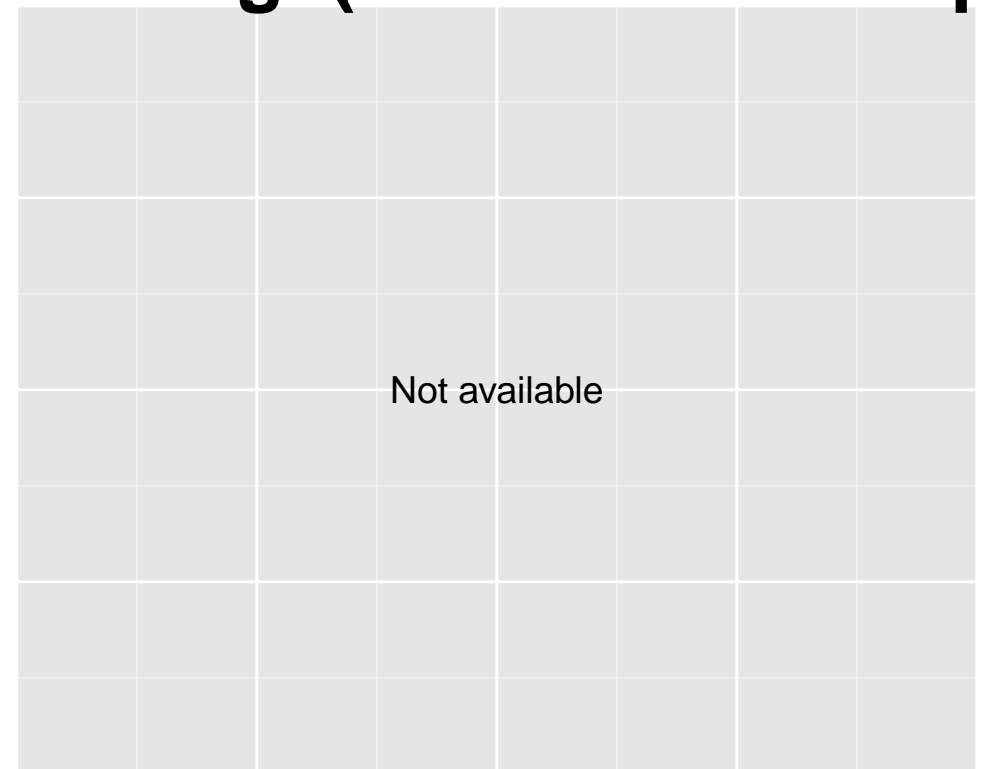

Supplement: SuppDataset_1.zip [file Gm10974_set_A.pdf › Supplemental Dataset 1/A-mRNA_nonrhyth_translation_nonrhyth/Gm10974_set_A.pdf]

## Gm11027

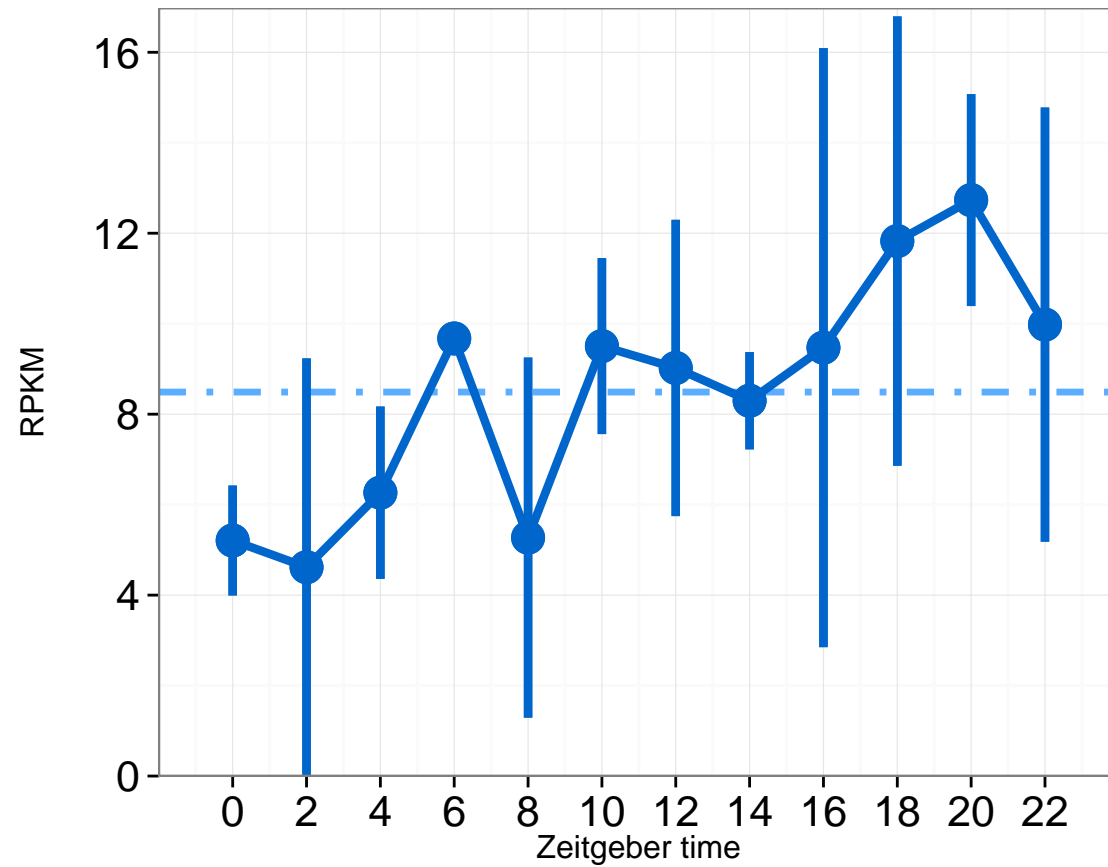

## Gm11027 log2(Ribosome occupancy)



Supplement: SuppDataset_1.zip [file Gm11027_set_A.pdf › Supplemental Dataset 1/A-mRNA_nonrhyth_translation_nonrhyth/Gm11027_set_A.pdf]

**Gm11992 TR**

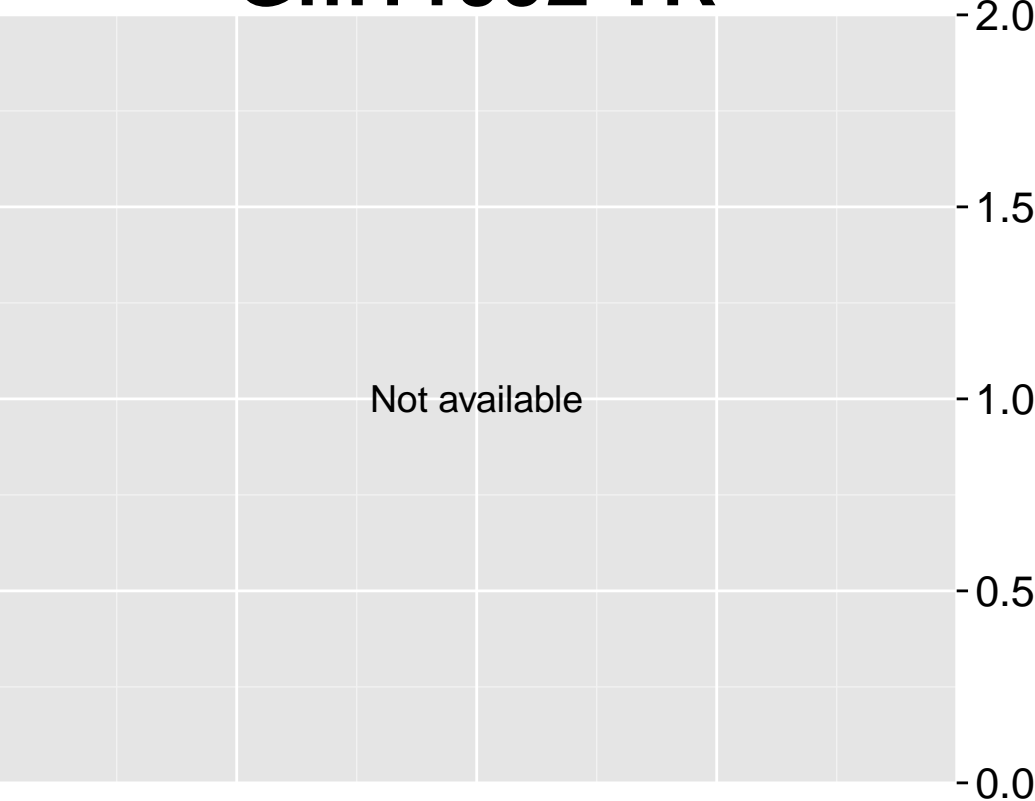

**Gm11992 log2(Ribosome occupanc**

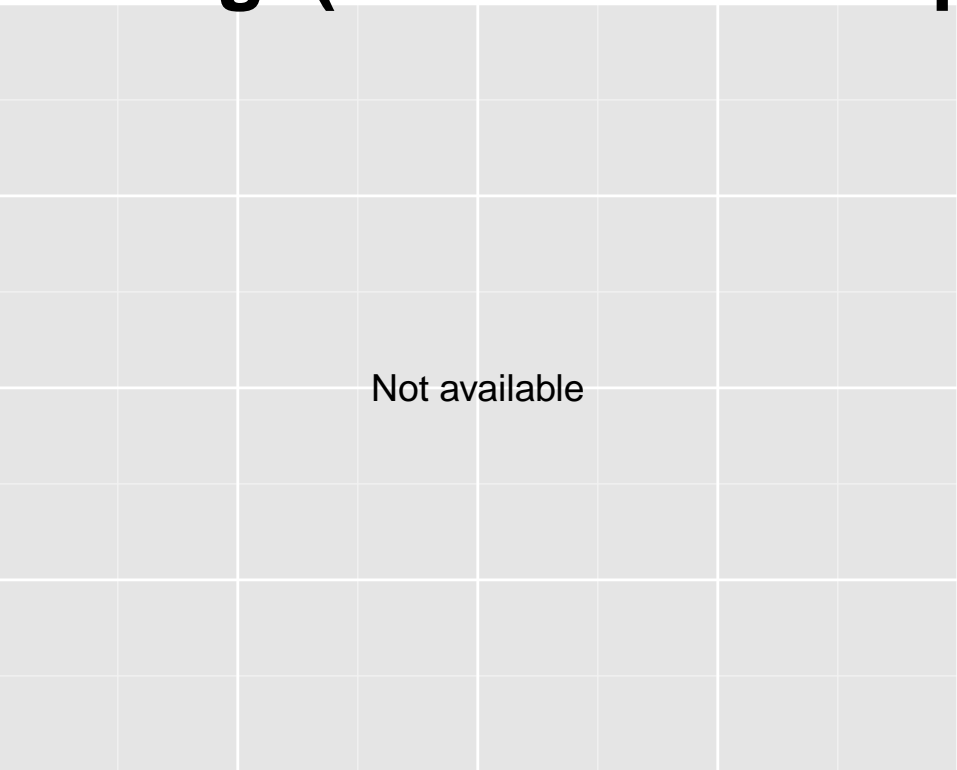

Supplement: SuppDataset_1.zip [file Gm11992_set_A.pdf › Supplemental Dataset 1/A-mRNA_nonrhyth_translation_nonrhyth/Gm11992_set_A.pdf]

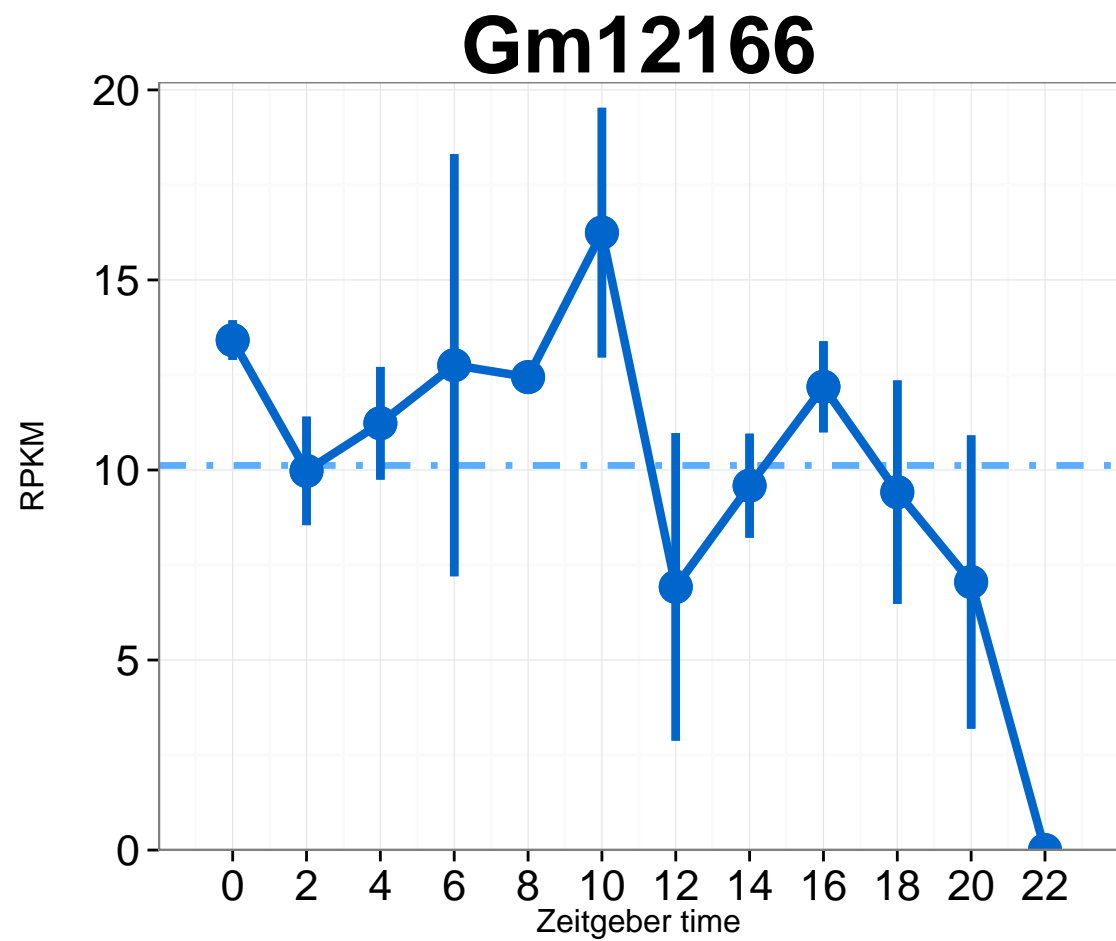

### Gm12166 log<sub>2</sub>(Ribosome occupanc

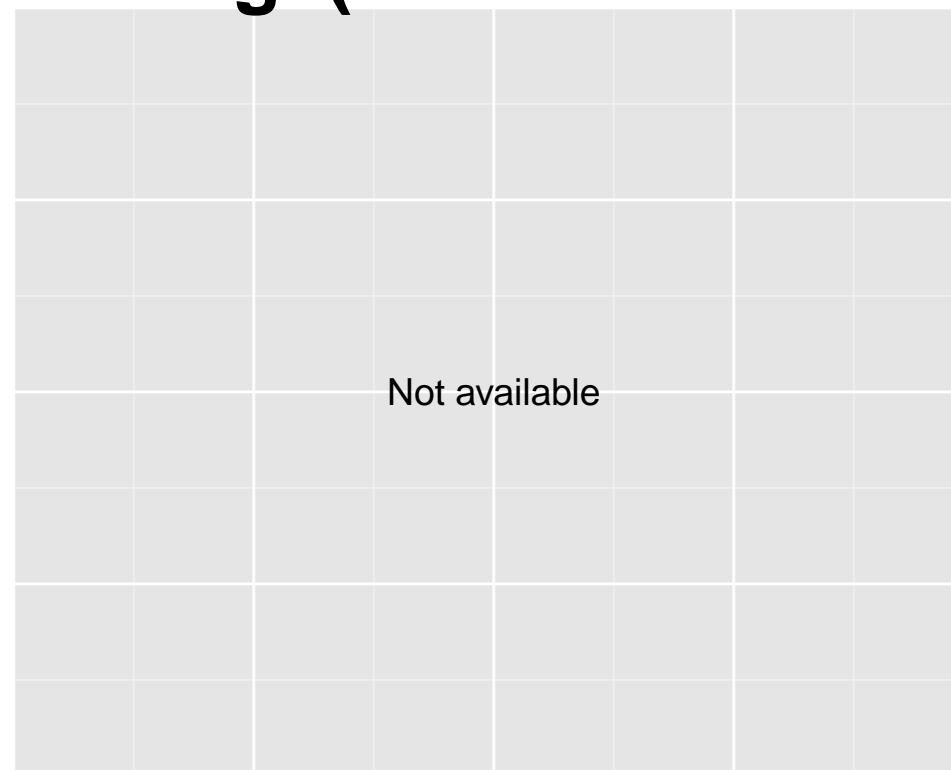

Supplement: SuppDataset_1.zip [file Gm12166_set_A.pdf › Supplemental Dataset 1/A-mRNA_nonrhyth_translation_nonrhyth/Gm12166_set_A.pdf]
