# Supplementary figures and images for: Ribosome profiling reveals the rhythmic liver translatome and circadian clock regulation by upstream open reading frames (part 106 of 113)
Source: HighWire-hosted journal article supplement (doi:10.1101/gr.195404.115), 2015-10-20

## Gbp9

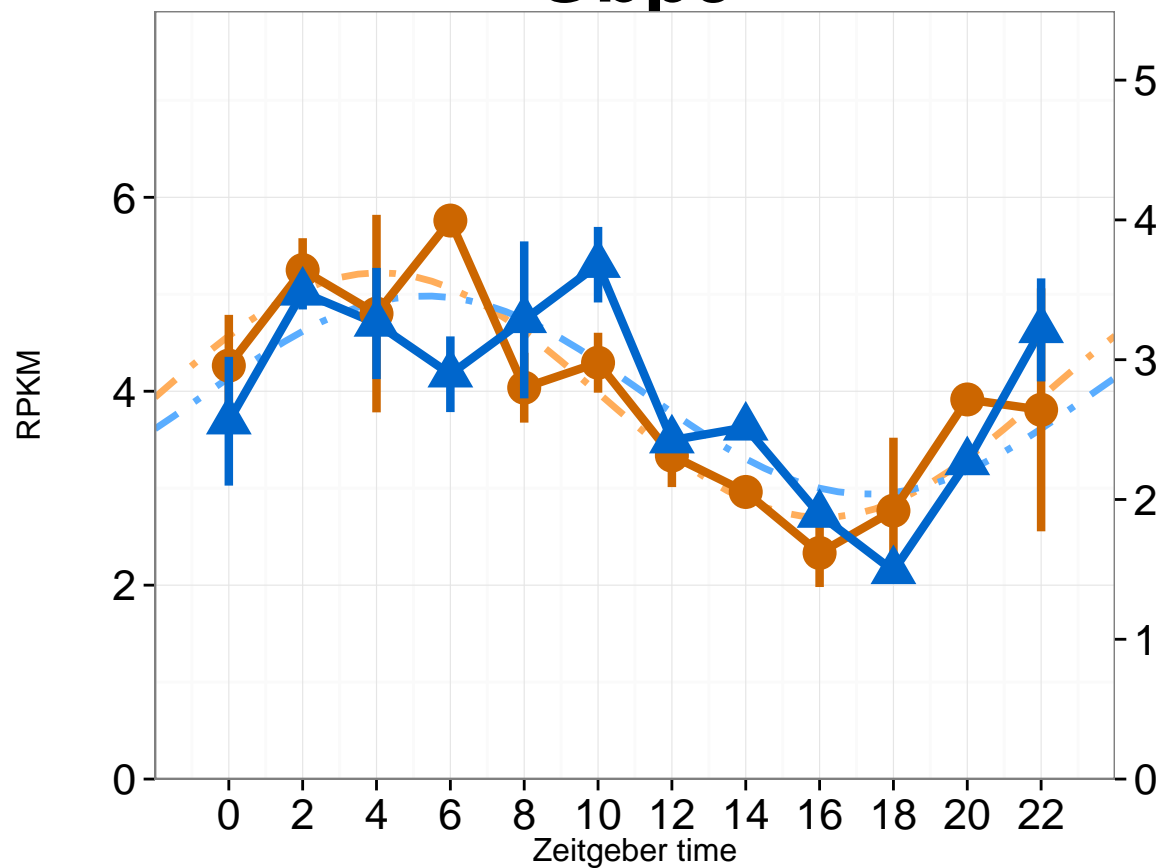

## Gbp9

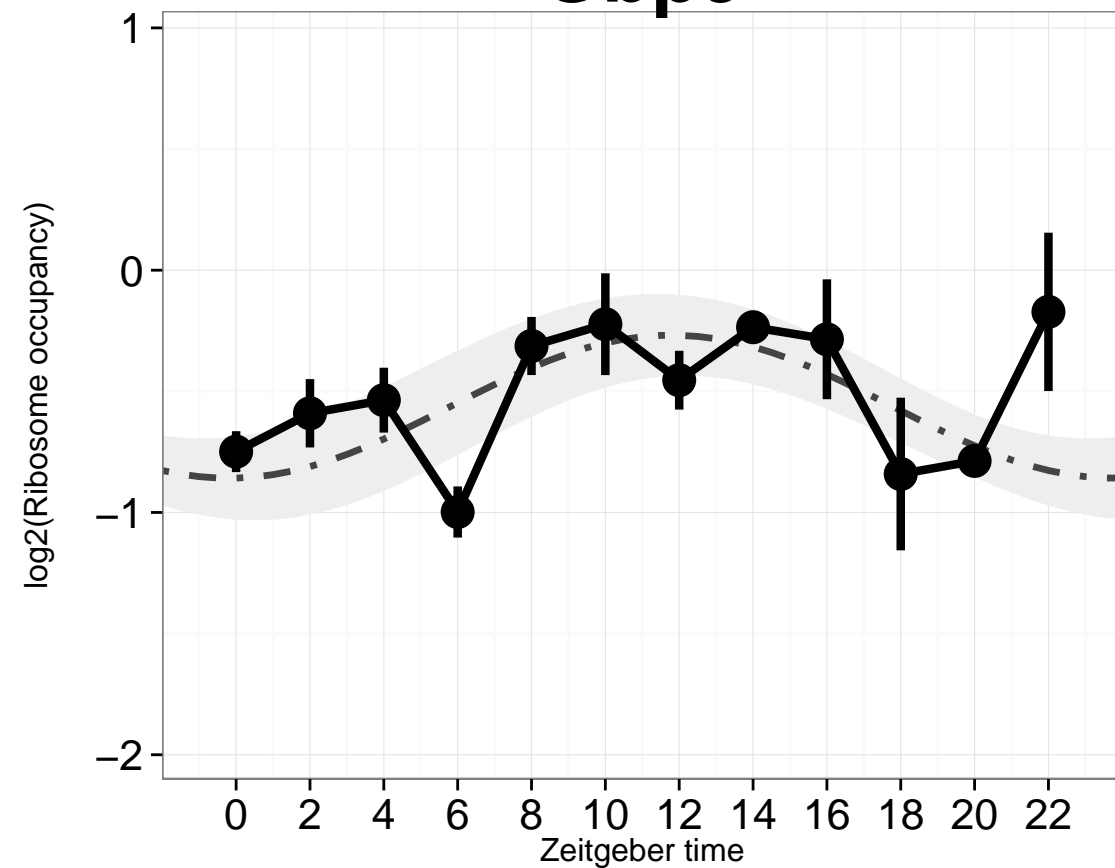

Supplement: SuppDataset_1.zip [file Gbp9_set_D.pdf › Supplemental Dataset 1/D-mRNA_rhythm_translation_rhyth/Gbp9_set_D.pdf]

## Gch1

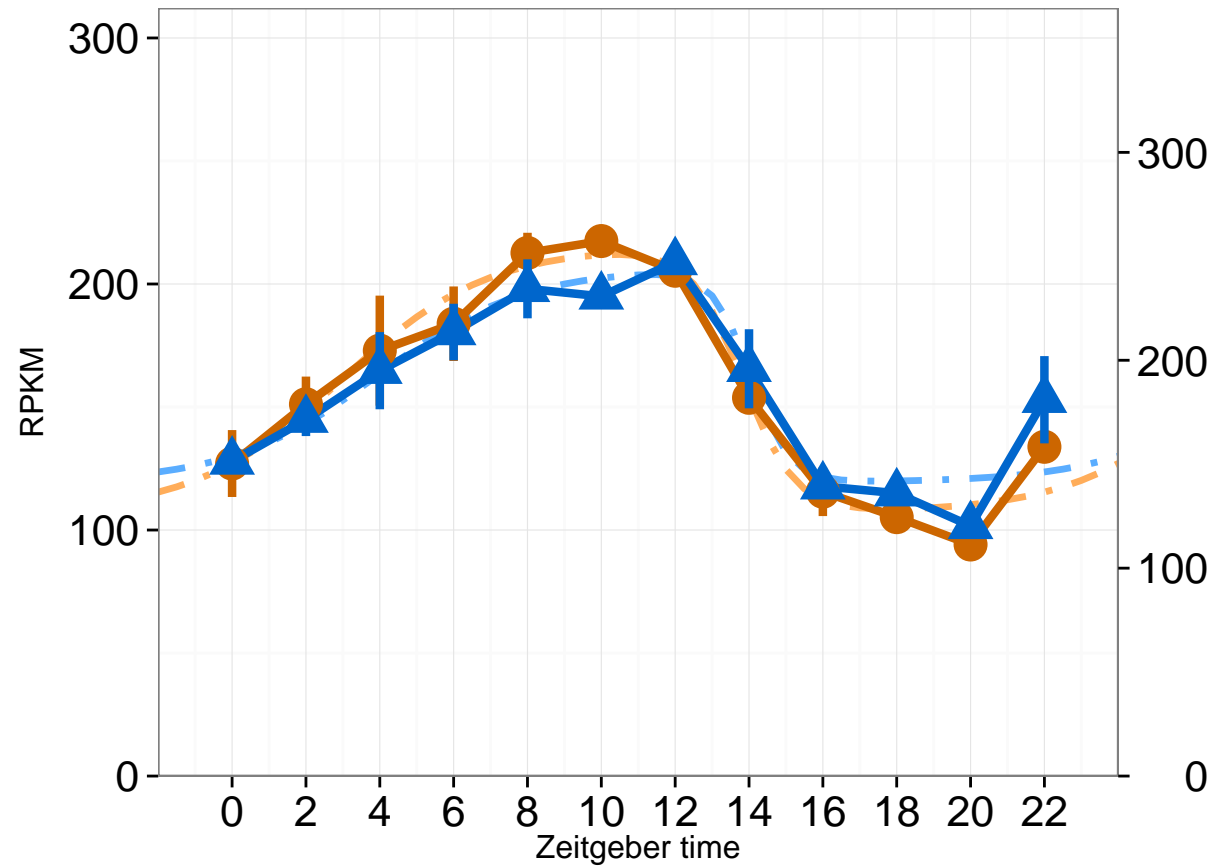

## Gch1

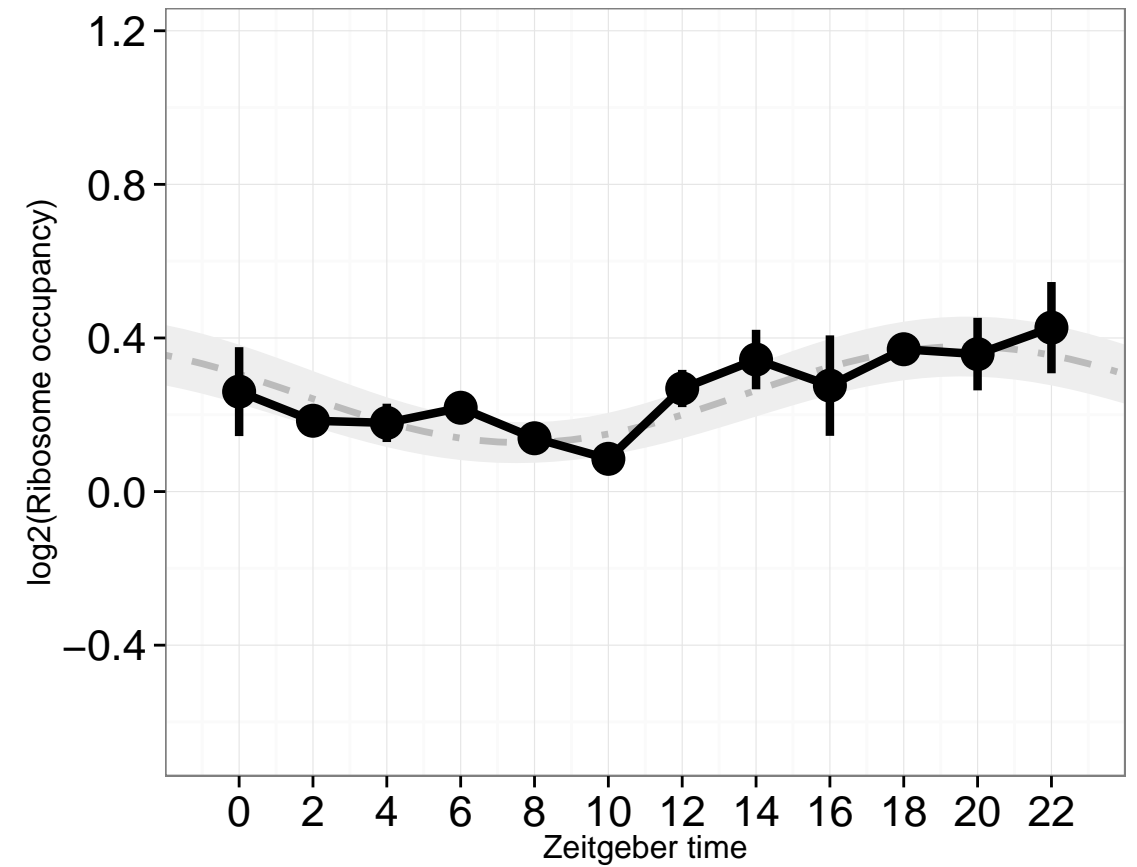

Supplement: SuppDataset_1.zip [file Gch1_set_D.pdf › Supplemental Dataset 1/D-mRNA_rhythm_translation_rhyth/Gch1_set_D.pdf]

## Gck

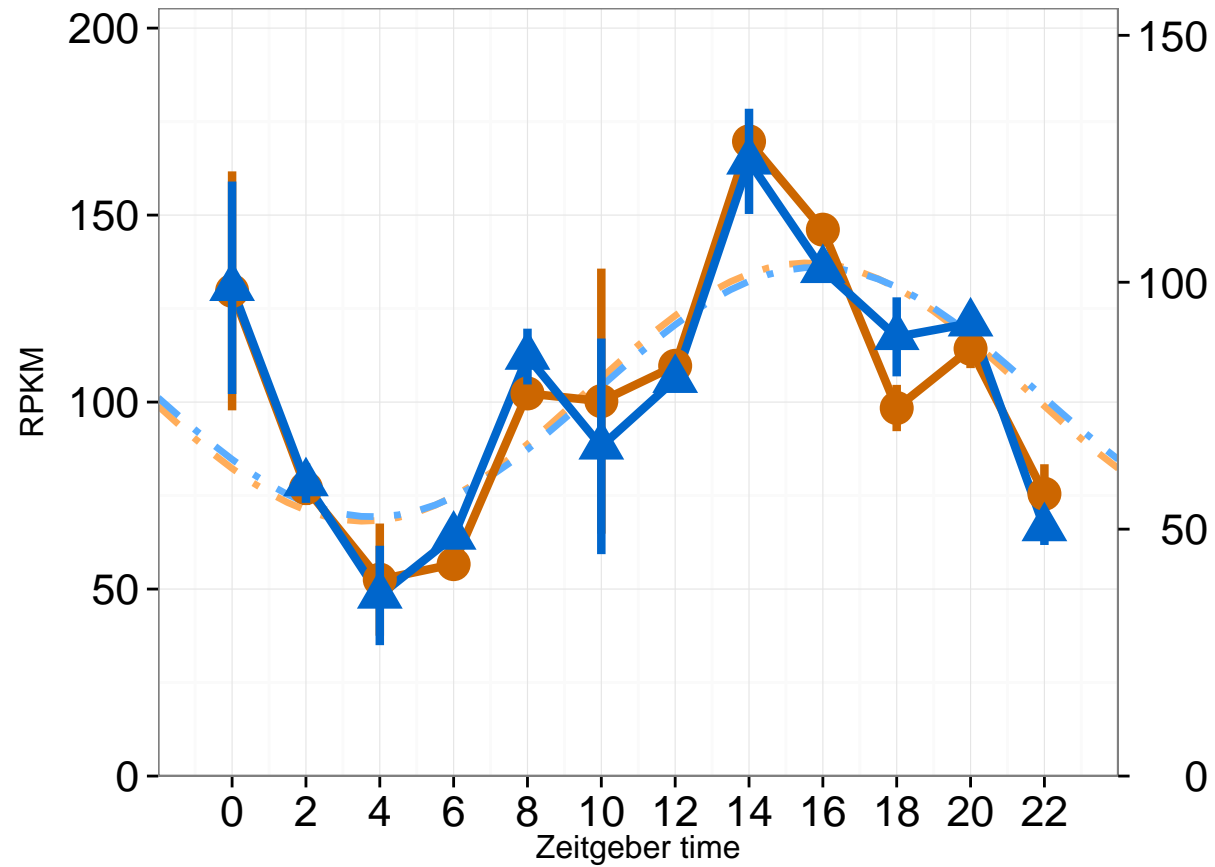

## Gck

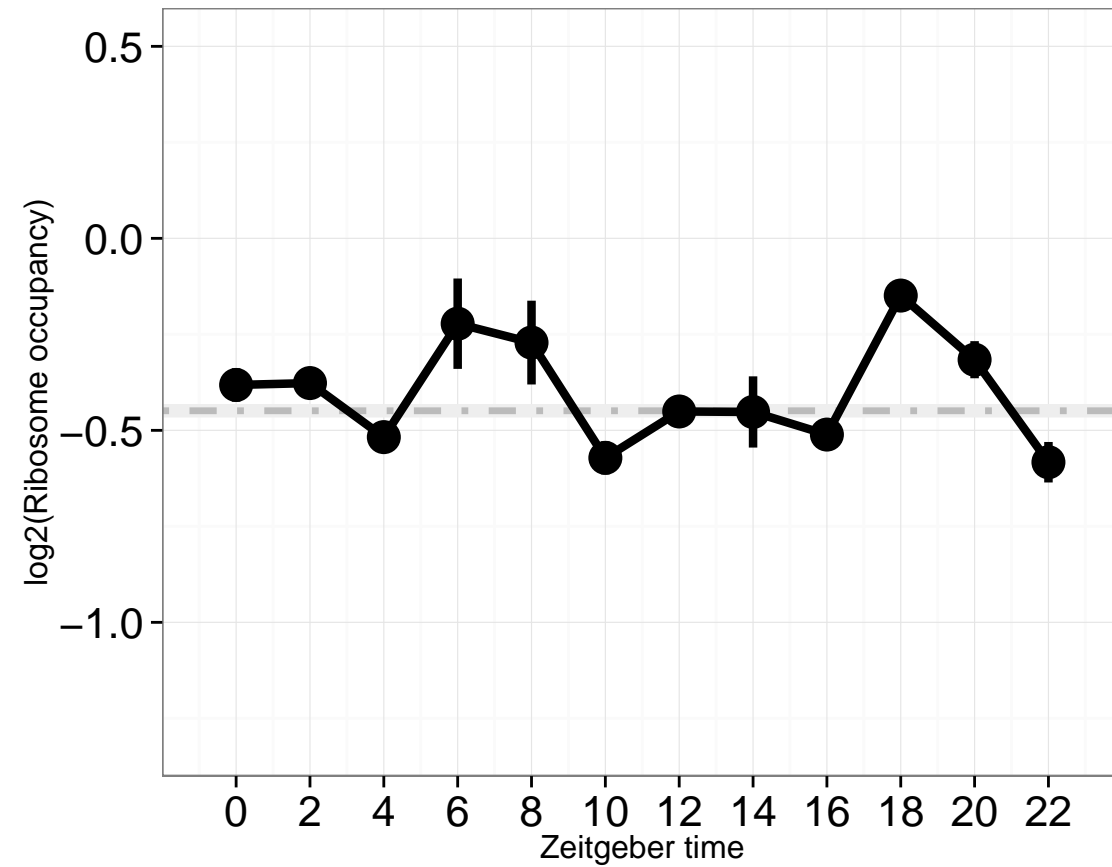

Supplement: SuppDataset_1.zip [file Gck_set_D.pdf › Supplemental Dataset 1/D-mRNA_rhythm_translation_rhyth/Gck_set_D.pdf]

## Gclc

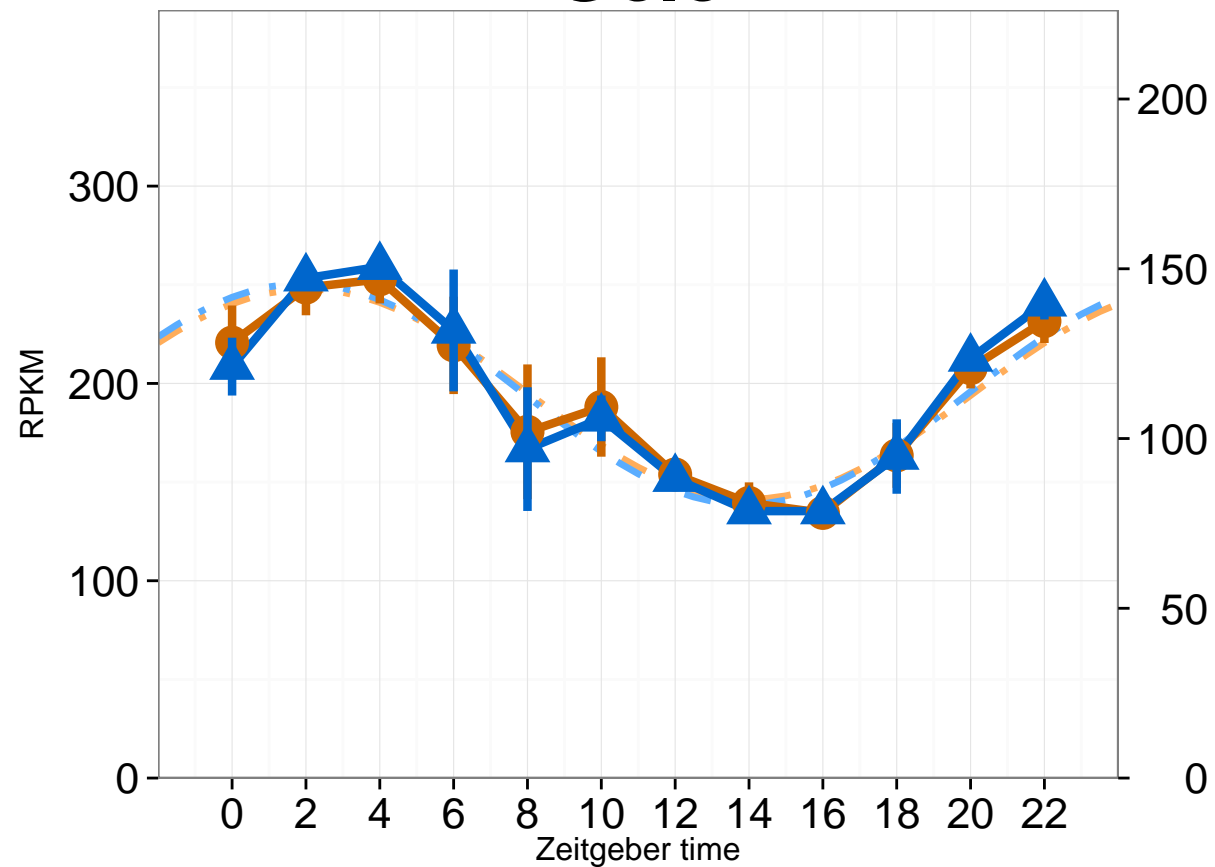

## Gclc

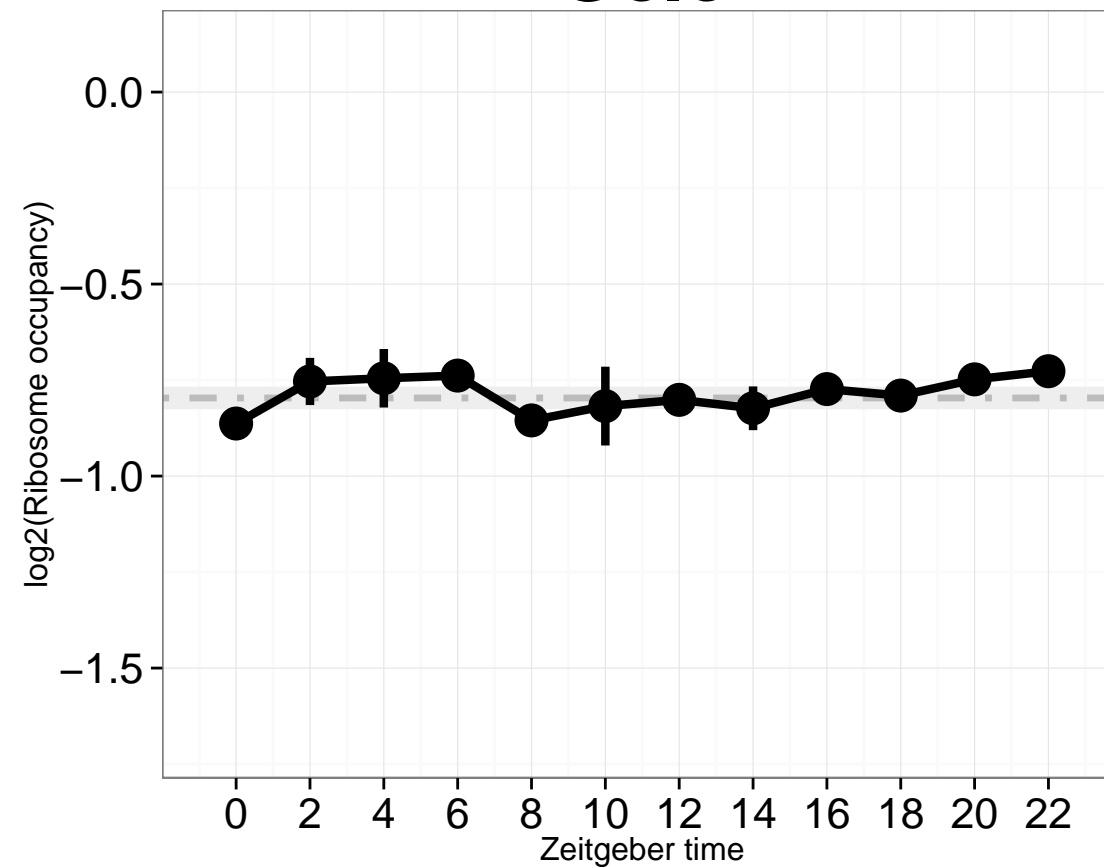

Supplement: SuppDataset_1.zip [file Gclc_set_D.pdf › Supplemental Dataset 1/D-mRNA_rhythm_translation_rhyth/Gclc_set_D.pdf]

## Gda

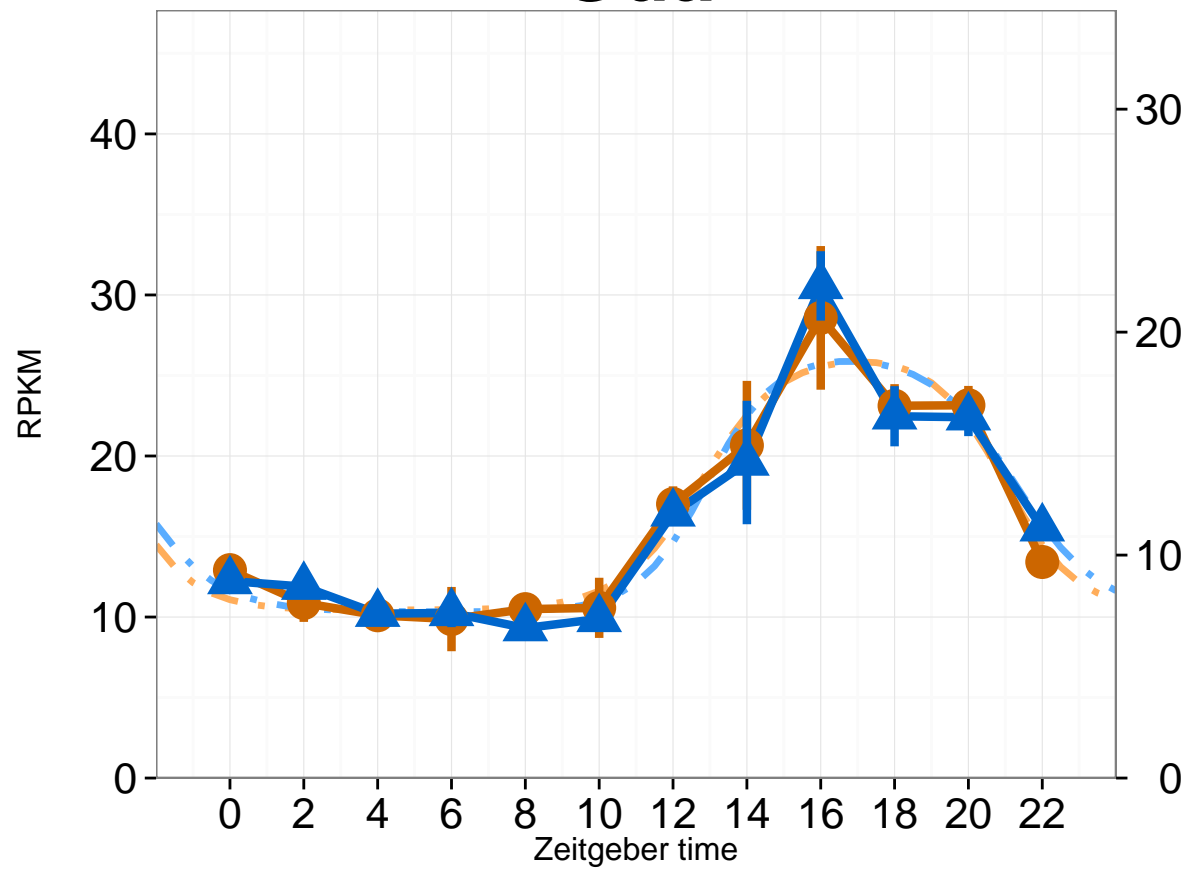

## Gda

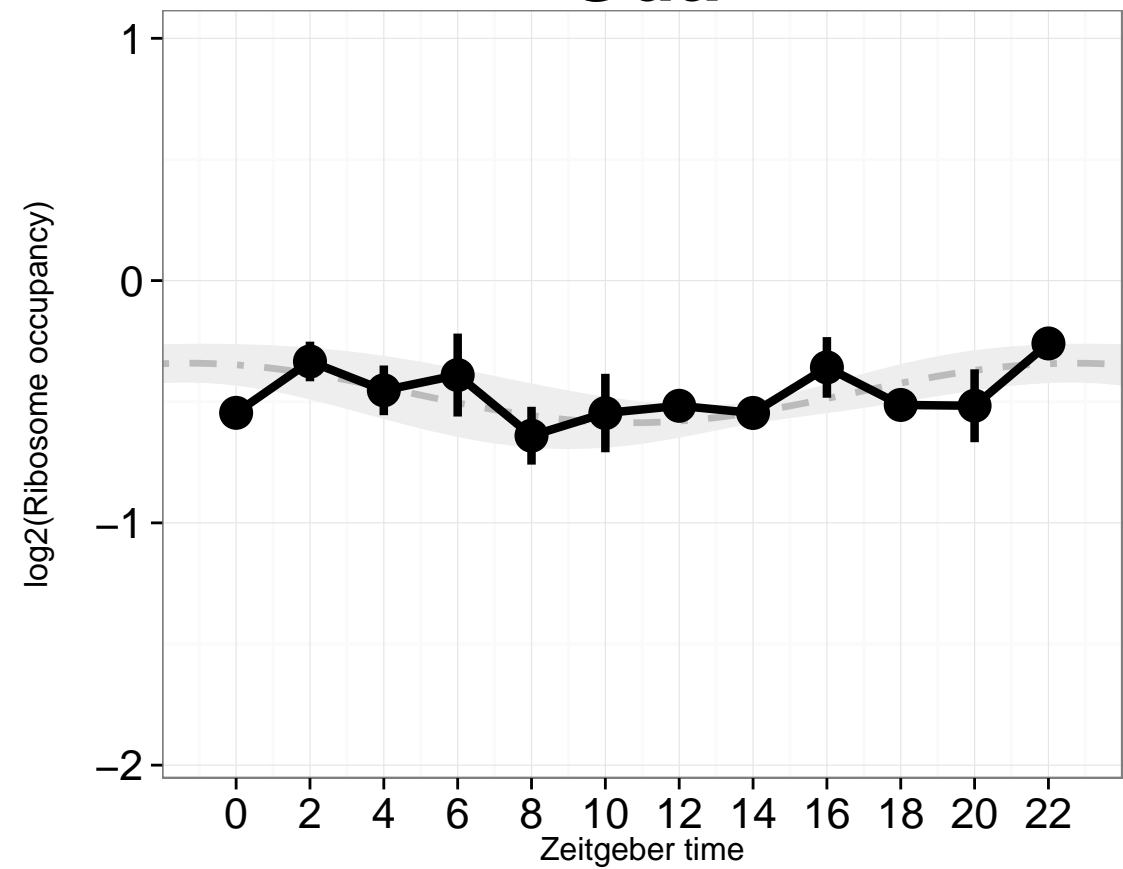

Supplement: SuppDataset_1.zip [file Gda_set_D.pdf › Supplemental Dataset 1/D-mRNA_rhythm_translation_rhyth/Gda_set_D.pdf]

# Gde1

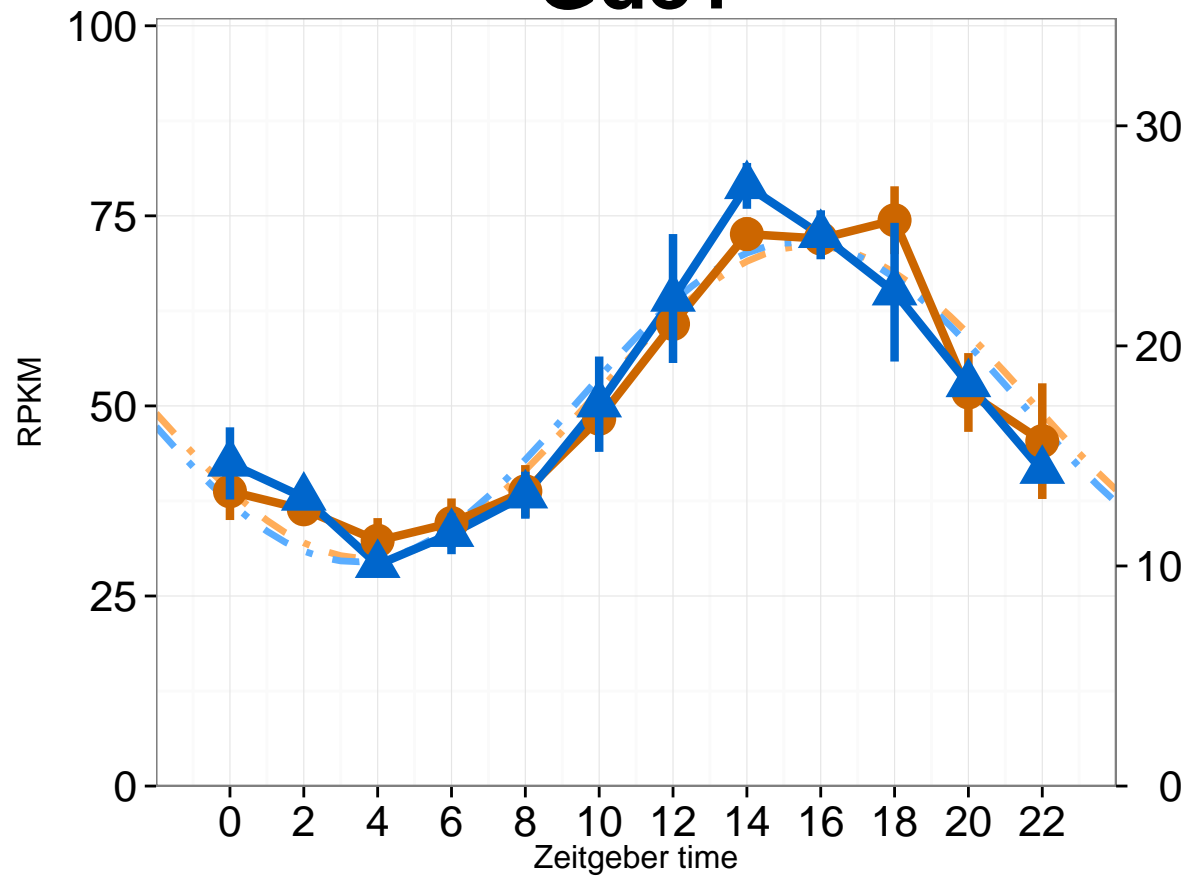

# Gde1

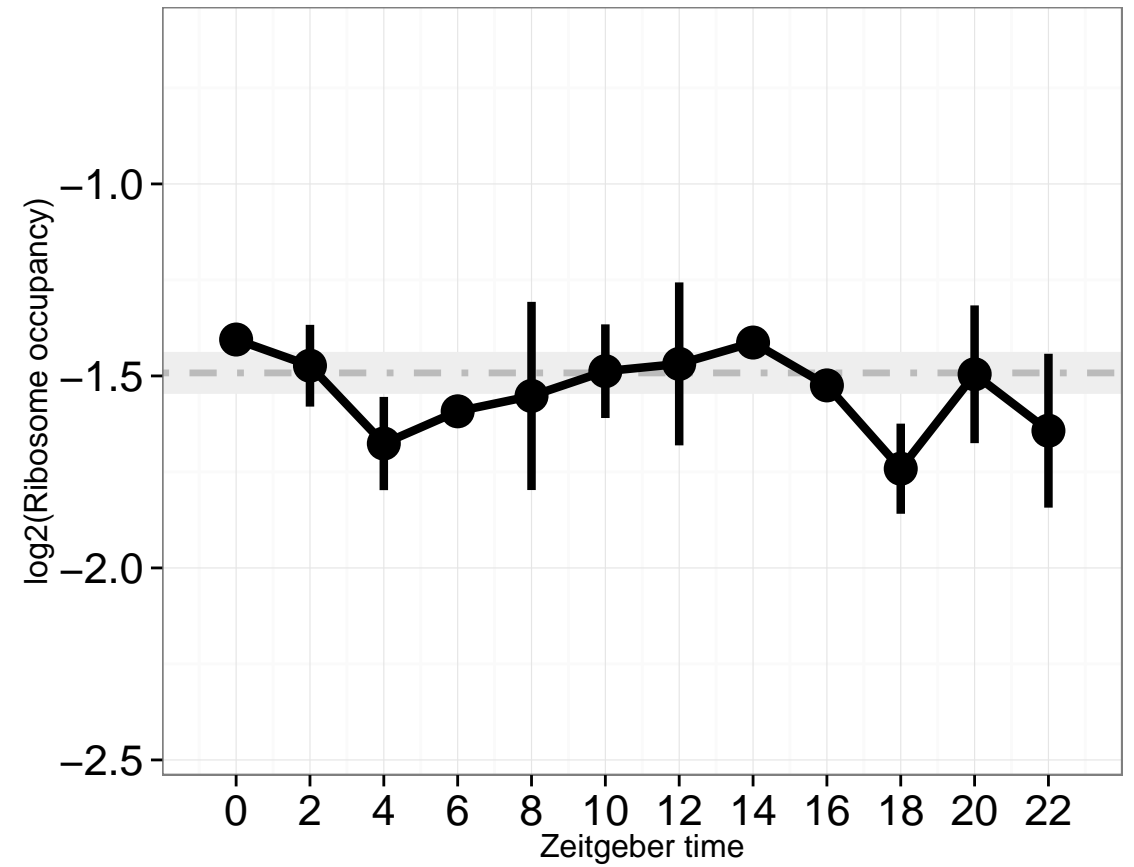

Supplement: SuppDataset_1.zip [file Gde1_set_D.pdf › Supplemental Dataset 1/D-mRNA_rhythm_translation_rhyth/Gde1_set_D.pdf]

## Gdf10

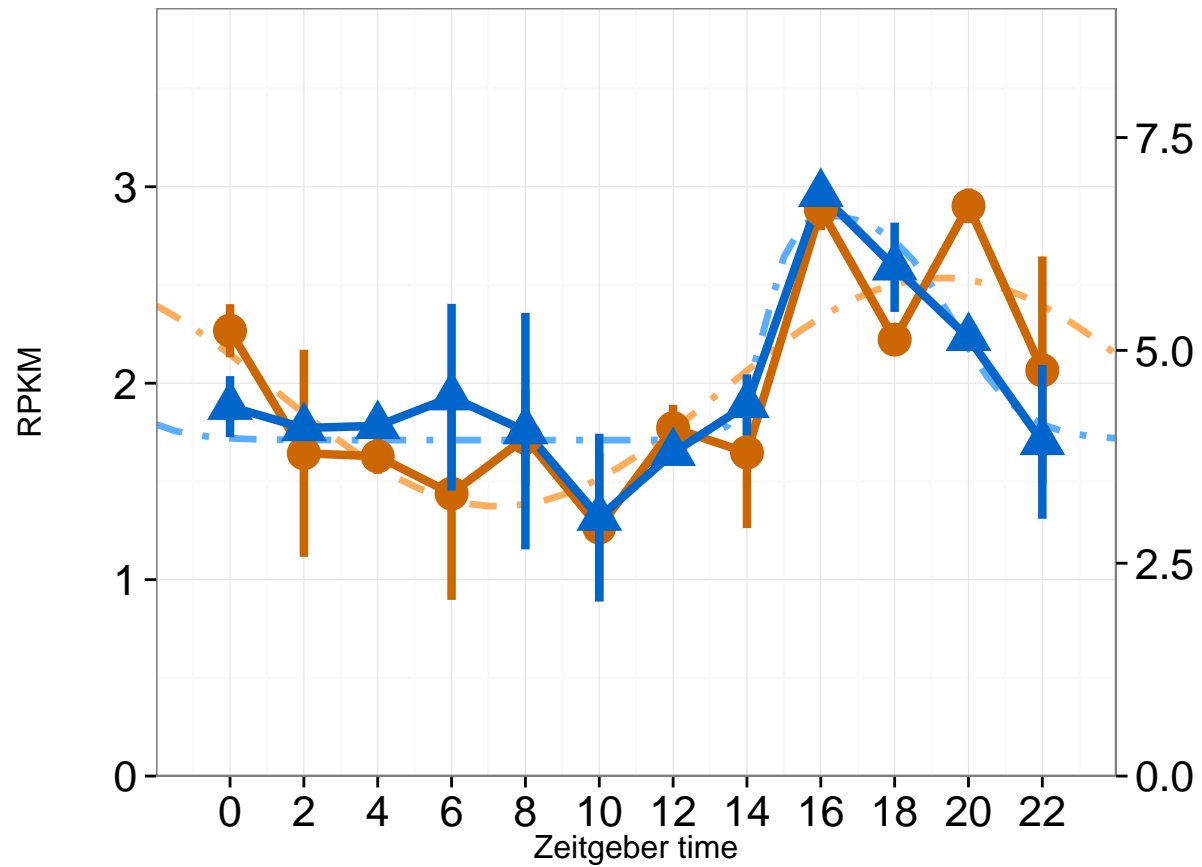

## Gdf10

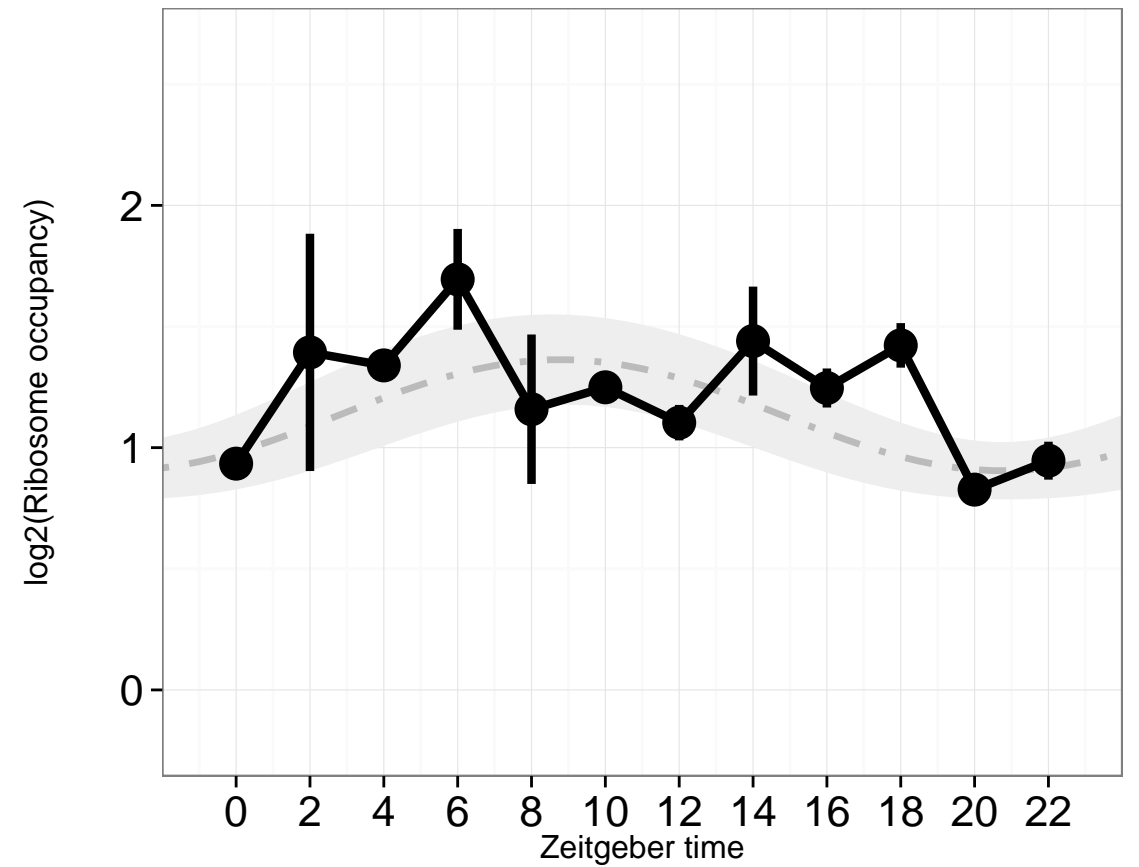

Supplement: SuppDataset_1.zip [file Gdf10_set_D.pdf › Supplemental Dataset 1/D-mRNA_rhythm_translation_rhyth/Gdf10_set_D.pdf]

# Gfod1

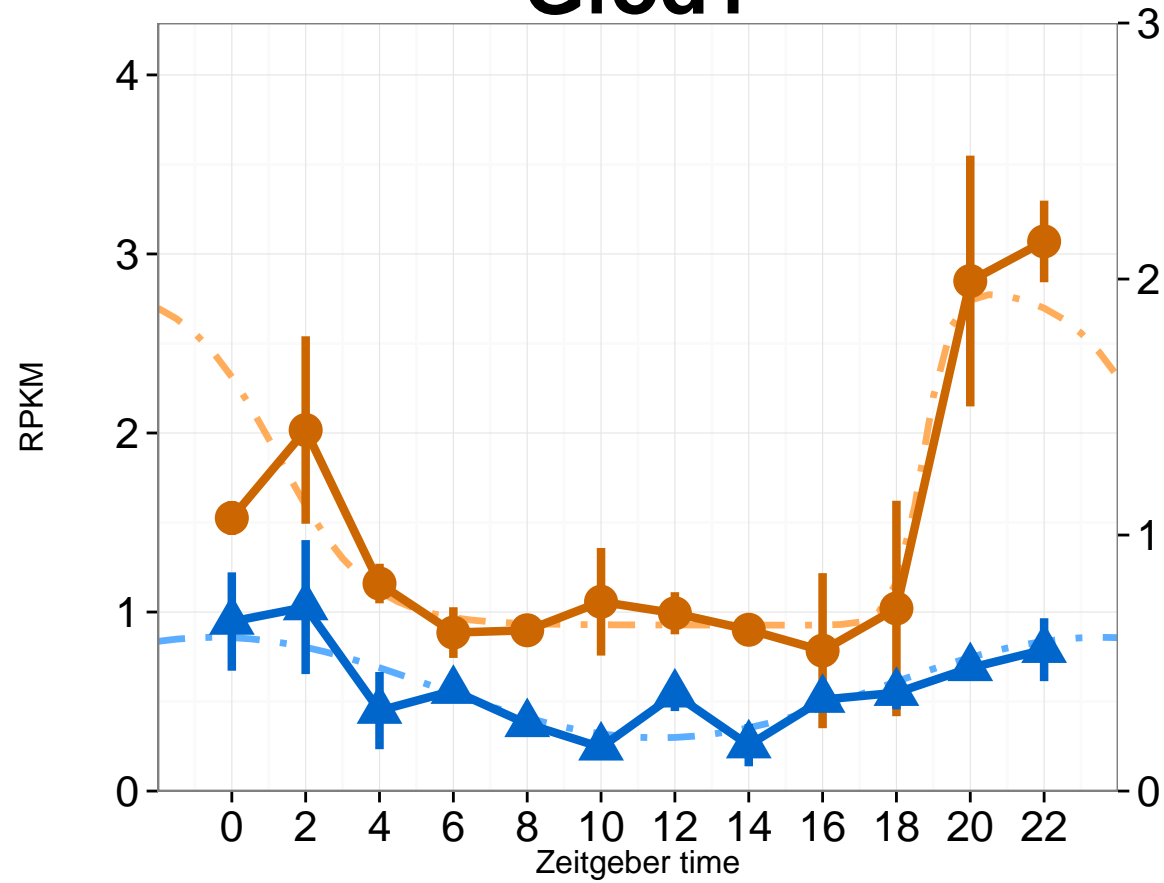

# Gfod1

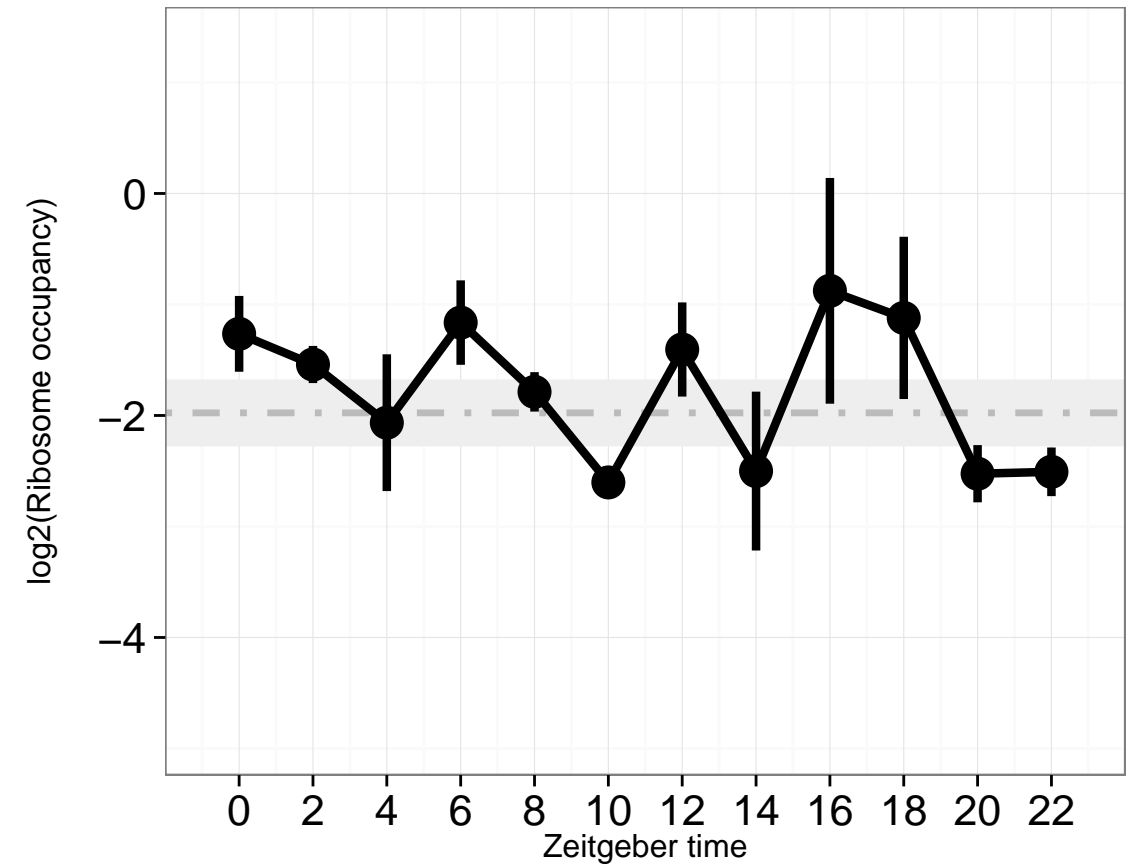

Supplement: SuppDataset_1.zip [file Gfod1_set_D.pdf › Supplemental Dataset 1/D-mRNA_rhythm_translation_rhyth/Gfod1_set_D.pdf]

## Gfod2

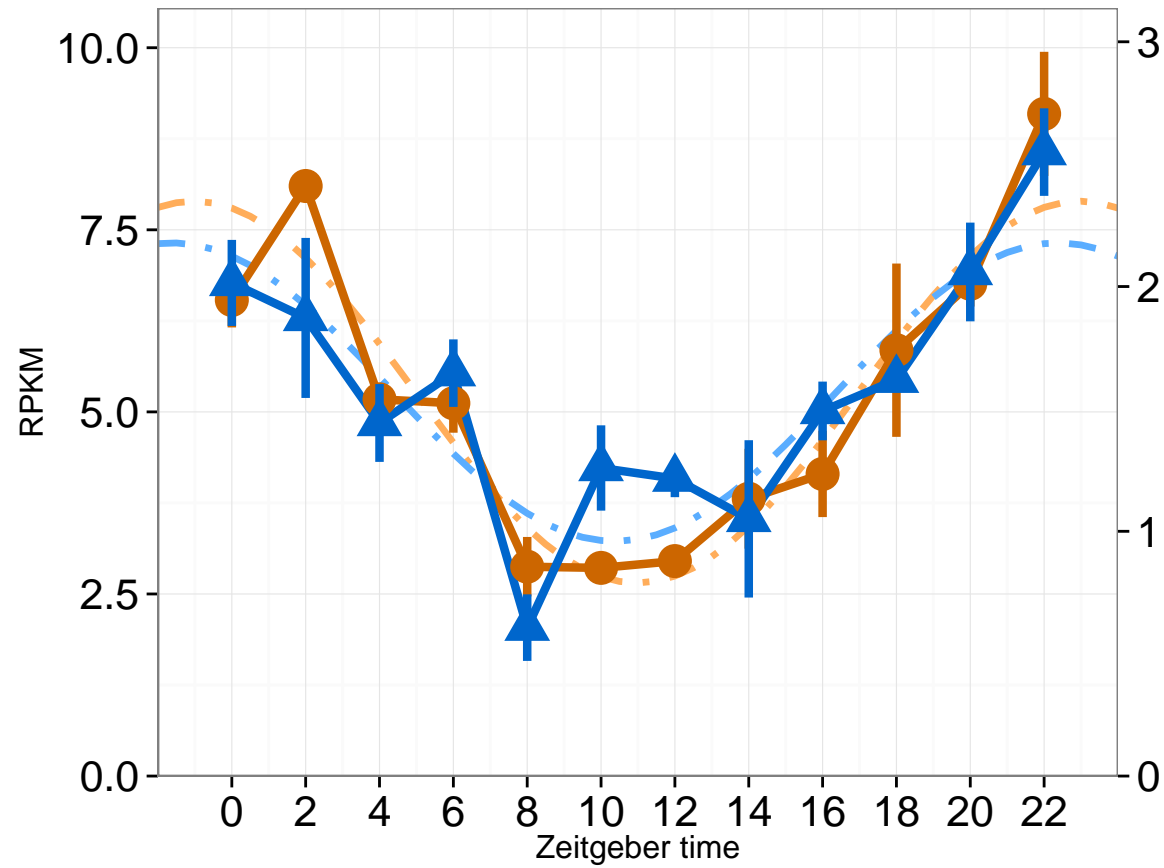

## Gfod2

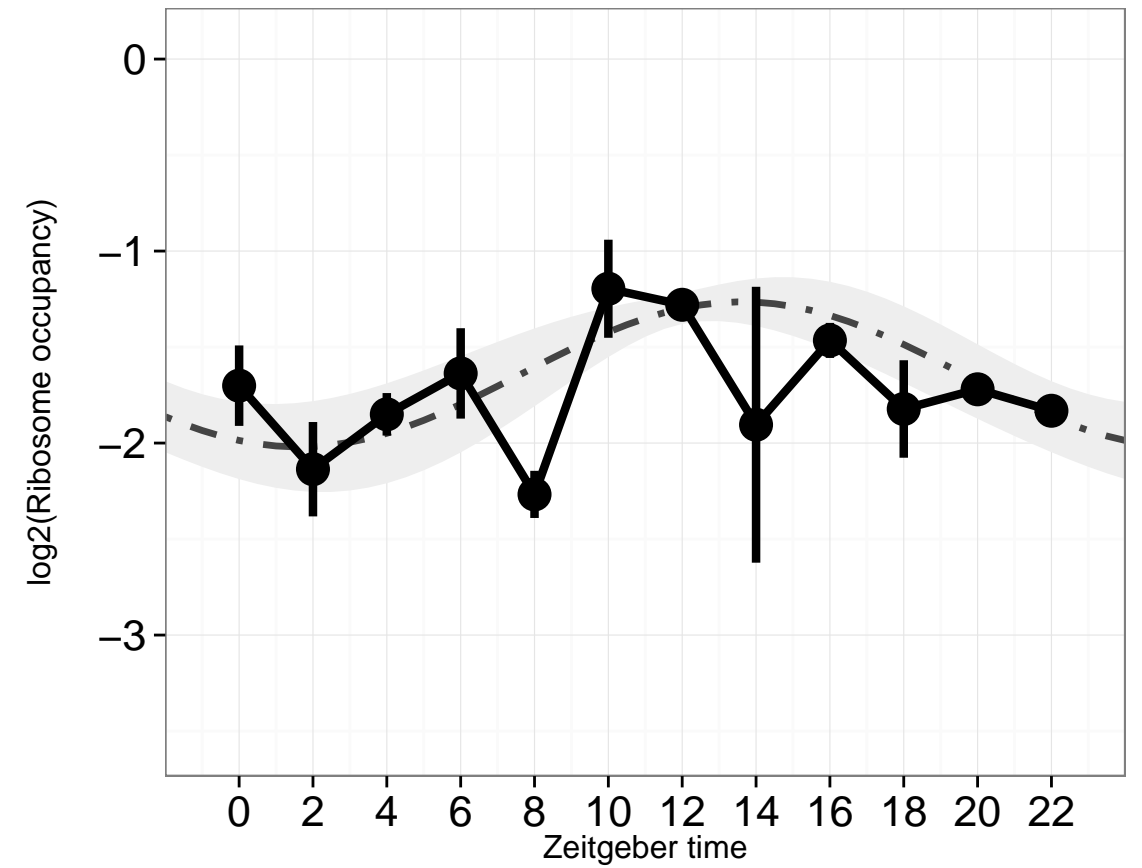

Supplement: SuppDataset_1.zip [file Gfod2_set_D.pdf › Supplemental Dataset 1/D-mRNA_rhythm_translation_rhyth/Gfod2_set_D.pdf]

## Gfra1

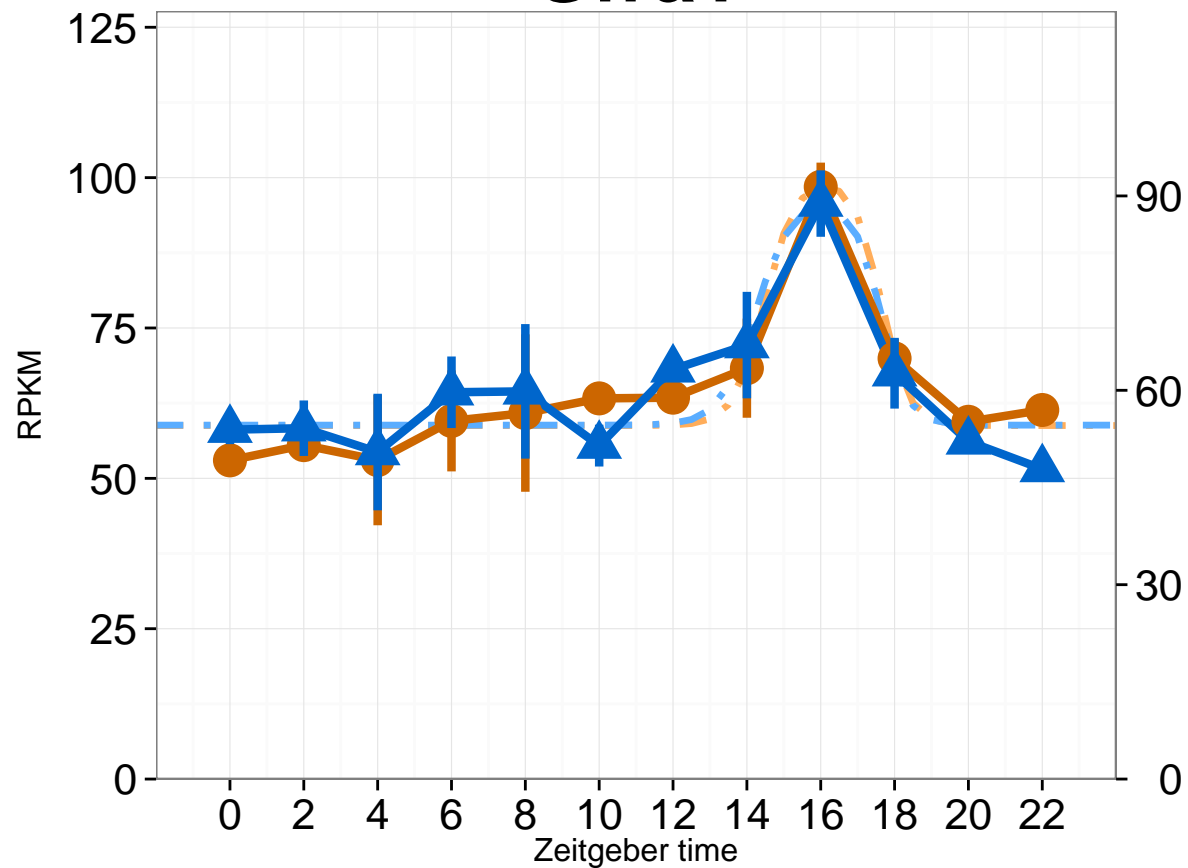

## Gfra1

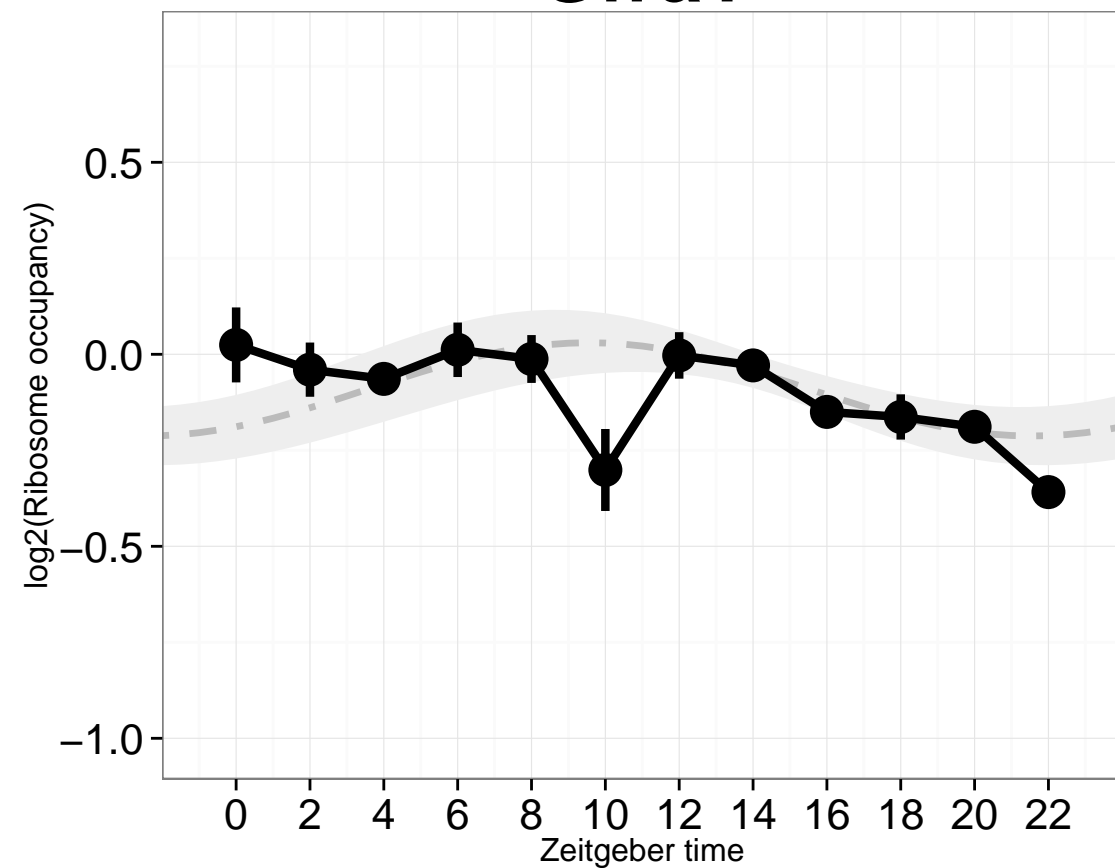

Supplement: SuppDataset_1.zip [file Gfra1_set_D.pdf › Supplemental Dataset 1/D-mRNA_rhythm_translation_rhyth/Gfra1_set_D.pdf]

## Gga2

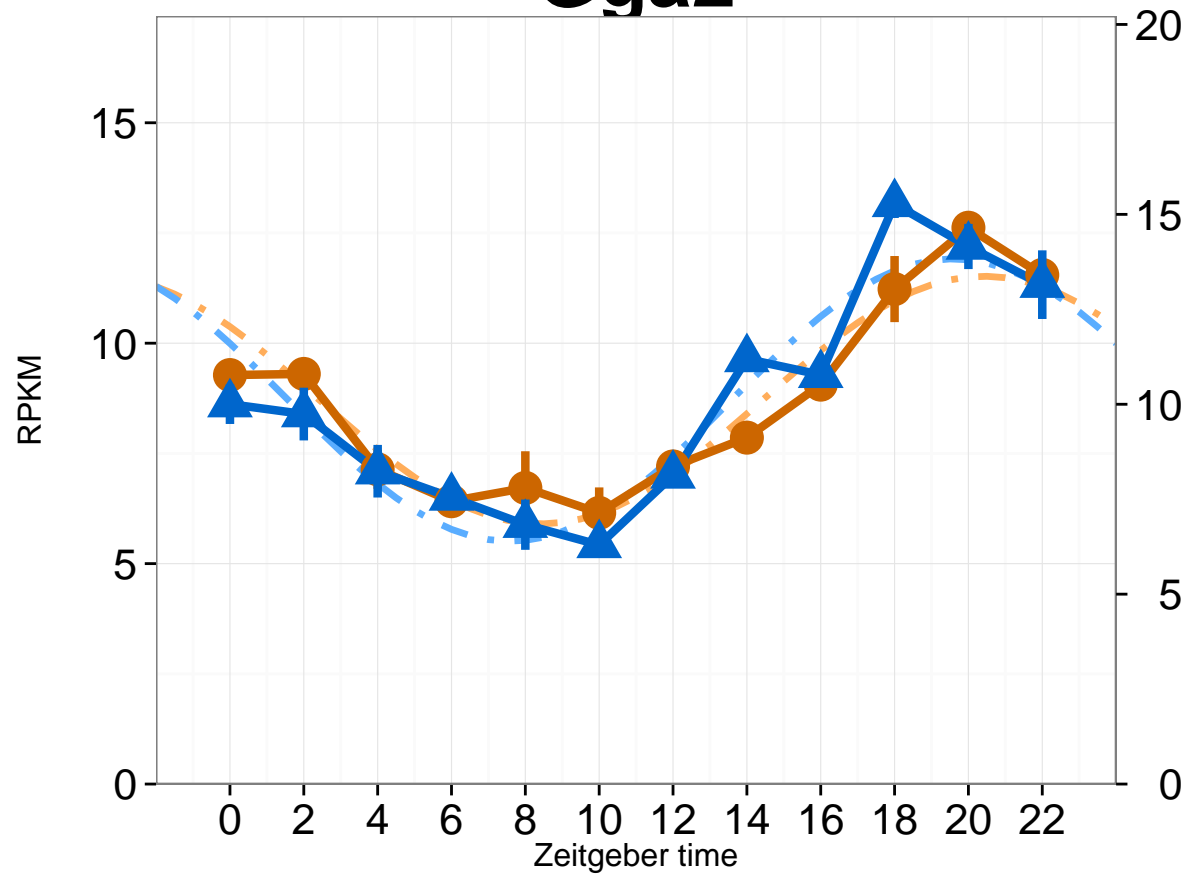

## Gga2

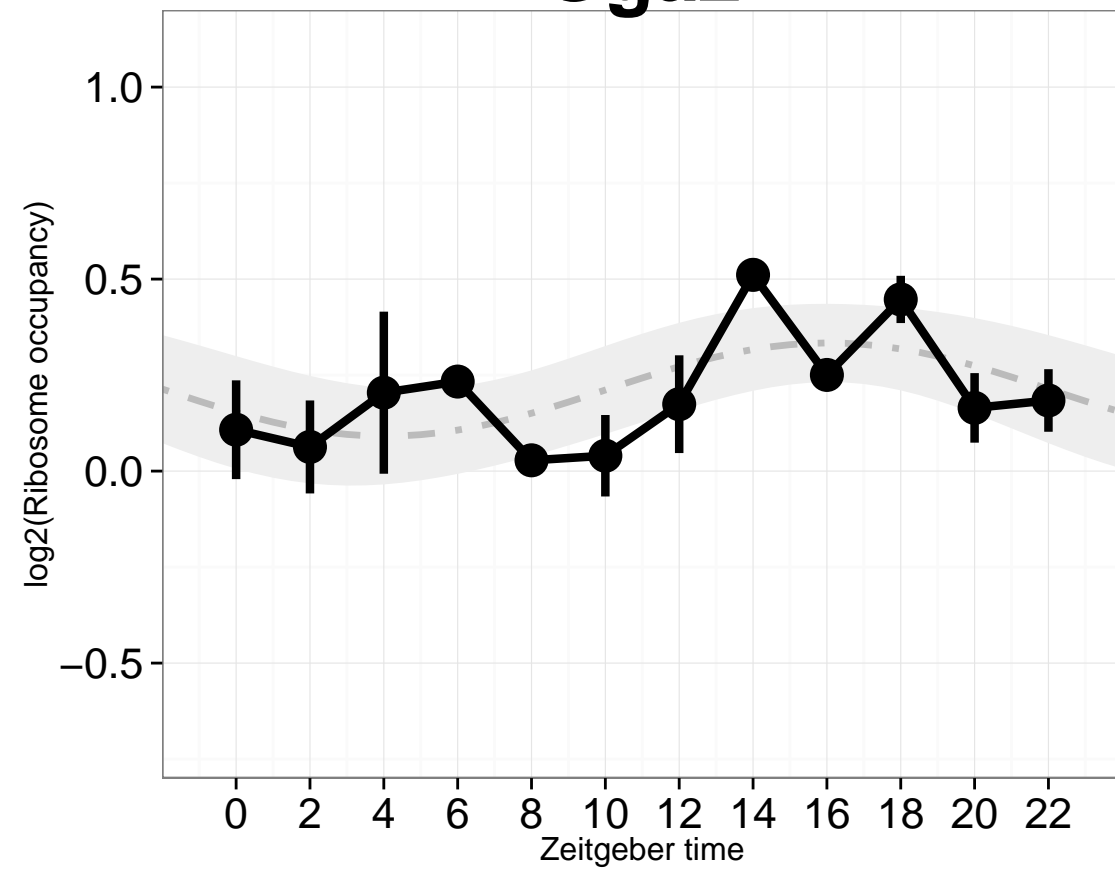

Supplement: SuppDataset_1.zip [file Gga2_set_D.pdf › Supplemental Dataset 1/D-mRNA_rhythm_translation_rhyth/Gga2_set_D.pdf]

## Ggct

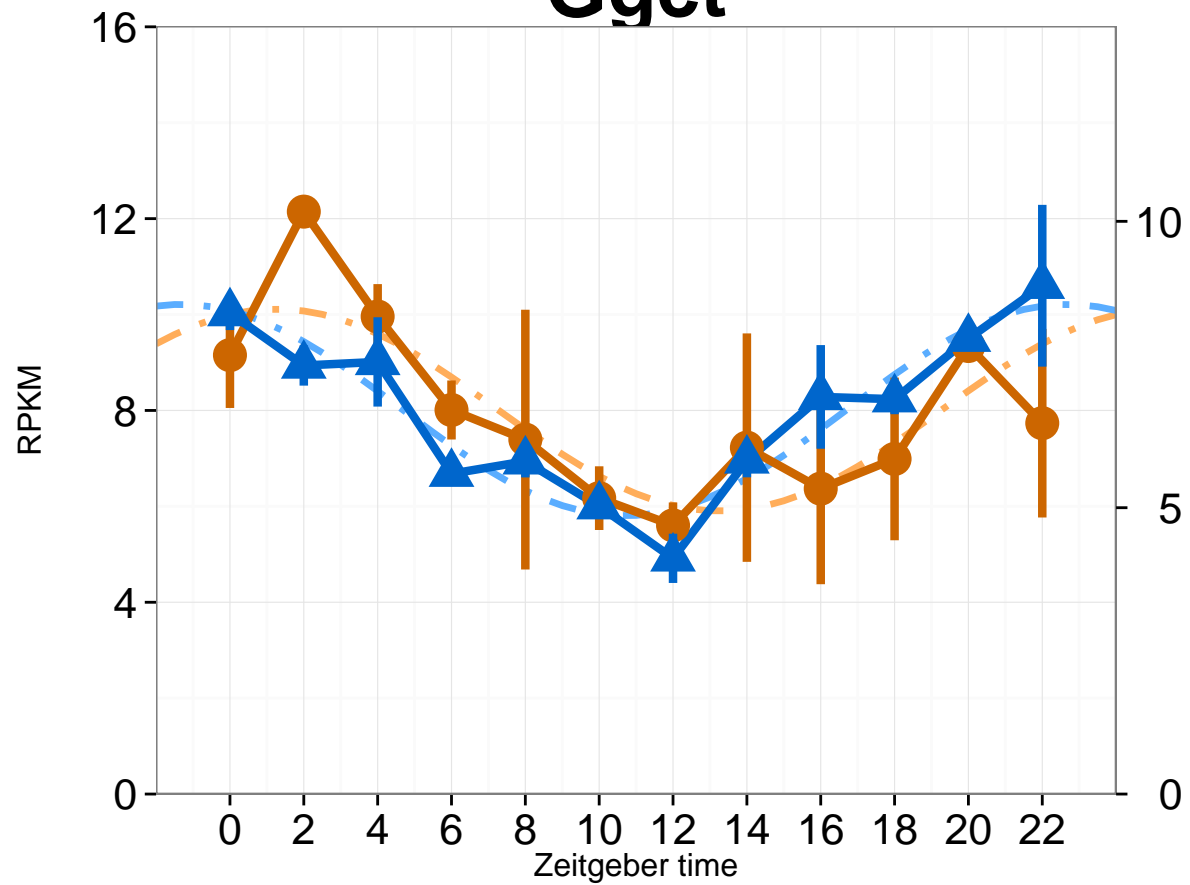

## Ggct

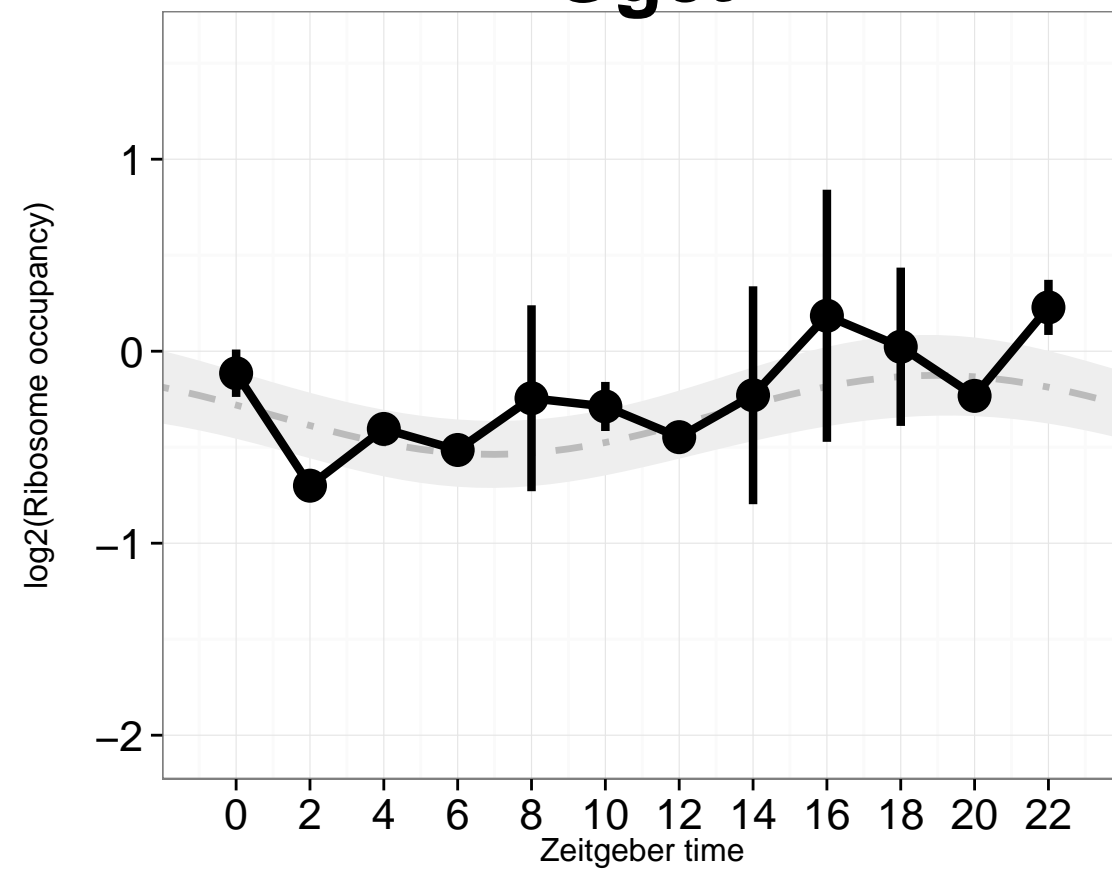

Supplement: SuppDataset_1.zip [file Ggct_set_D.pdf › Supplemental Dataset 1/D-mRNA_rhythm_translation_rhyth/Ggct_set_D.pdf]

## Ggt6

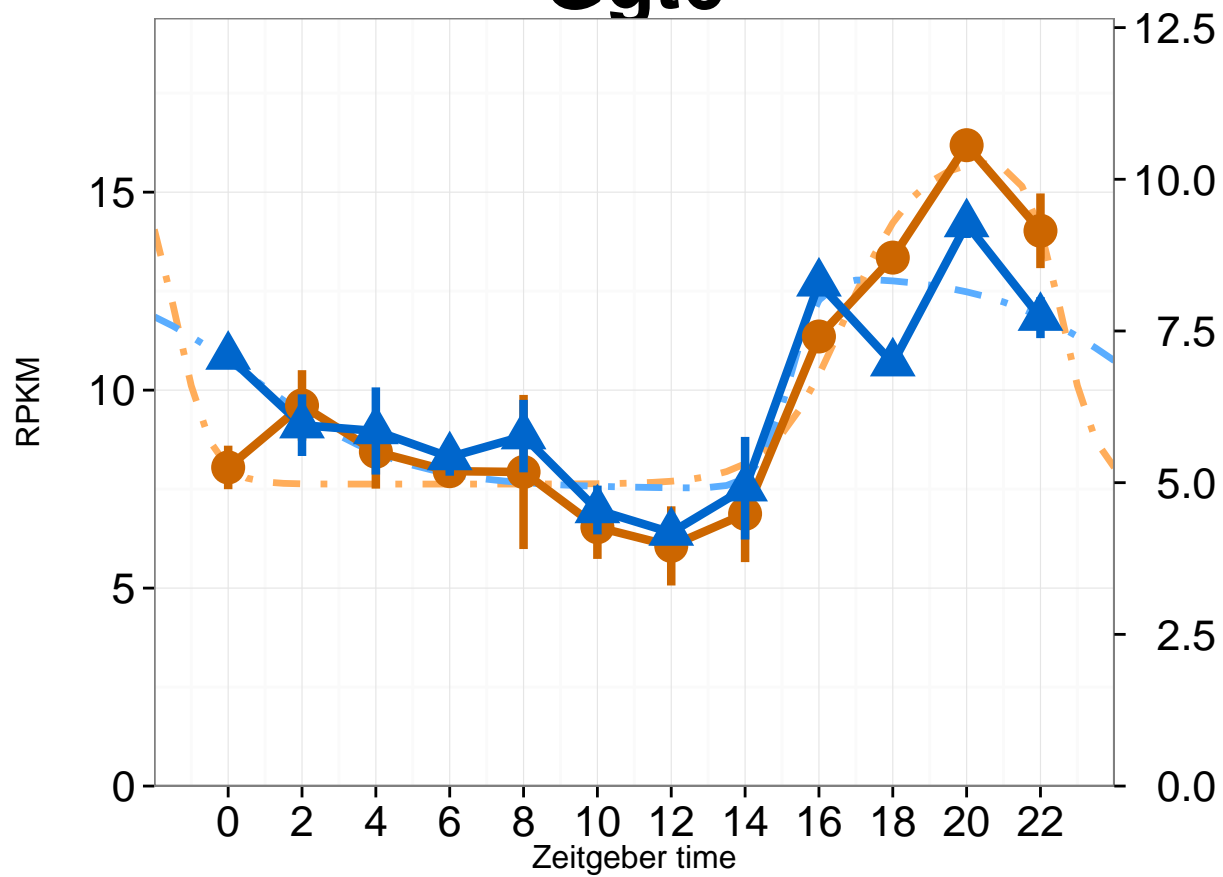

## Ggt6

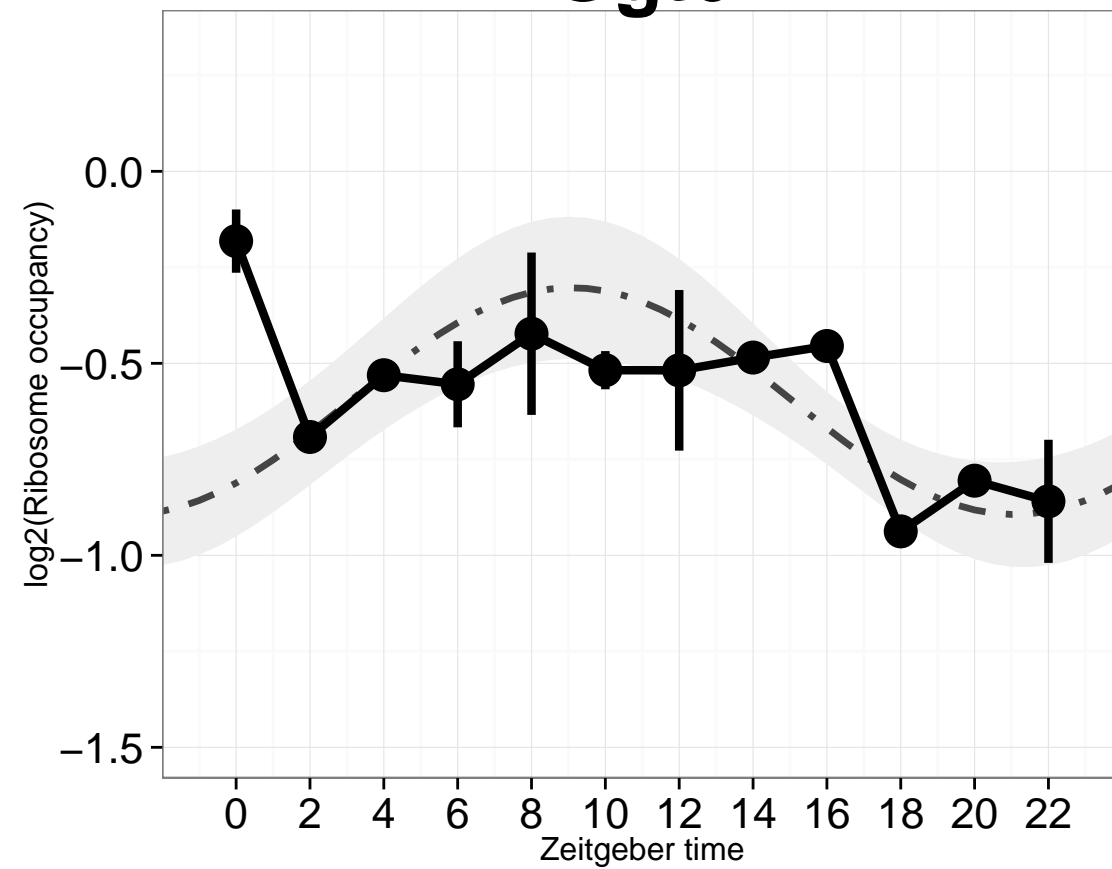

Supplement: SuppDataset_1.zip [file Ggt6_set_D.pdf › Supplemental Dataset 1/D-mRNA_rhythm_translation_rhyth/Ggt6_set_D.pdf]

# Gimap9

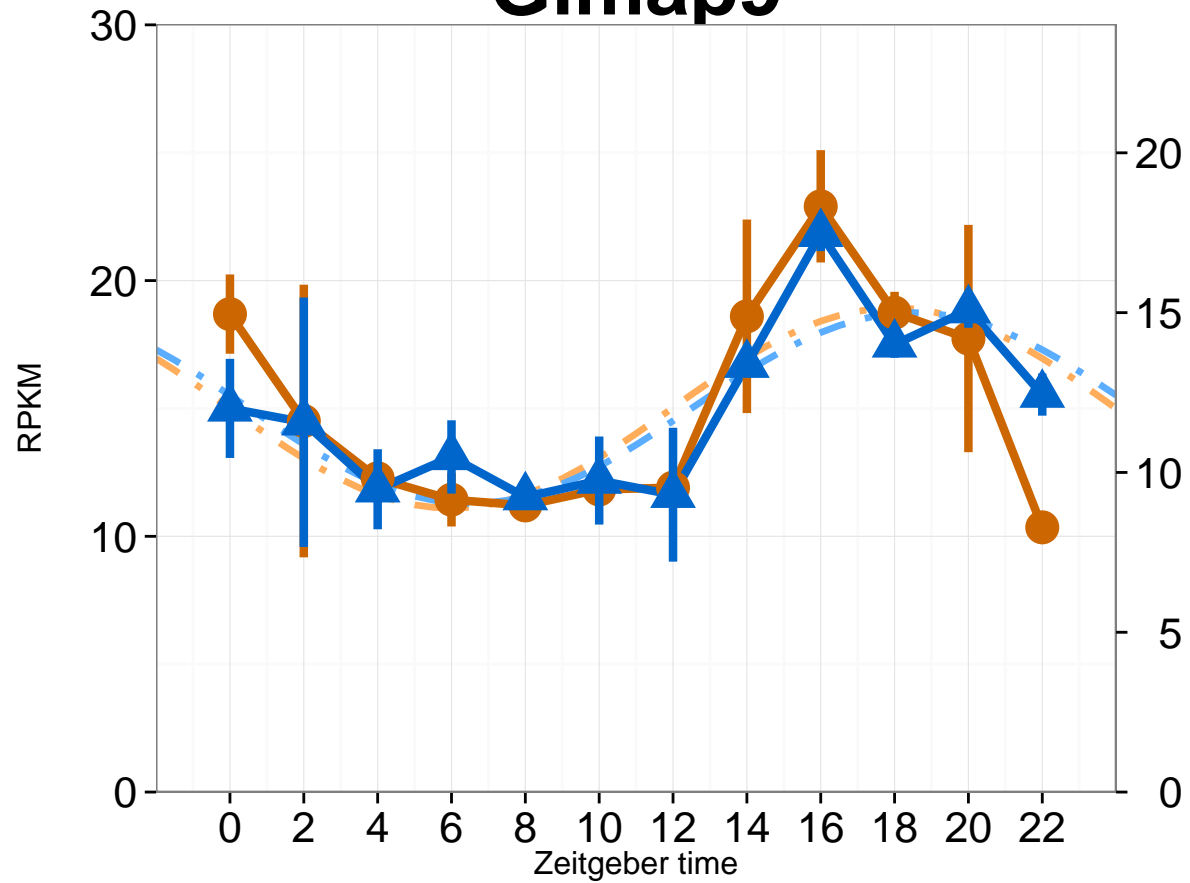

# Gimap9

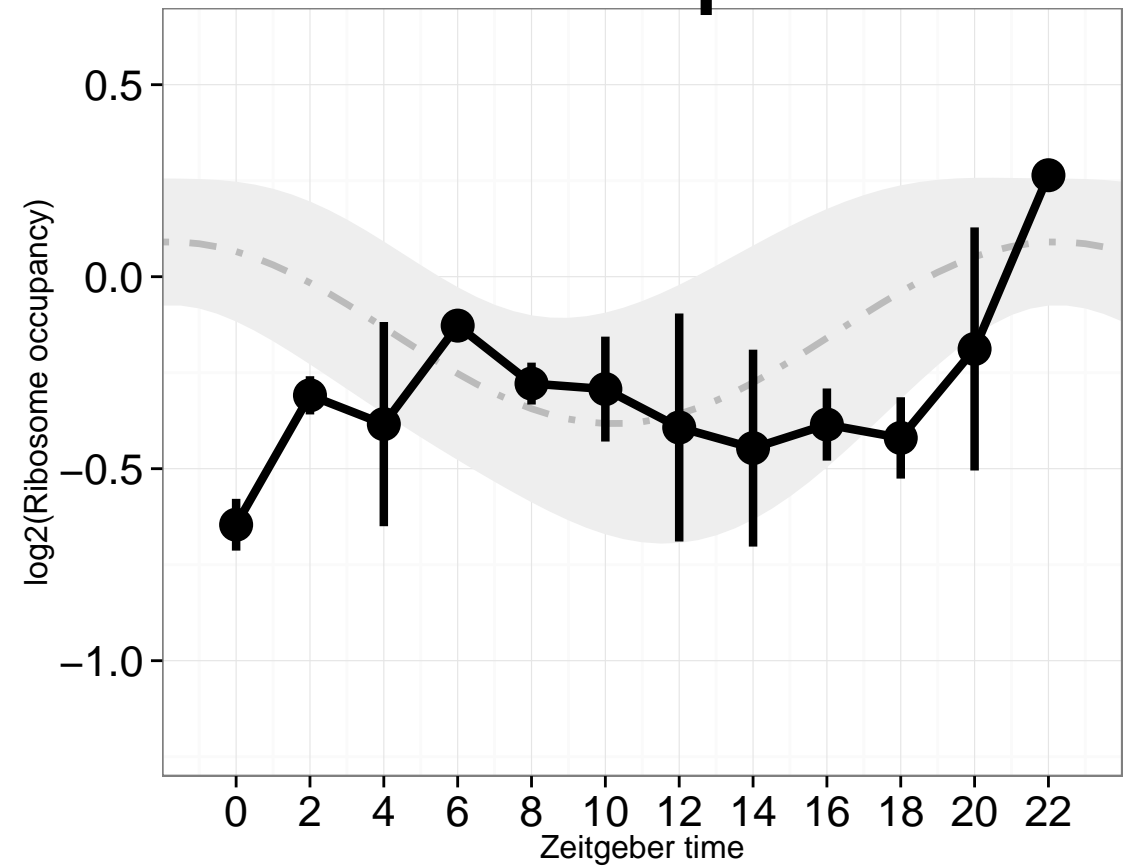

Supplement: SuppDataset_1.zip [file Gimap9_set_D.pdf › Supplemental Dataset 1/D-mRNA_rhythm_translation_rhyth/Gimap9_set_D.pdf]

## Gldc

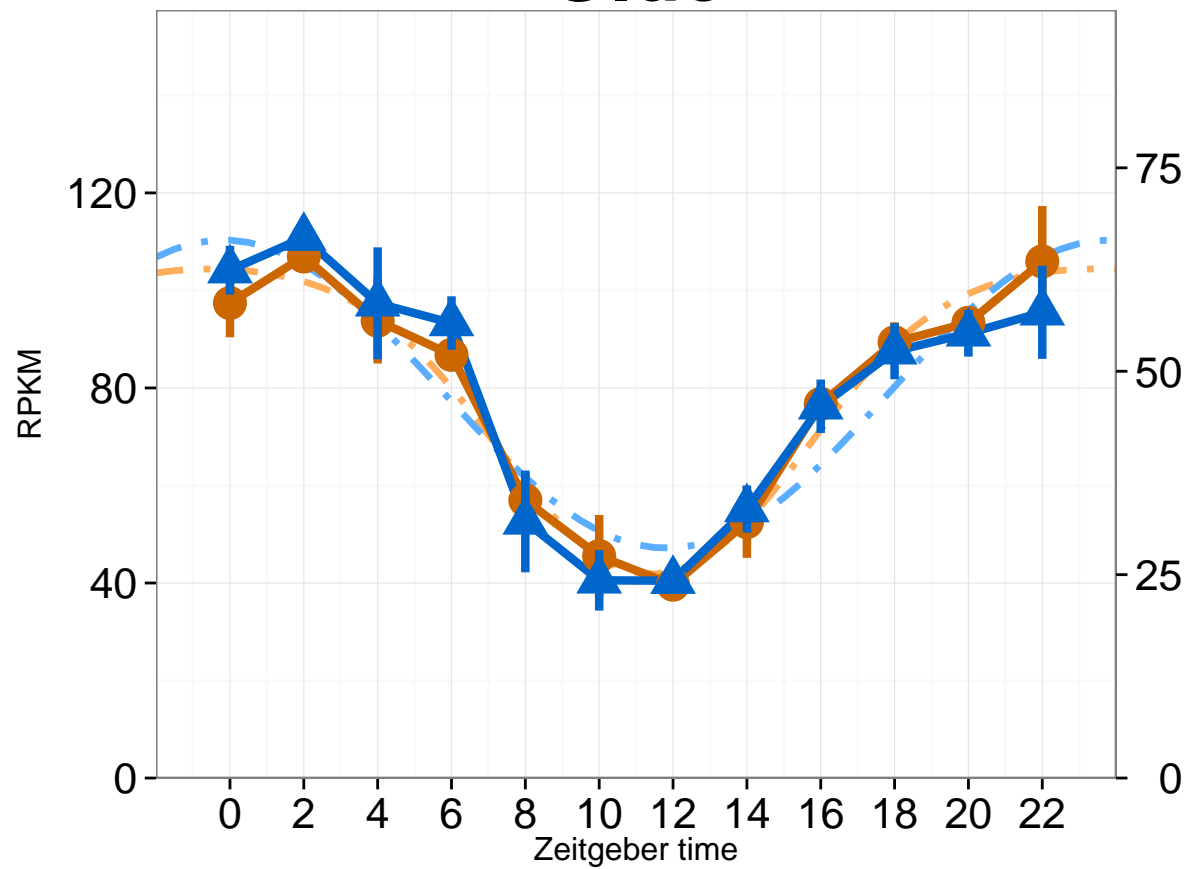

## Gldc

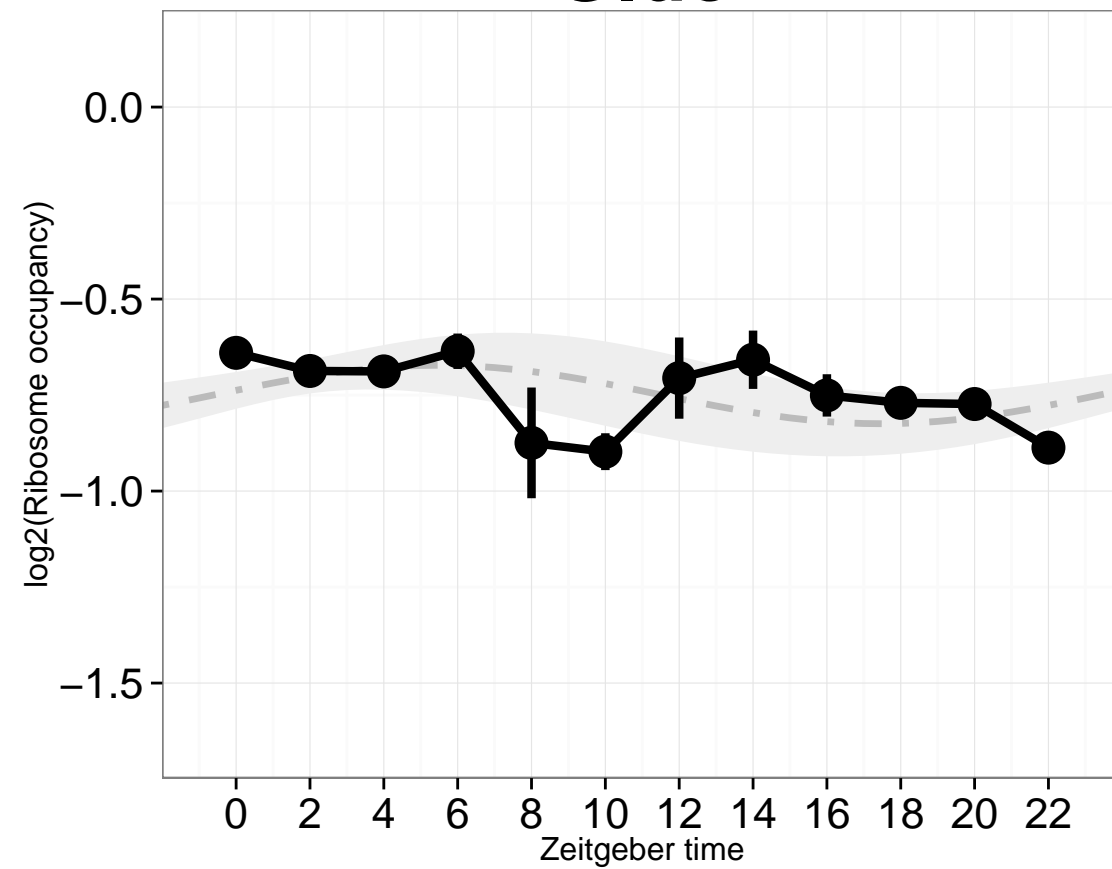

Supplement: SuppDataset_1.zip [file Gldc_set_D.pdf › Supplemental Dataset 1/D-mRNA_rhythm_translation_rhyth/Gldc_set_D.pdf]

## Glipr2

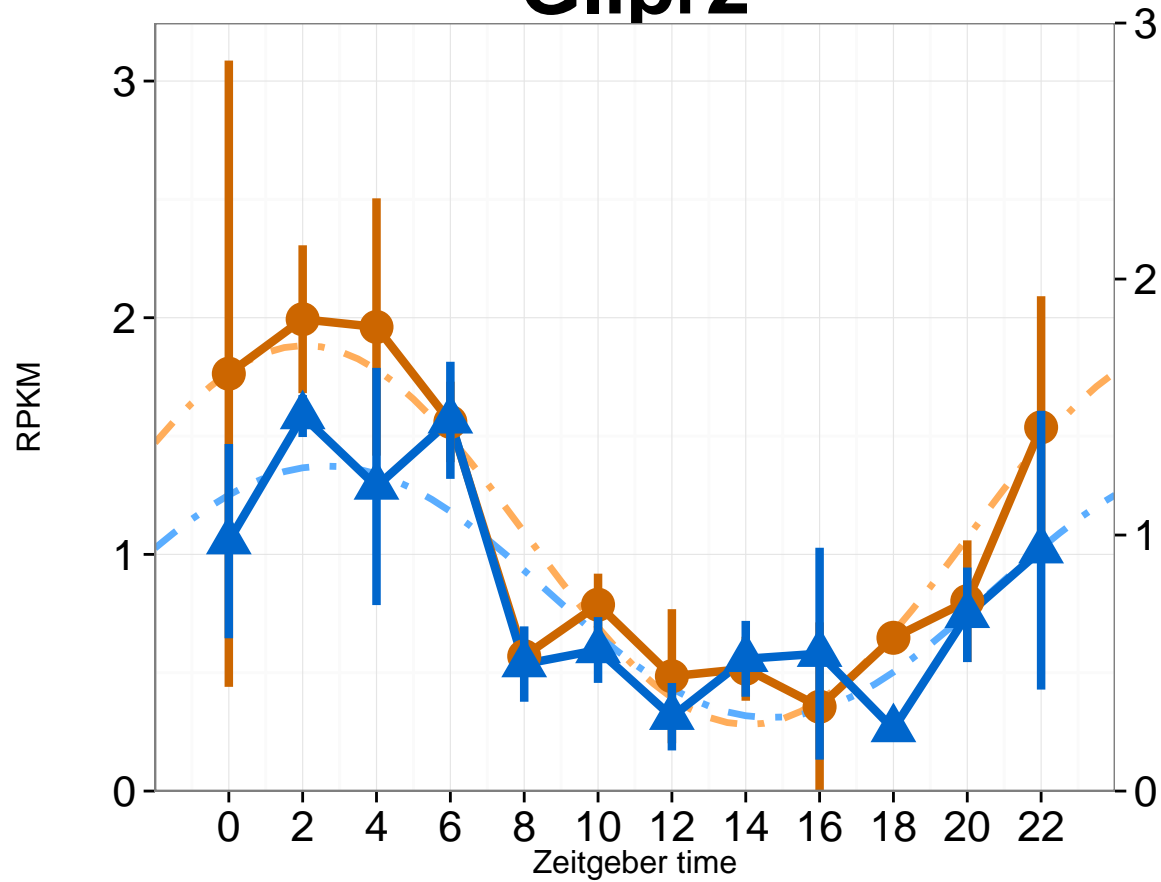

## Glipr2

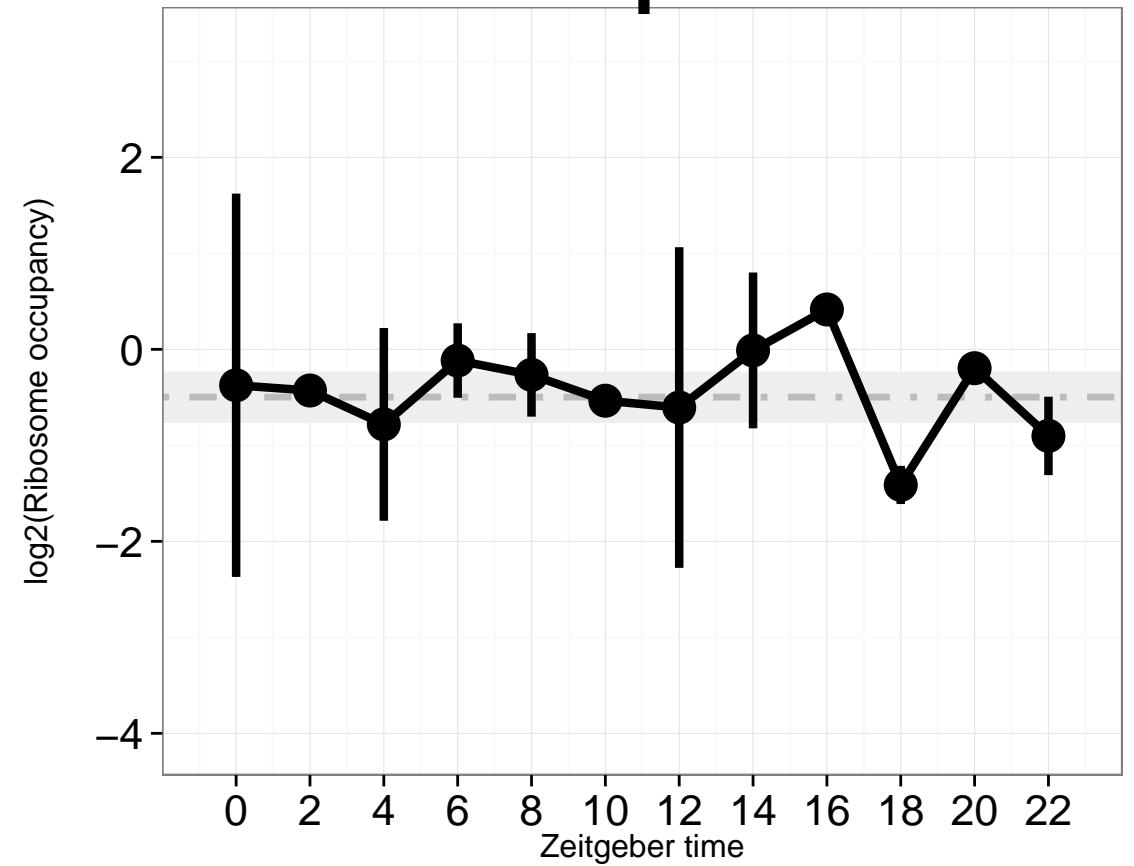

Supplement: SuppDataset_1.zip [file Glipr2_set_D.pdf › Supplemental Dataset 1/D-mRNA_rhythm_translation_rhyth/Glipr2_set_D.pdf]

## Glrx

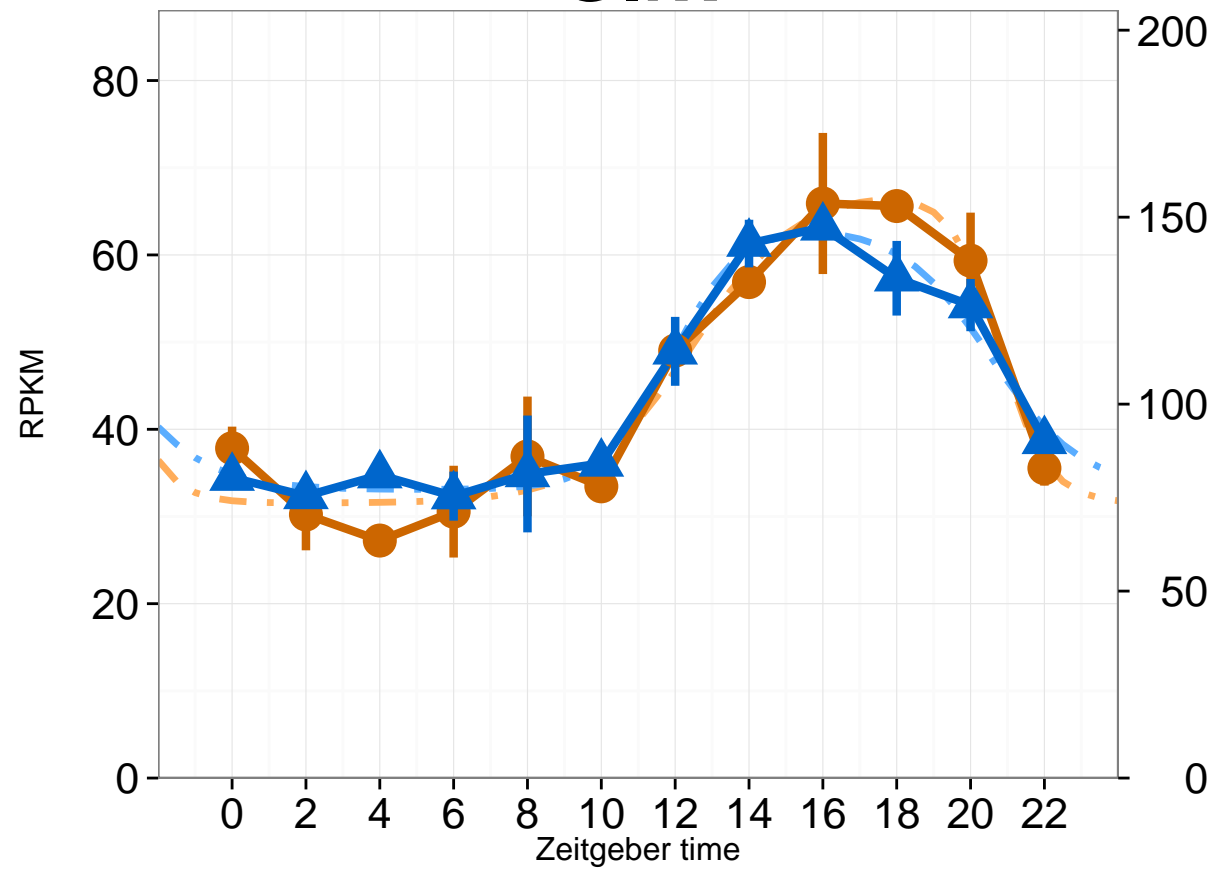

## Glrx

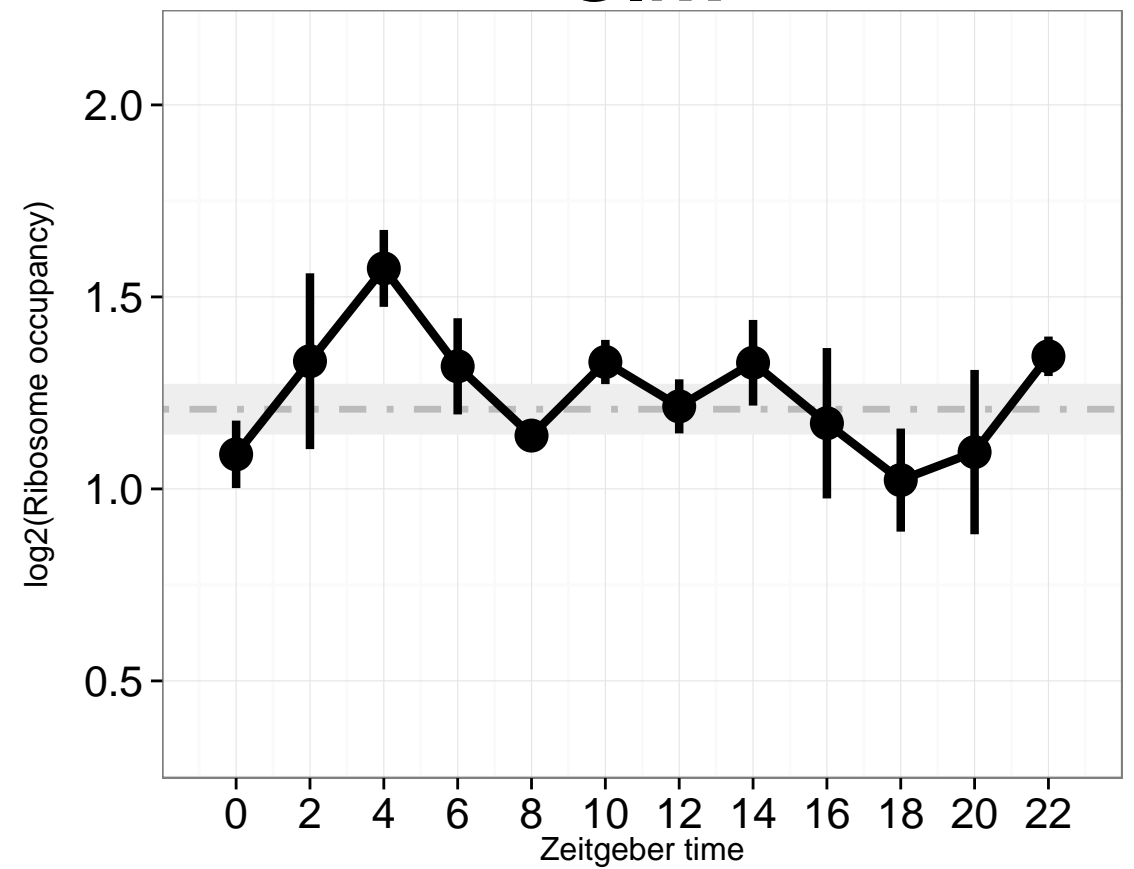

Supplement: SuppDataset_1.zip [file Glrx_set_D.pdf › Supplemental Dataset 1/D-mRNA_rhythm_translation_rhyth/Glrx_set_D.pdf]

## Gm11437

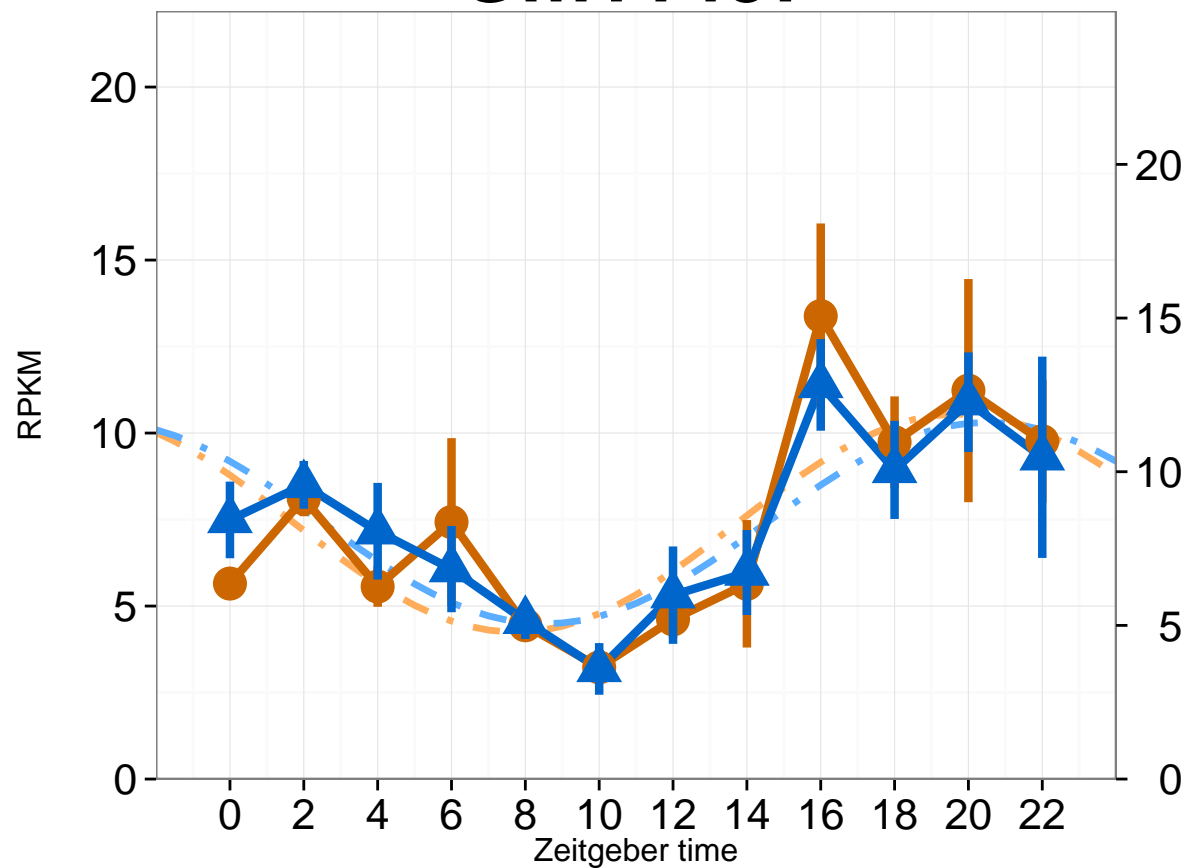

## Gm11437

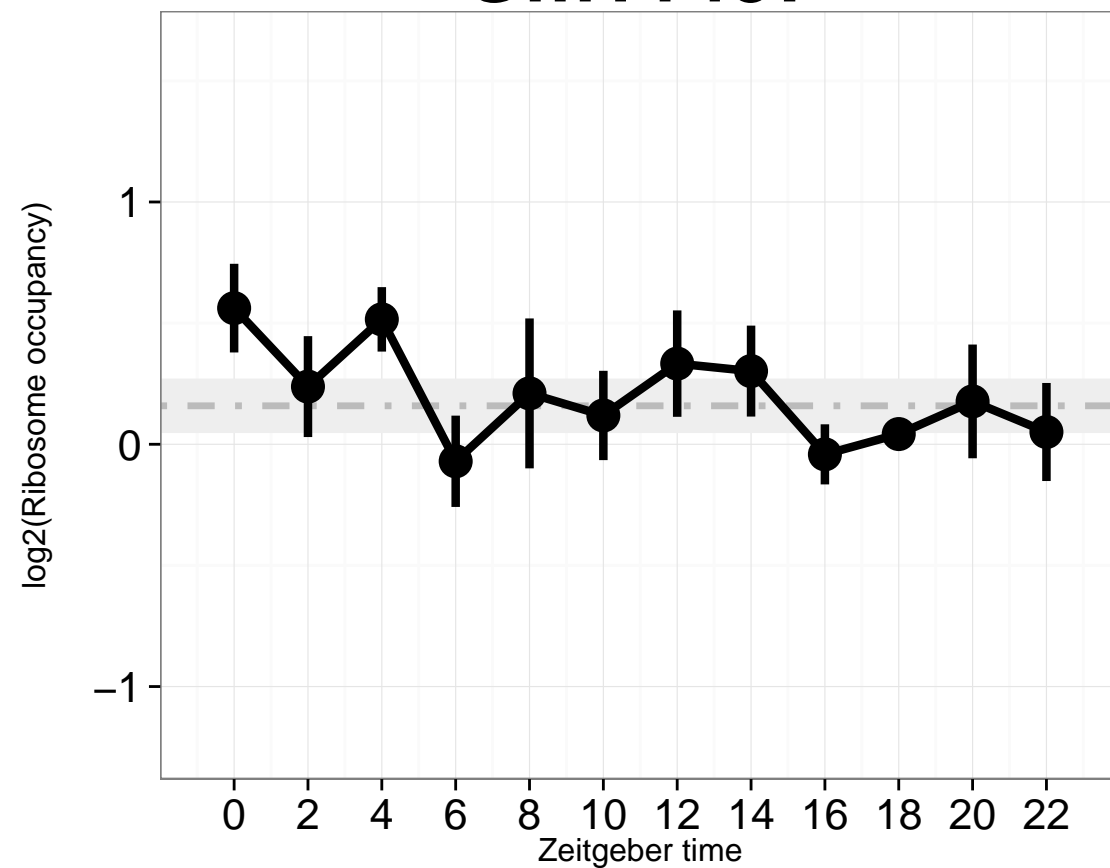

Supplement: SuppDataset_1.zip [file Gm11437_set_D.pdf › Supplemental Dataset 1/D-mRNA_rhythm_translation_rhyth/Gm11437_set_D.pdf]

## Gm129

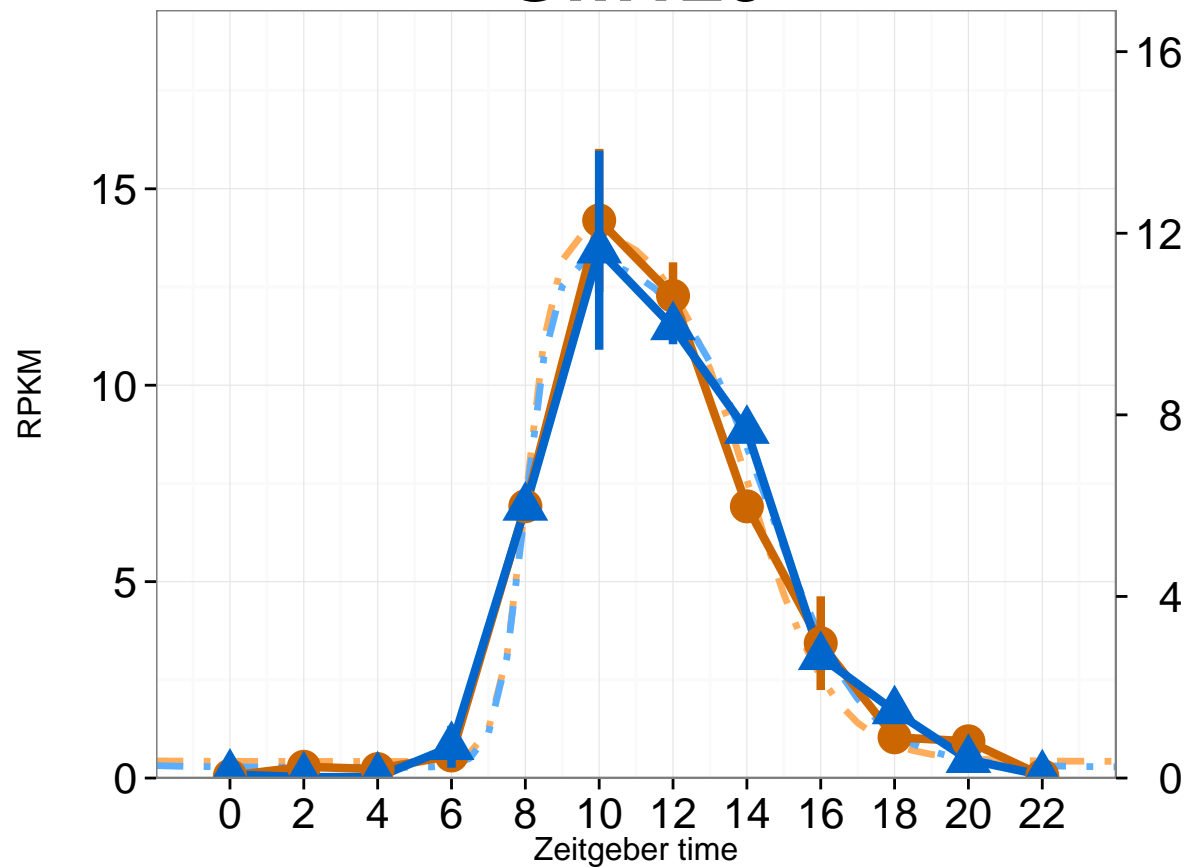

## Gm129

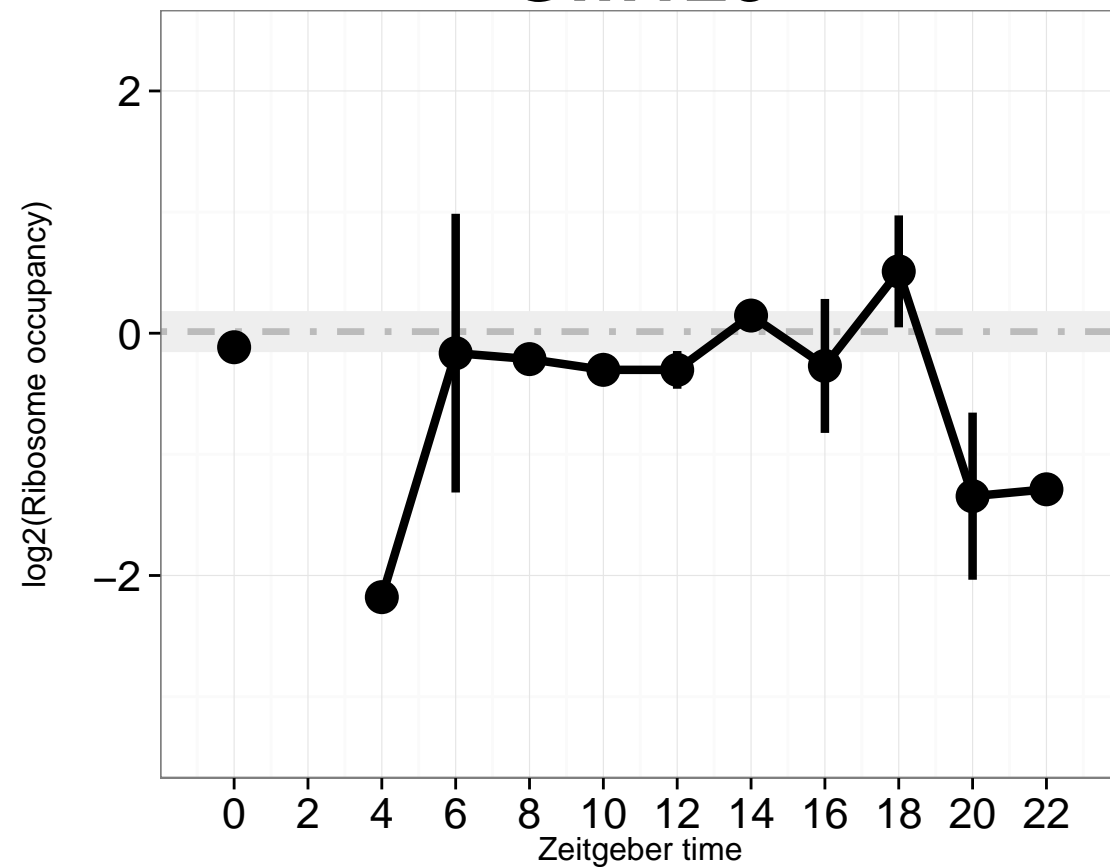

Supplement: SuppDataset_1.zip [file Gm129_set_D.pdf › Supplemental Dataset 1/D-mRNA_rhythm_translation_rhyth/Gm129_set_D.pdf]

# Gm14403

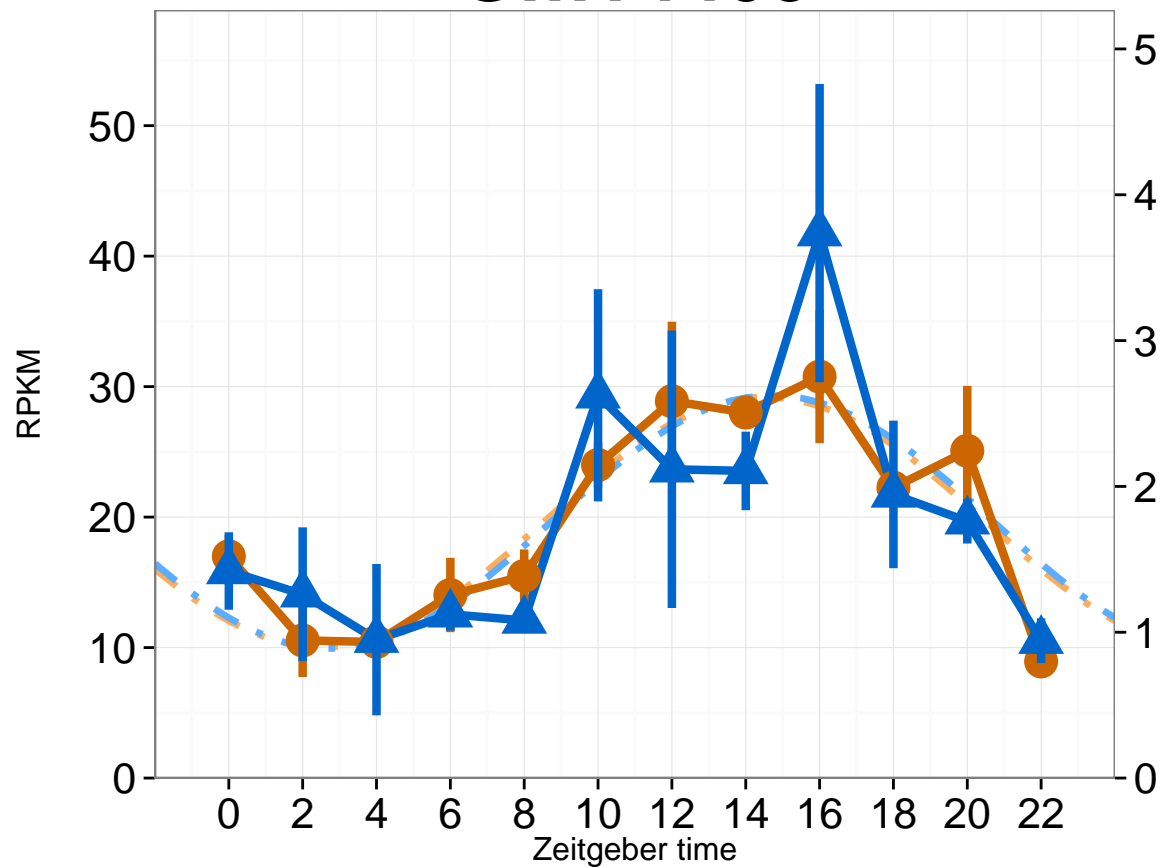

# Gm14403

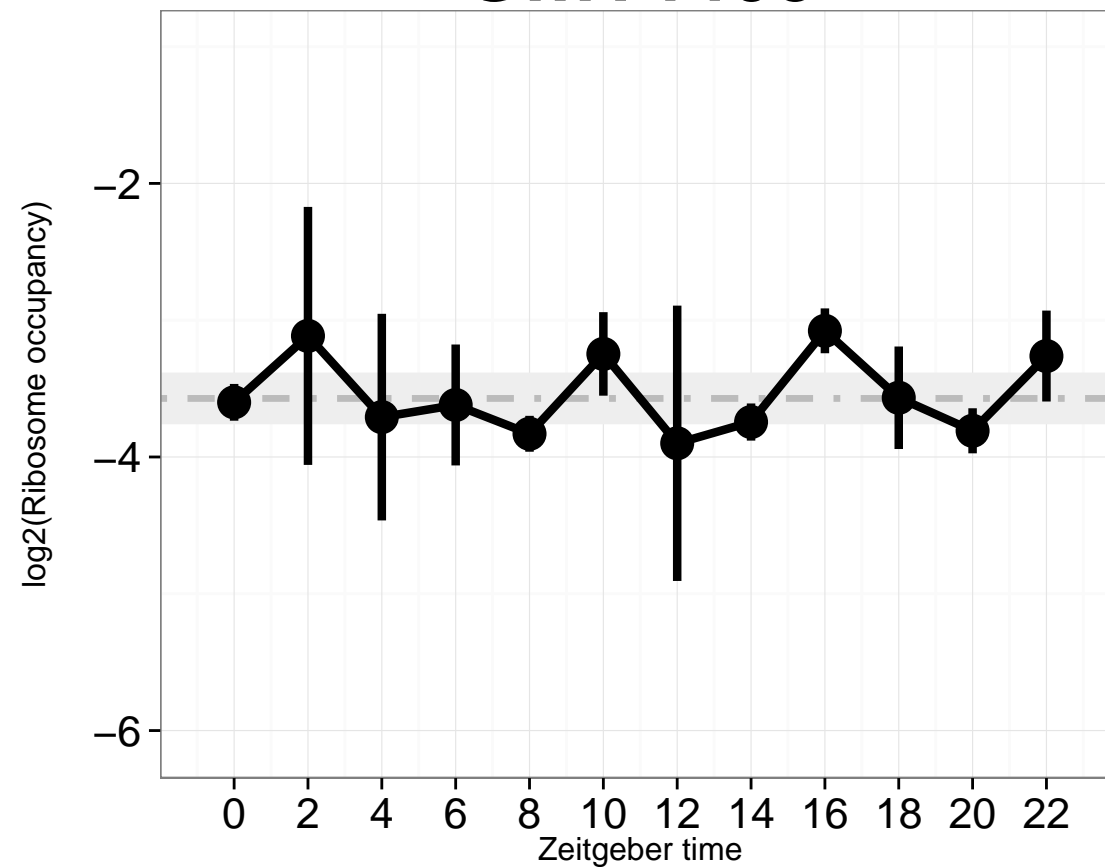

Supplement: SuppDataset_1.zip [file Gm14403_set_D.pdf › Supplemental Dataset 1/D-mRNA_rhythm_translation_rhyth/Gm14403_set_D.pdf]

# Gm4952

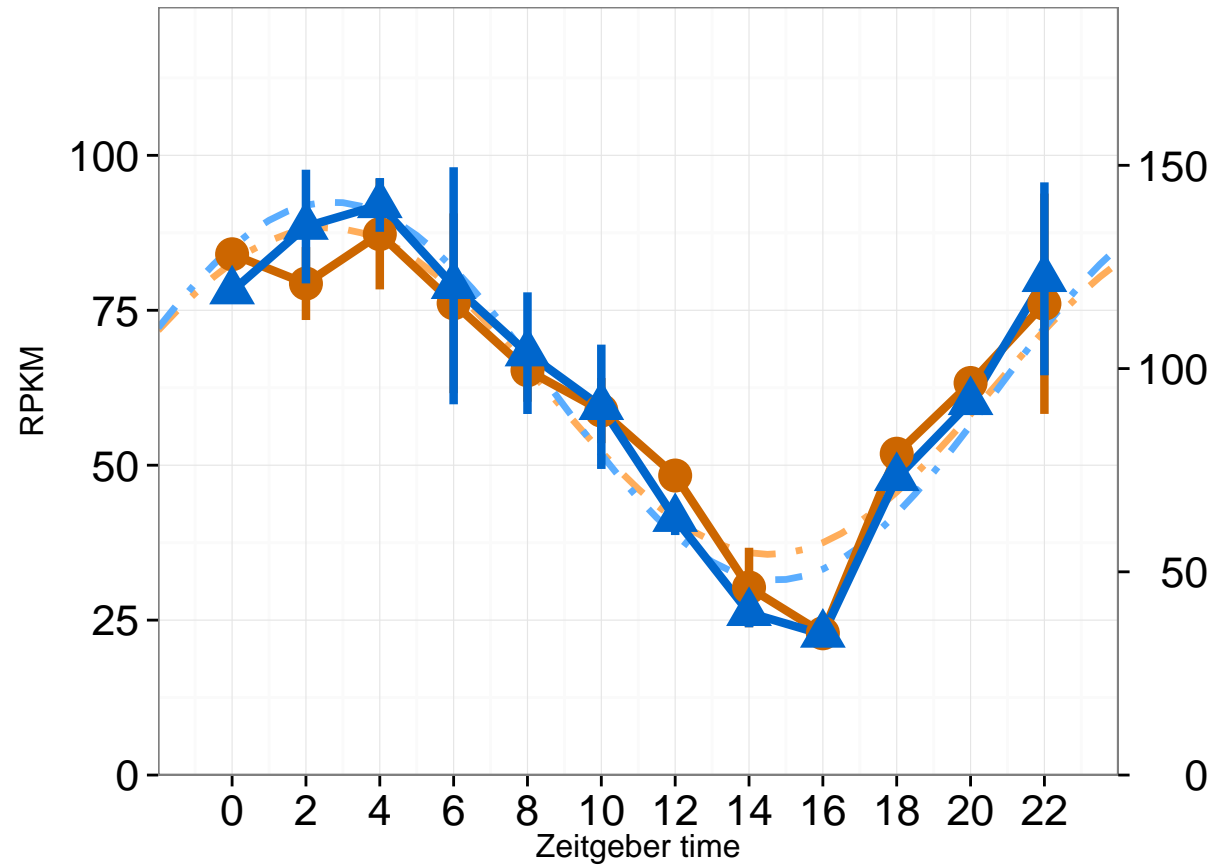

# Gm4952

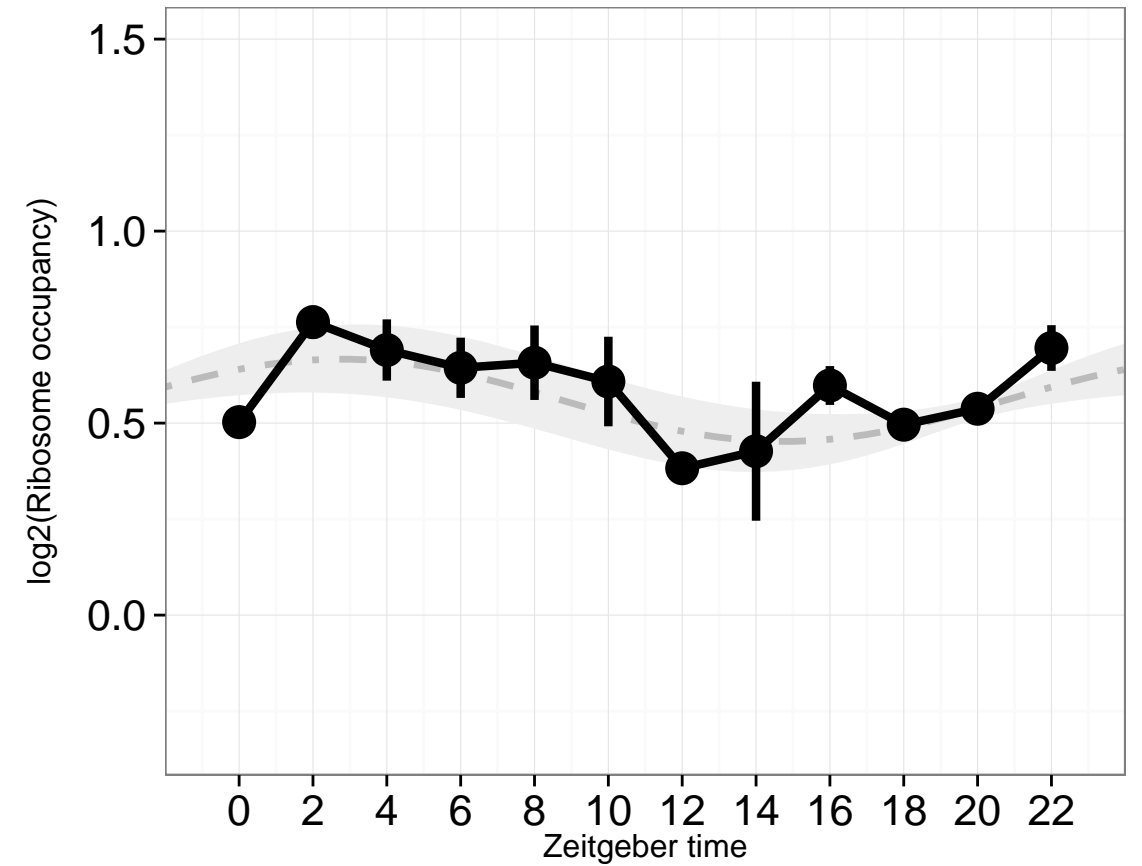

Supplement: SuppDataset_1.zip [file Gm4952_set_D.pdf › Supplemental Dataset 1/D-mRNA_rhythm_translation_rhyth/Gm4952_set_D.pdf]

## Gmnn

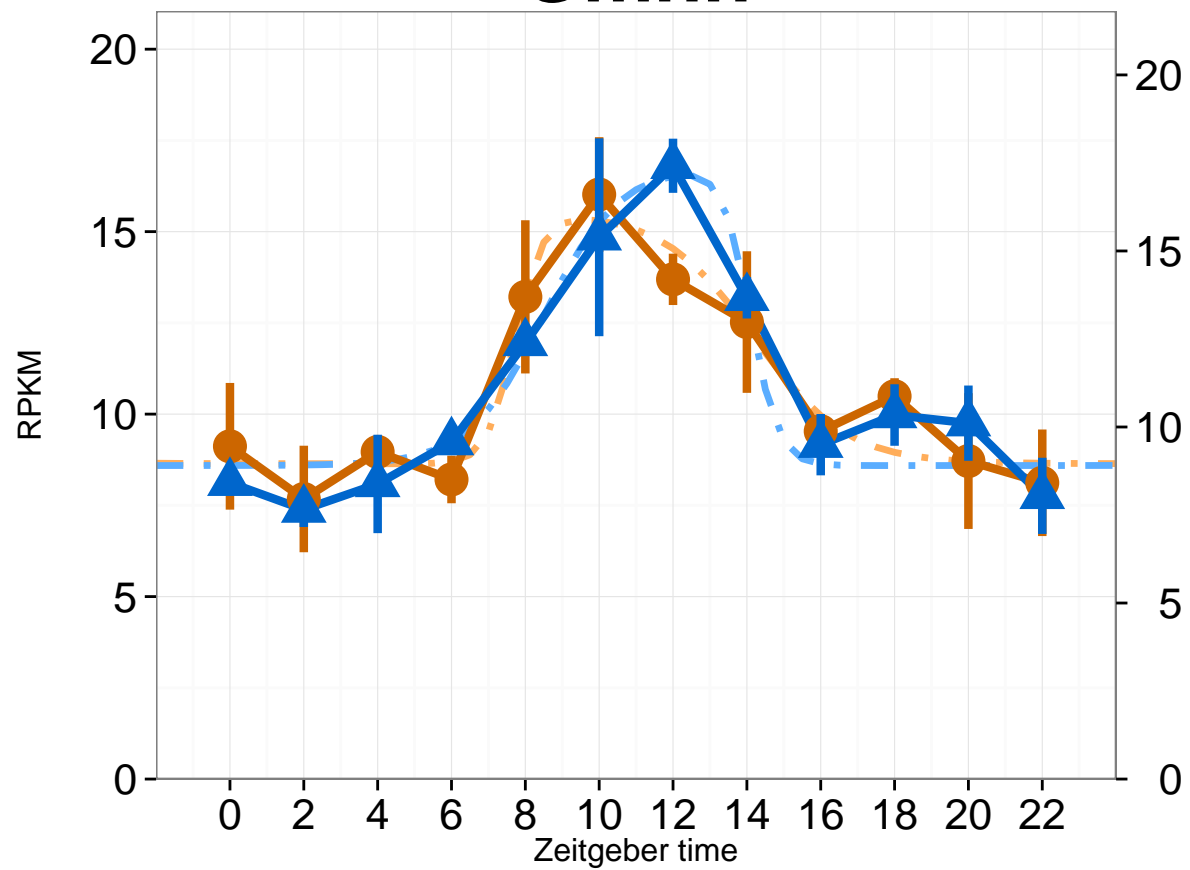

## Gmnn

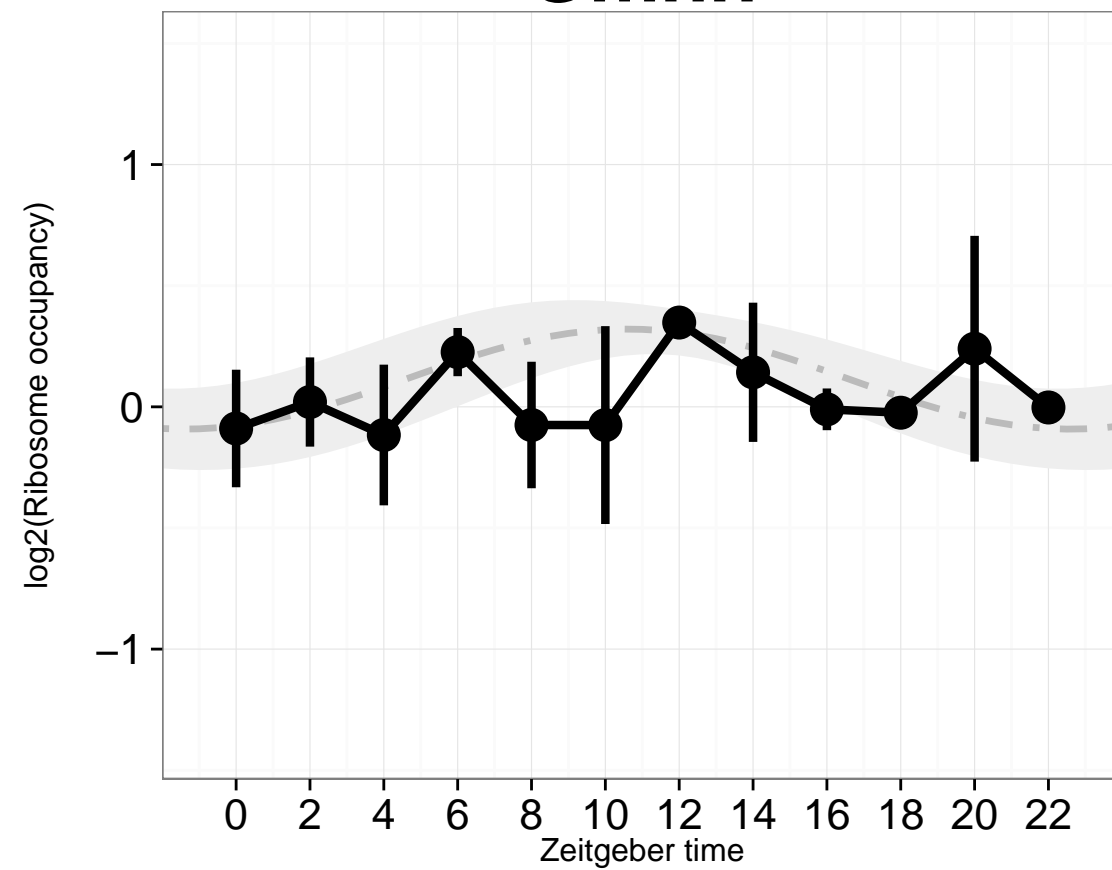

Supplement: SuppDataset_1.zip [file Gmnn_set_D.pdf › Supplemental Dataset 1/D-mRNA_rhythm_translation_rhyth/Gmnn_set_D.pdf]

## Gne

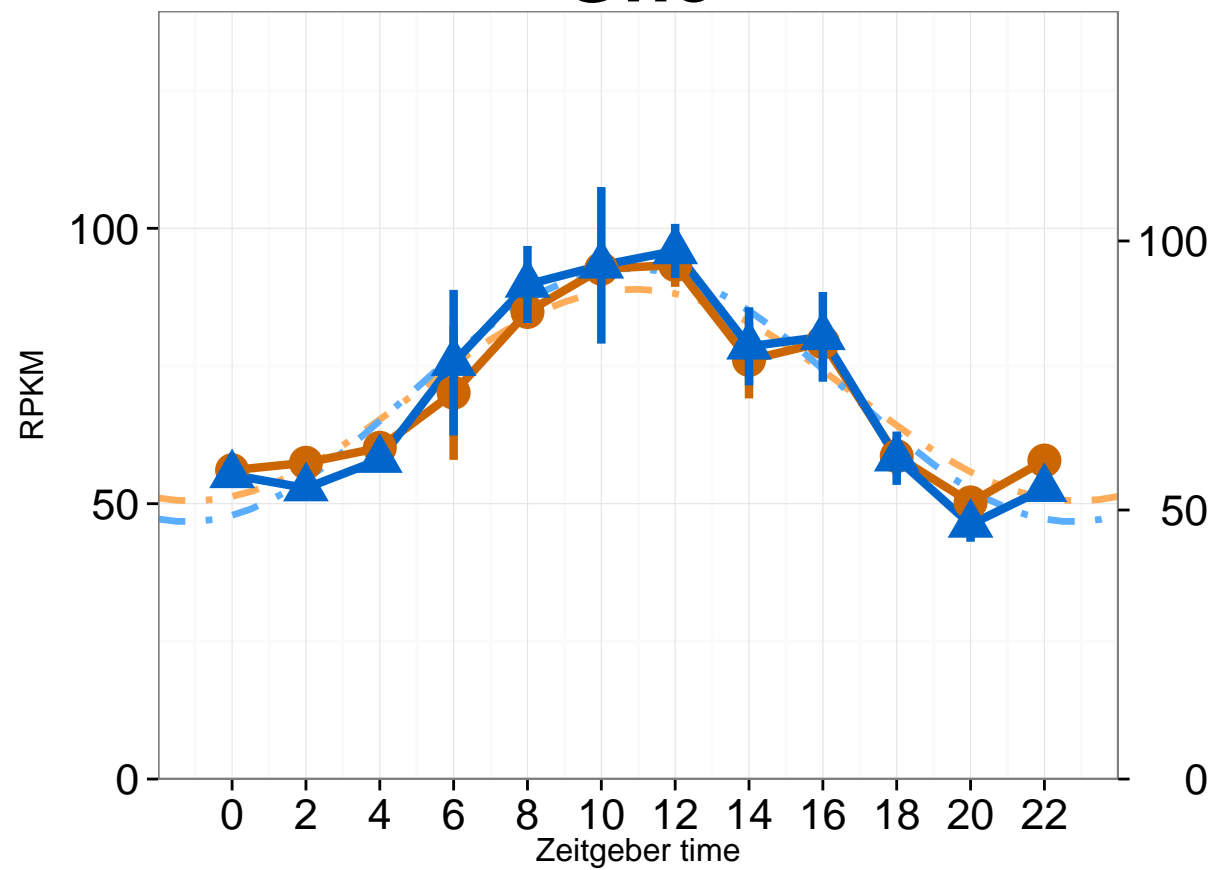

## Gne

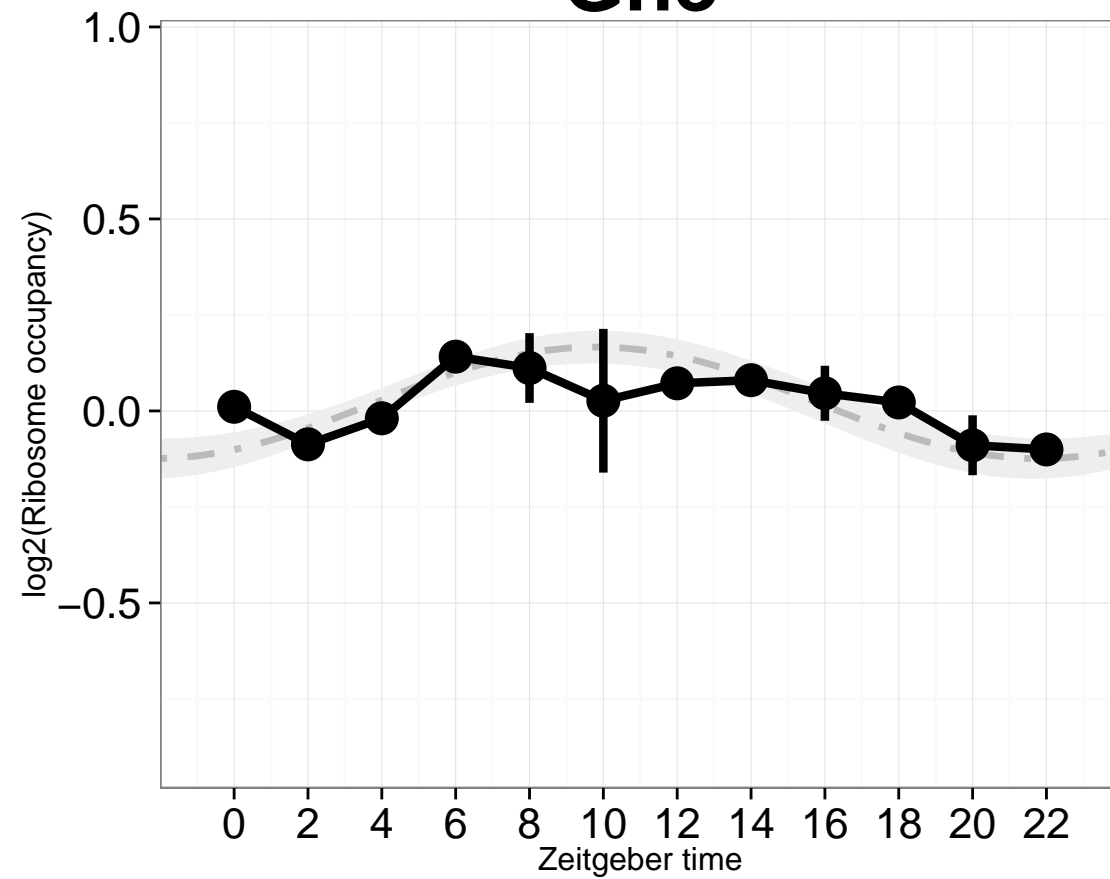

Supplement: SuppDataset_1.zip [file Gne_set_D.pdf › Supplemental Dataset 1/D-mRNA_rhythm_translation_rhyth/Gne_set_D.pdf]

## Gnl3

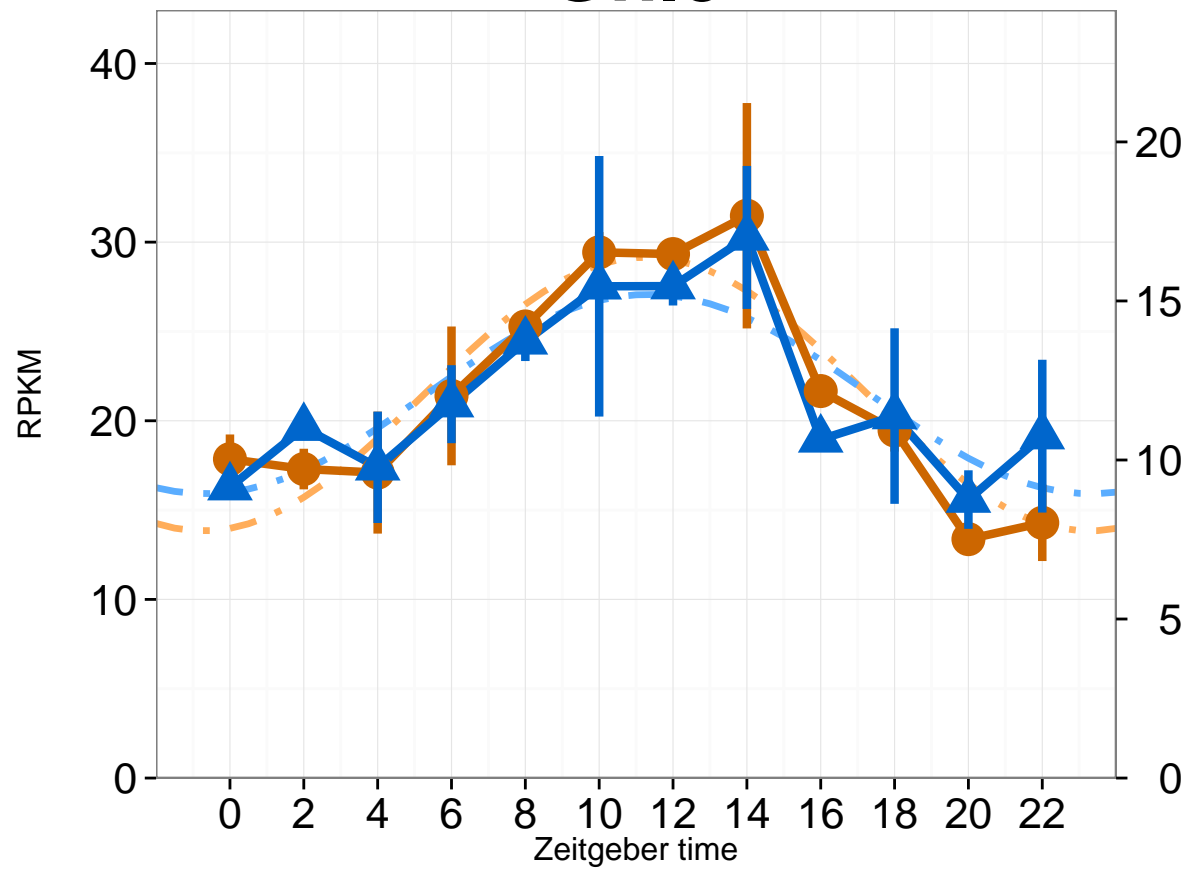

## Gnl3

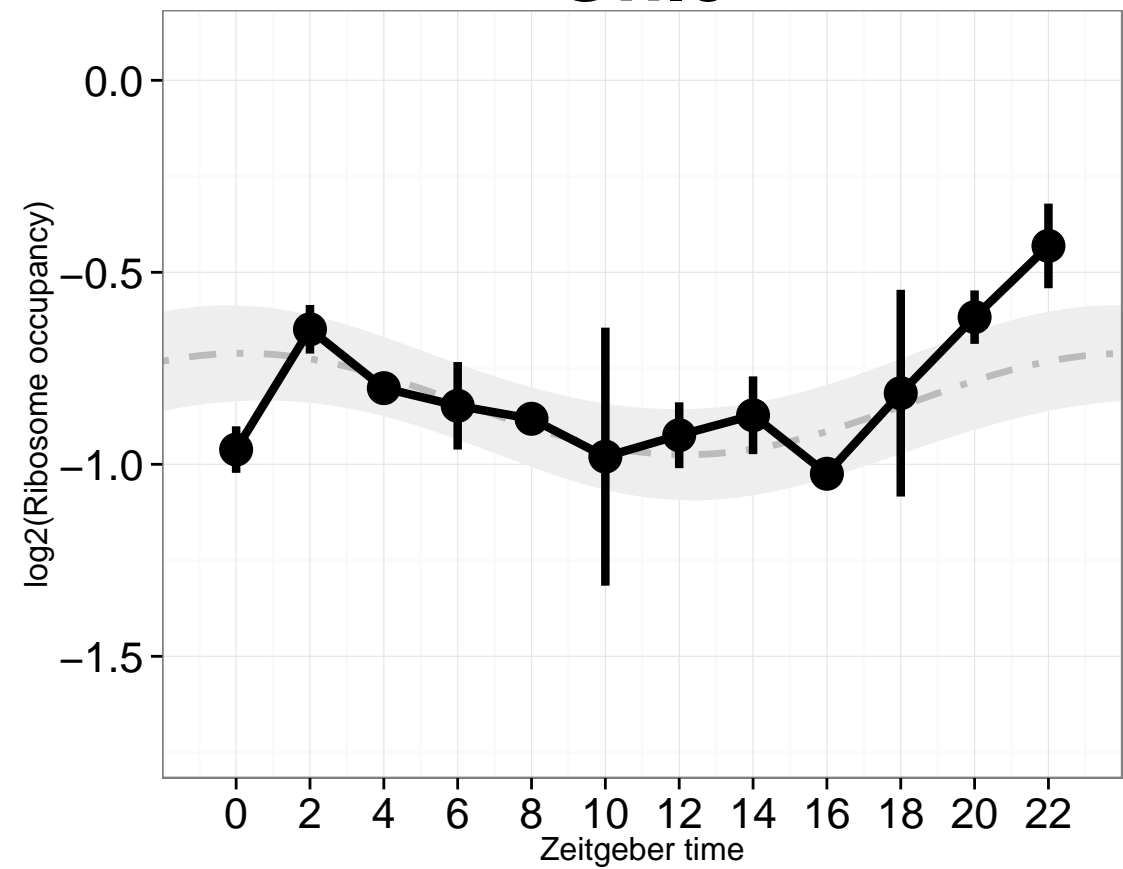

Supplement: SuppDataset_1.zip [file Gnl3_set_D.pdf › Supplemental Dataset 1/D-mRNA_rhythm_translation_rhyth/Gnl3_set_D.pdf]

# Gnpda2

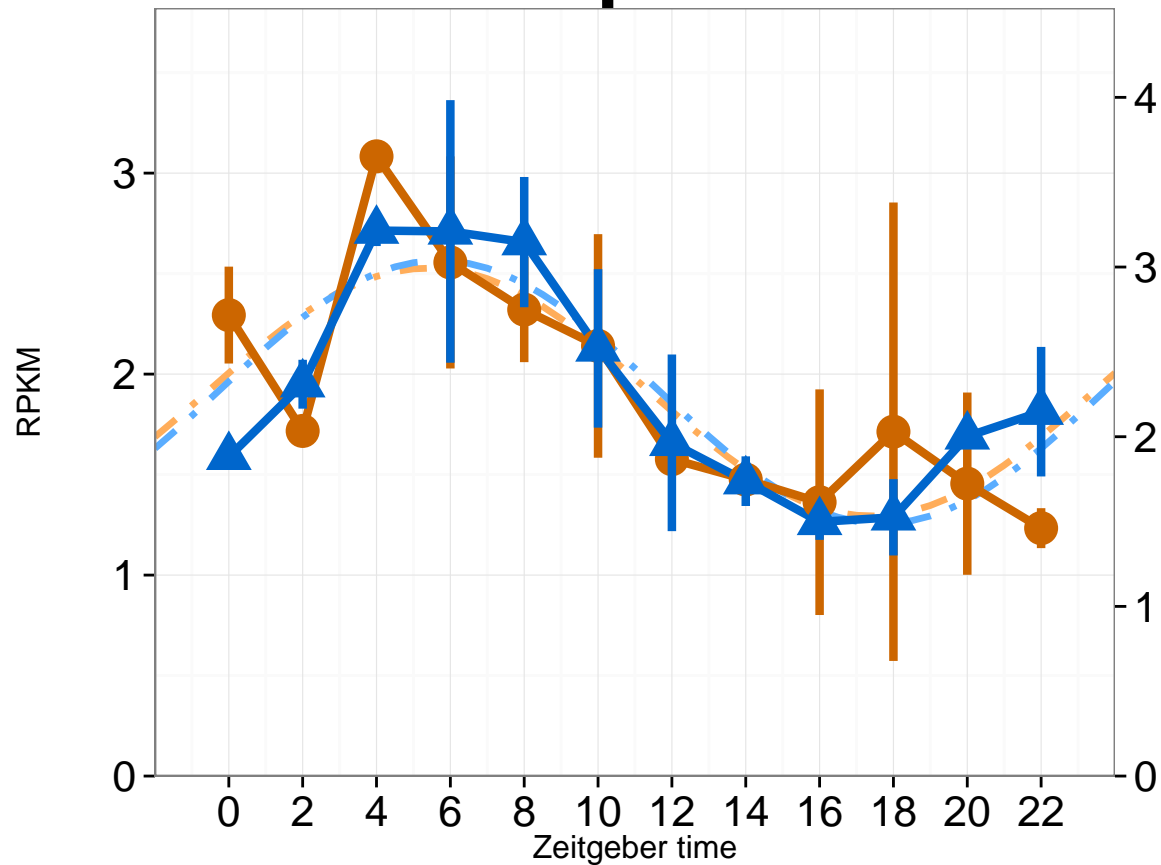

# Gnpda2

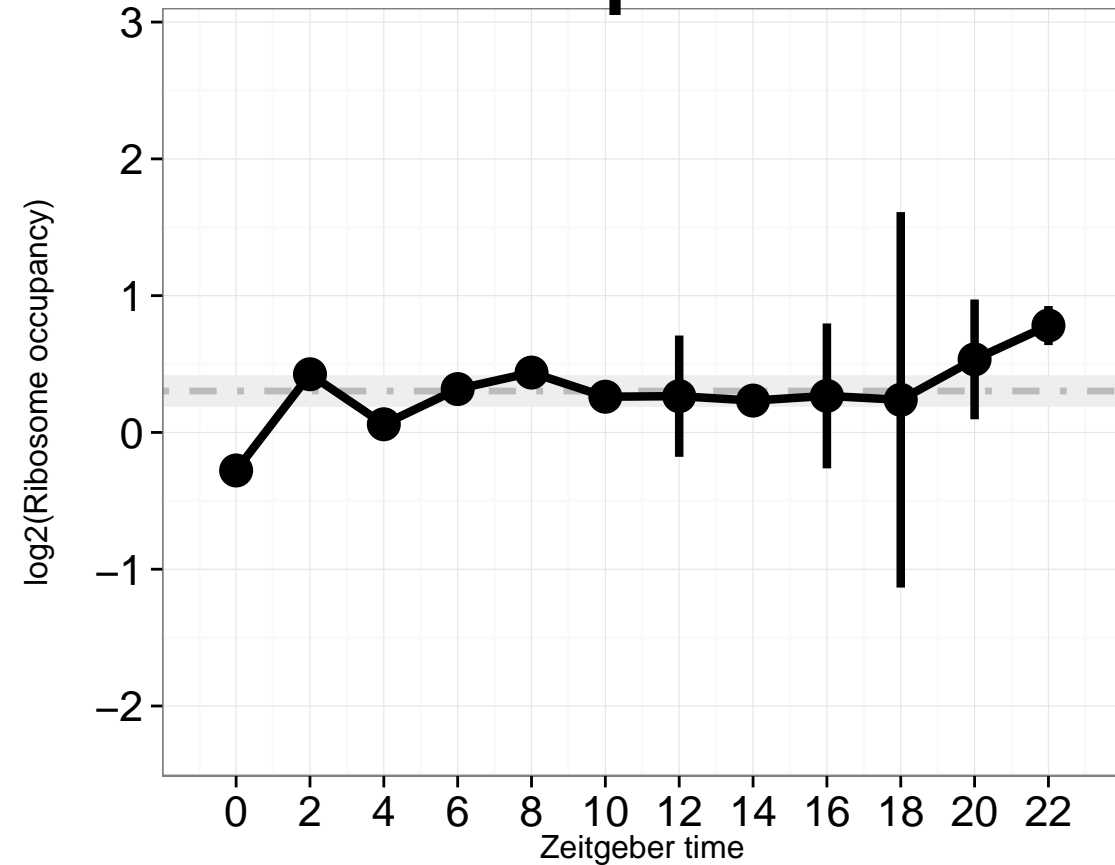

Supplement: SuppDataset_1.zip [file Gnpda2_set_D.pdf › Supplemental Dataset 1/D-mRNA_rhythm_translation_rhyth/Gnpda2_set_D.pdf]

## Gpam

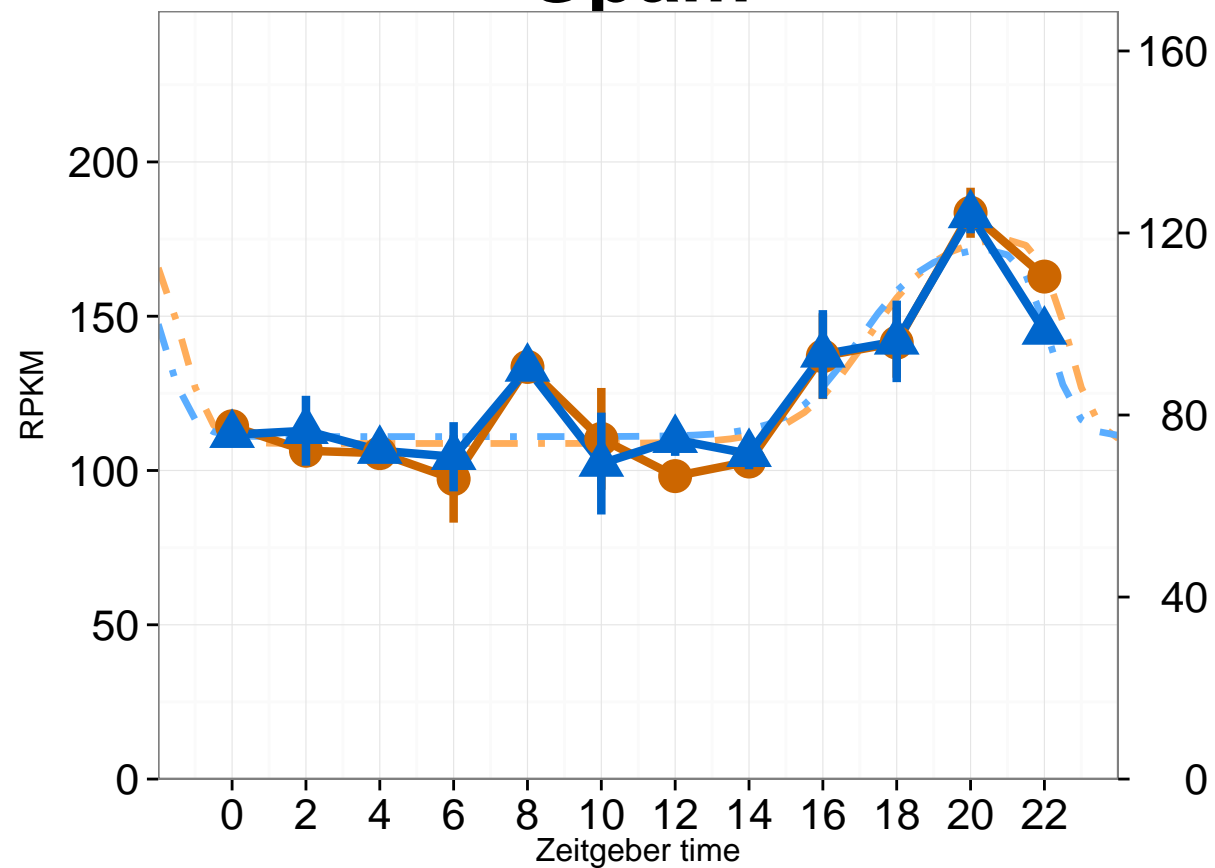

## Gpam

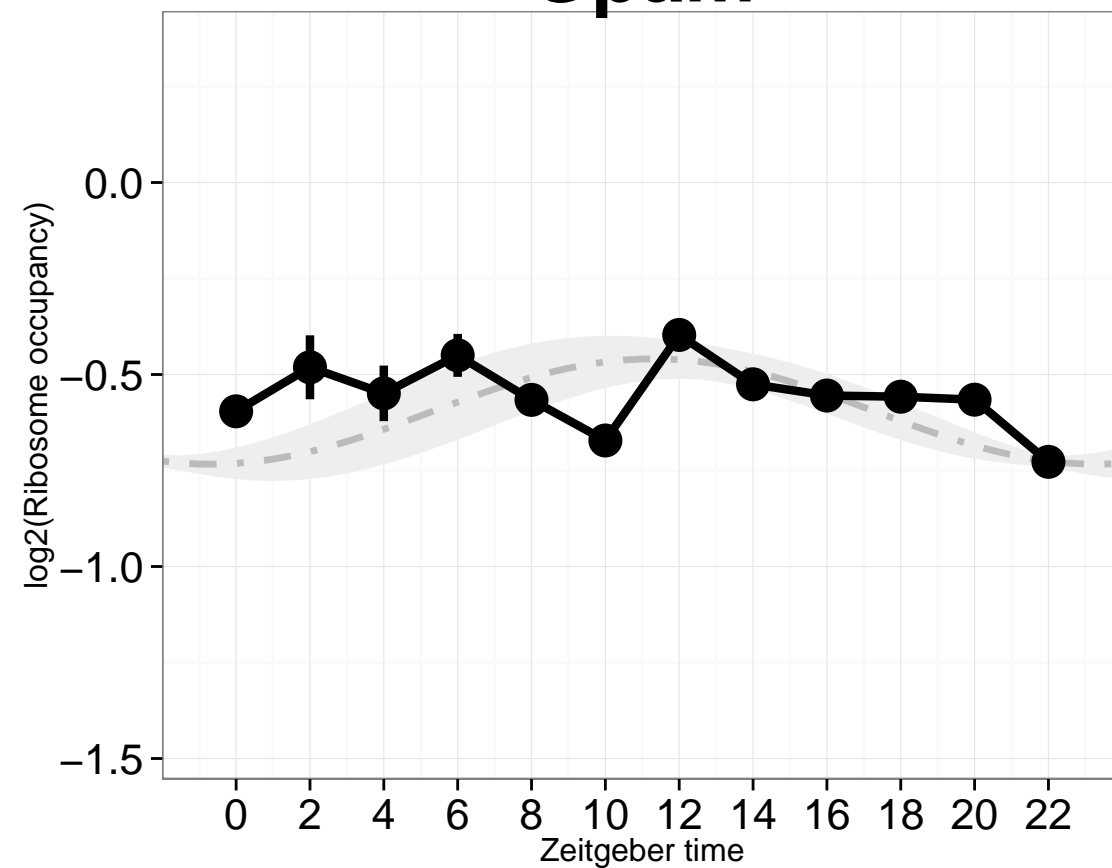

Supplement: SuppDataset_1.zip [file Gpam_set_D.pdf › Supplemental Dataset 1/D-mRNA_rhythm_translation_rhyth/Gpam_set_D.pdf]

## Gpat2

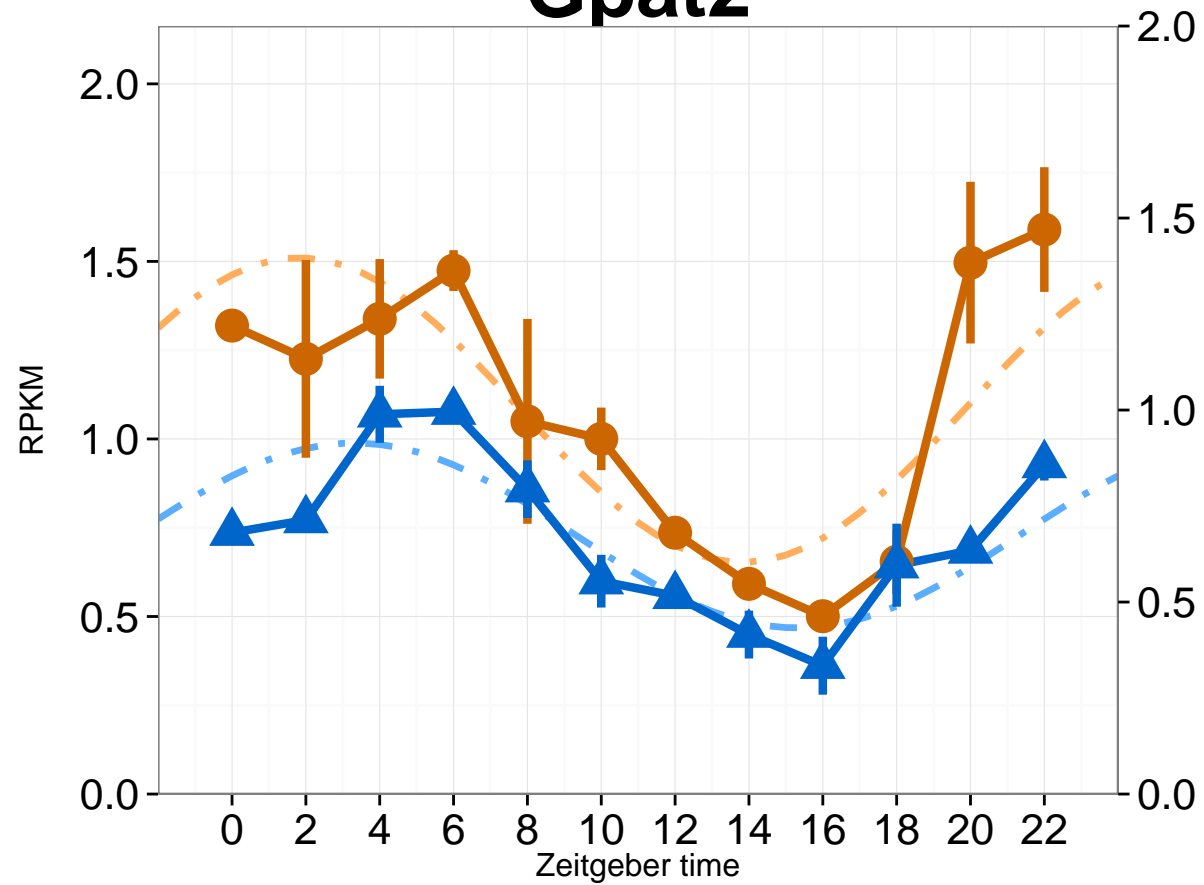

## Gpat2

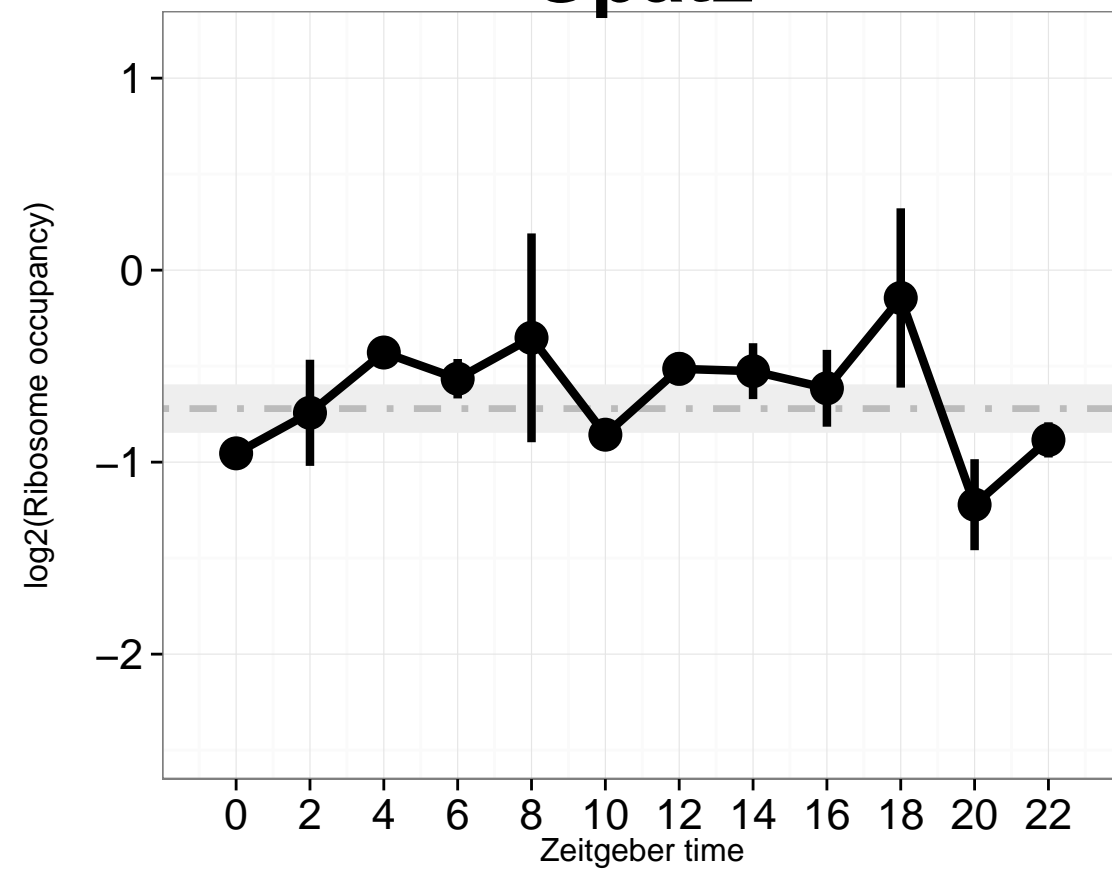

Supplement: SuppDataset_1.zip [file Gpat2_set_D.pdf › Supplemental Dataset 1/D-mRNA_rhythm_translation_rhyth/Gpat2_set_D.pdf]

# Gpcpd1

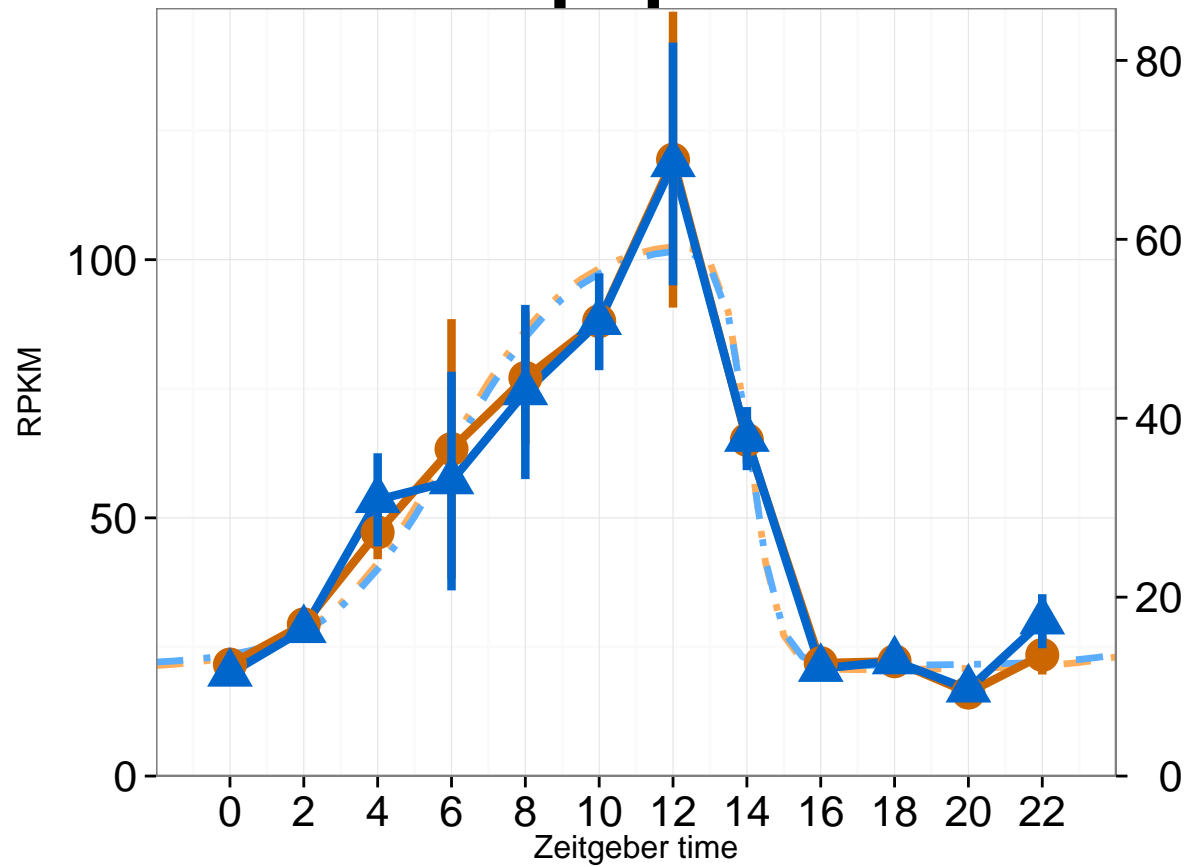

# Gpcpd1

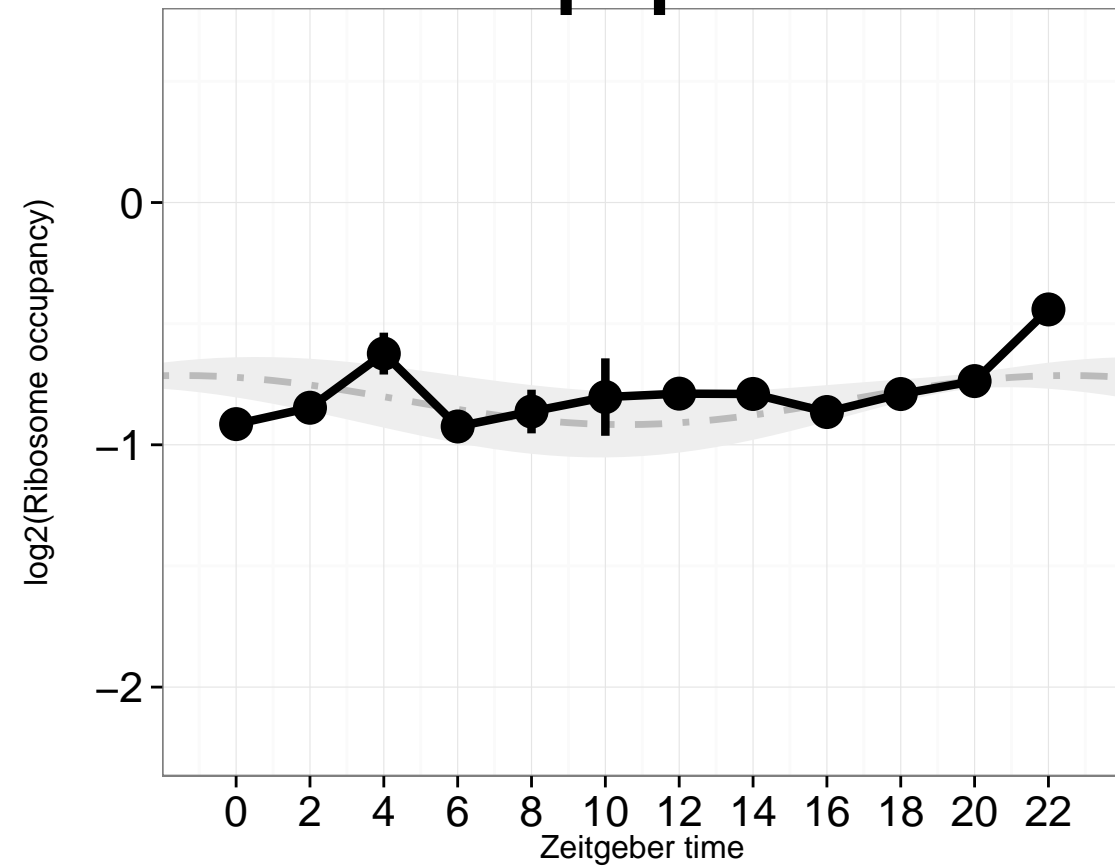

Supplement: SuppDataset_1.zip [file Gpcpd1_set_D.pdf › Supplemental Dataset 1/D-mRNA_rhythm_translation_rhyth/Gpcpd1_set_D.pdf]

# Gpd2

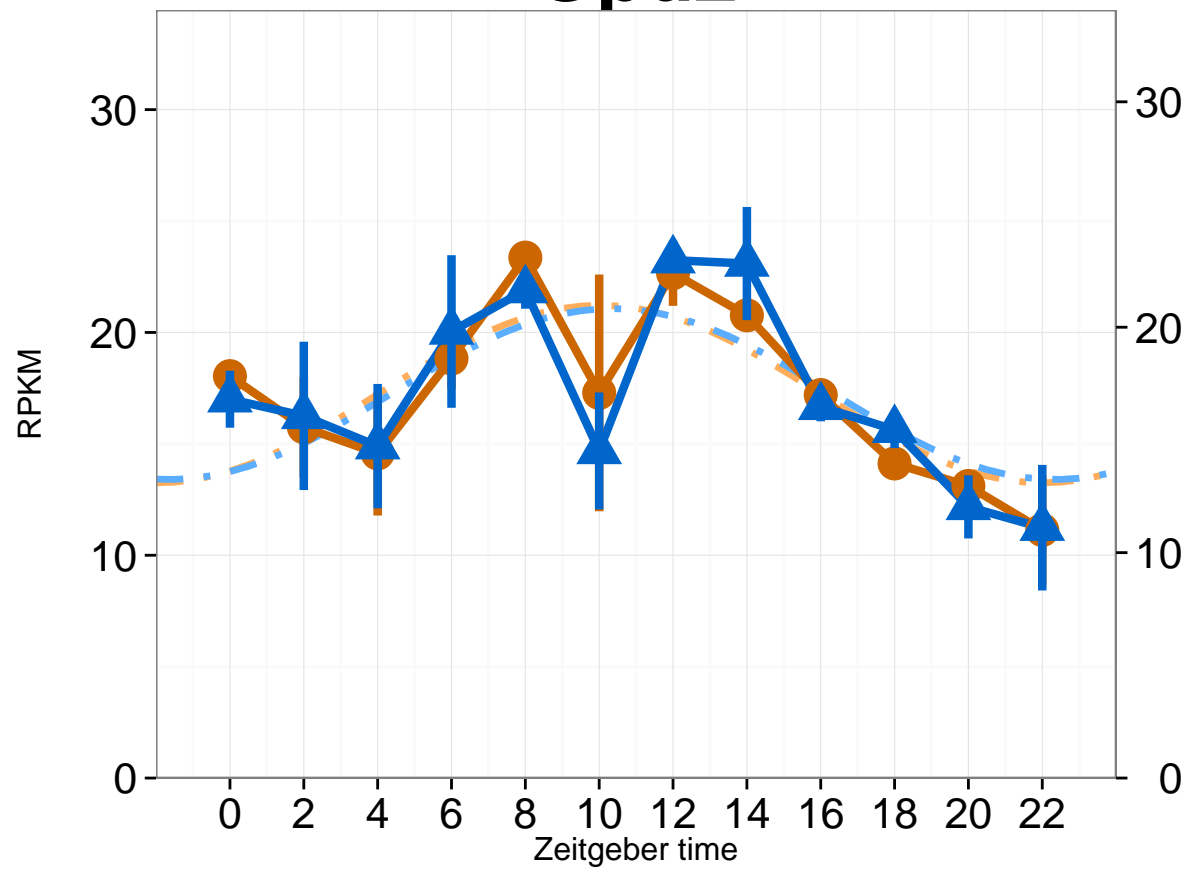

# Gpd2

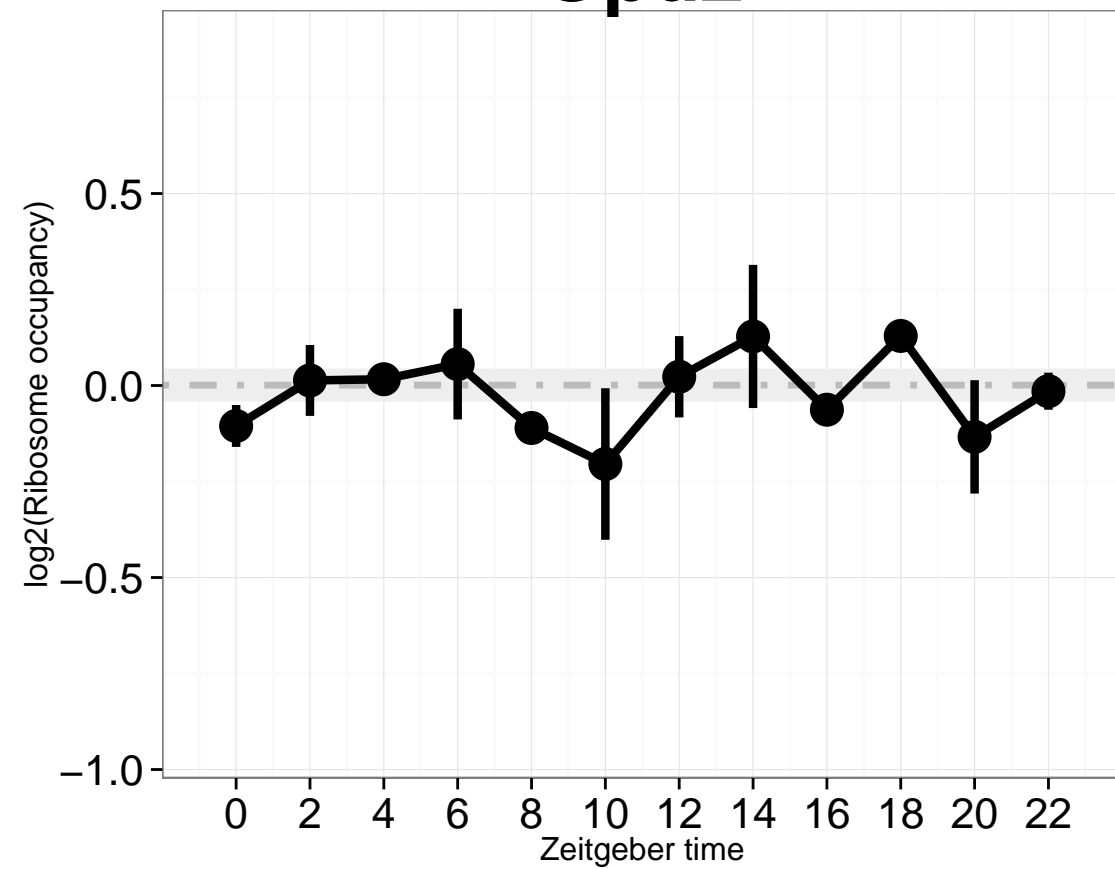

Supplement: SuppDataset_1.zip [file Gpd2_set_D.pdf › Supplemental Dataset 1/D-mRNA_rhythm_translation_rhyth/Gpd2_set_D.pdf]

# Gpi1

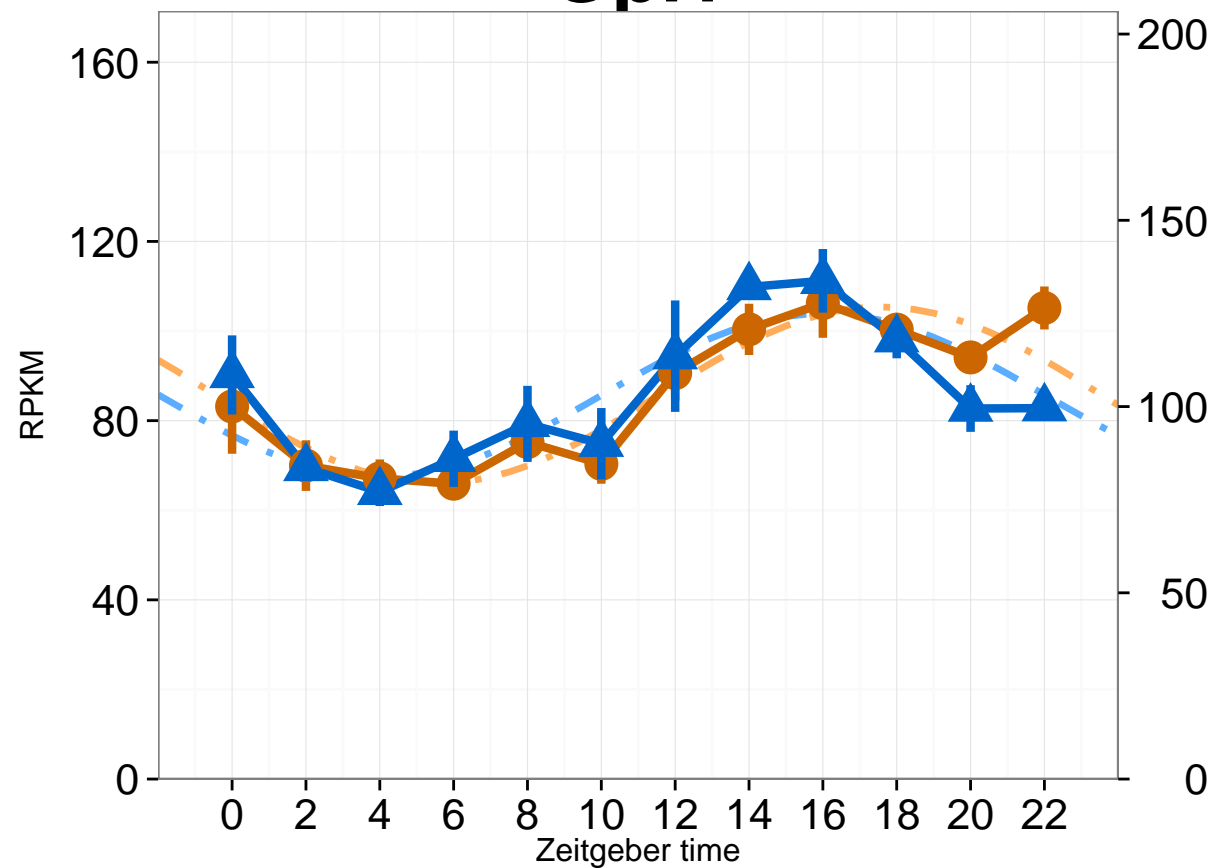

# Gpi1

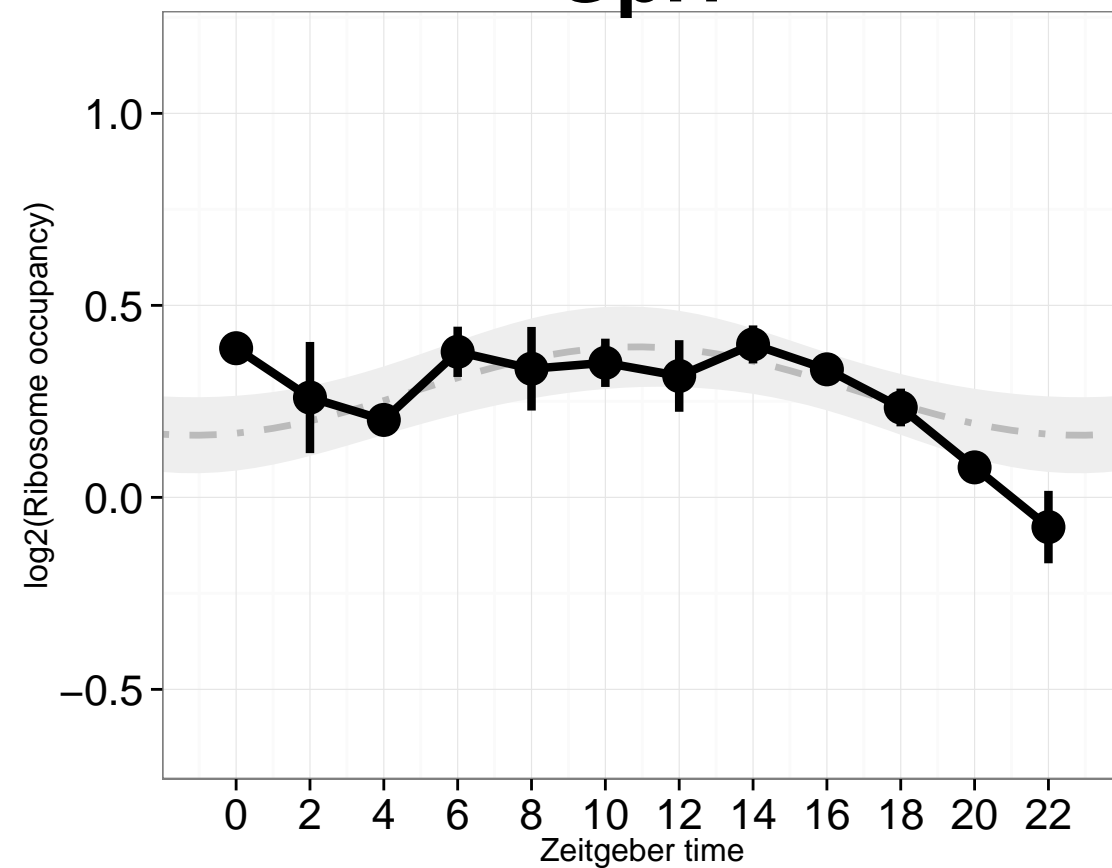

Supplement: SuppDataset_1.zip [file Gpi1_set_D.pdf › Supplemental Dataset 1/D-mRNA_rhythm_translation_rhyth/Gpi1_set_D.pdf]

# Gpr110

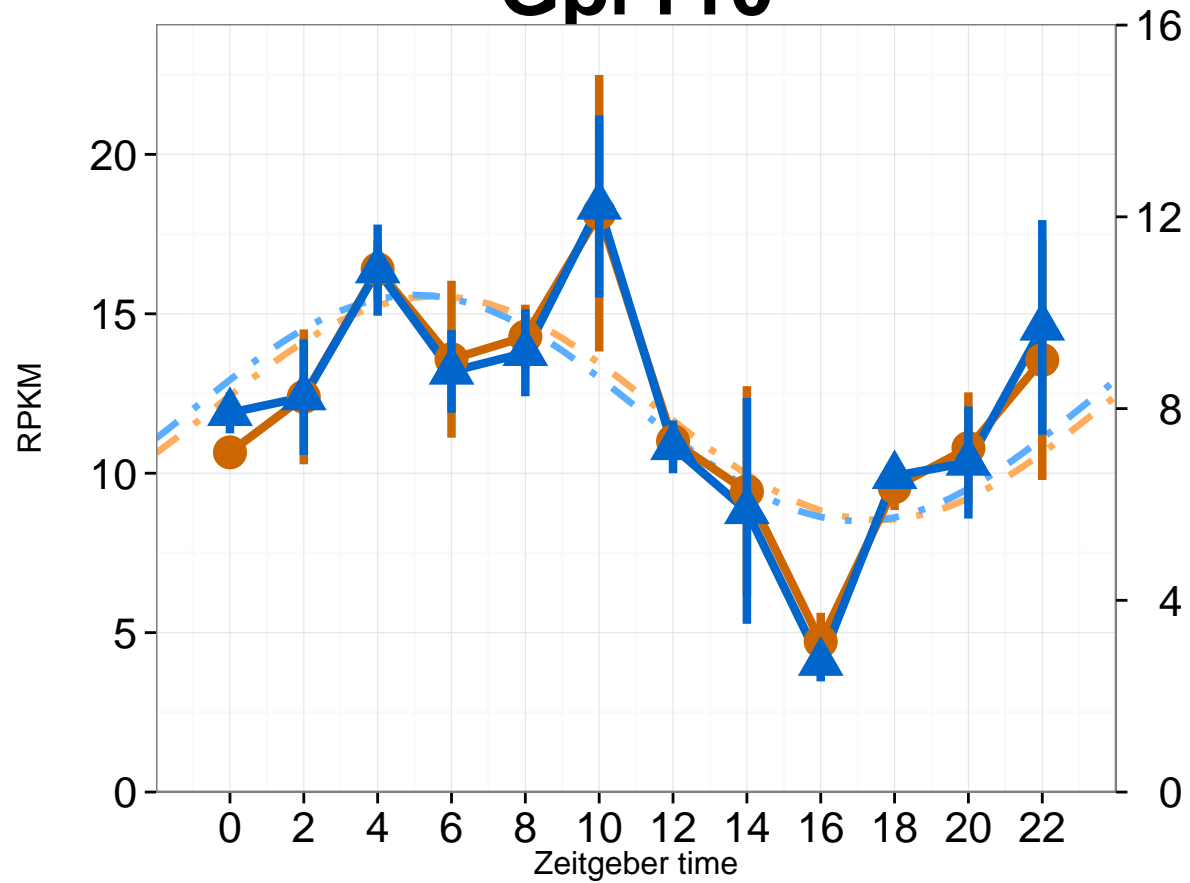

# Gpr110

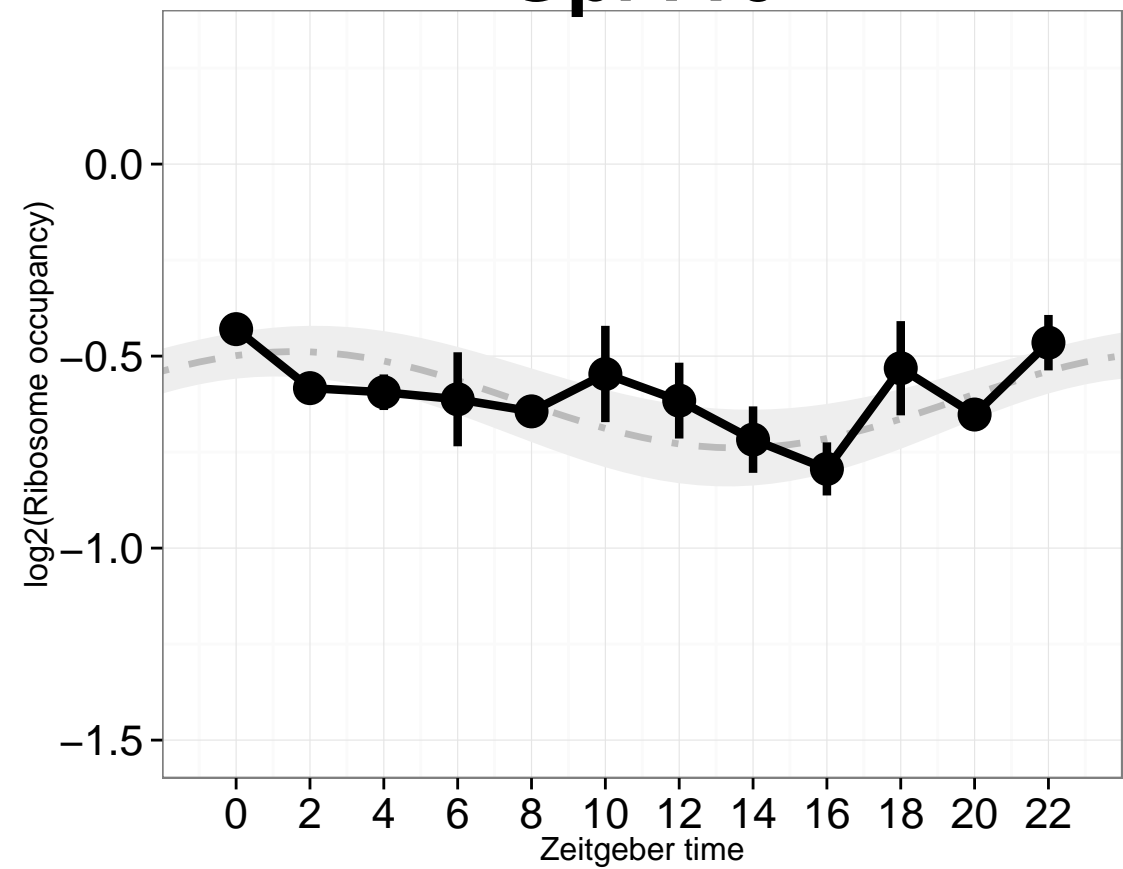

Supplement: SuppDataset_1.zip [file Gpr110_set_D.pdf › Supplemental Dataset 1/D-mRNA_rhythm_translation_rhyth/Gpr110_set_D.pdf]

# Gpr146

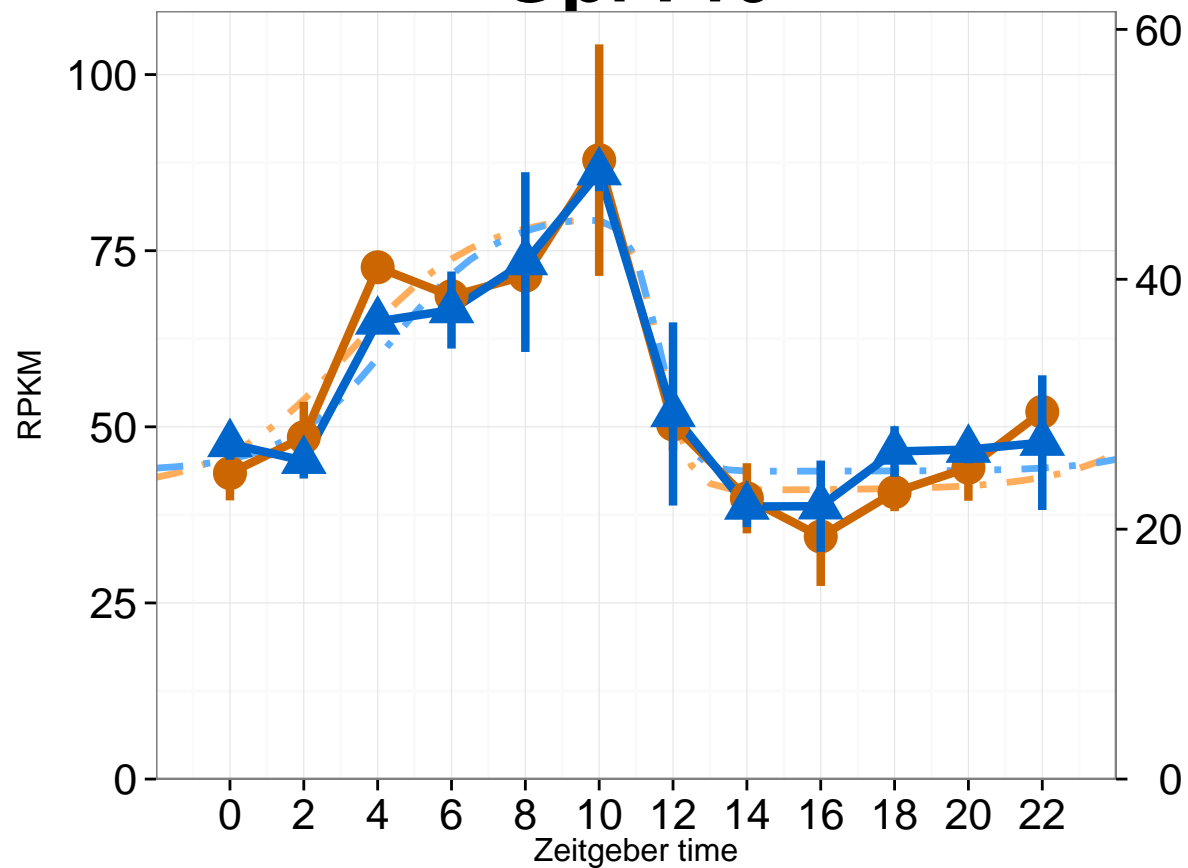

# Gpr146

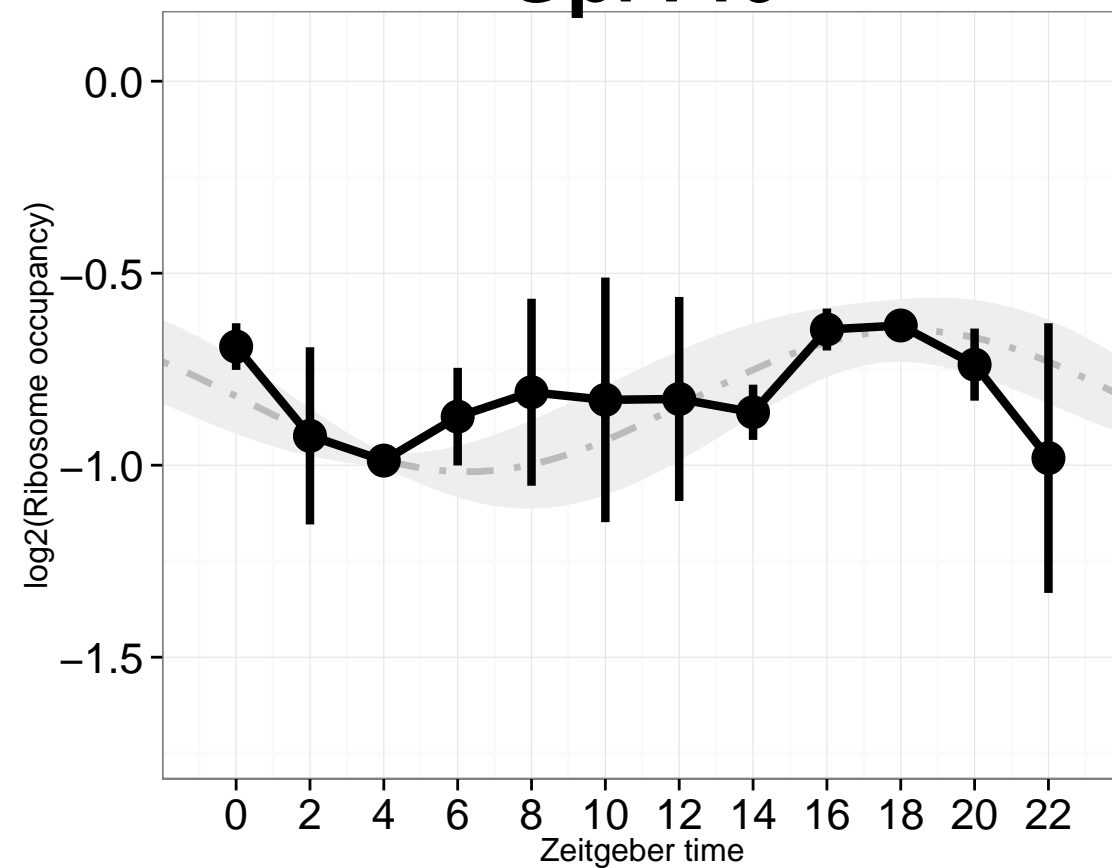

Supplement: SuppDataset_1.zip [file Gpr146_set_D.pdf › Supplemental Dataset 1/D-mRNA_rhythm_translation_rhyth/Gpr146_set_D.pdf]

## Gpr155

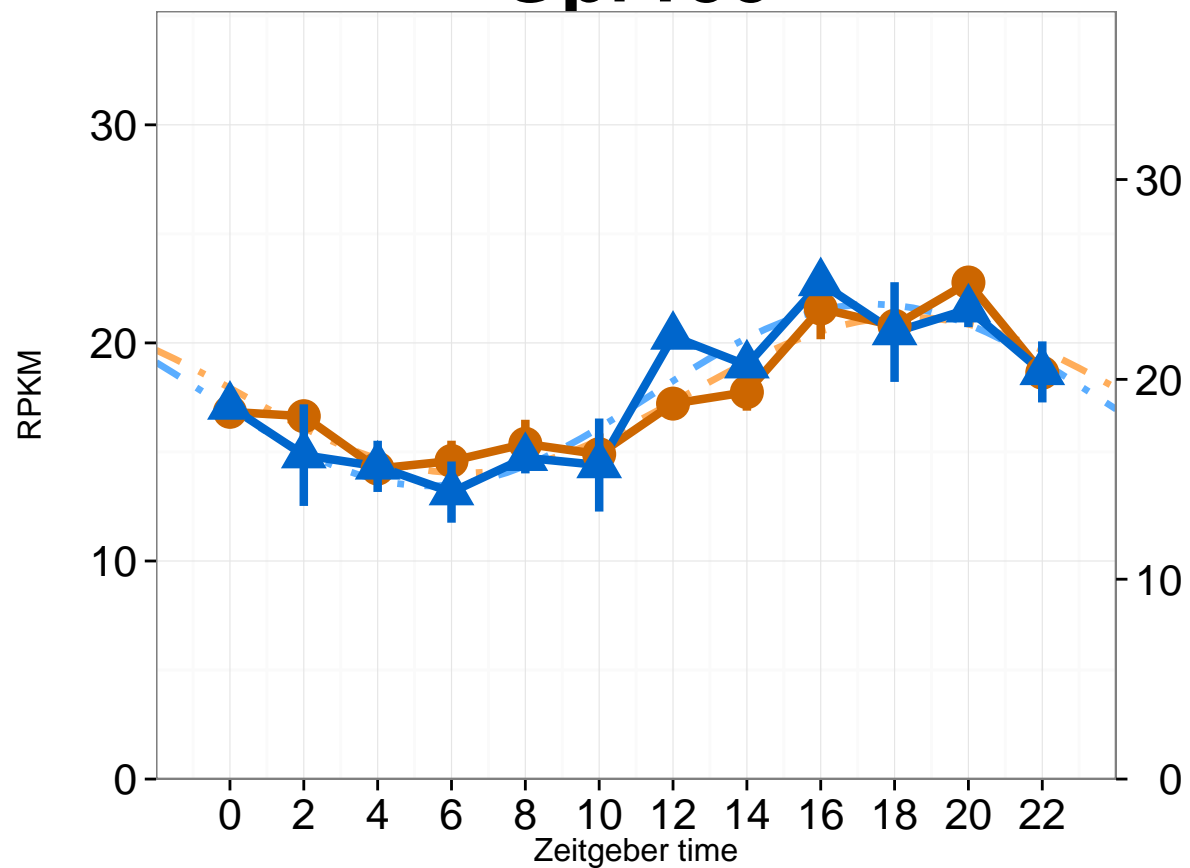

## Gpr155

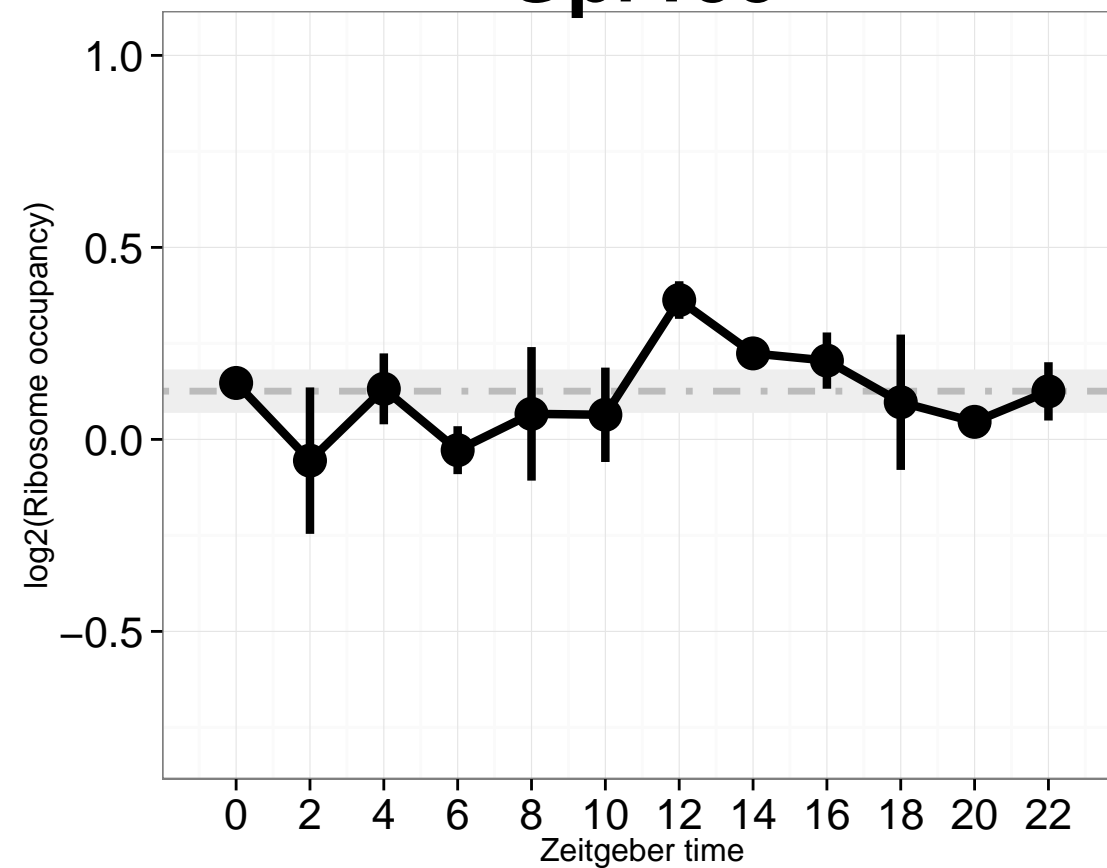

Supplement: SuppDataset_1.zip [file Gpr155_set_D.pdf › Supplemental Dataset 1/D-mRNA_rhythm_translation_rhyth/Gpr155_set_D.pdf]

# Gpr97

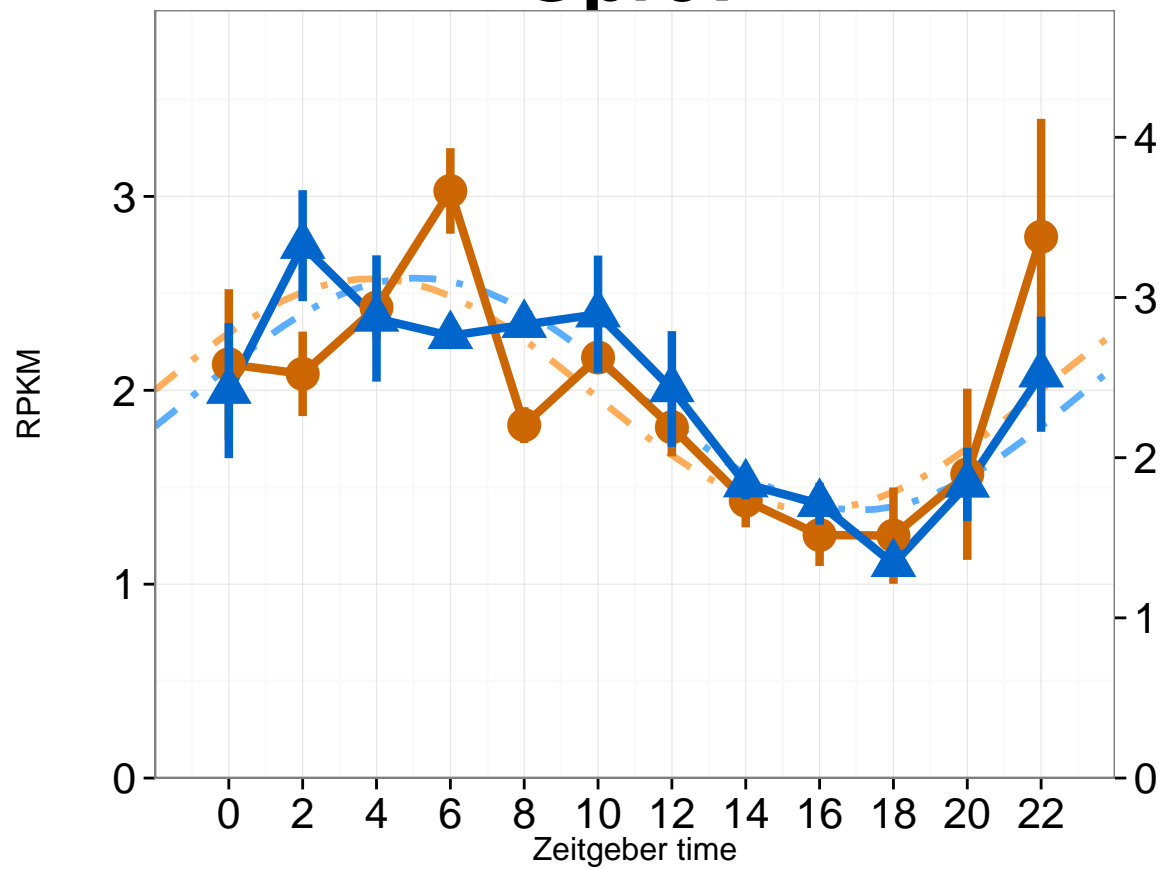

# Gpr97

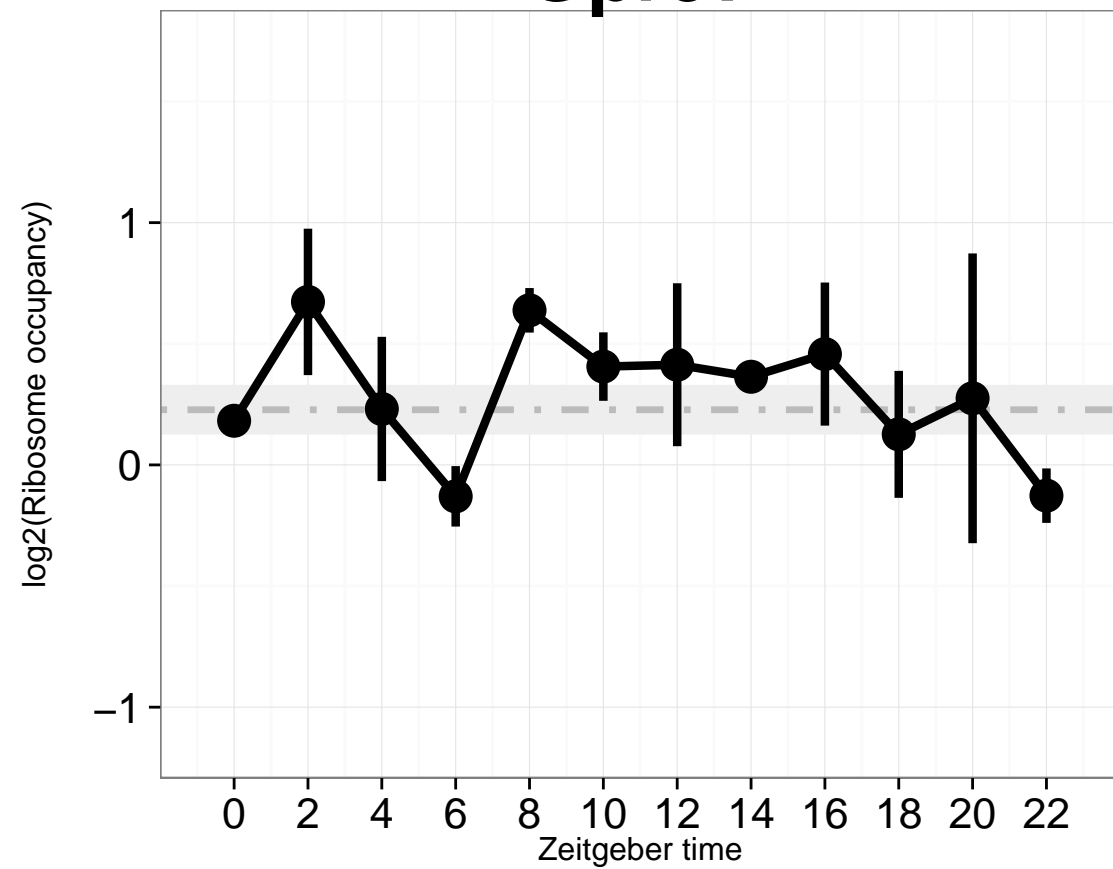

Supplement: SuppDataset_1.zip [file Gpr97_set_D.pdf › Supplemental Dataset 1/D-mRNA_rhythm_translation_rhyth/Gpr97_set_D.pdf]

# Gprin3

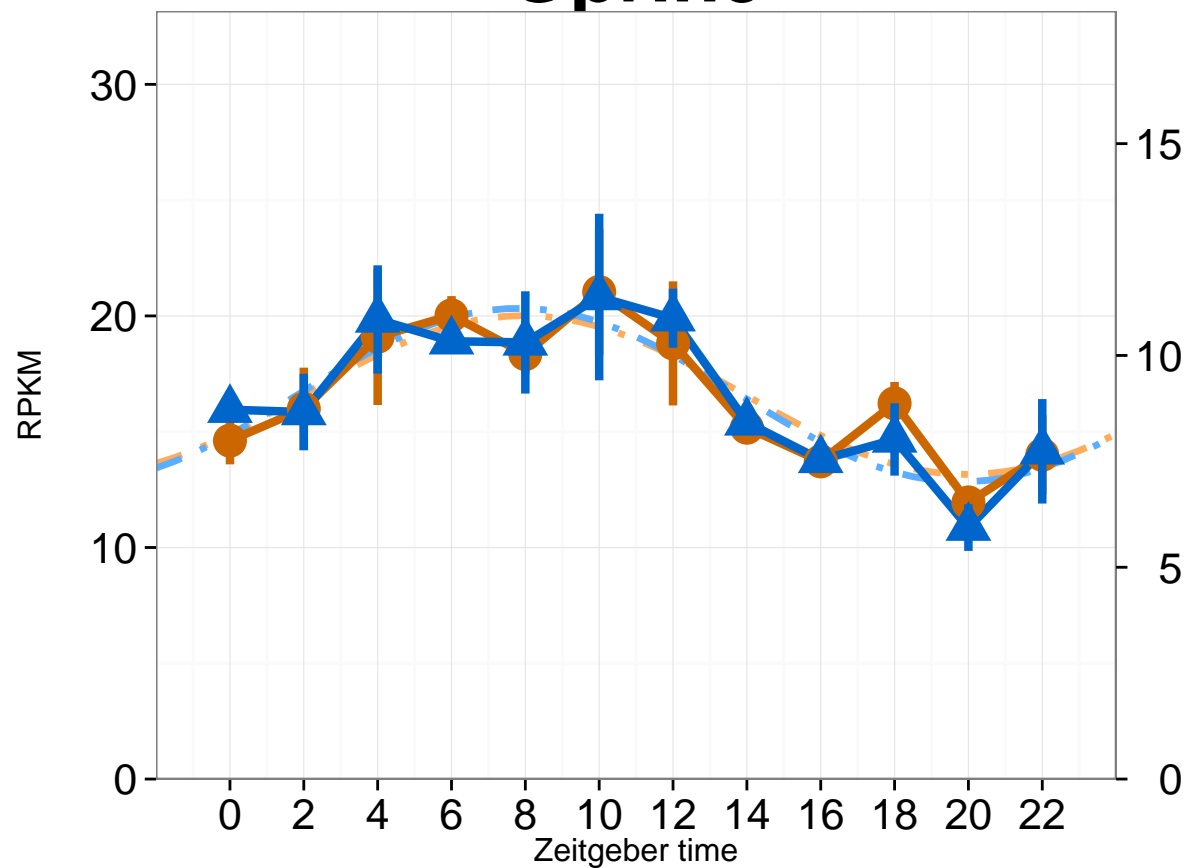

# Gprin3

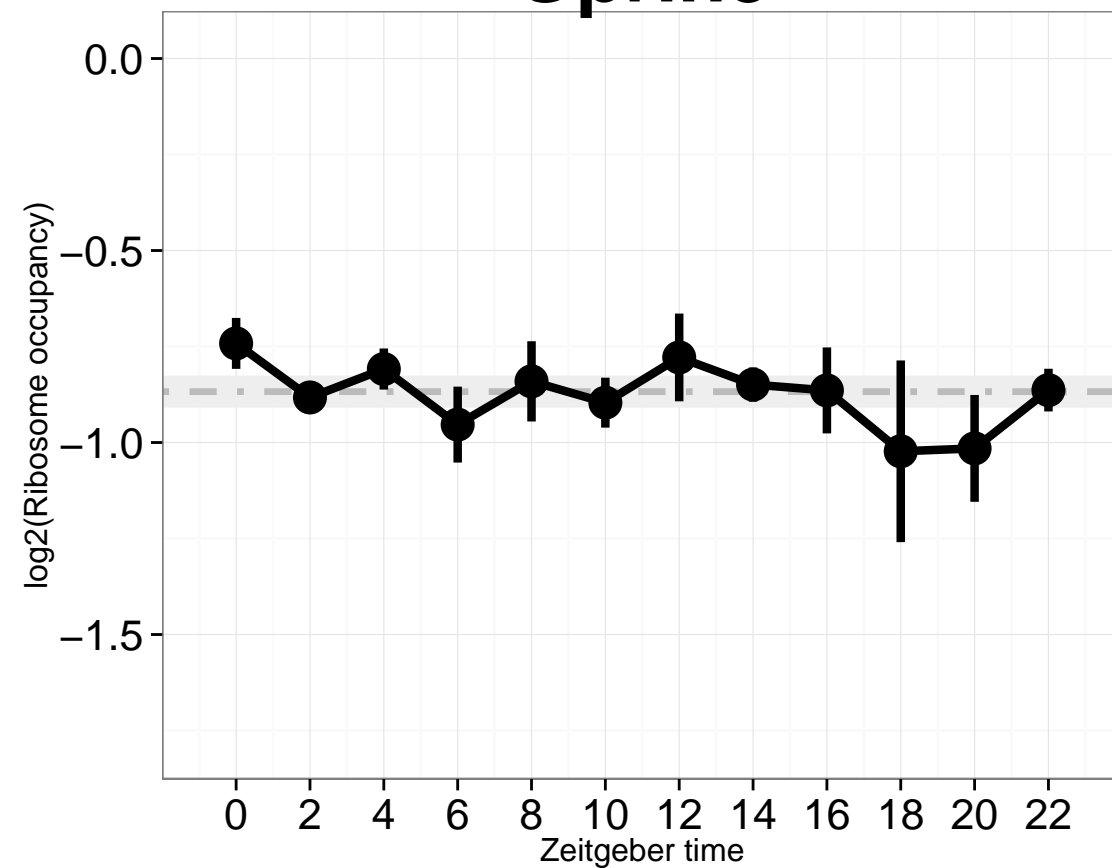

Supplement: SuppDataset_1.zip [file Gprin3_set_D.pdf › Supplemental Dataset 1/D-mRNA_rhythm_translation_rhyth/Gprin3_set_D.pdf]

## Gpt2

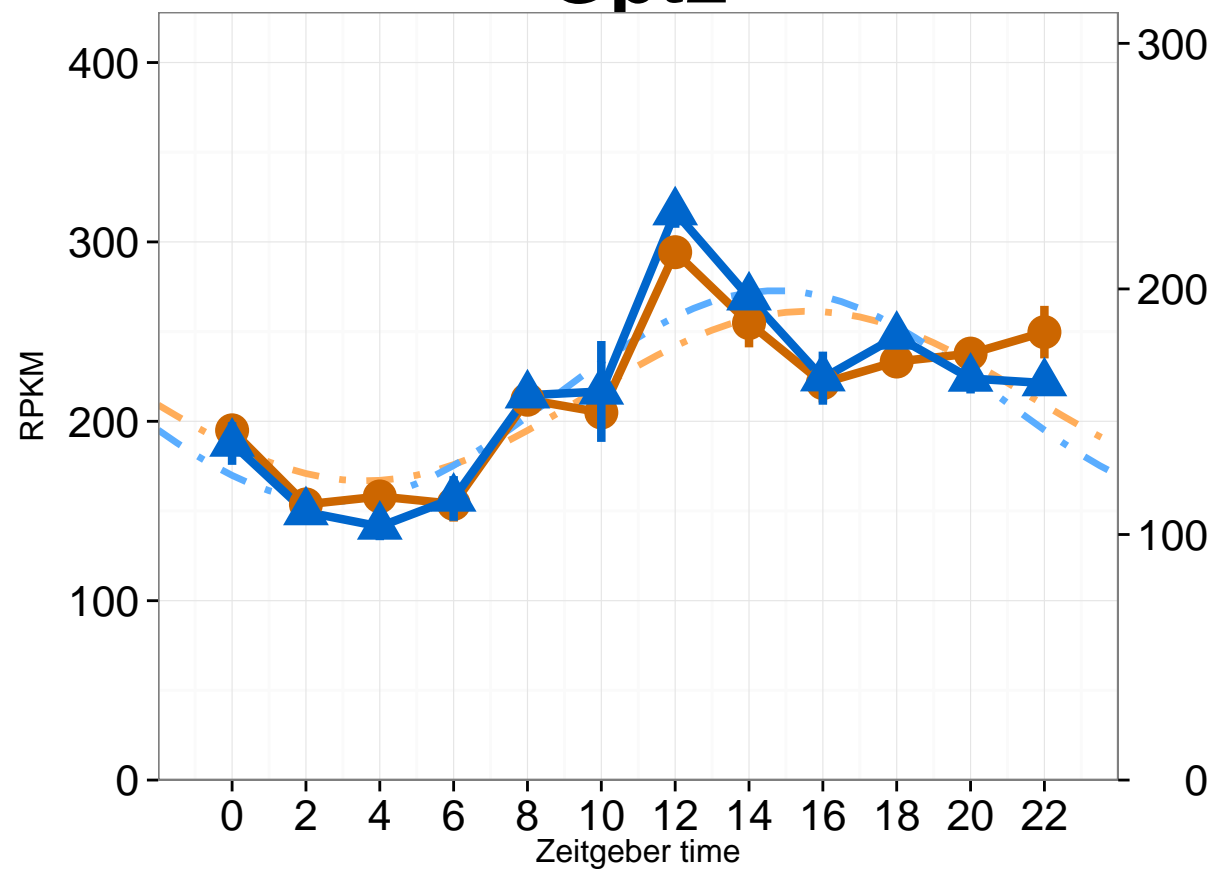

## Gpt2

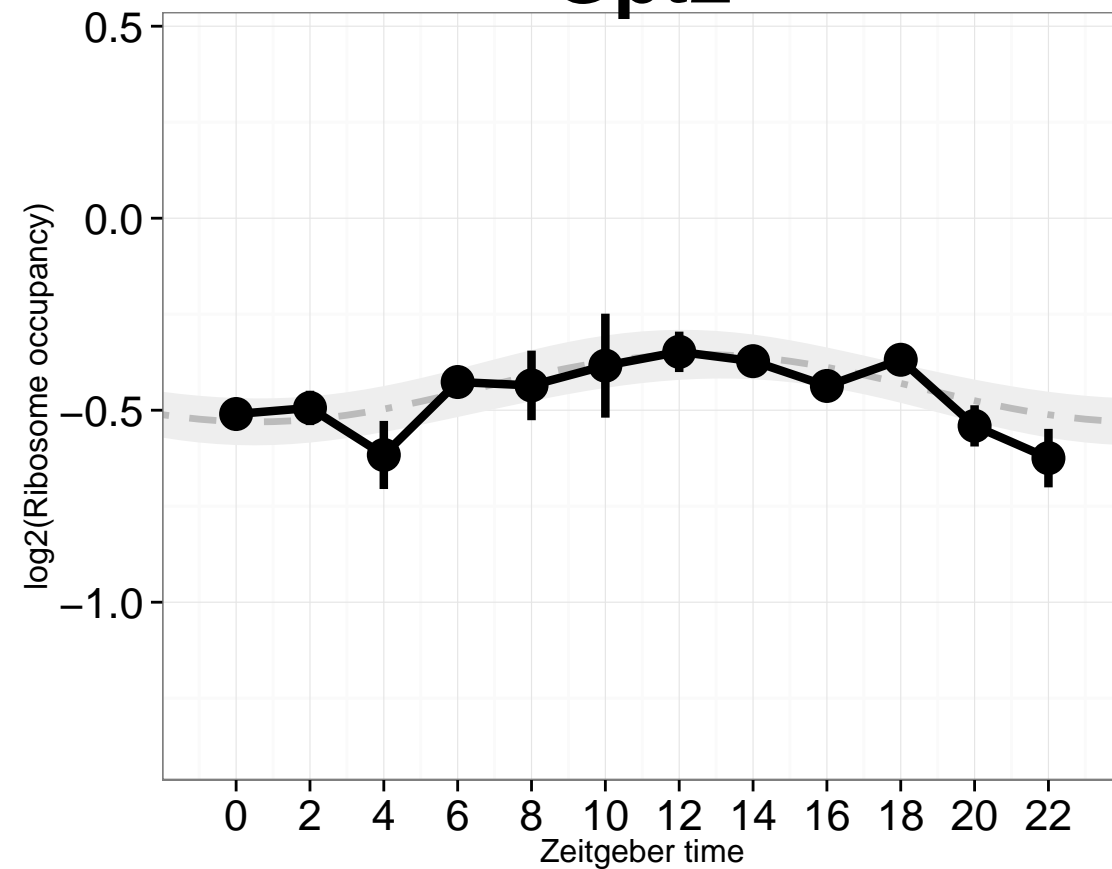

Supplement: SuppDataset_1.zip [file Gpt2_set_D.pdf › Supplemental Dataset 1/D-mRNA_rhythm_translation_rhyth/Gpt2_set_D.pdf]

# Gramd1c

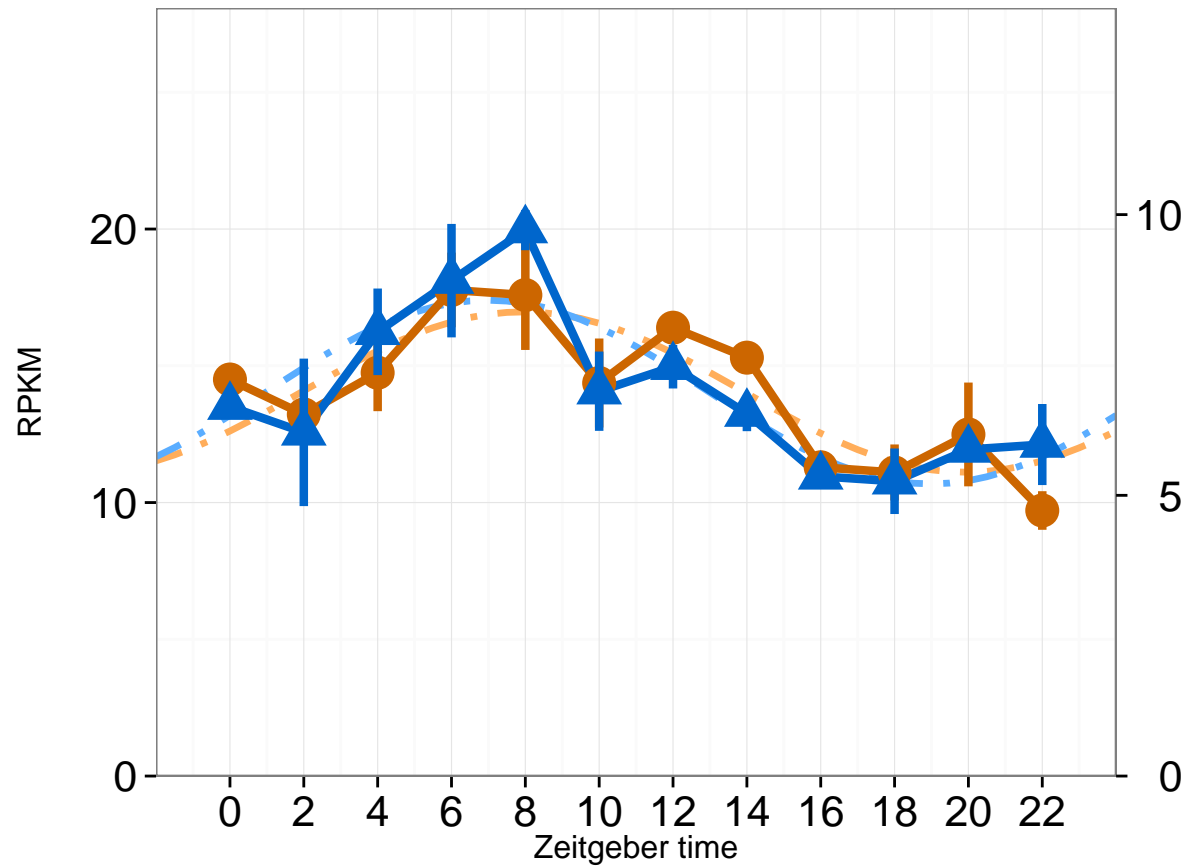

# Gramd1c

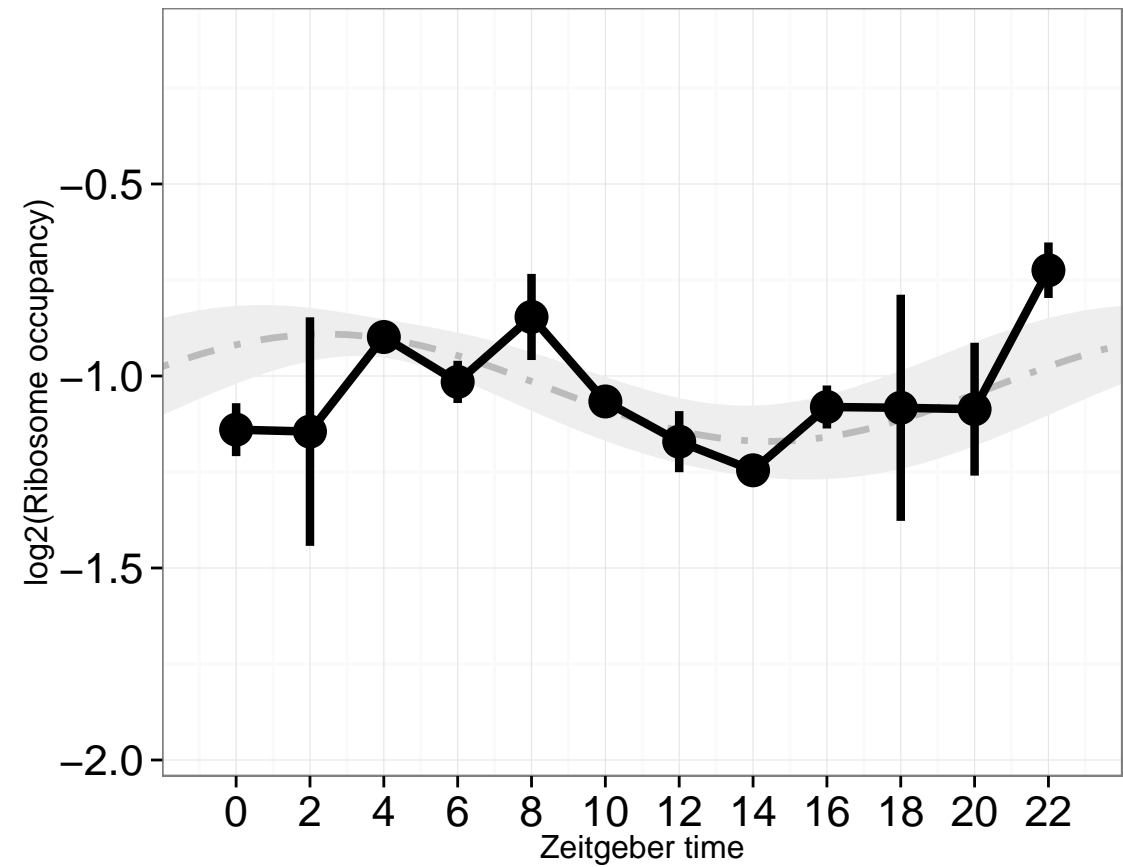

Supplement: SuppDataset_1.zip [file Gramd1c_set_D.pdf › Supplemental Dataset 1/D-mRNA_rhythm_translation_rhyth/Gramd1c_set_D.pdf]

## Grb7

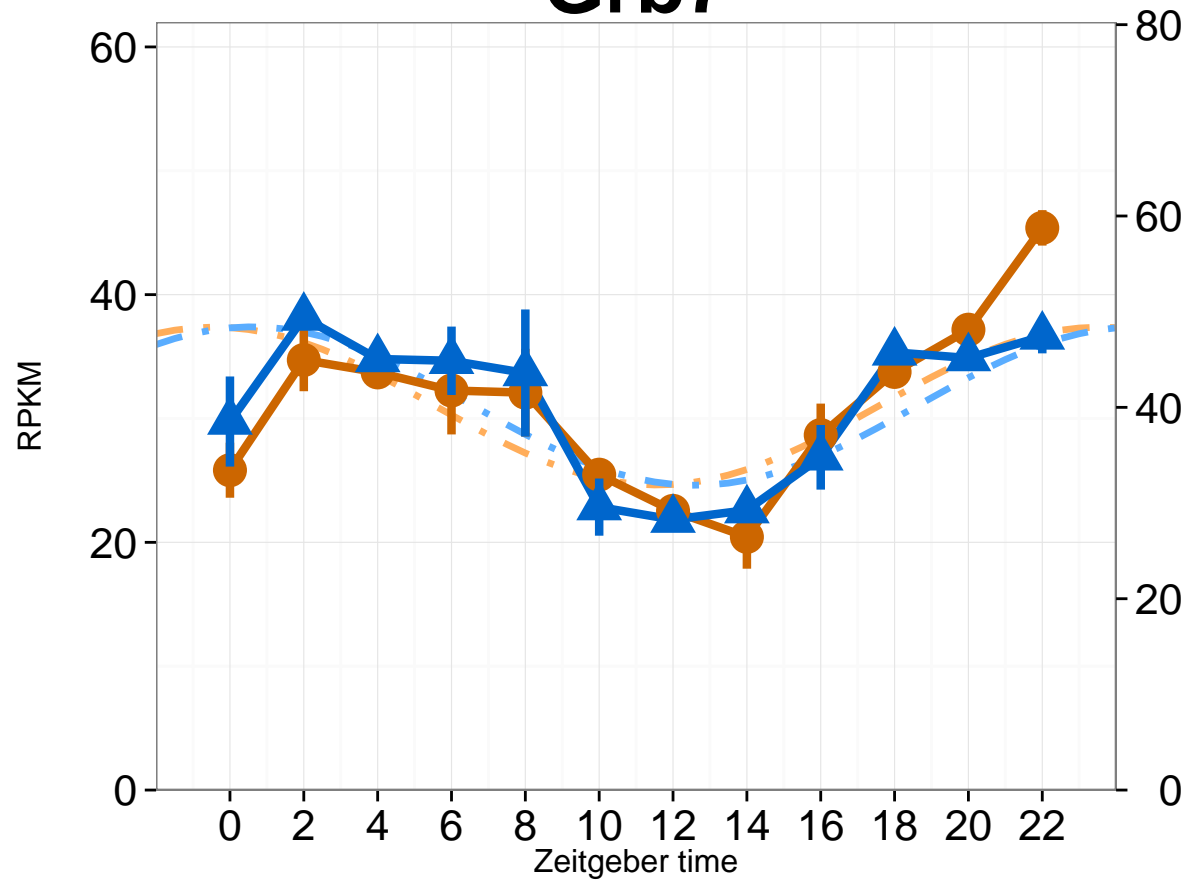

## Grb7

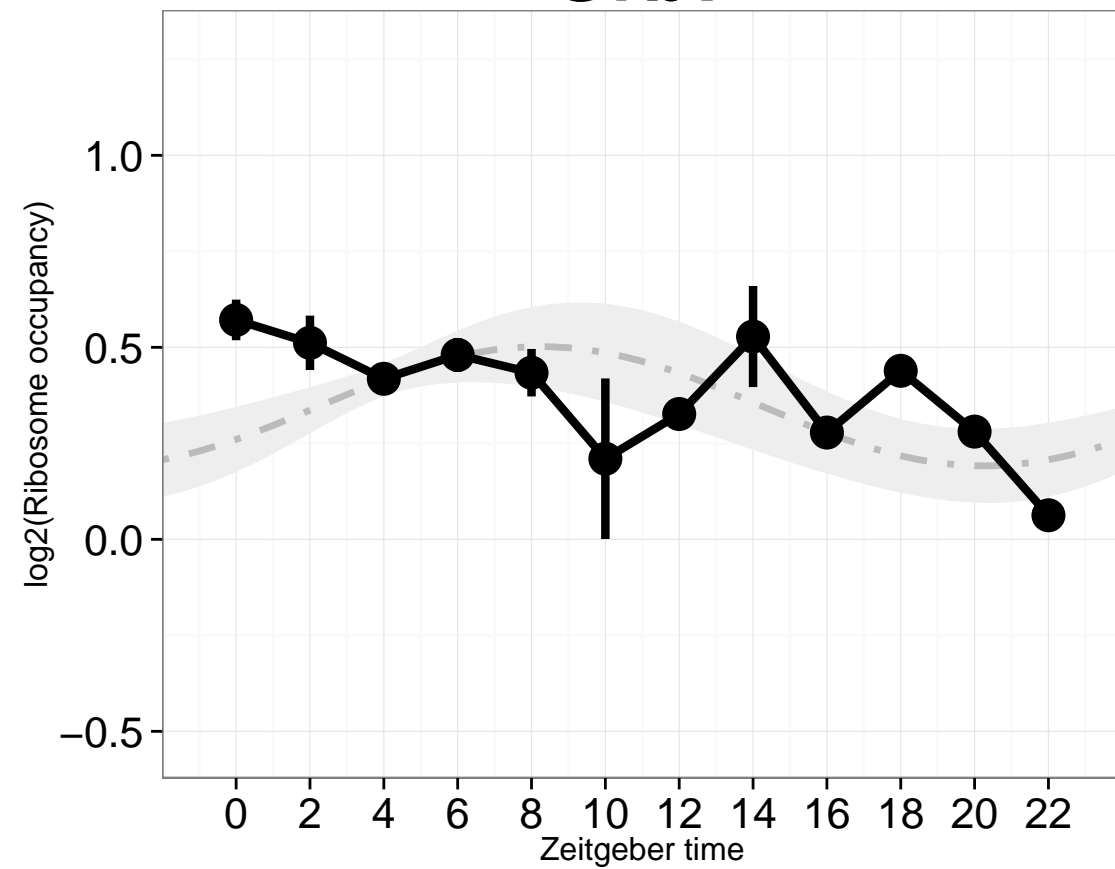

Supplement: SuppDataset_1.zip [file Grb7_set_D.pdf › Supplemental Dataset 1/D-mRNA_rhythm_translation_rhyth/Grb7_set_D.pdf]

# Grem2

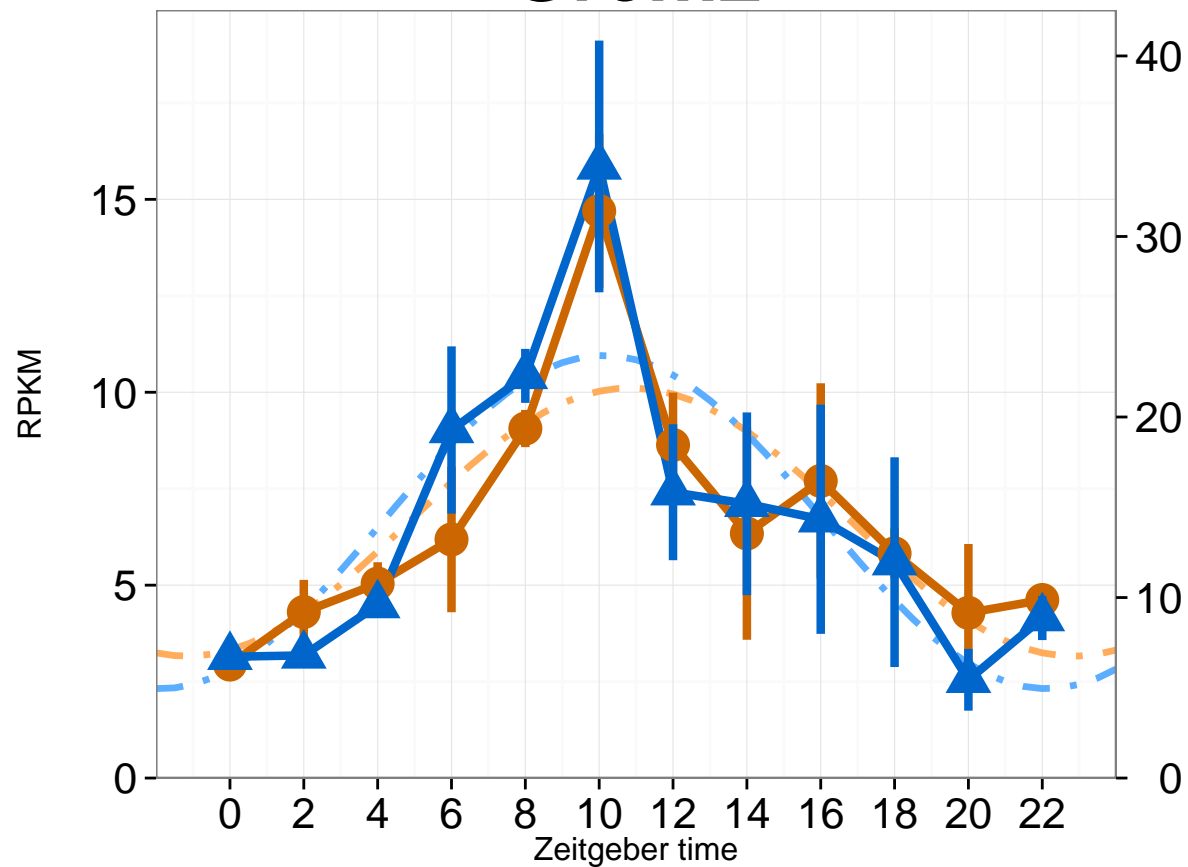

# Grem2

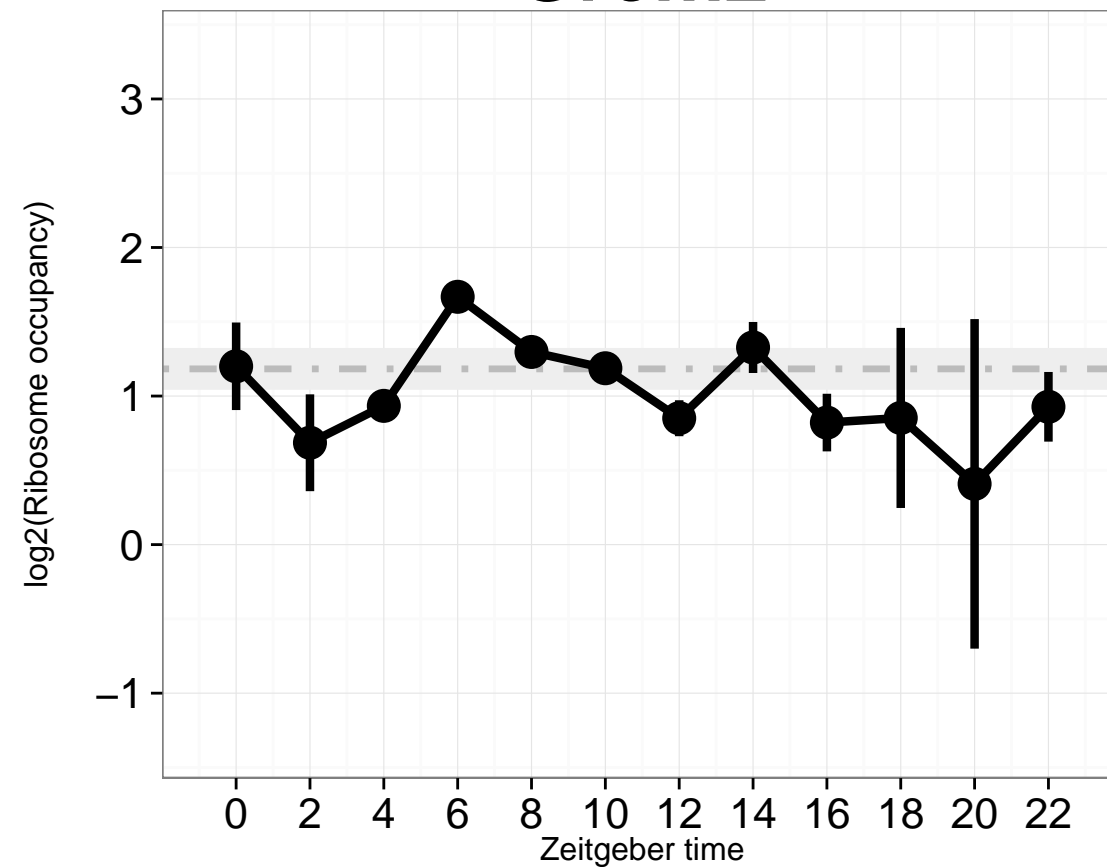

Supplement: SuppDataset_1.zip [file Grem2_set_D.pdf › Supplemental Dataset 1/D-mRNA_rhythm_translation_rhyth/Grem2_set_D.pdf]

# Grk5

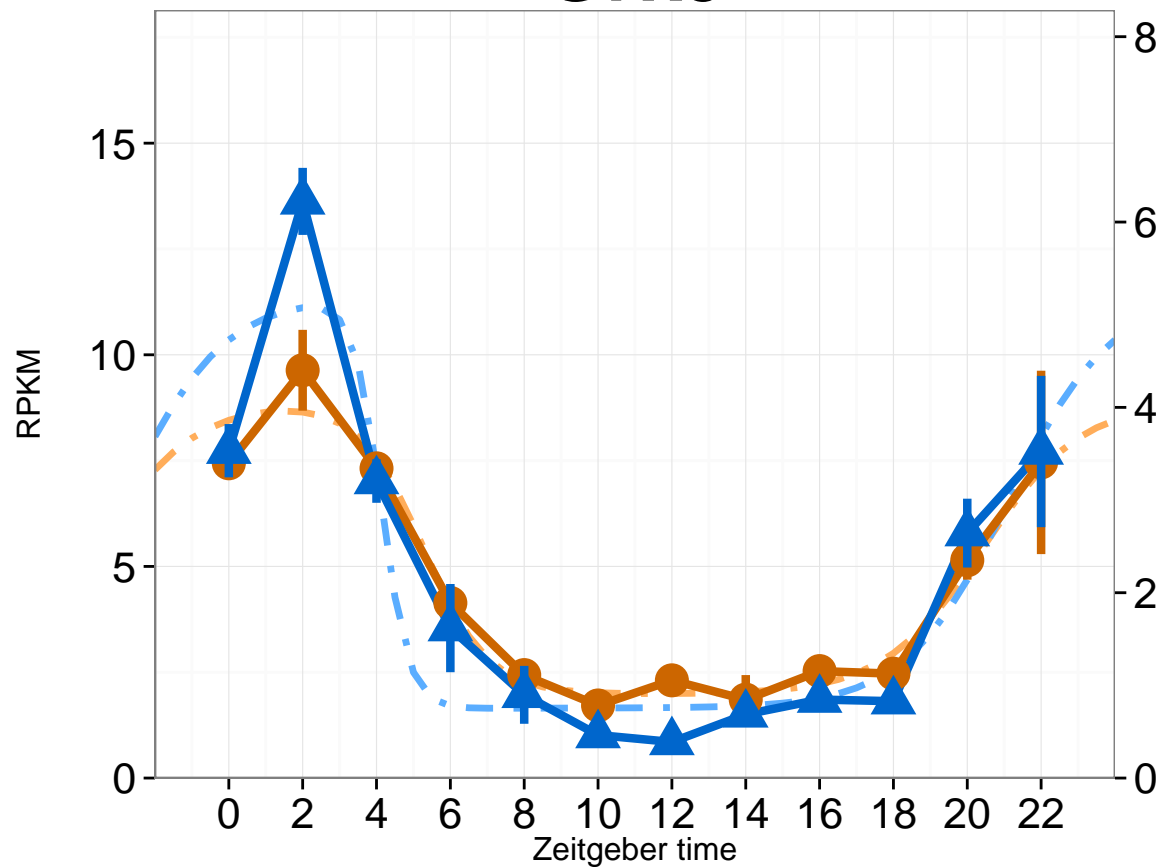

# Grk5

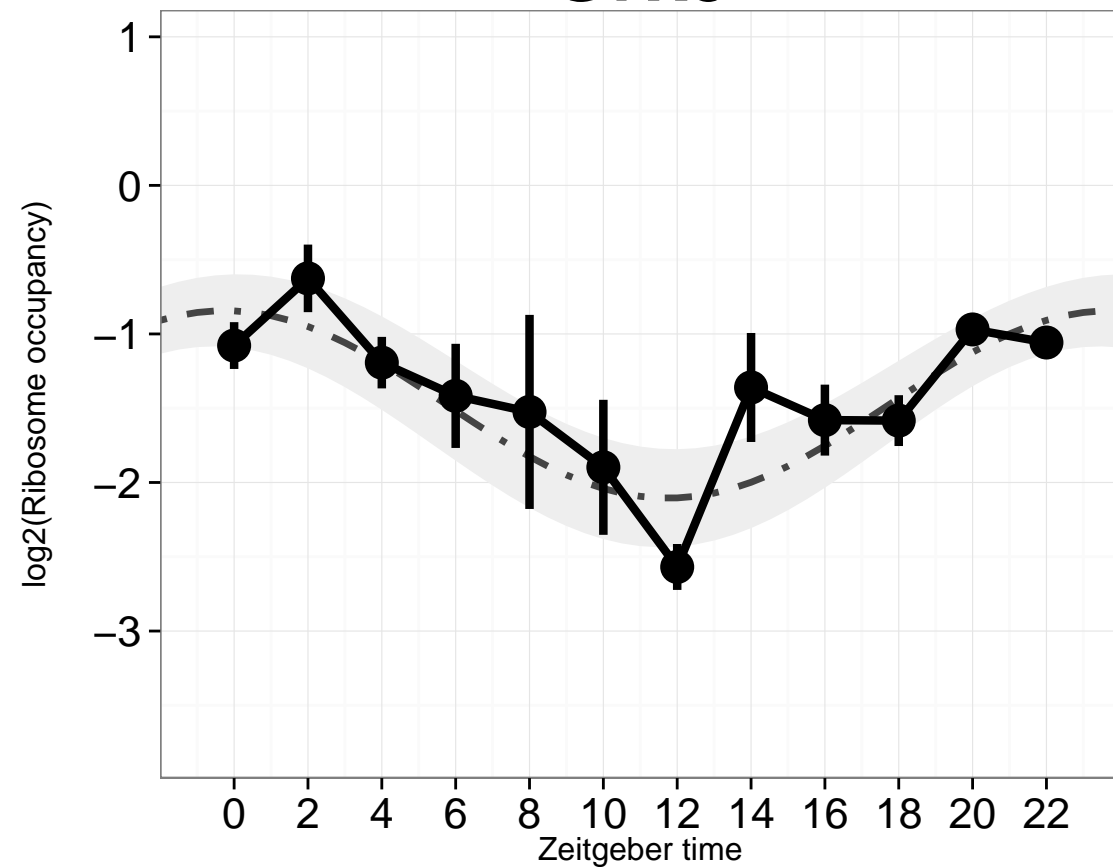

Supplement: SuppDataset_1.zip [file Grk5_set_D.pdf › Supplemental Dataset 1/D-mRNA_rhythm_translation_rhyth/Grk5_set_D.pdf]

## Gss

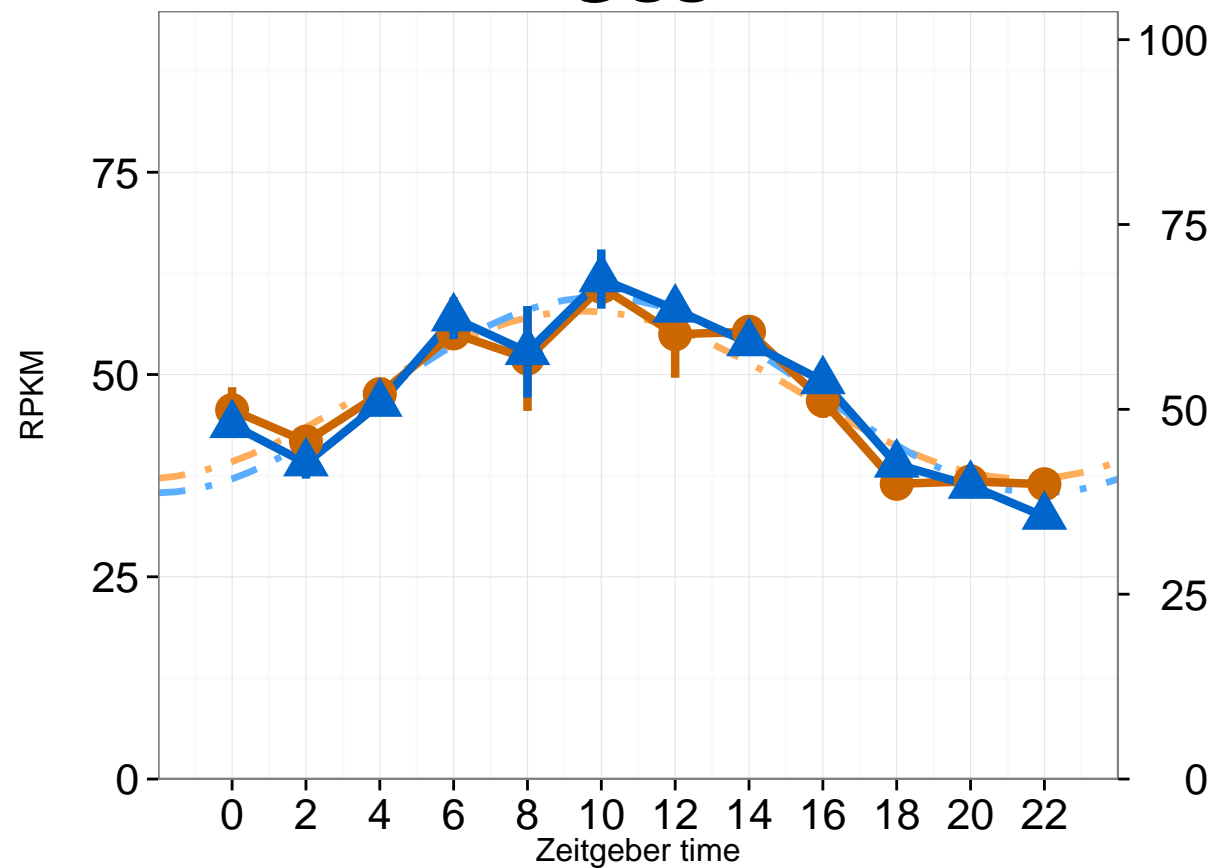

## Gss

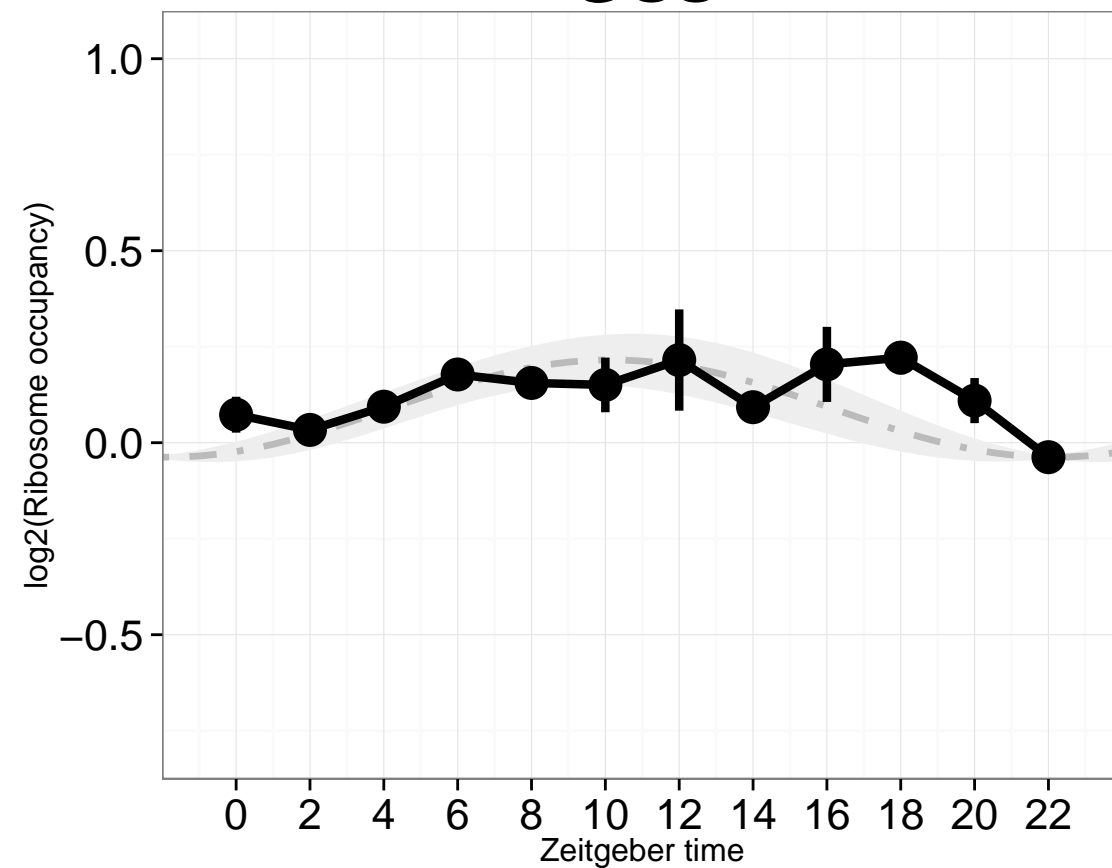

Supplement: SuppDataset_1.zip [file Gss_set_D.pdf › Supplemental Dataset 1/D-mRNA_rhythm_translation_rhyth/Gss_set_D.pdf]

## Gsta3

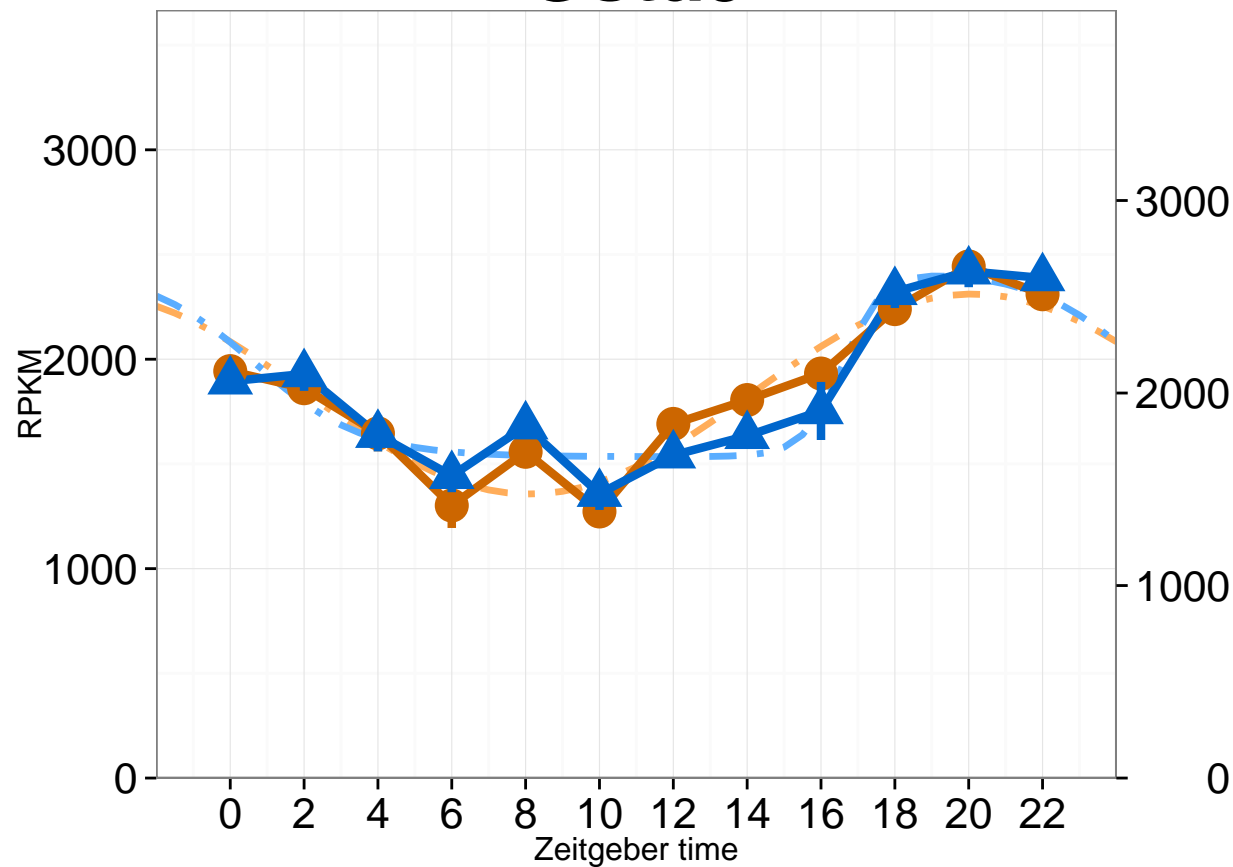

## Gsta3

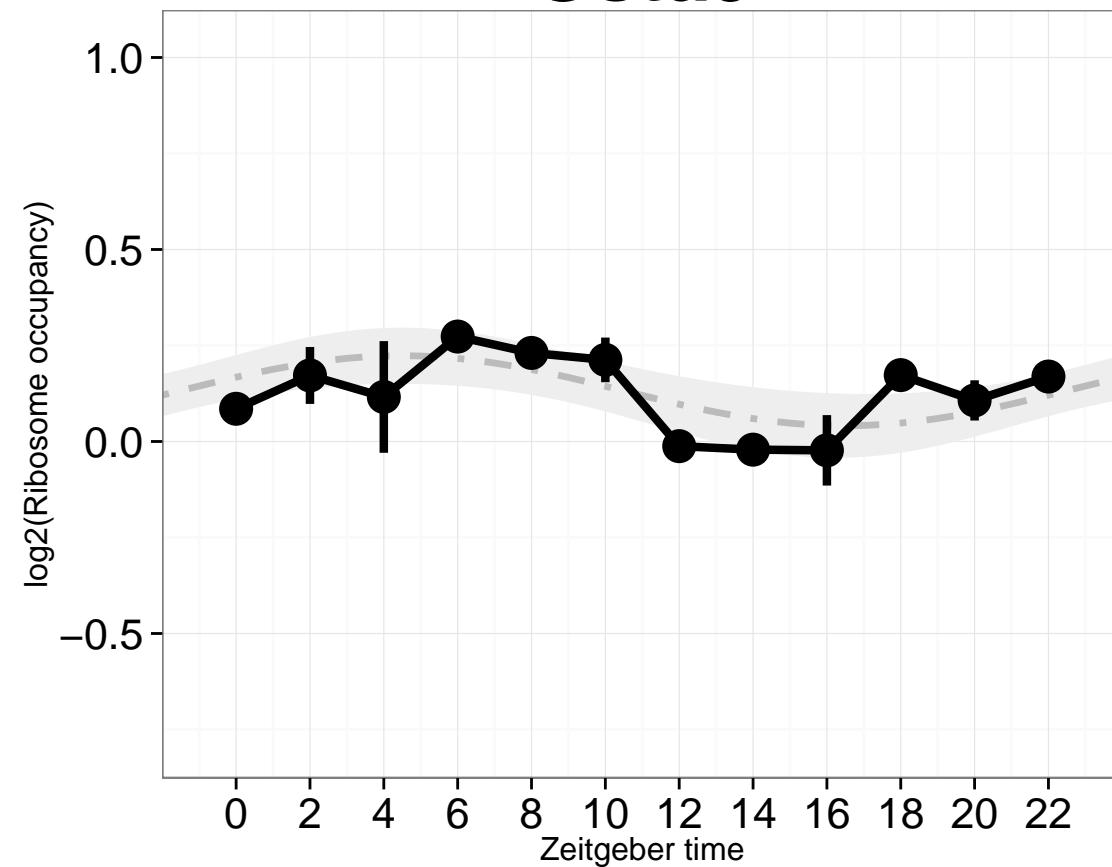

Supplement: SuppDataset_1.zip [file Gsta3_set_D.pdf › Supplemental Dataset 1/D-mRNA_rhythm_translation_rhyth/Gsta3_set_D.pdf]

## Gstm4

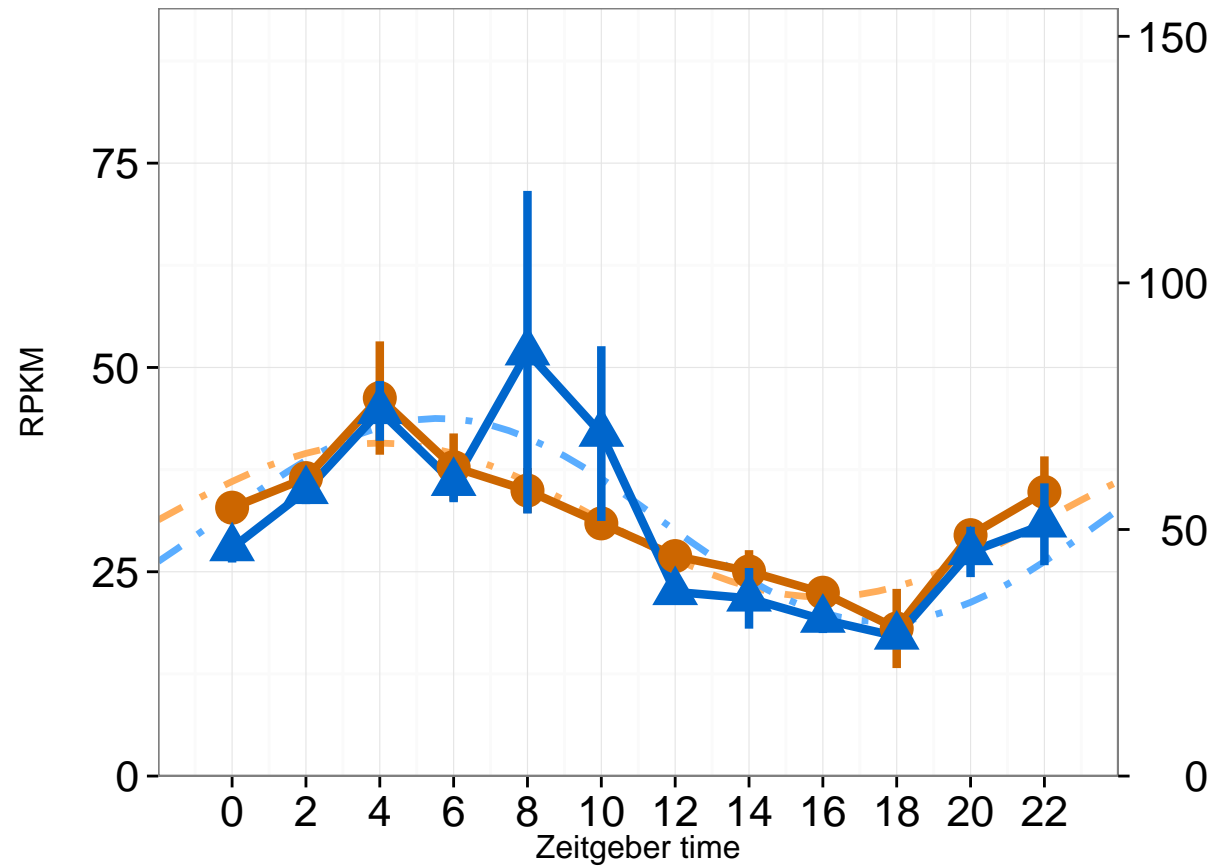

## Gstm4

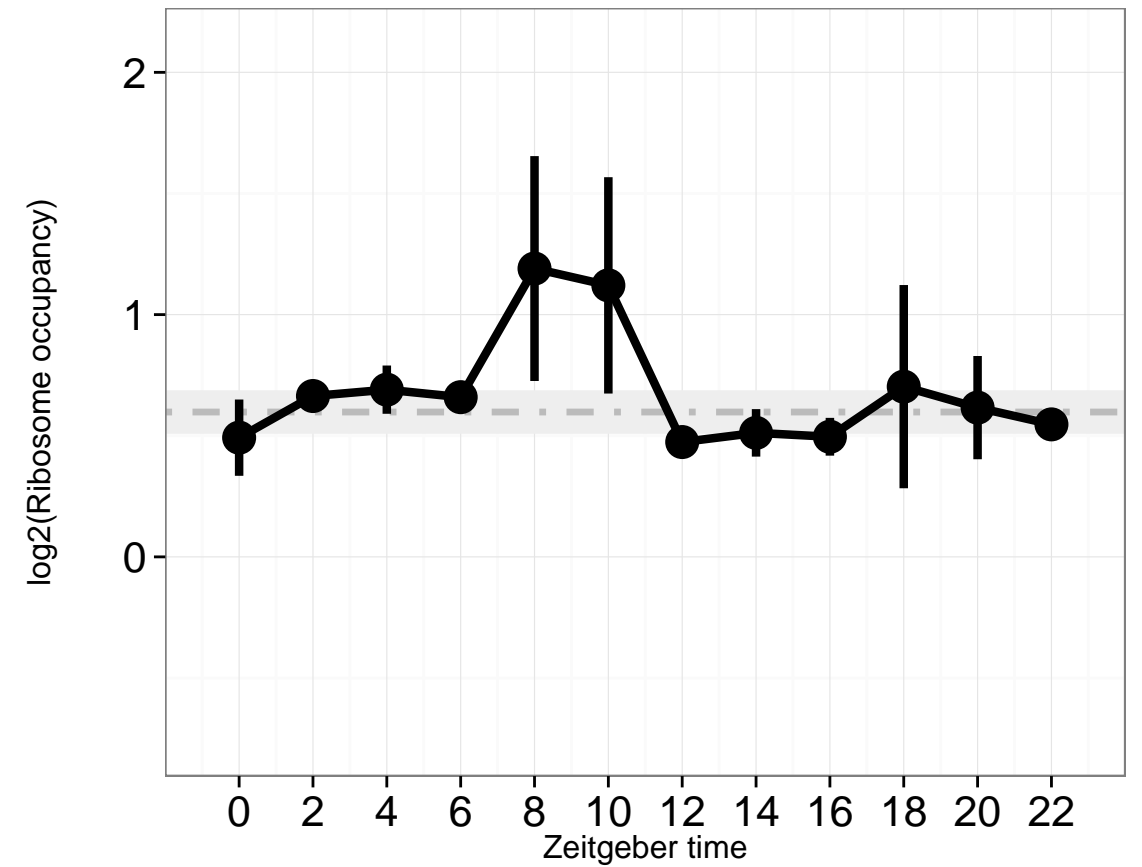

Supplement: SuppDataset_1.zip [file Gstm4_set_D.pdf › Supplemental Dataset 1/D-mRNA_rhythm_translation_rhyth/Gstm4_set_D.pdf]

# Gtf2a2

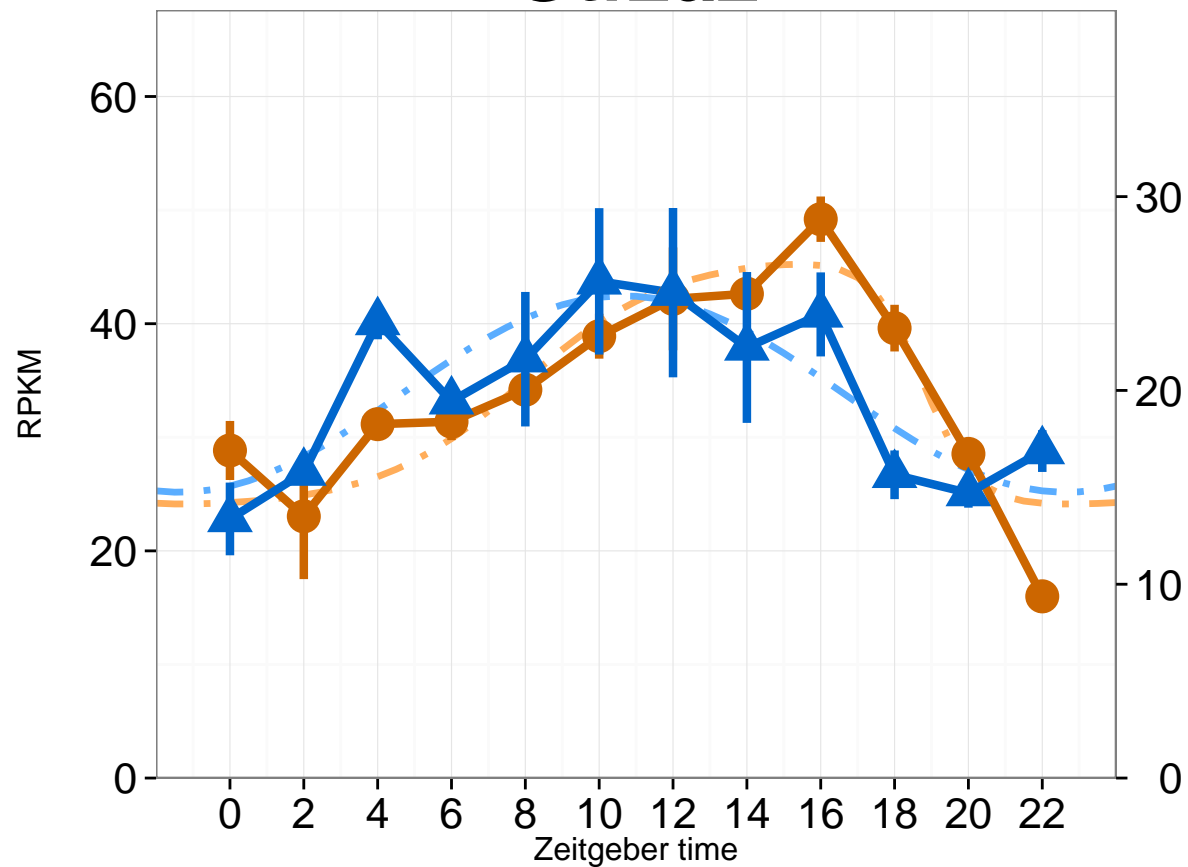

# Gtf2a2

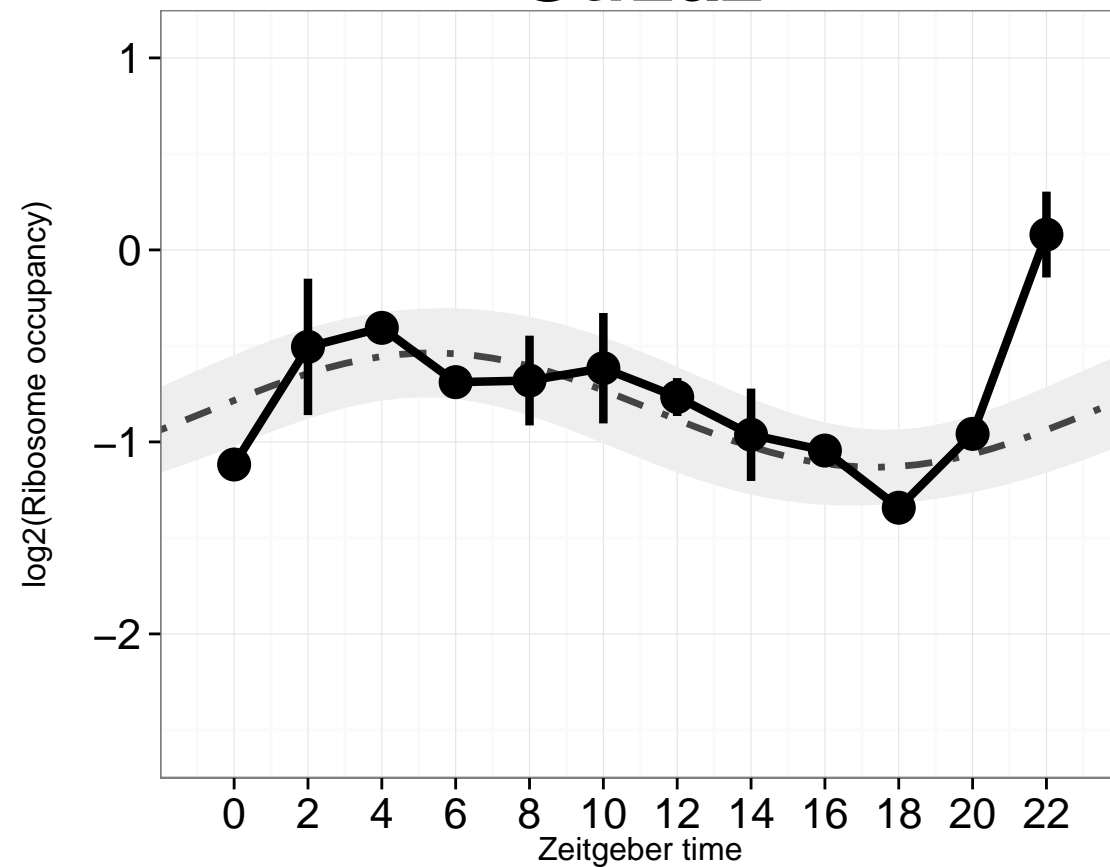

Supplement: SuppDataset_1.zip [file Gtf2a2_set_D.pdf › Supplemental Dataset 1/D-mRNA_rhythm_translation_rhyth/Gtf2a2_set_D.pdf]

# Gtf2b

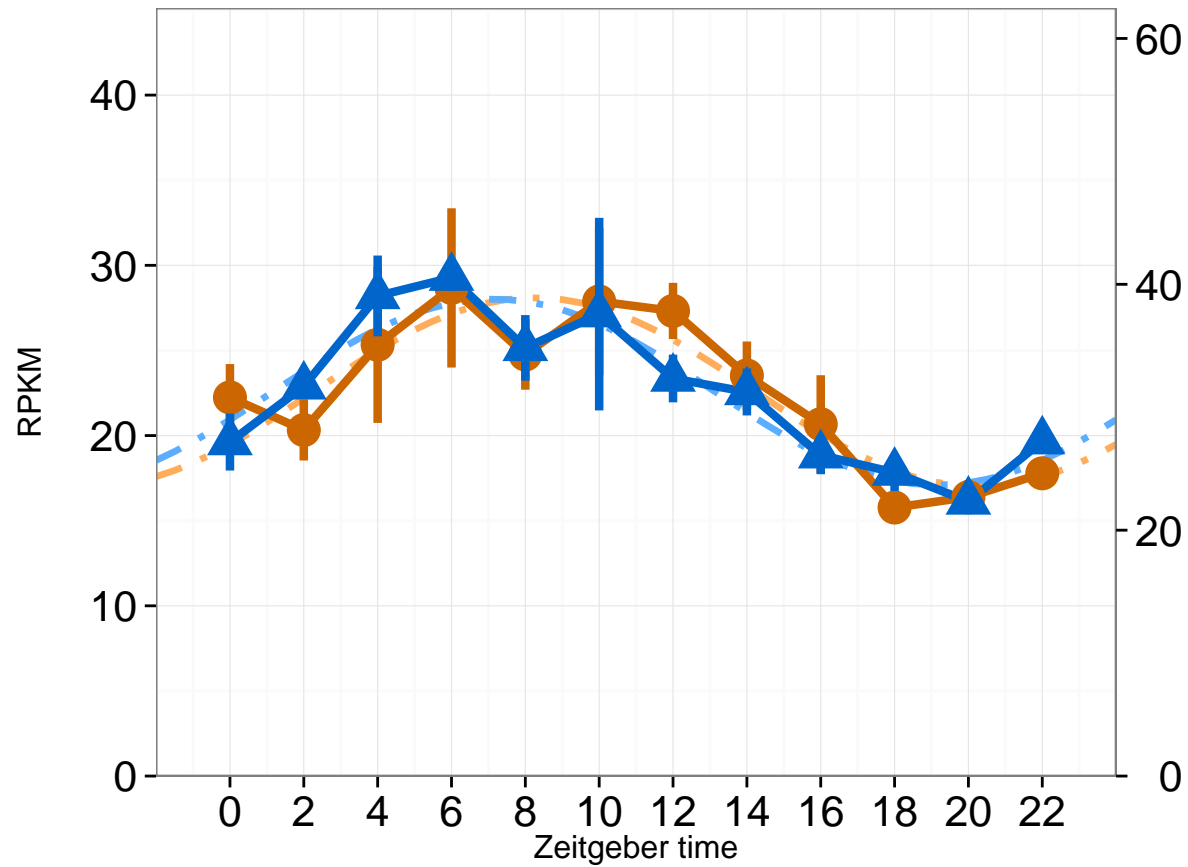

# Gtf2b

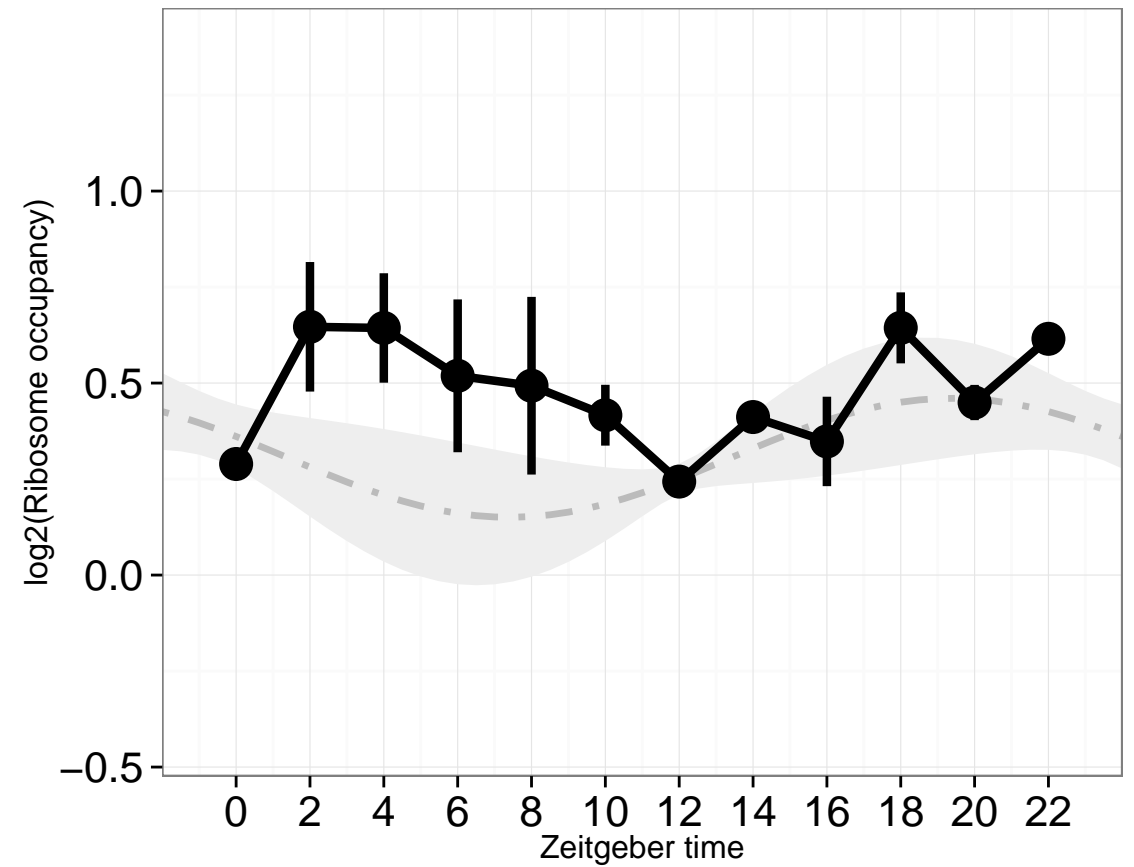

Supplement: SuppDataset_1.zip [file Gtf2b_set_D.pdf › Supplemental Dataset 1/D-mRNA_rhythm_translation_rhyth/Gtf2b_set_D.pdf]

# Gtf2ird1

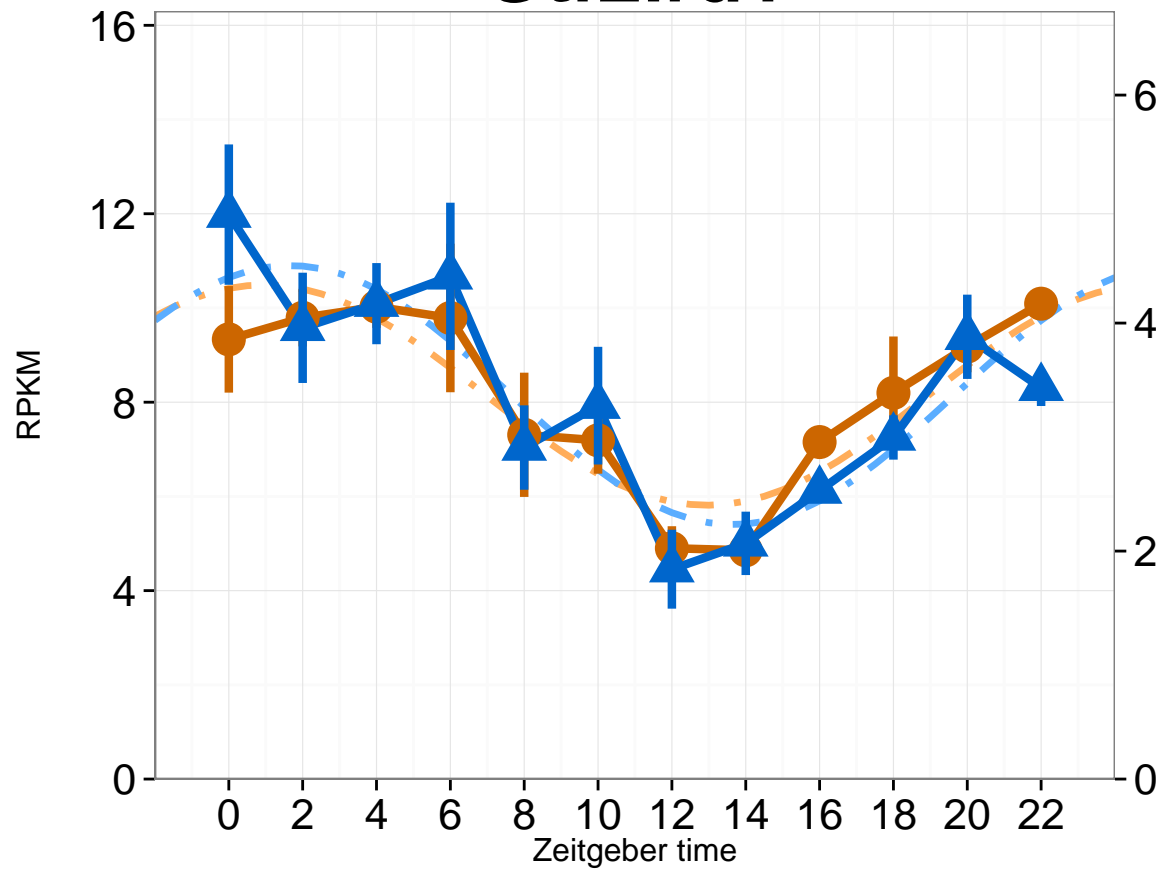

# Gtf2ird1

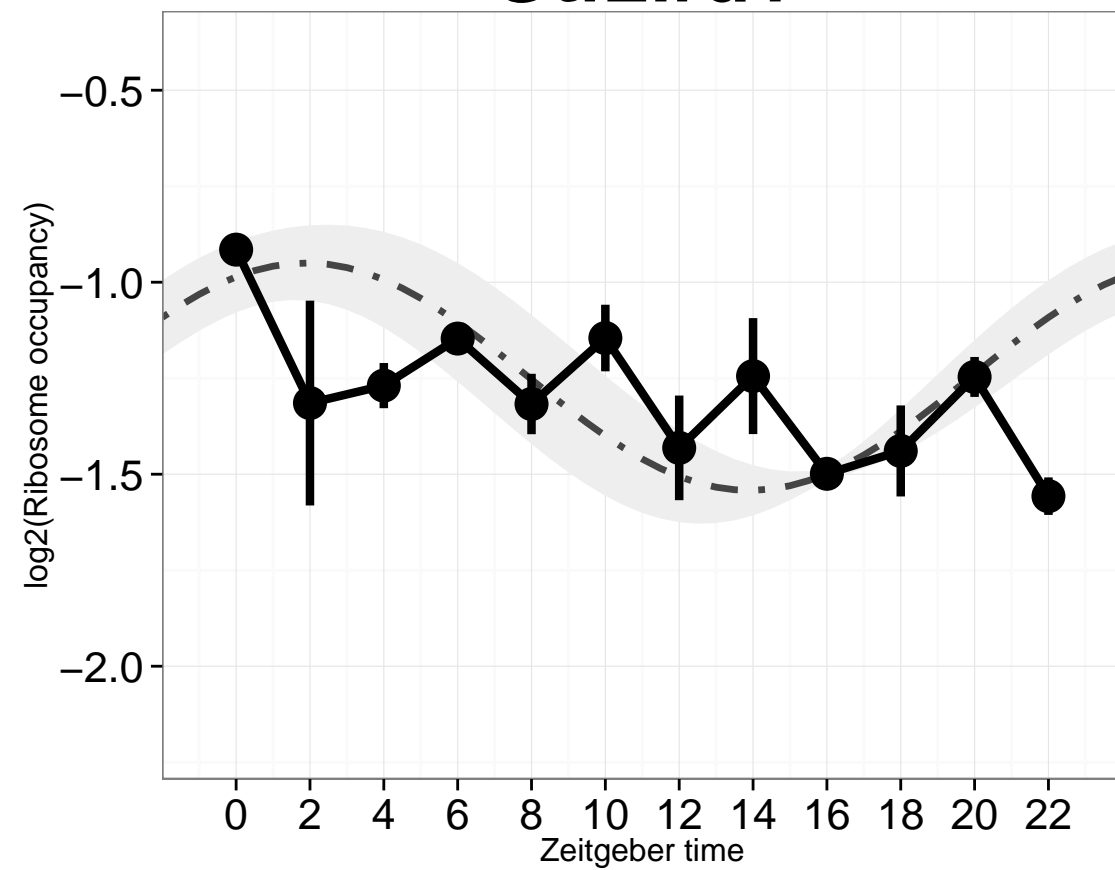

Supplement: SuppDataset_1.zip [file Gtf2ird1_set_D.pdf › Supplemental Dataset 1/D-mRNA_rhythm_translation_rhyth/Gtf2ird1_set_D.pdf]

# Gtf2ird2

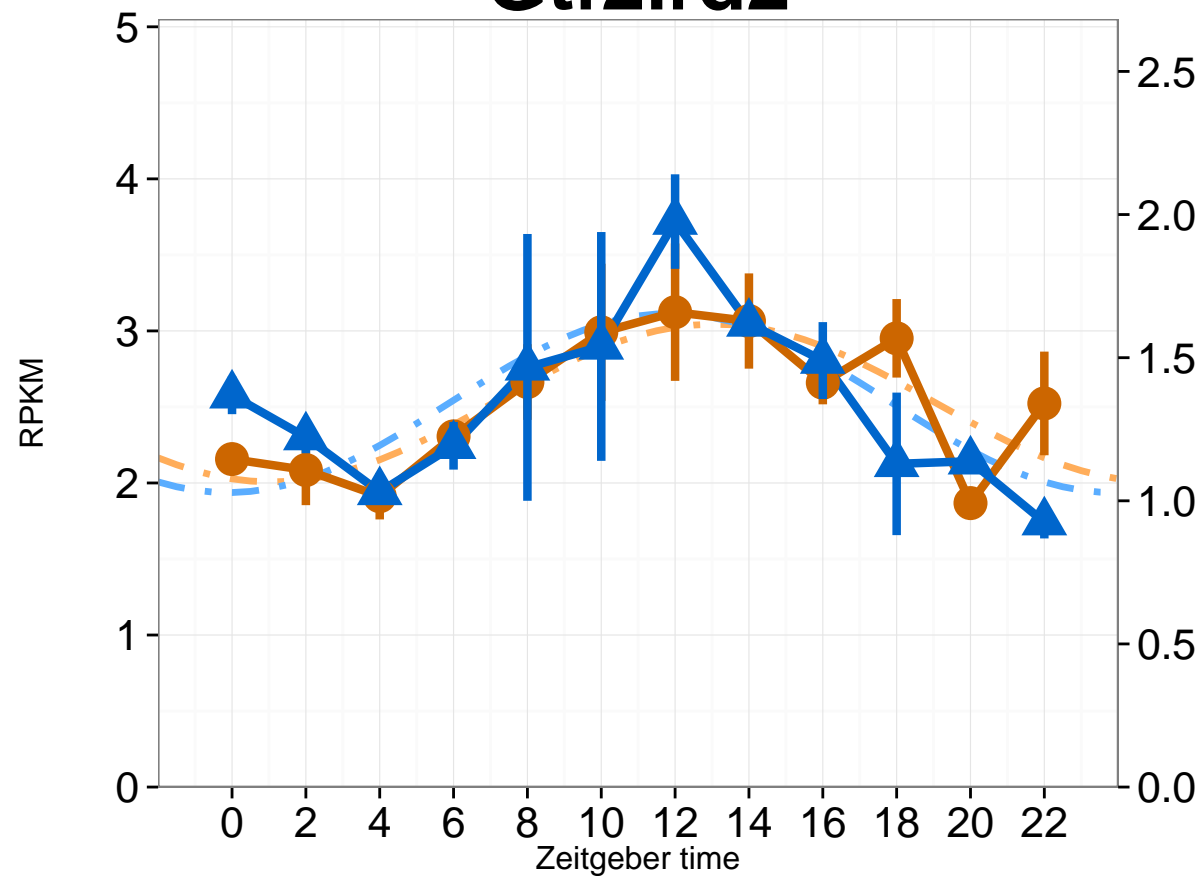

# Gtf2ird2

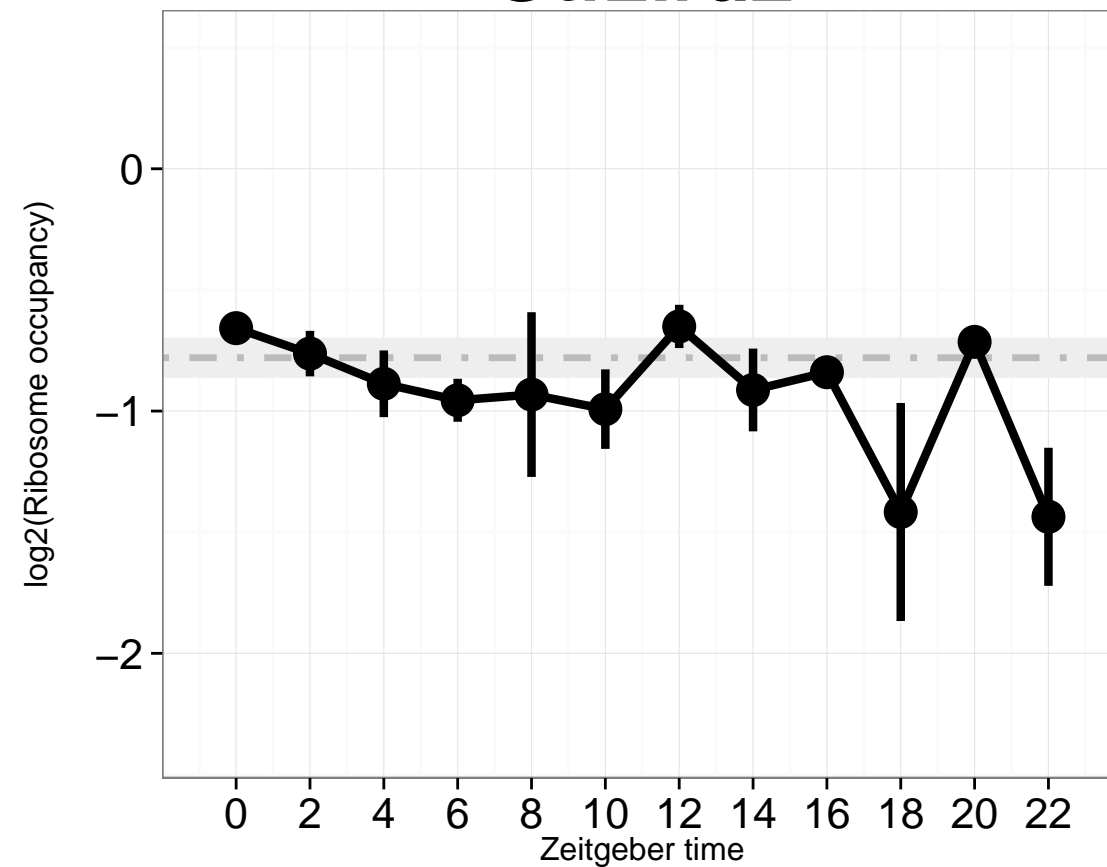

Supplement: SuppDataset_1.zip [file Gtf2ird2_set_D.pdf › Supplemental Dataset 1/D-mRNA_rhythm_translation_rhyth/Gtf2ird2_set_D.pdf]

# Gtpbp3

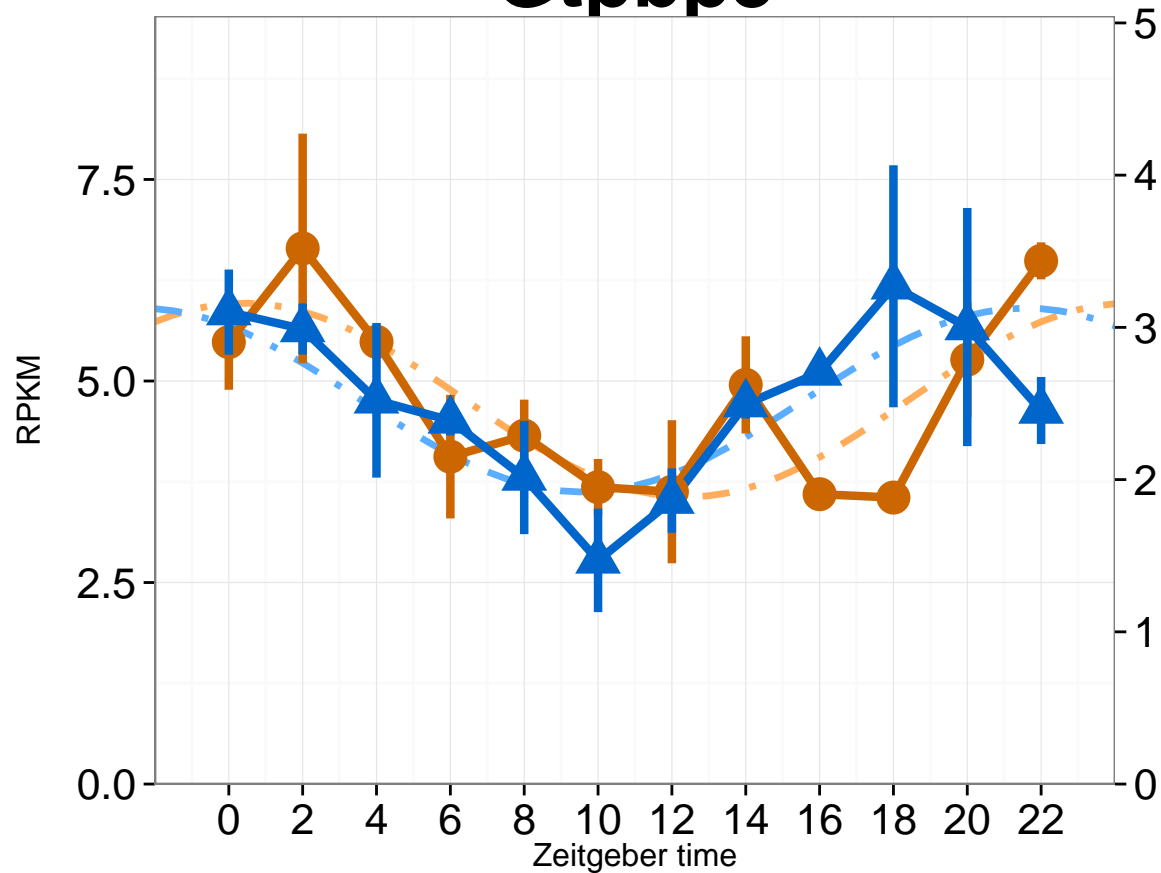

# Gtpbp3

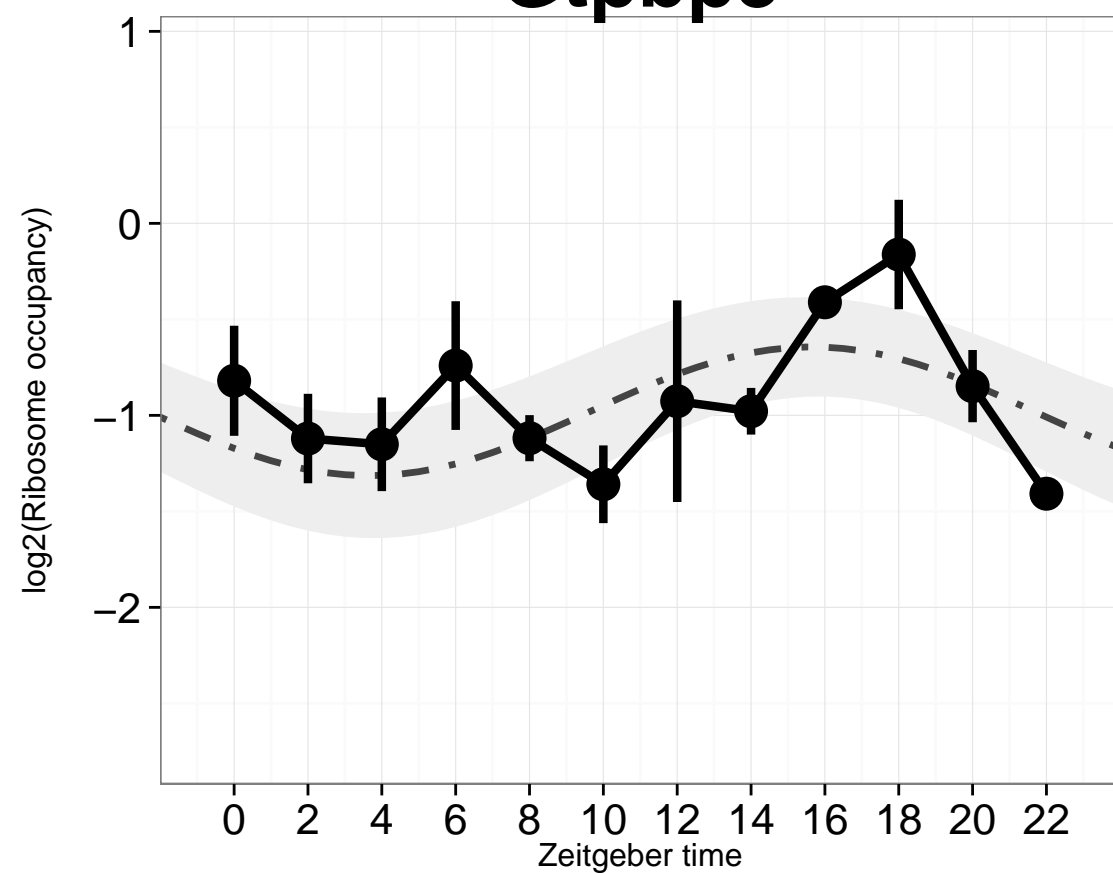

Supplement: SuppDataset_1.zip [file Gtpbp3_set_D.pdf › Supplemental Dataset 1/D-mRNA_rhythm_translation_rhyth/Gtpbp3_set_D.pdf]

## Gusb

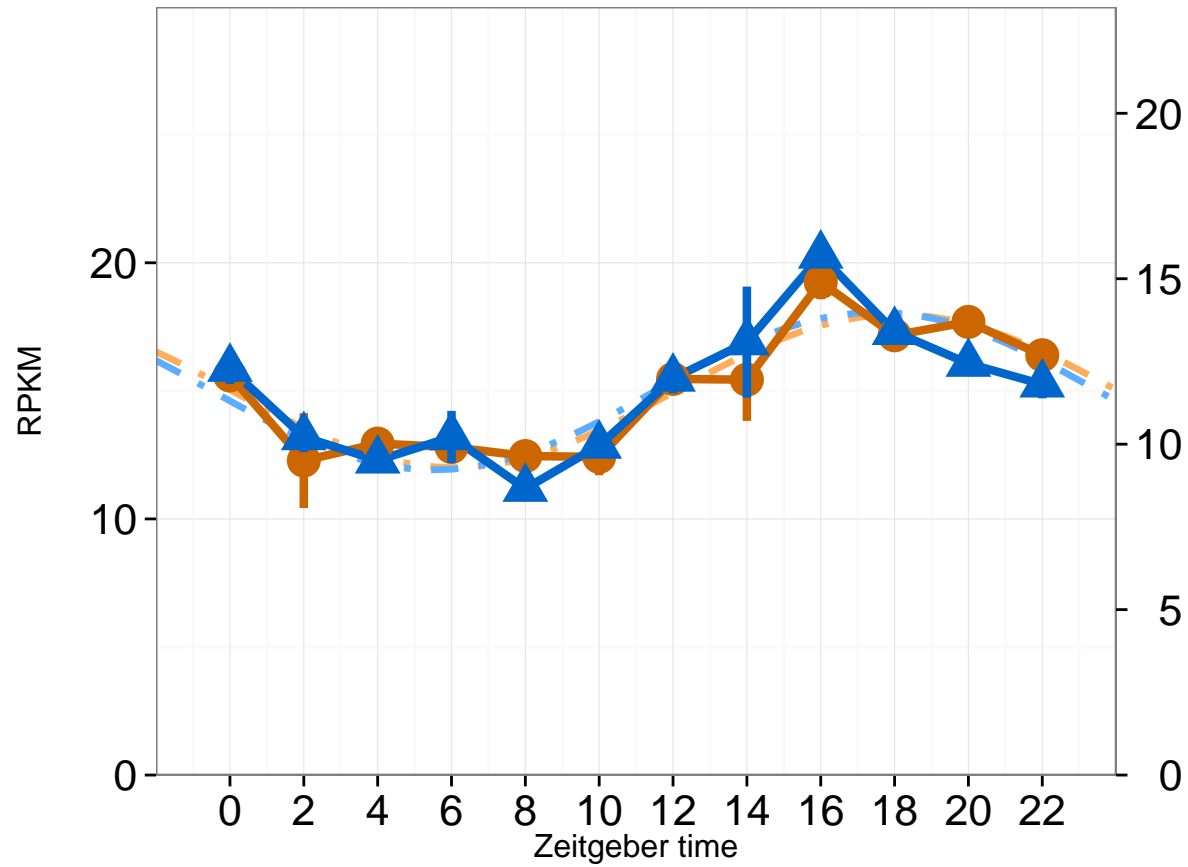

## Gusb

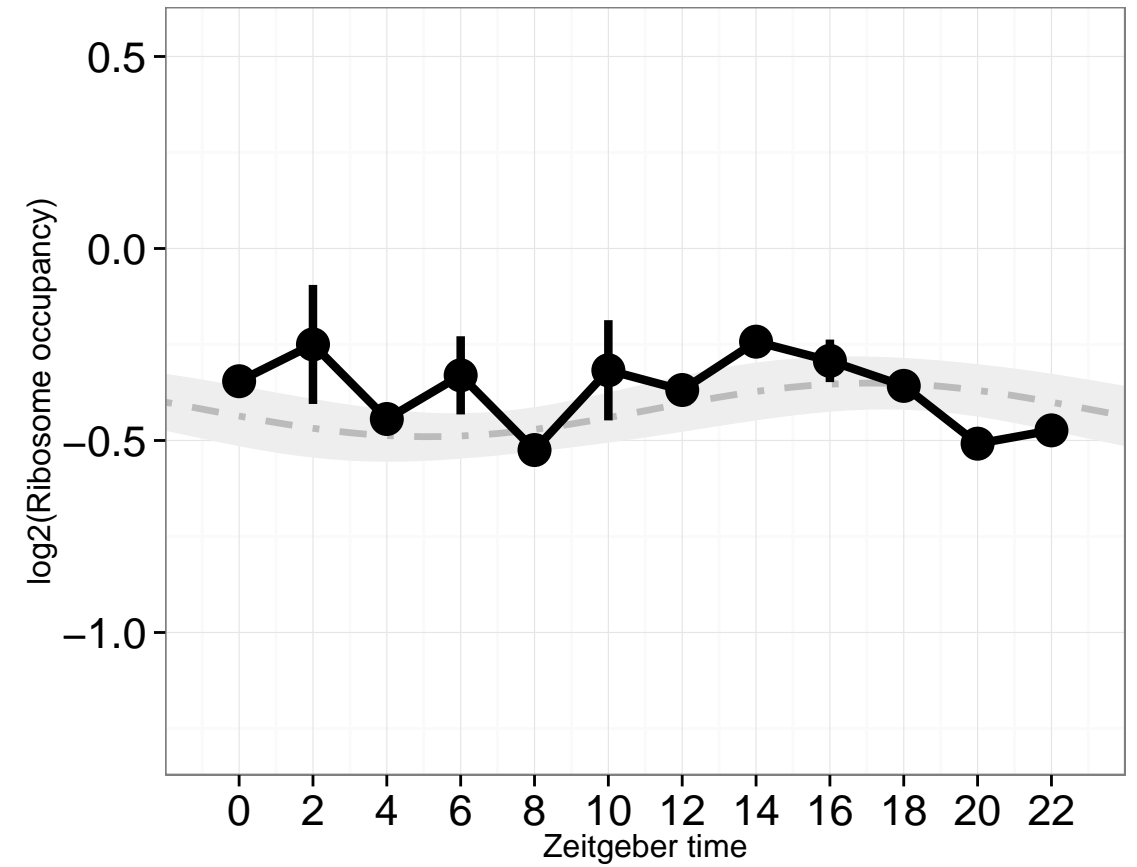

Supplement: SuppDataset_1.zip [file Gusb_set_D.pdf › Supplemental Dataset 1/D-mRNA_rhythm_translation_rhyth/Gusb_set_D.pdf]

## Gys1

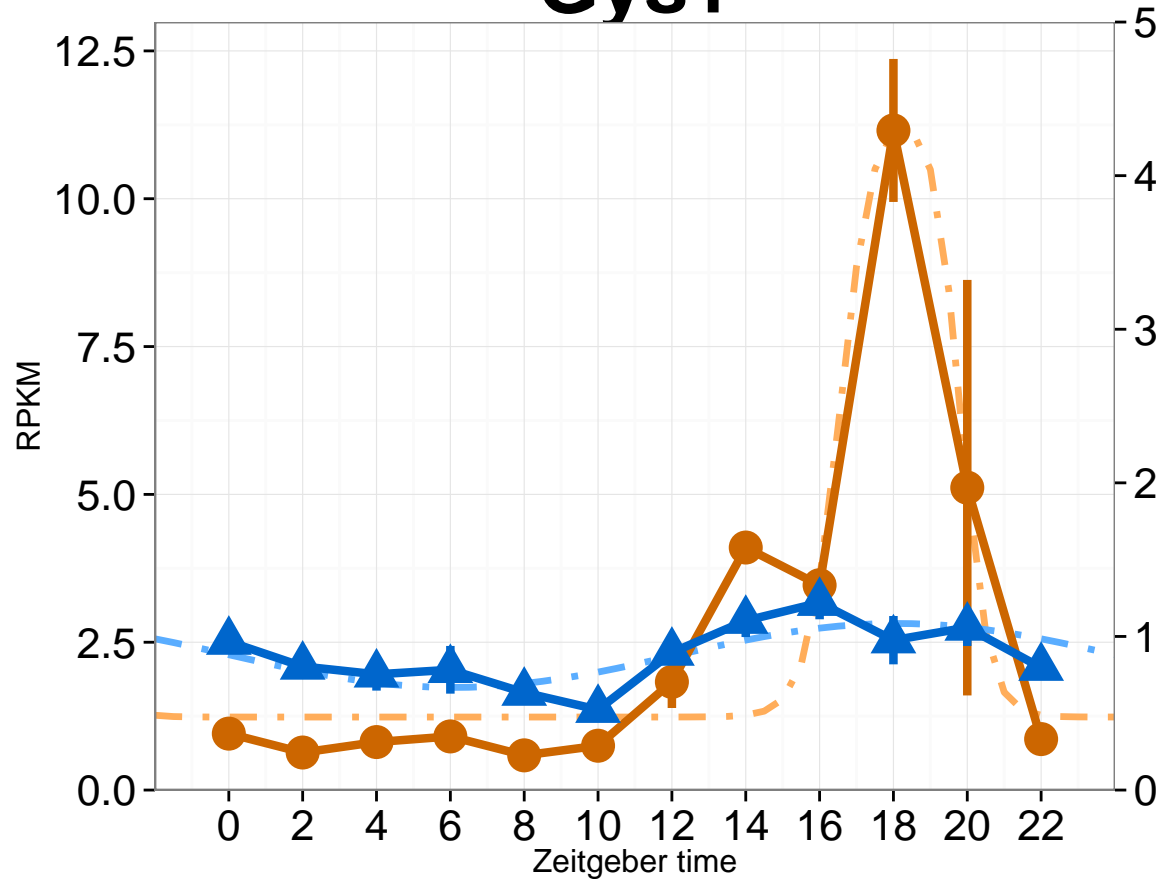

## Gys1

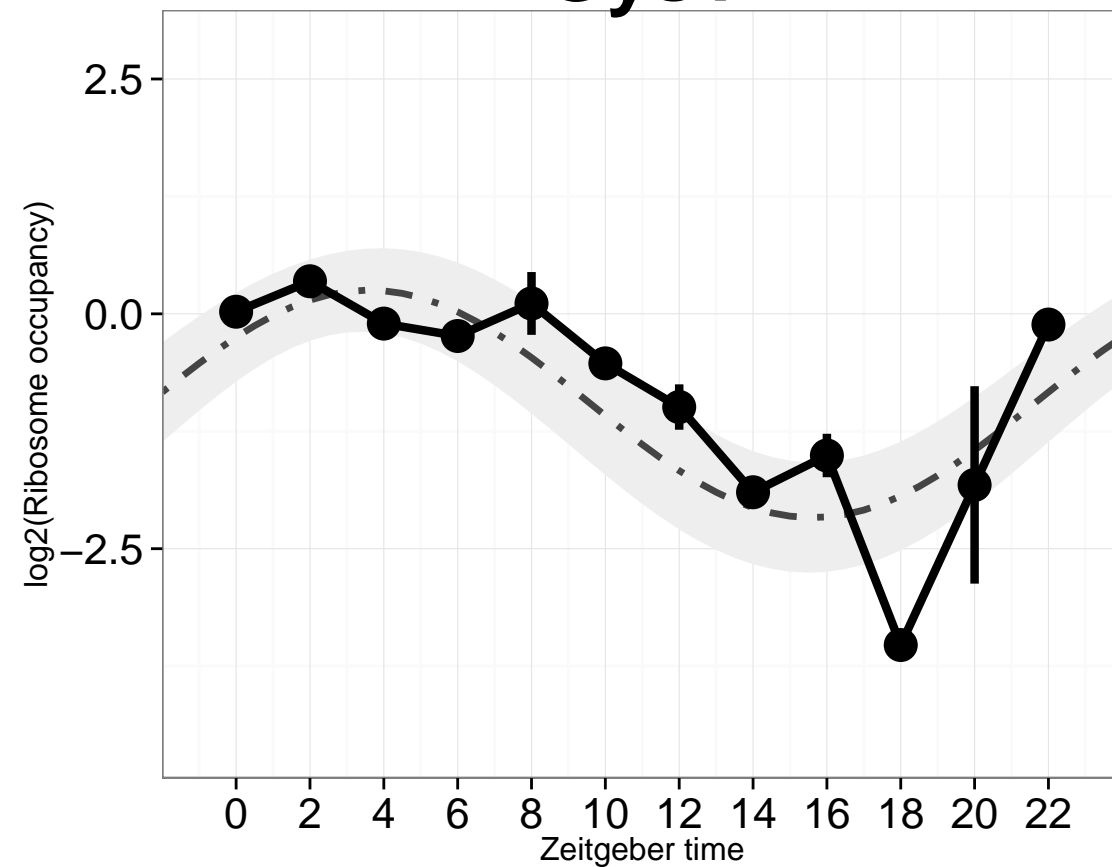

Supplement: SuppDataset_1.zip [file Gys1_set_D.pdf › Supplemental Dataset 1/D-mRNA_rhythm_translation_rhyth/Gys1_set_D.pdf]

## Gys2

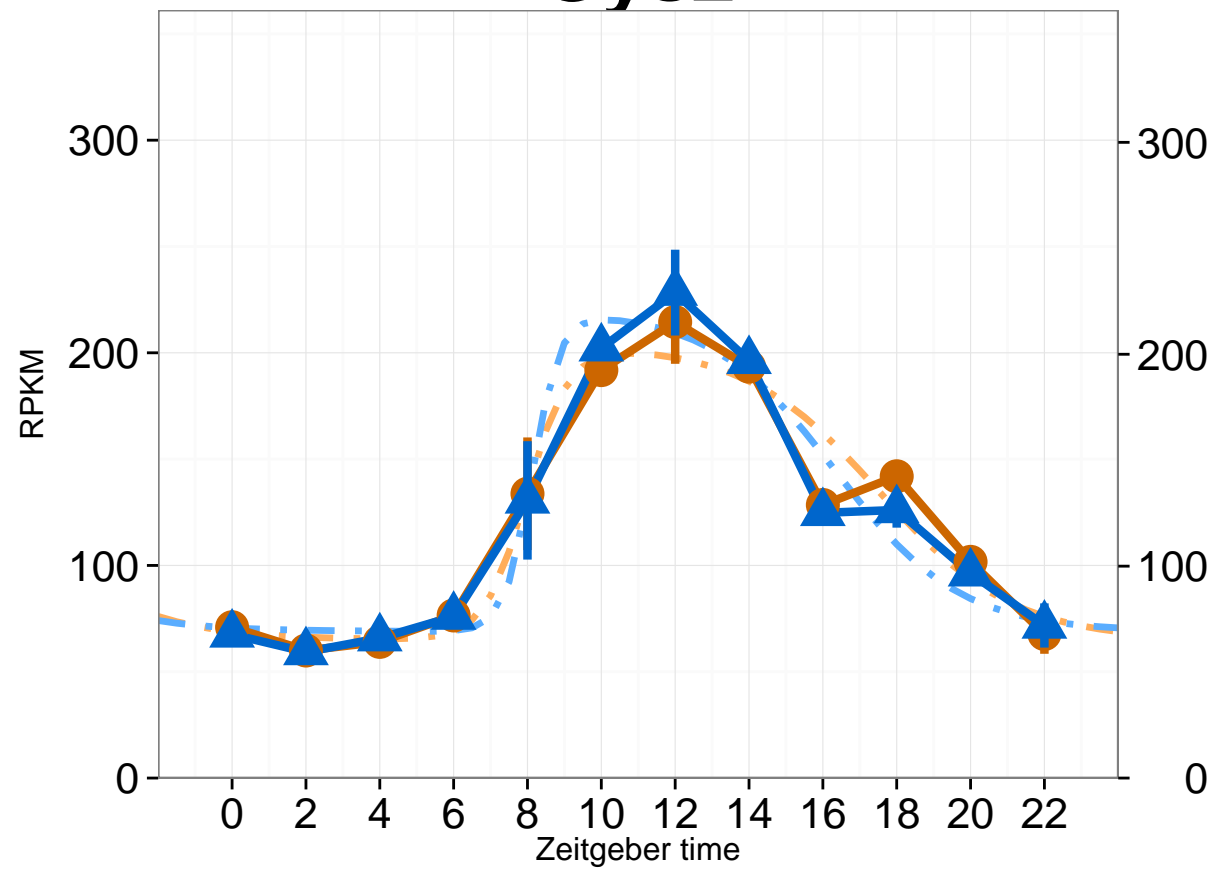

## Gys2

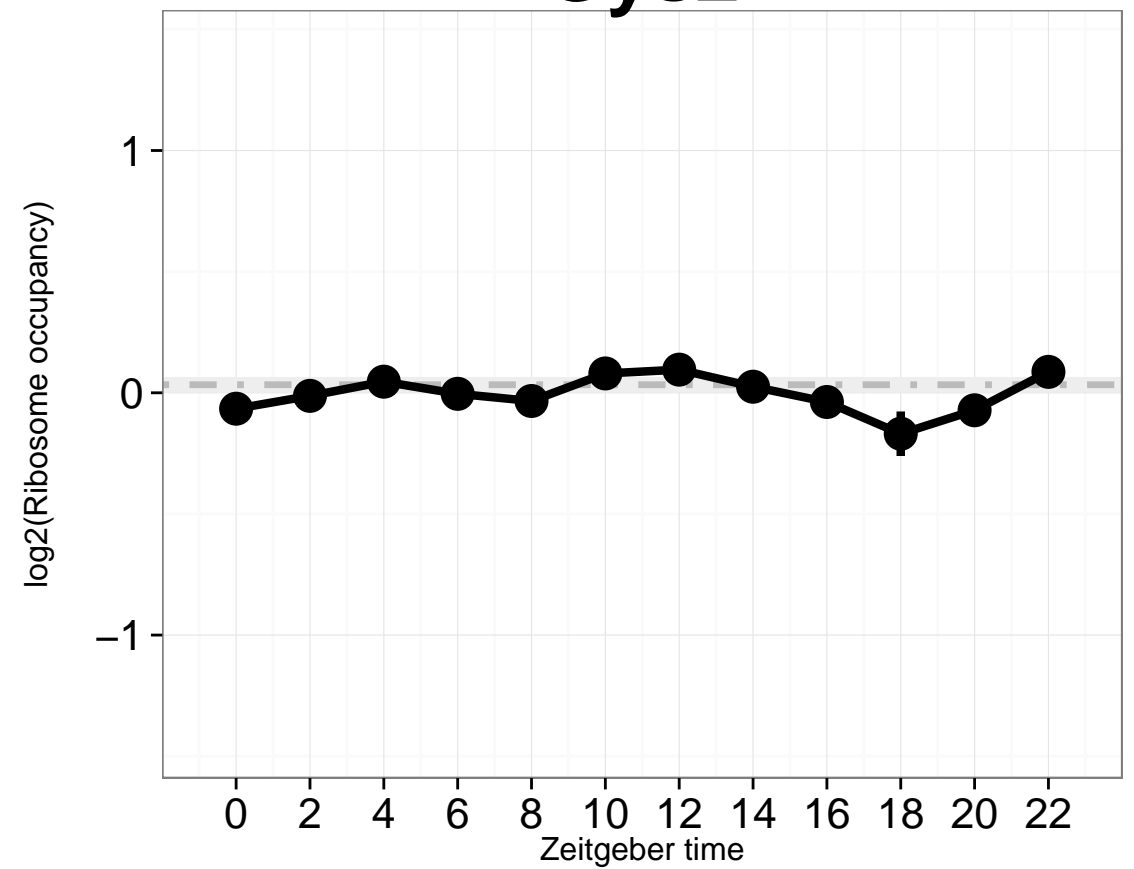

Supplement: SuppDataset_1.zip [file Gys2_set_D.pdf › Supplemental Dataset 1/D-mRNA_rhythm_translation_rhyth/Gys2_set_D.pdf]

# H6pd

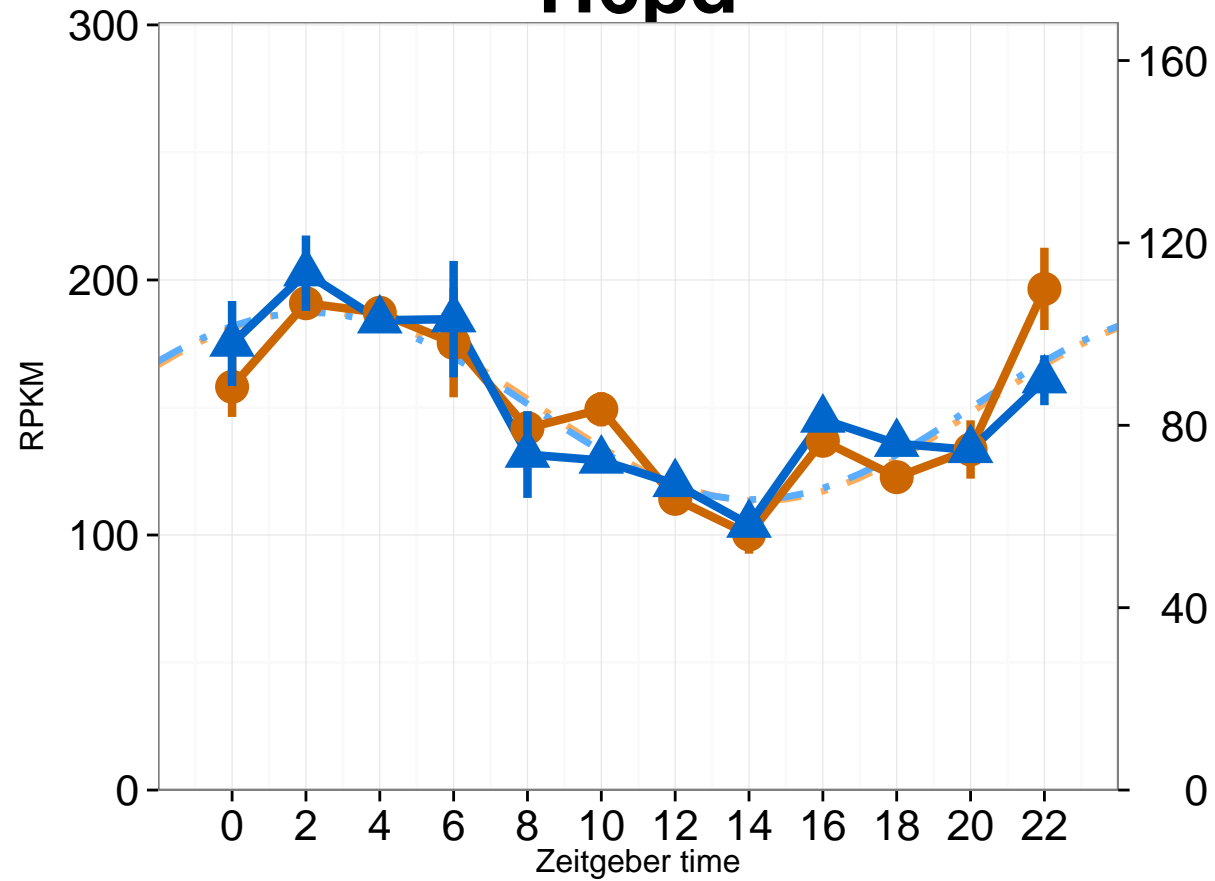

# H6pd

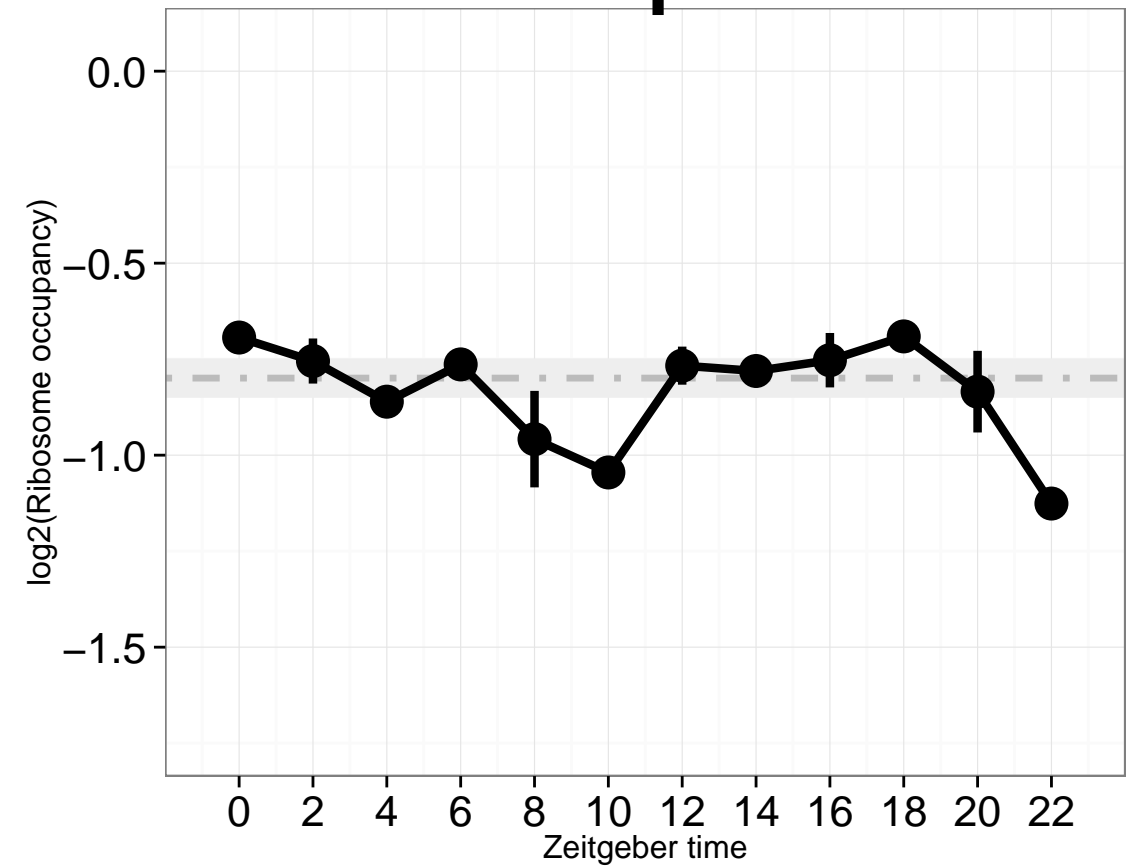

Supplement: SuppDataset_1.zip [file H6pd_set_D.pdf › Supplemental Dataset 1/D-mRNA_rhythm_translation_rhyth/H6pd_set_D.pdf]

# HacI1

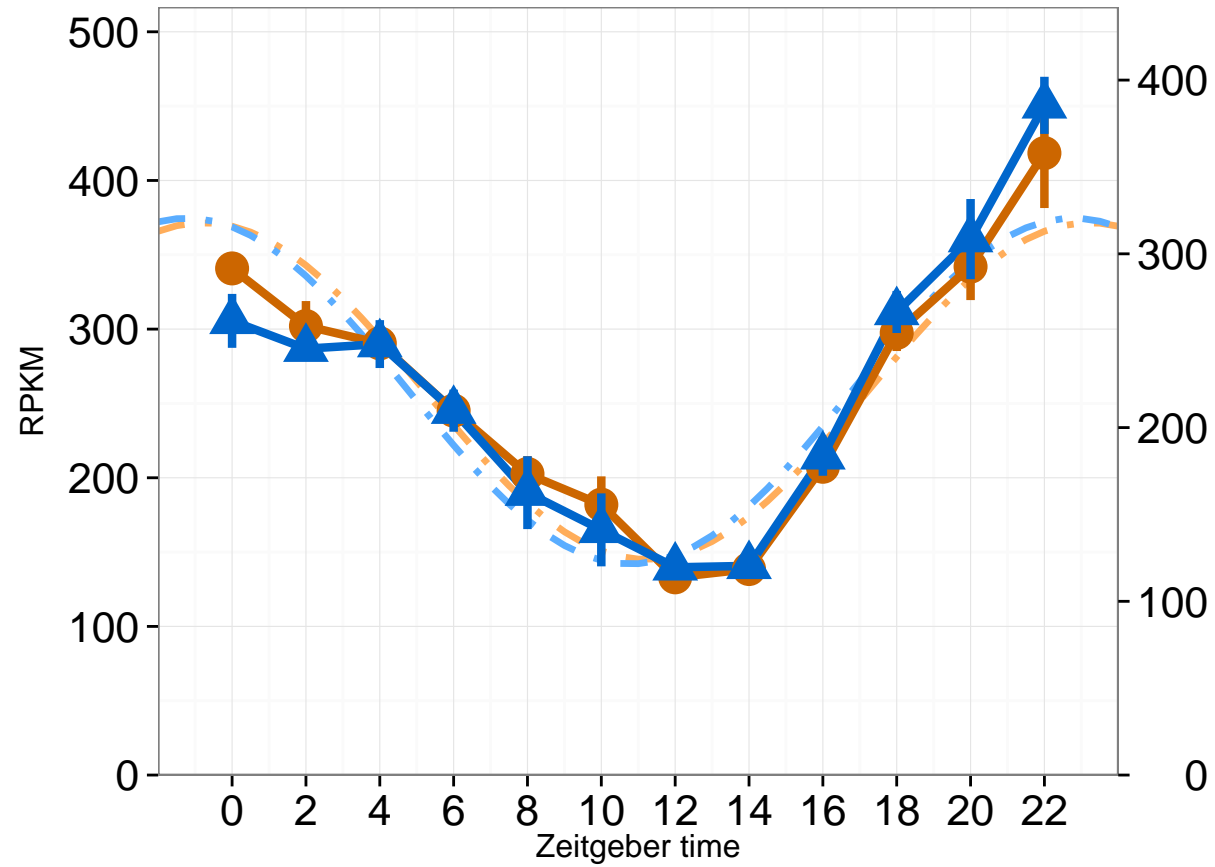

# HacI1

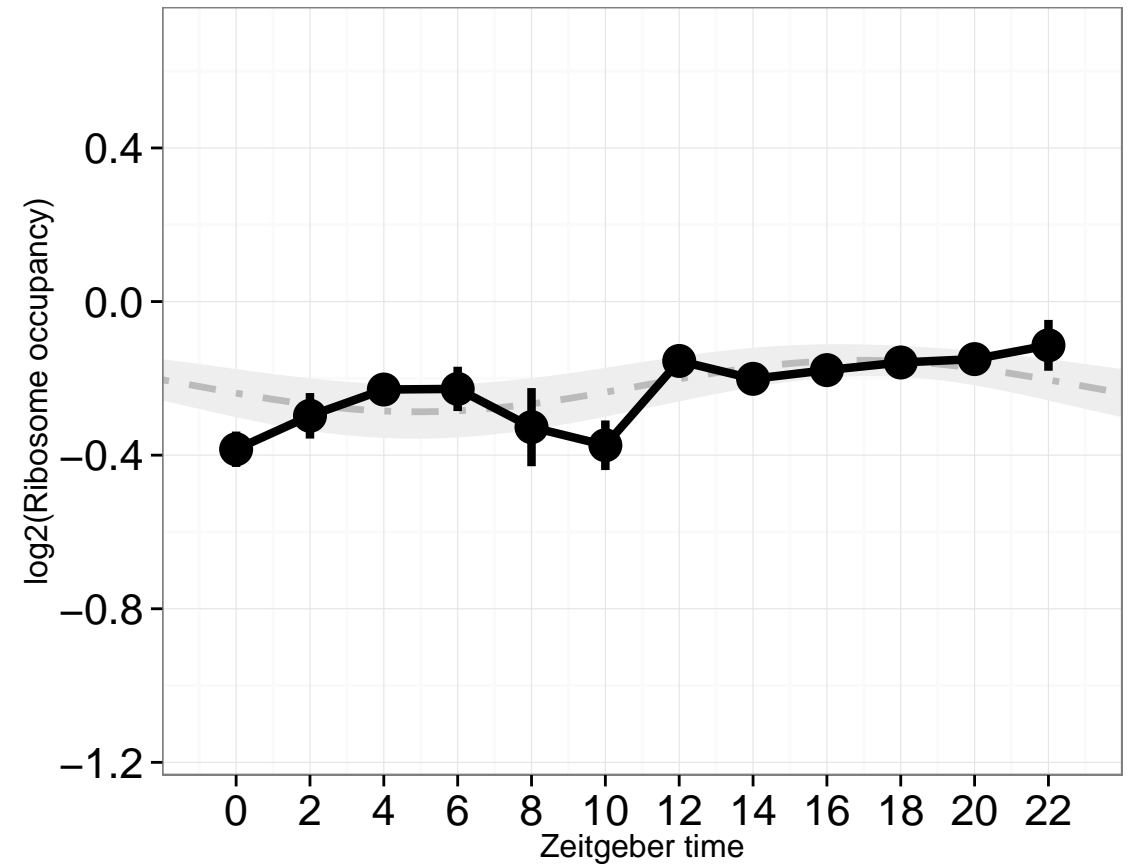

Supplement: SuppDataset_1.zip [file Hacl1_set_D.pdf › Supplemental Dataset 1/D-mRNA_rhythm_translation_rhyth/Hacl1_set_D.pdf]

# Hal

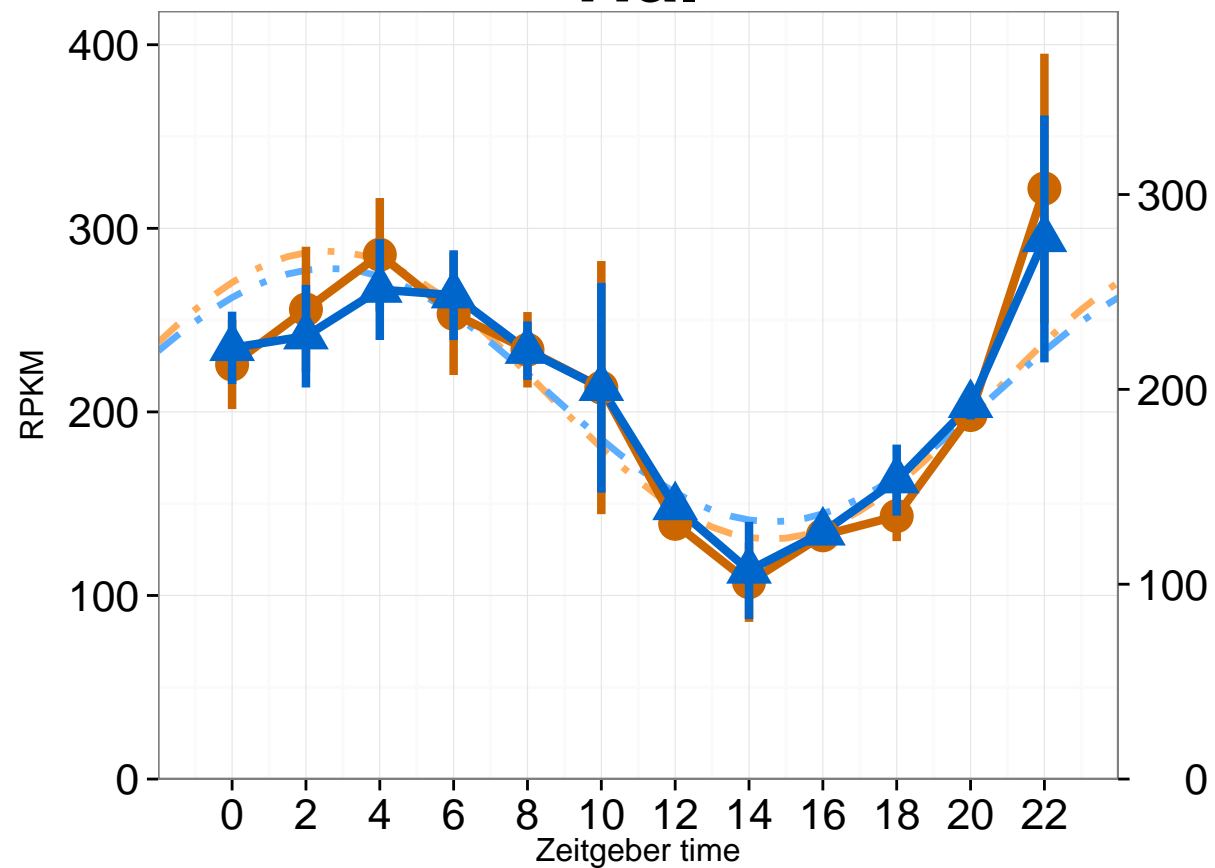

# Hal

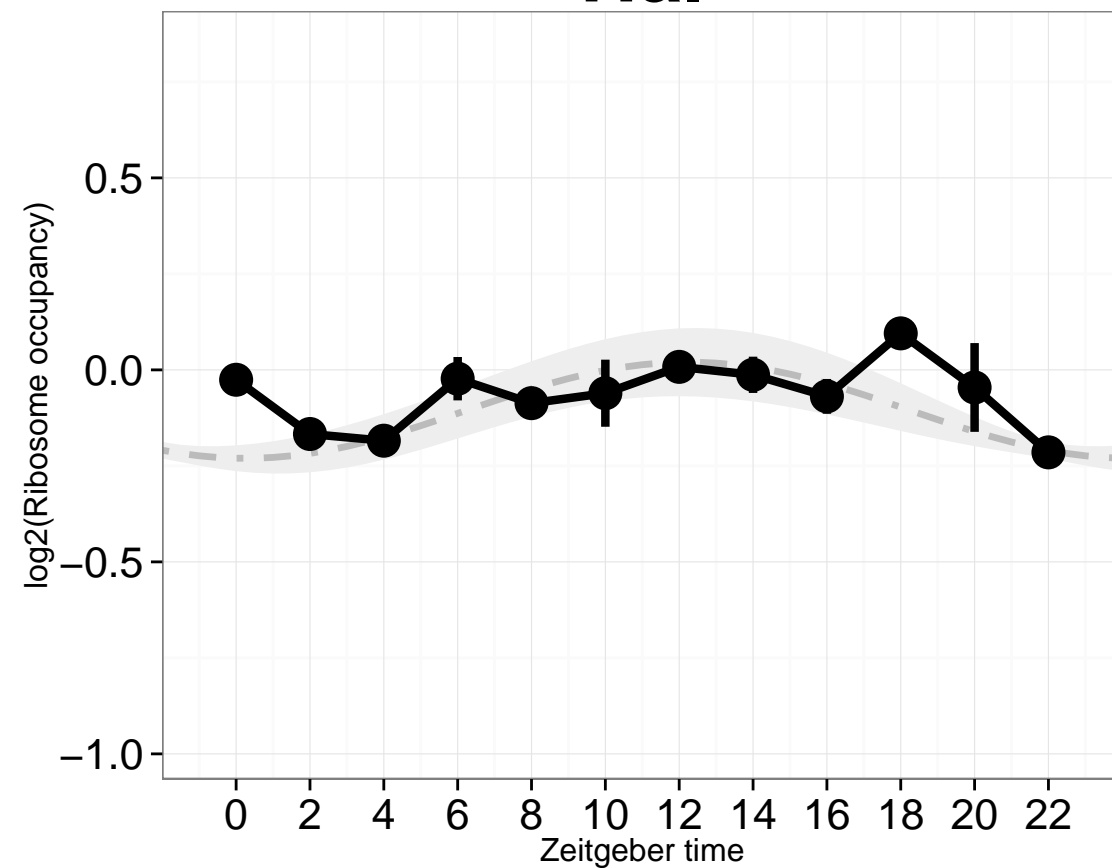

Supplement: SuppDataset_1.zip [file Hal_set_D.pdf › Supplemental Dataset 1/D-mRNA_rhythm_translation_rhyth/Hal_set_D.pdf]

## Hdac5

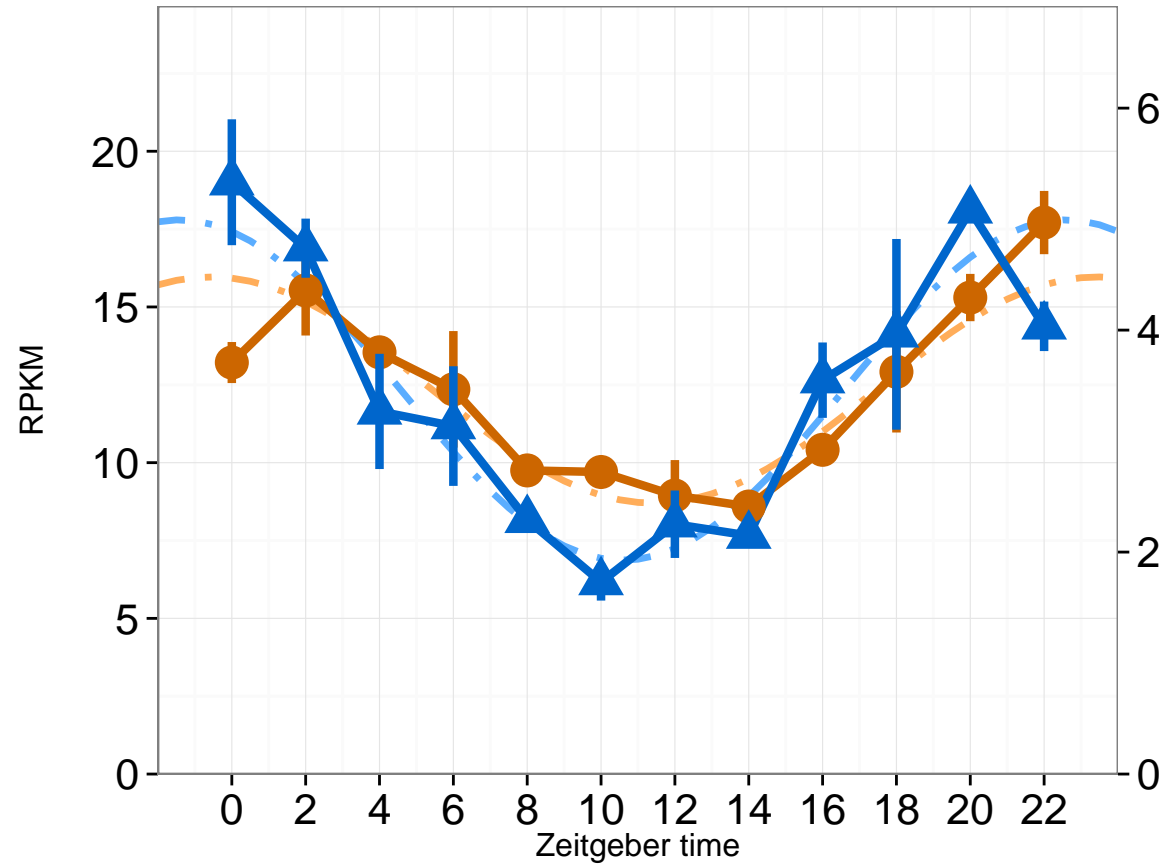

## Hdac5

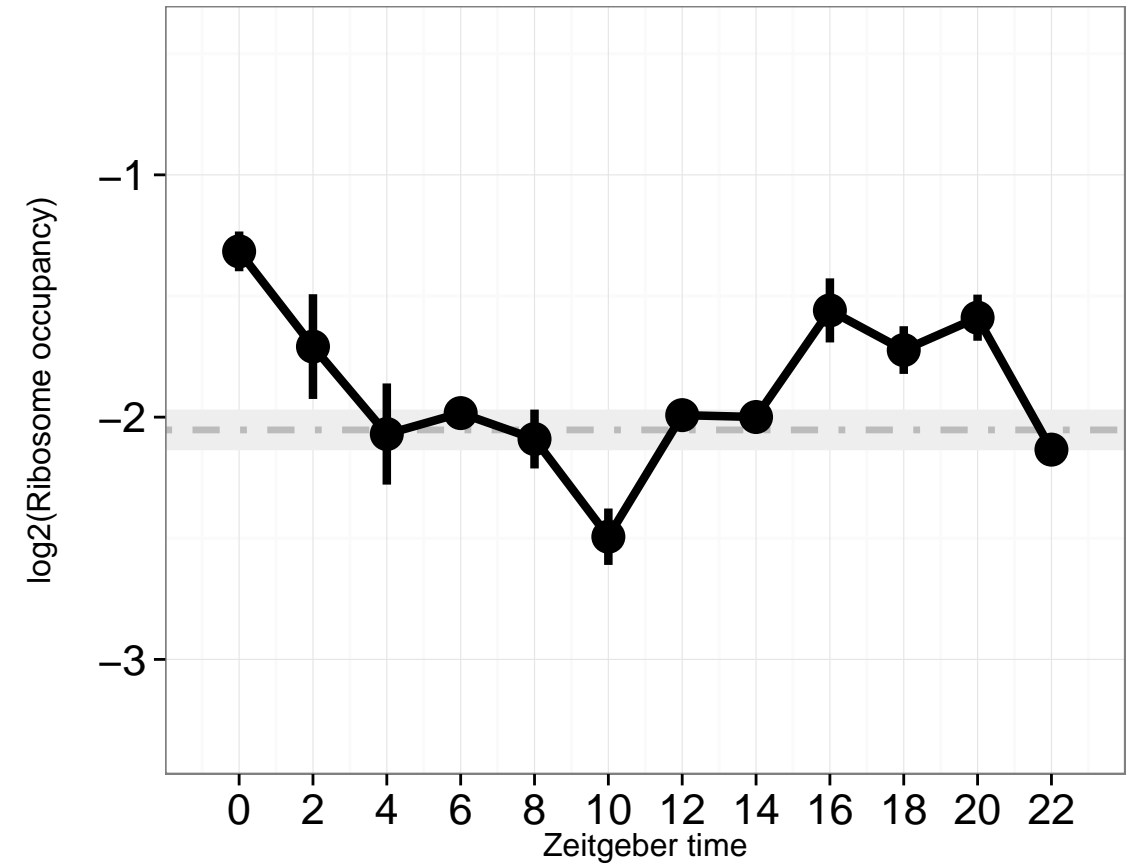

Supplement: SuppDataset_1.zip [file Hdac5_set_D.pdf › Supplemental Dataset 1/D-mRNA_rhythm_translation_rhyth/Hdac5_set_D.pdf]

## Hdhd3

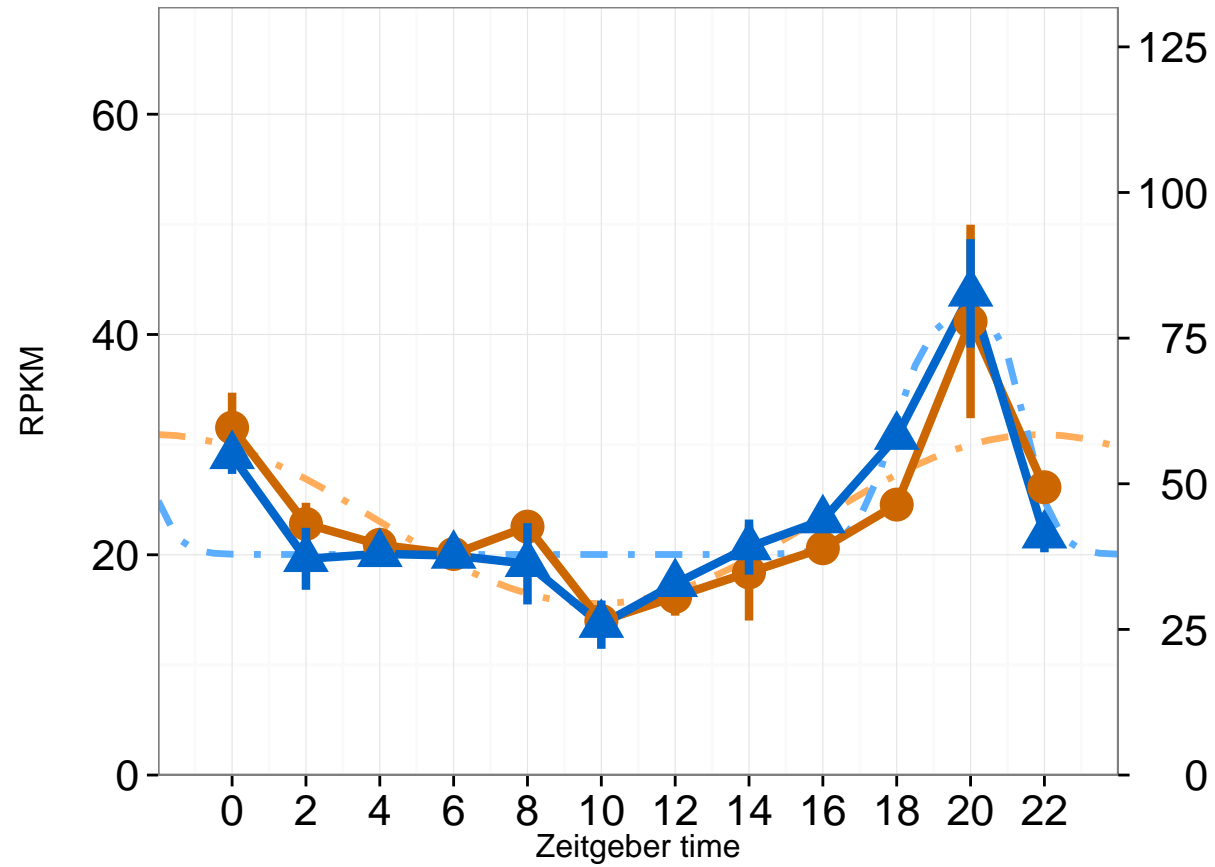

## Hdhd3

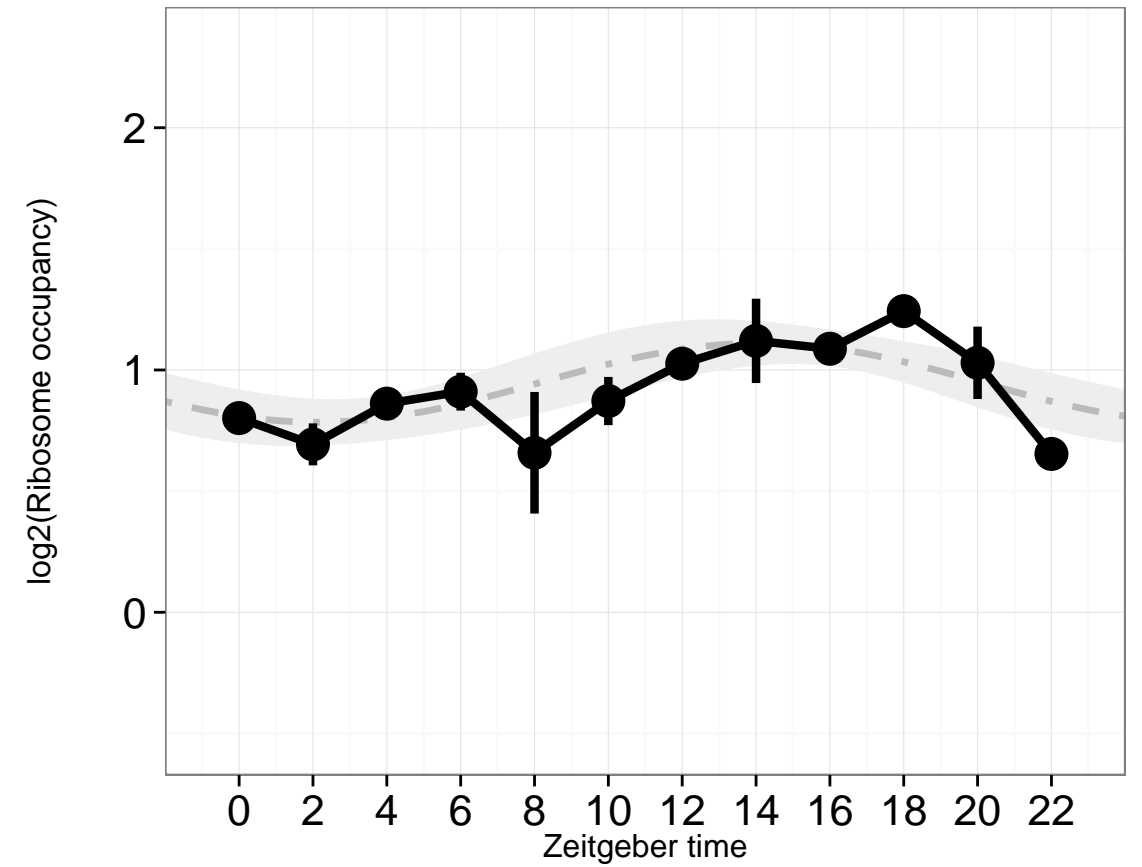

Supplement: SuppDataset_1.zip [file Hdhd3_set_D.pdf › Supplemental Dataset 1/D-mRNA_rhythm_translation_rhyth/Hdhd3_set_D.pdf]

# Helz2

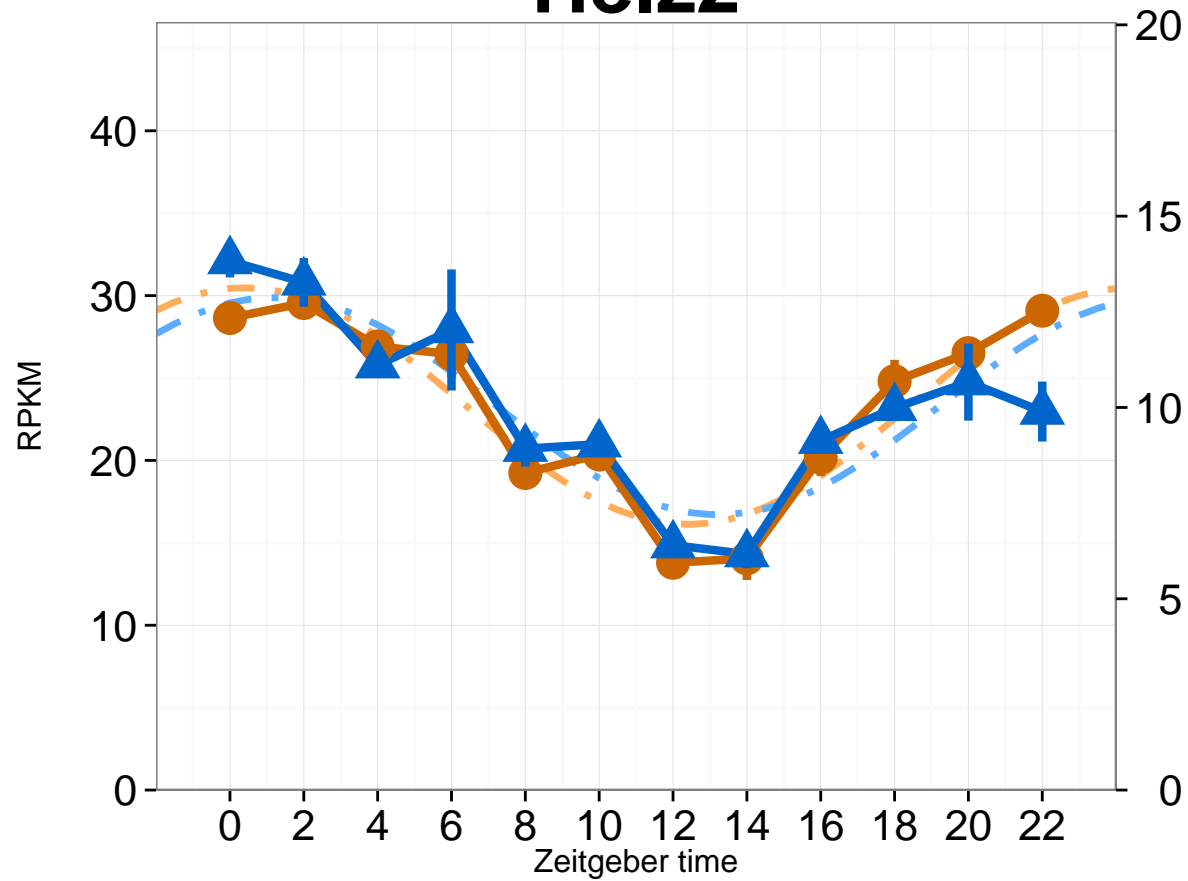

# Helz2

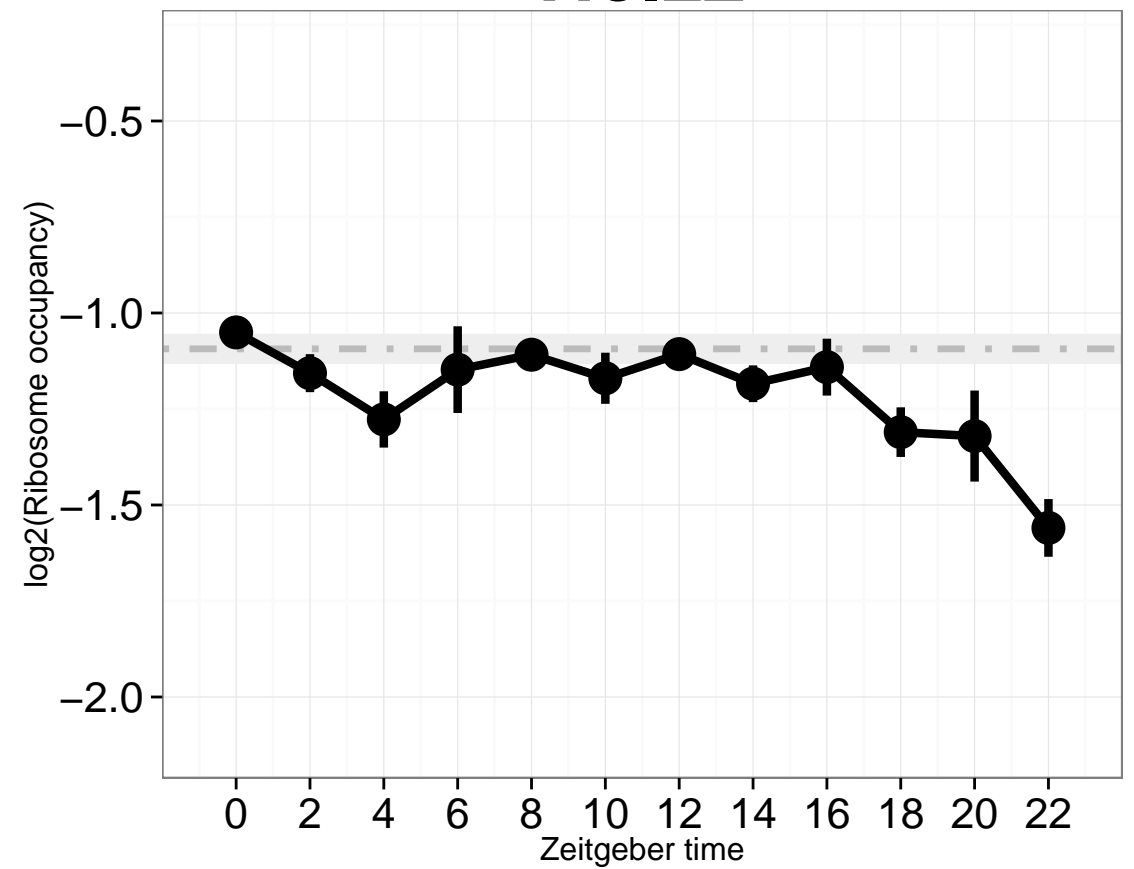

Supplement: SuppDataset_1.zip [file Helz2_set_D.pdf › Supplemental Dataset 1/D-mRNA_rhythm_translation_rhyth/Helz2_set_D.pdf]

## Herc3

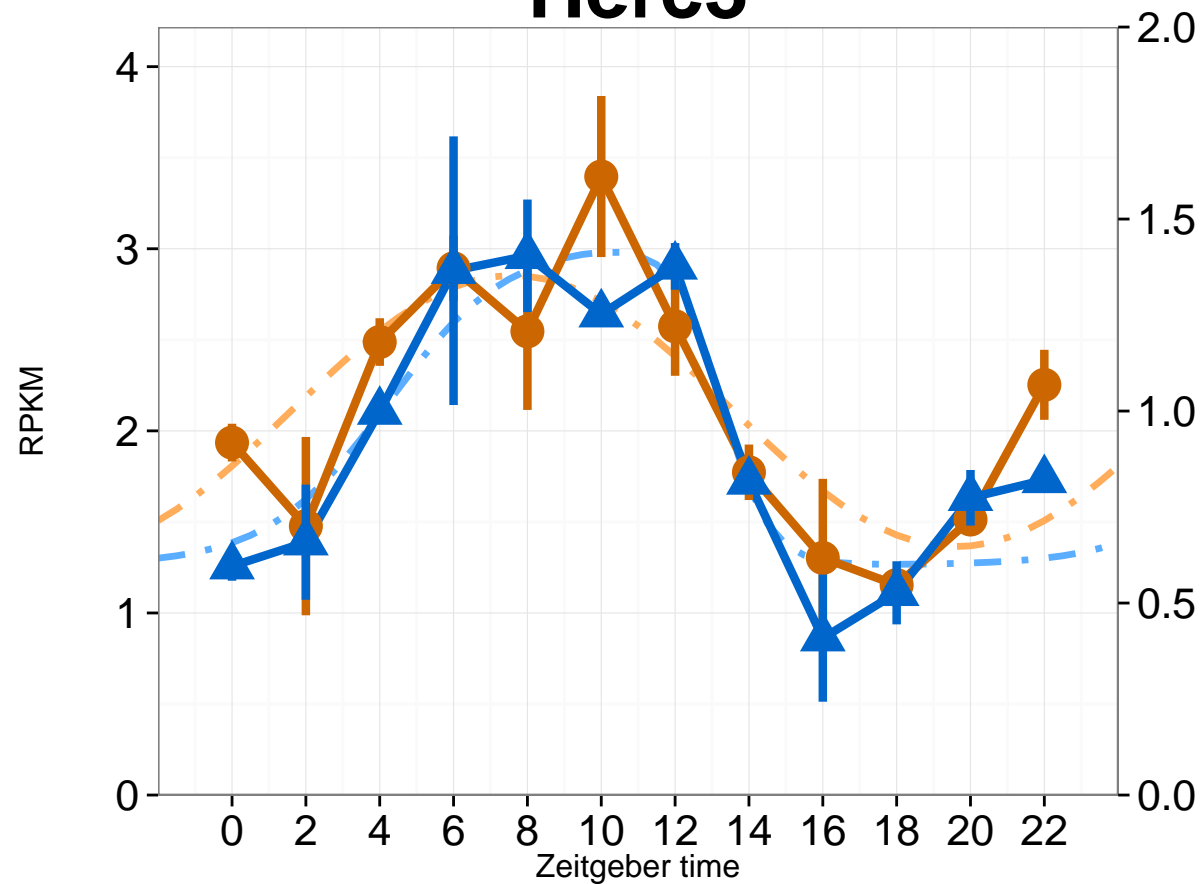

## Herc3

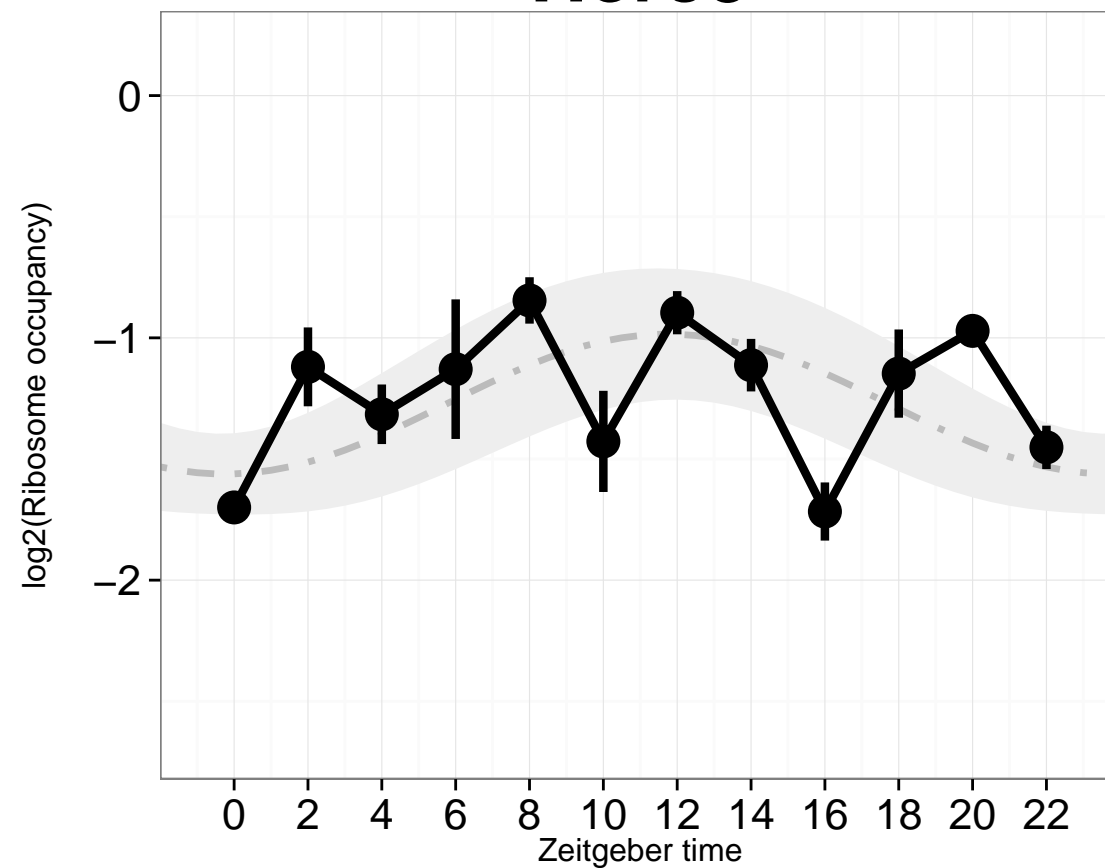

Supplement: SuppDataset_1.zip [file Herc3_set_D.pdf › Supplemental Dataset 1/D-mRNA_rhythm_translation_rhyth/Herc3_set_D.pdf]

## Herpud1

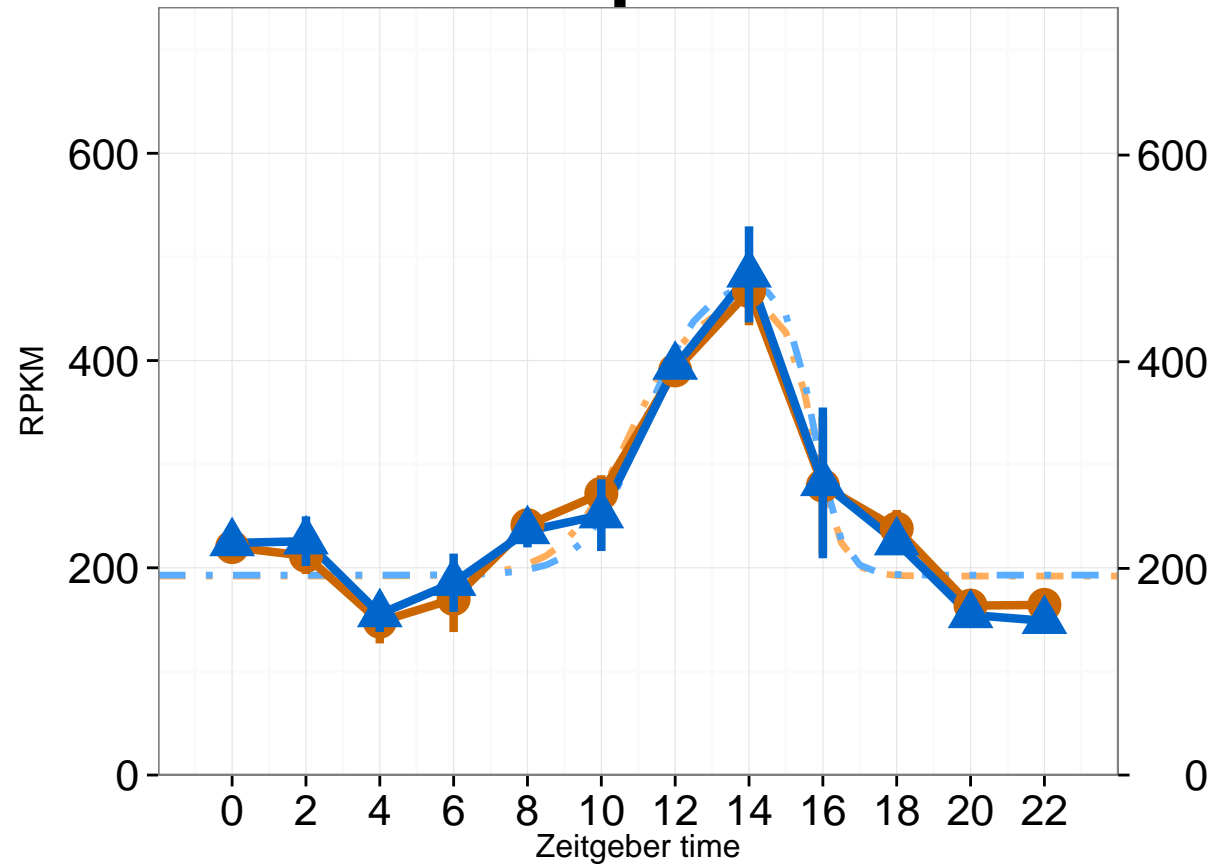

## Herpud1

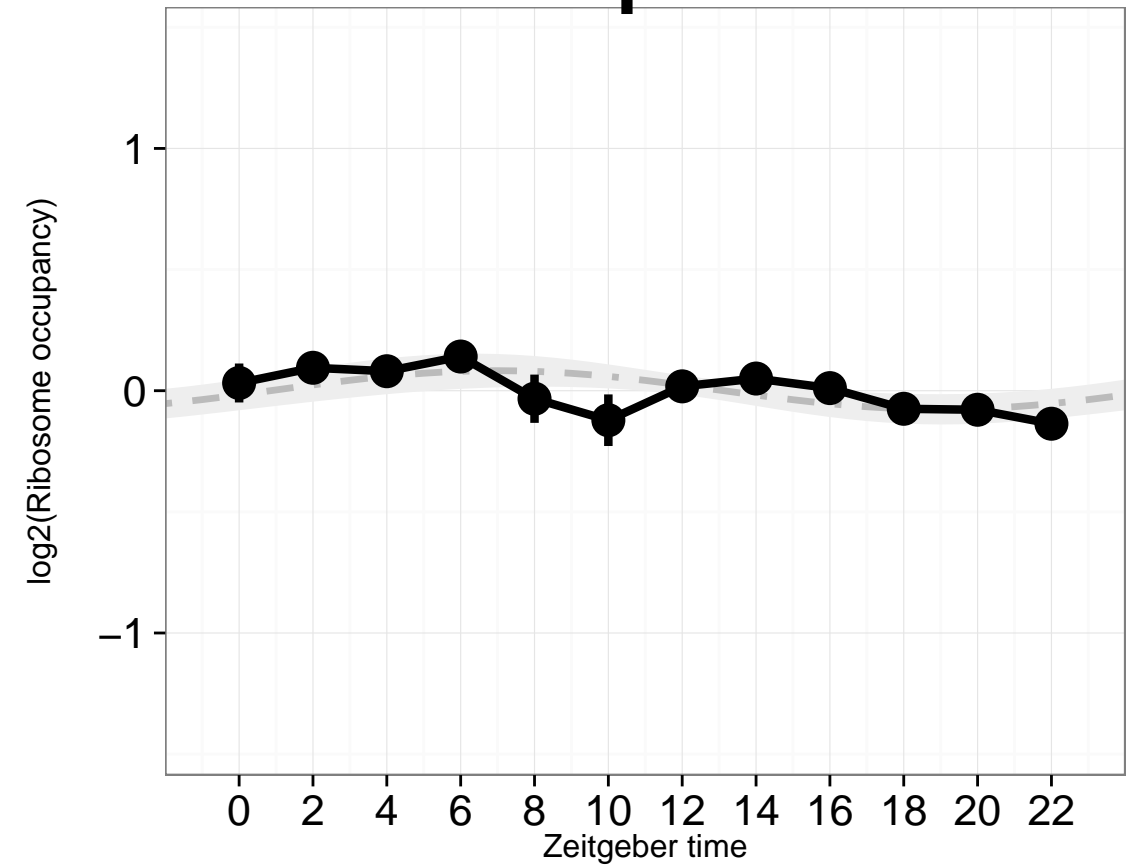

Supplement: SuppDataset_1.zip [file Herpud1_set_D.pdf › Supplemental Dataset 1/D-mRNA_rhythm_translation_rhyth/Herpud1_set_D.pdf]

## Hfe2

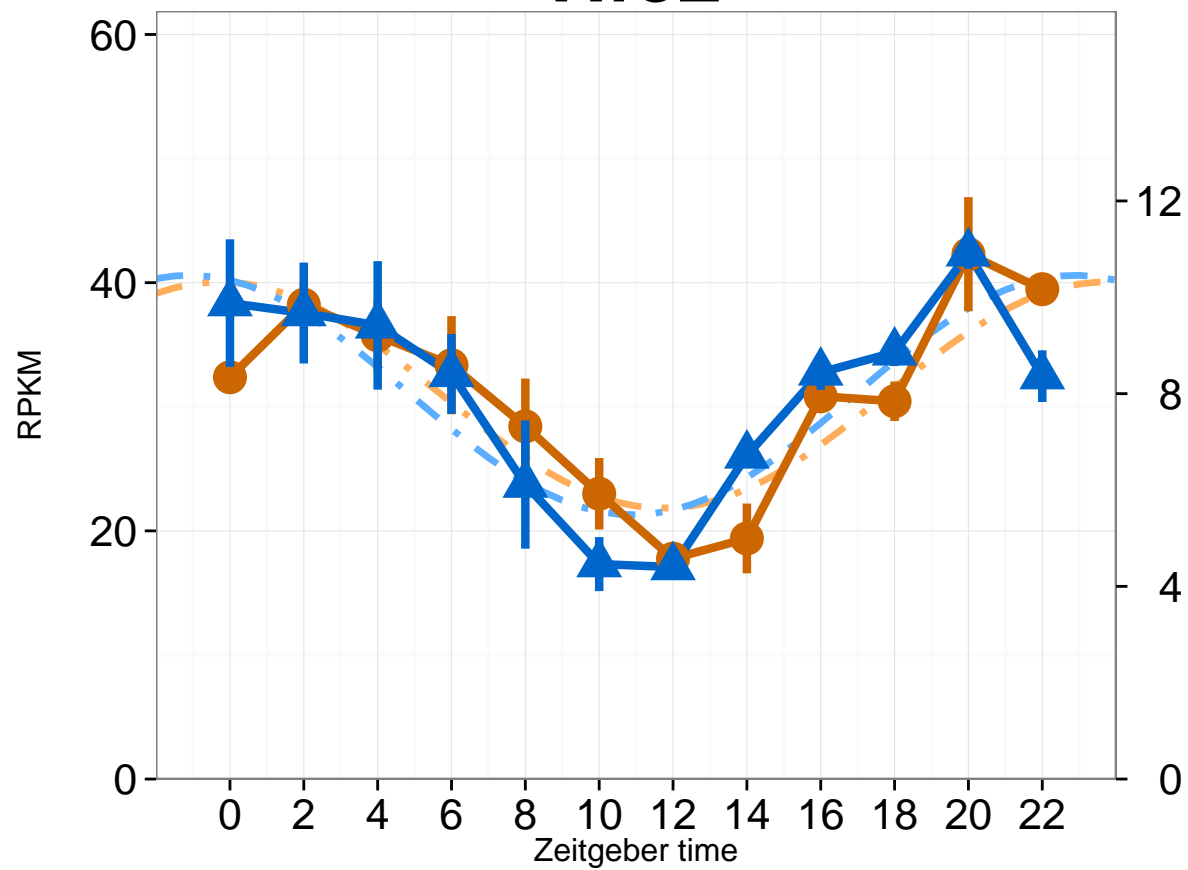

## Hfe2

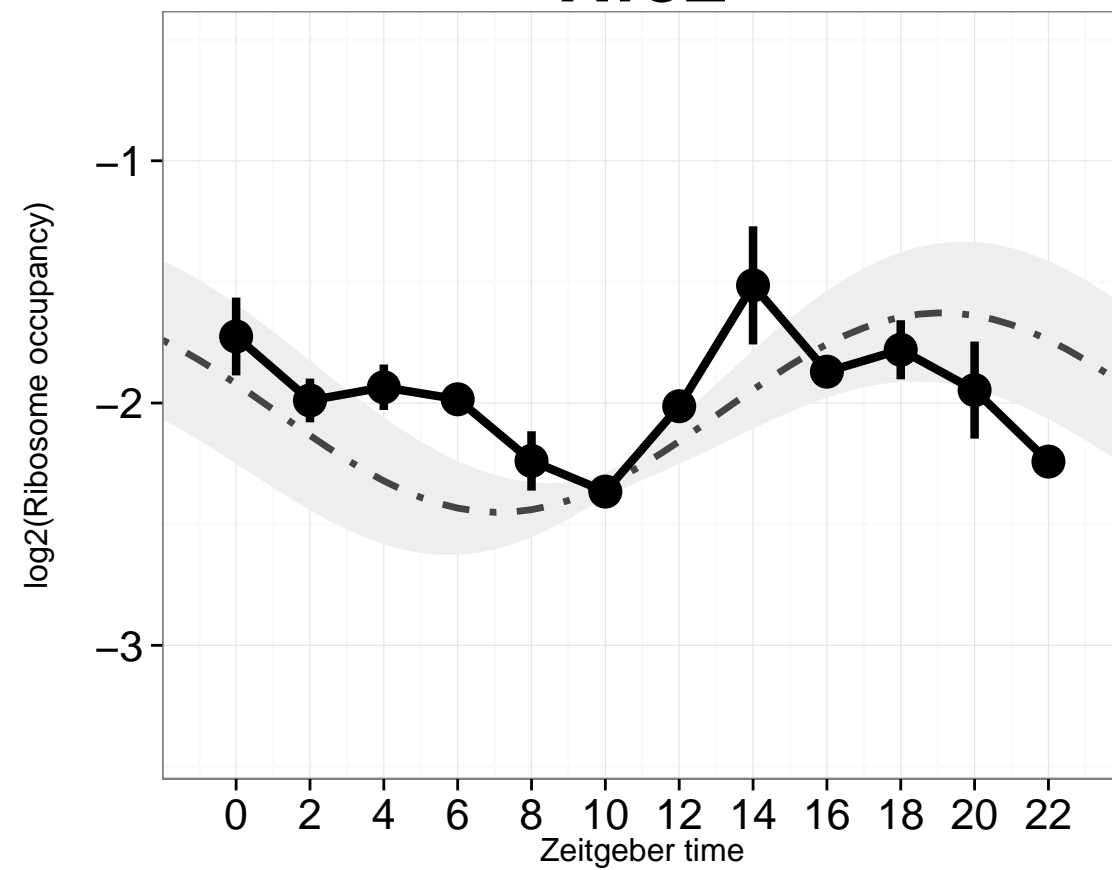

Supplement: SuppDataset_1.zip [file Hfe2_set_D.pdf › Supplemental Dataset 1/D-mRNA_rhythm_translation_rhyth/Hfe2_set_D.pdf]

## Hhip

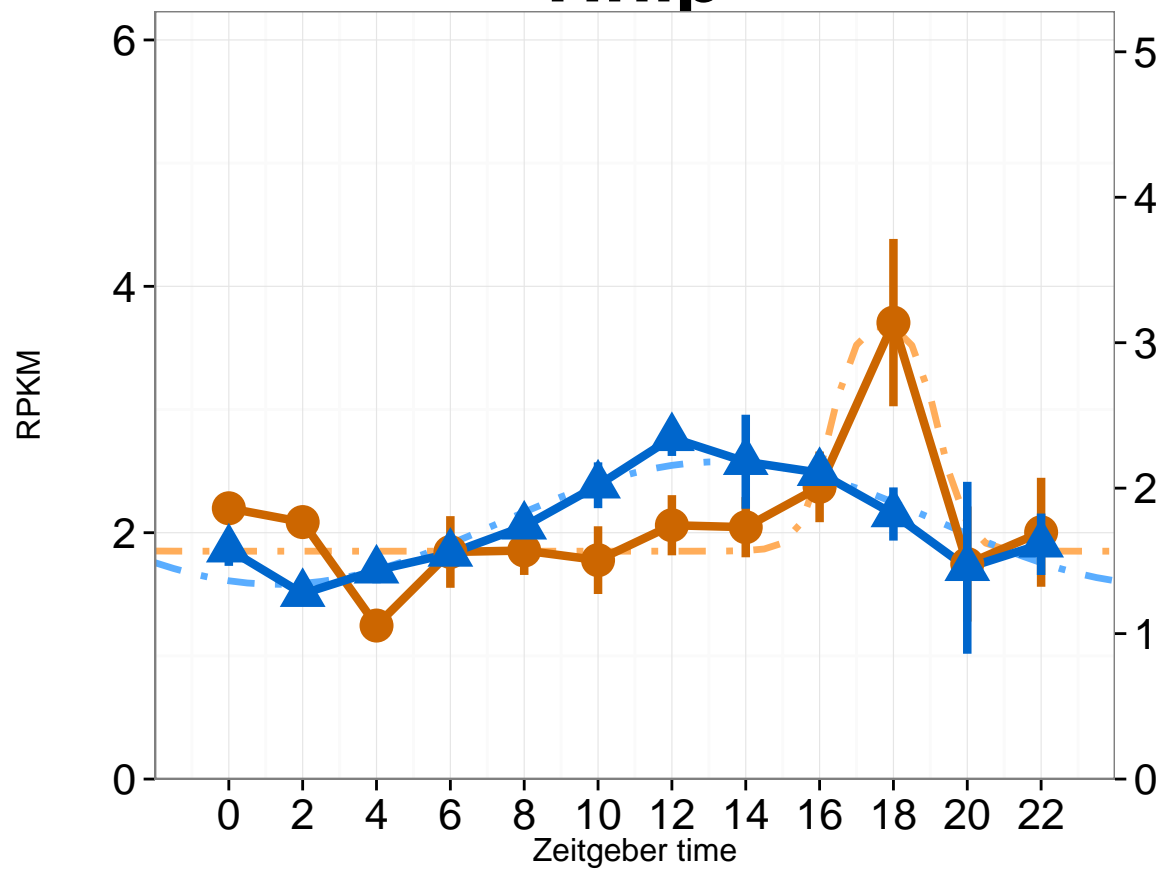

## Hhip

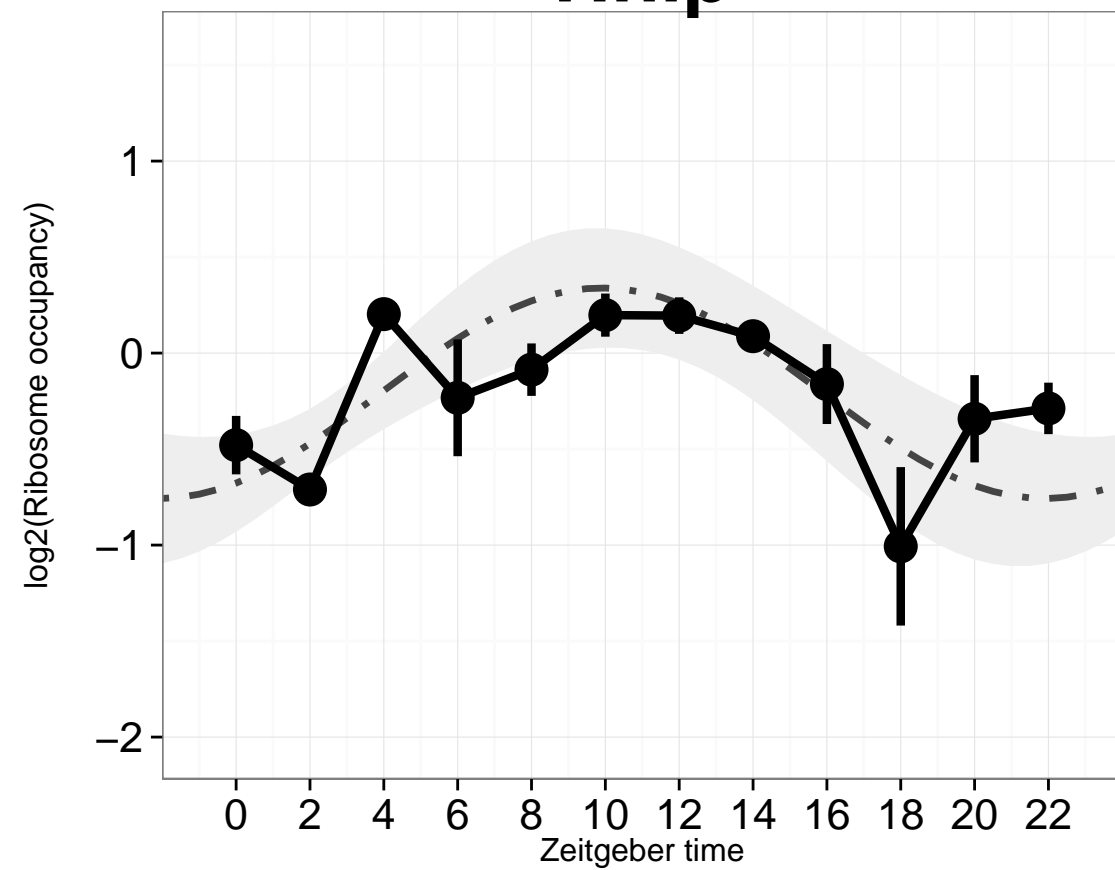

Supplement: SuppDataset_1.zip [file Hhip_set_D.pdf › Supplemental Dataset 1/D-mRNA_rhythm_translation_rhyth/Hhip_set_D.pdf]

# Hist1h1a

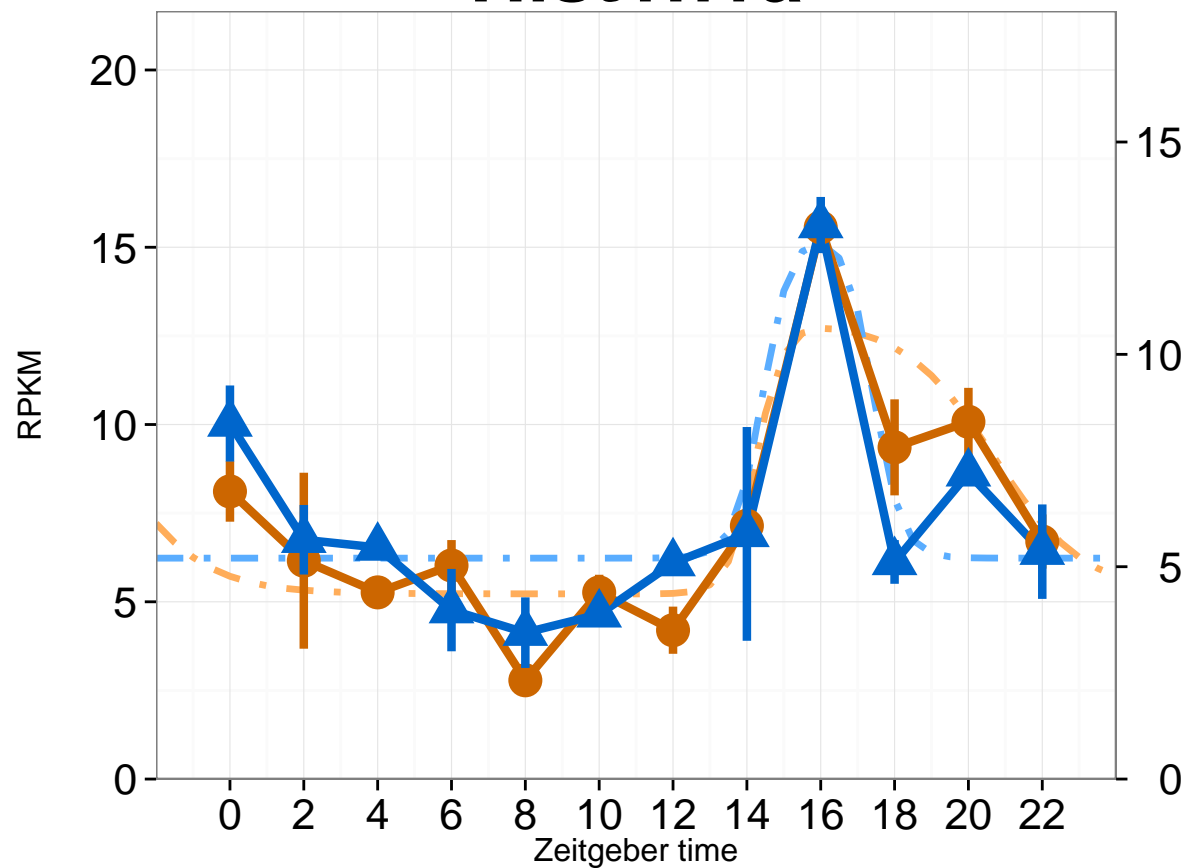

# Hist1h1a

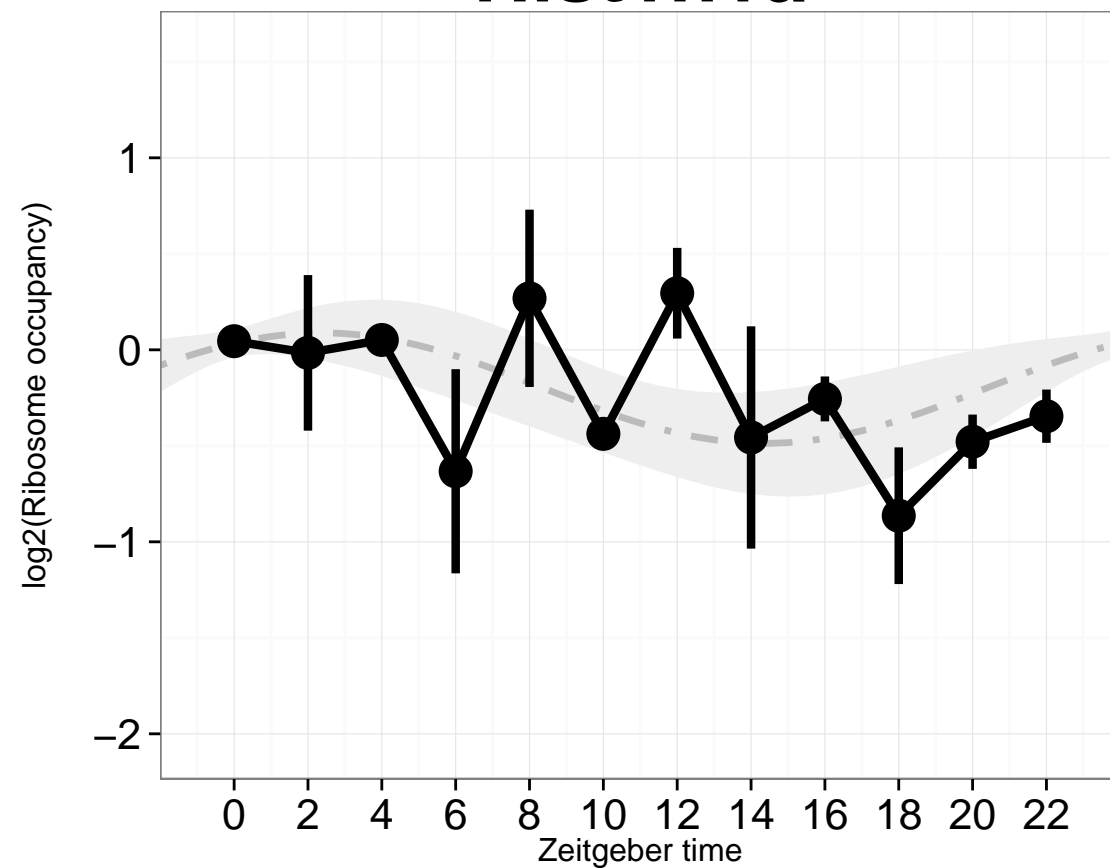

Supplement: SuppDataset_1.zip [file Hist1h1a_set_D.pdf › Supplemental Dataset 1/D-mRNA_rhythm_translation_rhyth/Hist1h1a_set_D.pdf]

# Hist1h1c

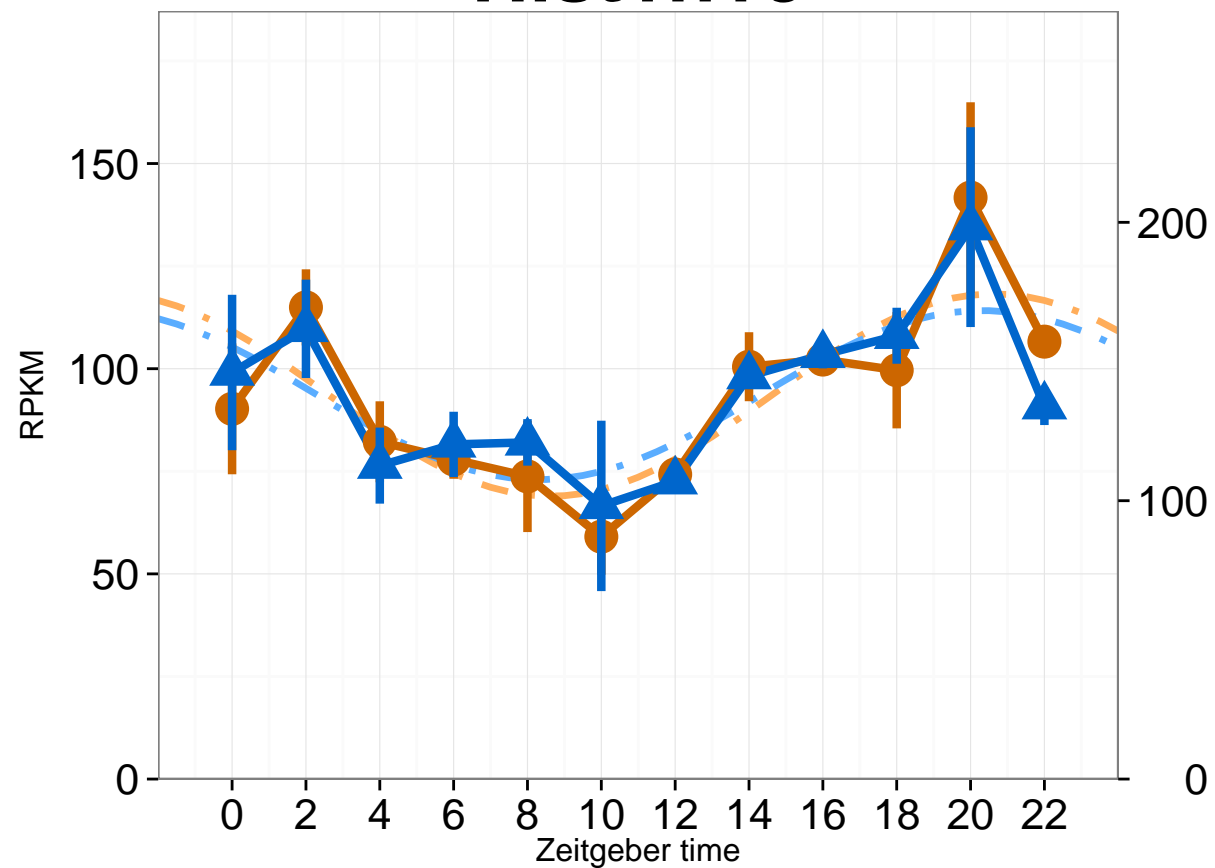

# Hist1h1c

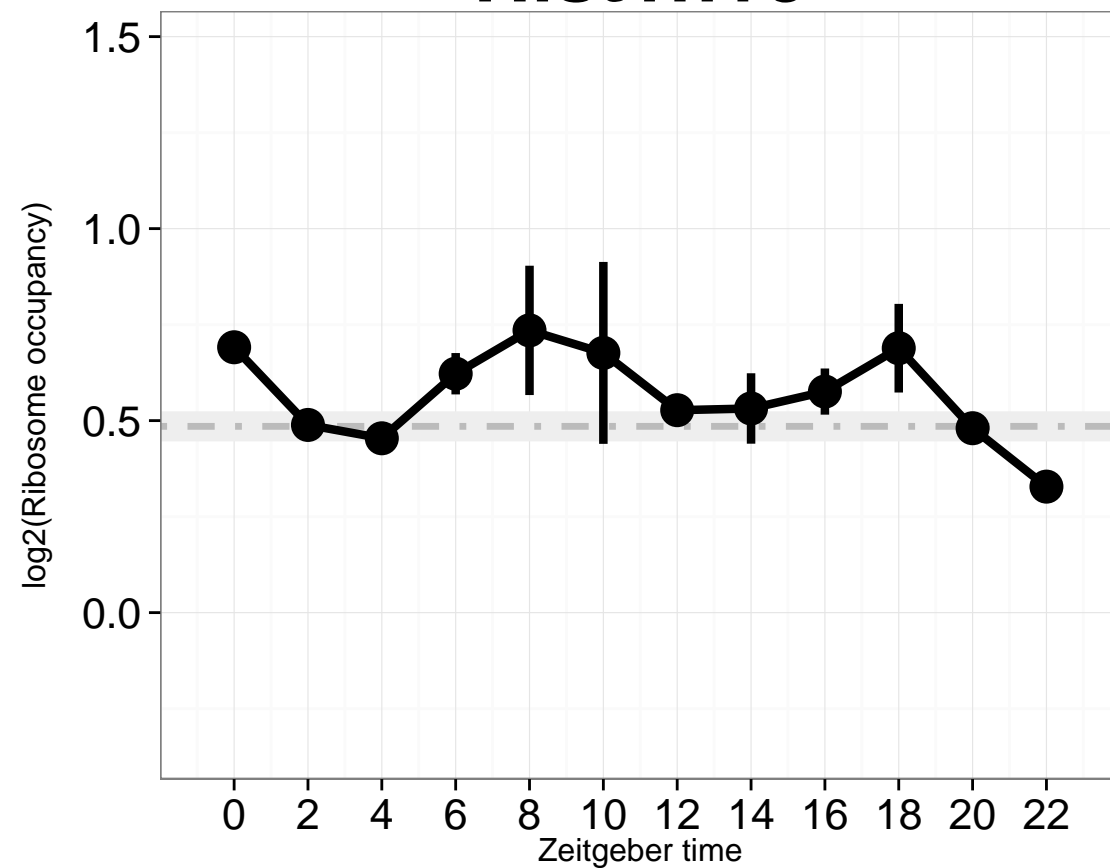

Supplement: SuppDataset_1.zip [file Hist1h1c_set_D.pdf › Supplemental Dataset 1/D-mRNA_rhythm_translation_rhyth/Hist1h1c_set_D.pdf]

# Hist1h4h

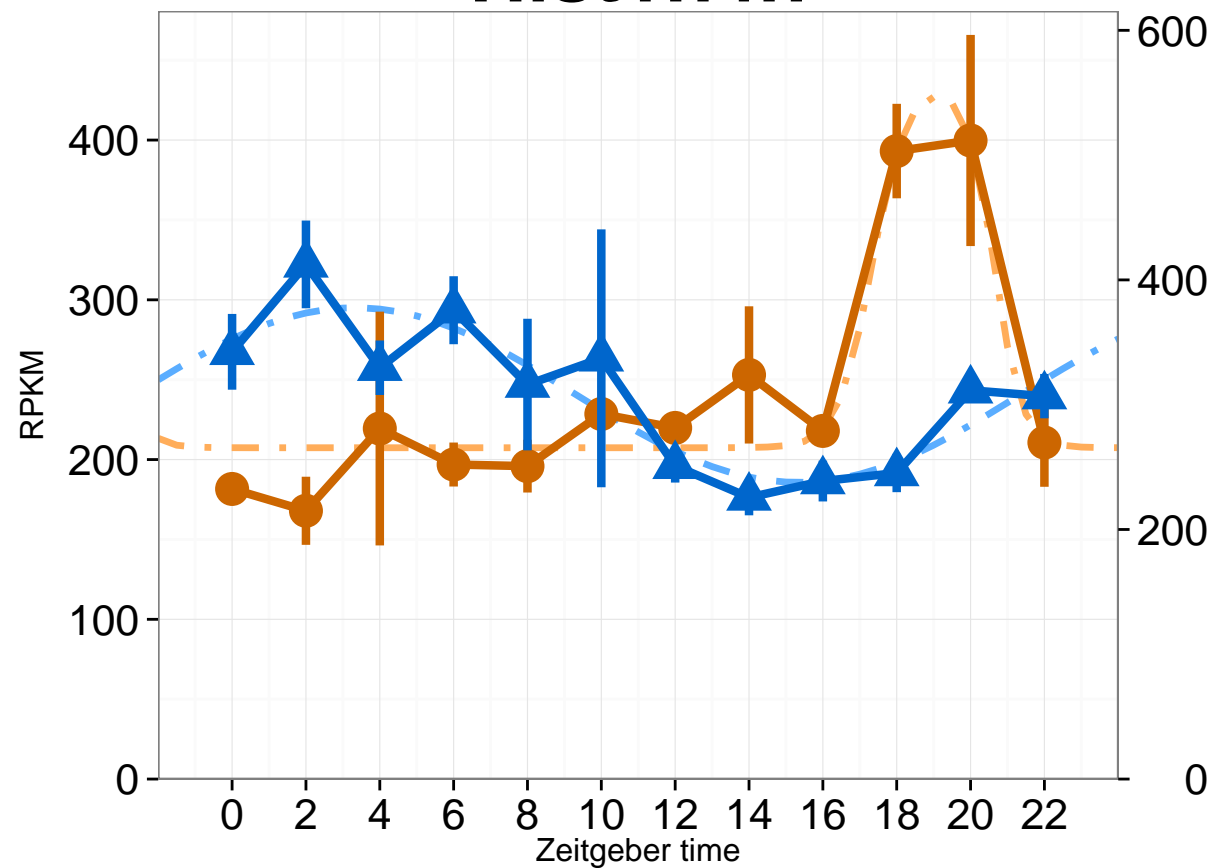

# Hist1h4h

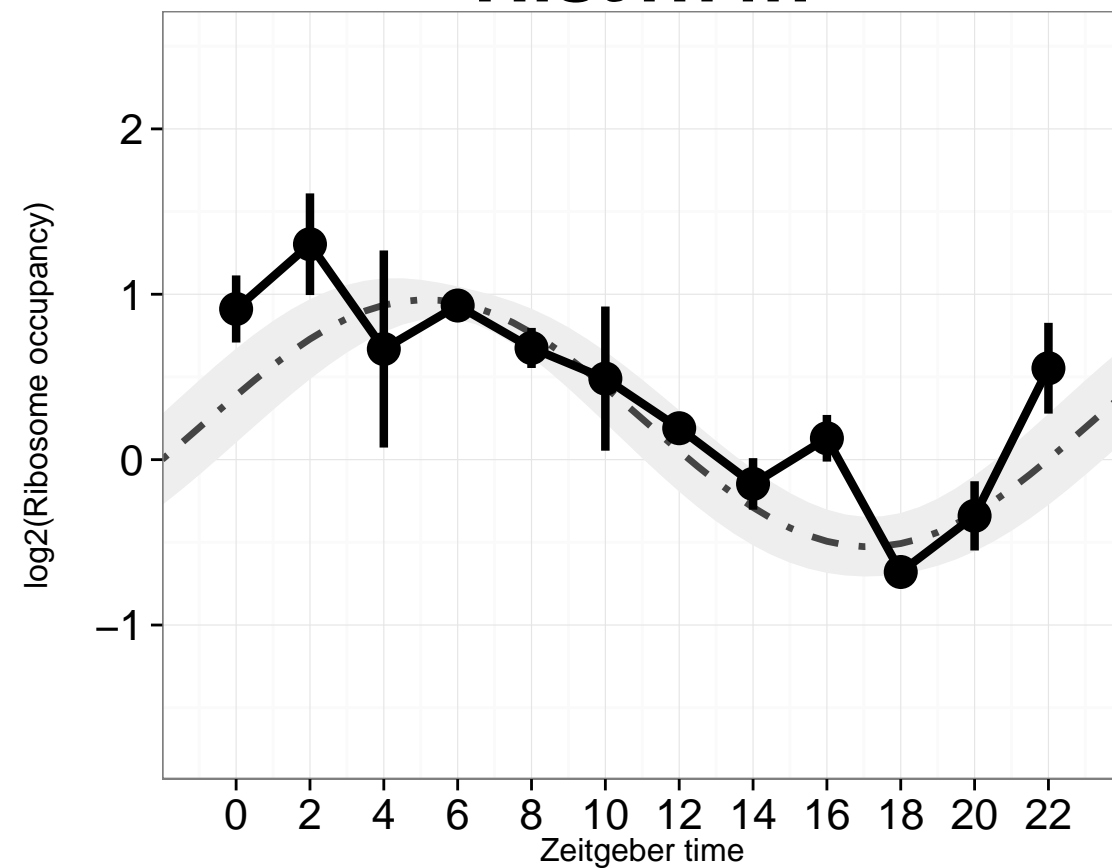

Supplement: SuppDataset_1.zip [file Hist1h4h_set_D.pdf › Supplemental Dataset 1/D-mRNA_rhythm_translation_rhyth/Hist1h4h_set_D.pdf]

# Hist1h4j

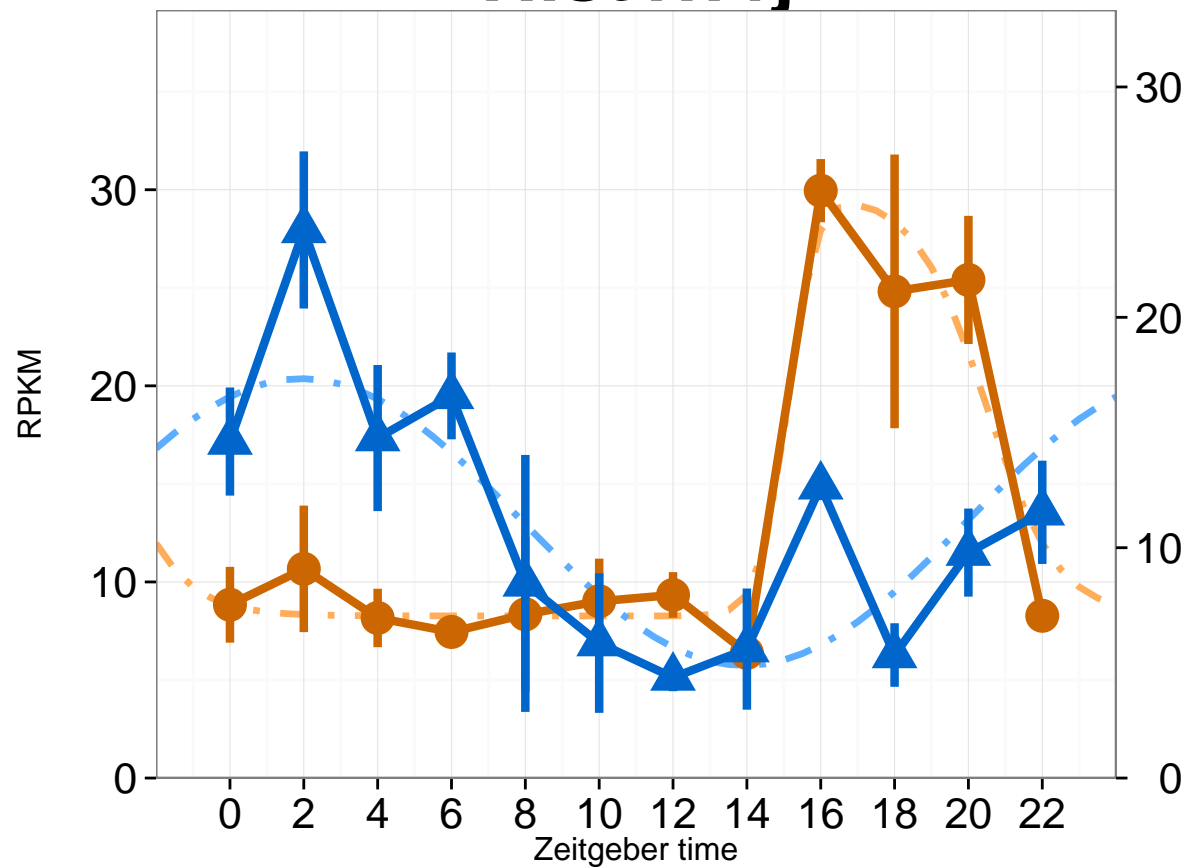

# Hist1h4j

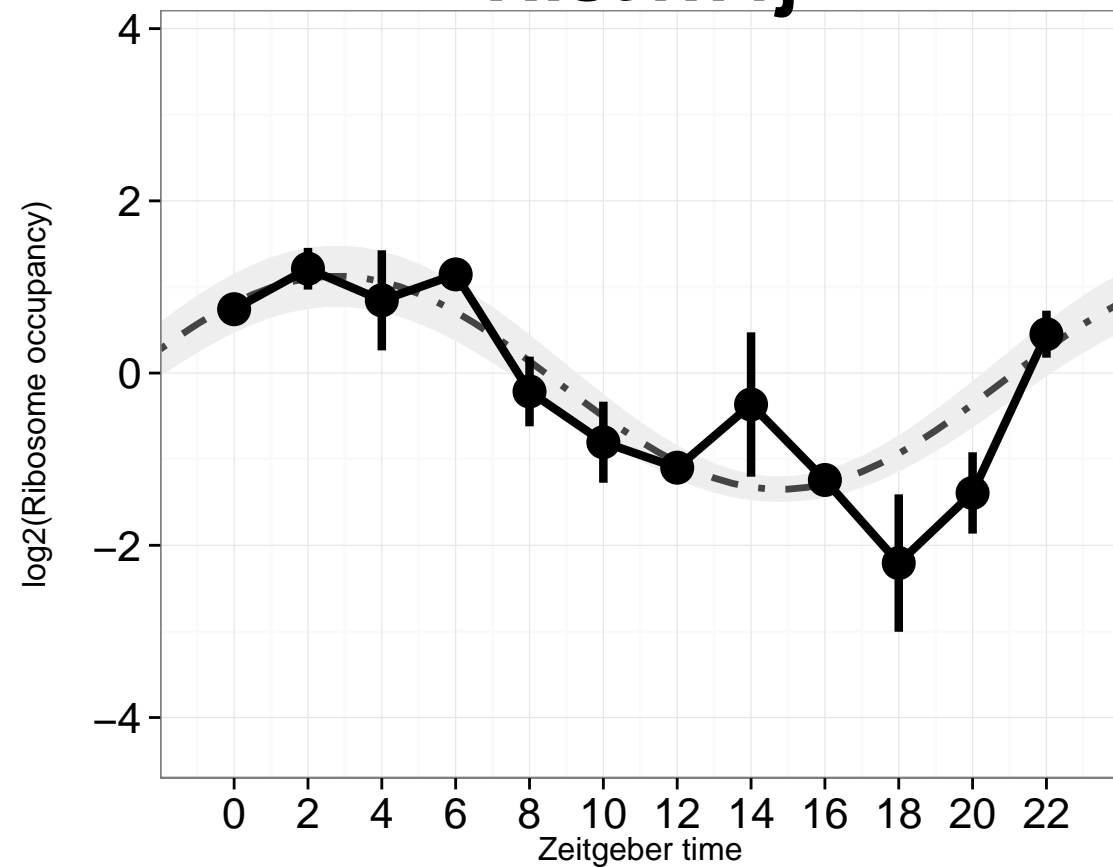

Supplement: SuppDataset_1.zip [file Hist1h4j_set_D.pdf › Supplemental Dataset 1/D-mRNA_rhythm_translation_rhyth/Hist1h4j_set_D.pdf]

# Hist2h2be

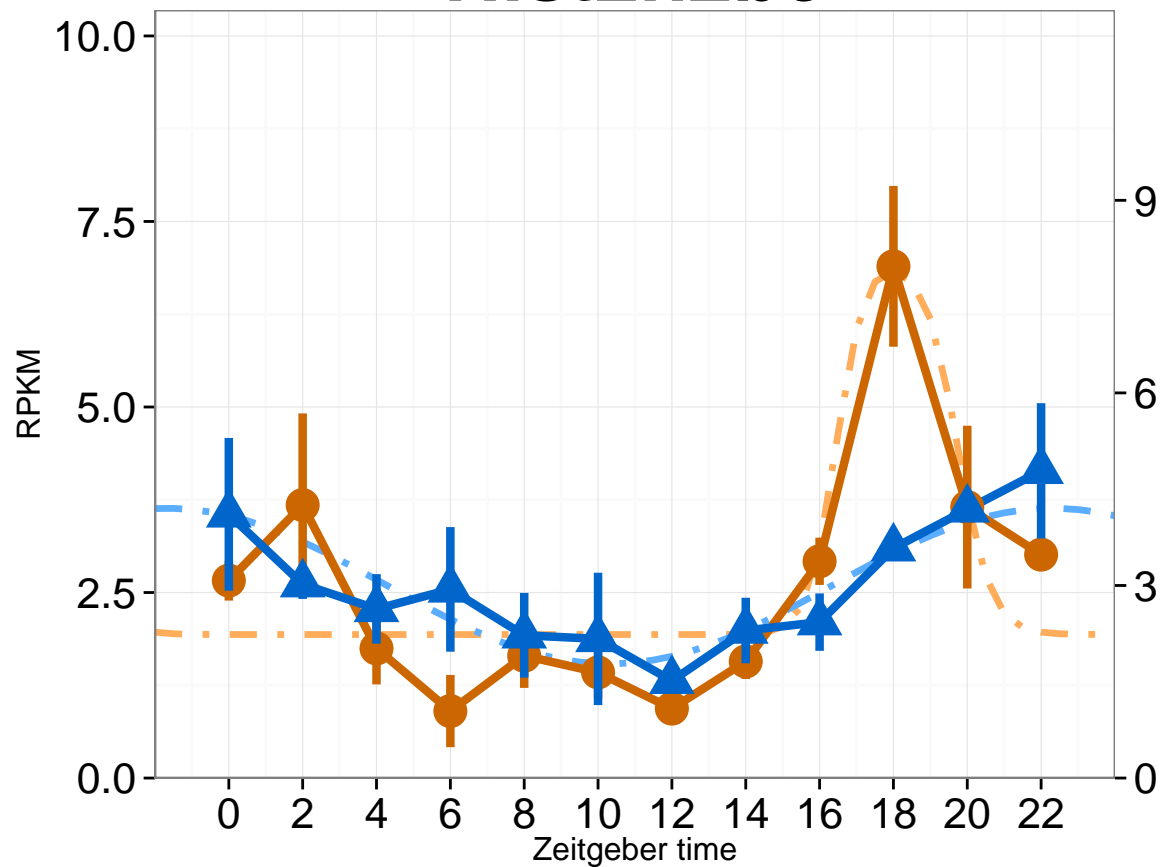

# Hist2h2be

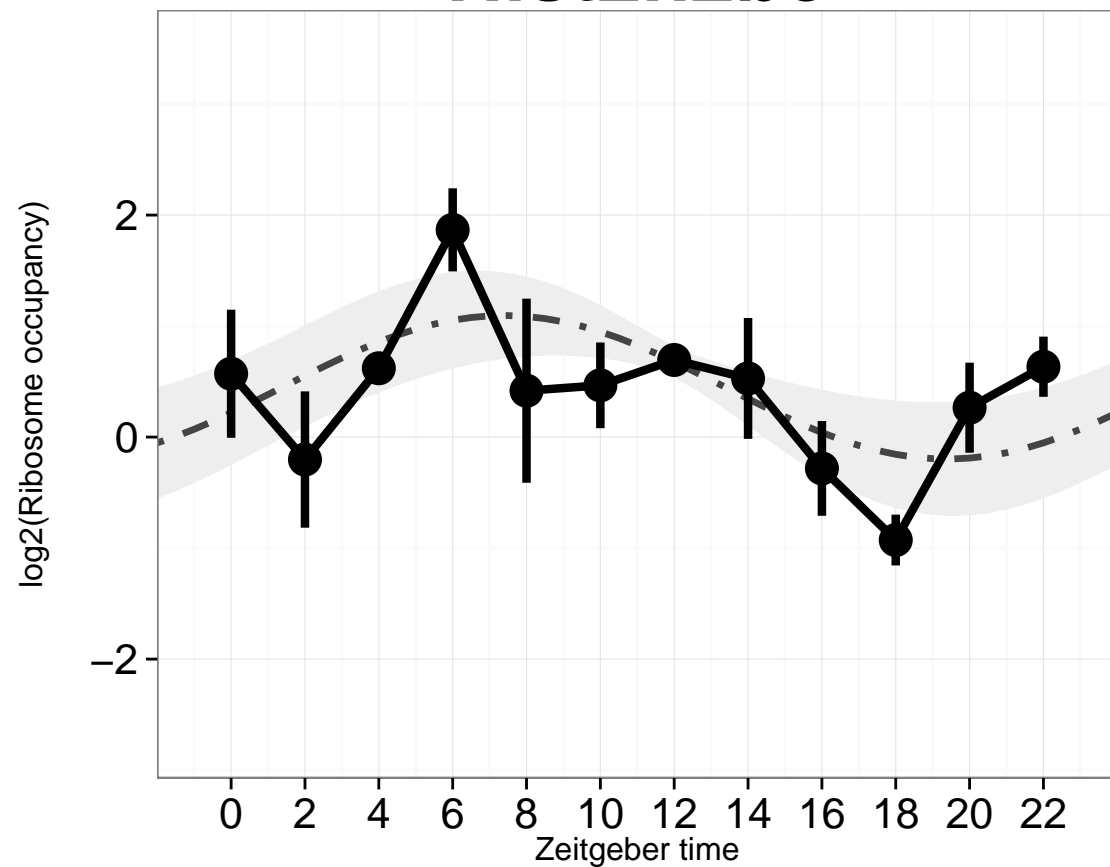

Supplement: SuppDataset_1.zip [file Hist2h2be_set_D.pdf › Supplemental Dataset 1/D-mRNA_rhythm_translation_rhyth/Hist2h2be_set_D.pdf]

# Hif

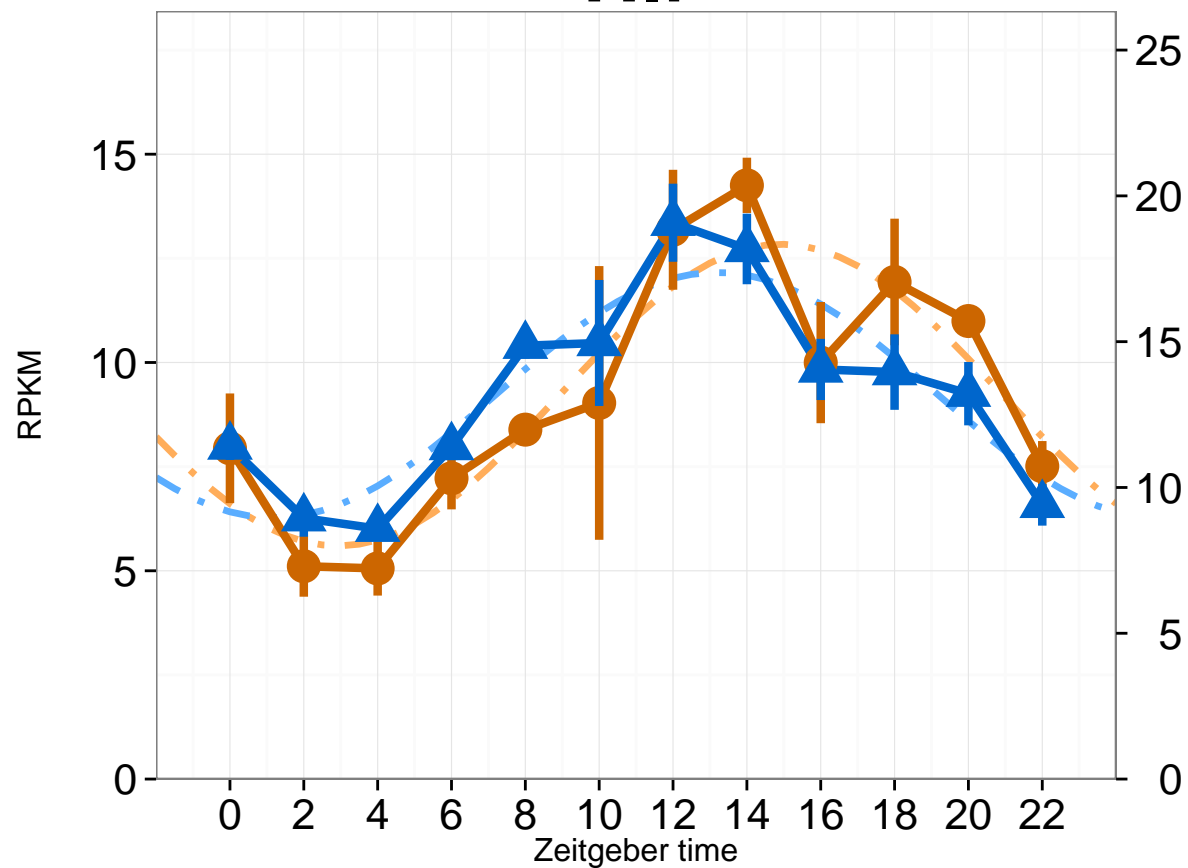

# Hif

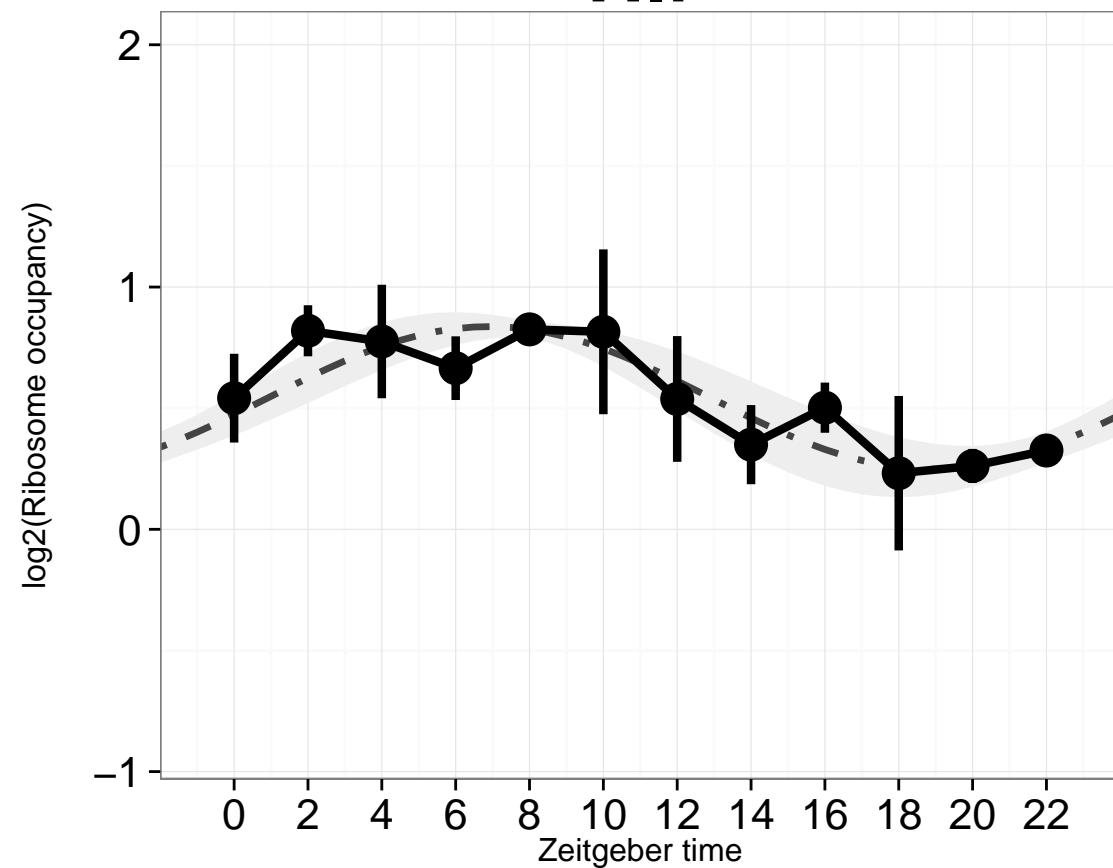

Supplement: SuppDataset_1.zip [file Hlf_set_D.pdf › Supplemental Dataset 1/D-mRNA_rhythm_translation_rhyth/Hlf_set_D.pdf]

## Hmgcr

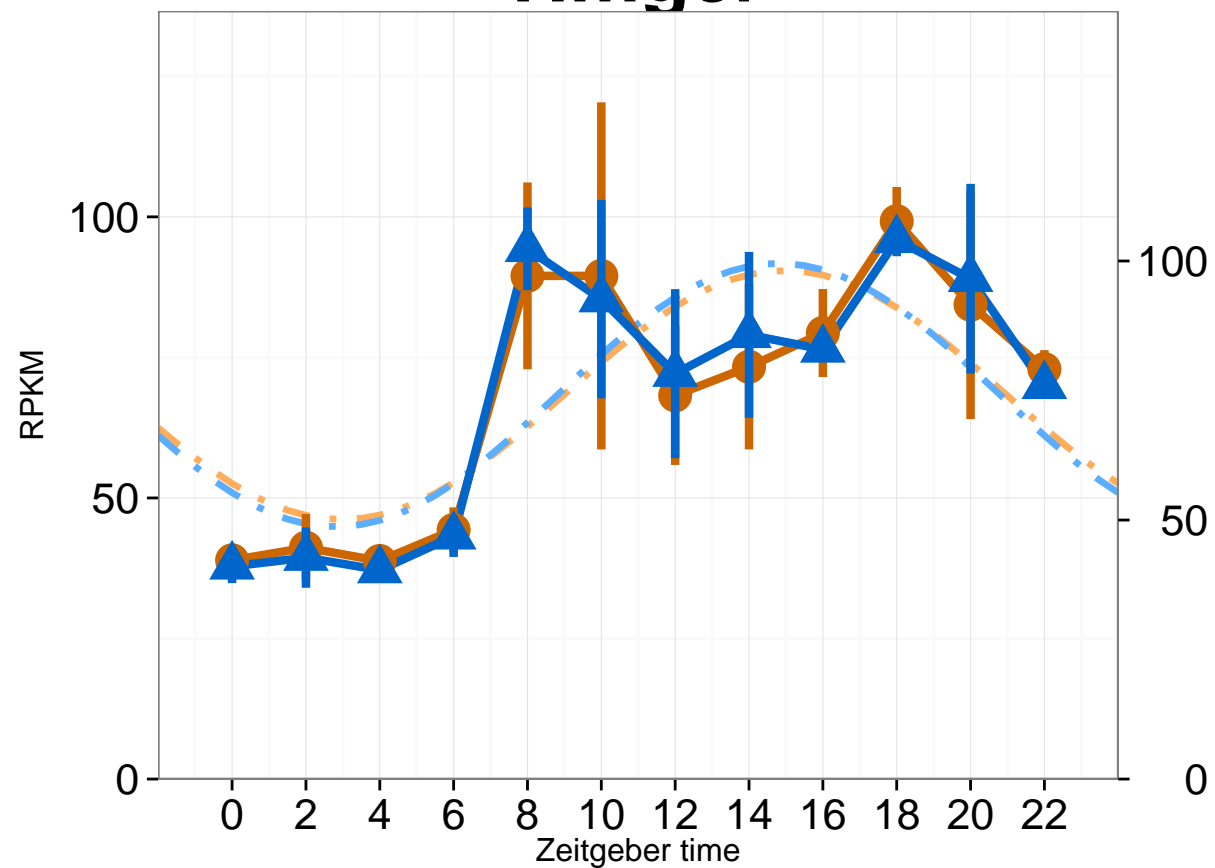

## Hmgcr

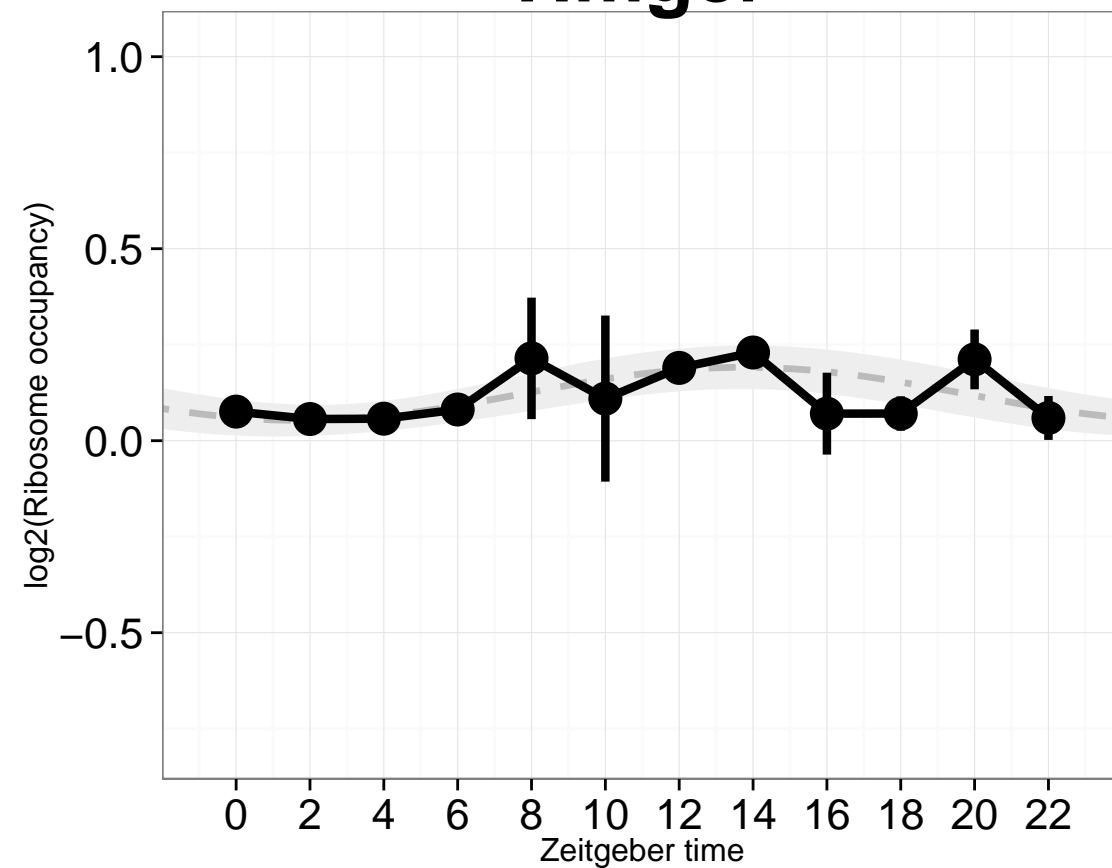

Supplement: SuppDataset_1.zip [file Hmgcr_set_D.pdf › Supplemental Dataset 1/D-mRNA_rhythm_translation_rhyth/Hmgcr_set_D.pdf]

## Hmgcs1

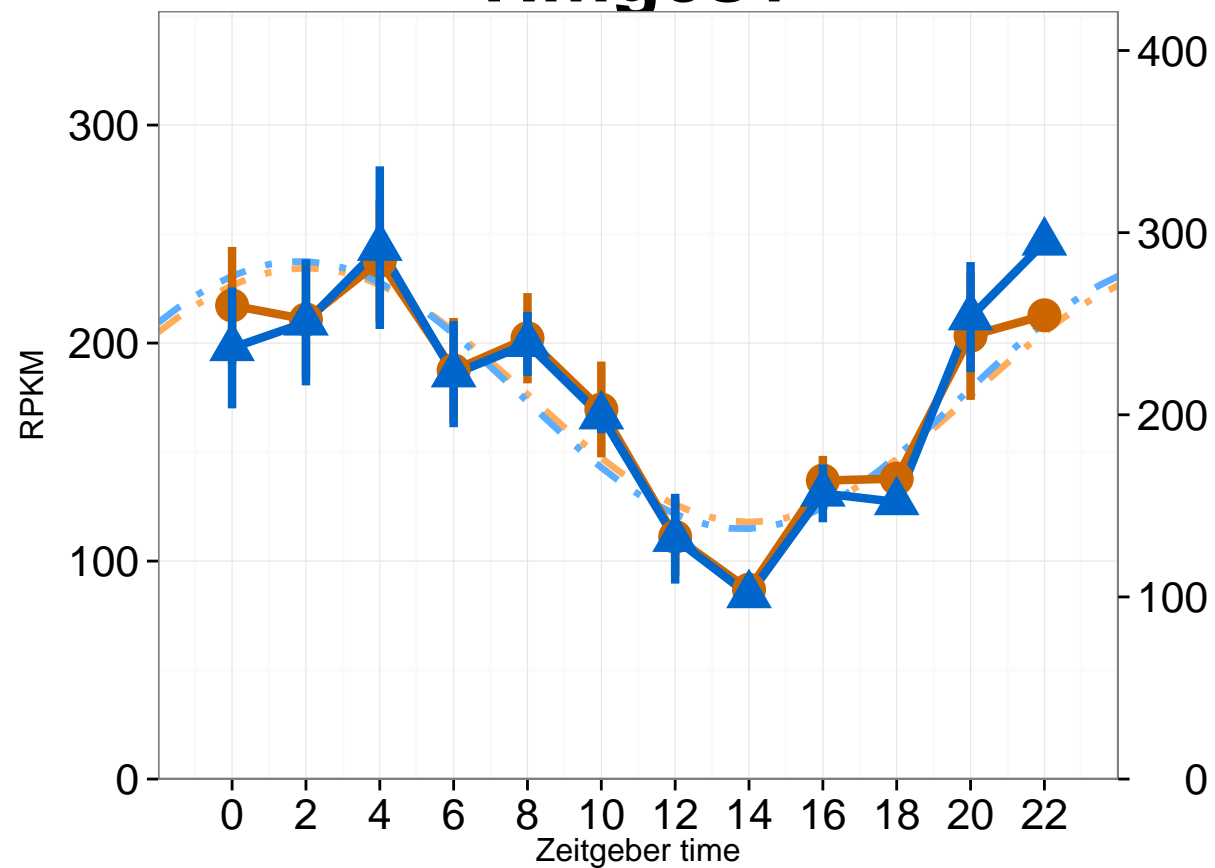

## Hmgcs1

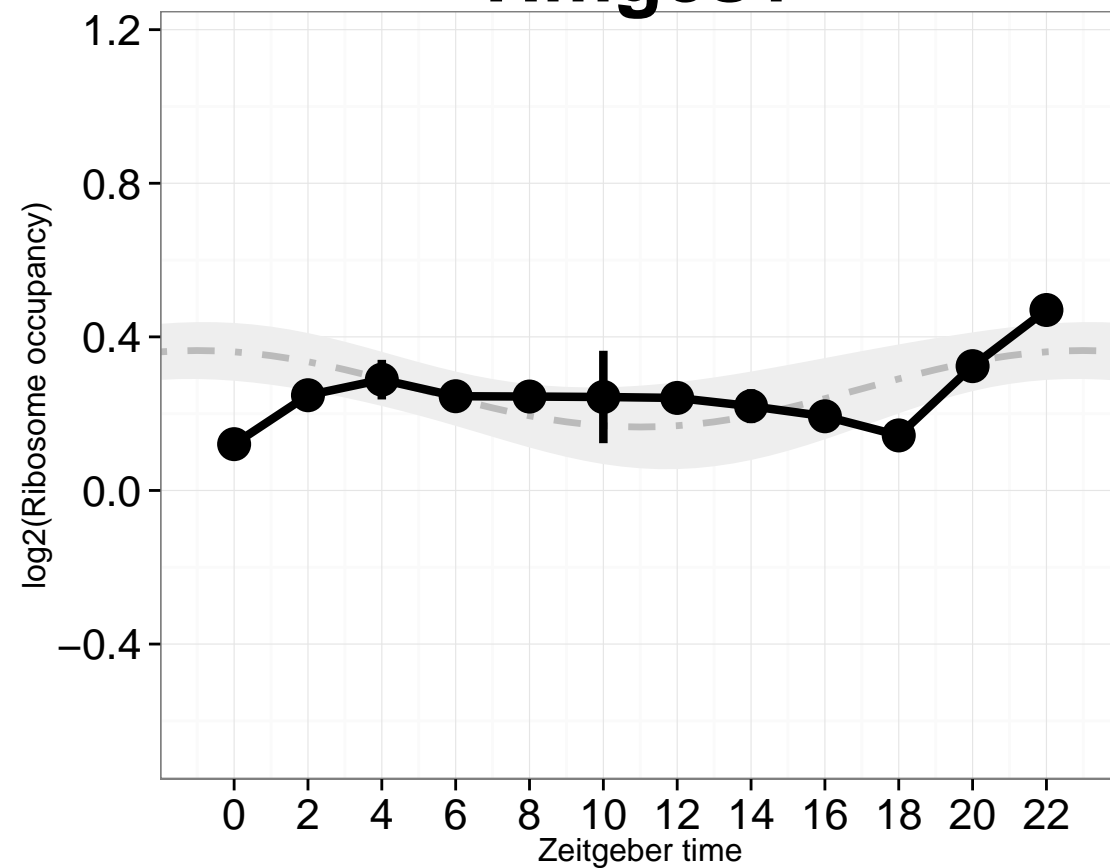

Supplement: SuppDataset_1.zip [file Hmgcs1_set_D.pdf › Supplemental Dataset 1/D-mRNA_rhythm_translation_rhyth/Hmgcs1_set_D.pdf]

## Hnf1b

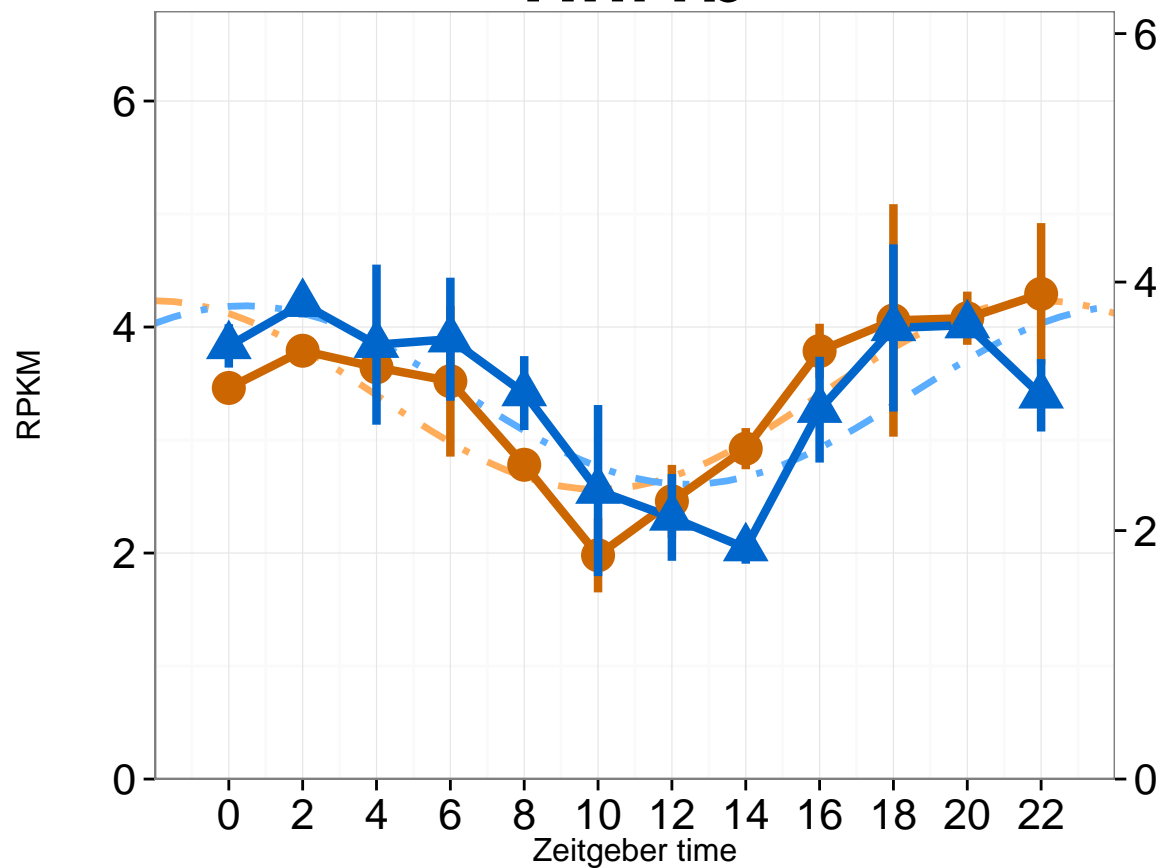

## Hnf1b

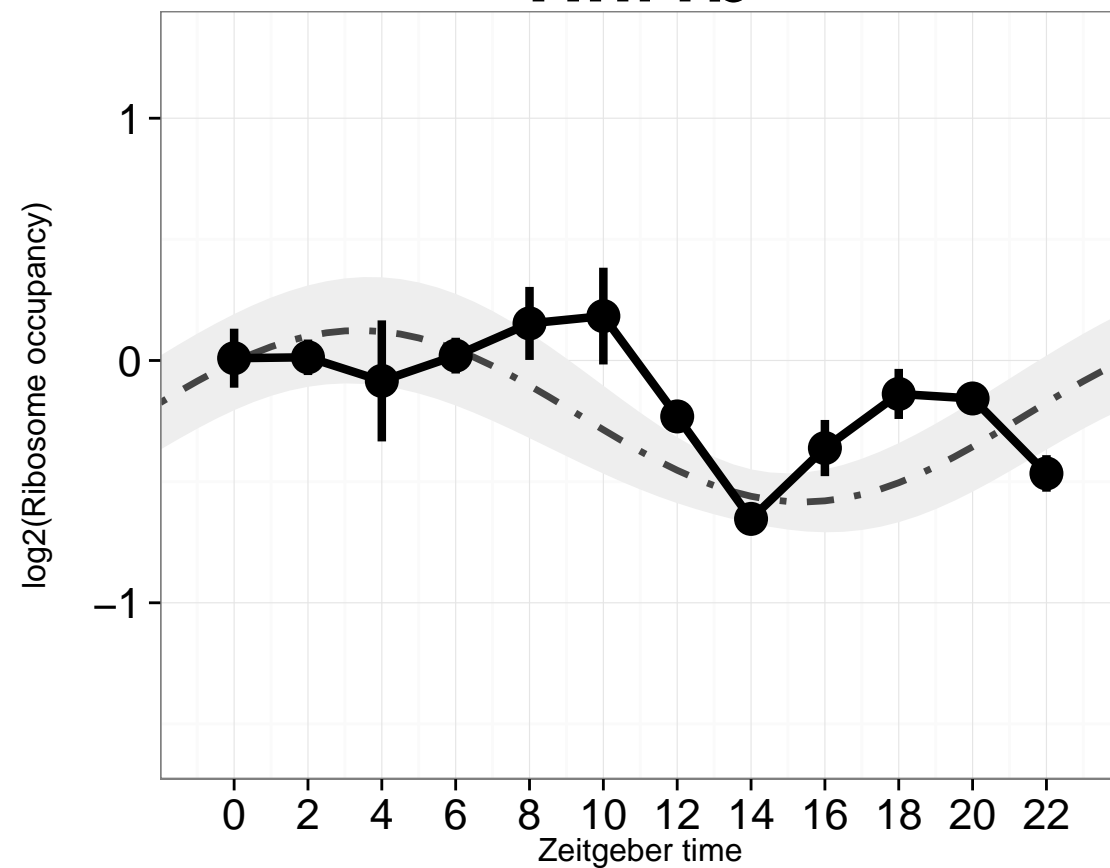

Supplement: SuppDataset_1.zip [file Hnf1b_set_D.pdf › Supplemental Dataset 1/D-mRNA_rhythm_translation_rhyth/Hnf1b_set_D.pdf]

# Hnrnpc

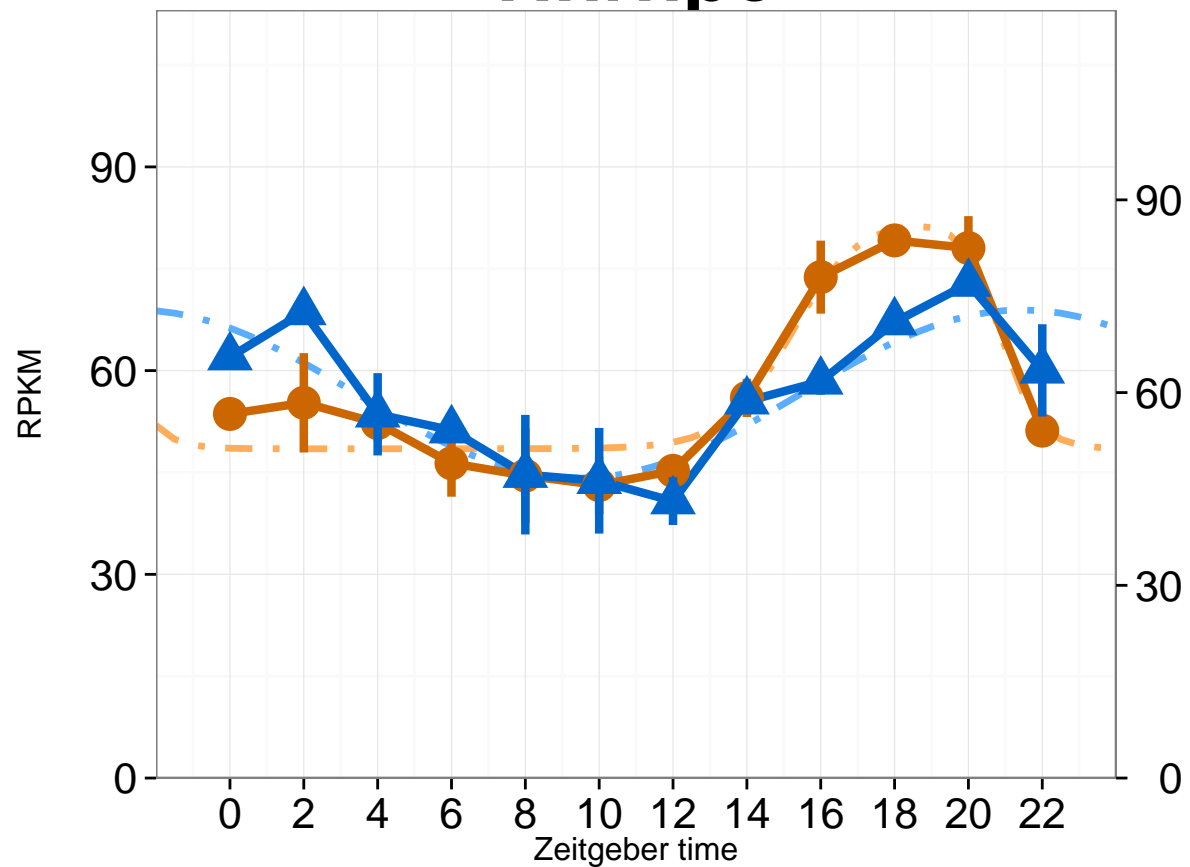

# Hnrnpc

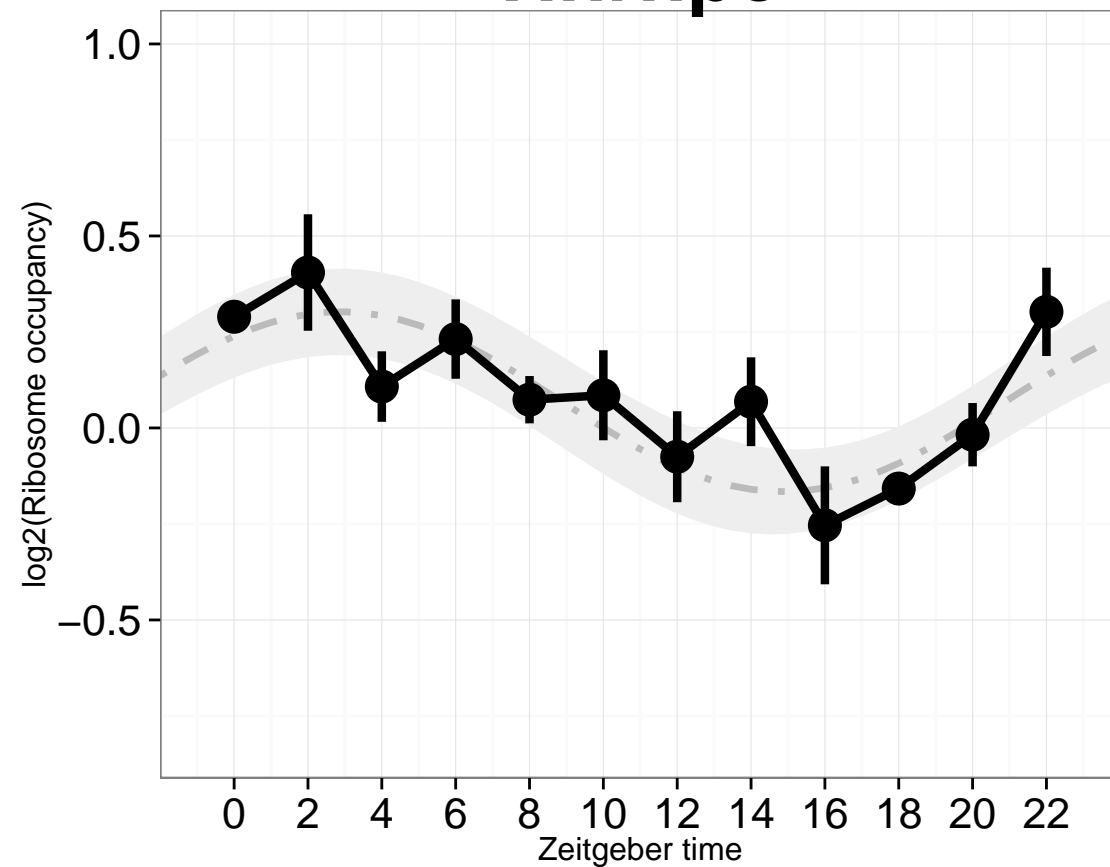

Supplement: SuppDataset_1.zip [file Hnrnpc_set_D.pdf › Supplemental Dataset 1/D-mRNA_rhythm_translation_rhyth/Hnrnpc_set_D.pdf]

## Hnrnpdl

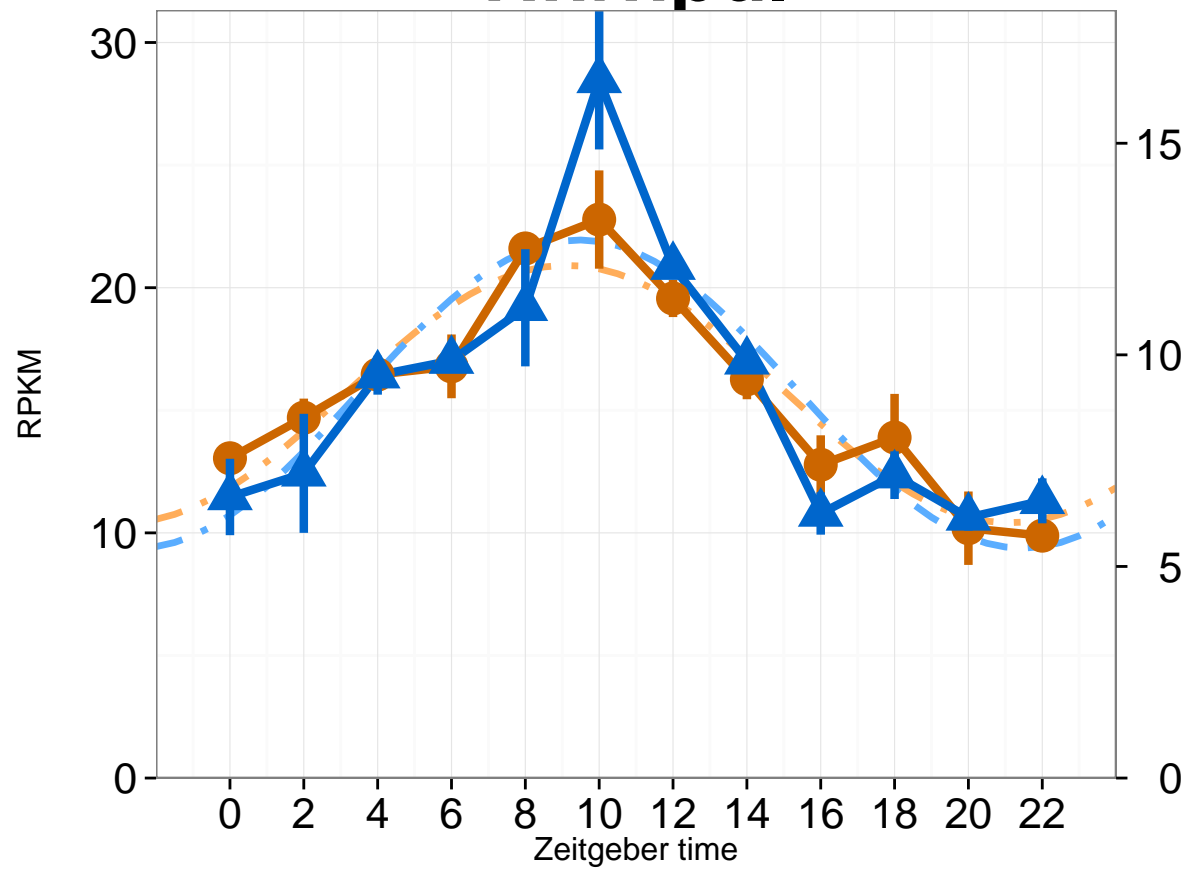

## Hnrnpdl

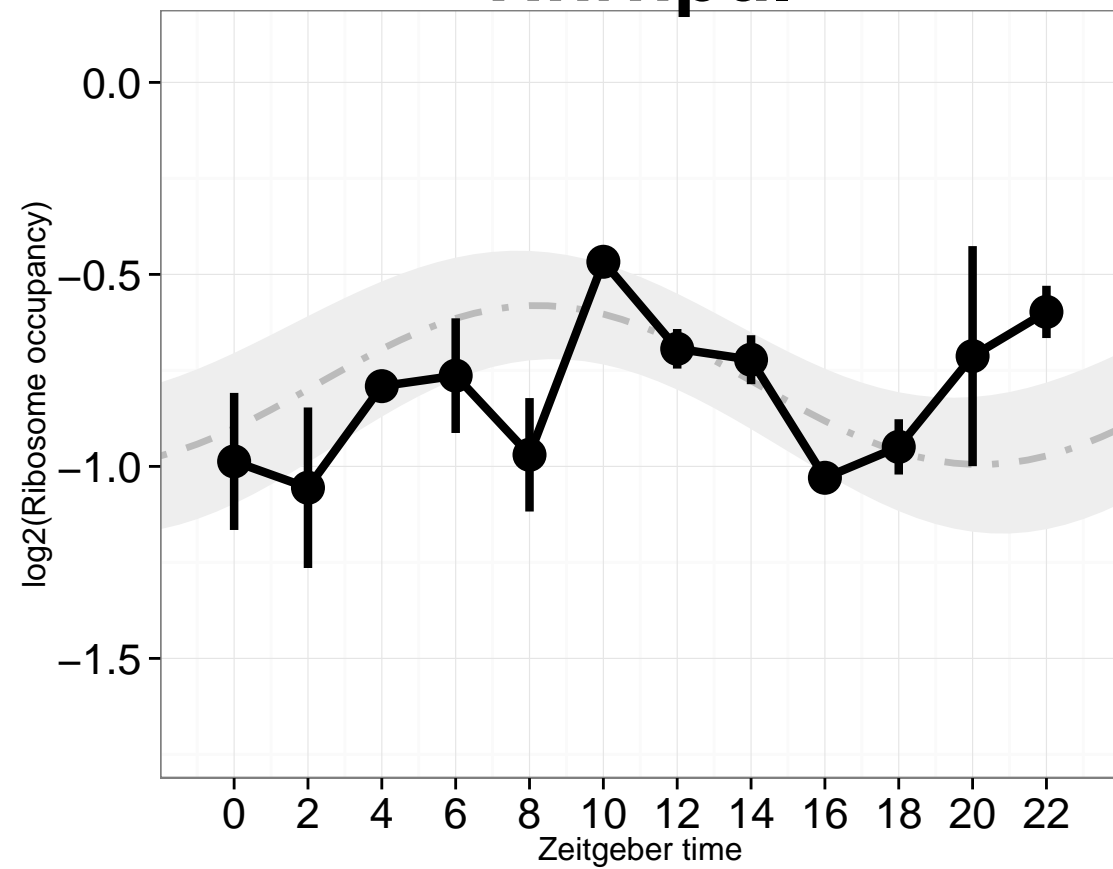

Supplement: SuppDataset_1.zip [file Hnrnpdl_set_D.pdf › Supplemental Dataset 1/D-mRNA_rhythm_translation_rhyth/Hnrnpdl_set_D.pdf]

## Hnrrnph3

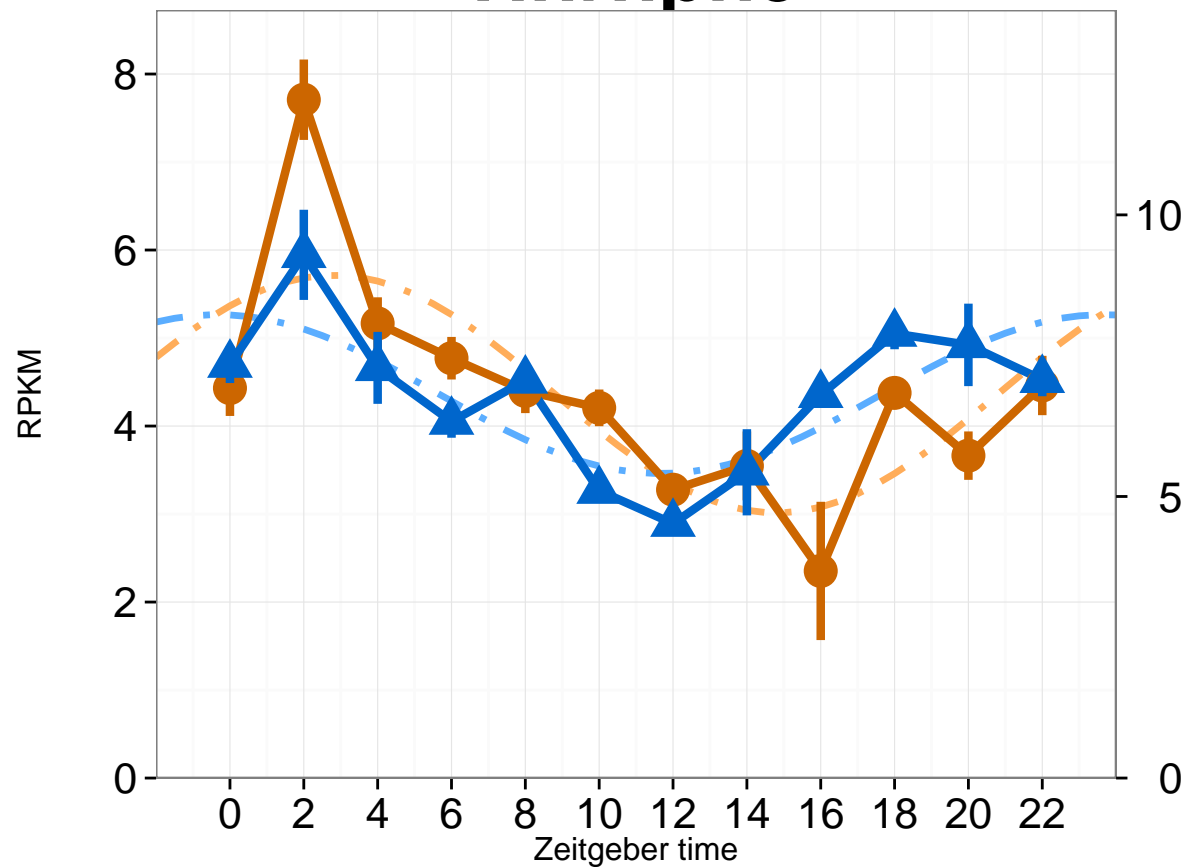

## Hnrrnph3

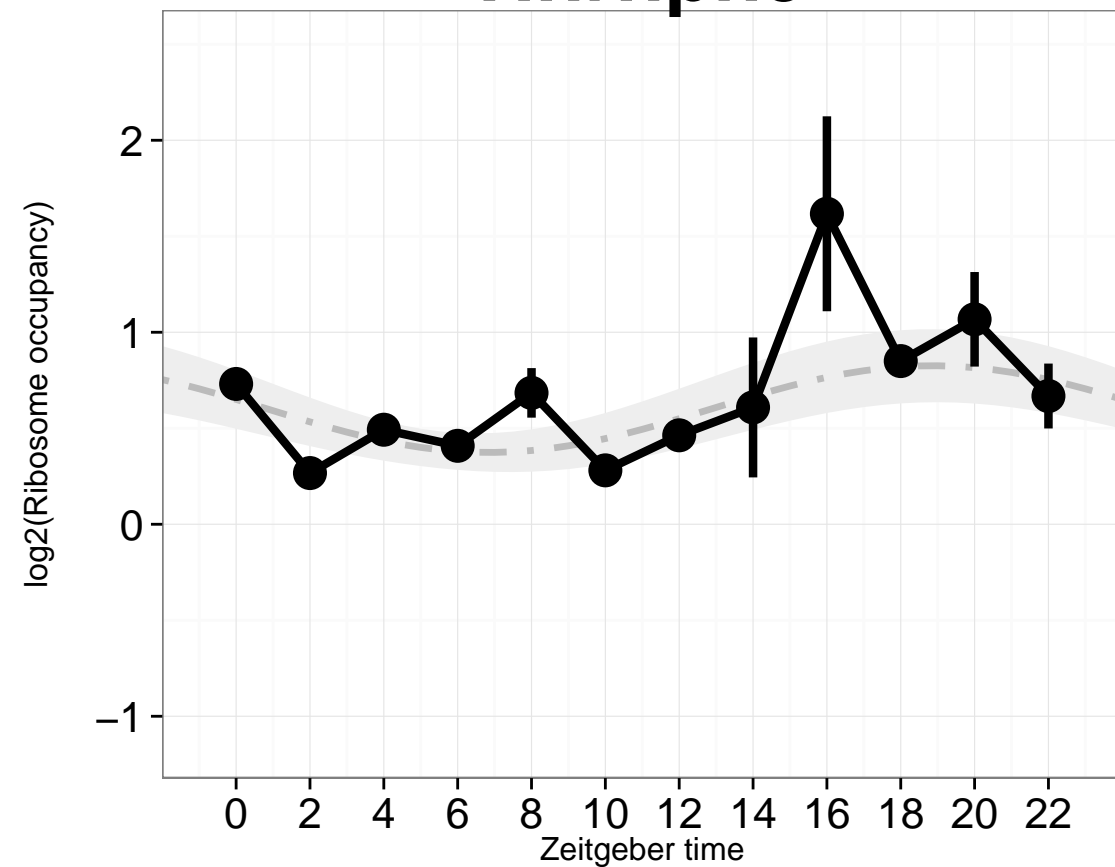

Supplement: SuppDataset_1.zip [file Hnrnph3_set_D.pdf › Supplemental Dataset 1/D-mRNA_rhythm_translation_rhyth/Hnrnph3_set_D.pdf]

# Homer2

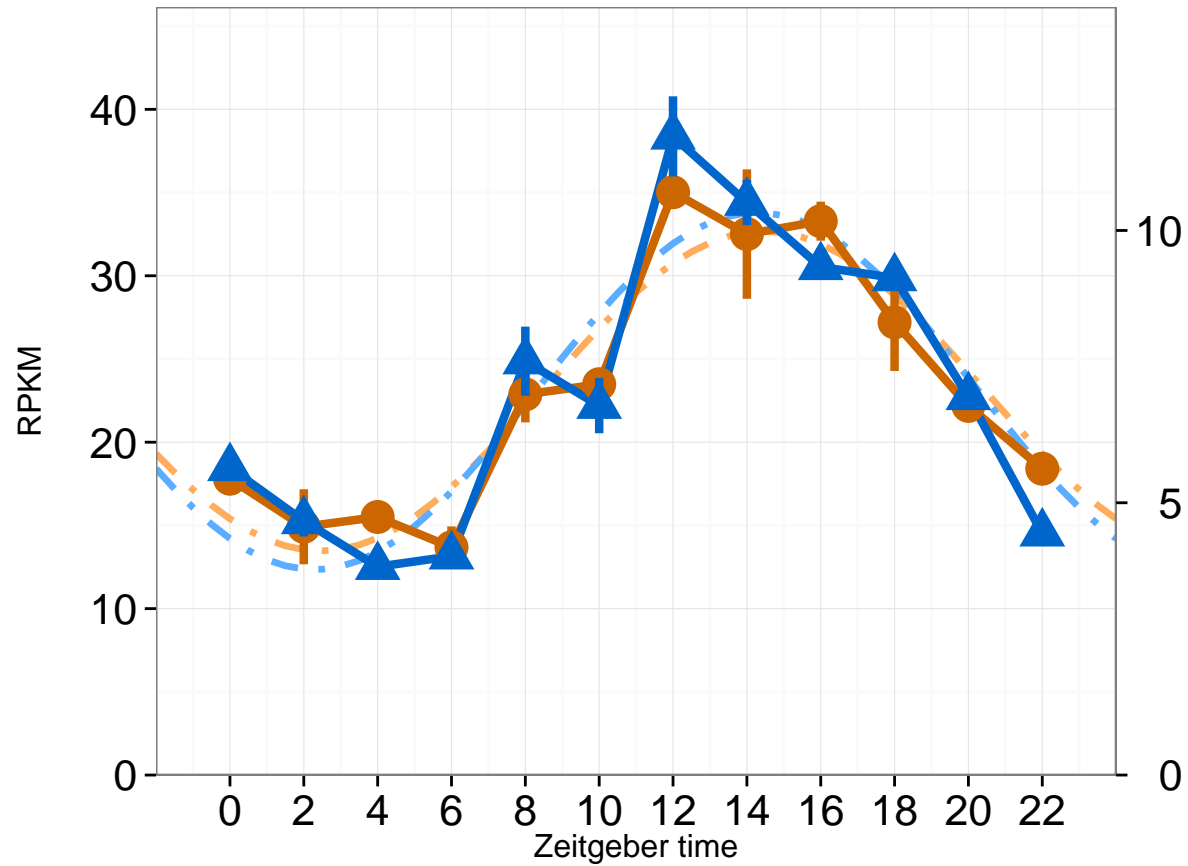

# Homer2

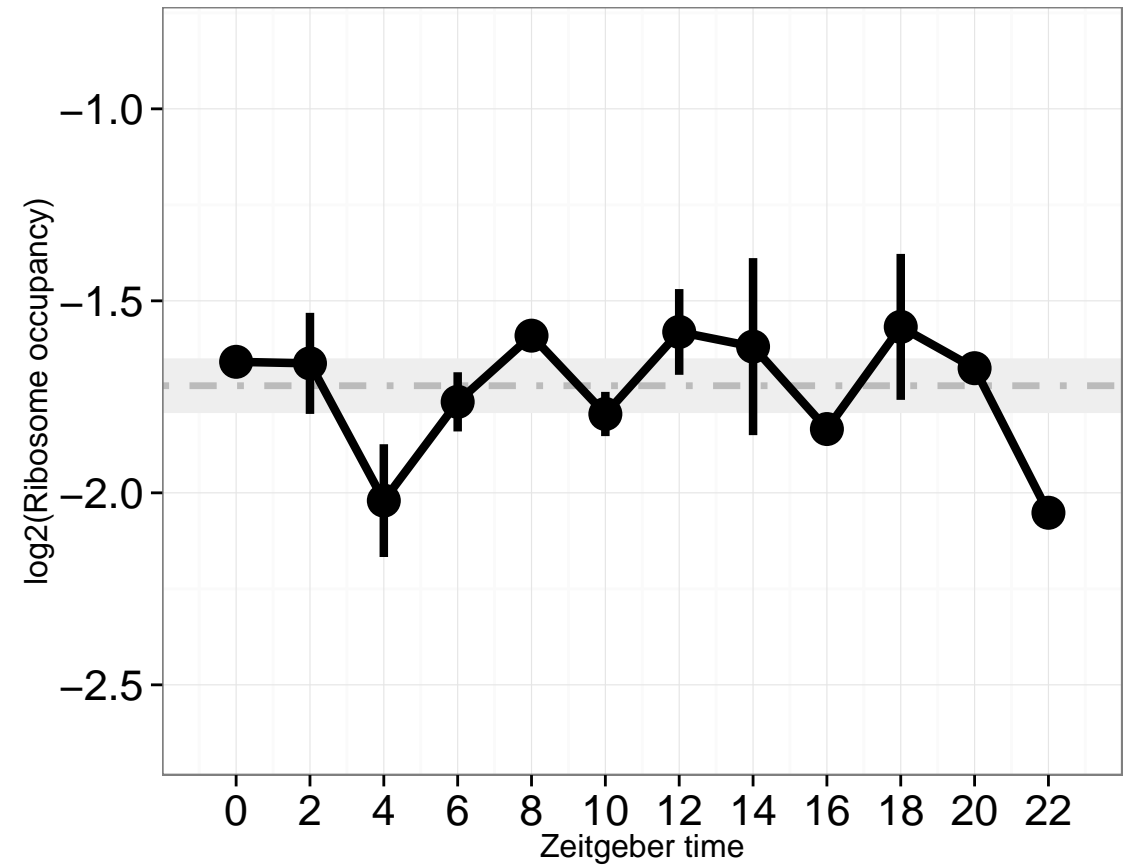

Supplement: SuppDataset_1.zip [file Homer2_set_D.pdf › Supplemental Dataset 1/D-mRNA_rhythm_translation_rhyth/Homer2_set_D.pdf]

## Hook2

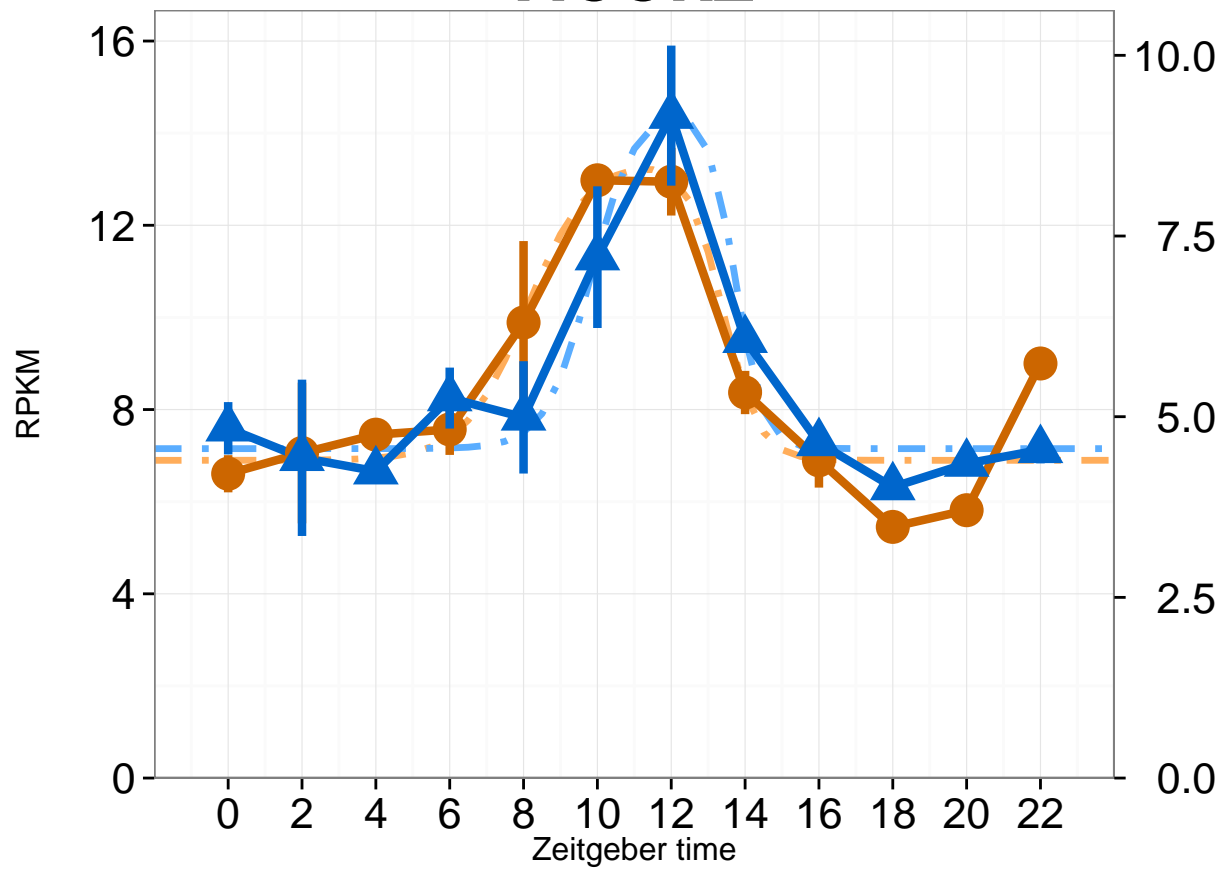

## Hook2

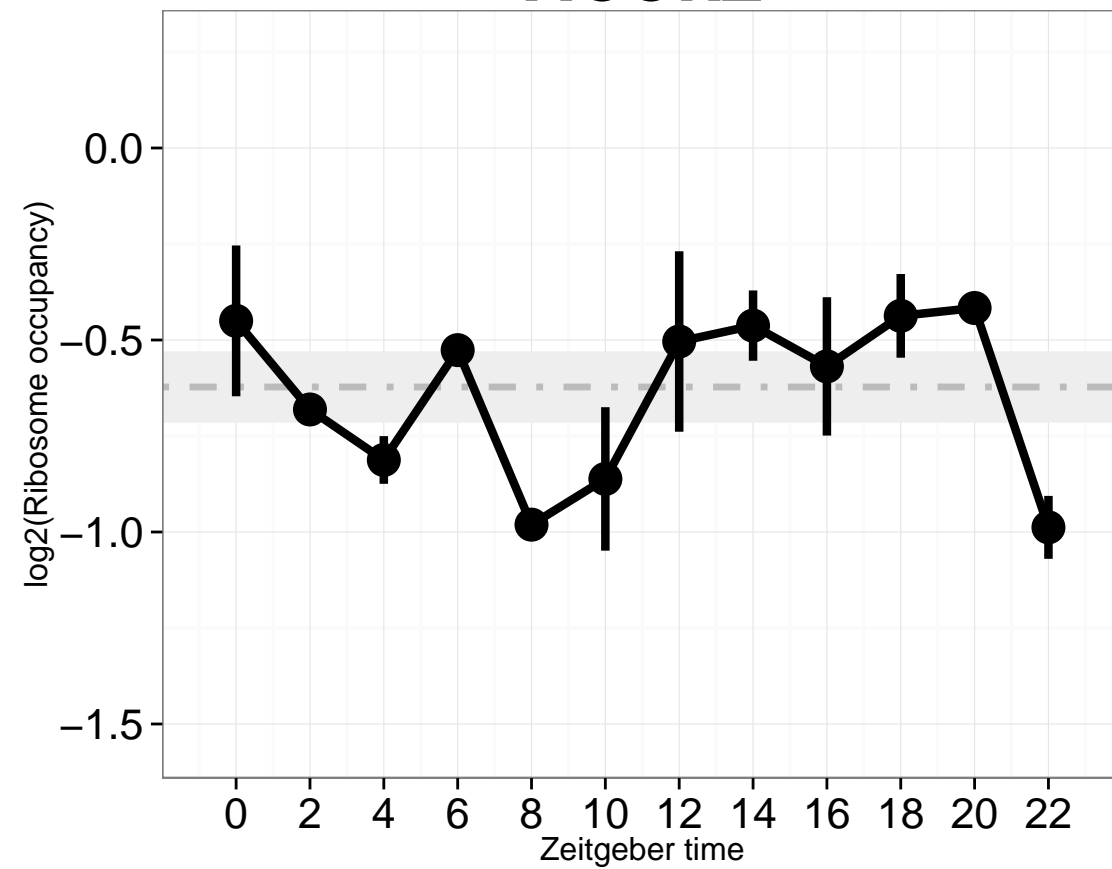

Supplement: SuppDataset_1.zip [file Hook2_set_D.pdf › Supplemental Dataset 1/D-mRNA_rhythm_translation_rhyth/Hook2_set_D.pdf]

# Hp

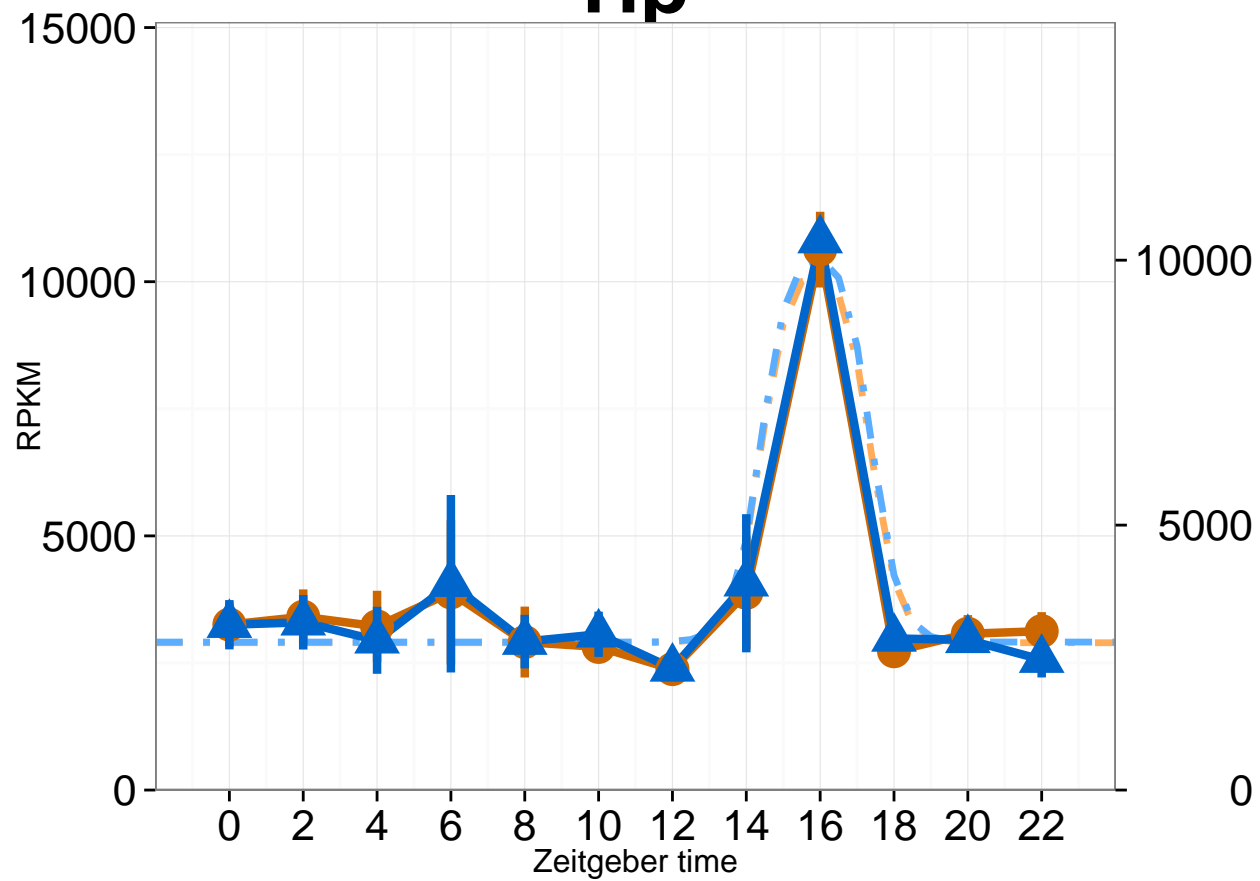

# Hp

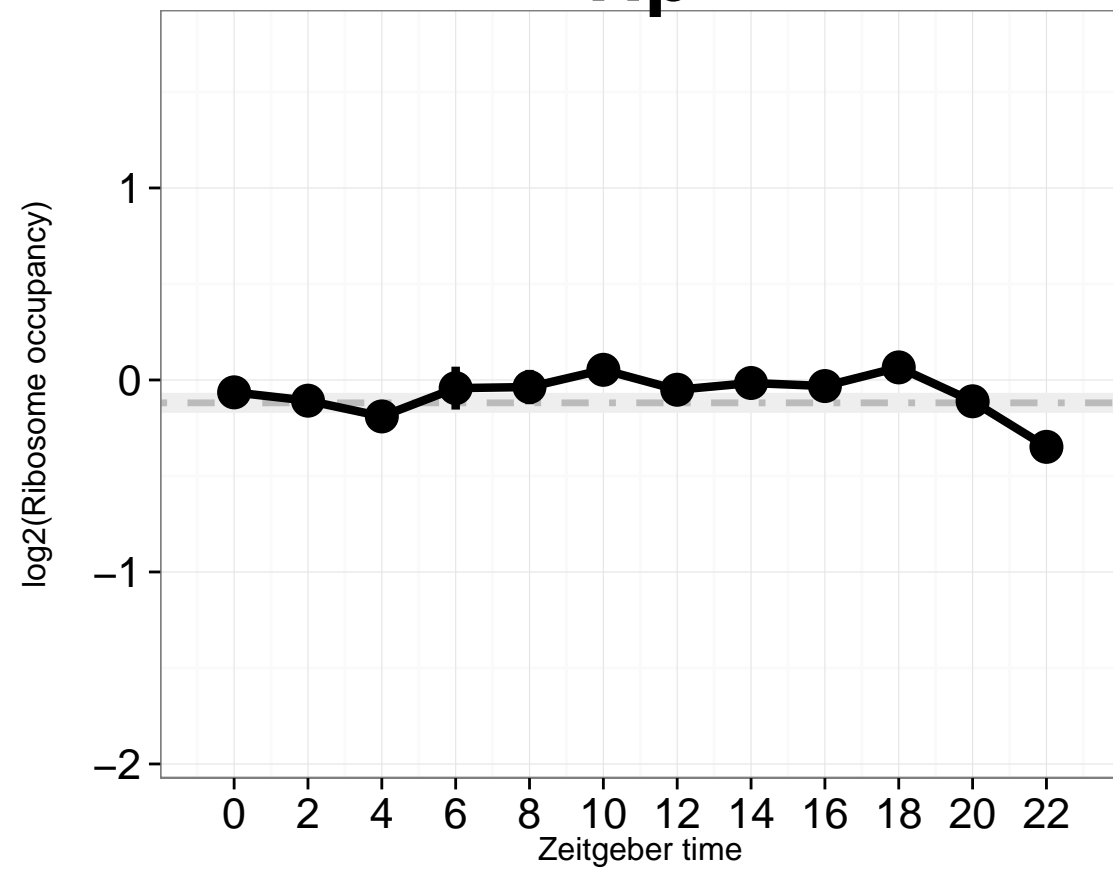

Supplement: SuppDataset_1.zip [file Hp_set_D.pdf › Supplemental Dataset 1/D-mRNA_rhythm_translation_rhyth/Hp_set_D.pdf]

## Hps1

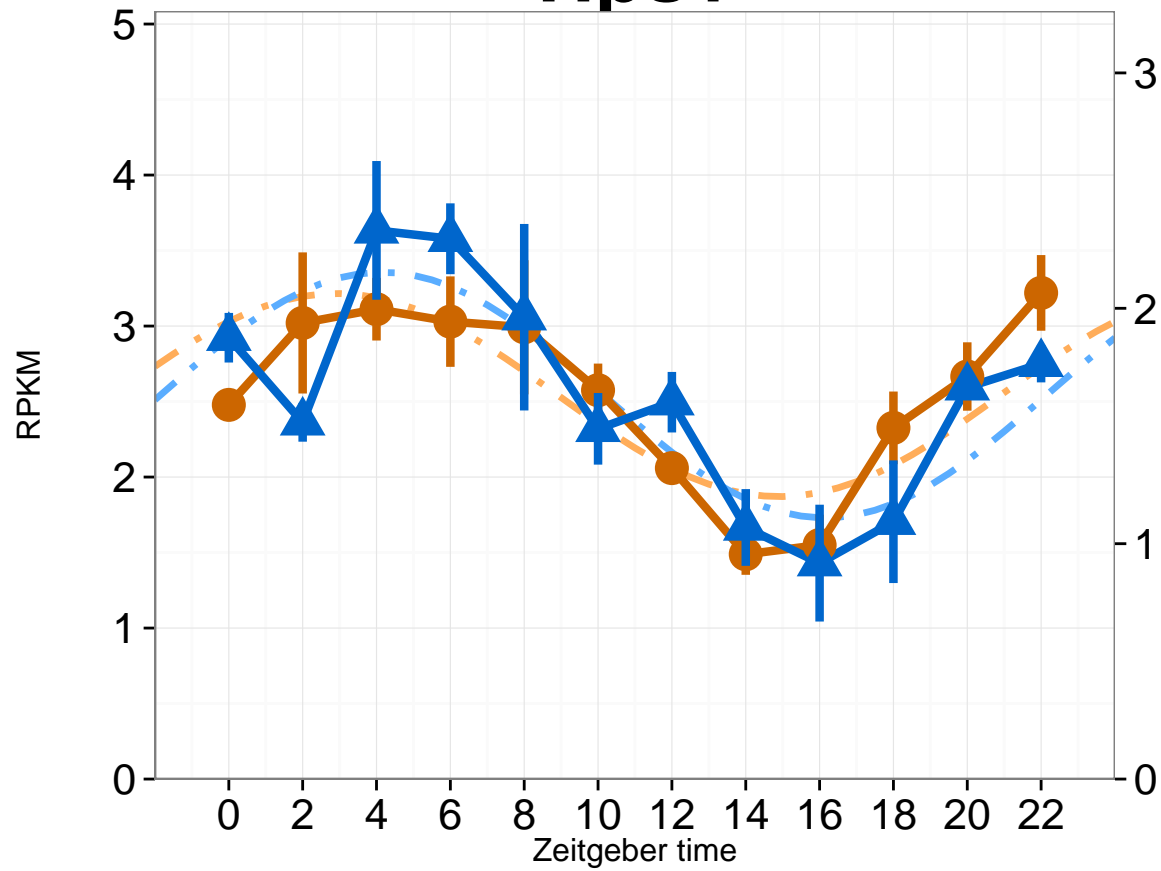

## Hps1

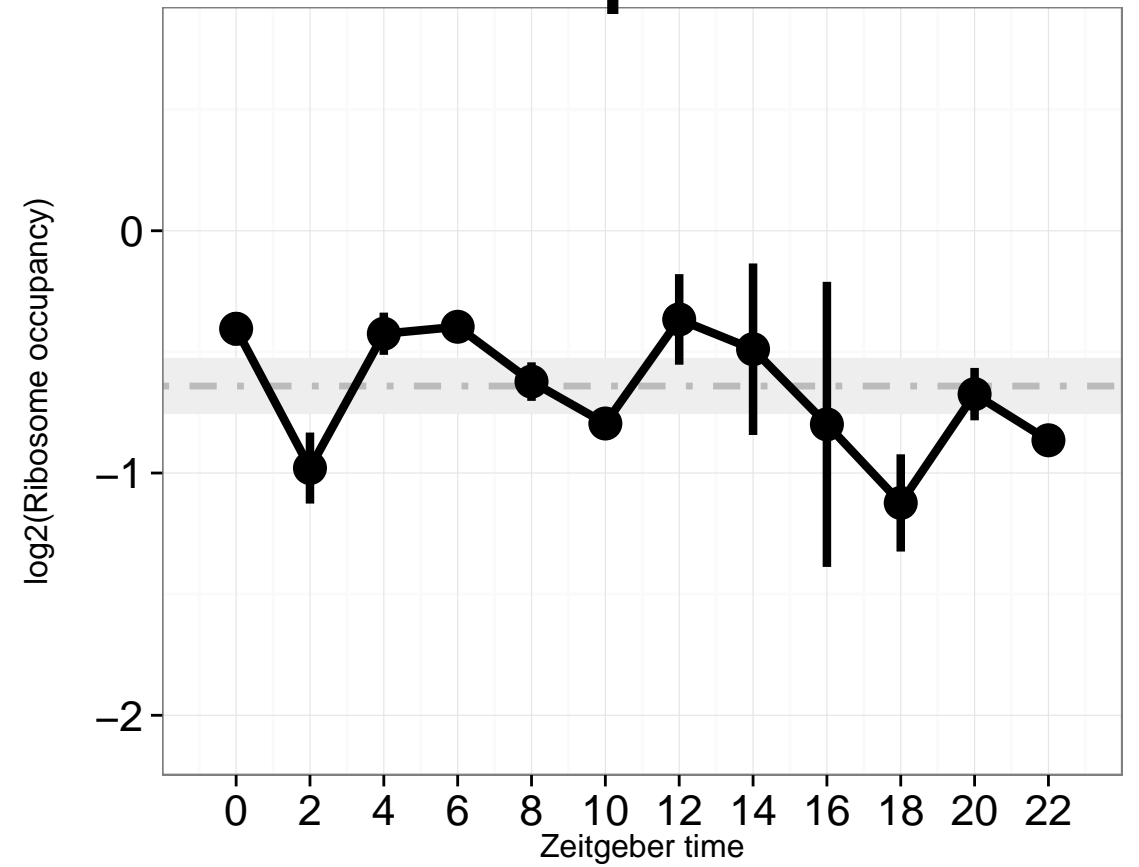

Supplement: SuppDataset_1.zip [file Hps1_set_D.pdf › Supplemental Dataset 1/D-mRNA_rhythm_translation_rhyth/Hps1_set_D.pdf]

## Hps4

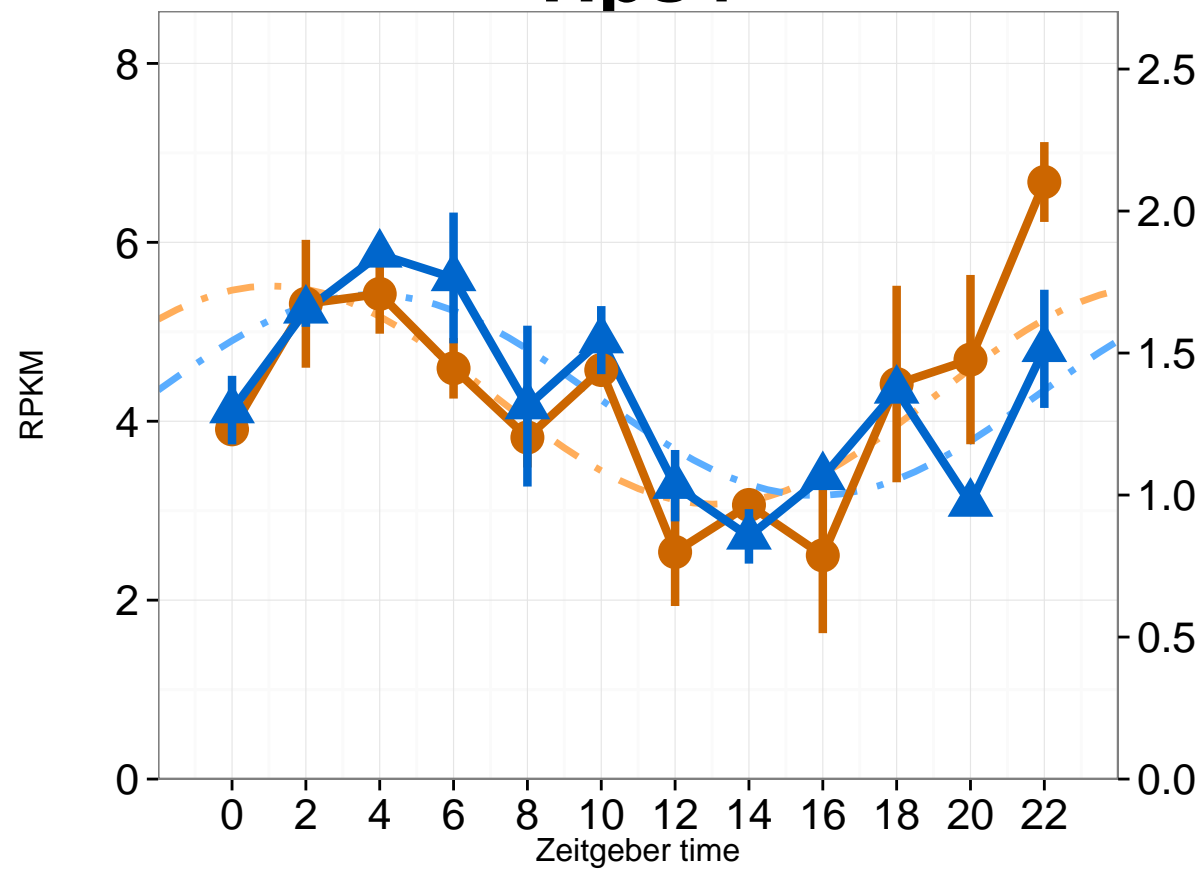

## Hps4

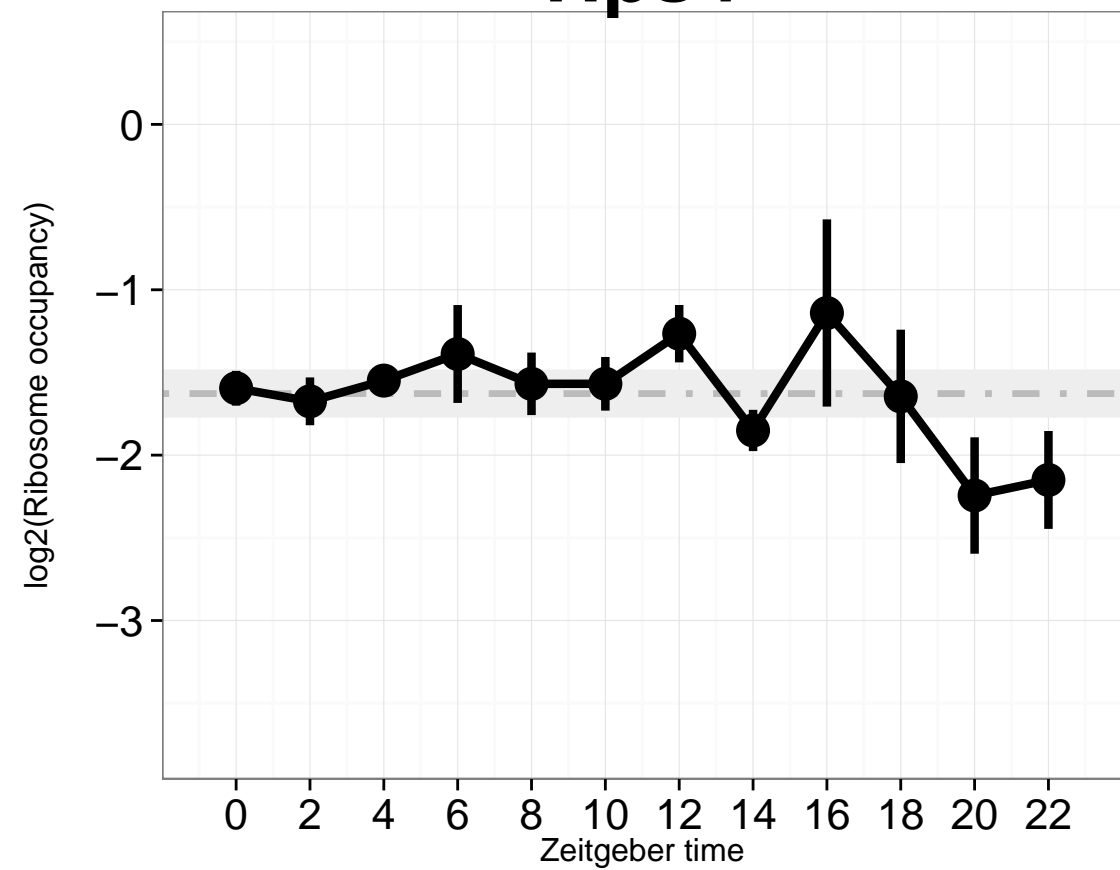

Supplement: SuppDataset_1.zip [file Hps4_set_D.pdf › Supplemental Dataset 1/D-mRNA_rhythm_translation_rhyth/Hps4_set_D.pdf]

## Hpx

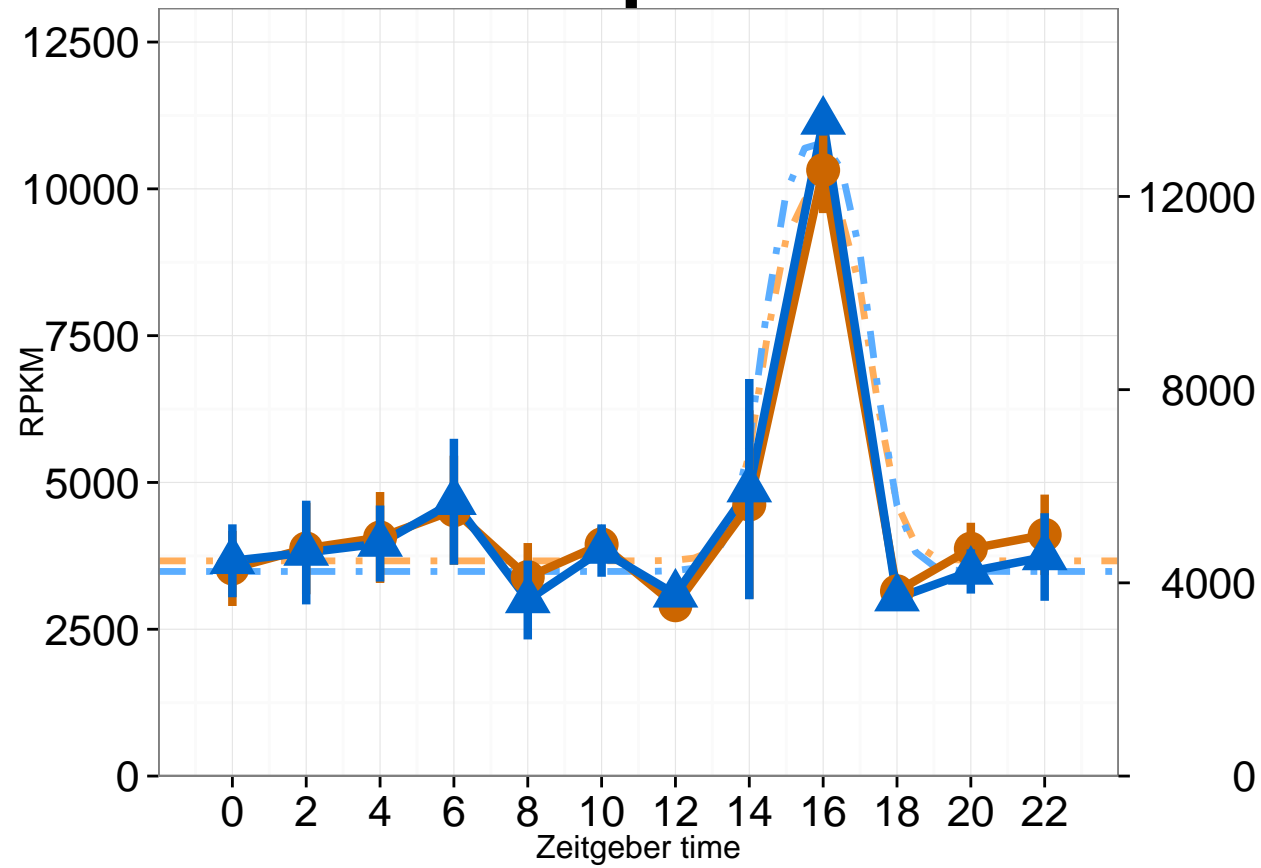

## Hpx

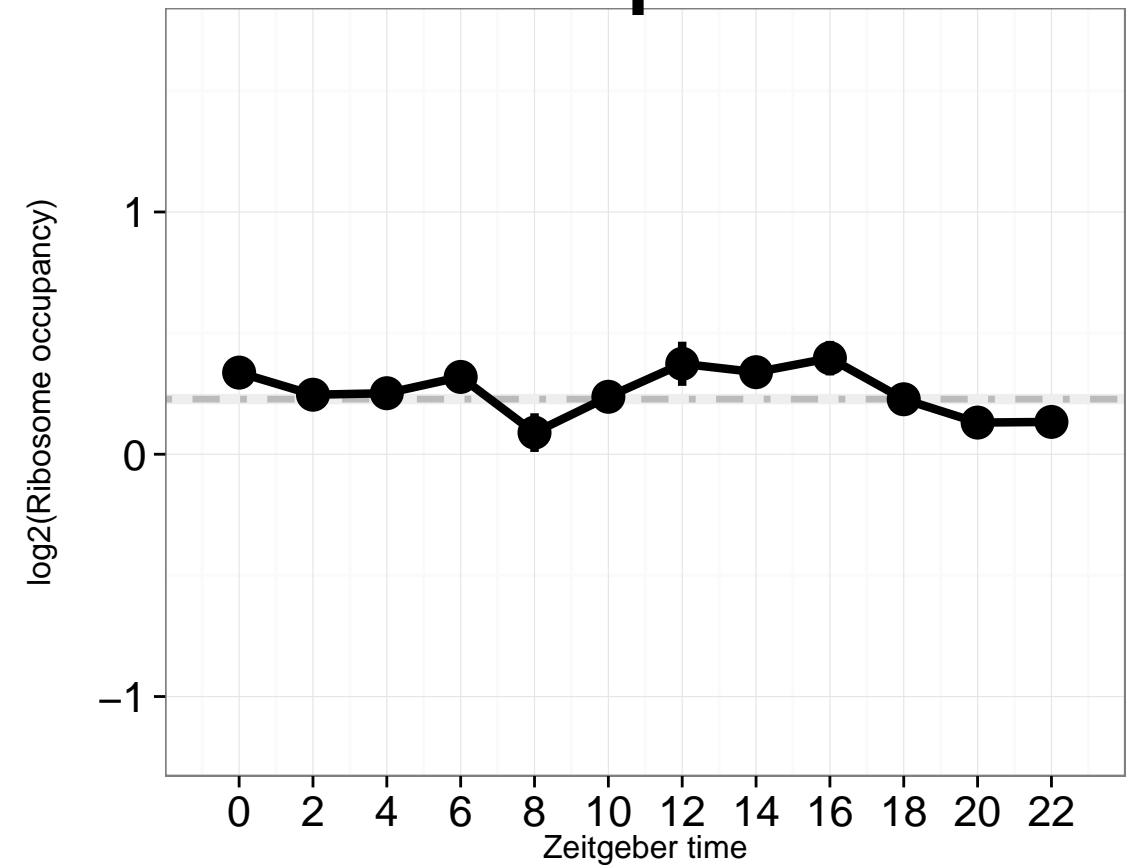

Supplement: SuppDataset_1.zip [file Hpx_set_D.pdf › Supplemental Dataset 1/D-mRNA_rhythm_translation_rhyth/Hpx_set_D.pdf]

## Hrg

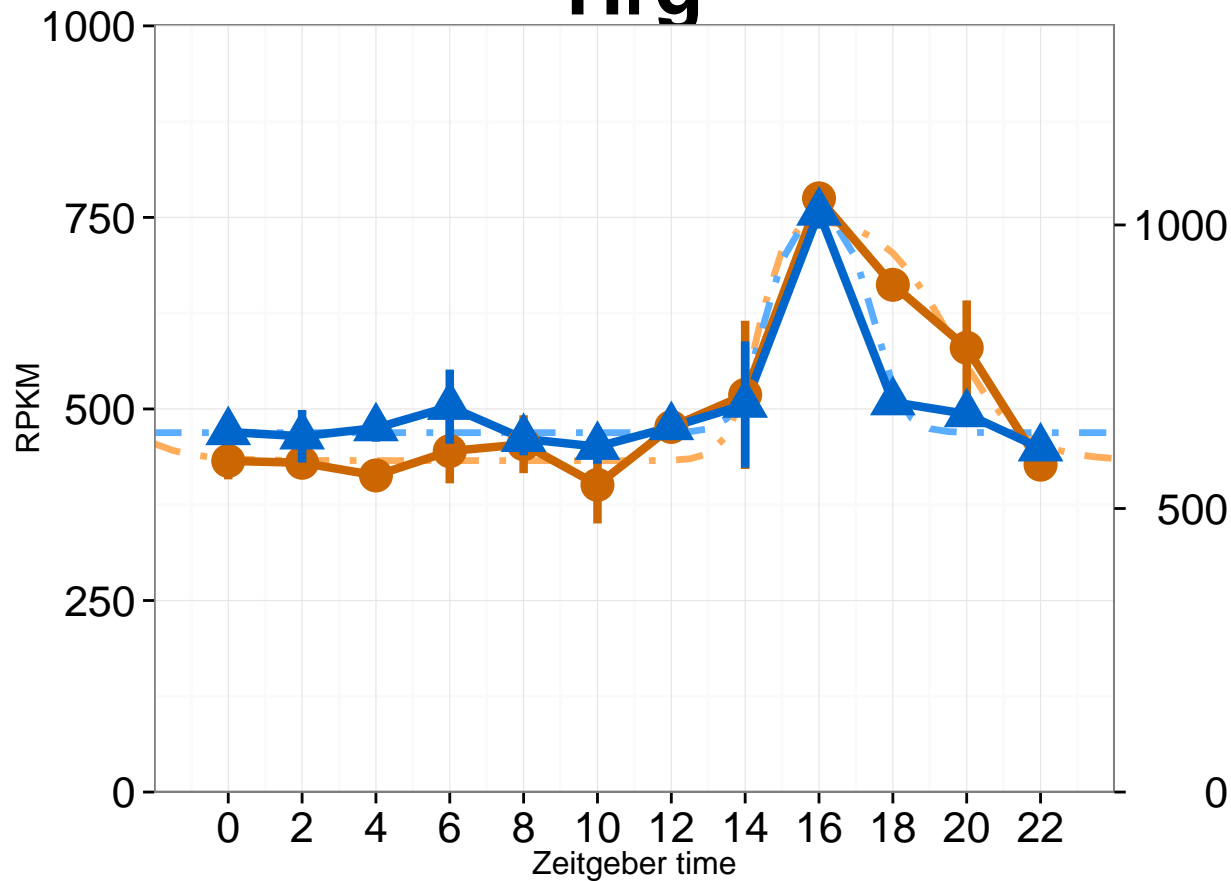

## Hrg

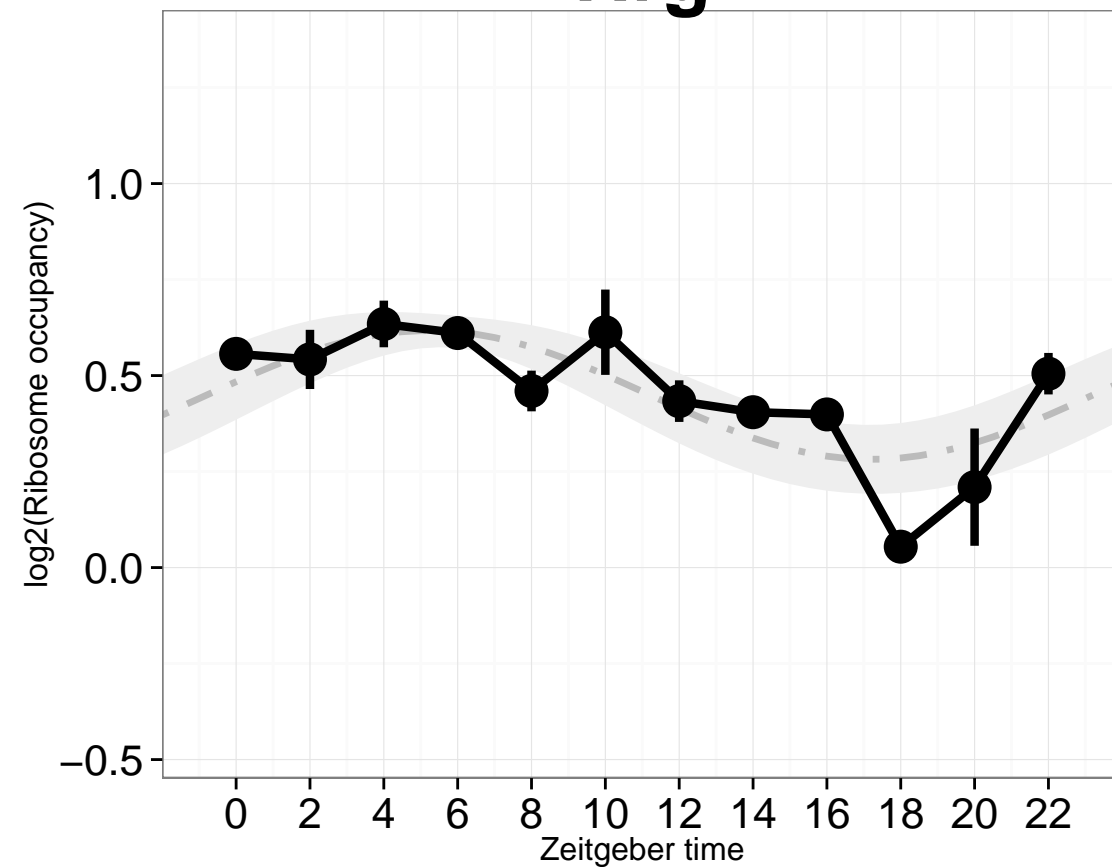

Supplement: SuppDataset_1.zip [file Hrg_set_D.pdf › Supplemental Dataset 1/D-mRNA_rhythm_translation_rhyth/Hrg_set_D.pdf]

## Hsd17b2

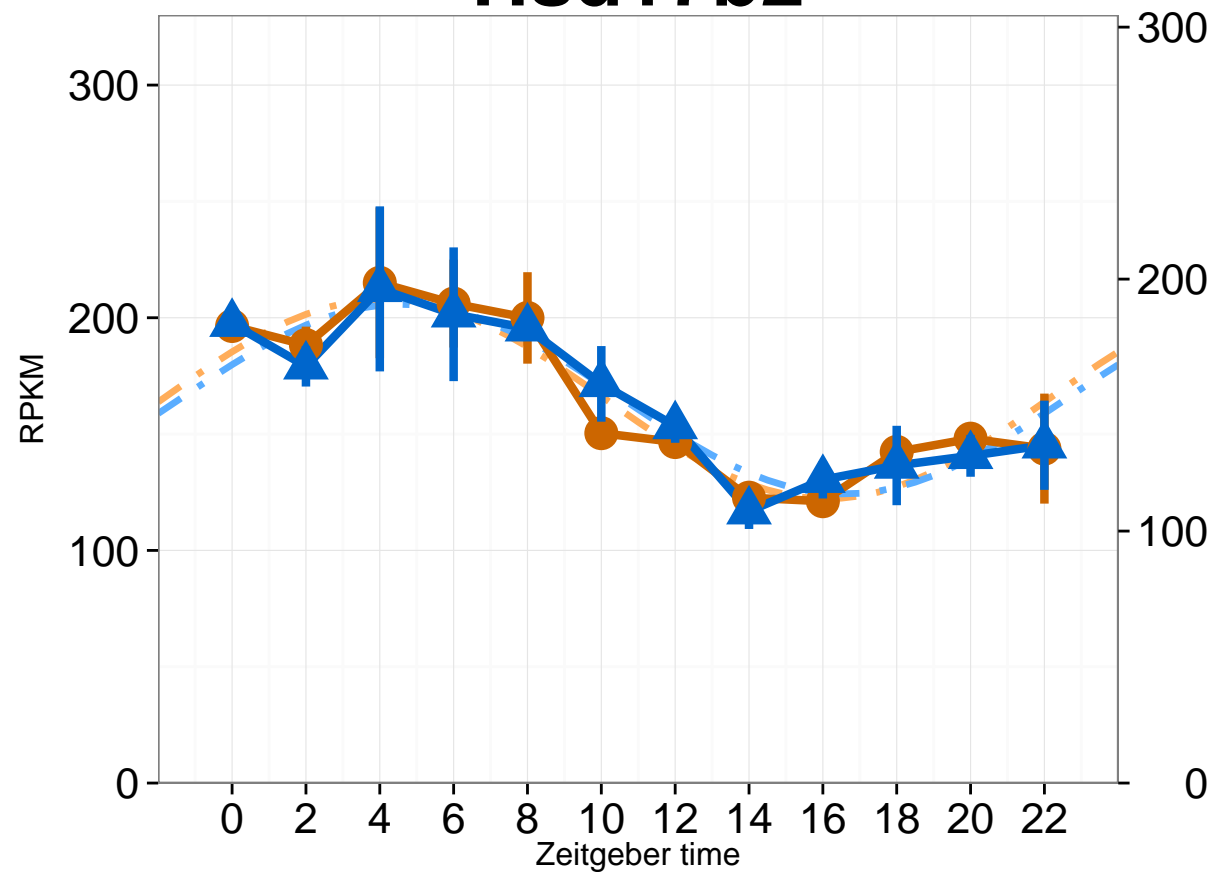

## Hsd17b2

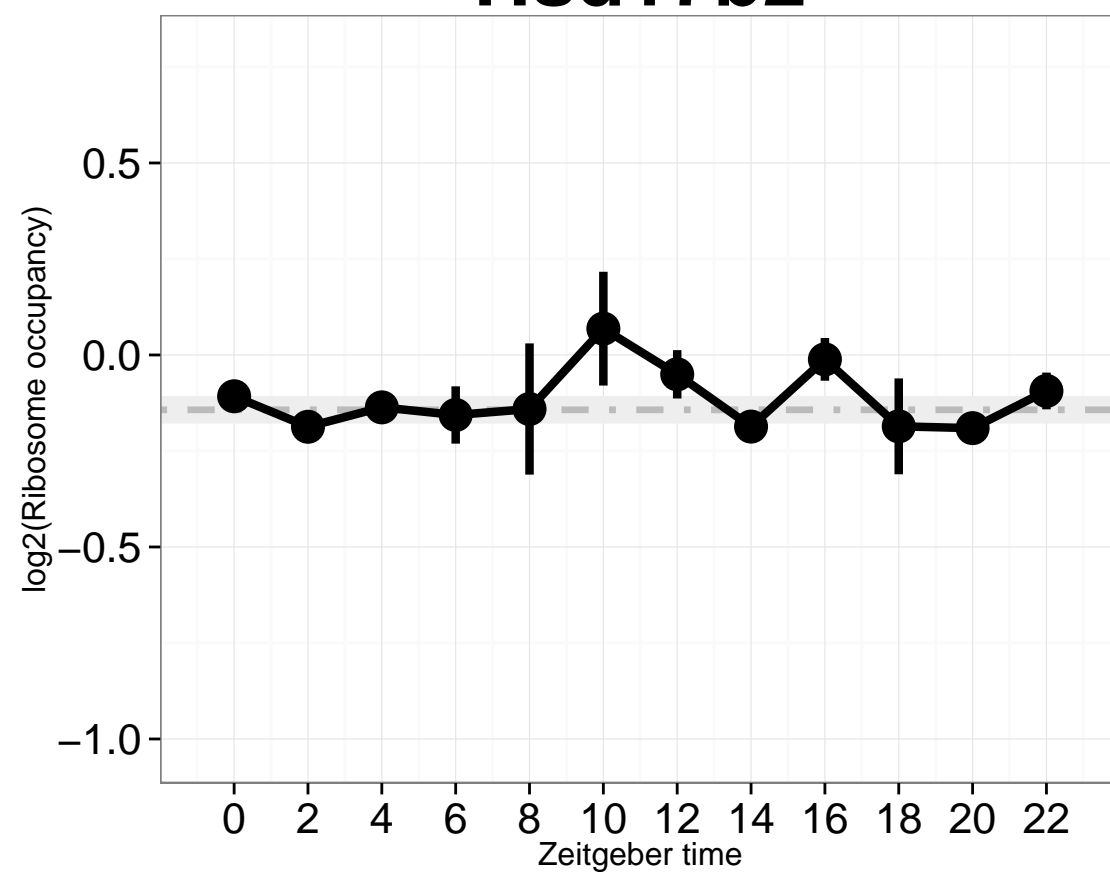

Supplement: SuppDataset_1.zip [file Hsd17b2_set_D.pdf › Supplemental Dataset 1/D-mRNA_rhythm_translation_rhyth/Hsd17b2_set_D.pdf]

# Hsd17b6

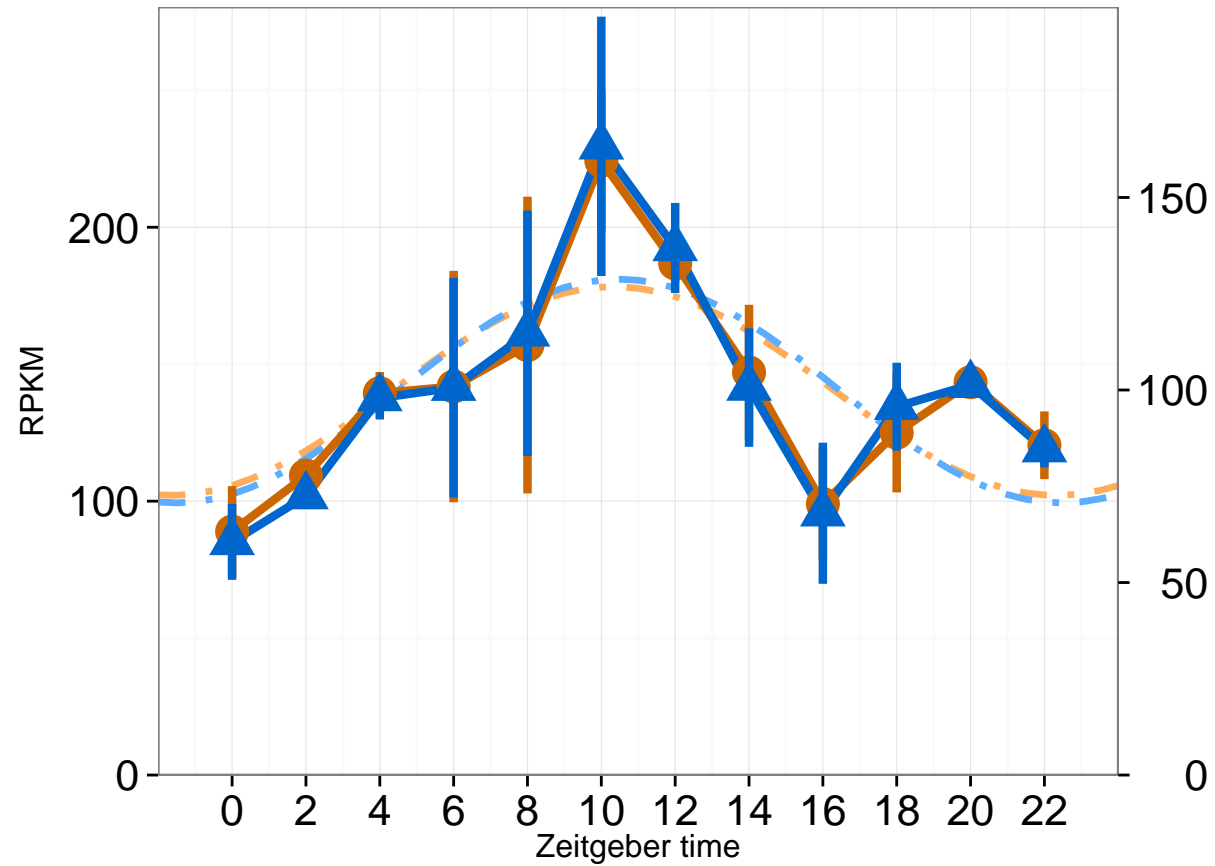

# Hsd17b6

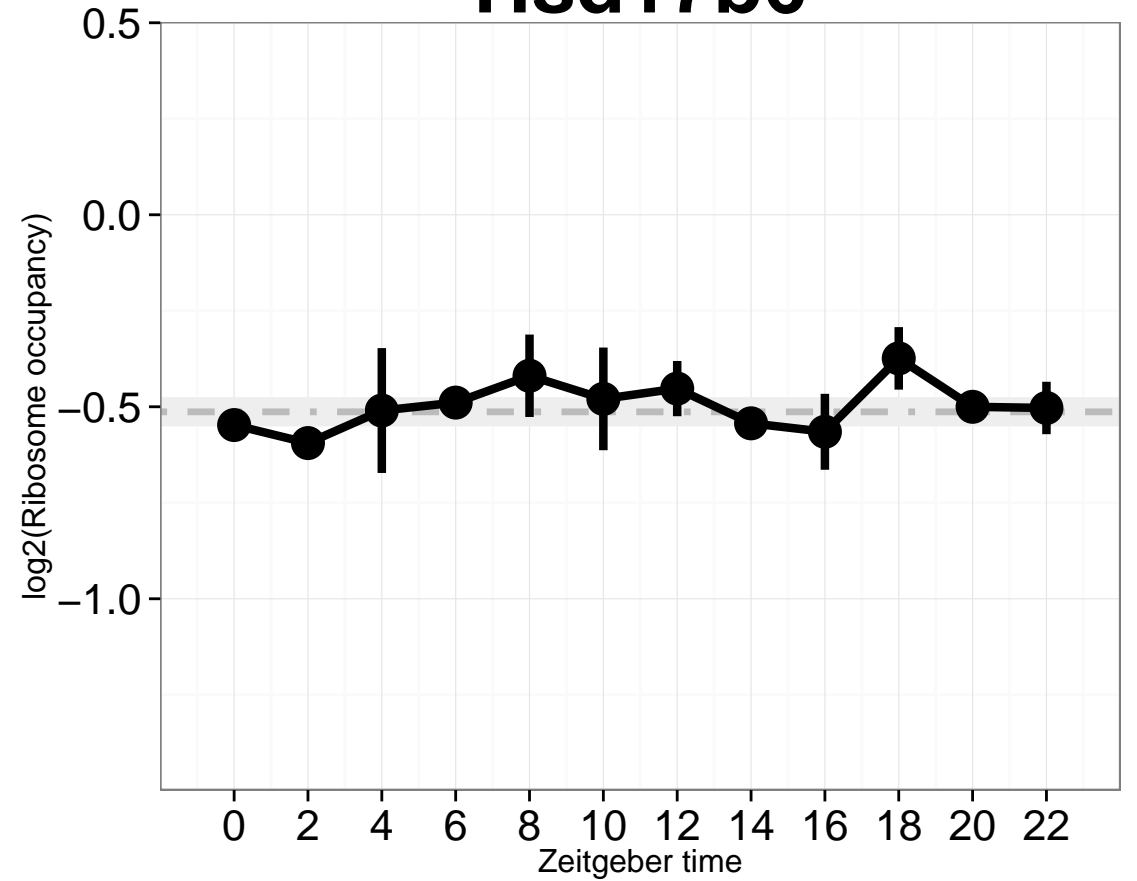

Supplement: SuppDataset_1.zip [file Hsd17b6_set_D.pdf › Supplemental Dataset 1/D-mRNA_rhythm_translation_rhyth/Hsd17b6_set_D.pdf]

## Hsd3b5

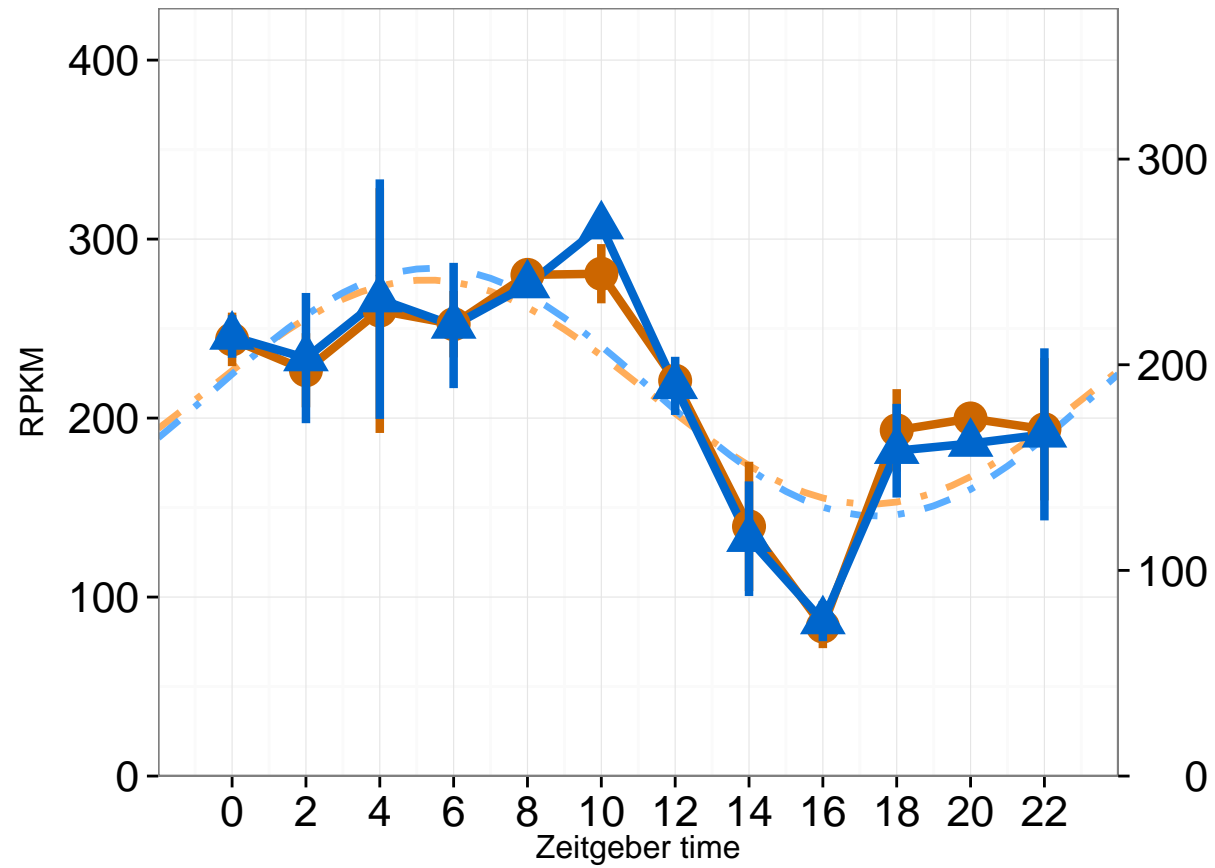

## Hsd3b5

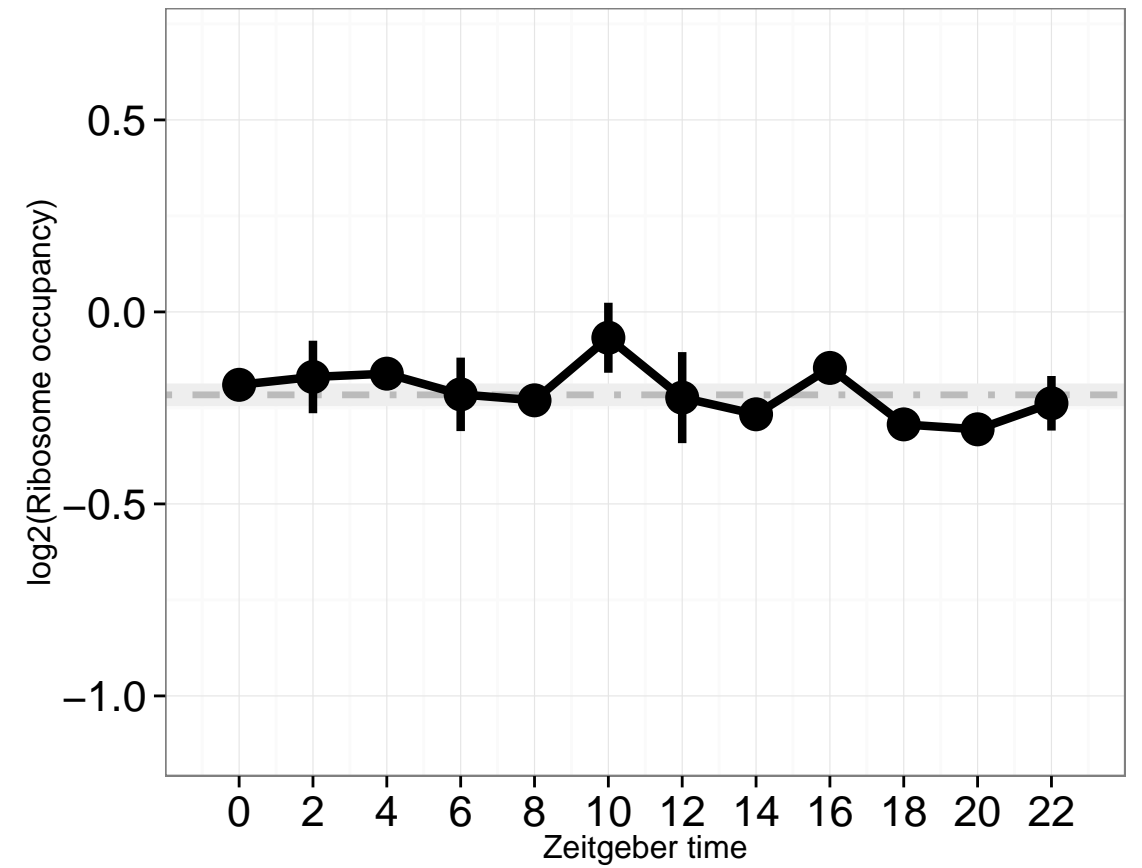

Supplement: SuppDataset_1.zip [file Hsd3b5_set_D.pdf › Supplemental Dataset 1/D-mRNA_rhythm_translation_rhyth/Hsd3b5_set_D.pdf]

# Hsd3b7

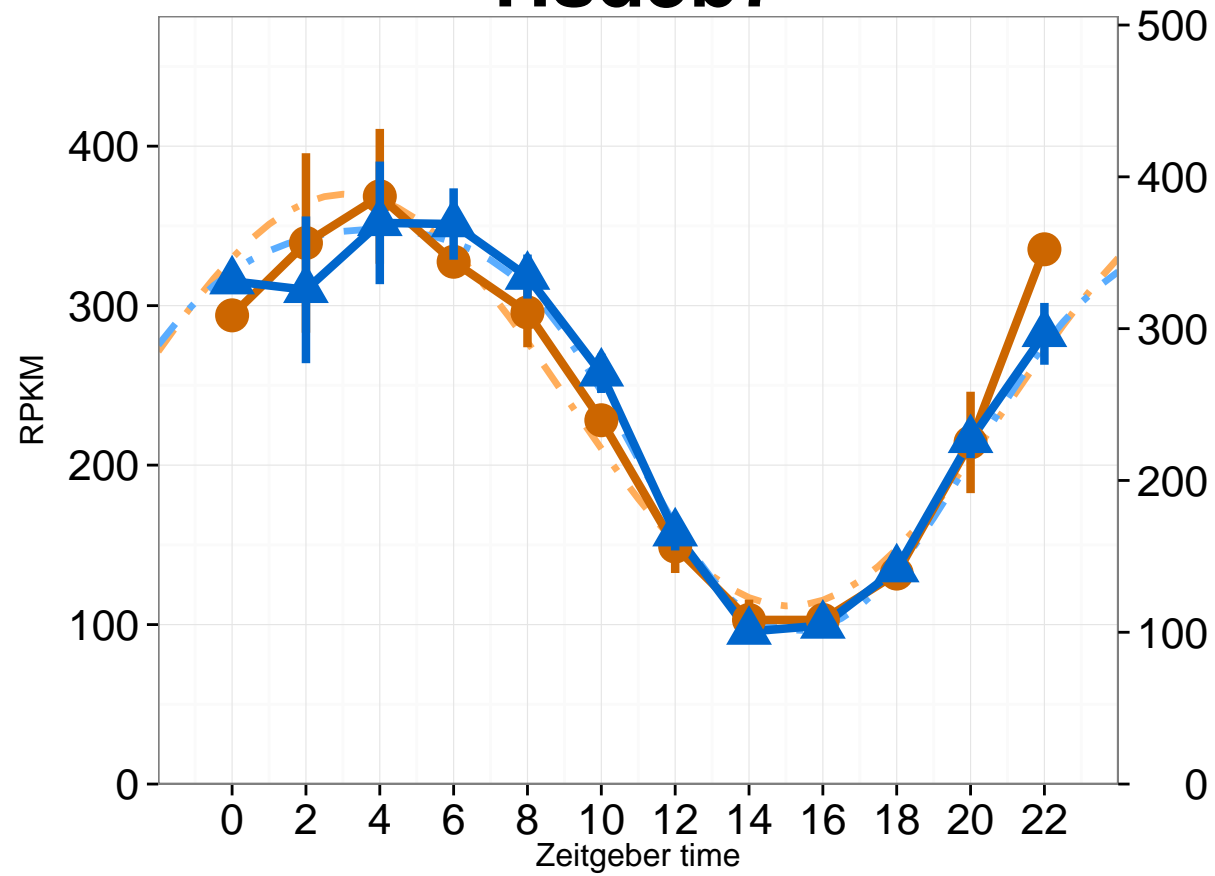

# Hsd3b7

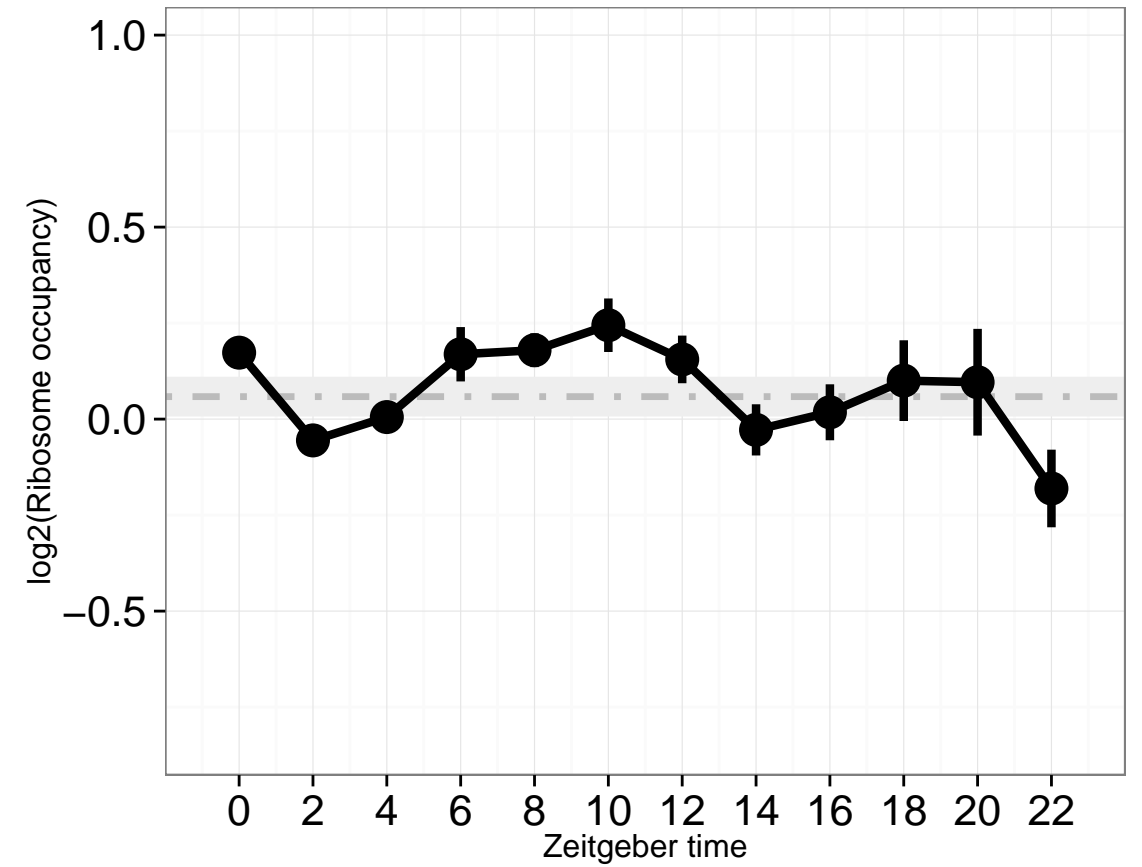

Supplement: SuppDataset_1.zip [file Hsd3b7_set_D.pdf › Supplemental Dataset 1/D-mRNA_rhythm_translation_rhyth/Hsd3b7_set_D.pdf]

# Hsp90aa1

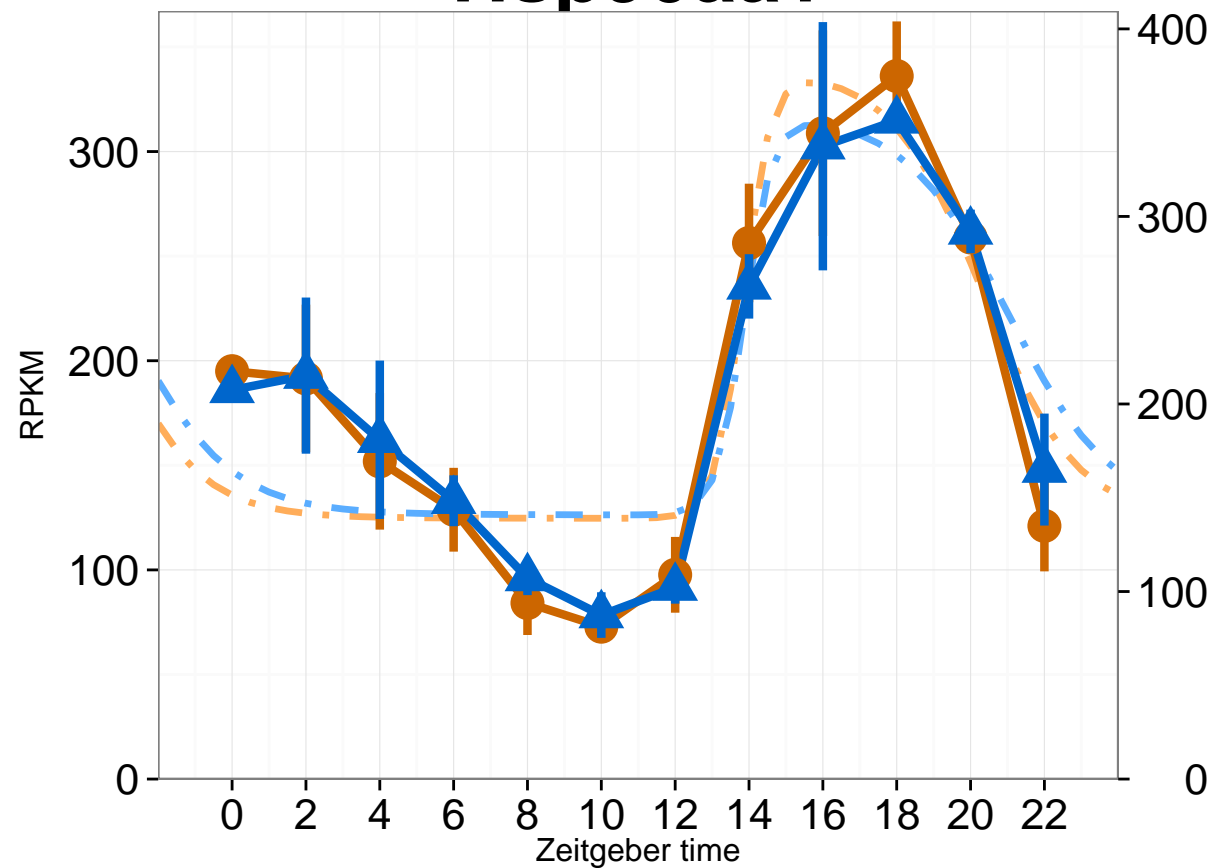

# Hsp90aa1

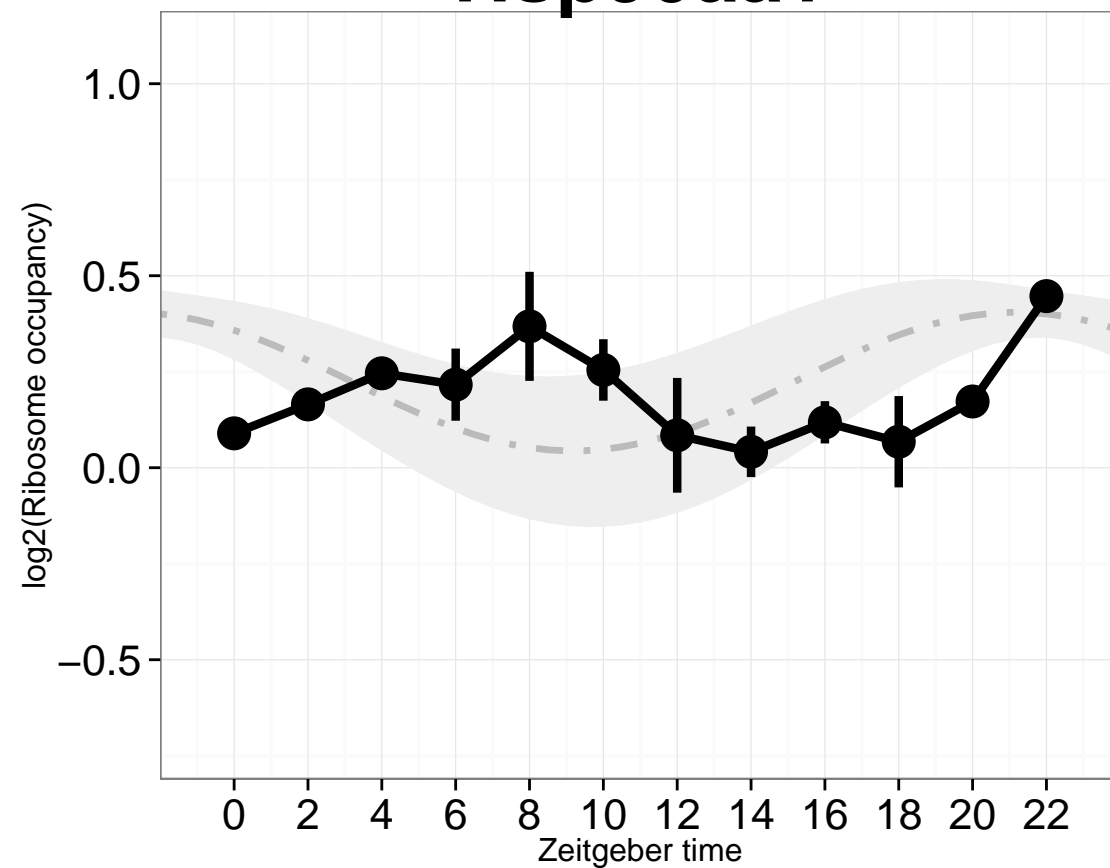

Supplement: SuppDataset_1.zip [file Hsp90aa1_set_D.pdf › Supplemental Dataset 1/D-mRNA_rhythm_translation_rhyth/Hsp90aa1_set_D.pdf]

# Hsp90ab1

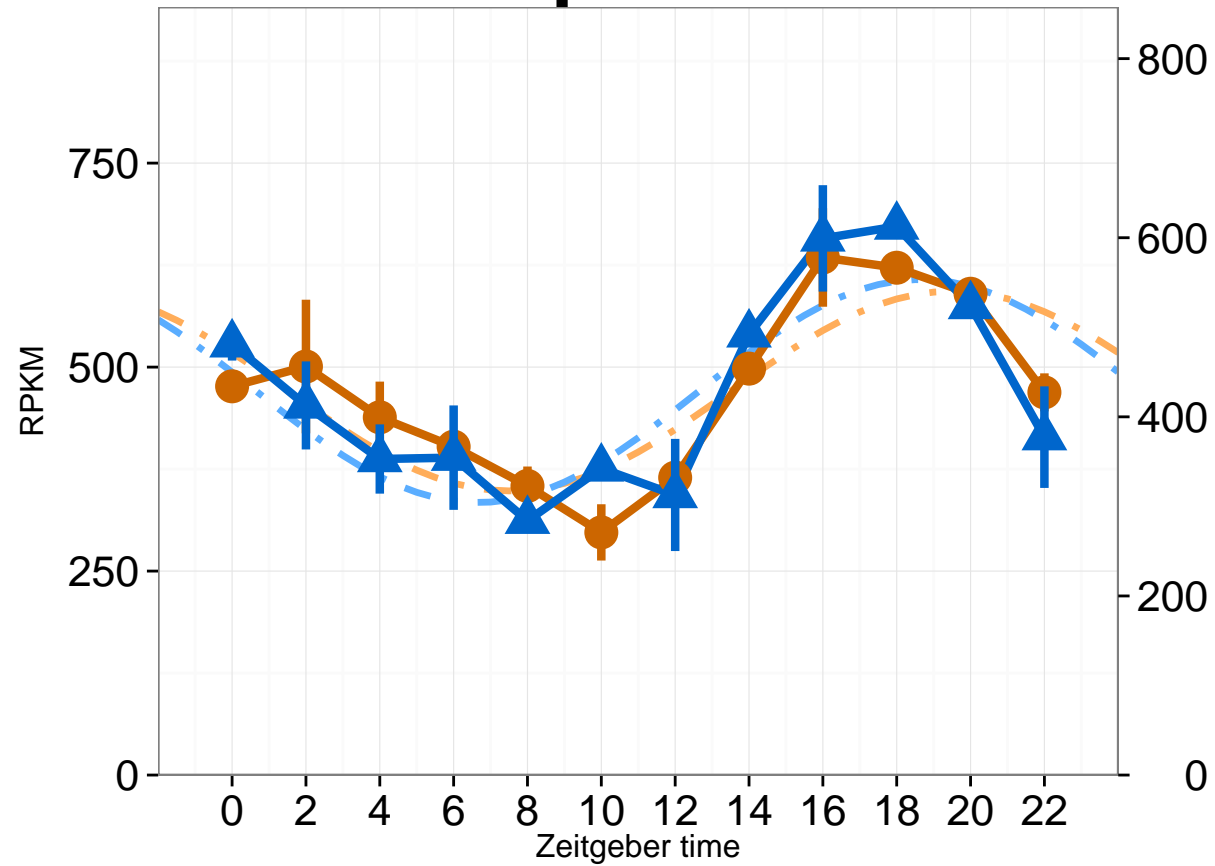

# Hsp90ab1

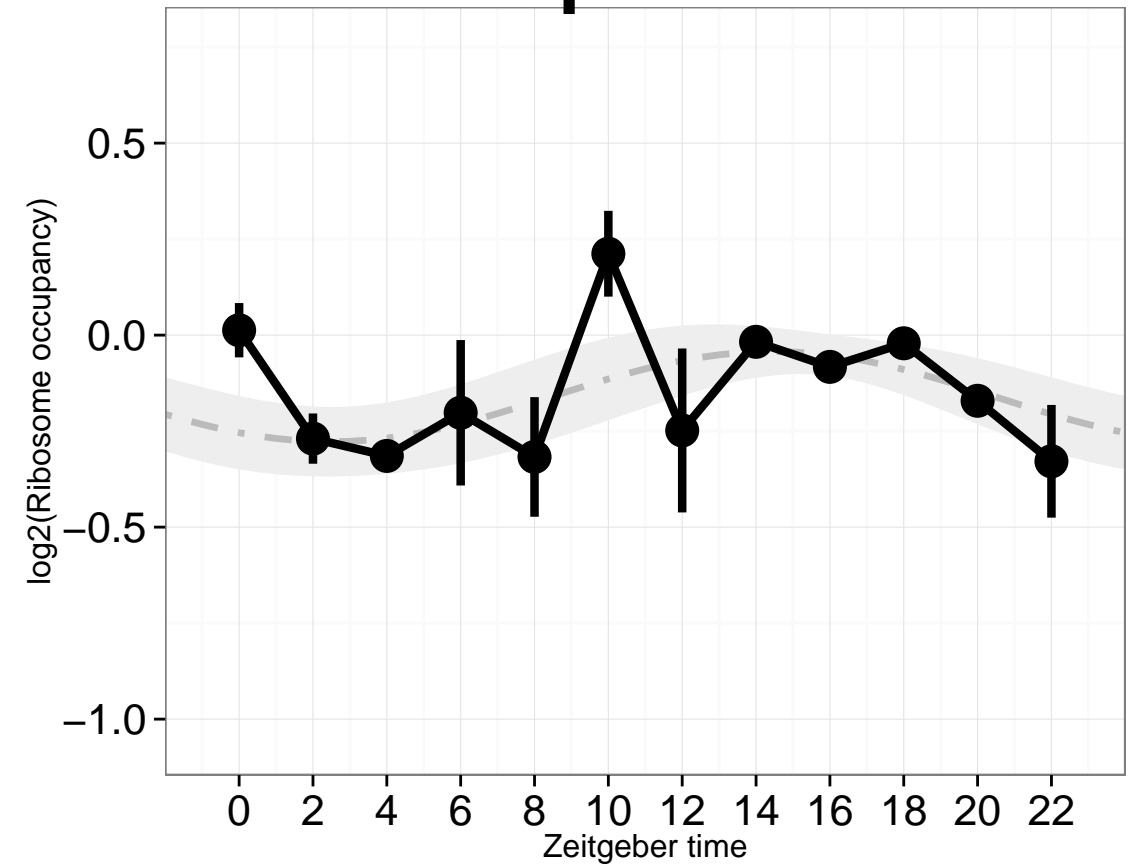

Supplement: SuppDataset_1.zip [file Hsp90ab1_set_D.pdf › Supplemental Dataset 1/D-mRNA_rhythm_translation_rhyth/Hsp90ab1_set_D.pdf]

# Hspa1a

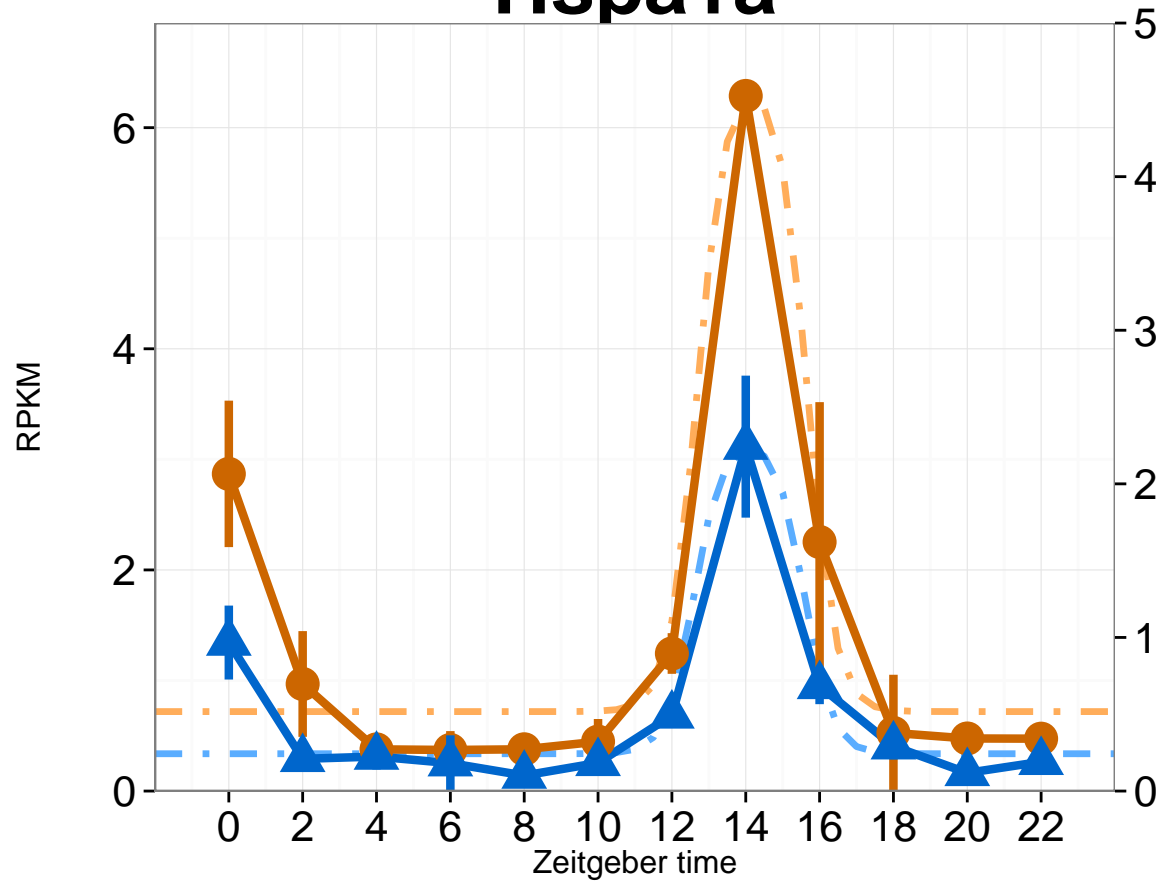

# Hspa1a

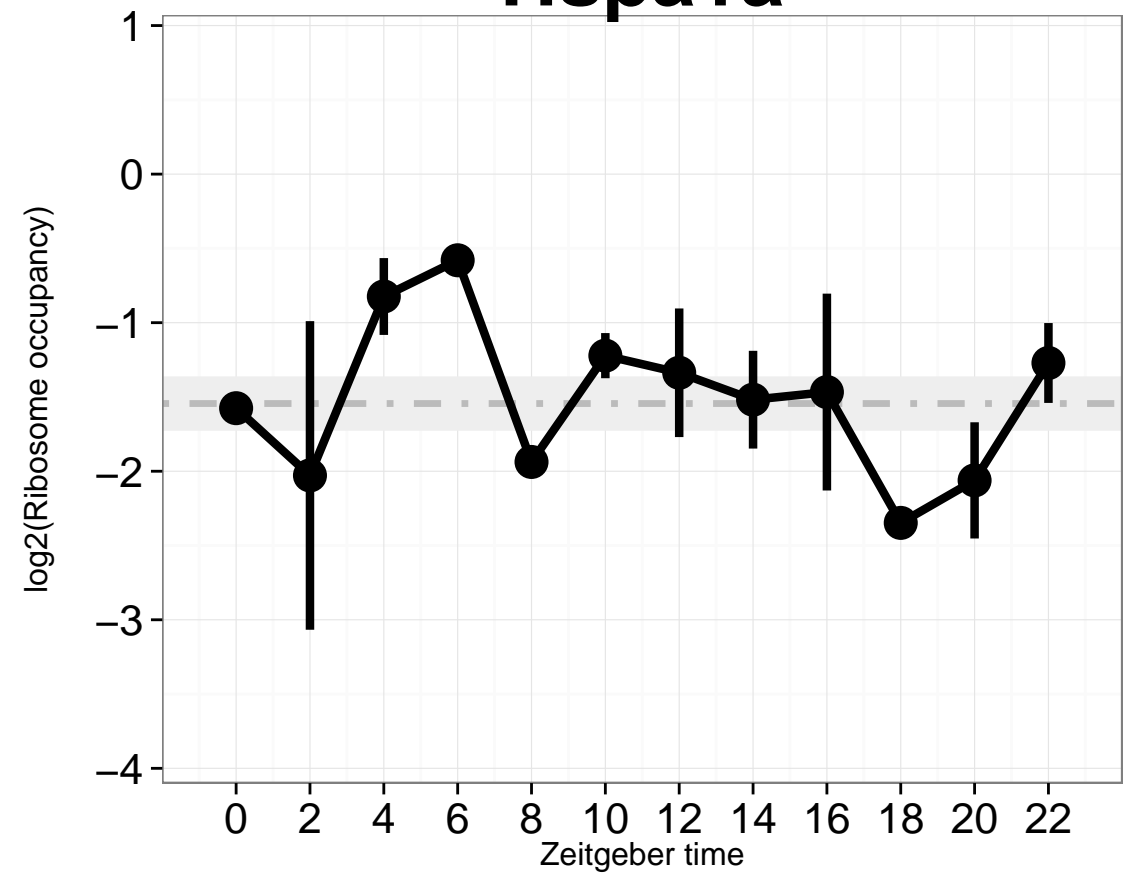

Supplement: SuppDataset_1.zip [file Hspa1a_set_D.pdf › Supplemental Dataset 1/D-mRNA_rhythm_translation_rhyth/Hspa1a_set_D.pdf]

# Hspa1b

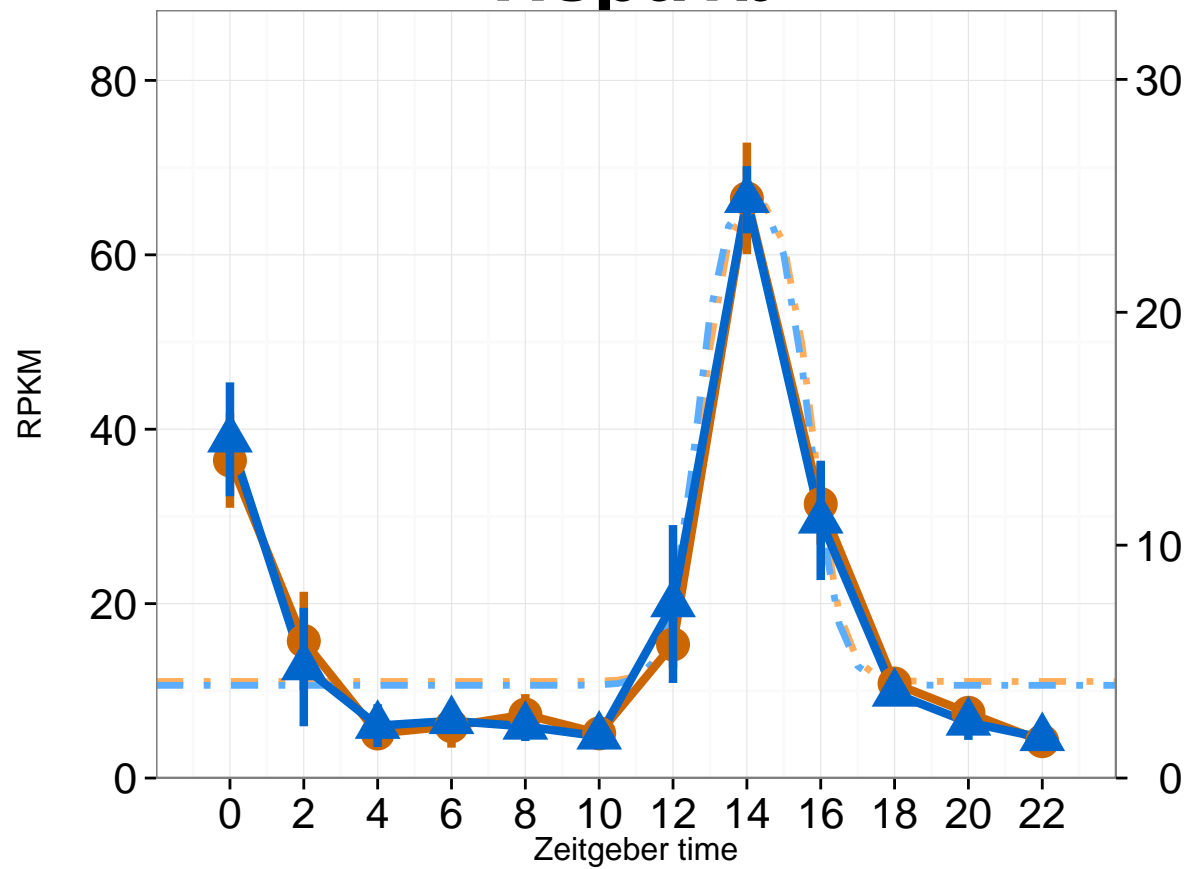

# Hspa1b

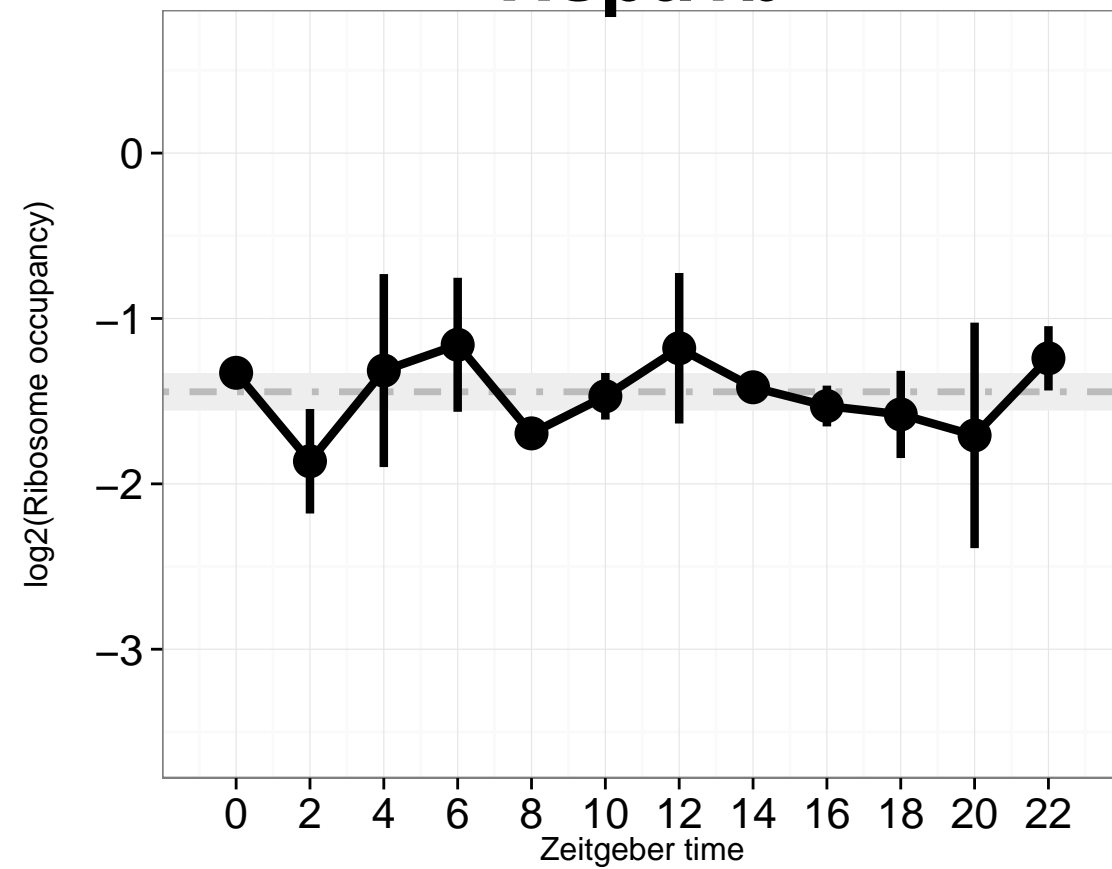

Supplement: SuppDataset_1.zip [file Hspa1b_set_D.pdf › Supplemental Dataset 1/D-mRNA_rhythm_translation_rhyth/Hspa1b_set_D.pdf]

# Hspa2

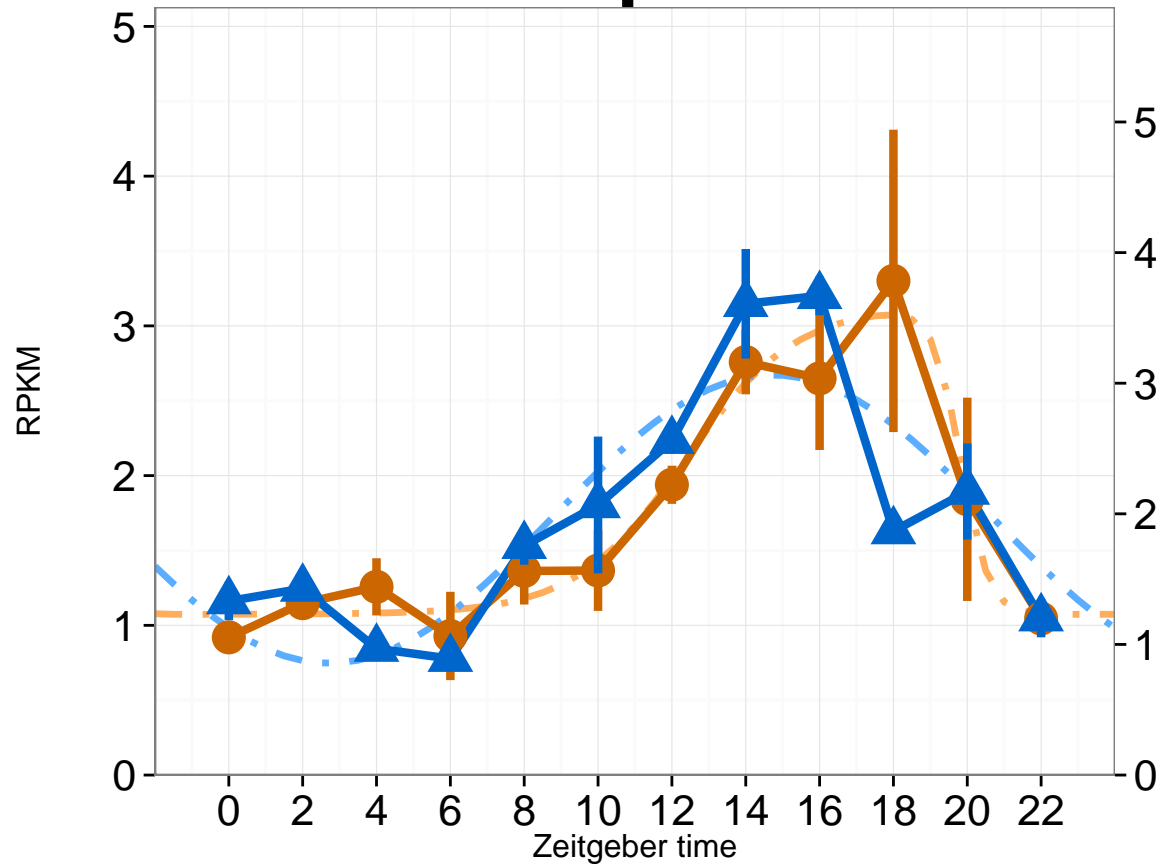

# Hspa2

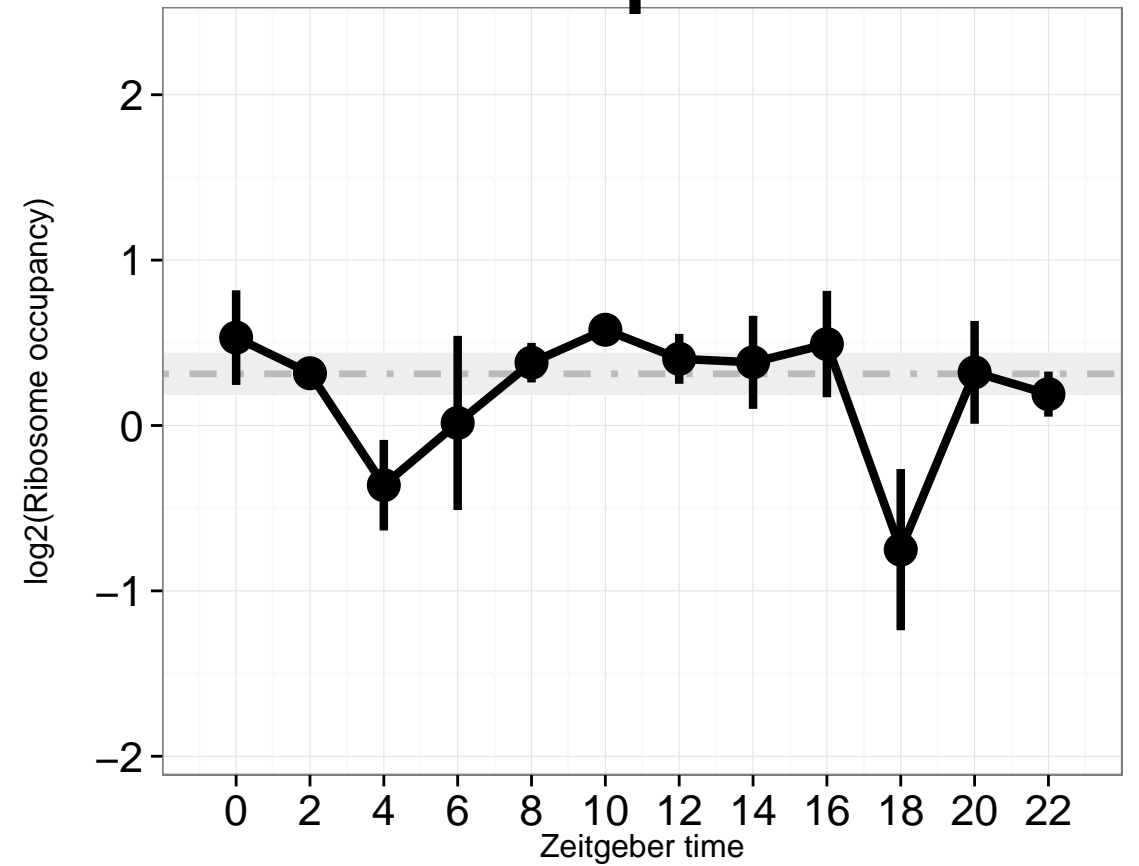

Supplement: SuppDataset_1.zip [file Hspa2_set_D.pdf › Supplemental Dataset 1/D-mRNA_rhythm_translation_rhyth/Hspa2_set_D.pdf]

# Hspa4l

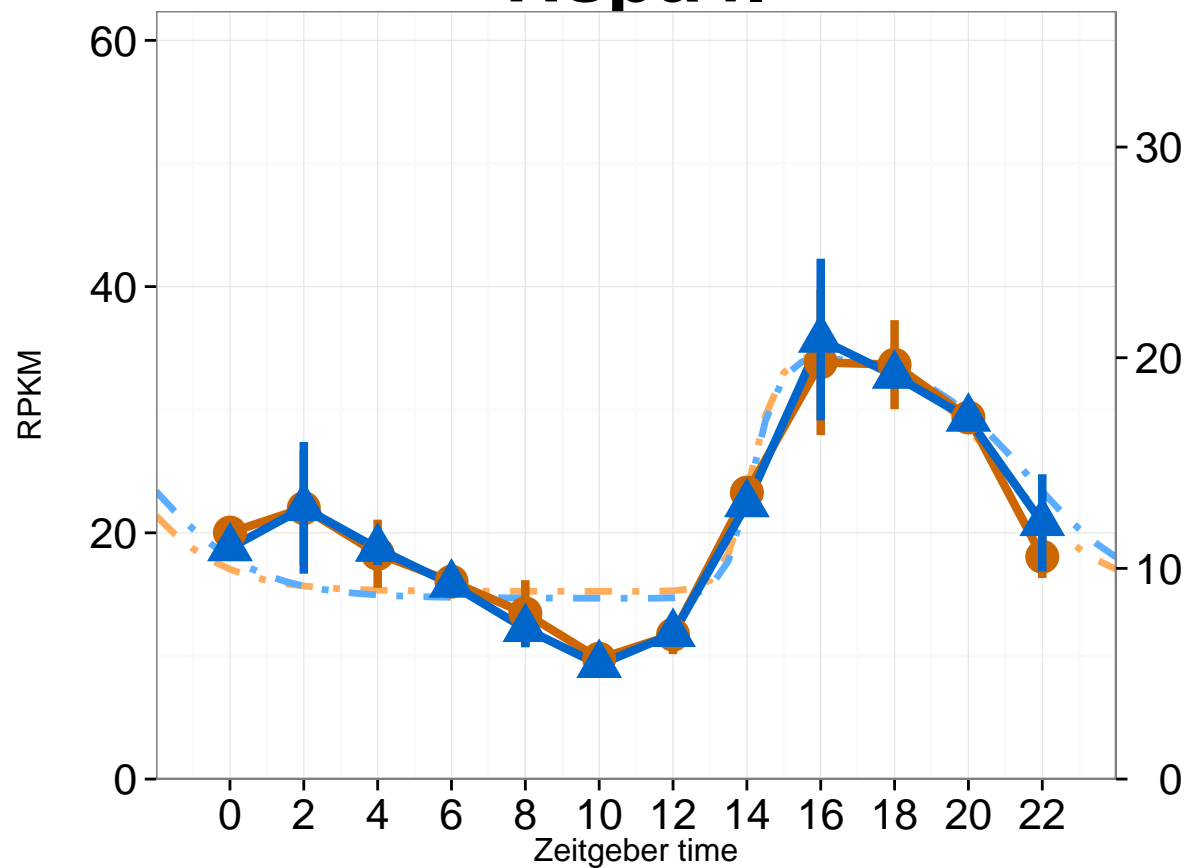

# Hspa4l

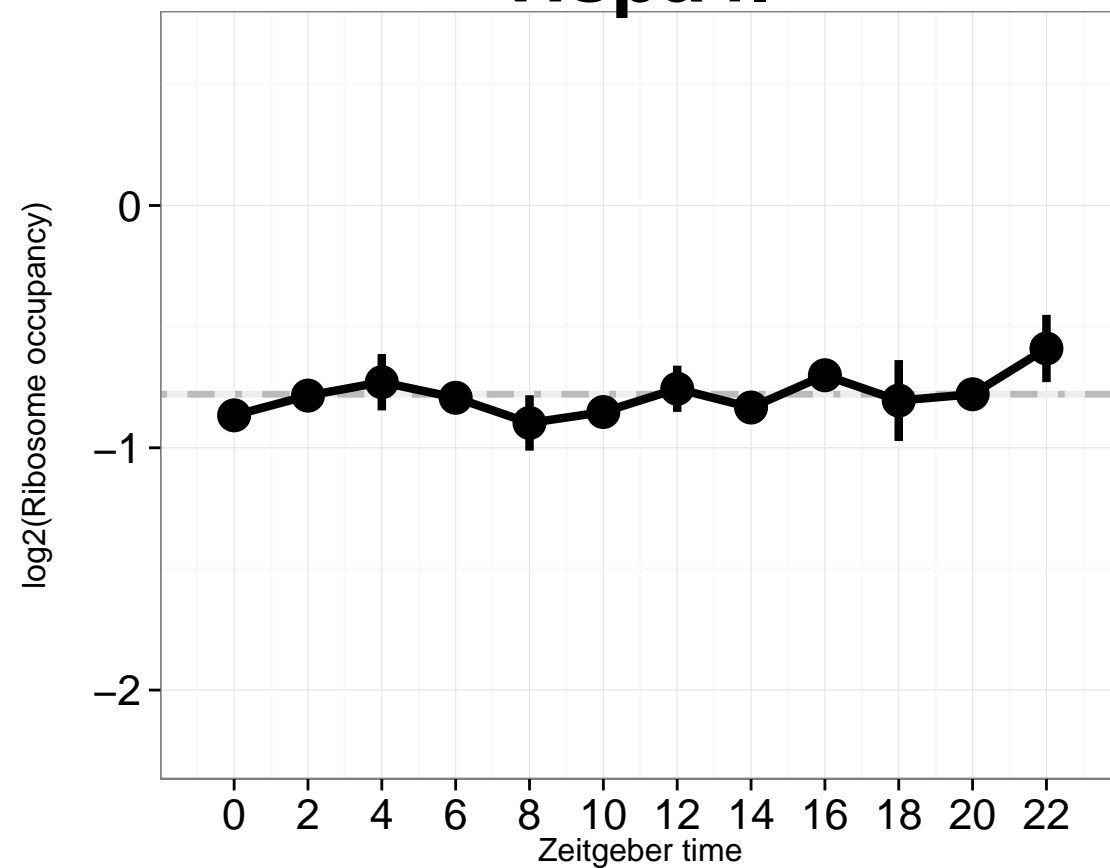

Supplement: SuppDataset_1.zip [file Hspa4l_set_D.pdf › Supplemental Dataset 1/D-mRNA_rhythm_translation_rhyth/Hspa4l_set_D.pdf]

# Hspa8

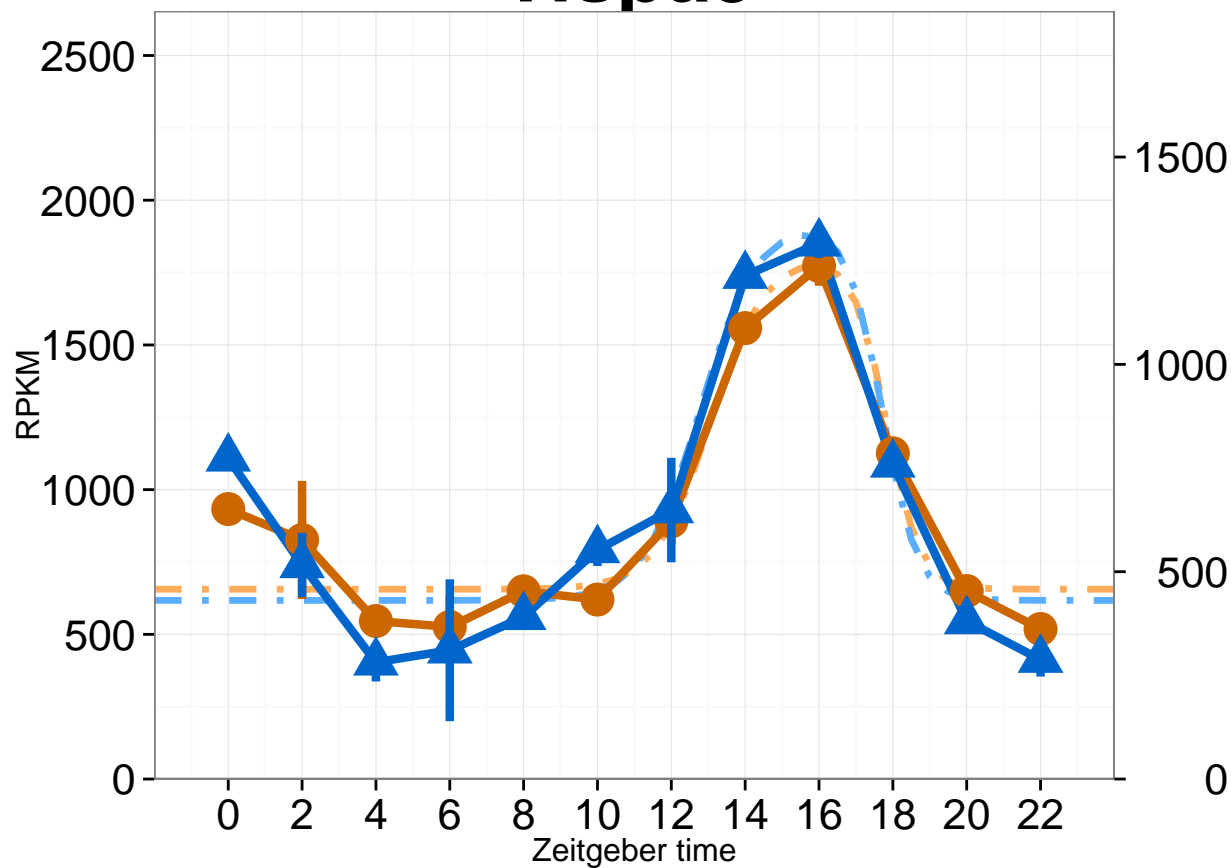

# Hspa8

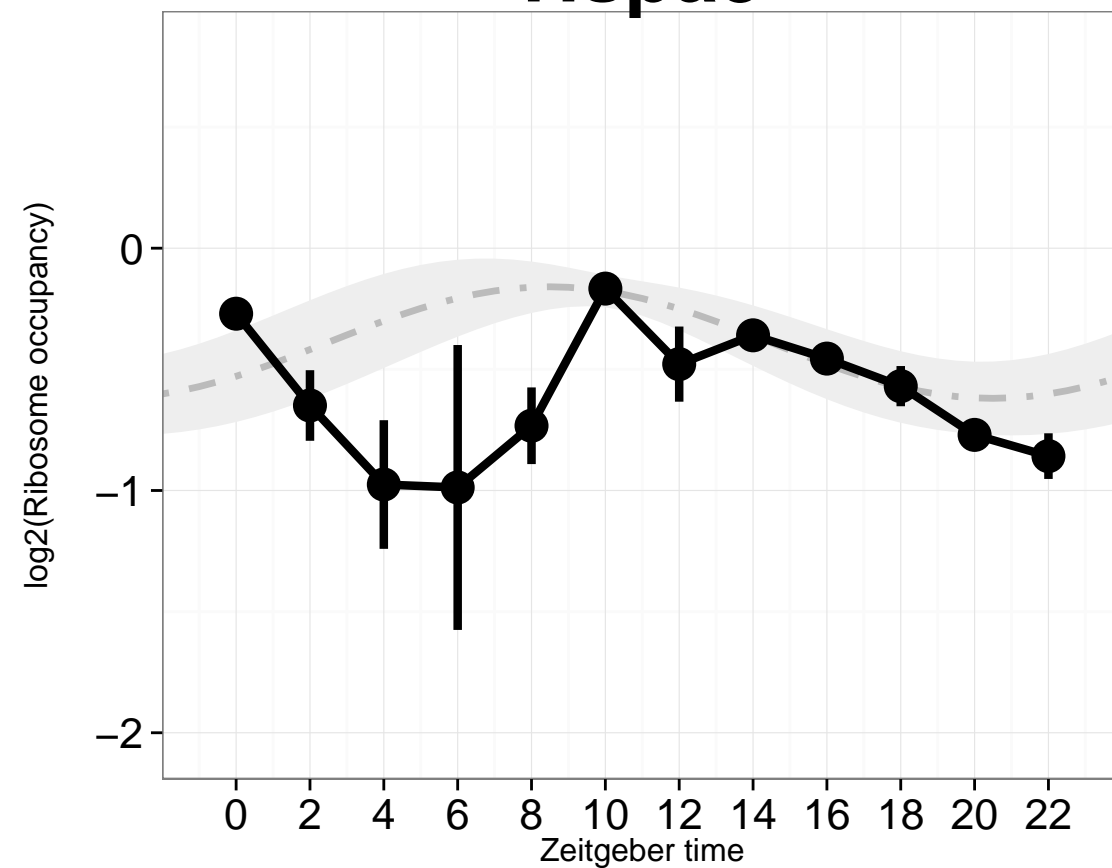

Supplement: SuppDataset_1.zip [file Hspa8_set_D.pdf › Supplemental Dataset 1/D-mRNA_rhythm_translation_rhyth/Hspa8_set_D.pdf]

# Hspb1

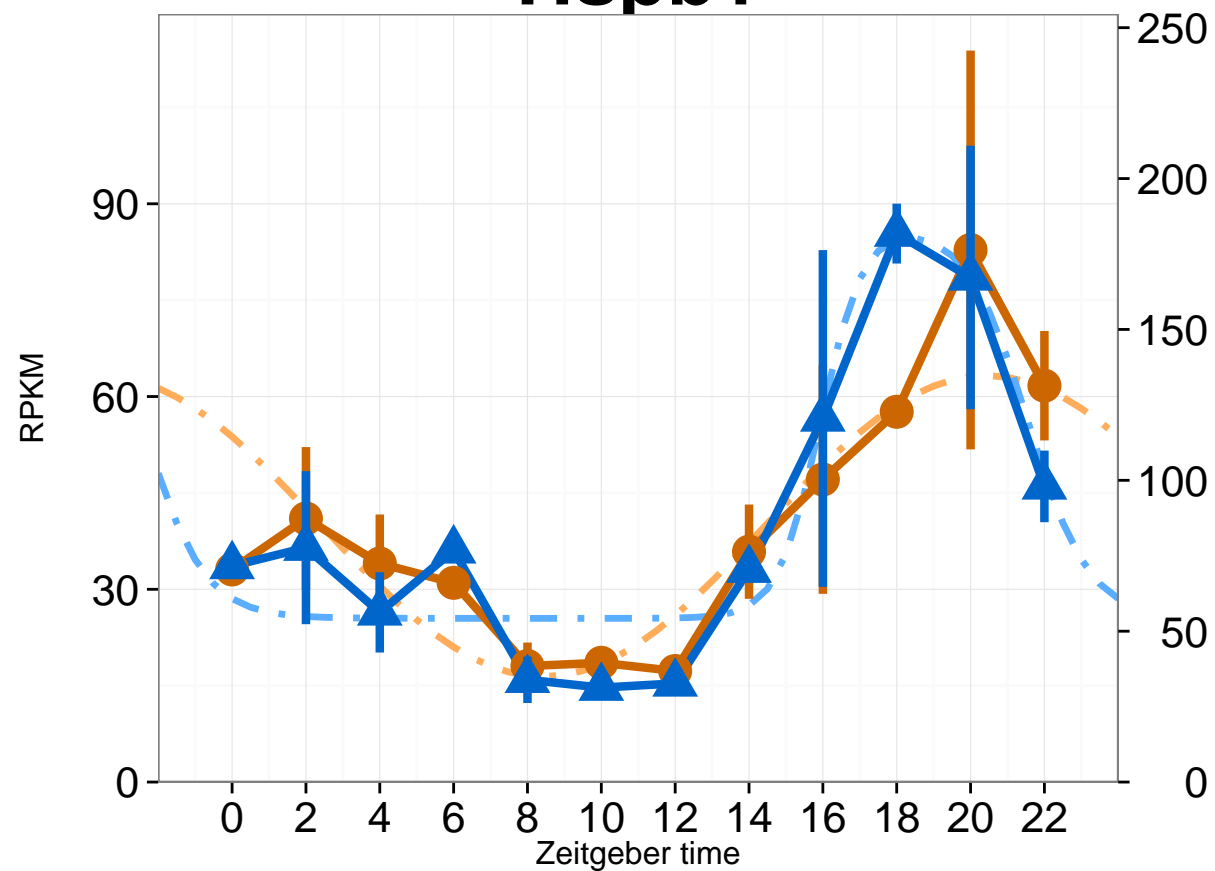

# Hspb1

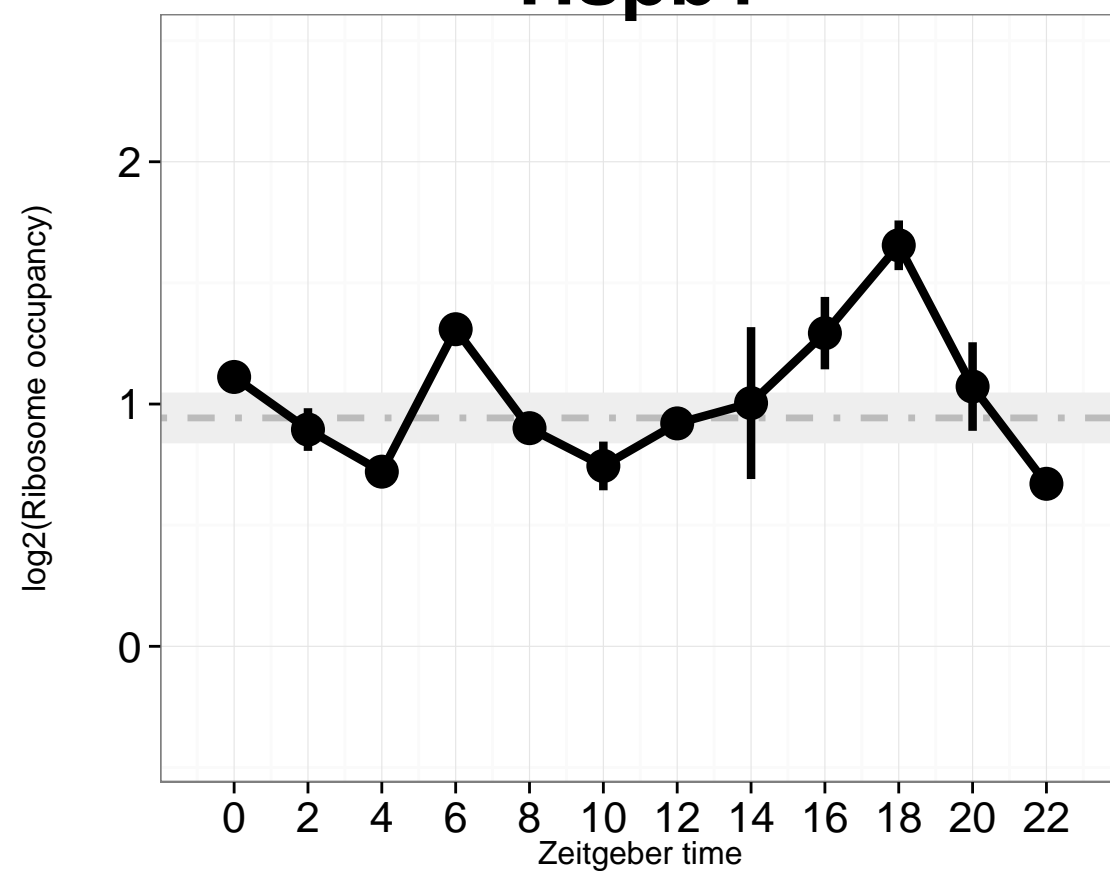

Supplement: SuppDataset_1.zip [file Hspb1_set_D.pdf › Supplemental Dataset 1/D-mRNA_rhythm_translation_rhyth/Hspb1_set_D.pdf]

# Hspb8

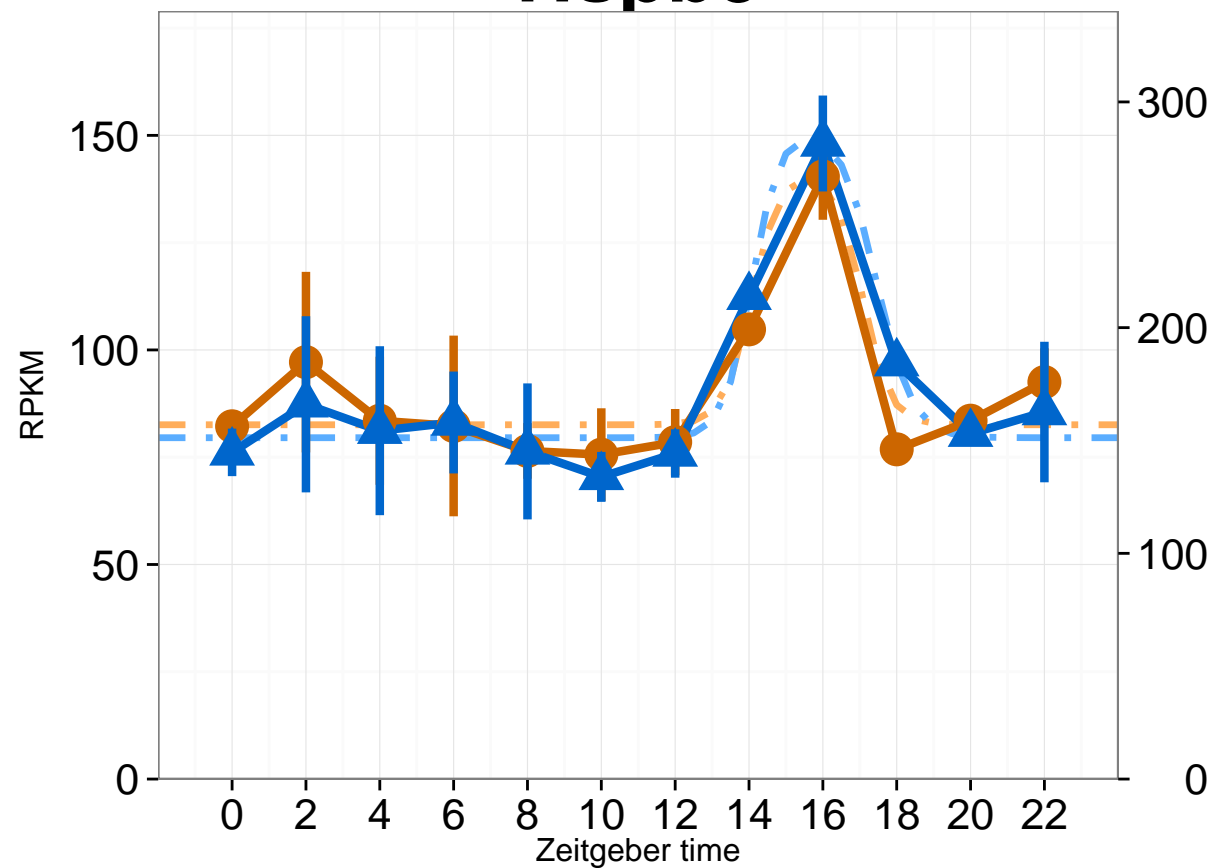

# Hspb8

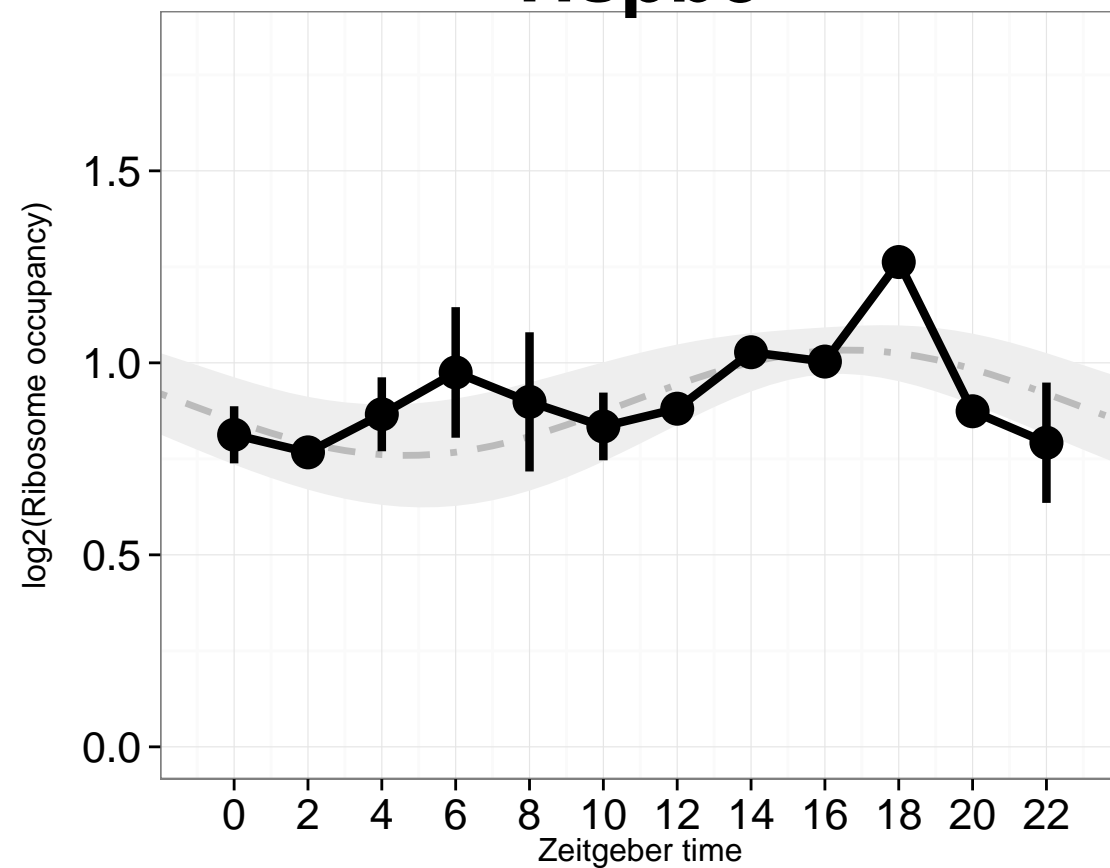

Supplement: SuppDataset_1.zip [file Hspb8_set_D.pdf › Supplemental Dataset 1/D-mRNA_rhythm_translation_rhyth/Hspb8_set_D.pdf]

# Hsph1

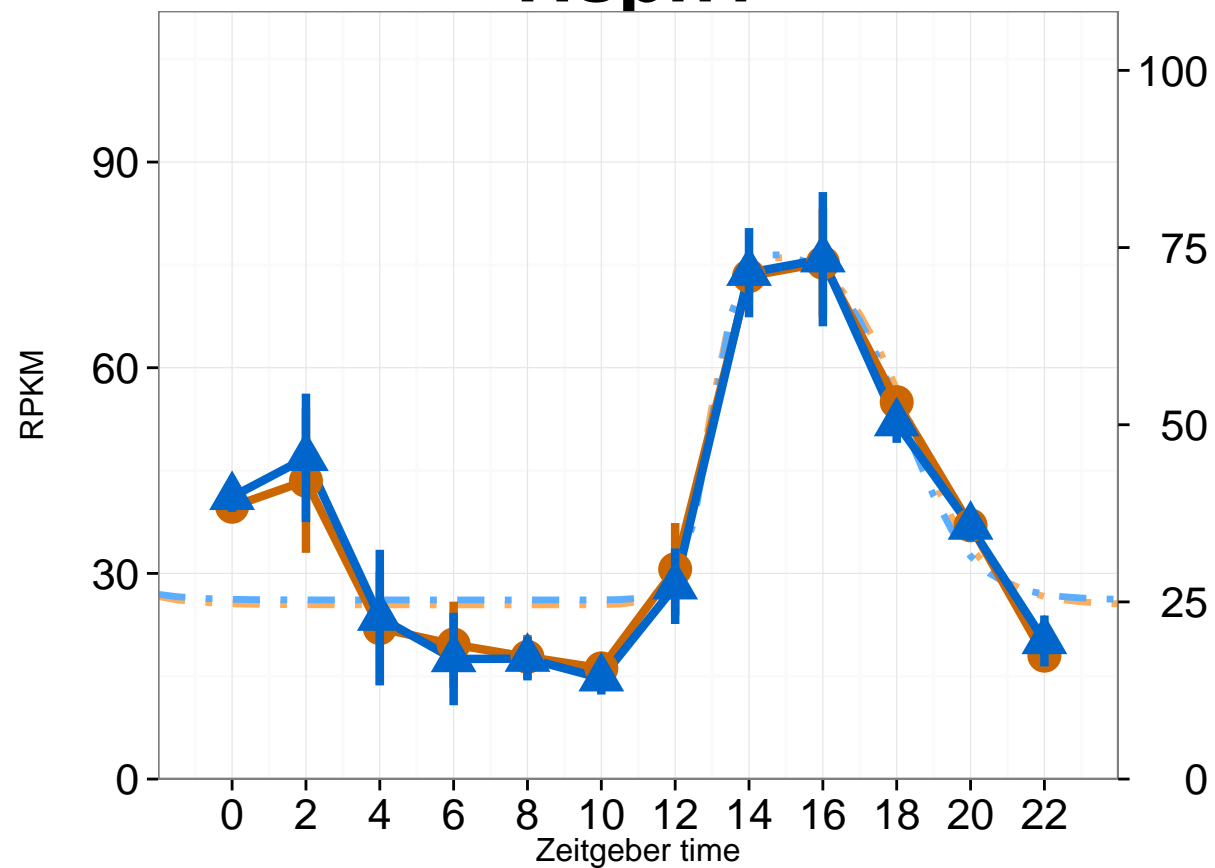

# Hsph1

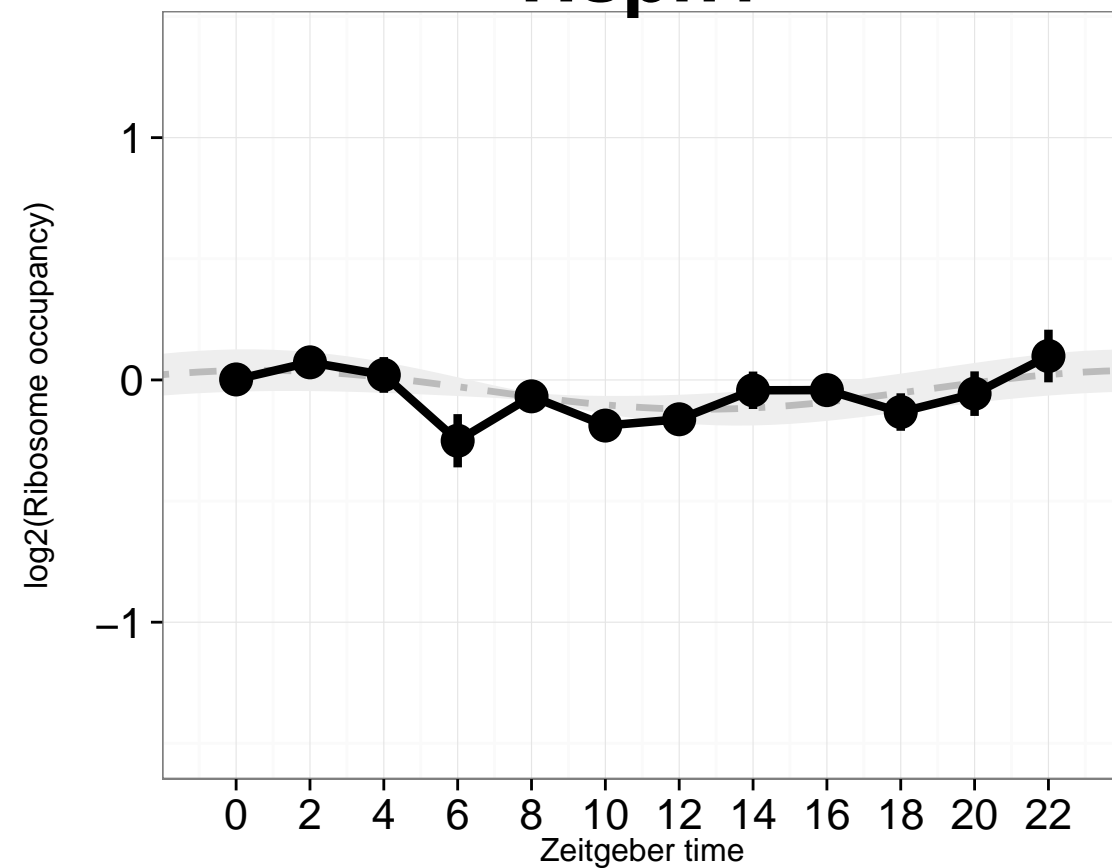

Supplement: SuppDataset_1.zip [file Hsph1_set_D.pdf › Supplemental Dataset 1/D-mRNA_rhythm_translation_rhyth/Hsph1_set_D.pdf]

# Hyal1

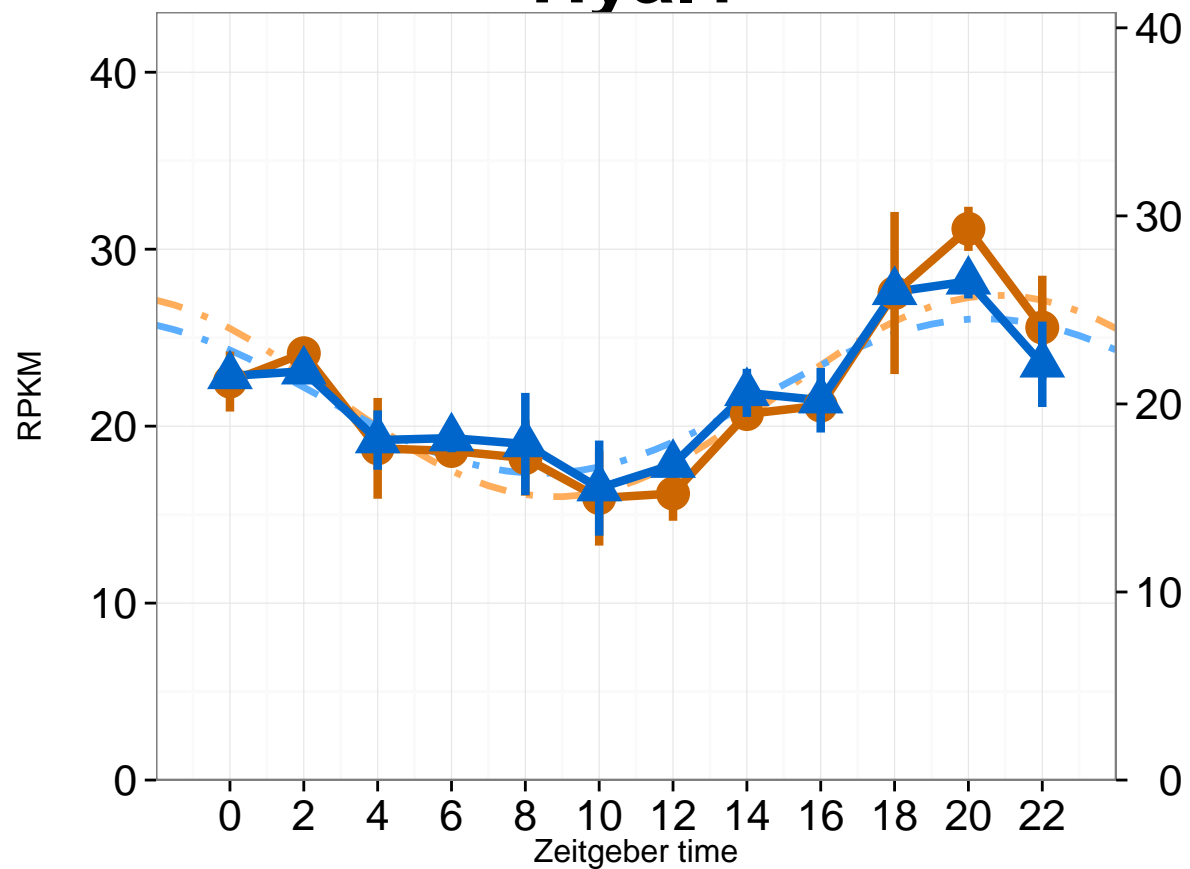

# Hyal1

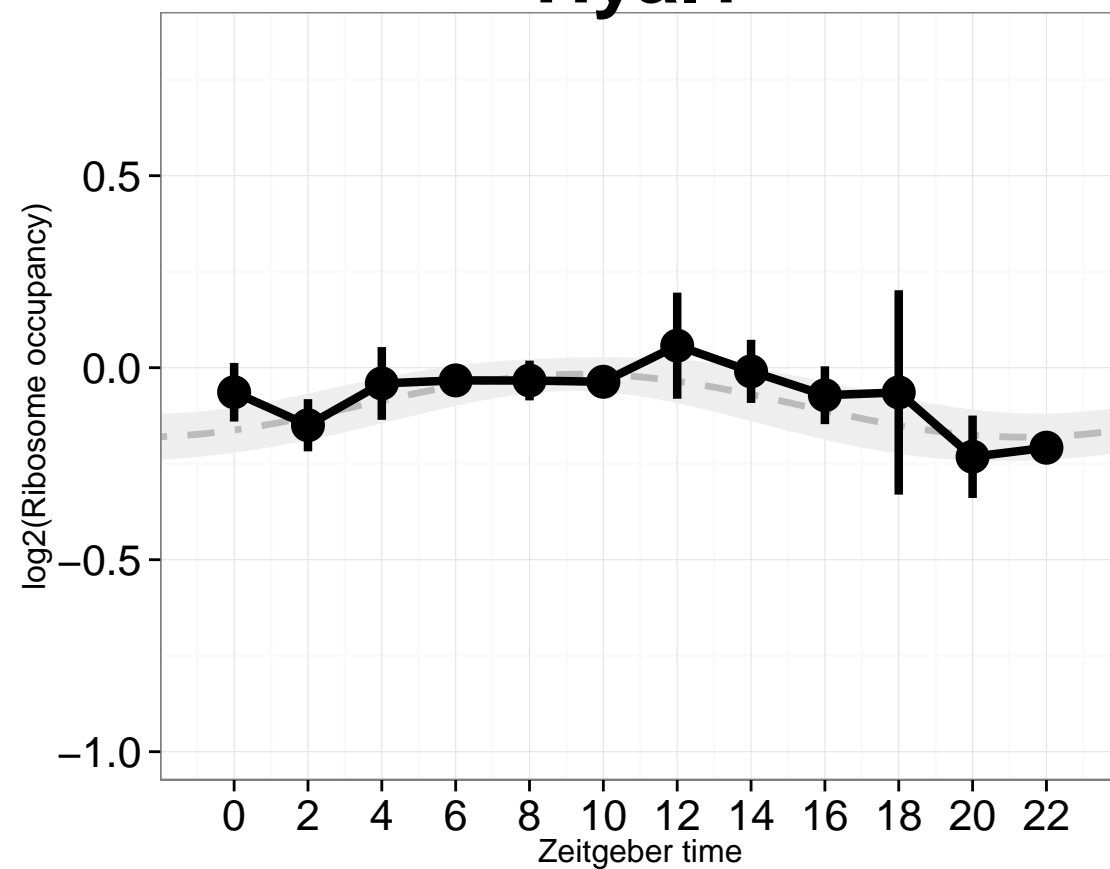

Supplement: SuppDataset_1.zip [file Hyal1_set_D.pdf › Supplemental Dataset 1/D-mRNA_rhythm_translation_rhyth/Hyal1_set_D.pdf]

## Hykk

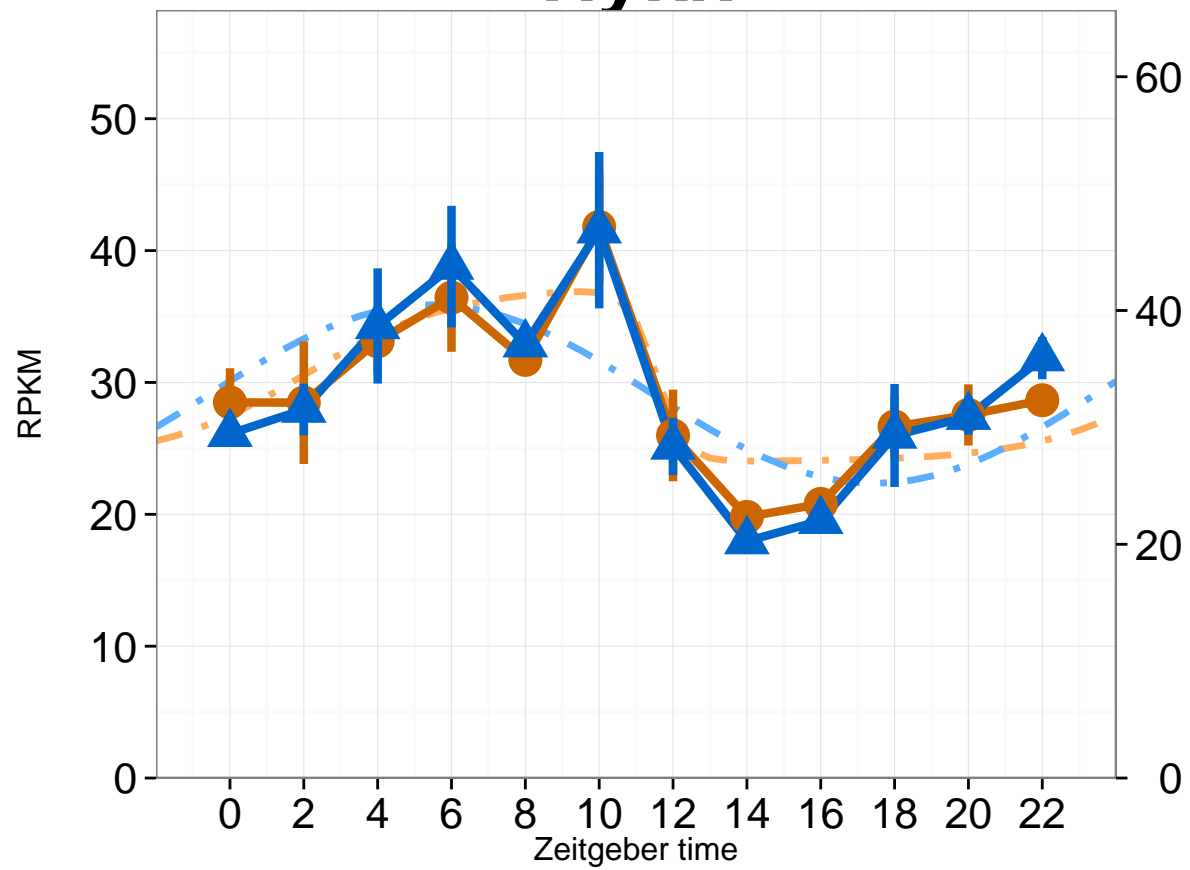

## Hykk

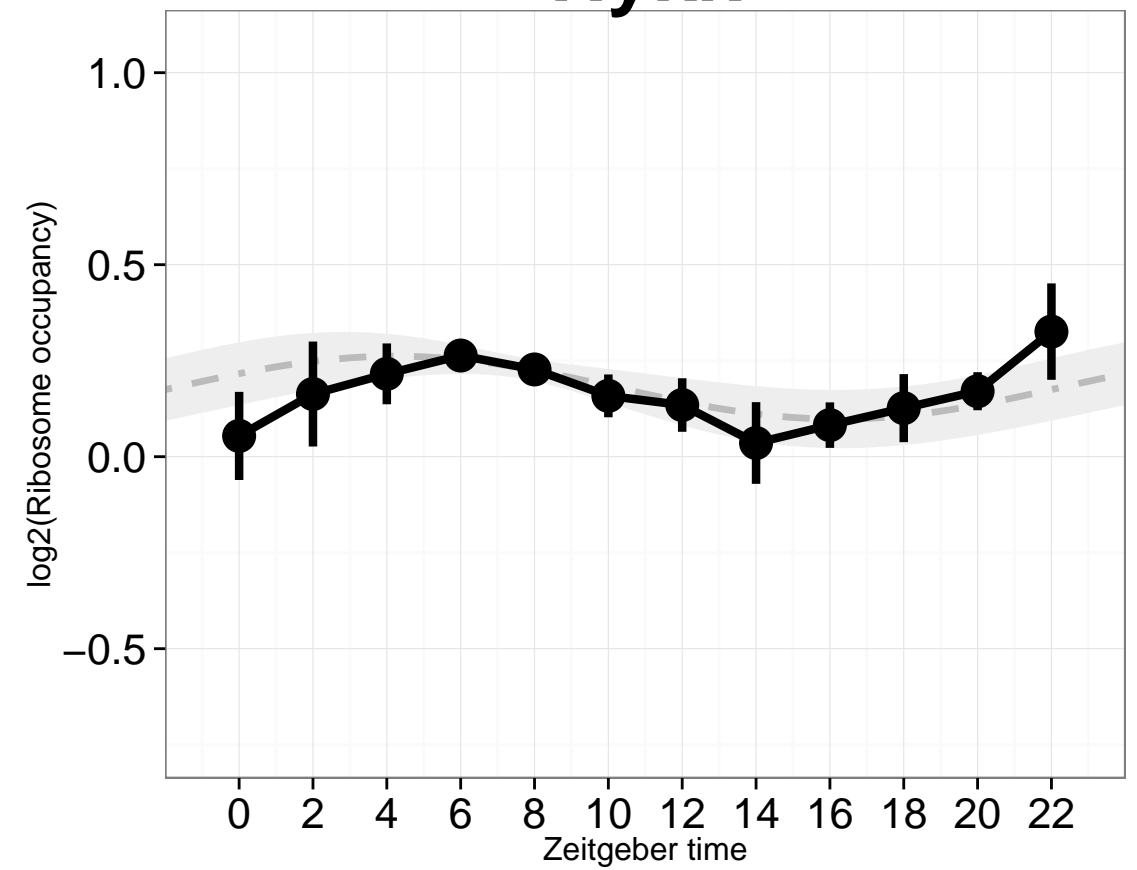

Supplement: SuppDataset_1.zip [file Hykk_set_D.pdf › Supplemental Dataset 1/D-mRNA_rhythm_translation_rhyth/Hykk_set_D.pdf]

## Id2

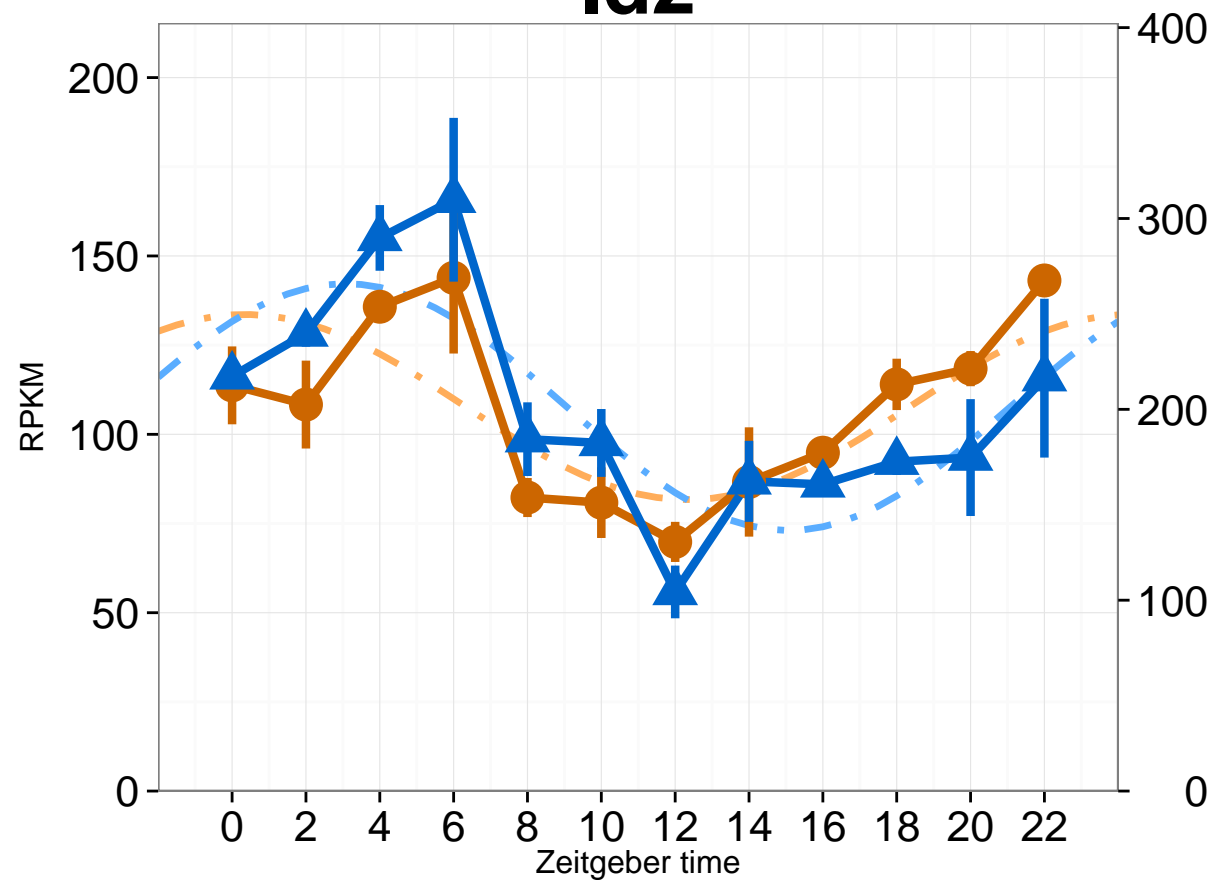

## Id2

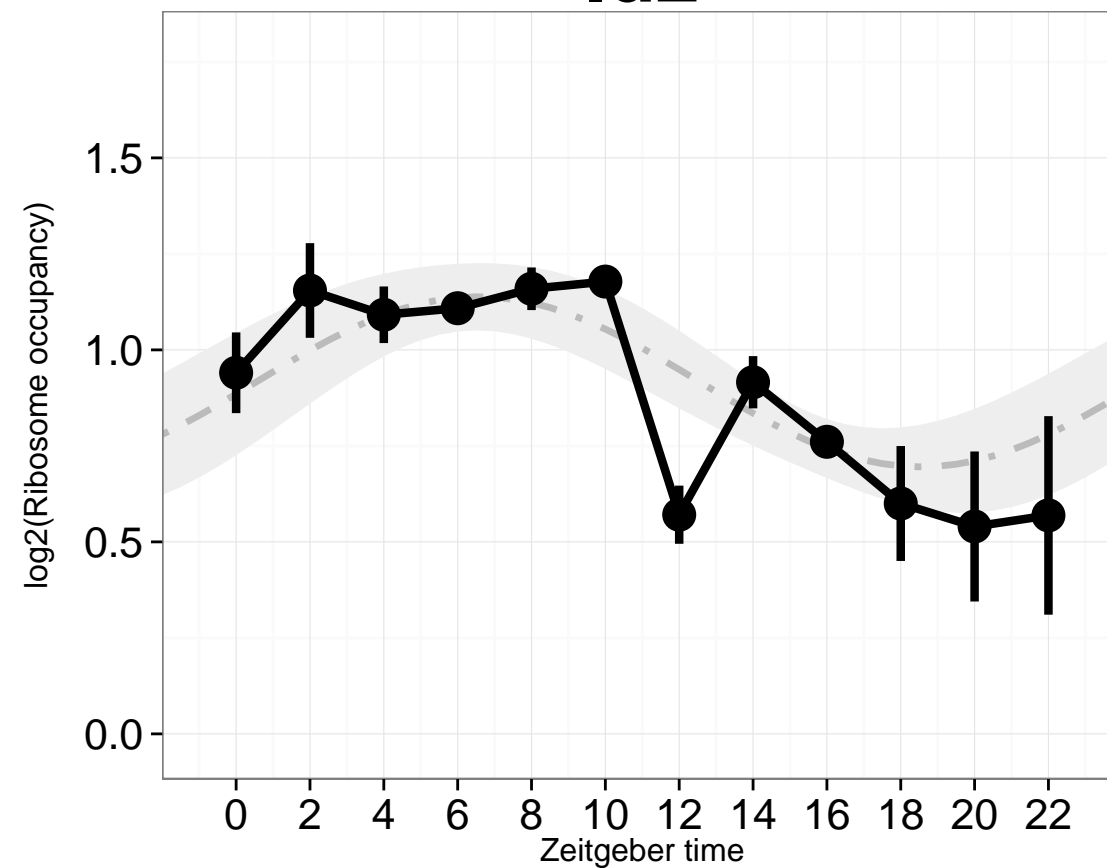

Supplement: SuppDataset_1.zip [file Id2_set_D.pdf › Supplemental Dataset 1/D-mRNA_rhythm_translation_rhyth/Id2_set_D.pdf]

## Ido2

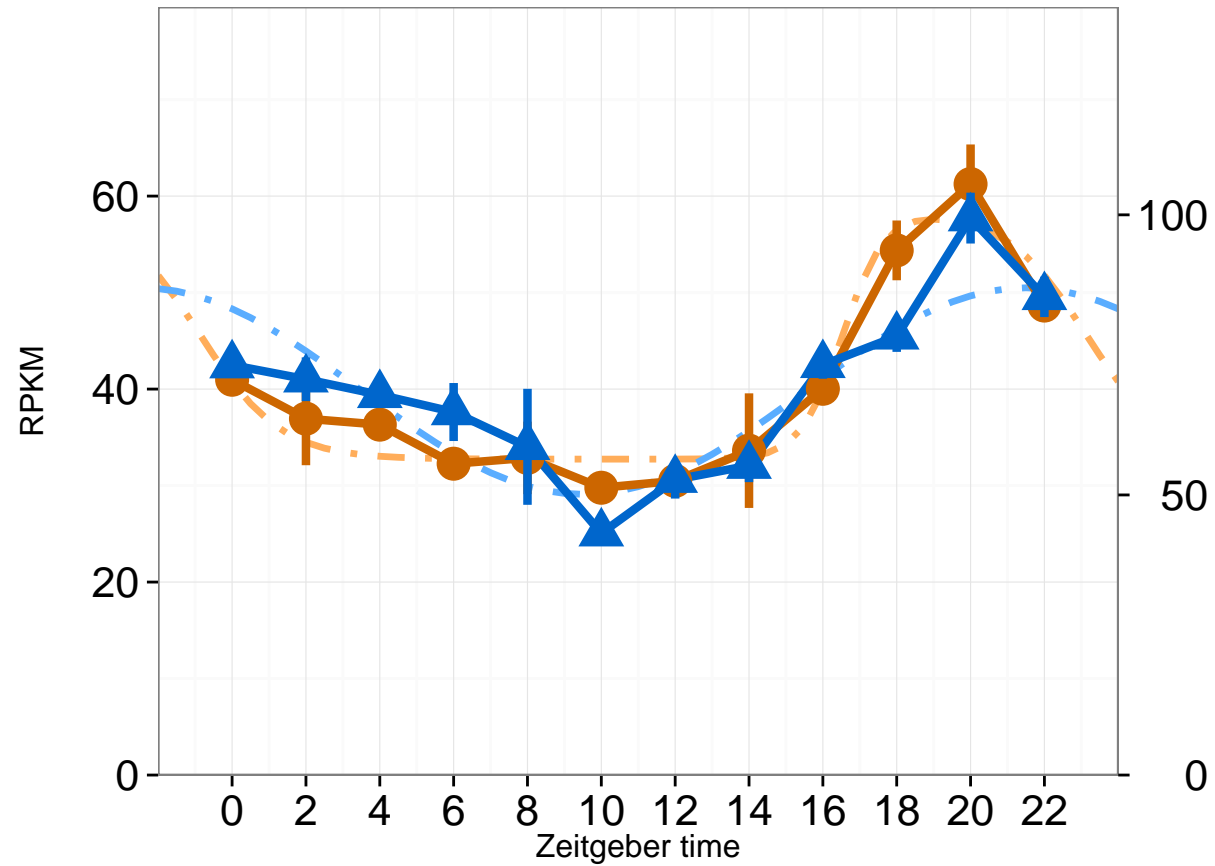

## Ido2

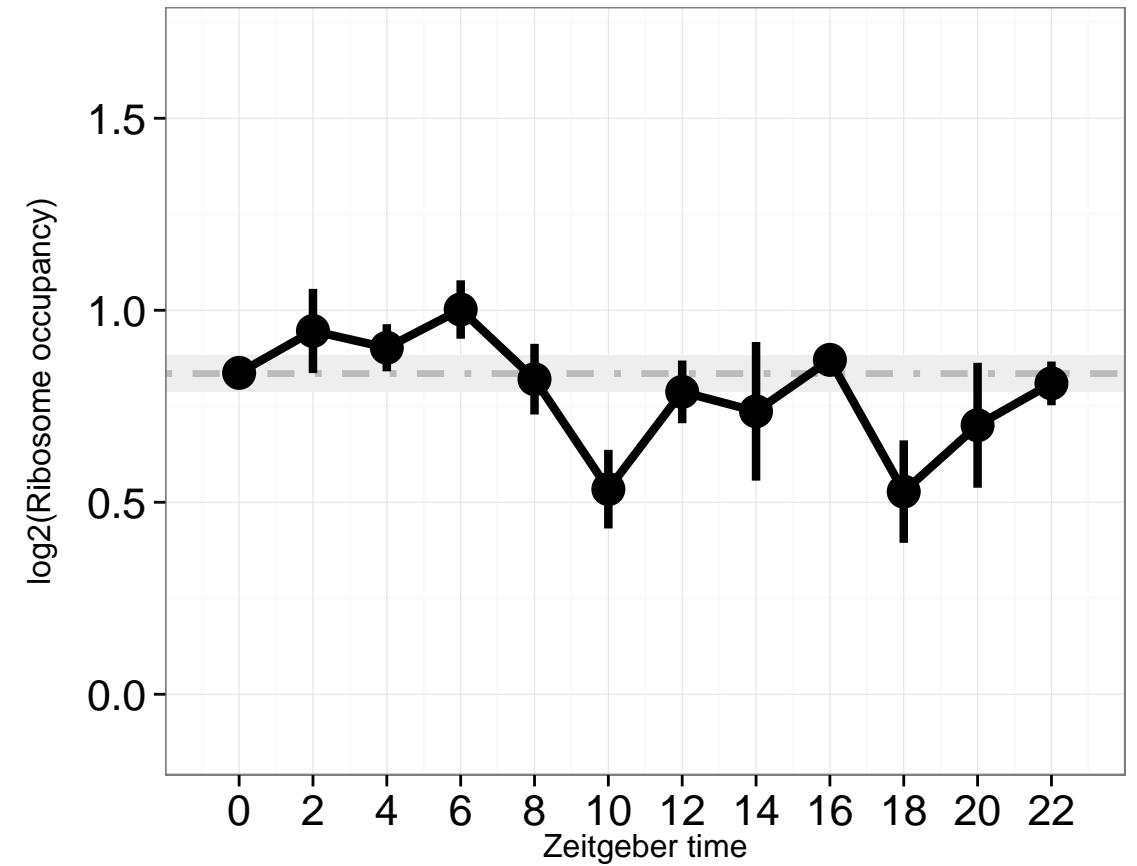

Supplement: SuppDataset_1.zip [file Ido2_set_D.pdf › Supplemental Dataset 1/D-mRNA_rhythm_translation_rhyth/Ido2_set_D.pdf]

## lfi47

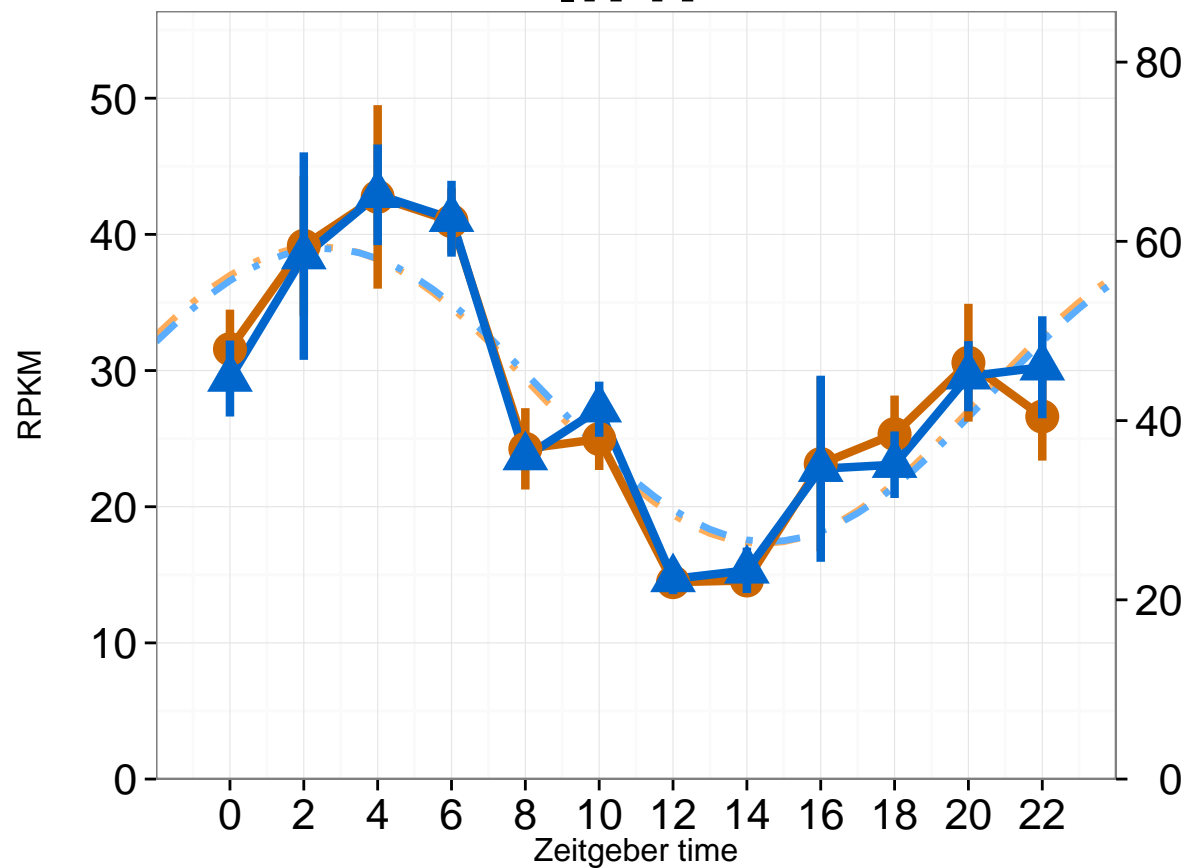

## lfi47

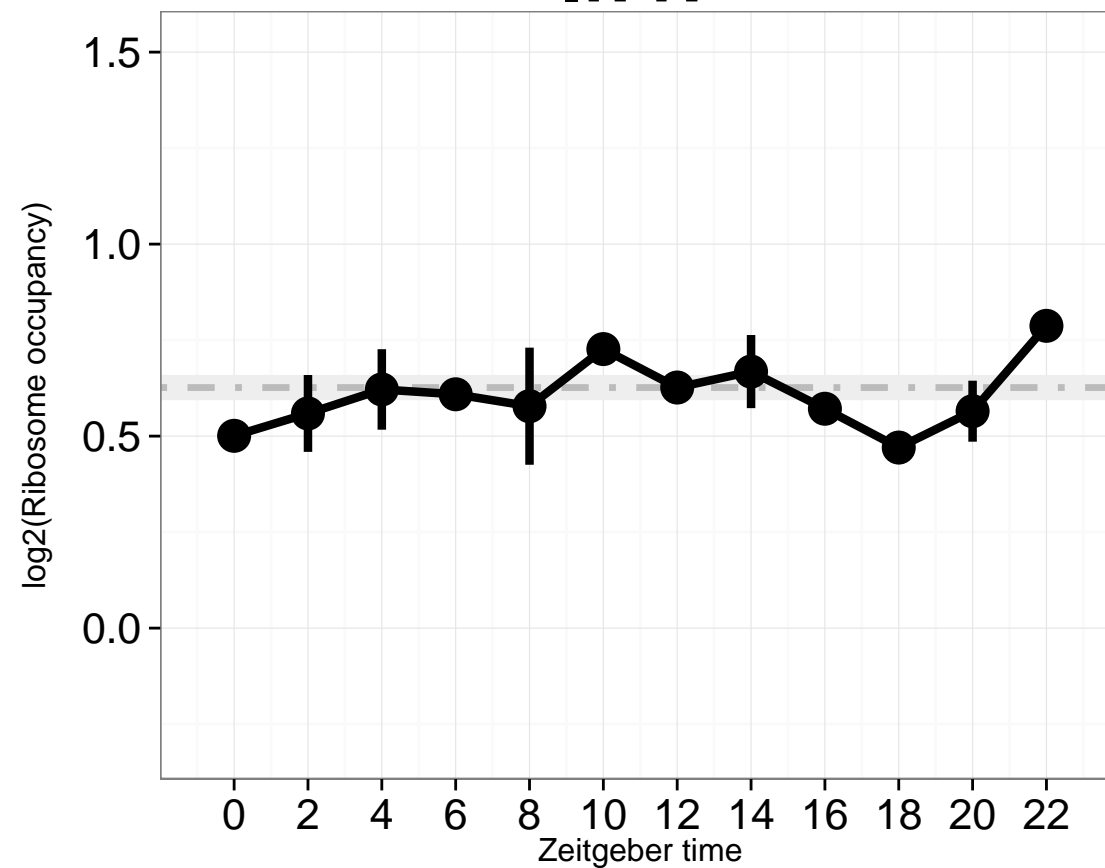

Supplement: SuppDataset_1.zip [file Ifi47_set_D.pdf › Supplemental Dataset 1/D-mRNA_rhythm_translation_rhyth/Ifi47_set_D.pdf]

# Ifit1

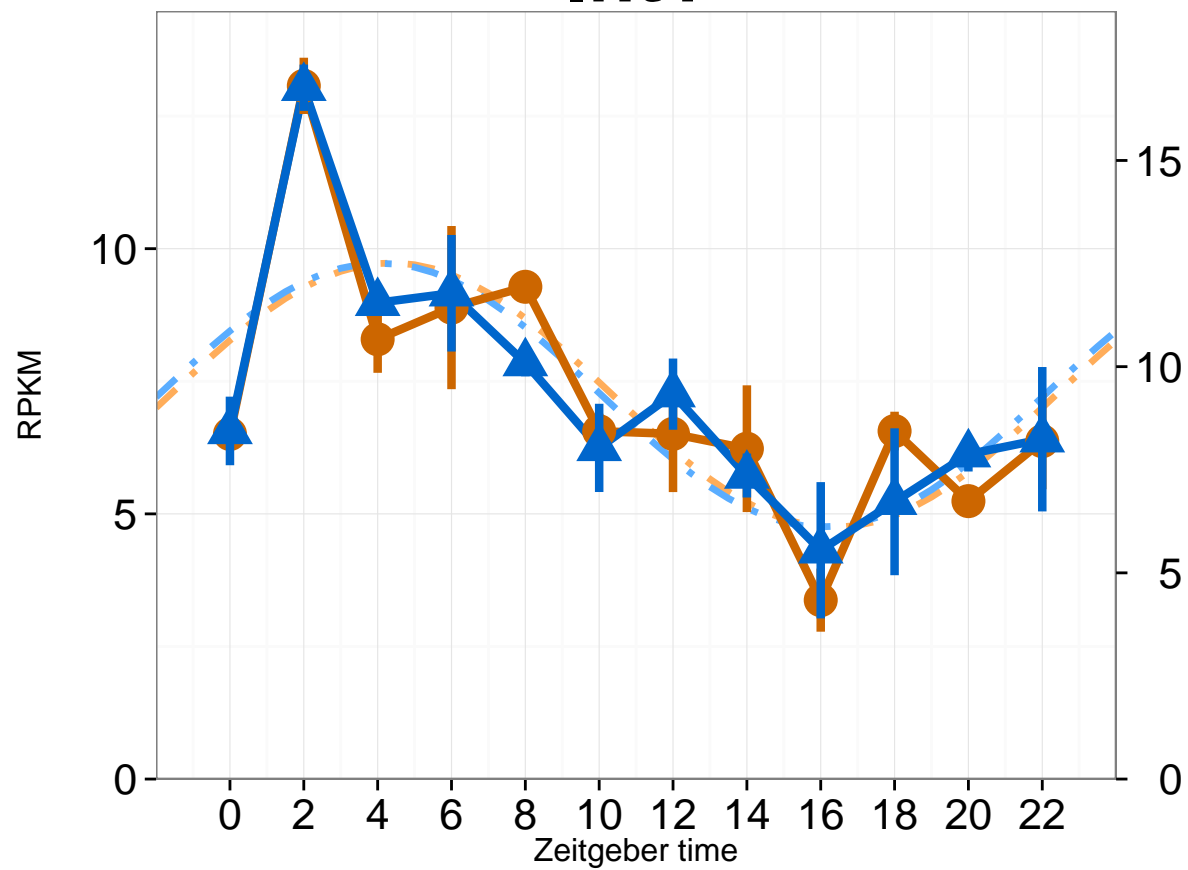

# Ifit1

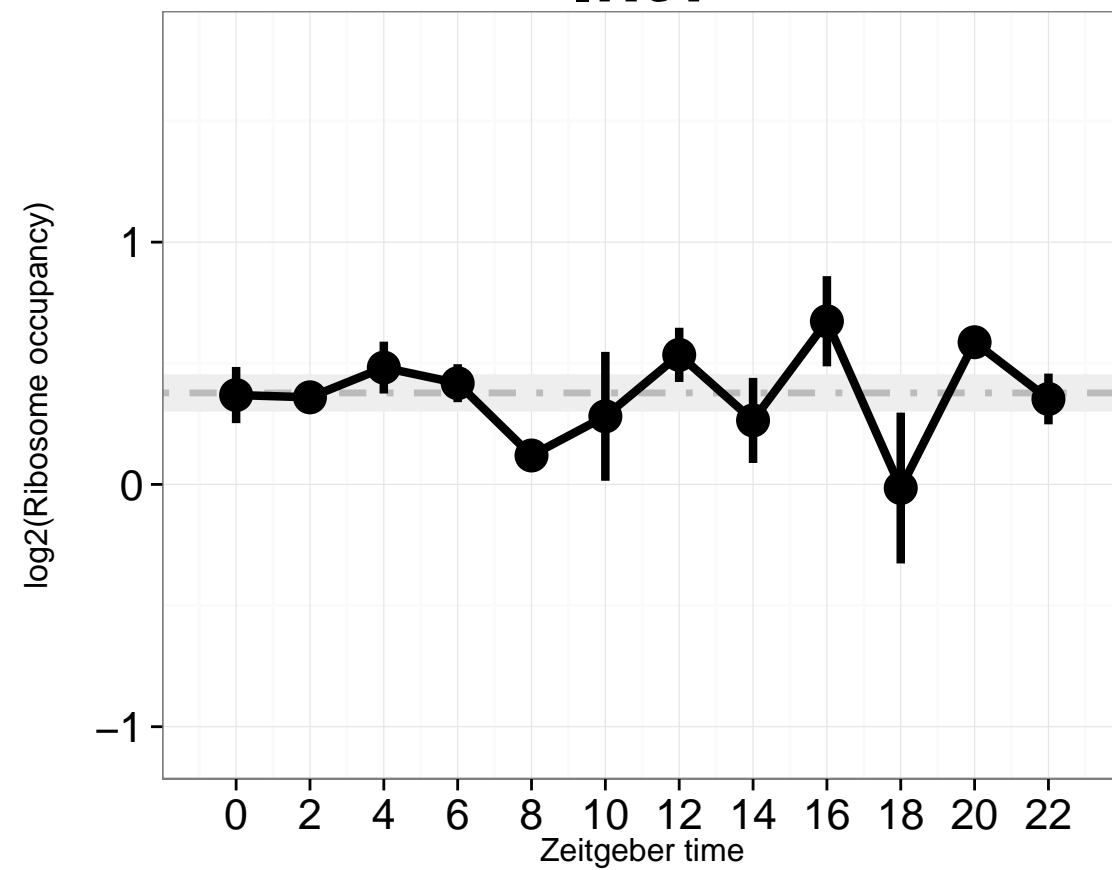

Supplement: SuppDataset_1.zip [file Ifit1_set_D.pdf › Supplemental Dataset 1/D-mRNA_rhythm_translation_rhyth/Ifit1_set_D.pdf]
