# Supplementary figures and images for: Ribosome profiling reveals the rhythmic liver translatome and circadian clock regulation by upstream open reading frames (part 97 of 113)
Source: HighWire-hosted journal article supplement (doi:10.1101/gr.195404.115), 2015-10-20

# Gja4

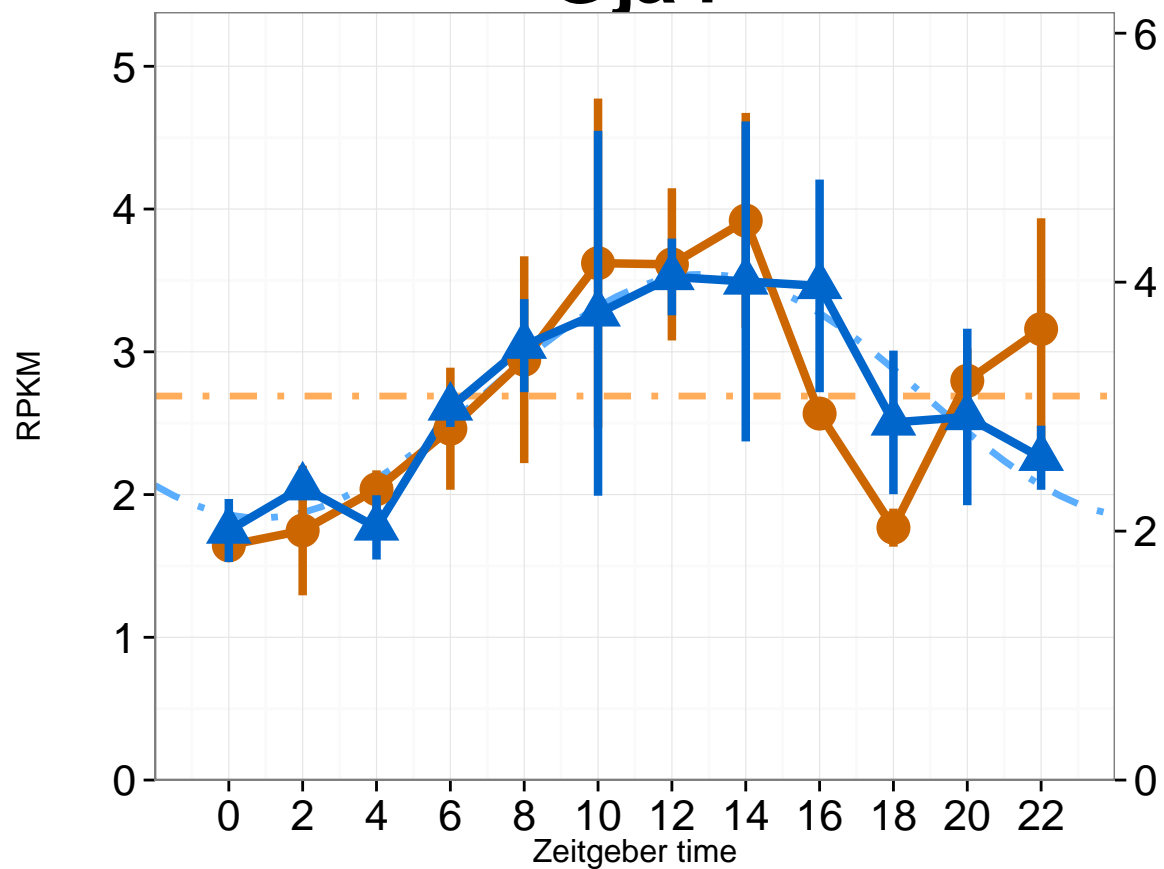

# Gja4

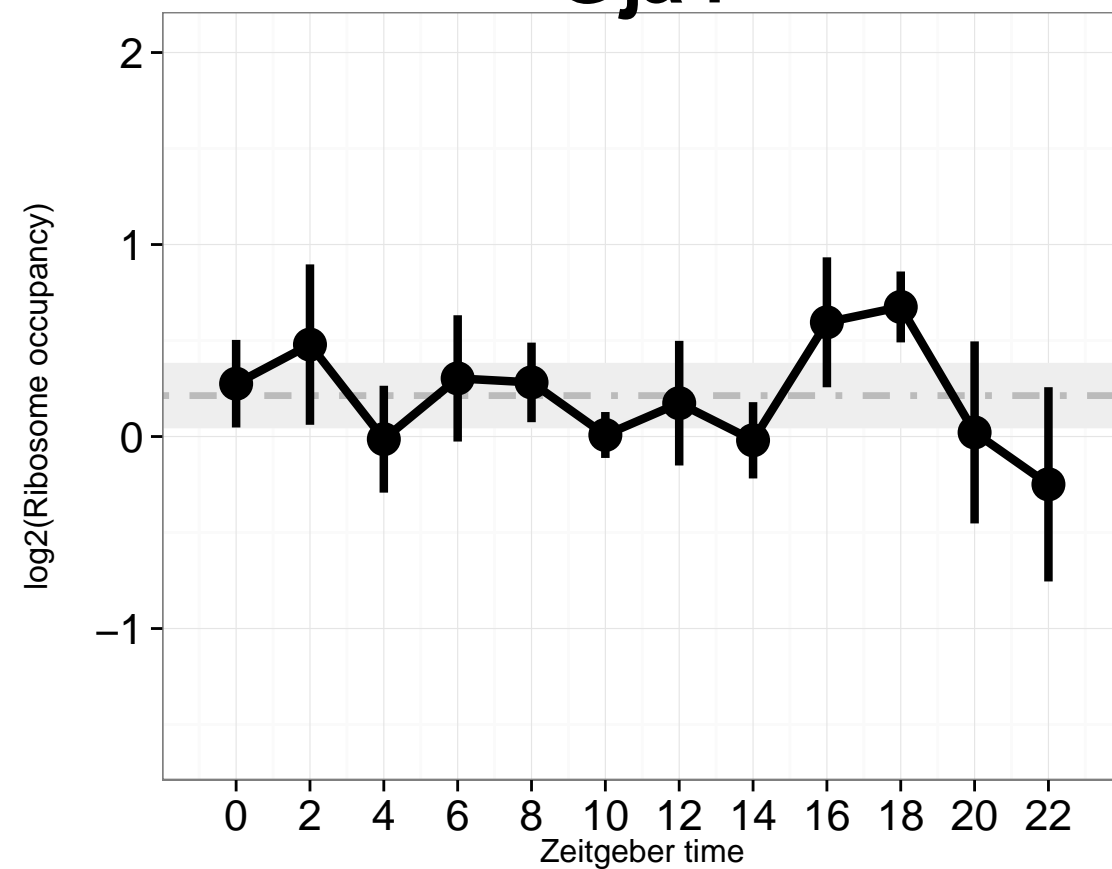

Supplement: SuppDataset_1.zip [file Gja4_set_C.pdf › Supplemental Dataset 1/C-mRNA_nonrhythm_translation_rhyth/Gja4_set_C.pdf]

**Gja5 TR**

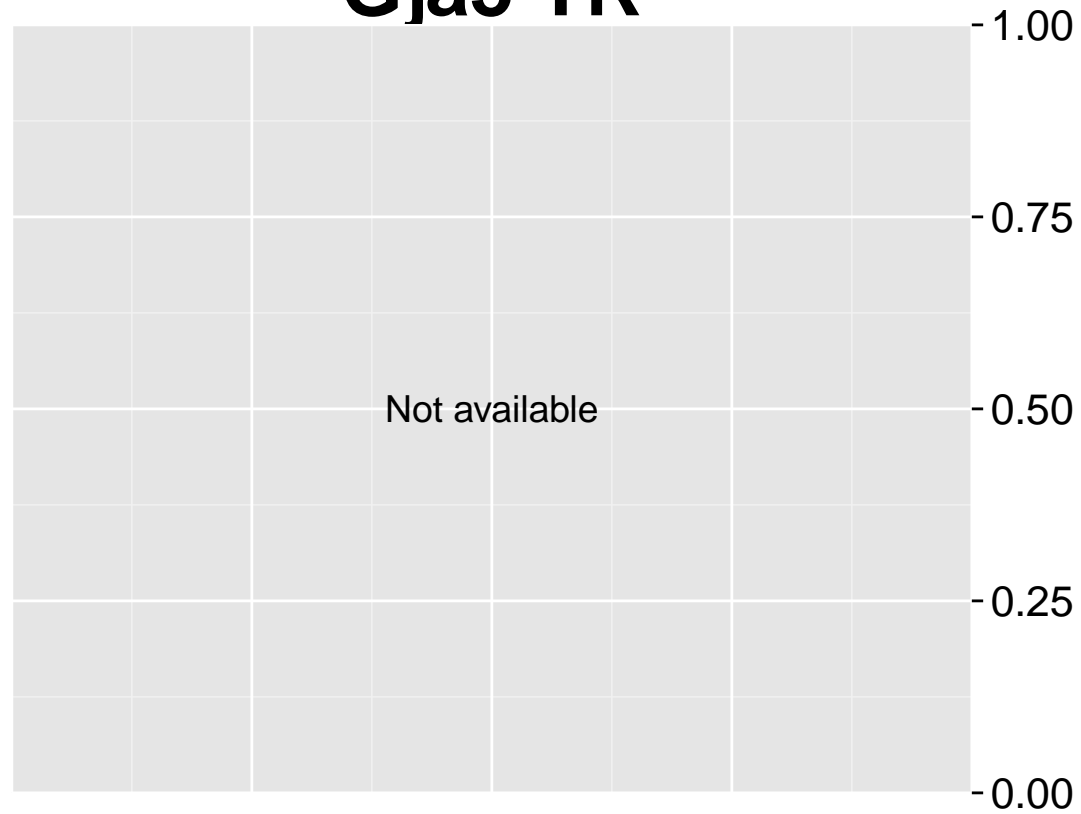

**Gja5 log2(Ribosome occupancy)**

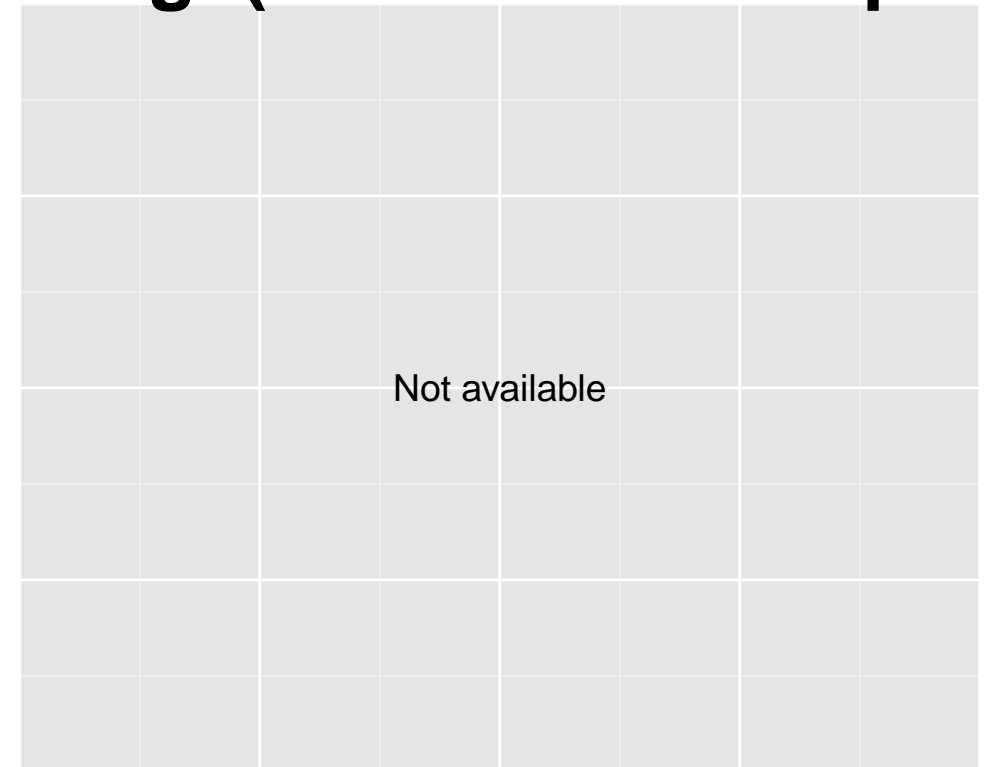

Supplement: SuppDataset_1.zip [file Gja5_set_C.pdf › Supplemental Dataset 1/C-mRNA_nonrhythm_translation_rhyth/Gja5_set_C.pdf]

**Gjc2 TR**

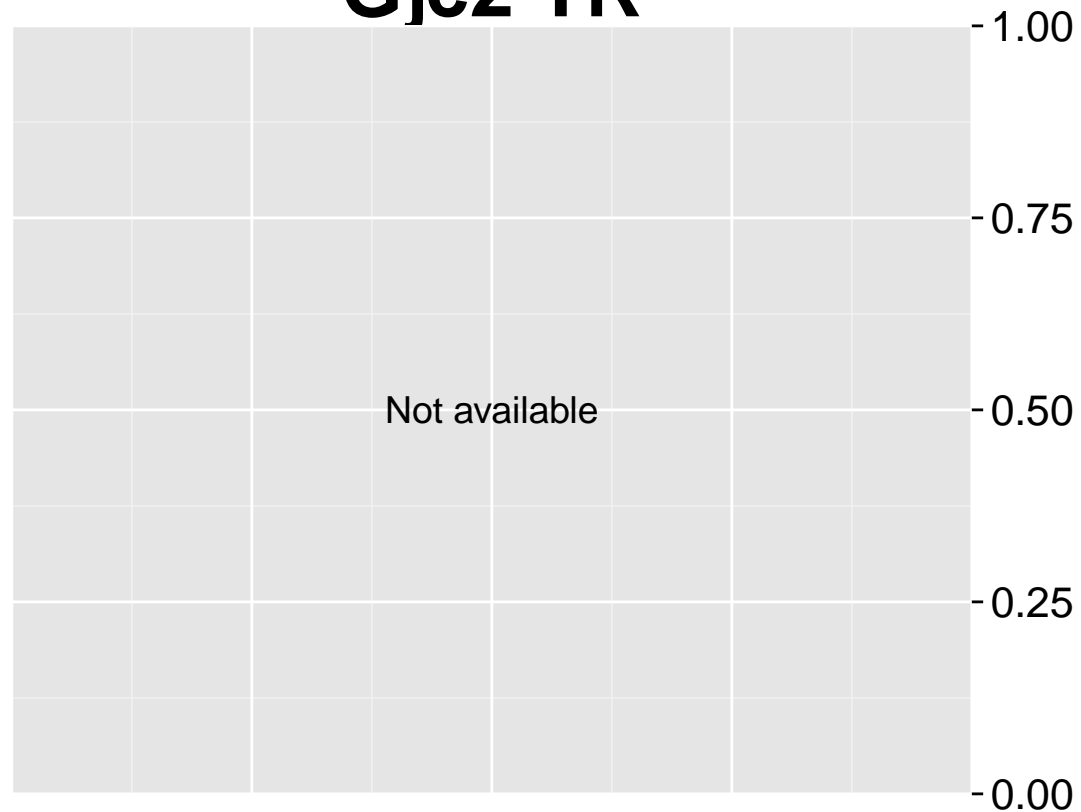

**Gjc2 log2(Ribosome occupancy)**

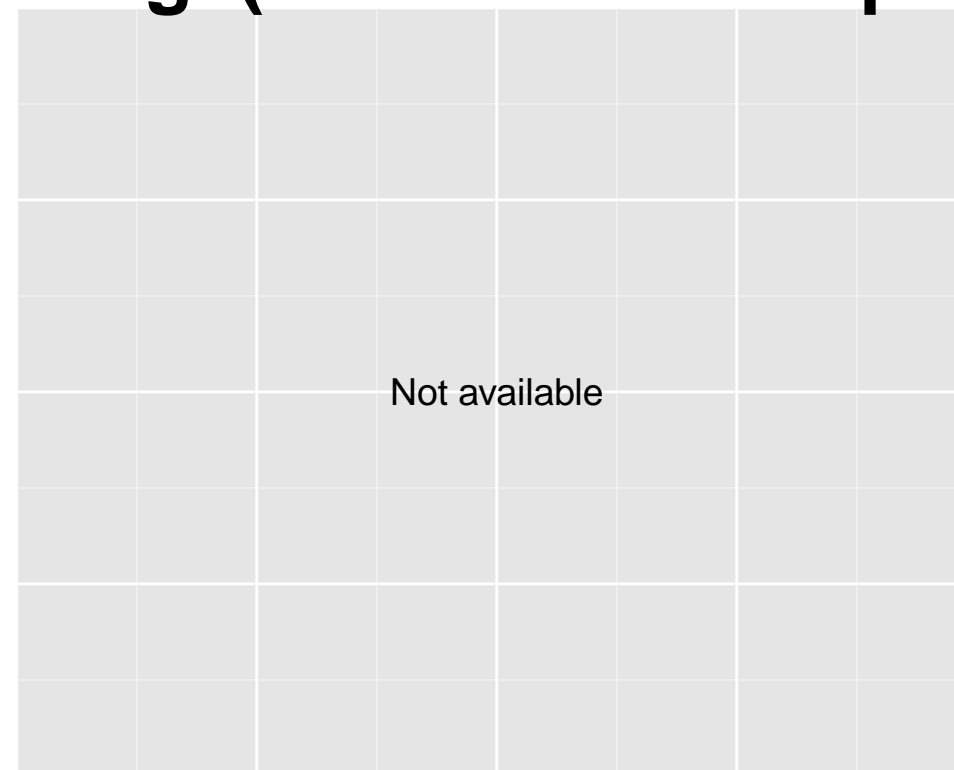

Supplement: SuppDataset_1.zip [file Gjc2_set_C.pdf › Supplemental Dataset 1/C-mRNA_nonrhythm_translation_rhyth/Gjc2_set_C.pdf]

## Glcci1

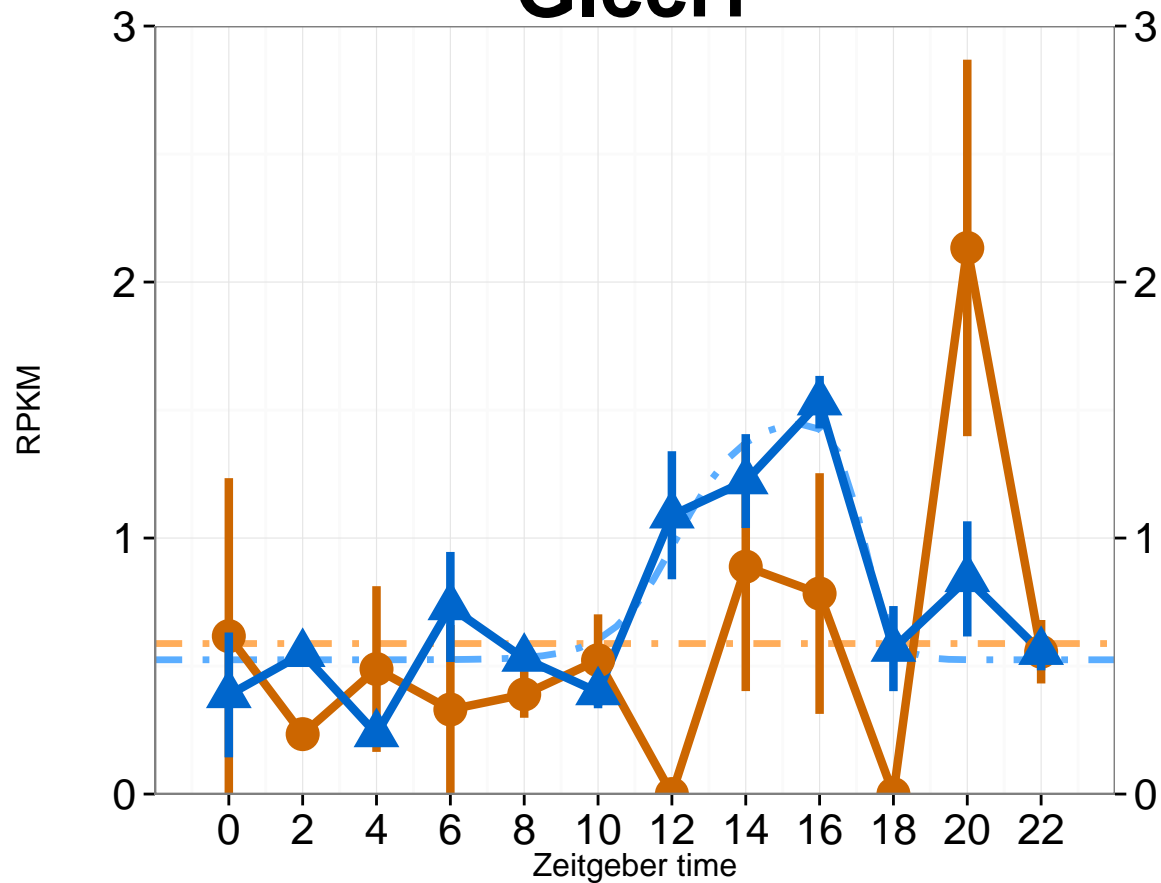

## Glcci1

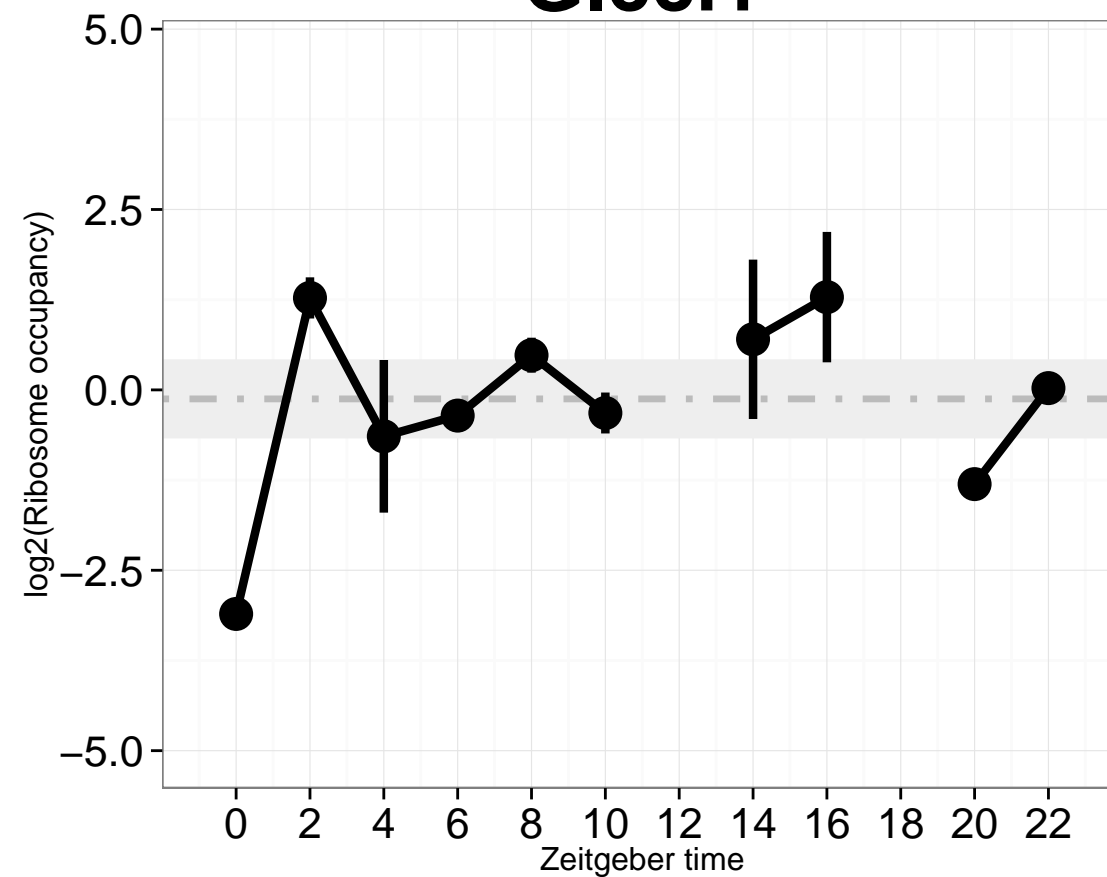

Supplement: SuppDataset_1.zip [file Glcci1_set_C.pdf › Supplemental Dataset 1/C-mRNA_nonrhythm_translation_rhyth/Glcci1_set_C.pdf]

## Glo1

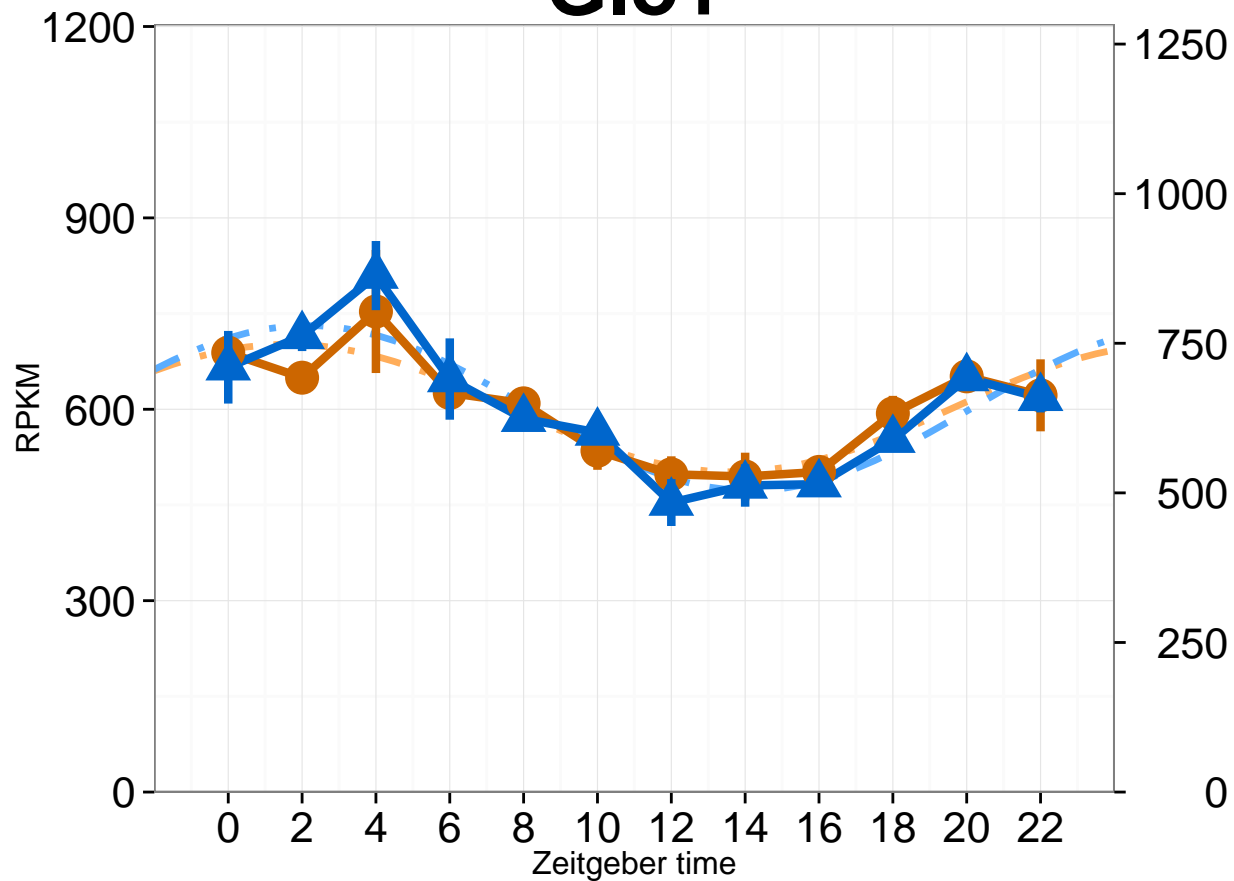

## Glo1

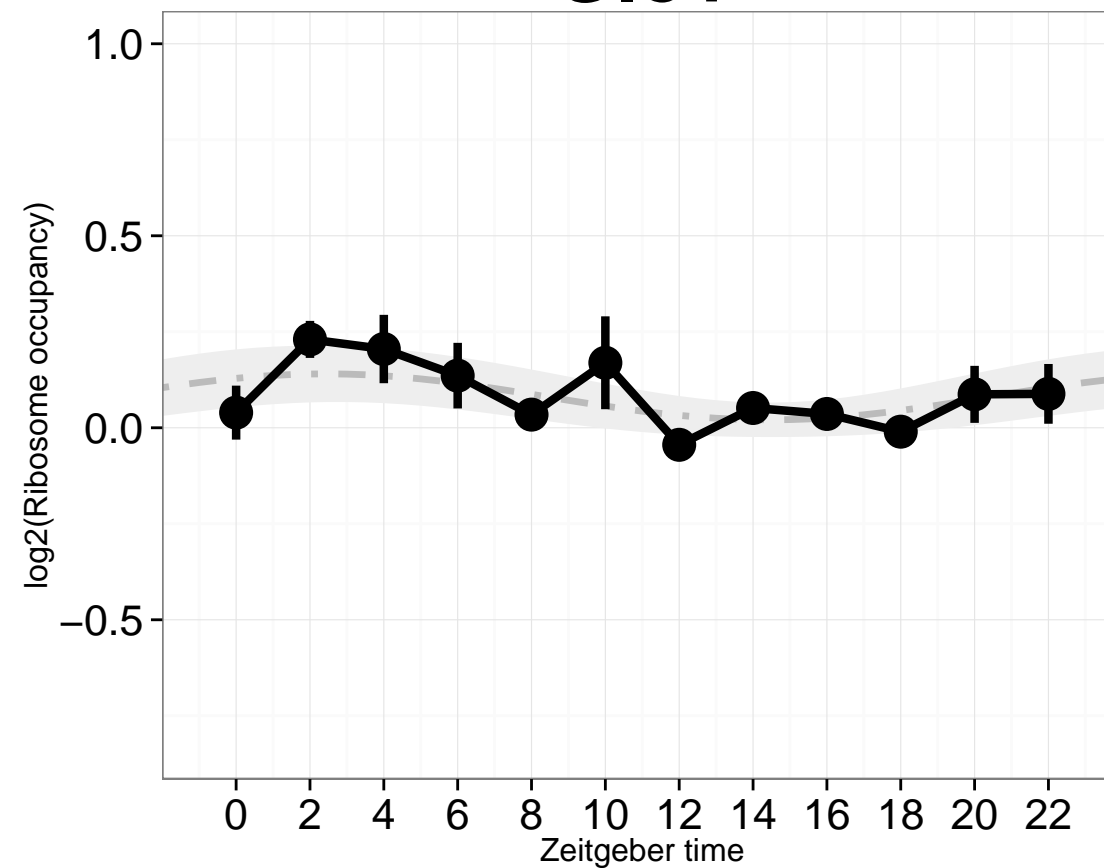

Supplement: SuppDataset_1.zip [file Glo1_set_C.pdf › Supplemental Dataset 1/C-mRNA_nonrhythm_translation_rhyth/Glo1_set_C.pdf]

## Glx5

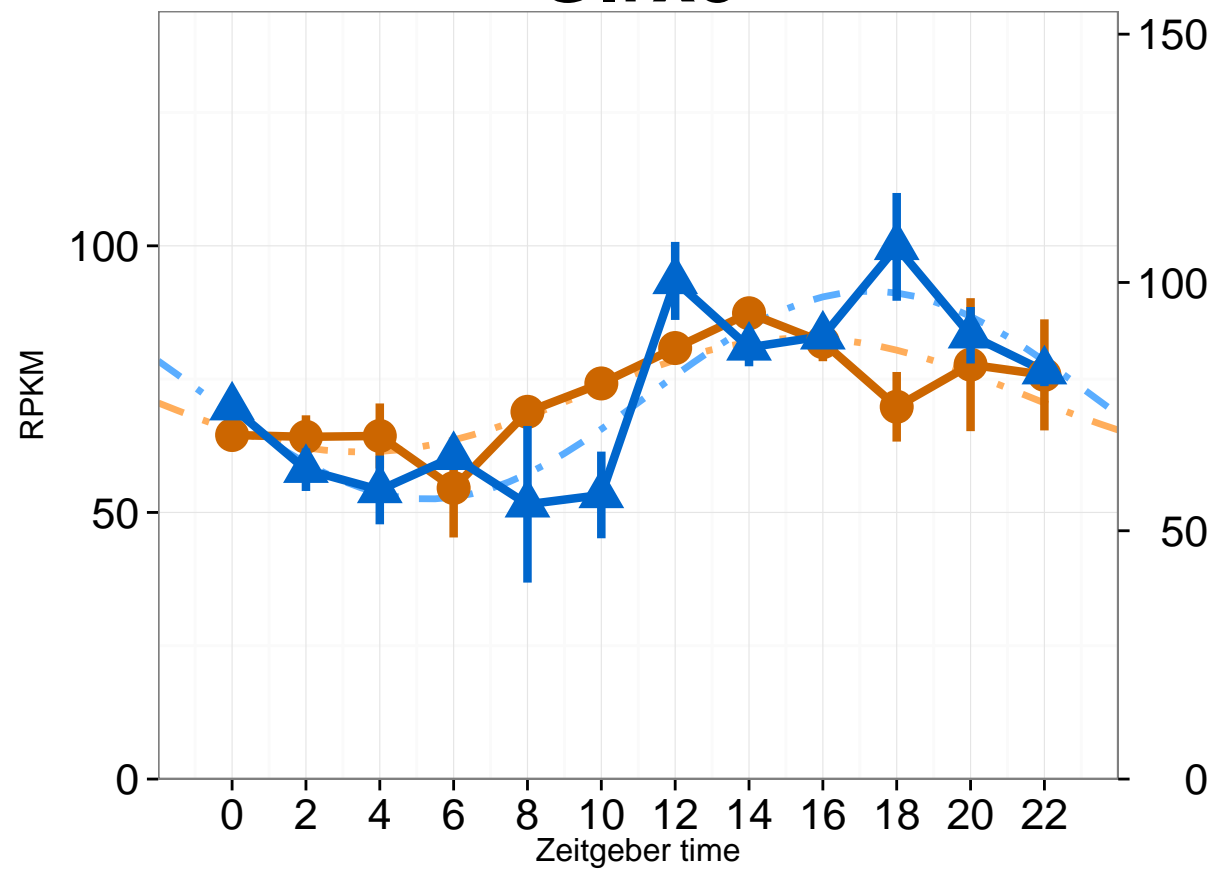

## Glx5

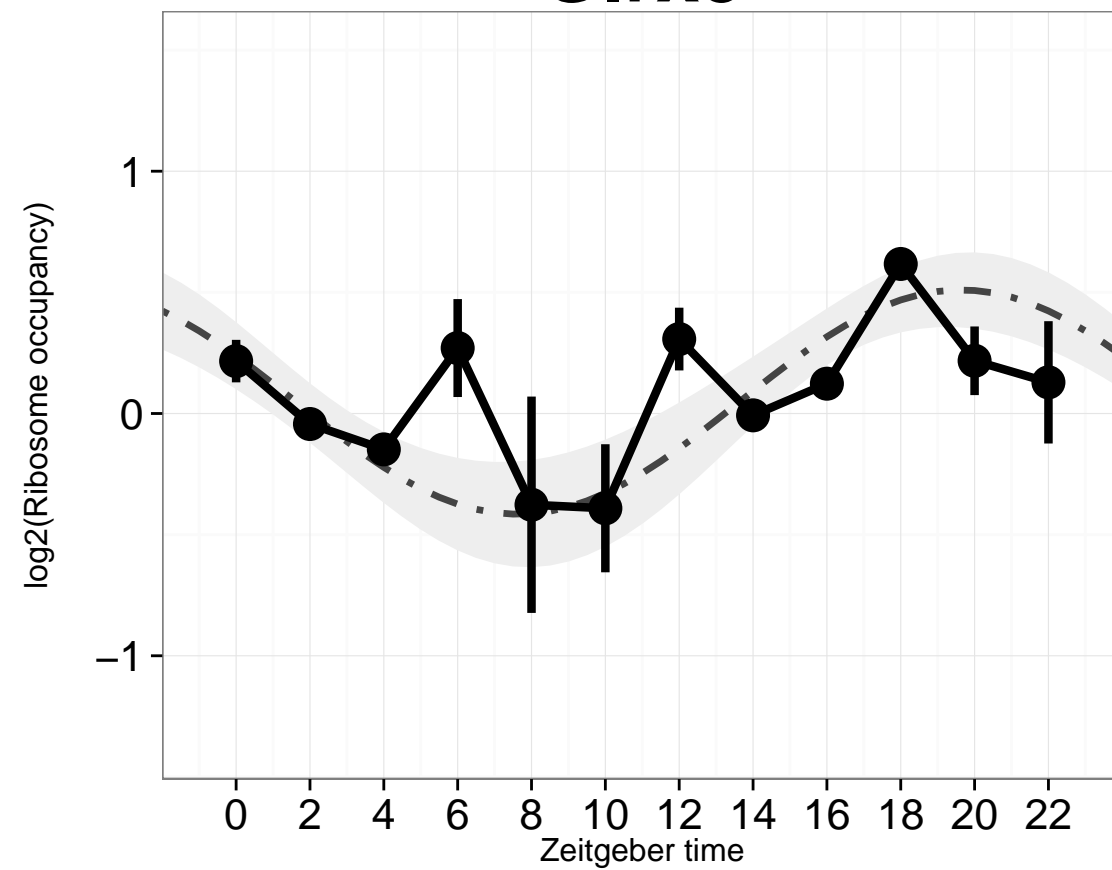

Supplement: SuppDataset_1.zip [file Glrx5_set_C.pdf › Supplemental Dataset 1/C-mRNA_nonrhythm_translation_rhyth/Glrx5_set_C.pdf]

# Glt1d1

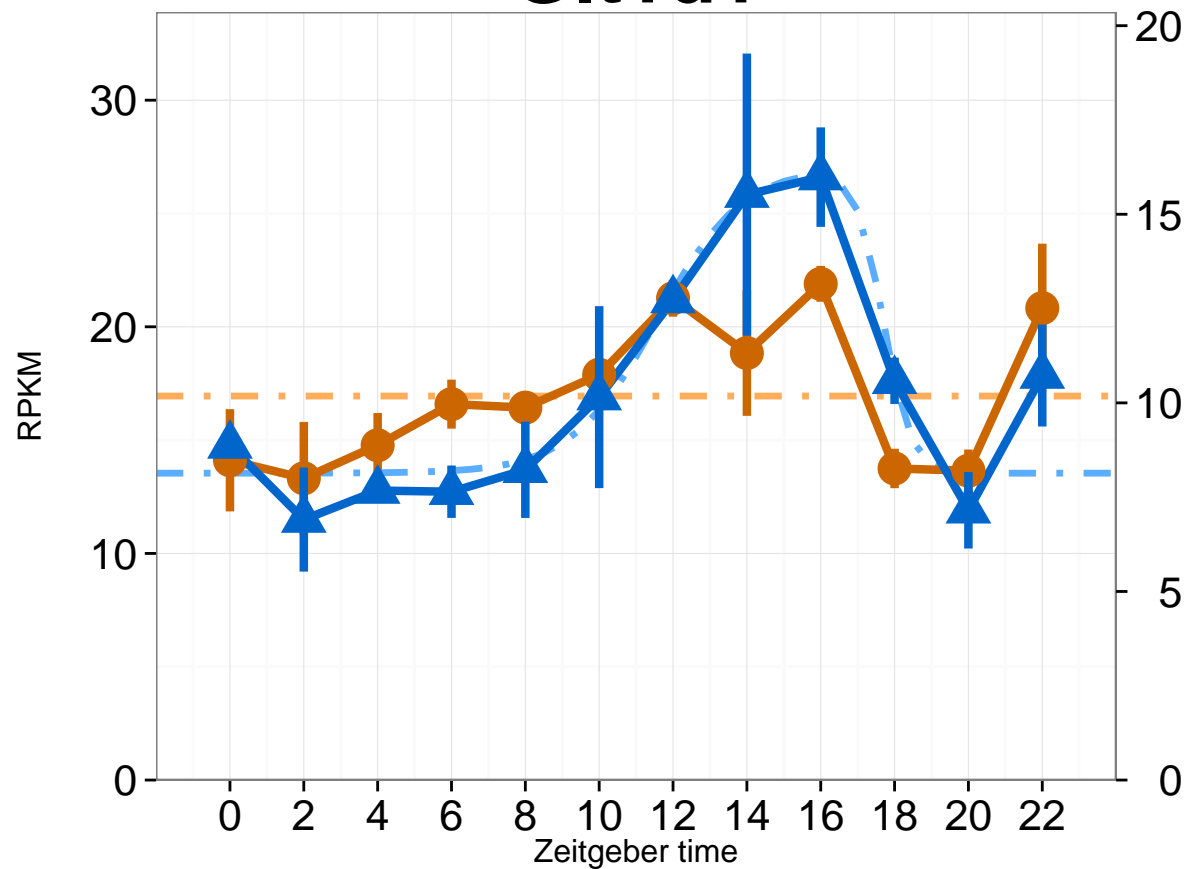

# Glt1d1

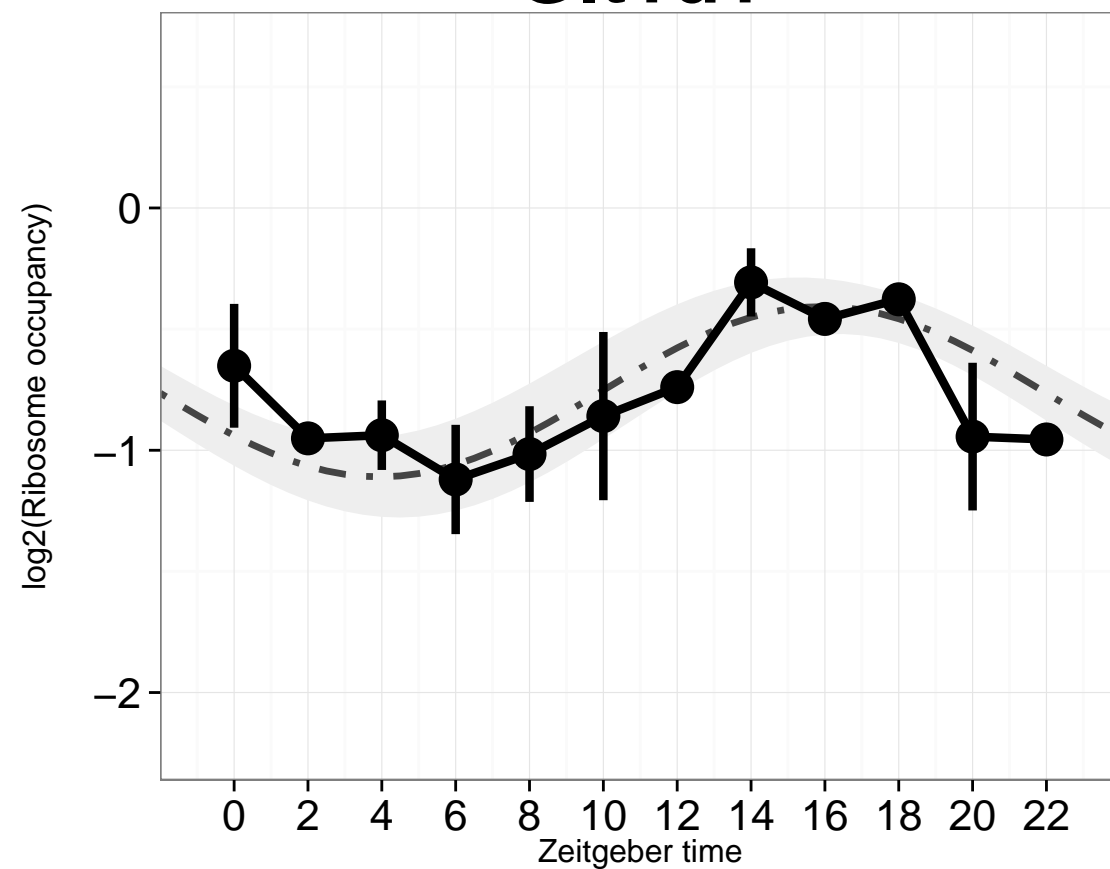

Supplement: SuppDataset_1.zip [file Glt1d1_set_C.pdf › Supplemental Dataset 1/C-mRNA_nonrhythm_translation_rhyth/Glt1d1_set_C.pdf]

**Gm11175 TR**

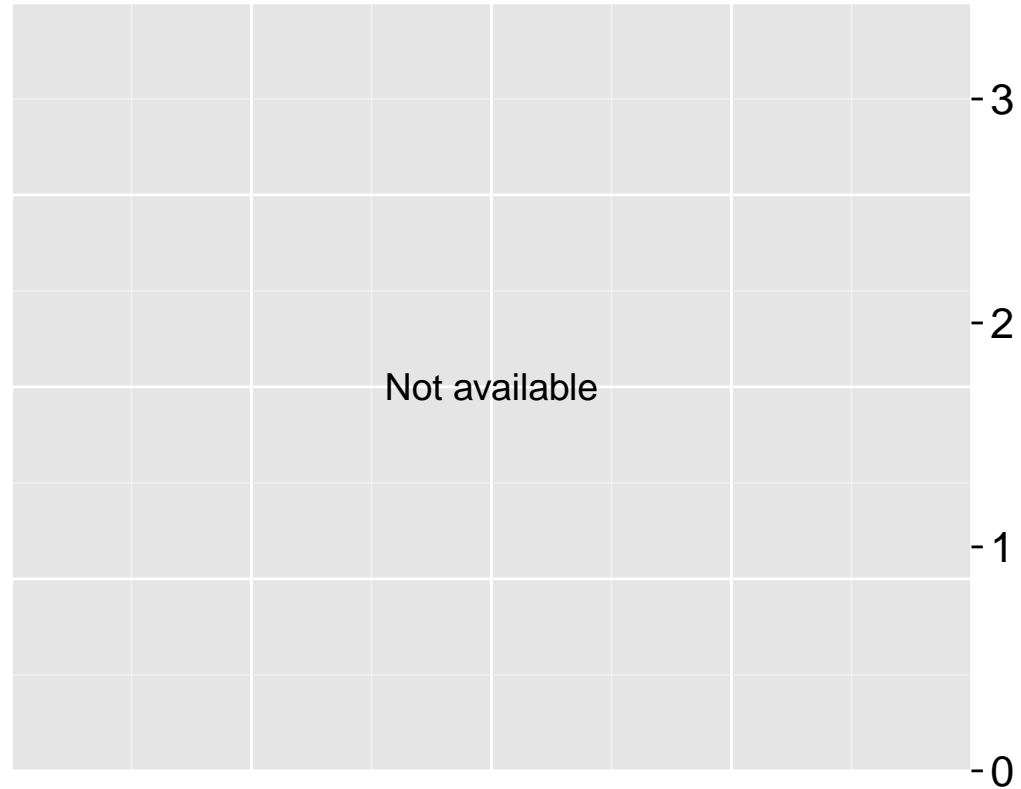

**Gm11175 log2(Ribosome occupanc**

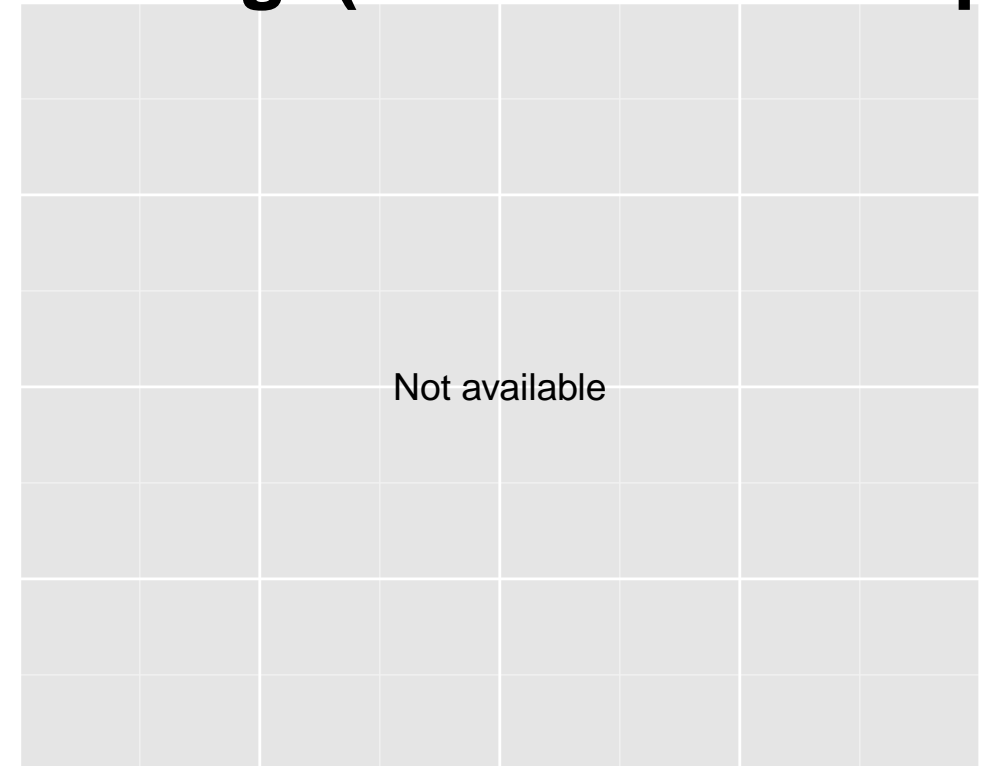

Supplement: SuppDataset_1.zip [file Gm11175_set_C.pdf › Supplemental Dataset 1/C-mRNA_nonrhythm_translation_rhyth/Gm11175_set_C.pdf]

# Gm12942

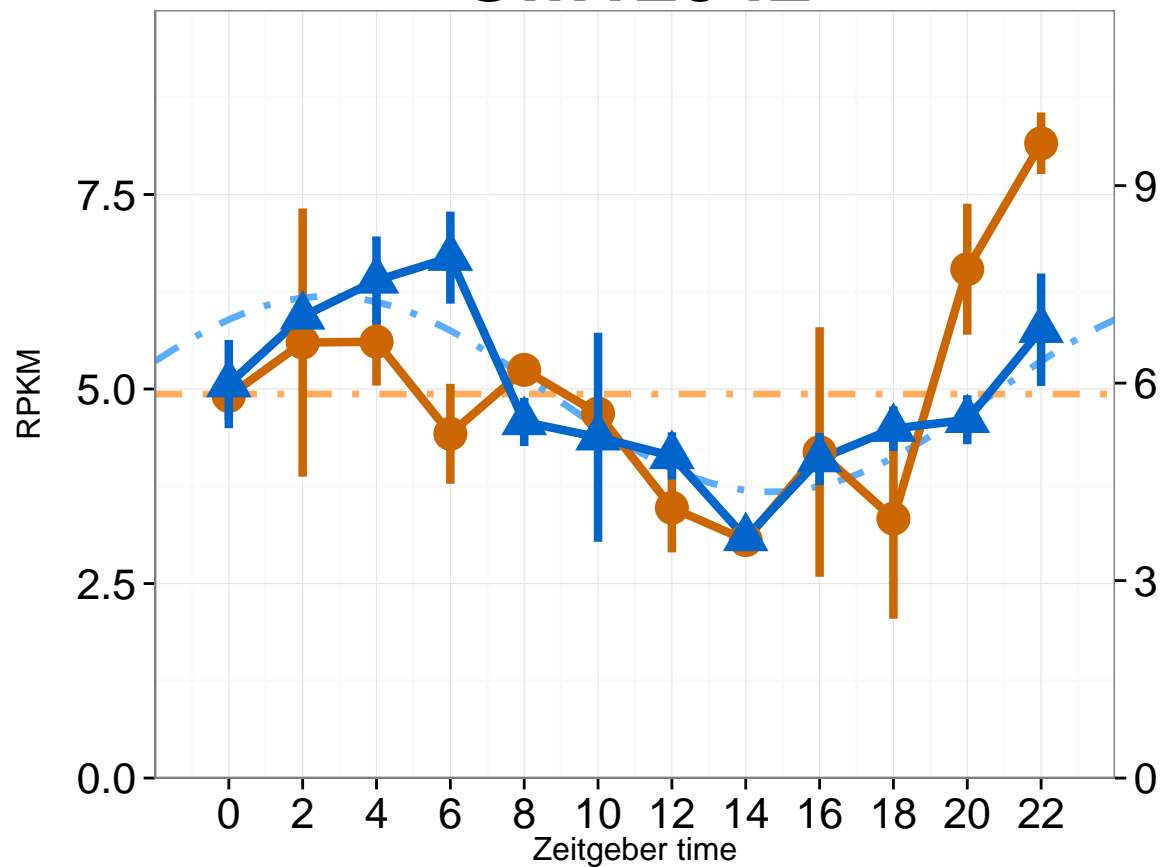

# Gm12942

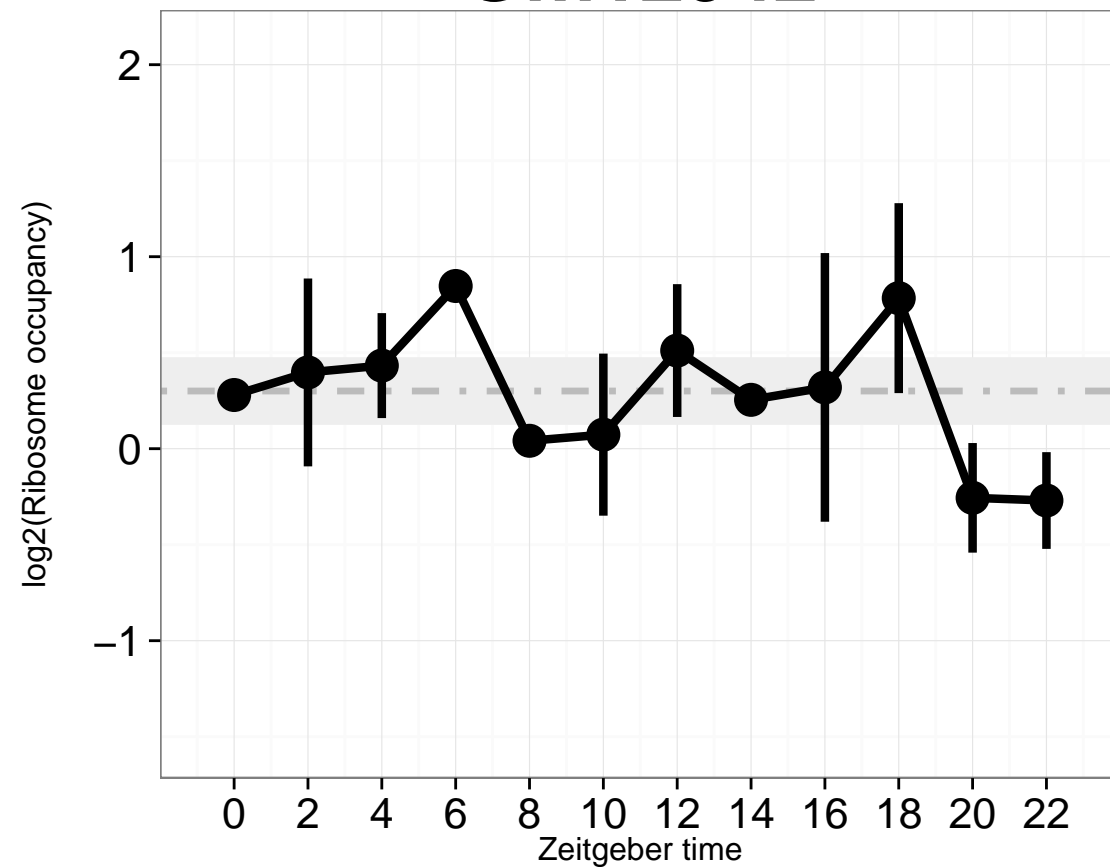

Supplement: SuppDataset_1.zip [file Gm12942_set_C.pdf › Supplemental Dataset 1/C-mRNA_nonrhythm_translation_rhyth/Gm12942_set_C.pdf]

# Gm379

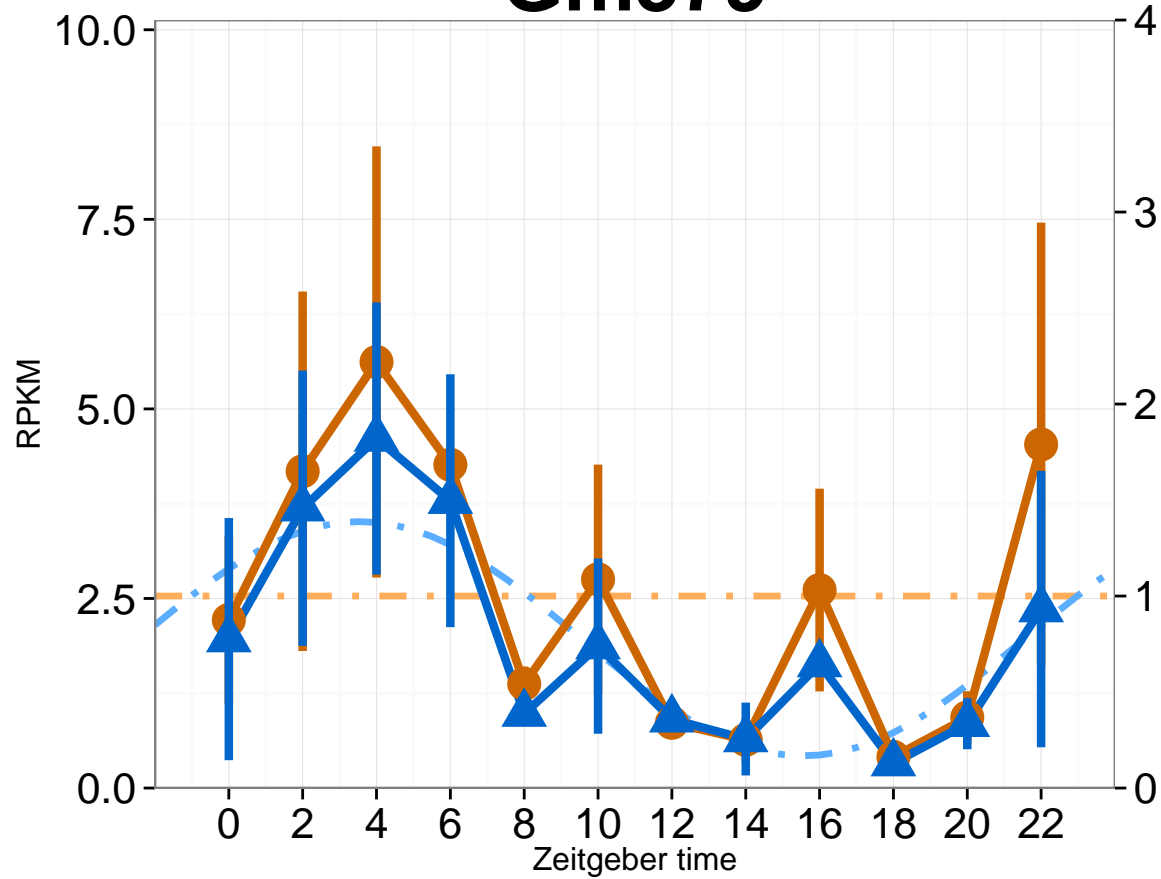

# Gm379

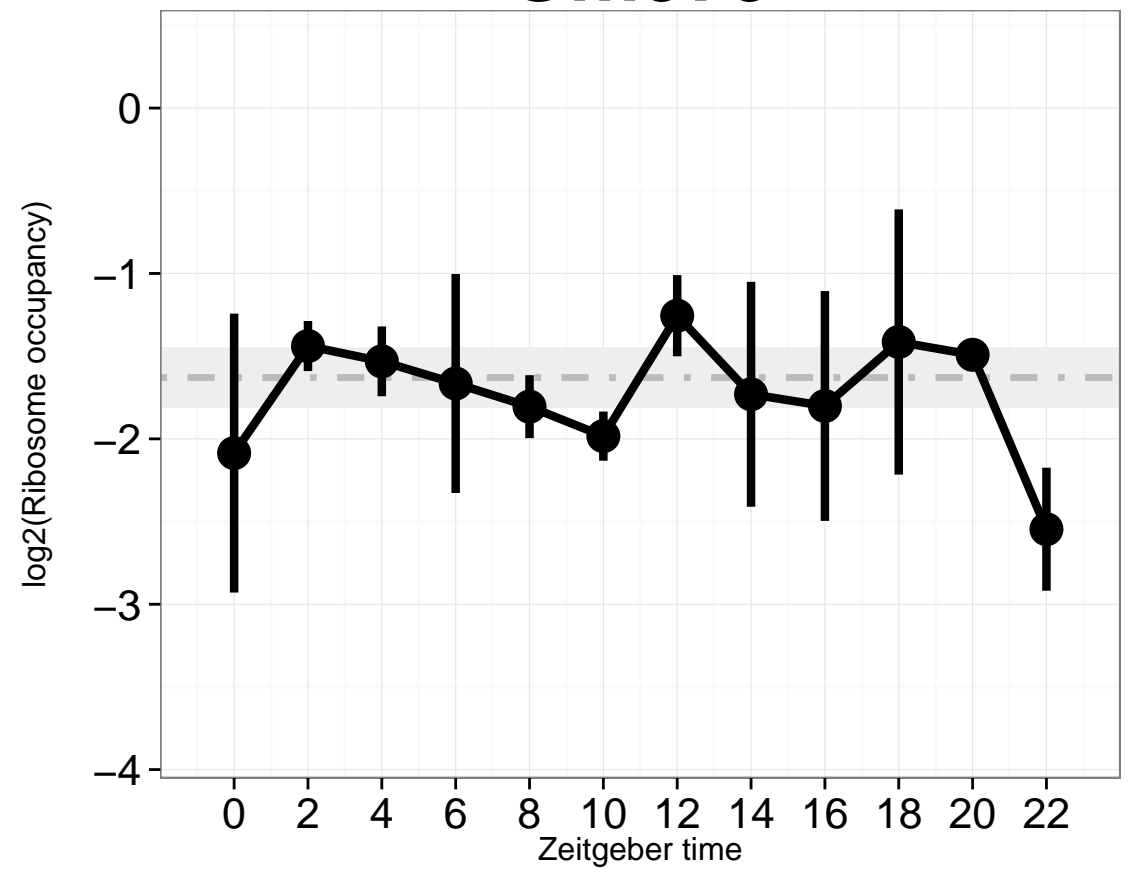

Supplement: SuppDataset_1.zip [file Gm379_set_C.pdf › Supplemental Dataset 1/C-mRNA_nonrhythm_translation_rhyth/Gm379_set_C.pdf]

## Gm5617

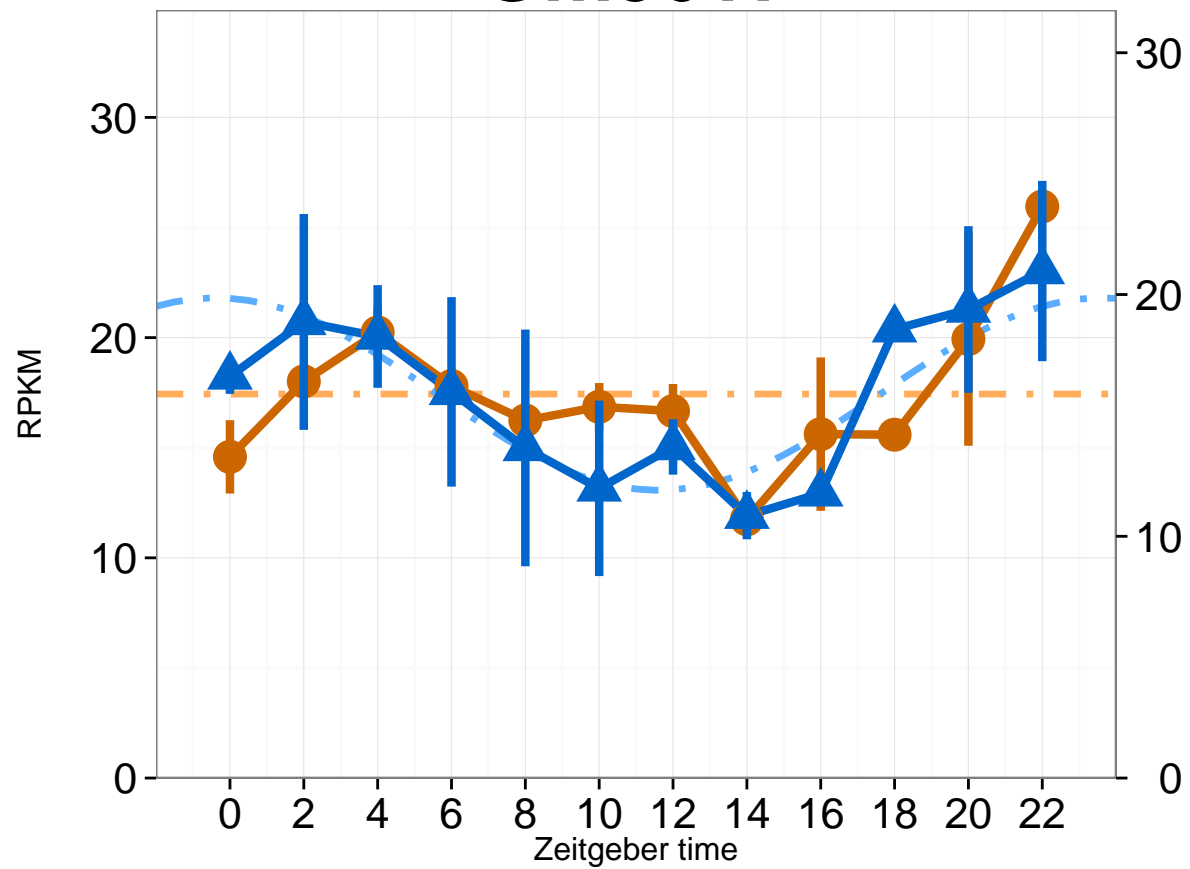

## Gm5617

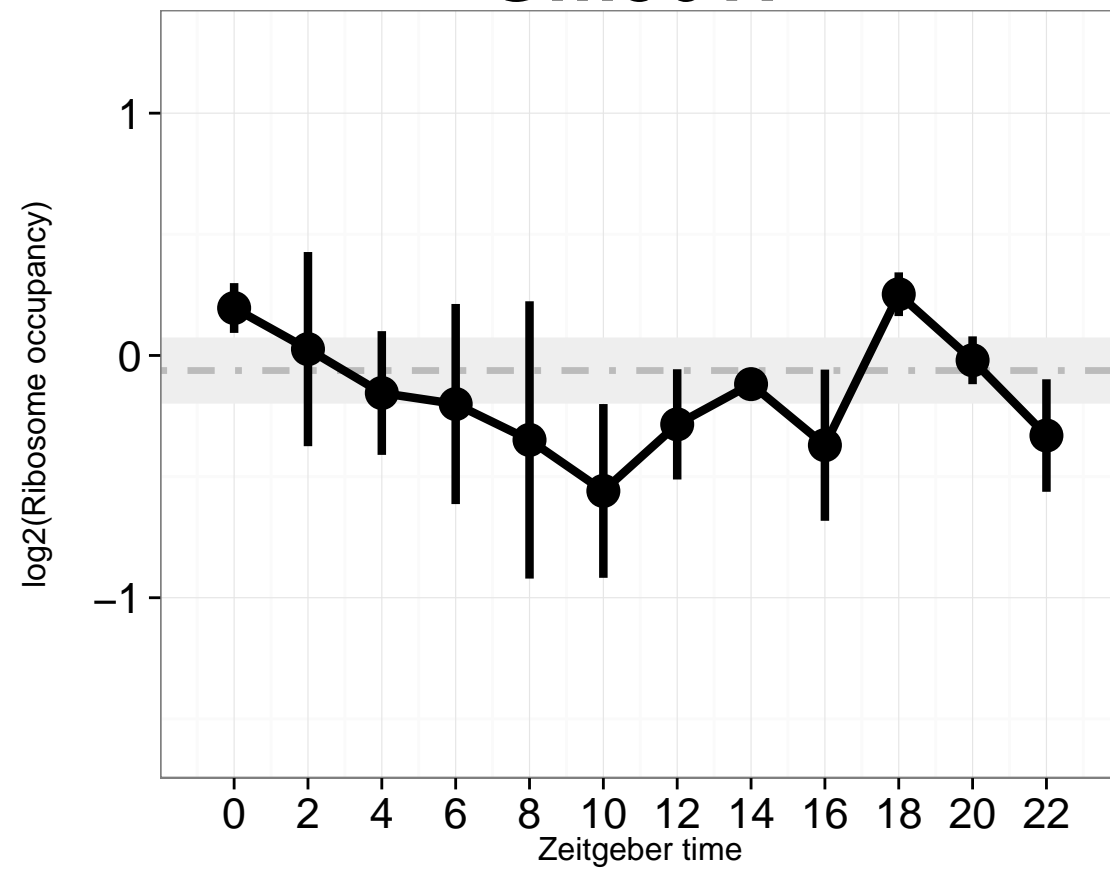

Supplement: SuppDataset_1.zip [file Gm5617_set_C.pdf › Supplemental Dataset 1/C-mRNA_nonrhythm_translation_rhyth/Gm5617_set_C.pdf]

# Gm7694

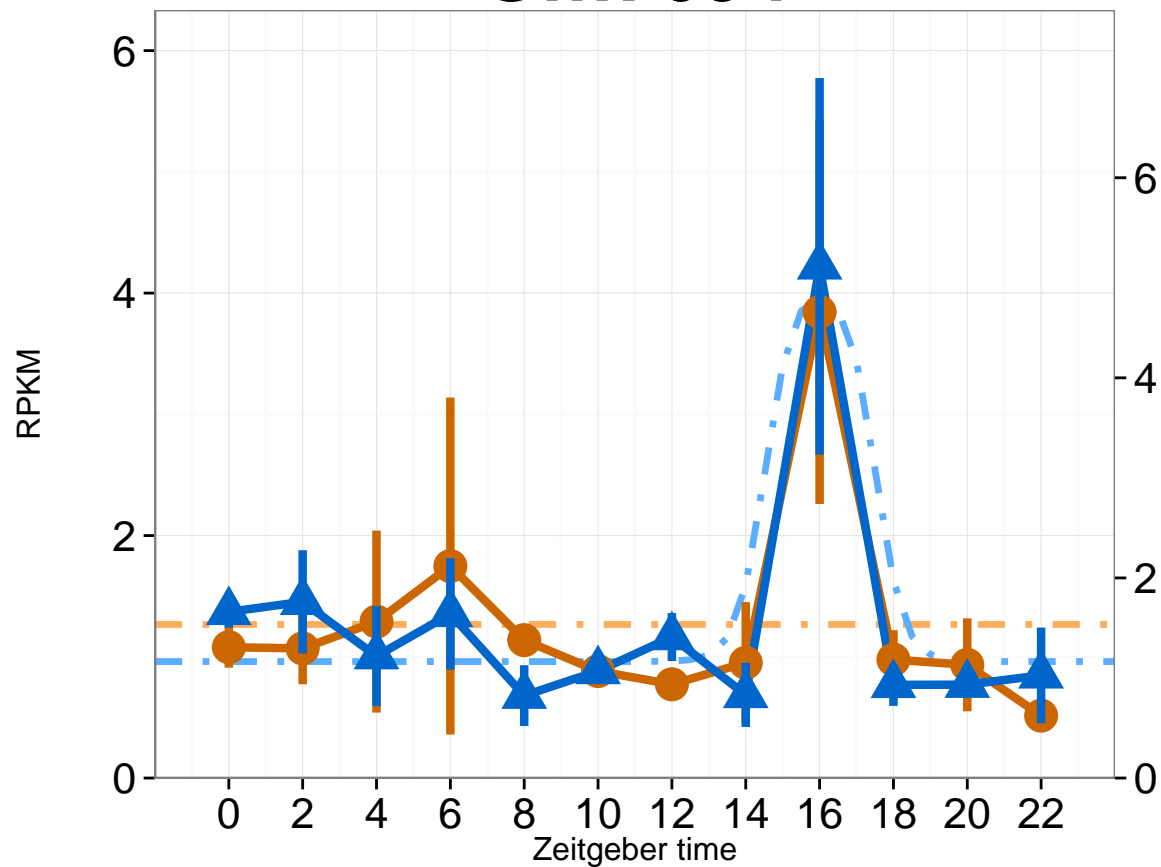

# Gm7694

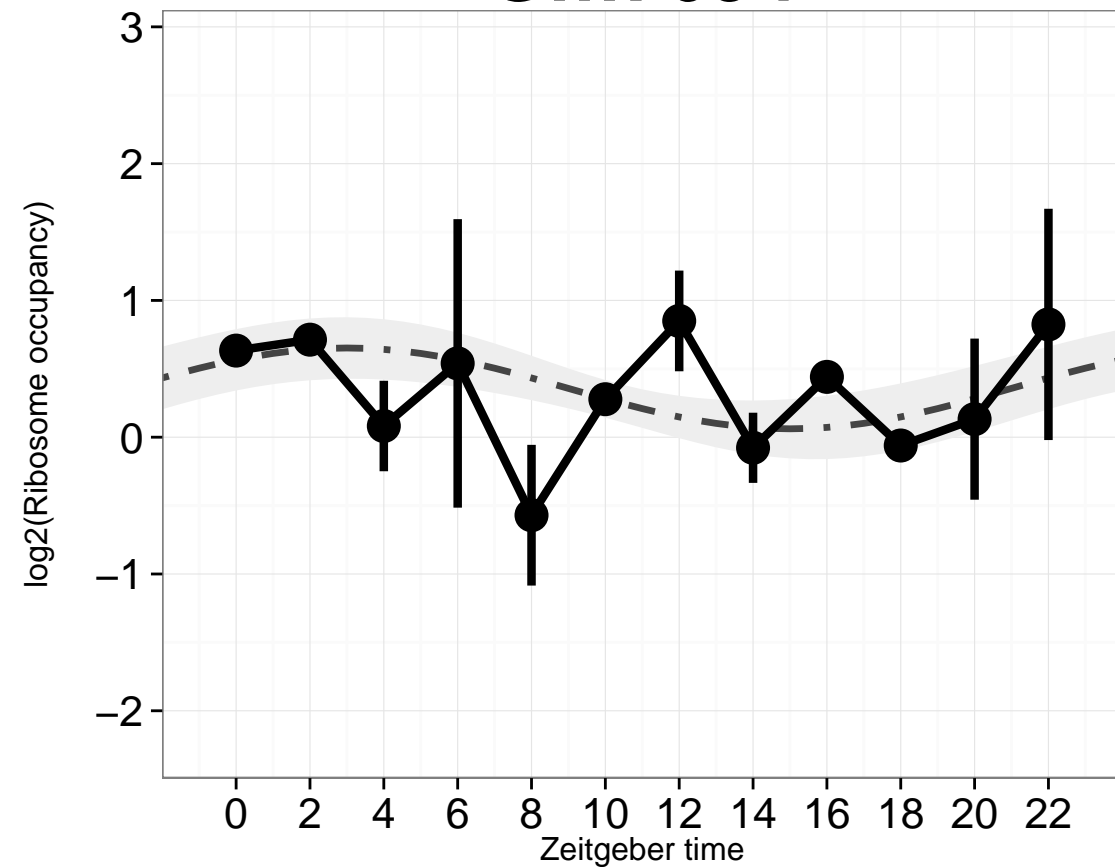

Supplement: SuppDataset_1.zip [file Gm7694_set_C.pdf › Supplemental Dataset 1/C-mRNA_nonrhythm_translation_rhyth/Gm7694_set_C.pdf]

# Gmeb1

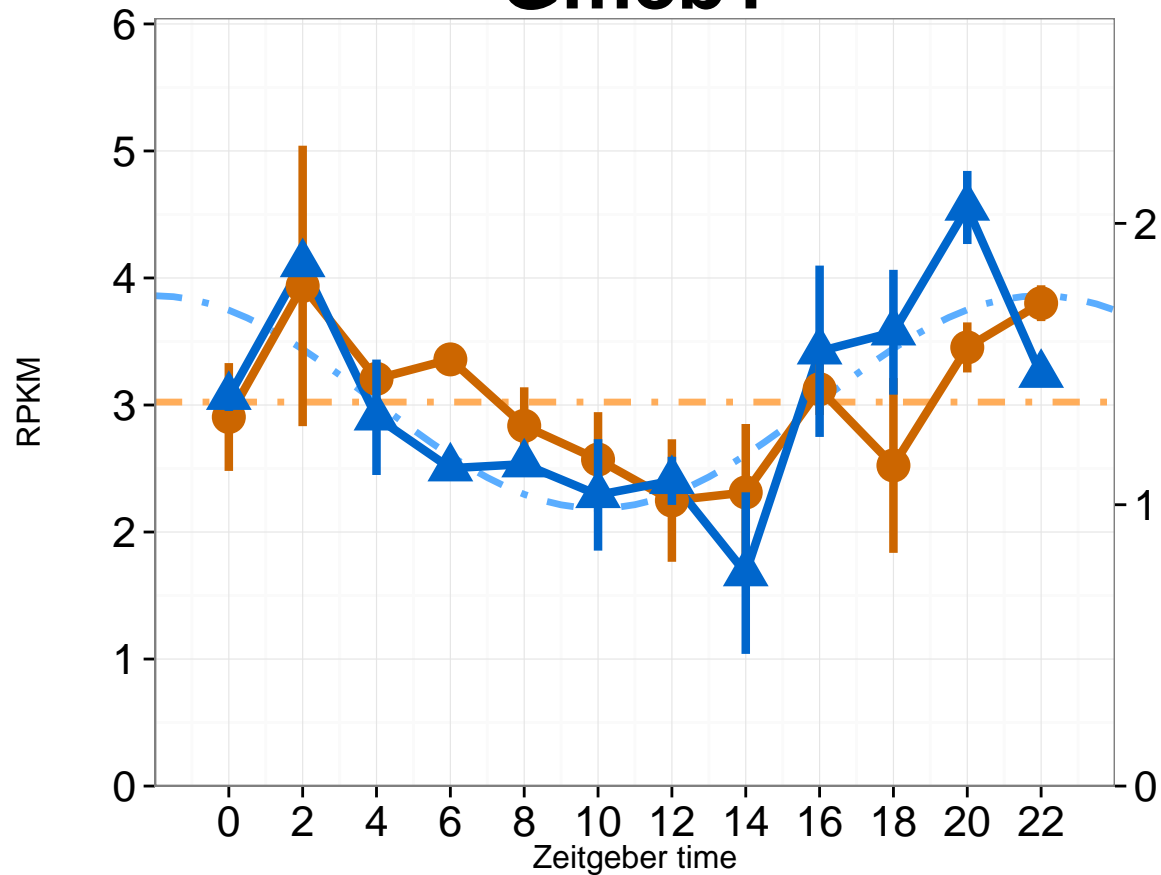

# Gmeb1

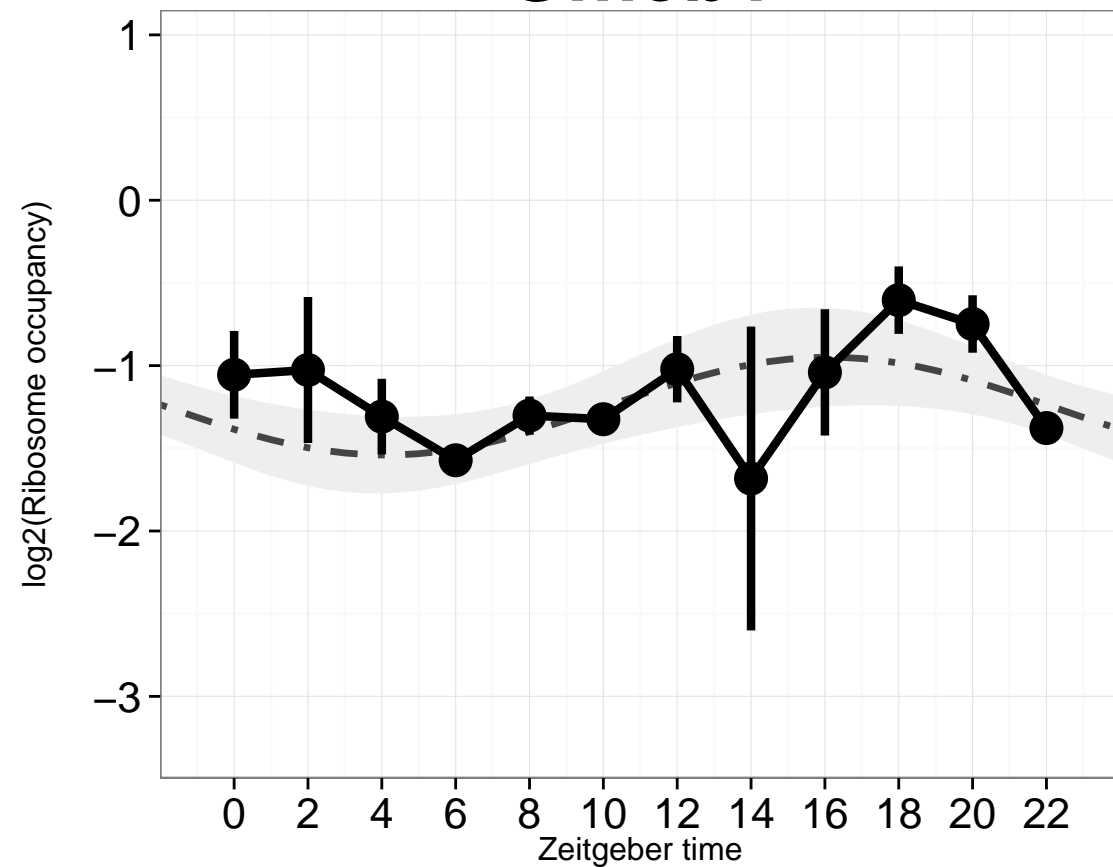

Supplement: SuppDataset_1.zip [file Gmeb1_set_C.pdf › Supplemental Dataset 1/C-mRNA_nonrhythm_translation_rhyth/Gmeb1_set_C.pdf]

## Gmppb

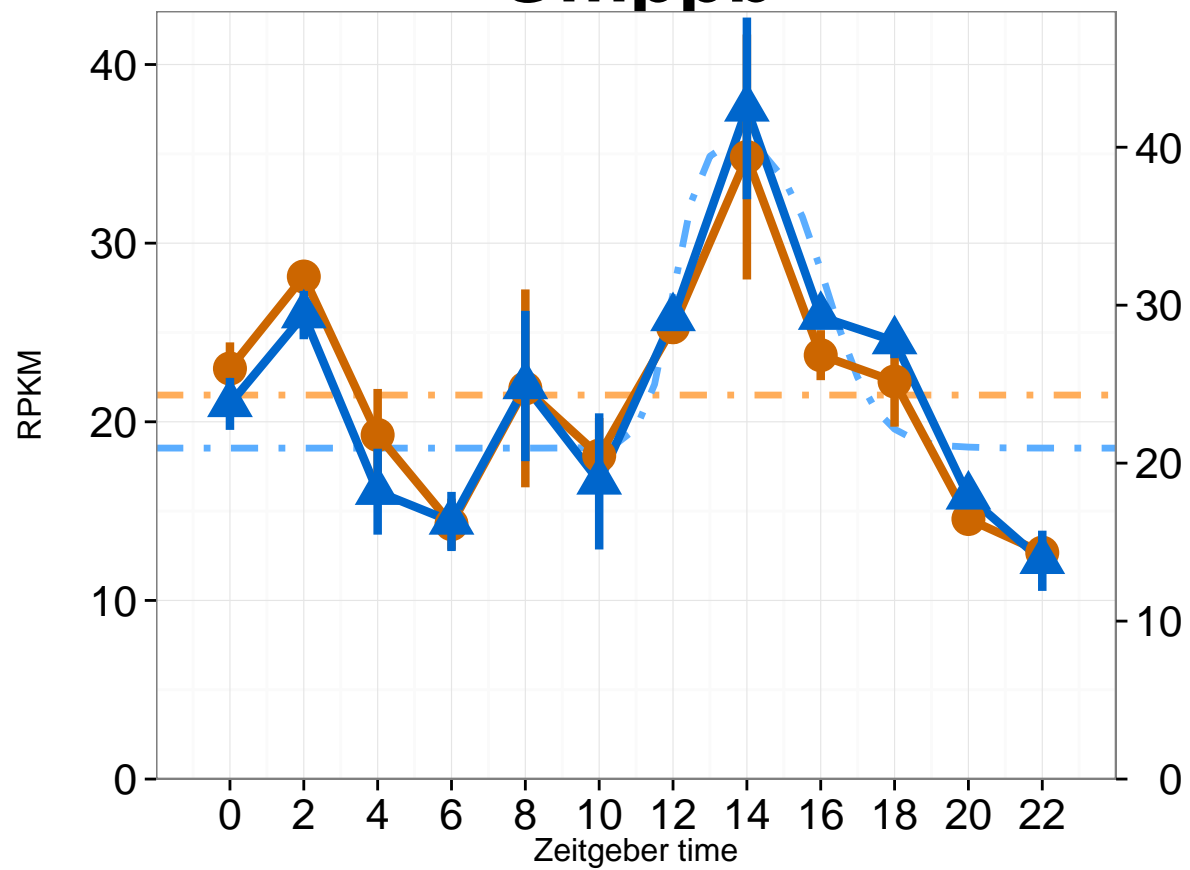

## Gmppb

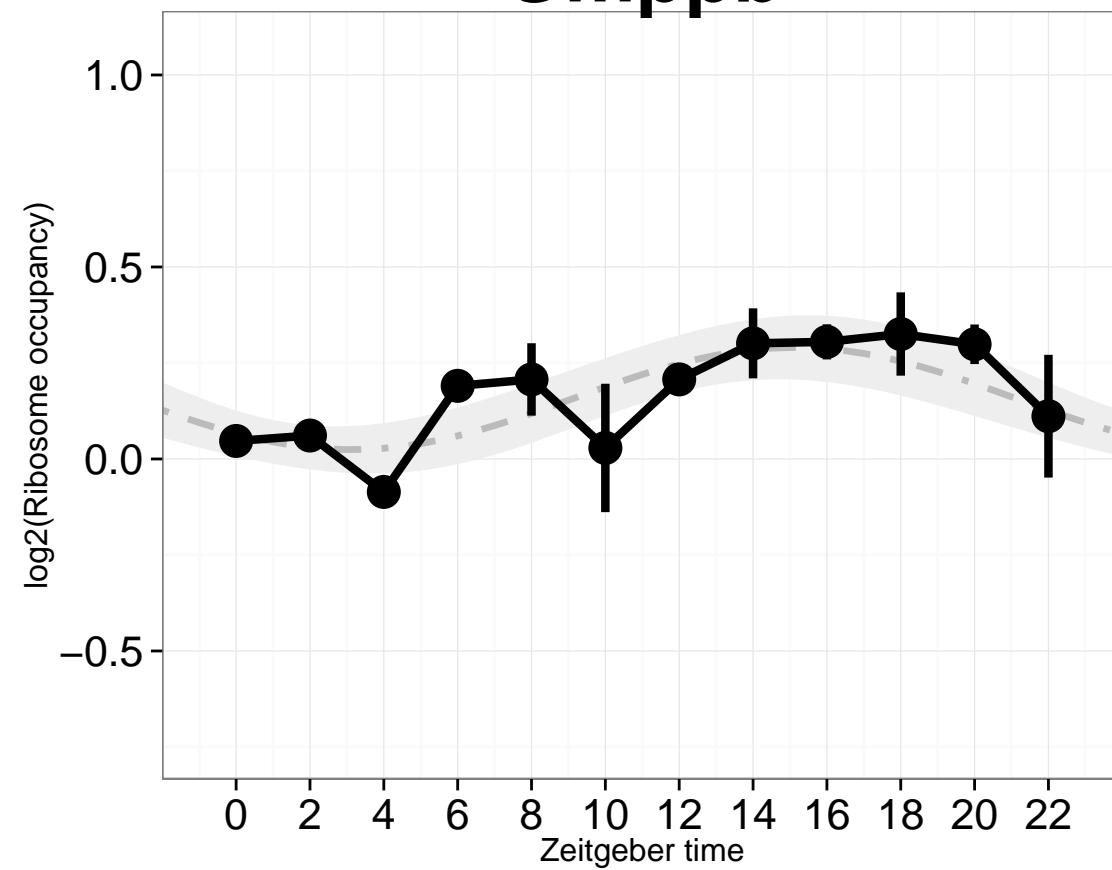

Supplement: SuppDataset_1.zip [file Gmppb_set_C.pdf › Supplemental Dataset 1/C-mRNA_nonrhythm_translation_rhyth/Gmppb_set_C.pdf]

# Gnat1

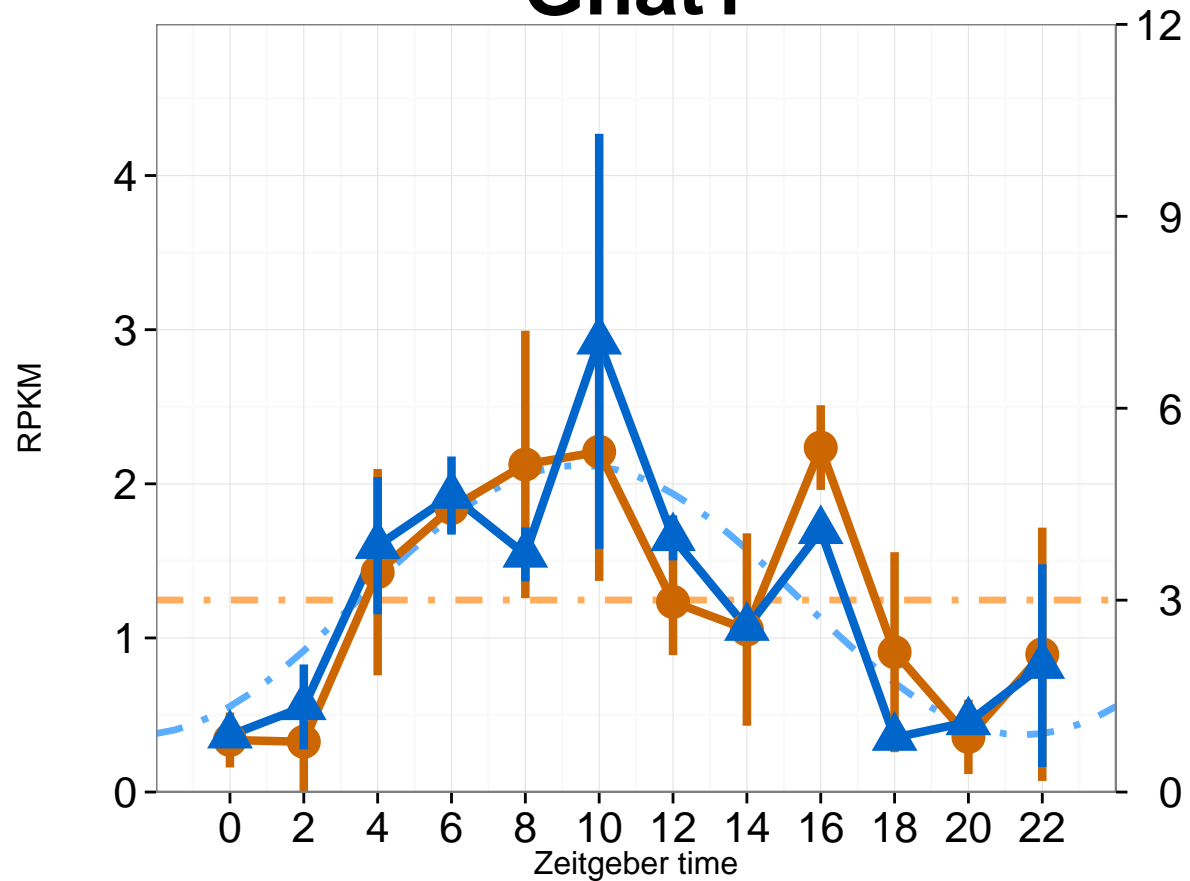

# Gnat1

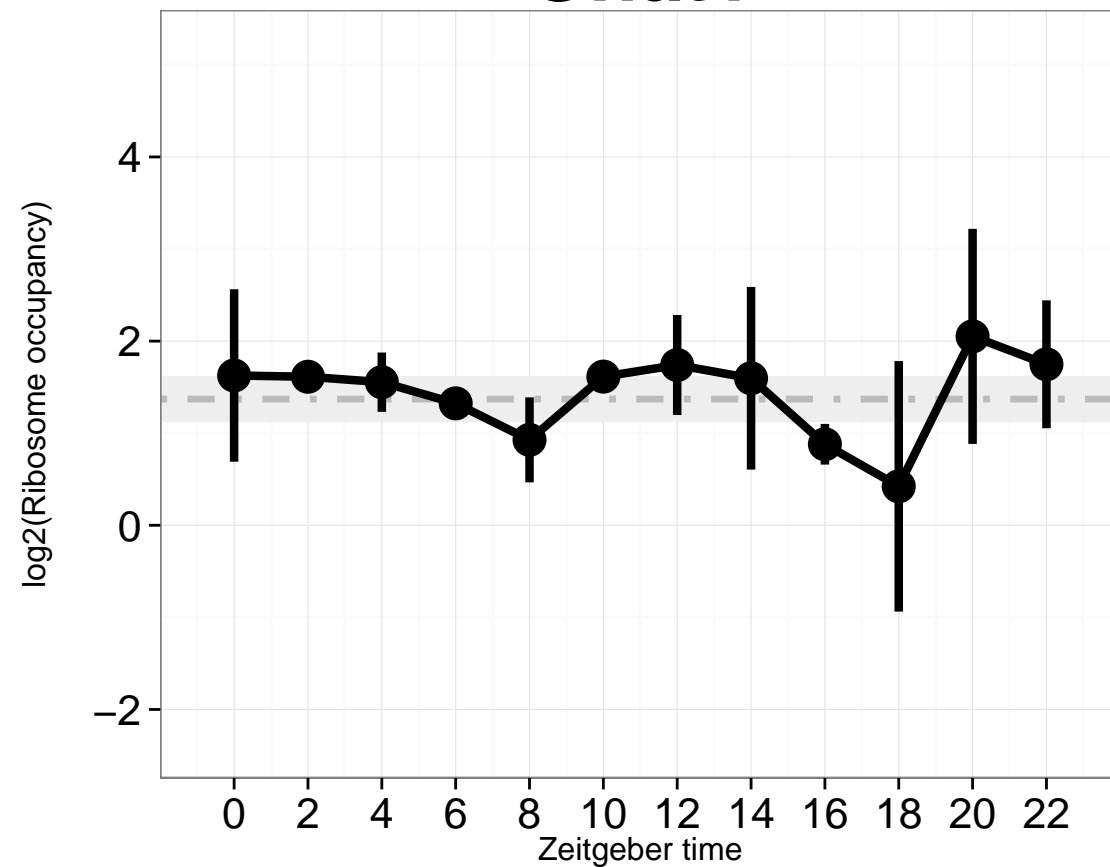

Supplement: SuppDataset_1.zip [file Gnat1_set_C.pdf › Supplemental Dataset 1/C-mRNA_nonrhythm_translation_rhyth/Gnat1_set_C.pdf]

# Gnb2l1

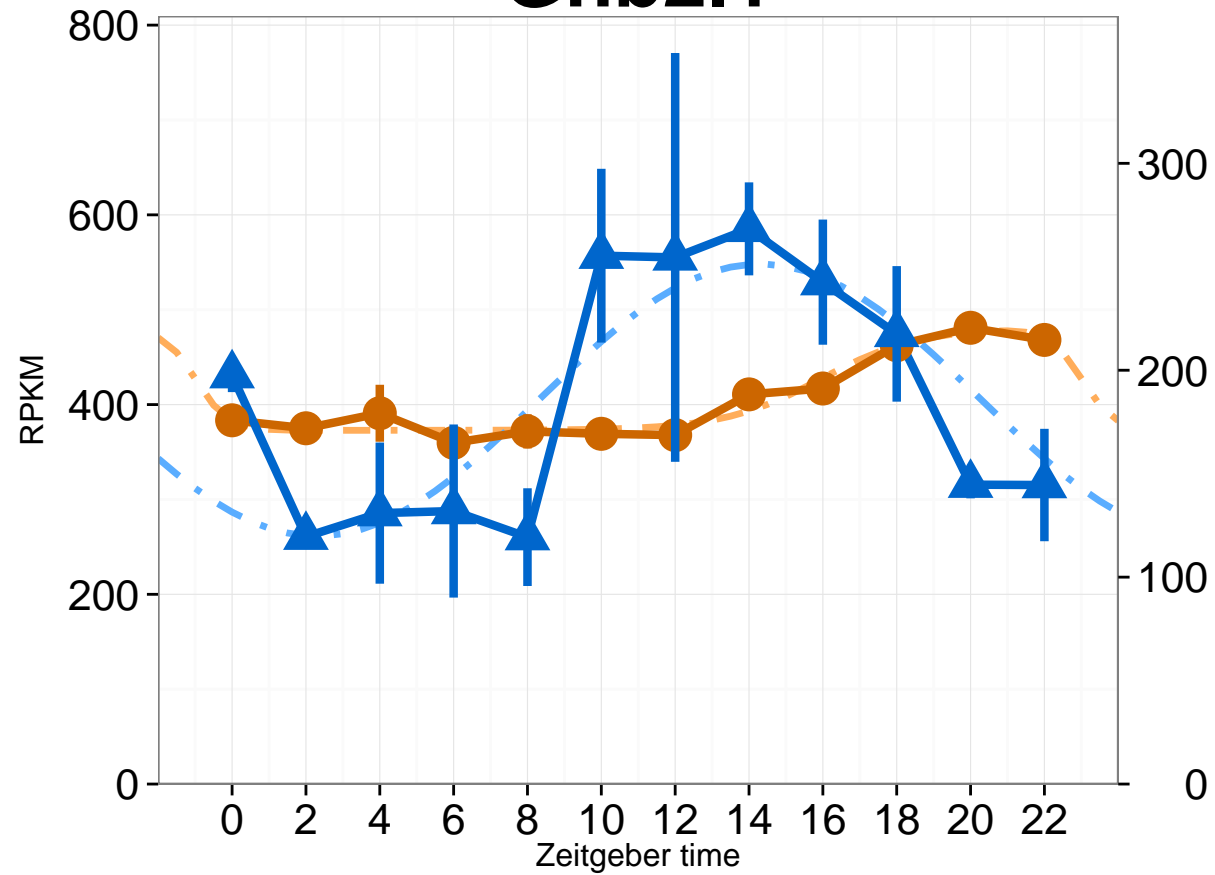

# Gnb2l1

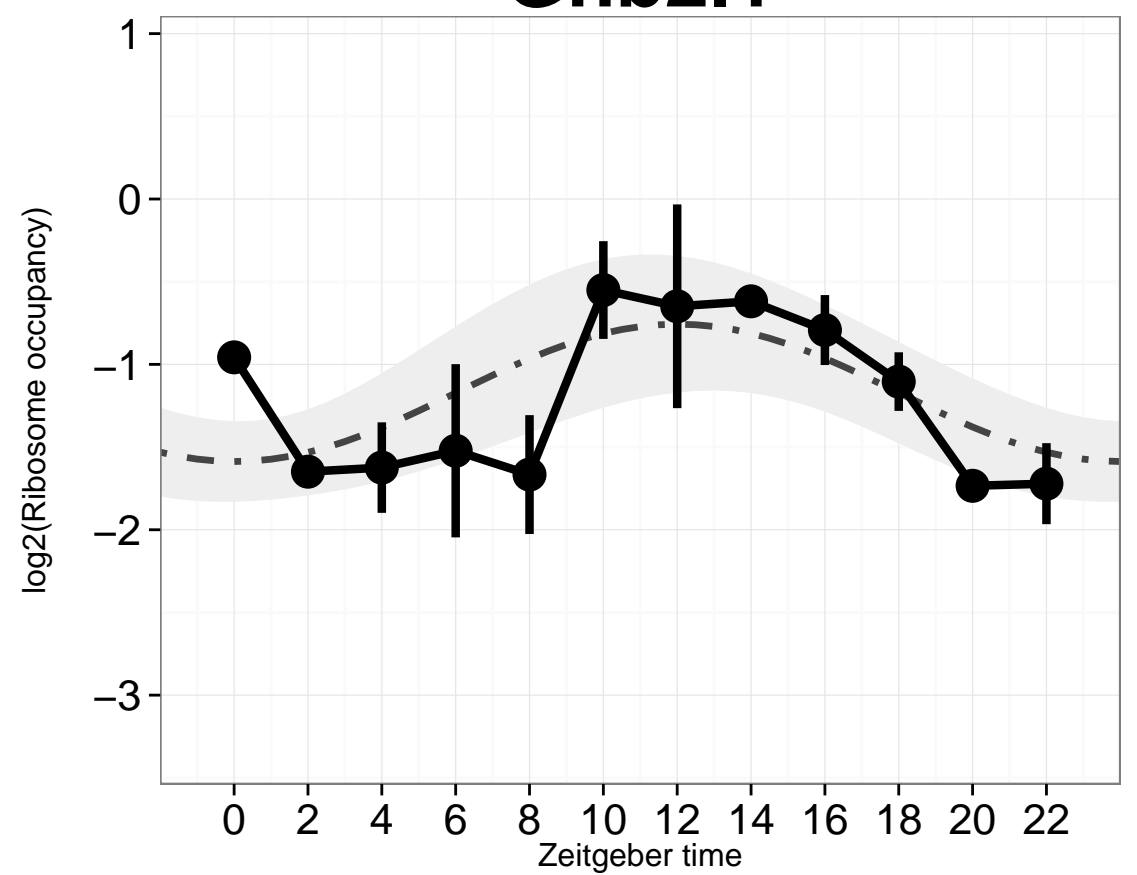

Supplement: SuppDataset_1.zip [file Gnb2l1_set_C.pdf › Supplemental Dataset 1/C-mRNA_nonrhythm_translation_rhyth/Gnb2l1_set_C.pdf]

## Gng11

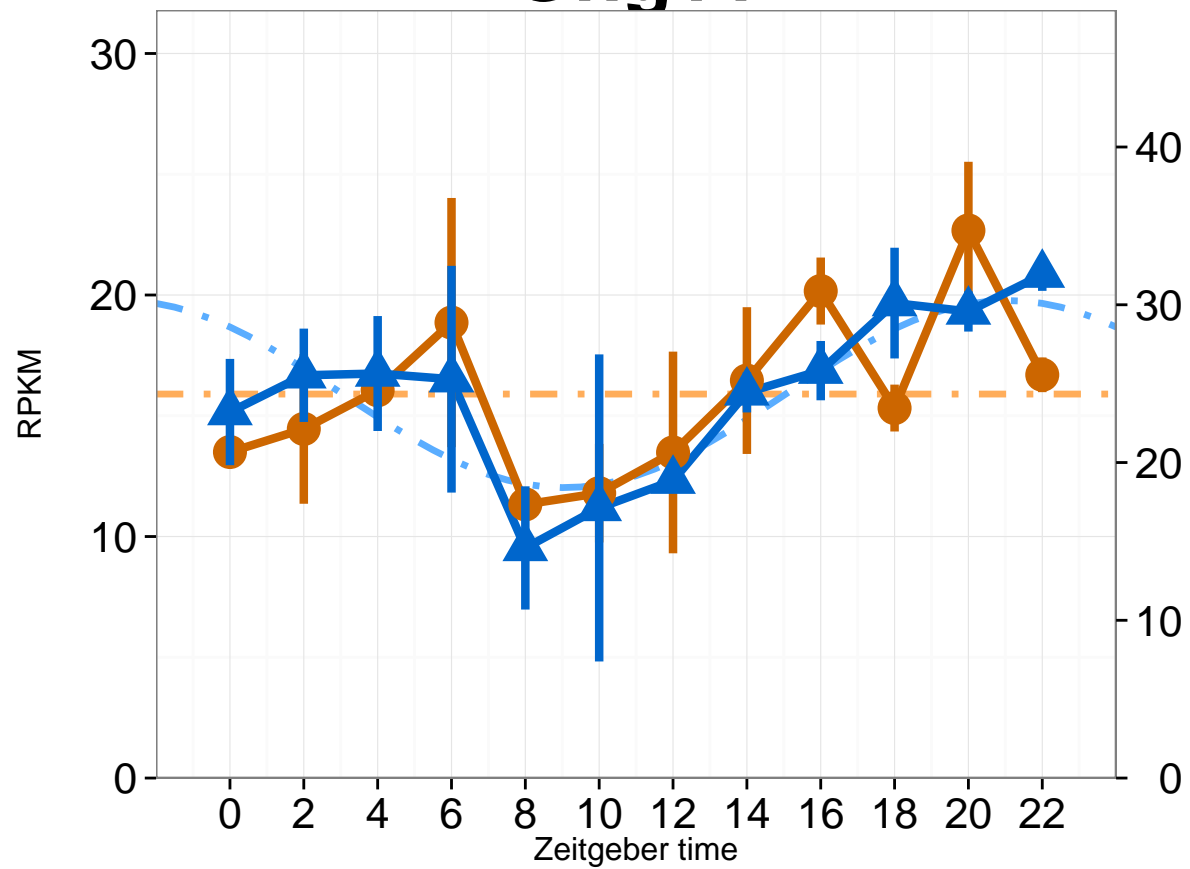

## Gng11

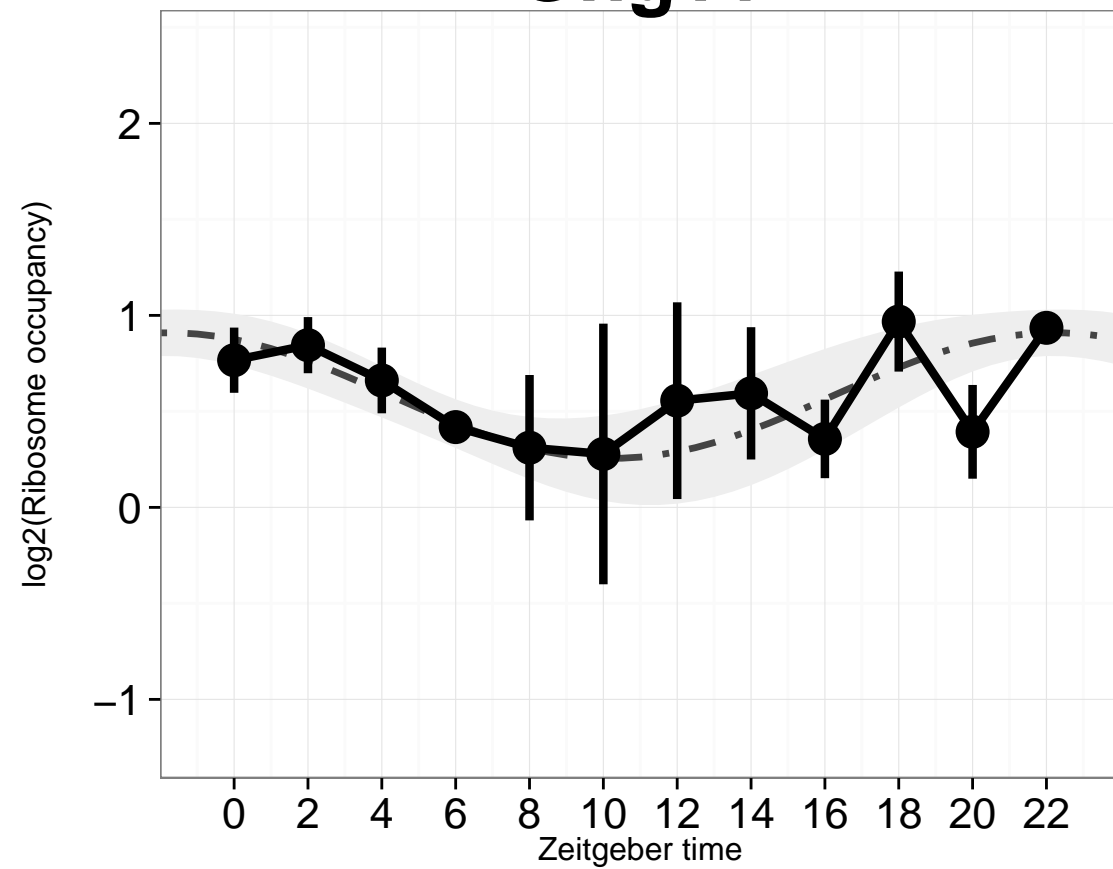

Supplement: SuppDataset_1.zip [file Gng11_set_C.pdf › Supplemental Dataset 1/C-mRNA_nonrhythm_translation_rhyth/Gng11_set_C.pdf]

## Golga1

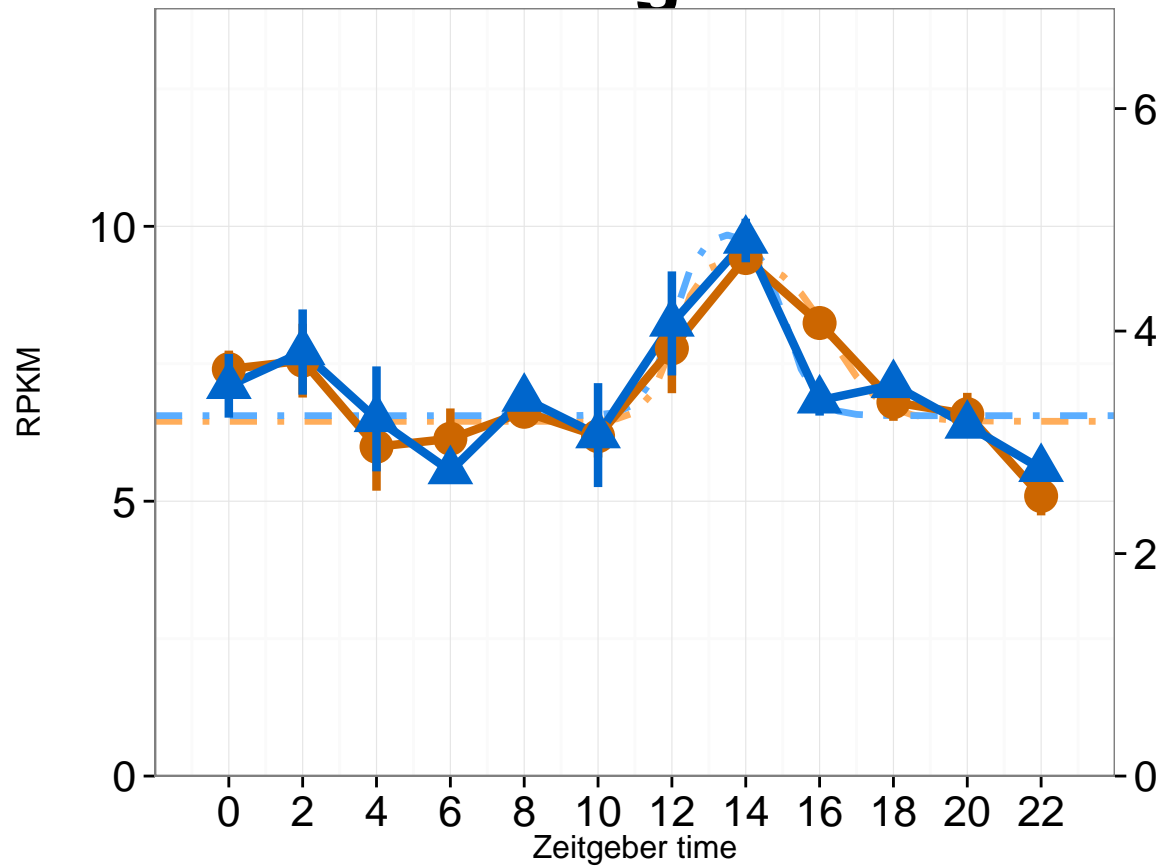

## Golga1

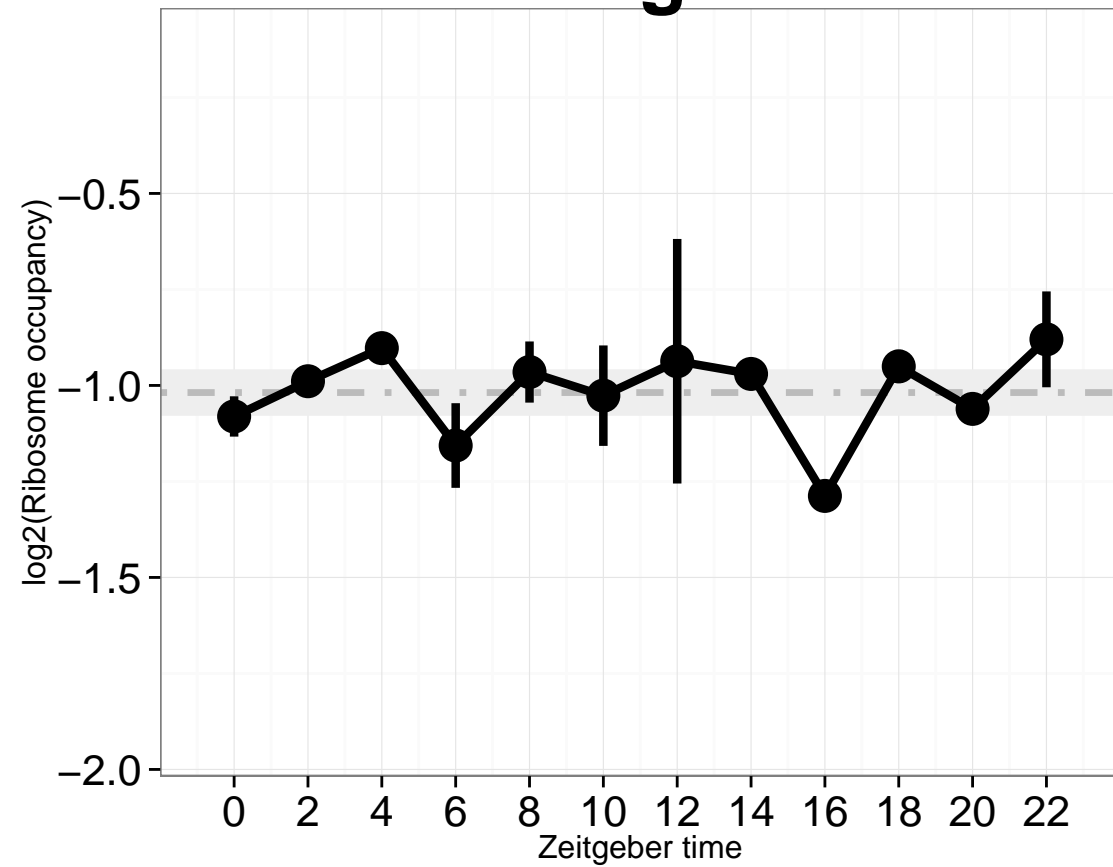

Supplement: SuppDataset_1.zip [file Golga1_set_C.pdf › Supplemental Dataset 1/C-mRNA_nonrhythm_translation_rhyth/Golga1_set_C.pdf]

## Golph3l

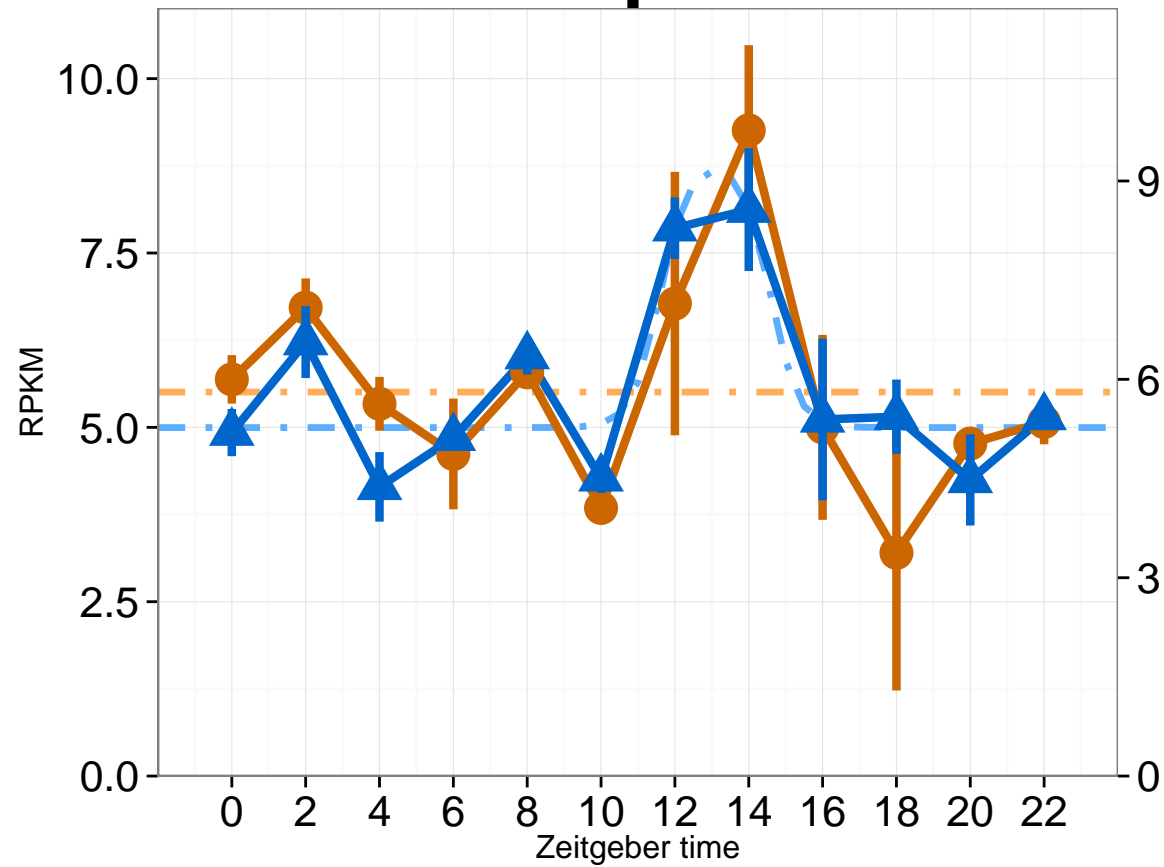

## Golph3l

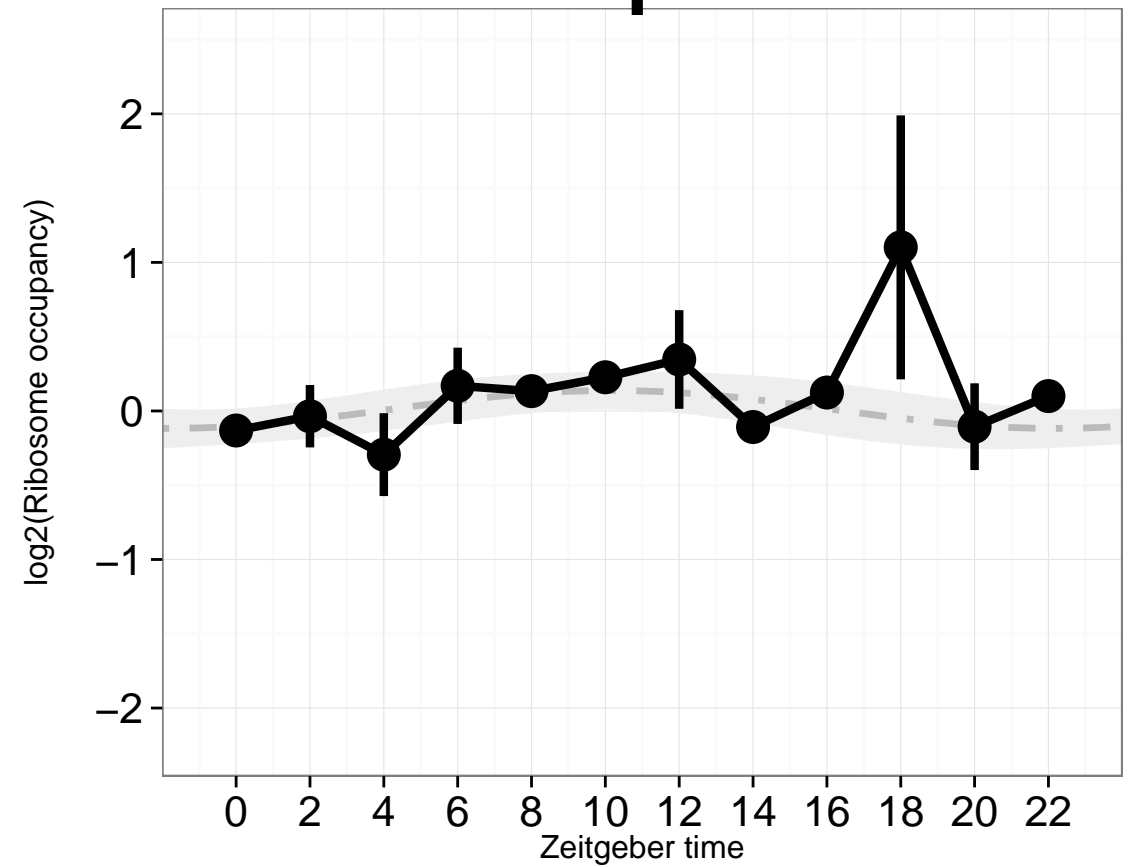

Supplement: SuppDataset_1.zip [file Golph3l_set_C.pdf › Supplemental Dataset 1/C-mRNA_nonrhythm_translation_rhyth/Golph3l_set_C.pdf]

# Golt1b

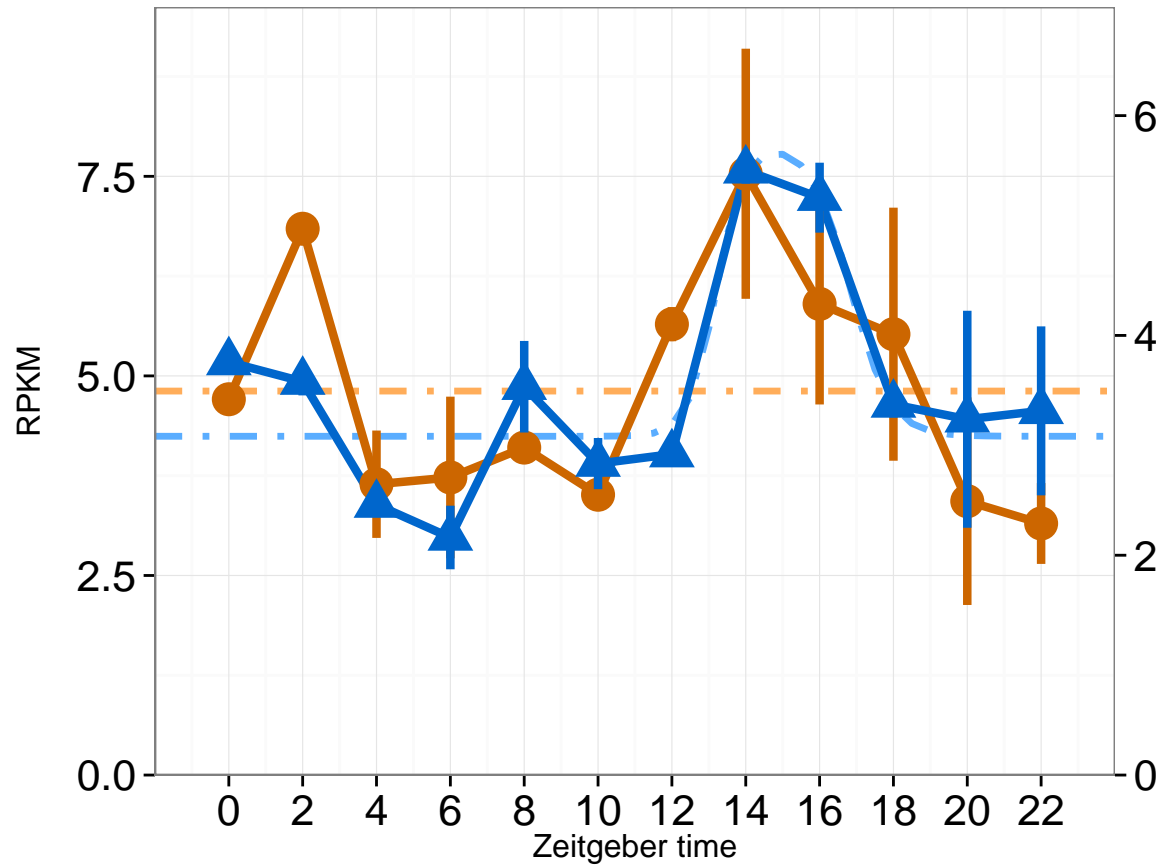

# Golt1b

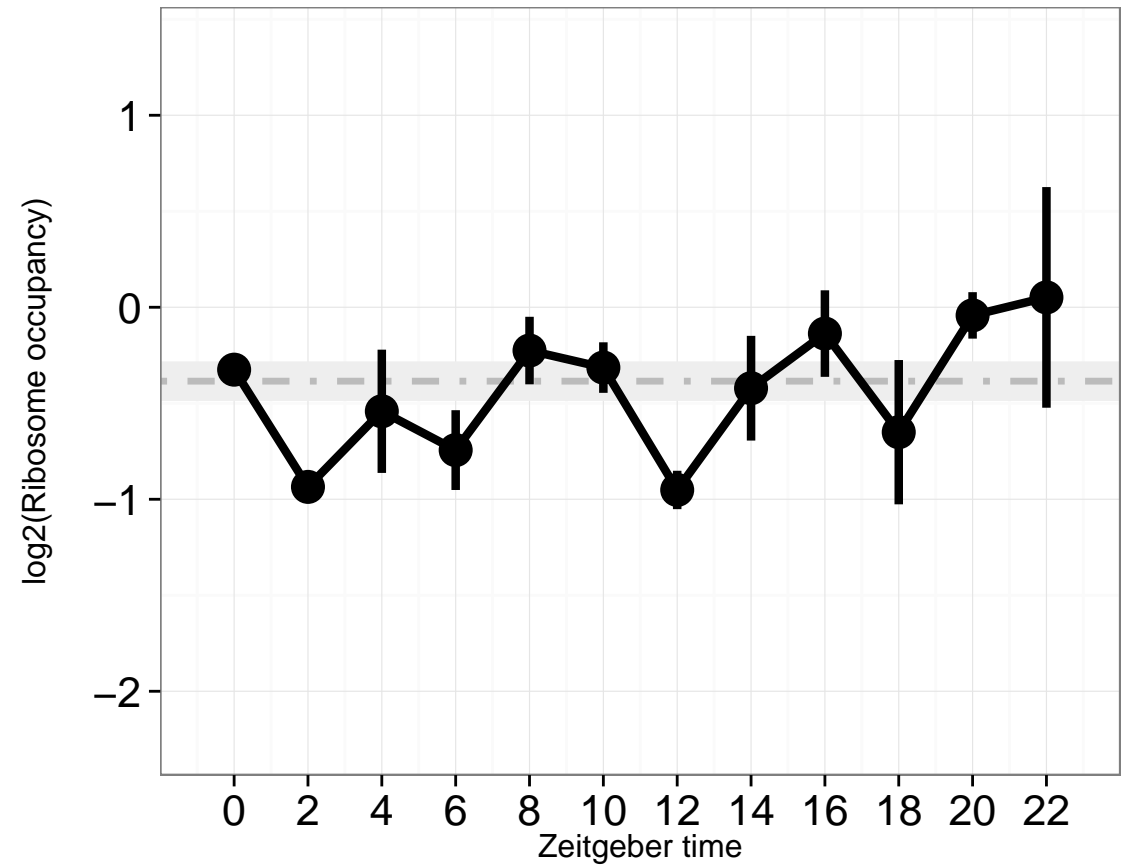

Supplement: SuppDataset_1.zip [file Golt1b_set_C.pdf › Supplemental Dataset 1/C-mRNA_nonrhythm_translation_rhyth/Golt1b_set_C.pdf]

# Gpc1

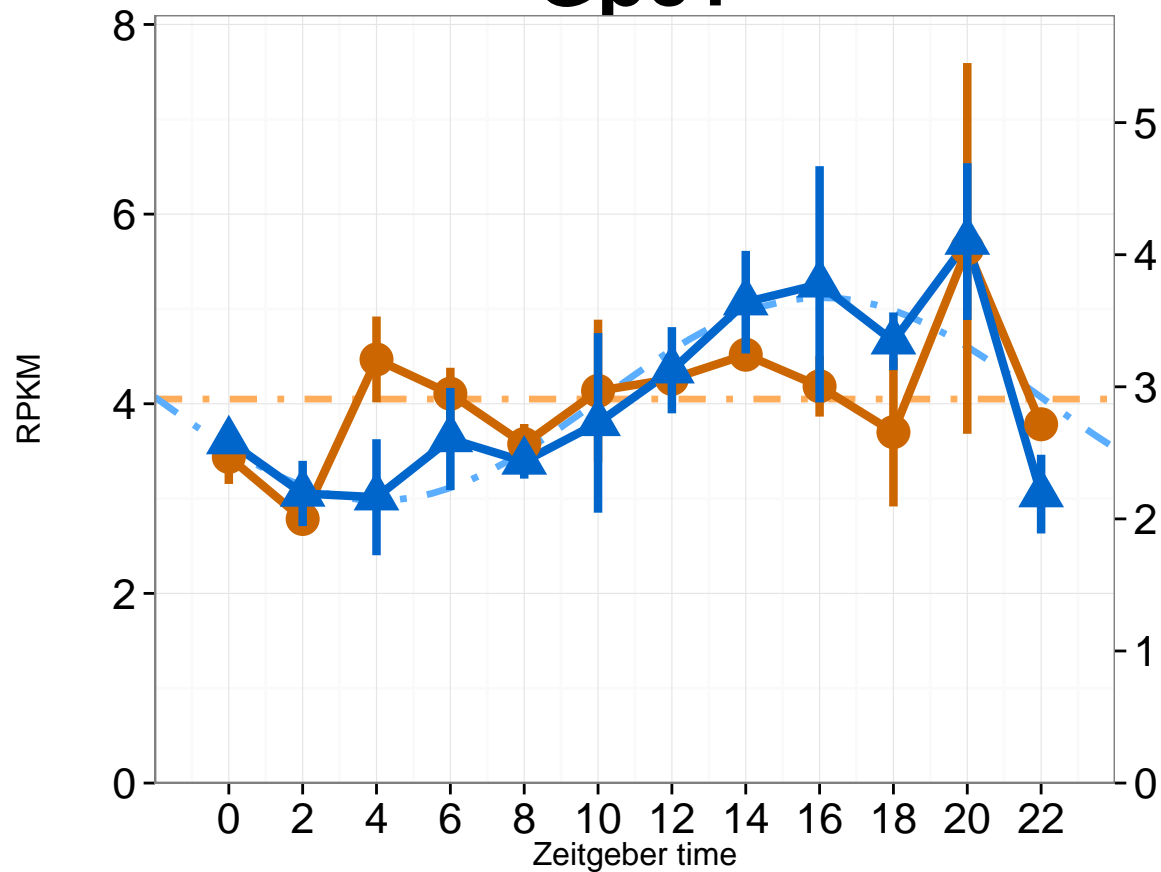

# Gpc1

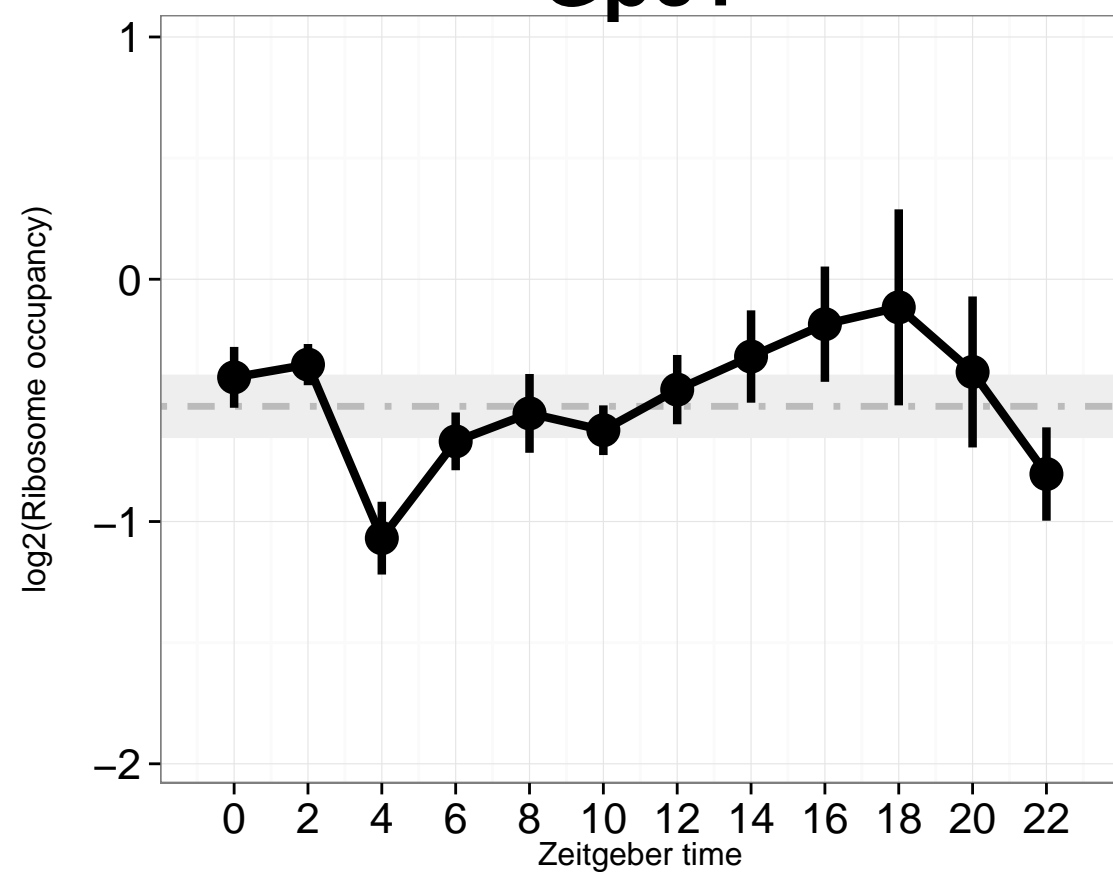

Supplement: SuppDataset_1.zip [file Gpc1_set_C.pdf › Supplemental Dataset 1/C-mRNA_nonrhythm_translation_rhyth/Gpc1_set_C.pdf]

# Gpr125

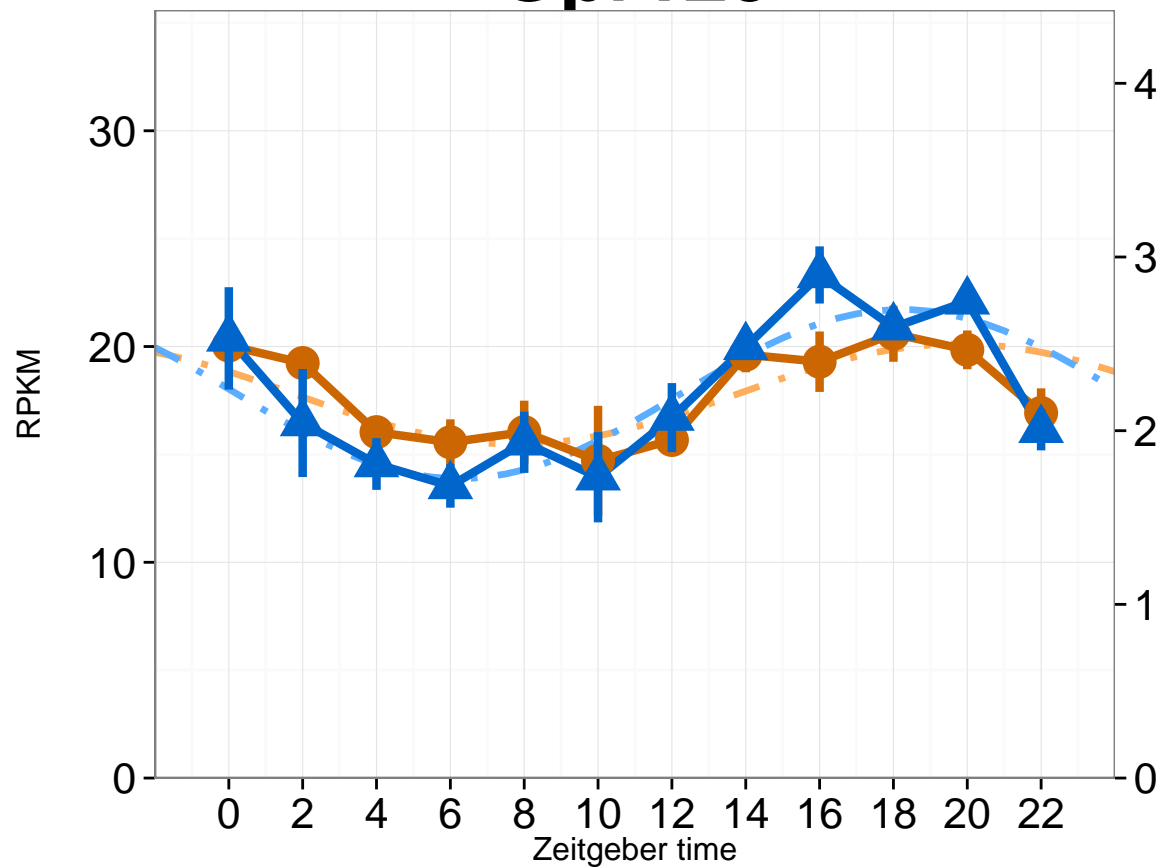

# Gpr125

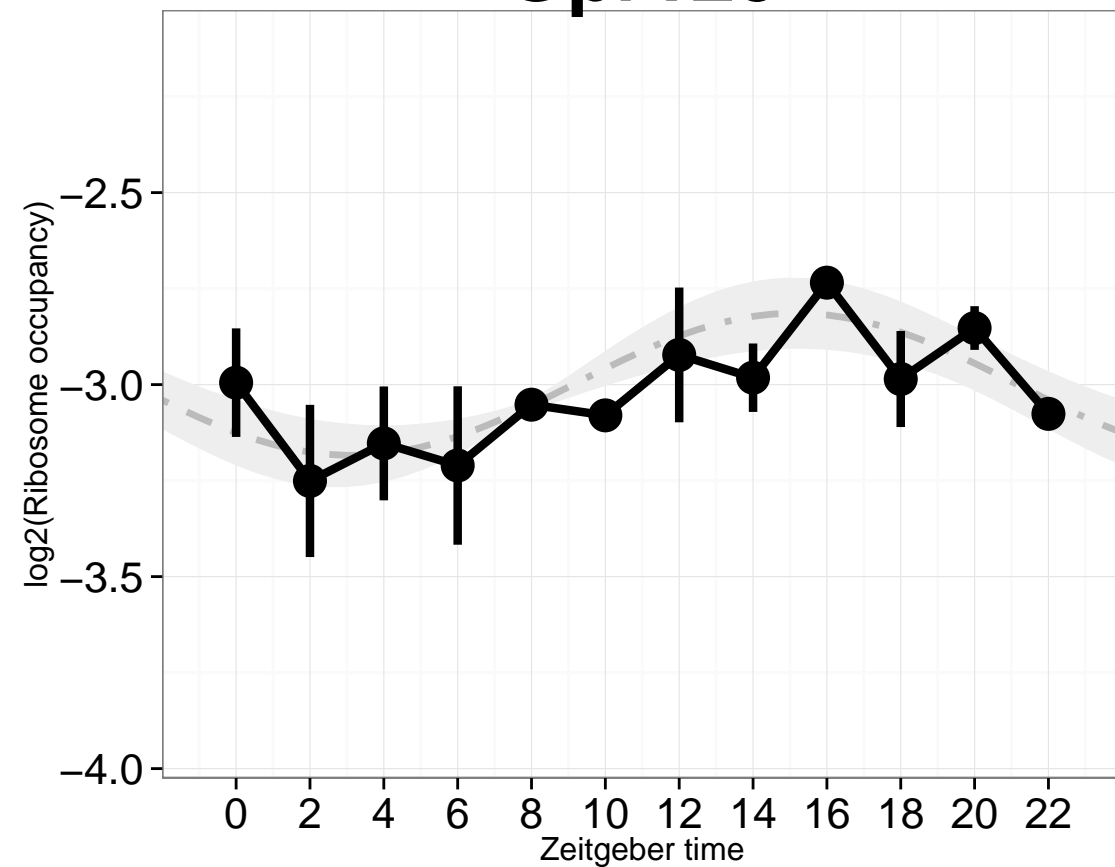

Supplement: SuppDataset_1.zip [file Gpr125_set_C.pdf › Supplemental Dataset 1/C-mRNA_nonrhythm_translation_rhyth/Gpr125_set_C.pdf]

# Gpr157

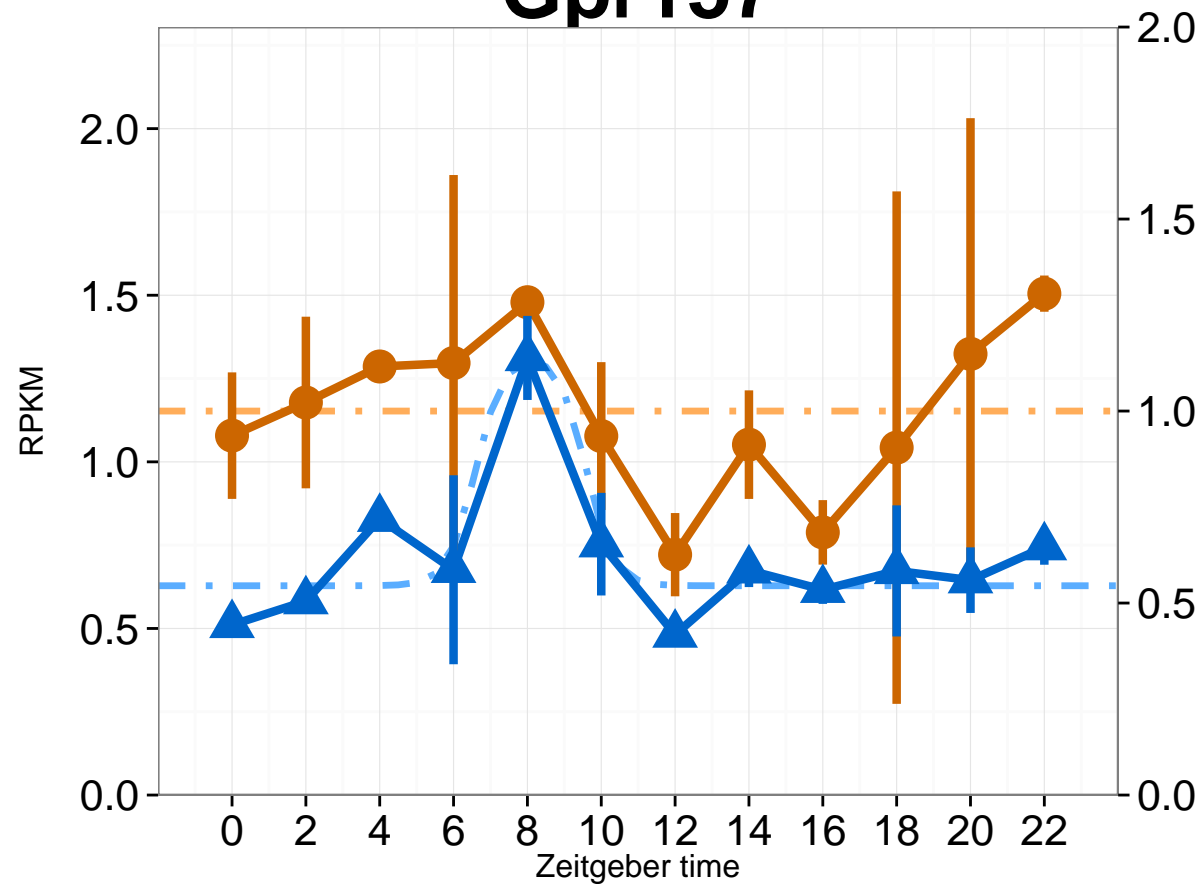

# Gpr157

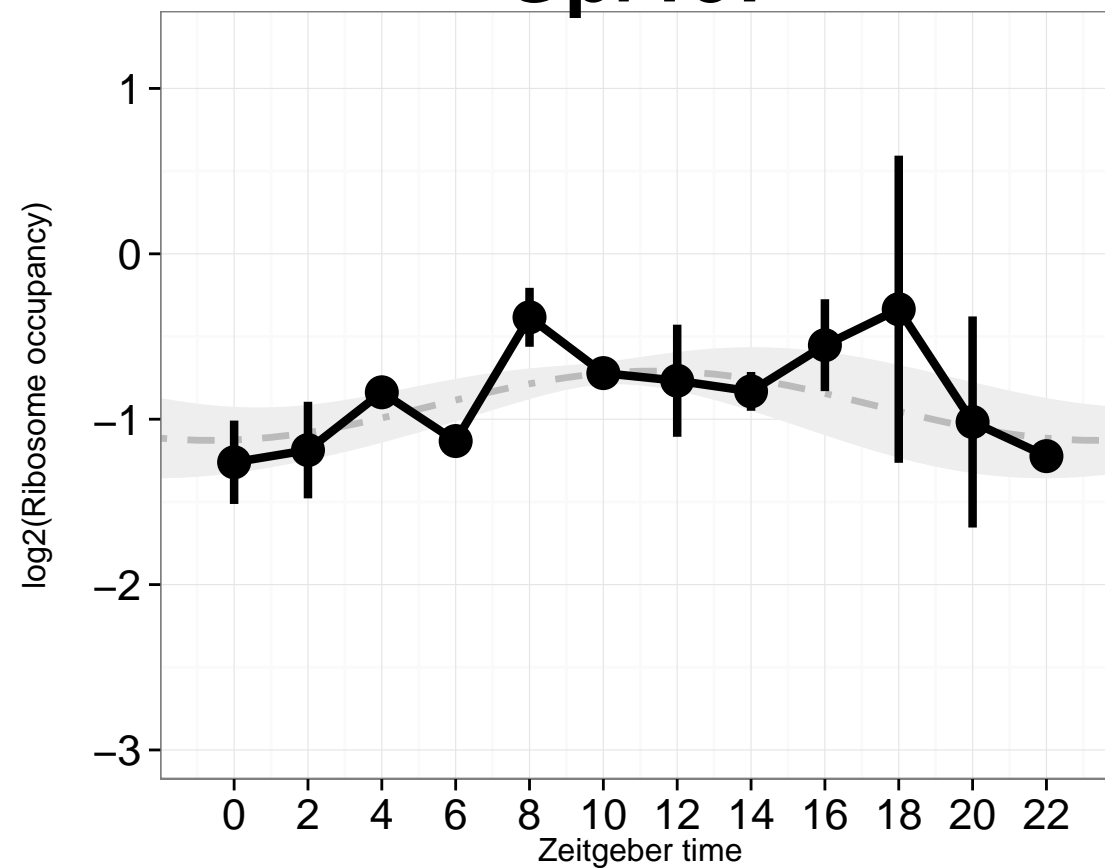

Supplement: SuppDataset_1.zip [file Gpr157_set_C.pdf › Supplemental Dataset 1/C-mRNA_nonrhythm_translation_rhyth/Gpr157_set_C.pdf]

# Gpr39

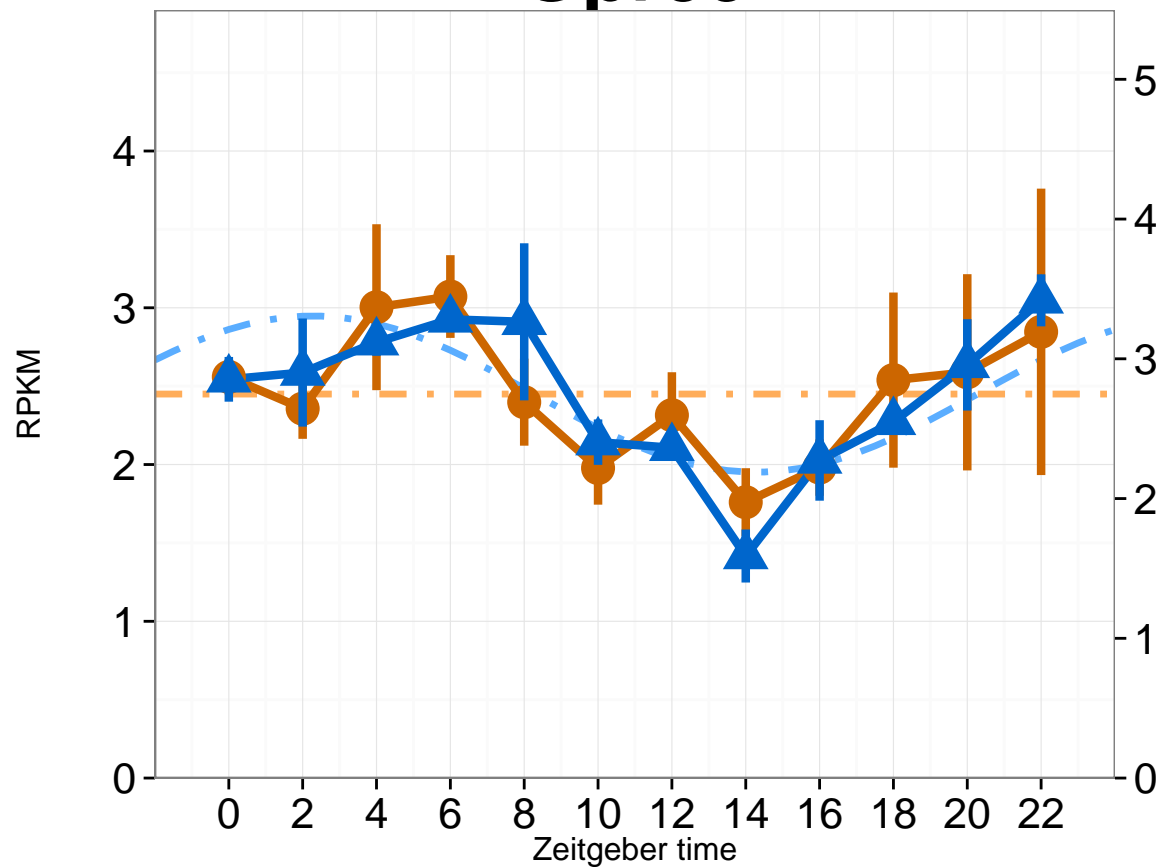

# Gpr39

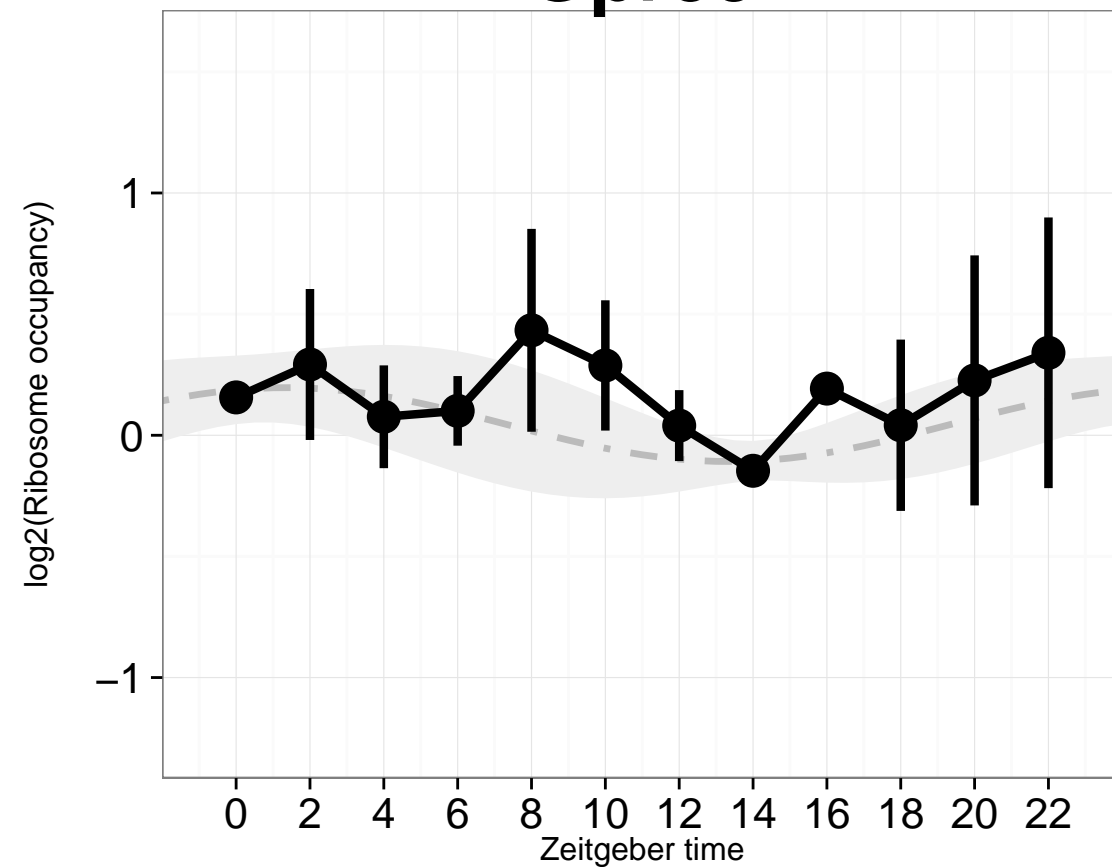

Supplement: SuppDataset_1.zip [file Gpr39_set_C.pdf › Supplemental Dataset 1/C-mRNA_nonrhythm_translation_rhyth/Gpr39_set_C.pdf]

# Gprasp1

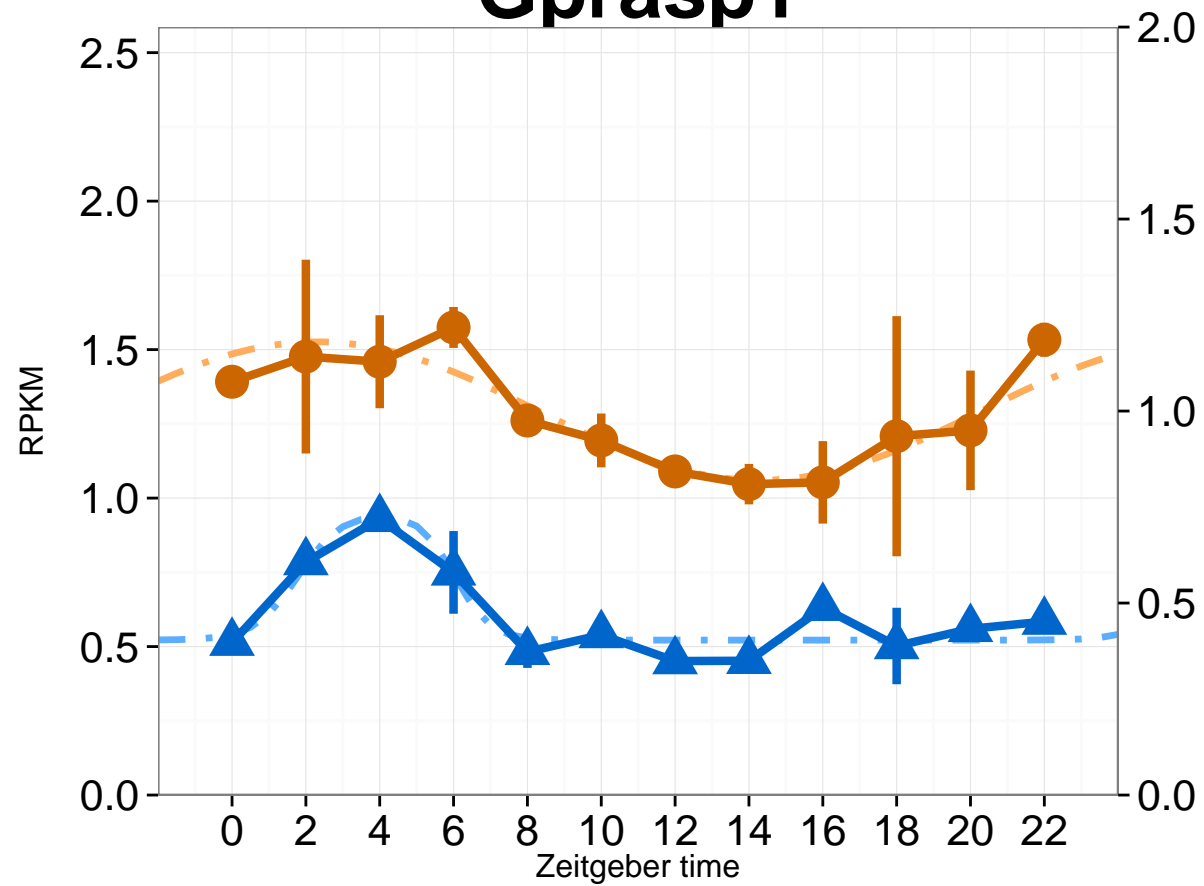

# Gprasp1

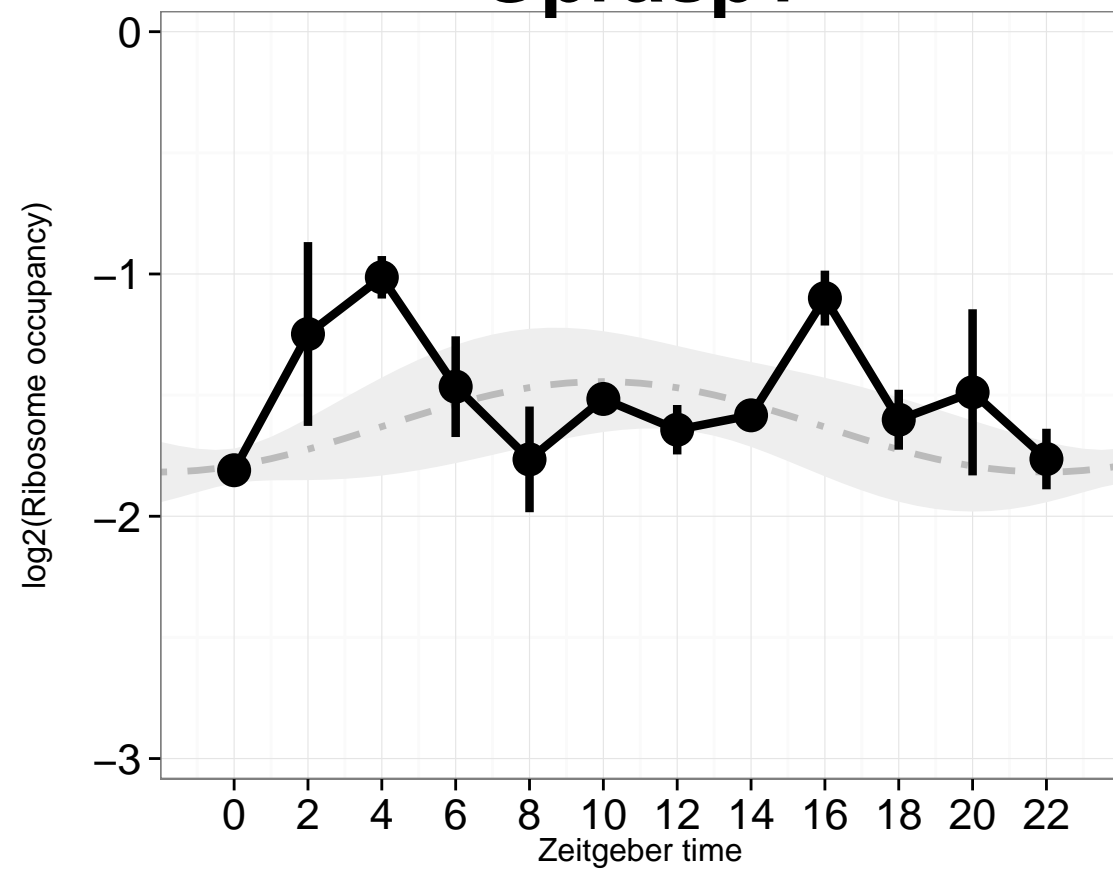

Supplement: SuppDataset_1.zip [file Gprasp1_set_C.pdf › Supplemental Dataset 1/C-mRNA_nonrhythm_translation_rhyth/Gprasp1_set_C.pdf]

# Gpsm2

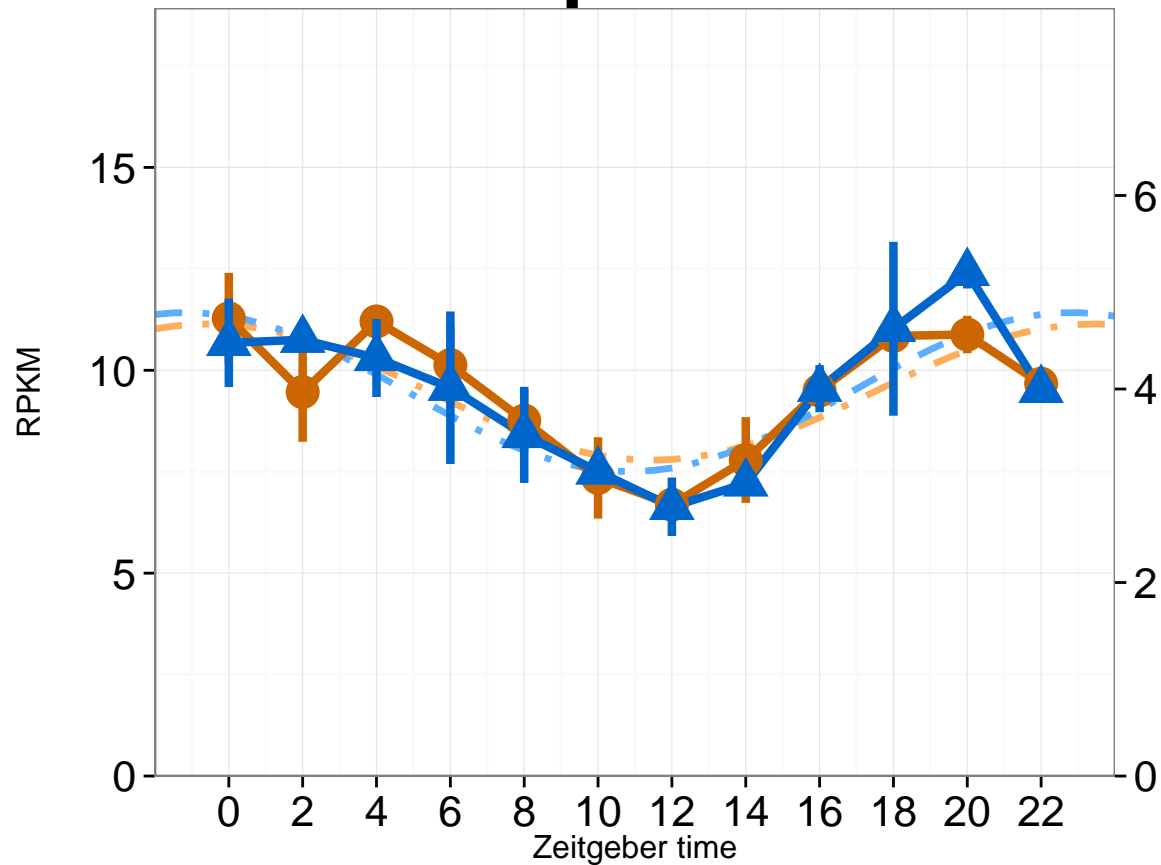

# Gpsm2

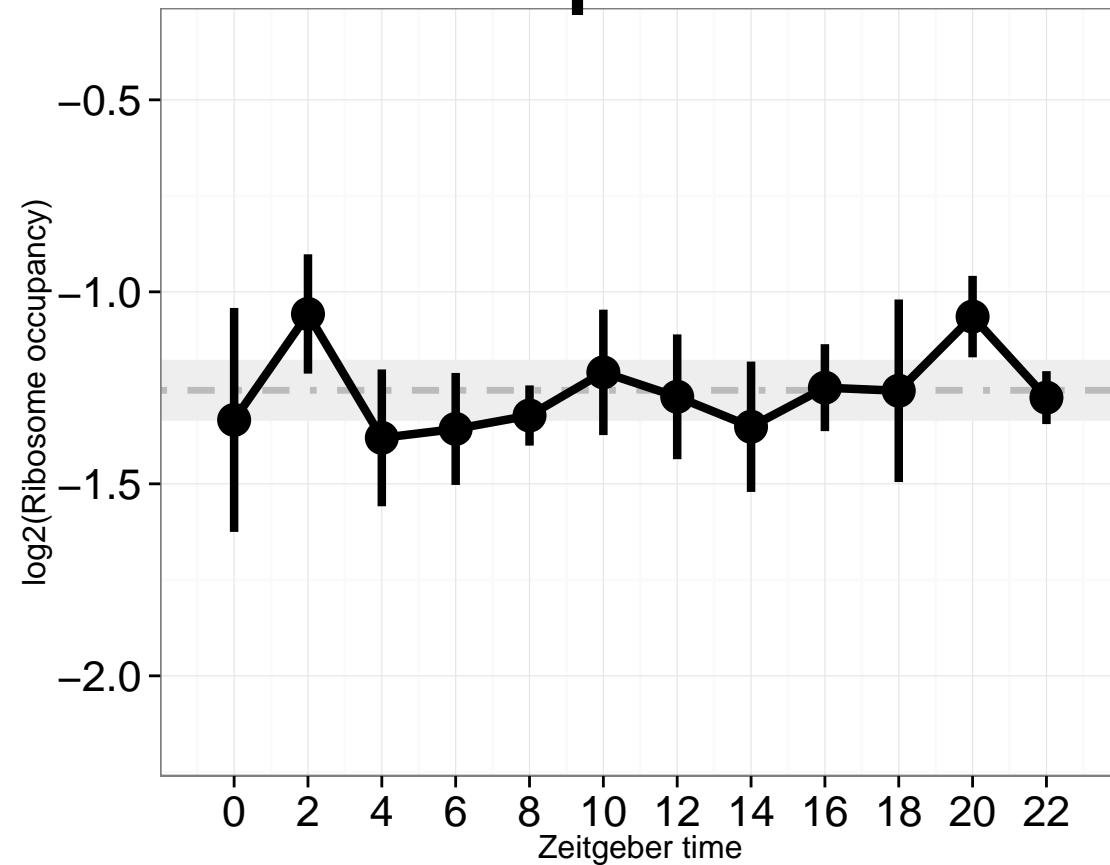

Supplement: SuppDataset_1.zip [file Gpsm2_set_C.pdf › Supplemental Dataset 1/C-mRNA_nonrhythm_translation_rhyth/Gpsm2_set_C.pdf]

## Grb14

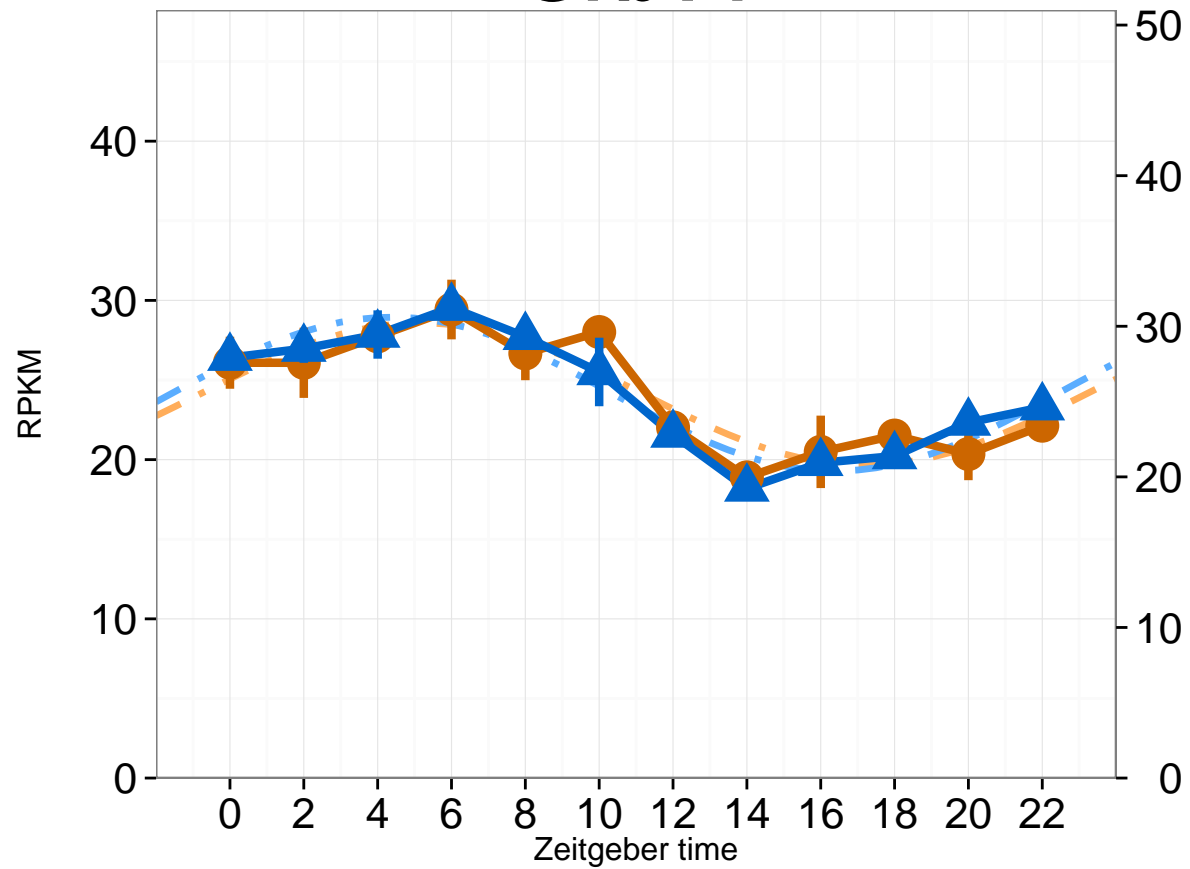

## Grb14

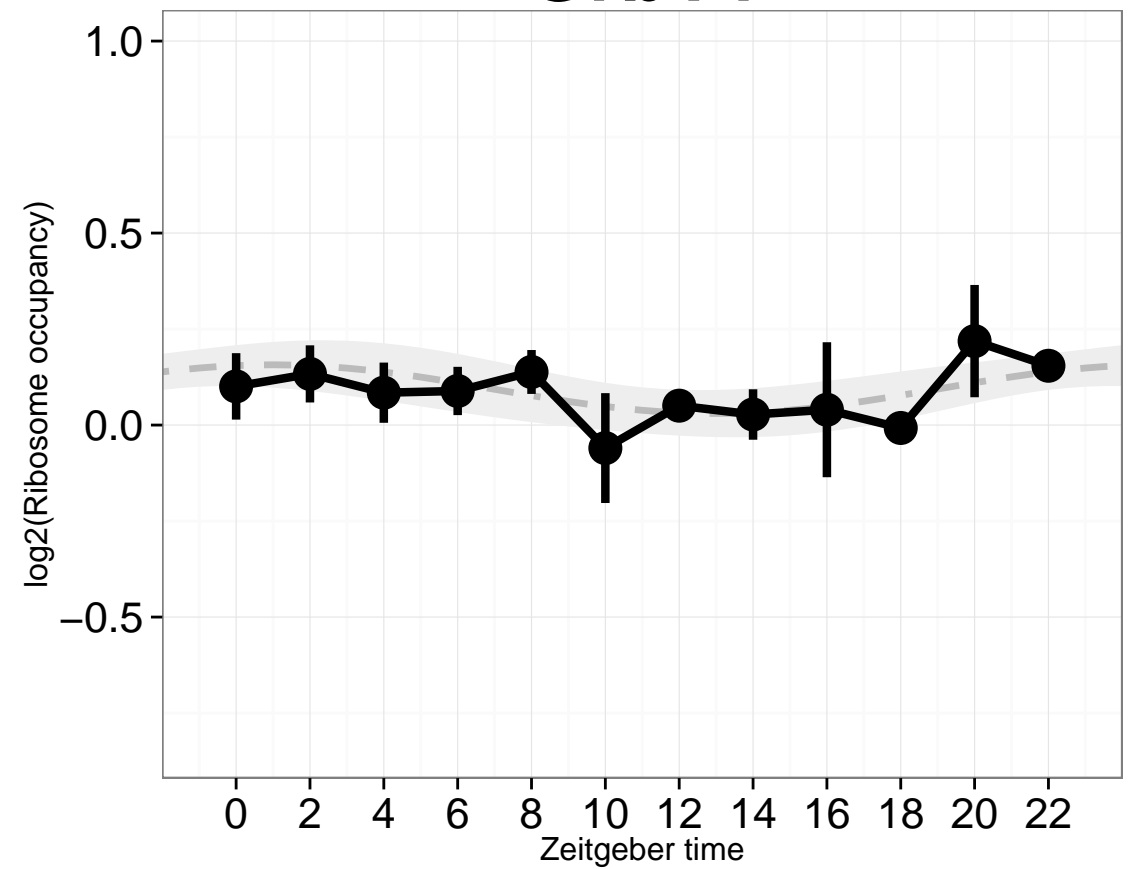

Supplement: SuppDataset_1.zip [file Grb14_set_C.pdf › Supplemental Dataset 1/C-mRNA_nonrhythm_translation_rhyth/Grb14_set_C.pdf]

## Grn

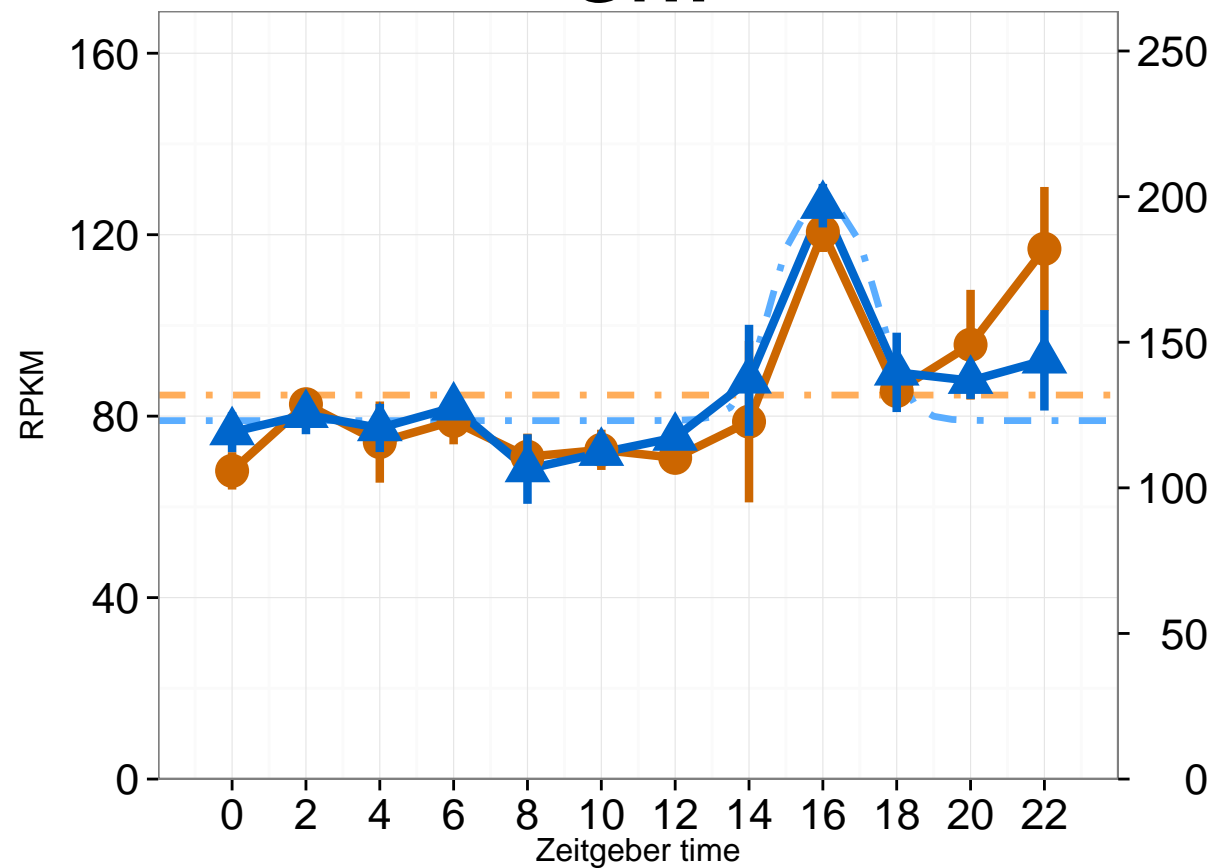

## Grn

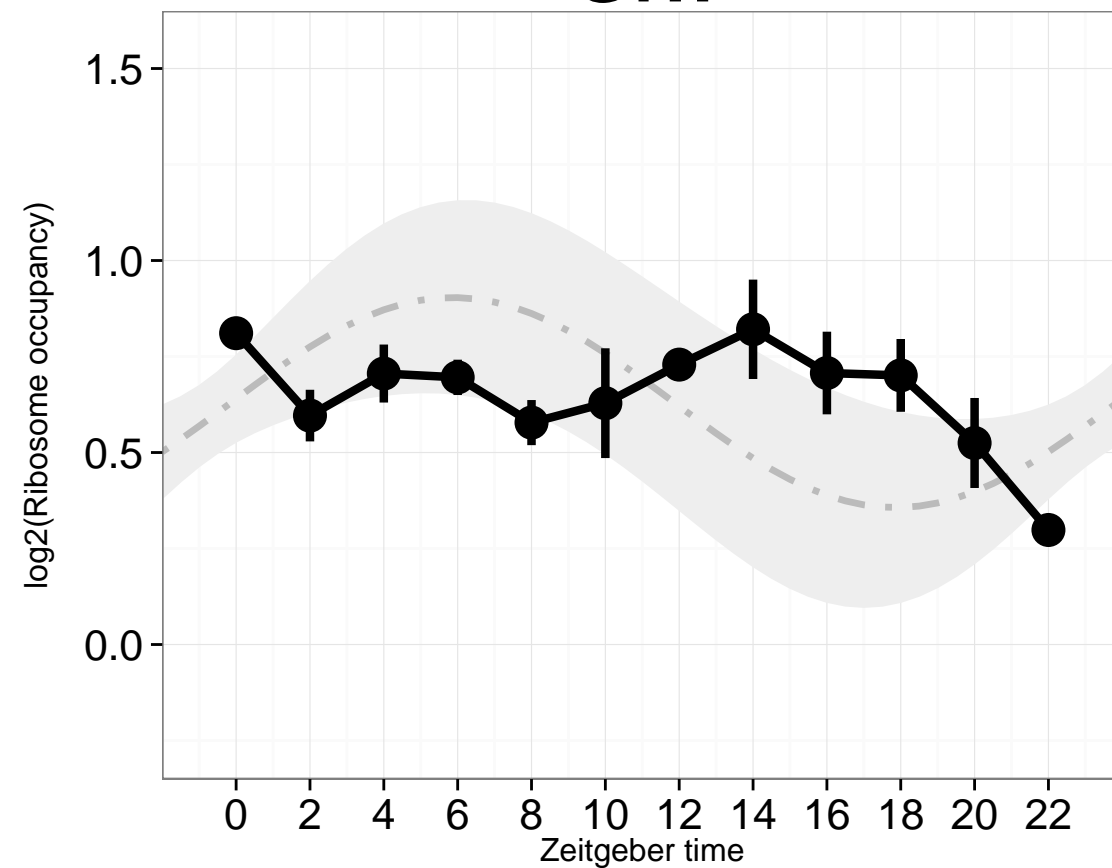

Supplement: SuppDataset_1.zip [file Grn_set_C.pdf › Supplemental Dataset 1/C-mRNA_nonrhythm_translation_rhyth/Grn_set_C.pdf]

## Gsap

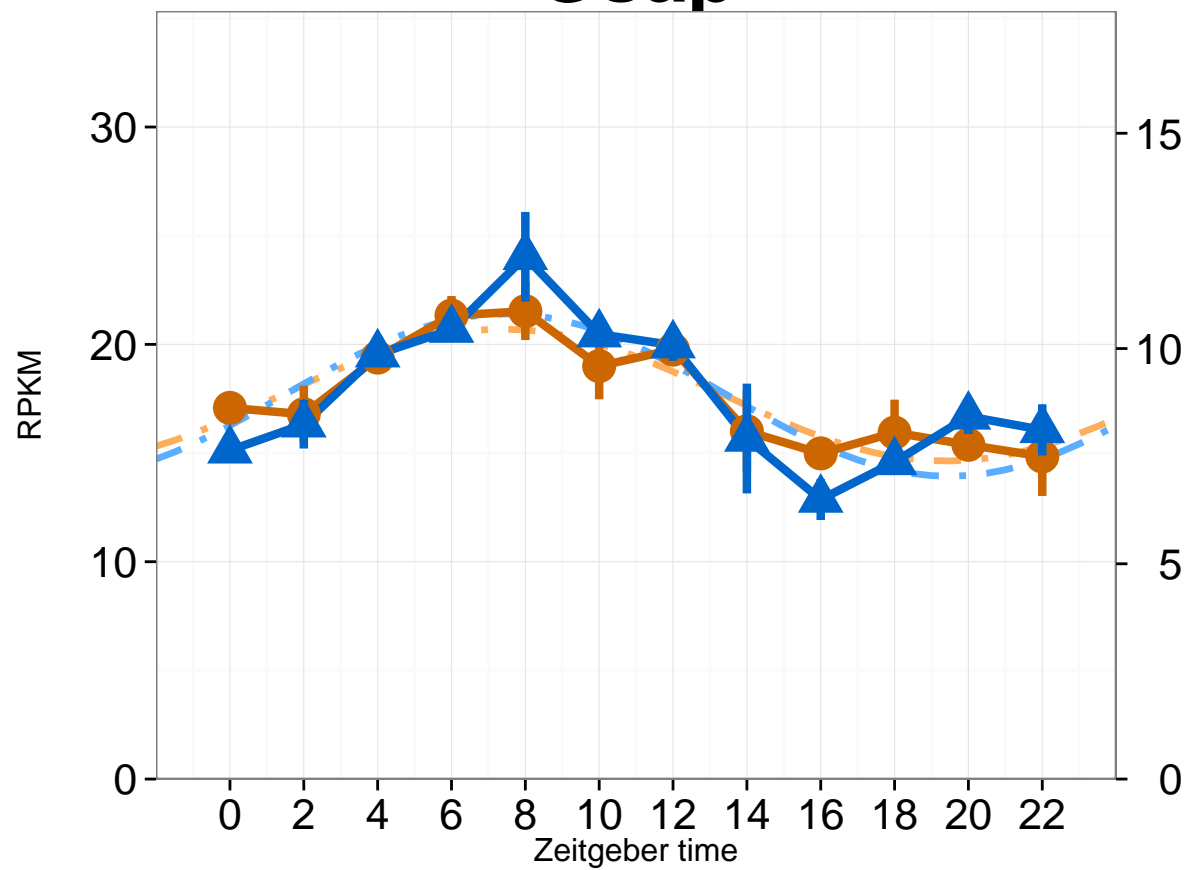

## Gsap

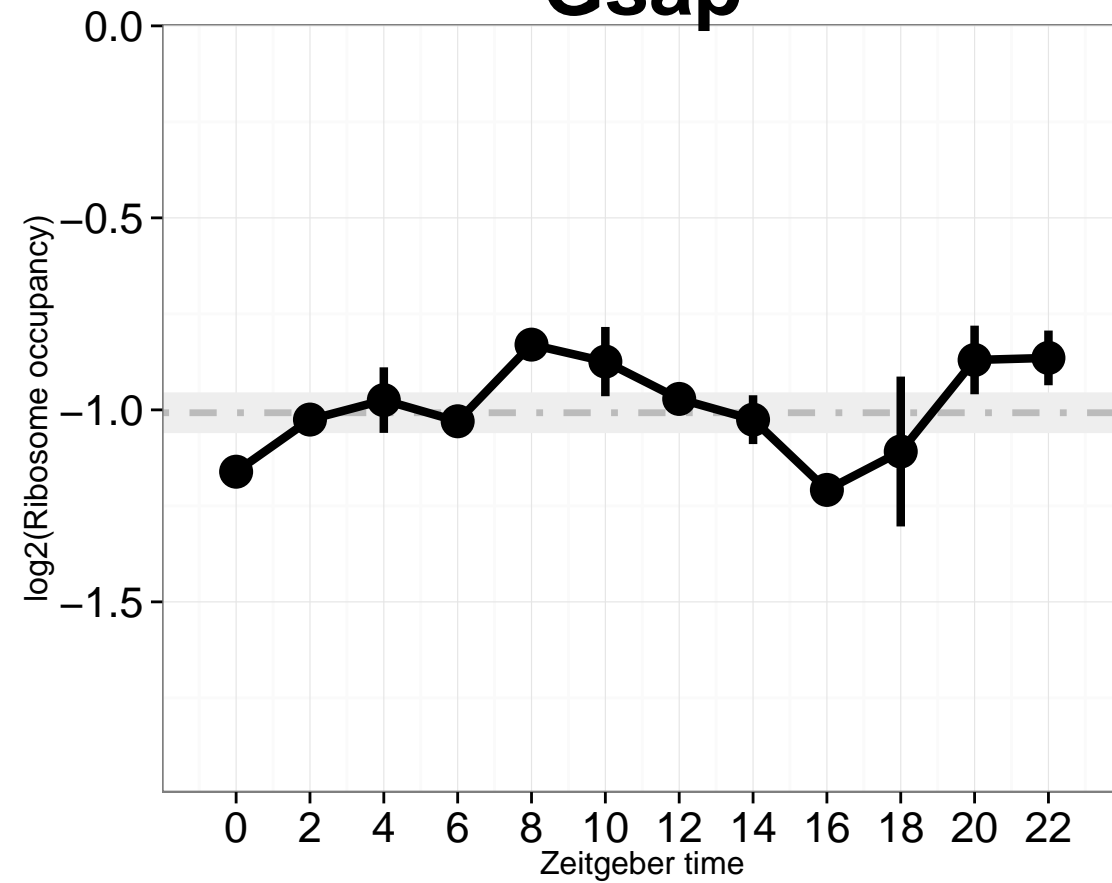

Supplement: SuppDataset_1.zip [file Gsap_set_C.pdf › Supplemental Dataset 1/C-mRNA_nonrhythm_translation_rhyth/Gsap_set_C.pdf]

## Gskip

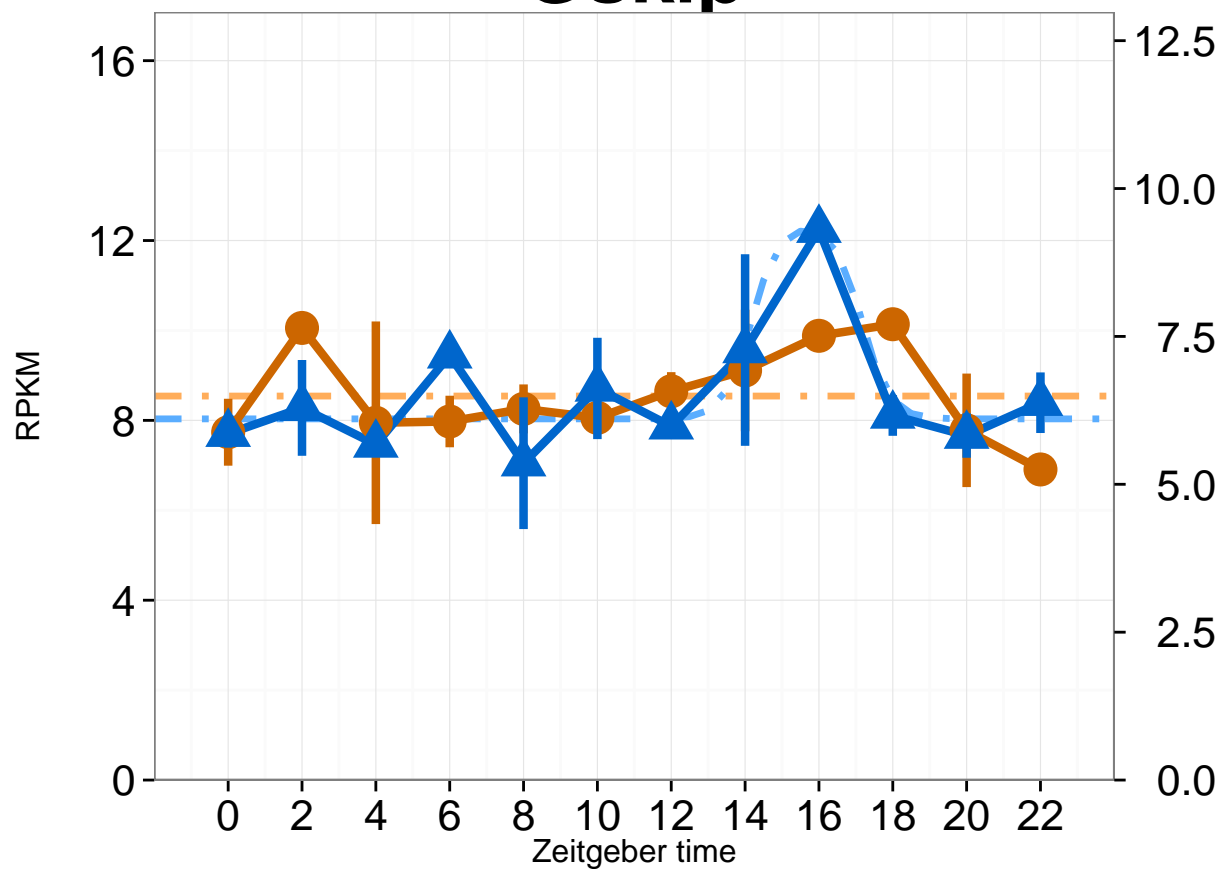

## Gskip

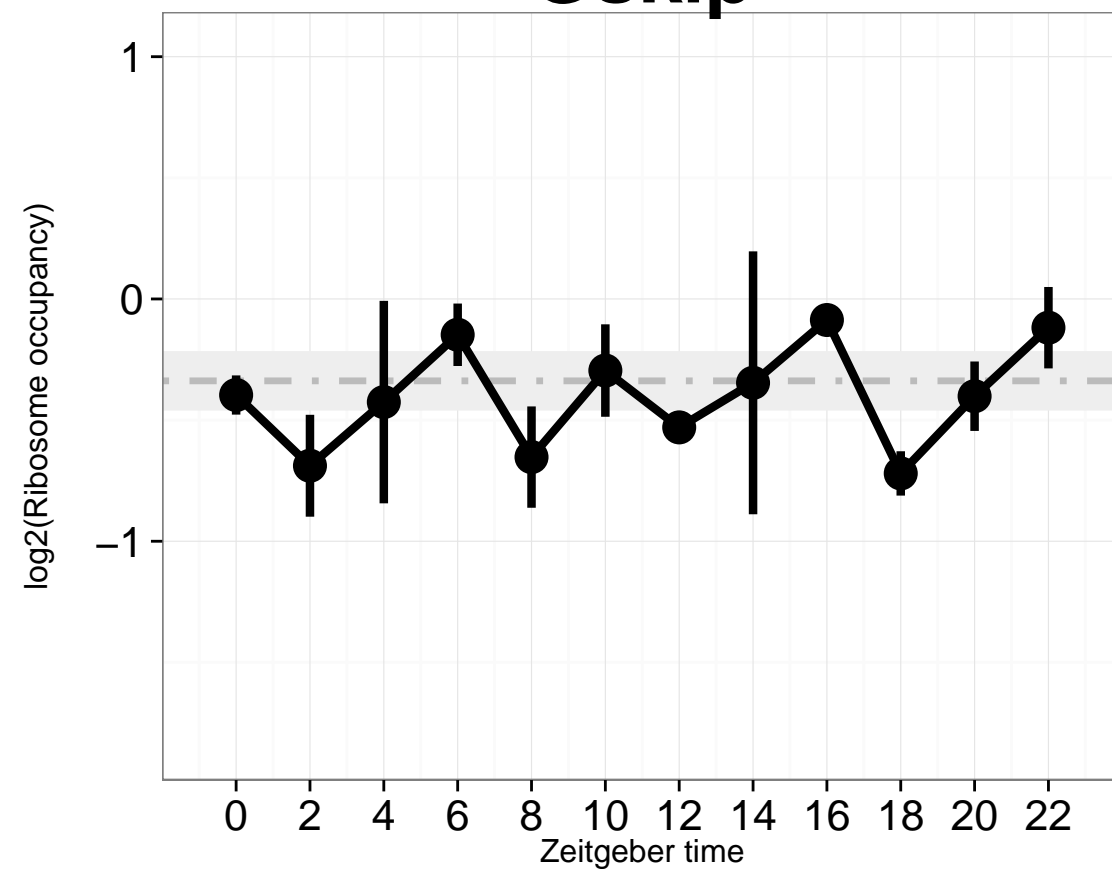

Supplement: SuppDataset_1.zip [file Gskip_set_C.pdf › Supplemental Dataset 1/C-mRNA_nonrhythm_translation_rhyth/Gskip_set_C.pdf]

## Gsta4

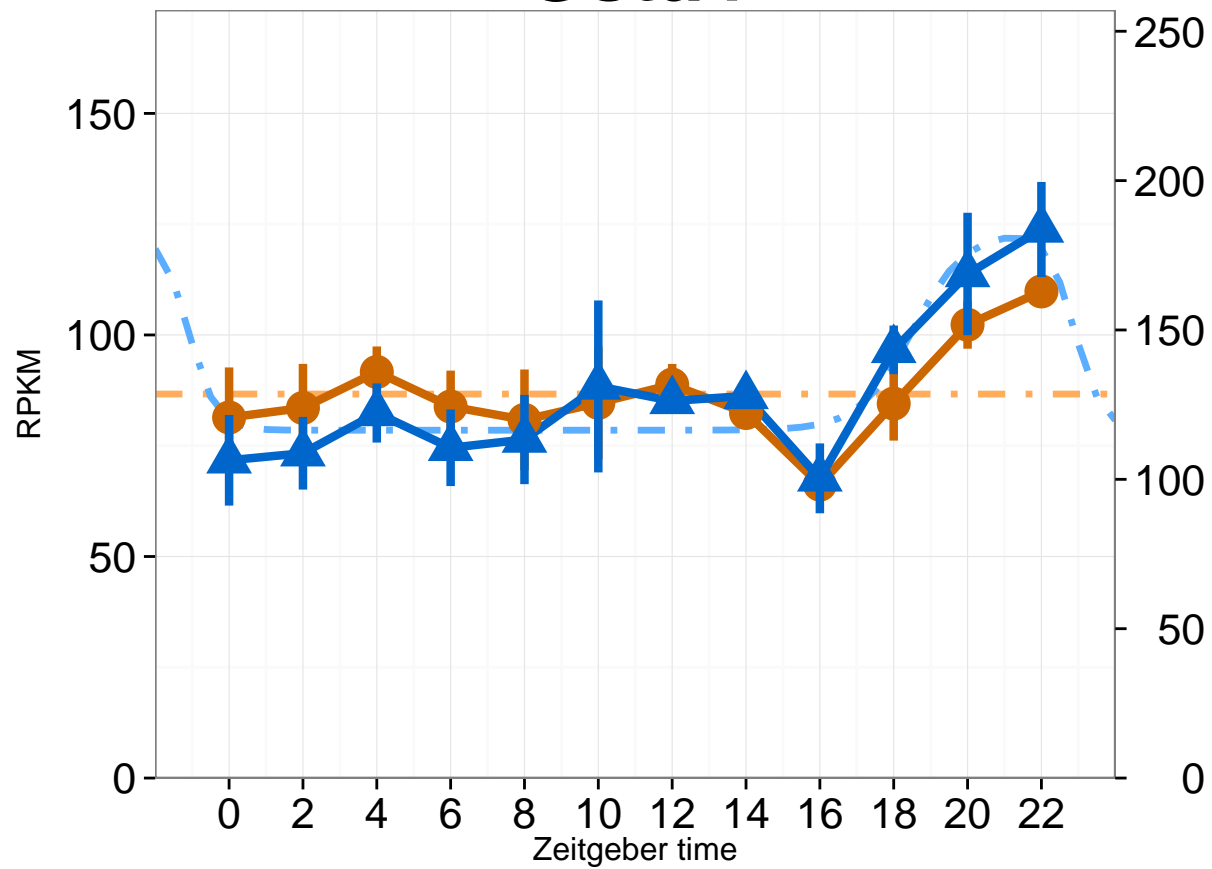

## Gsta4

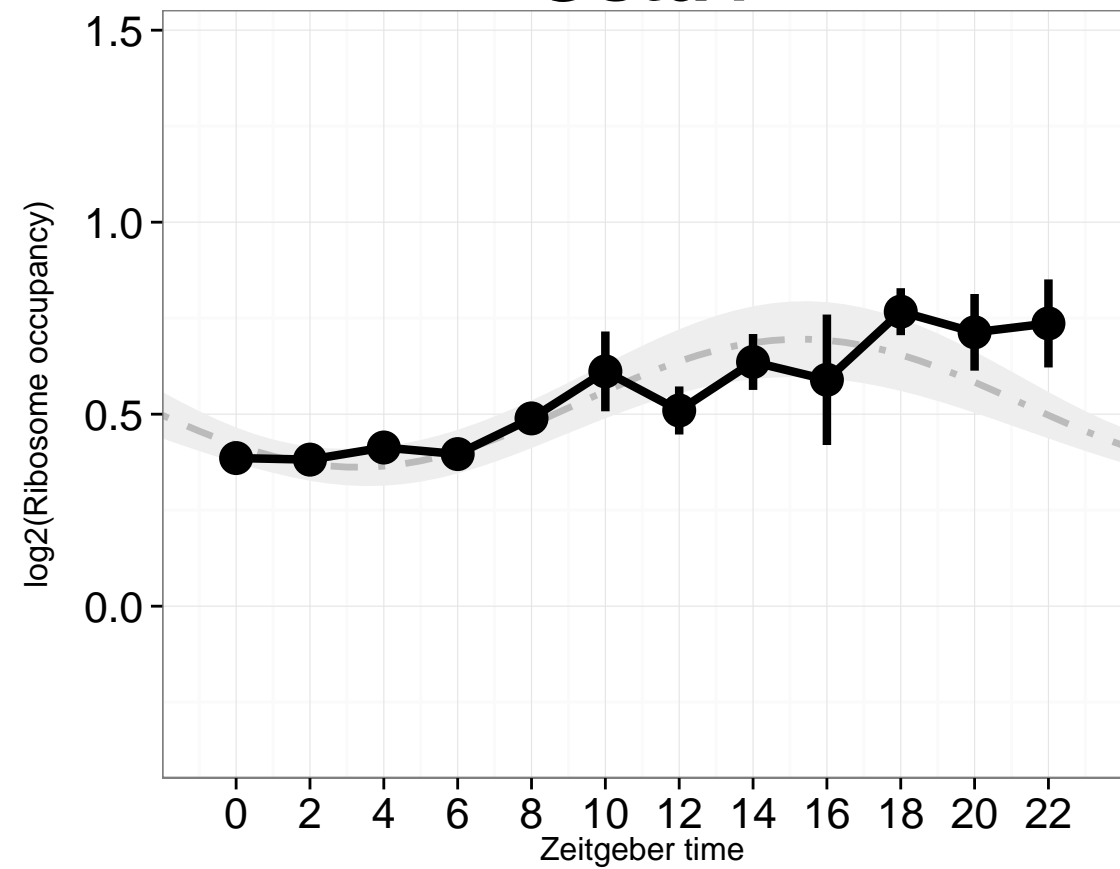

Supplement: SuppDataset_1.zip [file Gsta4_set_C.pdf › Supplemental Dataset 1/C-mRNA_nonrhythm_translation_rhyth/Gsta4_set_C.pdf]

## Gstt2

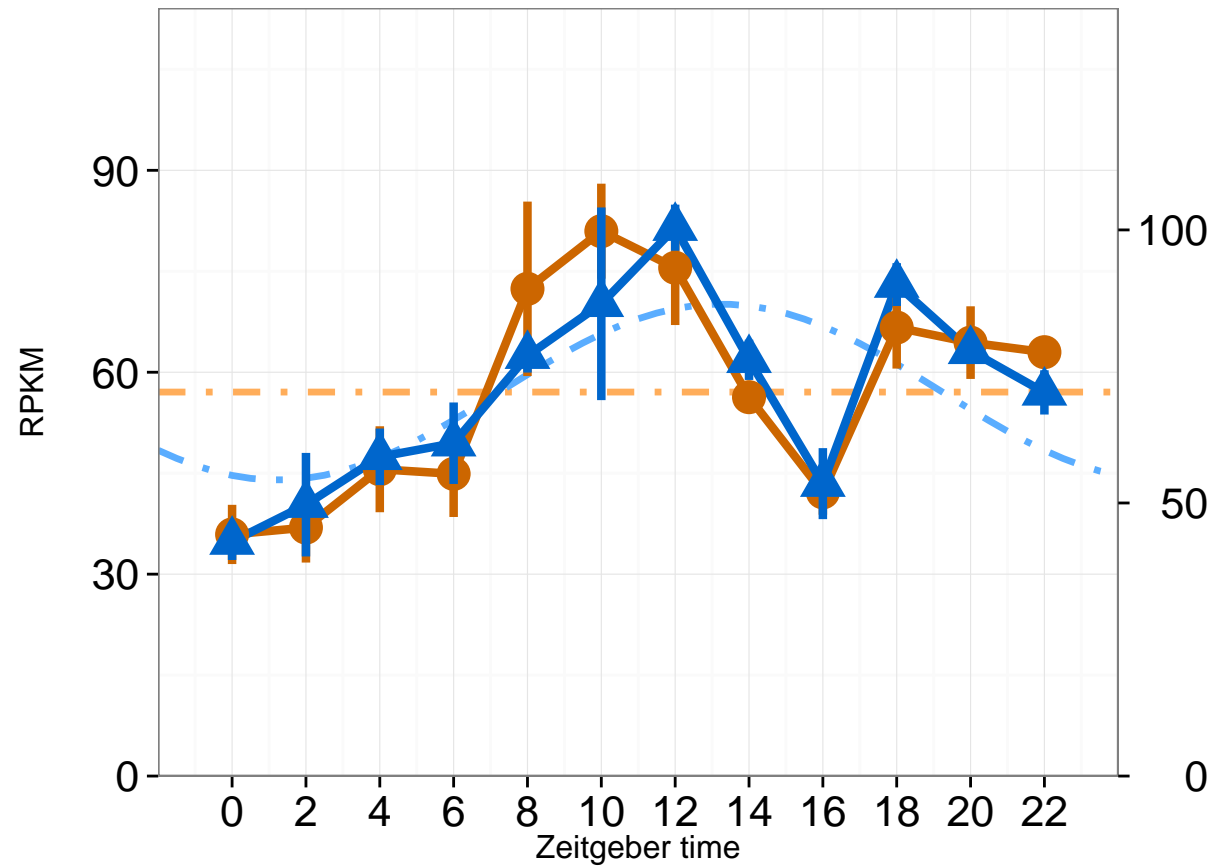

## Gstt2

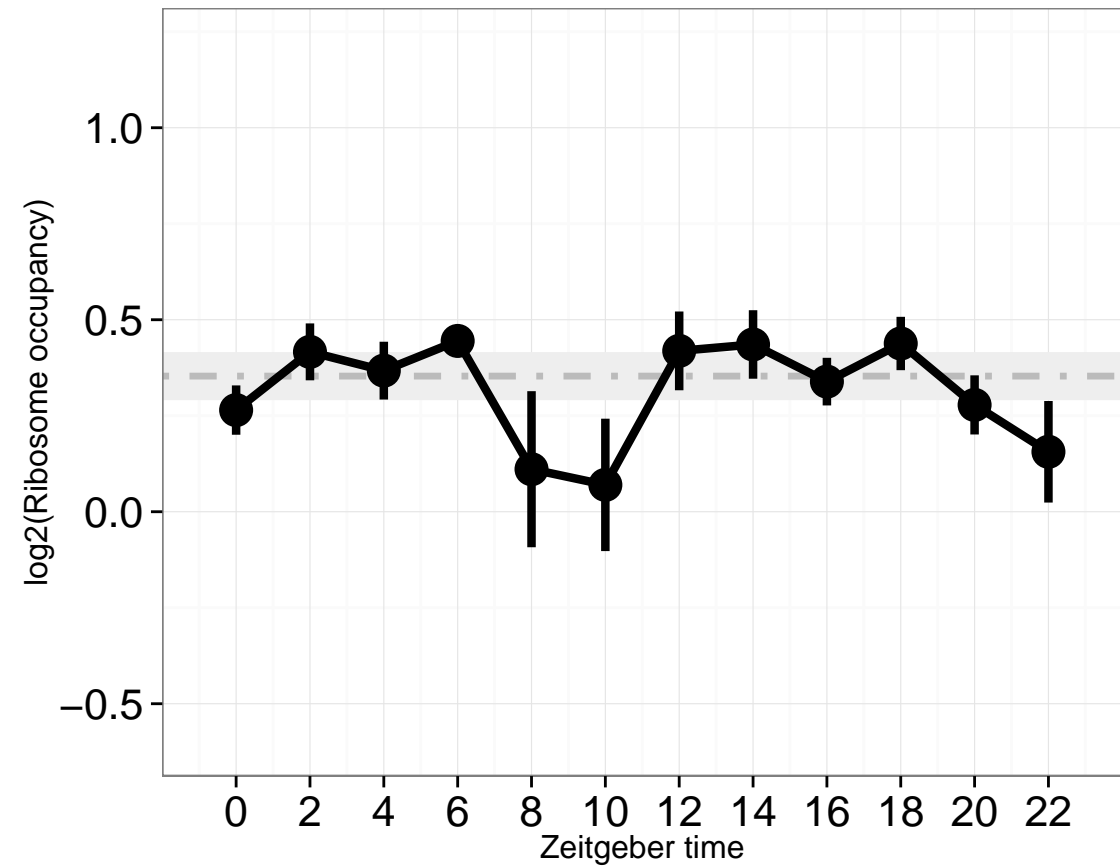

Supplement: SuppDataset_1.zip [file Gstt2_set_C.pdf › Supplemental Dataset 1/C-mRNA_nonrhythm_translation_rhyth/Gstt2_set_C.pdf]

# Gtf3c5

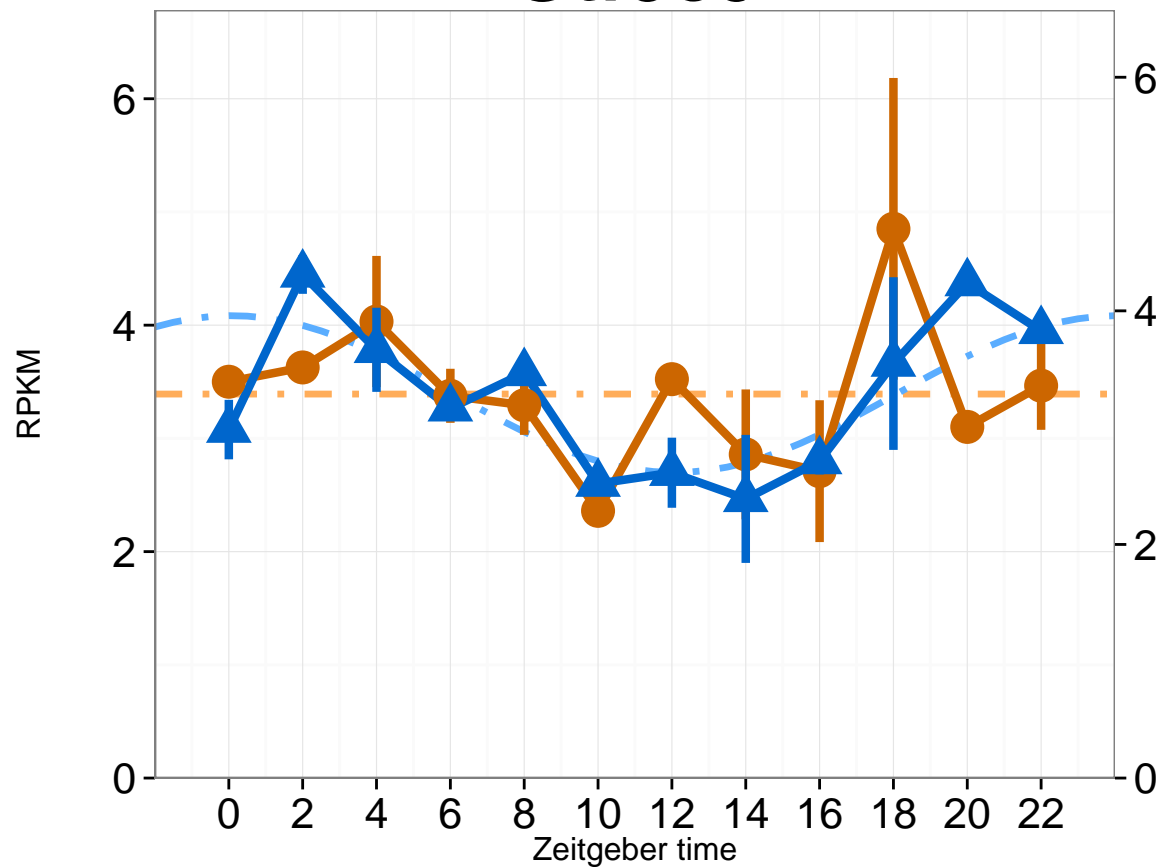

# Gtf3c5

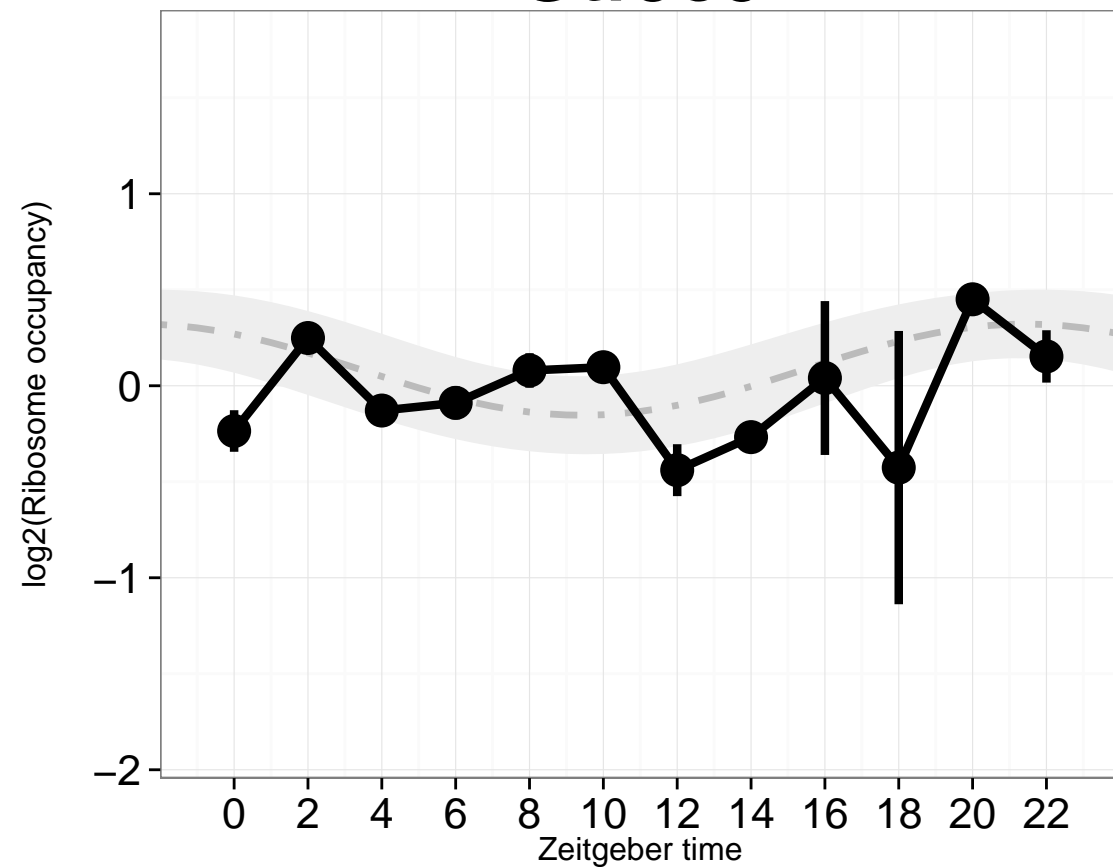

Supplement: SuppDataset_1.zip [file Gtf3c5_set_C.pdf › Supplemental Dataset 1/C-mRNA_nonrhythm_translation_rhyth/Gtf3c5_set_C.pdf]

## Gtpbp4

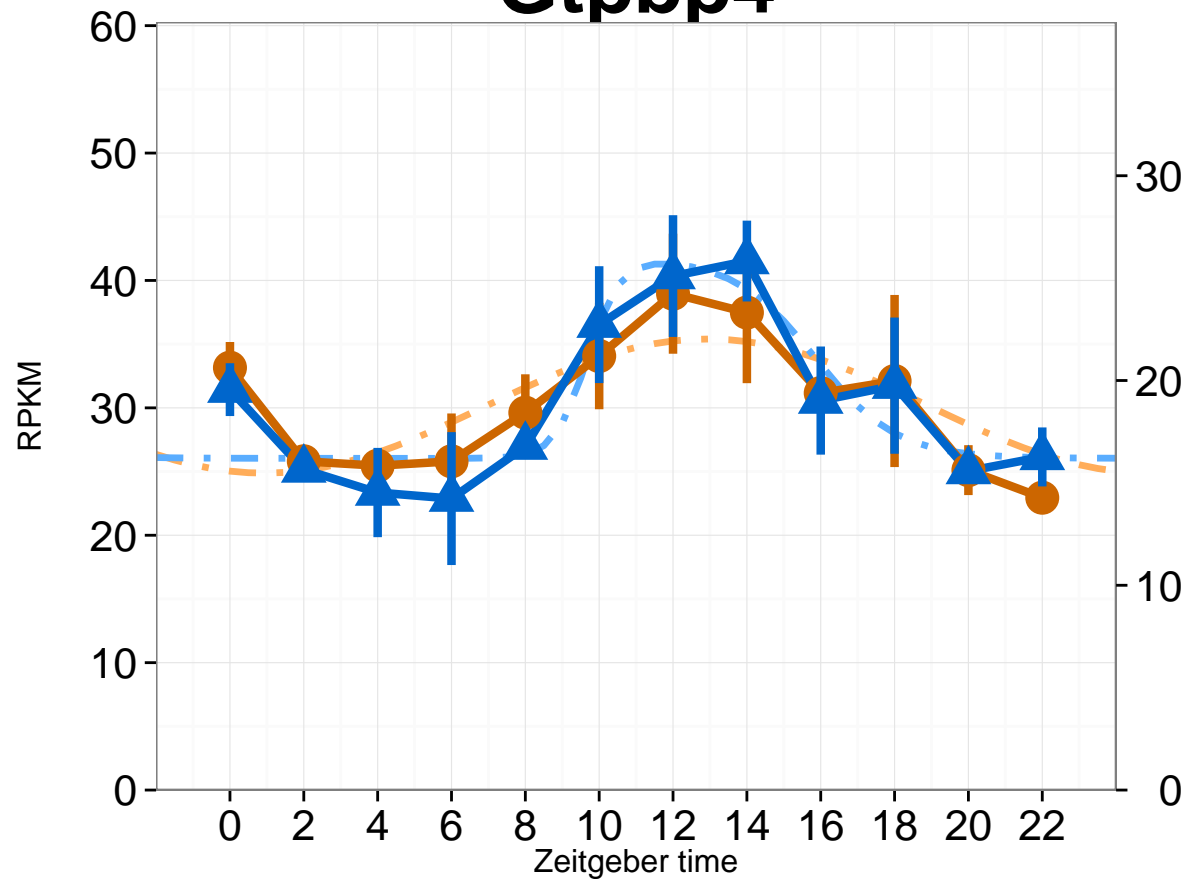

## Gtpbp4

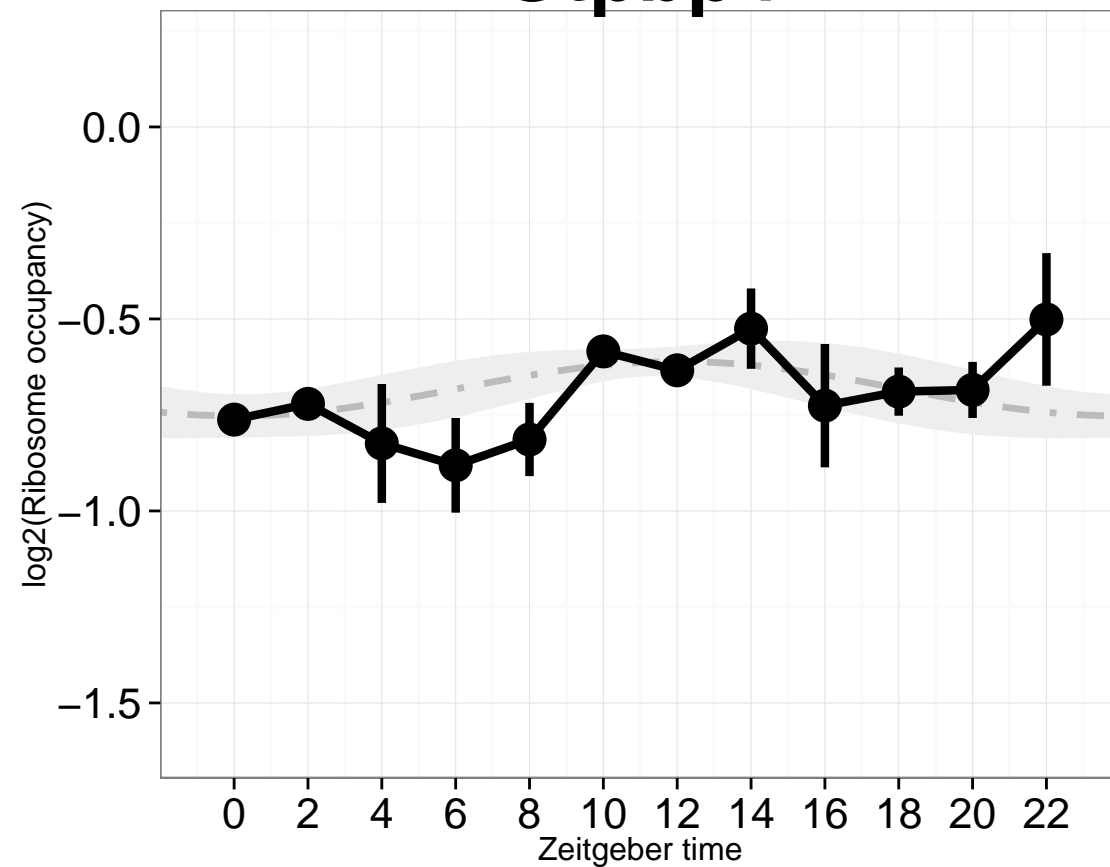

Supplement: SuppDataset_1.zip [file Gtpbp4_set_C.pdf › Supplemental Dataset 1/C-mRNA_nonrhythm_translation_rhyth/Gtpbp4_set_C.pdf]

**Gypc TR**

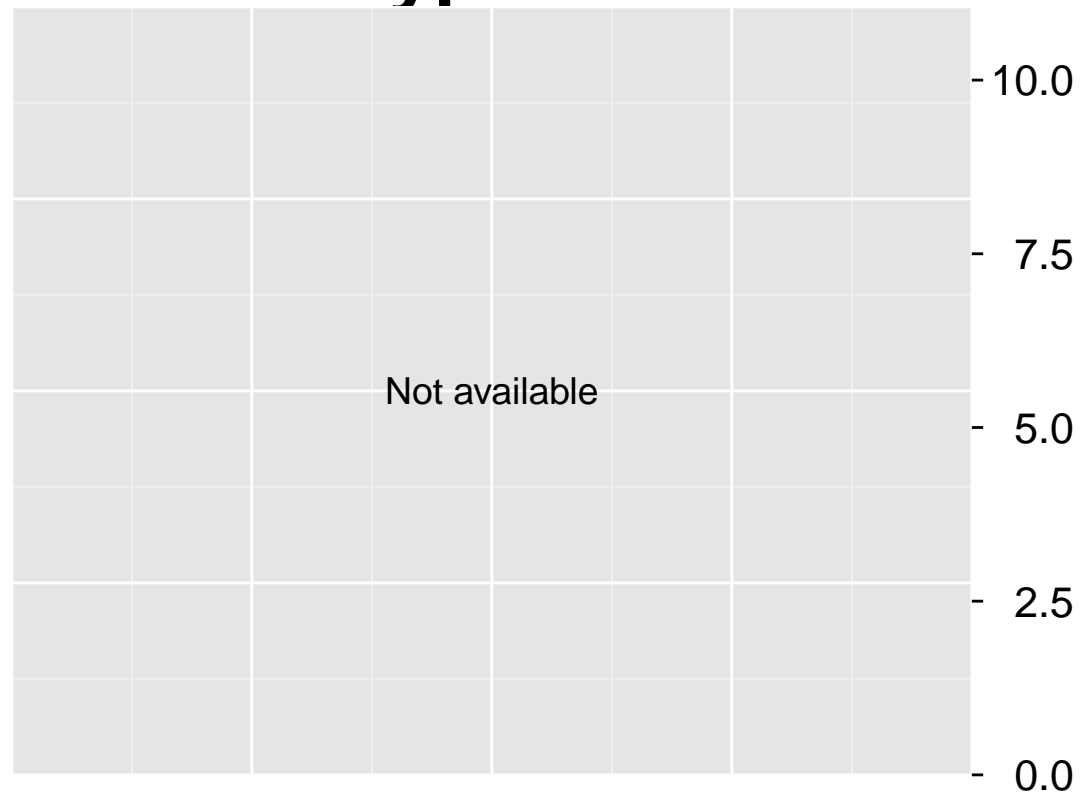

**Gypc log2(Ribosome occupancy)**

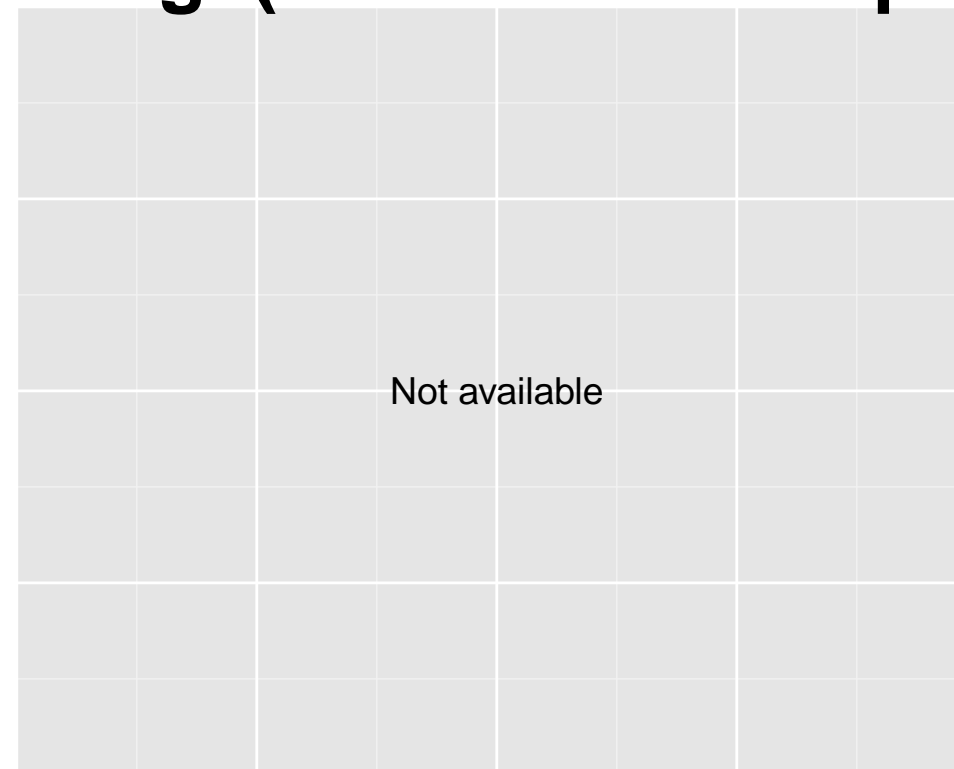

Supplement: SuppDataset_1.zip [file Gypc_set_C.pdf › Supplemental Dataset 1/C-mRNA_nonrhythm_translation_rhyth/Gypc_set_C.pdf]

# HapIn4

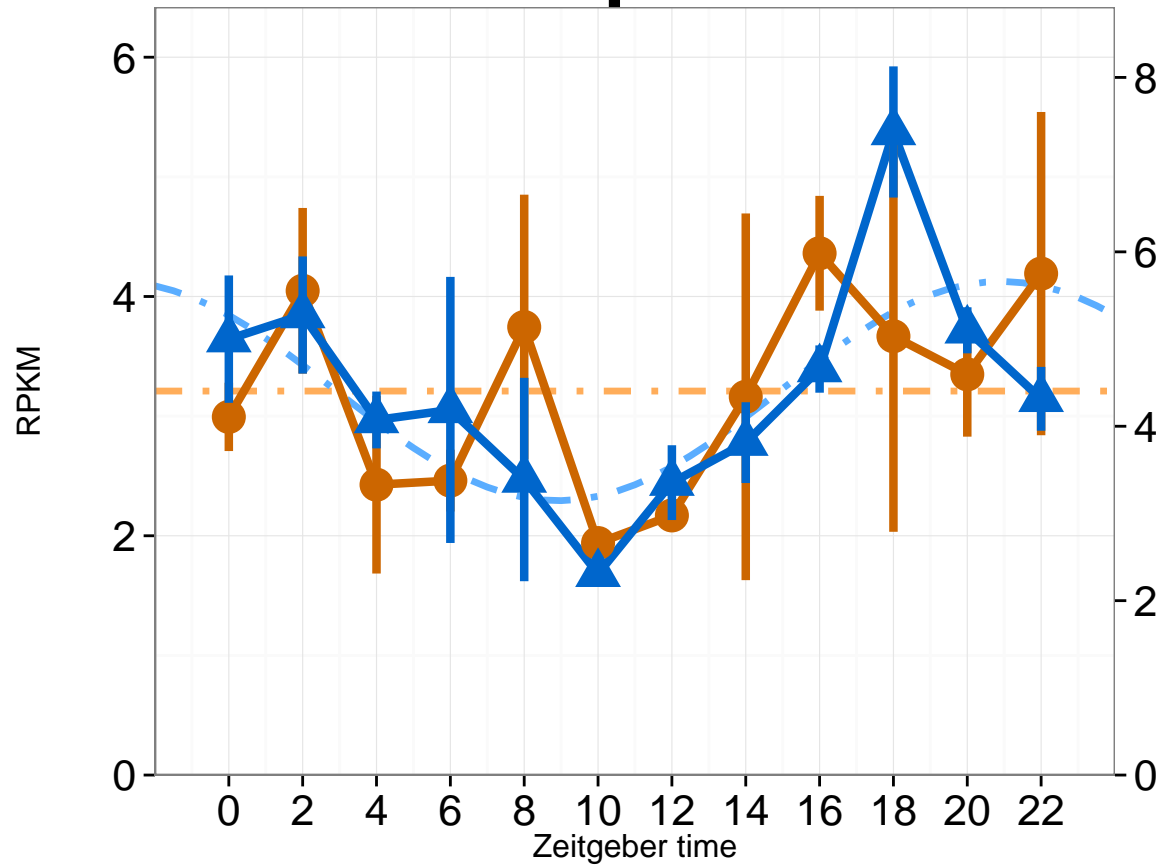

# HapIn4

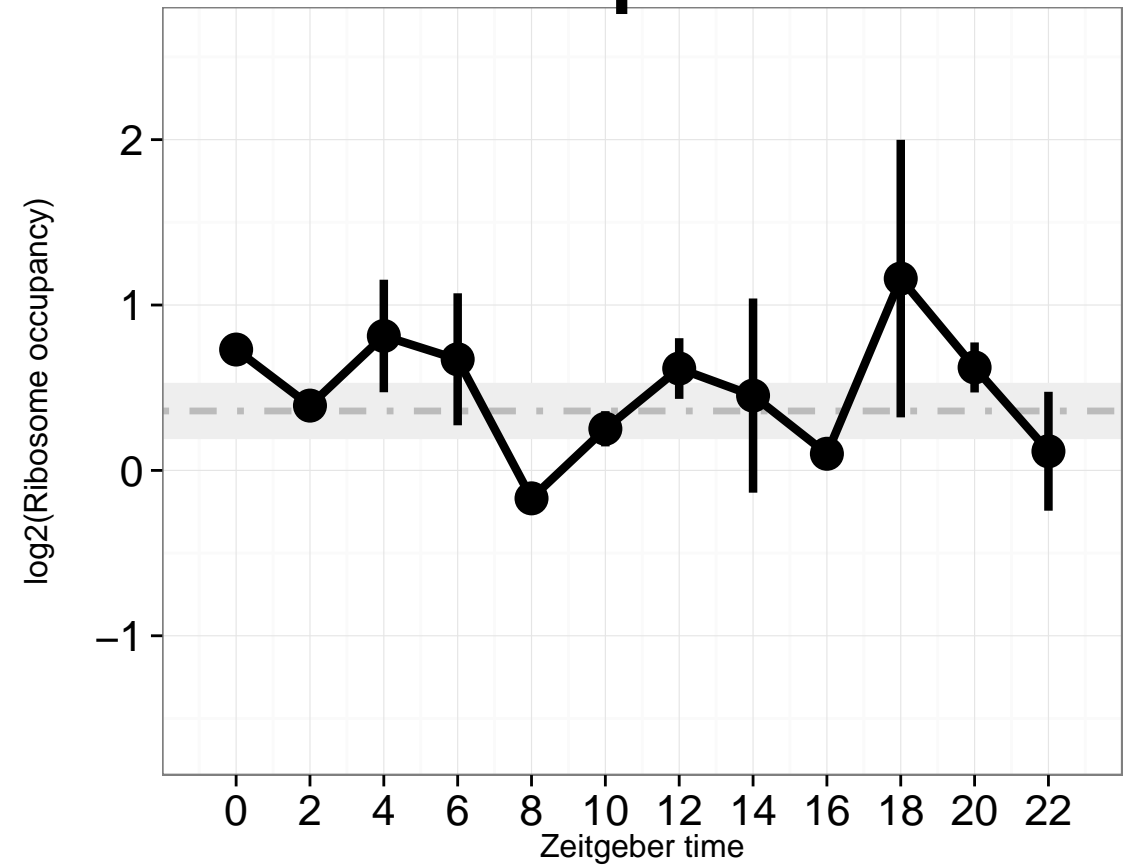

Supplement: SuppDataset_1.zip [file Hapln4_set_C.pdf › Supplemental Dataset 1/C-mRNA_nonrhythm_translation_rhyth/Hapln4_set_C.pdf]

# Haus5

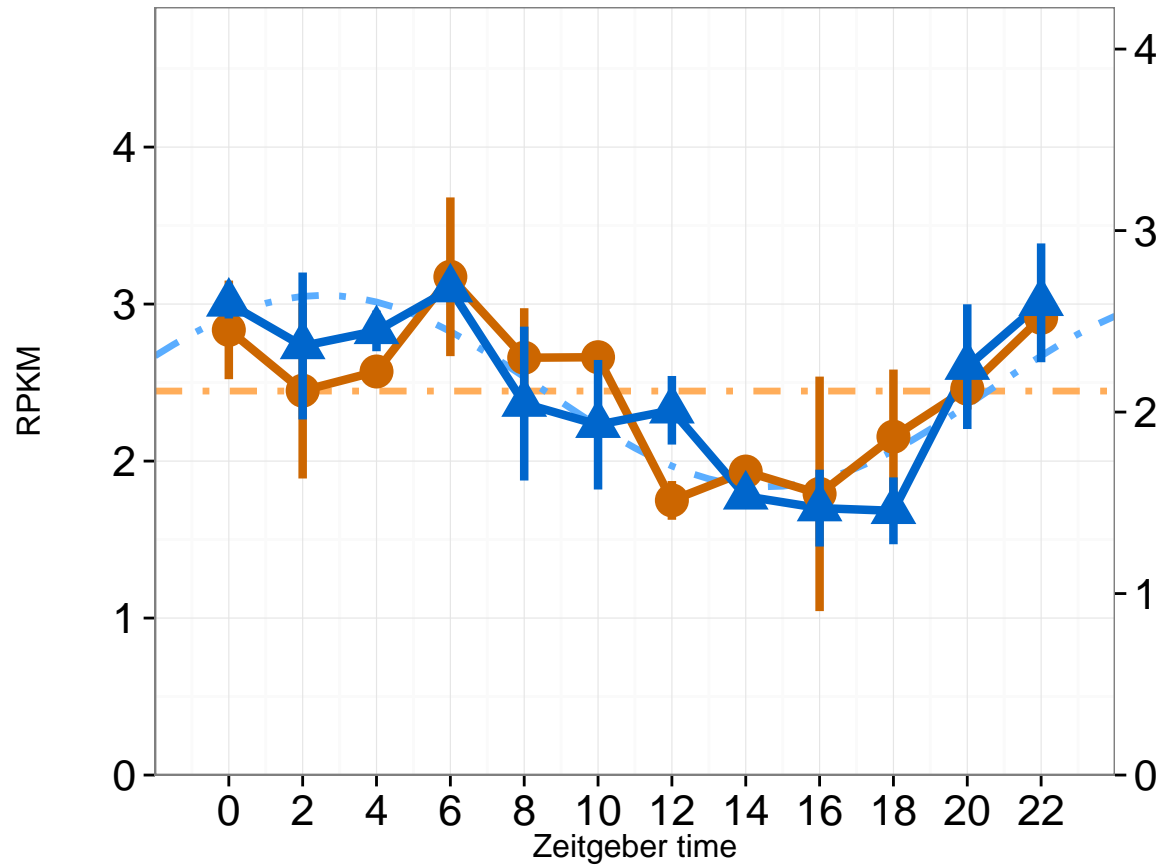

# Haus5

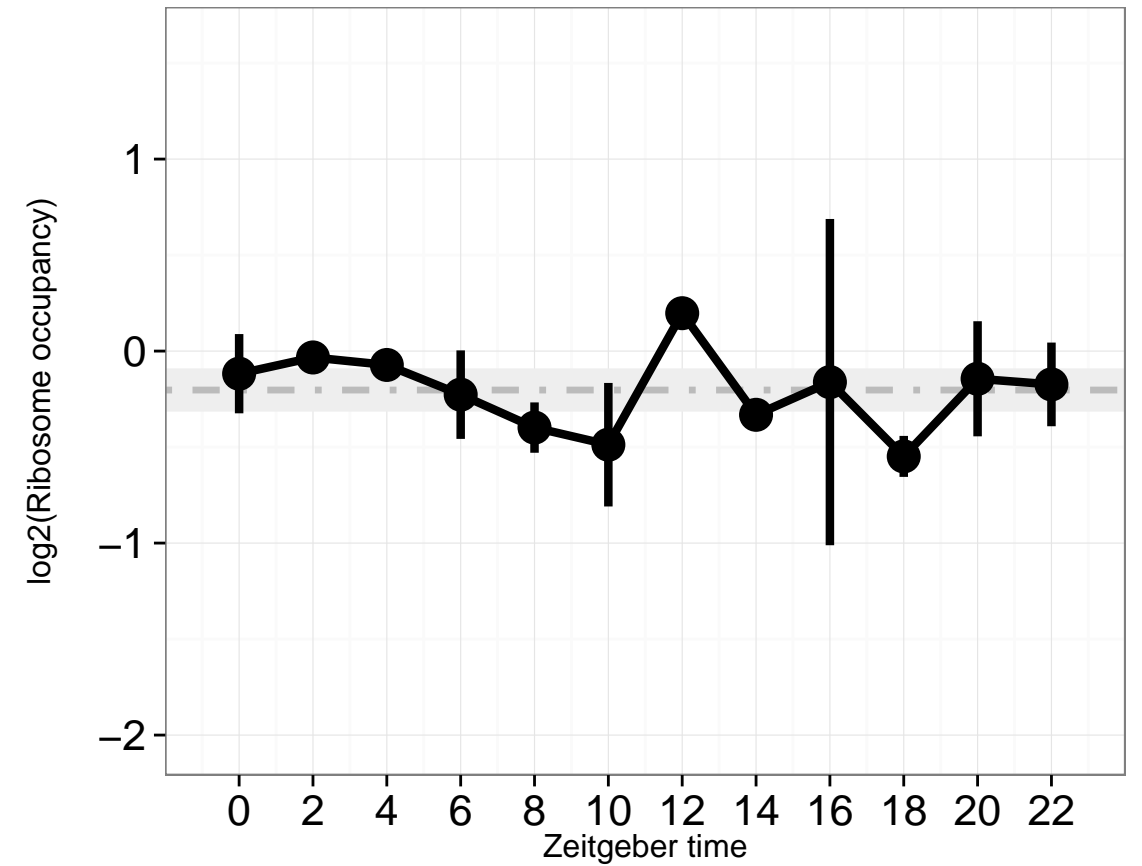

Supplement: SuppDataset_1.zip [file Haus5_set_C.pdf › Supplemental Dataset 1/C-mRNA_nonrhythm_translation_rhyth/Haus5_set_C.pdf]

# Hba-a1

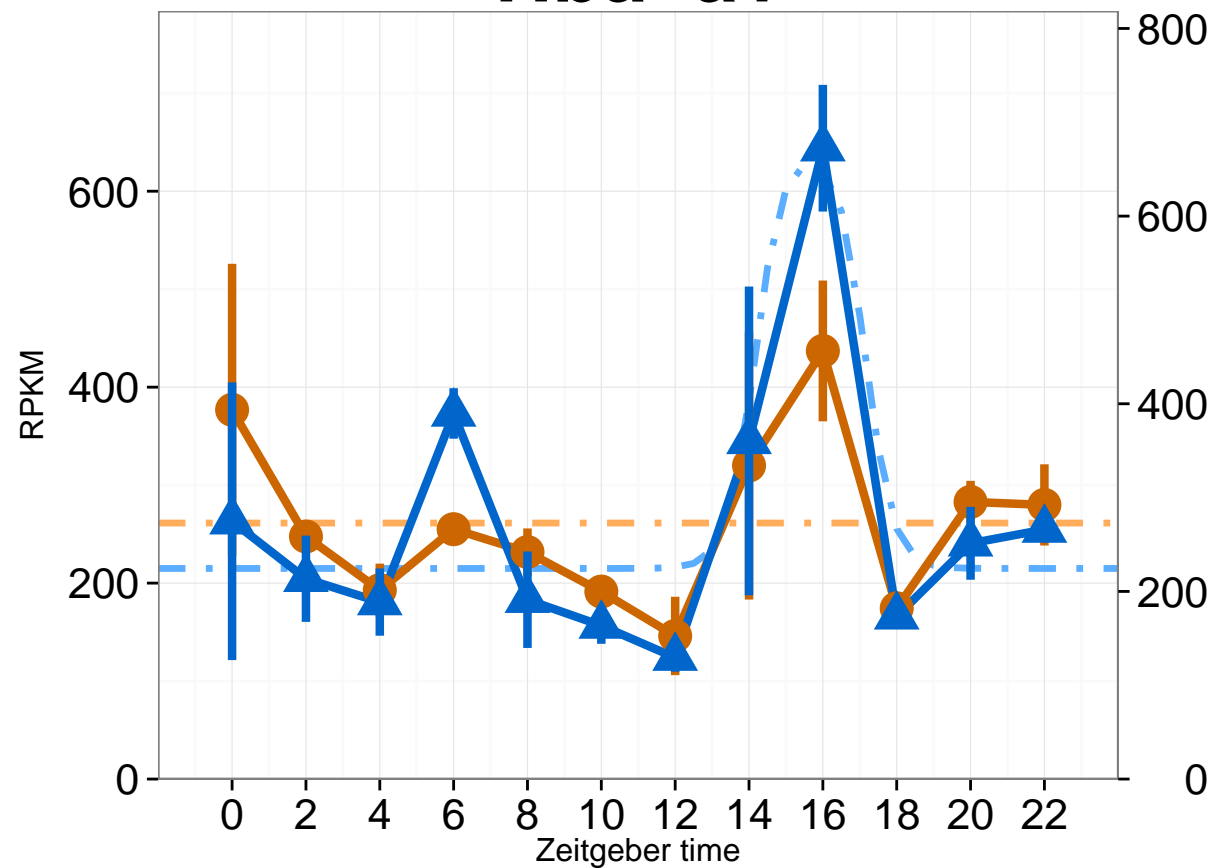

# Hba-a1

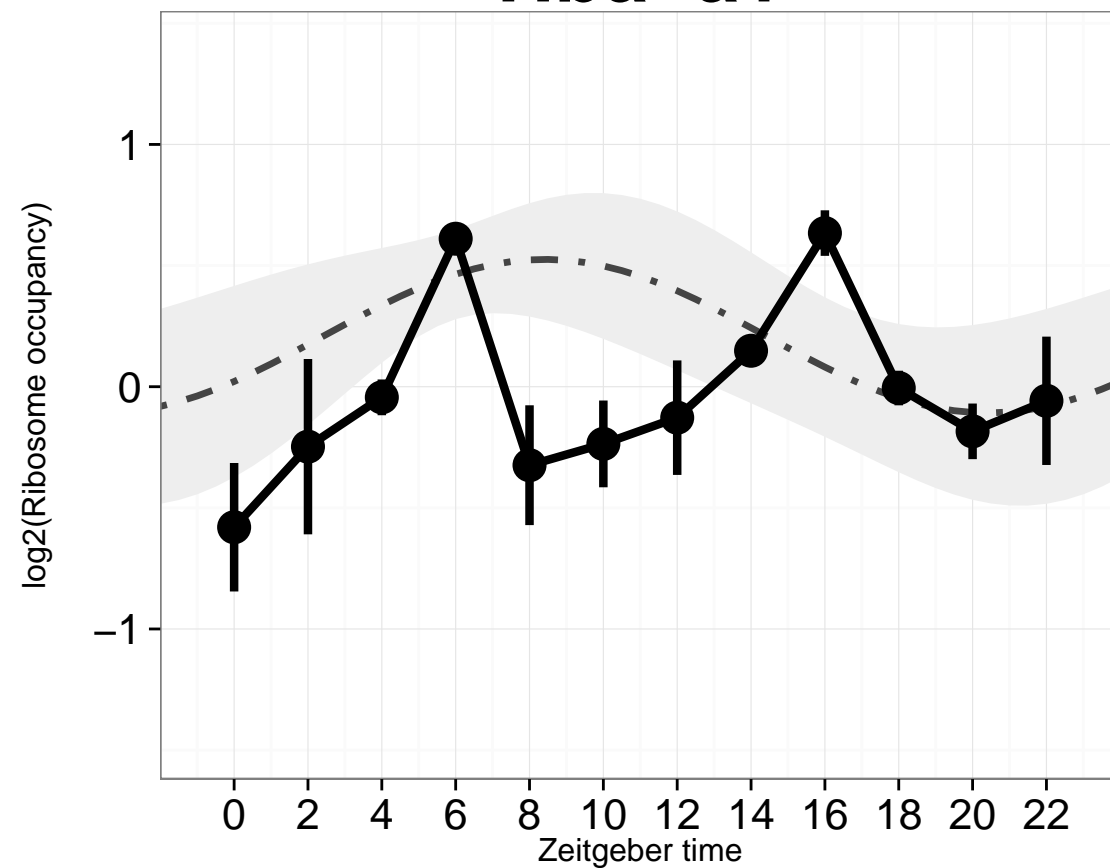

Supplement: SuppDataset_1.zip [file Hba-a1_set_C.pdf › Supplemental Dataset 1/C-mRNA_nonrhythm_translation_rhyth/Hba-a1_set_C.pdf]

# Hba-a2

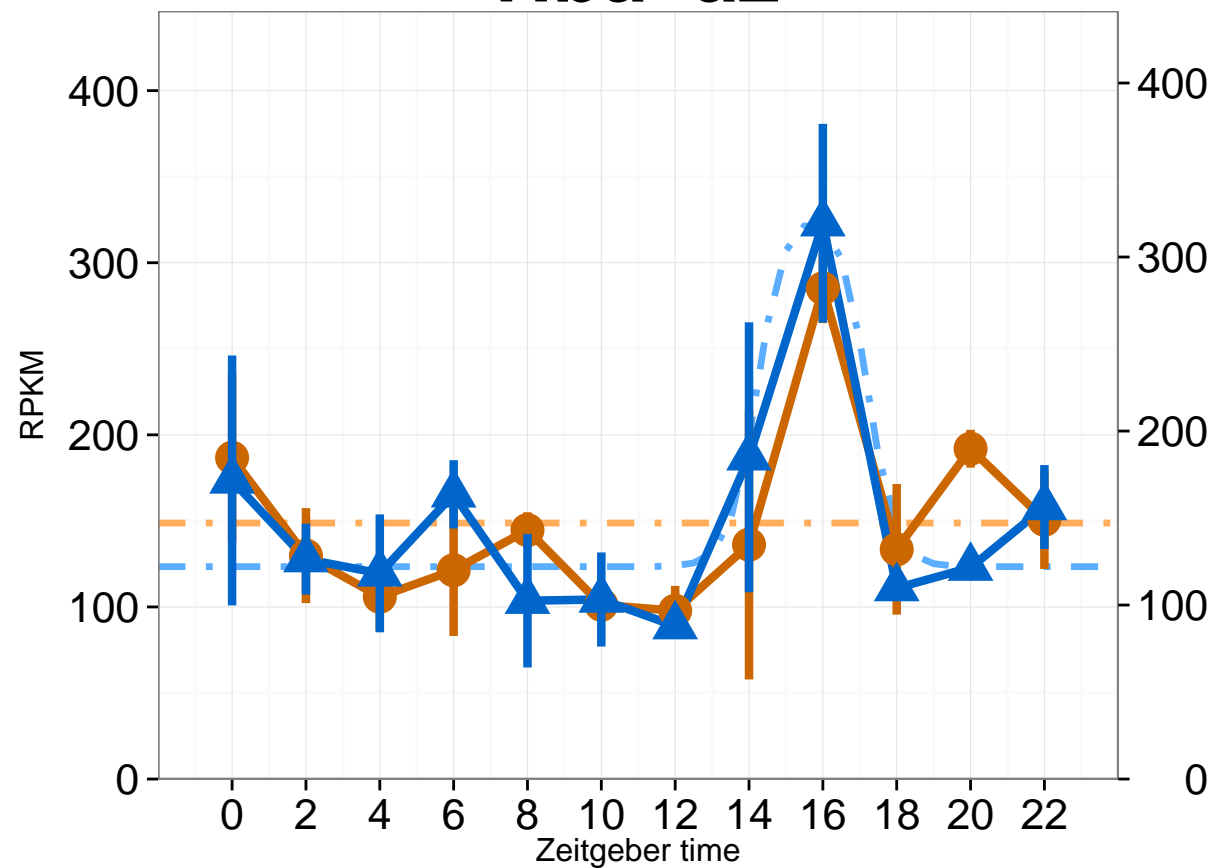

# Hba-a2

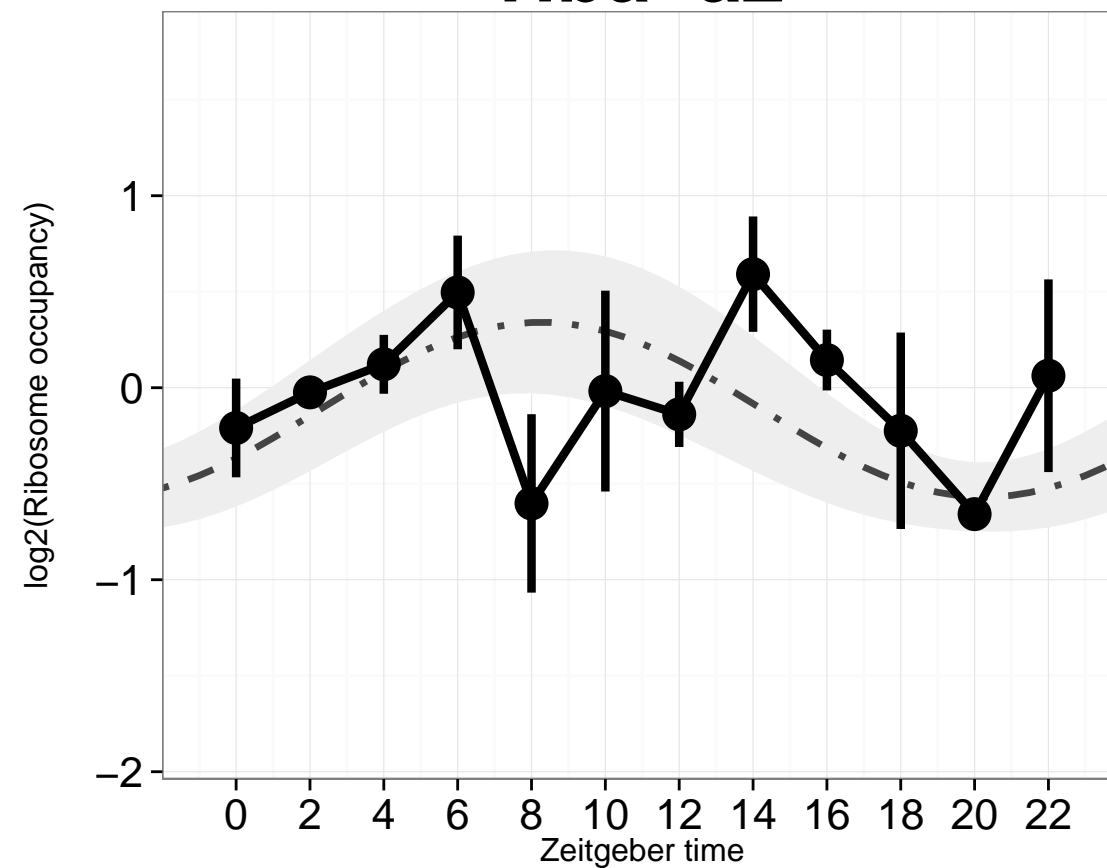

Supplement: SuppDataset_1.zip [file Hba-a2_set_C.pdf › Supplemental Dataset 1/C-mRNA_nonrhythm_translation_rhyth/Hba-a2_set_C.pdf]

# Hc

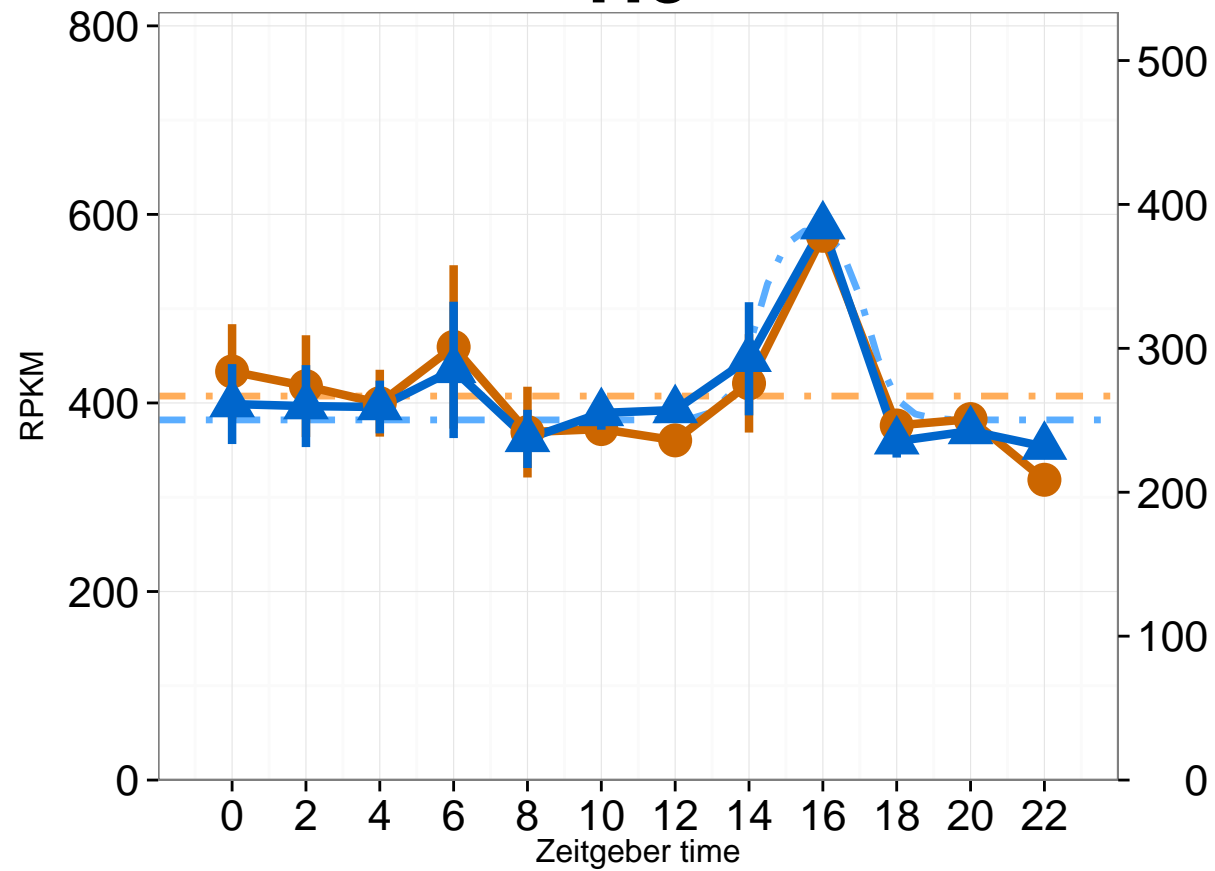

# Hc

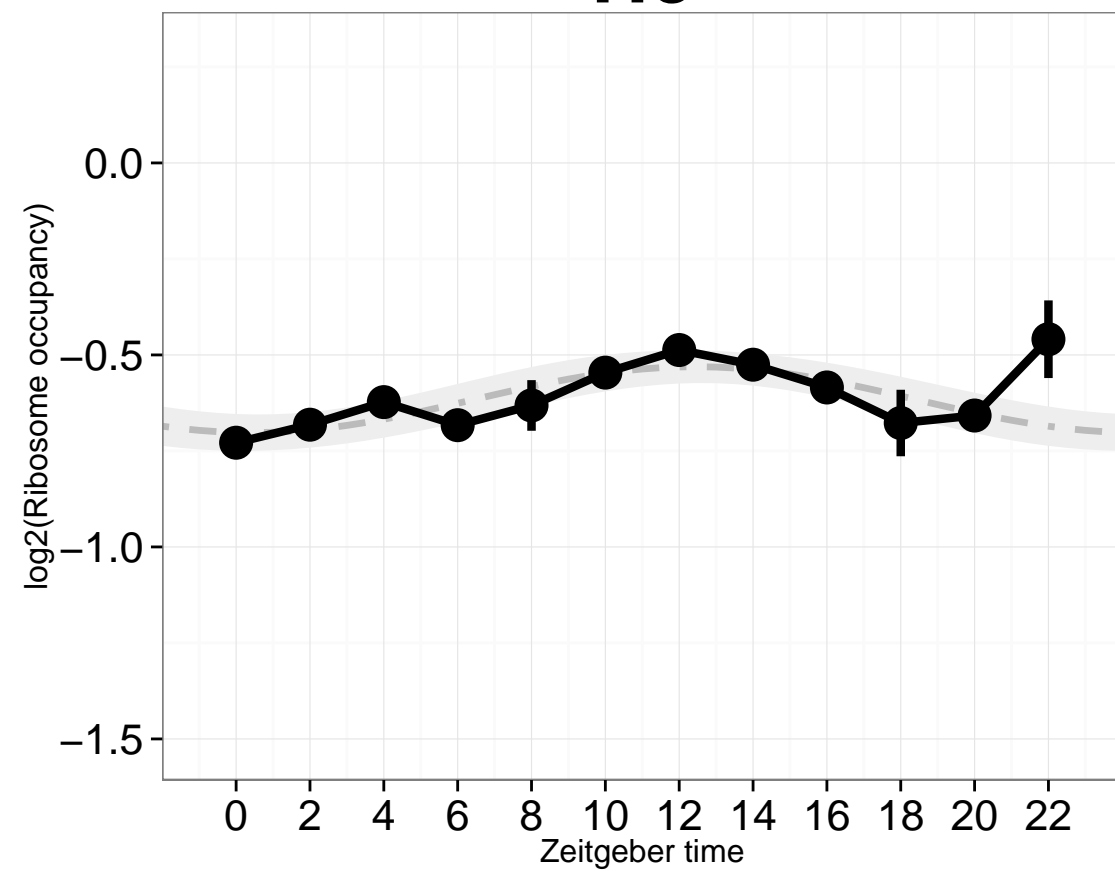

Supplement: SuppDataset_1.zip [file Hc_set_C.pdf › Supplemental Dataset 1/C-mRNA_nonrhythm_translation_rhyth/Hc_set_C.pdf]

## Hdc

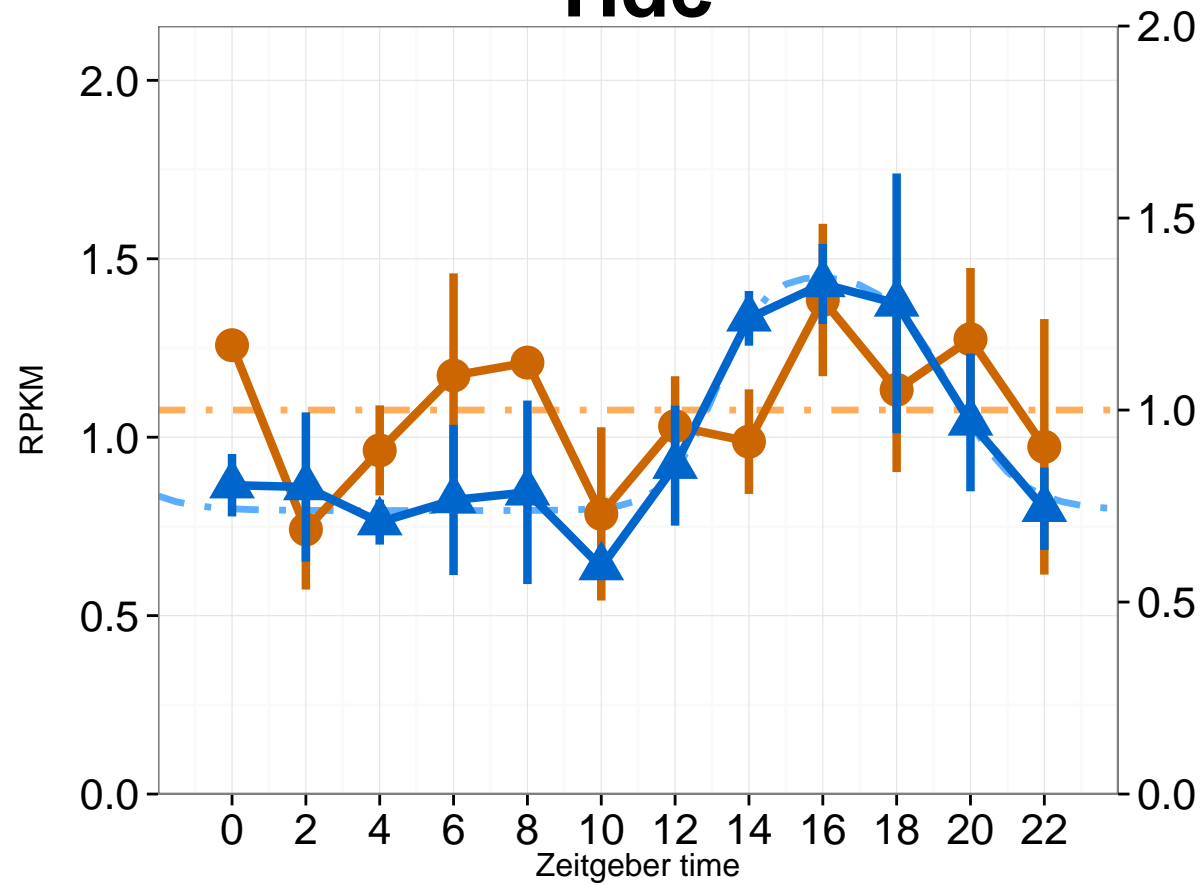

## Hdc

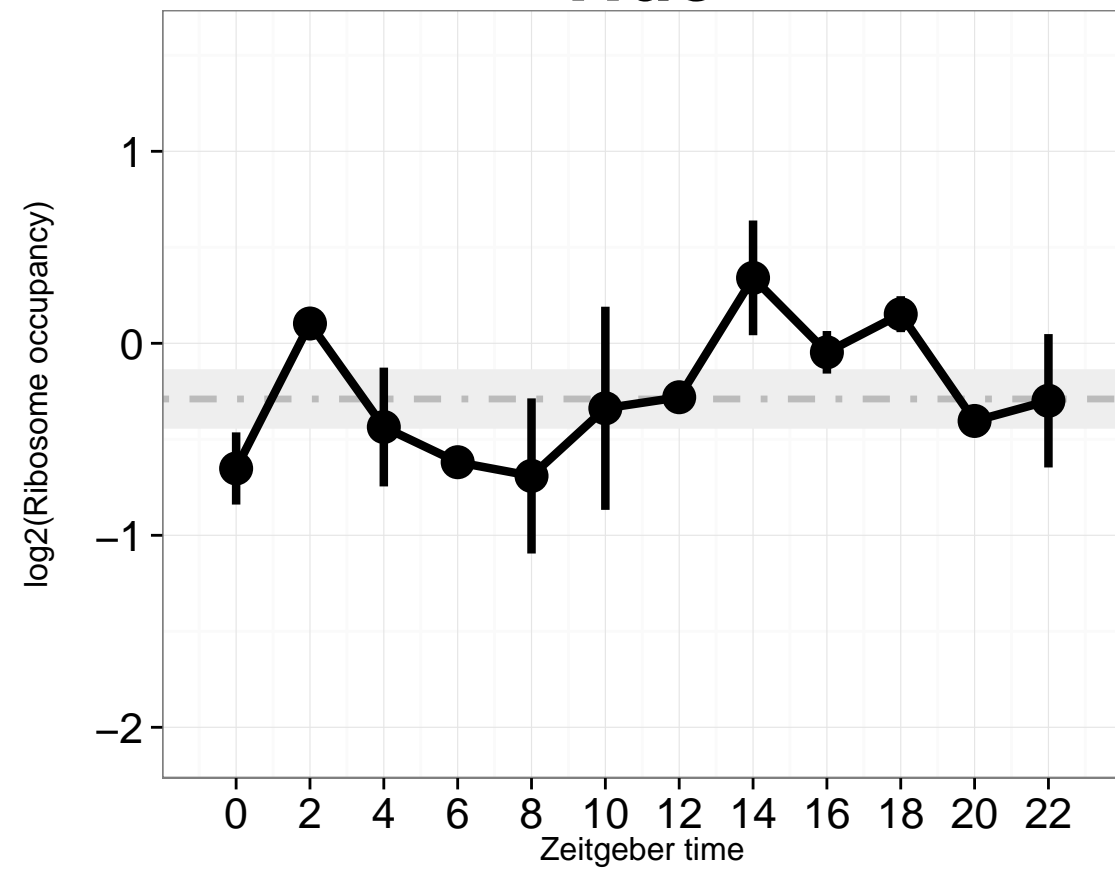

Supplement: SuppDataset_1.zip [file Hdc_set_C.pdf › Supplemental Dataset 1/C-mRNA_nonrhythm_translation_rhyth/Hdc_set_C.pdf]

## Hddc2

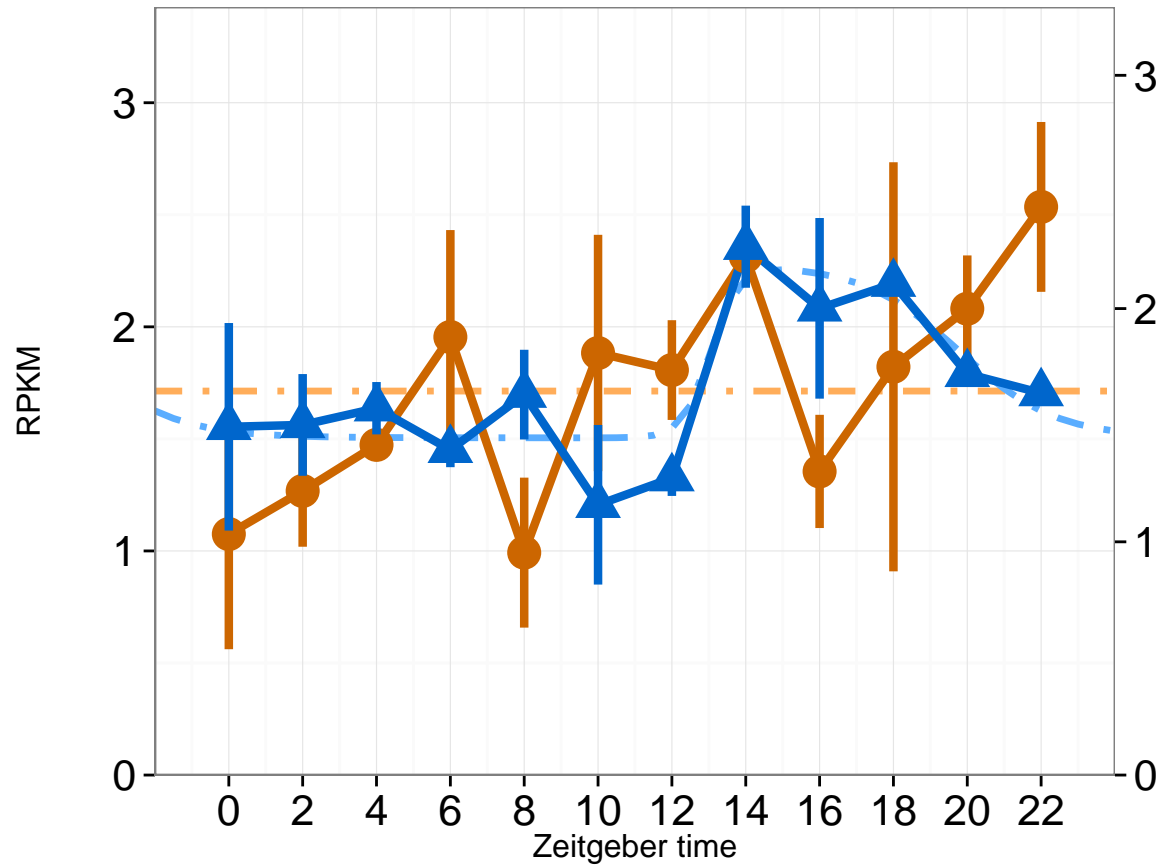

## Hddc2

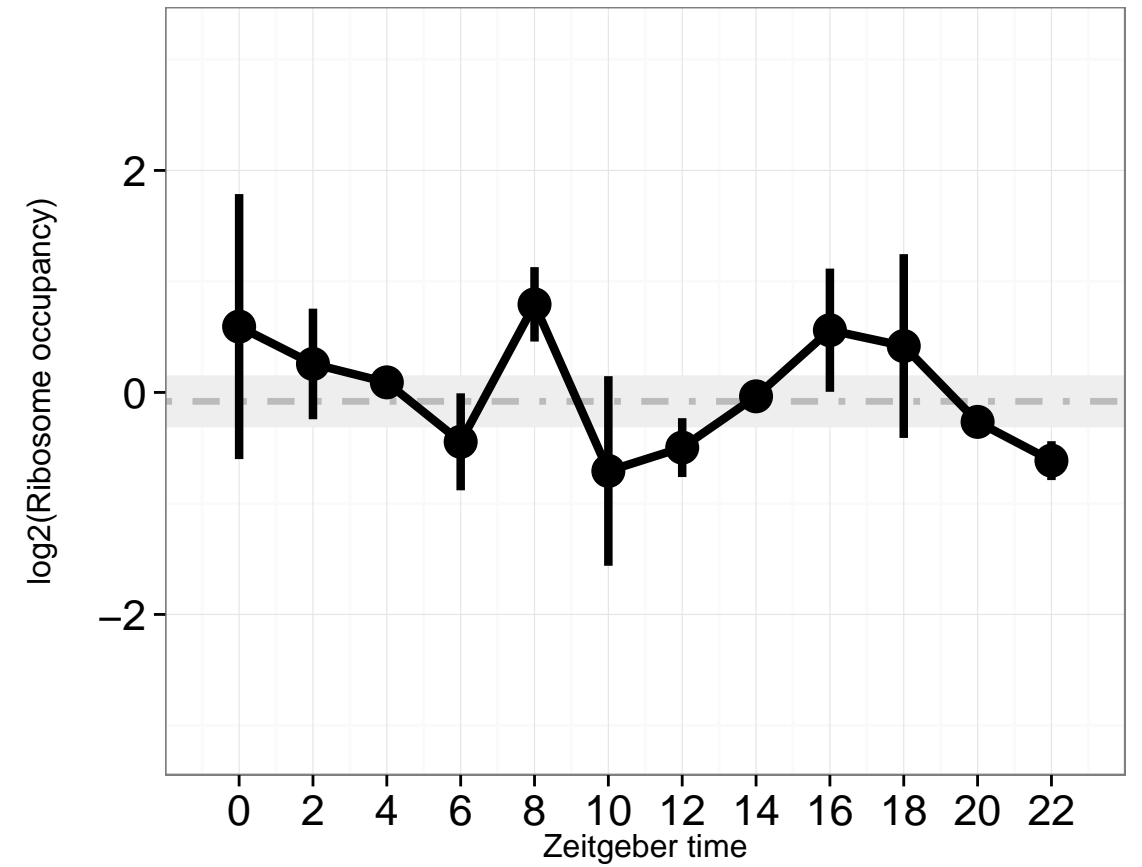

Supplement: SuppDataset_1.zip [file Hddc2_set_C.pdf › Supplemental Dataset 1/C-mRNA_nonrhythm_translation_rhyth/Hddc2_set_C.pdf]

## Hes1

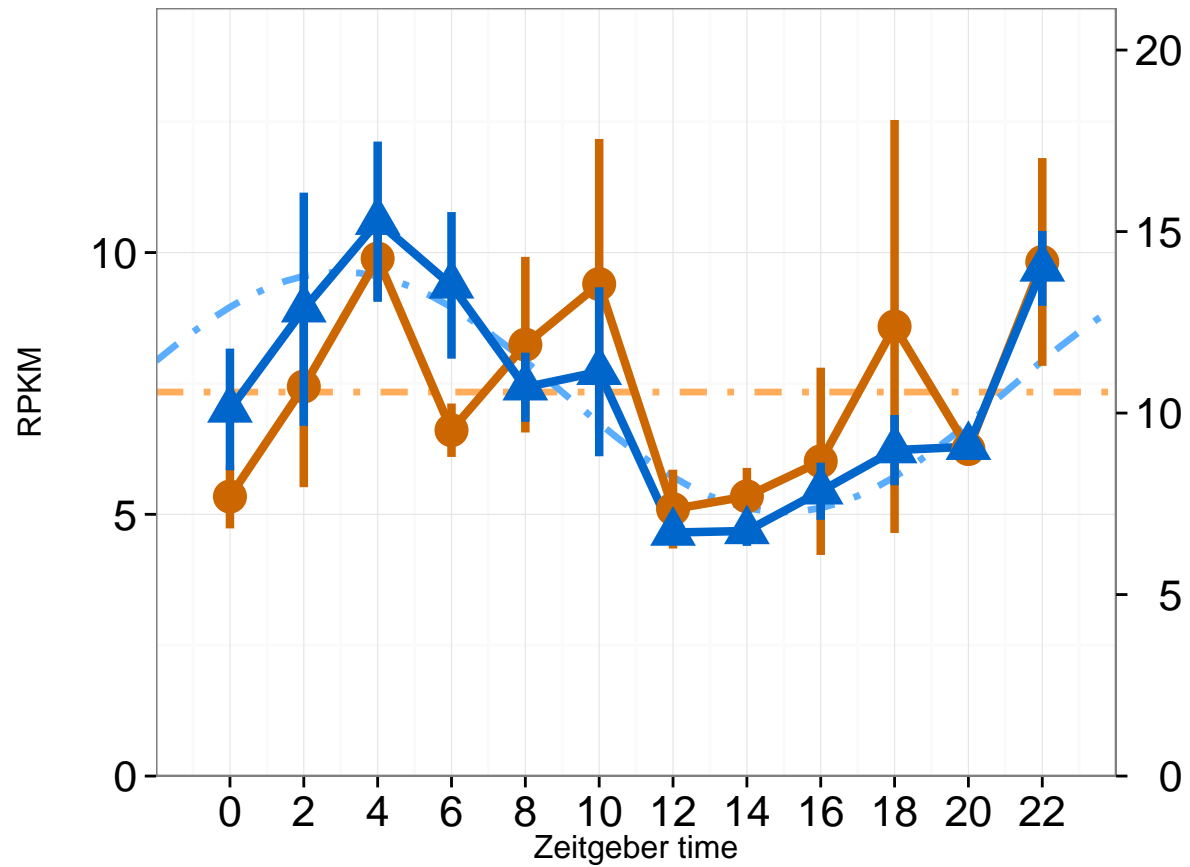

## Hes1

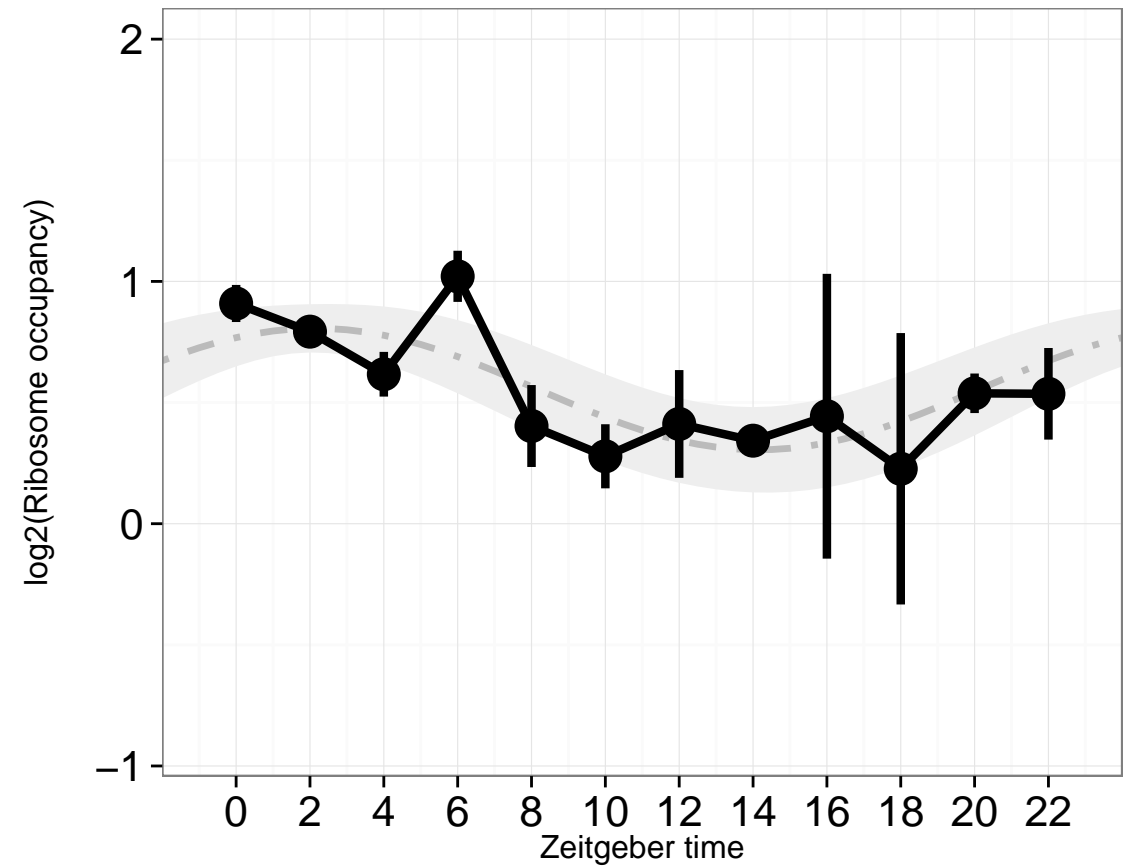

Supplement: SuppDataset_1.zip [file Hes1_set_C.pdf › Supplemental Dataset 1/C-mRNA_nonrhythm_translation_rhyth/Hes1_set_C.pdf]

## Hes6

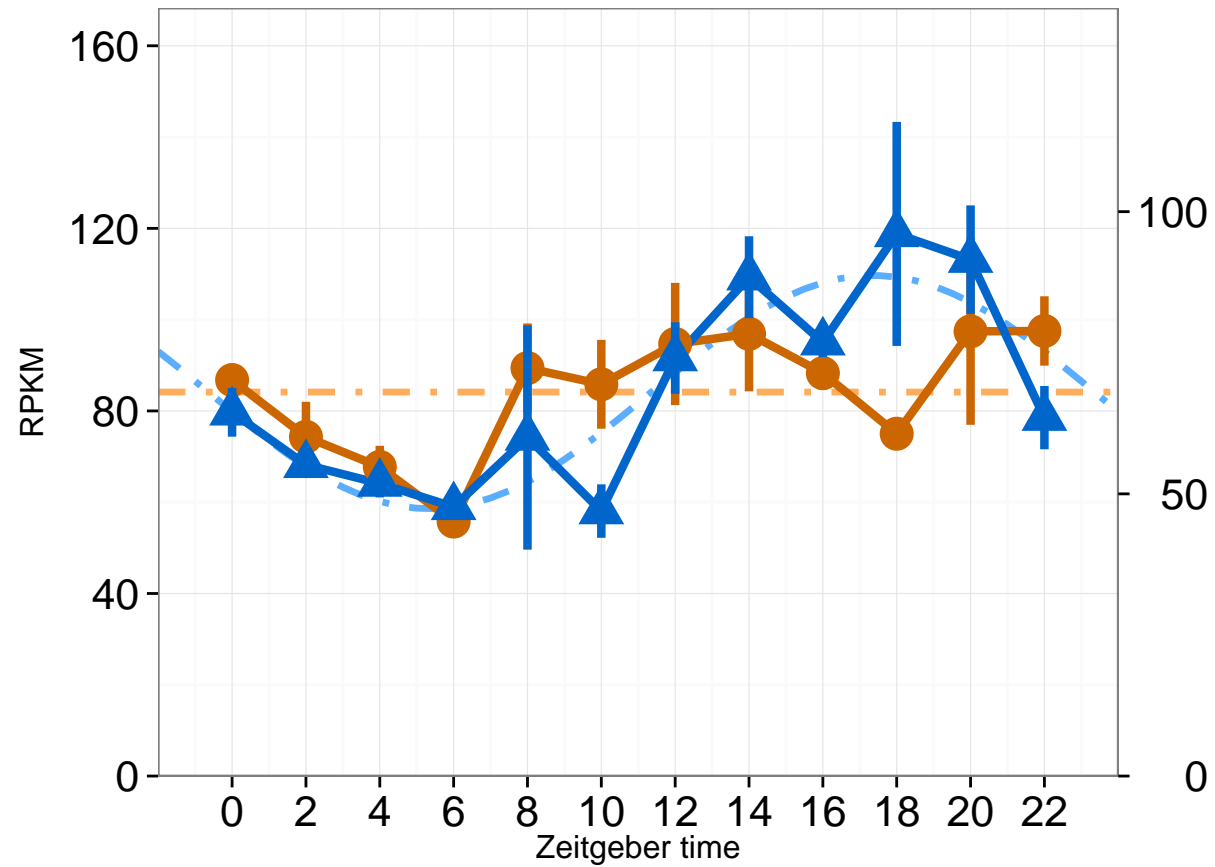

## Hes6

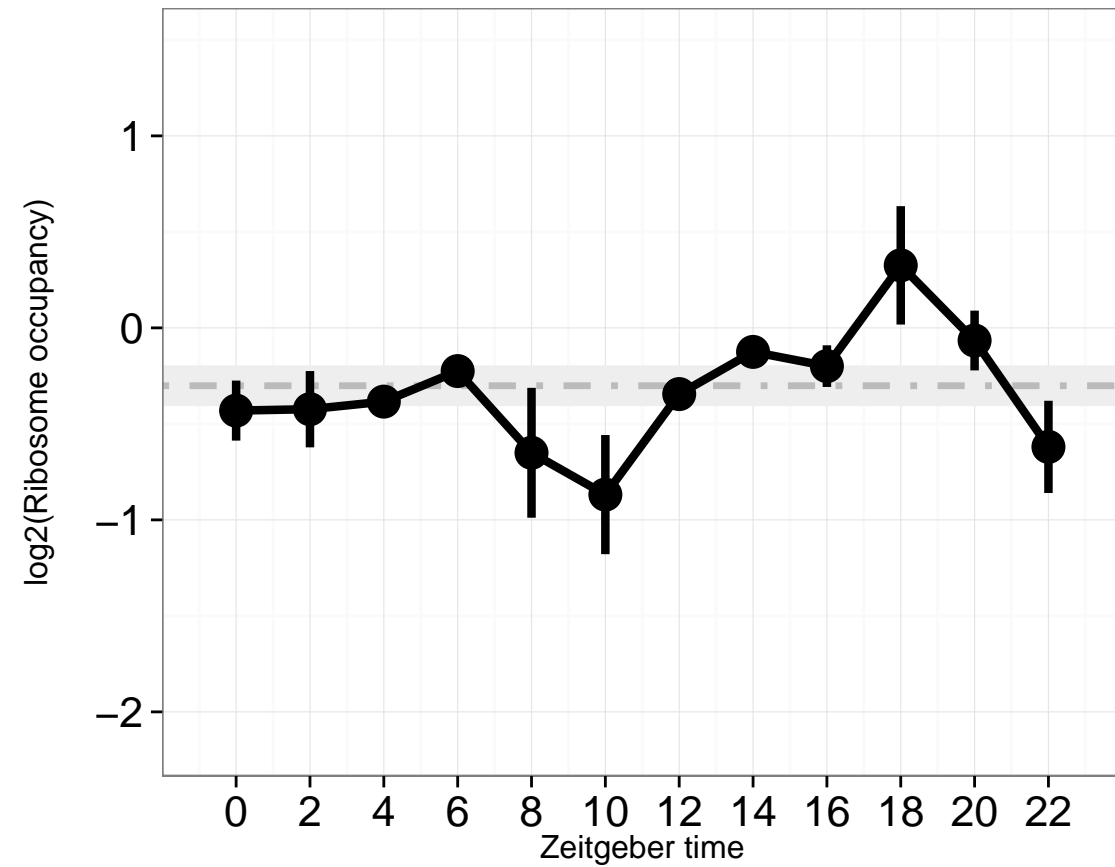

Supplement: SuppDataset_1.zip [file Hes6_set_C.pdf › Supplemental Dataset 1/C-mRNA_nonrhythm_translation_rhyth/Hes6_set_C.pdf]

# Hexim1

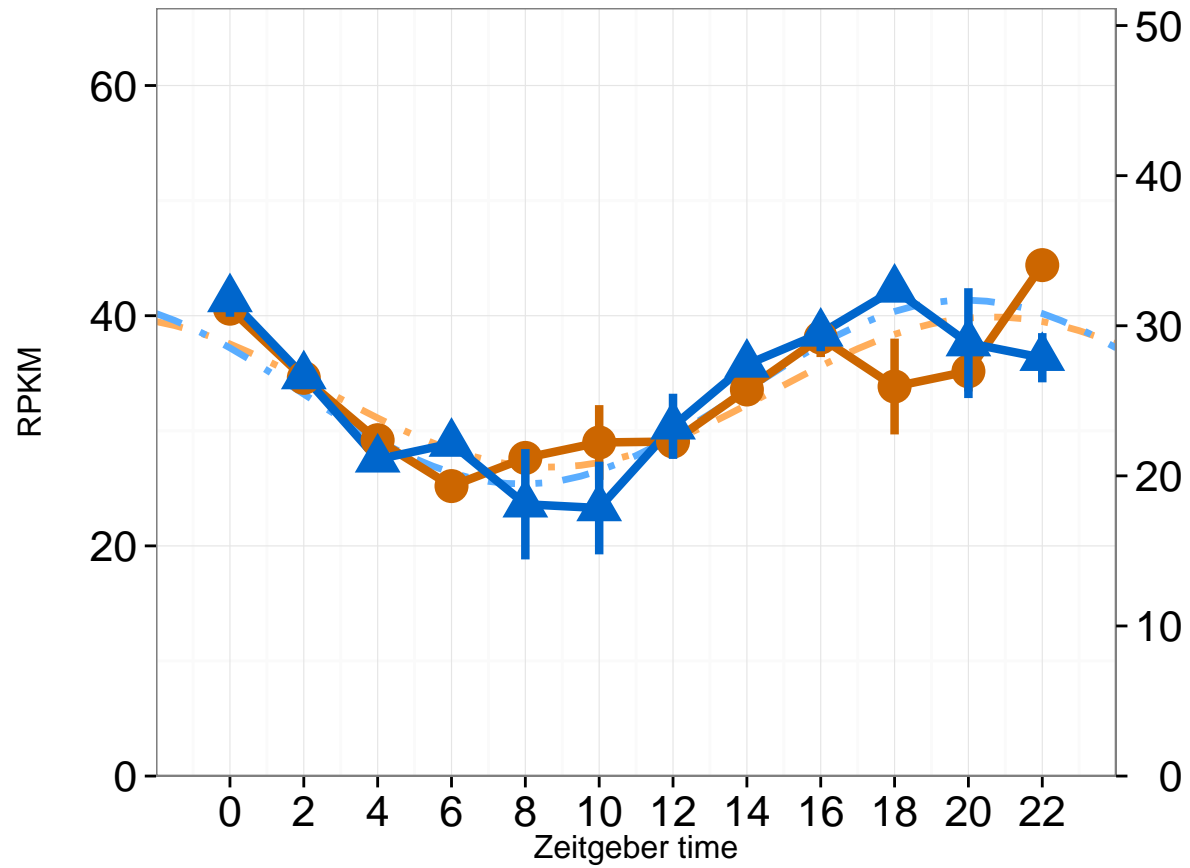

# Hexim1

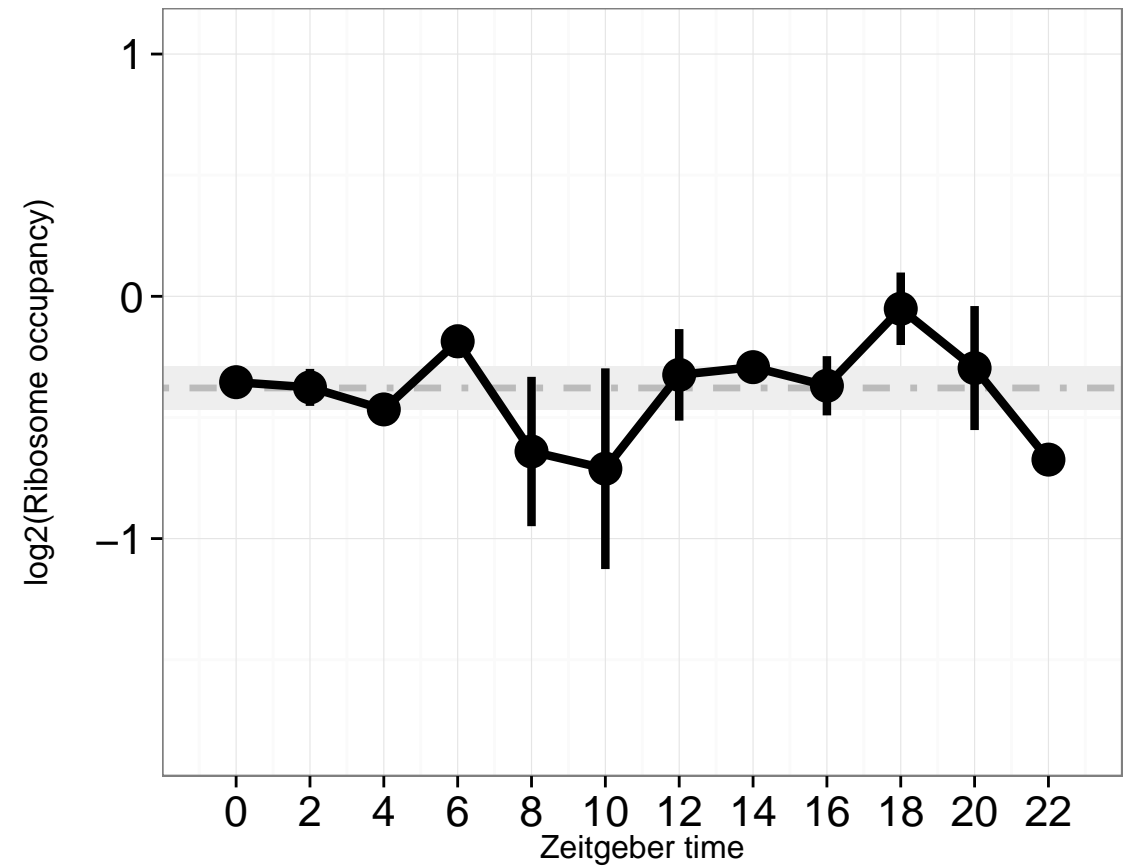

Supplement: SuppDataset_1.zip [file Hexim1_set_C.pdf › Supplemental Dataset 1/C-mRNA_nonrhythm_translation_rhyth/Hexim1_set_C.pdf]

# Heyl

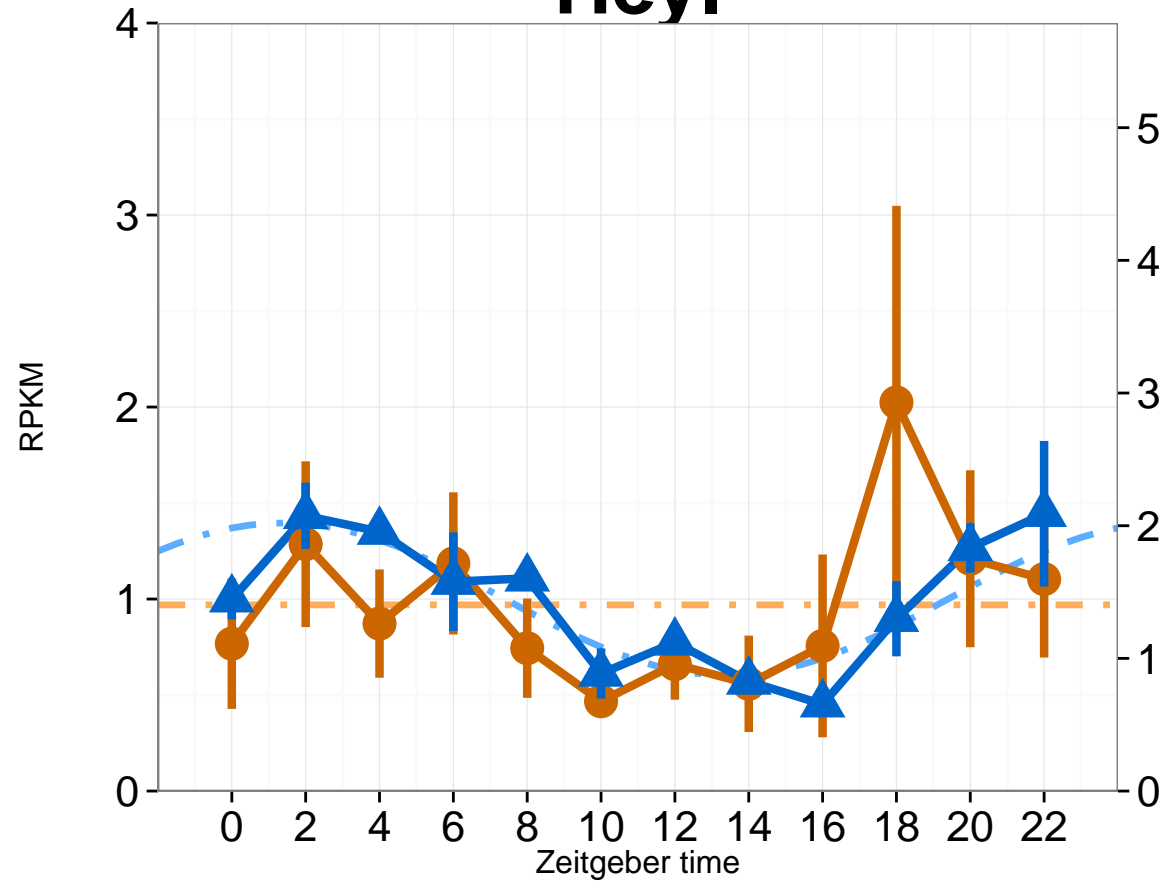

# Heyl

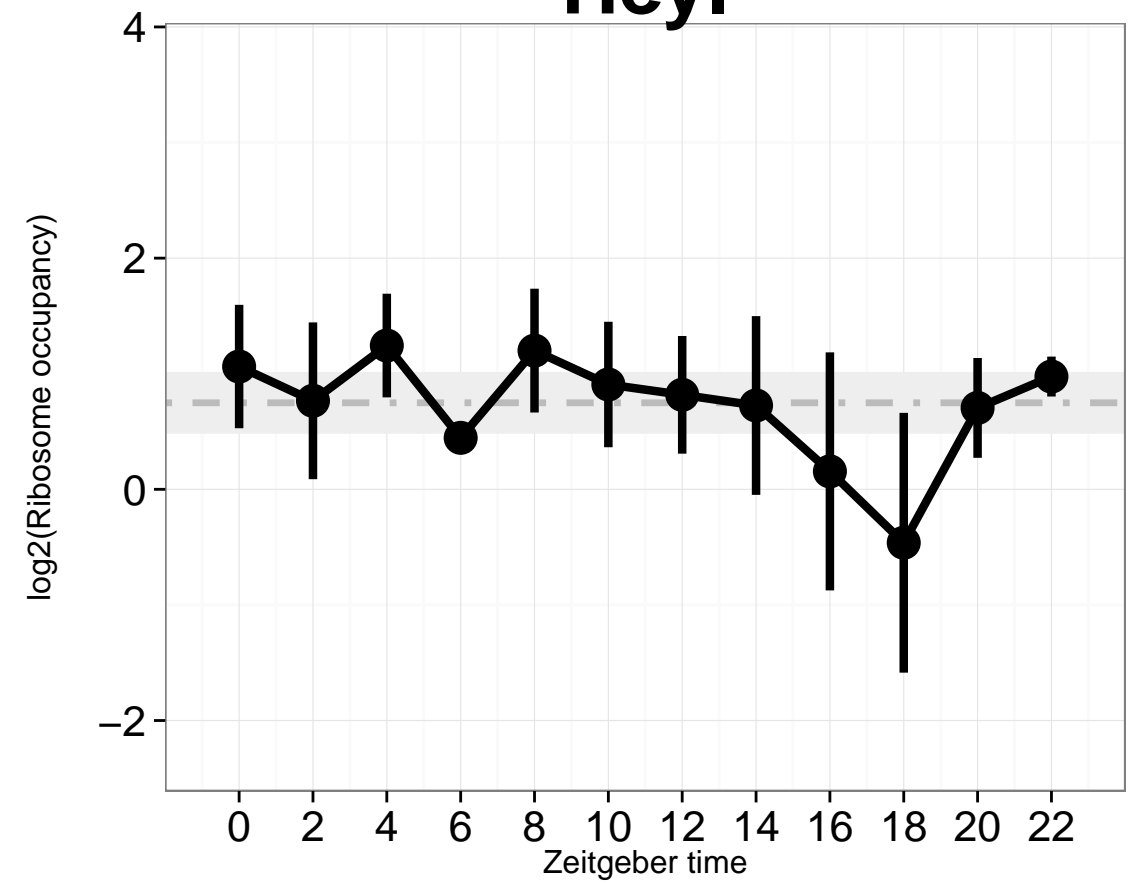

Supplement: SuppDataset_1.zip [file Heyl_set_C.pdf › Supplemental Dataset 1/C-mRNA_nonrhythm_translation_rhyth/Heyl_set_C.pdf]

# Hist1h2ad

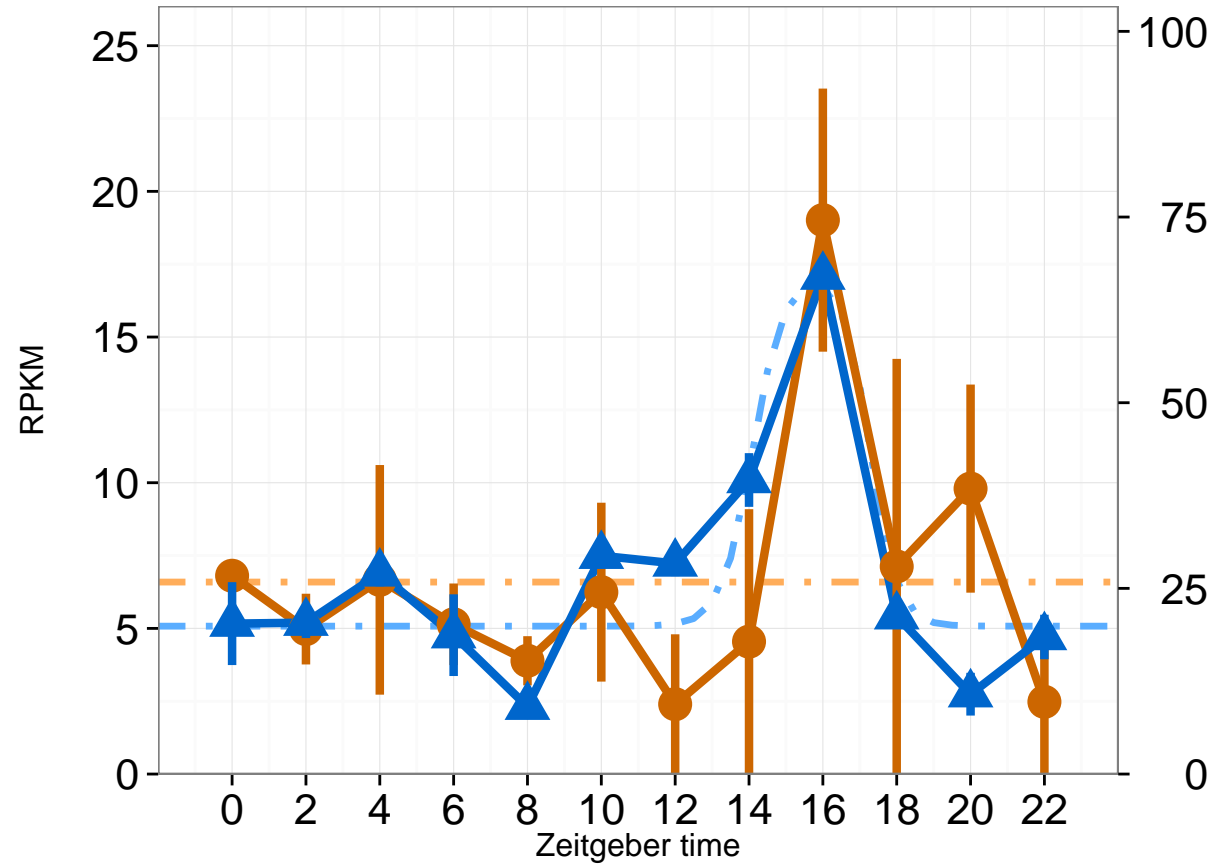

# Hist1h2ad

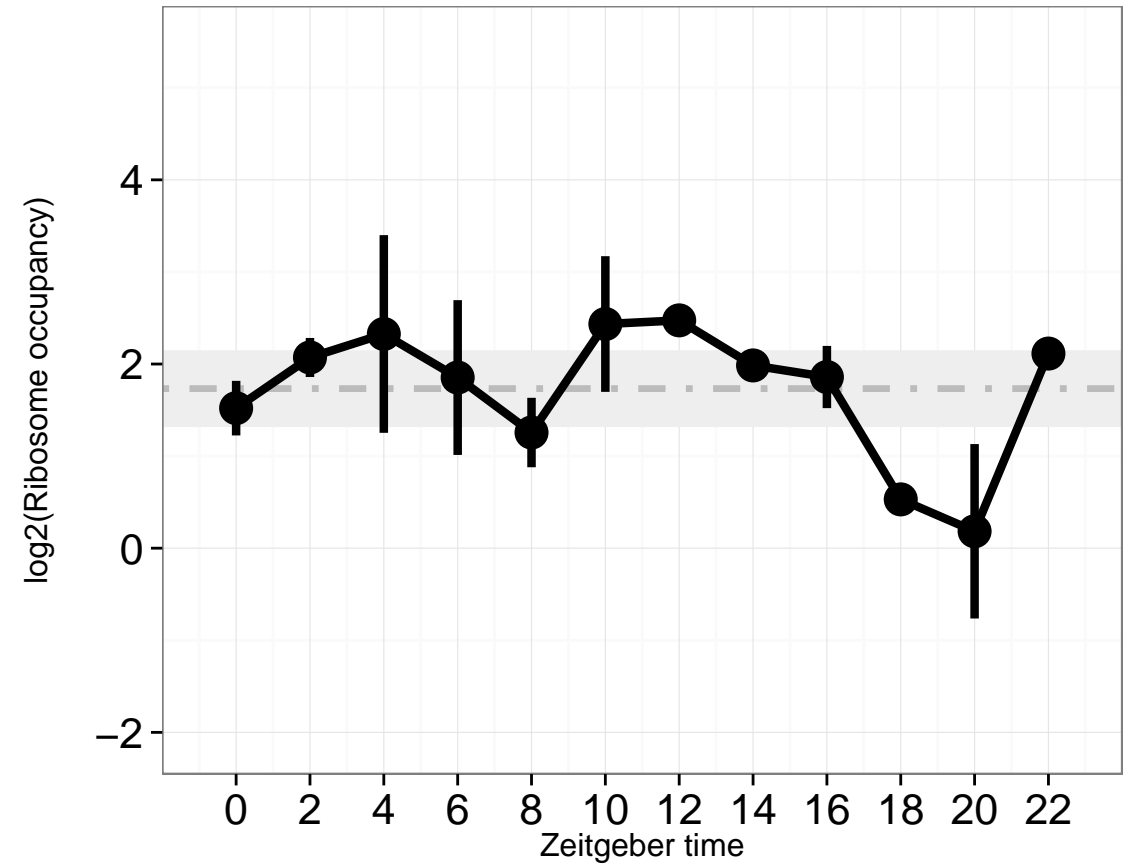

Supplement: SuppDataset_1.zip [file Hist1h2ad_set_C.pdf › Supplemental Dataset 1/C-mRNA_nonrhythm_translation_rhyth/Hist1h2ad_set_C.pdf]

# Hist1h2ap

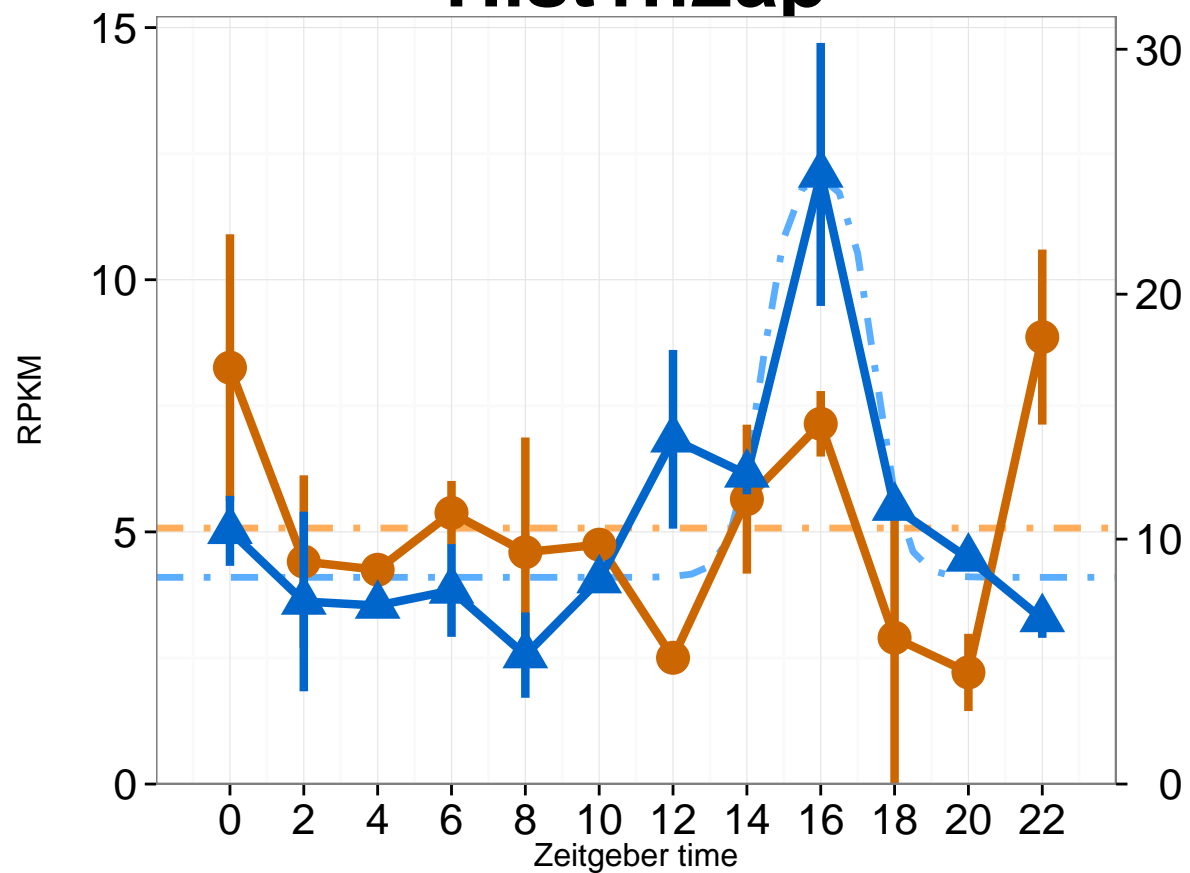

# Hist1h2ap

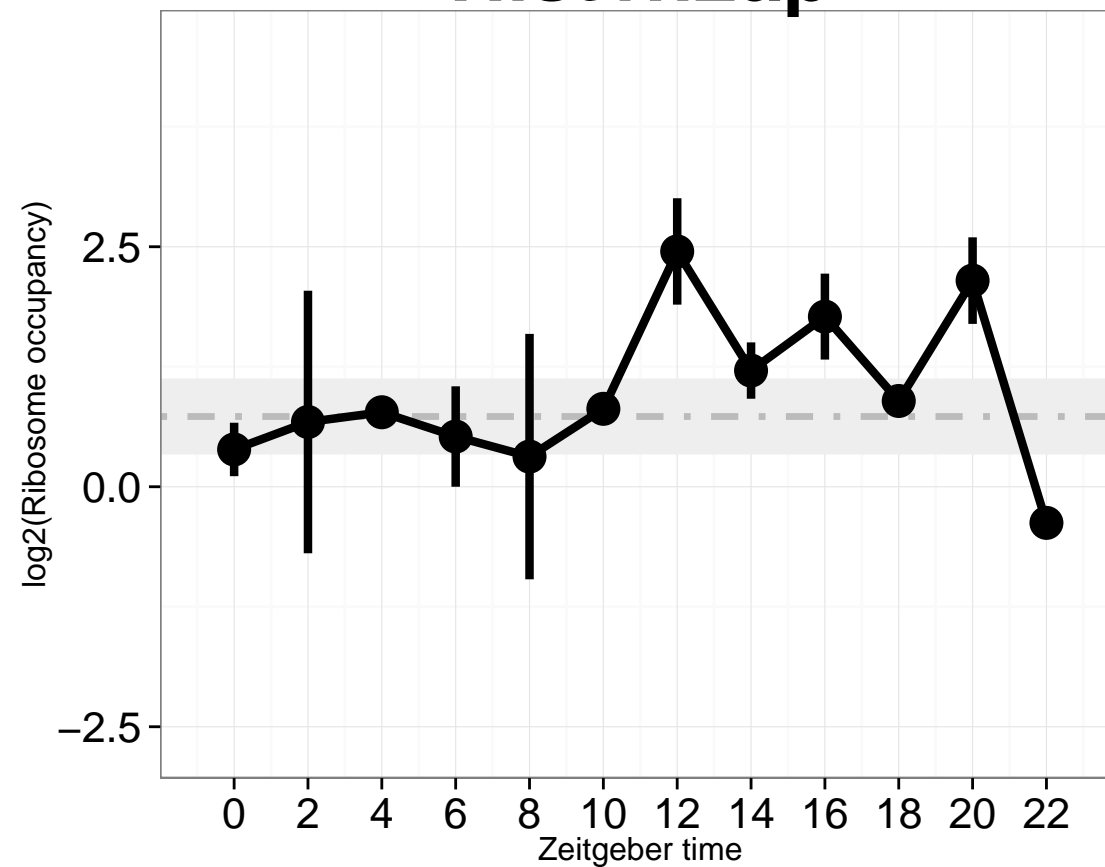

Supplement: SuppDataset_1.zip [file Hist1h2ap_set_C.pdf › Supplemental Dataset 1/C-mRNA_nonrhythm_translation_rhyth/Hist1h2ap_set_C.pdf]

# Hist1h3b

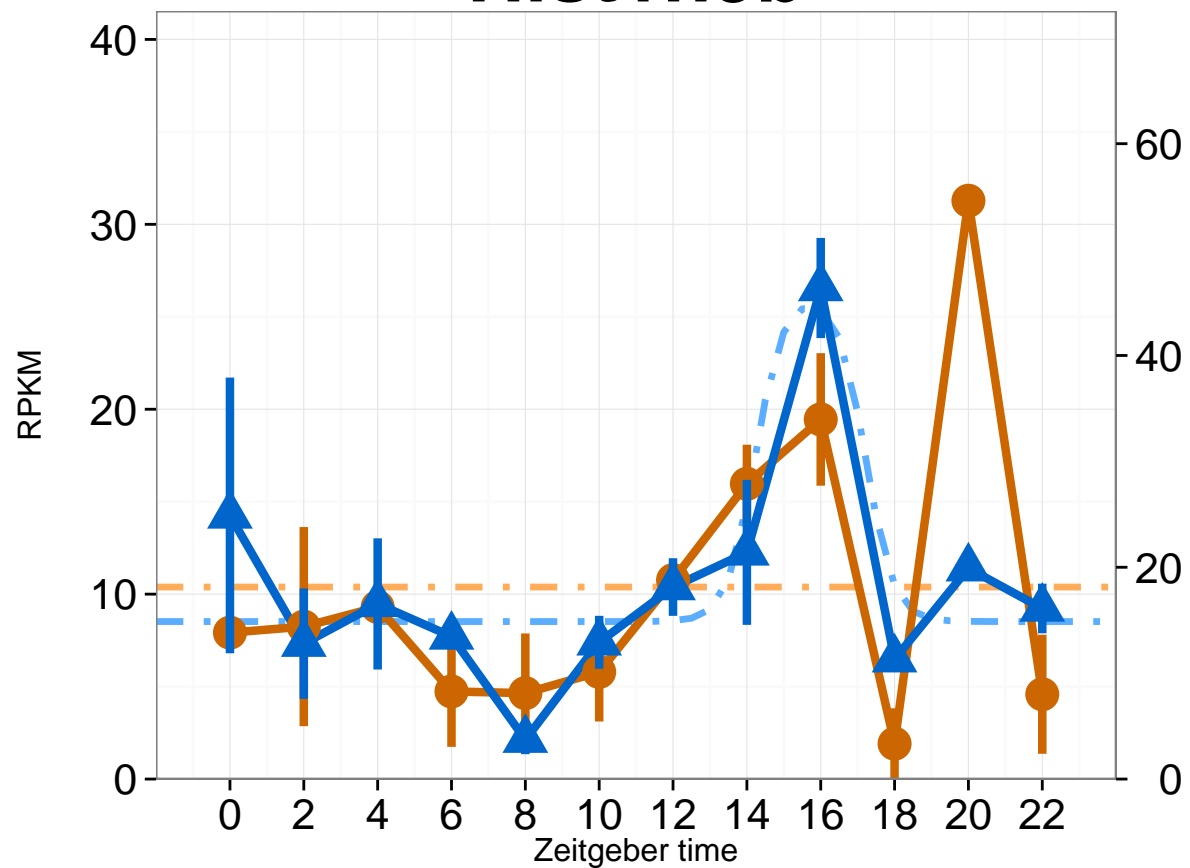

# Hist1h3b

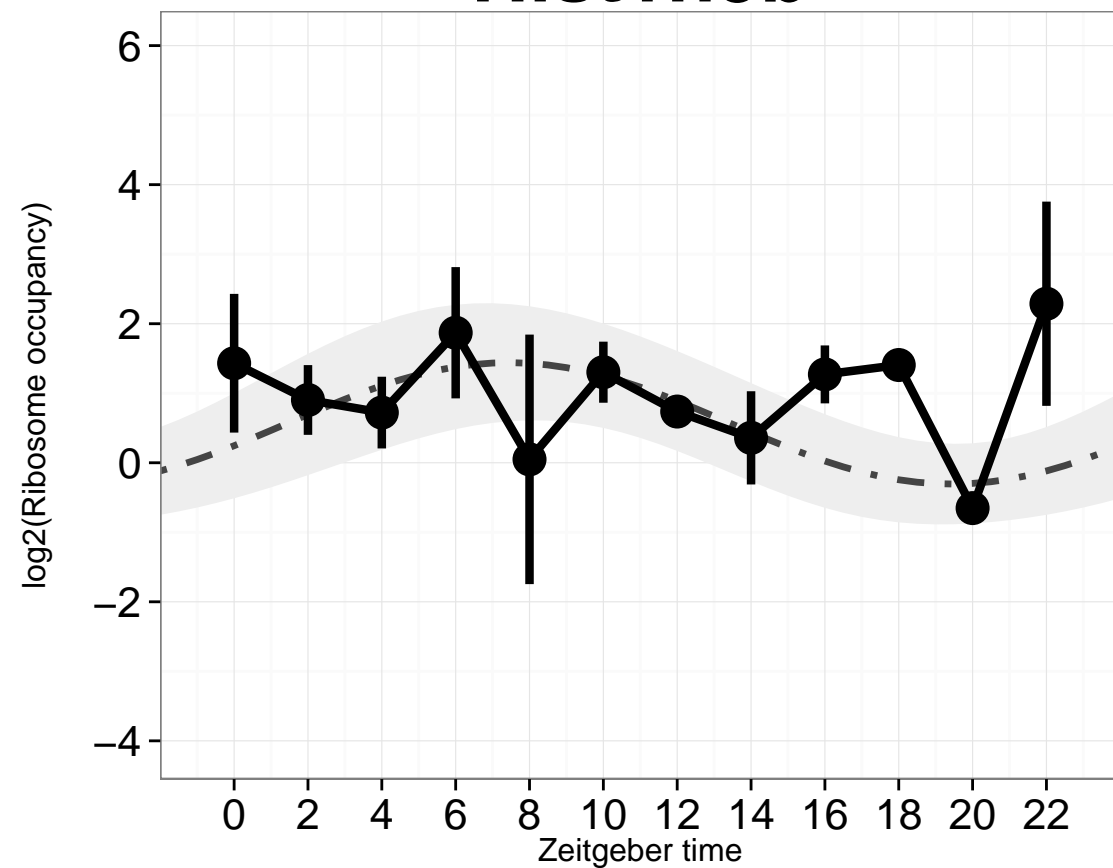

Supplement: SuppDataset_1.zip [file Hist1h3b_set_C.pdf › Supplemental Dataset 1/C-mRNA_nonrhythm_translation_rhyth/Hist1h3b_set_C.pdf]

# Hist1h3h

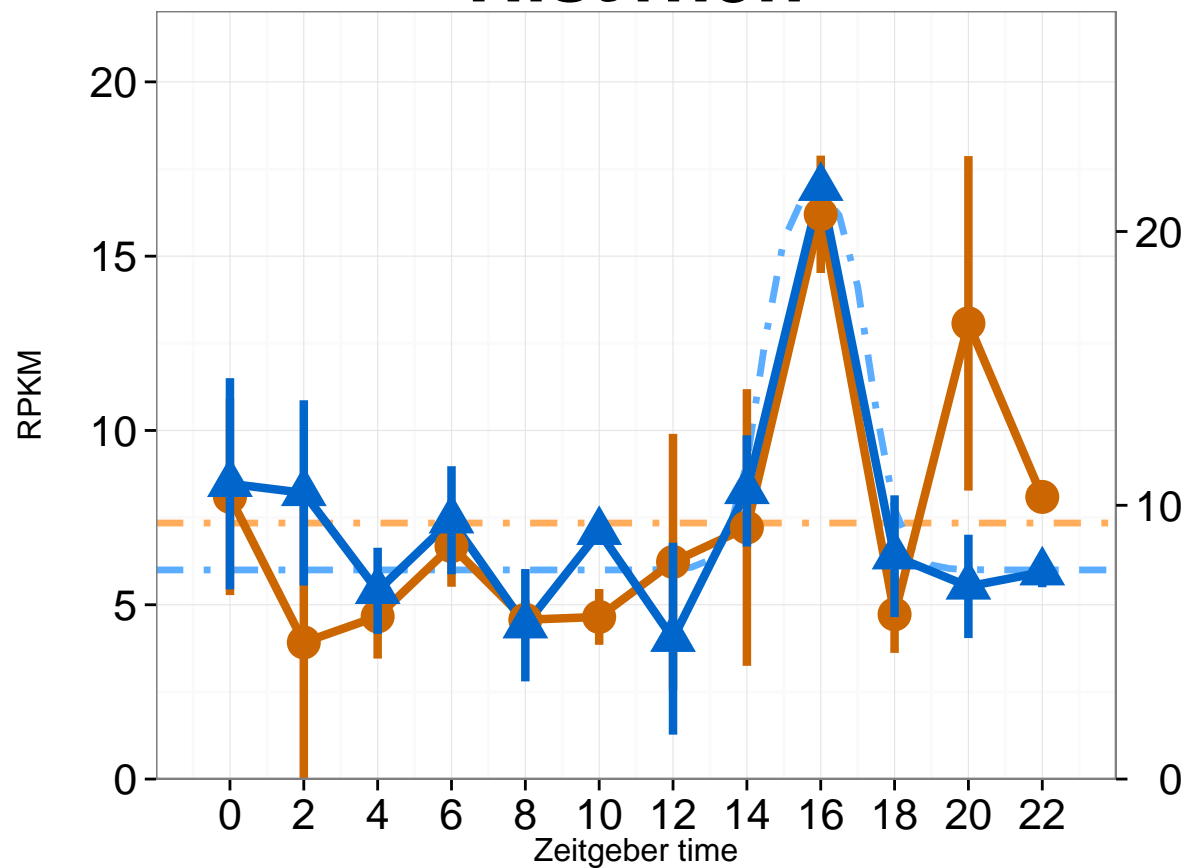

# Hist1h3h

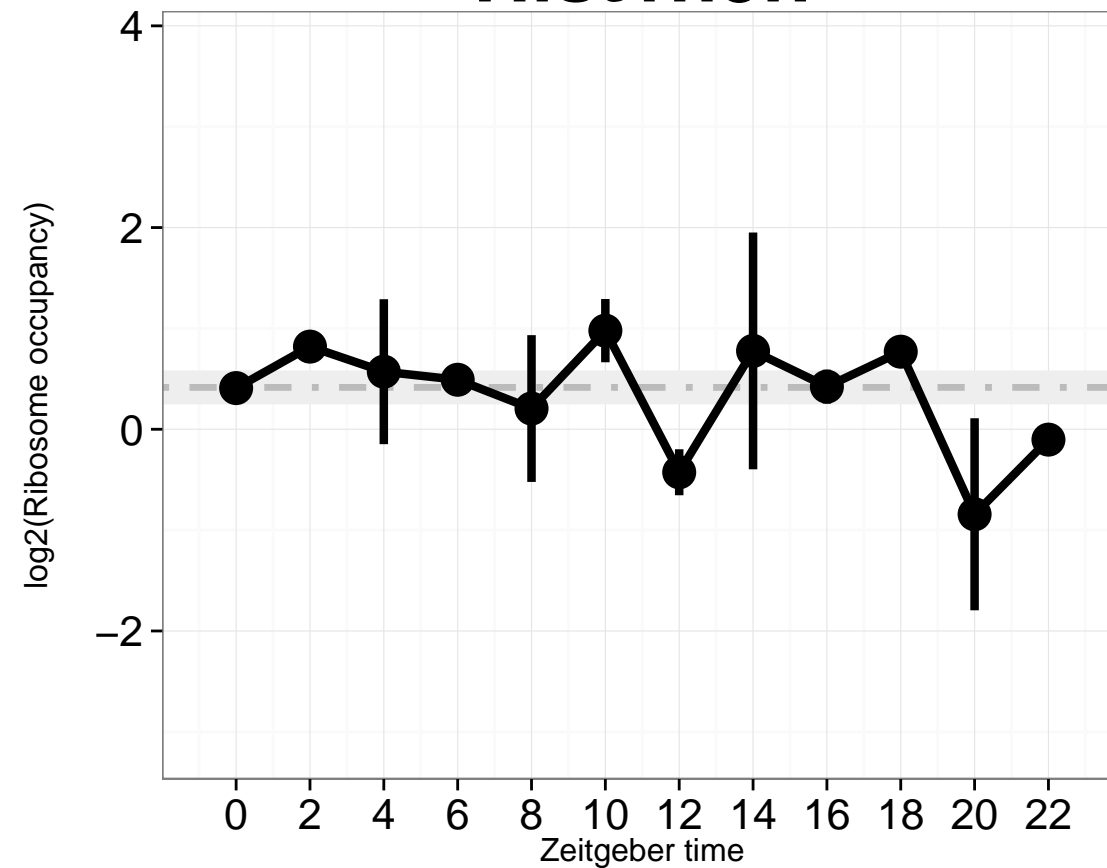

Supplement: SuppDataset_1.zip [file Hist1h3h_set_C.pdf › Supplemental Dataset 1/C-mRNA_nonrhythm_translation_rhyth/Hist1h3h_set_C.pdf]

# Hist2h2bb

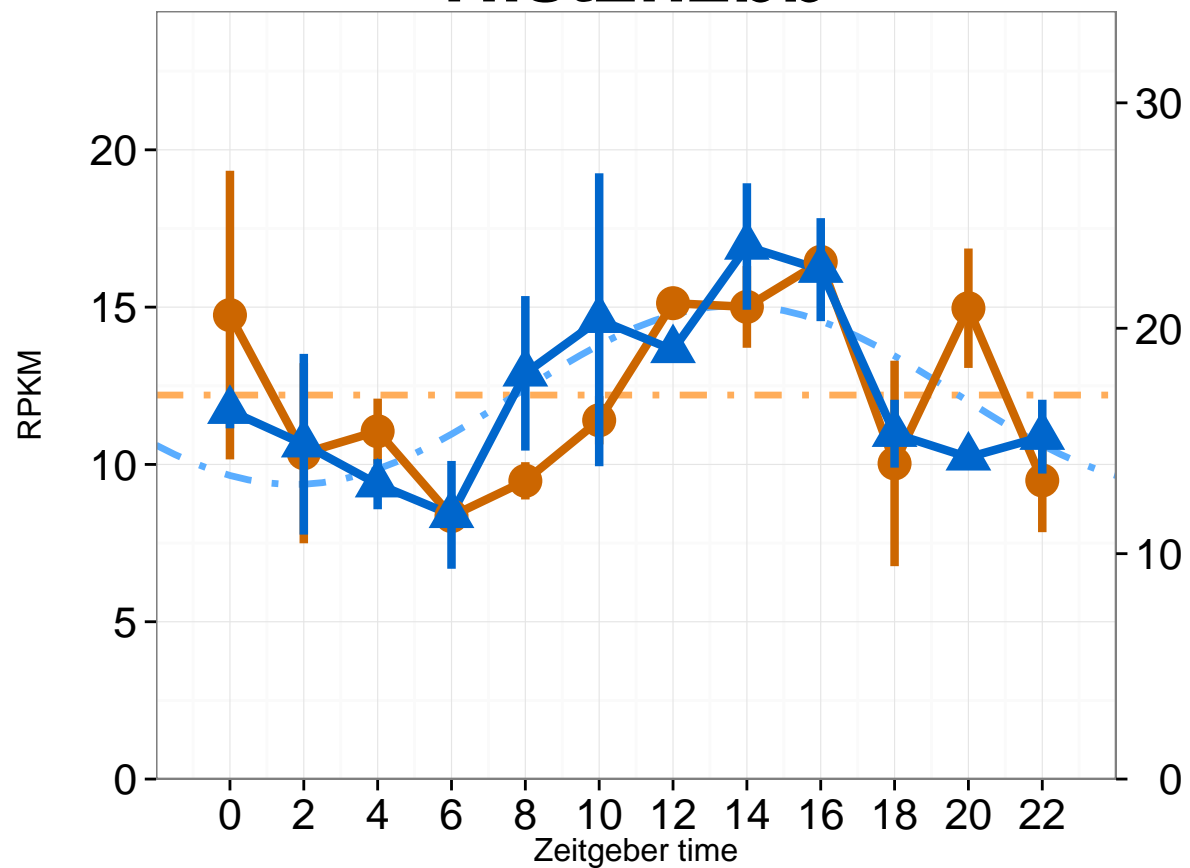

# Hist2h2bb

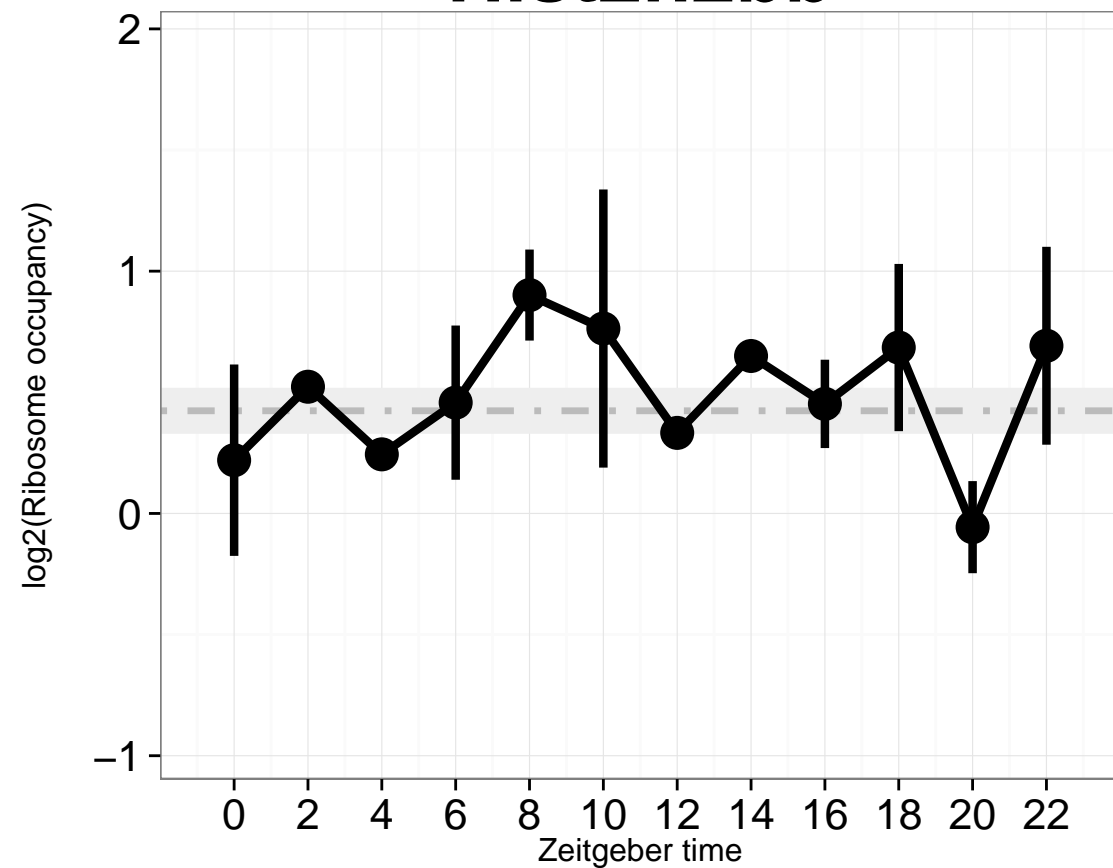

Supplement: SuppDataset_1.zip [file Hist2h2bb_set_C.pdf › Supplemental Dataset 1/C-mRNA_nonrhythm_translation_rhyth/Hist2h2bb_set_C.pdf]

## Hmgb2

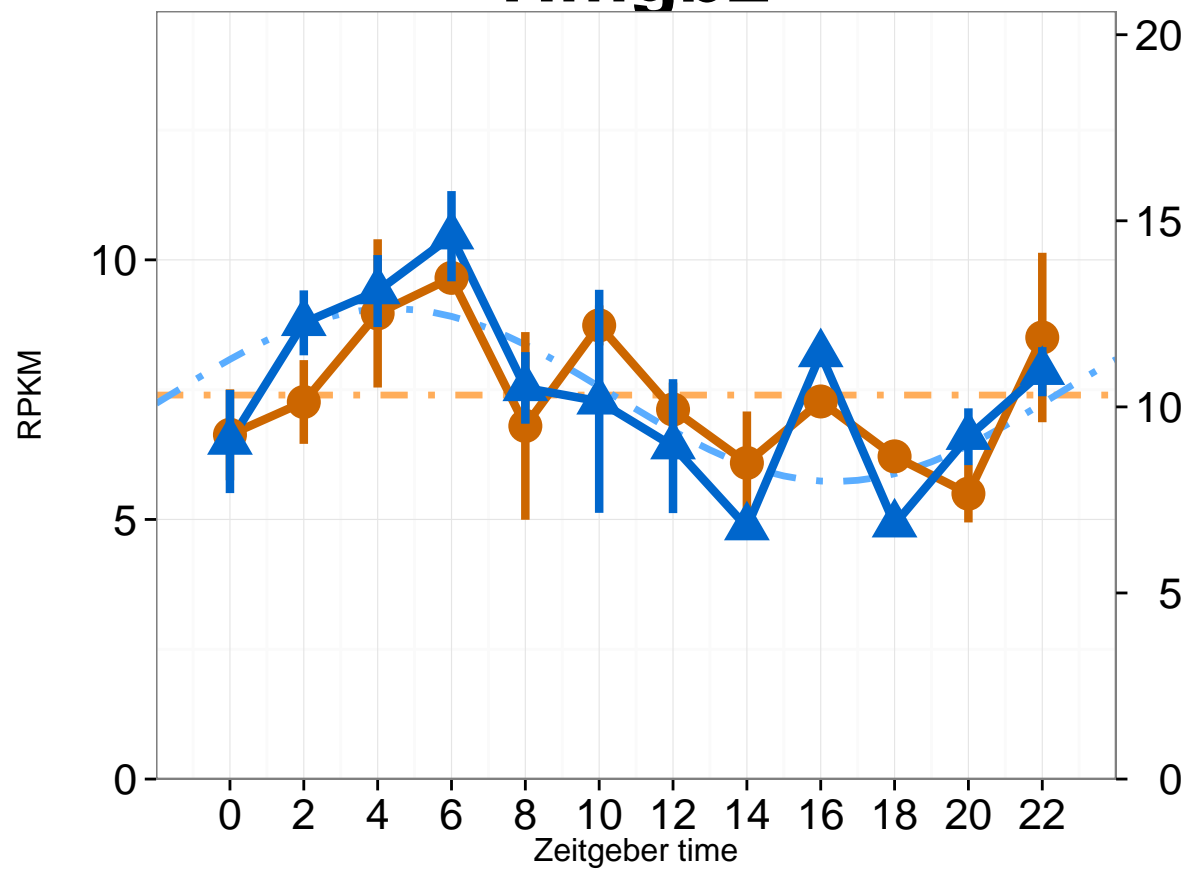

## Hmgb2

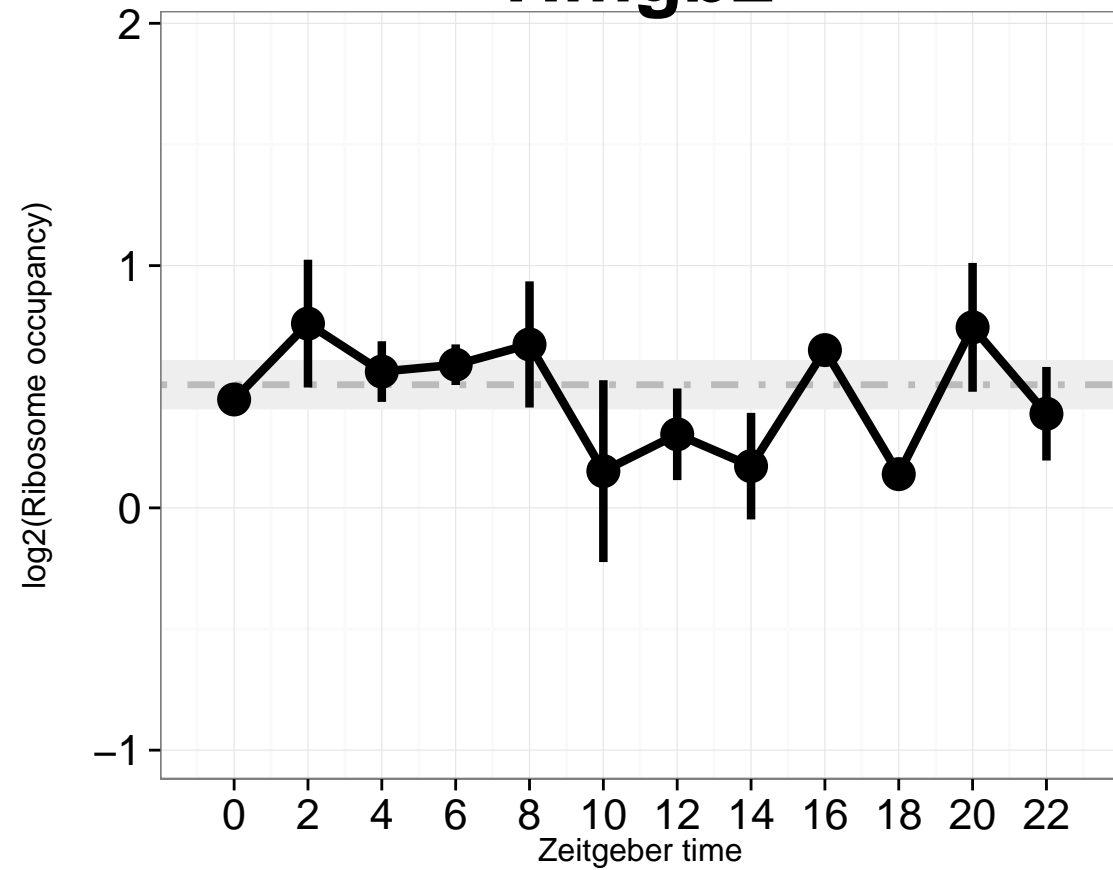

Supplement: SuppDataset_1.zip [file Hmgb2_set_C.pdf › Supplemental Dataset 1/C-mRNA_nonrhythm_translation_rhyth/Hmgb2_set_C.pdf]

# Hmgxb4

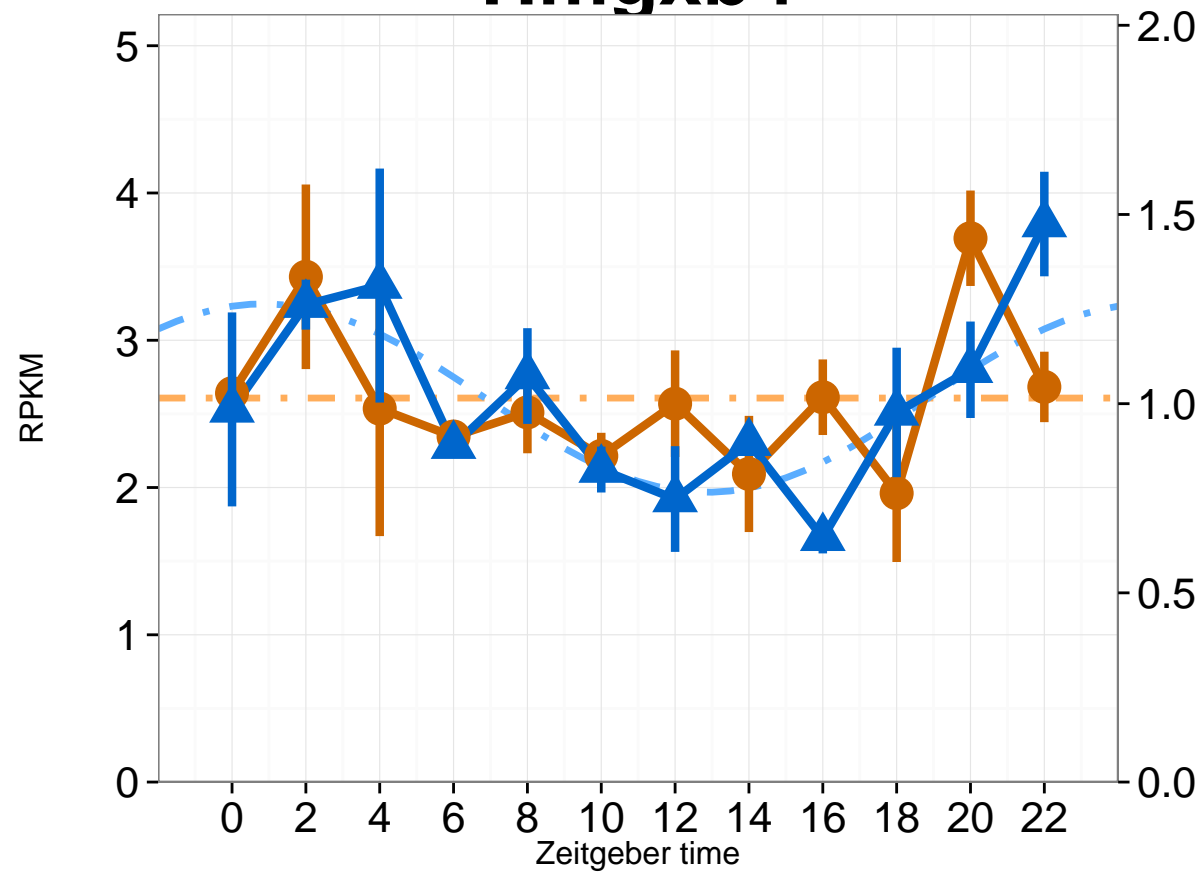

# Hmgxb4

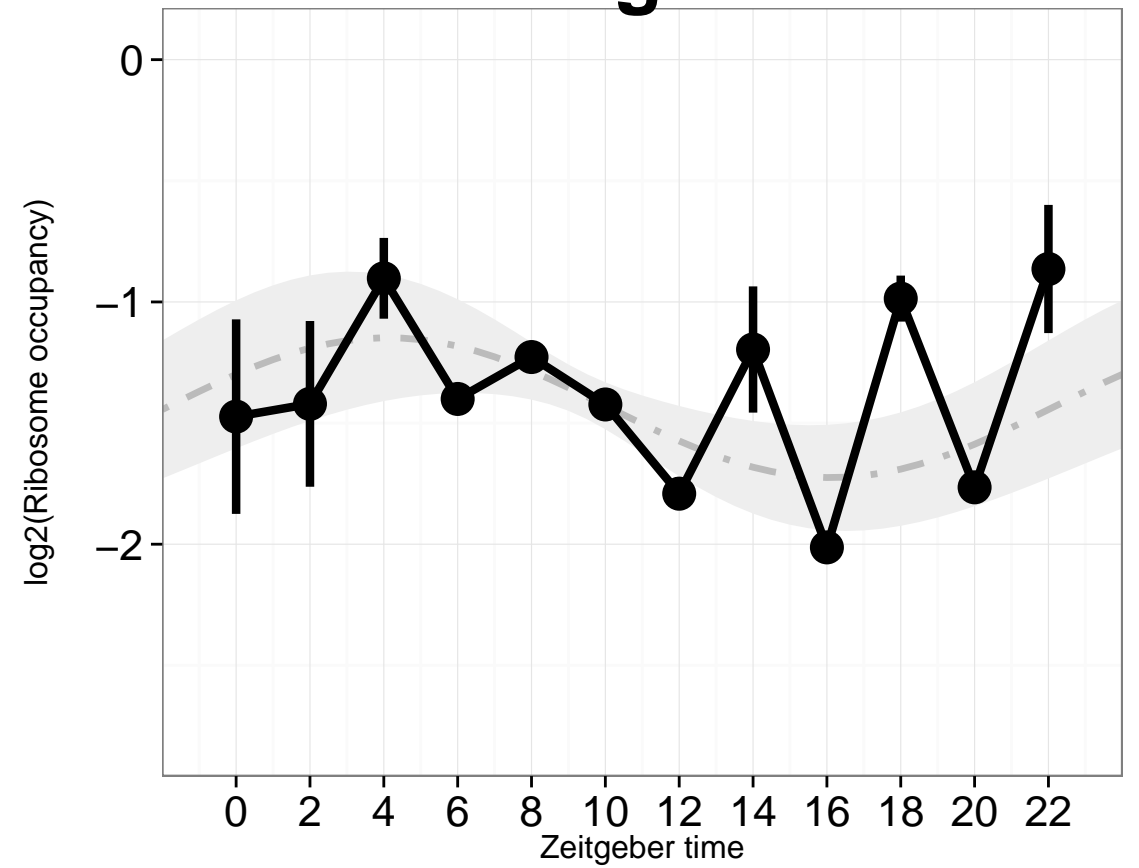

Supplement: SuppDataset_1.zip [file Hmgxb4_set_C.pdf › Supplemental Dataset 1/C-mRNA_nonrhythm_translation_rhyth/Hmgxb4_set_C.pdf]

## Hn1l

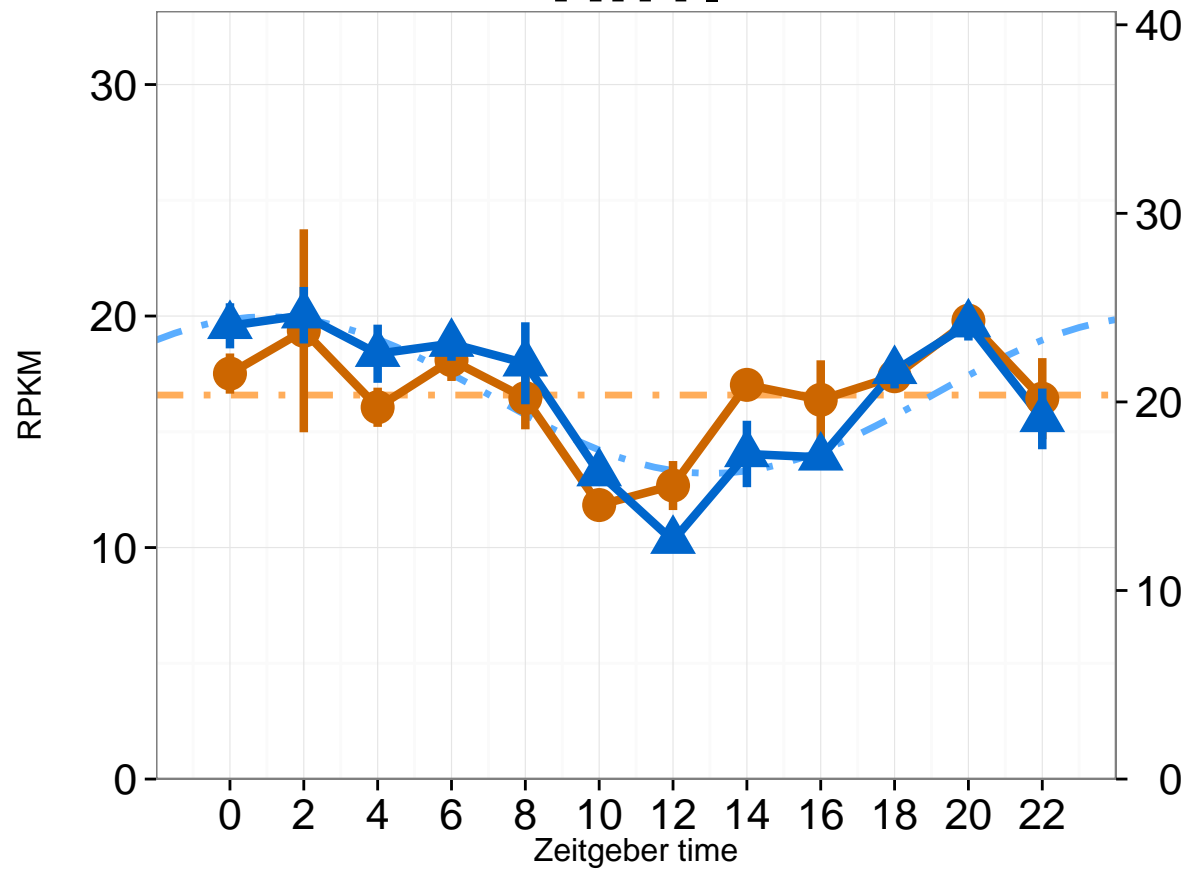

## Hn1l

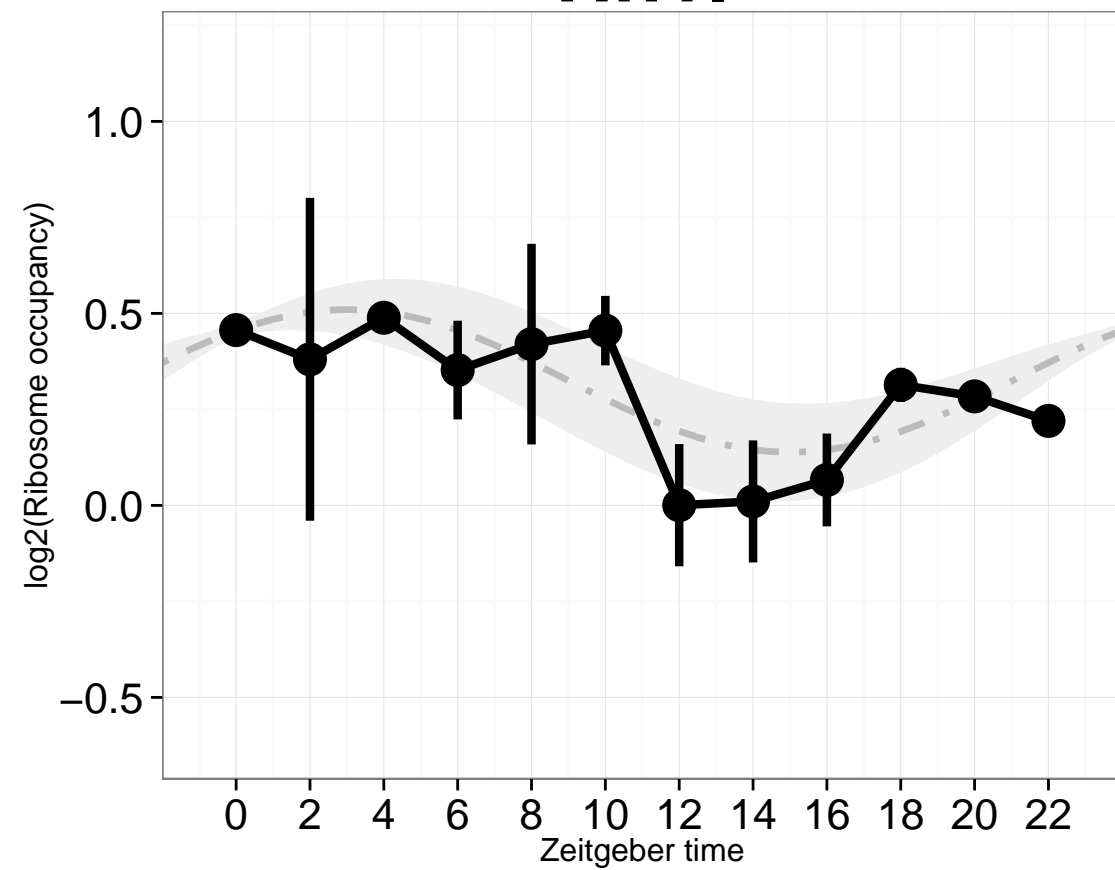

Supplement: SuppDataset_1.zip [file Hn1l_set_C.pdf › Supplemental Dataset 1/C-mRNA_nonrhythm_translation_rhyth/Hn1l_set_C.pdf]

# Hnrnp1

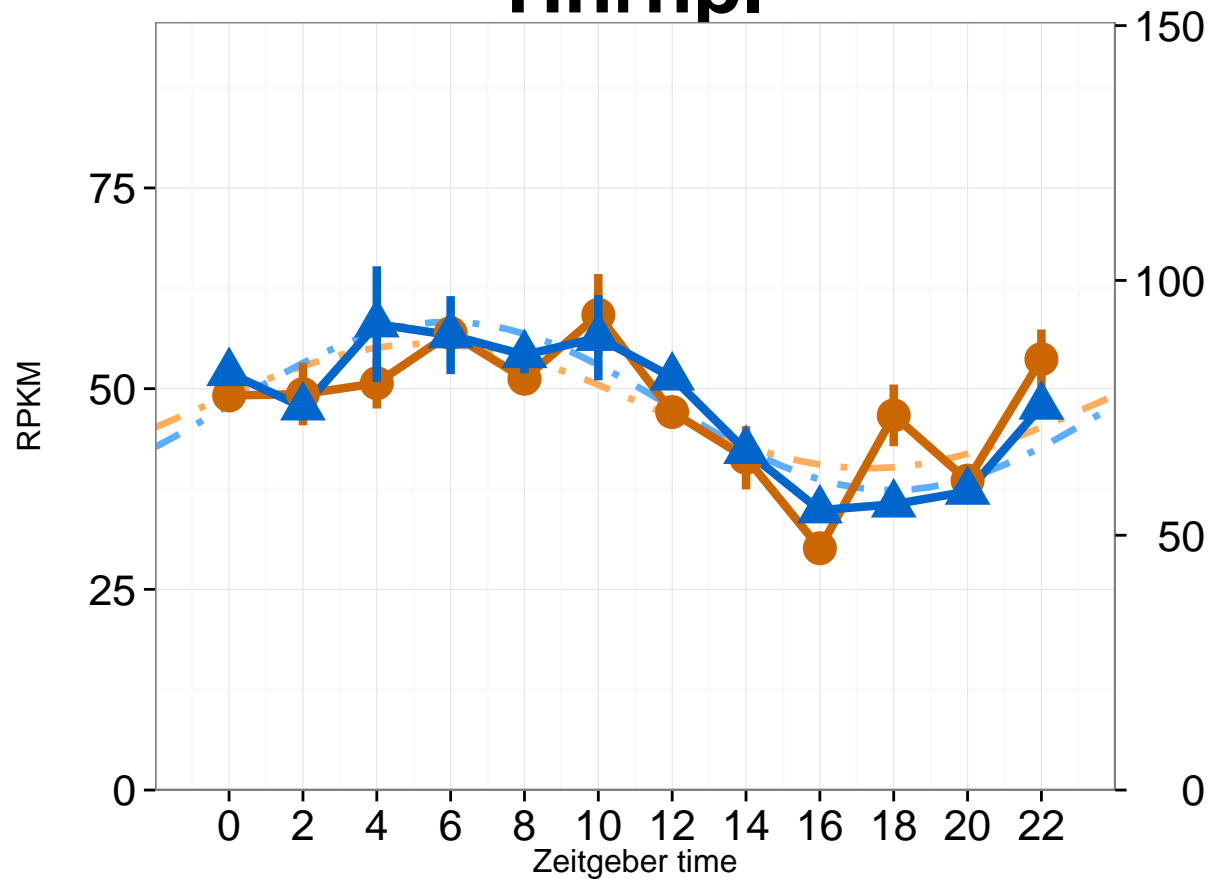

# Hnrnp1

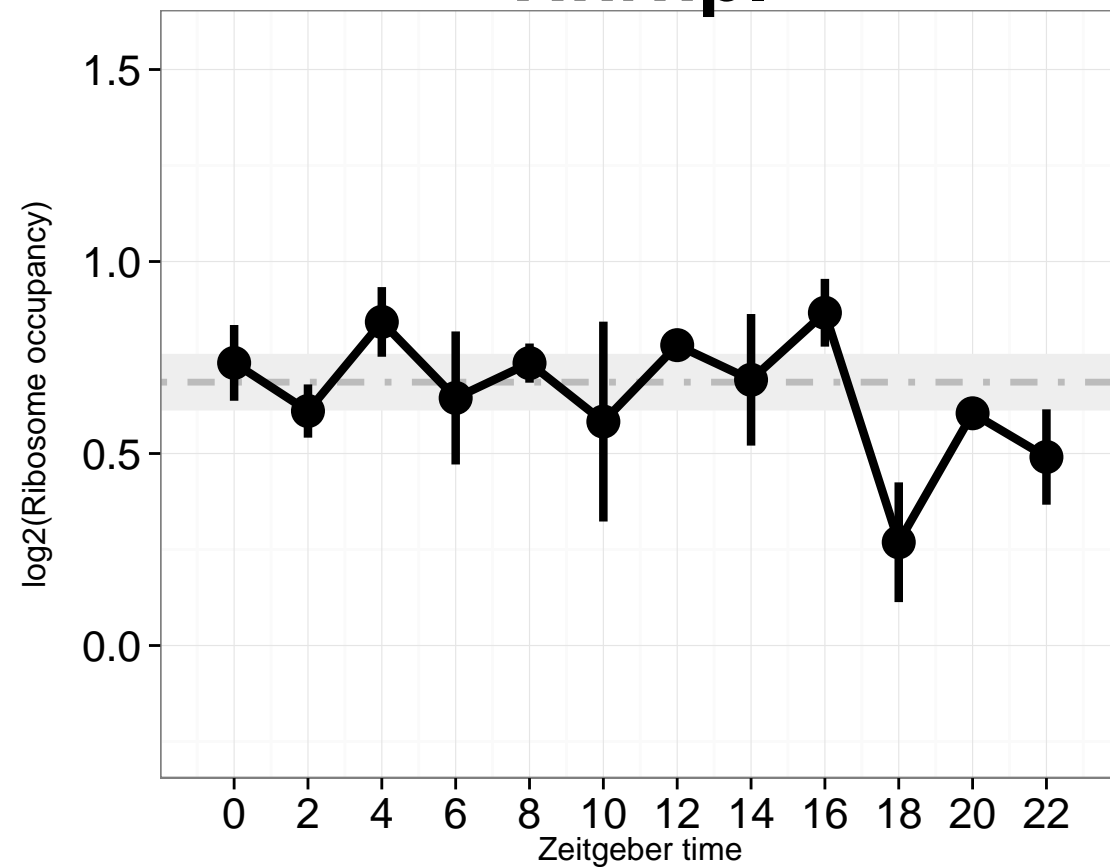

Supplement: SuppDataset_1.zip [file Hnrnpl_set_C.pdf › Supplemental Dataset 1/C-mRNA_nonrhythm_translation_rhyth/Hnrnpl_set_C.pdf]

## Hoga1

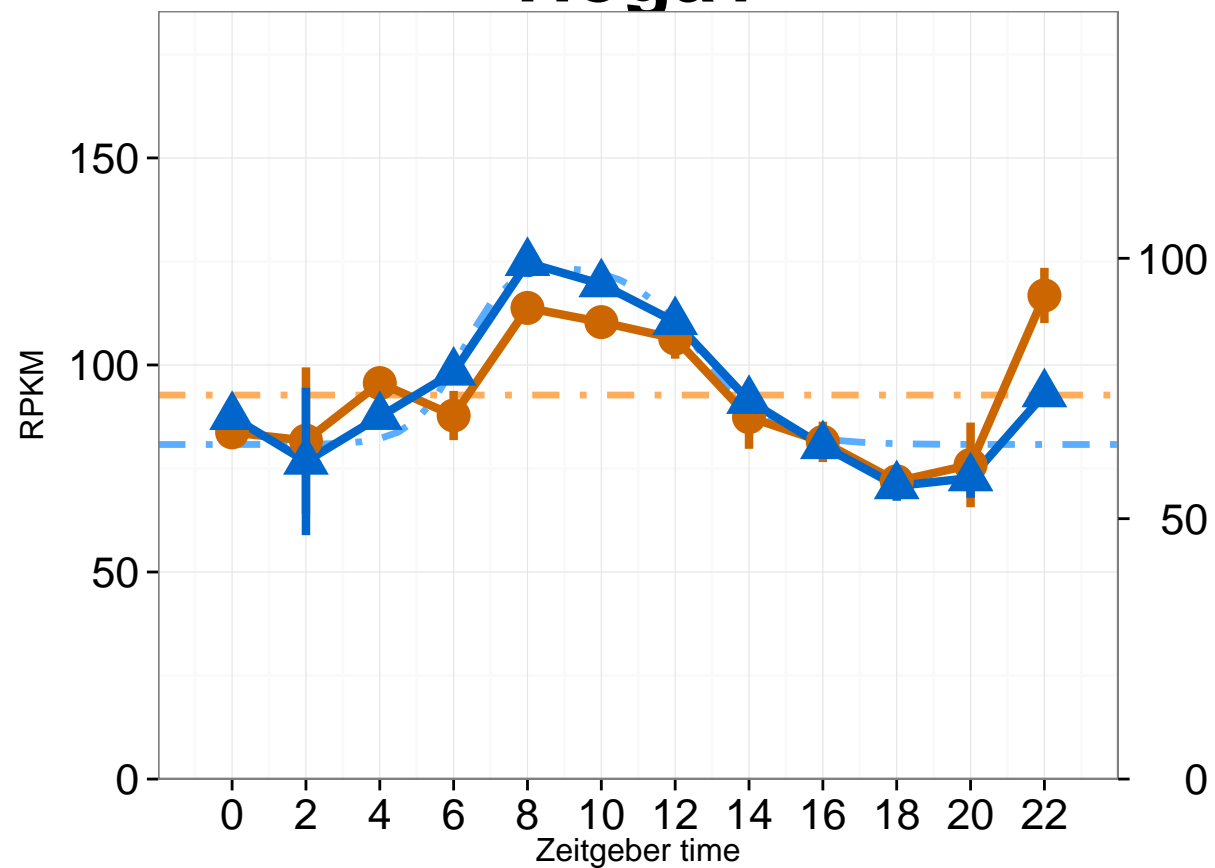

## Hoga1

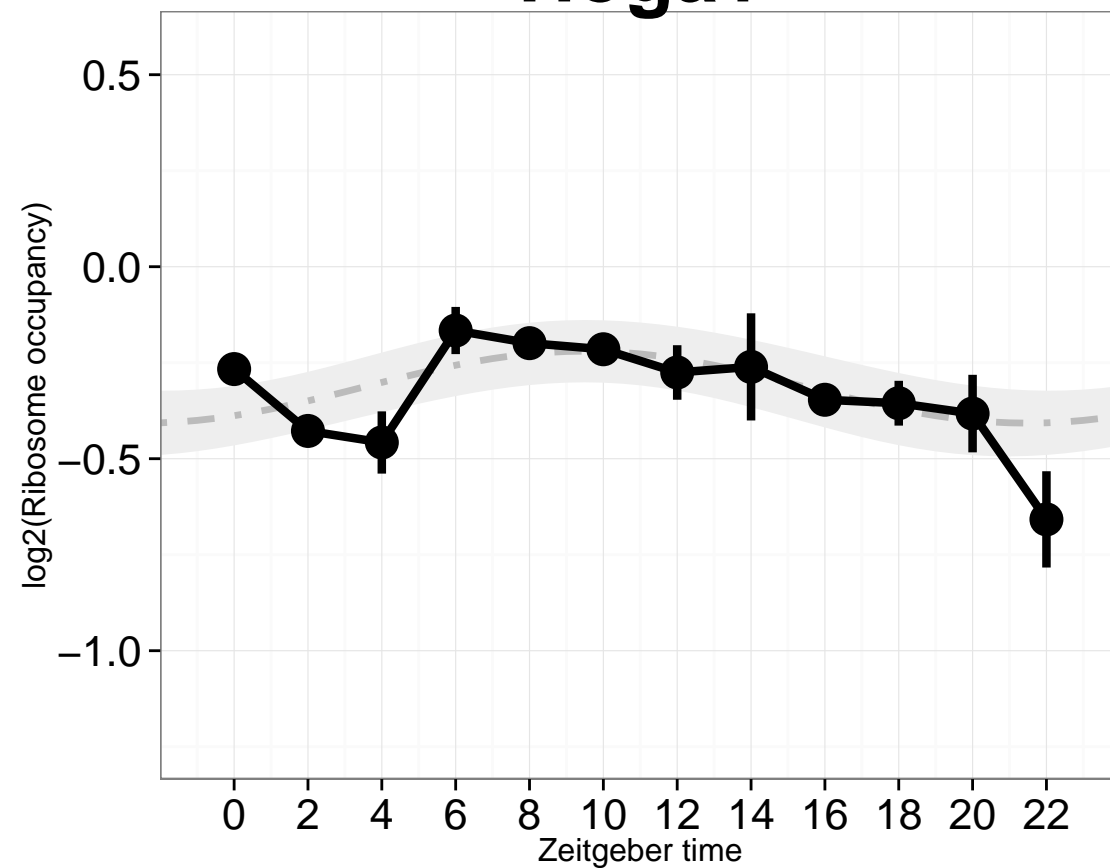

Supplement: SuppDataset_1.zip [file Hoga1_set_C.pdf › Supplemental Dataset 1/C-mRNA_nonrhythm_translation_rhyth/Hoga1_set_C.pdf]

# Hs1bp3

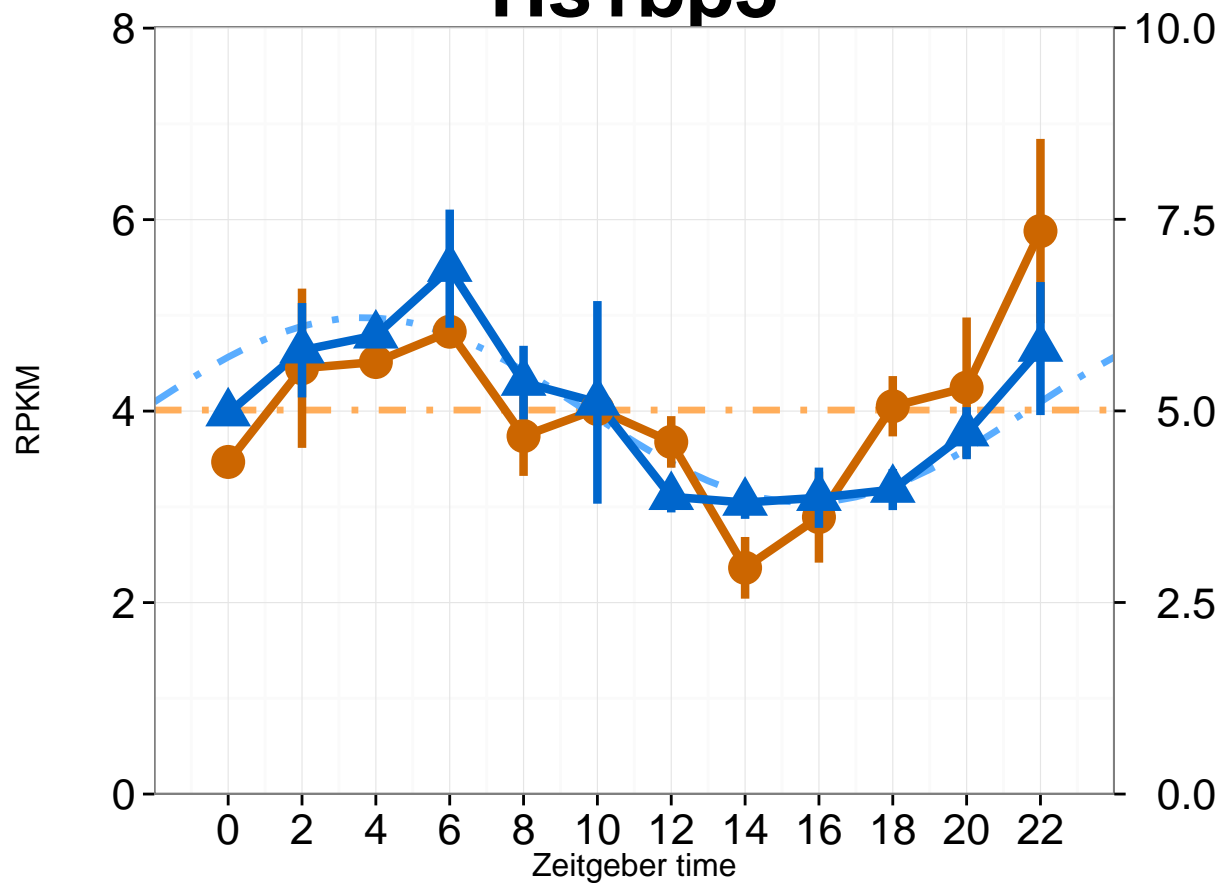

# Hs1bp3

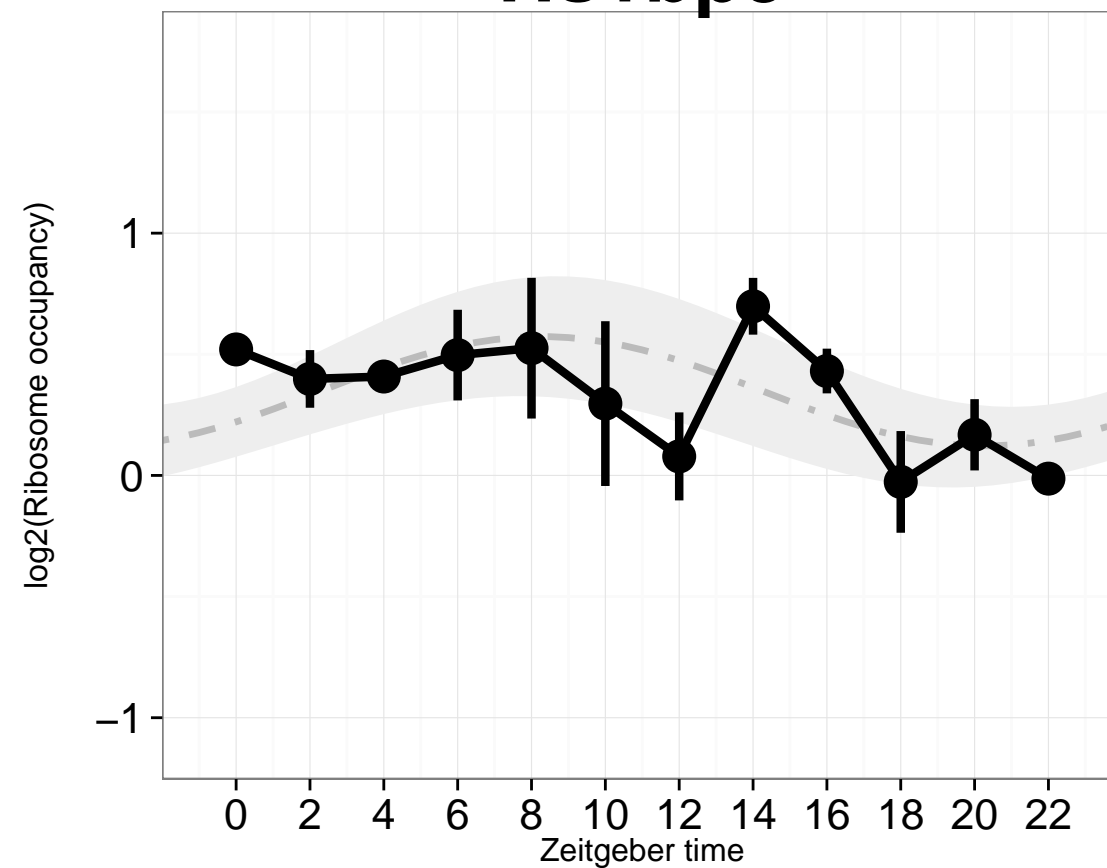

Supplement: SuppDataset_1.zip [file Hs1bp3_set_C.pdf › Supplemental Dataset 1/C-mRNA_nonrhythm_translation_rhyth/Hs1bp3_set_C.pdf]

# Hsbp1l1

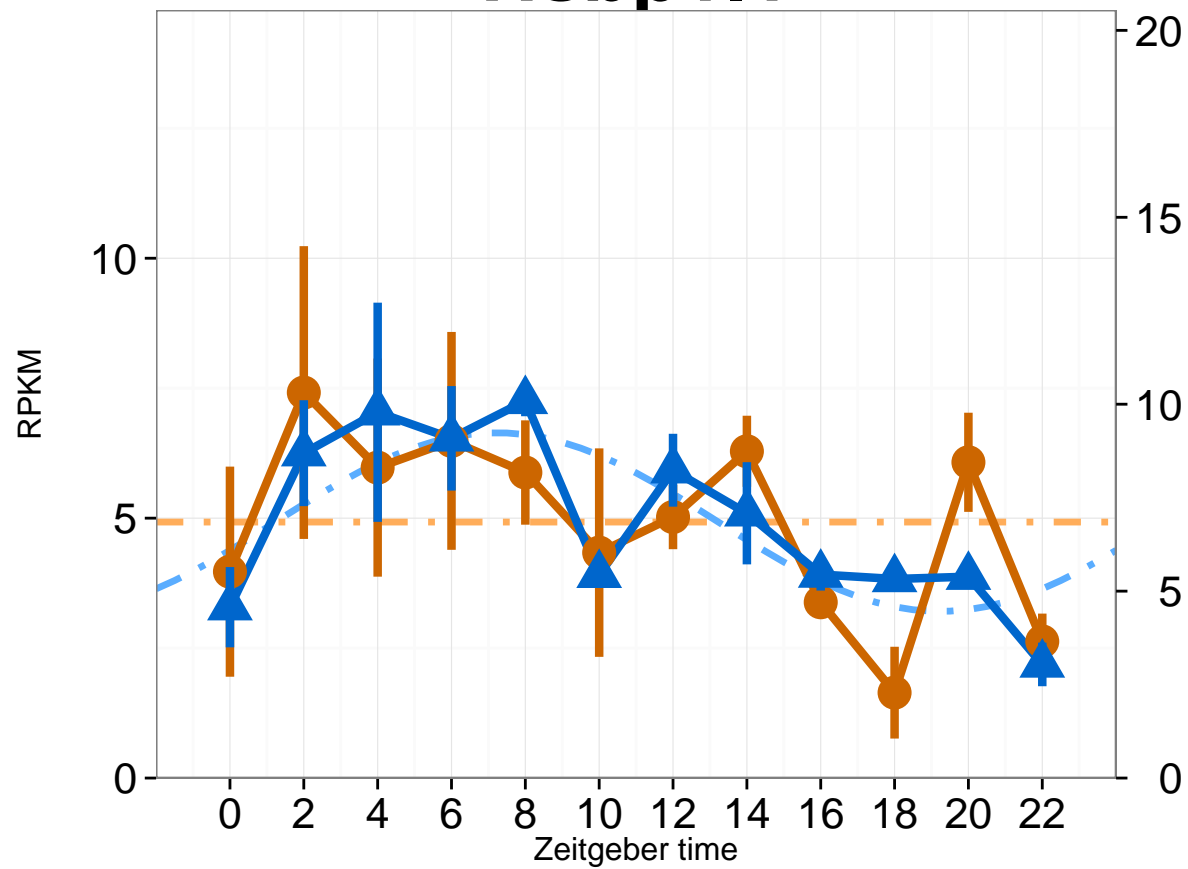

# Hsbp1l1

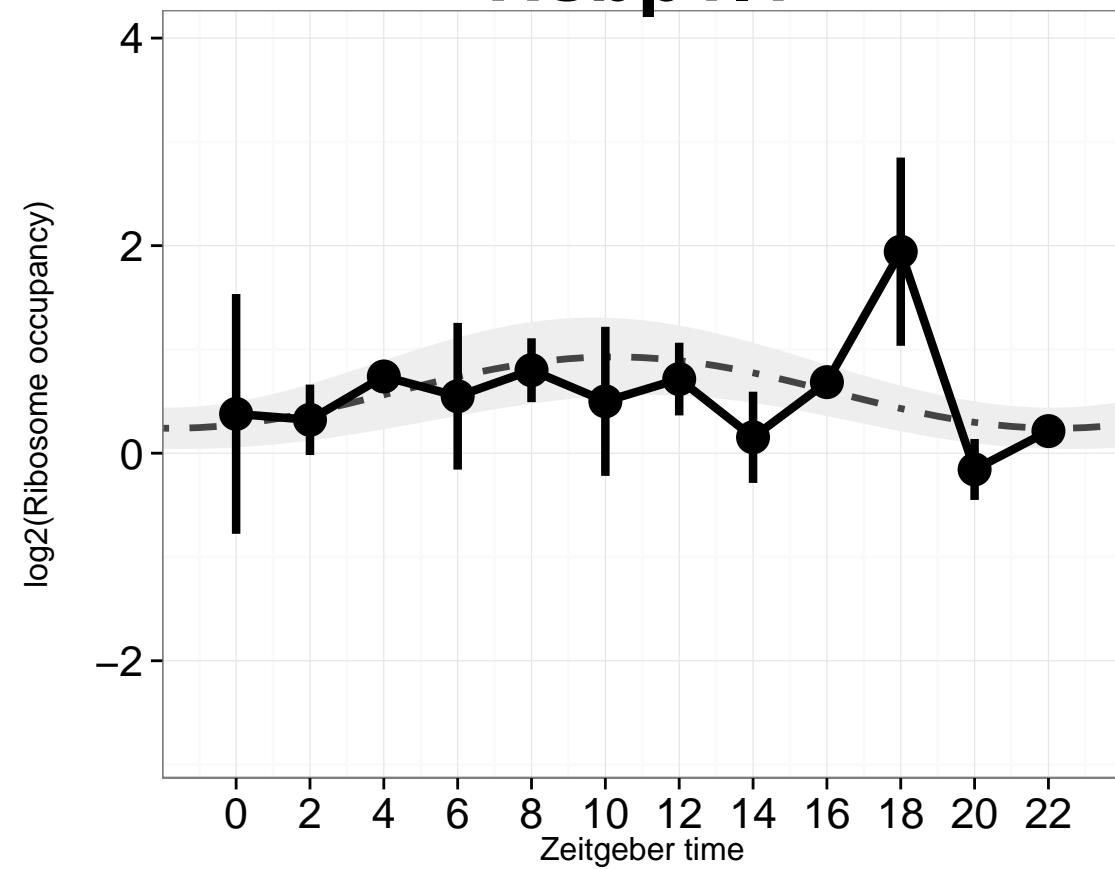

Supplement: SuppDataset_1.zip [file Hsbp1l1_set_C.pdf › Supplemental Dataset 1/C-mRNA_nonrhythm_translation_rhyth/Hsbp1l1_set_C.pdf]

# Hspb11

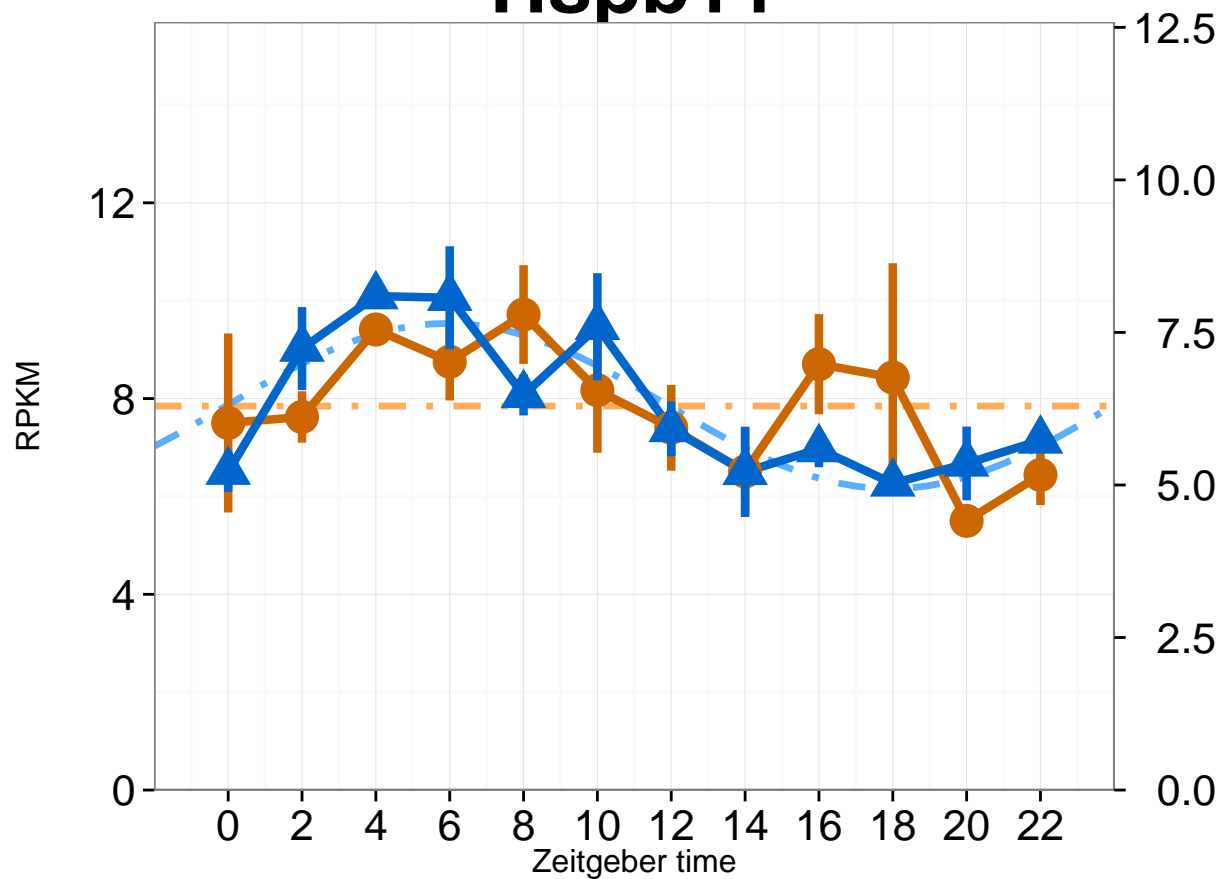

# Hspb11

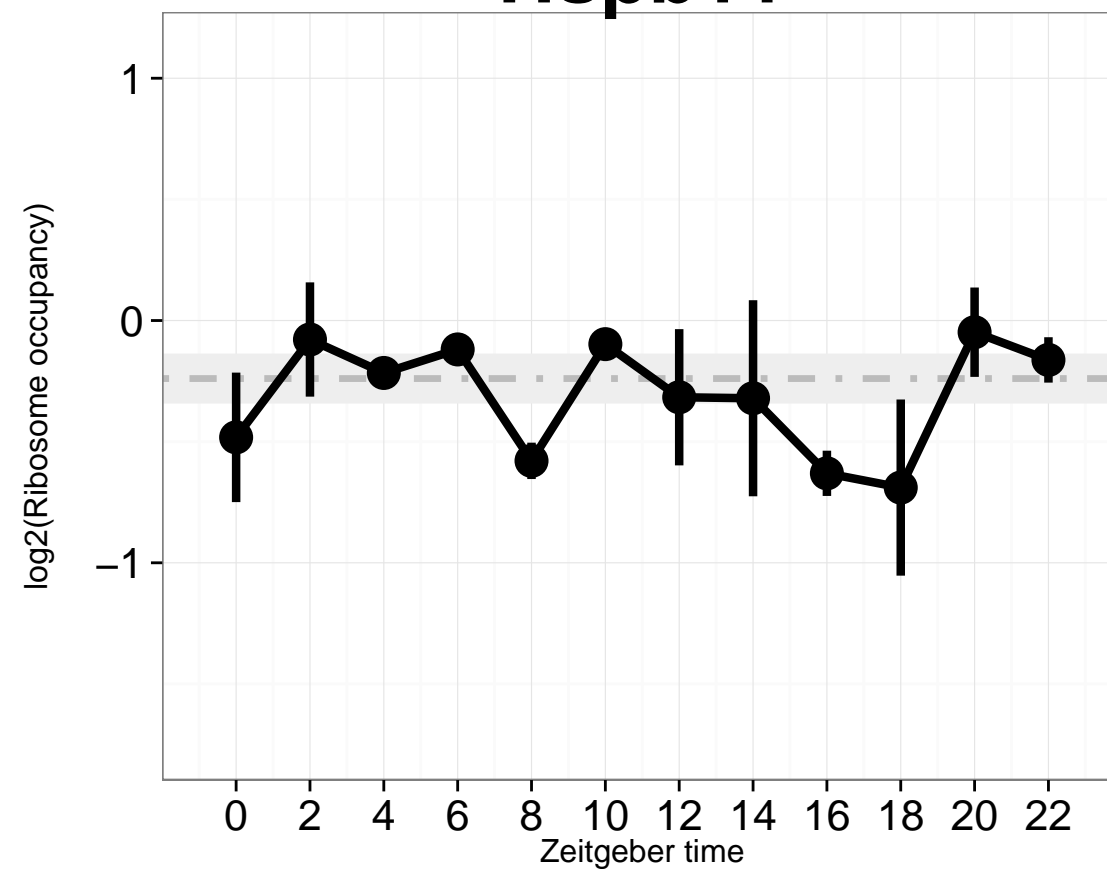

Supplement: SuppDataset_1.zip [file Hspb11_set_C.pdf › Supplemental Dataset 1/C-mRNA_nonrhythm_translation_rhyth/Hspb11_set_C.pdf]

# Hunk

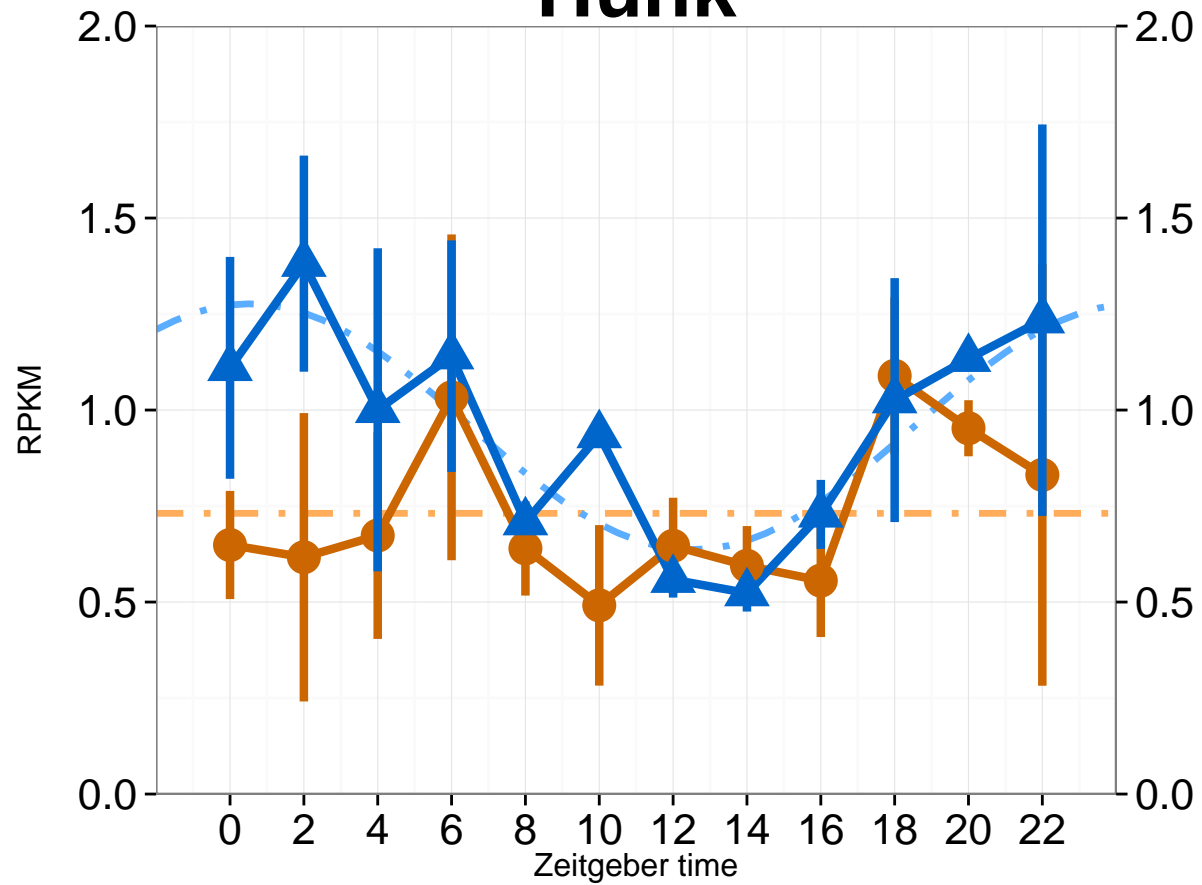

# Hunk

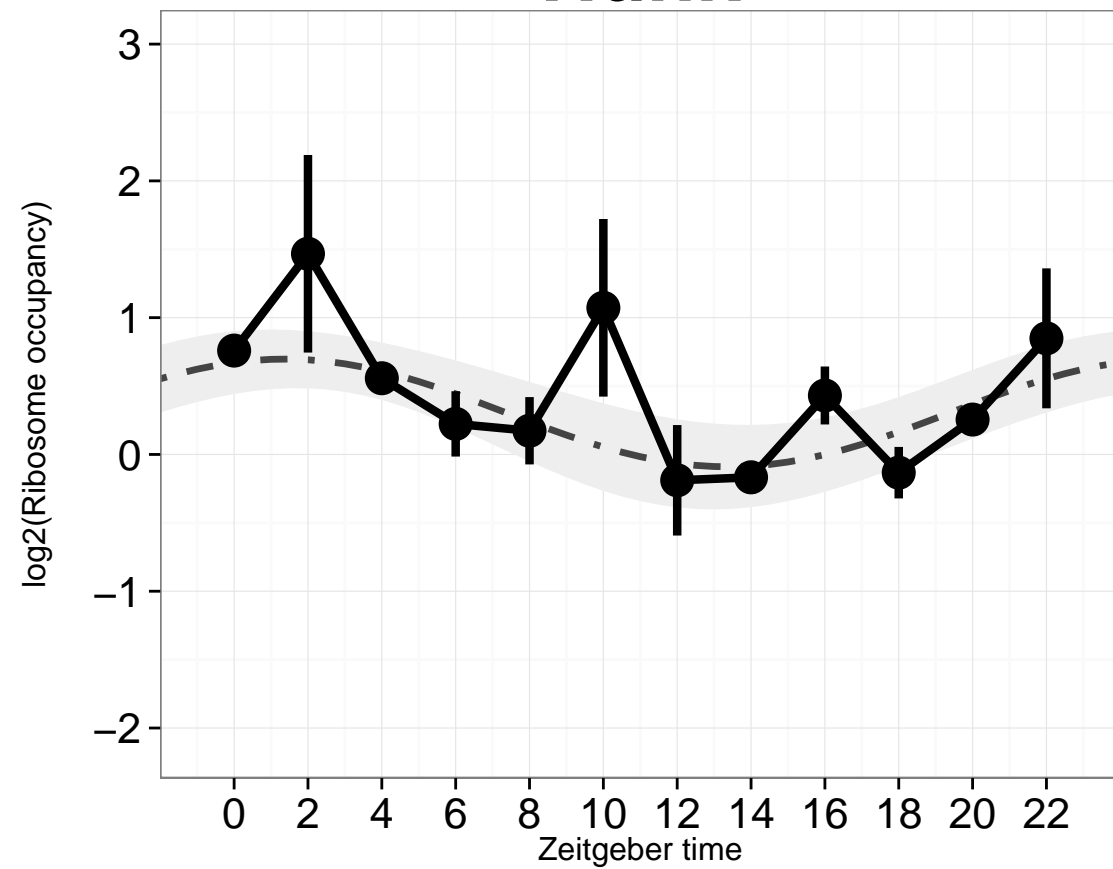

Supplement: SuppDataset_1.zip [file Hunk_set_C.pdf › Supplemental Dataset 1/C-mRNA_nonrhythm_translation_rhyth/Hunk_set_C.pdf]

## Ids

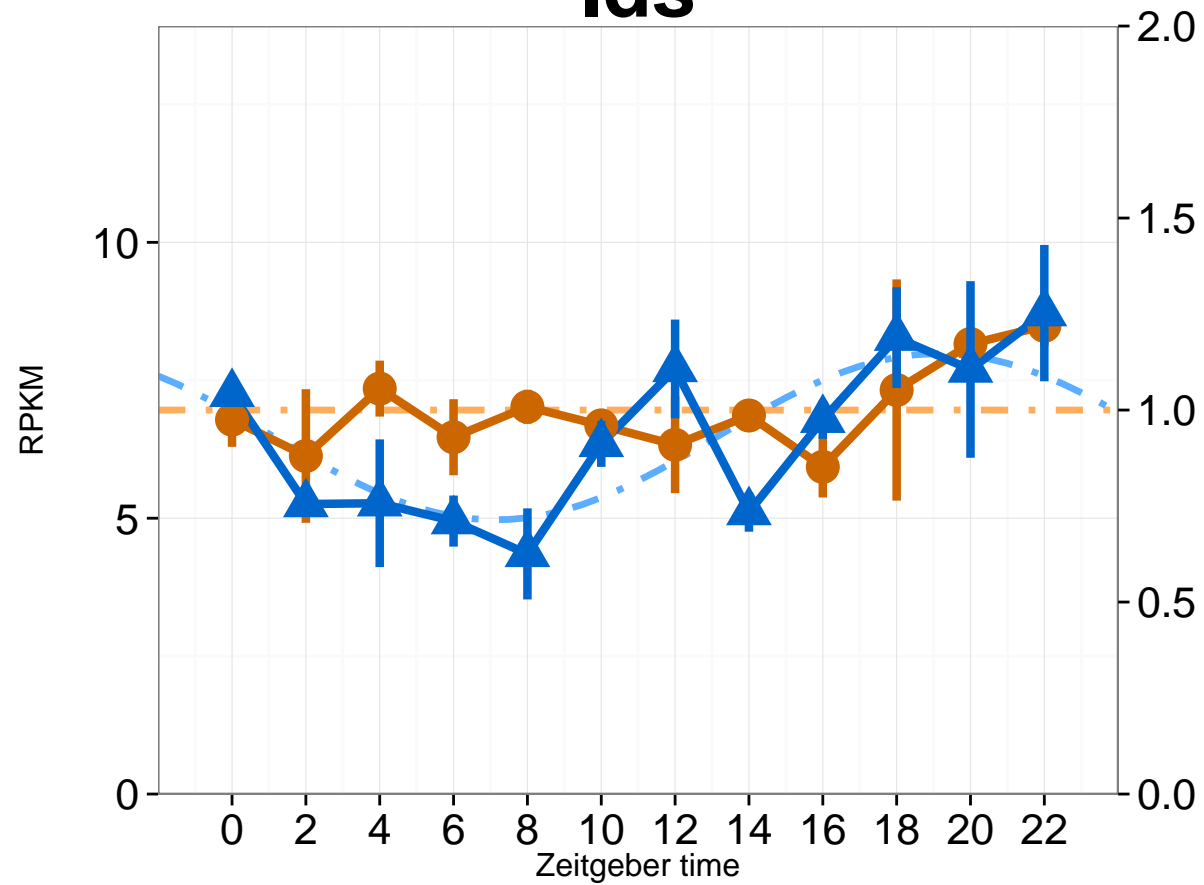

## Ids

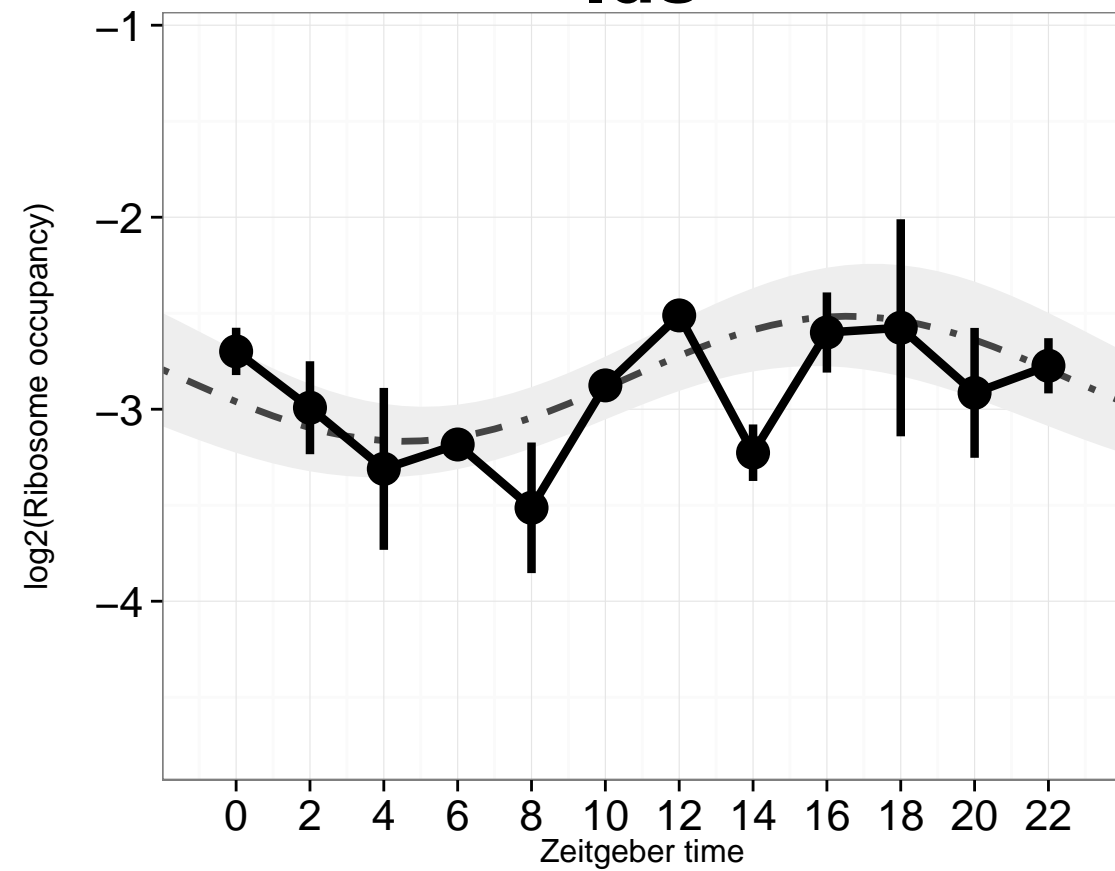

Supplement: SuppDataset_1.zip [file Ids_set_C.pdf › Supplemental Dataset 1/C-mRNA_nonrhythm_translation_rhyth/Ids_set_C.pdf]

## Iffo2

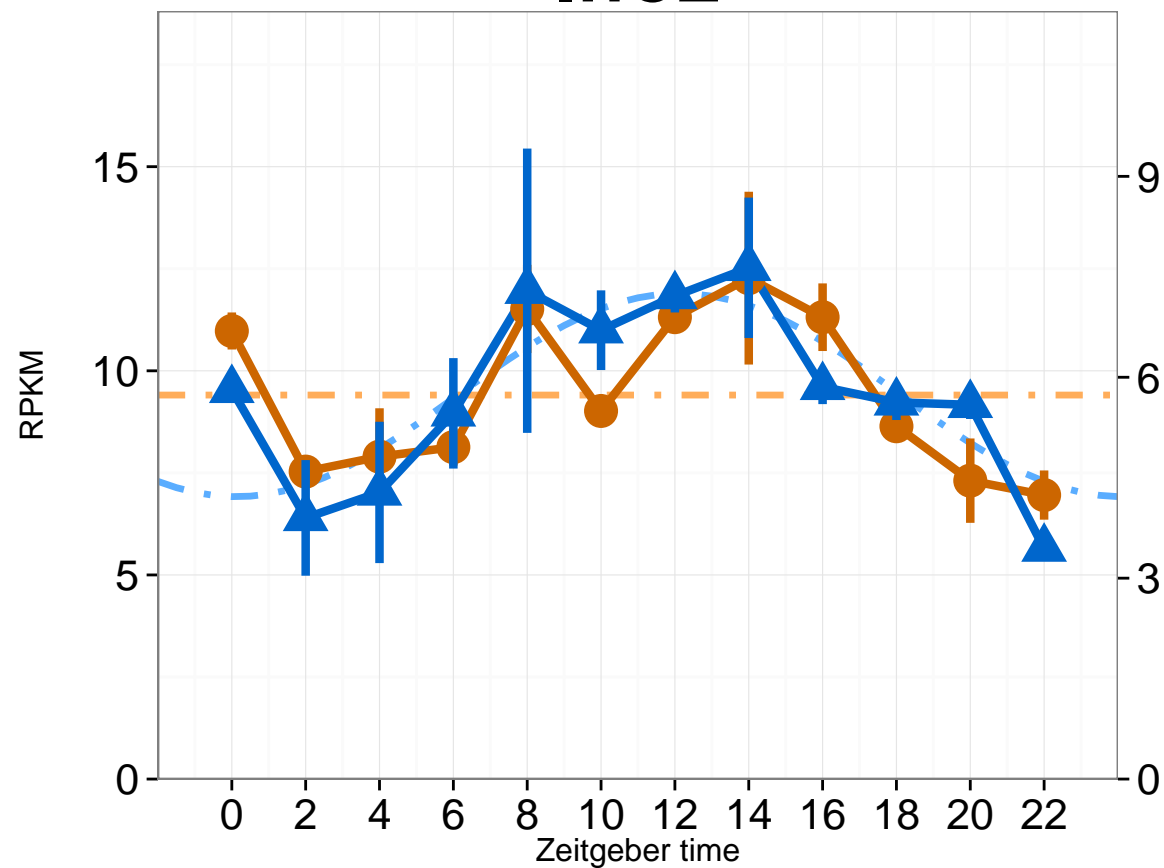

## Iffo2

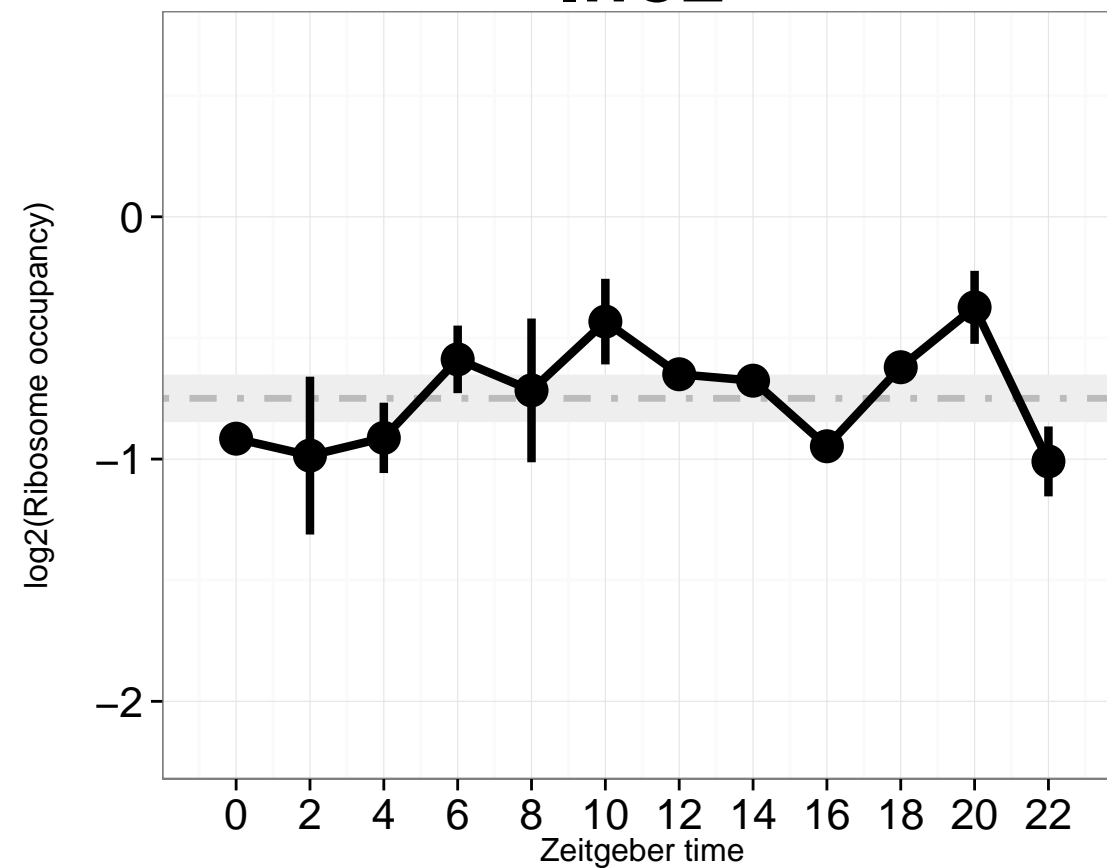

Supplement: SuppDataset_1.zip [file Iffo2_set_C.pdf › Supplemental Dataset 1/C-mRNA_nonrhythm_translation_rhyth/Iffo2_set_C.pdf]

## lfih1

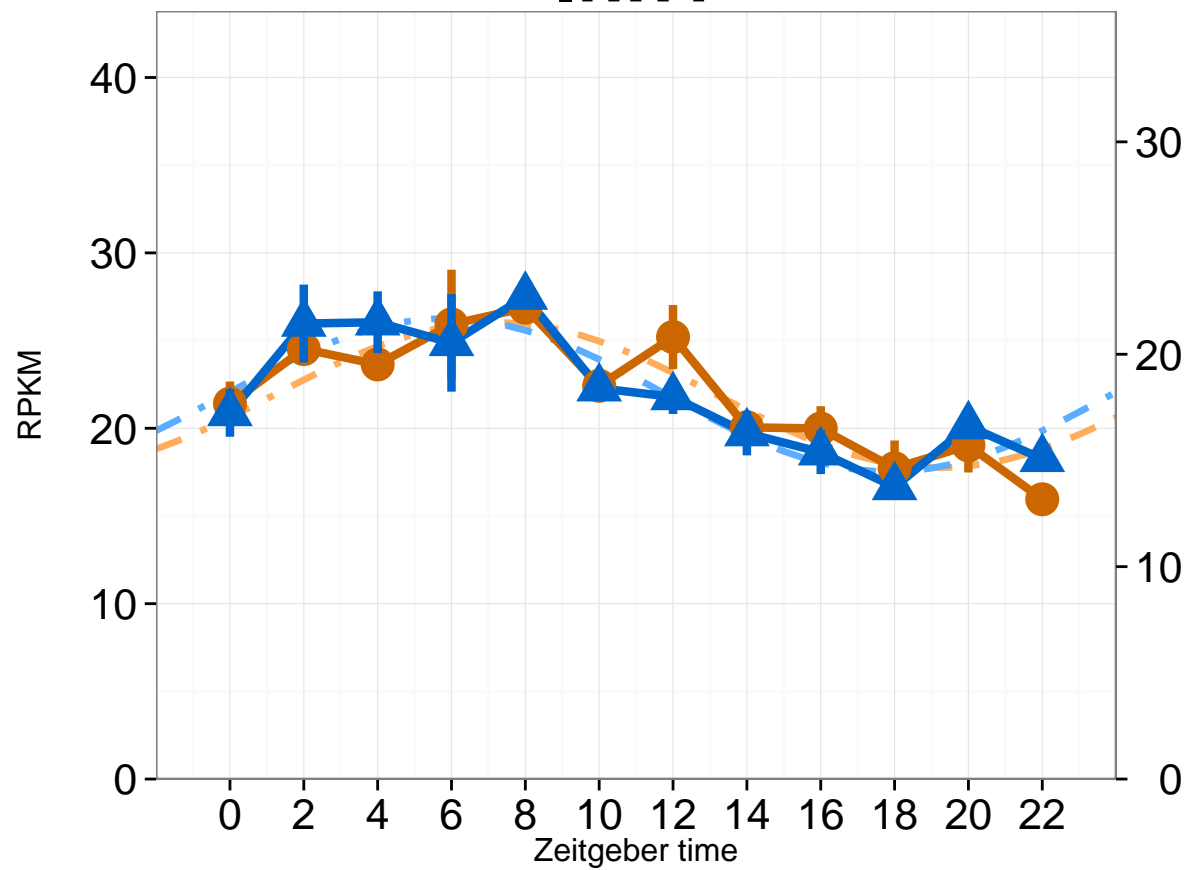

## lfih1

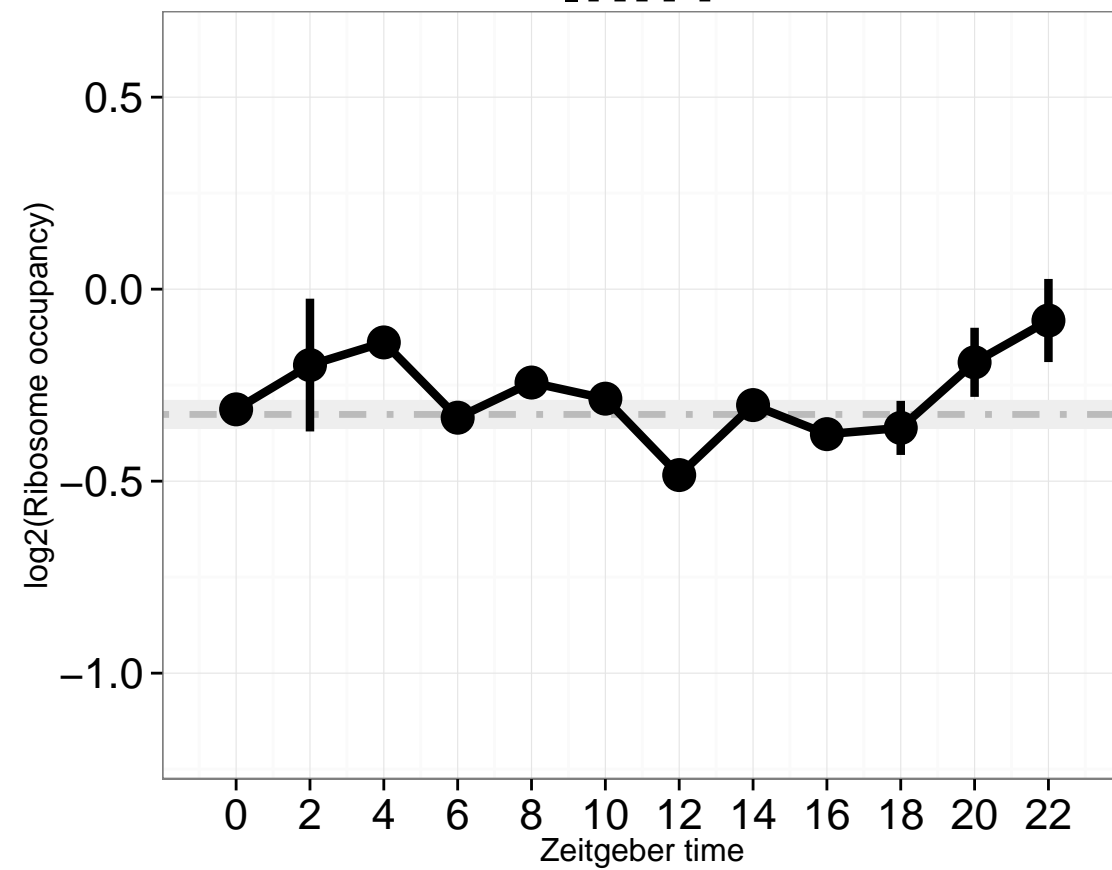

Supplement: SuppDataset_1.zip [file Ifih1_set_C.pdf › Supplemental Dataset 1/C-mRNA_nonrhythm_translation_rhyth/Ifih1_set_C.pdf]

# Ifit2

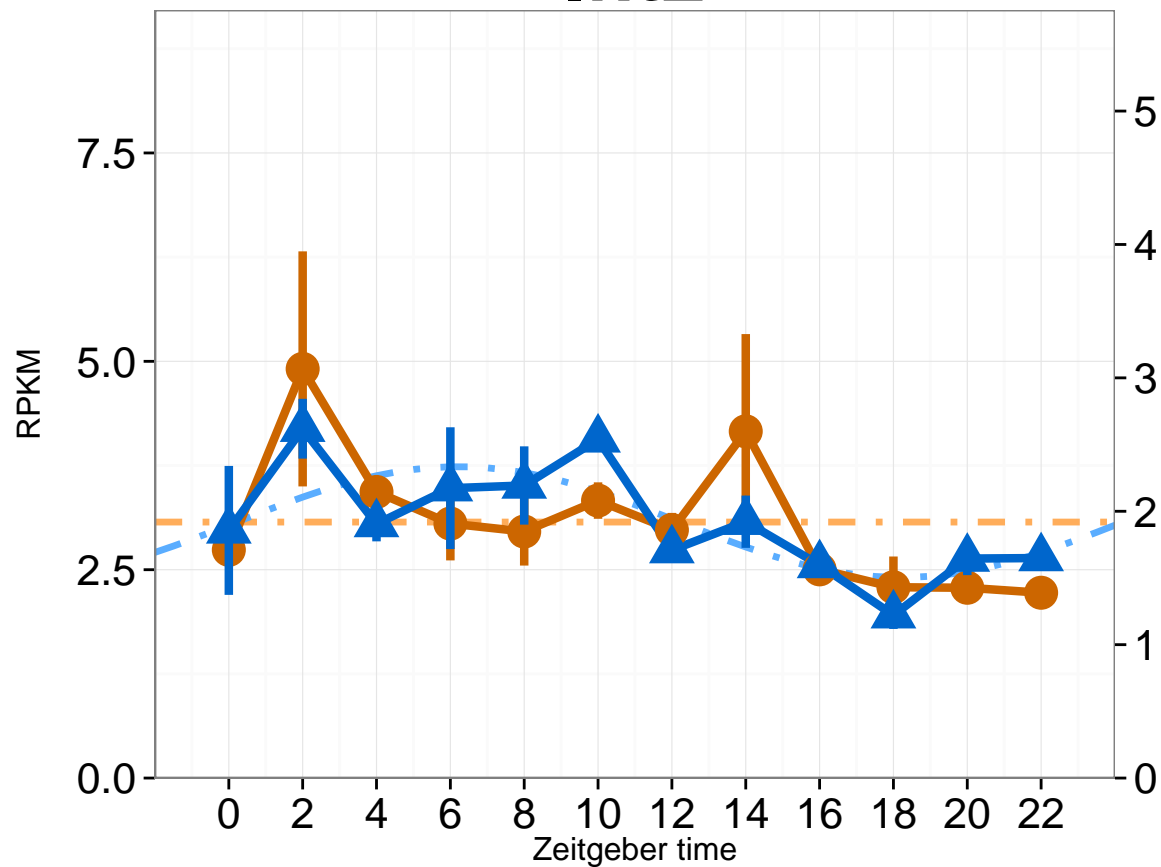

# Ifit2

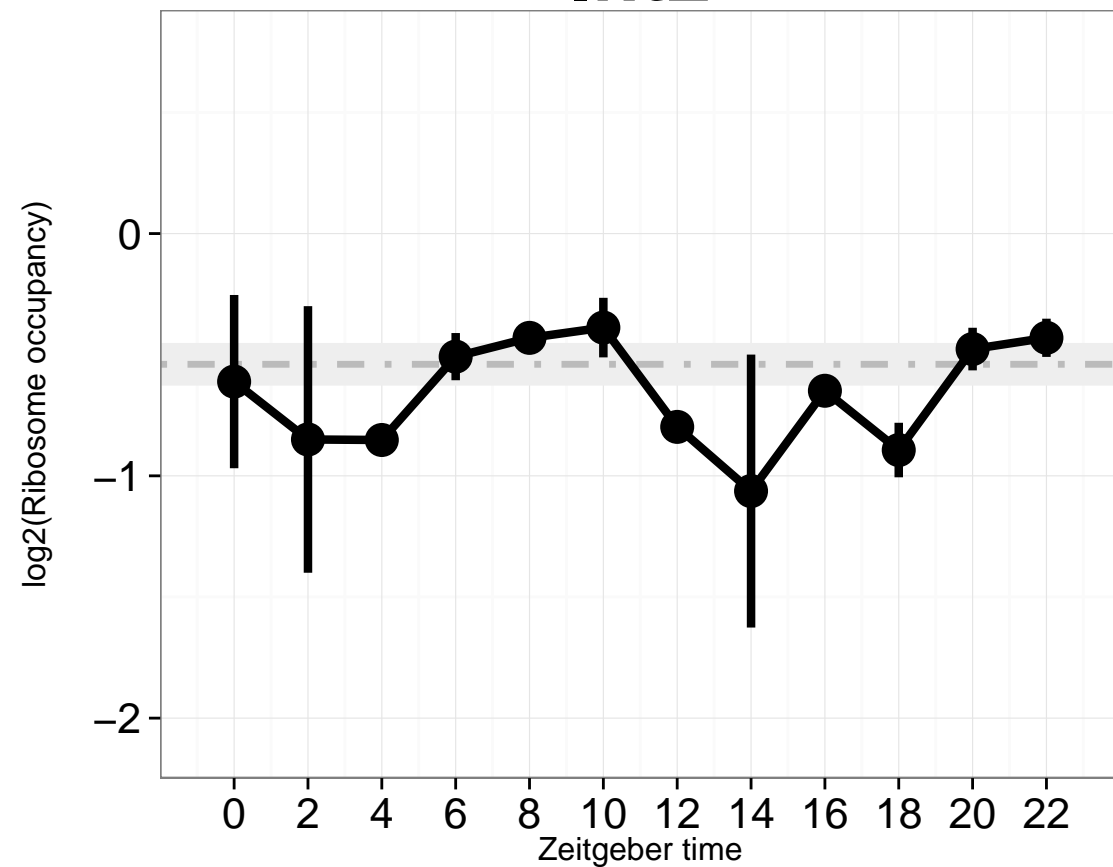

Supplement: SuppDataset_1.zip [file Ifit2_set_C.pdf › Supplemental Dataset 1/C-mRNA_nonrhythm_translation_rhyth/Ifit2_set_C.pdf]

# Ift81

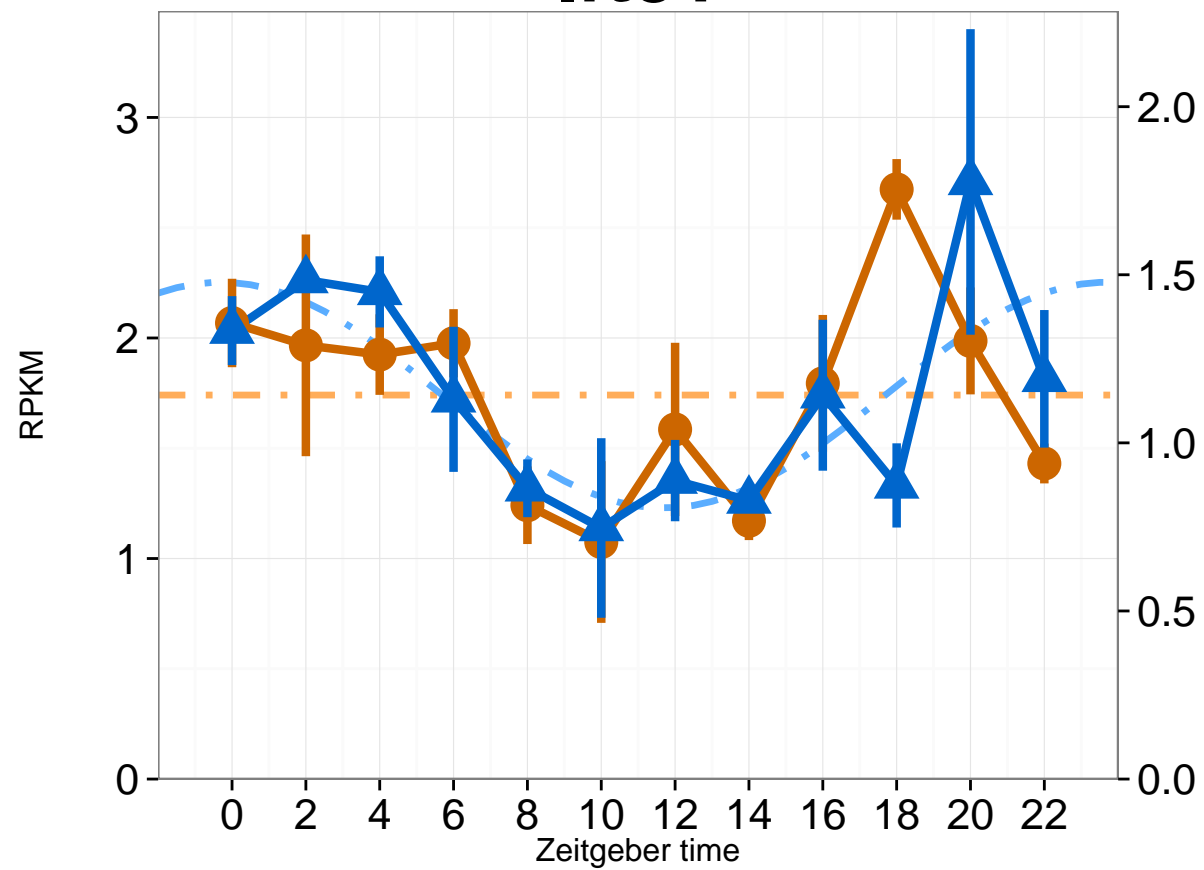

# Ift81

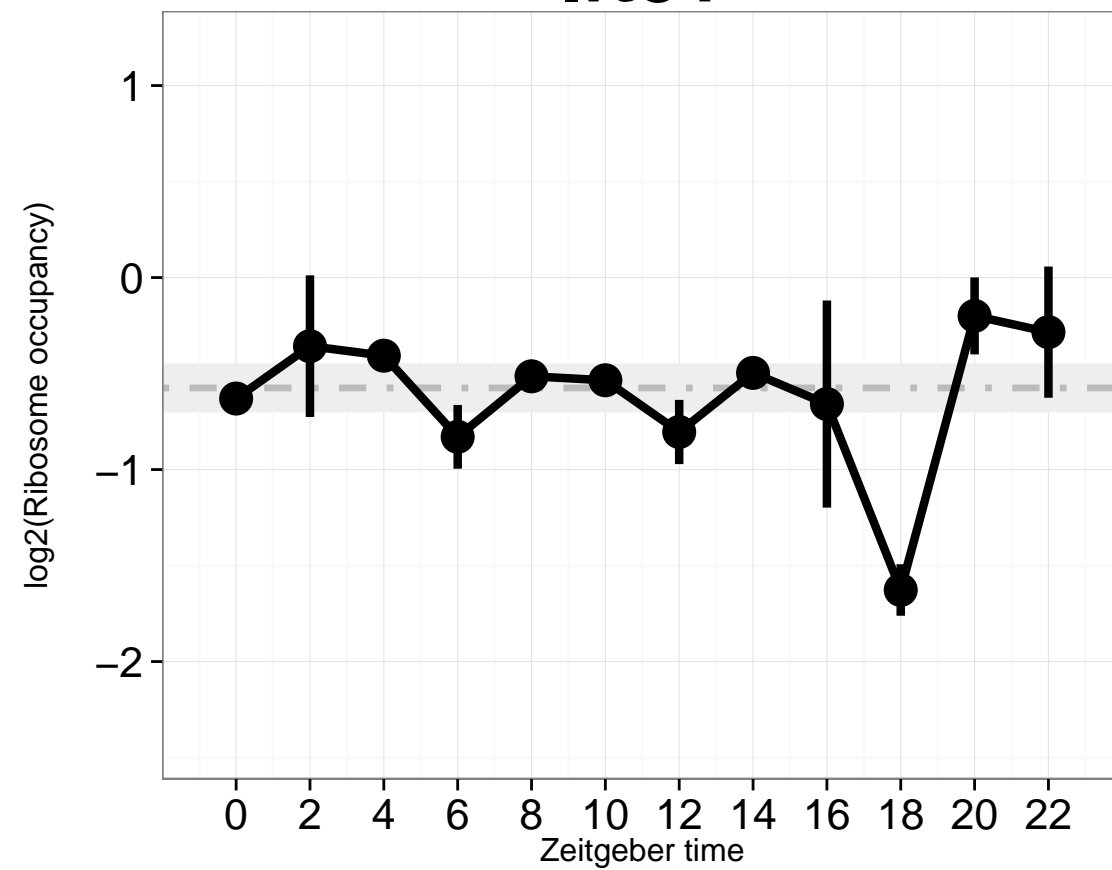

Supplement: SuppDataset_1.zip [file Ift81_set_C.pdf › Supplemental Dataset 1/C-mRNA_nonrhythm_translation_rhyth/Ift81_set_C.pdf]

# Igsf8

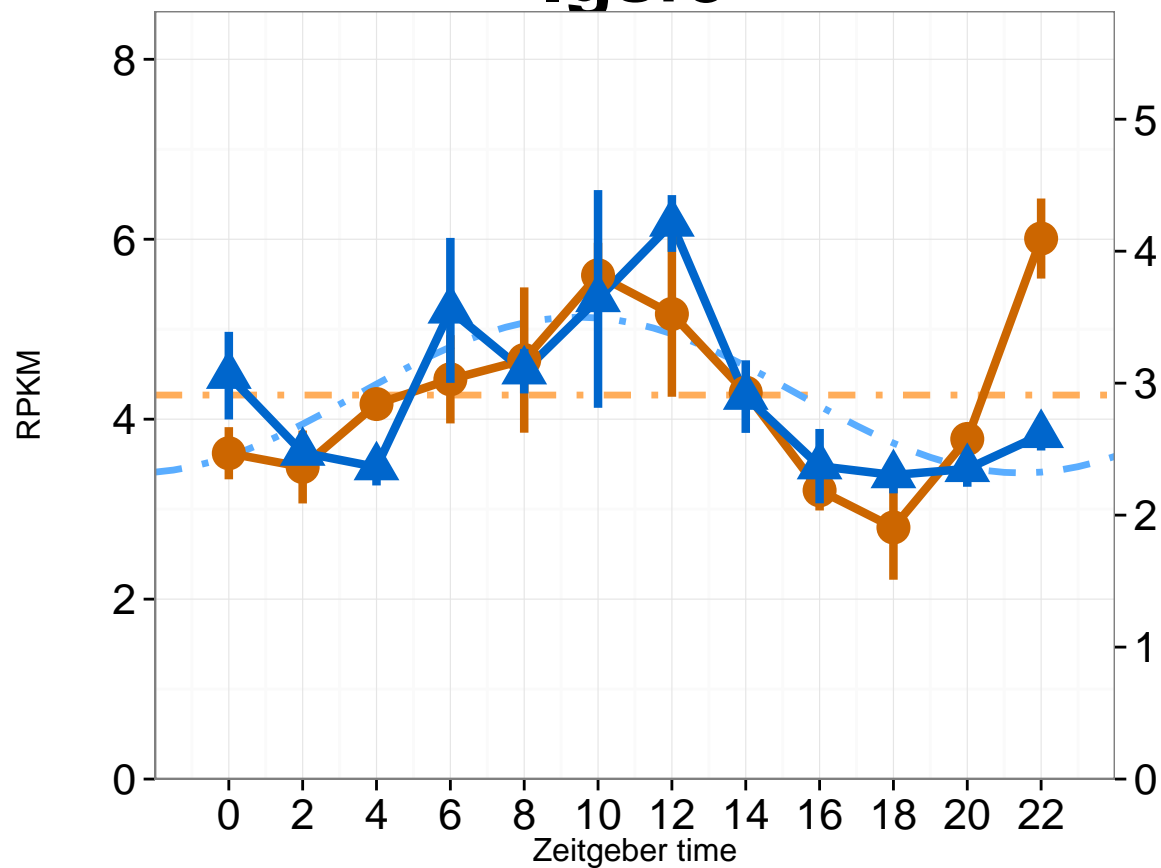

# Igsf8

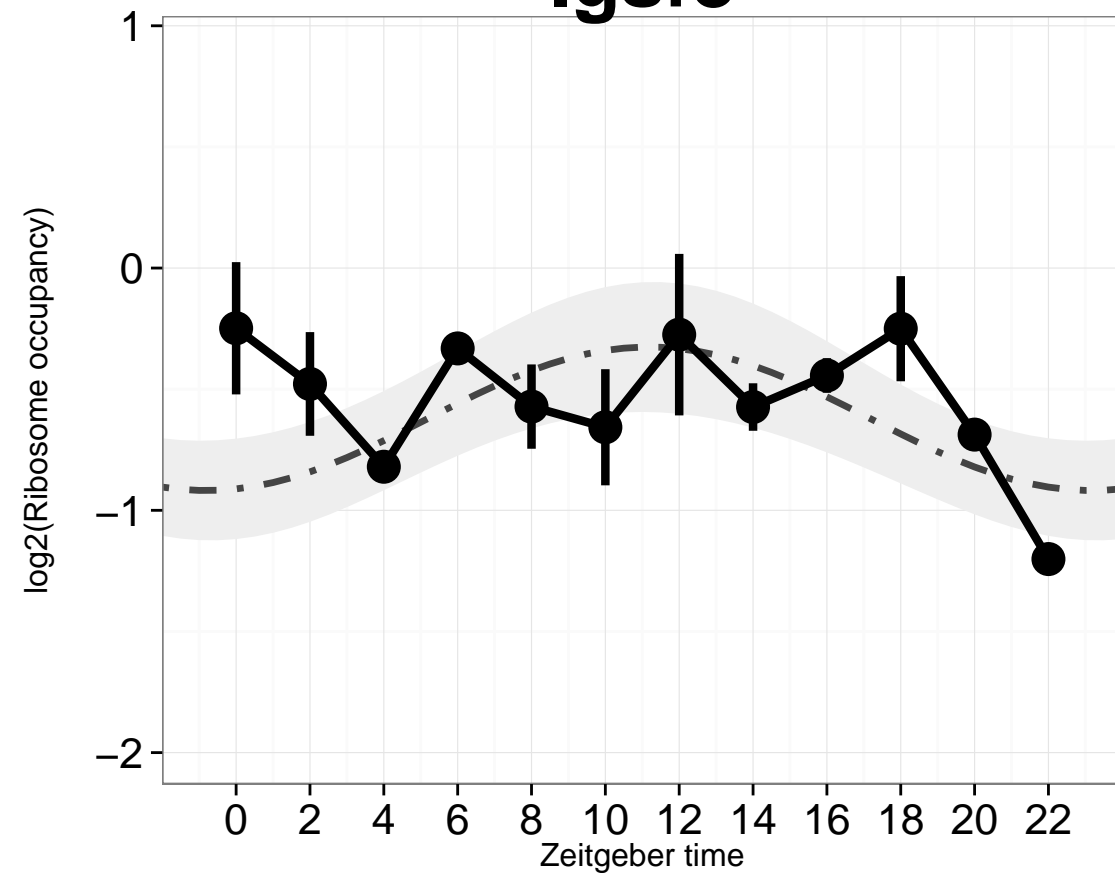

Supplement: SuppDataset_1.zip [file Igsf8_set_C.pdf › Supplemental Dataset 1/C-mRNA_nonrhythm_translation_rhyth/Igsf8_set_C.pdf]

## Il12rb1

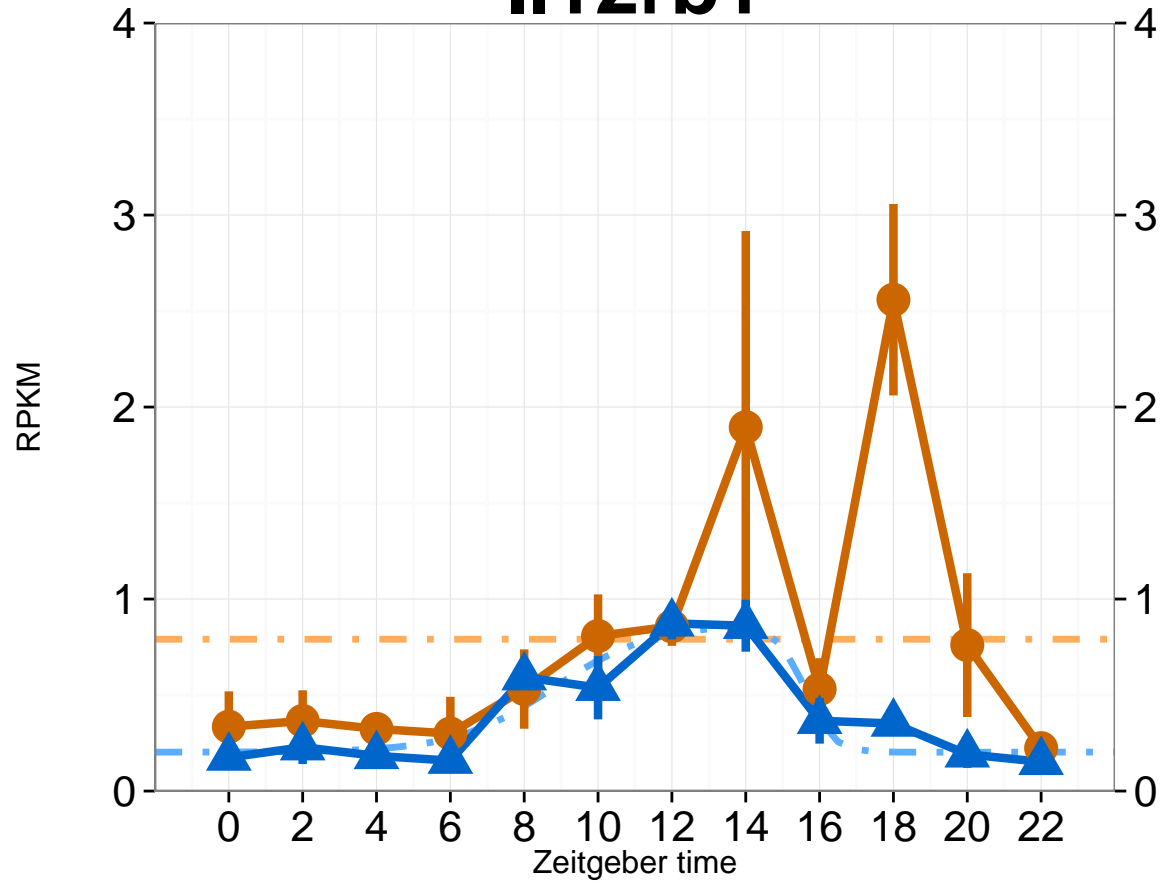

## Il12rb1

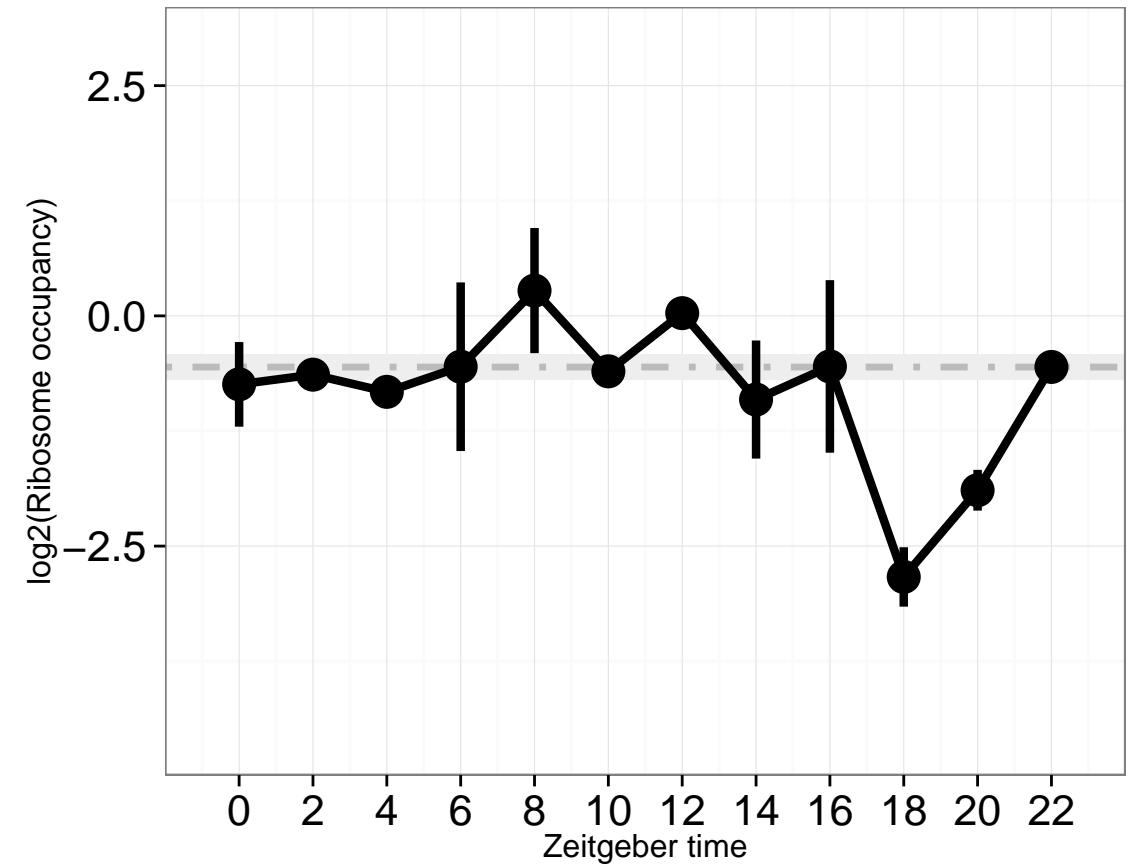

Supplement: SuppDataset_1.zip [file Il12rb1_set_C.pdf › Supplemental Dataset 1/C-mRNA_nonrhythm_translation_rhyth/Il12rb1_set_C.pdf]

# II13ra2 TR

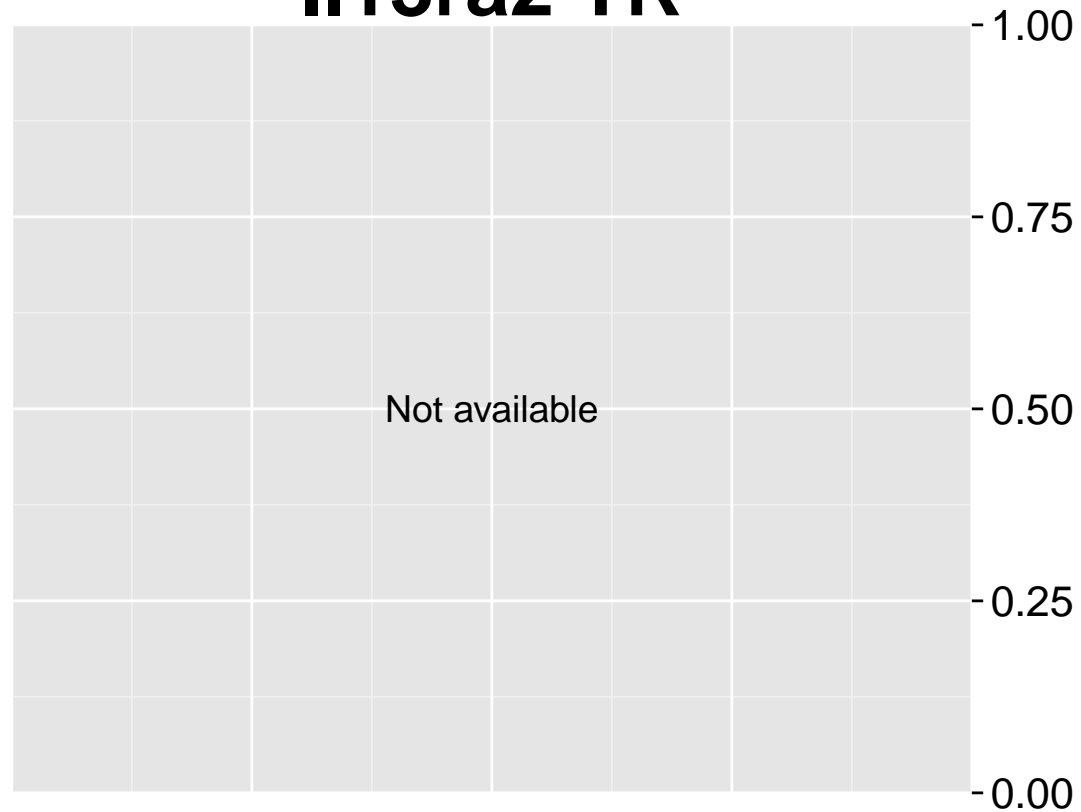

# Il13ra2 log2(Ribosome occupancy

Supplement: SuppDataset_1.zip [file Il13ra2_set_C.pdf › Supplemental Dataset 1/C-mRNA_nonrhythm_translation_rhyth/Il13ra2_set_C.pdf]

## Il17ra

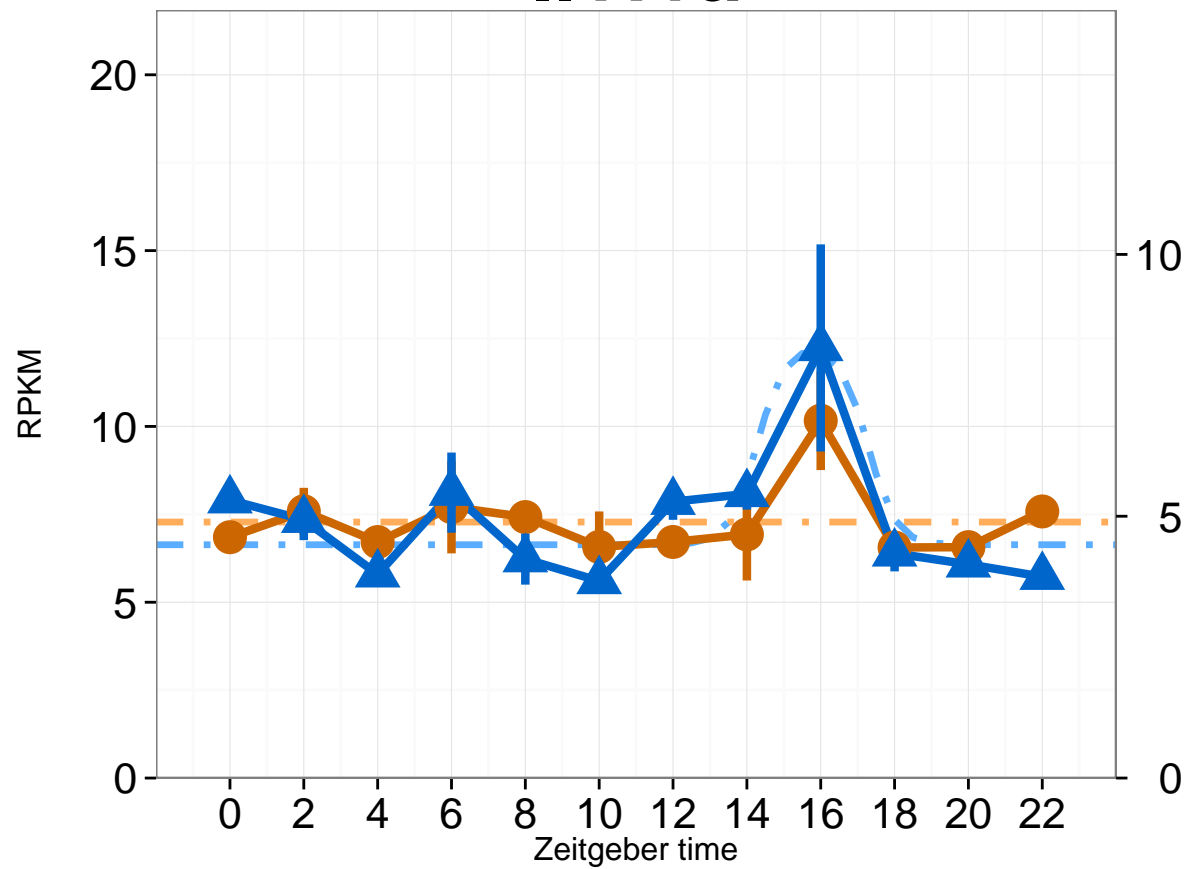

## Il17ra

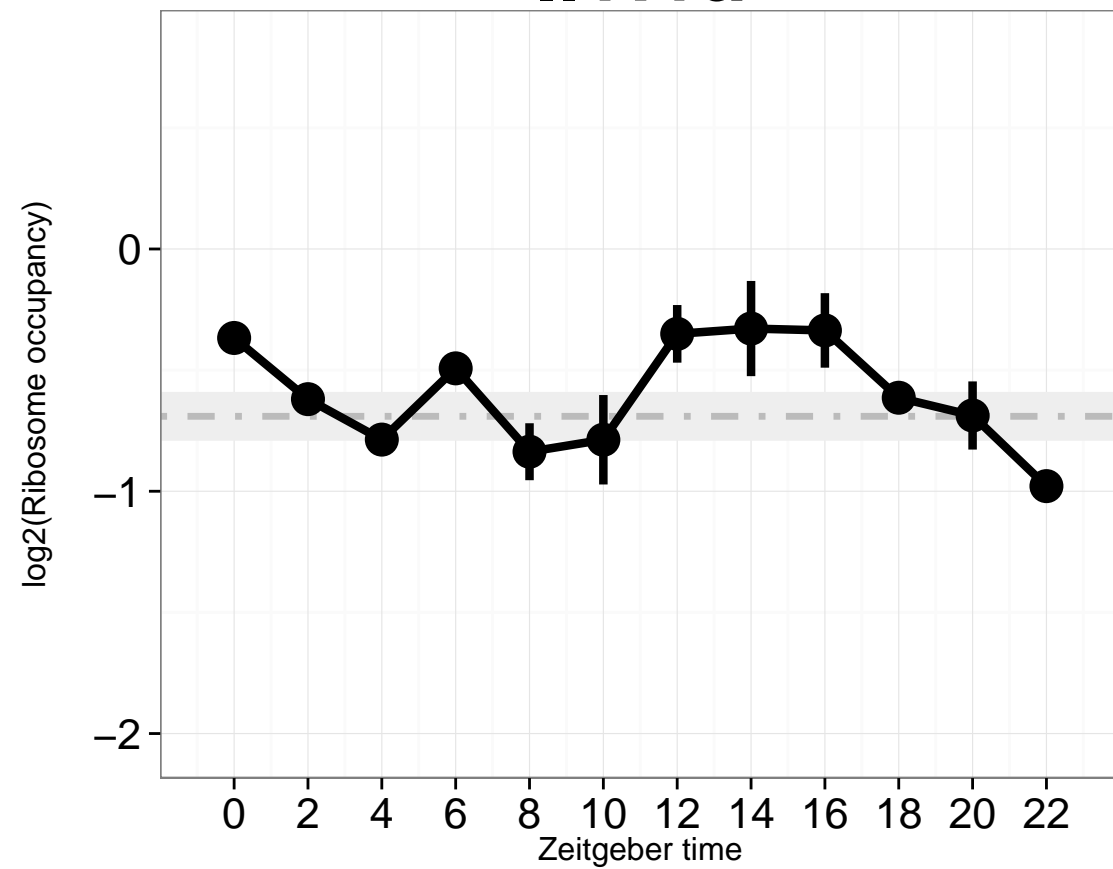

Supplement: SuppDataset_1.zip [file Il17ra_set_C.pdf › Supplemental Dataset 1/C-mRNA_nonrhythm_translation_rhyth/Il17ra_set_C.pdf]

# Ing1

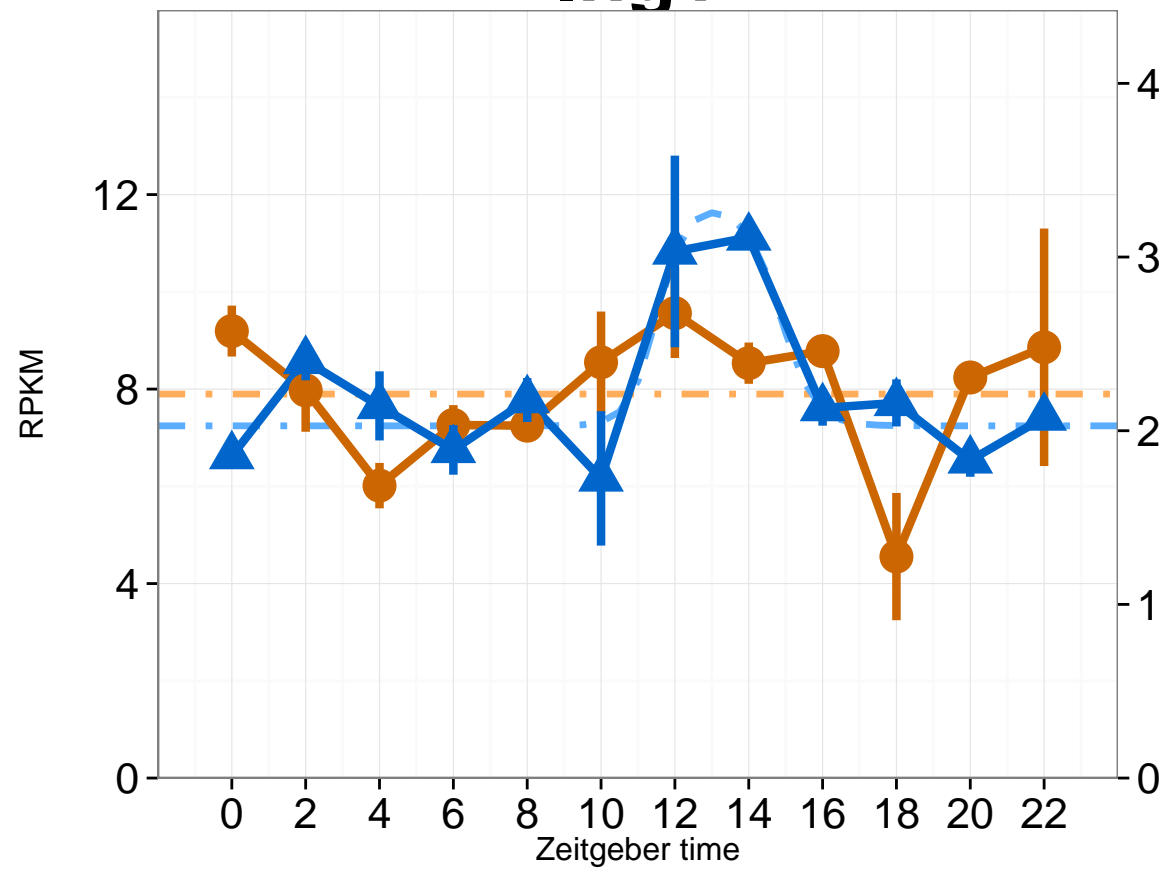

# Ing1

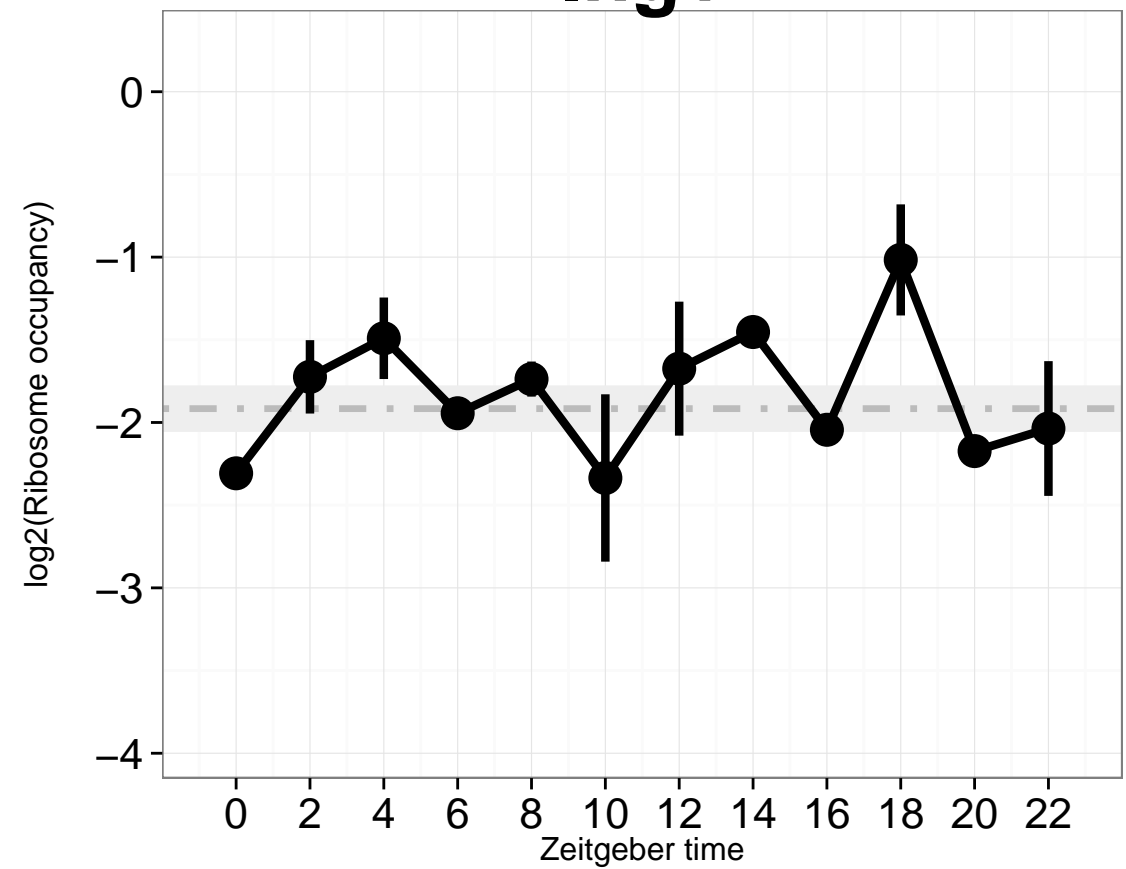

Supplement: SuppDataset_1.zip [file Ing1_set_C.pdf › Supplemental Dataset 1/C-mRNA_nonrhythm_translation_rhyth/Ing1_set_C.pdf]

## Ing4

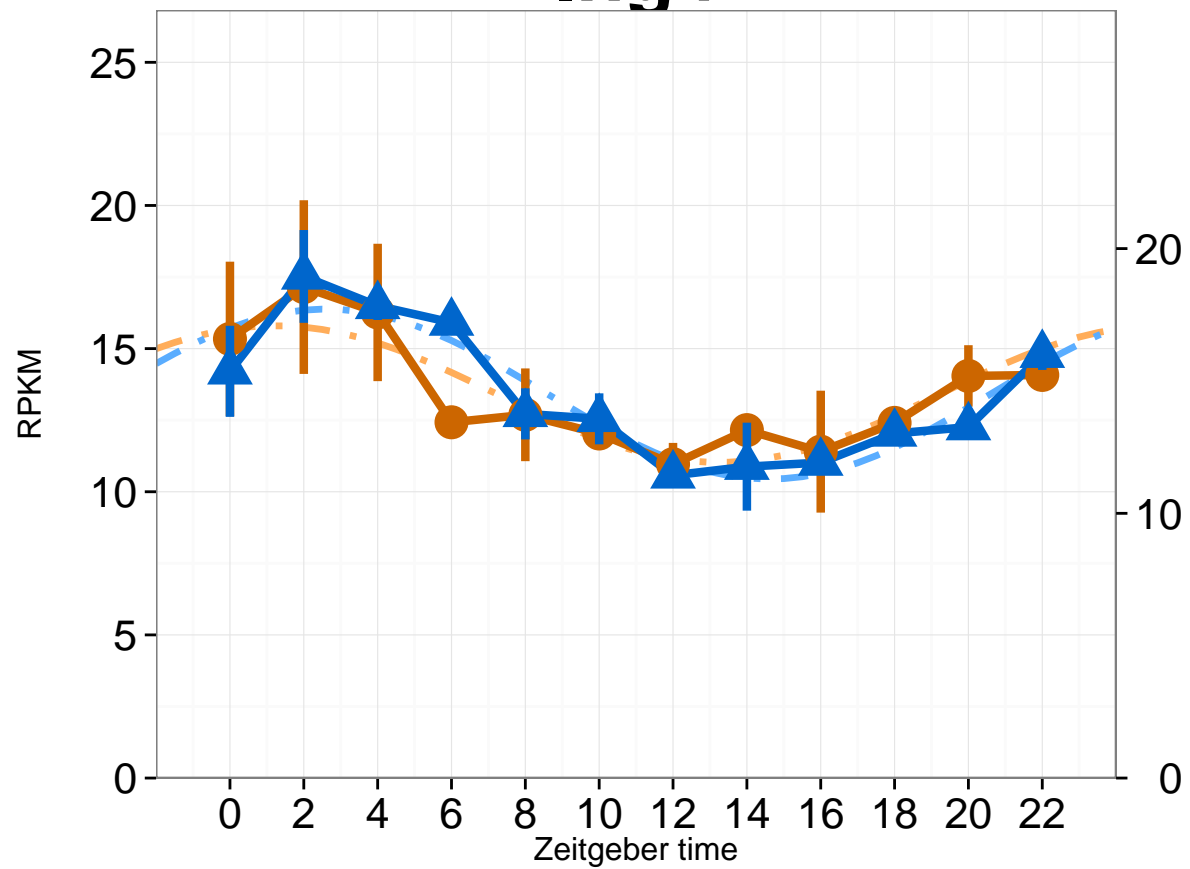

## Ing4

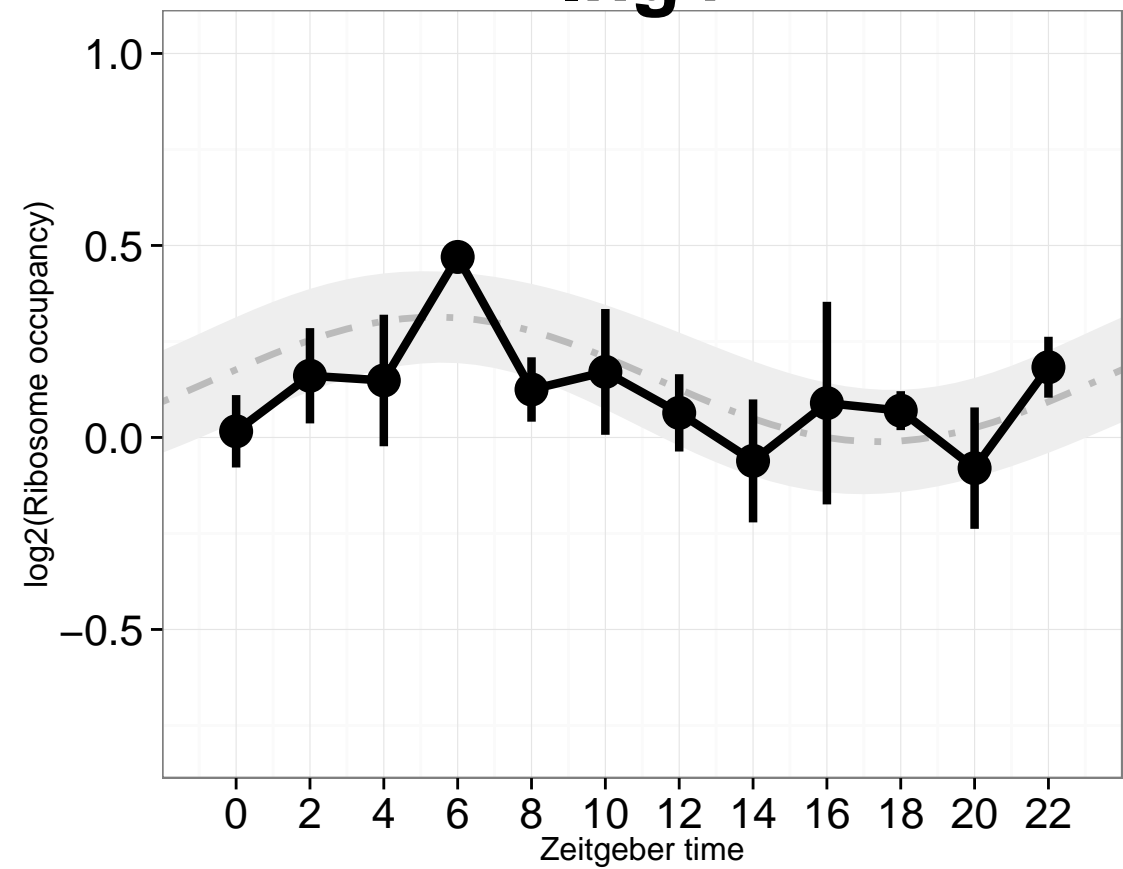

Supplement: SuppDataset_1.zip [file Ing4_set_C.pdf › Supplemental Dataset 1/C-mRNA_nonrhythm_translation_rhyth/Ing4_set_C.pdf]

# Inpp5k

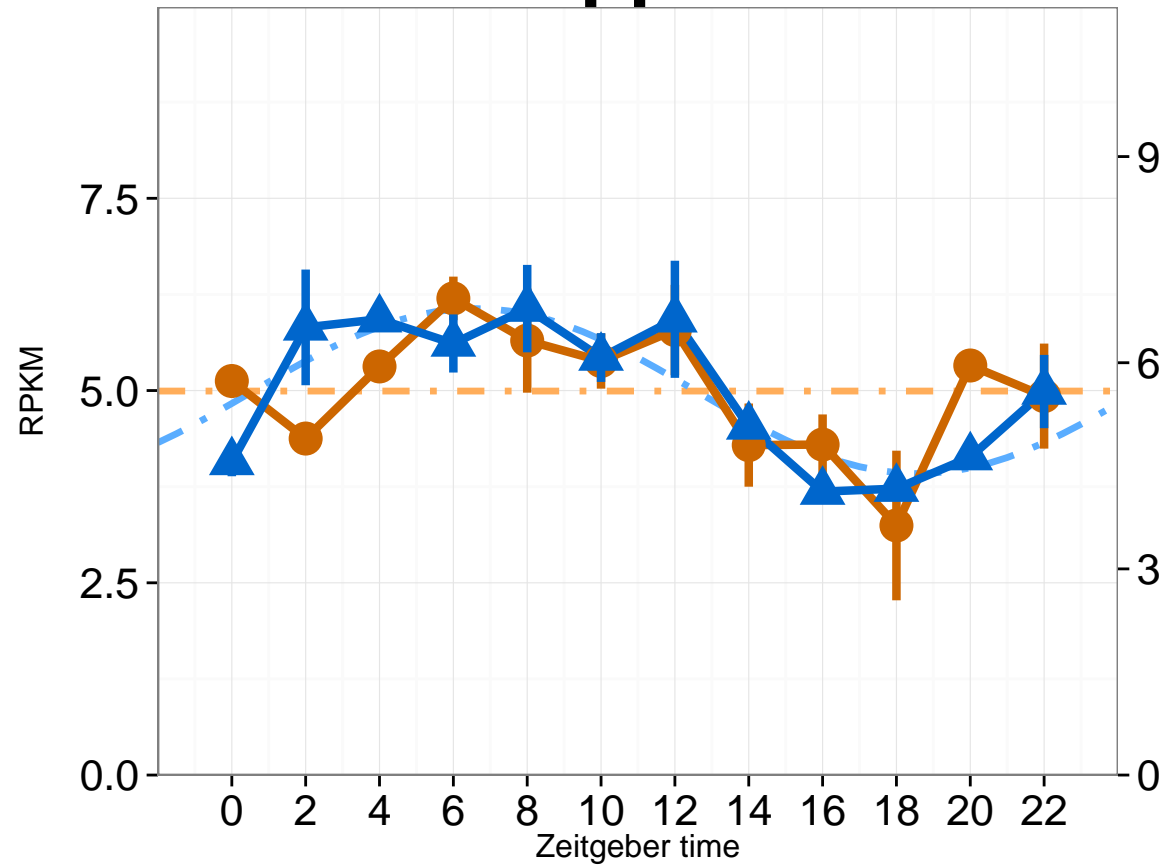

# Inpp5k

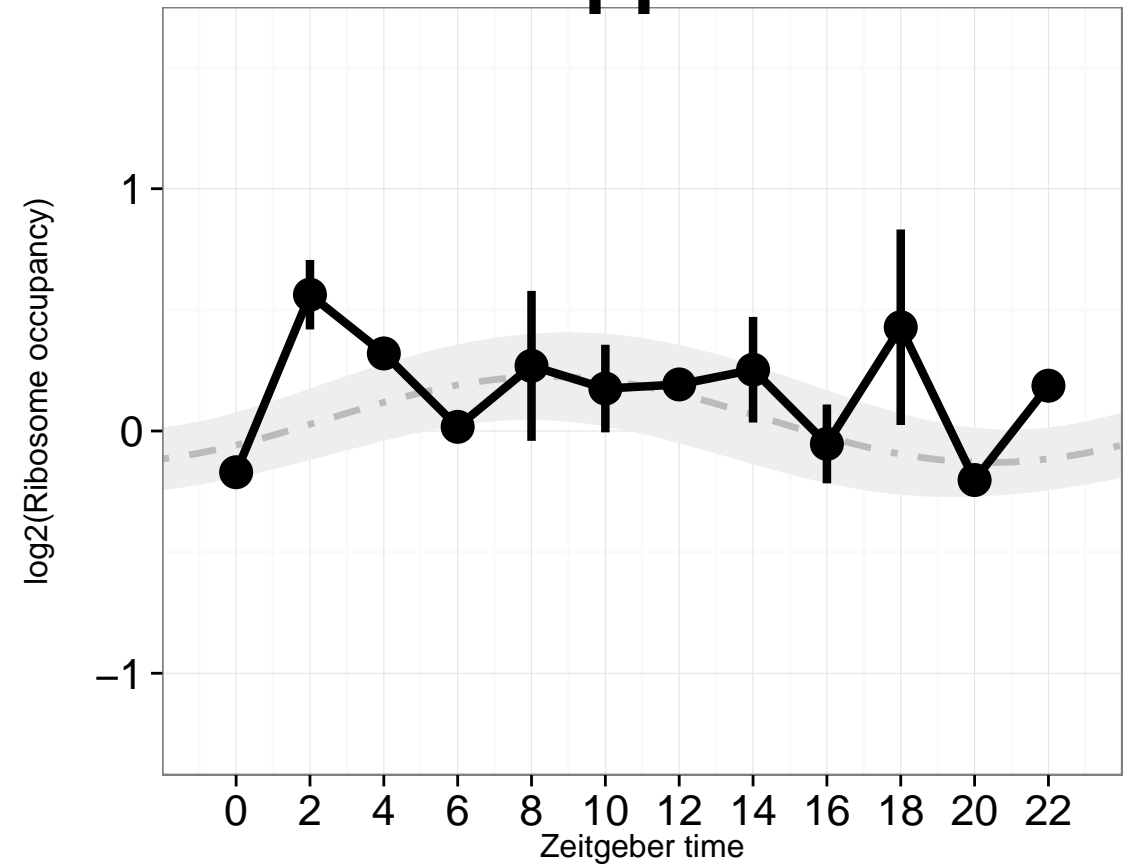

Supplement: SuppDataset_1.zip [file Inpp5k_set_C.pdf › Supplemental Dataset 1/C-mRNA_nonrhythm_translation_rhyth/Inpp5k_set_C.pdf]

## Insig1

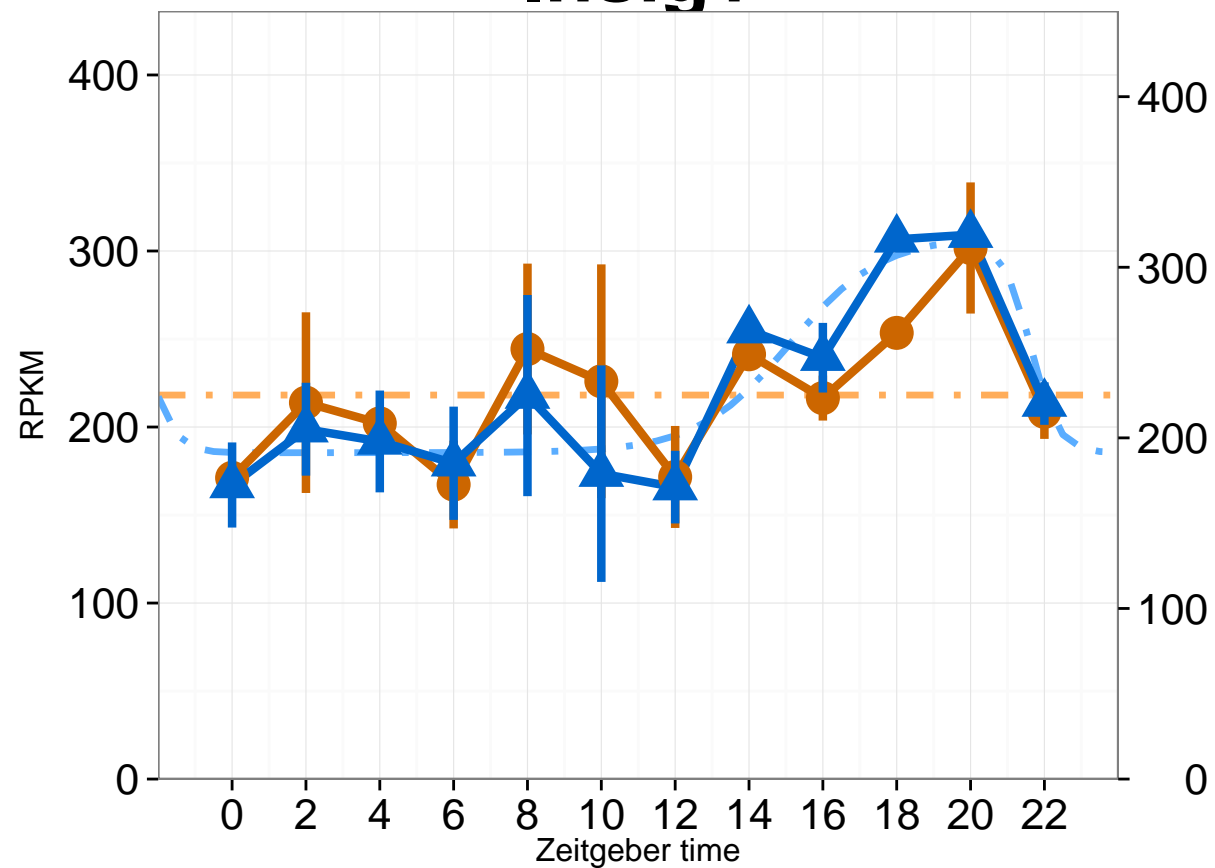

## Insig1

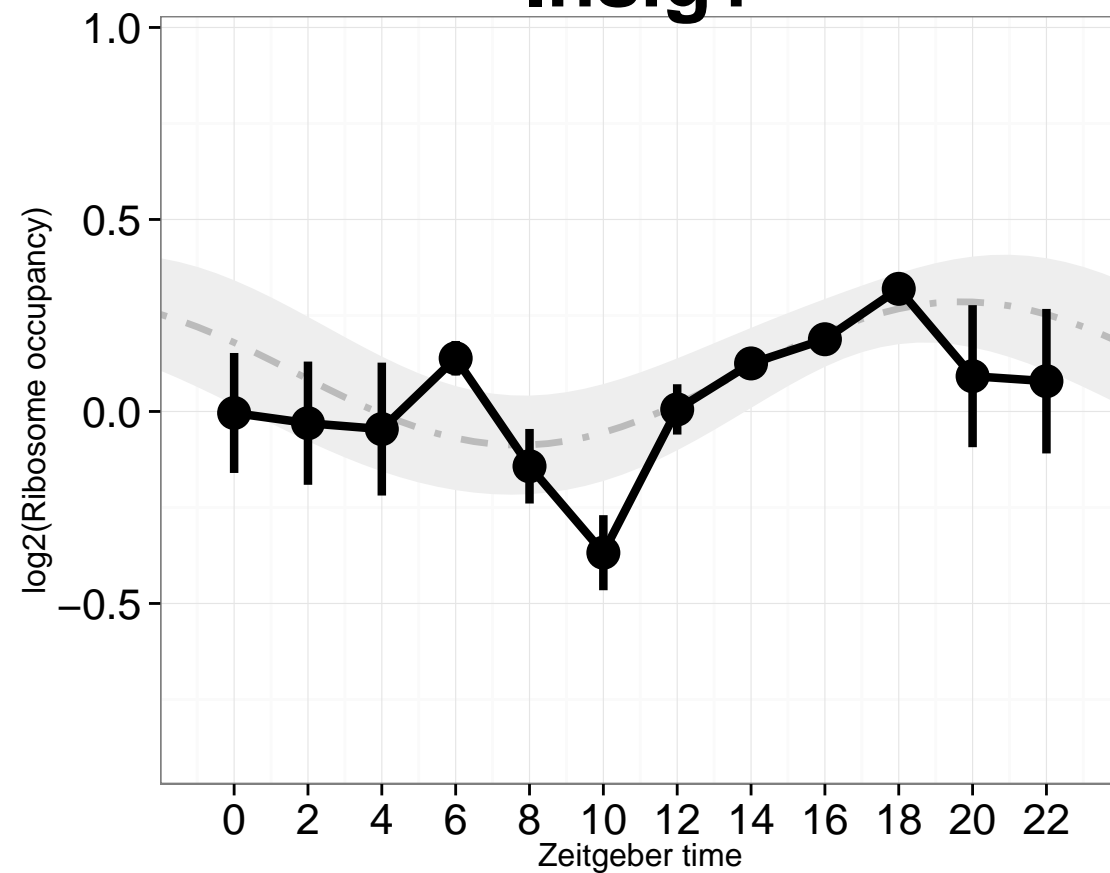

Supplement: SuppDataset_1.zip [file Insig1_set_C.pdf › Supplemental Dataset 1/C-mRNA_nonrhythm_translation_rhyth/Insig1_set_C.pdf]

## Intu

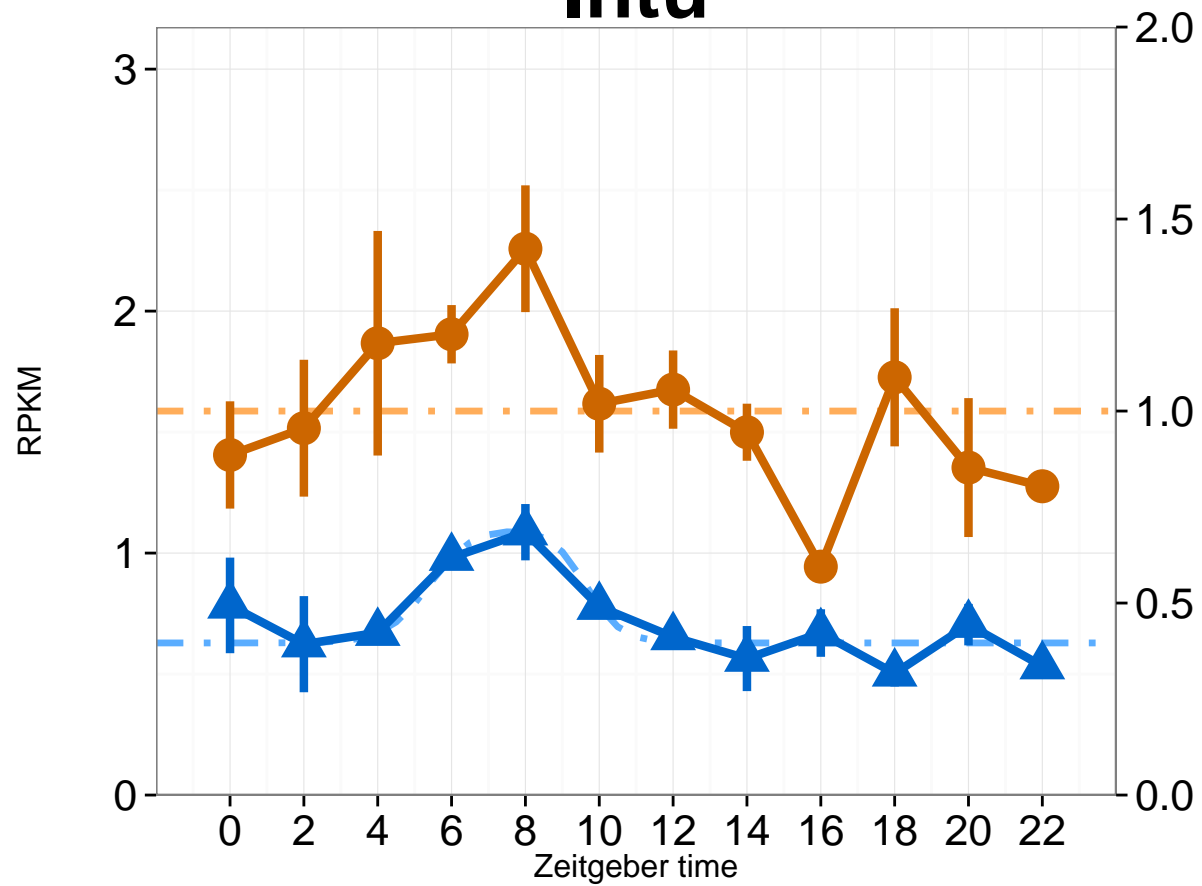

## Intu

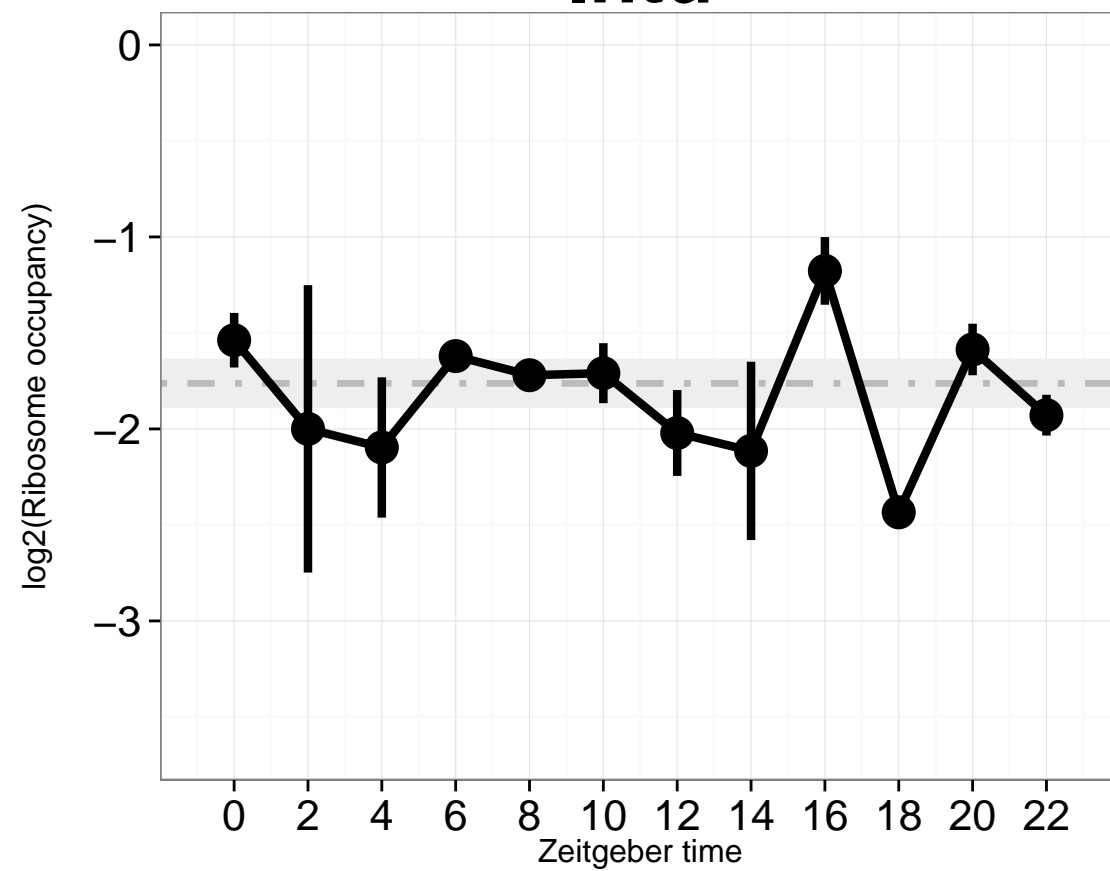

Supplement: SuppDataset_1.zip [file Intu_set_C.pdf › Supplemental Dataset 1/C-mRNA_nonrhythm_translation_rhyth/Intu_set_C.pdf]

## Ipo5

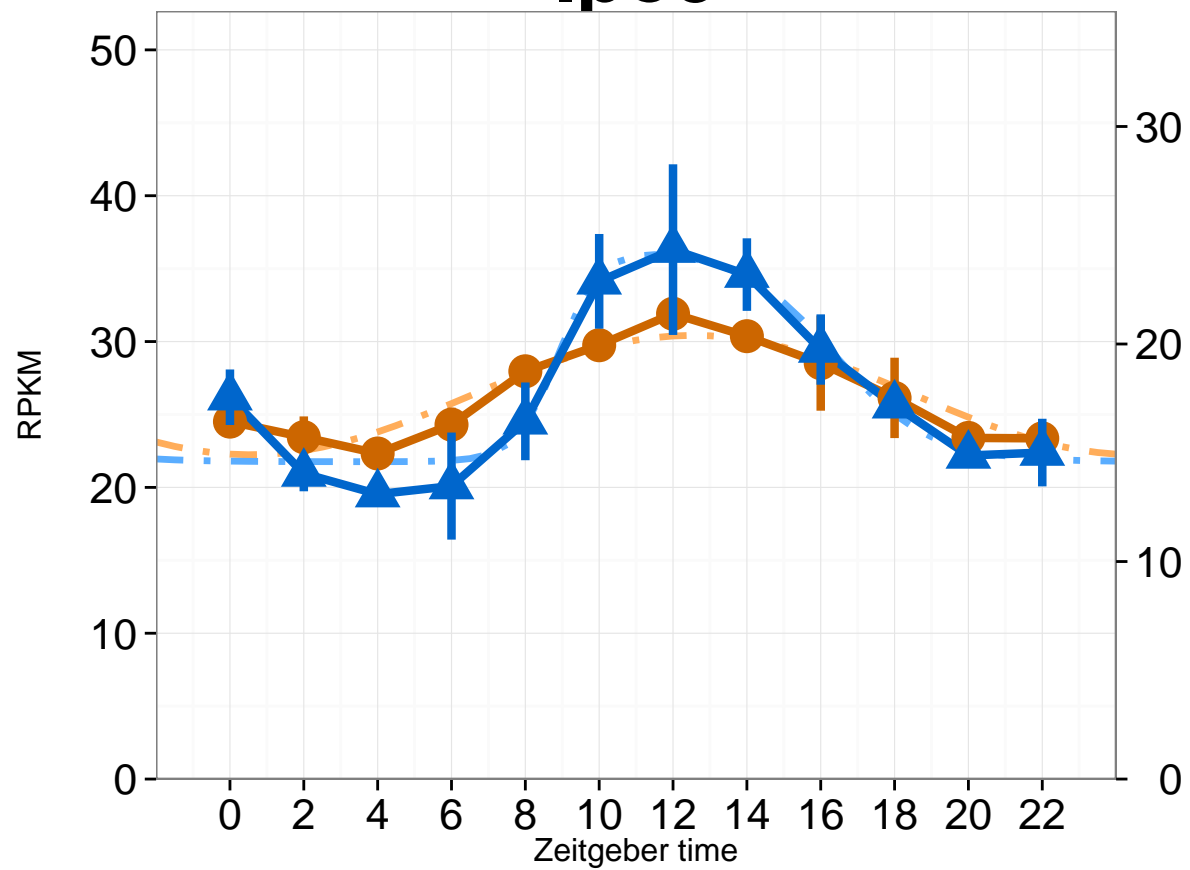

## Ipo5

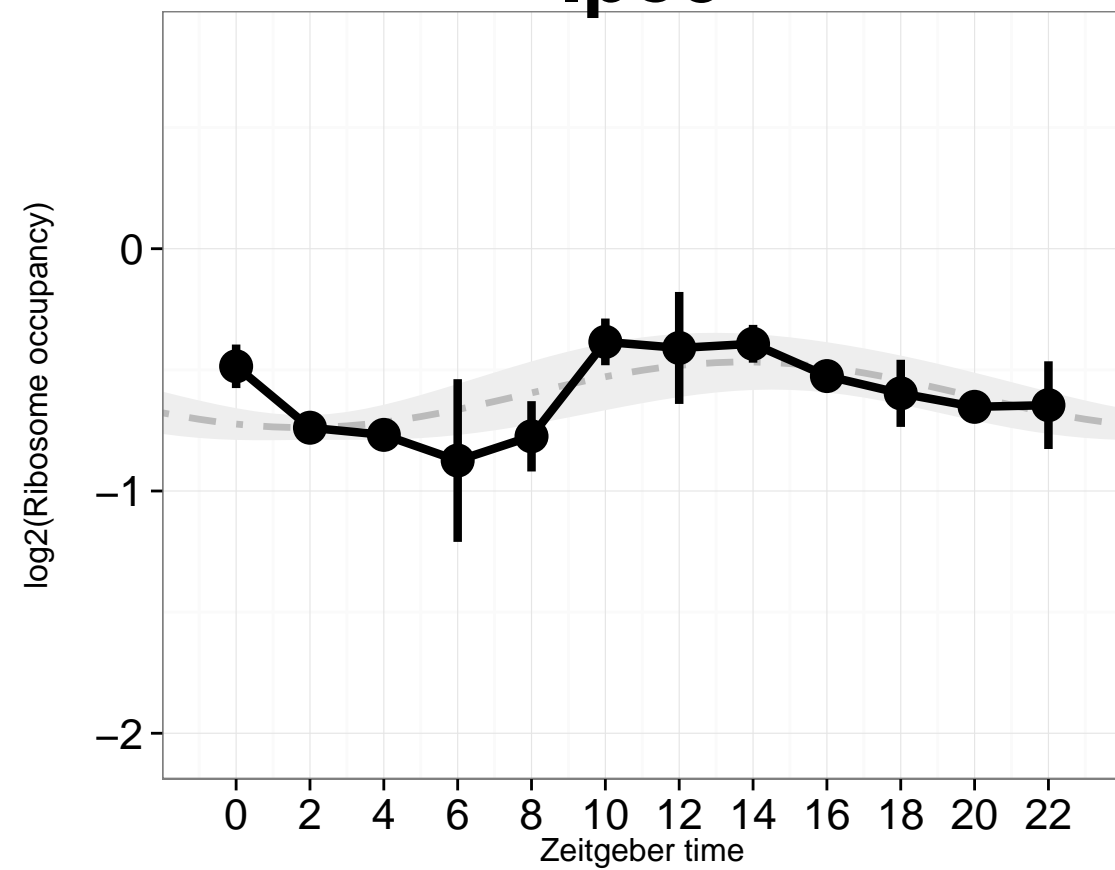

Supplement: SuppDataset_1.zip [file Ipo5_set_C.pdf › Supplemental Dataset 1/C-mRNA_nonrhythm_translation_rhyth/Ipo5_set_C.pdf]

## lppk

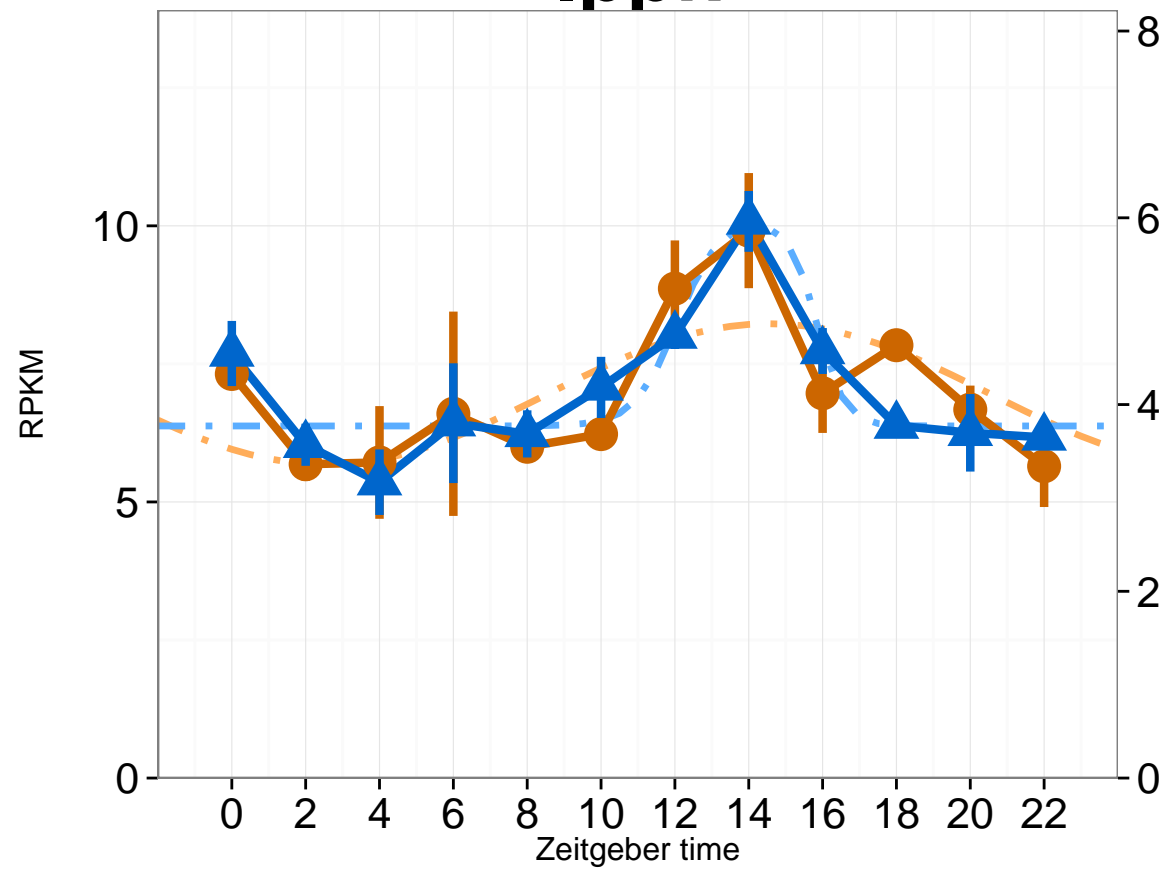

## lppk

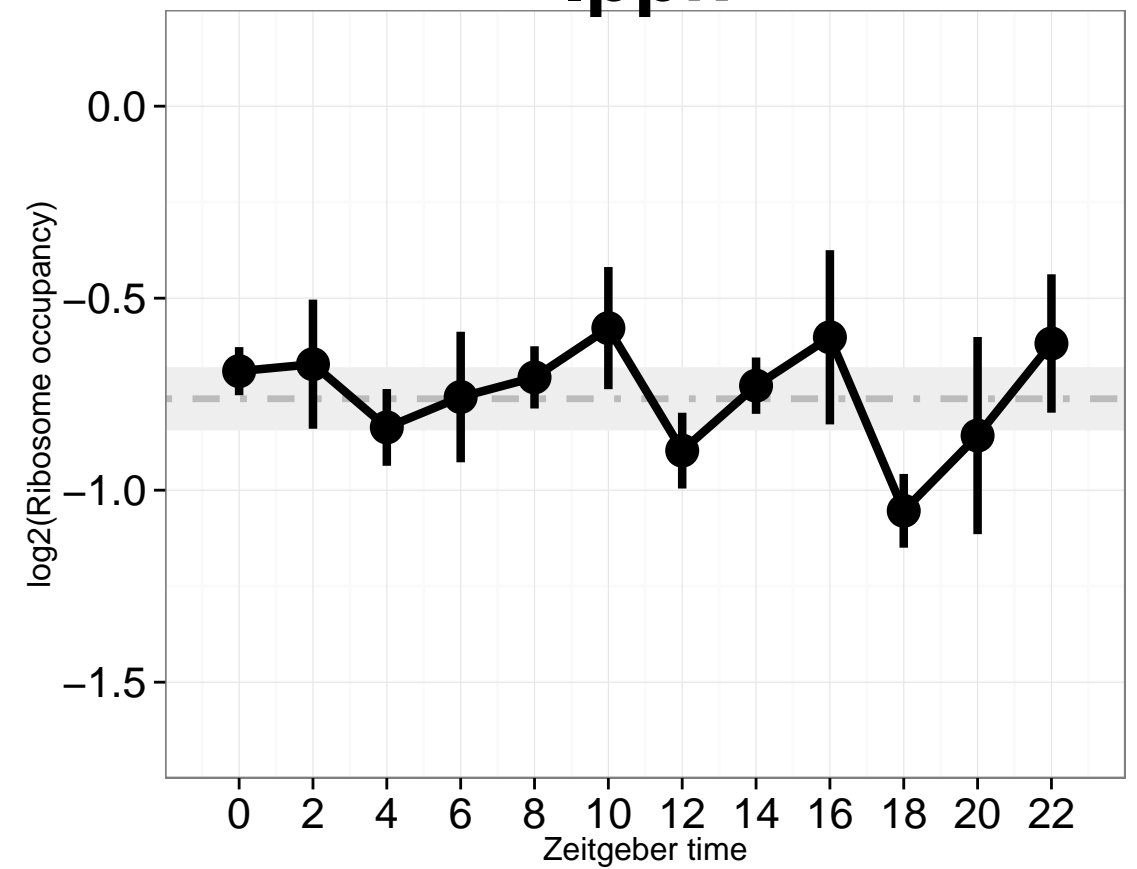

Supplement: SuppDataset_1.zip [file Ippk_set_C.pdf › Supplemental Dataset 1/C-mRNA_nonrhythm_translation_rhyth/Ippk_set_C.pdf]

## Irf2bp2

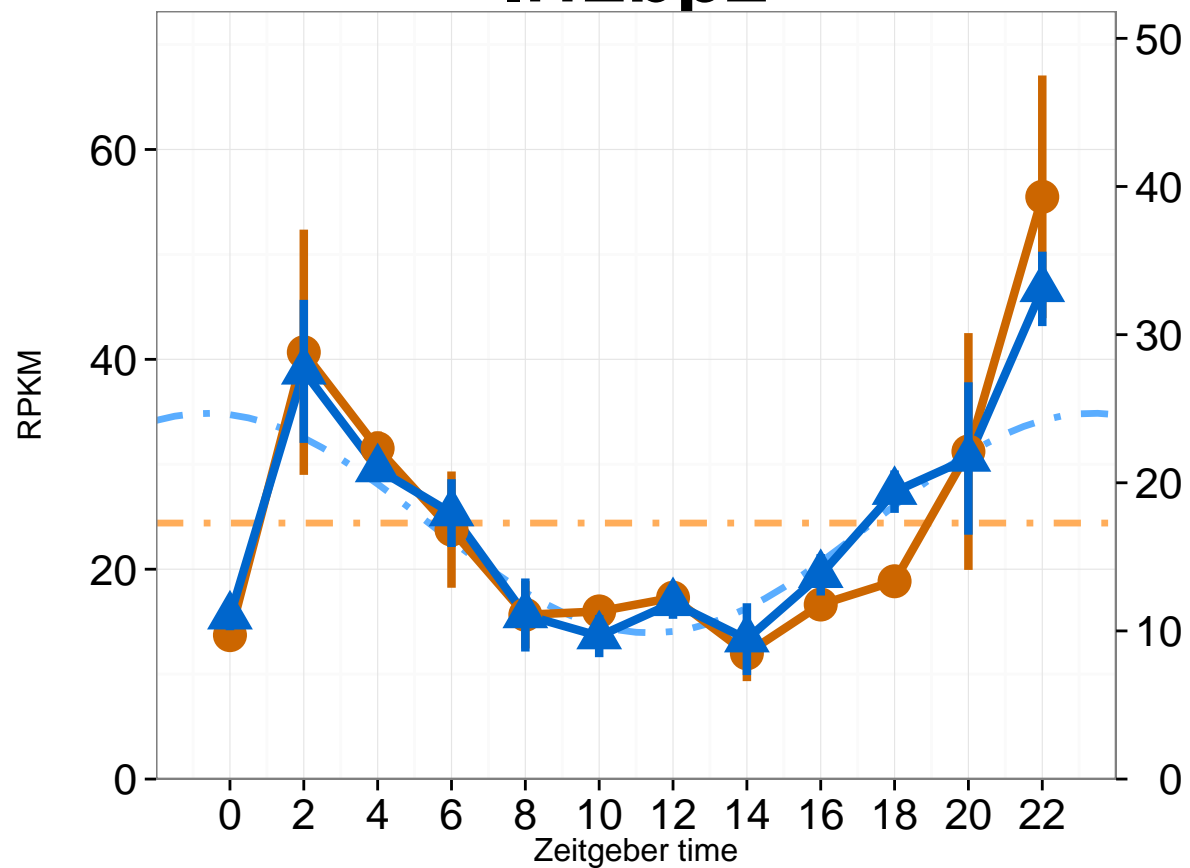

## Irf2bp2

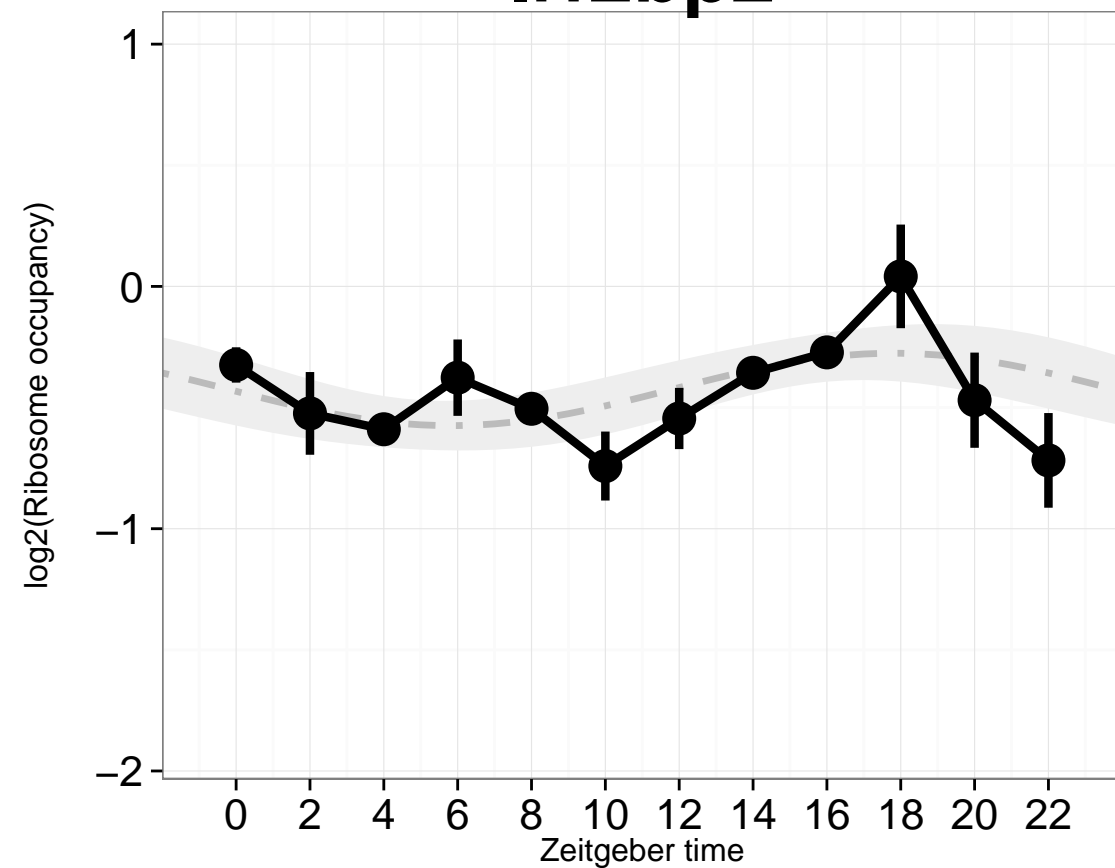

Supplement: SuppDataset_1.zip [file Irf2bp2_set_C.pdf › Supplemental Dataset 1/C-mRNA_nonrhythm_translation_rhyth/Irf2bp2_set_C.pdf]

## Irf7

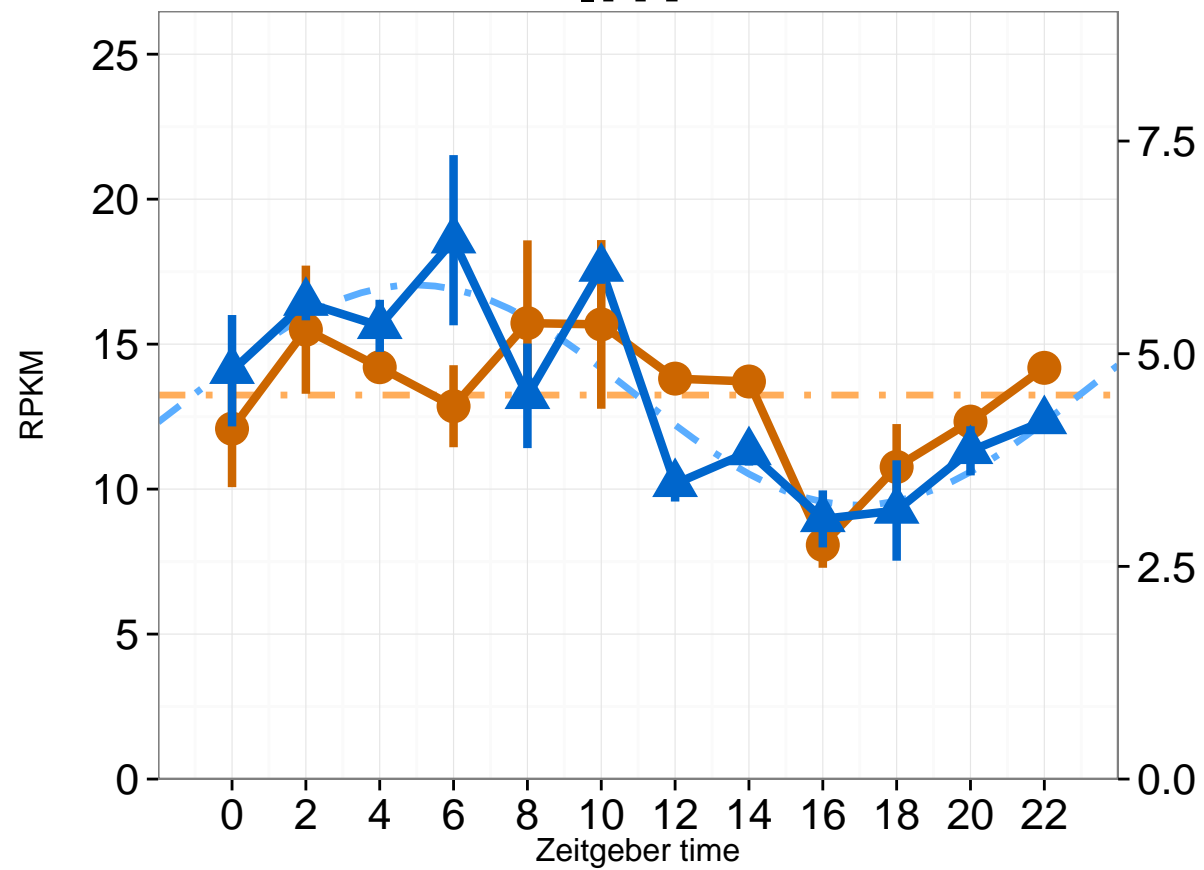

## Irf7

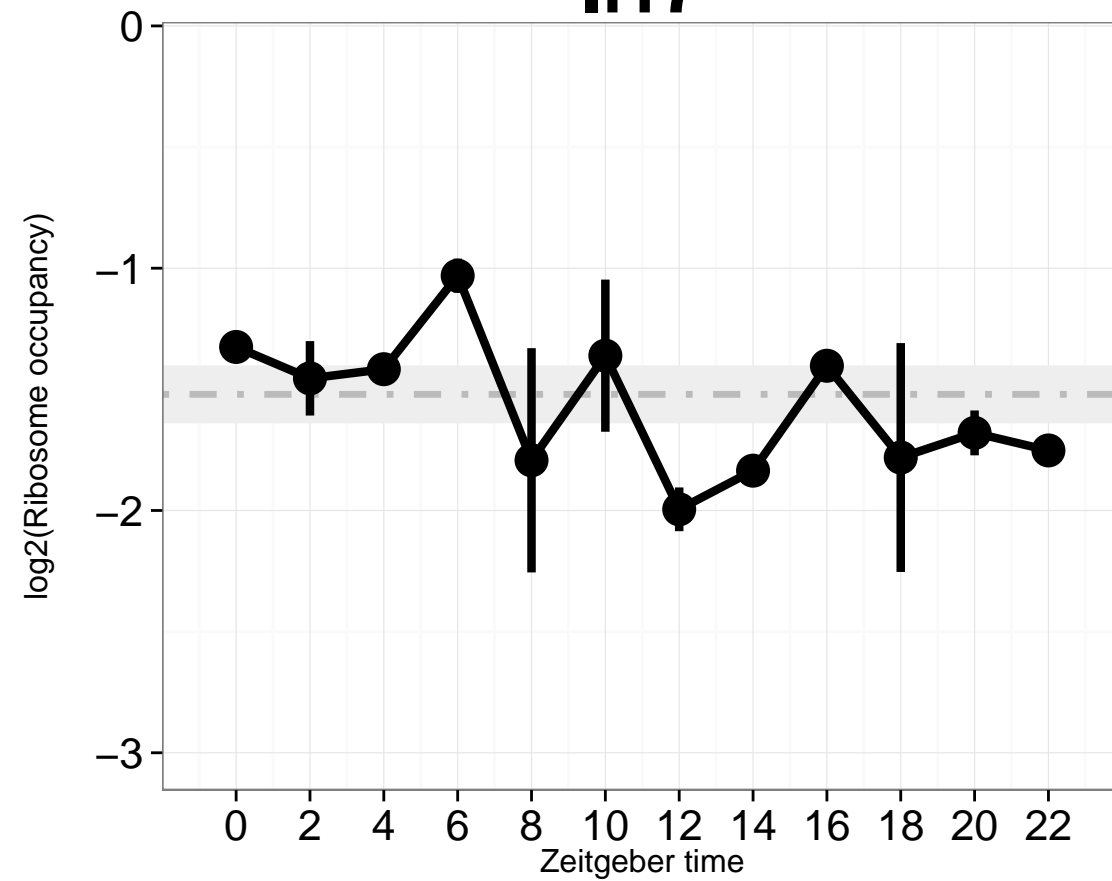

Supplement: SuppDataset_1.zip [file Irf7_set_C.pdf › Supplemental Dataset 1/C-mRNA_nonrhythm_translation_rhyth/Irf7_set_C.pdf]

## Irf9

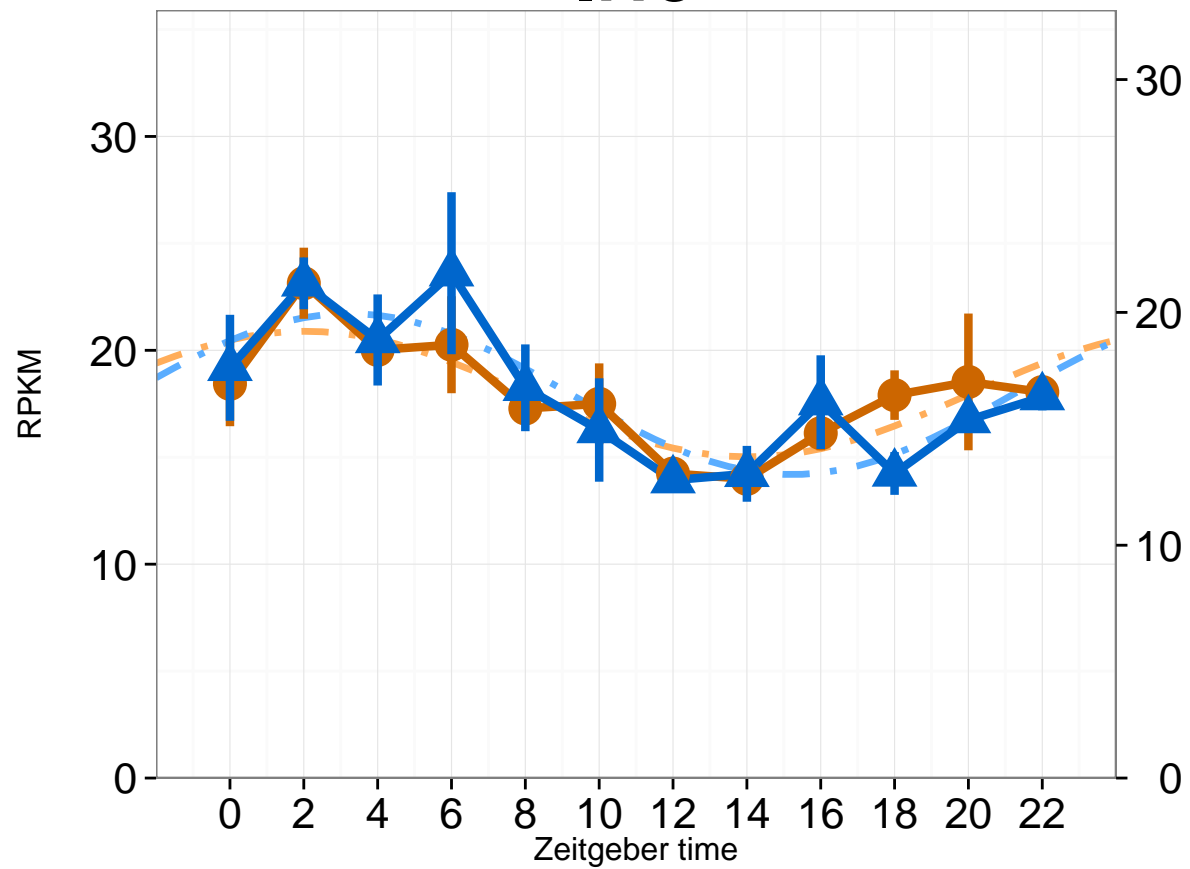

## Irf9

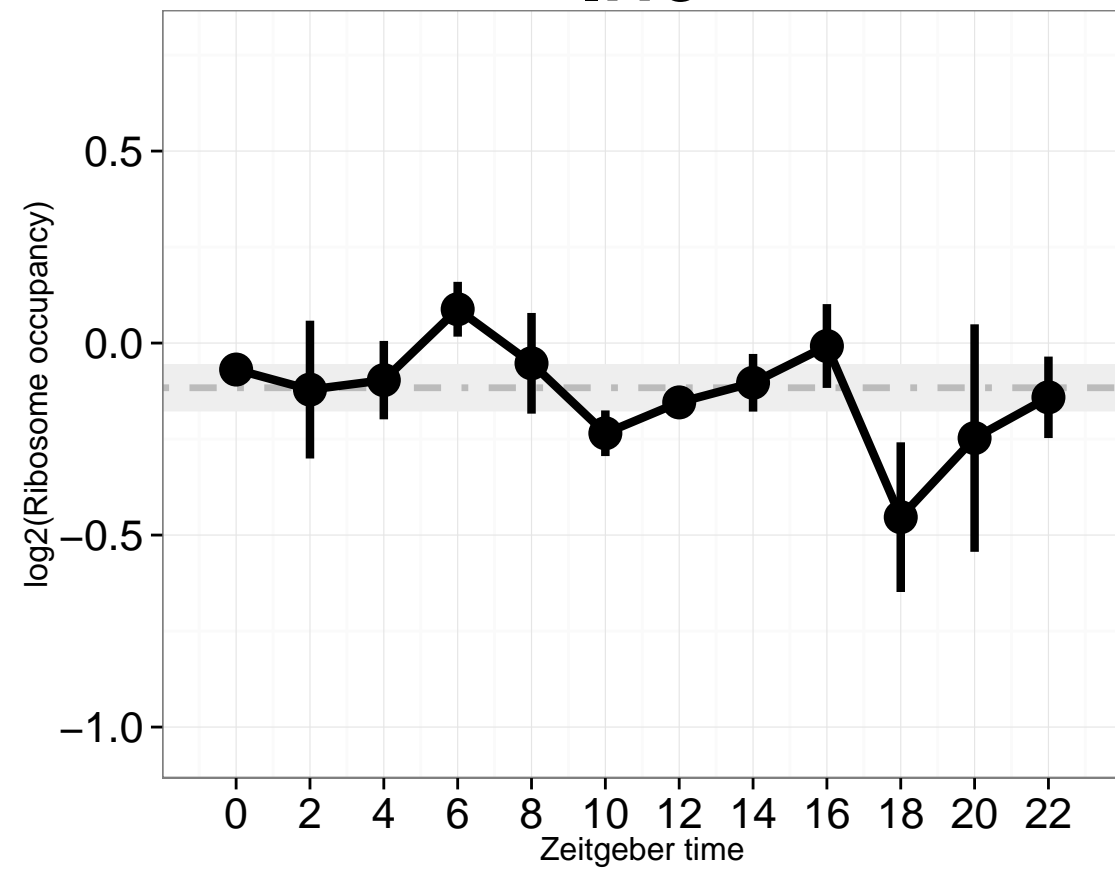

Supplement: SuppDataset_1.zip [file Irf9_set_C.pdf › Supplemental Dataset 1/C-mRNA_nonrhythm_translation_rhyth/Irf9_set_C.pdf]

## Irgq

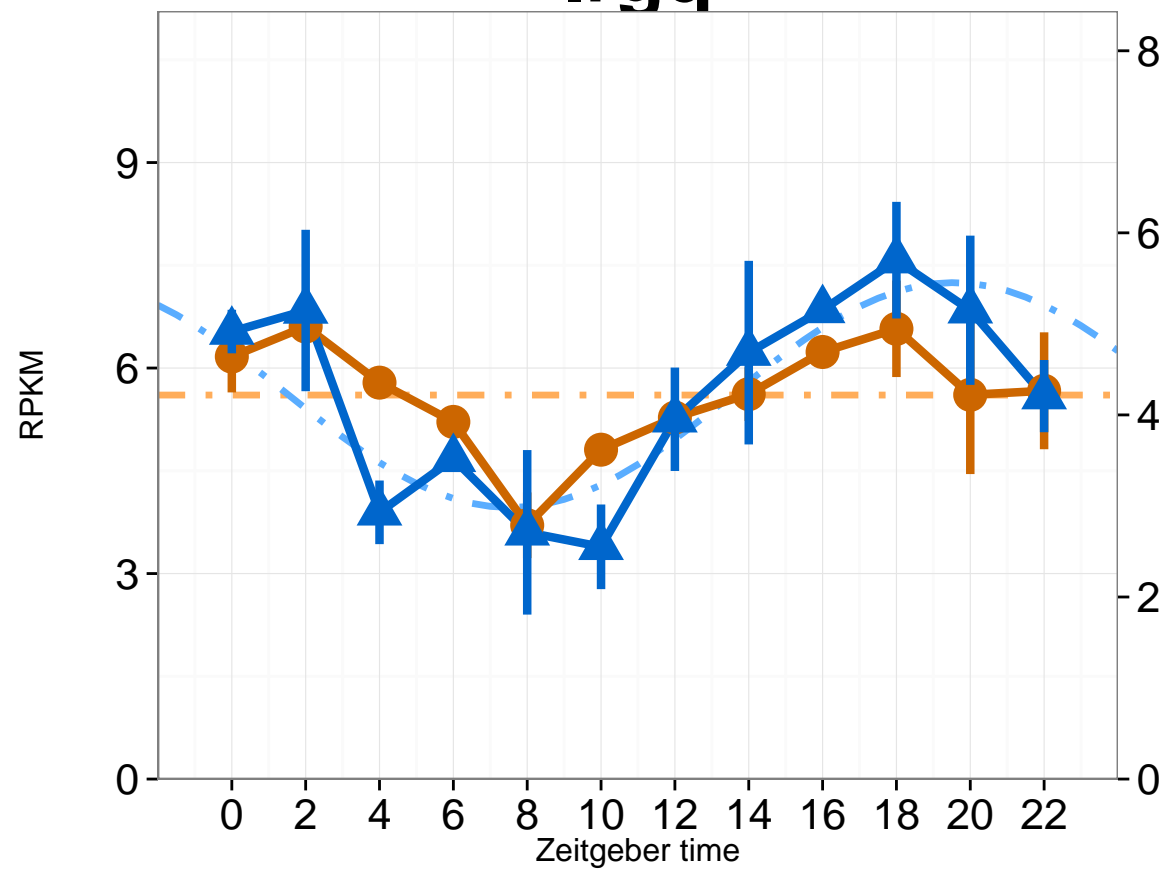

## Irgq

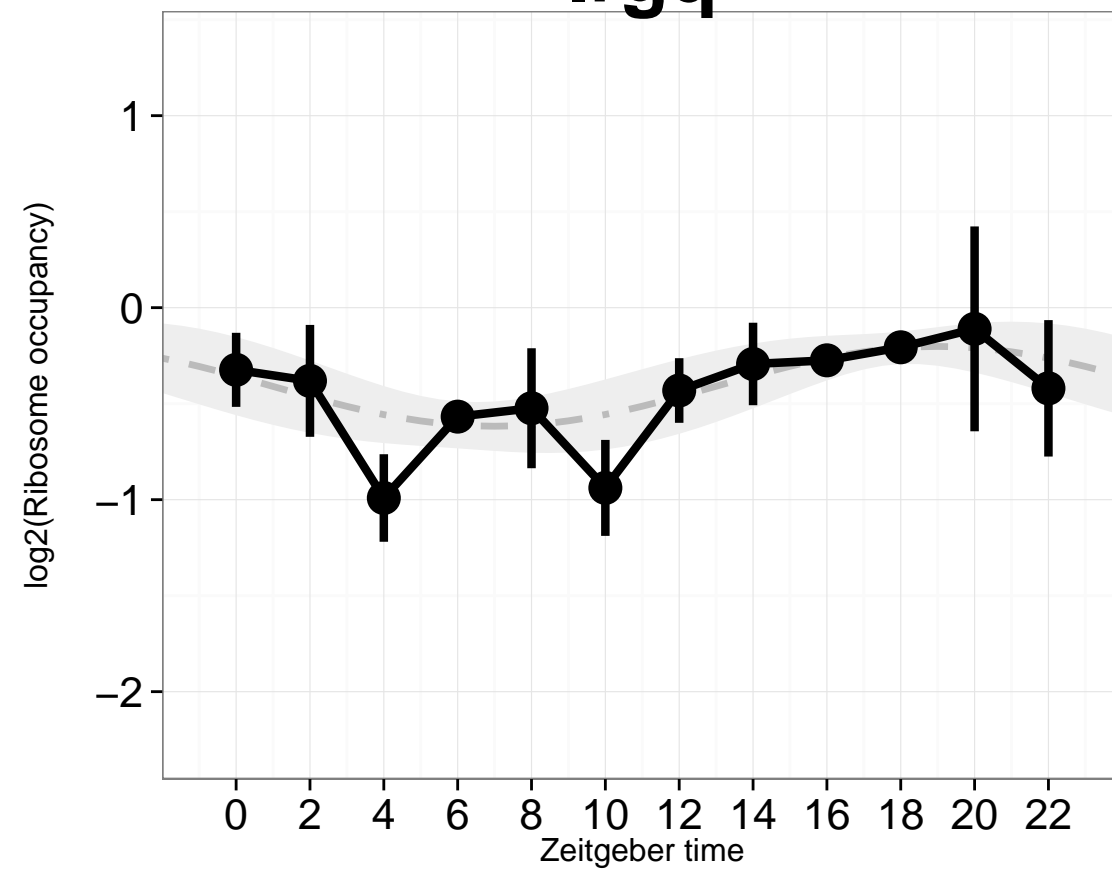

Supplement: SuppDataset_1.zip [file Irgq_set_C.pdf › Supplemental Dataset 1/C-mRNA_nonrhythm_translation_rhyth/Irgq_set_C.pdf]

# Isoc2b

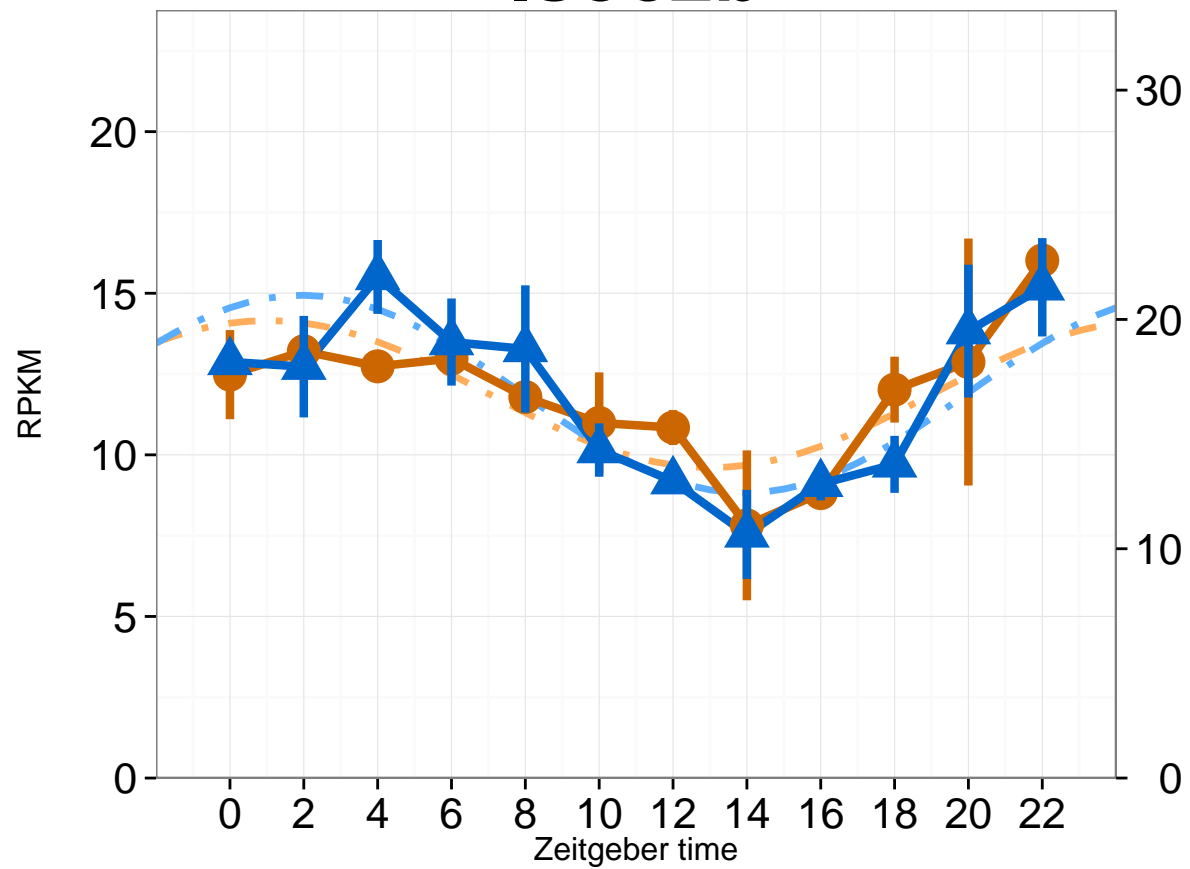

# Isoc2b

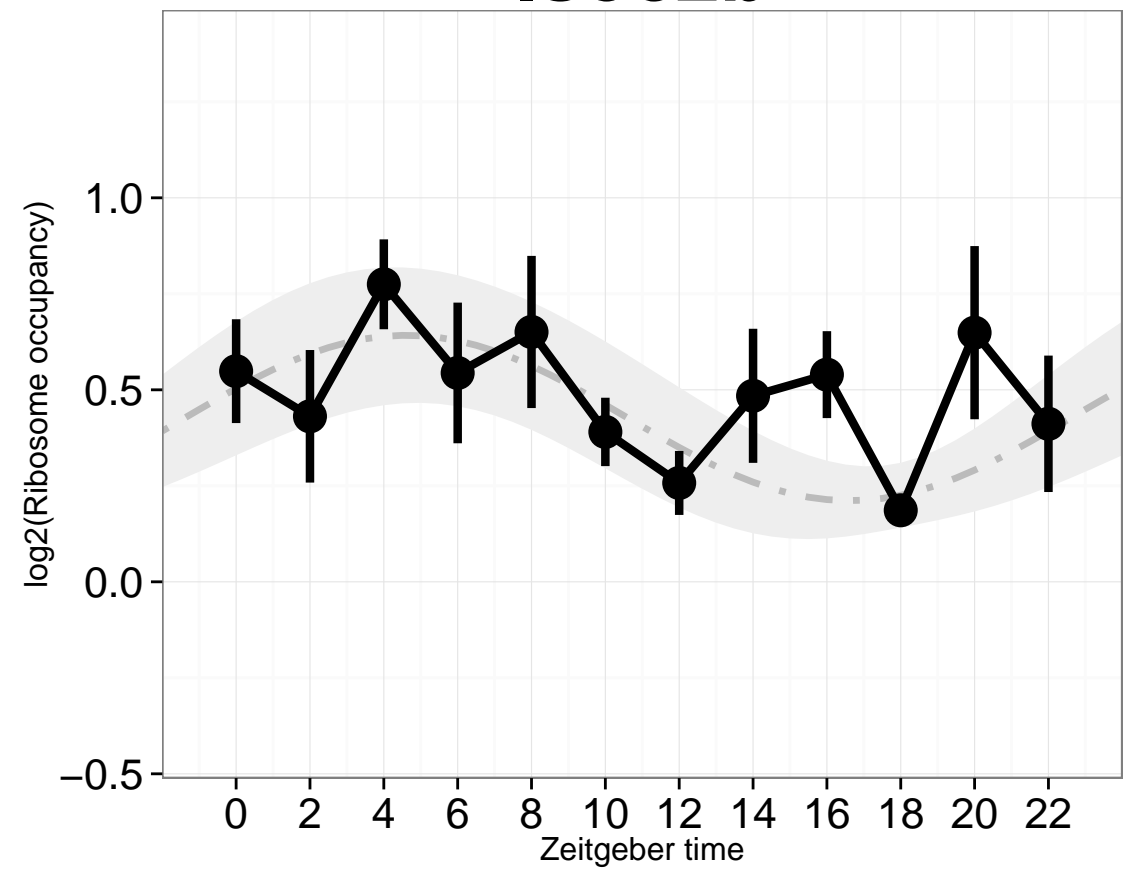

Supplement: SuppDataset_1.zip [file Isoc2b_set_C.pdf › Supplemental Dataset 1/C-mRNA_nonrhythm_translation_rhyth/Isoc2b_set_C.pdf]

# Itpr1

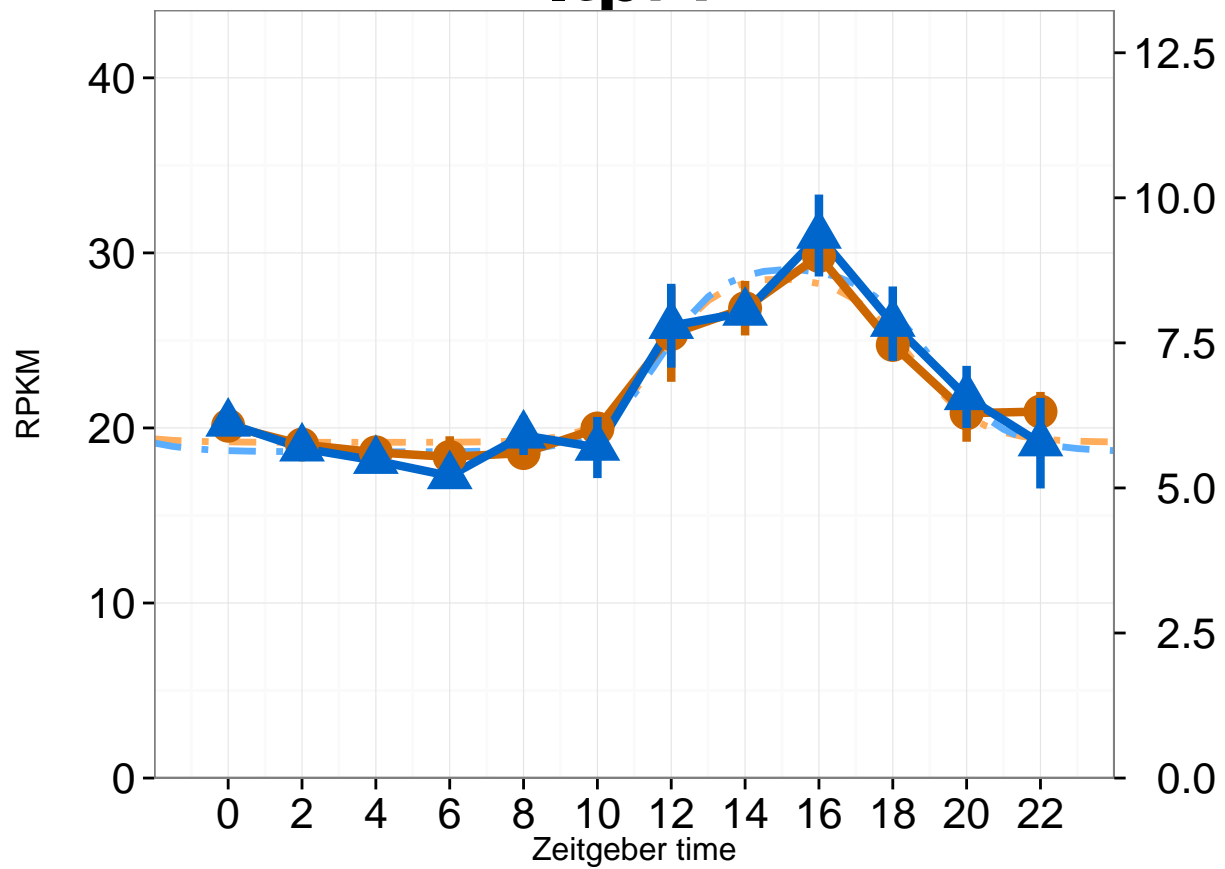

# Itpr1

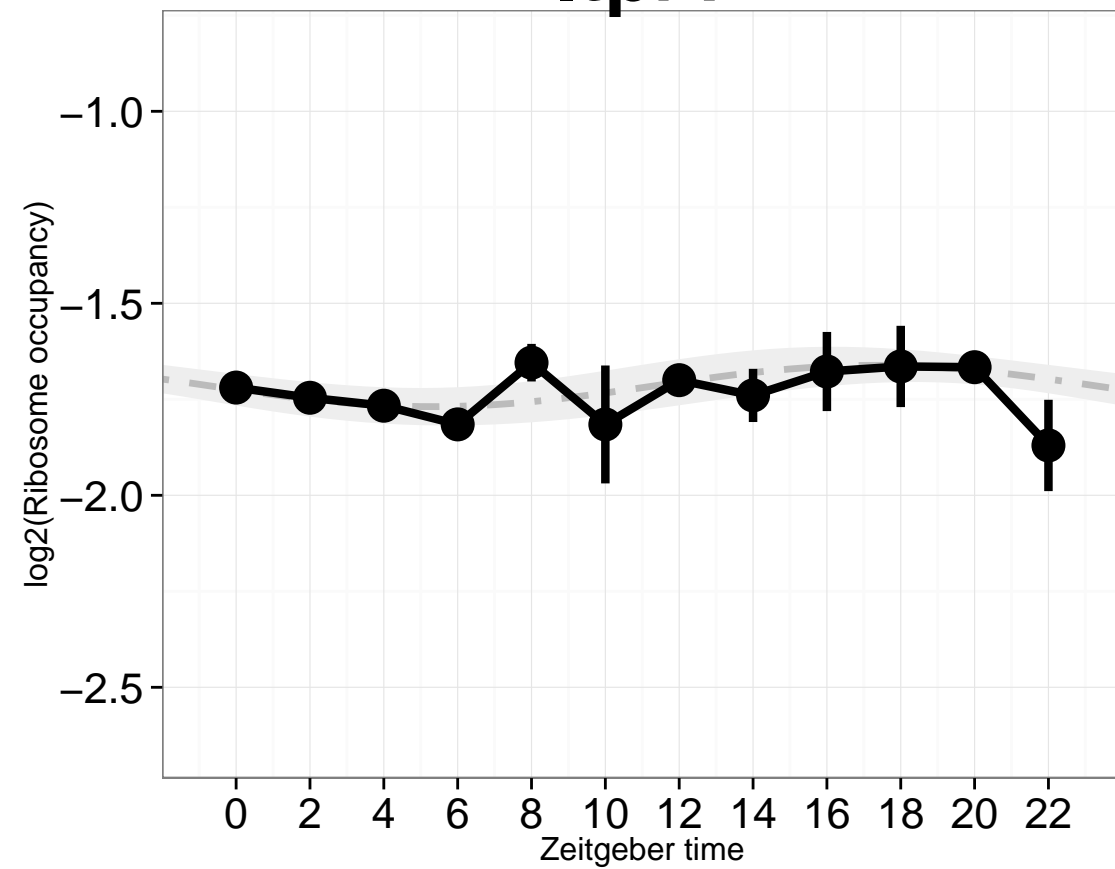

Supplement: SuppDataset_1.zip [file Itpr1_set_C.pdf › Supplemental Dataset 1/C-mRNA_nonrhythm_translation_rhyth/Itpr1_set_C.pdf]

## Jund

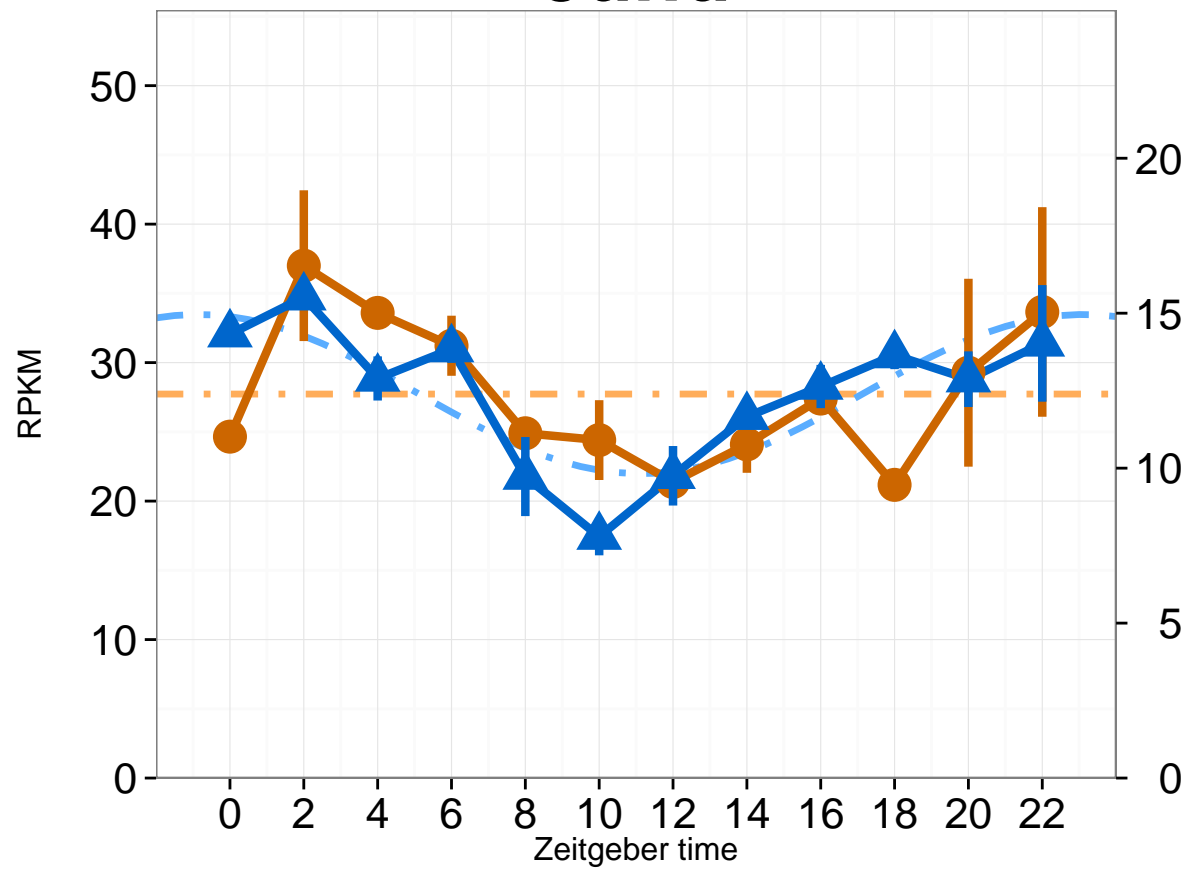

## Jund

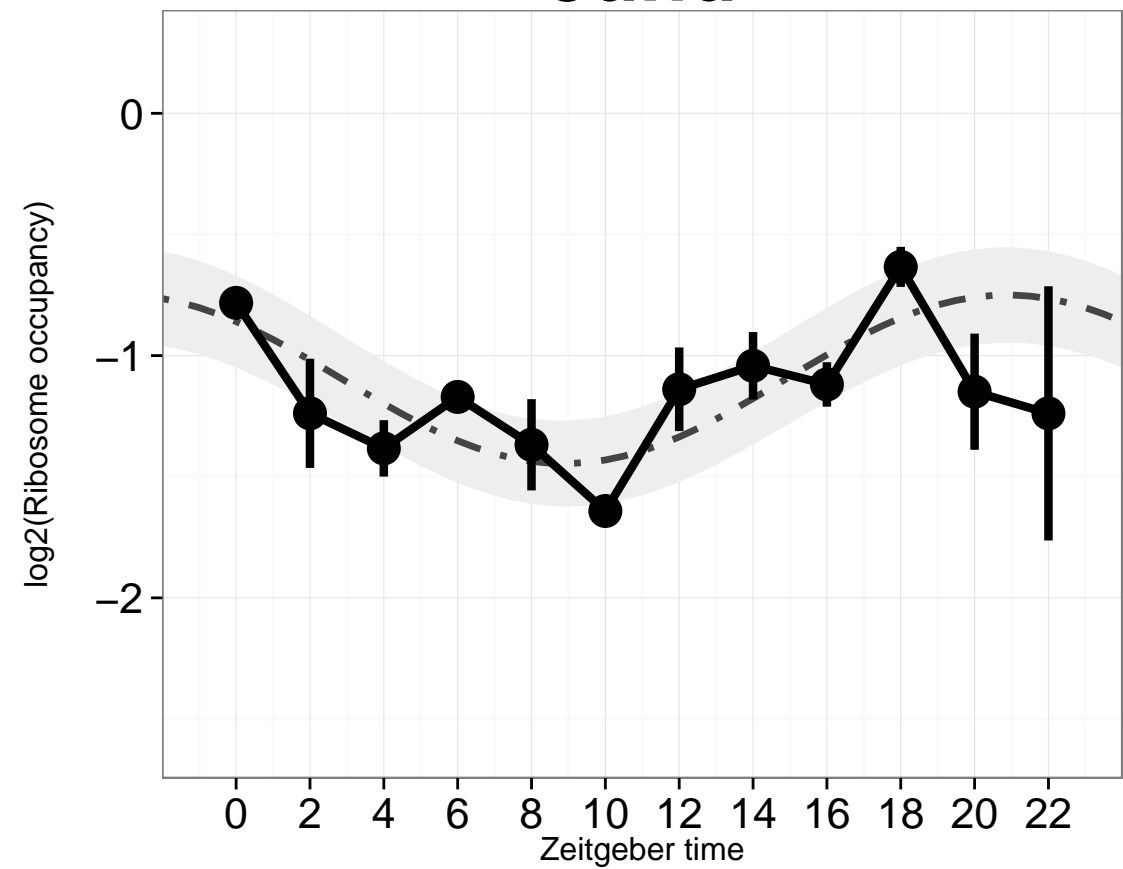

Supplement: SuppDataset_1.zip [file Jund_set_C.pdf › Supplemental Dataset 1/C-mRNA_nonrhythm_translation_rhyth/Jund_set_C.pdf]

## Kcnj16

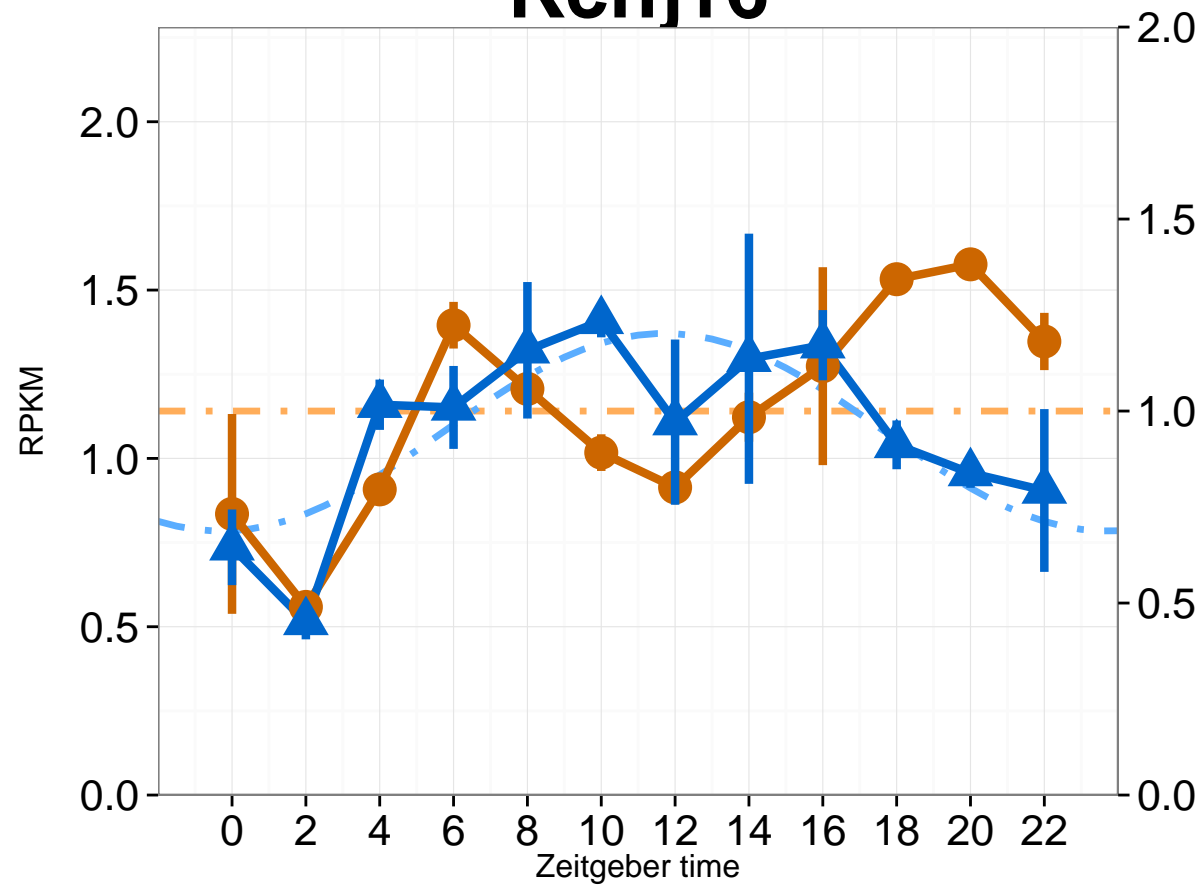

## Kcnj16

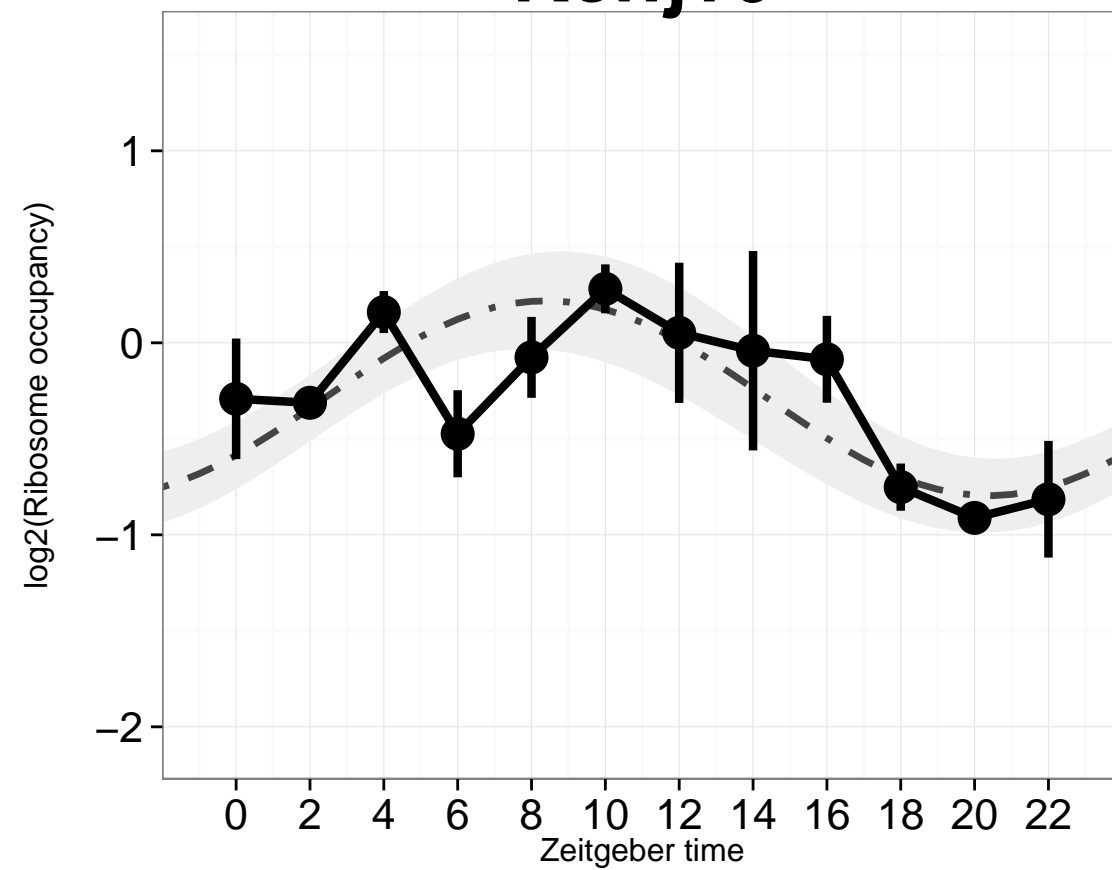

Supplement: SuppDataset_1.zip [file Kcnj16_set_C.pdf › Supplemental Dataset 1/C-mRNA_nonrhythm_translation_rhyth/Kcnj16_set_C.pdf]

# Kctd6

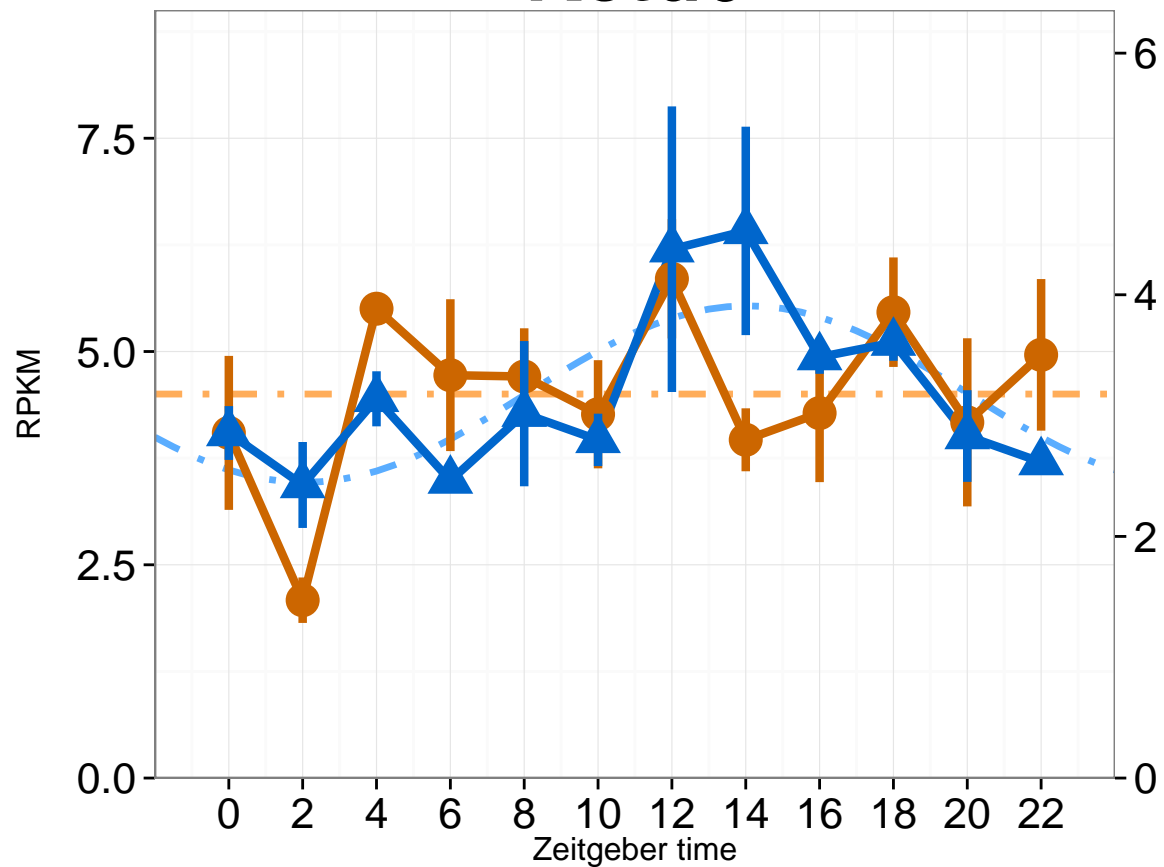

# Kctd6

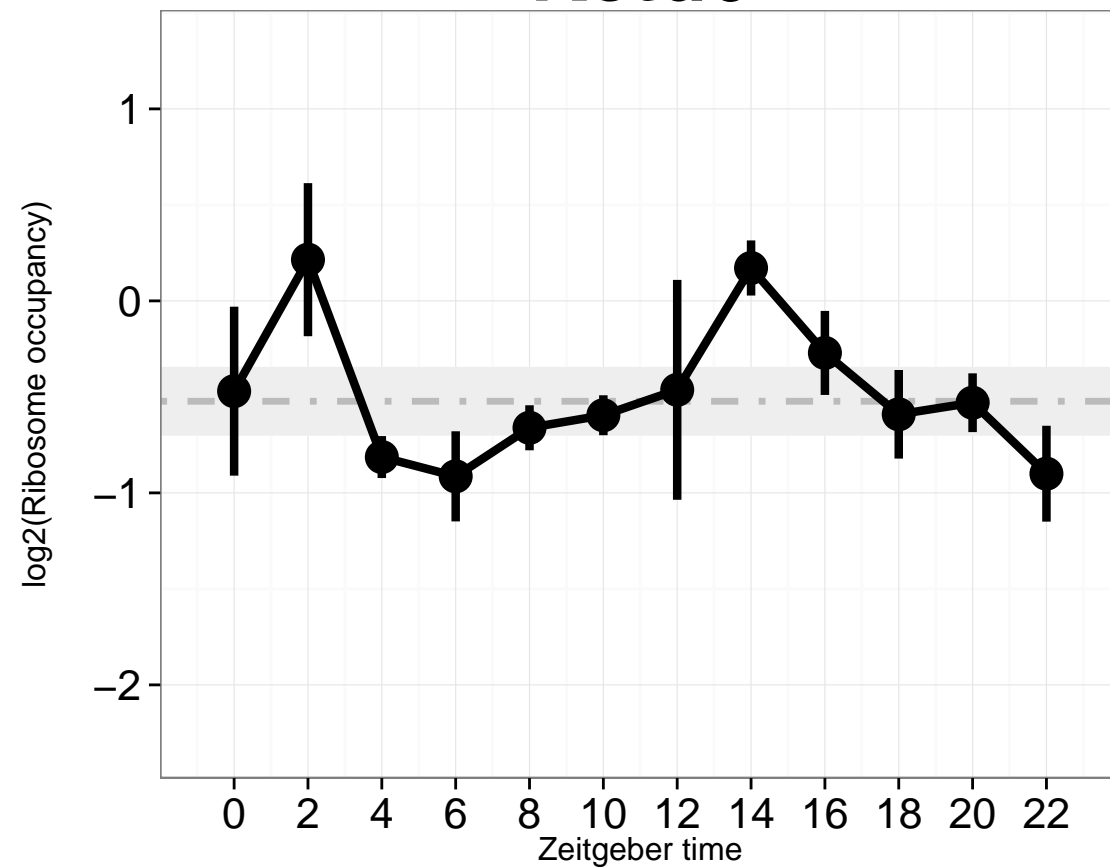

Supplement: SuppDataset_1.zip [file Kctd6_set_C.pdf › Supplemental Dataset 1/C-mRNA_nonrhythm_translation_rhyth/Kctd6_set_C.pdf]

## Kif1c

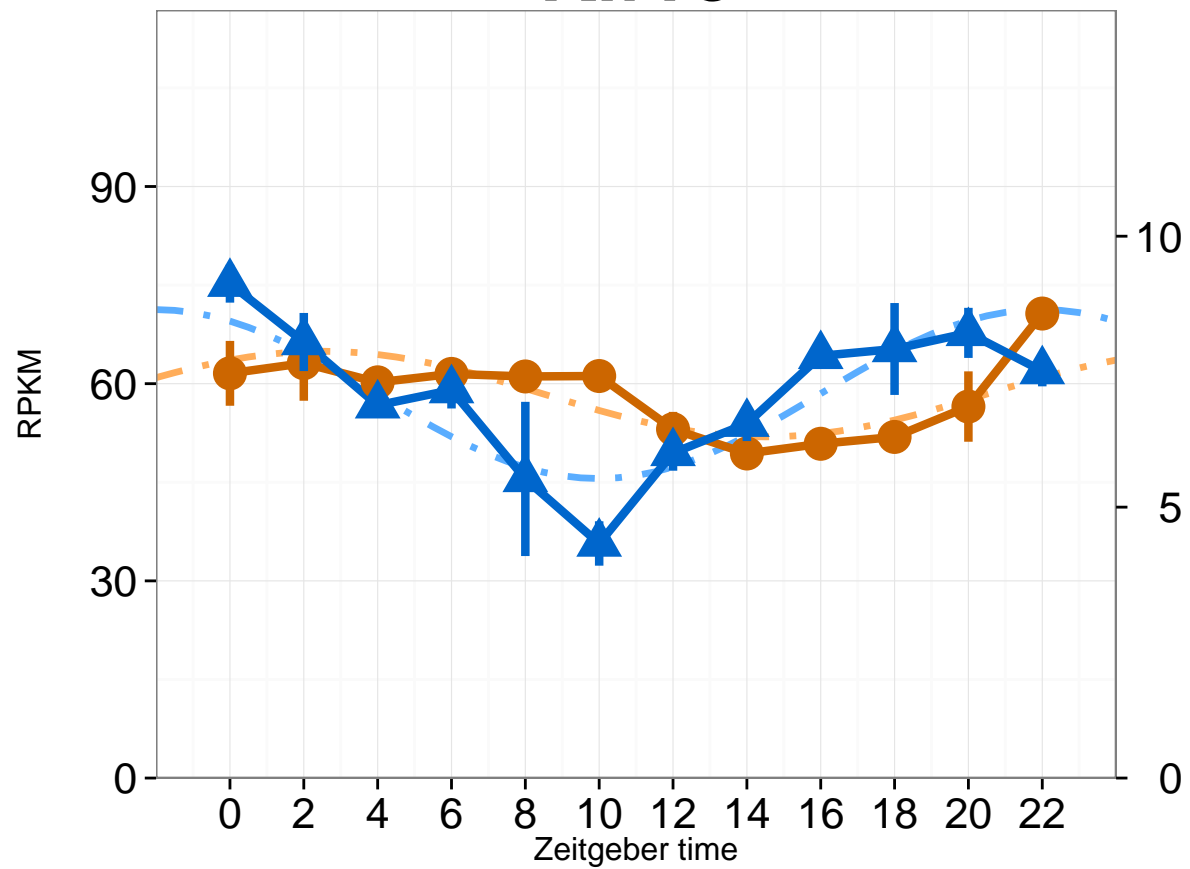

## Kif1c

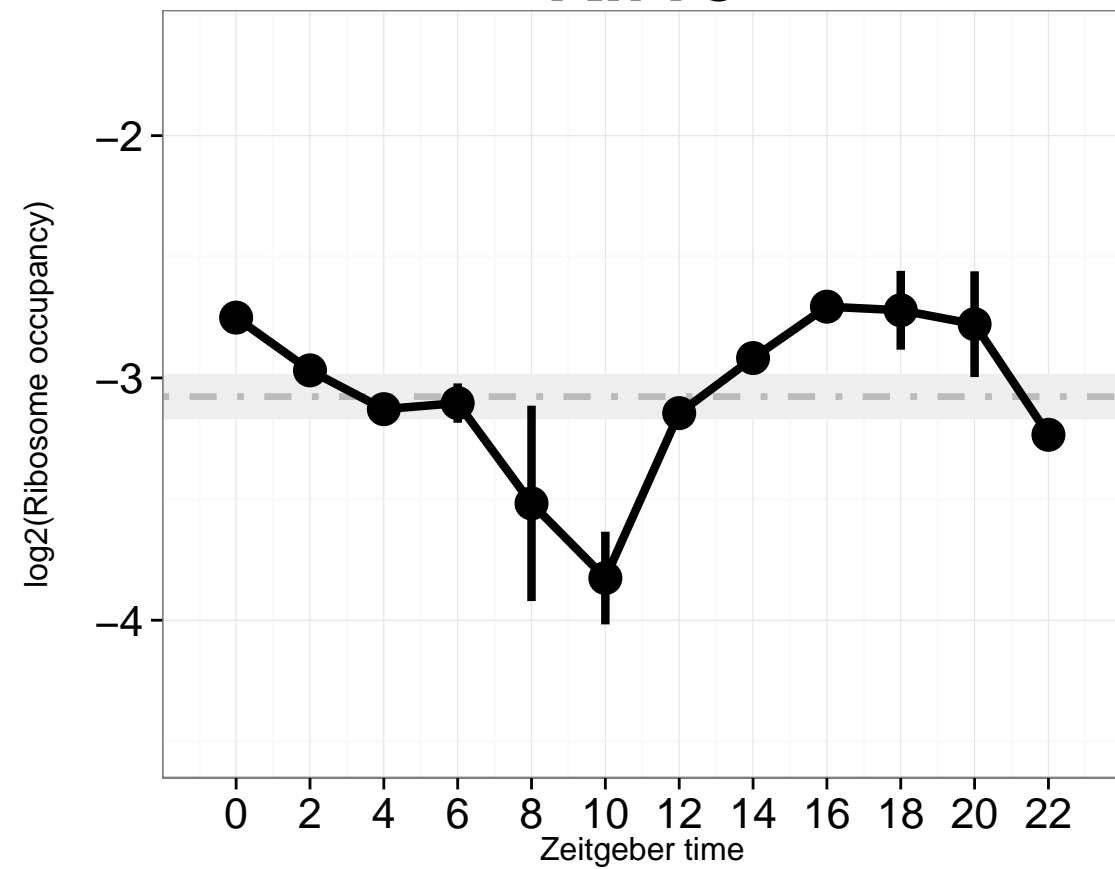

Supplement: SuppDataset_1.zip [file Kif1c_set_C.pdf › Supplemental Dataset 1/C-mRNA_nonrhythm_translation_rhyth/Kif1c_set_C.pdf]

## Kif3a

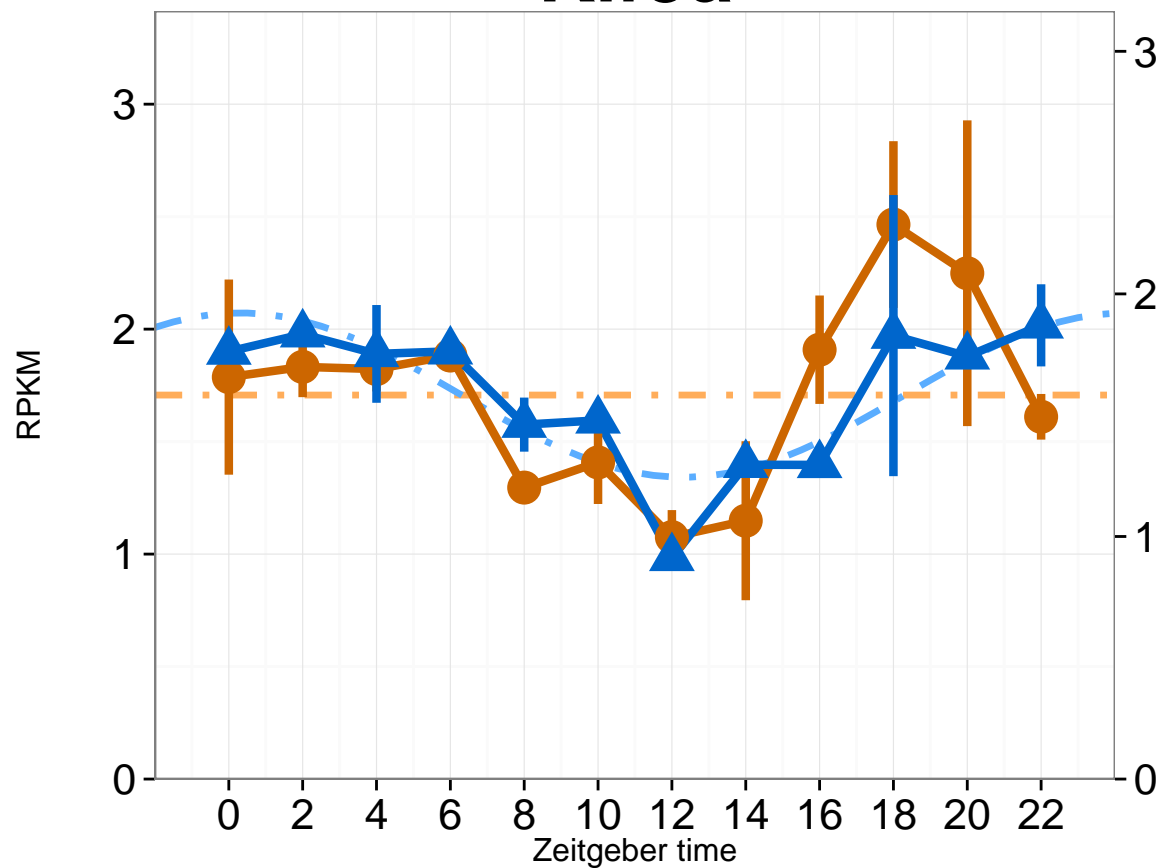

## Kif3a

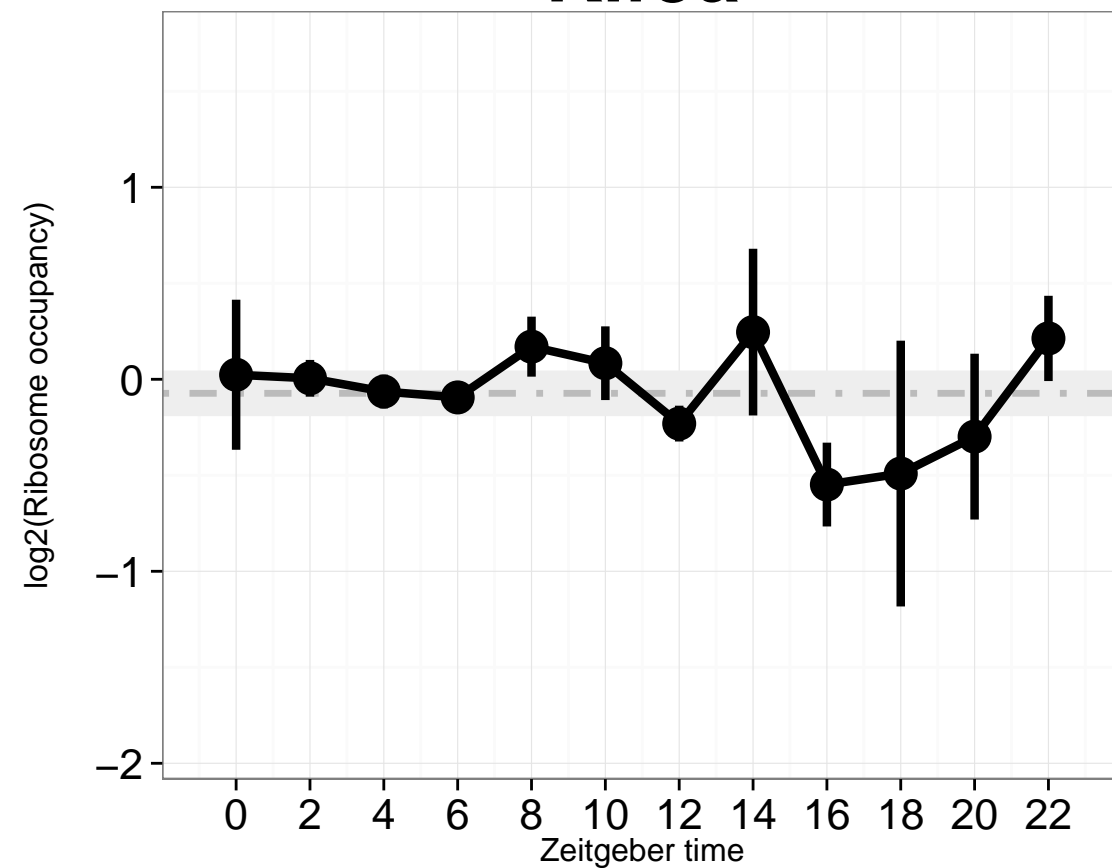

Supplement: SuppDataset_1.zip [file Kif3a_set_C.pdf › Supplemental Dataset 1/C-mRNA_nonrhythm_translation_rhyth/Kif3a_set_C.pdf]

# Kifap3

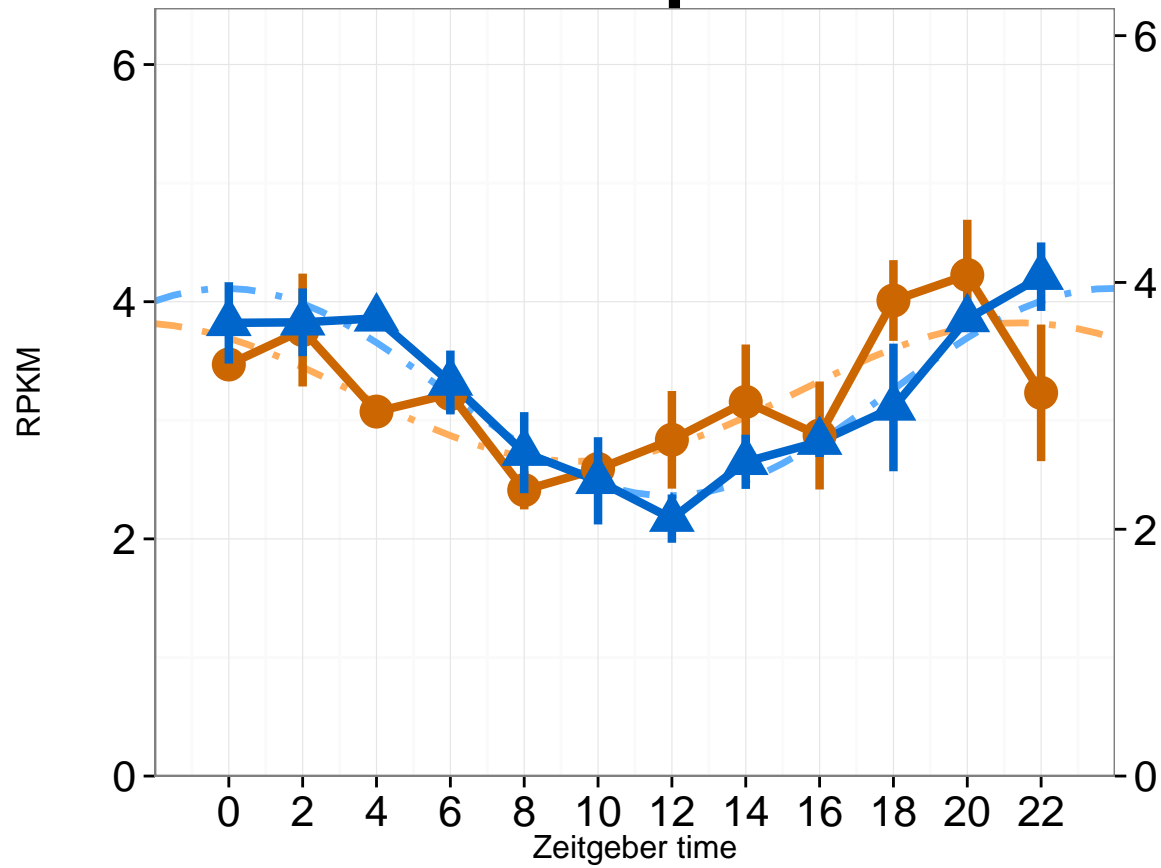

# Kifap3

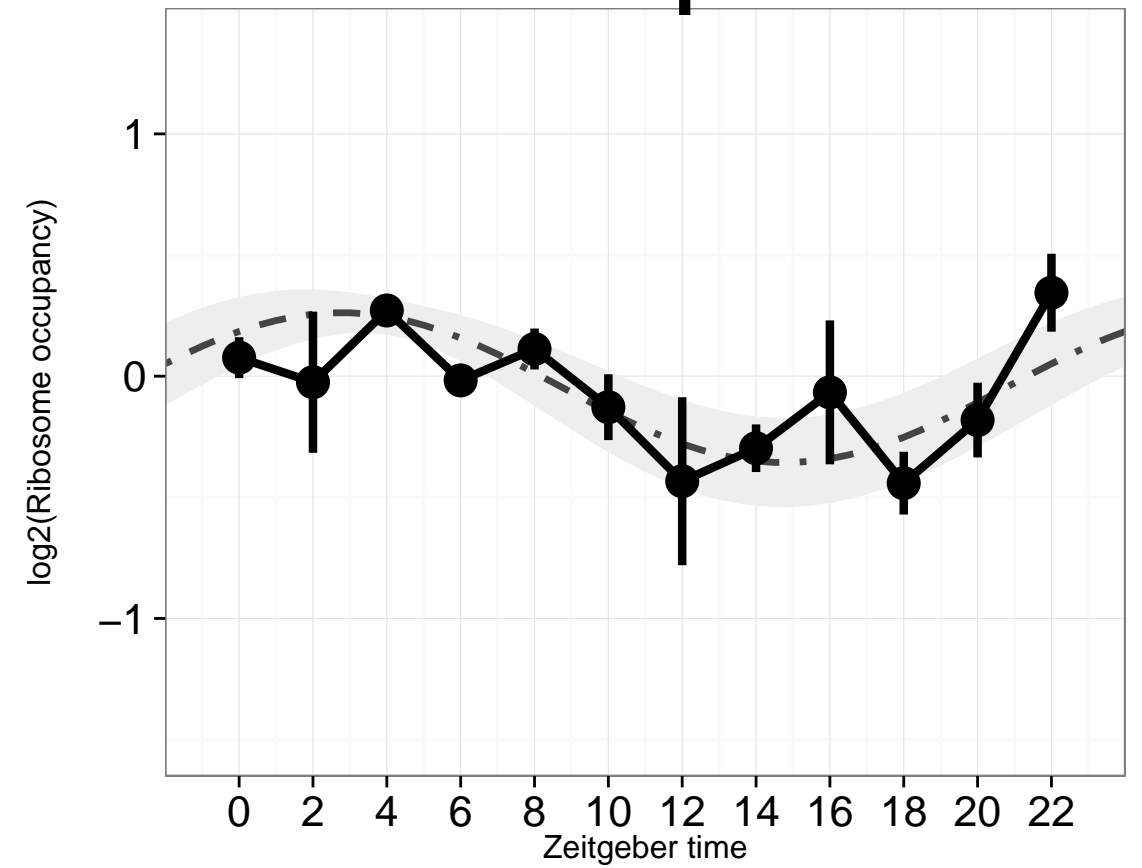

Supplement: SuppDataset_1.zip [file Kifap3_set_C.pdf › Supplemental Dataset 1/C-mRNA_nonrhythm_translation_rhyth/Kifap3_set_C.pdf]

## Klf12

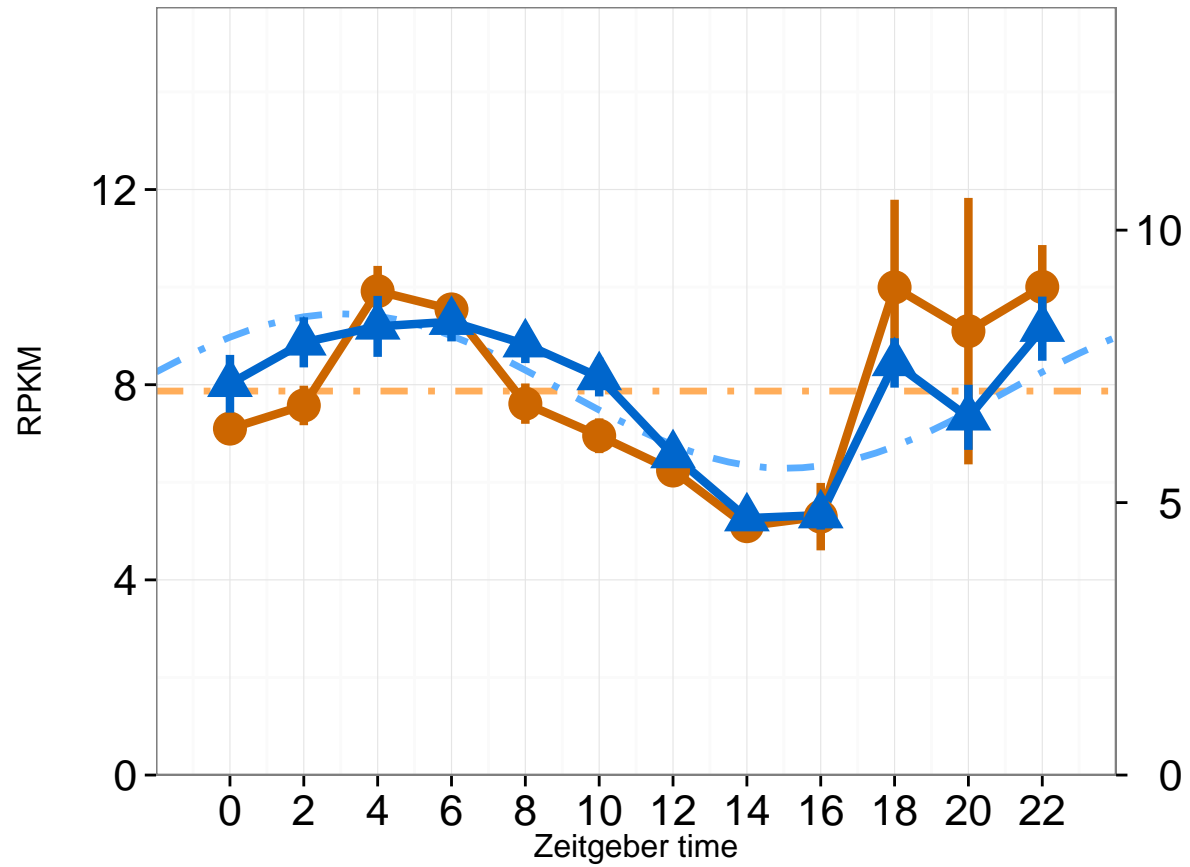

## Klf12

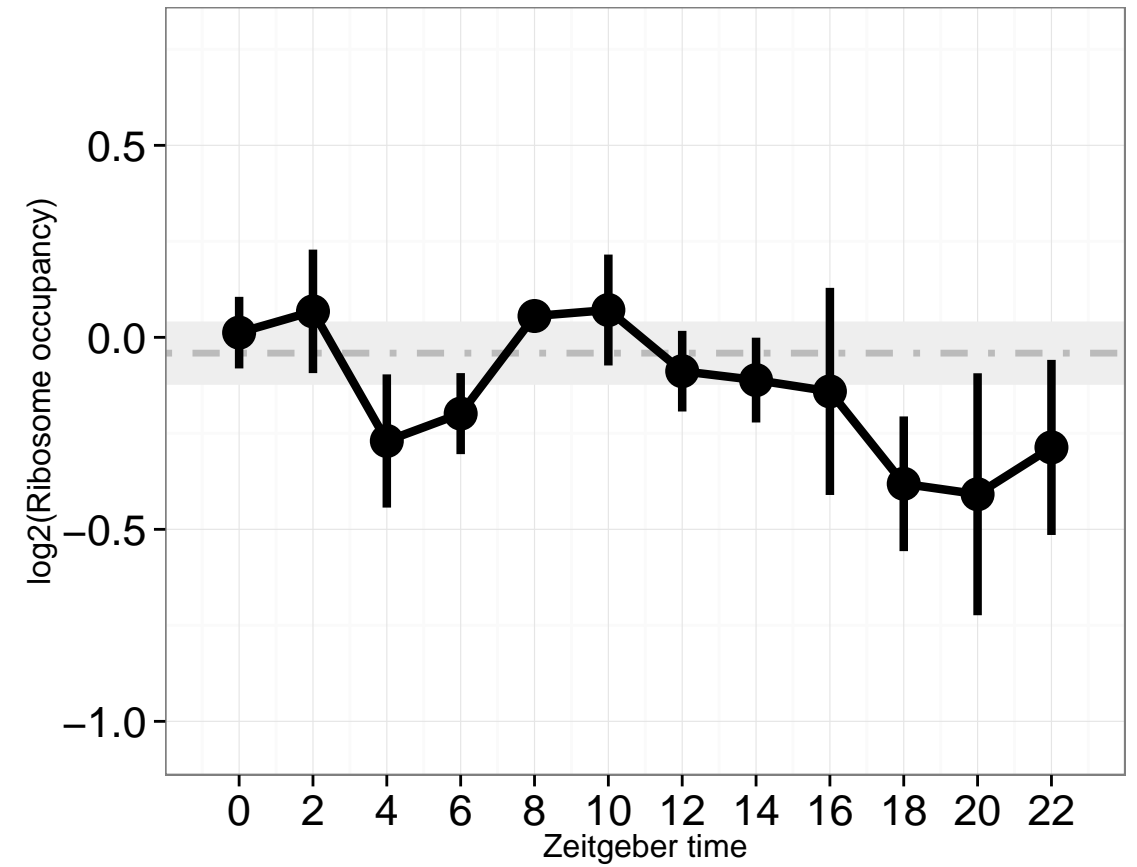

Supplement: SuppDataset_1.zip [file Klf12_set_C.pdf › Supplemental Dataset 1/C-mRNA_nonrhythm_translation_rhyth/Klf12_set_C.pdf]

## Klh11

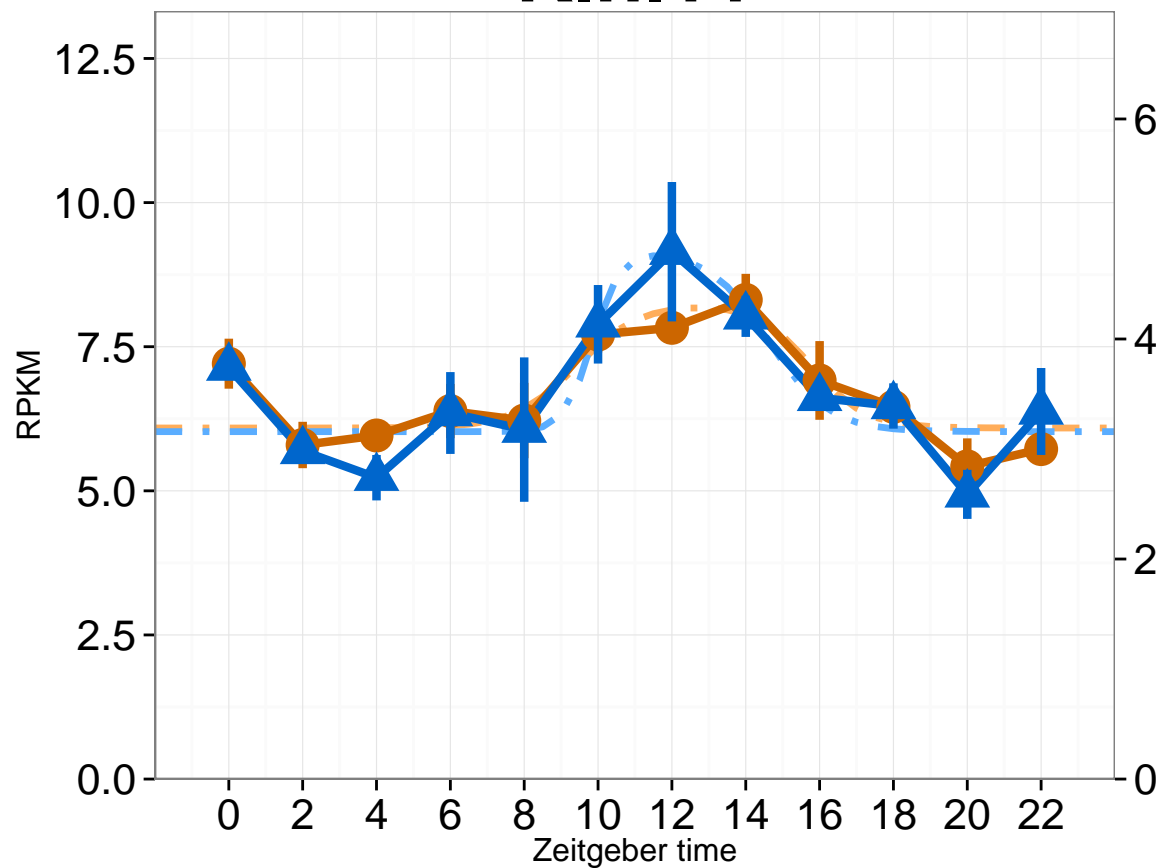

## Klh11

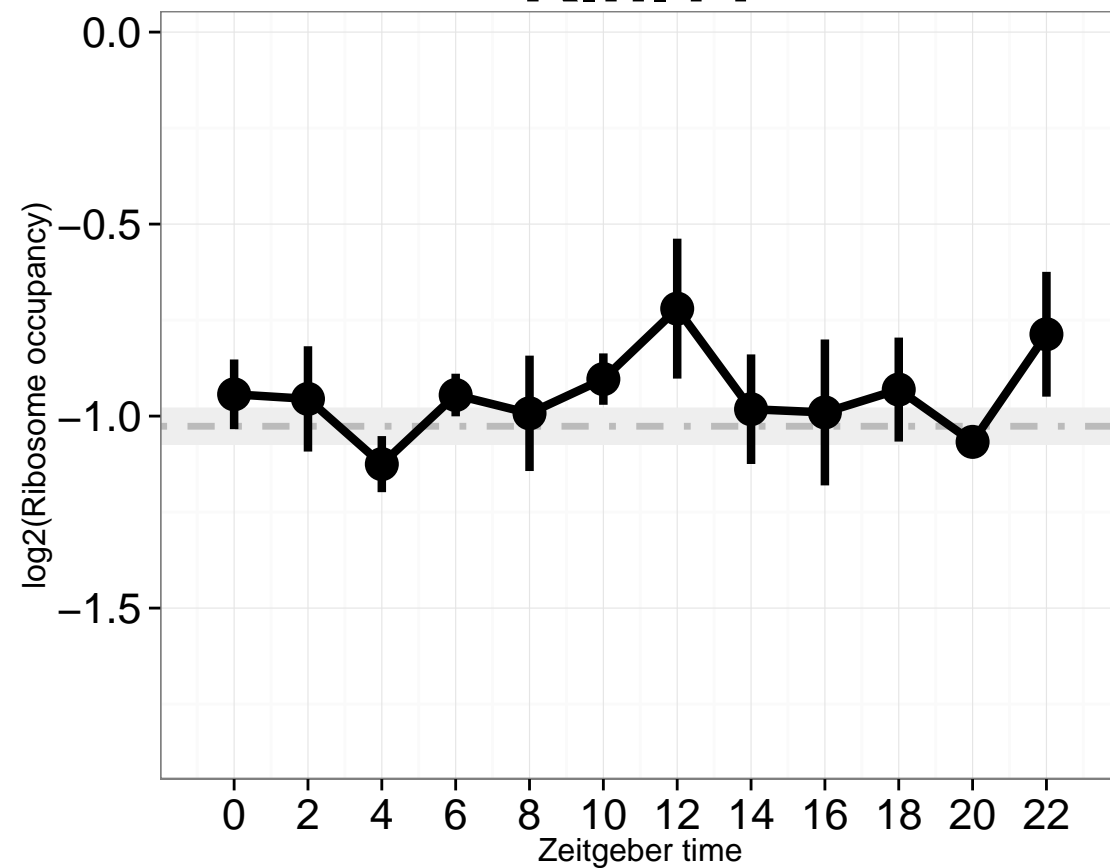

Supplement: SuppDataset_1.zip [file Klhl11_set_C.pdf › Supplemental Dataset 1/C-mRNA_nonrhythm_translation_rhyth/Klhl11_set_C.pdf]

# Krt19

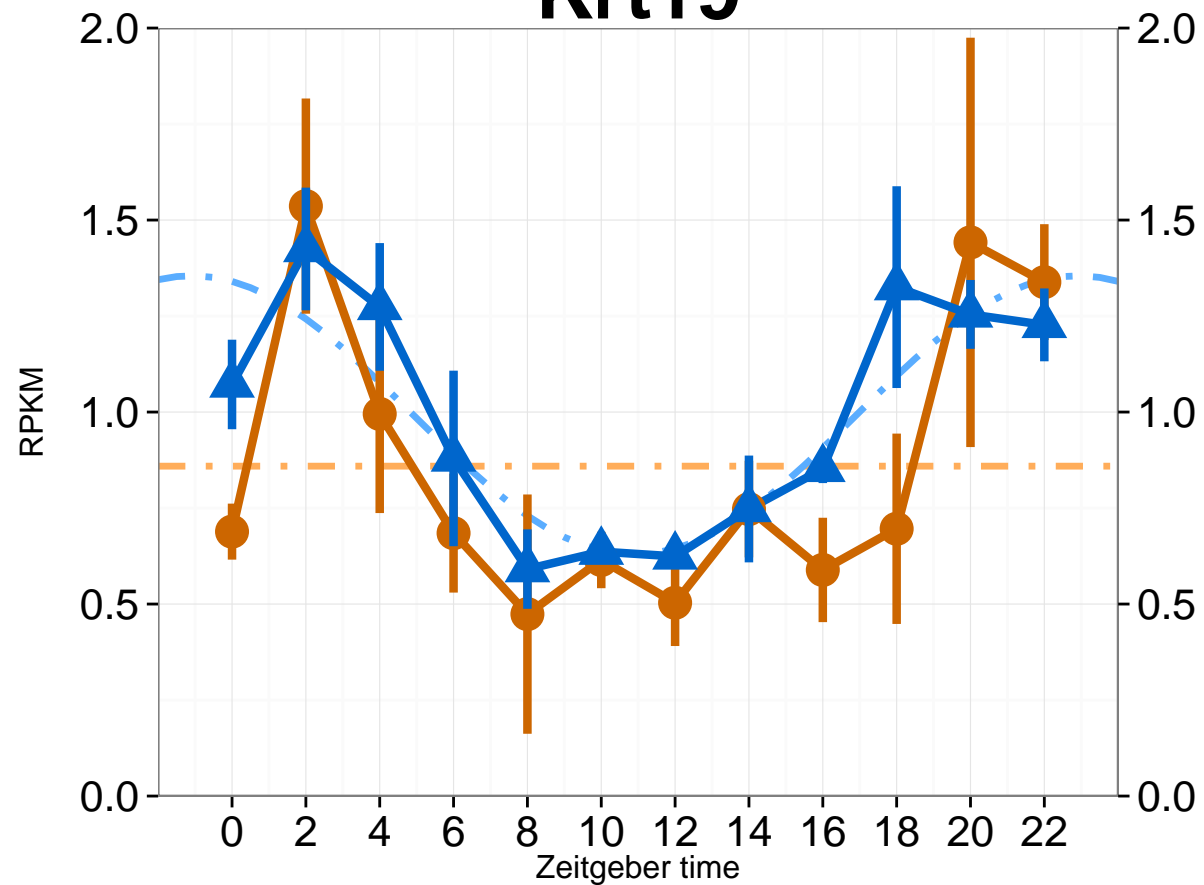

# Krt19

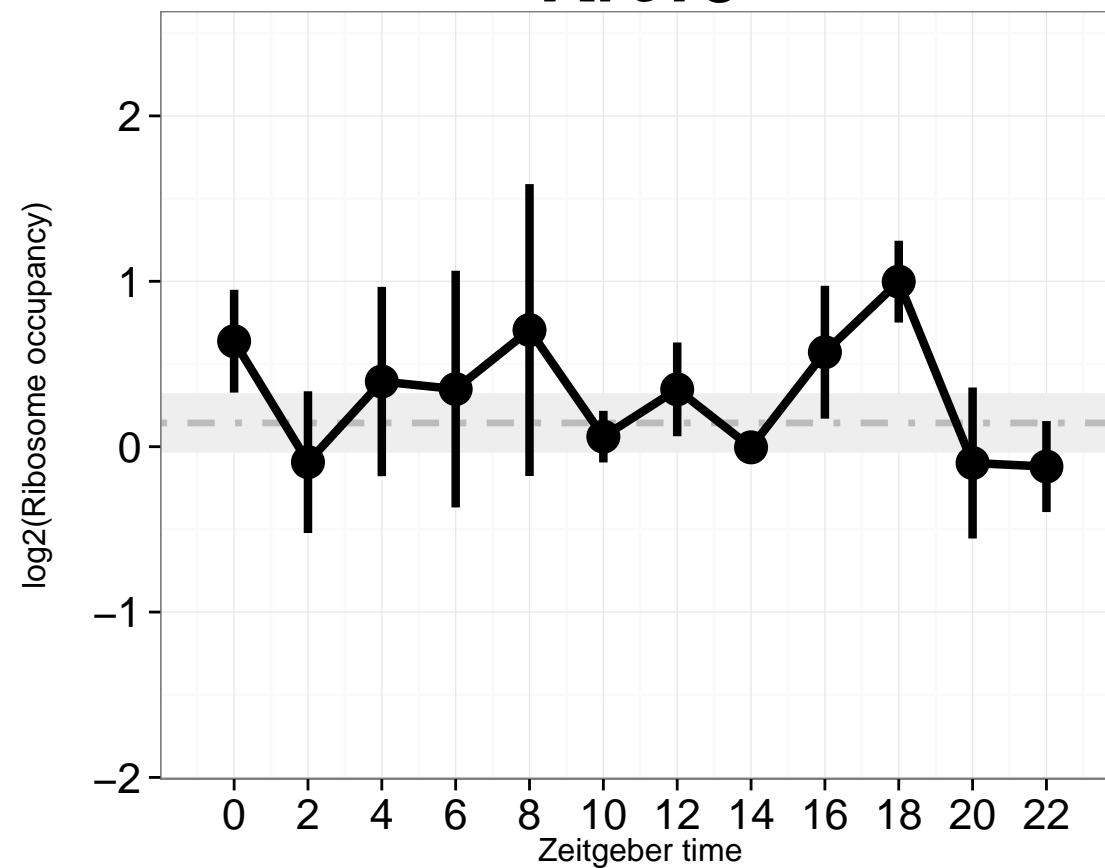

Supplement: SuppDataset_1.zip [file Krt19_set_C.pdf › Supplemental Dataset 1/C-mRNA_nonrhythm_translation_rhyth/Krt19_set_C.pdf]

# Lama3

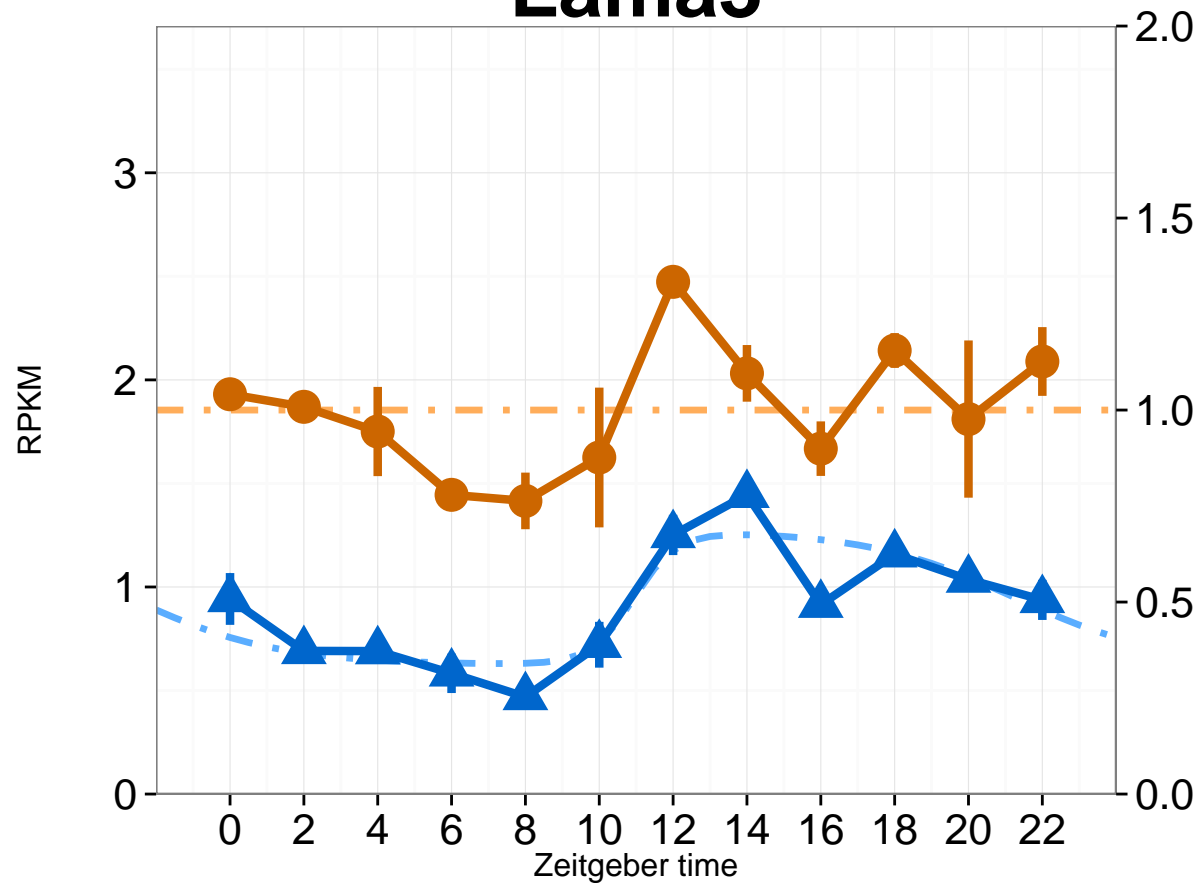

# Lama3

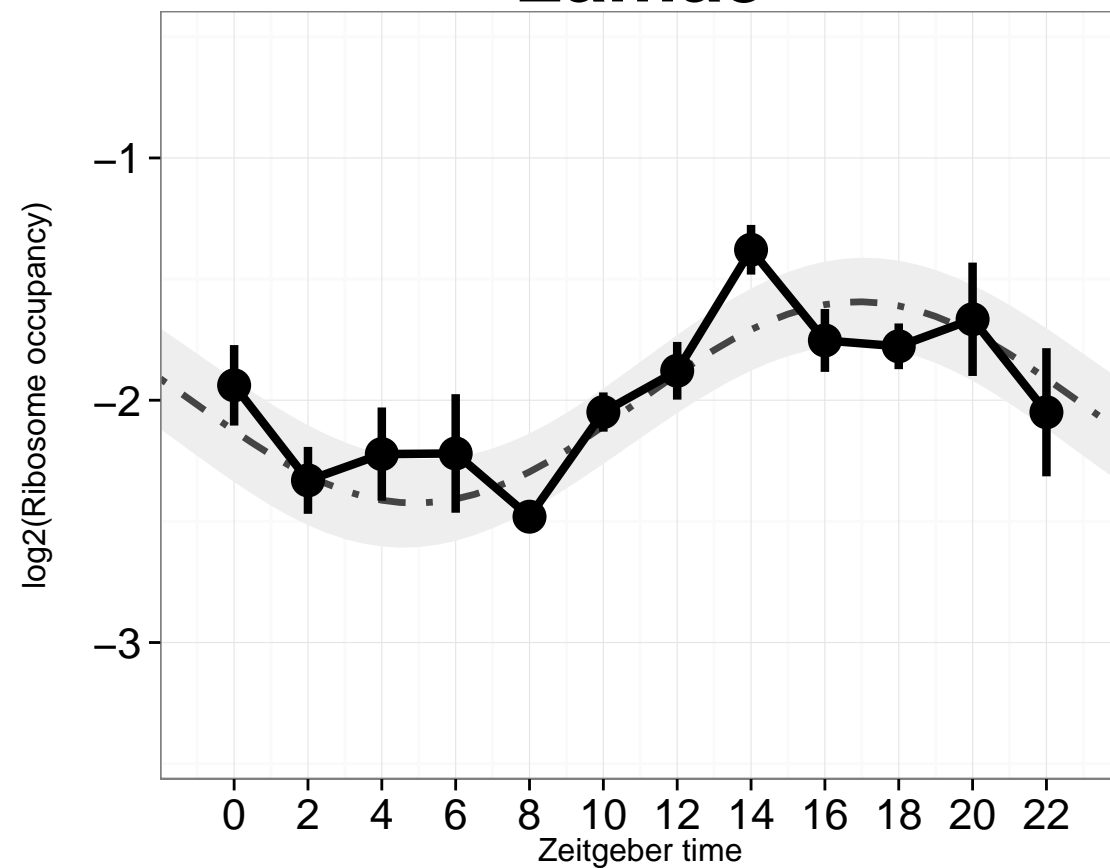

Supplement: SuppDataset_1.zip [file Lama3_set_C.pdf › Supplemental Dataset 1/C-mRNA_nonrhythm_translation_rhyth/Lama3_set_C.pdf]

## Ldb1

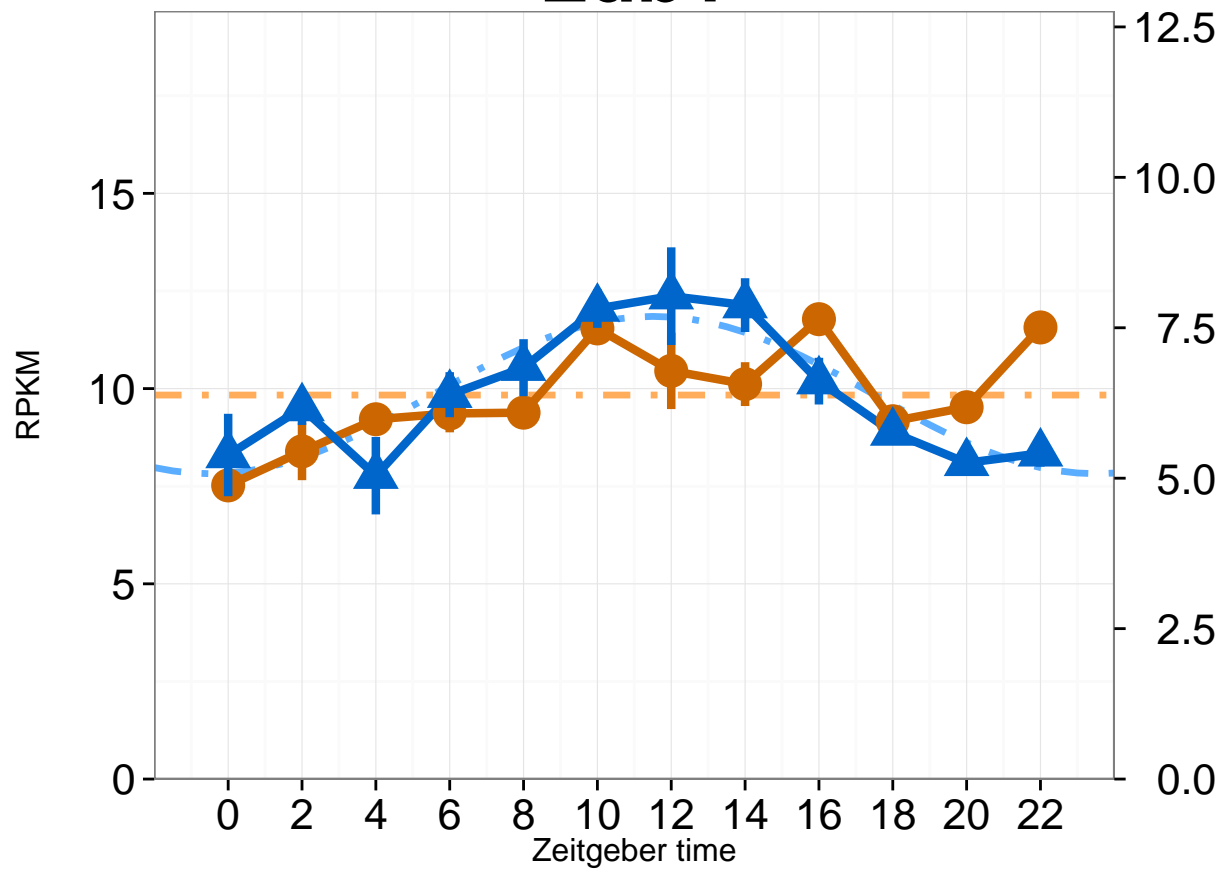

## Ldb1

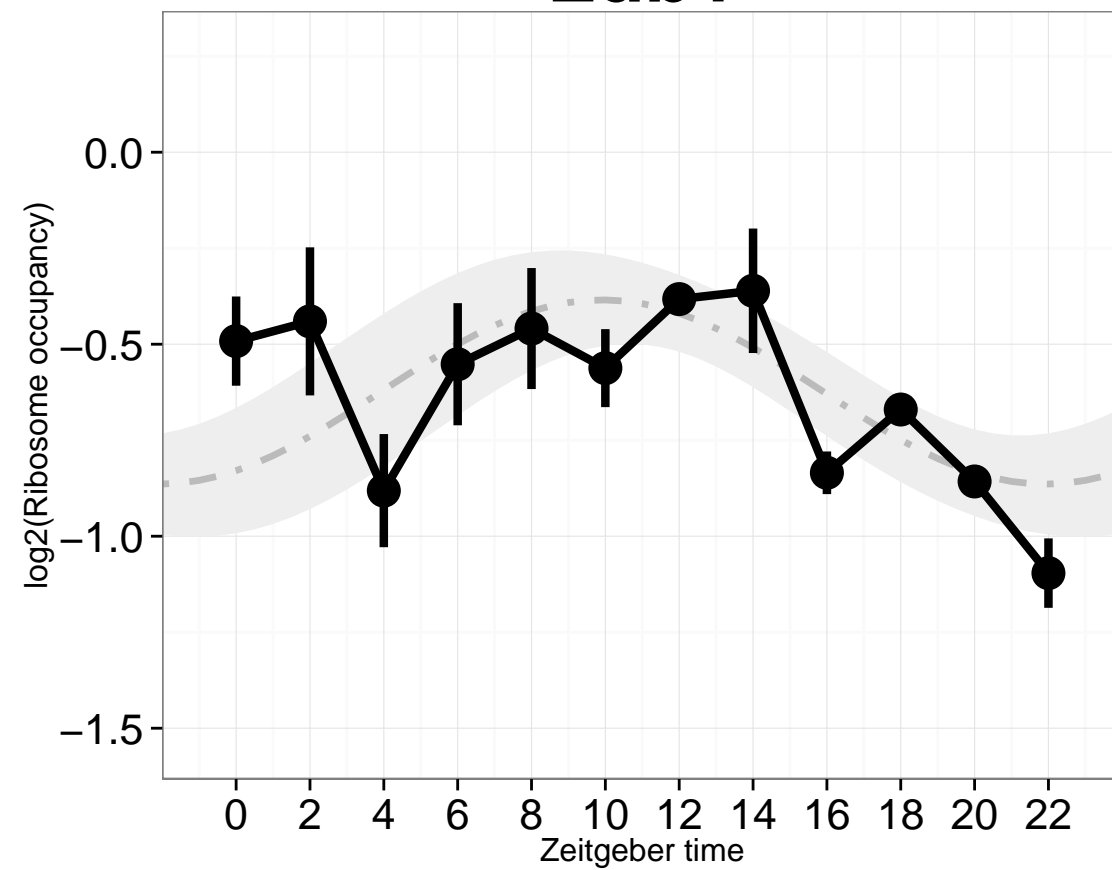

Supplement: SuppDataset_1.zip [file Ldb1_set_C.pdf › Supplemental Dataset 1/C-mRNA_nonrhythm_translation_rhyth/Ldb1_set_C.pdf]

# Leng9

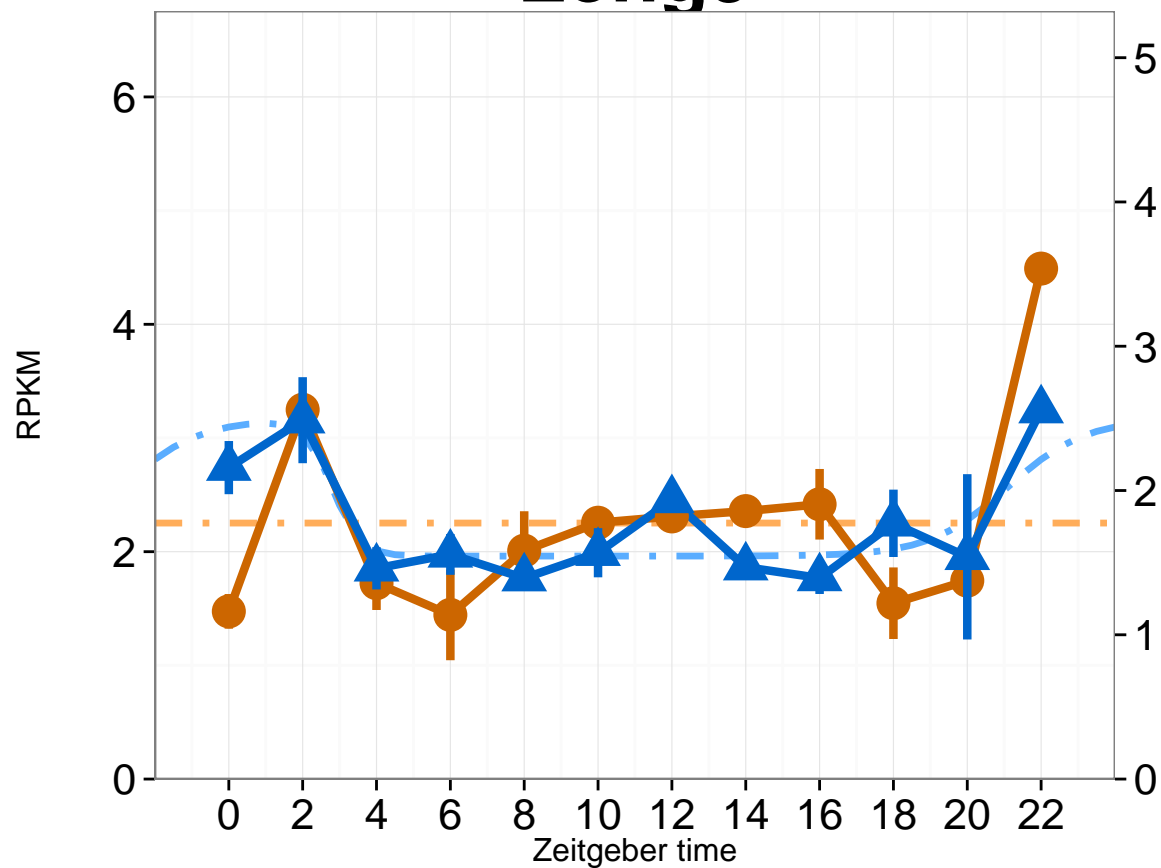

# Leng9

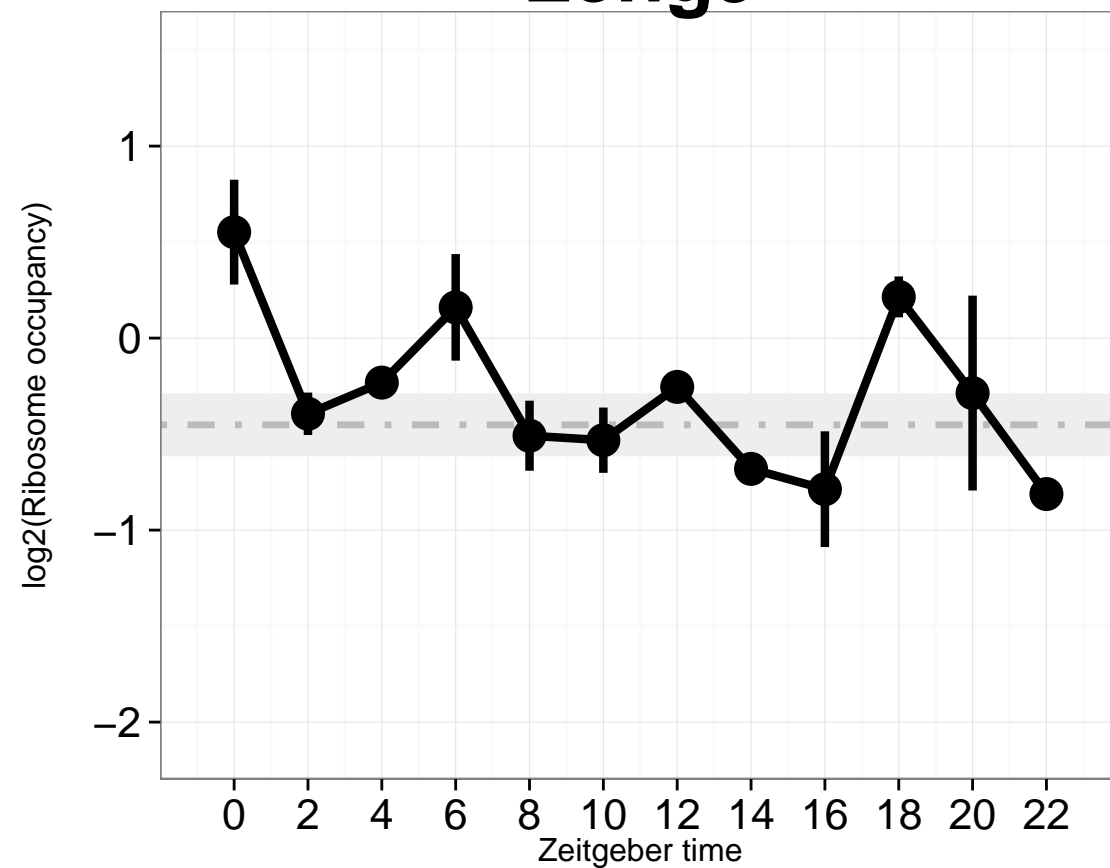

Supplement: SuppDataset_1.zip [file Leng9_set_C.pdf › Supplemental Dataset 1/C-mRNA_nonrhythm_translation_rhyth/Leng9_set_C.pdf]

## Lig4

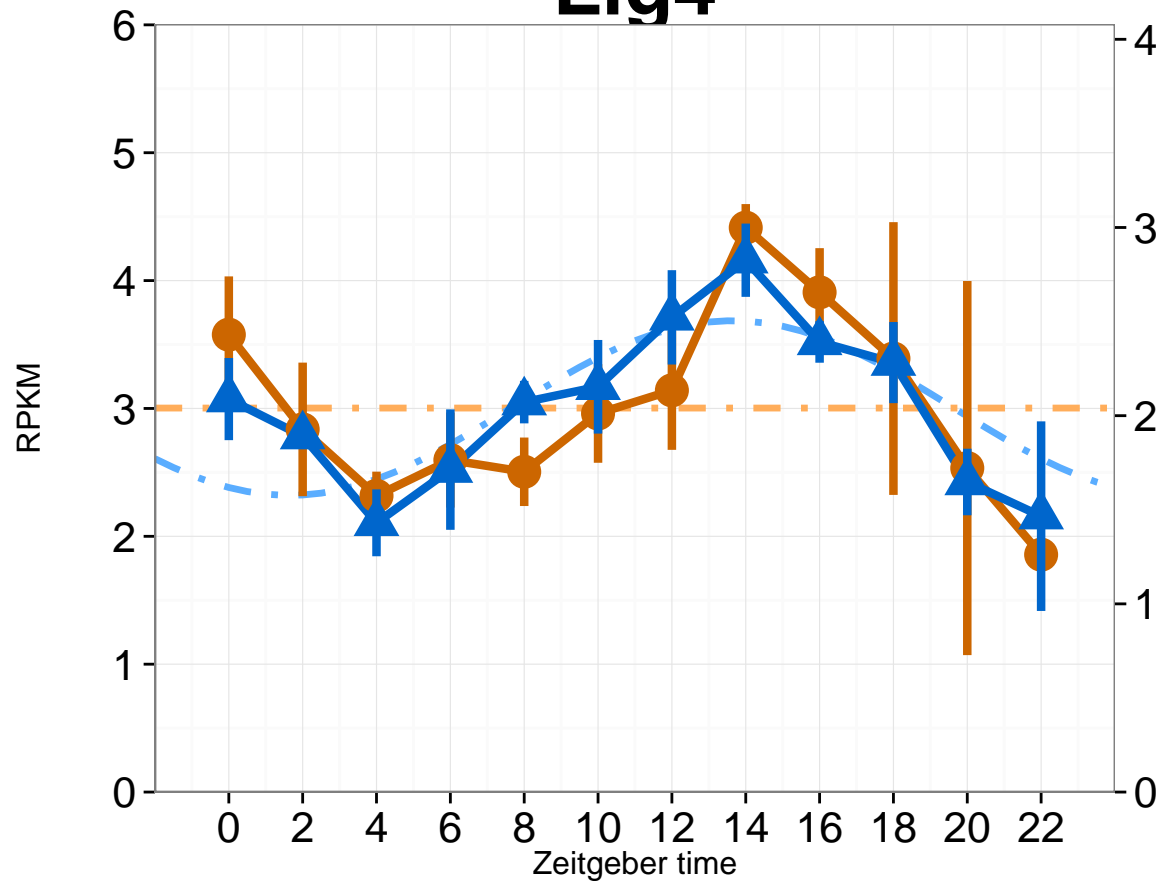

## Lig4

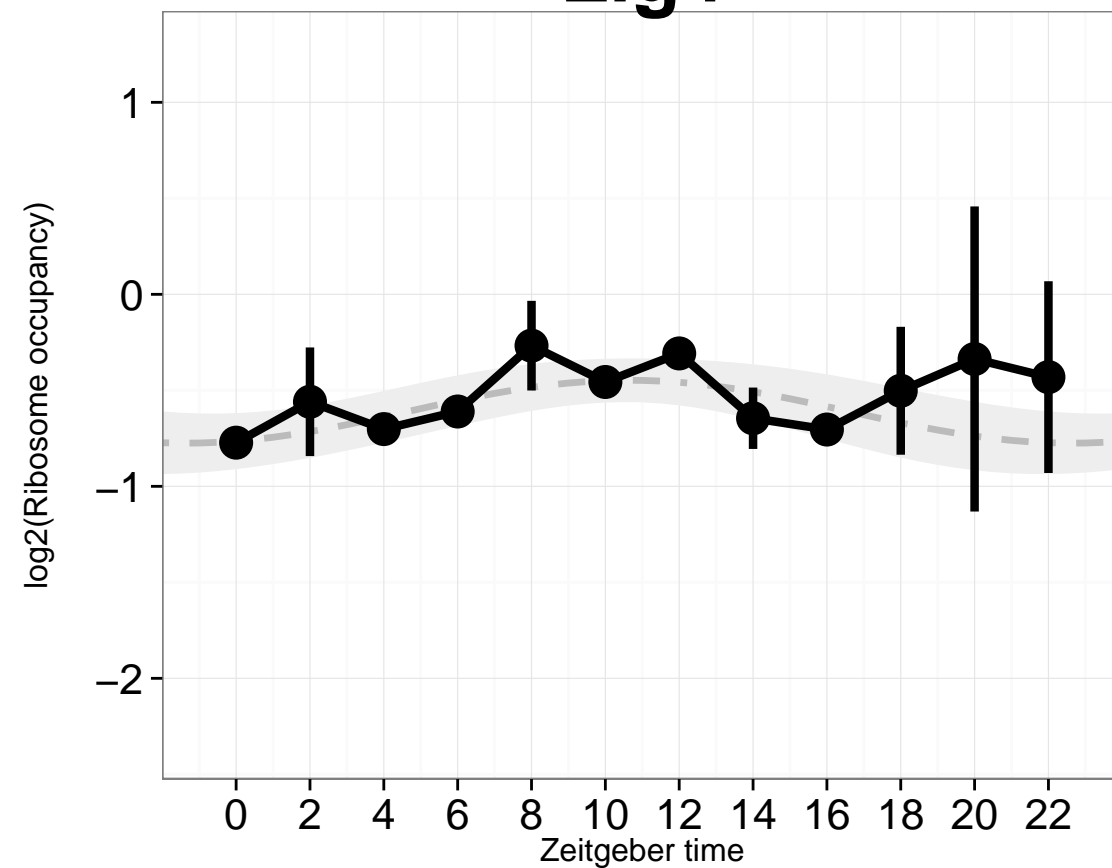

Supplement: SuppDataset_1.zip [file Lig4_set_C.pdf › Supplemental Dataset 1/C-mRNA_nonrhythm_translation_rhyth/Lig4_set_C.pdf]

## LmIn

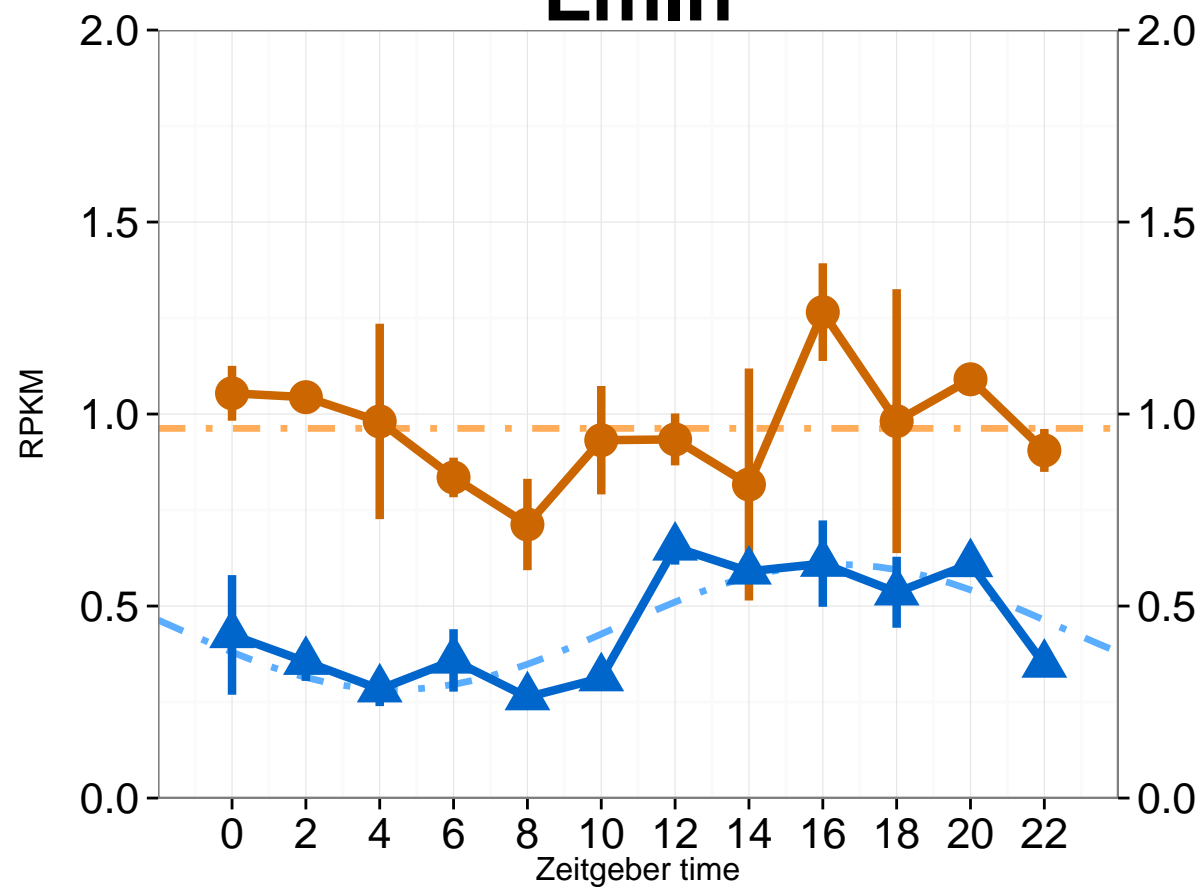

## LmIn

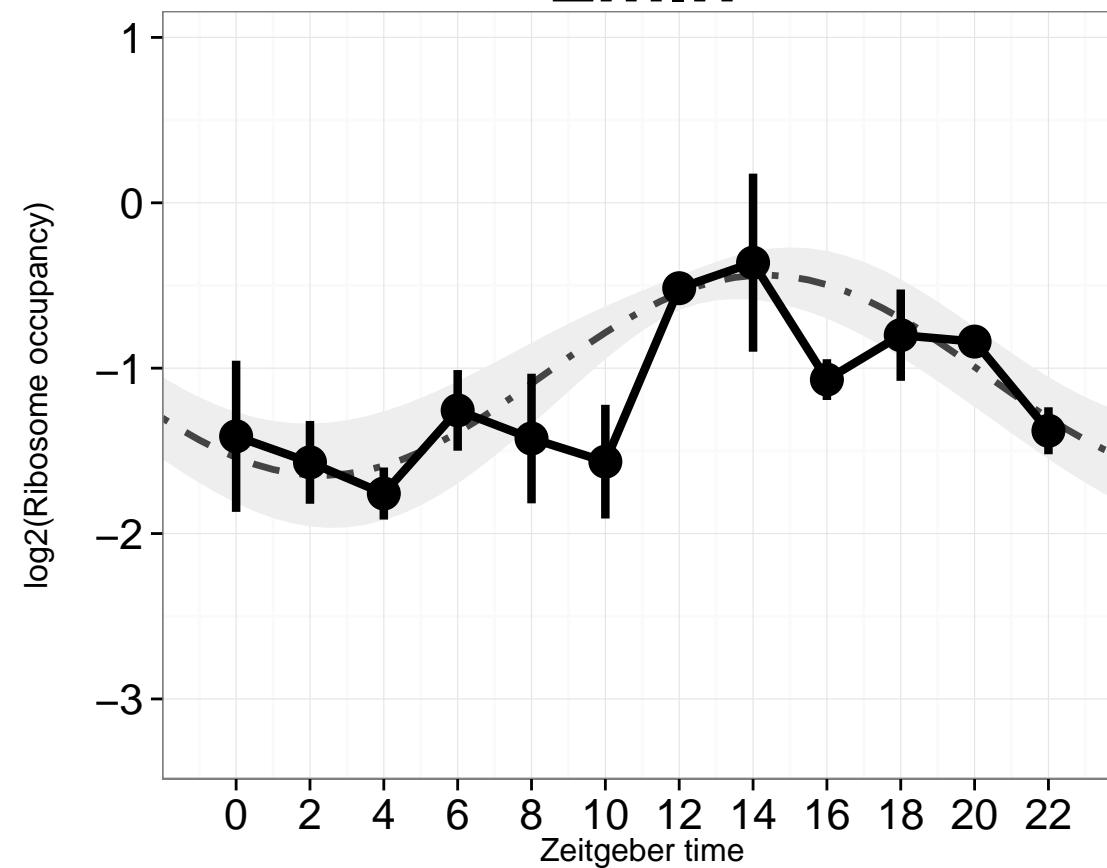

Supplement: SuppDataset_1.zip [file Lmln_set_C.pdf › Supplemental Dataset 1/C-mRNA_nonrhythm_translation_rhyth/Lmln_set_C.pdf]

## Lmnb2

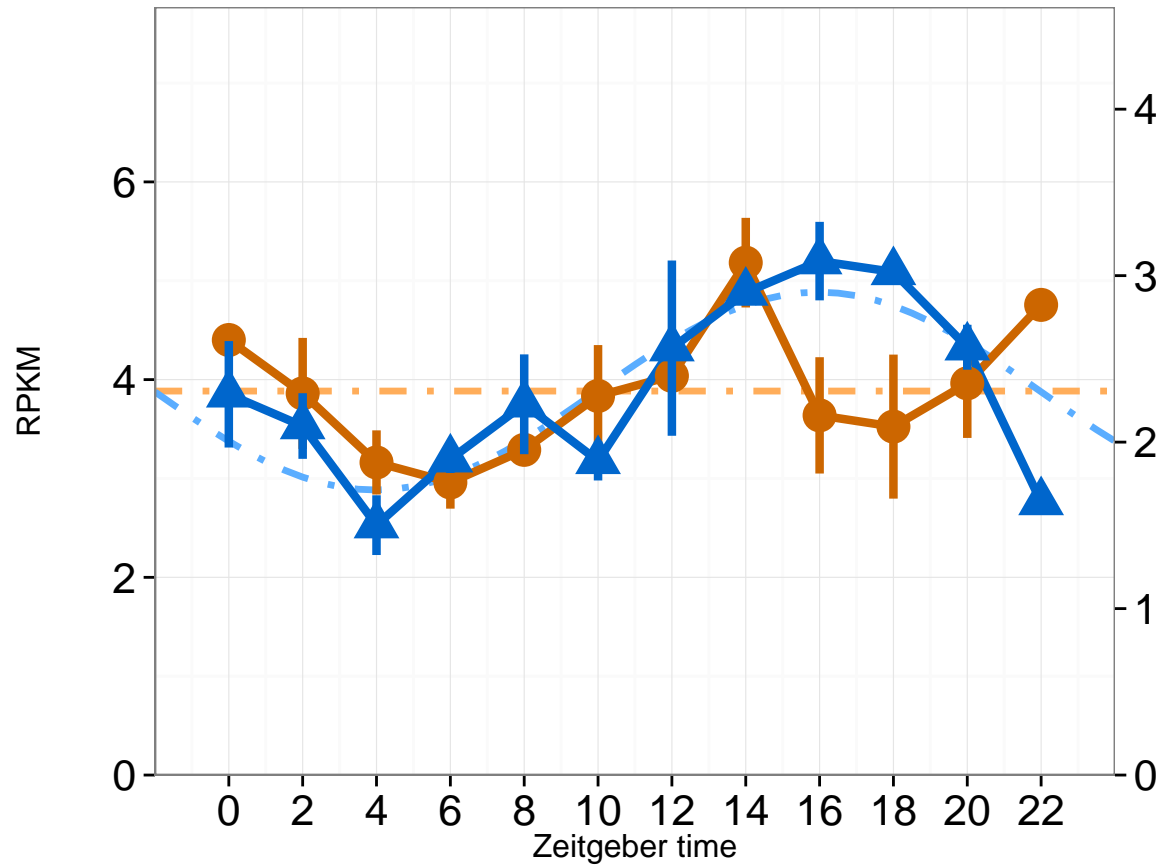

## Lmnb2

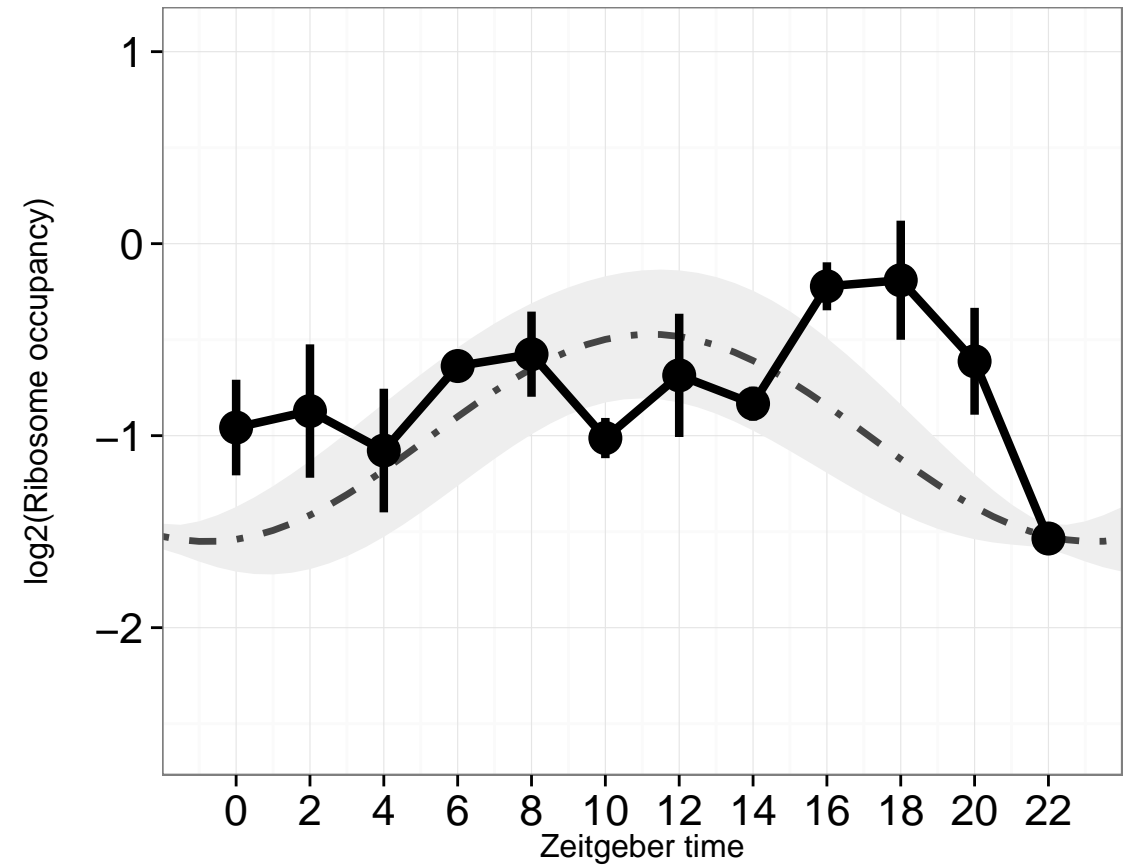

Supplement: SuppDataset_1.zip [file Lmnb2_set_C.pdf › Supplemental Dataset 1/C-mRNA_nonrhythm_translation_rhyth/Lmnb2_set_C.pdf]

## Loxl2

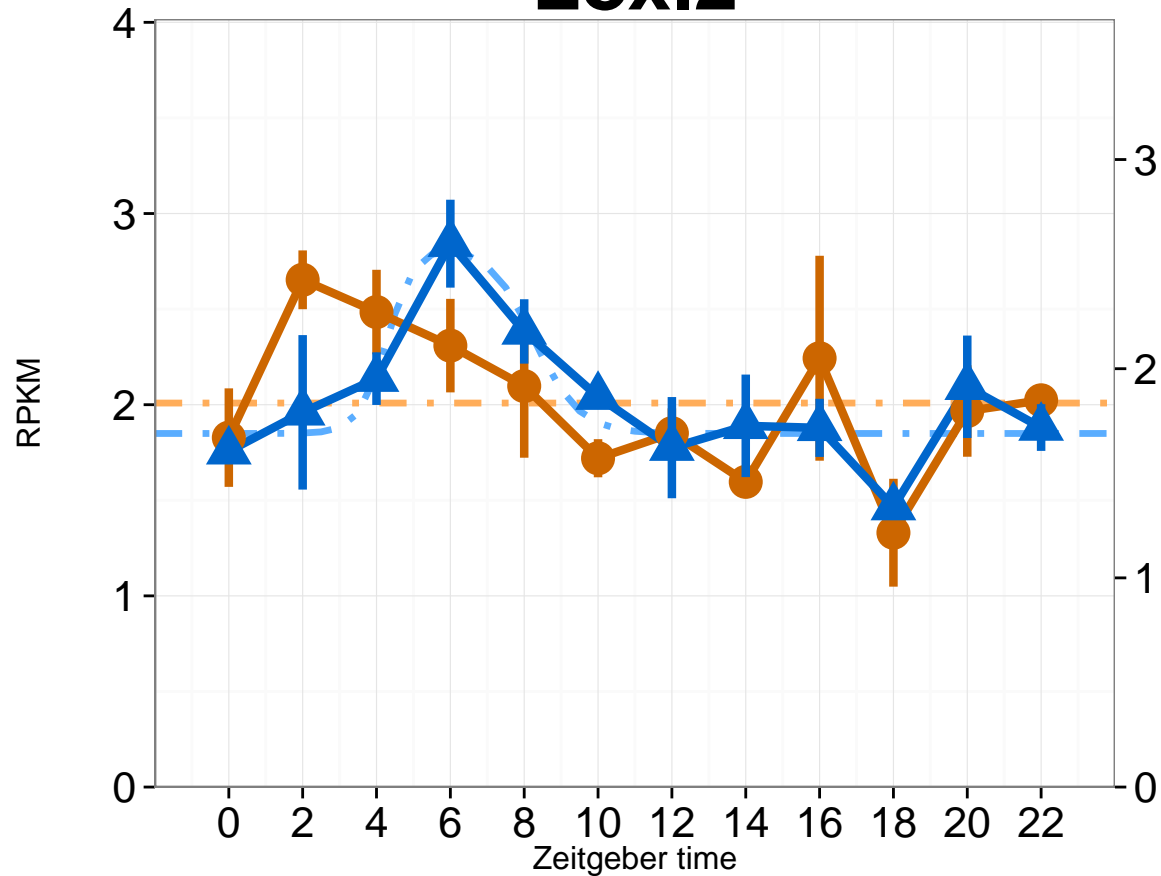

## Loxl2

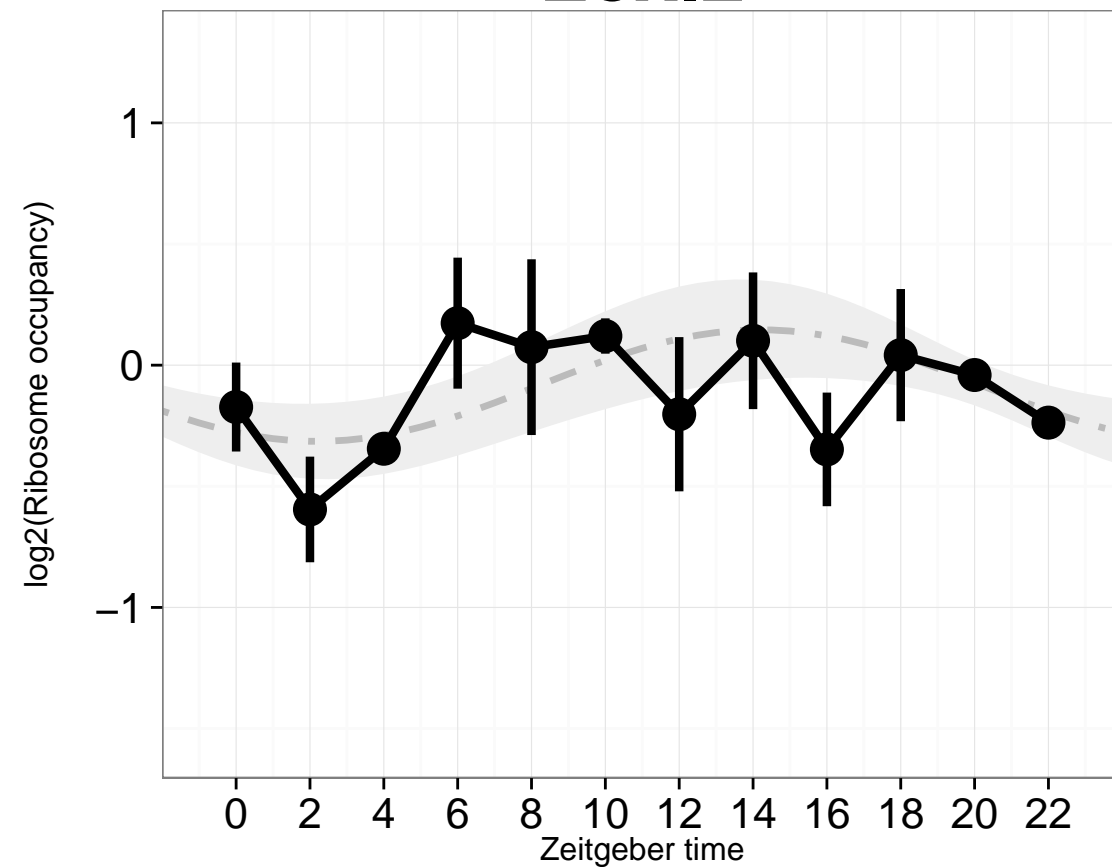

Supplement: SuppDataset_1.zip [file Loxl2_set_C.pdf › Supplemental Dataset 1/C-mRNA_nonrhythm_translation_rhyth/Loxl2_set_C.pdf]

## Lpar2 TR

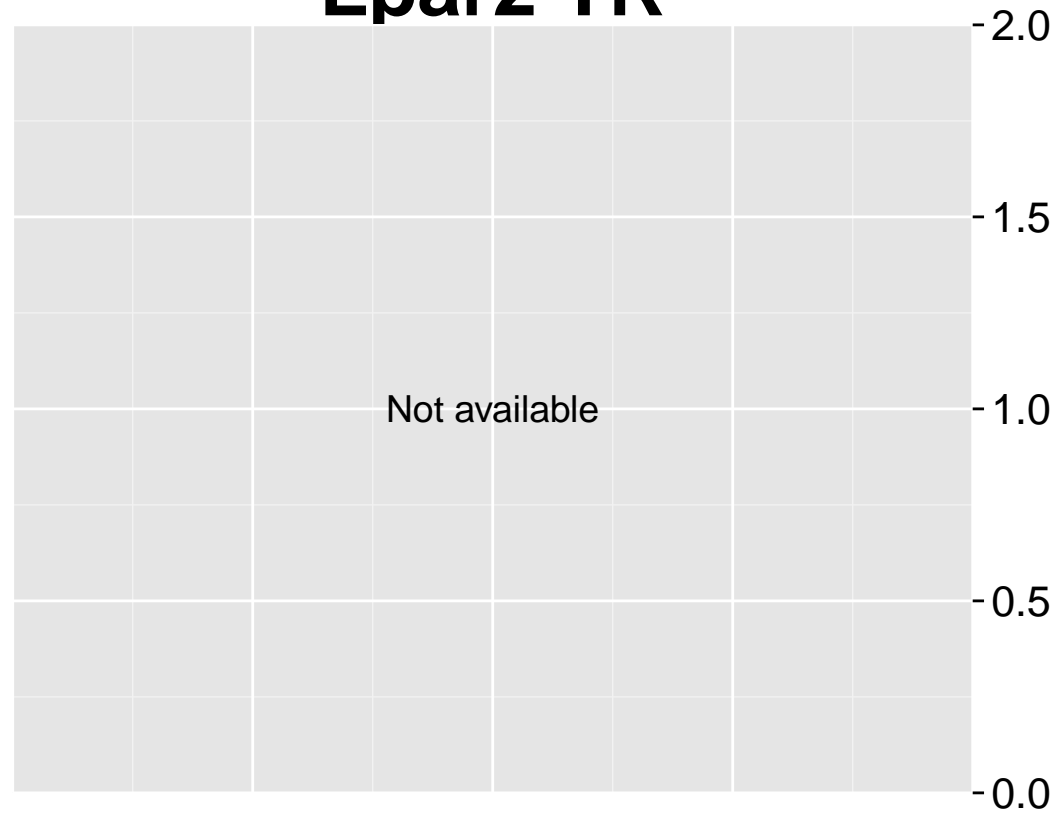

## Lpar2 log2(Ribosome occupancy)

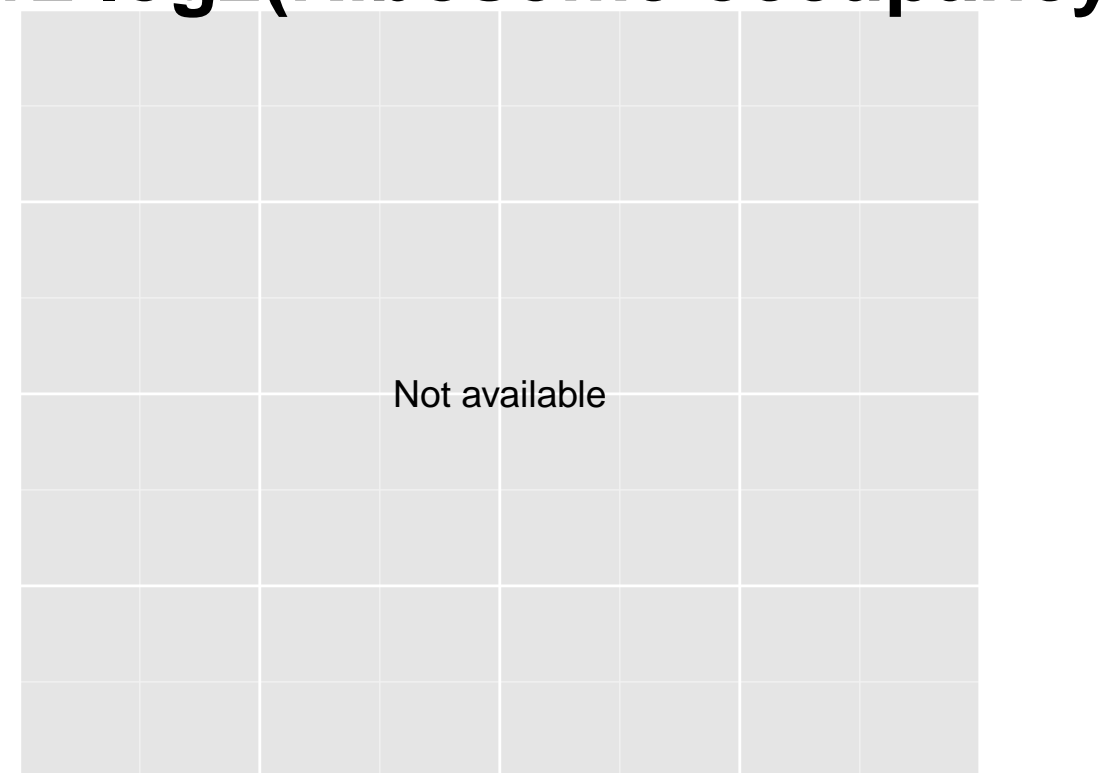

Supplement: SuppDataset_1.zip [file Lpar2_set_C.pdf › Supplemental Dataset 1/C-mRNA_nonrhythm_translation_rhyth/Lpar2_set_C.pdf]

# Lpcat1

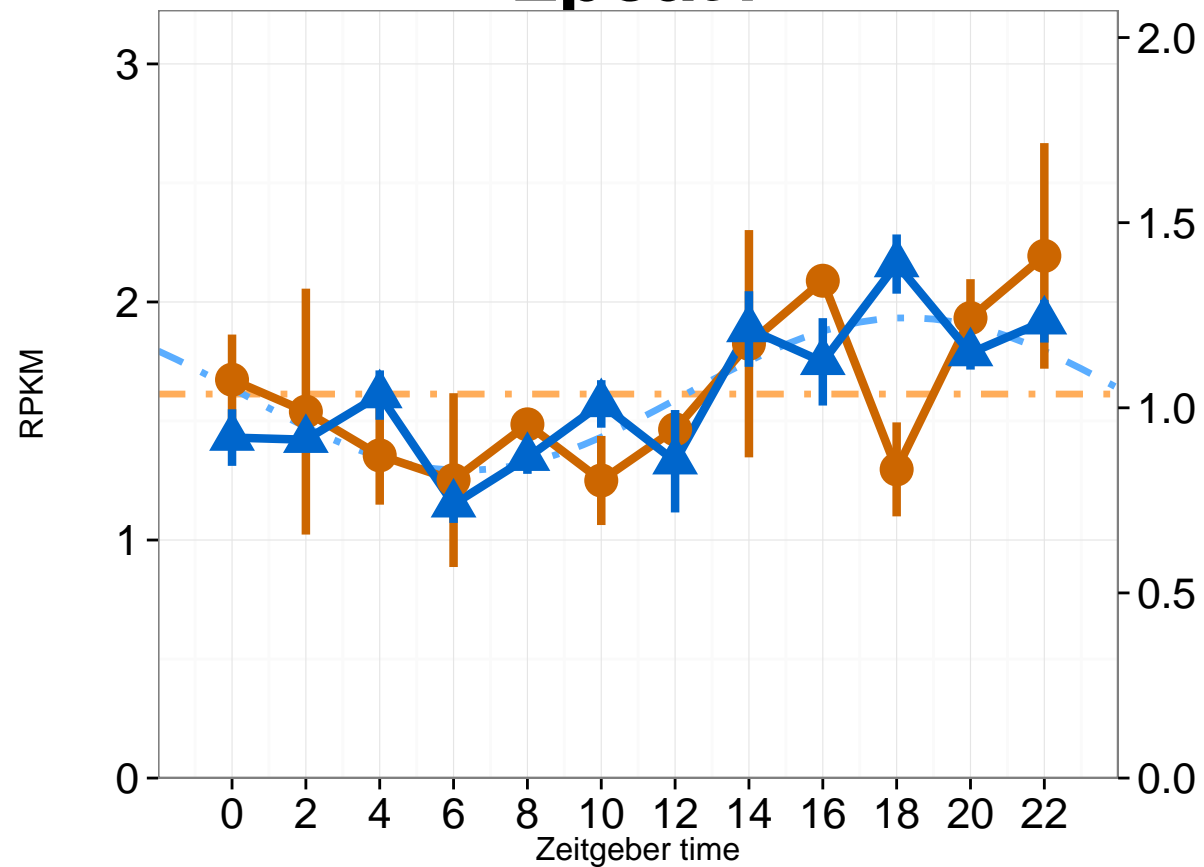

# Lpcat1

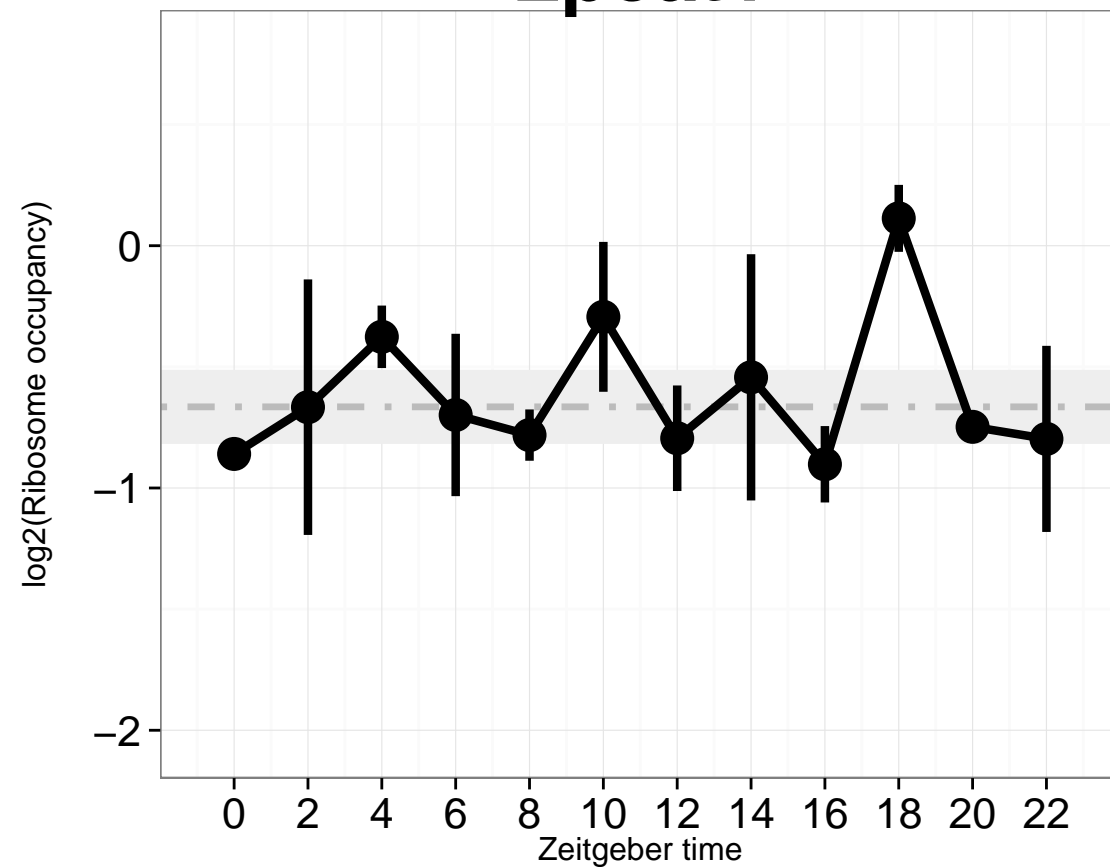

Supplement: SuppDataset_1.zip [file Lpcat1_set_C.pdf › Supplemental Dataset 1/C-mRNA_nonrhythm_translation_rhyth/Lpcat1_set_C.pdf]
