# Supplementary figures and images for: Ribosome profiling reveals the rhythmic liver translatome and circadian clock regulation by upstream open reading frames (part 31 of 113)
Source: HighWire-hosted journal article supplement (doi:10.1101/gr.195404.115), 2015-10-20

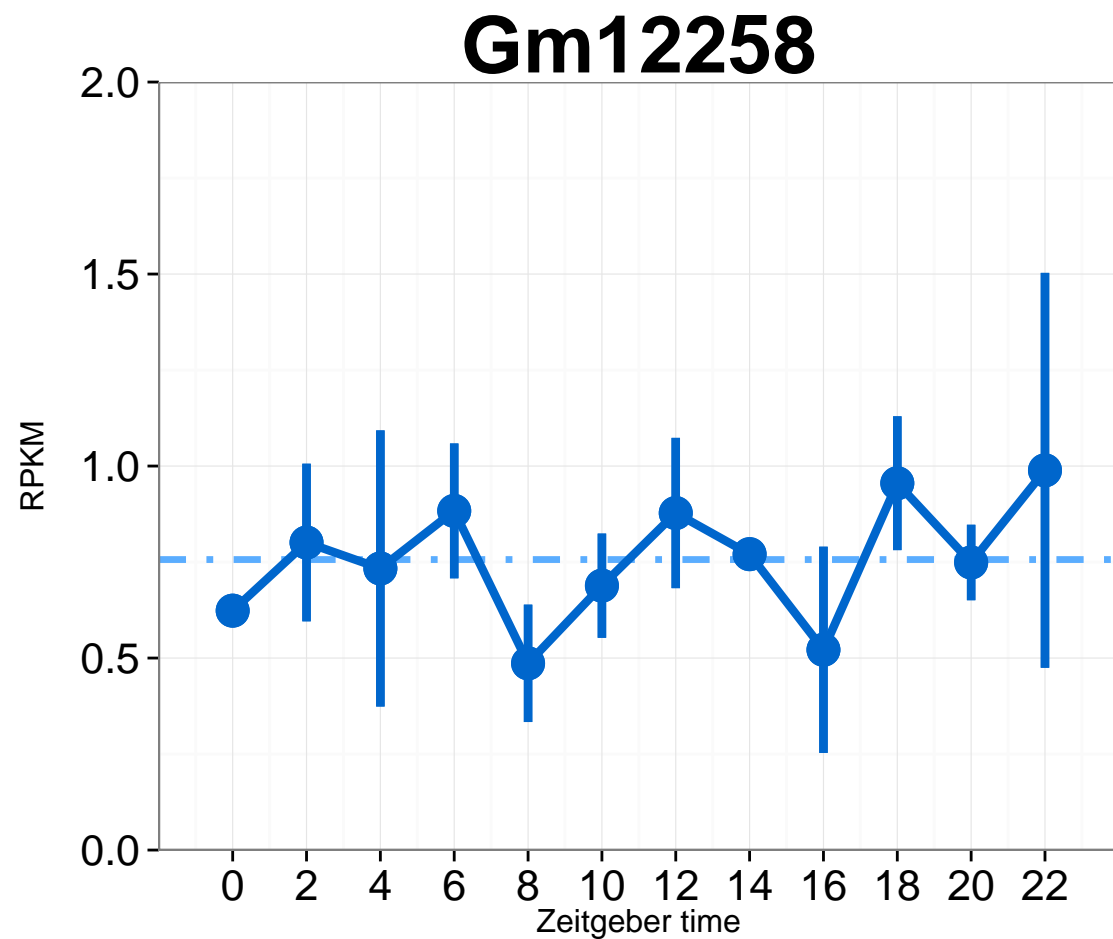

### Gm12258 log<sub>2</sub>(Ribosome occupanc

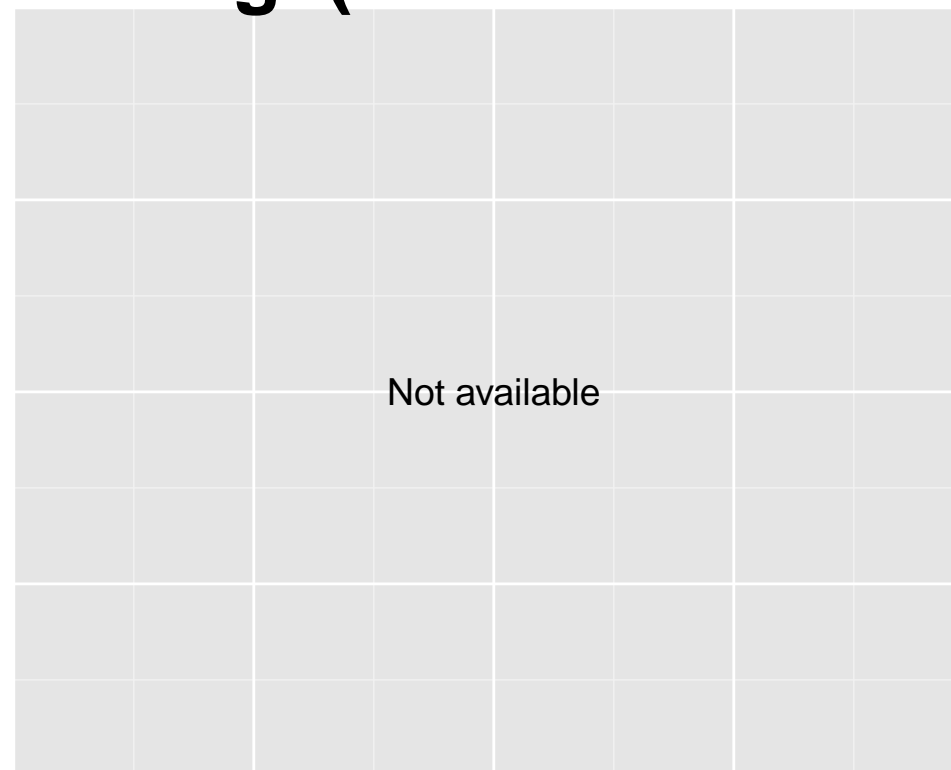

Supplement: SuppDataset_1.zip [file Gm12258_set_A.pdf › Supplemental Dataset 1/A-mRNA_nonrhyth_translation_nonrhyth/Gm12258_set_A.pdf]

# Gm13157

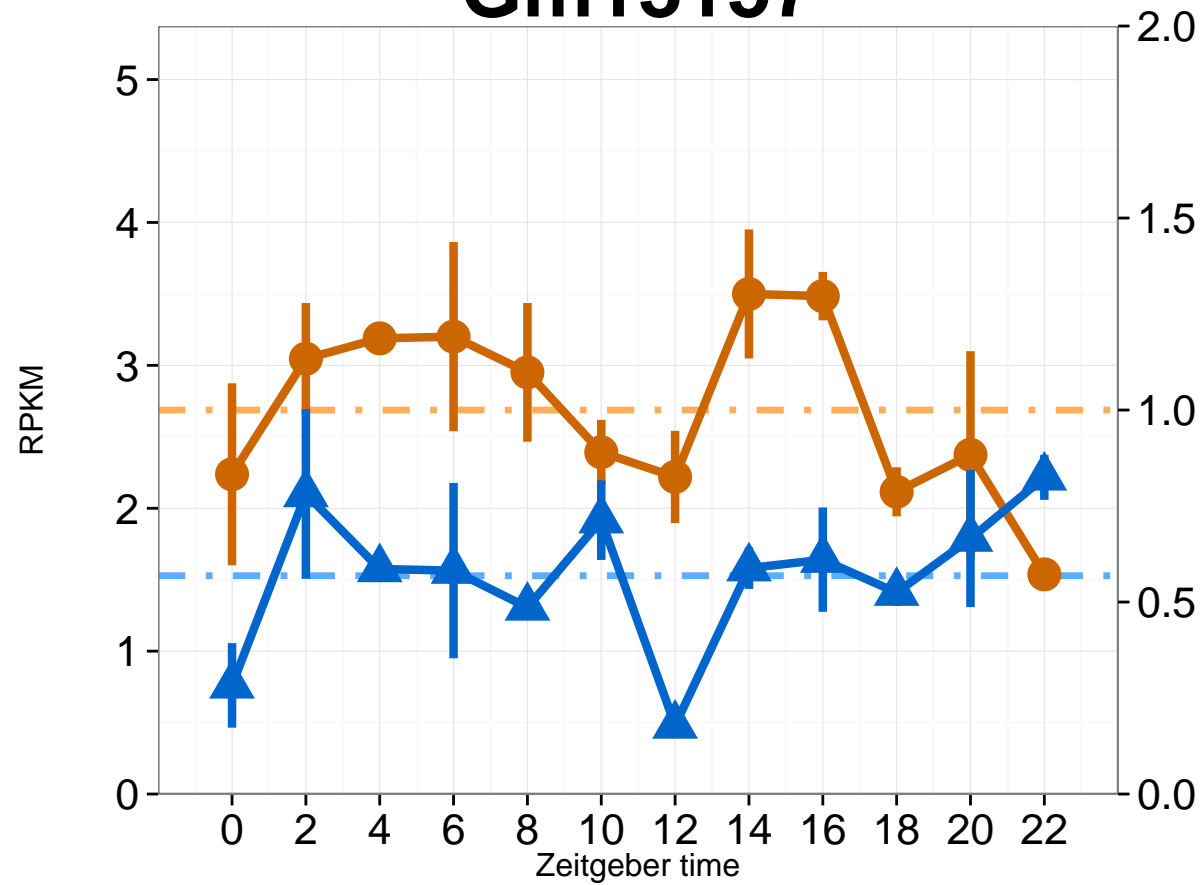

# Gm13157

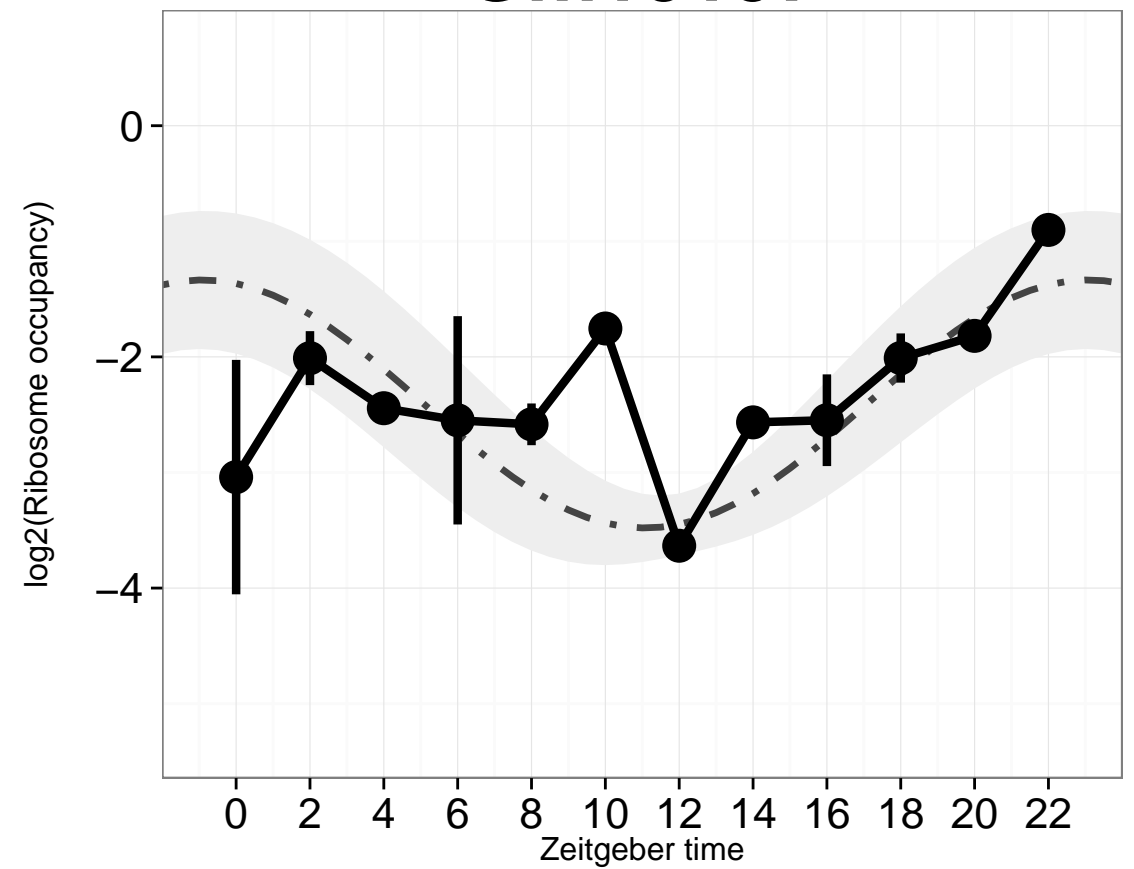

Supplement: SuppDataset_1.zip [file Gm13157_set_A.pdf › Supplemental Dataset 1/A-mRNA_nonrhyth_translation_nonrhyth/Gm13157_set_A.pdf]

# Gm13251

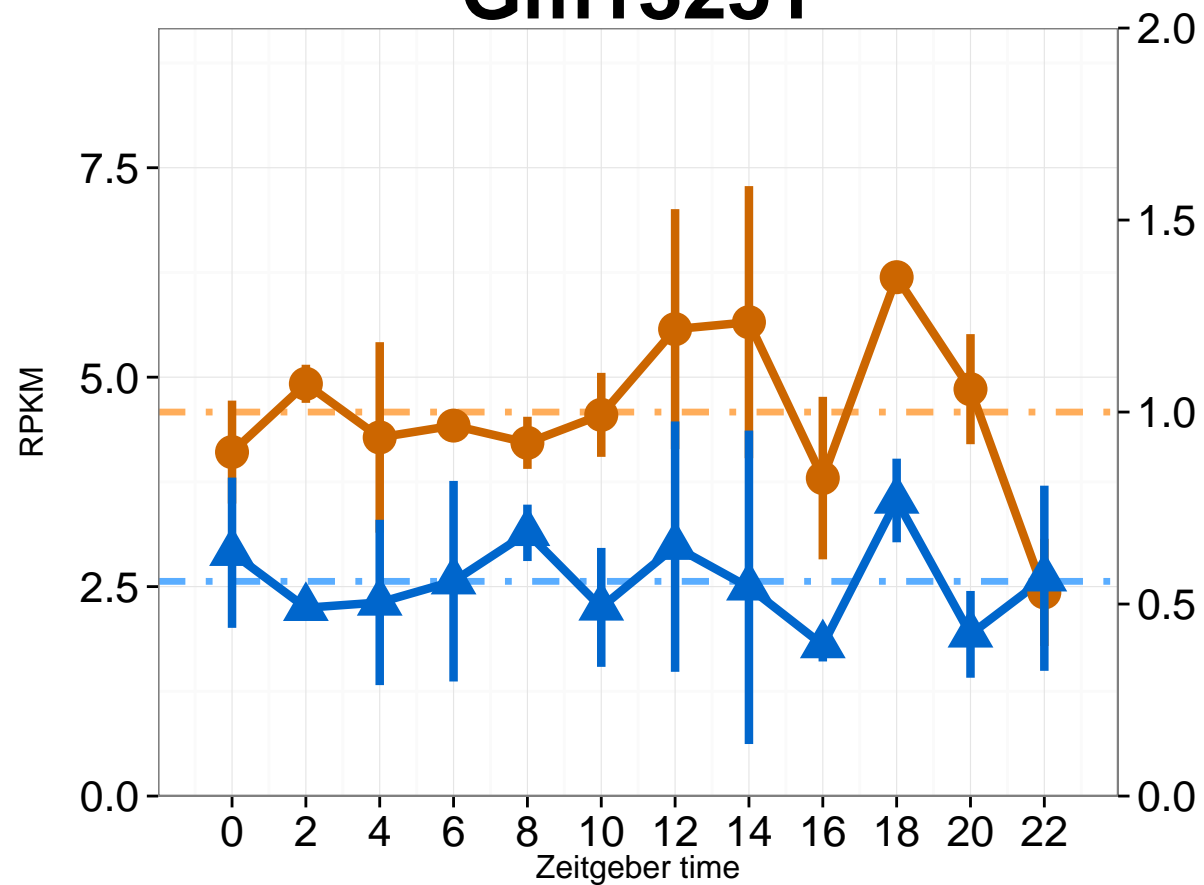

# Gm13251

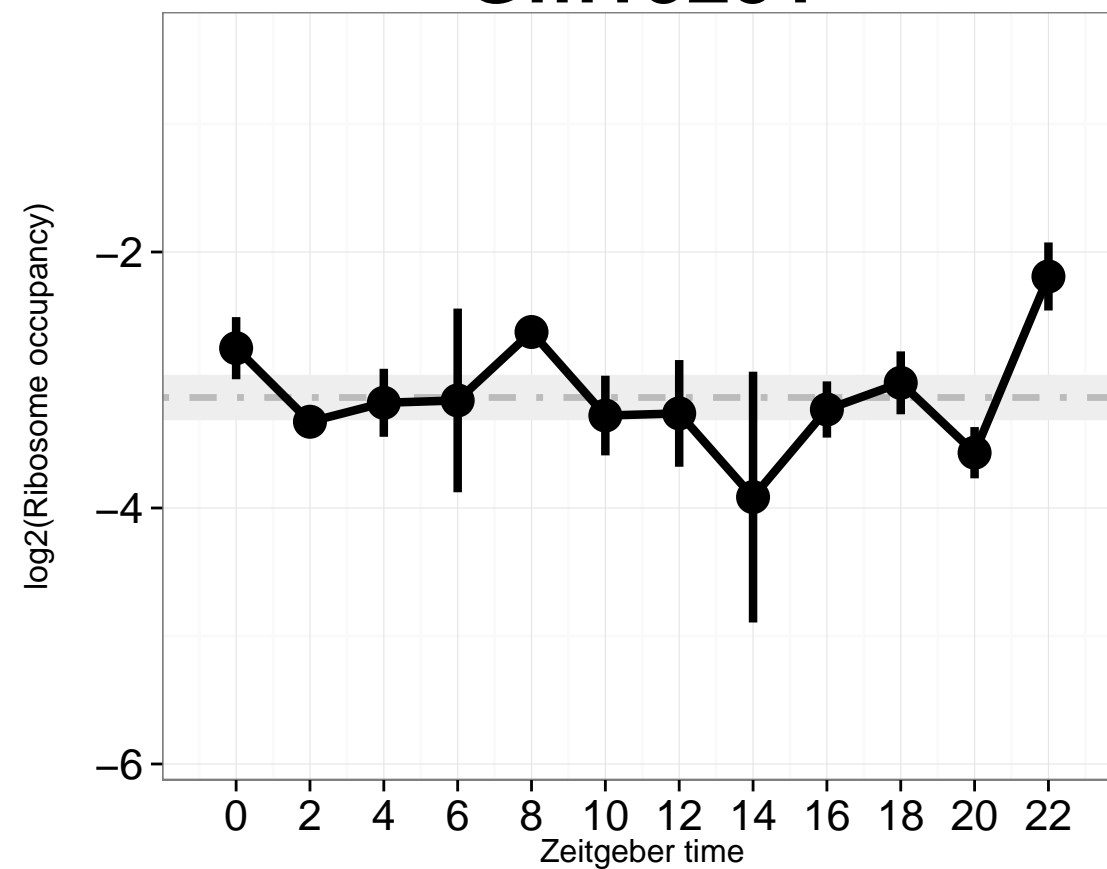

Supplement: SuppDataset_1.zip [file Gm13251_set_A.pdf › Supplemental Dataset 1/A-mRNA_nonrhyth_translation_nonrhyth/Gm13251_set_A.pdf]

# Gm14296

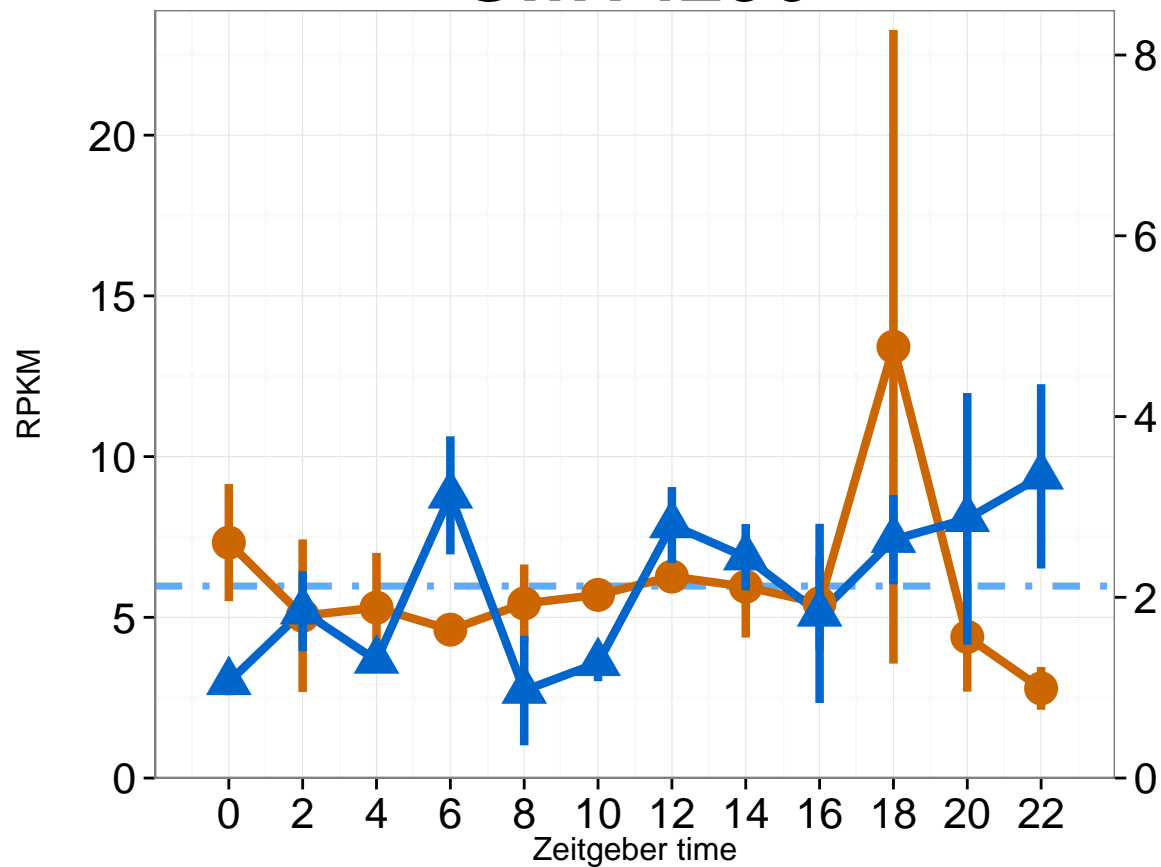

# Gm14296

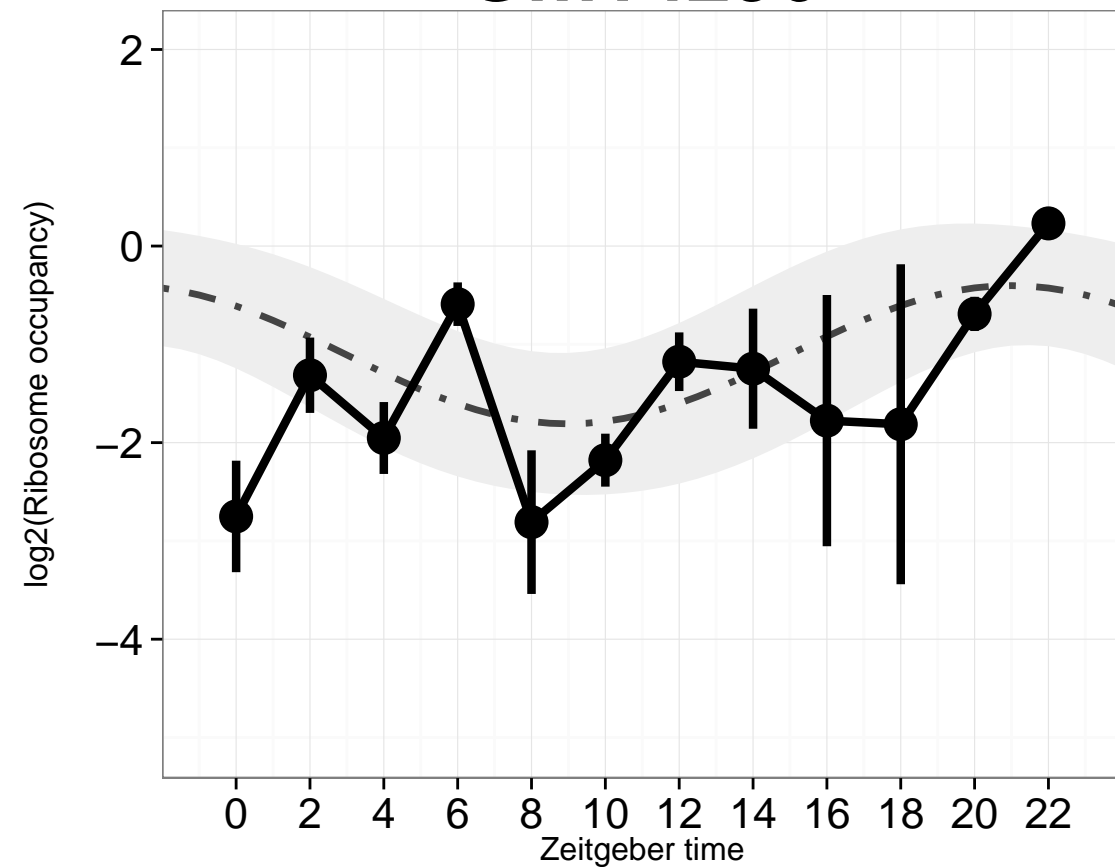

Supplement: SuppDataset_1.zip [file Gm14296_set_A.pdf › Supplemental Dataset 1/A-mRNA_nonrhyth_translation_nonrhyth/Gm14296_set_A.pdf]

# Gm14698

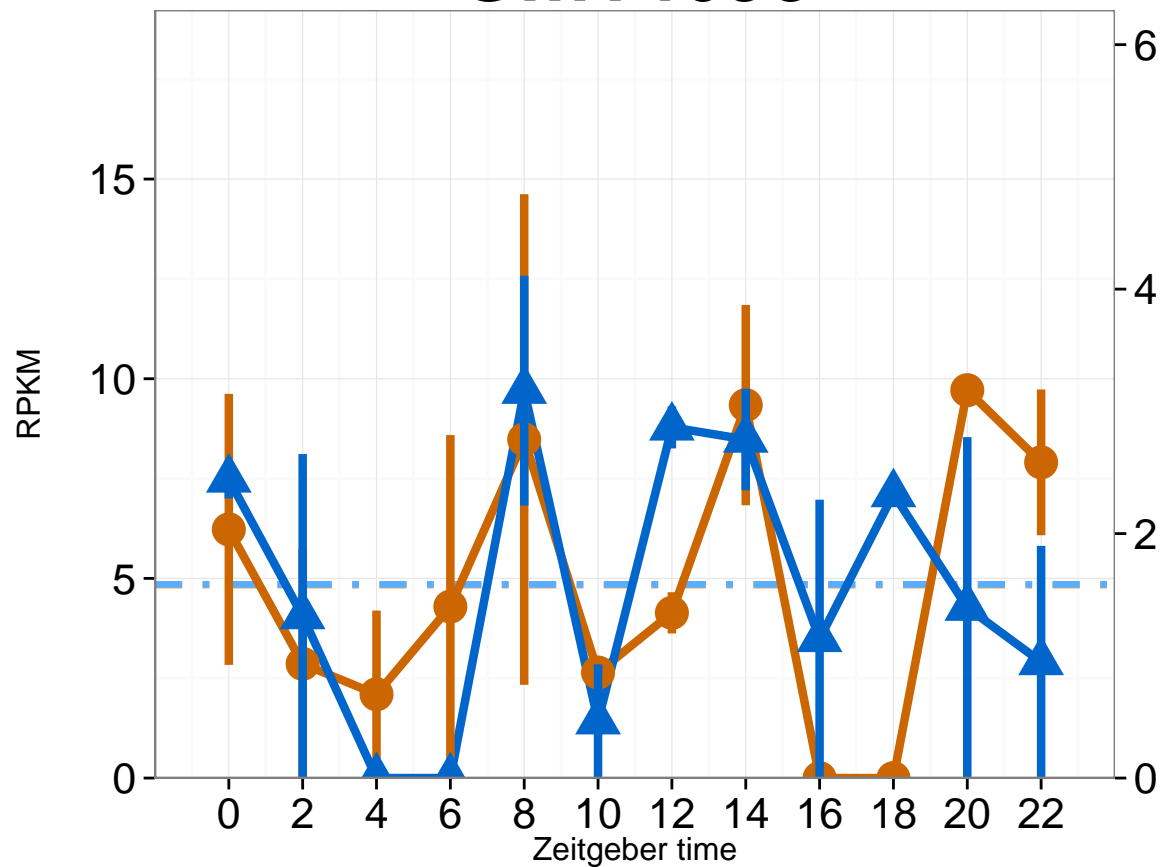

# Gm14698

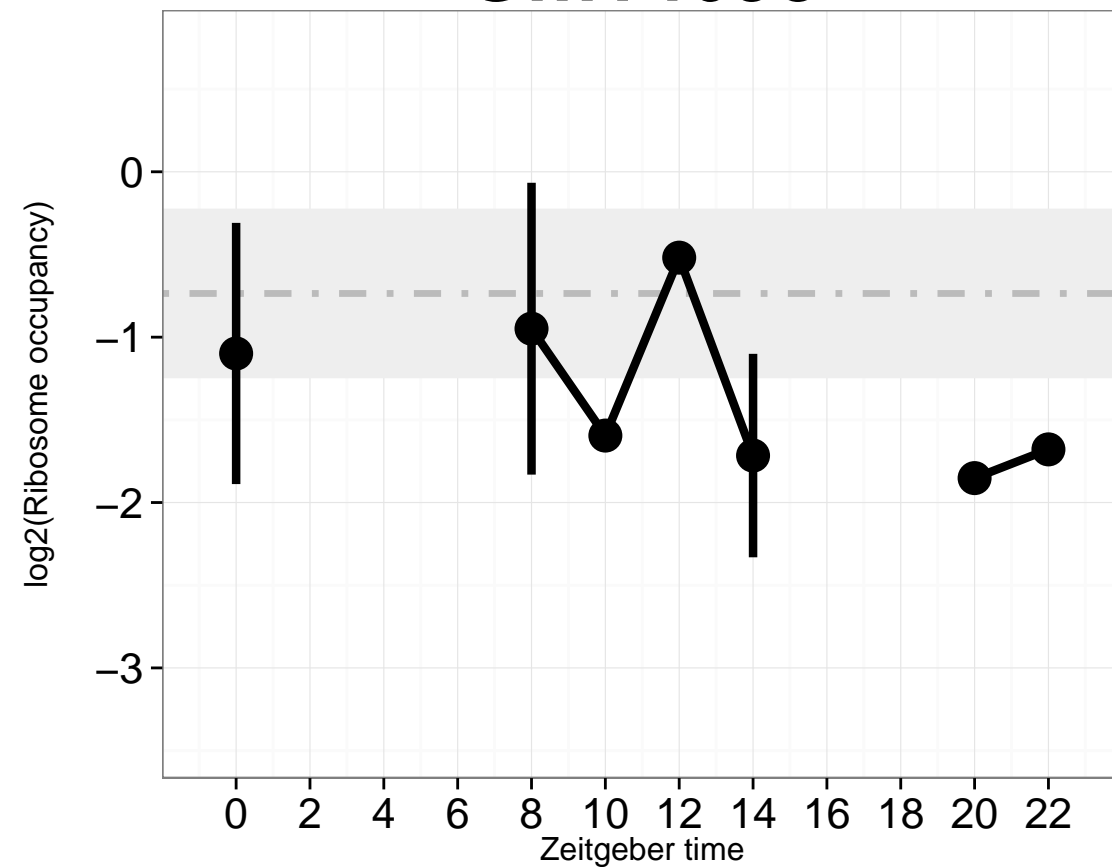

Supplement: SuppDataset_1.zip [file Gm14698_set_A.pdf › Supplemental Dataset 1/A-mRNA_nonrhyth_translation_nonrhyth/Gm14698_set_A.pdf]

## Gm16039

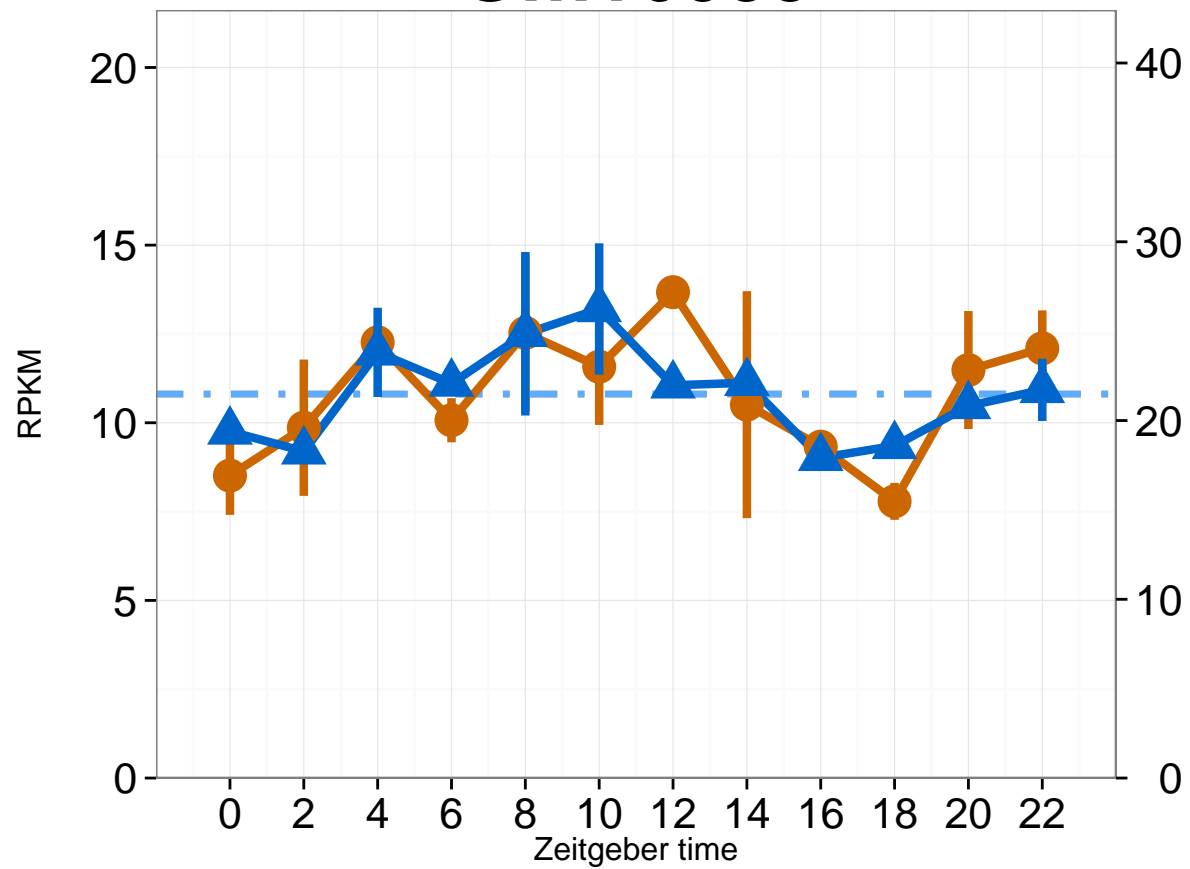

## Gm16039

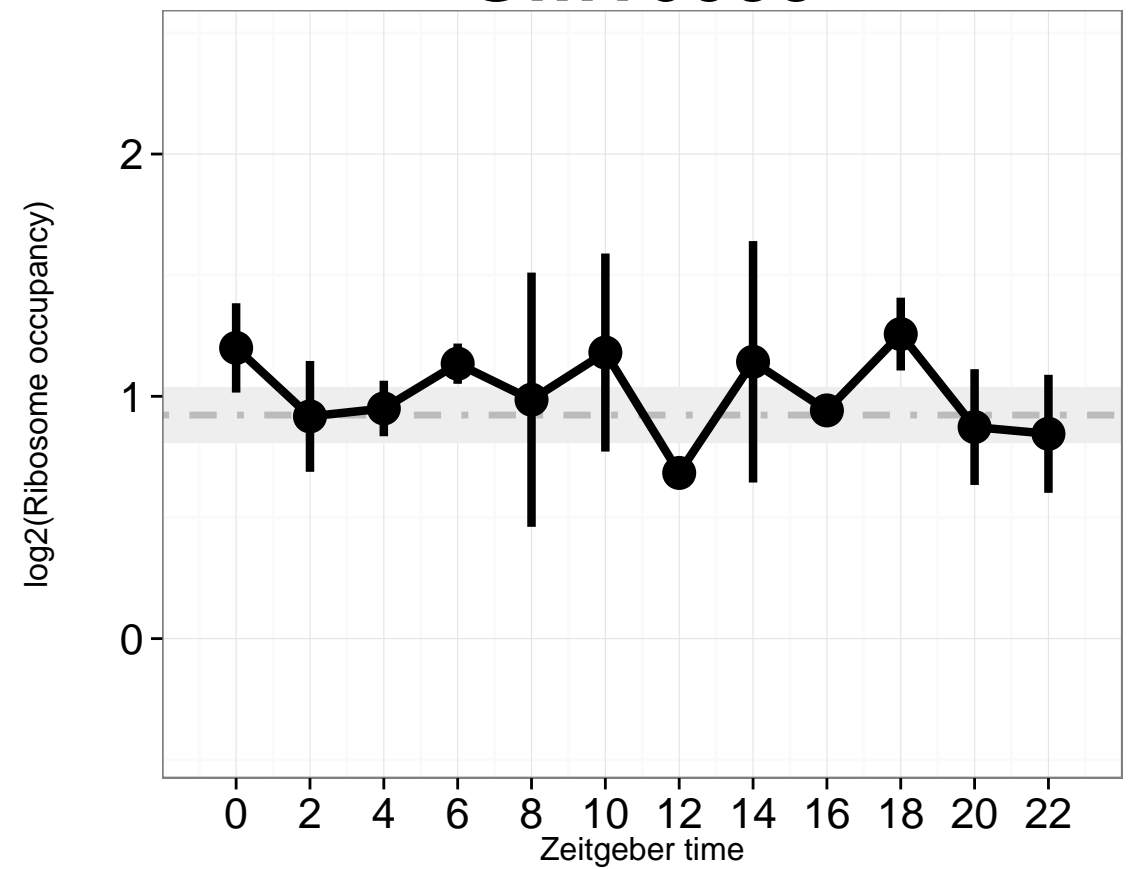

Supplement: SuppDataset_1.zip [file Gm16039_set_A.pdf › Supplemental Dataset 1/A-mRNA_nonrhyth_translation_nonrhyth/Gm16039_set_A.pdf]

# Gm166

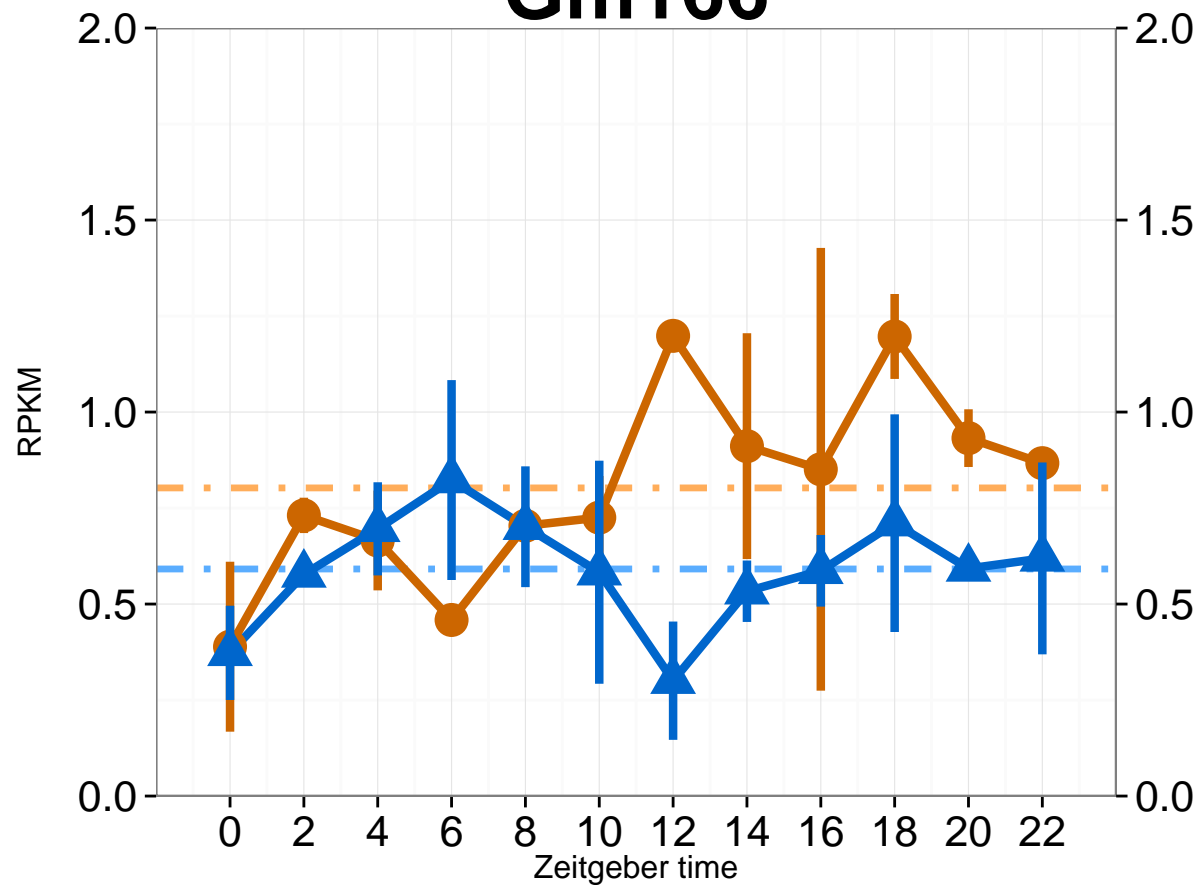

# Gm166

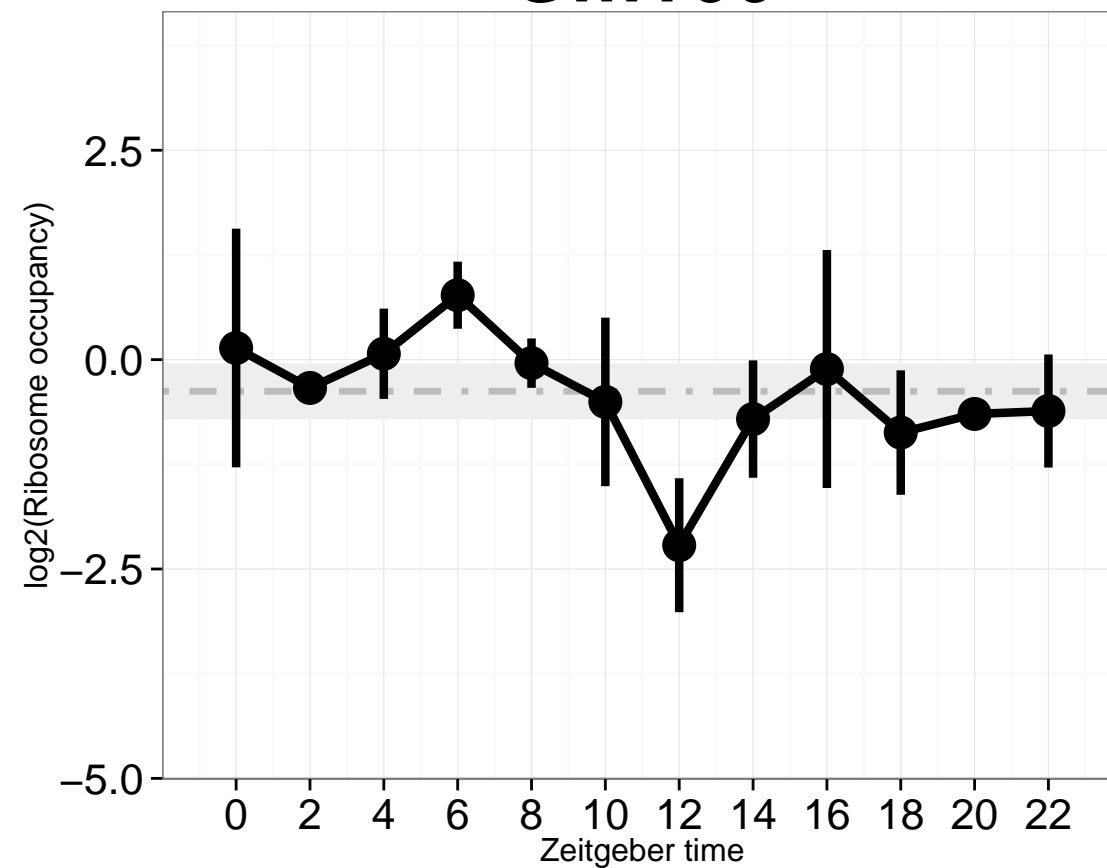

Supplement: SuppDataset_1.zip [file Gm166_set_A.pdf › Supplemental Dataset 1/A-mRNA_nonrhyth_translation_nonrhyth/Gm166_set_A.pdf]

# Gm17296

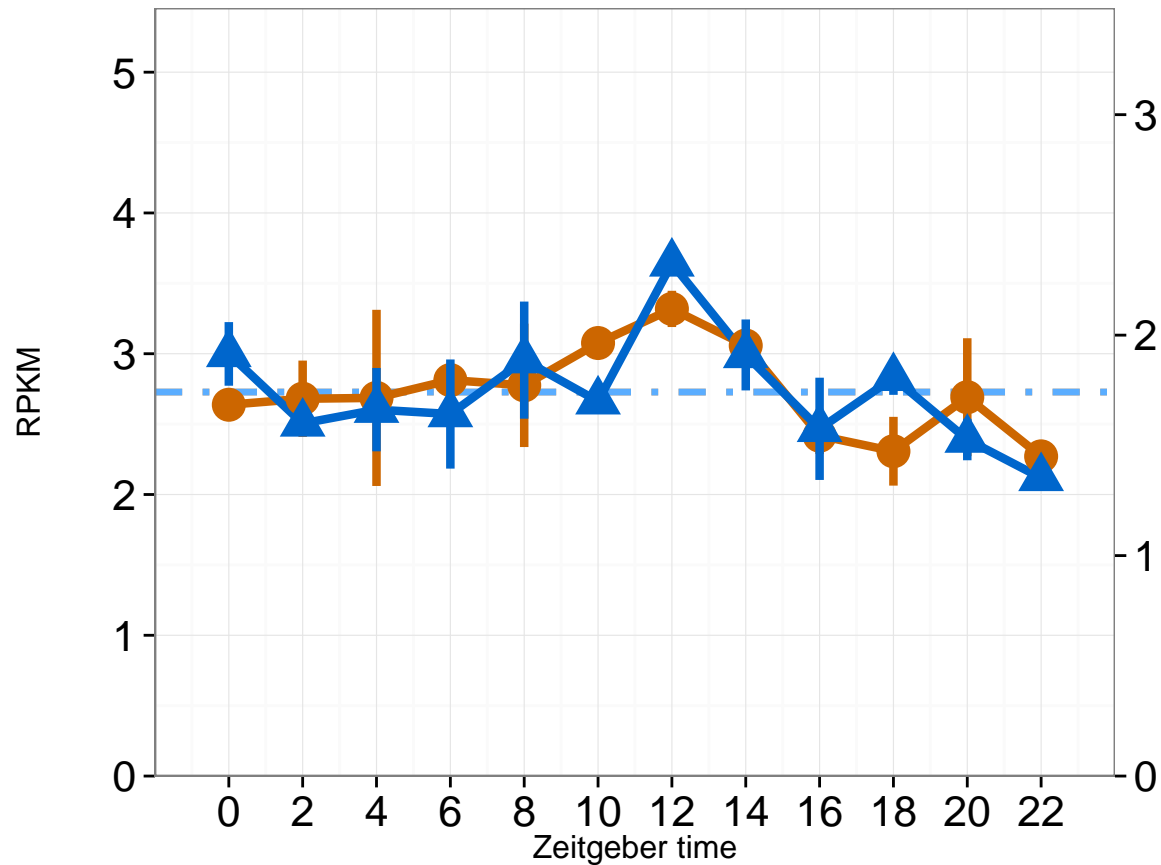

# Gm17296

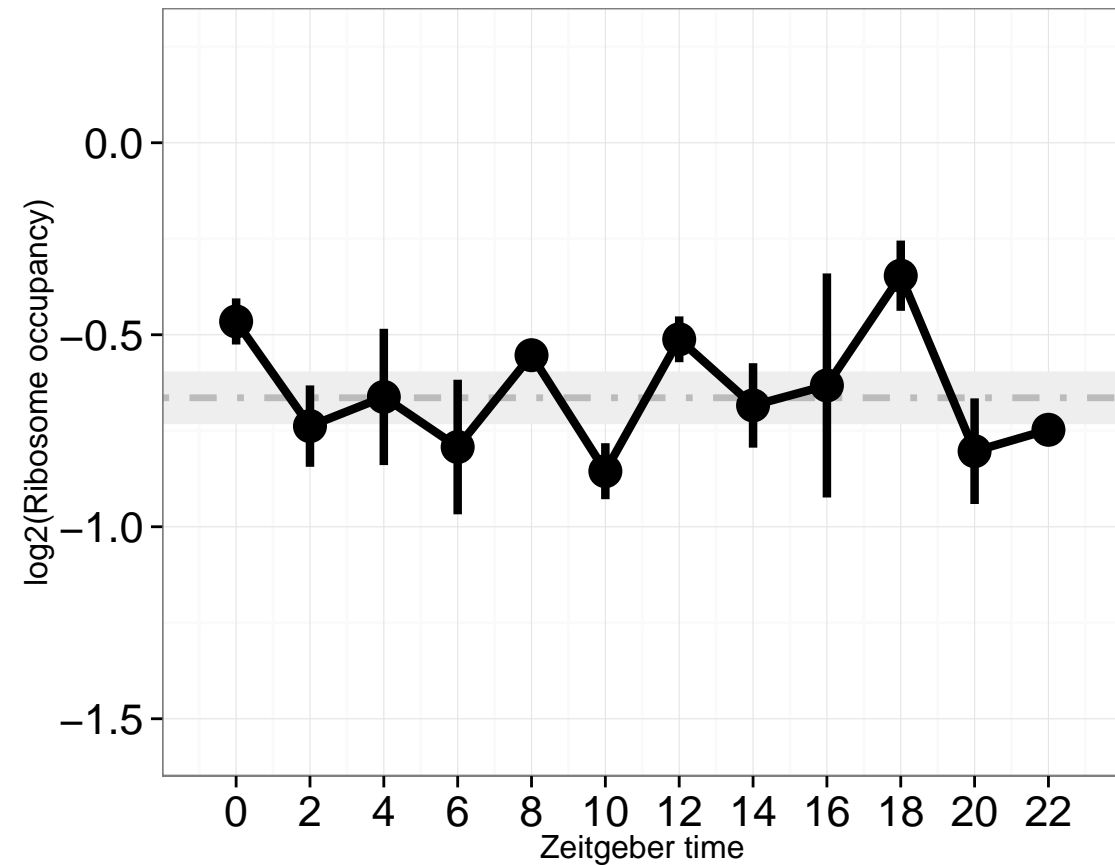

Supplement: SuppDataset_1.zip [file Gm17296_set_A.pdf › Supplemental Dataset 1/A-mRNA_nonrhyth_translation_nonrhyth/Gm17296_set_A.pdf]

## Gm17555

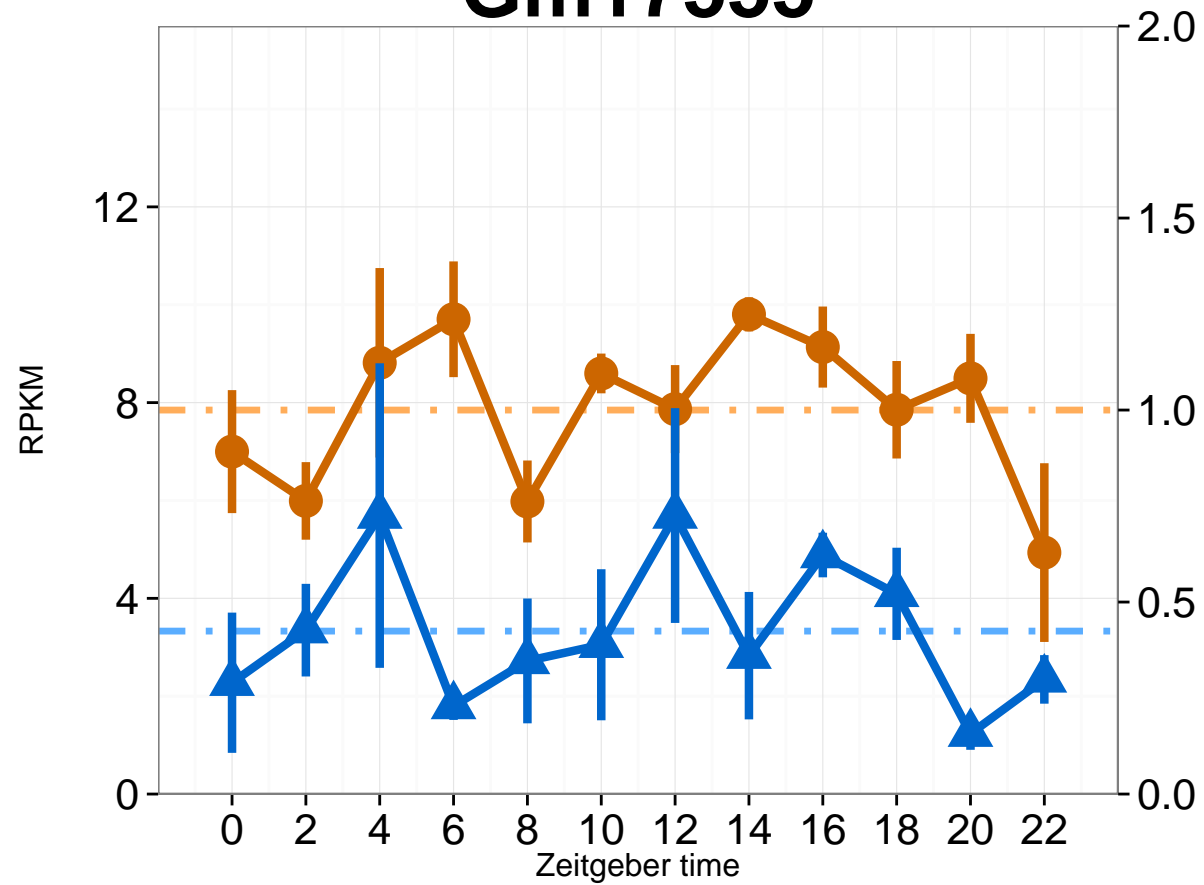

## Gm17555

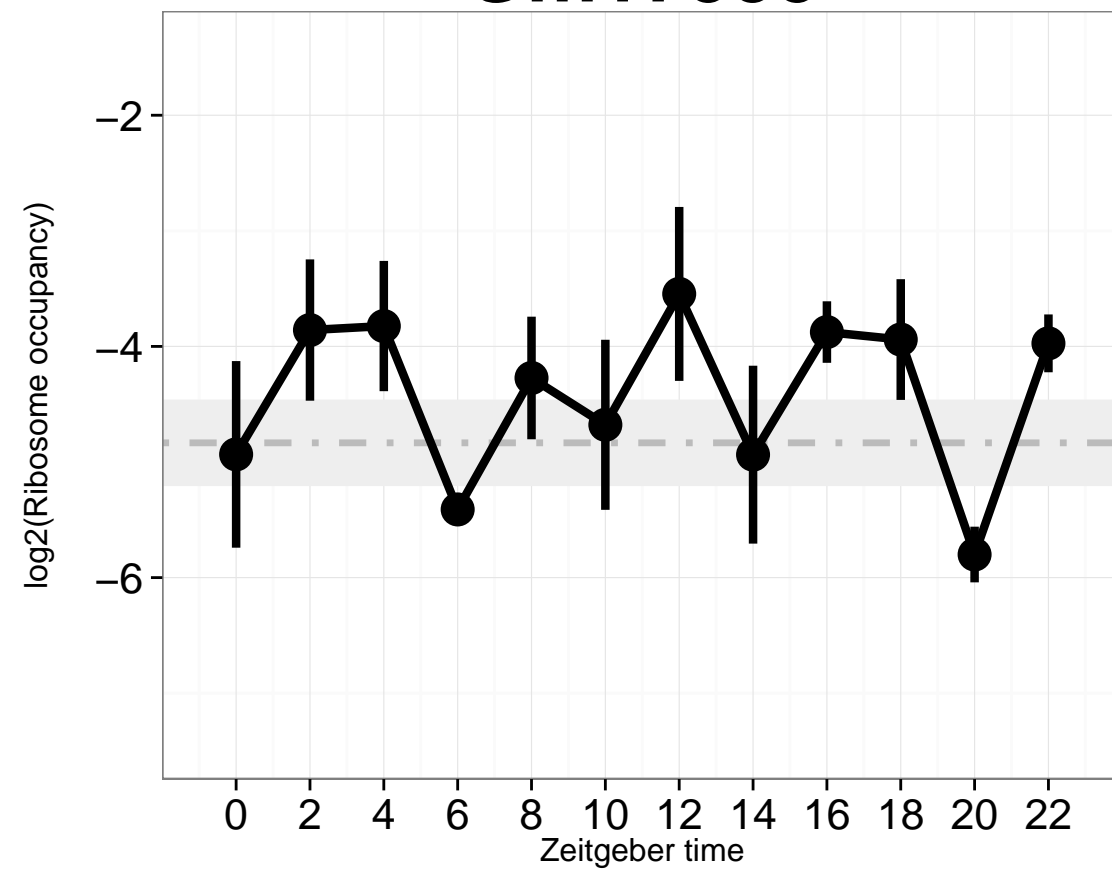

Supplement: SuppDataset_1.zip [file Gm17555_set_A.pdf › Supplemental Dataset 1/A-mRNA_nonrhyth_translation_nonrhyth/Gm17555_set_A.pdf]

## Gm17604

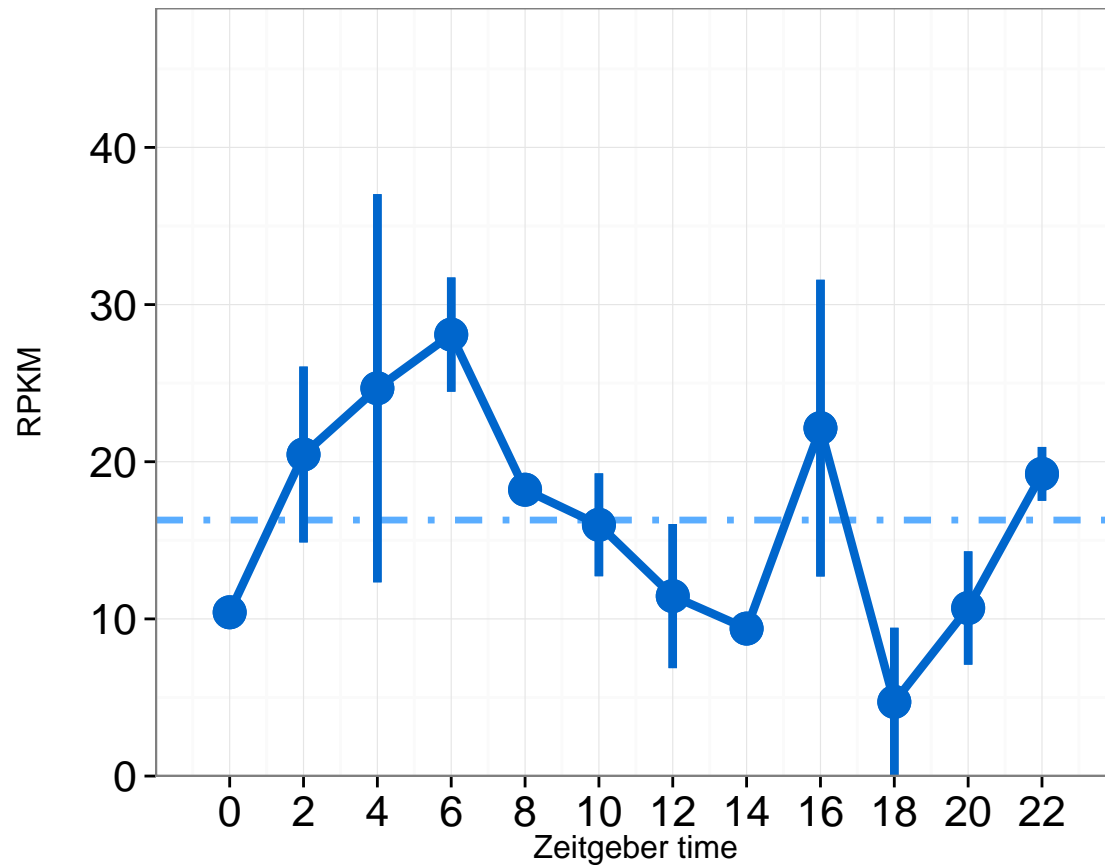

## Gm17604 log2(Ribosome occupanc

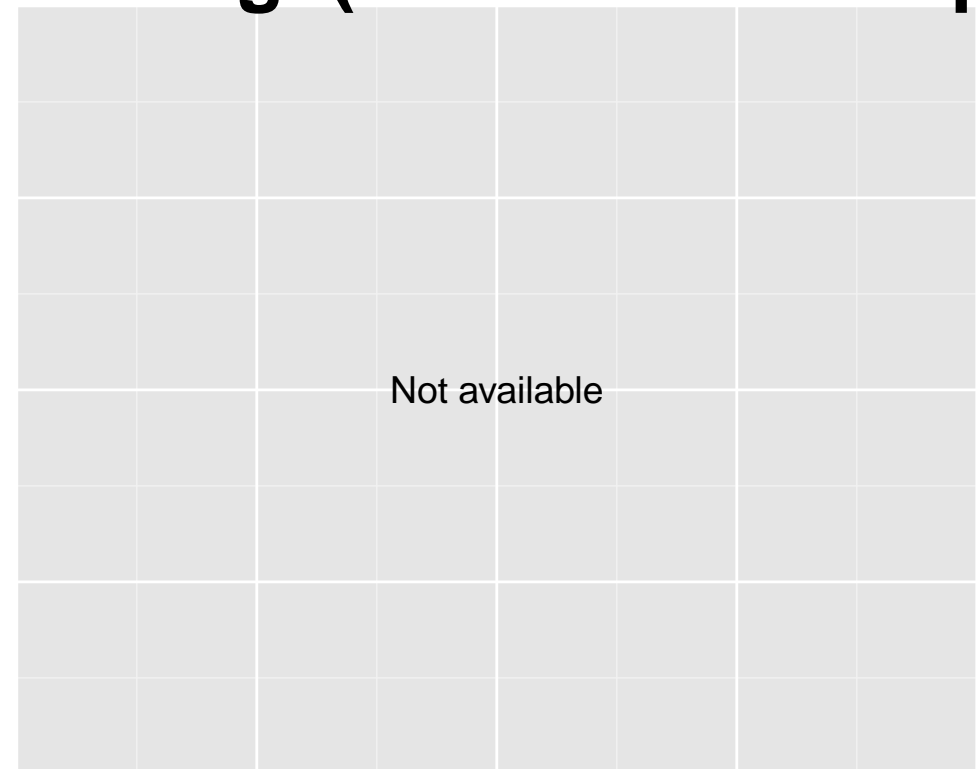

Supplement: SuppDataset_1.zip [file Gm17604_set_A.pdf › Supplemental Dataset 1/A-mRNA_nonrhyth_translation_nonrhyth/Gm17604_set_A.pdf]

# Gm17615

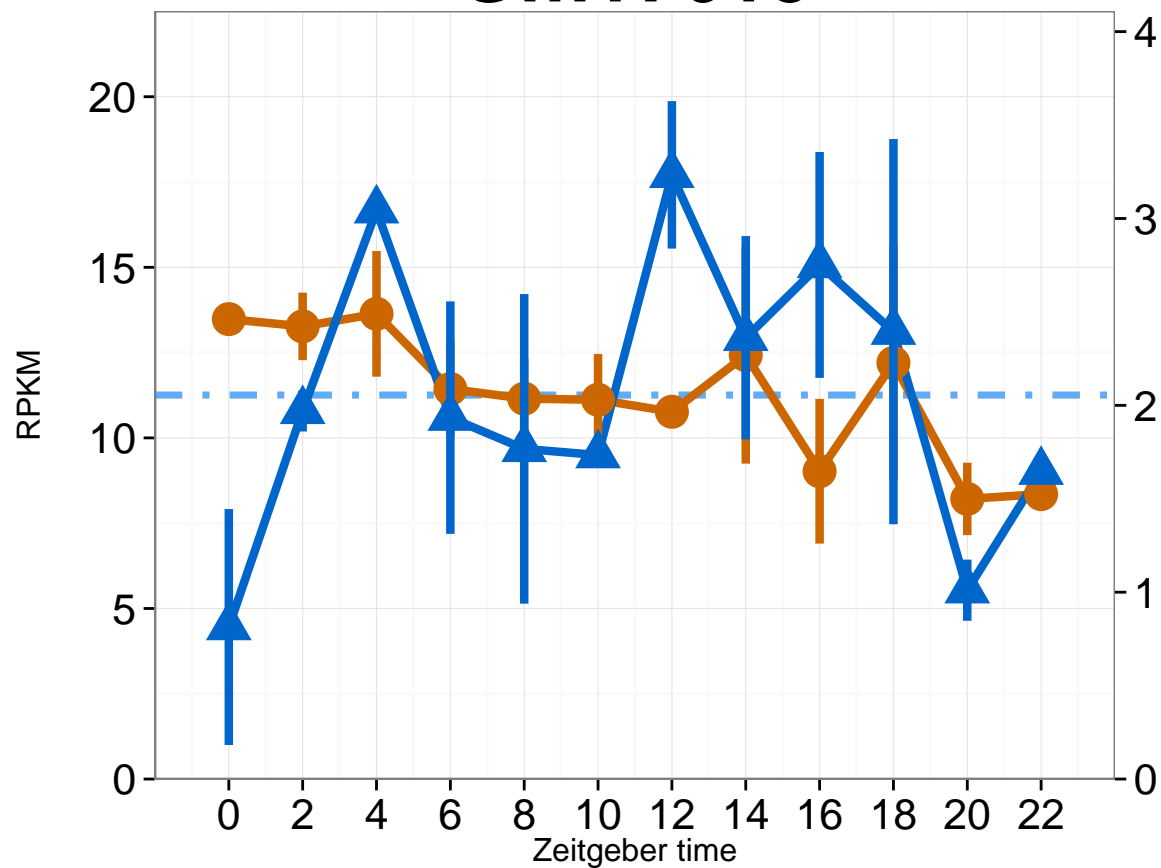

# Gm17615

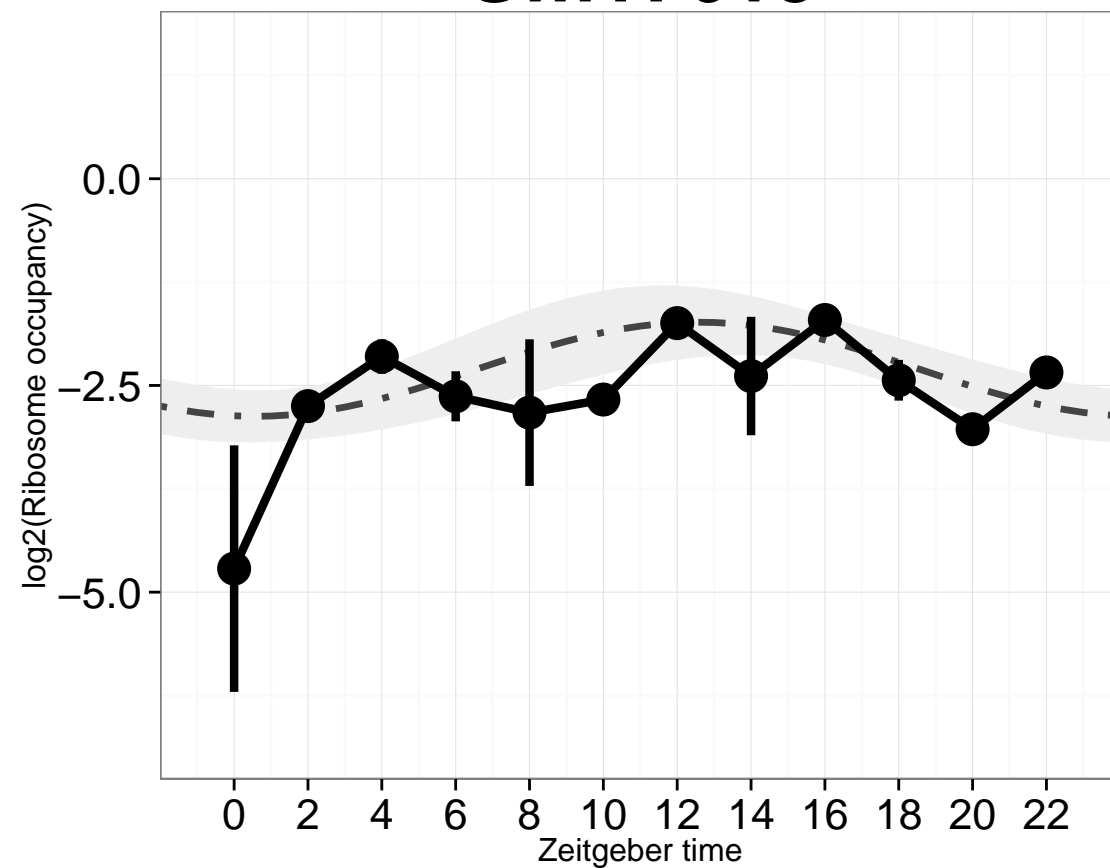

Supplement: SuppDataset_1.zip [file Gm17615_set_A.pdf › Supplemental Dataset 1/A-mRNA_nonrhyth_translation_nonrhyth/Gm17615_set_A.pdf]

## Gm17655

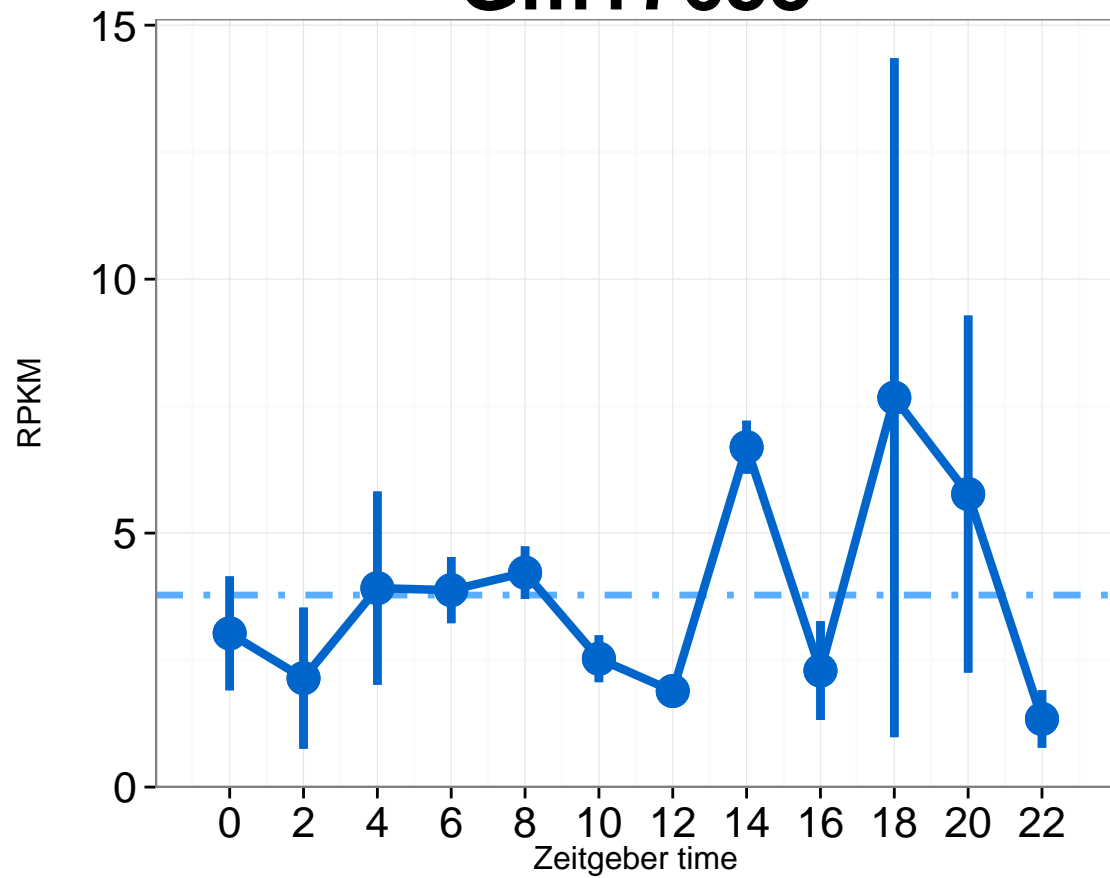

## Gm17655 log2(Ribosome occupanc

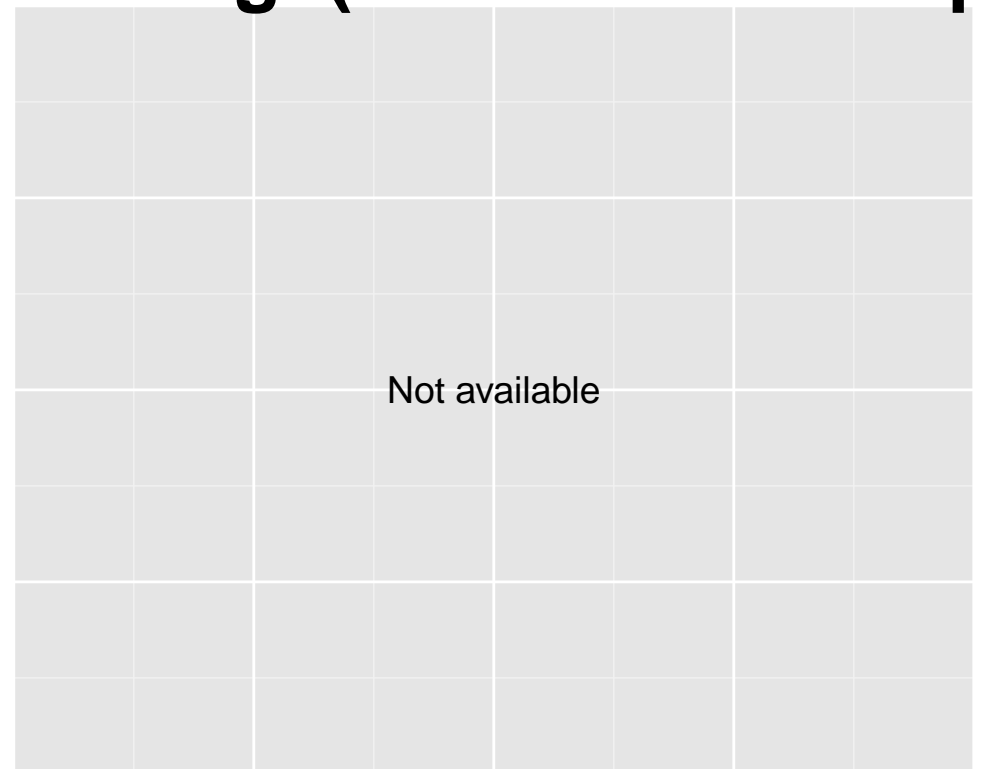

Supplement: SuppDataset_1.zip [file Gm17655_set_A.pdf › Supplemental Dataset 1/A-mRNA_nonrhyth_translation_nonrhyth/Gm17655_set_A.pdf]

# Gm20939

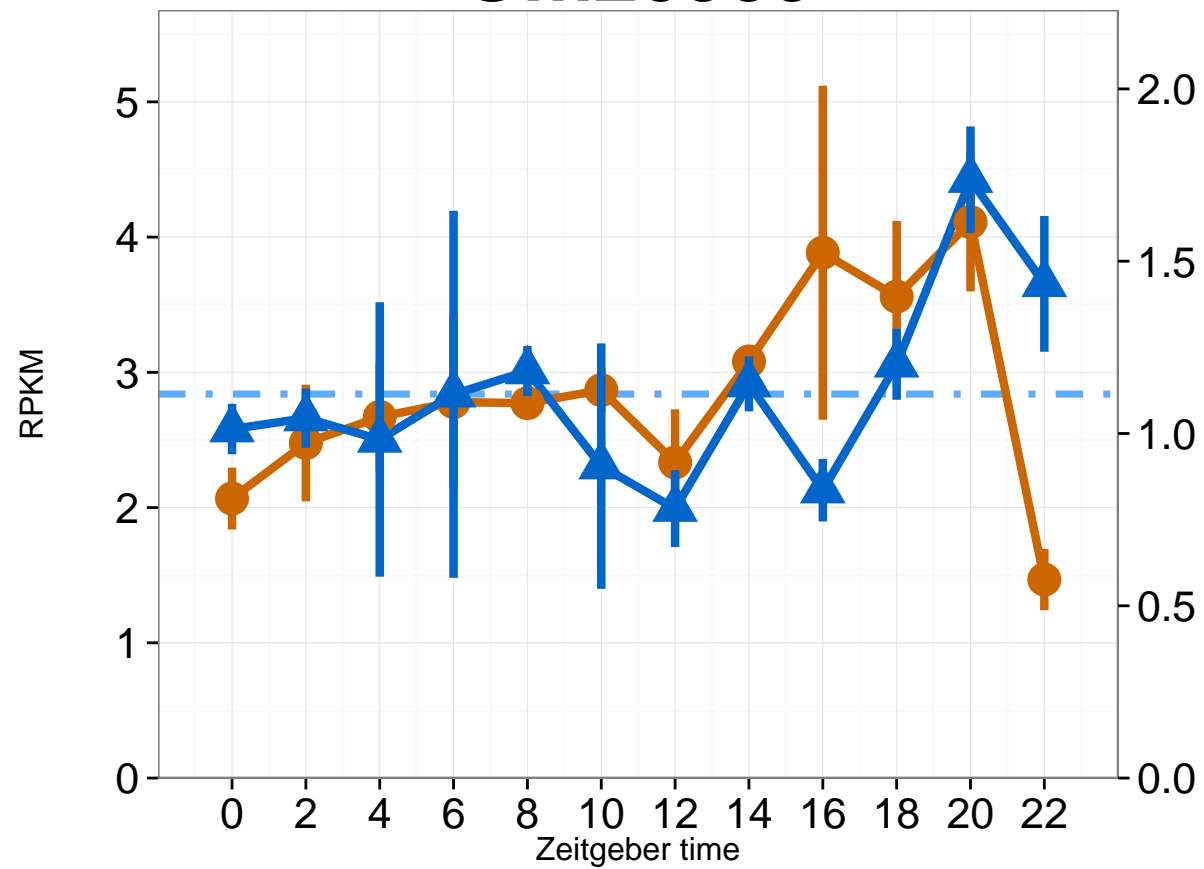

# Gm20939

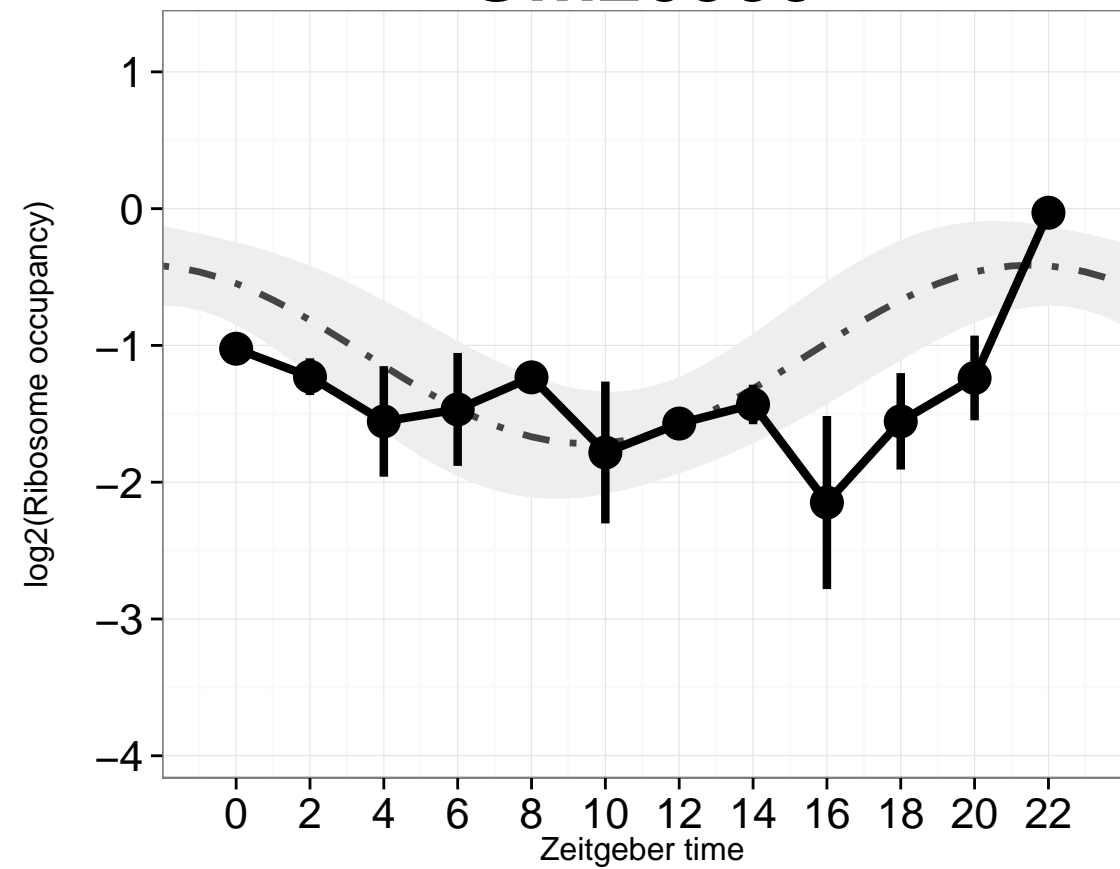

Supplement: SuppDataset_1.zip [file Gm20939_set_A.pdf › Supplemental Dataset 1/A-mRNA_nonrhyth_translation_nonrhyth/Gm20939_set_A.pdf]

## Gm21092

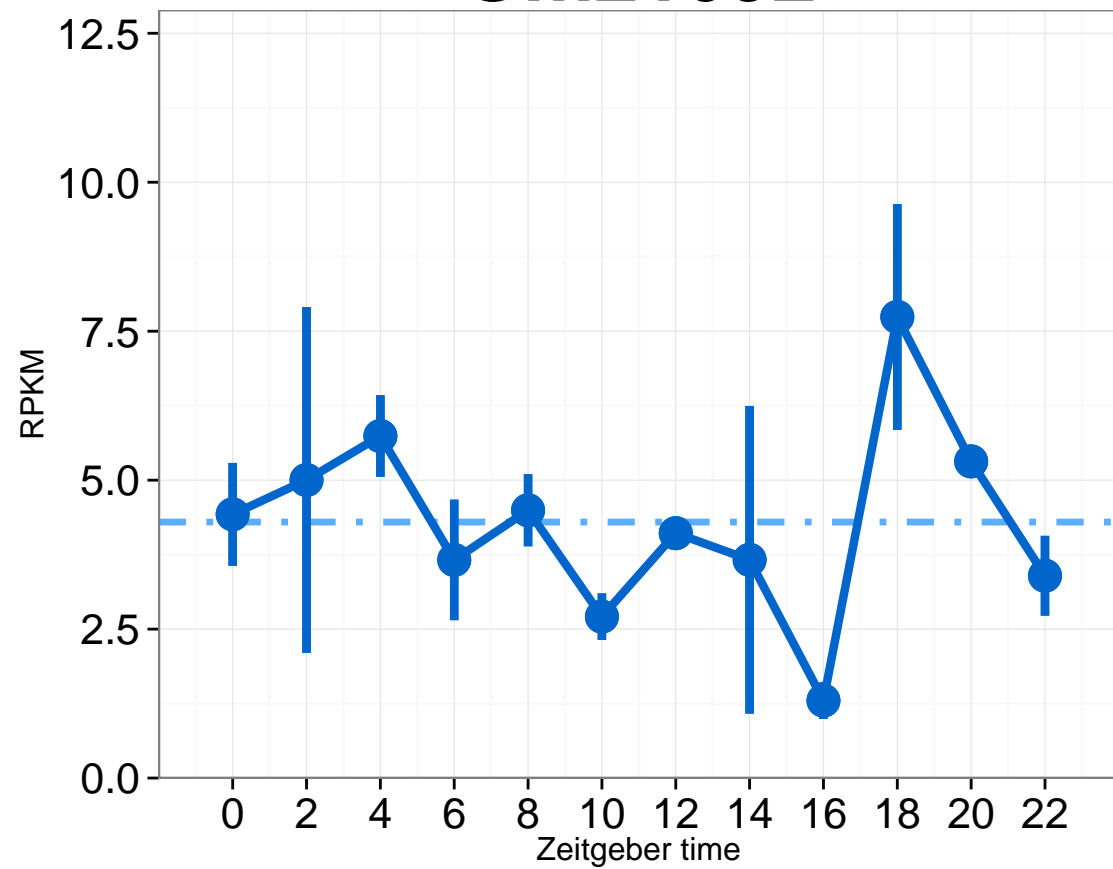

## Gm21092 log2(Ribosome occupancy)

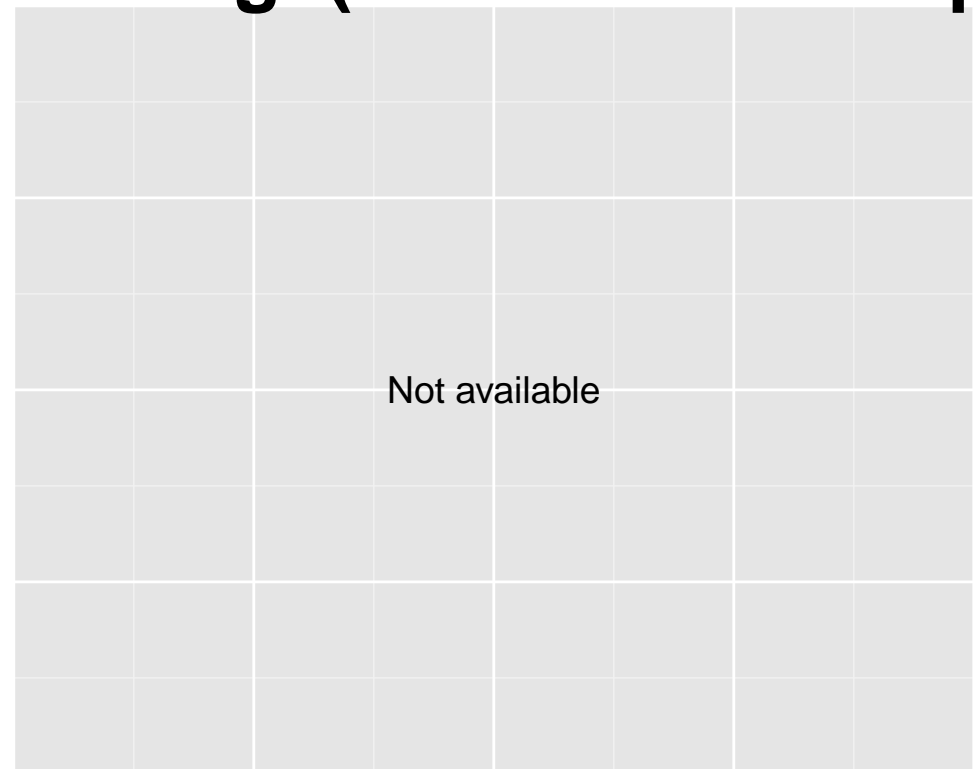

Supplement: SuppDataset_1.zip [file Gm21092_set_A.pdf › Supplemental Dataset 1/A-mRNA_nonrhyth_translation_nonrhyth/Gm21092_set_A.pdf]

# Gm21750

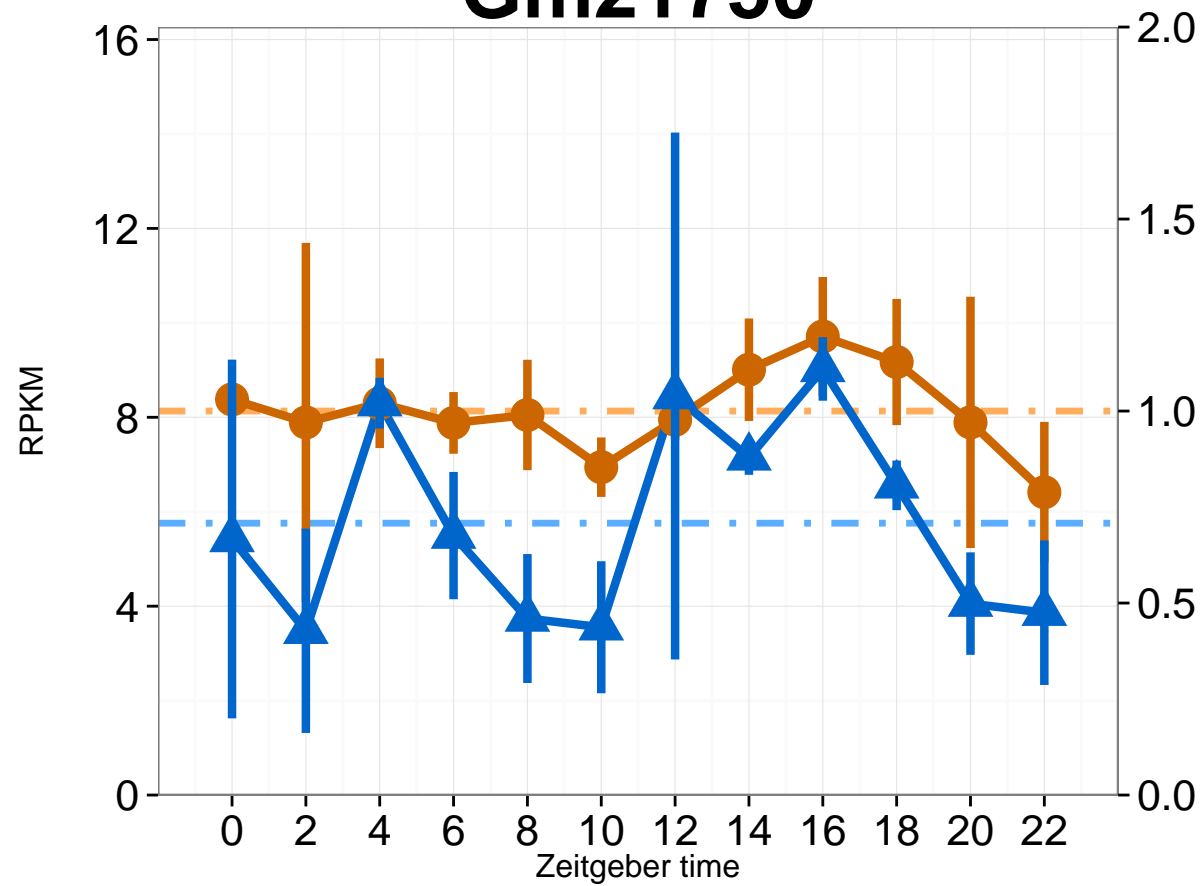

# Gm21750

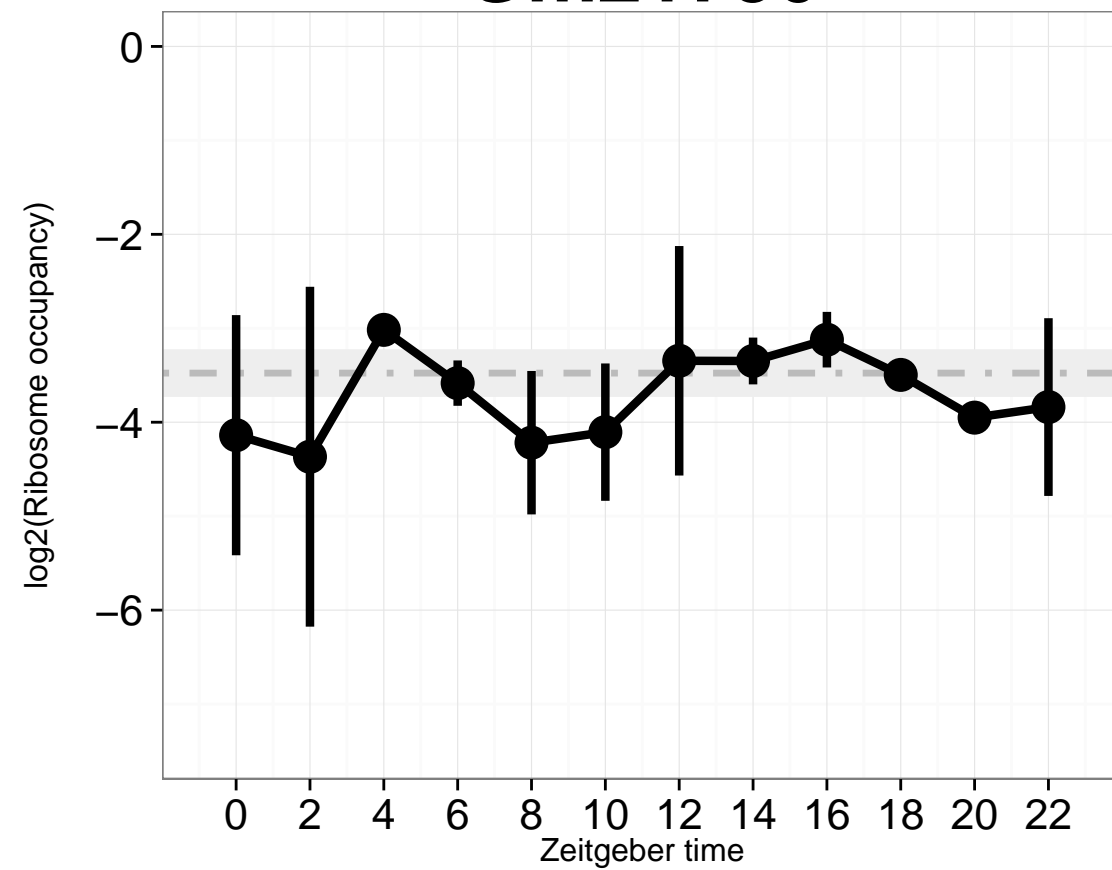

Supplement: SuppDataset_1.zip [file Gm21750_set_A.pdf › Supplemental Dataset 1/A-mRNA_nonrhyth_translation_nonrhyth/Gm21750_set_A.pdf]

## Gm21807

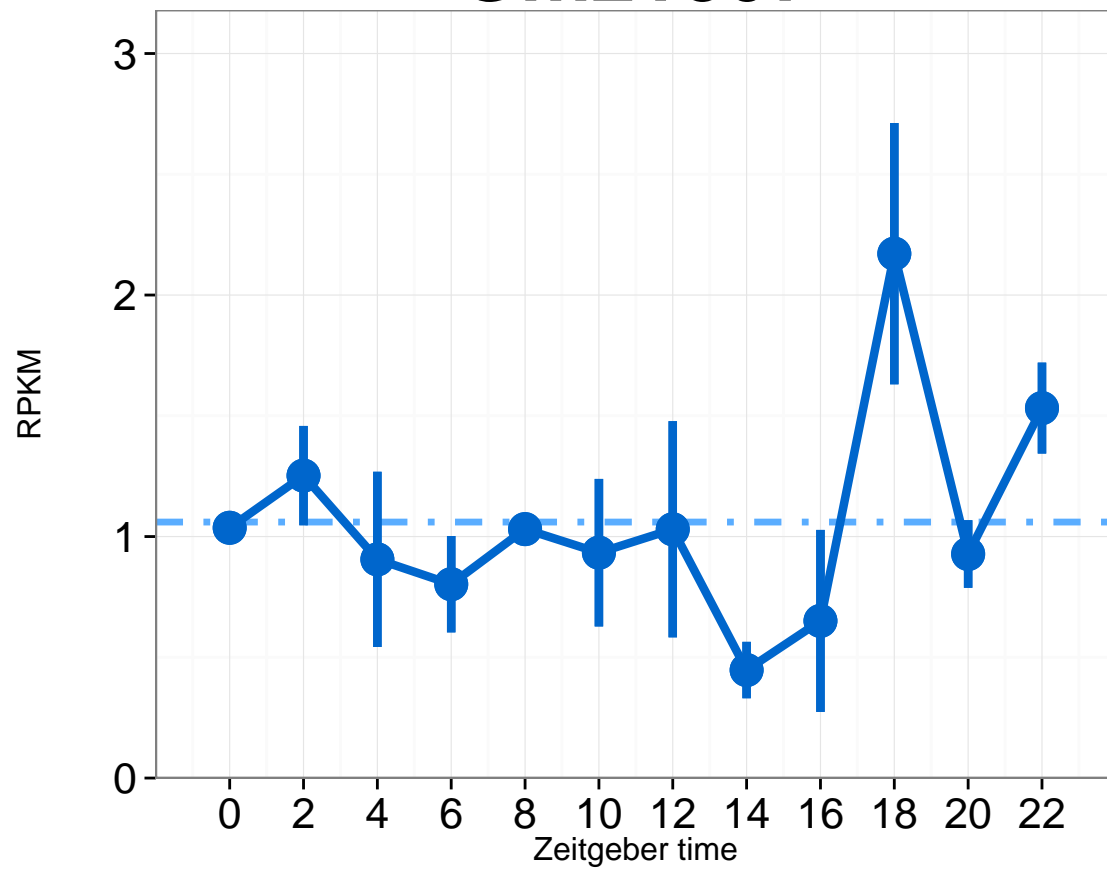

## Gm21807 log2(Ribosome occupanc



Supplement: SuppDataset_1.zip [file Gm21807_set_A.pdf › Supplemental Dataset 1/A-mRNA_nonrhyth_translation_nonrhyth/Gm21807_set_A.pdf]

## Gm21833

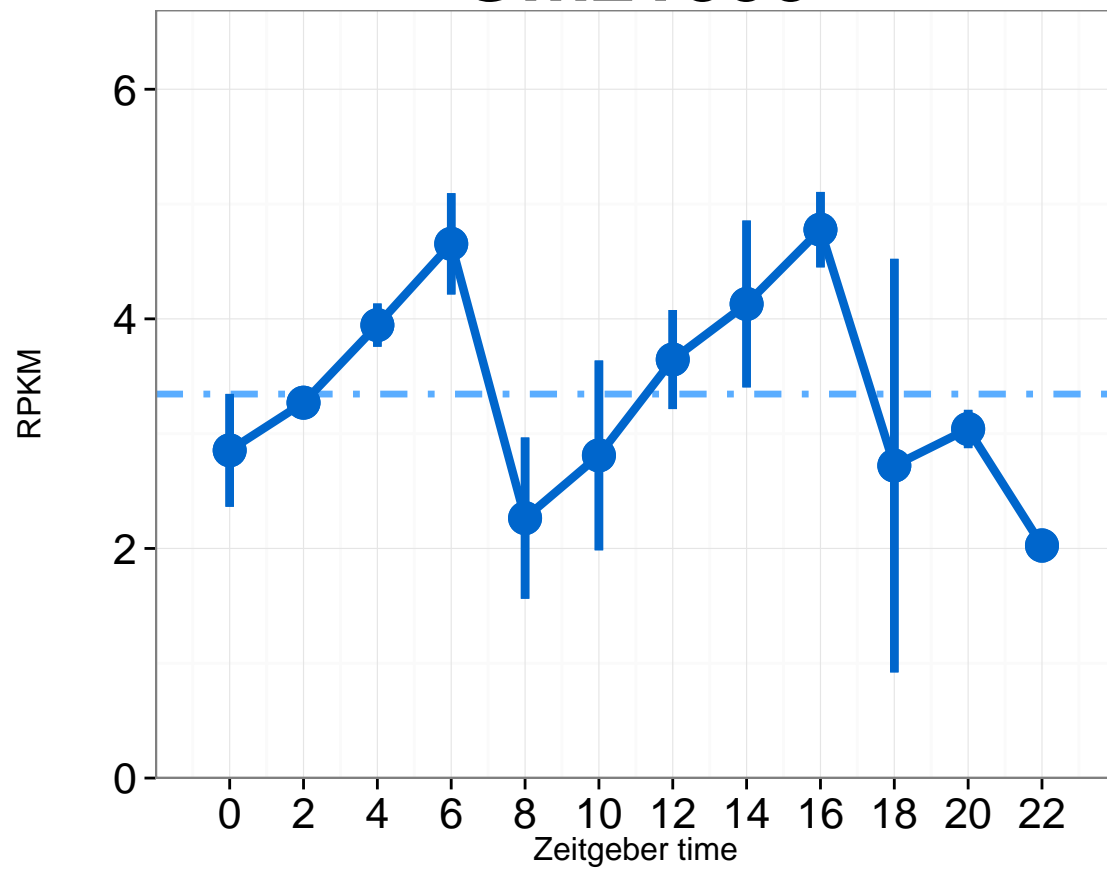

## Gm21833 log<sub>2</sub>(Ribosome occupancy)

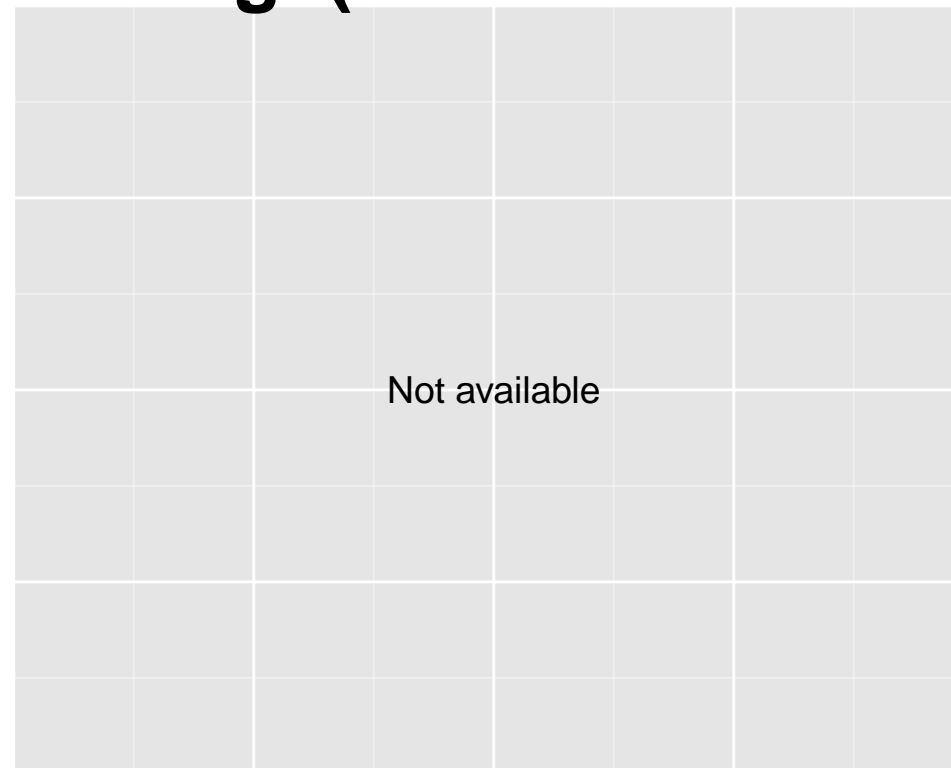

Supplement: SuppDataset_1.zip [file Gm21833_set_A.pdf › Supplemental Dataset 1/A-mRNA_nonrhyth_translation_nonrhyth/Gm21833_set_A.pdf]

# Gm21897

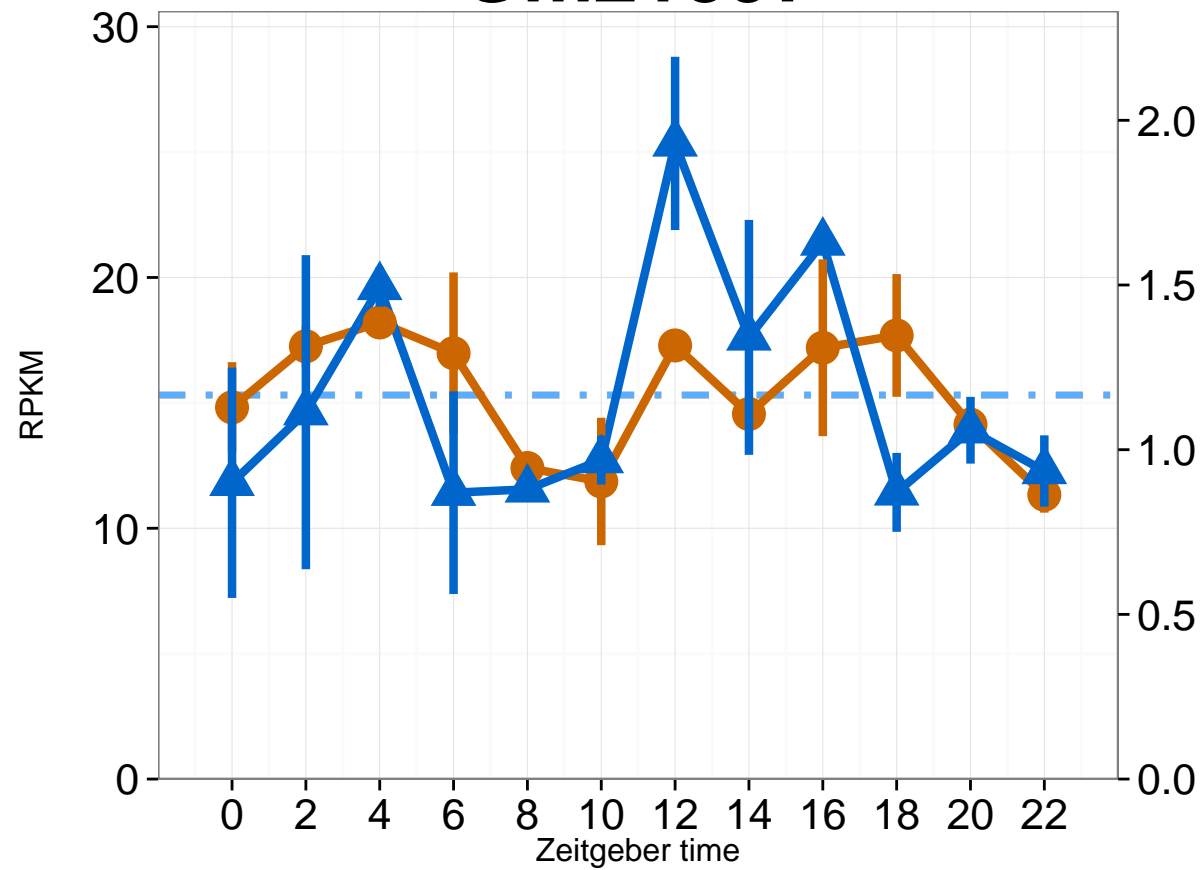

# Gm21897

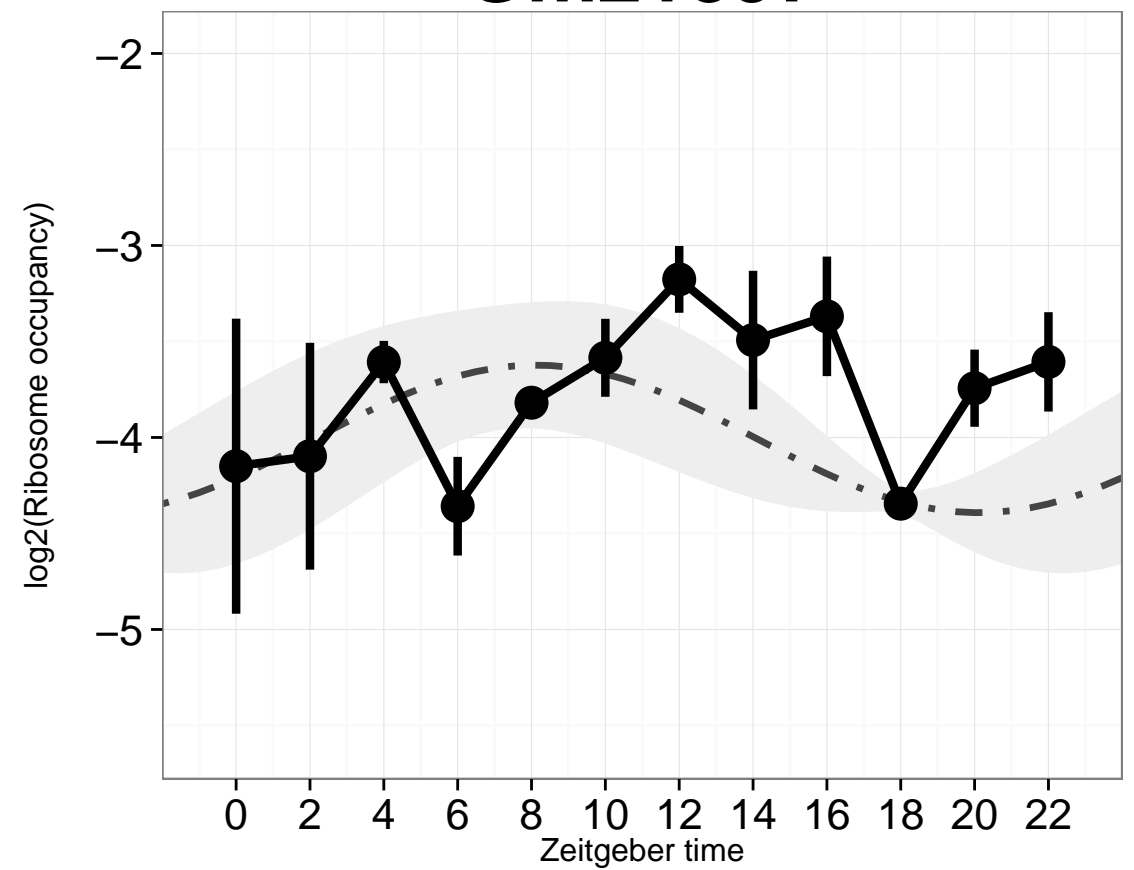

Supplement: SuppDataset_1.zip [file Gm21897_set_A.pdf › Supplemental Dataset 1/A-mRNA_nonrhyth_translation_nonrhyth/Gm21897_set_A.pdf]

# Gm21962

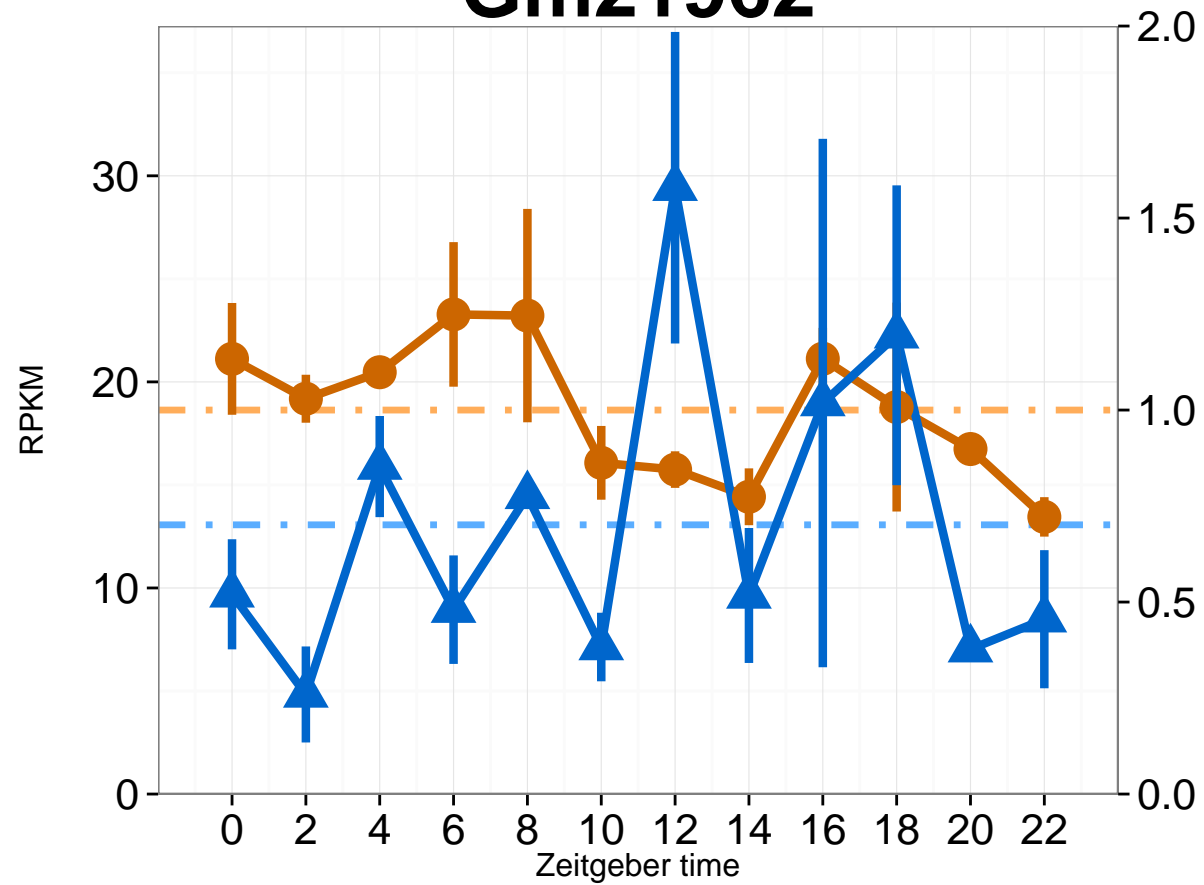

# Gm21962

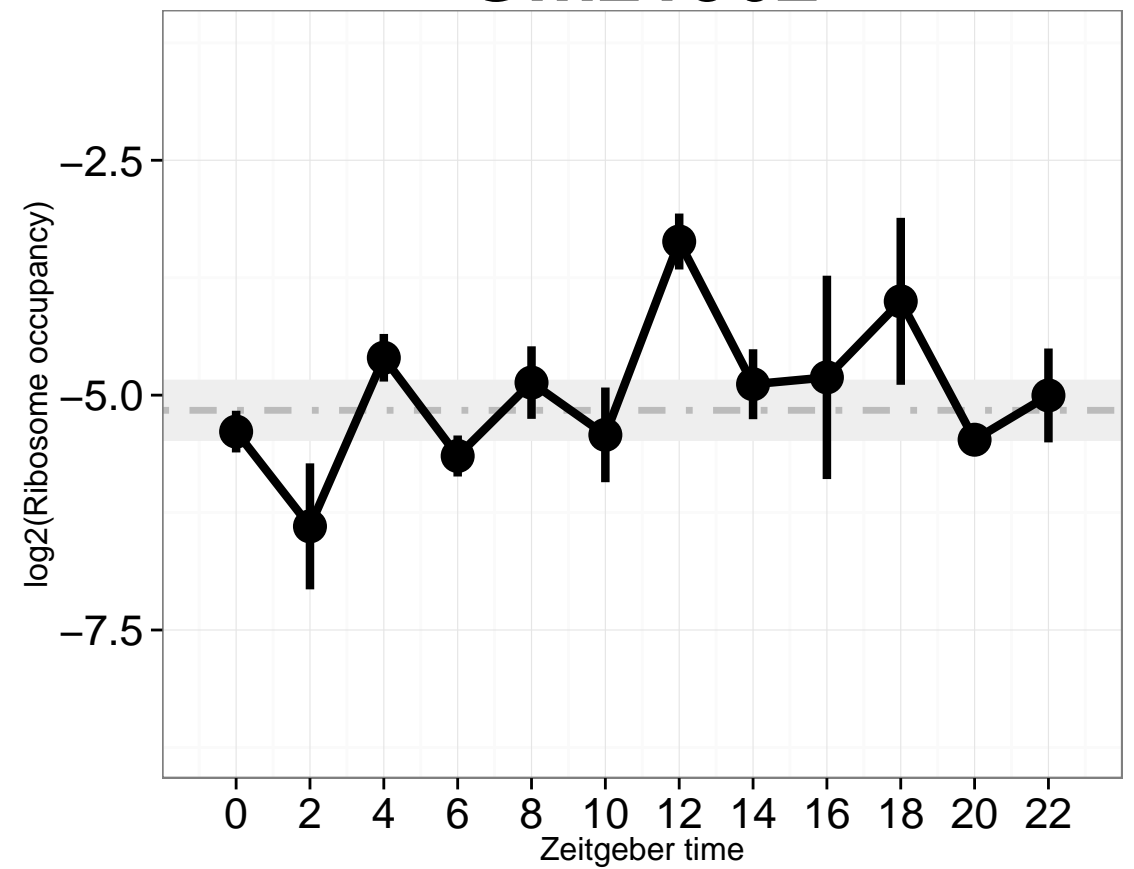

Supplement: SuppDataset_1.zip [file Gm21962_set_A.pdf › Supplemental Dataset 1/A-mRNA_nonrhyth_translation_nonrhyth/Gm21962_set_A.pdf]

# Gm21967

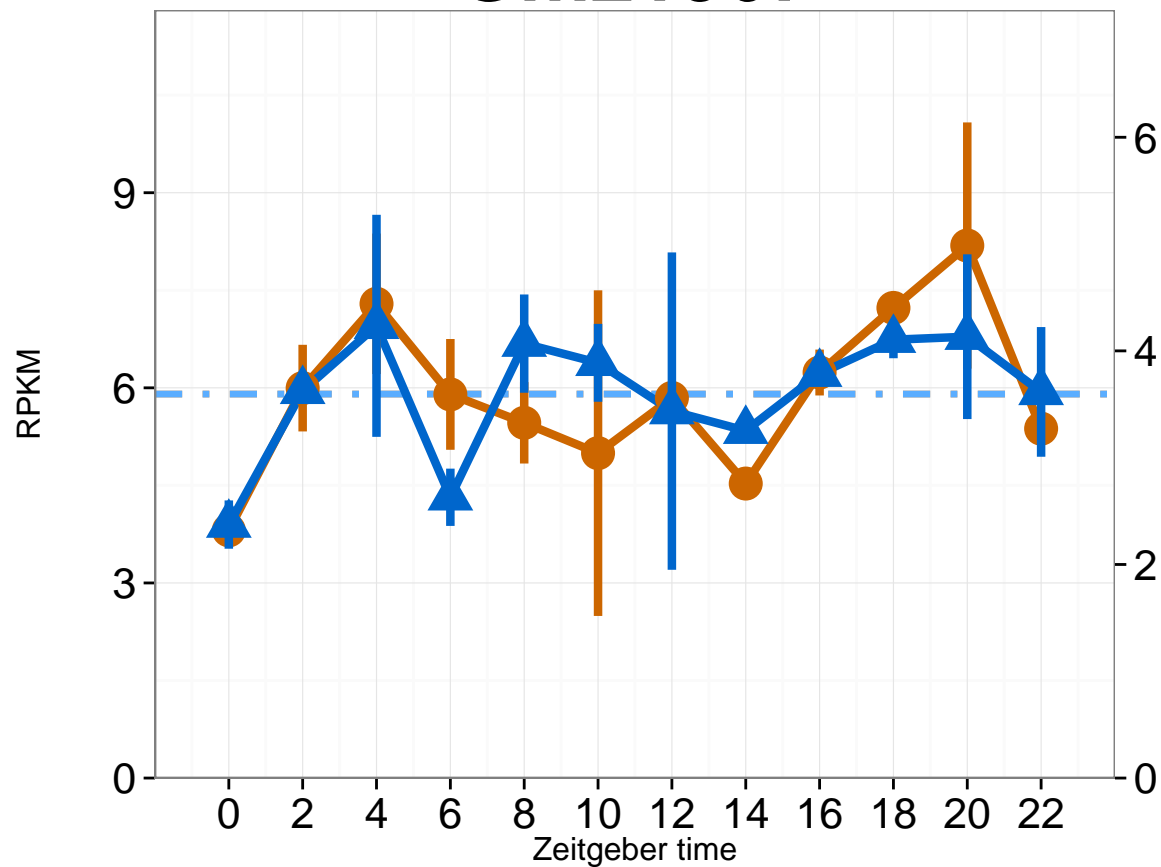

# Gm21967

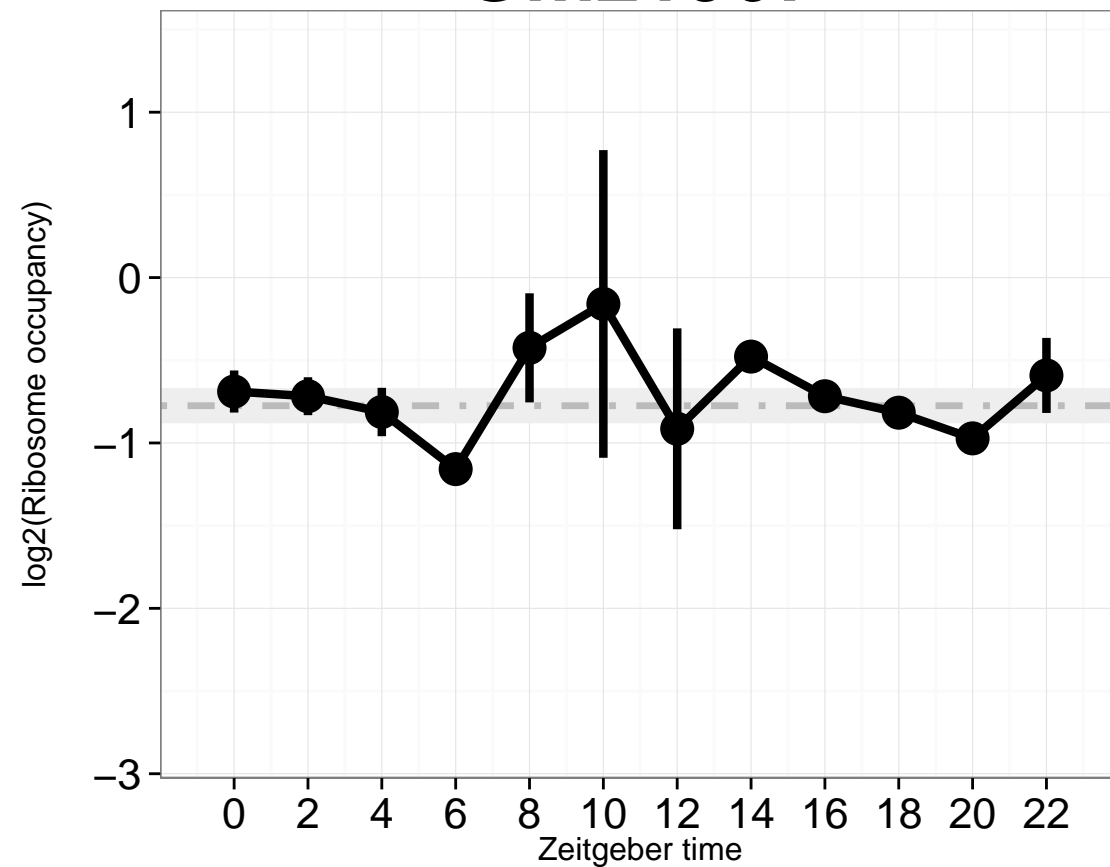

Supplement: SuppDataset_1.zip [file Gm21967_set_A.pdf › Supplemental Dataset 1/A-mRNA_nonrhyth_translation_nonrhyth/Gm21967_set_A.pdf]

## Gm21992

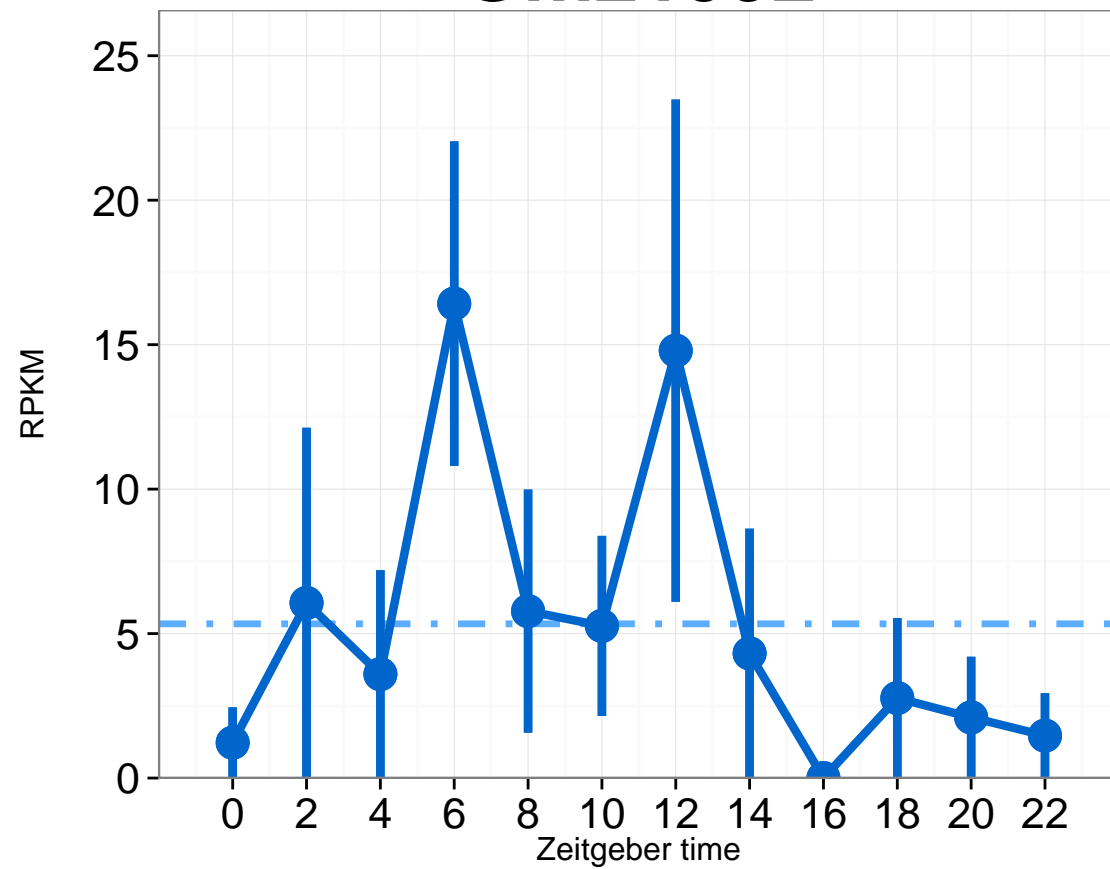

## Gm21992 log2(Ribosome occupancy)

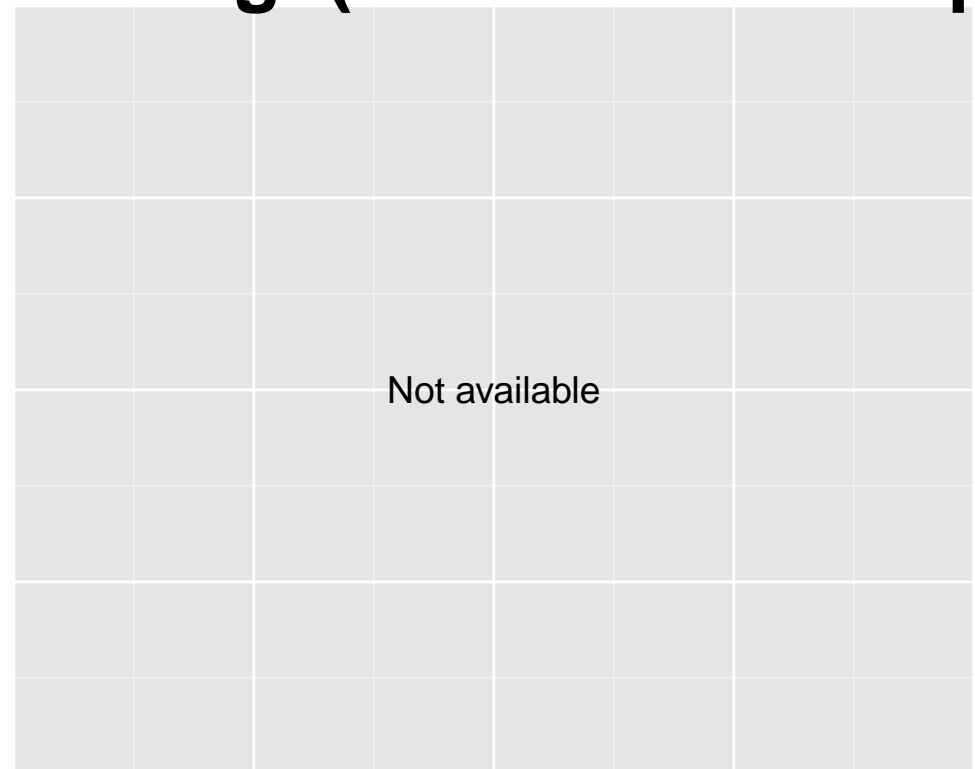

Supplement: SuppDataset_1.zip [file Gm21992_set_A.pdf › Supplemental Dataset 1/A-mRNA_nonrhyth_translation_nonrhyth/Gm21992_set_A.pdf]

# Gm21994

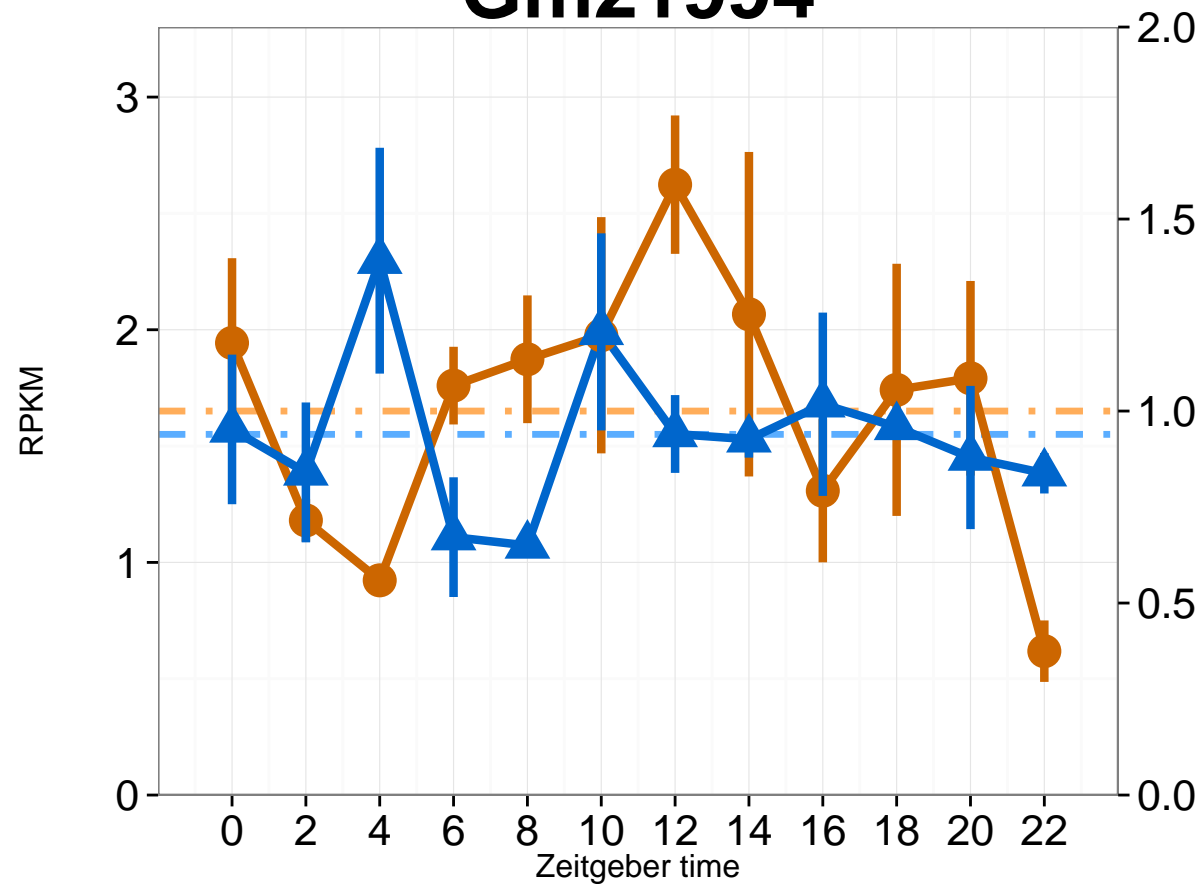

# Gm21994

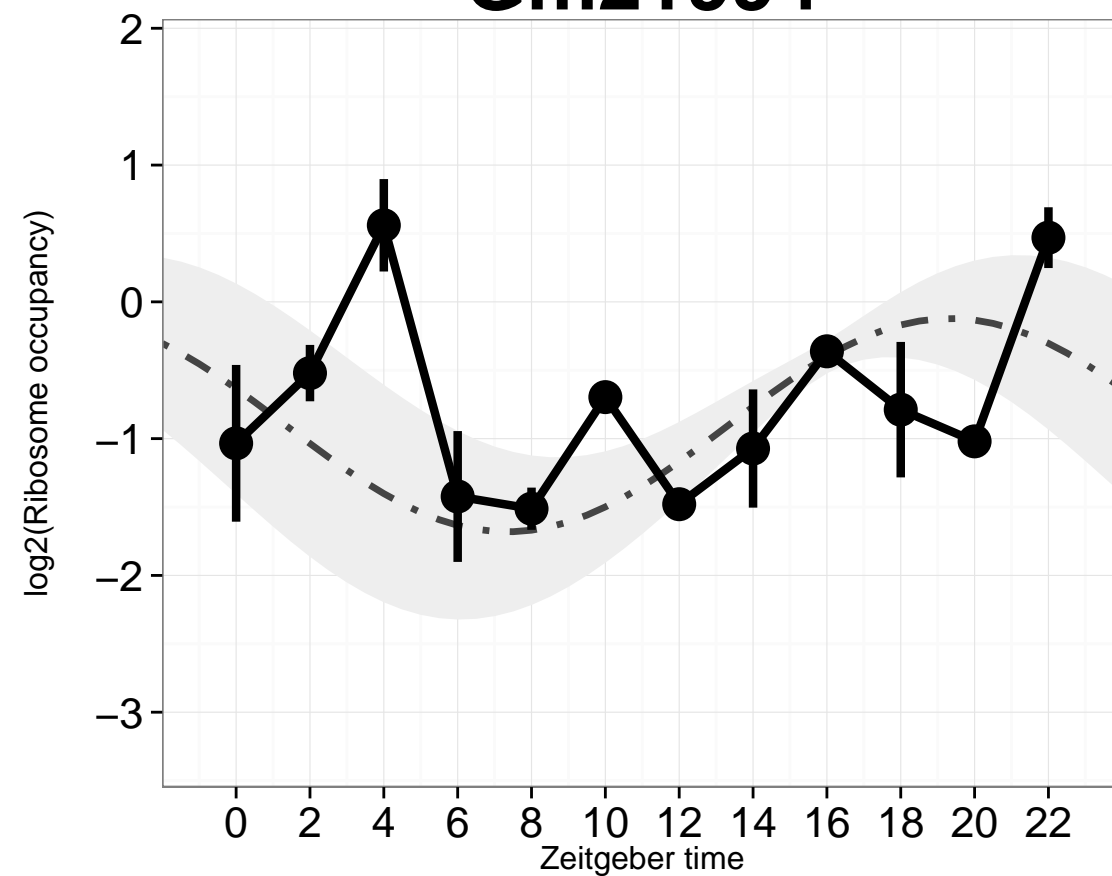

Supplement: SuppDataset_1.zip [file Gm21994_set_A.pdf › Supplemental Dataset 1/A-mRNA_nonrhyth_translation_nonrhyth/Gm21994_set_A.pdf]

## Gm2382

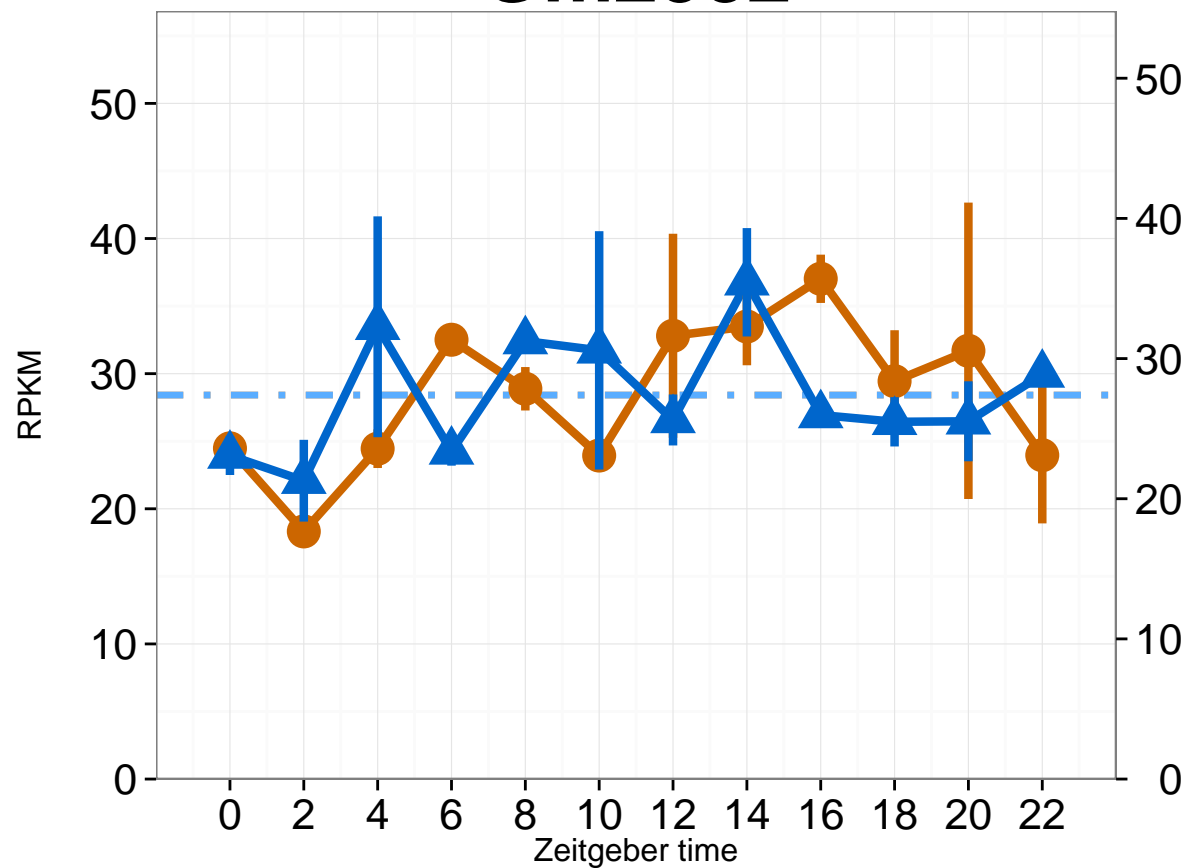

## Gm2382

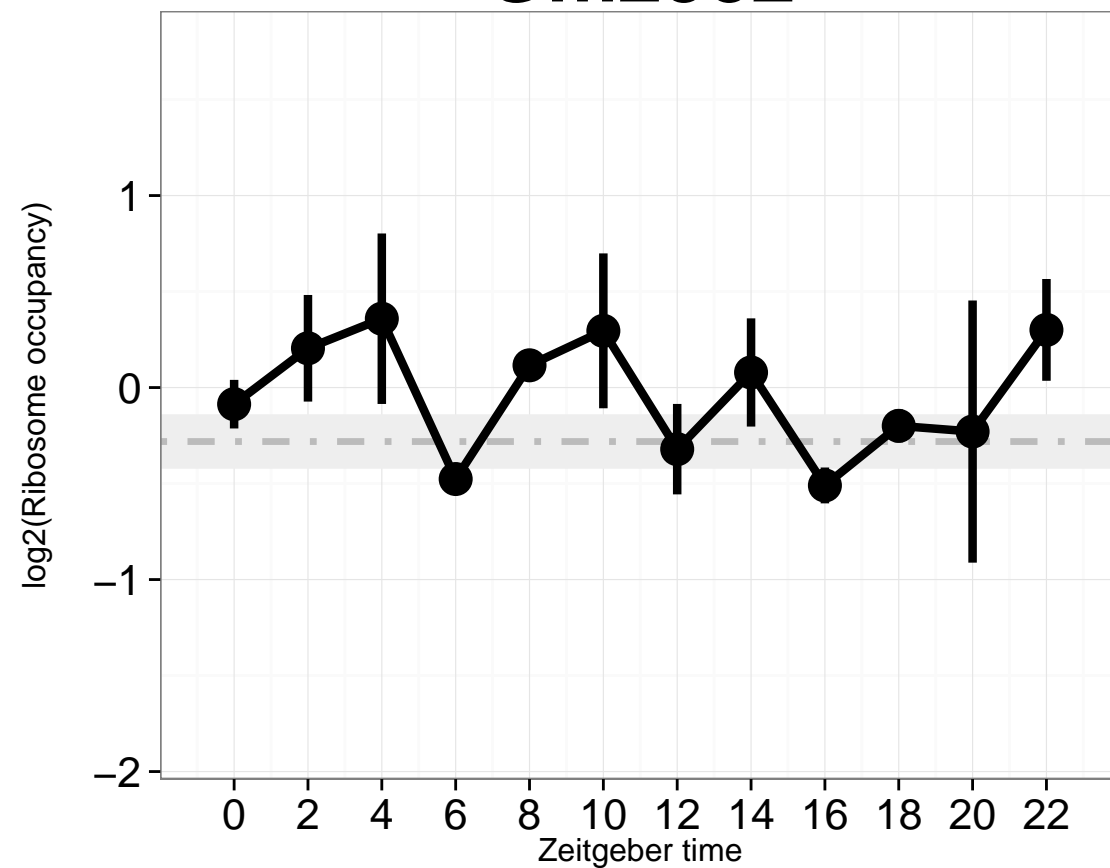

Supplement: SuppDataset_1.zip [file Gm2382_set_A.pdf › Supplemental Dataset 1/A-mRNA_nonrhyth_translation_nonrhyth/Gm2382_set_A.pdf]

# Gm2a

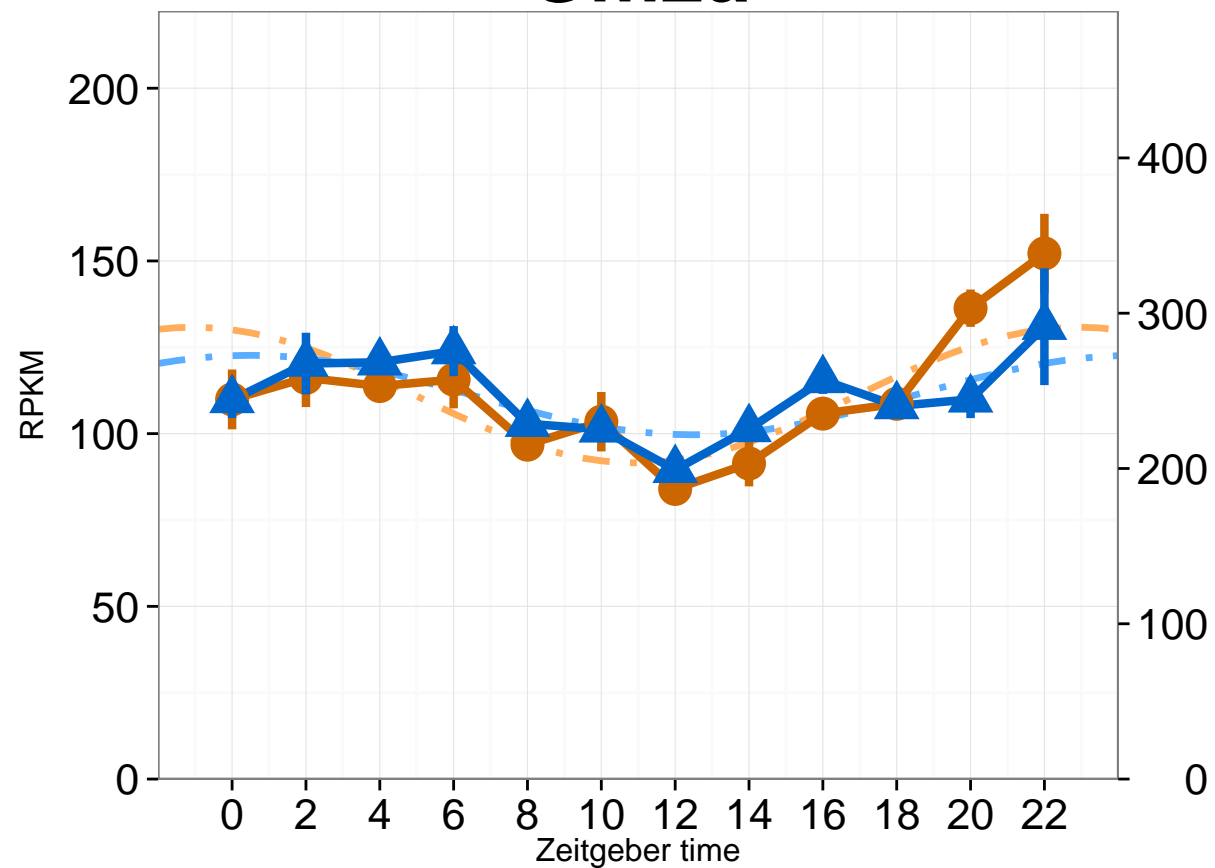

# Gm2a

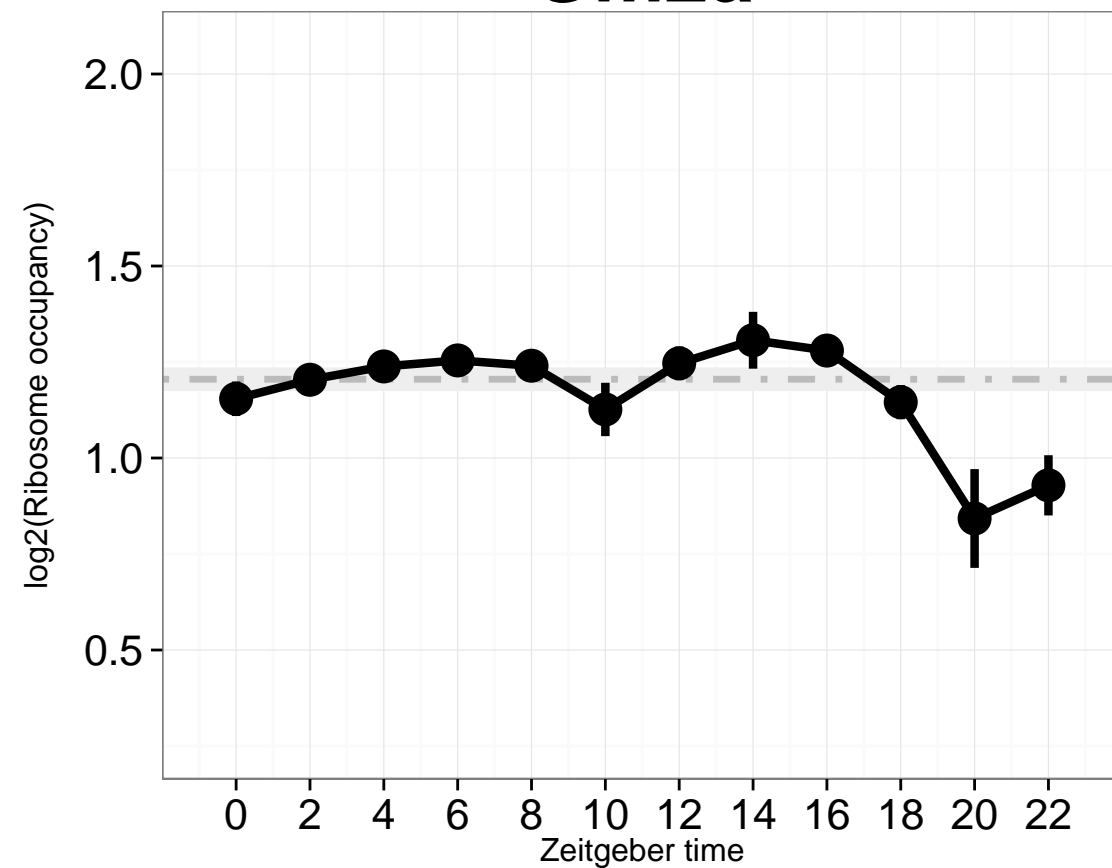

Supplement: SuppDataset_1.zip [file Gm2a_set_A.pdf › Supplemental Dataset 1/A-mRNA_nonrhyth_translation_nonrhyth/Gm2a_set_A.pdf]

# Gm340

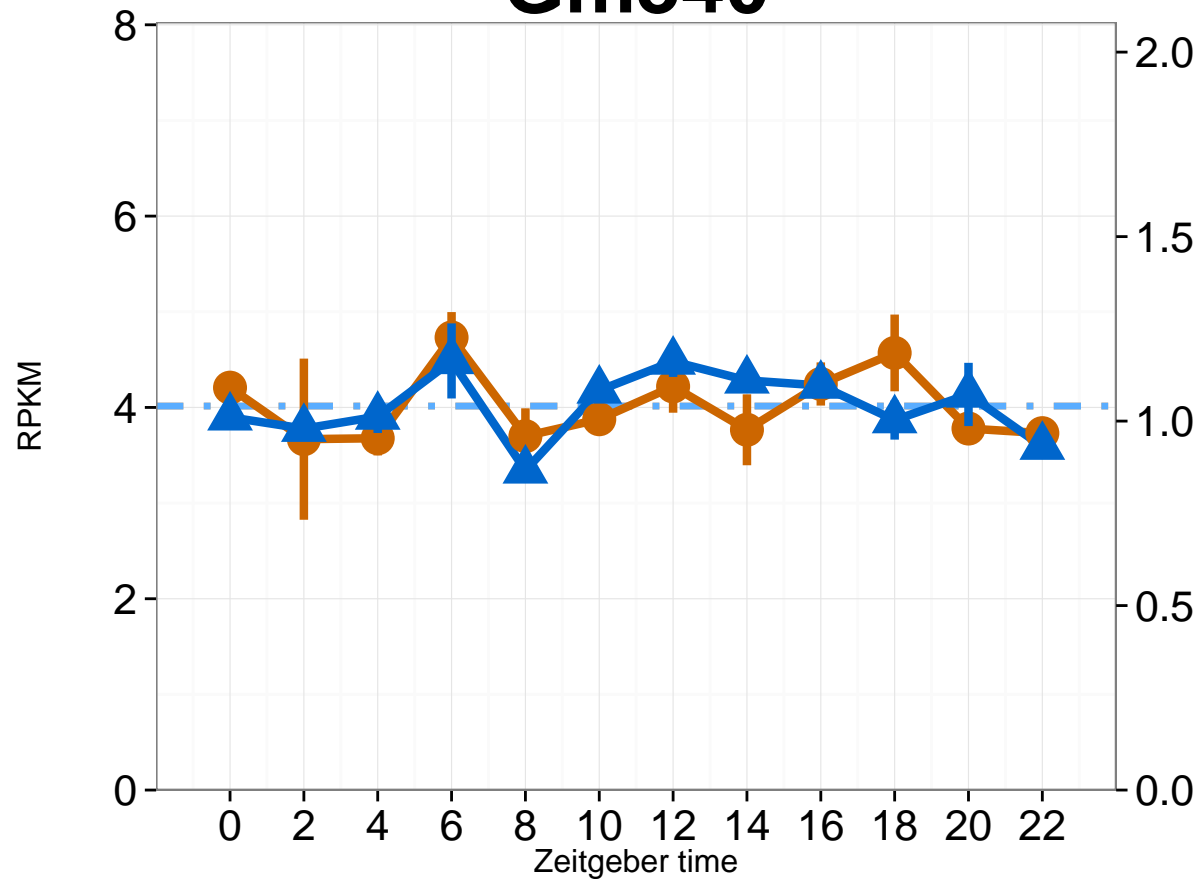

# Gm340

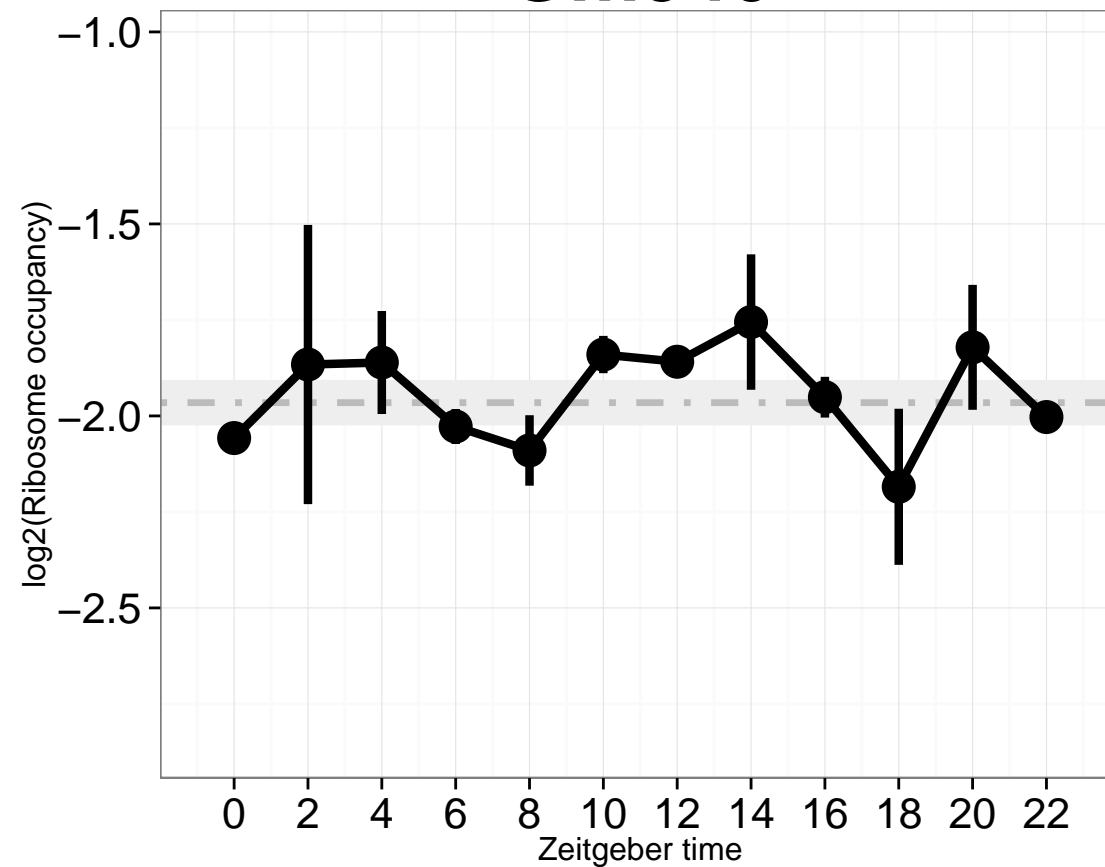

Supplement: SuppDataset_1.zip [file Gm340_set_A.pdf › Supplemental Dataset 1/A-mRNA_nonrhyth_translation_nonrhyth/Gm340_set_A.pdf]

# Gm4204

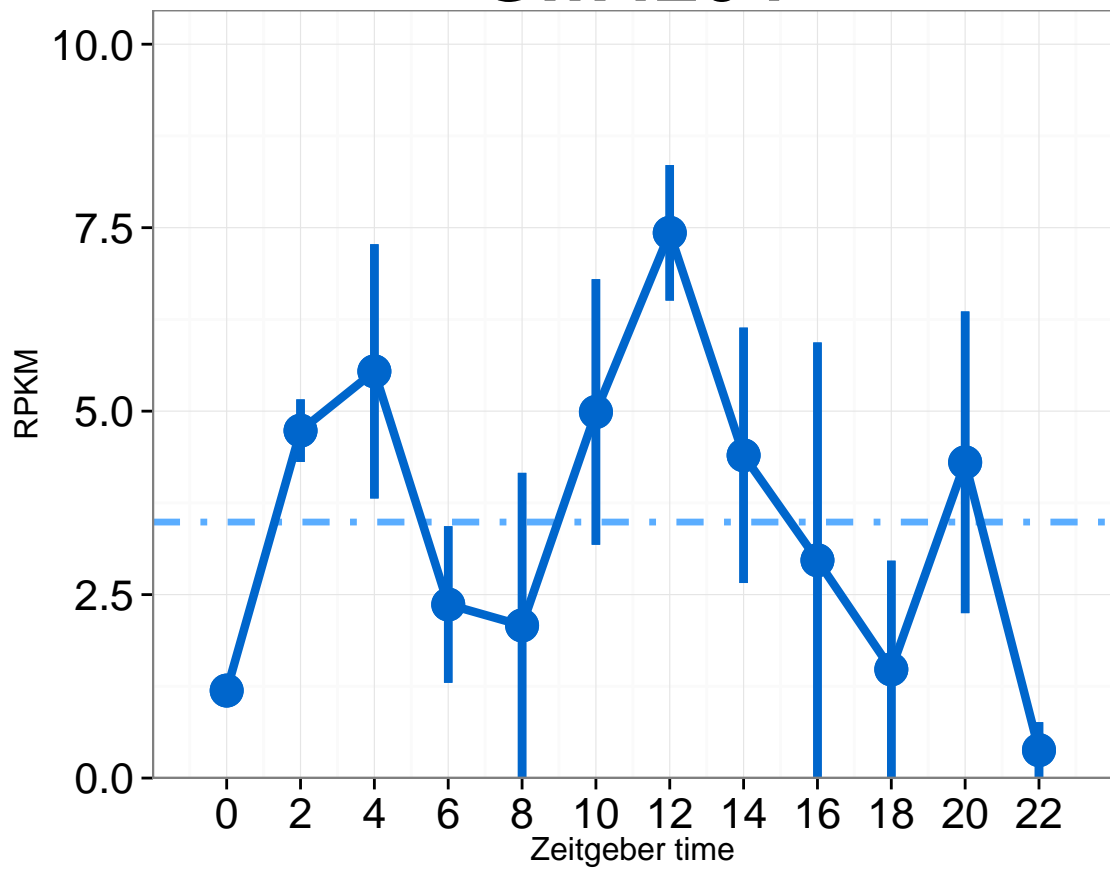

# Gm4204 log2(Ribosome occupanc

Supplement: SuppDataset_1.zip [file Gm4204_set_A.pdf › Supplemental Dataset 1/A-mRNA_nonrhyth_translation_nonrhyth/Gm4204_set_A.pdf]

# Gm4540

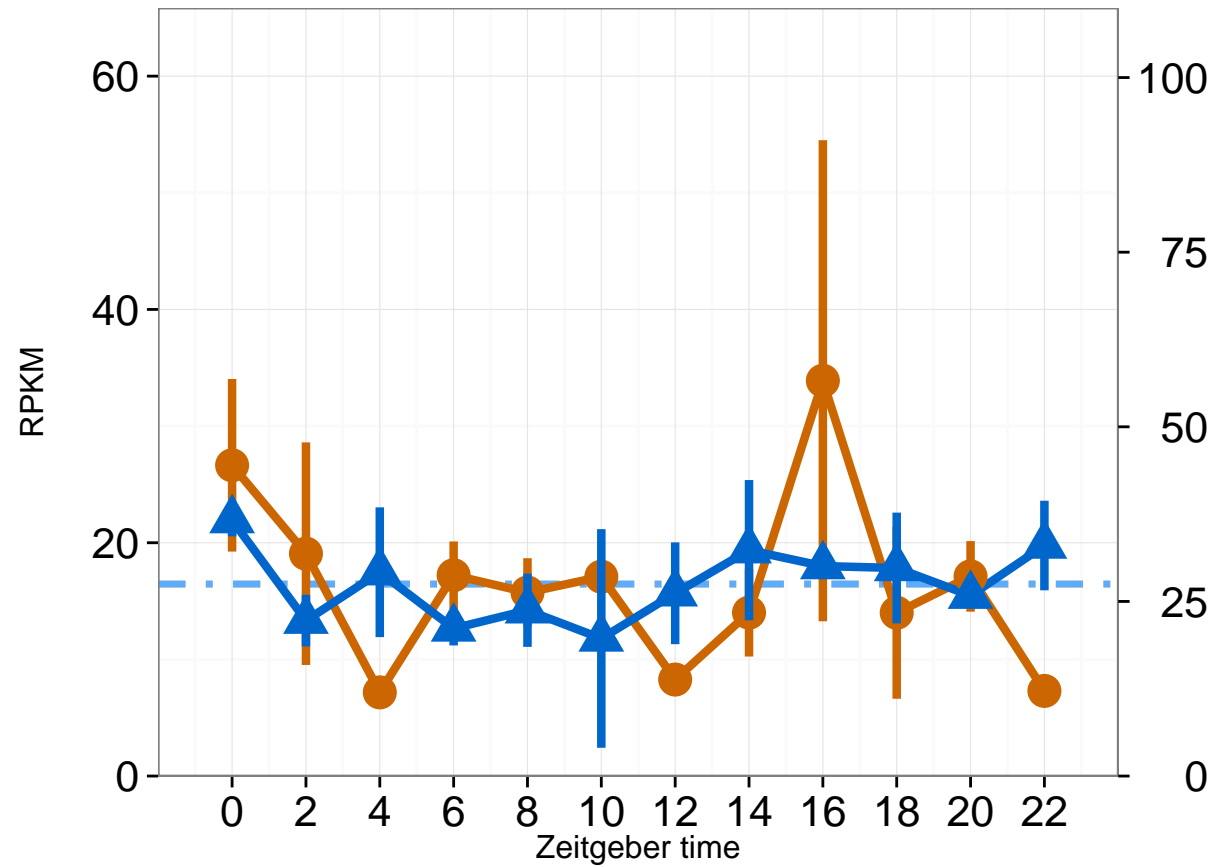

# Gm4540

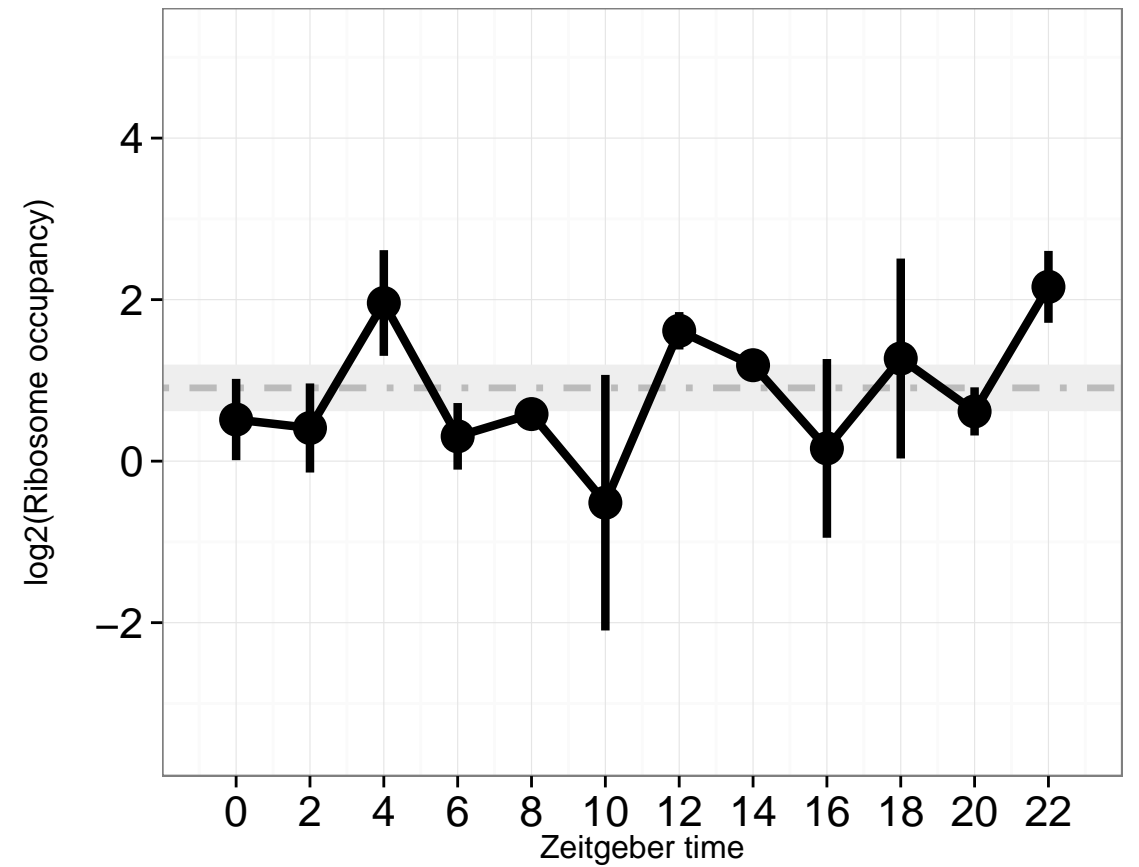

Supplement: SuppDataset_1.zip [file Gm4540_set_A.pdf › Supplemental Dataset 1/A-mRNA_nonrhyth_translation_nonrhyth/Gm4540_set_A.pdf]

## Gm4788

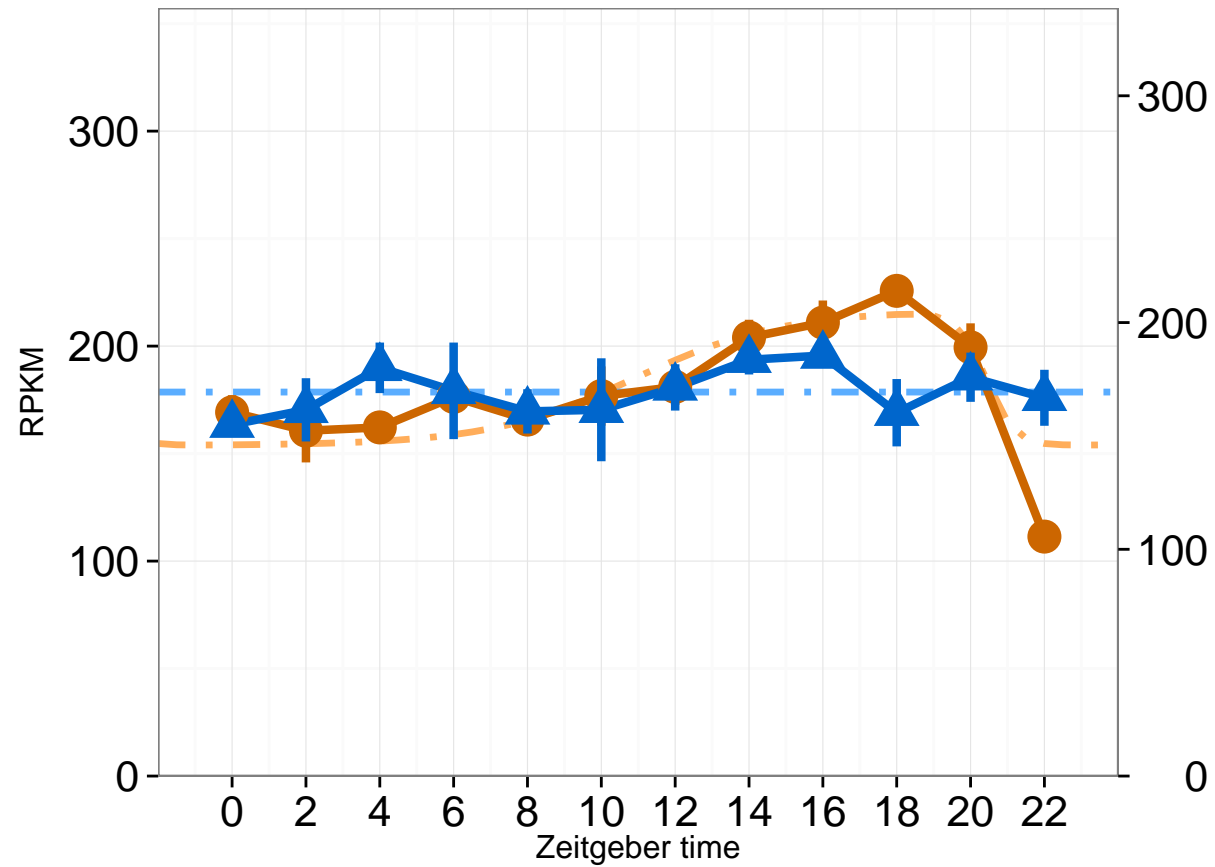

## Gm4788

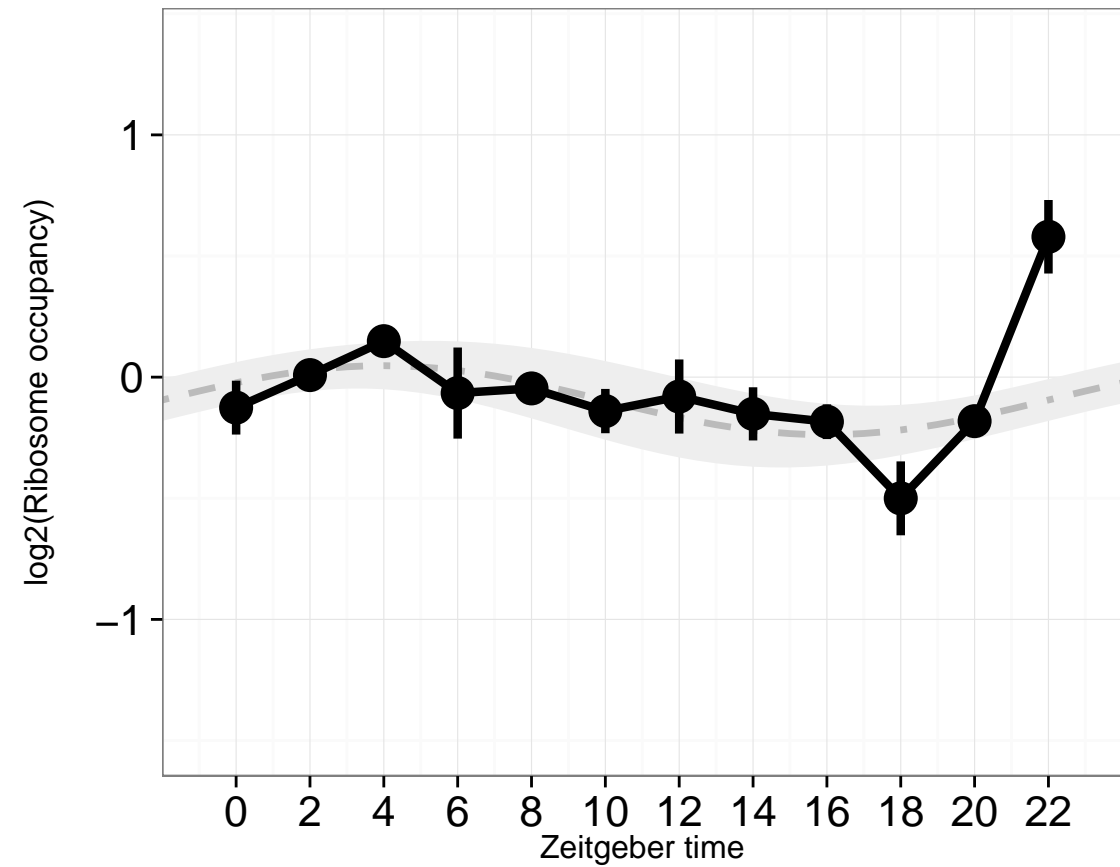

Supplement: SuppDataset_1.zip [file Gm4788_set_A.pdf › Supplemental Dataset 1/A-mRNA_nonrhyth_translation_nonrhyth/Gm4788_set_A.pdf]

**Gm4841 TR**

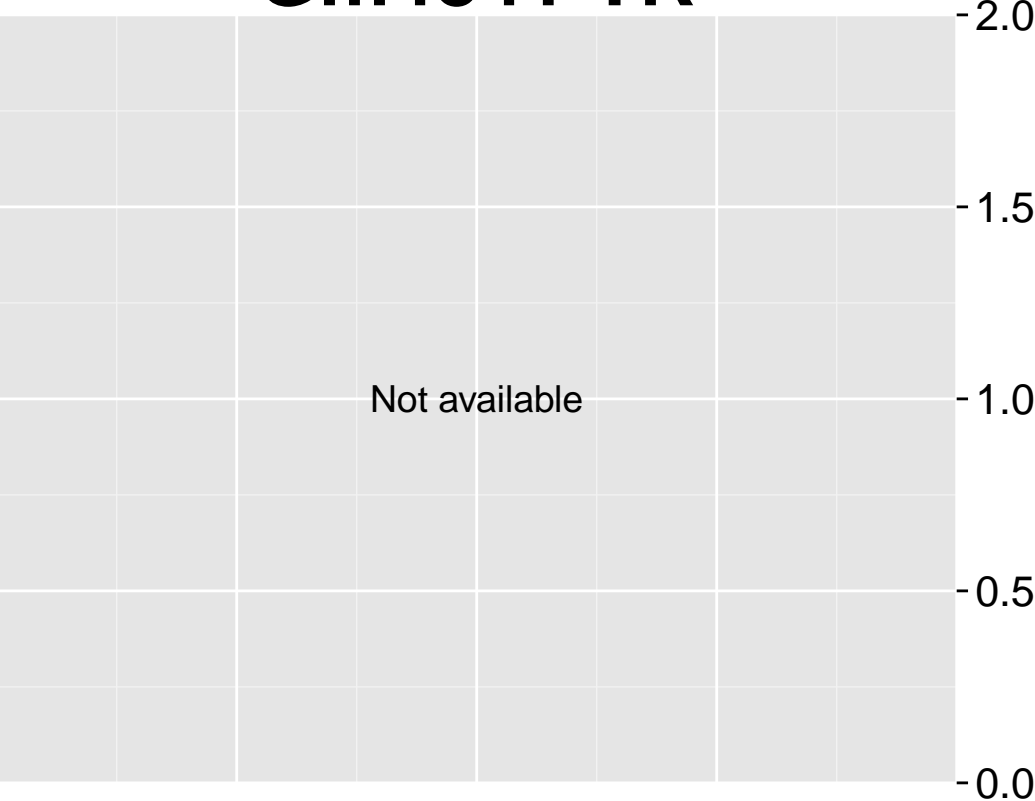

**Gm4841 log2(Ribosome occupanc**

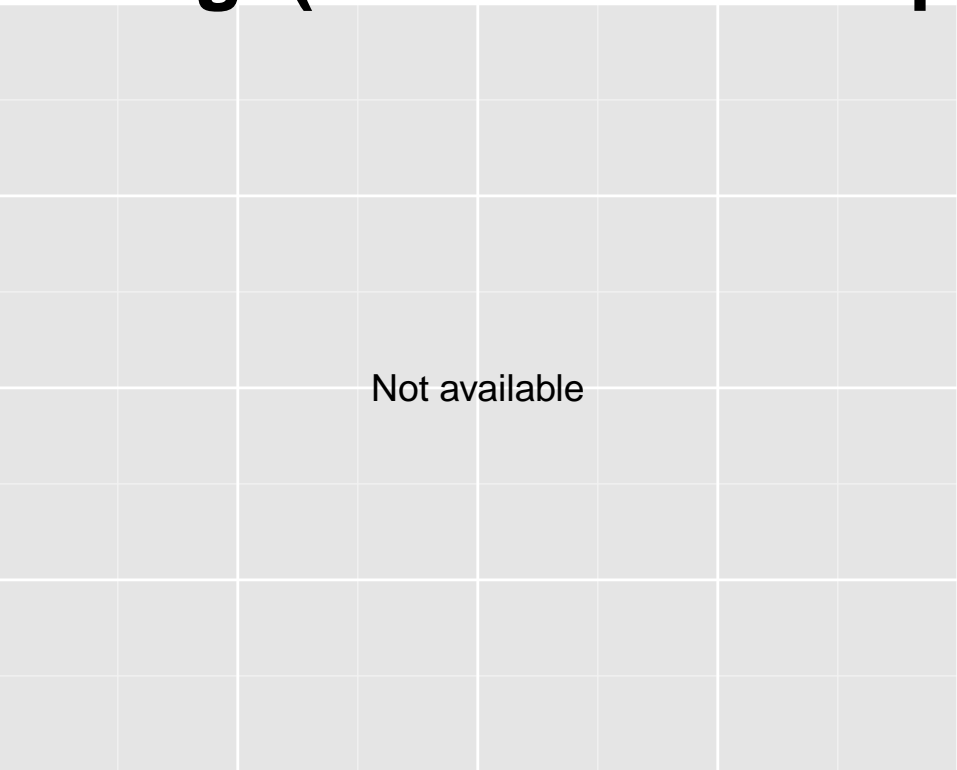

Supplement: SuppDataset_1.zip [file Gm4841_set_A.pdf › Supplemental Dataset 1/A-mRNA_nonrhyth_translation_nonrhyth/Gm4841_set_A.pdf]

## Gm4924

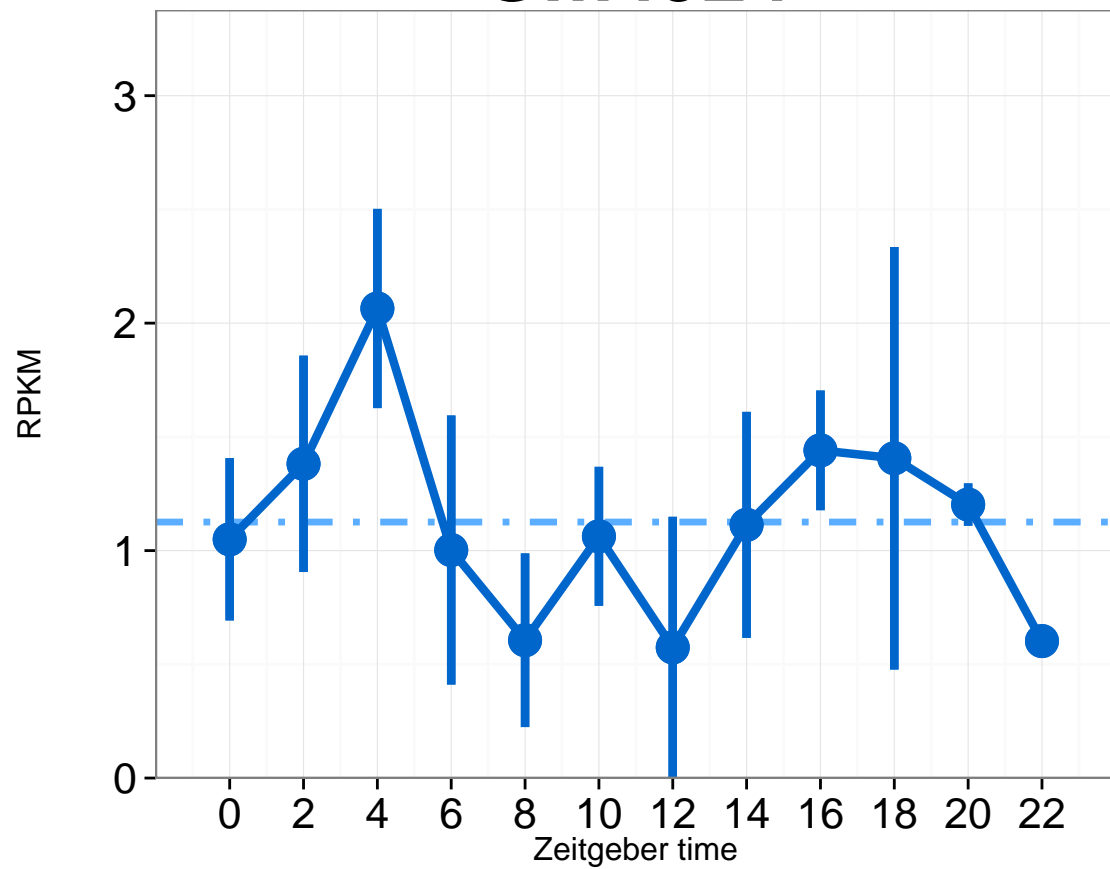

## Gm4924 log2(Ribosome occupanc

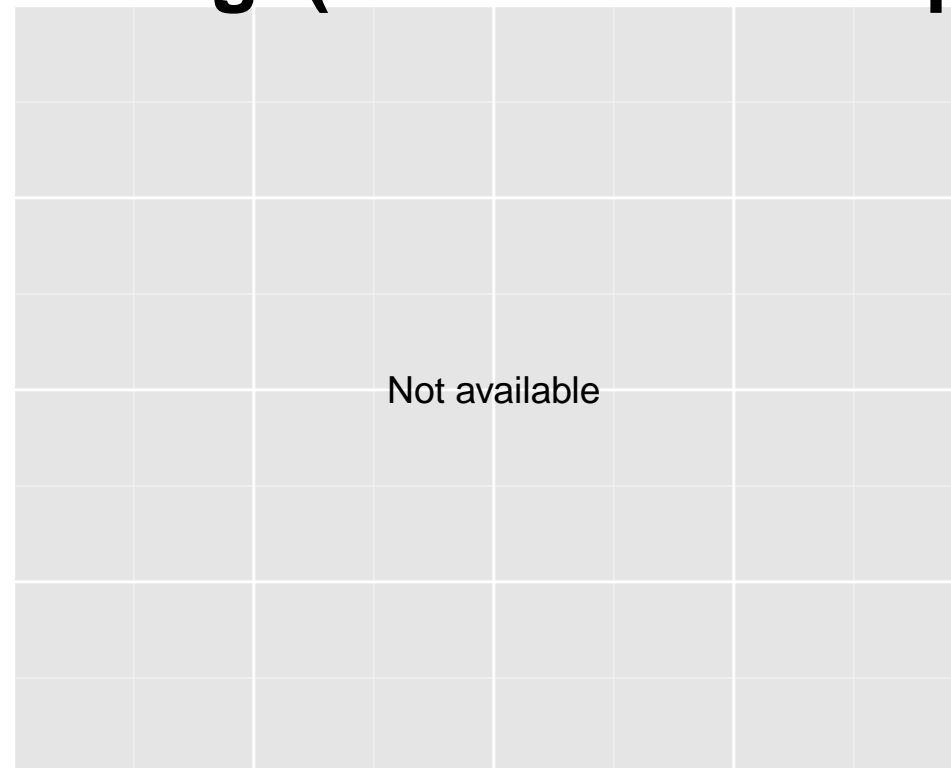

Supplement: SuppDataset_1.zip [file Gm4924_set_A.pdf › Supplemental Dataset 1/A-mRNA_nonrhyth_translation_nonrhyth/Gm4924_set_A.pdf]

# Gm4944

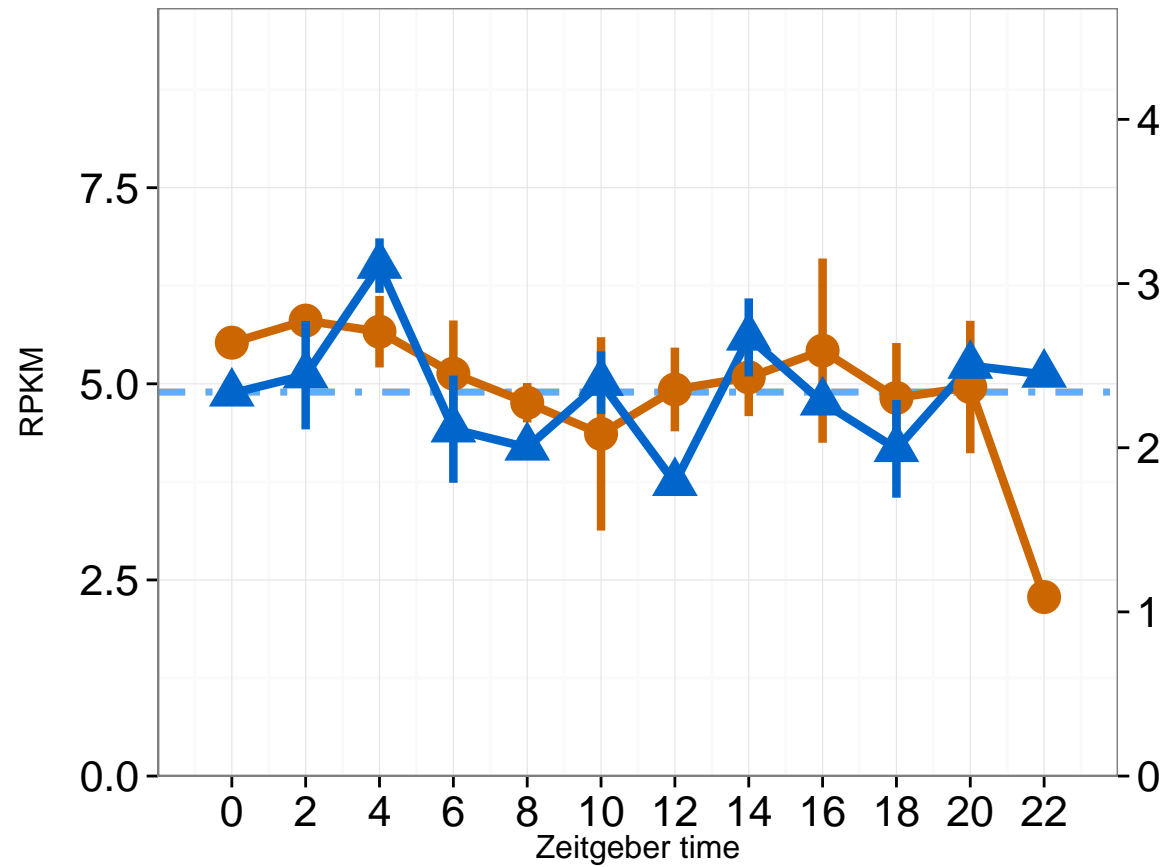

# Gm4944

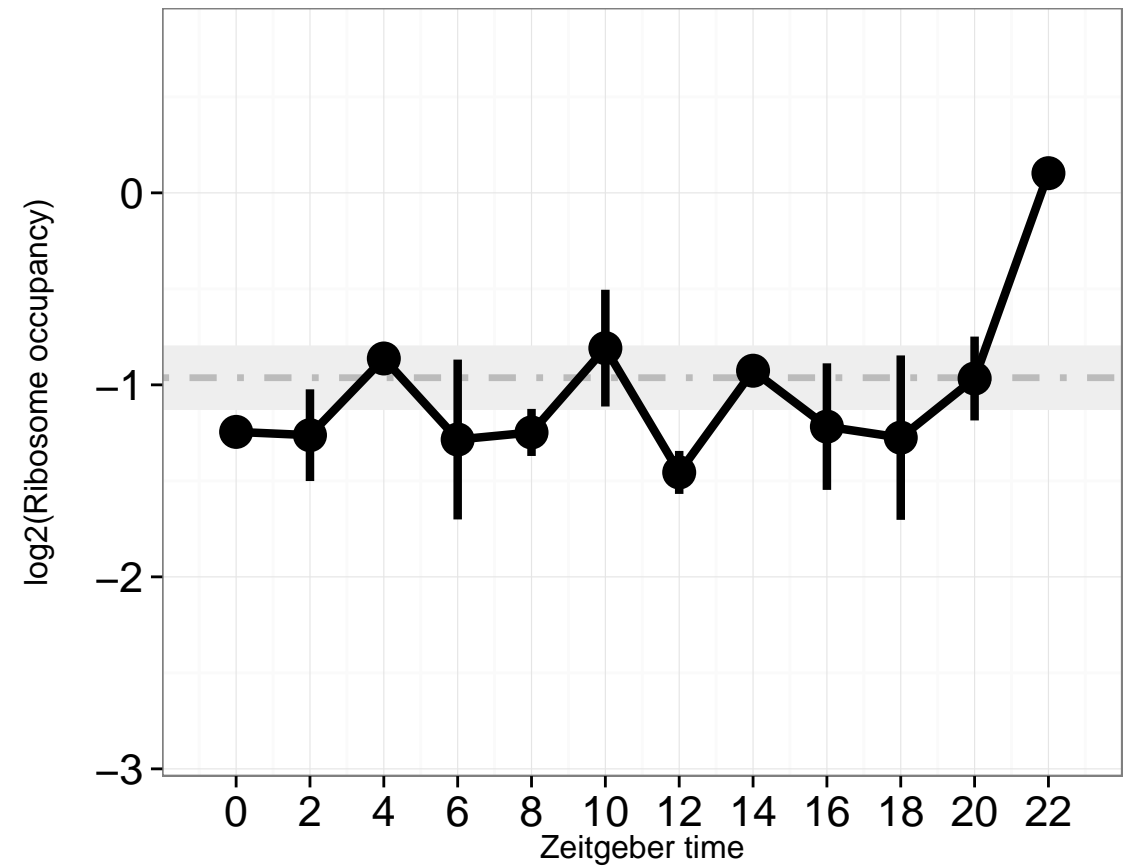

Supplement: SuppDataset_1.zip [file Gm4944_set_A.pdf › Supplemental Dataset 1/A-mRNA_nonrhyth_translation_nonrhyth/Gm4944_set_A.pdf]

# Gm4951

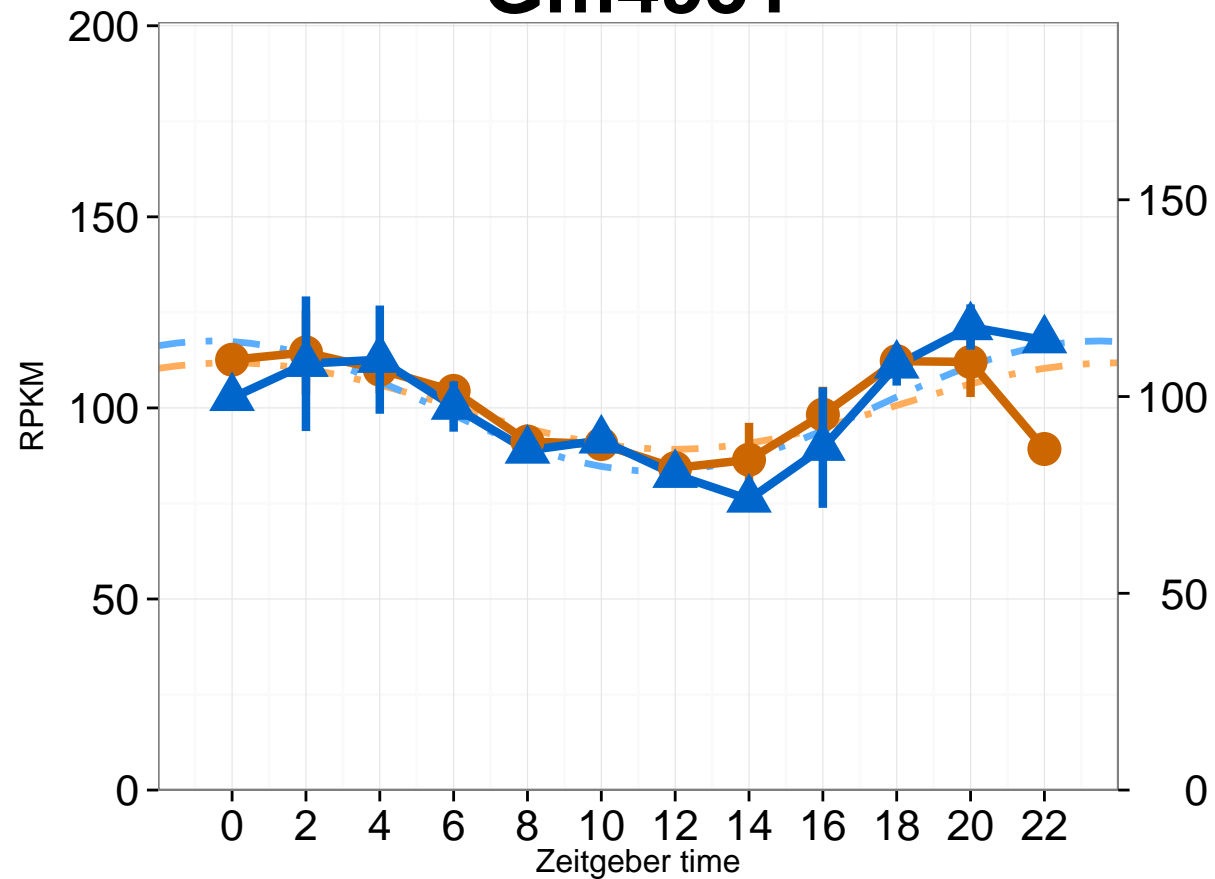

# Gm4951

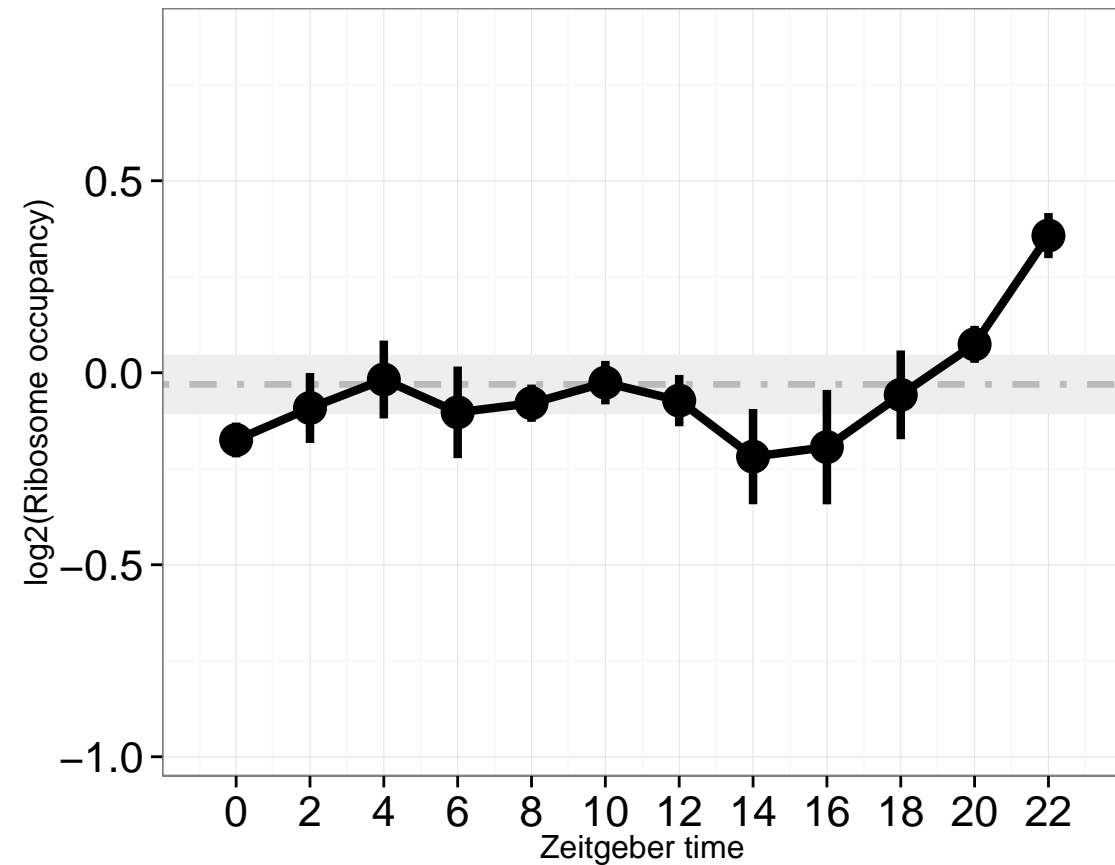

Supplement: SuppDataset_1.zip [file Gm4951_set_A.pdf › Supplemental Dataset 1/A-mRNA_nonrhyth_translation_nonrhyth/Gm4951_set_A.pdf]

## Gm4980

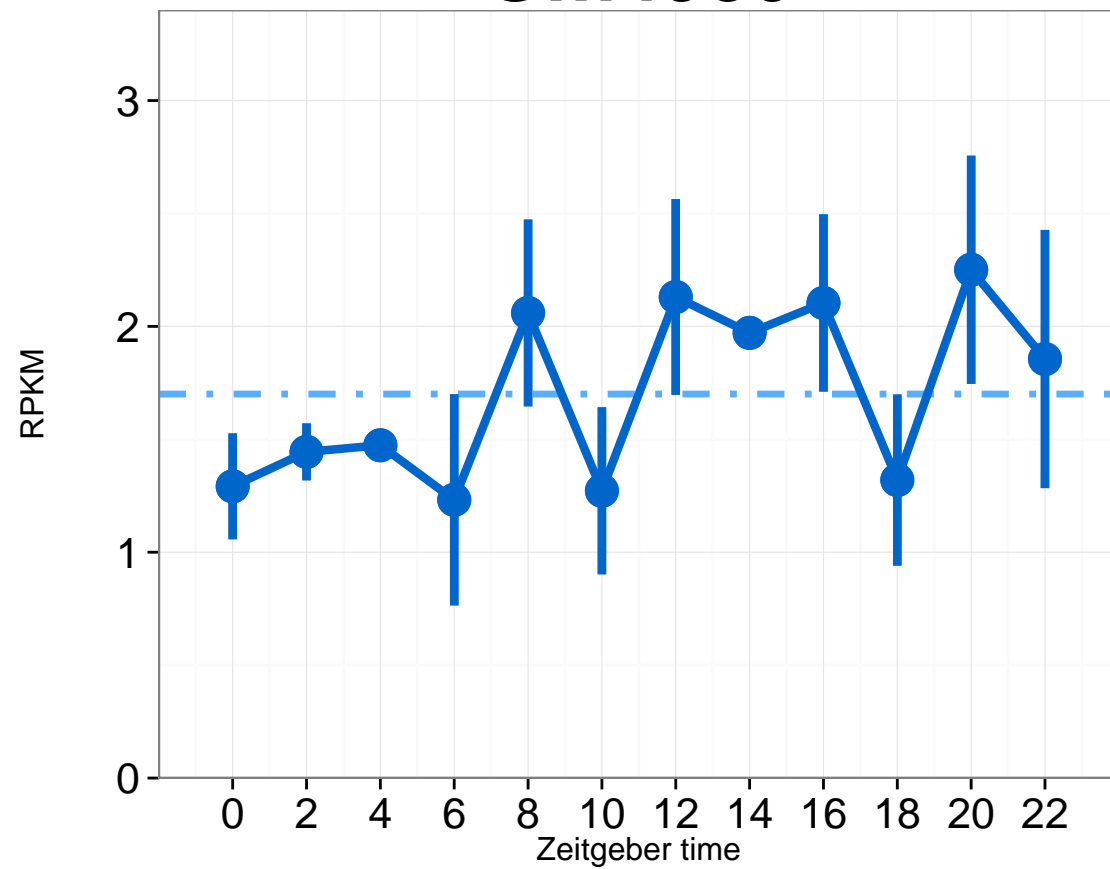

## Gm4980 log2(Ribosome occupanc



Supplement: SuppDataset_1.zip [file Gm4980_set_A.pdf › Supplemental Dataset 1/A-mRNA_nonrhyth_translation_nonrhyth/Gm4980_set_A.pdf]

# Gm5096

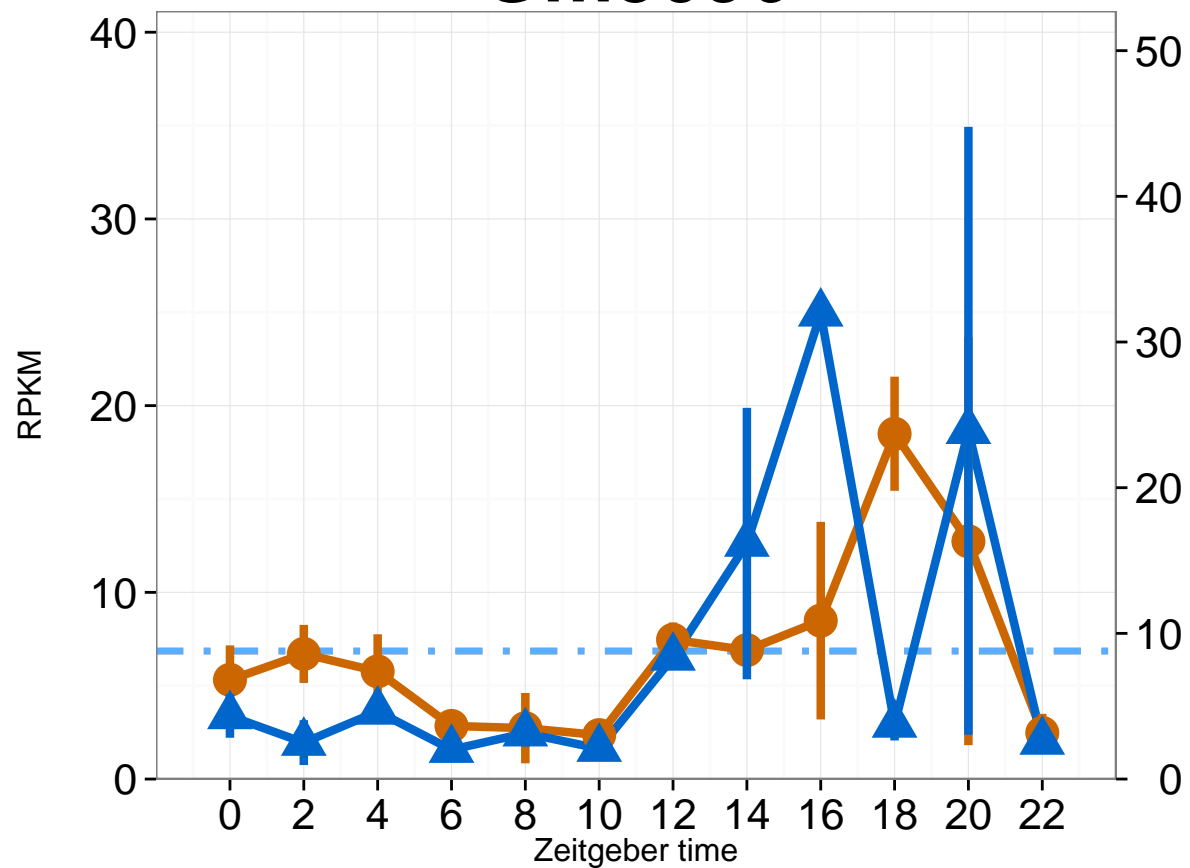

# Gm5096

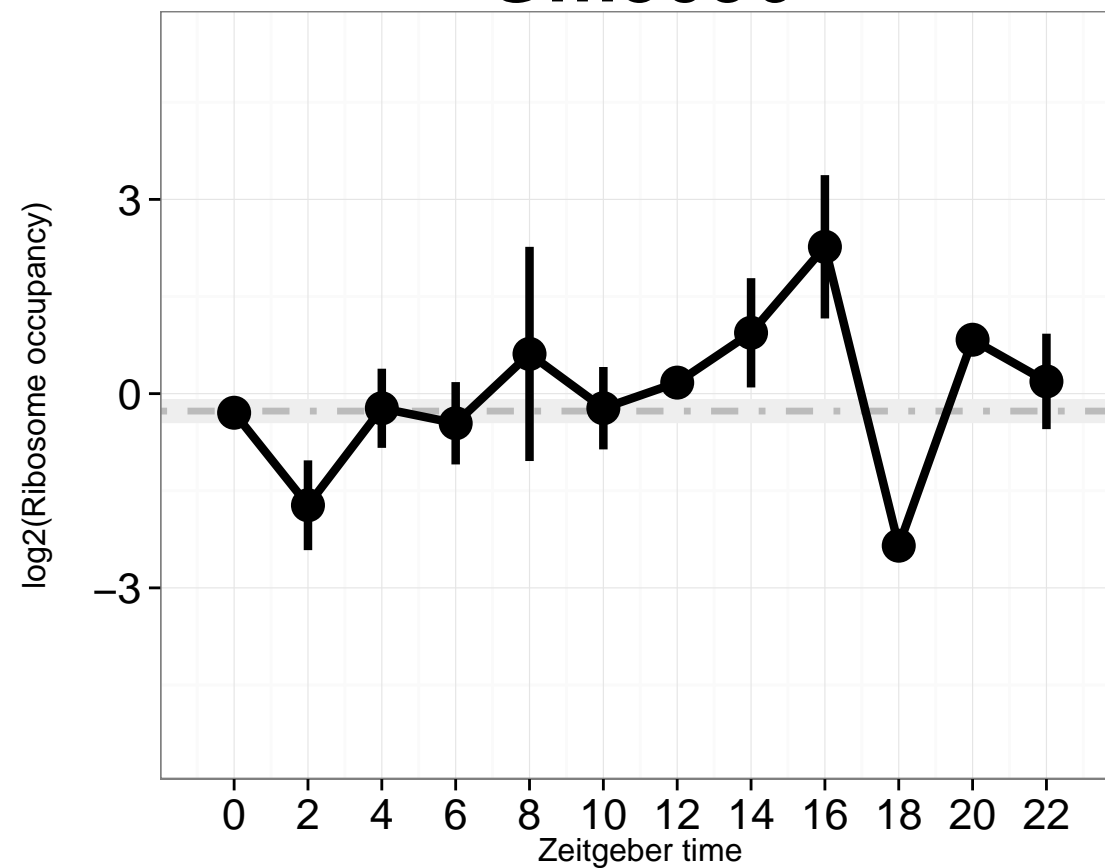

Supplement: SuppDataset_1.zip [file Gm5096_set_A.pdf › Supplemental Dataset 1/A-mRNA_nonrhyth_translation_nonrhyth/Gm5096_set_A.pdf]

# Gm5150

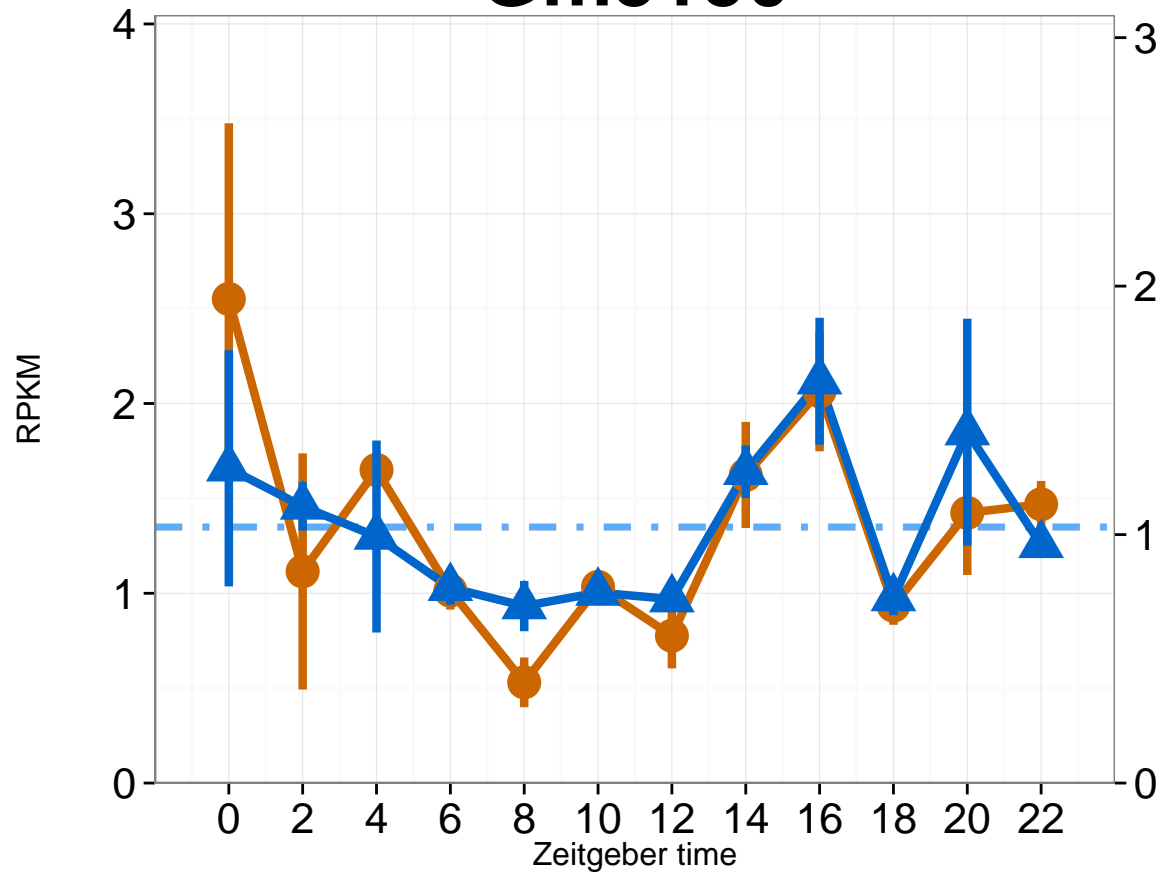

# Gm5150

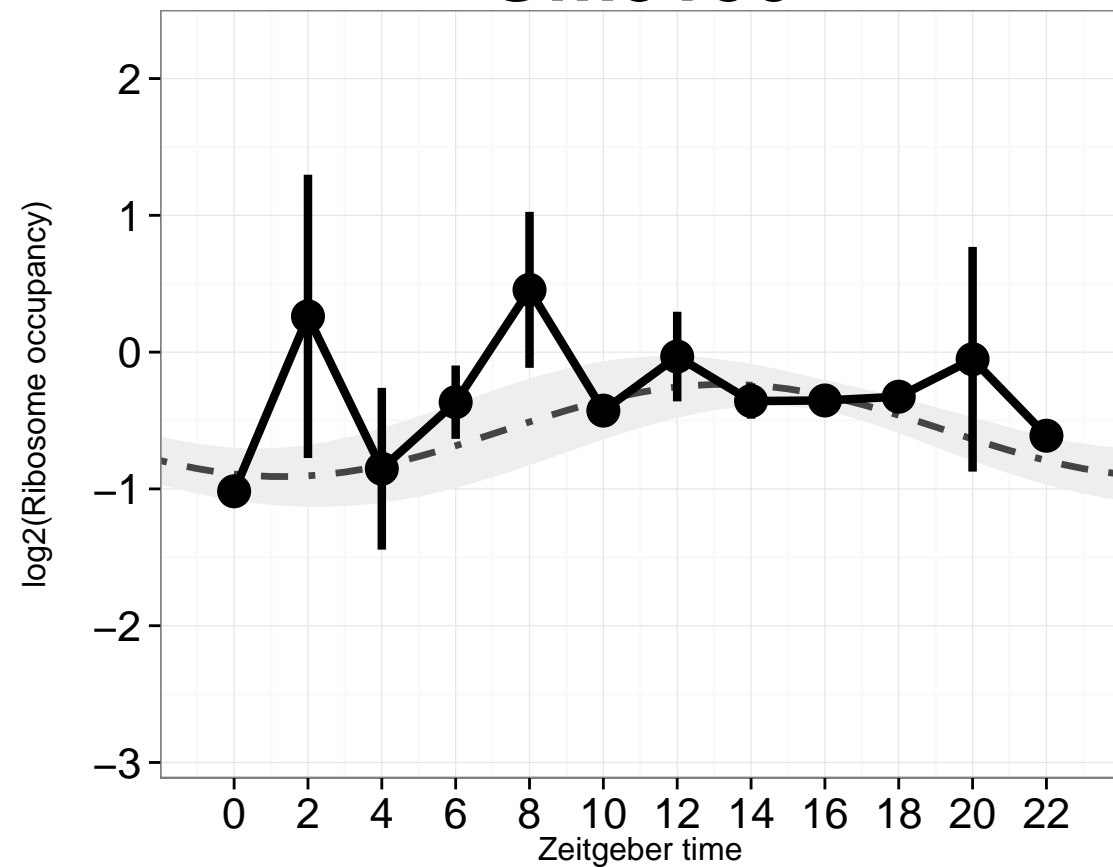

Supplement: SuppDataset_1.zip [file Gm5150_set_A.pdf › Supplemental Dataset 1/A-mRNA_nonrhyth_translation_nonrhyth/Gm5150_set_A.pdf]

## Gm5424

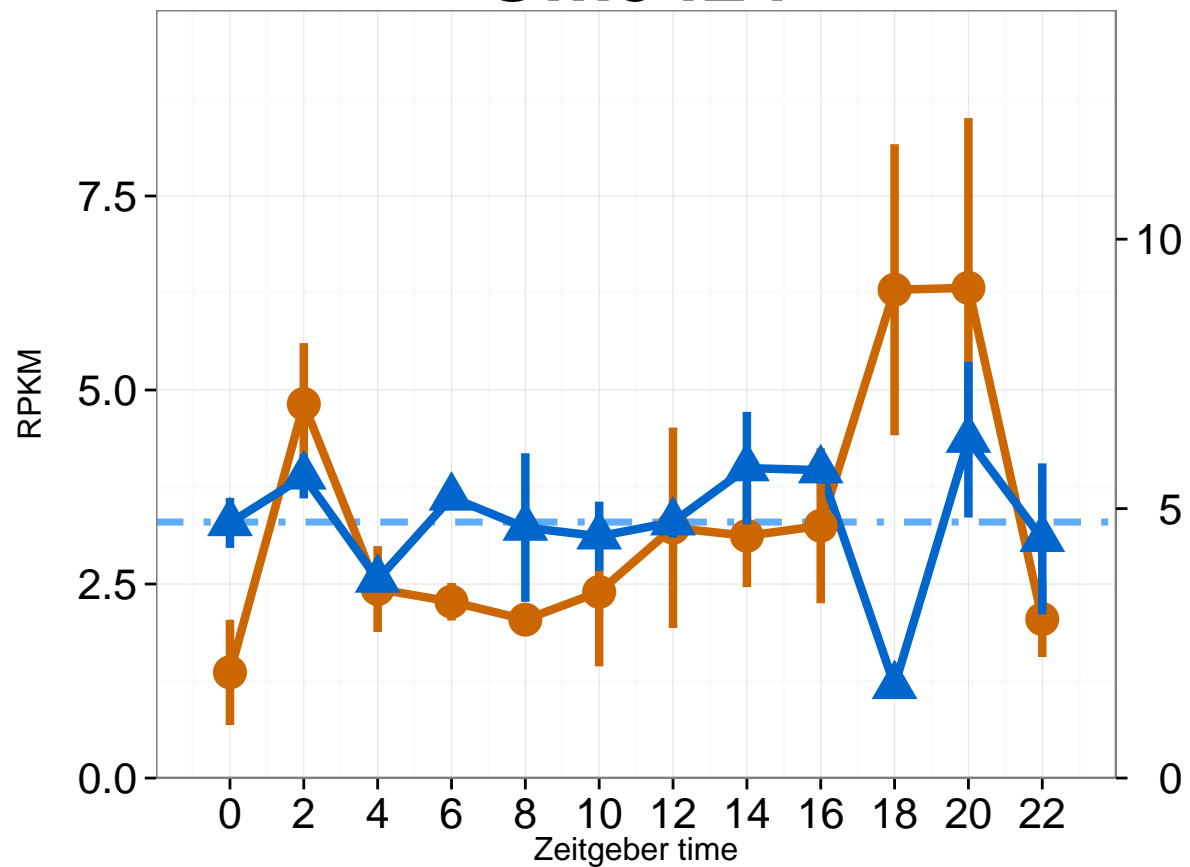

## Gm5424

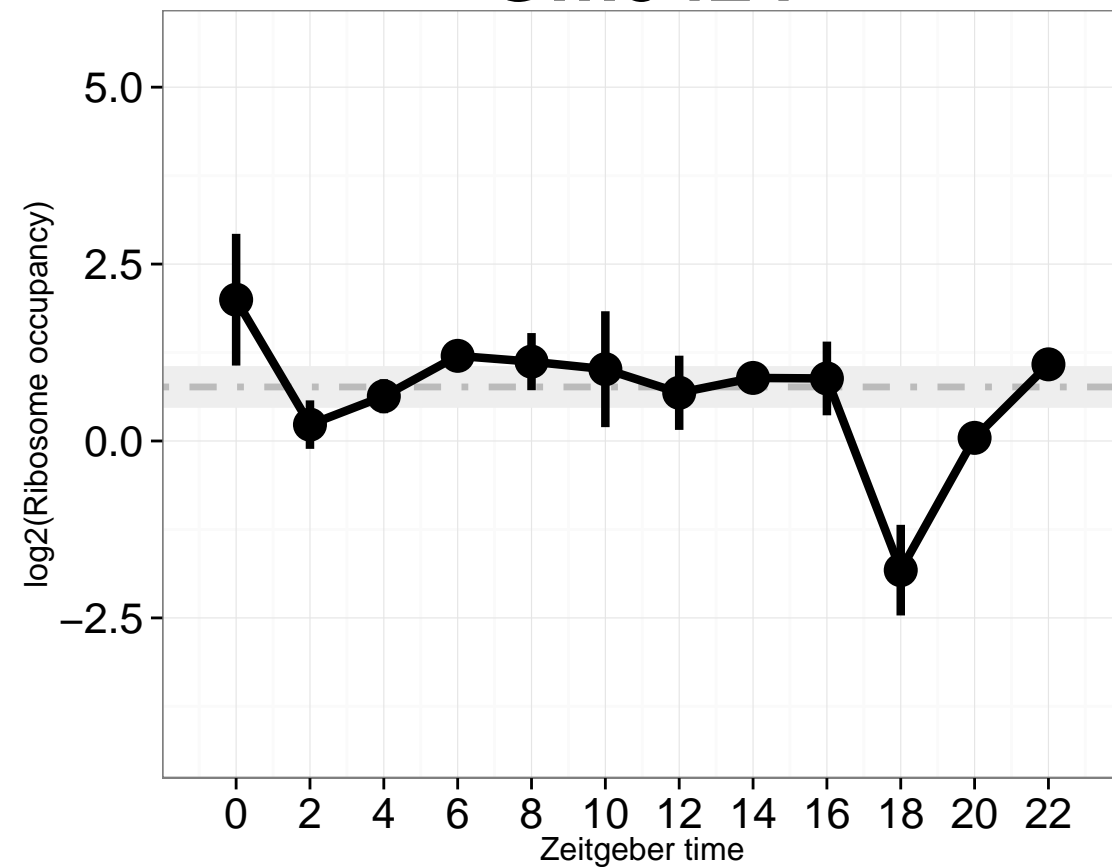

Supplement: SuppDataset_1.zip [file Gm5424_set_A.pdf › Supplemental Dataset 1/A-mRNA_nonrhyth_translation_nonrhyth/Gm5424_set_A.pdf]

# Gm5431

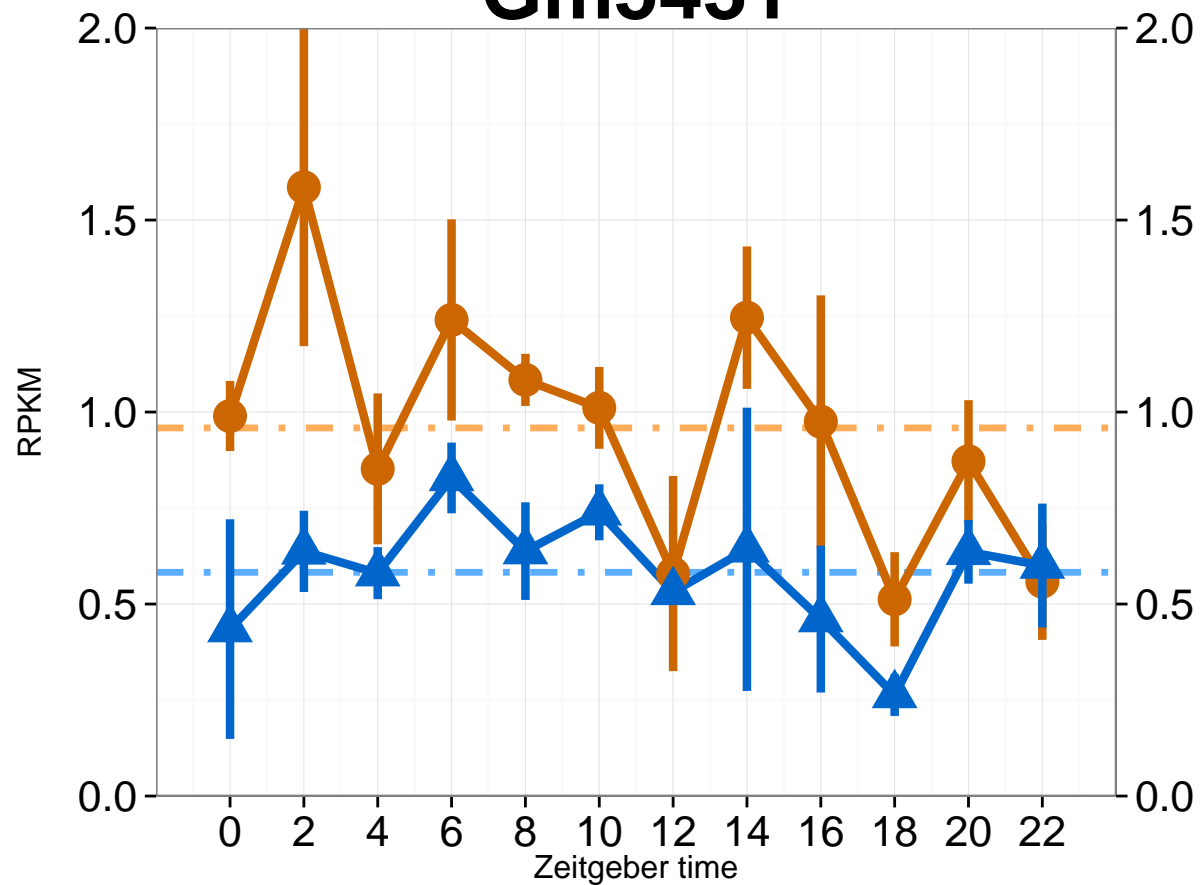

# Gm5431

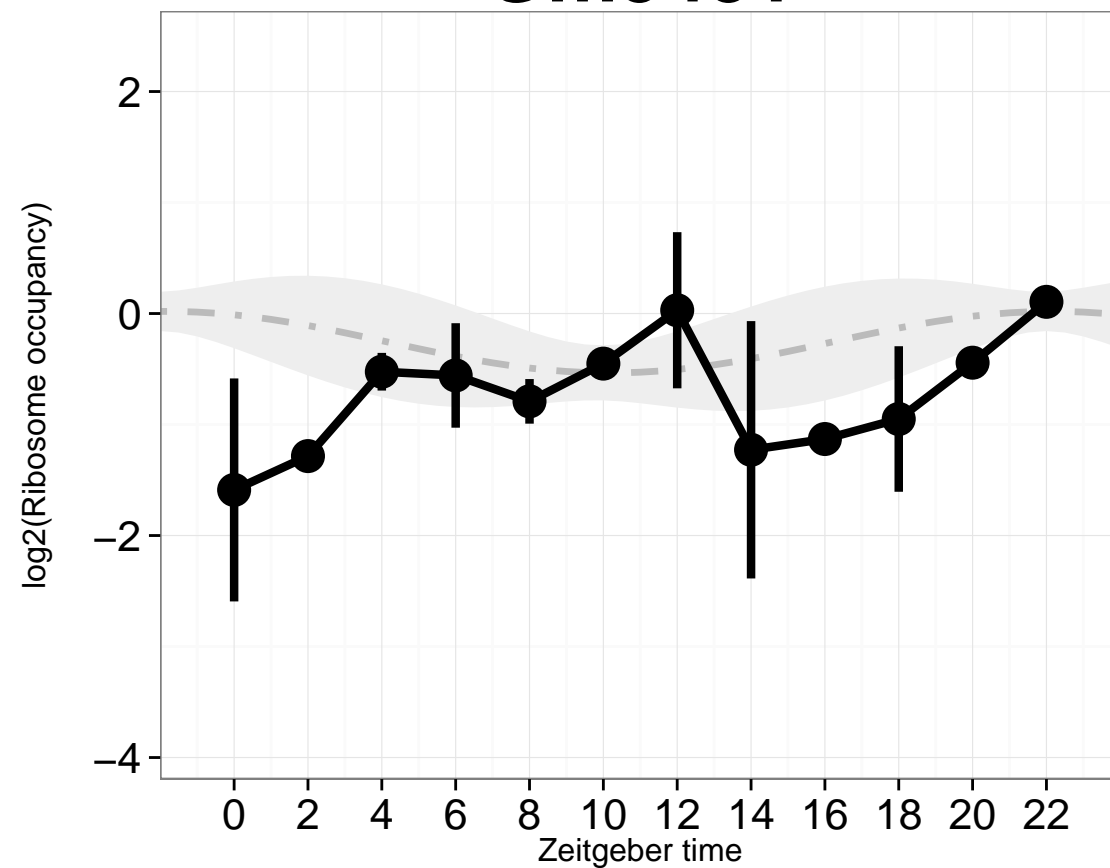

Supplement: SuppDataset_1.zip [file Gm5431_set_A.pdf › Supplemental Dataset 1/A-mRNA_nonrhyth_translation_nonrhyth/Gm5431_set_A.pdf]

# Gm5549

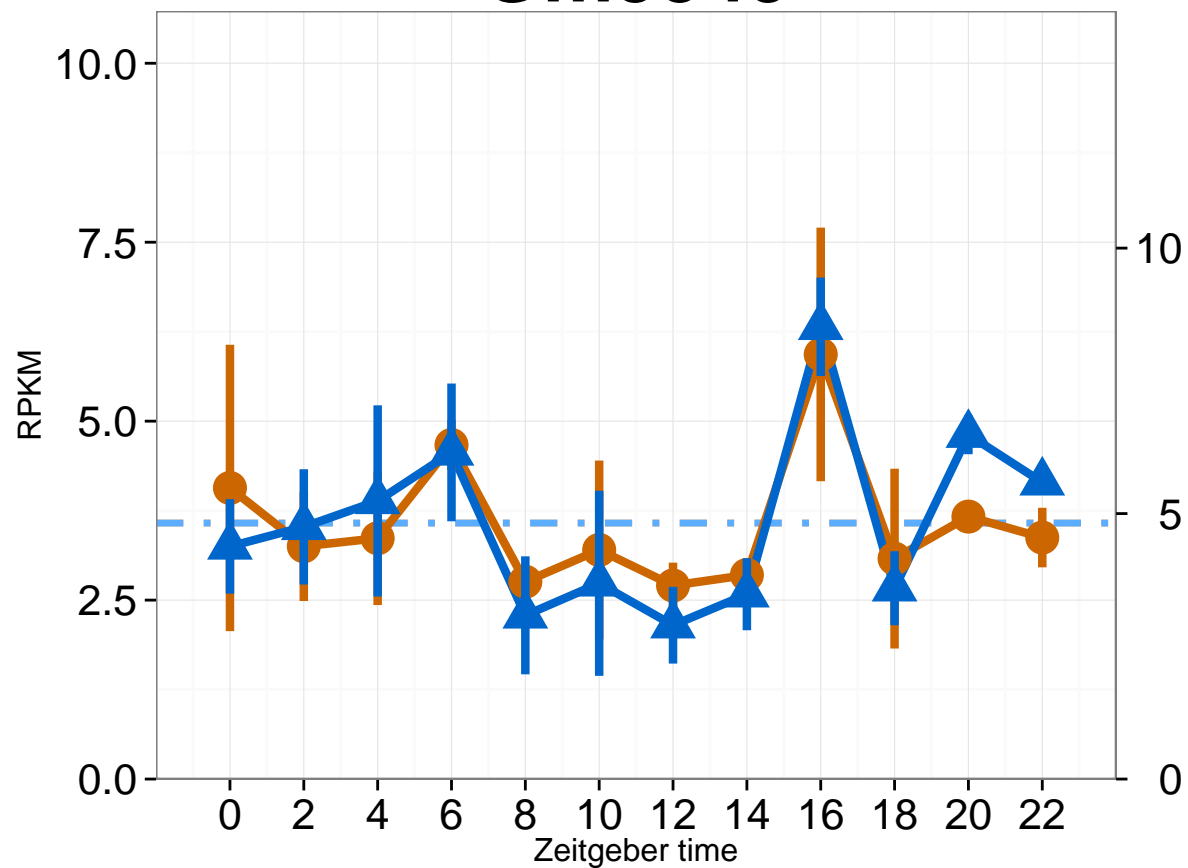

# Gm5549

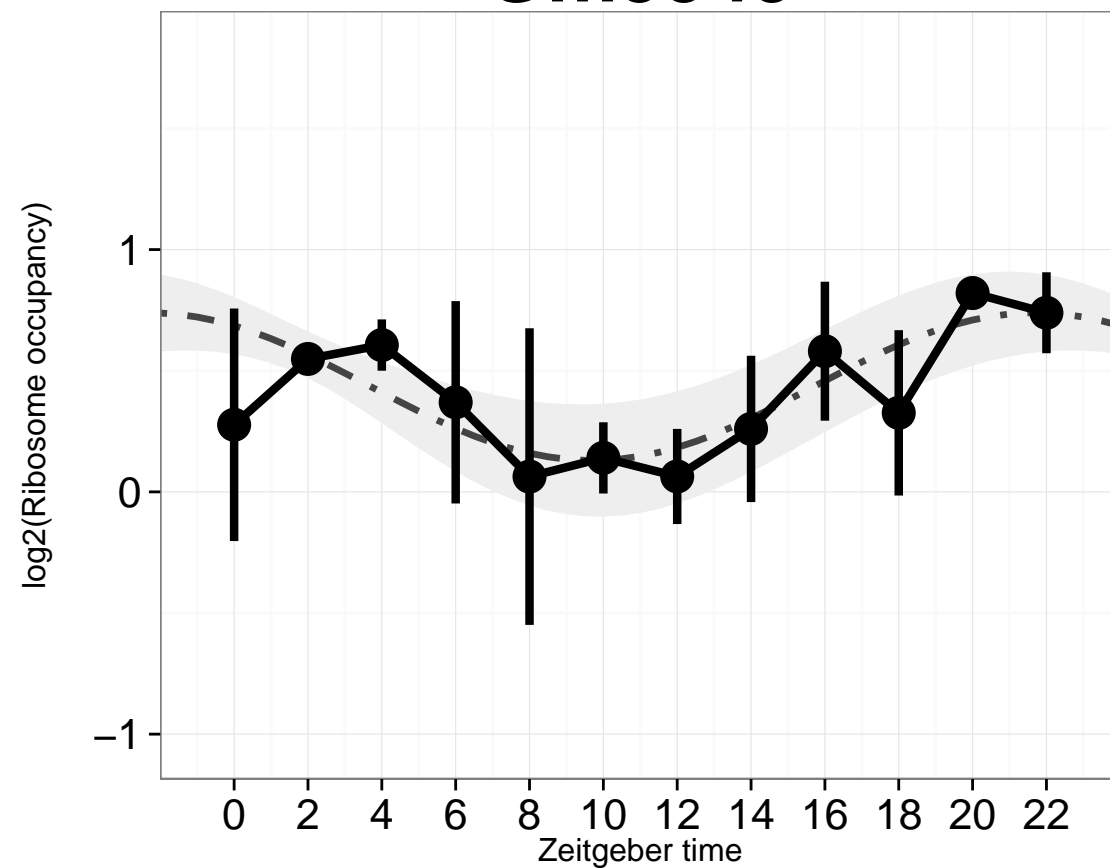

Supplement: SuppDataset_1.zip [file Gm5549_set_A.pdf › Supplemental Dataset 1/A-mRNA_nonrhyth_translation_nonrhyth/Gm5549_set_A.pdf]

## Gm5595

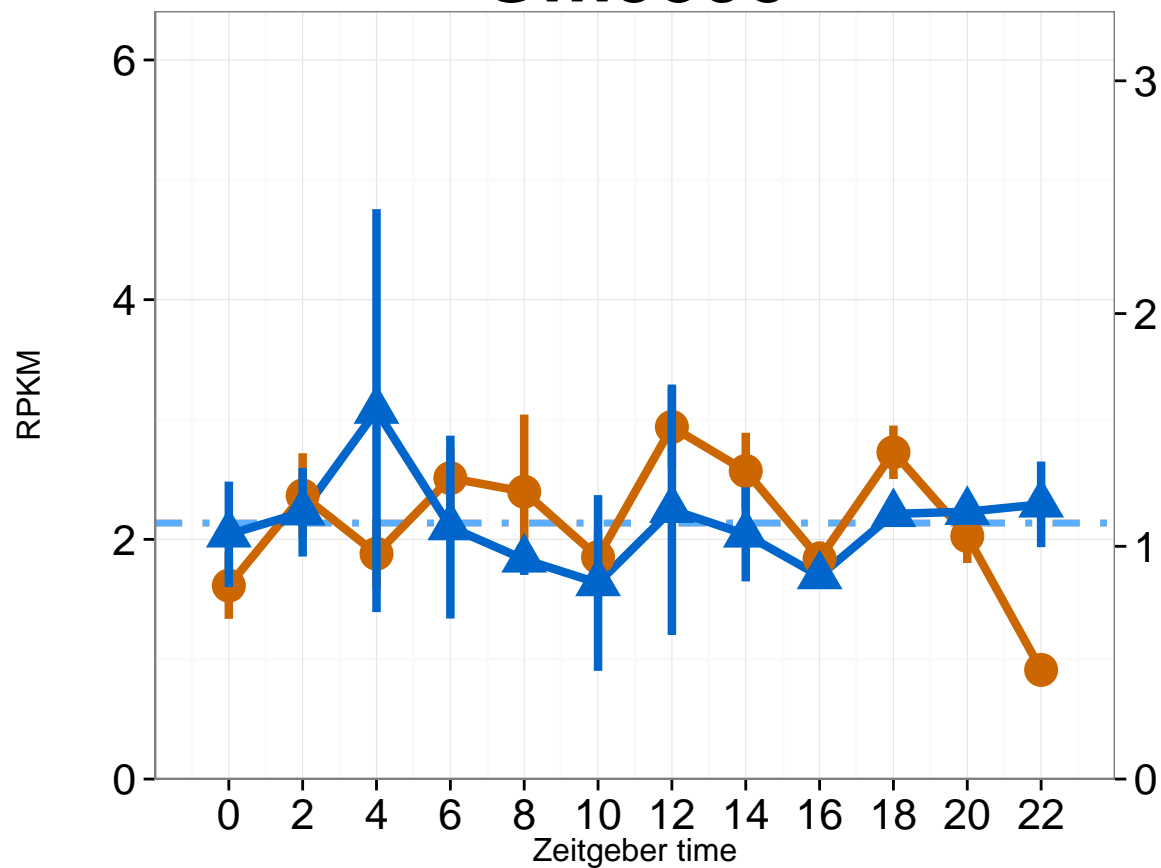

## Gm5595

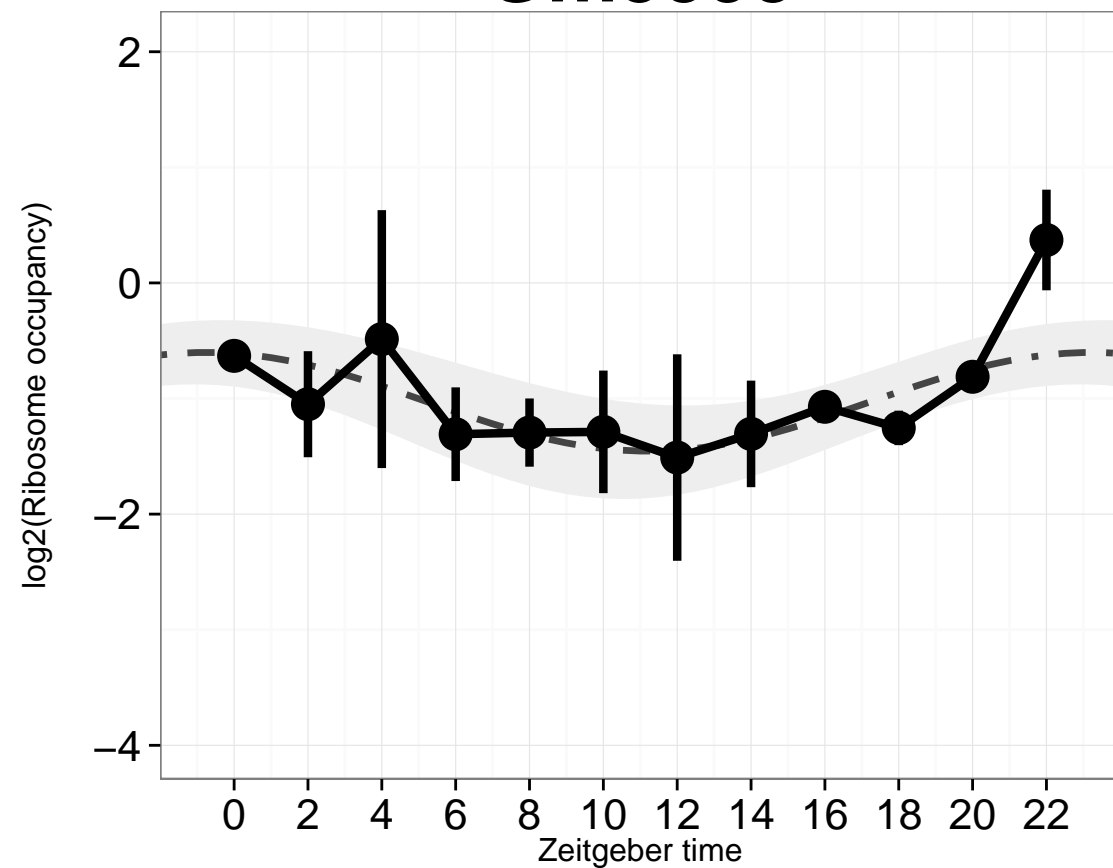

Supplement: SuppDataset_1.zip [file Gm5595_set_A.pdf › Supplemental Dataset 1/A-mRNA_nonrhyth_translation_nonrhyth/Gm5595_set_A.pdf]

## Gm561

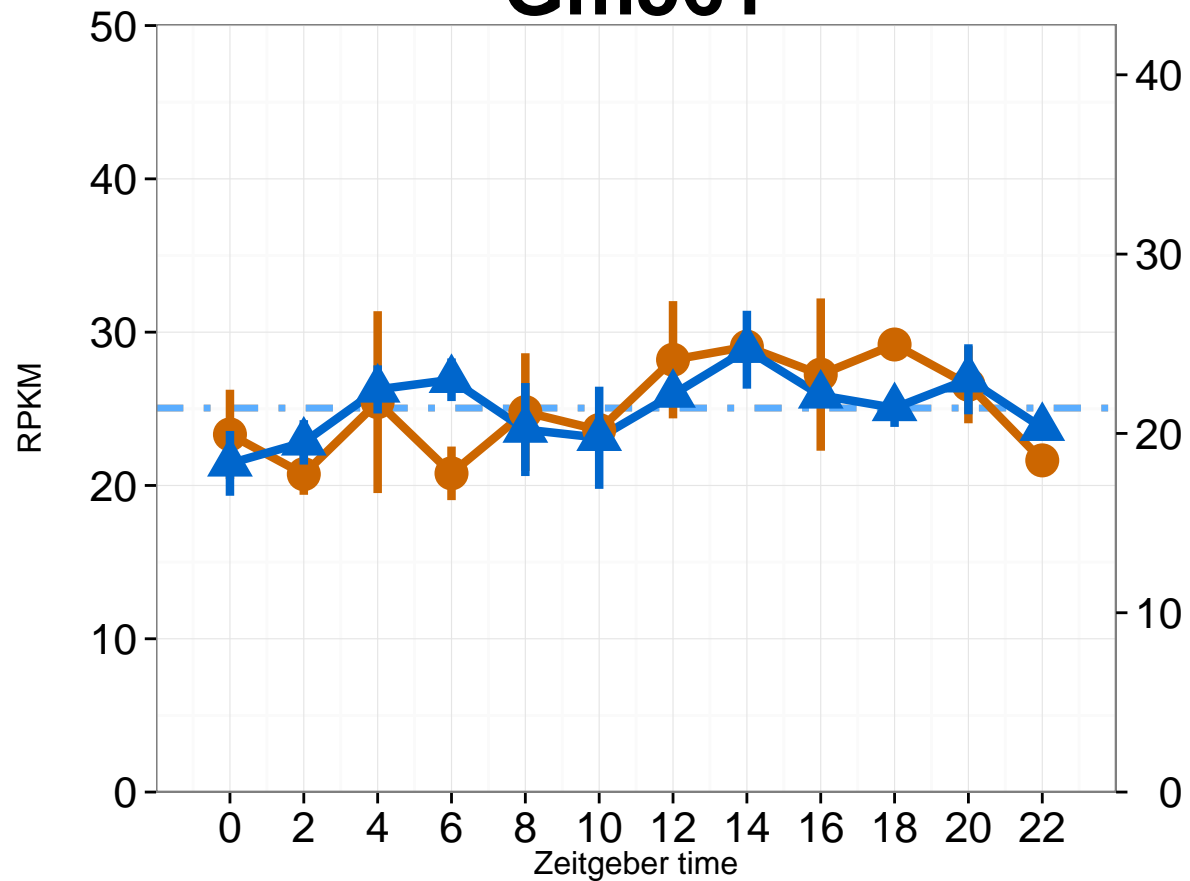

## Gm561

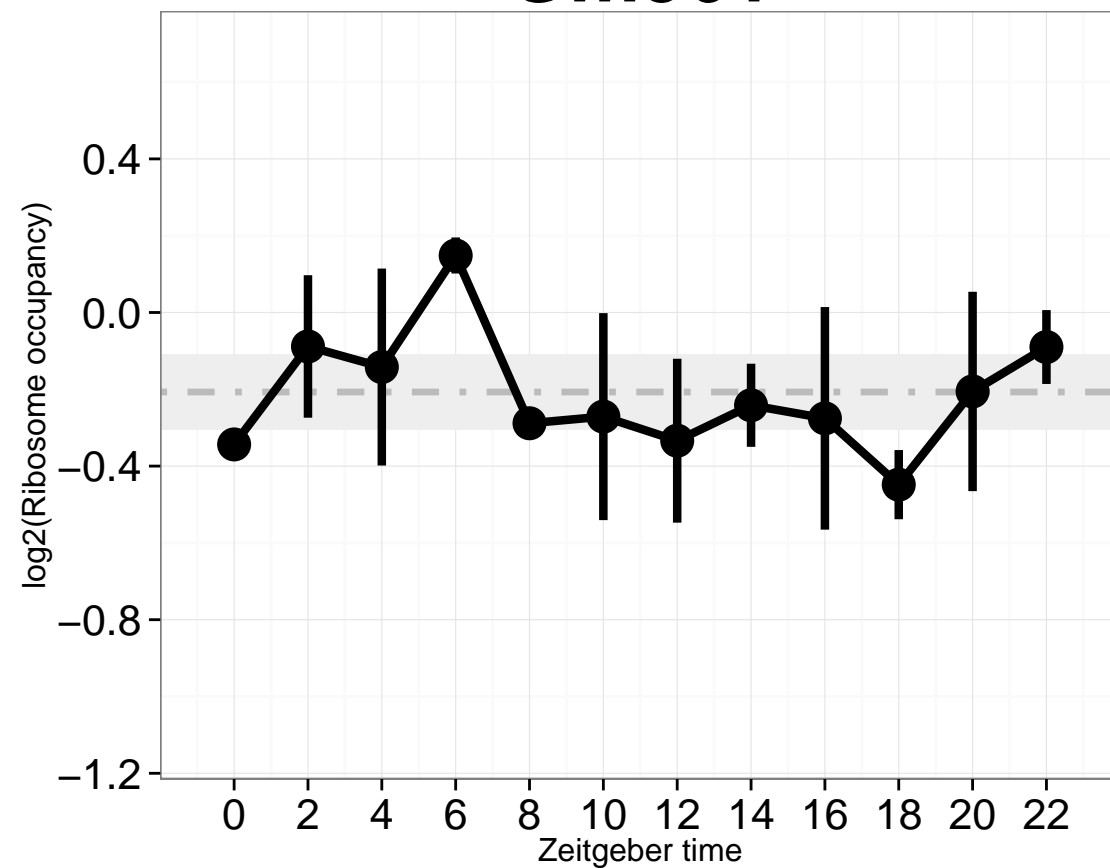

Supplement: SuppDataset_1.zip [file Gm561_set_A.pdf › Supplemental Dataset 1/A-mRNA_nonrhyth_translation_nonrhyth/Gm561_set_A.pdf]

# Gm608

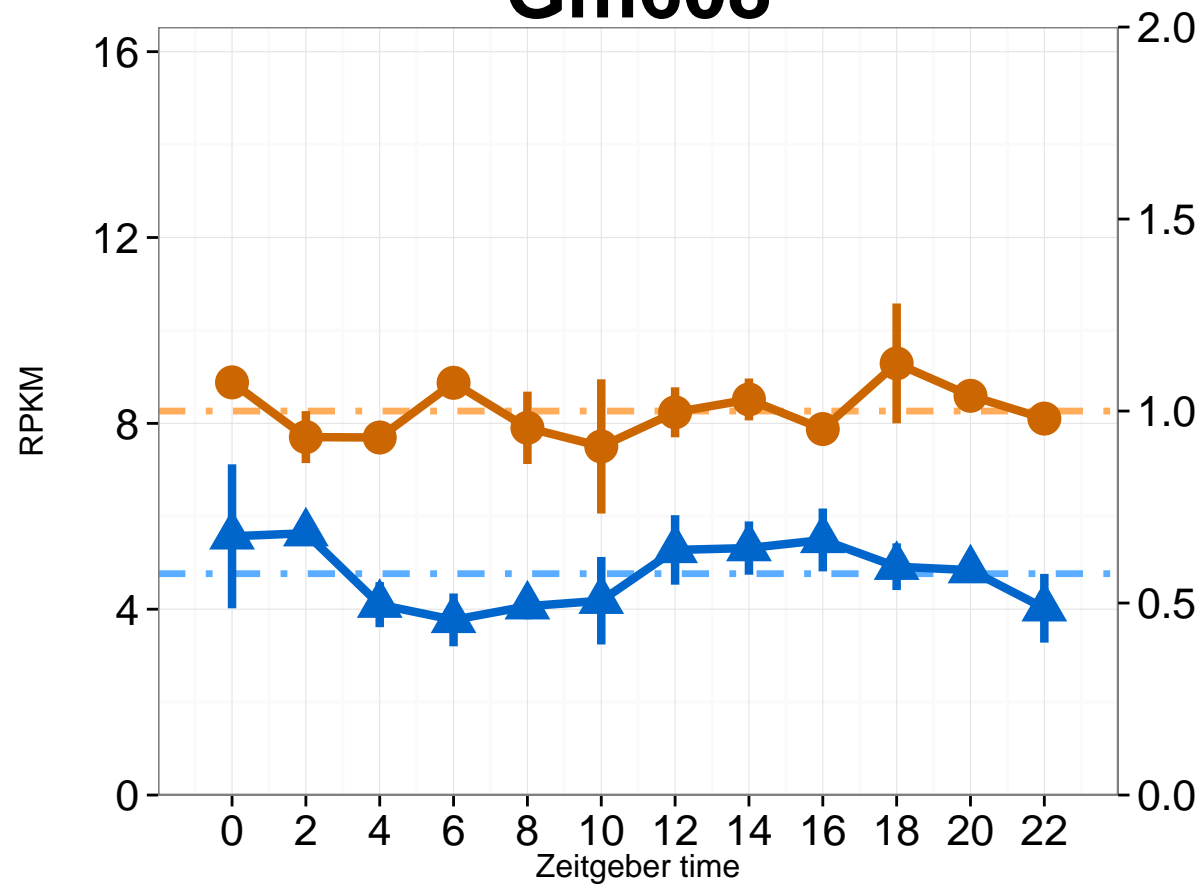

# Gm608

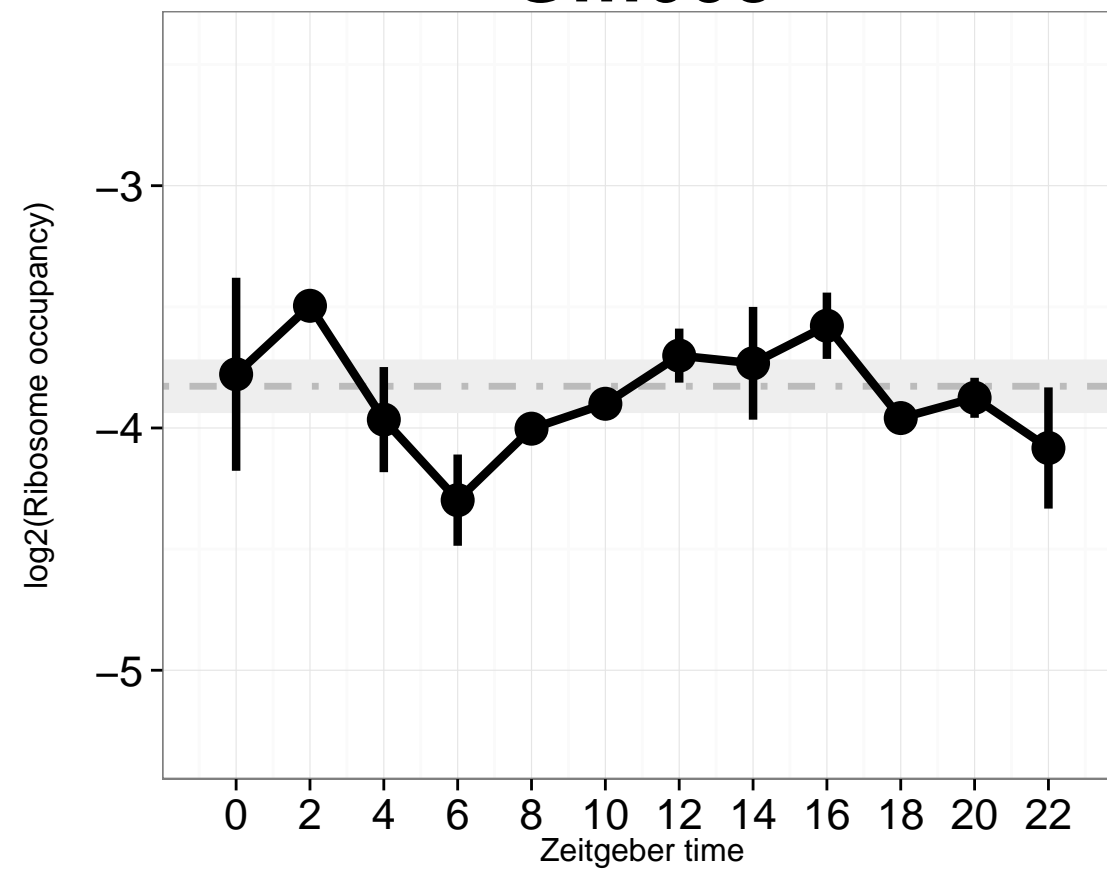

Supplement: SuppDataset_1.zip [file Gm608_set_A.pdf › Supplemental Dataset 1/A-mRNA_nonrhyth_translation_nonrhyth/Gm608_set_A.pdf]

# Gm6484

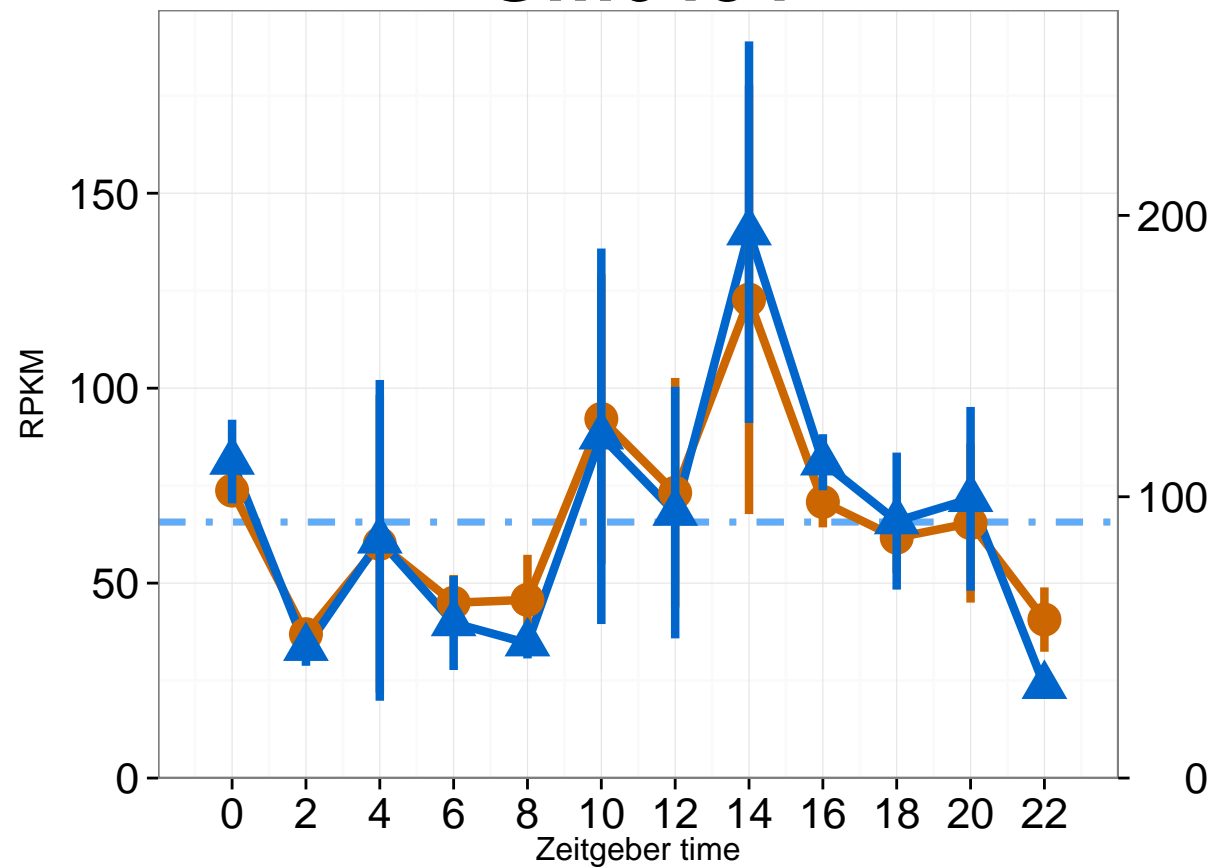

# Gm6484

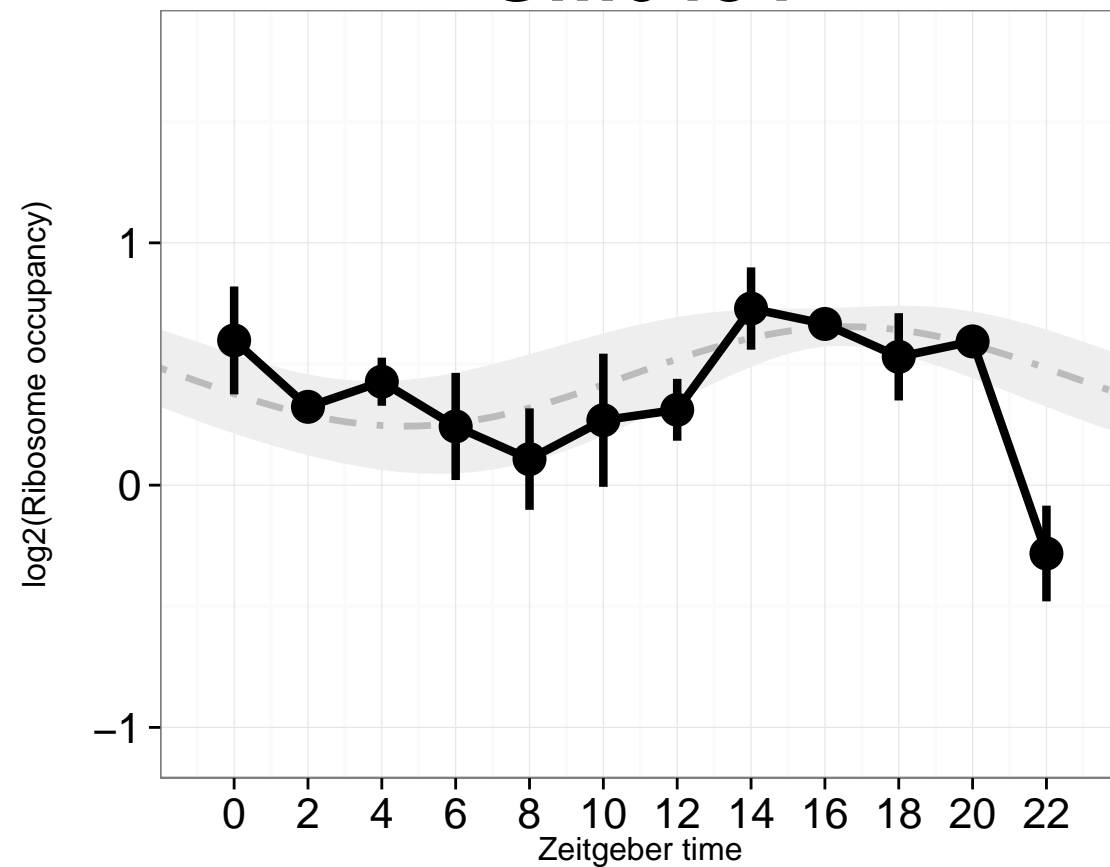

Supplement: SuppDataset_1.zip [file Gm6484_set_A.pdf › Supplemental Dataset 1/A-mRNA_nonrhyth_translation_nonrhyth/Gm6484_set_A.pdf]

## Gm6625

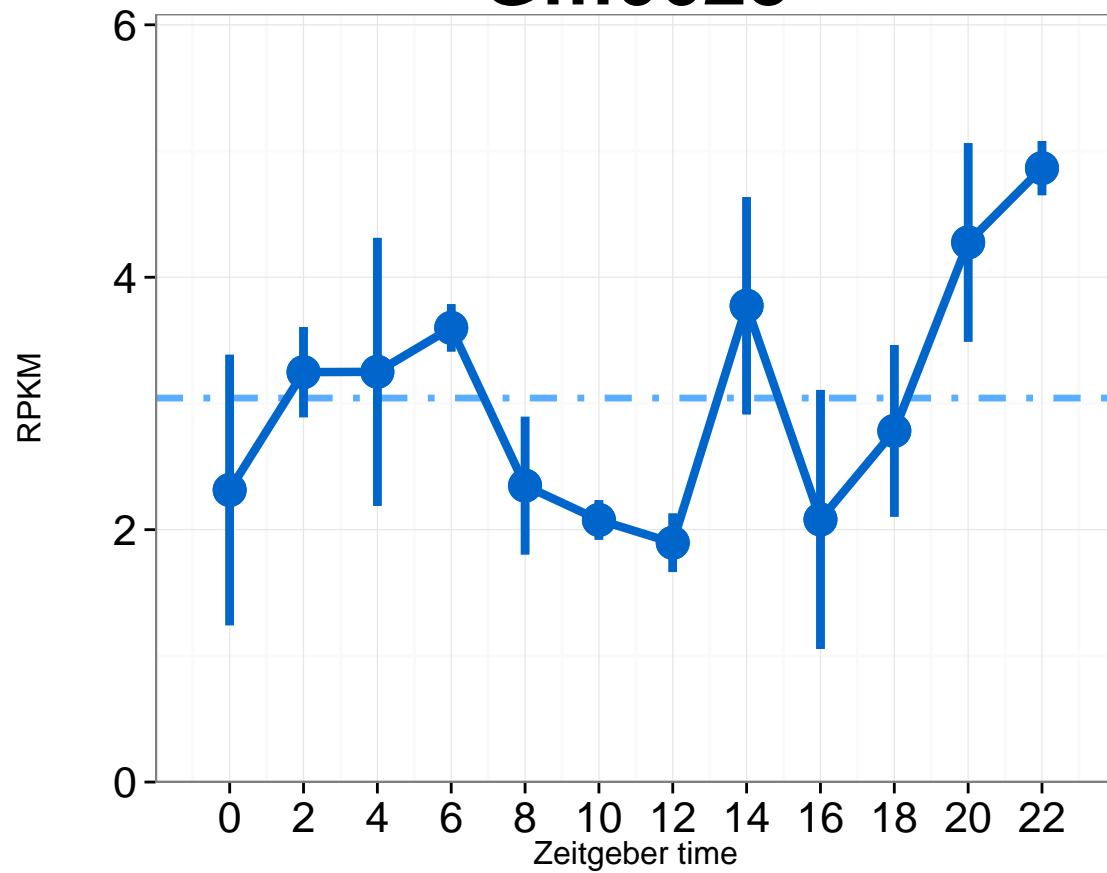

## Gm6625 log2(Ribosome occupanc

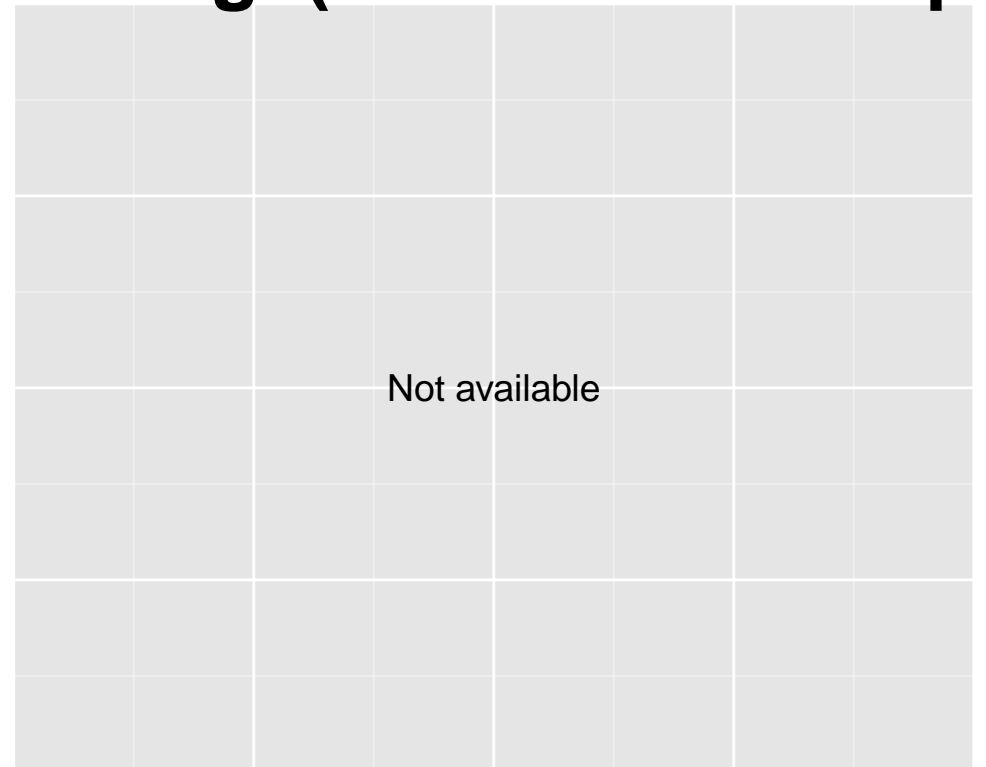

Supplement: SuppDataset_1.zip [file Gm6625_set_A.pdf › Supplemental Dataset 1/A-mRNA_nonrhyth_translation_nonrhyth/Gm6625_set_A.pdf]

# Gm6712

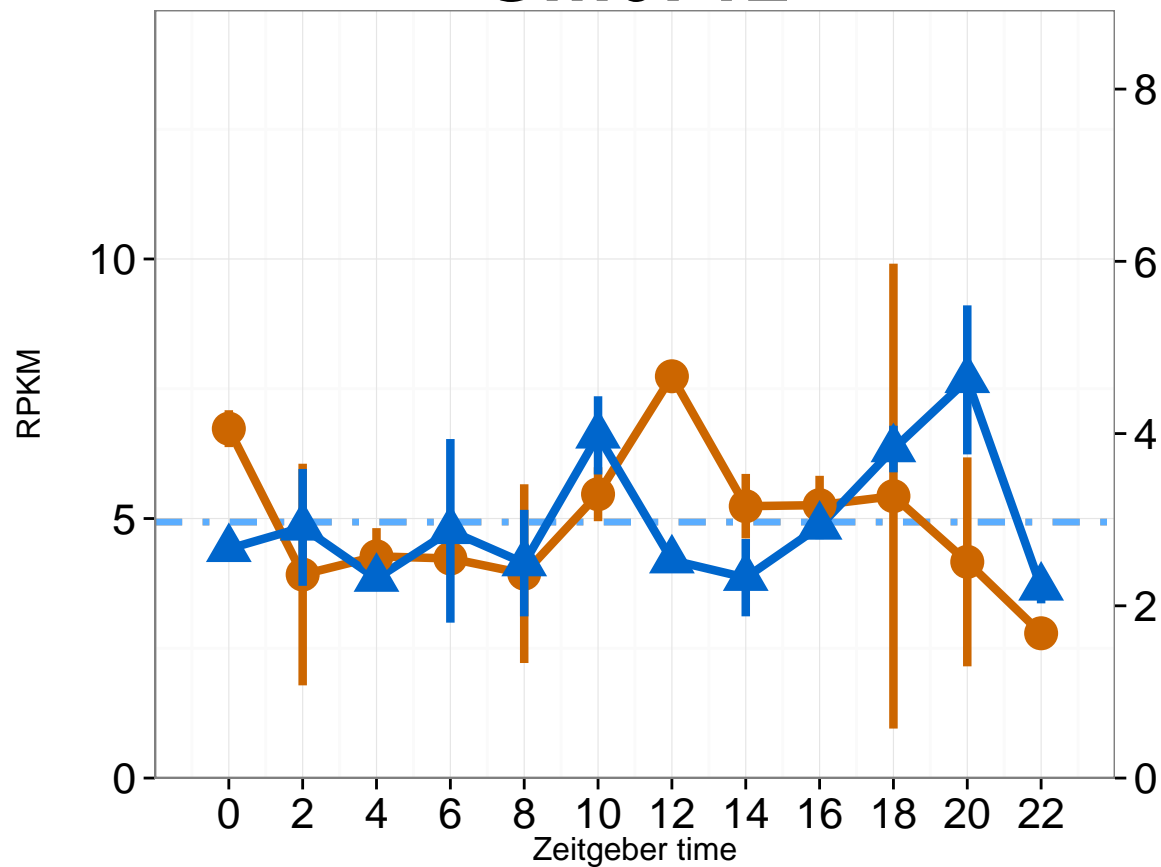

# Gm6712

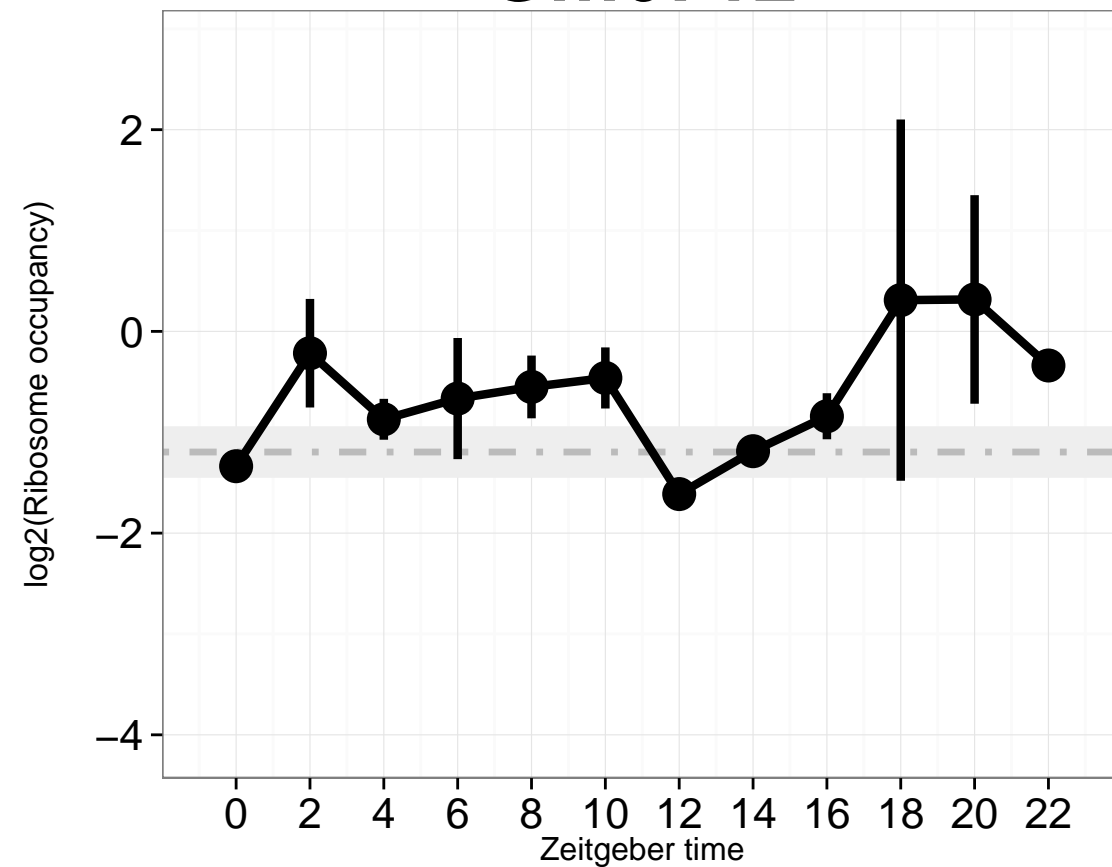

Supplement: SuppDataset_1.zip [file Gm6712_set_A.pdf › Supplemental Dataset 1/A-mRNA_nonrhyth_translation_nonrhyth/Gm6712_set_A.pdf]

# Gm9846

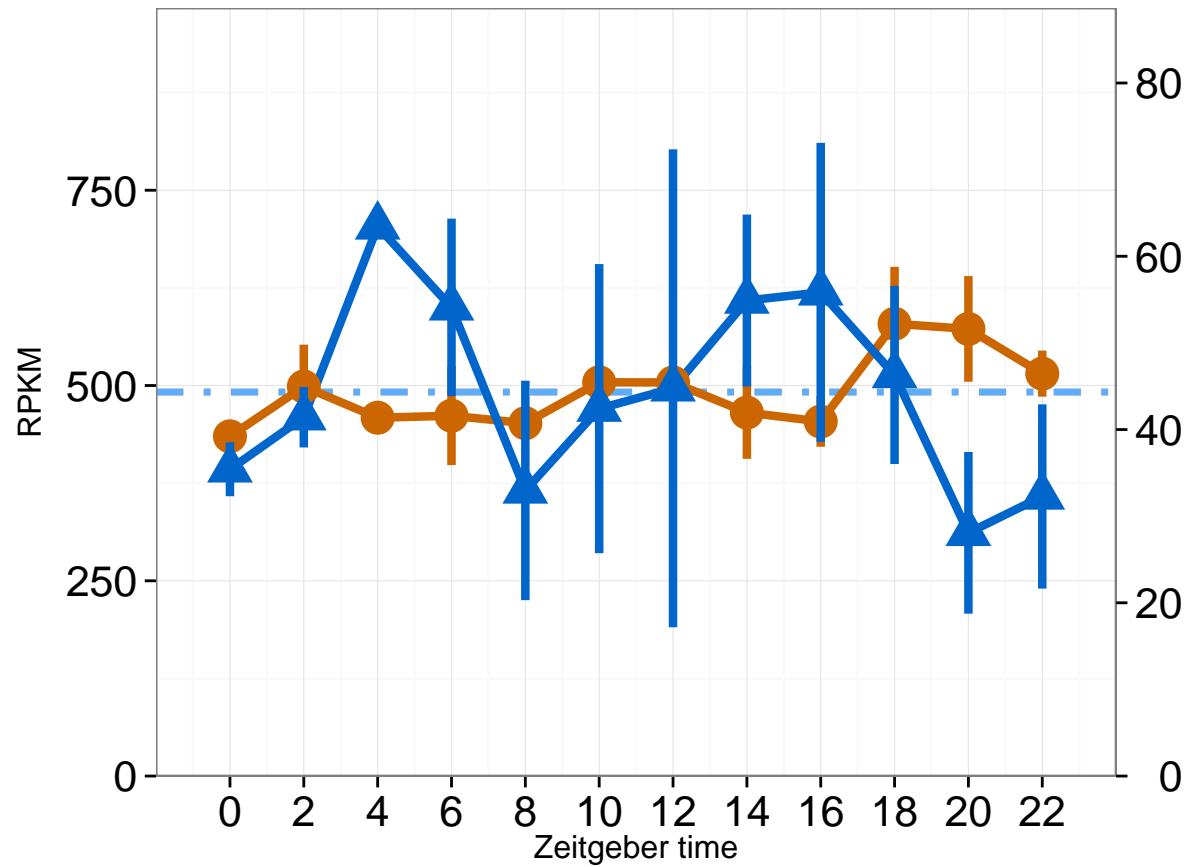

# Gm9846

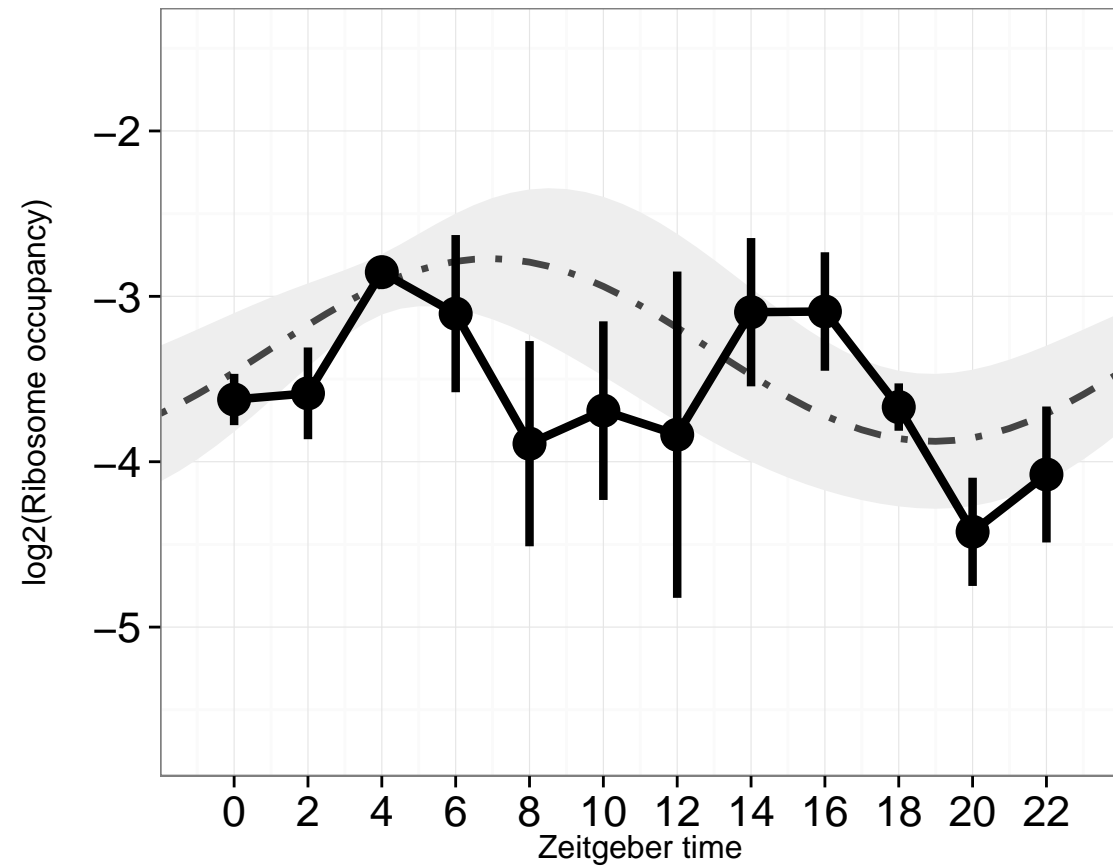

Supplement: SuppDataset_1.zip [file Gm9846_set_A.pdf › Supplemental Dataset 1/A-mRNA_nonrhyth_translation_nonrhyth/Gm9846_set_A.pdf]

## Gm9897

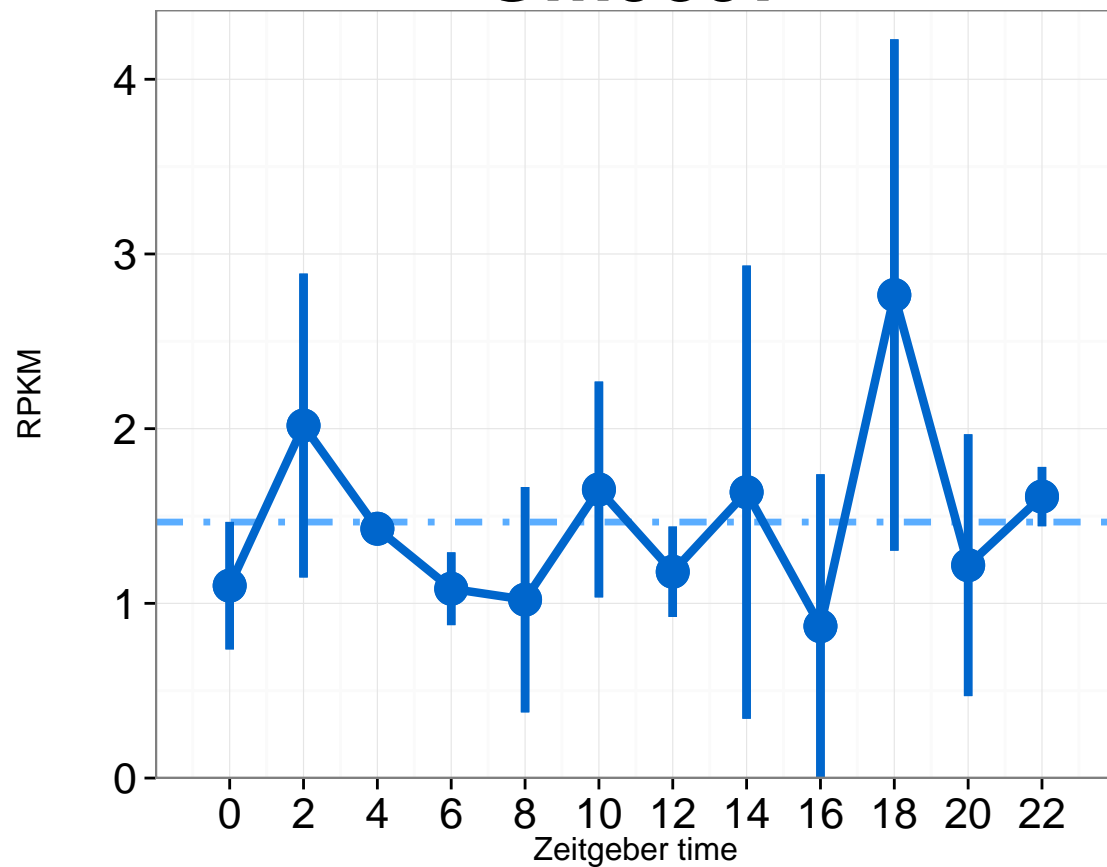

## Gm9897 log2(Ribosome occupanc

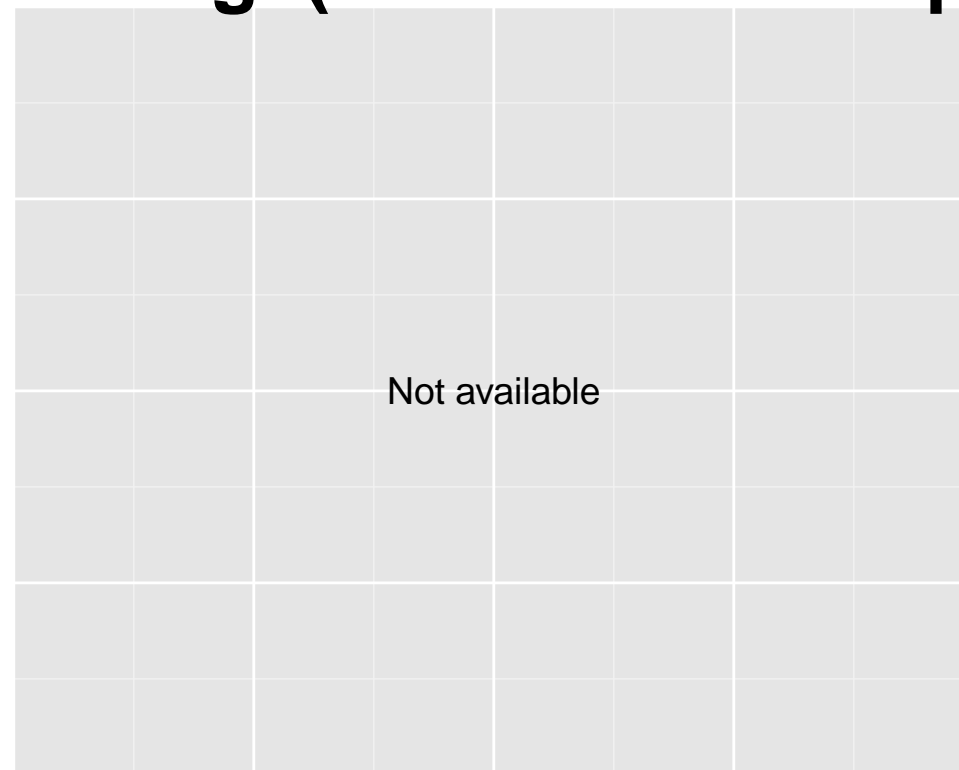

Supplement: SuppDataset_1.zip [file Gm9897_set_A.pdf › Supplemental Dataset 1/A-mRNA_nonrhyth_translation_nonrhyth/Gm9897_set_A.pdf]

## Gm9938

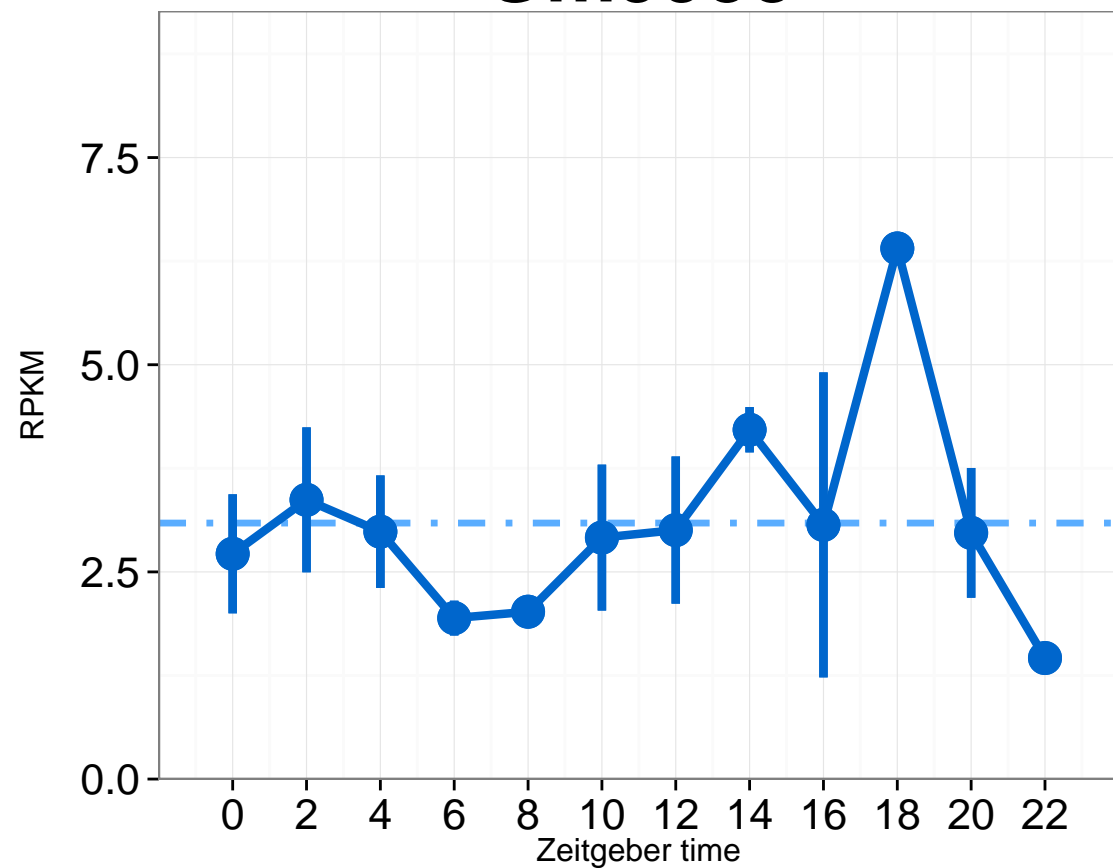

## Gm9938 log2(Ribosome occupanc

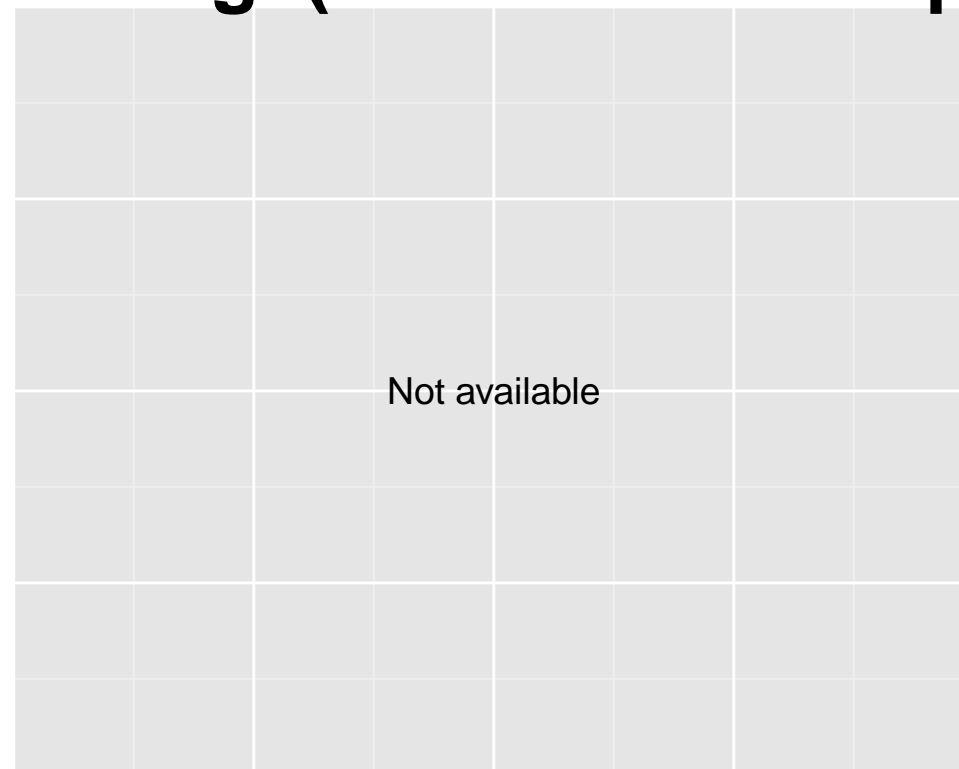

Supplement: SuppDataset_1.zip [file Gm9938_set_A.pdf › Supplemental Dataset 1/A-mRNA_nonrhyth_translation_nonrhyth/Gm9938_set_A.pdf]

## Gm9978

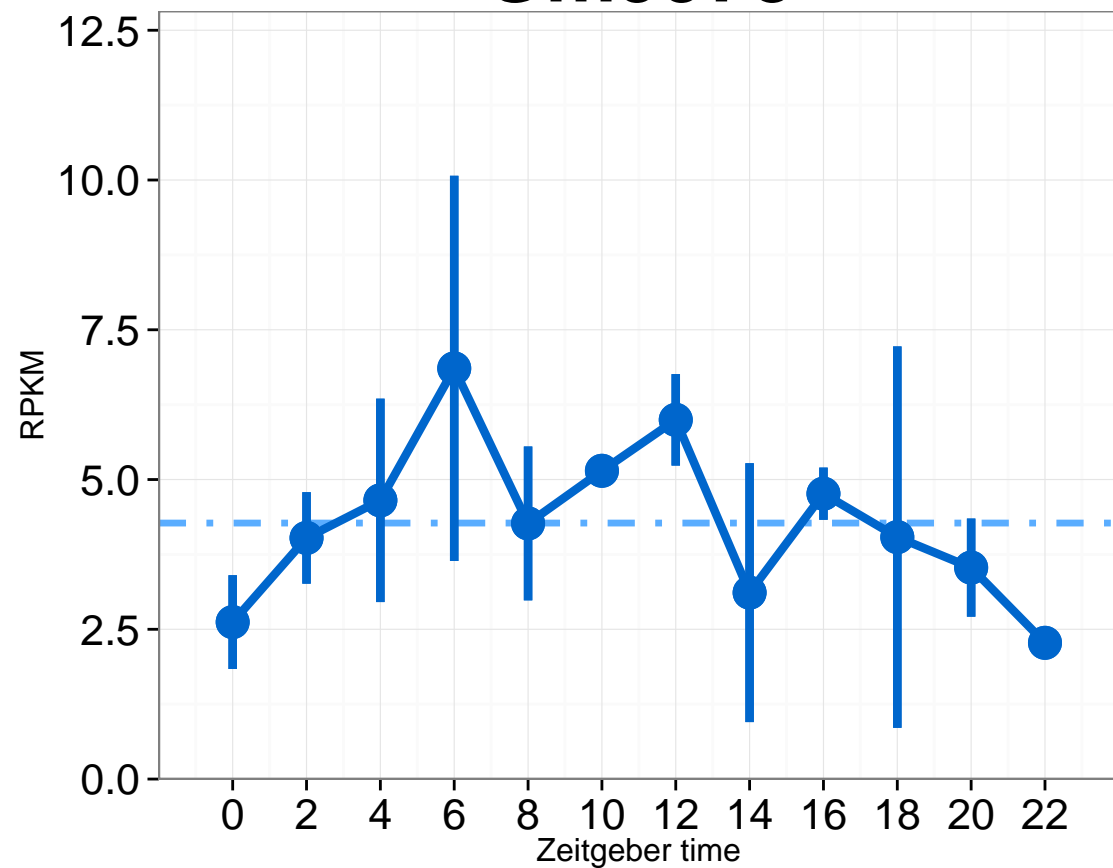

## Gm9978 log<sub>2</sub>(Ribosome occupanc



Supplement: SuppDataset_1.zip [file Gm9978_set_A.pdf › Supplemental Dataset 1/A-mRNA_nonrhyth_translation_nonrhyth/Gm9978_set_A.pdf]

## Gmcl1

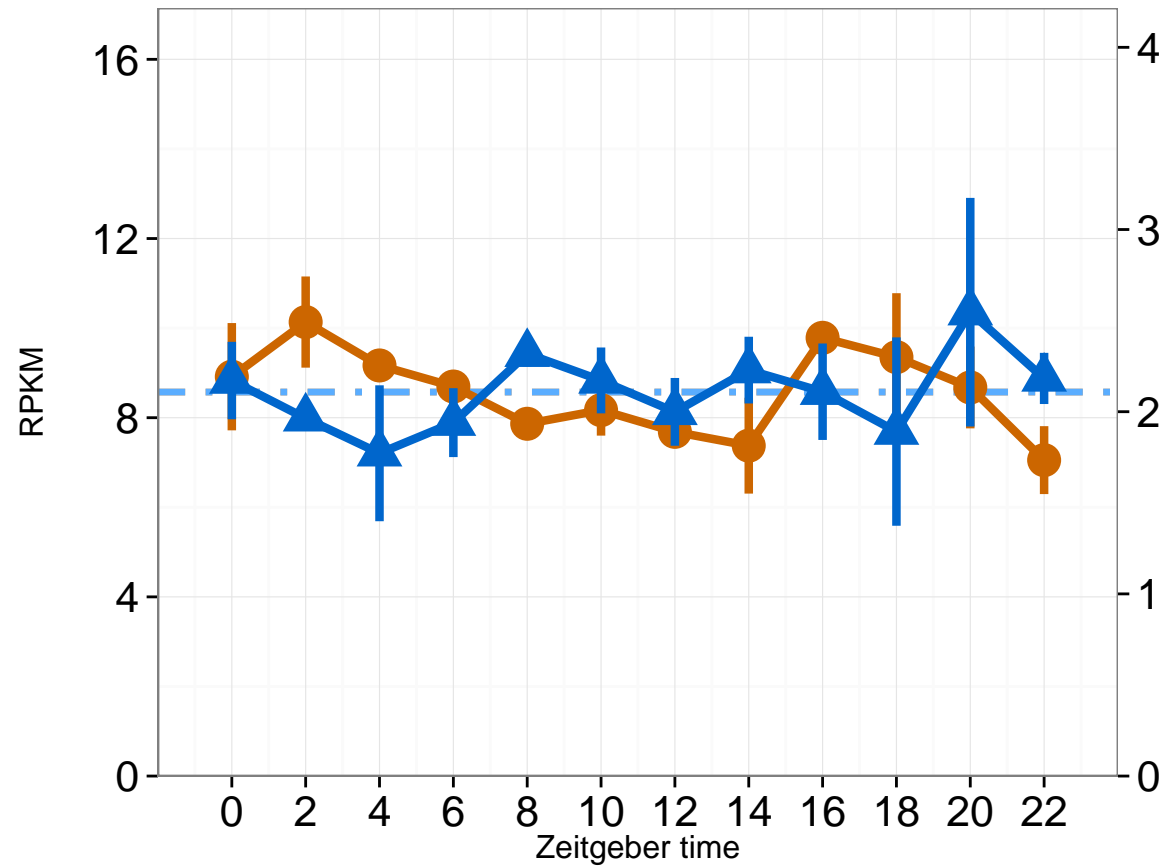

## Gmcl1

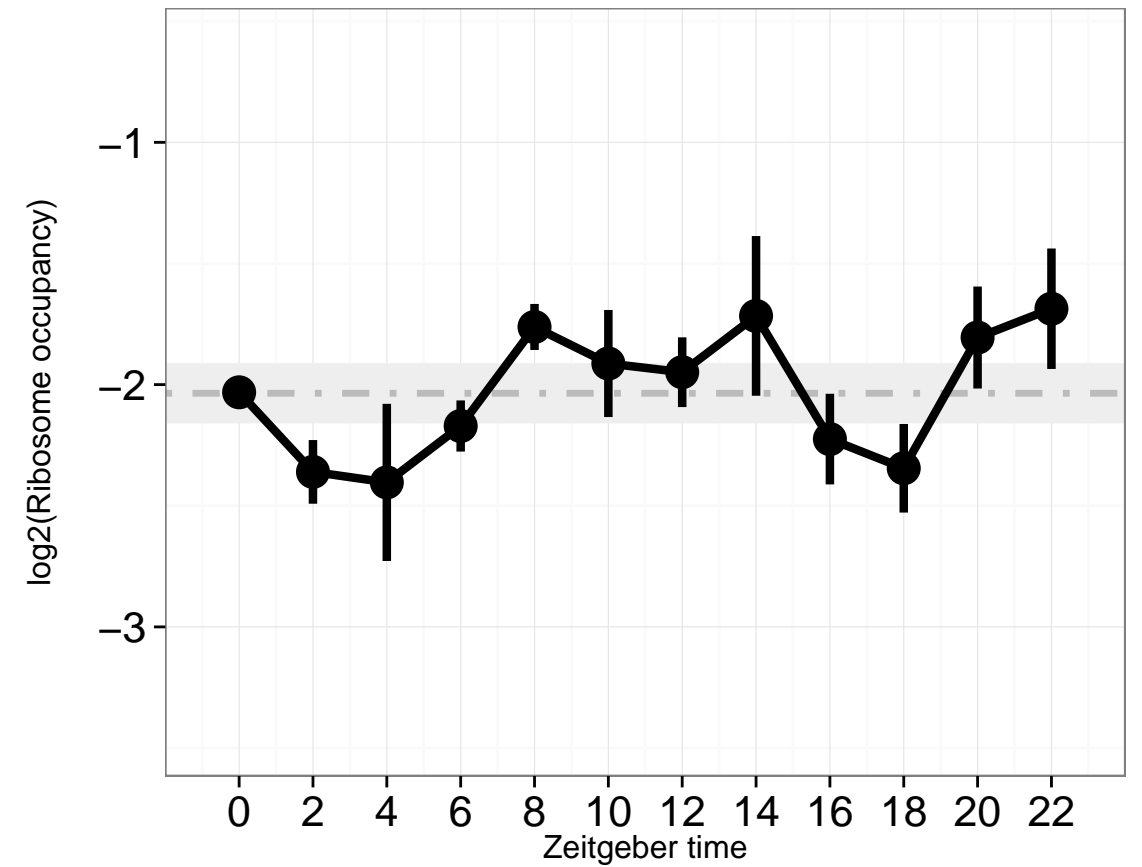

Supplement: SuppDataset_1.zip [file Gmcl1_set_A.pdf › Supplemental Dataset 1/A-mRNA_nonrhyth_translation_nonrhyth/Gmcl1_set_A.pdf]

## Gmeb2

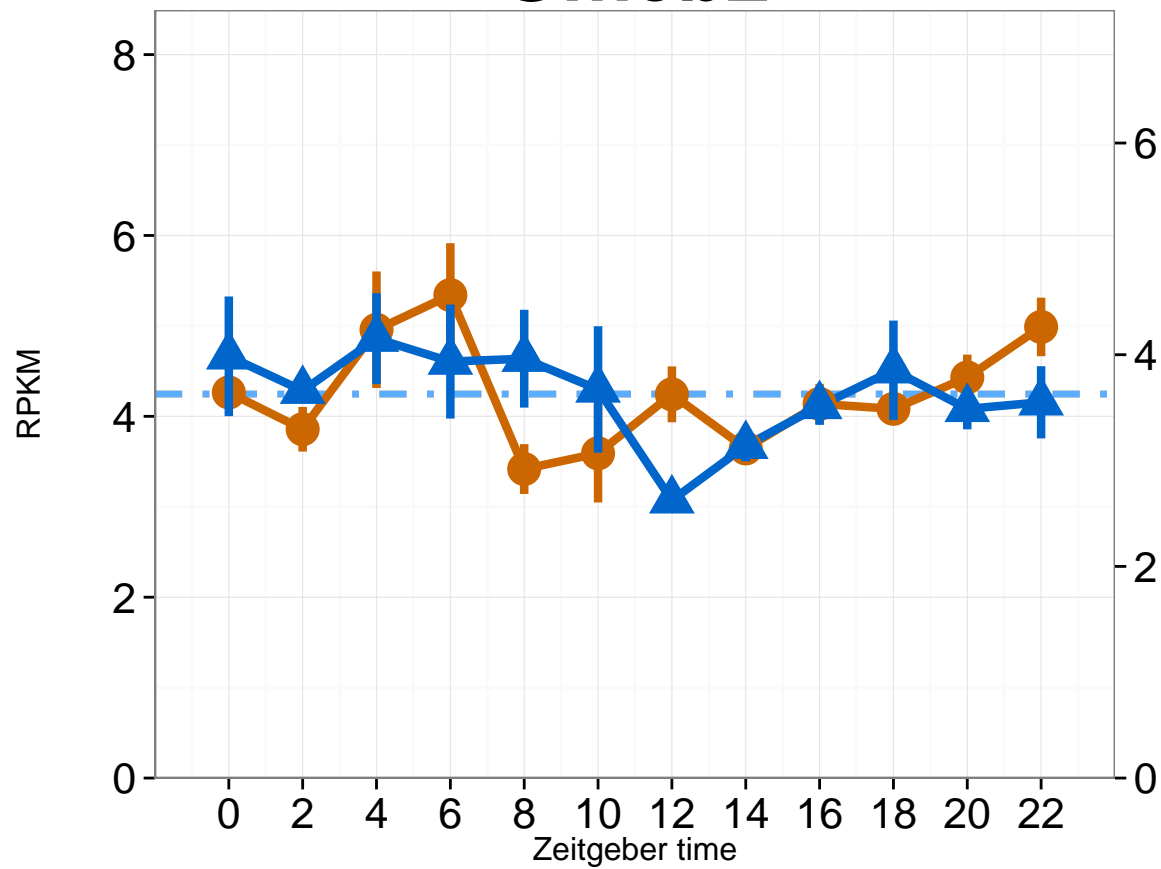

## Gmeb2

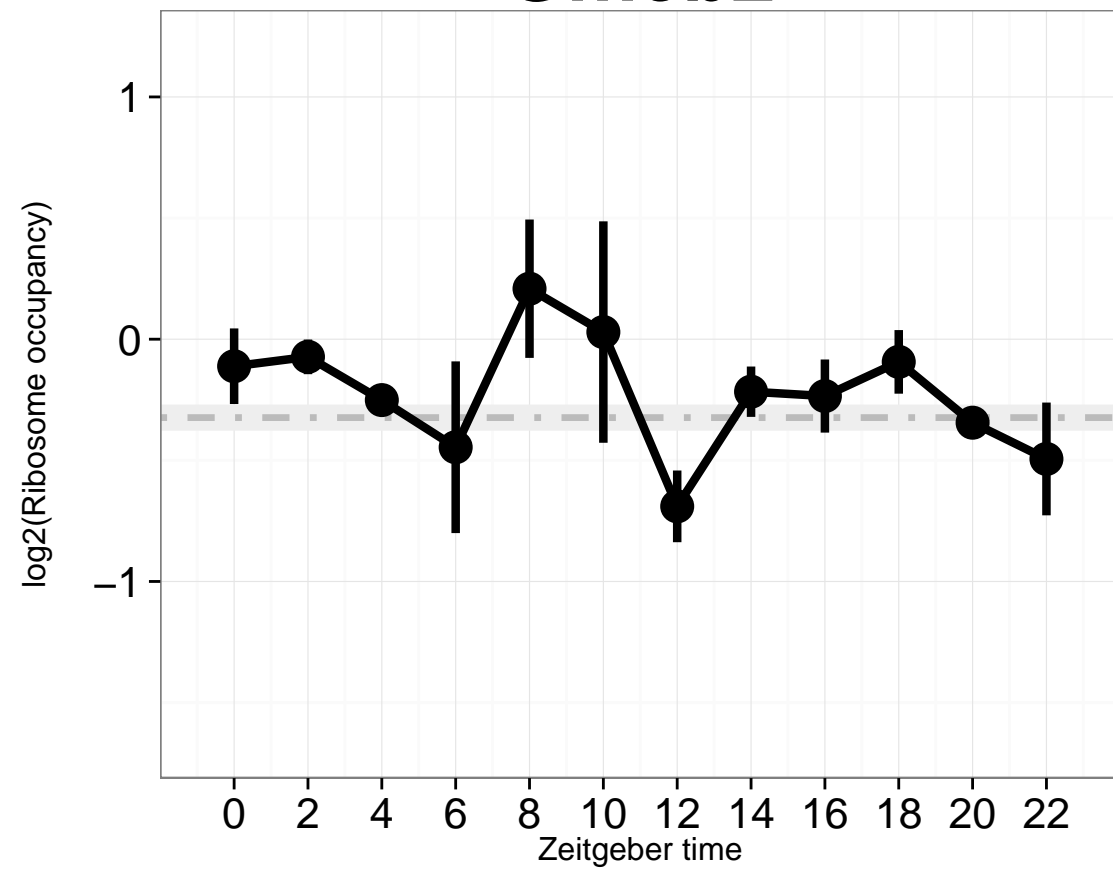

Supplement: SuppDataset_1.zip [file Gmeb2_set_A.pdf › Supplemental Dataset 1/A-mRNA_nonrhyth_translation_nonrhyth/Gmeb2_set_A.pdf]

## Gmfb

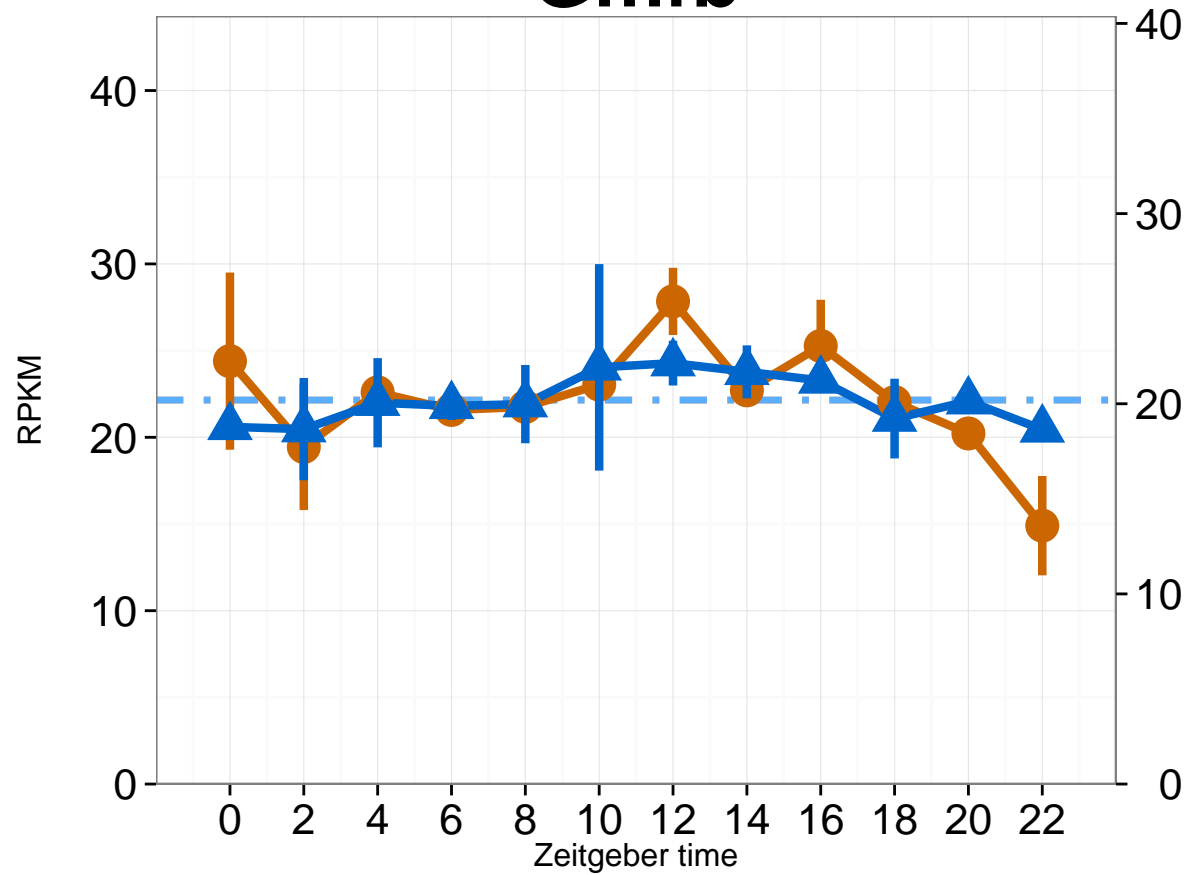

## Gmfb

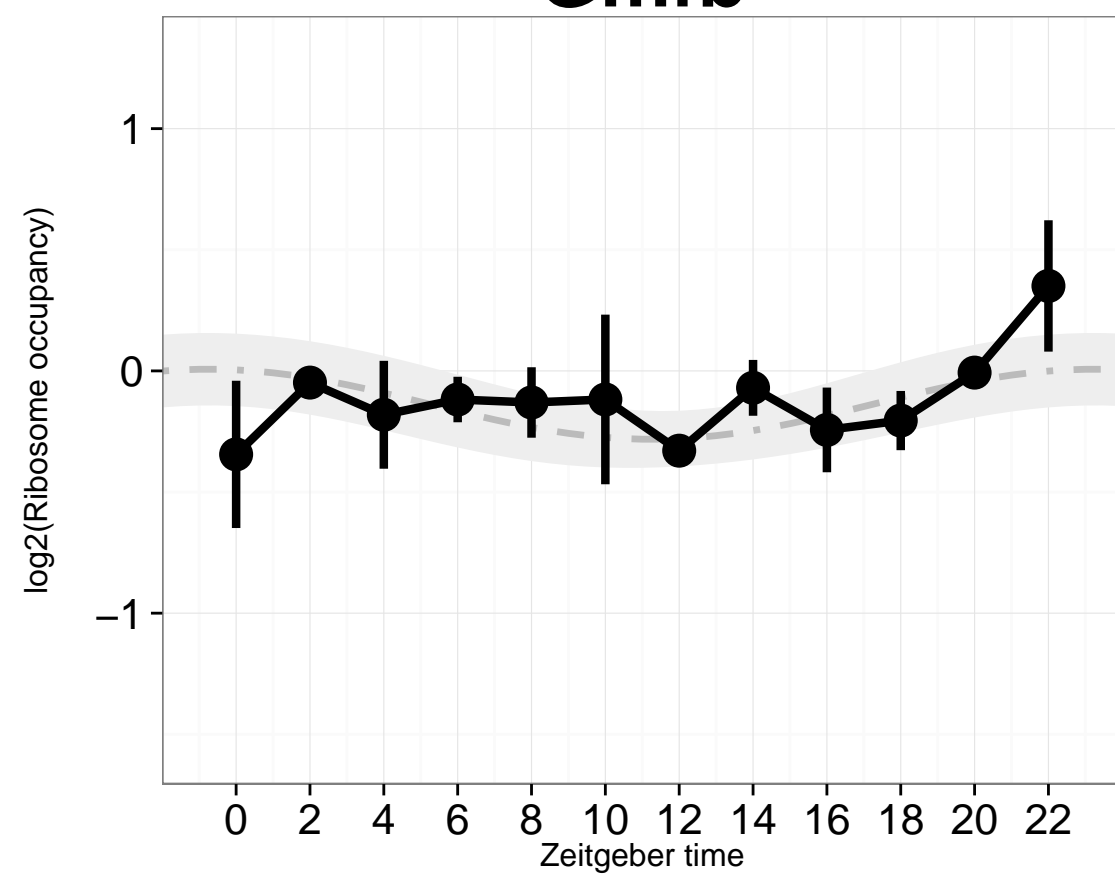

Supplement: SuppDataset_1.zip [file Gmfb_set_A.pdf › Supplemental Dataset 1/A-mRNA_nonrhyth_translation_nonrhyth/Gmfb_set_A.pdf]

## Gmfg

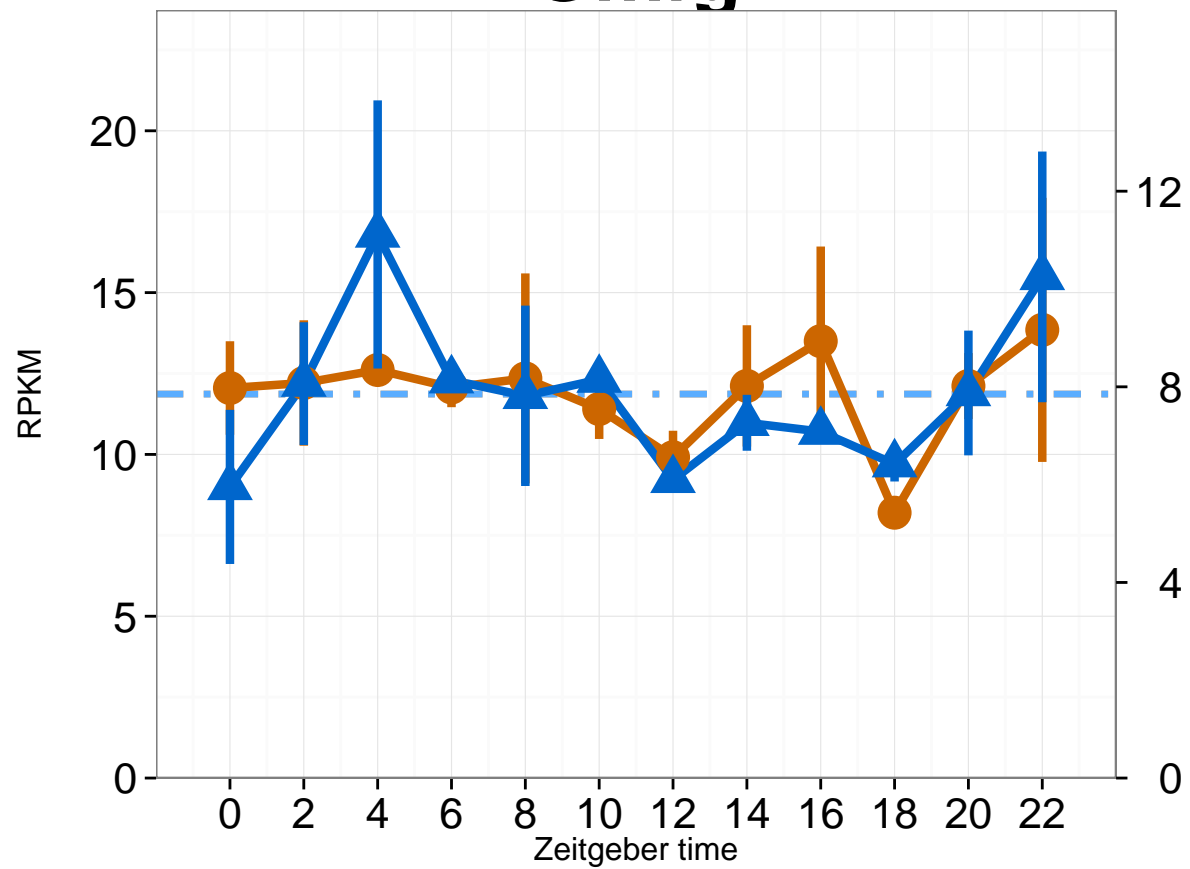

## Gmfg

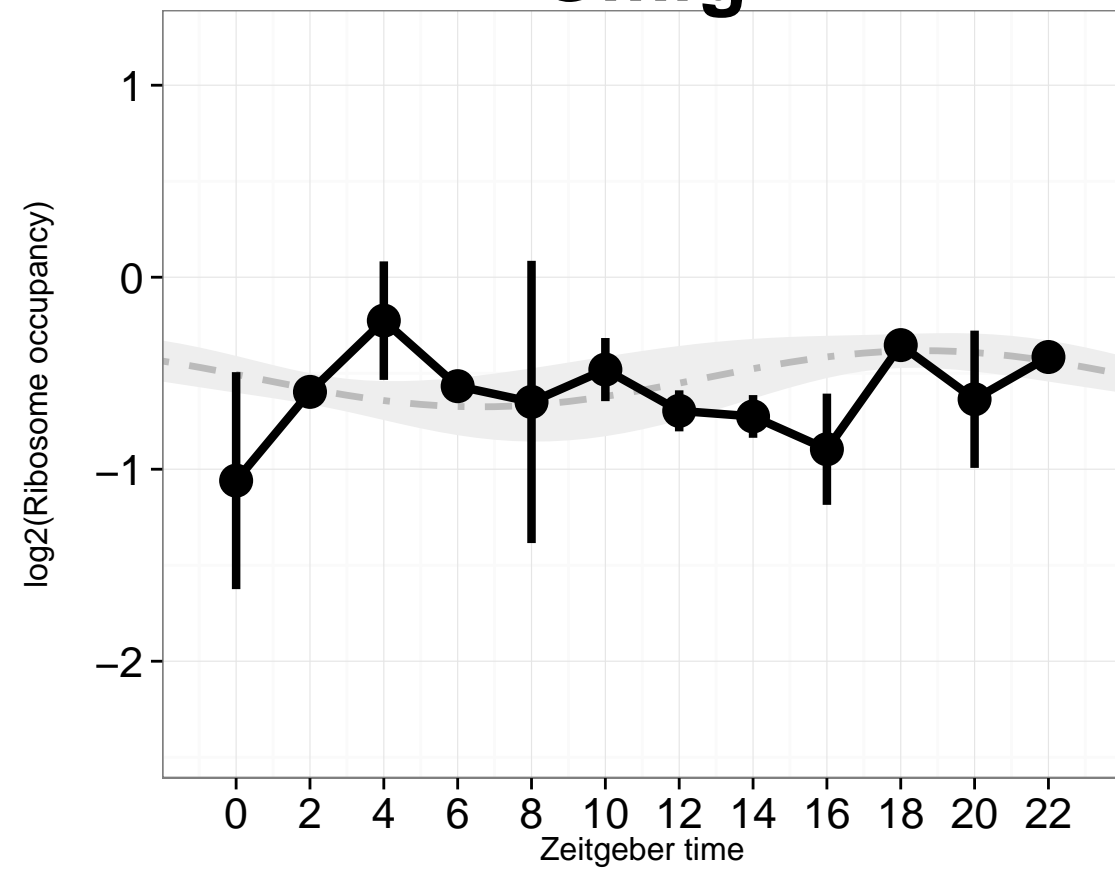

Supplement: SuppDataset_1.zip [file Gmfg_set_A.pdf › Supplemental Dataset 1/A-mRNA_nonrhyth_translation_nonrhyth/Gmfg_set_A.pdf]

## Gmip

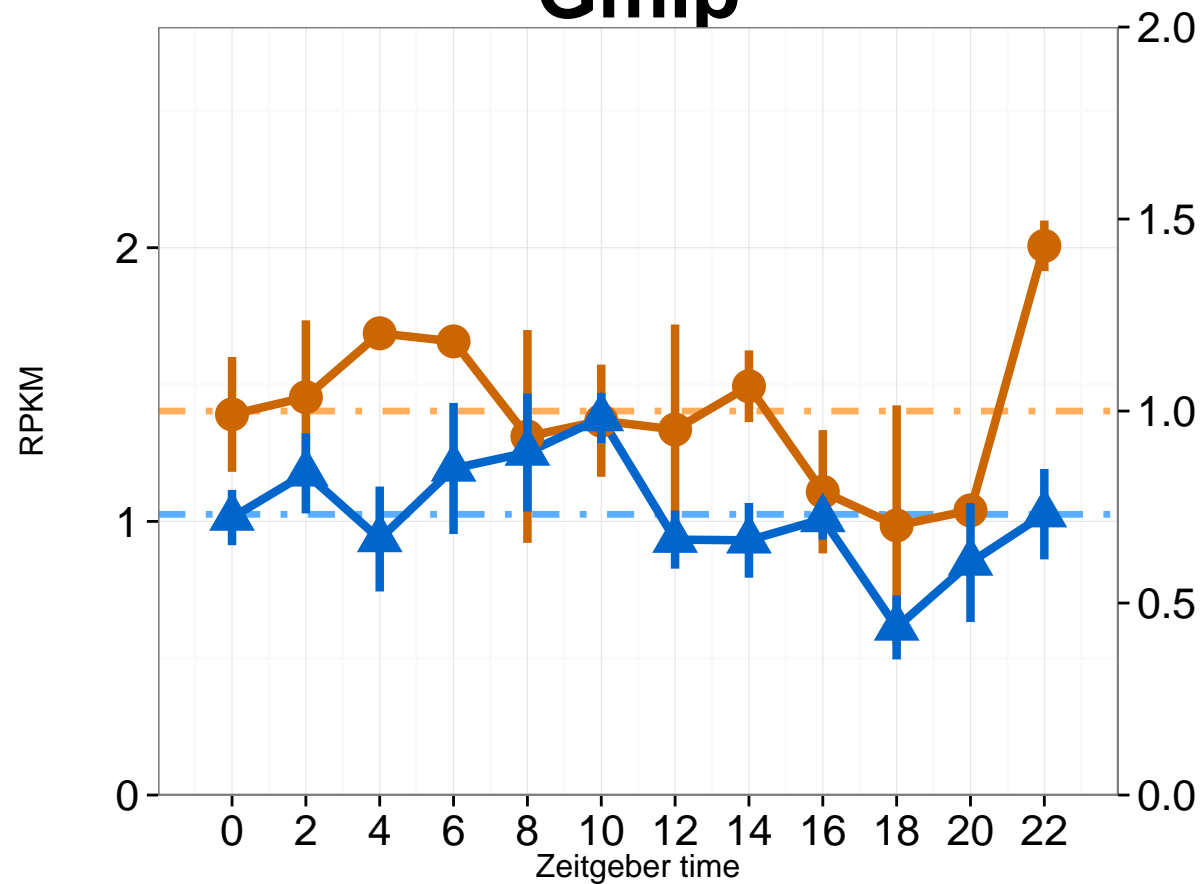

## Gmip

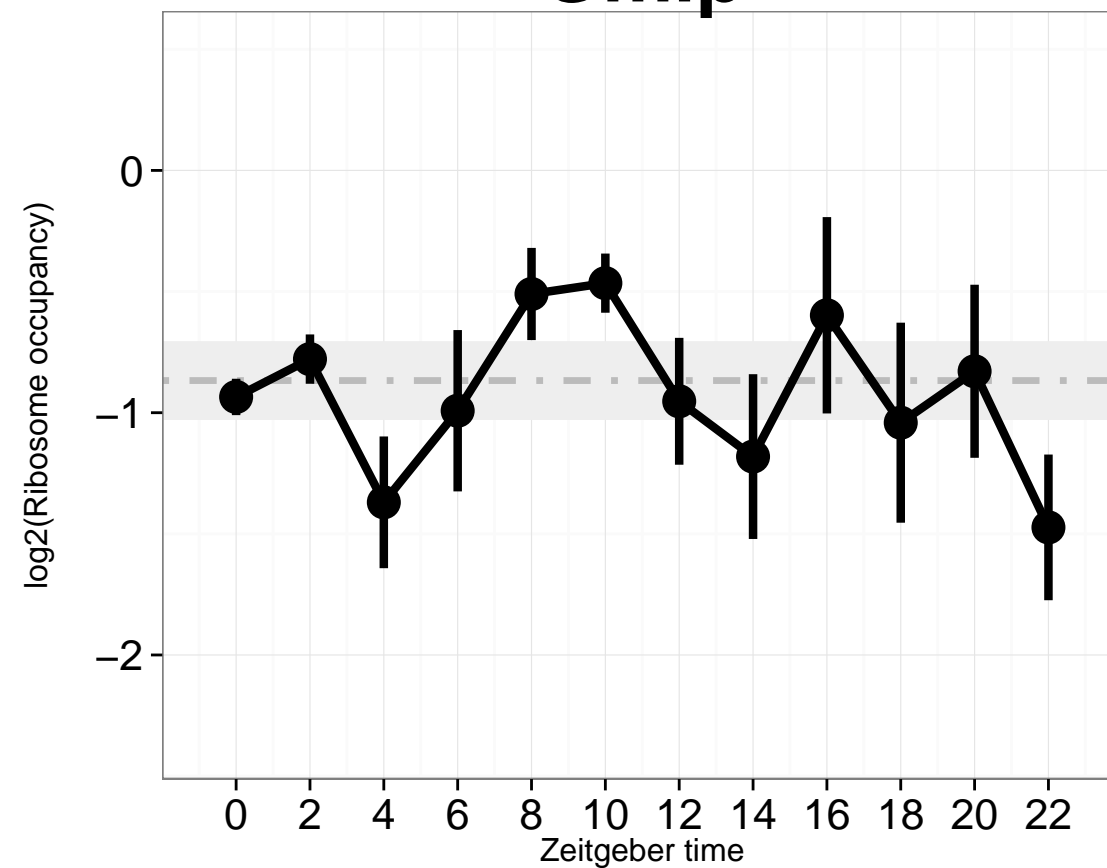

Supplement: SuppDataset_1.zip [file Gmip_set_A.pdf › Supplemental Dataset 1/A-mRNA_nonrhyth_translation_nonrhyth/Gmip_set_A.pdf]

## Gmppa

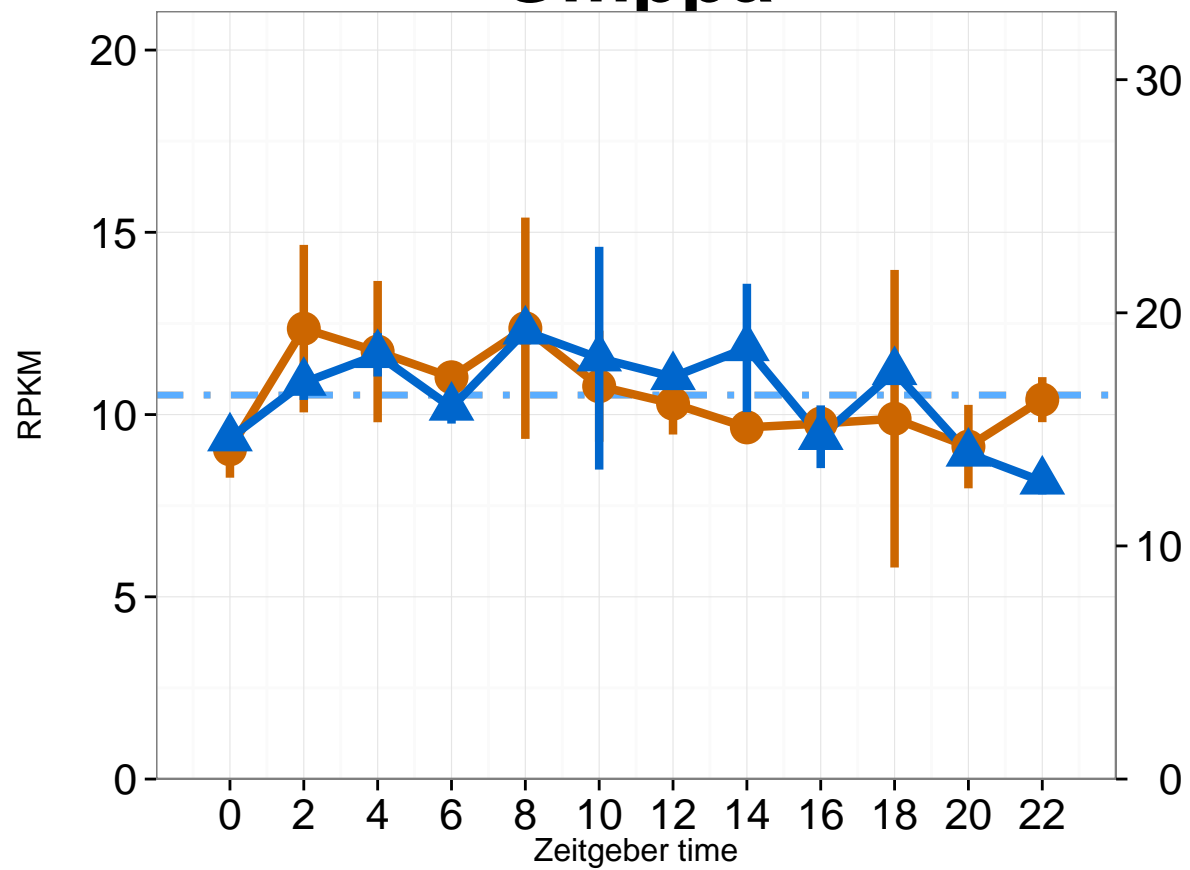

## Gmppa

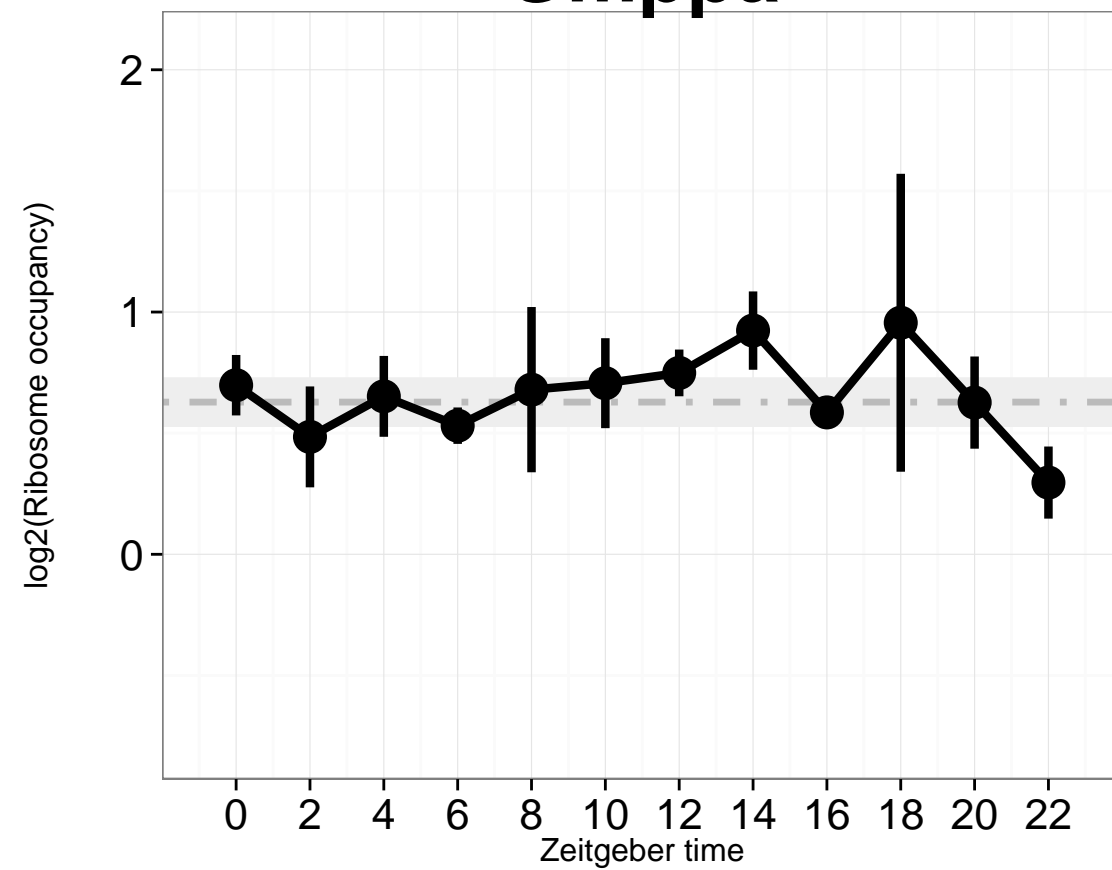

Supplement: SuppDataset_1.zip [file Gmppa_set_A.pdf › Supplemental Dataset 1/A-mRNA_nonrhyth_translation_nonrhyth/Gmppa_set_A.pdf]

# Gmpr2

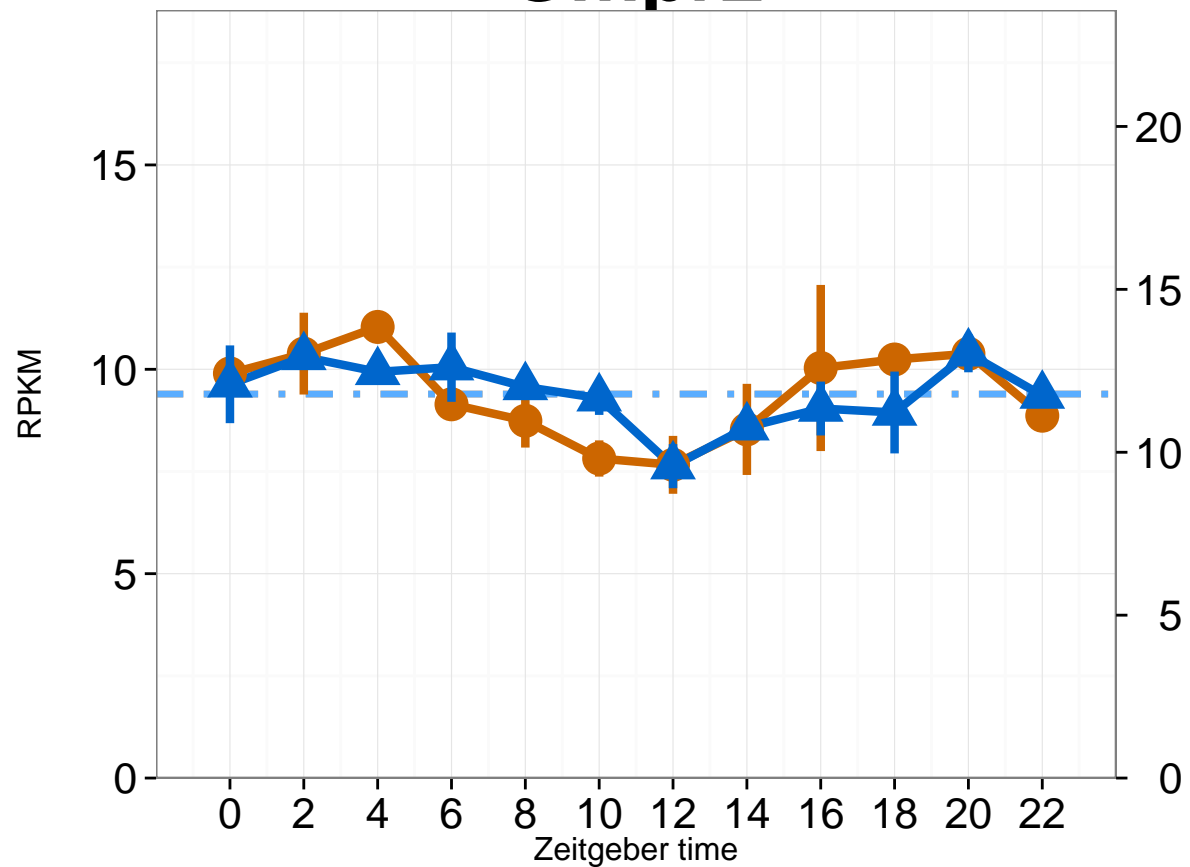

# Gmpr2

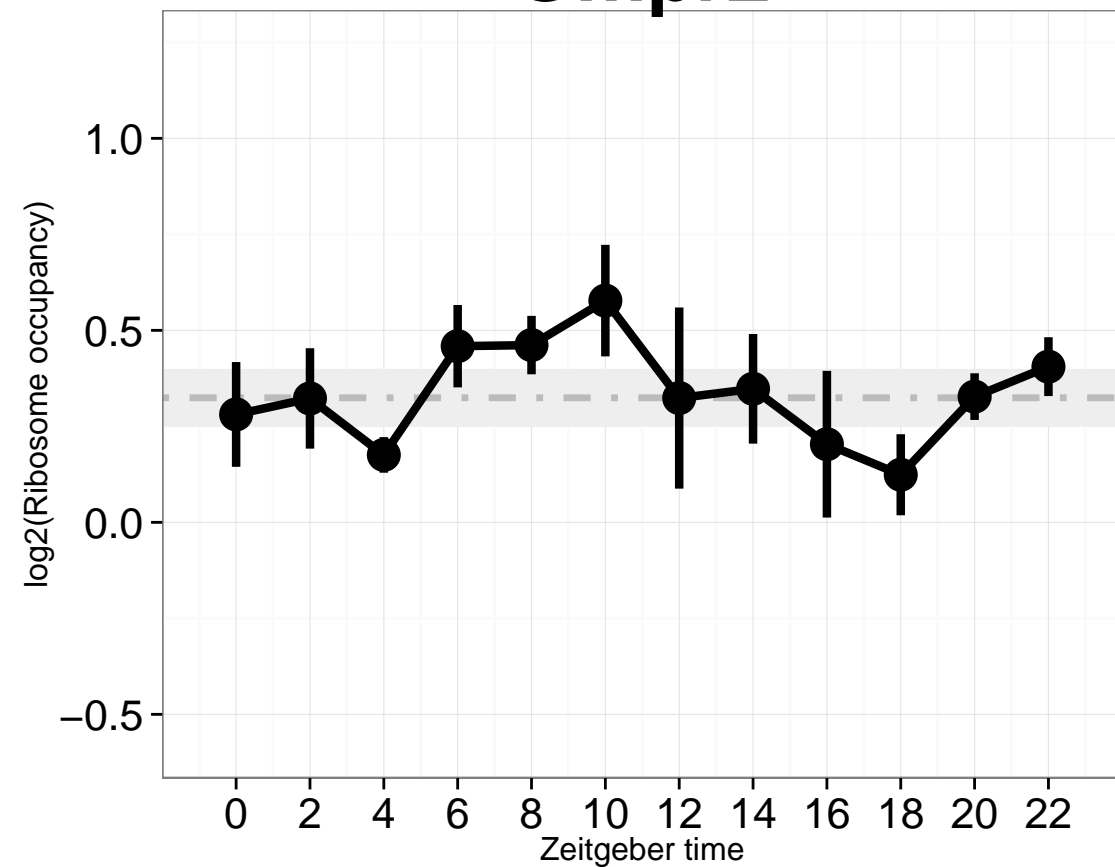

Supplement: SuppDataset_1.zip [file Gmpr2_set_A.pdf › Supplemental Dataset 1/A-mRNA_nonrhyth_translation_nonrhyth/Gmpr2_set_A.pdf]

## Gmps

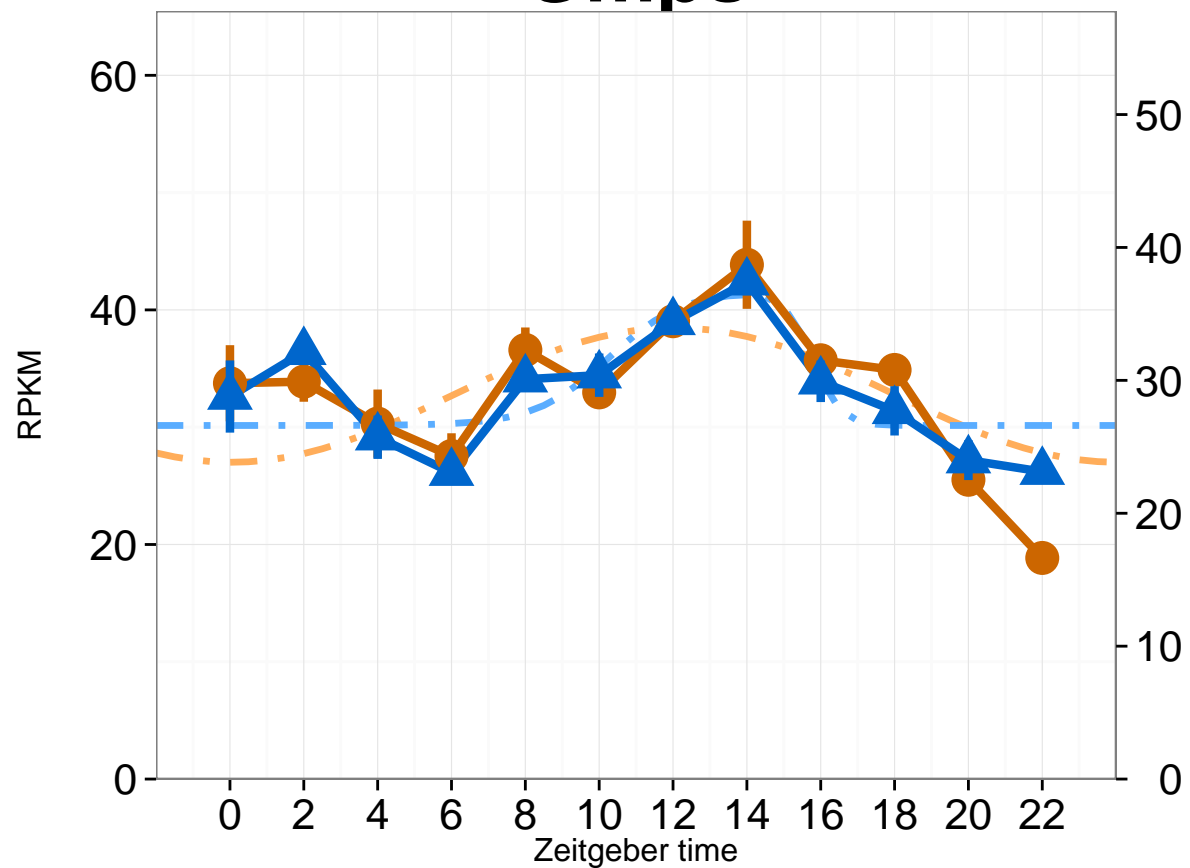

## Gmps

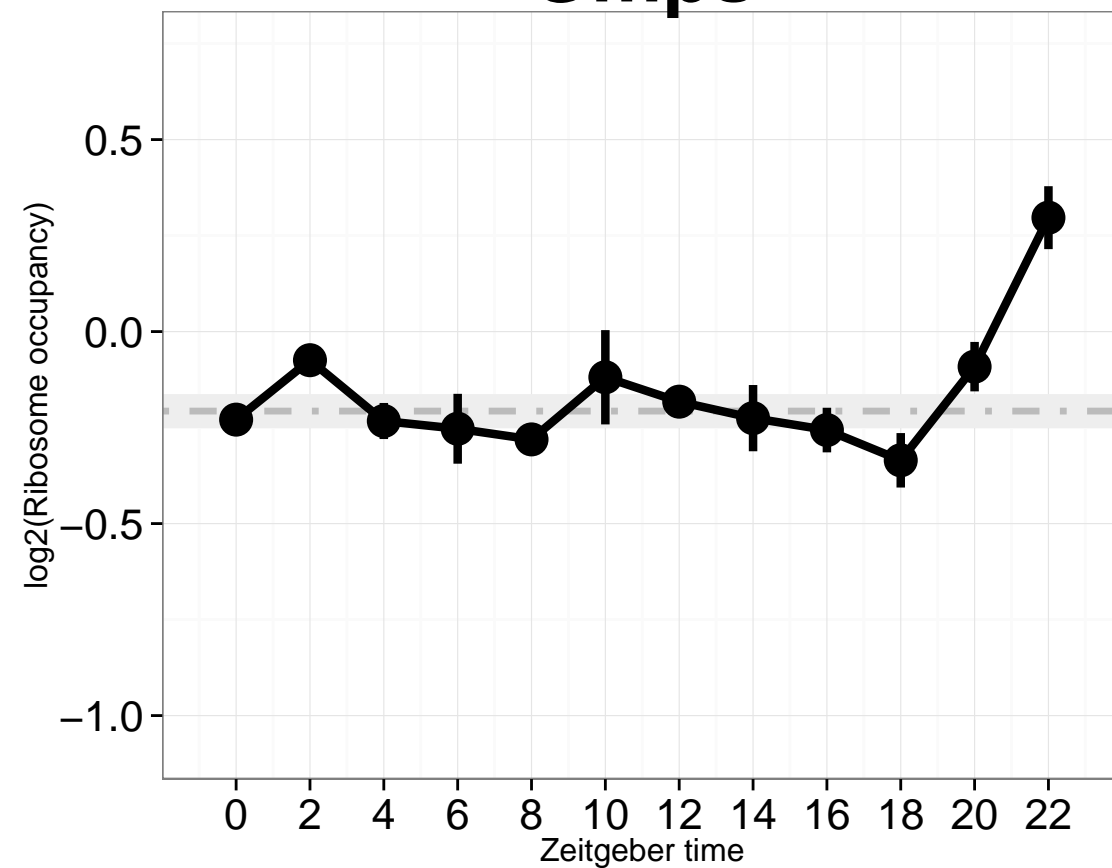

Supplement: SuppDataset_1.zip [file Gmps_set_A.pdf › Supplemental Dataset 1/A-mRNA_nonrhyth_translation_nonrhyth/Gmps_set_A.pdf]

## Gna11

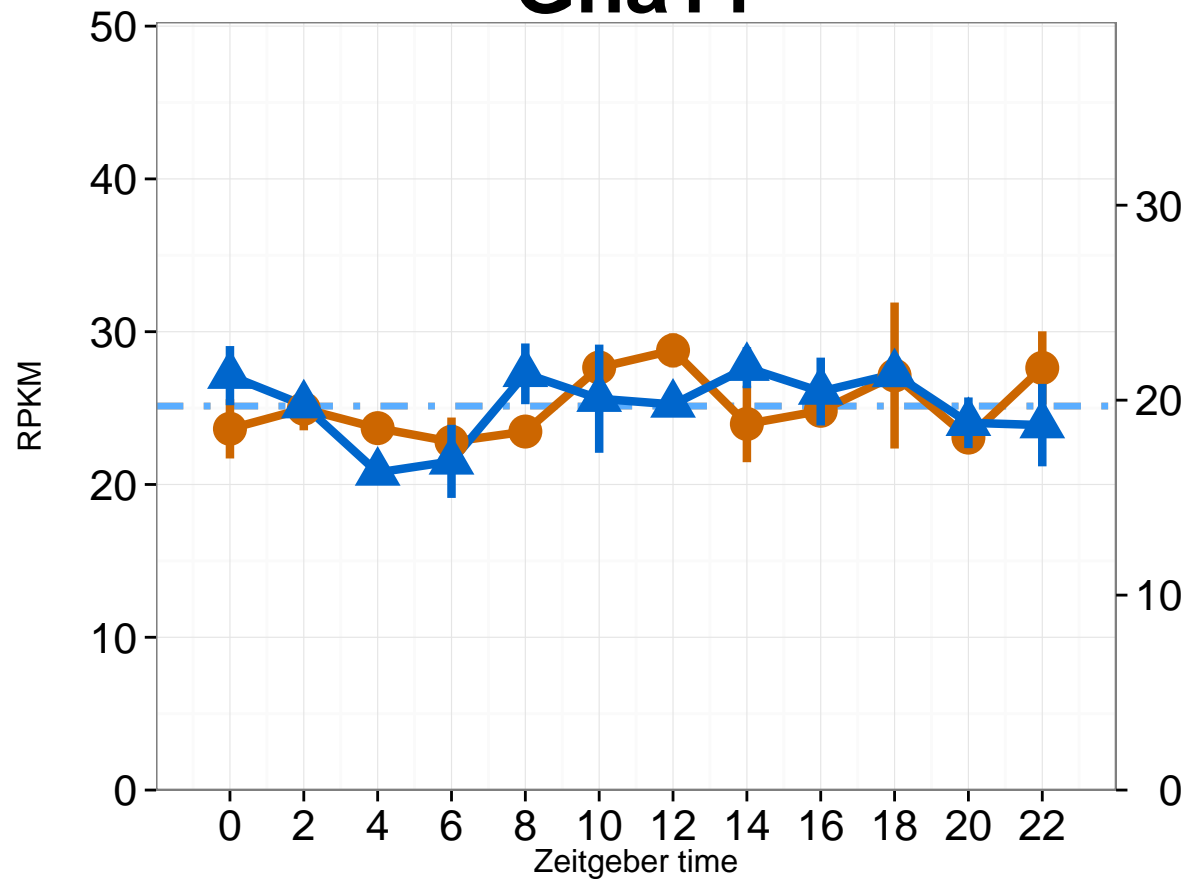

## Gna11

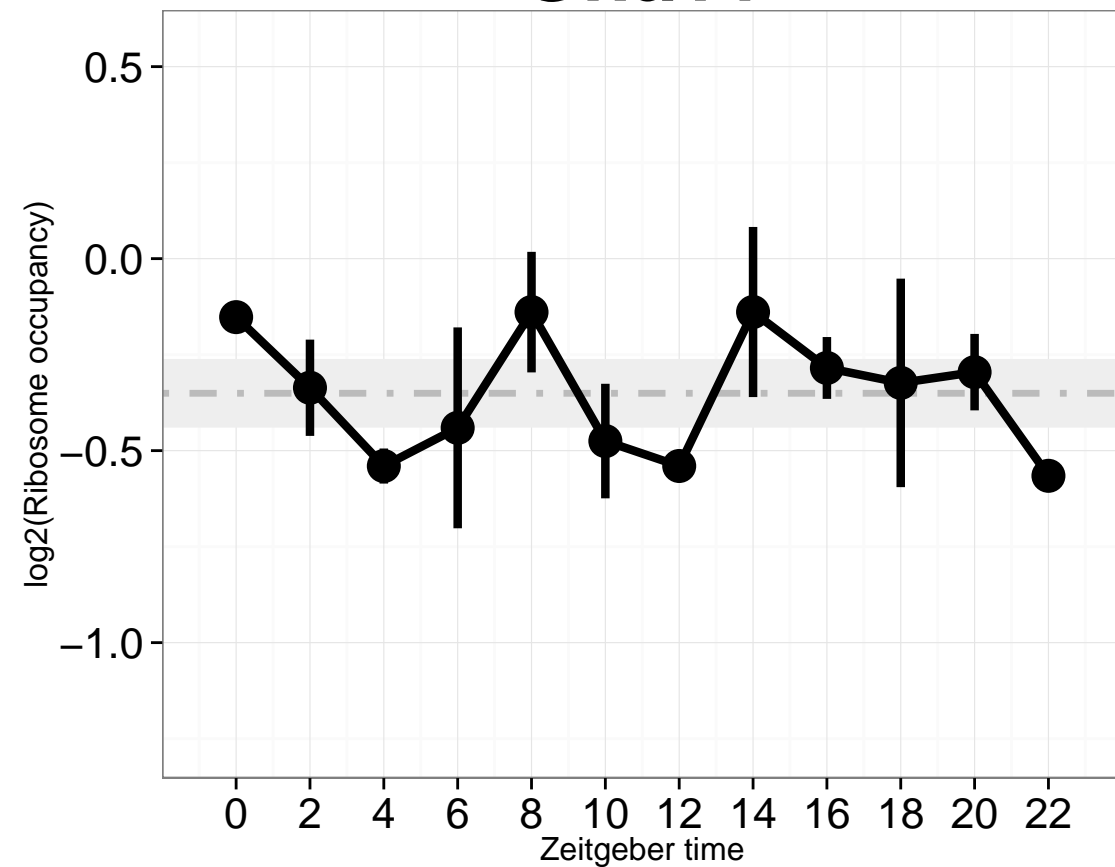

Supplement: SuppDataset_1.zip [file Gna11_set_A.pdf › Supplemental Dataset 1/A-mRNA_nonrhyth_translation_nonrhyth/Gna11_set_A.pdf]

## Gna12

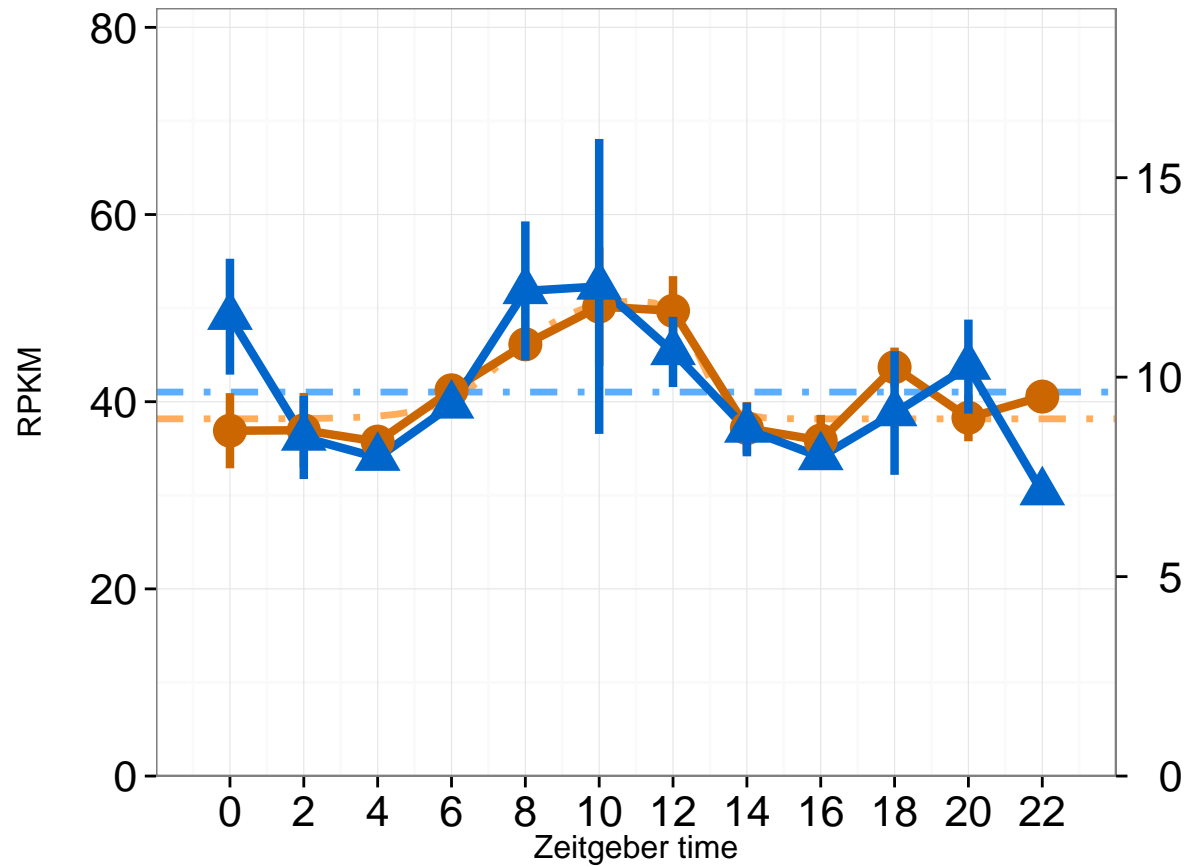

## Gna12

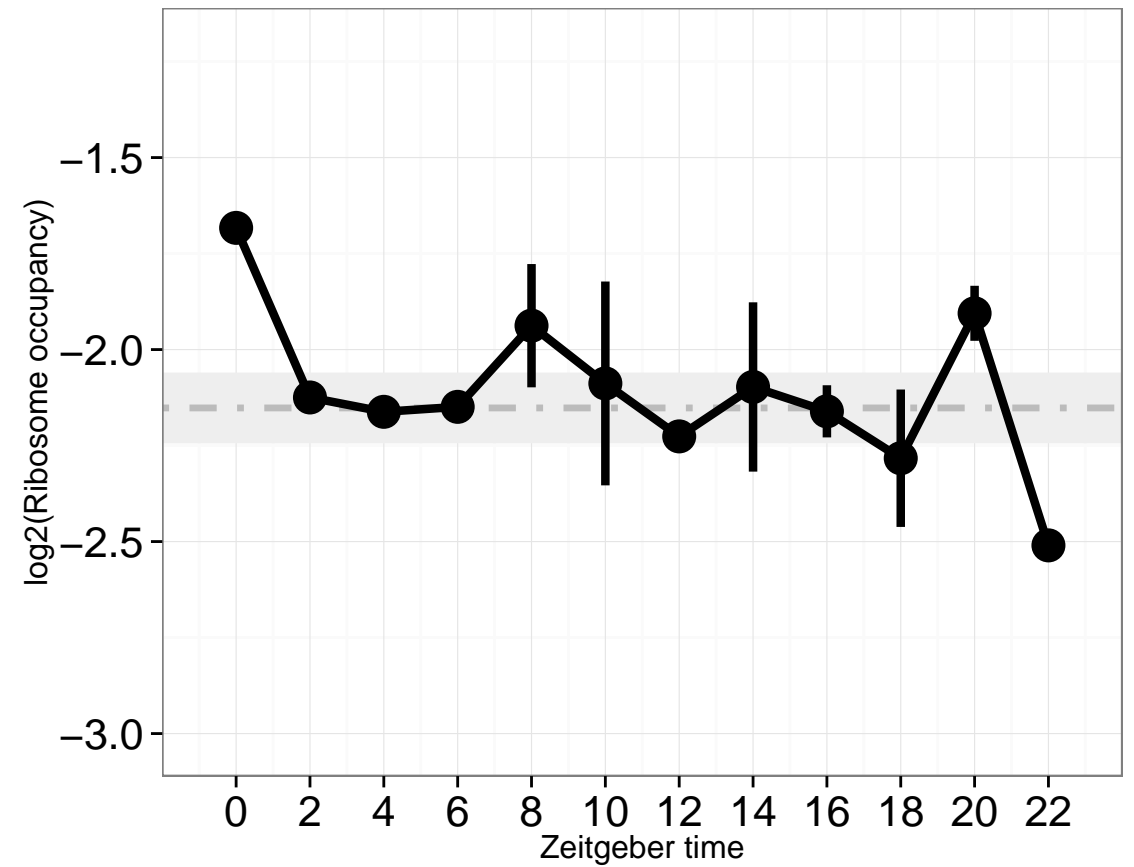

Supplement: SuppDataset_1.zip [file Gna12_set_A.pdf › Supplemental Dataset 1/A-mRNA_nonrhyth_translation_nonrhyth/Gna12_set_A.pdf]

## Gna13

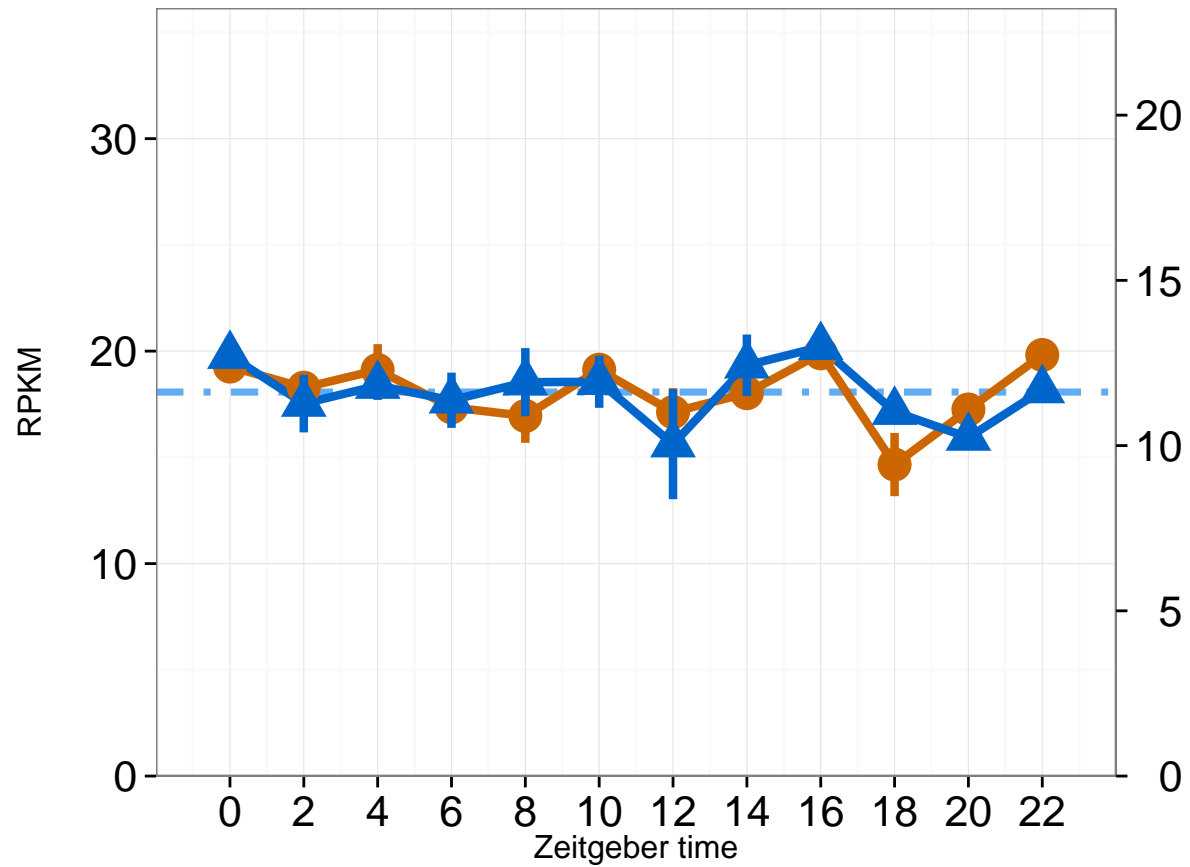

## Gna13

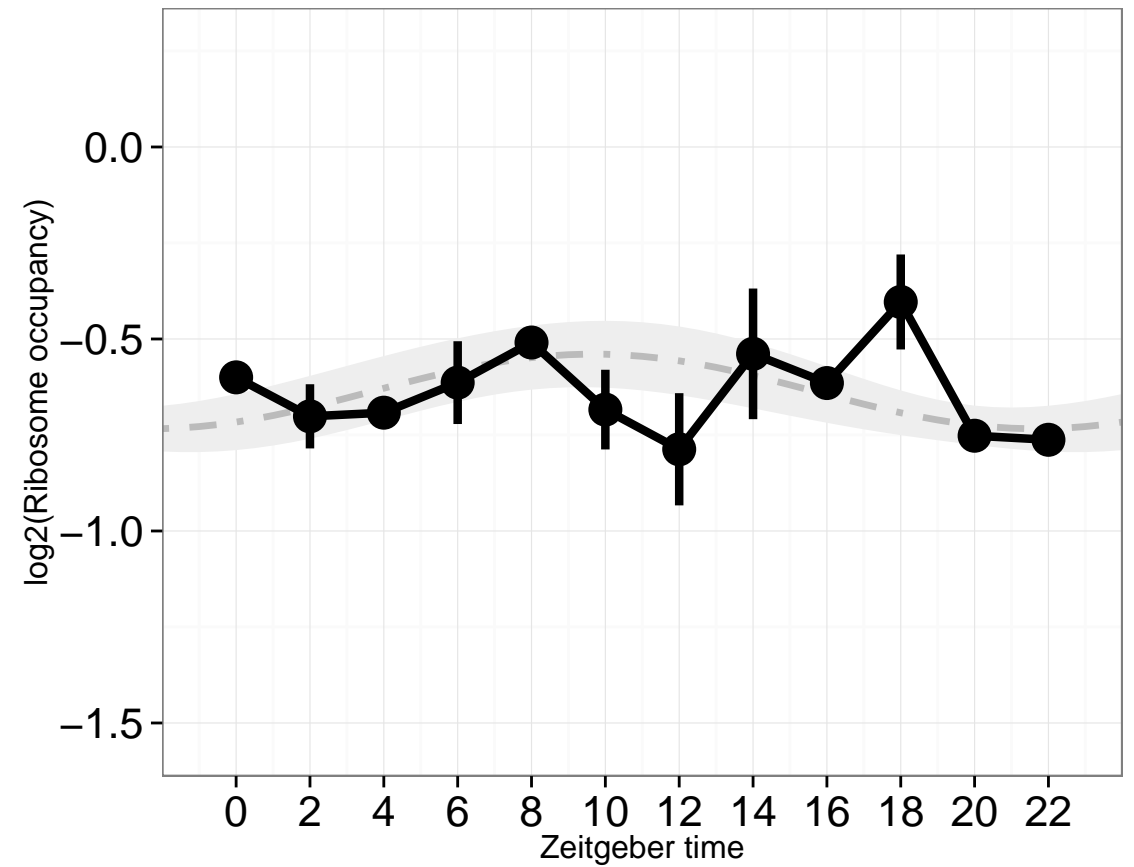

Supplement: SuppDataset_1.zip [file Gna13_set_A.pdf › Supplemental Dataset 1/A-mRNA_nonrhyth_translation_nonrhyth/Gna13_set_A.pdf]

# Gna14

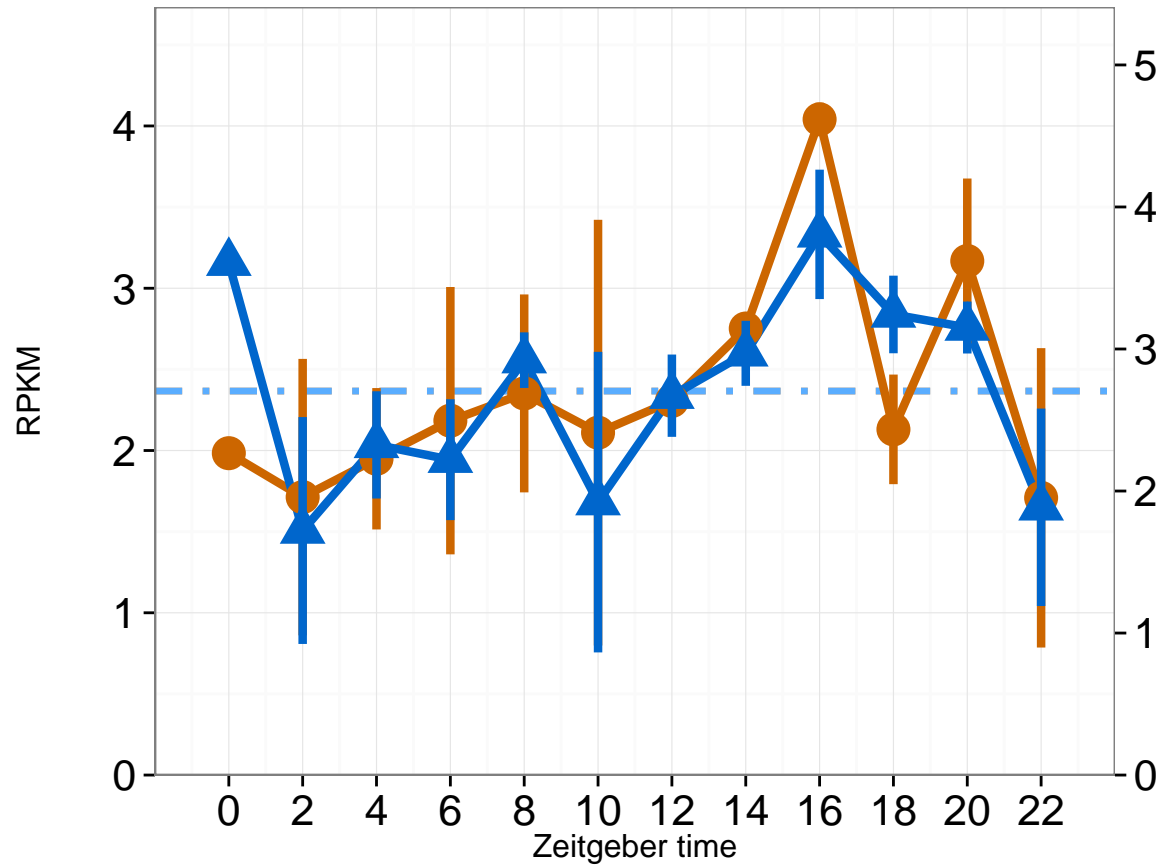

# Gna14

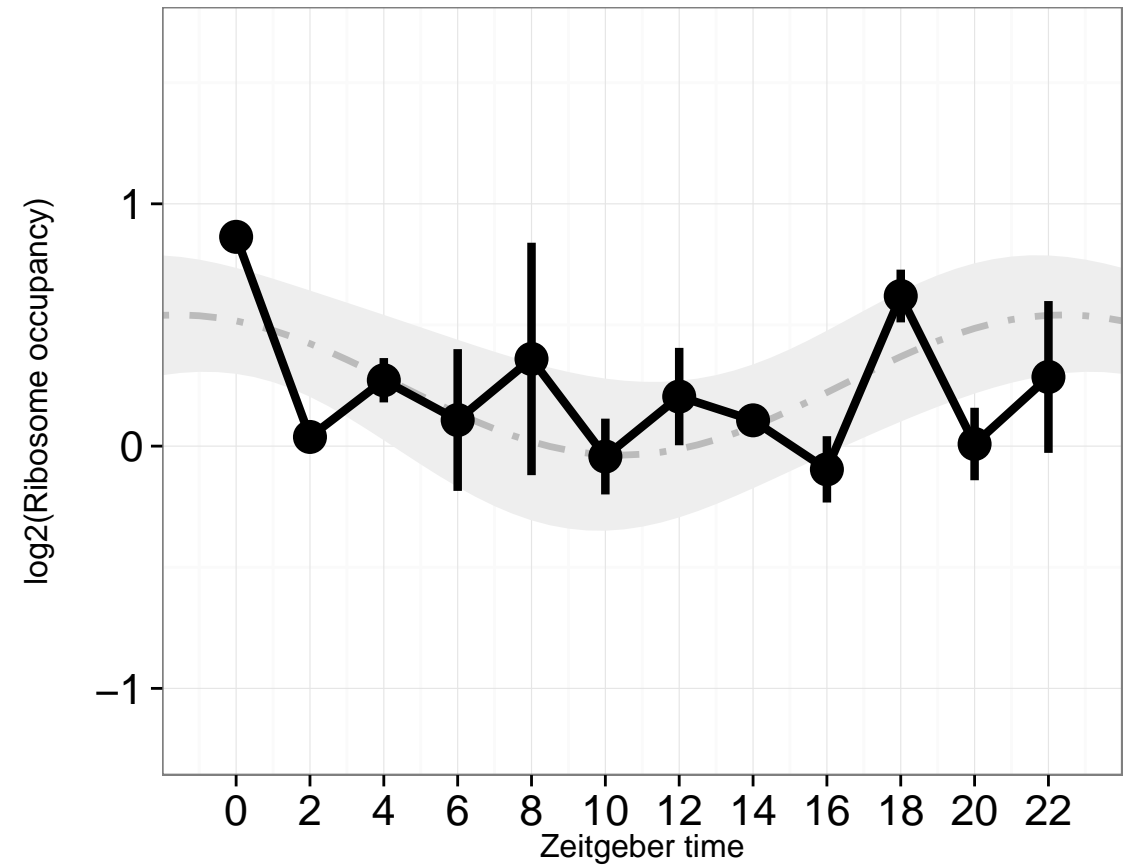

Supplement: SuppDataset_1.zip [file Gna14_set_A.pdf › Supplemental Dataset 1/A-mRNA_nonrhyth_translation_nonrhyth/Gna14_set_A.pdf]

## Gnai2

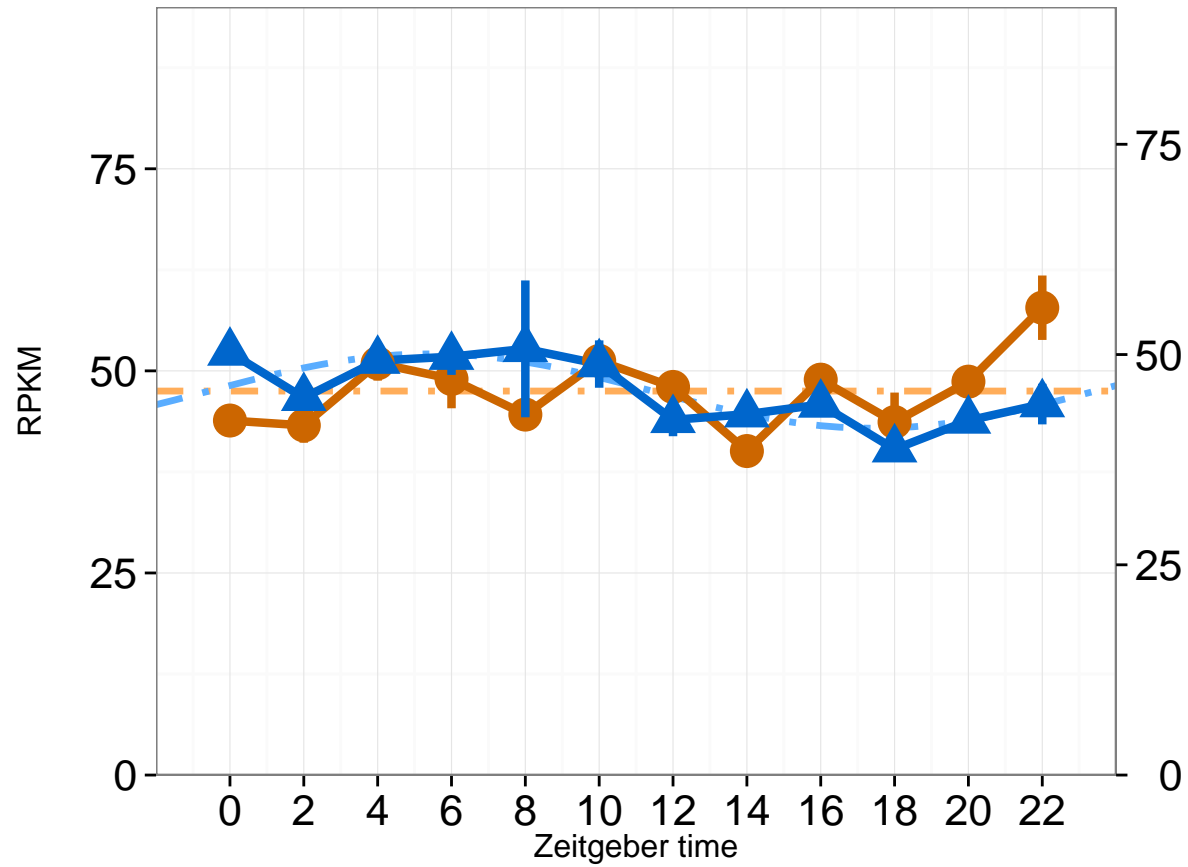

## Gnai2

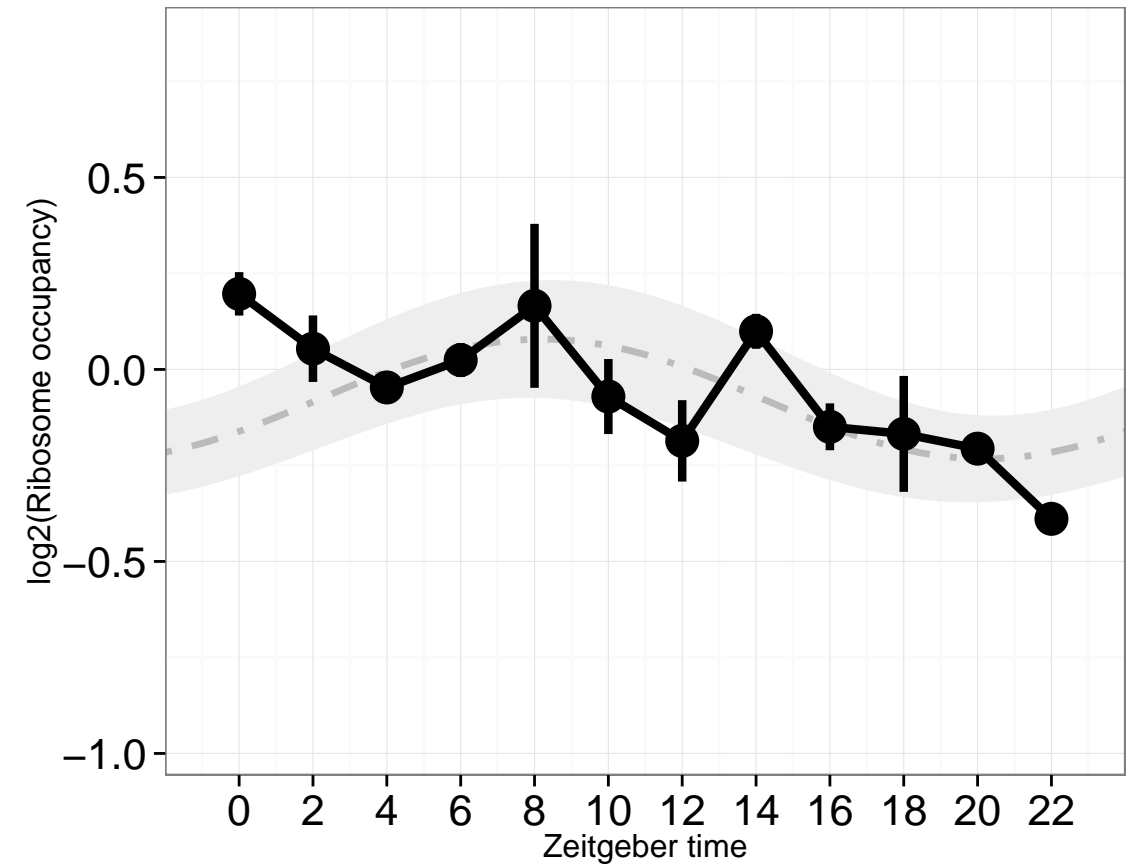

Supplement: SuppDataset_1.zip [file Gnai2_set_A.pdf › Supplemental Dataset 1/A-mRNA_nonrhyth_translation_nonrhyth/Gnai2_set_A.pdf]

## Gnai3

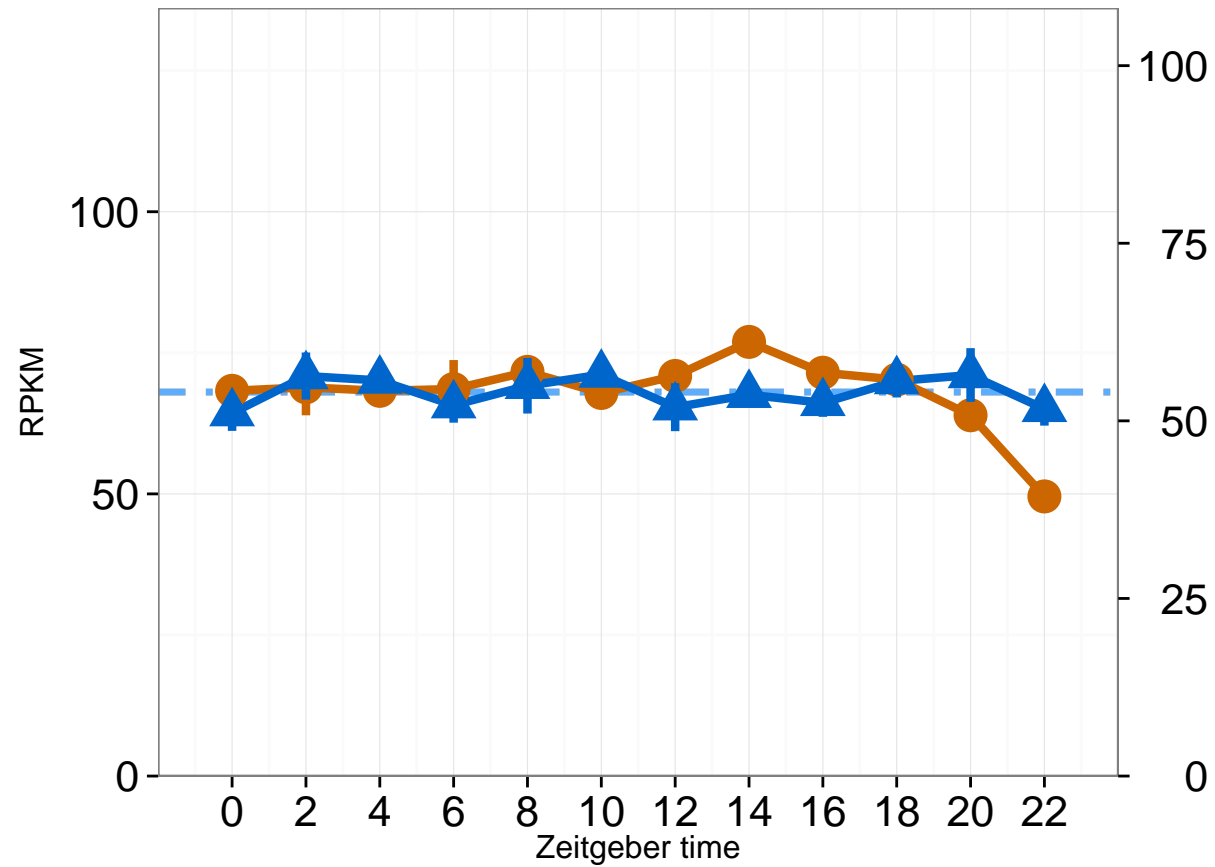

## Gnai3

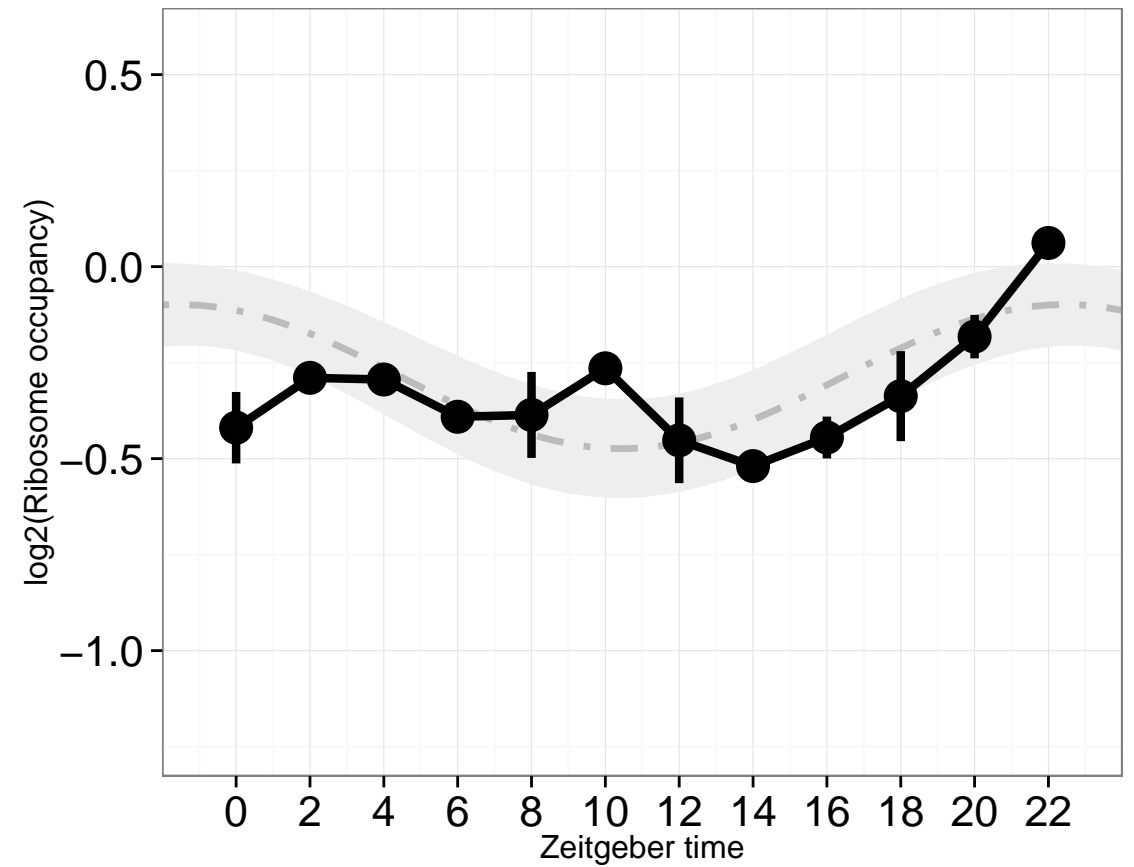

Supplement: SuppDataset_1.zip [file Gnai3_set_A.pdf › Supplemental Dataset 1/A-mRNA_nonrhyth_translation_nonrhyth/Gnai3_set_A.pdf]

## Gnaq

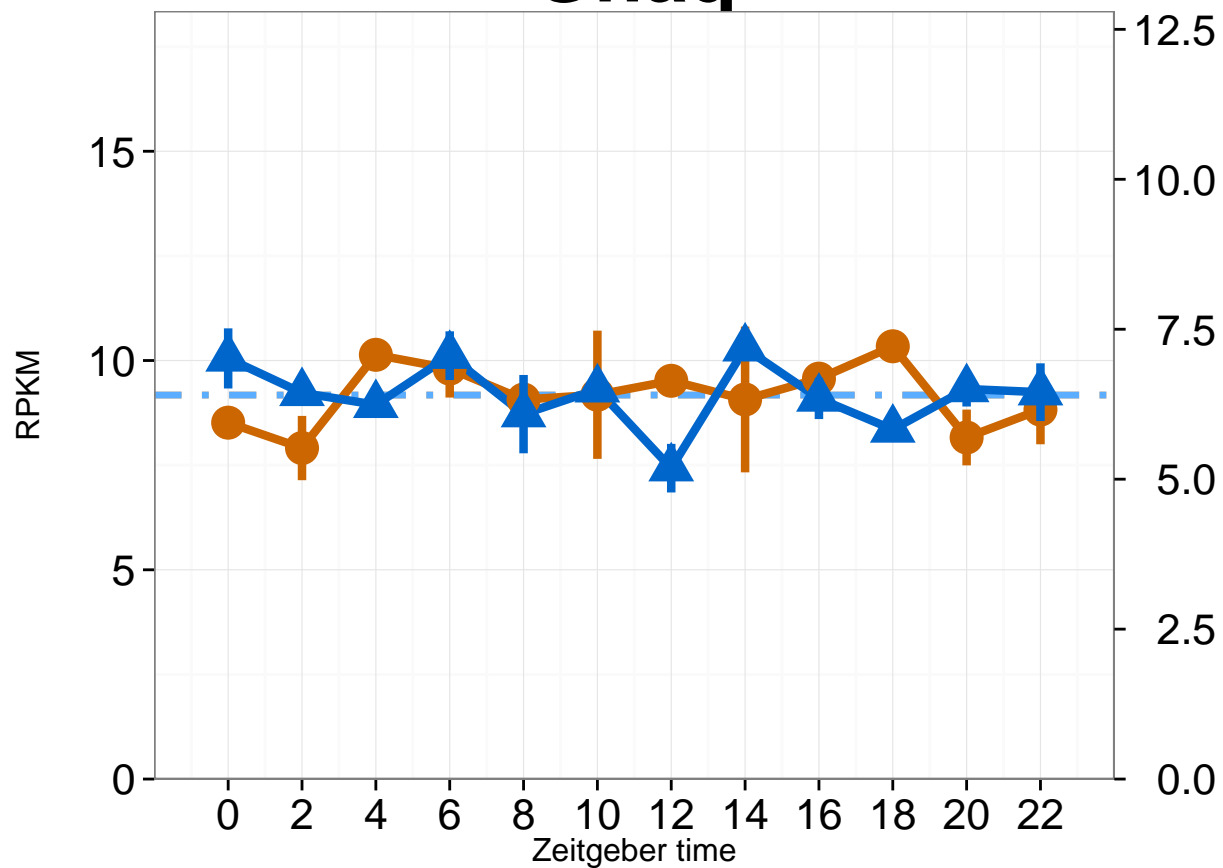

## Gnaq

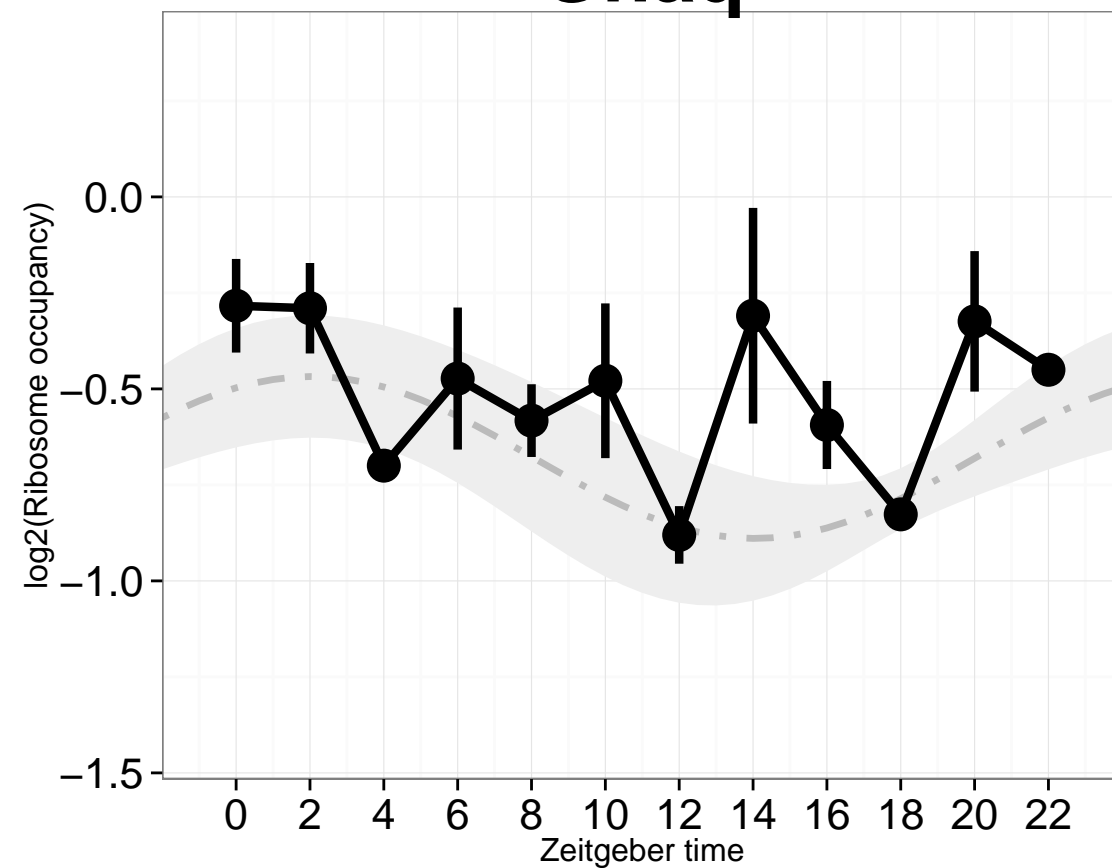

Supplement: SuppDataset_1.zip [file Gnaq_set_A.pdf › Supplemental Dataset 1/A-mRNA_nonrhyth_translation_nonrhyth/Gnaq_set_A.pdf]

## Gnas

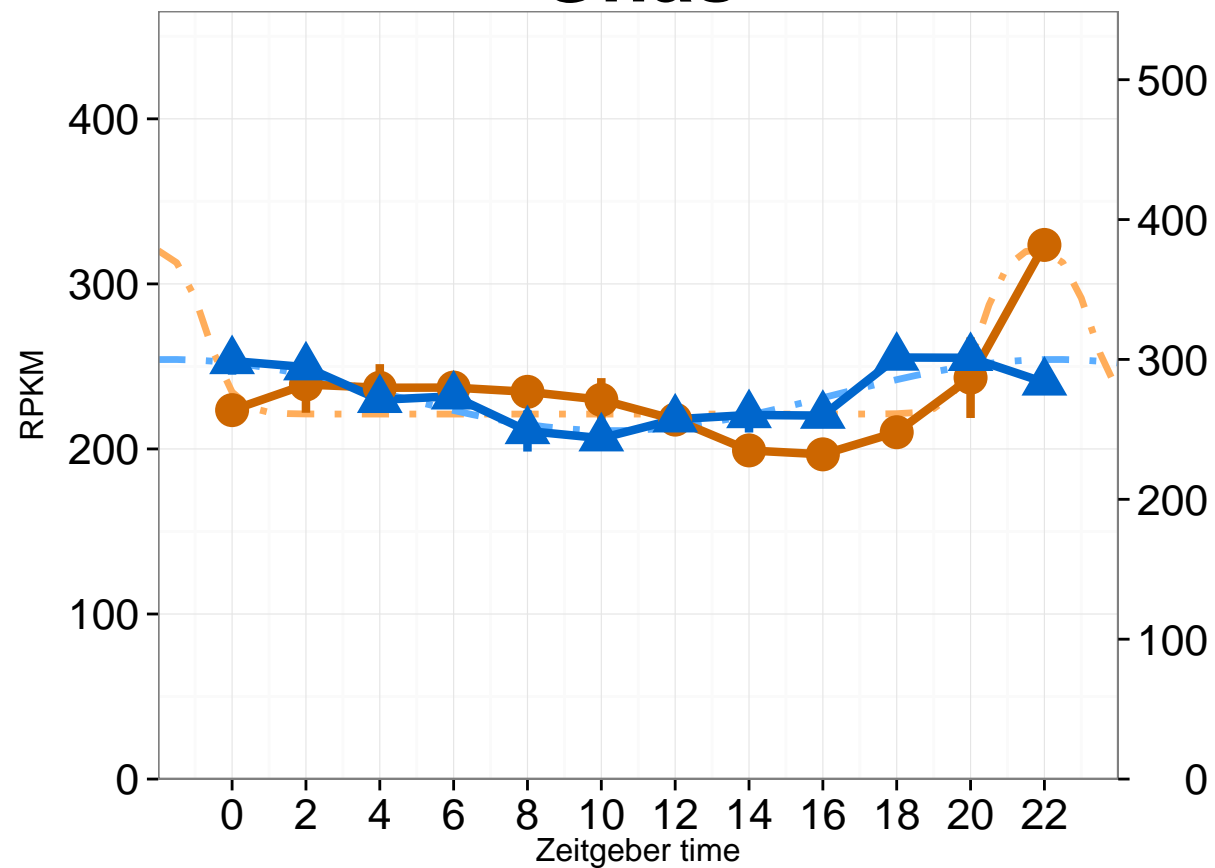

## Gnas

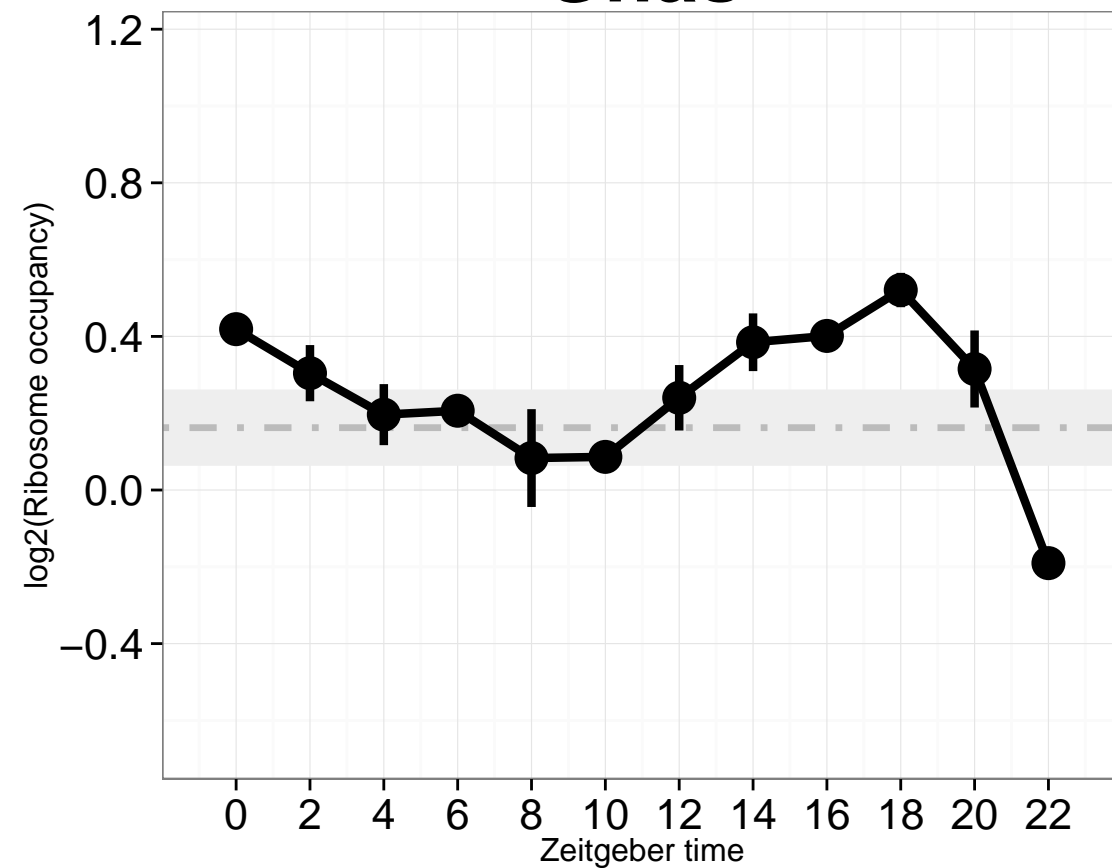

Supplement: SuppDataset_1.zip [file Gnas_set_A.pdf › Supplemental Dataset 1/A-mRNA_nonrhyth_translation_nonrhyth/Gnas_set_A.pdf]

# Gnat2

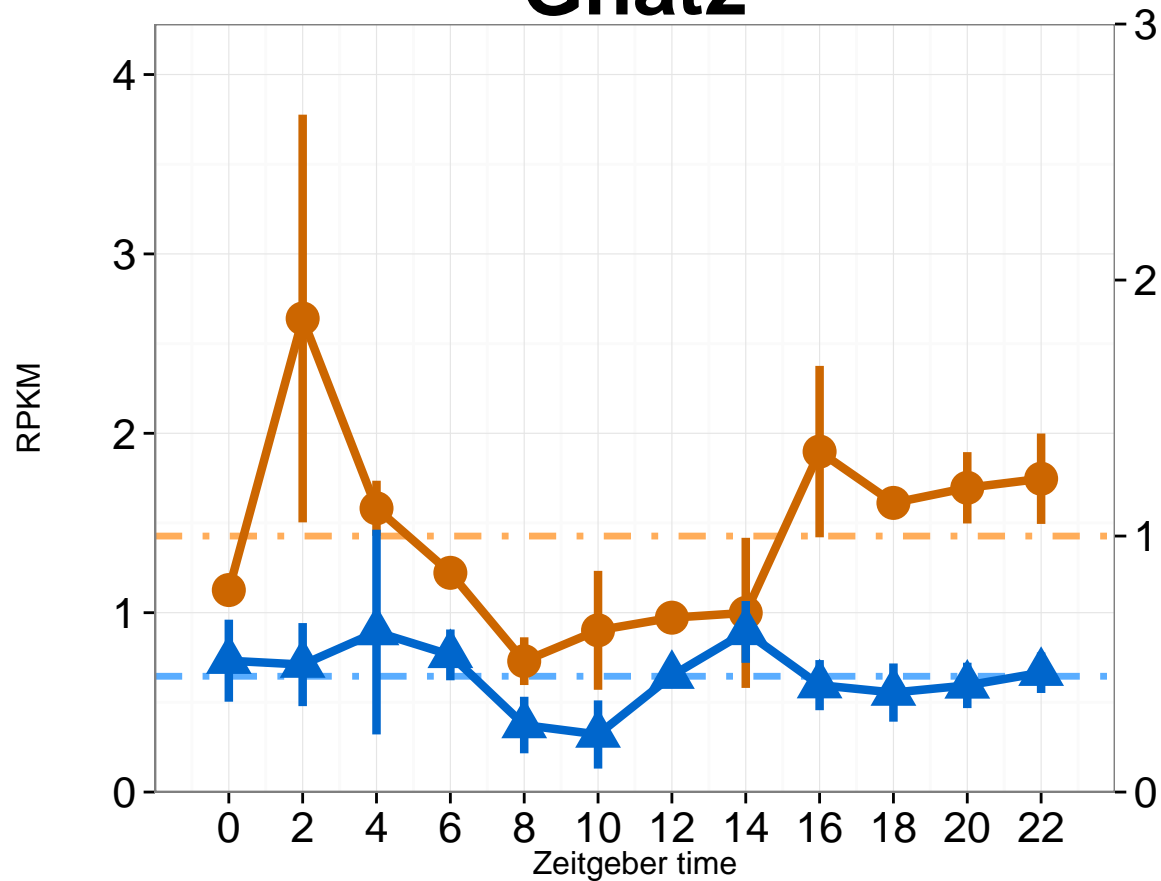

# Gnat2

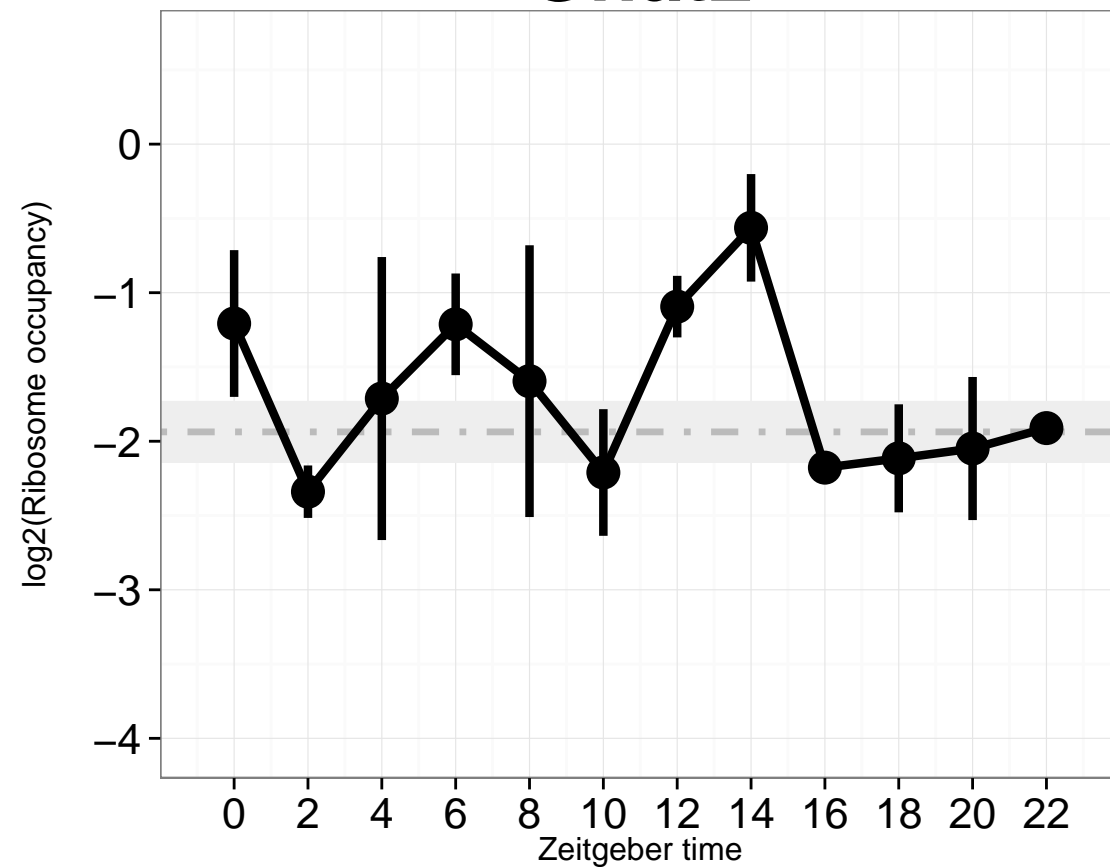

Supplement: SuppDataset_1.zip [file Gnat2_set_A.pdf › Supplemental Dataset 1/A-mRNA_nonrhyth_translation_nonrhyth/Gnat2_set_A.pdf]

# Gnb1

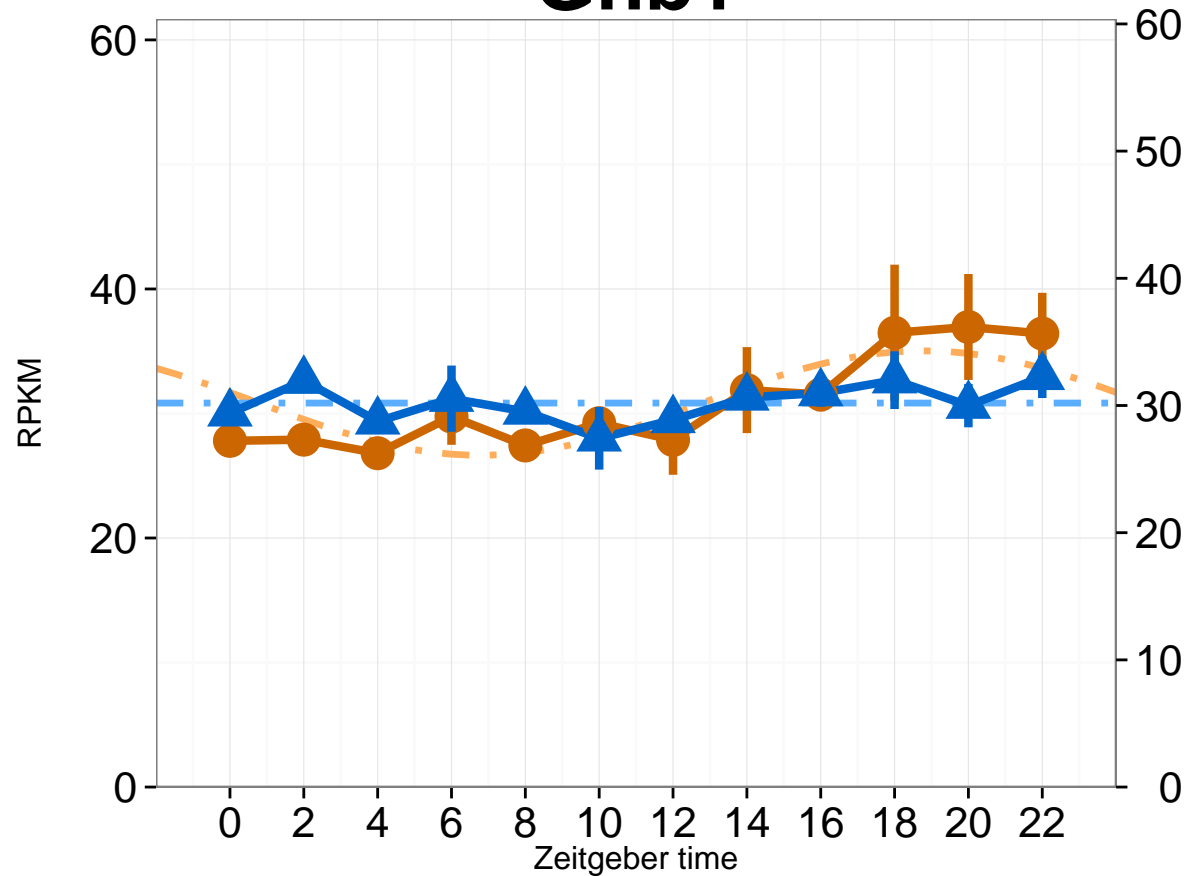

# Gnb1

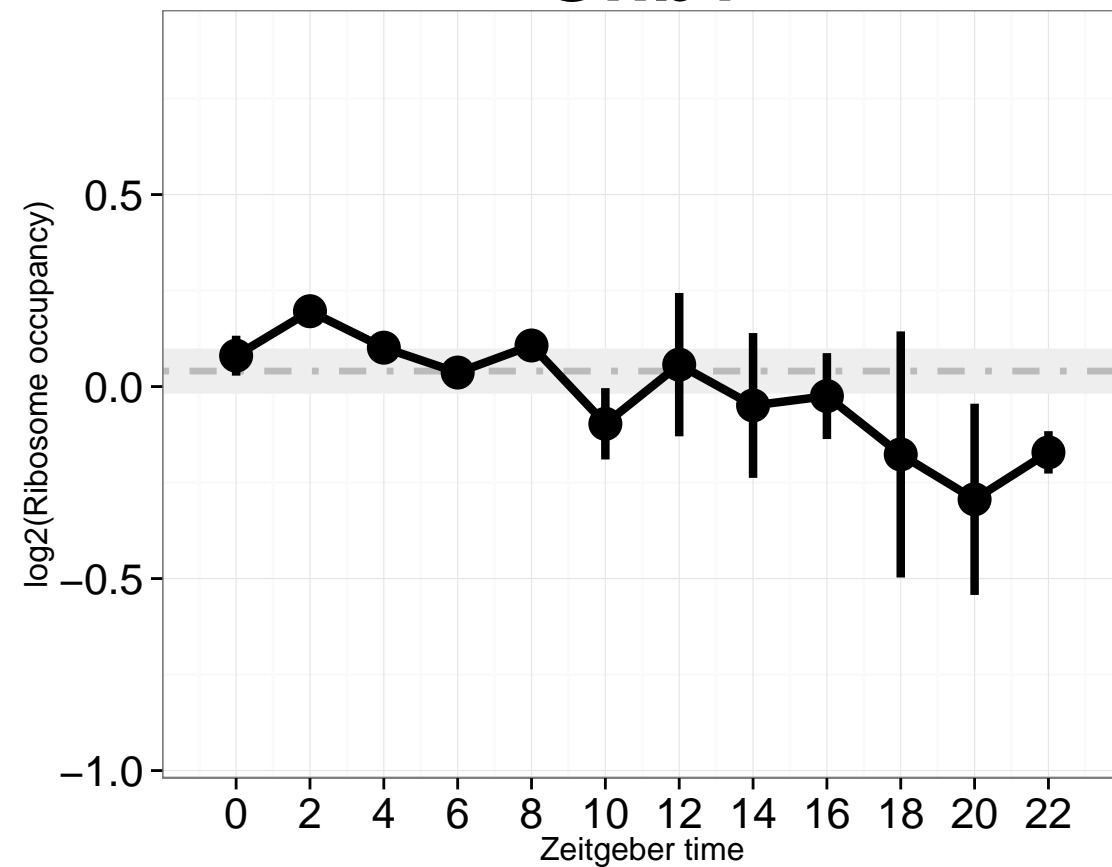

Supplement: SuppDataset_1.zip [file Gnb1_set_A.pdf › Supplemental Dataset 1/A-mRNA_nonrhyth_translation_nonrhyth/Gnb1_set_A.pdf]

# Gnb2

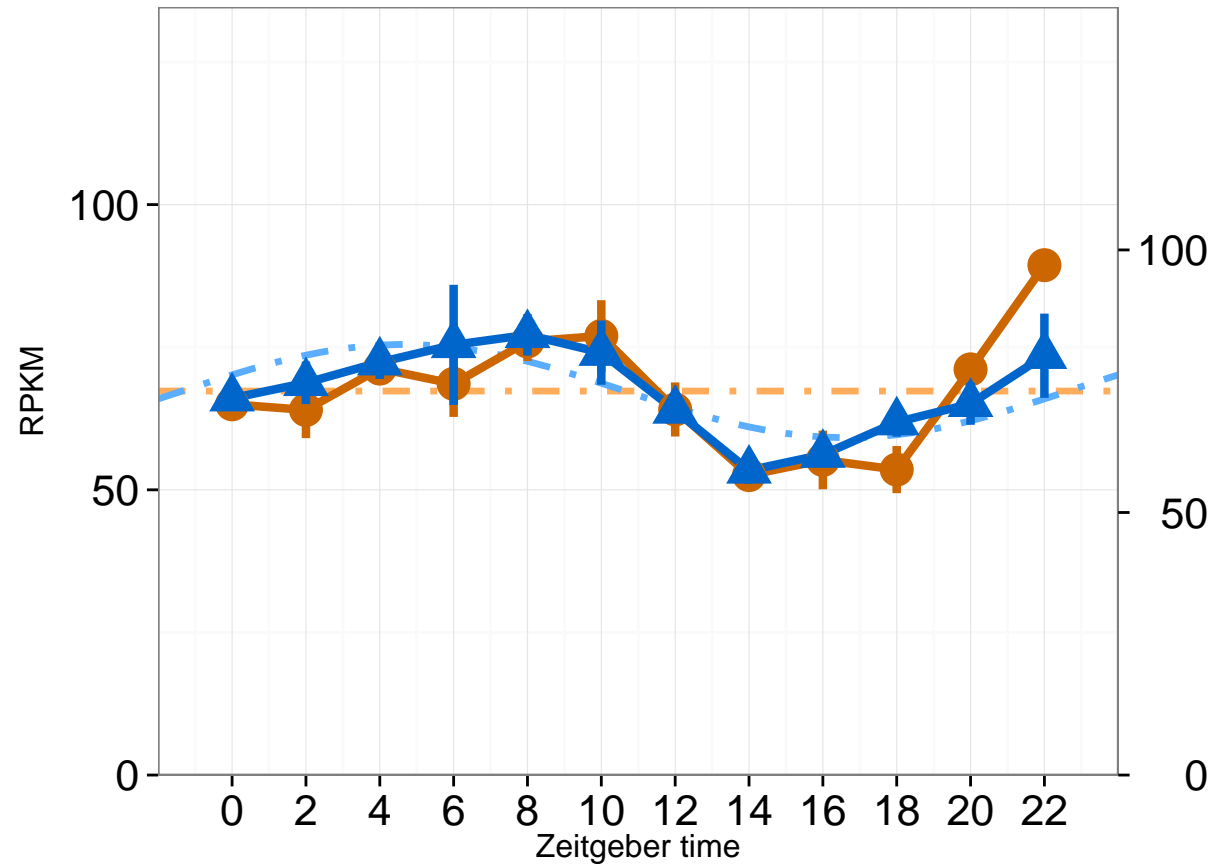

# Gnb2

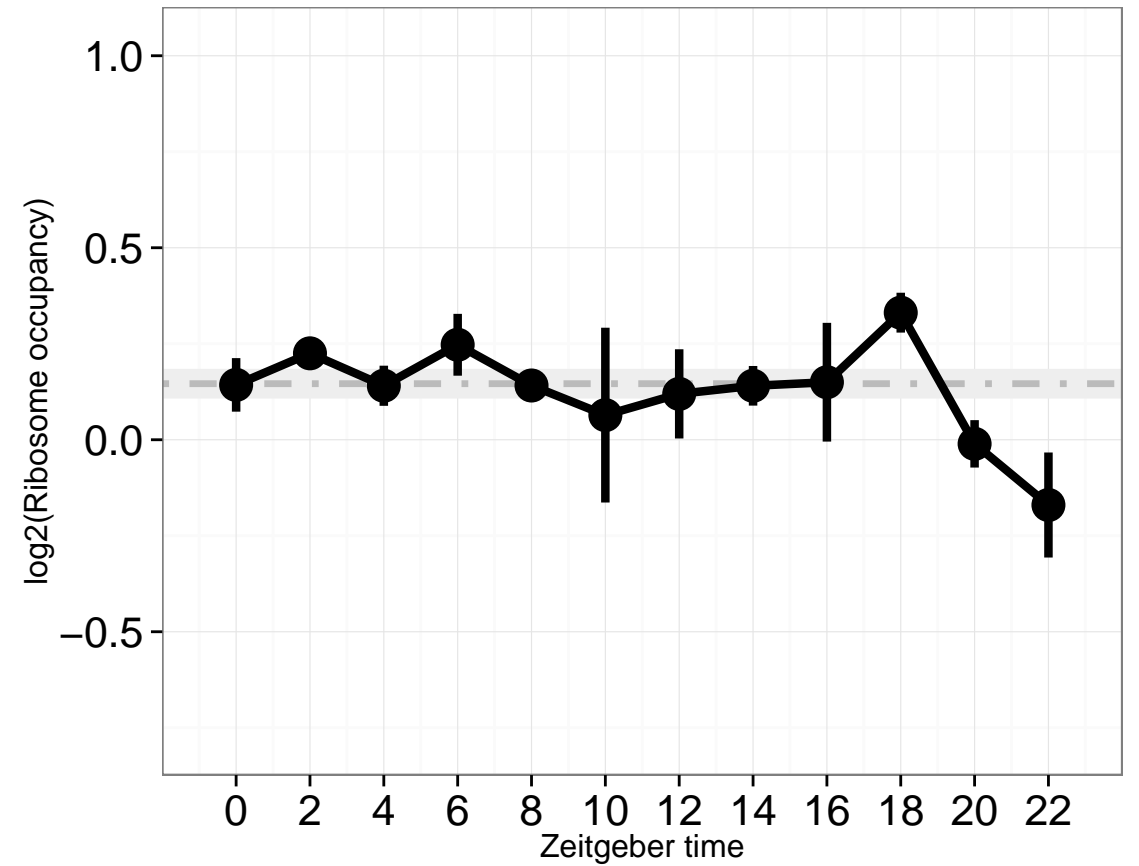

Supplement: SuppDataset_1.zip [file Gnb2_set_A.pdf › Supplemental Dataset 1/A-mRNA_nonrhyth_translation_nonrhyth/Gnb2_set_A.pdf]

# Gnb4

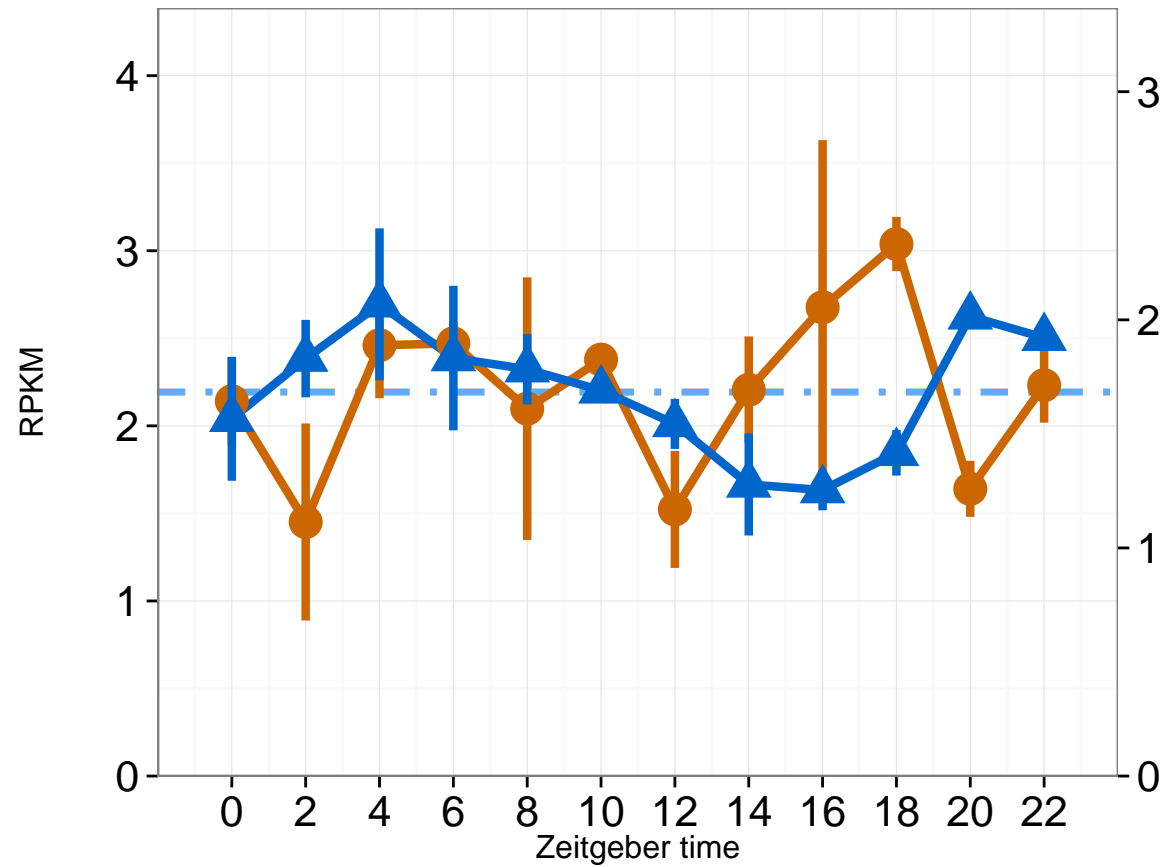

# Gnb4

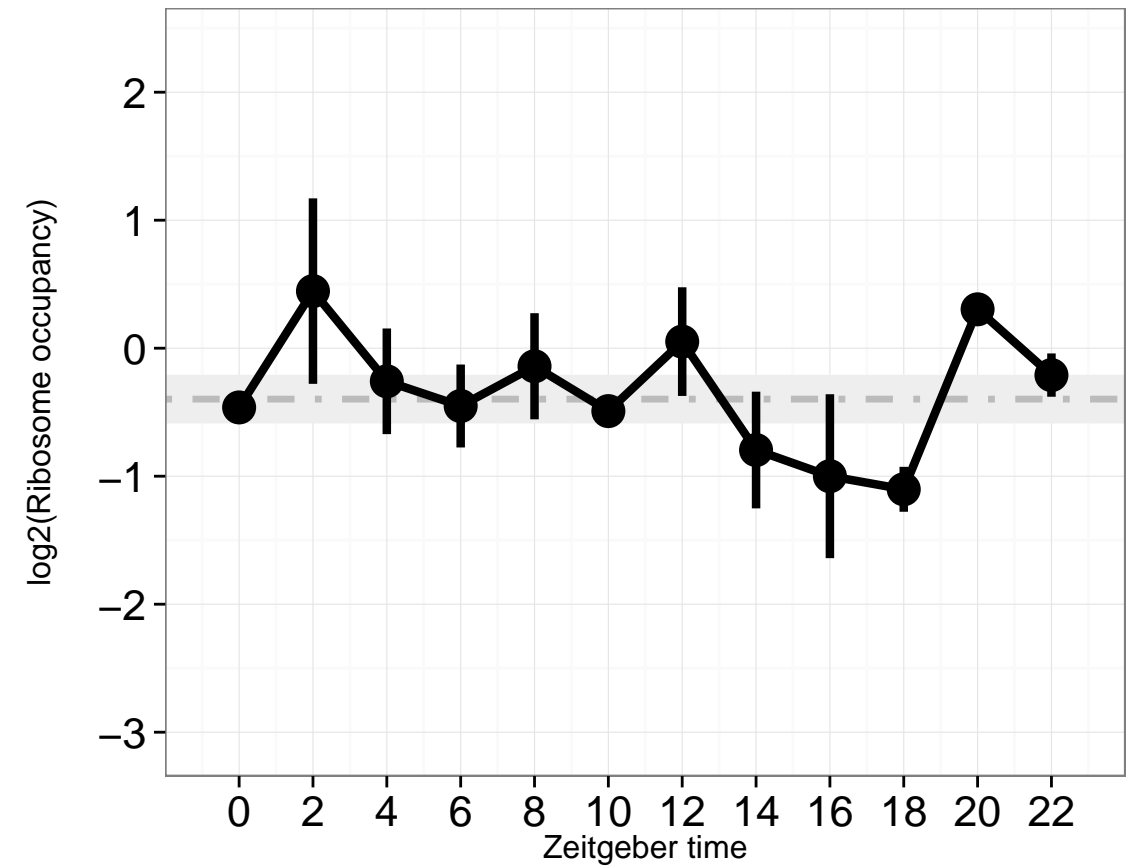

Supplement: SuppDataset_1.zip [file Gnb4_set_A.pdf › Supplemental Dataset 1/A-mRNA_nonrhyth_translation_nonrhyth/Gnb4_set_A.pdf]

# Gng10

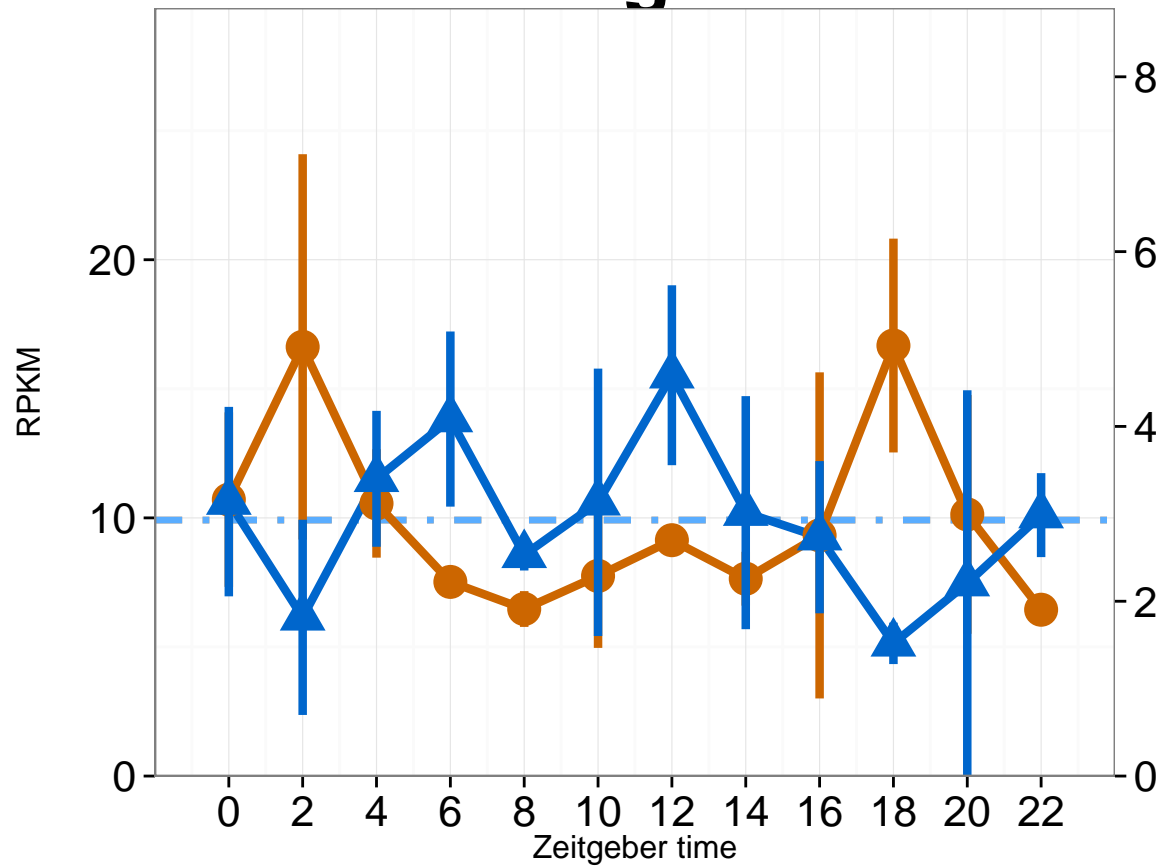

# Gng10

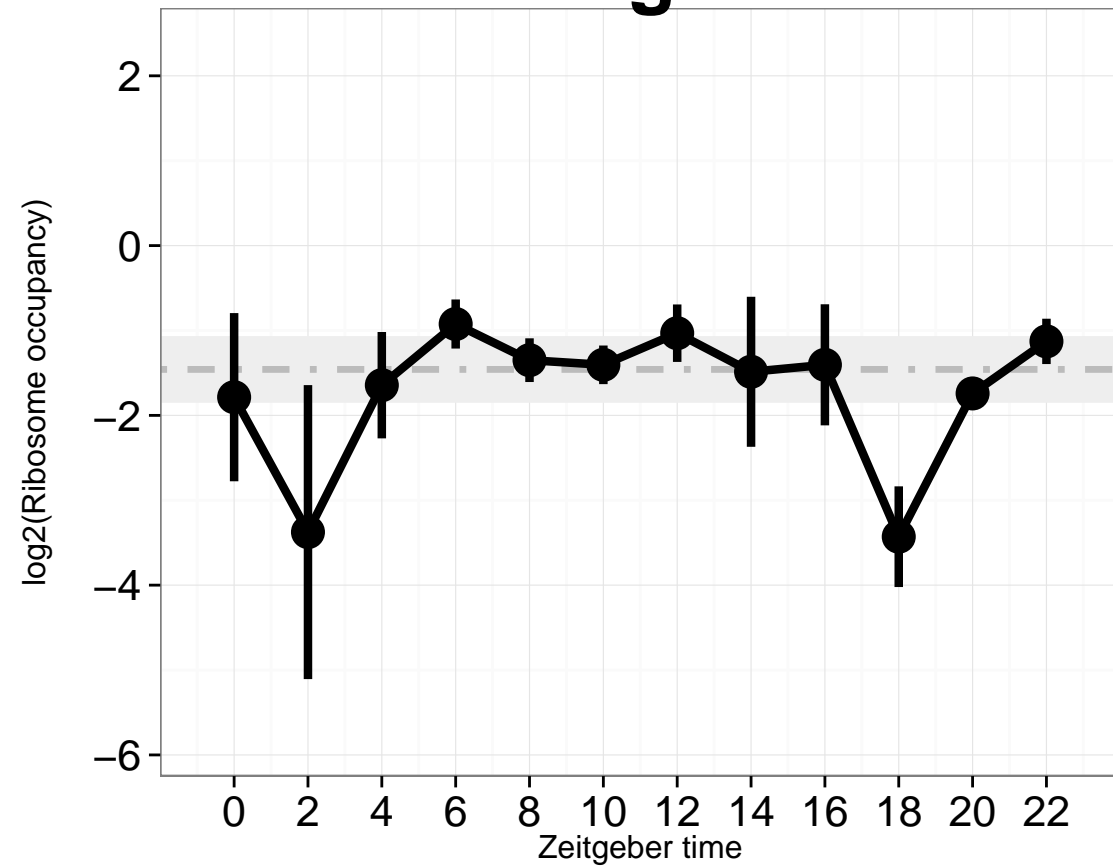

Supplement: SuppDataset_1.zip [file Gng10_set_A.pdf › Supplemental Dataset 1/A-mRNA_nonrhyth_translation_nonrhyth/Gng10_set_A.pdf]

## Gng12

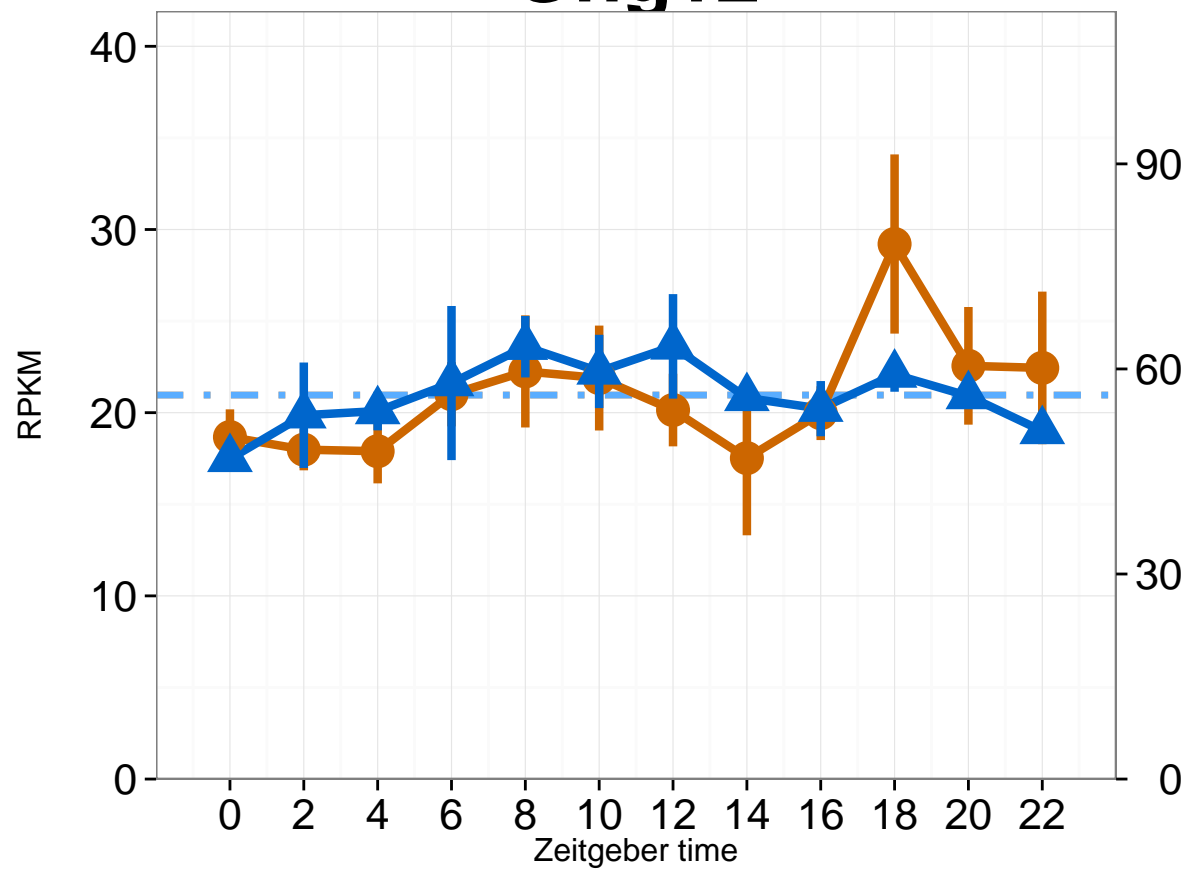

## Gng12

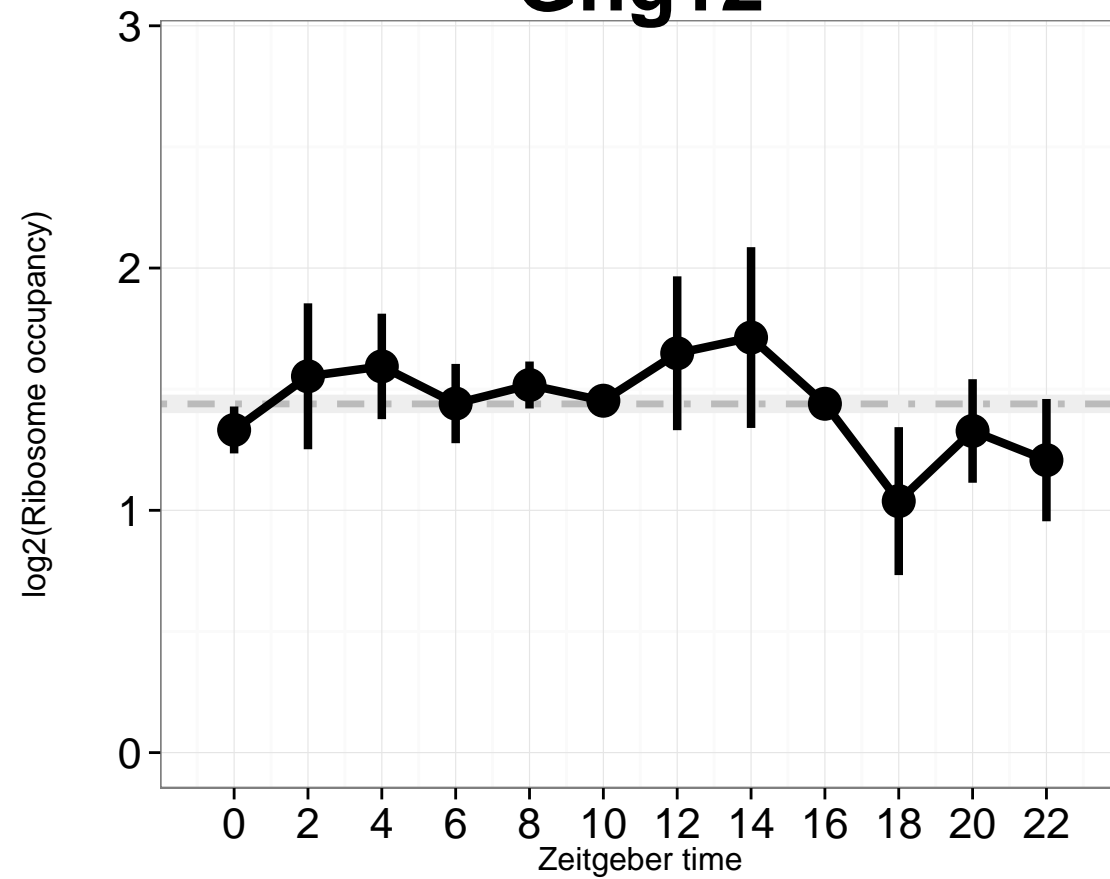

Supplement: SuppDataset_1.zip [file Gng12_set_A.pdf › Supplemental Dataset 1/A-mRNA_nonrhyth_translation_nonrhyth/Gng12_set_A.pdf]

## Gng5

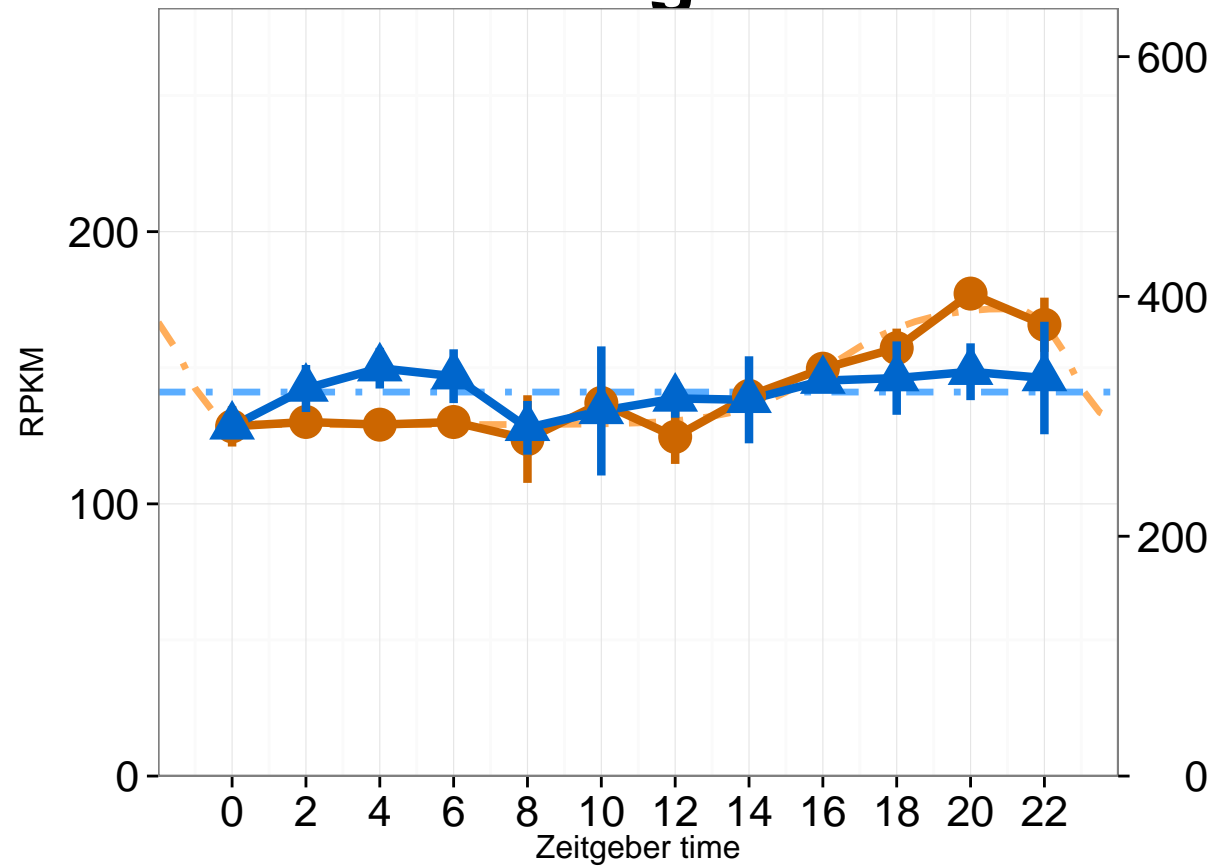

## Gng5

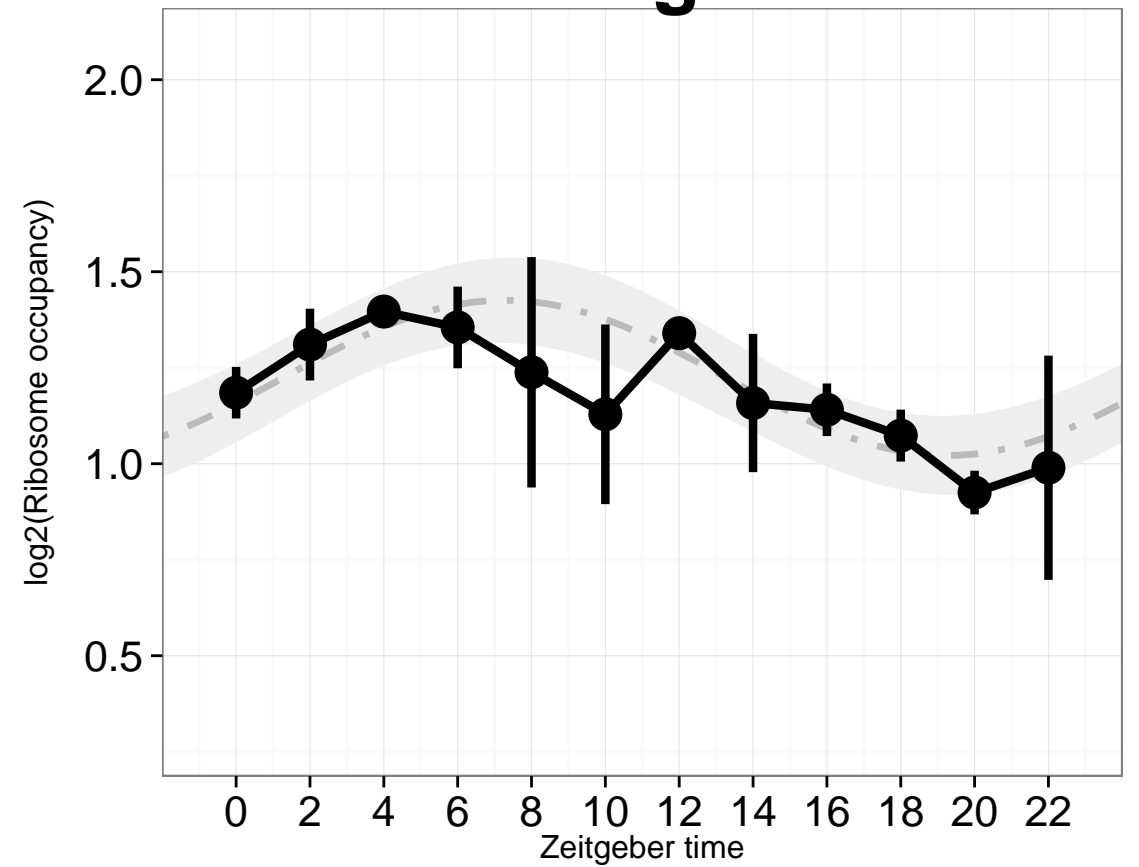

Supplement: SuppDataset_1.zip [file Gng5_set_A.pdf › Supplemental Dataset 1/A-mRNA_nonrhyth_translation_nonrhyth/Gng5_set_A.pdf]

# Gngt2

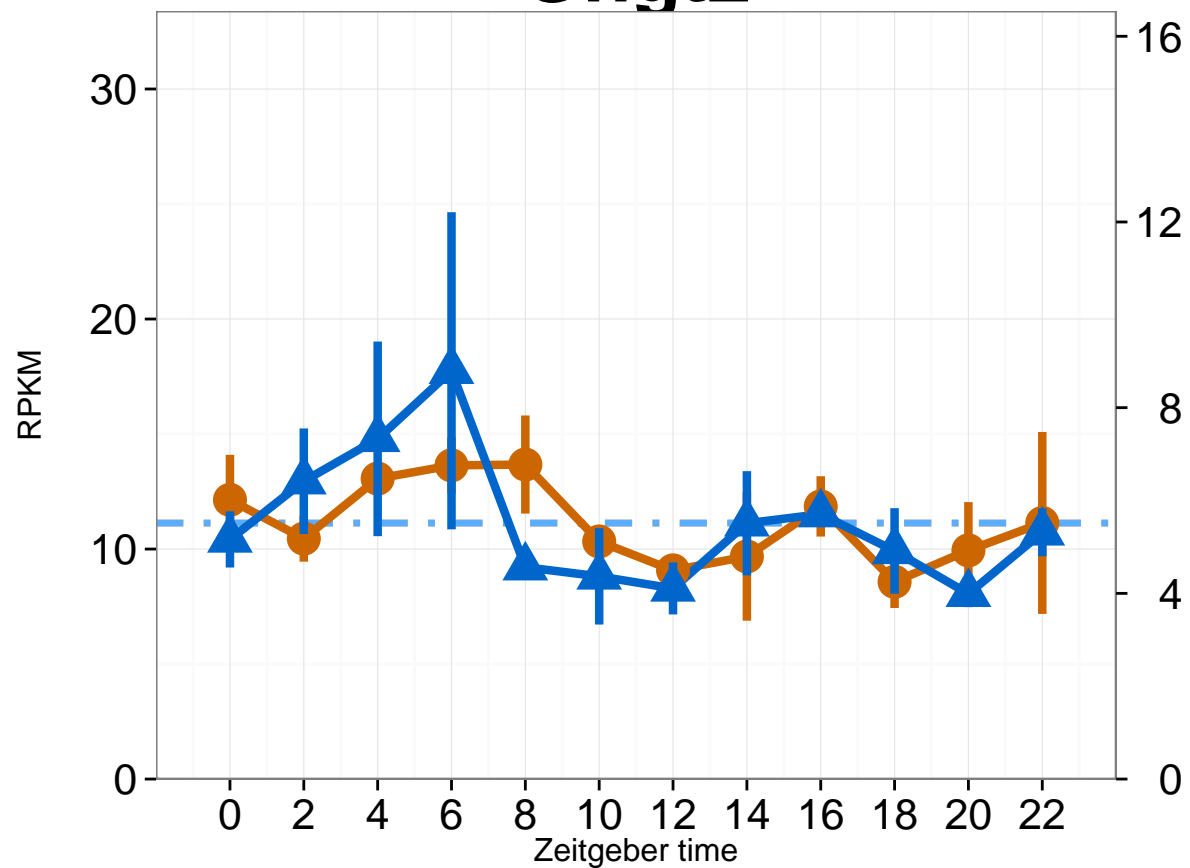

# Gngt2

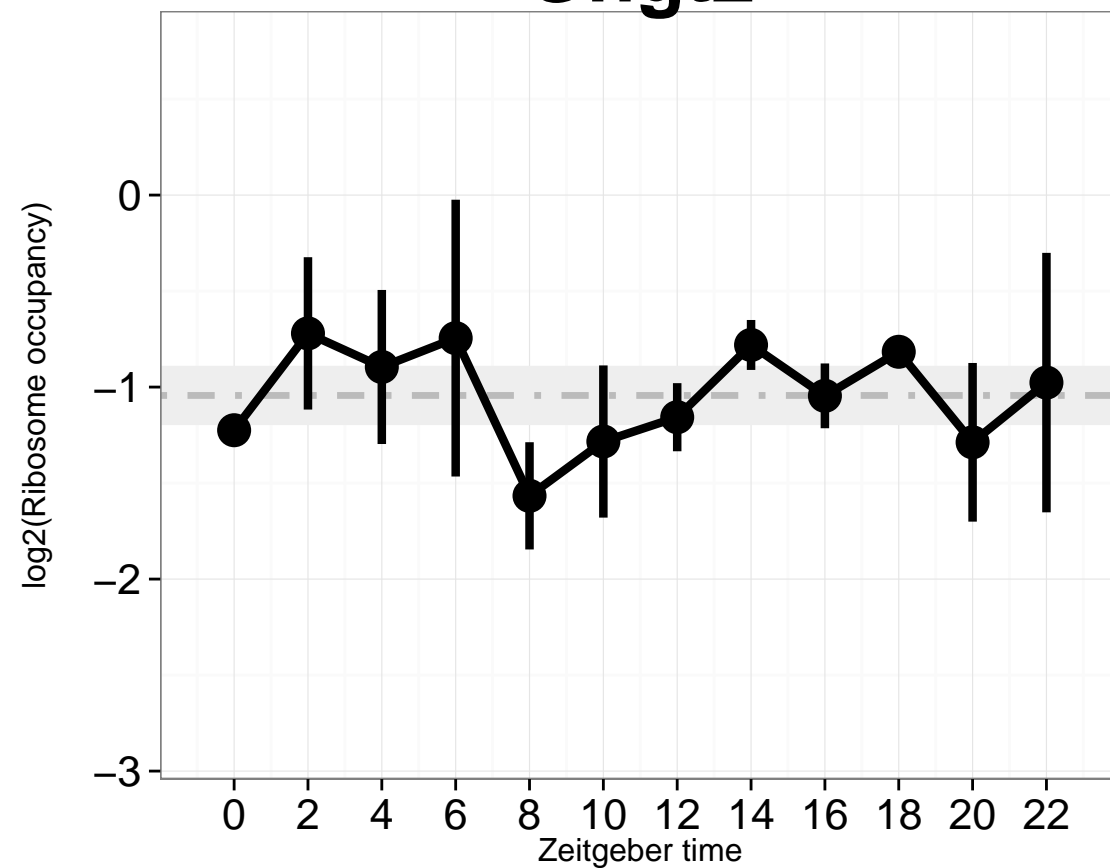

Supplement: SuppDataset_1.zip [file Gngt2_set_A.pdf › Supplemental Dataset 1/A-mRNA_nonrhyth_translation_nonrhyth/Gngt2_set_A.pdf]

## Gnl1

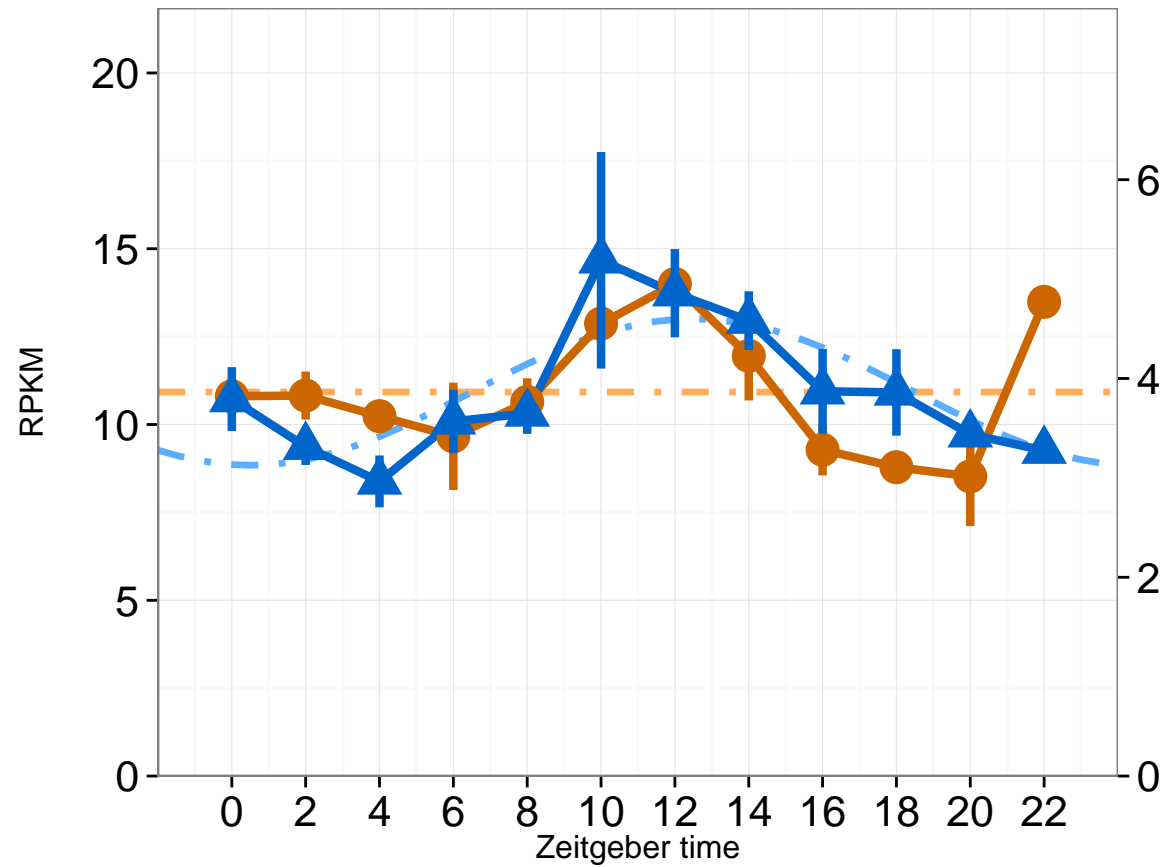

## Gnl1

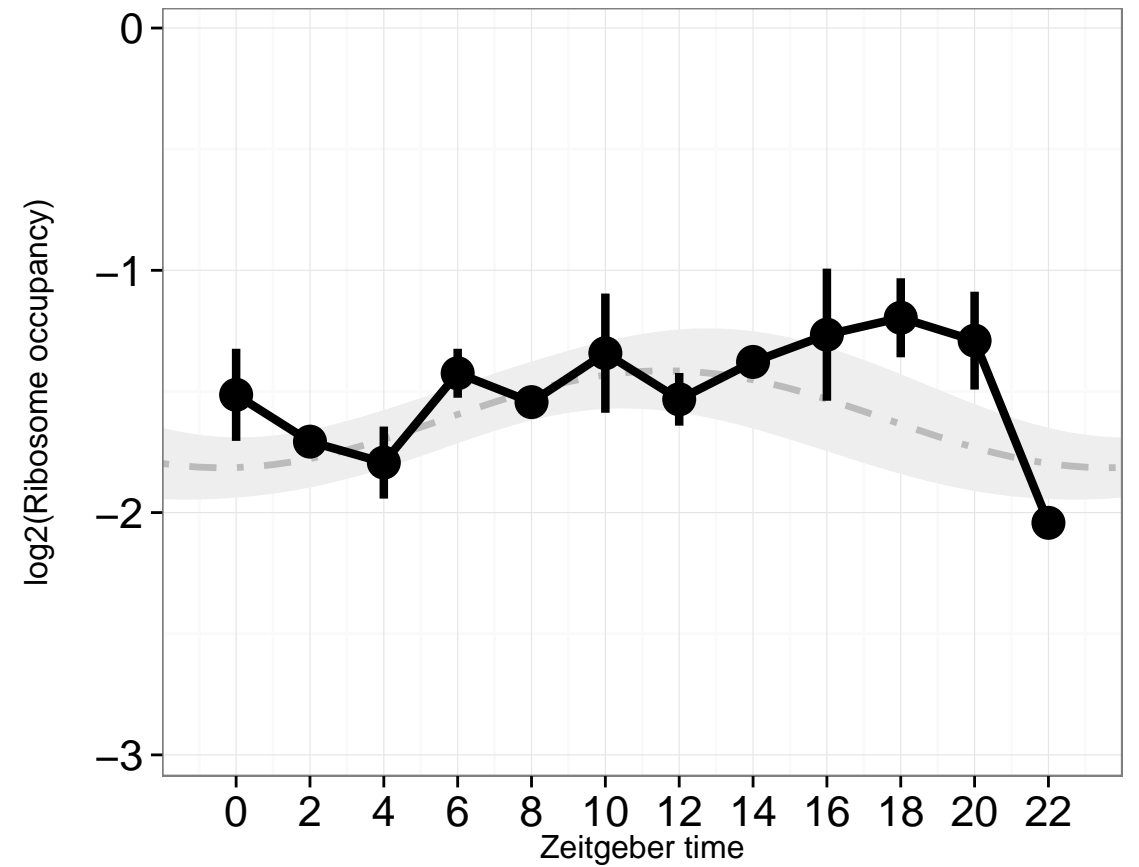

Supplement: SuppDataset_1.zip [file Gnl1_set_A.pdf › Supplemental Dataset 1/A-mRNA_nonrhyth_translation_nonrhyth/Gnl1_set_A.pdf]

## Gnl2

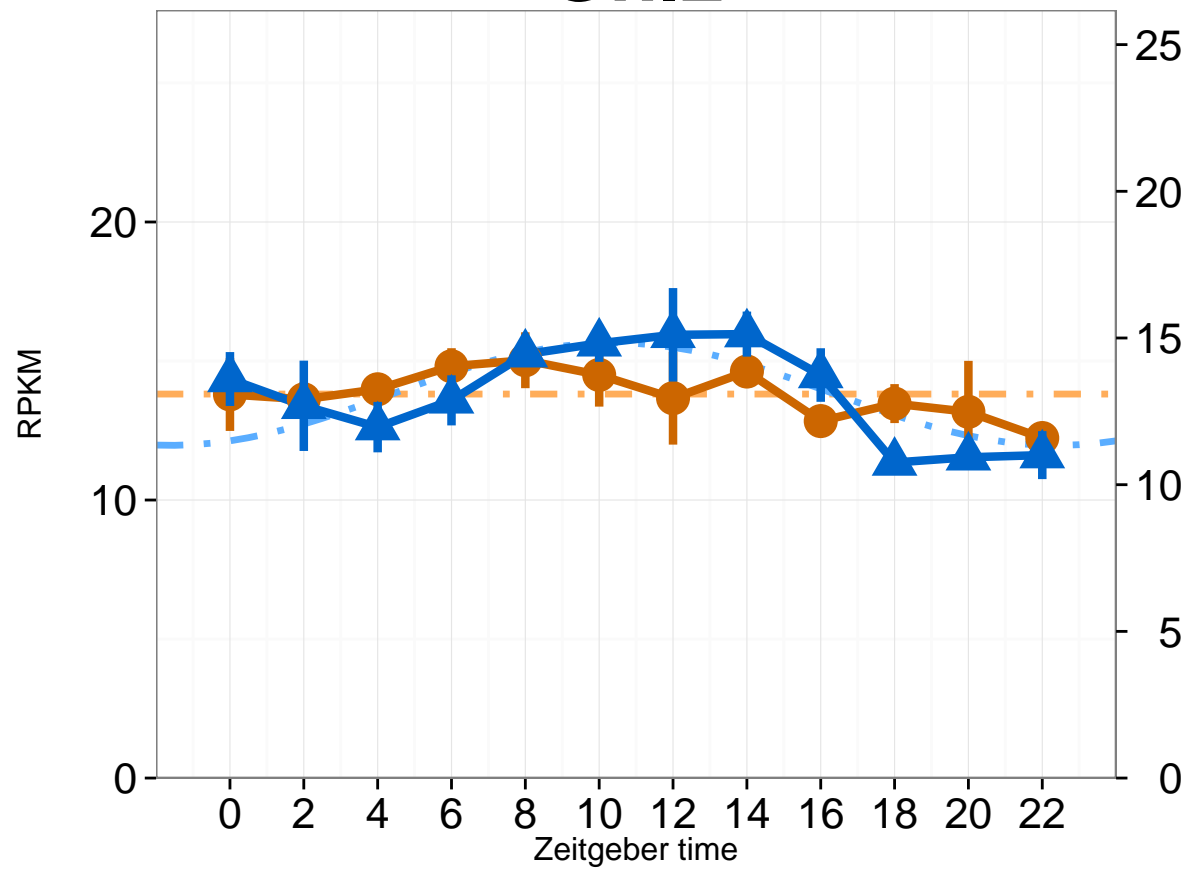

## Gnl2

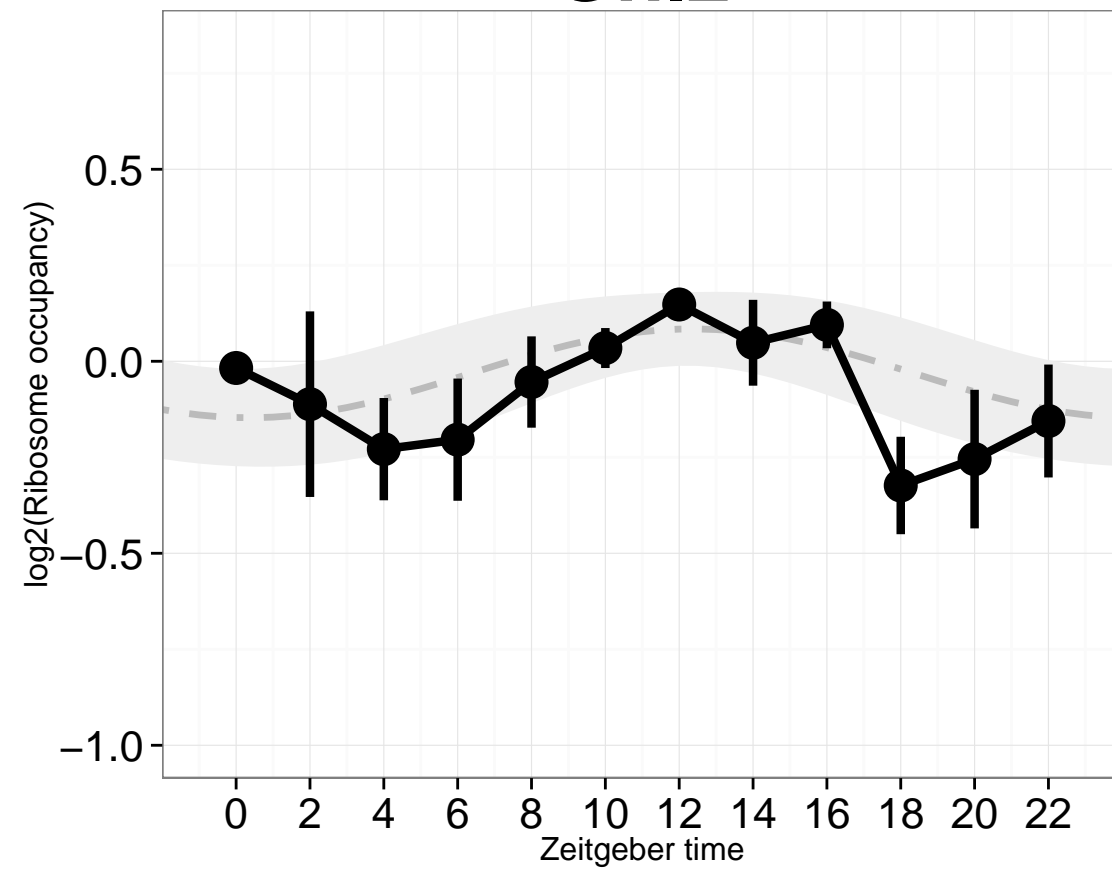

Supplement: SuppDataset_1.zip [file Gnl2_set_A.pdf › Supplemental Dataset 1/A-mRNA_nonrhyth_translation_nonrhyth/Gnl2_set_A.pdf]

## Gnl3l

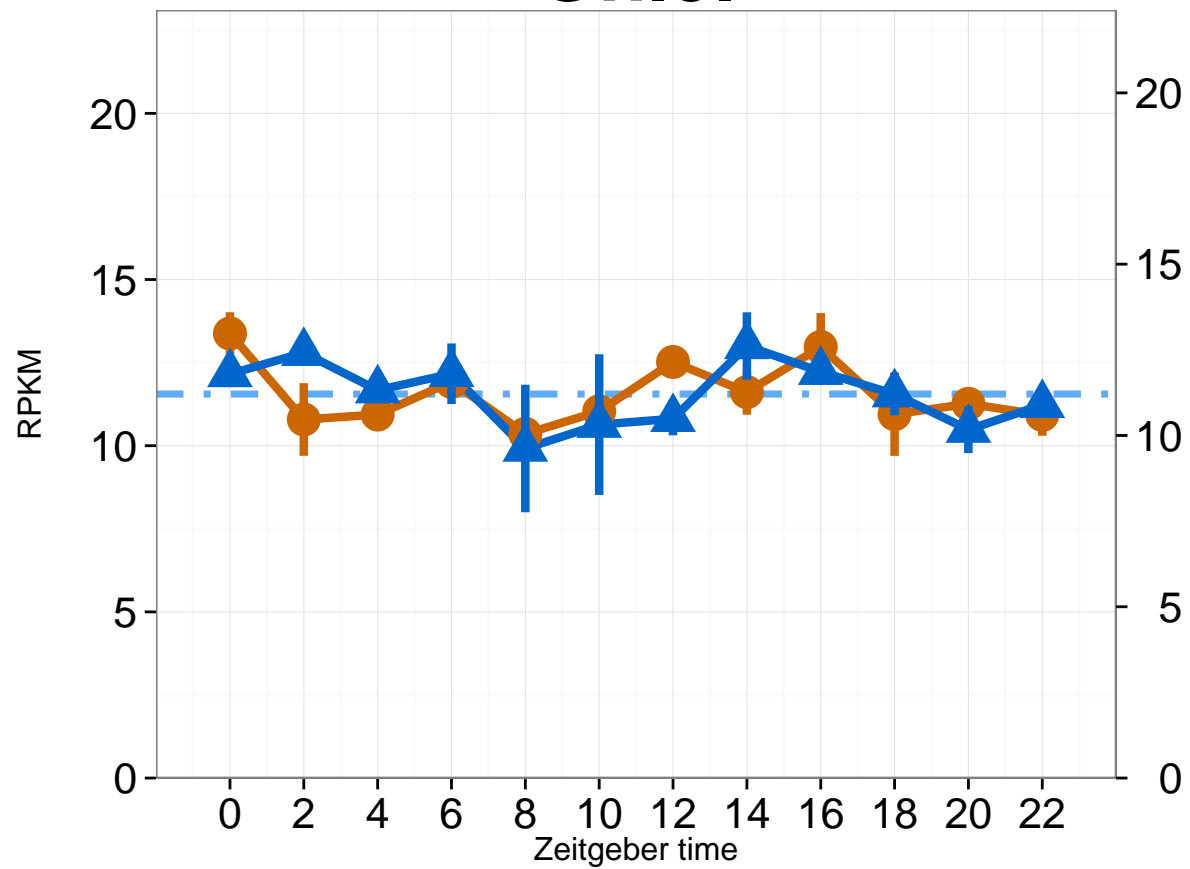

## Gnl3l

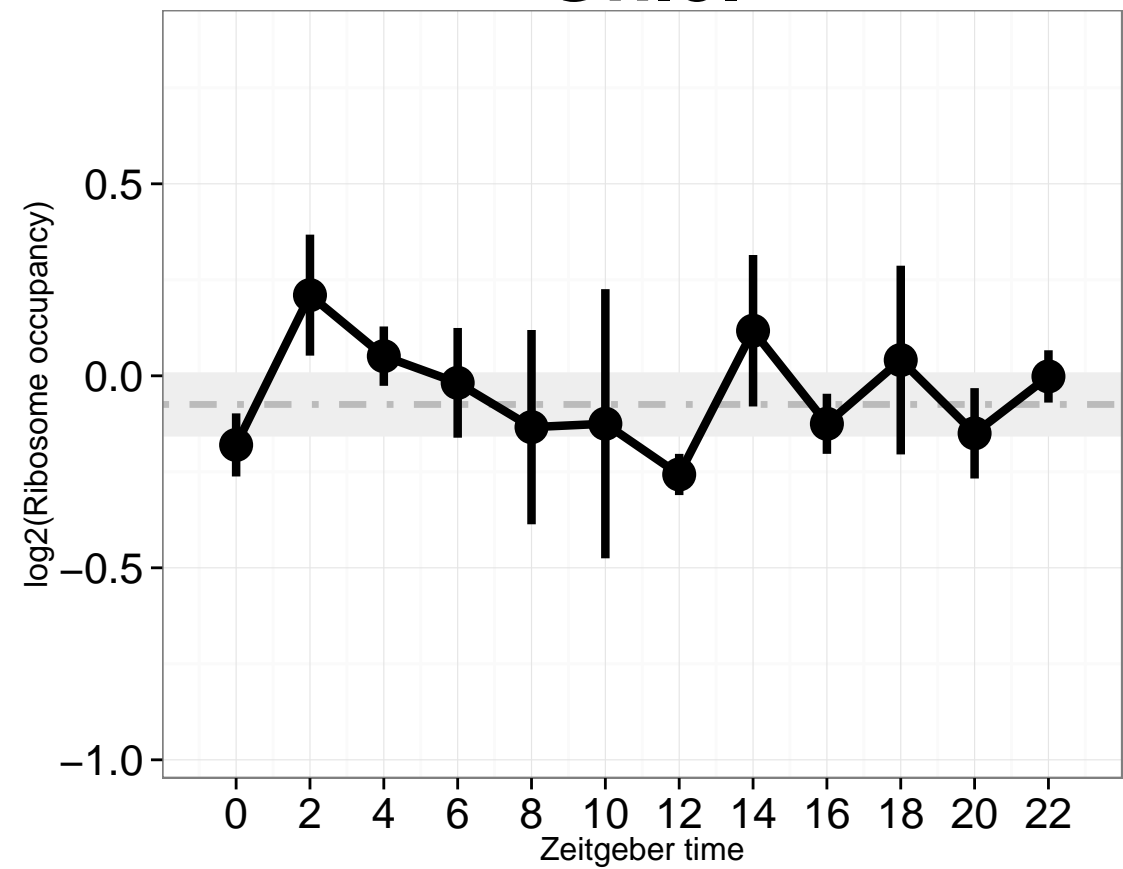

Supplement: SuppDataset_1.zip [file Gnl3l_set_A.pdf › Supplemental Dataset 1/A-mRNA_nonrhyth_translation_nonrhyth/Gnl3l_set_A.pdf]

## Gnmt

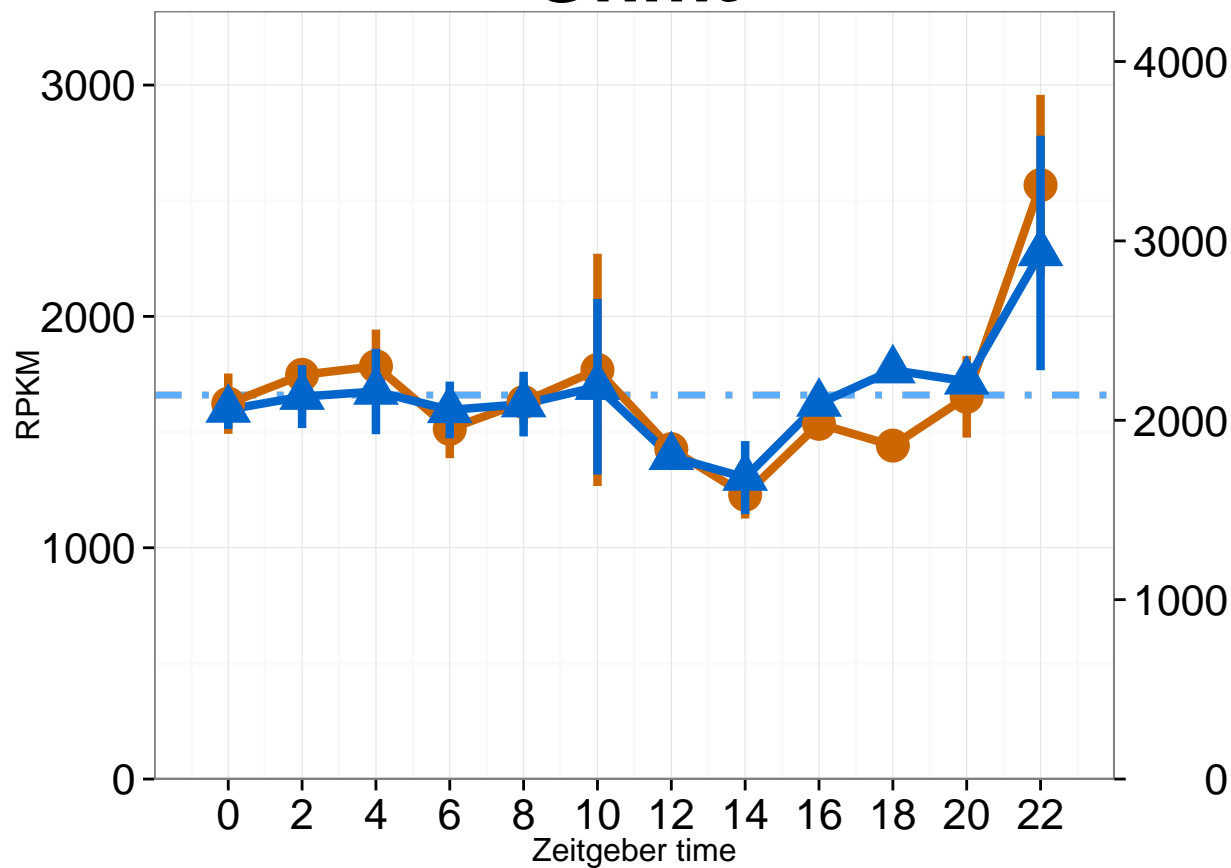

## Gnmt

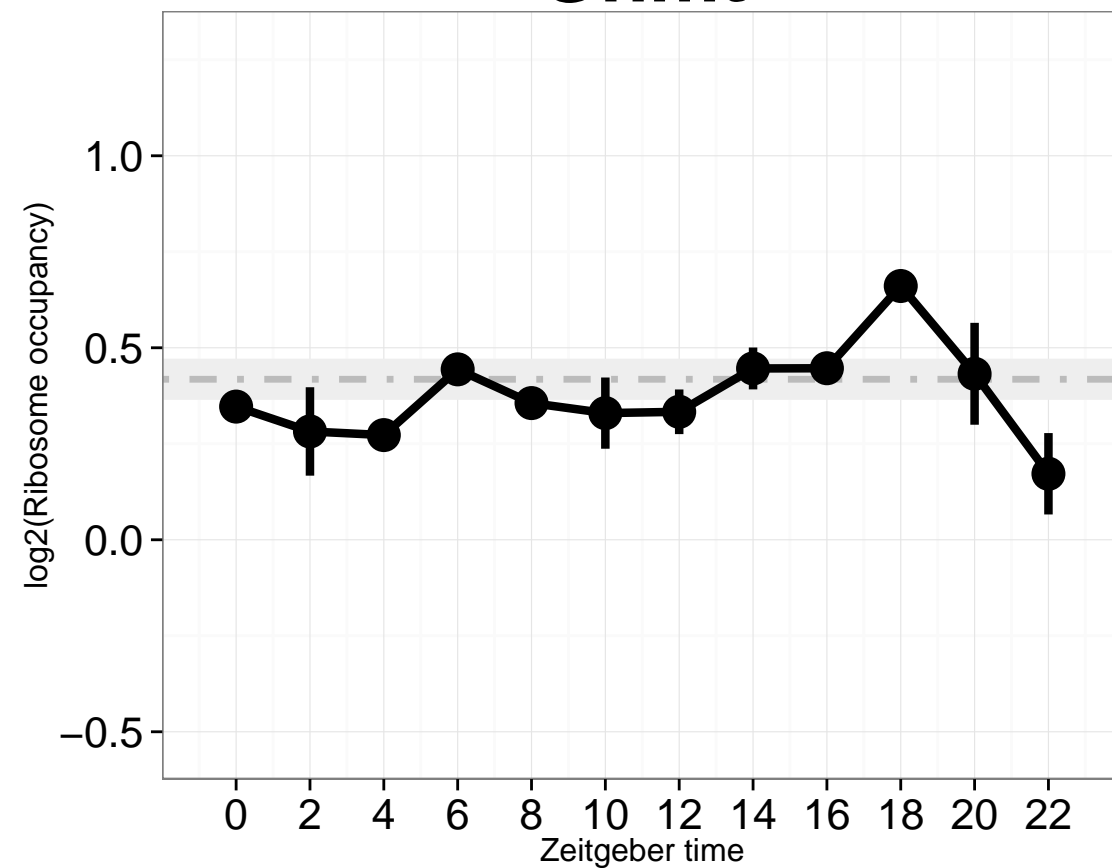

Supplement: SuppDataset_1.zip [file Gnmt_set_A.pdf › Supplemental Dataset 1/A-mRNA_nonrhyth_translation_nonrhyth/Gnmt_set_A.pdf]

# Gnpat

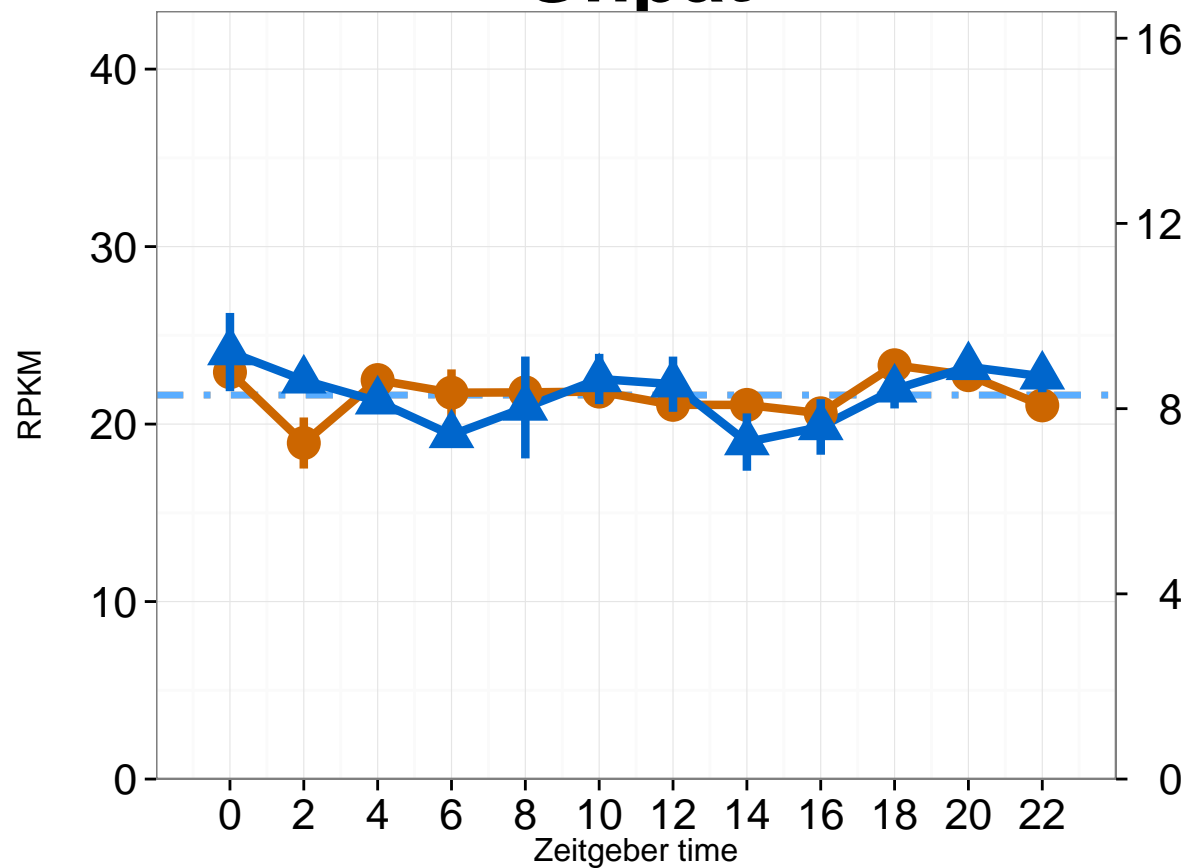

# Gnpat

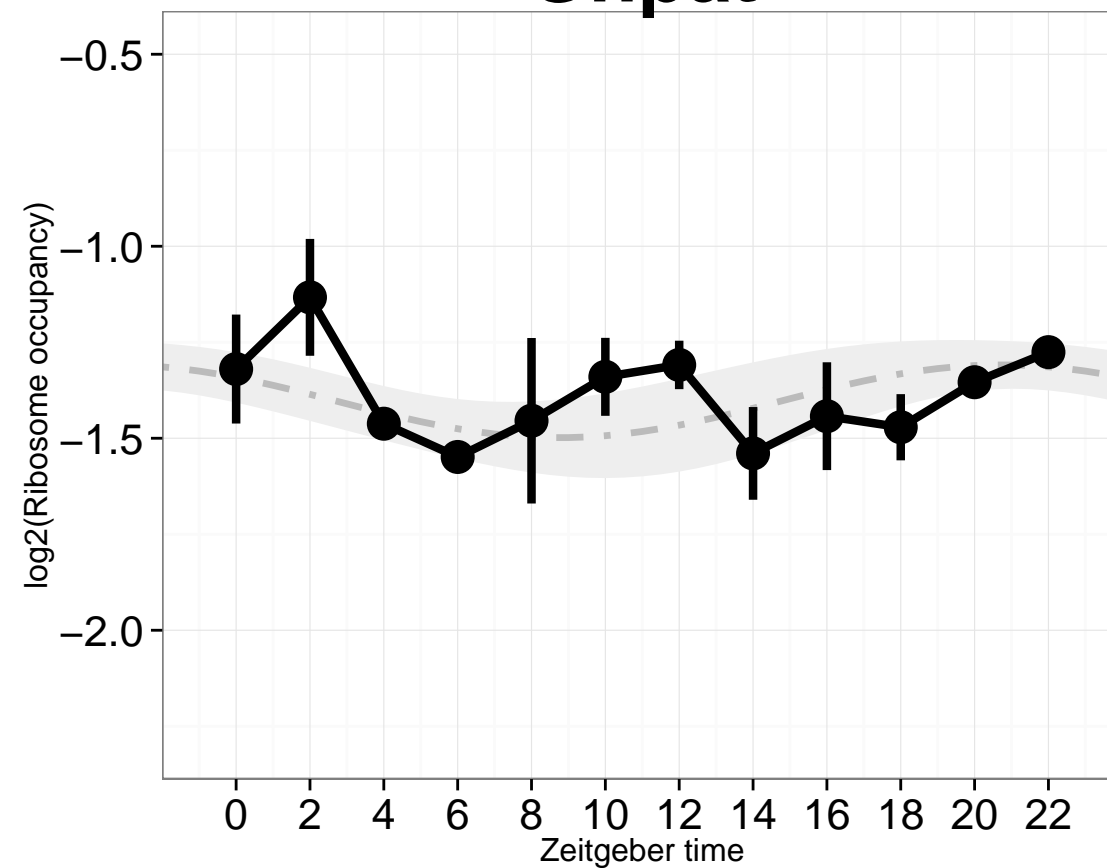

Supplement: SuppDataset_1.zip [file Gnpat_set_A.pdf › Supplemental Dataset 1/A-mRNA_nonrhyth_translation_nonrhyth/Gnpat_set_A.pdf]

# Gnpnat1

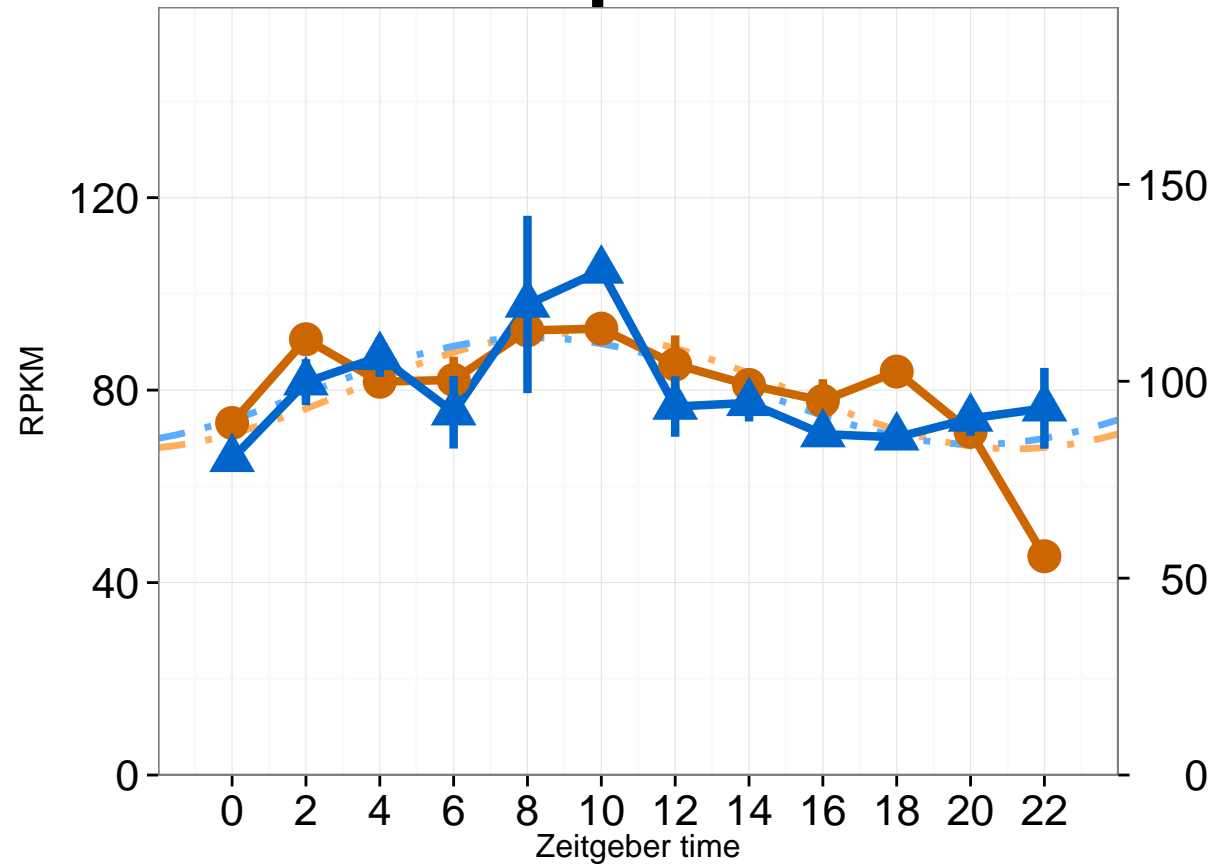

# Gnpnat1

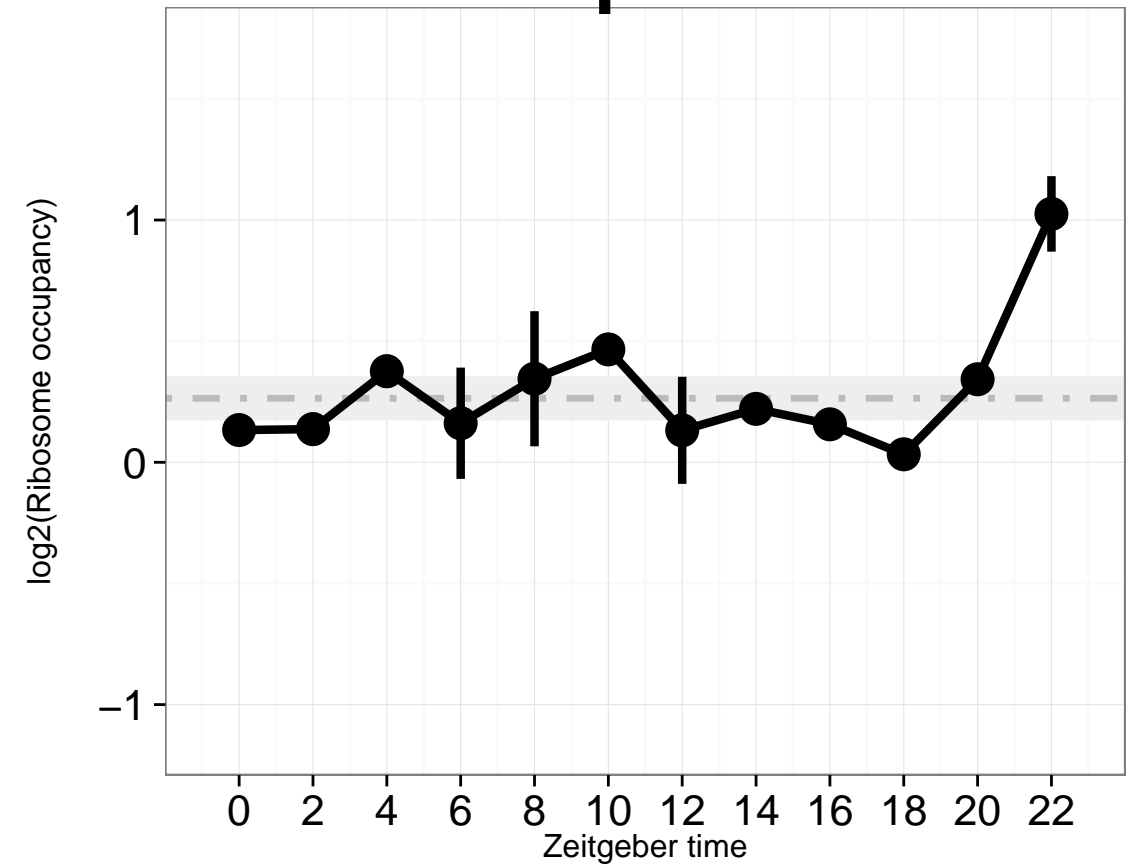

Supplement: SuppDataset_1.zip [file Gnpnat1_set_A.pdf › Supplemental Dataset 1/A-mRNA_nonrhyth_translation_nonrhyth/Gnpnat1_set_A.pdf]

## Gnptab

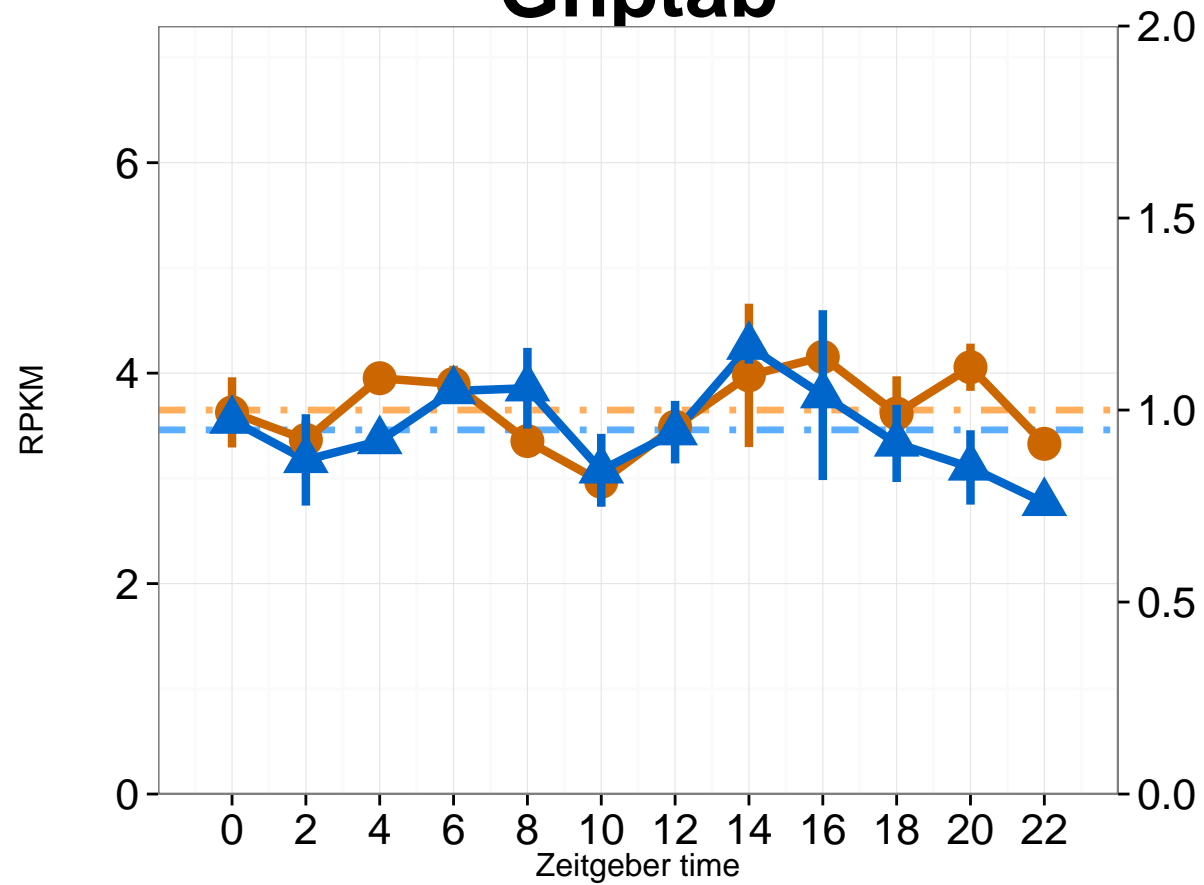

## Gnptab

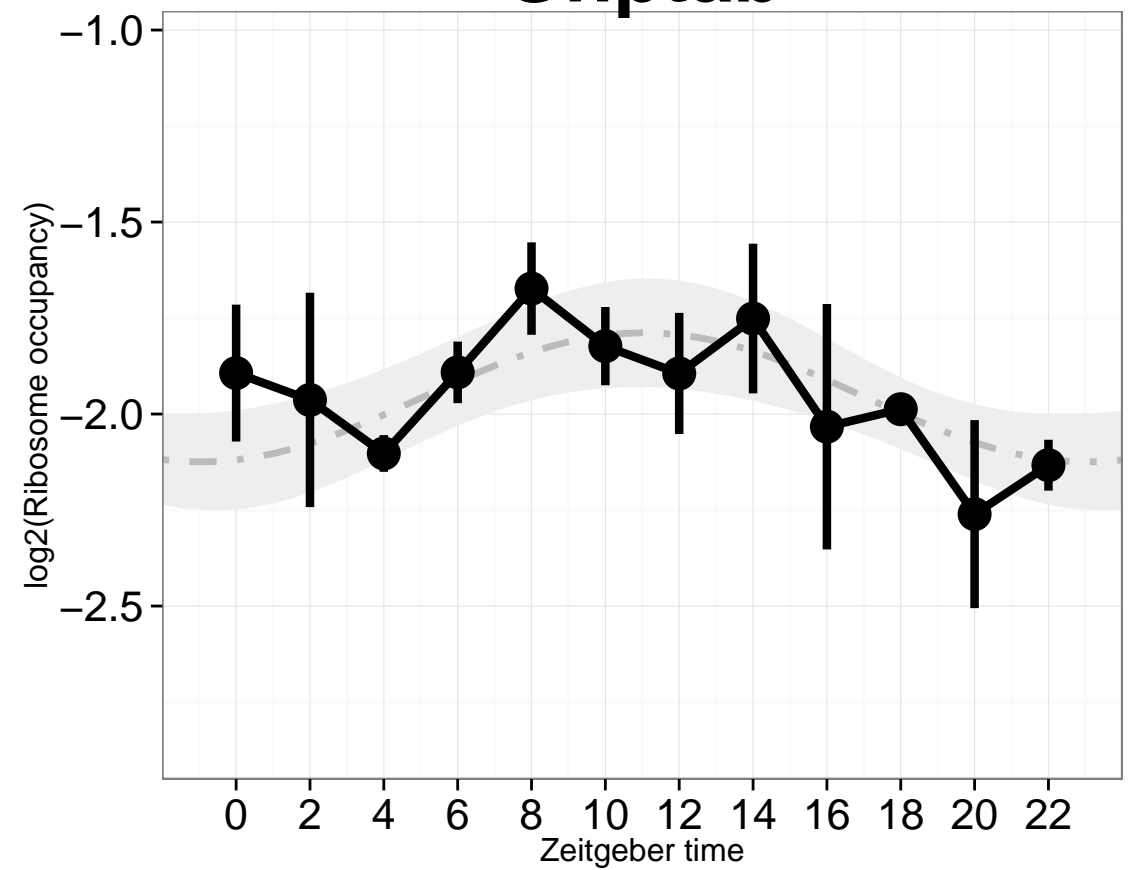

Supplement: SuppDataset_1.zip [file Gnptab_set_A.pdf › Supplemental Dataset 1/A-mRNA_nonrhyth_translation_nonrhyth/Gnptab_set_A.pdf]

## Gnptg

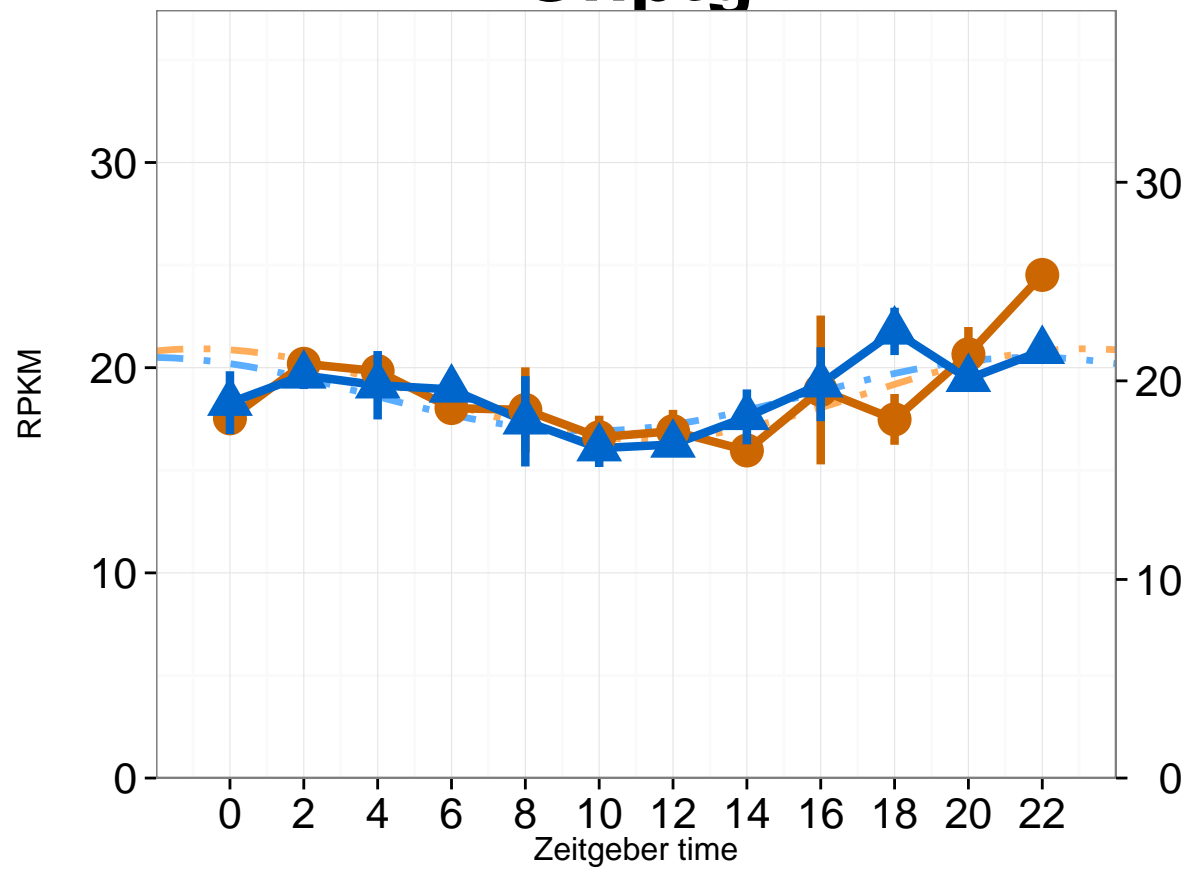

## Gnptg

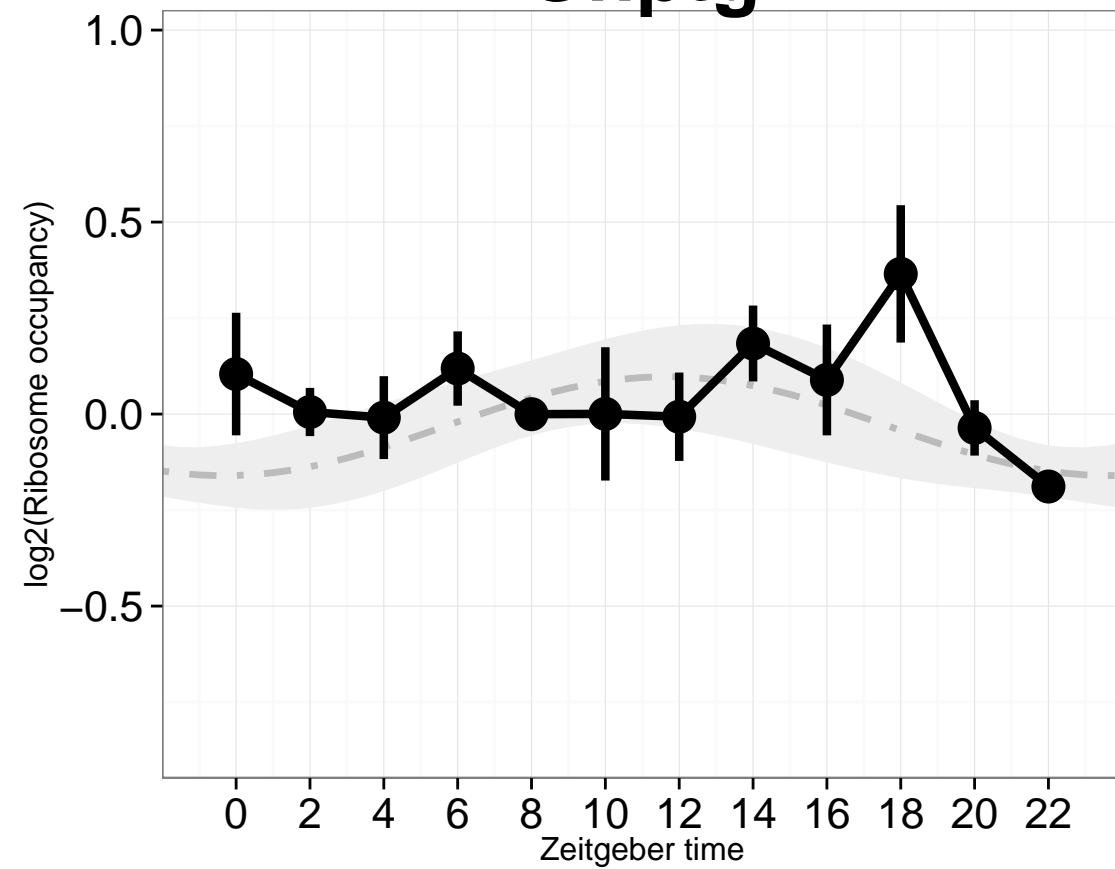

Supplement: SuppDataset_1.zip [file Gnptg_set_A.pdf › Supplemental Dataset 1/A-mRNA_nonrhyth_translation_nonrhyth/Gnptg_set_A.pdf]

## Gns

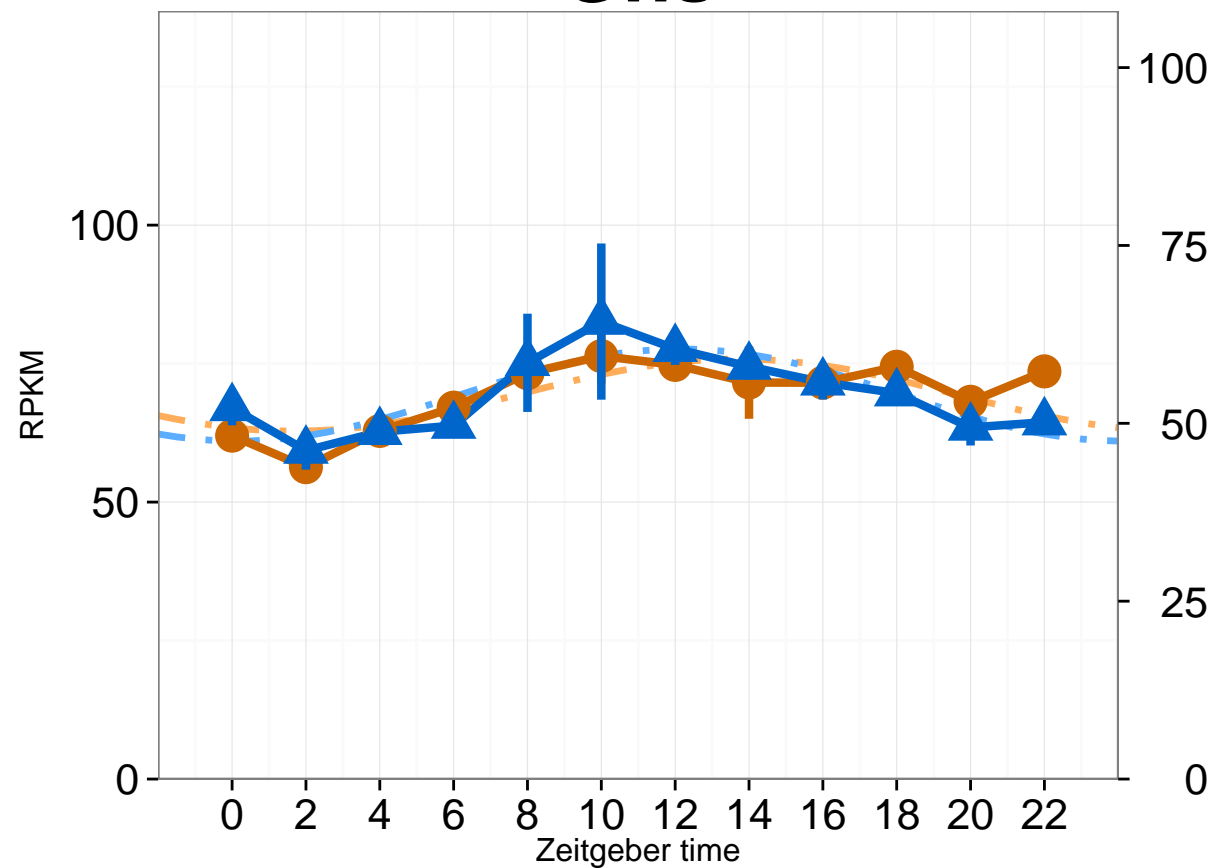

## Gns

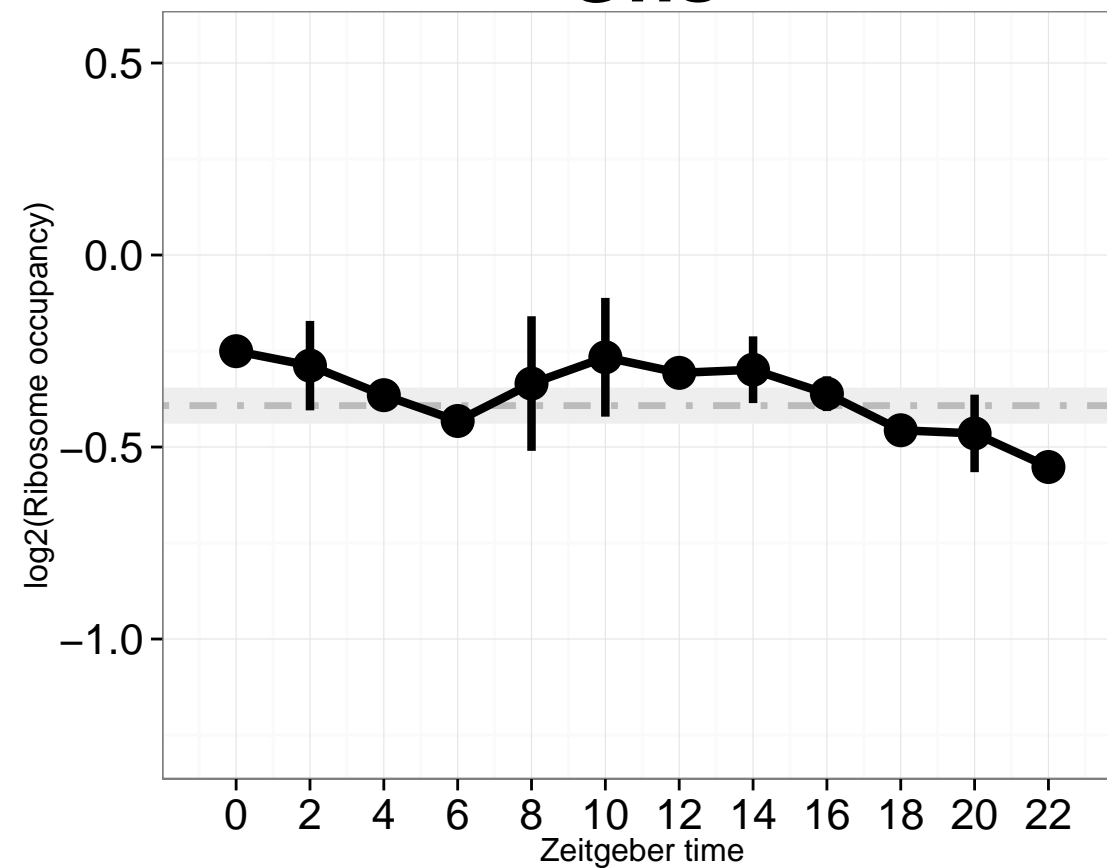

Supplement: SuppDataset_1.zip [file Gns_set_A.pdf › Supplemental Dataset 1/A-mRNA_nonrhyth_translation_nonrhyth/Gns_set_A.pdf]

## Golga2

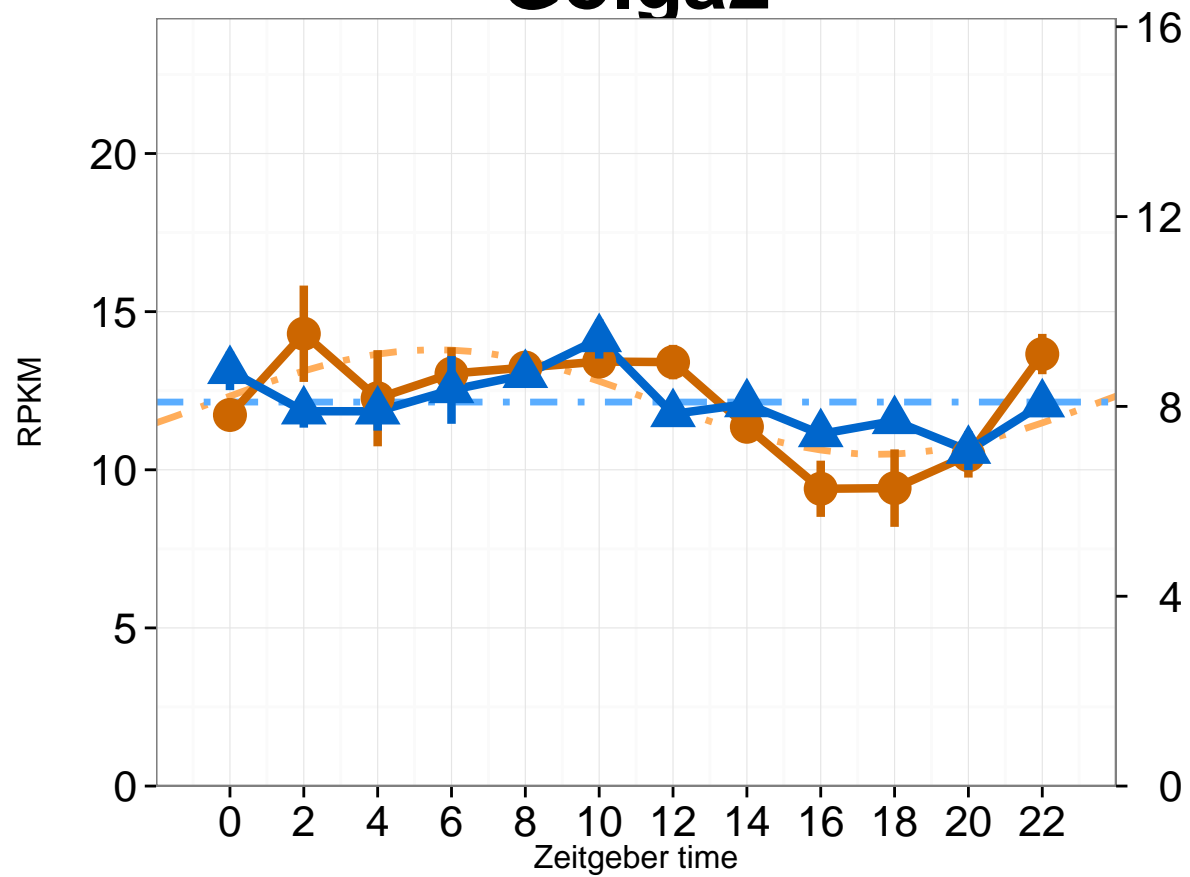

## Golga2

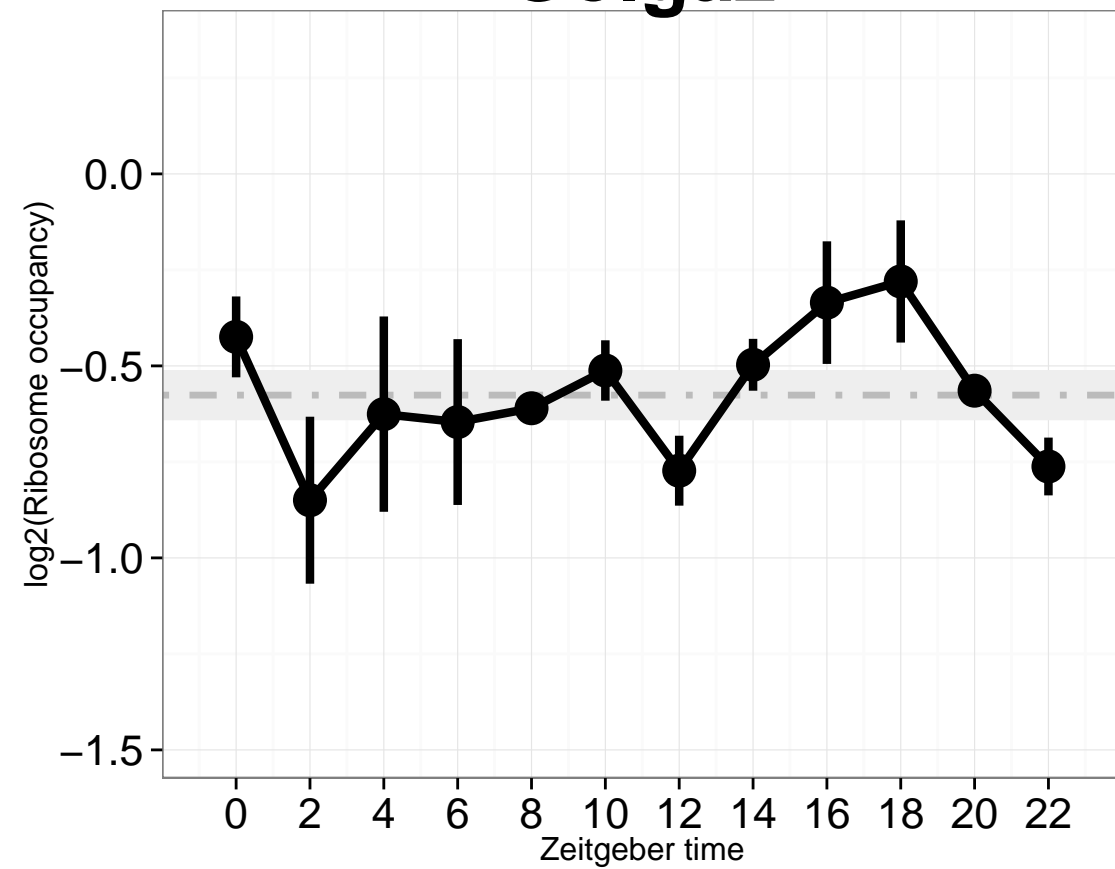

Supplement: SuppDataset_1.zip [file Golga2_set_A.pdf › Supplemental Dataset 1/A-mRNA_nonrhyth_translation_nonrhyth/Golga2_set_A.pdf]

## Golga3

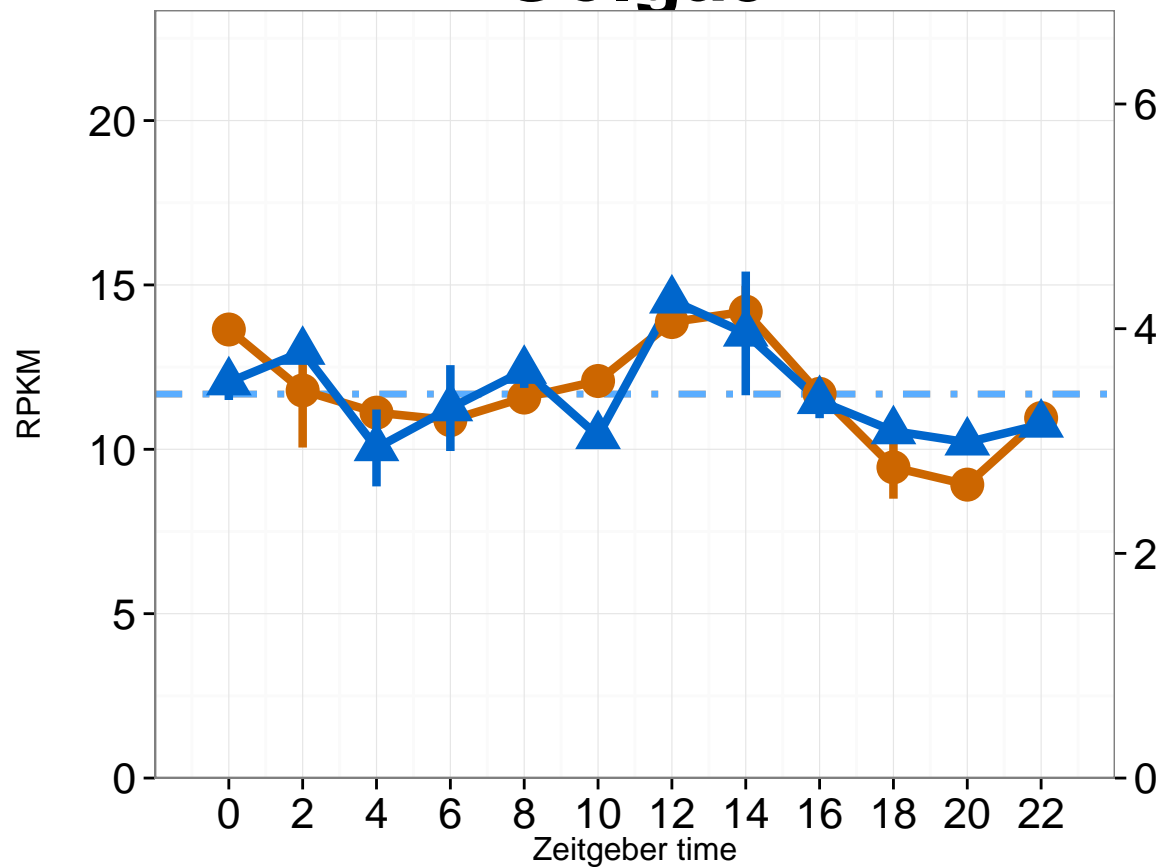

## Golga3

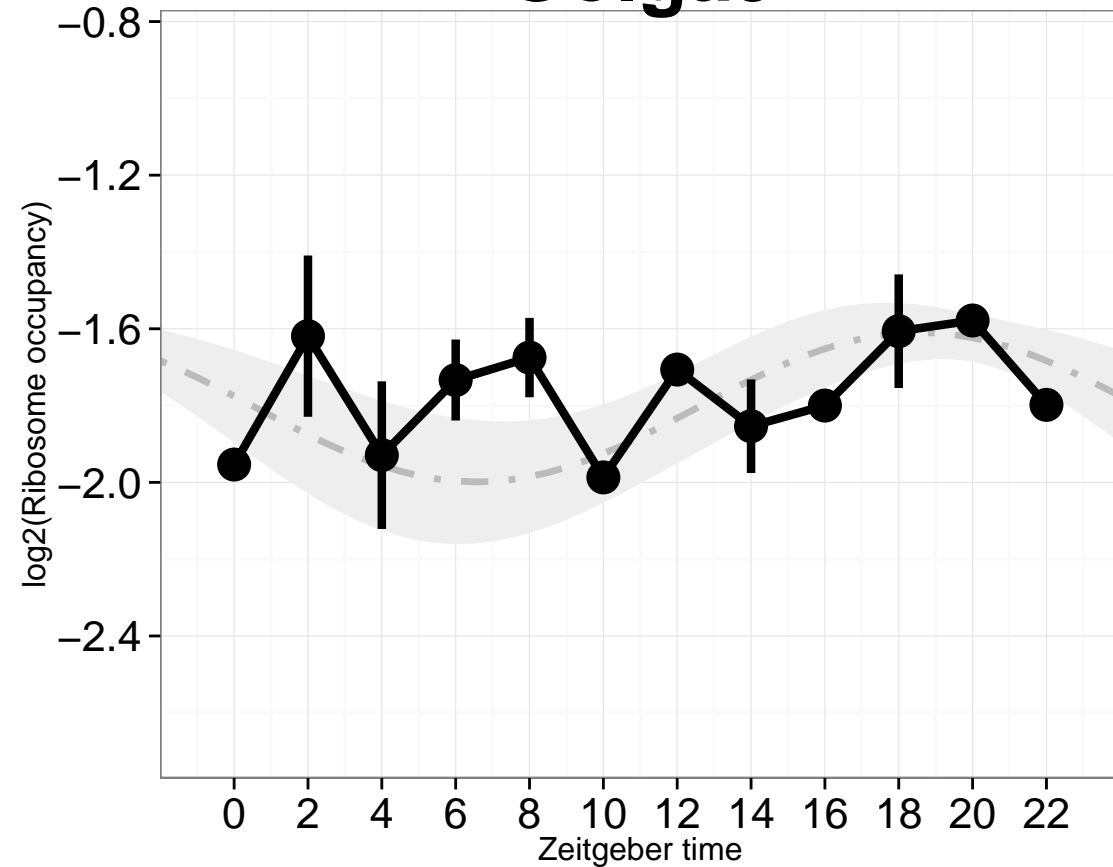

Supplement: SuppDataset_1.zip [file Golga3_set_A.pdf › Supplemental Dataset 1/A-mRNA_nonrhyth_translation_nonrhyth/Golga3_set_A.pdf]

## Golga4

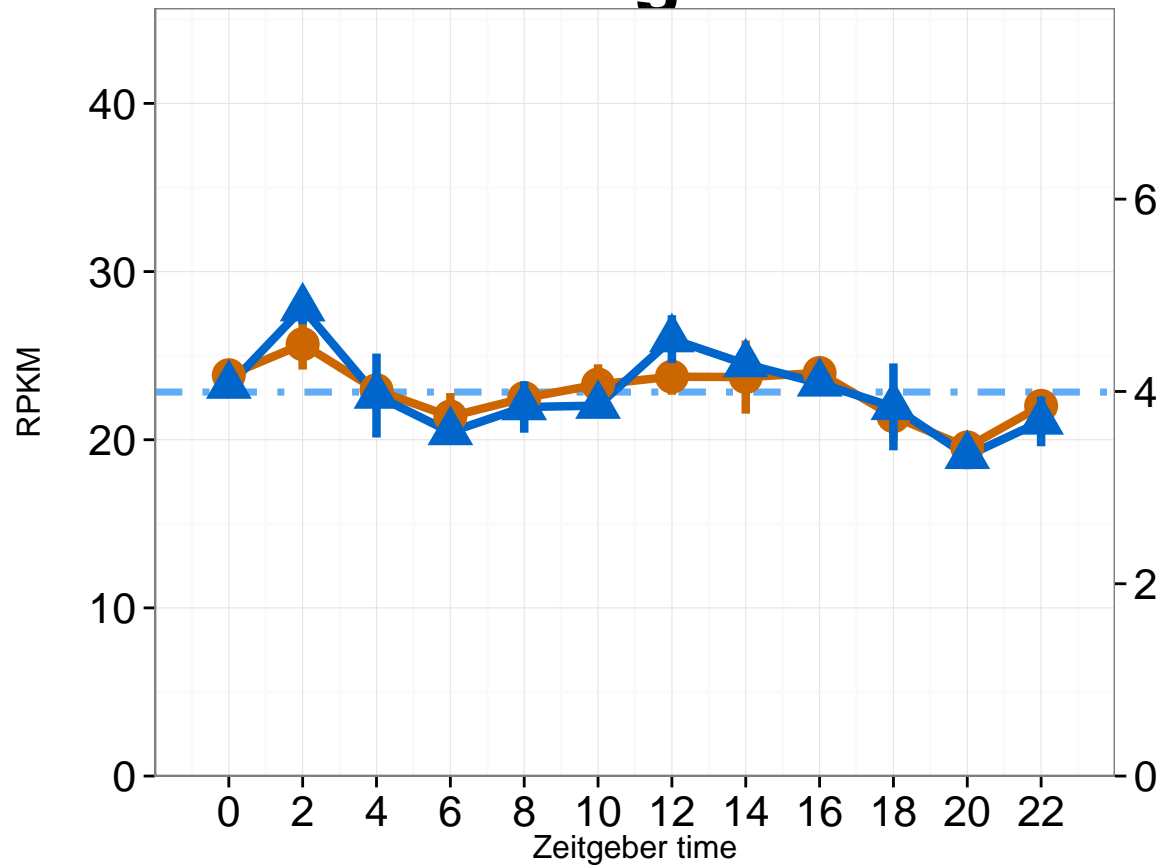

## Golga4

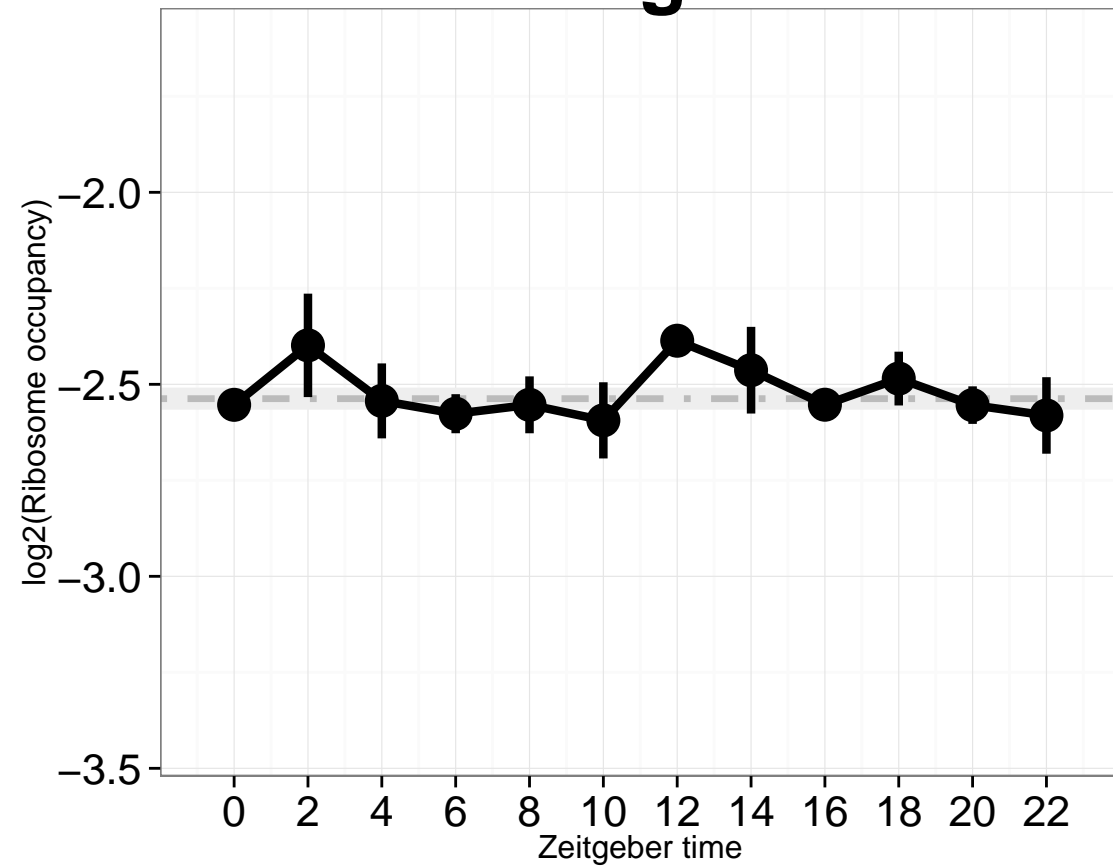

Supplement: SuppDataset_1.zip [file Golga4_set_A.pdf › Supplemental Dataset 1/A-mRNA_nonrhyth_translation_nonrhyth/Golga4_set_A.pdf]

## Golga5

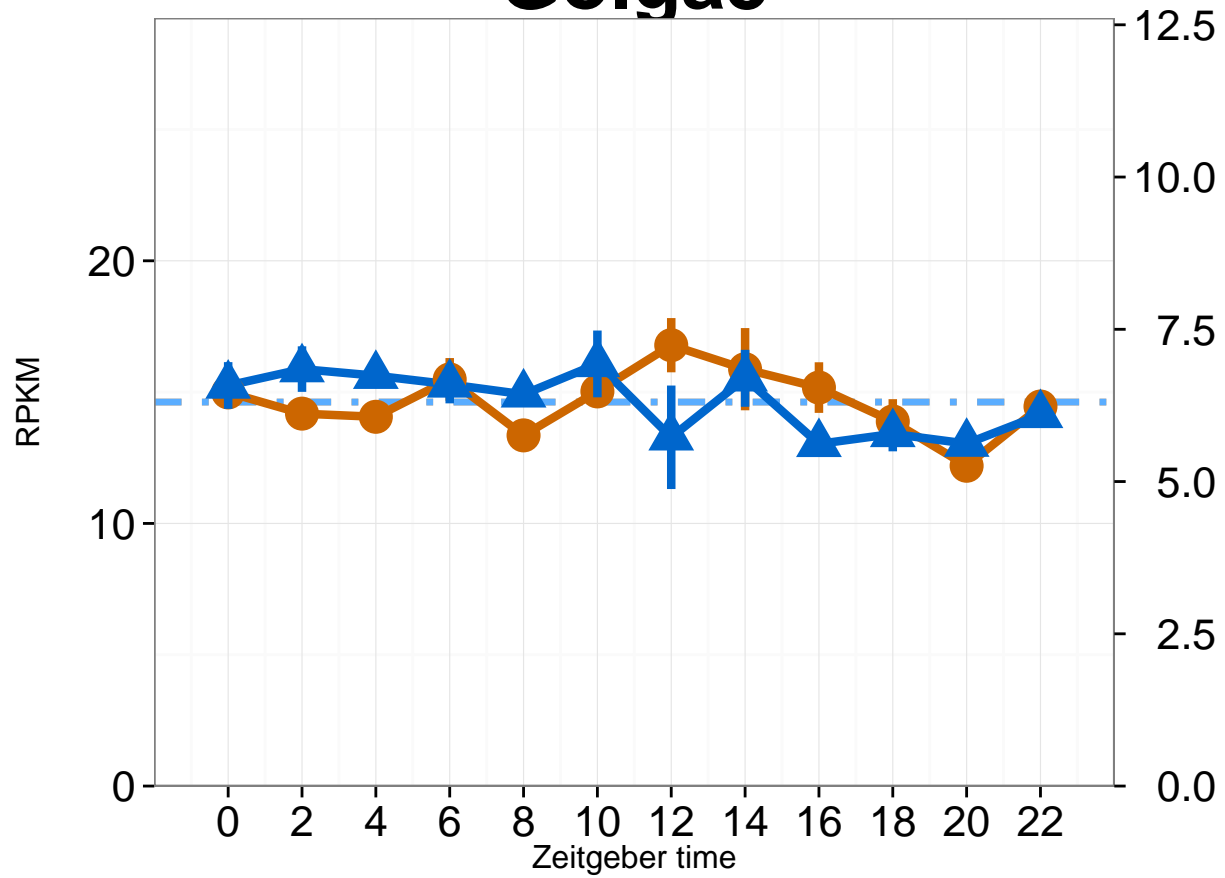

## Golga5

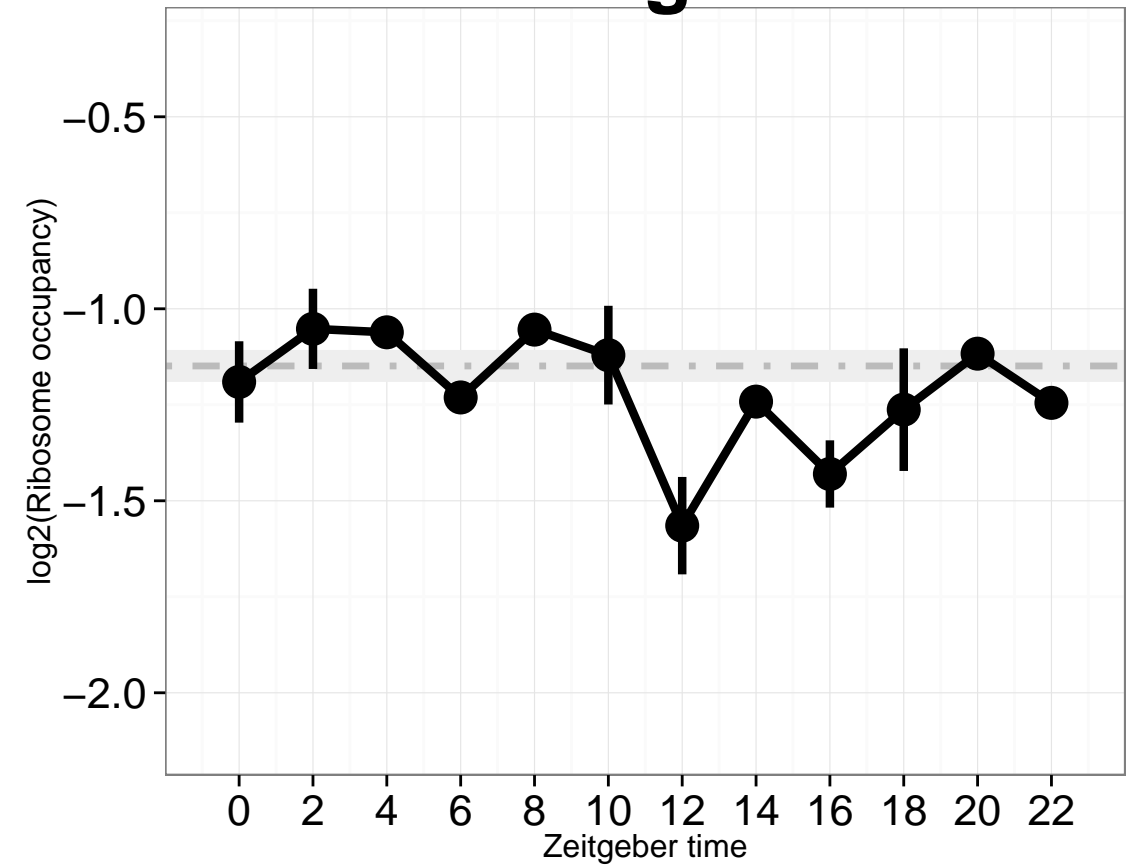

Supplement: SuppDataset_1.zip [file Golga5_set_A.pdf › Supplemental Dataset 1/A-mRNA_nonrhyth_translation_nonrhyth/Golga5_set_A.pdf]

## Golga7

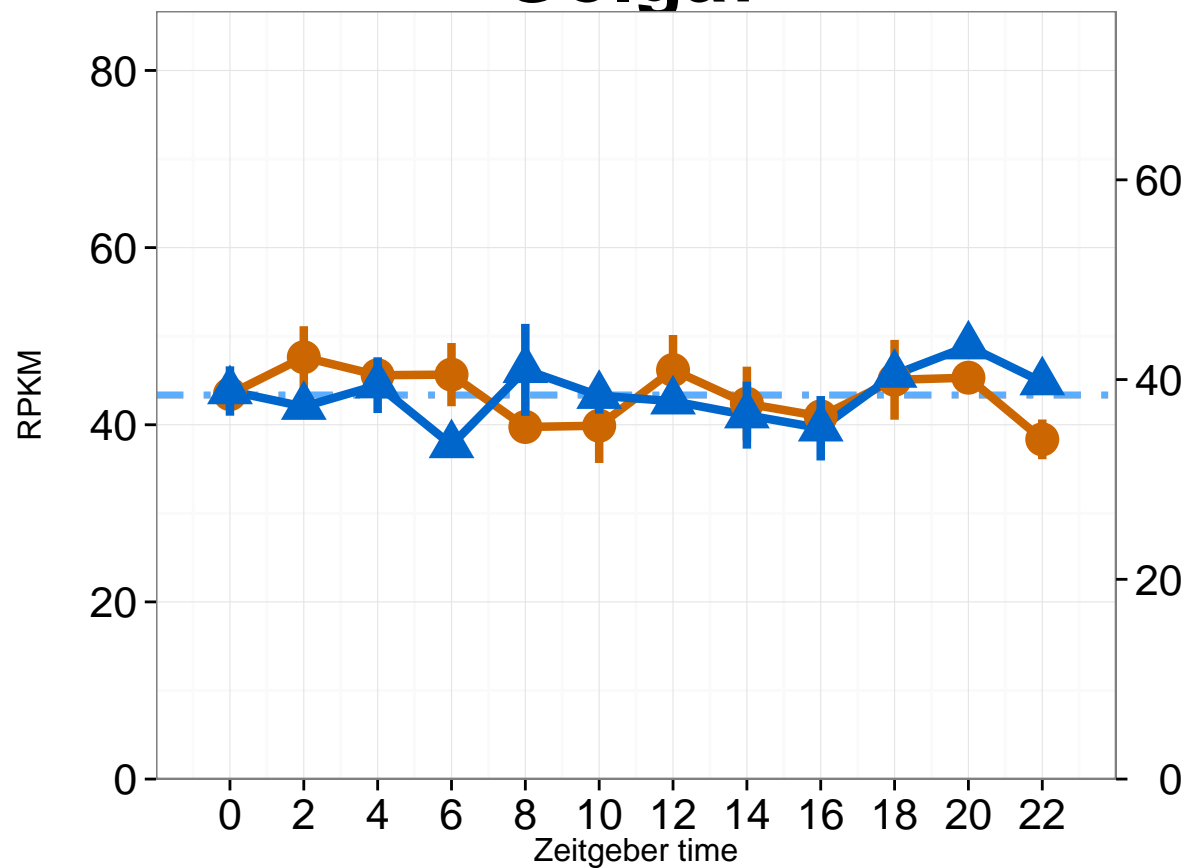

## Golga7

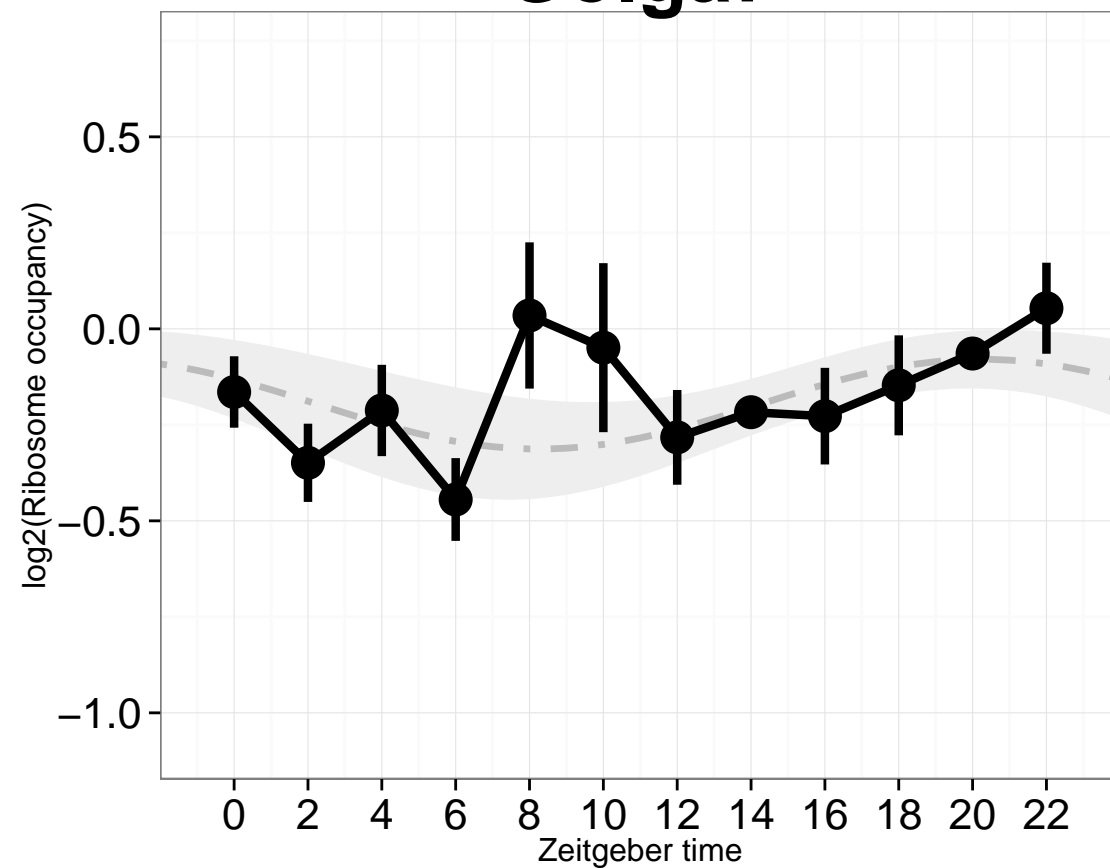

Supplement: SuppDataset_1.zip [file Golga7_set_A.pdf › Supplemental Dataset 1/A-mRNA_nonrhyth_translation_nonrhyth/Golga7_set_A.pdf]

# Golgb1

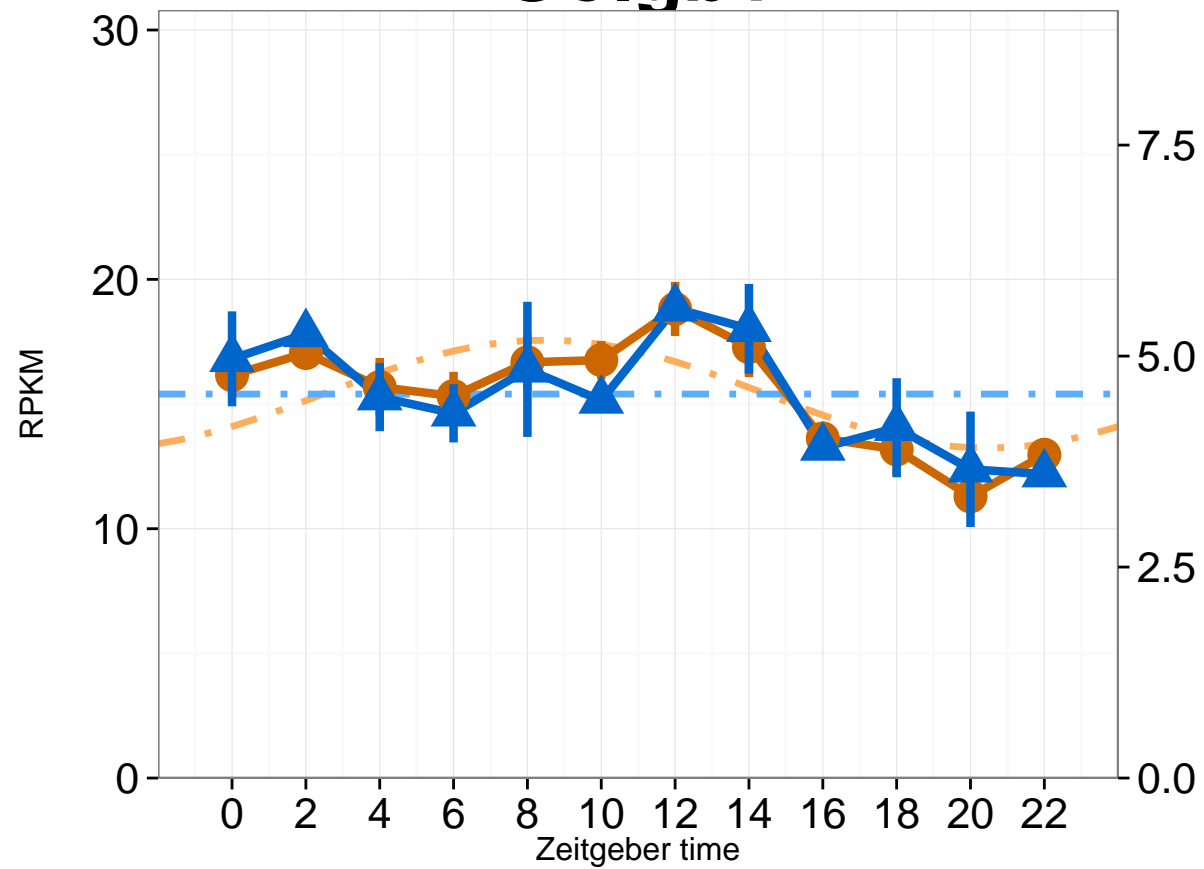

# Golgb1

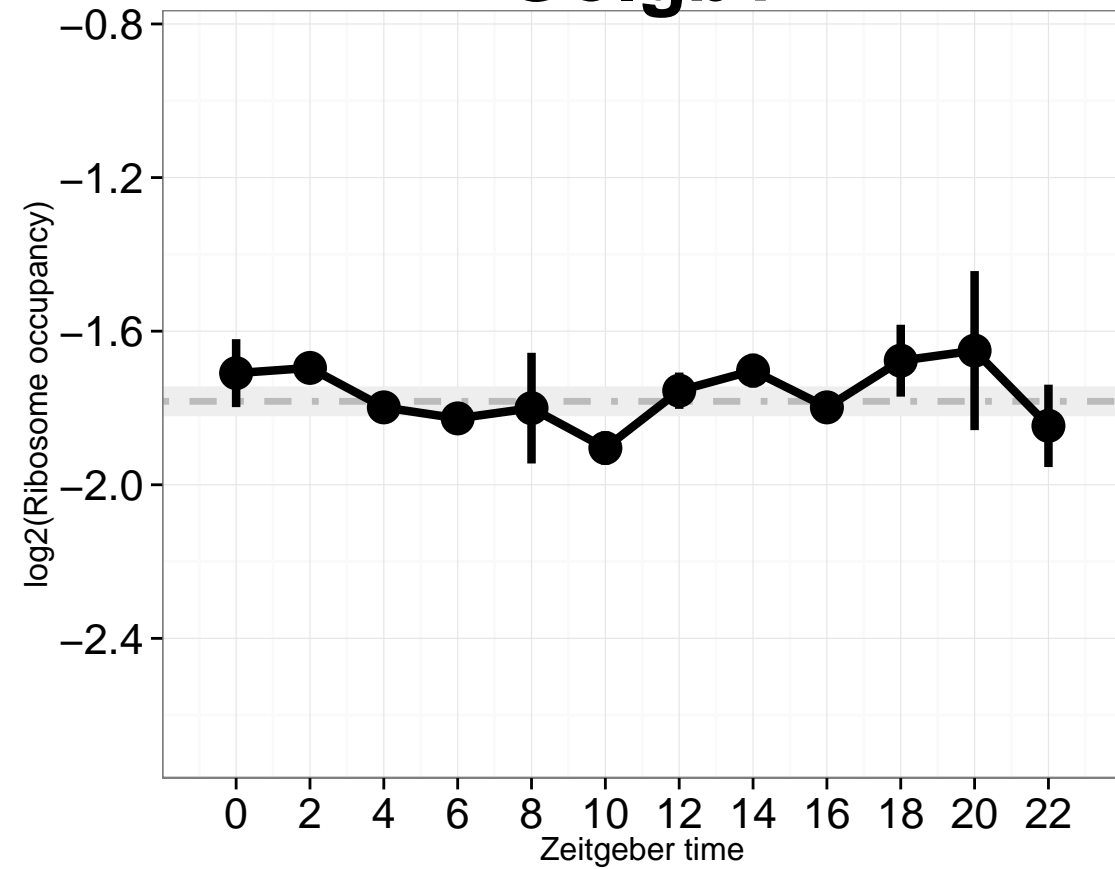

Supplement: SuppDataset_1.zip [file Golgb1_set_A.pdf › Supplemental Dataset 1/A-mRNA_nonrhyth_translation_nonrhyth/Golgb1_set_A.pdf]

## Golim4

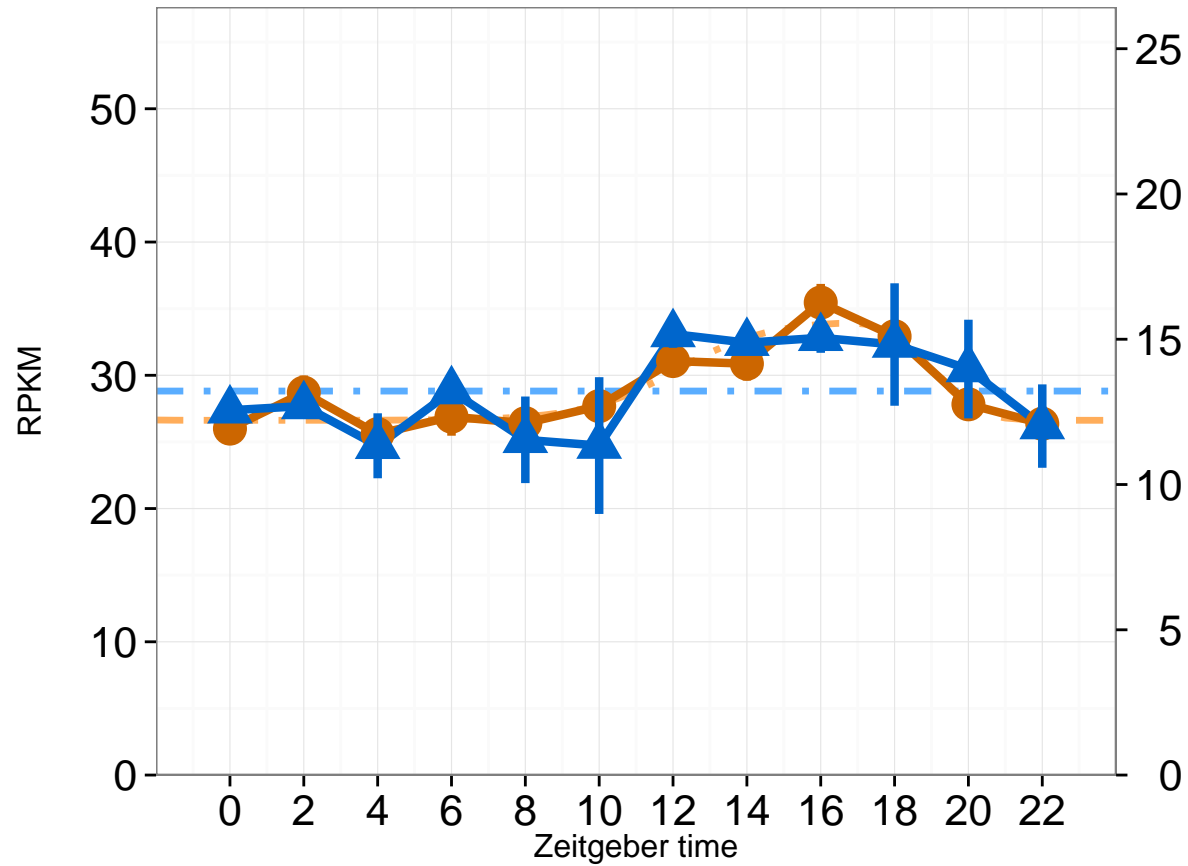

## Golim4

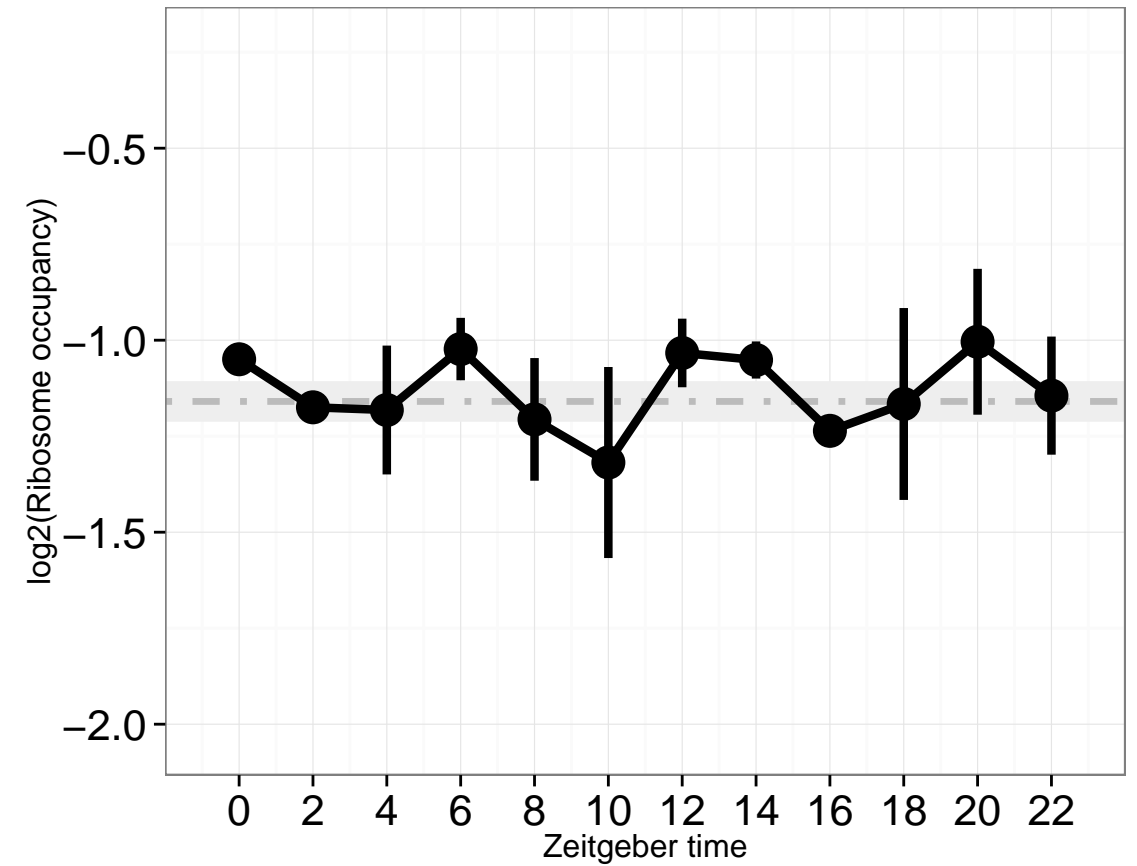

Supplement: SuppDataset_1.zip [file Golim4_set_A.pdf › Supplemental Dataset 1/A-mRNA_nonrhyth_translation_nonrhyth/Golim4_set_A.pdf]

# Golm1

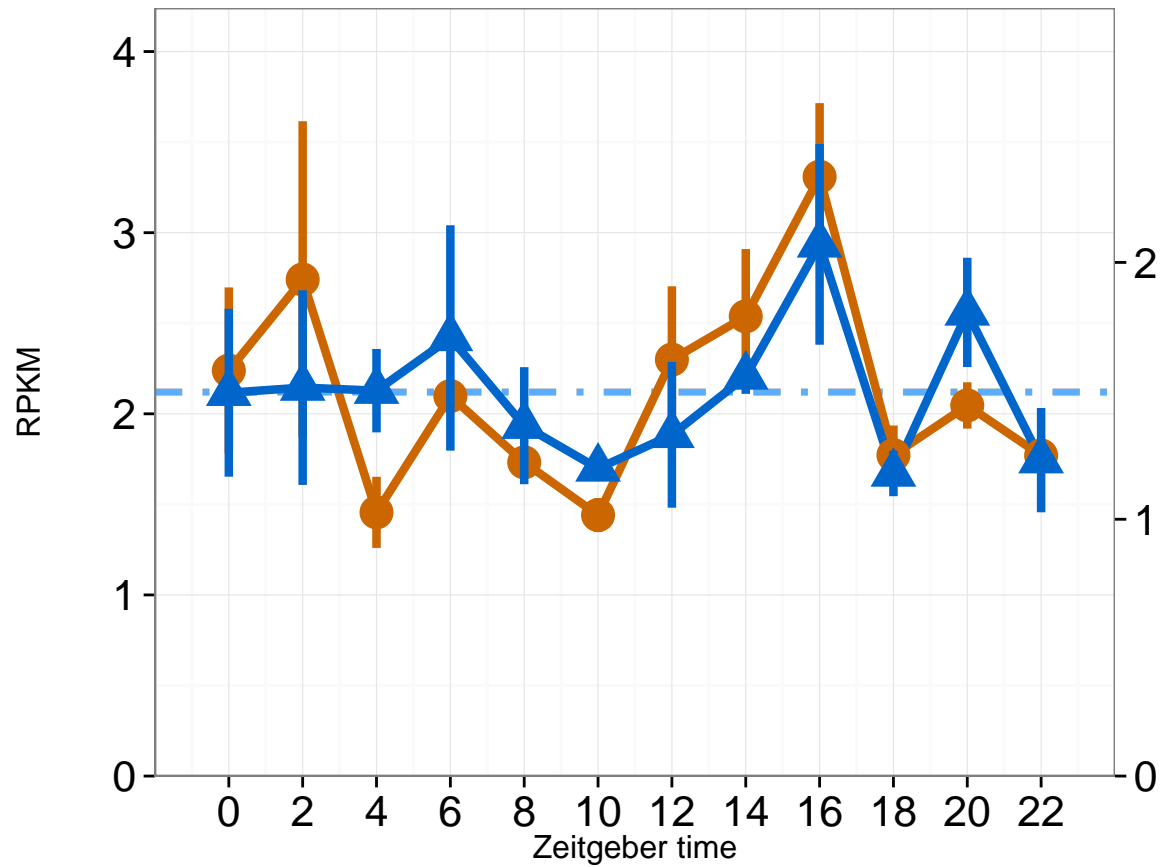

# Golm1

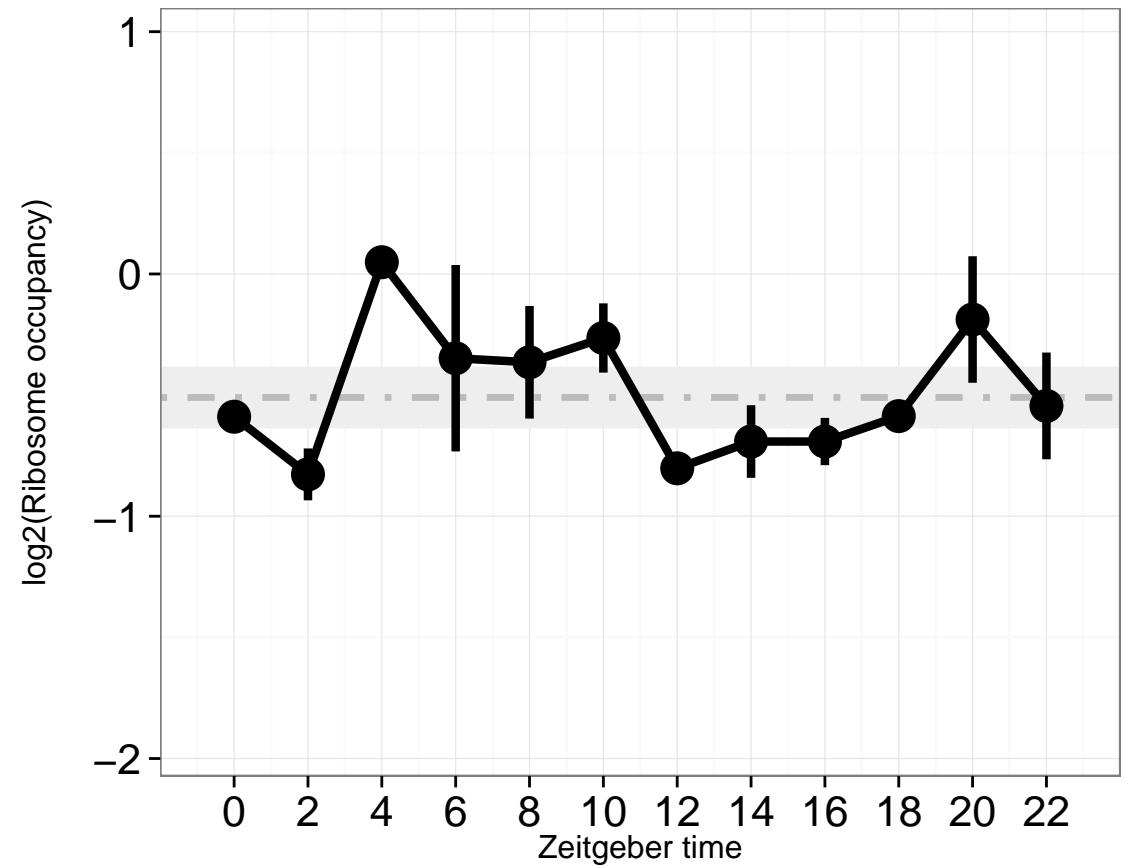

Supplement: SuppDataset_1.zip [file Golm1_set_A.pdf › Supplemental Dataset 1/A-mRNA_nonrhyth_translation_nonrhyth/Golm1_set_A.pdf]

## Golph3

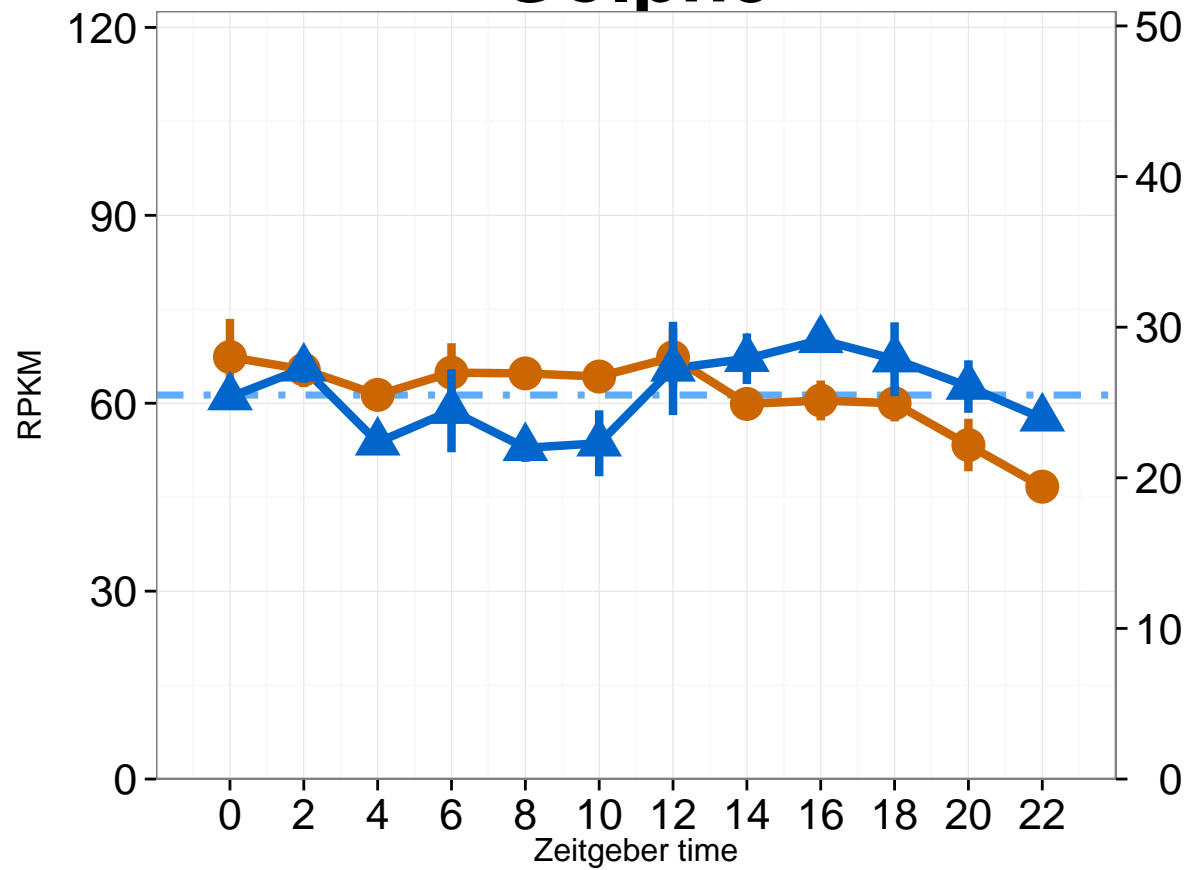

## Golph3

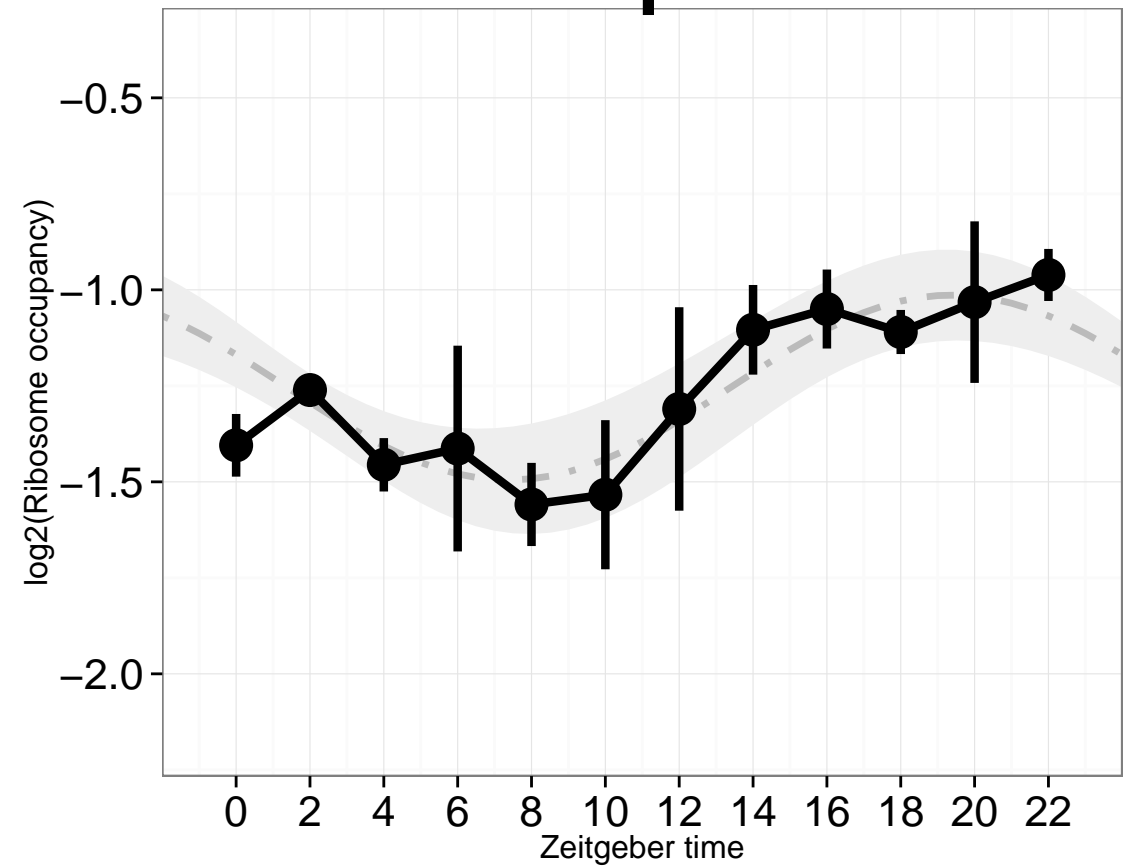

Supplement: SuppDataset_1.zip [file Golph3_set_A.pdf › Supplemental Dataset 1/A-mRNA_nonrhyth_translation_nonrhyth/Golph3_set_A.pdf]

# Gon4l

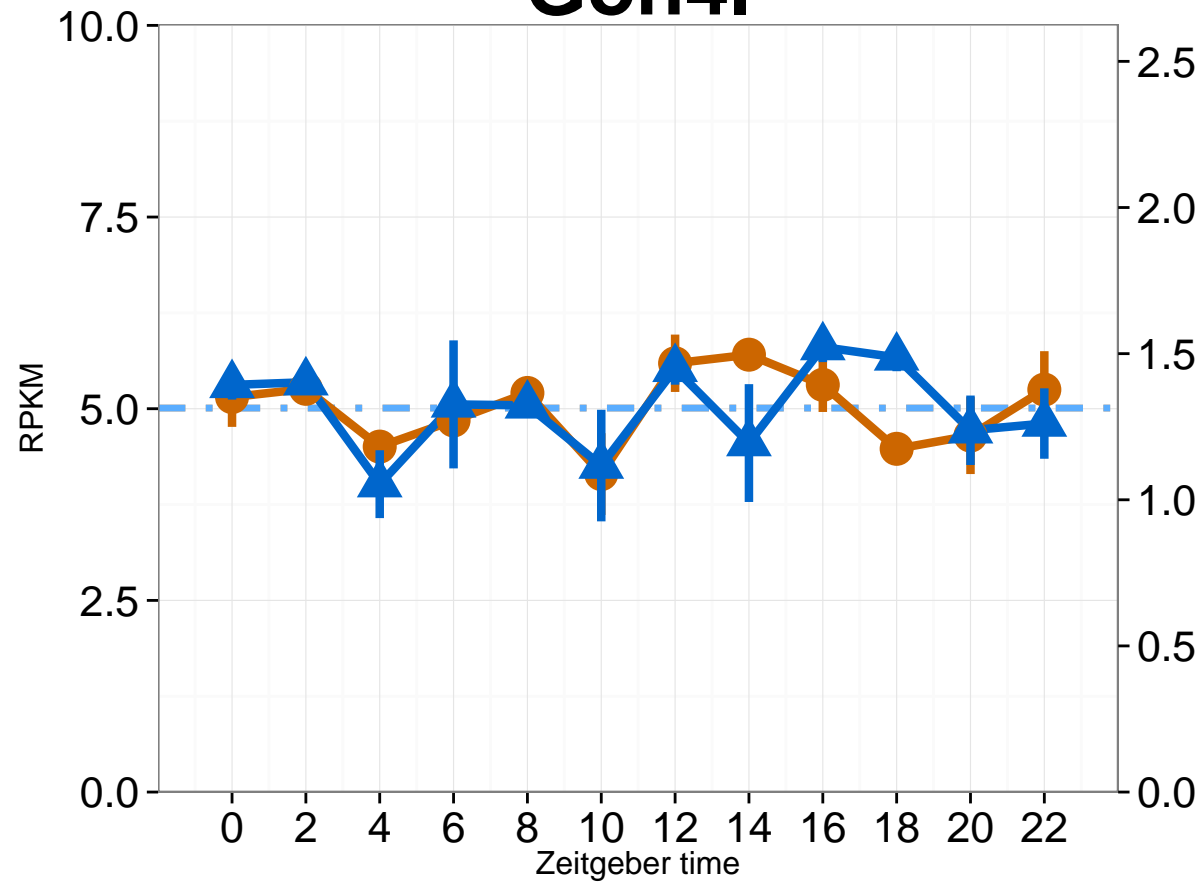

# Gon4l

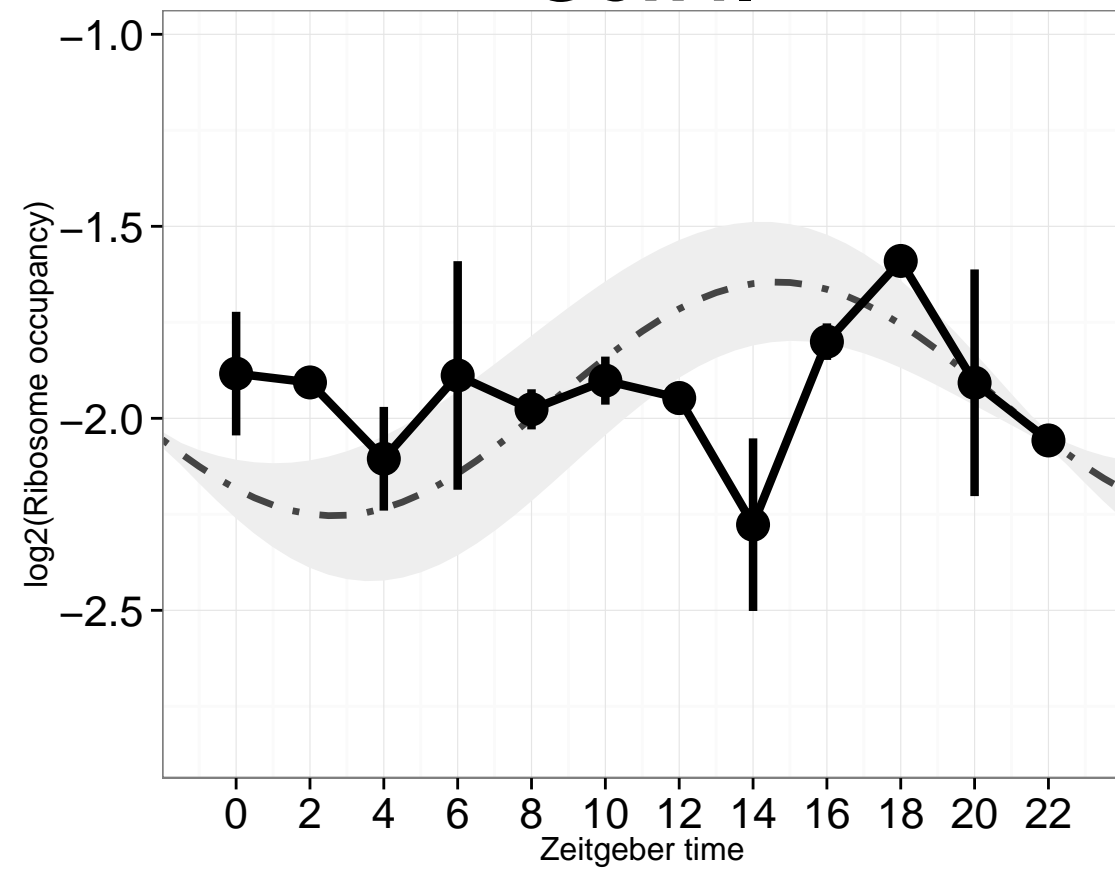

Supplement: SuppDataset_1.zip [file Gon4l_set_A.pdf › Supplemental Dataset 1/A-mRNA_nonrhyth_translation_nonrhyth/Gon4l_set_A.pdf]

## Gopc

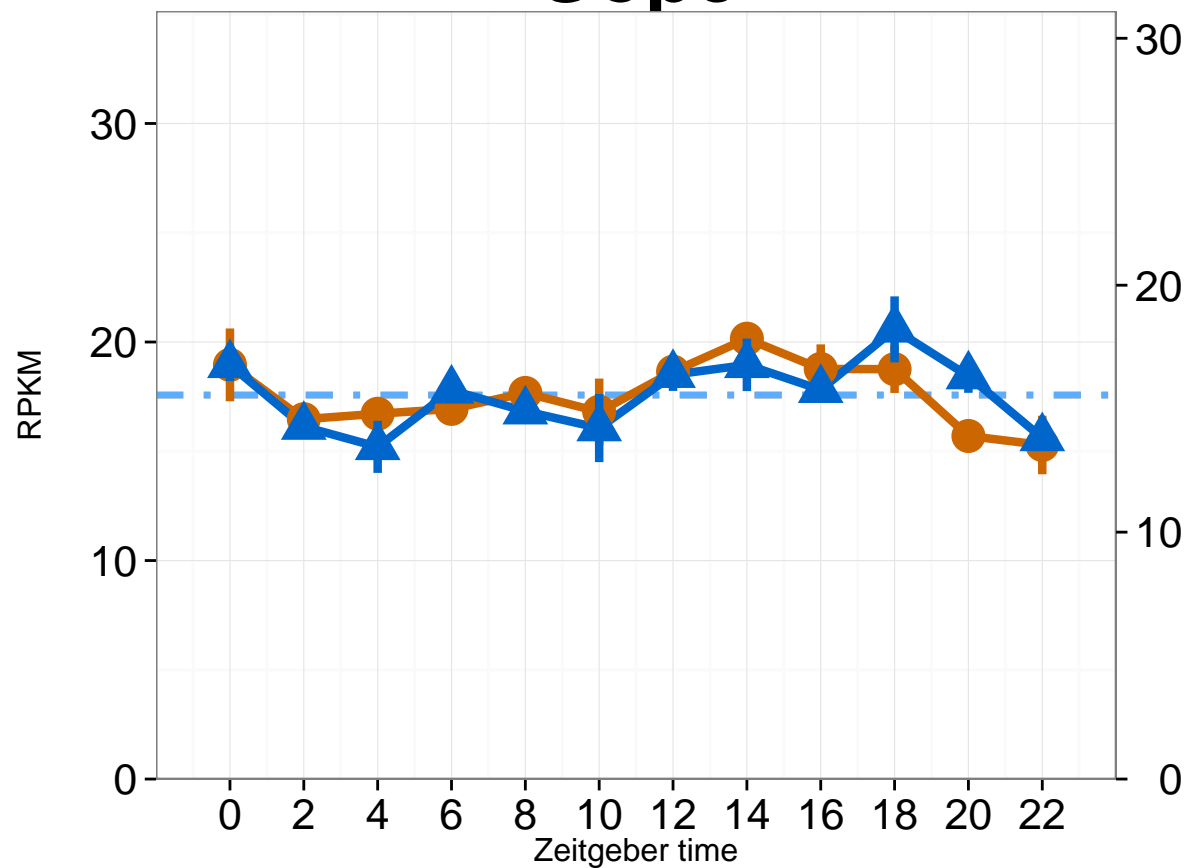

## Gopc

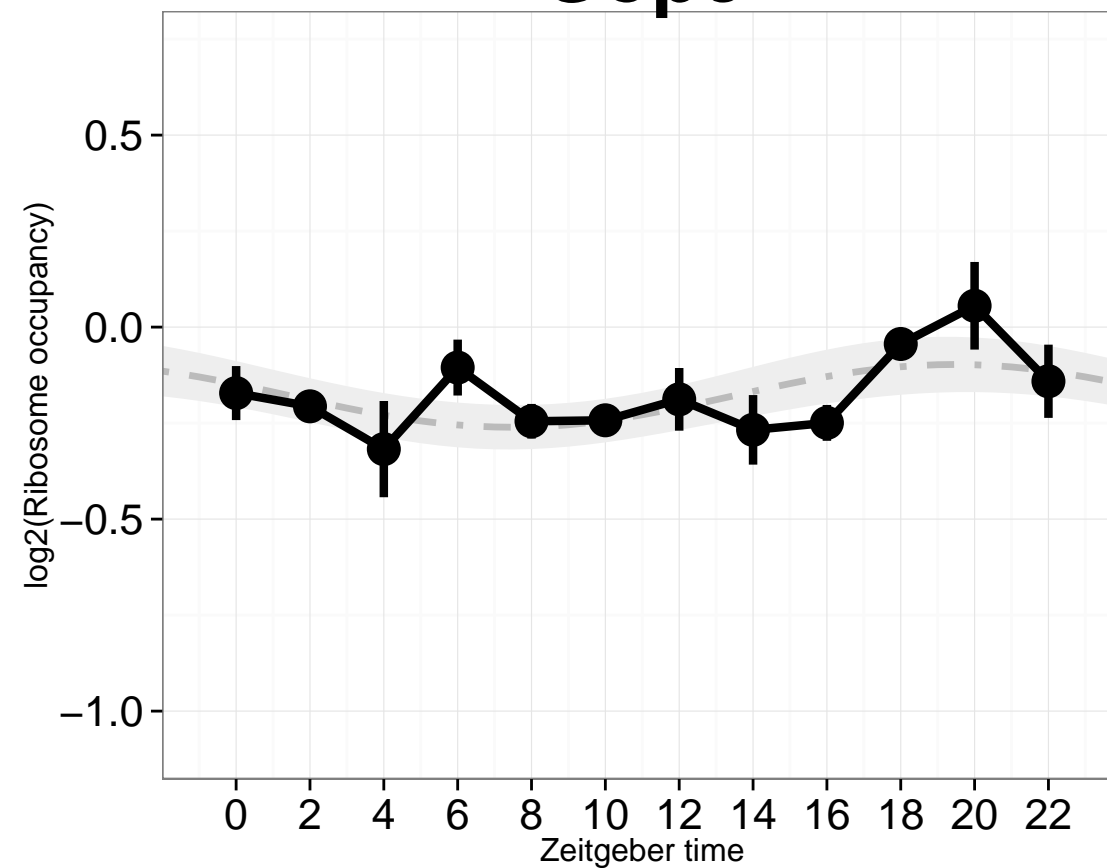

Supplement: SuppDataset_1.zip [file Gopc_set_A.pdf › Supplemental Dataset 1/A-mRNA_nonrhyth_translation_nonrhyth/Gopc_set_A.pdf]

## Gorab

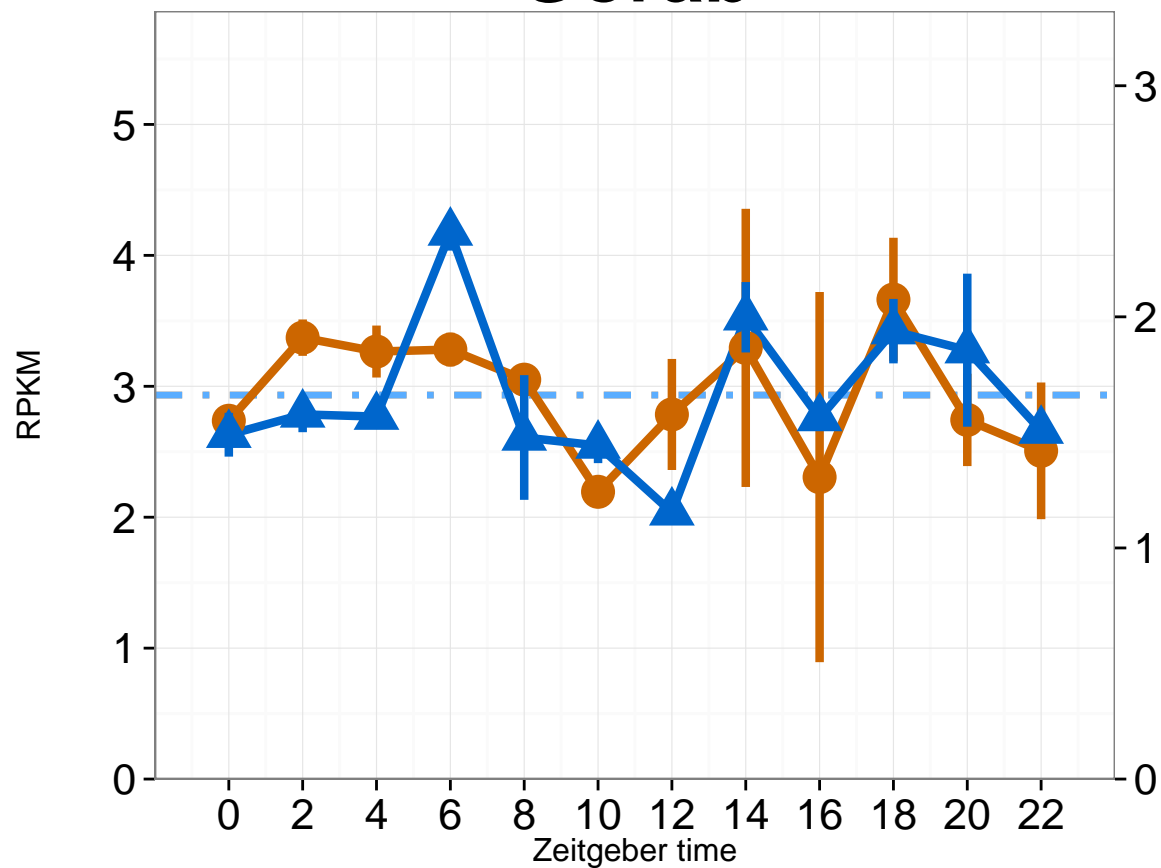

## Gorab

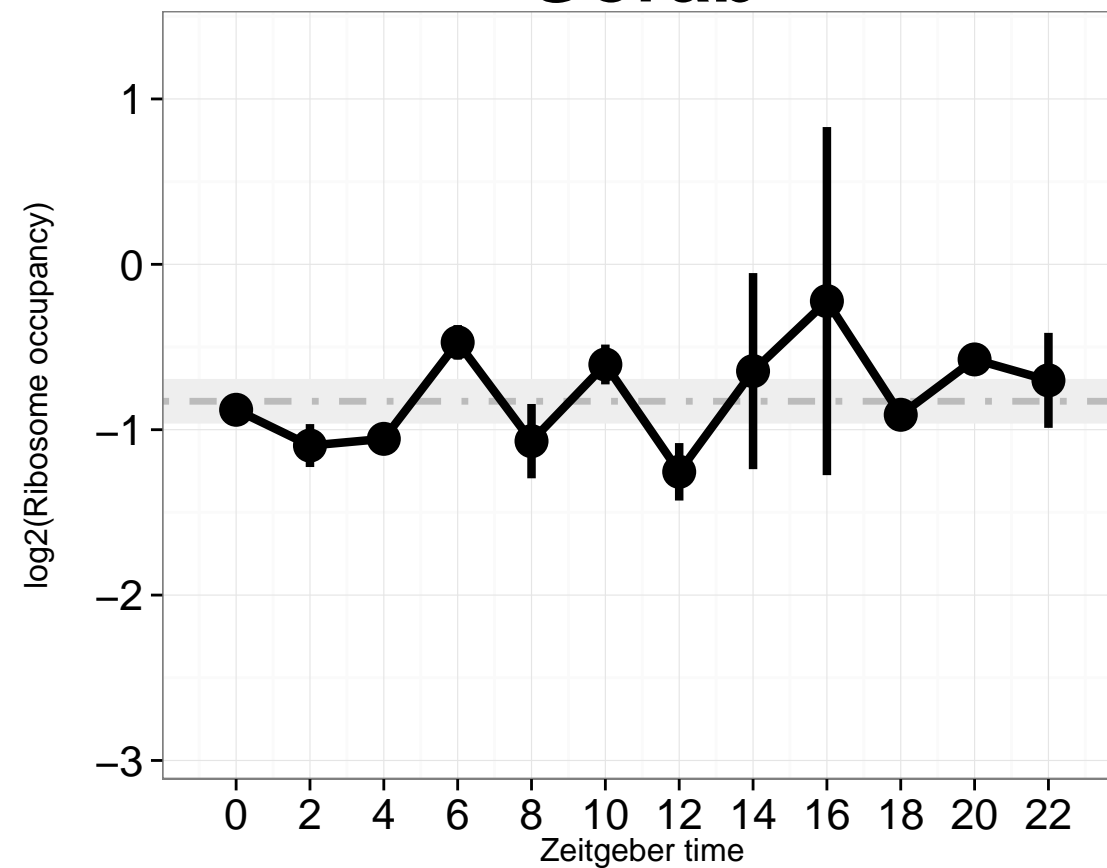

Supplement: SuppDataset_1.zip [file Gorab_set_A.pdf › Supplemental Dataset 1/A-mRNA_nonrhyth_translation_nonrhyth/Gorab_set_A.pdf]

# Gorasp1

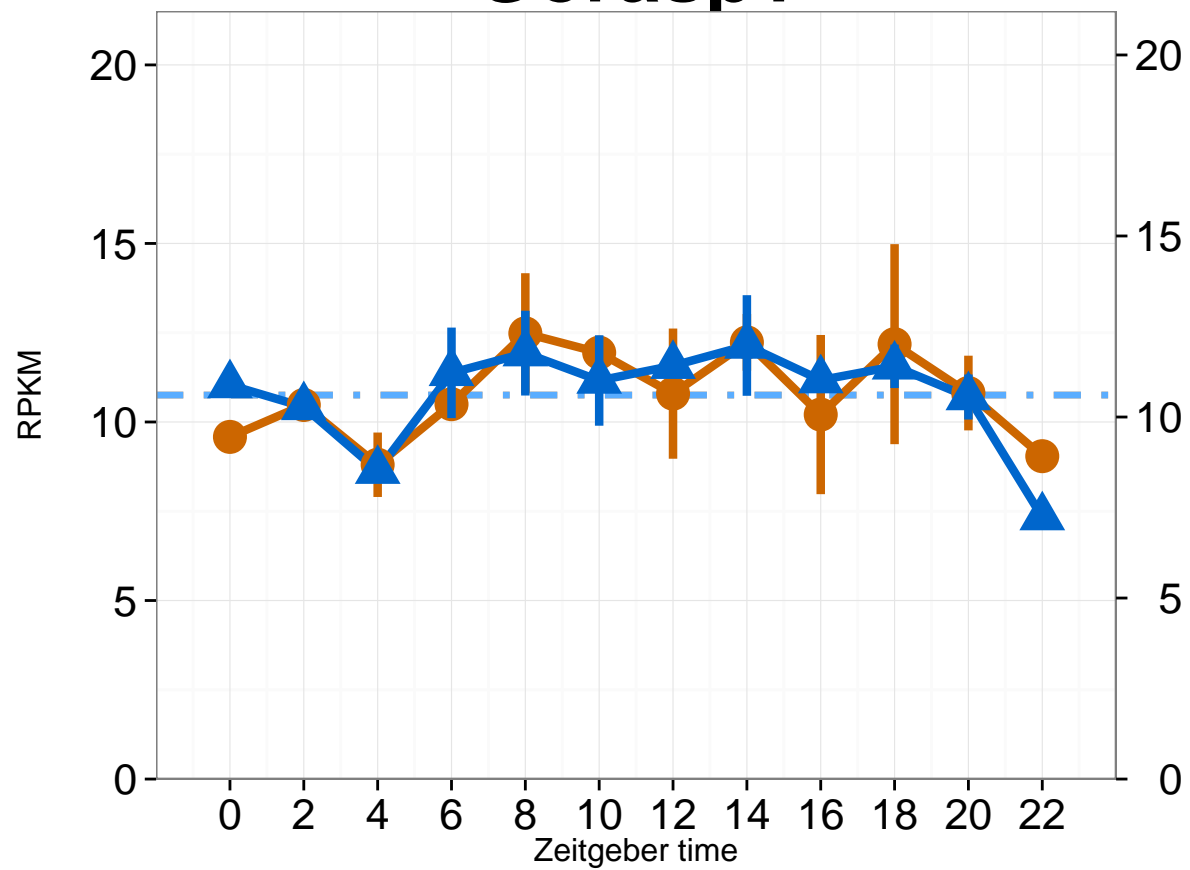

# Gorasp1

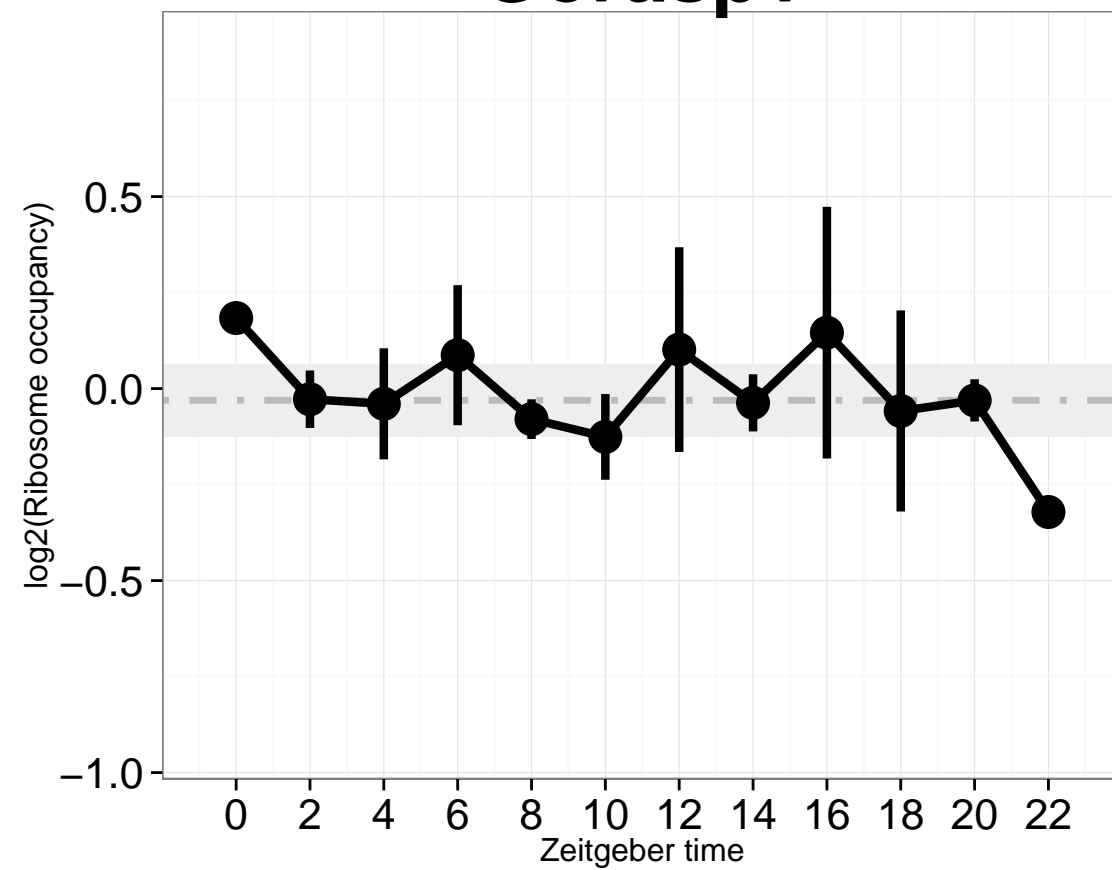

Supplement: SuppDataset_1.zip [file Gorasp1_set_A.pdf › Supplemental Dataset 1/A-mRNA_nonrhyth_translation_nonrhyth/Gorasp1_set_A.pdf]

## Gorasp2

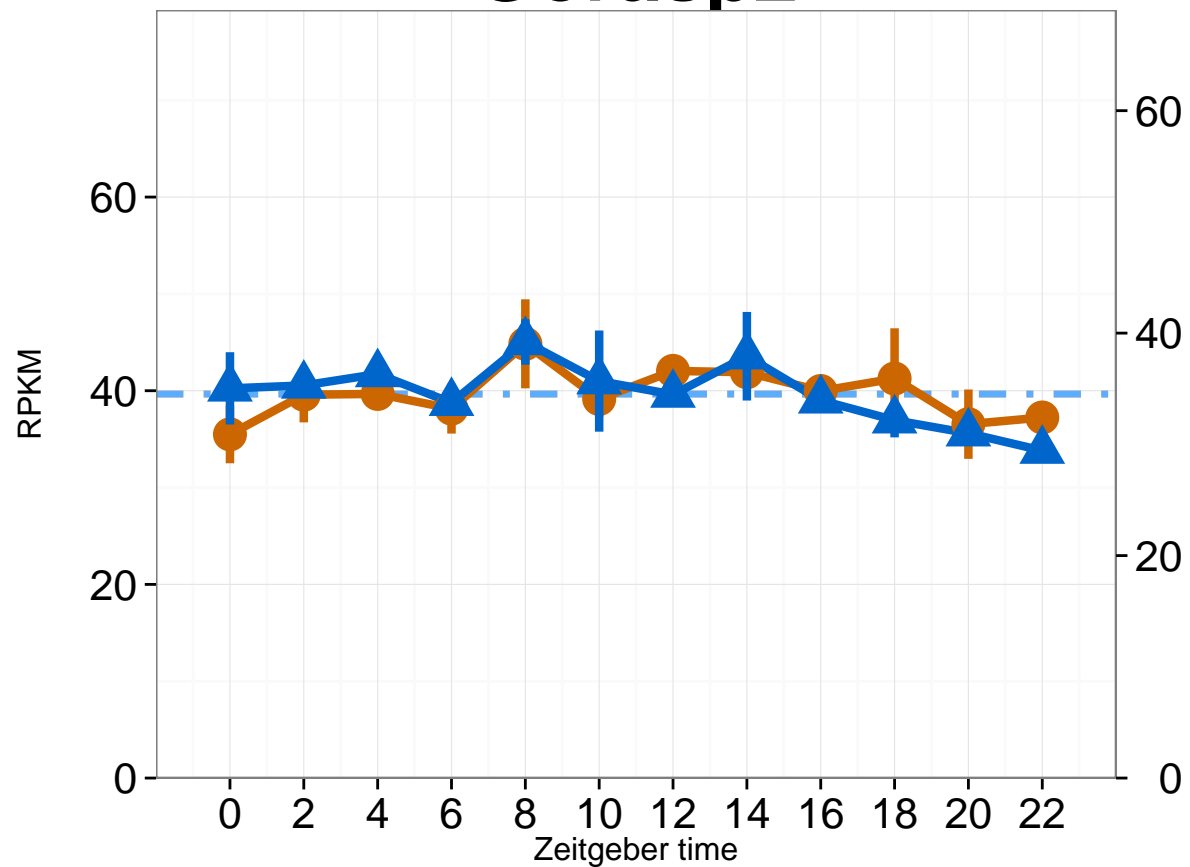

## Gorasp2

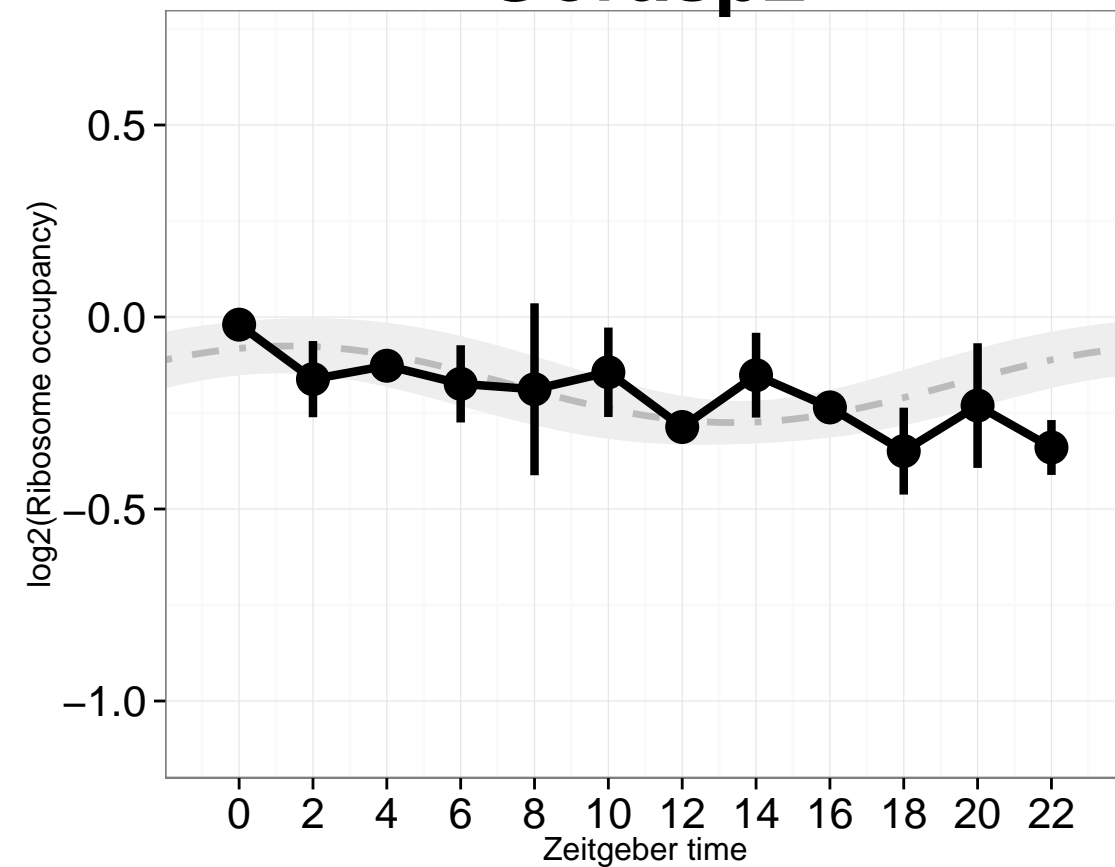

Supplement: SuppDataset_1.zip [file Gorasp2_set_A.pdf › Supplemental Dataset 1/A-mRNA_nonrhyth_translation_nonrhyth/Gorasp2_set_A.pdf]

# Gosr1

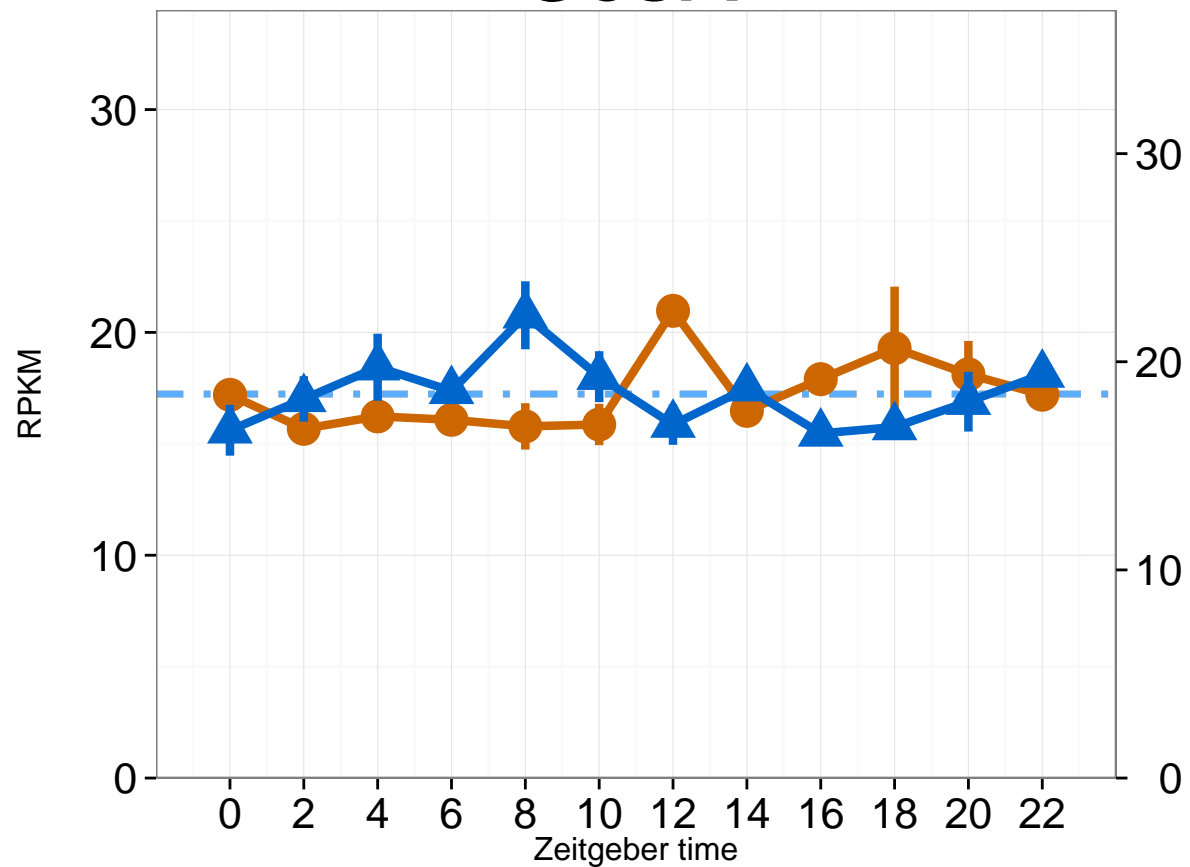

# Gosr1

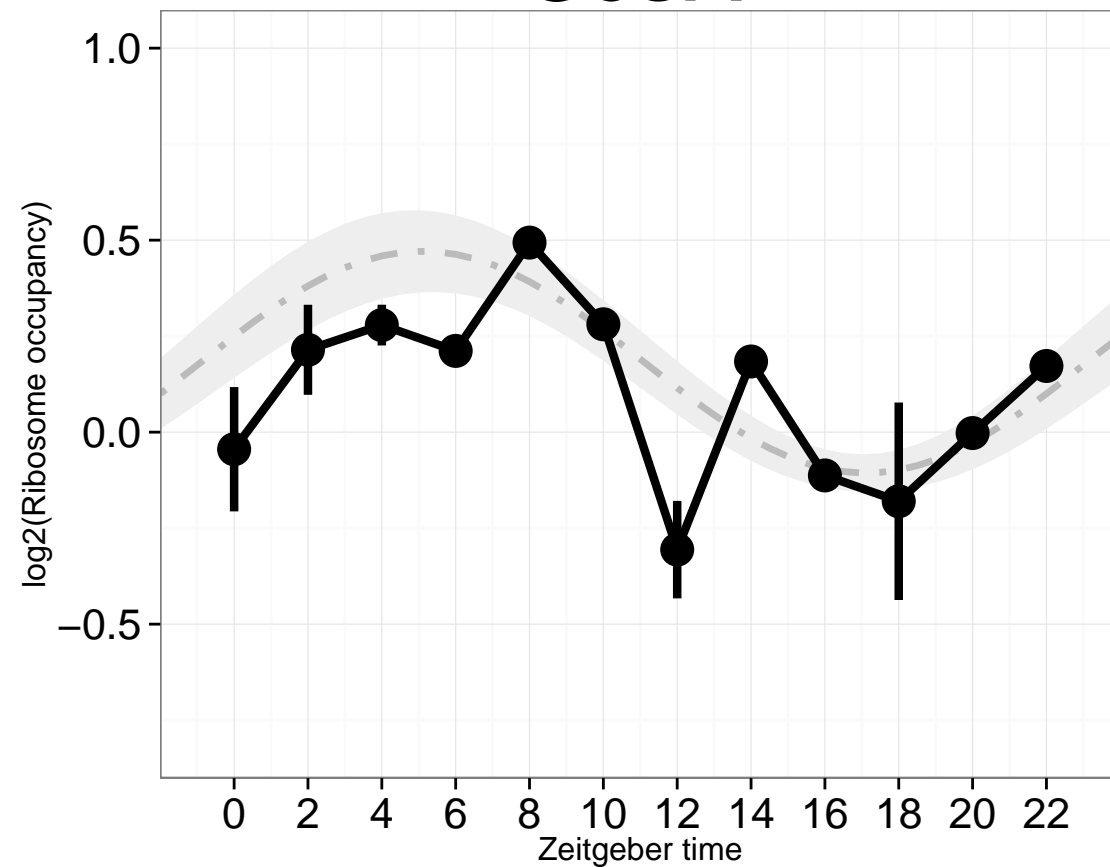

Supplement: SuppDataset_1.zip [file Gosr1_set_A.pdf › Supplemental Dataset 1/A-mRNA_nonrhyth_translation_nonrhyth/Gosr1_set_A.pdf]

# Gosr2

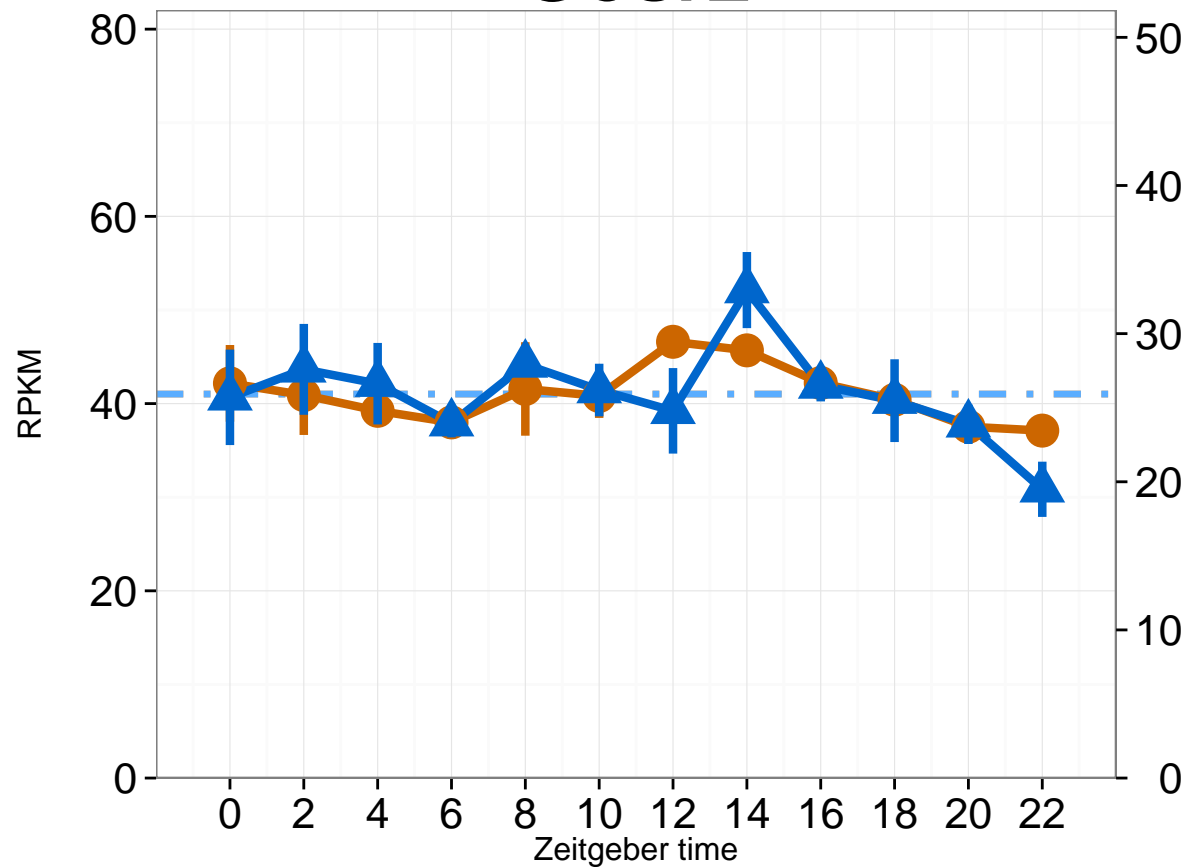

# Gosr2

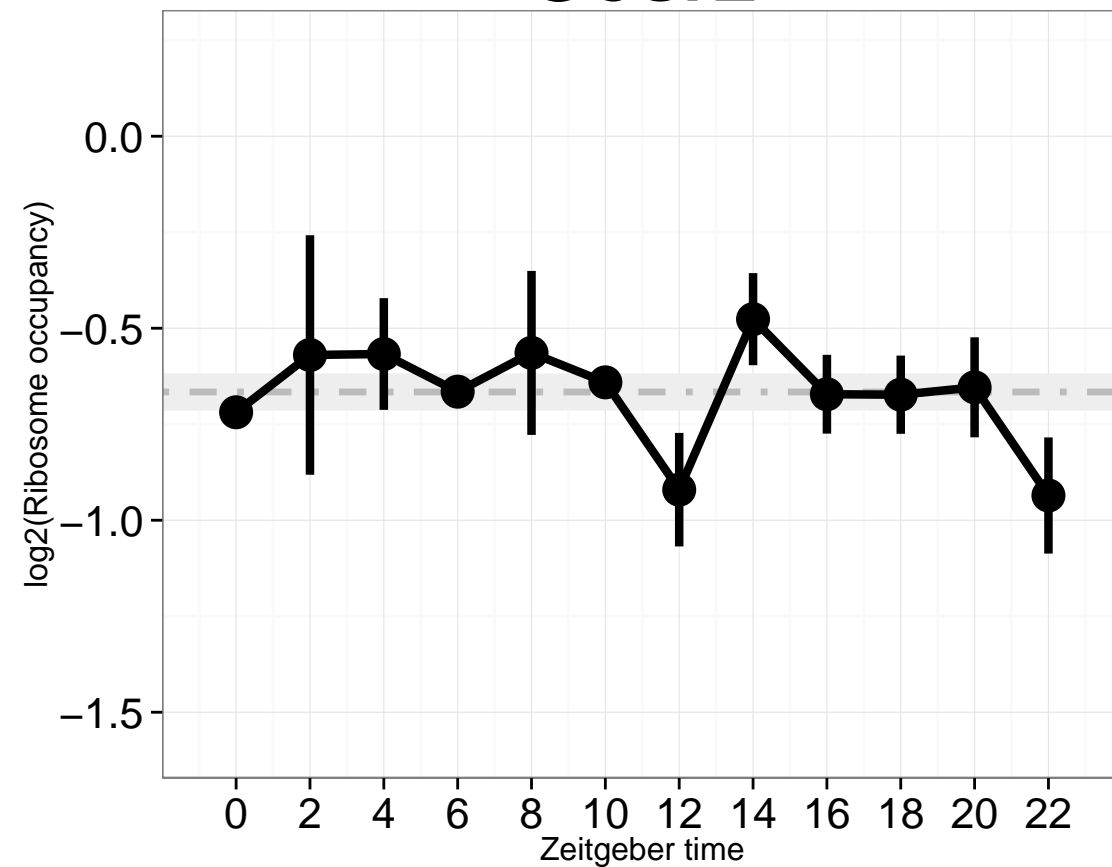

Supplement: SuppDataset_1.zip [file Gosr2_set_A.pdf › Supplemental Dataset 1/A-mRNA_nonrhyth_translation_nonrhyth/Gosr2_set_A.pdf]

## Got1

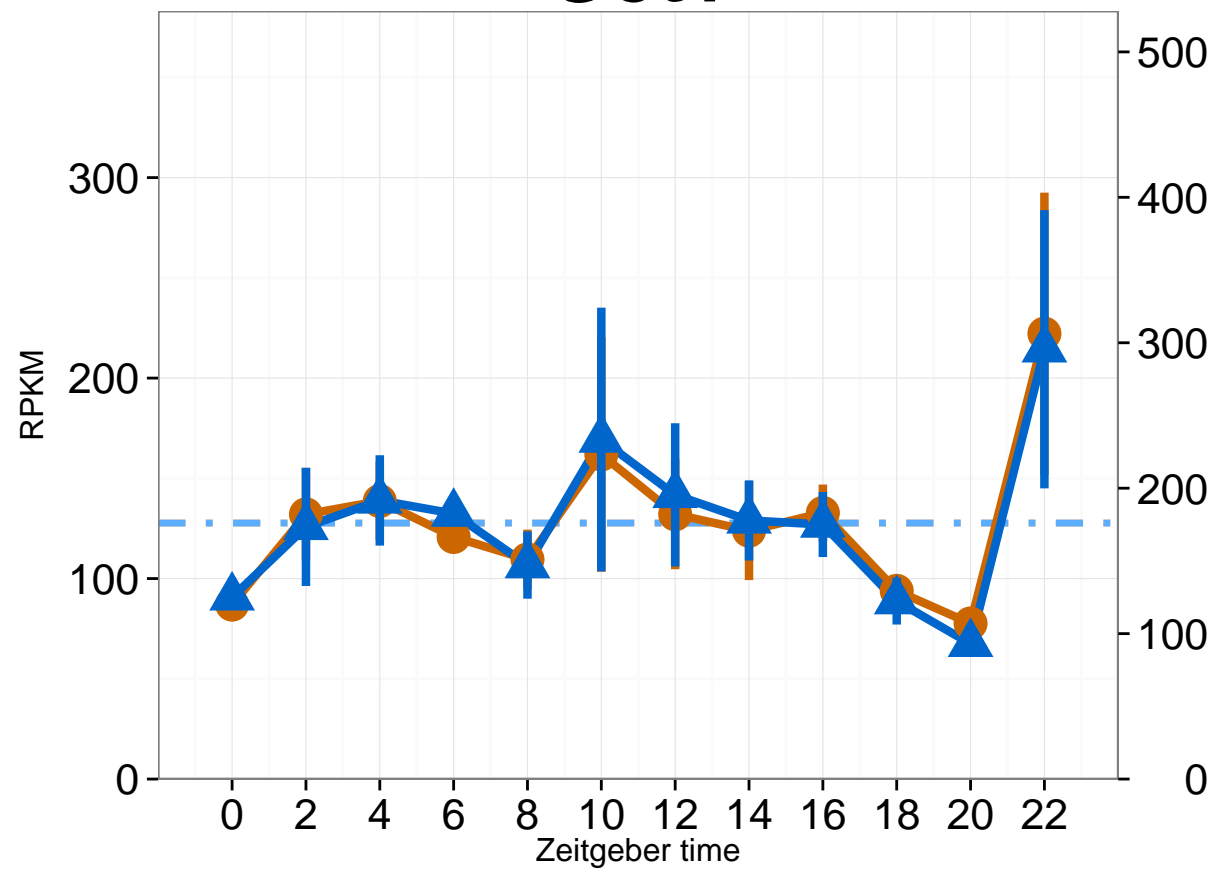

## Got1

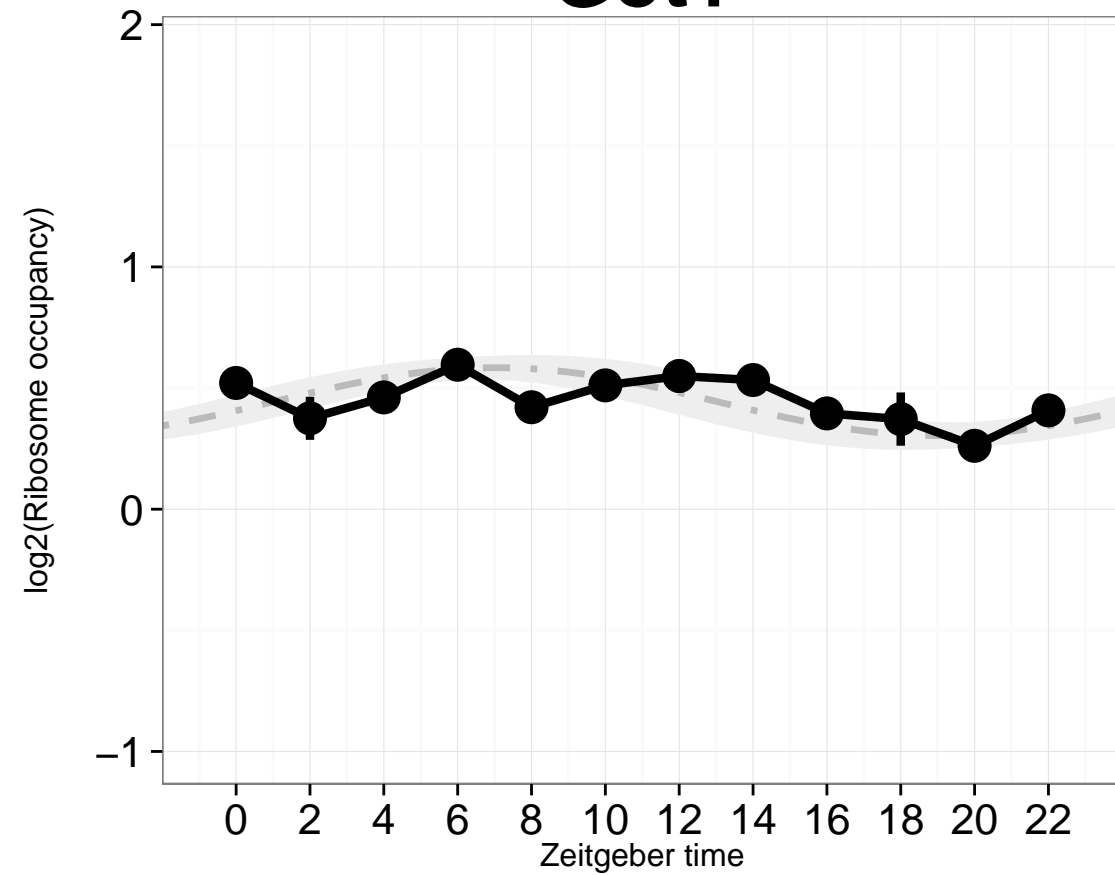

Supplement: SuppDataset_1.zip [file Got1_set_A.pdf › Supplemental Dataset 1/A-mRNA_nonrhyth_translation_nonrhyth/Got1_set_A.pdf]

## Got2

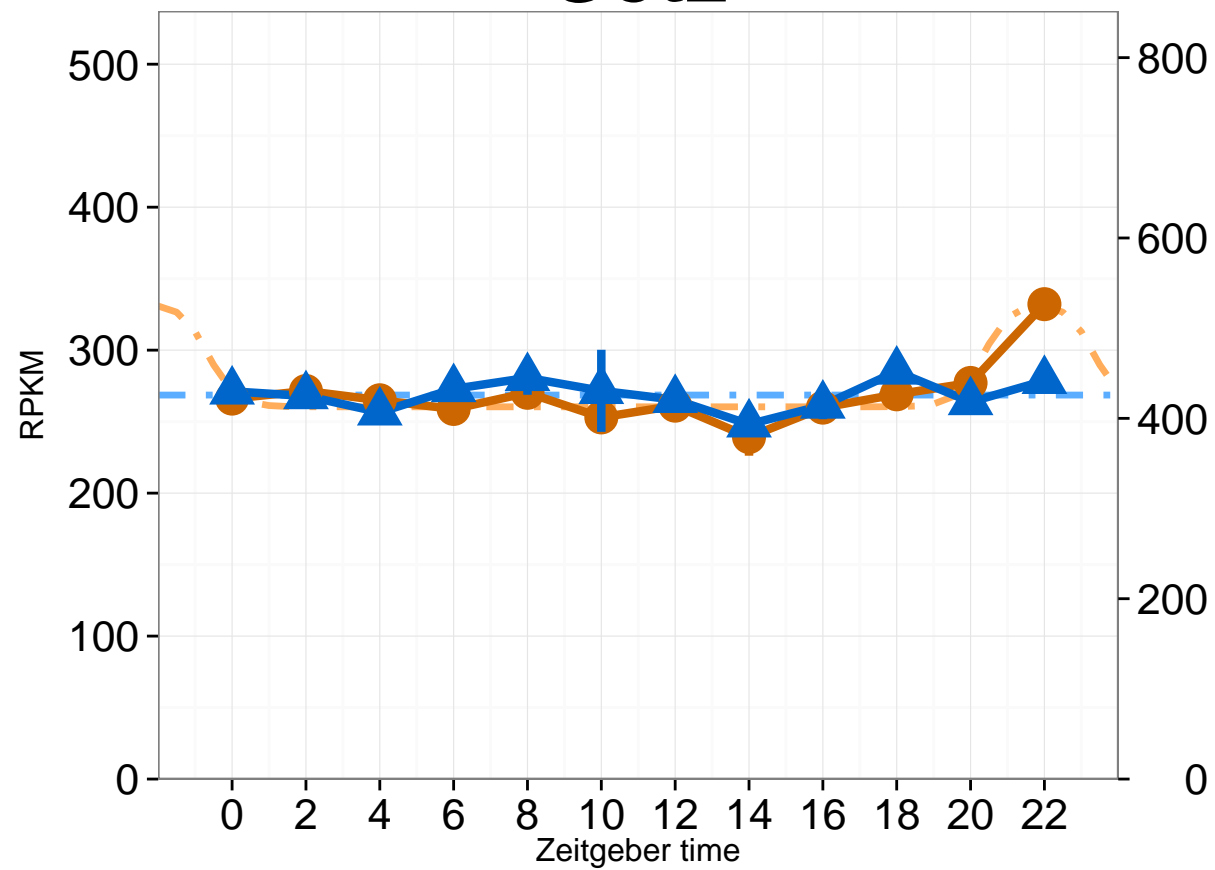

## Got2

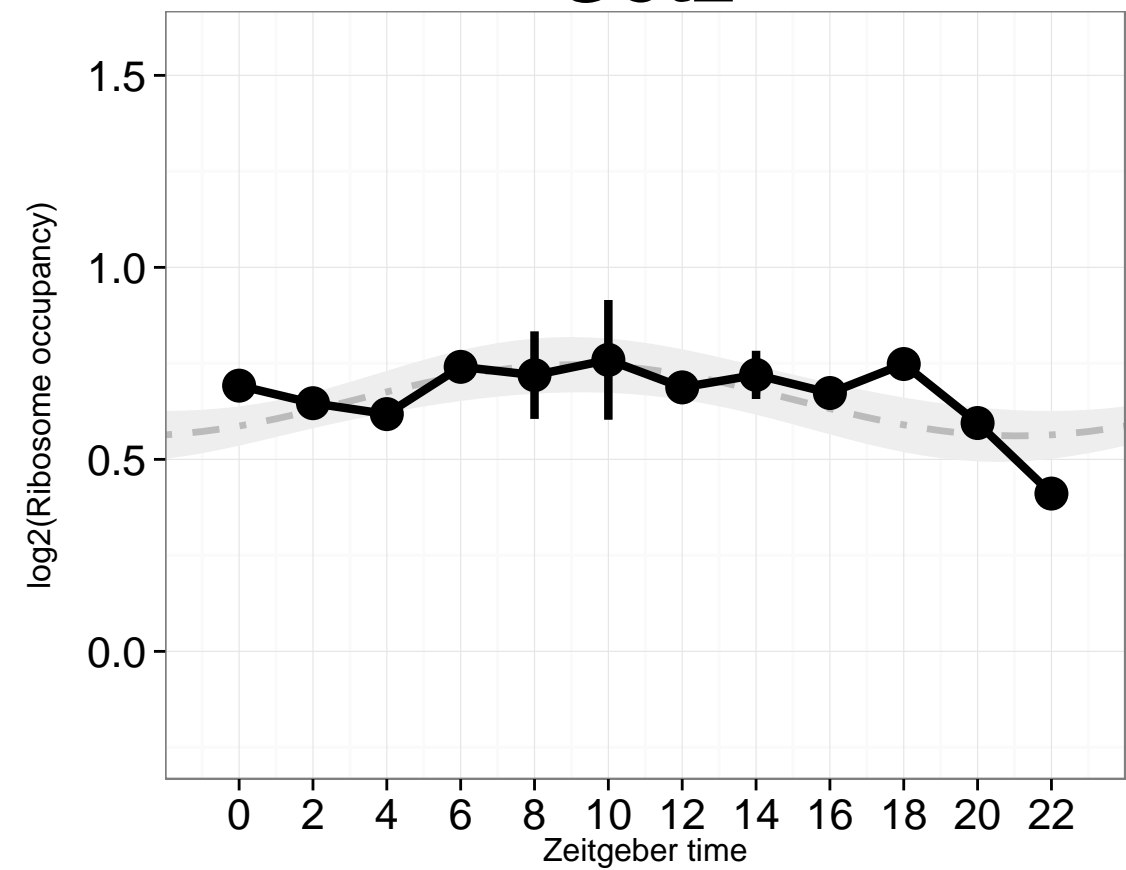

Supplement: SuppDataset_1.zip [file Got2_set_A.pdf › Supplemental Dataset 1/A-mRNA_nonrhyth_translation_nonrhyth/Got2_set_A.pdf]

## Gp49a

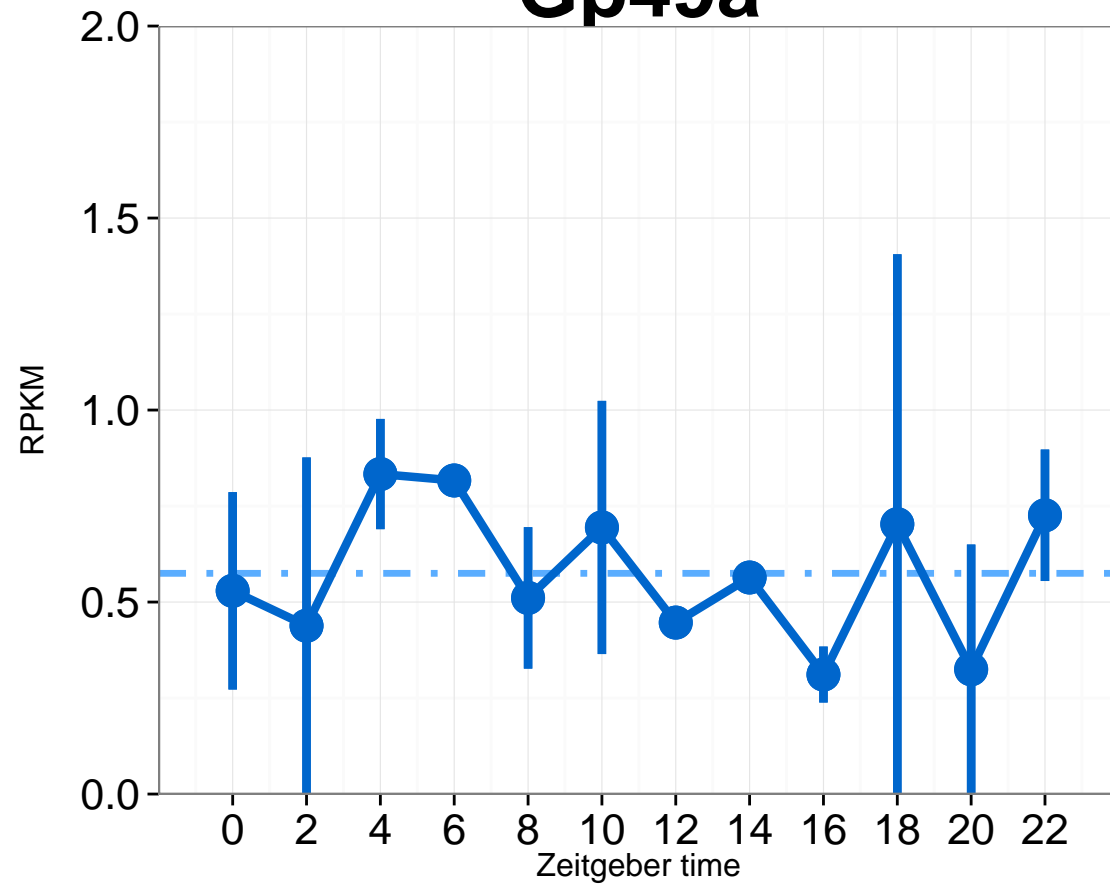

## Gp49a log2(Ribosome occupancy

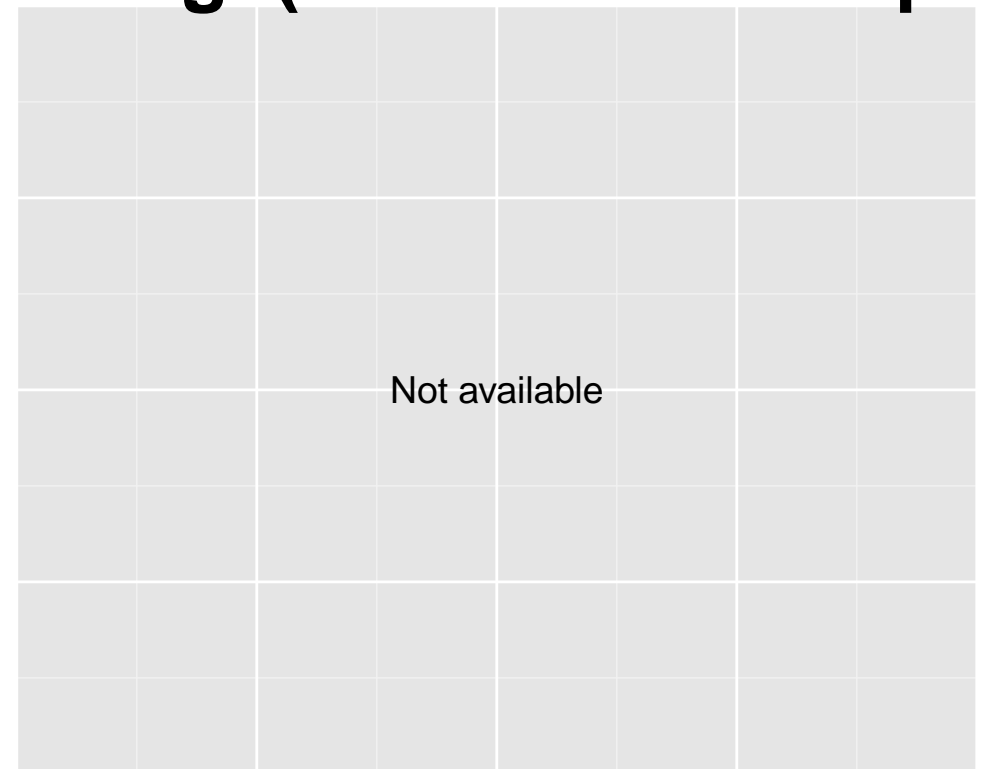

Supplement: SuppDataset_1.zip [file Gp49a_set_A.pdf › Supplemental Dataset 1/A-mRNA_nonrhyth_translation_nonrhyth/Gp49a_set_A.pdf]
