# Supplementary figures and images for: Ribosome profiling reveals the rhythmic liver translatome and circadian clock regulation by upstream open reading frames (part 90 of 113)
Source: HighWire-hosted journal article supplement (doi:10.1101/gr.195404.115), 2015-10-20

# Gnai1

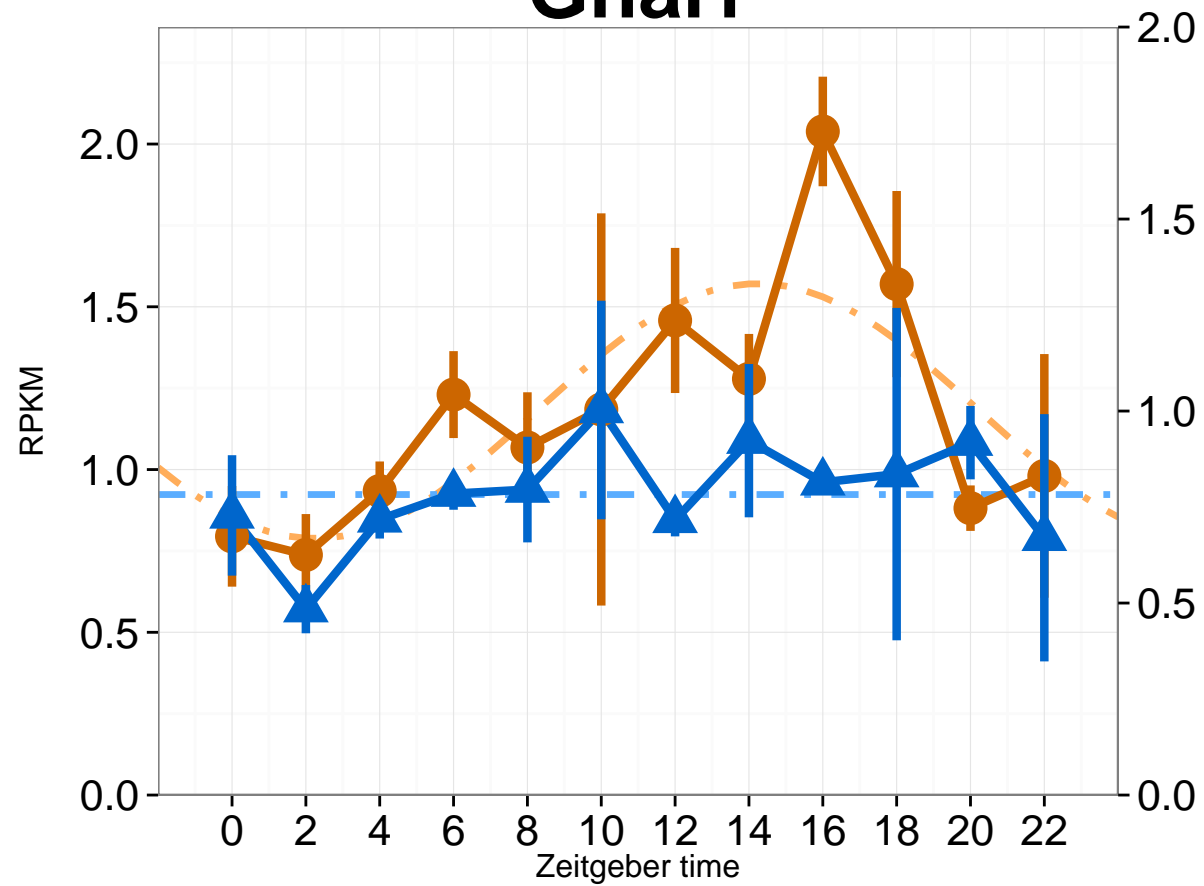

# Gnai1

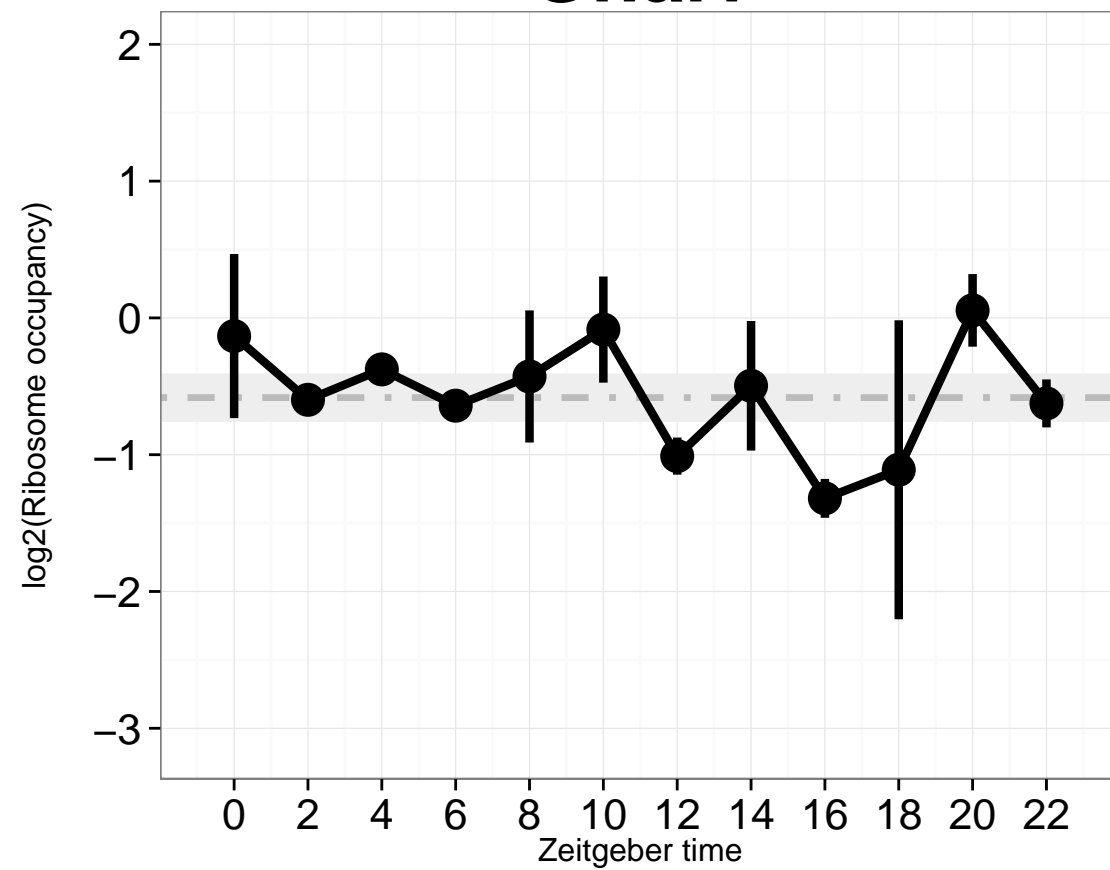

Supplement: SuppDataset_1.zip [file Gnai1_set_B.pdf › Supplemental Dataset 1/B-mRNA_rhythm_translation_nonrhyth/Gnai1_set_B.pdf]

# Gpatch4

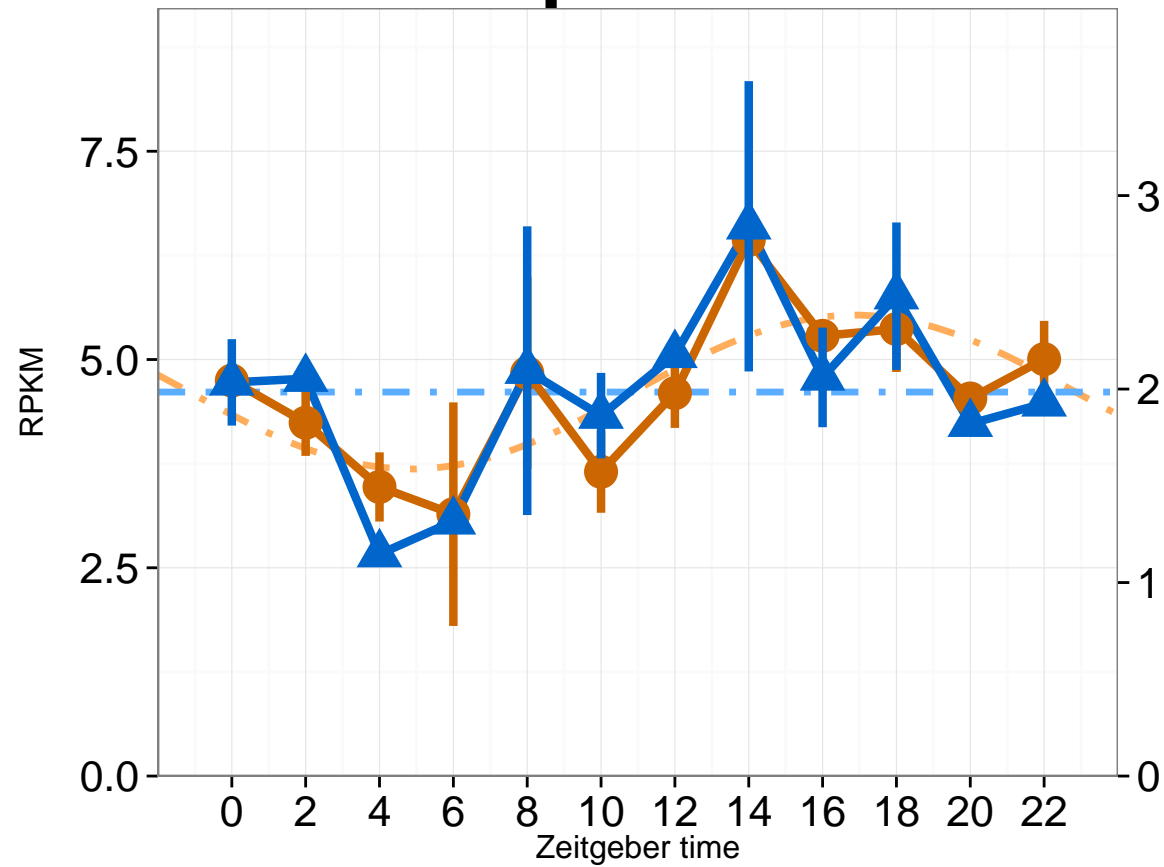

# Gpatch4

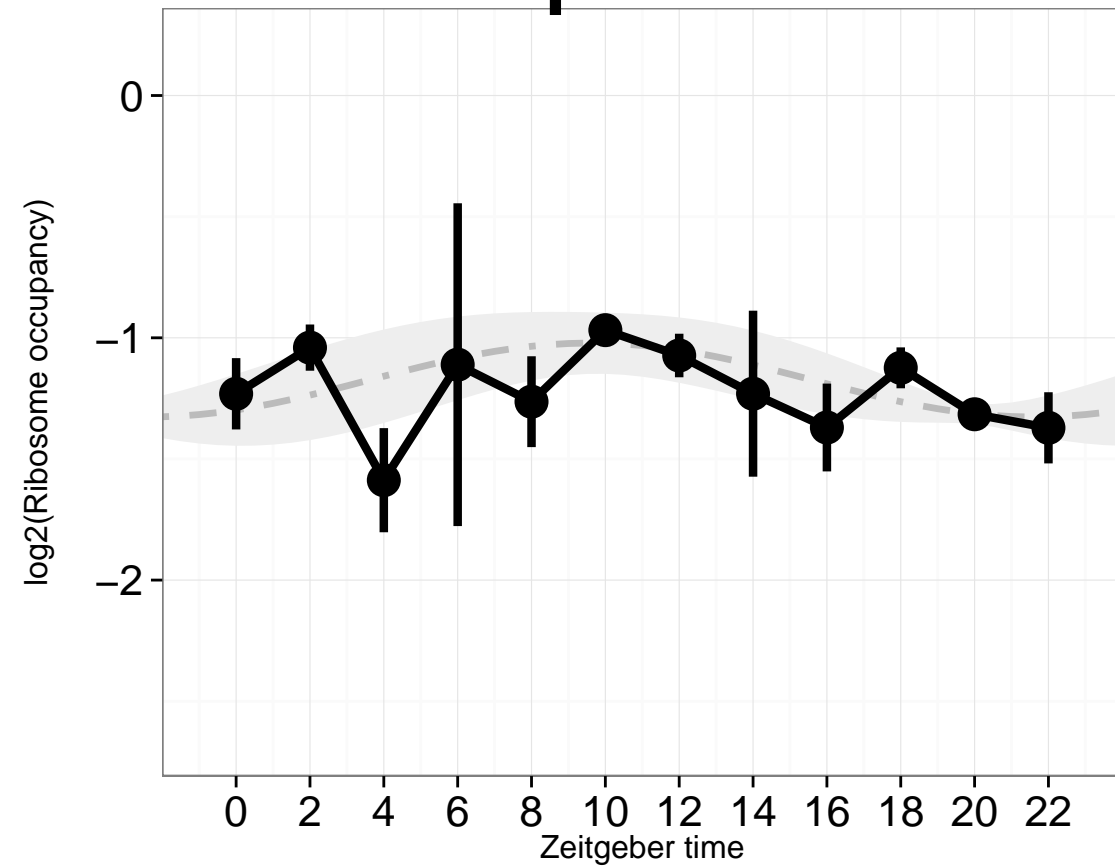

Supplement: SuppDataset_1.zip [file Gpatch4_set_B.pdf › Supplemental Dataset 1/B-mRNA_rhythm_translation_nonrhyth/Gpatch4_set_B.pdf]

## Gpc3

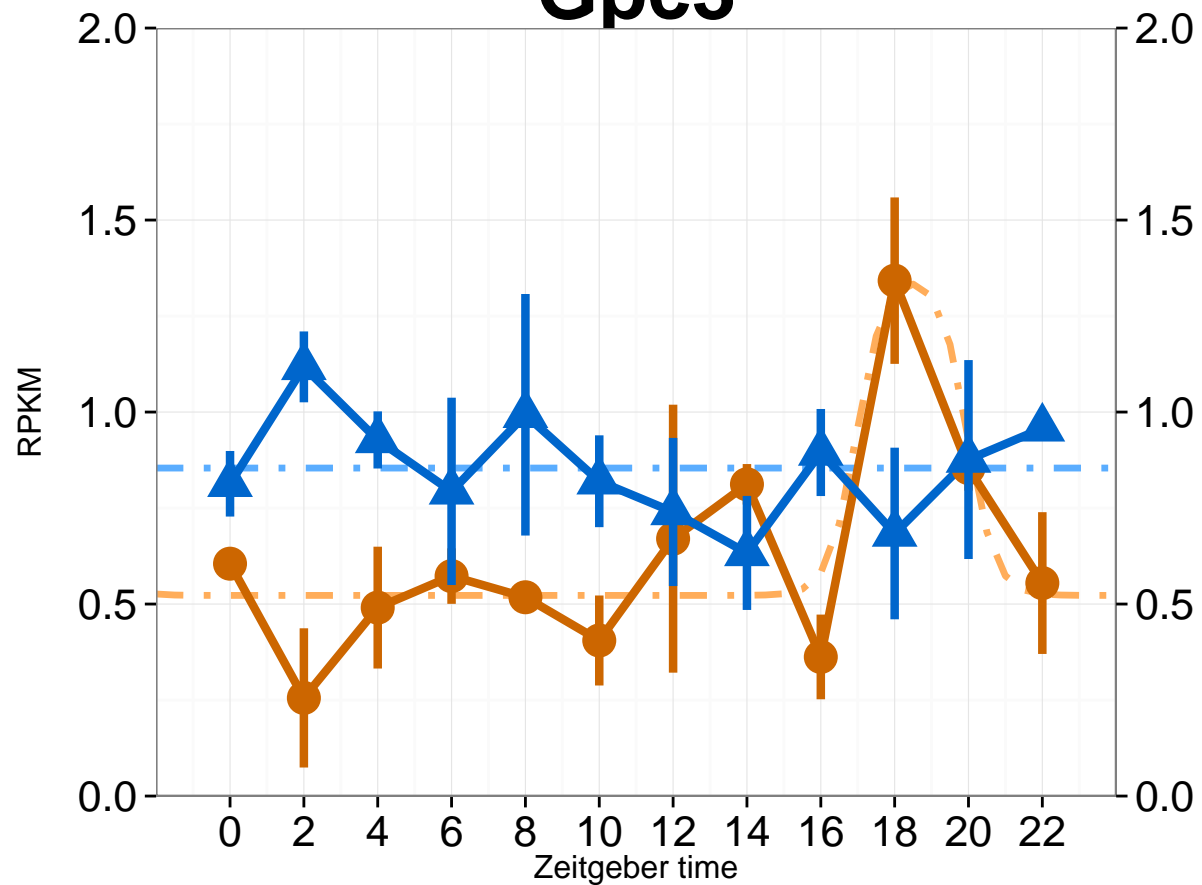

## Gpc3

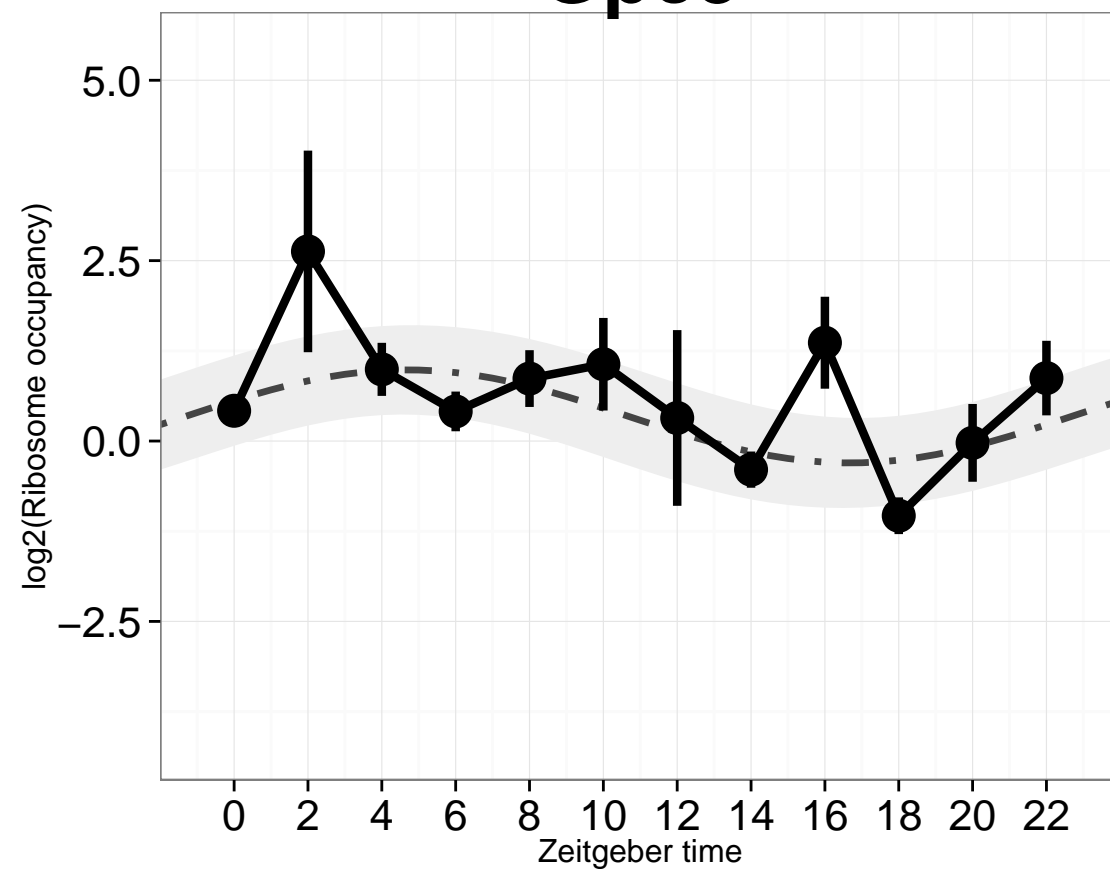

Supplement: SuppDataset_1.zip [file Gpc3_set_B.pdf › Supplemental Dataset 1/B-mRNA_rhythm_translation_nonrhyth/Gpc3_set_B.pdf]

# Gpr137

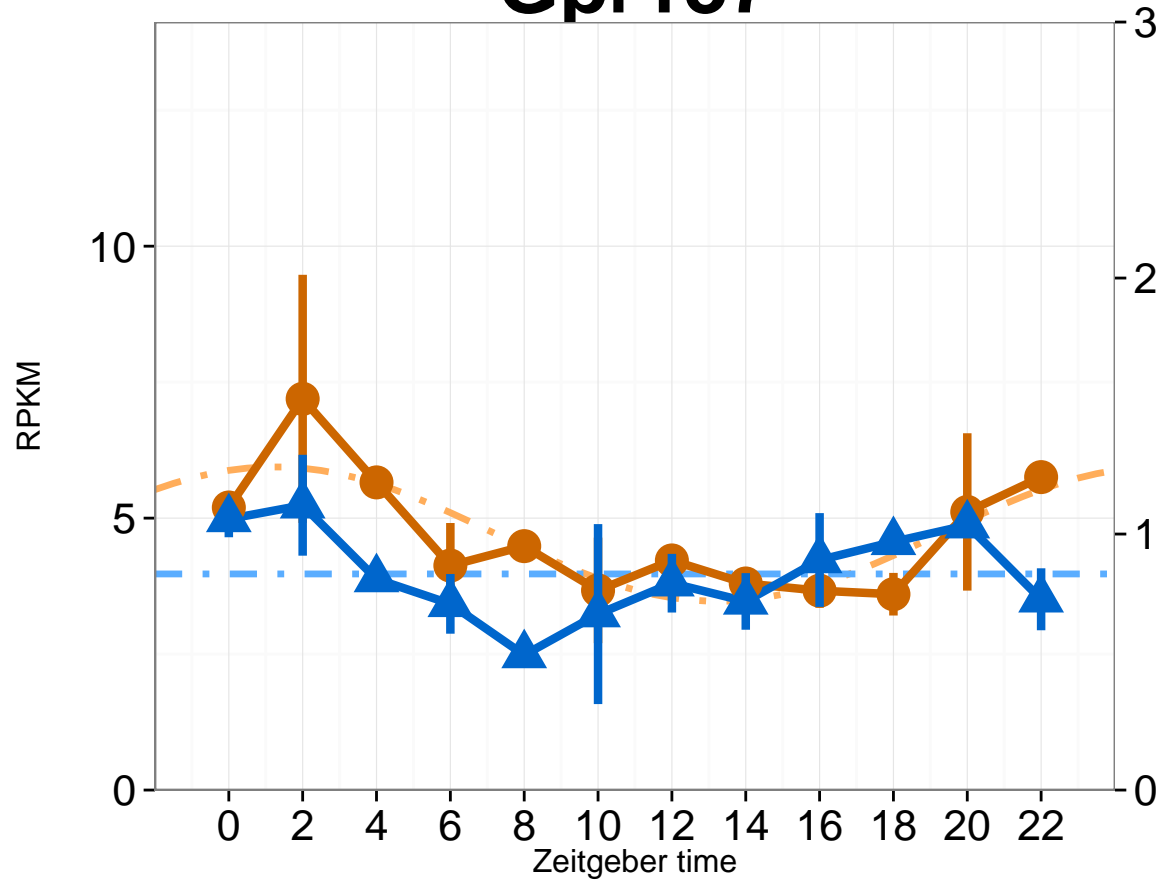

# Gpr137

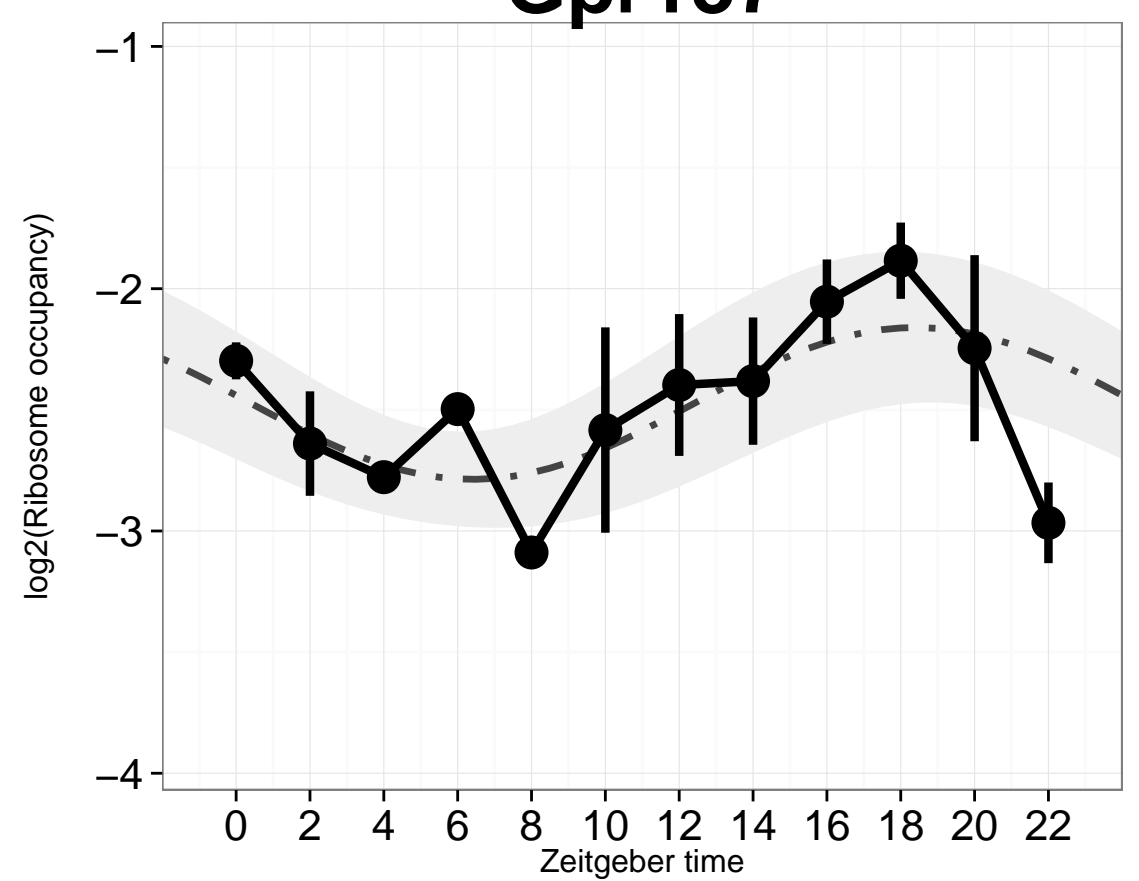

Supplement: SuppDataset_1.zip [file Gpr137_set_B.pdf › Supplemental Dataset 1/B-mRNA_rhythm_translation_nonrhyth/Gpr137_set_B.pdf]

# Gpr56

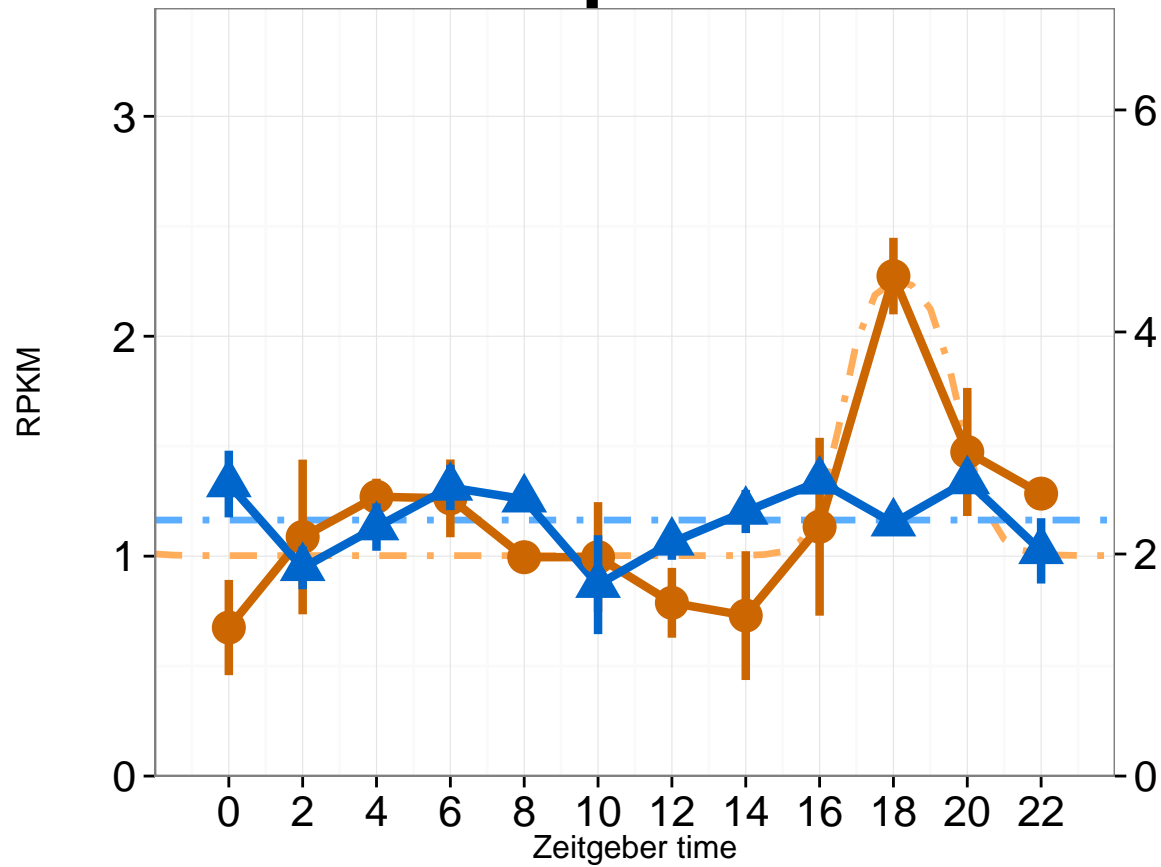

# Gpr56

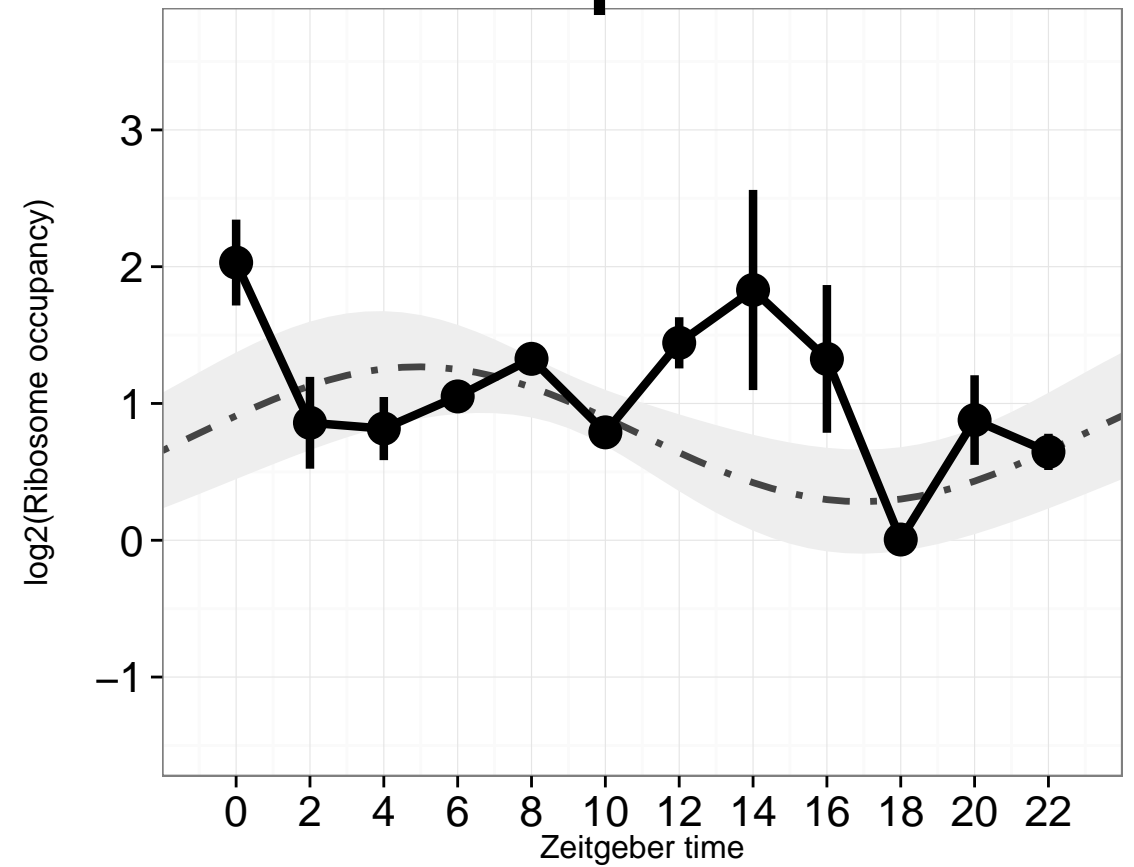

Supplement: SuppDataset_1.zip [file Gpr56_set_B.pdf › Supplemental Dataset 1/B-mRNA_rhythm_translation_nonrhyth/Gpr56_set_B.pdf]

## Gpx3

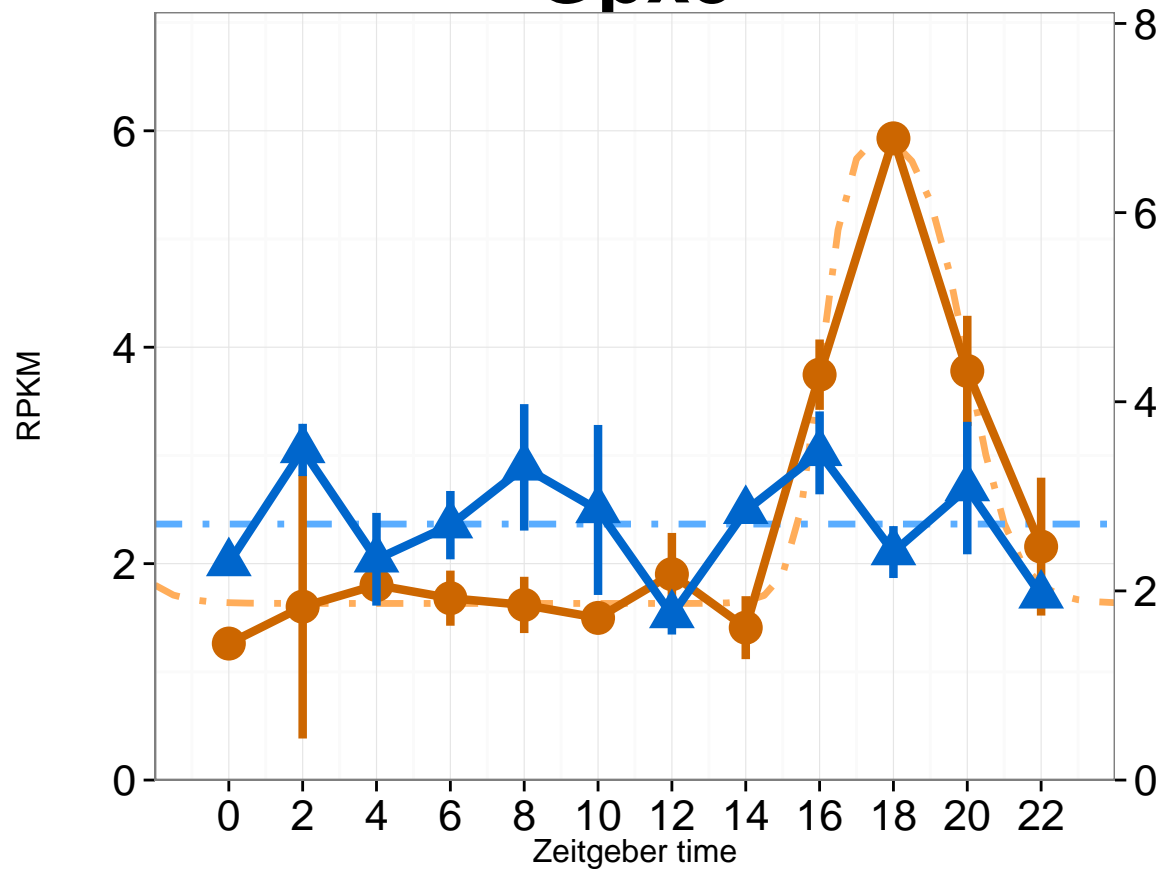

## Gpx3

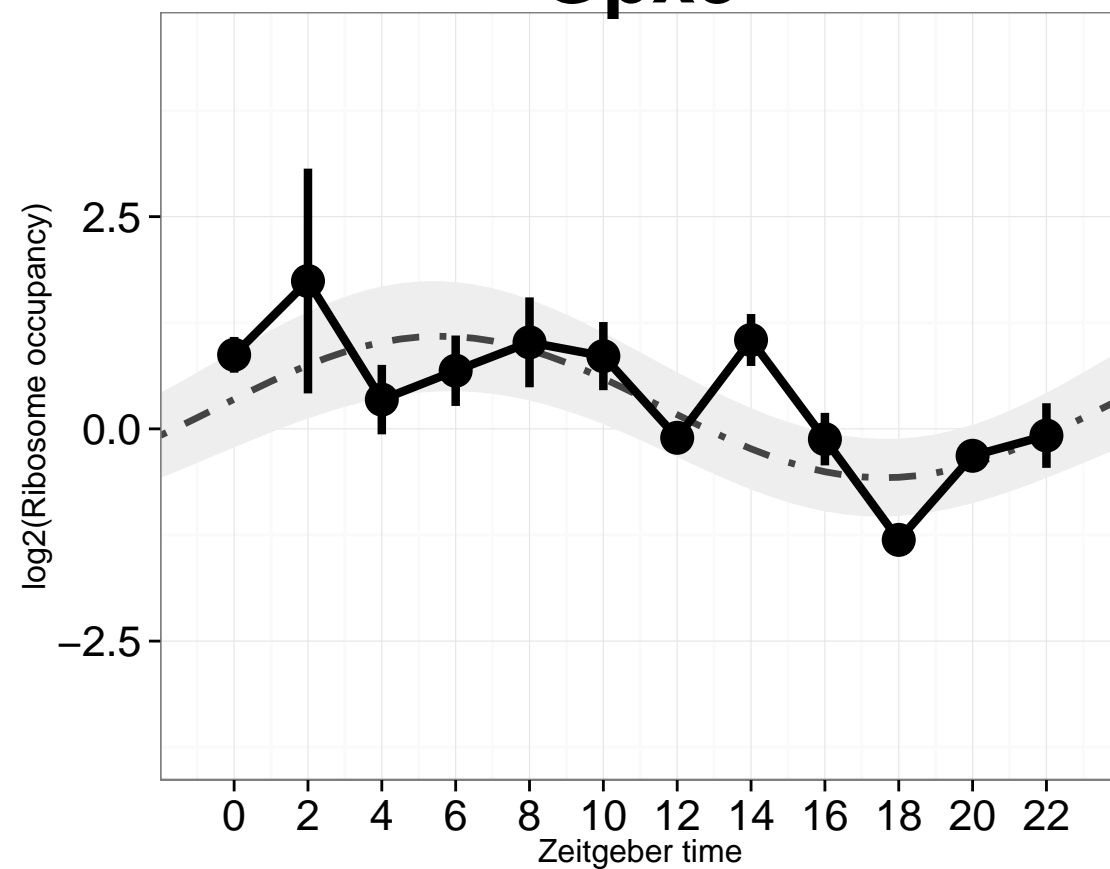

Supplement: SuppDataset_1.zip [file Gpx3_set_B.pdf › Supplemental Dataset 1/B-mRNA_rhythm_translation_nonrhyth/Gpx3_set_B.pdf]

# Grpel2

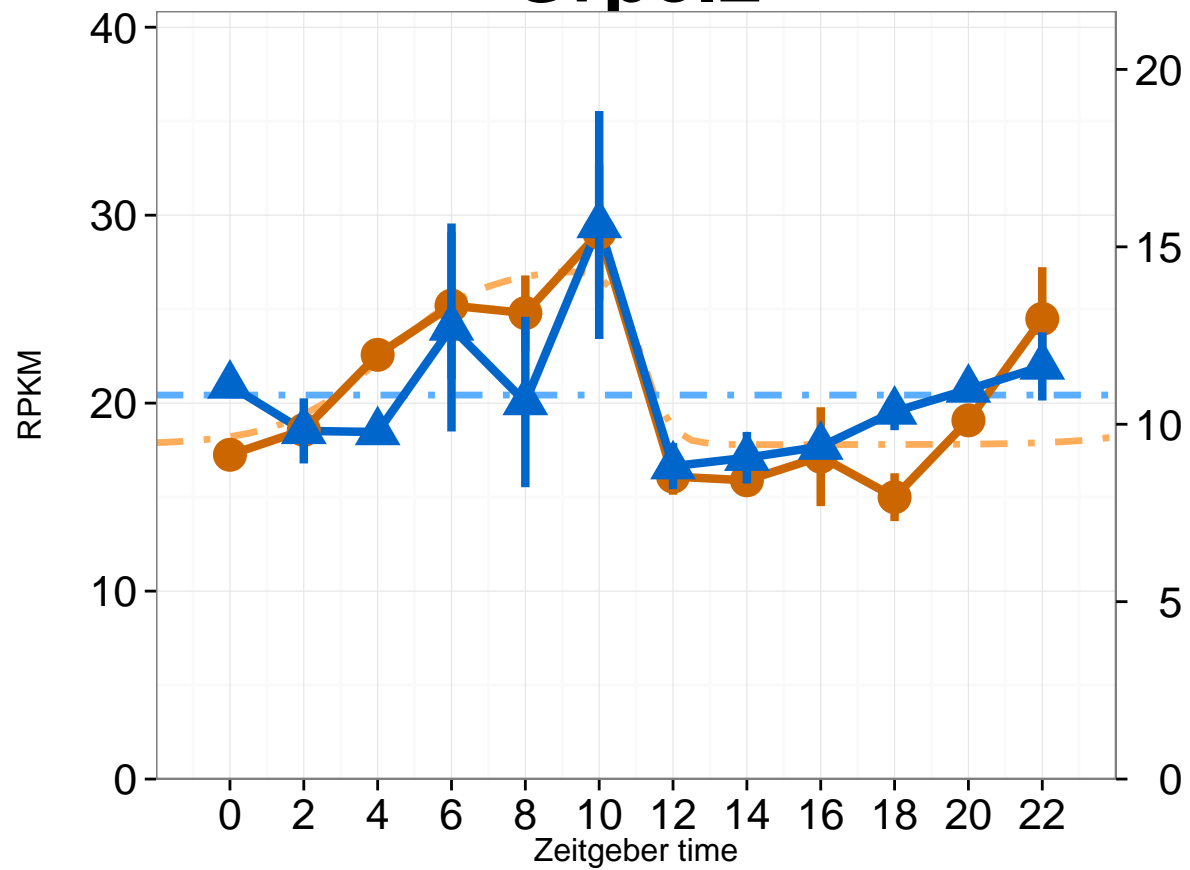

# Grpel2

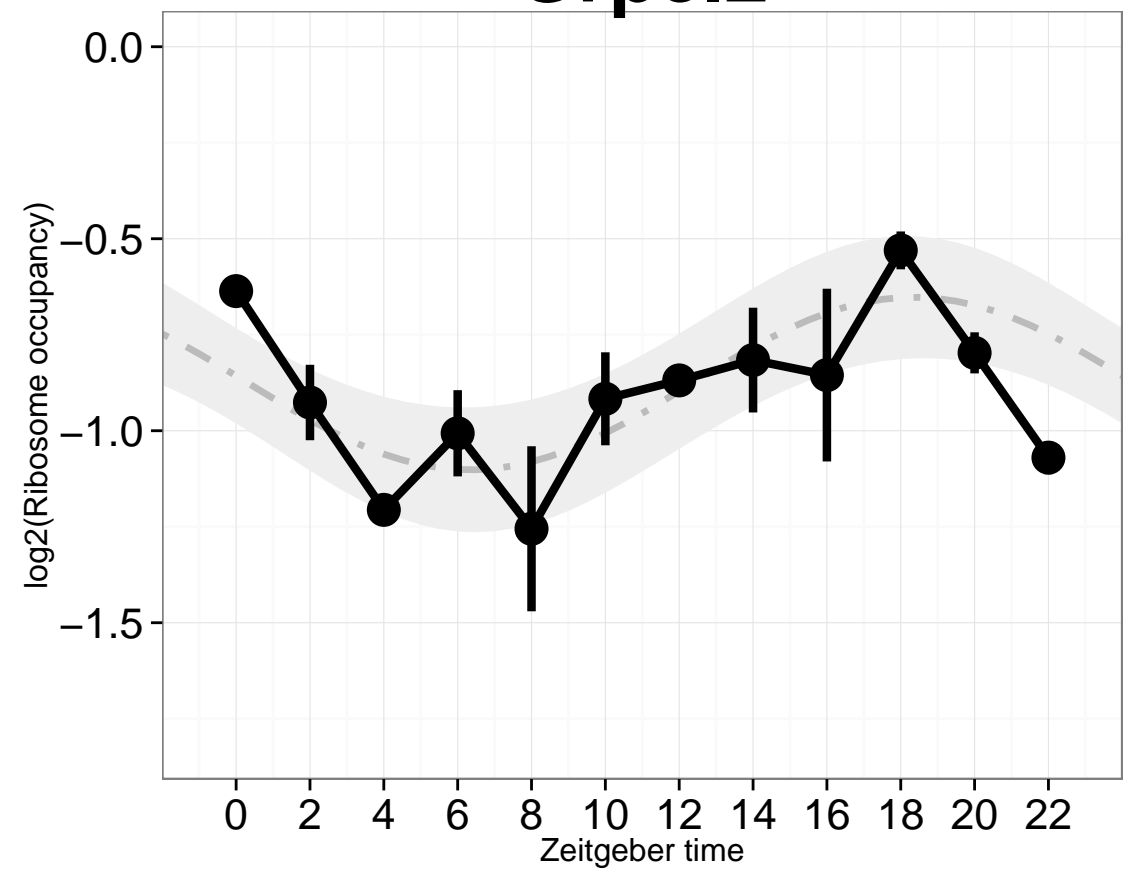

Supplement: SuppDataset_1.zip [file Grpel2_set_B.pdf › Supplemental Dataset 1/B-mRNA_rhythm_translation_nonrhyth/Grpel2_set_B.pdf]

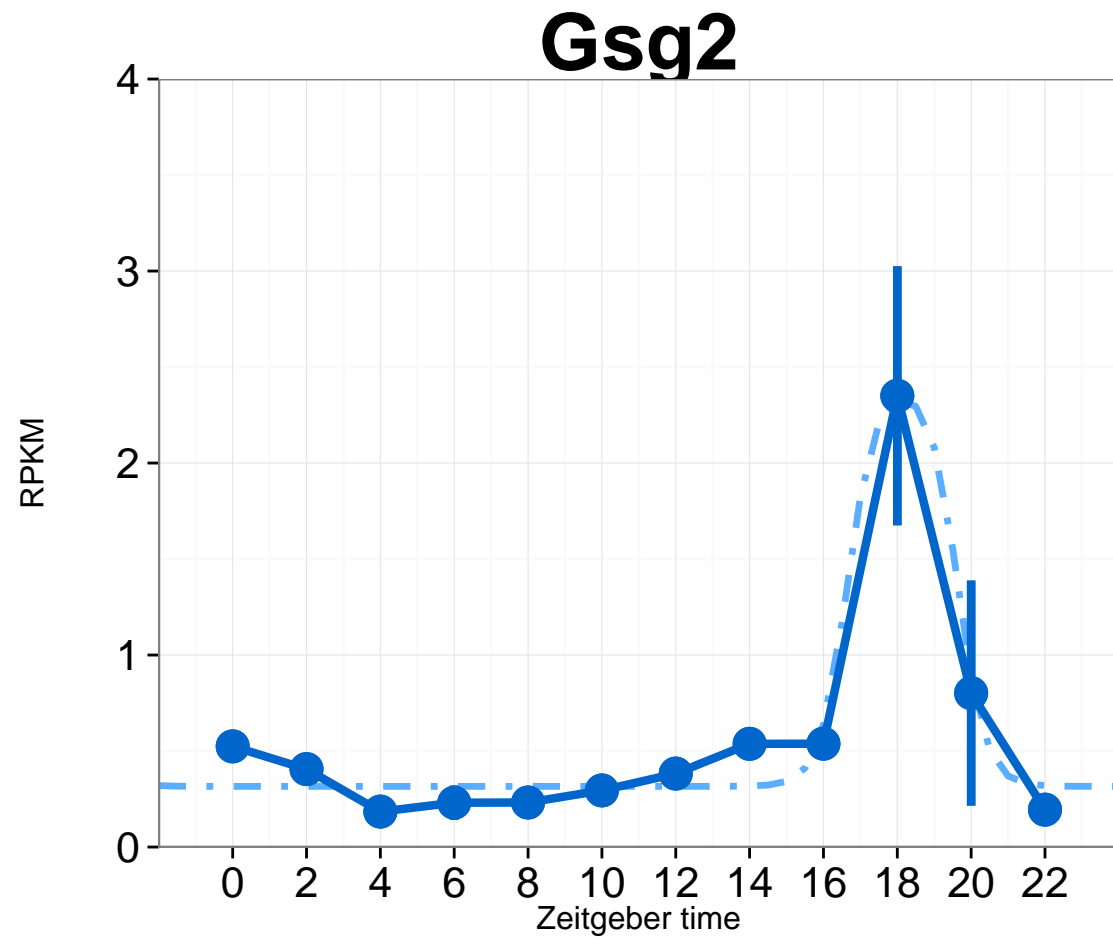

### Gsg2 log2(Ribosome occupancy)

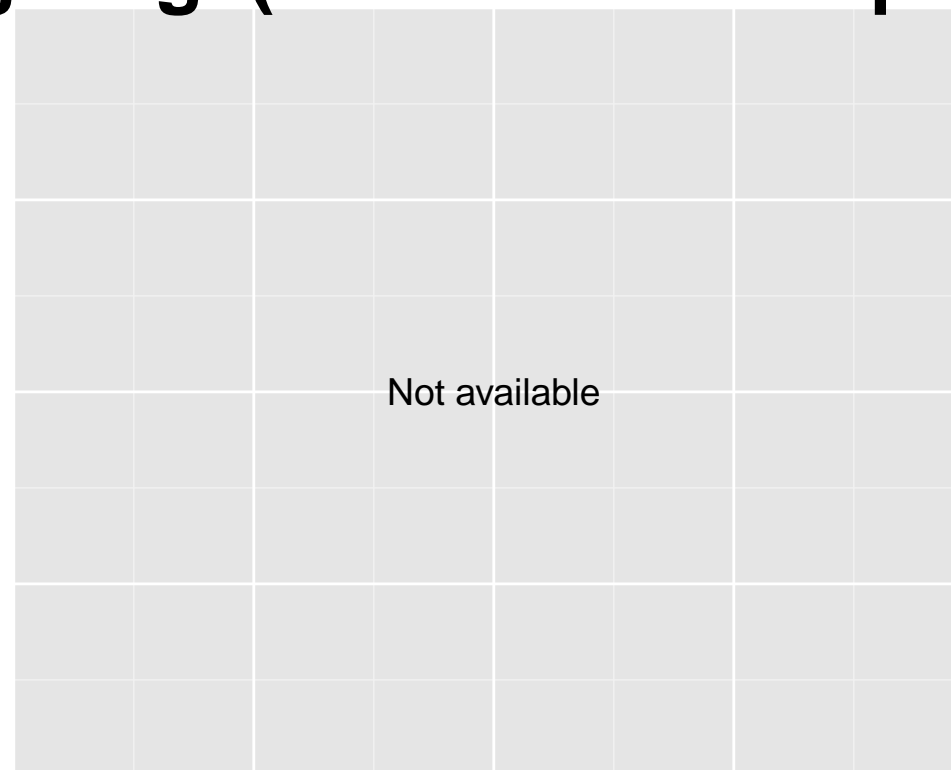

Supplement: SuppDataset_1.zip [file Gsg2_set_B.pdf › Supplemental Dataset 1/B-mRNA_rhythm_translation_nonrhyth/Gsg2_set_B.pdf]

## Gstcd

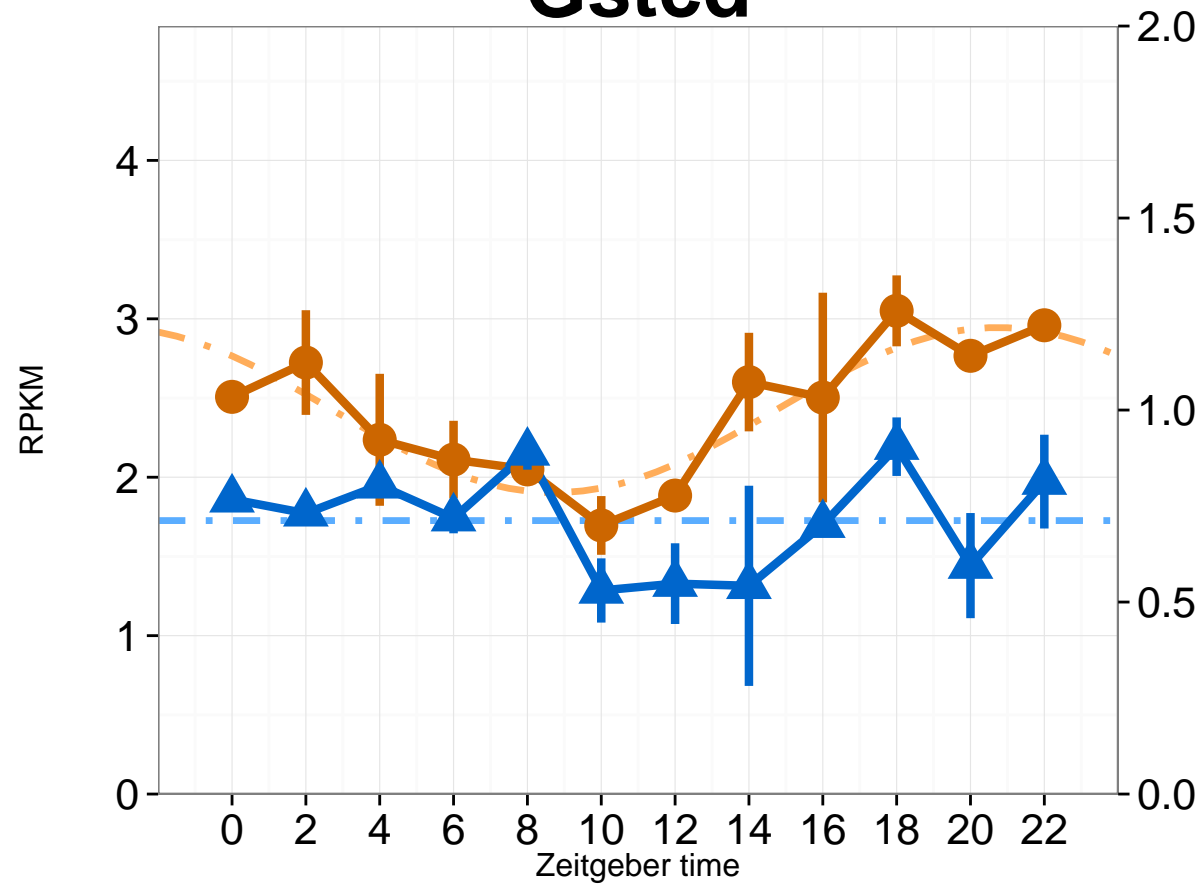

## Gstcd

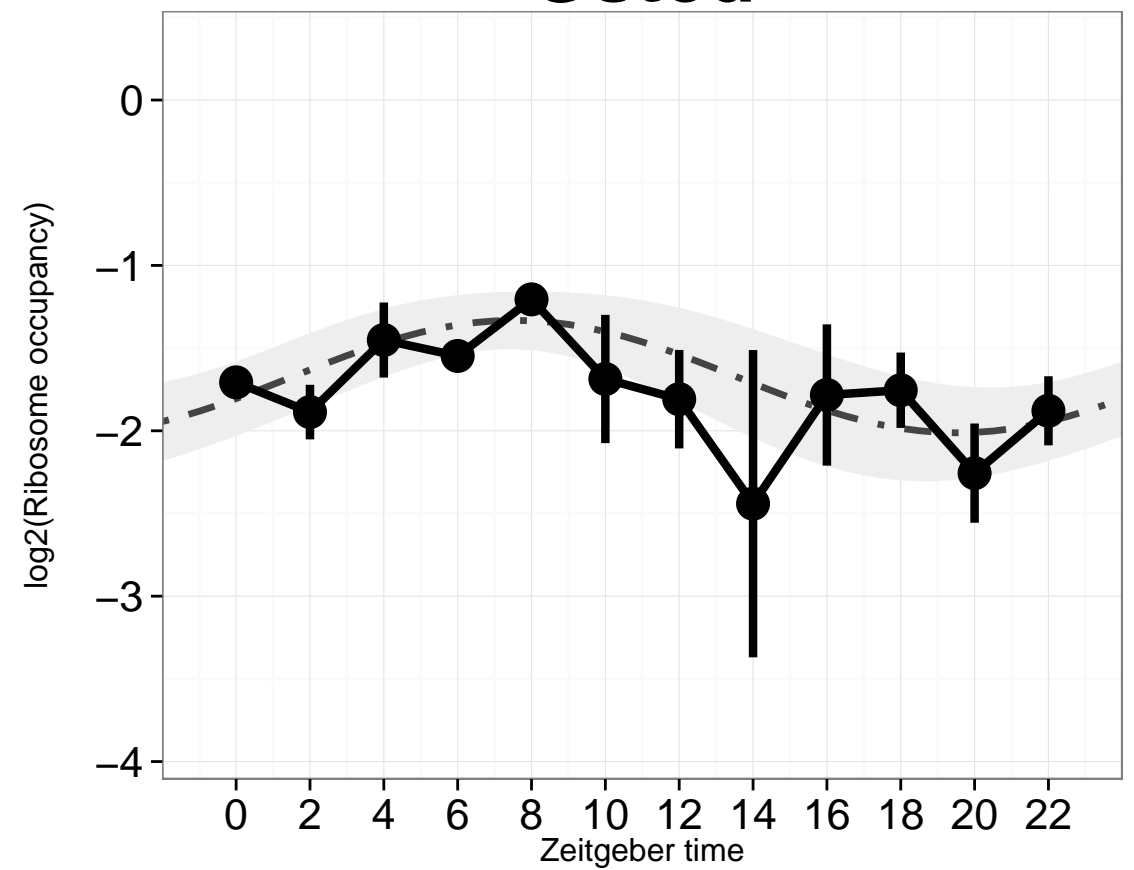

Supplement: SuppDataset_1.zip [file Gstcd_set_B.pdf › Supplemental Dataset 1/B-mRNA_rhythm_translation_nonrhyth/Gstcd_set_B.pdf]

## Gstm5

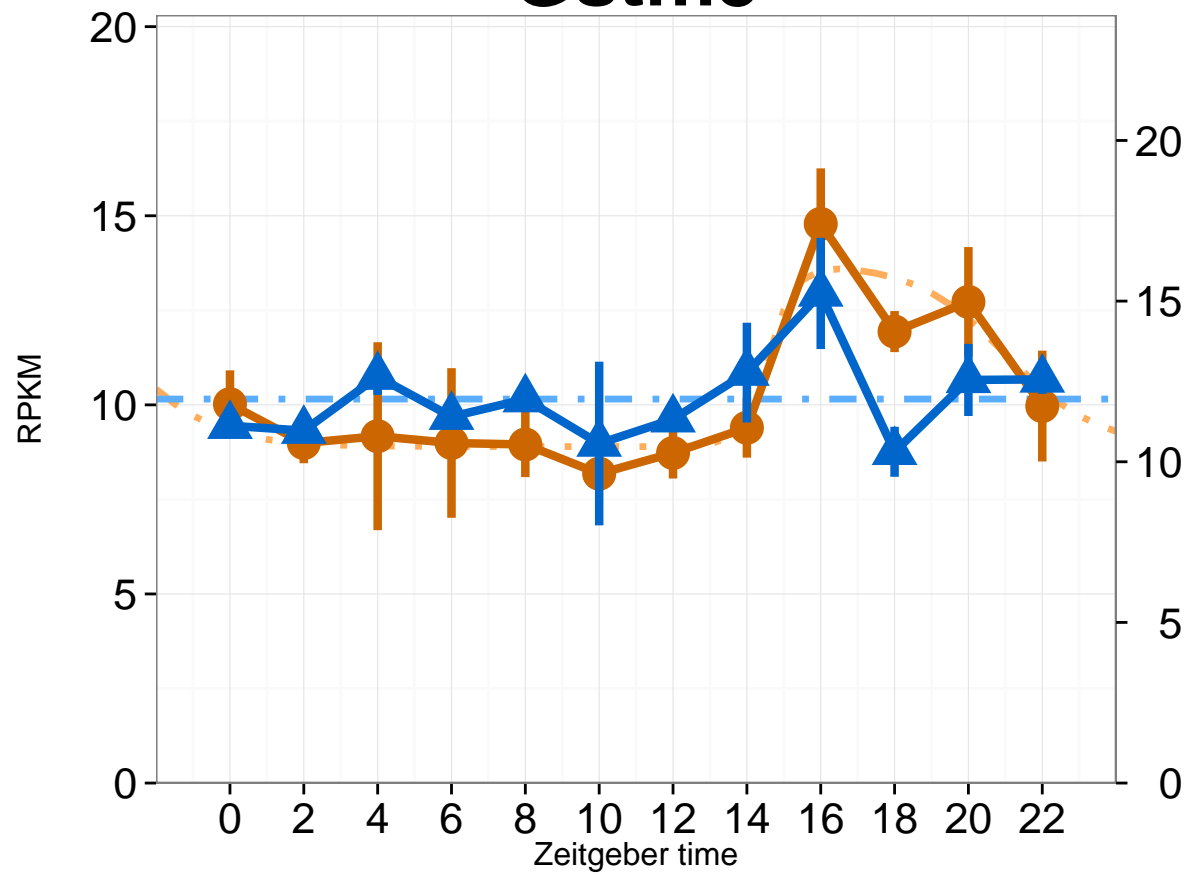

## Gstm5

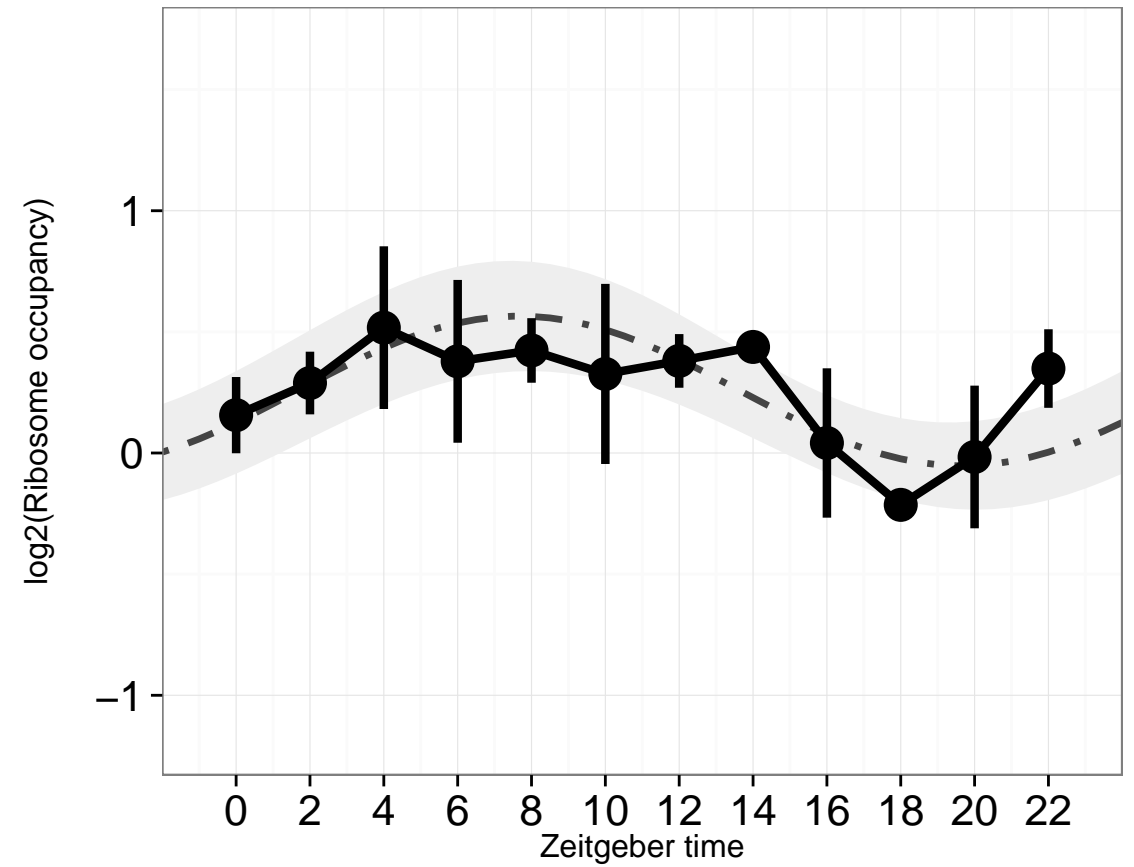

Supplement: SuppDataset_1.zip [file Gstm5_set_B.pdf › Supplemental Dataset 1/B-mRNA_rhythm_translation_nonrhyth/Gstm5_set_B.pdf]

## Gtf2e2

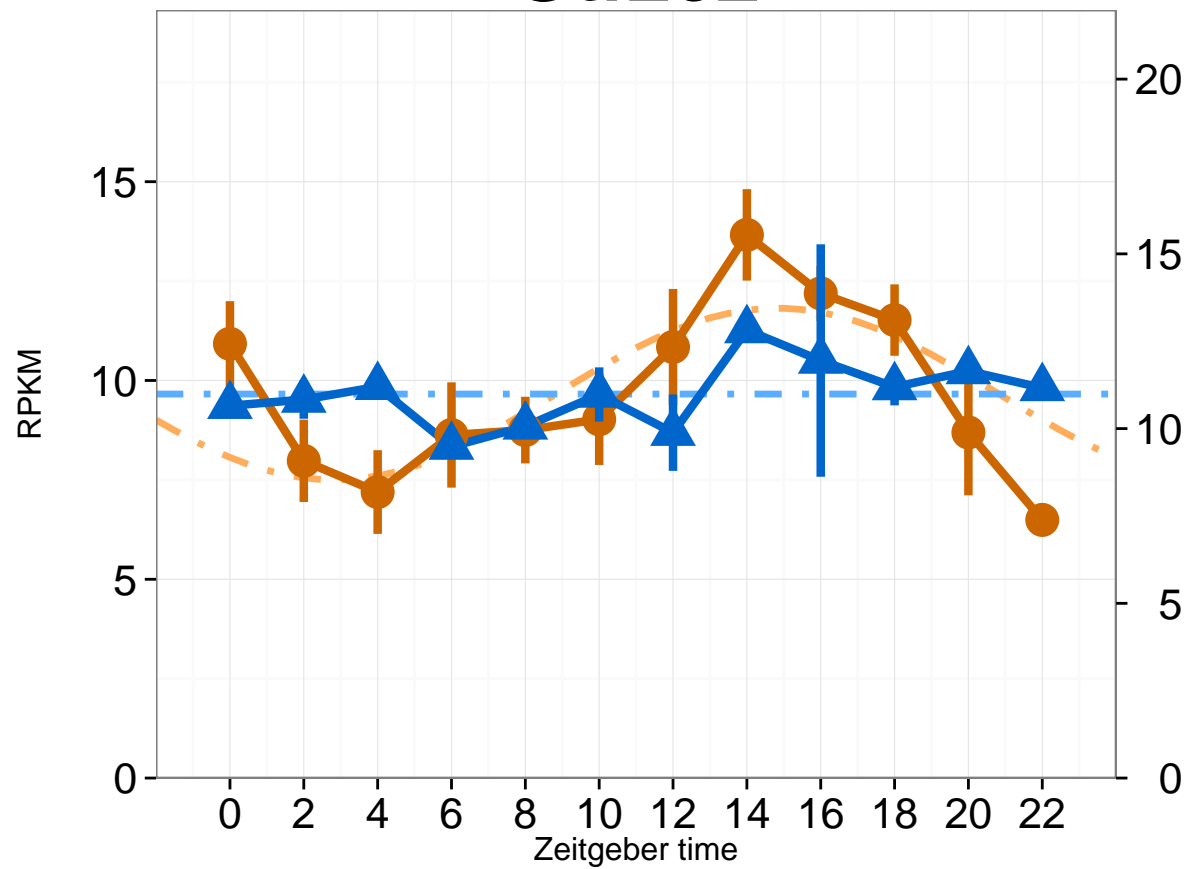

## Gtf2e2

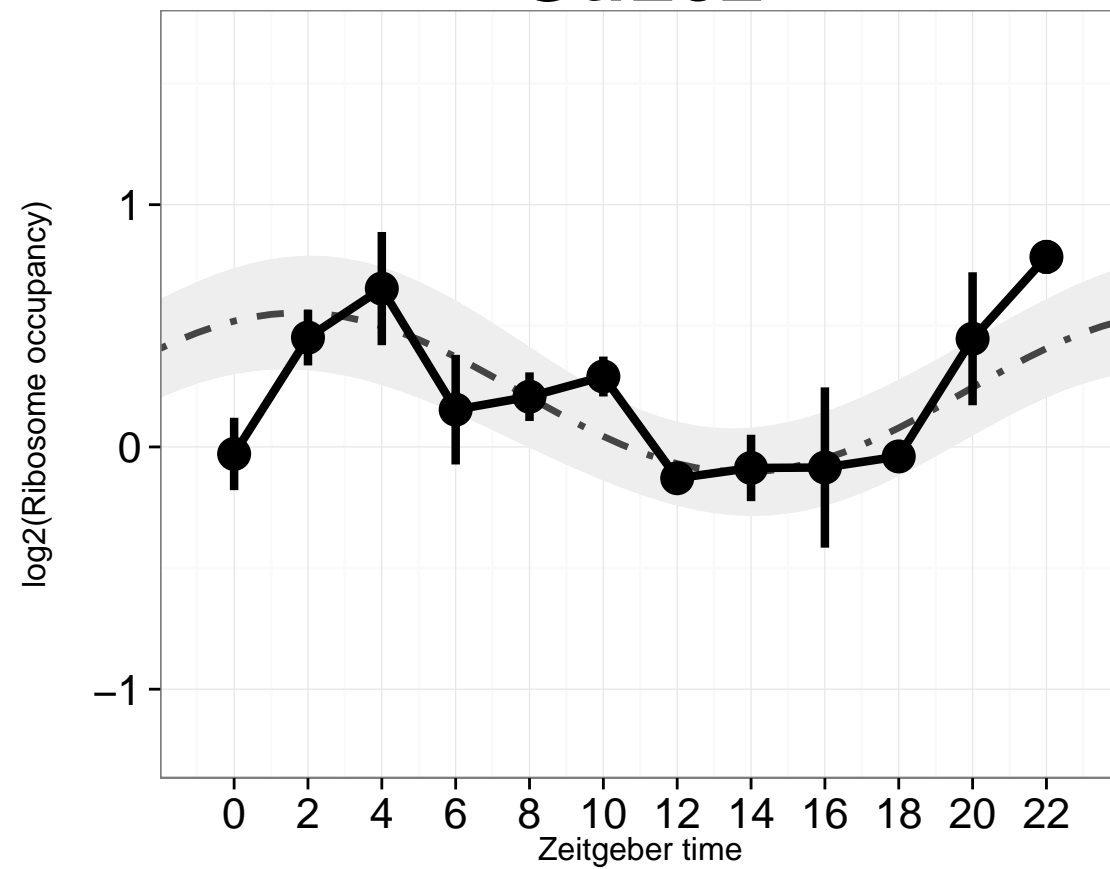

Supplement: SuppDataset_1.zip [file Gtf2e2_set_B.pdf › Supplemental Dataset 1/B-mRNA_rhythm_translation_nonrhyth/Gtf2e2_set_B.pdf]

# Gtf2h4

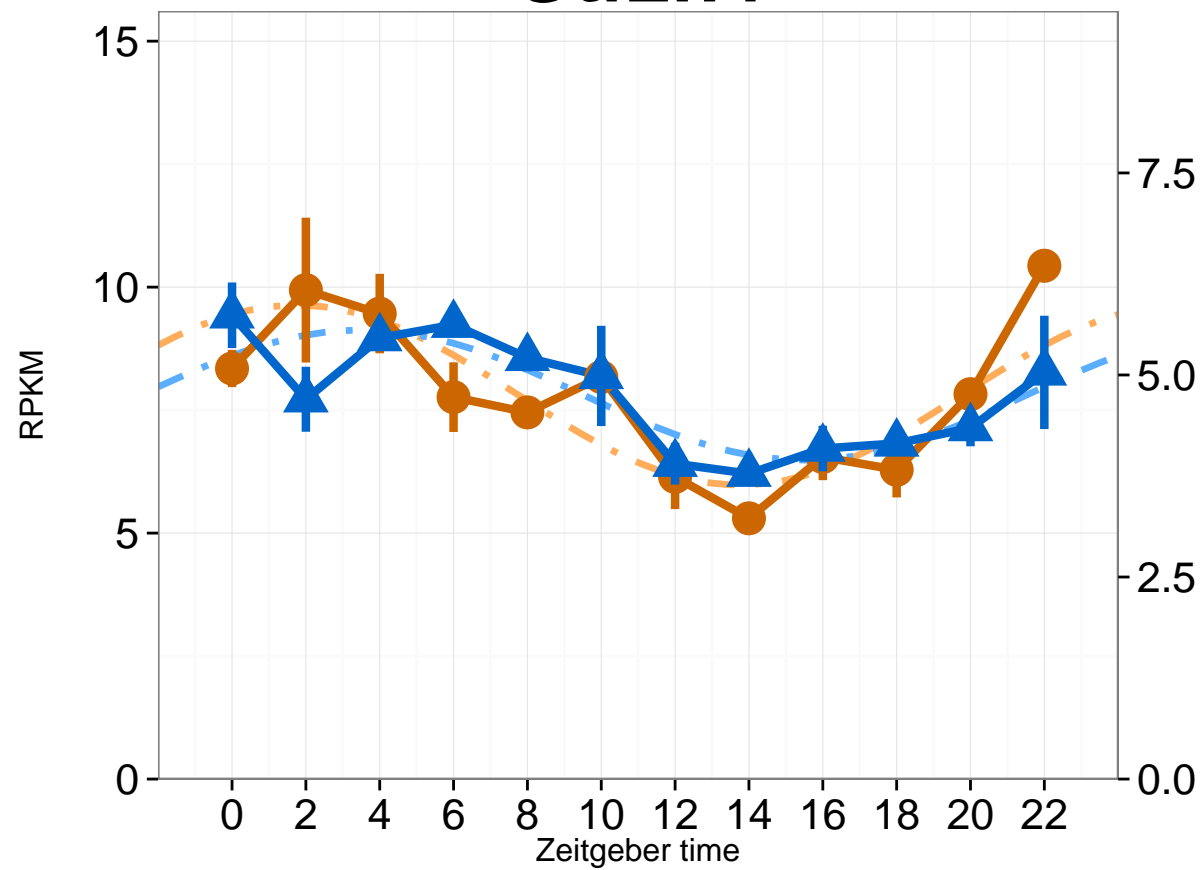

# Gtf2h4

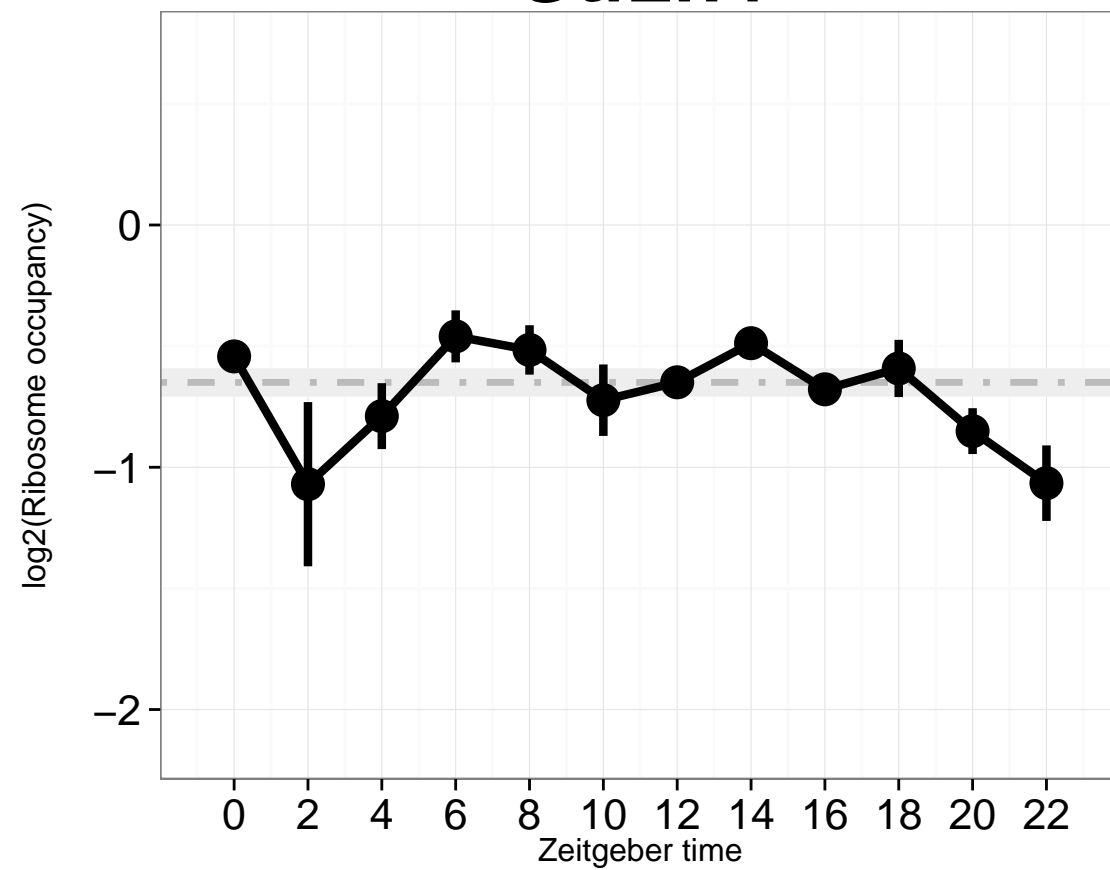

Supplement: SuppDataset_1.zip [file Gtf2h4_set_B.pdf › Supplemental Dataset 1/B-mRNA_rhythm_translation_nonrhyth/Gtf2h4_set_B.pdf]

# Gtpbp2

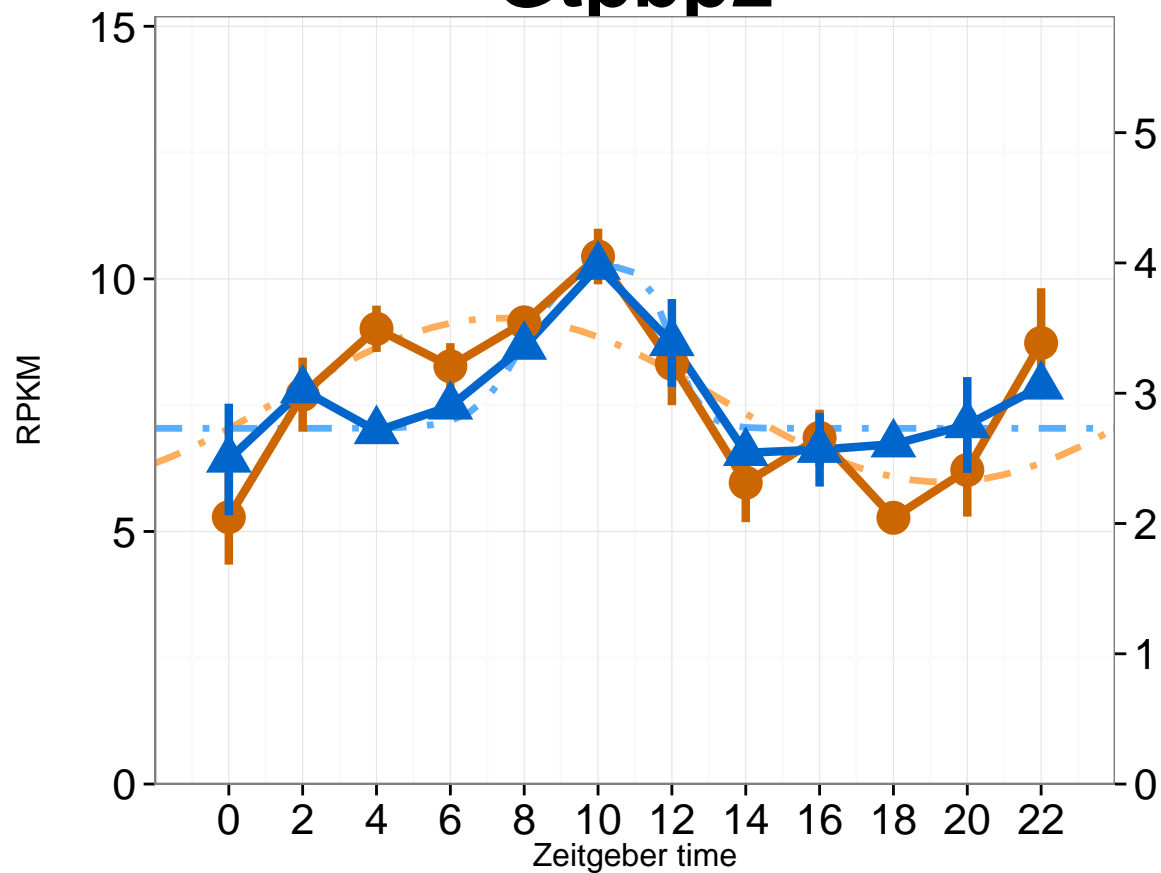

# Gtpbp2

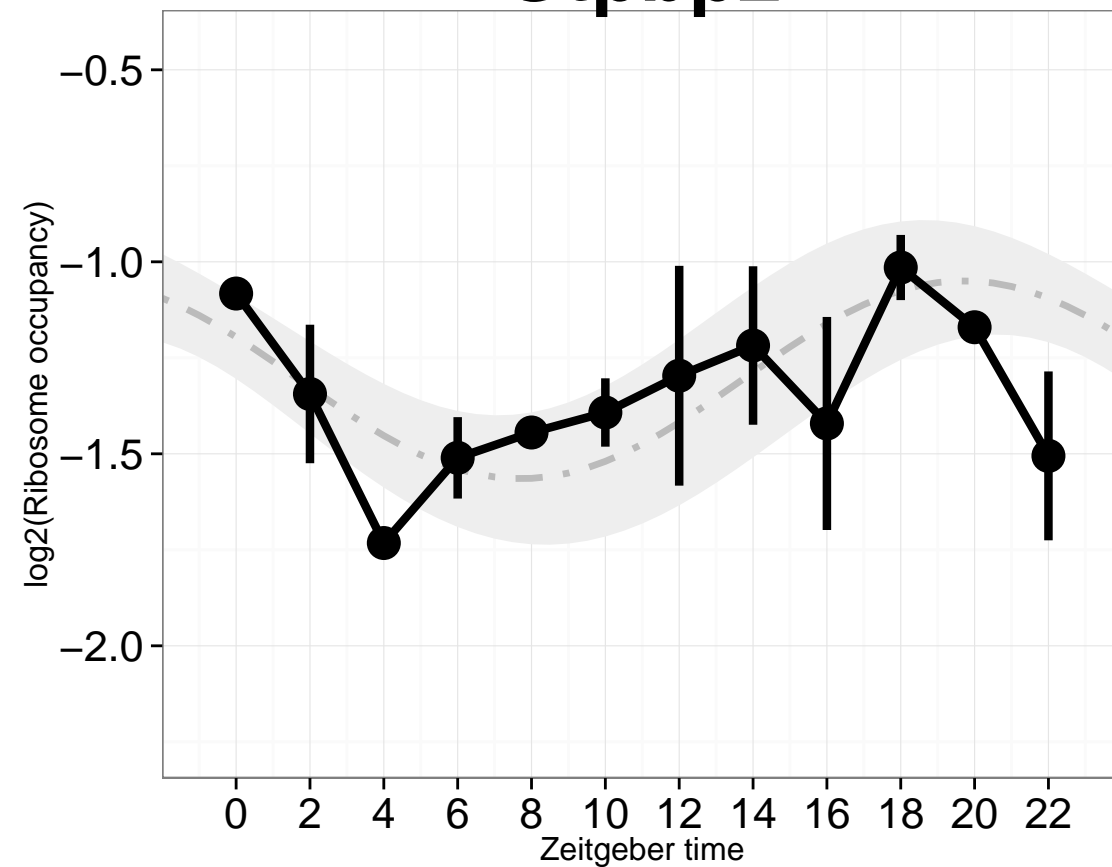

Supplement: SuppDataset_1.zip [file Gtpbp2_set_B.pdf › Supplemental Dataset 1/B-mRNA_rhythm_translation_nonrhyth/Gtpbp2_set_B.pdf]

# Gucd1

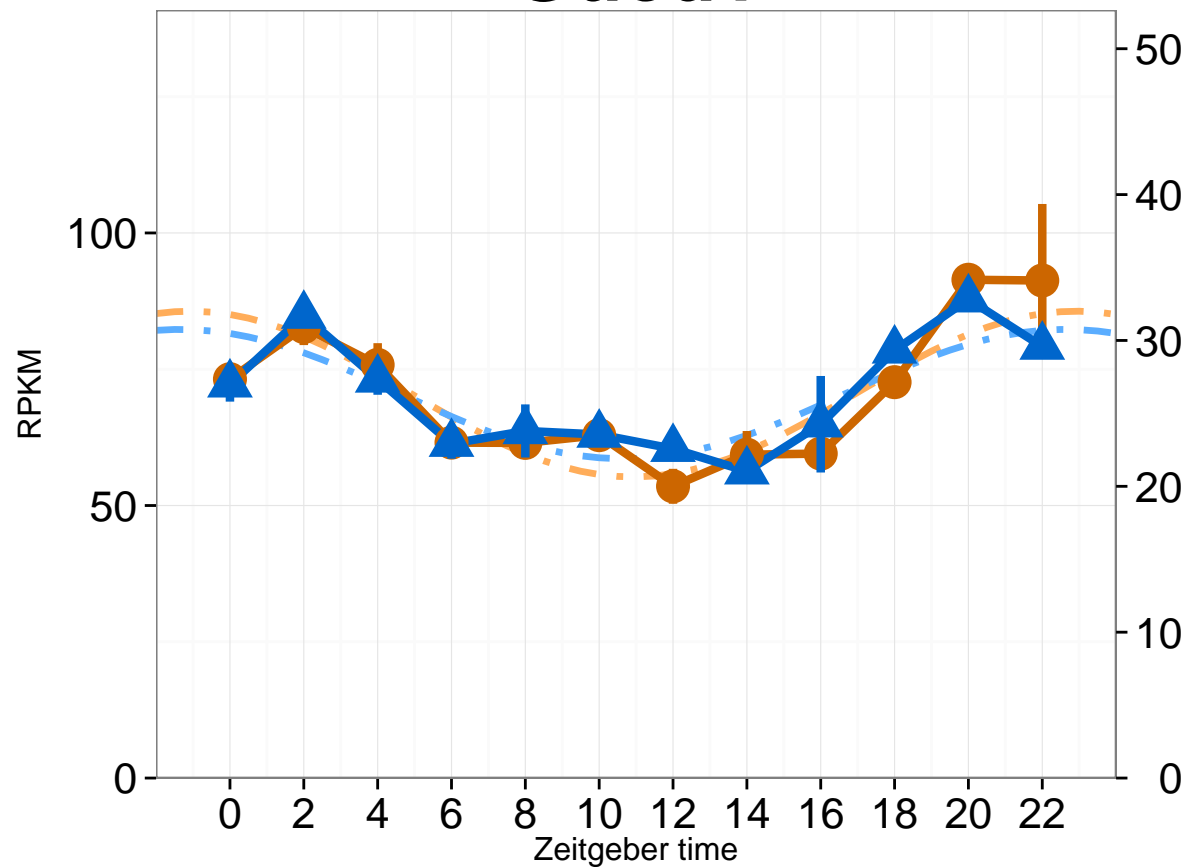

# Gucd1

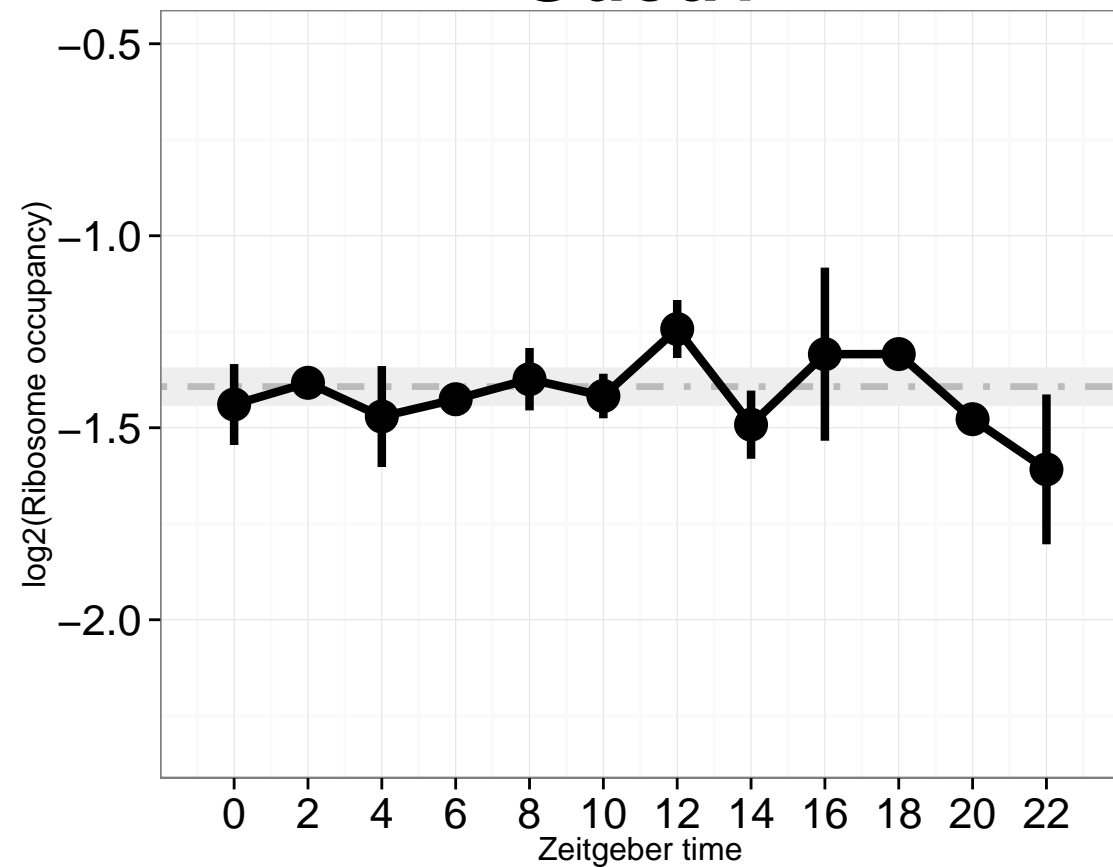

Supplement: SuppDataset_1.zip [file Gucd1_set_B.pdf › Supplemental Dataset 1/B-mRNA_rhythm_translation_nonrhyth/Gucd1_set_B.pdf]

# Haghl

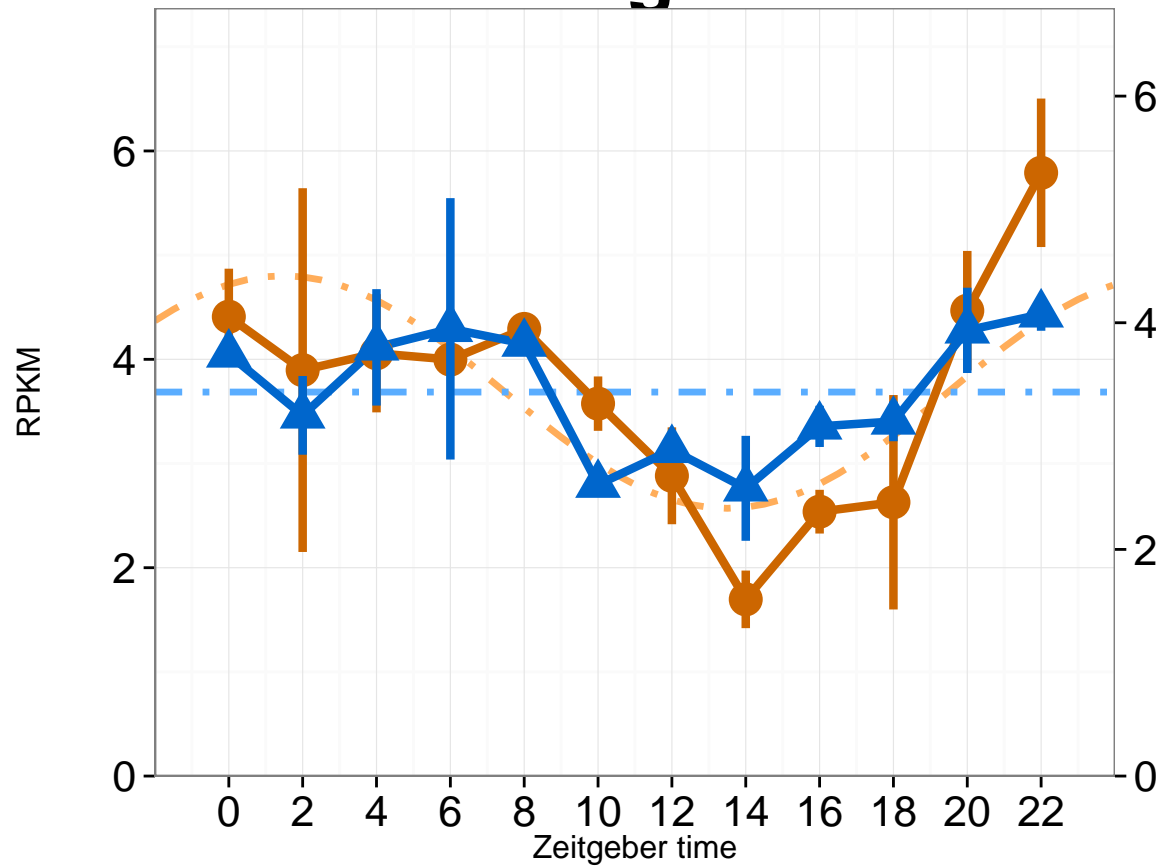

# Haghl

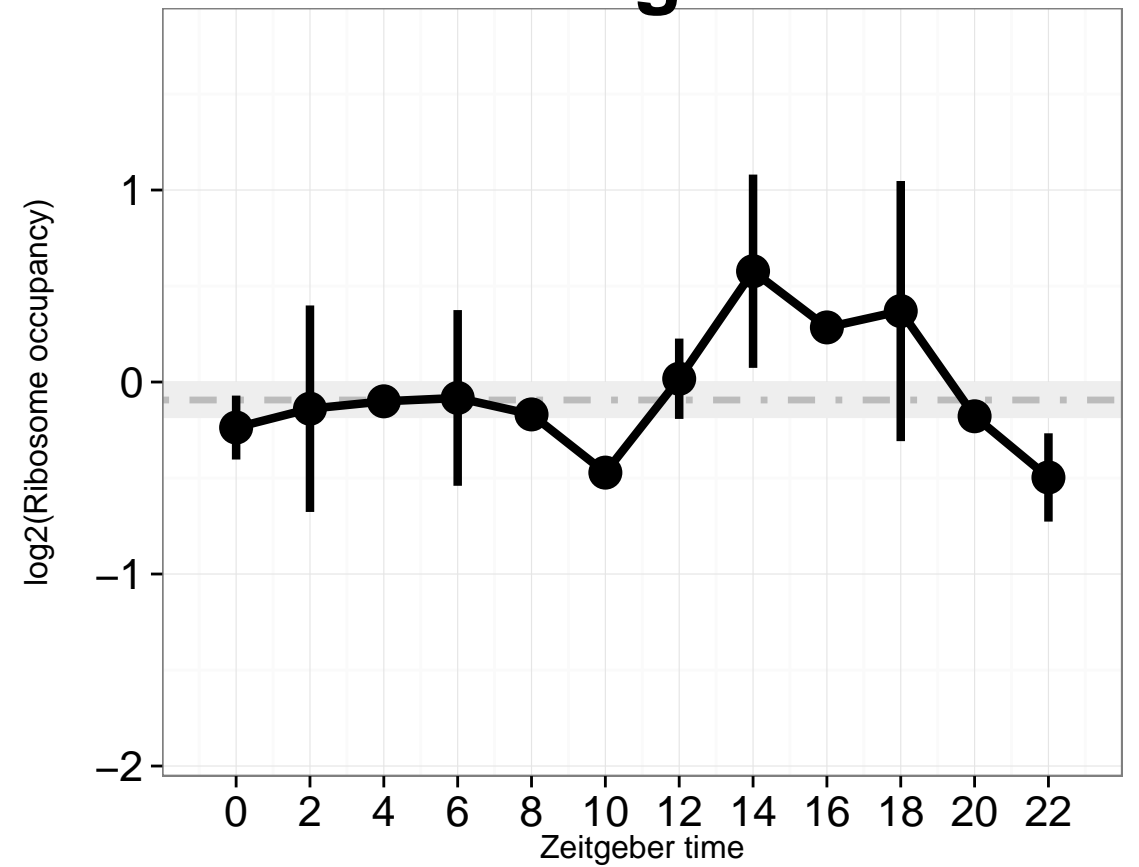

Supplement: SuppDataset_1.zip [file Haghl_set_B.pdf › Supplemental Dataset 1/B-mRNA_rhythm_translation_nonrhyth/Haghl_set_B.pdf]

## Hamp

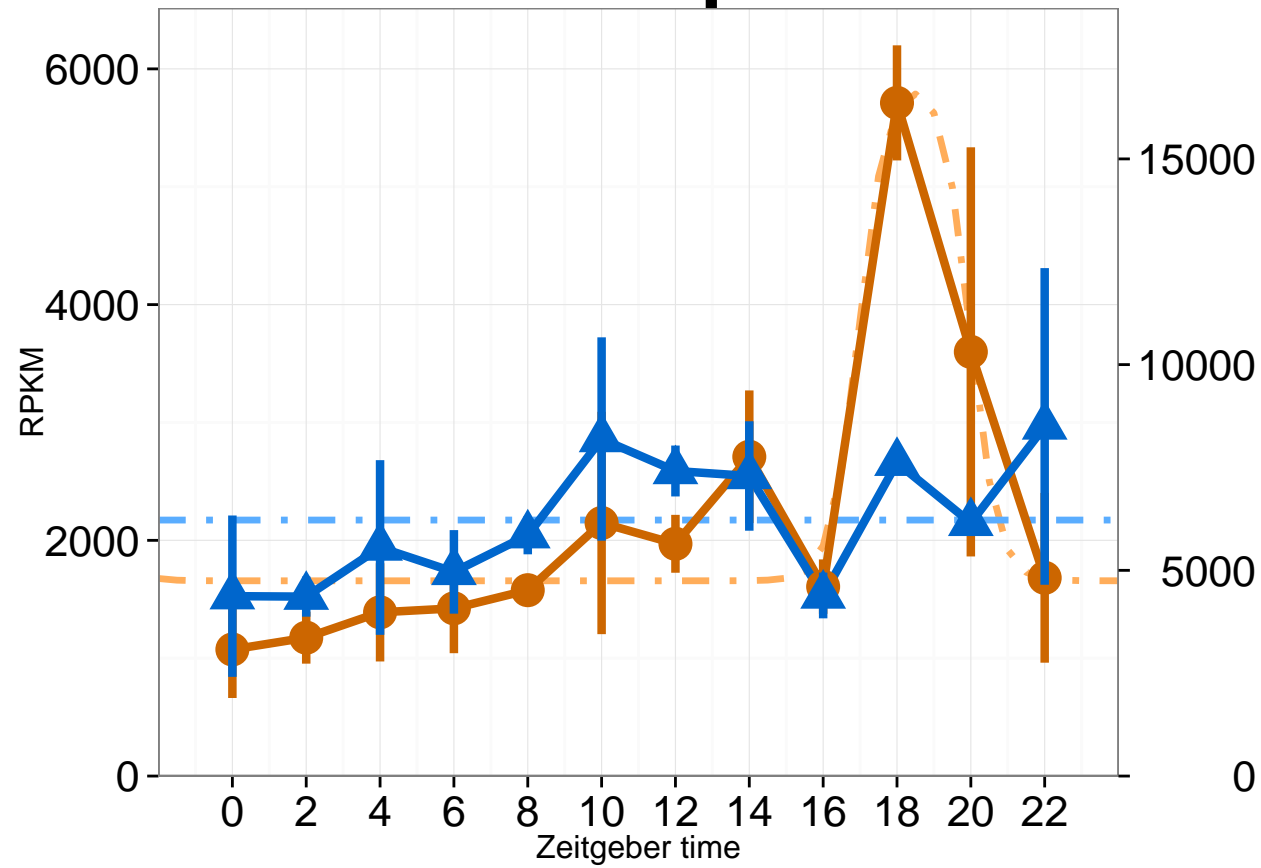

## Hamp

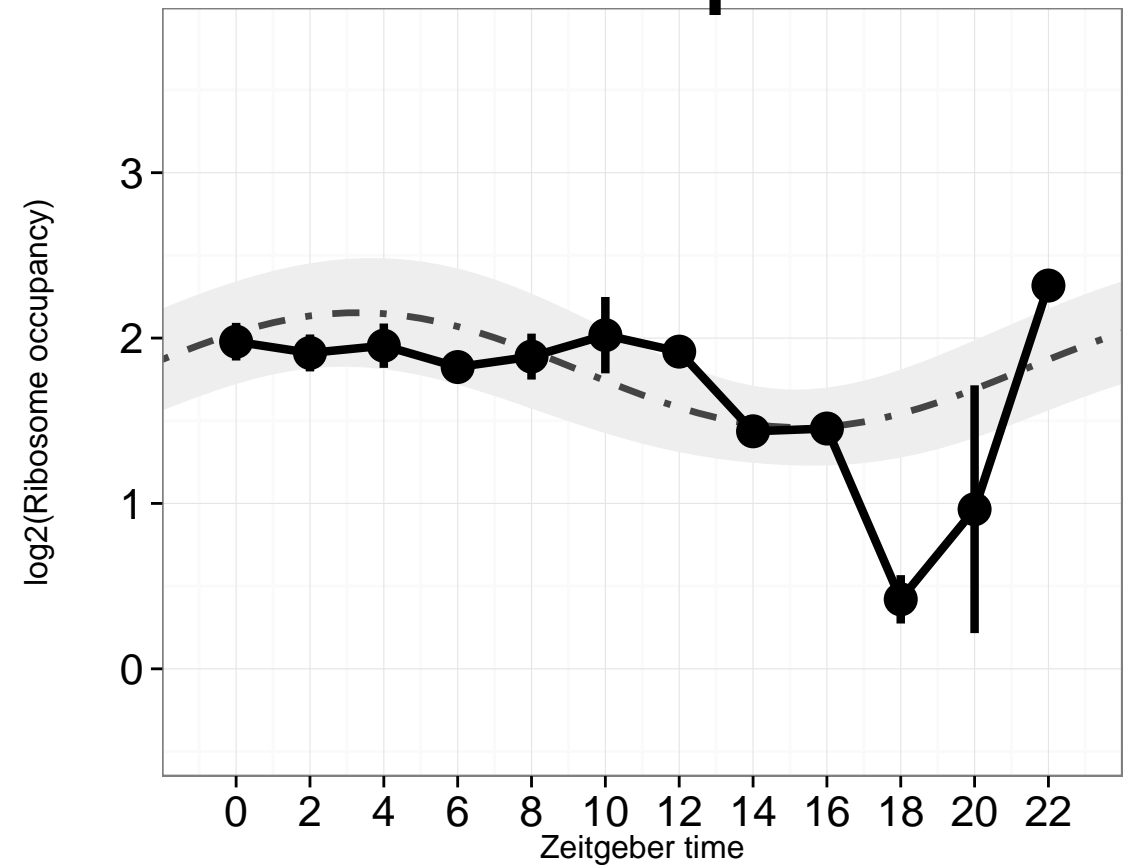

Supplement: SuppDataset_1.zip [file Hamp_set_B.pdf › Supplemental Dataset 1/B-mRNA_rhythm_translation_nonrhyth/Hamp_set_B.pdf]

# Haus3

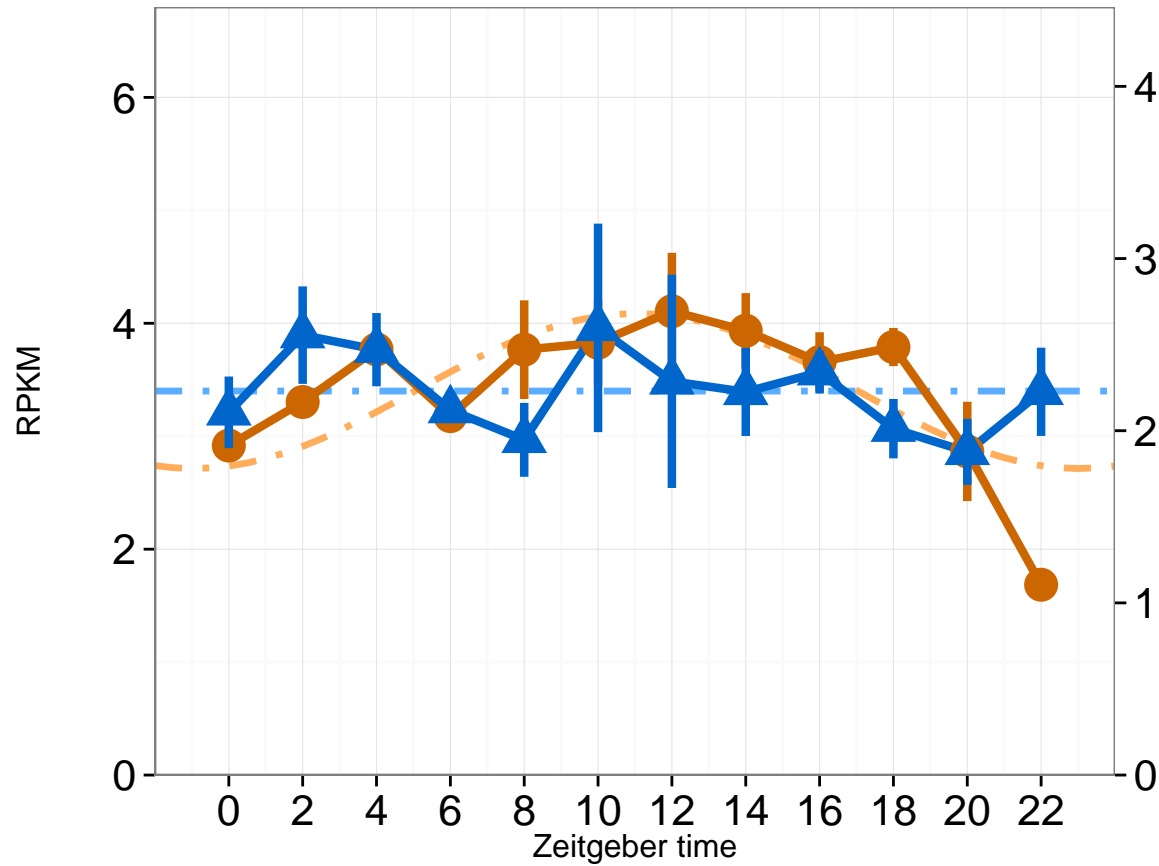

# Haus3

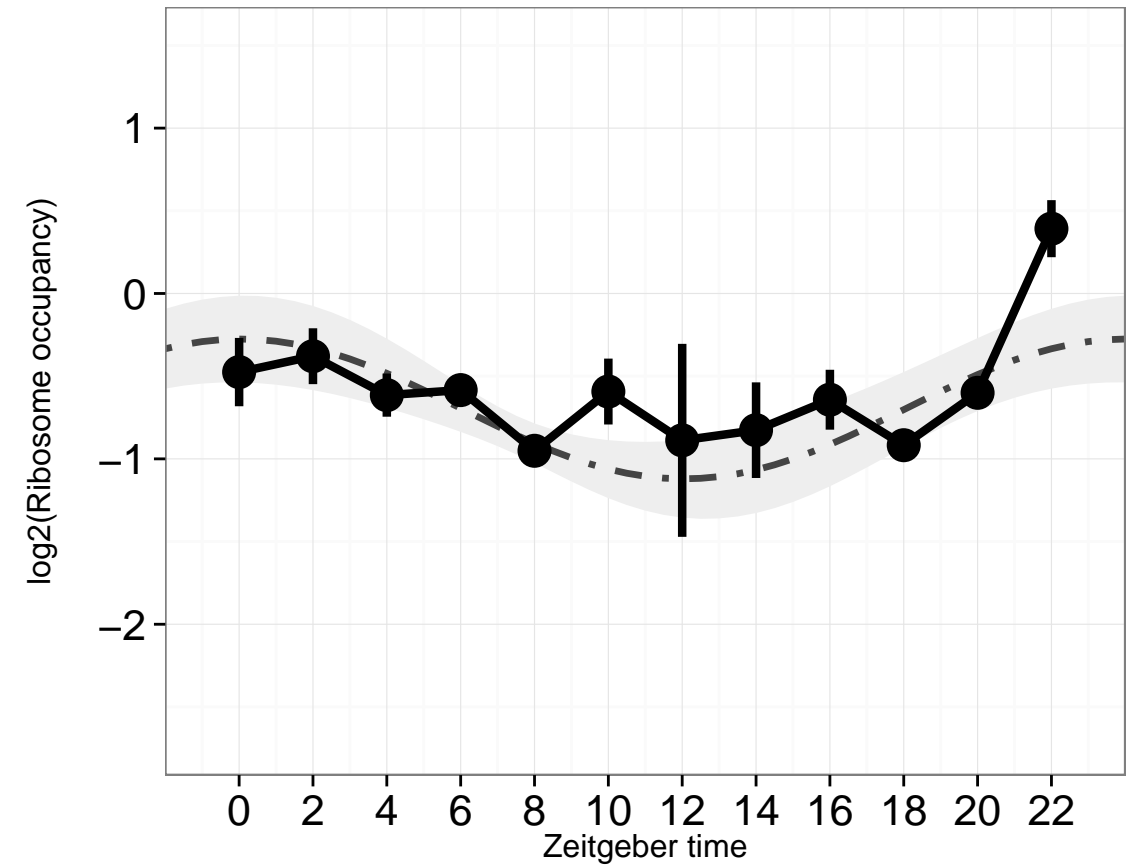

Supplement: SuppDataset_1.zip [file Haus3_set_B.pdf › Supplemental Dataset 1/B-mRNA_rhythm_translation_nonrhyth/Haus3_set_B.pdf]

# Hcfc1r1

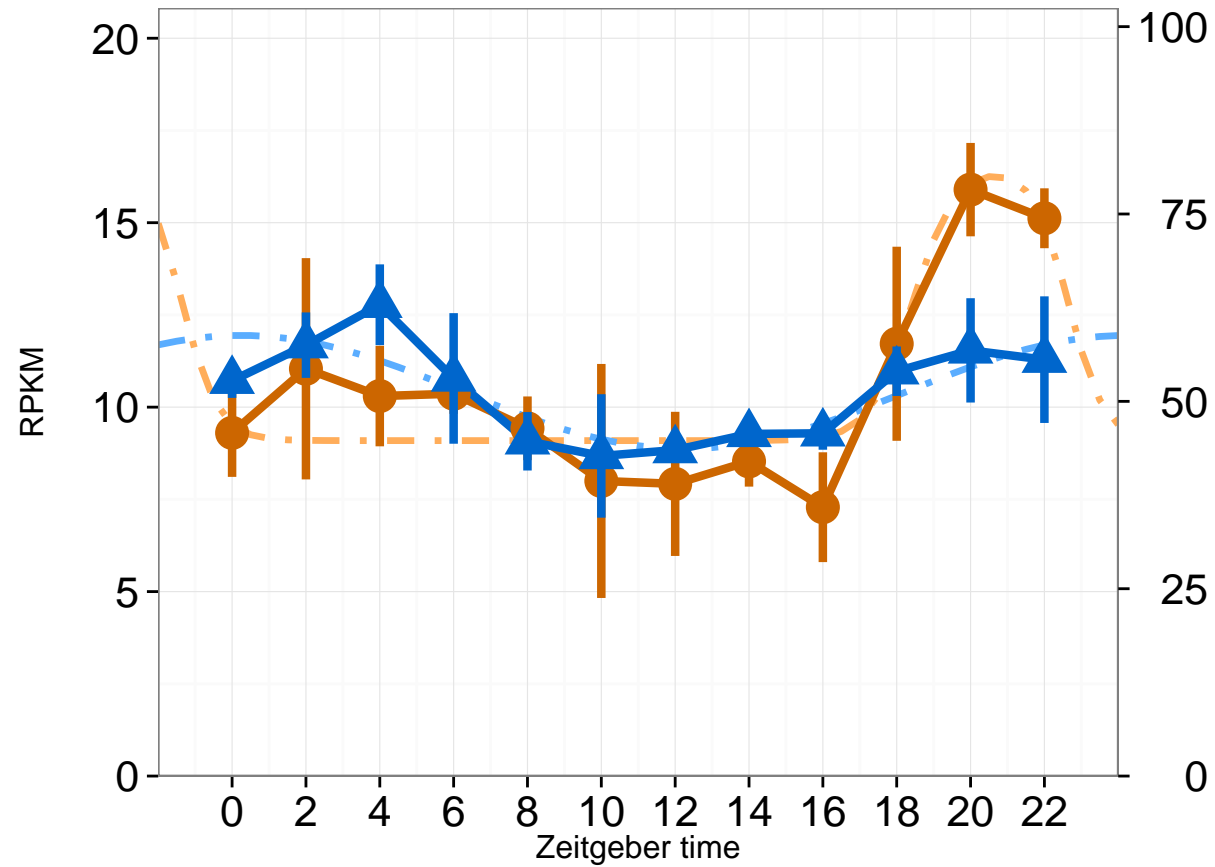

# Hcfc1r1

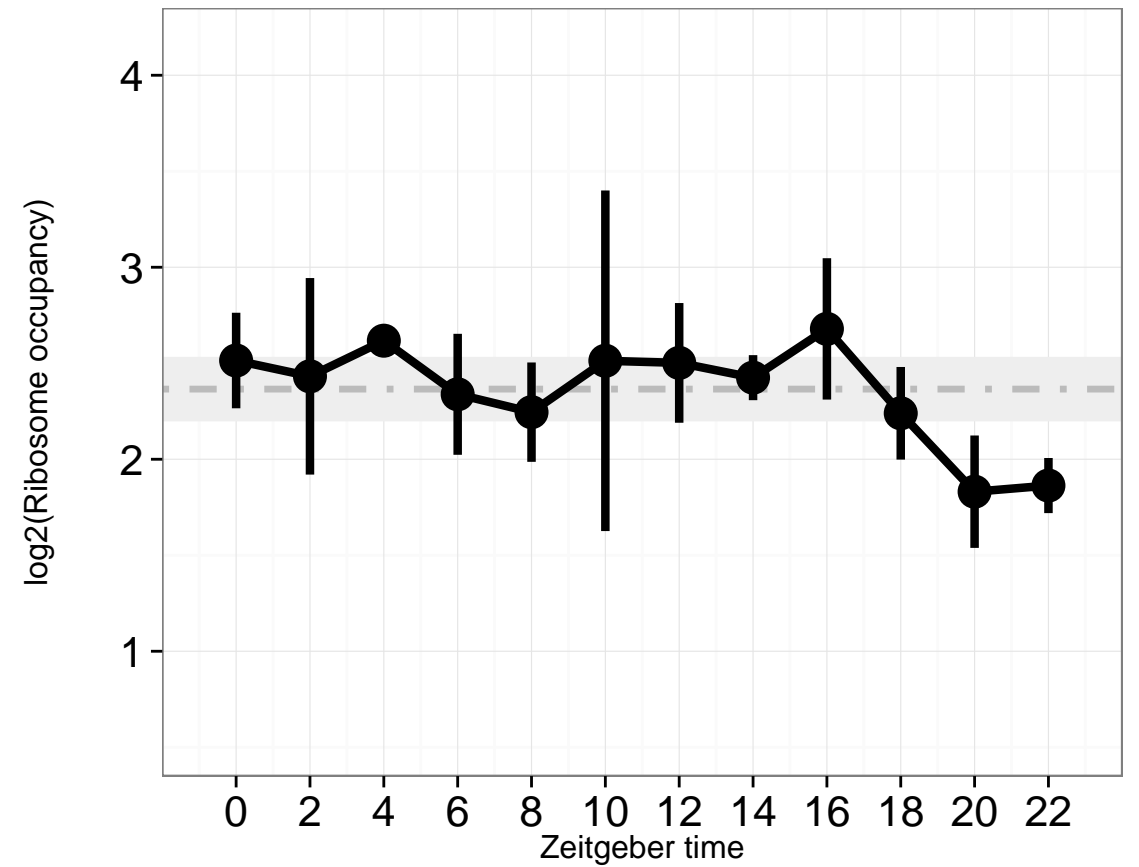

Supplement: SuppDataset_1.zip [file Hcfc1r1_set_B.pdf › Supplemental Dataset 1/B-mRNA_rhythm_translation_nonrhyth/Hcfc1r1_set_B.pdf]

## Hdgfl1

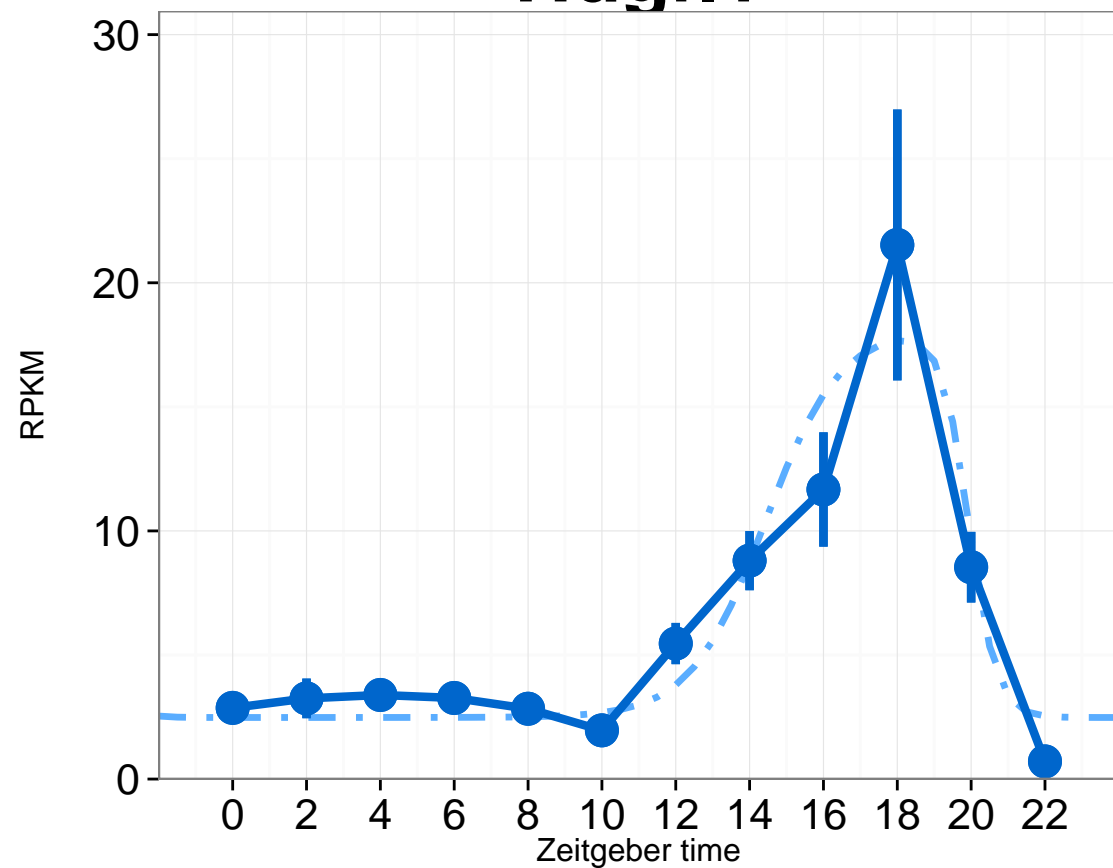

## Hdgfl1 log2(Ribosome occupancy

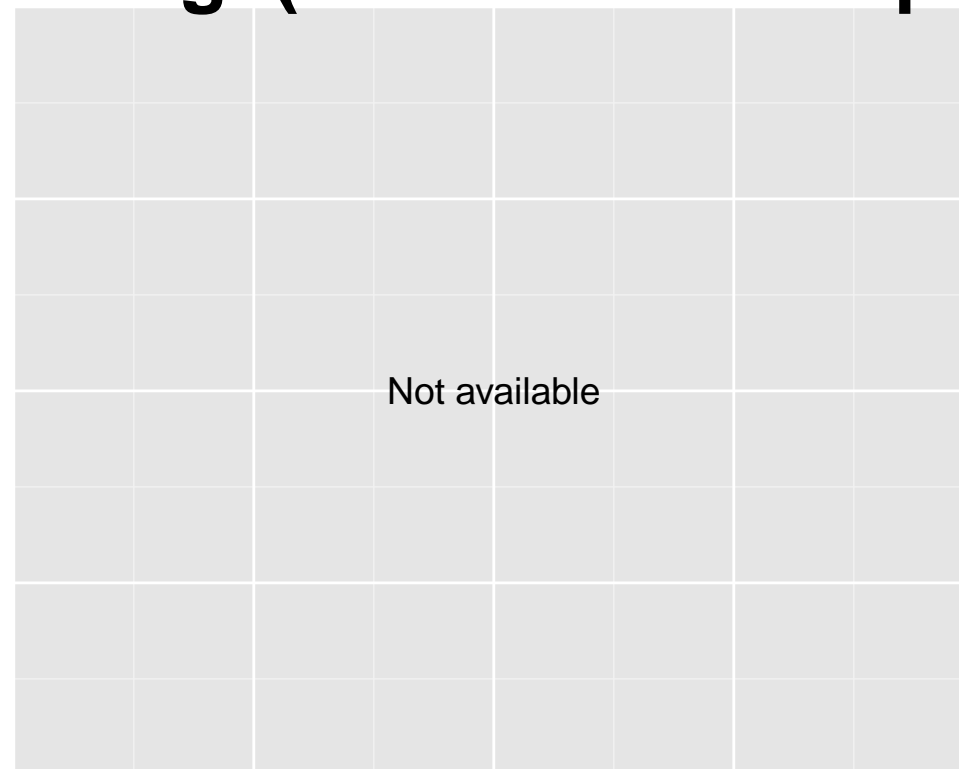

Supplement: SuppDataset_1.zip [file Hdgfl1_set_B.pdf › Supplemental Dataset 1/B-mRNA_rhythm_translation_nonrhyth/Hdgfl1_set_B.pdf]

## Hells

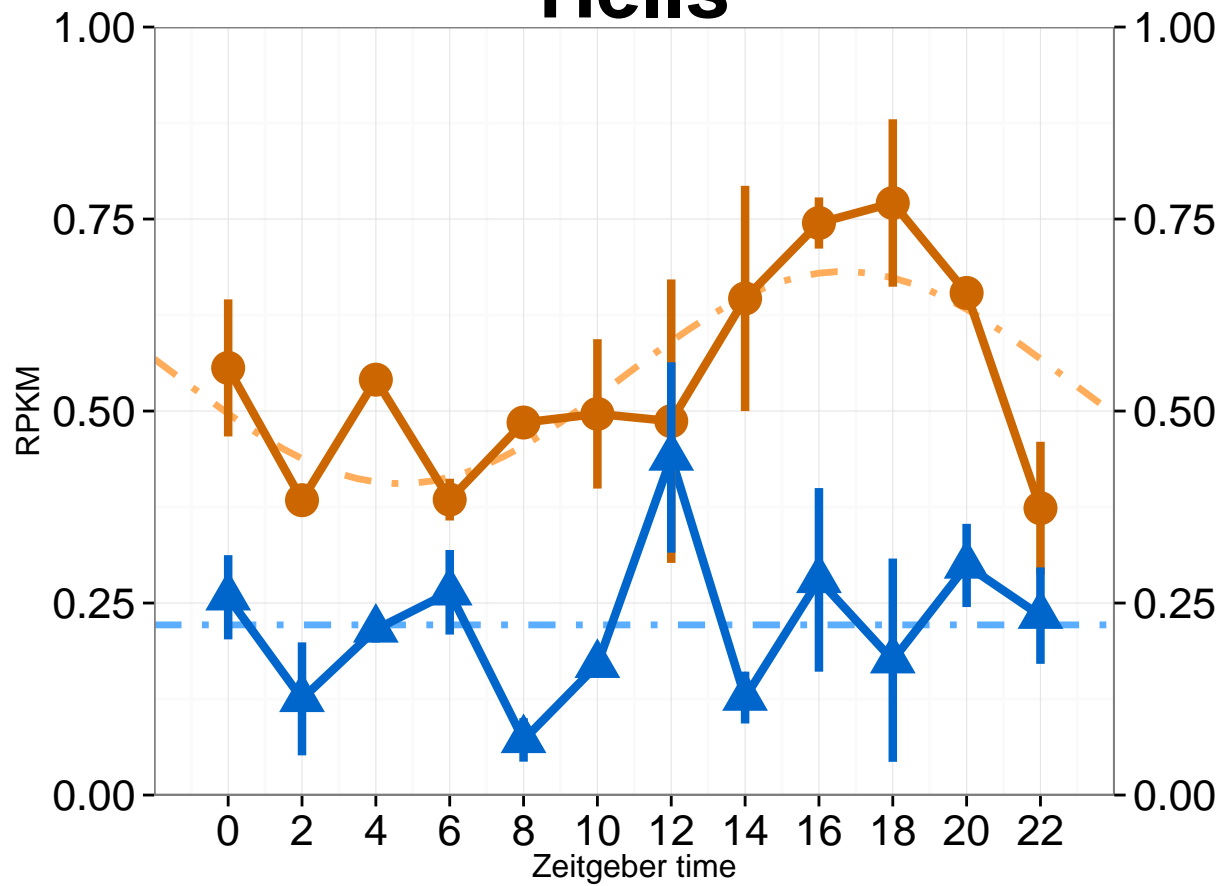

## Hells

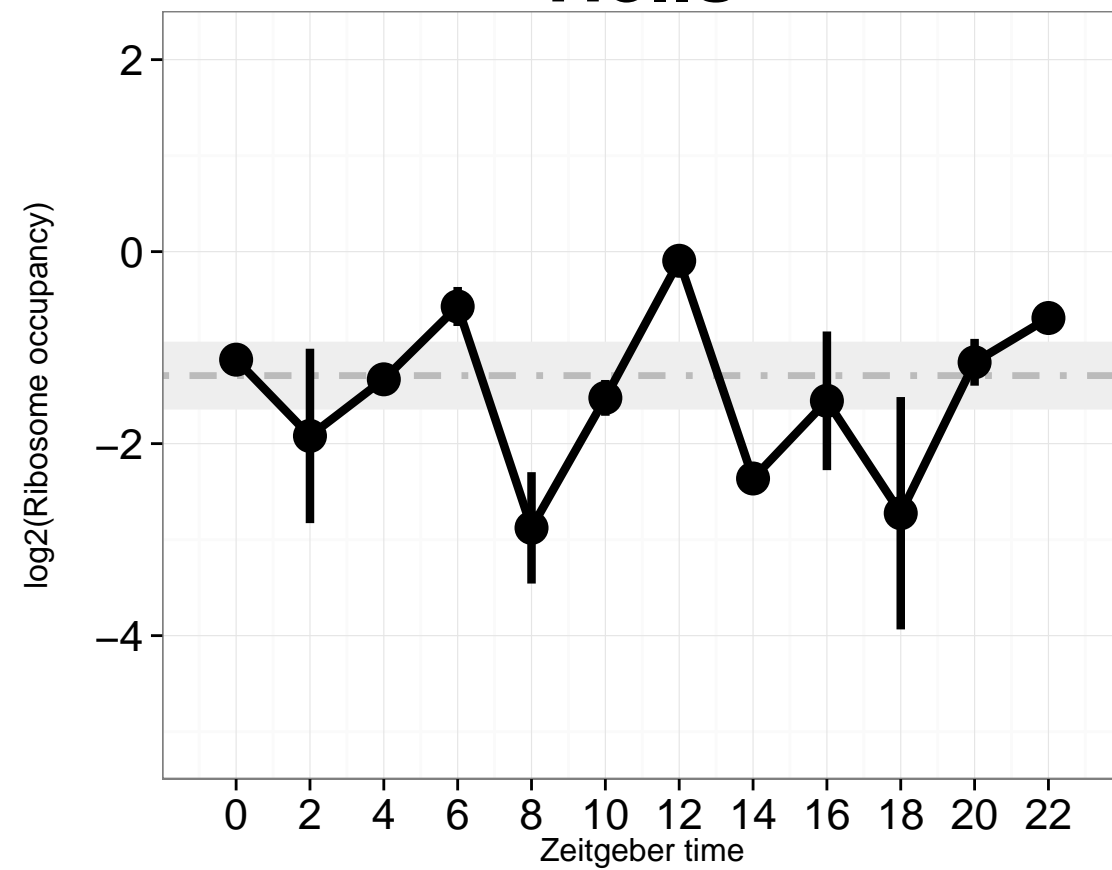

Supplement: SuppDataset_1.zip [file Hells_set_B.pdf › Supplemental Dataset 1/B-mRNA_rhythm_translation_nonrhyth/Hells_set_B.pdf]

# Hic1

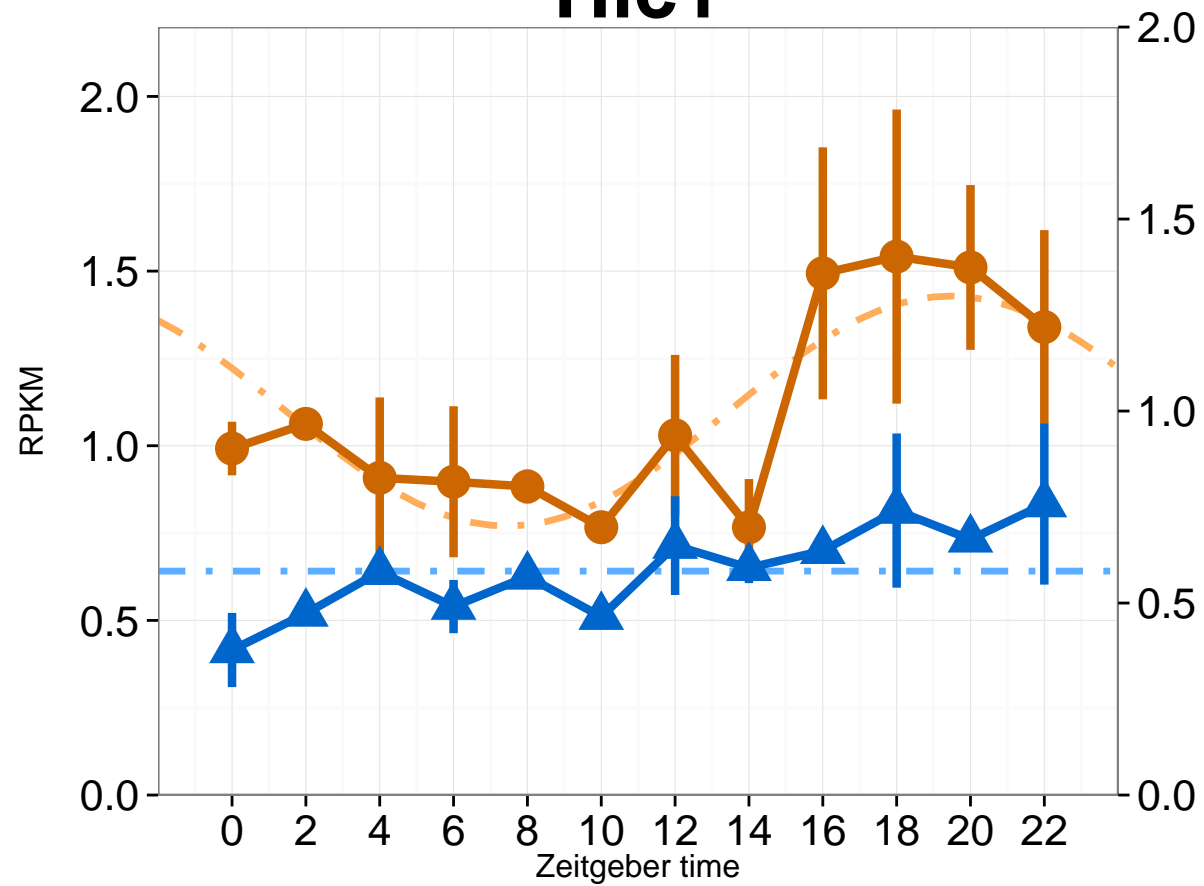

# Hic1

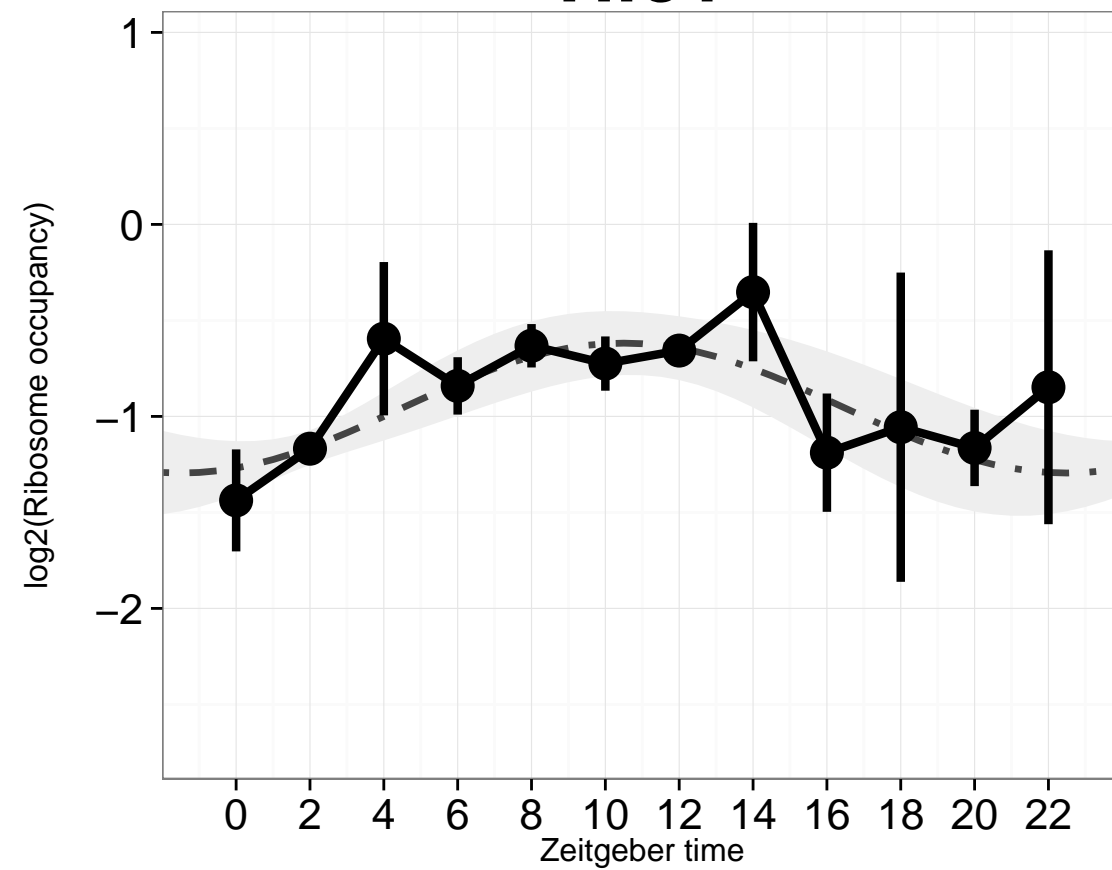

Supplement: SuppDataset_1.zip [file Hic1_set_B.pdf › Supplemental Dataset 1/B-mRNA_rhythm_translation_nonrhyth/Hic1_set_B.pdf]

# Hist1h1b

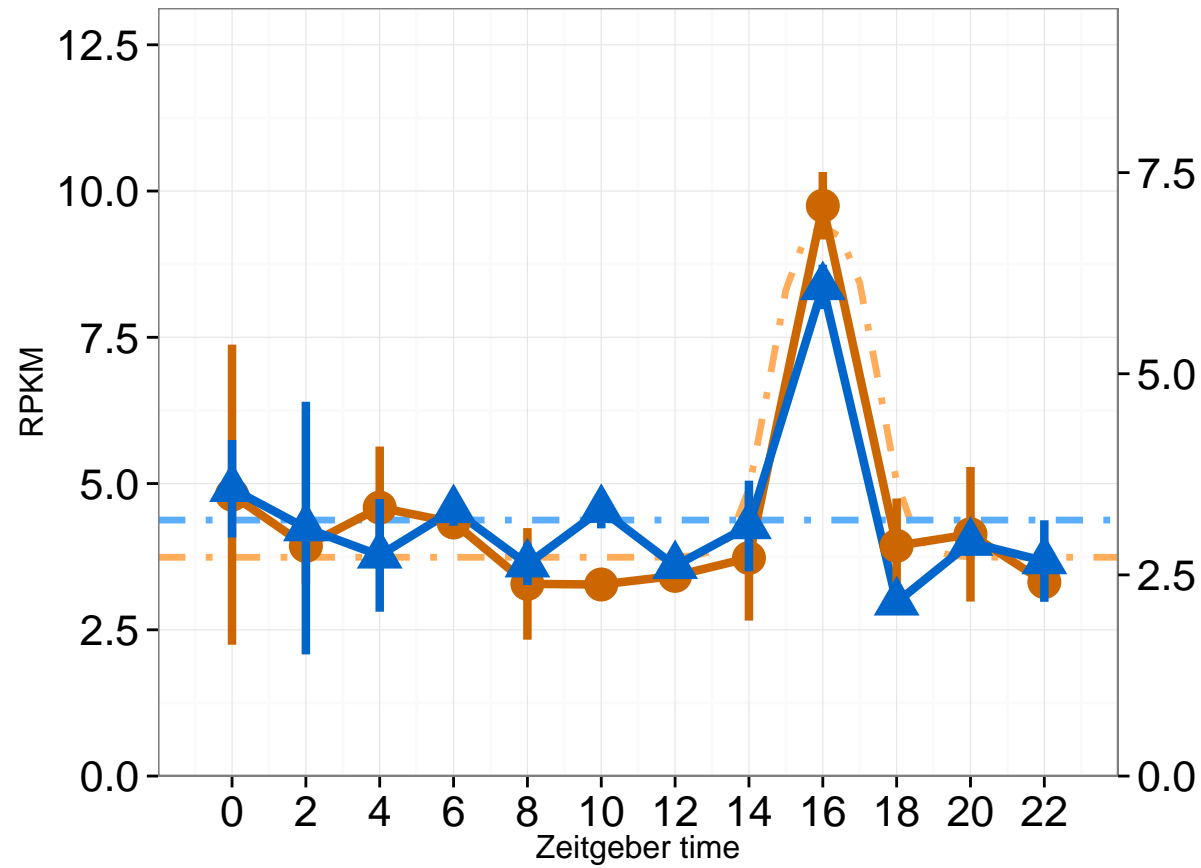

# Hist1h1b

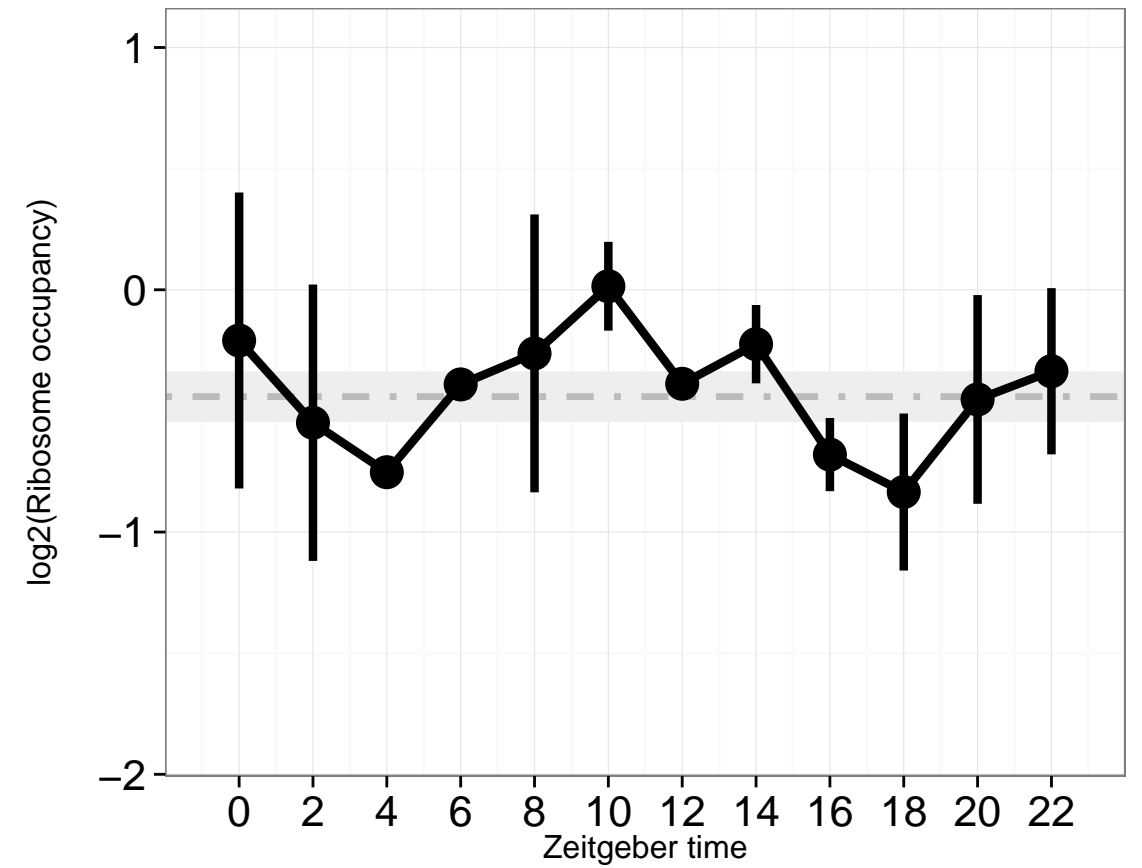

Supplement: SuppDataset_1.zip [file Hist1h1b_set_B.pdf › Supplemental Dataset 1/B-mRNA_rhythm_translation_nonrhyth/Hist1h1b_set_B.pdf]

# Hist1h1d

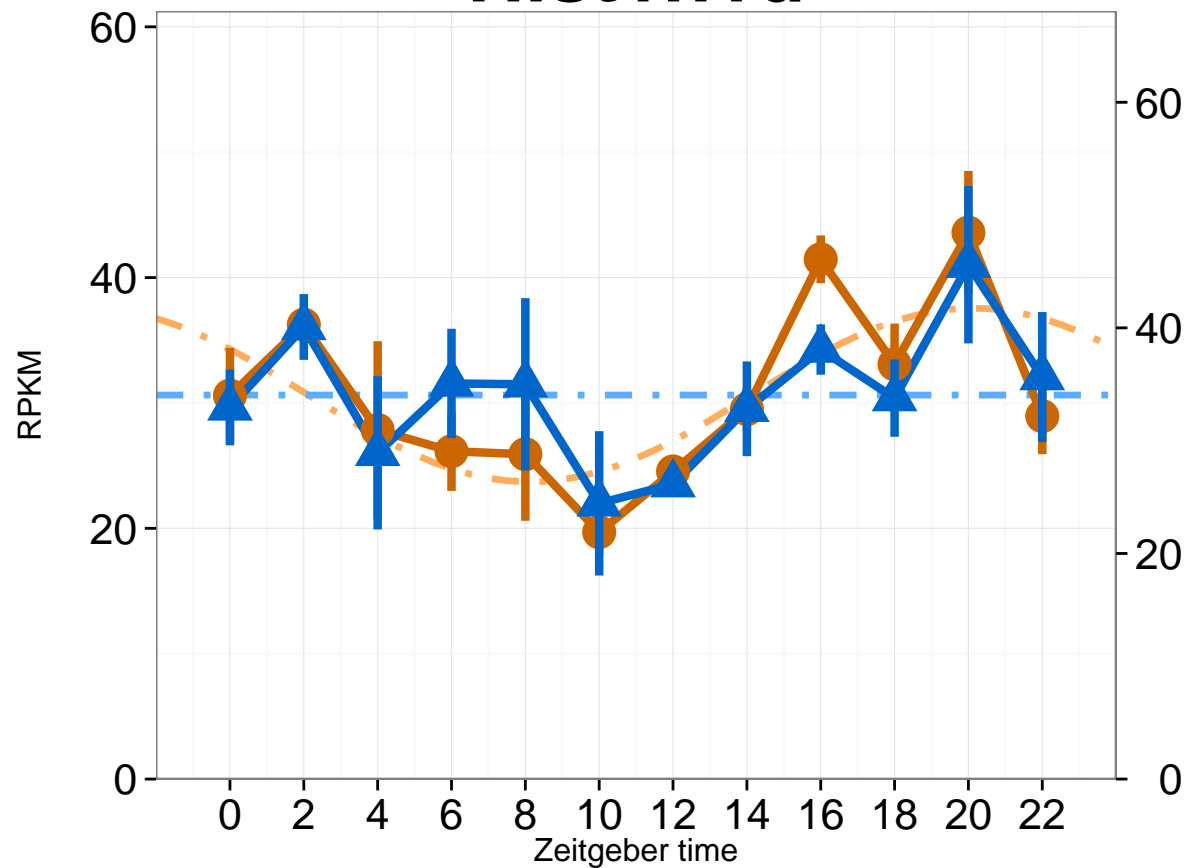

# Hist1h1d

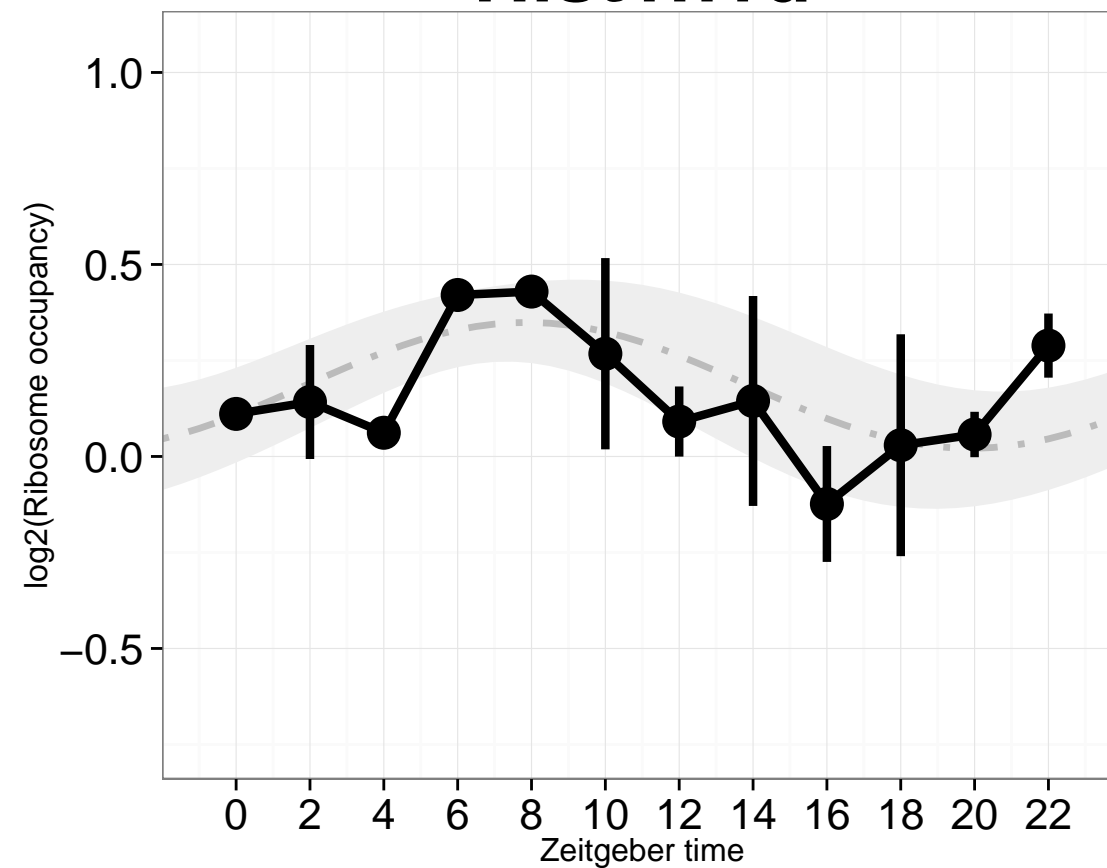

Supplement: SuppDataset_1.zip [file Hist1h1d_set_B.pdf › Supplemental Dataset 1/B-mRNA_rhythm_translation_nonrhyth/Hist1h1d_set_B.pdf]

# Hist1h2bb

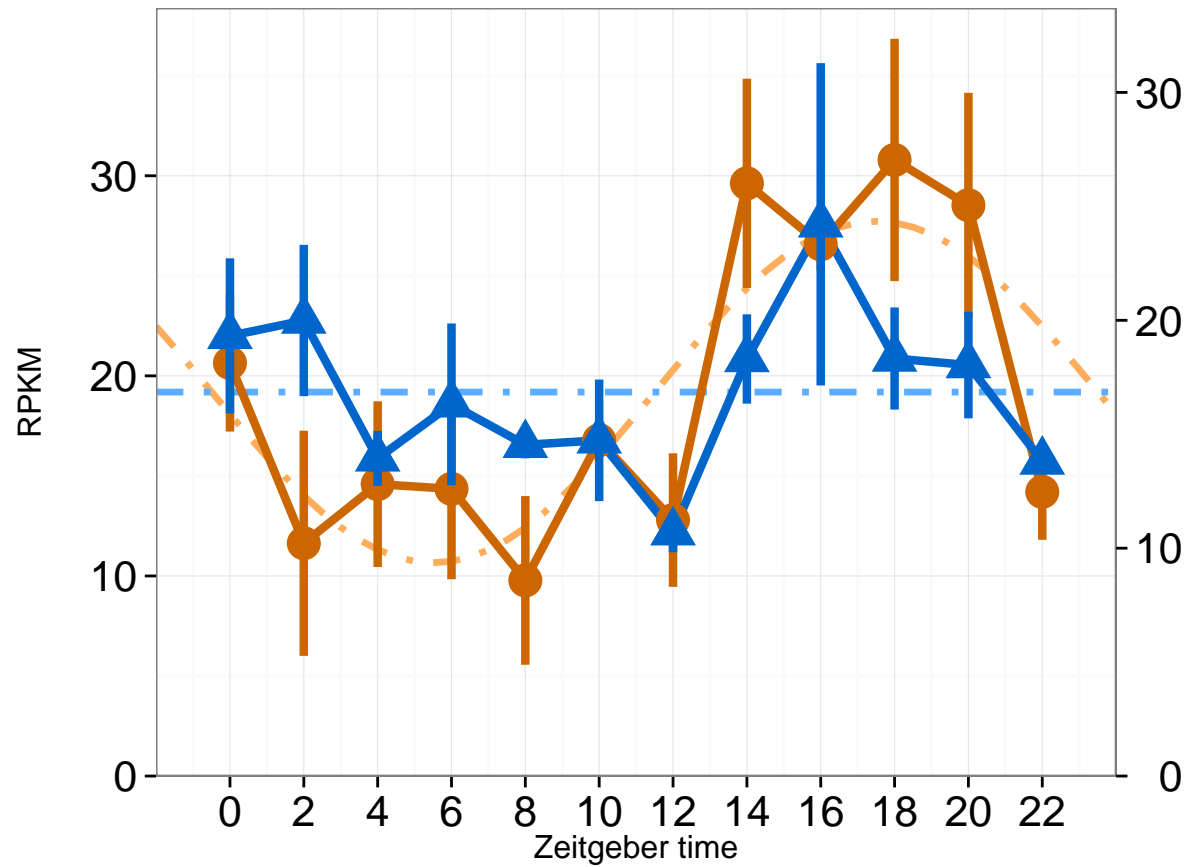

# Hist1h2bb

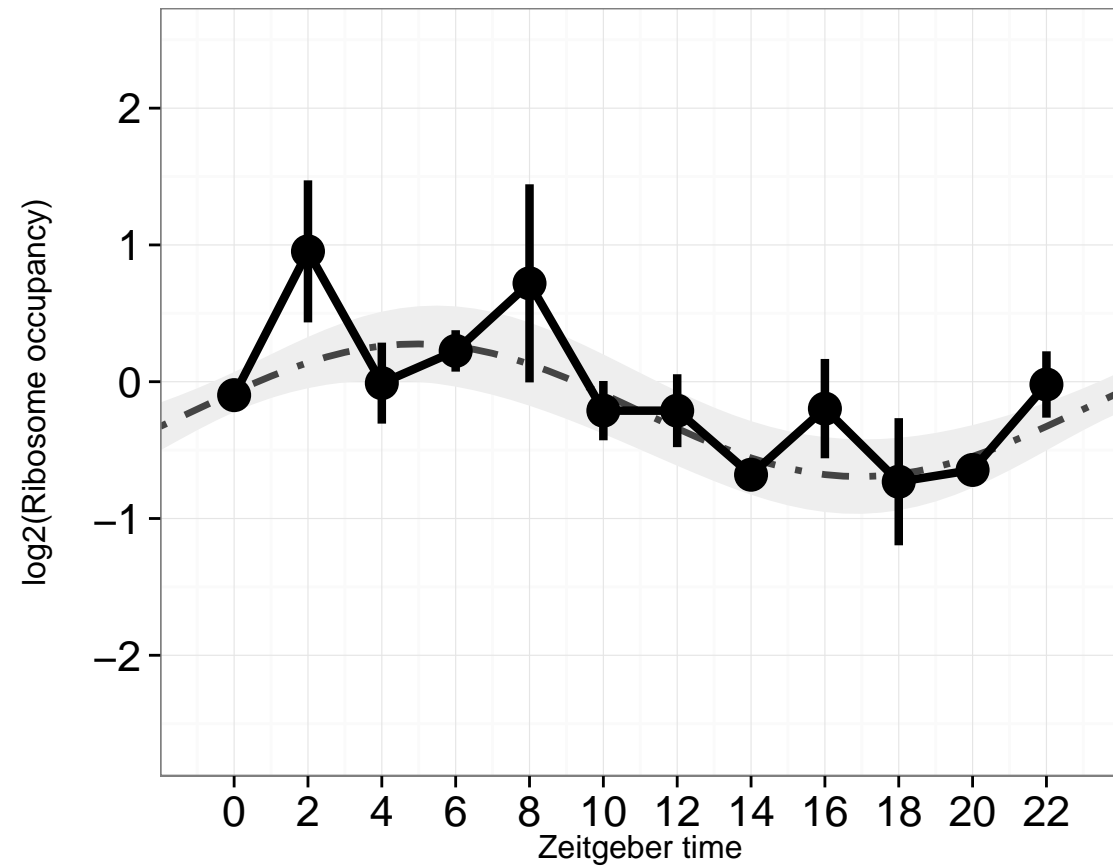

Supplement: SuppDataset_1.zip [file Hist1h2bb_set_B.pdf › Supplemental Dataset 1/B-mRNA_rhythm_translation_nonrhyth/Hist1h2bb_set_B.pdf]

# Hist1h2bc

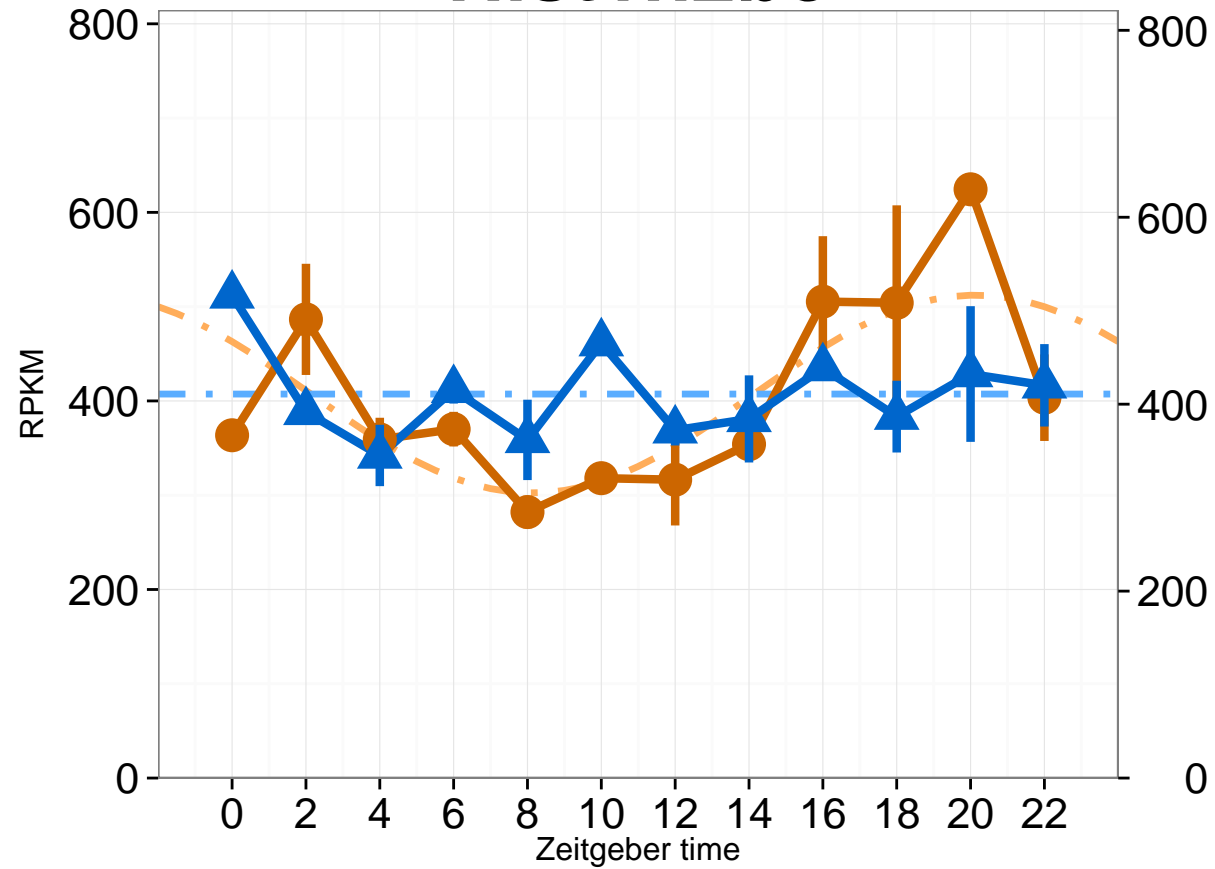

# Hist1h2bc

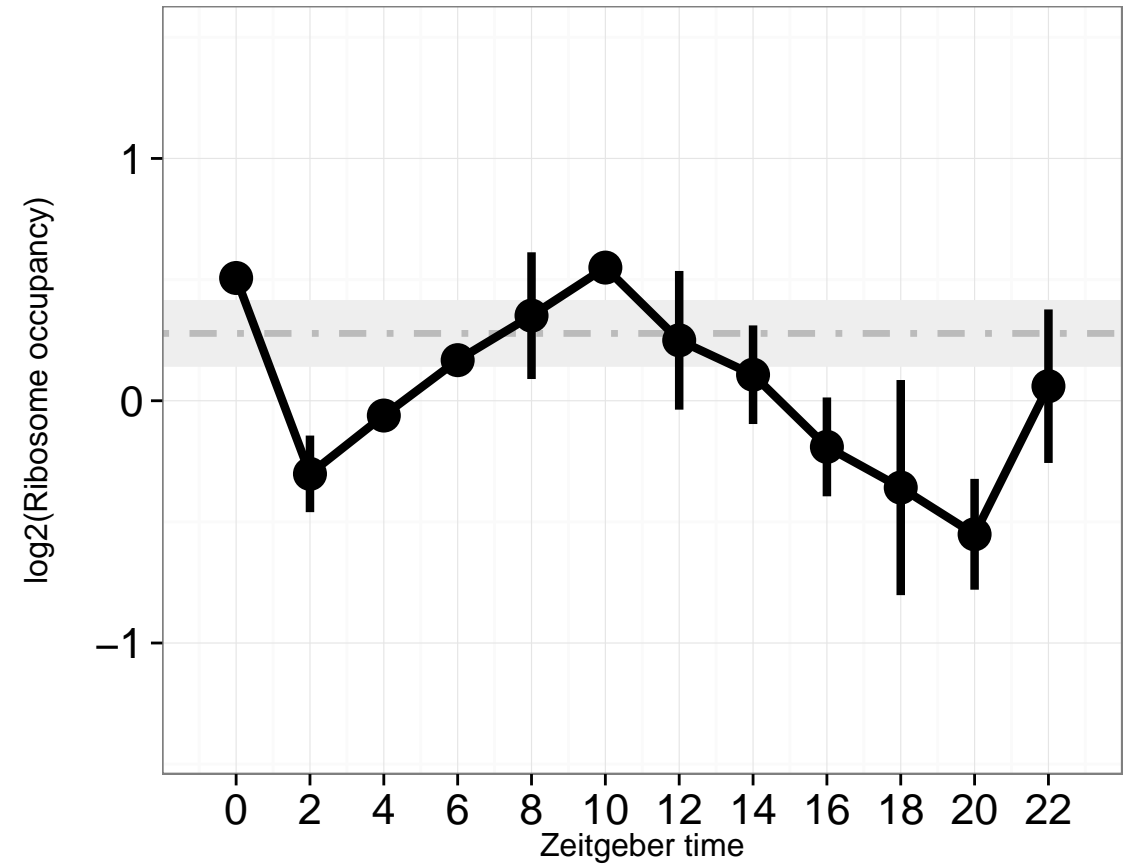

Supplement: SuppDataset_1.zip [file Hist1h2bc_set_B.pdf › Supplemental Dataset 1/B-mRNA_rhythm_translation_nonrhyth/Hist1h2bc_set_B.pdf]

# Hist1h2be

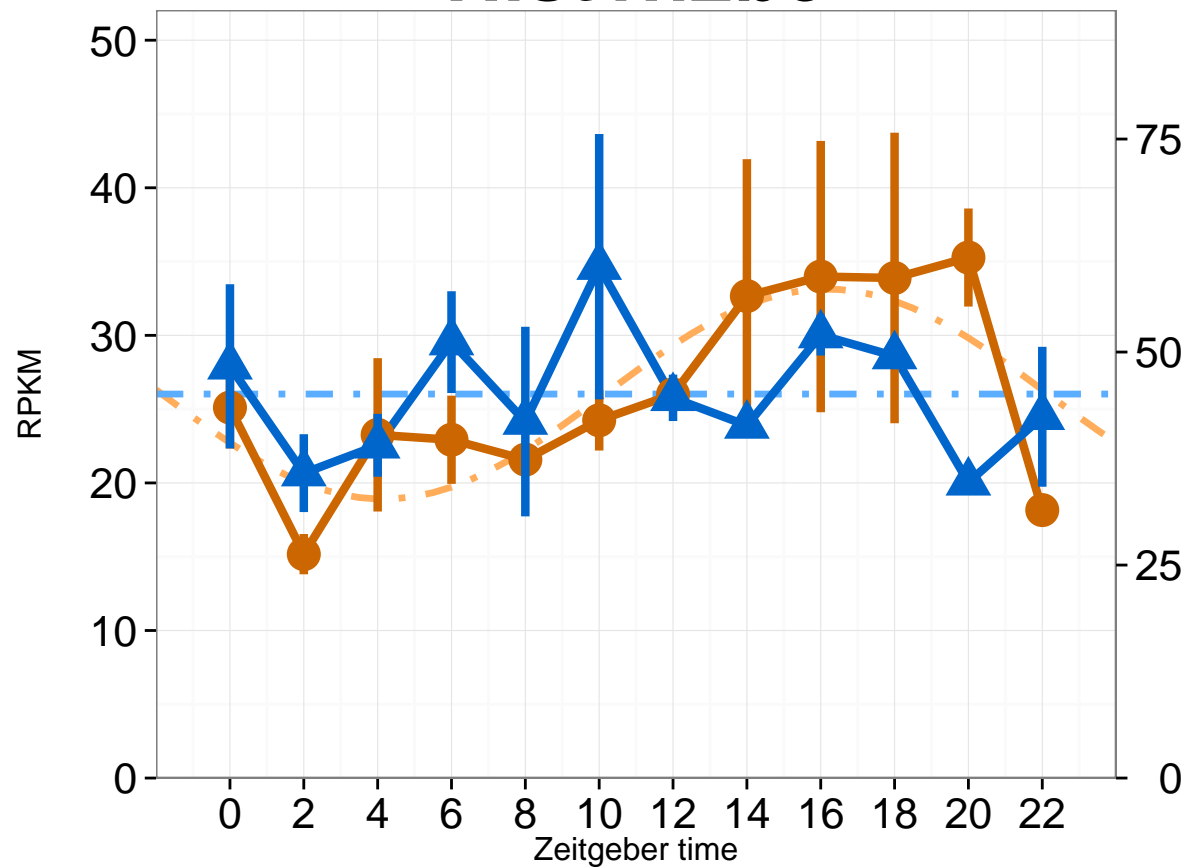

# Hist1h2be

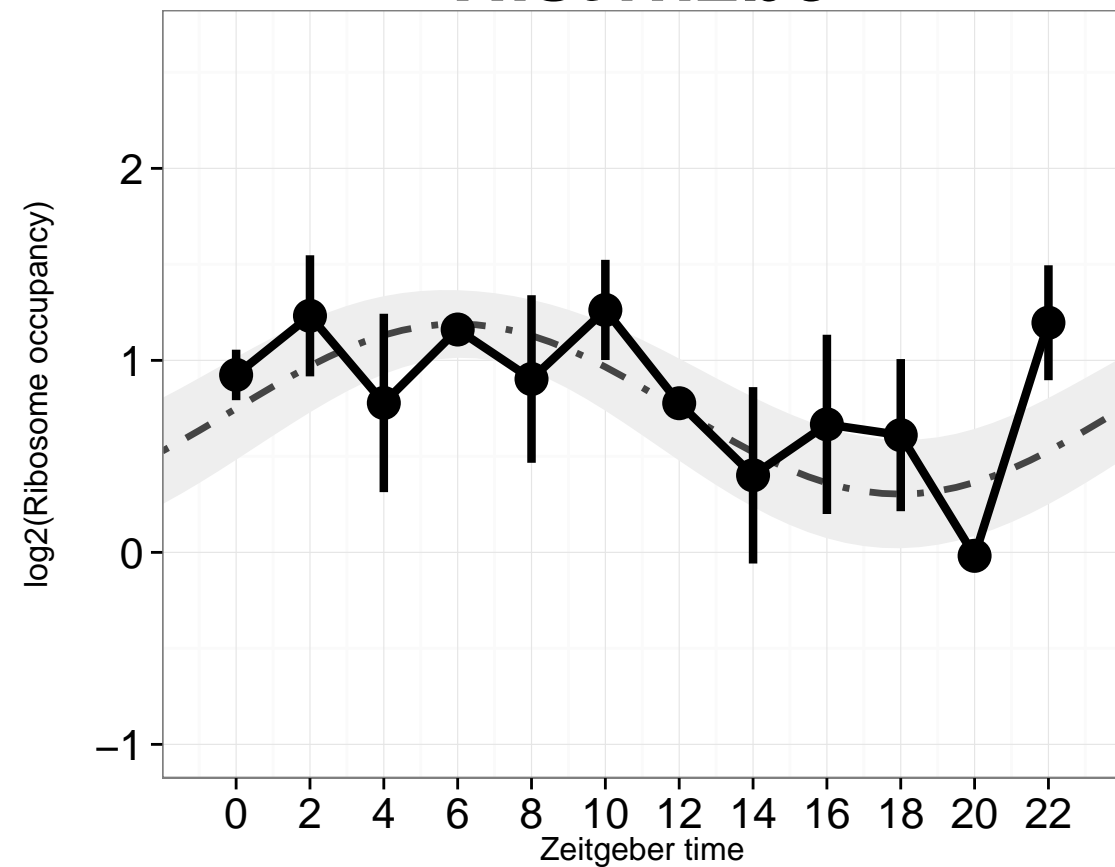

Supplement: SuppDataset_1.zip [file Hist1h2be_set_B.pdf › Supplemental Dataset 1/B-mRNA_rhythm_translation_nonrhyth/Hist1h2be_set_B.pdf]

# Hist1h2bk

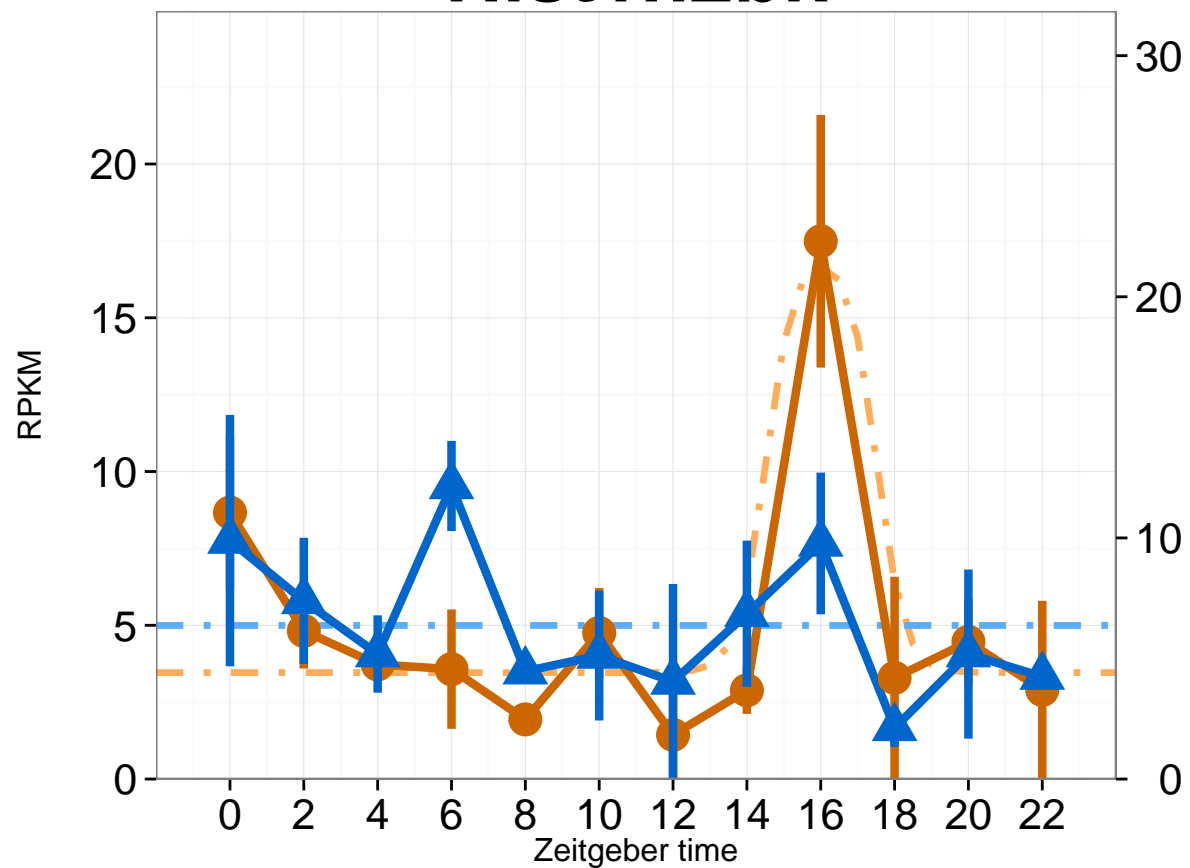

# Hist1h2bk

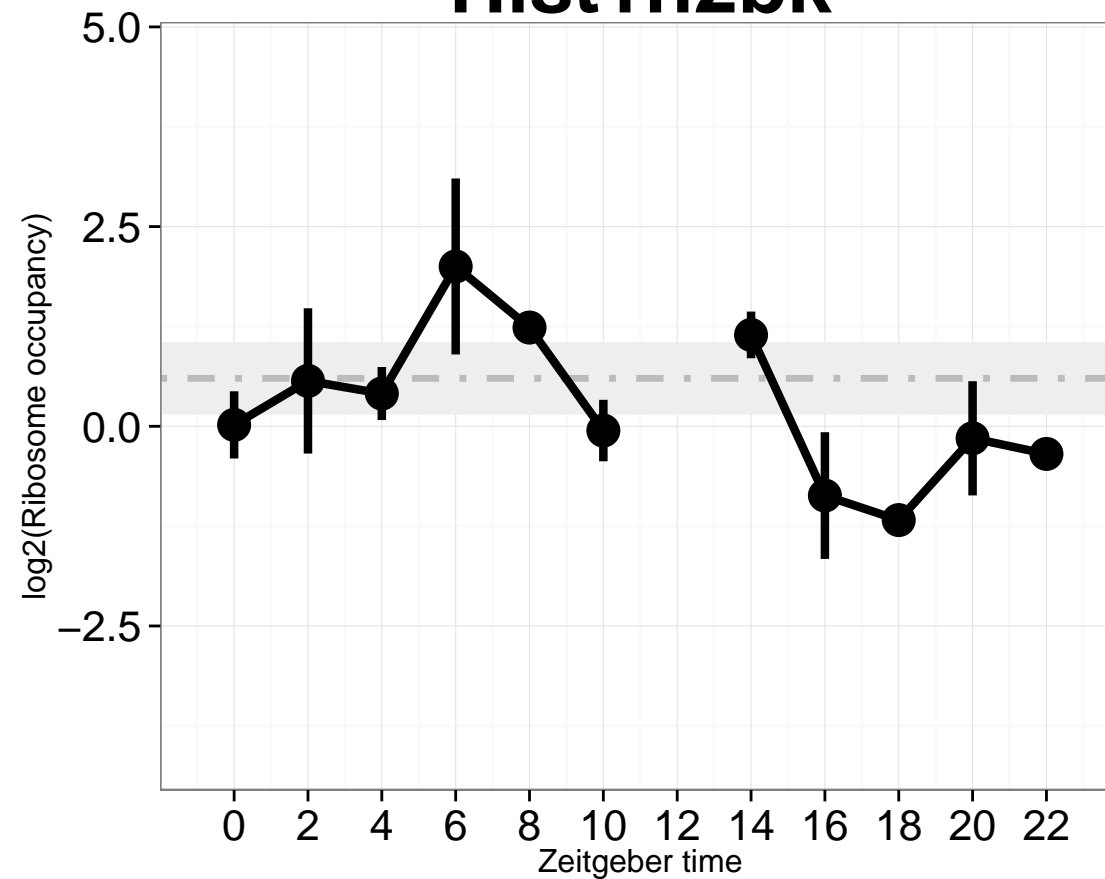

Supplement: SuppDataset_1.zip [file Hist1h2bk_set_B.pdf › Supplemental Dataset 1/B-mRNA_rhythm_translation_nonrhyth/Hist1h2bk_set_B.pdf]

# Hist1h3c

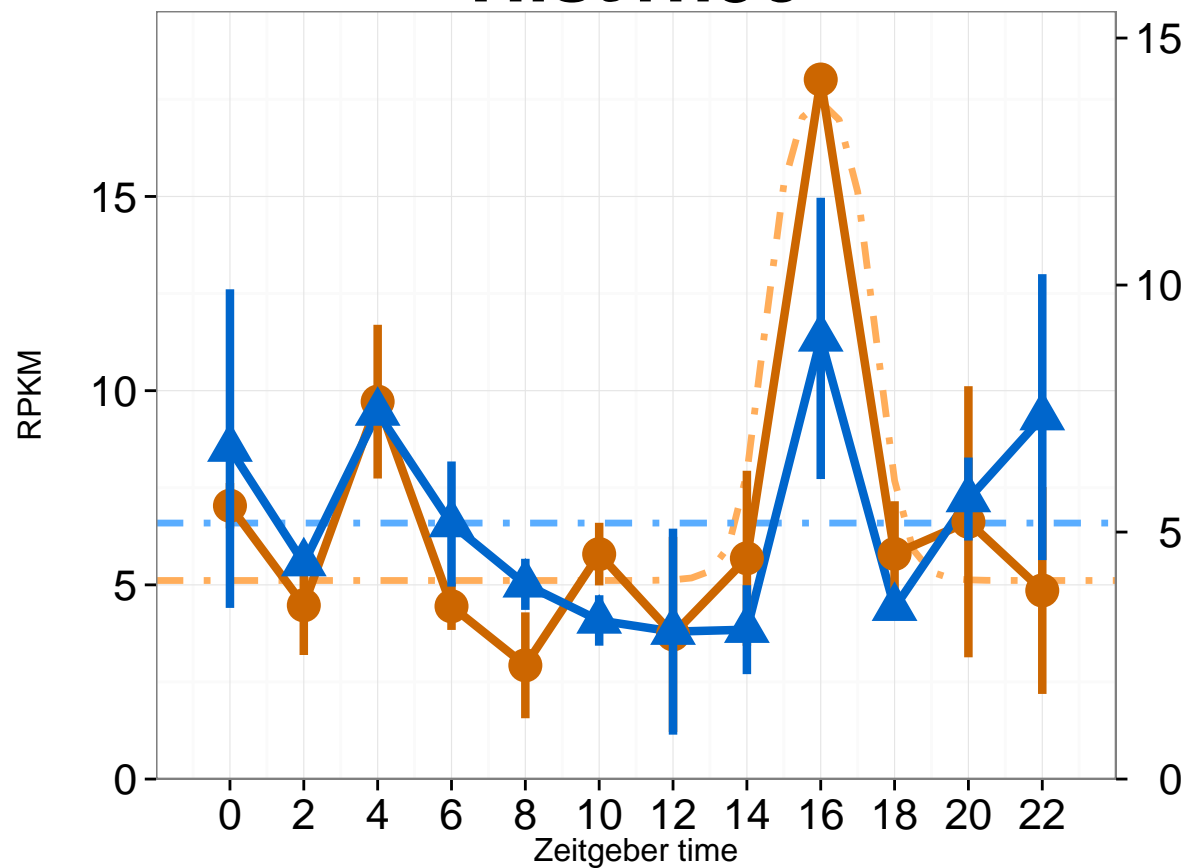

# Hist1h3c

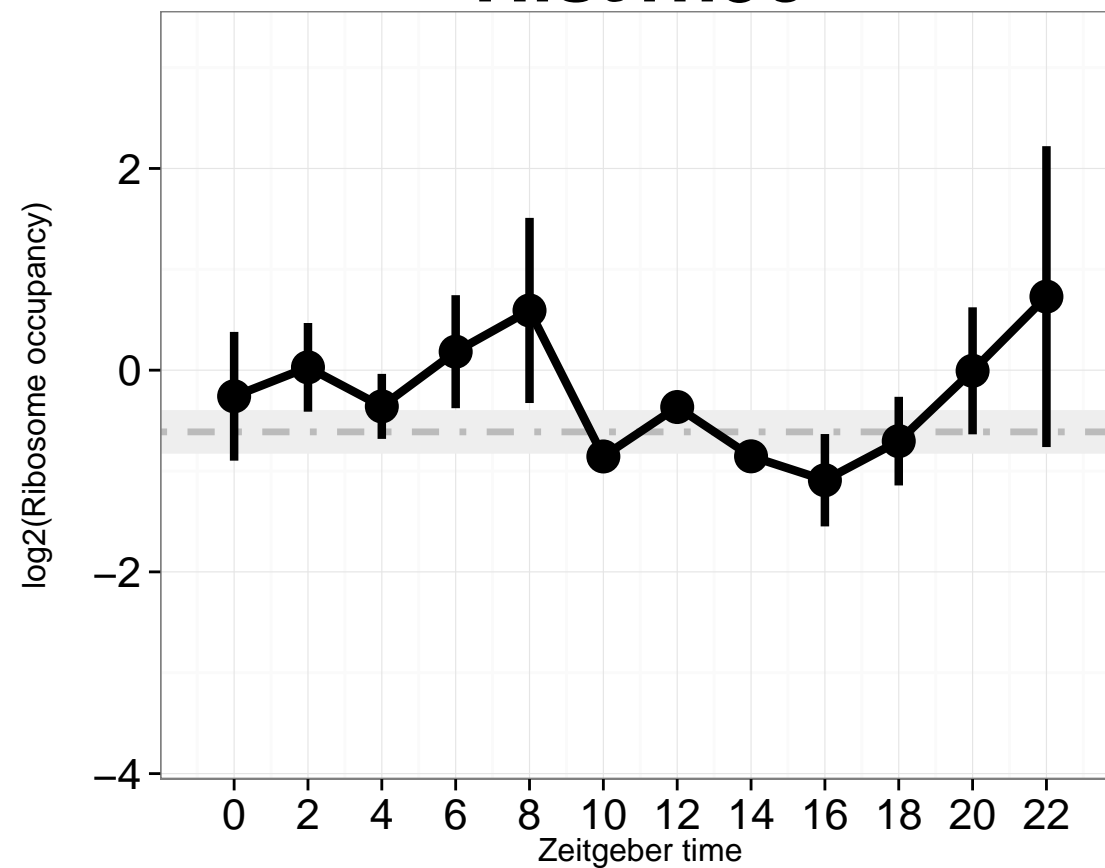

Supplement: SuppDataset_1.zip [file Hist1h3c_set_B.pdf › Supplemental Dataset 1/B-mRNA_rhythm_translation_nonrhyth/Hist1h3c_set_B.pdf]

# Hist1h3f

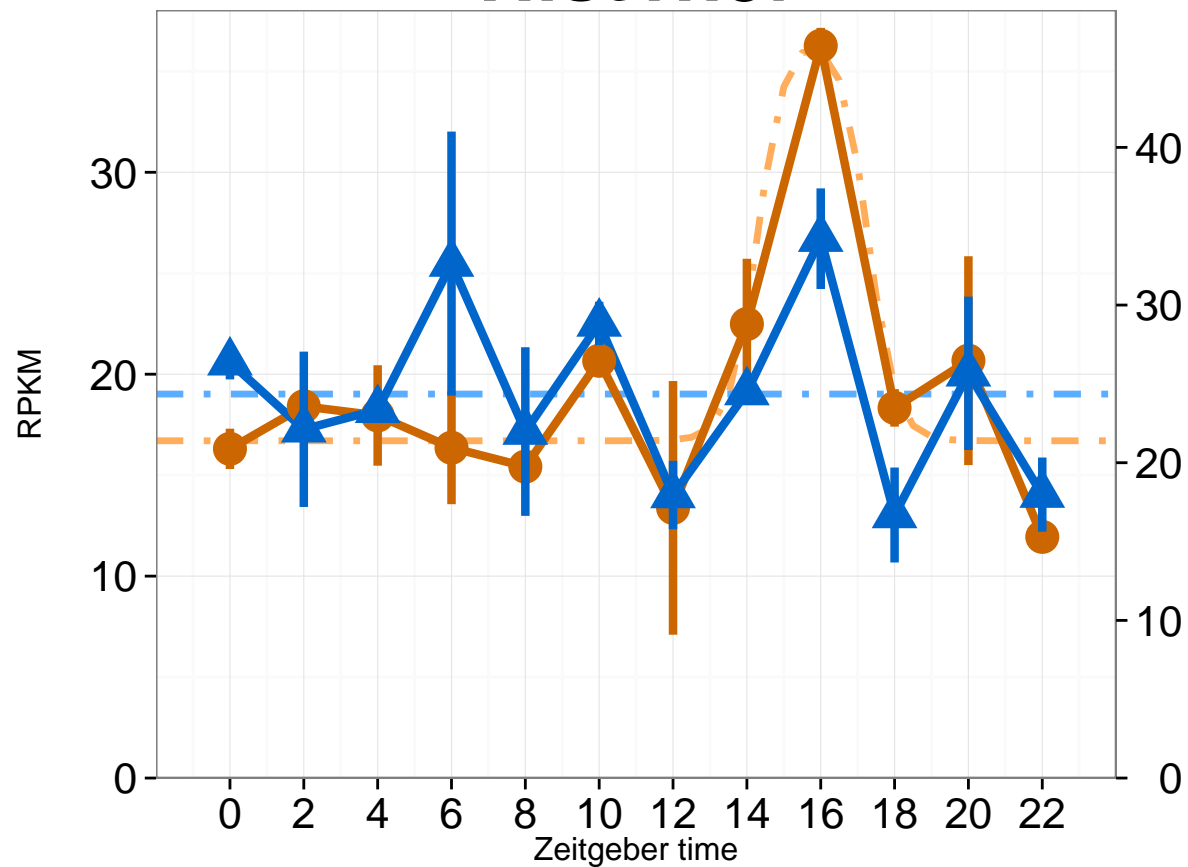

# Hist1h3f

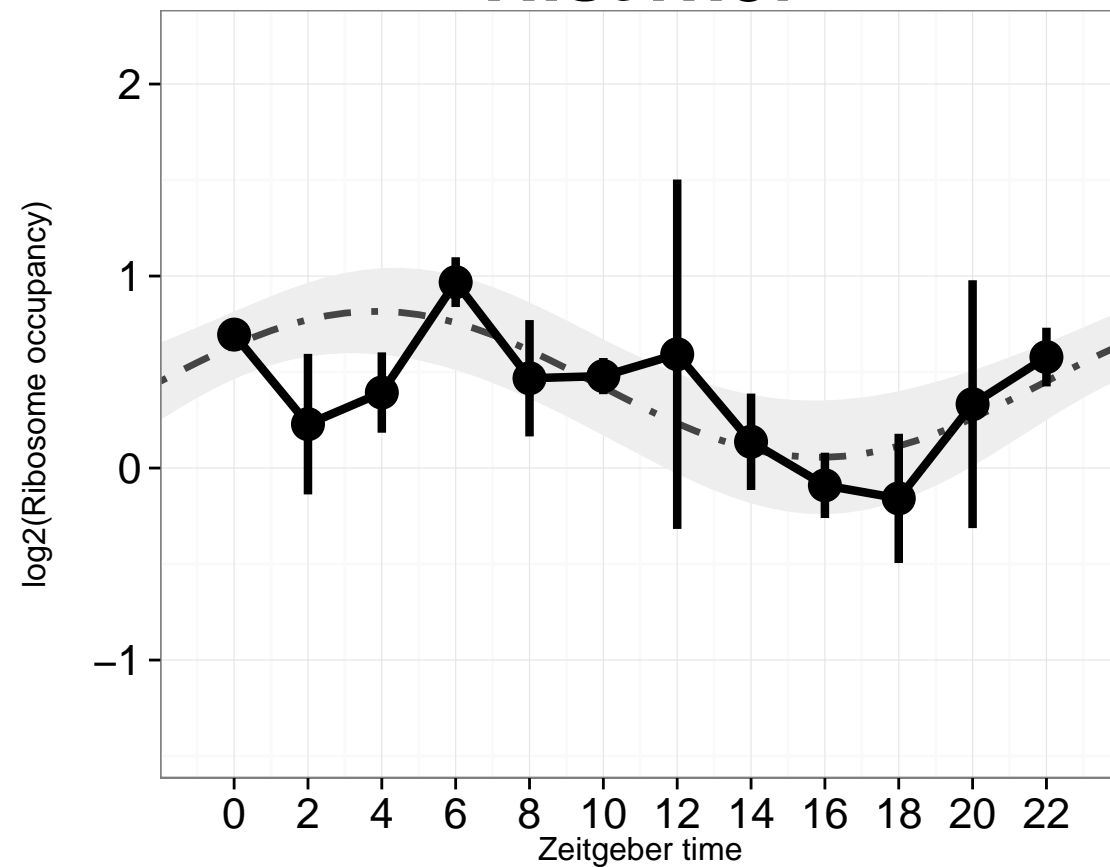

Supplement: SuppDataset_1.zip [file Hist1h3f_set_B.pdf › Supplemental Dataset 1/B-mRNA_rhythm_translation_nonrhyth/Hist1h3f_set_B.pdf]

# Hist1h4a

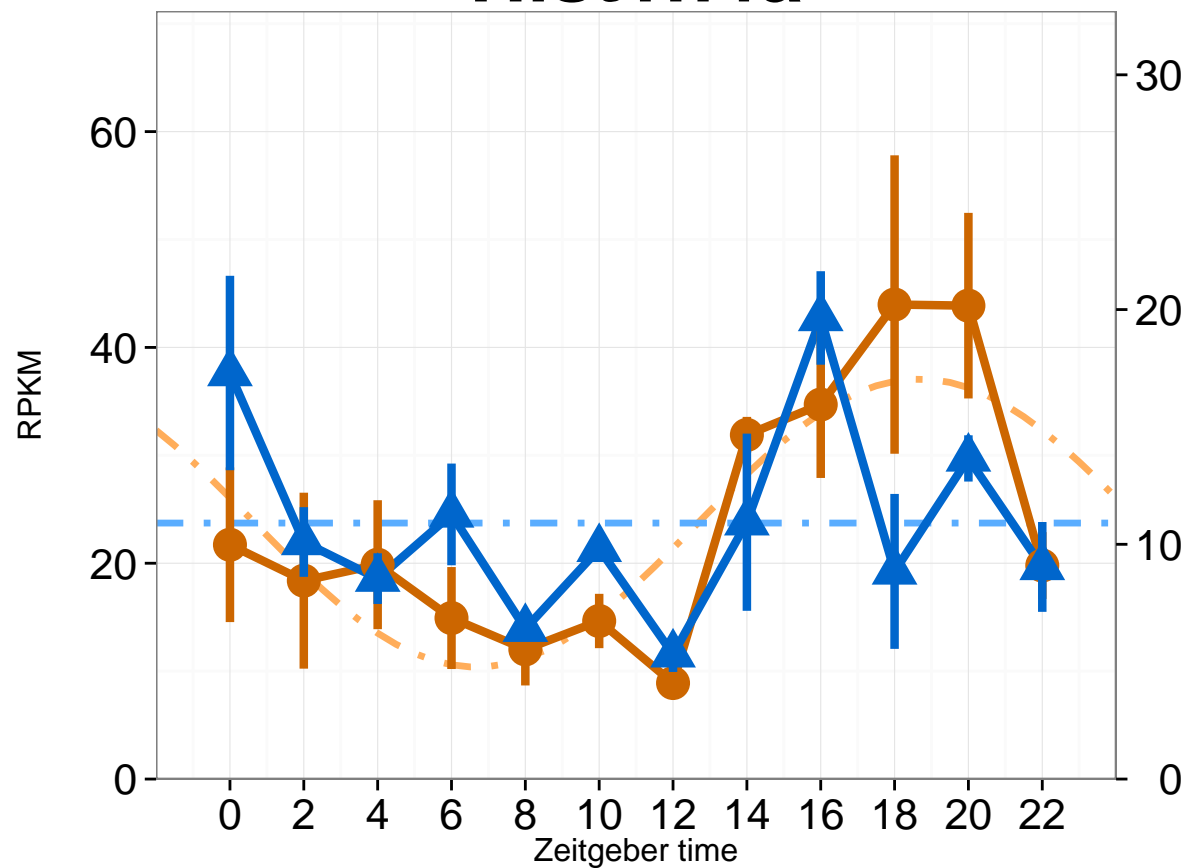

# Hist1h4a

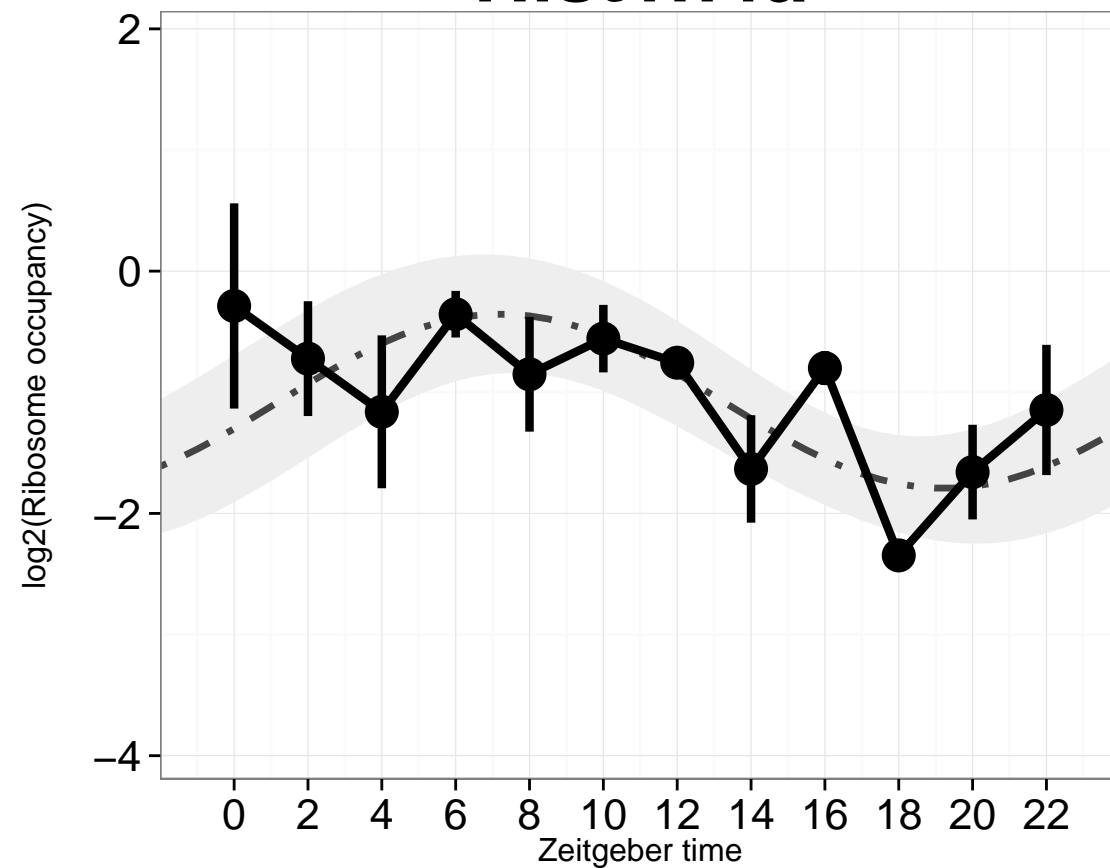

Supplement: SuppDataset_1.zip [file Hist1h4a_set_B.pdf › Supplemental Dataset 1/B-mRNA_rhythm_translation_nonrhyth/Hist1h4a_set_B.pdf]

# Hist1h4b

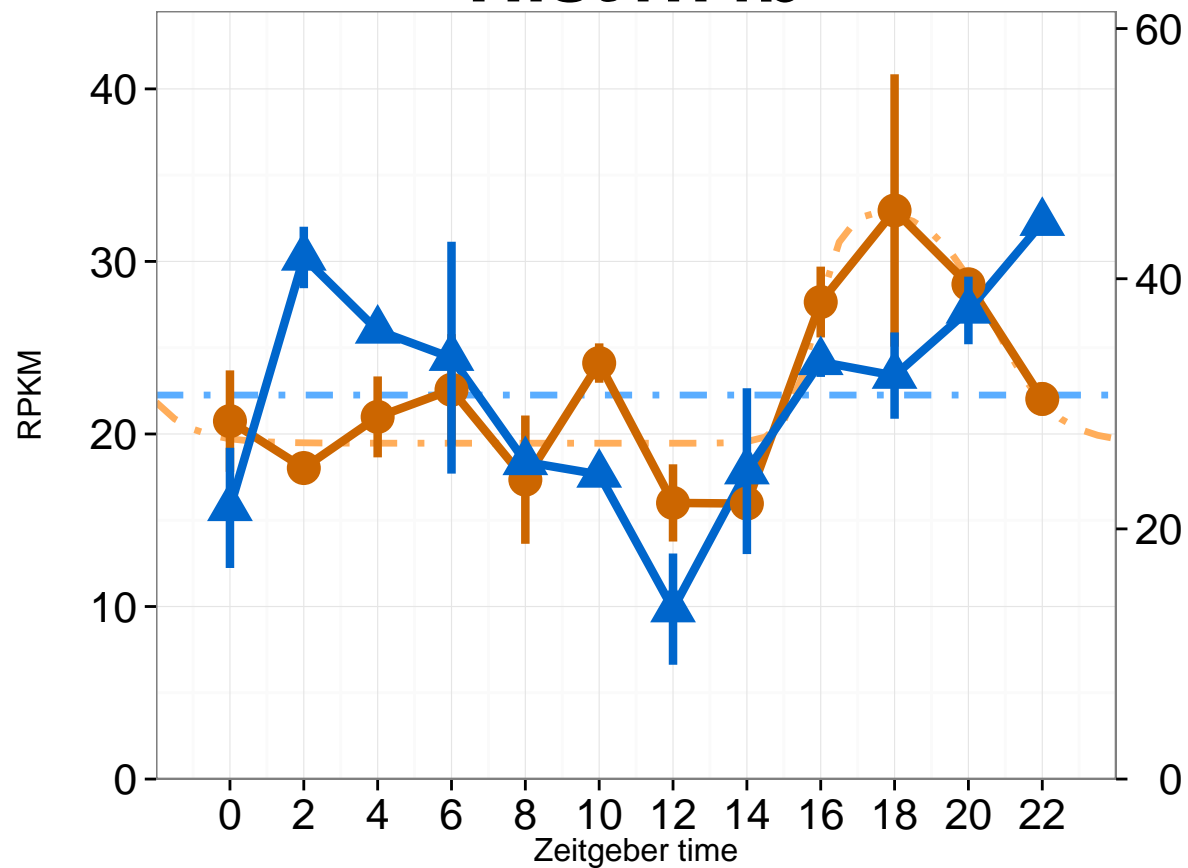

# Hist1h4b

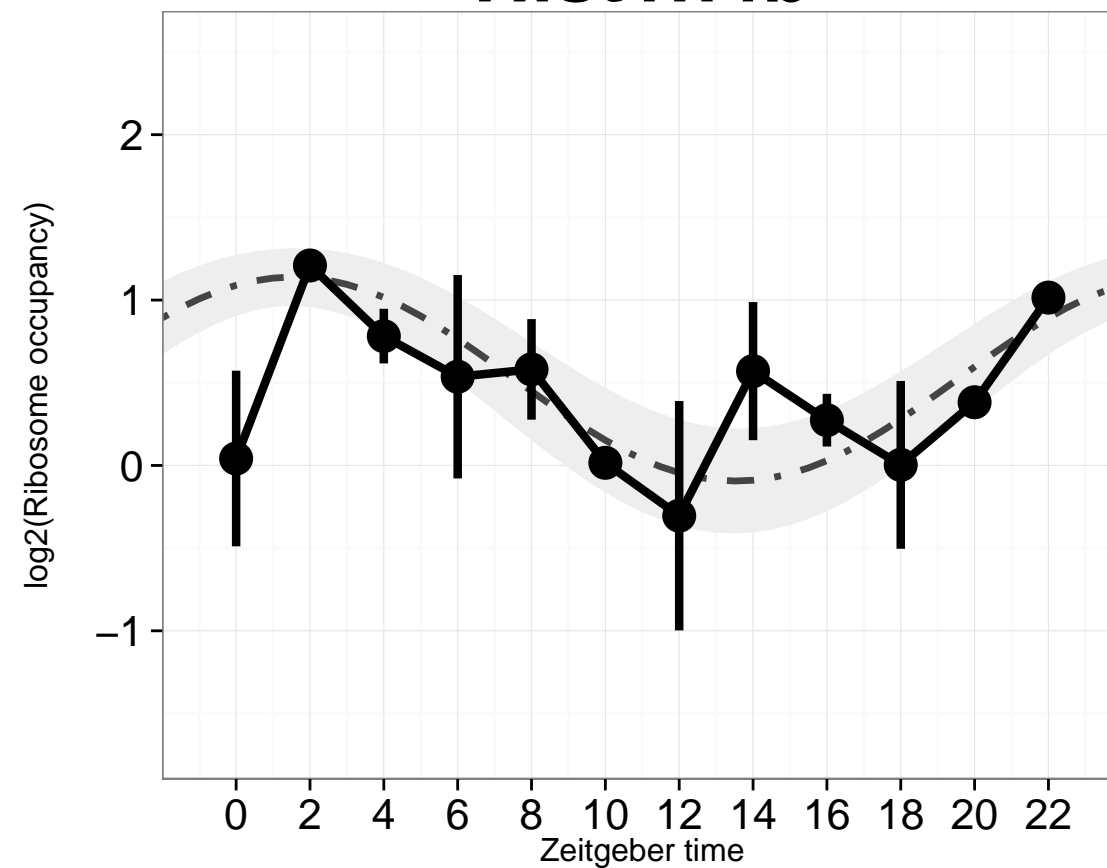

Supplement: SuppDataset_1.zip [file Hist1h4b_set_B.pdf › Supplemental Dataset 1/B-mRNA_rhythm_translation_nonrhyth/Hist1h4b_set_B.pdf]

# Hist1h4c

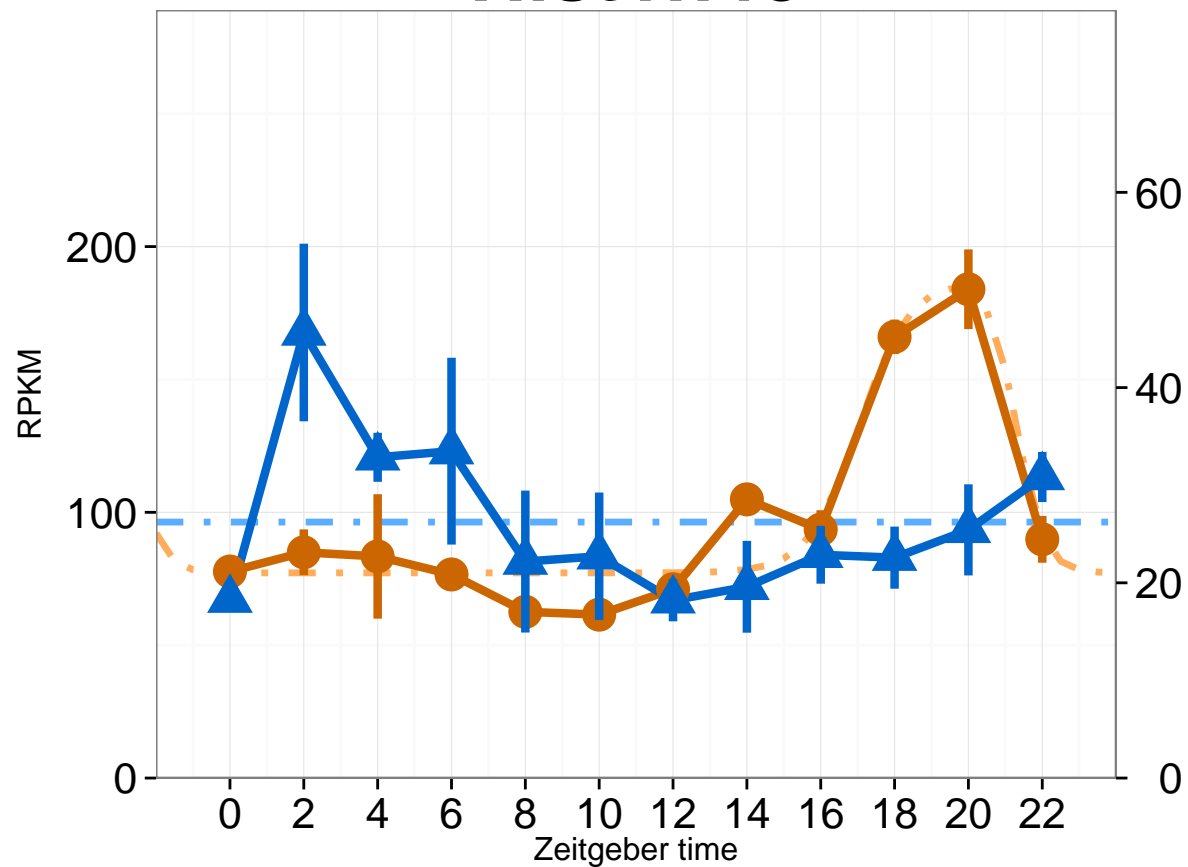

# Hist1h4c

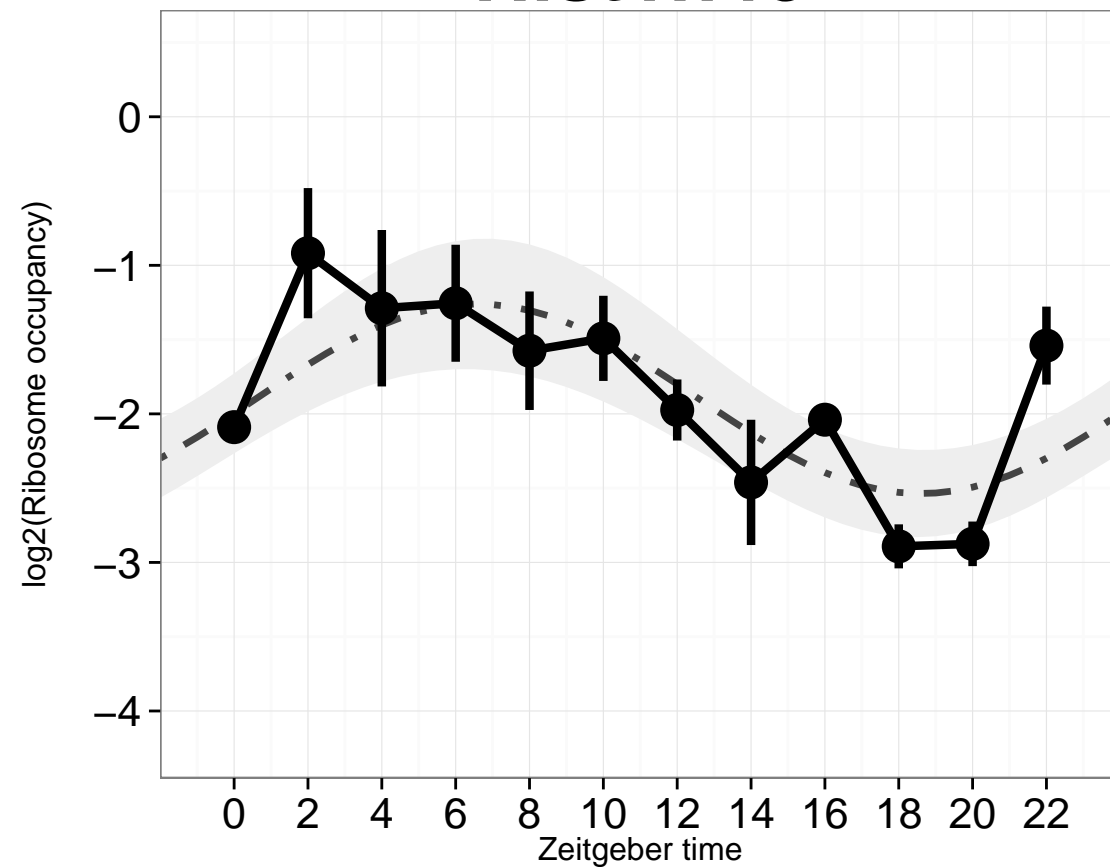

Supplement: SuppDataset_1.zip [file Hist1h4c_set_B.pdf › Supplemental Dataset 1/B-mRNA_rhythm_translation_nonrhyth/Hist1h4c_set_B.pdf]

# Hist1h4d

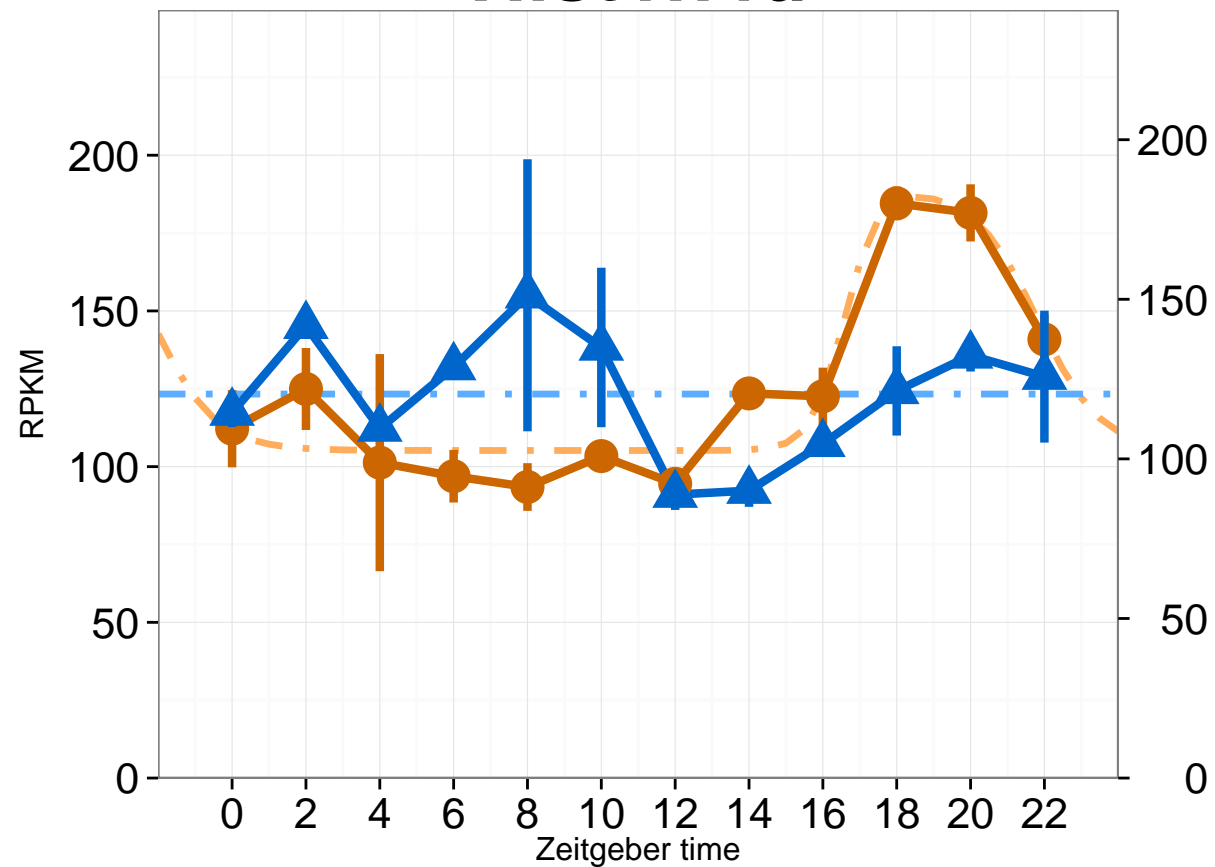

# Hist1h4d

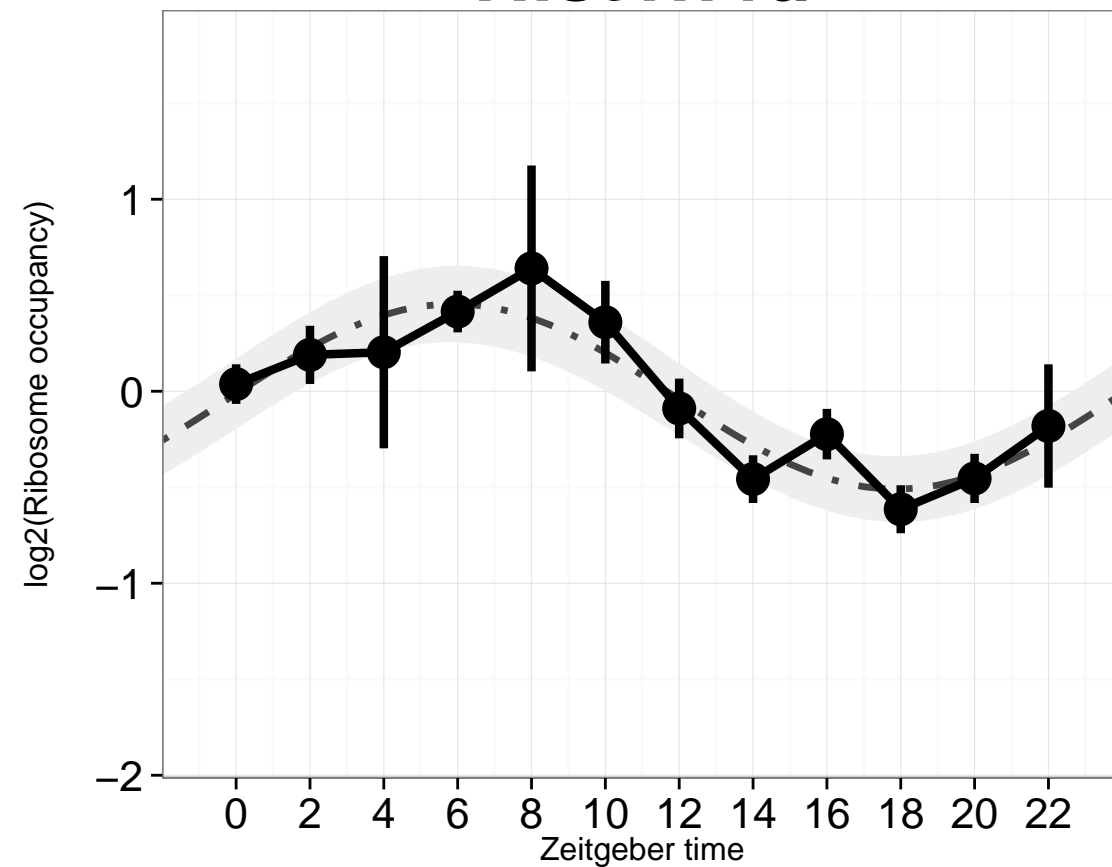

Supplement: SuppDataset_1.zip [file Hist1h4d_set_B.pdf › Supplemental Dataset 1/B-mRNA_rhythm_translation_nonrhyth/Hist1h4d_set_B.pdf]

# Hist1h4n

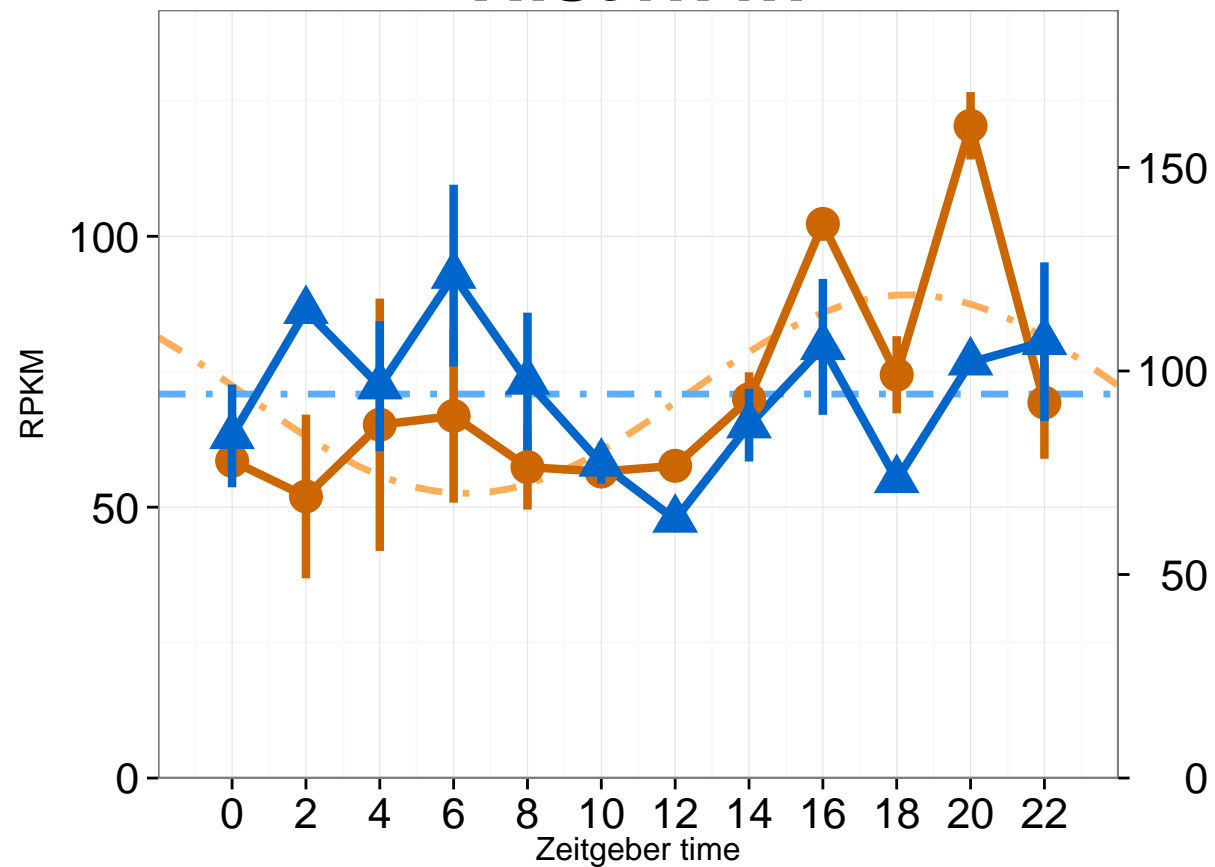

# Hist1h4n

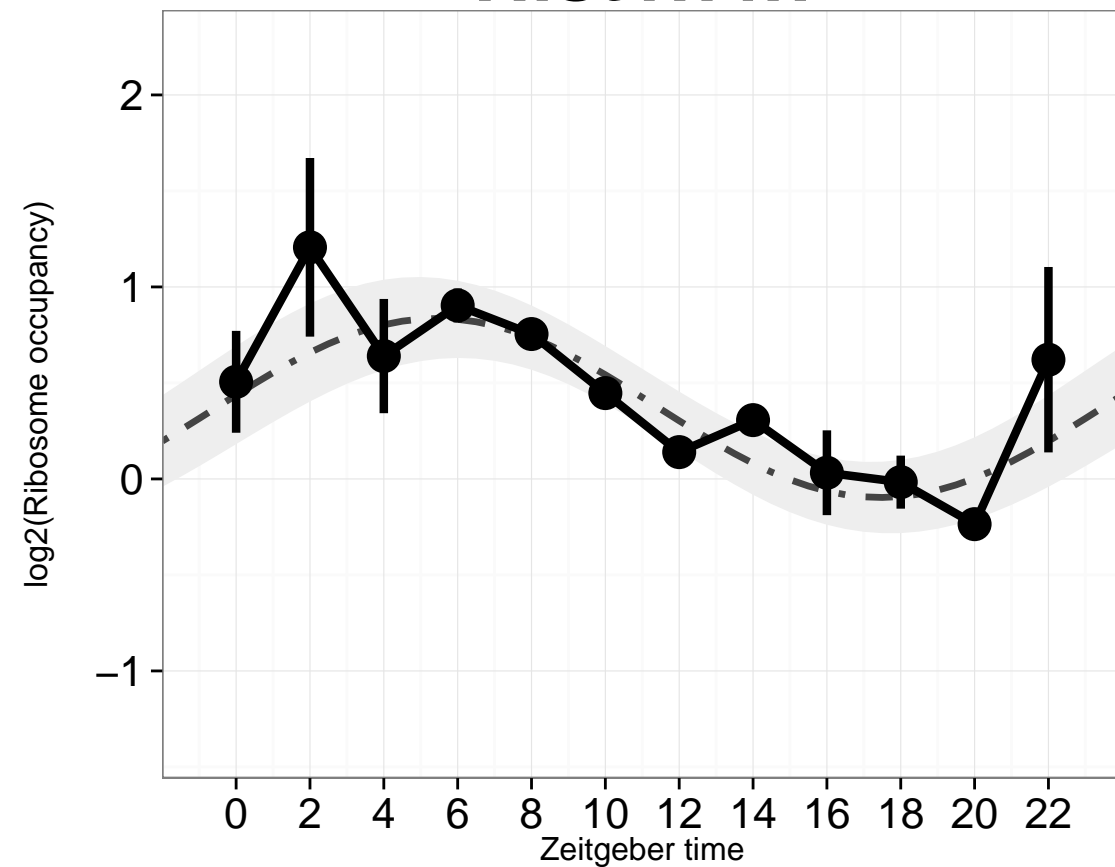

Supplement: SuppDataset_1.zip [file Hist1h4n_set_B.pdf › Supplemental Dataset 1/B-mRNA_rhythm_translation_nonrhyth/Hist1h4n_set_B.pdf]

# Hmga1

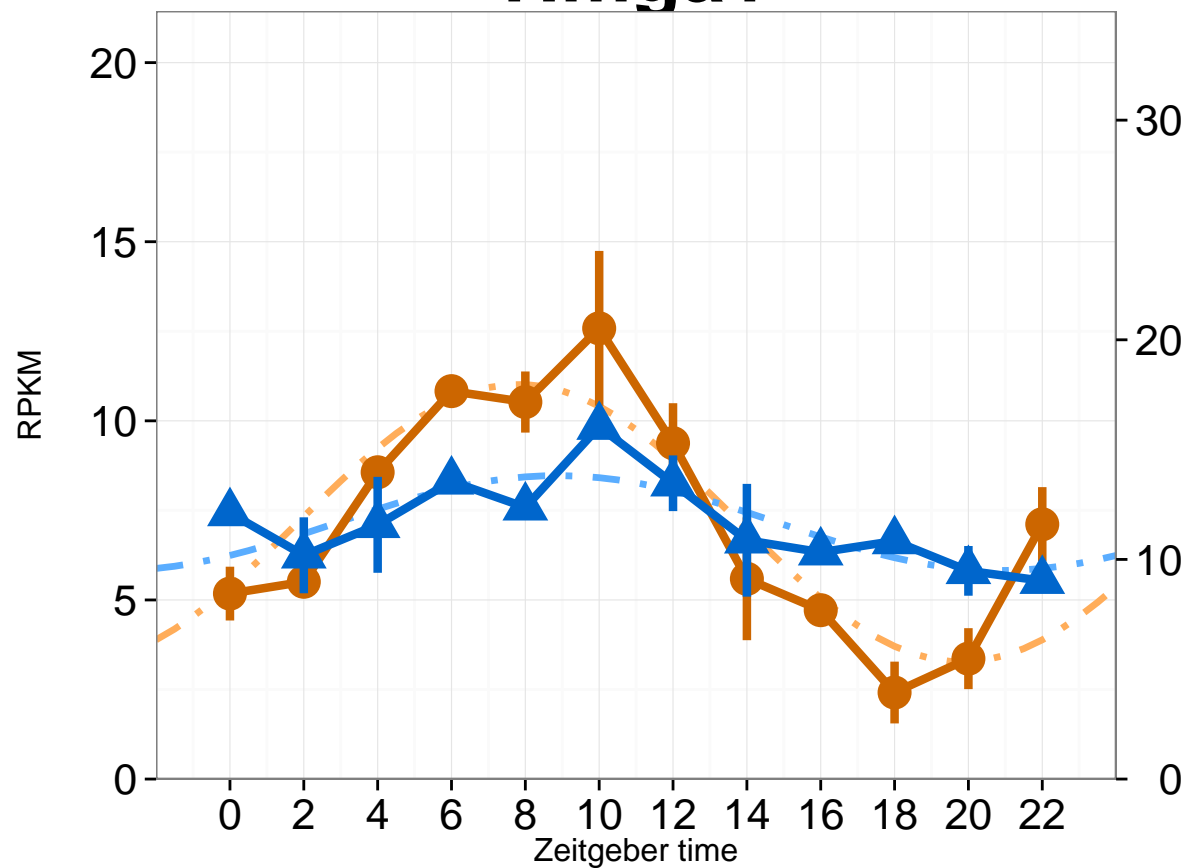

# Hmga1

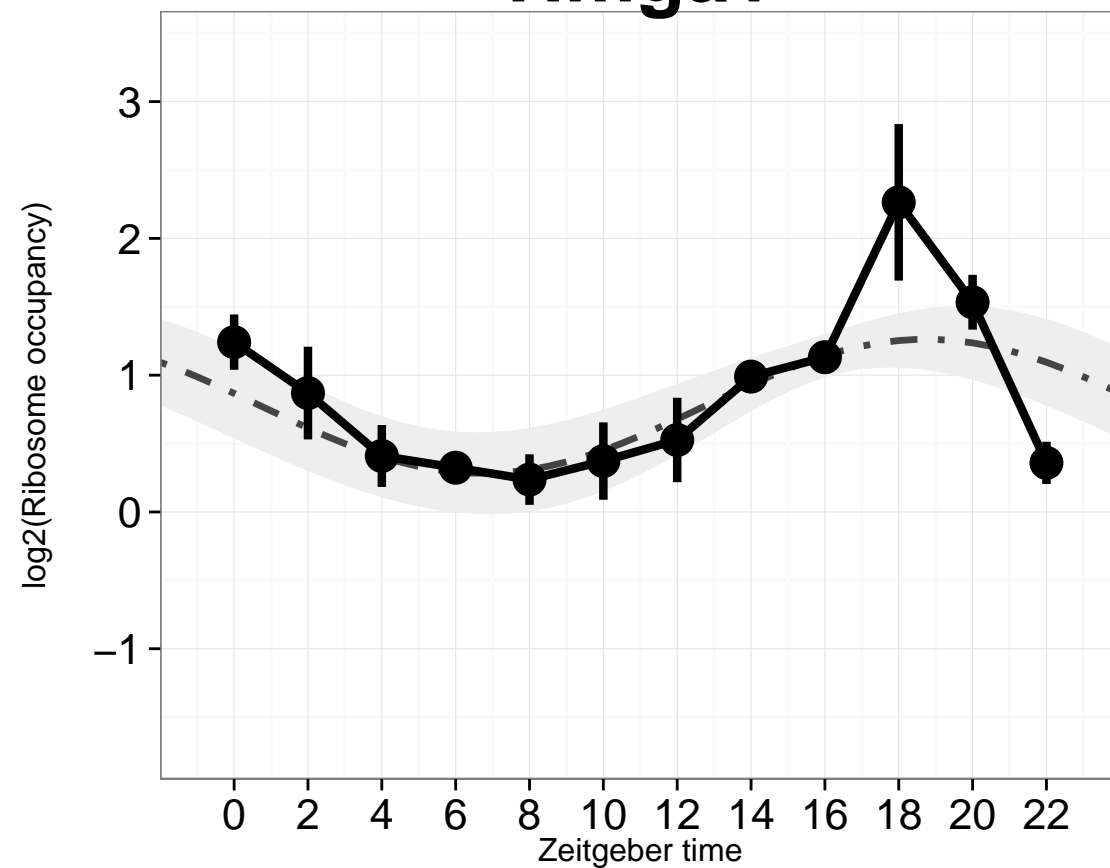

Supplement: SuppDataset_1.zip [file Hmga1_set_B.pdf › Supplemental Dataset 1/B-mRNA_rhythm_translation_nonrhyth/Hmga1_set_B.pdf]

# Hmgb1

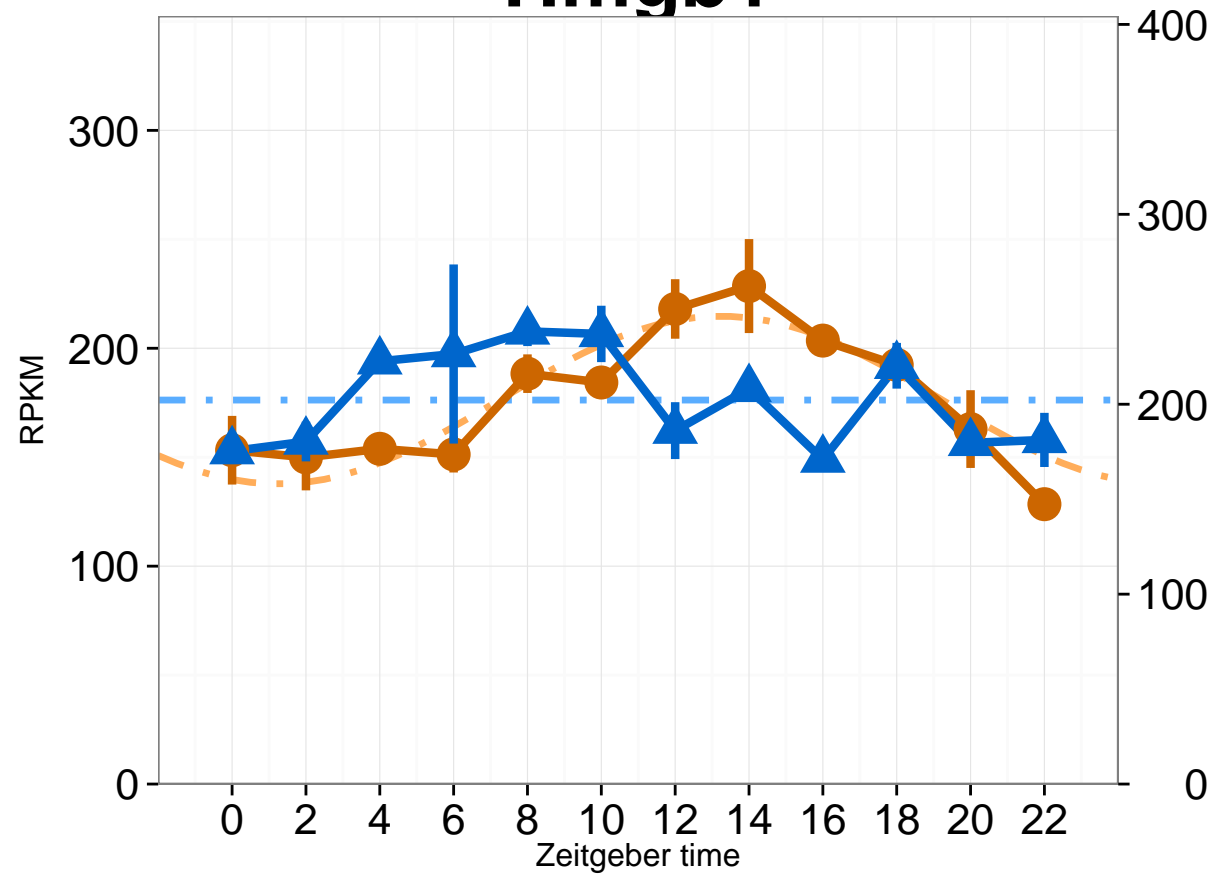

# Hmgb1

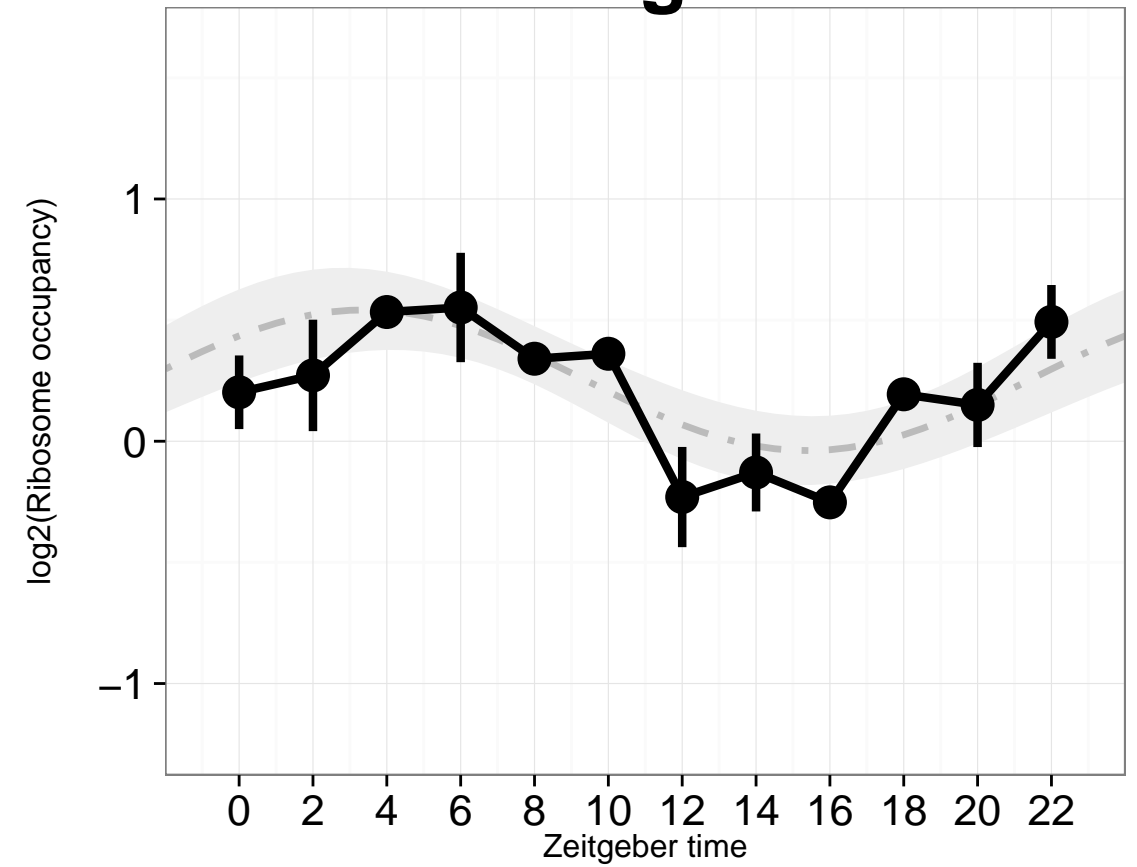

Supplement: SuppDataset_1.zip [file Hmgb1_set_B.pdf › Supplemental Dataset 1/B-mRNA_rhythm_translation_nonrhyth/Hmgb1_set_B.pdf]

# Hmgb3

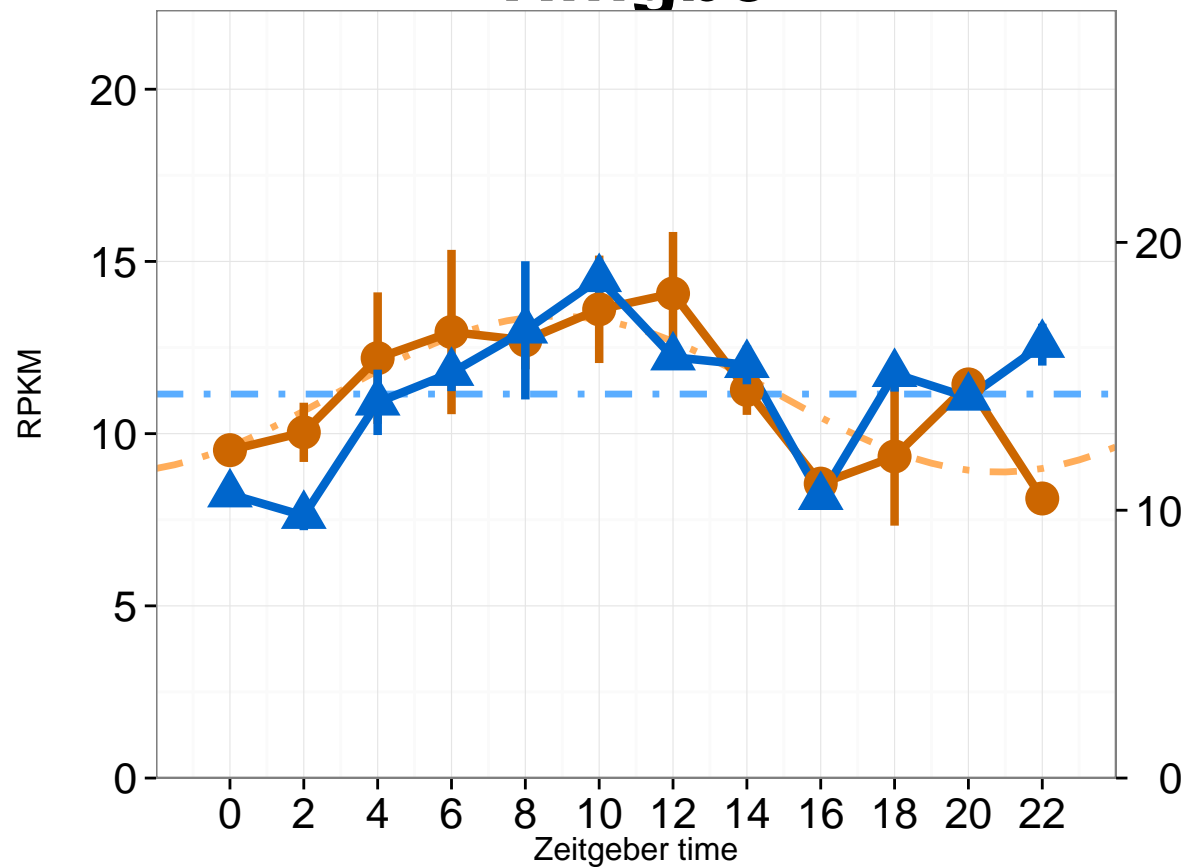

# Hmgb3

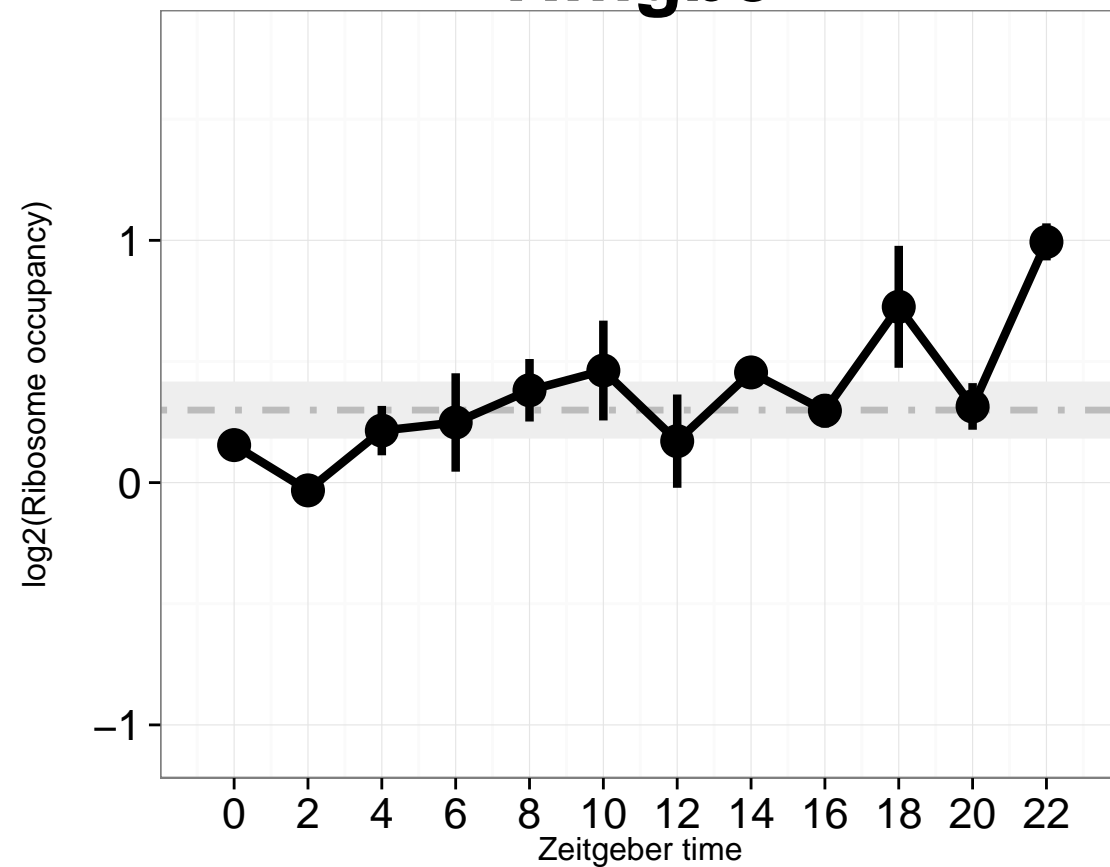

Supplement: SuppDataset_1.zip [file Hmgb3_set_B.pdf › Supplemental Dataset 1/B-mRNA_rhythm_translation_nonrhyth/Hmgb3_set_B.pdf]

## Hmgn5

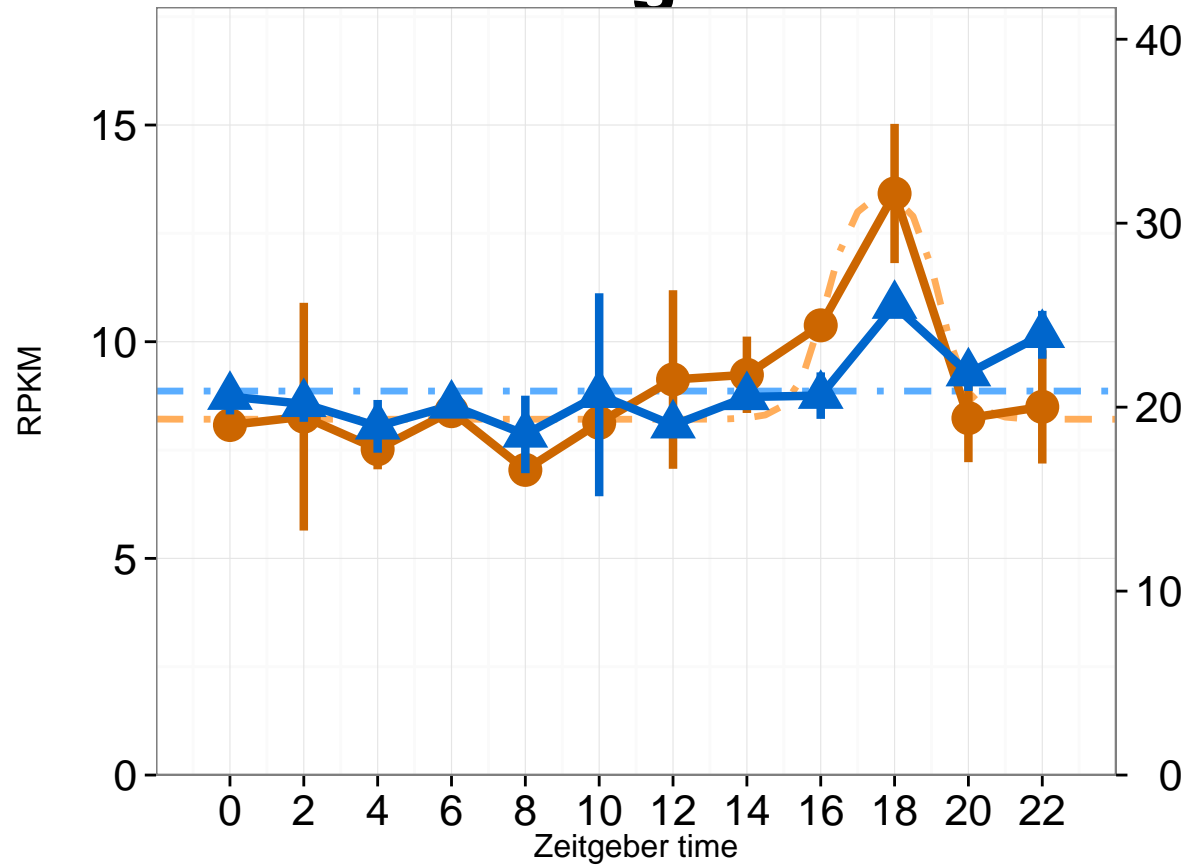

## Hmgn5

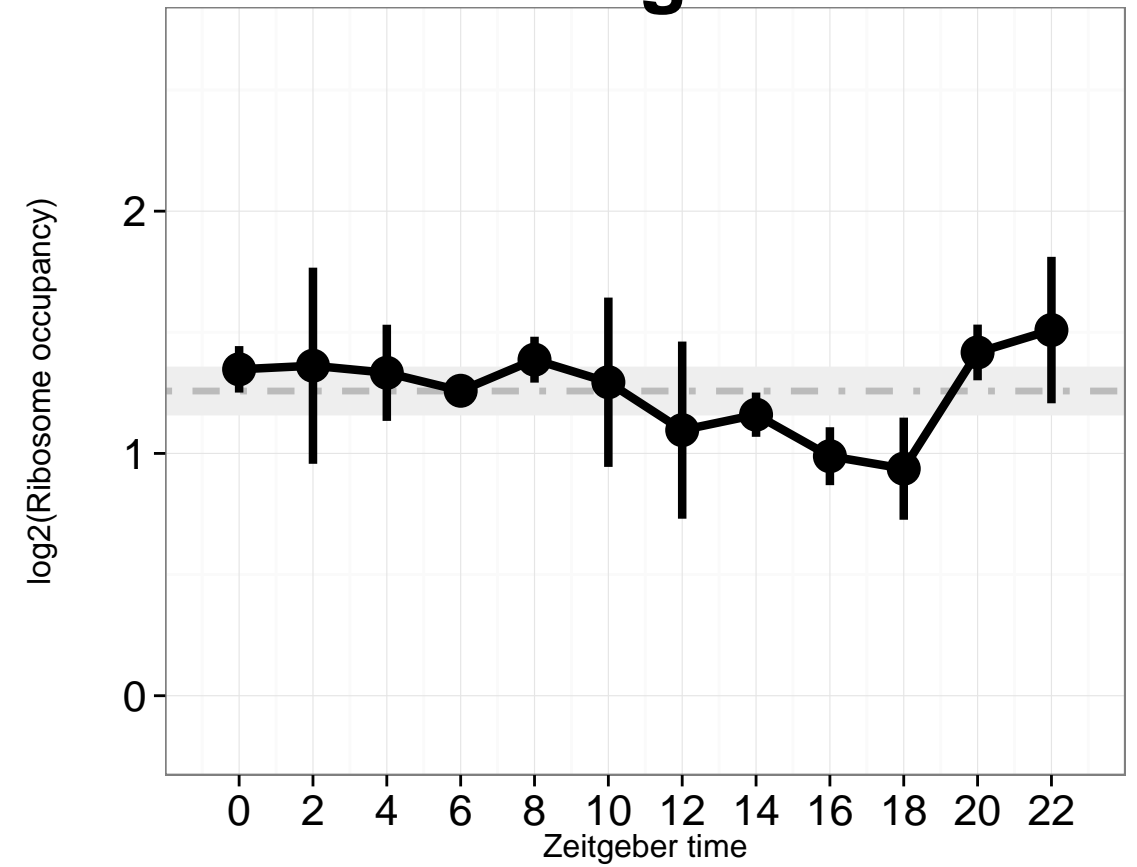

Supplement: SuppDataset_1.zip [file Hmgn5_set_B.pdf › Supplemental Dataset 1/B-mRNA_rhythm_translation_nonrhyth/Hmgn5_set_B.pdf]

# Hnmt

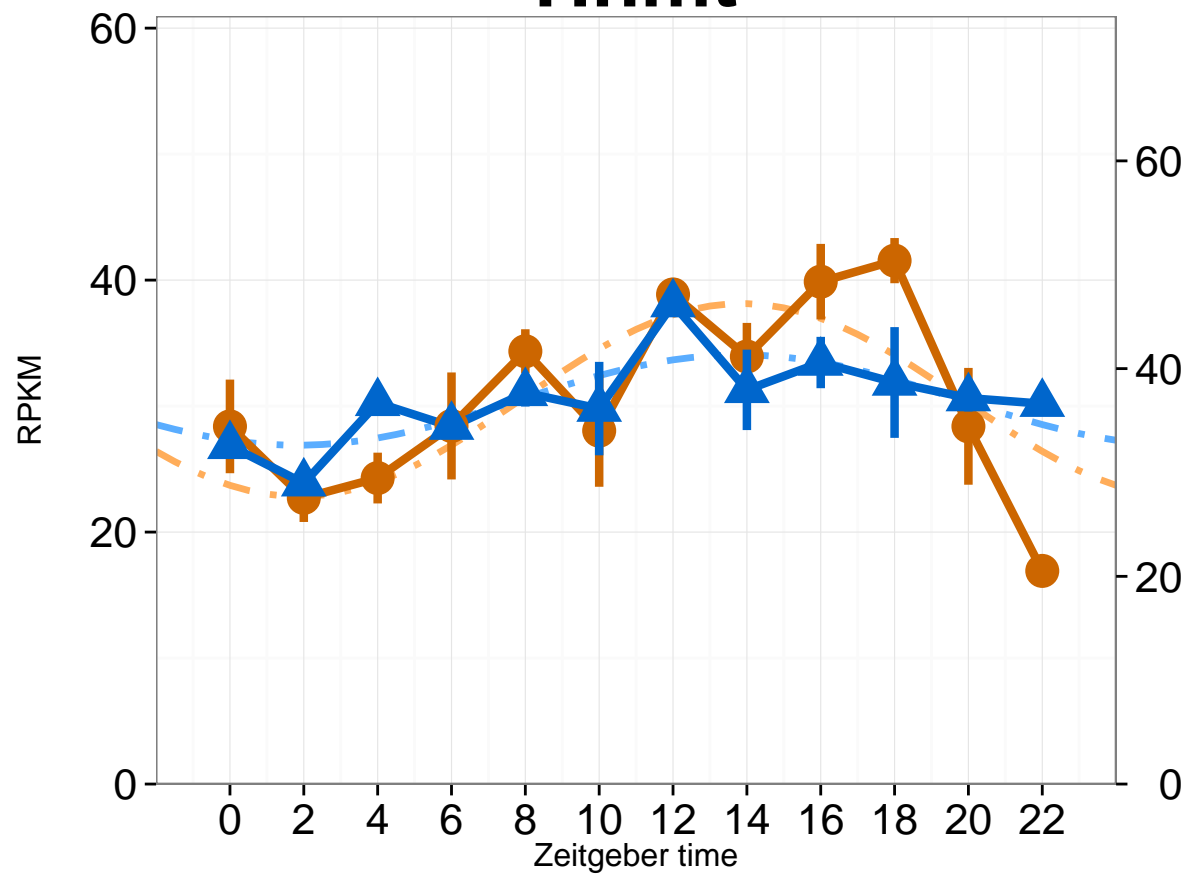

# Hnmt

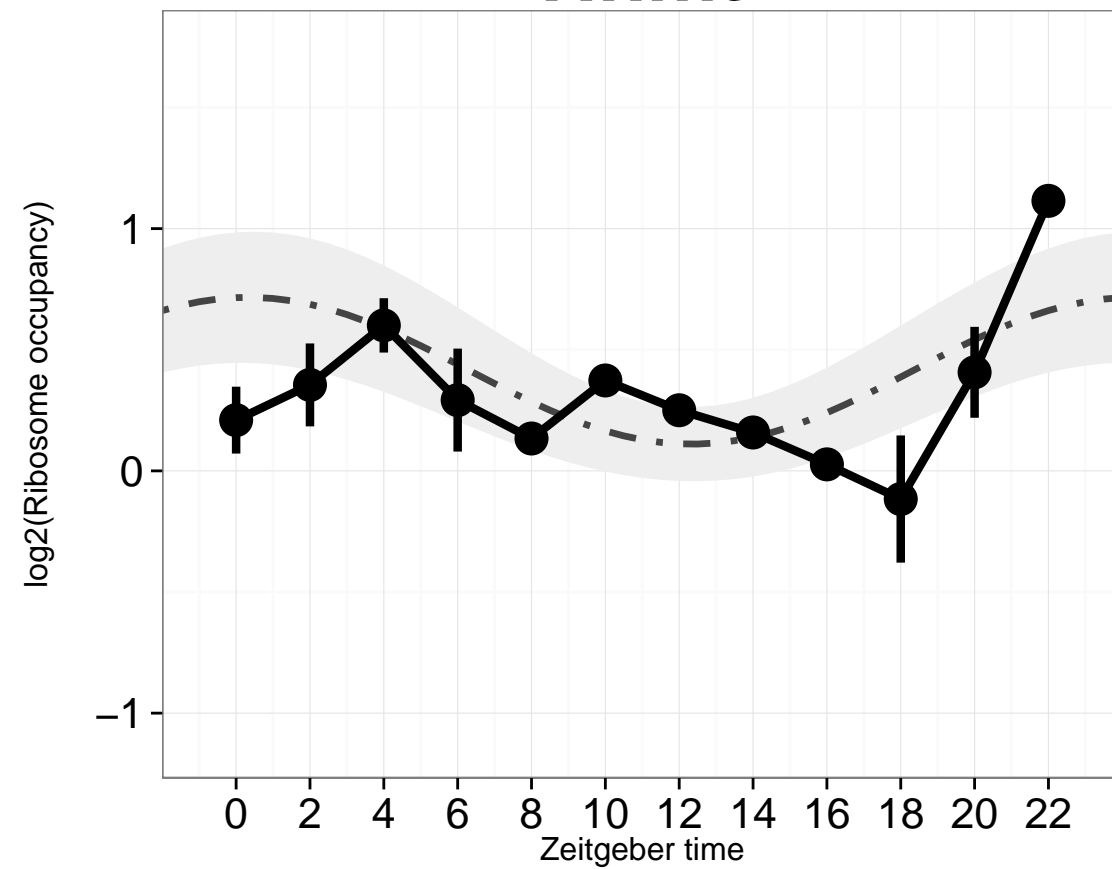

Supplement: SuppDataset_1.zip [file Hnmt_set_B.pdf › Supplemental Dataset 1/B-mRNA_rhythm_translation_nonrhyth/Hnmt_set_B.pdf]

## Hnrnpa0

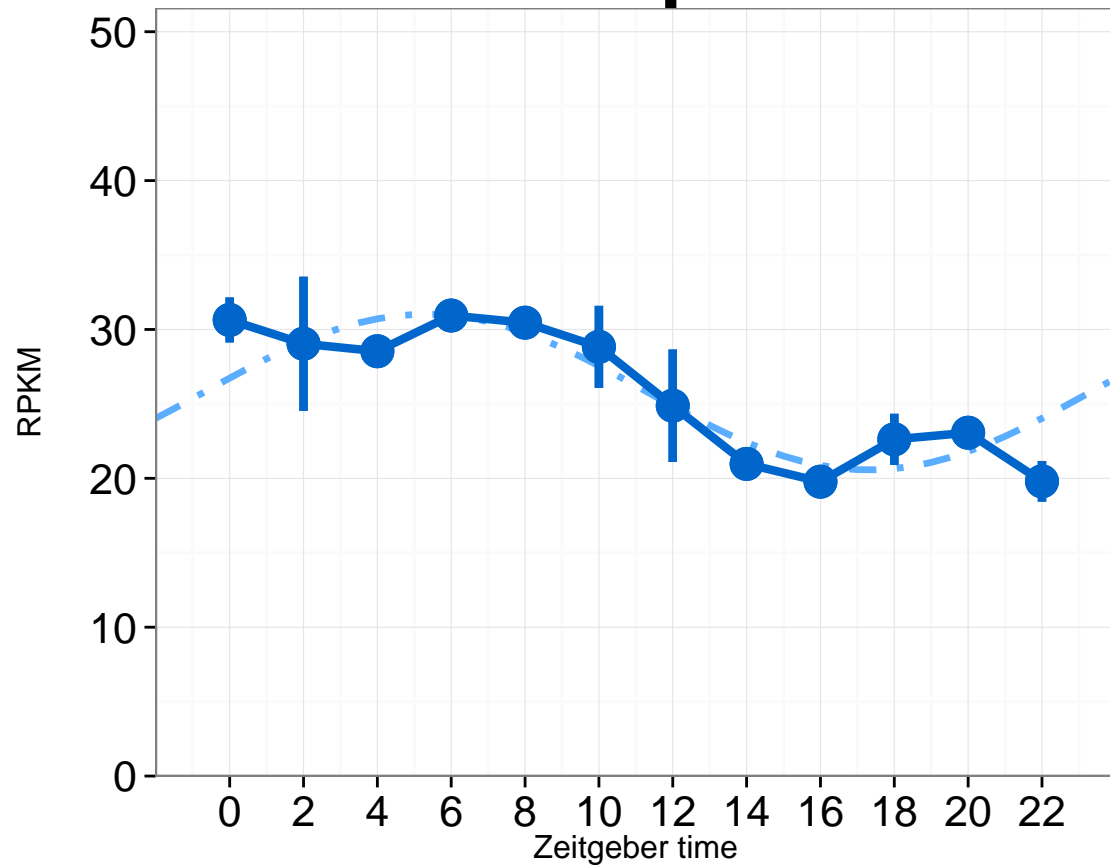

## Hnrnpa0 log2(Ribosome occupanc

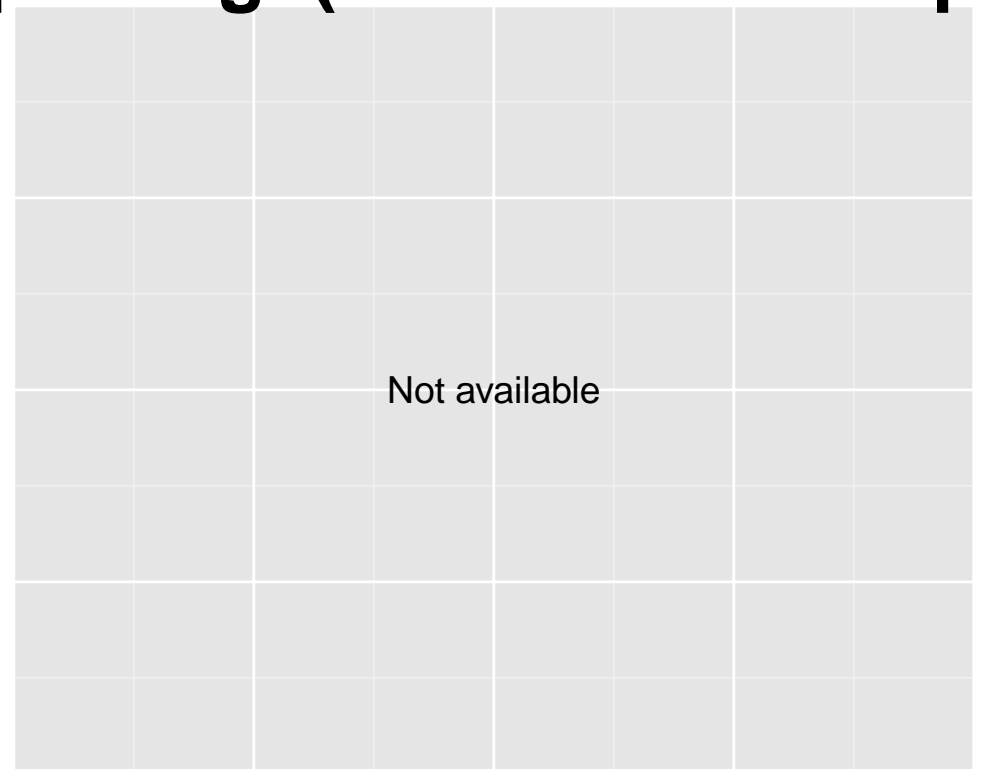

Supplement: SuppDataset_1.zip [file Hnrnpa0_set_B.pdf › Supplemental Dataset 1/B-mRNA_rhythm_translation_nonrhyth/Hnrnpa0_set_B.pdf]

# Hnrnpd

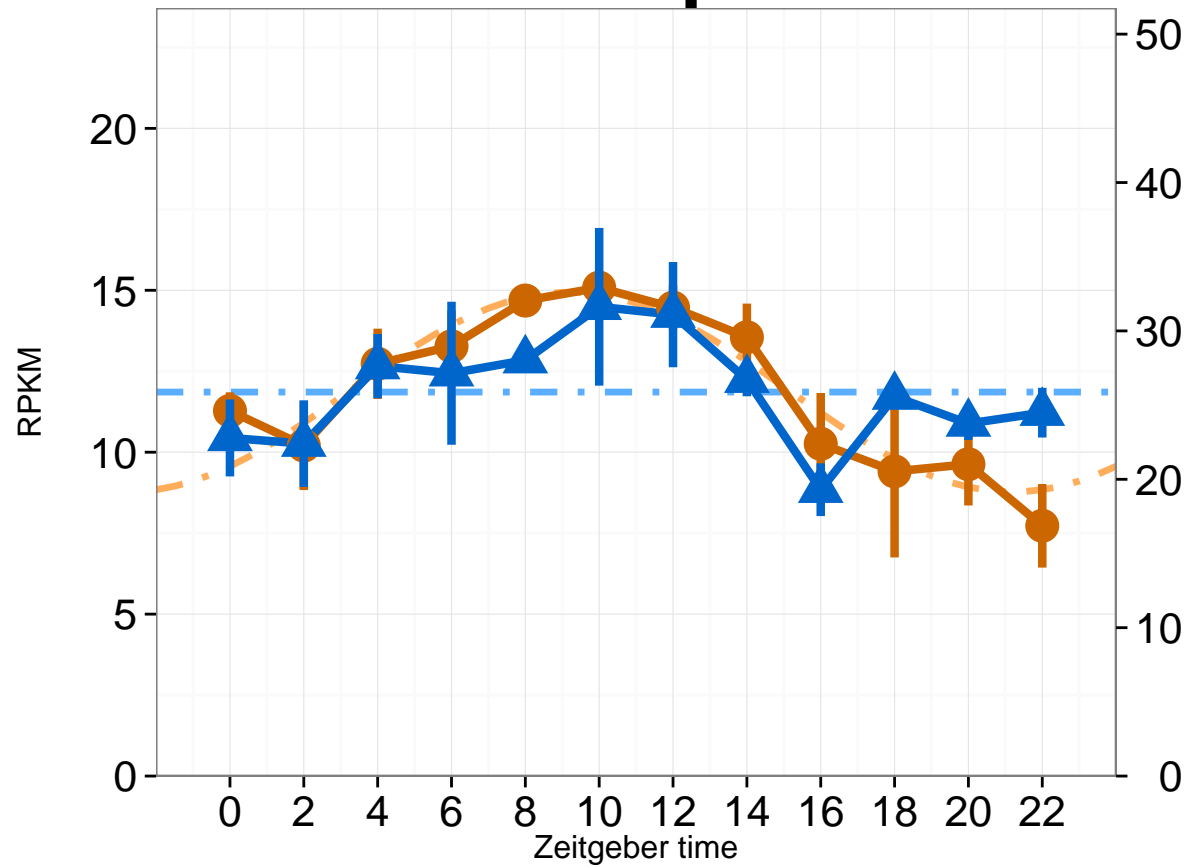

# Hnrnpd

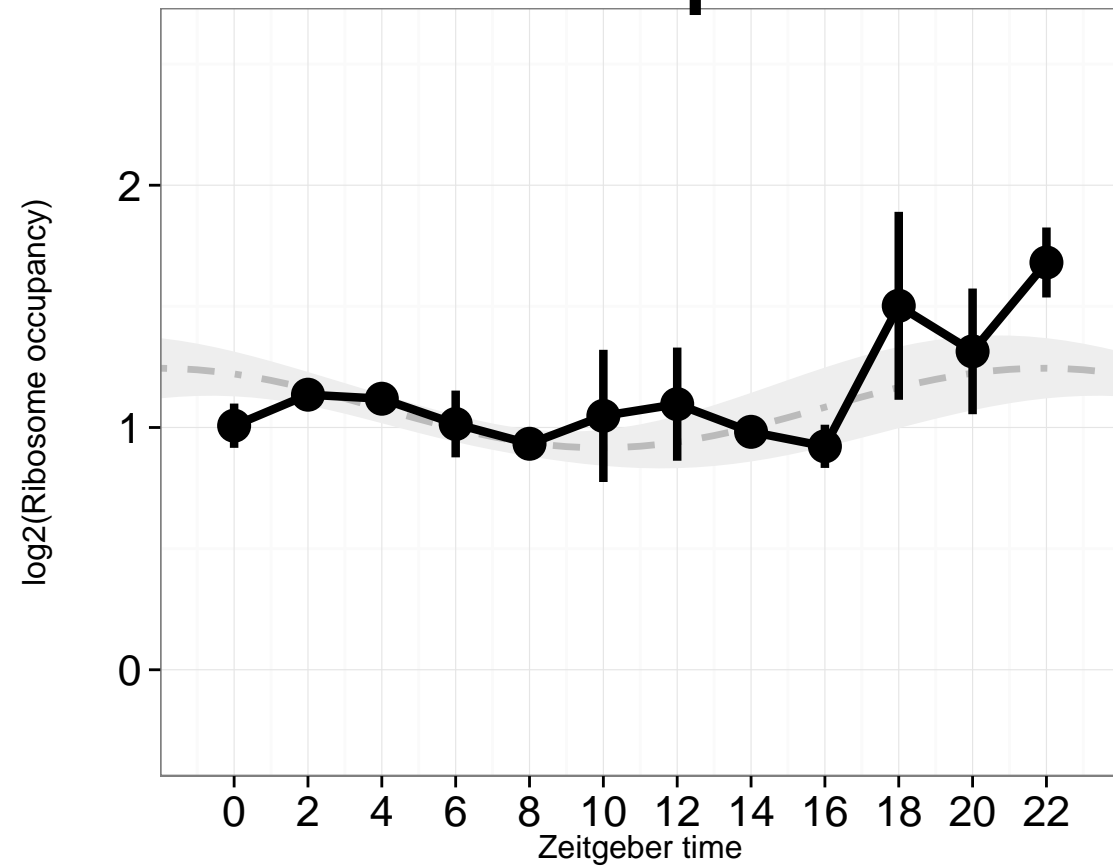

Supplement: SuppDataset_1.zip [file Hnrnpd_set_B.pdf › Supplemental Dataset 1/B-mRNA_rhythm_translation_nonrhyth/Hnrnpd_set_B.pdf]

# Hook1

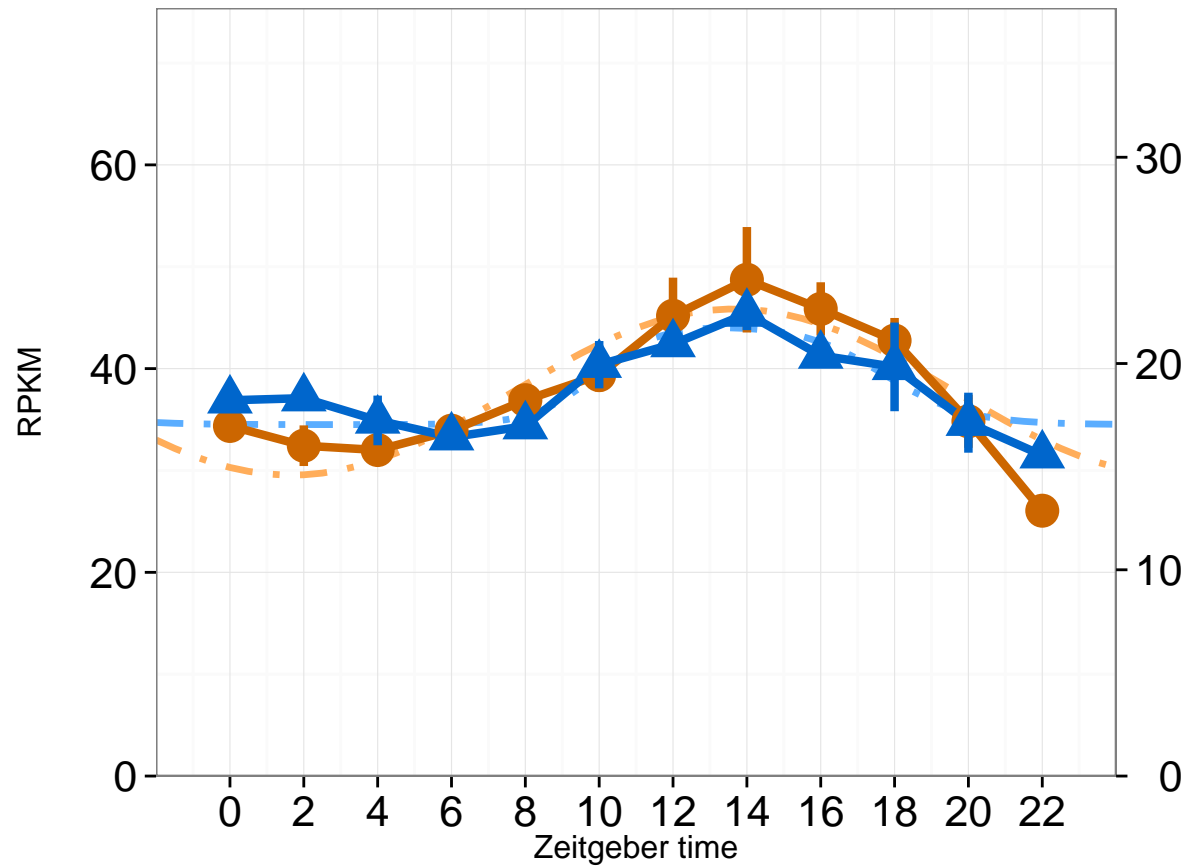

# Hook1

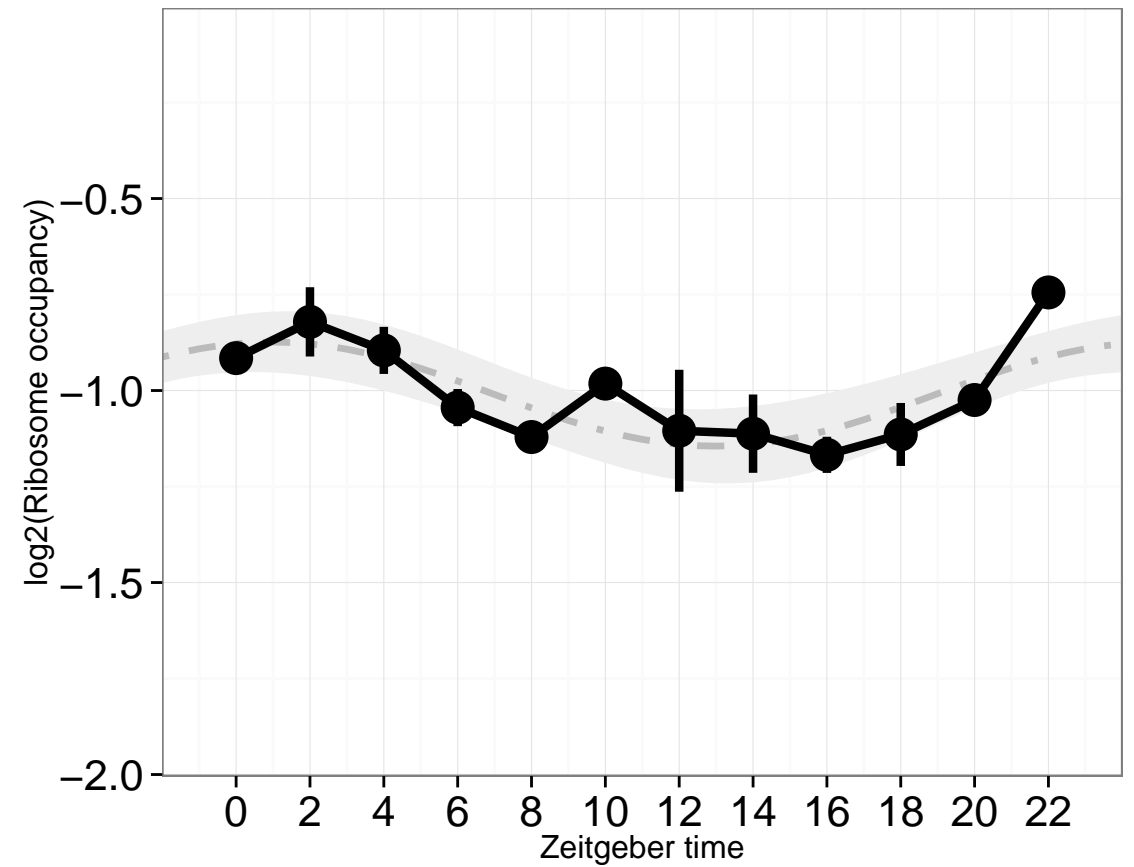

Supplement: SuppDataset_1.zip [file Hook1_set_B.pdf › Supplemental Dataset 1/B-mRNA_rhythm_translation_nonrhyth/Hook1_set_B.pdf]

## Hsf1

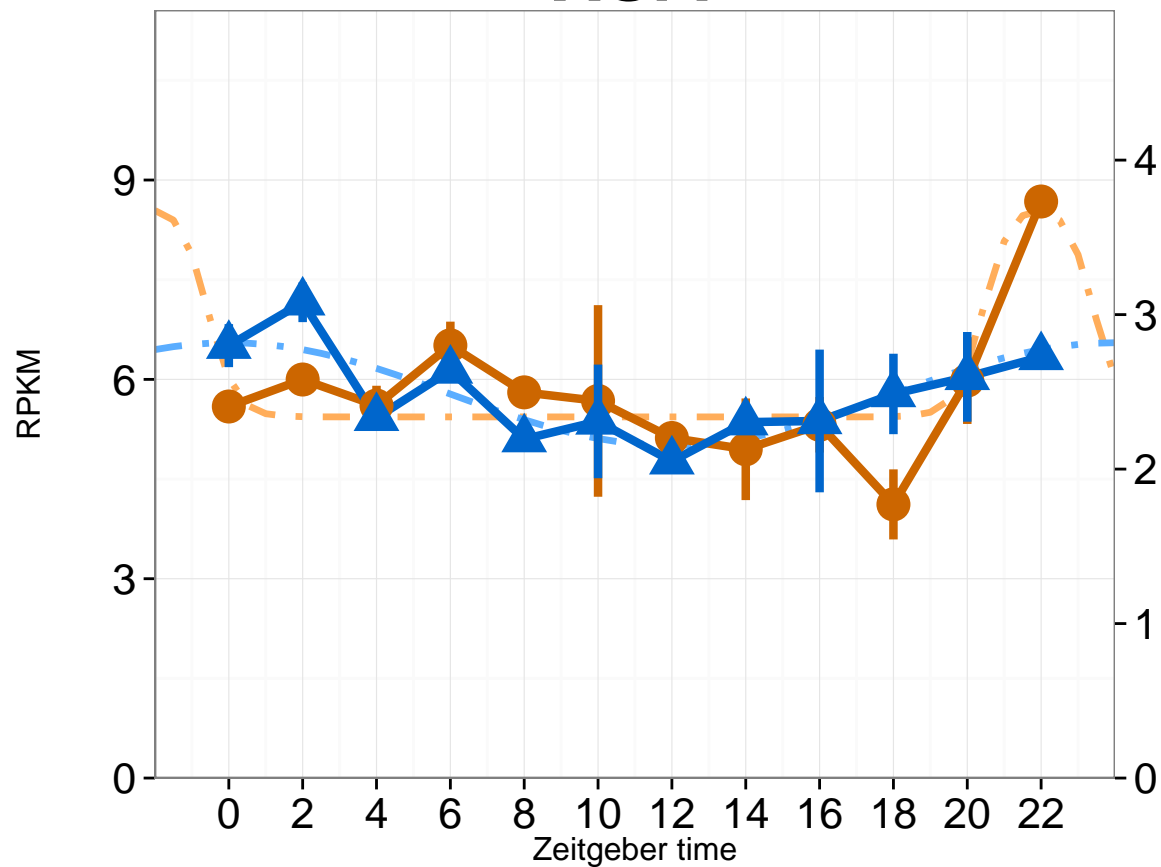

## Hsf1

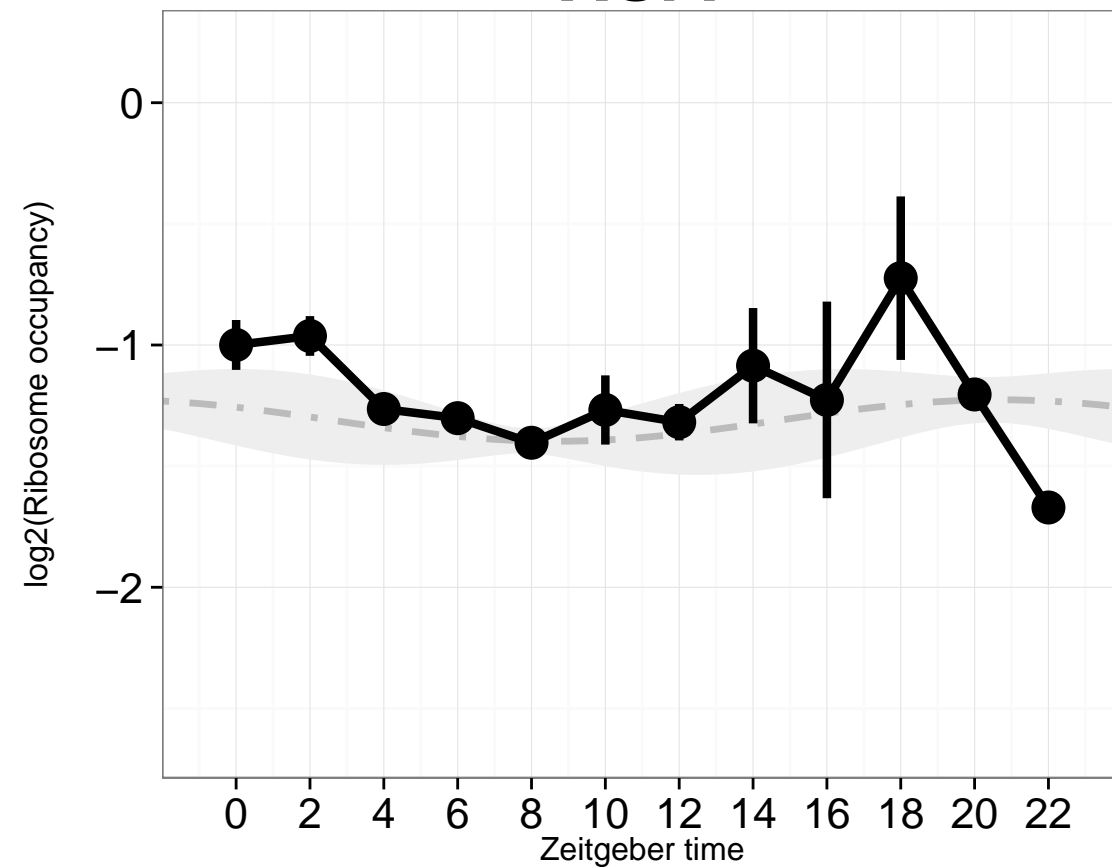

Supplement: SuppDataset_1.zip [file Hsf1_set_B.pdf › Supplemental Dataset 1/B-mRNA_rhythm_translation_nonrhyth/Hsf1_set_B.pdf]

# Hspa12a

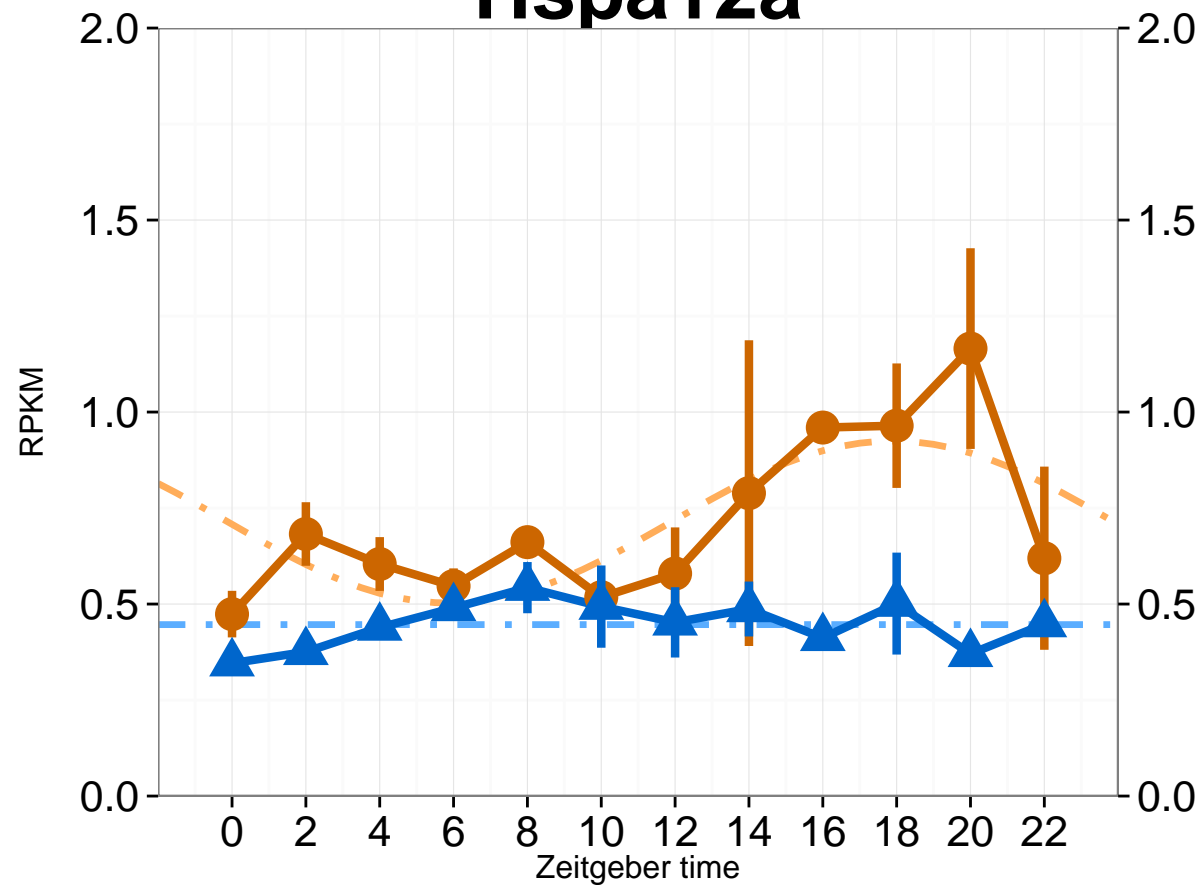

# Hspa12a

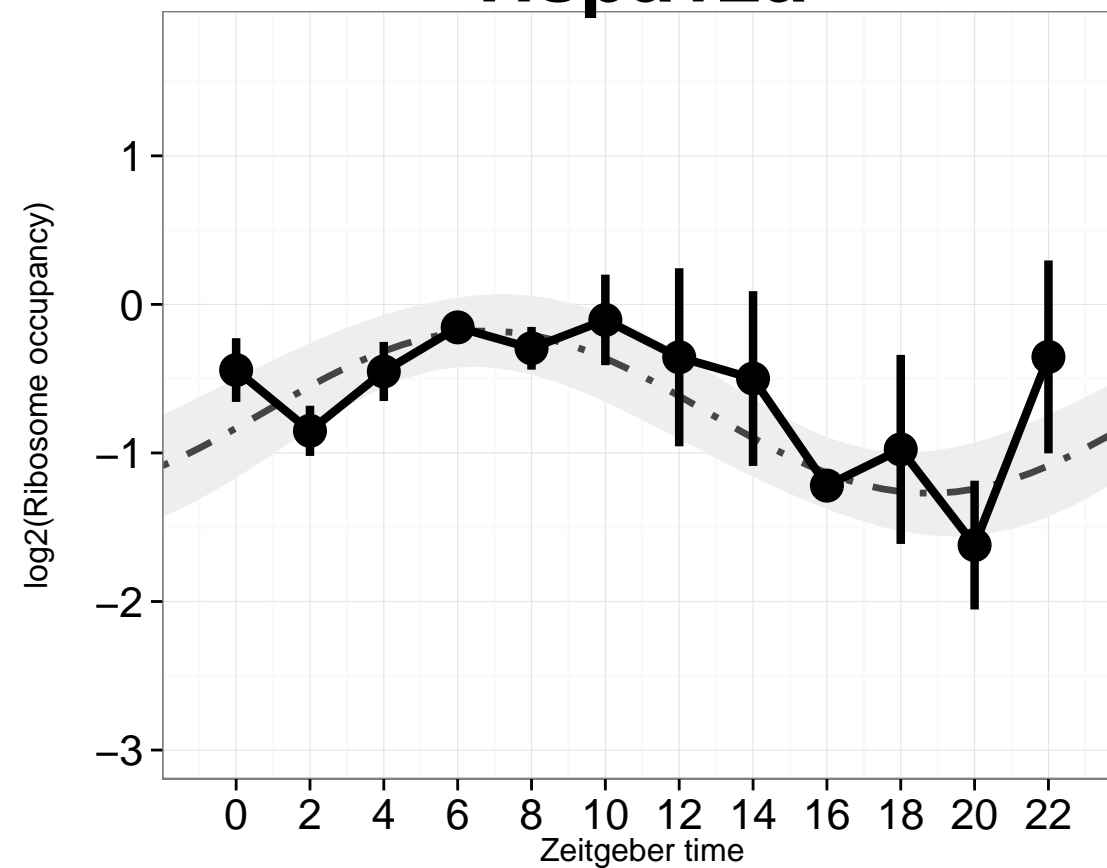

Supplement: SuppDataset_1.zip [file Hspa12a_set_B.pdf › Supplemental Dataset 1/B-mRNA_rhythm_translation_nonrhyth/Hspa12a_set_B.pdf]

# Hspb6

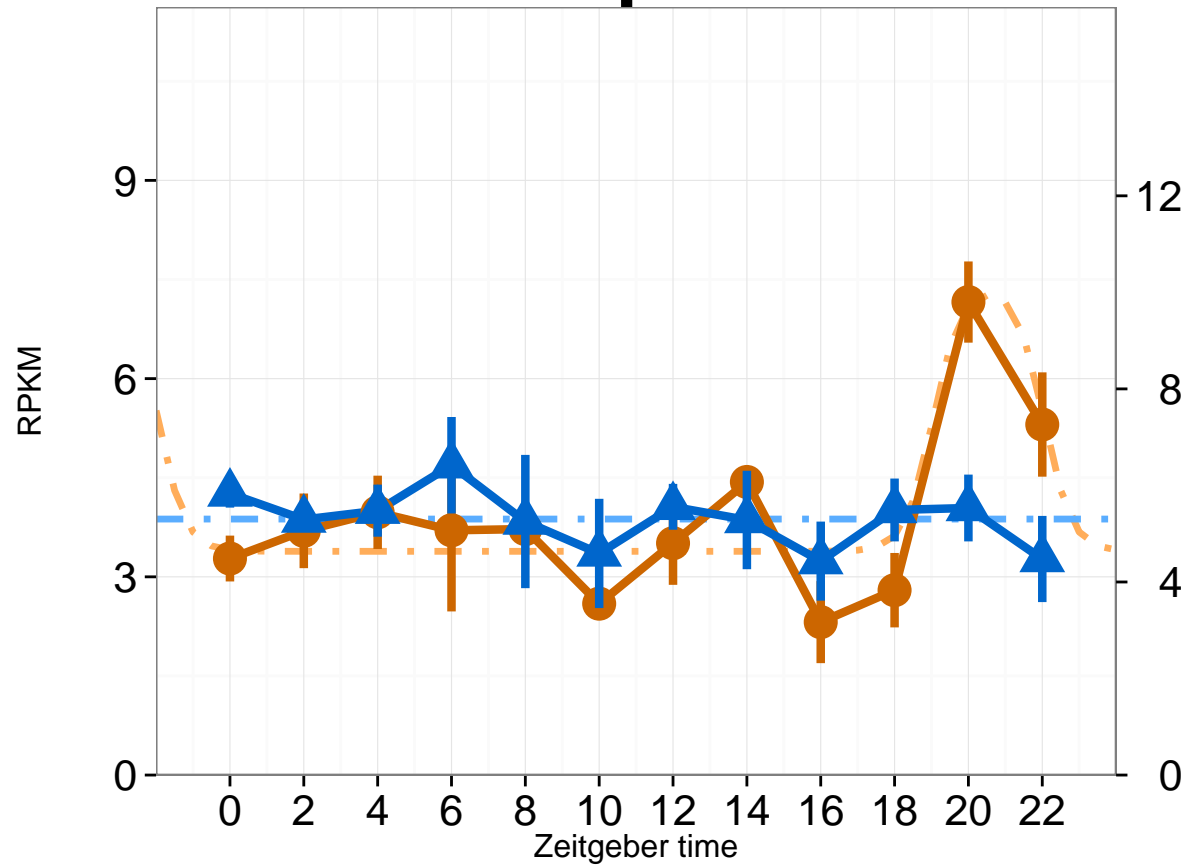

# Hspb6

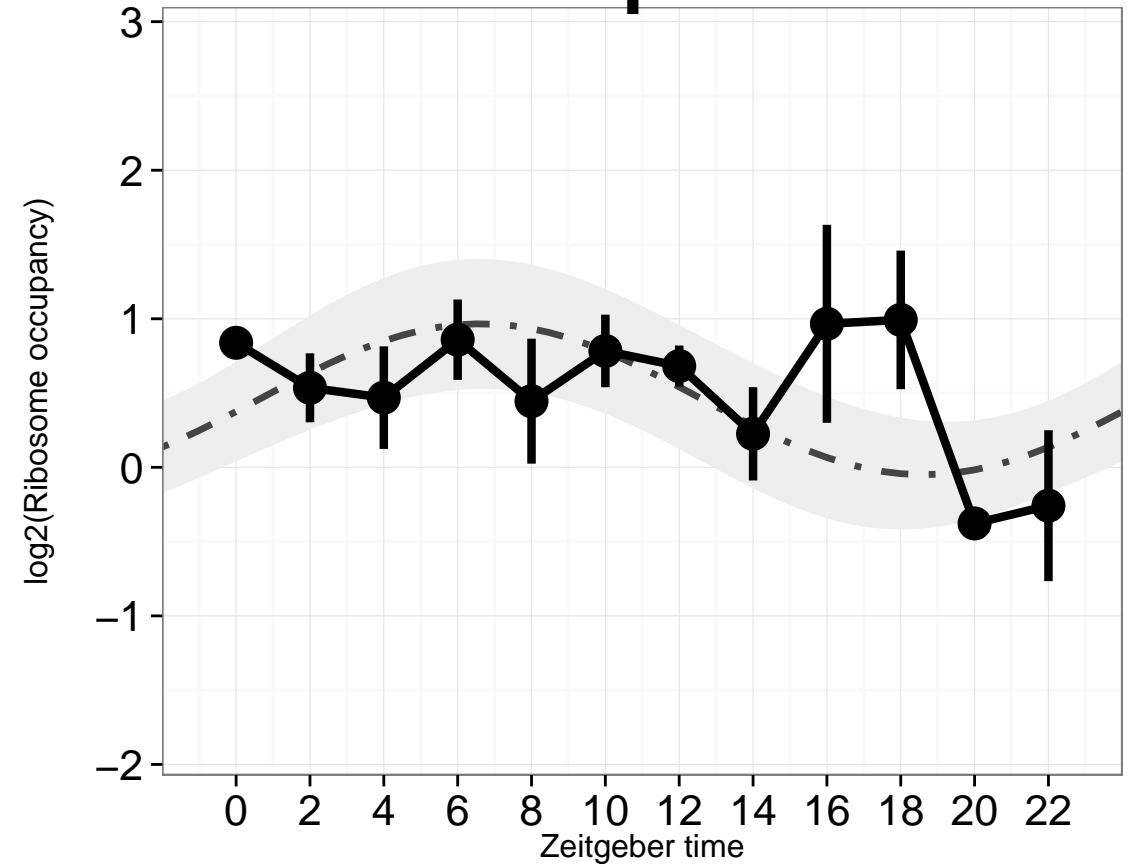

Supplement: SuppDataset_1.zip [file Hspb6_set_B.pdf › Supplemental Dataset 1/B-mRNA_rhythm_translation_nonrhyth/Hspb6_set_B.pdf]

# Hspbap1

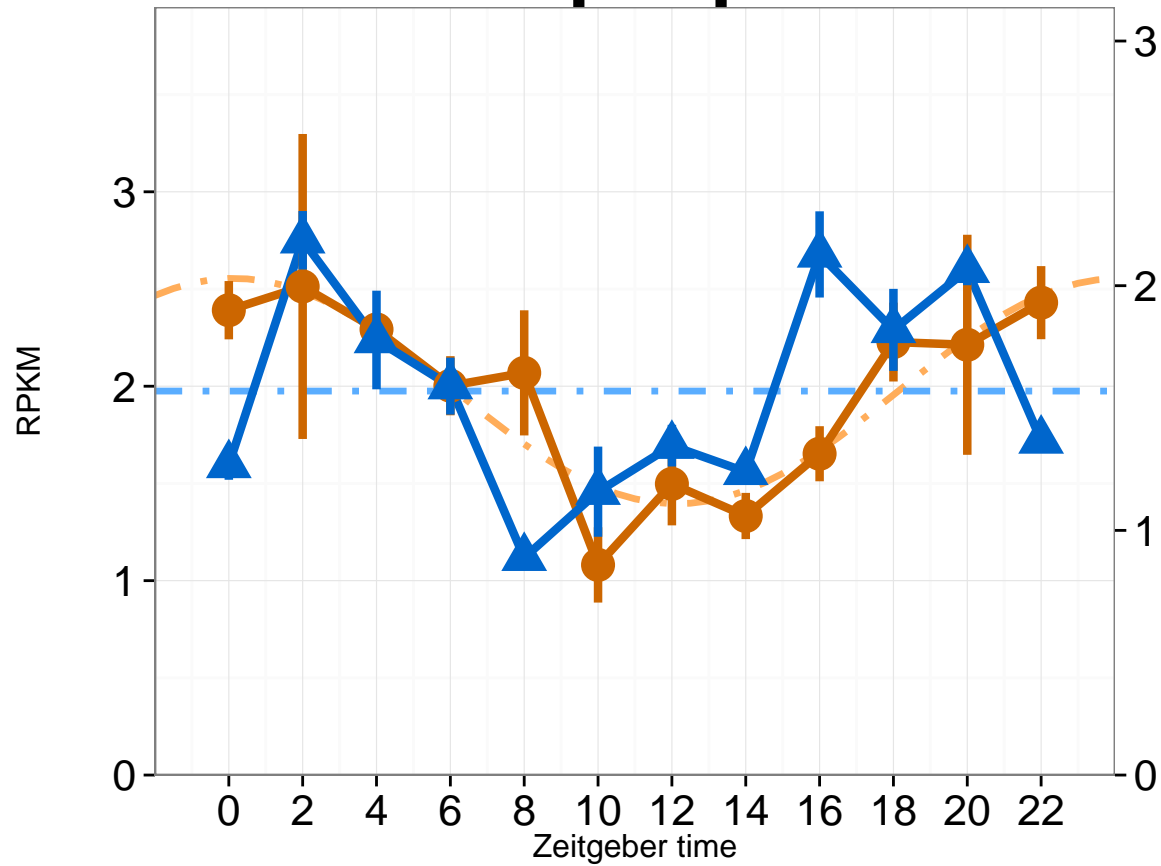

# Hspbap1

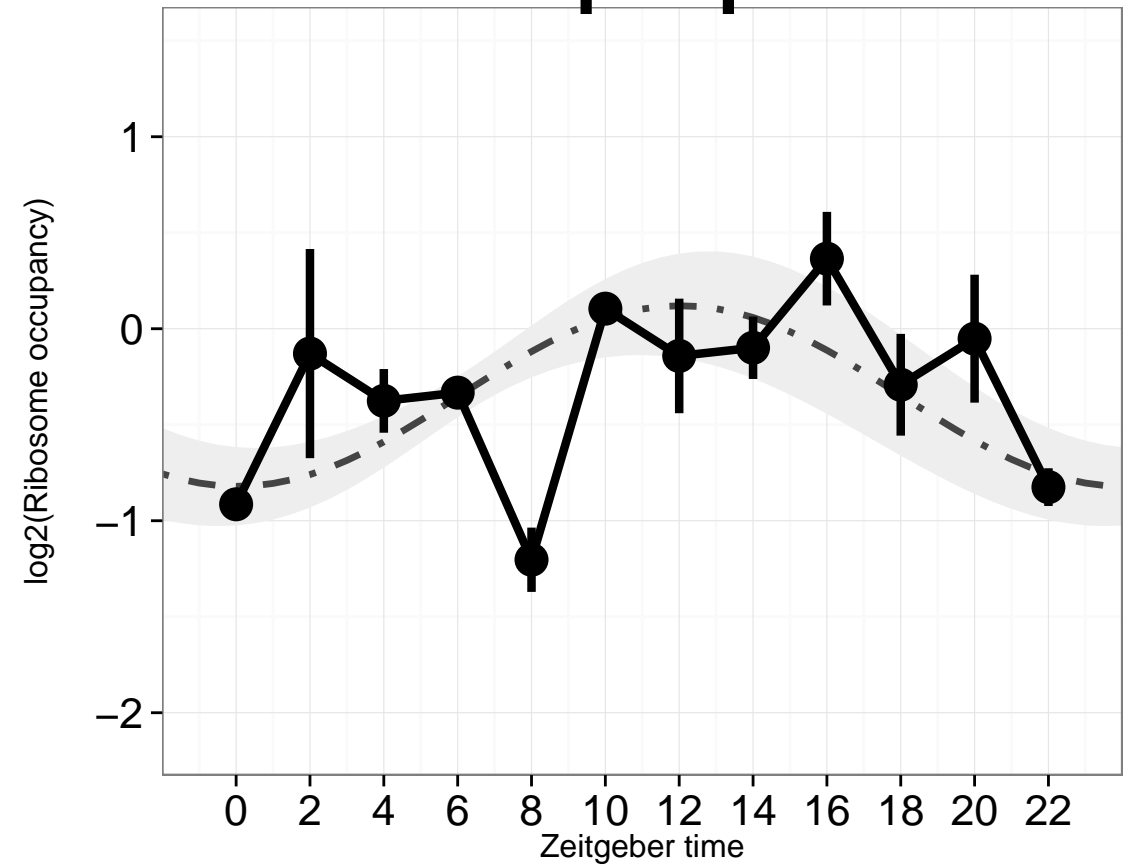

Supplement: SuppDataset_1.zip [file Hspbap1_set_B.pdf › Supplemental Dataset 1/B-mRNA_rhythm_translation_nonrhyth/Hspbap1_set_B.pdf]

## Hspbp1

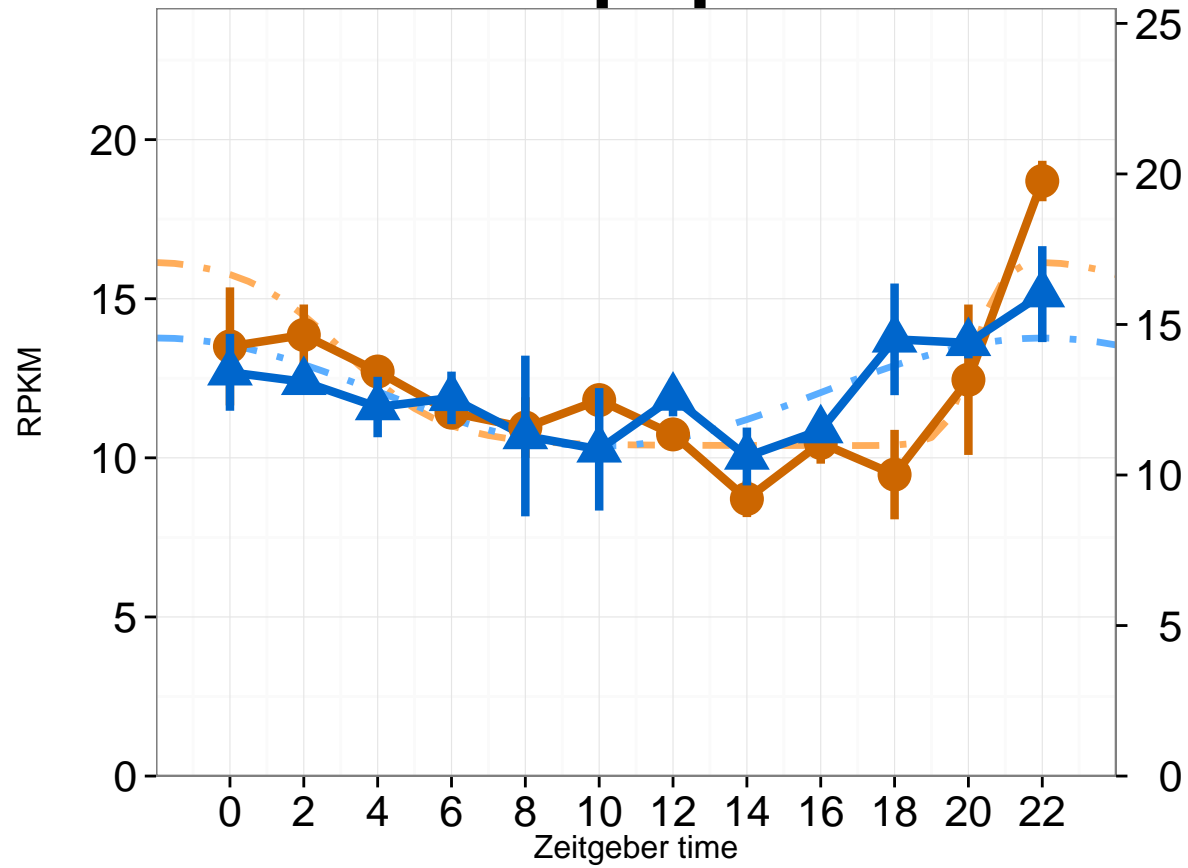

## Hspbp1

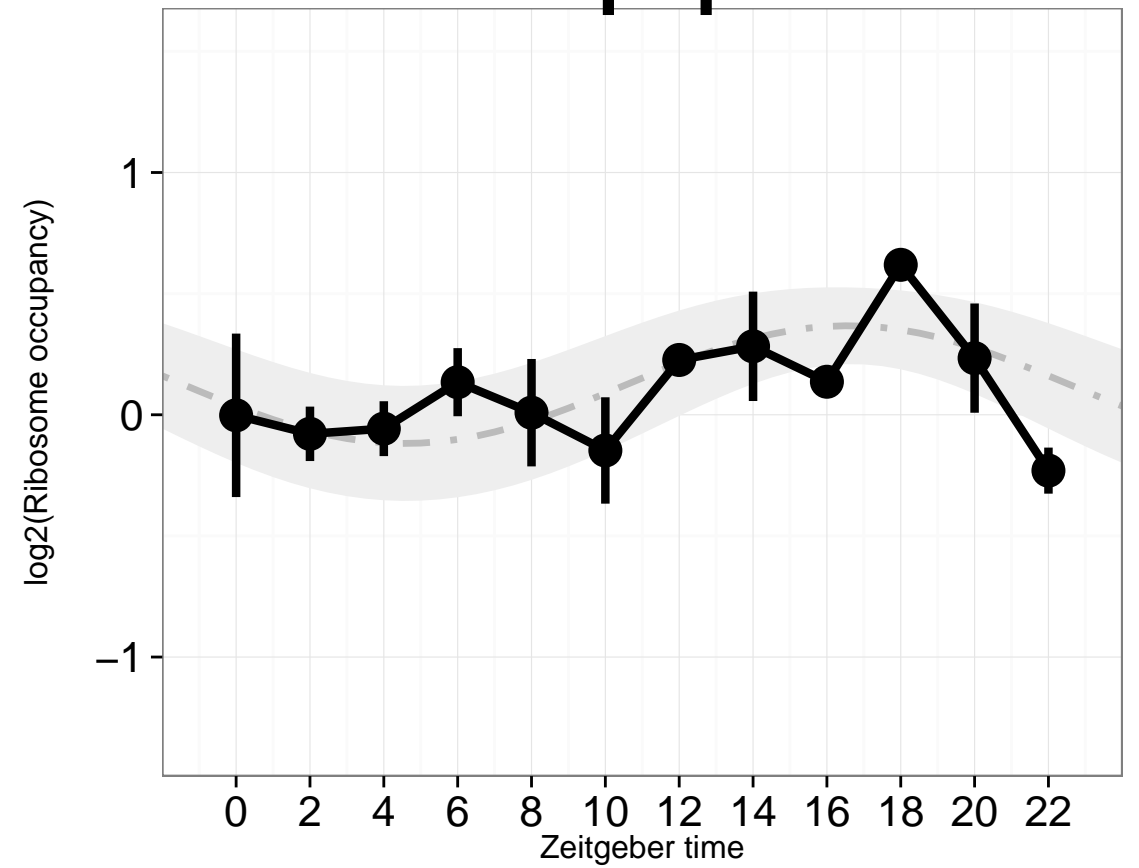

Supplement: SuppDataset_1.zip [file Hspbp1_set_B.pdf › Supplemental Dataset 1/B-mRNA_rhythm_translation_nonrhyth/Hspbp1_set_B.pdf]

# Hspg2

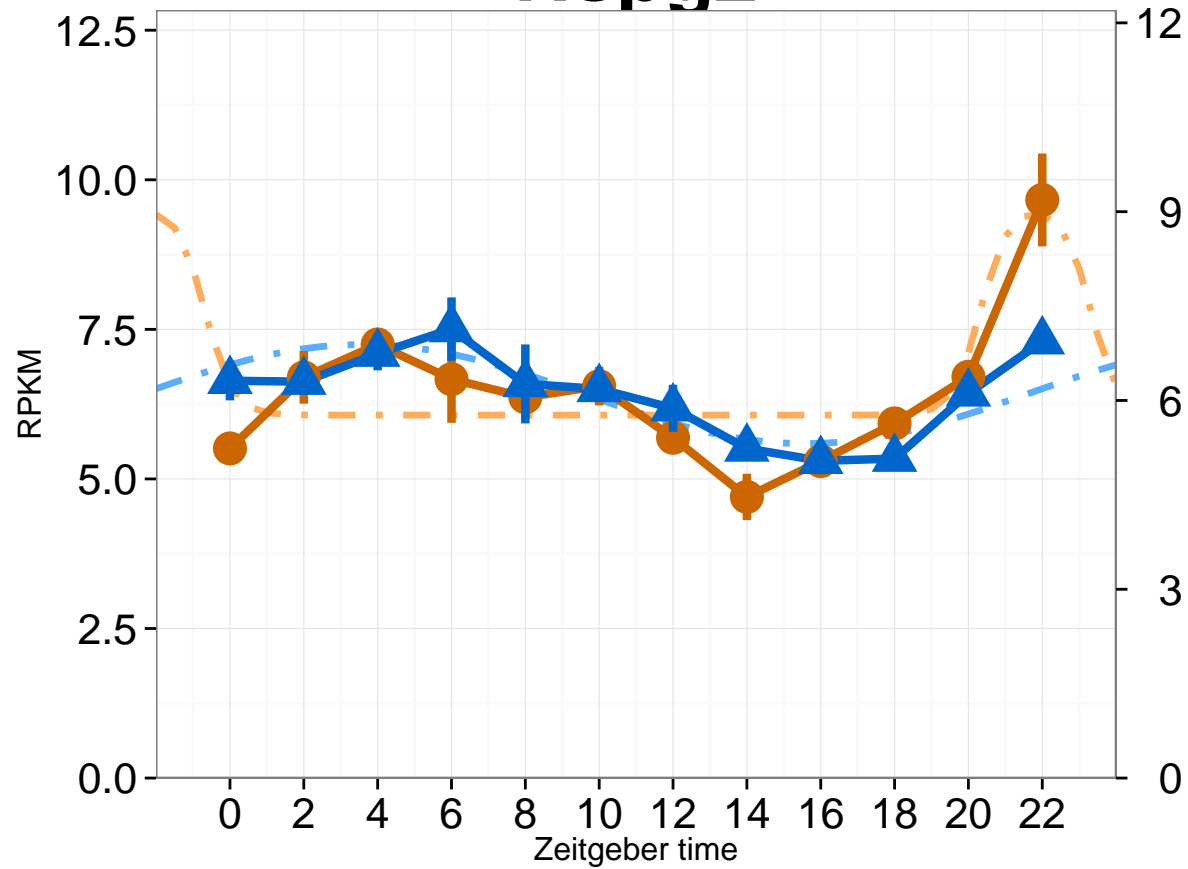

# Hspg2

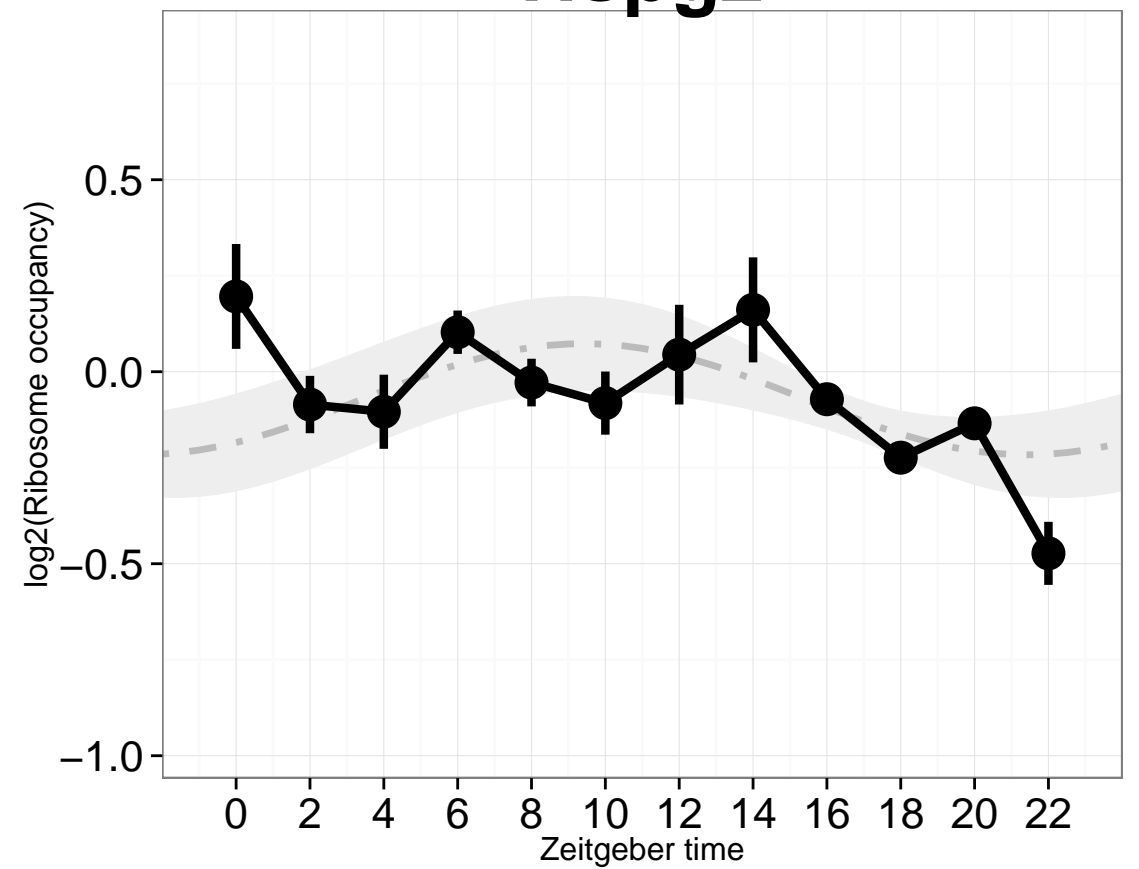

Supplement: SuppDataset_1.zip [file Hspg2_set_B.pdf › Supplemental Dataset 1/B-mRNA_rhythm_translation_nonrhyth/Hspg2_set_B.pdf]

## Htra3

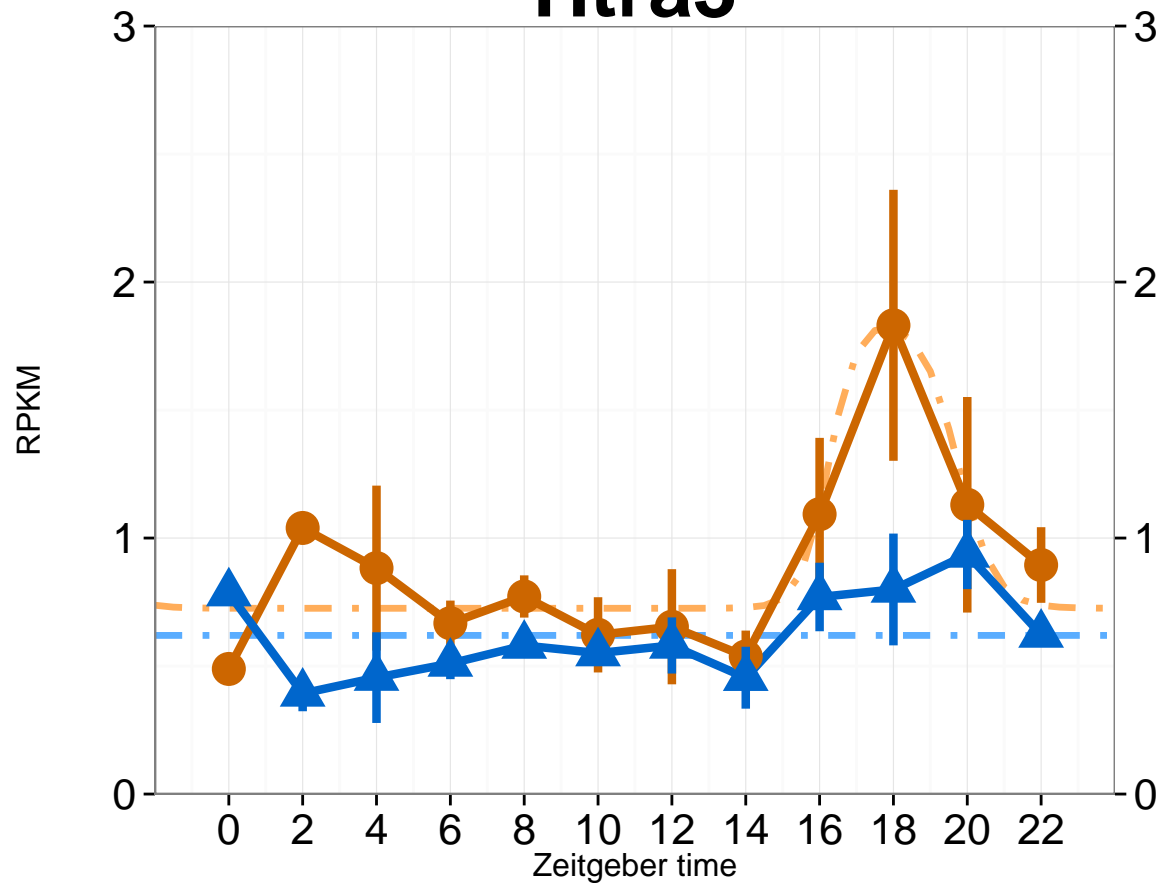

## Htra3

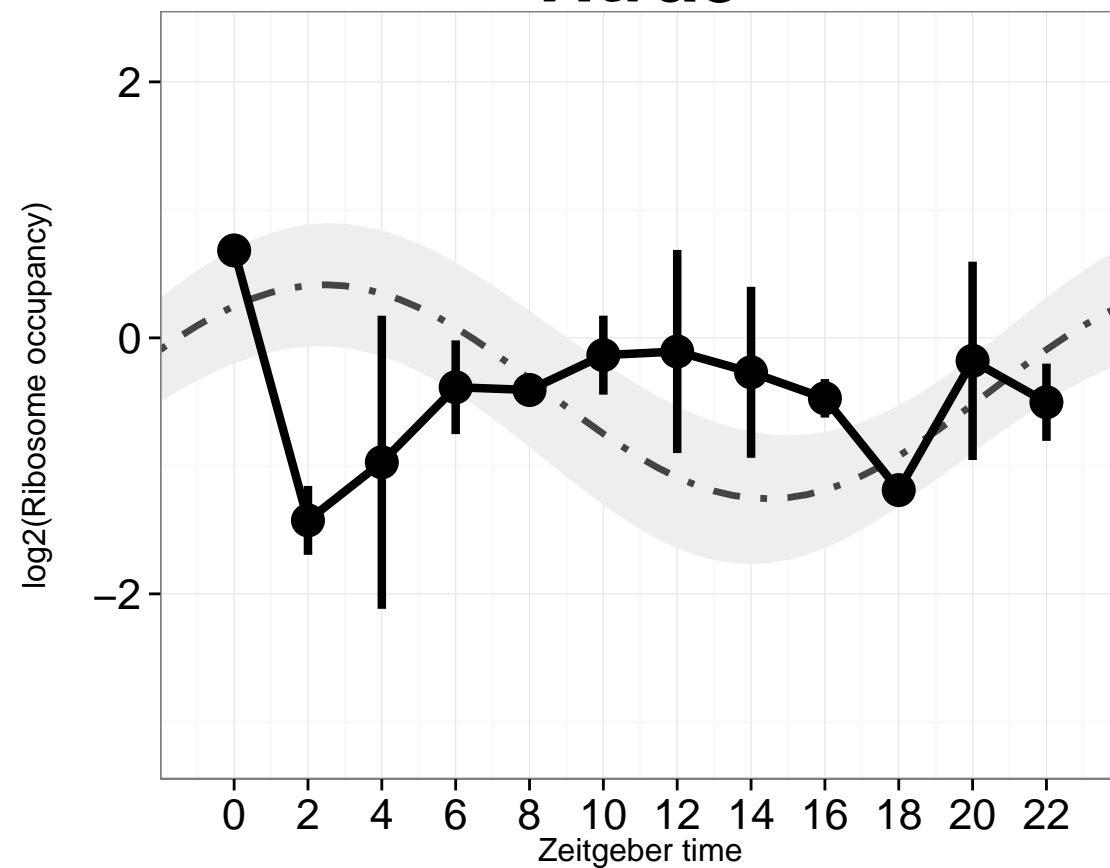

Supplement: SuppDataset_1.zip [file Htra3_set_B.pdf › Supplemental Dataset 1/B-mRNA_rhythm_translation_nonrhyth/Htra3_set_B.pdf]

## Hus1

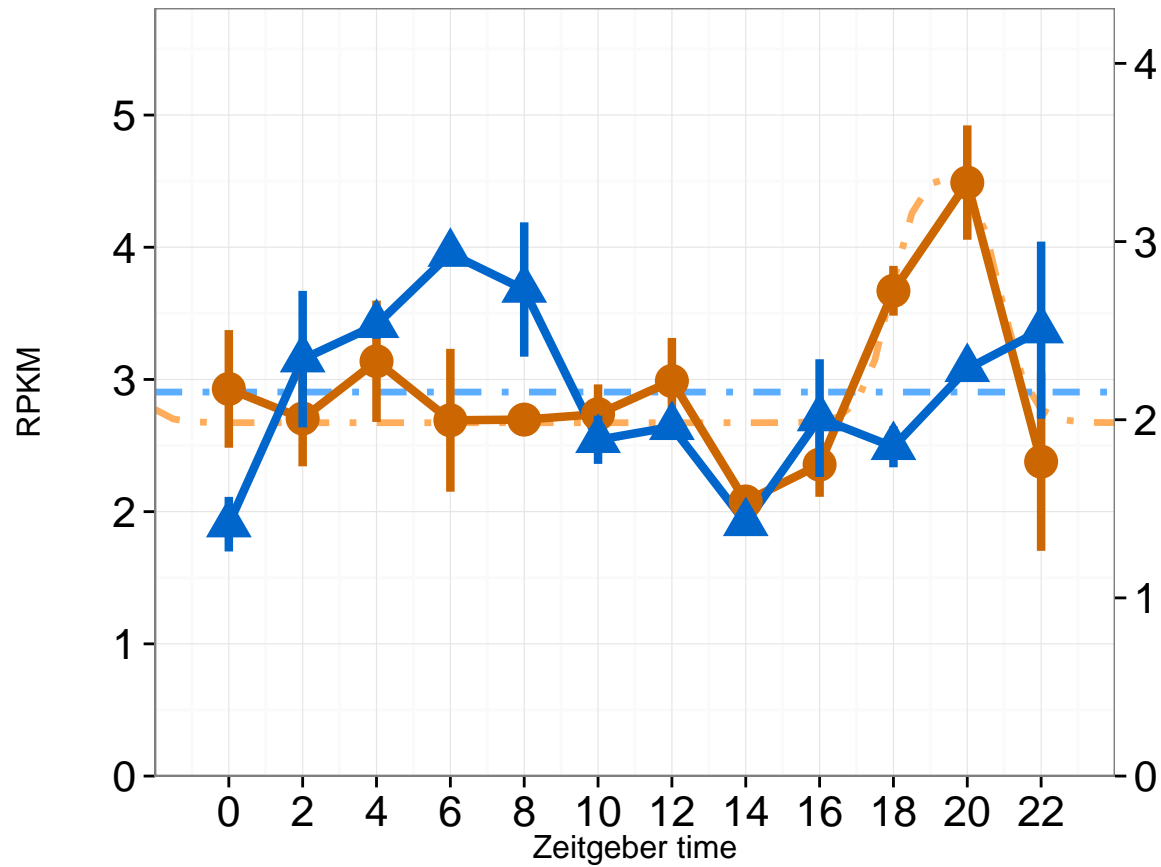

## Hus1

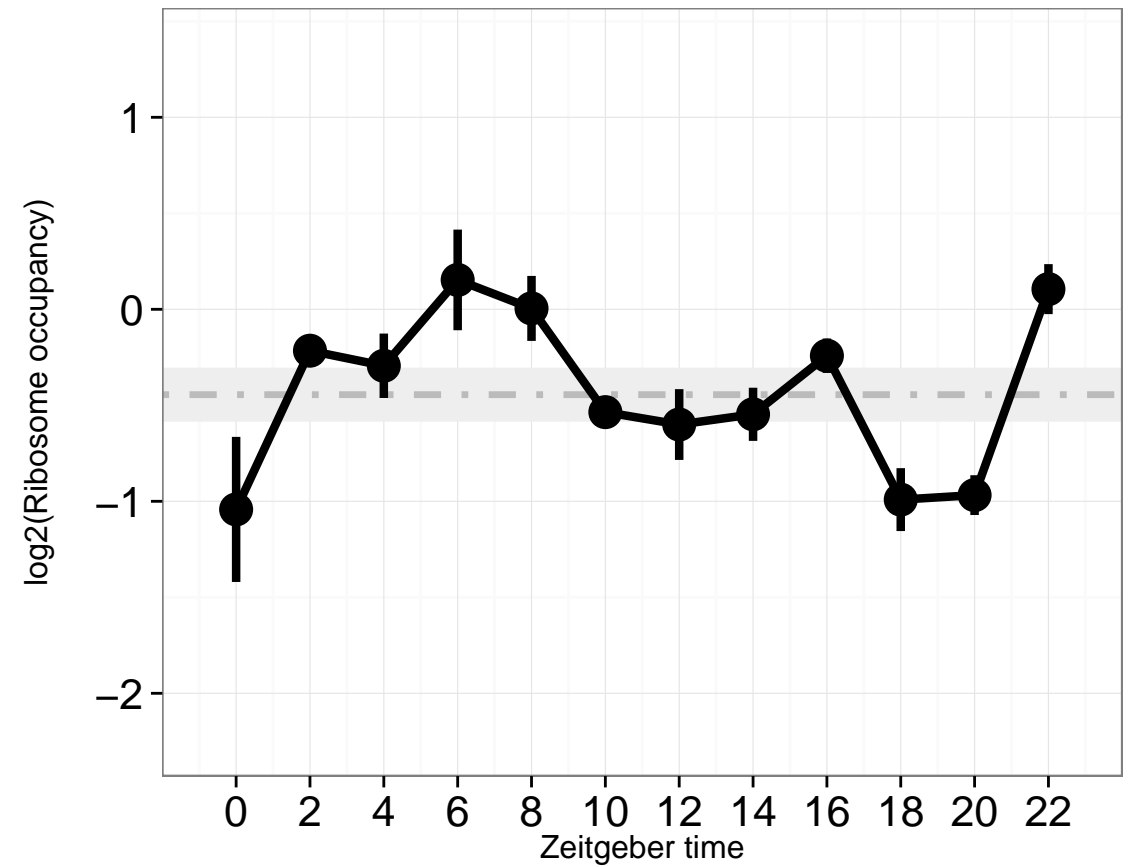

Supplement: SuppDataset_1.zip [file Hus1_set_B.pdf › Supplemental Dataset 1/B-mRNA_rhythm_translation_nonrhyth/Hus1_set_B.pdf]

# Iba57

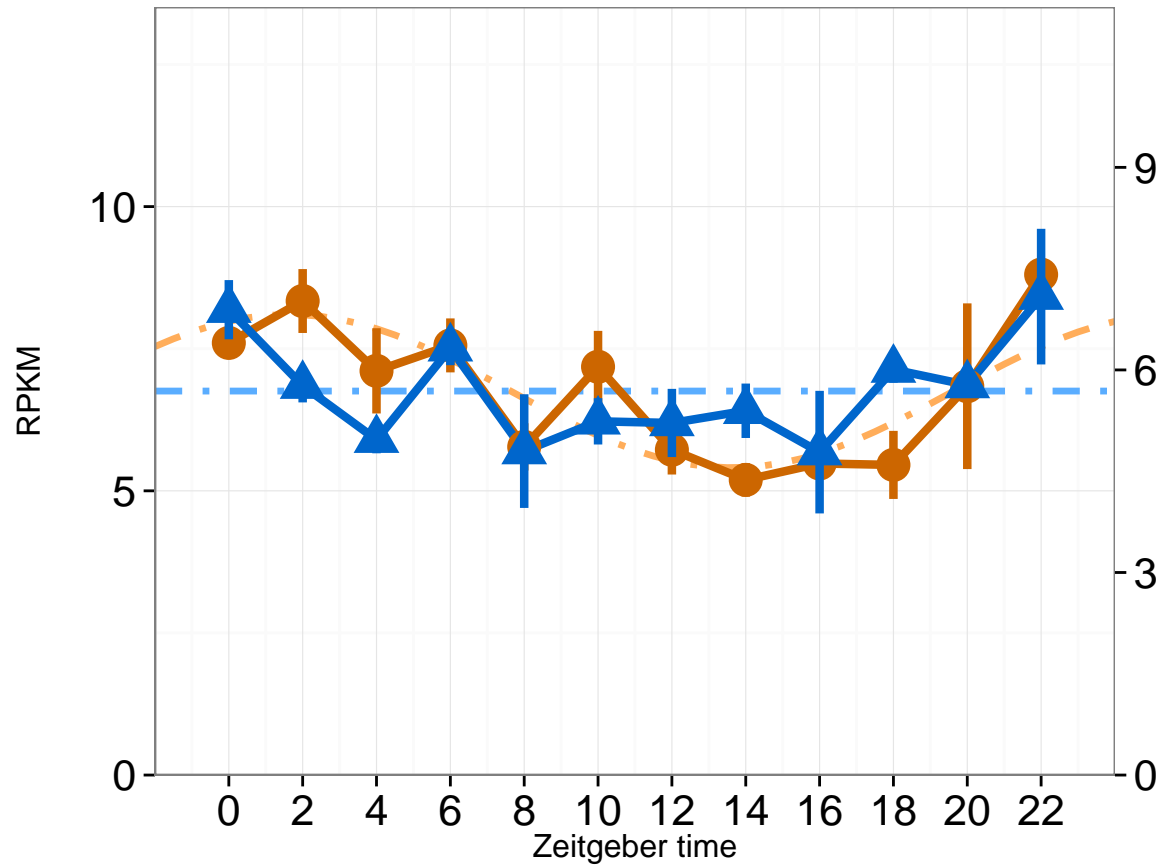

# Iba57

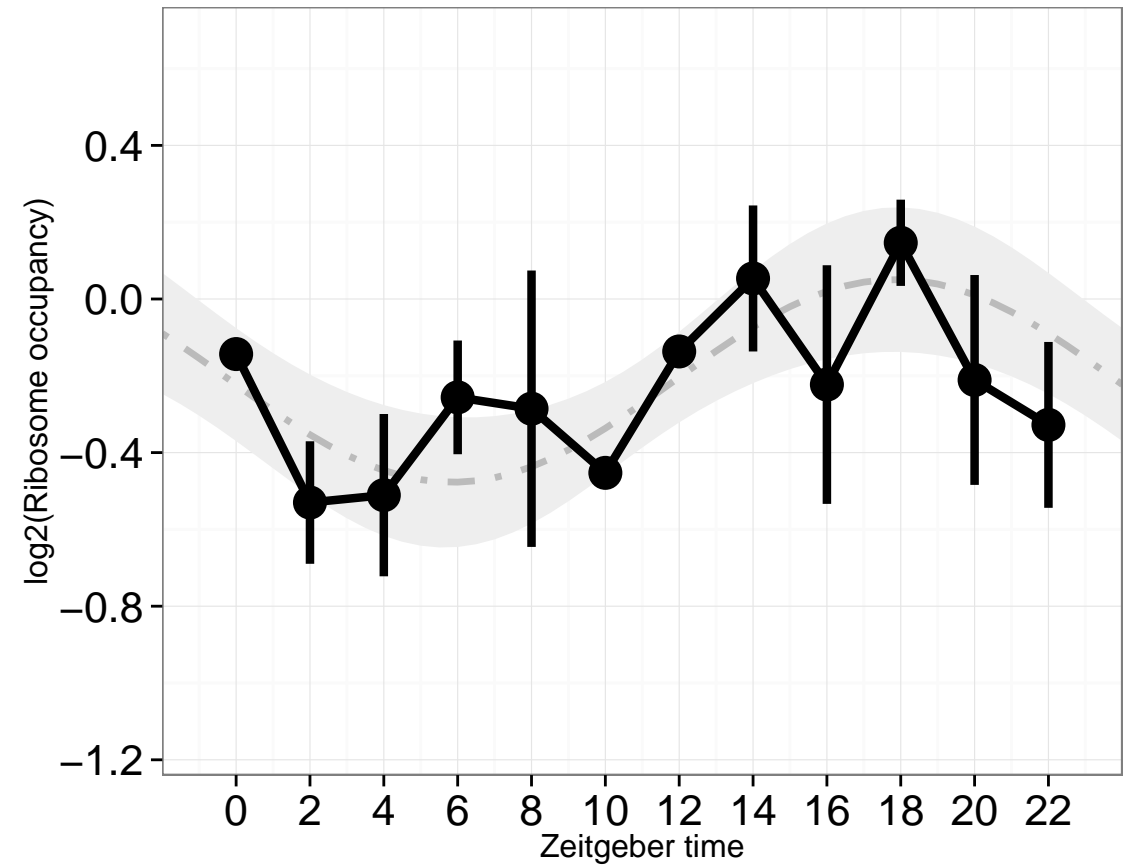

Supplement: SuppDataset_1.zip [file Iba57_set_B.pdf › Supplemental Dataset 1/B-mRNA_rhythm_translation_nonrhyth/Iba57_set_B.pdf]

## Idua

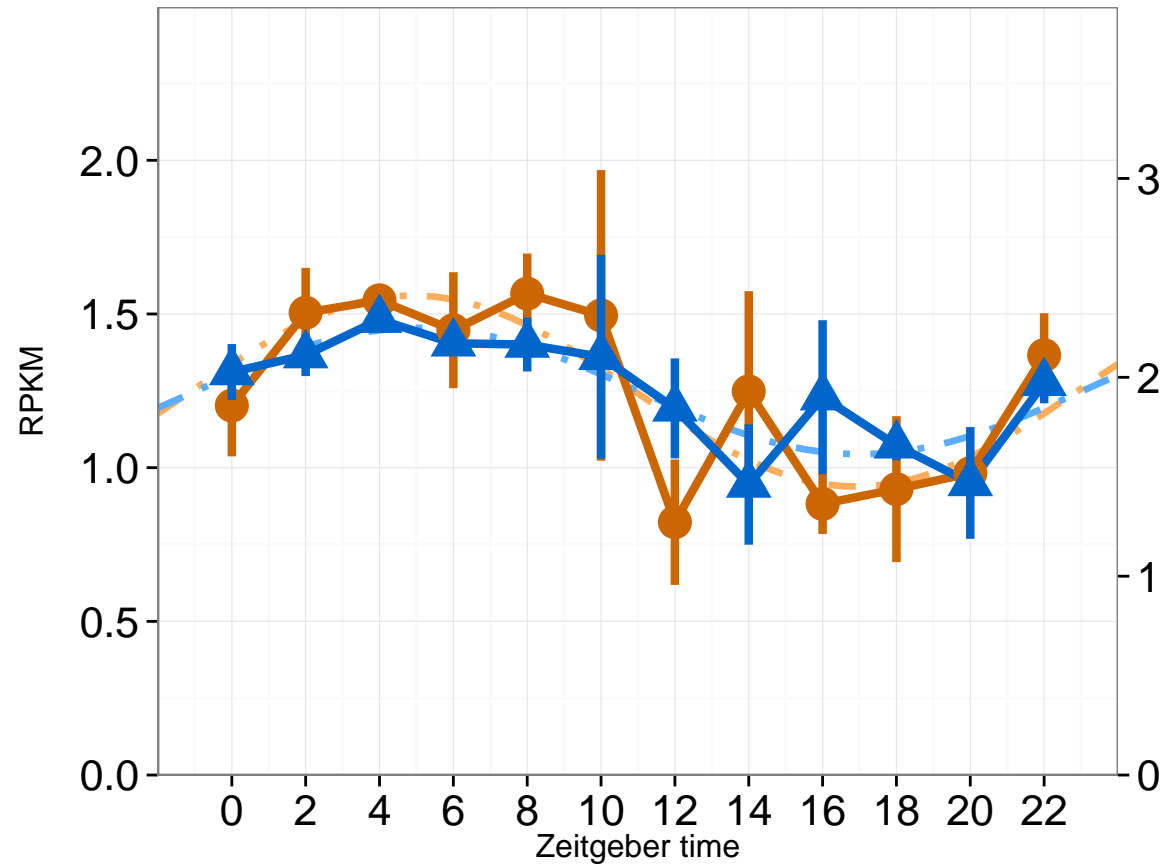

## Idua

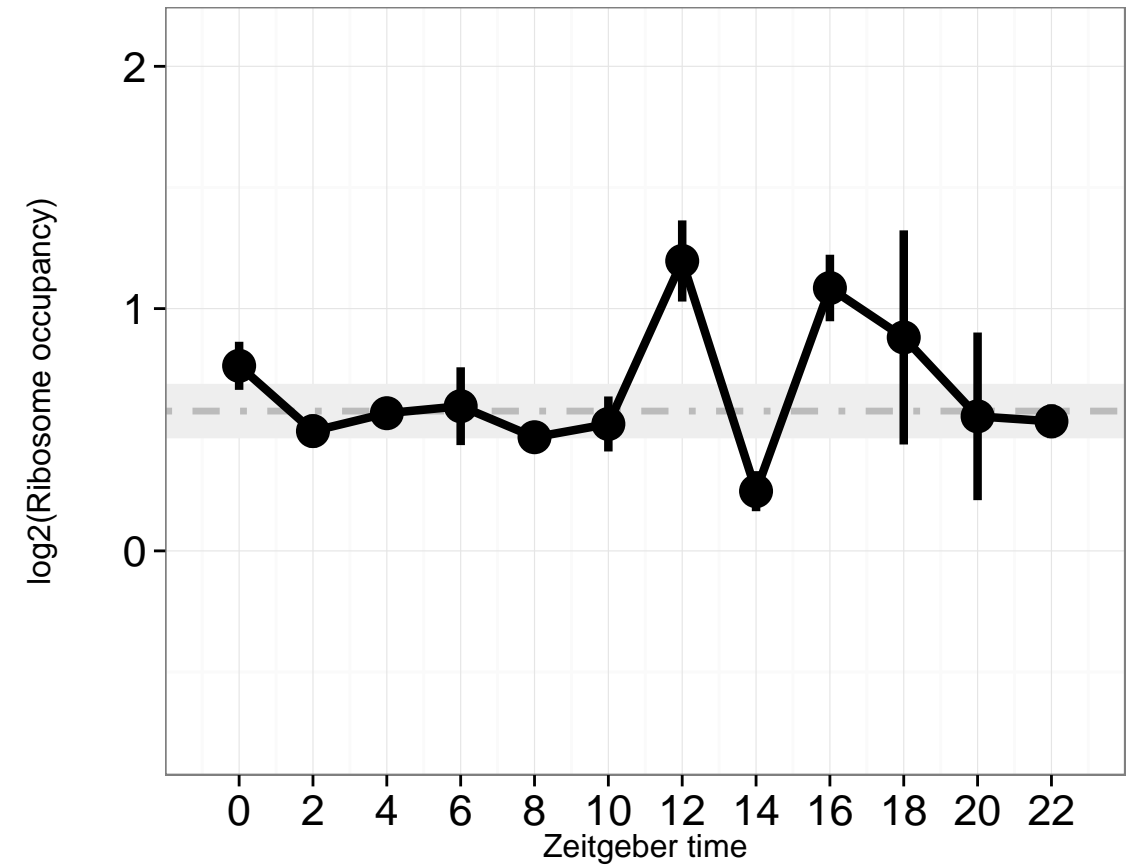

Supplement: SuppDataset_1.zip [file Idua_set_B.pdf › Supplemental Dataset 1/B-mRNA_rhythm_translation_nonrhyth/Idua_set_B.pdf]

## ler2

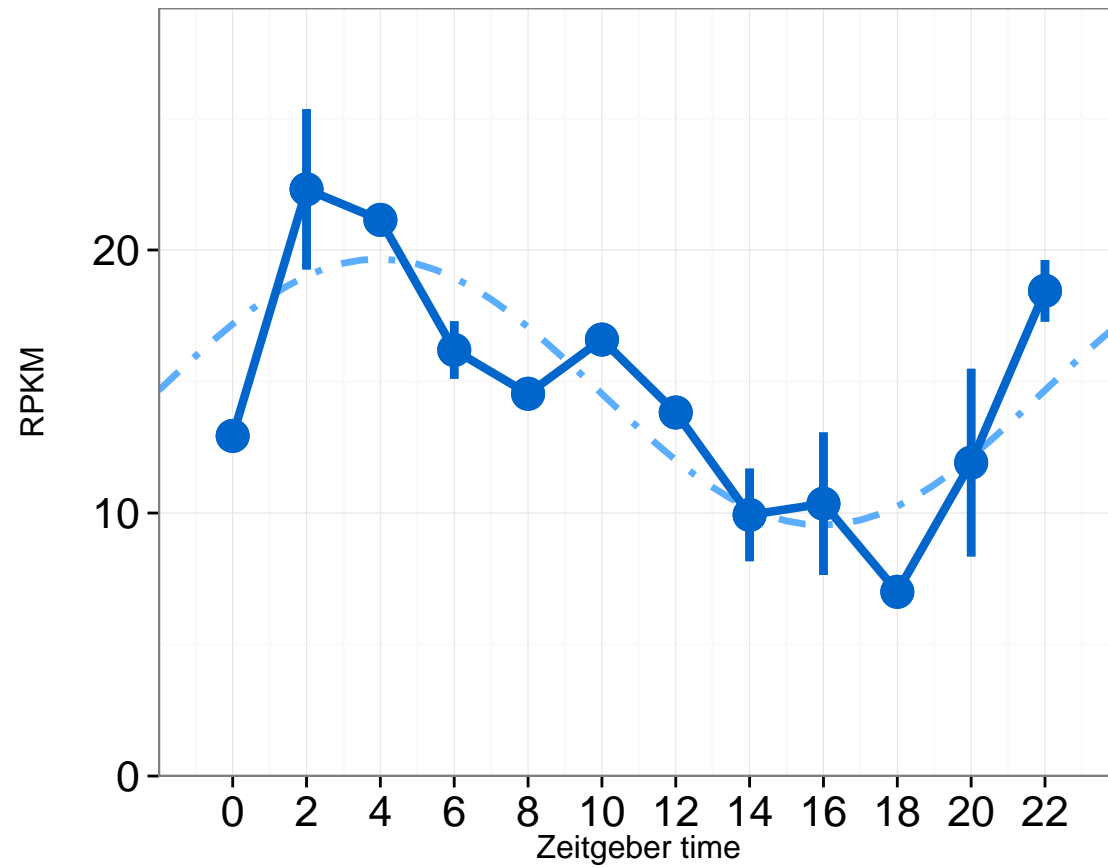

## ler2 log2(Ribosome occupancy)

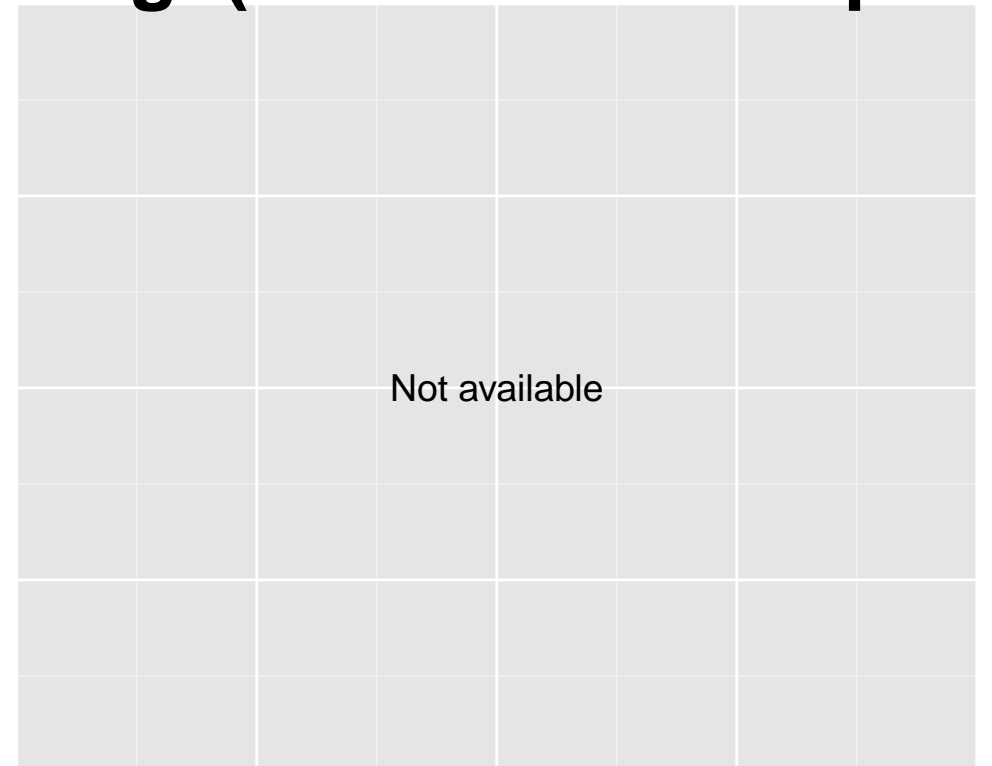

Supplement: SuppDataset_1.zip [file Ier2_set_B.pdf › Supplemental Dataset 1/B-mRNA_rhythm_translation_nonrhyth/Ier2_set_B.pdf]

## lfi44

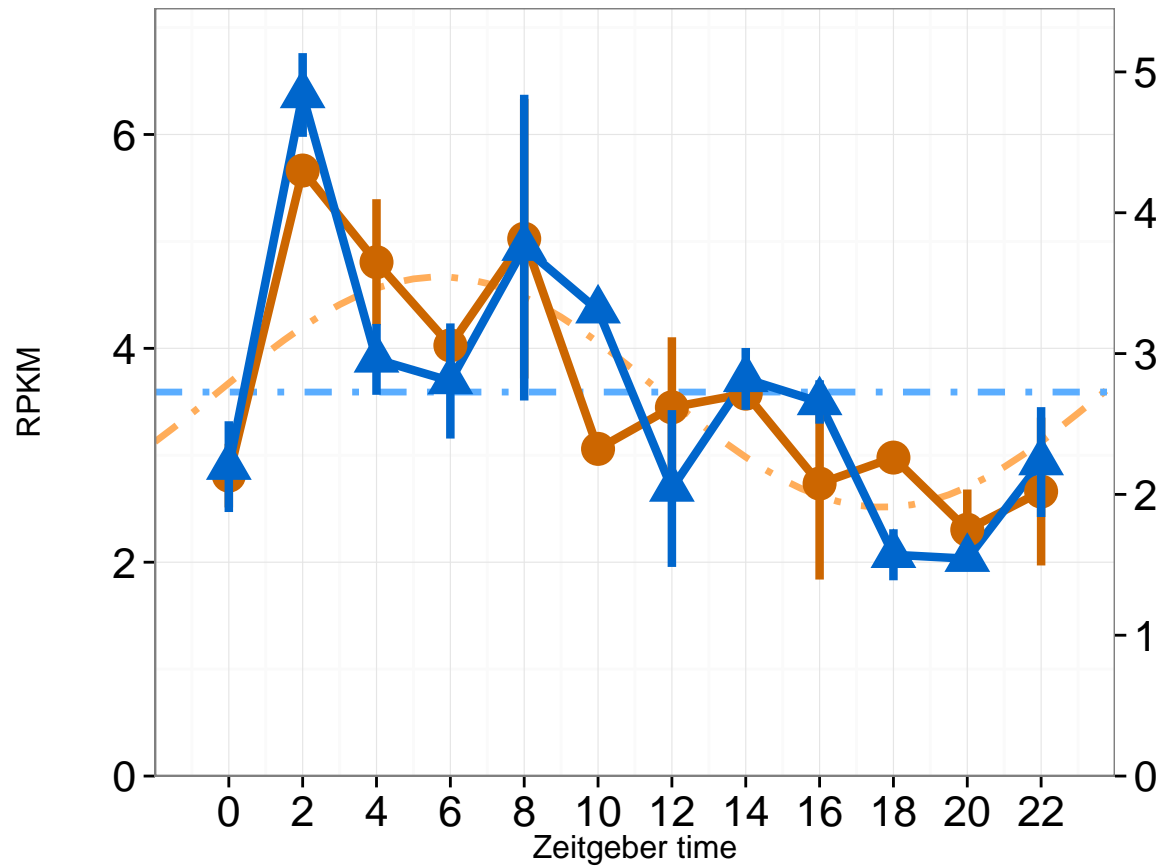

## lfi44

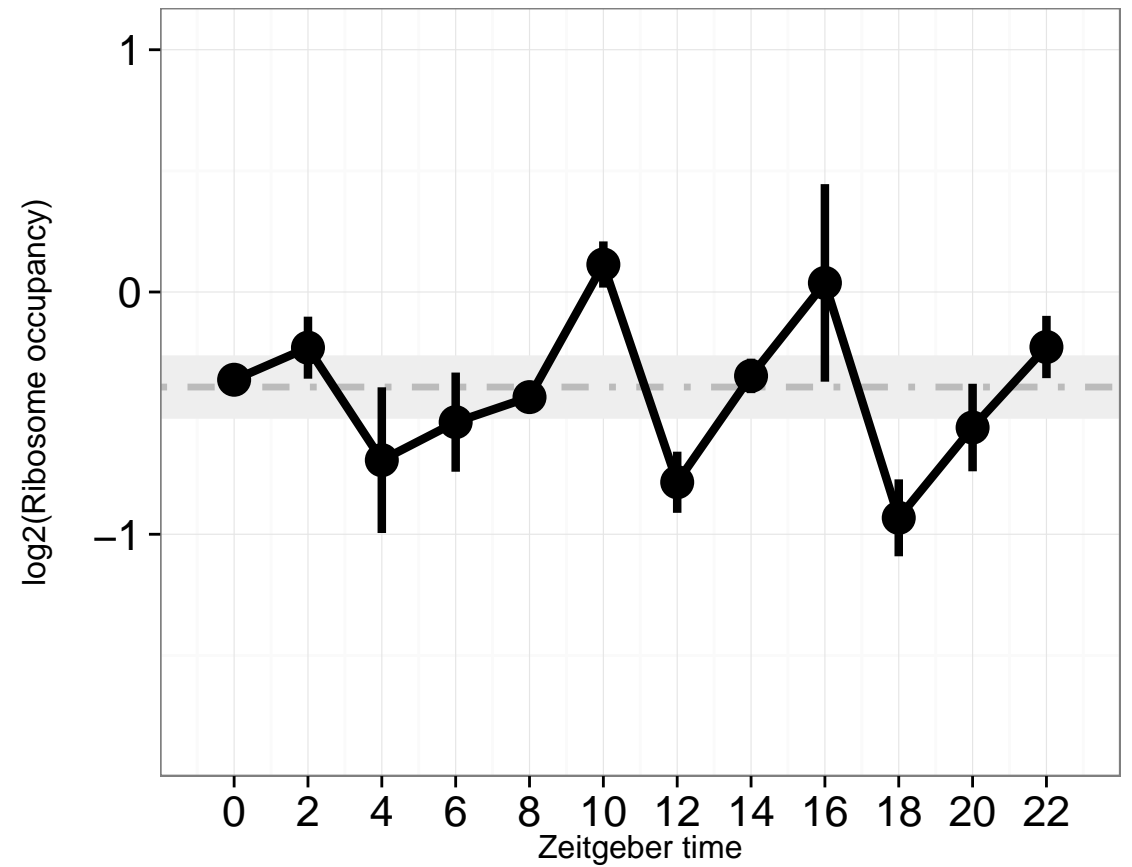

Supplement: SuppDataset_1.zip [file Ifi44_set_B.pdf › Supplemental Dataset 1/B-mRNA_rhythm_translation_nonrhyth/Ifi44_set_B.pdf]

# lfitm1

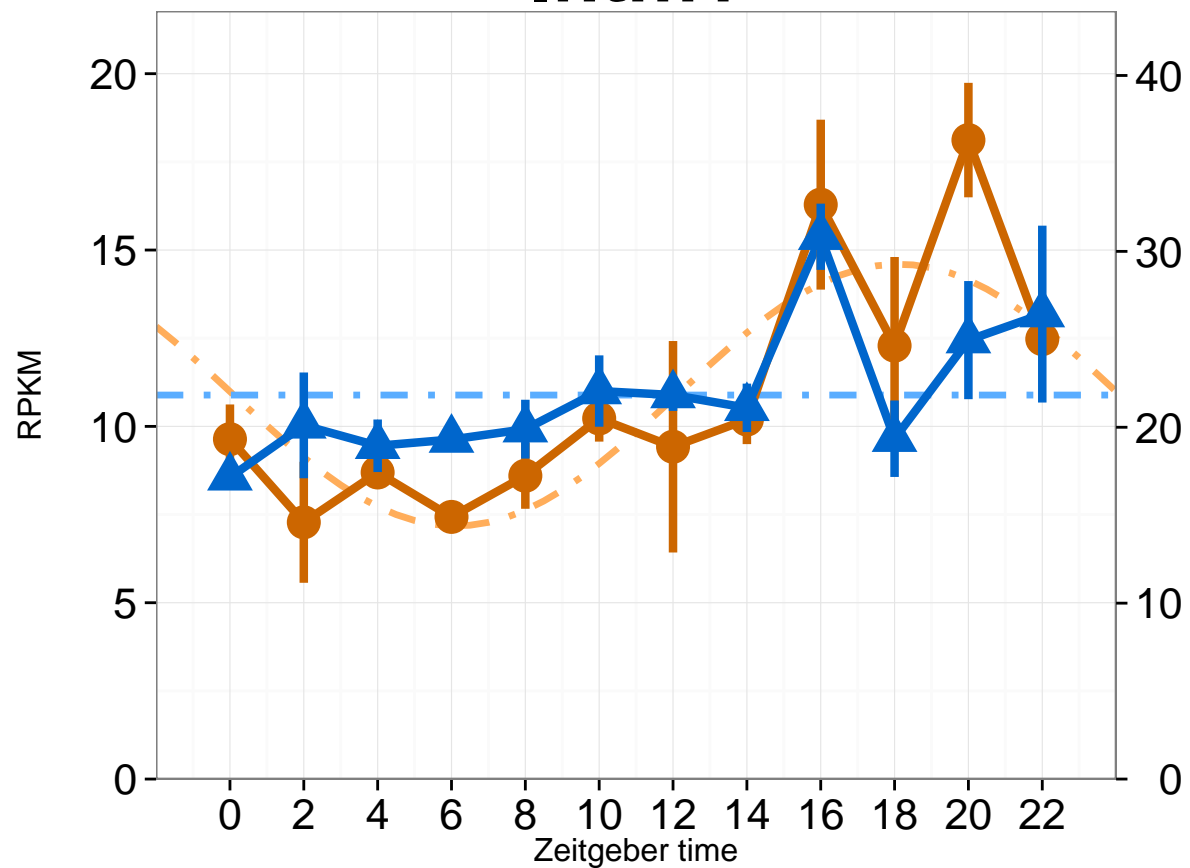

# lfitm1

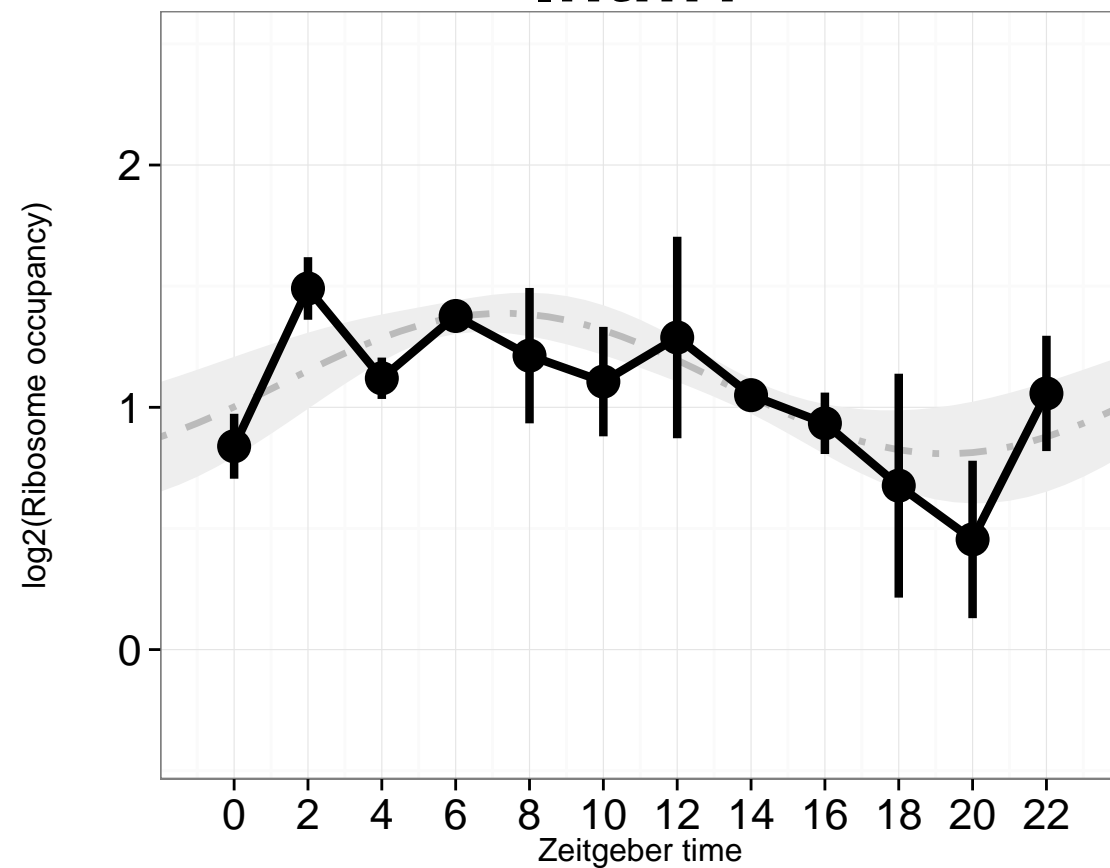

Supplement: SuppDataset_1.zip [file Ifitm1_set_B.pdf › Supplemental Dataset 1/B-mRNA_rhythm_translation_nonrhyth/Ifitm1_set_B.pdf]

# Ift122

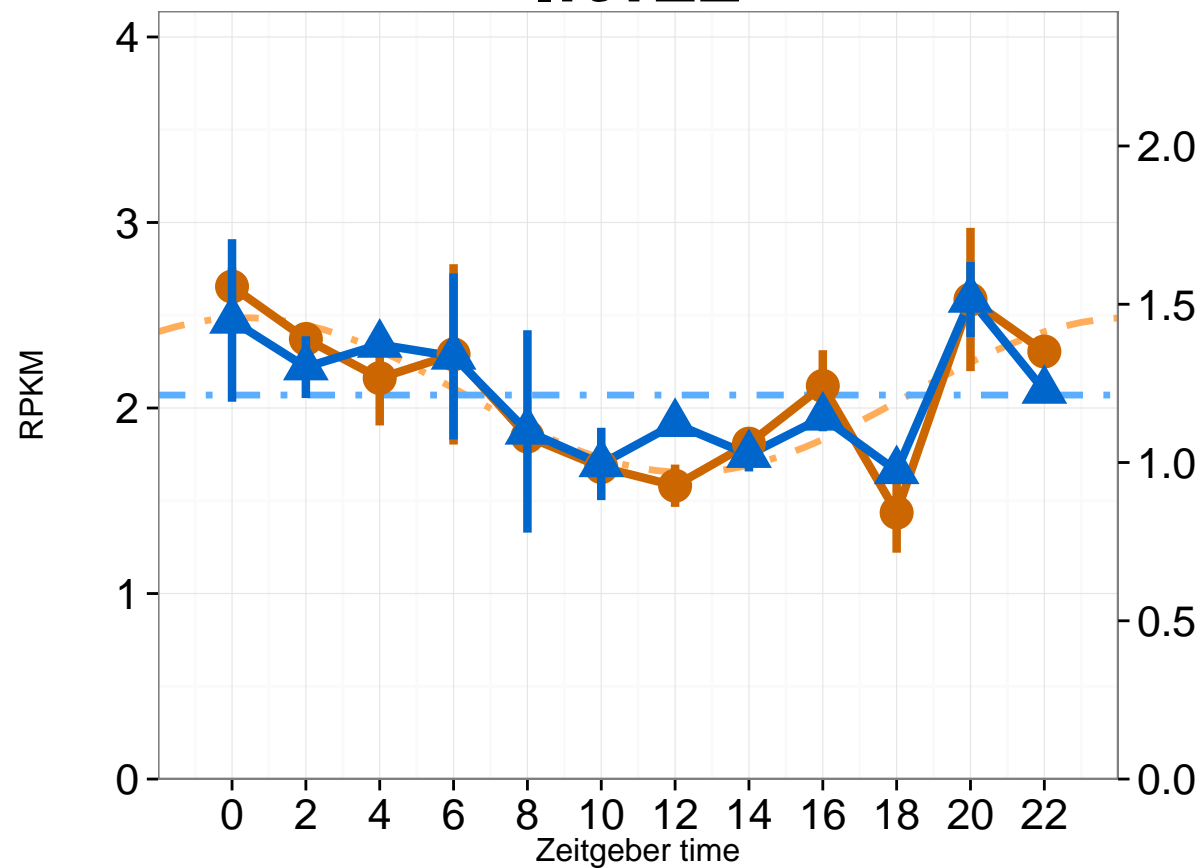

# Ift122

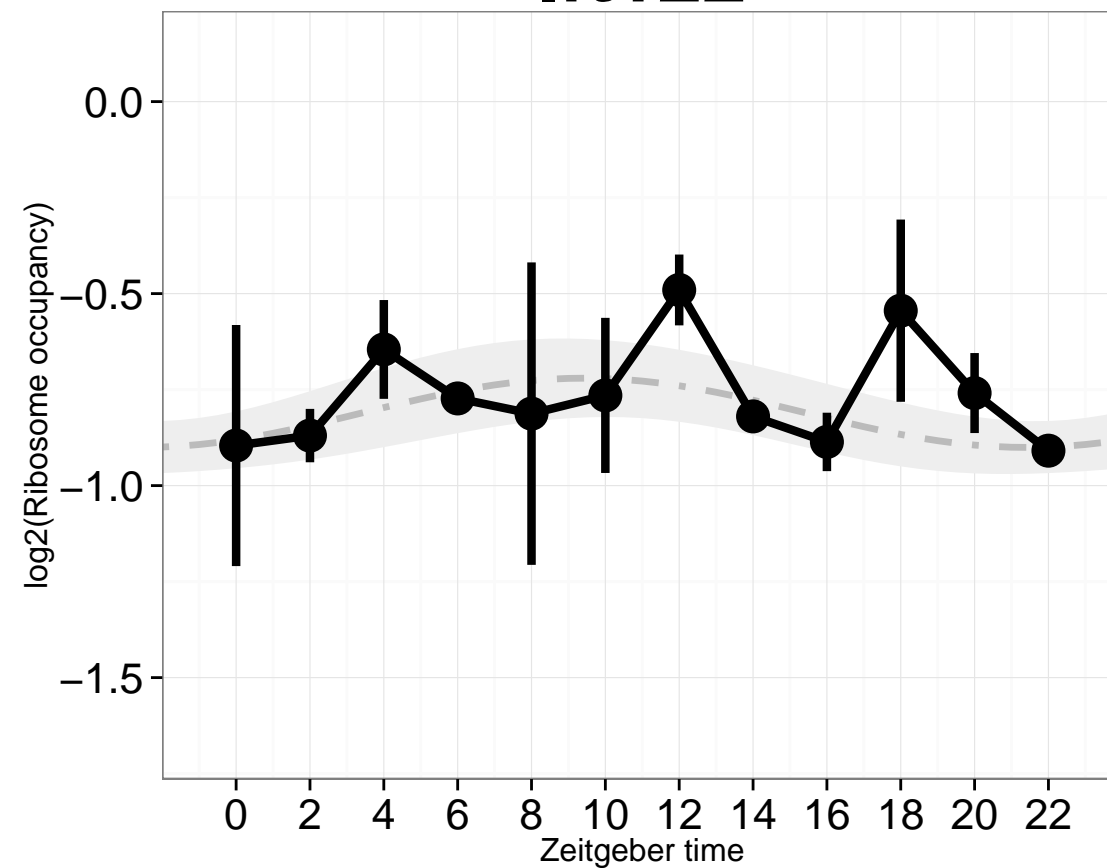

Supplement: SuppDataset_1.zip [file Ift122_set_B.pdf › Supplemental Dataset 1/B-mRNA_rhythm_translation_nonrhyth/Ift122_set_B.pdf]

## Ift46

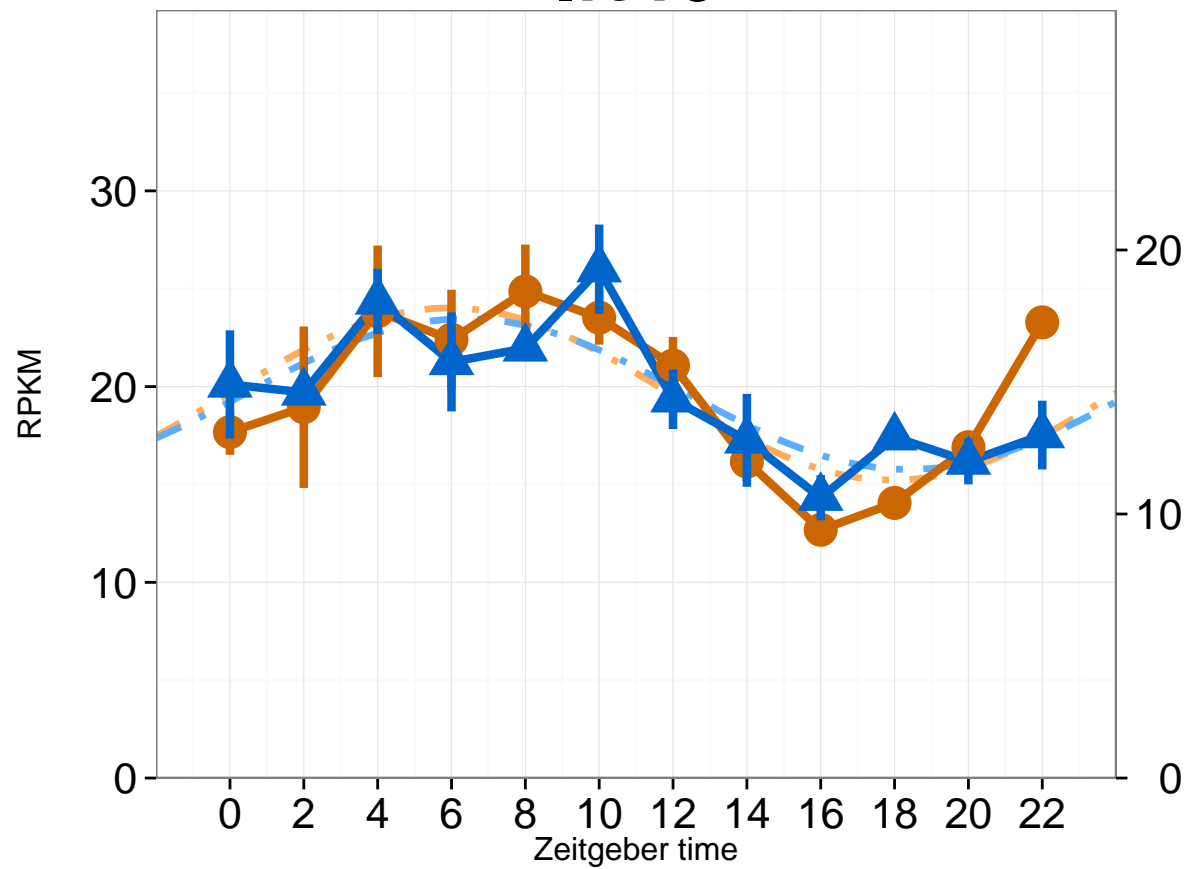

## Ift46

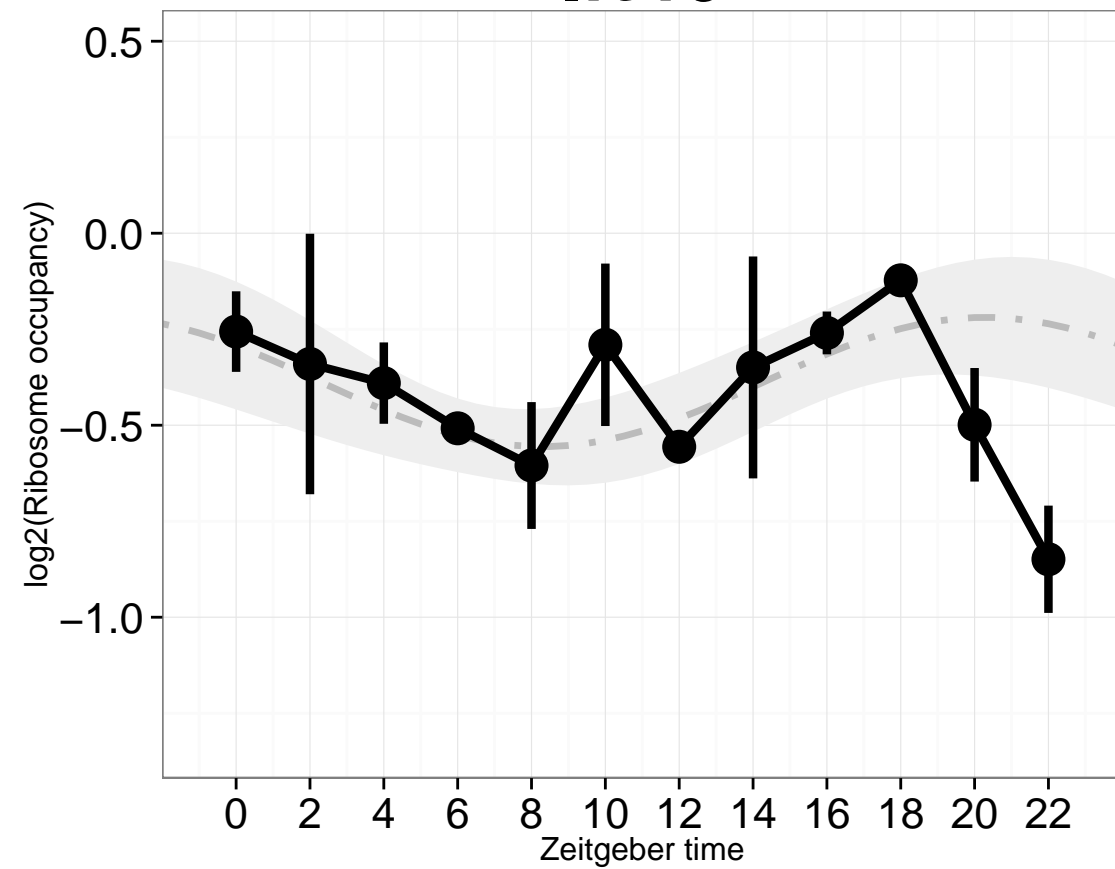

Supplement: SuppDataset_1.zip [file Ift46_set_B.pdf › Supplemental Dataset 1/B-mRNA_rhythm_translation_nonrhyth/Ift46_set_B.pdf]

## Igfals

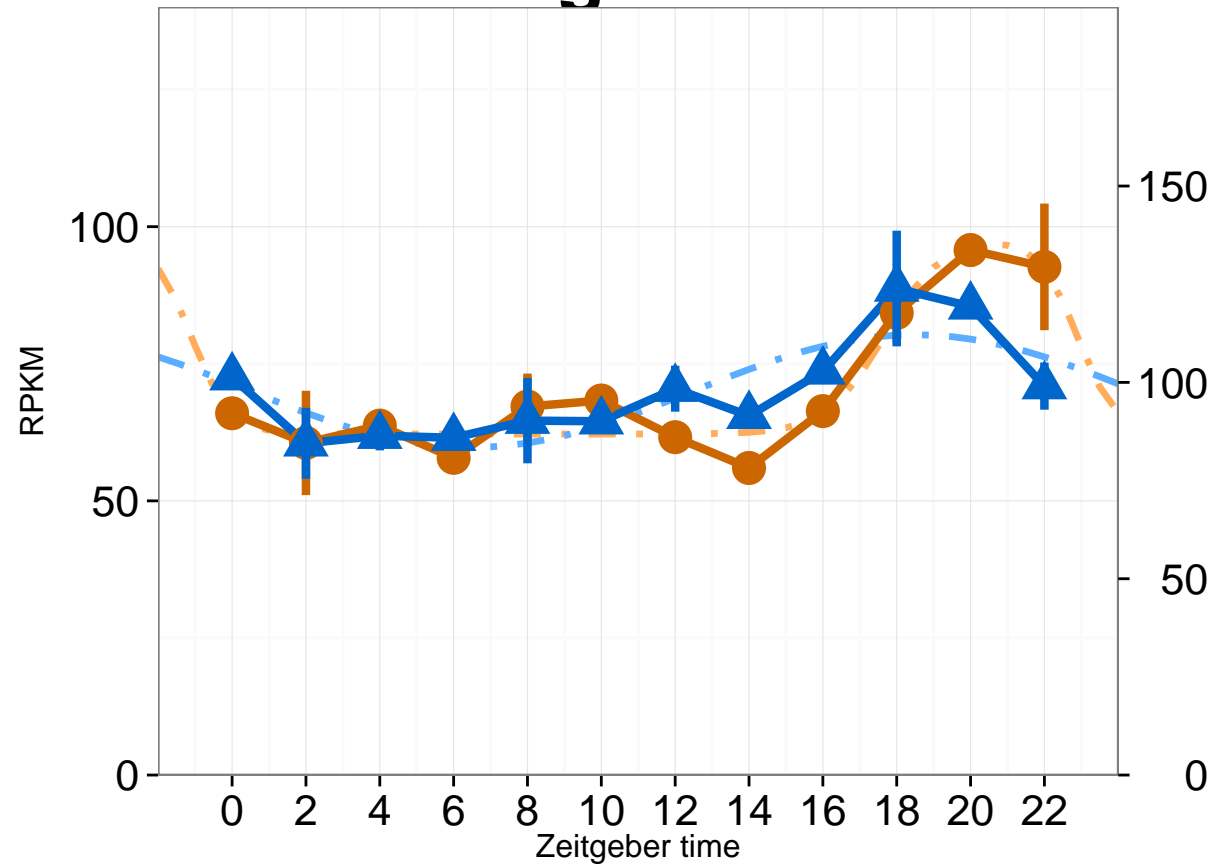

## Igfals

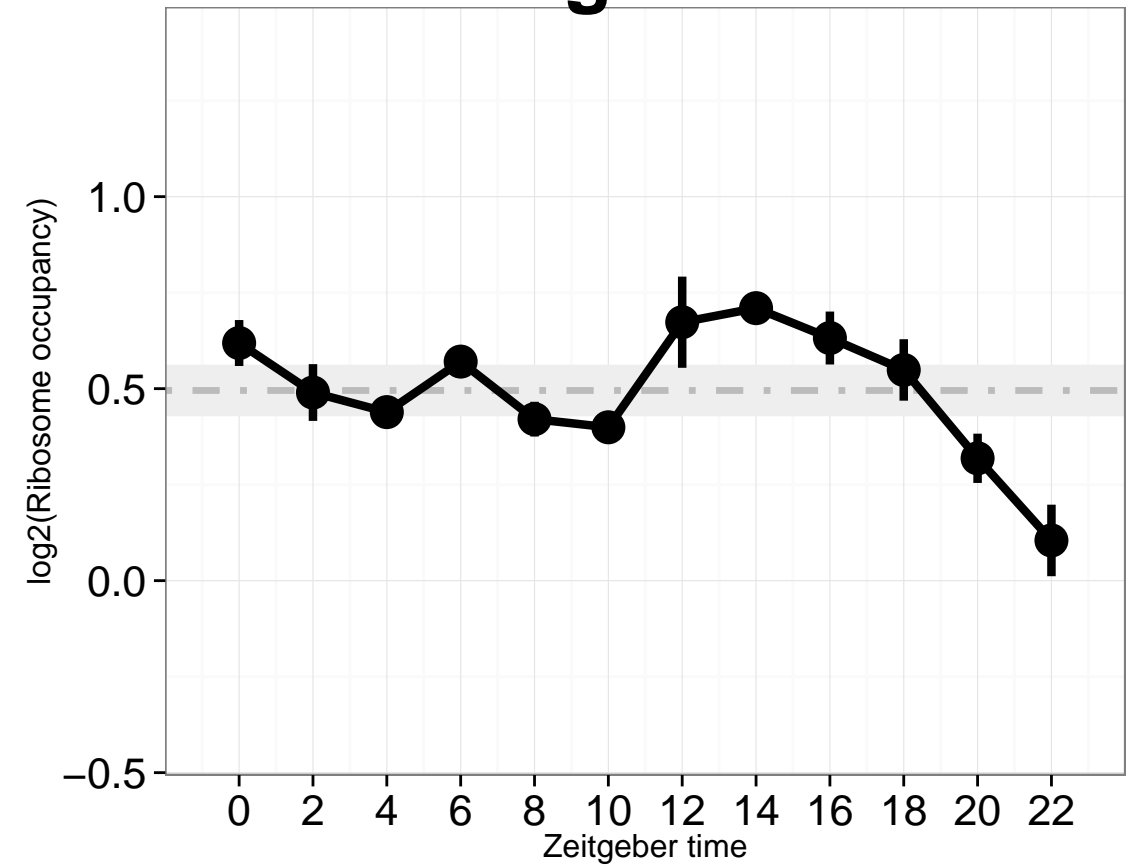

Supplement: SuppDataset_1.zip [file Igfals_set_B.pdf › Supplemental Dataset 1/B-mRNA_rhythm_translation_nonrhyth/Igfals_set_B.pdf]

# Igfbp5

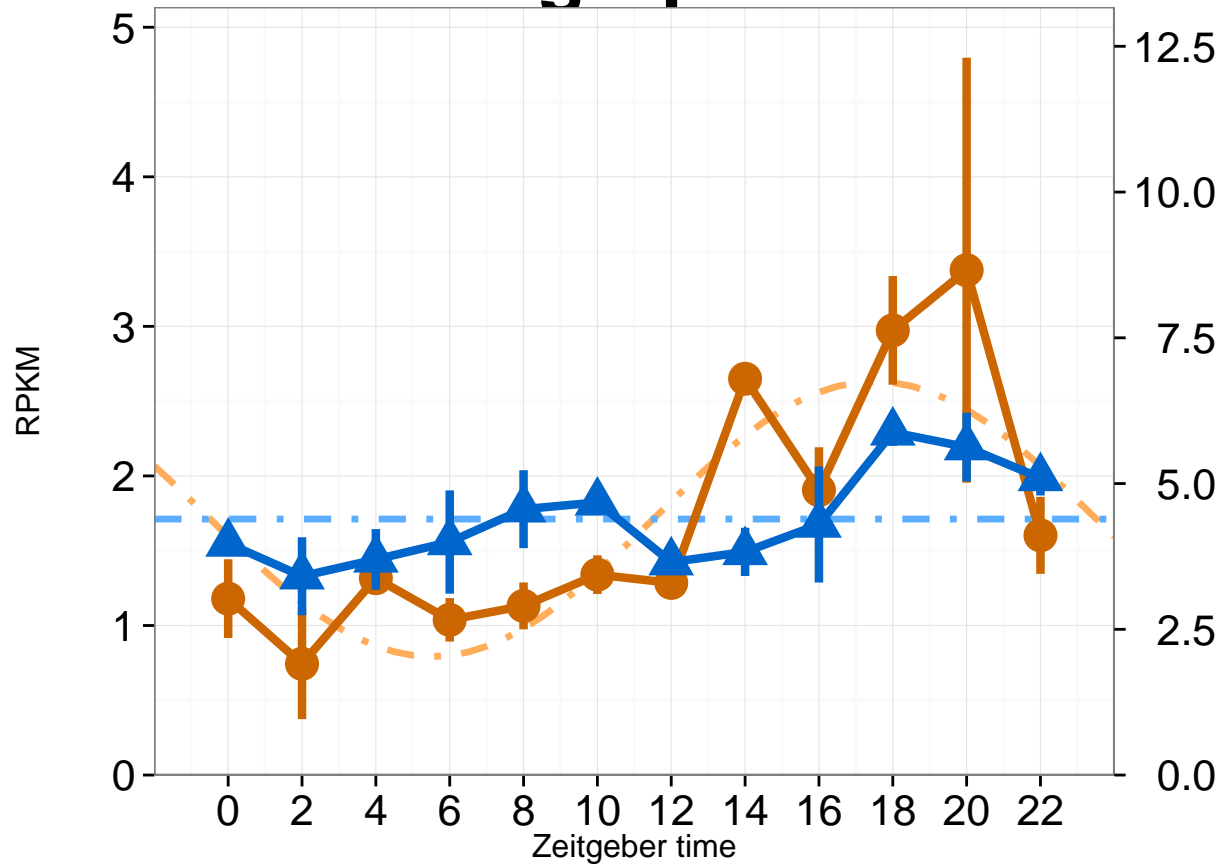

# Igfbp5

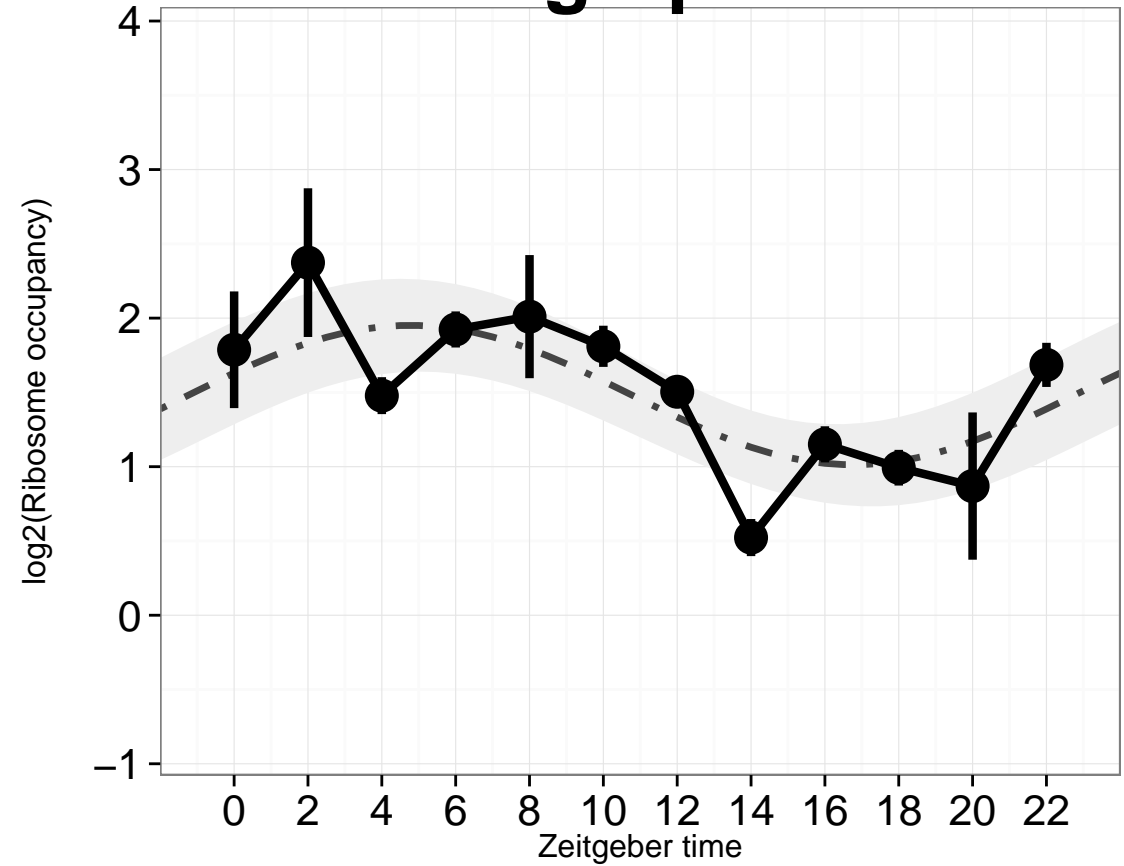

Supplement: SuppDataset_1.zip [file Igfbp5_set_B.pdf › Supplemental Dataset 1/B-mRNA_rhythm_translation_nonrhyth/Igfbp5_set_B.pdf]

## II17rc

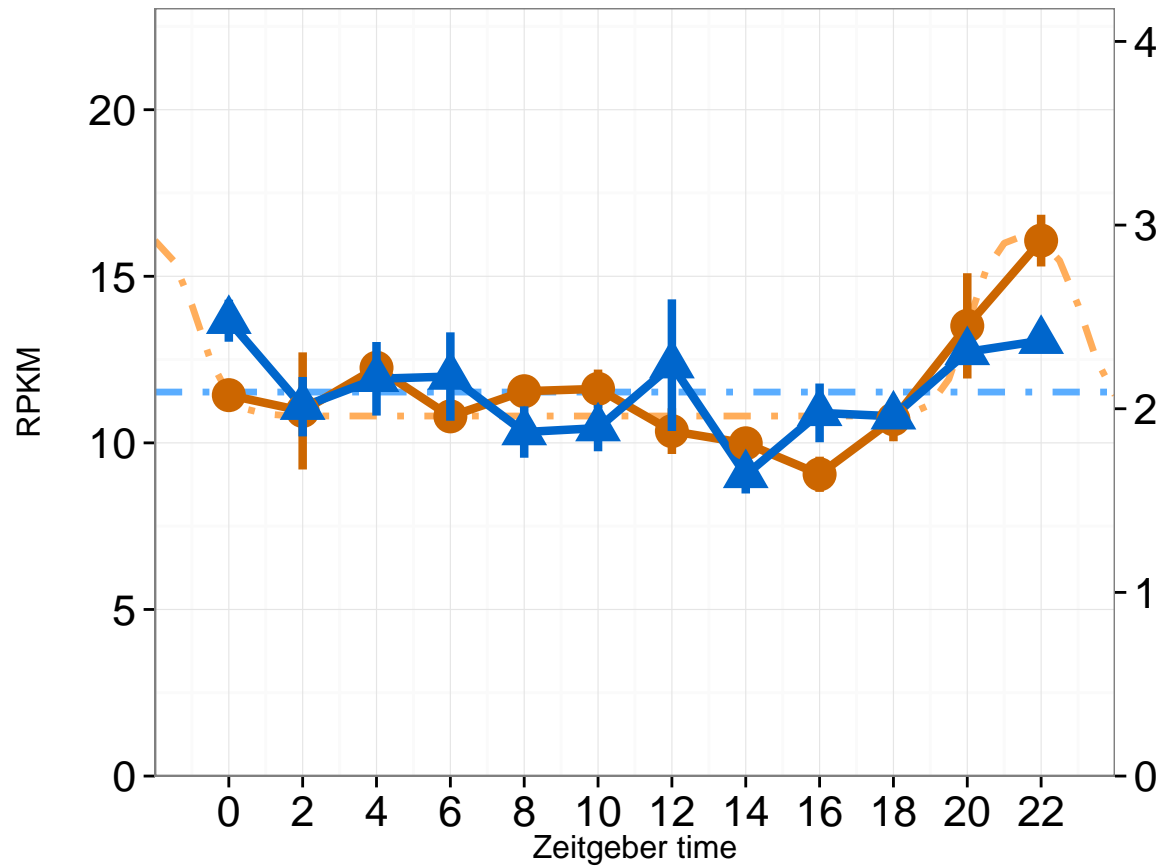

## II17rc

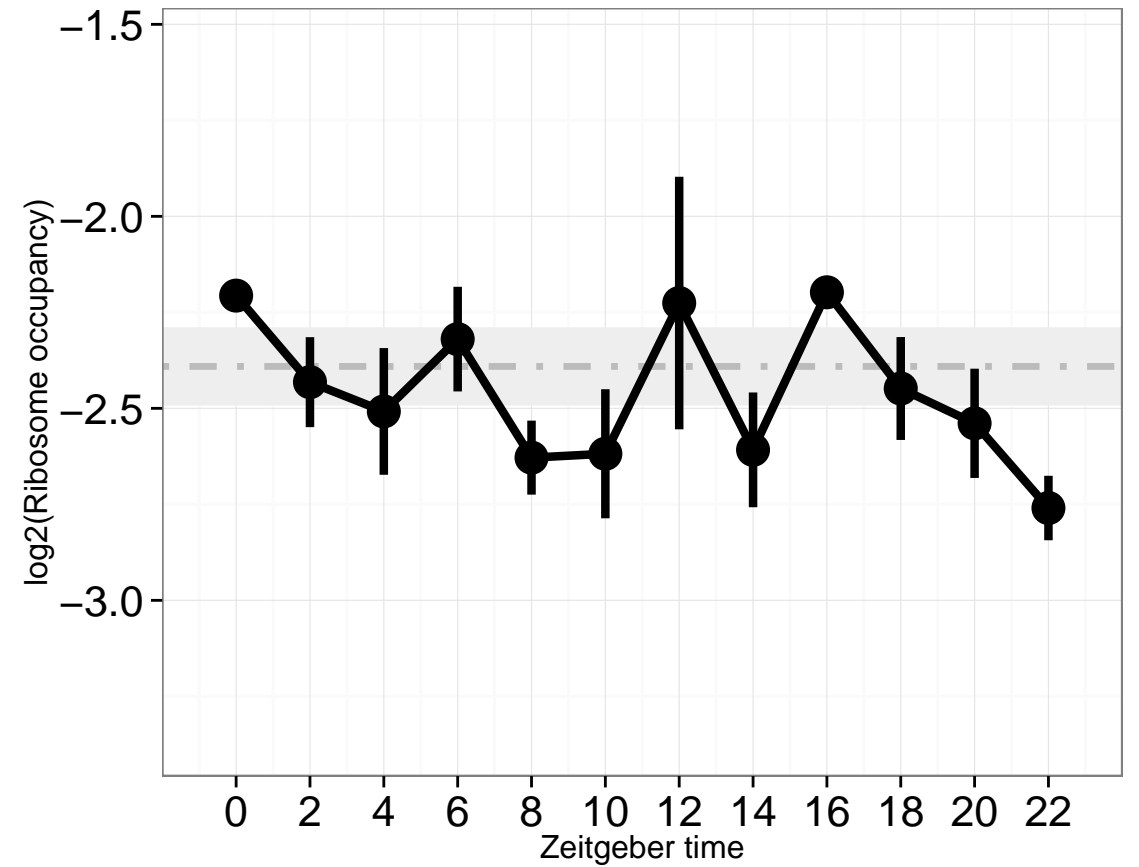

Supplement: SuppDataset_1.zip [file Il17rc_set_B.pdf › Supplemental Dataset 1/B-mRNA_rhythm_translation_nonrhyth/Il17rc_set_B.pdf]

## Inmt

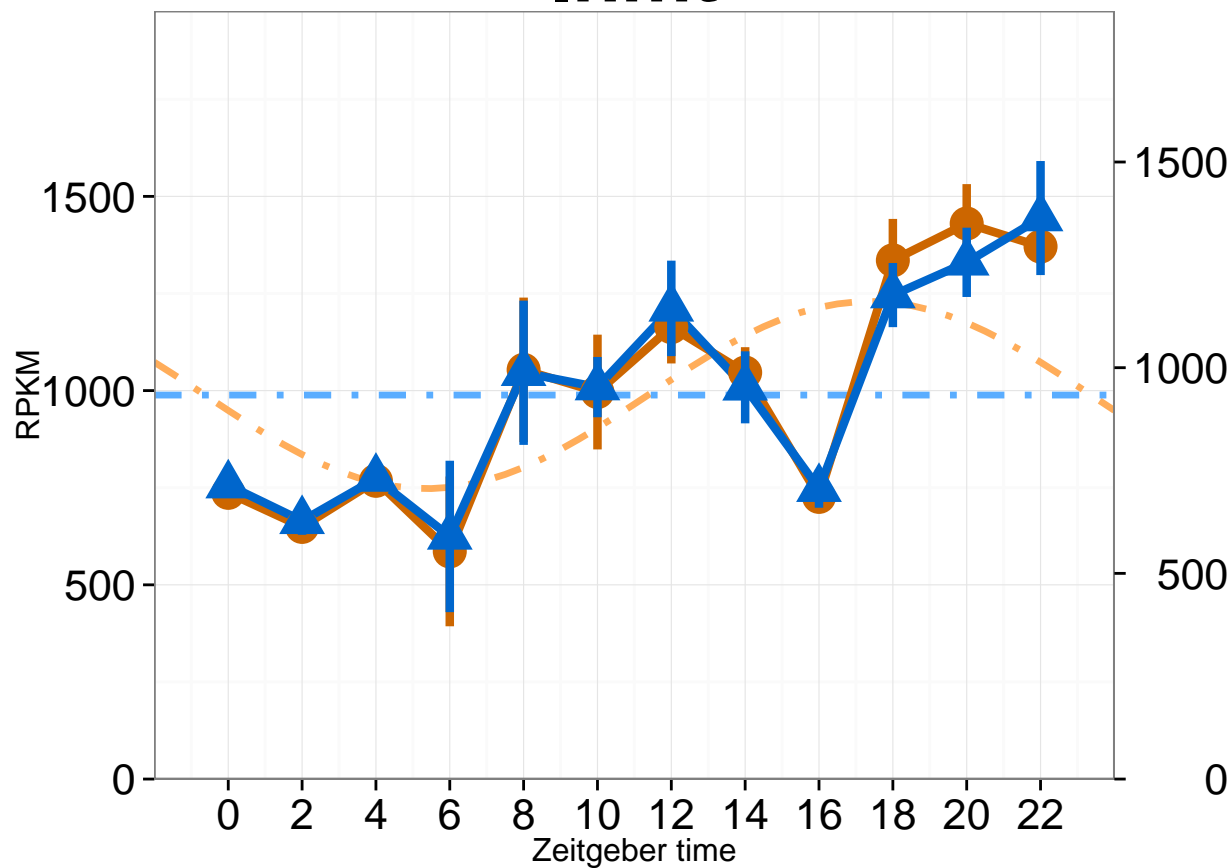

## Inmt

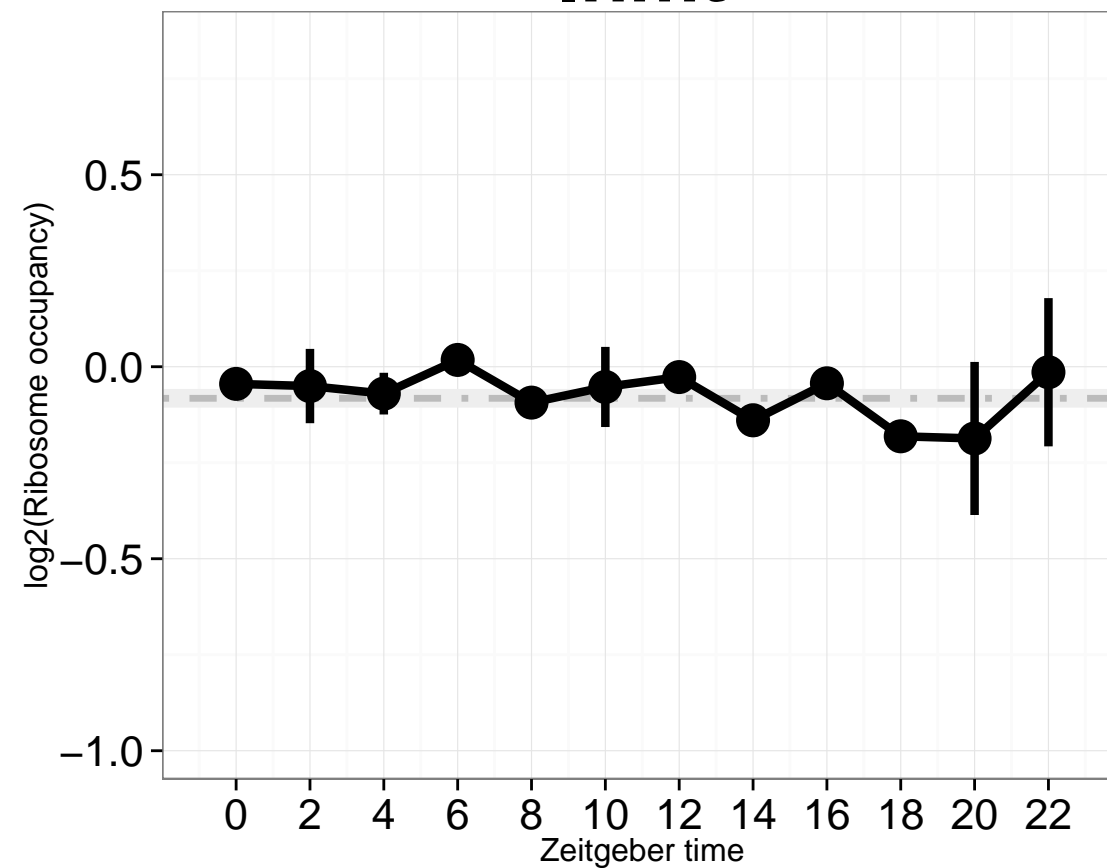

Supplement: SuppDataset_1.zip [file Inmt_set_B.pdf › Supplemental Dataset 1/B-mRNA_rhythm_translation_nonrhyth/Inmt_set_B.pdf]

## Inpp5e

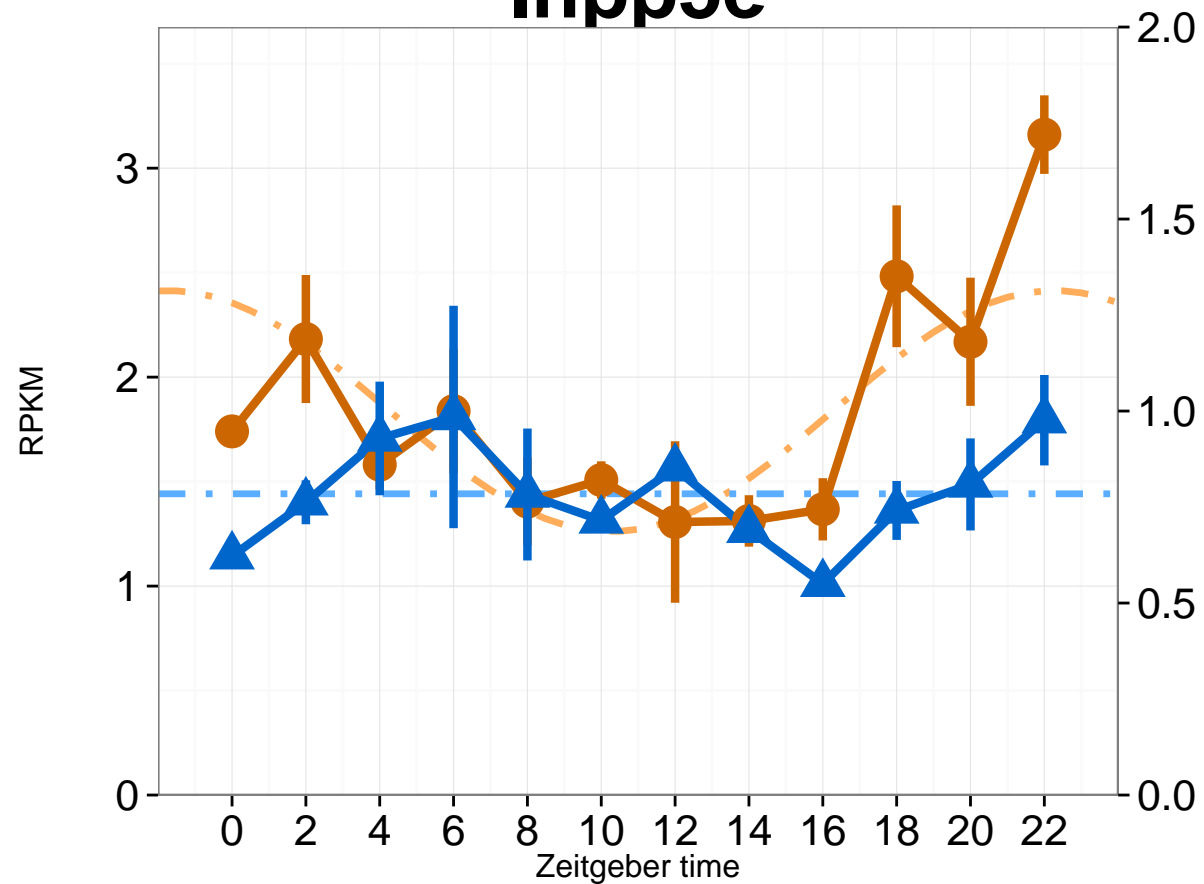

## Inpp5e

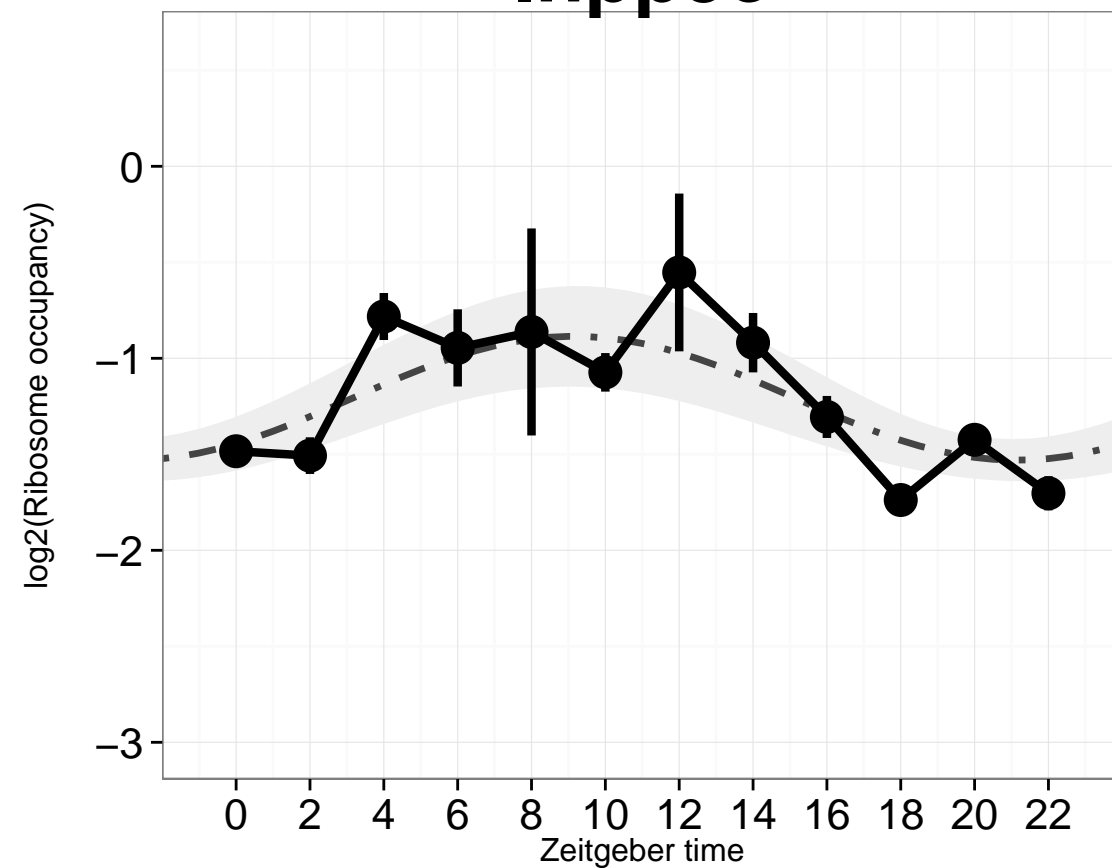

Supplement: SuppDataset_1.zip [file Inpp5e_set_B.pdf › Supplemental Dataset 1/B-mRNA_rhythm_translation_nonrhyth/Inpp5e_set_B.pdf]

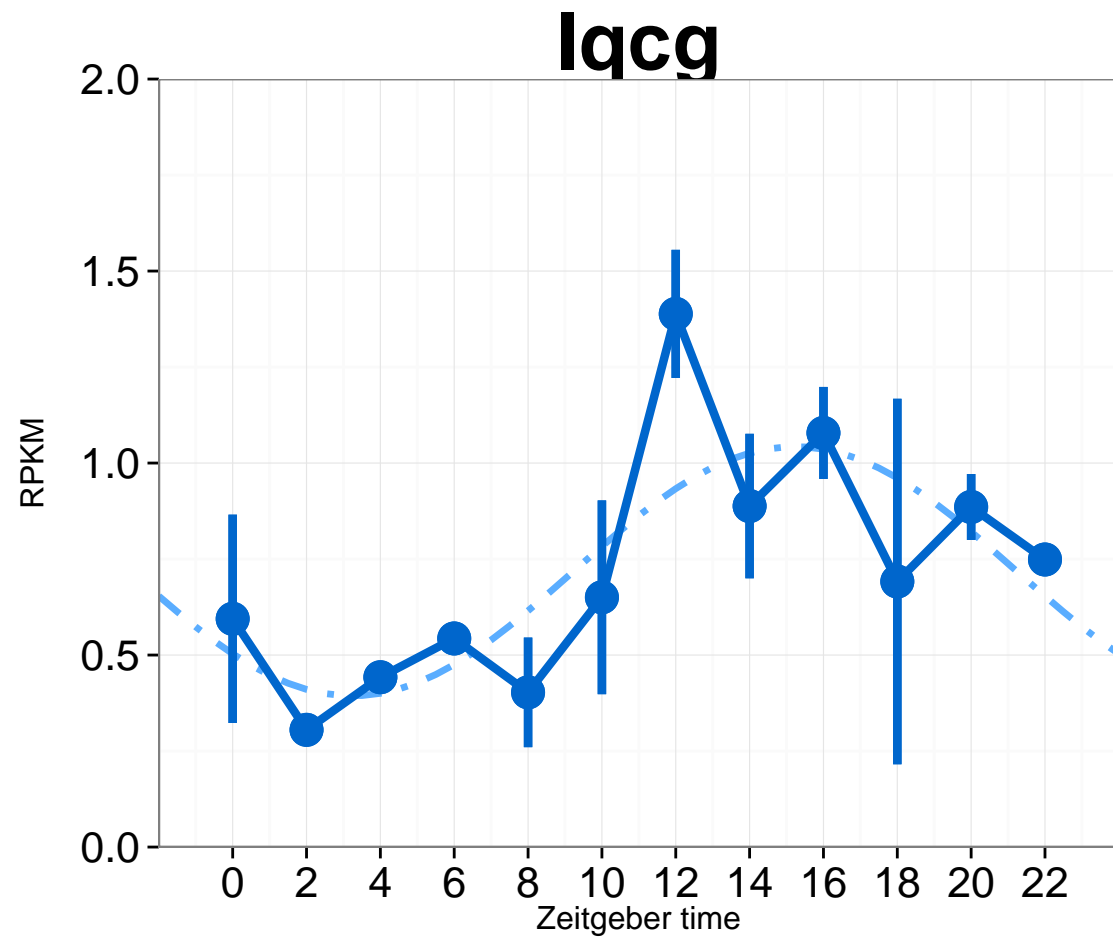

### lqcg log2(Ribosome occupancy)

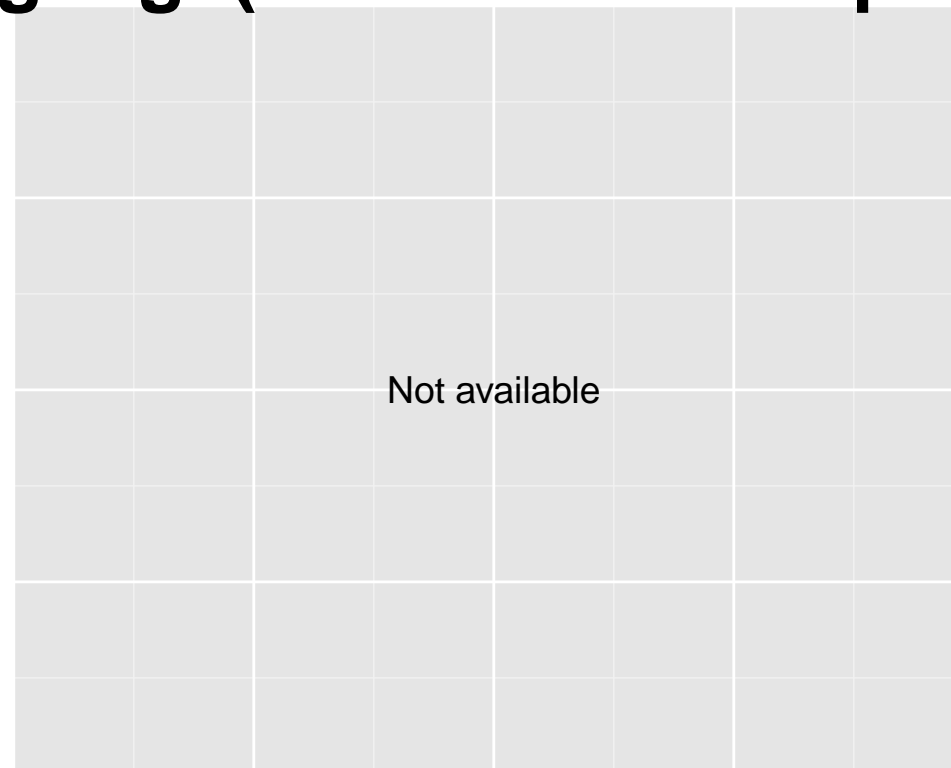

Supplement: SuppDataset_1.zip [file Iqcg_set_B.pdf › Supplemental Dataset 1/B-mRNA_rhythm_translation_nonrhyth/Iqcg_set_B.pdf]

**Irak1bp1**

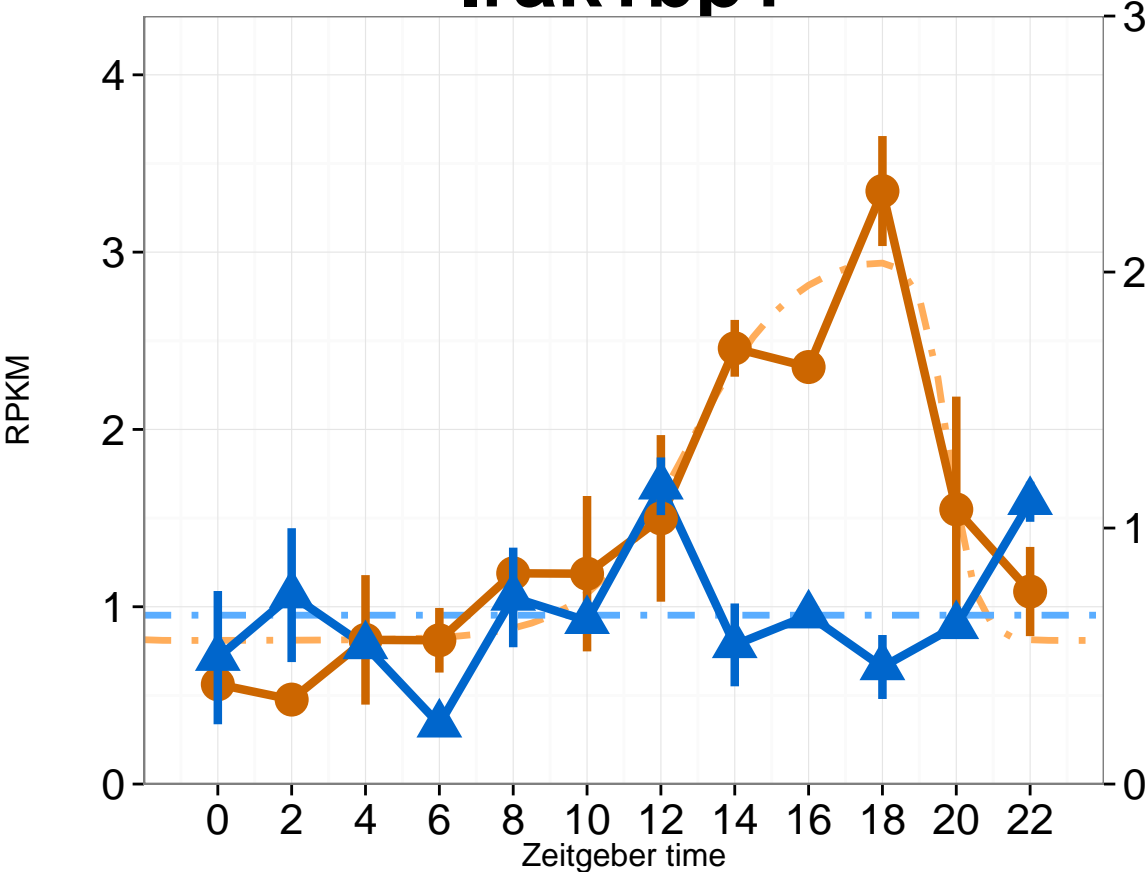

**Irak1bp1**

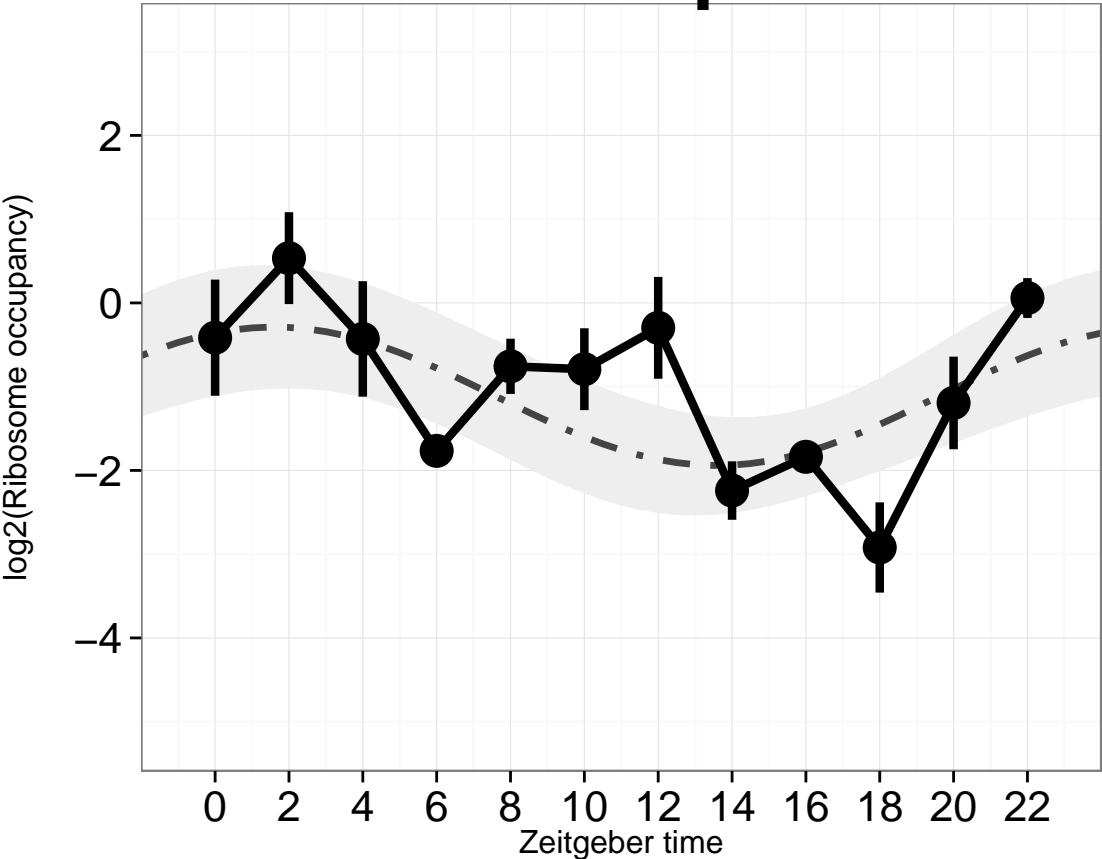

Supplement: SuppDataset_1.zip [file Irak1bp1_set_B.pdf › Supplemental Dataset 1/B-mRNA_rhythm_translation_nonrhyth/Irak1bp1_set_B.pdf]

# Irgm1

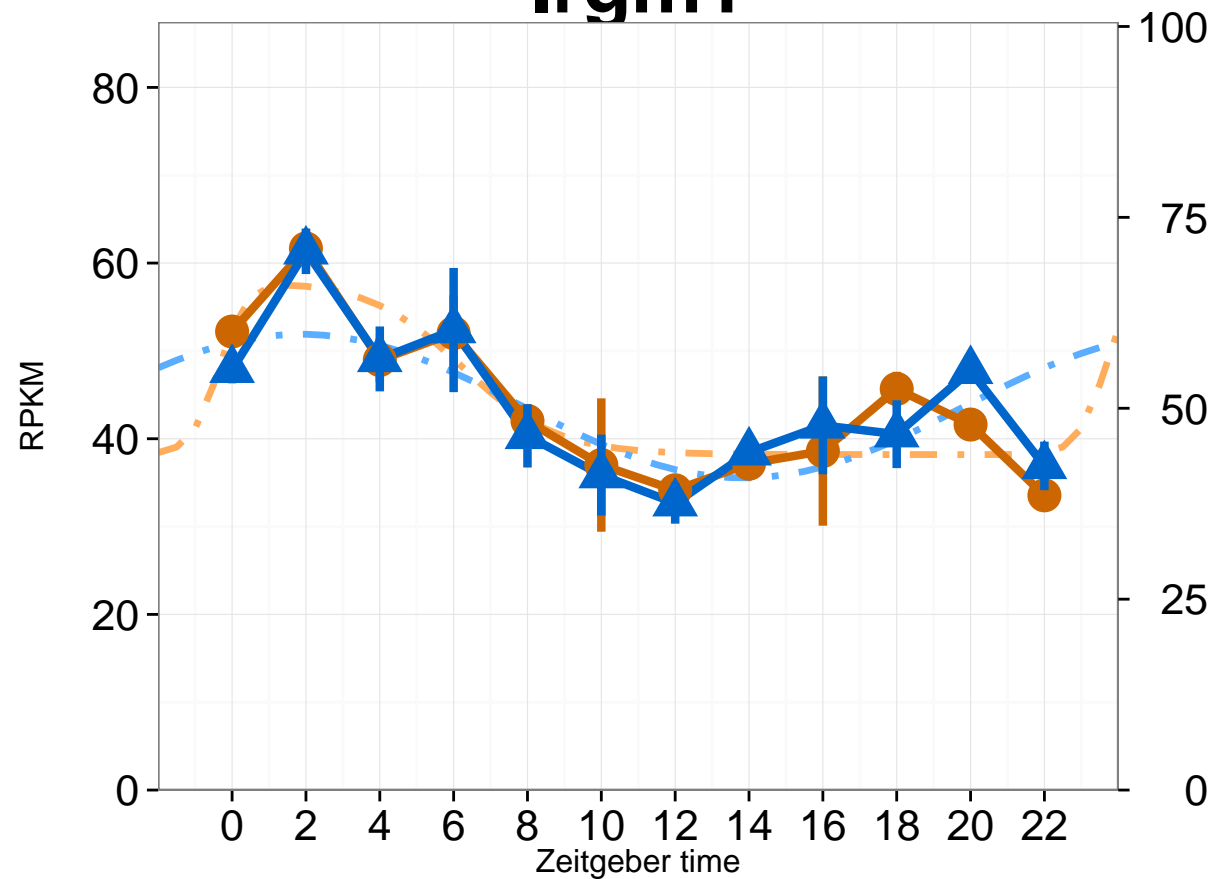

# Irgm1

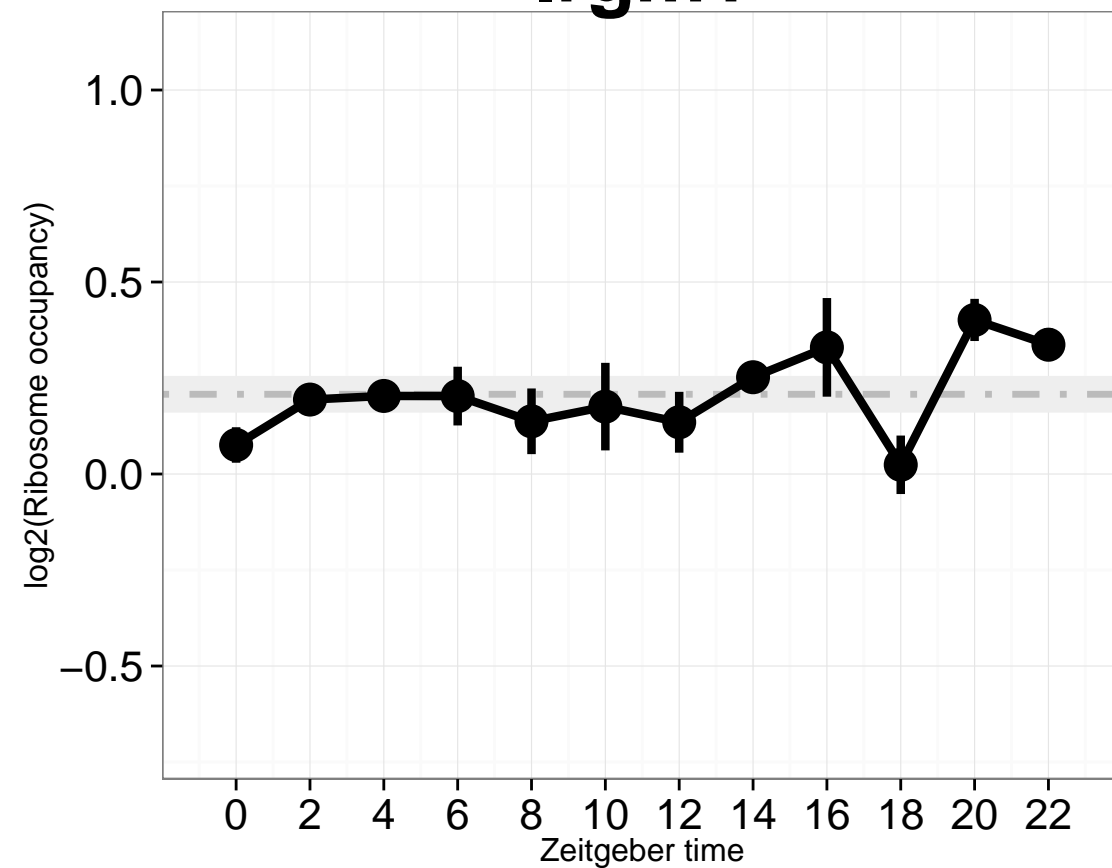

Supplement: SuppDataset_1.zip [file Irgm1_set_B.pdf › Supplemental Dataset 1/B-mRNA_rhythm_translation_nonrhyth/Irgm1_set_B.pdf]

# Isoc2a

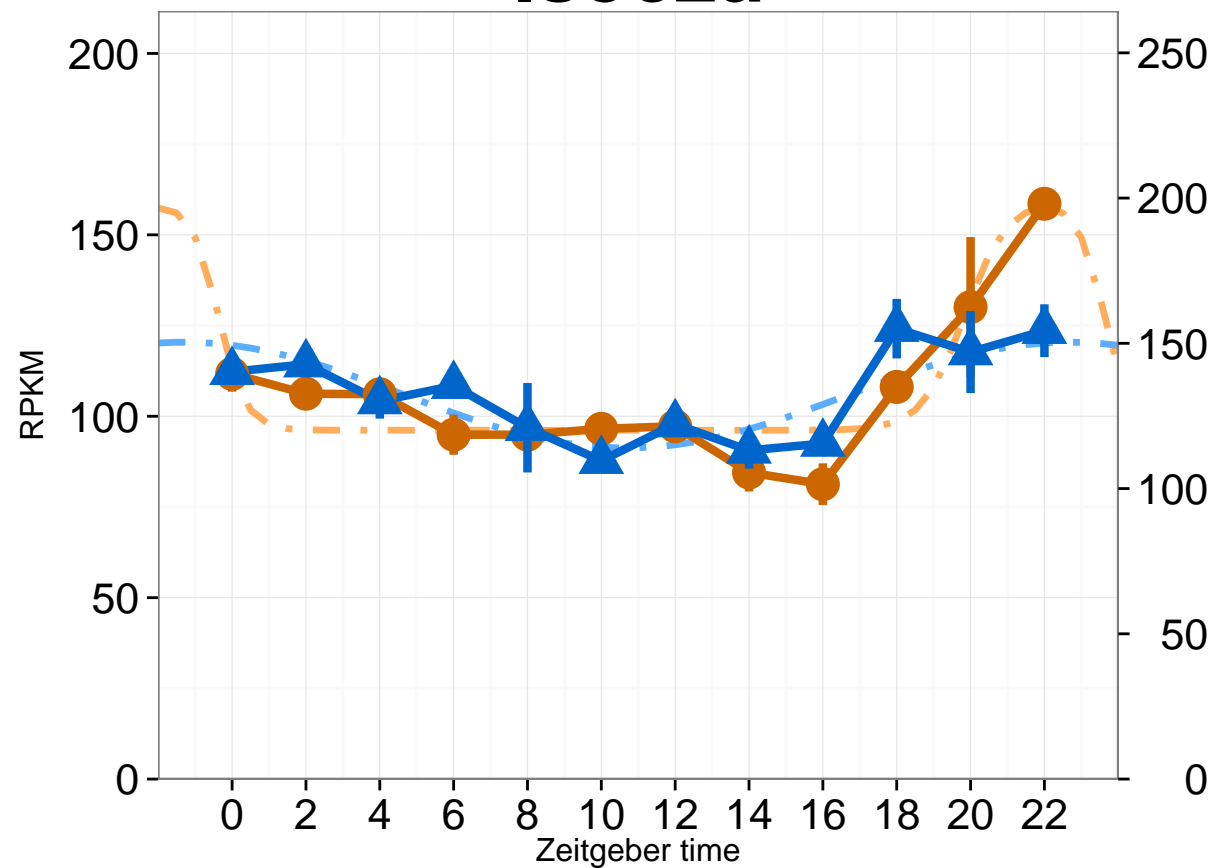

# Isoc2a

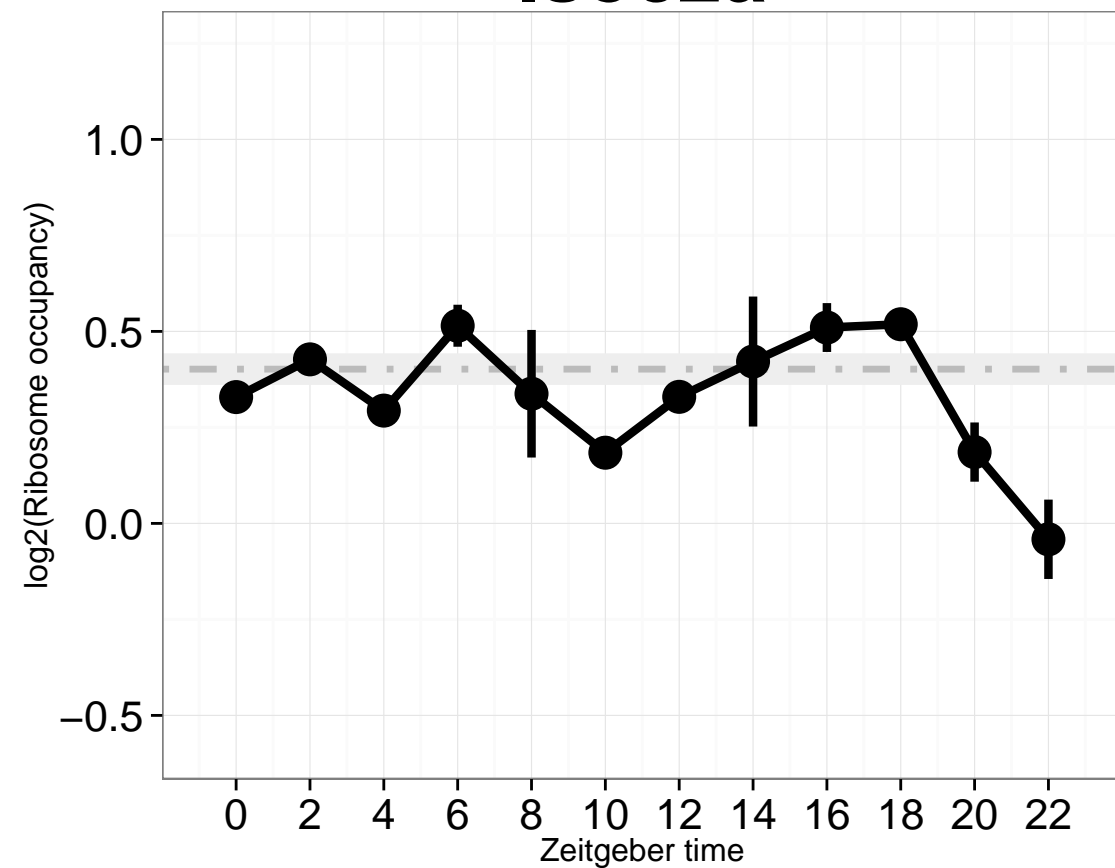

Supplement: SuppDataset_1.zip [file Isoc2a_set_B.pdf › Supplemental Dataset 1/B-mRNA_rhythm_translation_nonrhyth/Isoc2a_set_B.pdf]

# Itga3

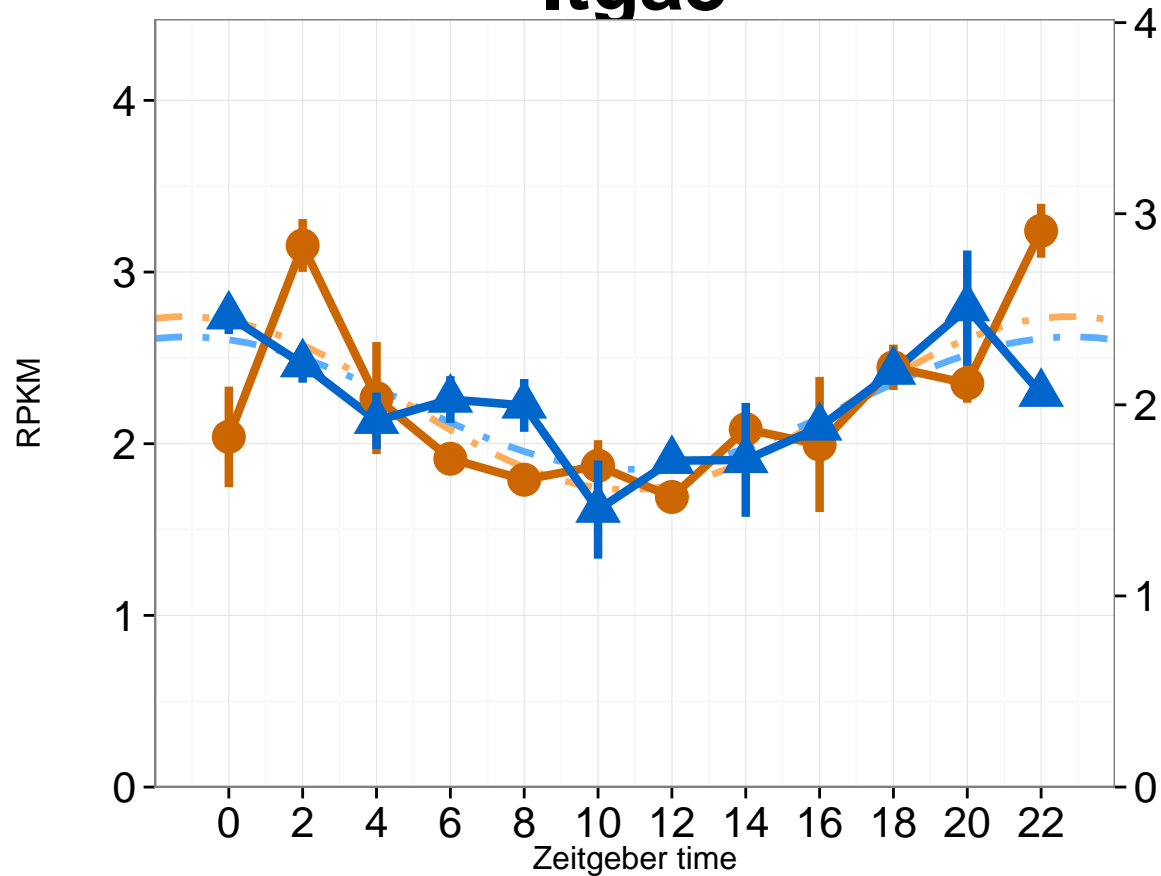

# Itga3

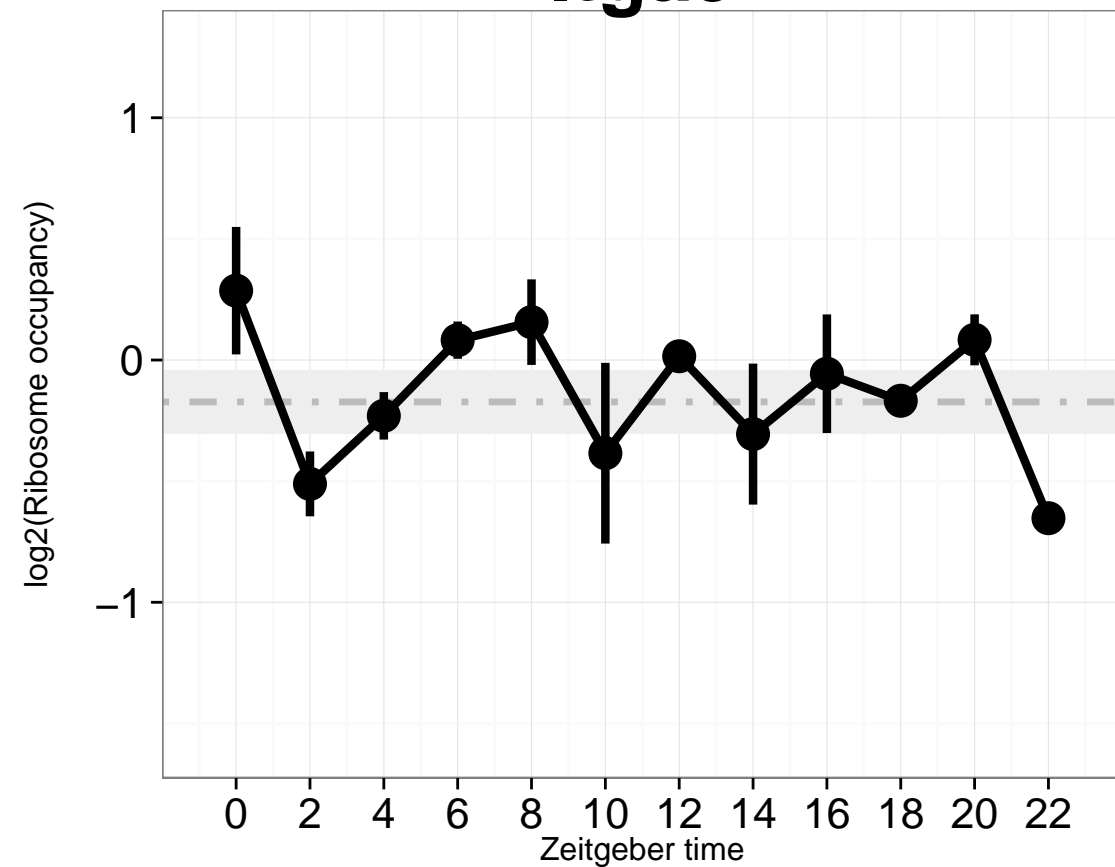

Supplement: SuppDataset_1.zip [file Itga3_set_B.pdf › Supplemental Dataset 1/B-mRNA_rhythm_translation_nonrhyth/Itga3_set_B.pdf]

# Itgb5

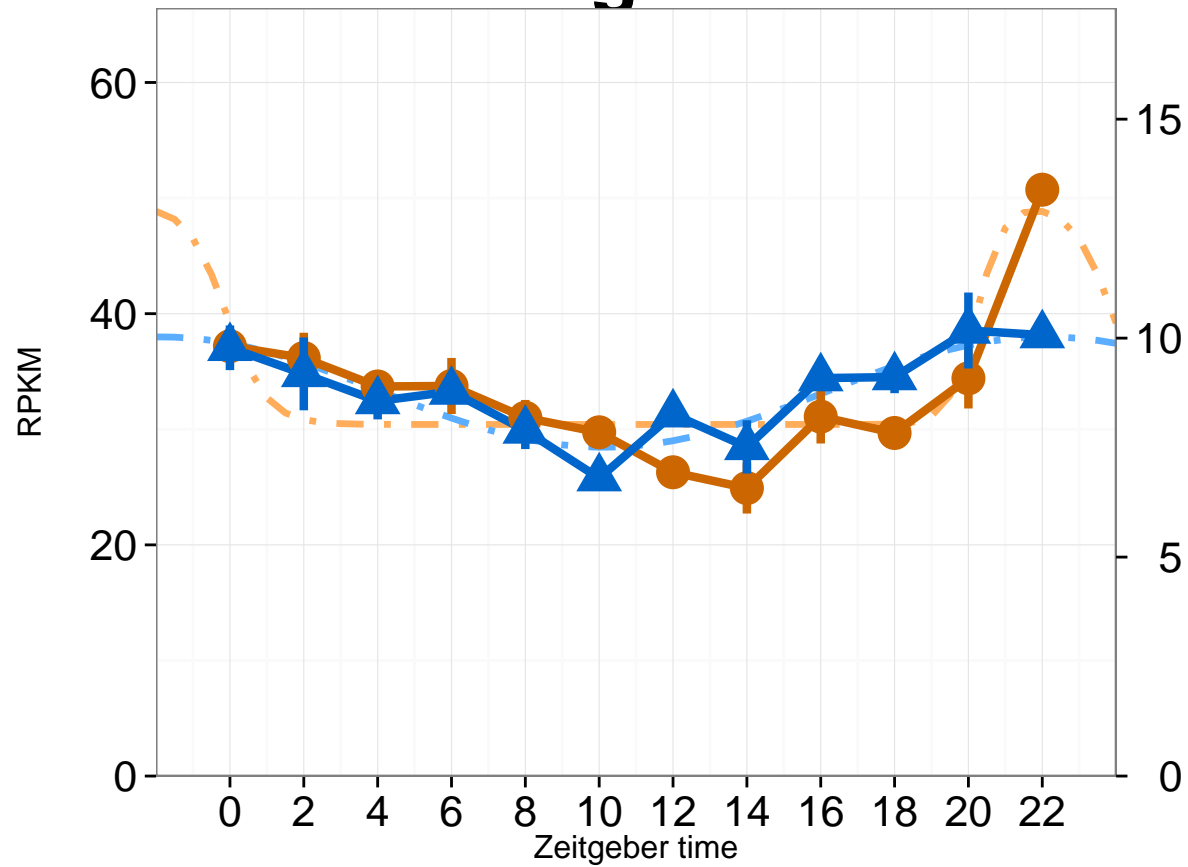

# Itgb5

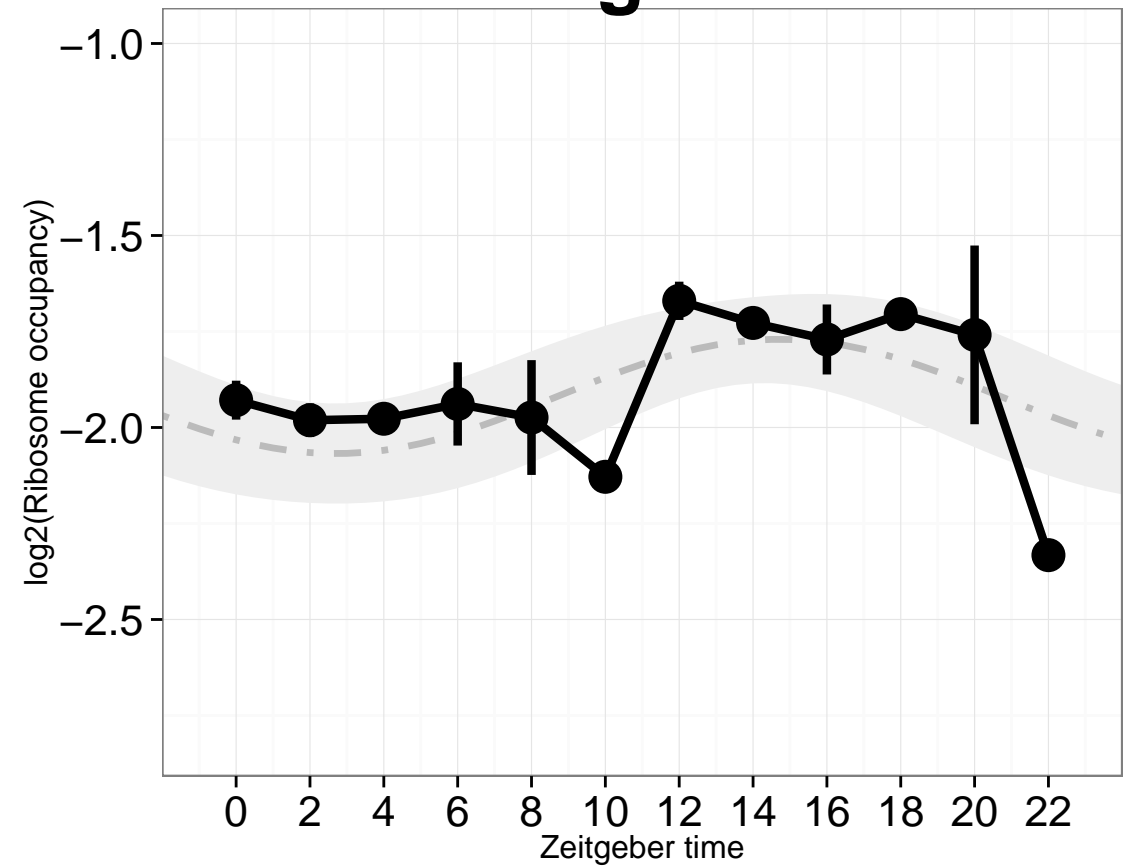

Supplement: SuppDataset_1.zip [file Itgb5_set_B.pdf › Supplemental Dataset 1/B-mRNA_rhythm_translation_nonrhyth/Itgb5_set_B.pdf]

## Jam3

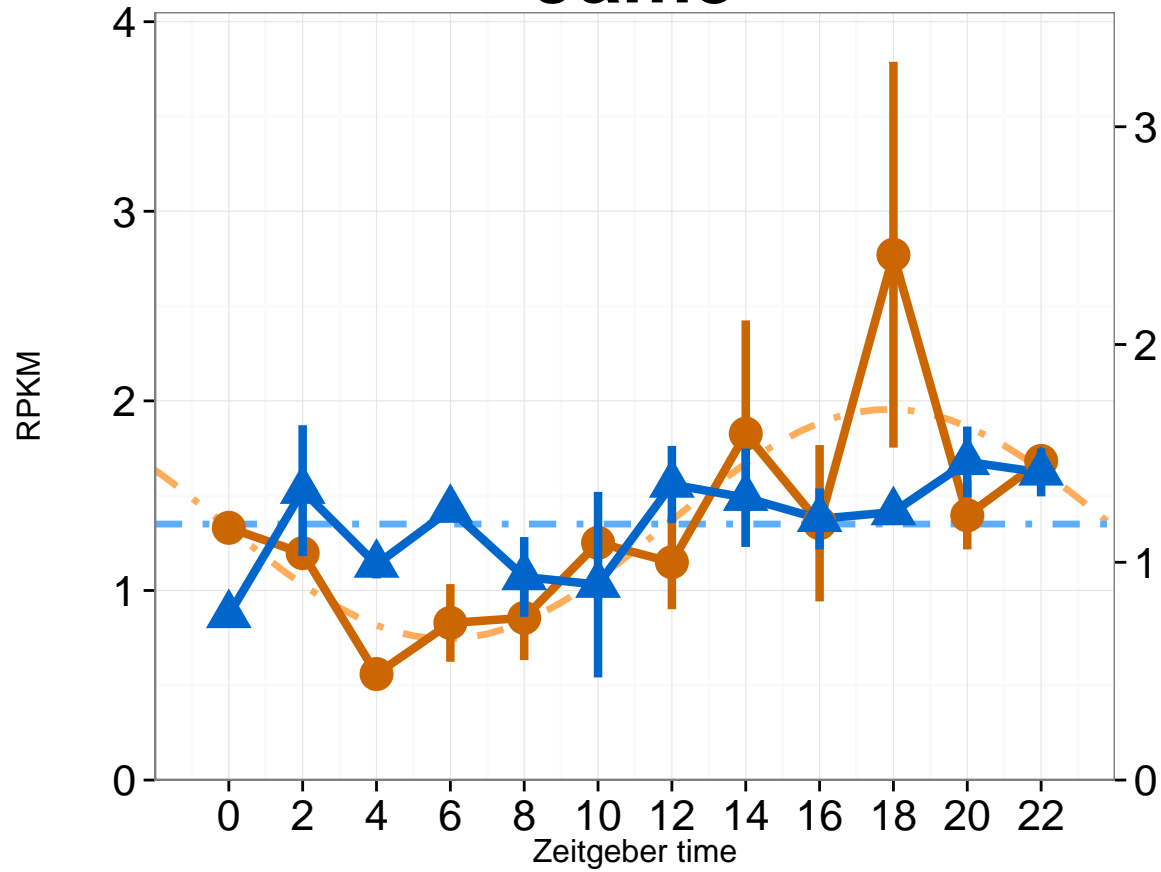

## Jam3

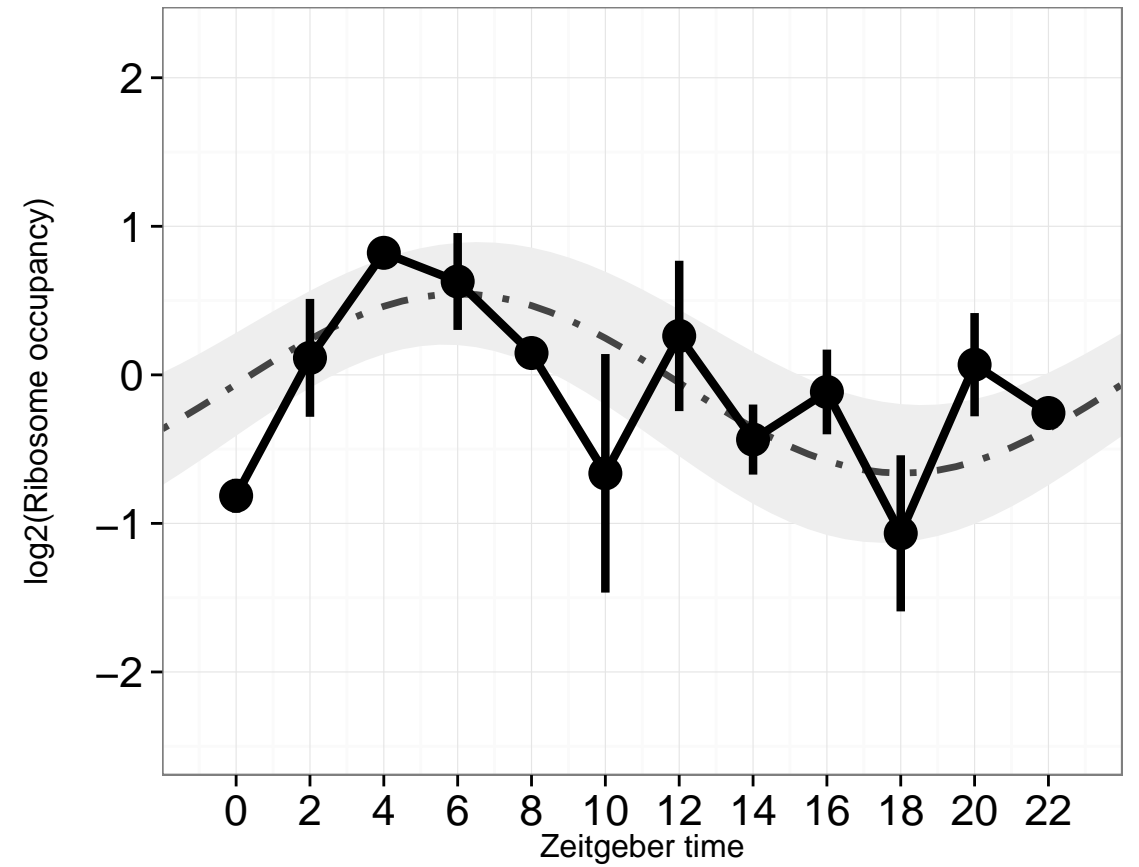

Supplement: SuppDataset_1.zip [file Jam3_set_B.pdf › Supplemental Dataset 1/B-mRNA_rhythm_translation_nonrhyth/Jam3_set_B.pdf]

## Josd2

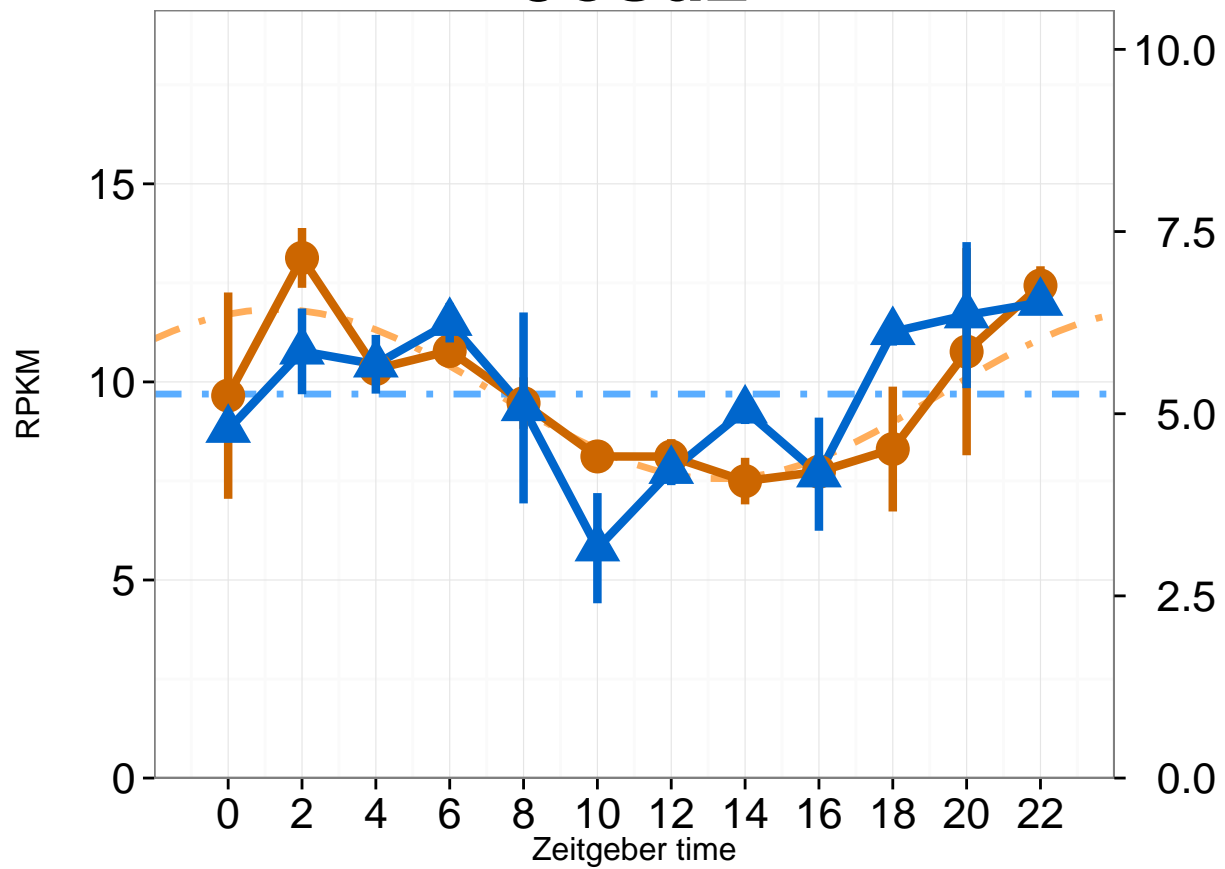

## Josd2

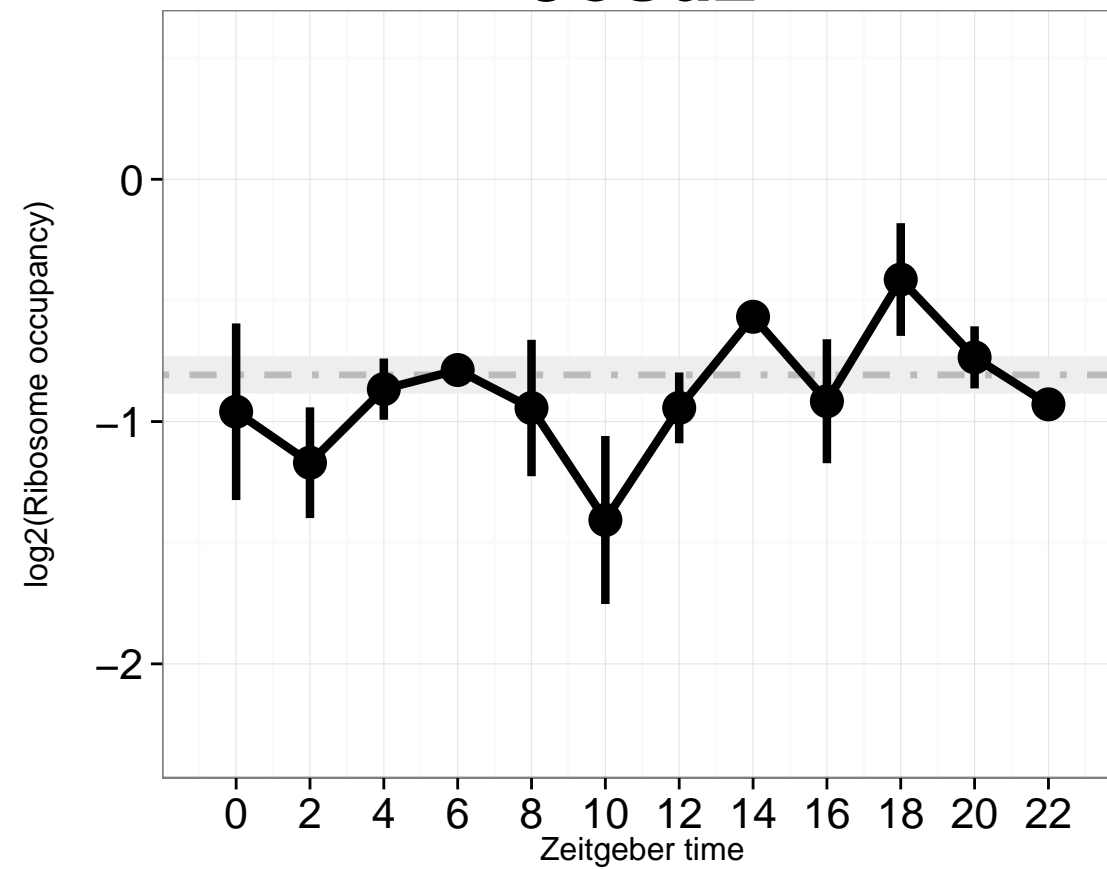

Supplement: SuppDataset_1.zip [file Josd2_set_B.pdf › Supplemental Dataset 1/B-mRNA_rhythm_translation_nonrhyth/Josd2_set_B.pdf]

# Katnb1

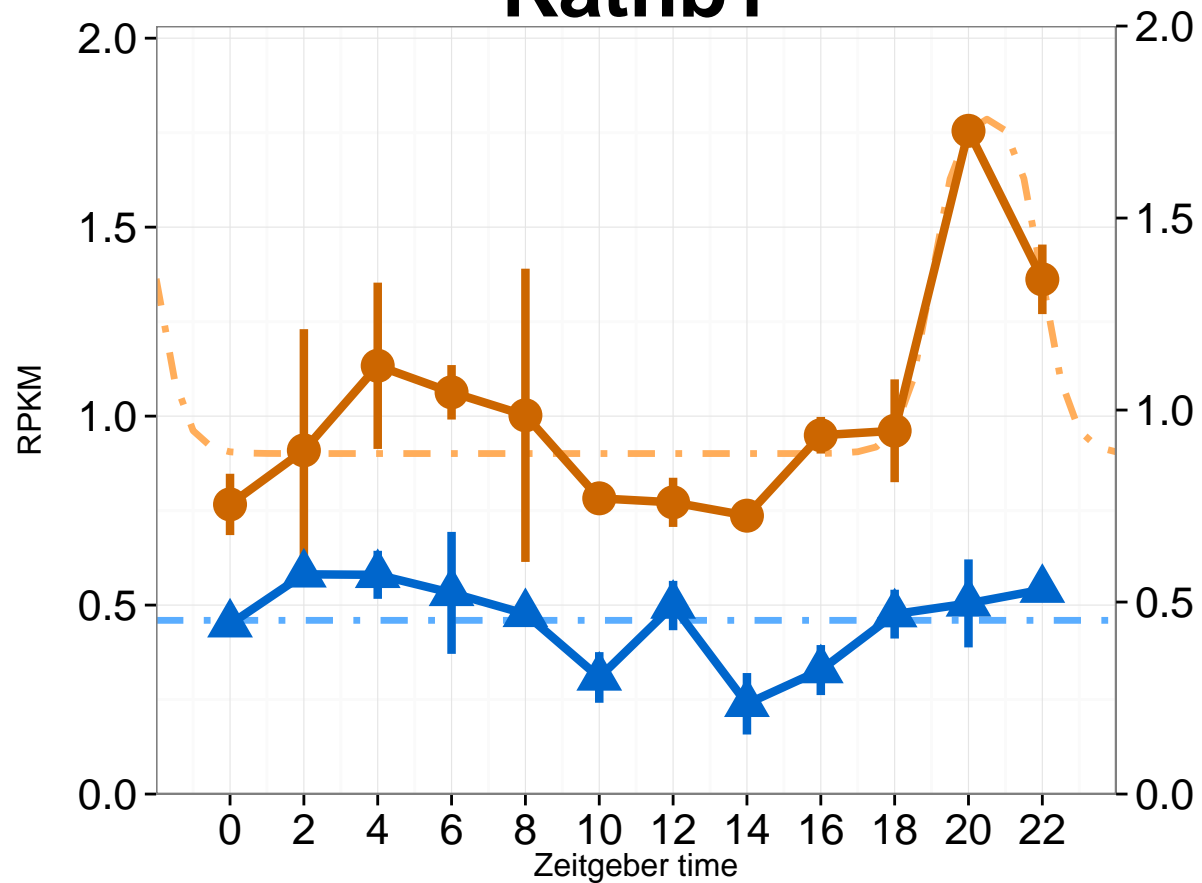

# Katnb1

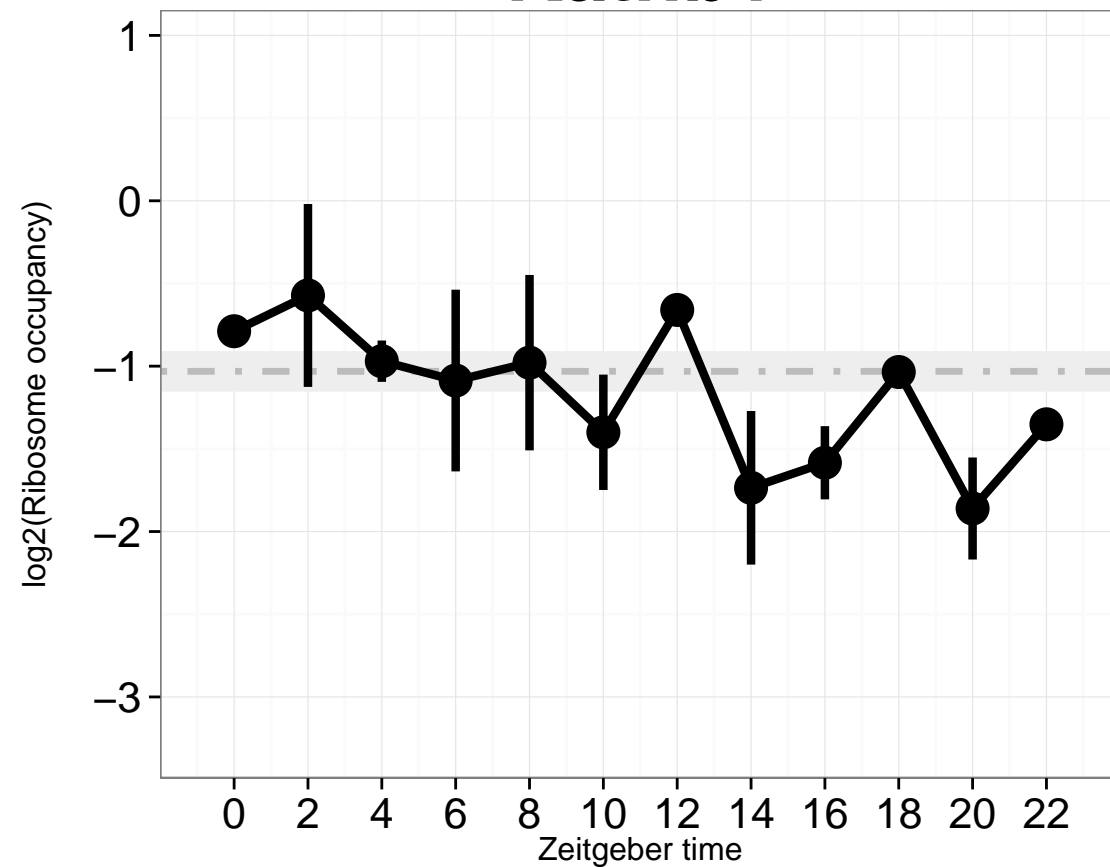

Supplement: SuppDataset_1.zip [file Katnb1_set_B.pdf › Supplemental Dataset 1/B-mRNA_rhythm_translation_nonrhyth/Katnb1_set_B.pdf]

## Kcnk10

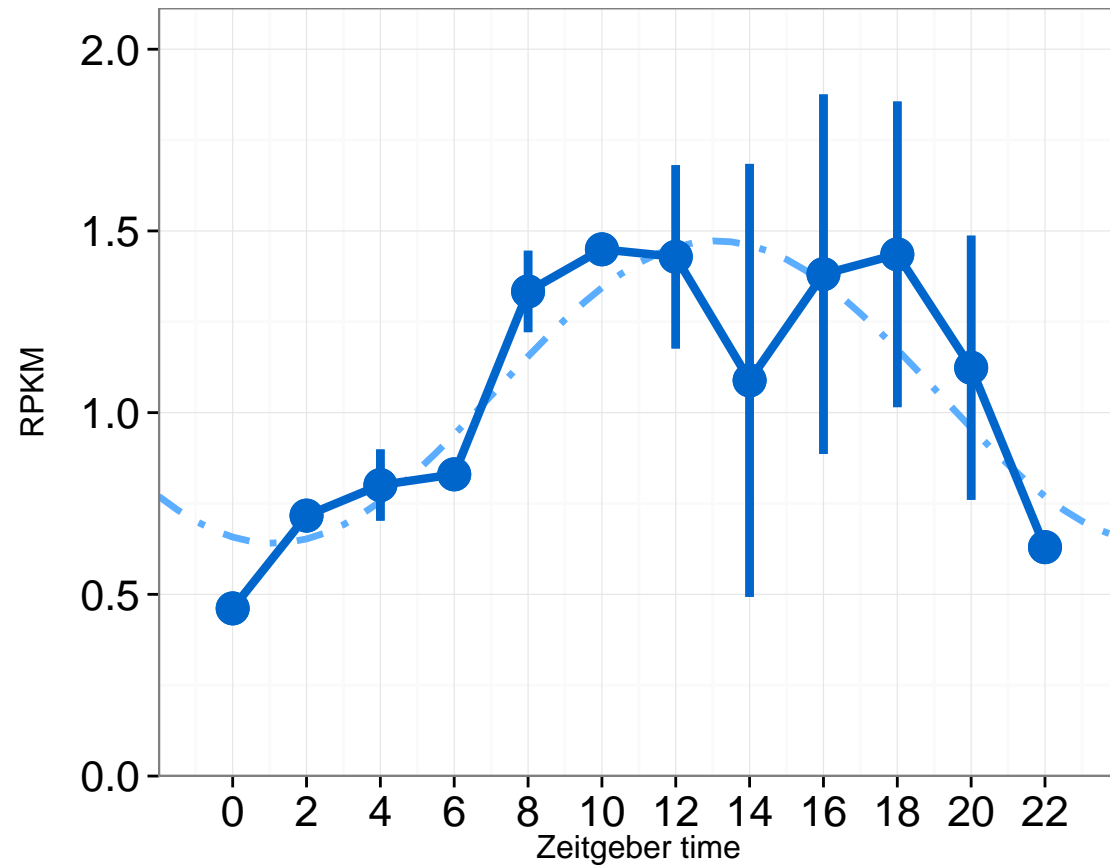

## Kcnk10 log2(Ribosome occupancy)

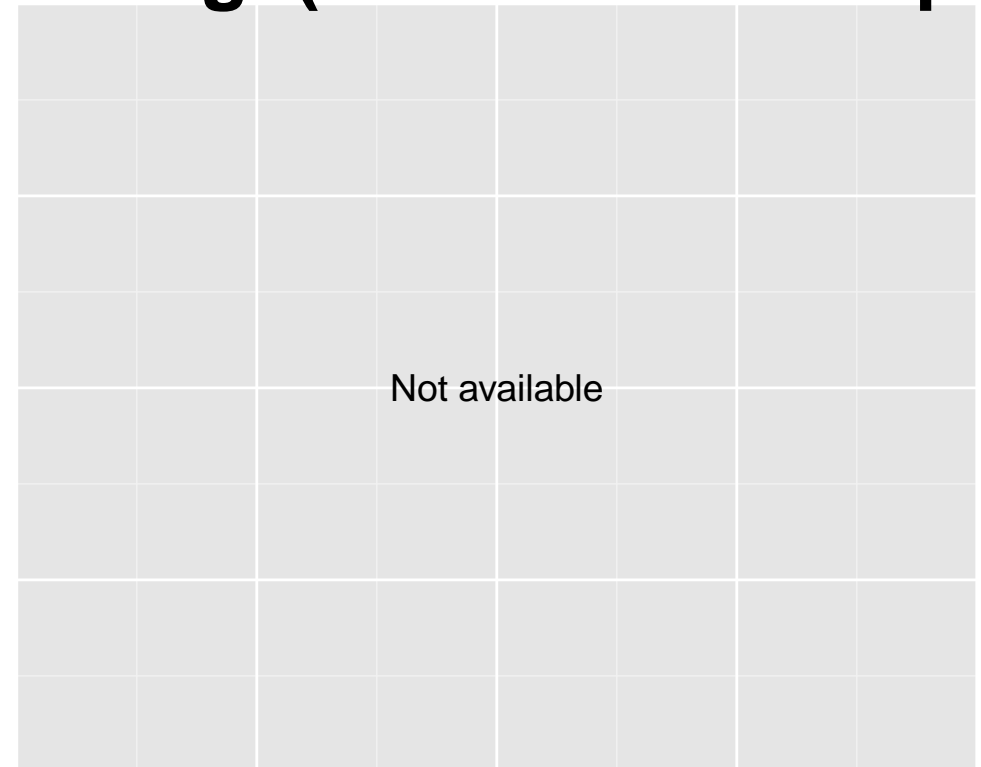

Supplement: SuppDataset_1.zip [file Kcnk10_set_B.pdf › Supplemental Dataset 1/B-mRNA_rhythm_translation_nonrhyth/Kcnk10_set_B.pdf]

## Kcnn1

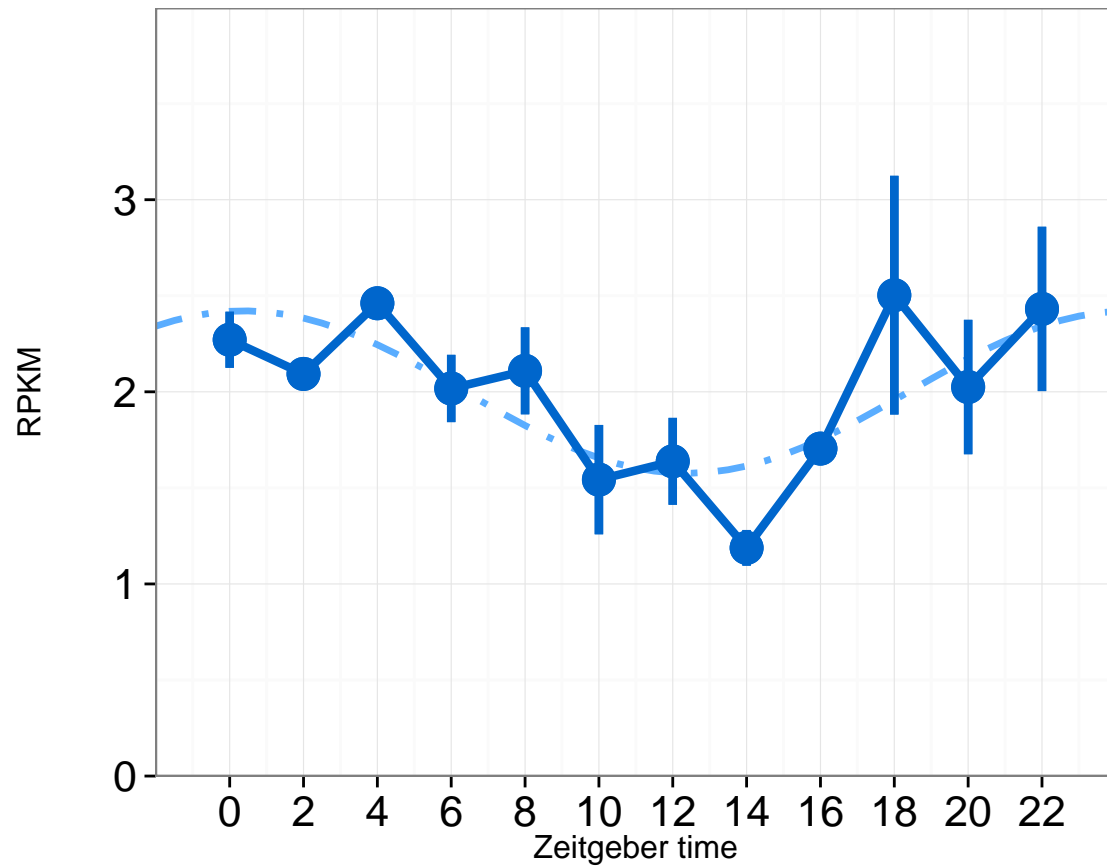

## Kcnn1 log2(Ribosome occupancy

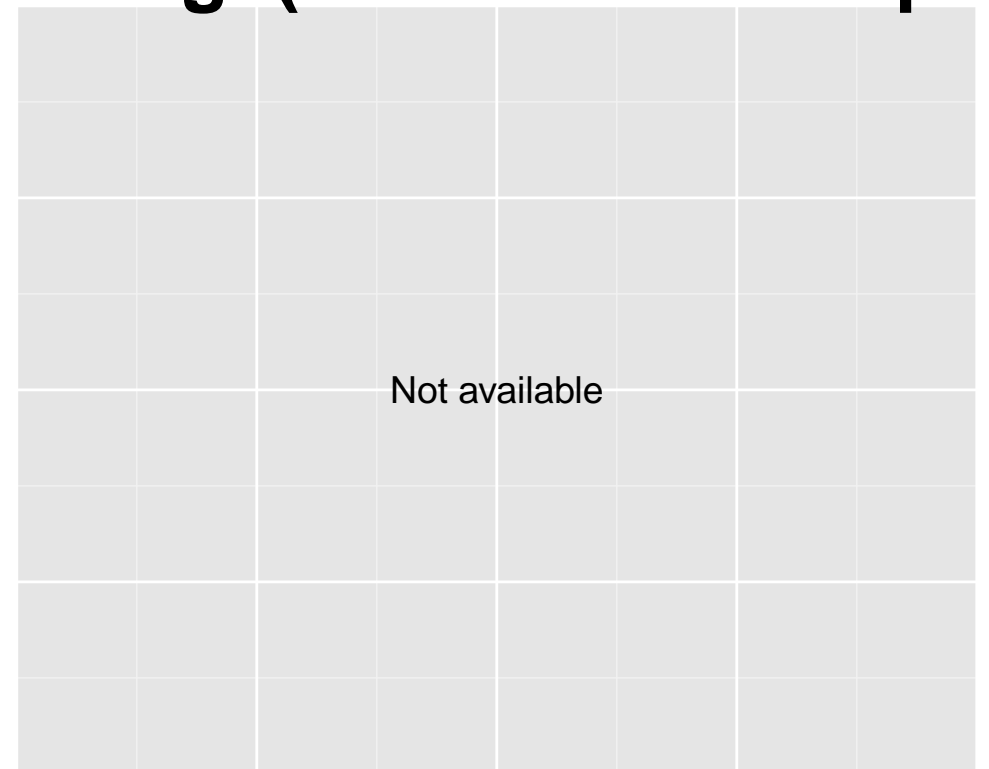

Supplement: SuppDataset_1.zip [file Kcnn1_set_B.pdf › Supplemental Dataset 1/B-mRNA_rhythm_translation_nonrhyth/Kcnn1_set_B.pdf]

## Kctd1

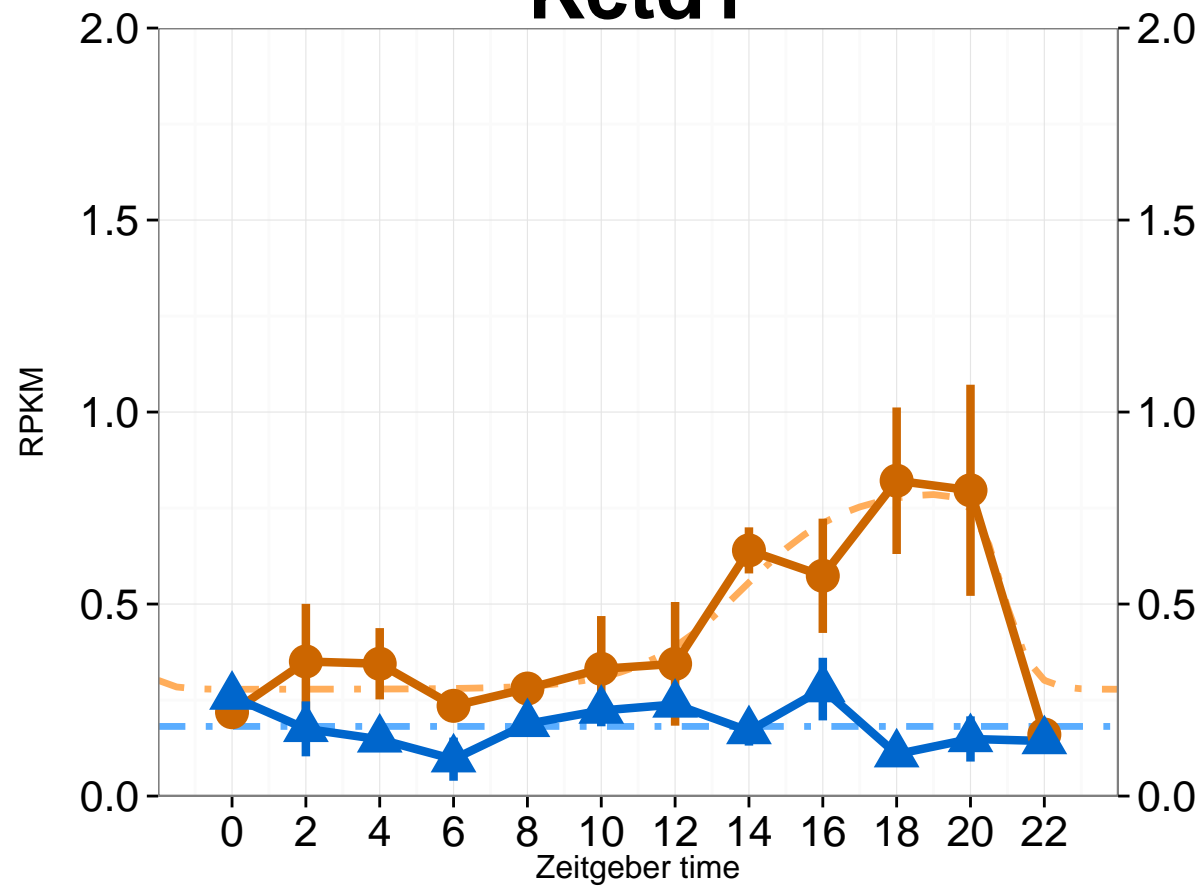

## Kctd1

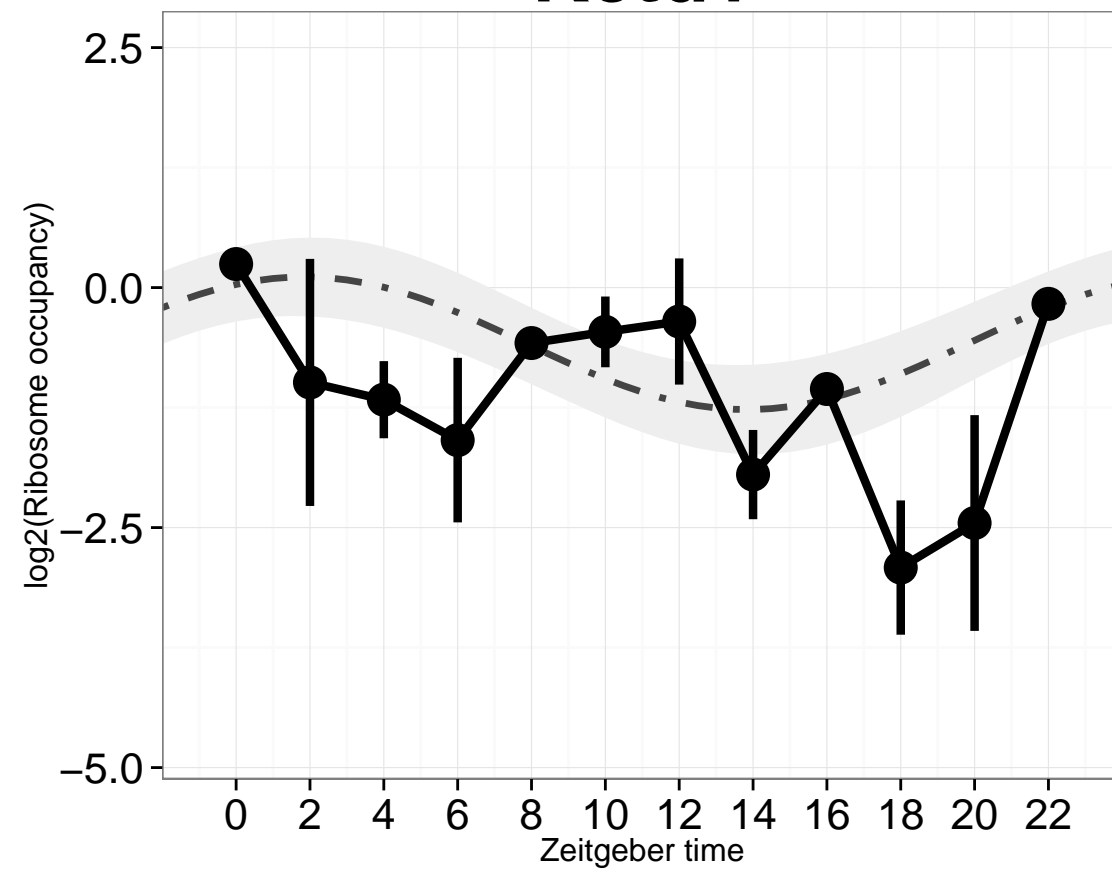

Supplement: SuppDataset_1.zip [file Kctd1_set_B.pdf › Supplemental Dataset 1/B-mRNA_rhythm_translation_nonrhyth/Kctd1_set_B.pdf]

## Kdelc2

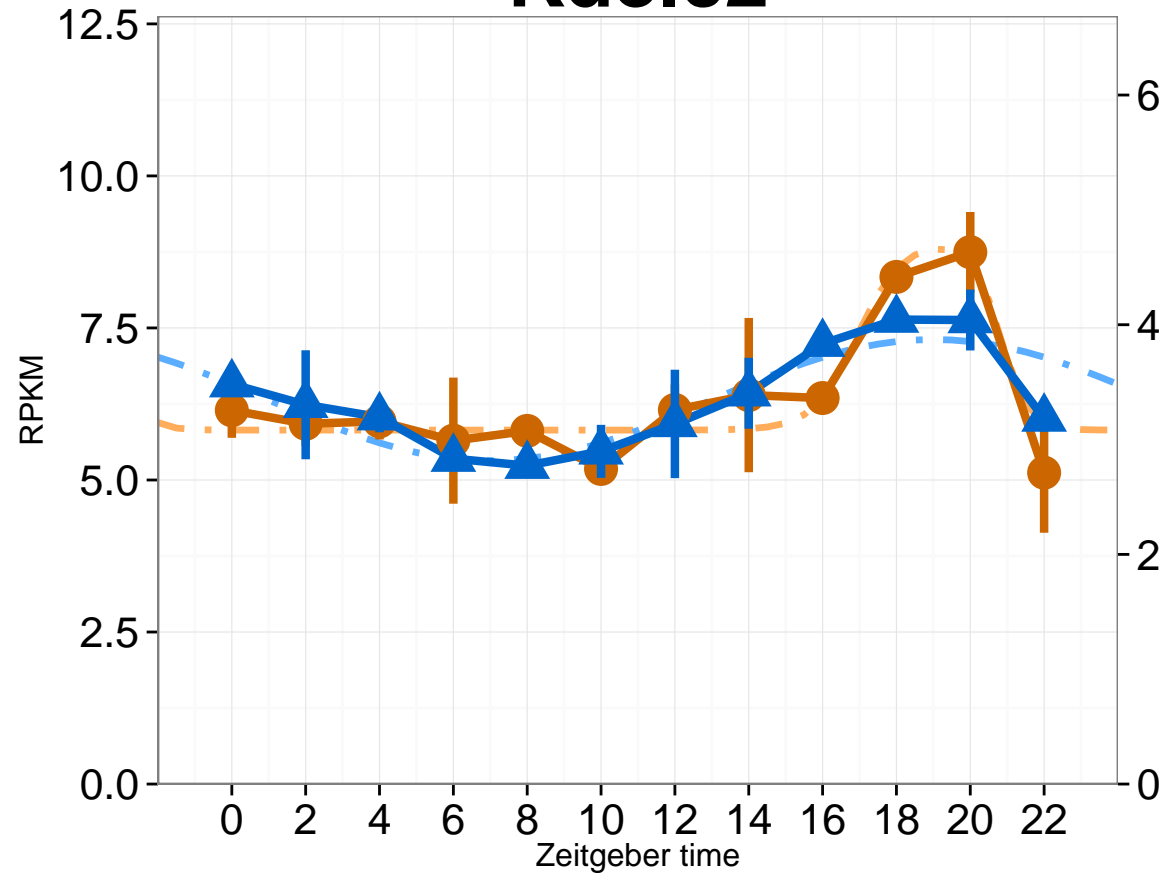

## Kdelc2

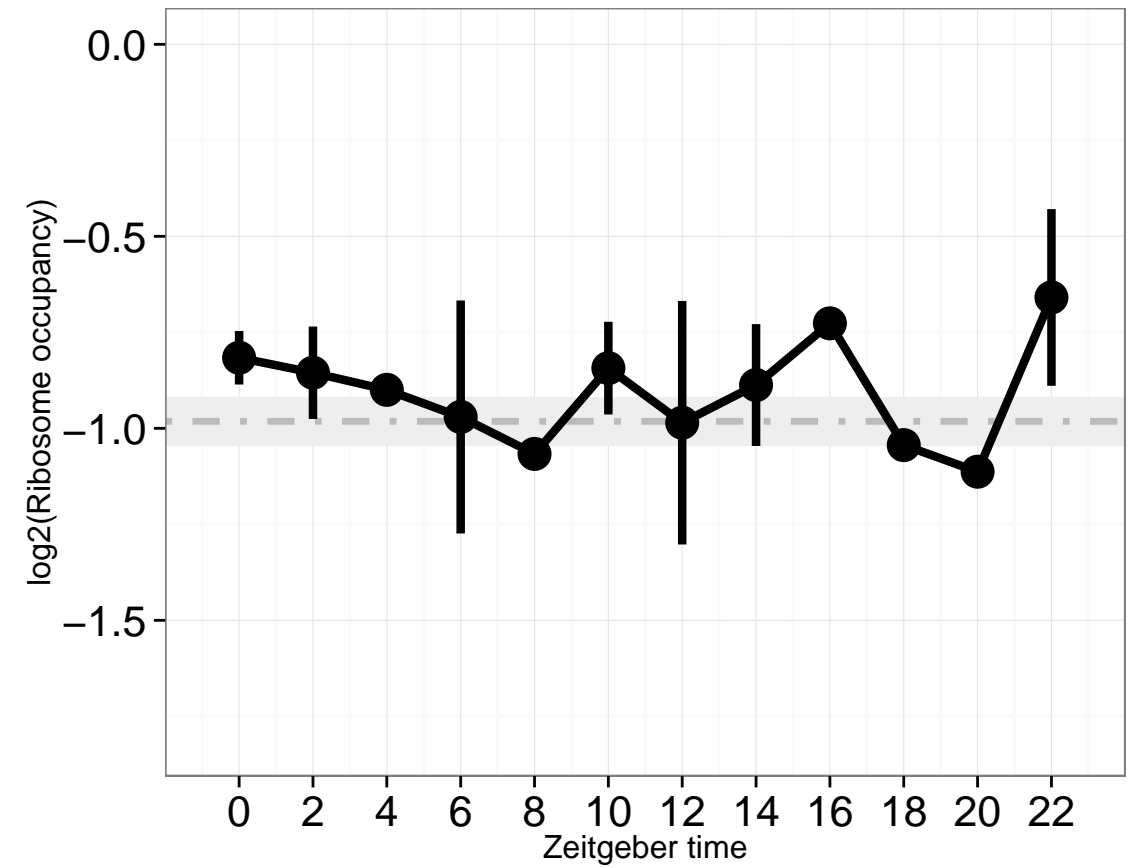

Supplement: SuppDataset_1.zip [file Kdelc2_set_B.pdf › Supplemental Dataset 1/B-mRNA_rhythm_translation_nonrhyth/Kdelc2_set_B.pdf]

# Kdm4a

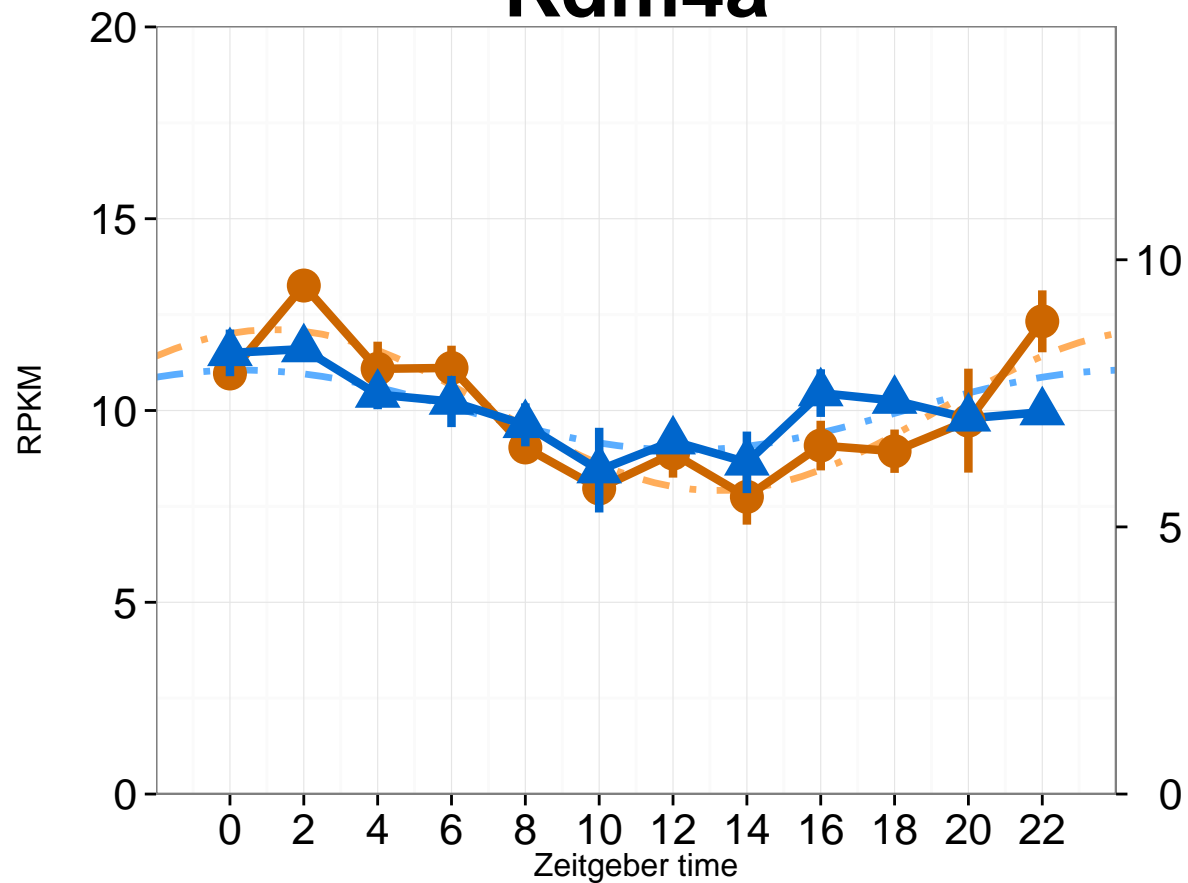

# Kdm4a

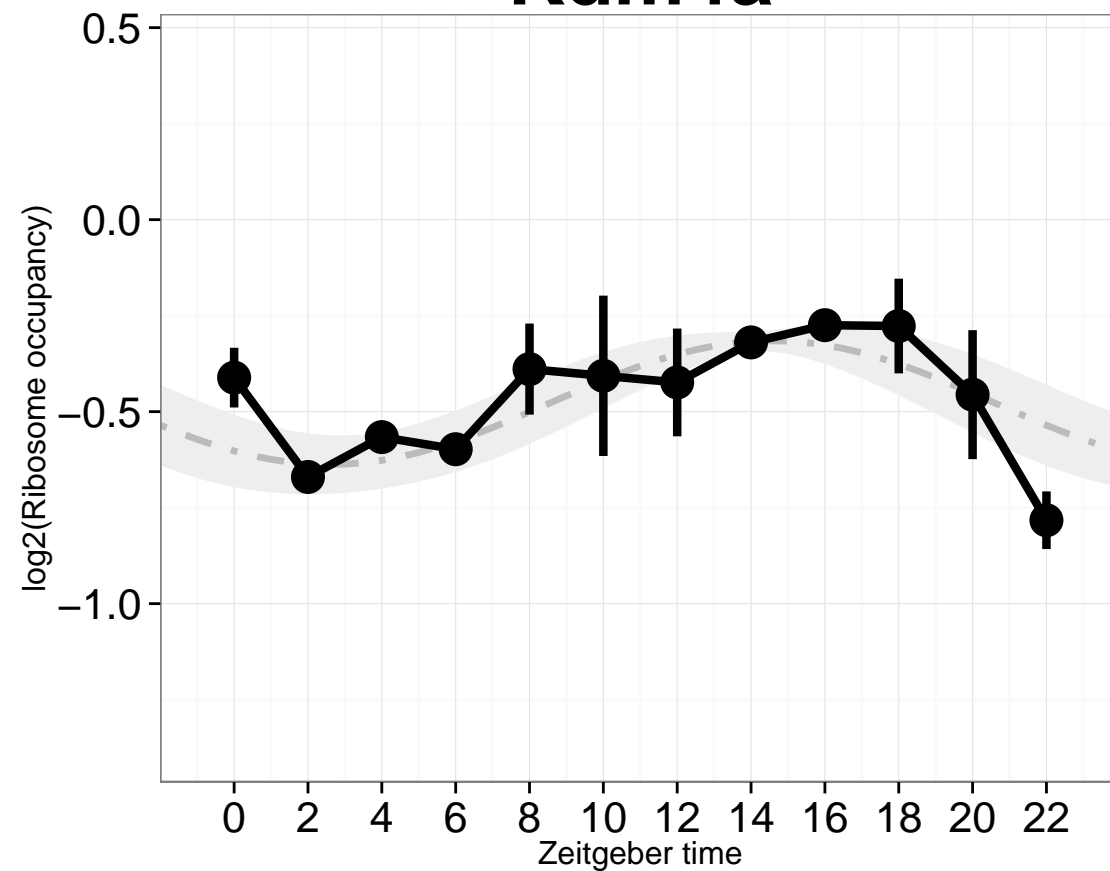

Supplement: SuppDataset_1.zip [file Kdm4a_set_B.pdf › Supplemental Dataset 1/B-mRNA_rhythm_translation_nonrhyth/Kdm4a_set_B.pdf]

# Kif26b

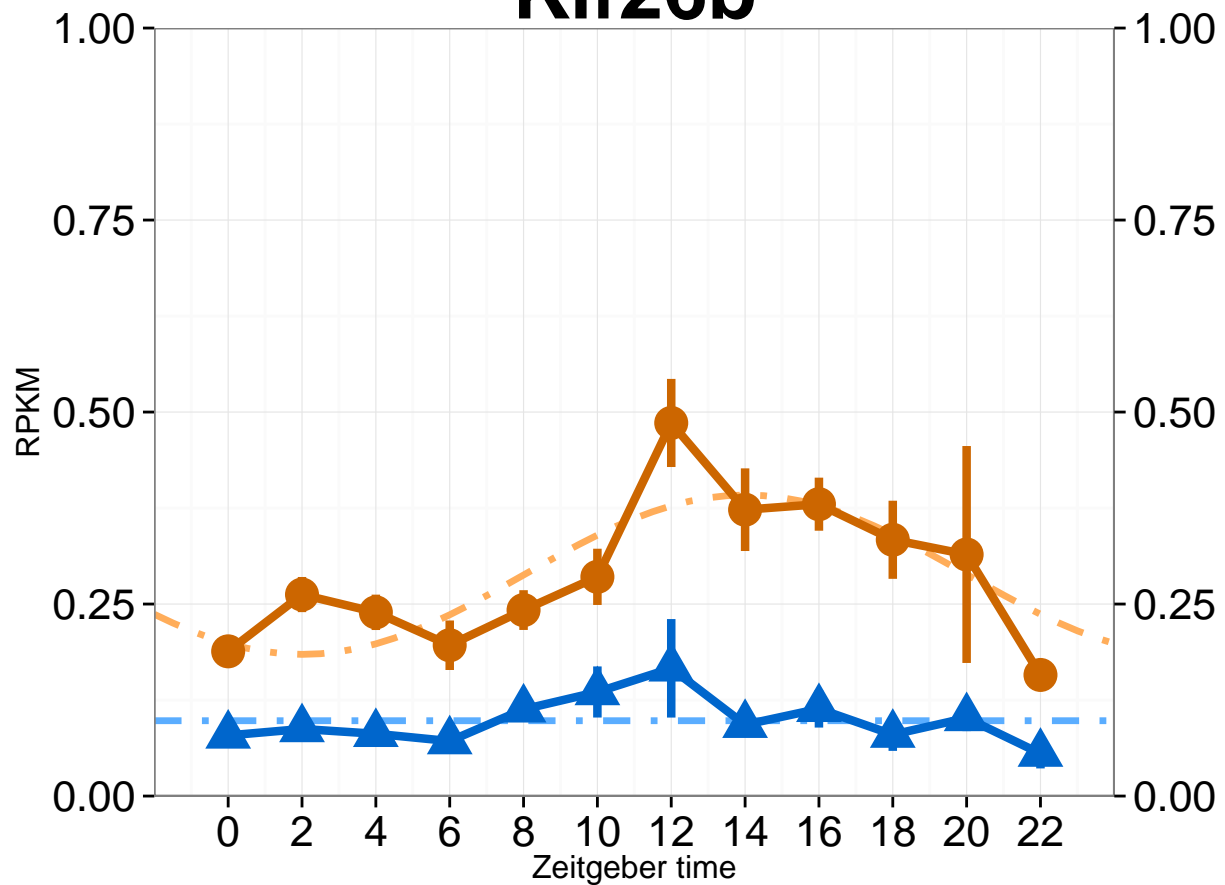

# Kif26b

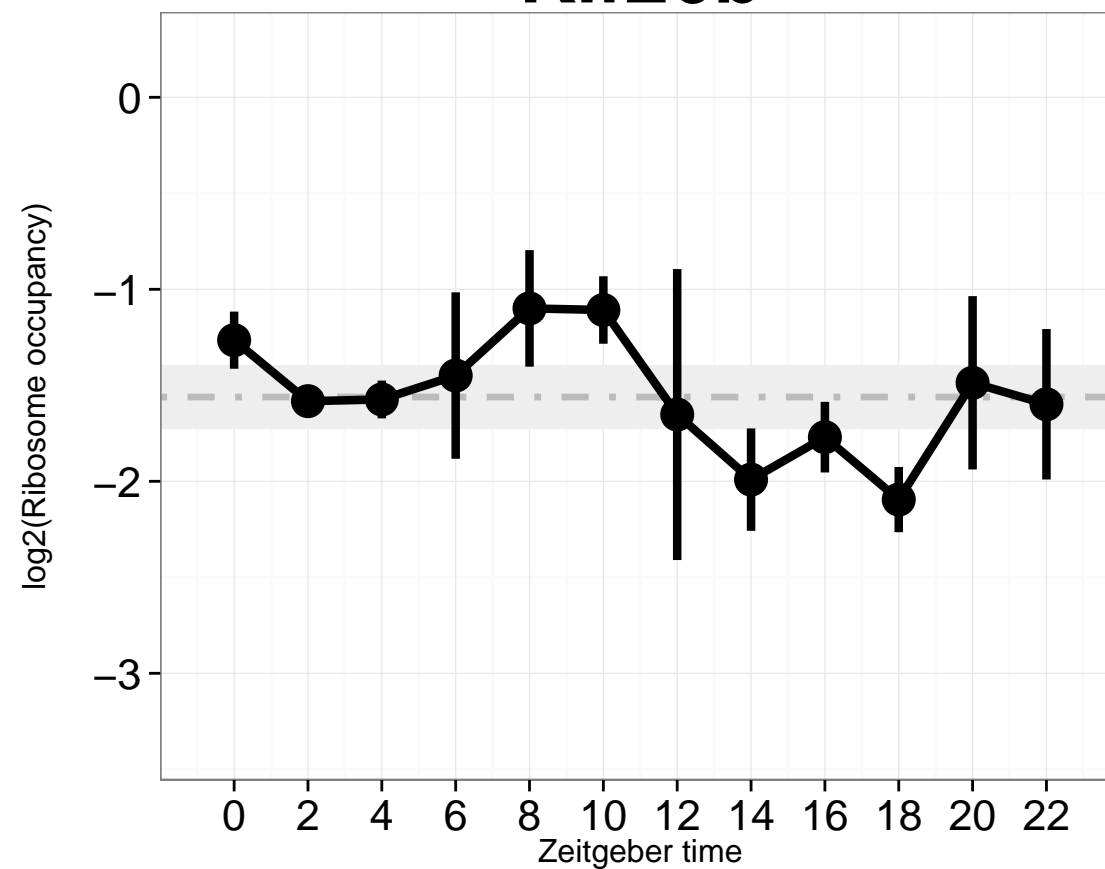

Supplement: SuppDataset_1.zip [file Kif26b_set_B.pdf › Supplemental Dataset 1/B-mRNA_rhythm_translation_nonrhyth/Kif26b_set_B.pdf]

## Kif3c

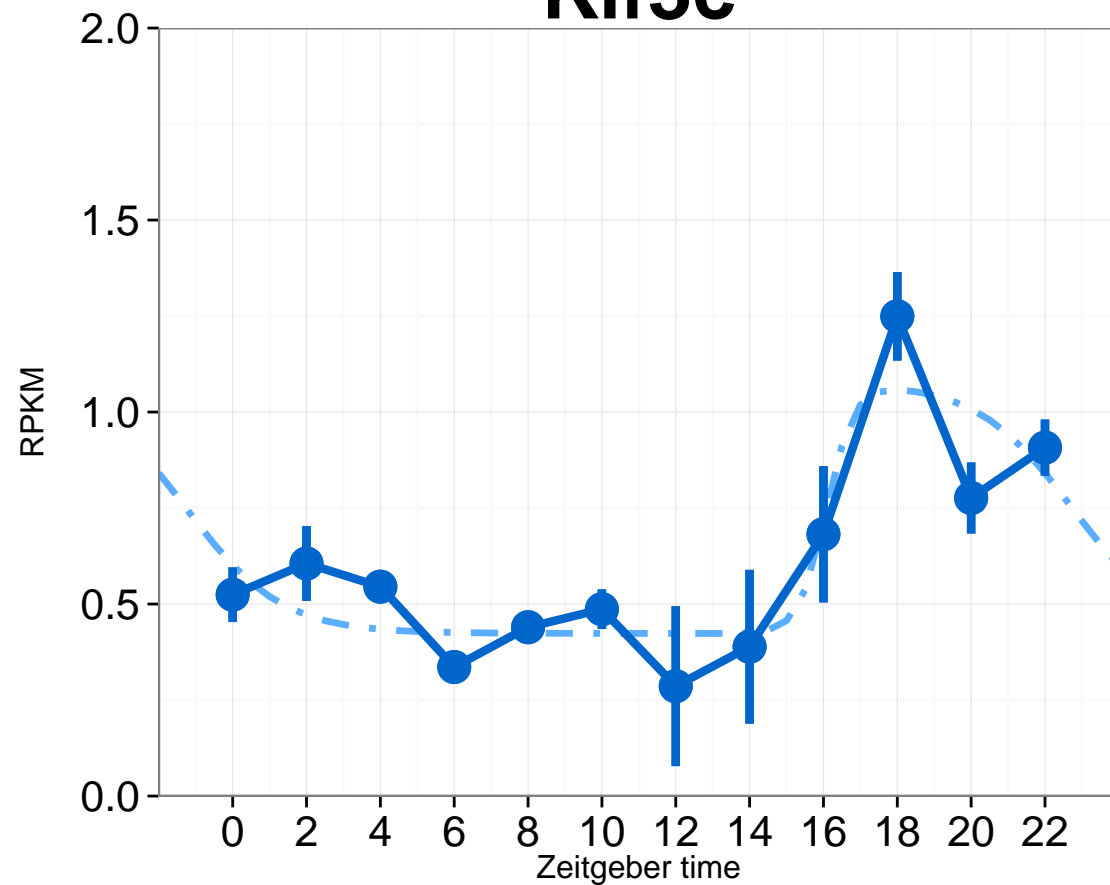

## Kif3c log<sub>2</sub>(Ribosome occupancy)

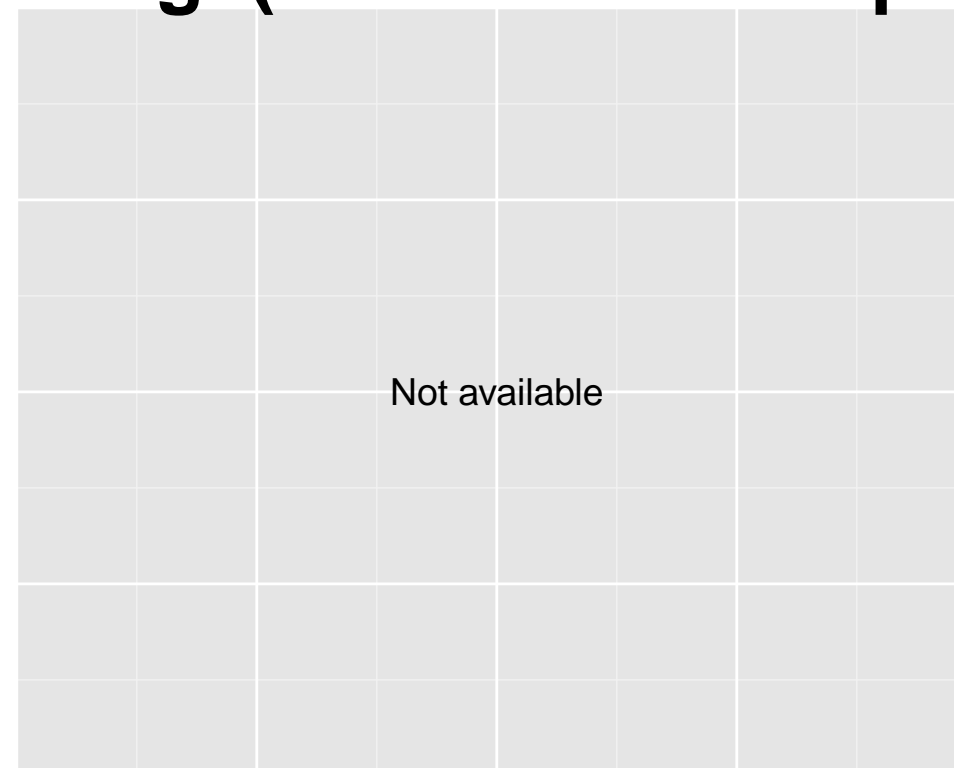

Supplement: SuppDataset_1.zip [file Kif3c_set_B.pdf › Supplemental Dataset 1/B-mRNA_rhythm_translation_nonrhyth/Kif3c_set_B.pdf]

## Kif4

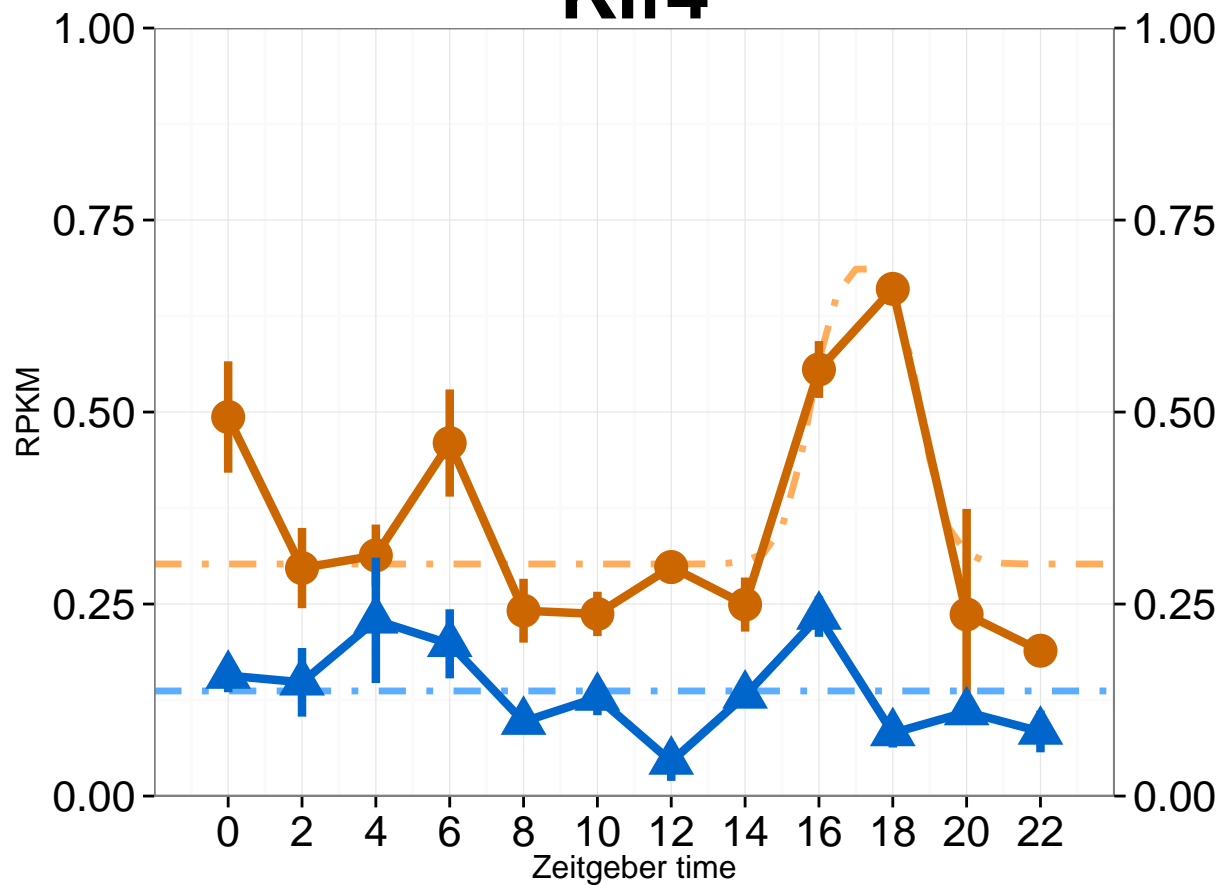

## Kif4

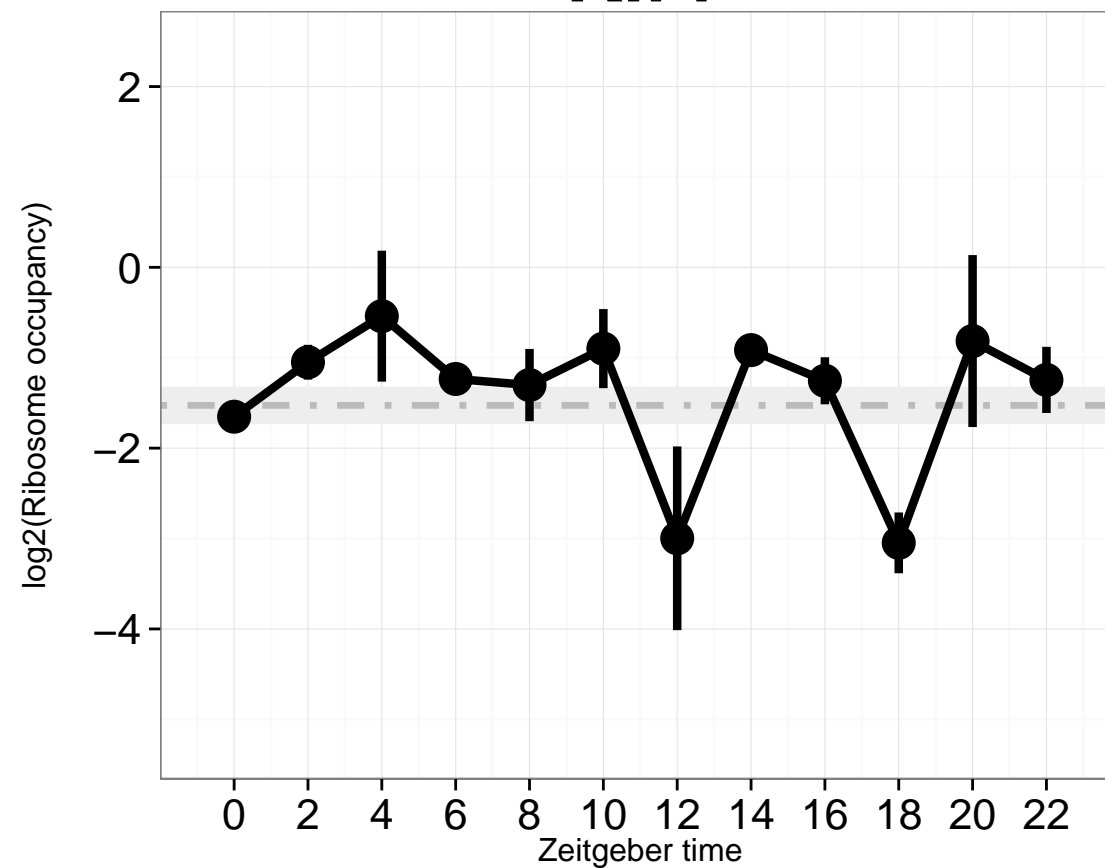

Supplement: SuppDataset_1.zip [file Kif4_set_B.pdf › Supplemental Dataset 1/B-mRNA_rhythm_translation_nonrhyth/Kif4_set_B.pdf]

## Kin

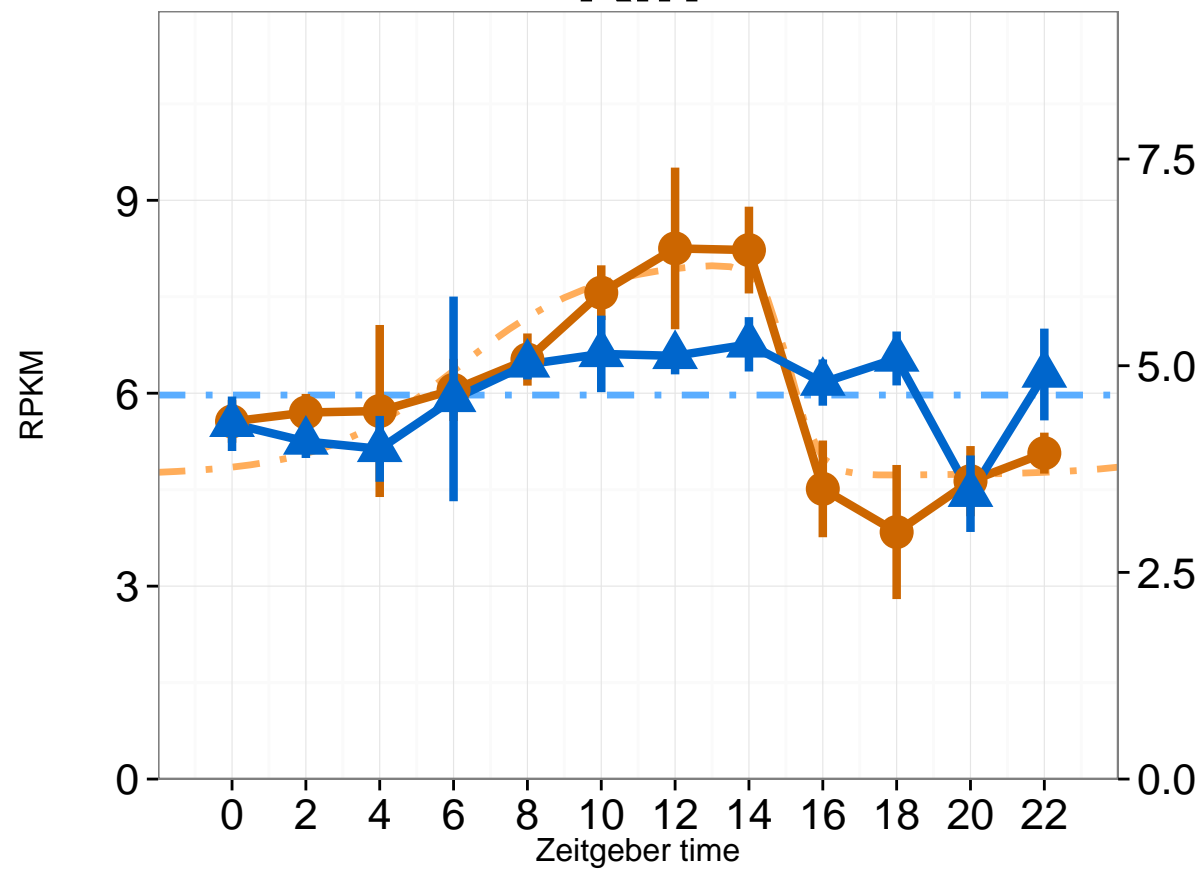

## Kin

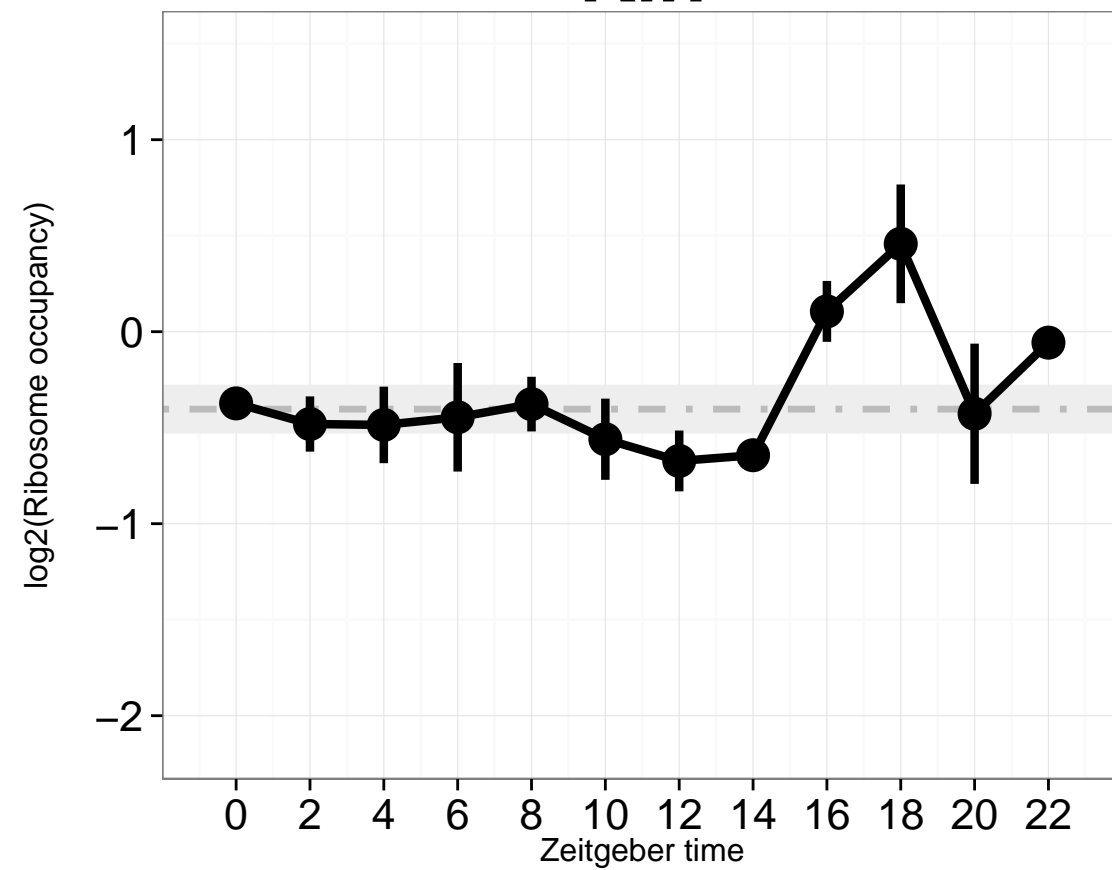

Supplement: SuppDataset_1.zip [file Kin_set_B.pdf › Supplemental Dataset 1/B-mRNA_rhythm_translation_nonrhyth/Kin_set_B.pdf]

## Kirrel

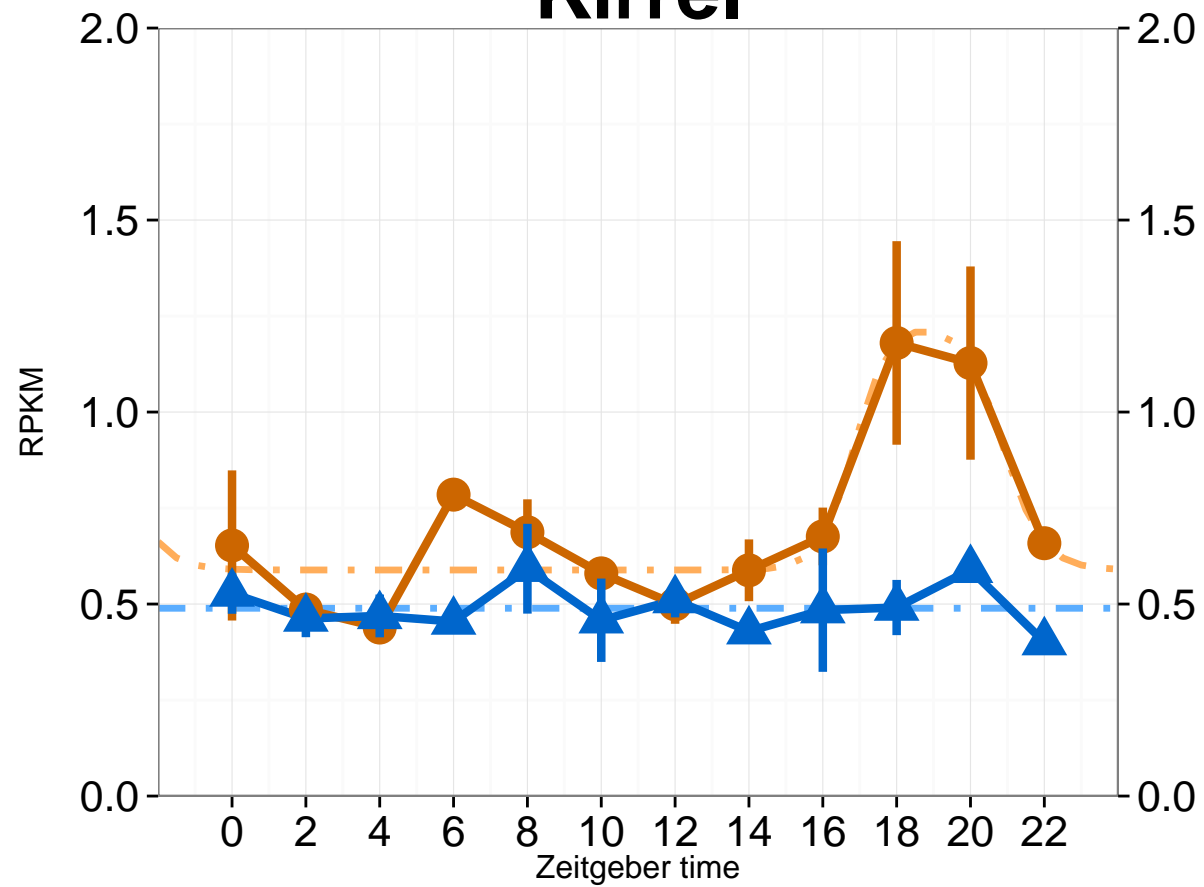

## Kirrel

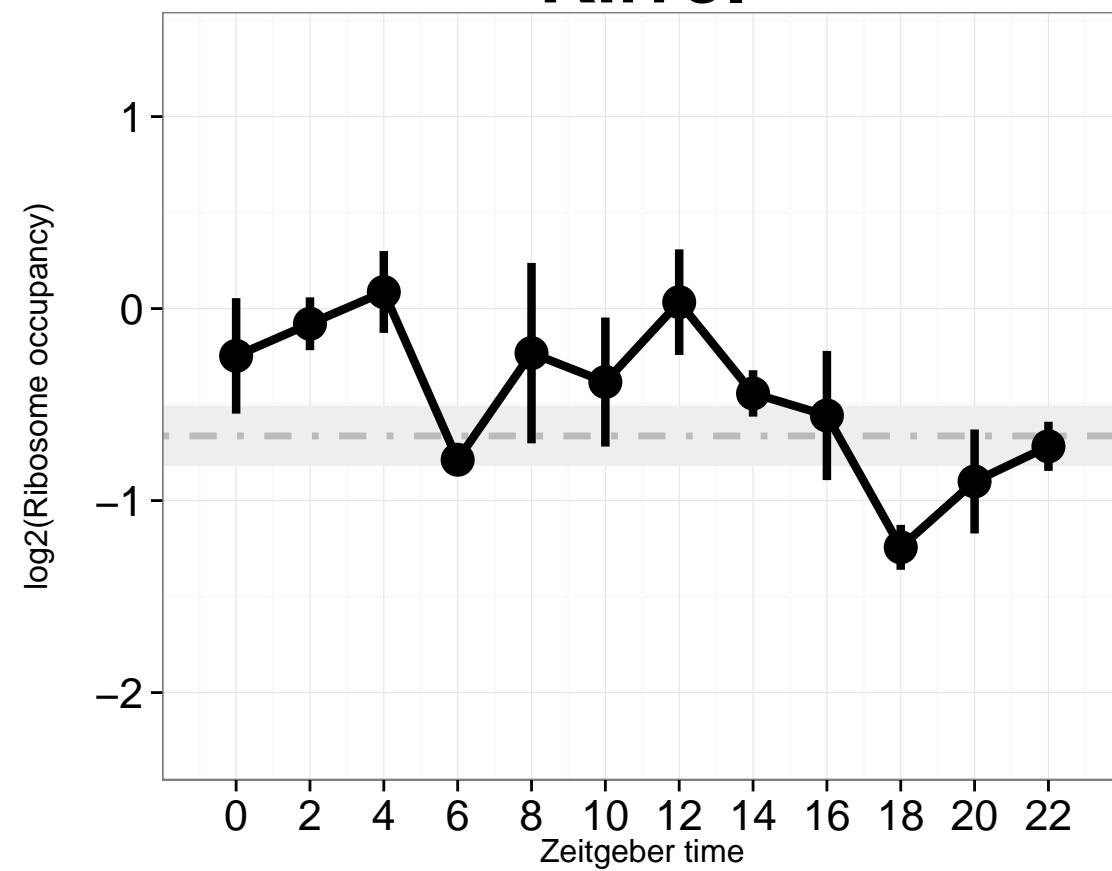

Supplement: SuppDataset_1.zip [file Kirrel_set_B.pdf › Supplemental Dataset 1/B-mRNA_rhythm_translation_nonrhyth/Kirrel_set_B.pdf]

# Kitl

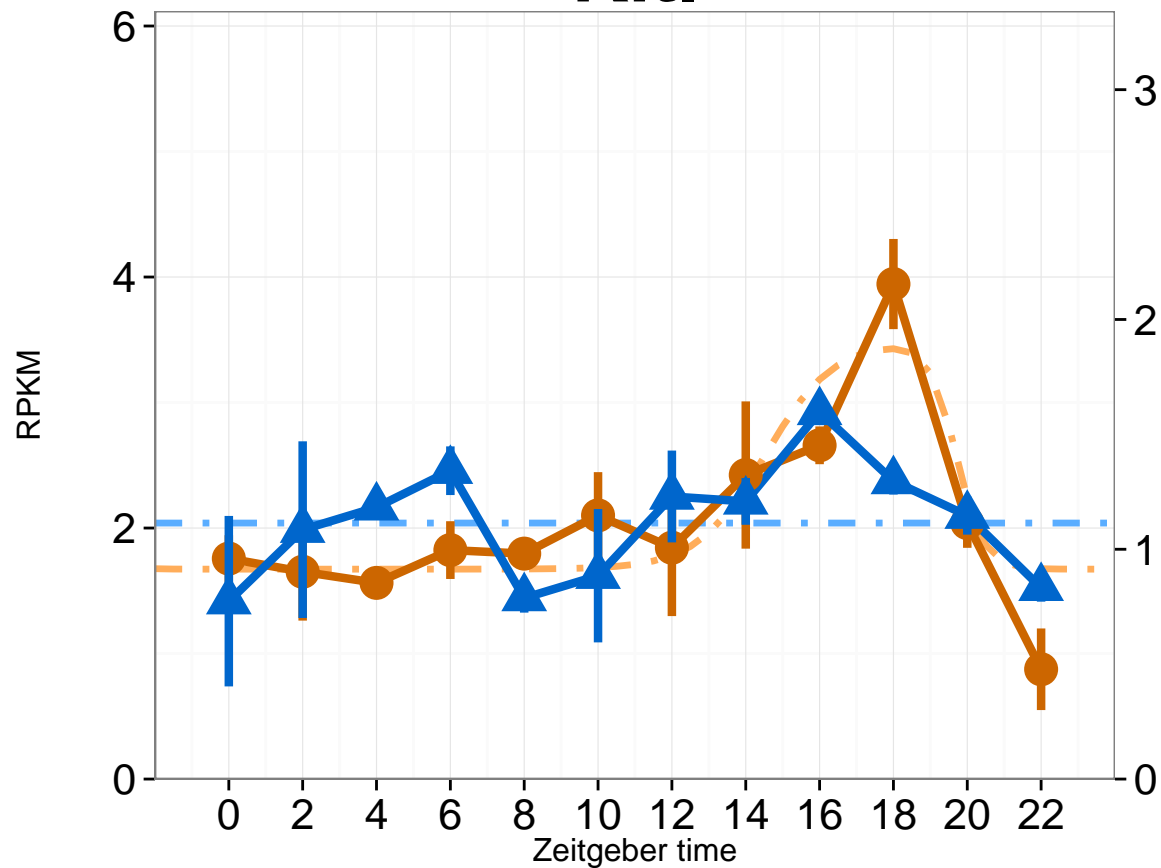

# Kitl

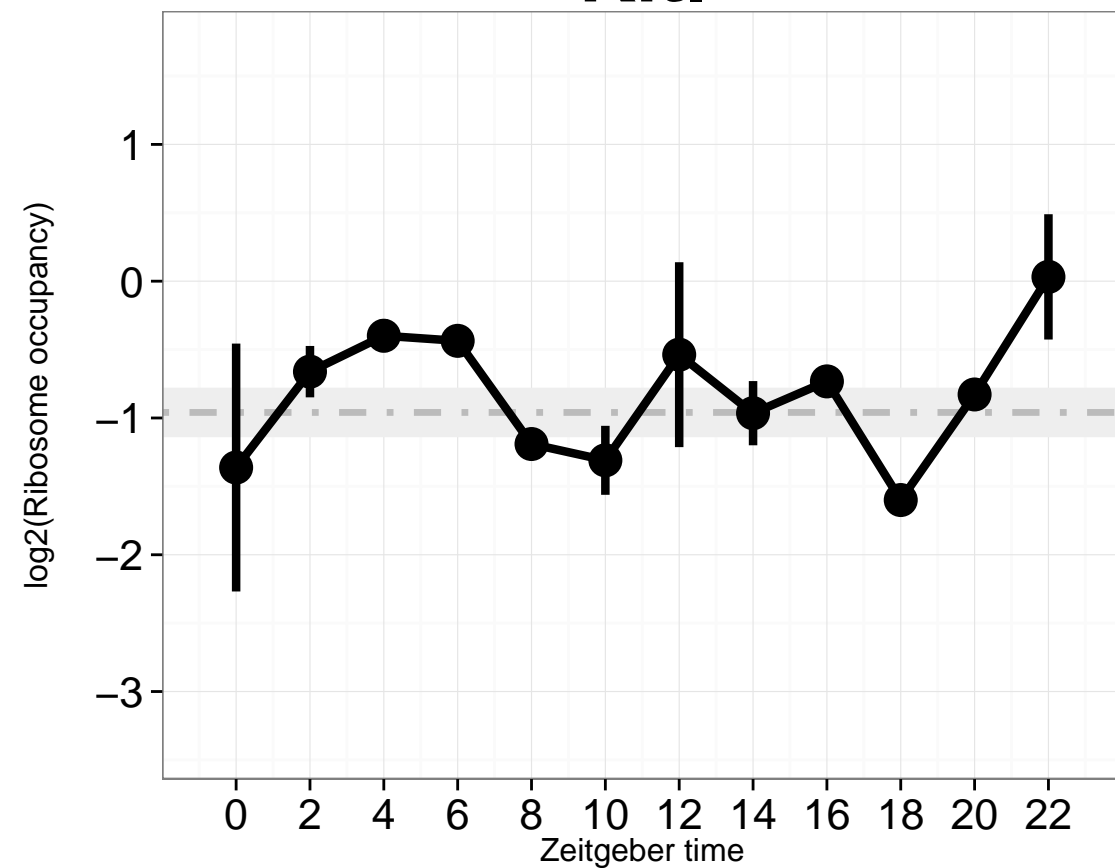

Supplement: SuppDataset_1.zip [file Kitl_set_B.pdf › Supplemental Dataset 1/B-mRNA_rhythm_translation_nonrhyth/Kitl_set_B.pdf]

## Klhdc8a

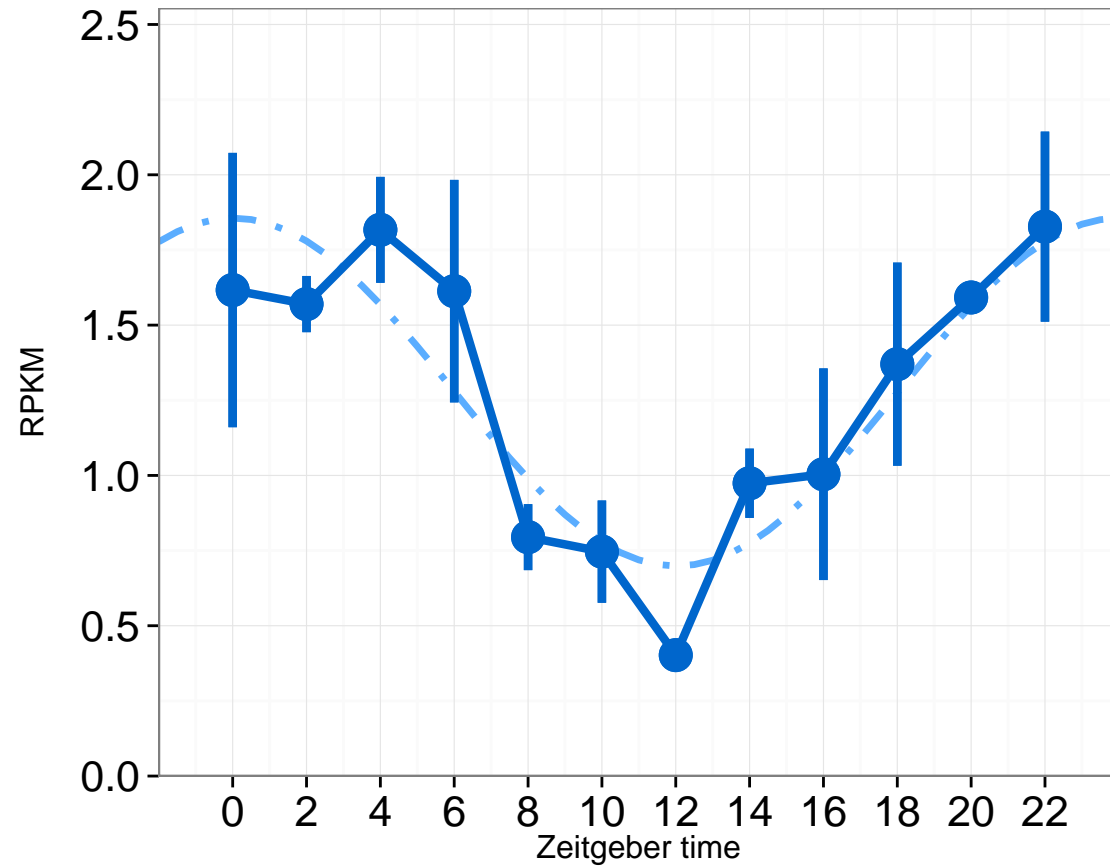

## Klhdc8a log2(Ribosome occupanc

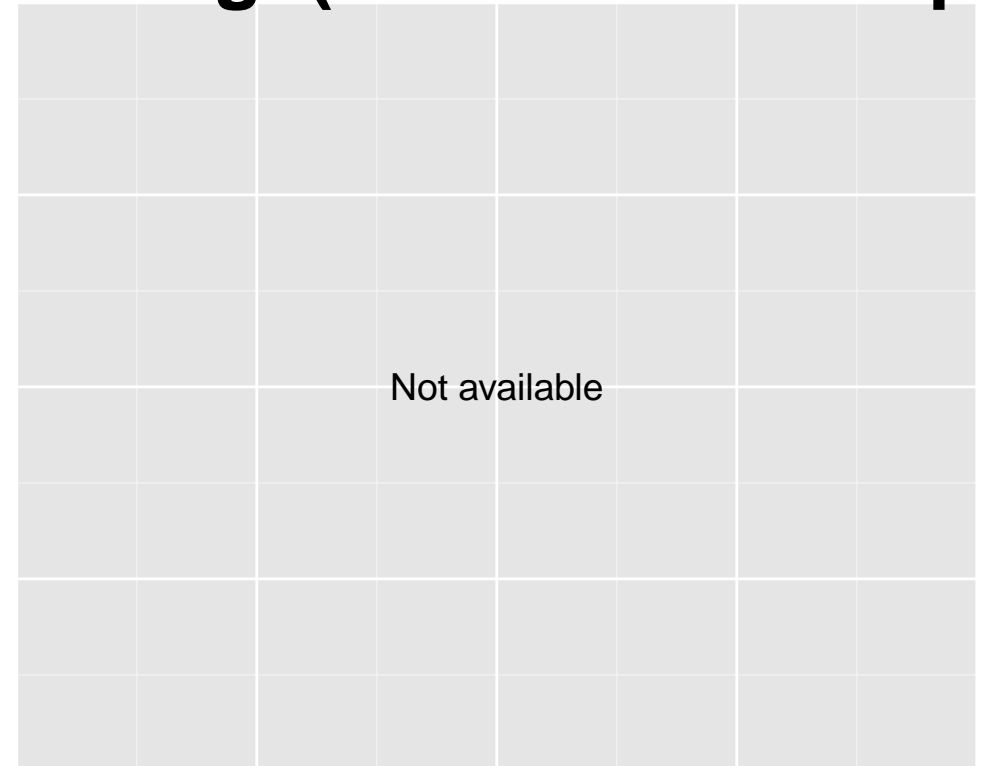

Supplement: SuppDataset_1.zip [file Klhdc8a_set_B.pdf › Supplemental Dataset 1/B-mRNA_rhythm_translation_nonrhyth/Klhdc8a_set_B.pdf]

# Klhl3

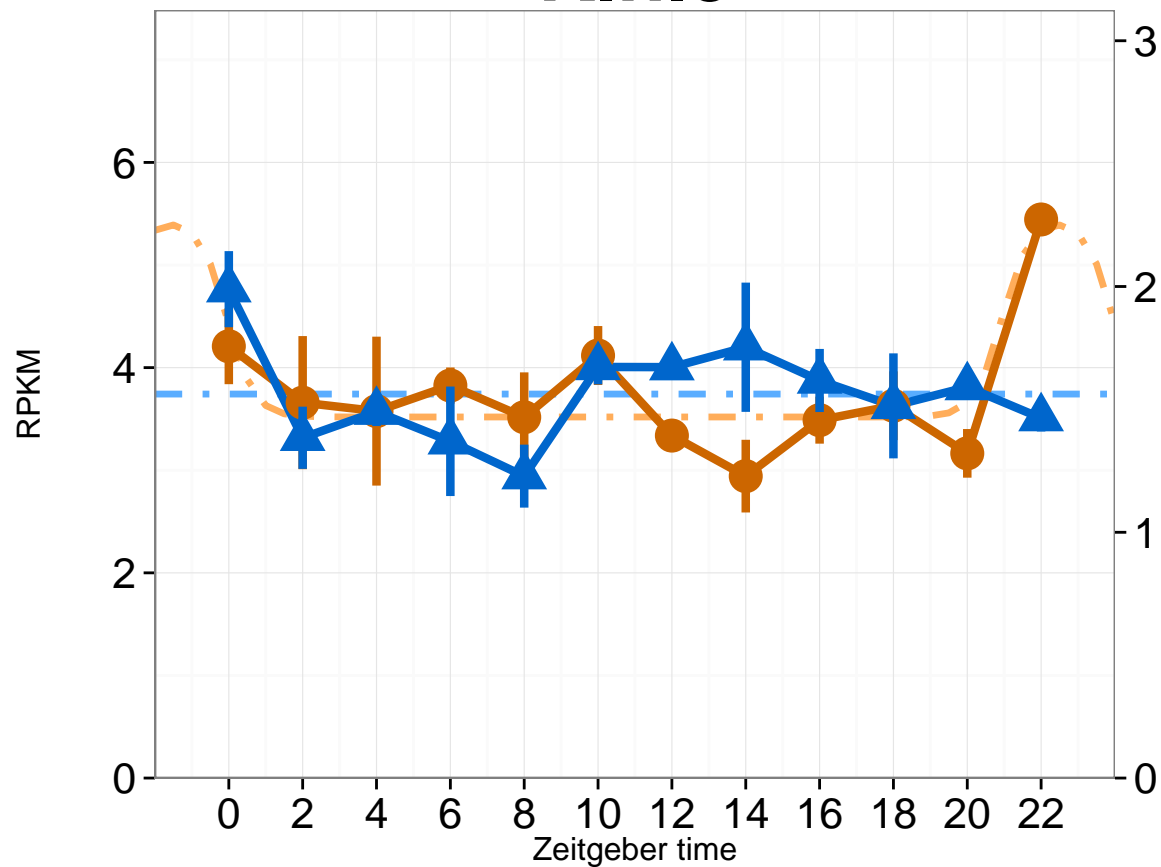

# Klhl3

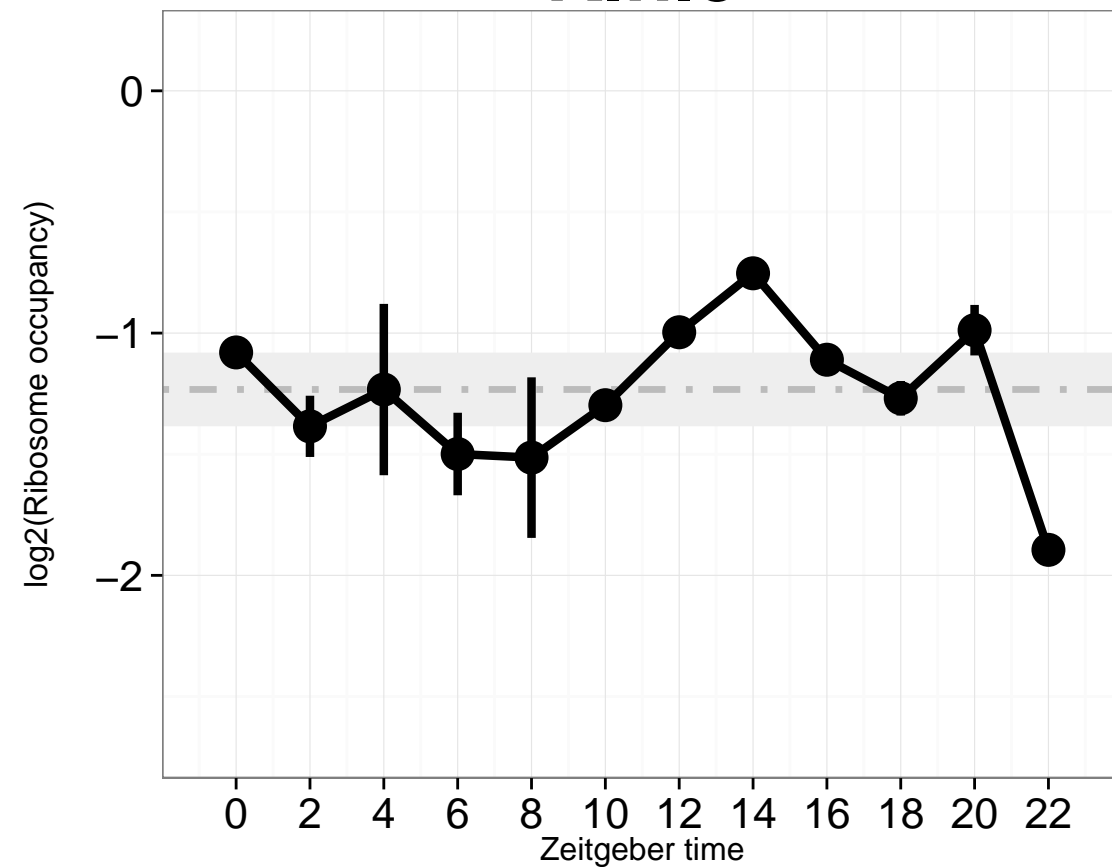

Supplement: SuppDataset_1.zip [file Klhl3_set_B.pdf › Supplemental Dataset 1/B-mRNA_rhythm_translation_nonrhyth/Klhl3_set_B.pdf]

## Kng2

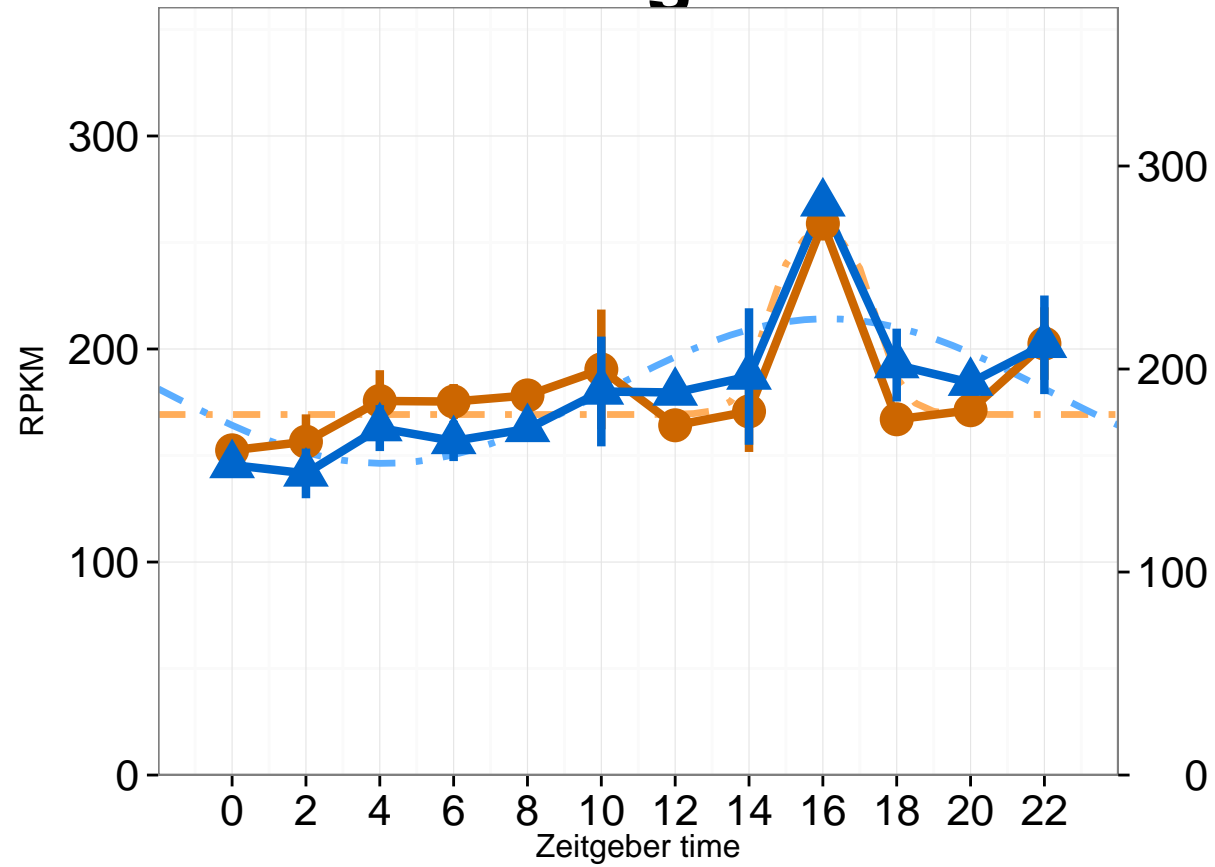

## Kng2

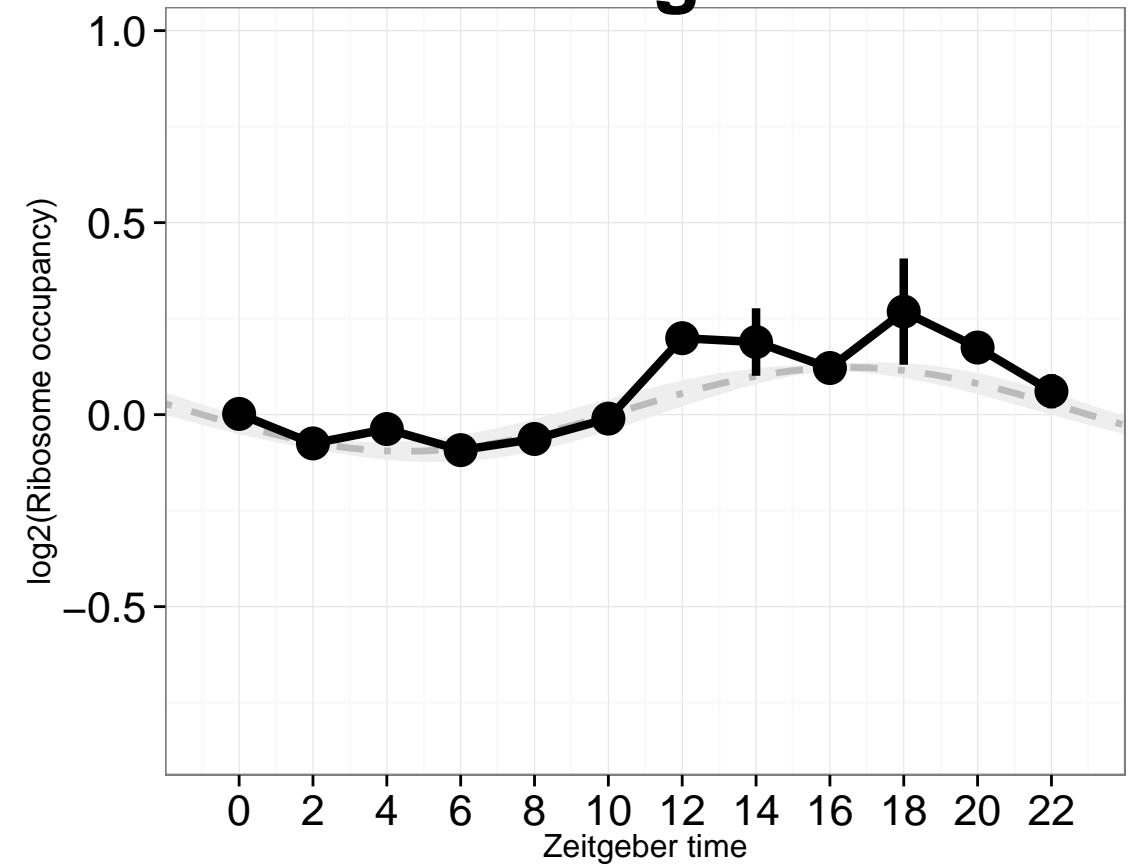

Supplement: SuppDataset_1.zip [file Kng2_set_B.pdf › Supplemental Dataset 1/B-mRNA_rhythm_translation_nonrhyth/Kng2_set_B.pdf]

# Krt18

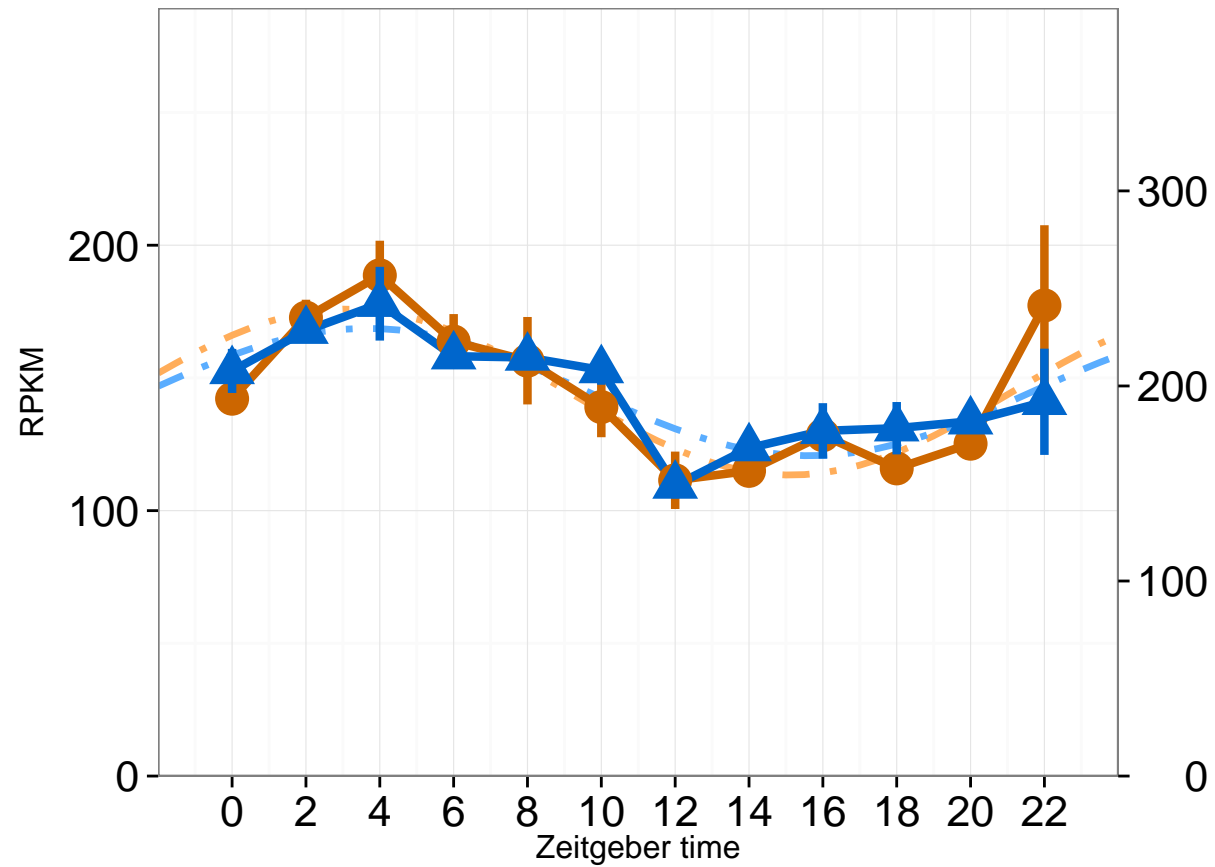

# Krt18

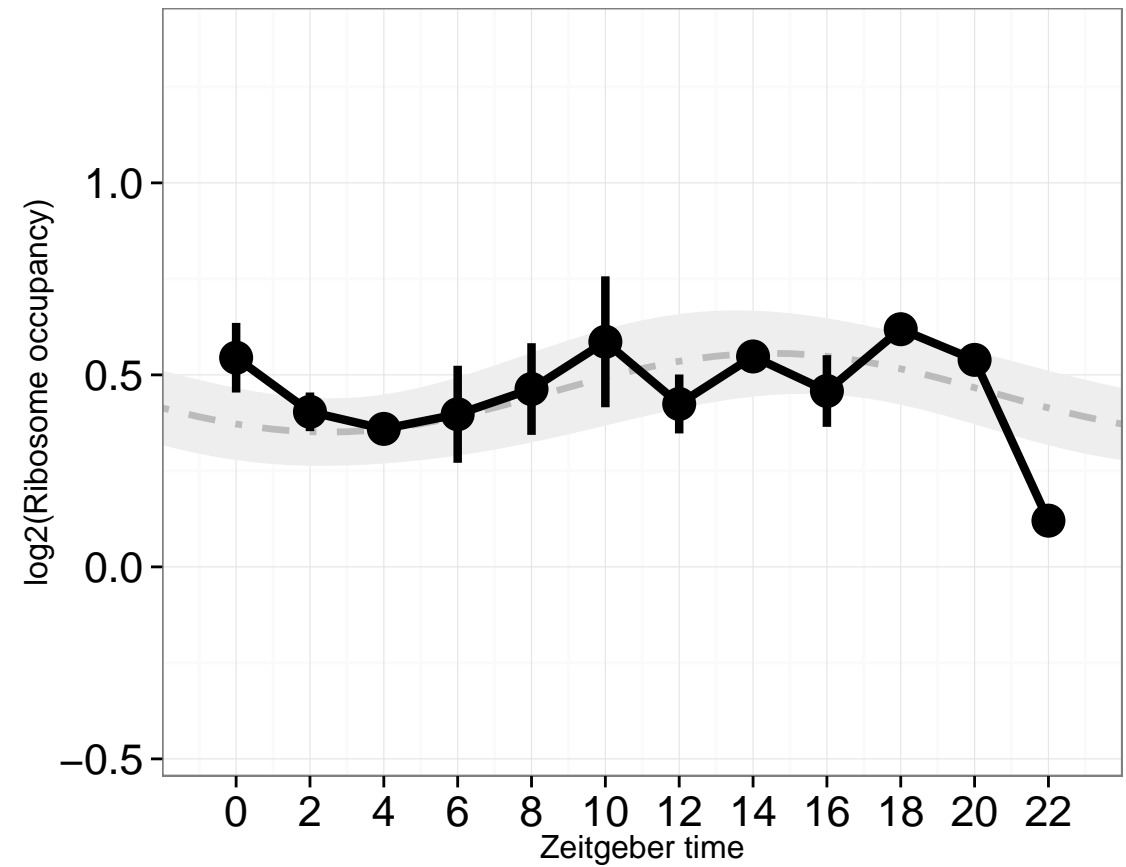

Supplement: SuppDataset_1.zip [file Krt18_set_B.pdf › Supplemental Dataset 1/B-mRNA_rhythm_translation_nonrhyth/Krt18_set_B.pdf]

# Ktn1

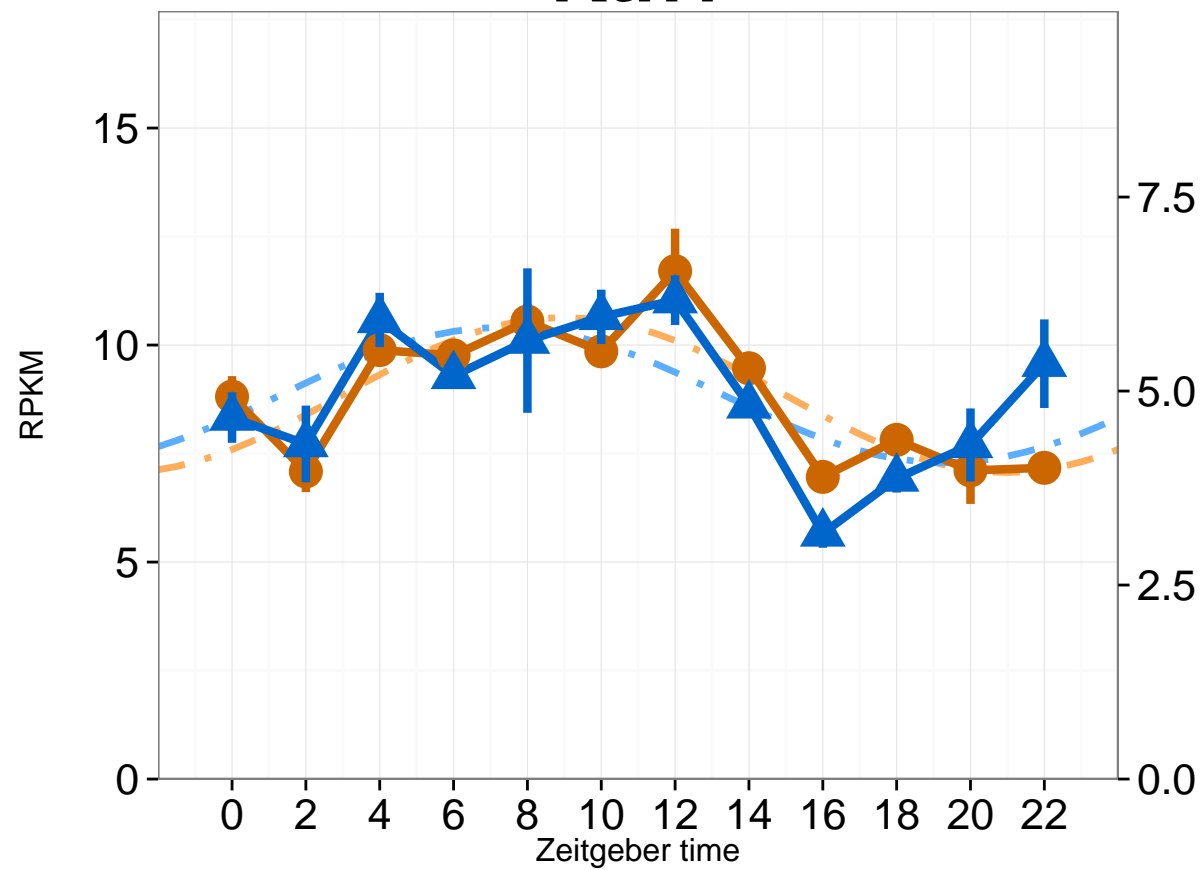

# Ktn1

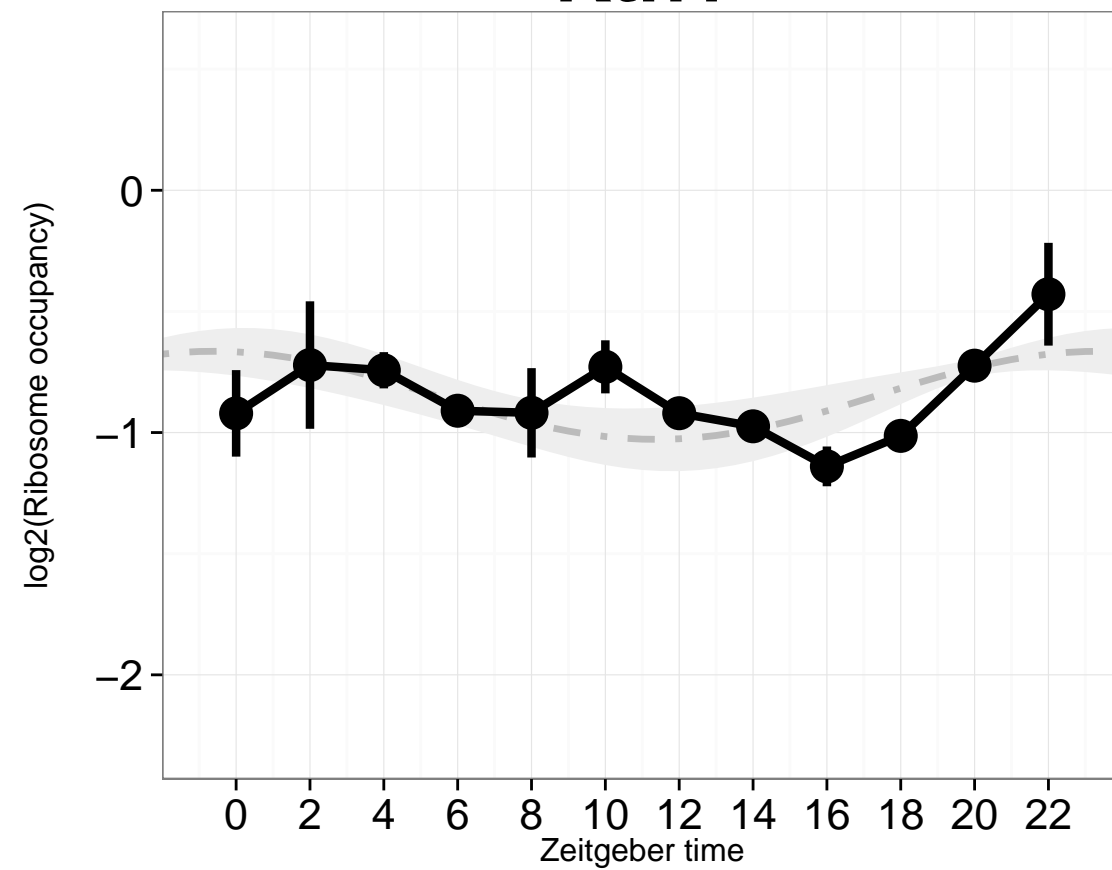

Supplement: SuppDataset_1.zip [file Ktn1_set_B.pdf › Supplemental Dataset 1/B-mRNA_rhythm_translation_nonrhyth/Ktn1_set_B.pdf]

## Lamtor1

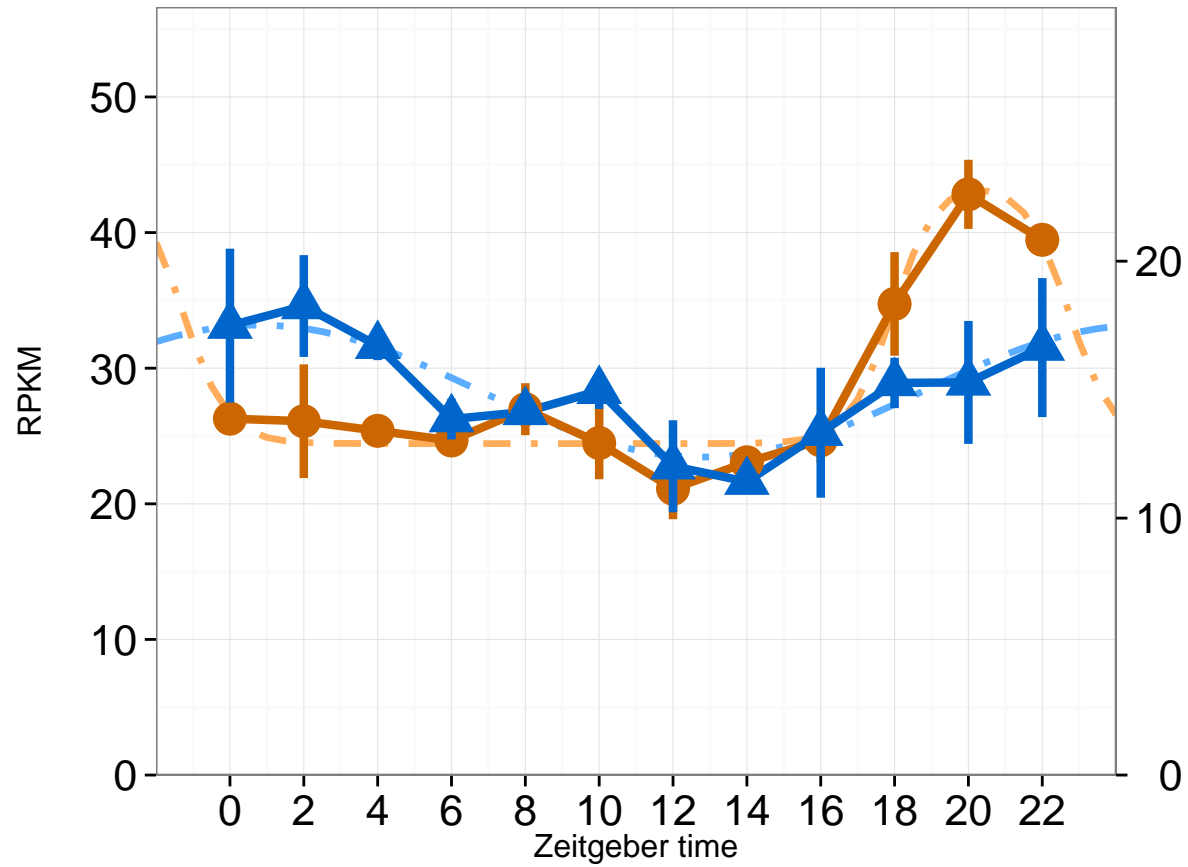

## Lamtor1

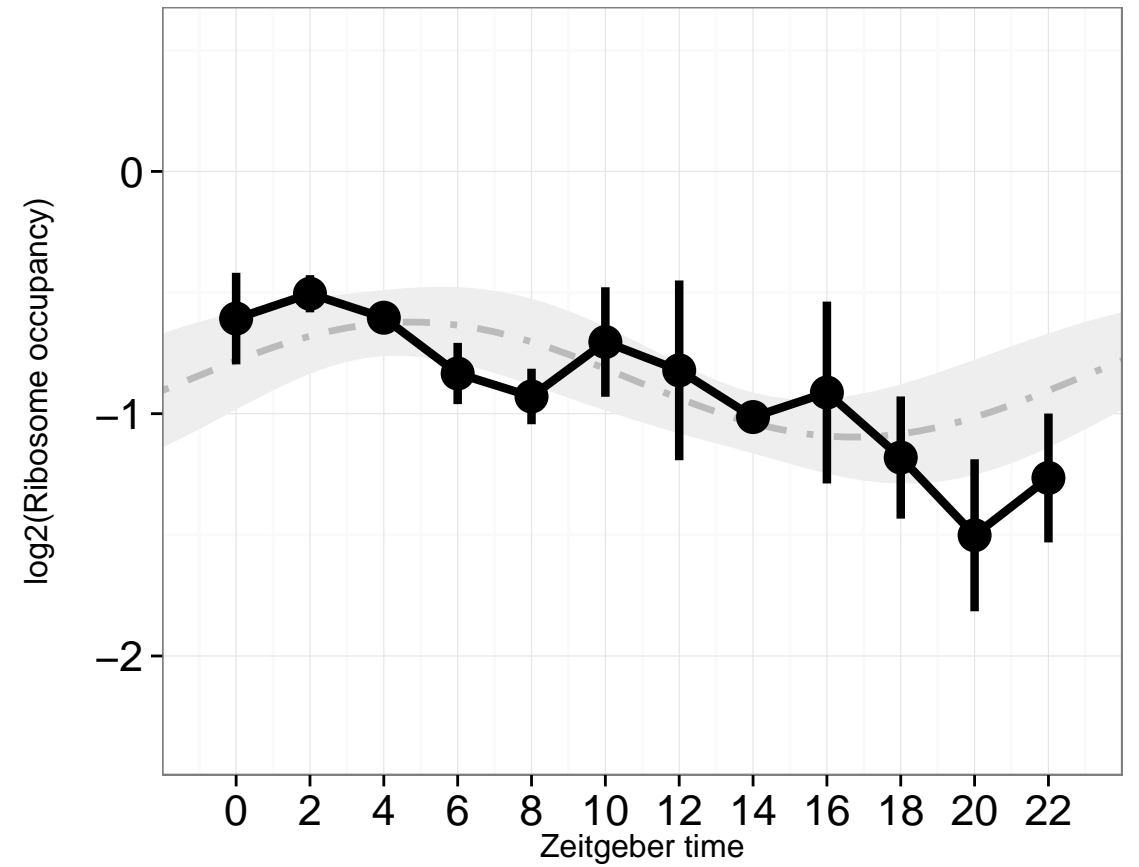

Supplement: SuppDataset_1.zip [file Lamtor1_set_B.pdf › Supplemental Dataset 1/B-mRNA_rhythm_translation_nonrhyth/Lamtor1_set_B.pdf]

## Lcorl

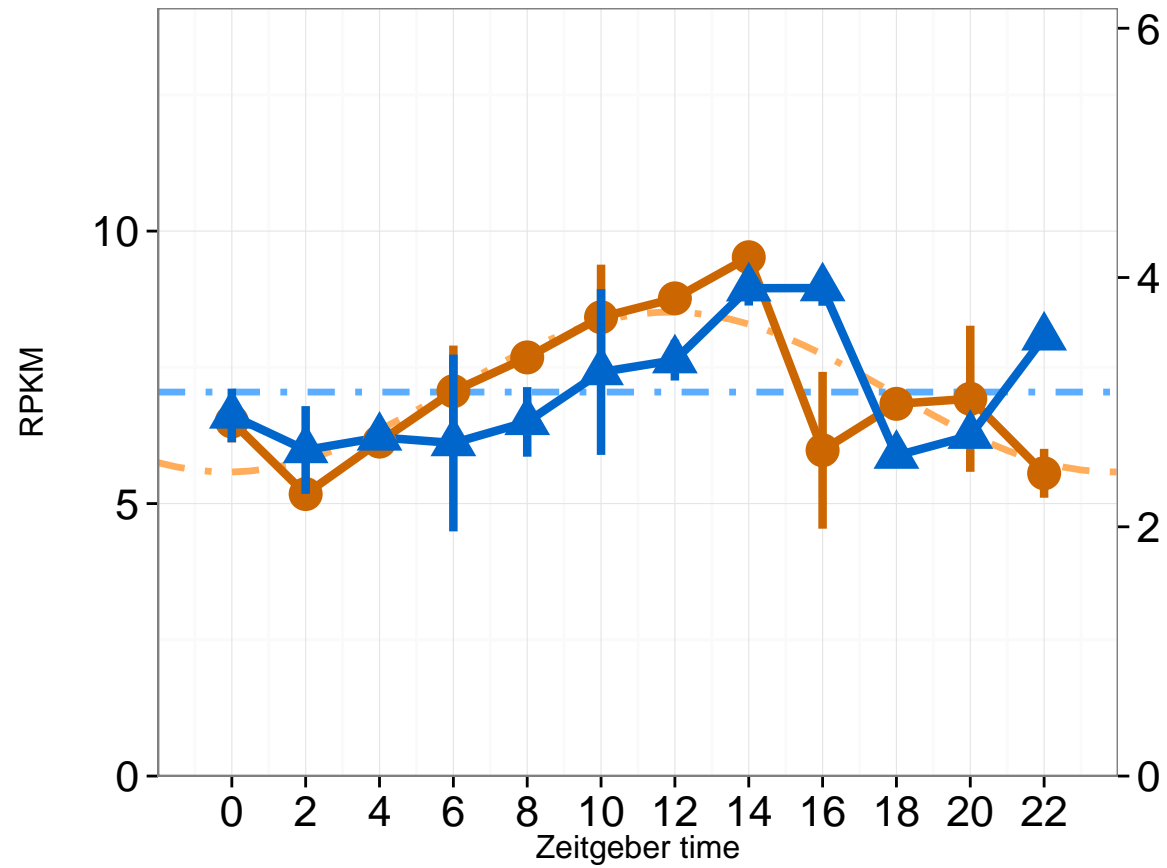

## Lcorl

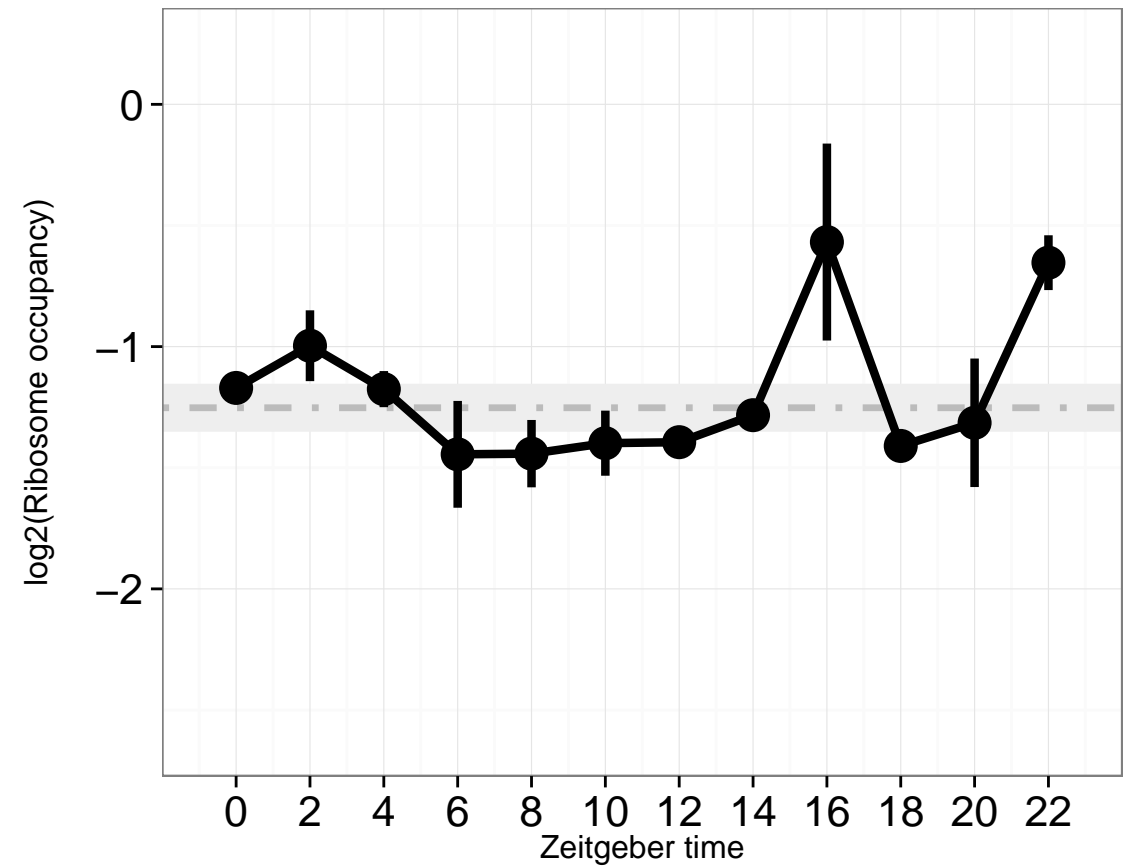

Supplement: SuppDataset_1.zip [file Lcorl_set_B.pdf › Supplemental Dataset 1/B-mRNA_rhythm_translation_nonrhyth/Lcorl_set_B.pdf]

# Leprel4

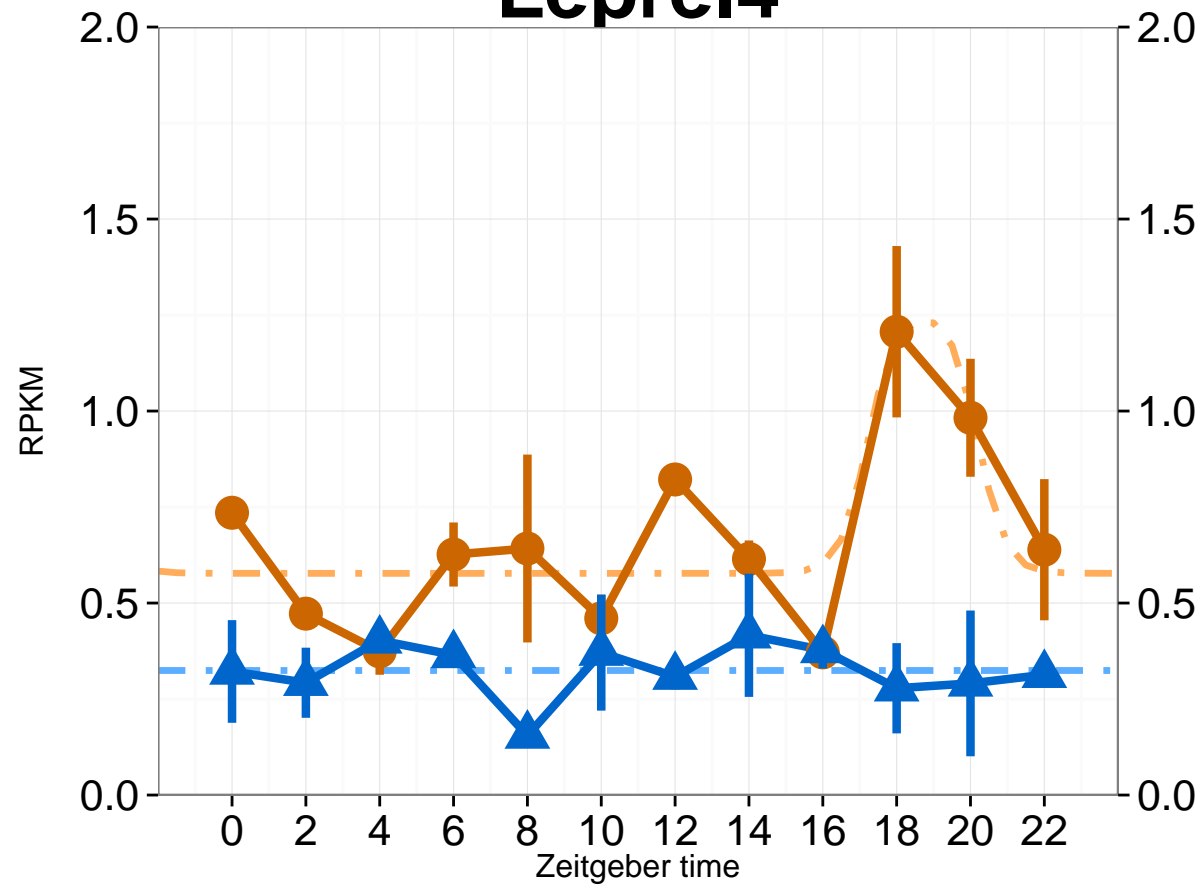

# Leprel4

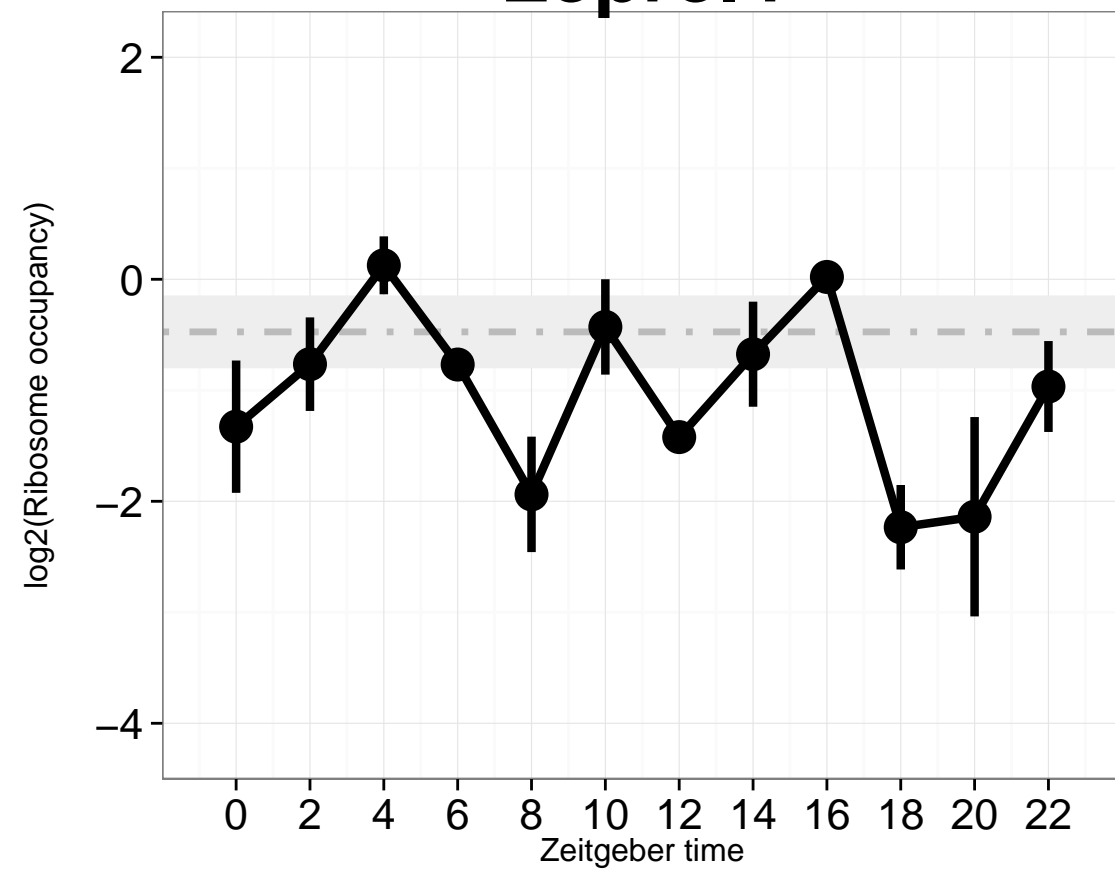

Supplement: SuppDataset_1.zip [file Leprel4_set_B.pdf › Supplemental Dataset 1/B-mRNA_rhythm_translation_nonrhyth/Leprel4_set_B.pdf]

## Leprot1

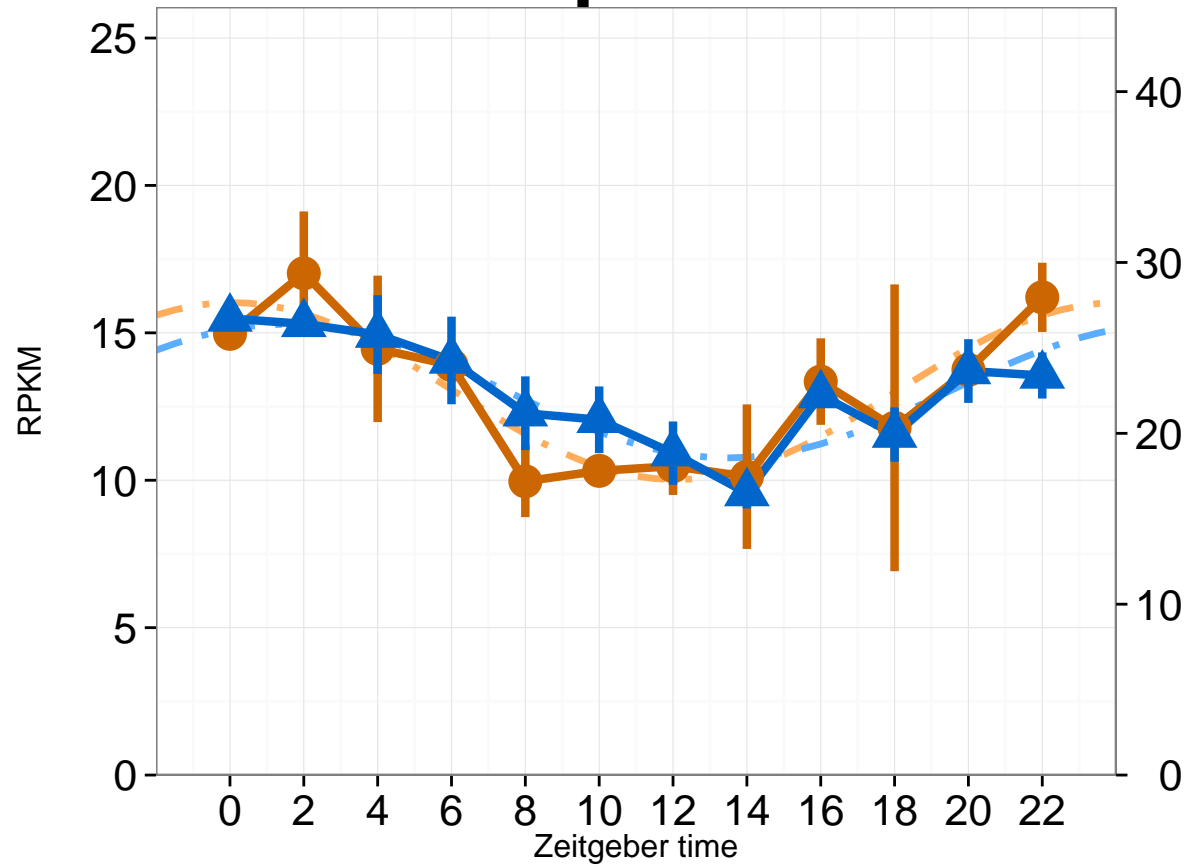

## Leprot1

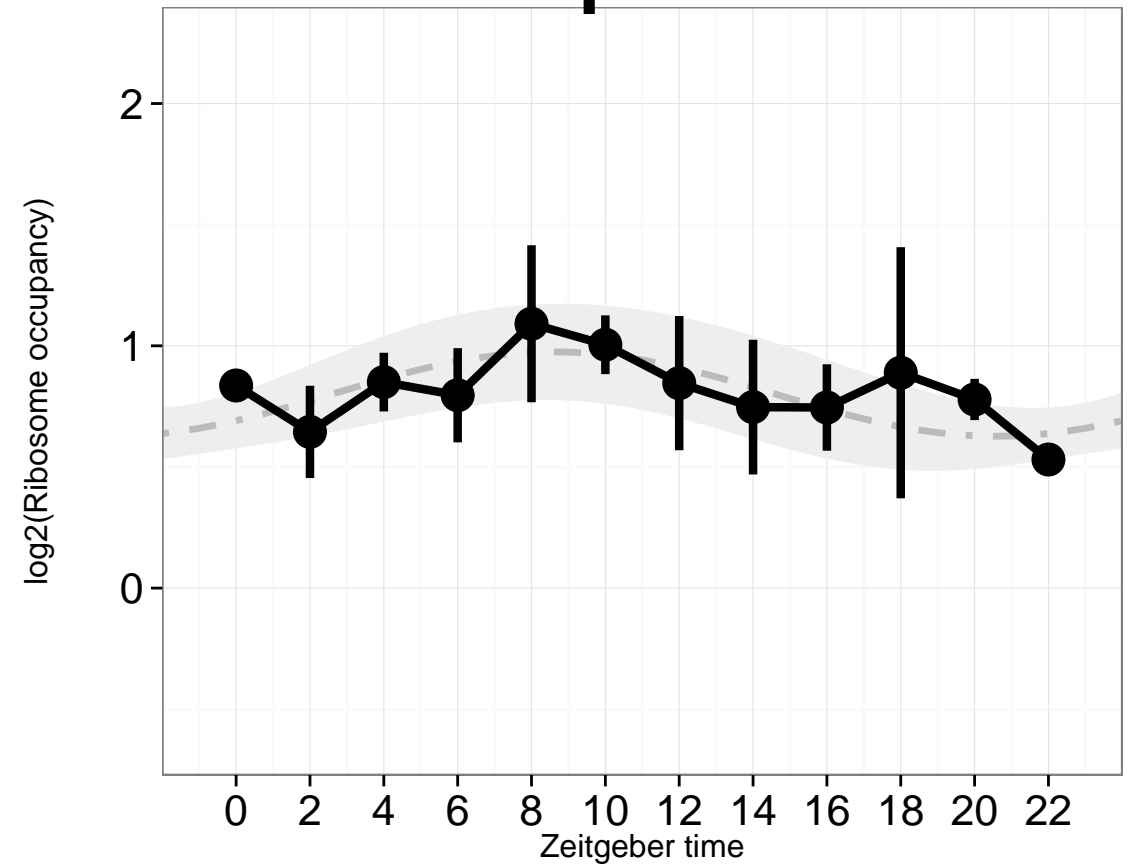

Supplement: SuppDataset_1.zip [file Leprotl1_set_B.pdf › Supplemental Dataset 1/B-mRNA_rhythm_translation_nonrhyth/Leprotl1_set_B.pdf]

## Lin52

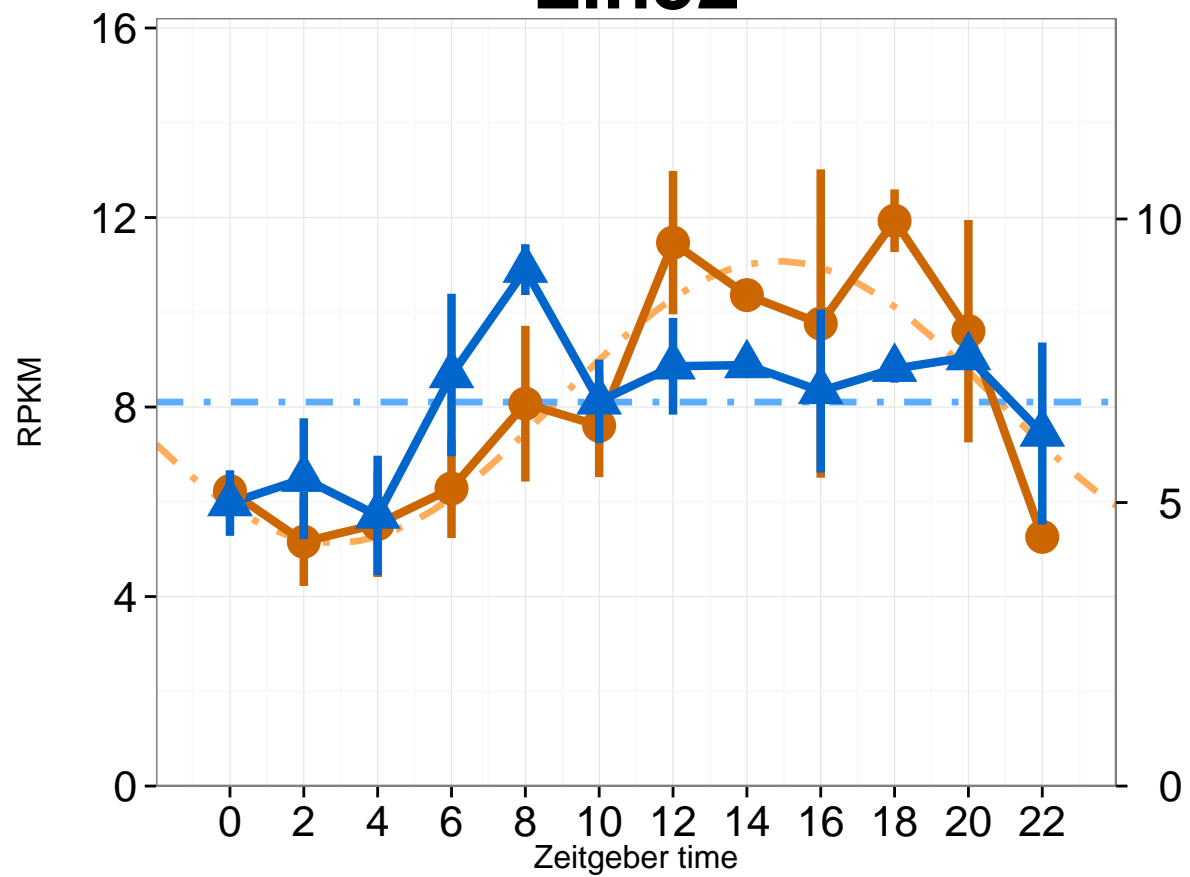

## Lin52

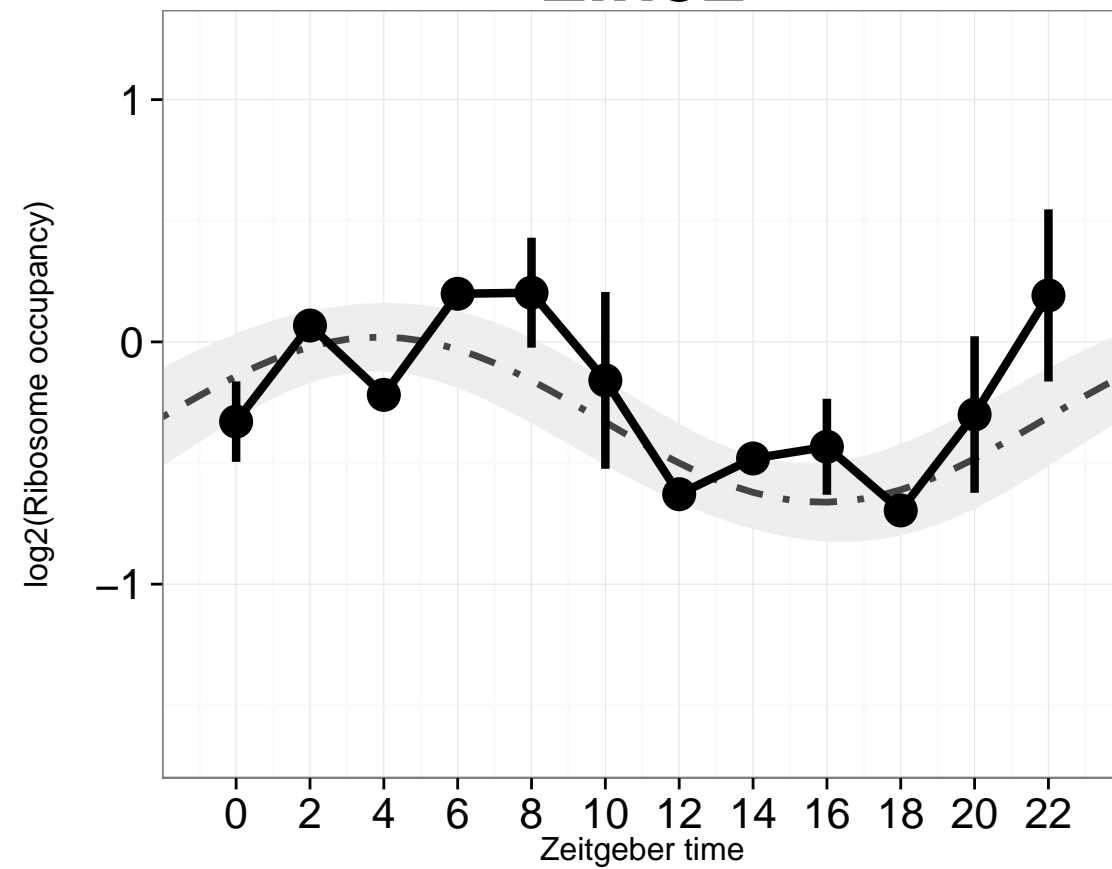

Supplement: SuppDataset_1.zip [file Lin52_set_B.pdf › Supplemental Dataset 1/B-mRNA_rhythm_translation_nonrhyth/Lin52_set_B.pdf]

## Litaf

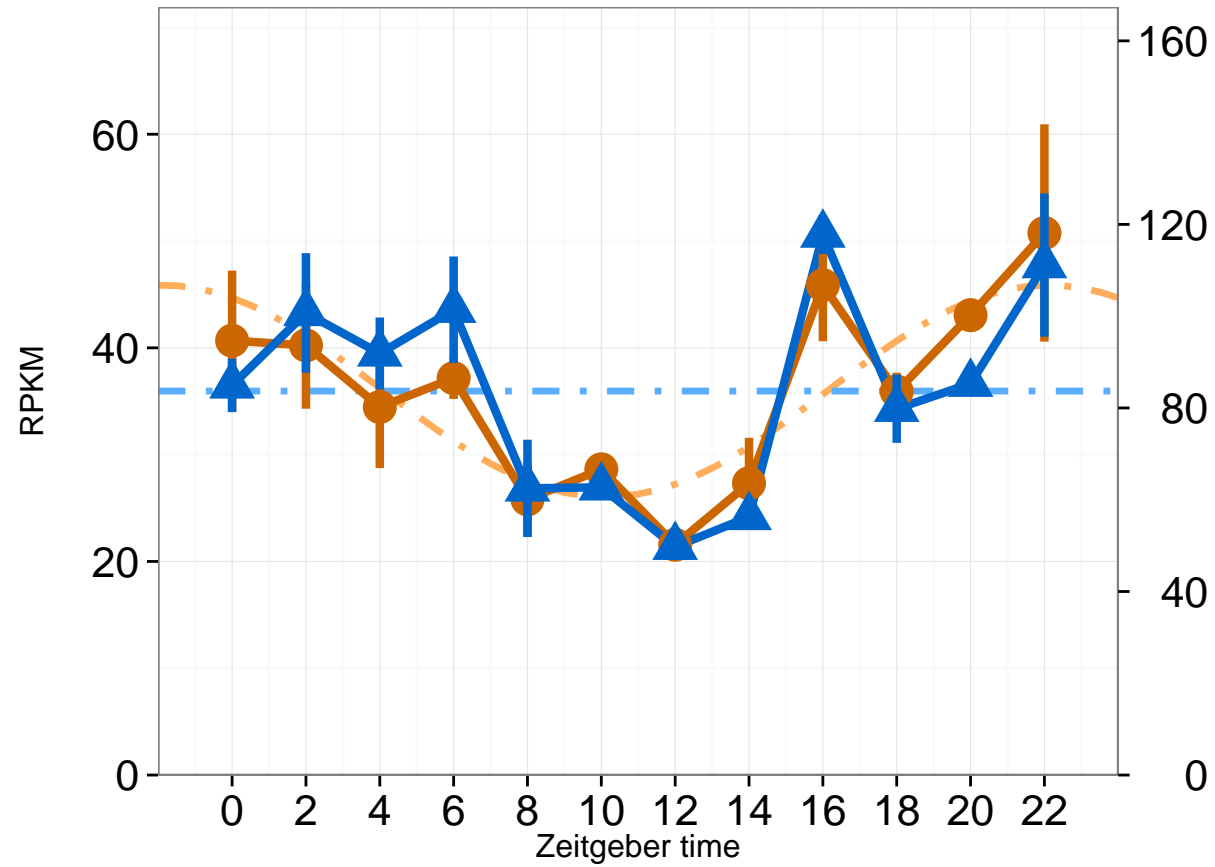

## Litaf

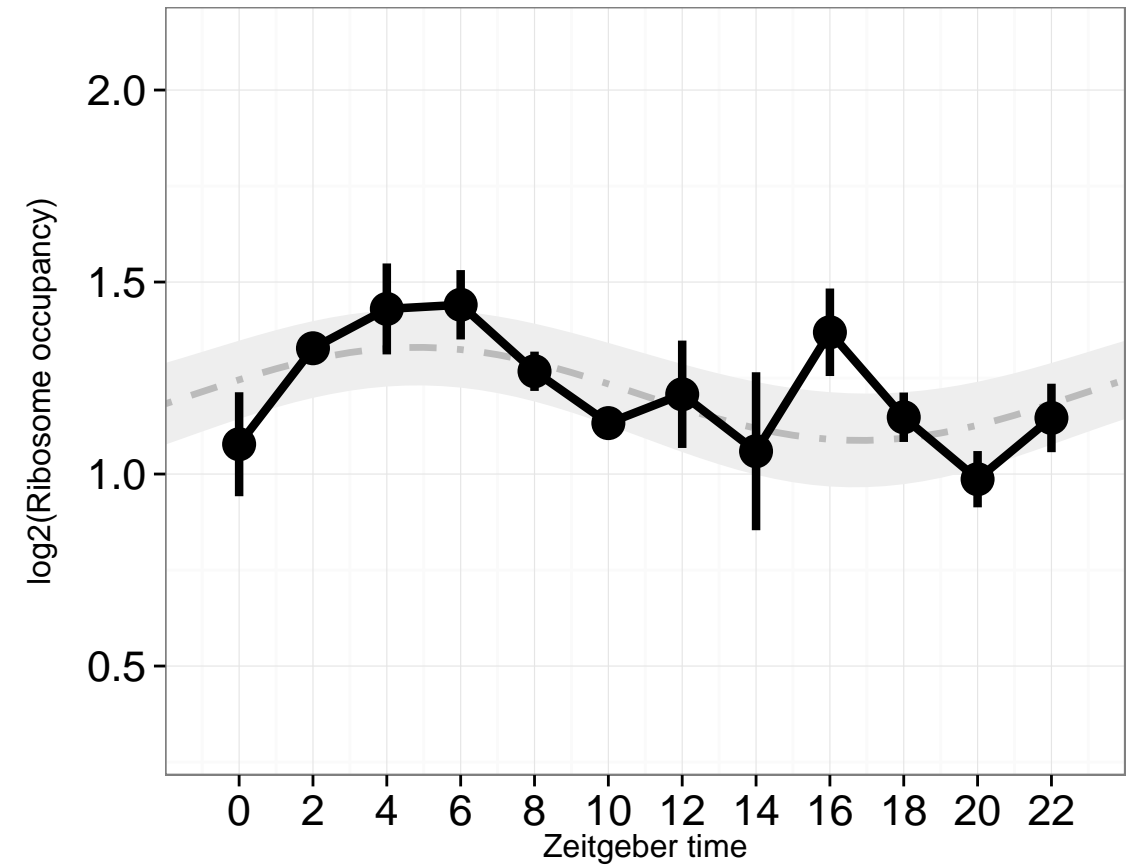

Supplement: SuppDataset_1.zip [file Litaf_set_B.pdf › Supplemental Dataset 1/B-mRNA_rhythm_translation_nonrhyth/Litaf_set_B.pdf]

## Lmf2

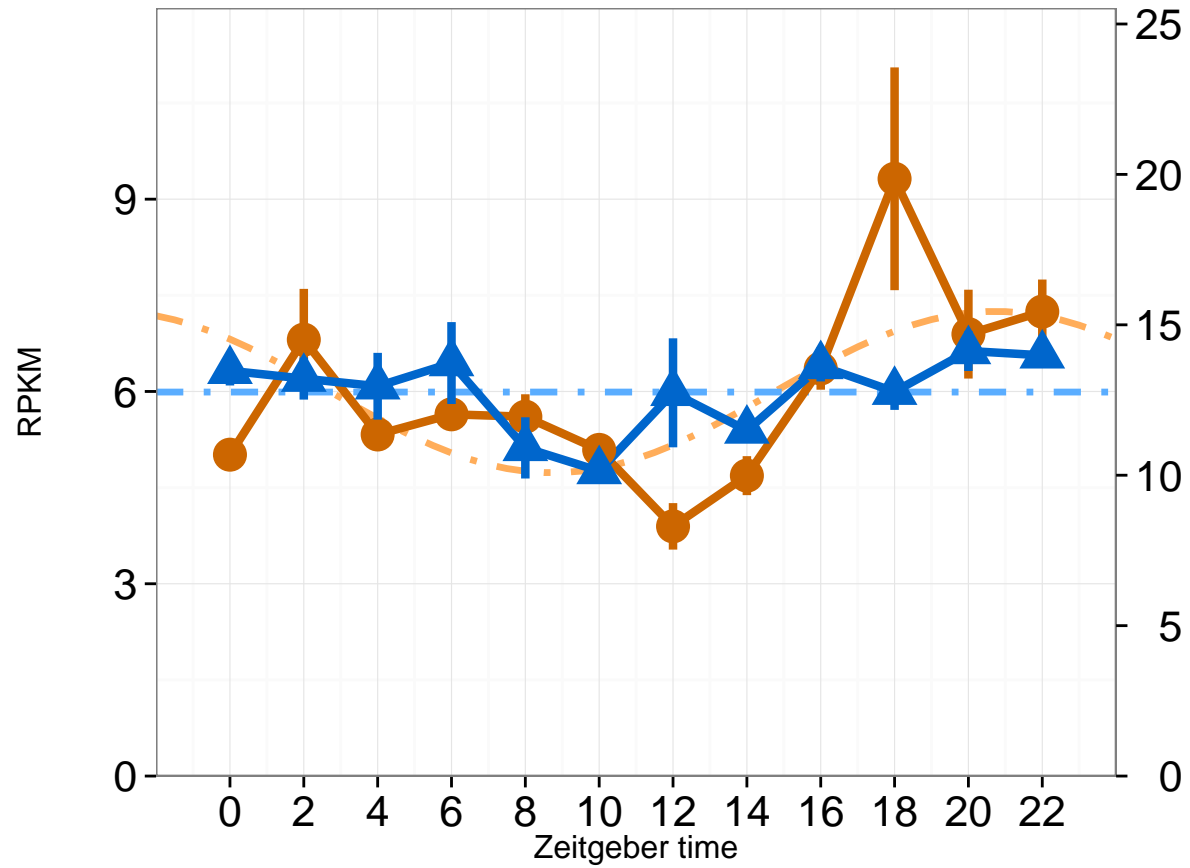

## Lmf2

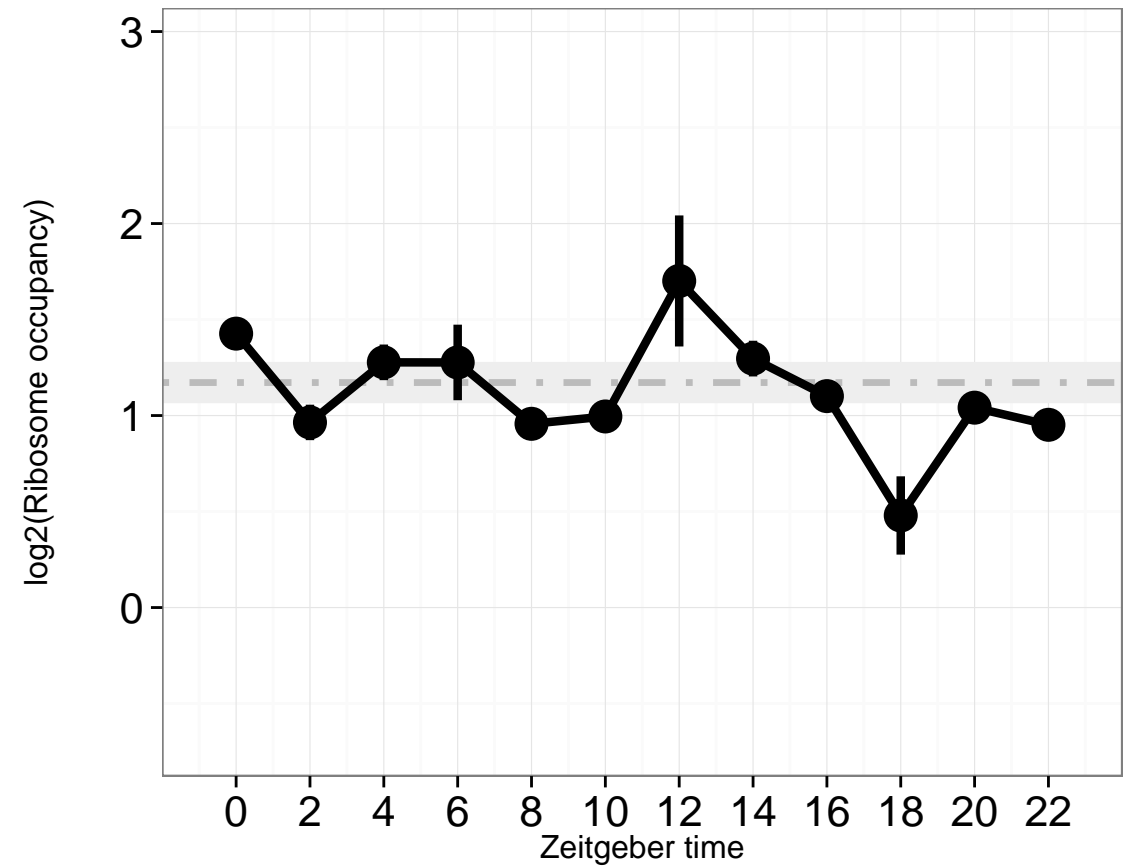

Supplement: SuppDataset_1.zip [file Lmf2_set_B.pdf › Supplemental Dataset 1/B-mRNA_rhythm_translation_nonrhyth/Lmf2_set_B.pdf]

## Lrit1

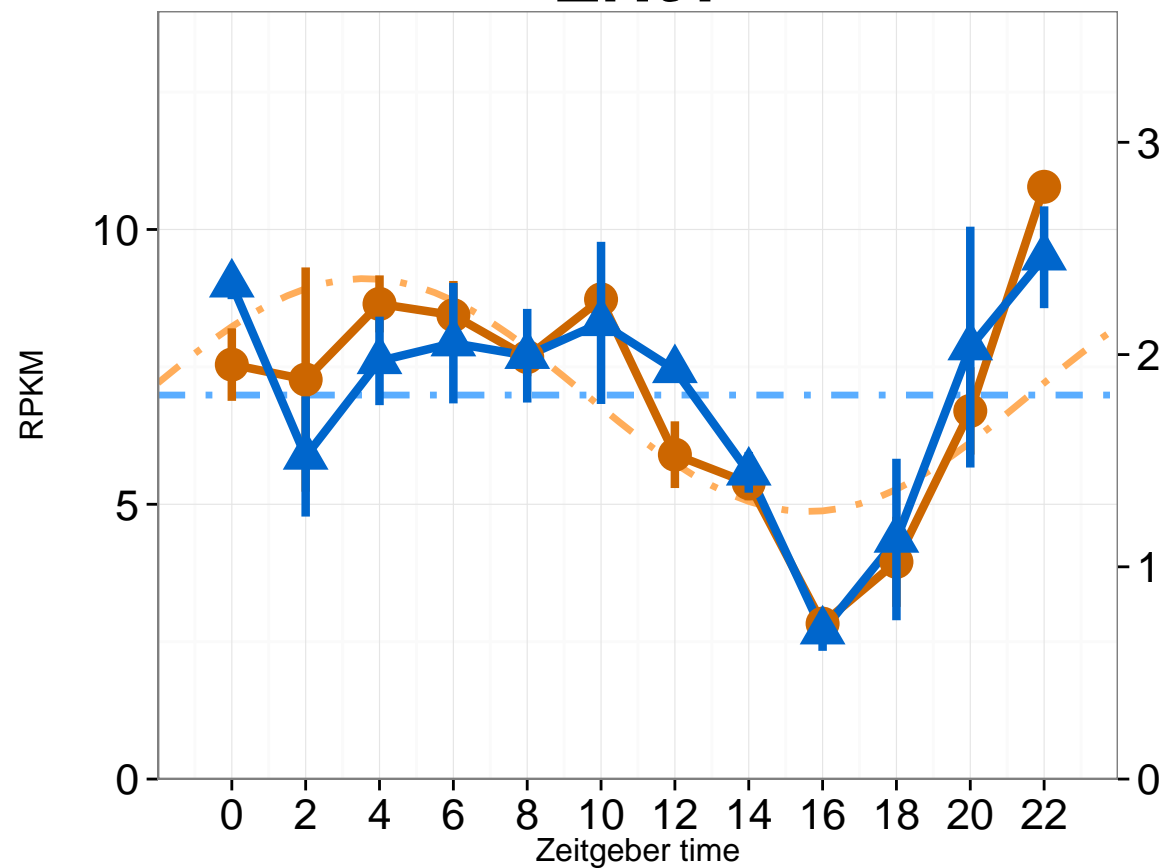

## Lrit1

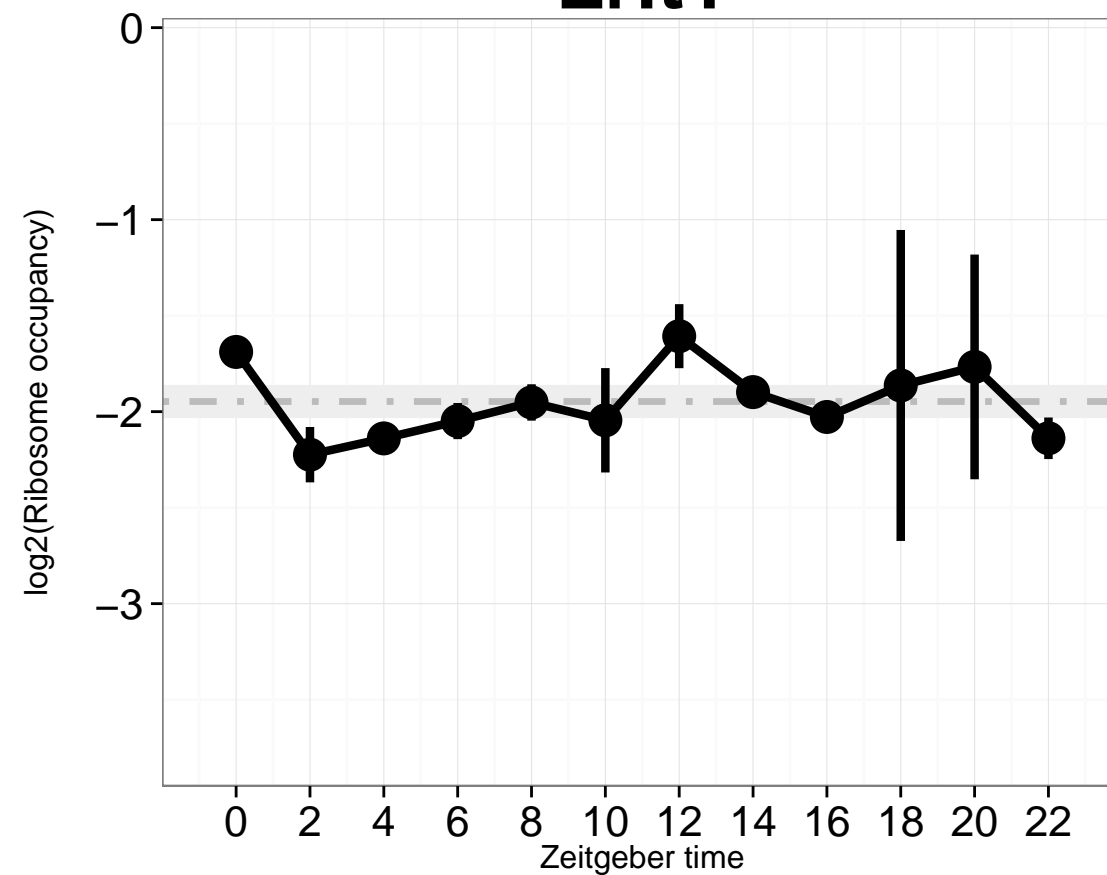

Supplement: SuppDataset_1.zip [file Lrit1_set_B.pdf › Supplemental Dataset 1/B-mRNA_rhythm_translation_nonrhyth/Lrit1_set_B.pdf]

## Lrit2

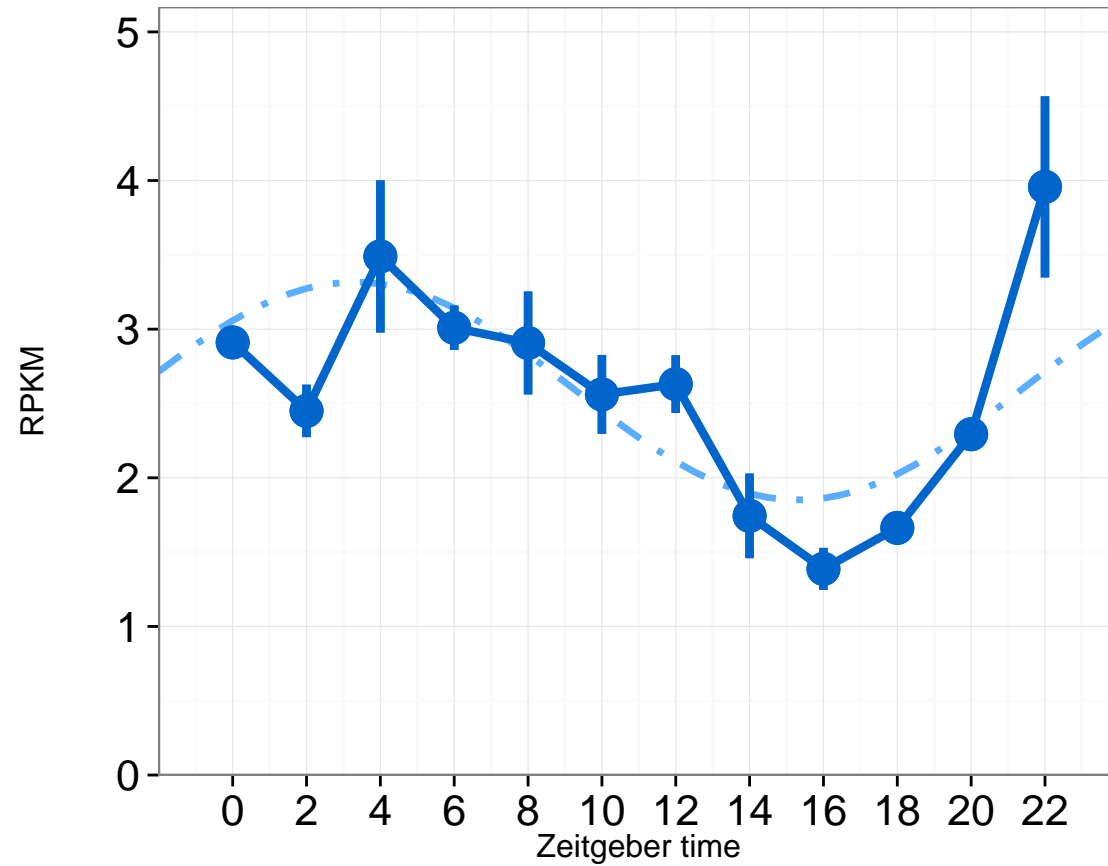

## Lrit2 log2(Ribosome occupancy)

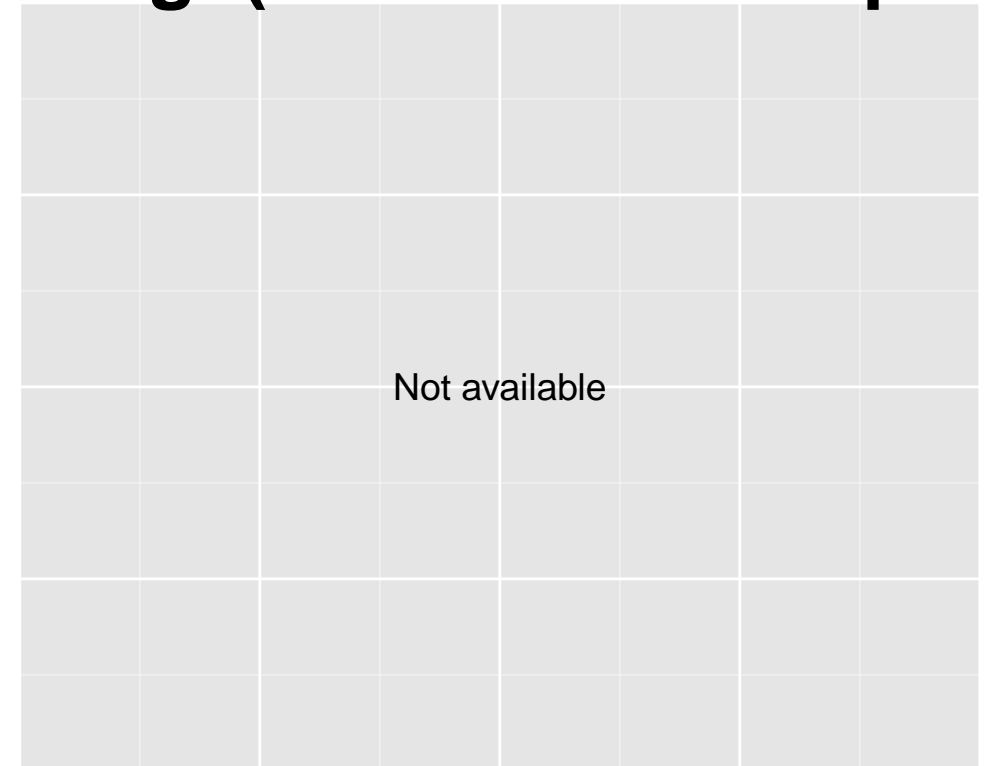

Supplement: SuppDataset_1.zip [file Lrit2_set_B.pdf › Supplemental Dataset 1/B-mRNA_rhythm_translation_nonrhyth/Lrit2_set_B.pdf]

## Lrp10

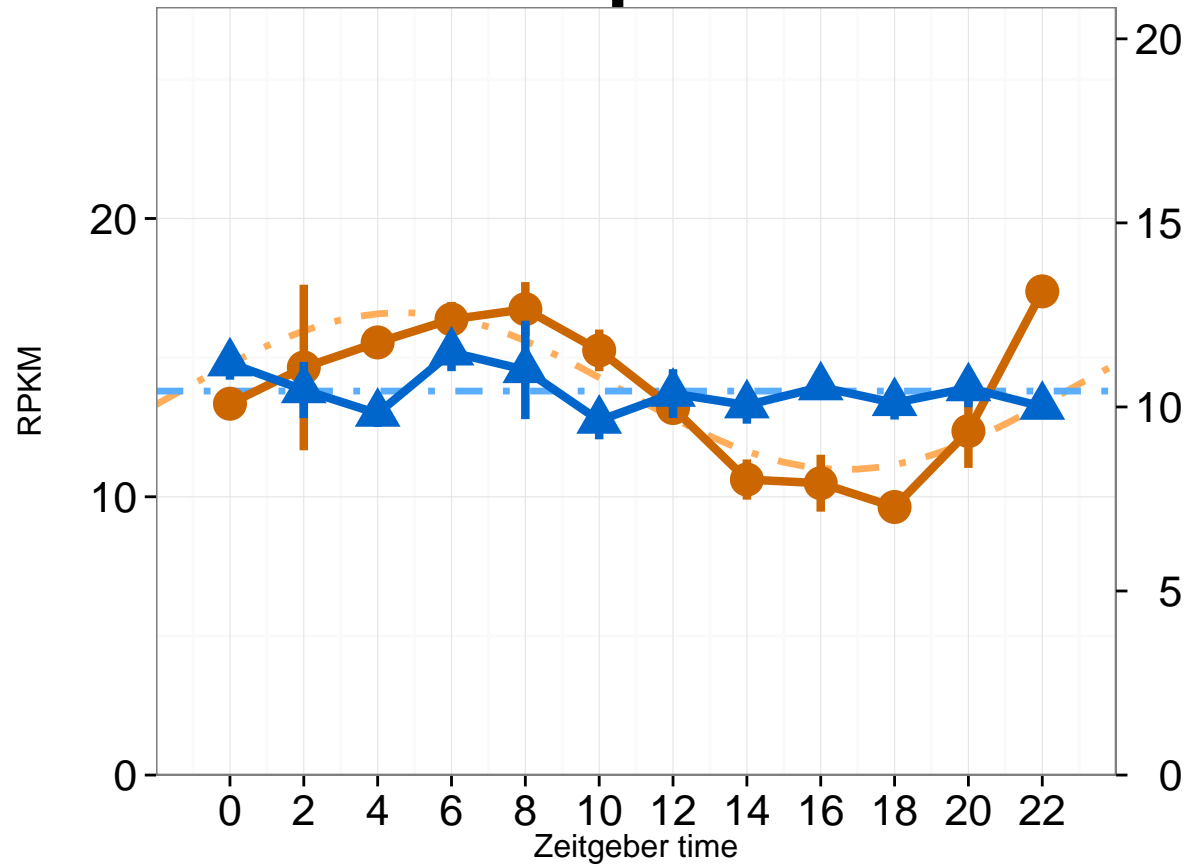

## Lrp10

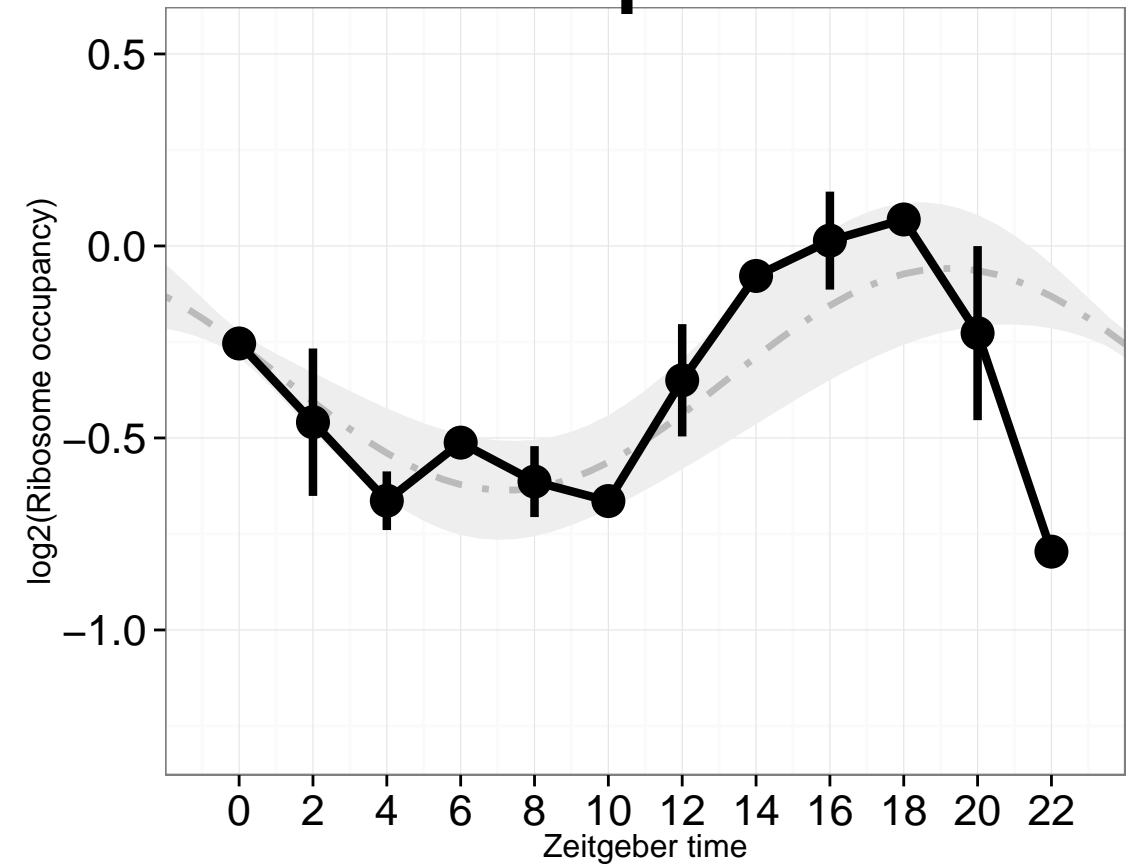

Supplement: SuppDataset_1.zip [file Lrp10_set_B.pdf › Supplemental Dataset 1/B-mRNA_rhythm_translation_nonrhyth/Lrp10_set_B.pdf]

## Lrp11

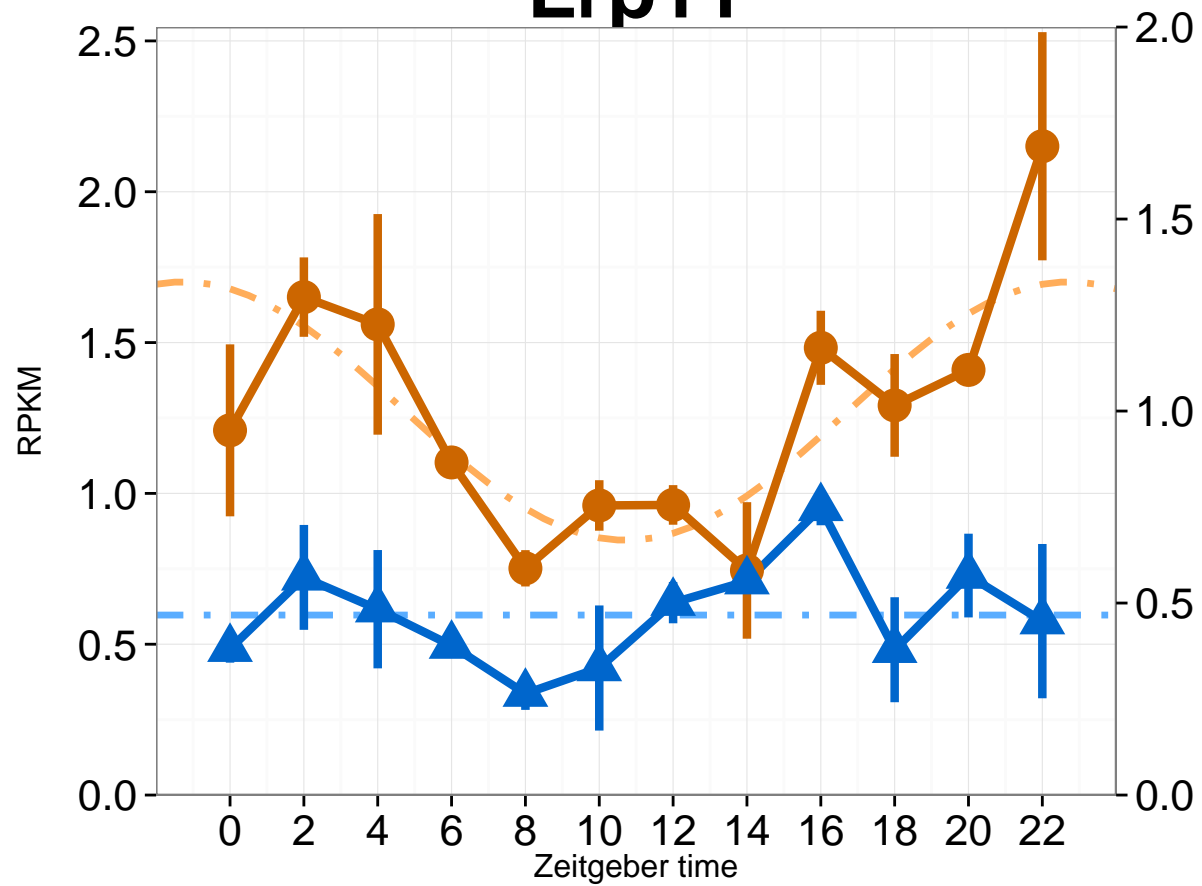

## Lrp11

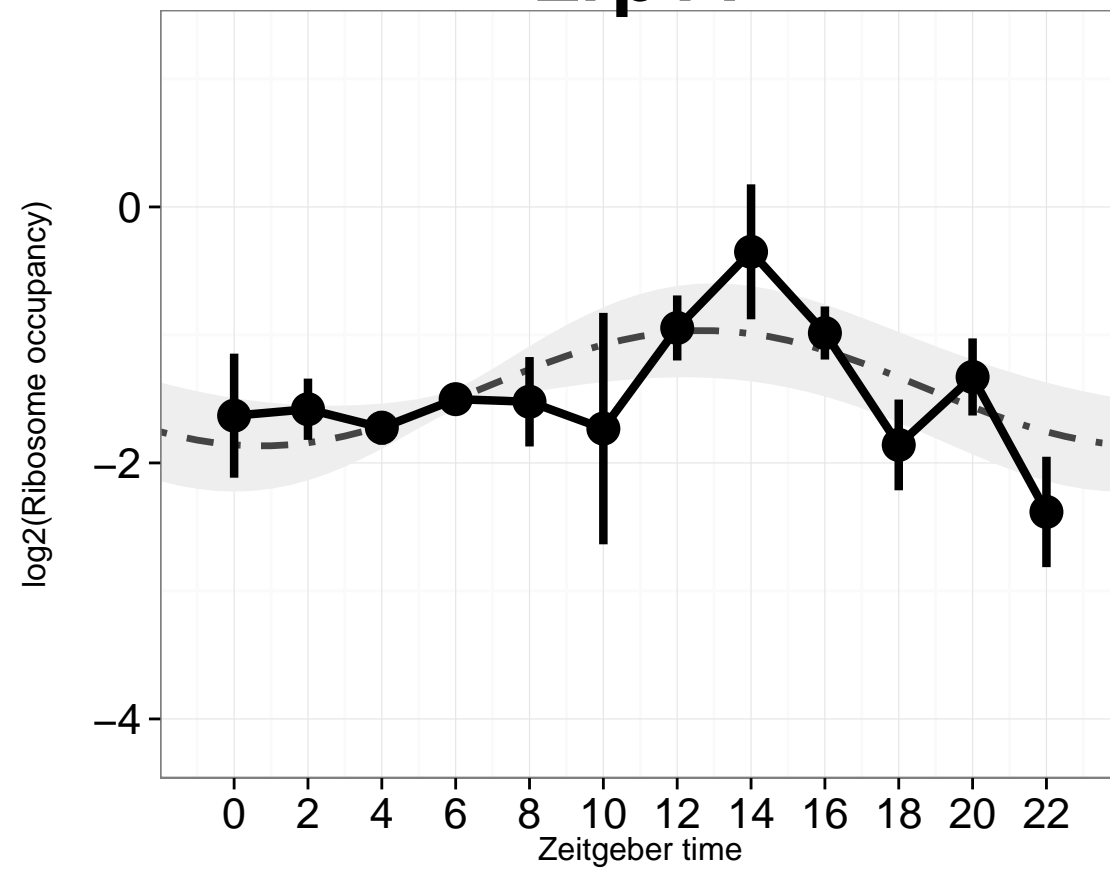

Supplement: SuppDataset_1.zip [file Lrp11_set_B.pdf › Supplemental Dataset 1/B-mRNA_rhythm_translation_nonrhyth/Lrp11_set_B.pdf]

# Lrrc42

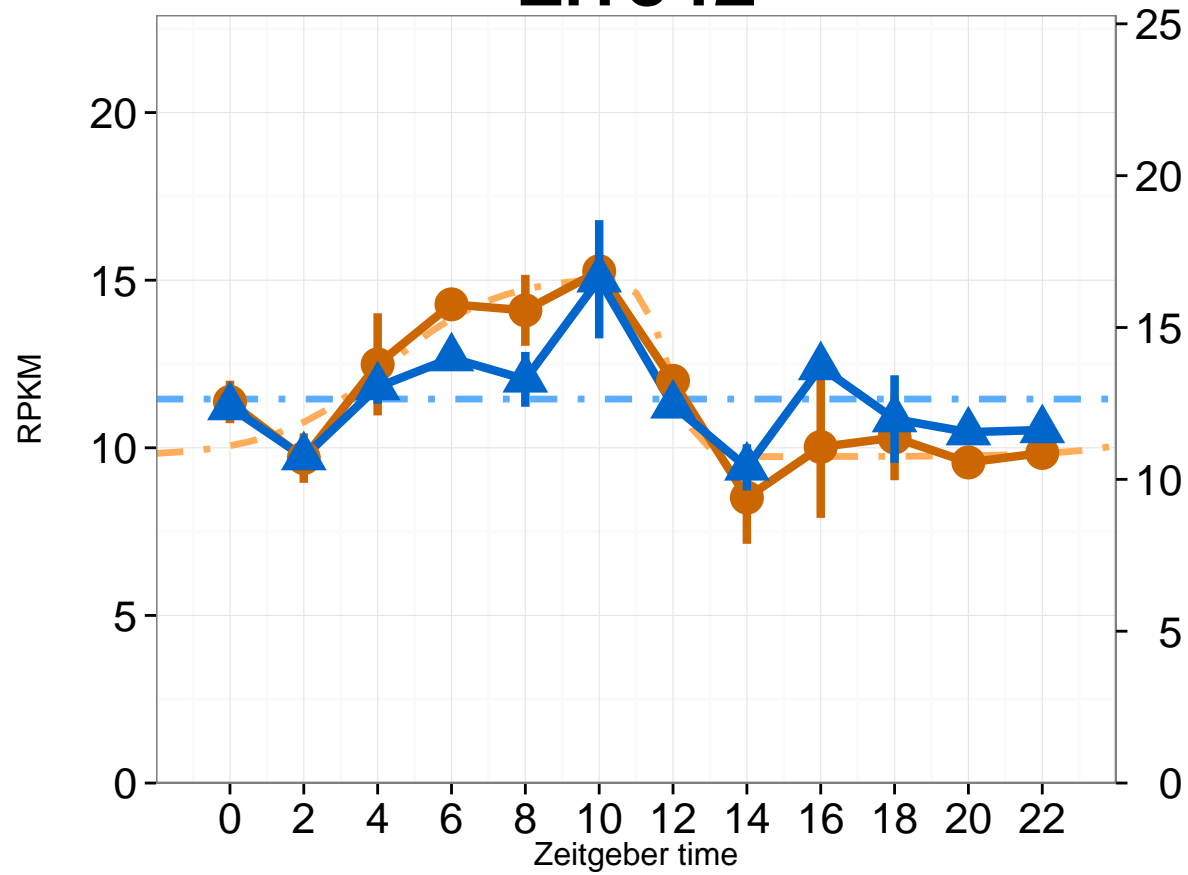

# Lrrc42

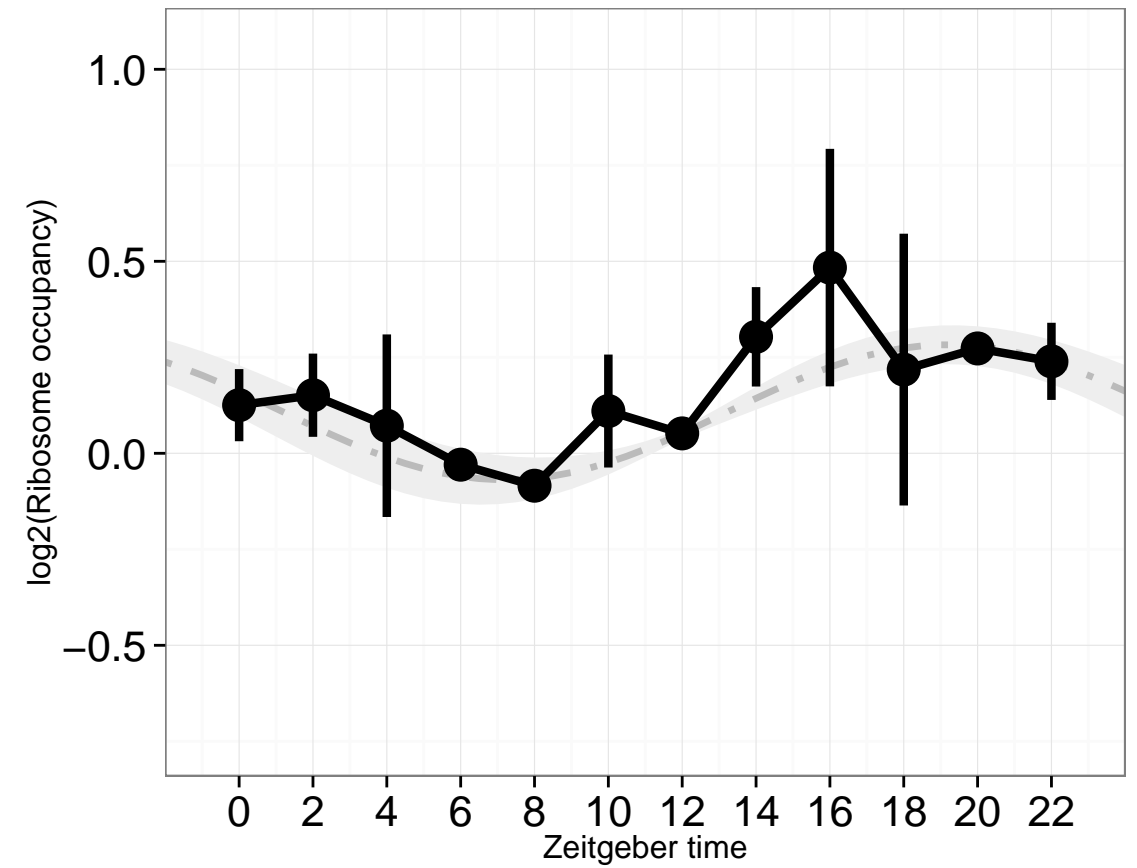

Supplement: SuppDataset_1.zip [file Lrrc42_set_B.pdf › Supplemental Dataset 1/B-mRNA_rhythm_translation_nonrhyth/Lrrc42_set_B.pdf]

# Lrrc46

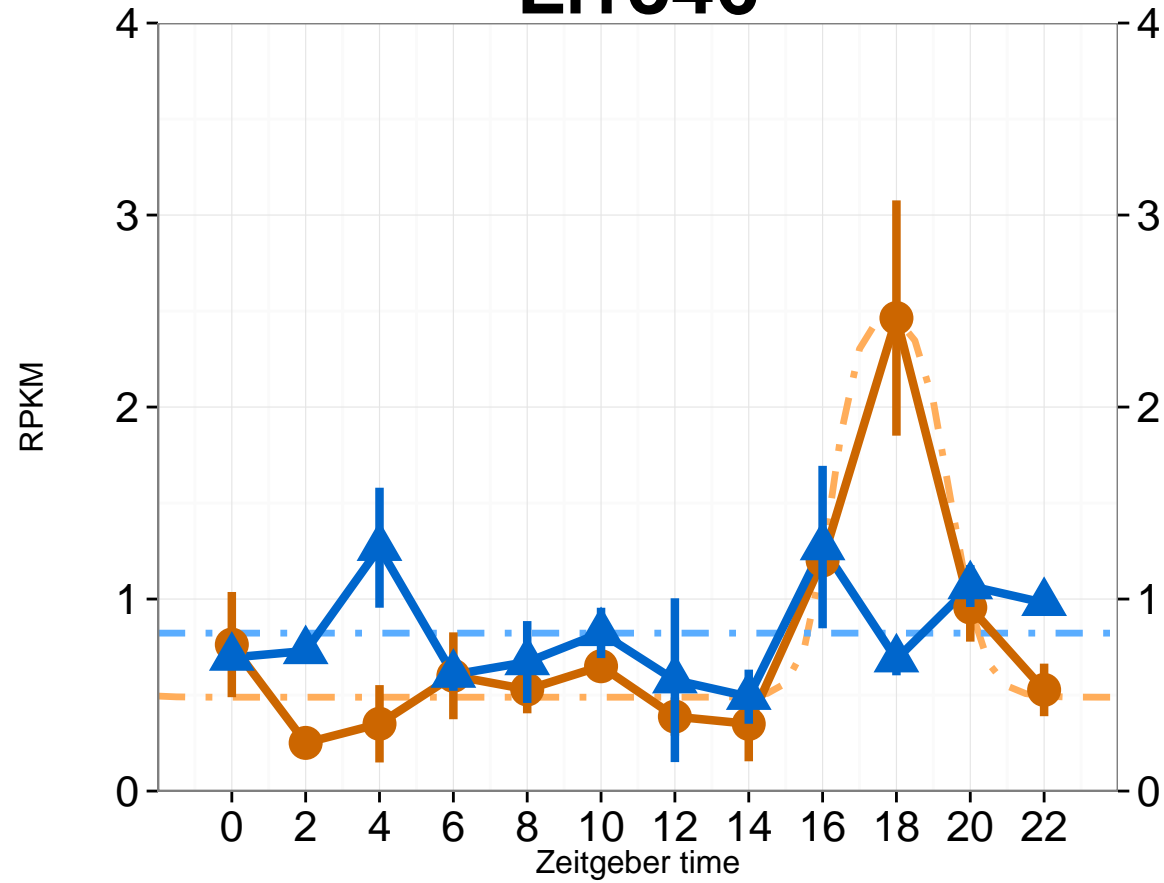

# Lrrc46

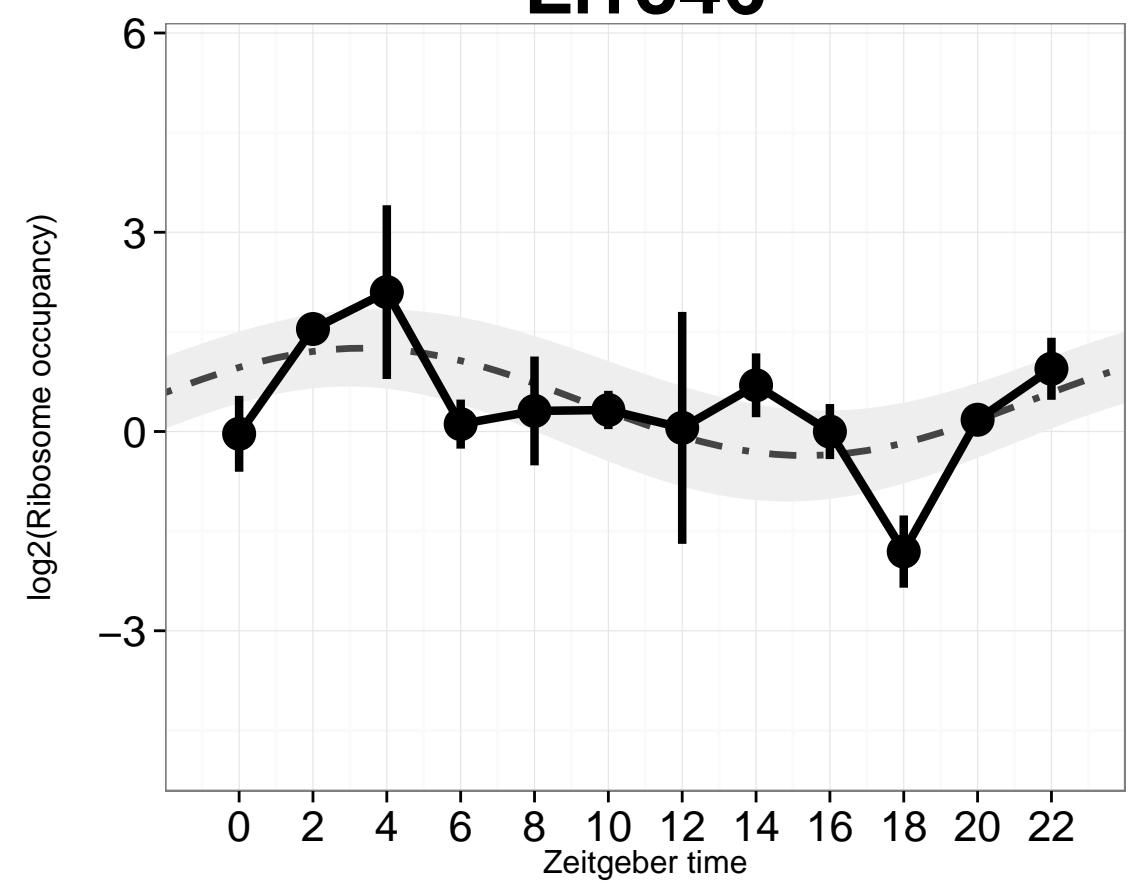

Supplement: SuppDataset_1.zip [file Lrrc46_set_B.pdf › Supplemental Dataset 1/B-mRNA_rhythm_translation_nonrhyth/Lrrc46_set_B.pdf]
