# Supplementary figures and images for: Ribosome profiling reveals the rhythmic liver translatome and circadian clock regulation by upstream open reading frames (part 32 of 113)
Source: HighWire-hosted journal article supplement (doi:10.1101/gr.195404.115), 2015-10-20

# Gpaa1

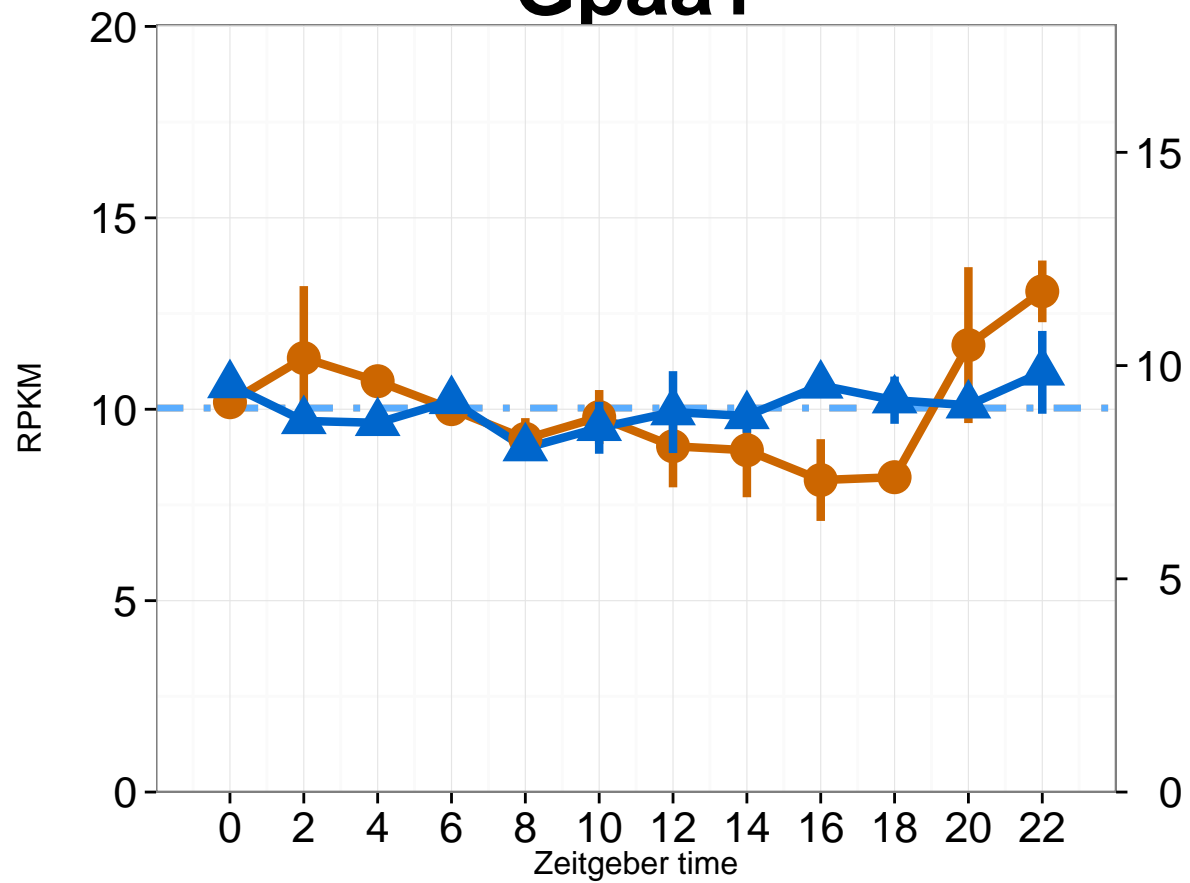

# Gpaa1

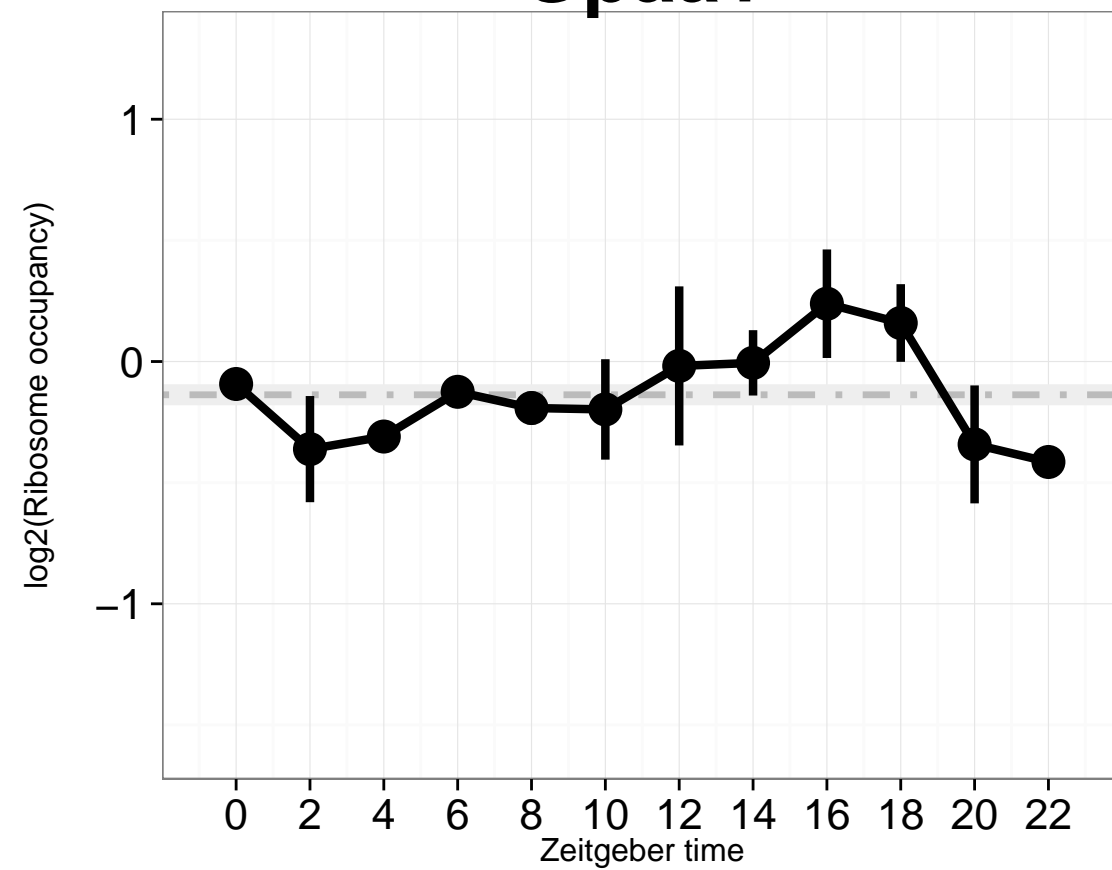

Supplement: SuppDataset_1.zip [file Gpaa1_set_A.pdf › Supplemental Dataset 1/A-mRNA_nonrhyth_translation_nonrhyth/Gpaa1_set_A.pdf]

## Gpalpp1

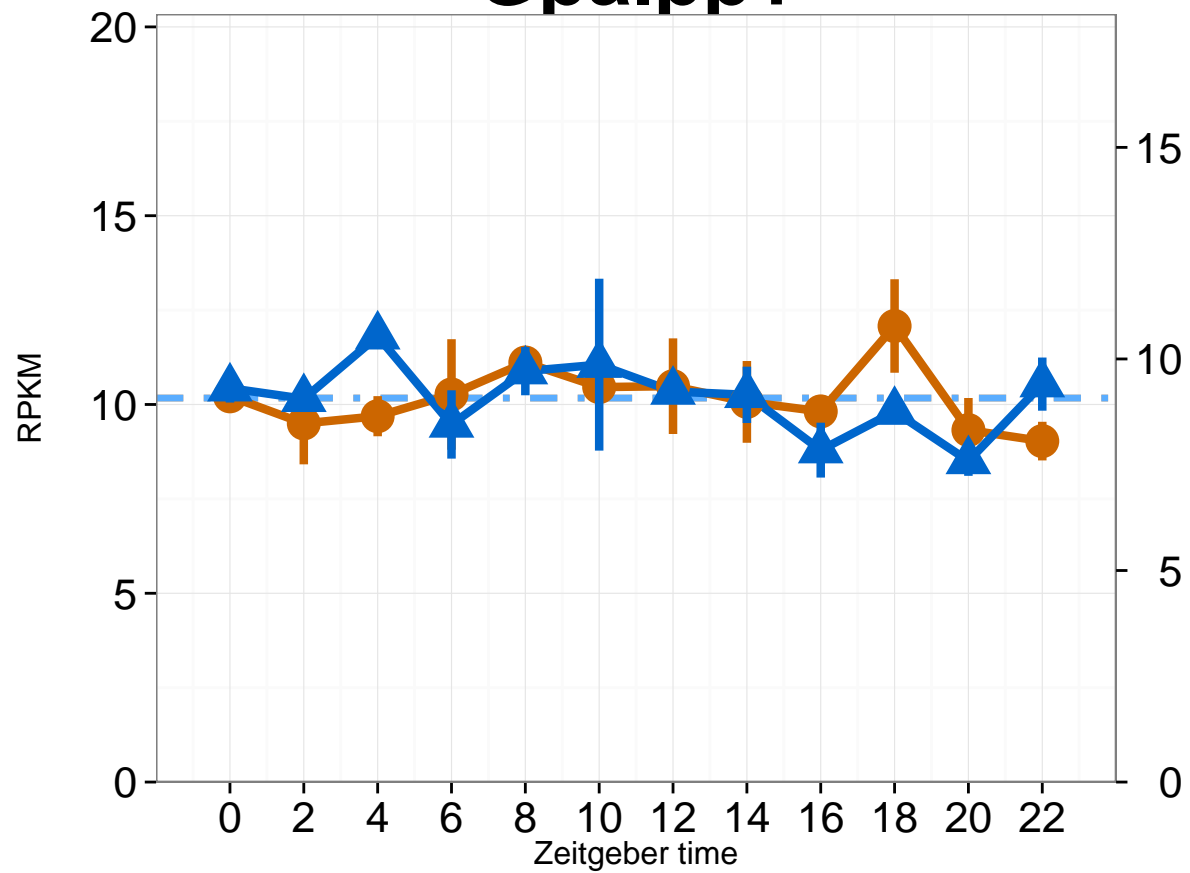

## Gpalpp1

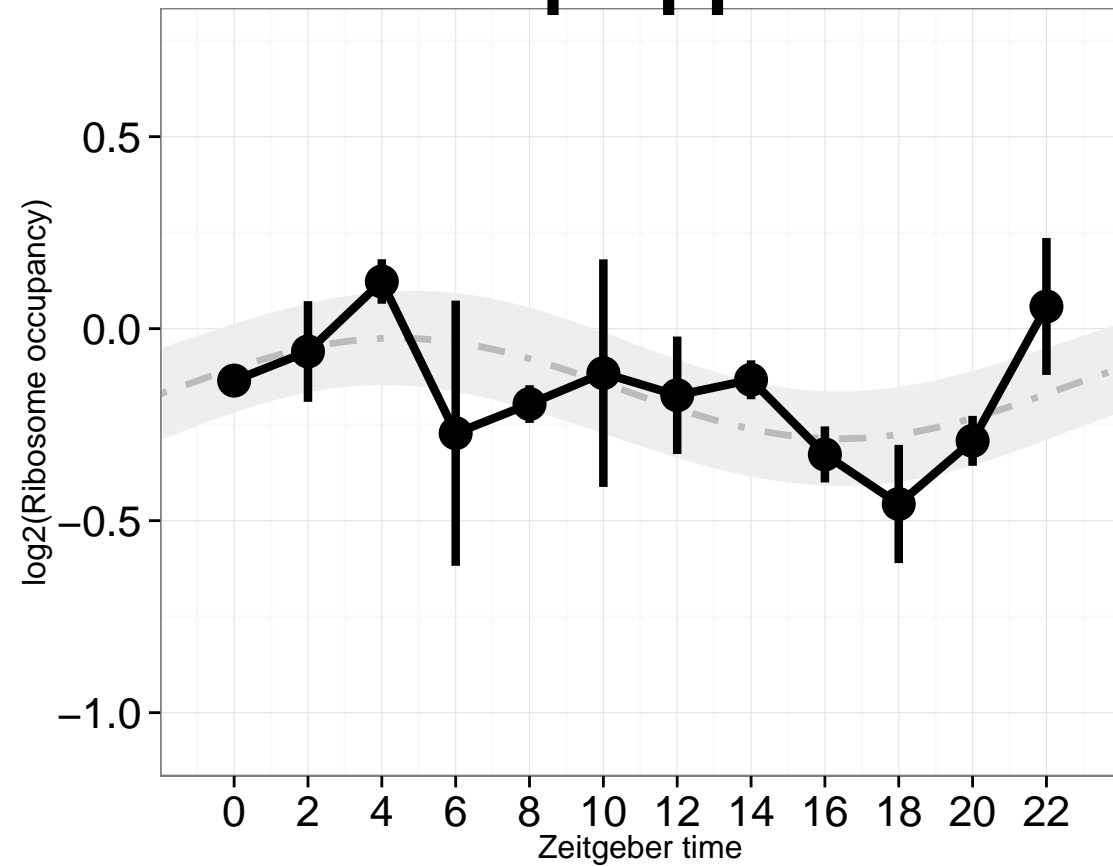

Supplement: SuppDataset_1.zip [file Gpalpp1_set_A.pdf › Supplemental Dataset 1/A-mRNA_nonrhyth_translation_nonrhyth/Gpalpp1_set_A.pdf]

# Gpank1

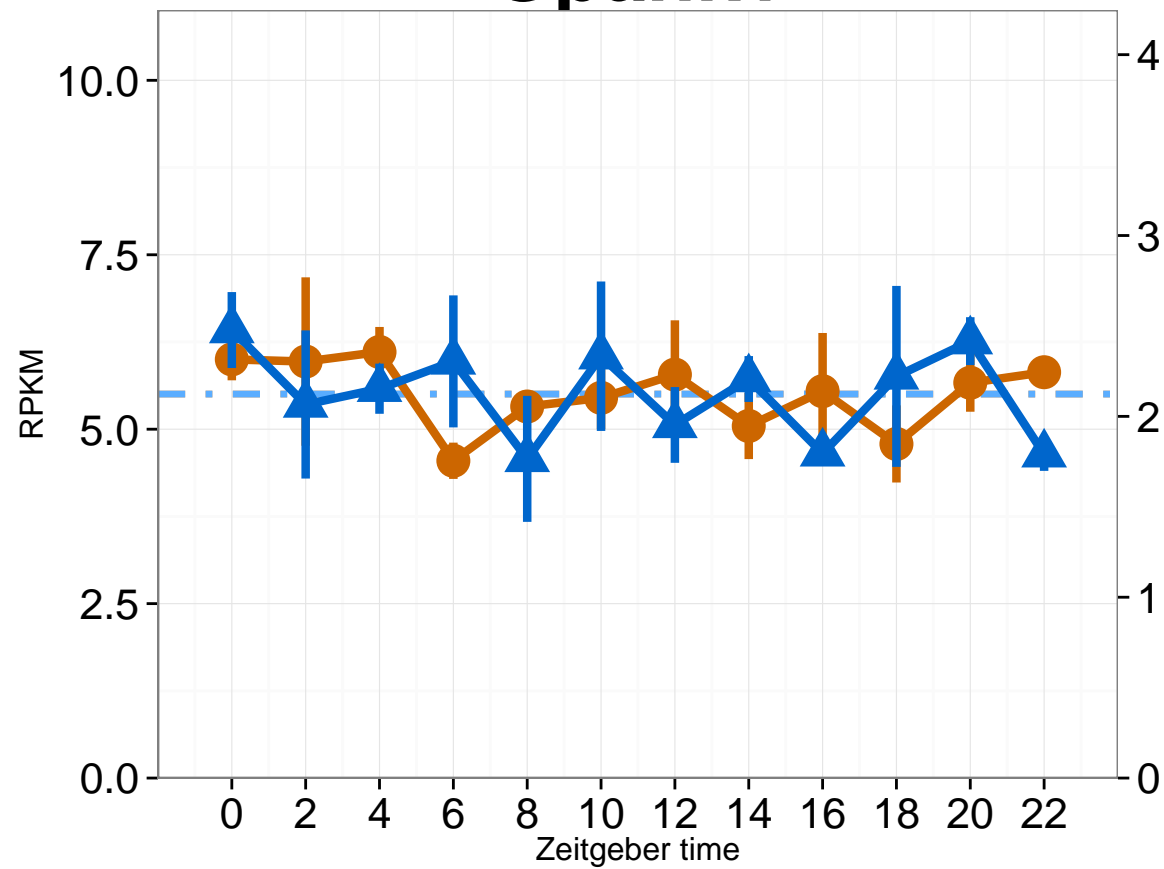

# Gpank1

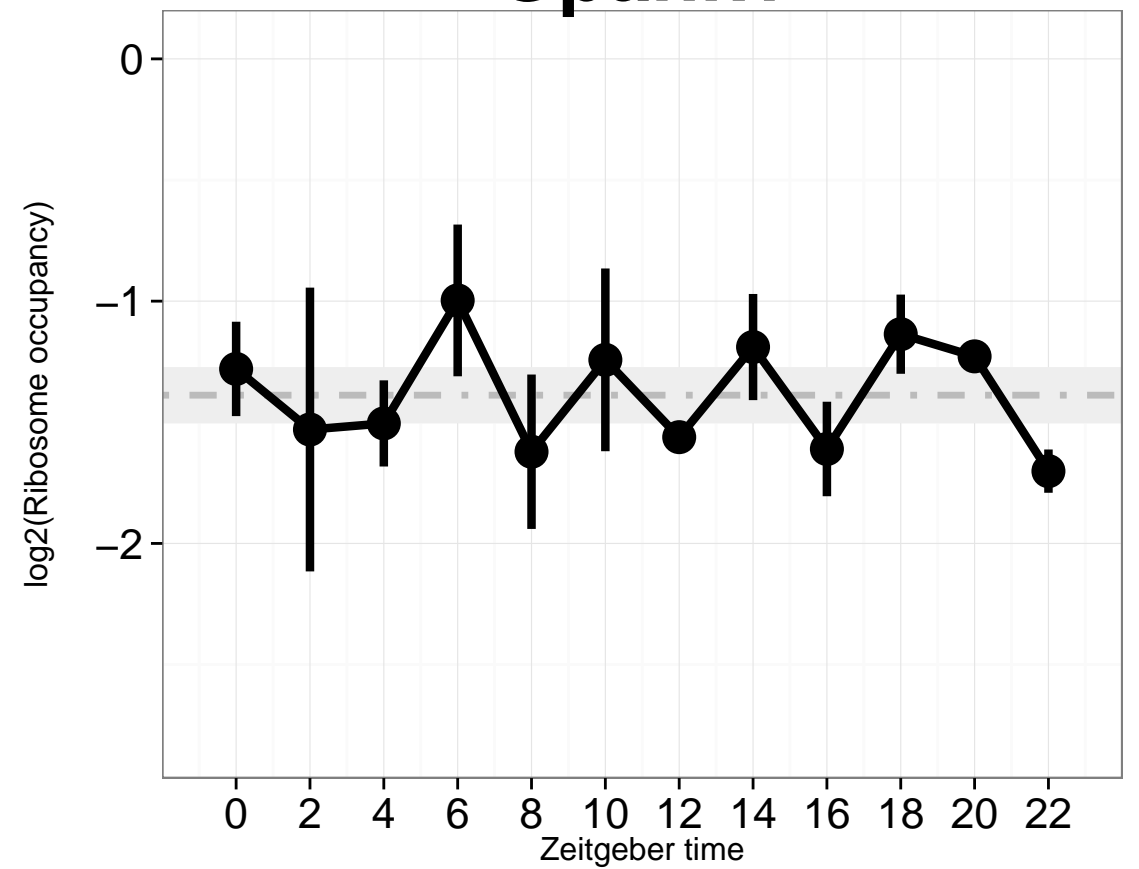

Supplement: SuppDataset_1.zip [file Gpank1_set_A.pdf › Supplemental Dataset 1/A-mRNA_nonrhyth_translation_nonrhyth/Gpank1_set_A.pdf]

# Gpatch11

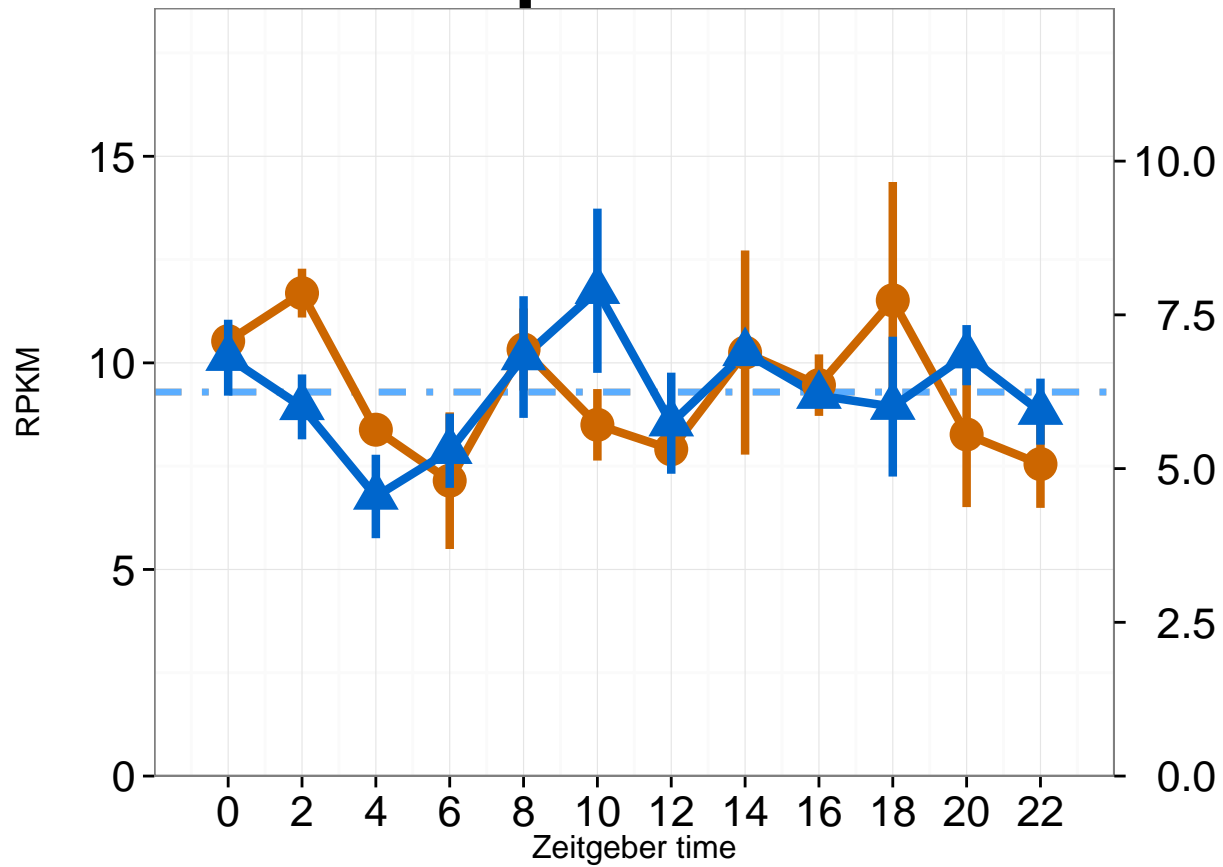

# Gpatch11

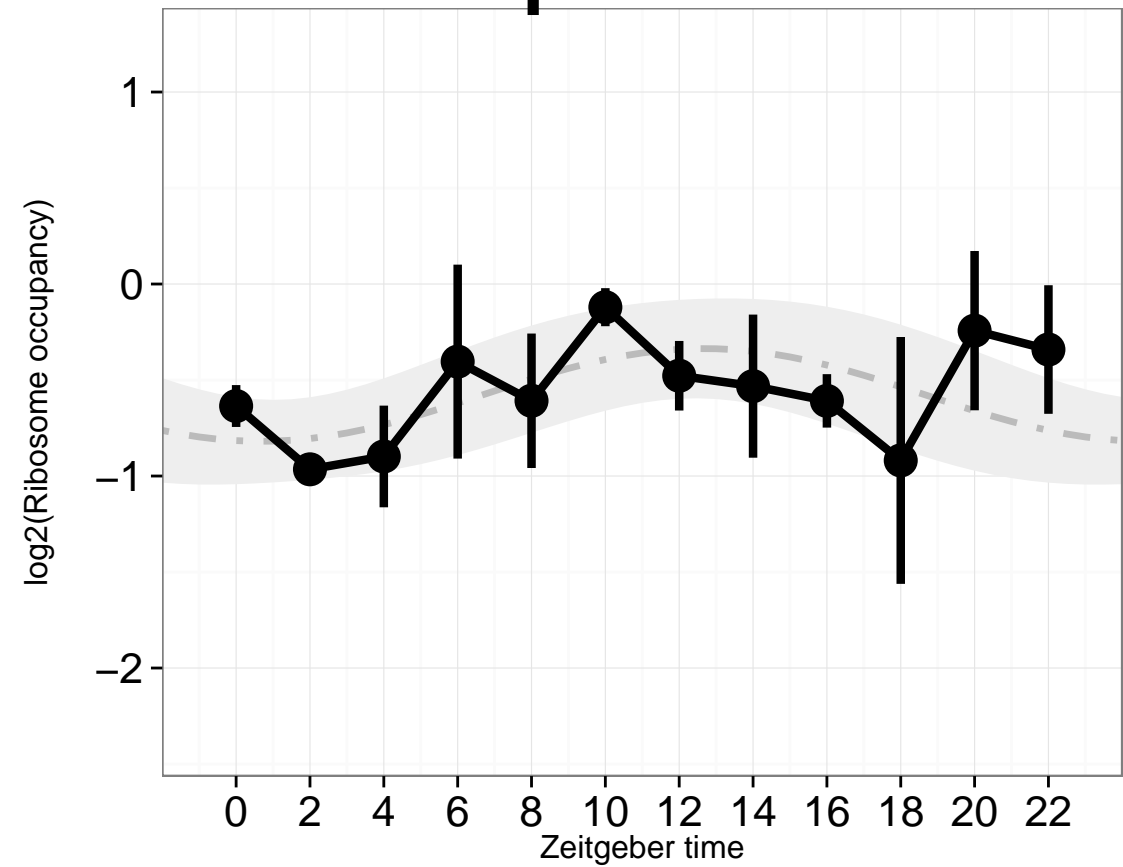

Supplement: SuppDataset_1.zip [file Gpatch11_set_A.pdf › Supplemental Dataset 1/A-mRNA_nonrhyth_translation_nonrhyth/Gpatch11_set_A.pdf]

# Gpatch1

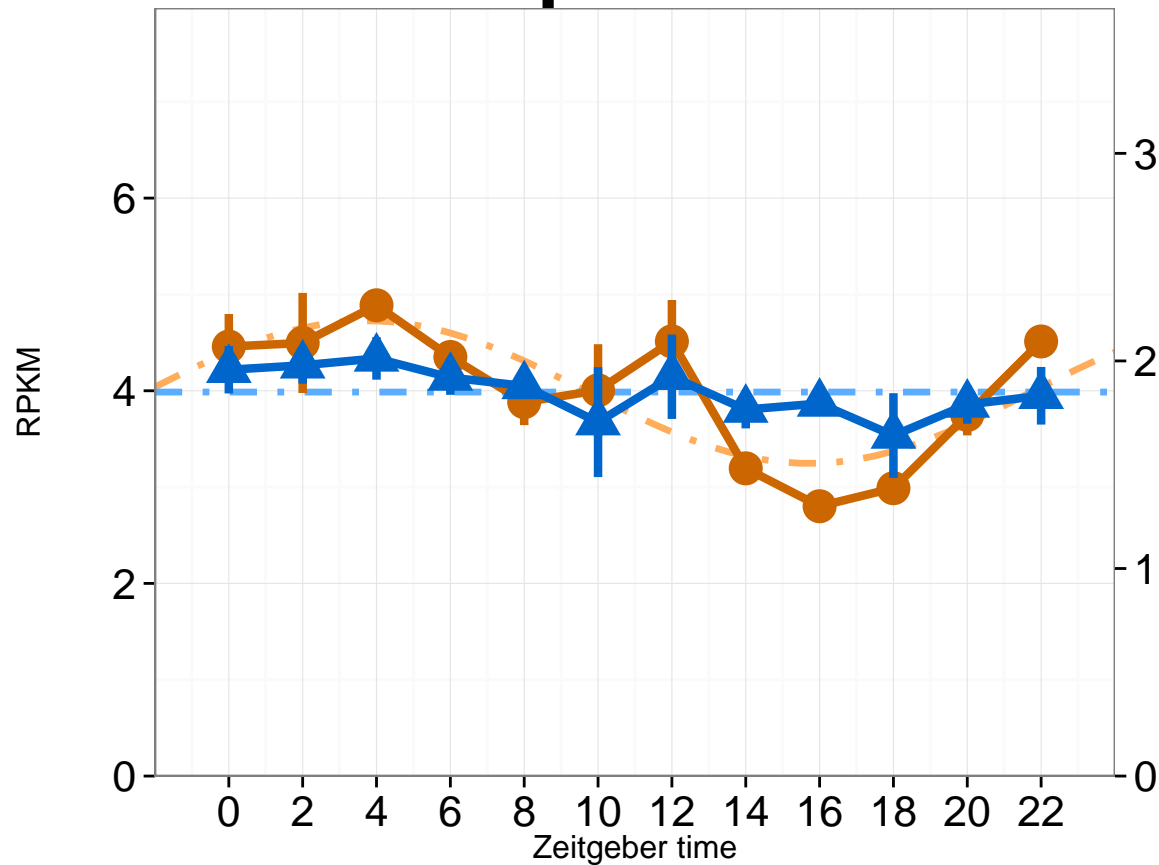

# Gpatch1

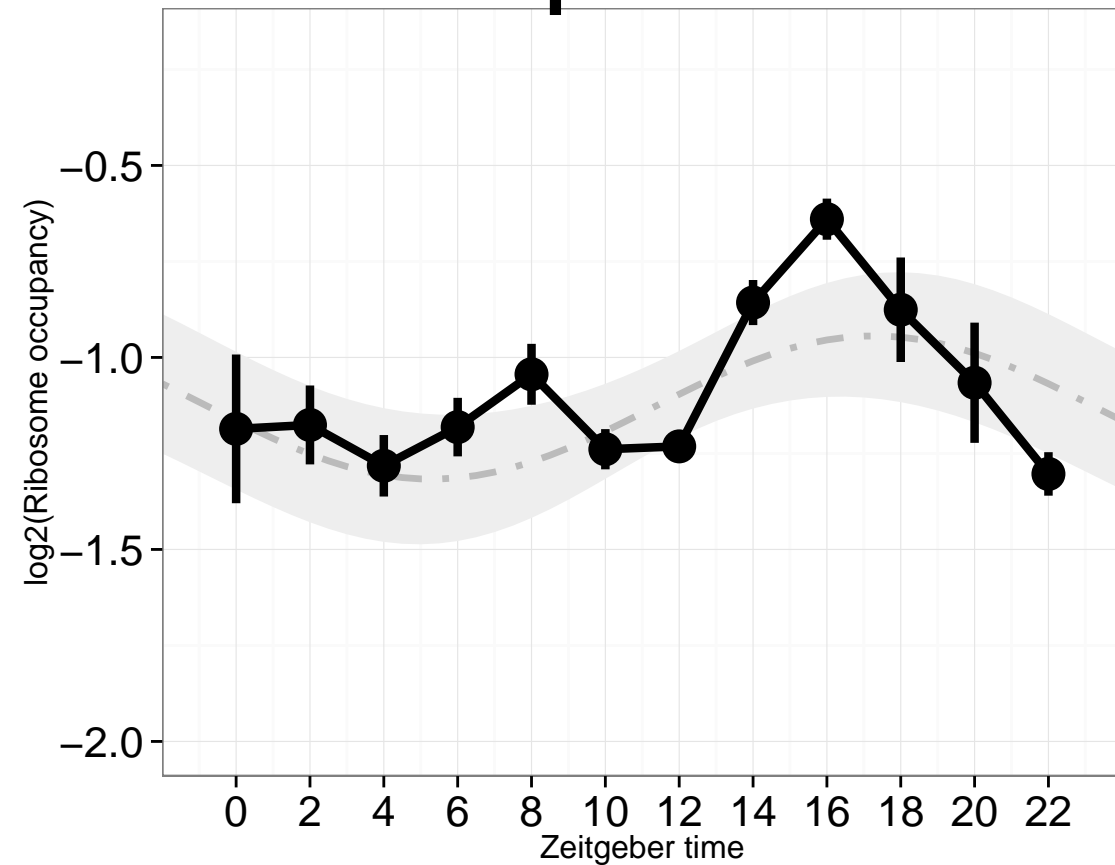

Supplement: SuppDataset_1.zip [file Gpatch1_set_A.pdf › Supplemental Dataset 1/A-mRNA_nonrhyth_translation_nonrhyth/Gpatch1_set_A.pdf]

## Gpatch2

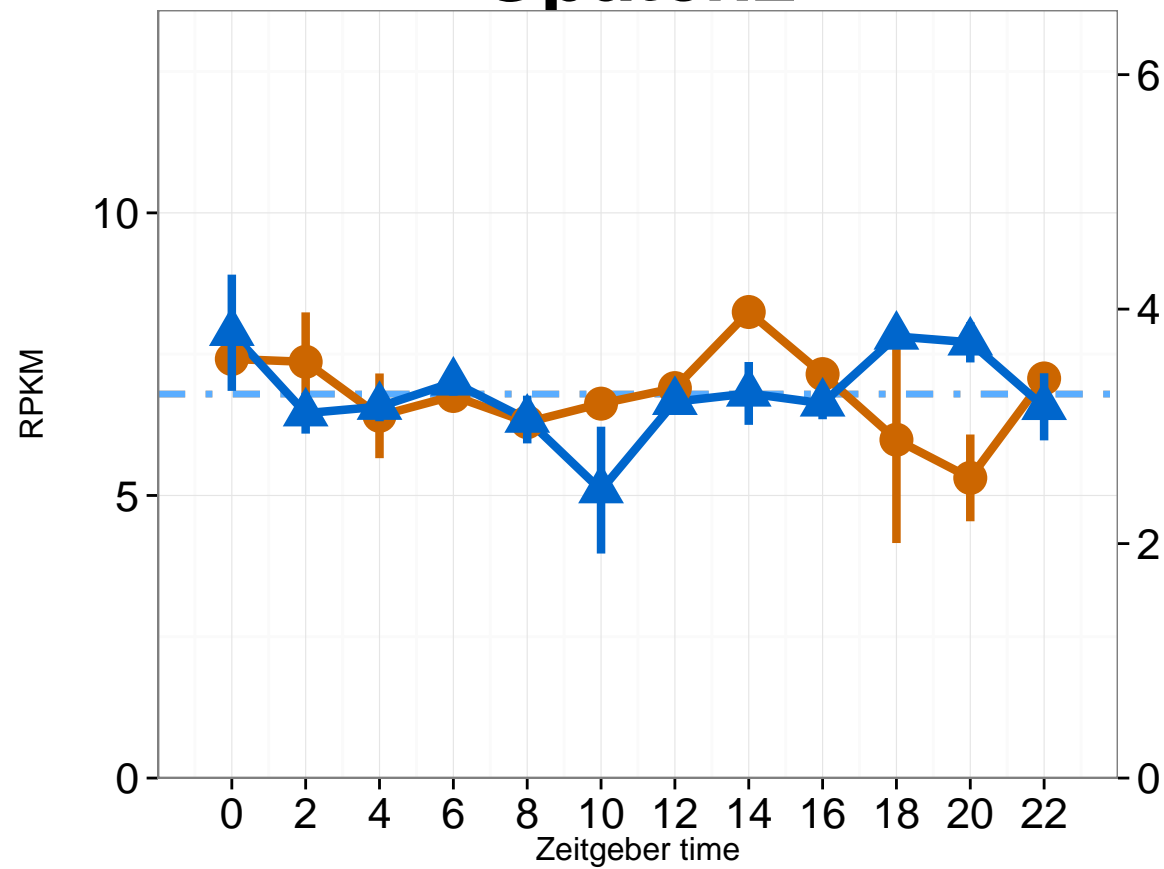

## Gpatch2

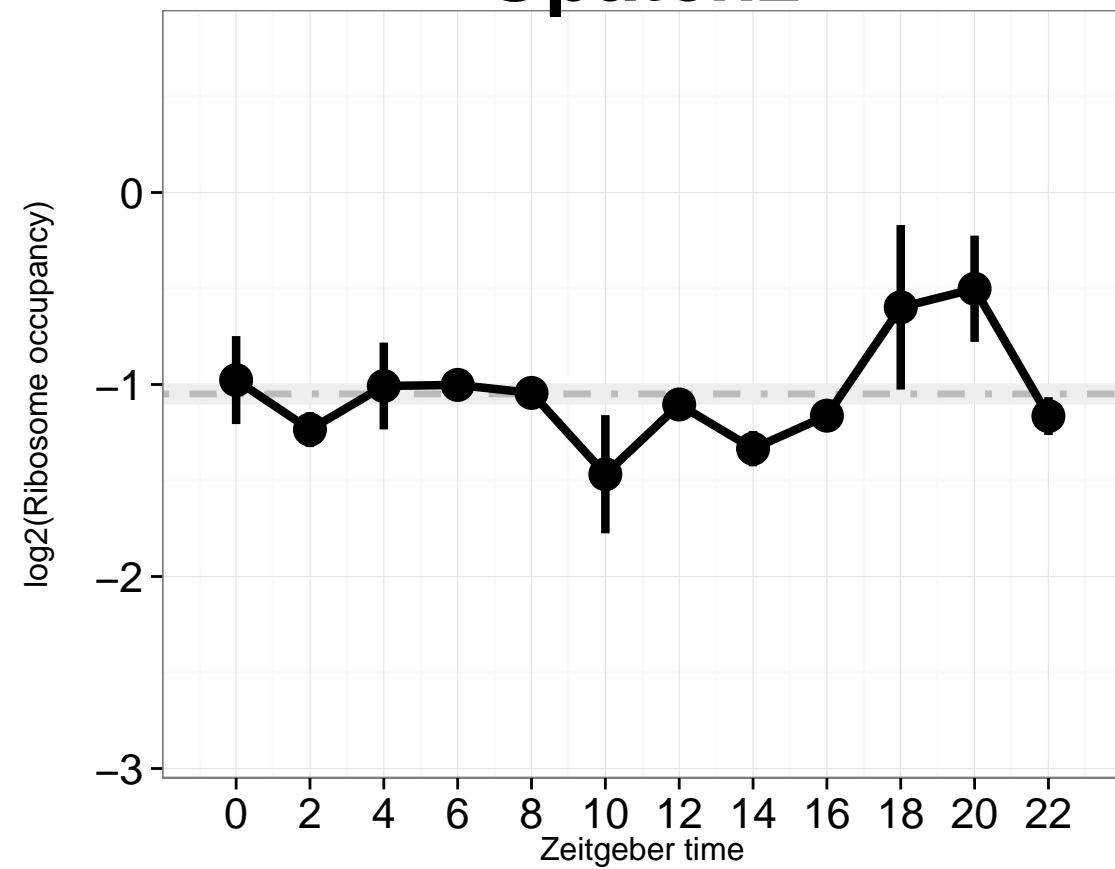

Supplement: SuppDataset_1.zip [file Gpatch2_set_A.pdf › Supplemental Dataset 1/A-mRNA_nonrhyth_translation_nonrhyth/Gpatch2_set_A.pdf]

## Gpatch2l

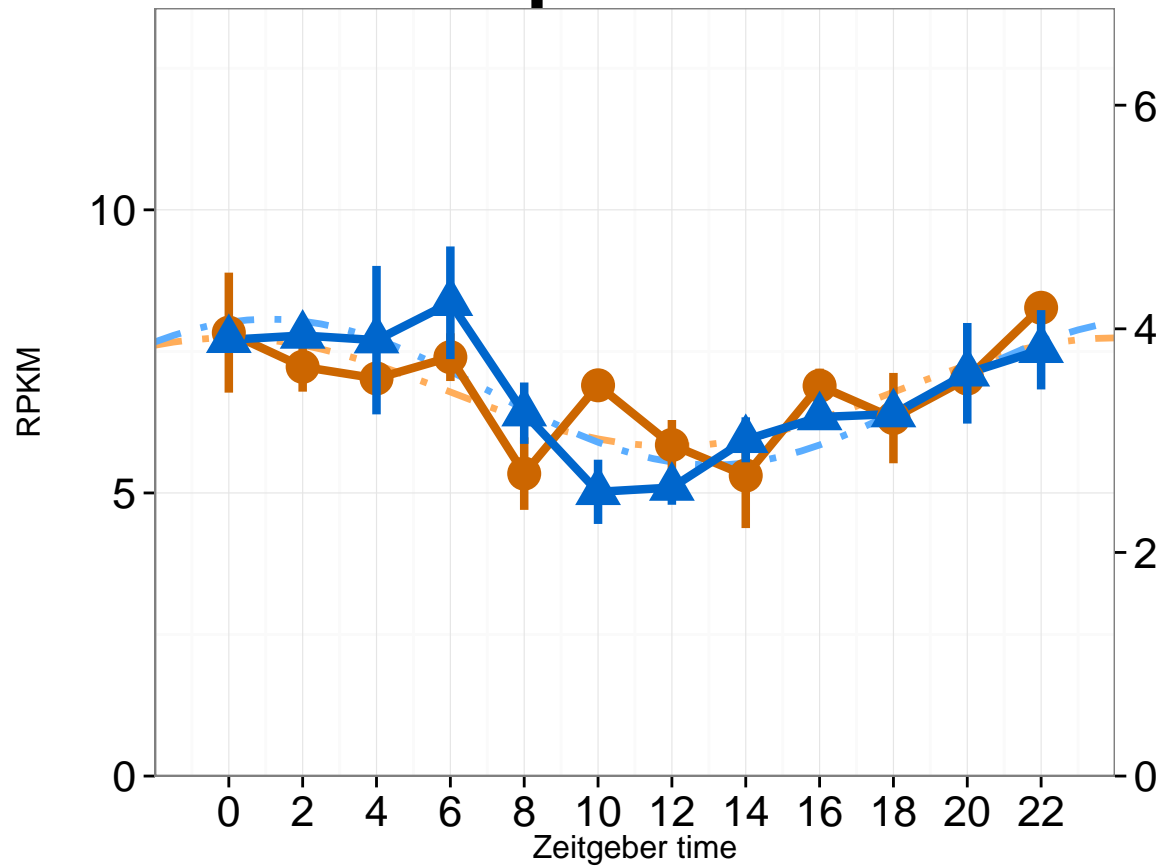

## Gpatch2l

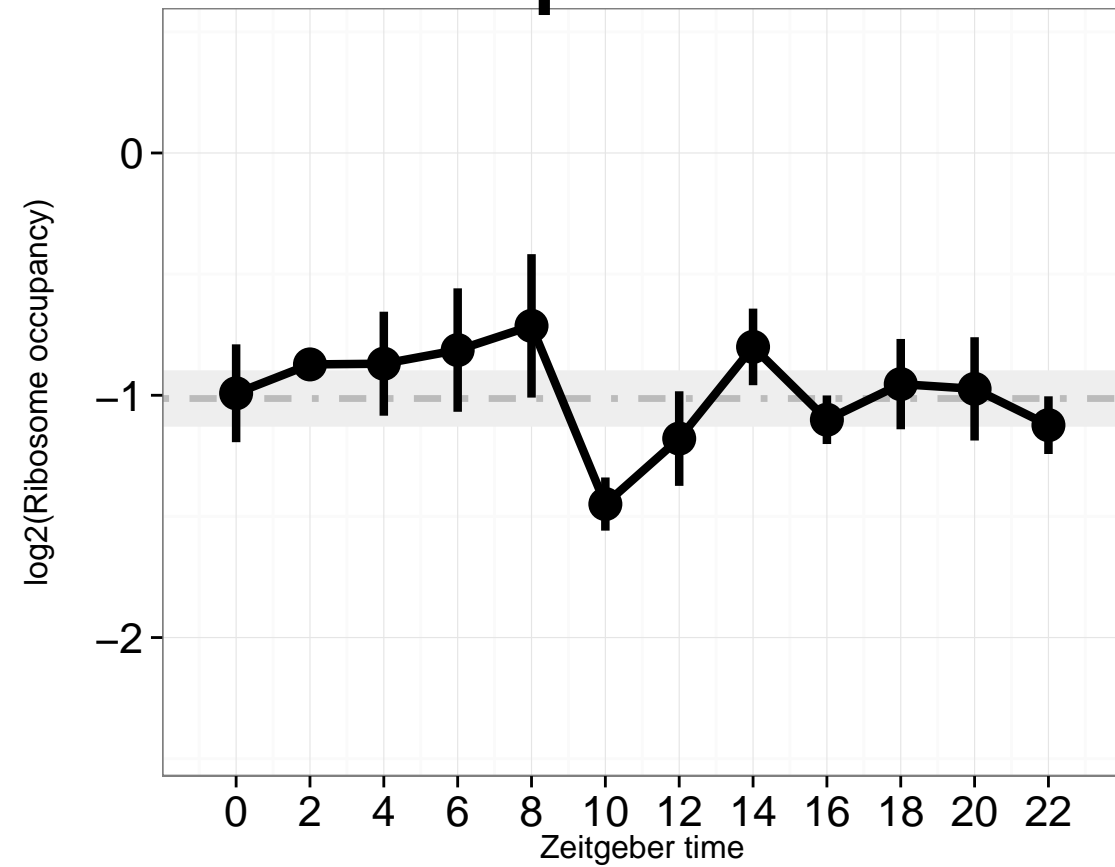

Supplement: SuppDataset_1.zip [file Gpatch2l_set_A.pdf › Supplemental Dataset 1/A-mRNA_nonrhyth_translation_nonrhyth/Gpatch2l_set_A.pdf]

## Gpatch3

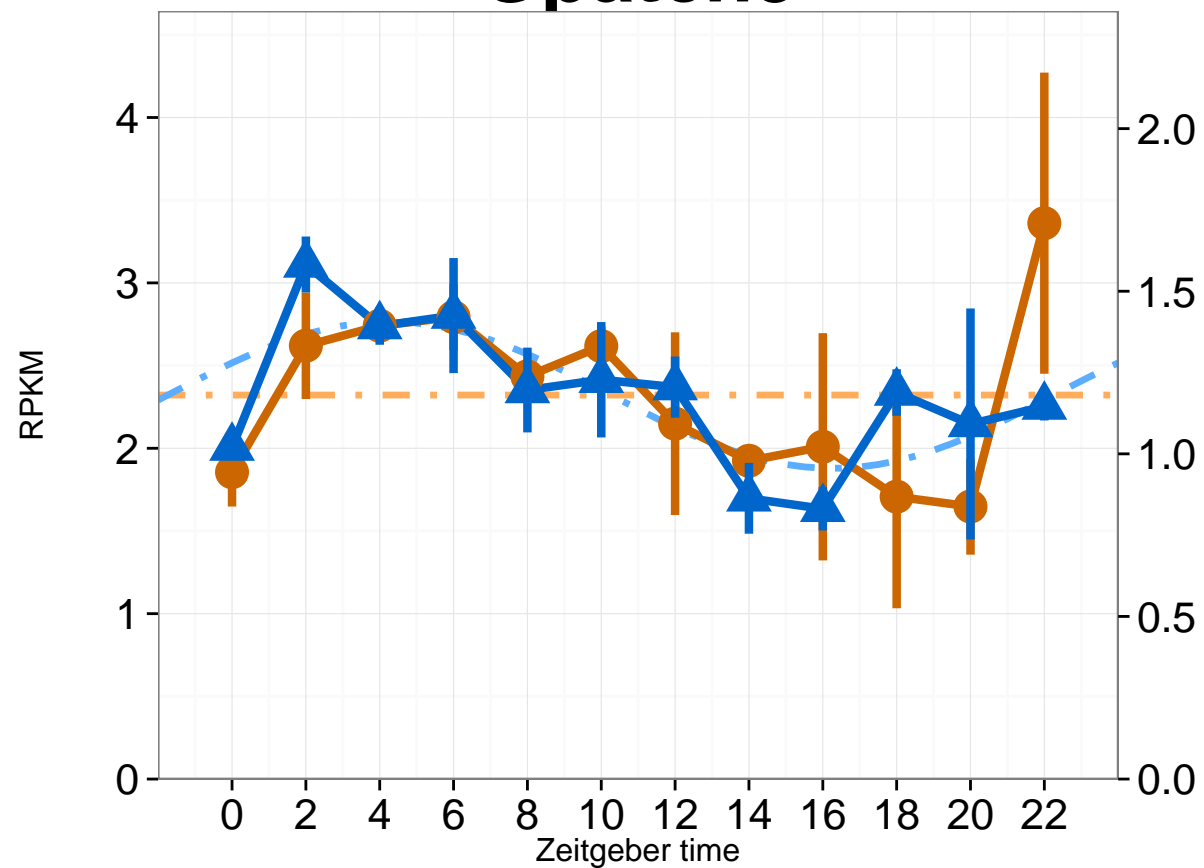

## Gpatch3

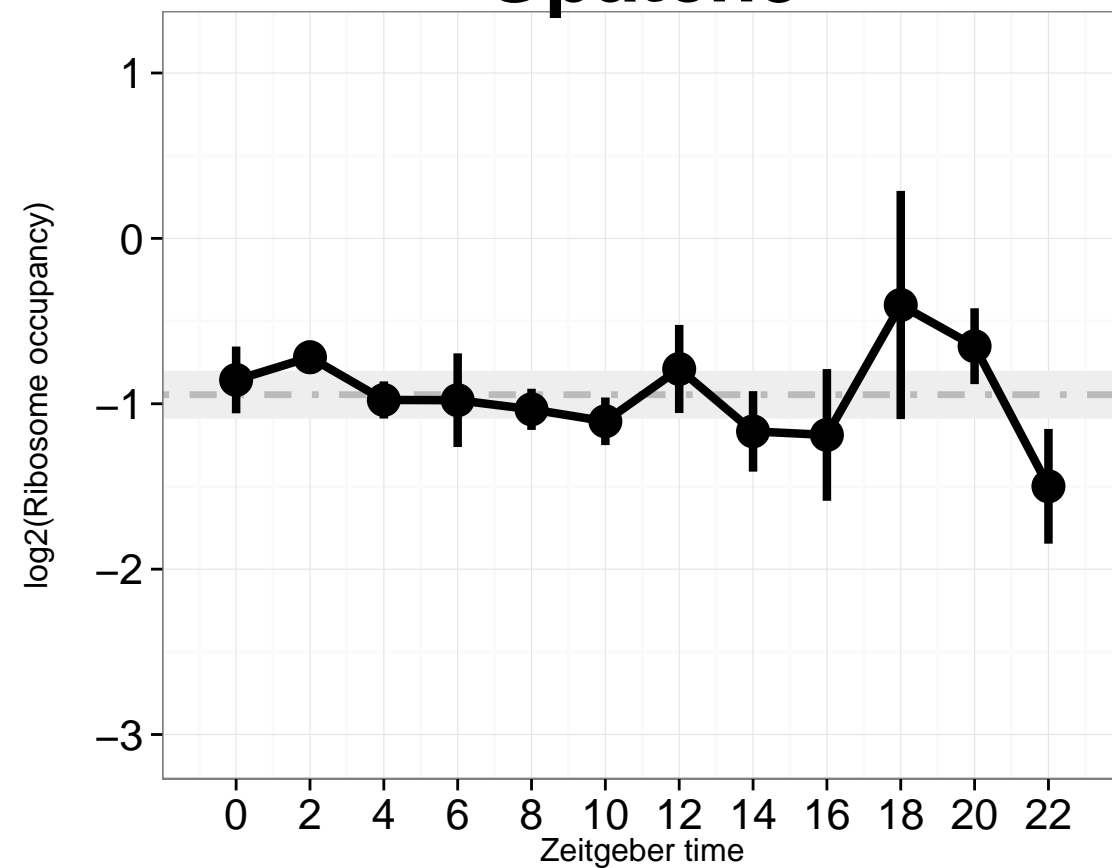

Supplement: SuppDataset_1.zip [file Gpatch3_set_A.pdf › Supplemental Dataset 1/A-mRNA_nonrhyth_translation_nonrhyth/Gpatch3_set_A.pdf]

# Gpatch8

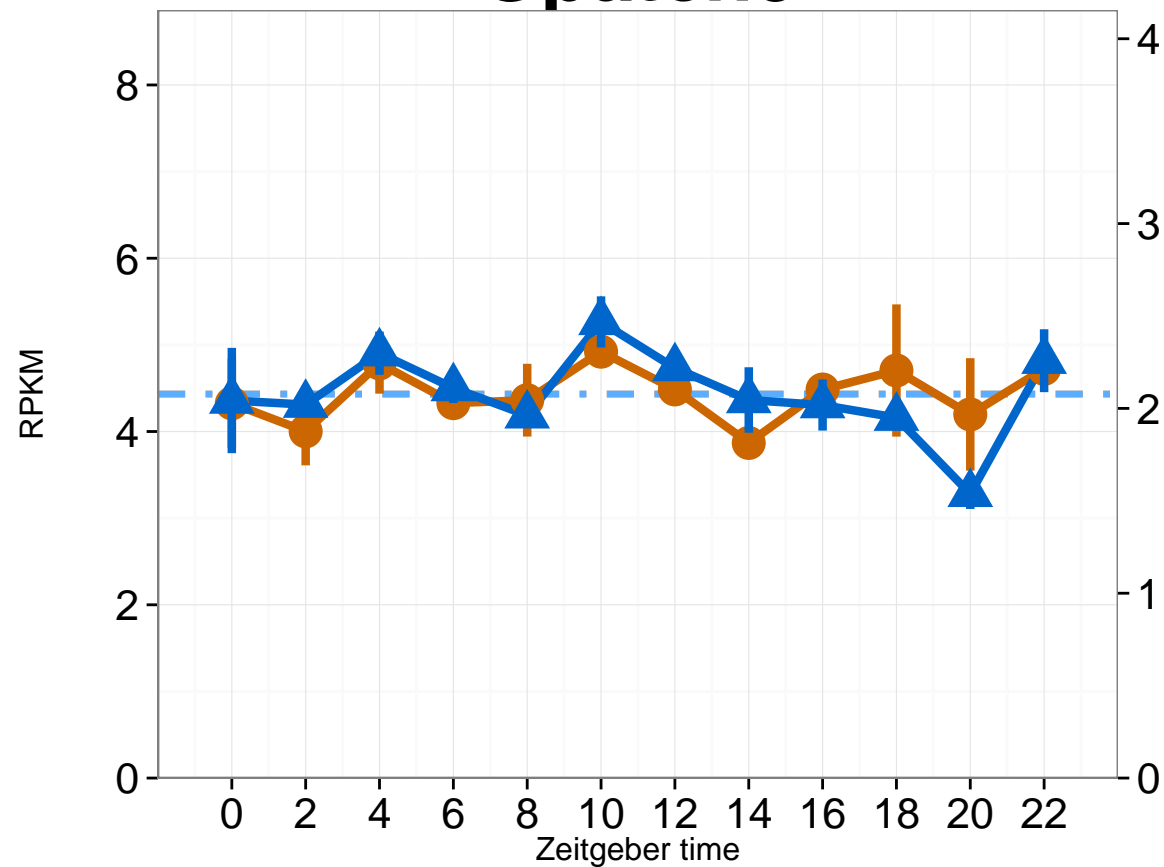

# Gpatch8

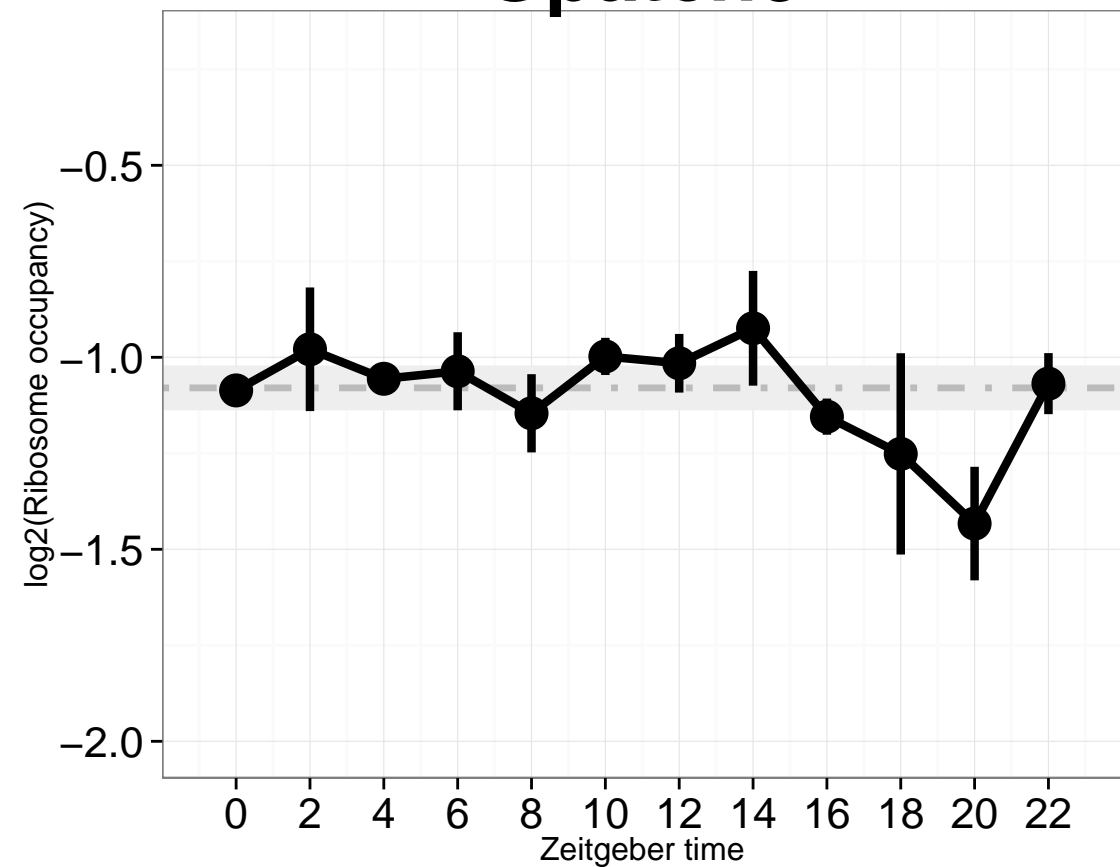

Supplement: SuppDataset_1.zip [file Gpatch8_set_A.pdf › Supplemental Dataset 1/A-mRNA_nonrhyth_translation_nonrhyth/Gpatch8_set_A.pdf]

## Gpbp1

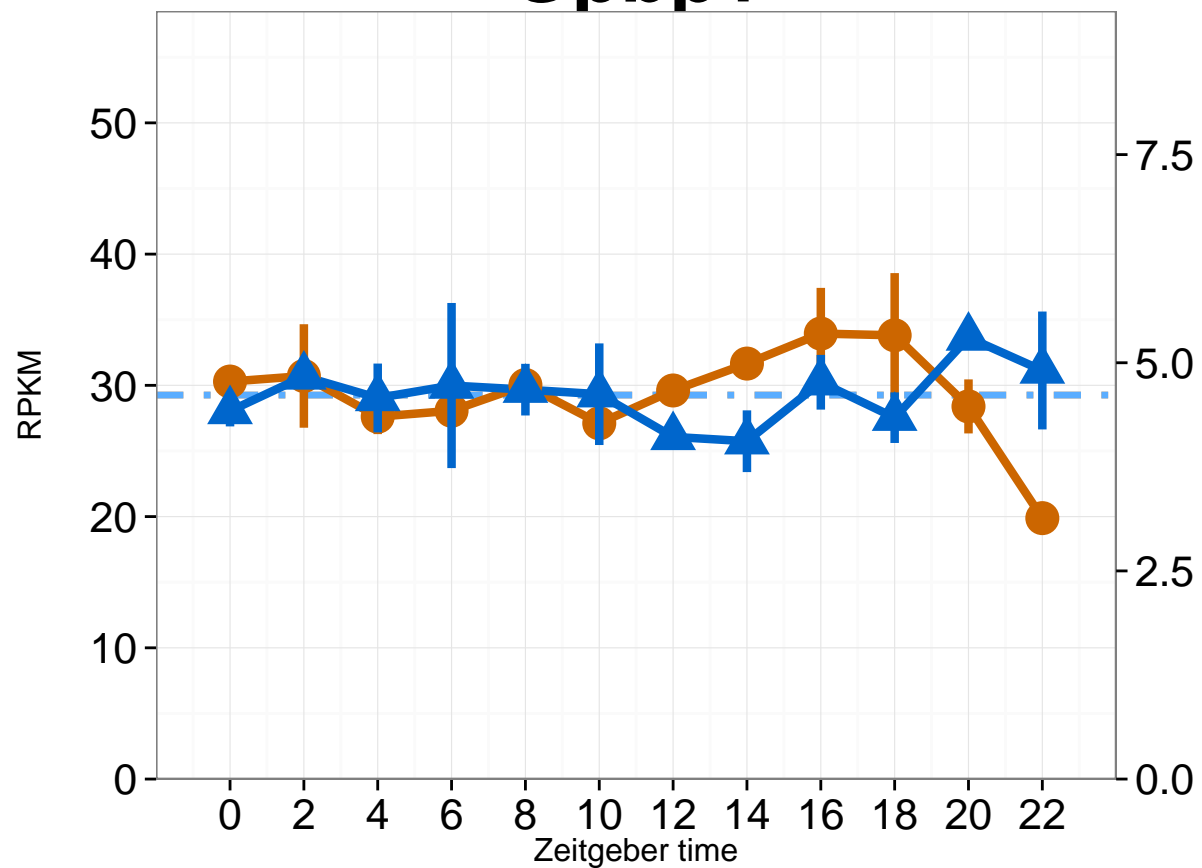

## Gpbp1

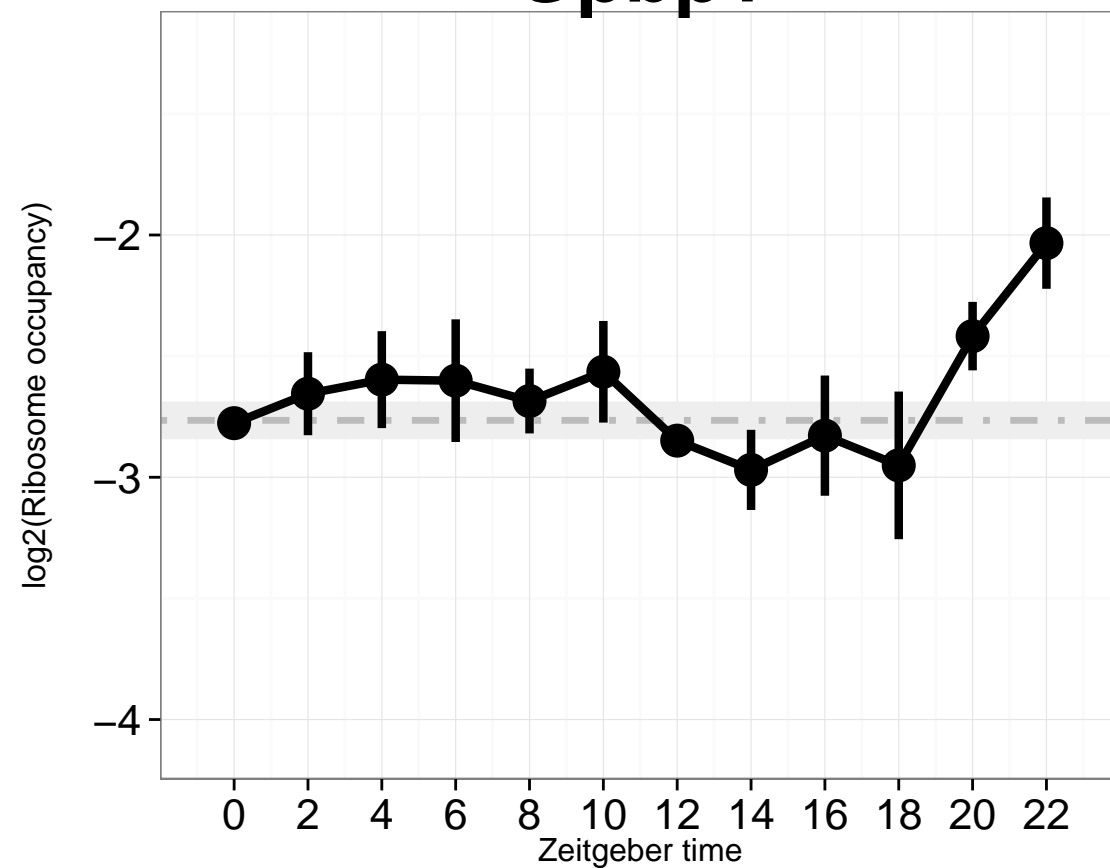

Supplement: SuppDataset_1.zip [file Gpbp1_set_A.pdf › Supplemental Dataset 1/A-mRNA_nonrhyth_translation_nonrhyth/Gpbp1_set_A.pdf]

# Gpbp1l1

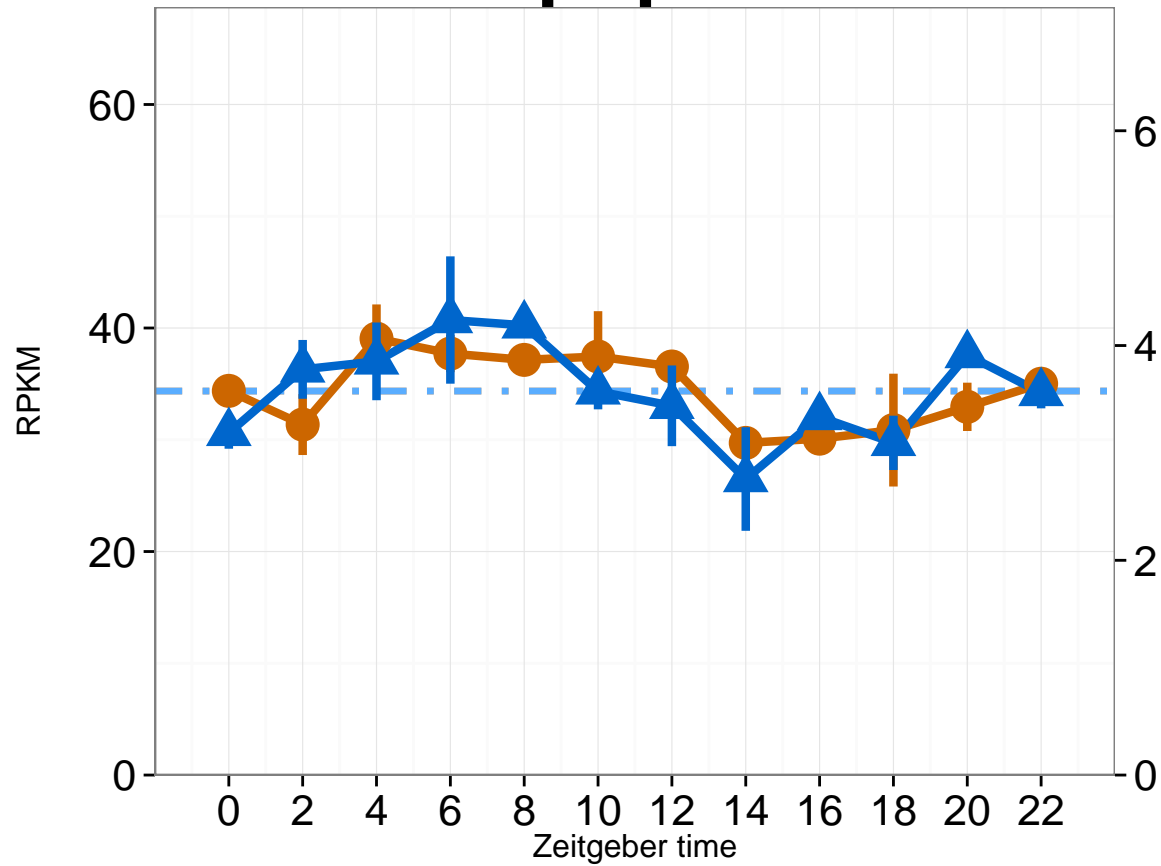

# Gpbp1l1

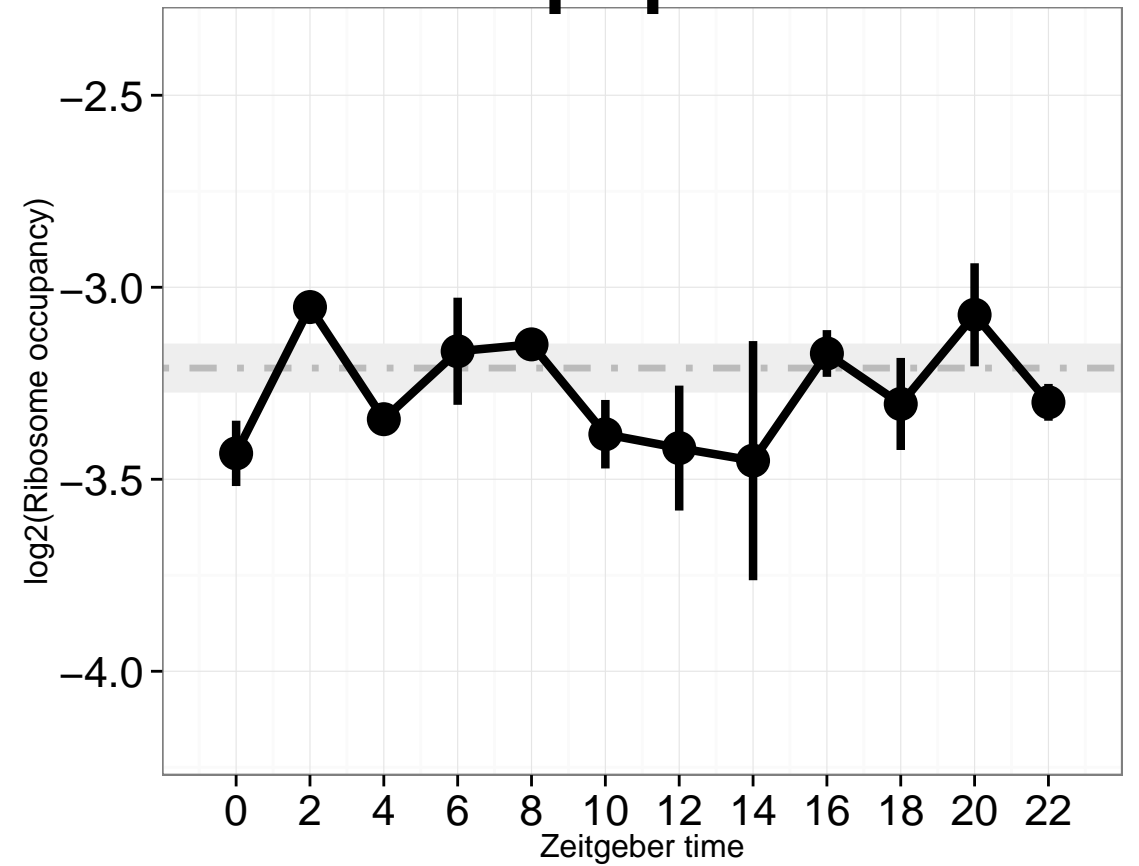

Supplement: SuppDataset_1.zip [file Gpbp1l1_set_A.pdf › Supplemental Dataset 1/A-mRNA_nonrhyth_translation_nonrhyth/Gpbp1l1_set_A.pdf]

## Gpc4

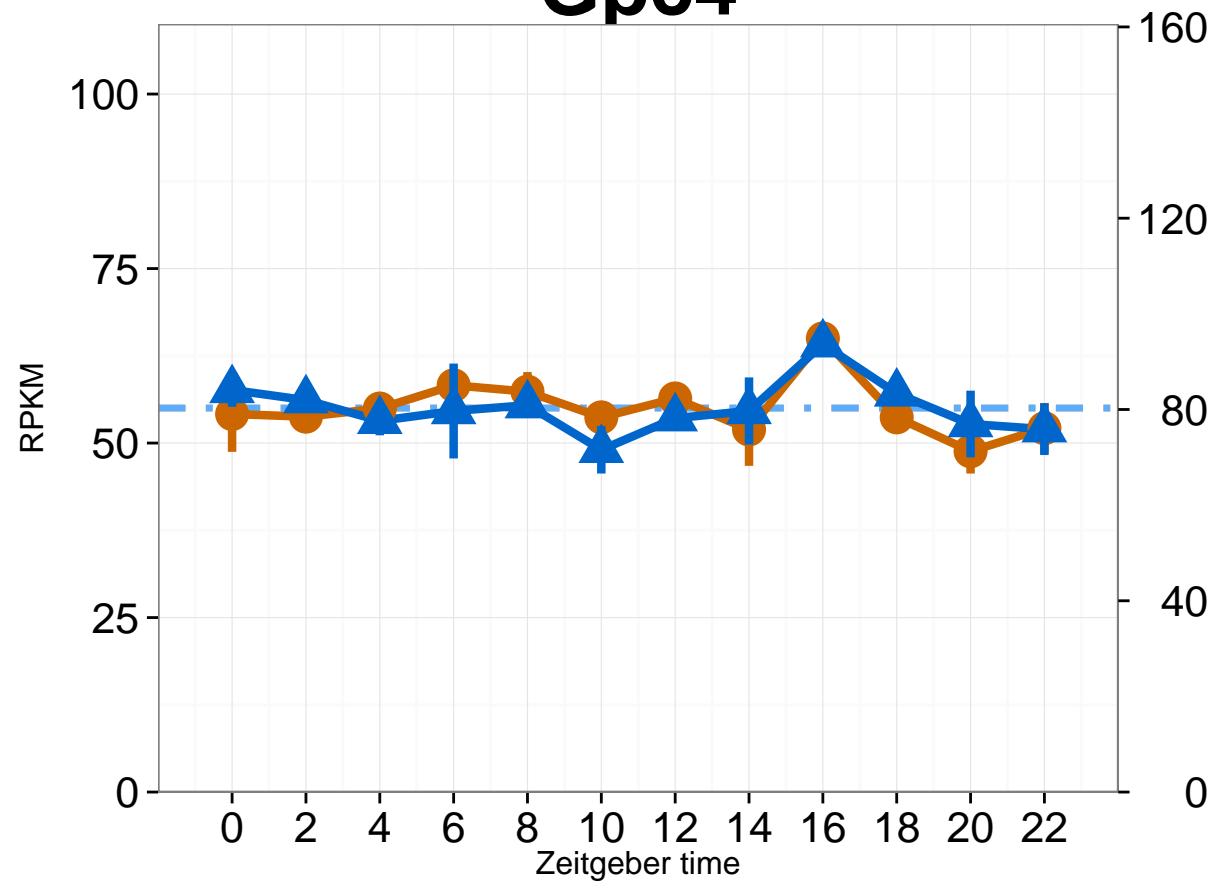

## Gpc4

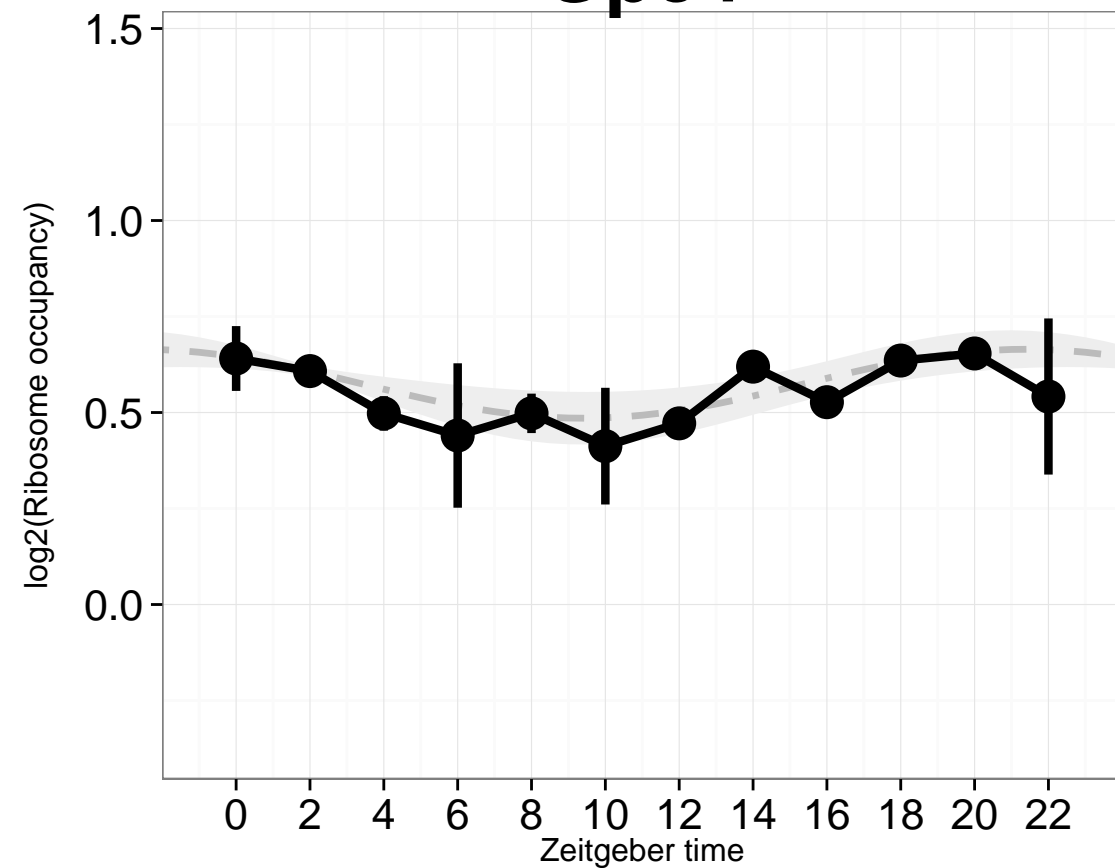

Supplement: SuppDataset_1.zip [file Gpc4_set_A.pdf › Supplemental Dataset 1/A-mRNA_nonrhyth_translation_nonrhyth/Gpc4_set_A.pdf]

# Gpc6

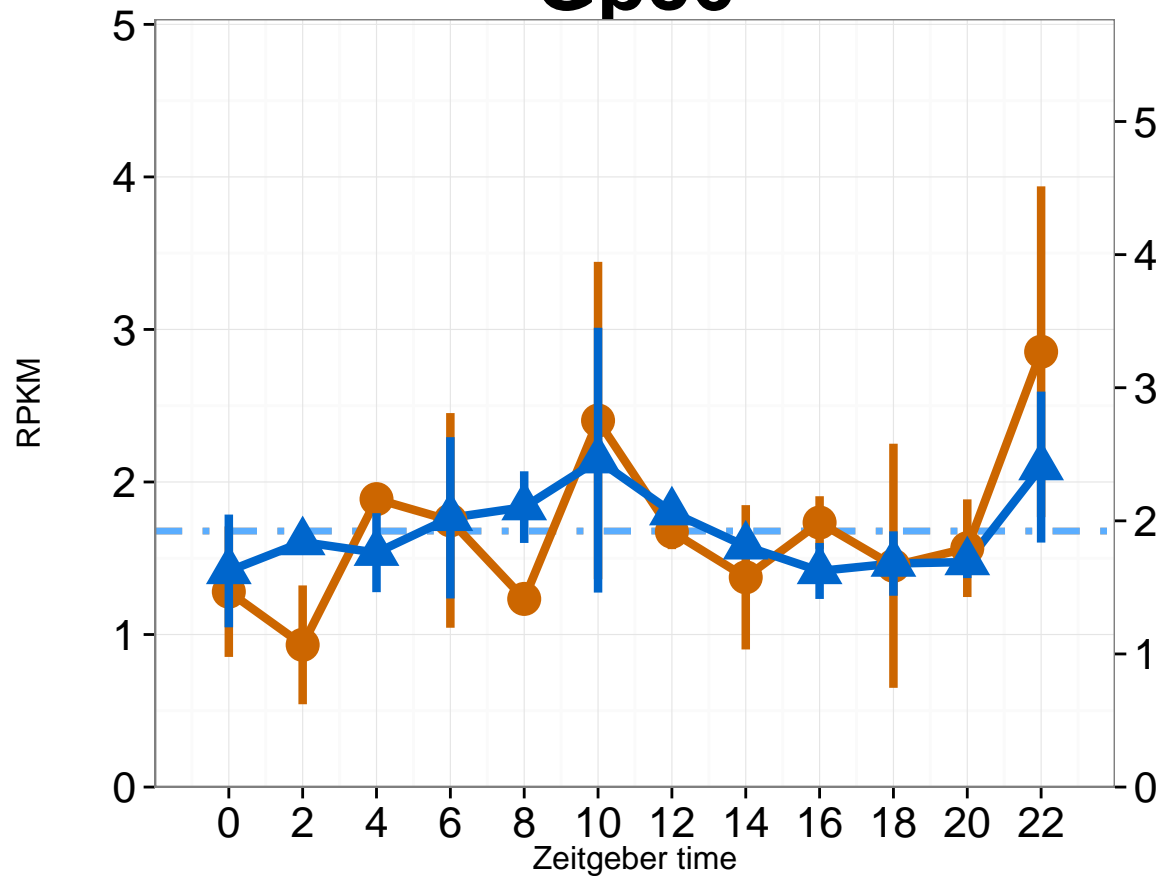

# Gpc6

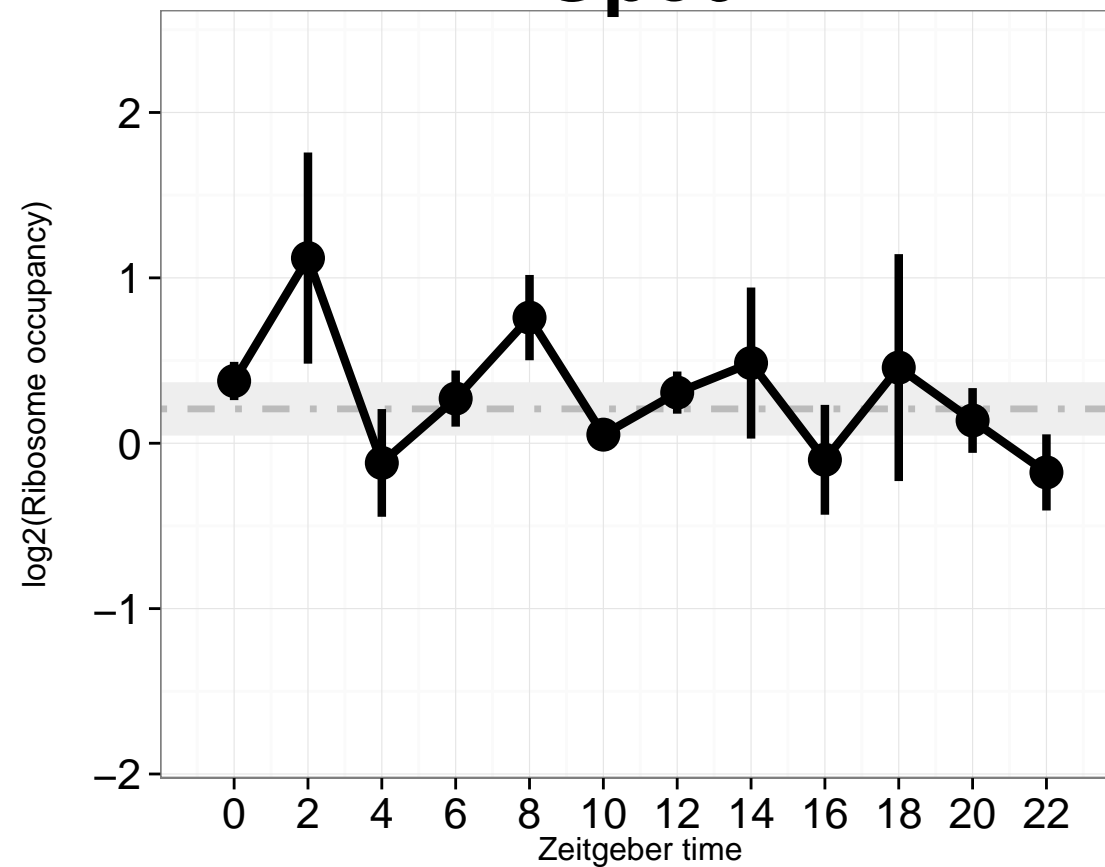

Supplement: SuppDataset_1.zip [file Gpc6_set_A.pdf › Supplemental Dataset 1/A-mRNA_nonrhyth_translation_nonrhyth/Gpc6_set_A.pdf]

# Gpd1

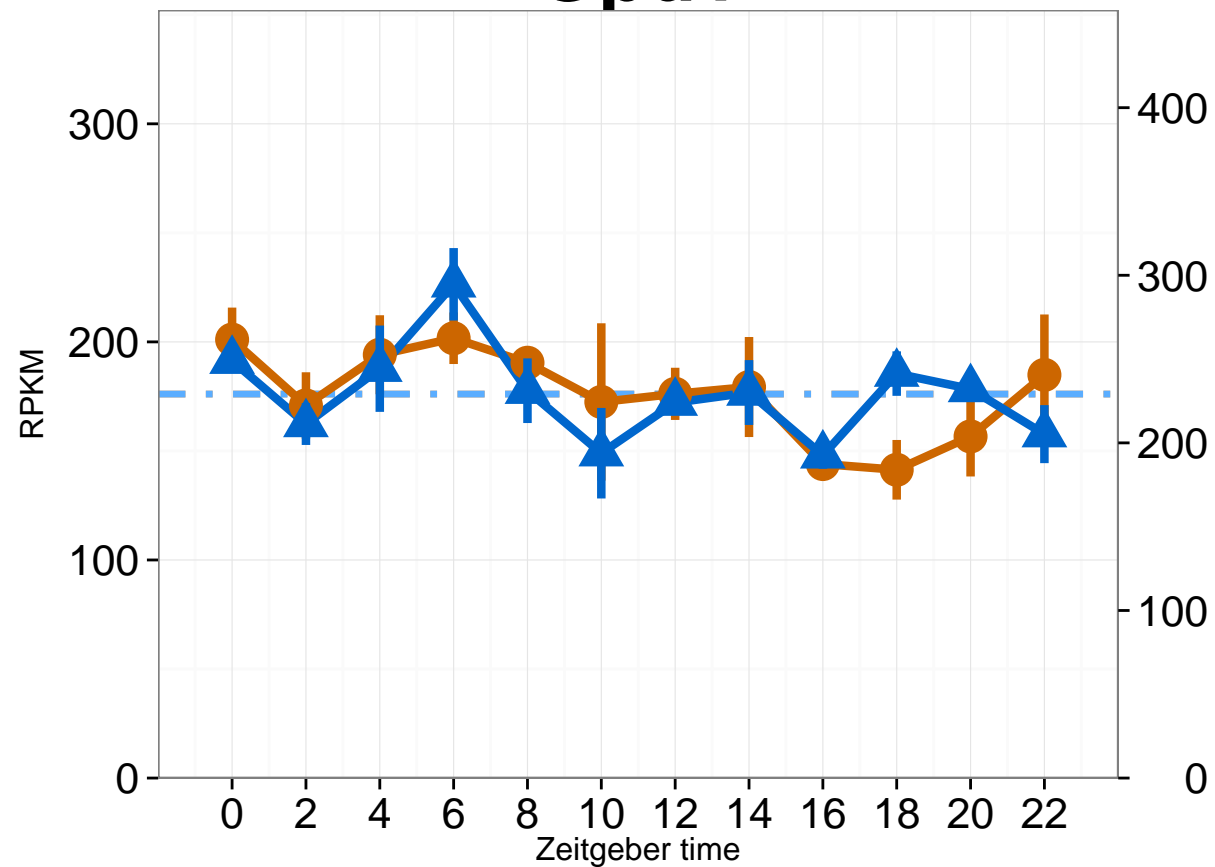

# Gpd1

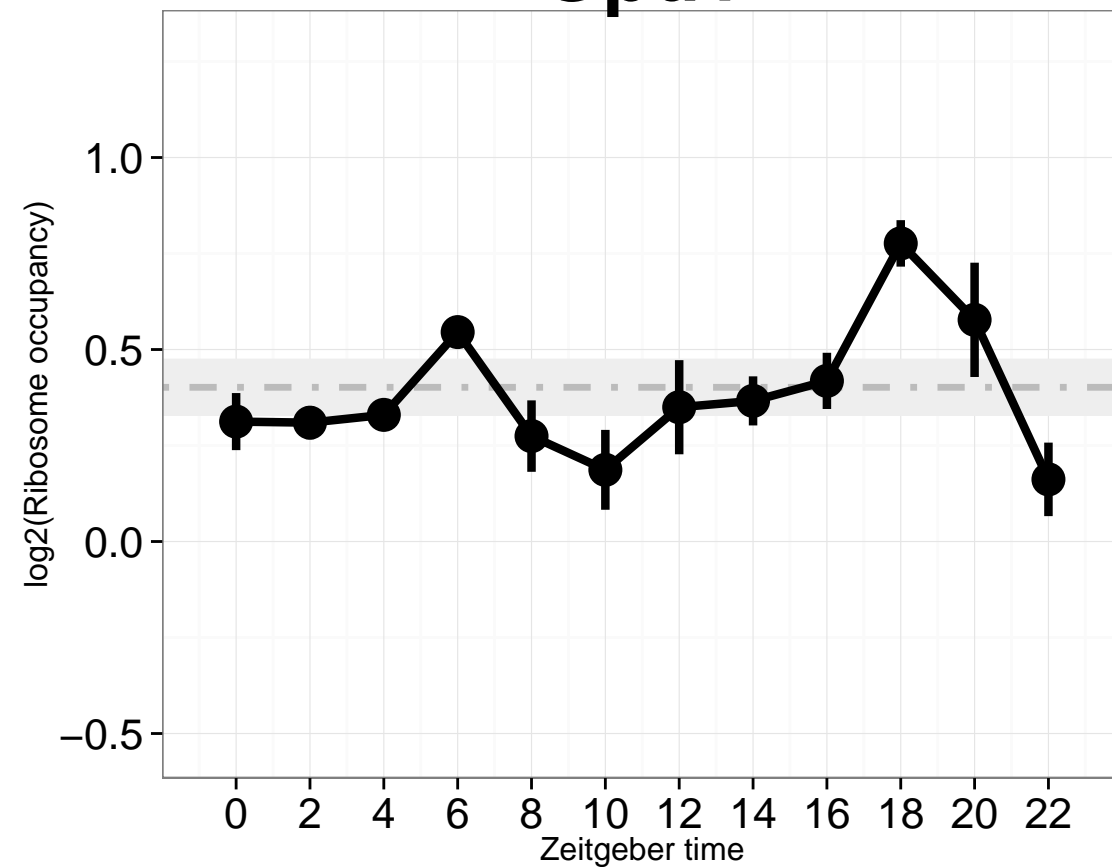

Supplement: SuppDataset_1.zip [file Gpd1_set_A.pdf › Supplemental Dataset 1/A-mRNA_nonrhyth_translation_nonrhyth/Gpd1_set_A.pdf]

# Gpd1l

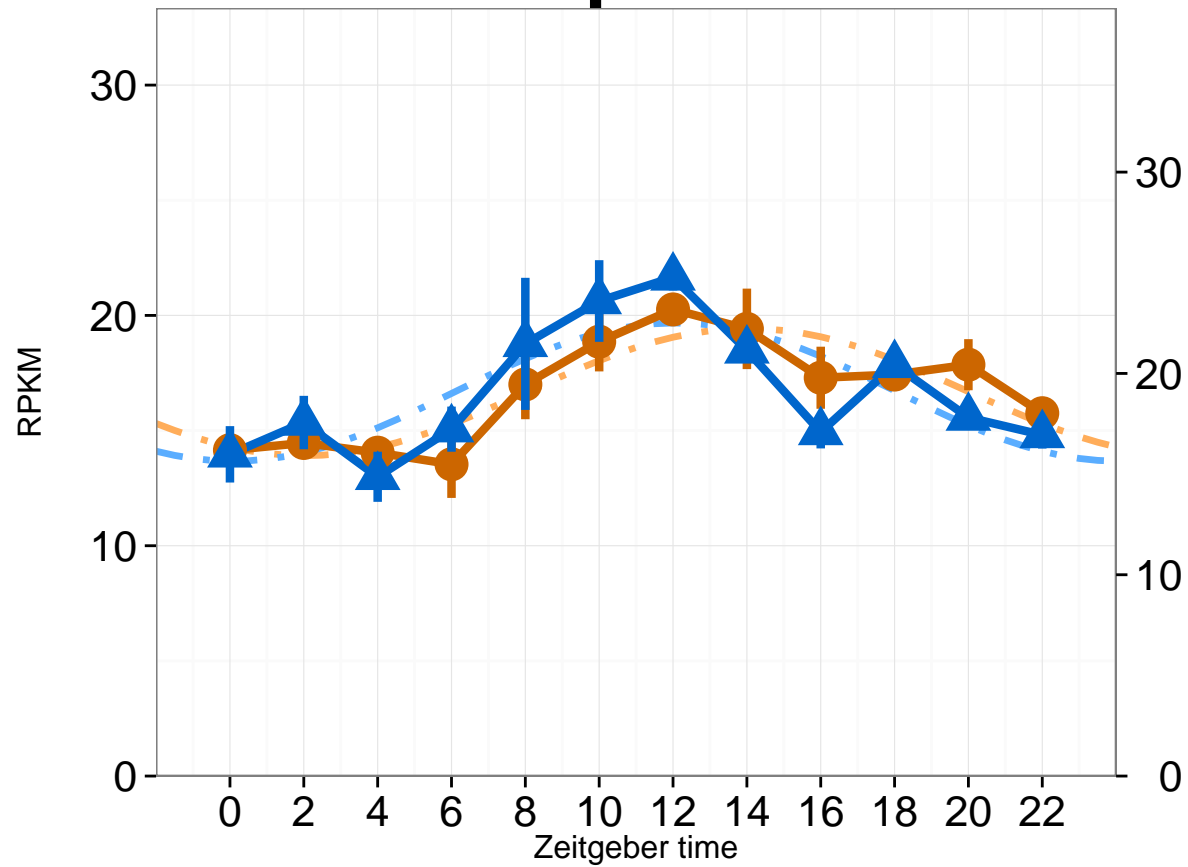

# Gpd1l

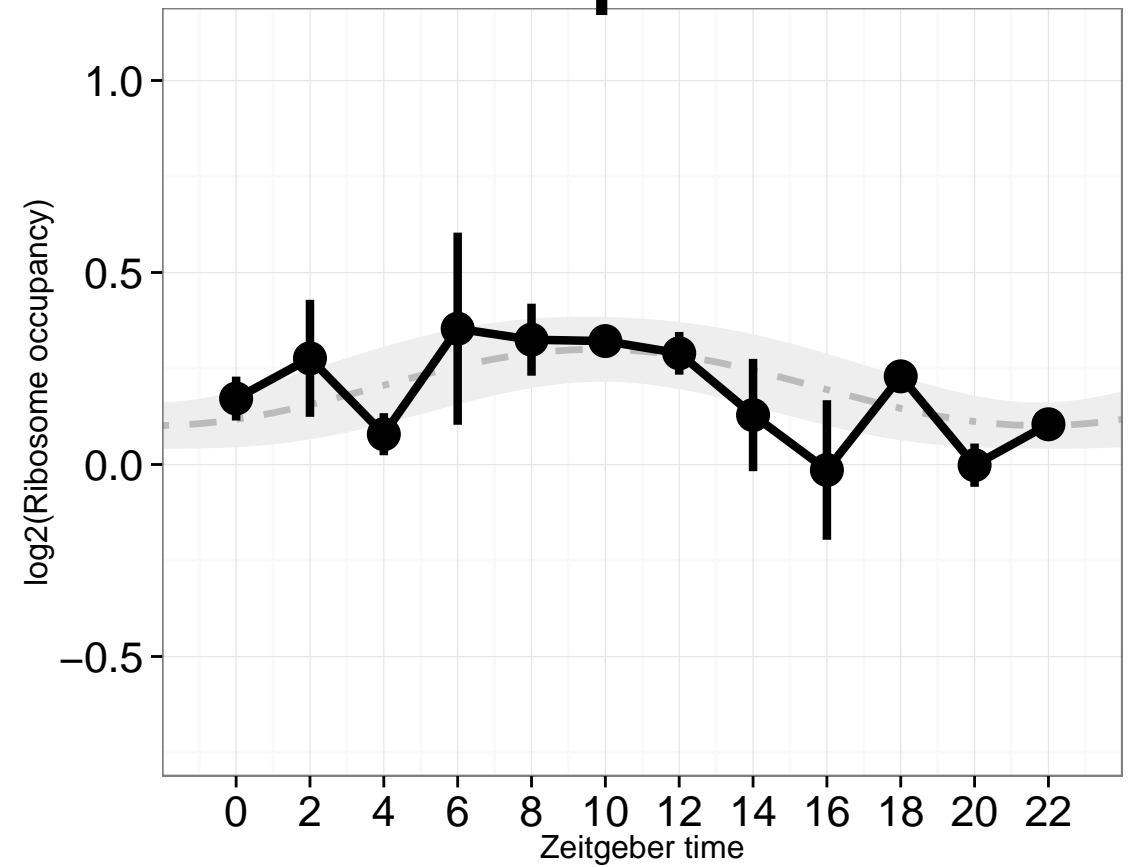

Supplement: SuppDataset_1.zip [file Gpd1l_set_A.pdf › Supplemental Dataset 1/A-mRNA_nonrhyth_translation_nonrhyth/Gpd1l_set_A.pdf]

## Gphn

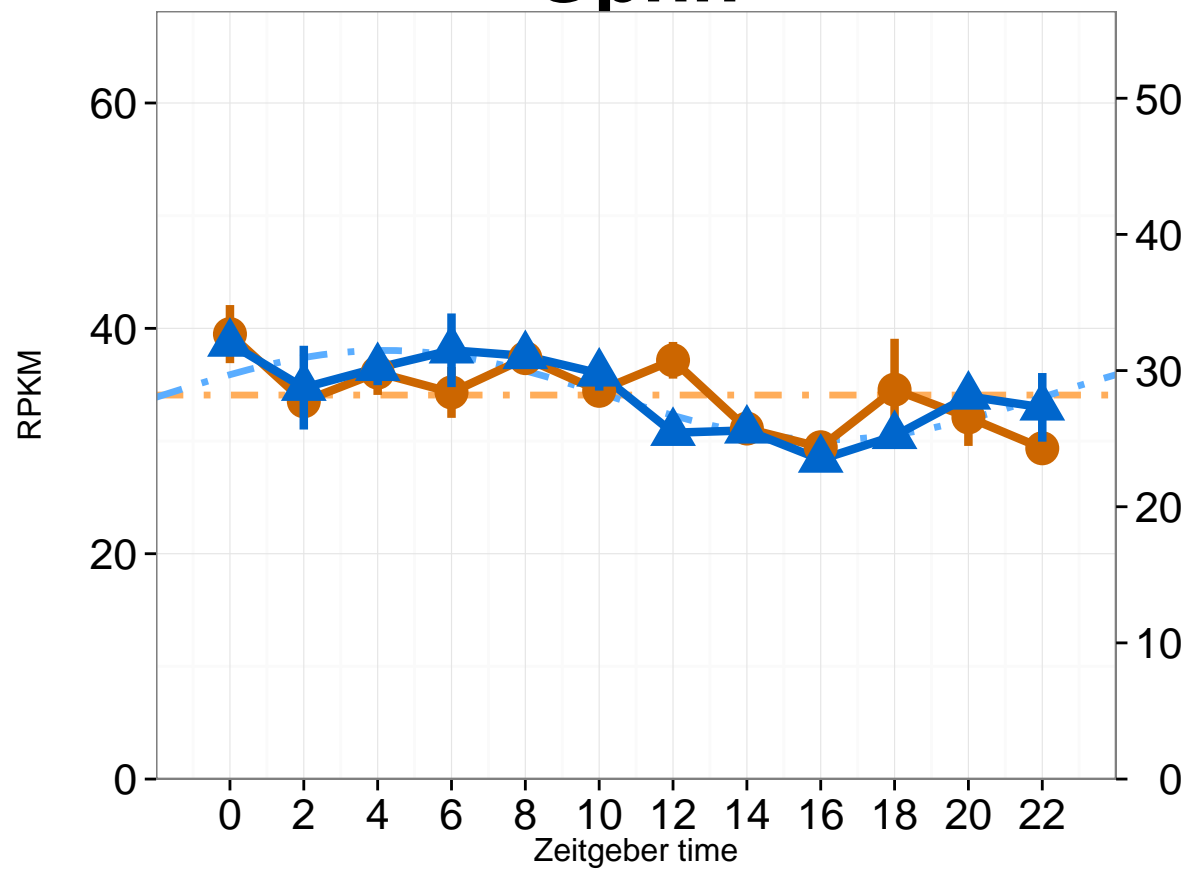

## Gphn

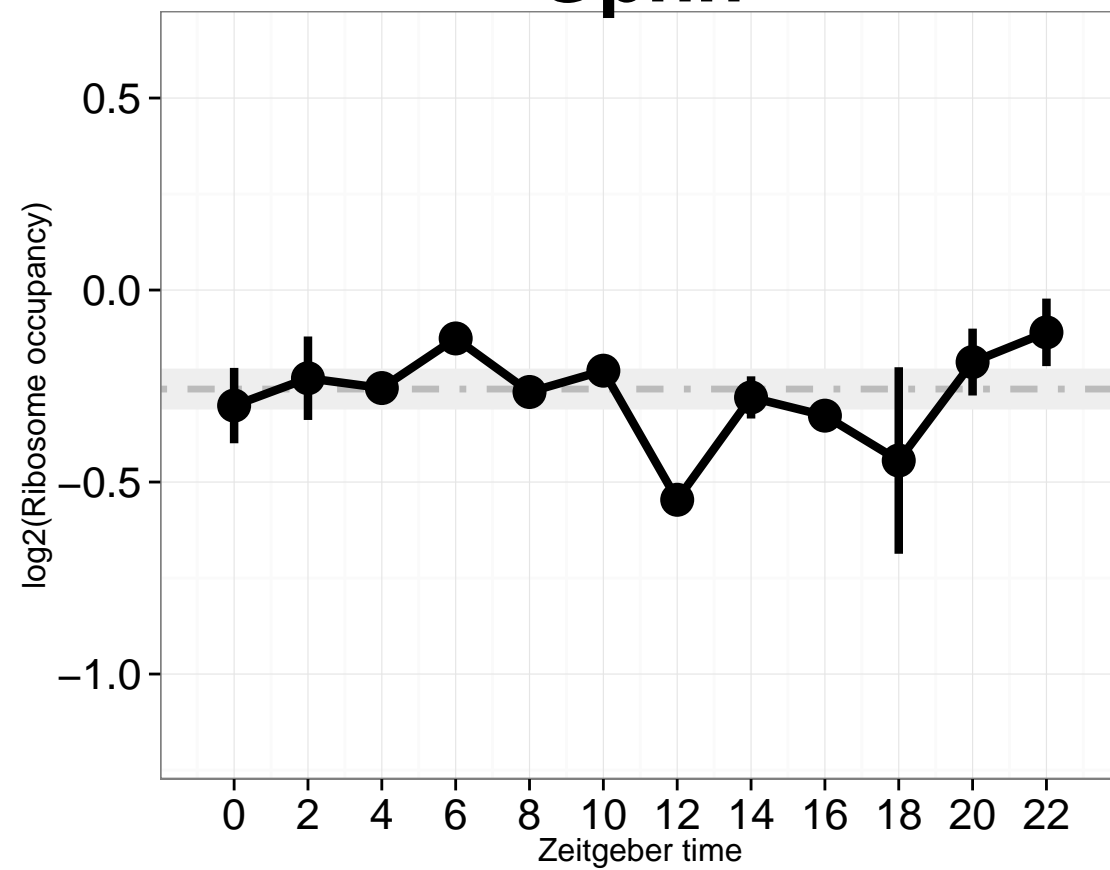

Supplement: SuppDataset_1.zip [file Gphn_set_A.pdf › Supplemental Dataset 1/A-mRNA_nonrhyth_translation_nonrhyth/Gphn_set_A.pdf]

## Gpihbp1

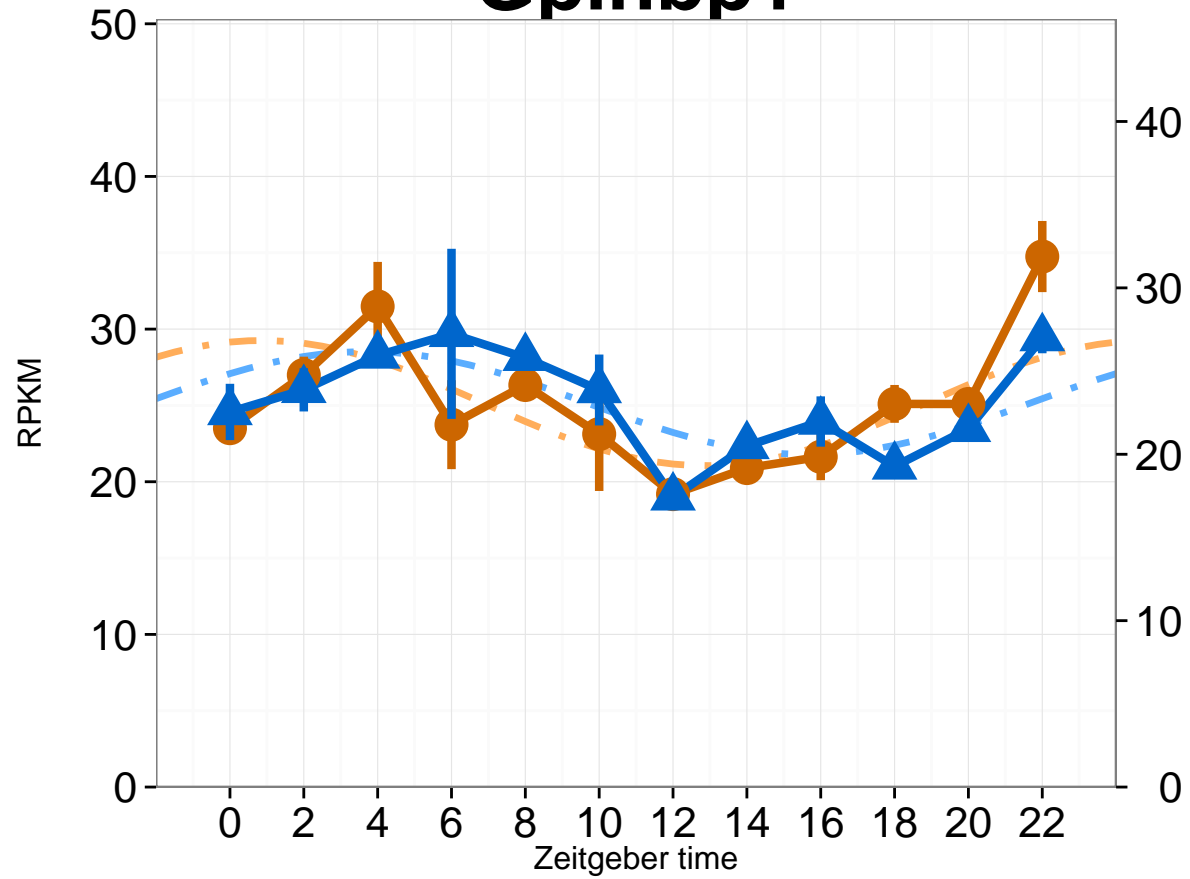

## Gpihbp1

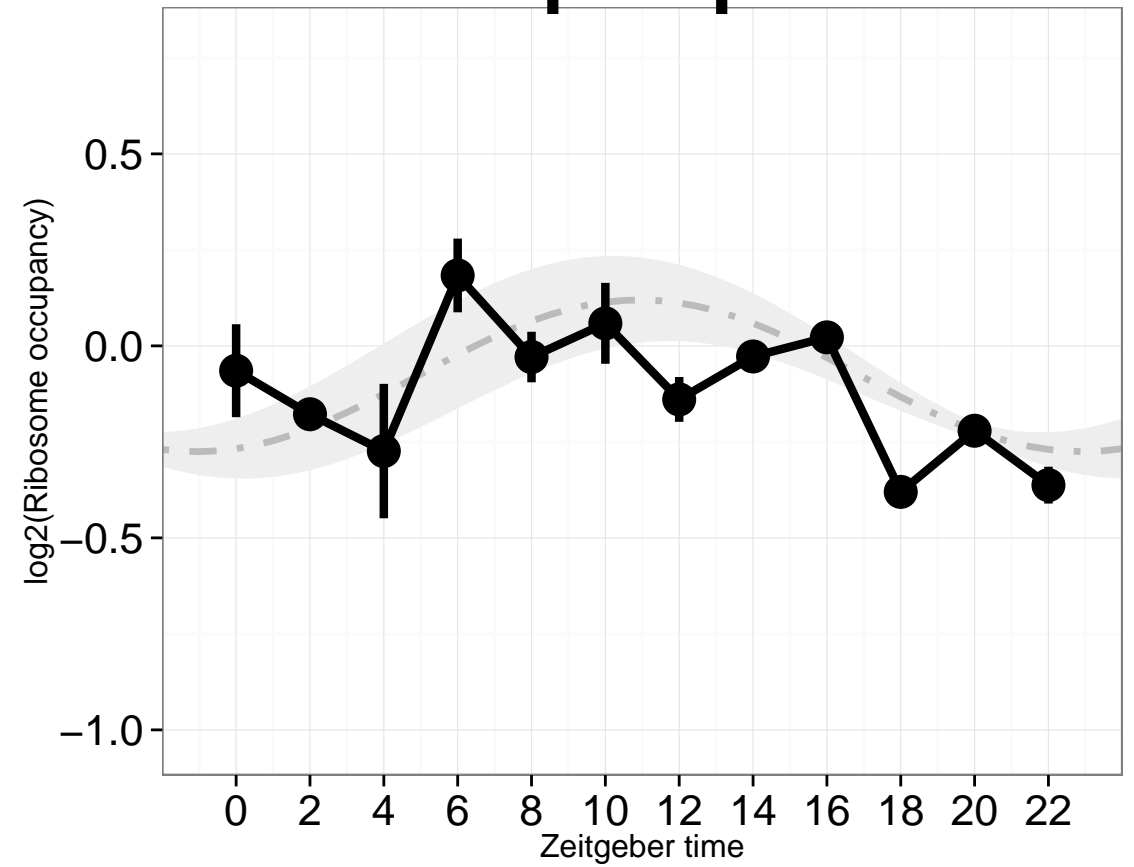

Supplement: SuppDataset_1.zip [file Gpihbp1_set_A.pdf › Supplemental Dataset 1/A-mRNA_nonrhyth_translation_nonrhyth/Gpihbp1_set_A.pdf]

## Gpkow

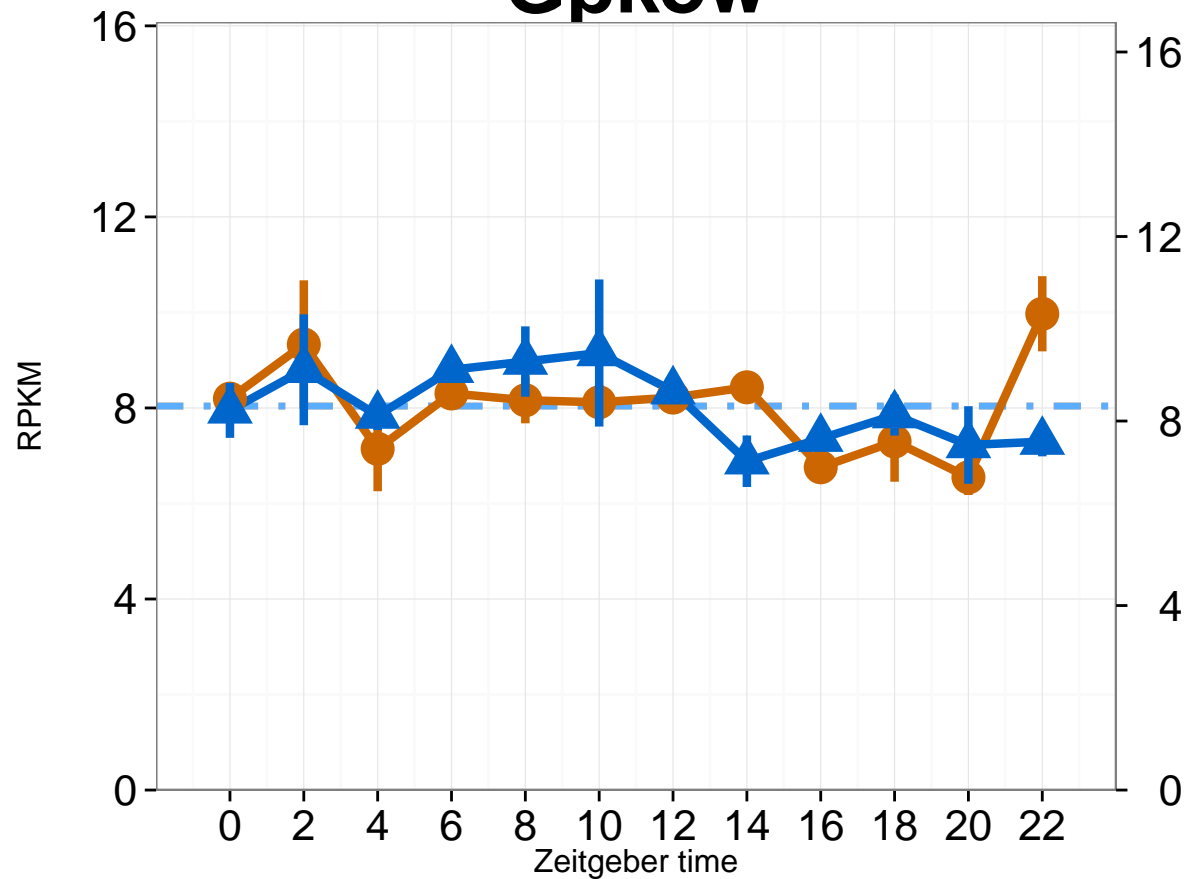

## Gpkow

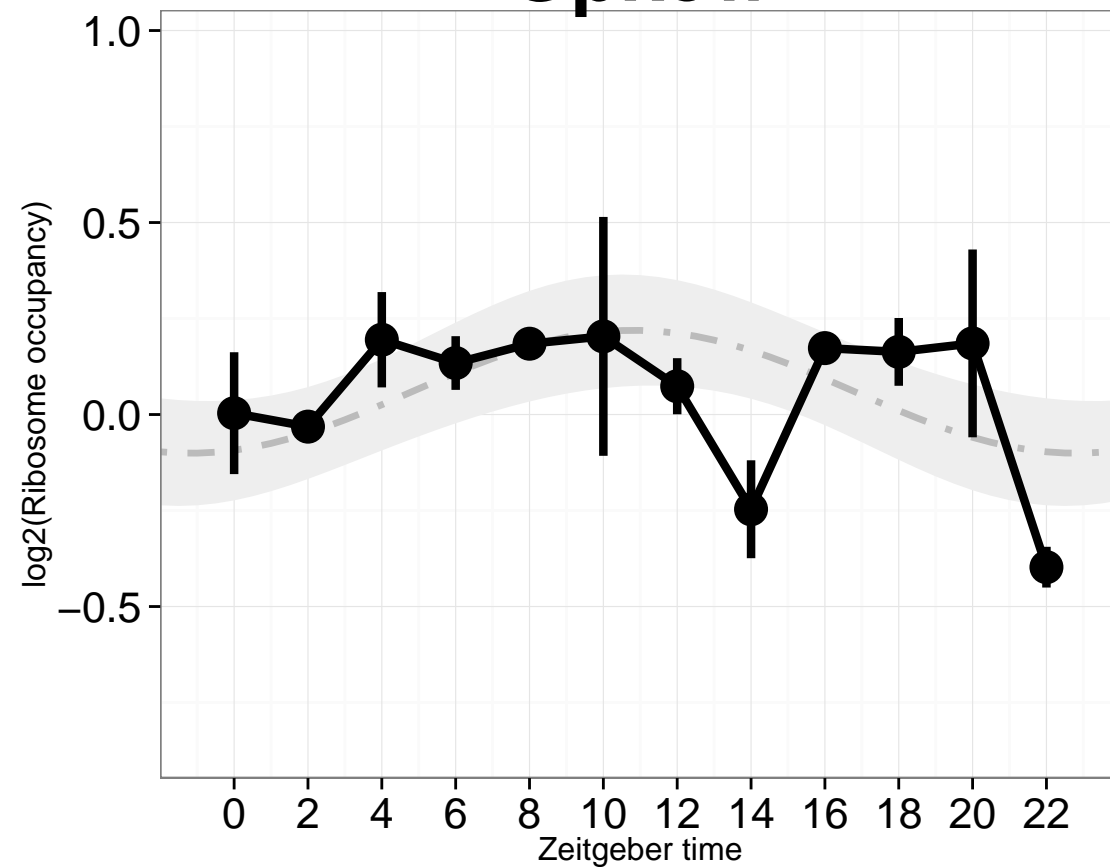

Supplement: SuppDataset_1.zip [file Gpkow_set_A.pdf › Supplemental Dataset 1/A-mRNA_nonrhyth_translation_nonrhyth/Gpkow_set_A.pdf]

## Gpld1

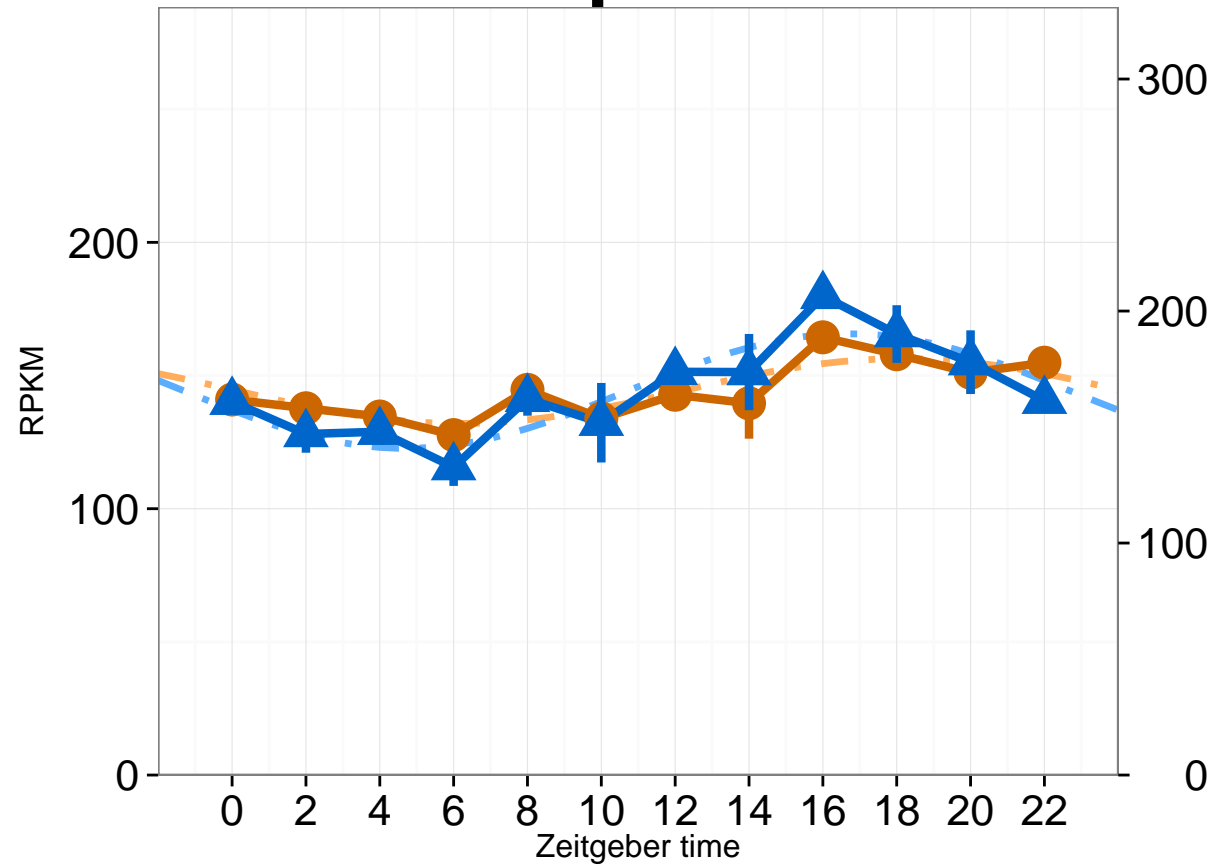

## Gpld1

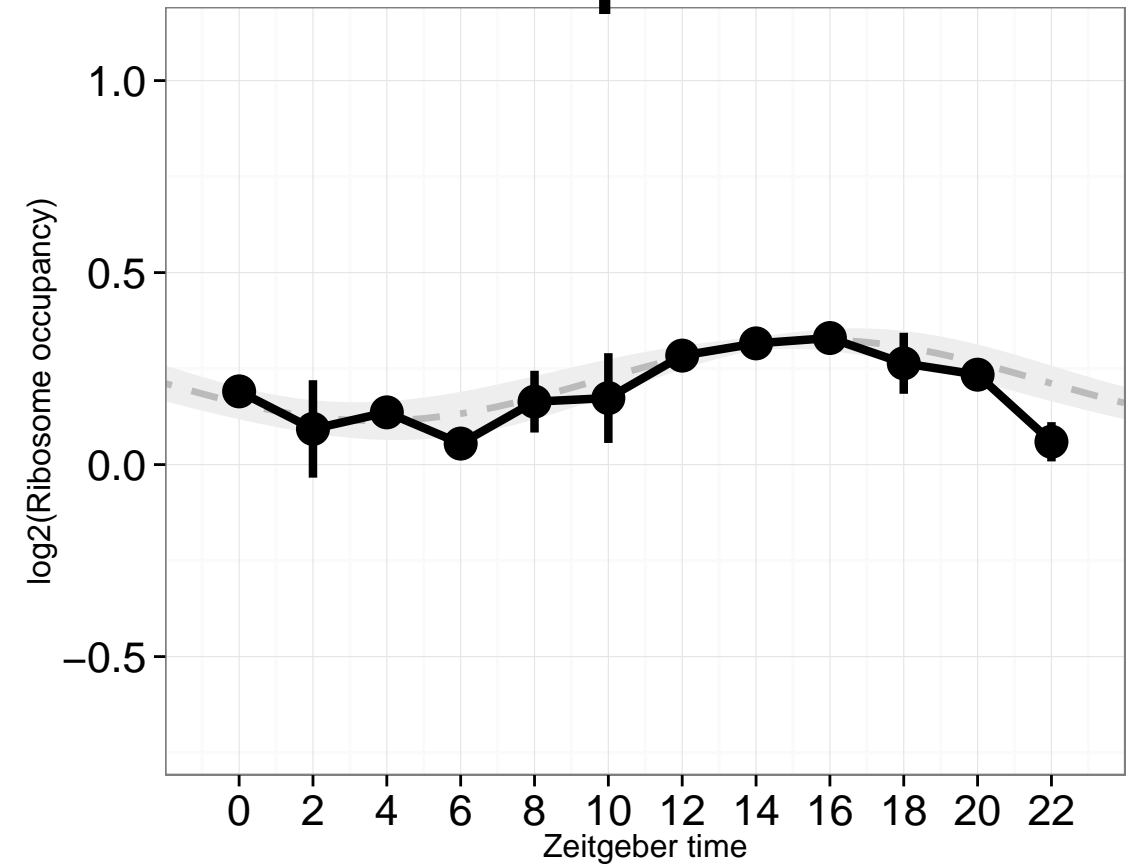

Supplement: SuppDataset_1.zip [file Gpld1_set_A.pdf › Supplemental Dataset 1/A-mRNA_nonrhyth_translation_nonrhyth/Gpld1_set_A.pdf]

# Gpm6a

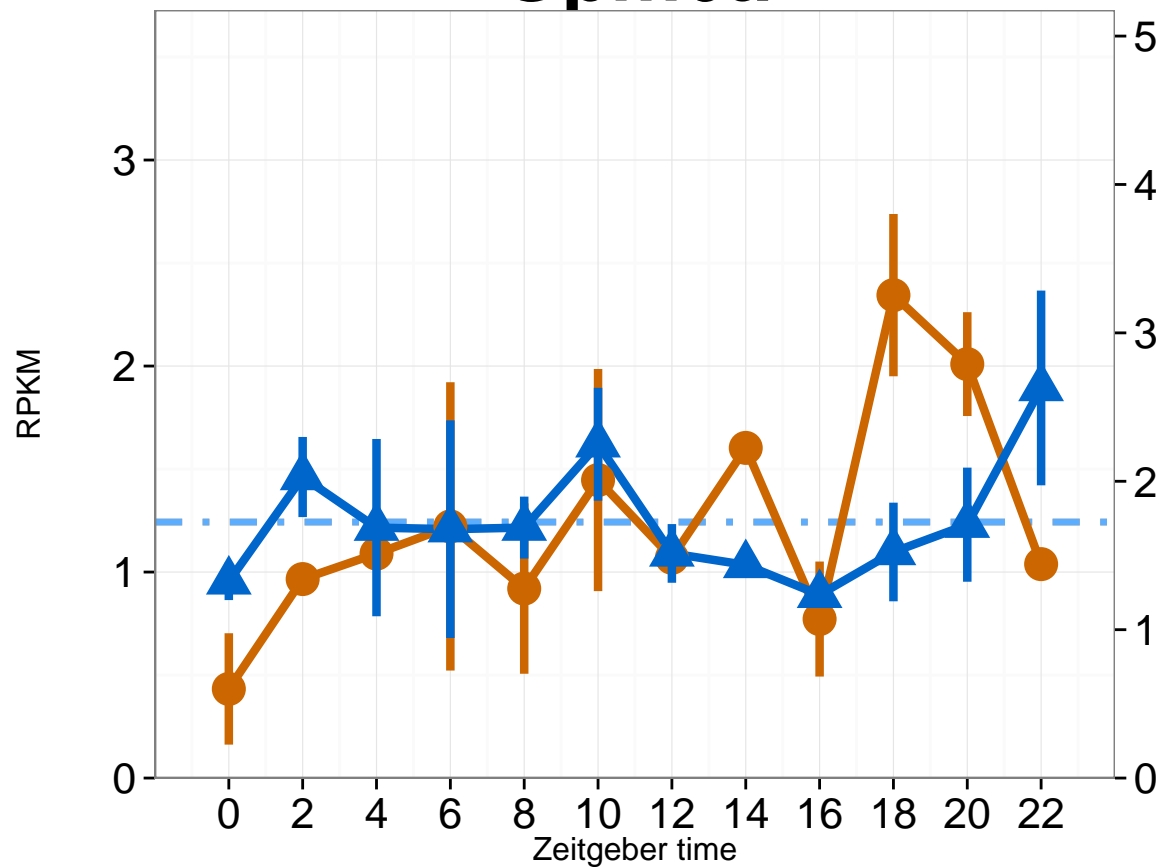

# Gpm6a

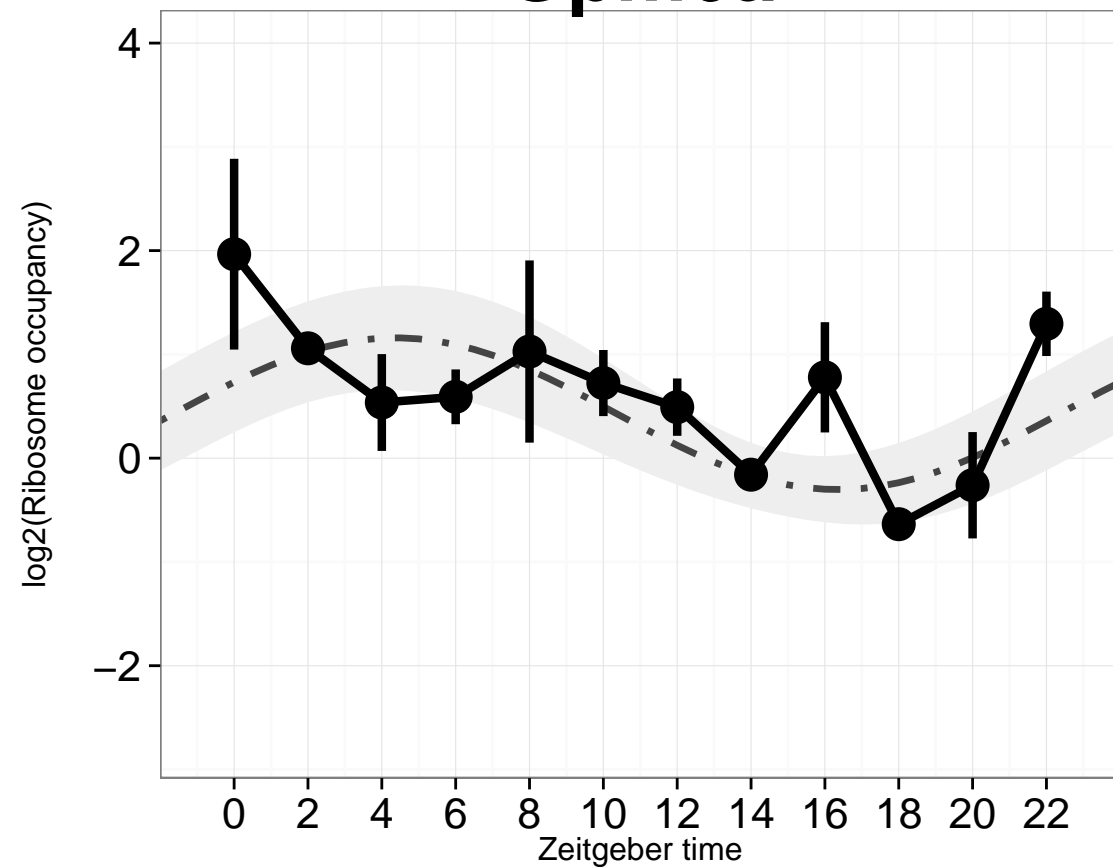

Supplement: SuppDataset_1.zip [file Gpm6a_set_A.pdf › Supplemental Dataset 1/A-mRNA_nonrhyth_translation_nonrhyth/Gpm6a_set_A.pdf]

**Gpm6b TR**

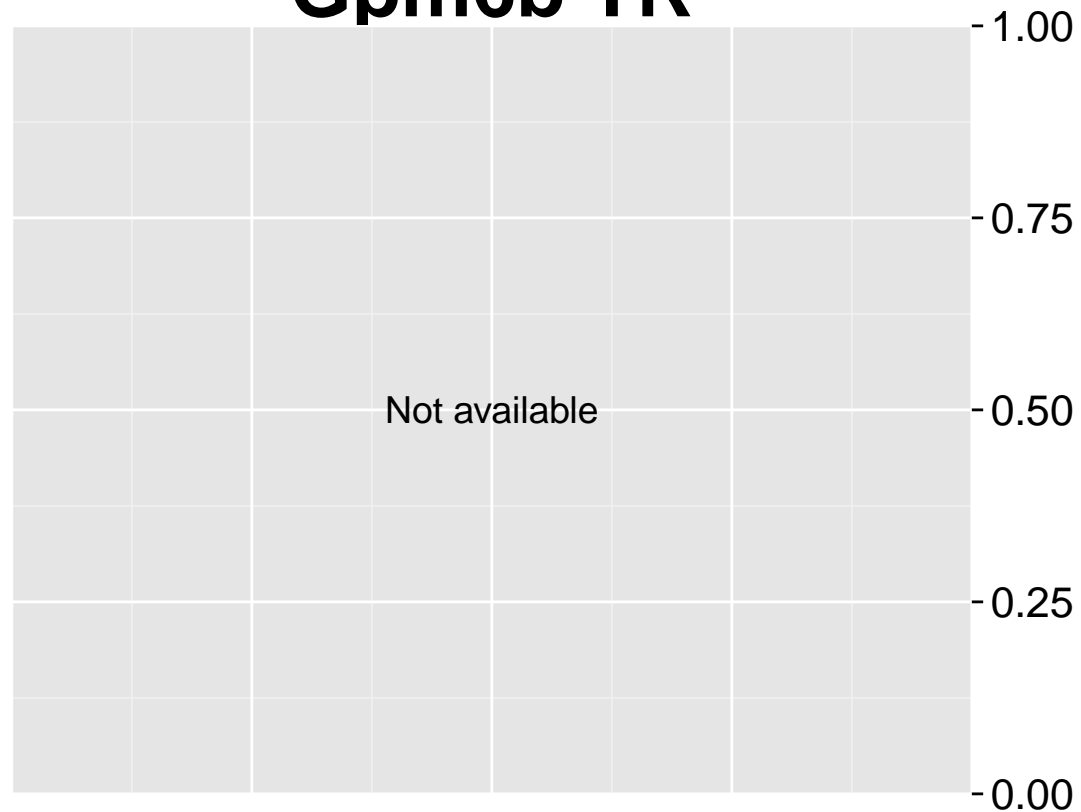

**Gpm6b log2(Ribosome occupancy**

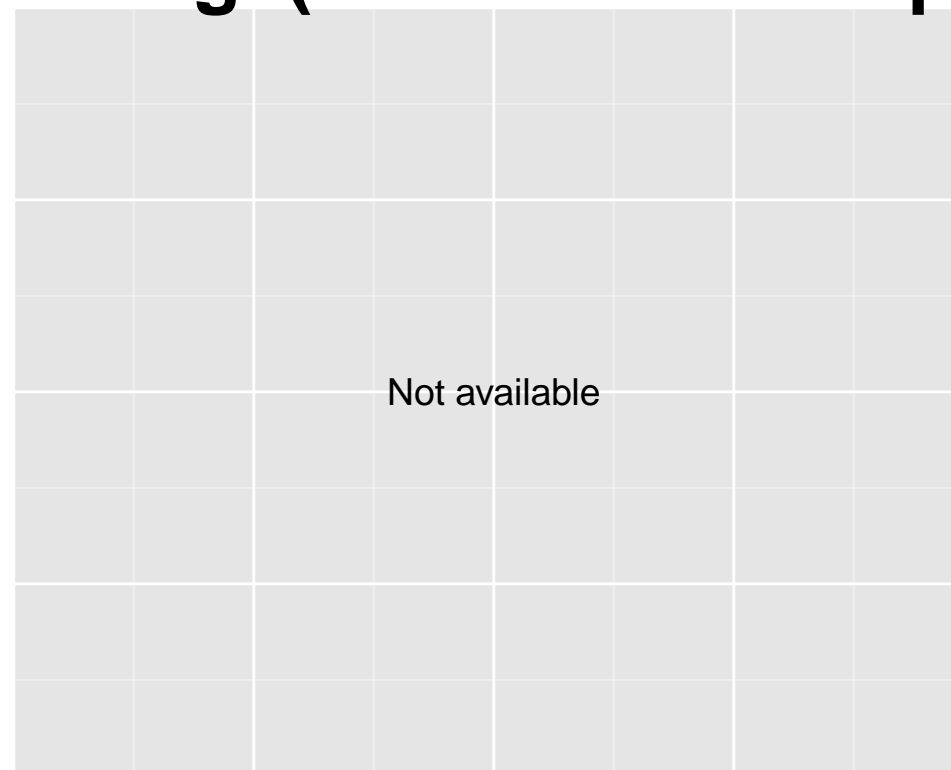

Supplement: SuppDataset_1.zip [file Gpm6b_set_A.pdf › Supplemental Dataset 1/A-mRNA_nonrhyth_translation_nonrhyth/Gpm6b_set_A.pdf]

# Gpn1

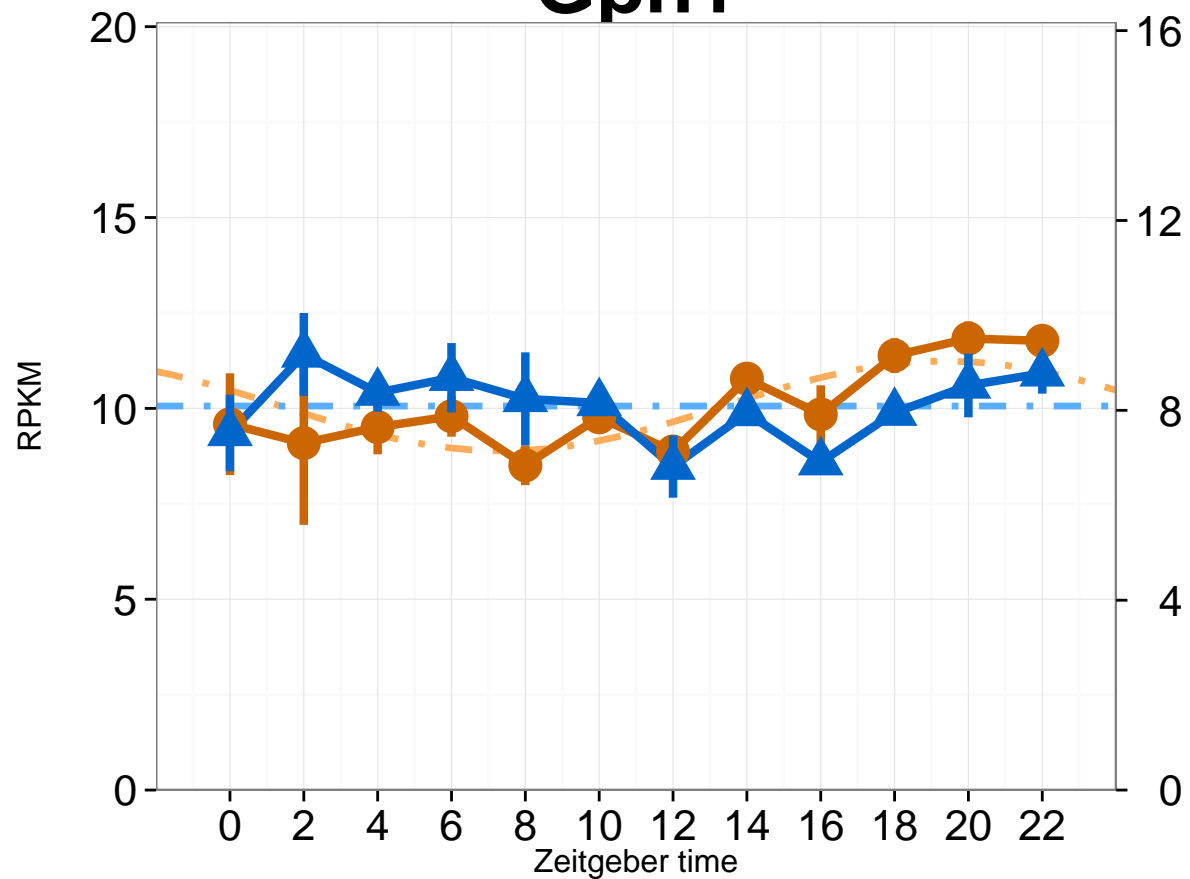

# Gpn1

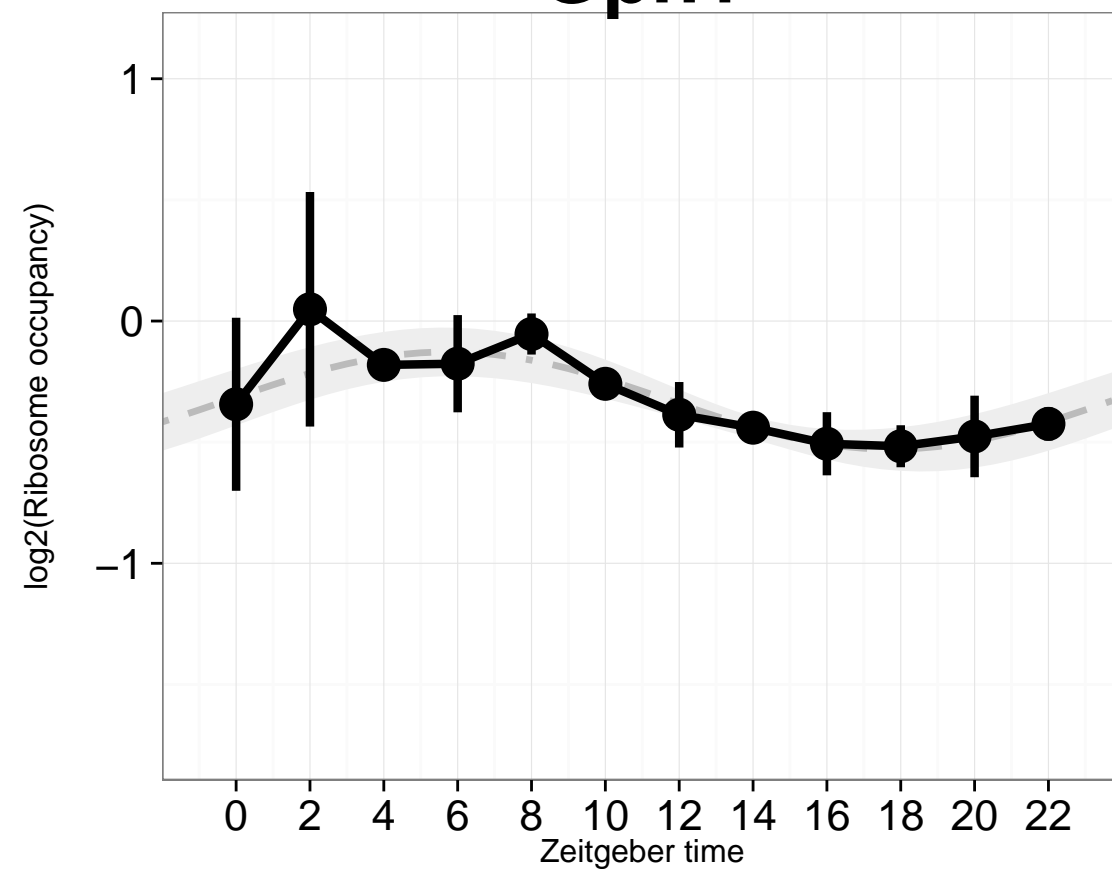

Supplement: SuppDataset_1.zip [file Gpn1_set_A.pdf › Supplemental Dataset 1/A-mRNA_nonrhyth_translation_nonrhyth/Gpn1_set_A.pdf]

# Gpn2

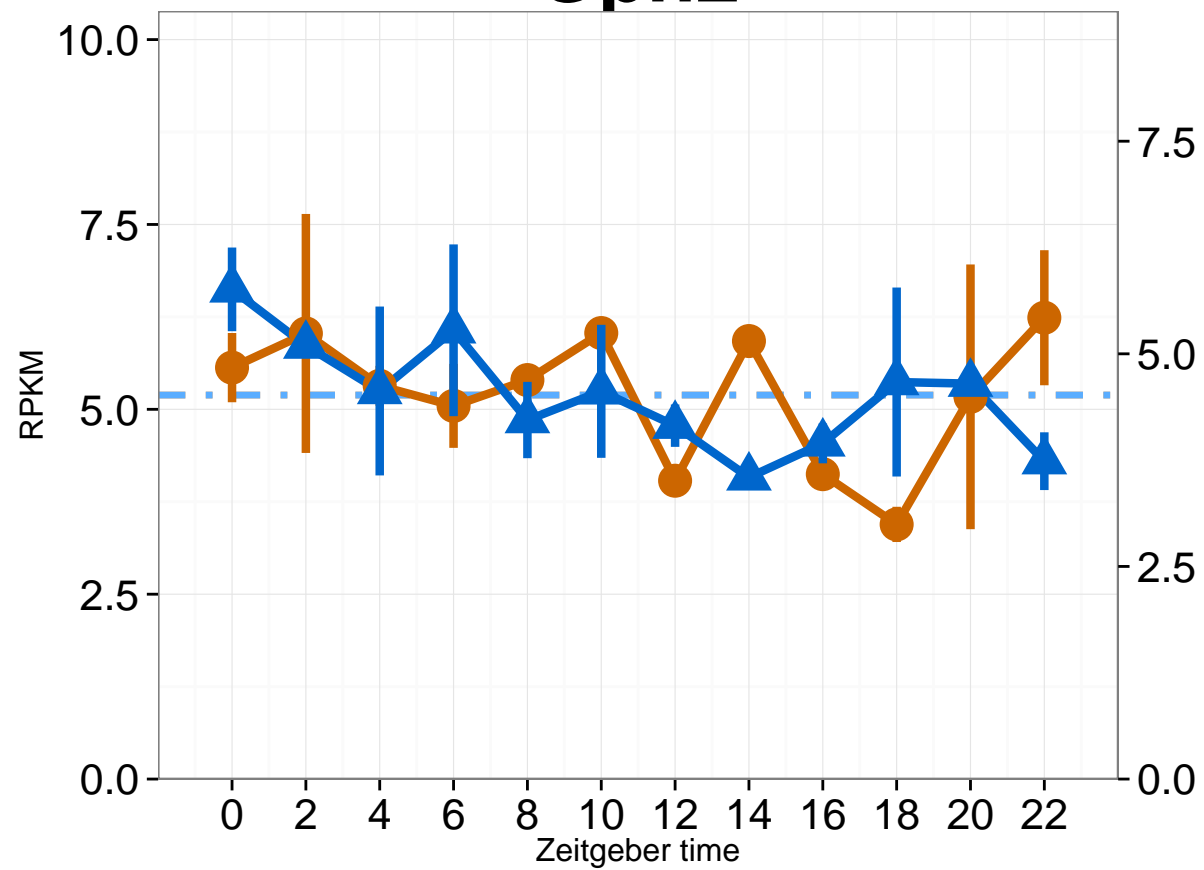

# Gpn2

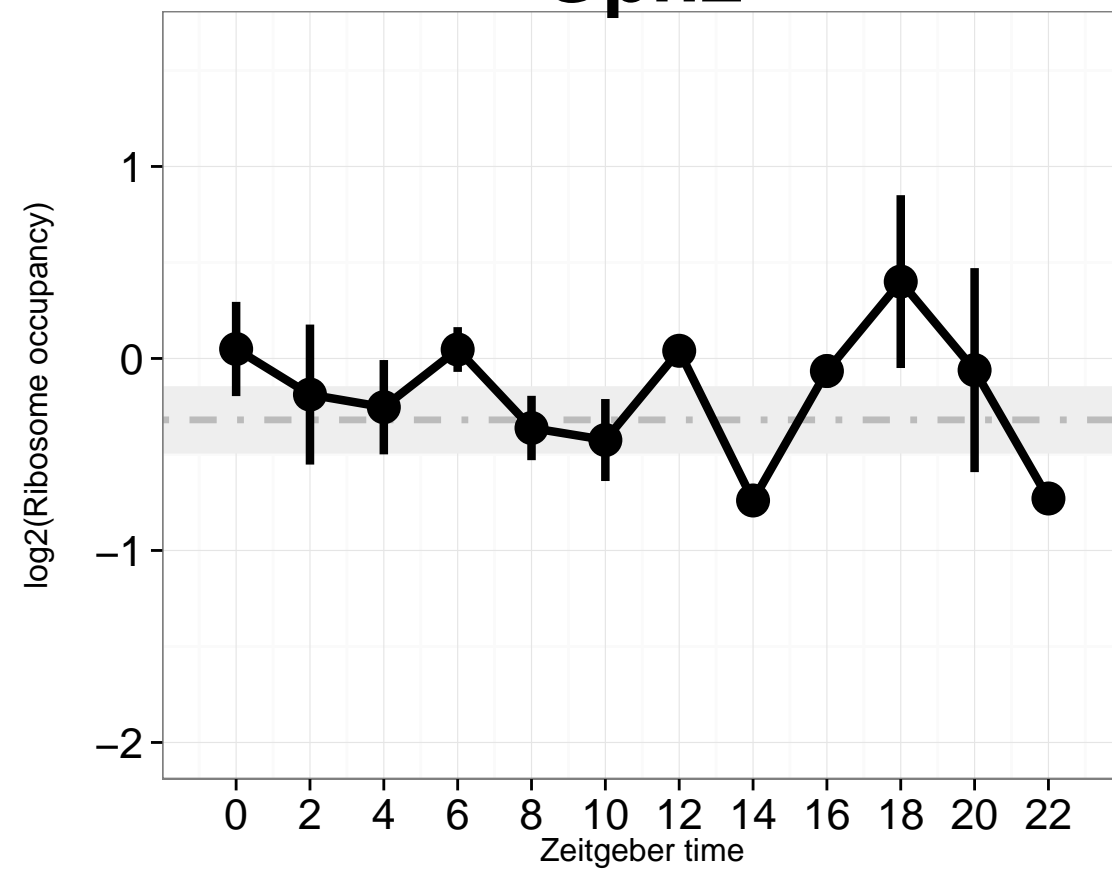

Supplement: SuppDataset_1.zip [file Gpn2_set_A.pdf › Supplemental Dataset 1/A-mRNA_nonrhyth_translation_nonrhyth/Gpn2_set_A.pdf]

## Gpn3

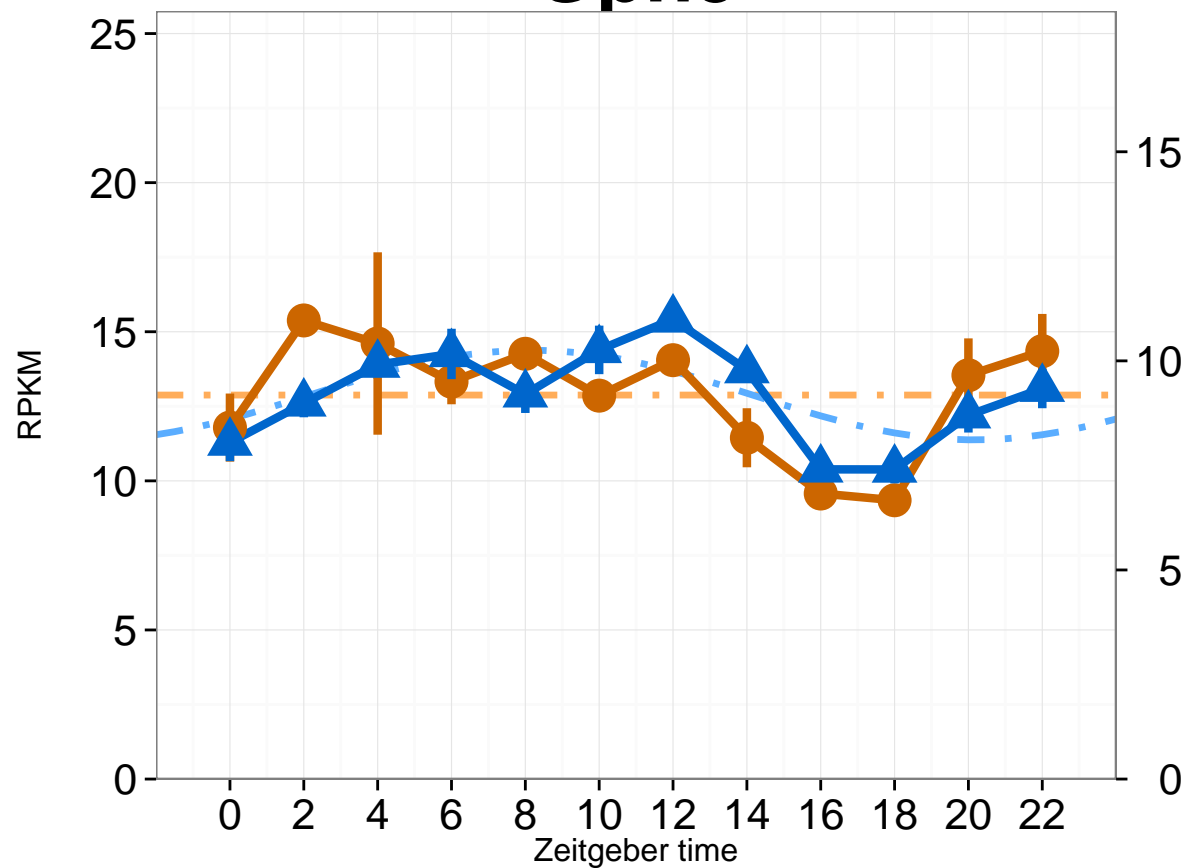

## Gpn3

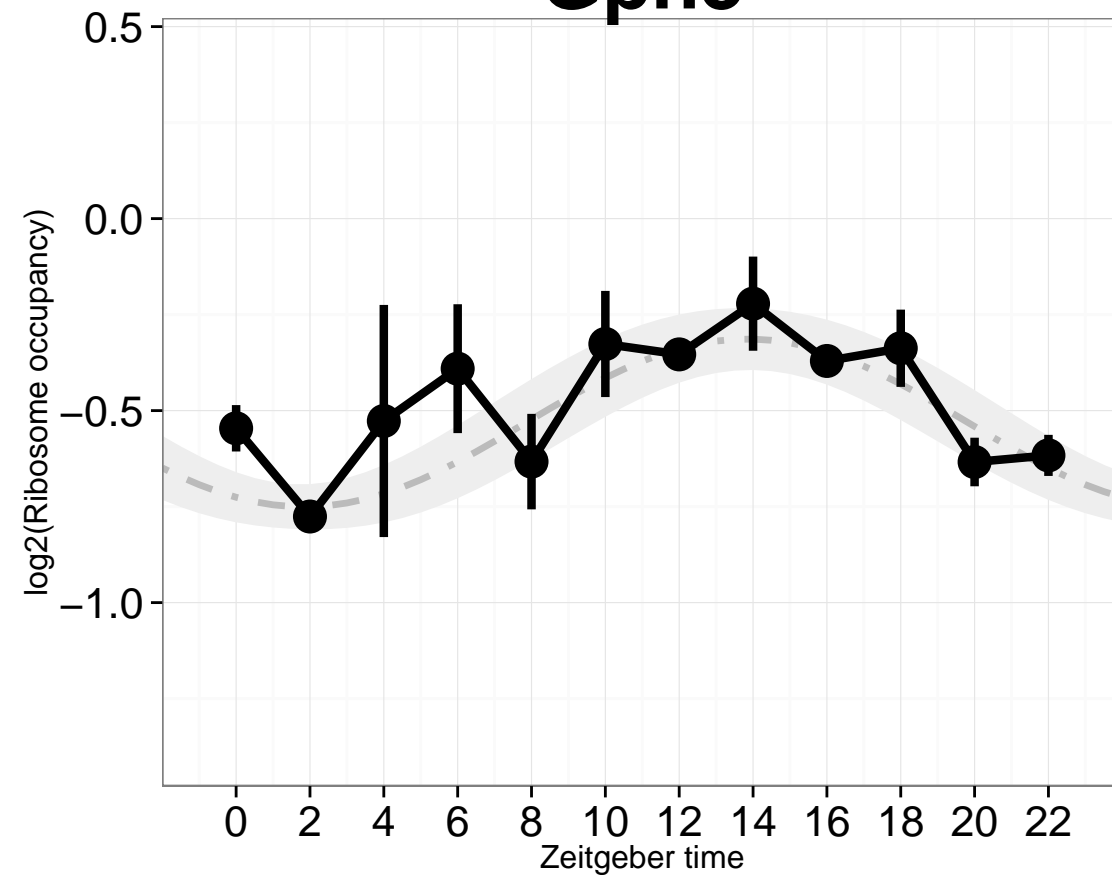

Supplement: SuppDataset_1.zip [file Gpn3_set_A.pdf › Supplemental Dataset 1/A-mRNA_nonrhyth_translation_nonrhyth/Gpn3_set_A.pdf]

# Gpr107

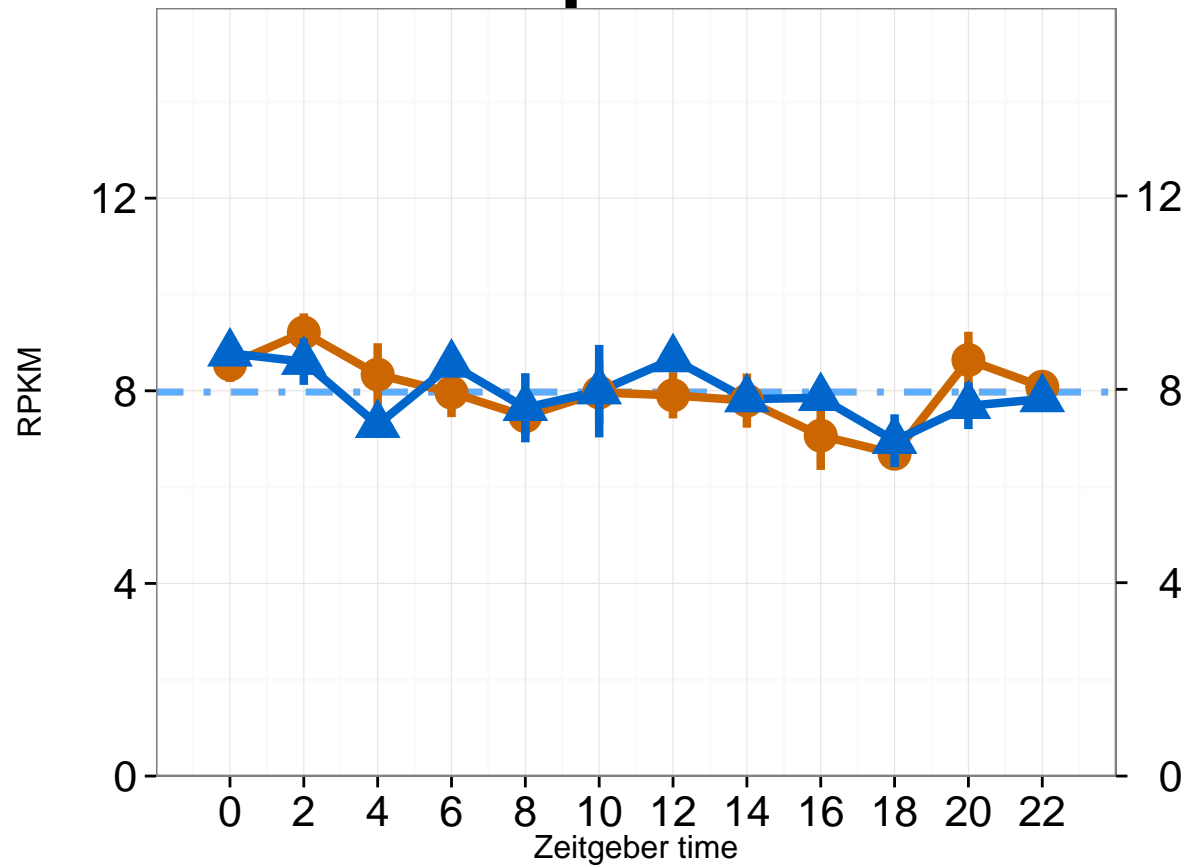

# Gpr107

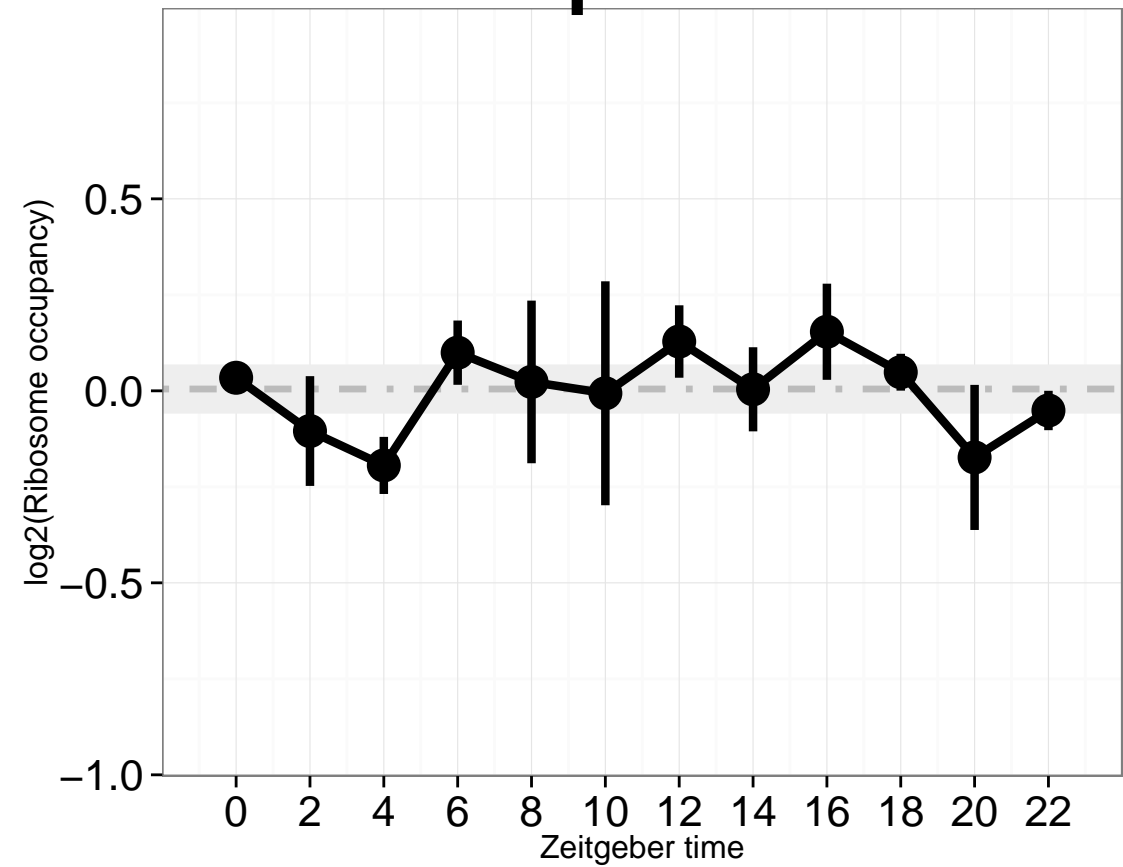

Supplement: SuppDataset_1.zip [file Gpr107_set_A.pdf › Supplemental Dataset 1/A-mRNA_nonrhyth_translation_nonrhyth/Gpr107_set_A.pdf]

# Gpr108

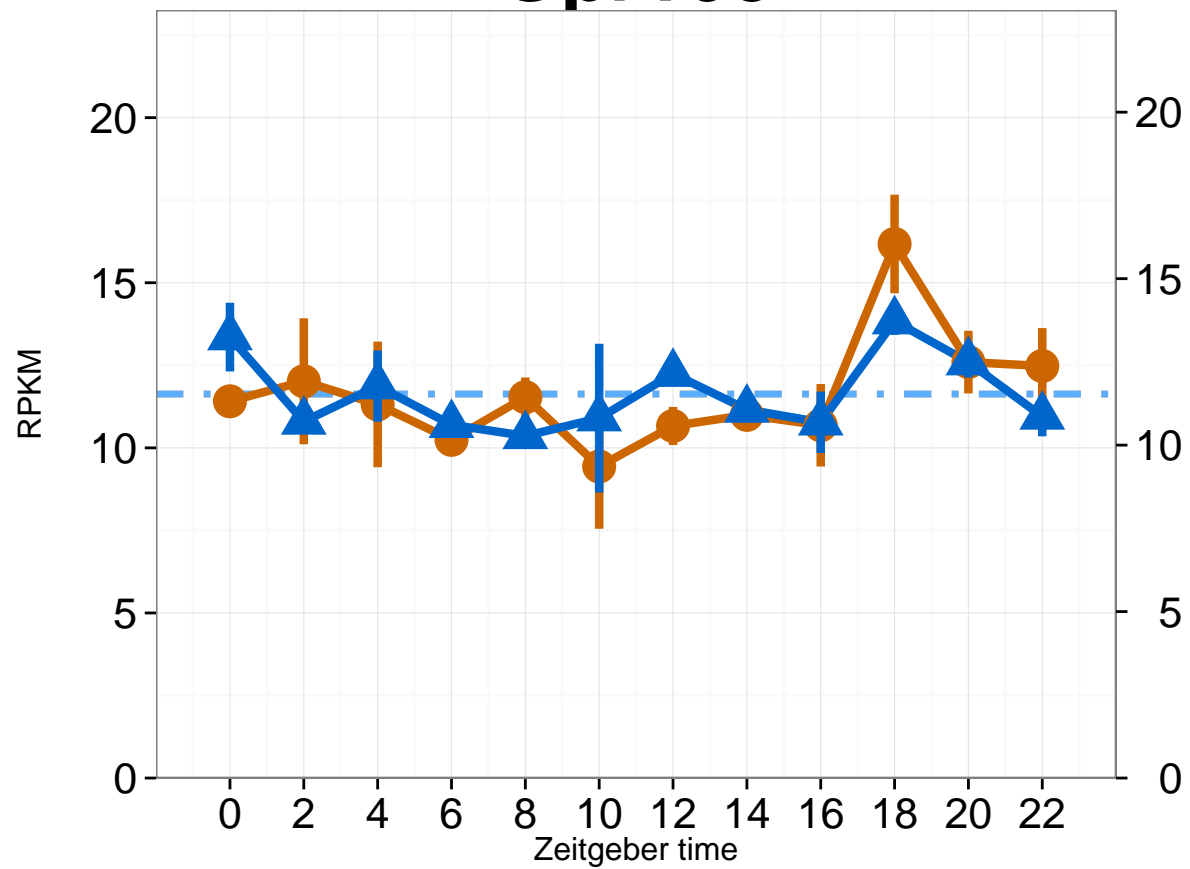

# Gpr108

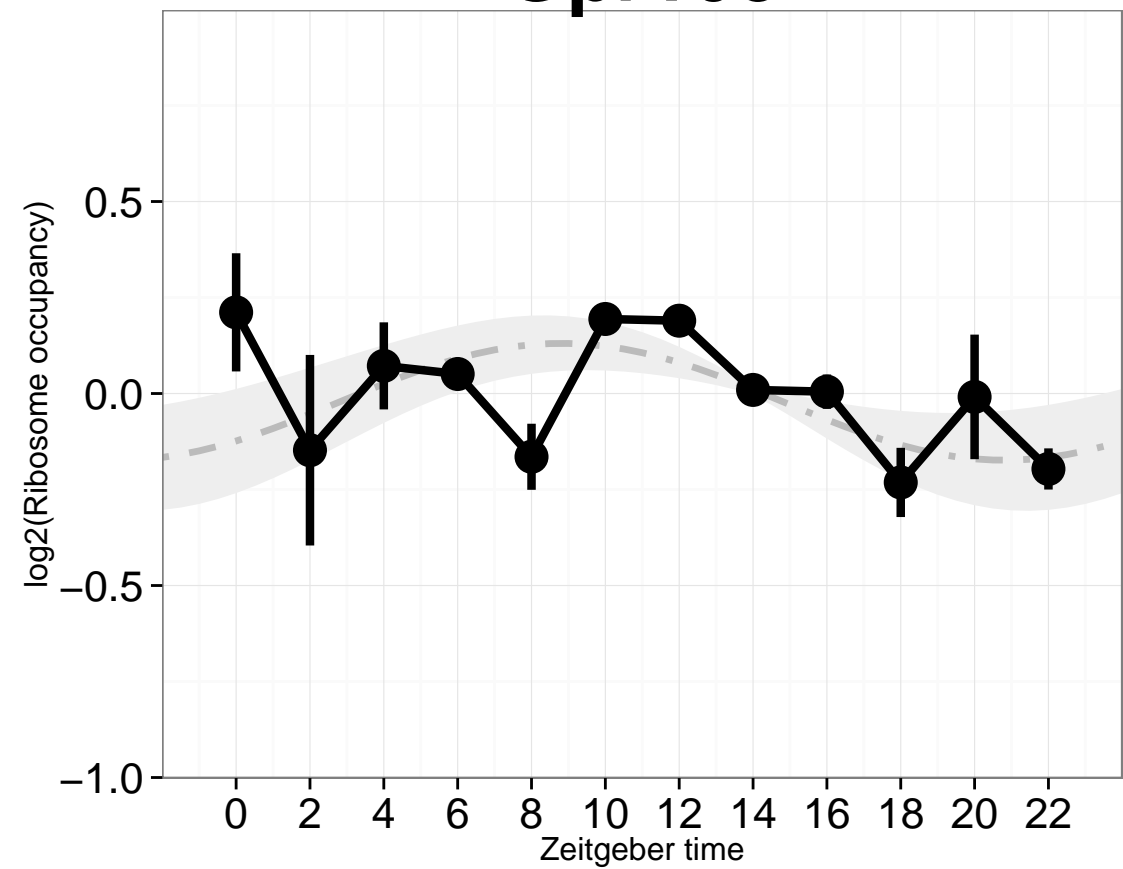

Supplement: SuppDataset_1.zip [file Gpr108_set_A.pdf › Supplemental Dataset 1/A-mRNA_nonrhyth_translation_nonrhyth/Gpr108_set_A.pdf]

## Gpr116

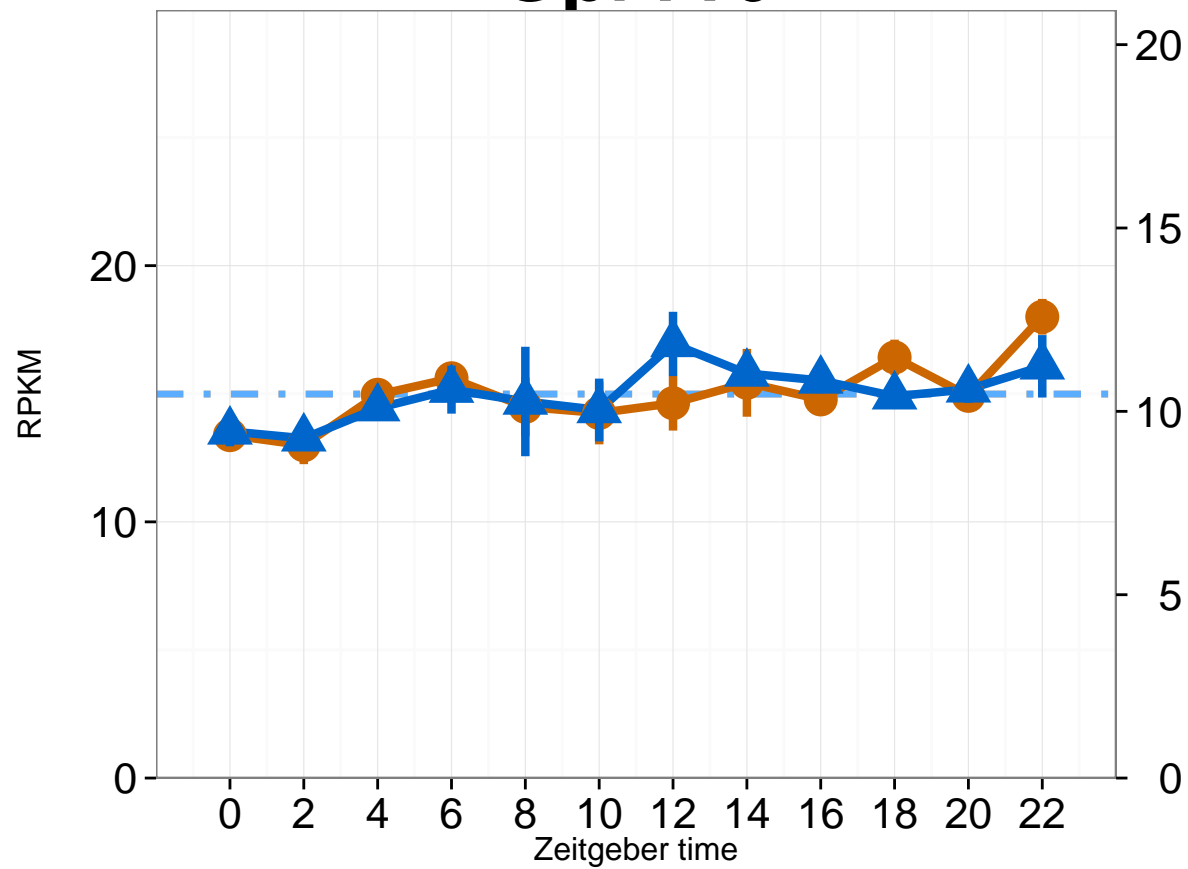

## Gpr116

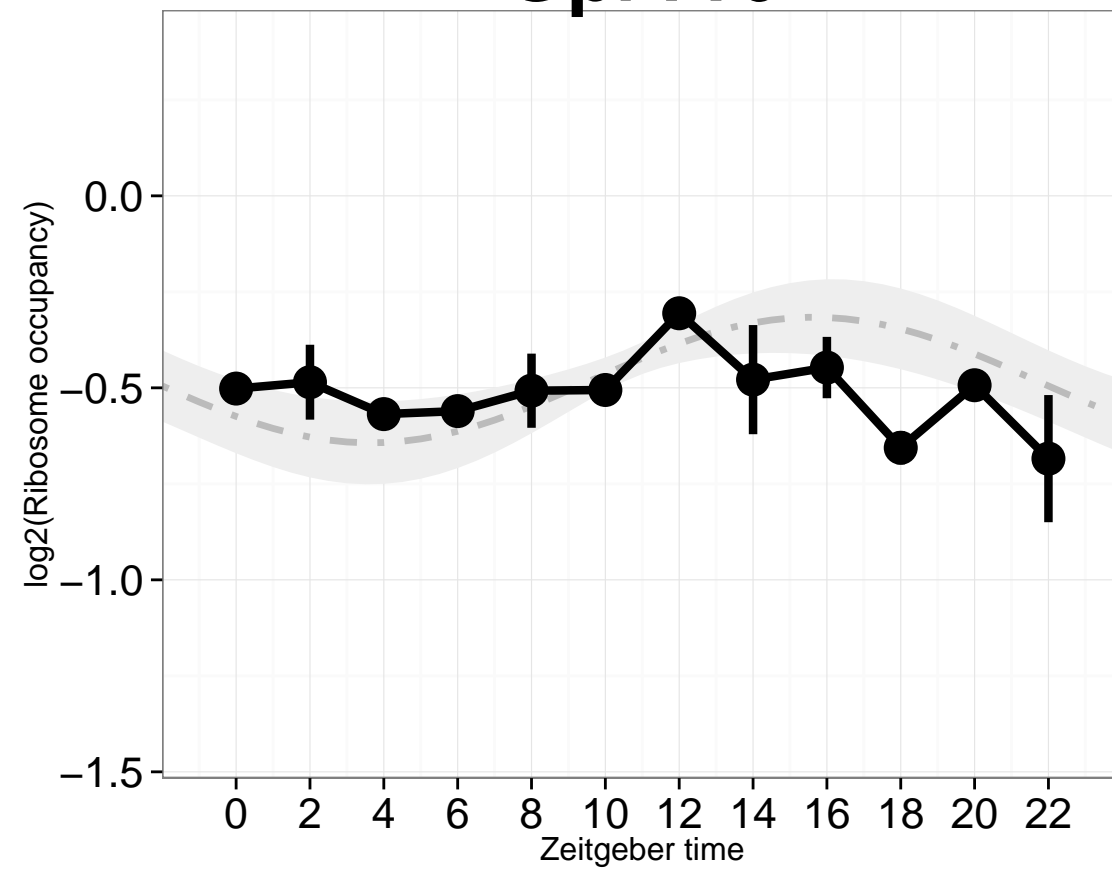

Supplement: SuppDataset_1.zip [file Gpr116_set_A.pdf › Supplemental Dataset 1/A-mRNA_nonrhyth_translation_nonrhyth/Gpr116_set_A.pdf]

# Gpr124

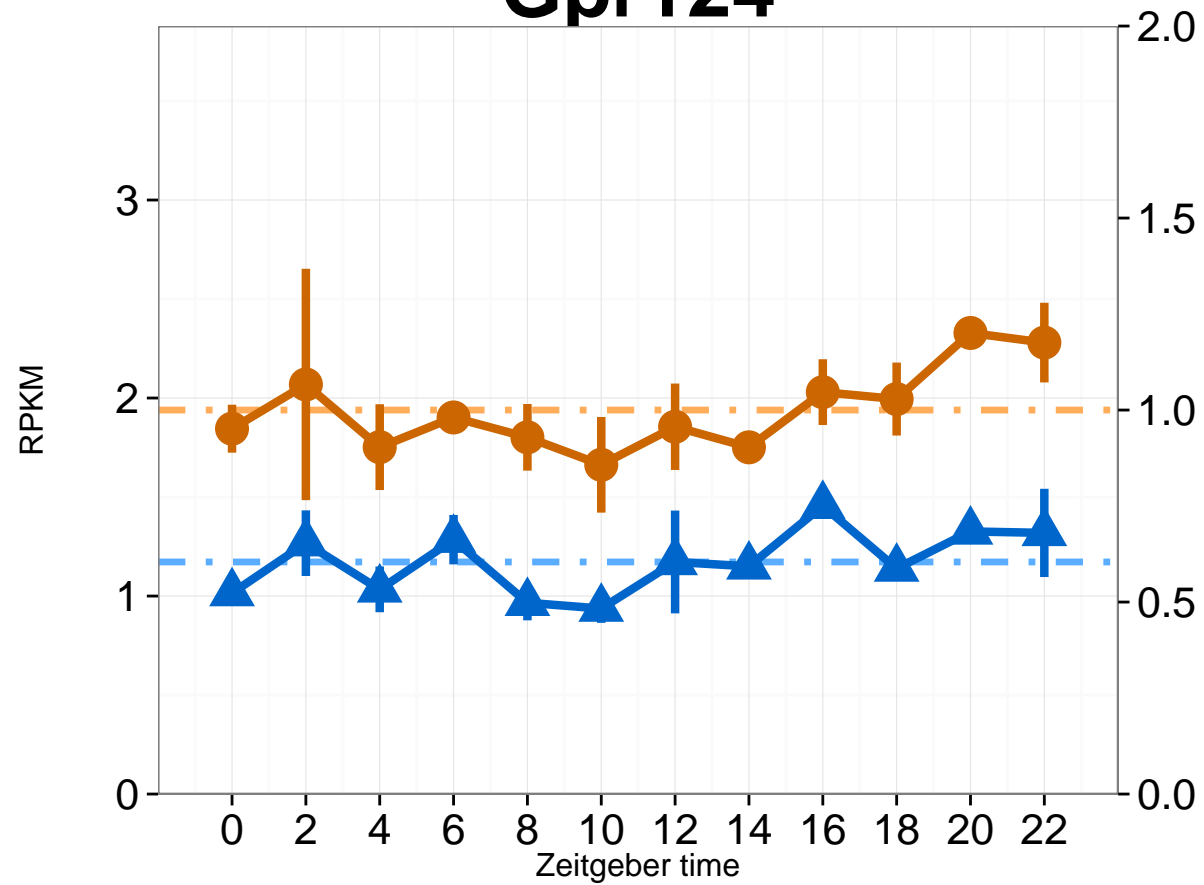

# Gpr124

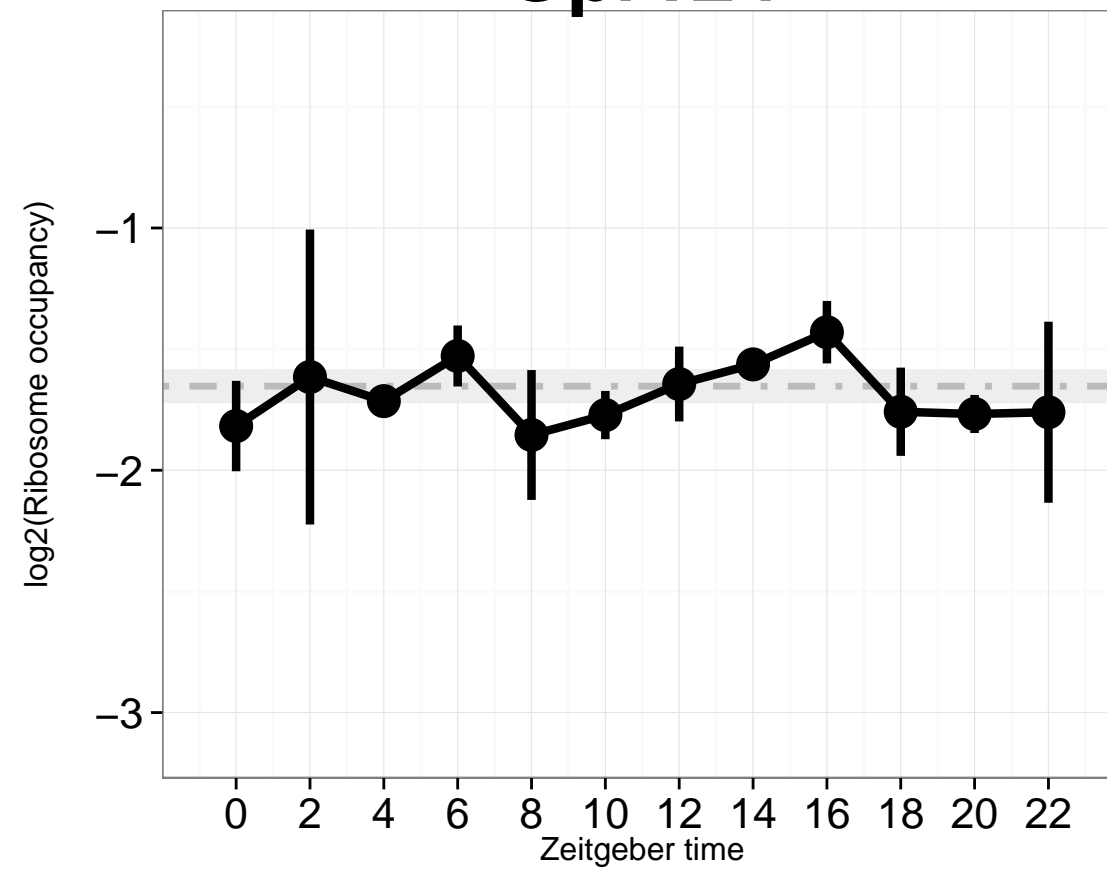

Supplement: SuppDataset_1.zip [file Gpr124_set_A.pdf › Supplemental Dataset 1/A-mRNA_nonrhyth_translation_nonrhyth/Gpr124_set_A.pdf]

# Gpr126

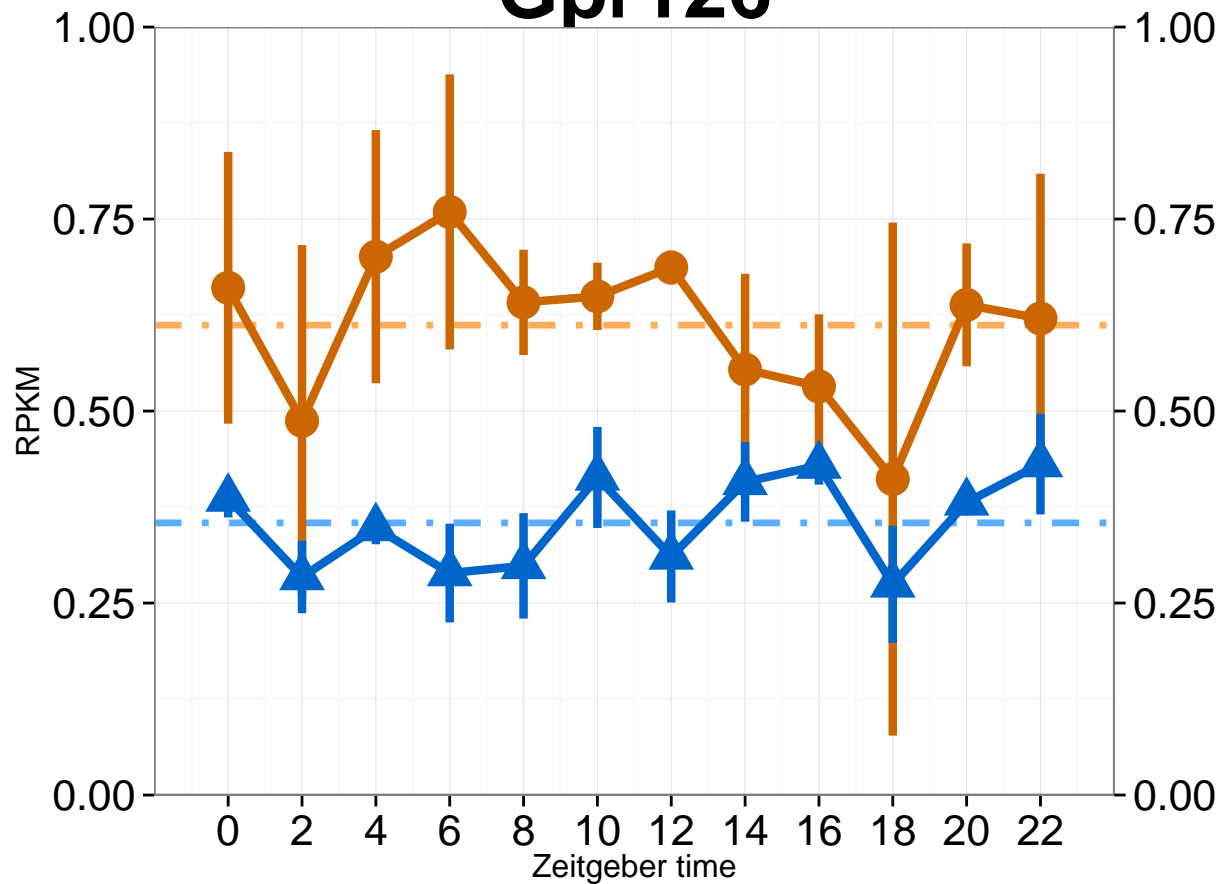

# Gpr126

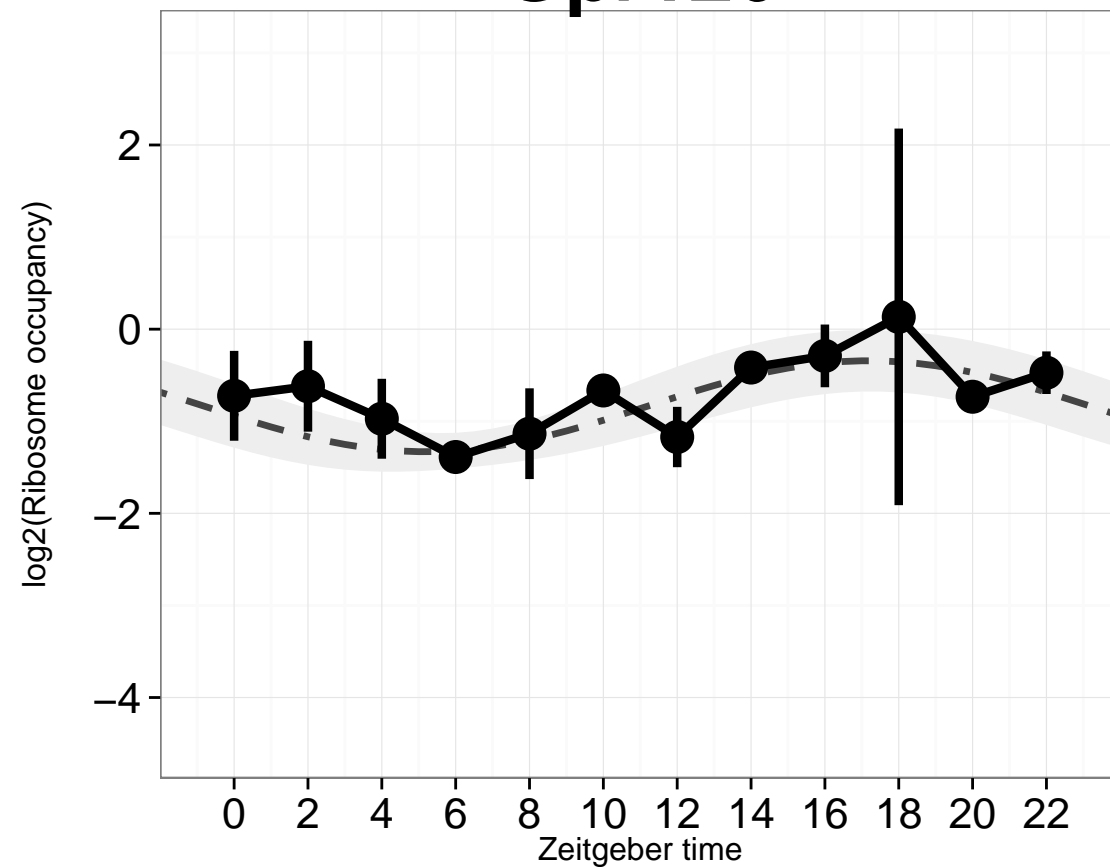

Supplement: SuppDataset_1.zip [file Gpr126_set_A.pdf › Supplemental Dataset 1/A-mRNA_nonrhyth_translation_nonrhyth/Gpr126_set_A.pdf]

# Gpr137b

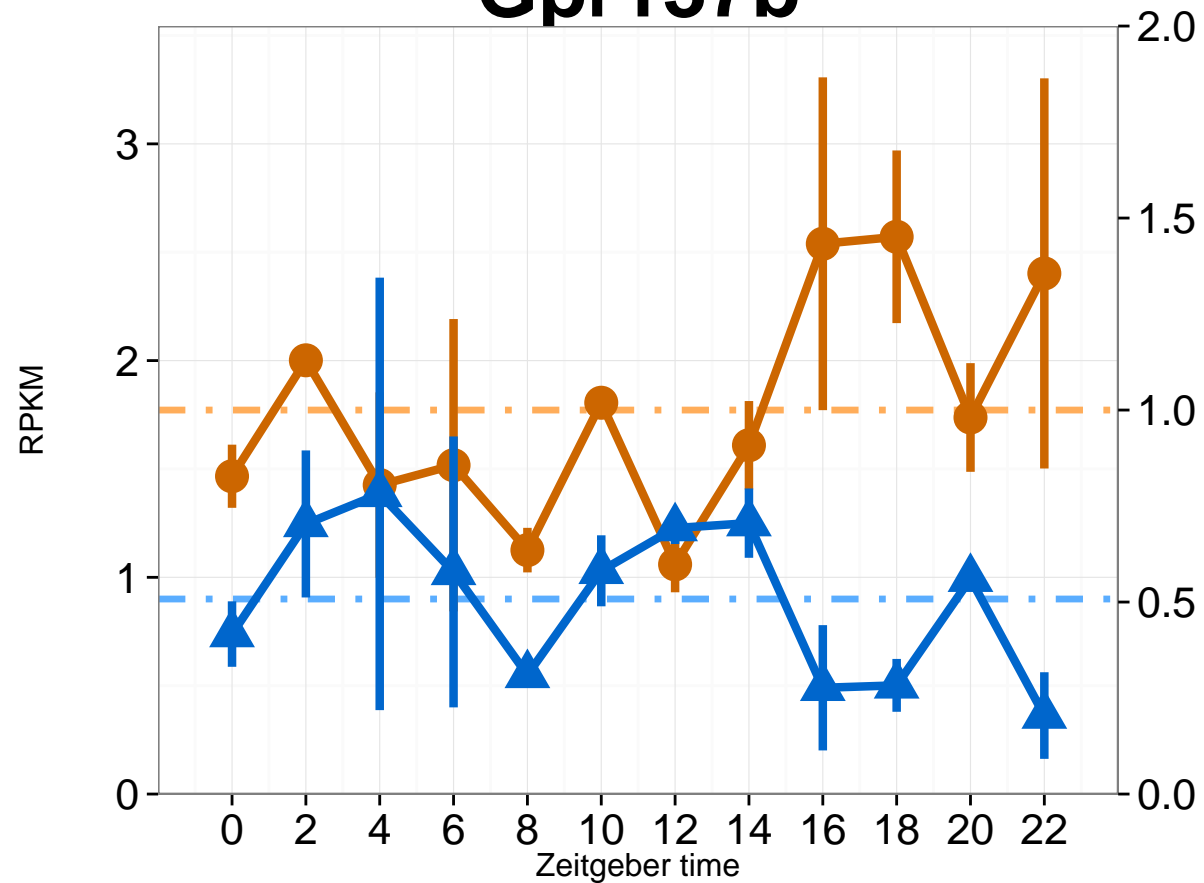

# Gpr137b

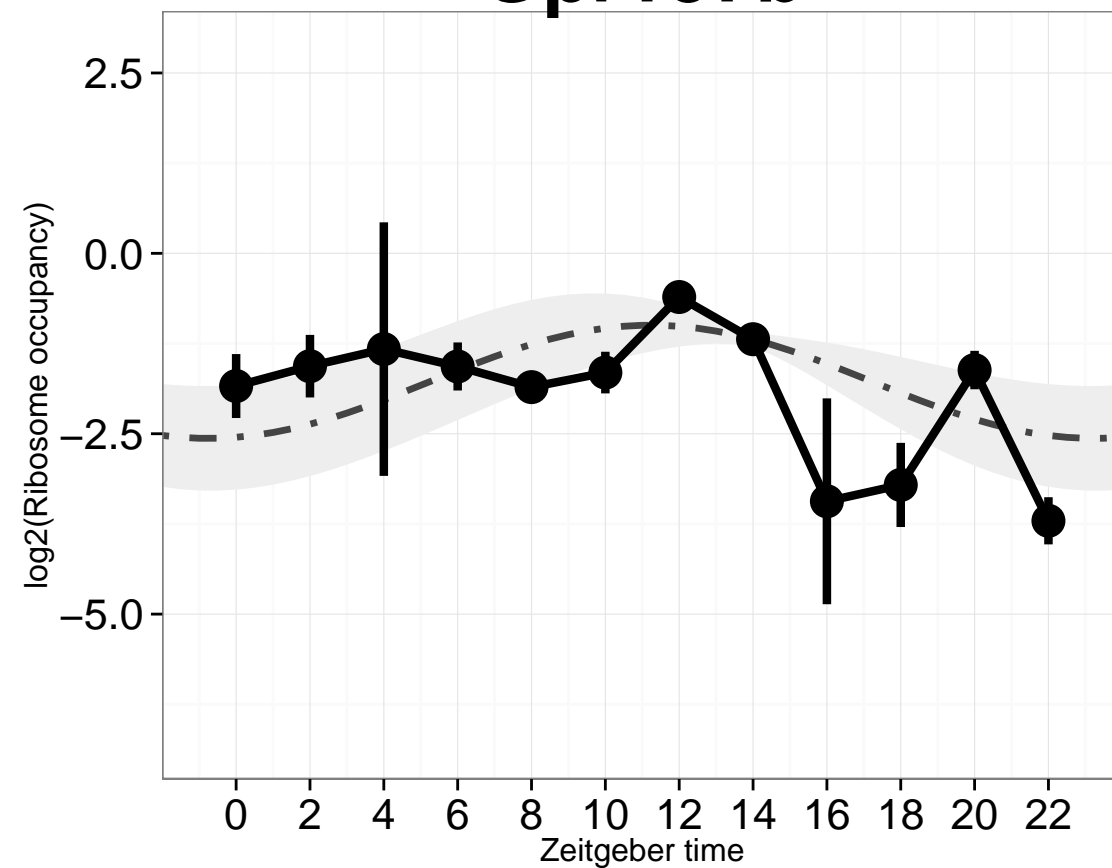

Supplement: SuppDataset_1.zip [file Gpr137b_set_A.pdf › Supplemental Dataset 1/A-mRNA_nonrhyth_translation_nonrhyth/Gpr137b_set_A.pdf]

## Gpr180

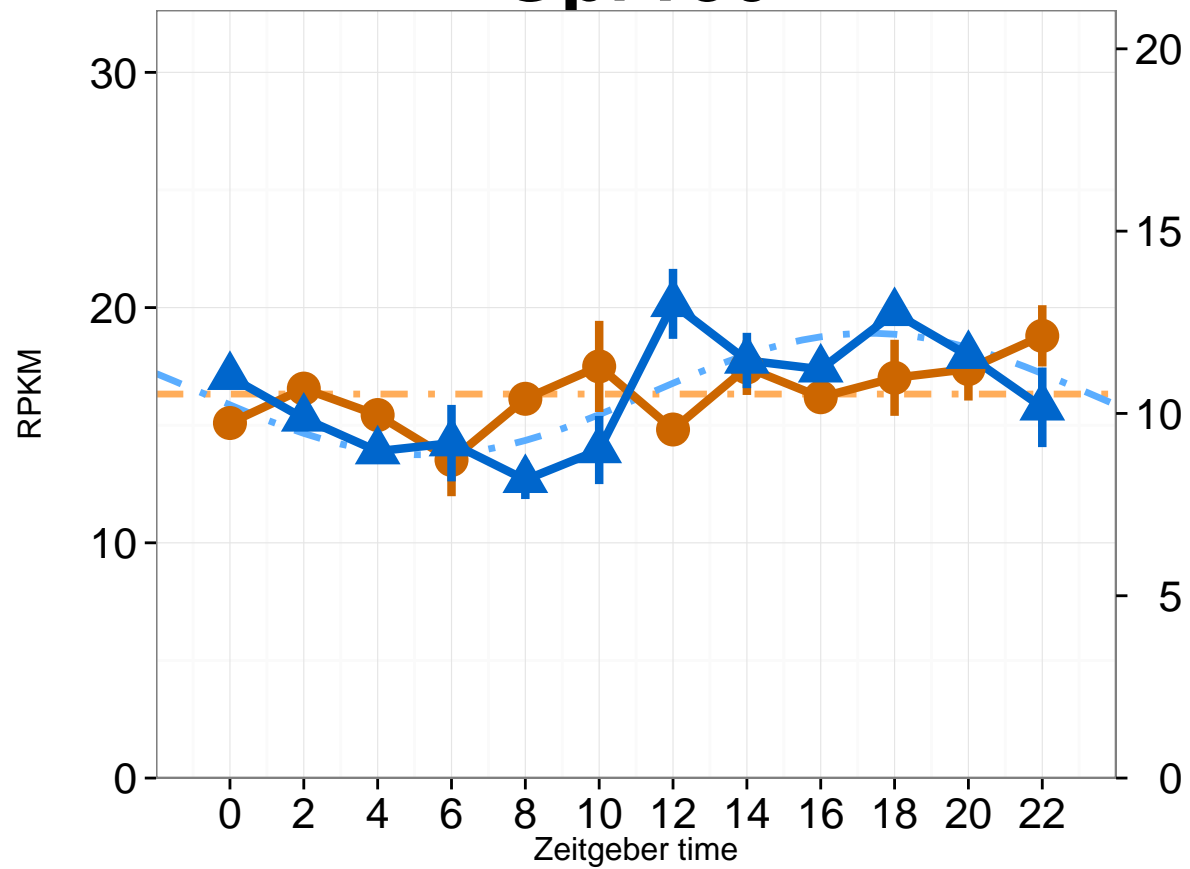

## Gpr180

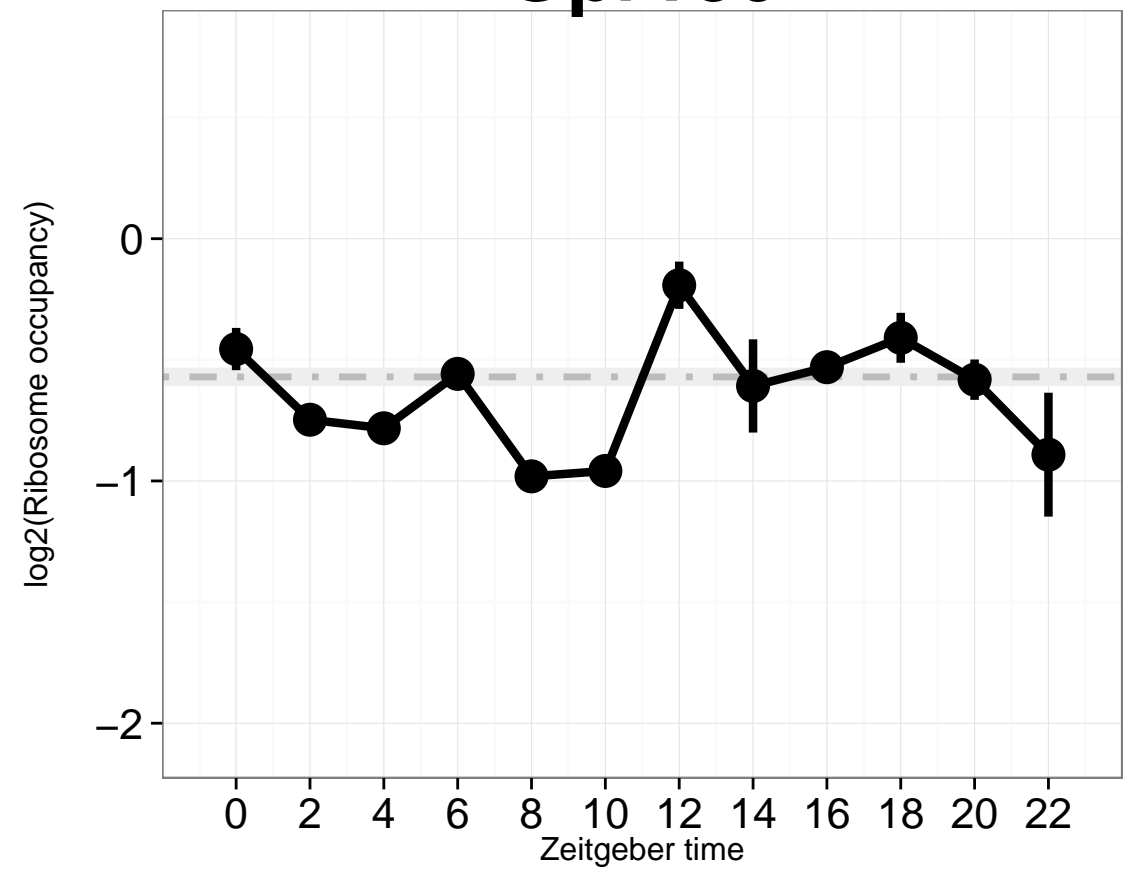

Supplement: SuppDataset_1.zip [file Gpr180_set_A.pdf › Supplemental Dataset 1/A-mRNA_nonrhyth_translation_nonrhyth/Gpr180_set_A.pdf]

## Gpr182

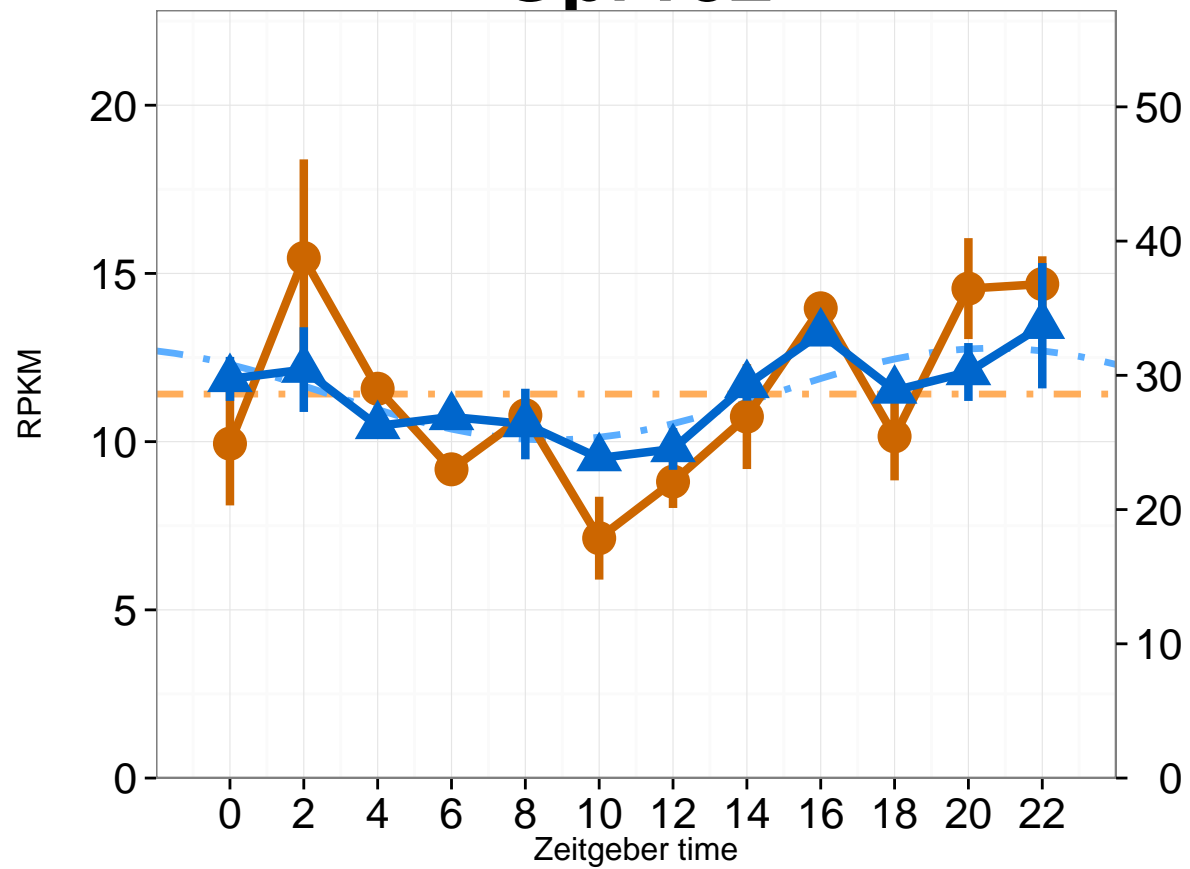

## Gpr182

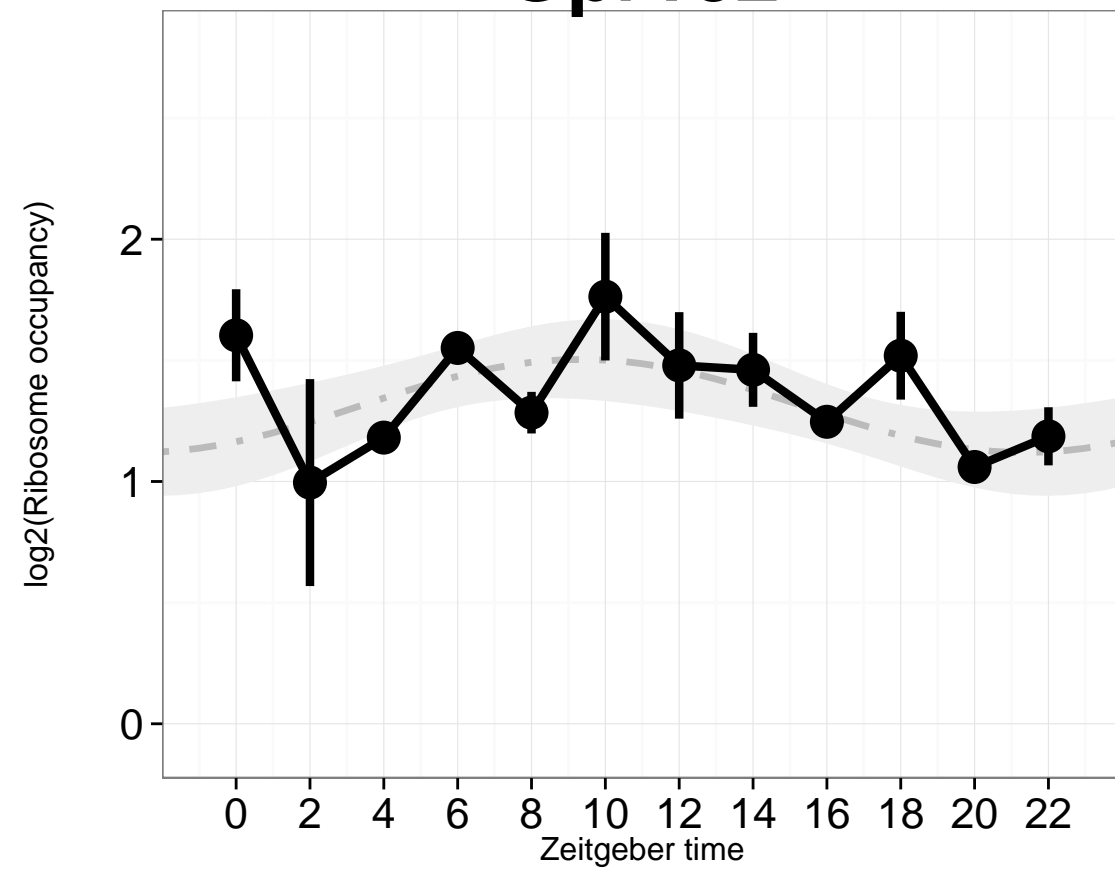

Supplement: SuppDataset_1.zip [file Gpr182_set_A.pdf › Supplemental Dataset 1/A-mRNA_nonrhyth_translation_nonrhyth/Gpr182_set_A.pdf]

# Gpr19

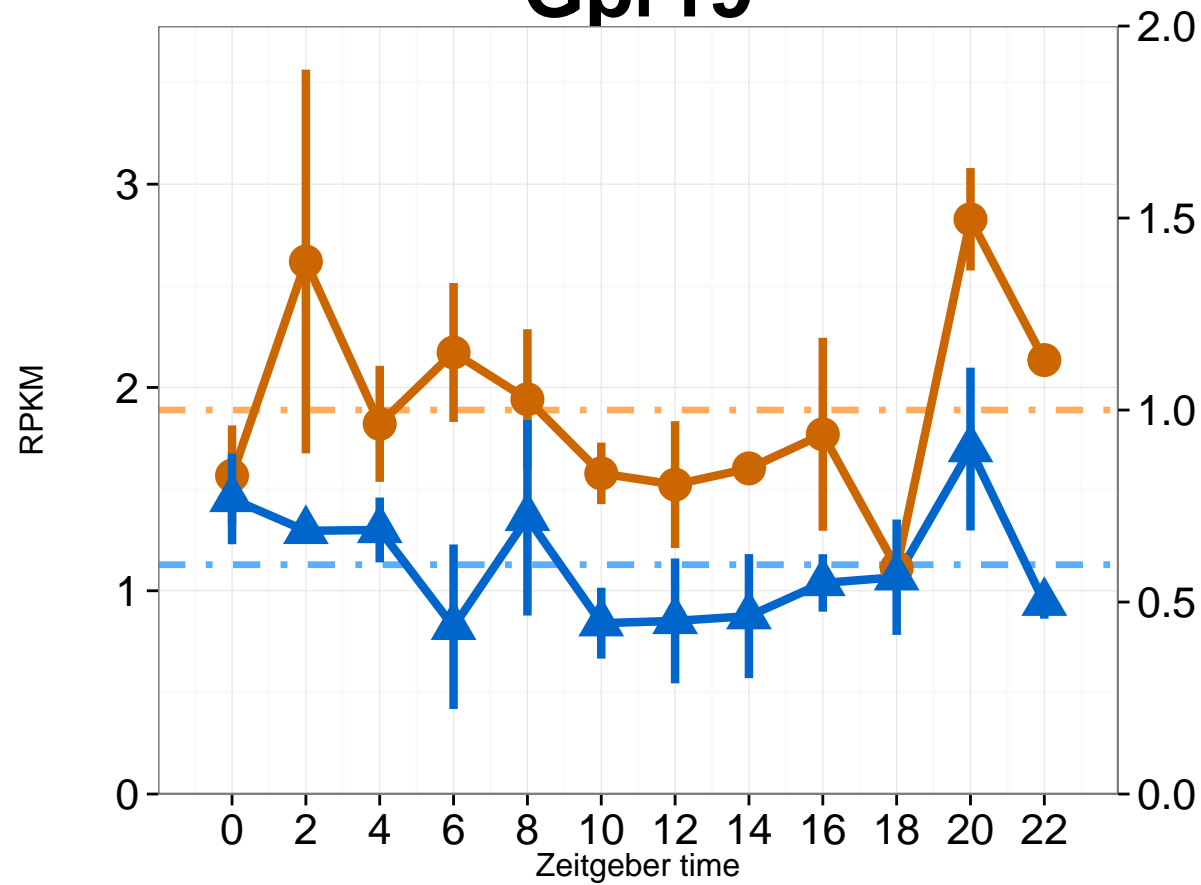

# Gpr19

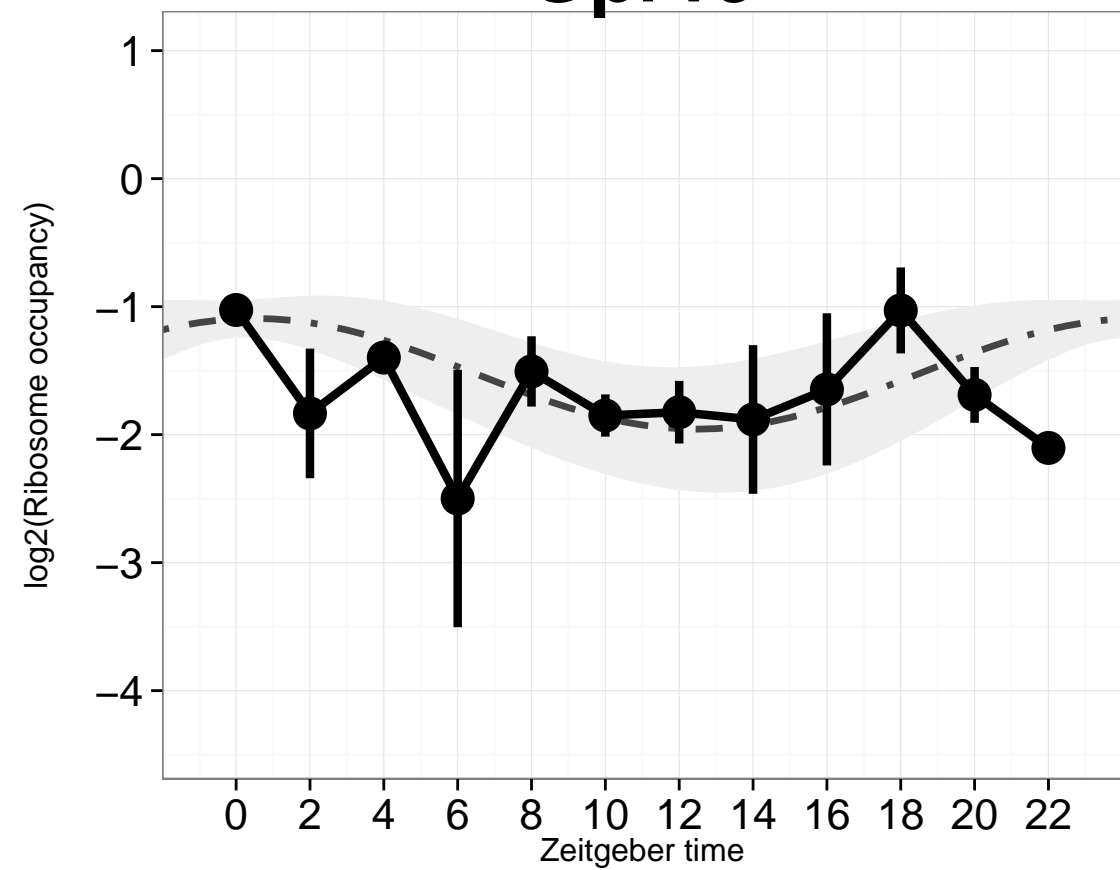

Supplement: SuppDataset_1.zip [file Gpr19_set_A.pdf › Supplemental Dataset 1/A-mRNA_nonrhyth_translation_nonrhyth/Gpr19_set_A.pdf]

**Gpr64 TR**

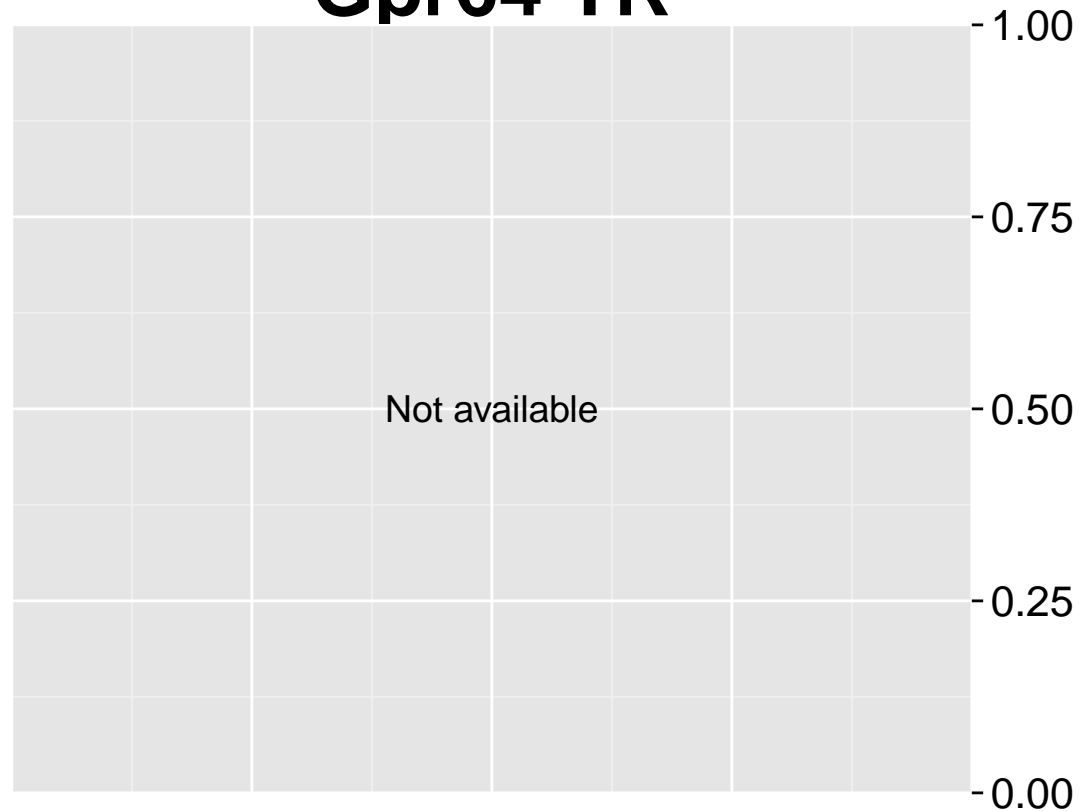

**Gpr64 log2(Ribosome occupancy**

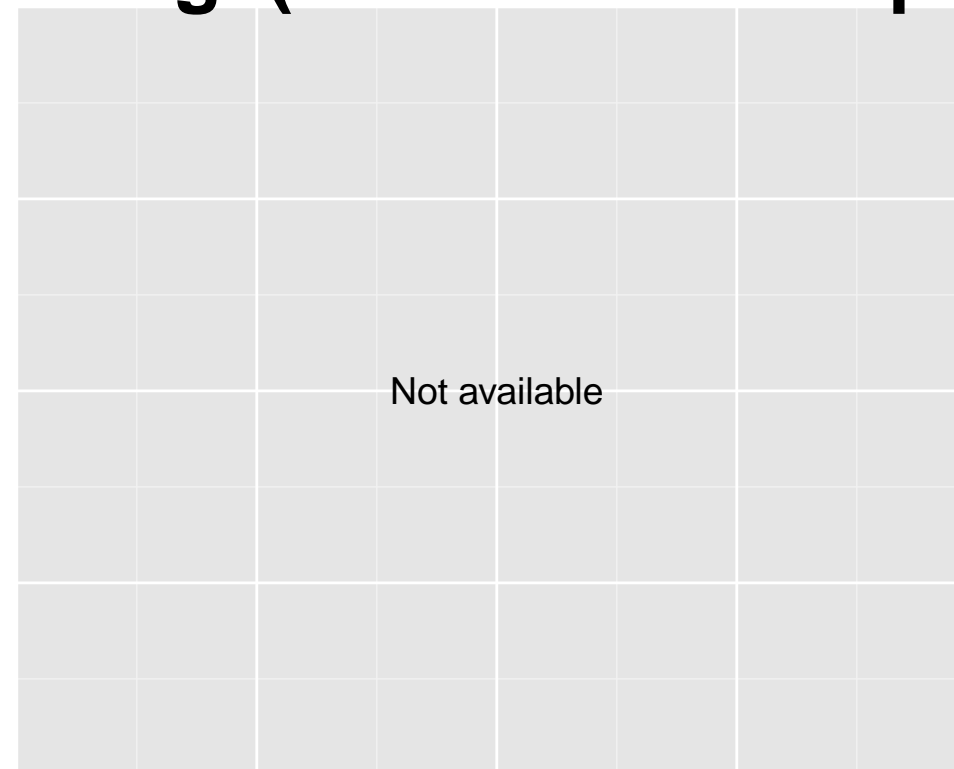

Supplement: SuppDataset_1.zip [file Gpr64_set_A.pdf › Supplemental Dataset 1/A-mRNA_nonrhyth_translation_nonrhyth/Gpr64_set_A.pdf]

# Gpr65

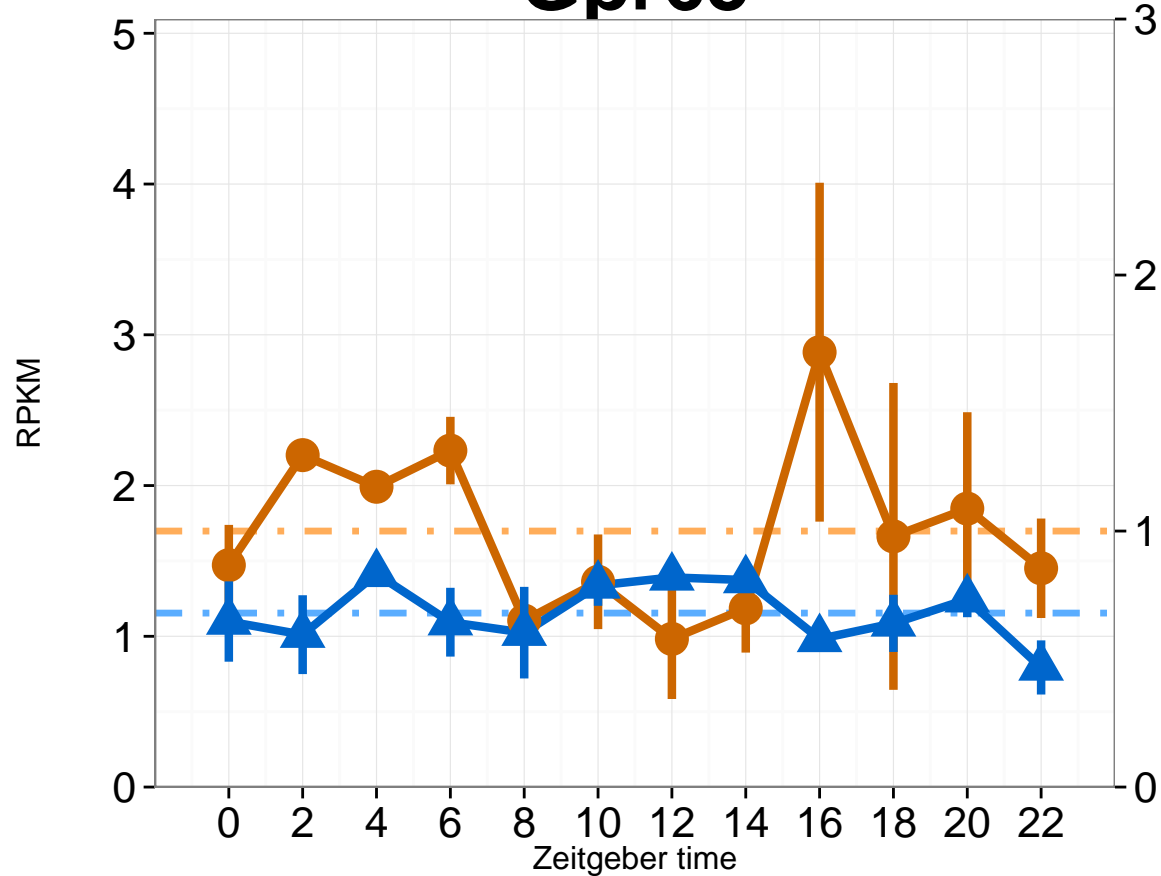

# Gpr65

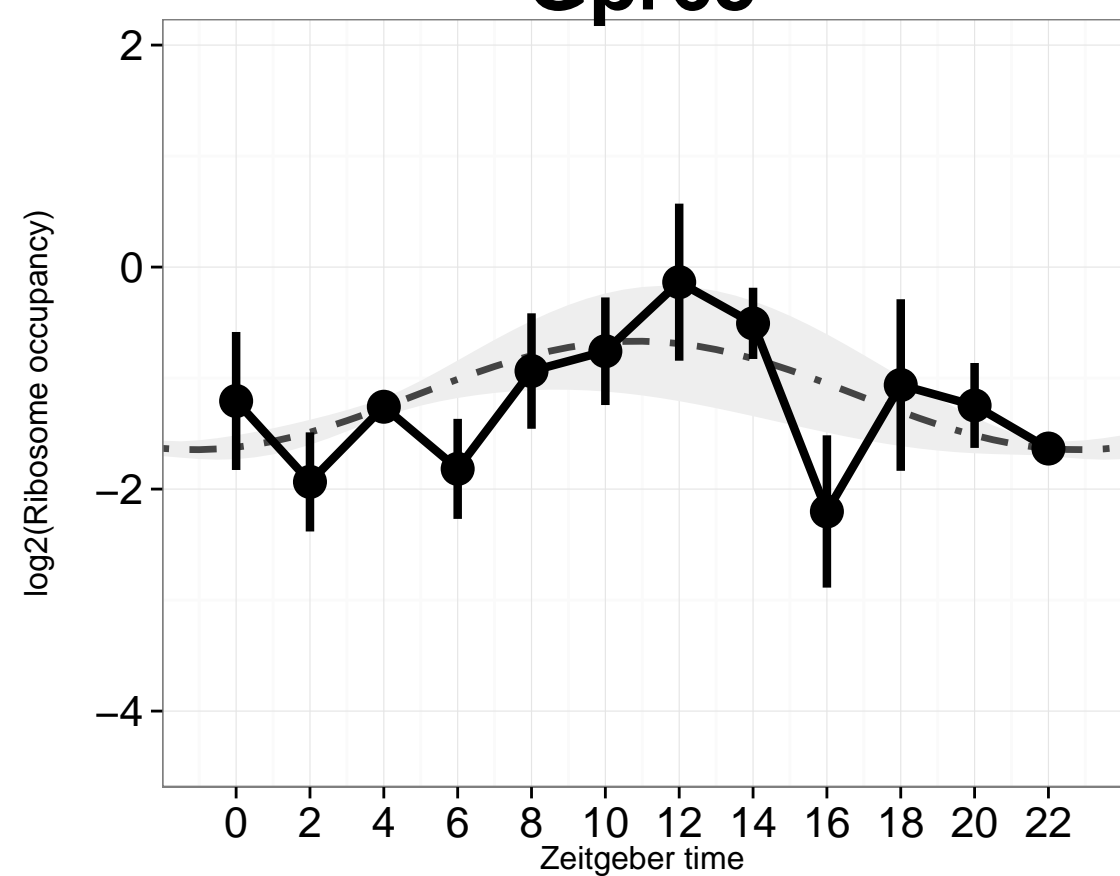

Supplement: SuppDataset_1.zip [file Gpr65_set_A.pdf › Supplemental Dataset 1/A-mRNA_nonrhyth_translation_nonrhyth/Gpr65_set_A.pdf]

# Gpr89

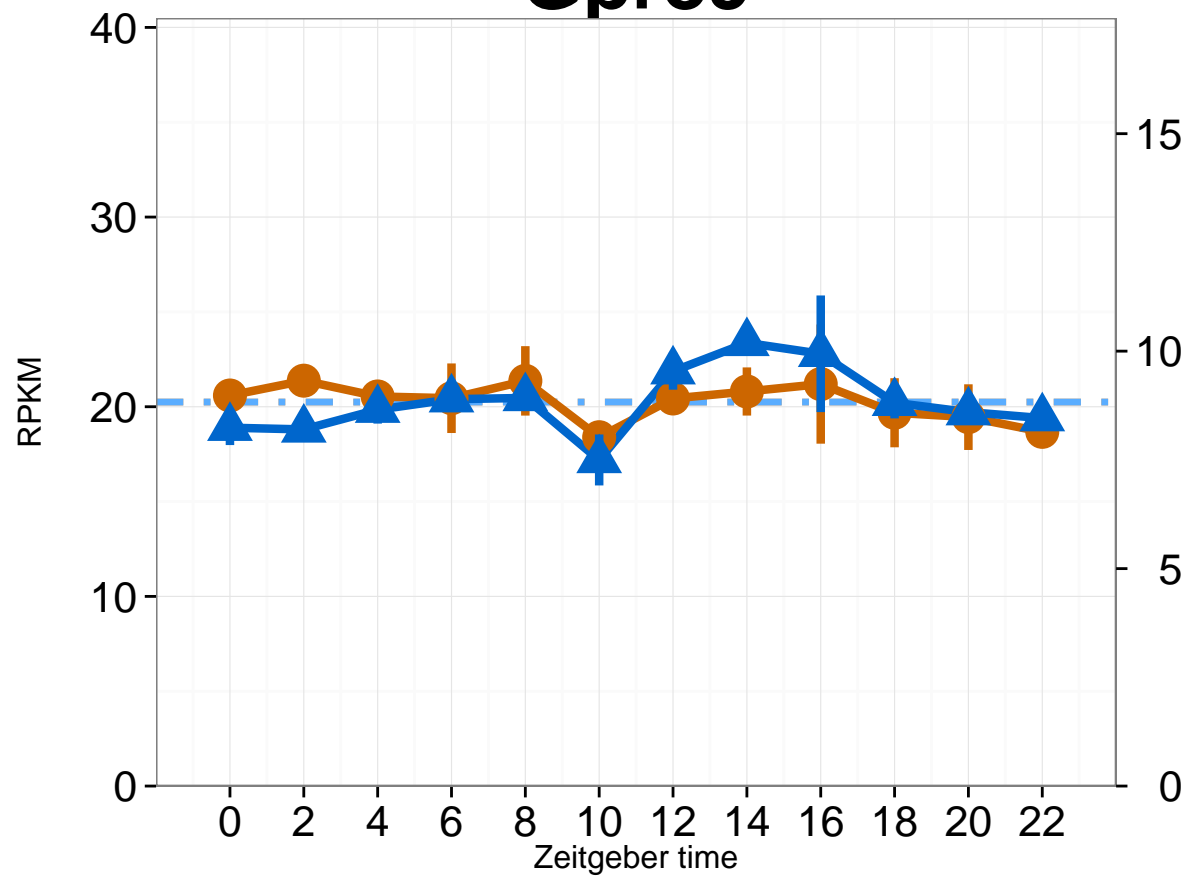

# Gpr89

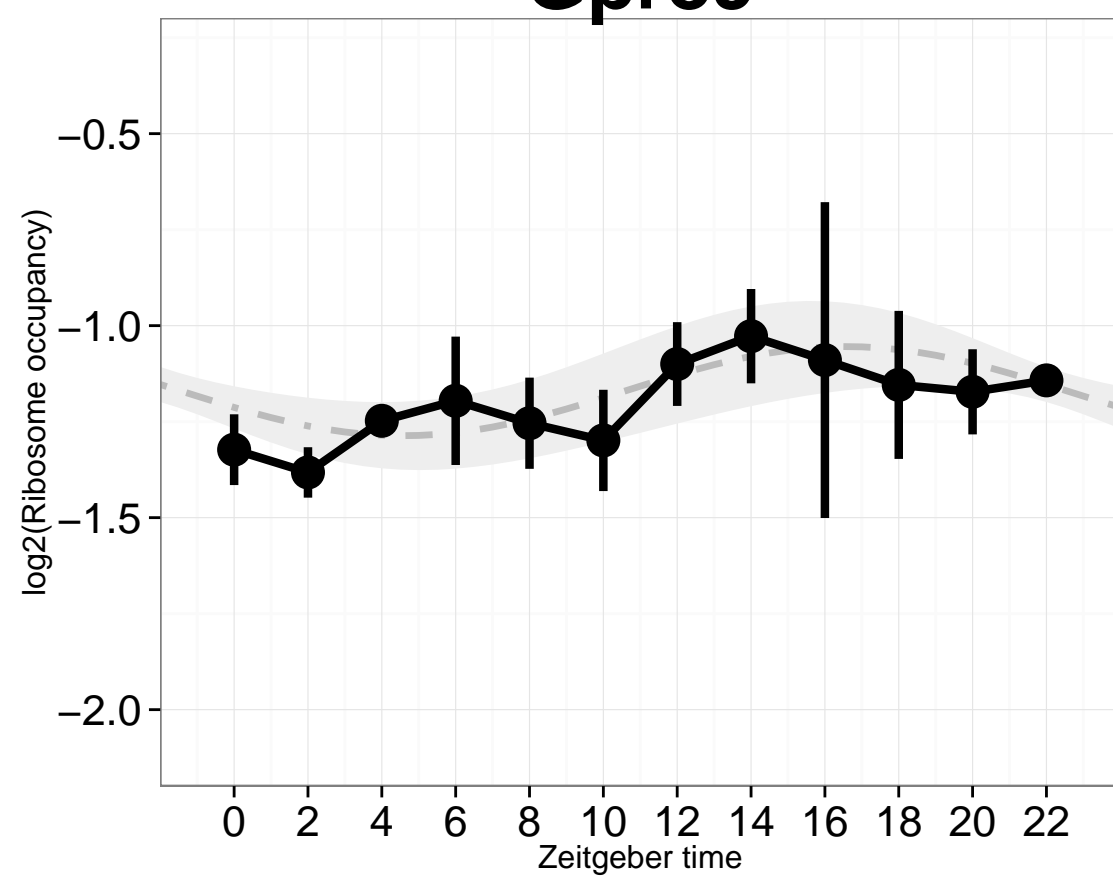

Supplement: SuppDataset_1.zip [file Gpr89_set_A.pdf › Supplemental Dataset 1/A-mRNA_nonrhyth_translation_nonrhyth/Gpr89_set_A.pdf]

## Gprc5c

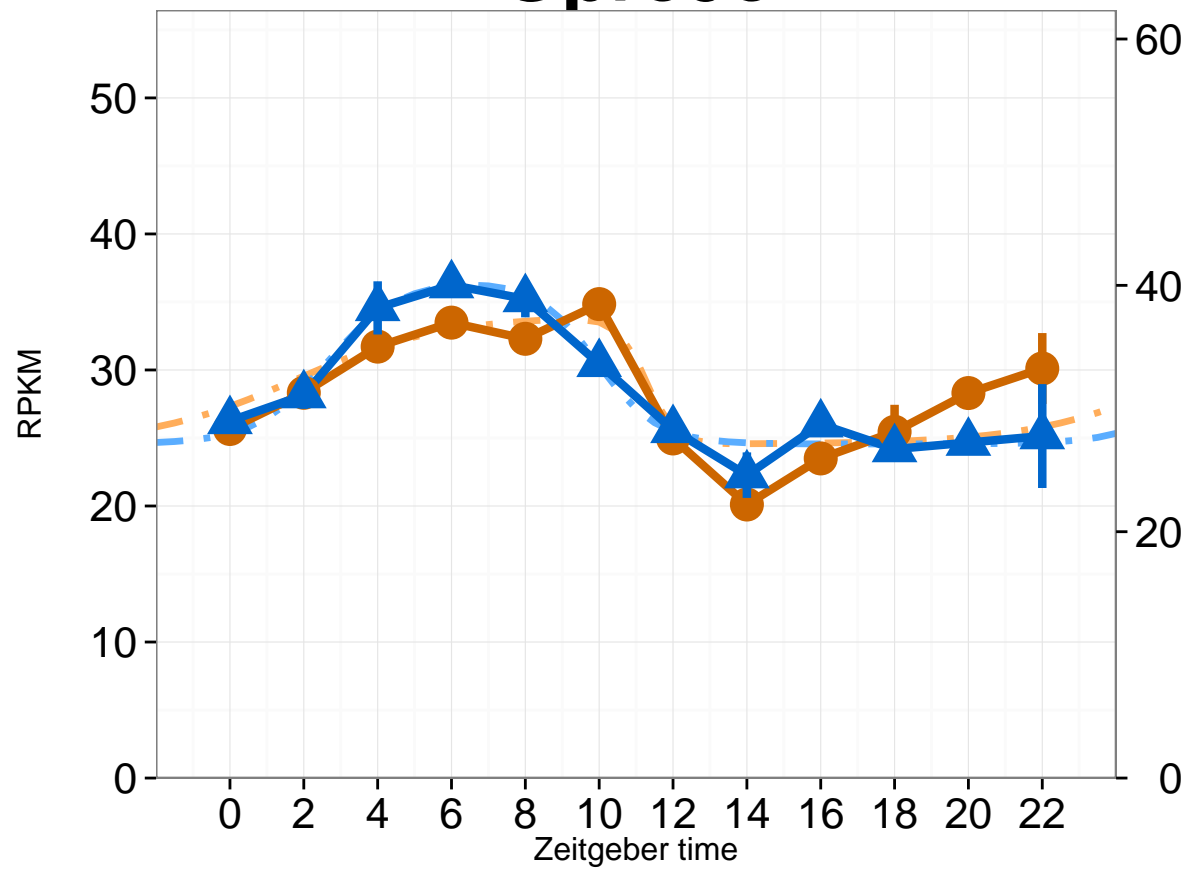

## Gprc5c

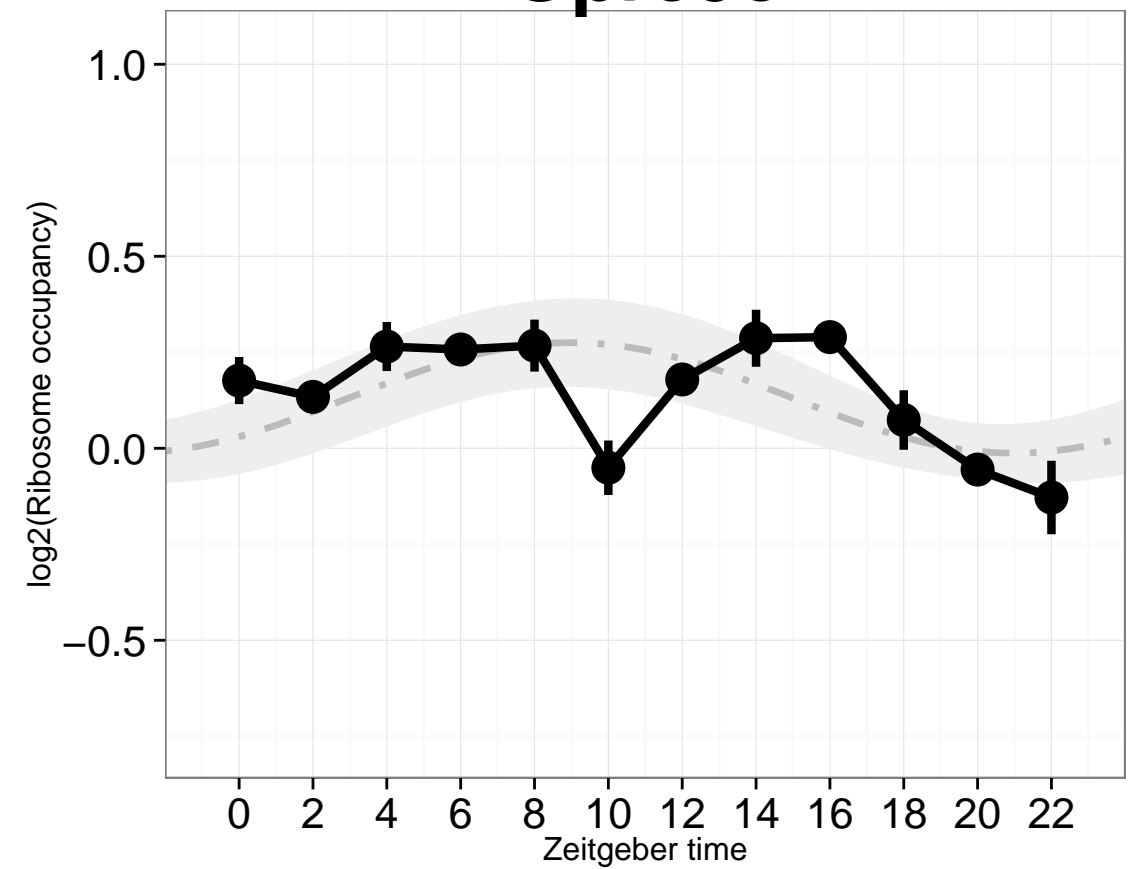

Supplement: SuppDataset_1.zip [file Gprc5c_set_A.pdf › Supplemental Dataset 1/A-mRNA_nonrhyth_translation_nonrhyth/Gprc5c_set_A.pdf]

## Gps1

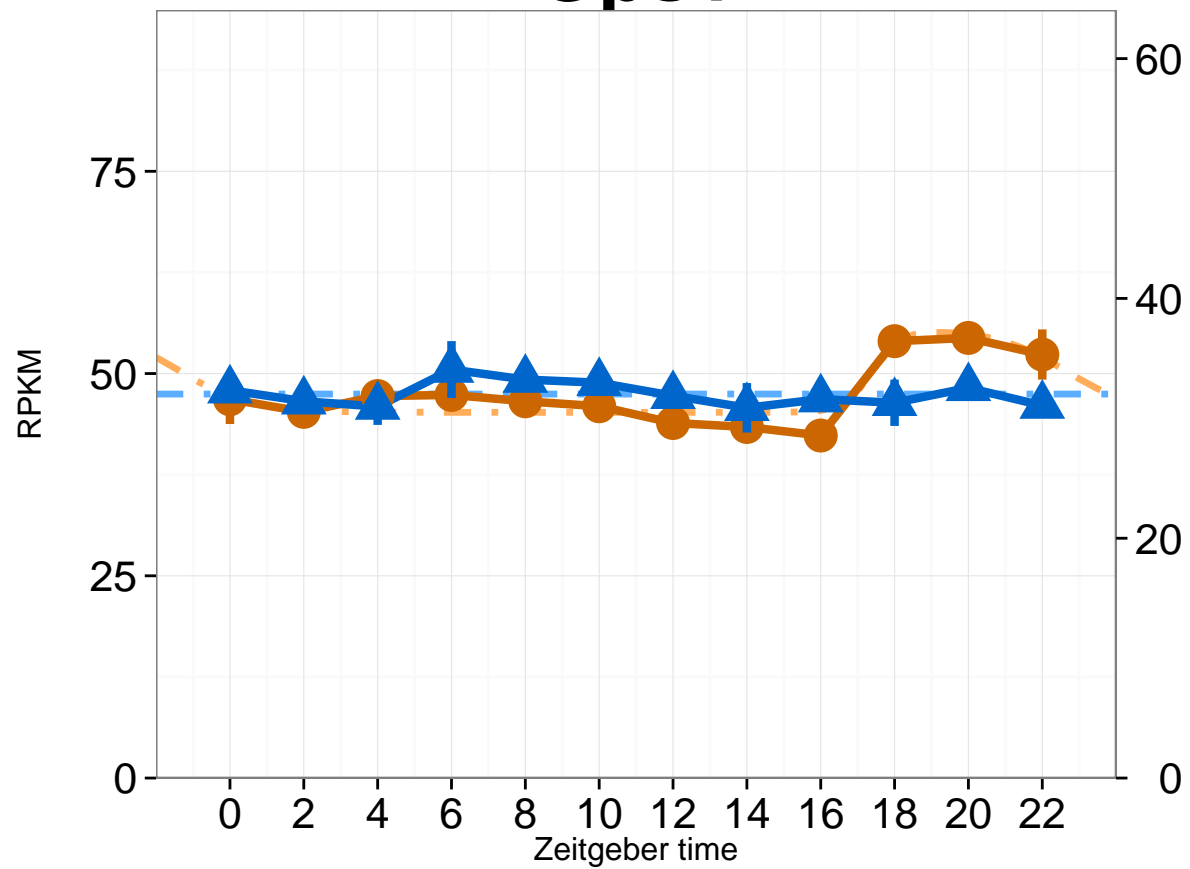

## Gps1

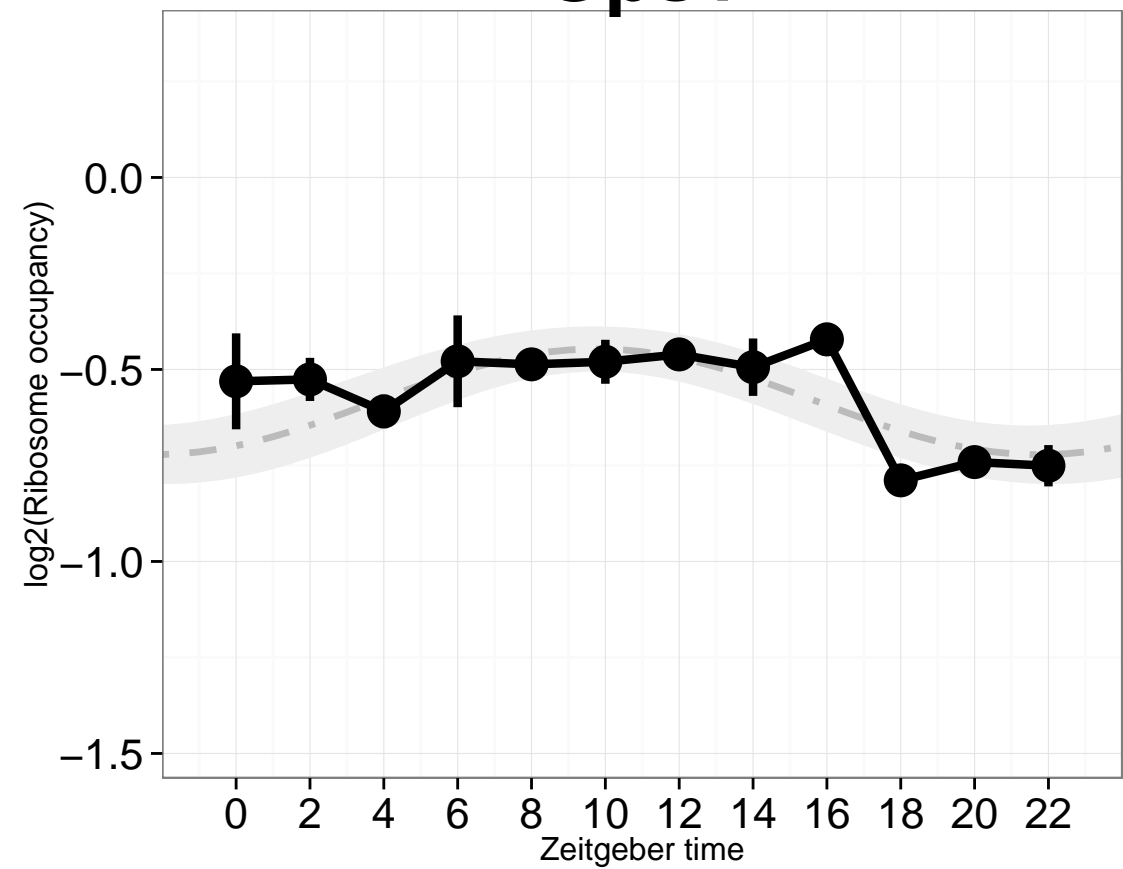

Supplement: SuppDataset_1.zip [file Gps1_set_A.pdf › Supplemental Dataset 1/A-mRNA_nonrhyth_translation_nonrhyth/Gps1_set_A.pdf]

## Gps2

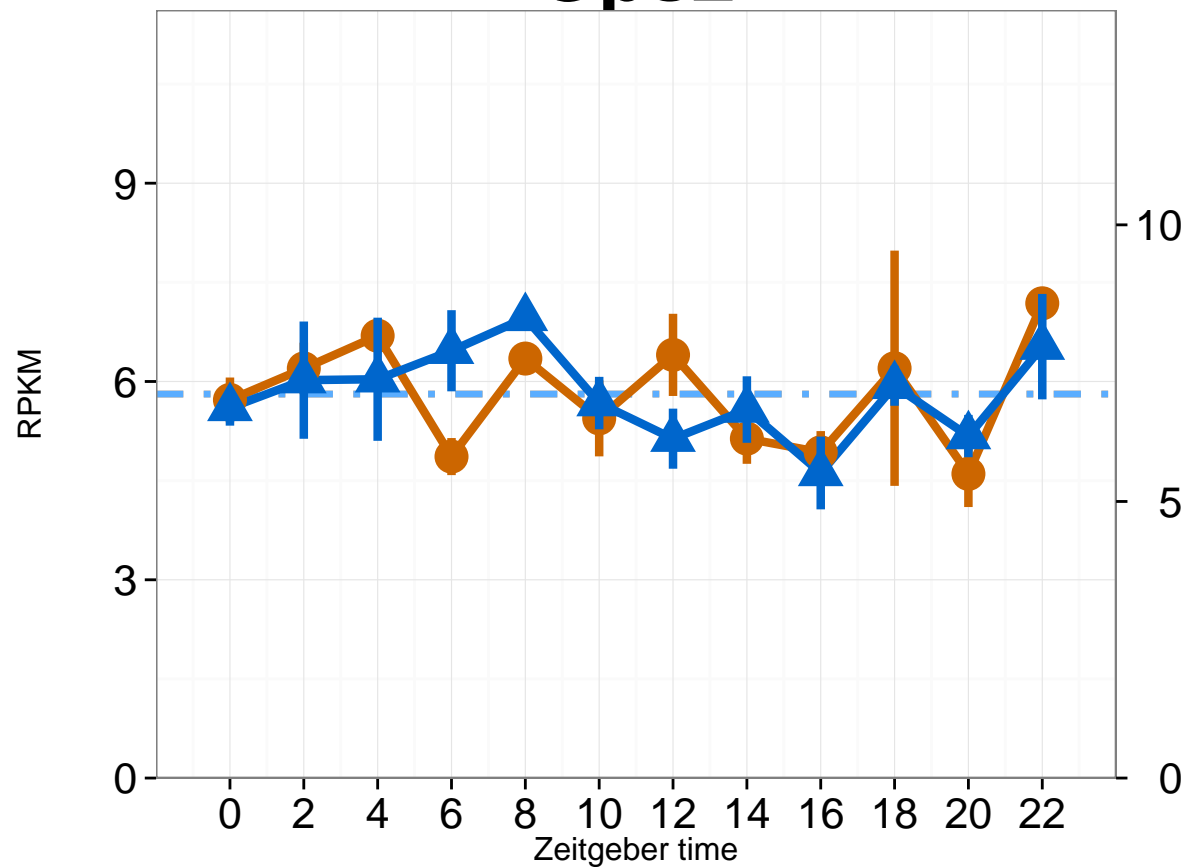

## Gps2

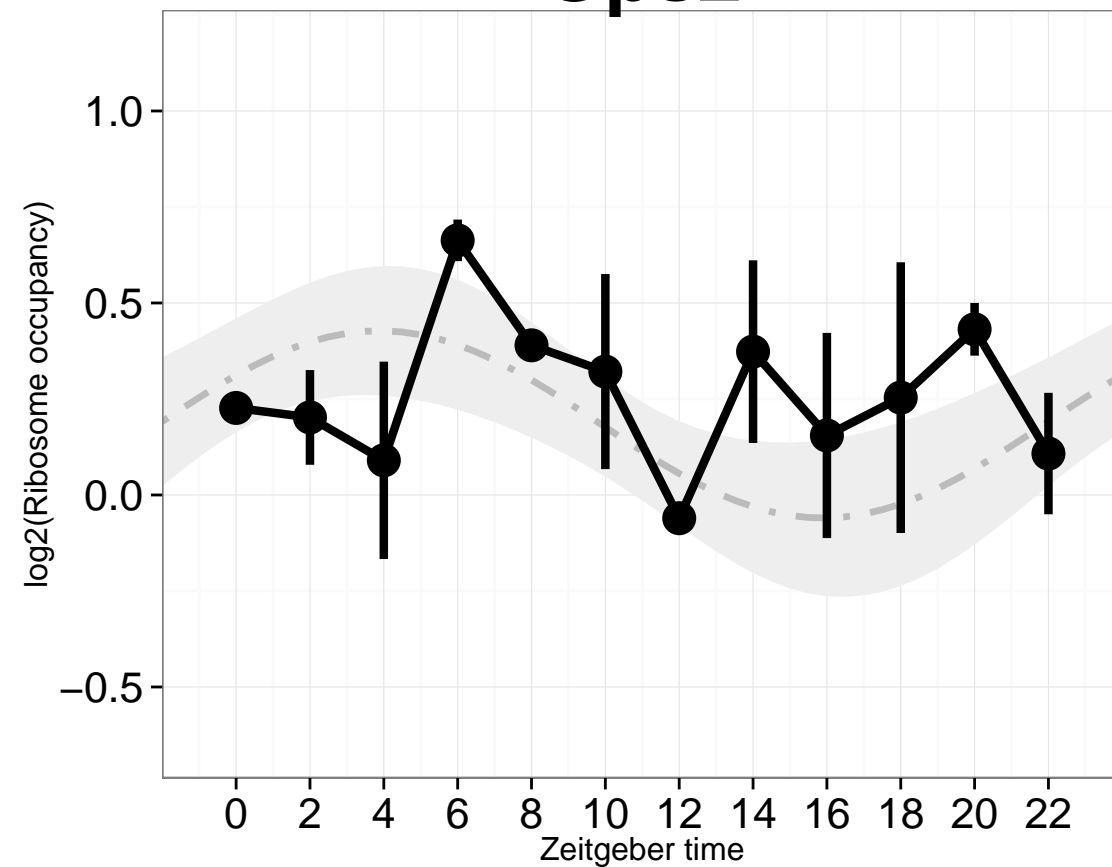

Supplement: SuppDataset_1.zip [file Gps2_set_A.pdf › Supplemental Dataset 1/A-mRNA_nonrhyth_translation_nonrhyth/Gps2_set_A.pdf]

## Gpsm3 TR

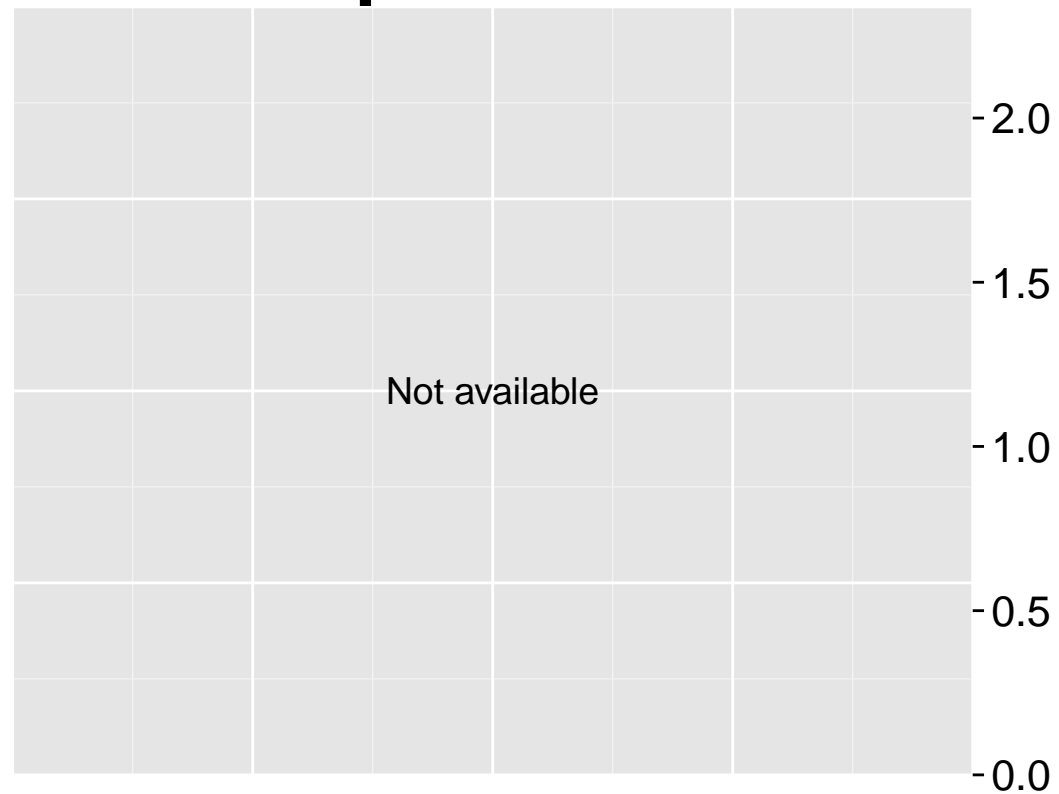

## Gpsm3 $\log_2$ (Ribosome occupancy

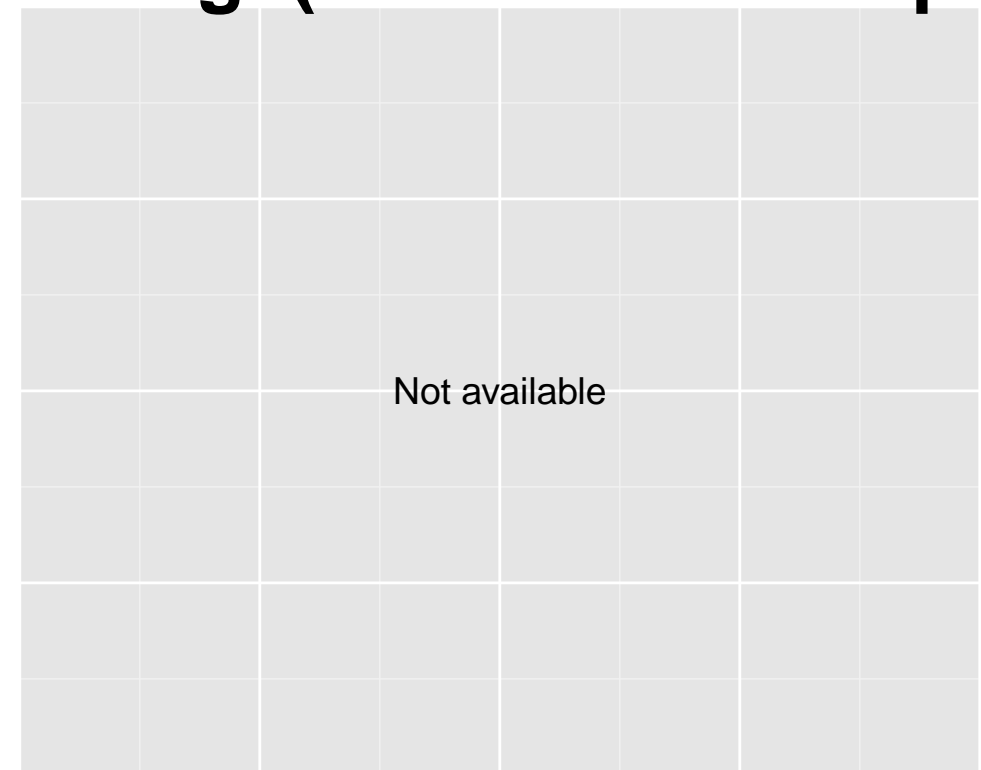

Supplement: SuppDataset_1.zip [file Gpsm3_set_A.pdf › Supplemental Dataset 1/A-mRNA_nonrhyth_translation_nonrhyth/Gpsm3_set_A.pdf]

## Gpt

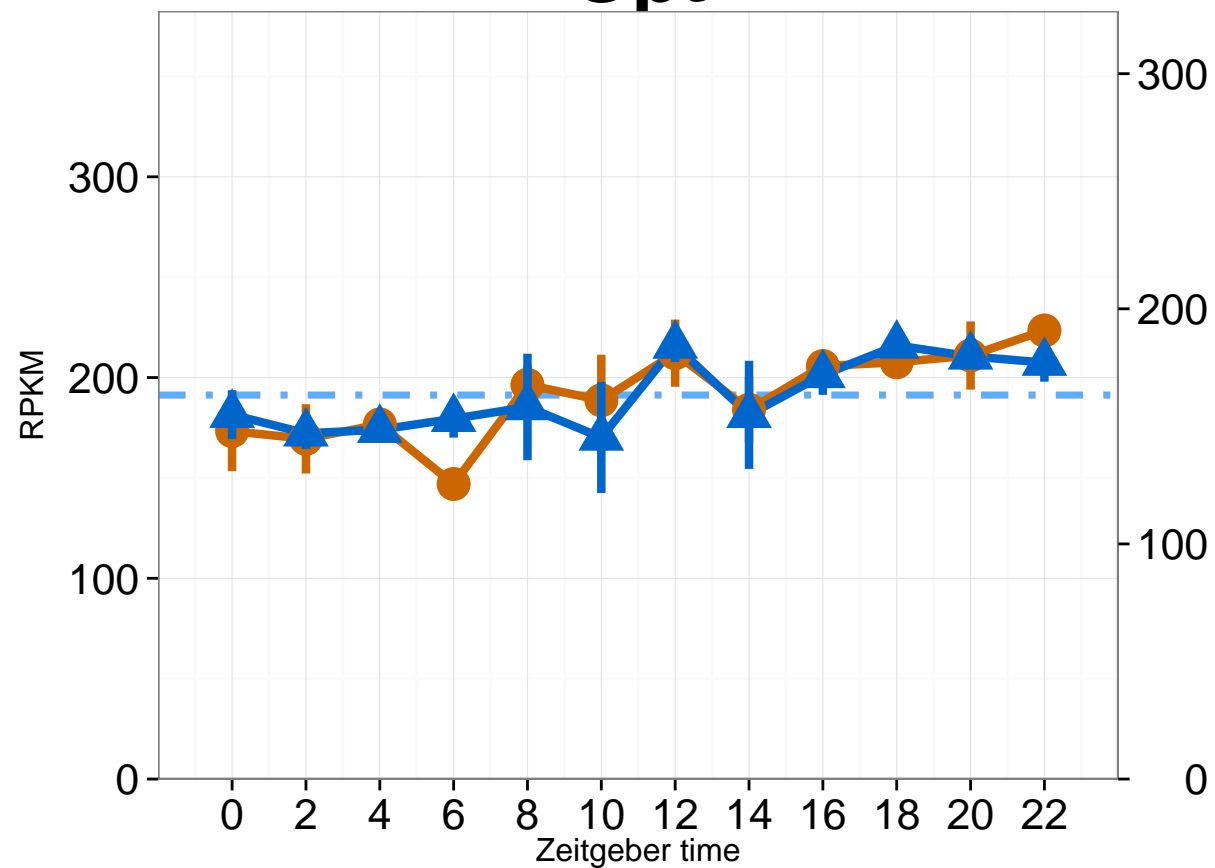

## Gpt

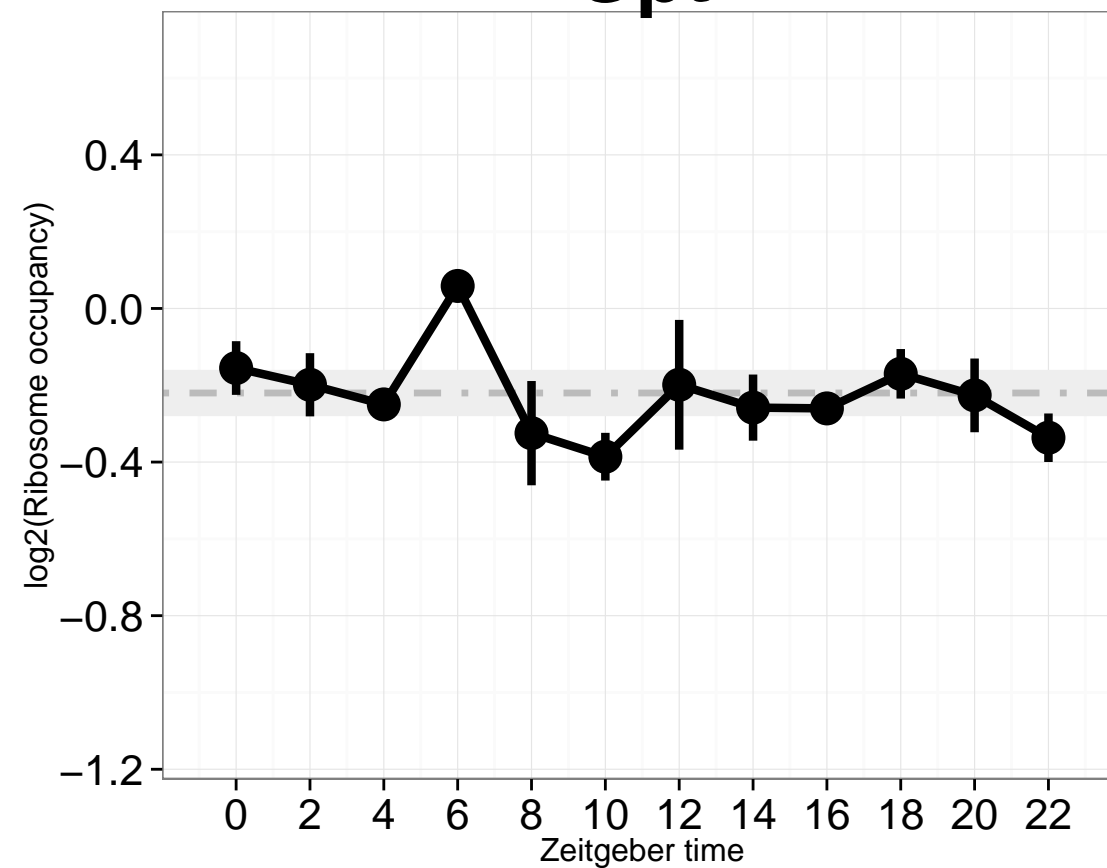

Supplement: SuppDataset_1.zip [file Gpt_set_A.pdf › Supplemental Dataset 1/A-mRNA_nonrhyth_translation_nonrhyth/Gpt_set_A.pdf]

## Gpx1

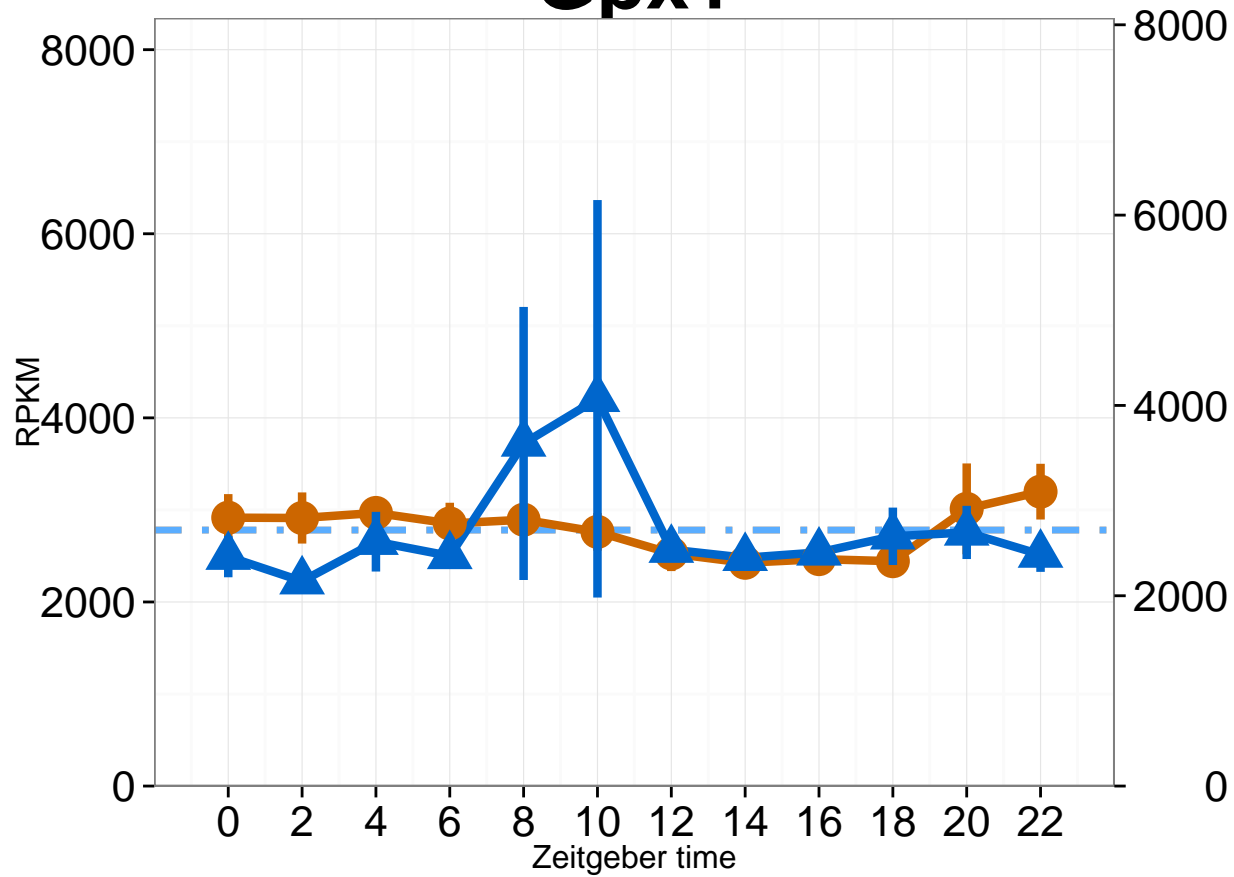

## Gpx1

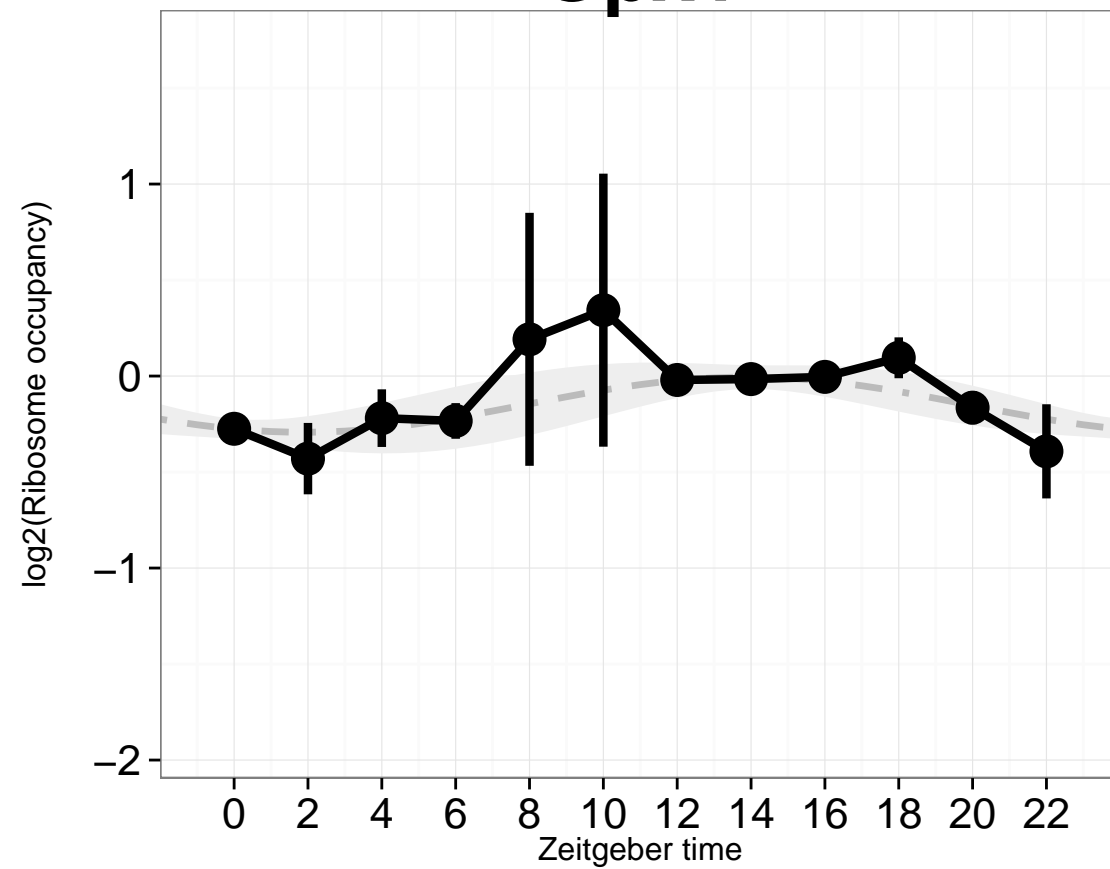

Supplement: SuppDataset_1.zip [file Gpx1_set_A.pdf › Supplemental Dataset 1/A-mRNA_nonrhyth_translation_nonrhyth/Gpx1_set_A.pdf]

## Gpx4

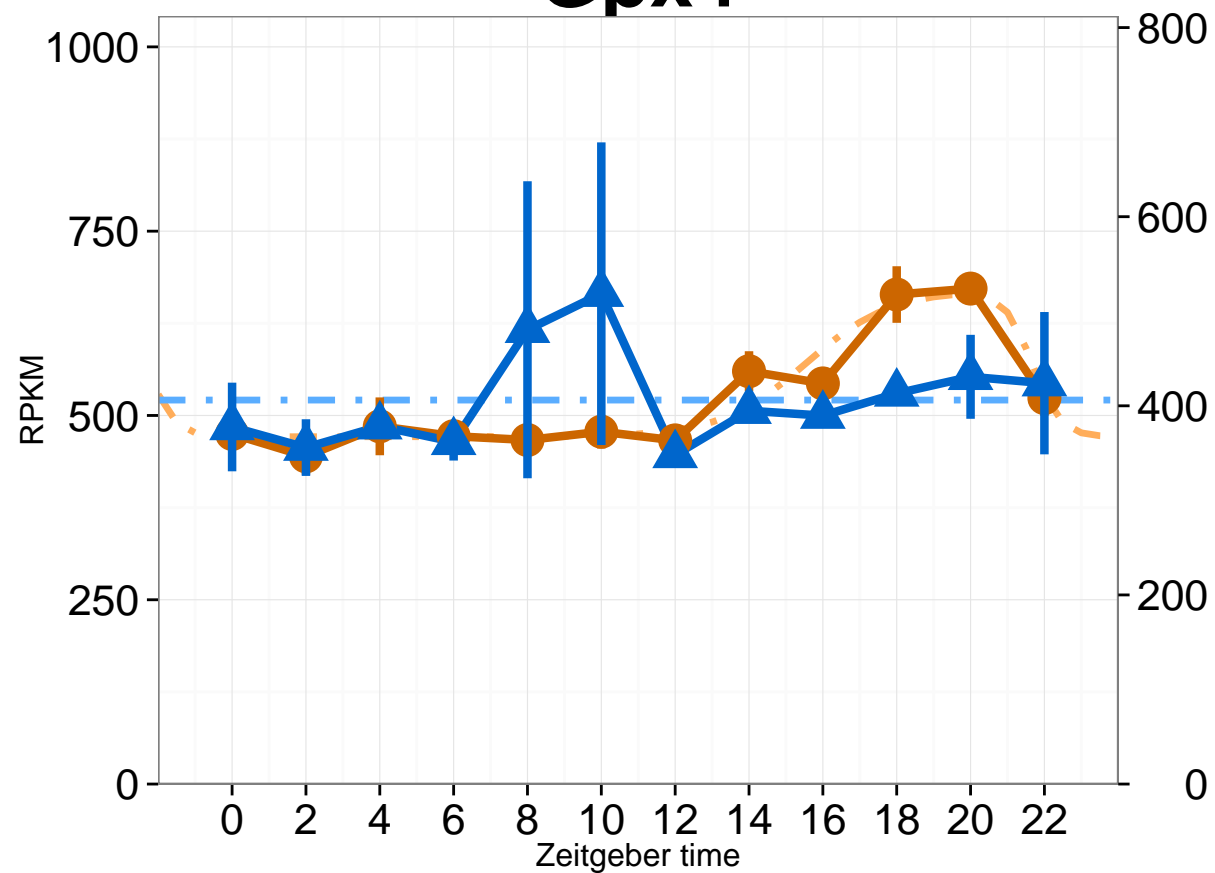

## Gpx4

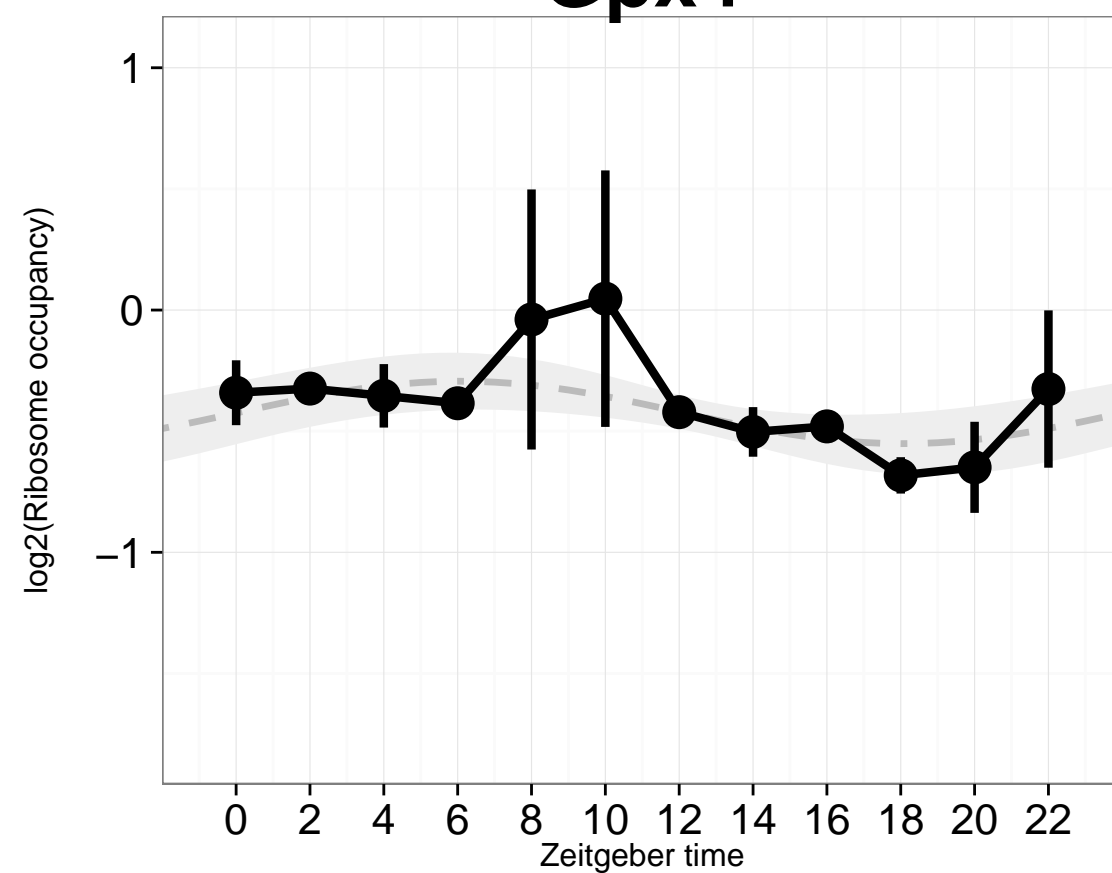

Supplement: SuppDataset_1.zip [file Gpx4_set_A.pdf › Supplemental Dataset 1/A-mRNA_nonrhyth_translation_nonrhyth/Gpx4_set_A.pdf]

## Gpx7

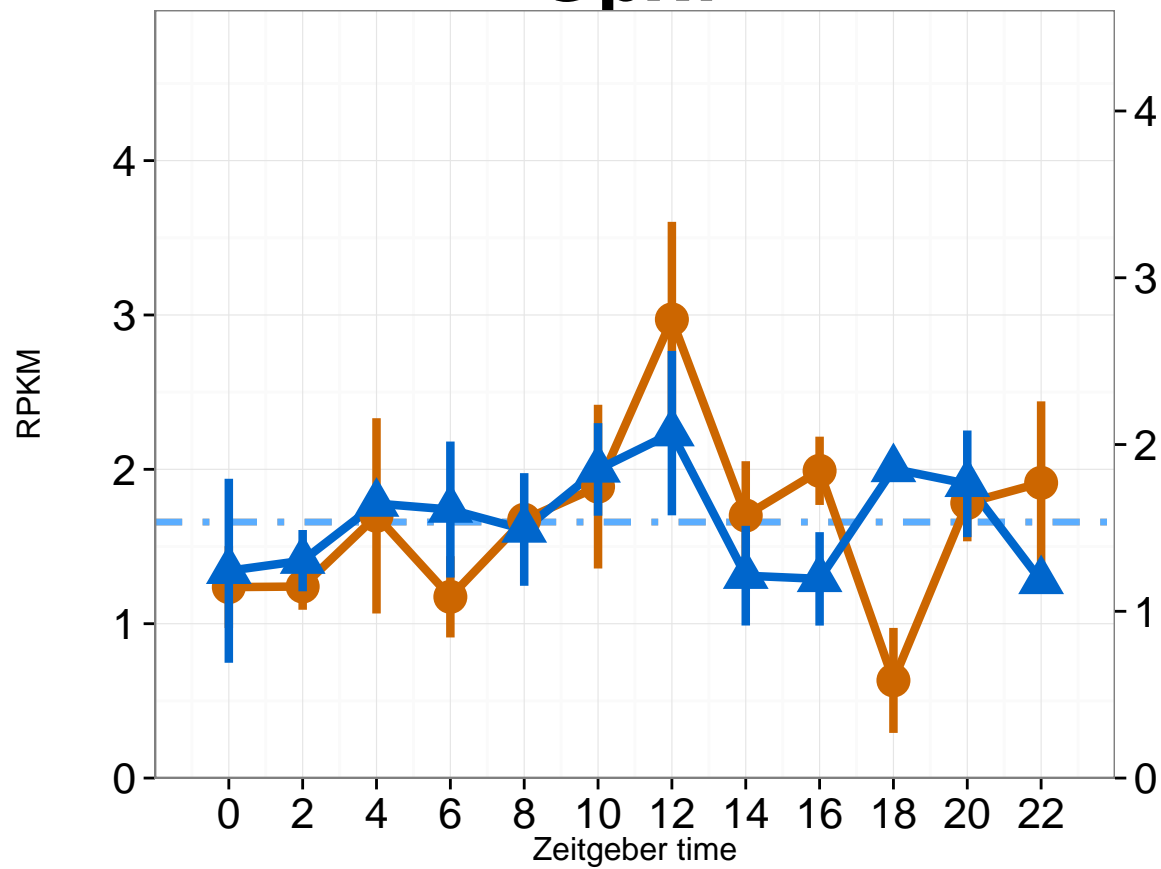

## Gpx7

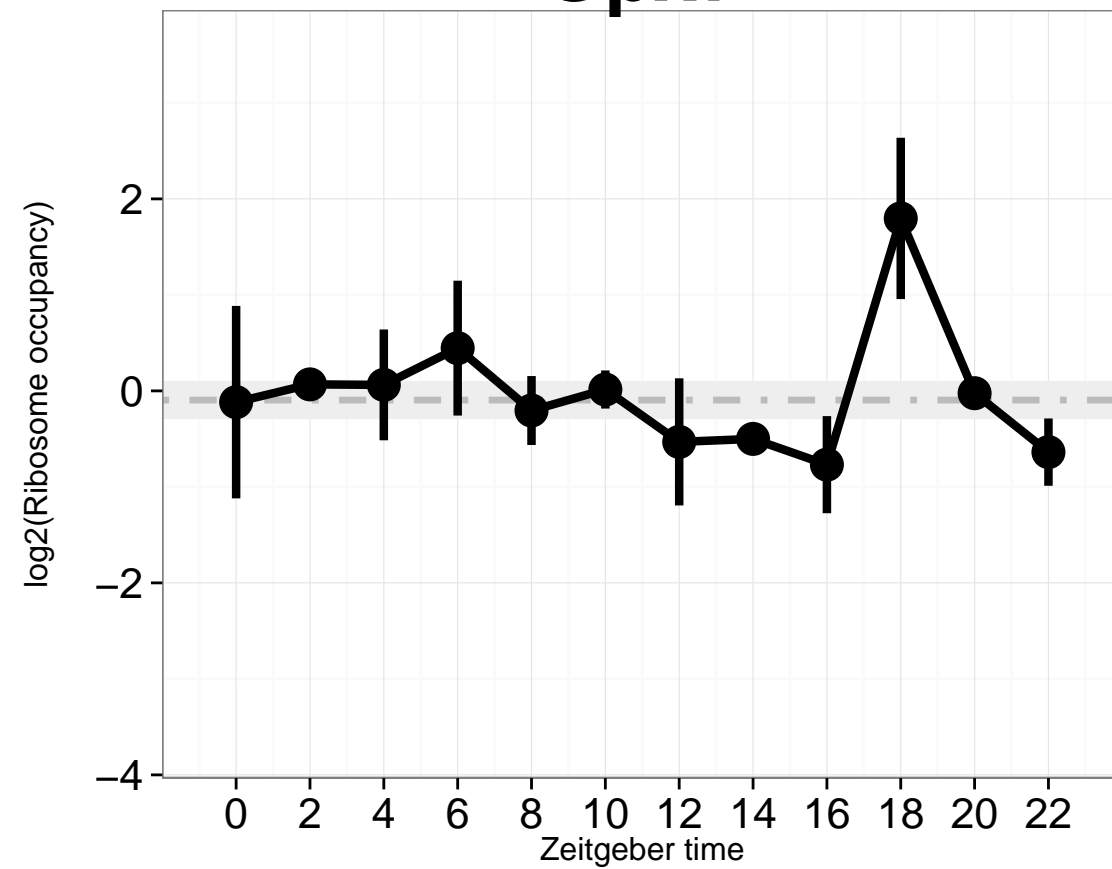

Supplement: SuppDataset_1.zip [file Gpx7_set_A.pdf › Supplemental Dataset 1/A-mRNA_nonrhyth_translation_nonrhyth/Gpx7_set_A.pdf]

# Gpx8

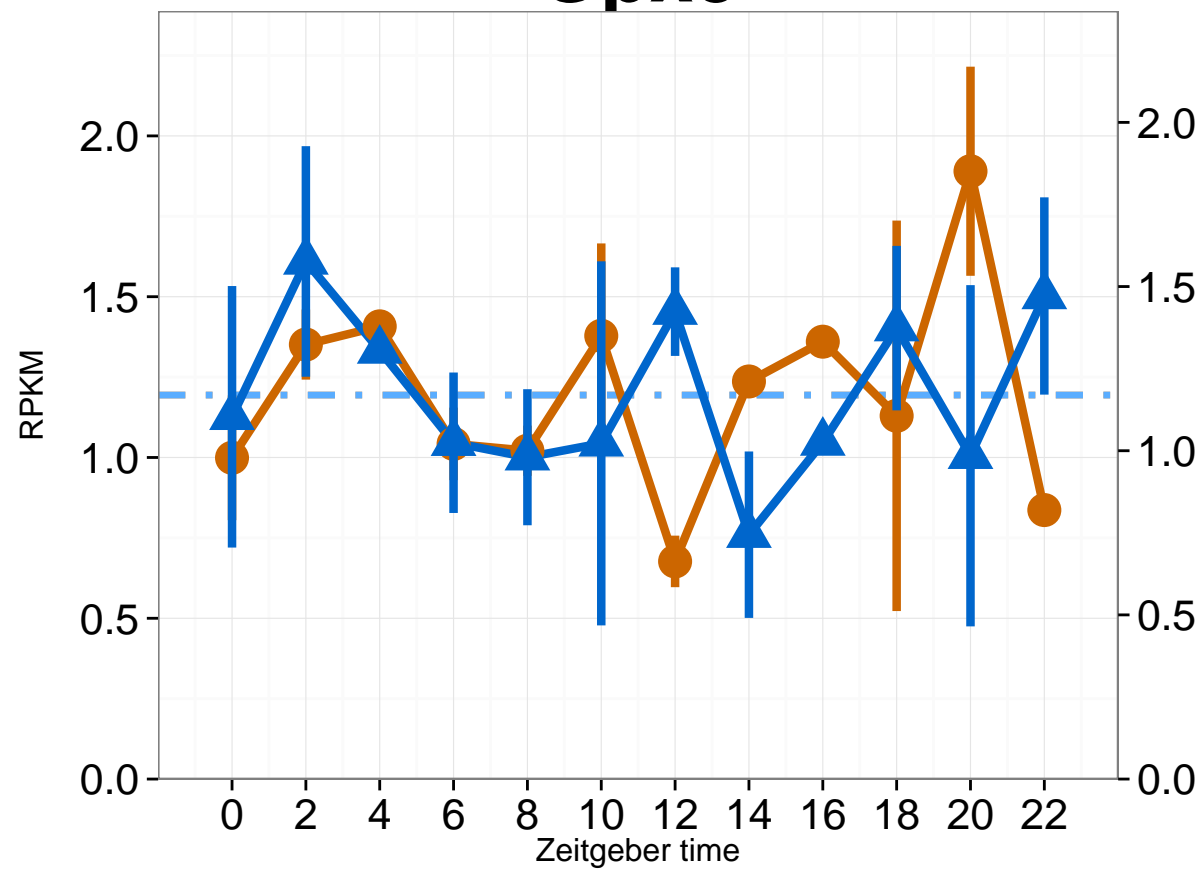

# Gpx8

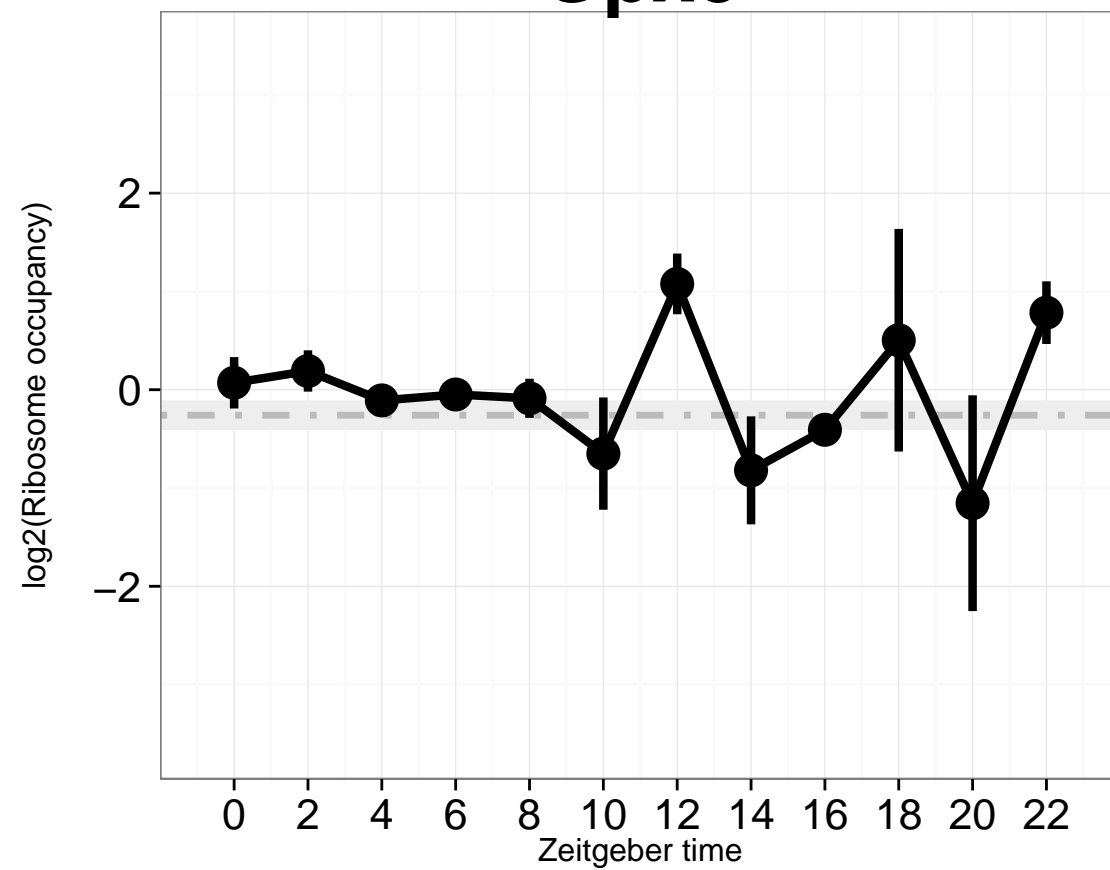

Supplement: SuppDataset_1.zip [file Gpx8_set_A.pdf › Supplemental Dataset 1/A-mRNA_nonrhyth_translation_nonrhyth/Gpx8_set_A.pdf]

# Gramd1a

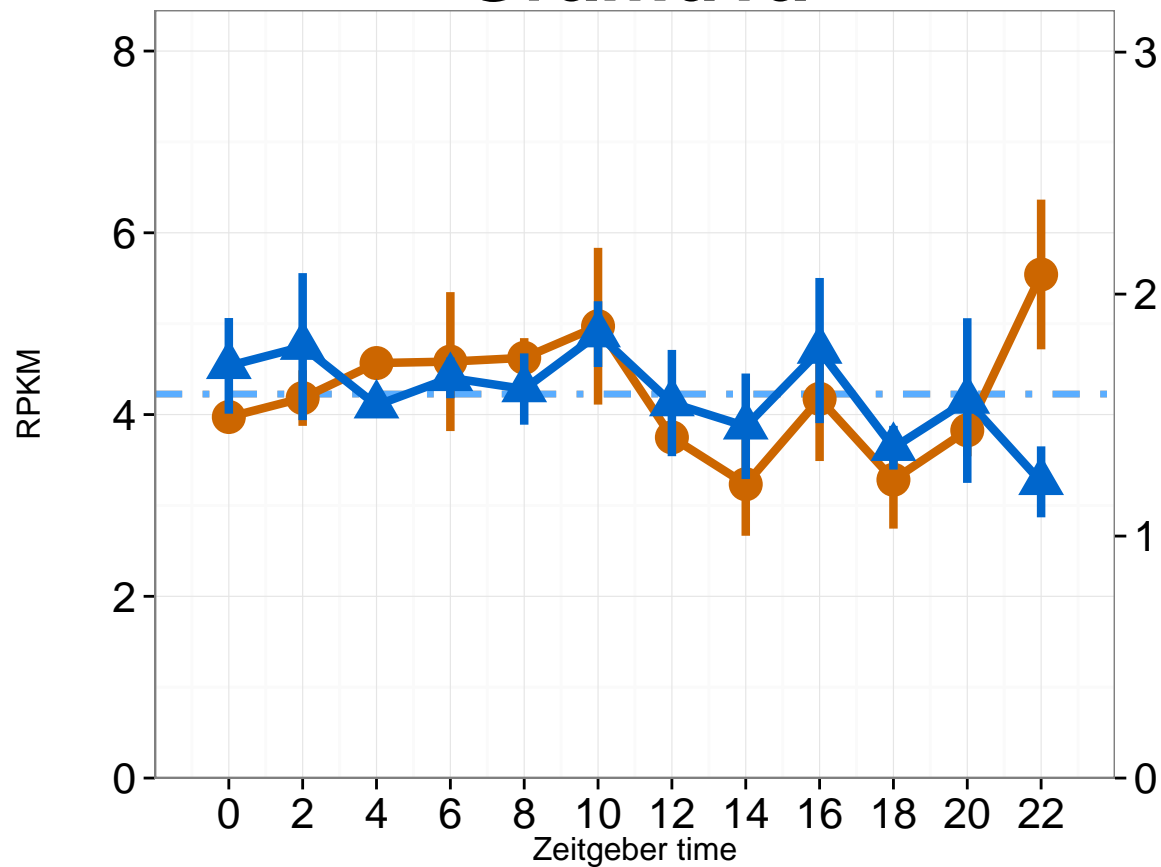

# Gramd1a

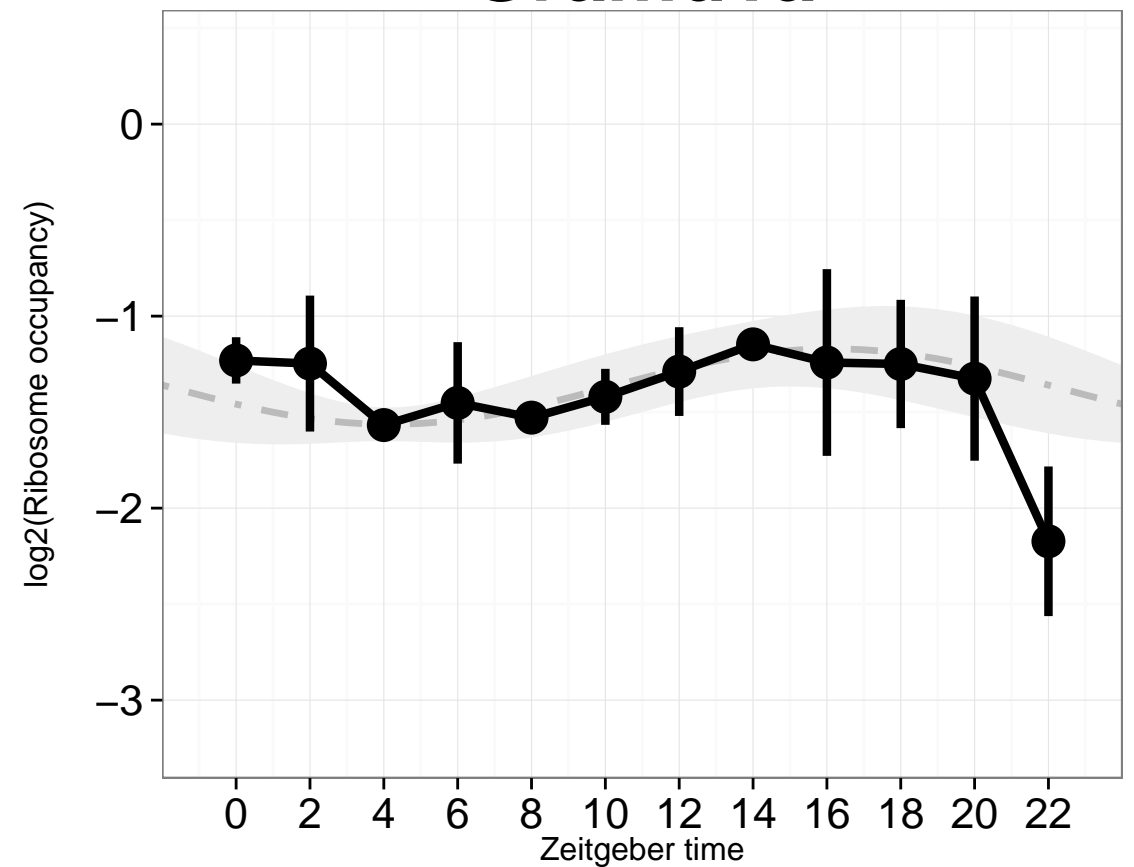

Supplement: SuppDataset_1.zip [file Gramd1a_set_A.pdf › Supplemental Dataset 1/A-mRNA_nonrhyth_translation_nonrhyth/Gramd1a_set_A.pdf]

# Gramd1b

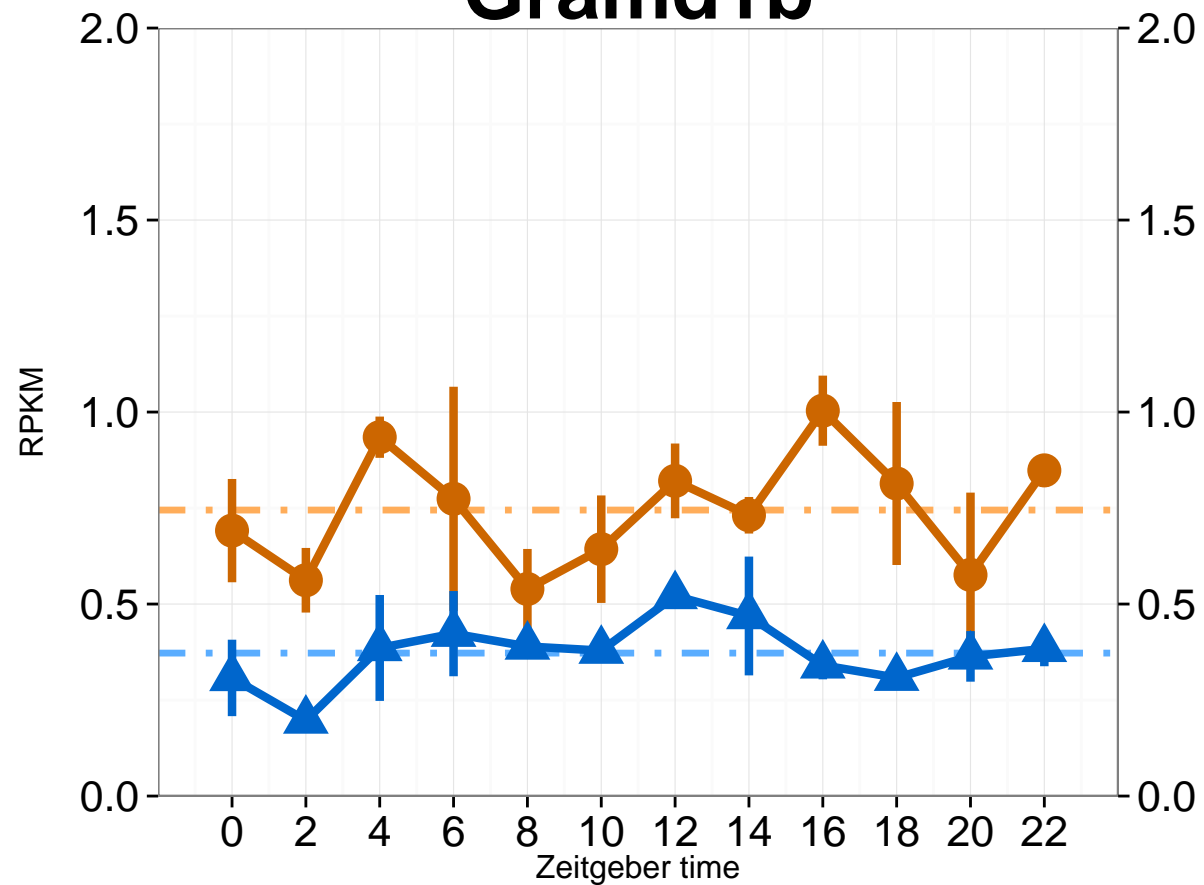

# Gramd1b

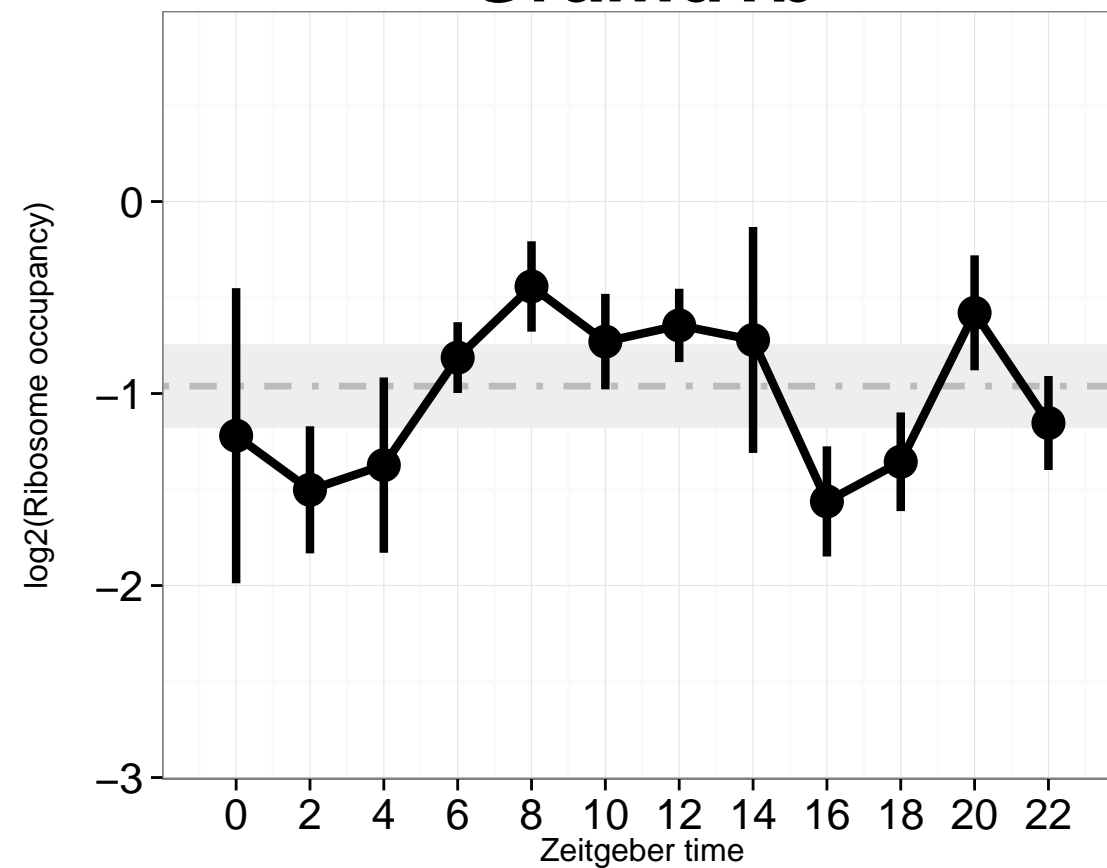

Supplement: SuppDataset_1.zip [file Gramd1b_set_A.pdf › Supplemental Dataset 1/A-mRNA_nonrhyth_translation_nonrhyth/Gramd1b_set_A.pdf]

# Gramd3

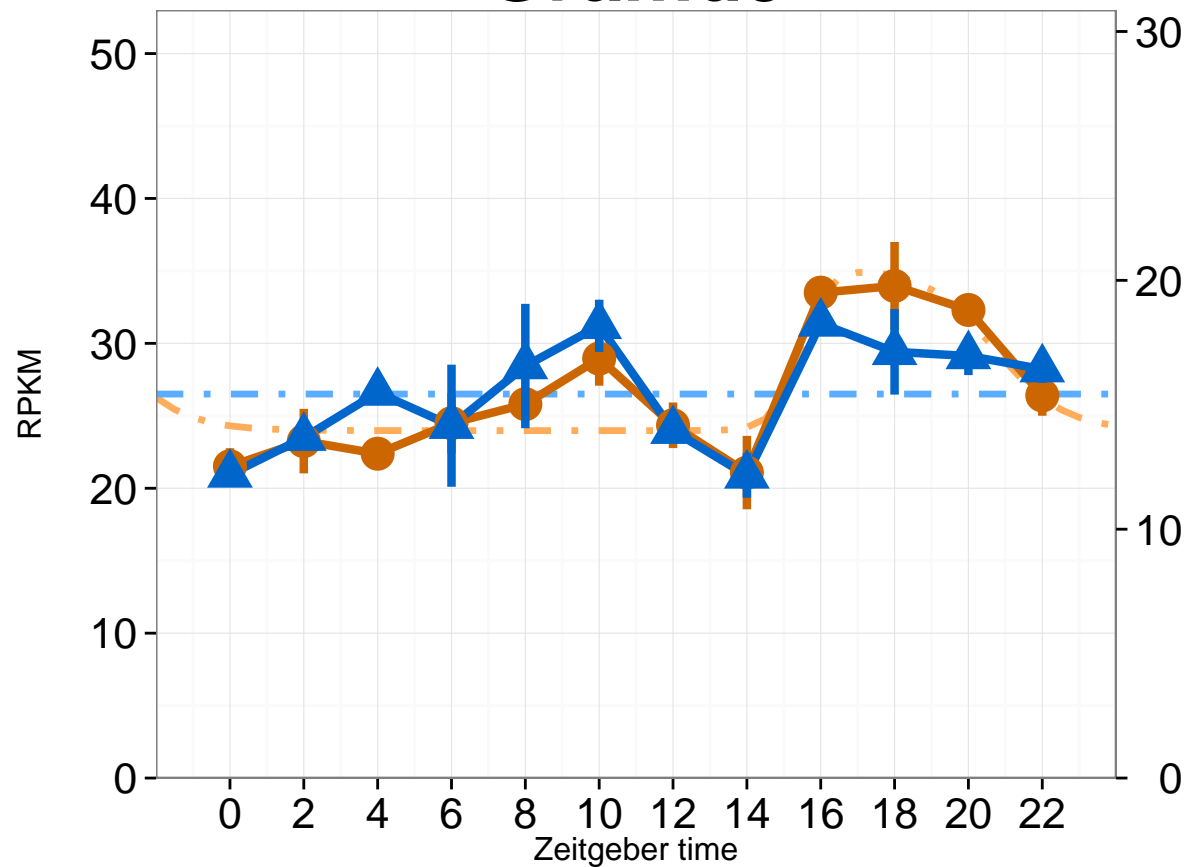

# Gramd3

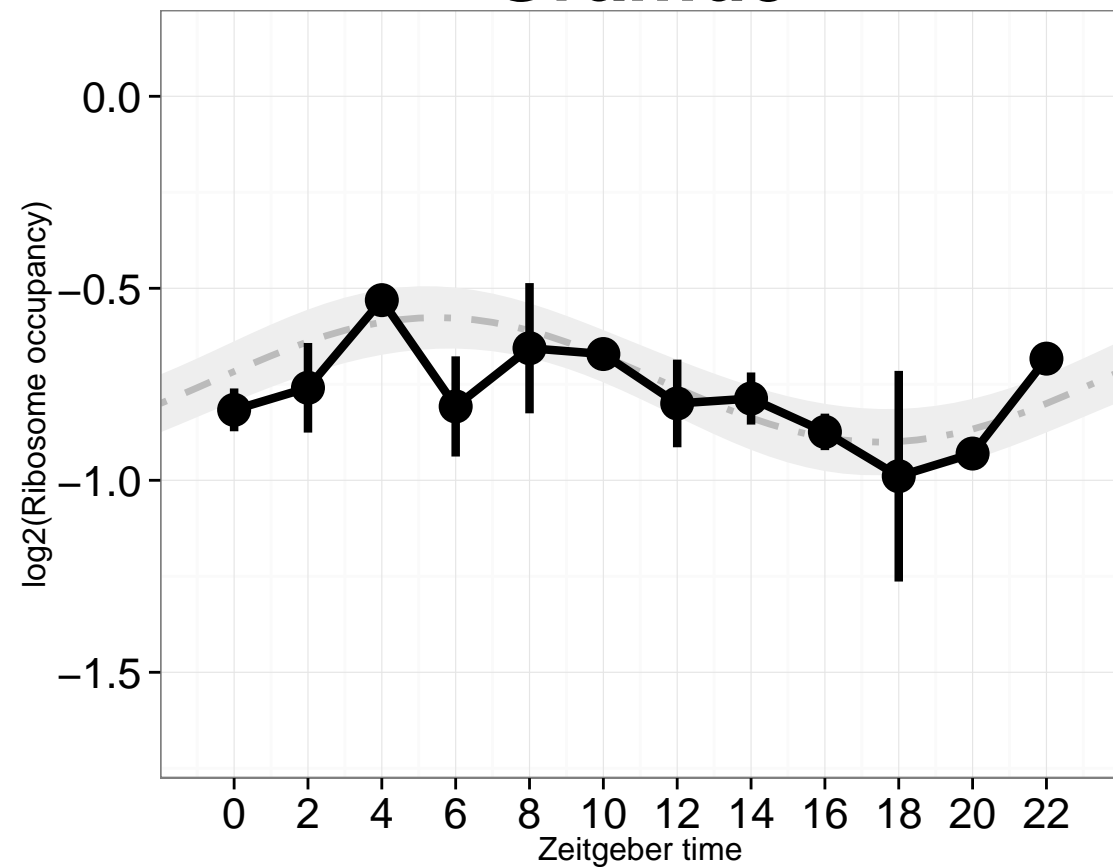

Supplement: SuppDataset_1.zip [file Gramd3_set_A.pdf › Supplemental Dataset 1/A-mRNA_nonrhyth_translation_nonrhyth/Gramd3_set_A.pdf]

# Grap

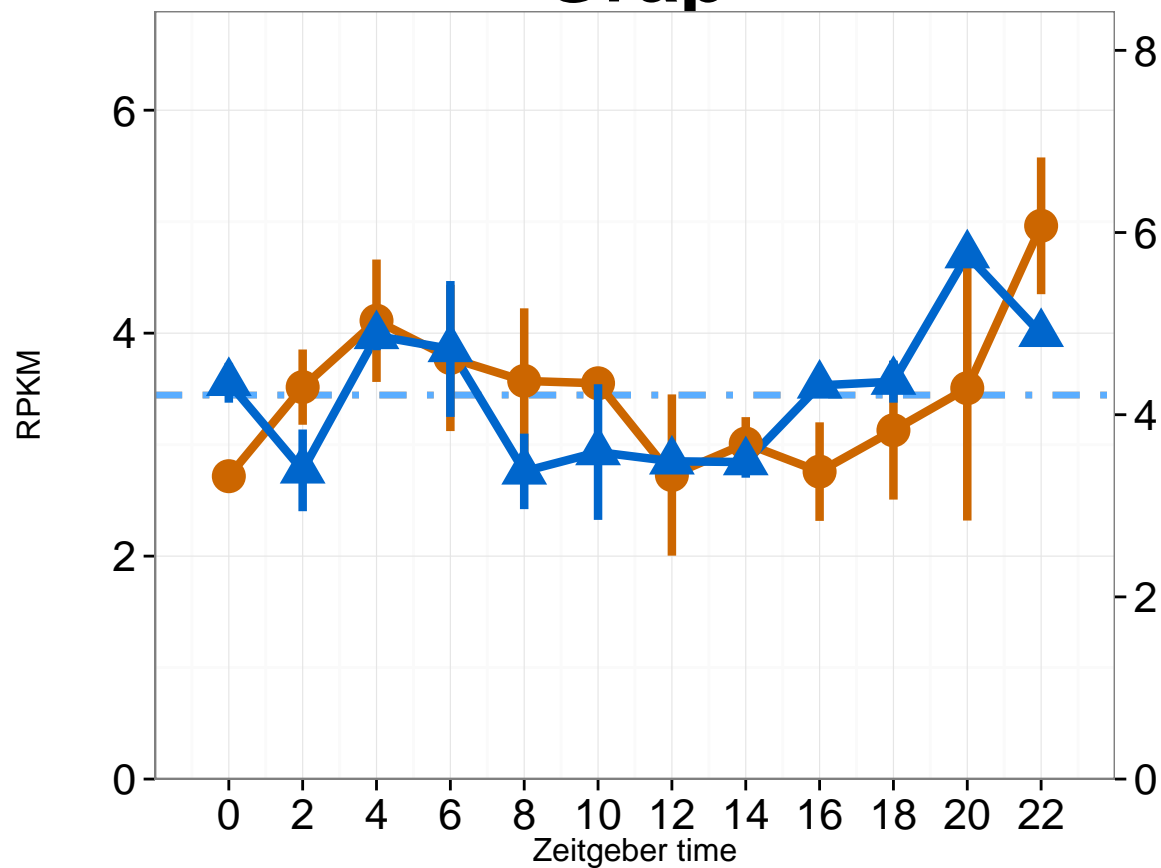

# Grap

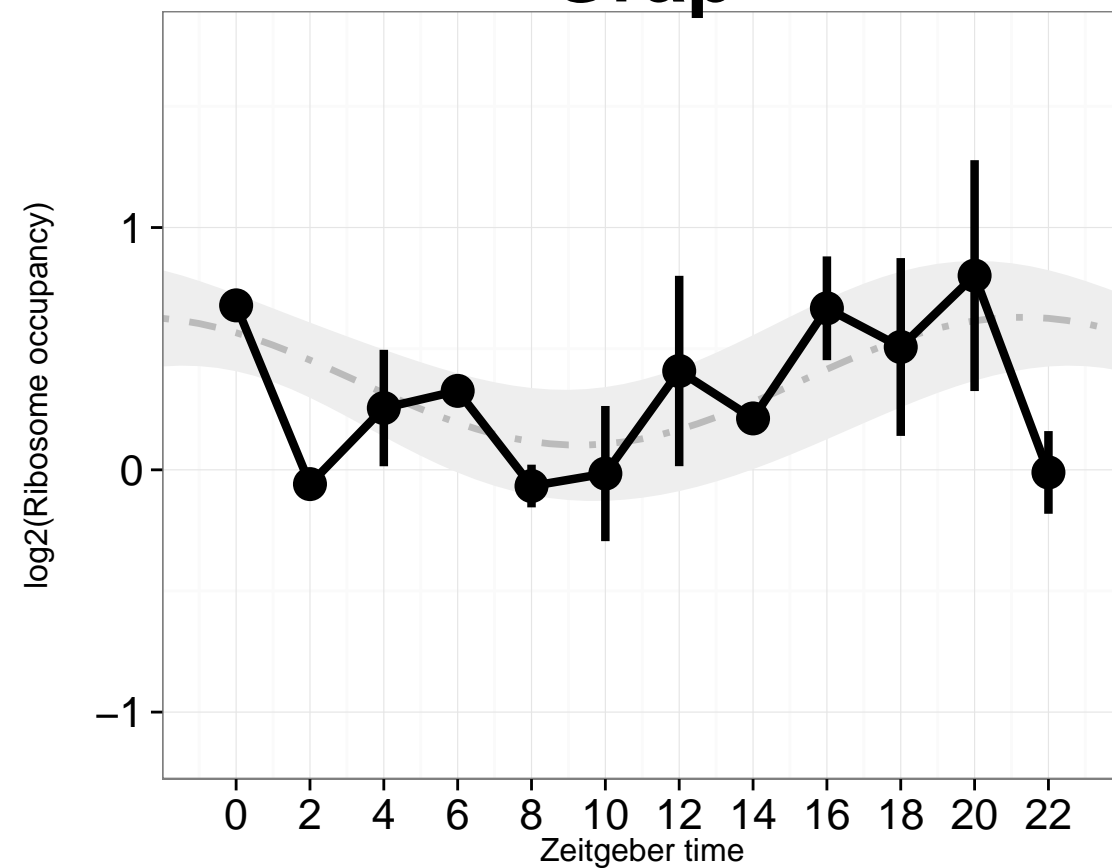

Supplement: SuppDataset_1.zip [file Grap_set_A.pdf › Supplemental Dataset 1/A-mRNA_nonrhyth_translation_nonrhyth/Grap_set_A.pdf]

## Grasp

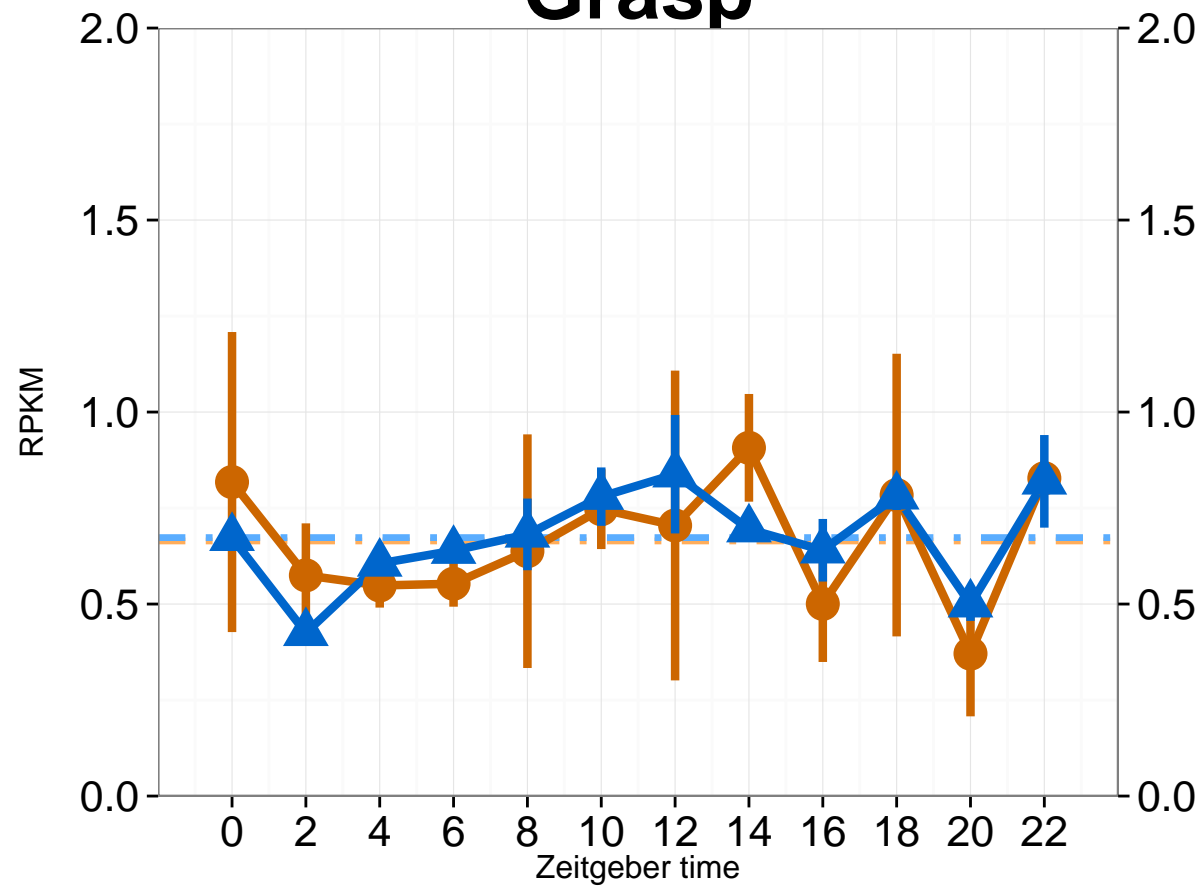

## Grasp

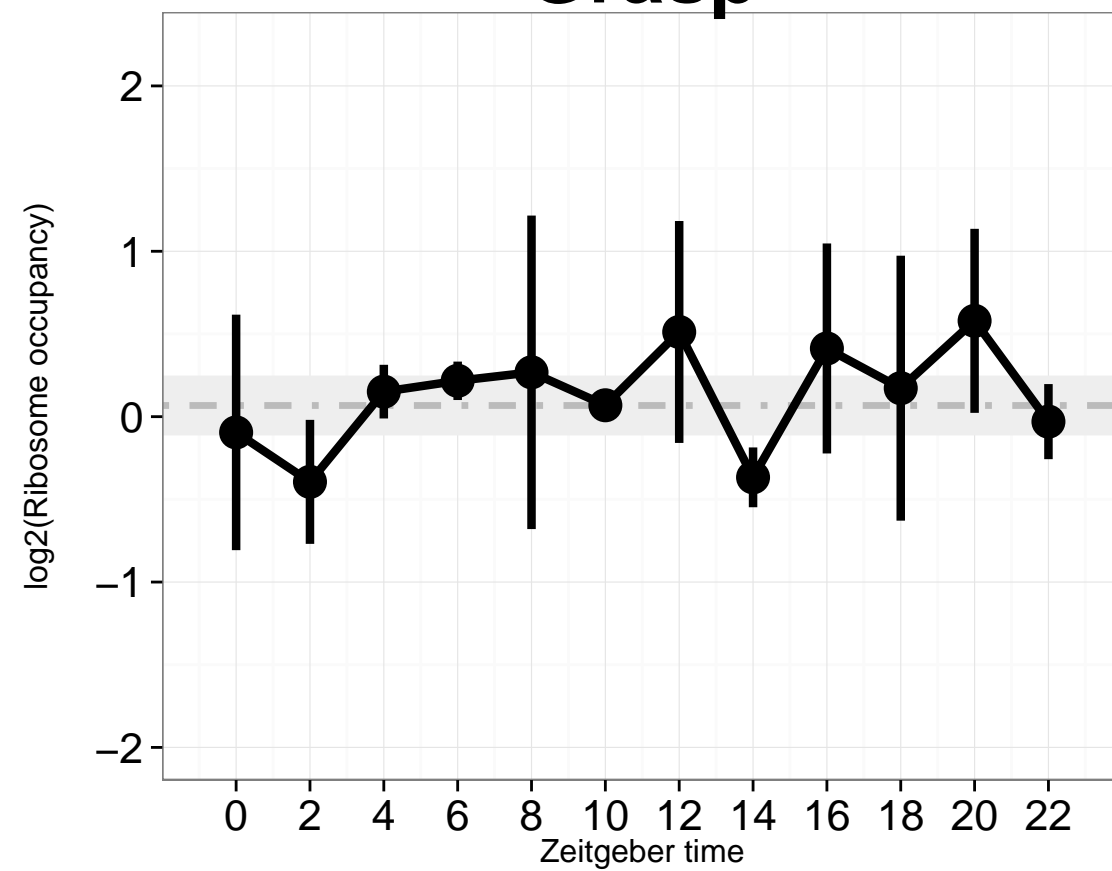

Supplement: SuppDataset_1.zip [file Grasp_set_A.pdf › Supplemental Dataset 1/A-mRNA_nonrhyth_translation_nonrhyth/Grasp_set_A.pdf]

## Grb10

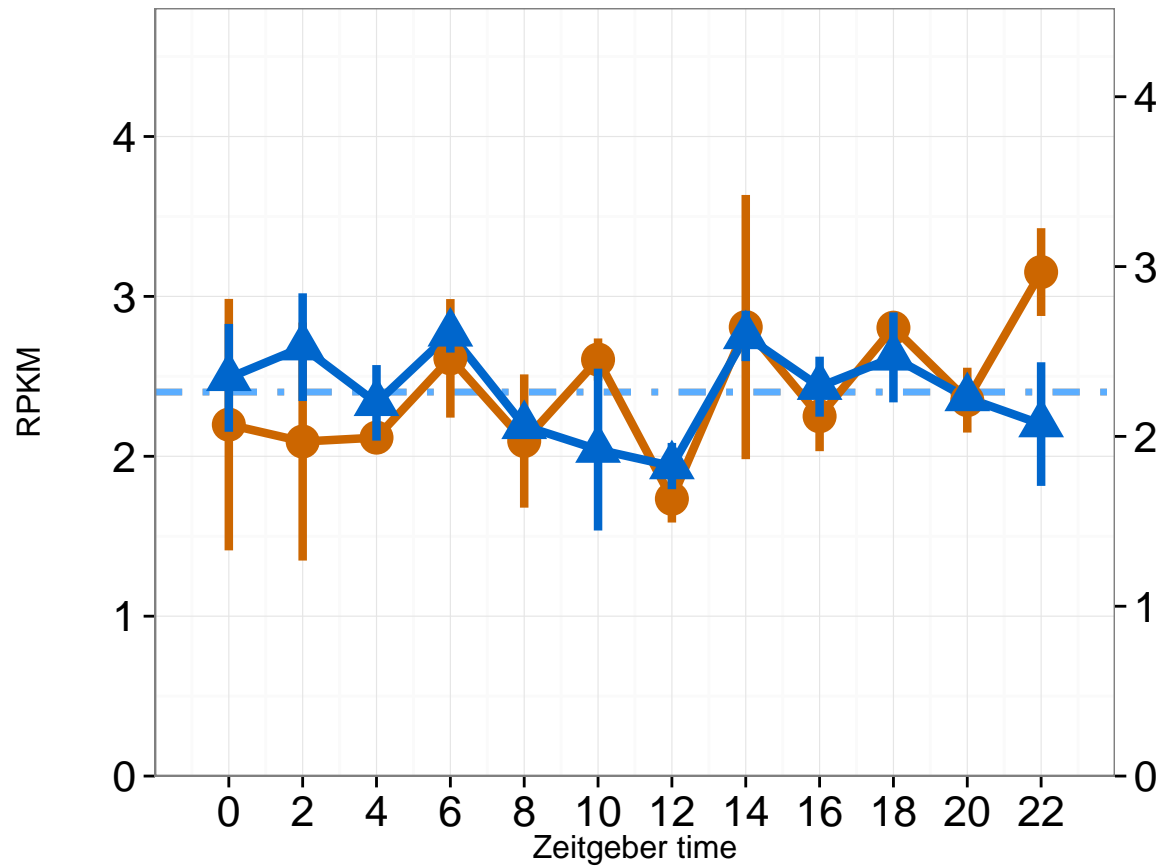

## Grb10

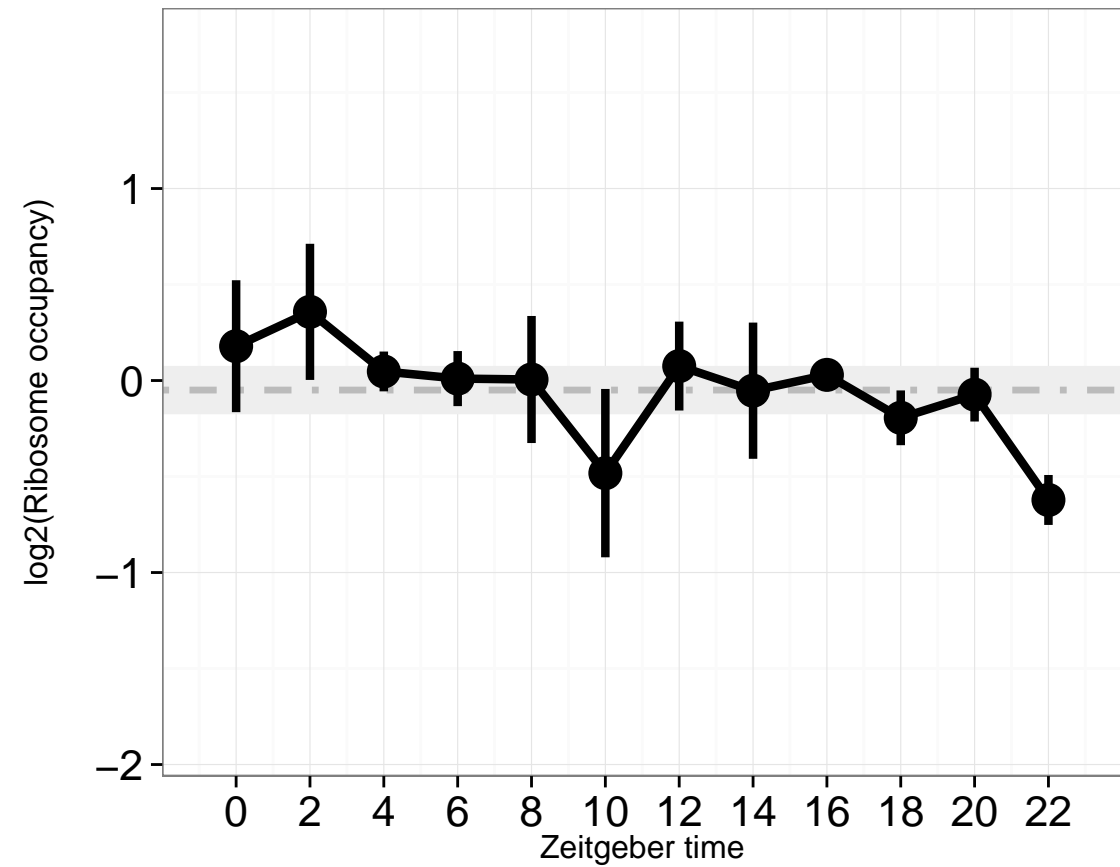

Supplement: SuppDataset_1.zip [file Grb10_set_A.pdf › Supplemental Dataset 1/A-mRNA_nonrhyth_translation_nonrhyth/Grb10_set_A.pdf]

## Grb2

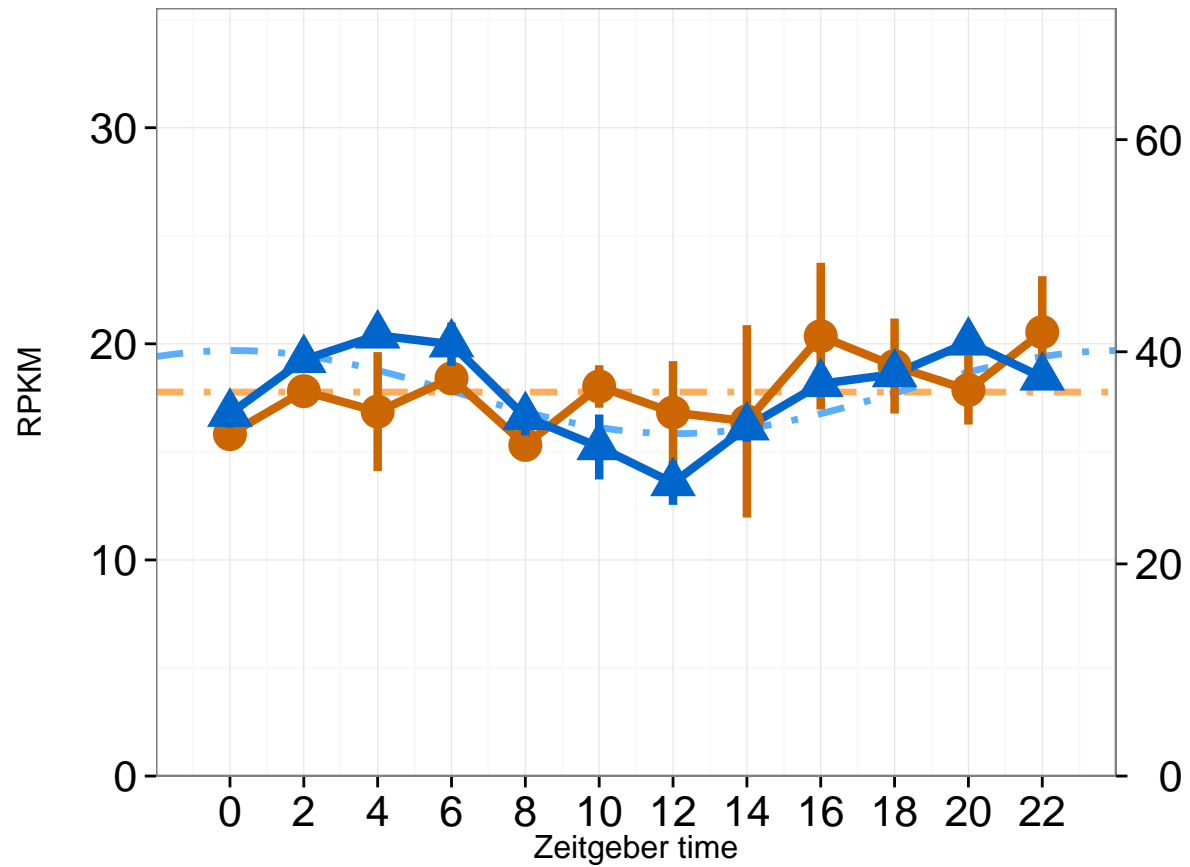

## Grb2

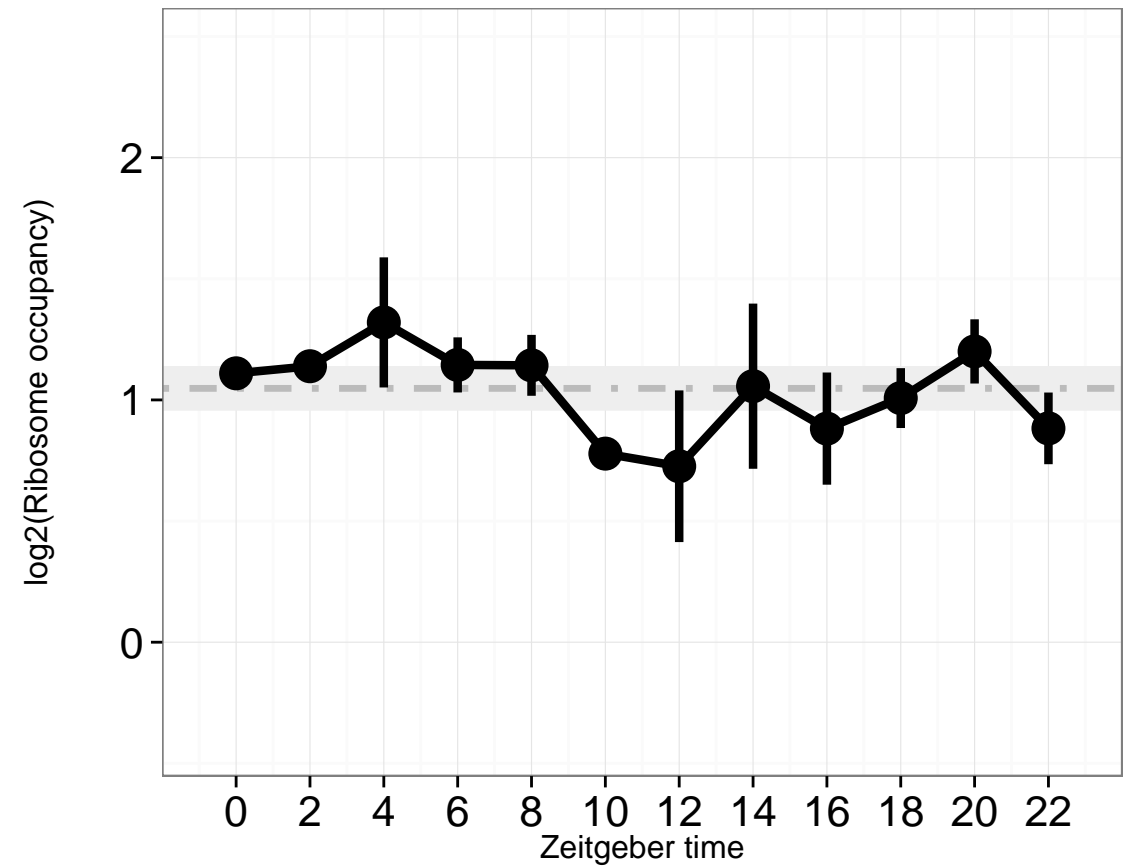

Supplement: SuppDataset_1.zip [file Grb2_set_A.pdf › Supplemental Dataset 1/A-mRNA_nonrhyth_translation_nonrhyth/Grb2_set_A.pdf]

# Grcc10

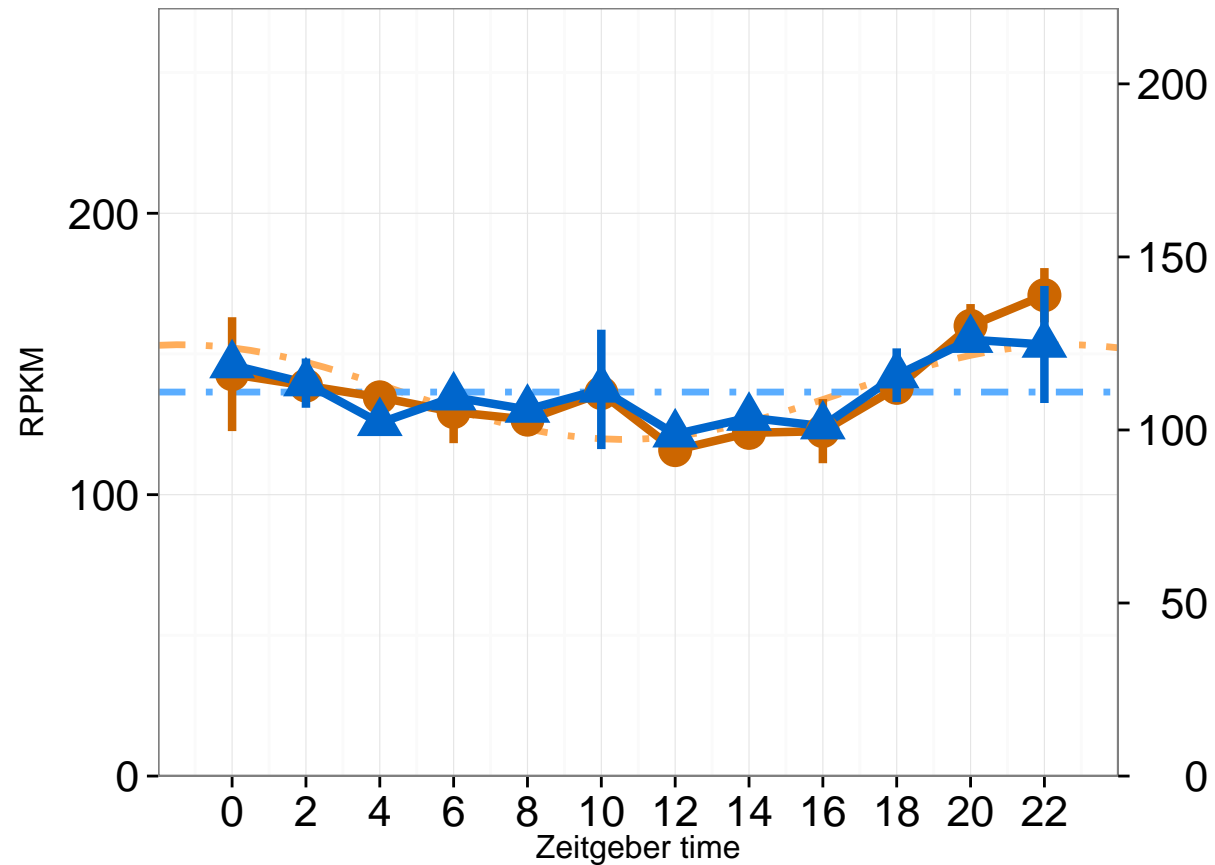

# Grcc10

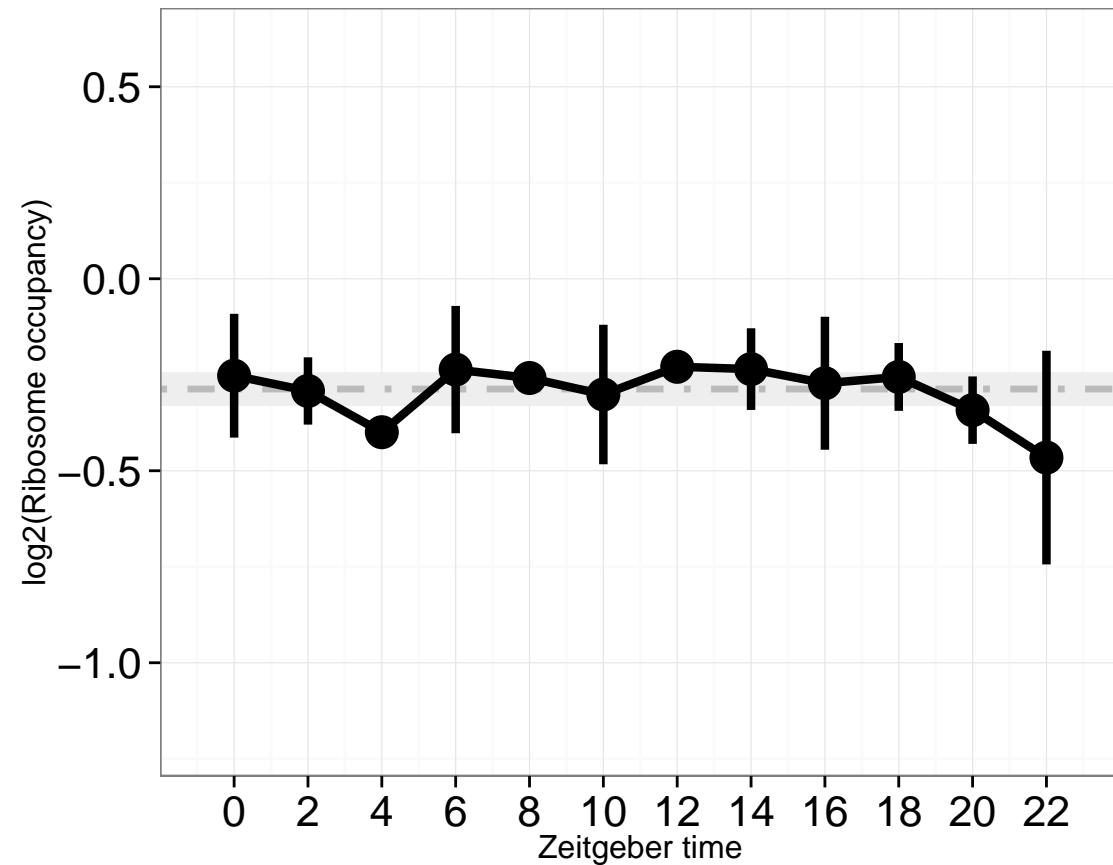

Supplement: SuppDataset_1.zip [file Grcc10_set_A.pdf › Supplemental Dataset 1/A-mRNA_nonrhyth_translation_nonrhyth/Grcc10_set_A.pdf]

## Greb1I

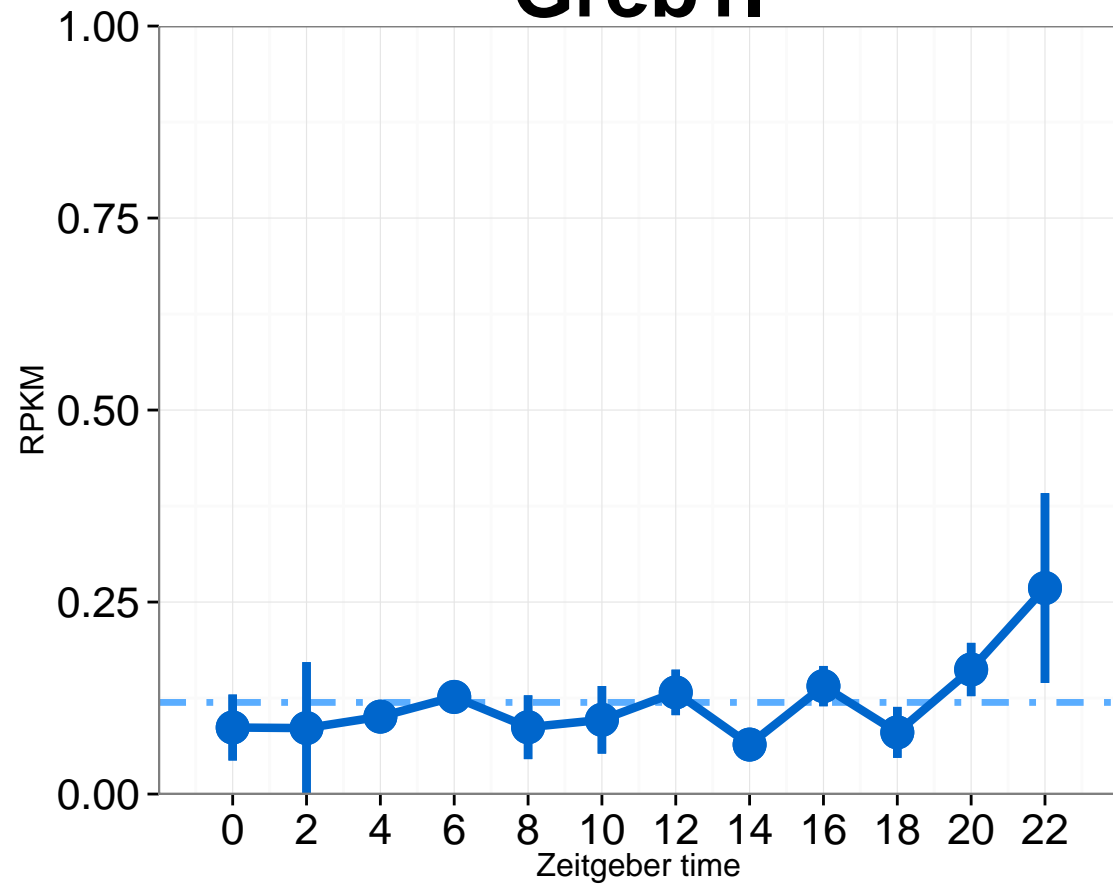

## Greb1I log2(Ribosome occupancy

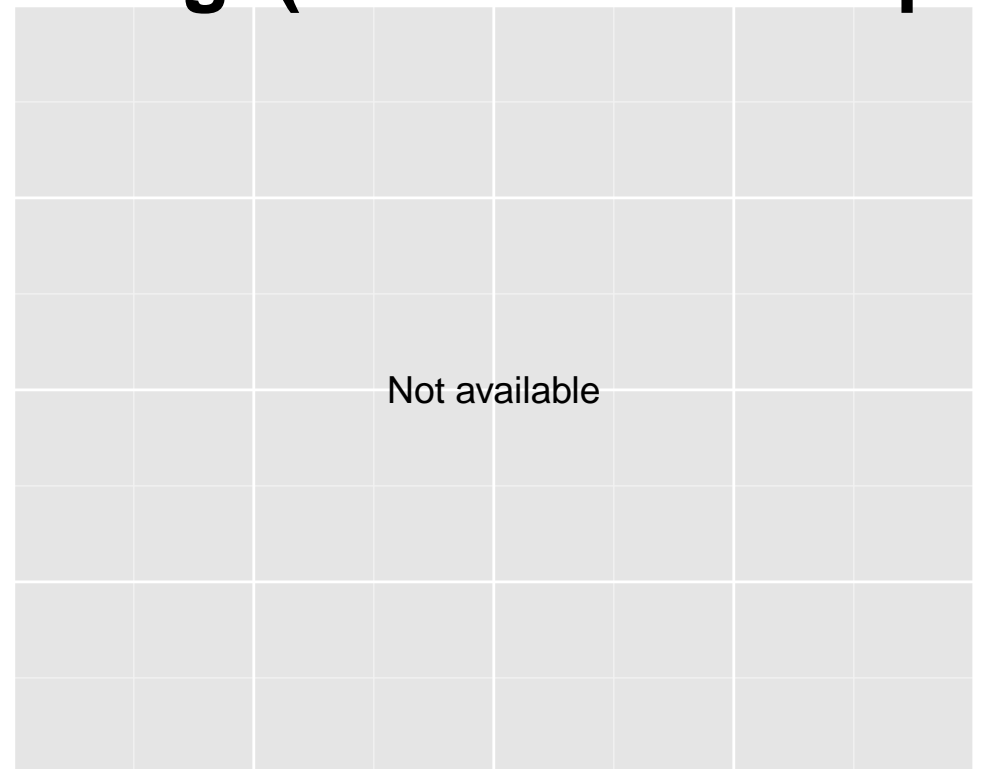

Supplement: SuppDataset_1.zip [file Greb1l_set_A.pdf › Supplemental Dataset 1/A-mRNA_nonrhyth_translation_nonrhyth/Greb1l_set_A.pdf]

## Grhl1

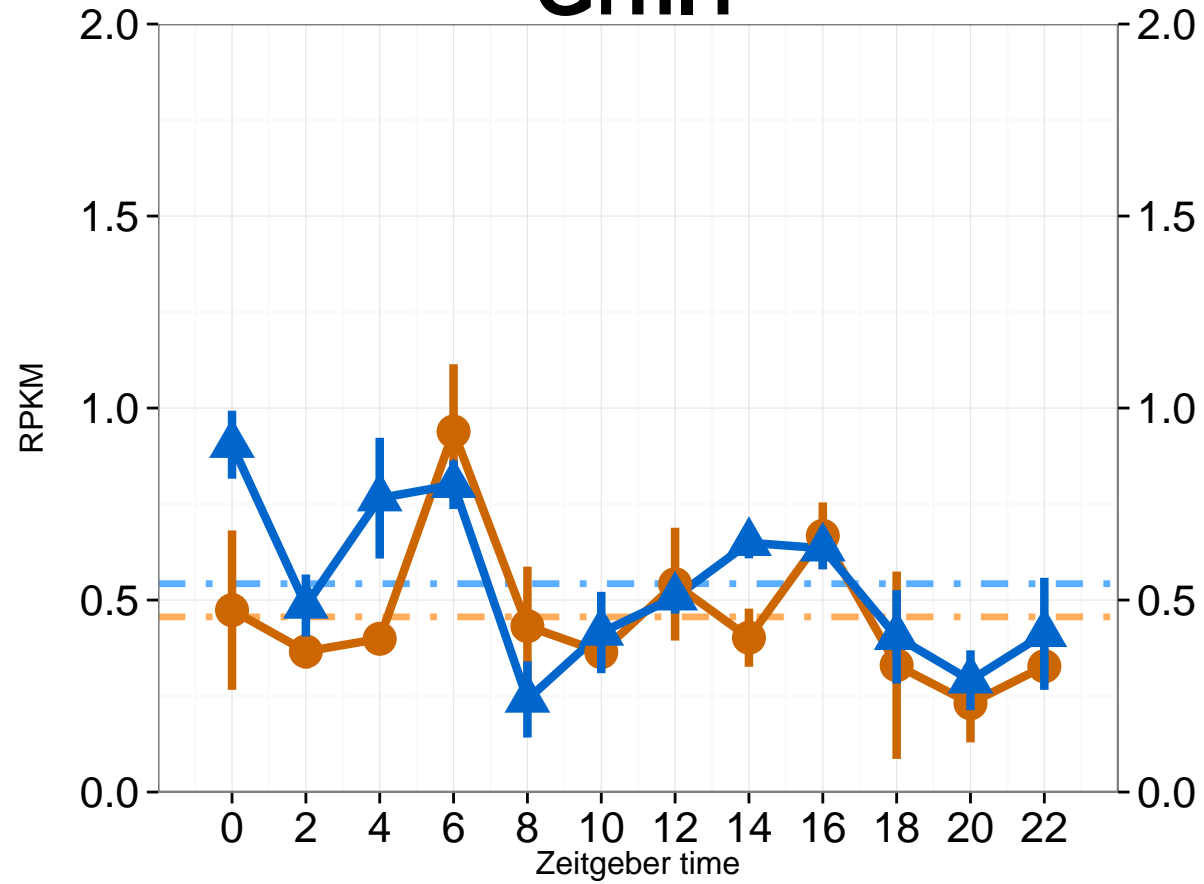

## Grhl1

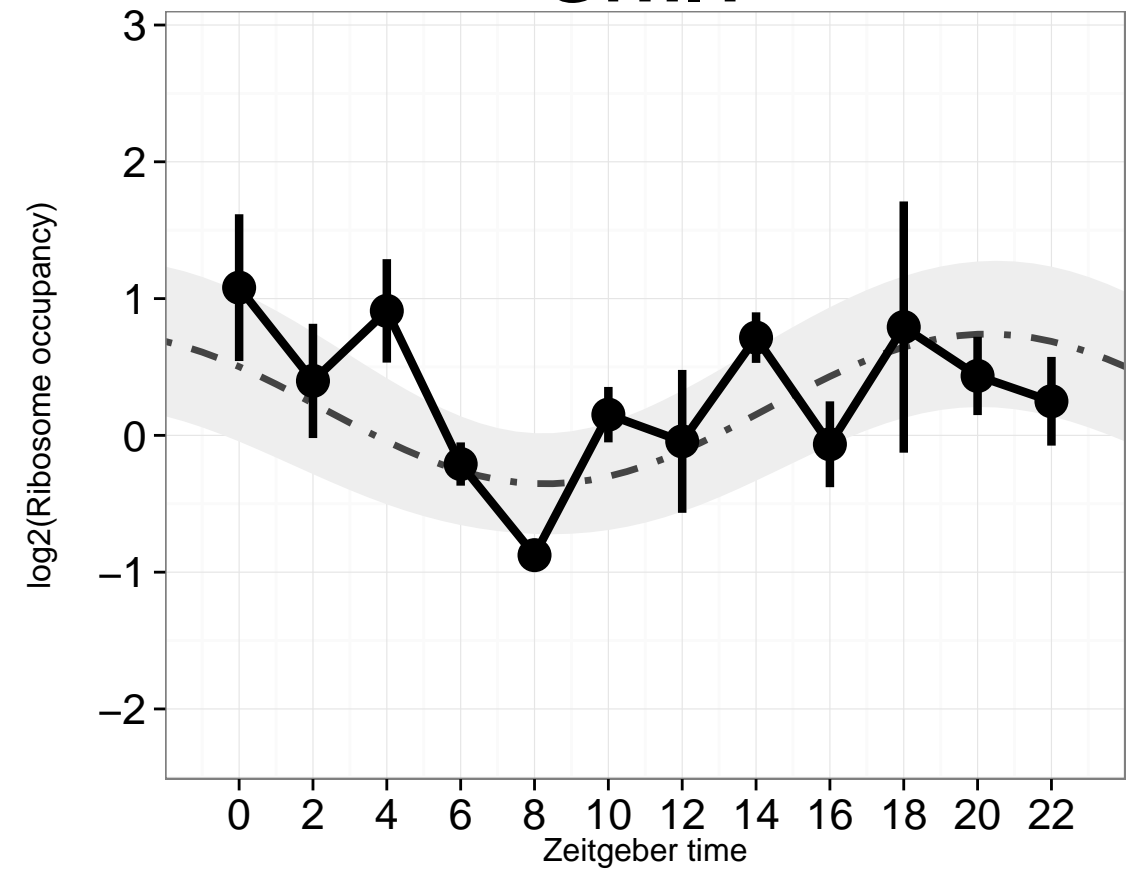

Supplement: SuppDataset_1.zip [file Grhl1_set_A.pdf › Supplemental Dataset 1/A-mRNA_nonrhyth_translation_nonrhyth/Grhl1_set_A.pdf]

## Grhpr

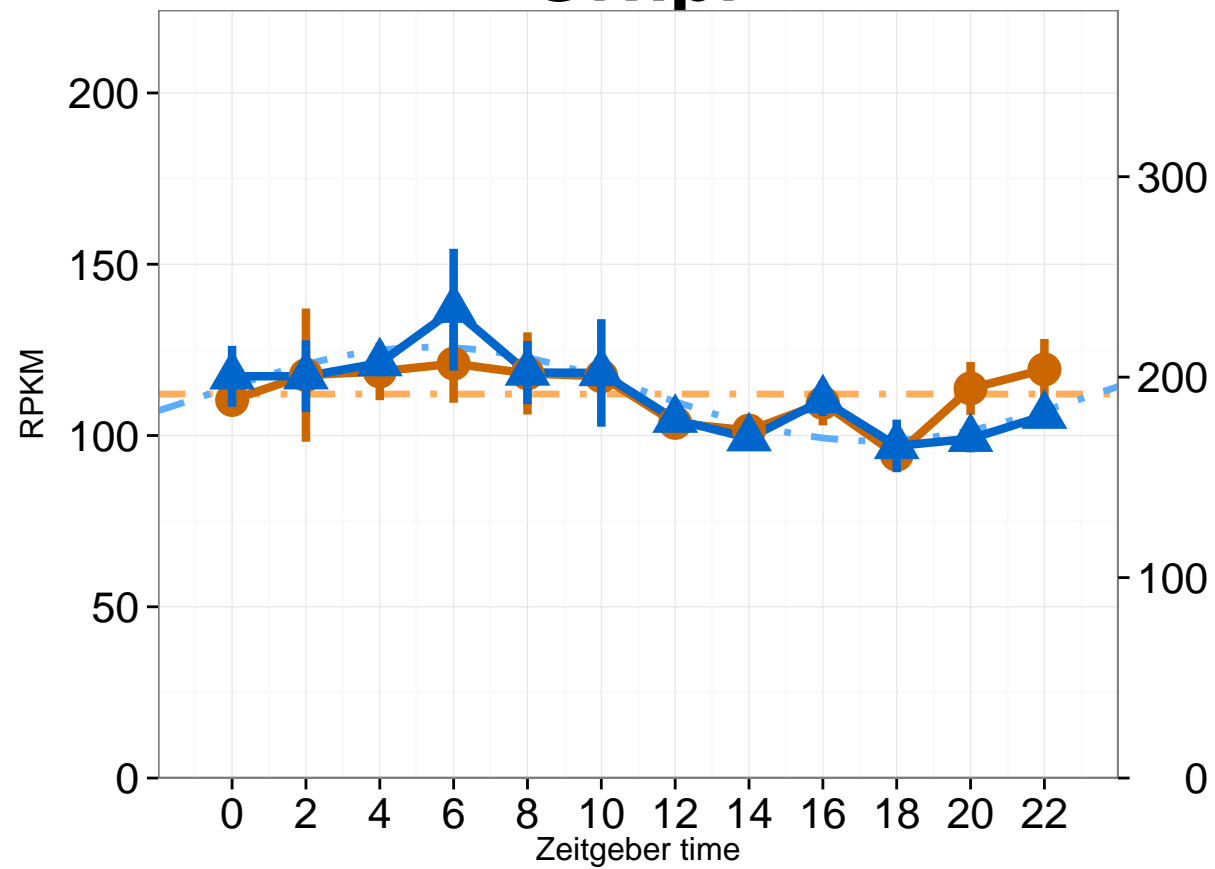

## Grhpr

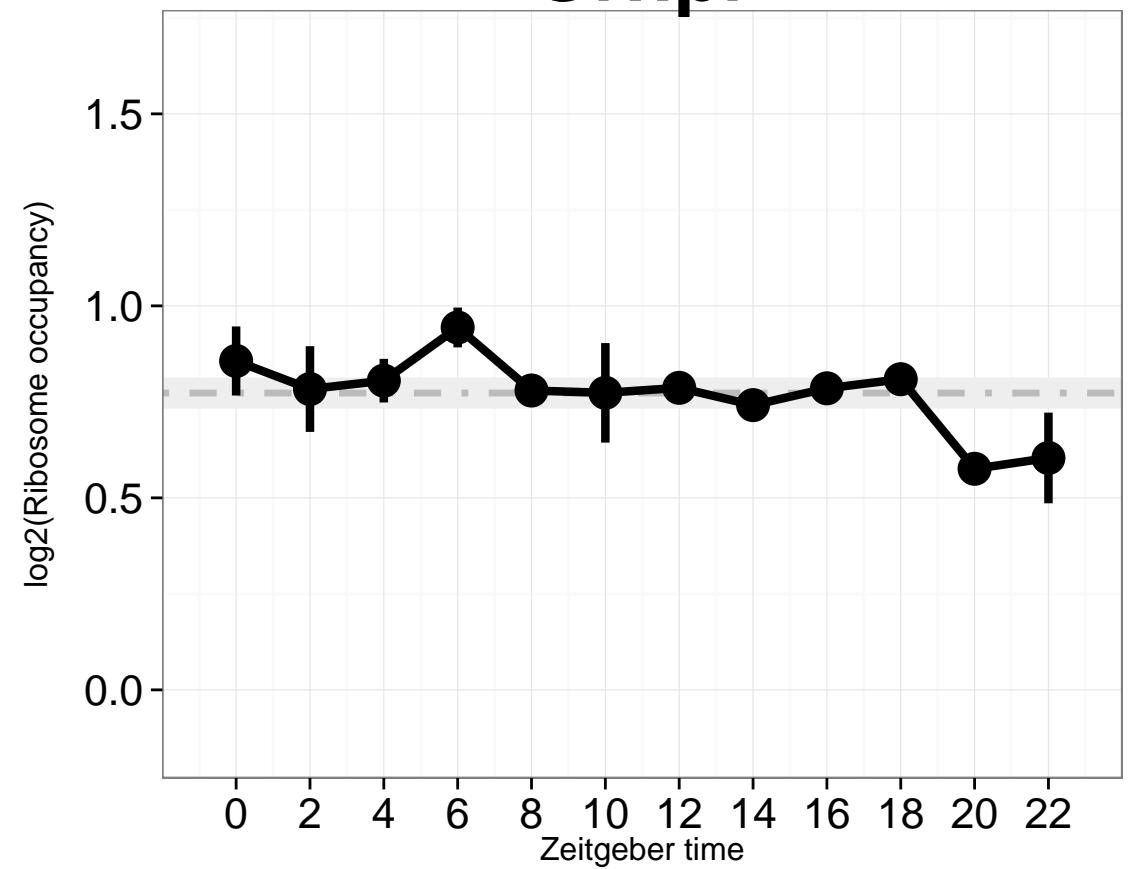

Supplement: SuppDataset_1.zip [file Grhpr_set_A.pdf › Supplemental Dataset 1/A-mRNA_nonrhyth_translation_nonrhyth/Grhpr_set_A.pdf]

## Gria3

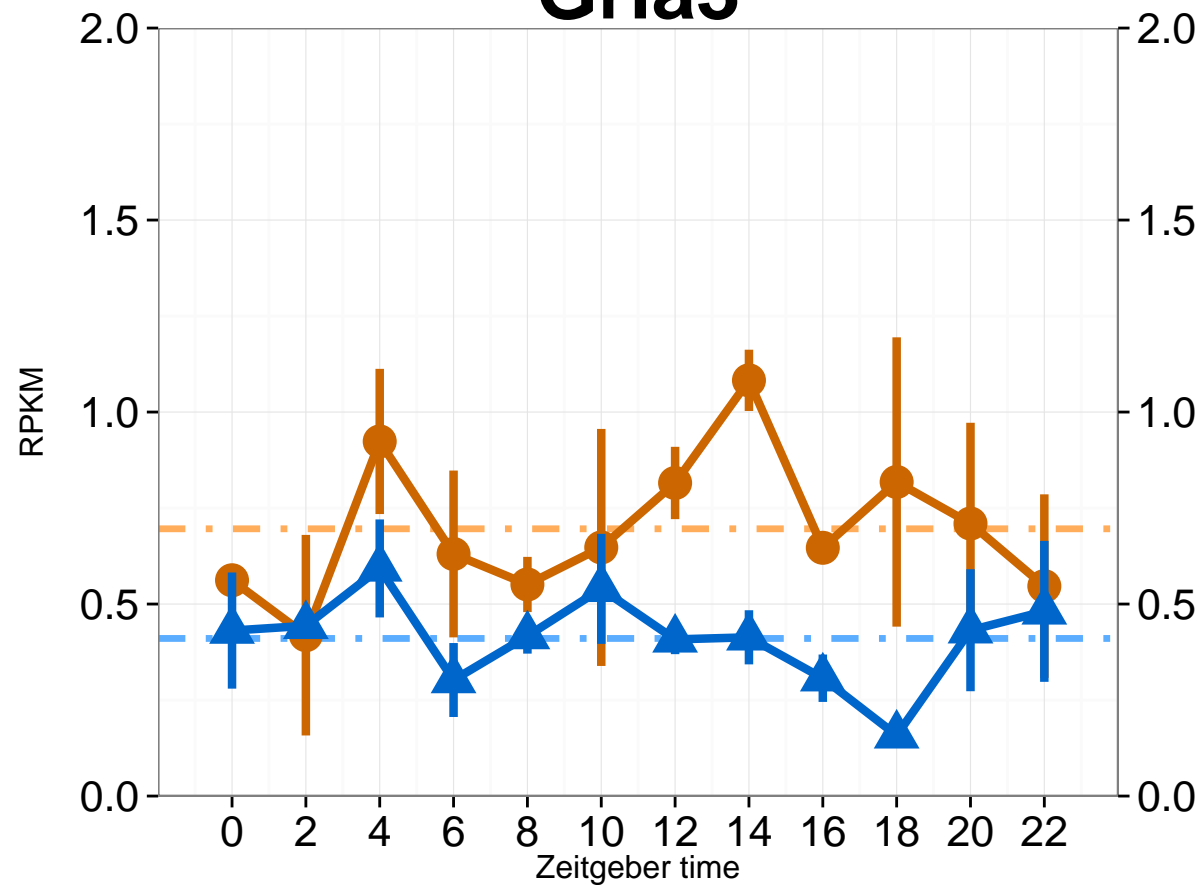

## Gria3

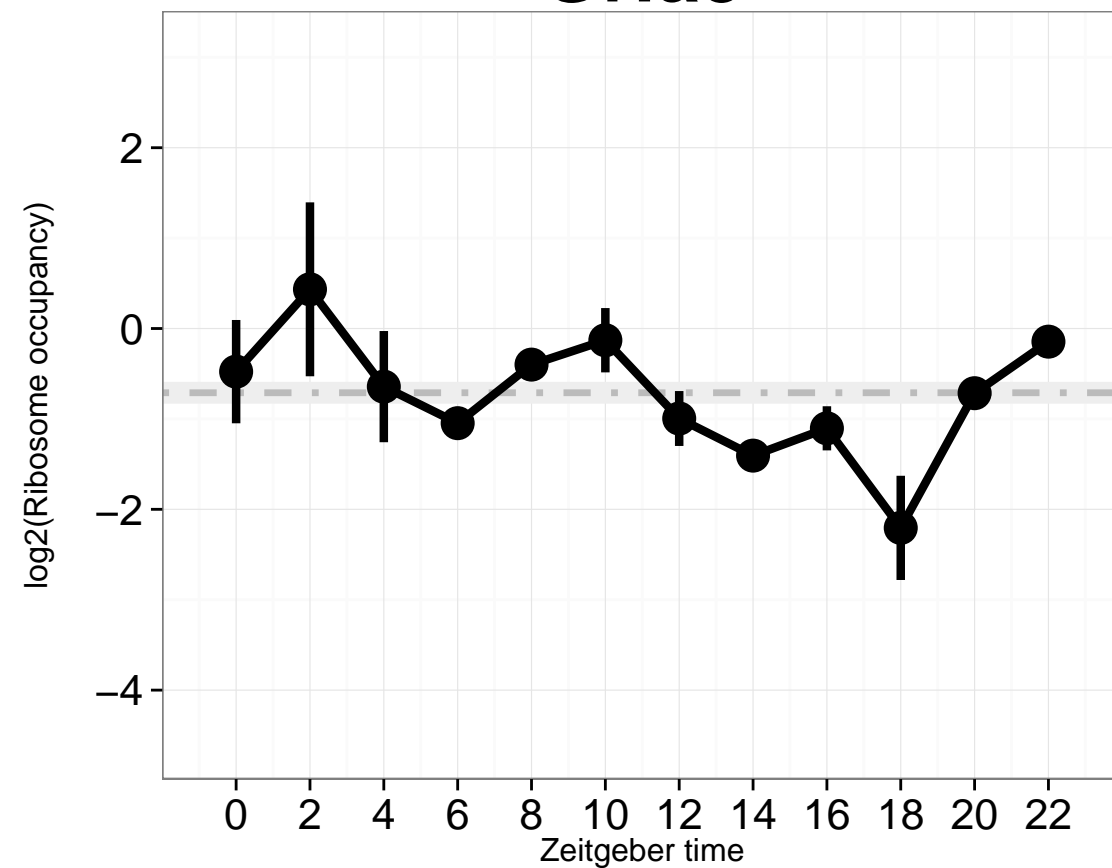

Supplement: SuppDataset_1.zip [file Gria3_set_A.pdf › Supplemental Dataset 1/A-mRNA_nonrhyth_translation_nonrhyth/Gria3_set_A.pdf]

# Grid1

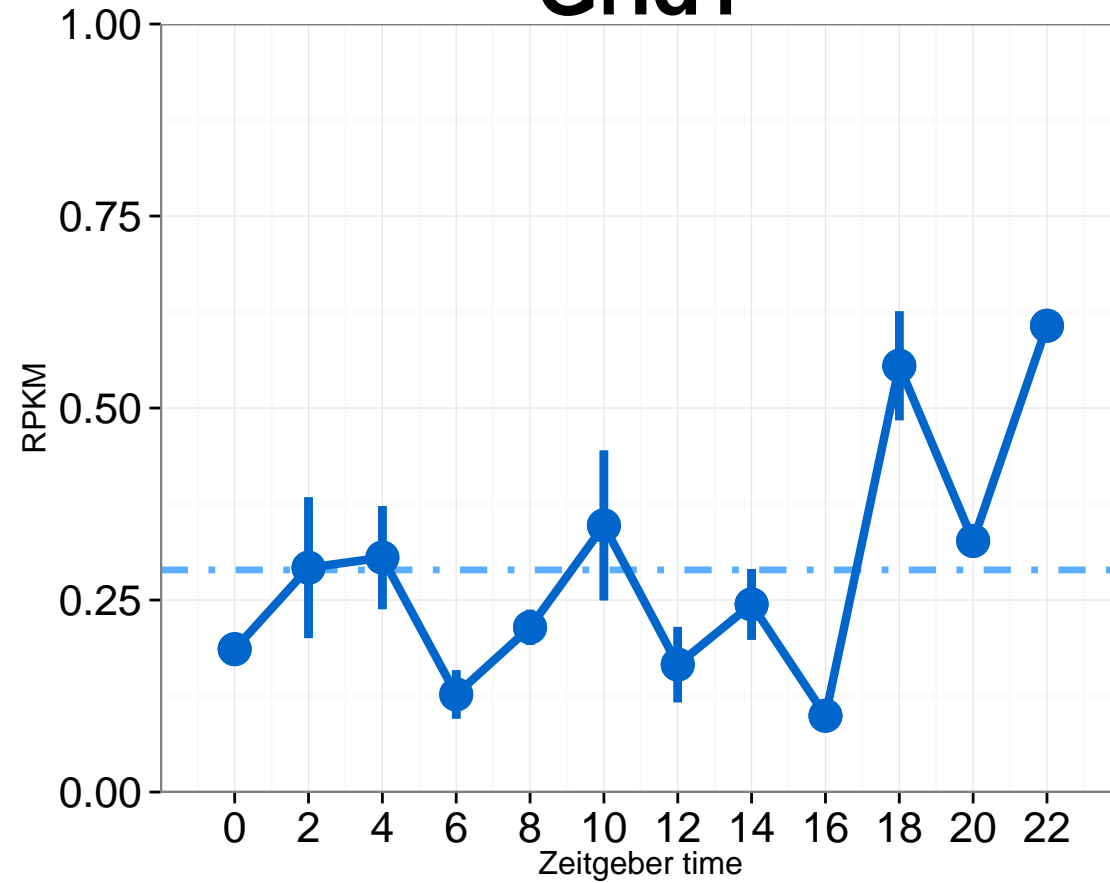

# Grid1 log2(Ribosome occupancy)

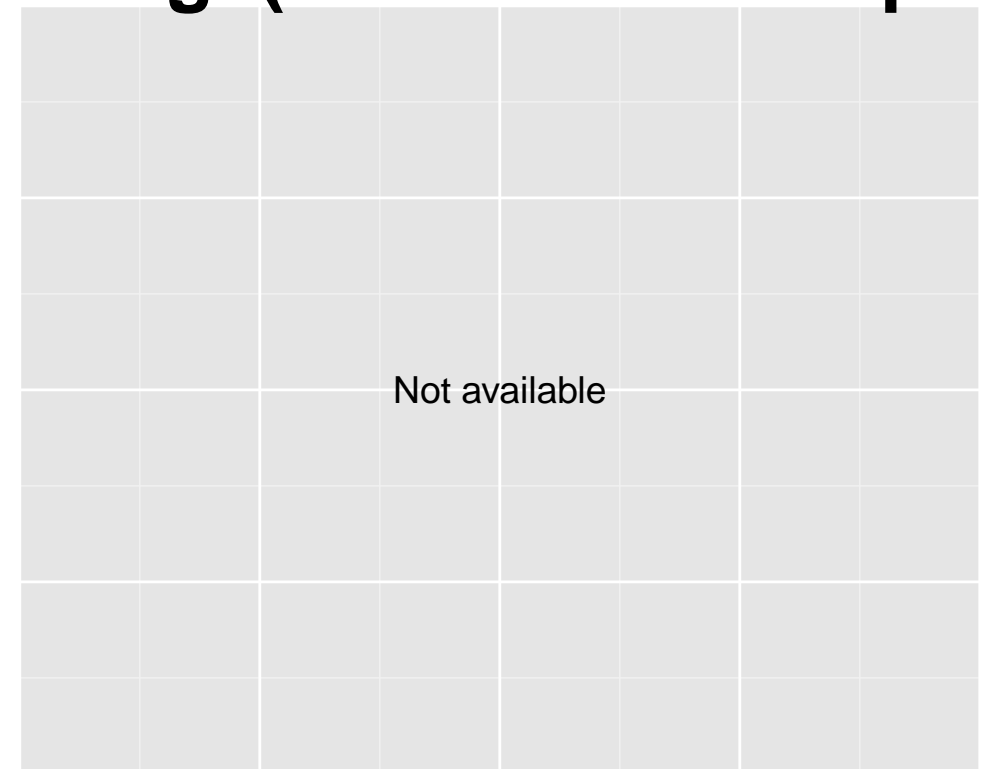

Supplement: SuppDataset_1.zip [file Grid1_set_A.pdf › Supplemental Dataset 1/A-mRNA_nonrhyth_translation_nonrhyth/Grid1_set_A.pdf]

## Grik5

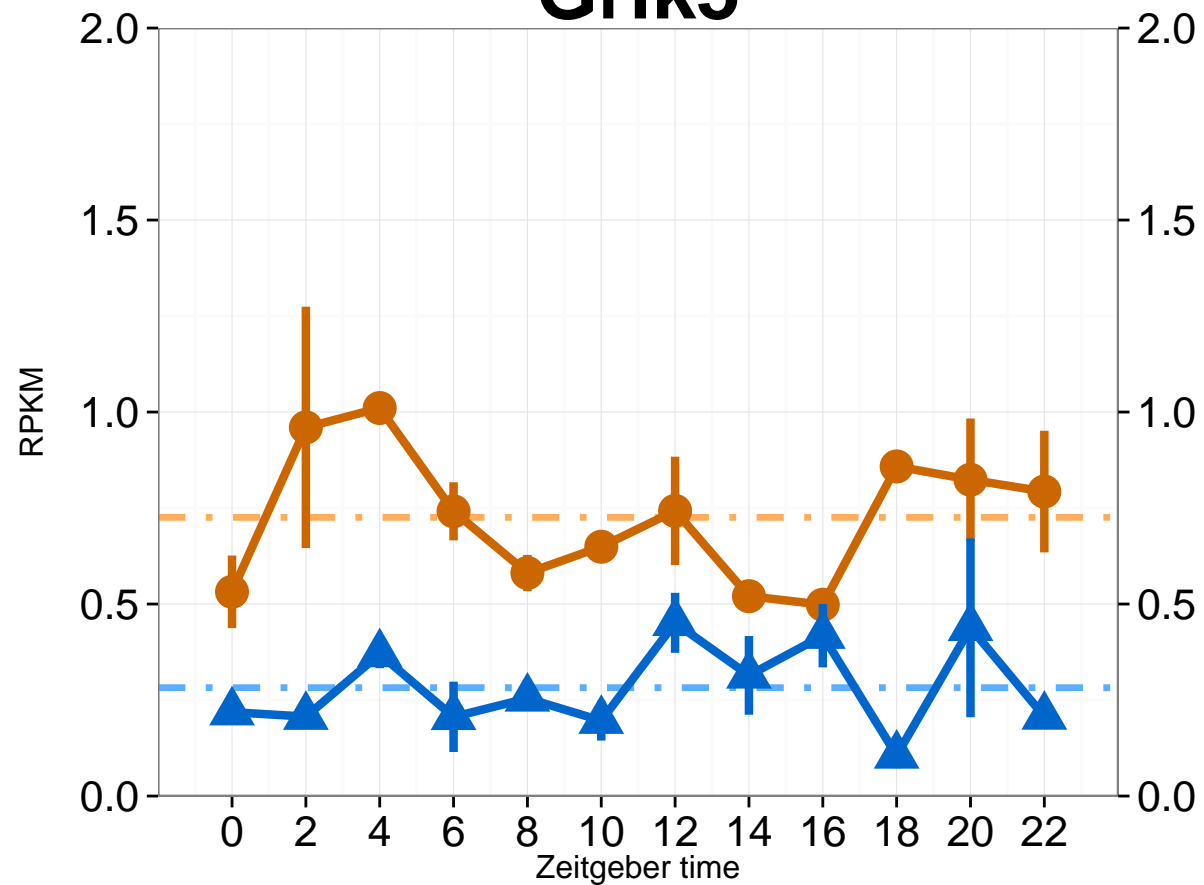

## Grik5

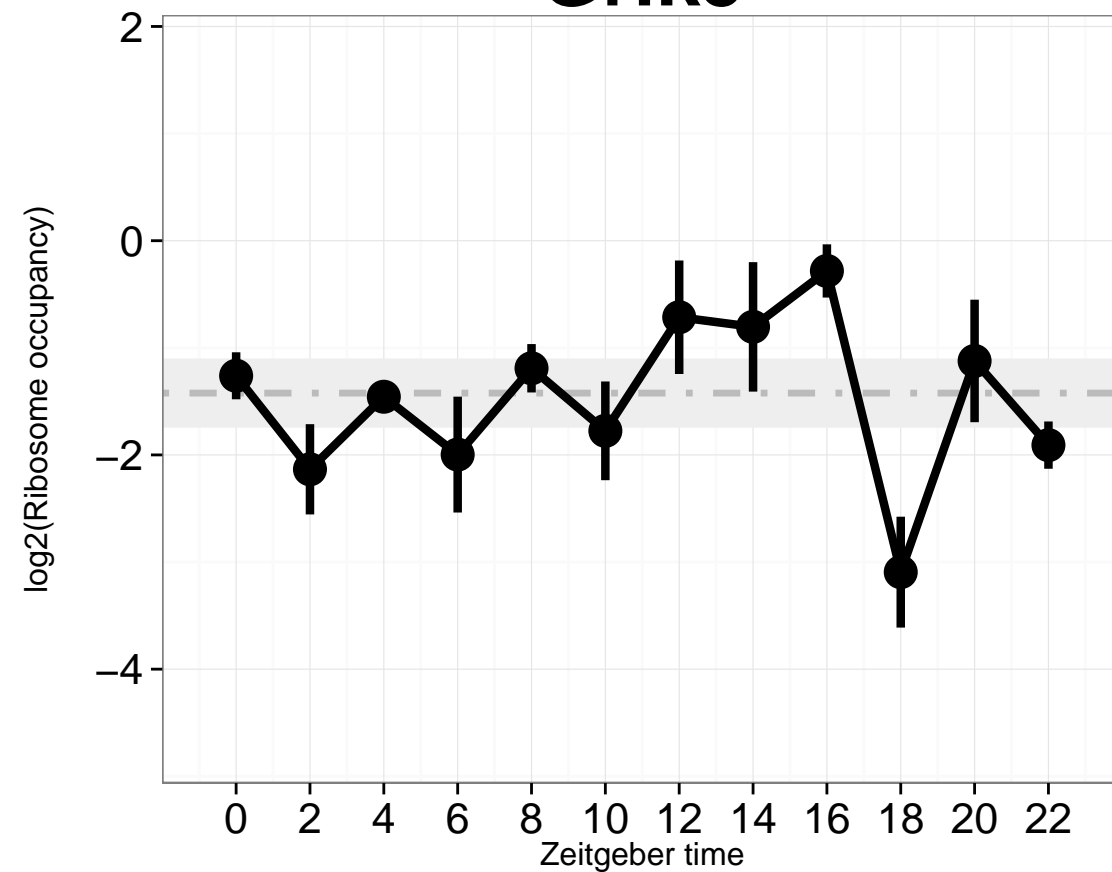

Supplement: SuppDataset_1.zip [file Grik5_set_A.pdf › Supplemental Dataset 1/A-mRNA_nonrhyth_translation_nonrhyth/Grik5_set_A.pdf]

## Grina

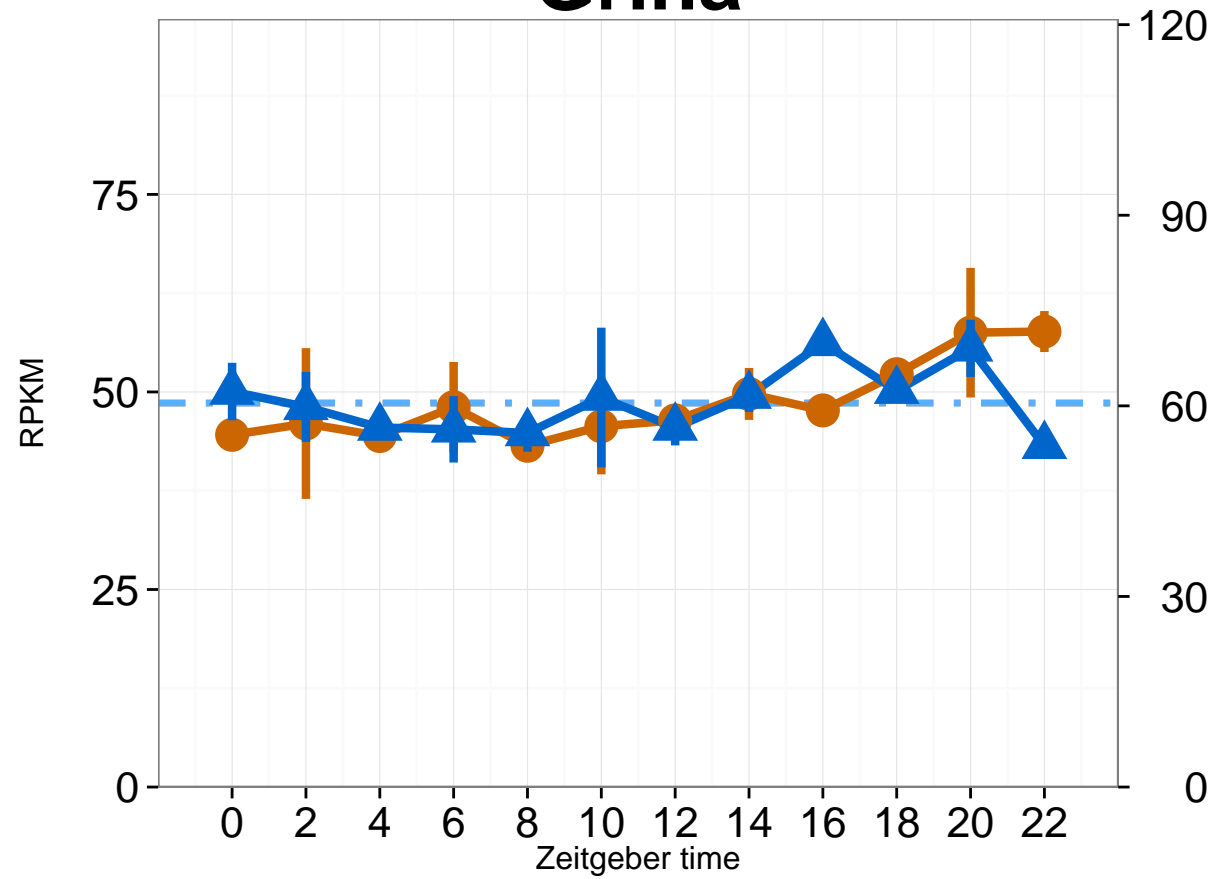

## Grina

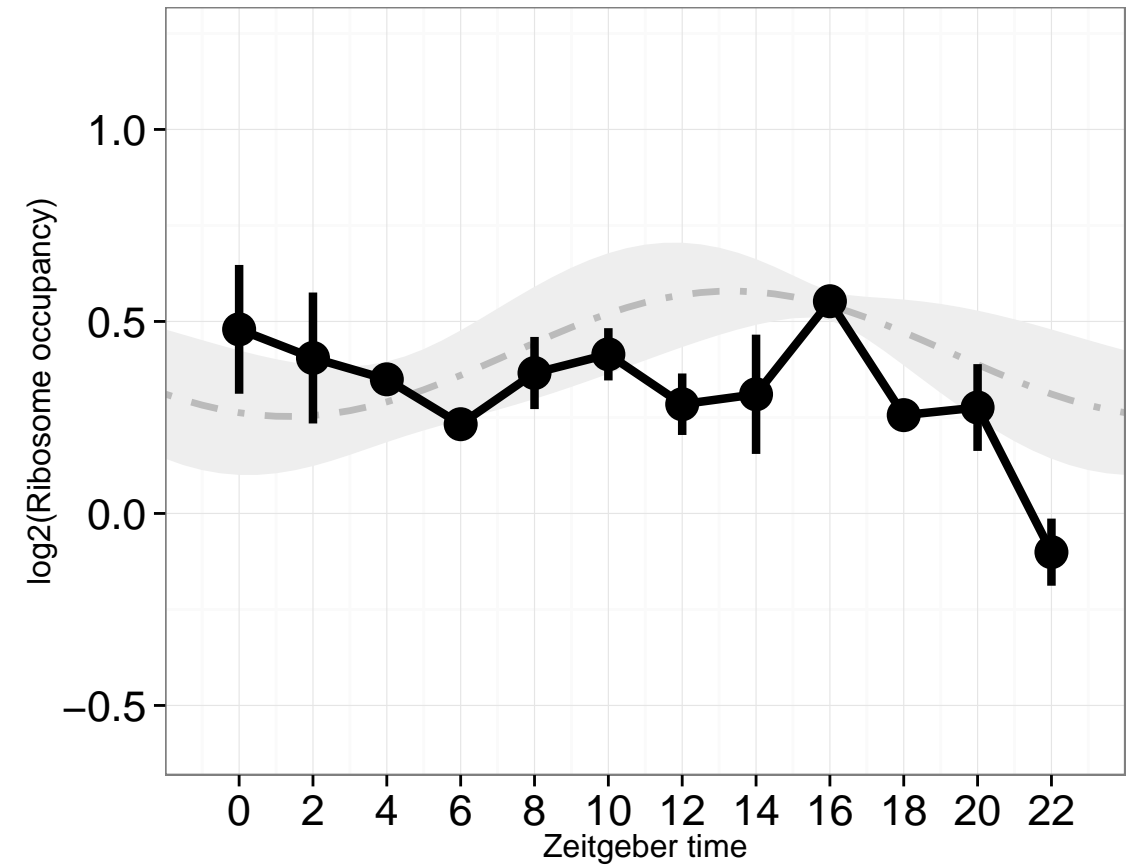

Supplement: SuppDataset_1.zip [file Grina_set_A.pdf › Supplemental Dataset 1/A-mRNA_nonrhyth_translation_nonrhyth/Grina_set_A.pdf]

# Gripap1

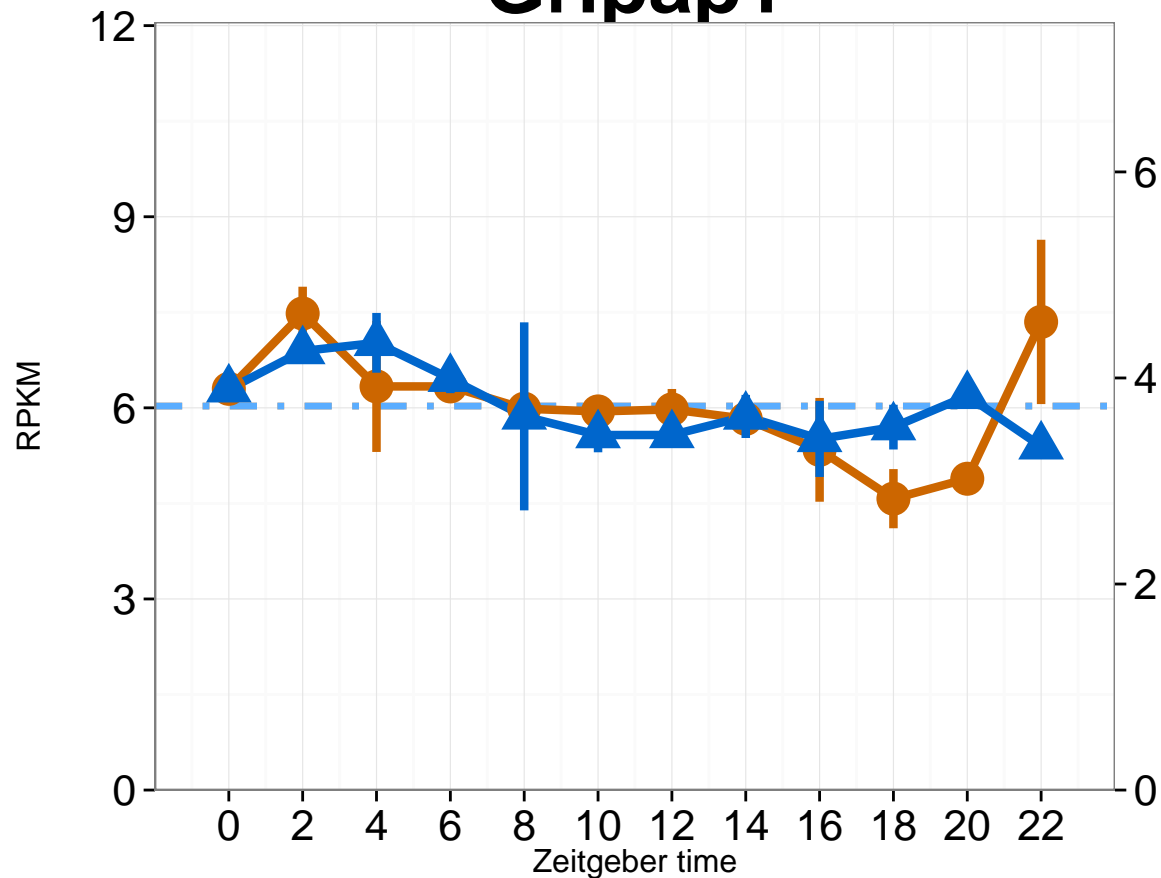

# Gripap1

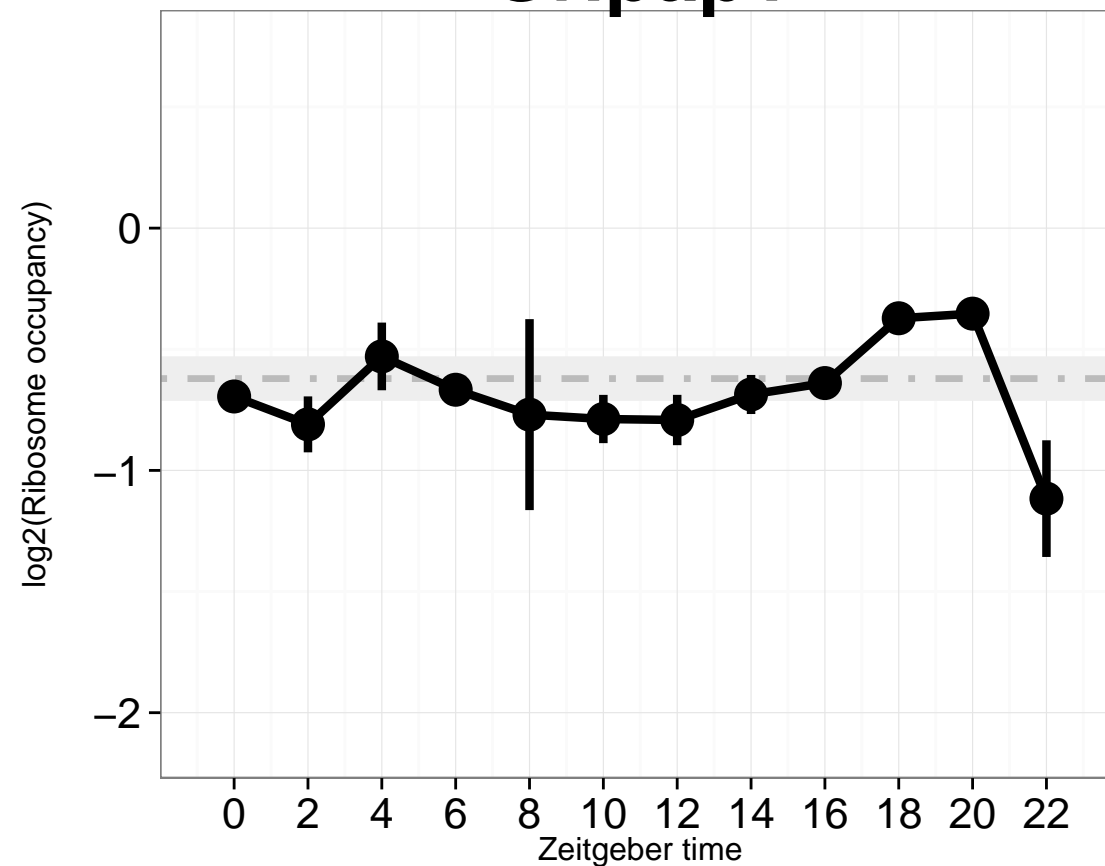

Supplement: SuppDataset_1.zip [file Gripap1_set_A.pdf › Supplemental Dataset 1/A-mRNA_nonrhyth_translation_nonrhyth/Gripap1_set_A.pdf]

# Grk6

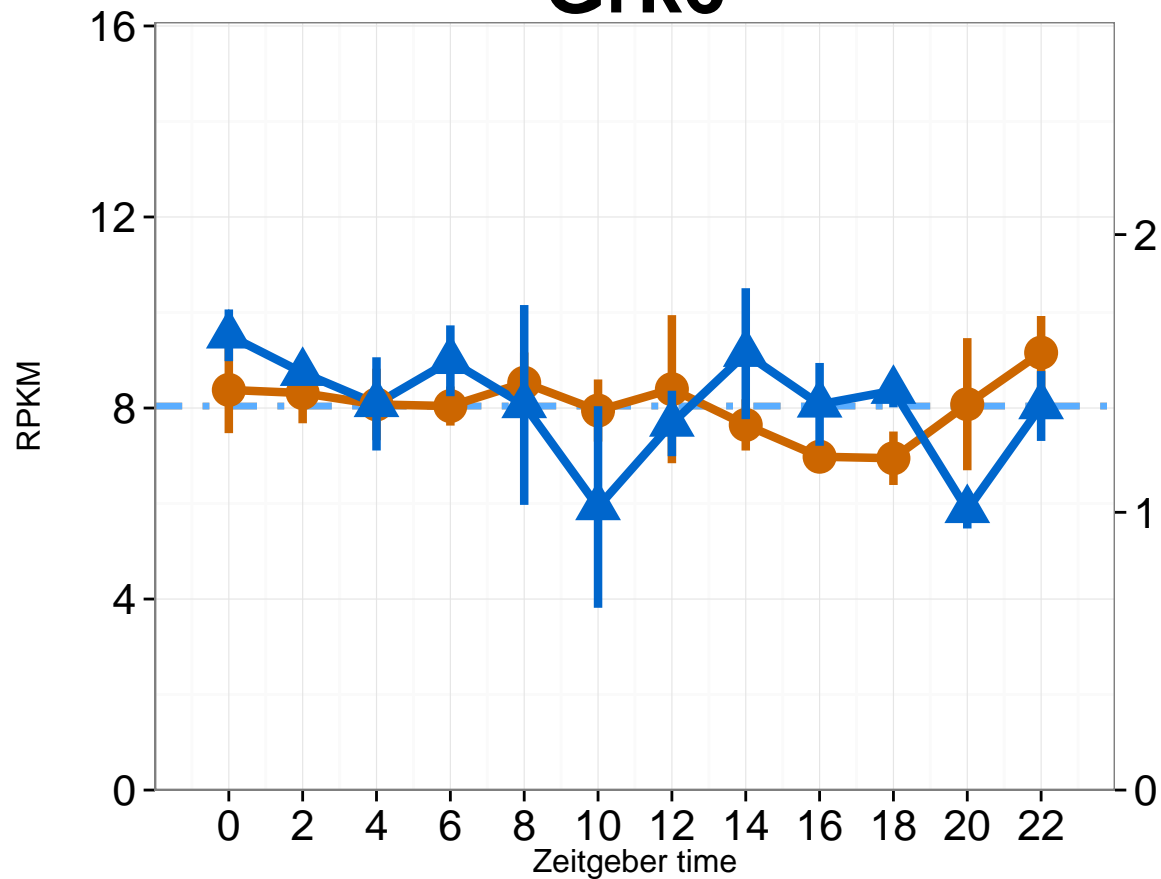

# Grk6

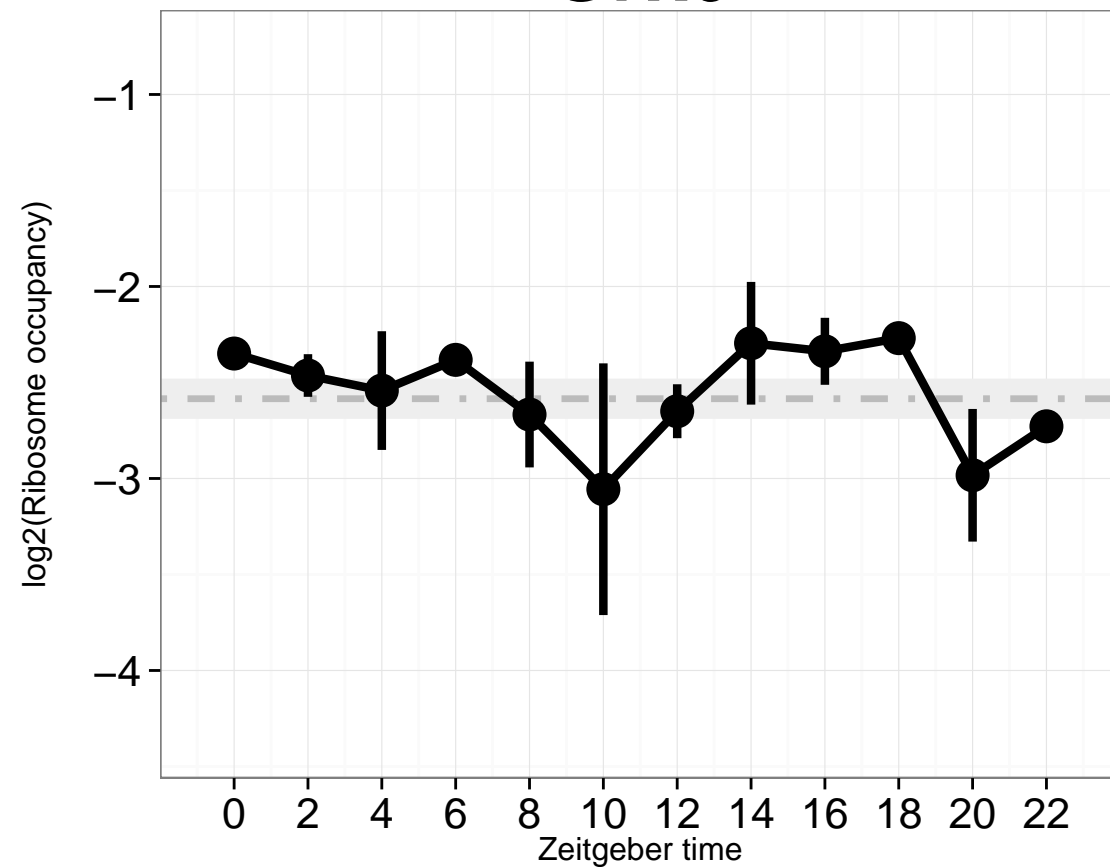

Supplement: SuppDataset_1.zip [file Grk6_set_A.pdf › Supplemental Dataset 1/A-mRNA_nonrhyth_translation_nonrhyth/Grk6_set_A.pdf]

## Grlf1

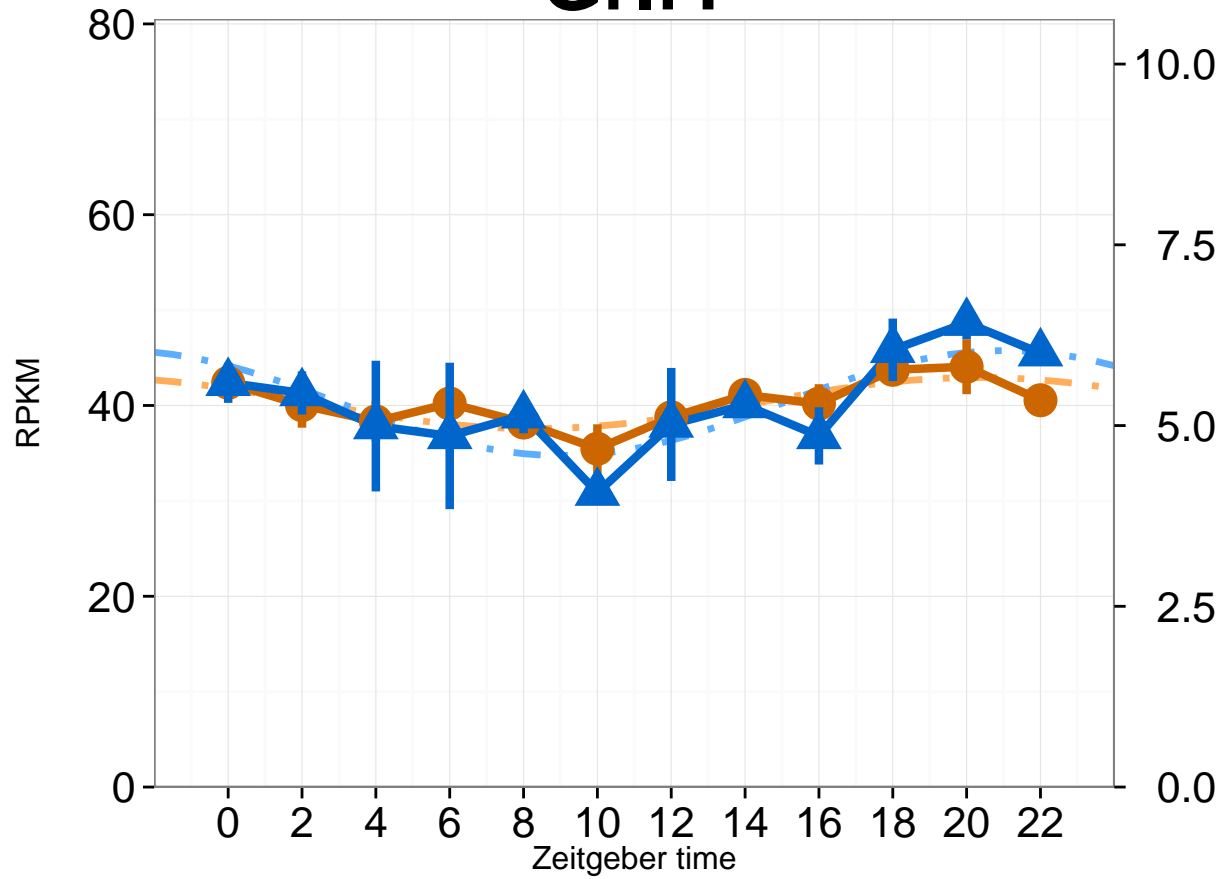

## Grlf1

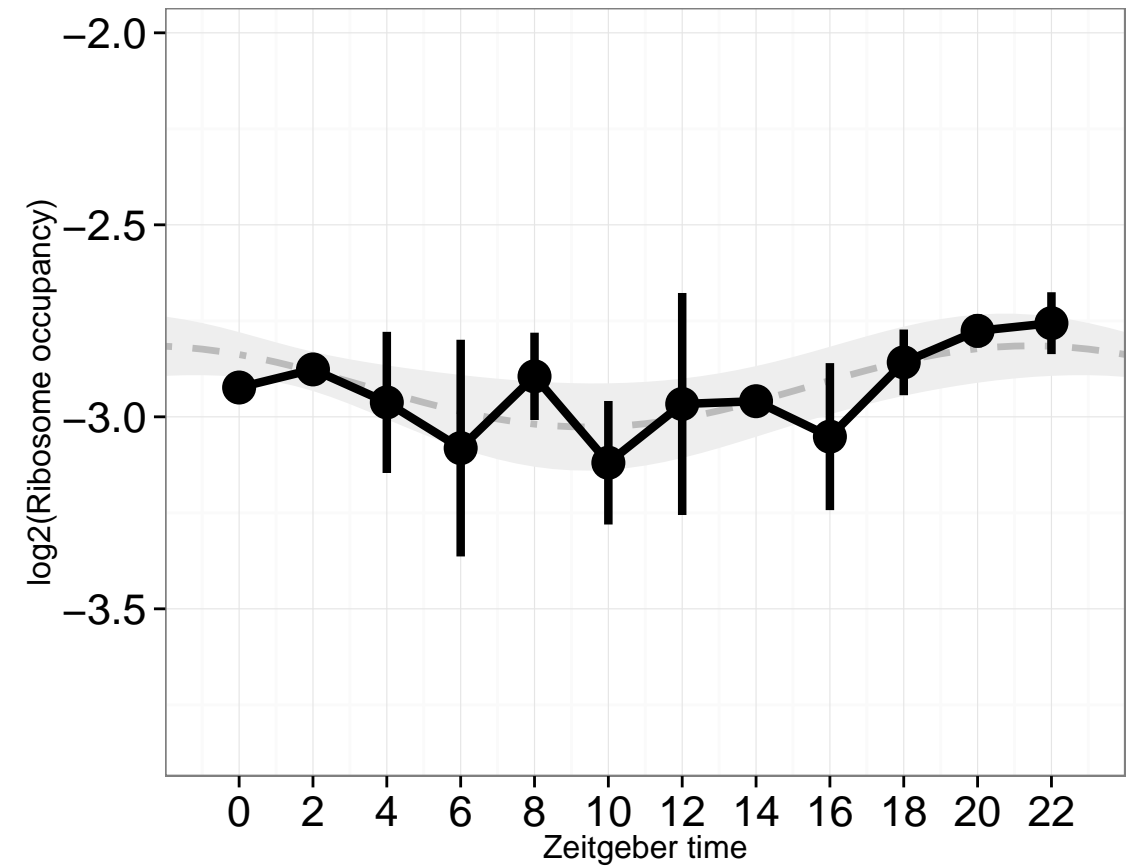

Supplement: SuppDataset_1.zip [file Grlf1_set_A.pdf › Supplemental Dataset 1/A-mRNA_nonrhyth_translation_nonrhyth/Grlf1_set_A.pdf]

# Grm8

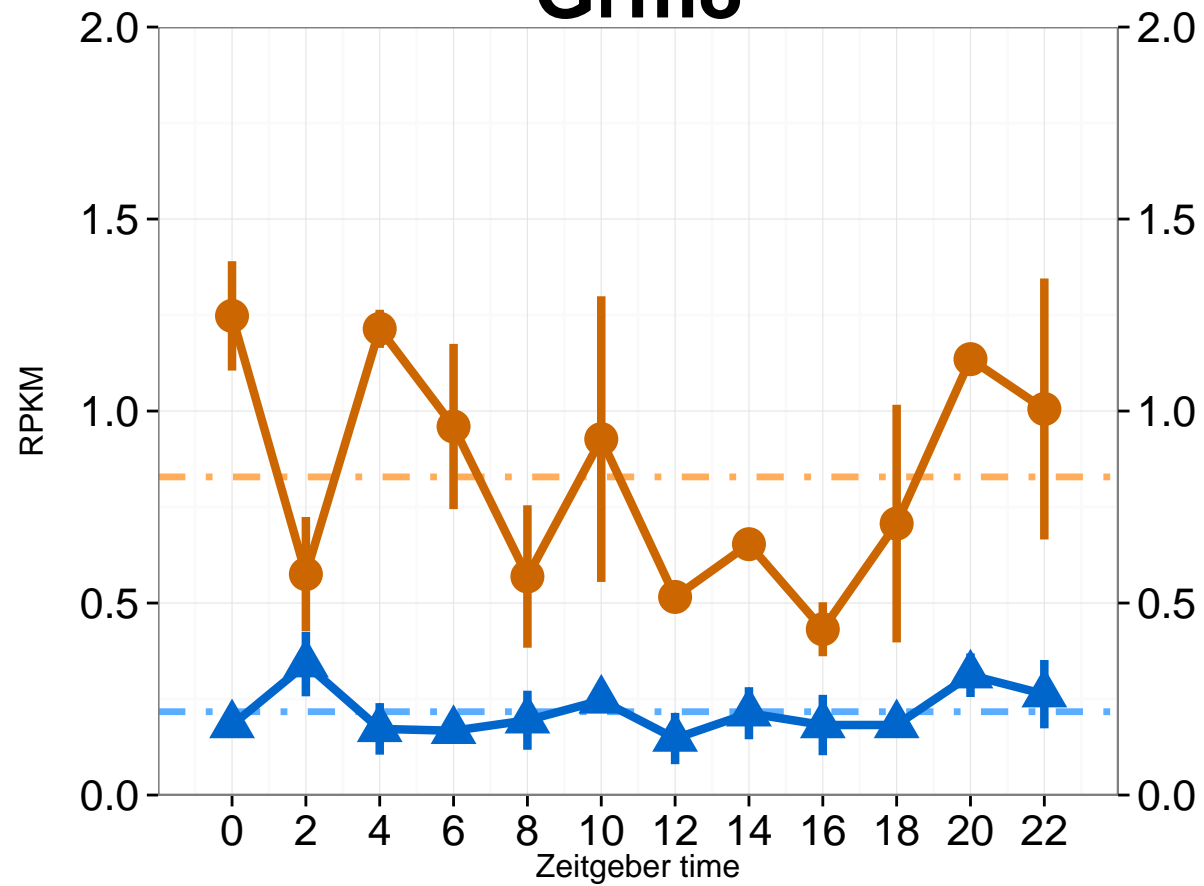

# Grm8

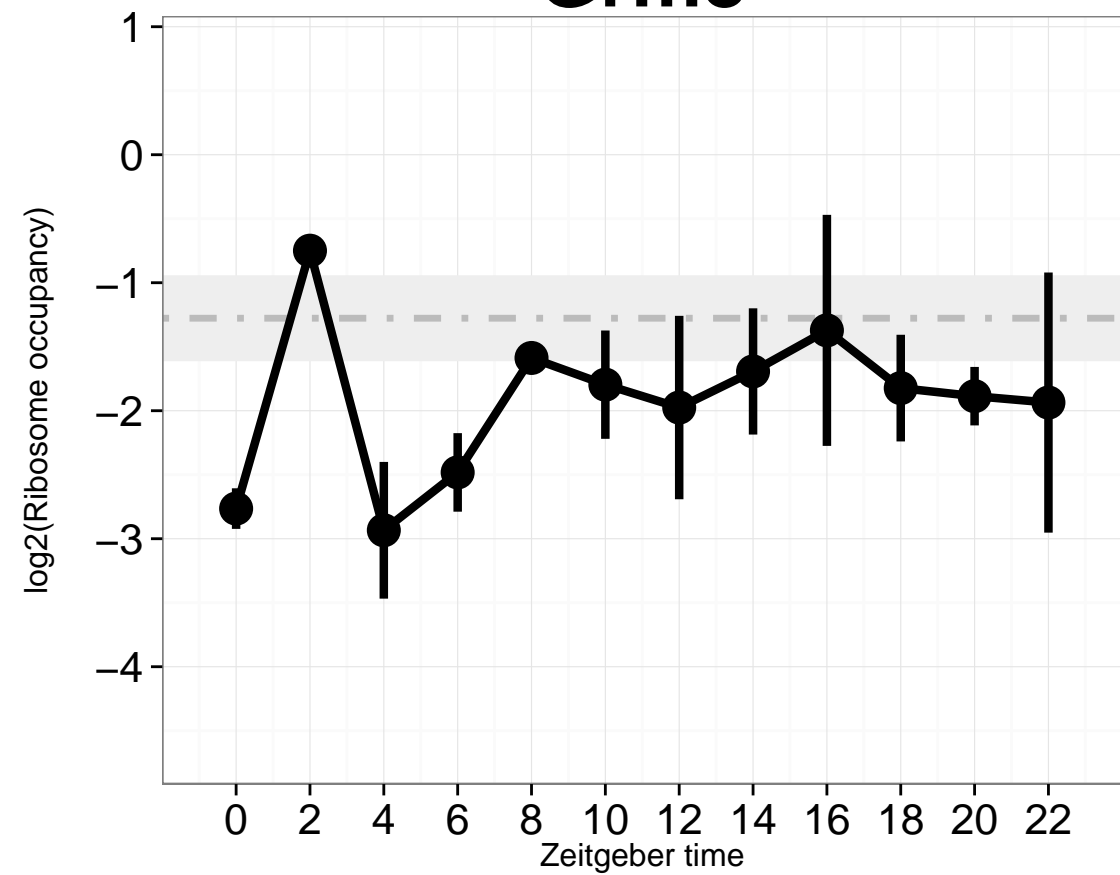

Supplement: SuppDataset_1.zip [file Grm8_set_A.pdf › Supplemental Dataset 1/A-mRNA_nonrhyth_translation_nonrhyth/Grm8_set_A.pdf]

# Grpel1

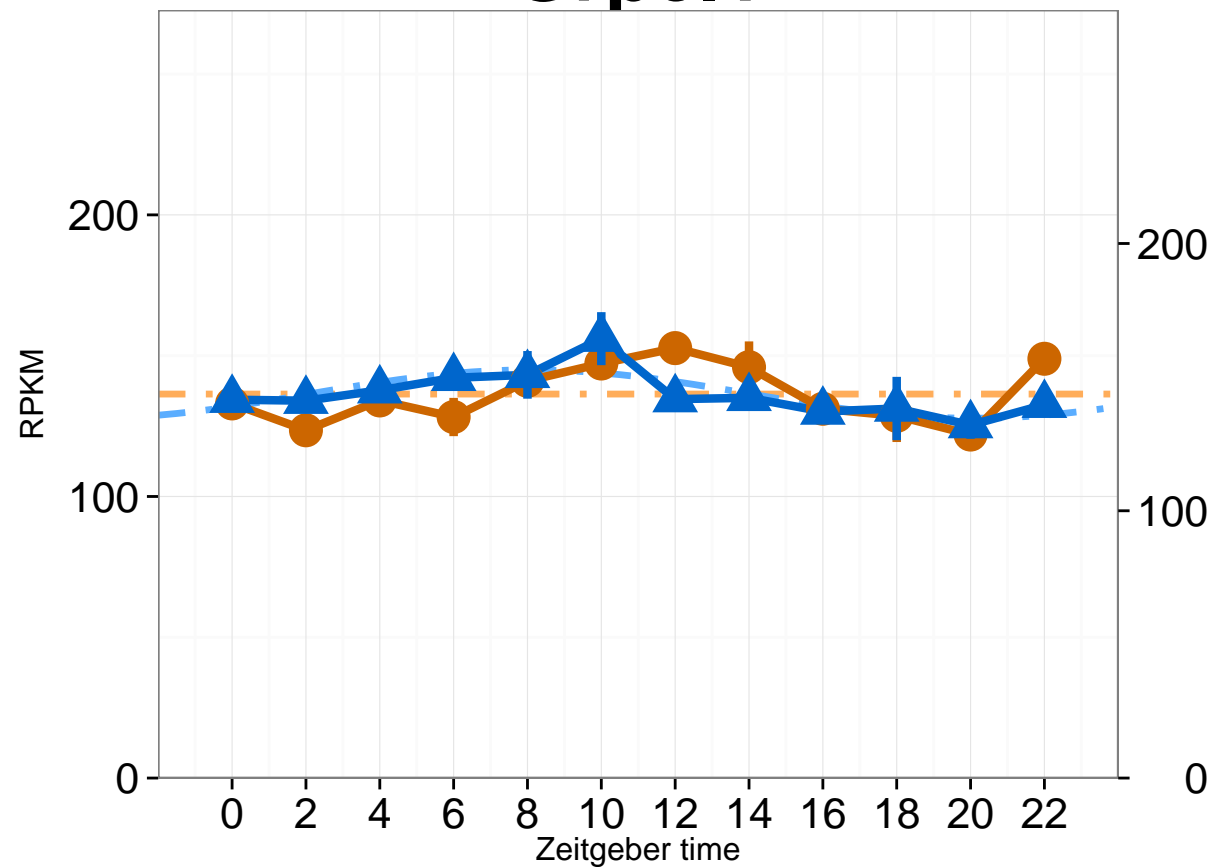

# Grpel1

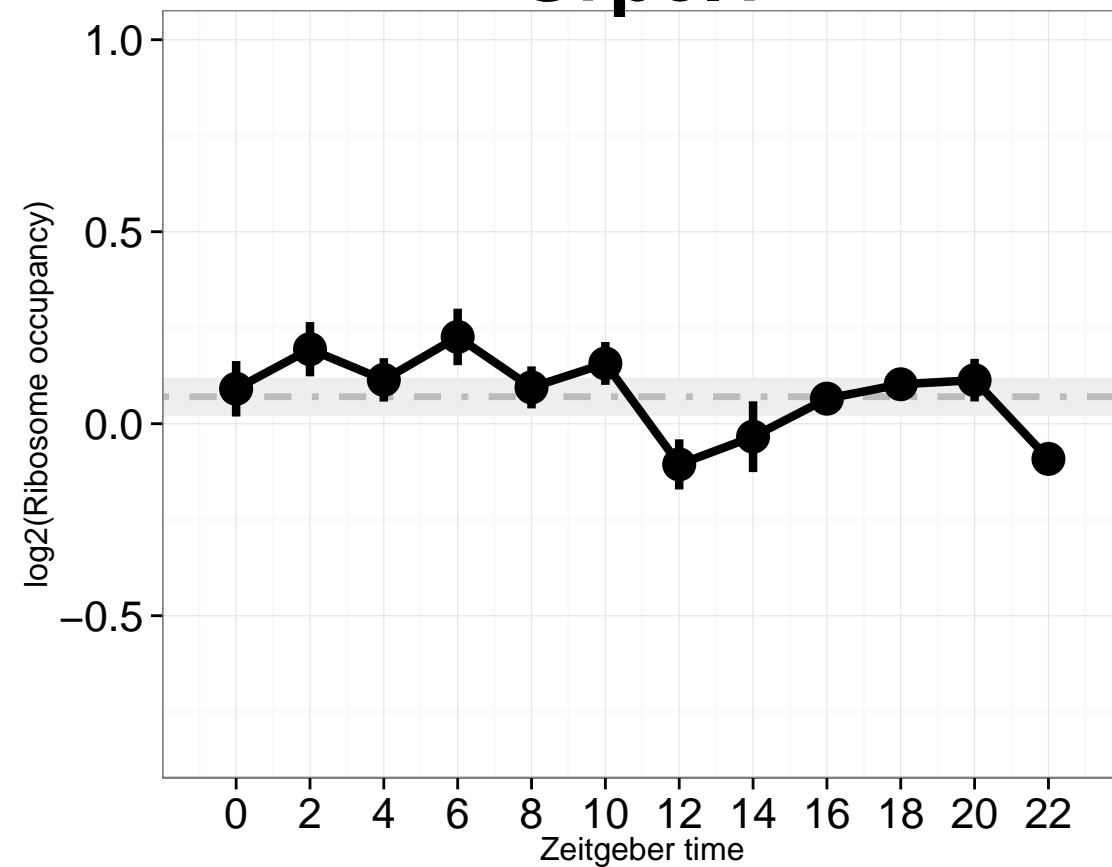

Supplement: SuppDataset_1.zip [file Grpel1_set_A.pdf › Supplemental Dataset 1/A-mRNA_nonrhyth_translation_nonrhyth/Grpel1_set_A.pdf]

## Grsf1

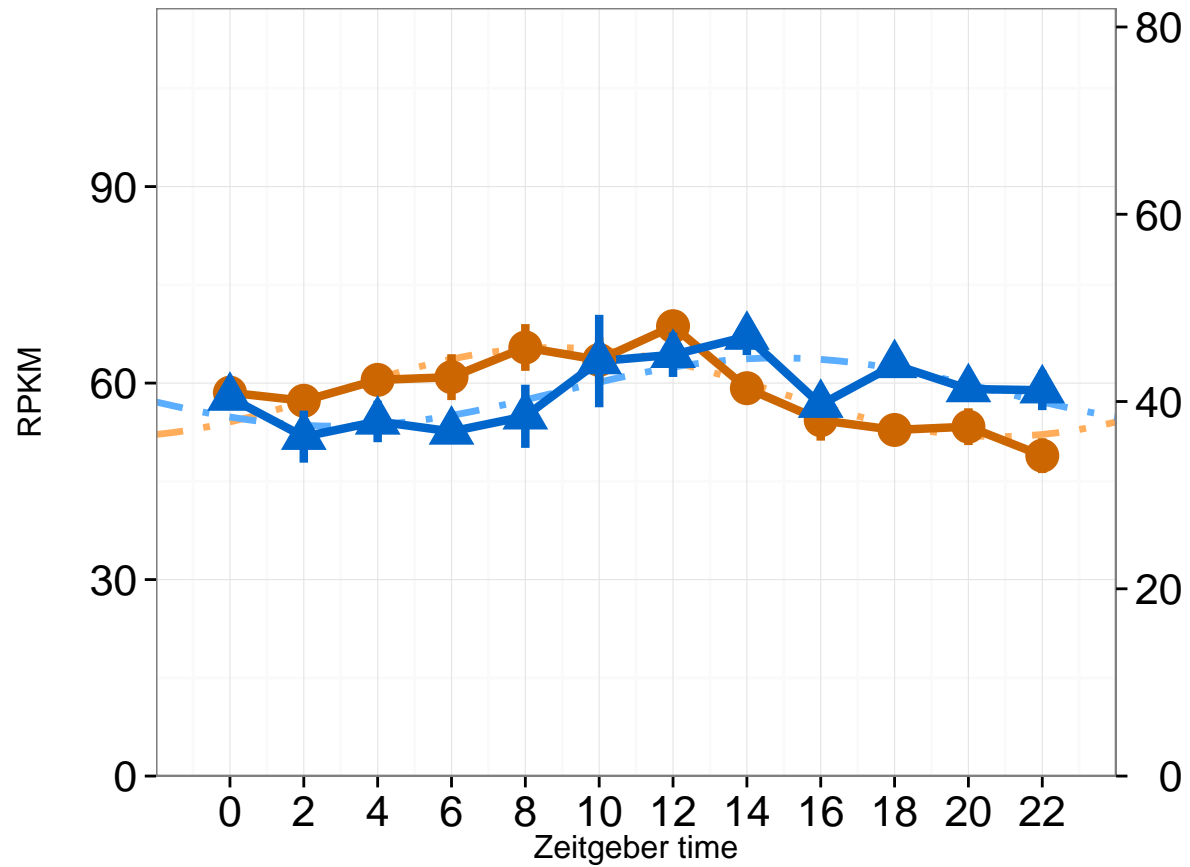

## Grsf1

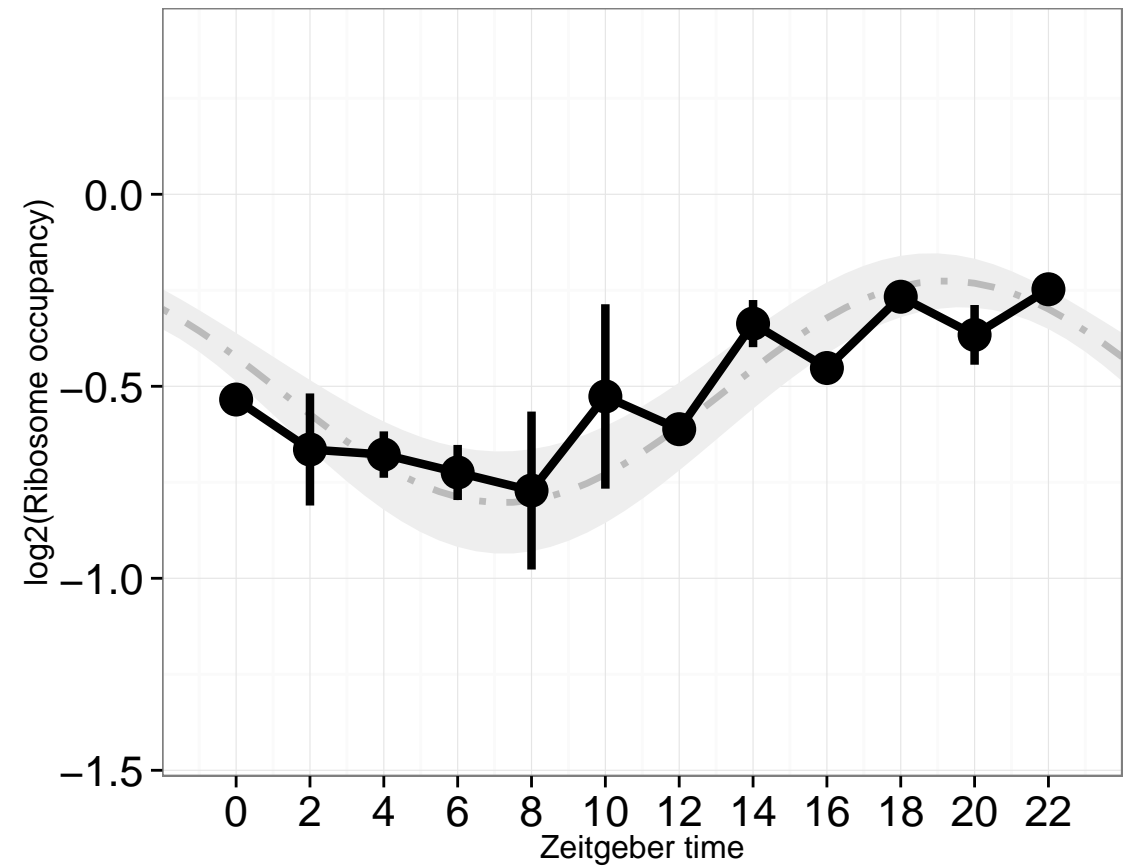

Supplement: SuppDataset_1.zip [file Grsf1_set_A.pdf › Supplemental Dataset 1/A-mRNA_nonrhyth_translation_nonrhyth/Grsf1_set_A.pdf]

# Grtp1

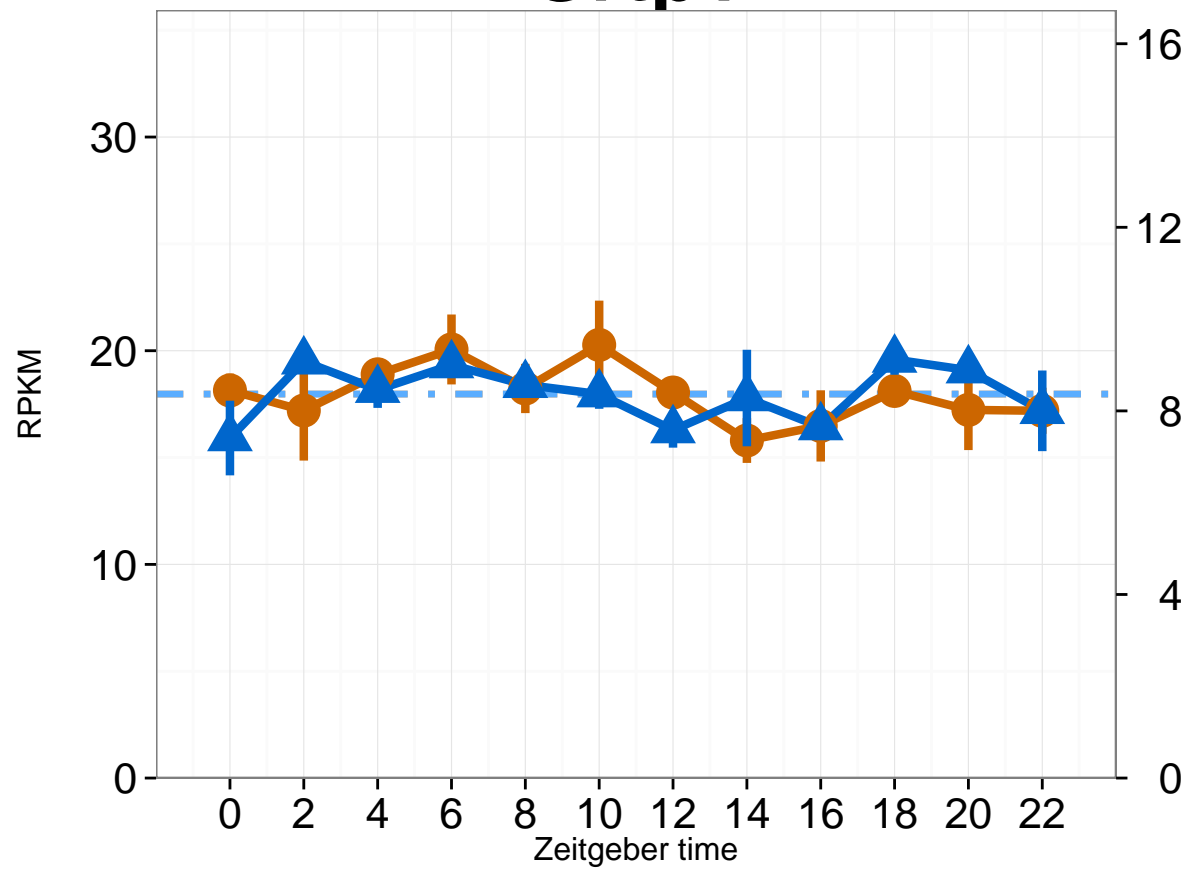

# Grtp1

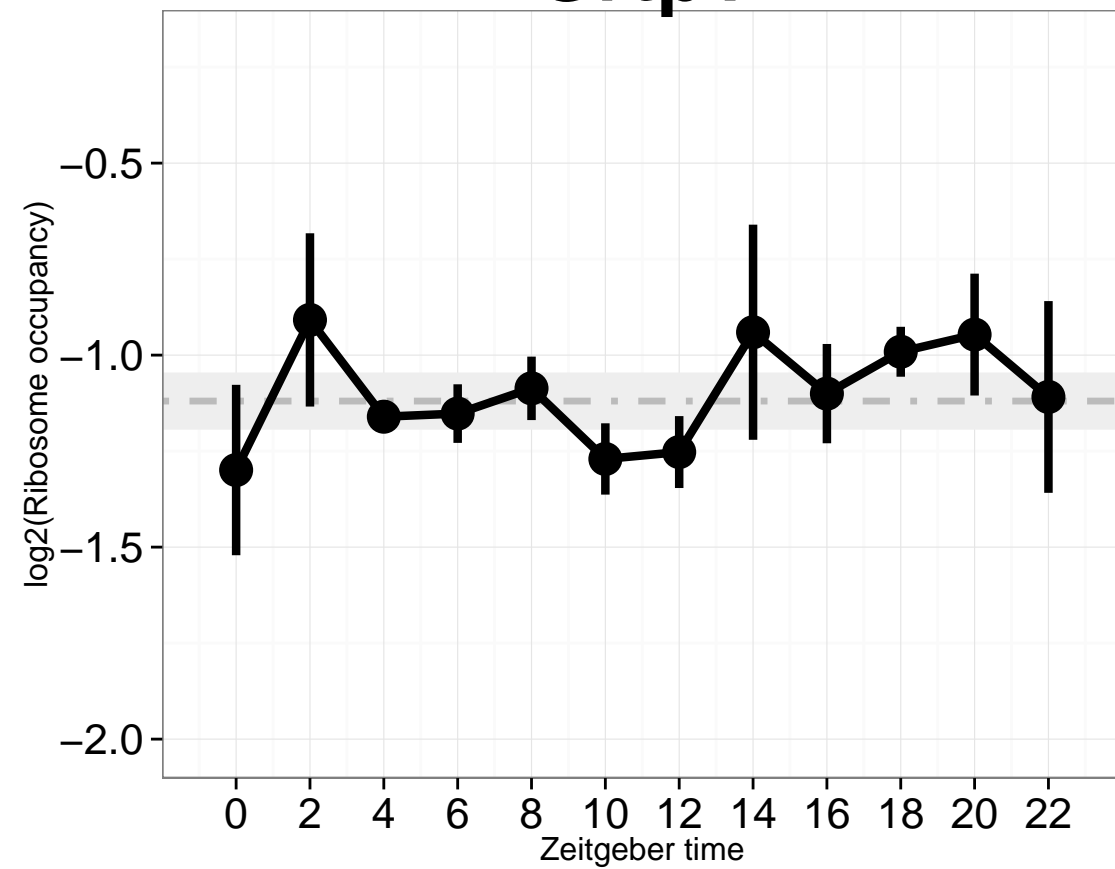

Supplement: SuppDataset_1.zip [file Grtp1_set_A.pdf › Supplemental Dataset 1/A-mRNA_nonrhyth_translation_nonrhyth/Grtp1_set_A.pdf]

# Grwd1

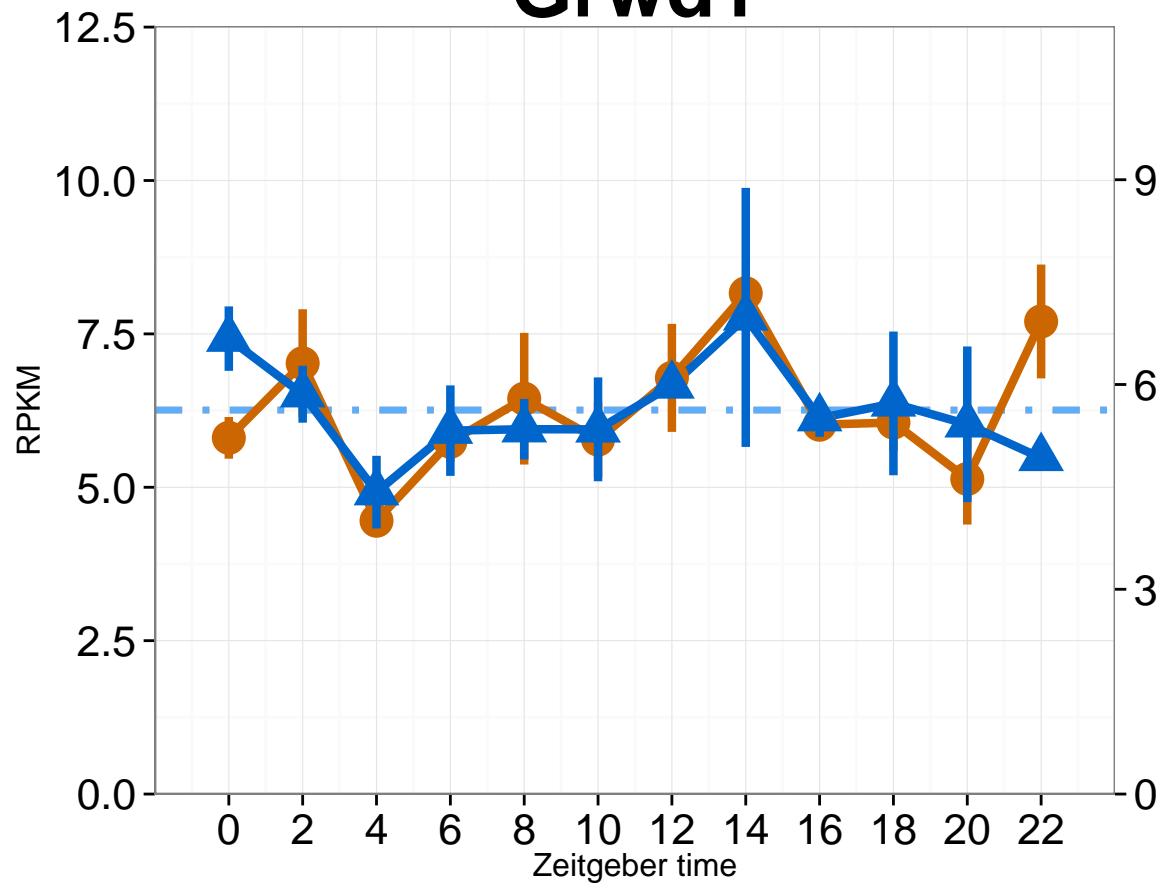

# Grwd1

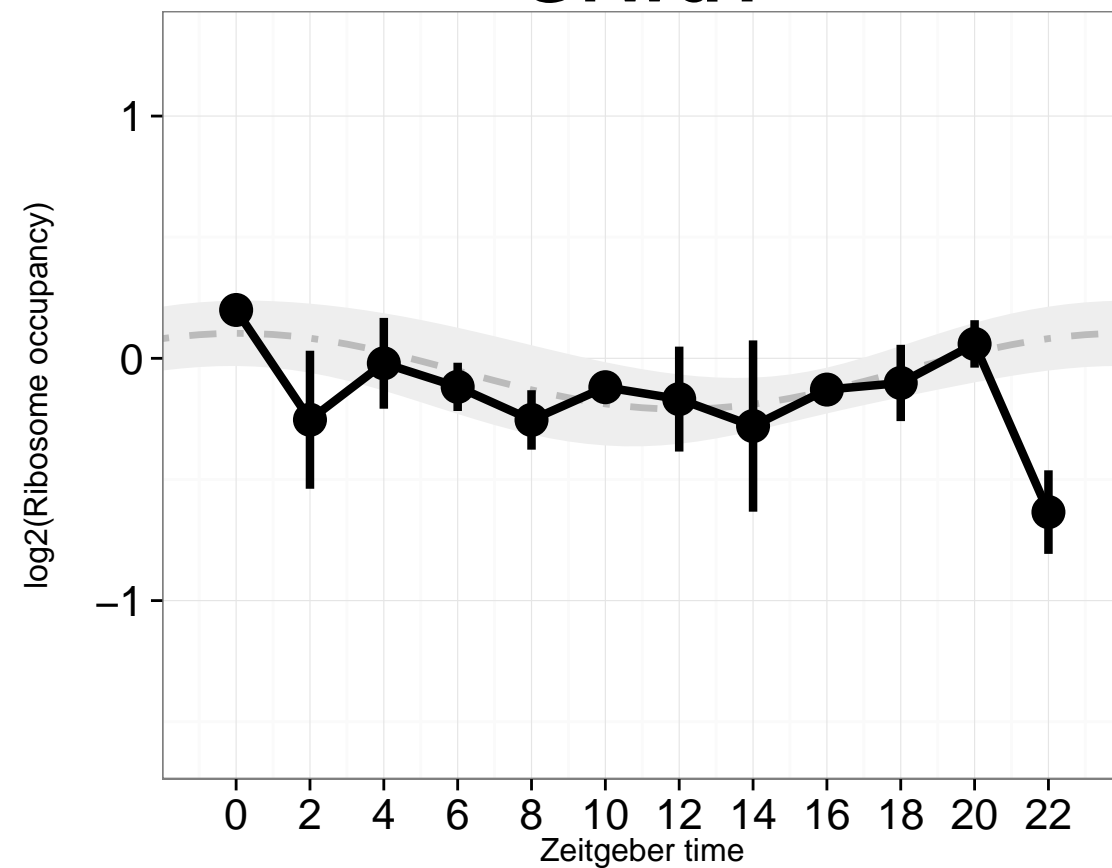

Supplement: SuppDataset_1.zip [file Grwd1_set_A.pdf › Supplemental Dataset 1/A-mRNA_nonrhyth_translation_nonrhyth/Grwd1_set_A.pdf]

## Gsdmd

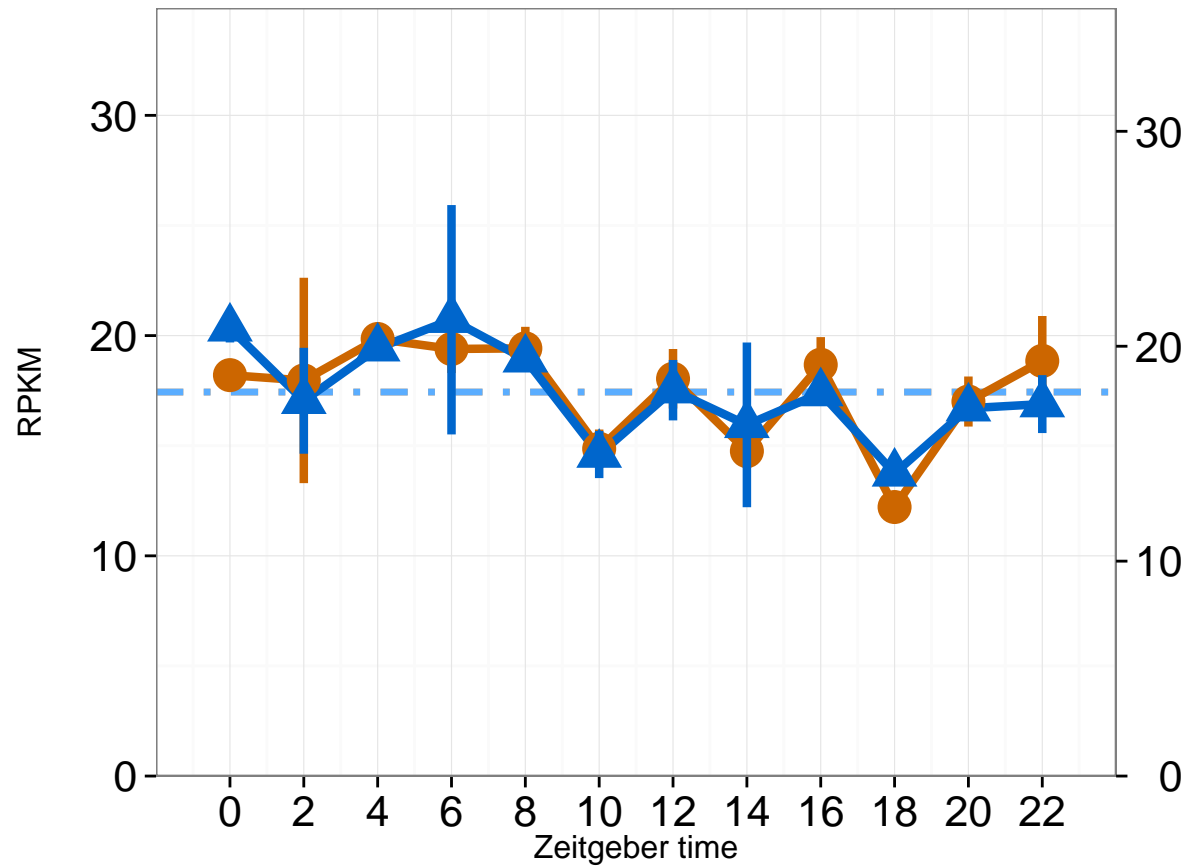

## Gsdmd

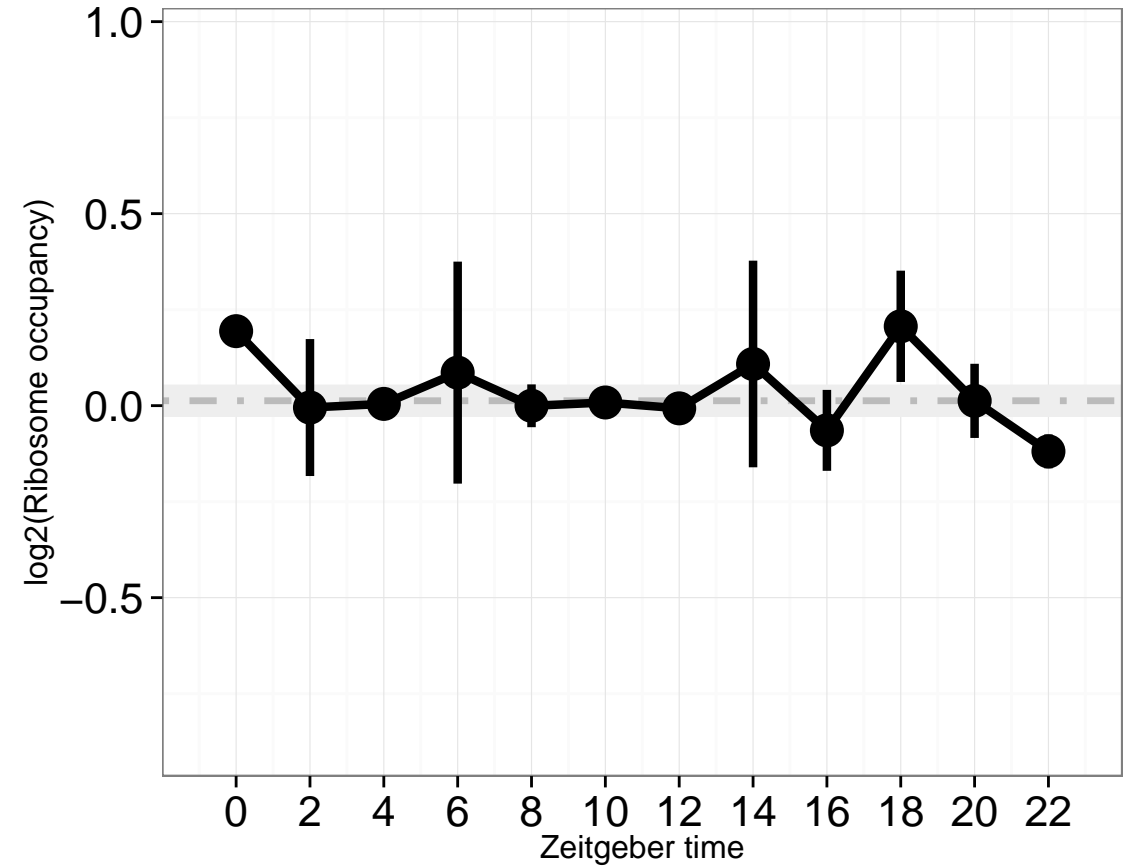

Supplement: SuppDataset_1.zip [file Gsdmd_set_A.pdf › Supplemental Dataset 1/A-mRNA_nonrhyth_translation_nonrhyth/Gsdmd_set_A.pdf]

## Gsk3a

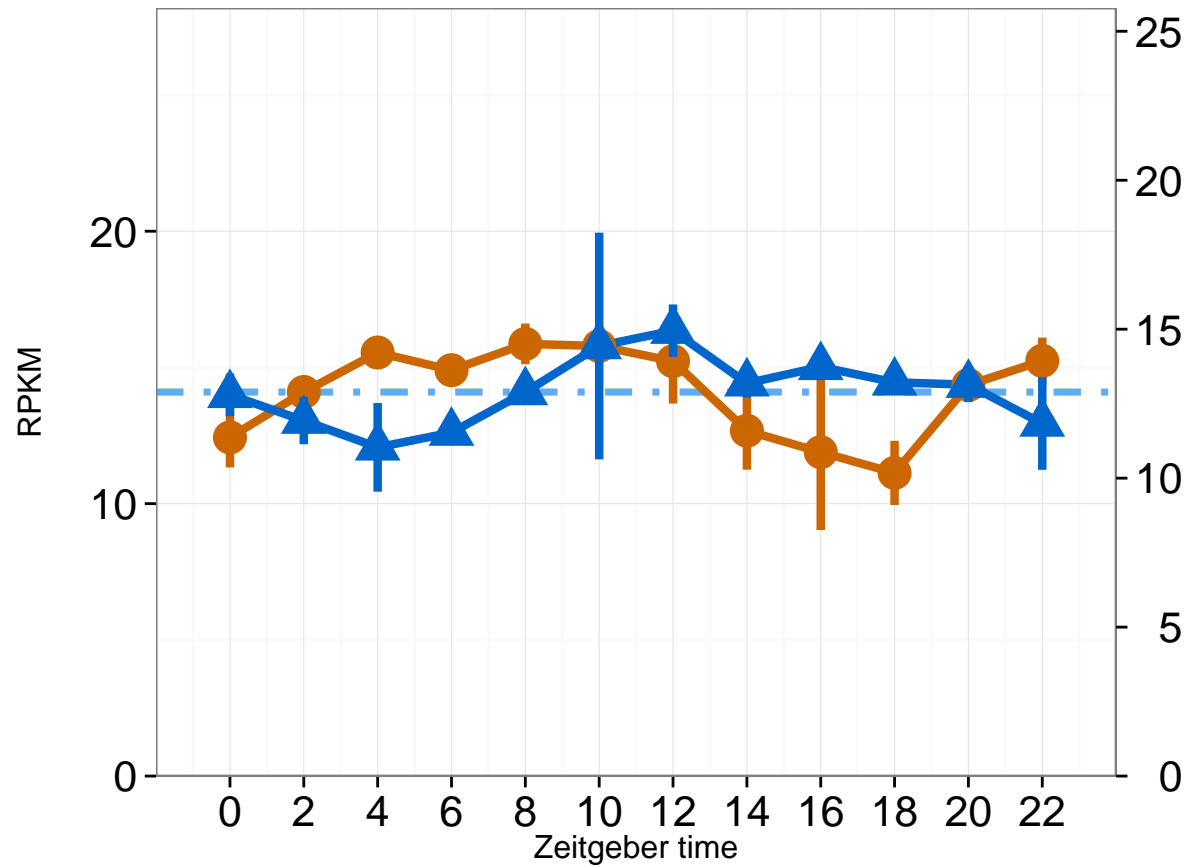

## Gsk3a

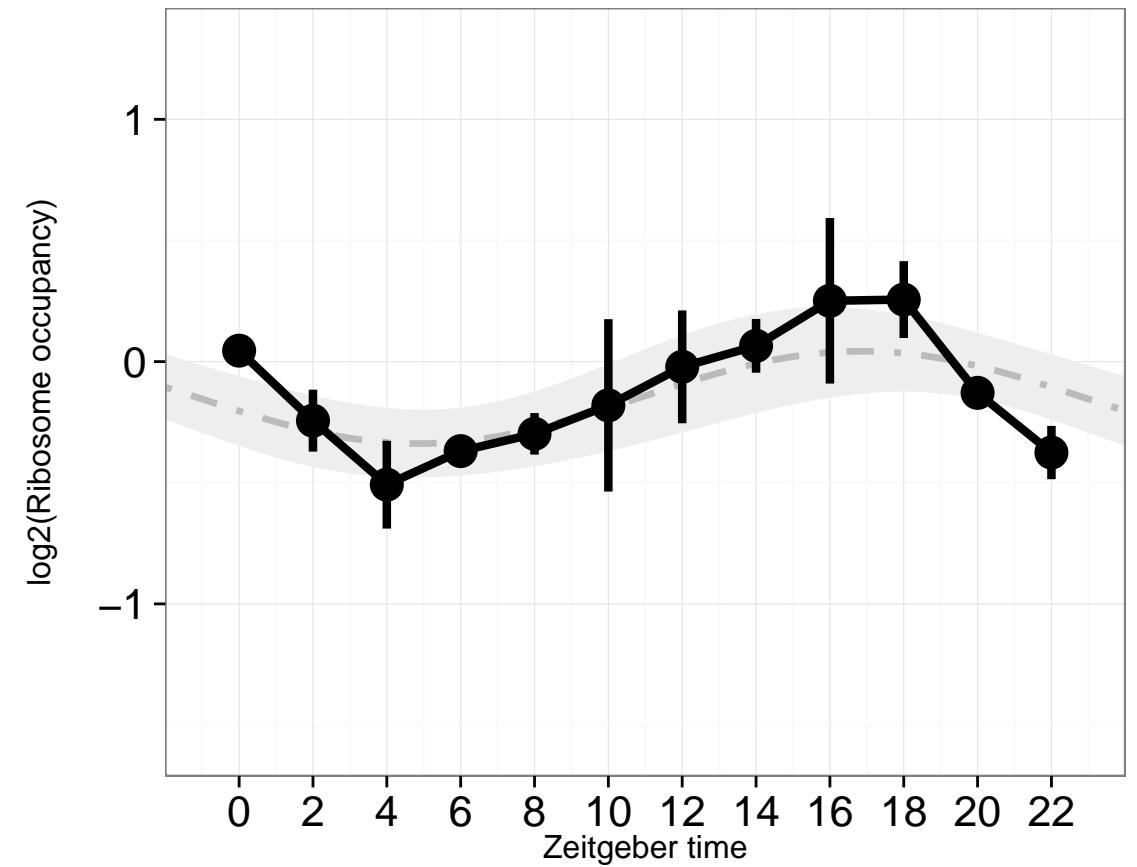

Supplement: SuppDataset_1.zip [file Gsk3a_set_A.pdf › Supplemental Dataset 1/A-mRNA_nonrhyth_translation_nonrhyth/Gsk3a_set_A.pdf]

## Gsk3b

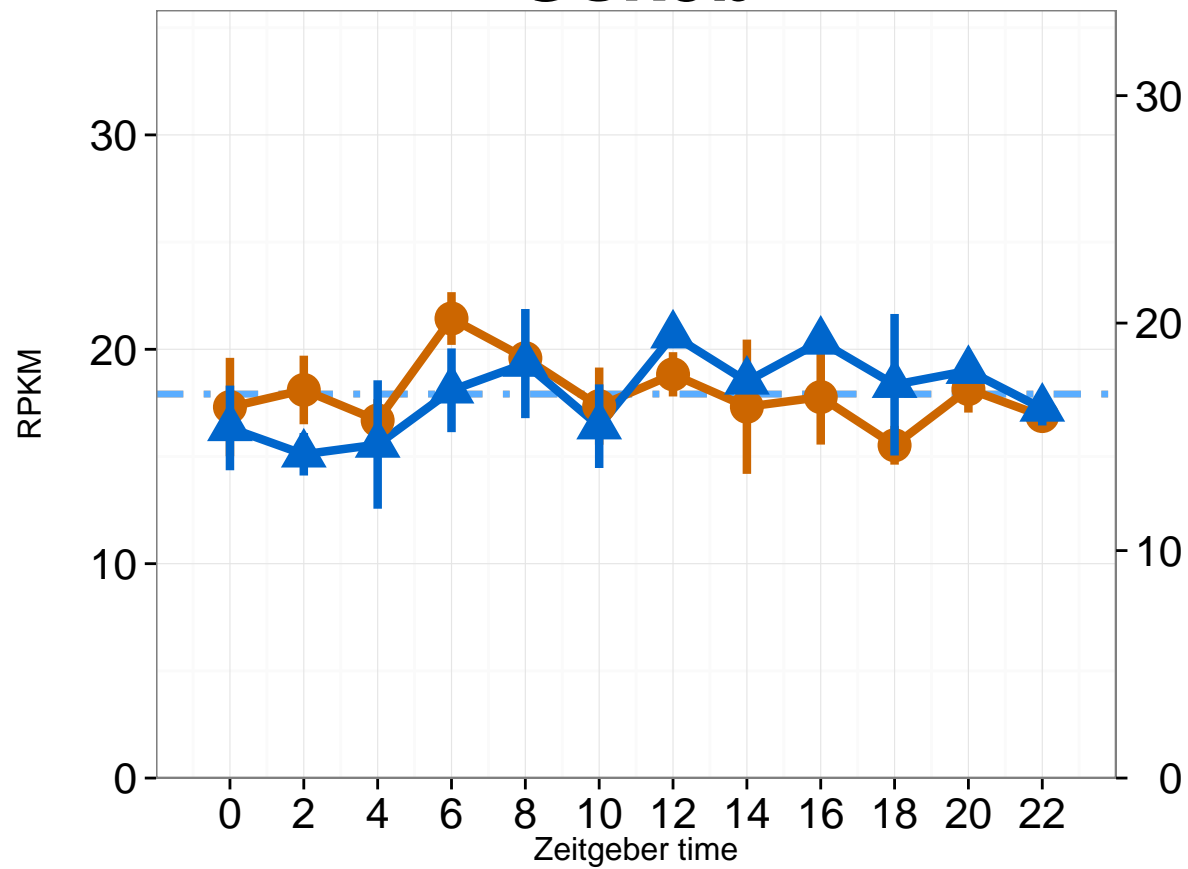

## Gsk3b

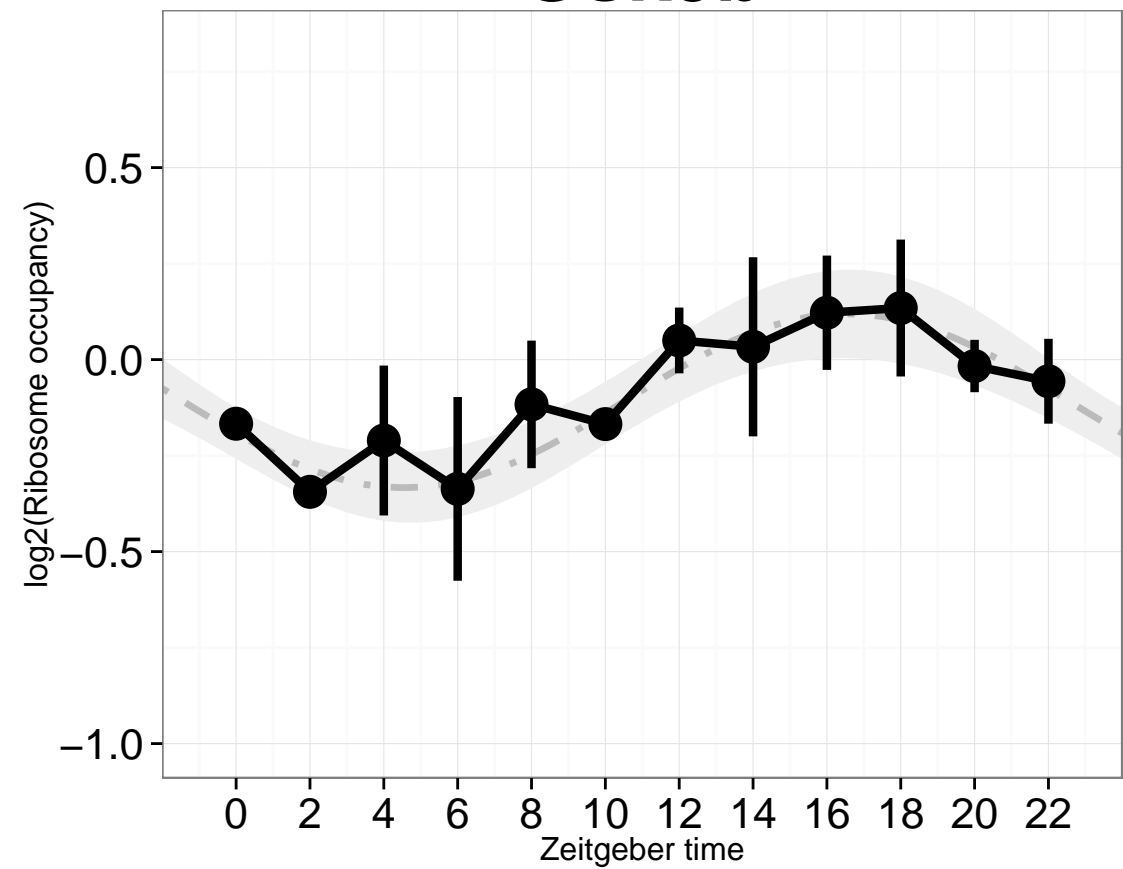

Supplement: SuppDataset_1.zip [file Gsk3b_set_A.pdf › Supplemental Dataset 1/A-mRNA_nonrhyth_translation_nonrhyth/Gsk3b_set_A.pdf]

## Gsn

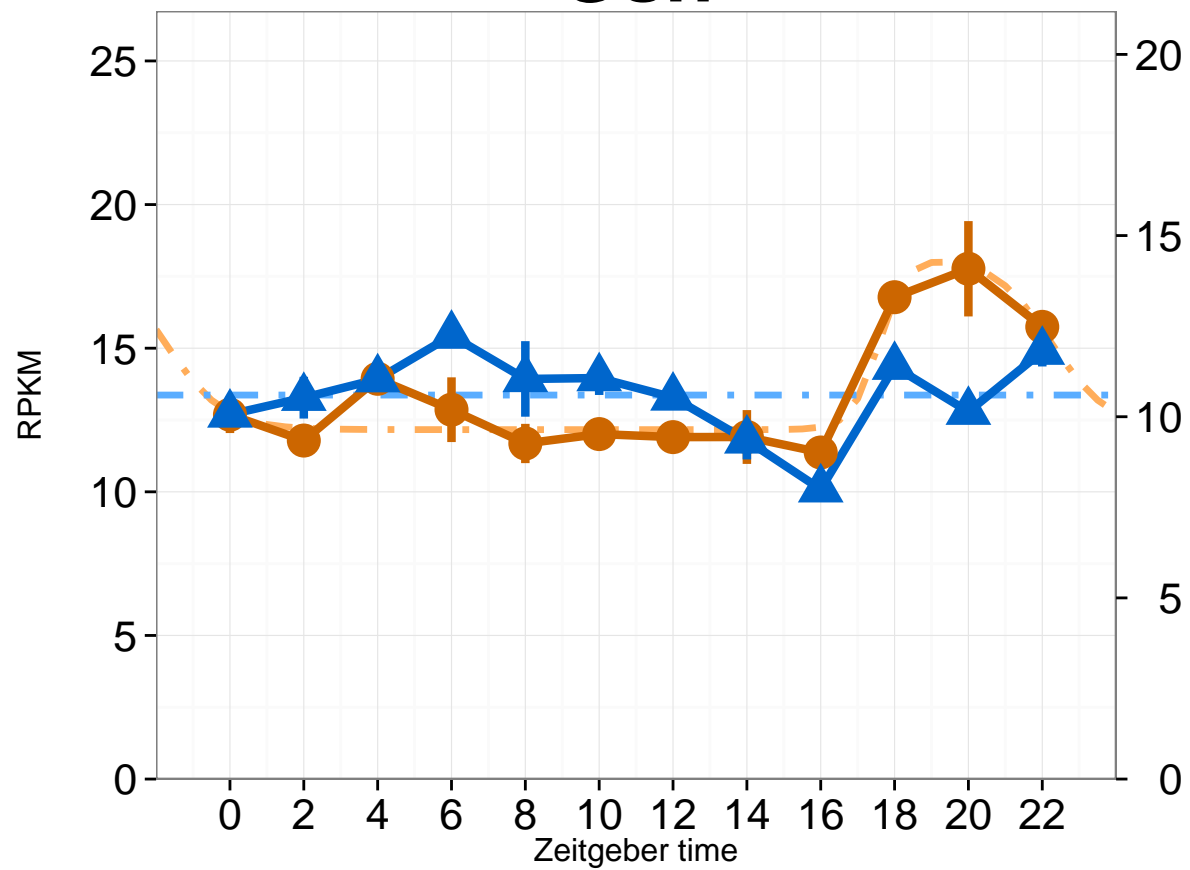

## Gsn

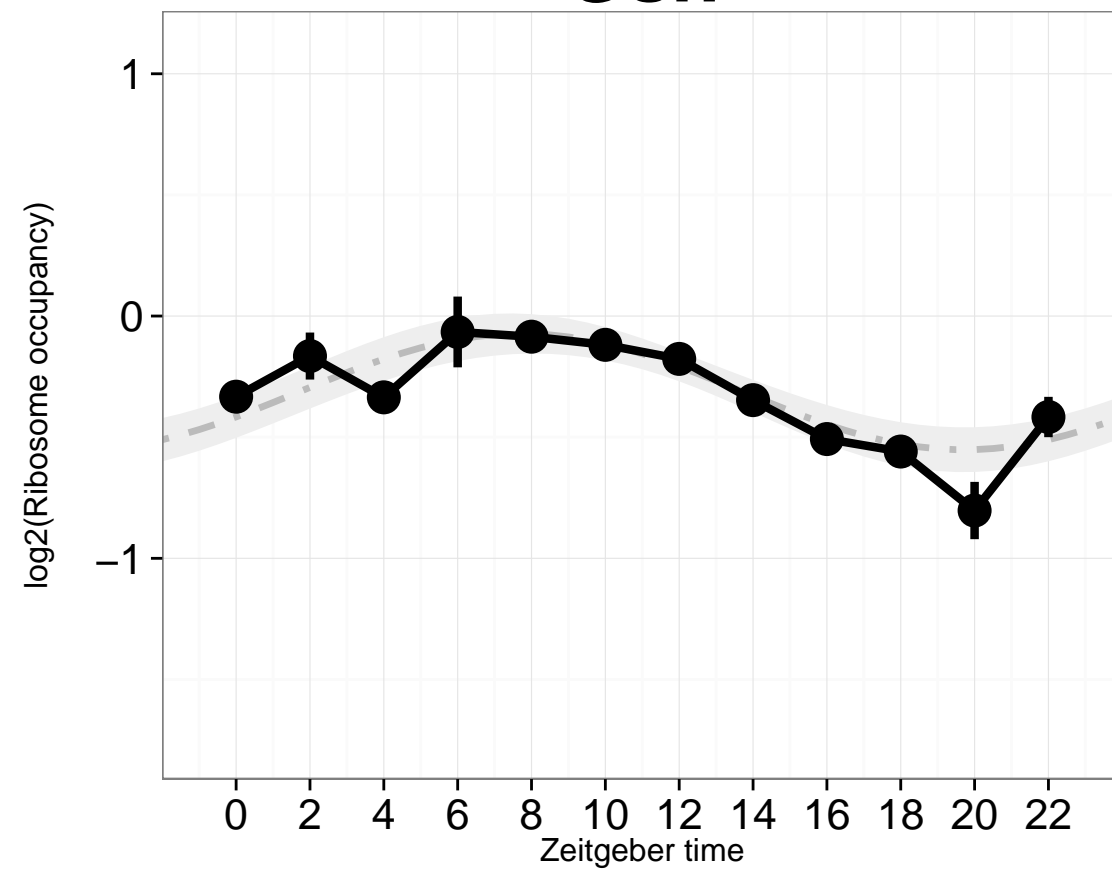

Supplement: SuppDataset_1.zip [file Gsn_set_A.pdf › Supplemental Dataset 1/A-mRNA_nonrhyth_translation_nonrhyth/Gsn_set_A.pdf]

## Gspt1

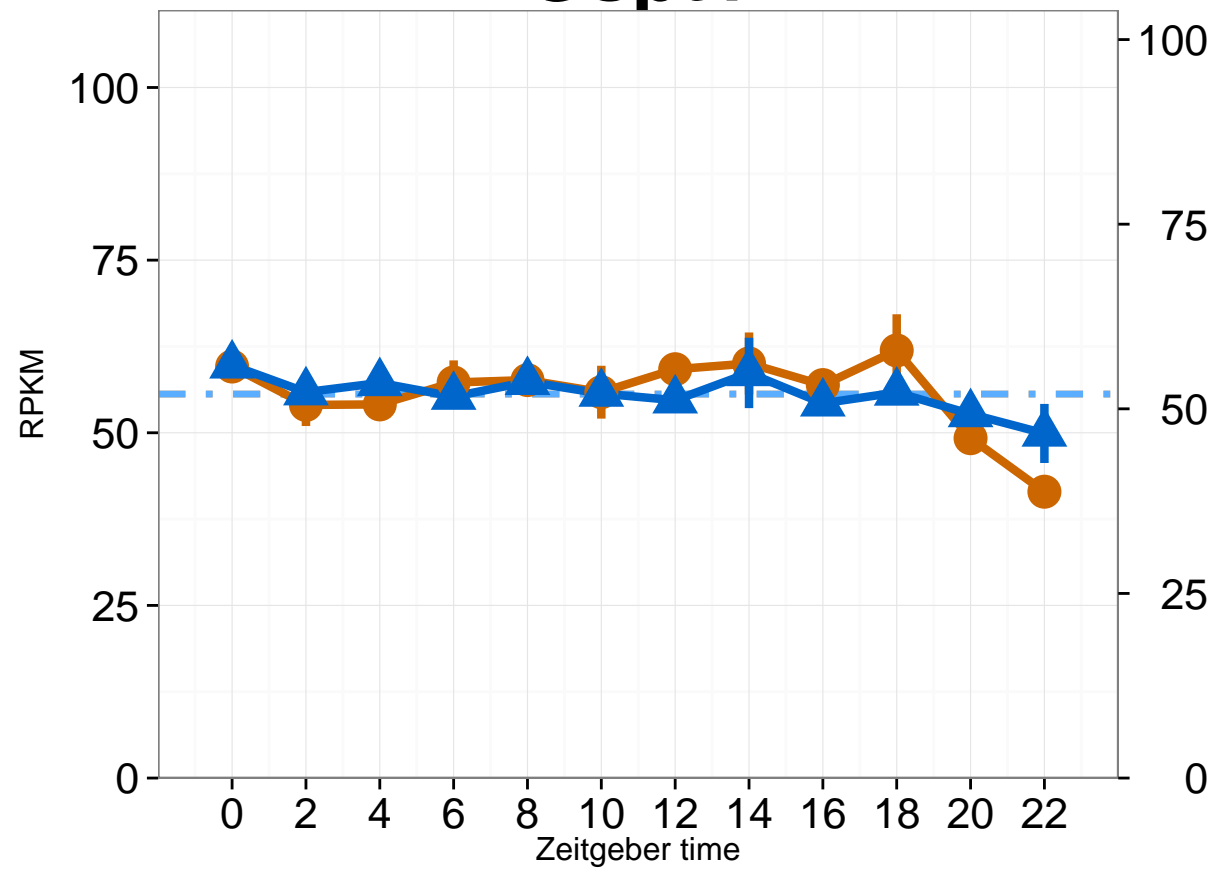

## Gspt1

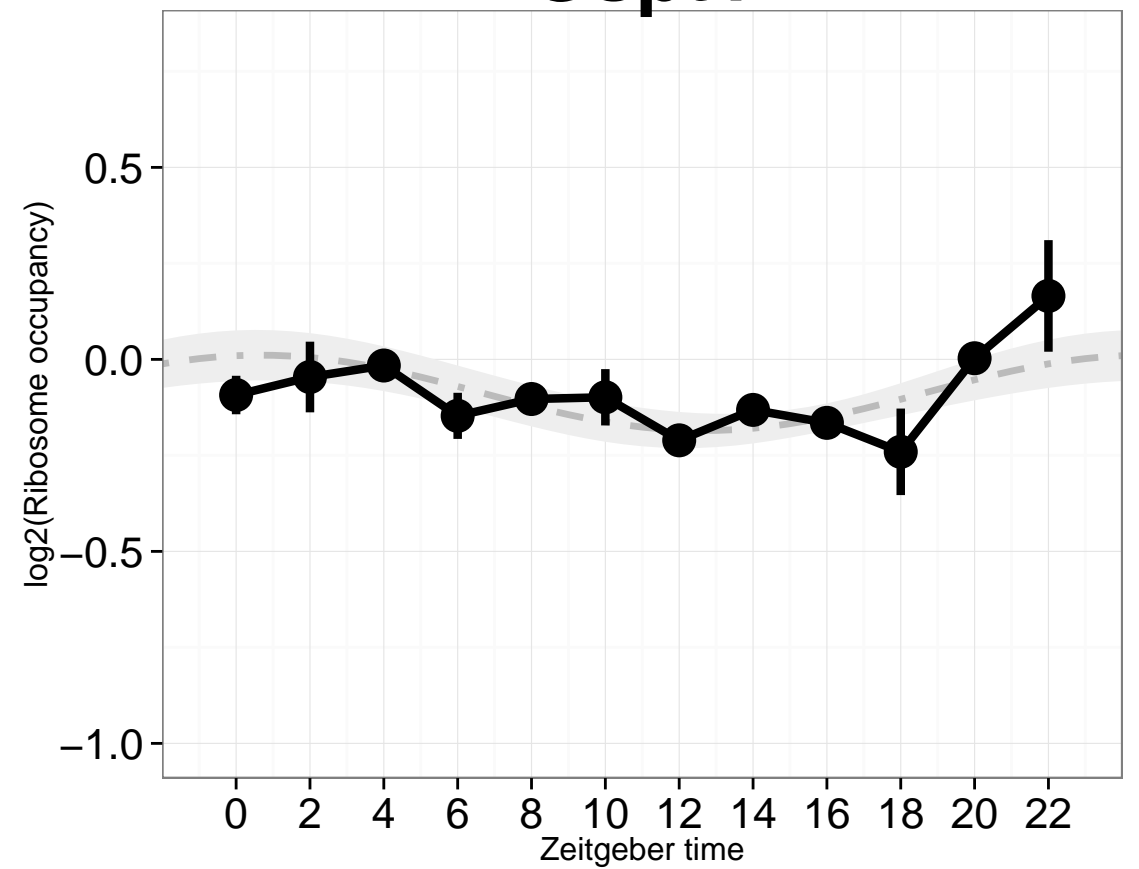

Supplement: SuppDataset_1.zip [file Gspt1_set_A.pdf › Supplemental Dataset 1/A-mRNA_nonrhyth_translation_nonrhyth/Gspt1_set_A.pdf]

## Gsr

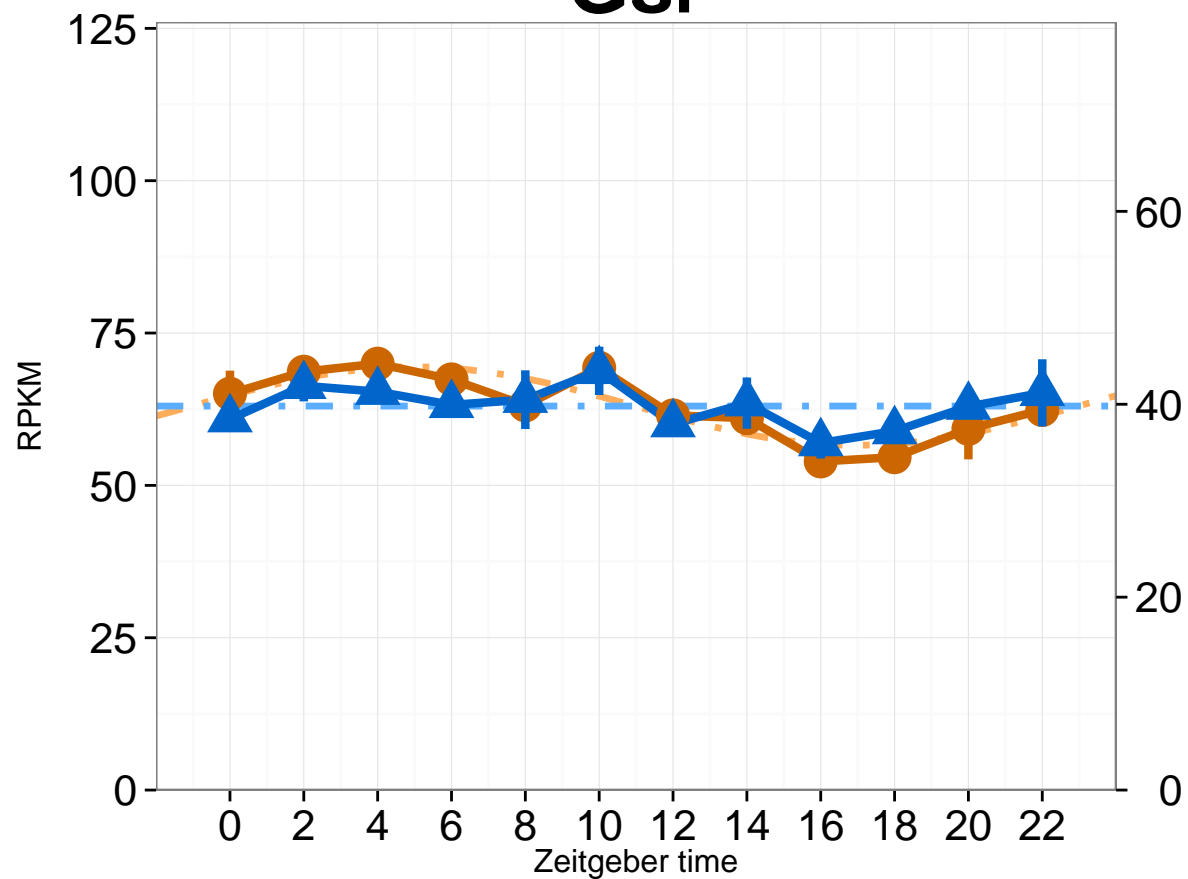

## Gsr

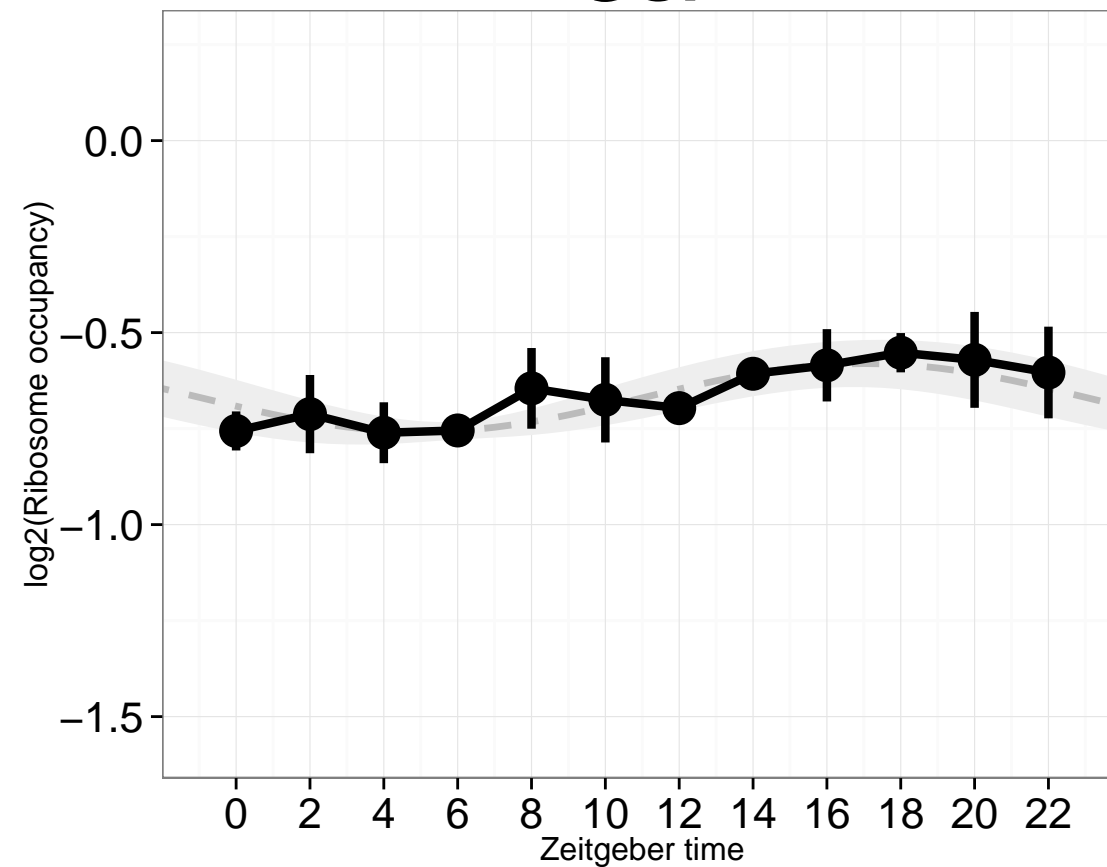

Supplement: SuppDataset_1.zip [file Gsr_set_A.pdf › Supplemental Dataset 1/A-mRNA_nonrhyth_translation_nonrhyth/Gsr_set_A.pdf]

# Gsta1

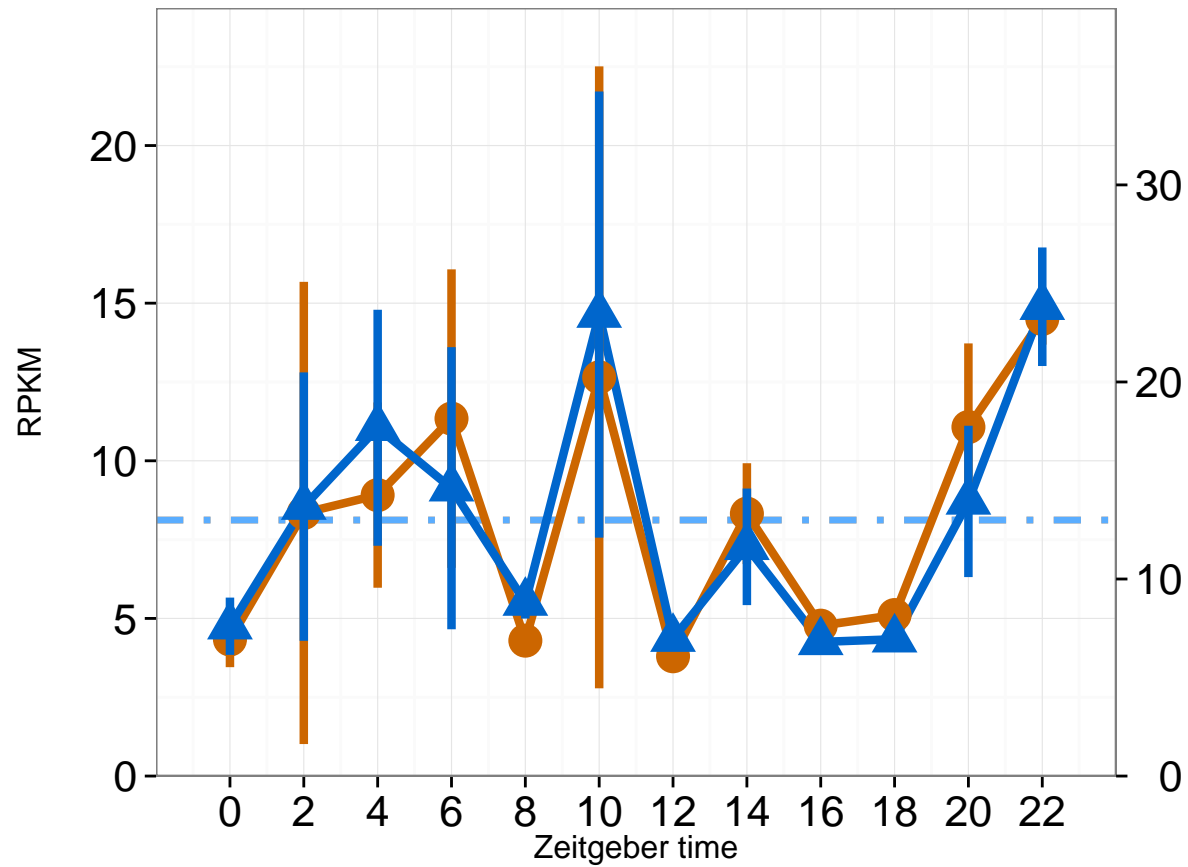

# Gsta1

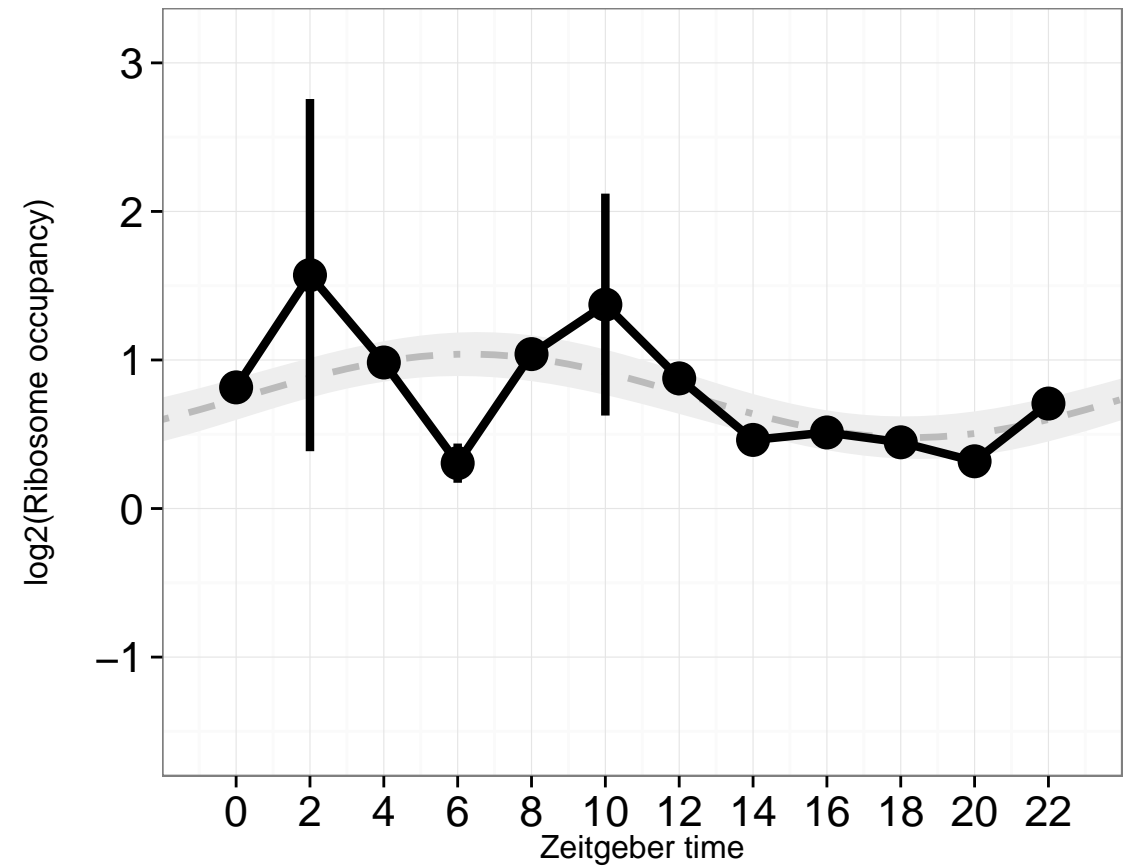

Supplement: SuppDataset_1.zip [file Gsta1_set_A.pdf › Supplemental Dataset 1/A-mRNA_nonrhyth_translation_nonrhyth/Gsta1_set_A.pdf]

## Gsta2

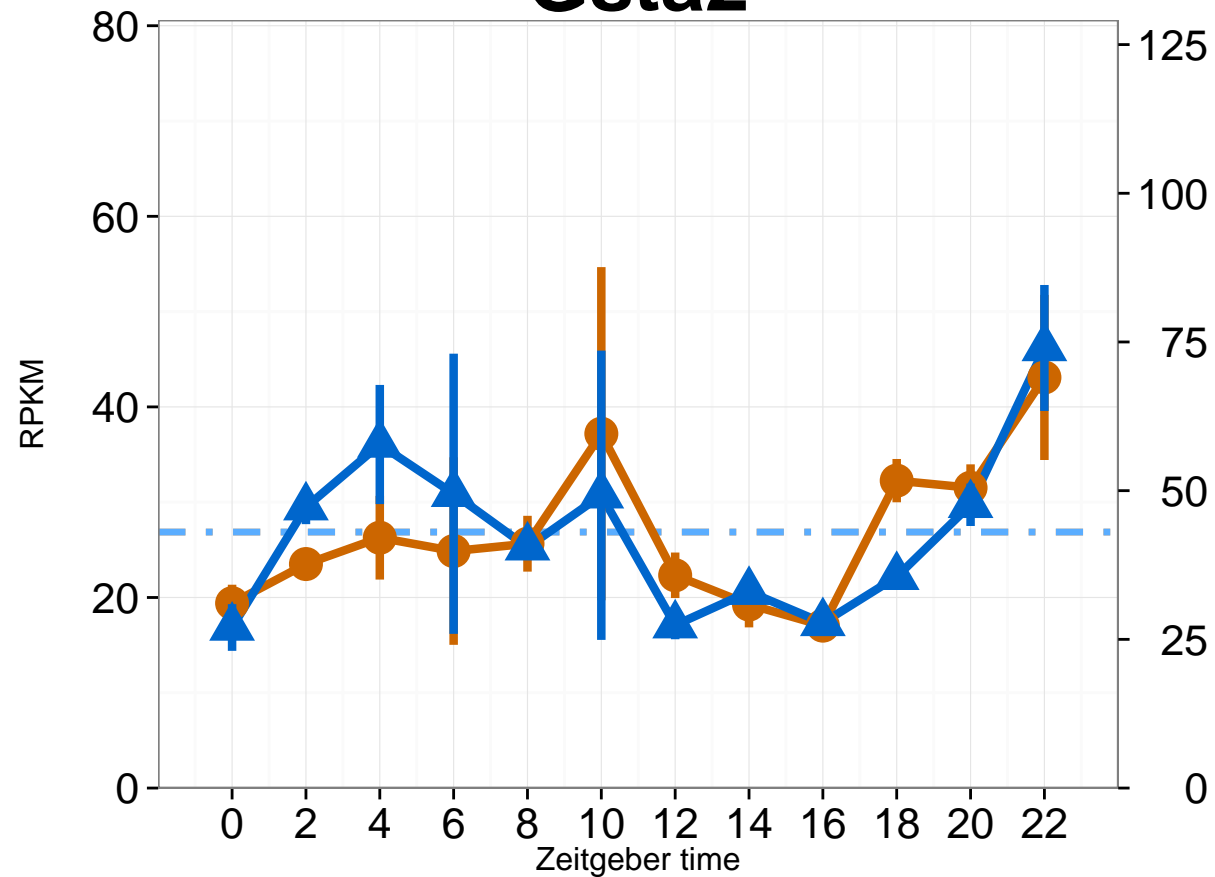

## Gsta2

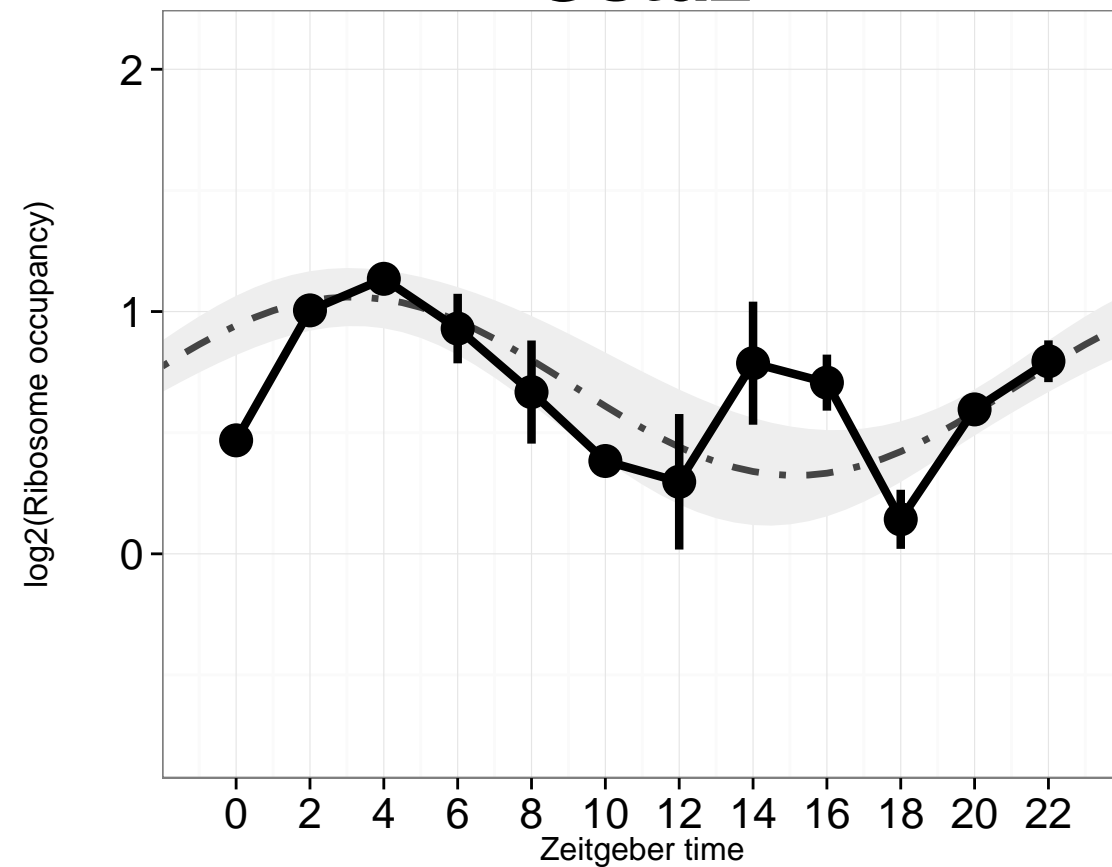

Supplement: SuppDataset_1.zip [file Gsta2_set_A.pdf › Supplemental Dataset 1/A-mRNA_nonrhyth_translation_nonrhyth/Gsta2_set_A.pdf]

## Gstk1

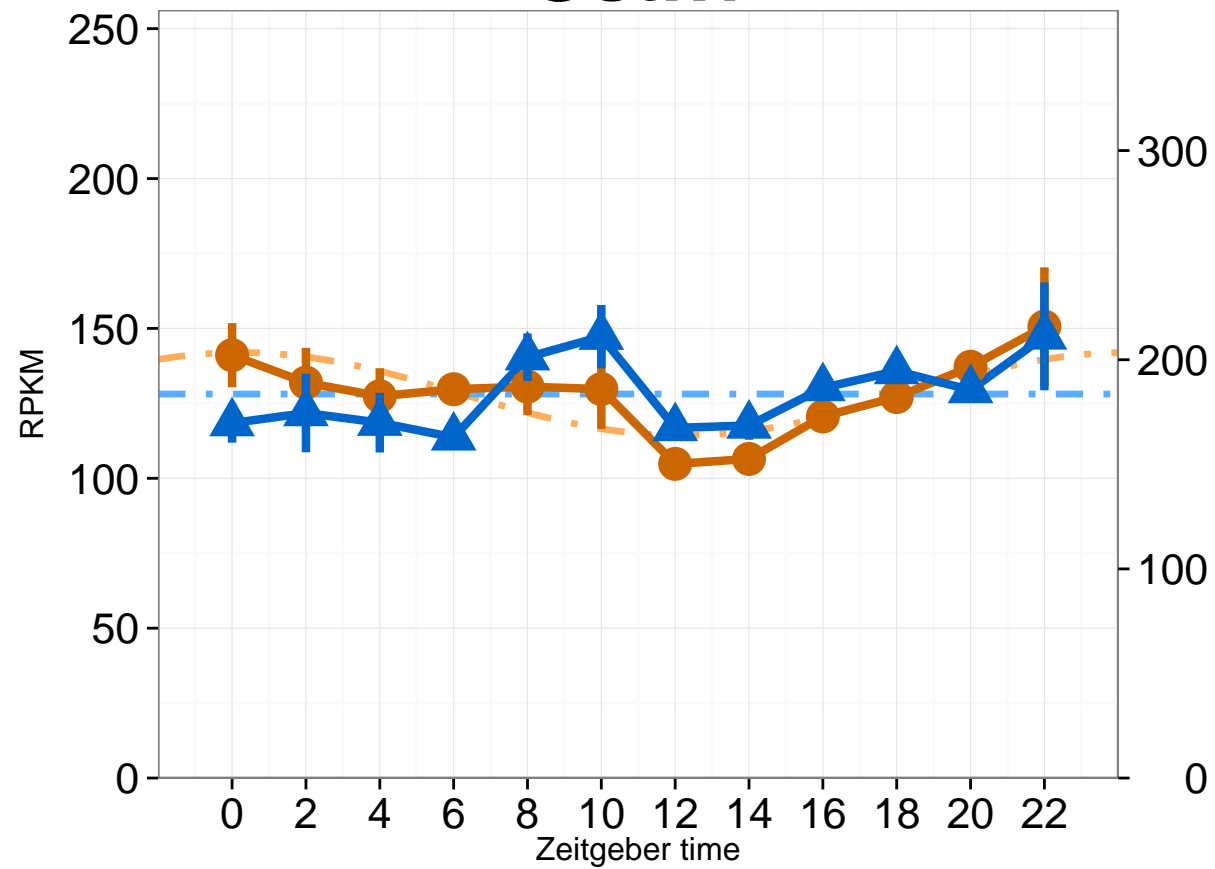

## Gstk1

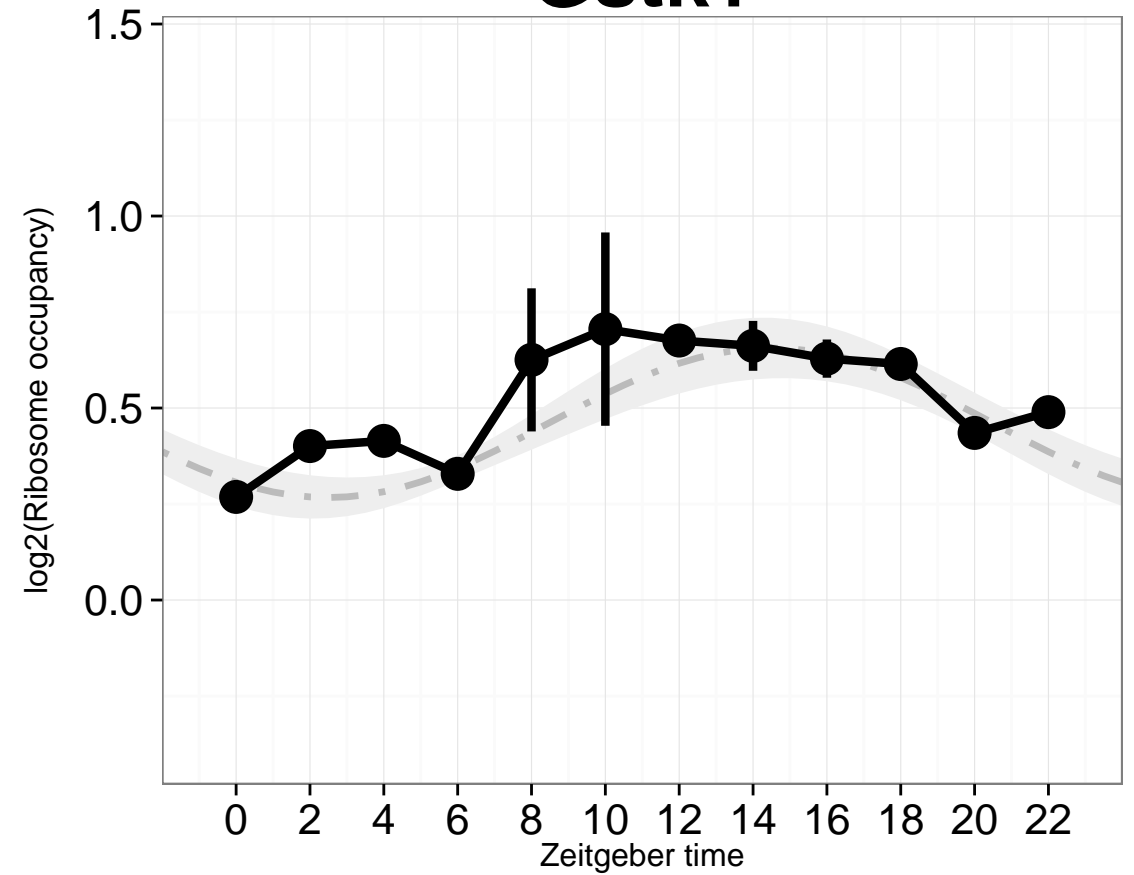

Supplement: SuppDataset_1.zip [file Gstk1_set_A.pdf › Supplemental Dataset 1/A-mRNA_nonrhyth_translation_nonrhyth/Gstk1_set_A.pdf]

# Gstm1

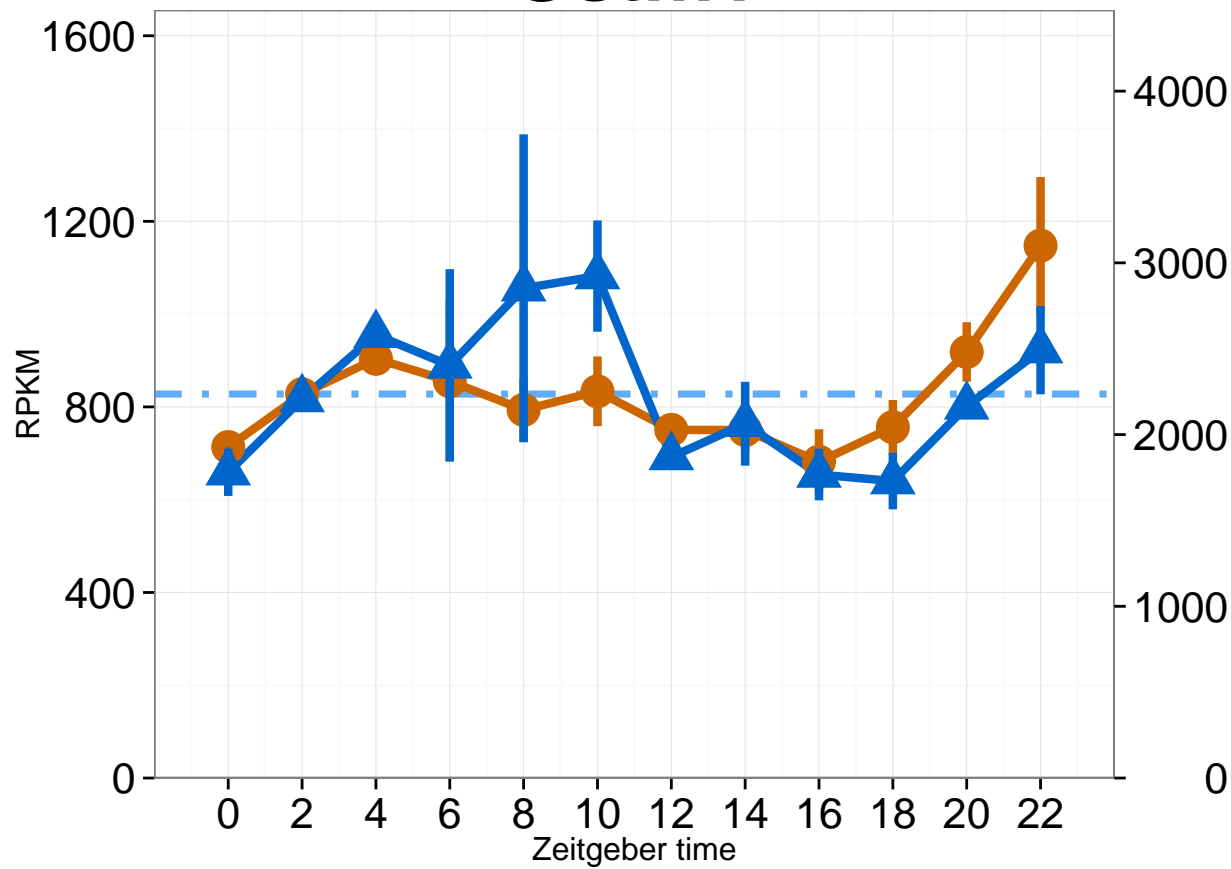

# Gstm1

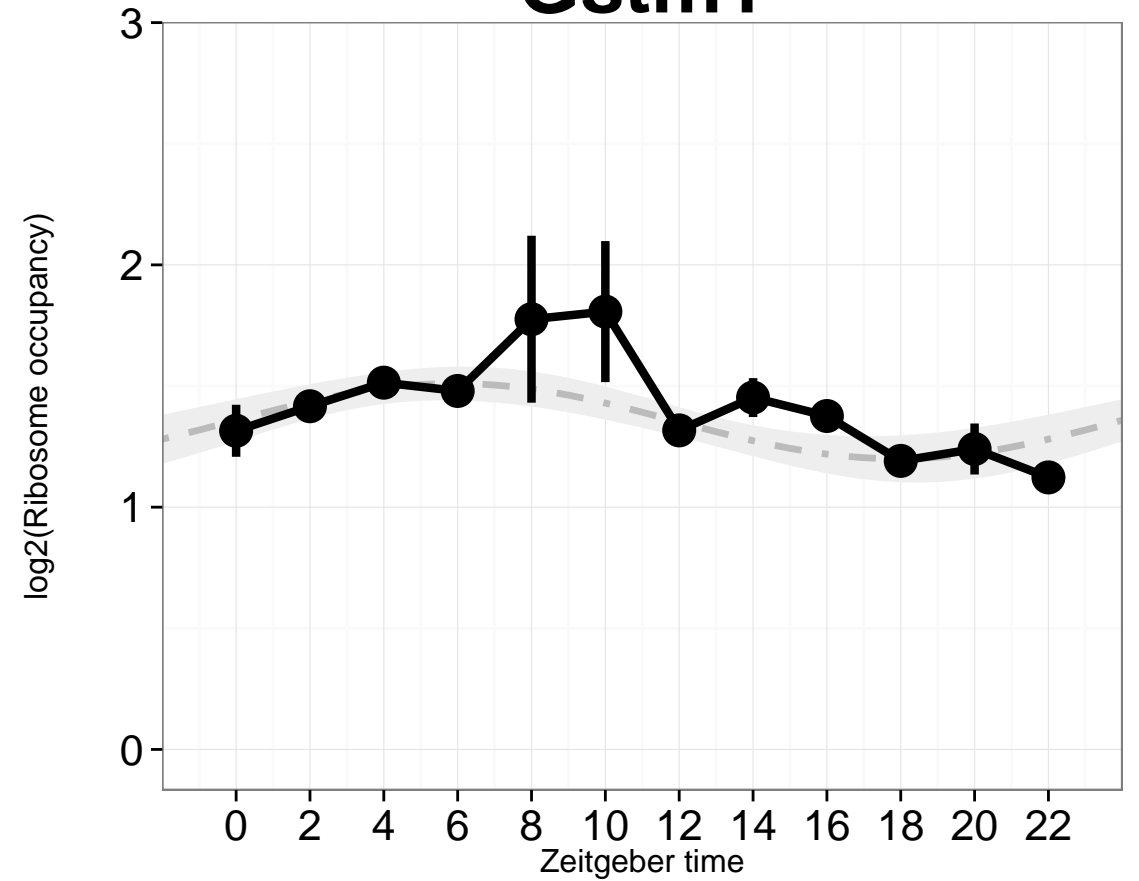

Supplement: SuppDataset_1.zip [file Gstm1_set_A.pdf › Supplemental Dataset 1/A-mRNA_nonrhyth_translation_nonrhyth/Gstm1_set_A.pdf]

# Gstm2

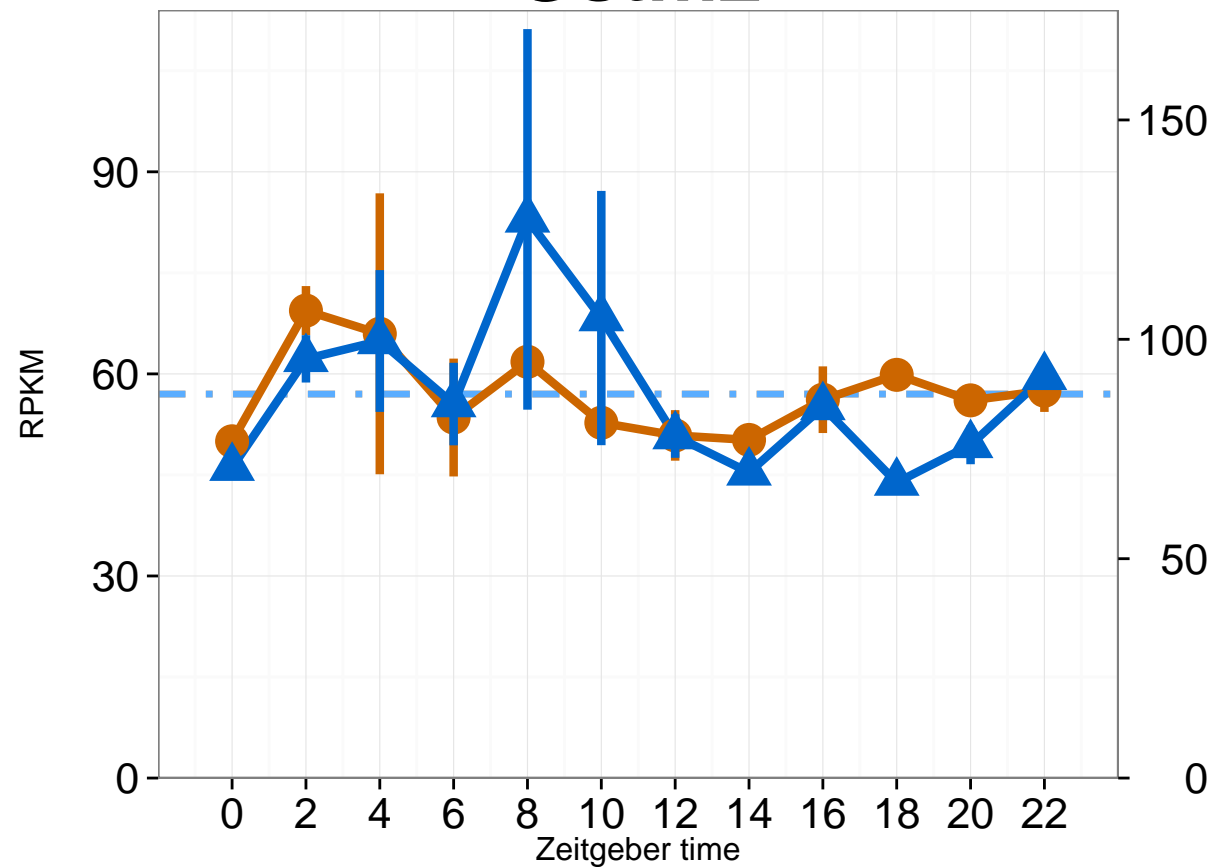

# Gstm2

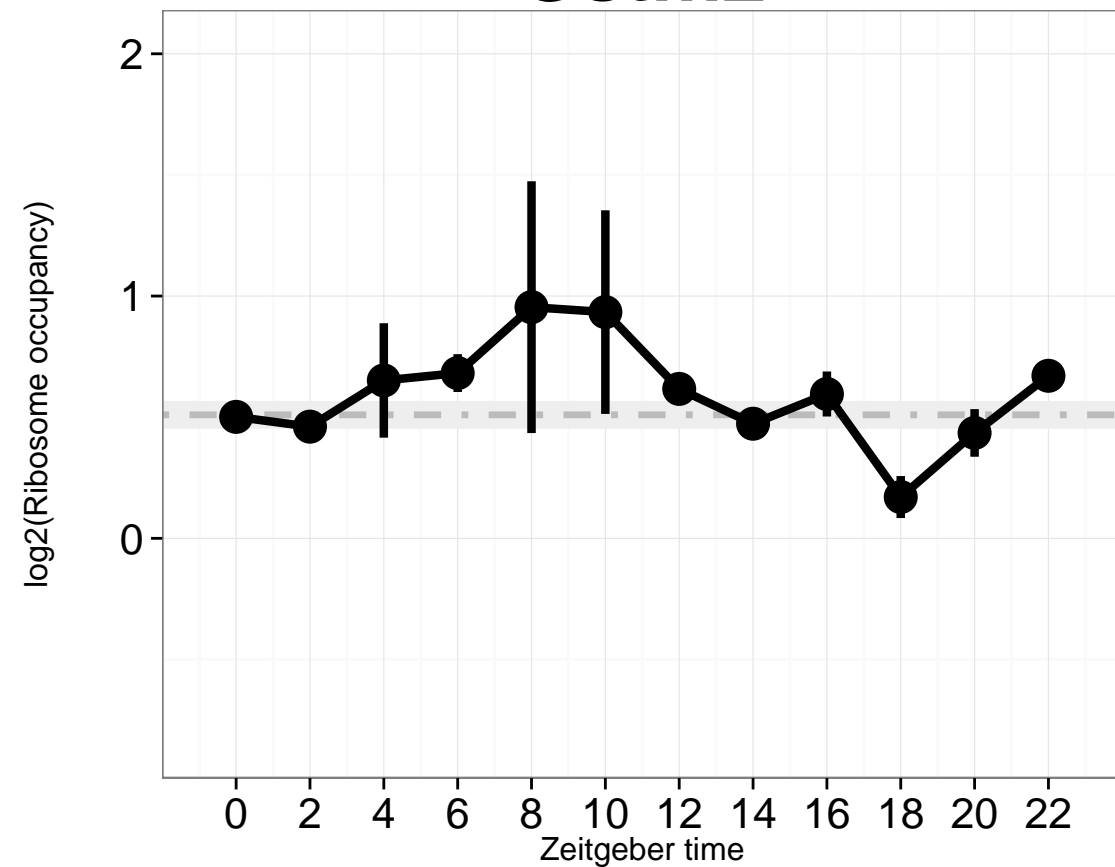

Supplement: SuppDataset_1.zip [file Gstm2_set_A.pdf › Supplemental Dataset 1/A-mRNA_nonrhyth_translation_nonrhyth/Gstm2_set_A.pdf]

# Gstm6

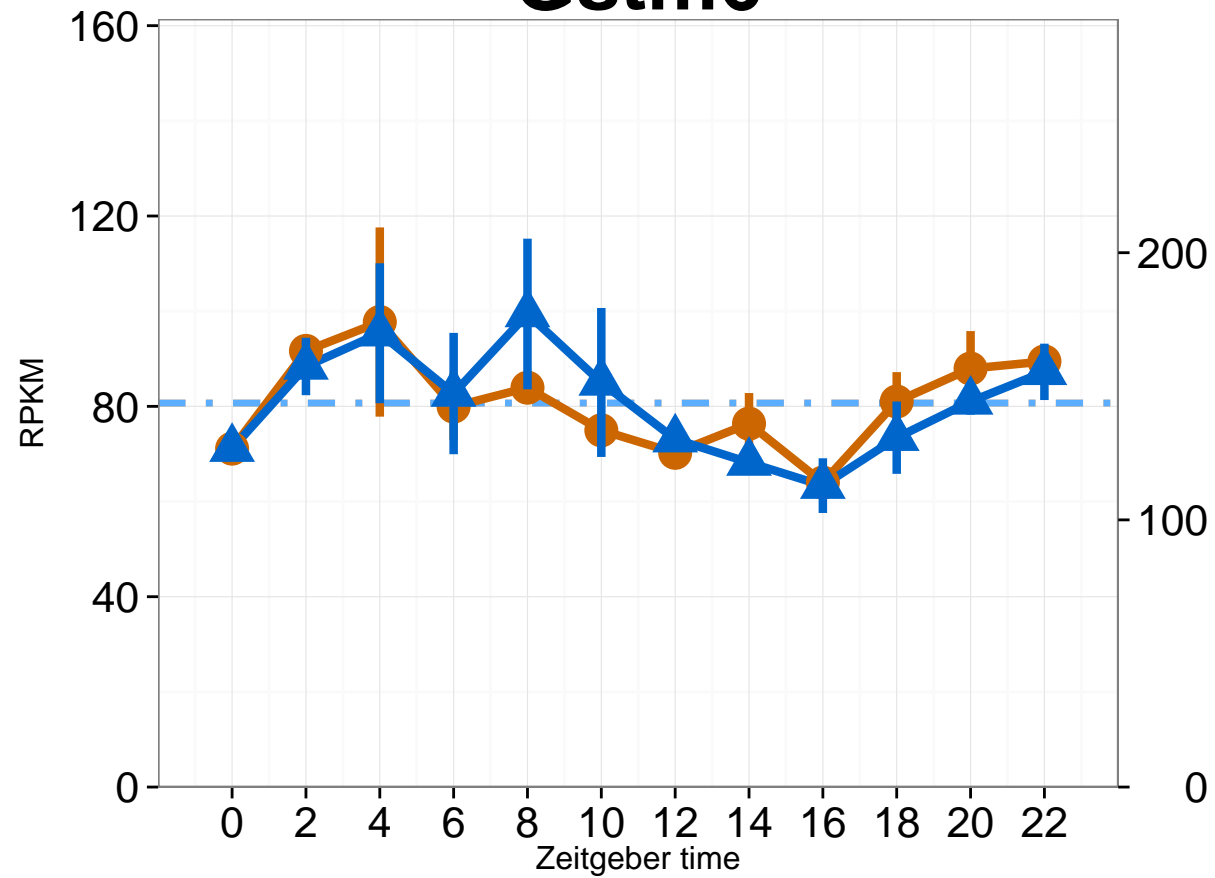

# Gstm6

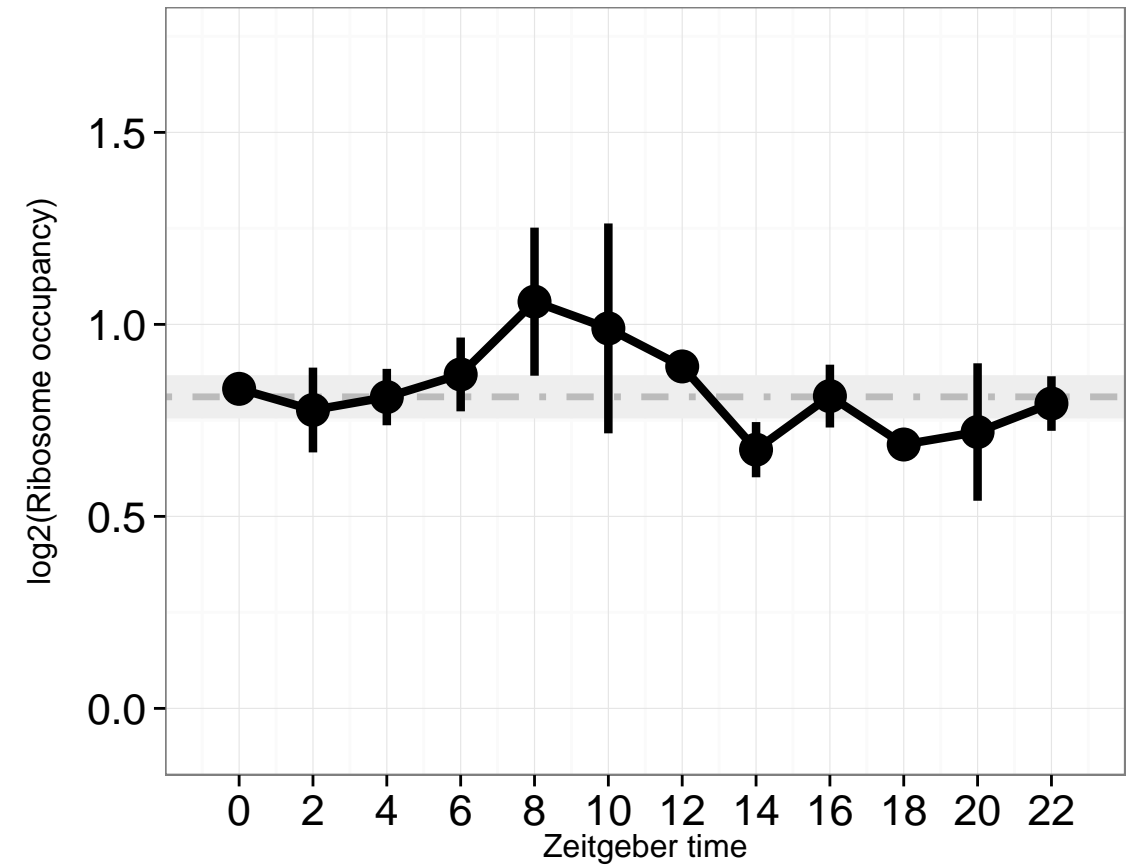

Supplement: SuppDataset_1.zip [file Gstm6_set_A.pdf › Supplemental Dataset 1/A-mRNA_nonrhyth_translation_nonrhyth/Gstm6_set_A.pdf]

# Gstm7

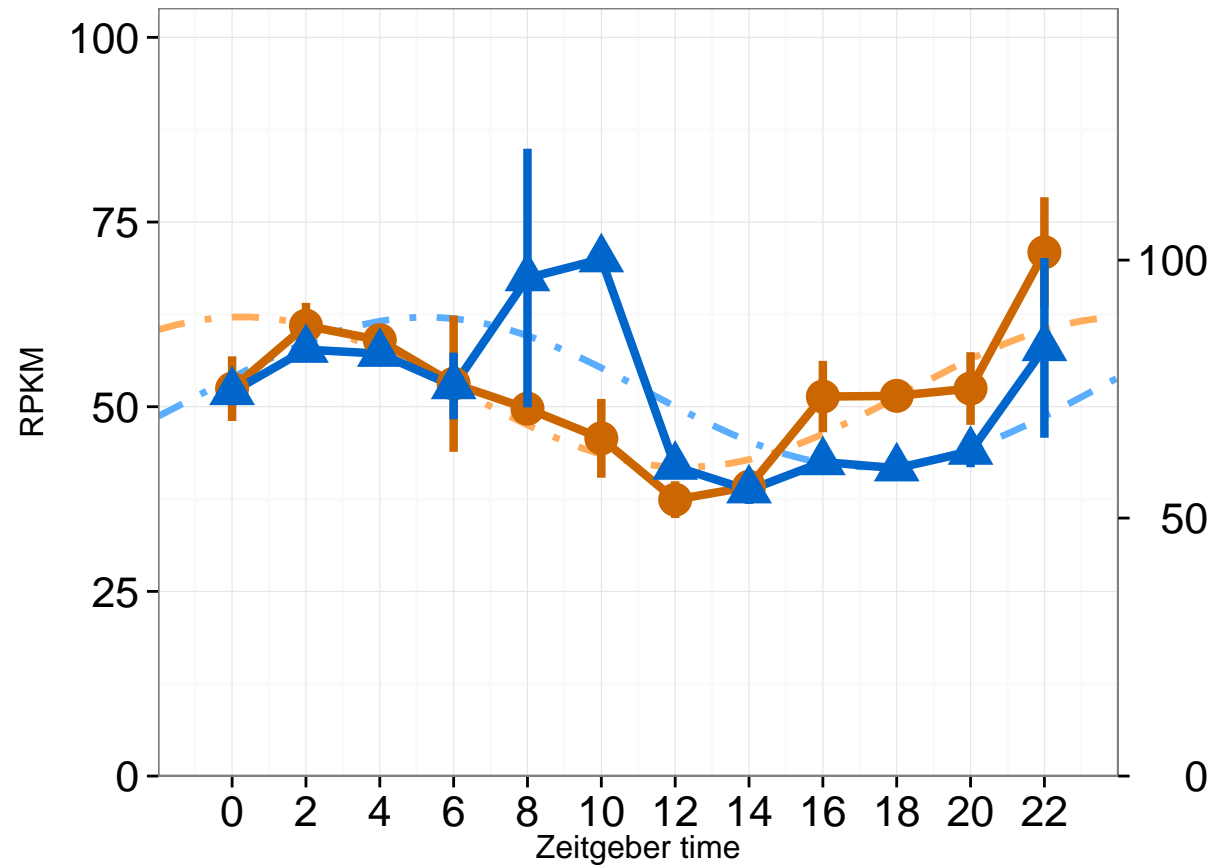

# Gstm7

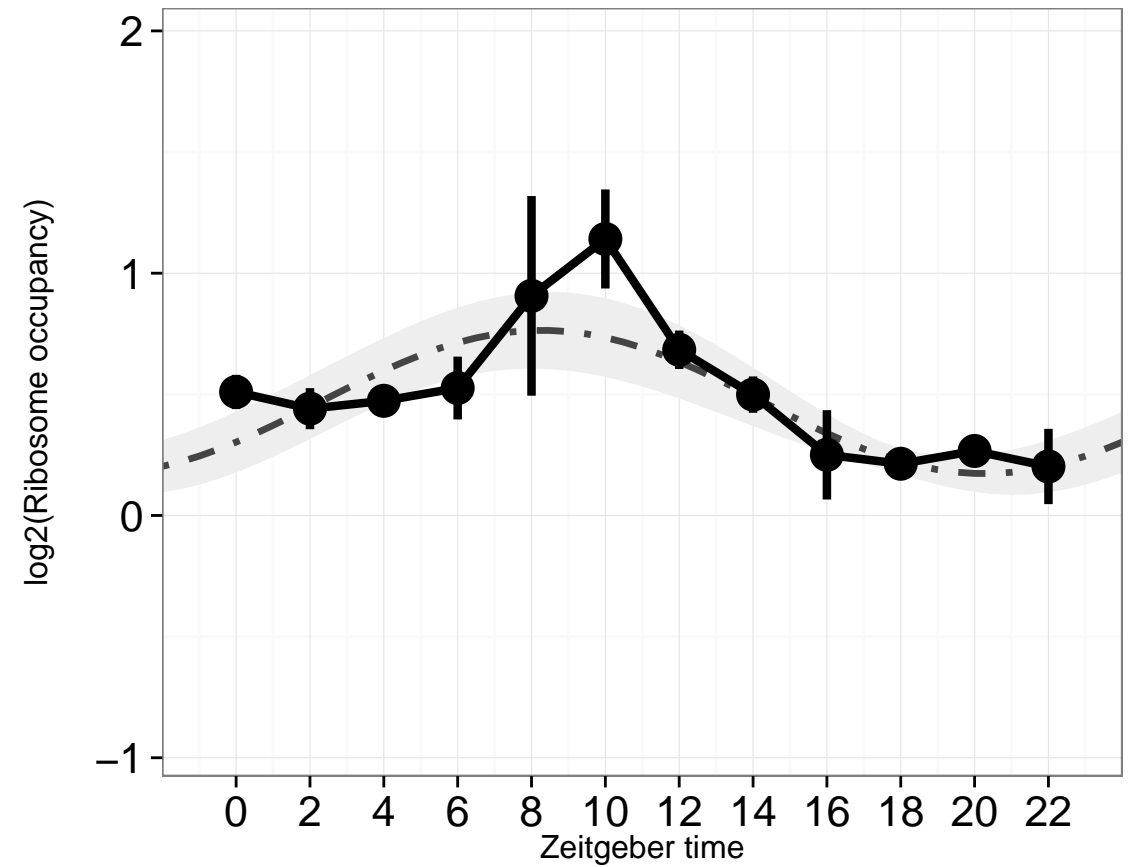

Supplement: SuppDataset_1.zip [file Gstm7_set_A.pdf › Supplemental Dataset 1/A-mRNA_nonrhyth_translation_nonrhyth/Gstm7_set_A.pdf]

## Gsto1

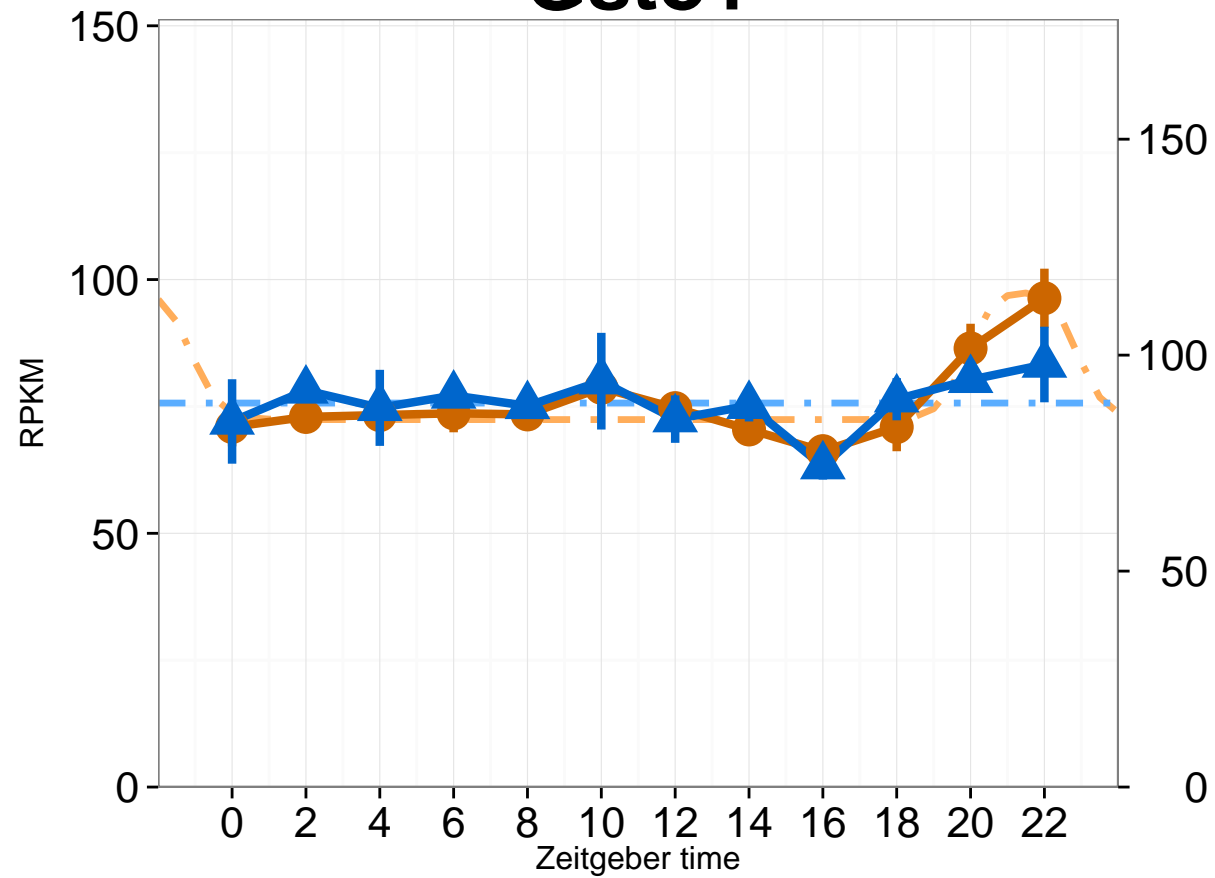

## Gsto1

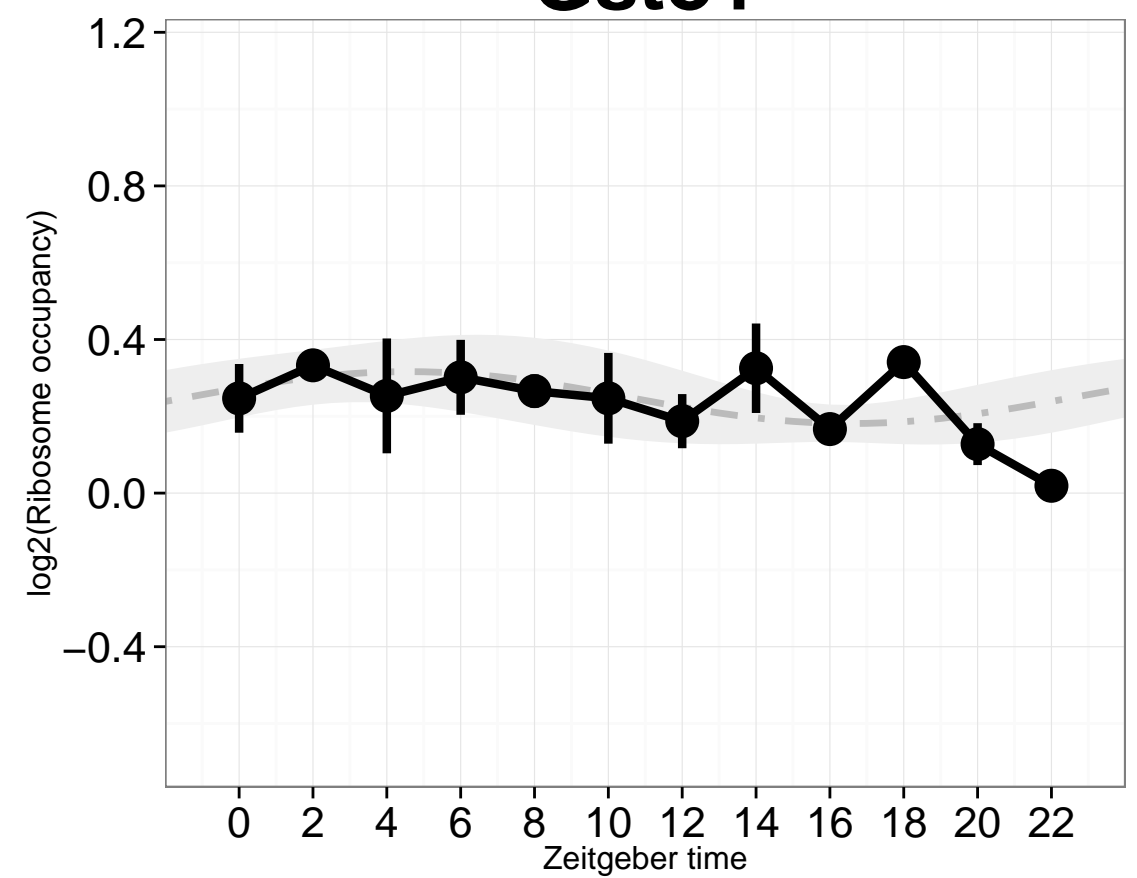

Supplement: SuppDataset_1.zip [file Gsto1_set_A.pdf › Supplemental Dataset 1/A-mRNA_nonrhyth_translation_nonrhyth/Gsto1_set_A.pdf]

## Gstt1

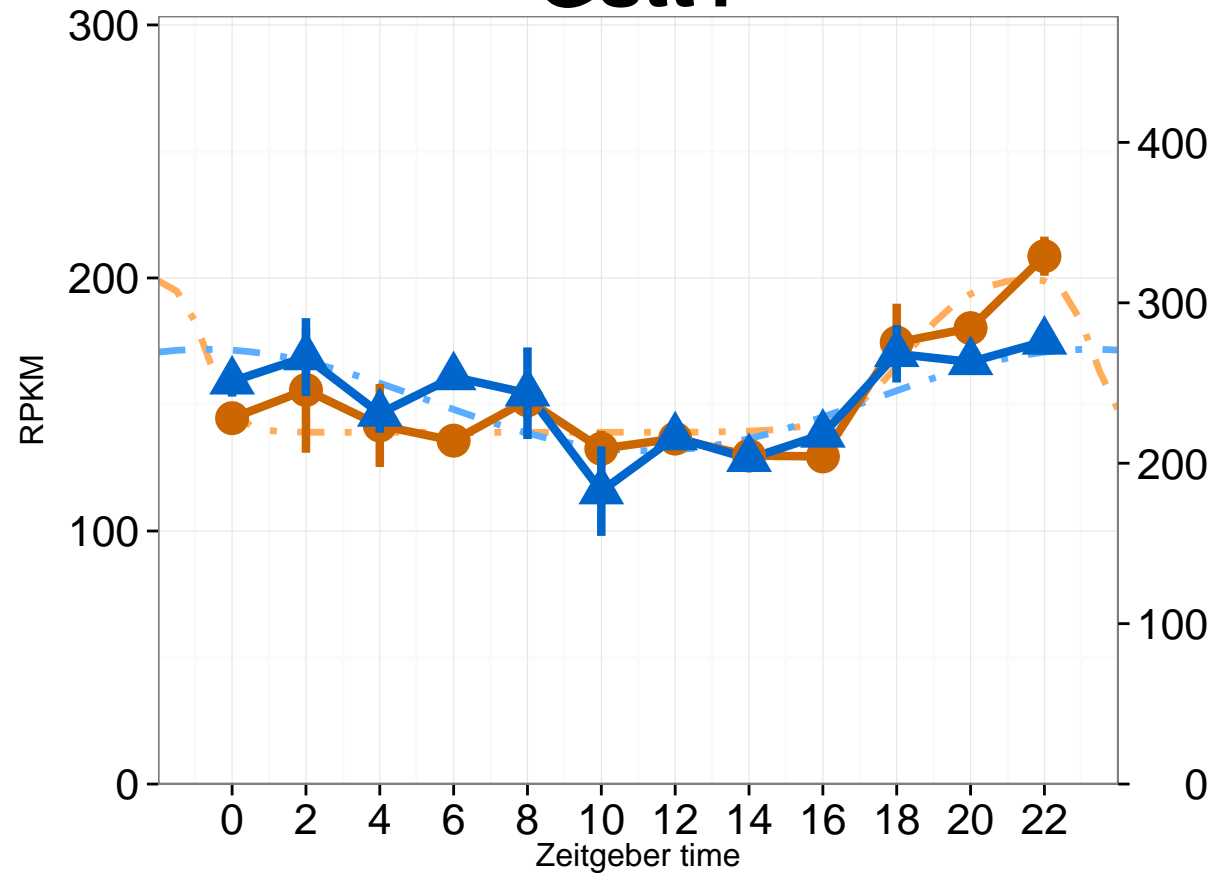

## Gstt1

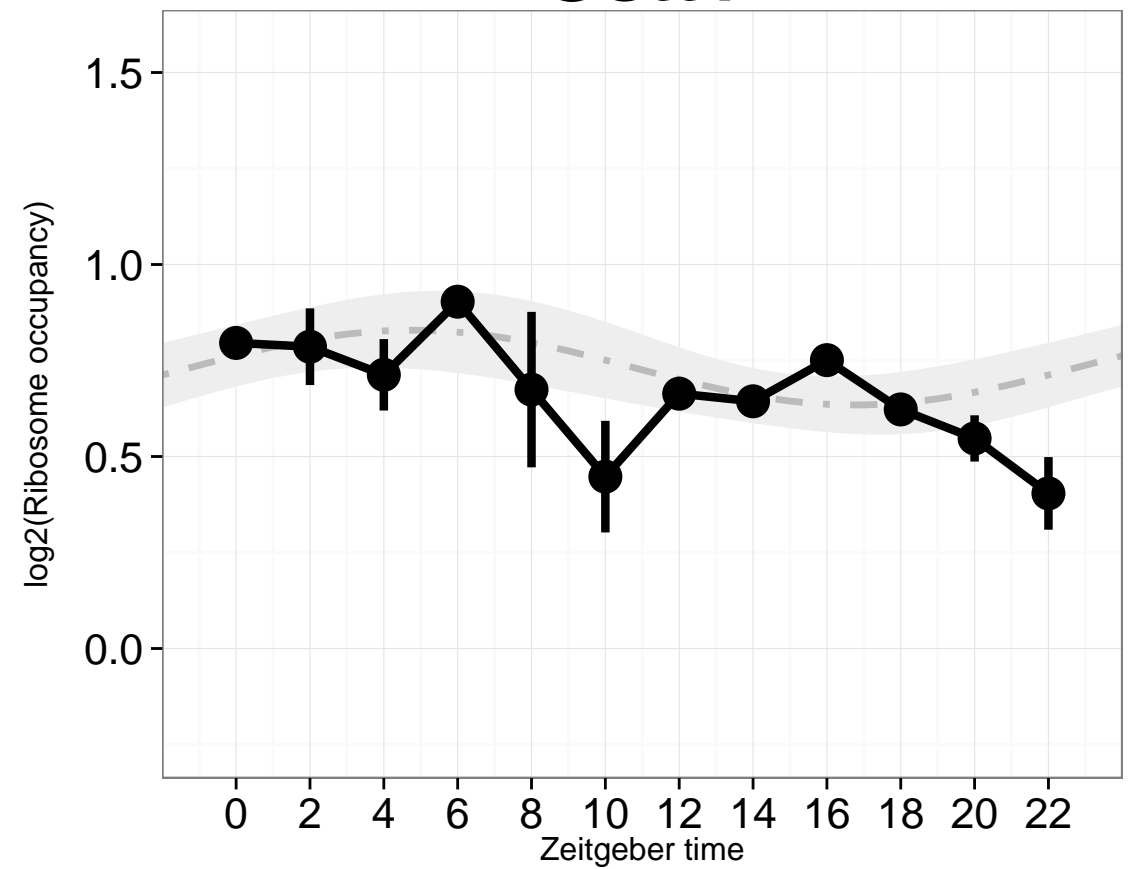

Supplement: SuppDataset_1.zip [file Gstt1_set_A.pdf › Supplemental Dataset 1/A-mRNA_nonrhyth_translation_nonrhyth/Gstt1_set_A.pdf]

## Gstt3

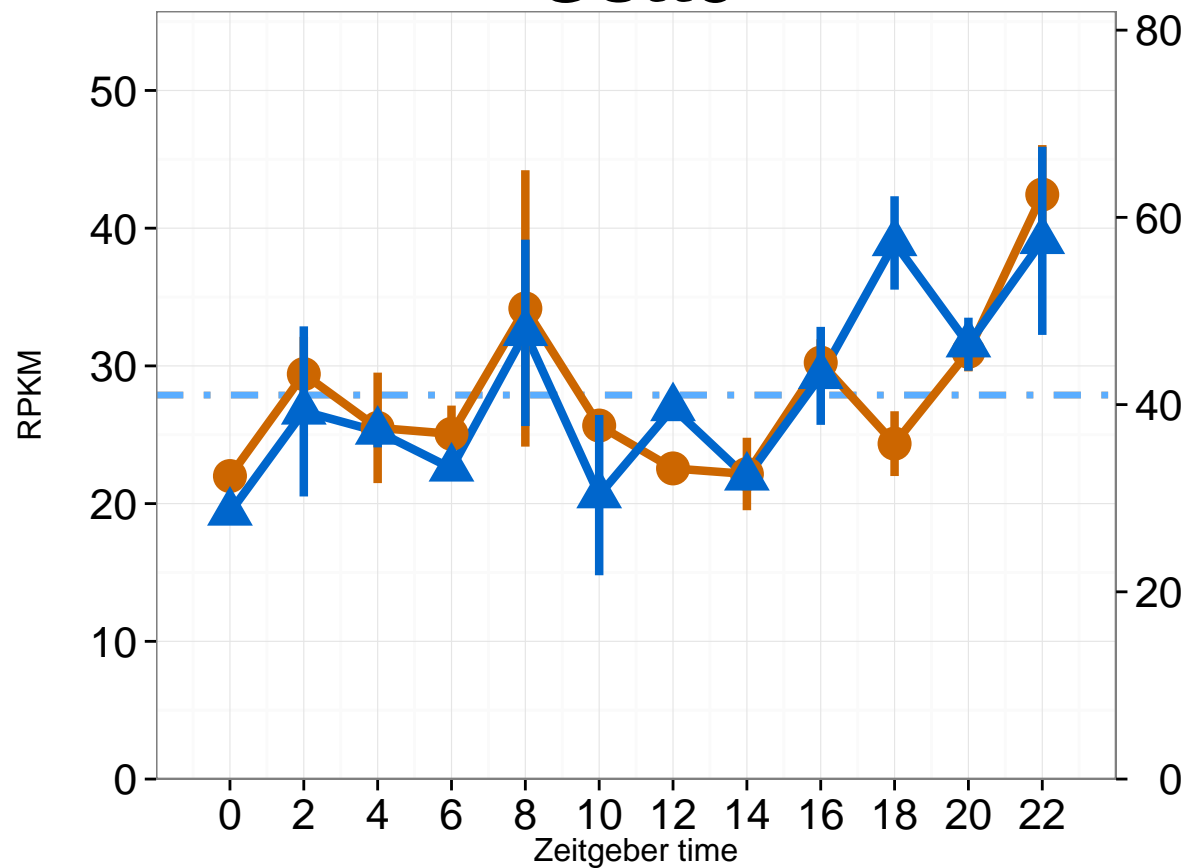

## Gstt3

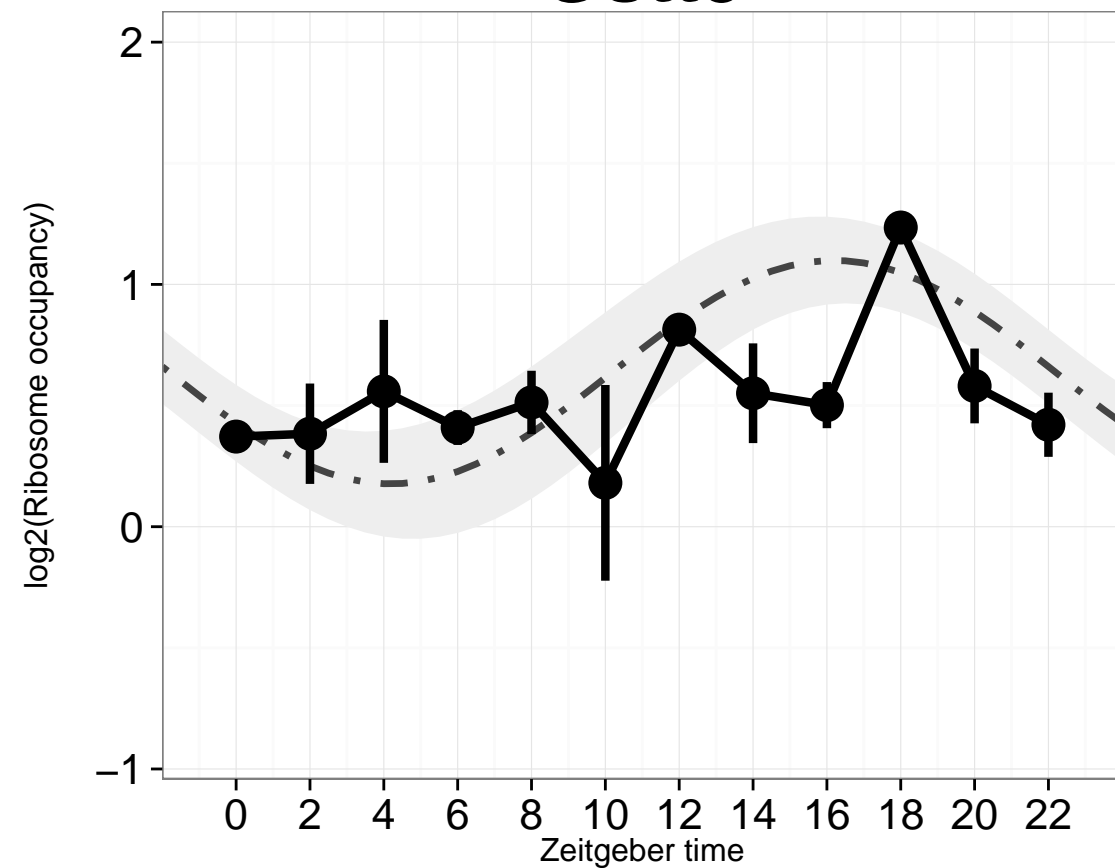

Supplement: SuppDataset_1.zip [file Gstt3_set_A.pdf › Supplemental Dataset 1/A-mRNA_nonrhyth_translation_nonrhyth/Gstt3_set_A.pdf]

## Gstz1

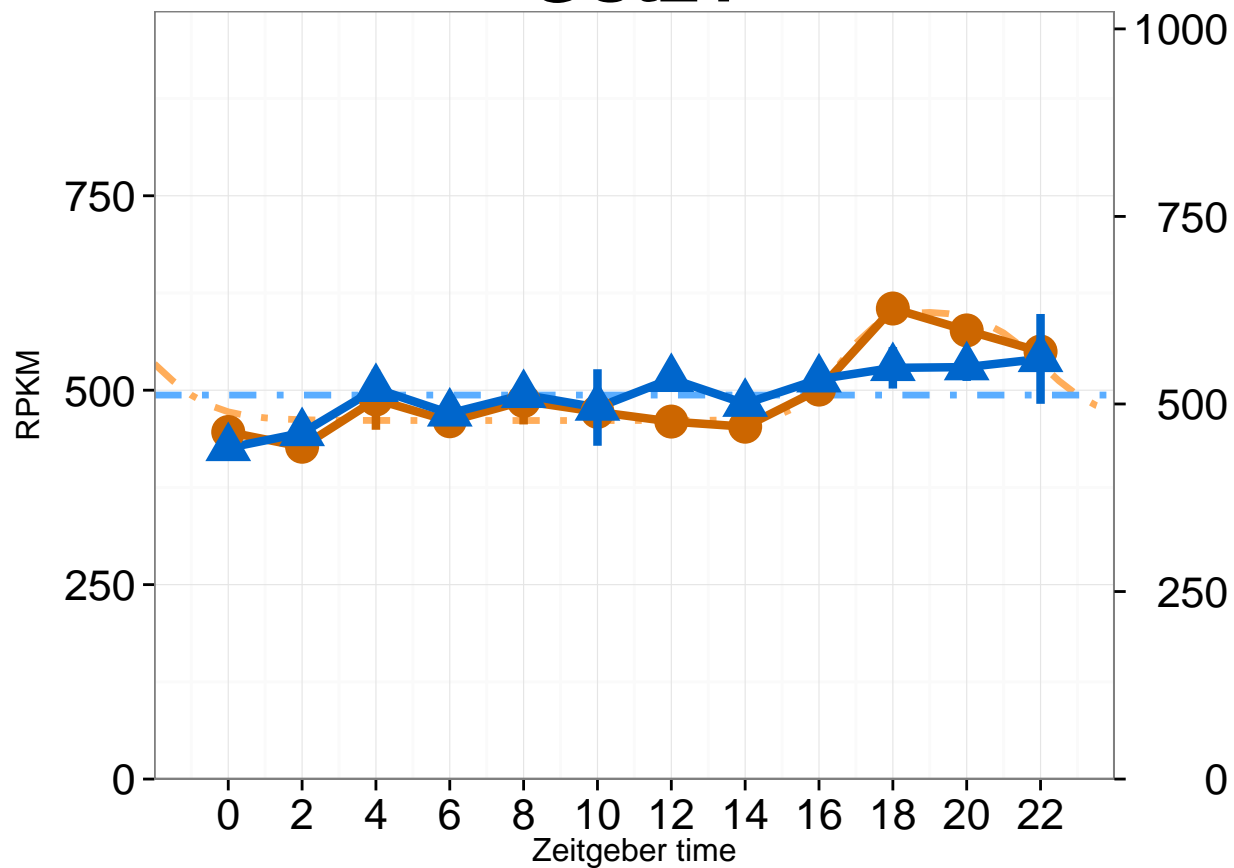

## Gstz1

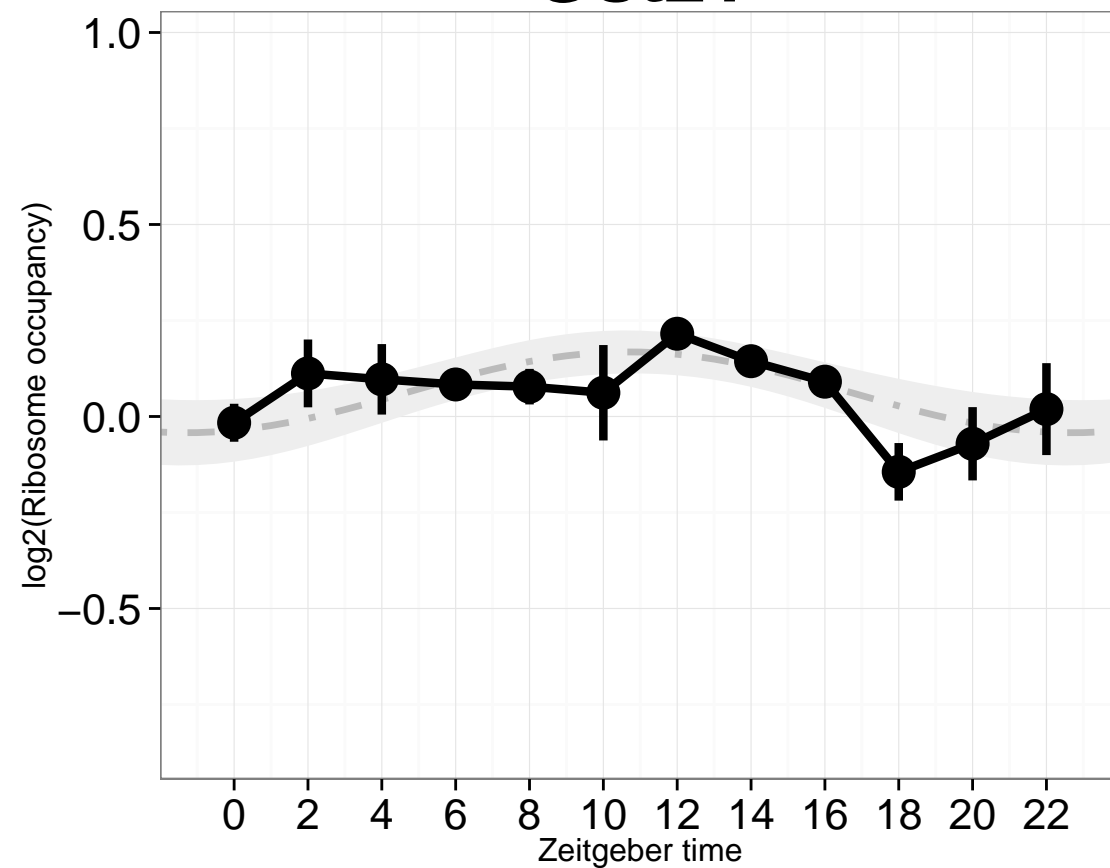

Supplement: SuppDataset_1.zip [file Gstz1_set_A.pdf › Supplemental Dataset 1/A-mRNA_nonrhyth_translation_nonrhyth/Gstz1_set_A.pdf]

# Gtdc1

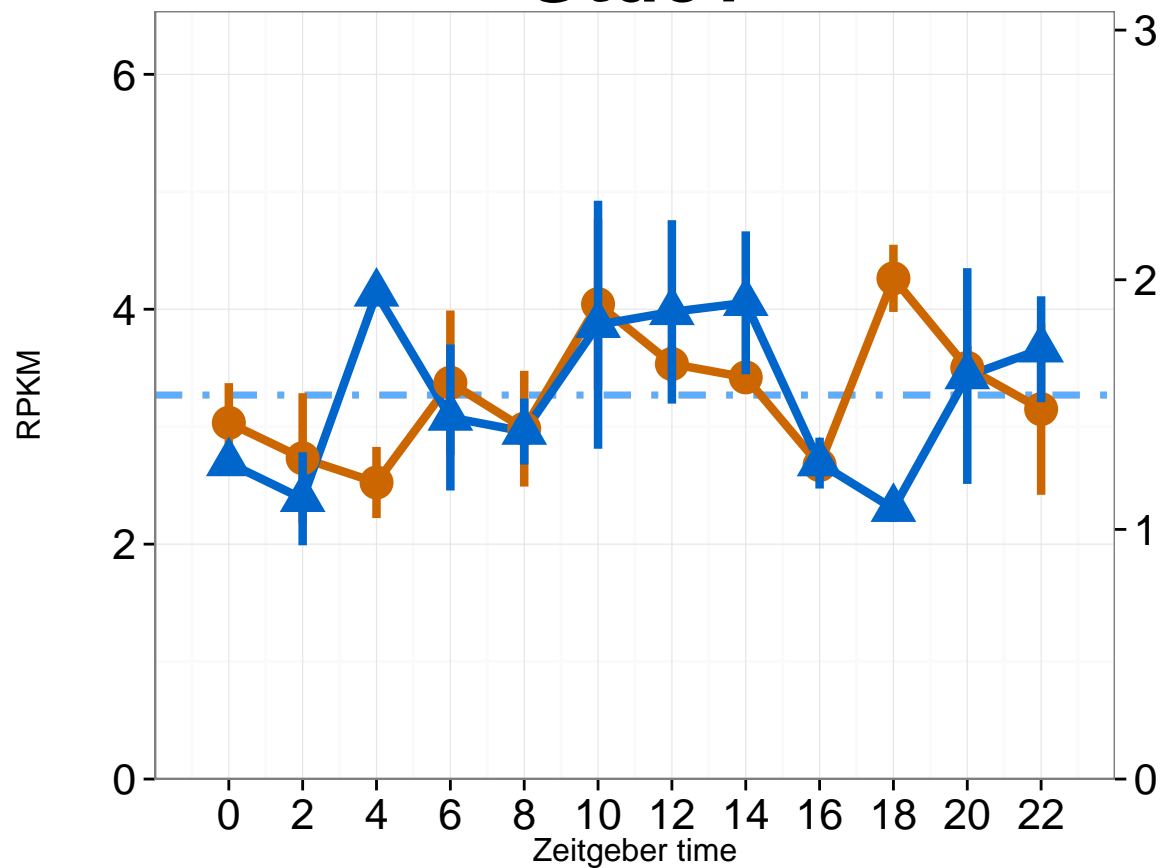

# Gtdc1

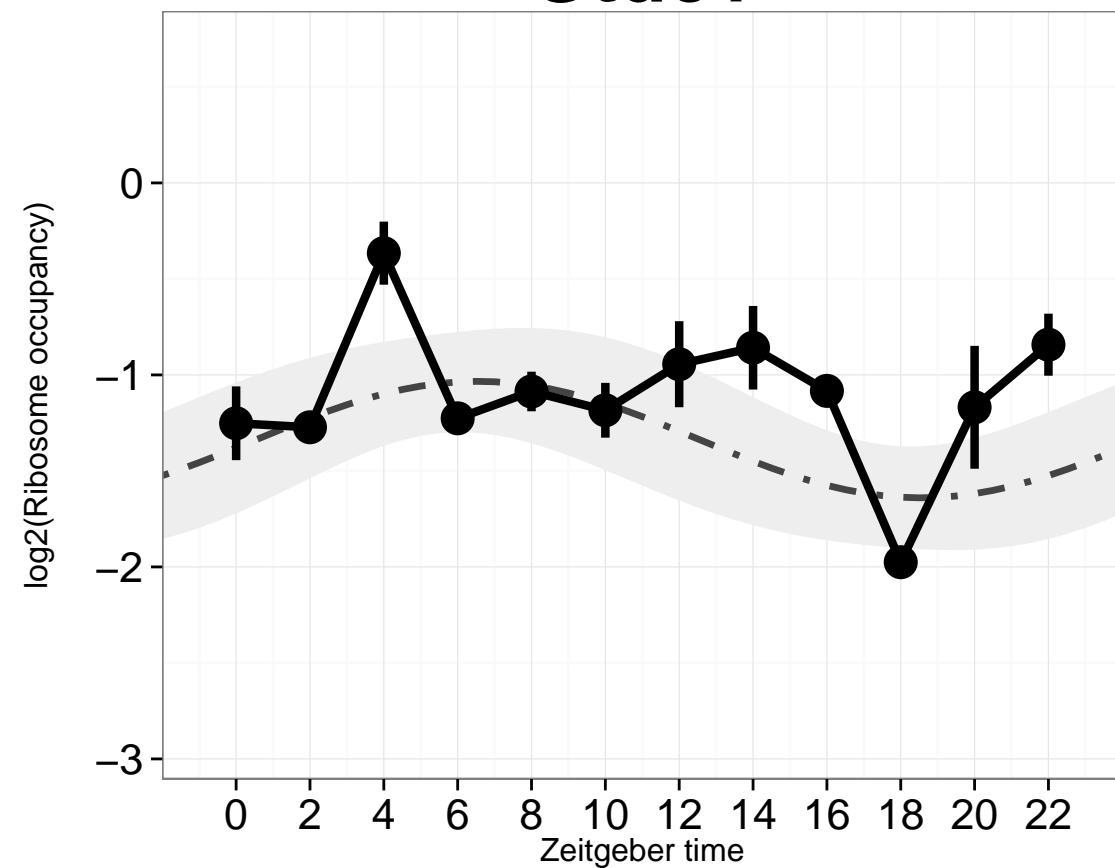

Supplement: SuppDataset_1.zip [file Gtdc1_set_A.pdf › Supplemental Dataset 1/A-mRNA_nonrhyth_translation_nonrhyth/Gtdc1_set_A.pdf]

# Gtf2a1

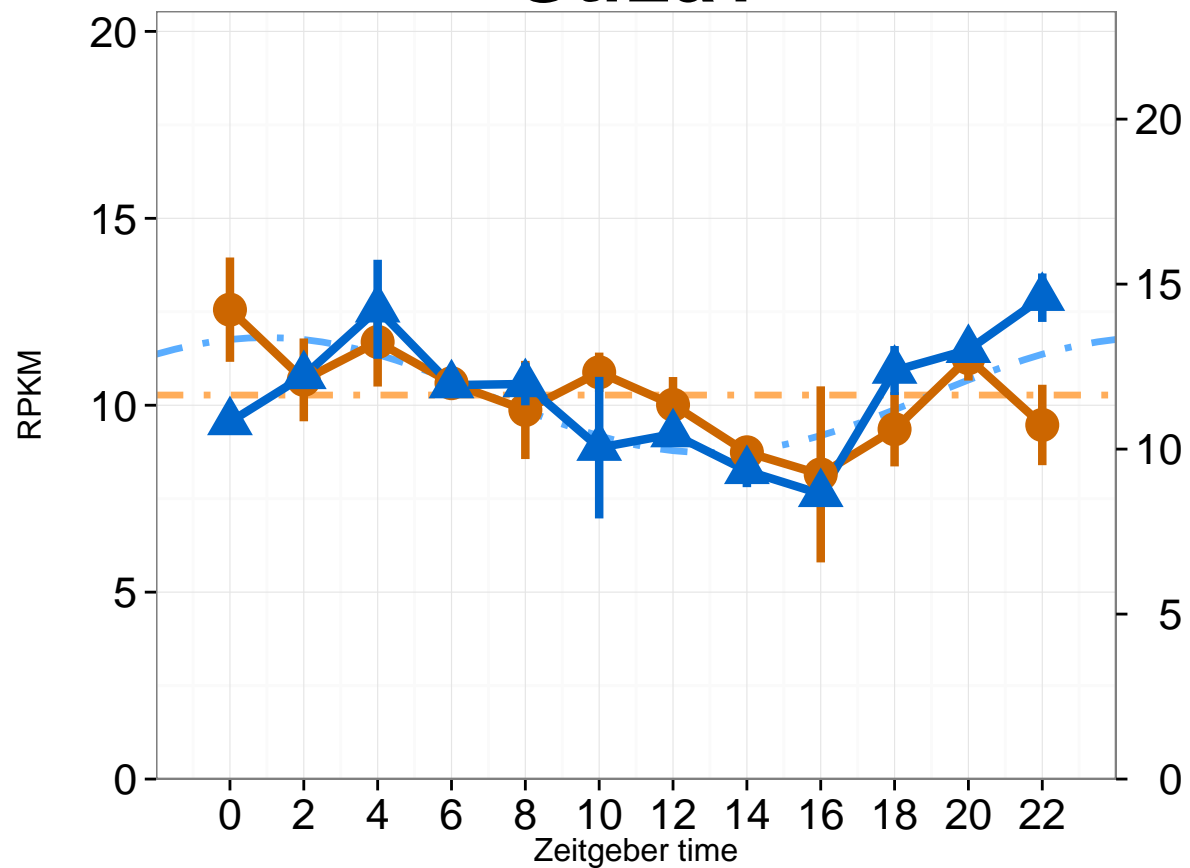

# Gtf2a1

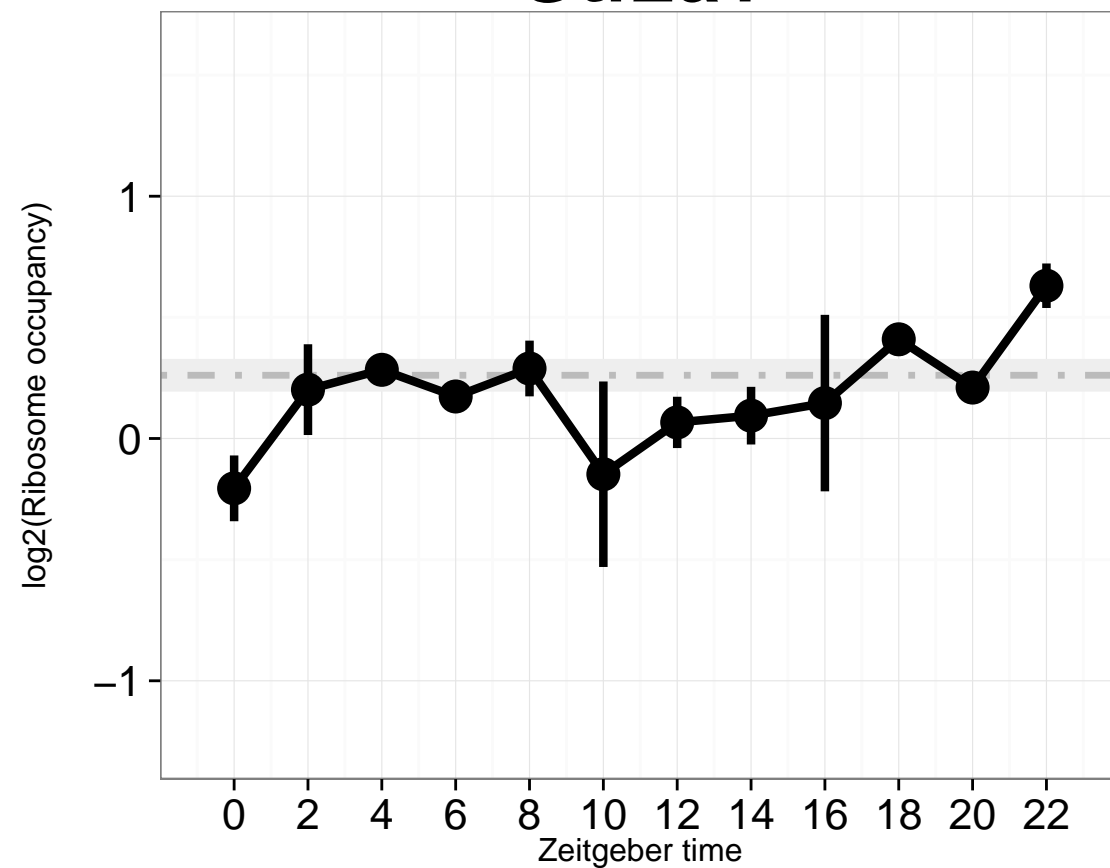

Supplement: SuppDataset_1.zip [file Gtf2a1_set_A.pdf › Supplemental Dataset 1/A-mRNA_nonrhyth_translation_nonrhyth/Gtf2a1_set_A.pdf]

# Gtf2e1

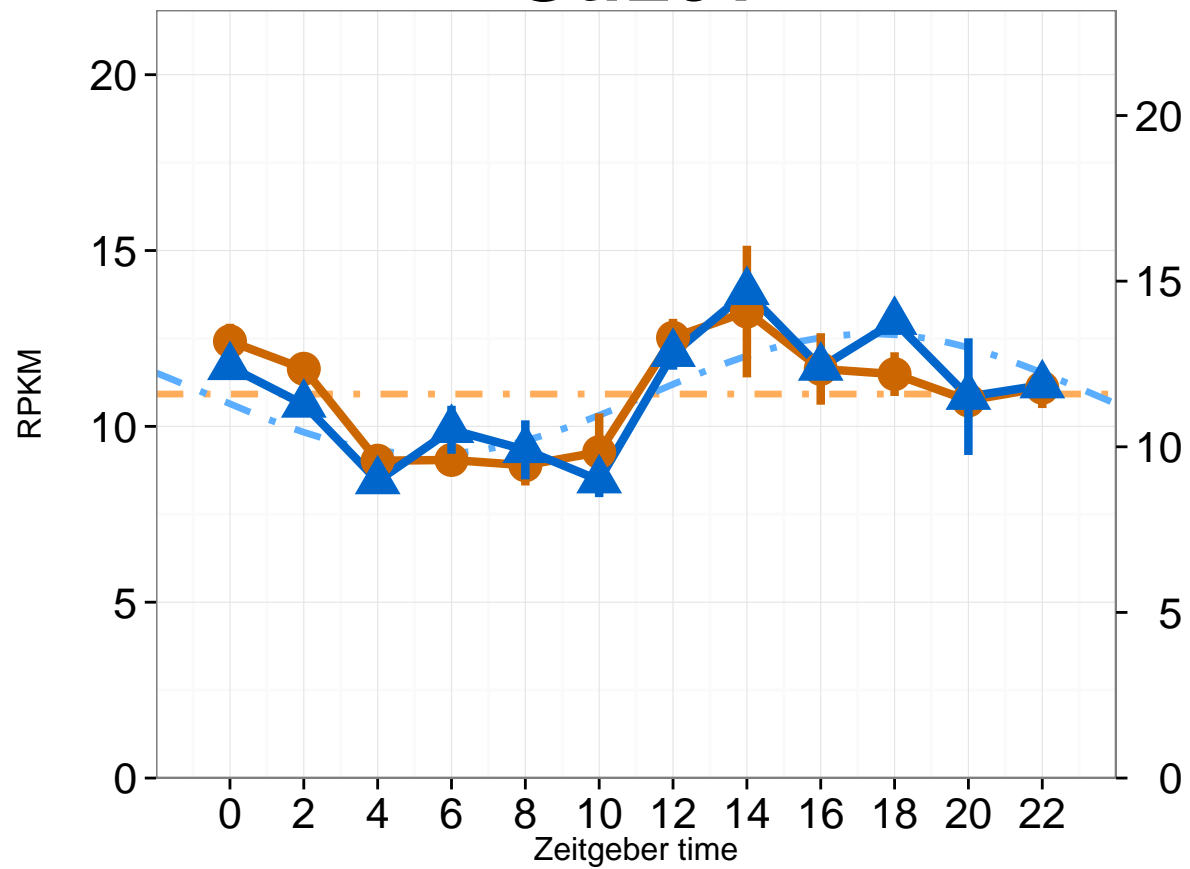

# Gtf2e1

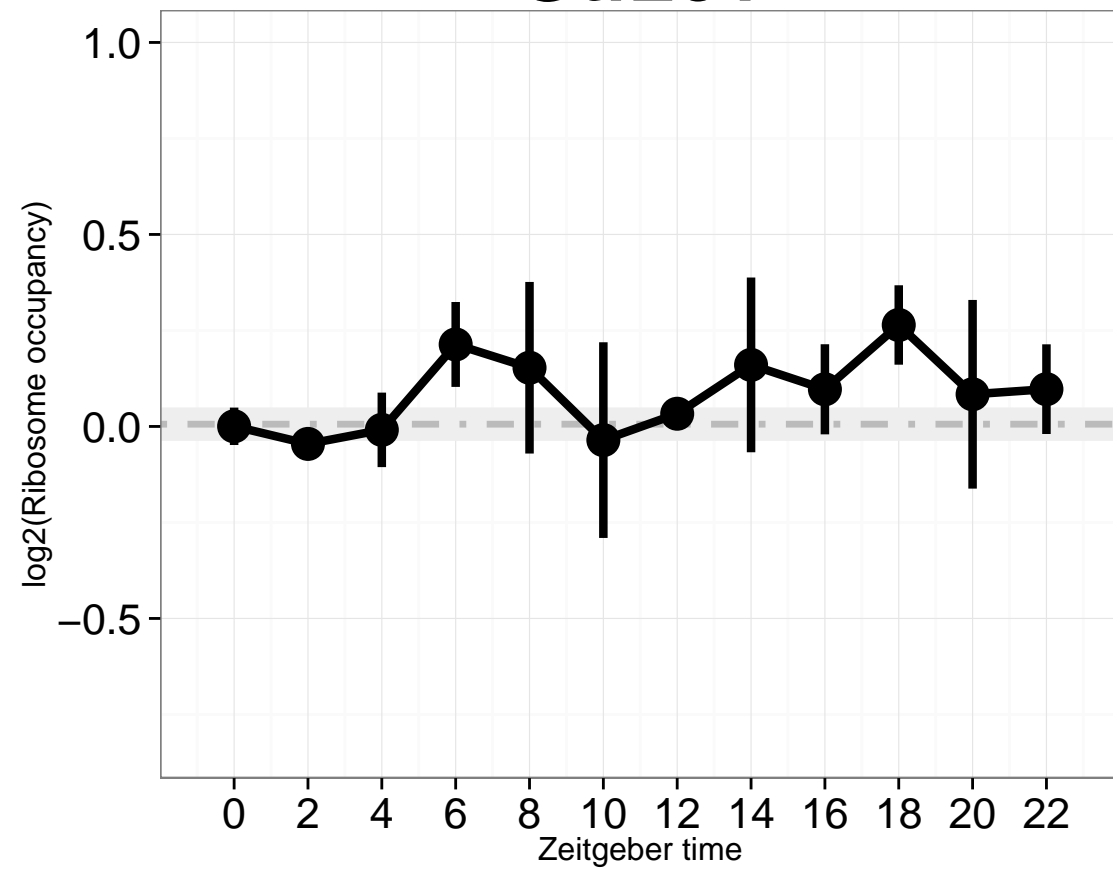

Supplement: SuppDataset_1.zip [file Gtf2e1_set_A.pdf › Supplemental Dataset 1/A-mRNA_nonrhyth_translation_nonrhyth/Gtf2e1_set_A.pdf]

# Gtf2f1

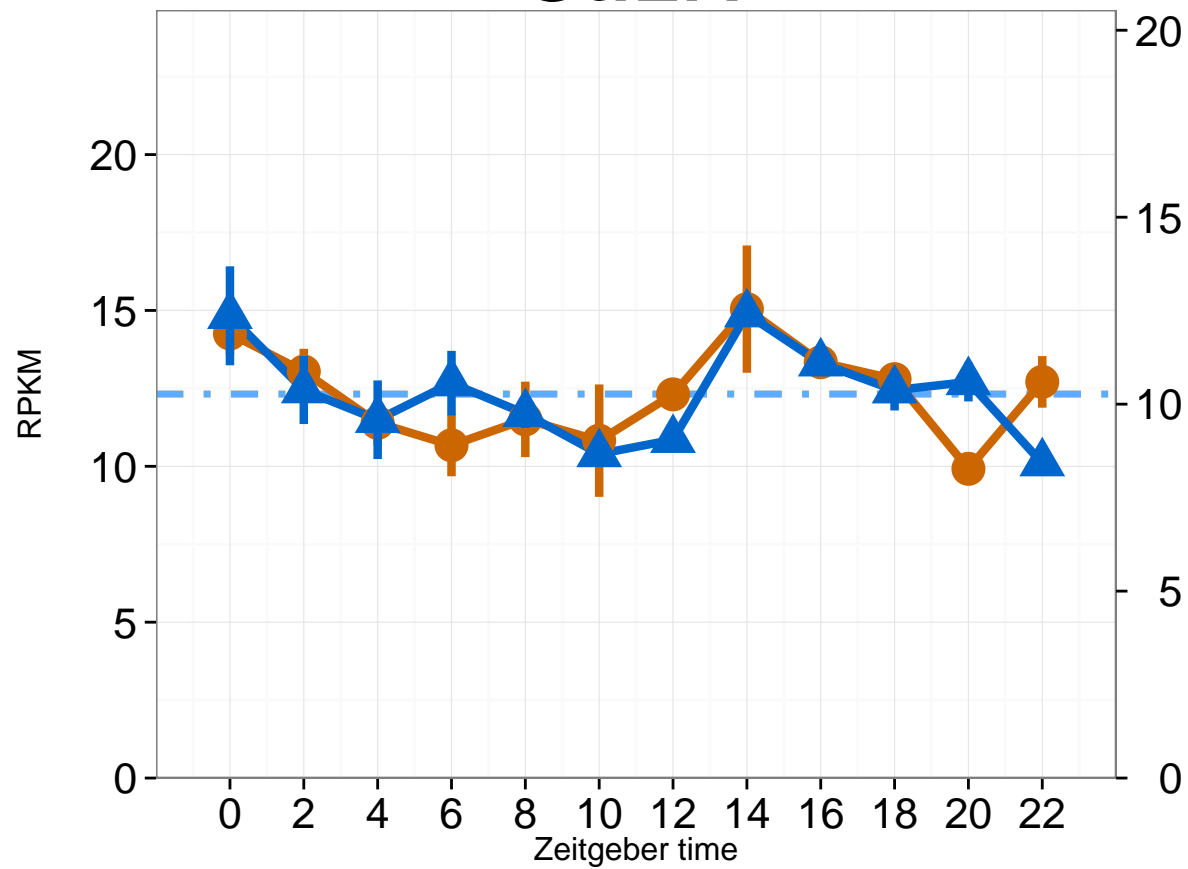

# Gtf2f1

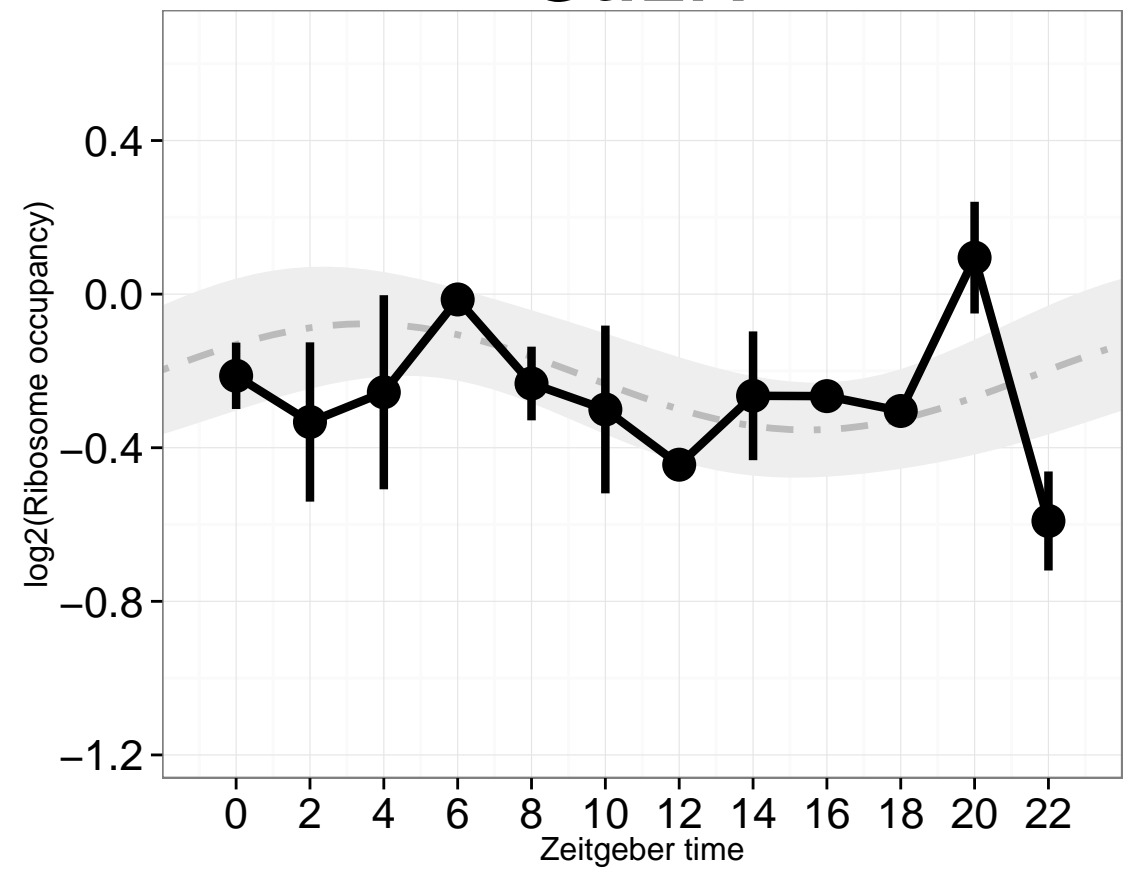

Supplement: SuppDataset_1.zip [file Gtf2f1_set_A.pdf › Supplemental Dataset 1/A-mRNA_nonrhyth_translation_nonrhyth/Gtf2f1_set_A.pdf]

# Gtf2f2

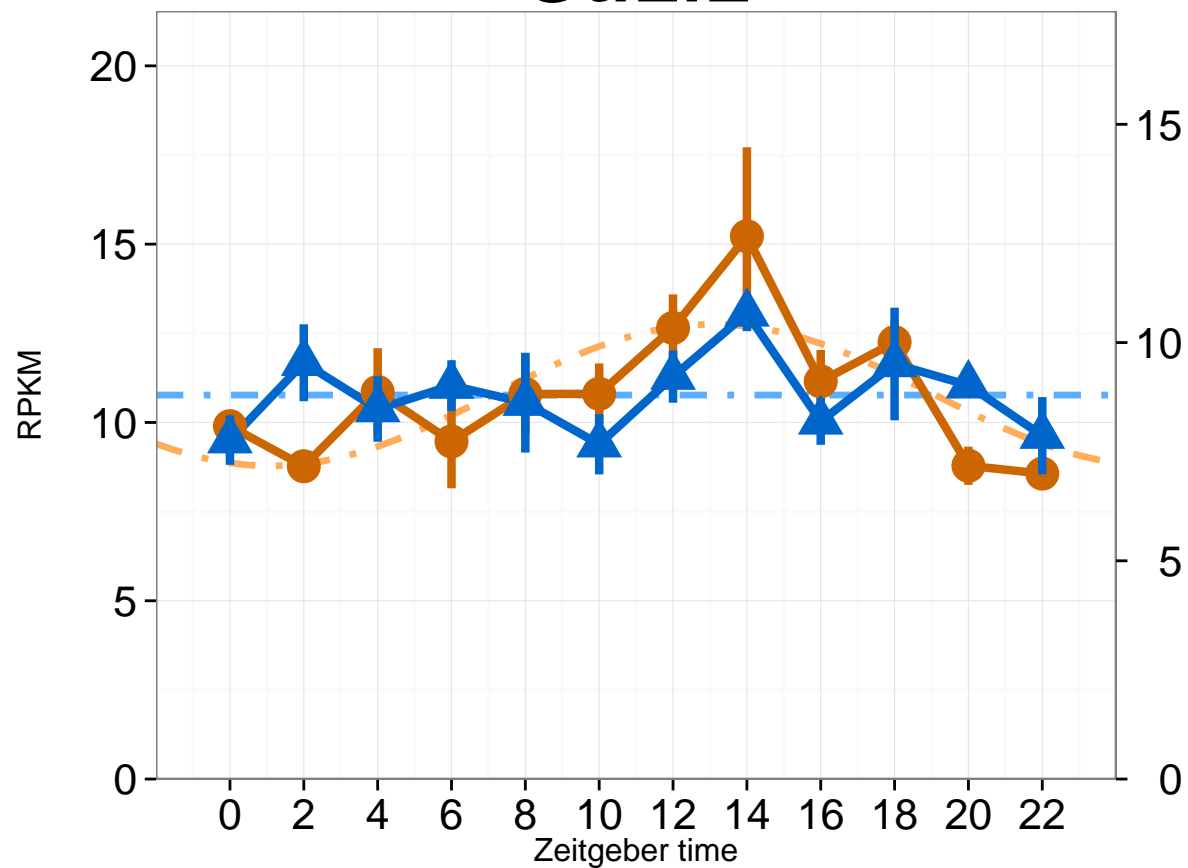

# Gtf2f2

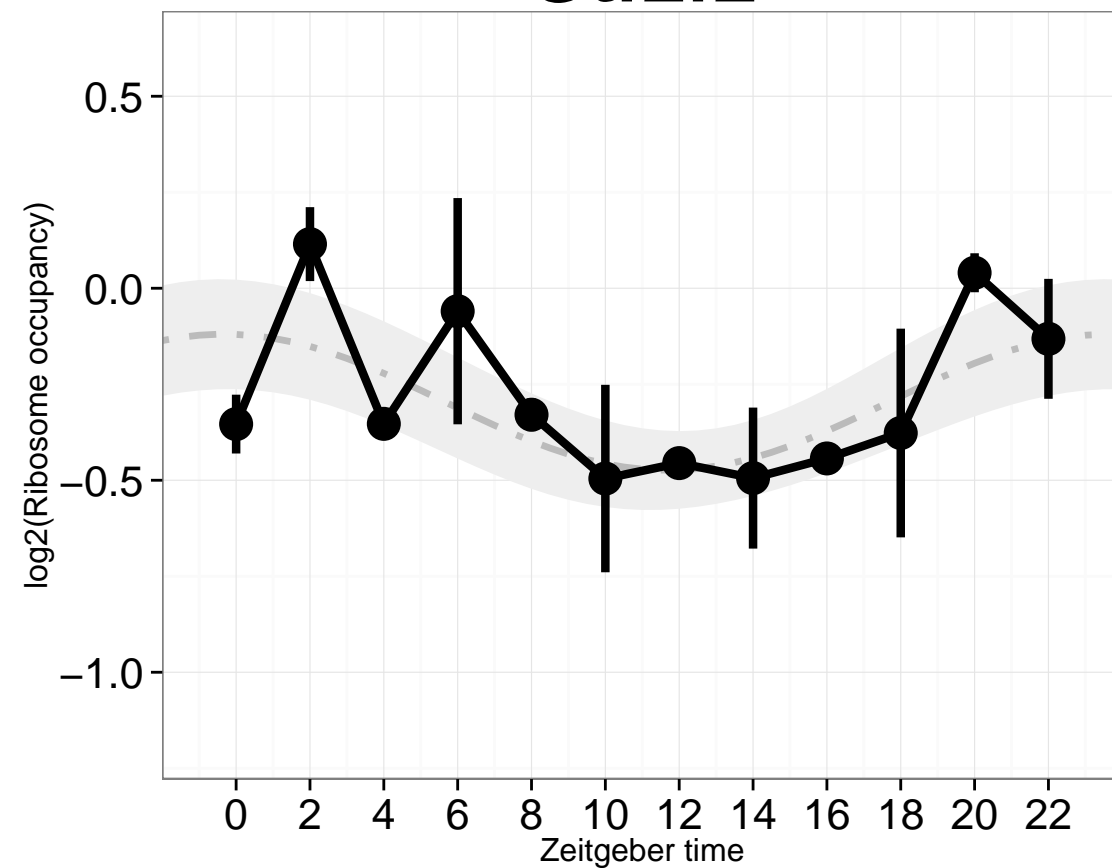

Supplement: SuppDataset_1.zip [file Gtf2f2_set_A.pdf › Supplemental Dataset 1/A-mRNA_nonrhyth_translation_nonrhyth/Gtf2f2_set_A.pdf]

# Gtf2h1

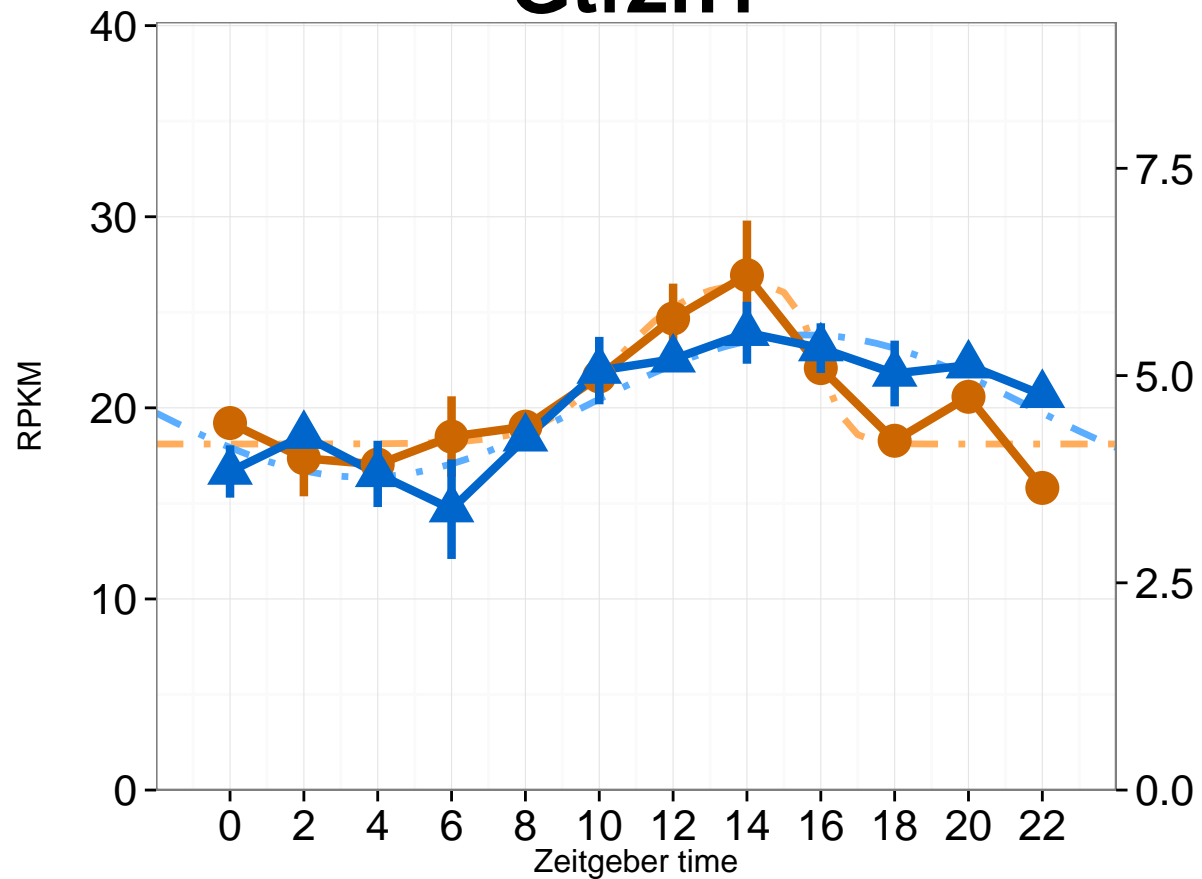

# Gtf2h1

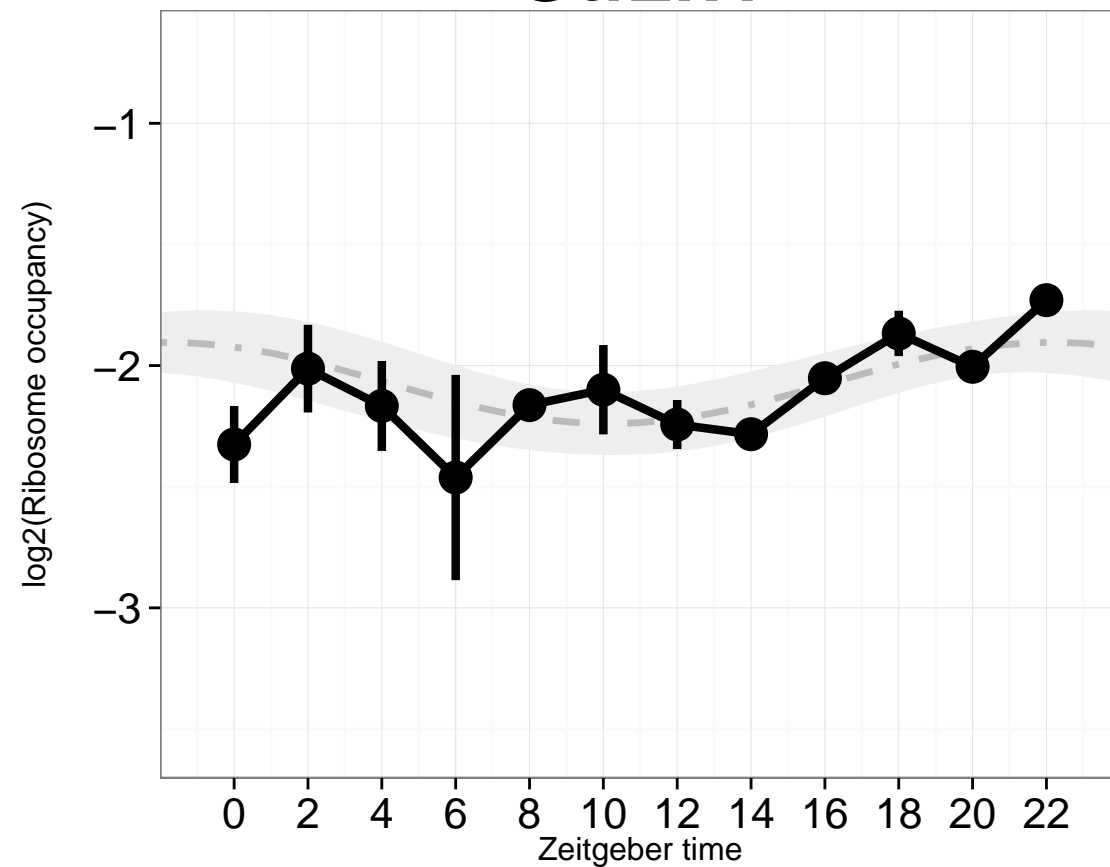

Supplement: SuppDataset_1.zip [file Gtf2h1_set_A.pdf › Supplemental Dataset 1/A-mRNA_nonrhyth_translation_nonrhyth/Gtf2h1_set_A.pdf]

# Gtf2h2

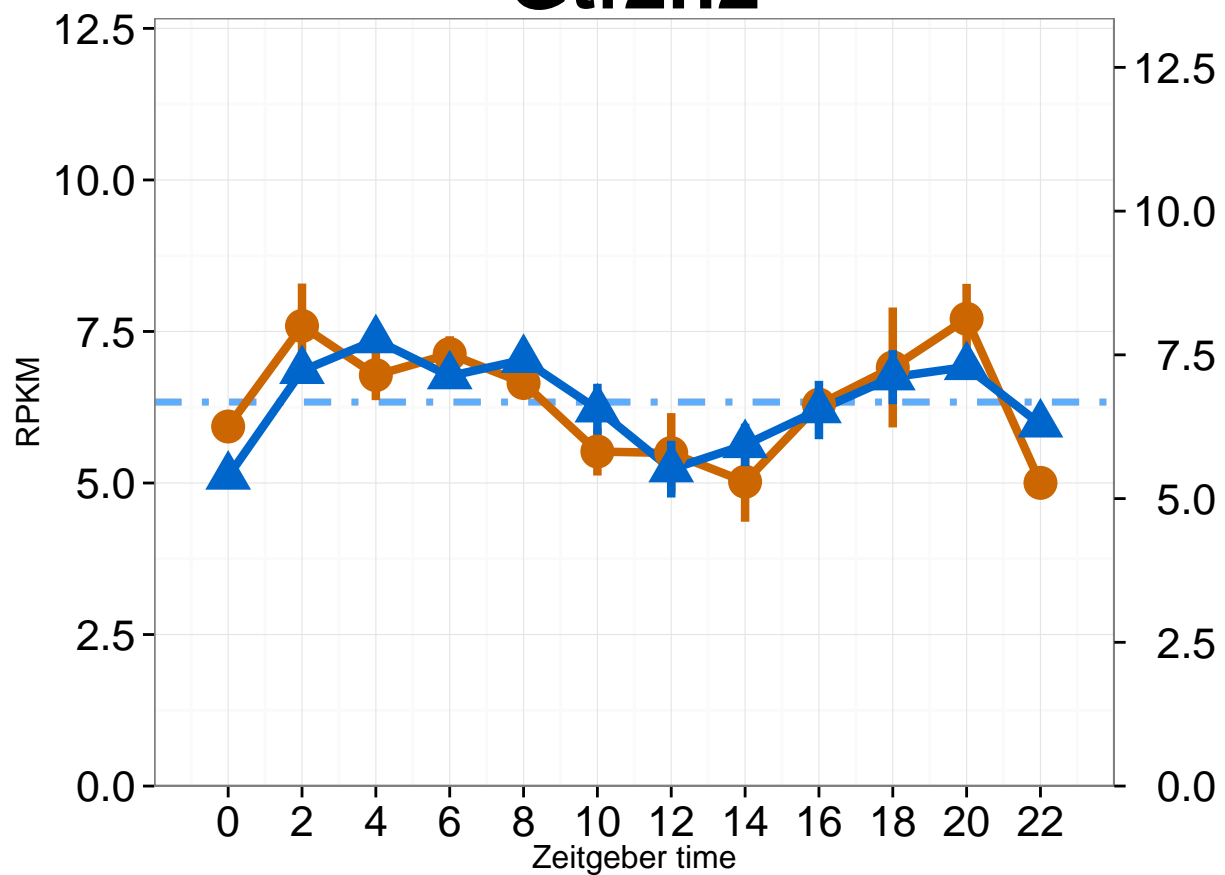

# Gtf2h2

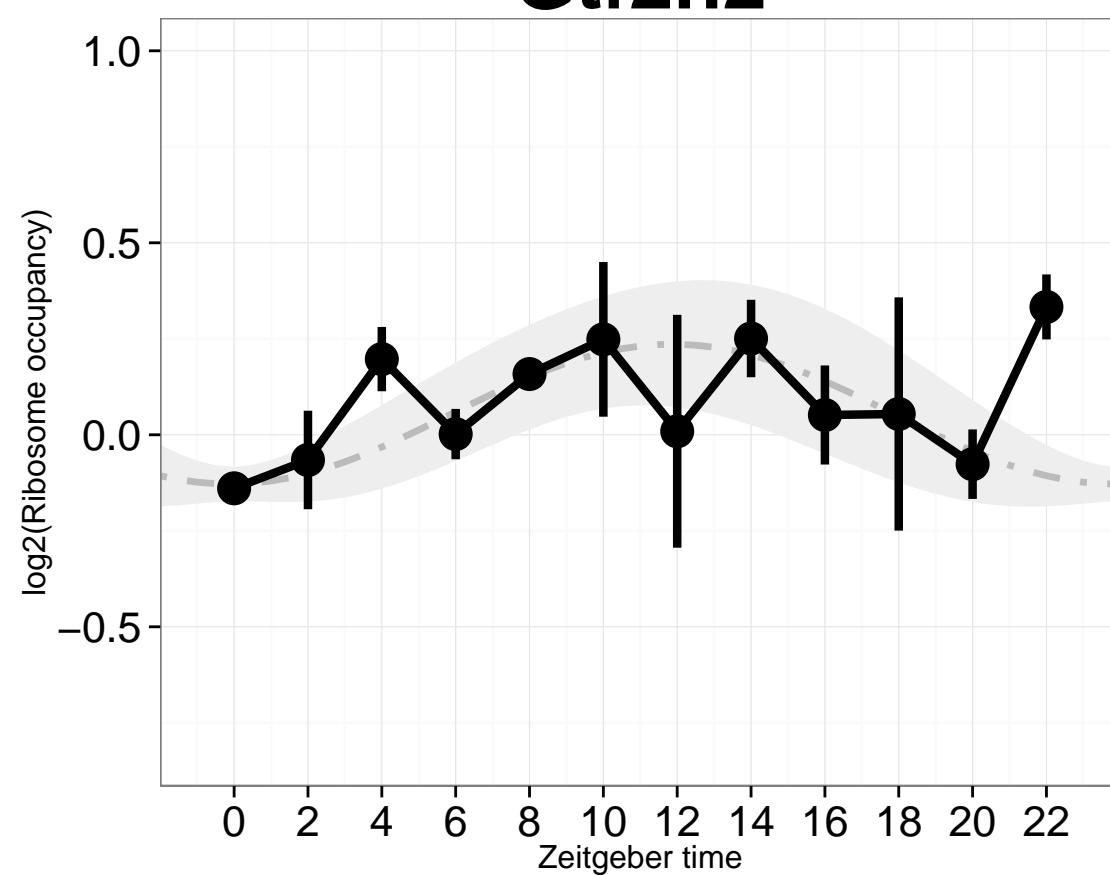

Supplement: SuppDataset_1.zip [file Gtf2h2_set_A.pdf › Supplemental Dataset 1/A-mRNA_nonrhyth_translation_nonrhyth/Gtf2h2_set_A.pdf]

## Gtf2h3

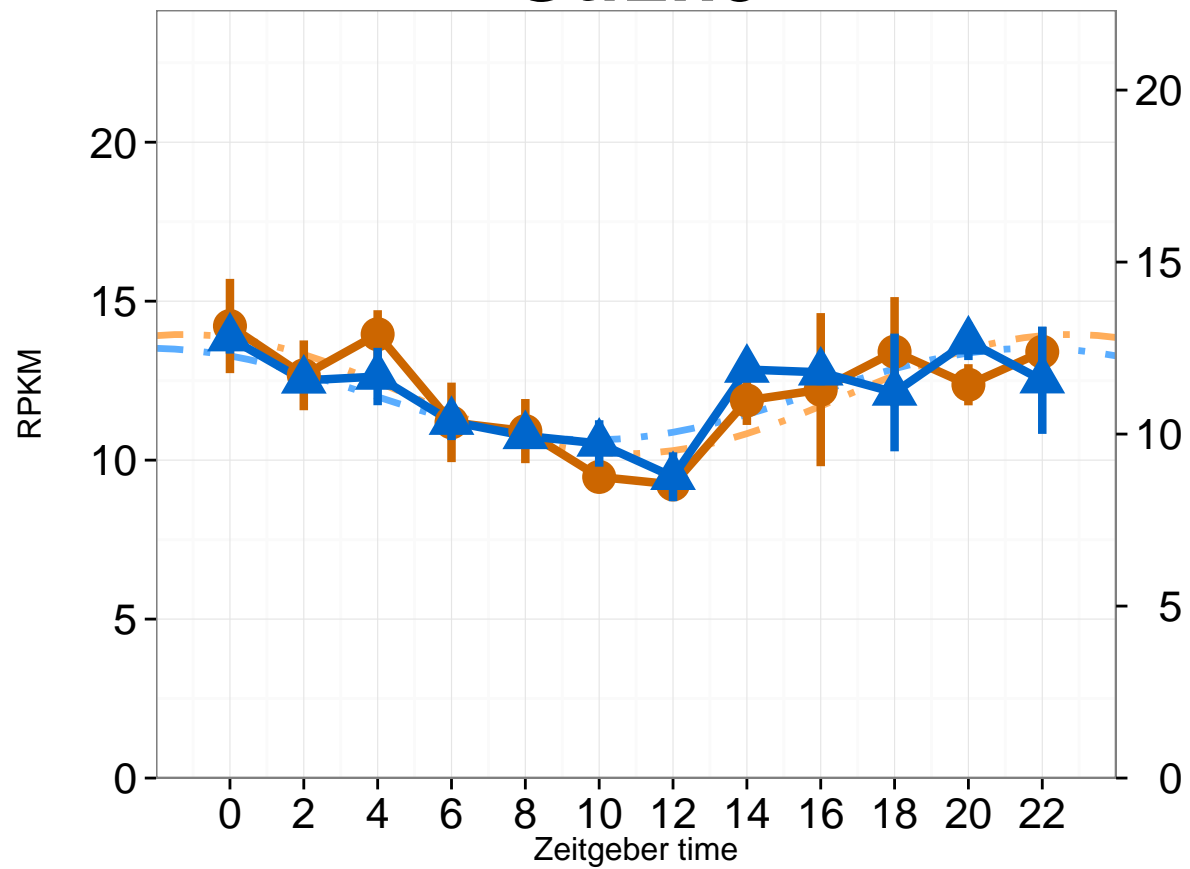

## Gtf2h3

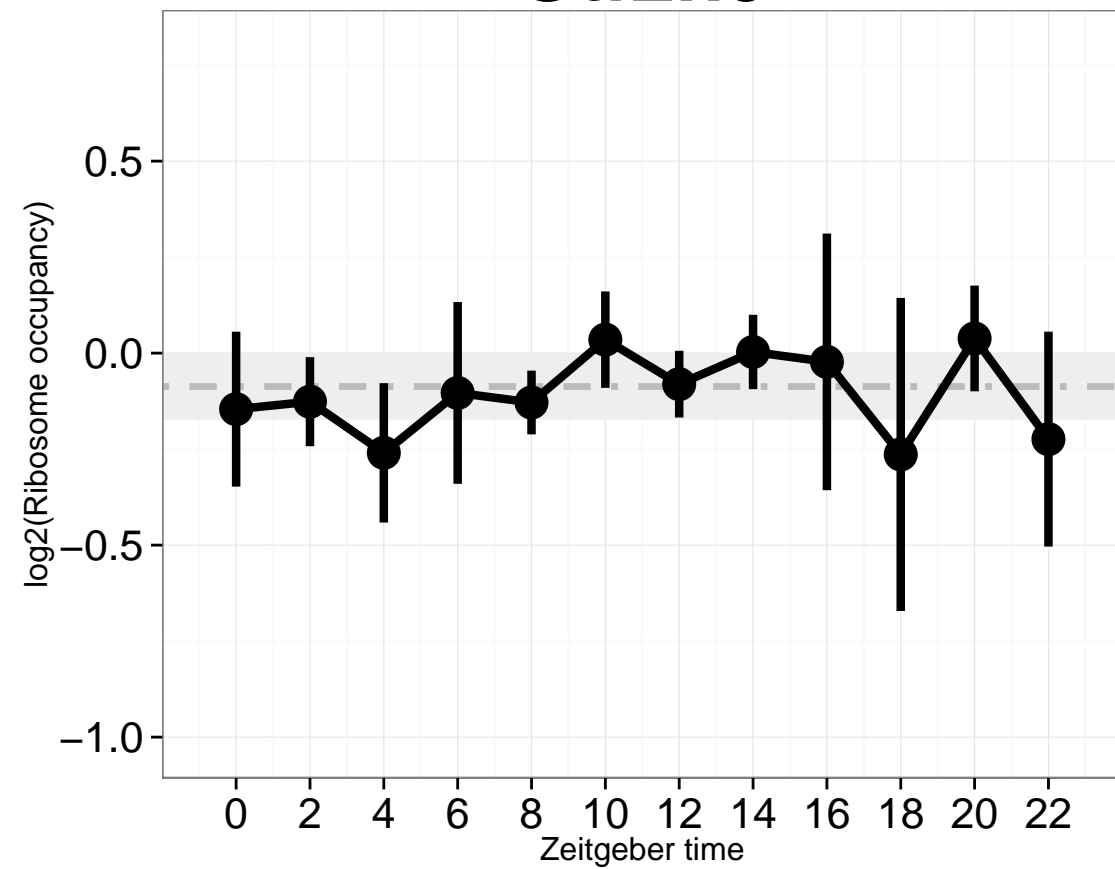

Supplement: SuppDataset_1.zip [file Gtf2h3_set_A.pdf › Supplemental Dataset 1/A-mRNA_nonrhyth_translation_nonrhyth/Gtf2h3_set_A.pdf]

## Gtf2h5

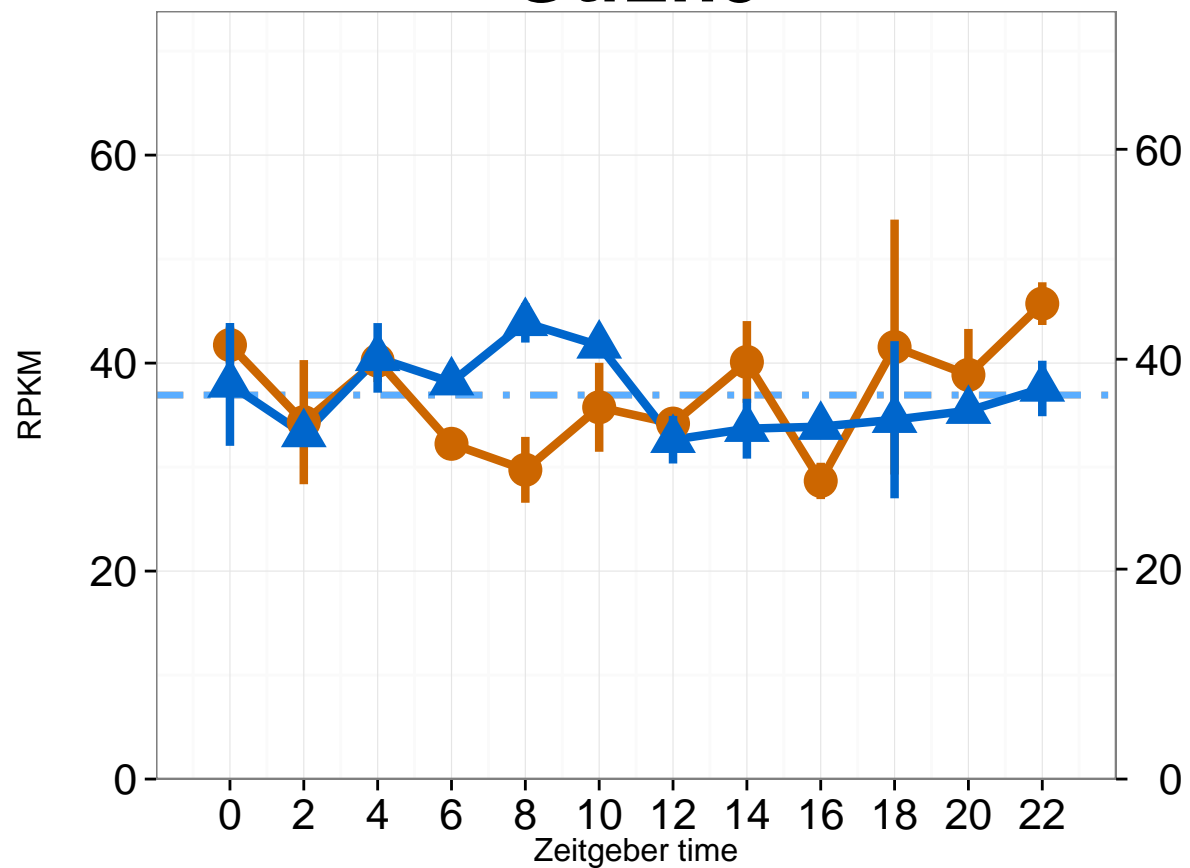

## Gtf2h5

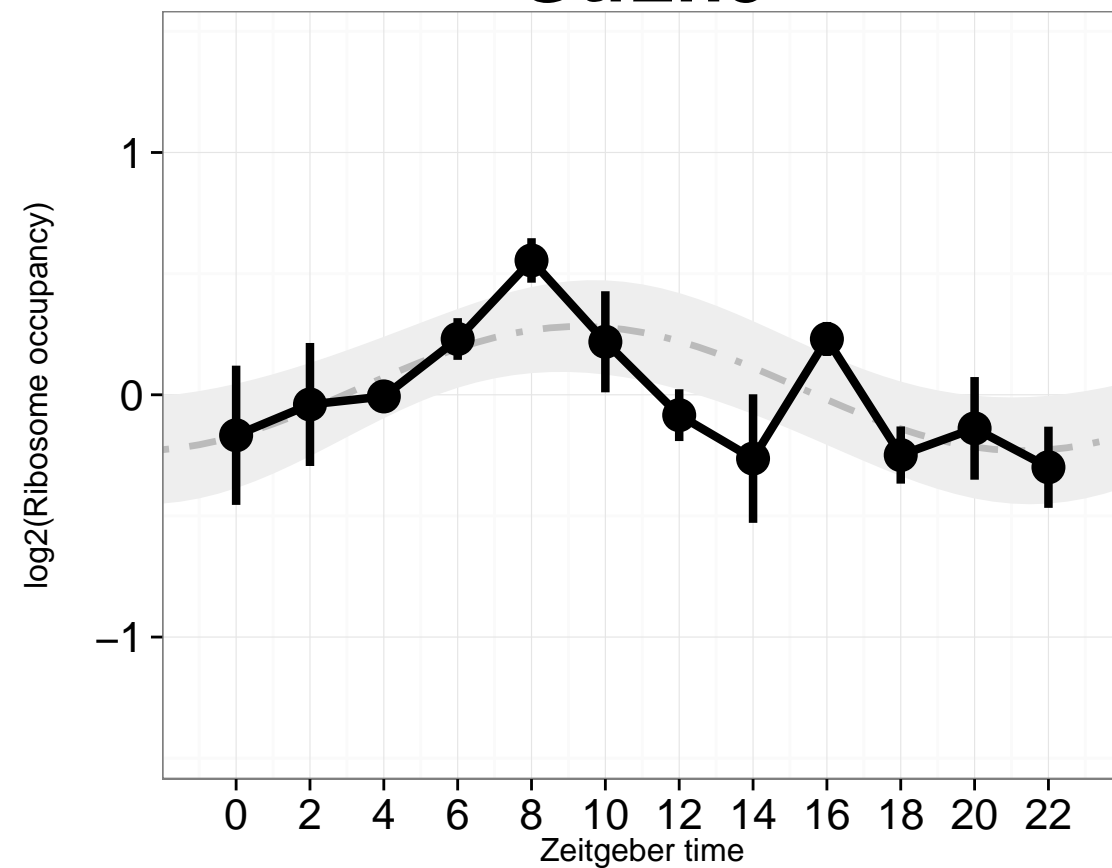

Supplement: SuppDataset_1.zip [file Gtf2h5_set_A.pdf › Supplemental Dataset 1/A-mRNA_nonrhyth_translation_nonrhyth/Gtf2h5_set_A.pdf]

## Gtf2i

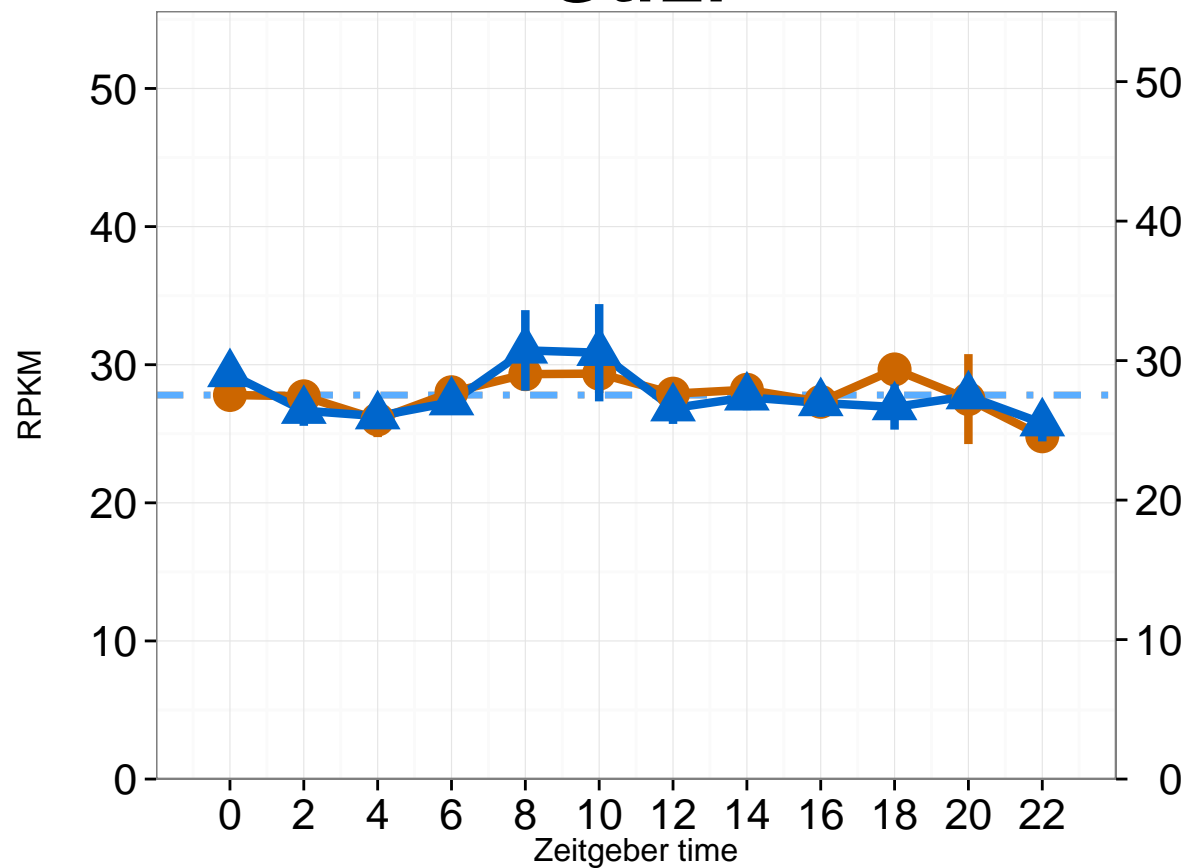

## Gtf2i

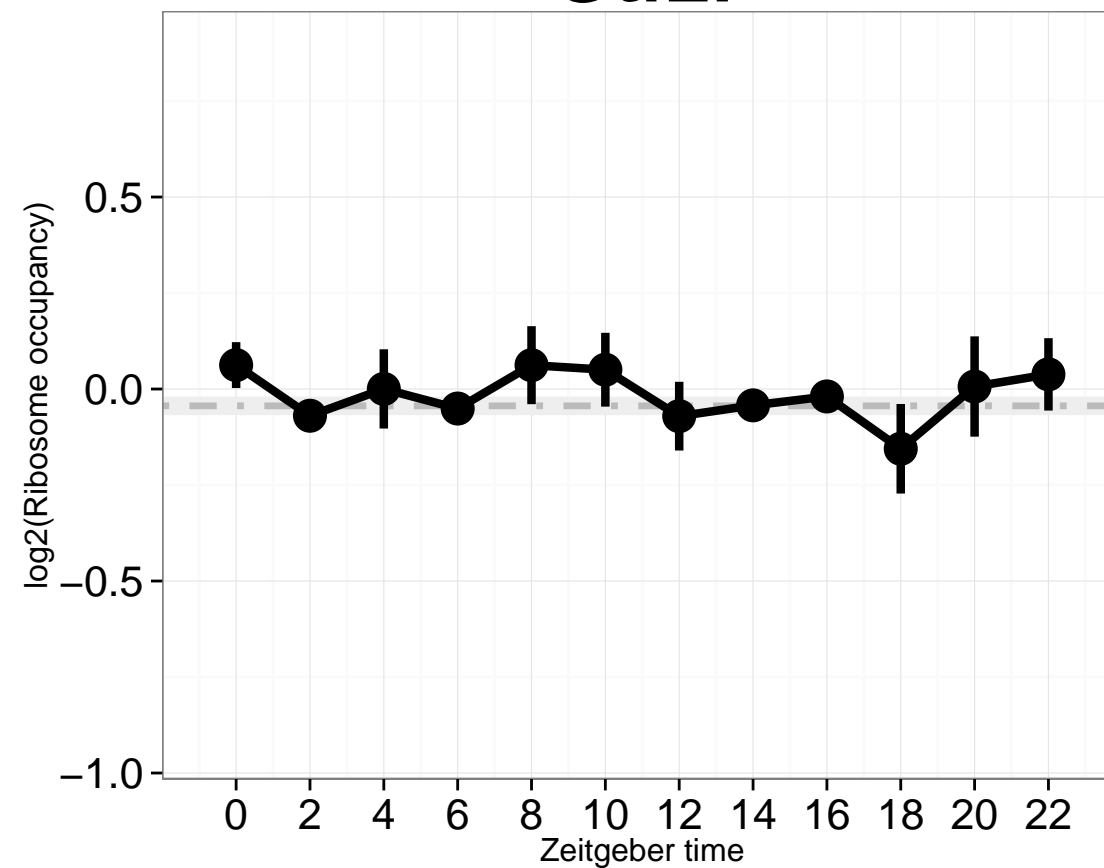

Supplement: SuppDataset_1.zip [file Gtf2i_set_A.pdf › Supplemental Dataset 1/A-mRNA_nonrhyth_translation_nonrhyth/Gtf2i_set_A.pdf]

# Gtf3c1

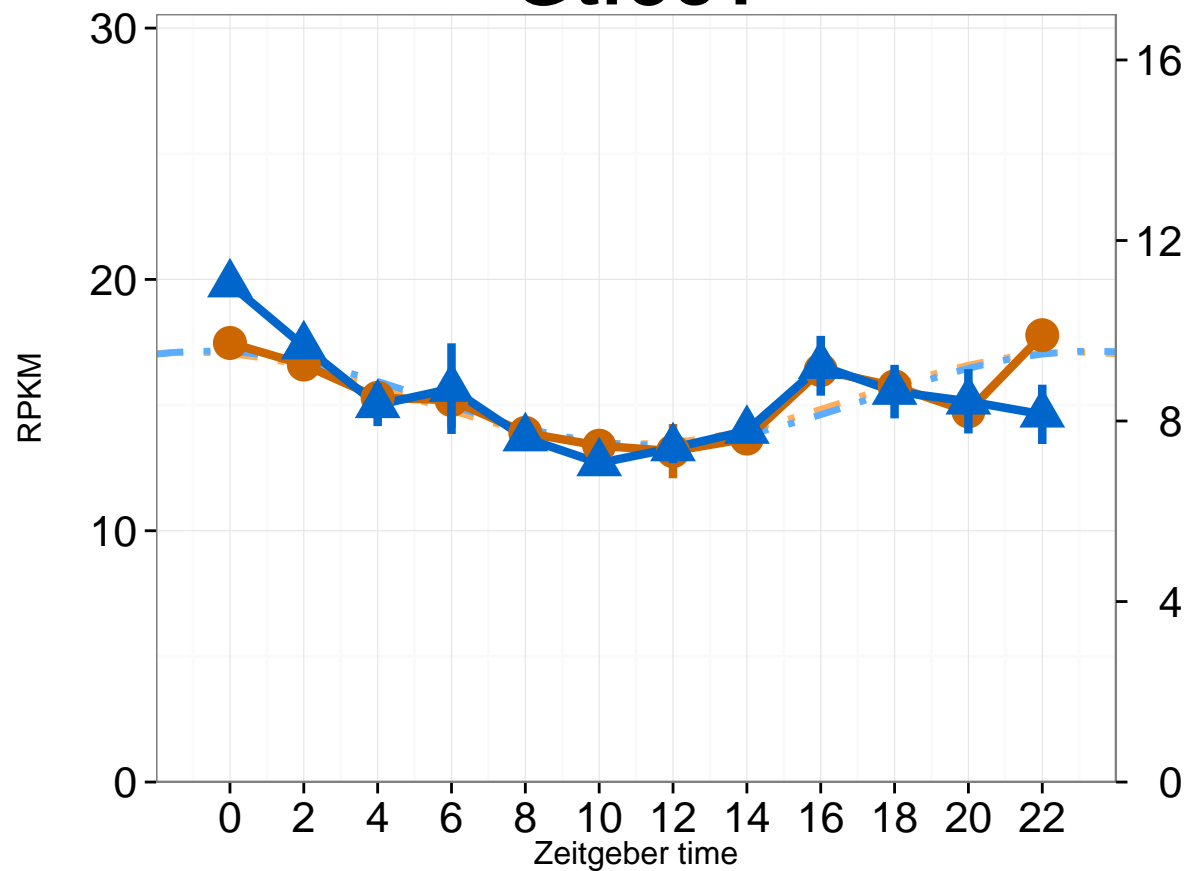

# Gtf3c1

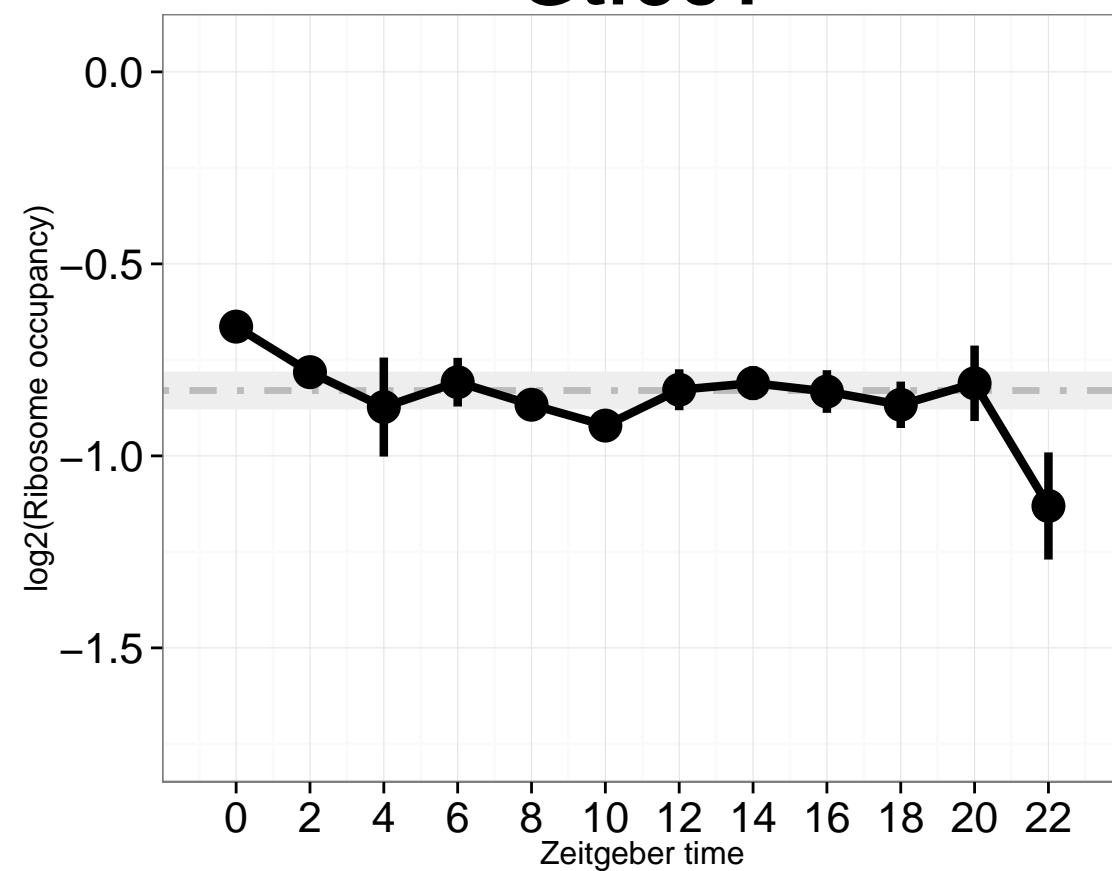

Supplement: SuppDataset_1.zip [file Gtf3c1_set_A.pdf › Supplemental Dataset 1/A-mRNA_nonrhyth_translation_nonrhyth/Gtf3c1_set_A.pdf]

# Gtf3c2

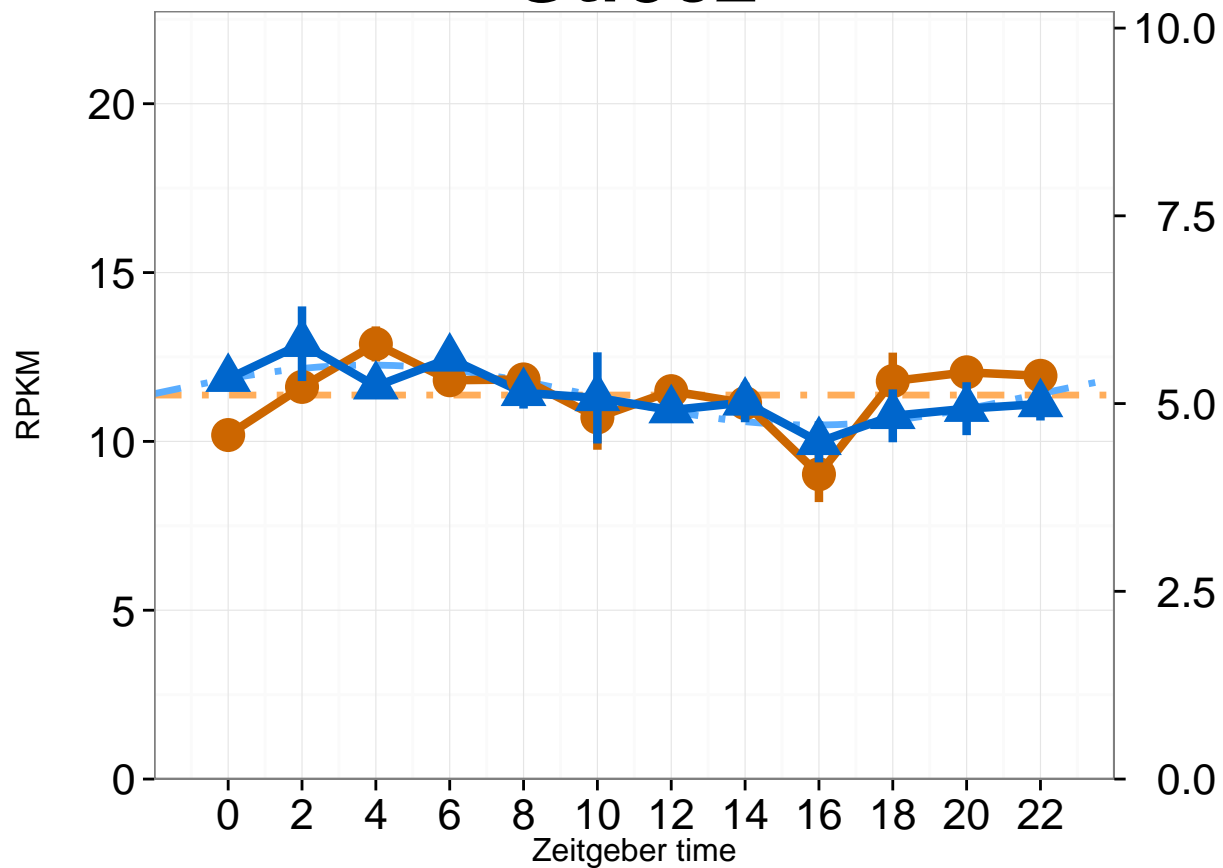

# Gtf3c2

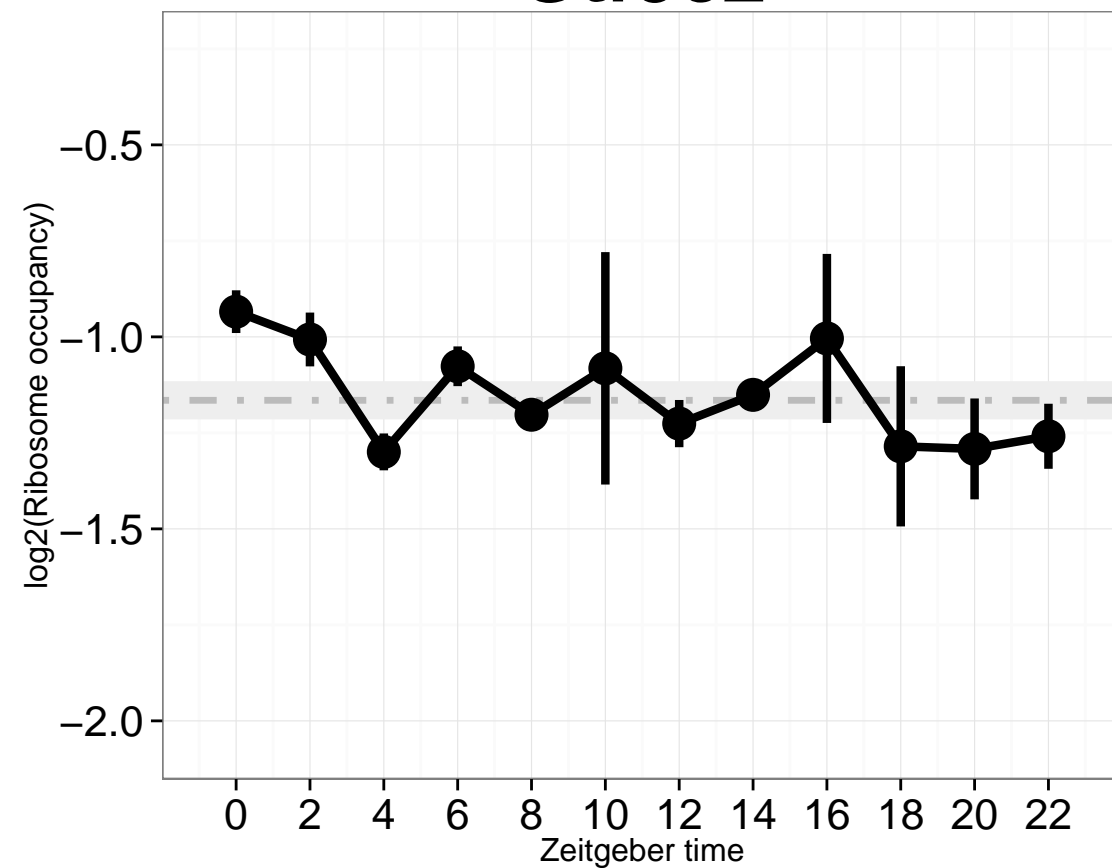

Supplement: SuppDataset_1.zip [file Gtf3c2_set_A.pdf › Supplemental Dataset 1/A-mRNA_nonrhyth_translation_nonrhyth/Gtf3c2_set_A.pdf]

## Gtf3c3

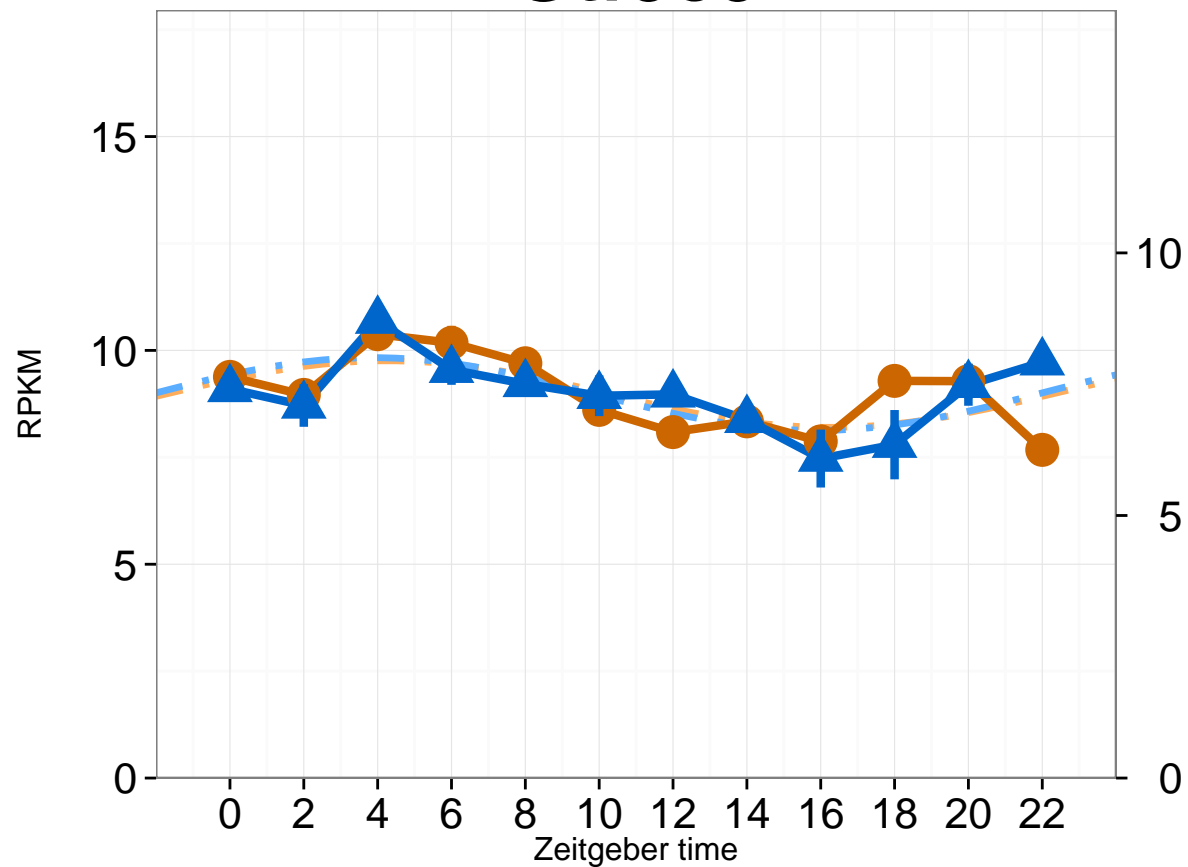

## Gtf3c3

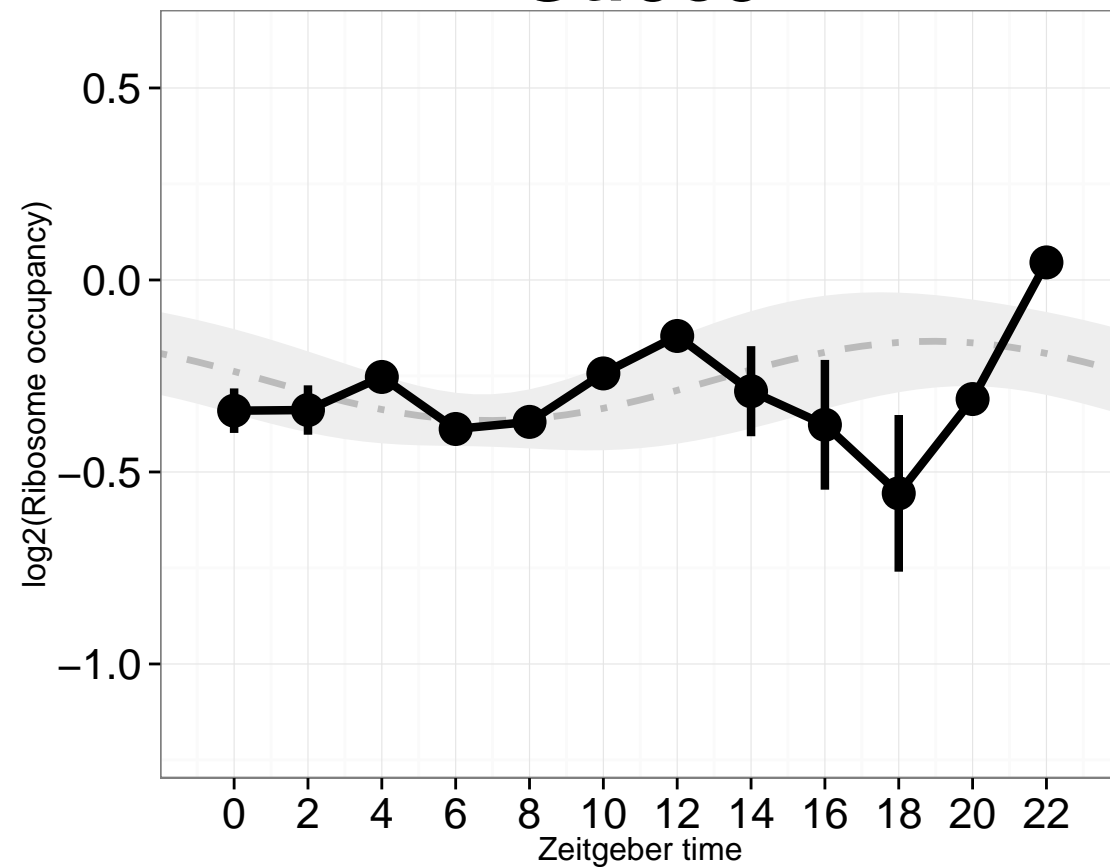

Supplement: SuppDataset_1.zip [file Gtf3c3_set_A.pdf › Supplemental Dataset 1/A-mRNA_nonrhyth_translation_nonrhyth/Gtf3c3_set_A.pdf]

# Gtf3c4

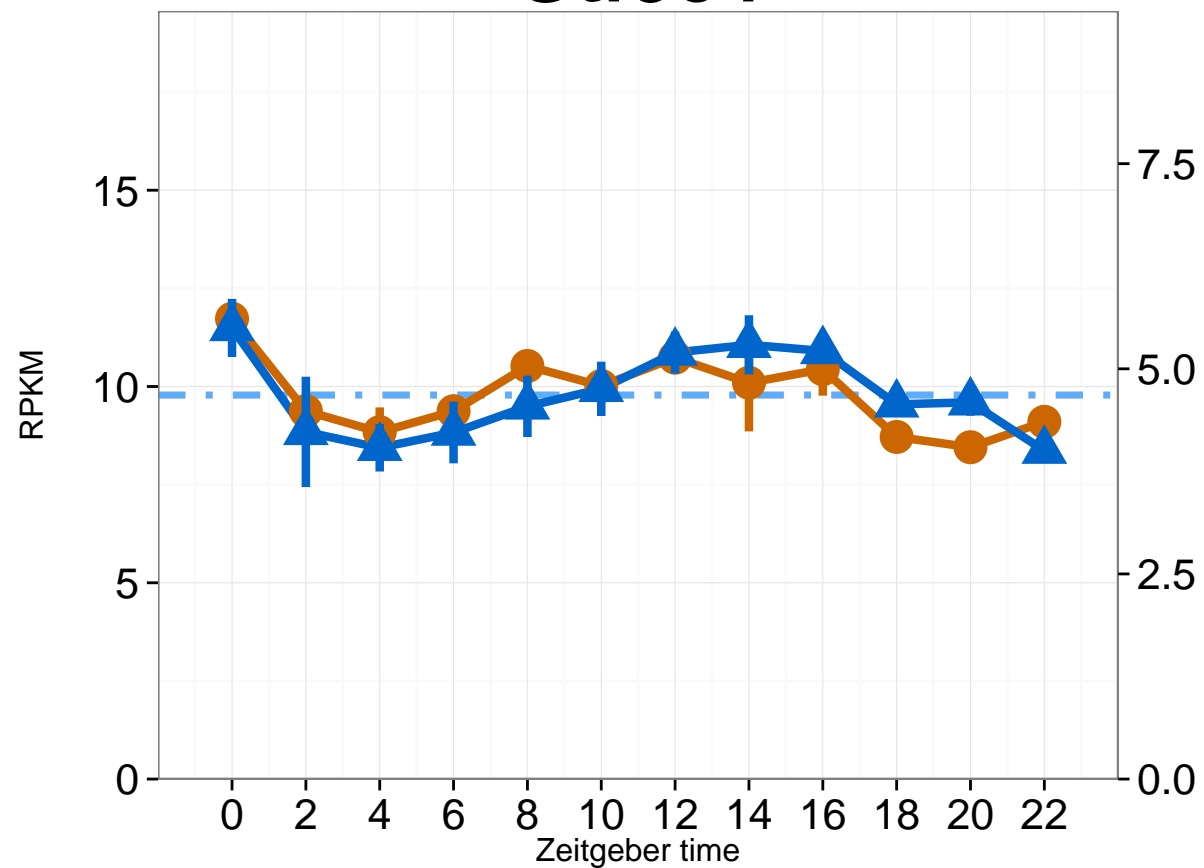

# Gtf3c4

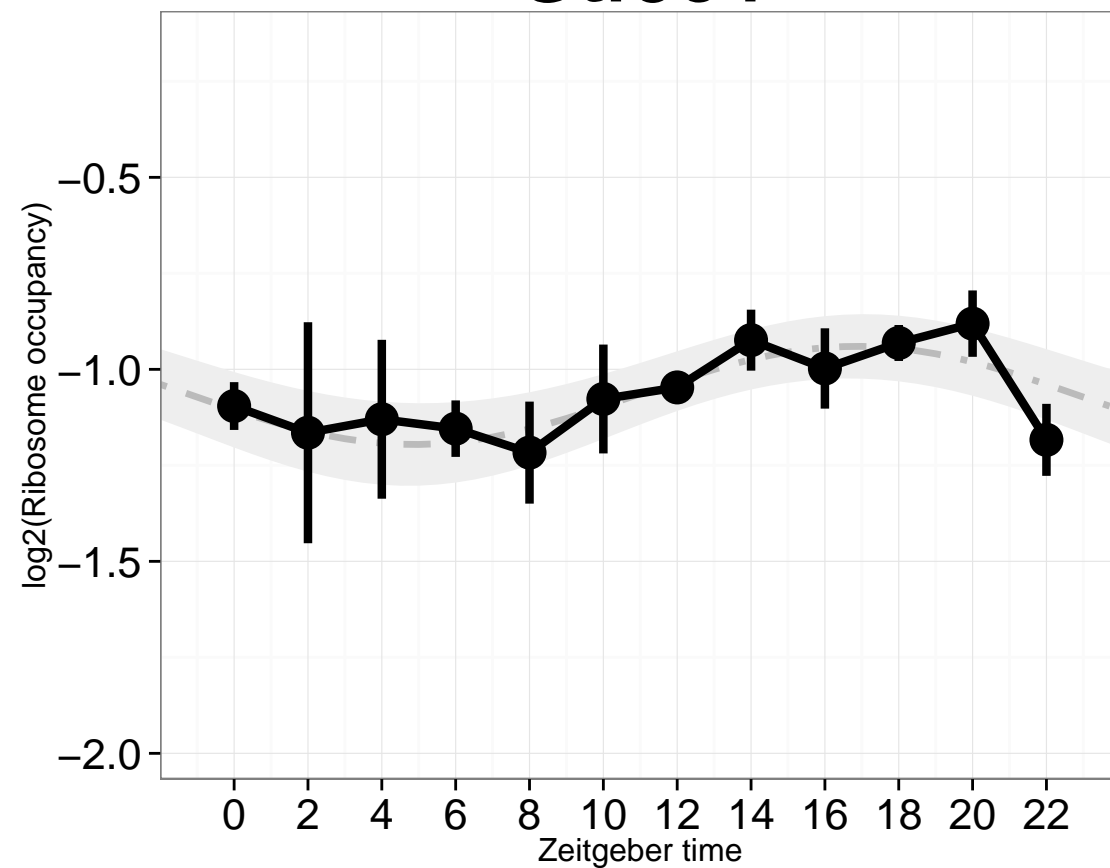

Supplement: SuppDataset_1.zip [file Gtf3c4_set_A.pdf › Supplemental Dataset 1/A-mRNA_nonrhyth_translation_nonrhyth/Gtf3c4_set_A.pdf]

# Gtf3c6

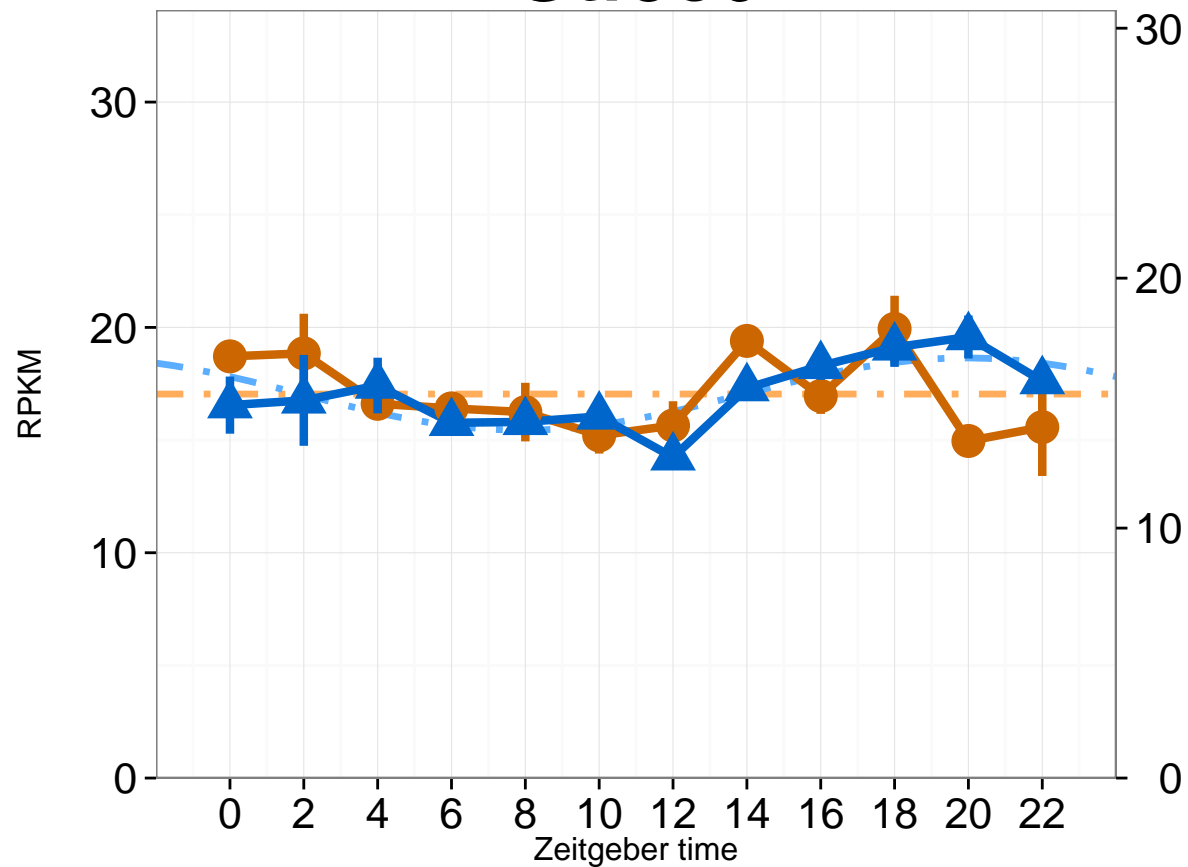

# Gtf3c6

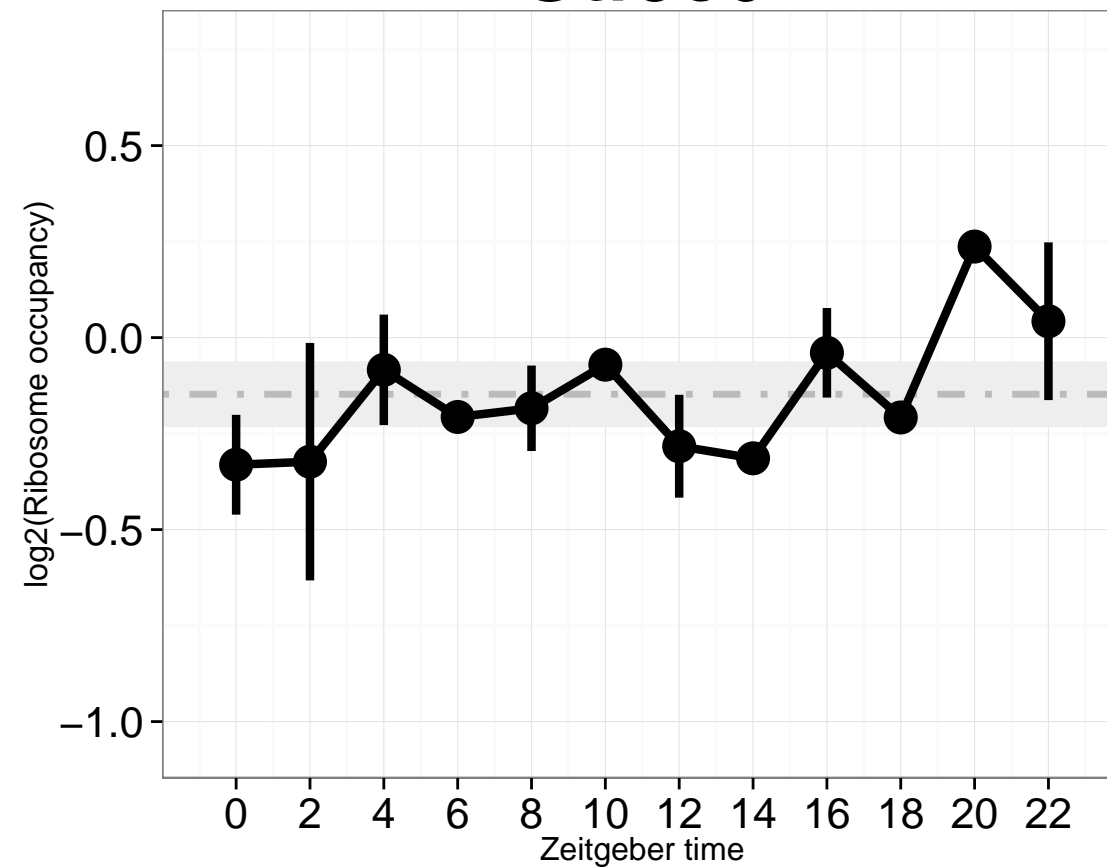

Supplement: SuppDataset_1.zip [file Gtf3c6_set_A.pdf › Supplemental Dataset 1/A-mRNA_nonrhyth_translation_nonrhyth/Gtf3c6_set_A.pdf]
