# Supplementary figures and images for: Ribosome profiling reveals the rhythmic liver translatome and circadian clock regulation by upstream open reading frames (part 33 of 113)
Source: HighWire-hosted journal article supplement (doi:10.1101/gr.195404.115), 2015-10-20

## Gtl3

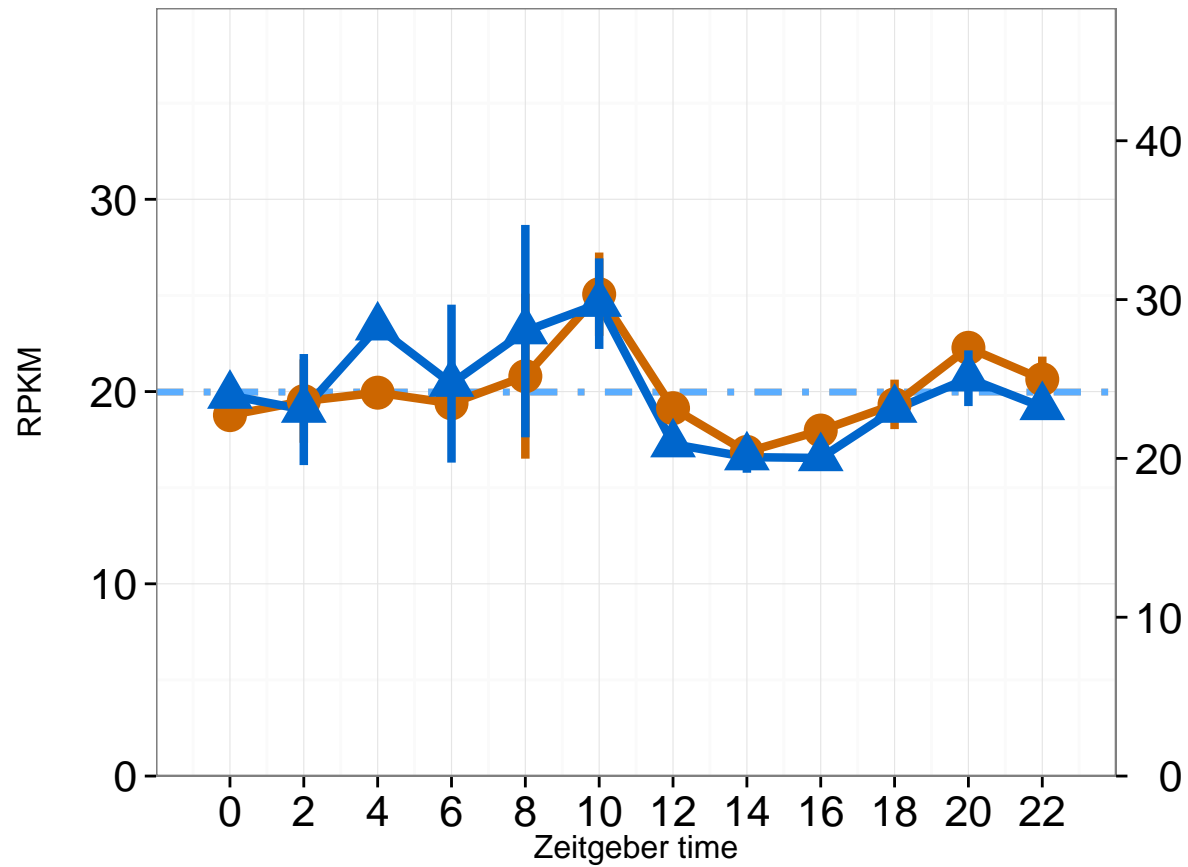

## Gtl3

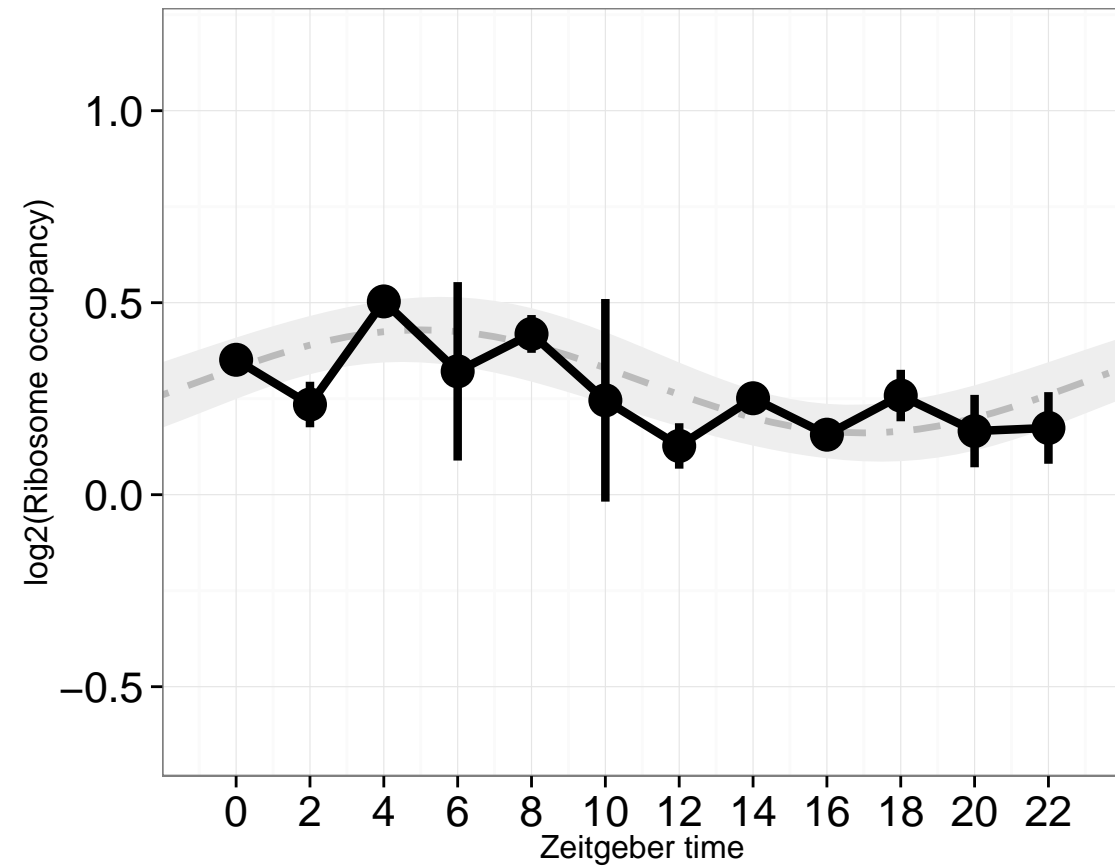

Supplement: SuppDataset_1.zip [file Gtl3_set_A.pdf › Supplemental Dataset 1/A-mRNA_nonrhyth_translation_nonrhyth/Gtl3_set_A.pdf]

Gtpbp10

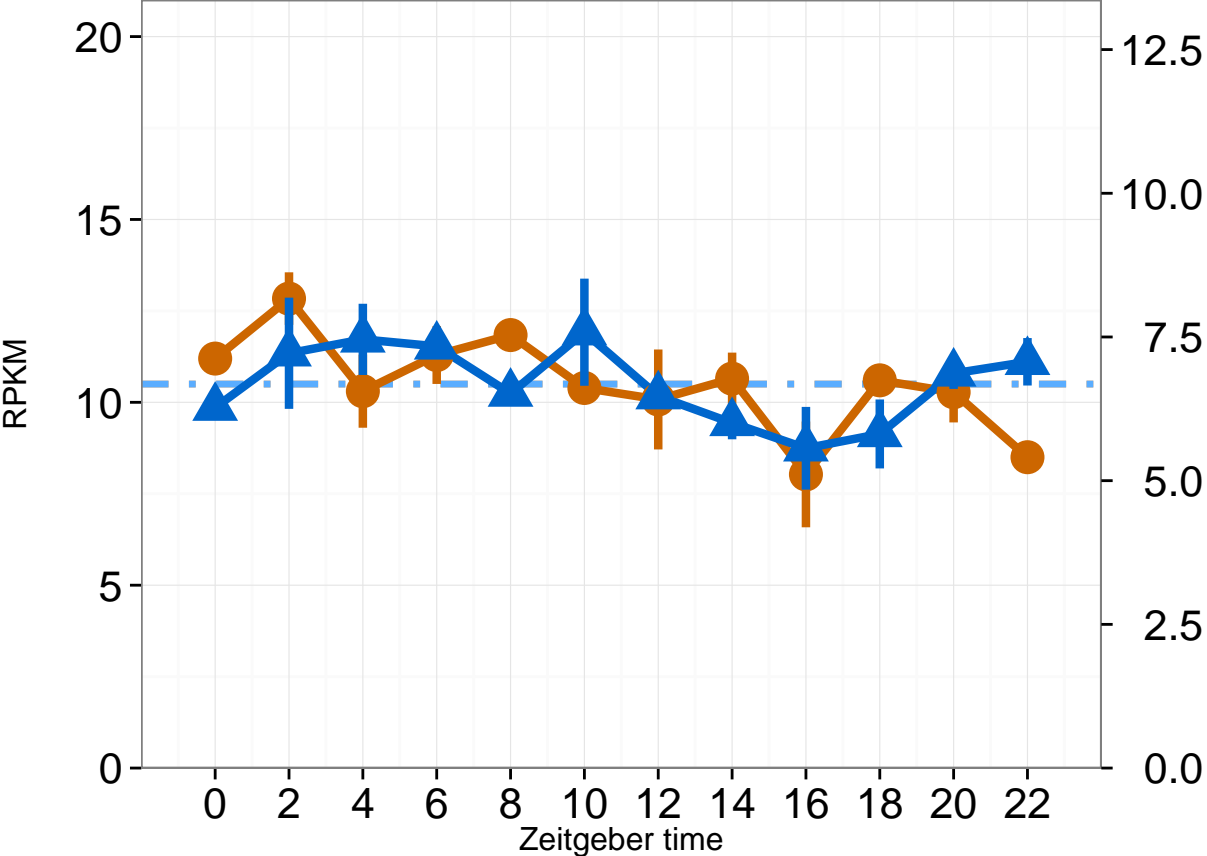

Gtpbp10

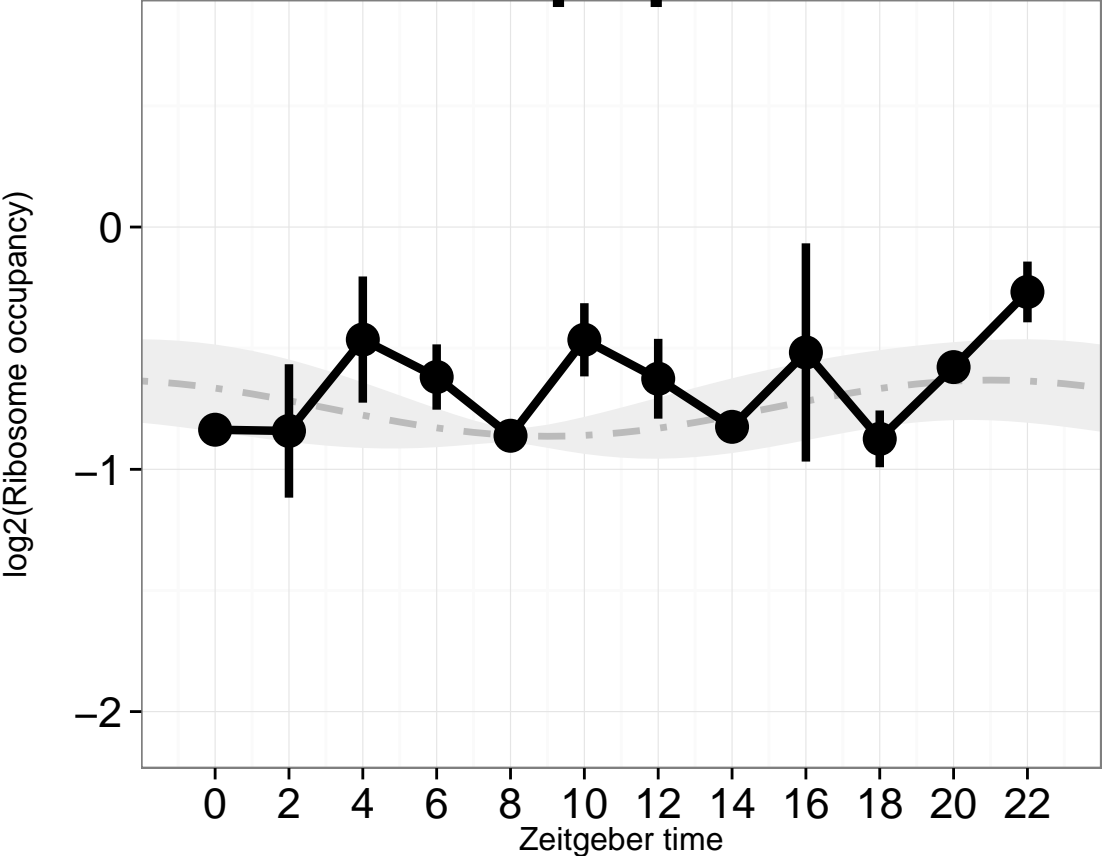

Supplement: SuppDataset_1.zip [file Gtpbp10_set_A.pdf › Supplemental Dataset 1/A-mRNA_nonrhyth_translation_nonrhyth/Gtpbp10_set_A.pdf]

# Gtpbp1

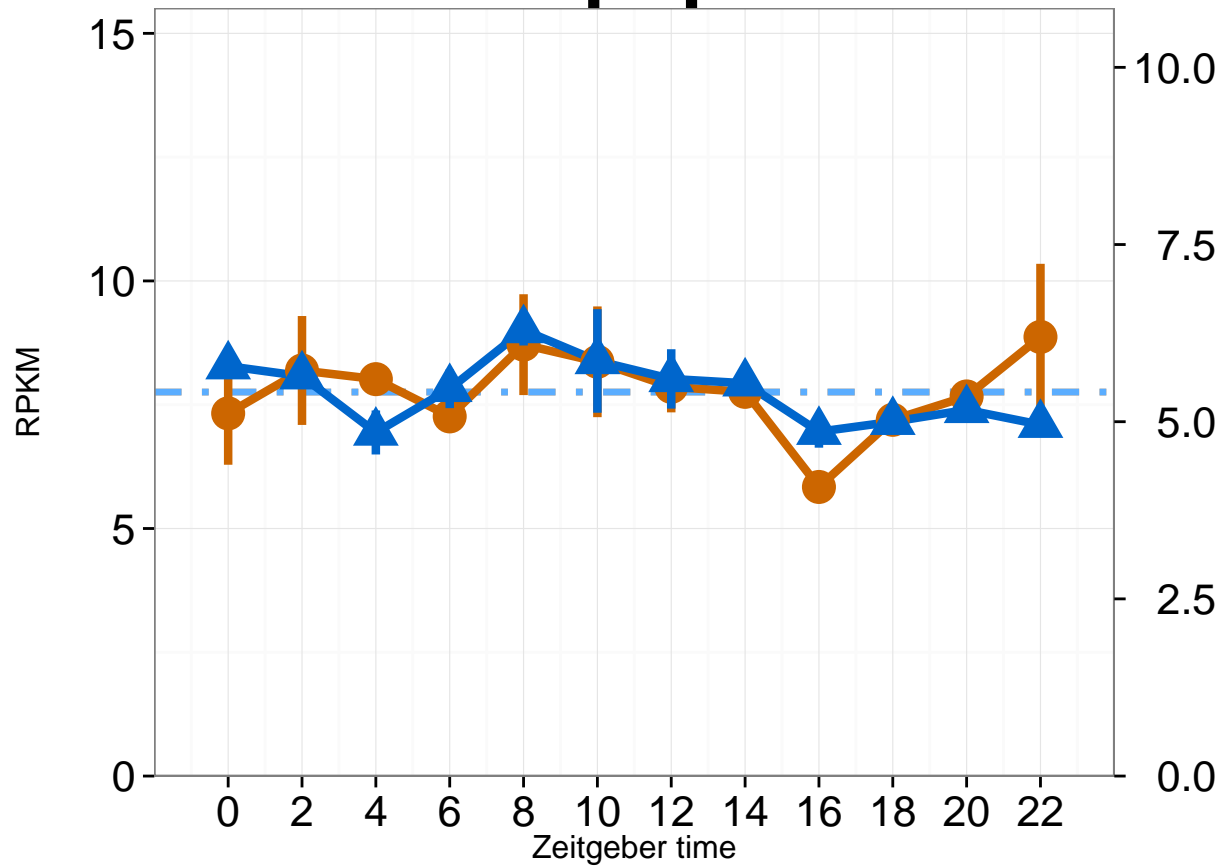

# Gtpbp1

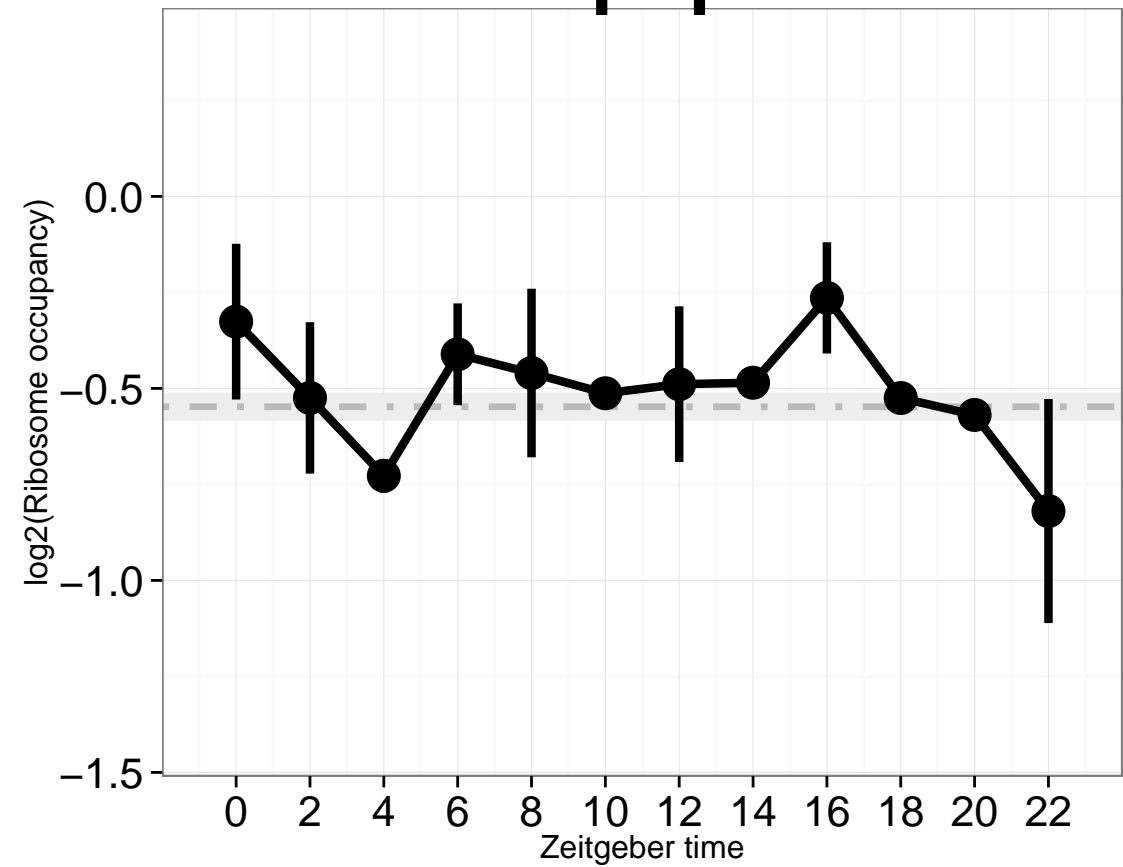

Supplement: SuppDataset_1.zip [file Gtpbp1_set_A.pdf › Supplemental Dataset 1/A-mRNA_nonrhyth_translation_nonrhyth/Gtpbp1_set_A.pdf]

## Gtpbp8

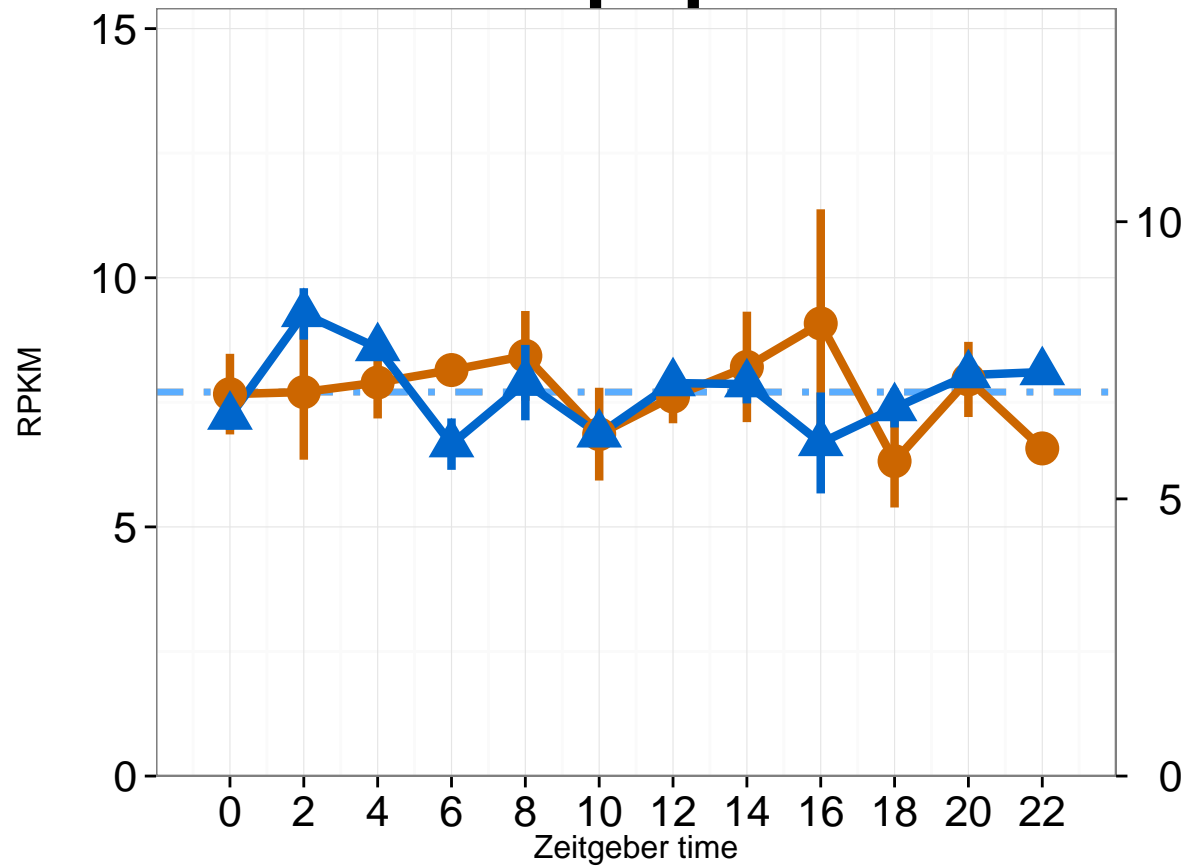

## Gtpbp8

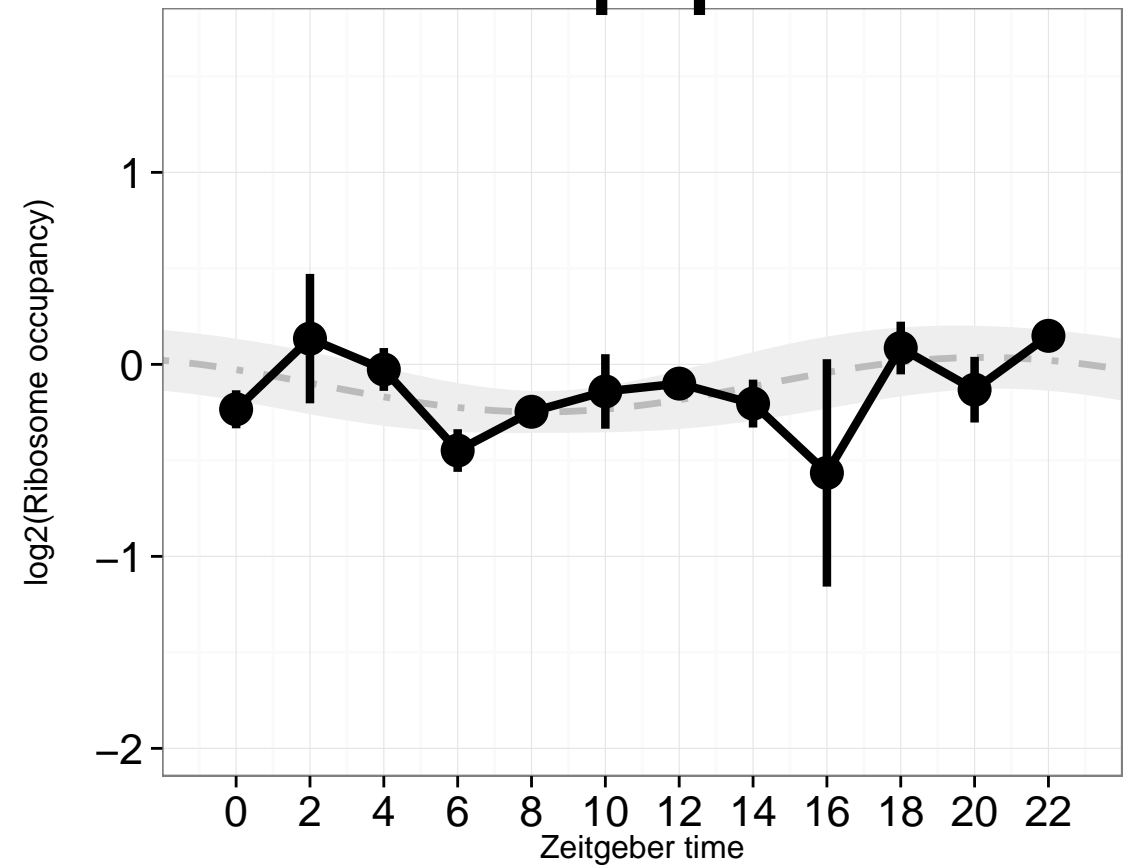

Supplement: SuppDataset_1.zip [file Gtpbp8_set_A.pdf › Supplemental Dataset 1/A-mRNA_nonrhyth_translation_nonrhyth/Gtpbp8_set_A.pdf]

**Gtse1 TR**

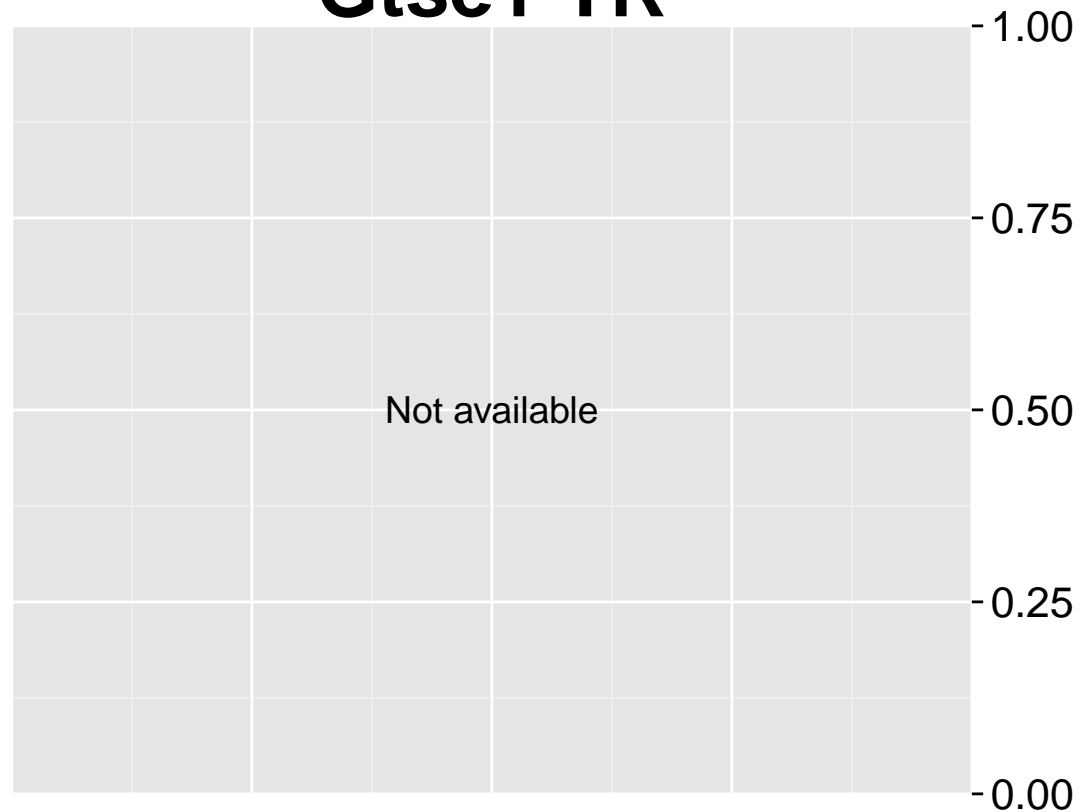

**Gtse1 log2(Ribosome occupancy**

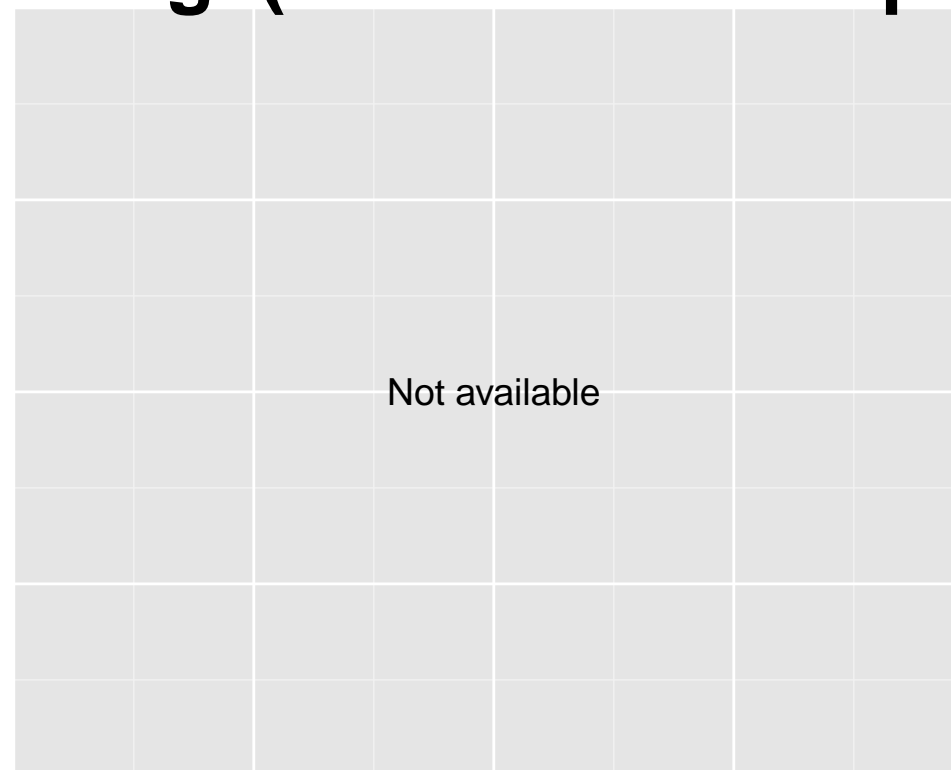

Supplement: SuppDataset_1.zip [file Gtse1_set_A.pdf › Supplemental Dataset 1/A-mRNA_nonrhyth_translation_nonrhyth/Gtse1_set_A.pdf]

# Guca1a

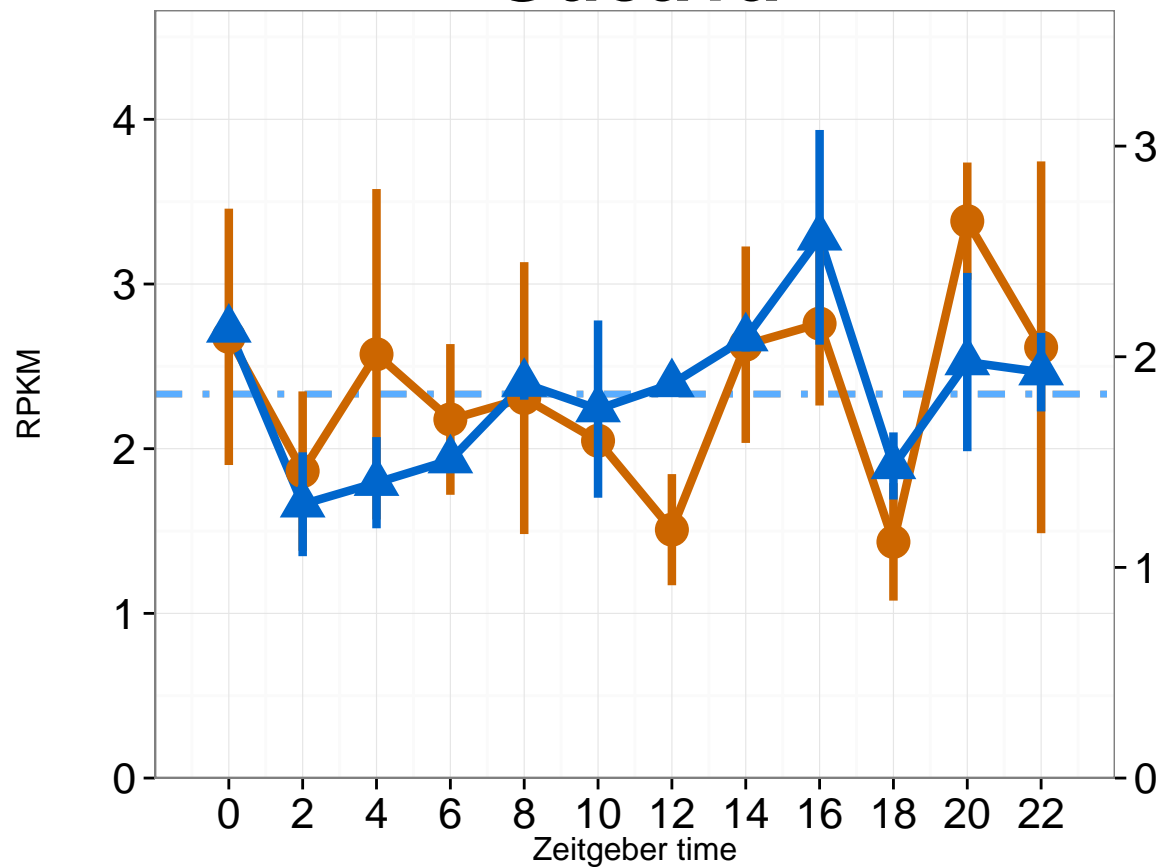

# Guca1a

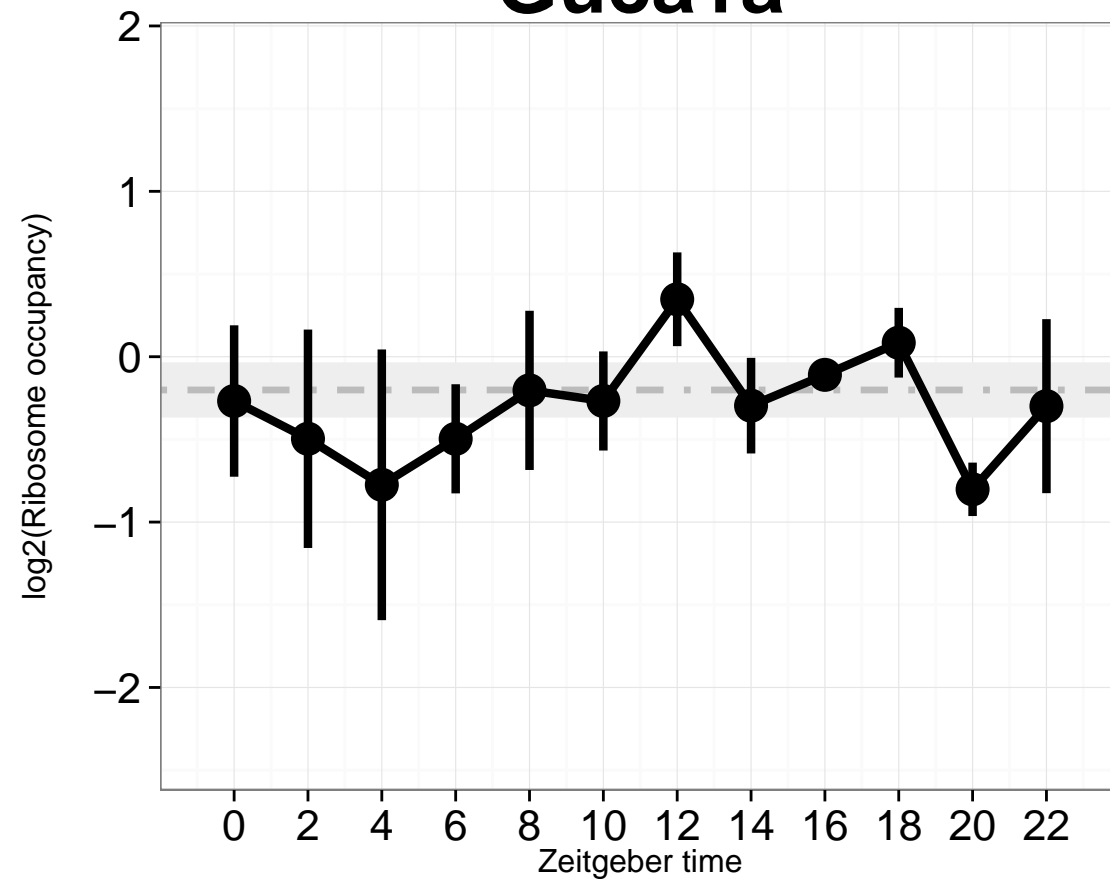

Supplement: SuppDataset_1.zip [file Guca1a_set_A.pdf › Supplemental Dataset 1/A-mRNA_nonrhyth_translation_nonrhyth/Guca1a_set_A.pdf]

## Gucy1a2

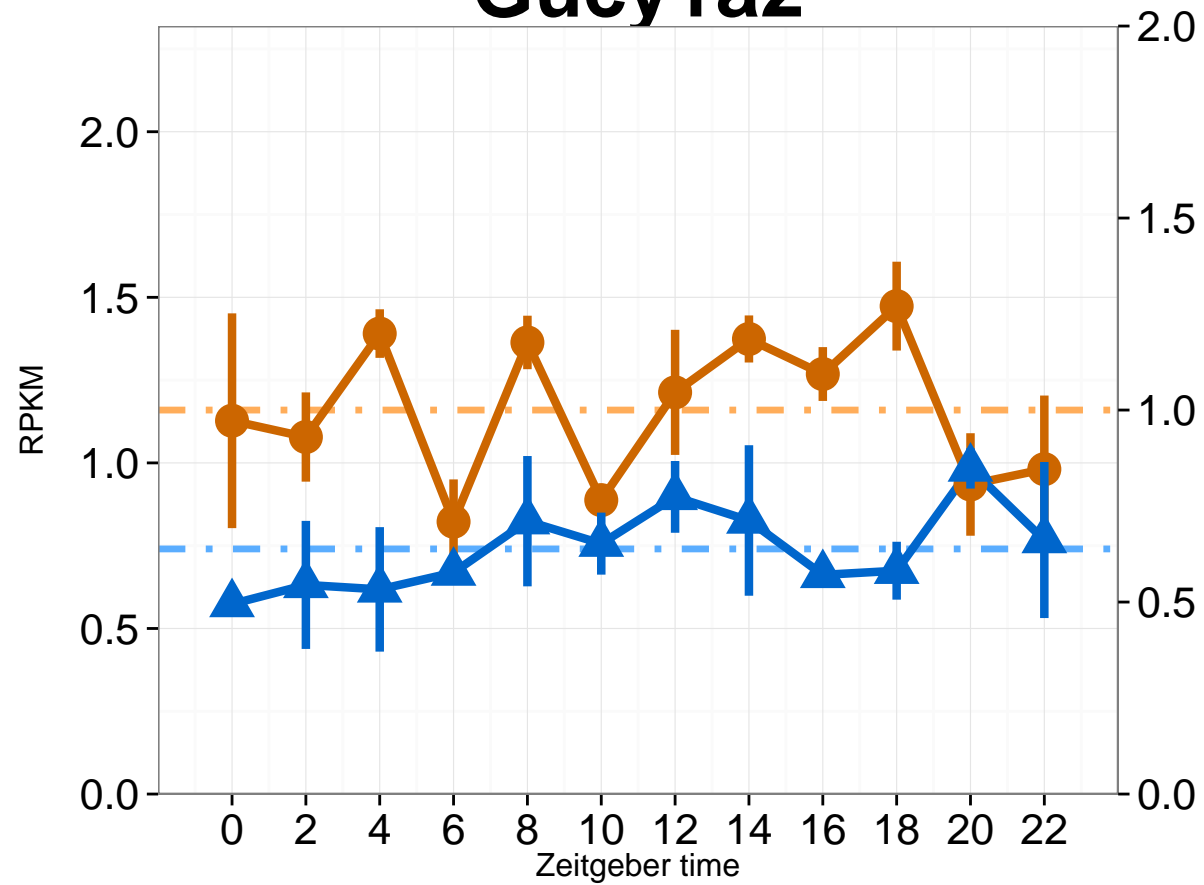

## Gucy1a2

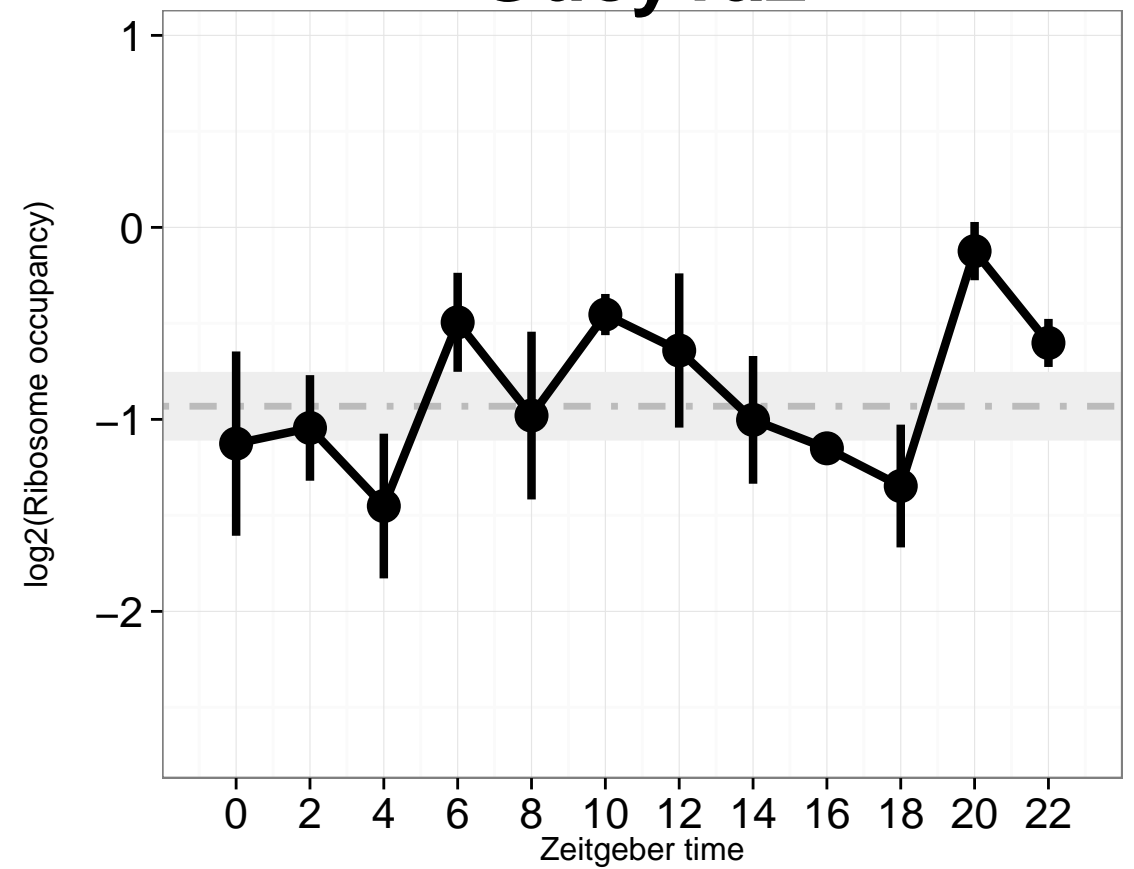

Supplement: SuppDataset_1.zip [file Gucy1a2_set_A.pdf › Supplemental Dataset 1/A-mRNA_nonrhyth_translation_nonrhyth/Gucy1a2_set_A.pdf]

# Gucy1a3

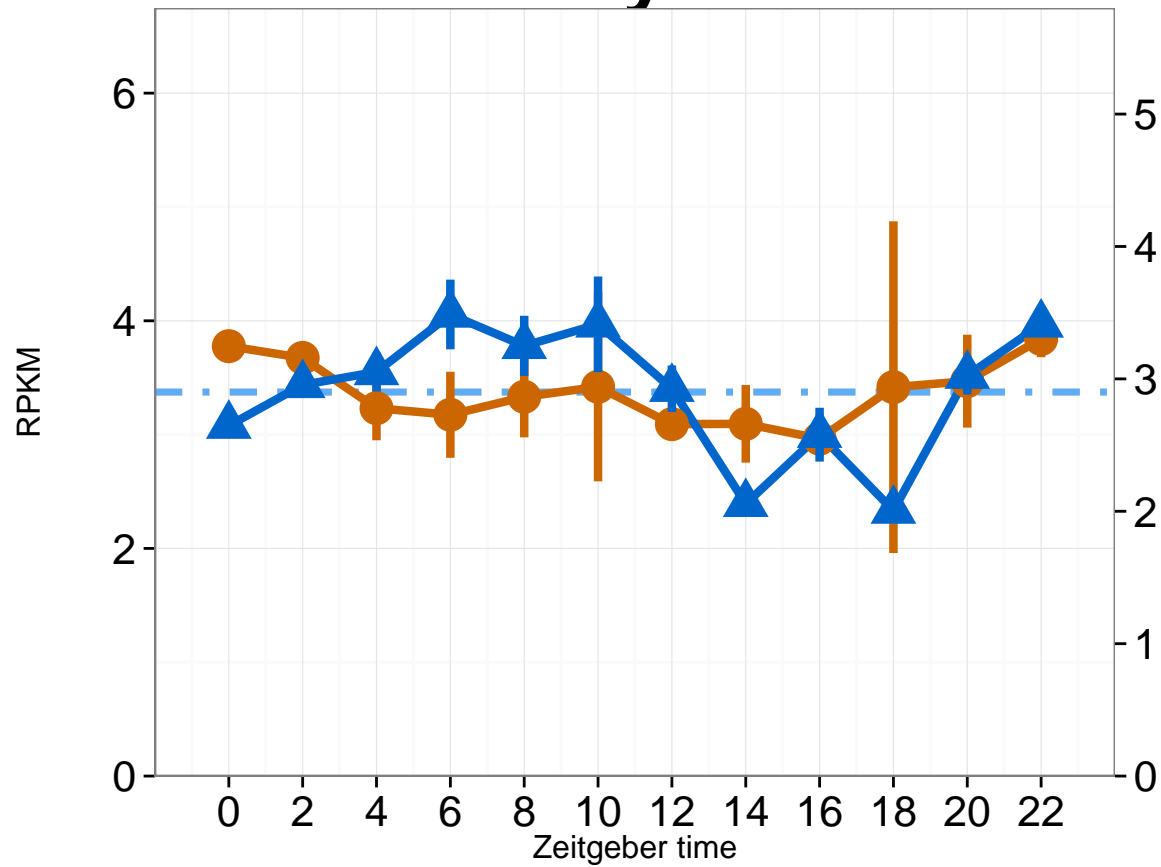

# Gucy1a3

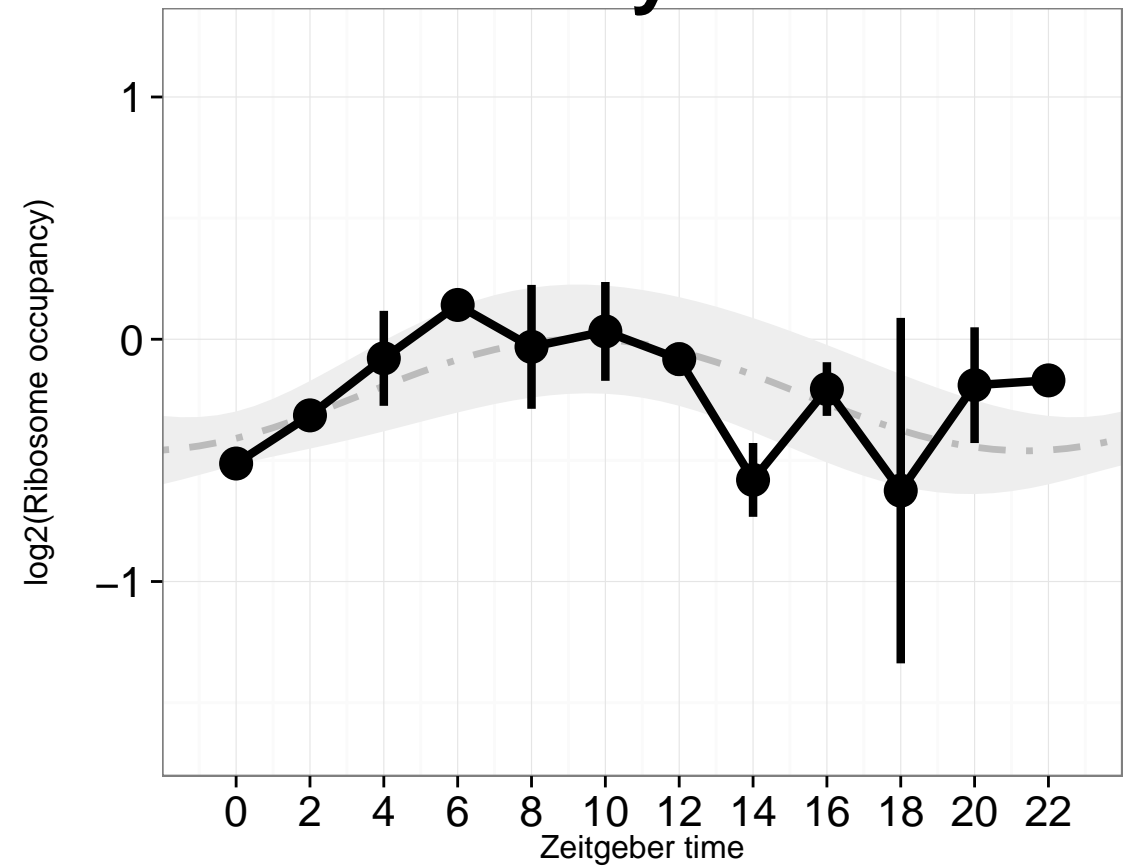

Supplement: SuppDataset_1.zip [file Gucy1a3_set_A.pdf › Supplemental Dataset 1/A-mRNA_nonrhyth_translation_nonrhyth/Gucy1a3_set_A.pdf]

# Gucy1b3

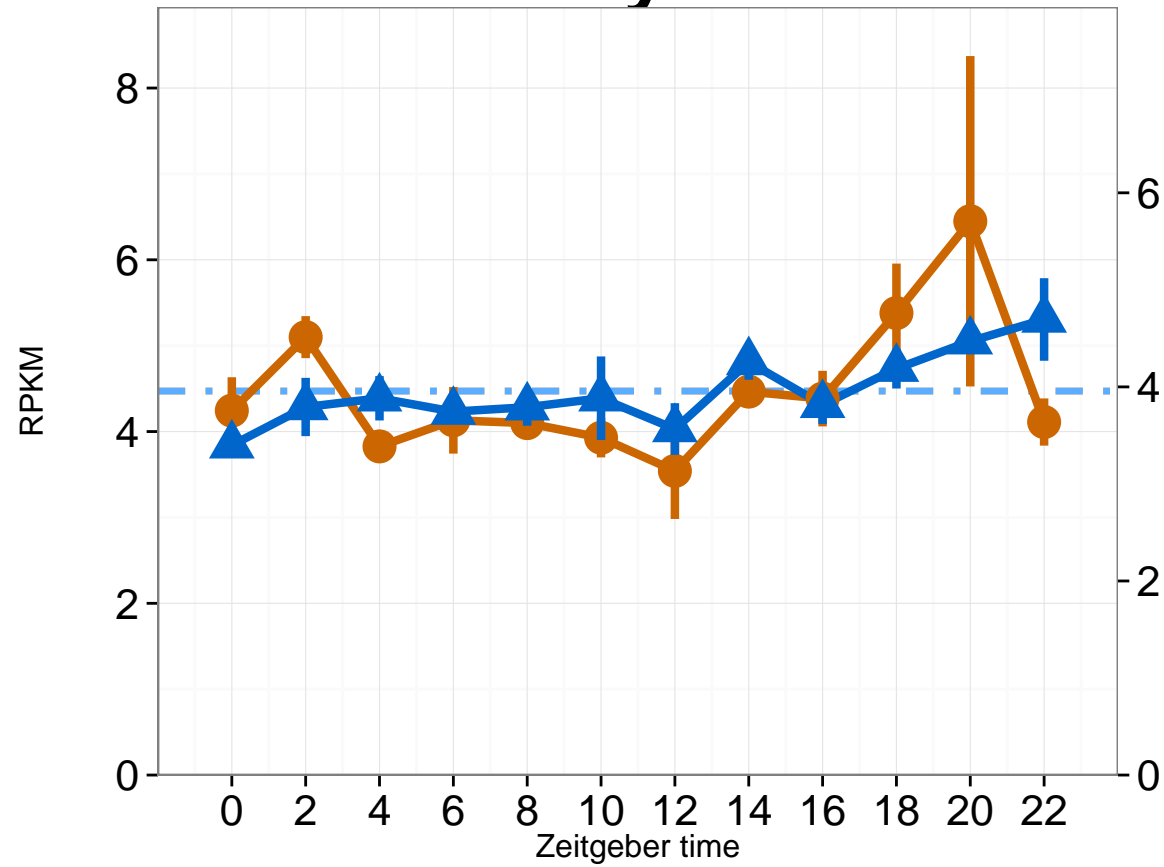

# Gucy1b3

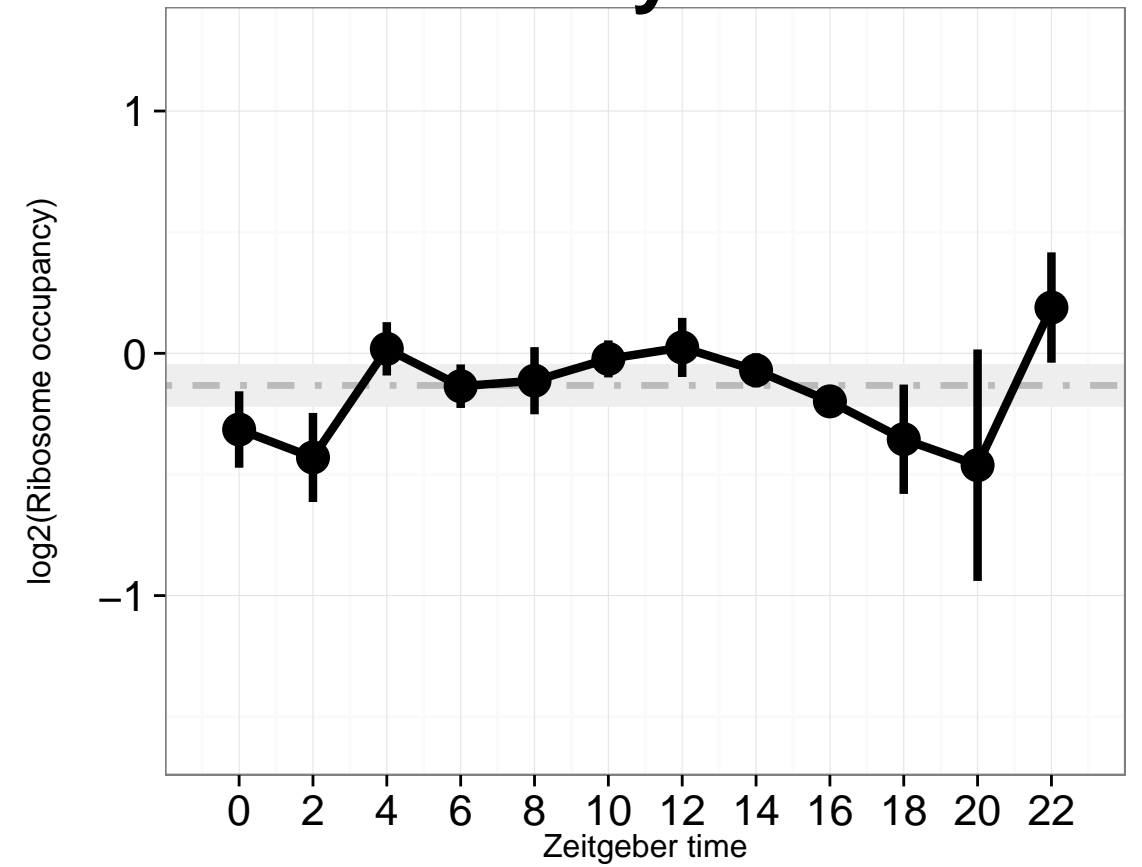

Supplement: SuppDataset_1.zip [file Gucy1b3_set_A.pdf › Supplemental Dataset 1/A-mRNA_nonrhyth_translation_nonrhyth/Gucy1b3_set_A.pdf]

# Gucy2c

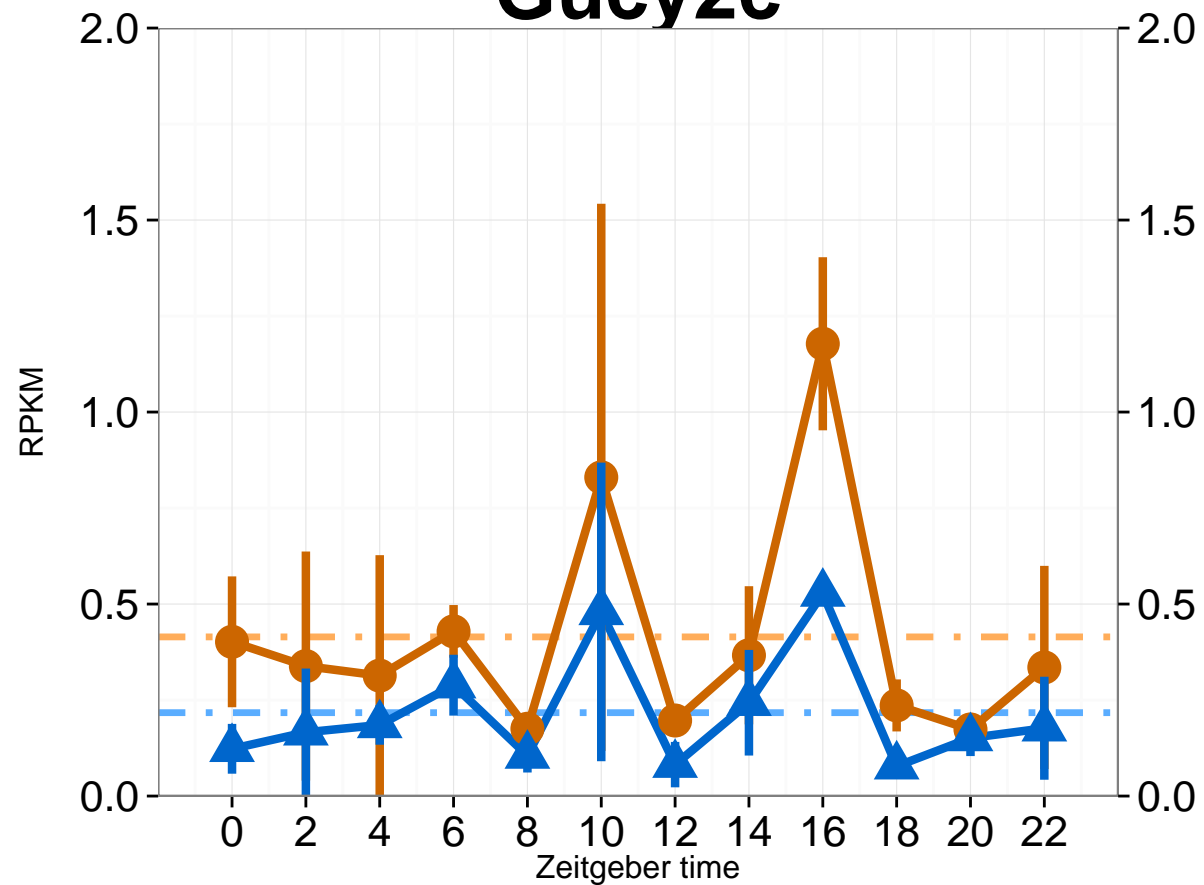

# Gucy2c

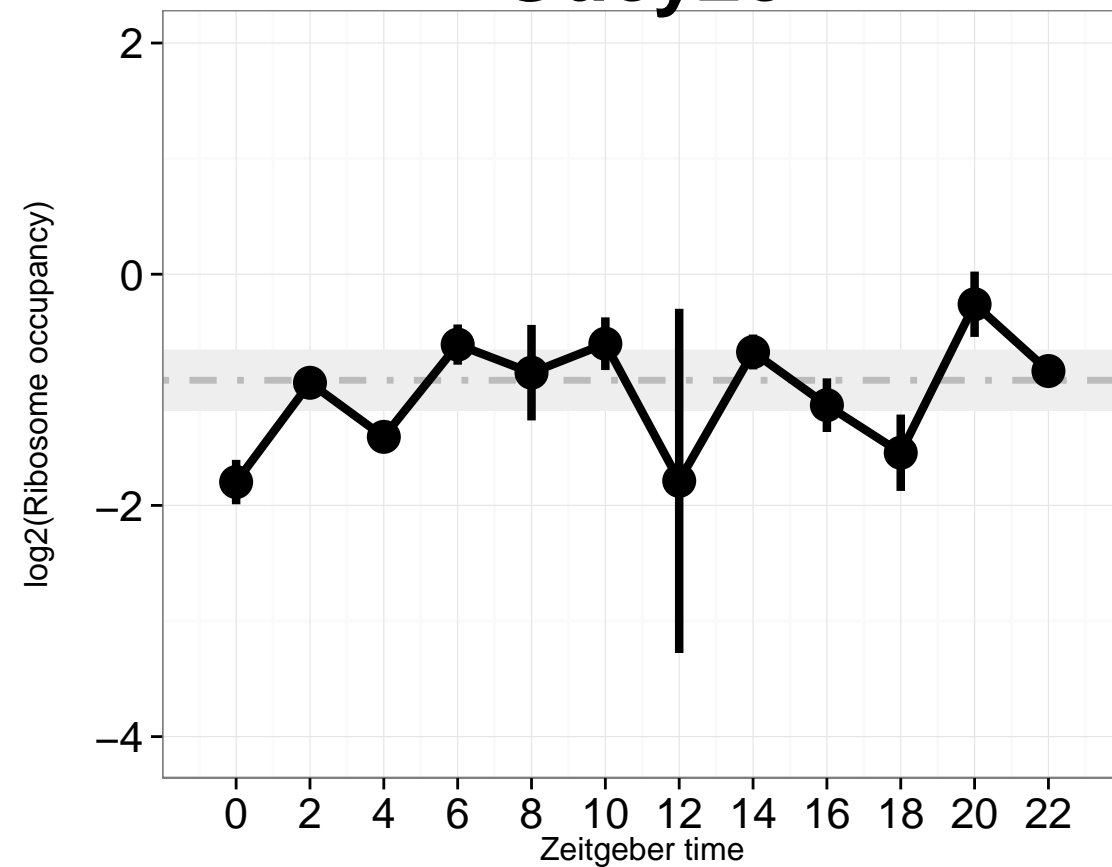

Supplement: SuppDataset_1.zip [file Gucy2c_set_A.pdf › Supplemental Dataset 1/A-mRNA_nonrhyth_translation_nonrhyth/Gucy2c_set_A.pdf]

# Guf1

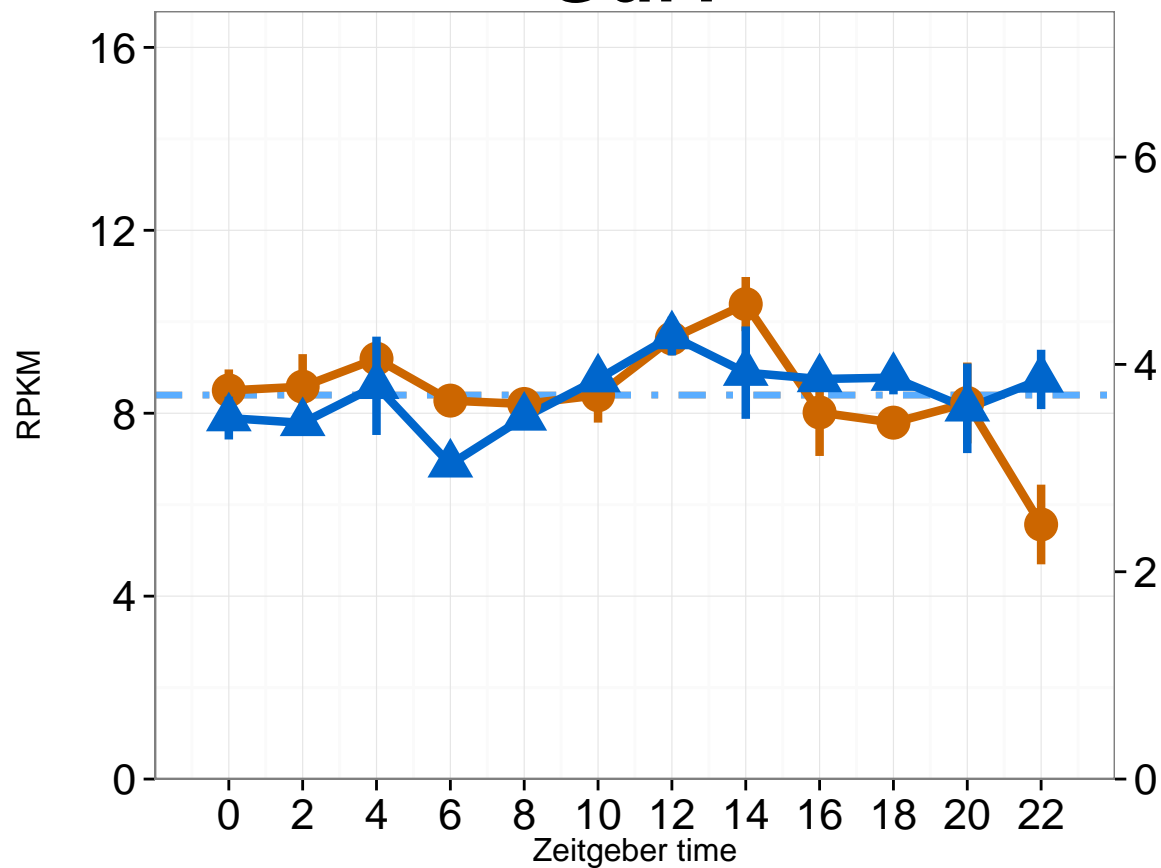

# Guf1

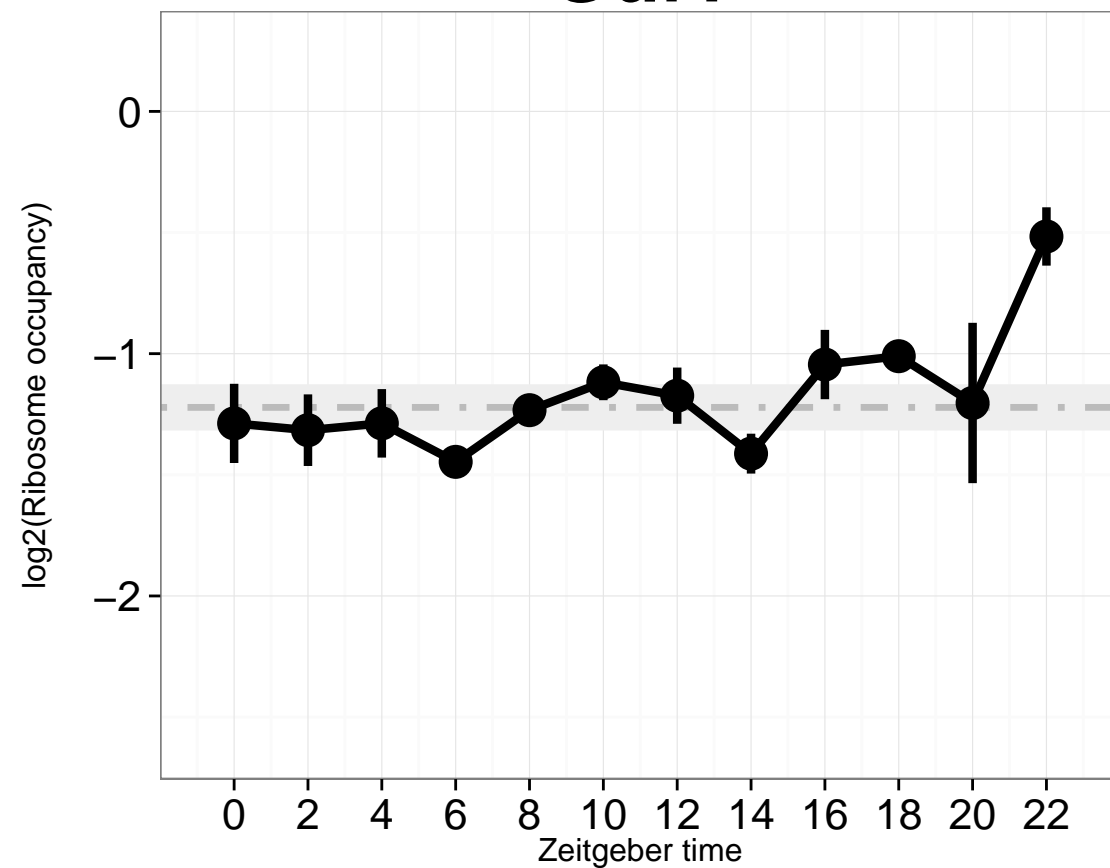

Supplement: SuppDataset_1.zip [file Guf1_set_A.pdf › Supplemental Dataset 1/A-mRNA_nonrhyth_translation_nonrhyth/Guf1_set_A.pdf]

## Guk1

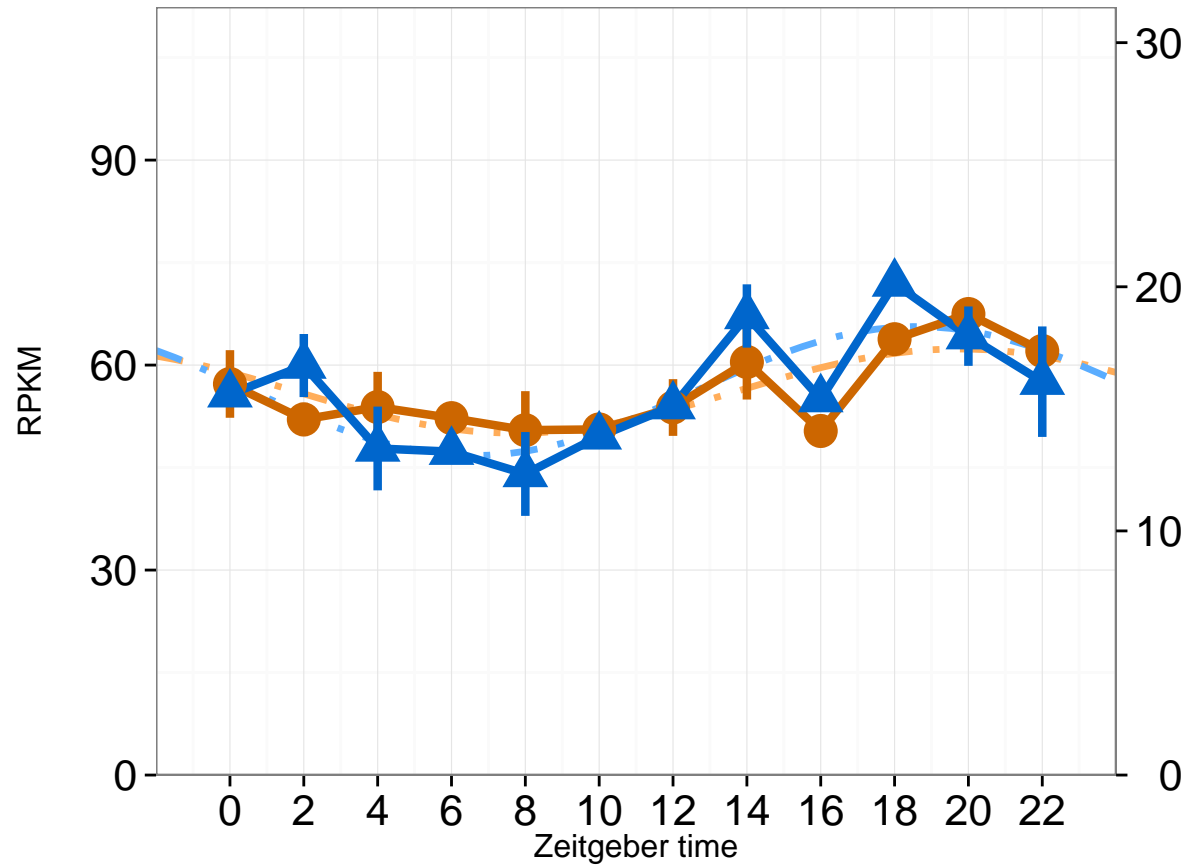

## Guk1

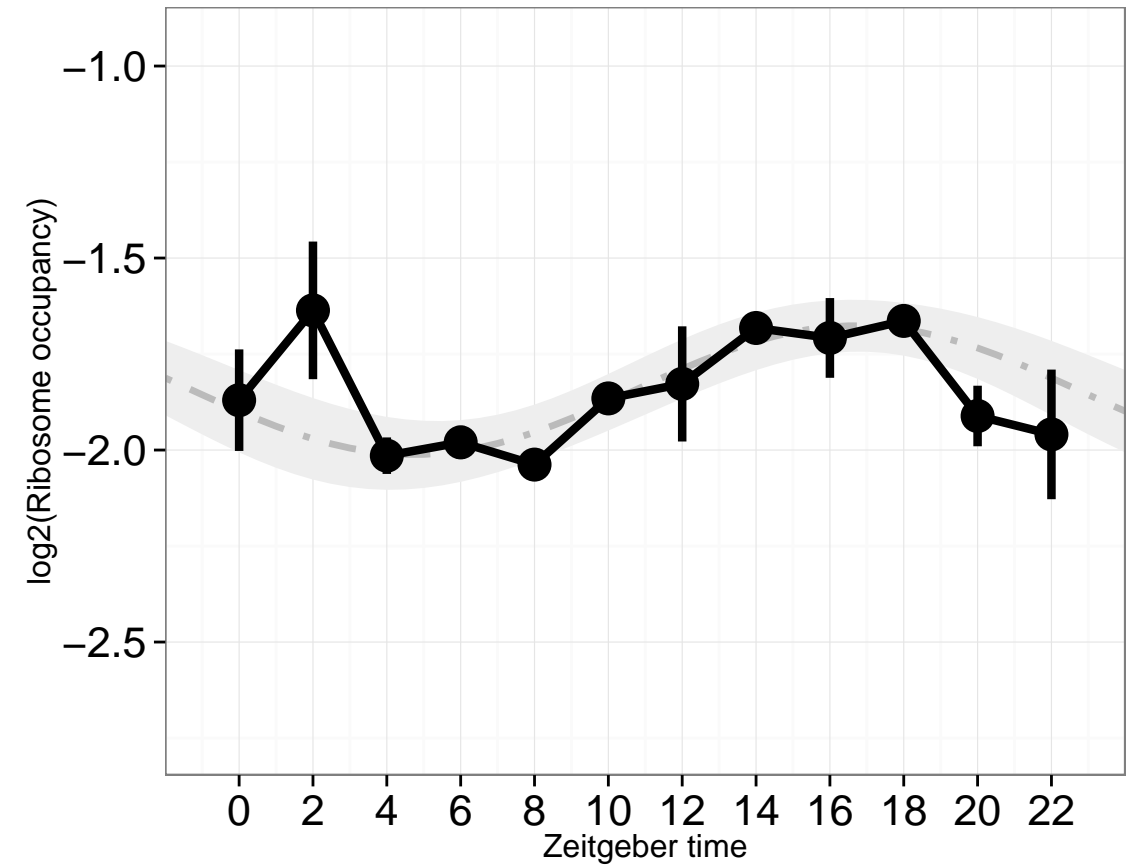

Supplement: SuppDataset_1.zip [file Guk1_set_A.pdf › Supplemental Dataset 1/A-mRNA_nonrhyth_translation_nonrhyth/Guk1_set_A.pdf]

## Gulo

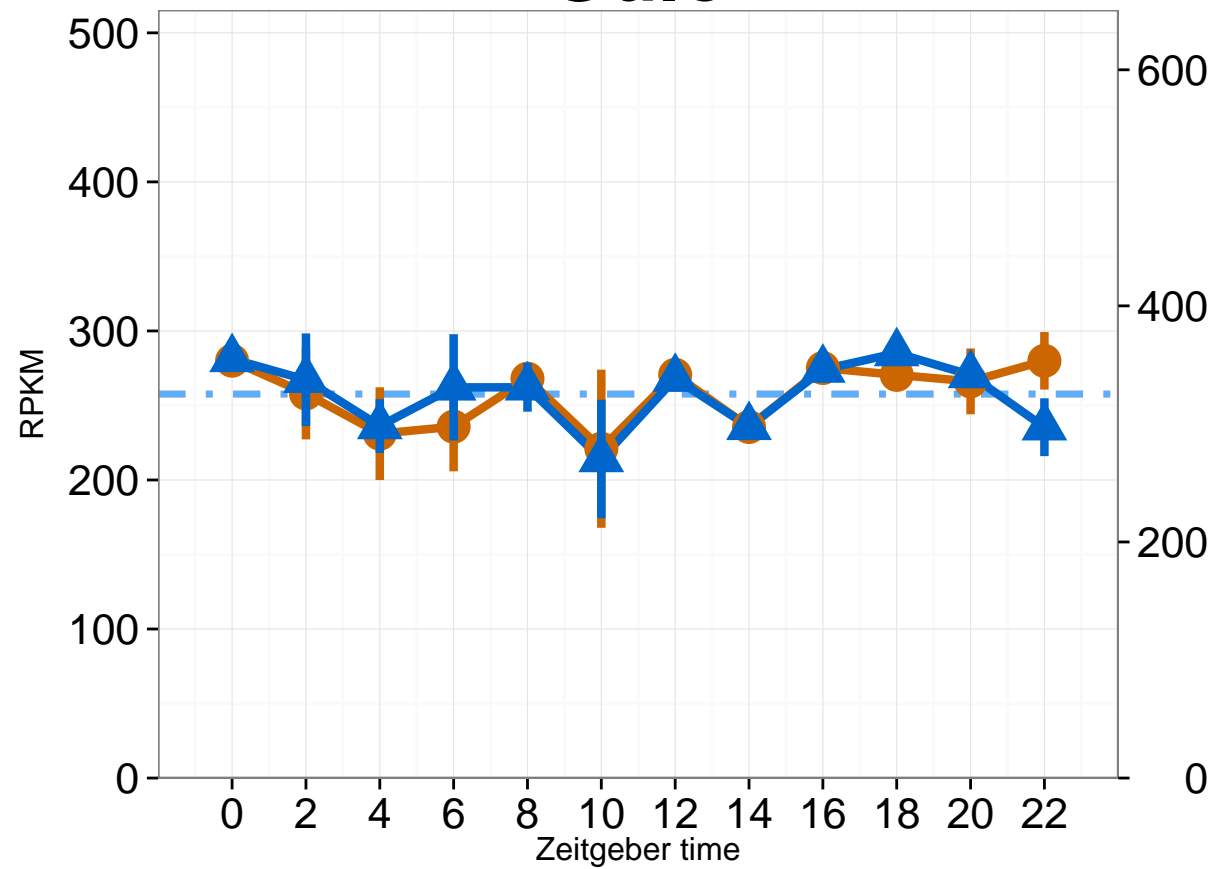

## Gulo

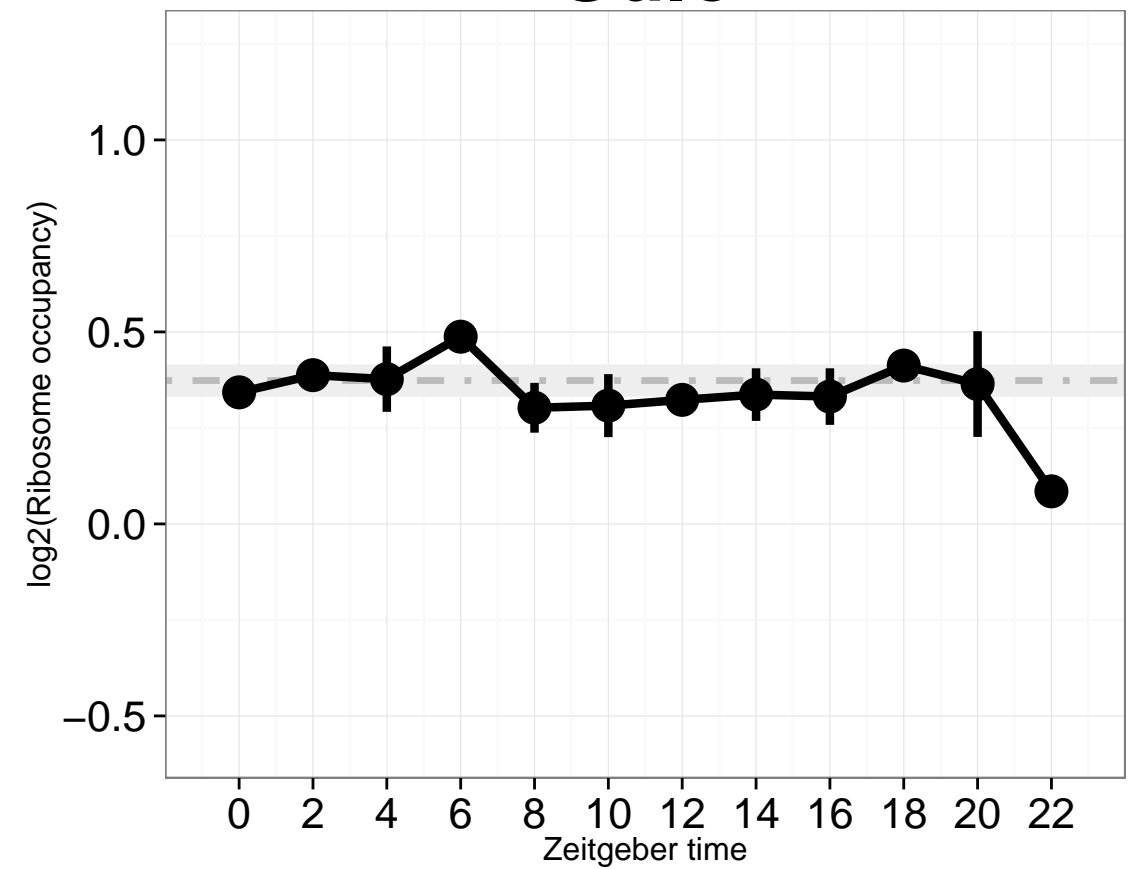

Supplement: SuppDataset_1.zip [file Gulo_set_A.pdf › Supplemental Dataset 1/A-mRNA_nonrhyth_translation_nonrhyth/Gulo_set_A.pdf]

**Gulp1 TR**

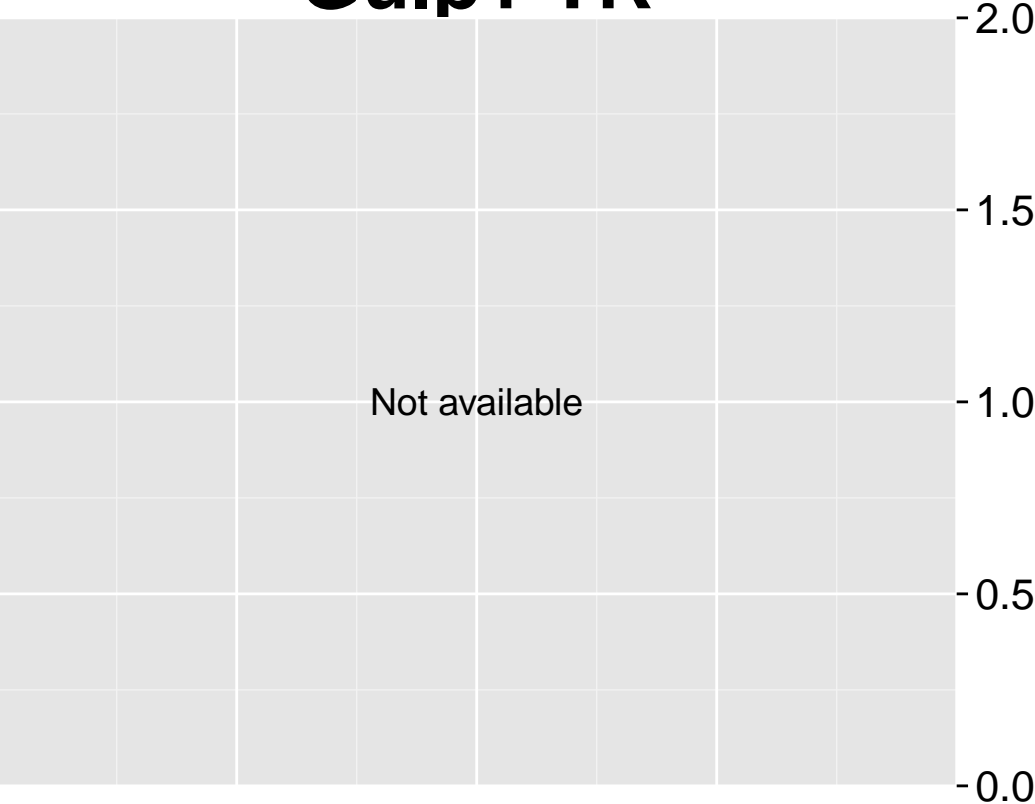

**Gulp1 log2(Ribosome occupancy**

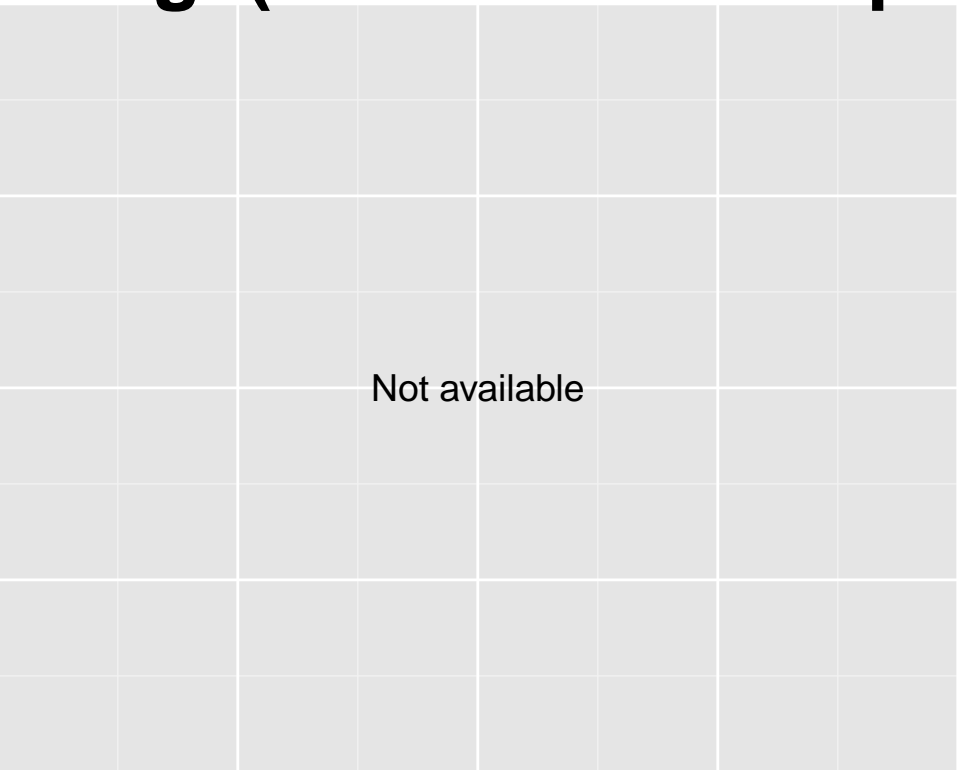

Supplement: SuppDataset_1.zip [file Gulp1_set_A.pdf › Supplemental Dataset 1/A-mRNA_nonrhyth_translation_nonrhyth/Gulp1_set_A.pdf]

# Gxylt1

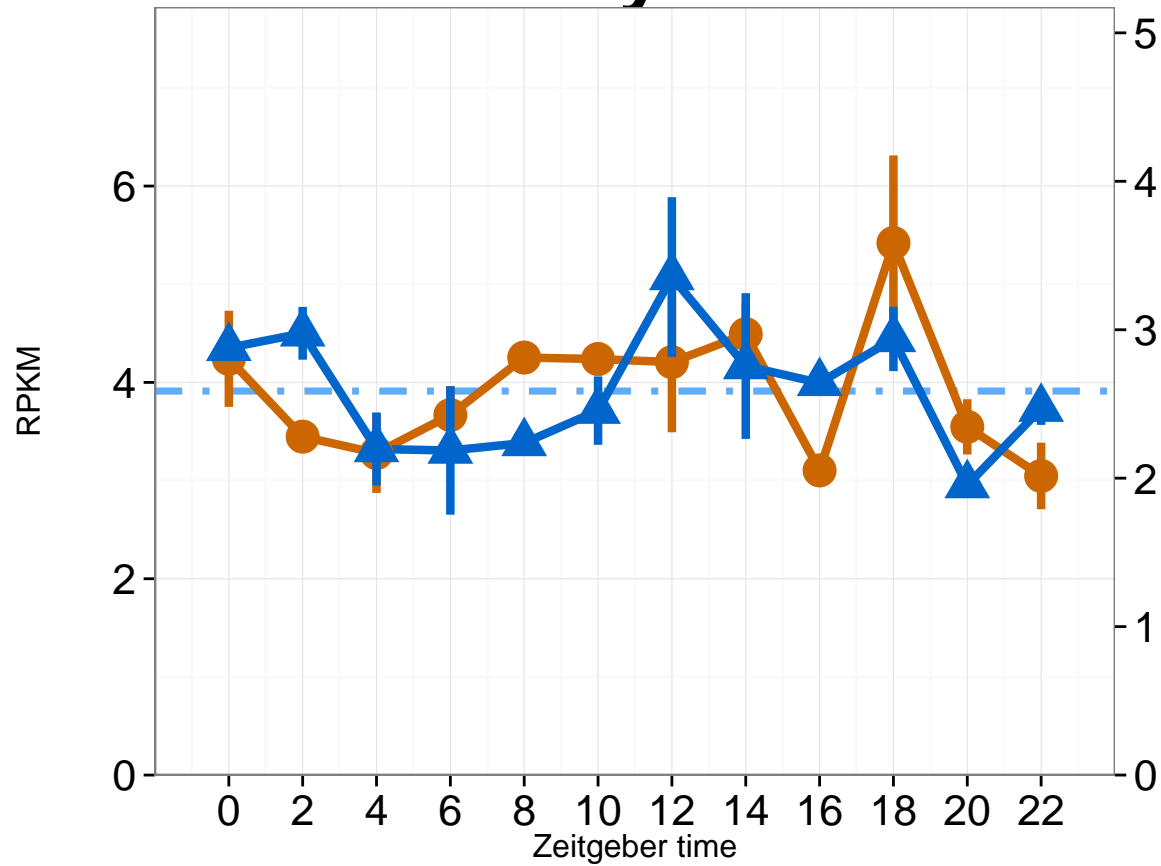

# Gxylt1

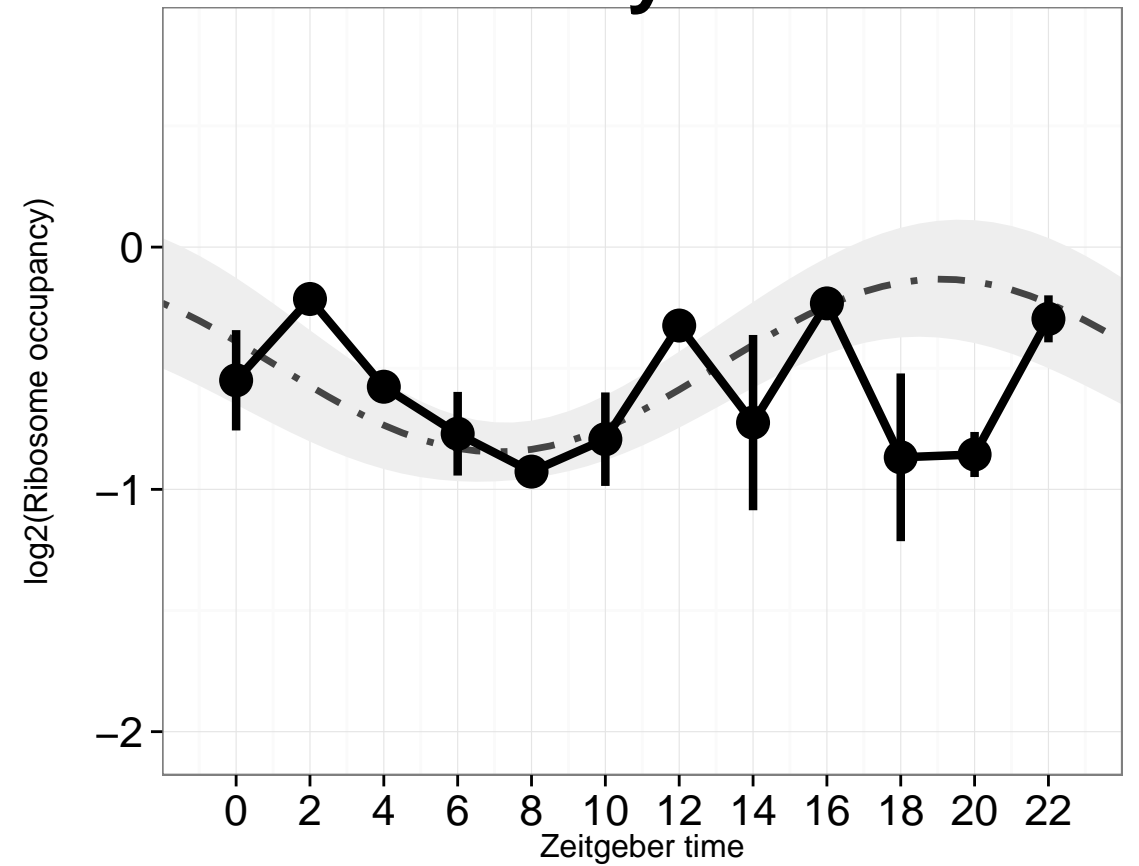

Supplement: SuppDataset_1.zip [file Gxylt1_set_A.pdf › Supplemental Dataset 1/A-mRNA_nonrhyth_translation_nonrhyth/Gxylt1_set_A.pdf]

# Gyk

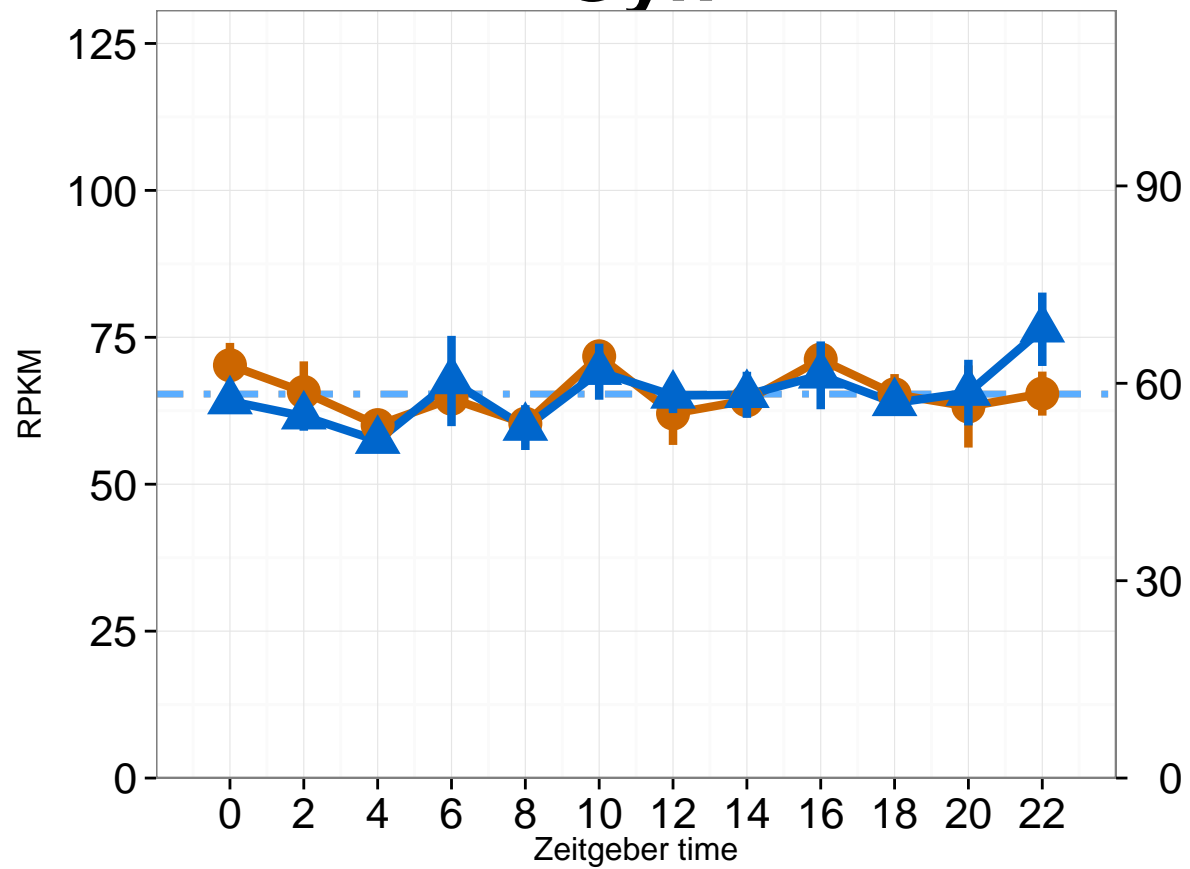

# Gyk

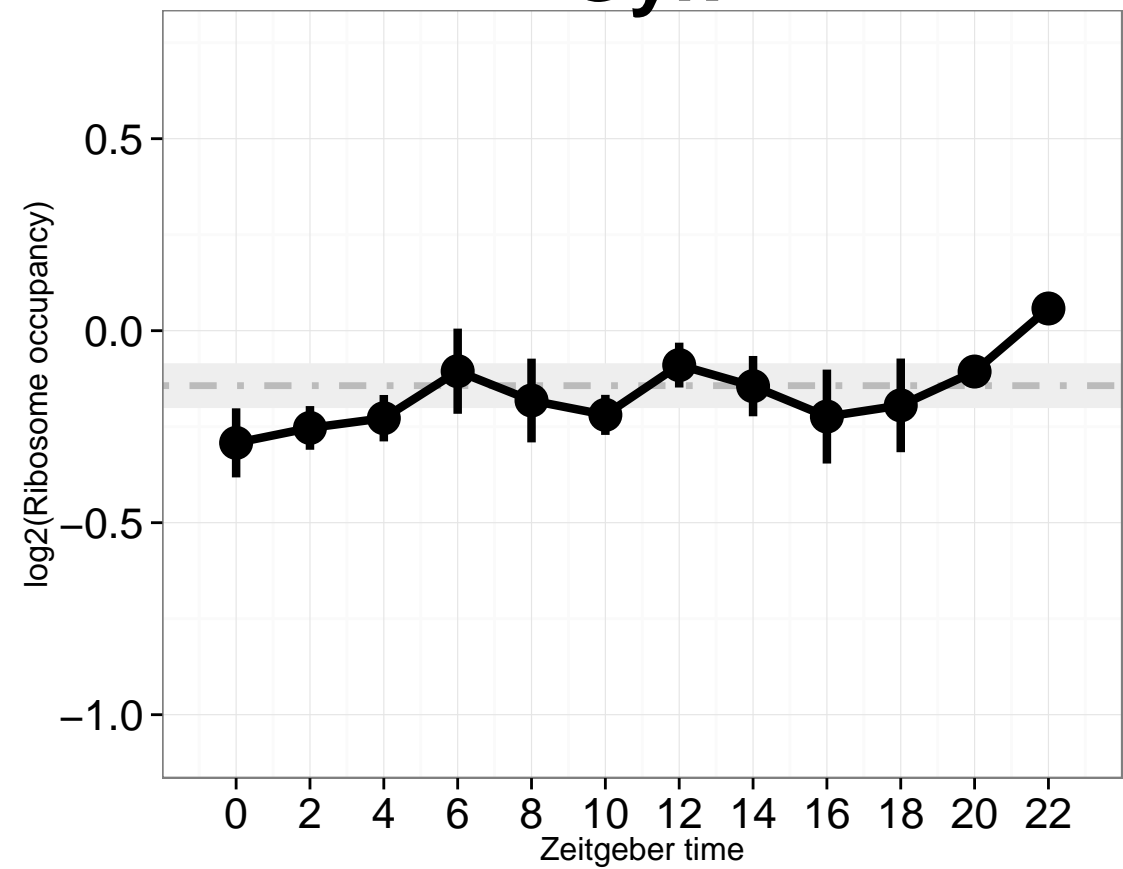

Supplement: SuppDataset_1.zip [file Gyk_set_A.pdf › Supplemental Dataset 1/A-mRNA_nonrhyth_translation_nonrhyth/Gyk_set_A.pdf]

## Gzf1

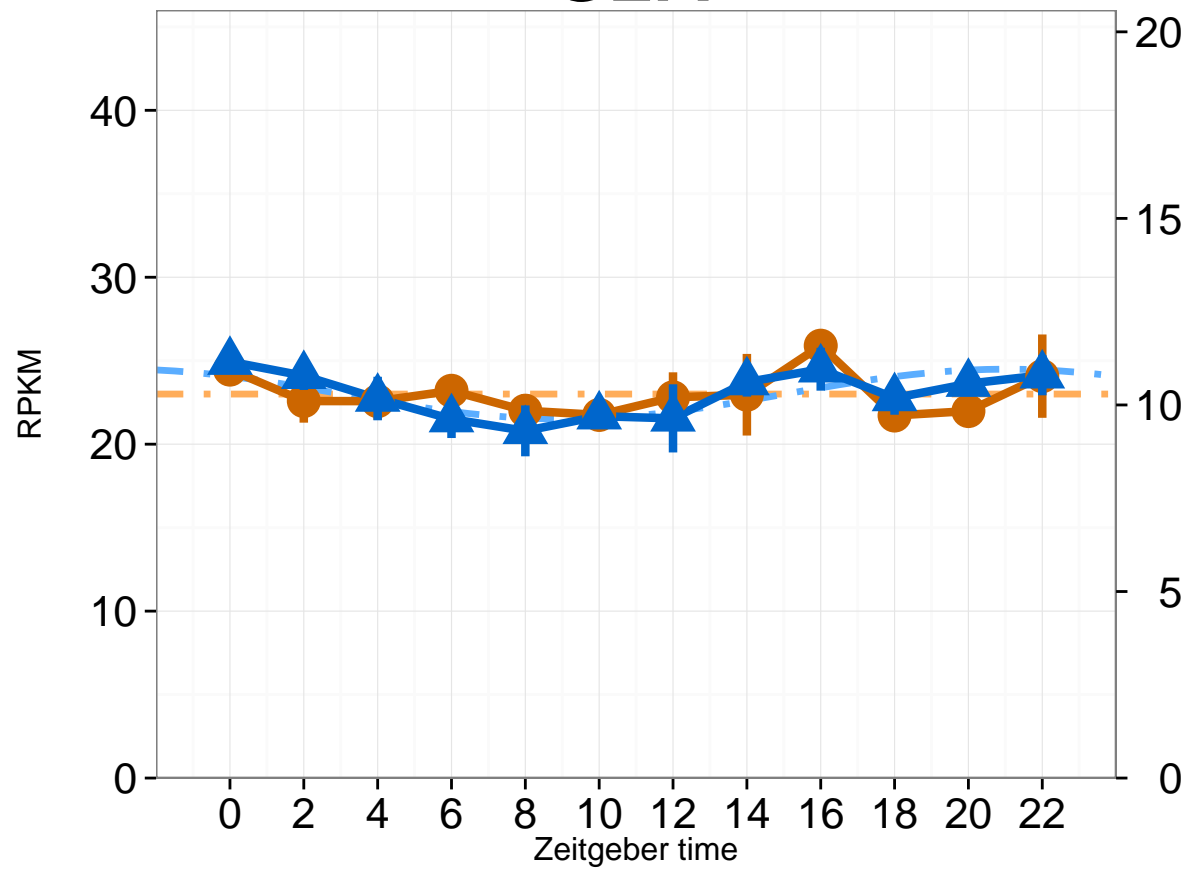

## Gzf1

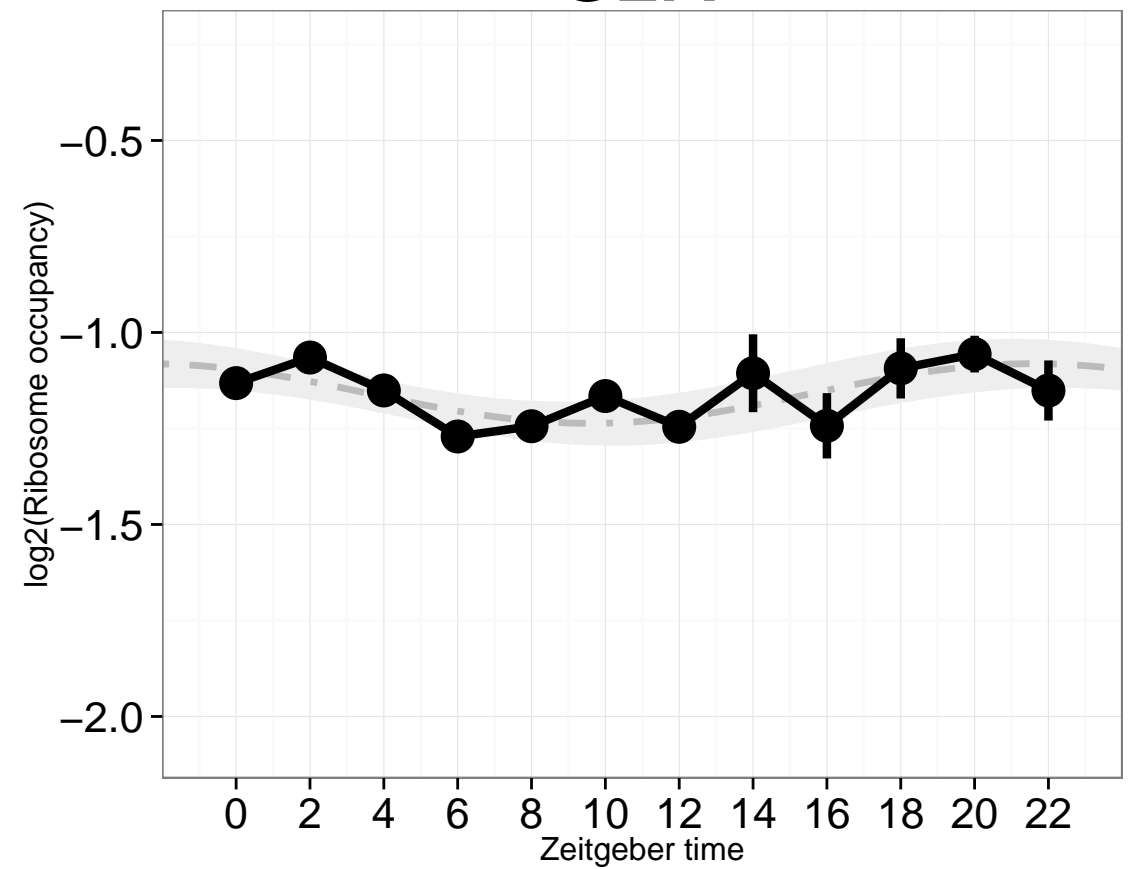

Supplement: SuppDataset_1.zip [file Gzf1_set_A.pdf › Supplemental Dataset 1/A-mRNA_nonrhyth_translation_nonrhyth/Gzf1_set_A.pdf]

## Gzma

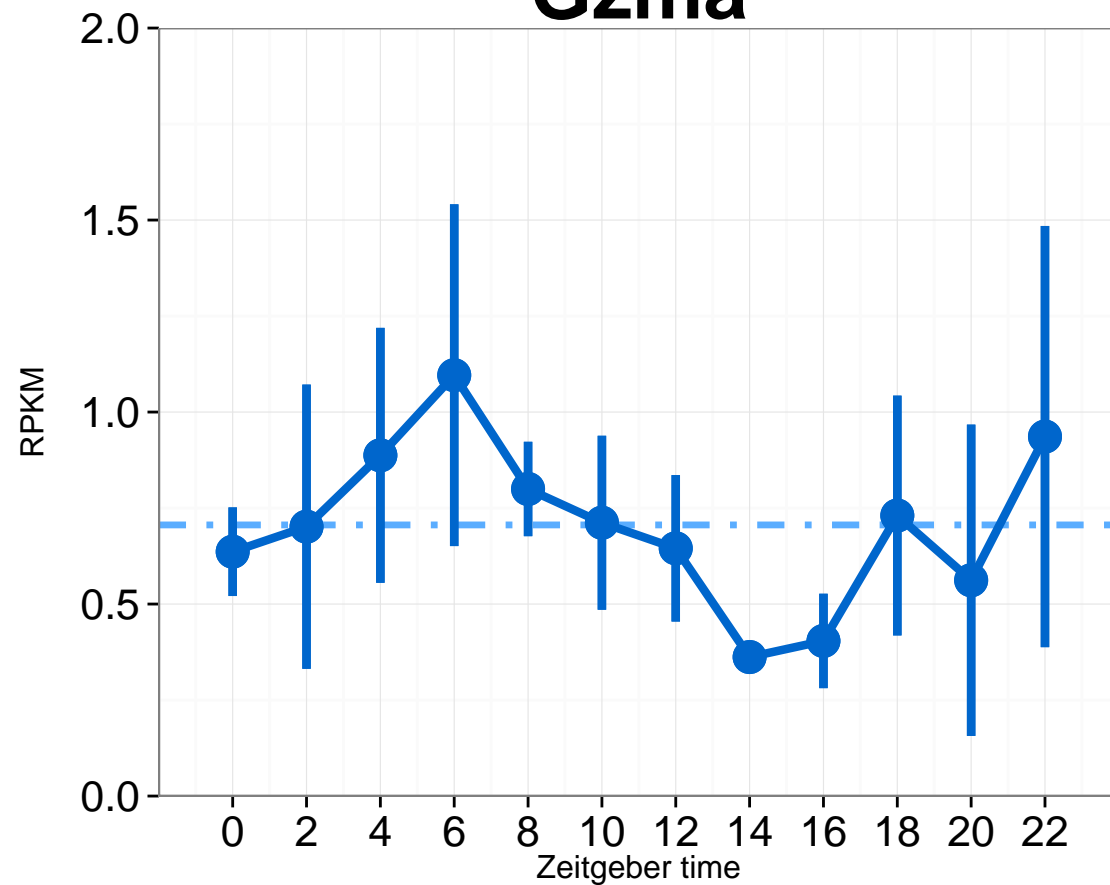

## Gzma log2(Ribosome occupancy)

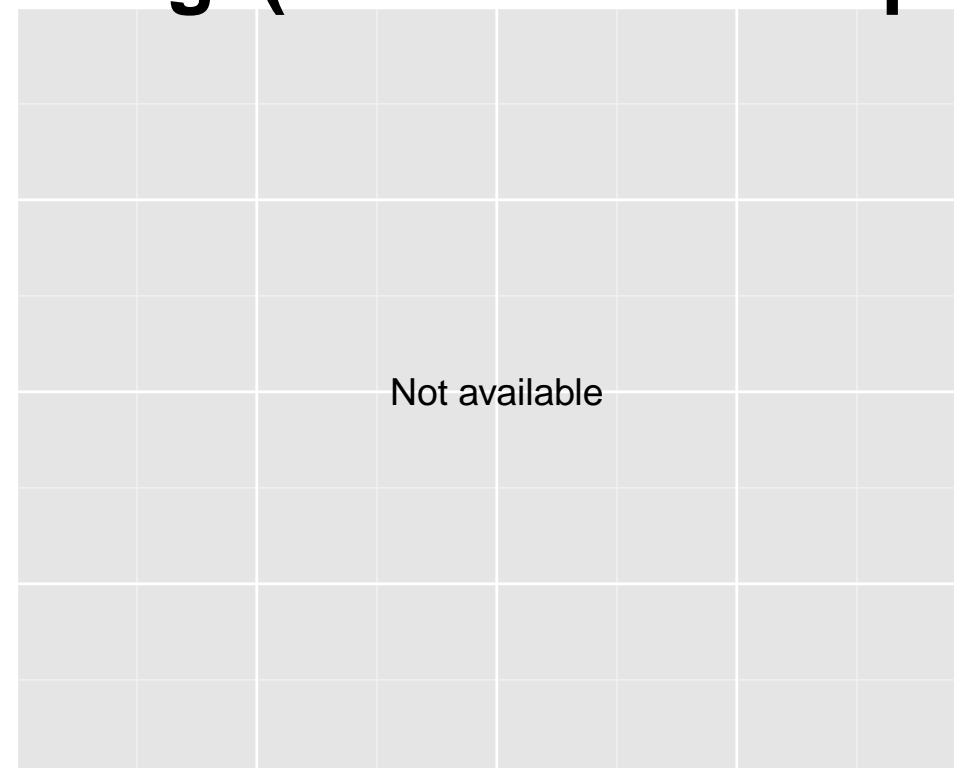

Supplement: SuppDataset_1.zip [file Gzma_set_A.pdf › Supplemental Dataset 1/A-mRNA_nonrhyth_translation_nonrhyth/Gzma_set_A.pdf]

## H13

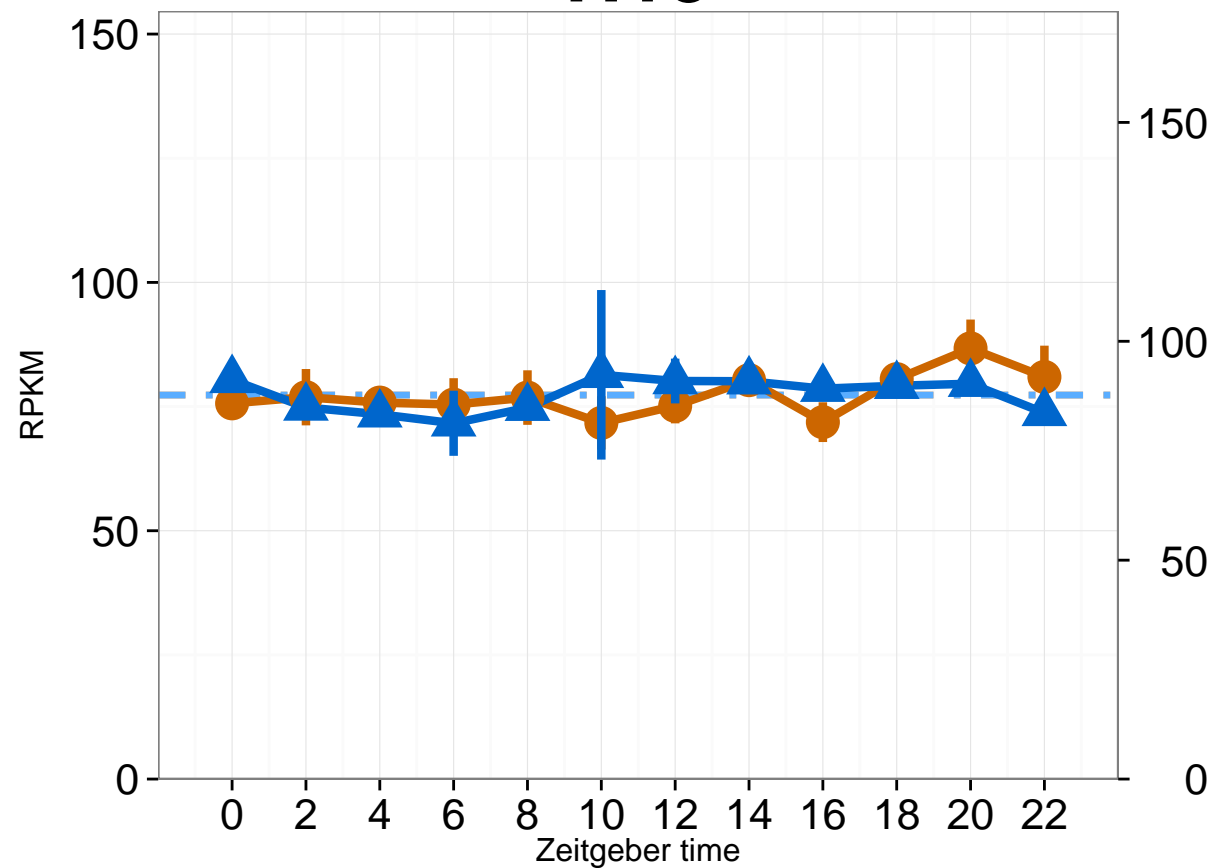

## H13

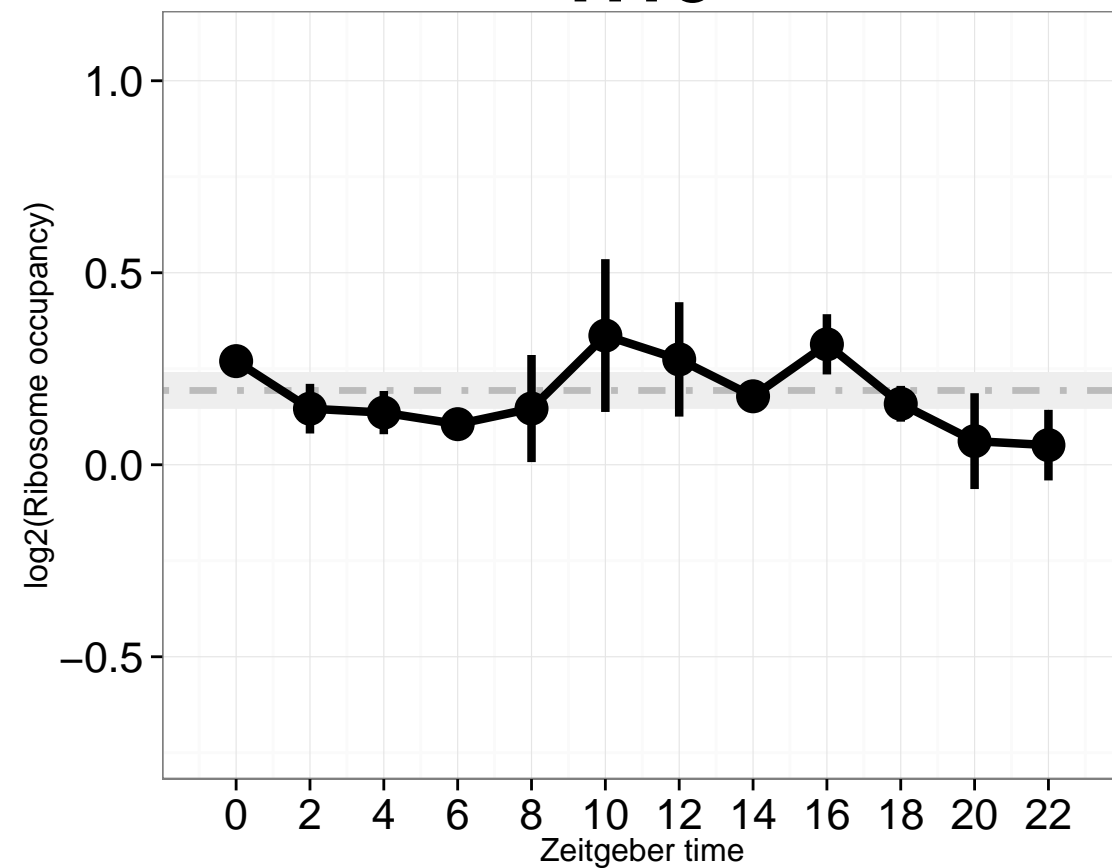

Supplement: SuppDataset_1.zip [file H13_set_A.pdf › Supplemental Dataset 1/A-mRNA_nonrhyth_translation_nonrhyth/H13_set_A.pdf]

## H1f0

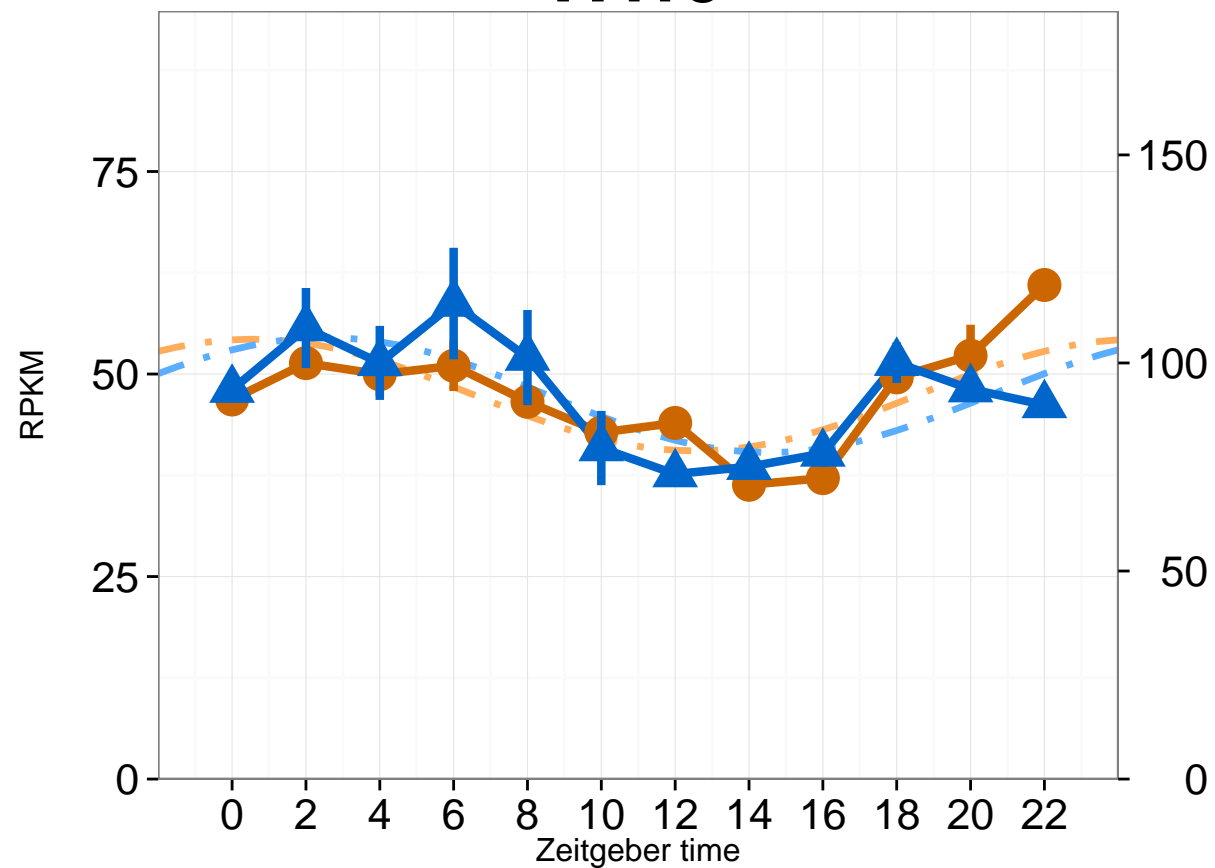

## H1f0

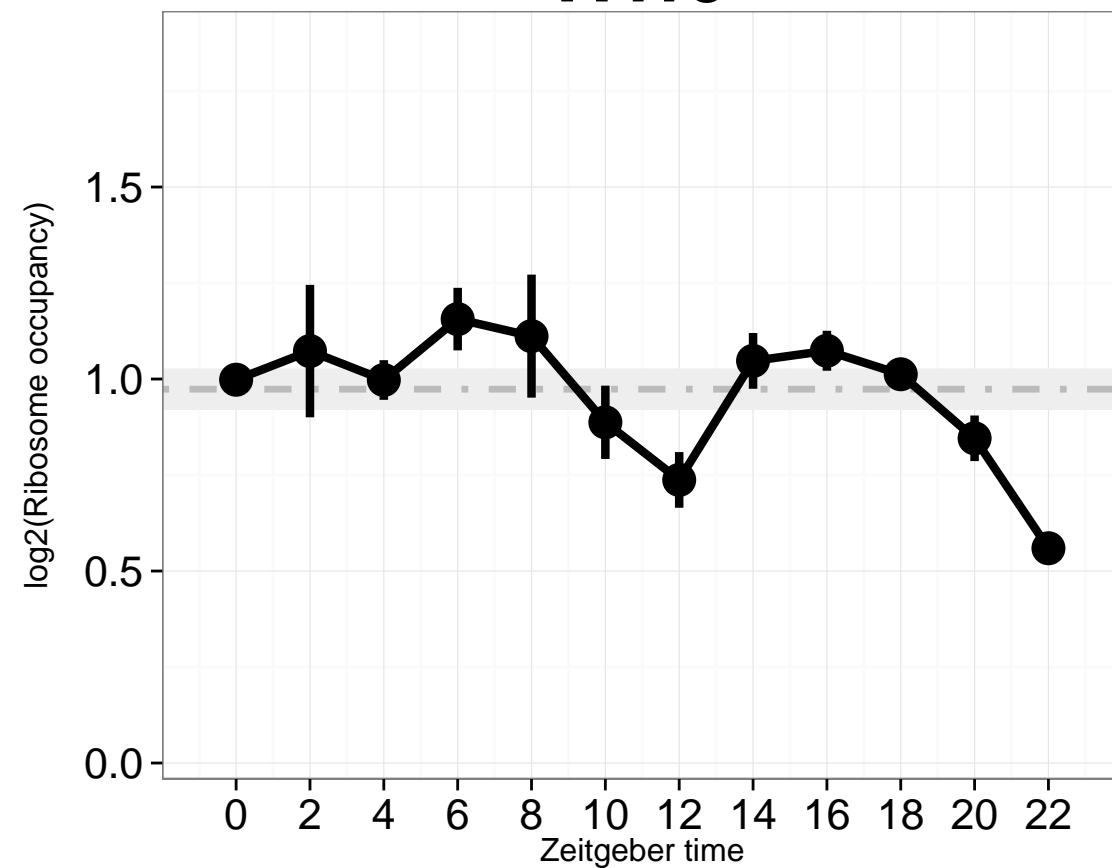

Supplement: SuppDataset_1.zip [file H1f0_set_A.pdf › Supplemental Dataset 1/A-mRNA_nonrhyth_translation_nonrhyth/H1f0_set_A.pdf]

## H2-Aa

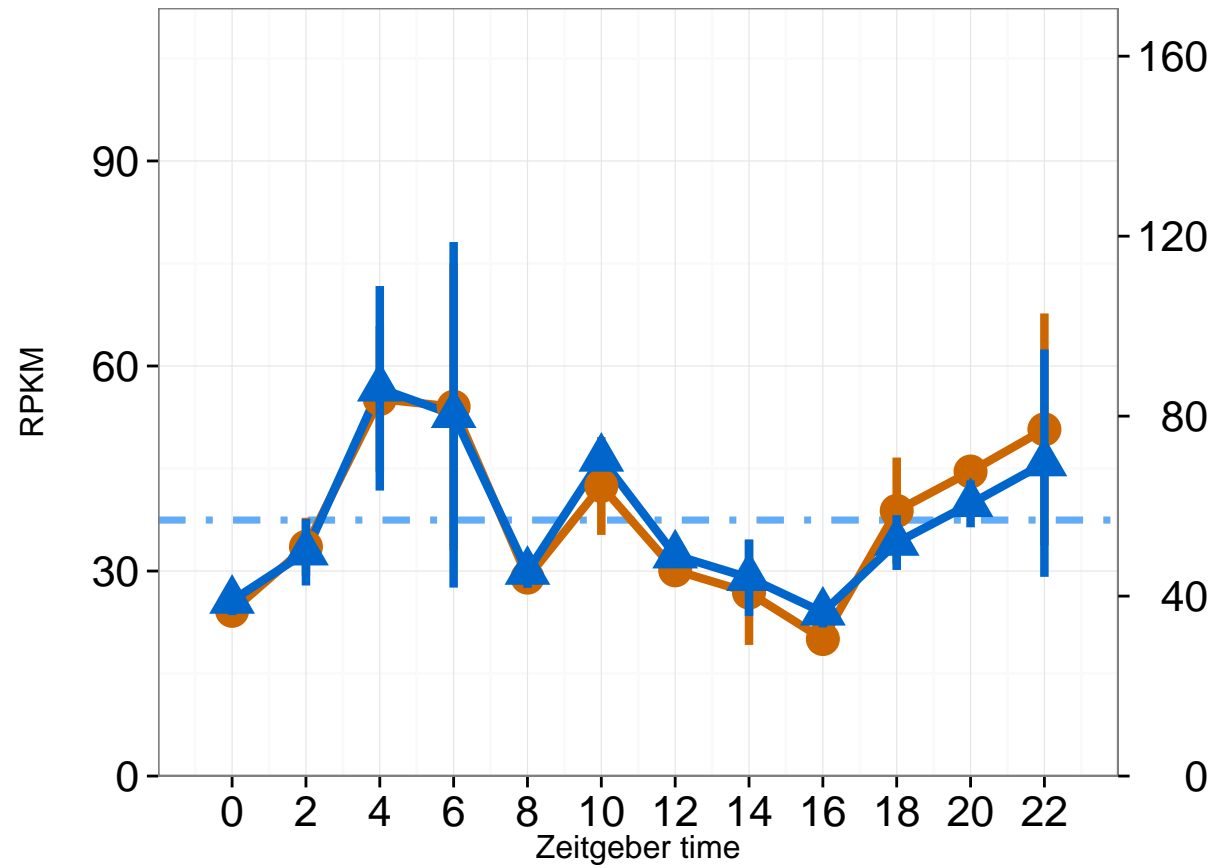

## H2-Aa

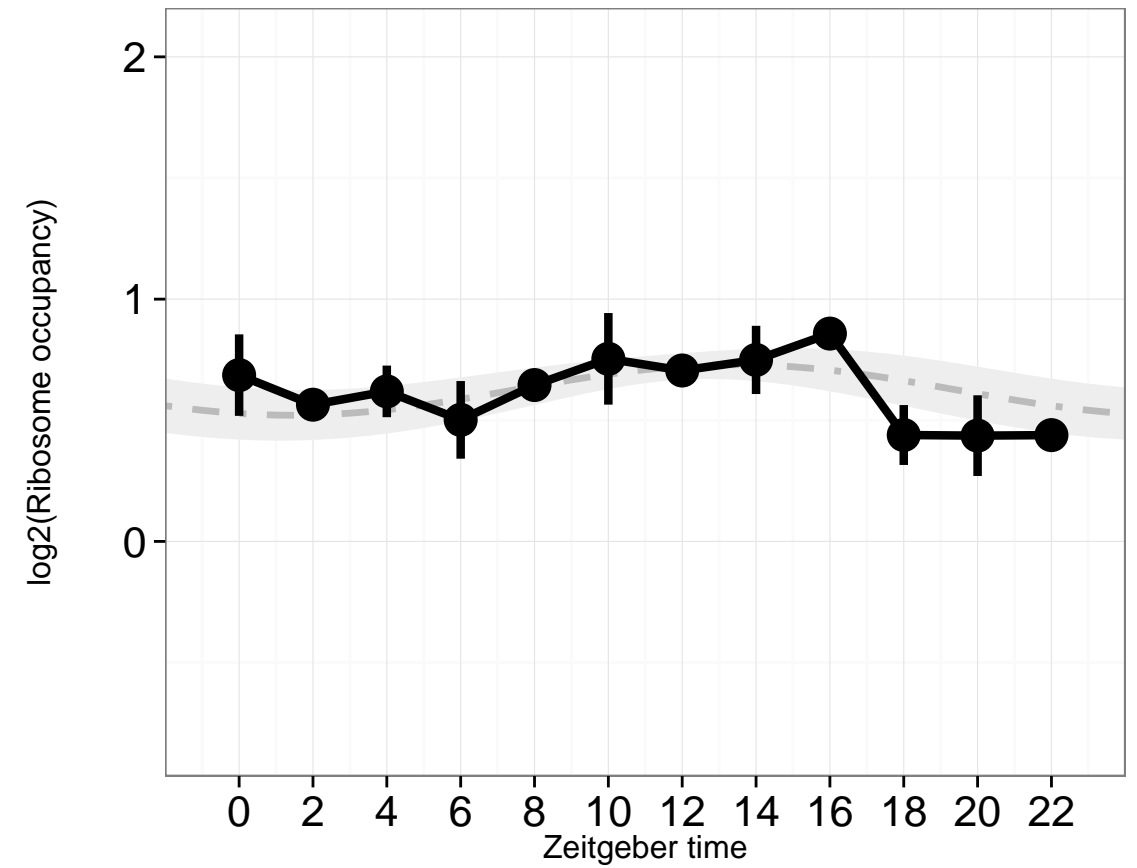

Supplement: SuppDataset_1.zip [file H2-Aa_set_A.pdf › Supplemental Dataset 1/A-mRNA_nonrhyth_translation_nonrhyth/H2-Aa_set_A.pdf]

# H2-Ab1

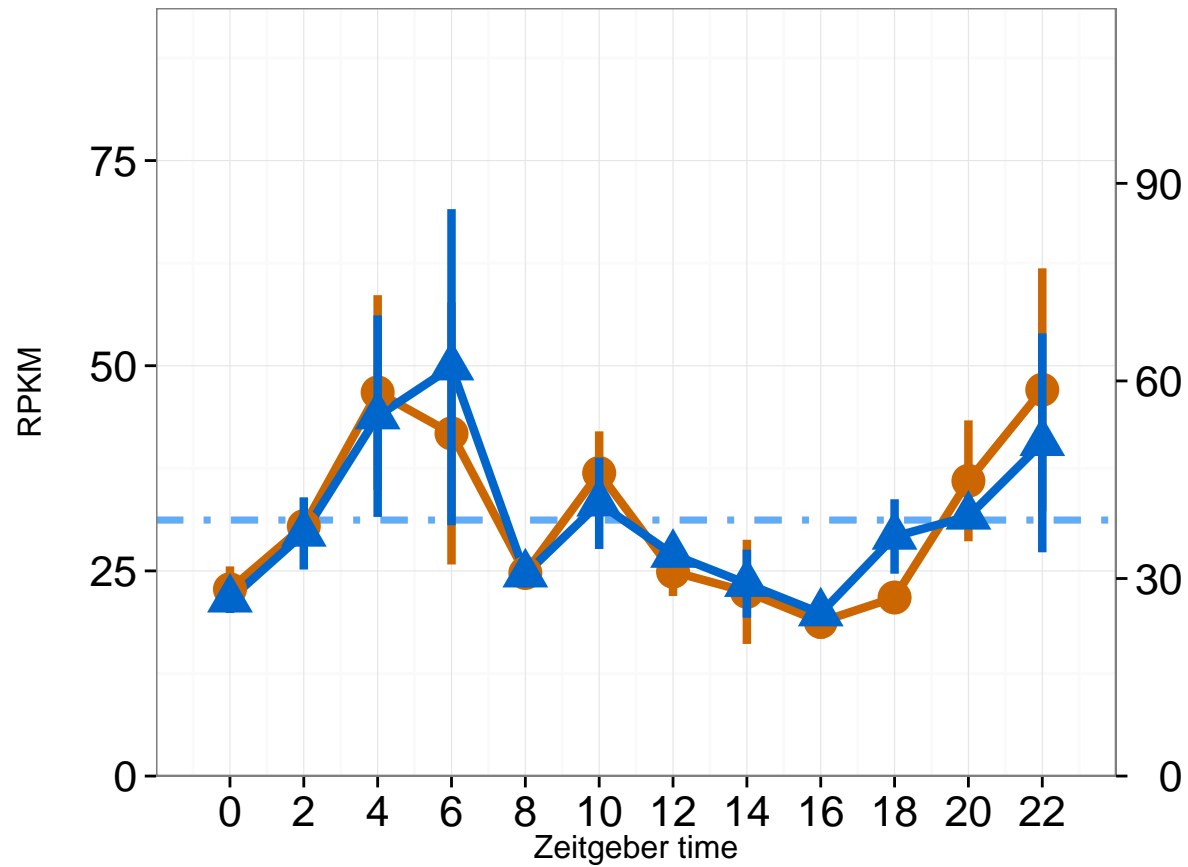

# H2-Ab1

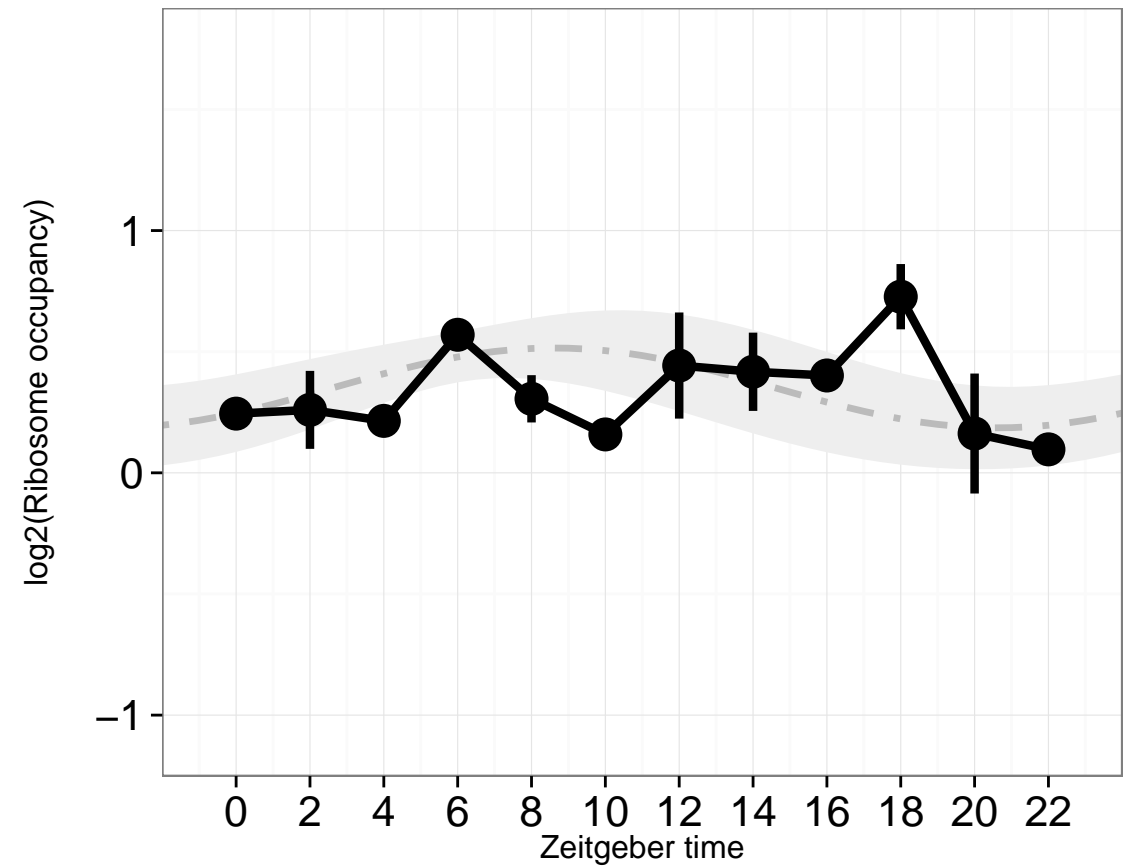

Supplement: SuppDataset_1.zip [file H2-Ab1_set_A.pdf › Supplemental Dataset 1/A-mRNA_nonrhyth_translation_nonrhyth/H2-Ab1_set_A.pdf]

# H2-D1

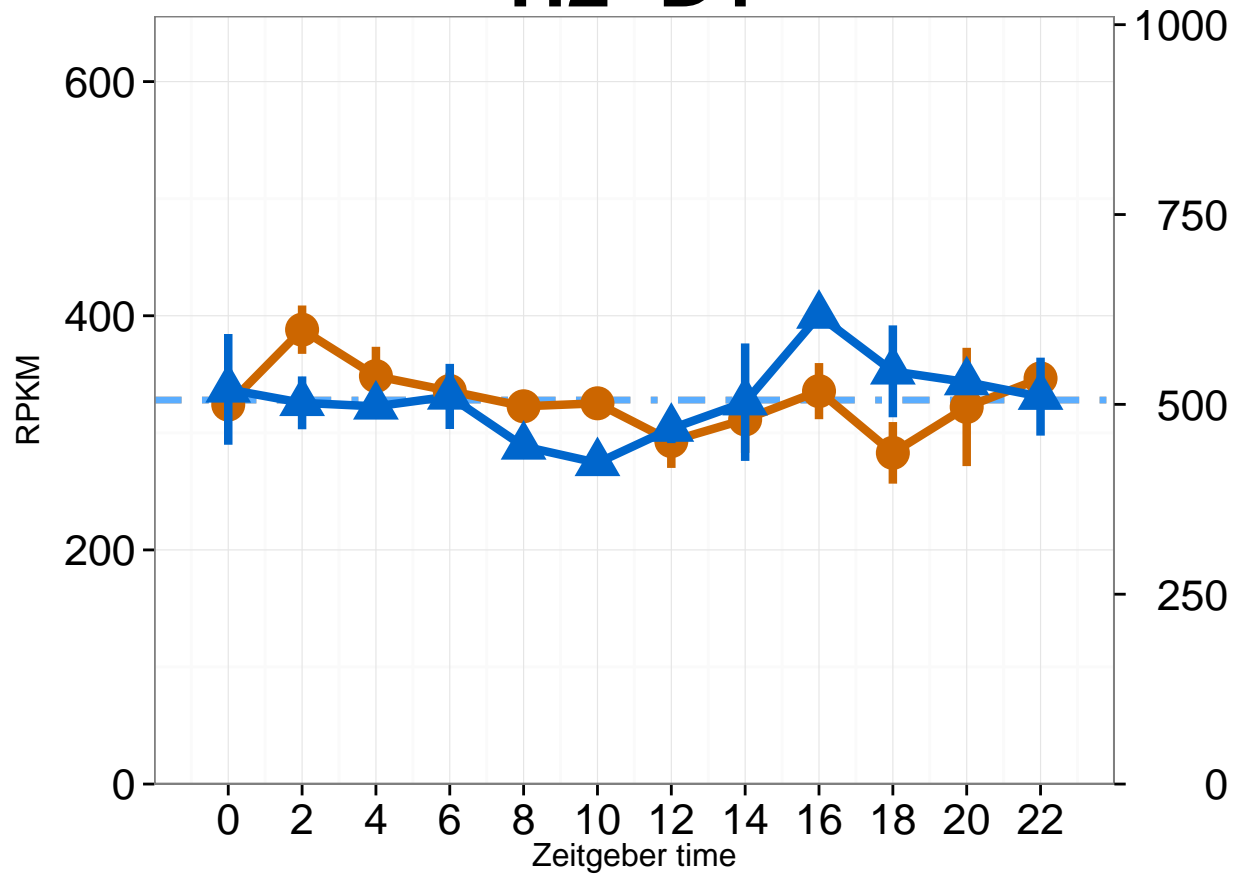

# H2-D1

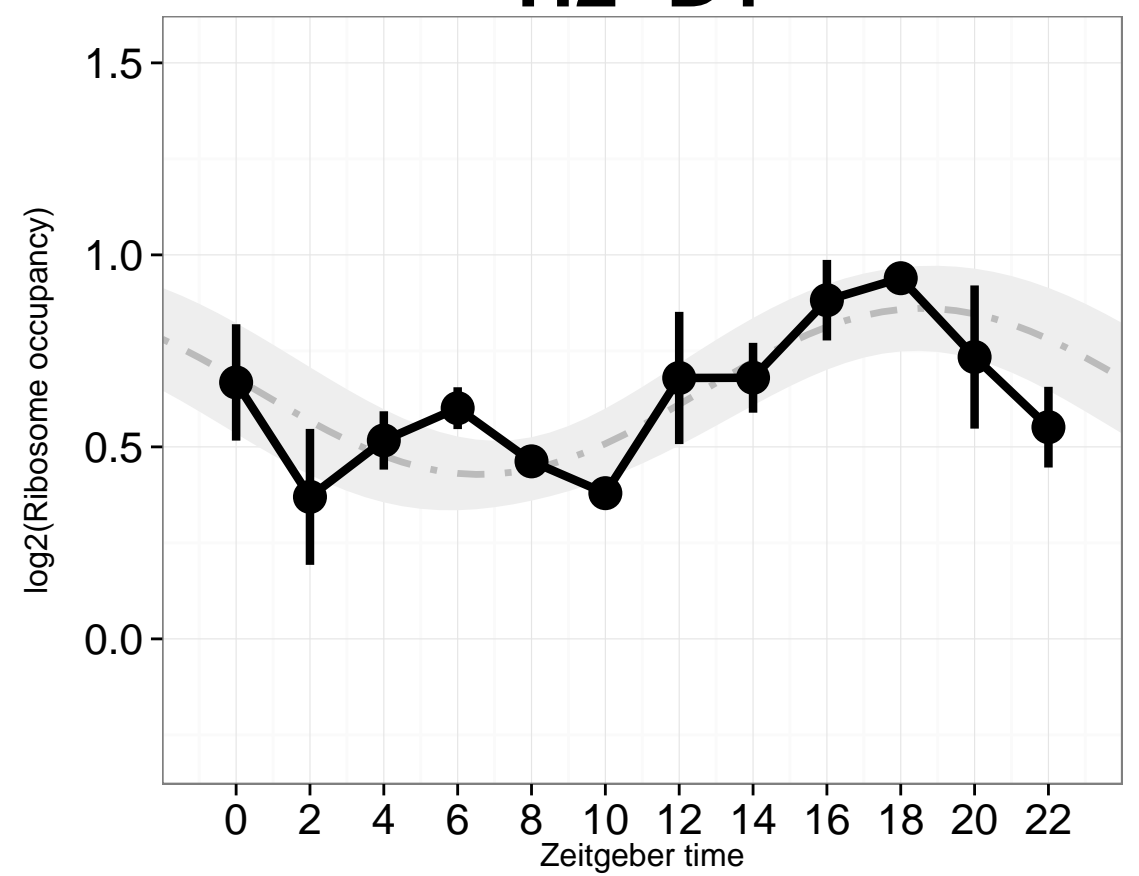

Supplement: SuppDataset_1.zip [file H2-D1_set_A.pdf › Supplemental Dataset 1/A-mRNA_nonrhyth_translation_nonrhyth/H2-D1_set_A.pdf]

# H2-DMa

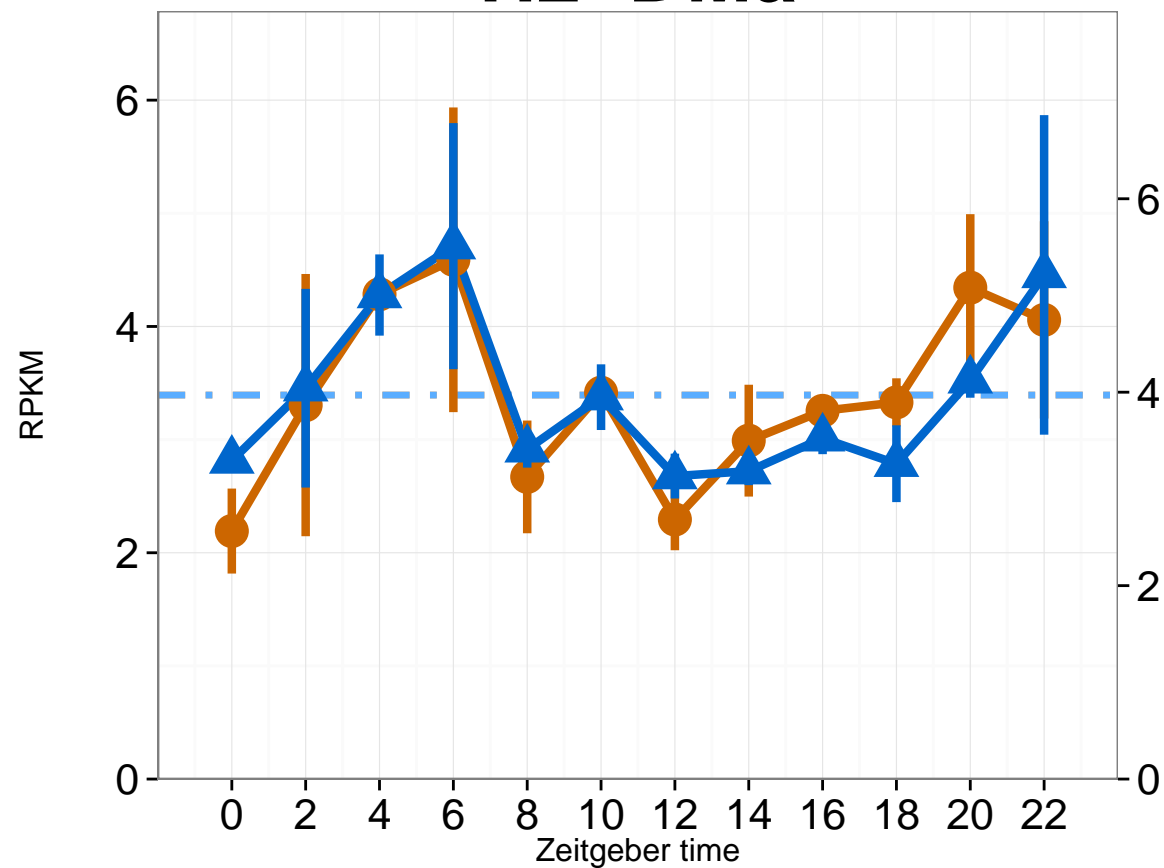

# H2-DMa

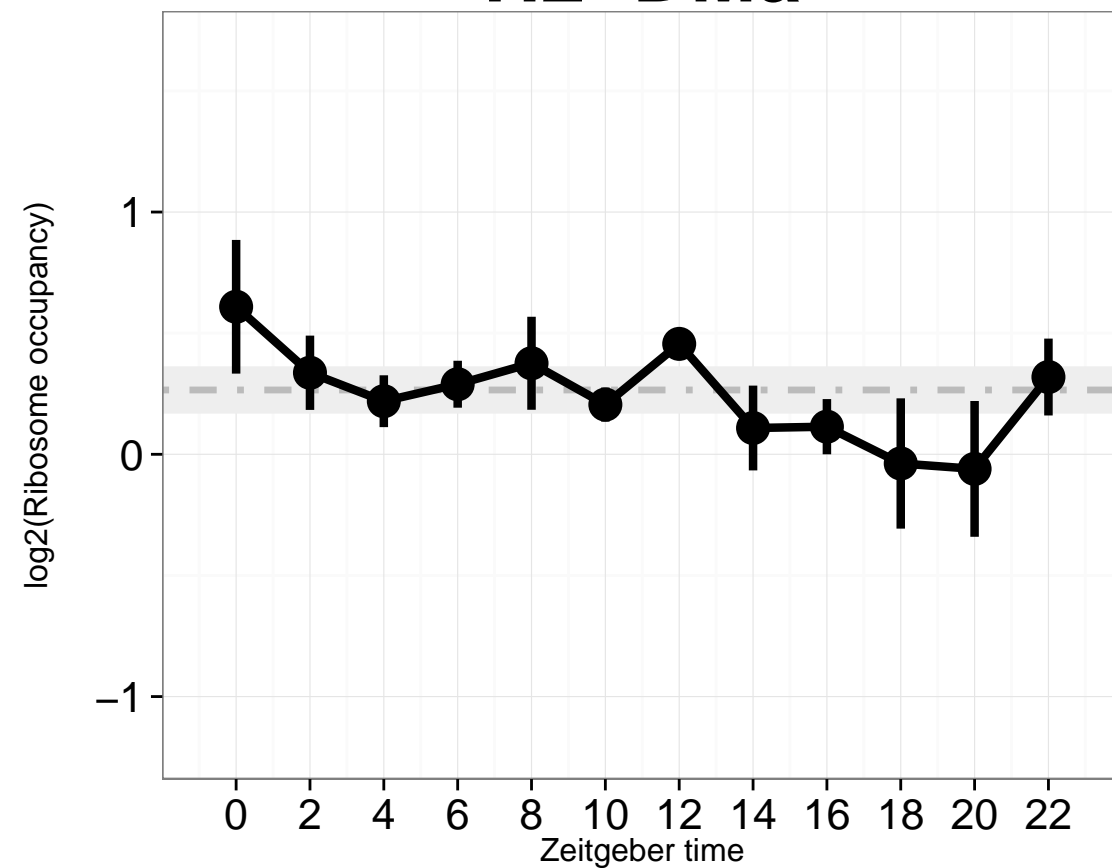

Supplement: SuppDataset_1.zip [file H2-DMa_set_A.pdf › Supplemental Dataset 1/A-mRNA_nonrhyth_translation_nonrhyth/H2-DMa_set_A.pdf]

# H2-DMb1

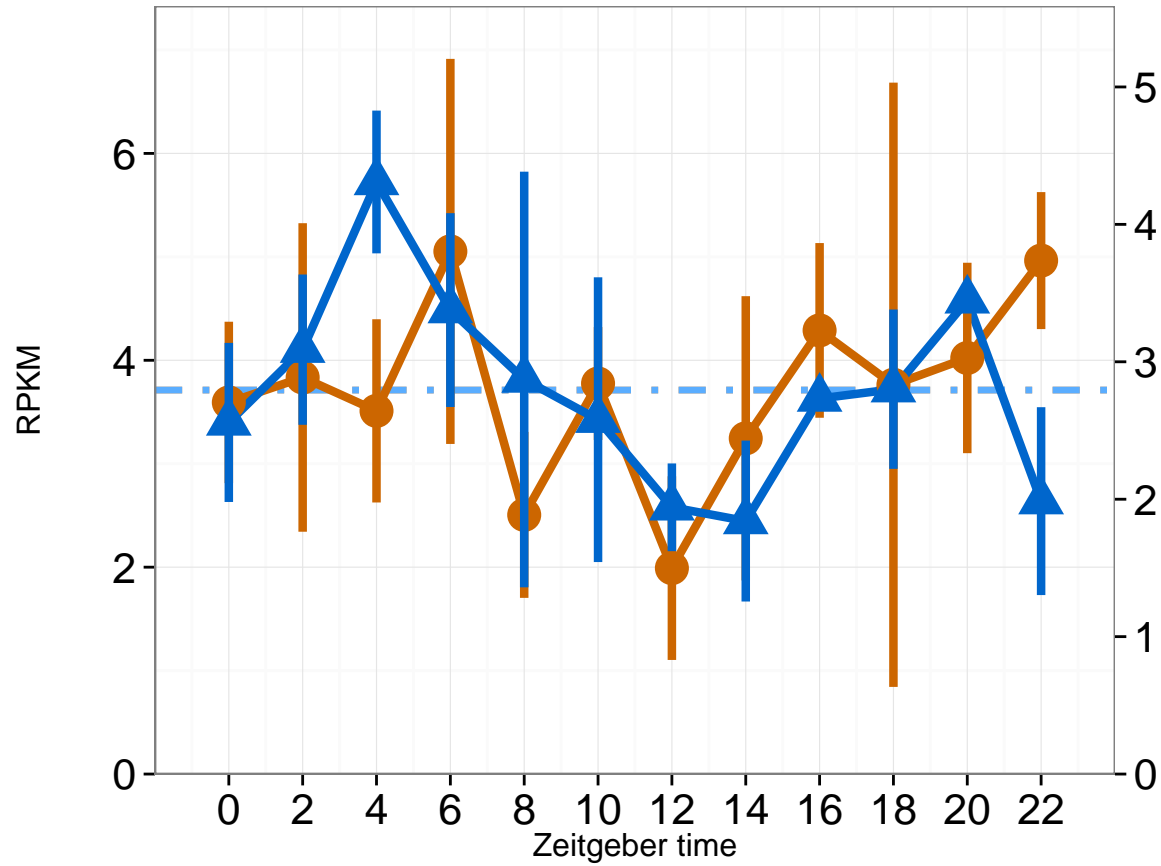

# H2-DMb1

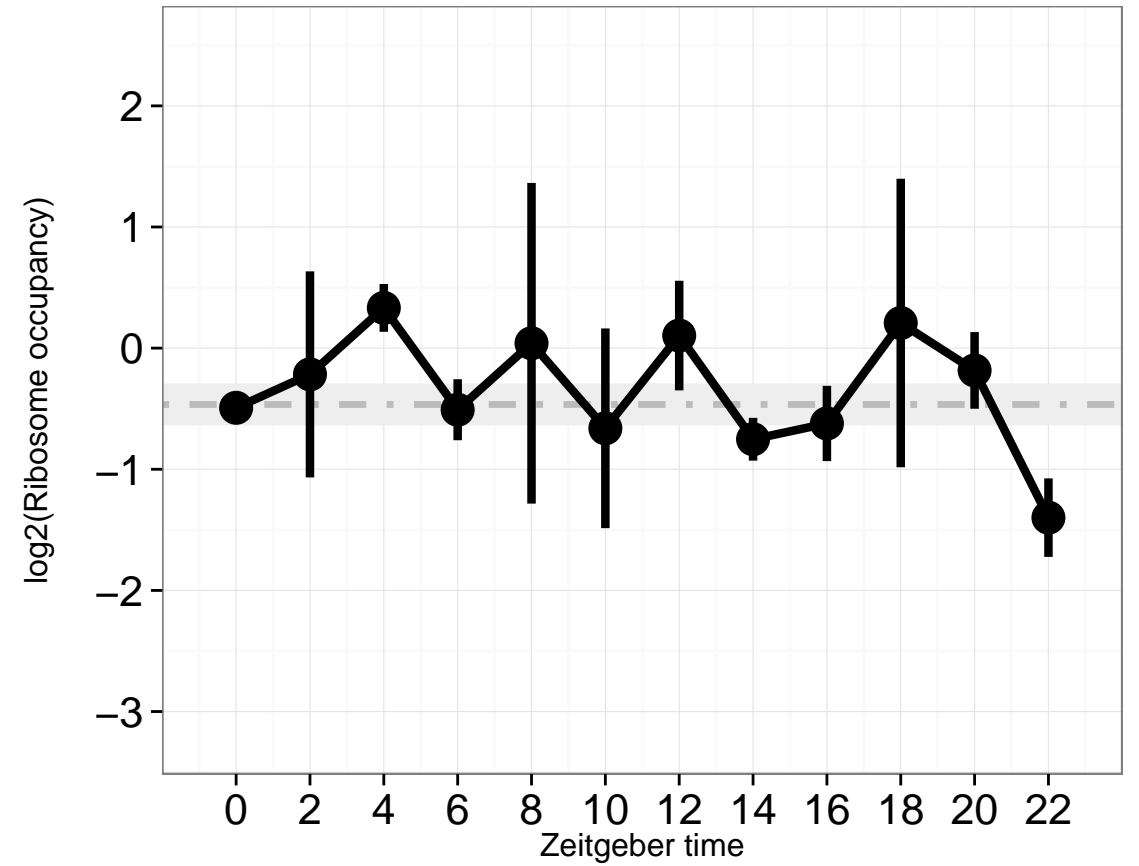

Supplement: SuppDataset_1.zip [file H2-DMb1_set_A.pdf › Supplemental Dataset 1/A-mRNA_nonrhyth_translation_nonrhyth/H2-DMb1_set_A.pdf]

# H2-Eb1

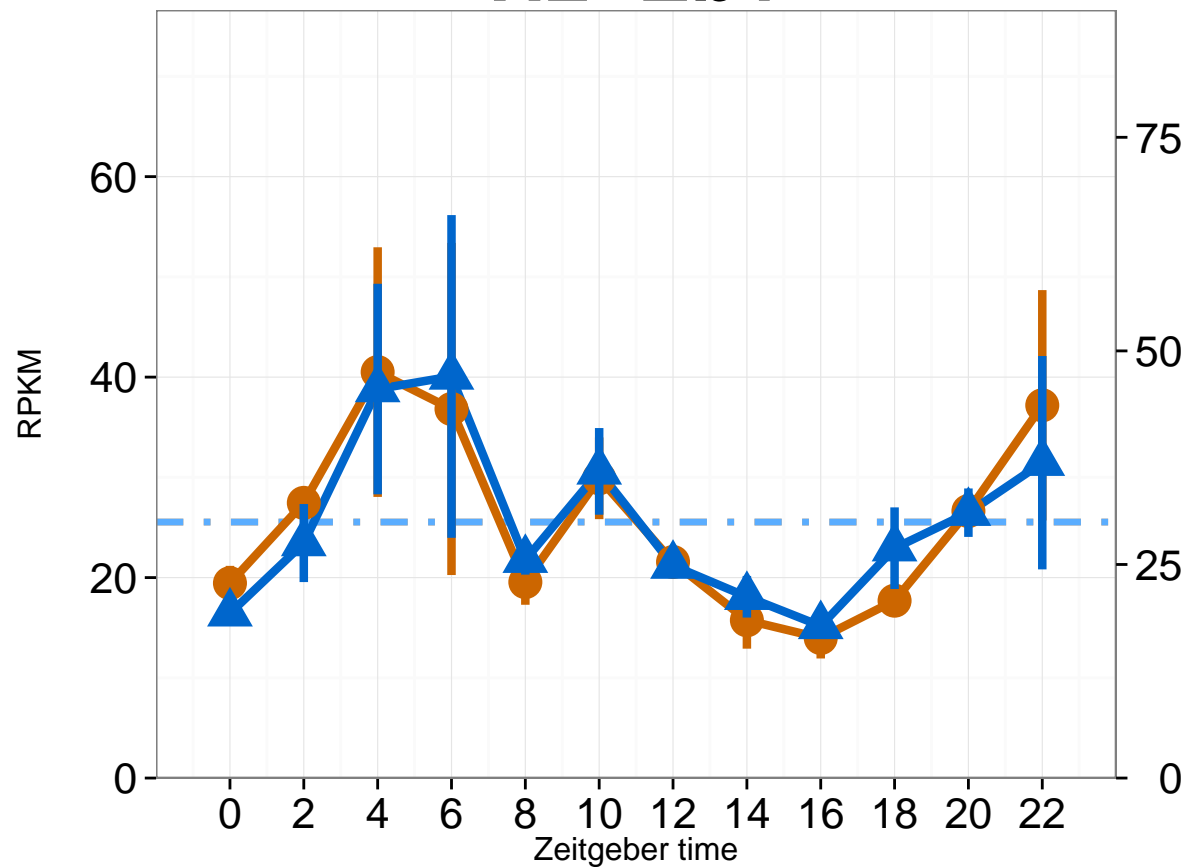

# H2-Eb1

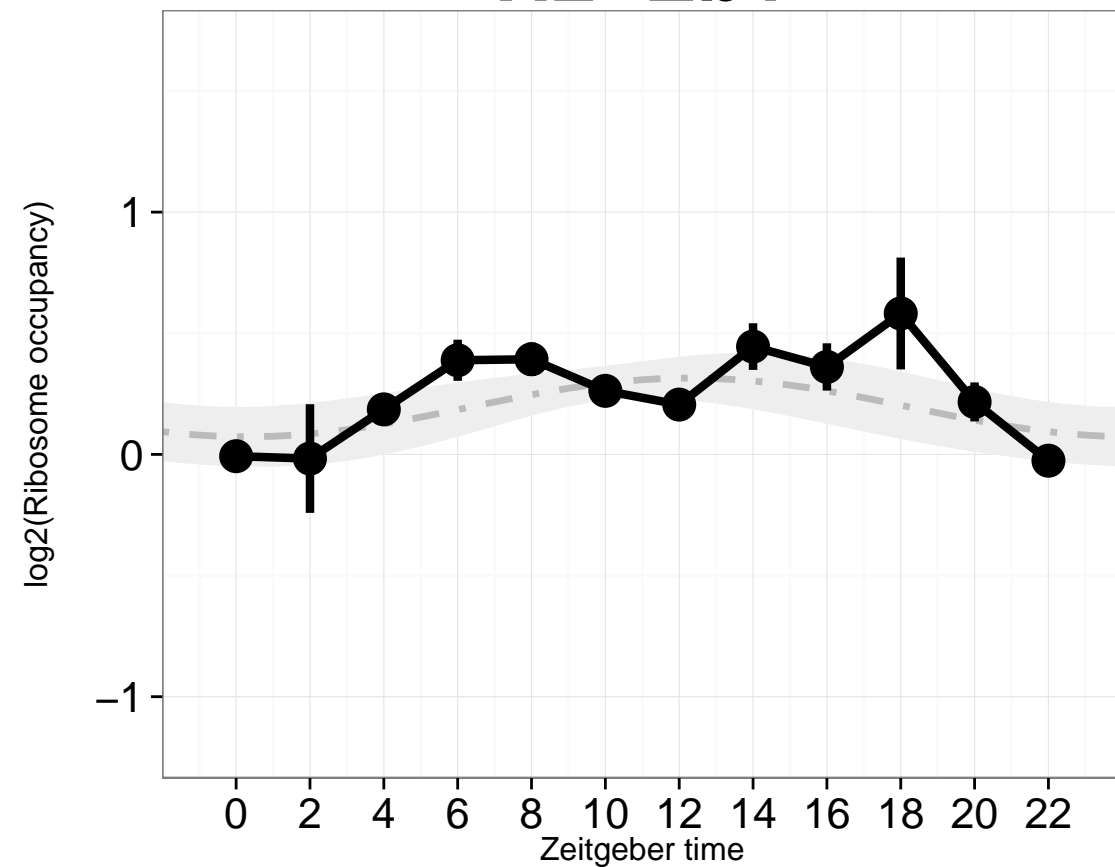

Supplement: SuppDataset_1.zip [file H2-Eb1_set_A.pdf › Supplemental Dataset 1/A-mRNA_nonrhyth_translation_nonrhyth/H2-Eb1_set_A.pdf]

## H2-K1

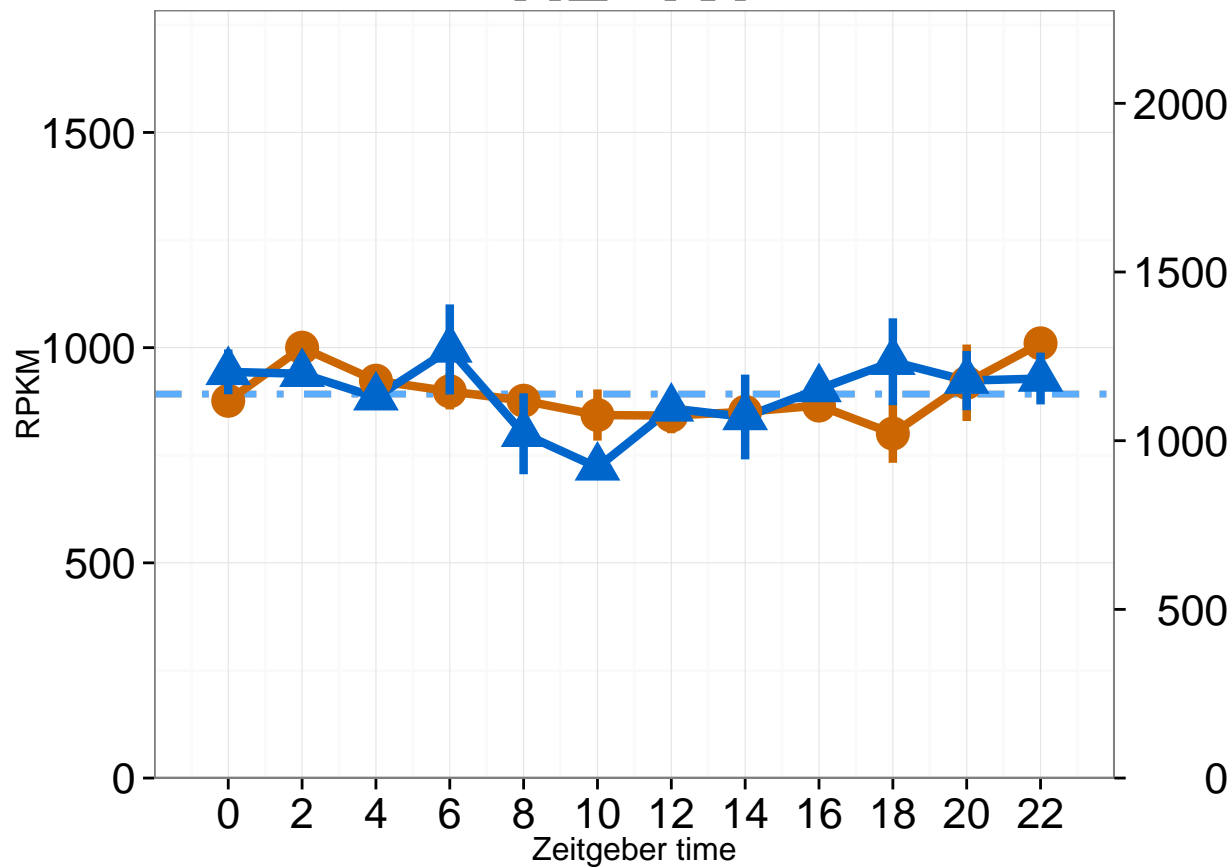

## H2-K1

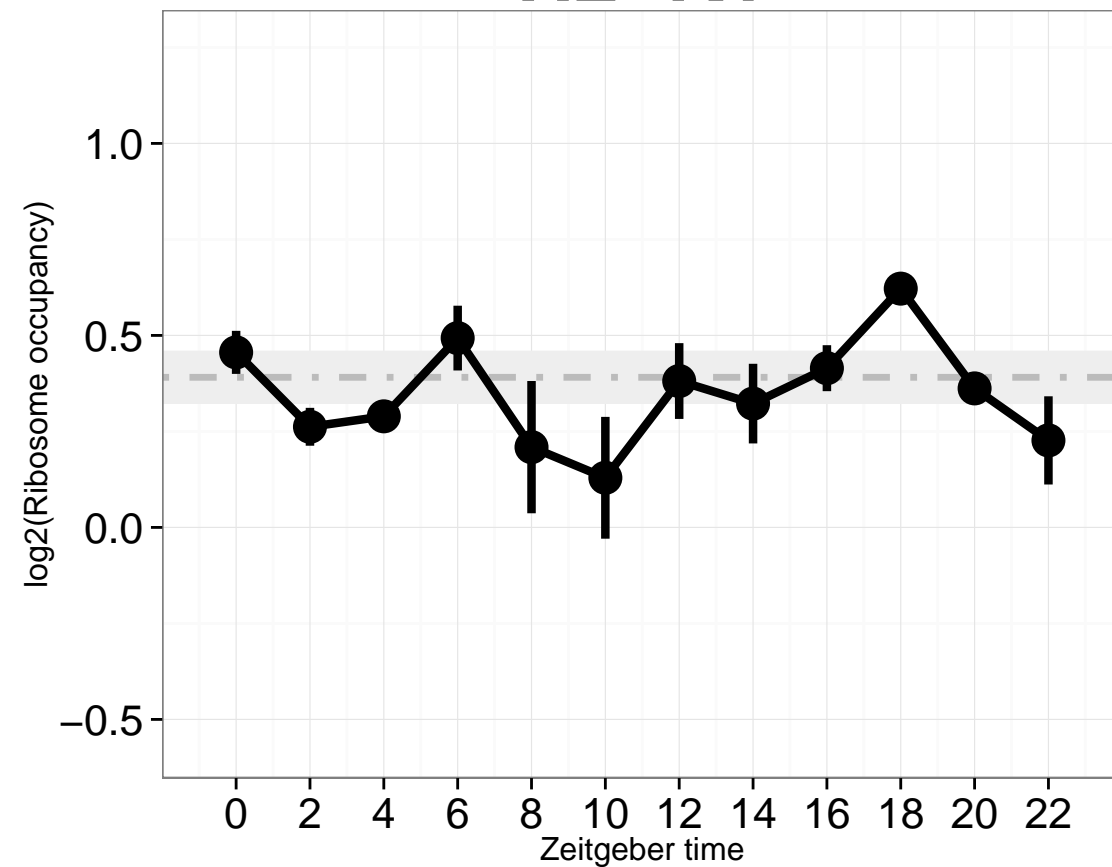

Supplement: SuppDataset_1.zip [file H2-K1_set_A.pdf › Supplemental Dataset 1/A-mRNA_nonrhyth_translation_nonrhyth/H2-K1_set_A.pdf]

# H2-Ke2

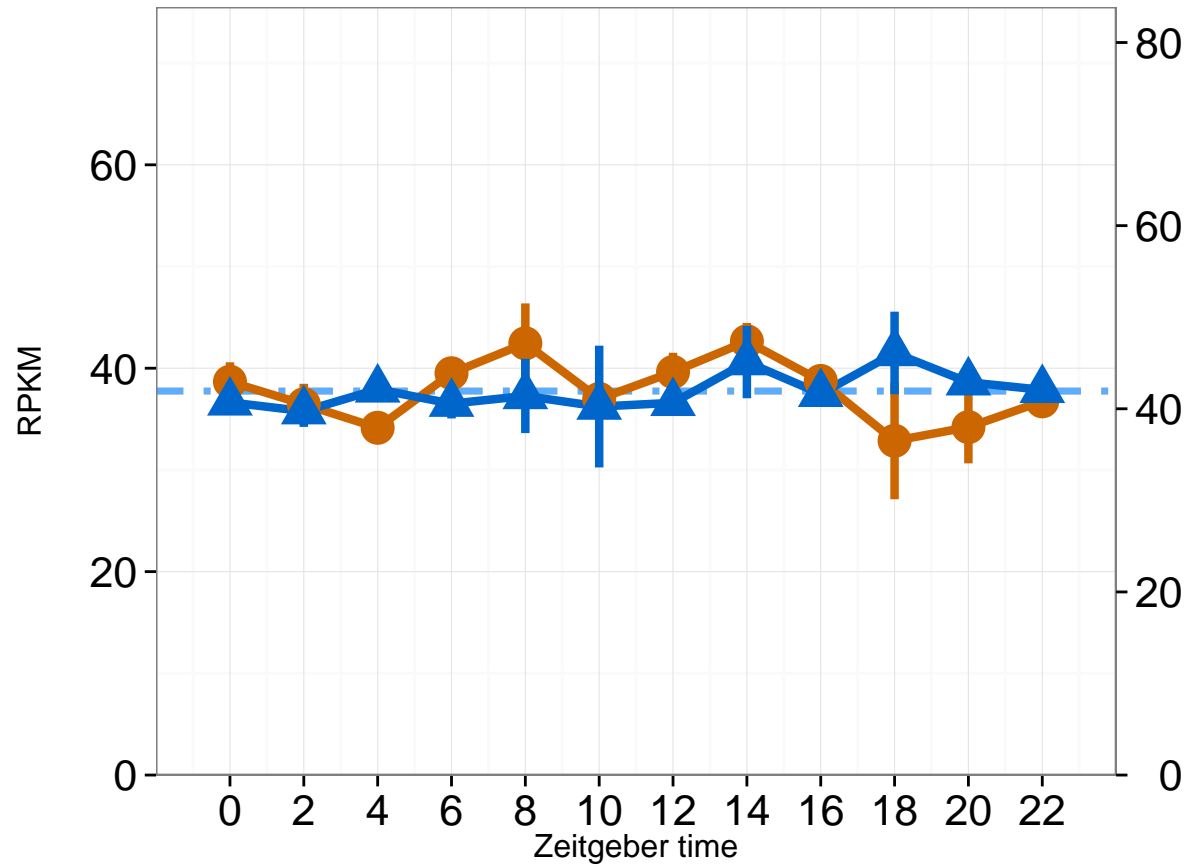

# H2-Ke2

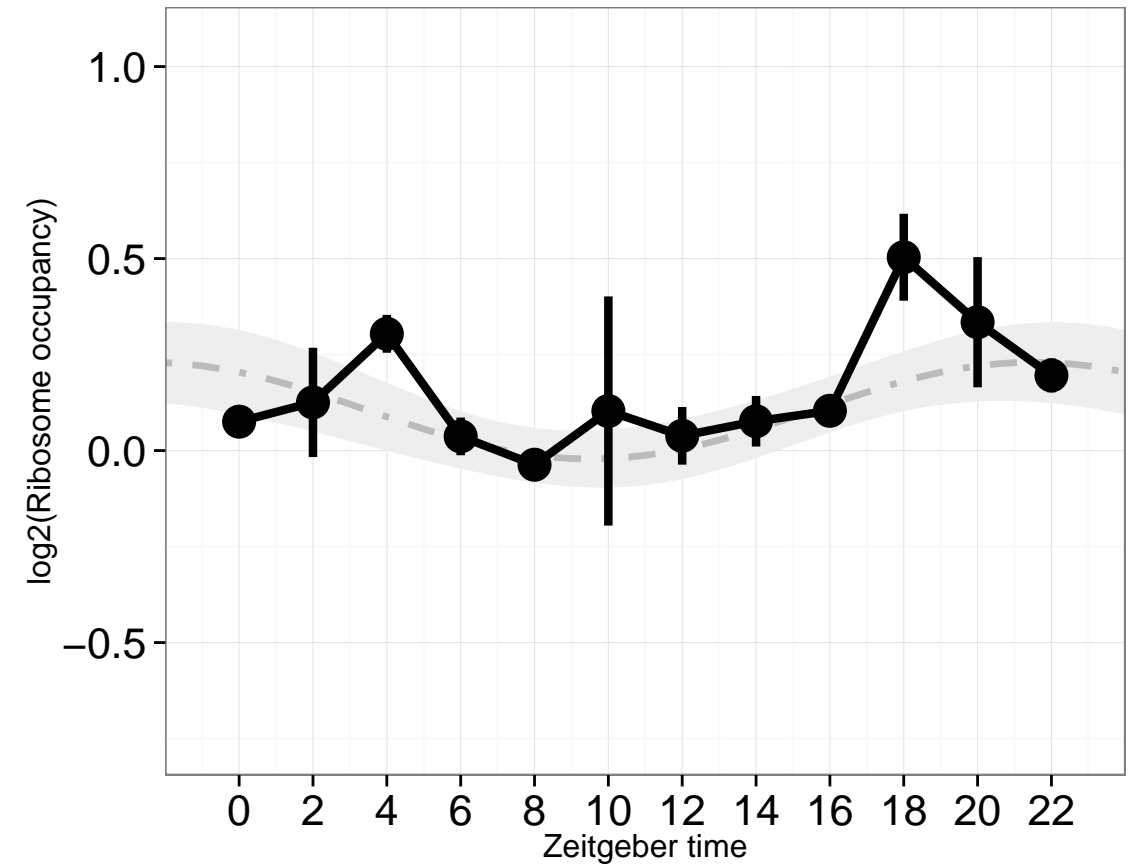

Supplement: SuppDataset_1.zip [file H2-Ke2_set_A.pdf › Supplemental Dataset 1/A-mRNA_nonrhyth_translation_nonrhyth/H2-Ke2_set_A.pdf]

# H2-Ke6

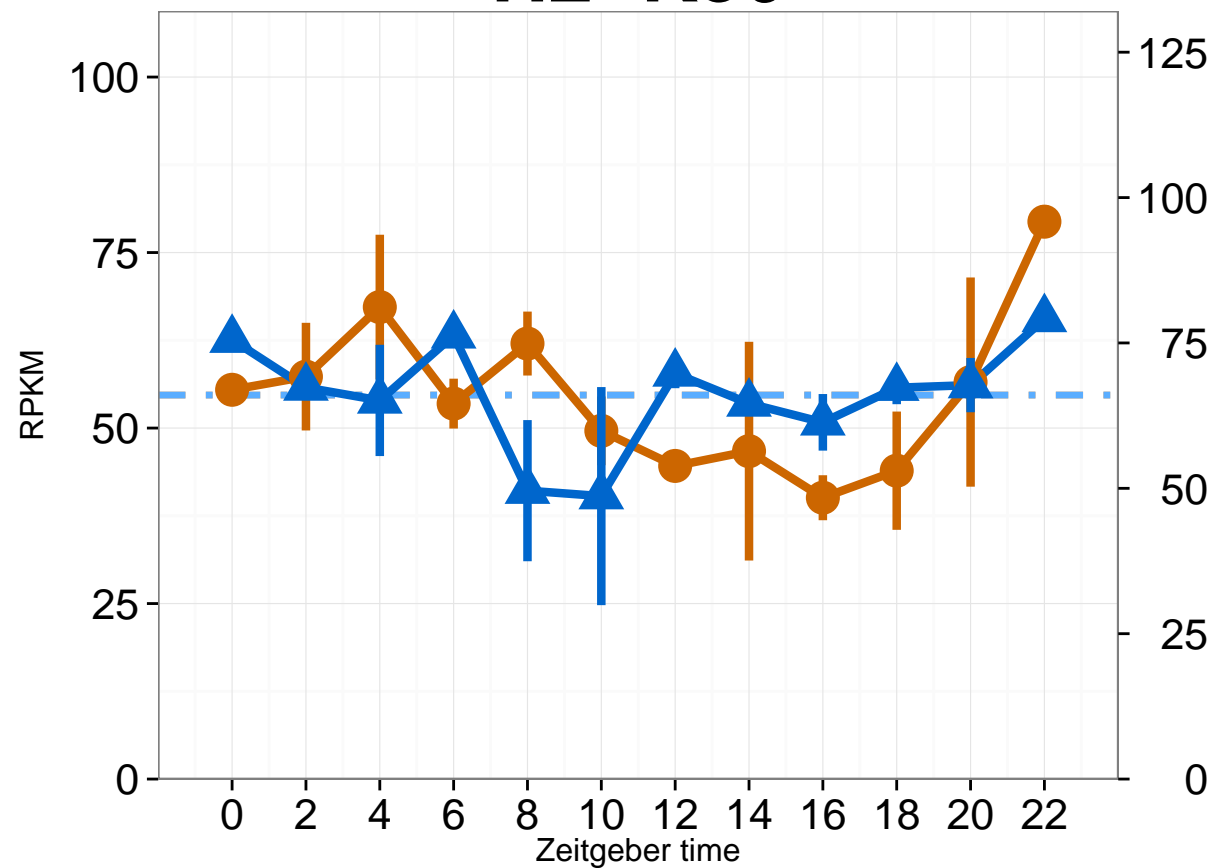

# H2-Ke6

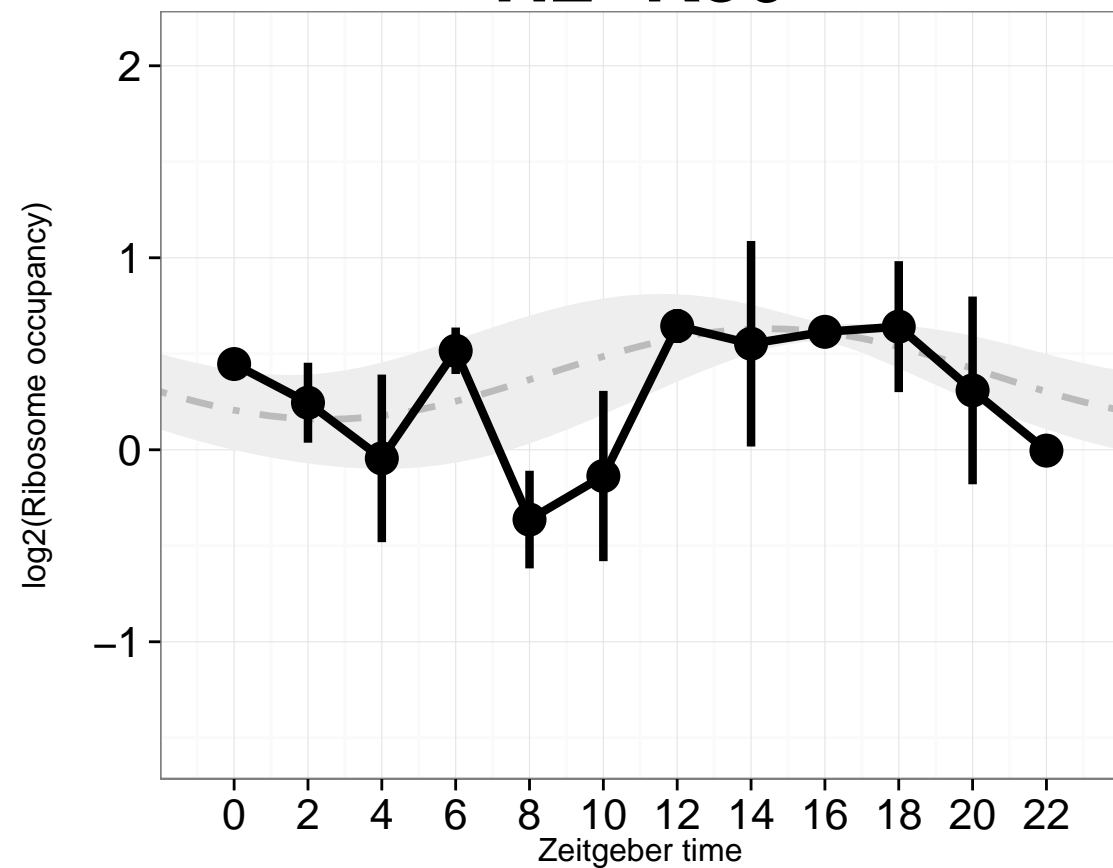

Supplement: SuppDataset_1.zip [file H2-Ke6_set_A.pdf › Supplemental Dataset 1/A-mRNA_nonrhyth_translation_nonrhyth/H2-Ke6_set_A.pdf]

# H2-M3

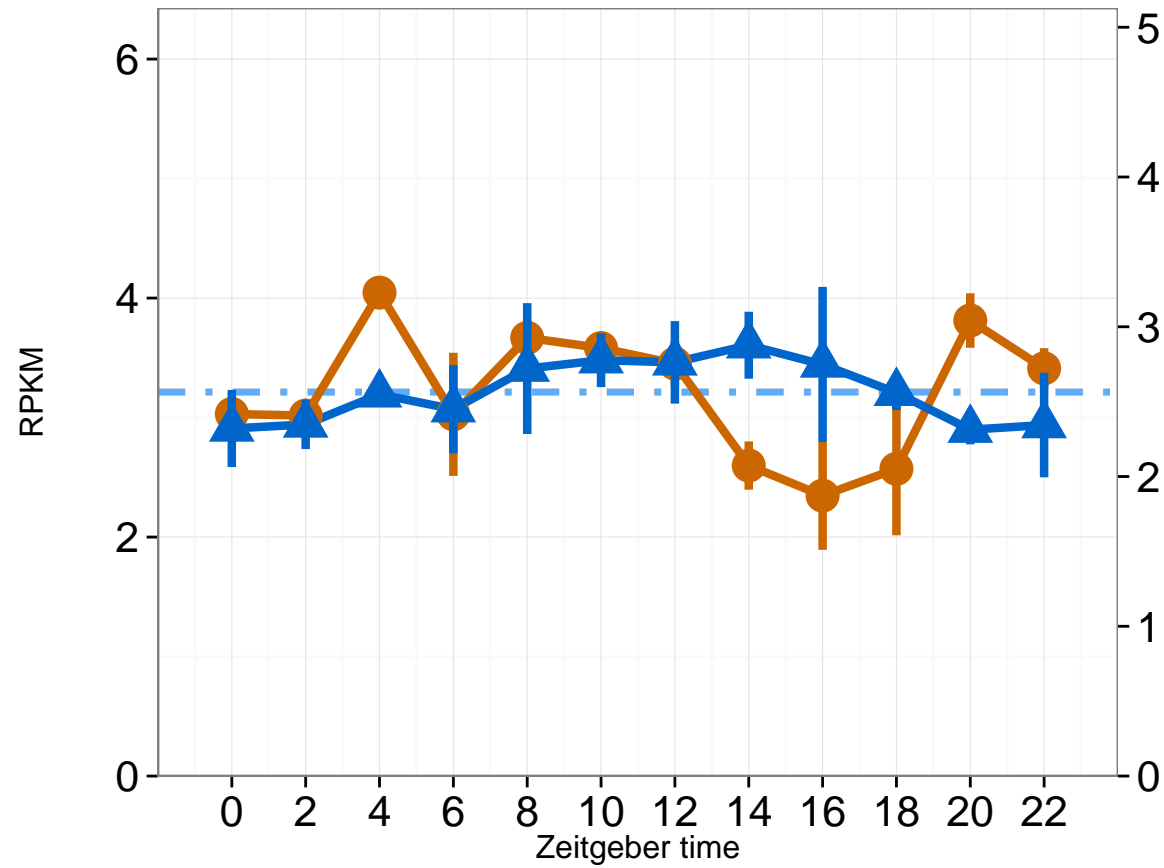

# H2-M3

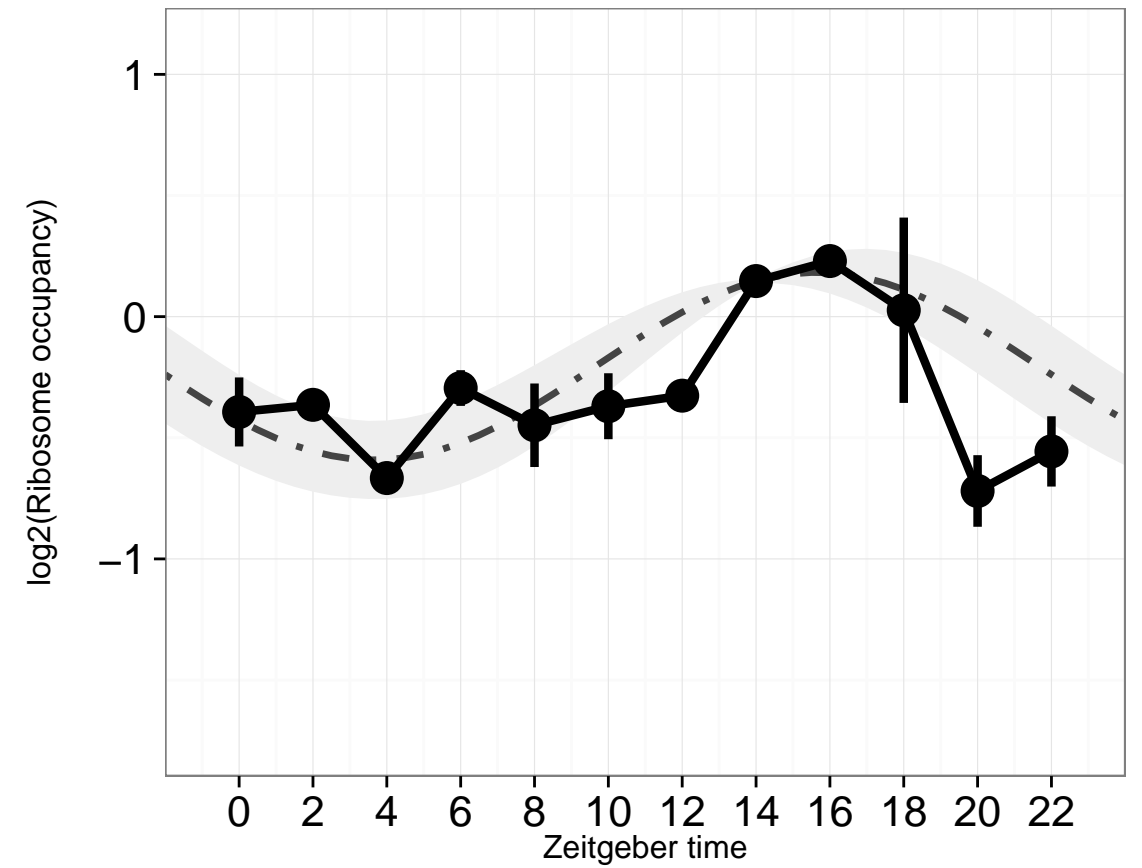

Supplement: SuppDataset_1.zip [file H2-M3_set_A.pdf › Supplemental Dataset 1/A-mRNA_nonrhyth_translation_nonrhyth/H2-M3_set_A.pdf]

# H2-Q10

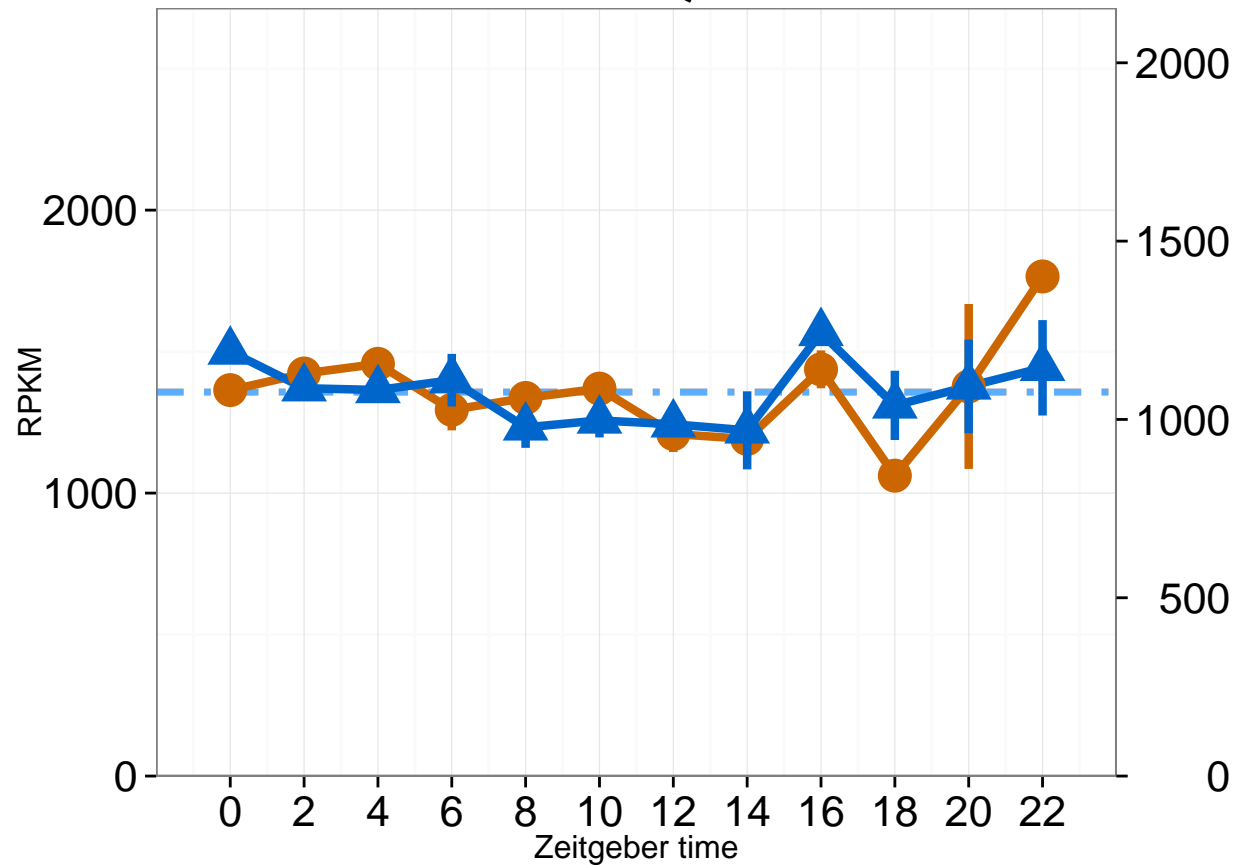

# H2-Q10

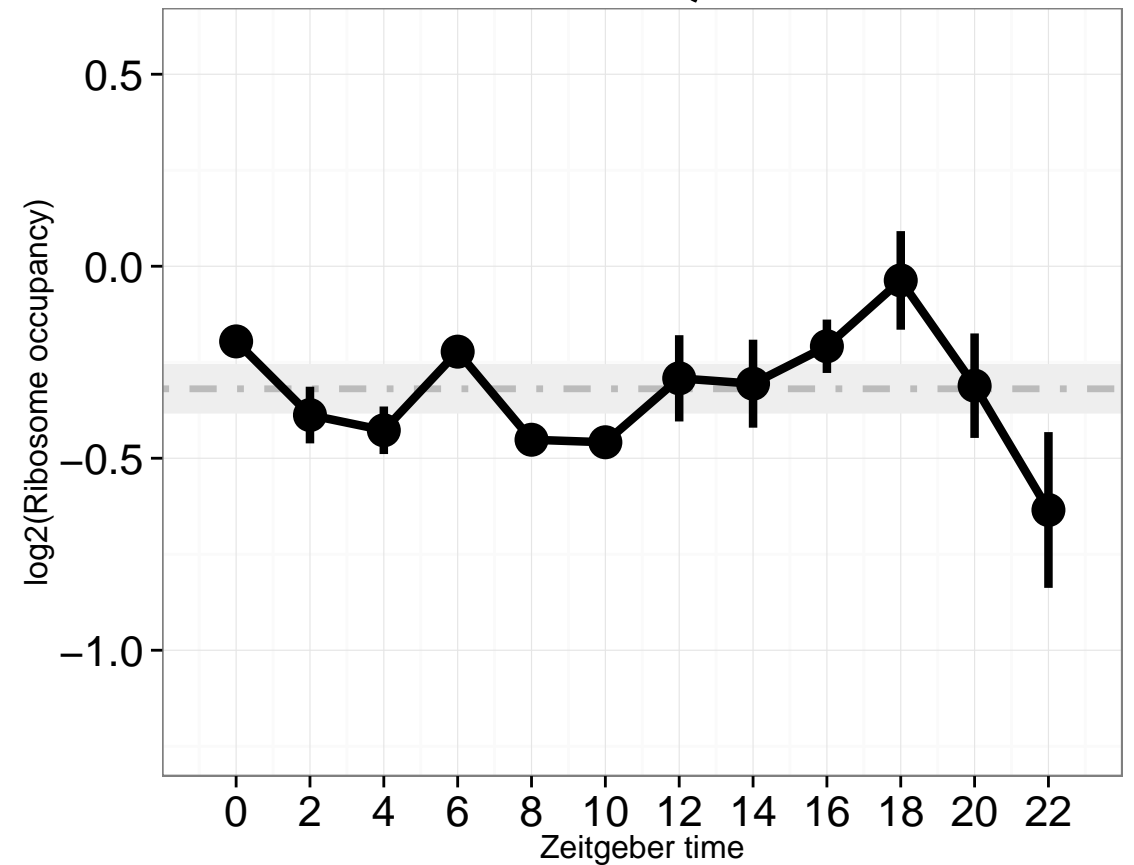

Supplement: SuppDataset_1.zip [file H2-Q10_set_A.pdf › Supplemental Dataset 1/A-mRNA_nonrhyth_translation_nonrhyth/H2-Q10_set_A.pdf]

# H2-Q1

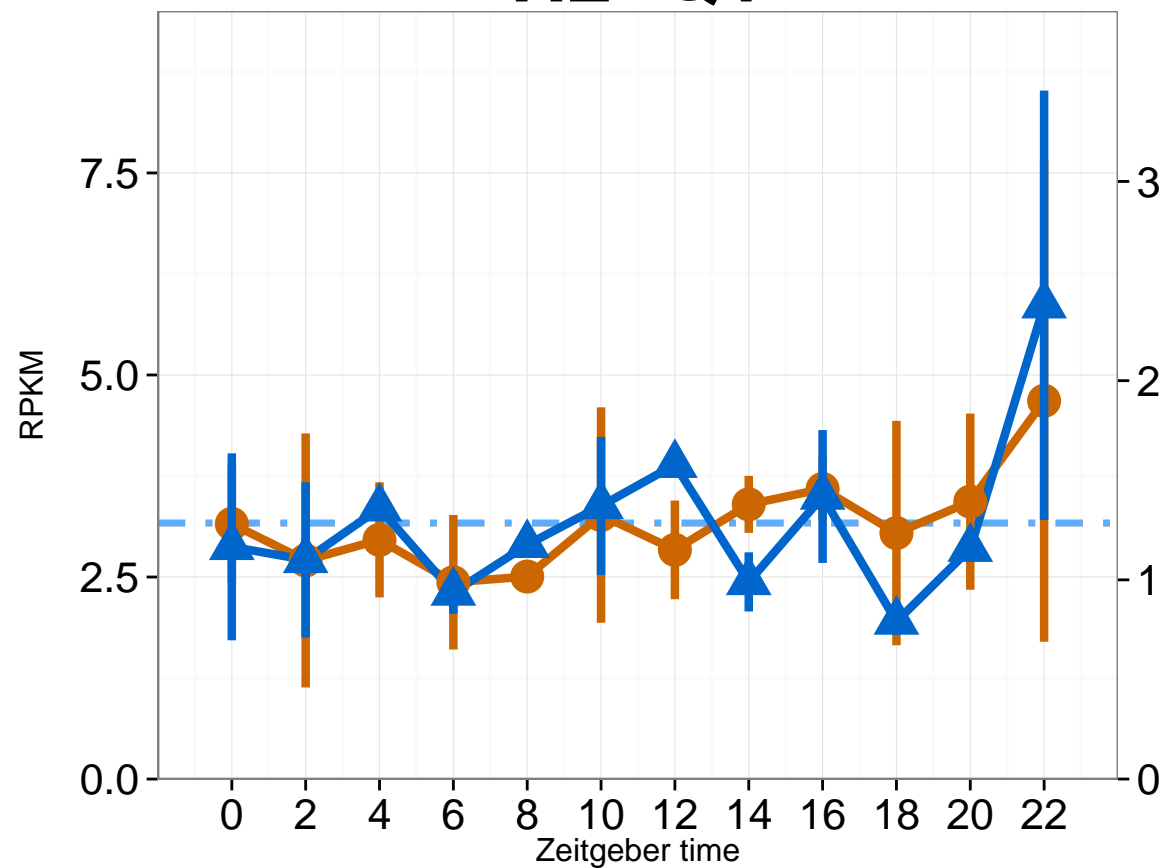

# H2-Q1

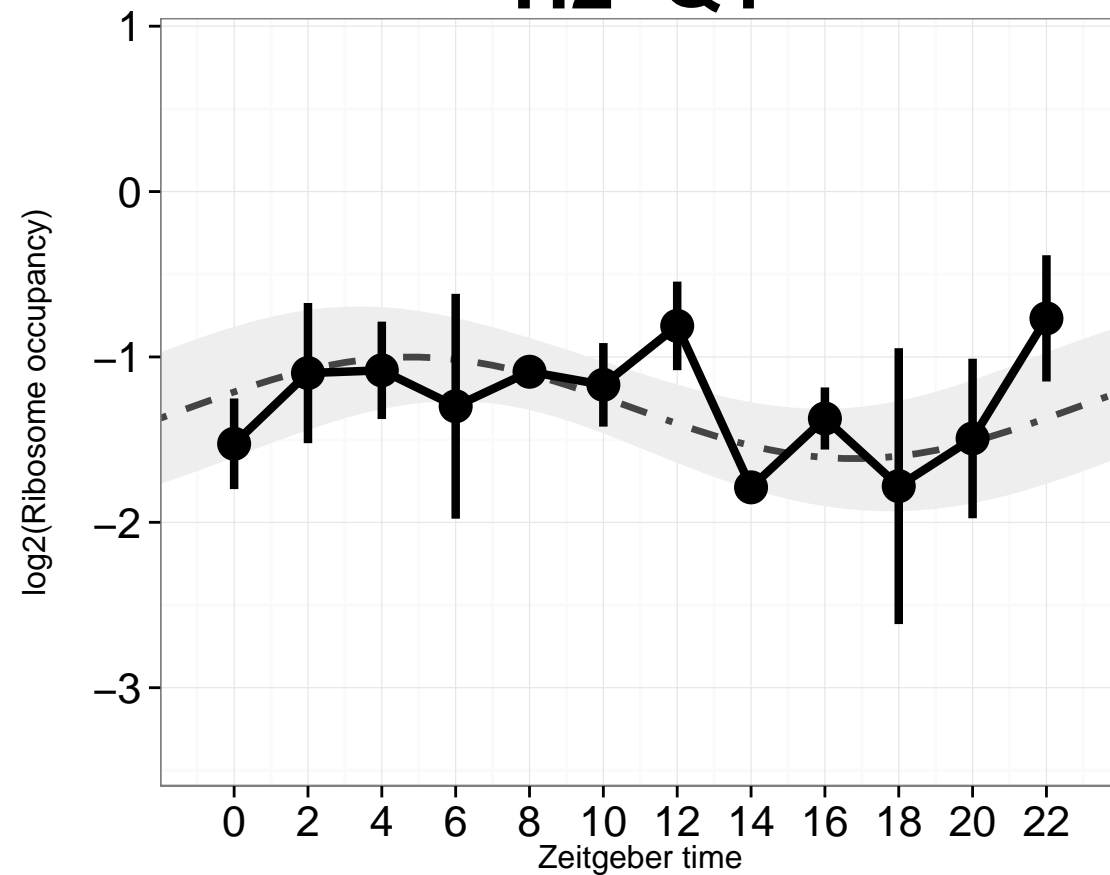

Supplement: SuppDataset_1.zip [file H2-Q1_set_A.pdf › Supplemental Dataset 1/A-mRNA_nonrhyth_translation_nonrhyth/H2-Q1_set_A.pdf]

# H2-Q2

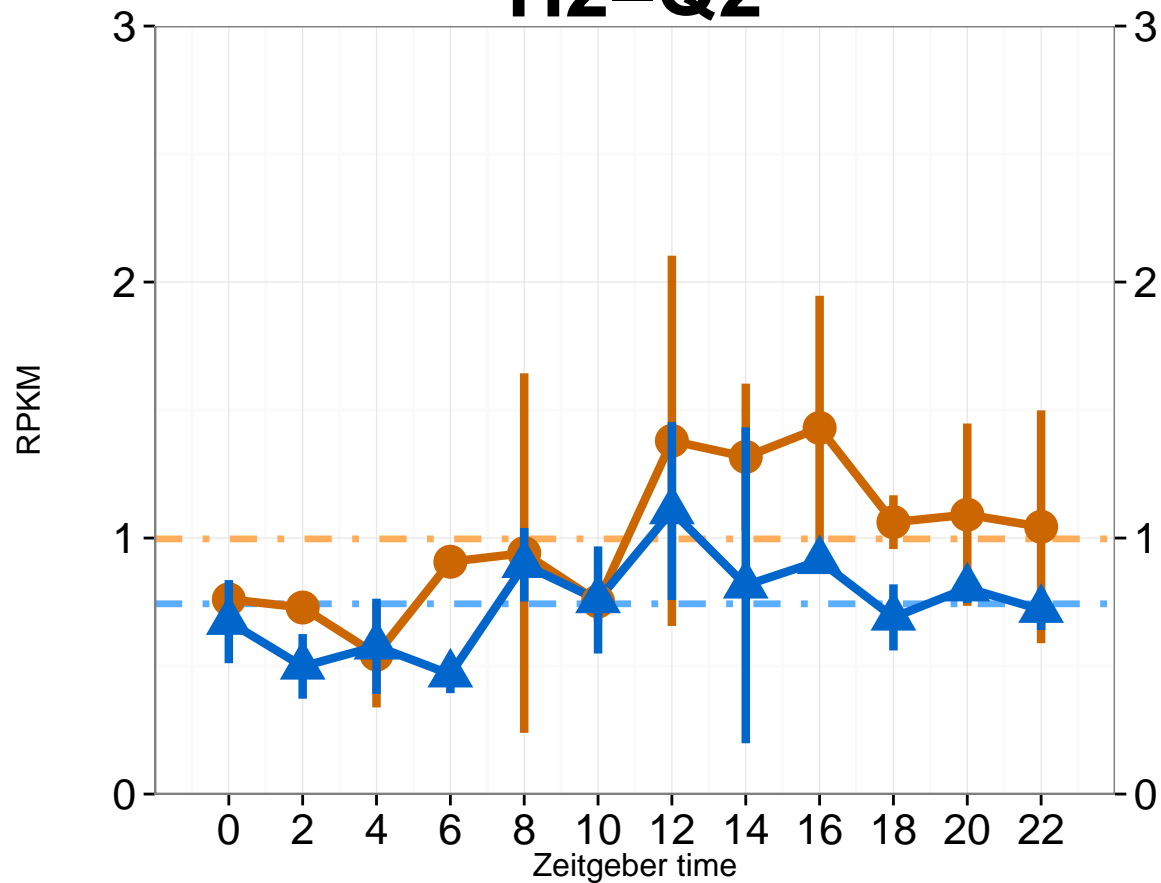

# H2-Q2

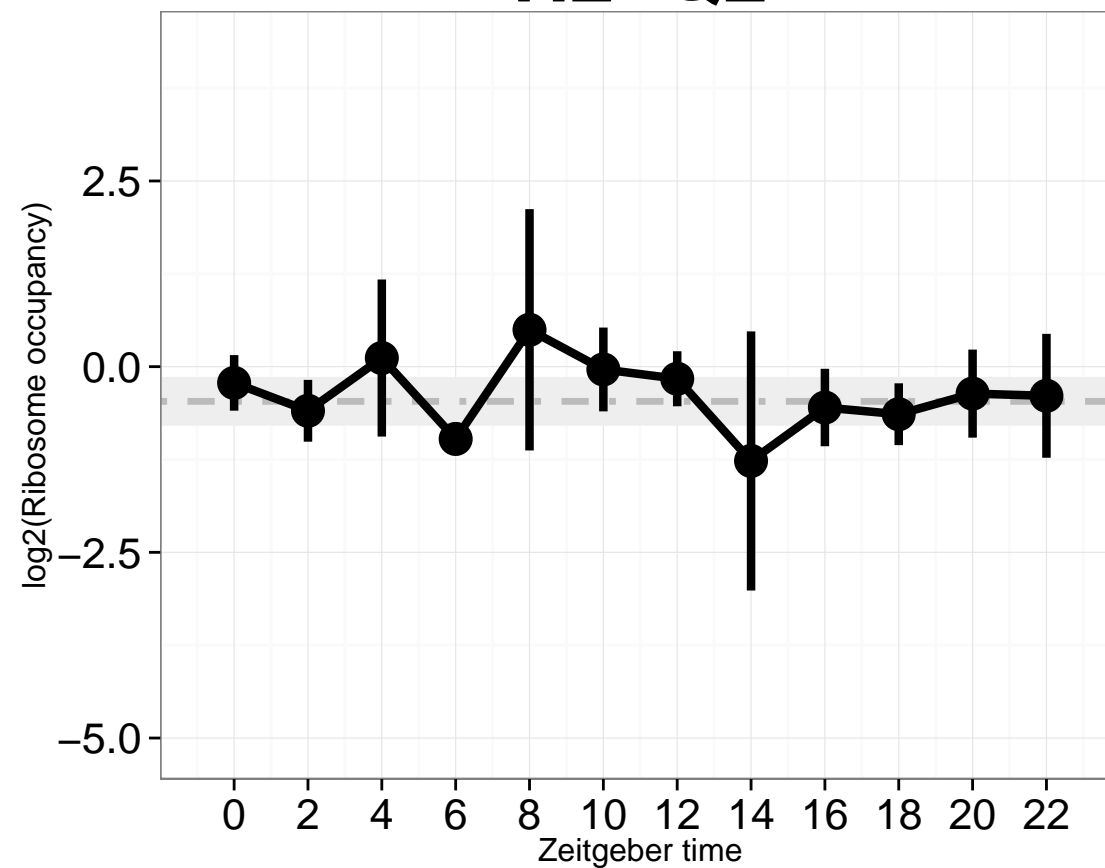

Supplement: SuppDataset_1.zip [file H2-Q2_set_A.pdf › Supplemental Dataset 1/A-mRNA_nonrhyth_translation_nonrhyth/H2-Q2_set_A.pdf]

# H2-Q4

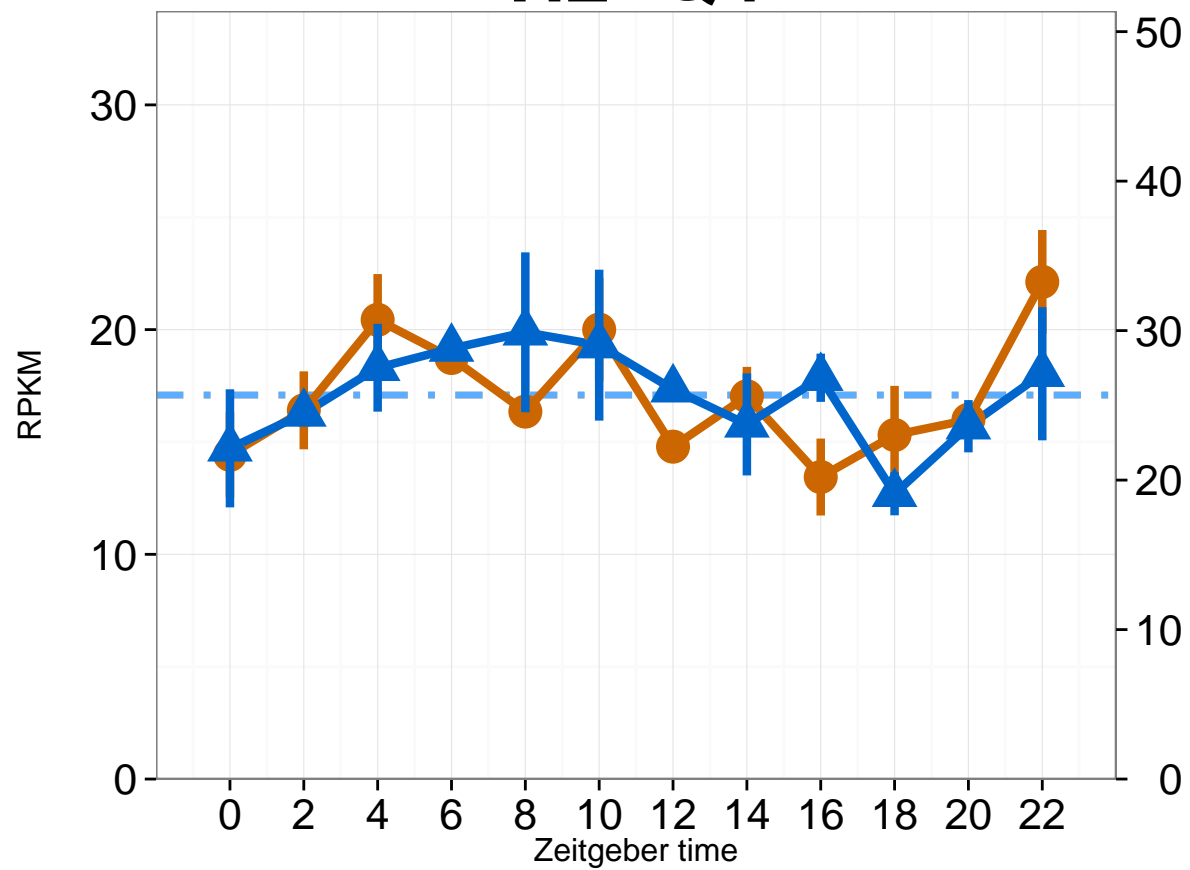

# H2-Q4

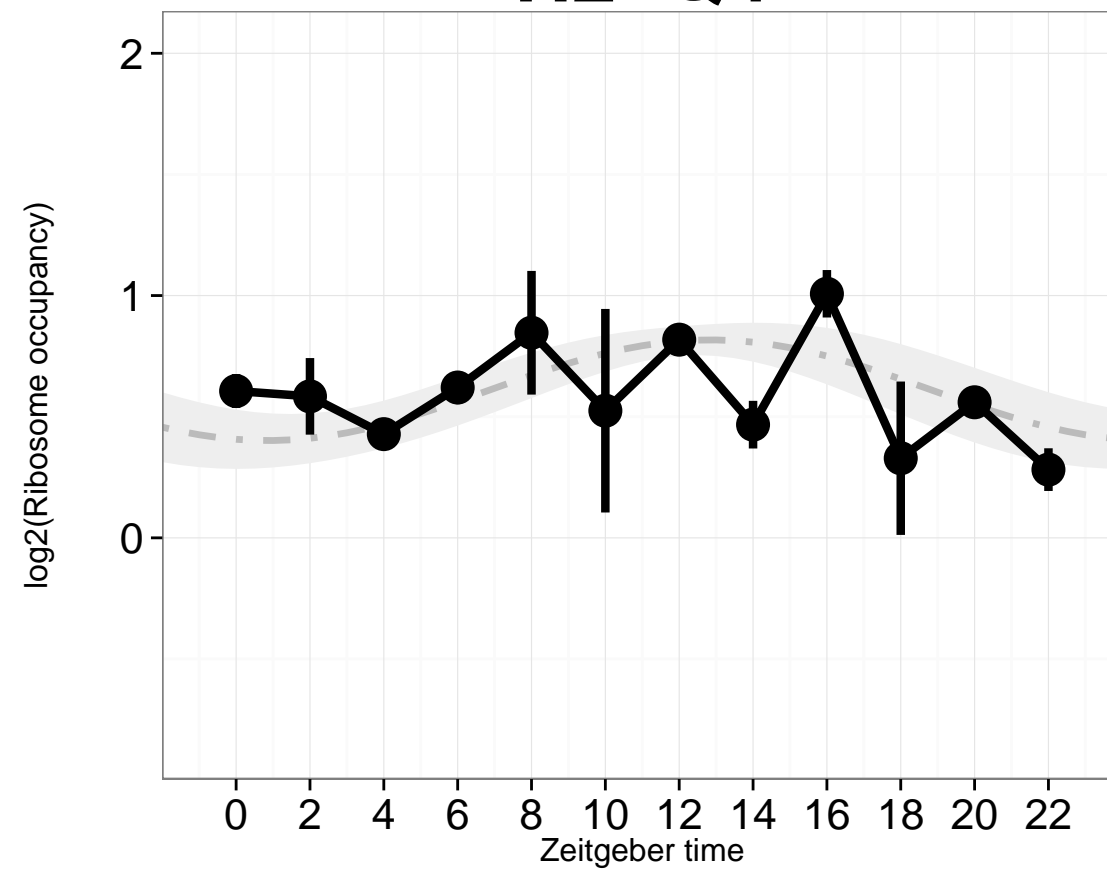

Supplement: SuppDataset_1.zip [file H2-Q4_set_A.pdf › Supplemental Dataset 1/A-mRNA_nonrhyth_translation_nonrhyth/H2-Q4_set_A.pdf]

# H2-Q6

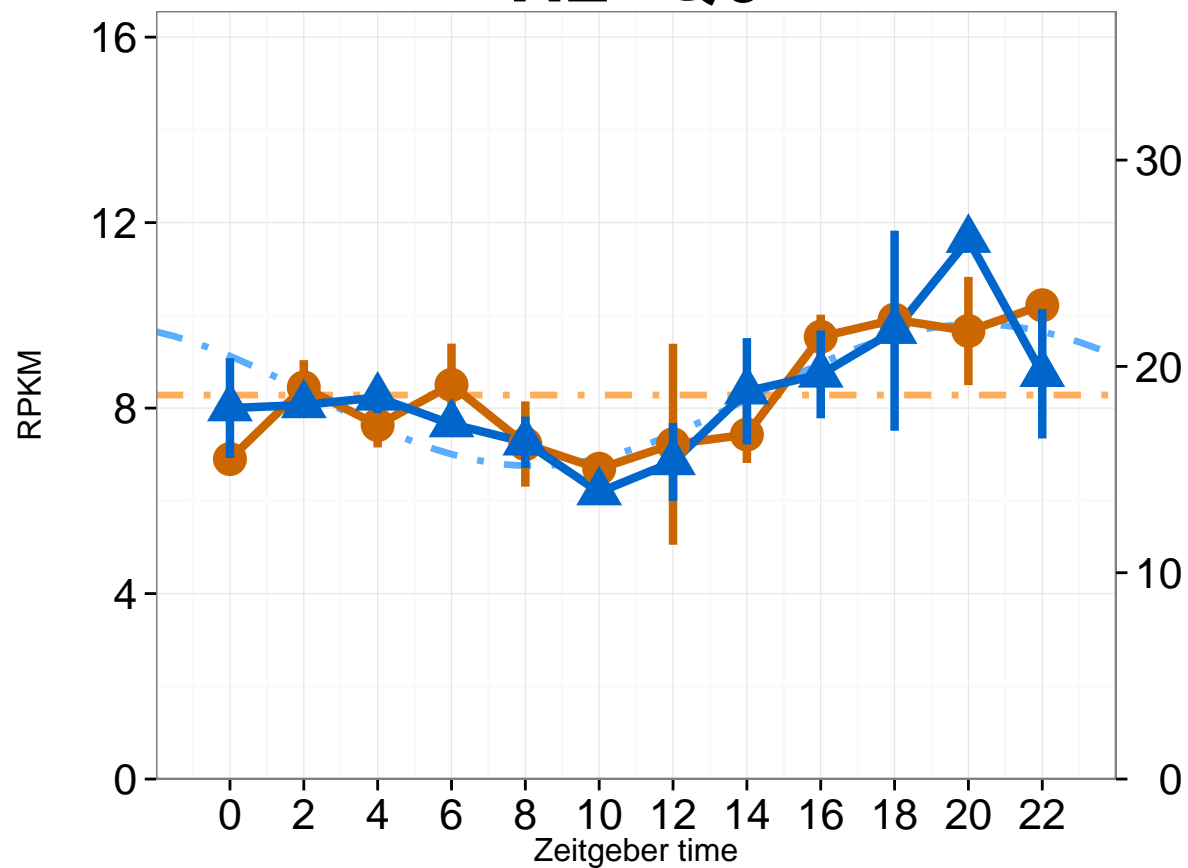

# H2-Q6

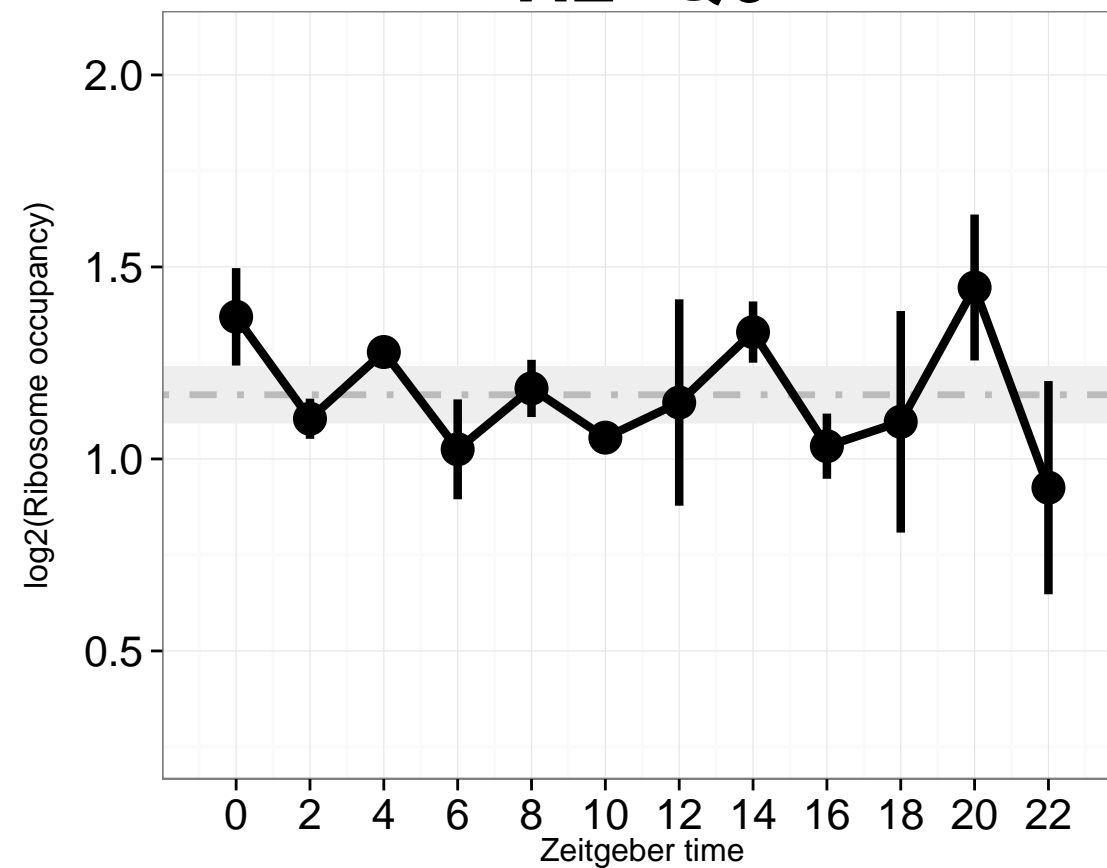

Supplement: SuppDataset_1.zip [file H2-Q6_set_A.pdf › Supplemental Dataset 1/A-mRNA_nonrhyth_translation_nonrhyth/H2-Q6_set_A.pdf]

# H2-Q7

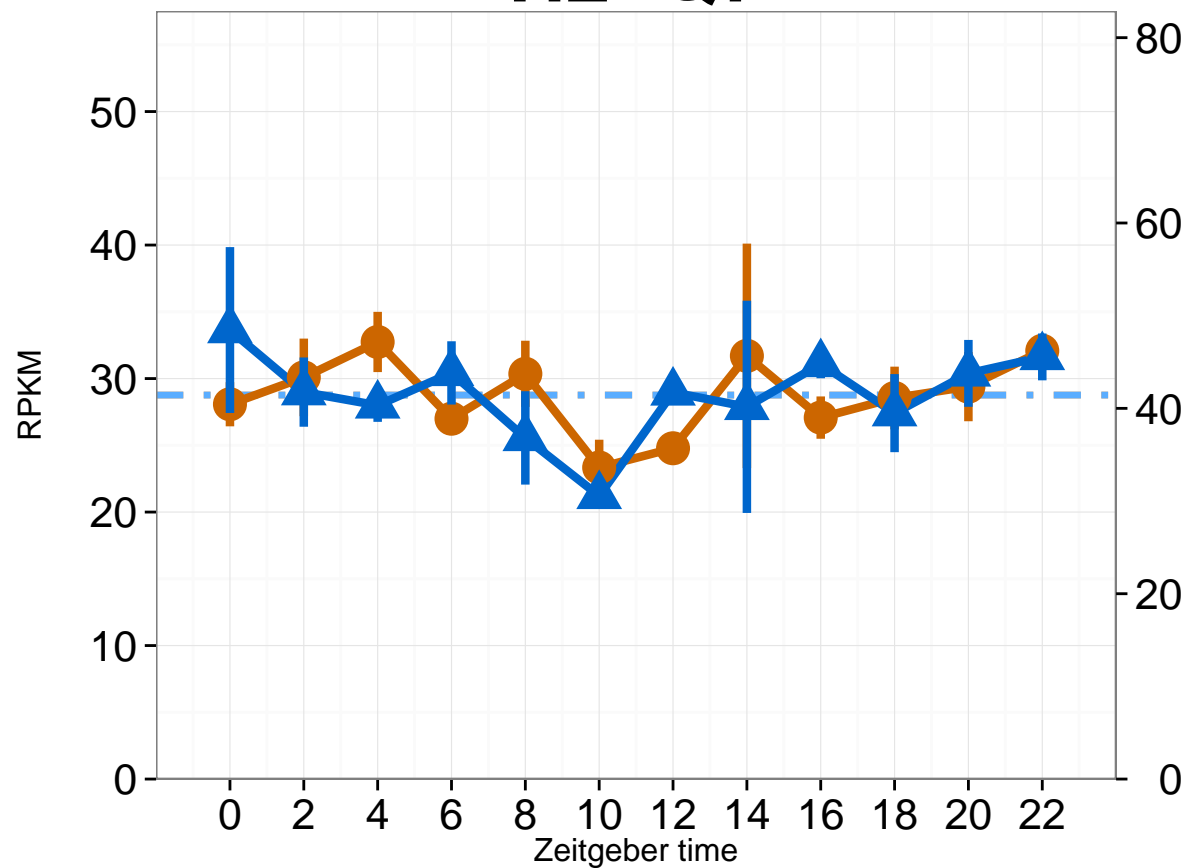

# H2-Q7

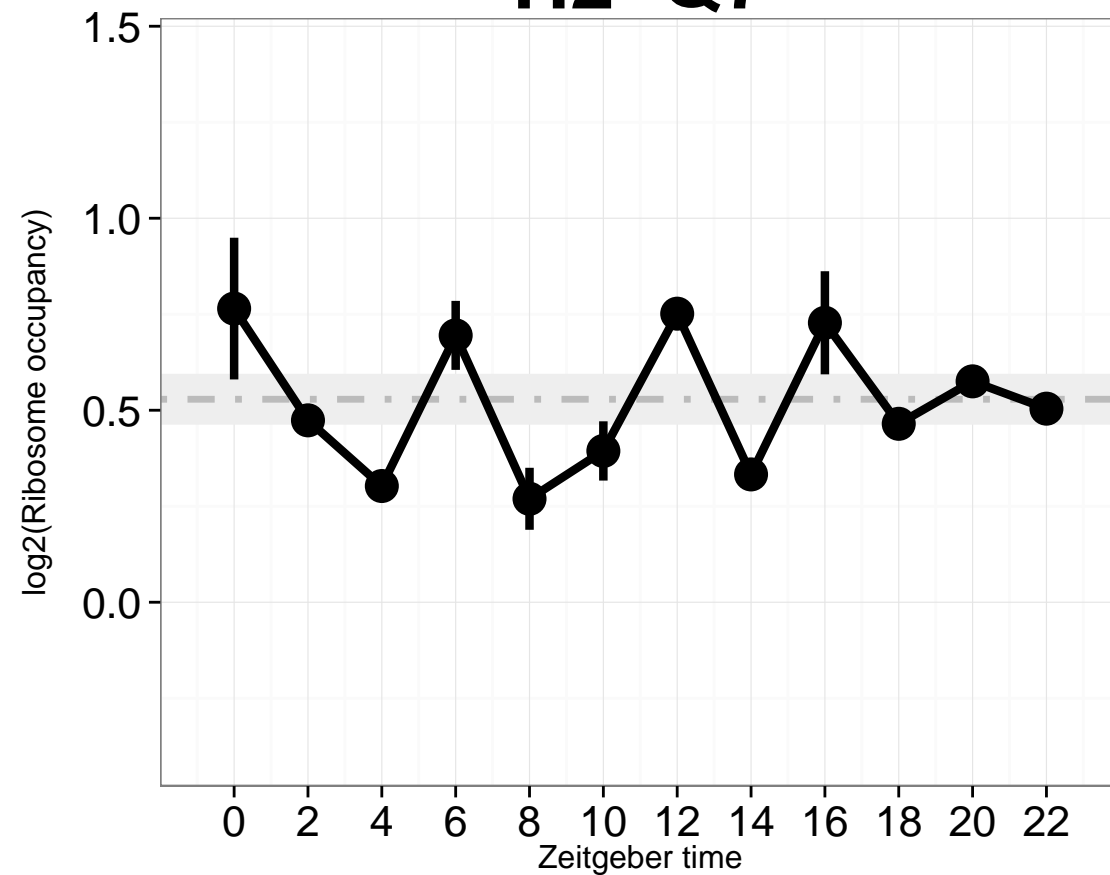

Supplement: SuppDataset_1.zip [file H2-Q7_set_A.pdf › Supplemental Dataset 1/A-mRNA_nonrhyth_translation_nonrhyth/H2-Q7_set_A.pdf]

# H2-T22

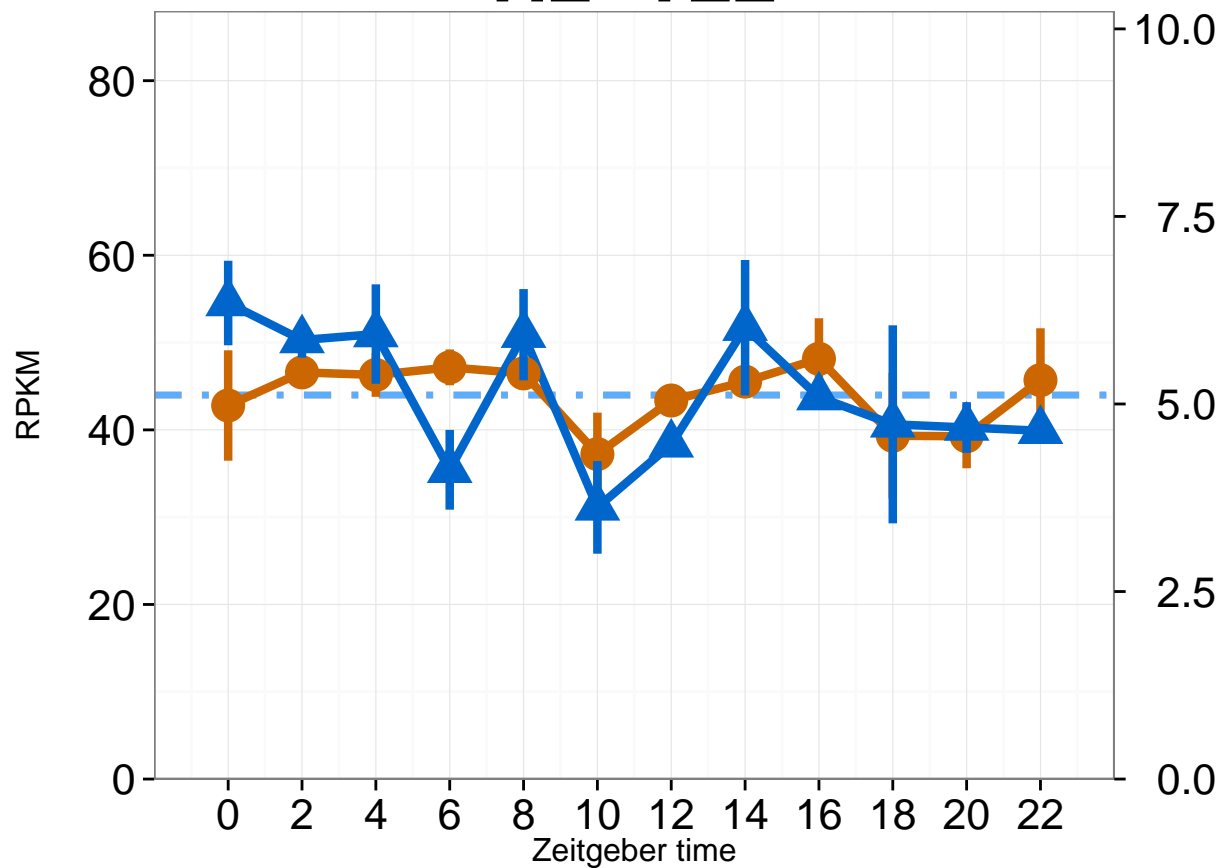

# H2-T22

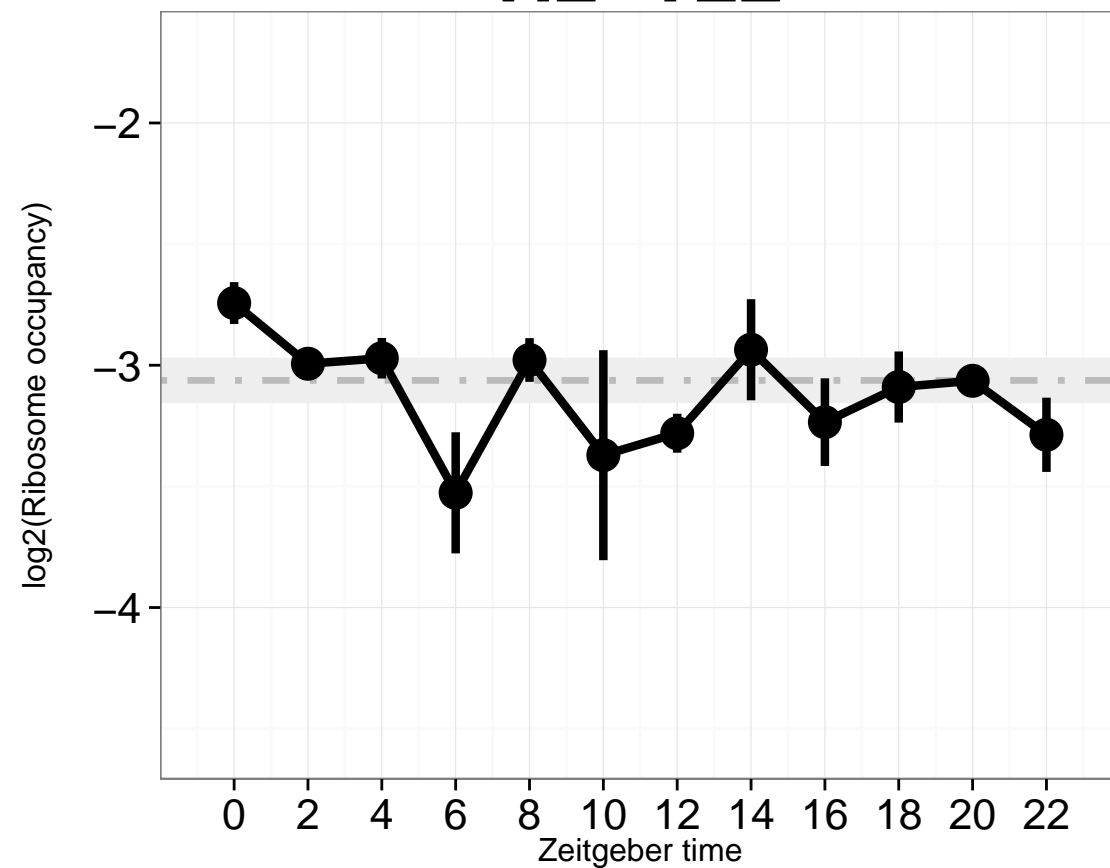

Supplement: SuppDataset_1.zip [file H2-T22_set_A.pdf › Supplemental Dataset 1/A-mRNA_nonrhyth_translation_nonrhyth/H2-T22_set_A.pdf]

# H2-T23

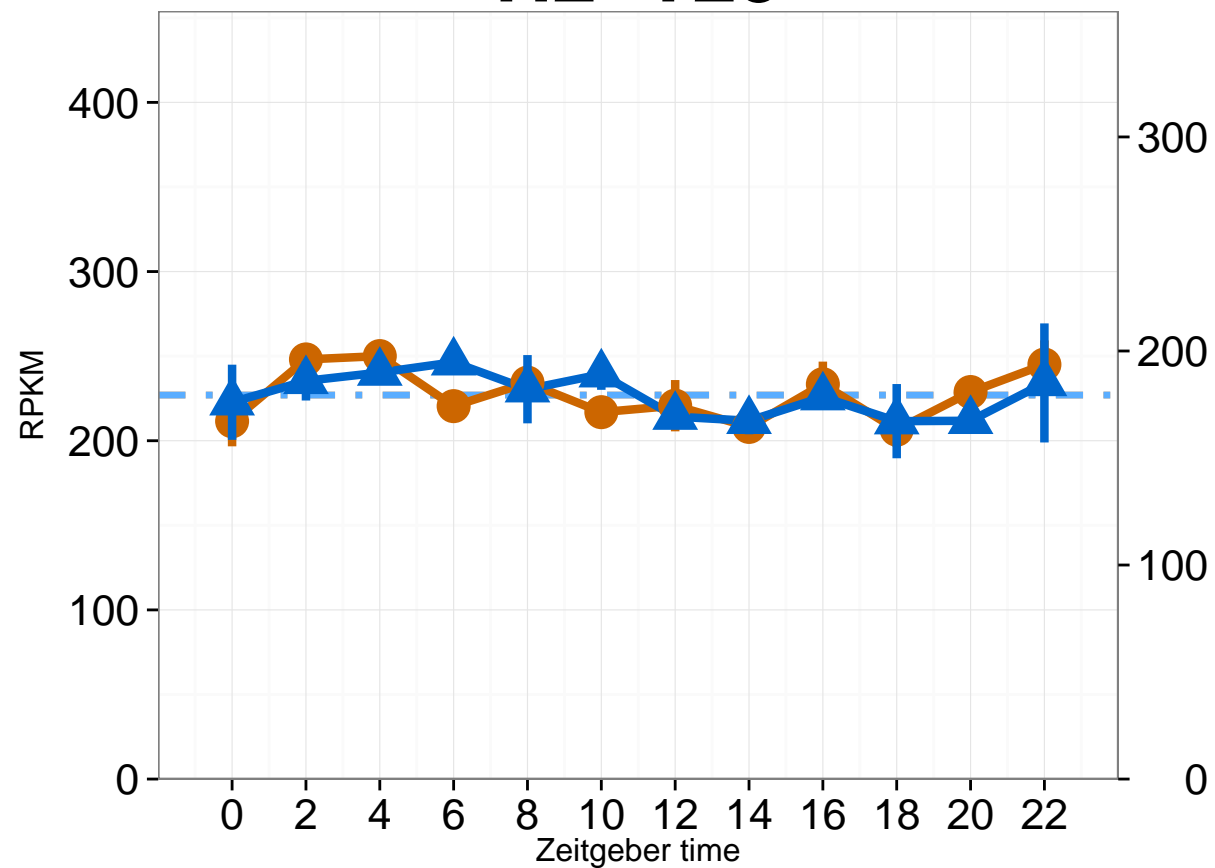

# H2-T23

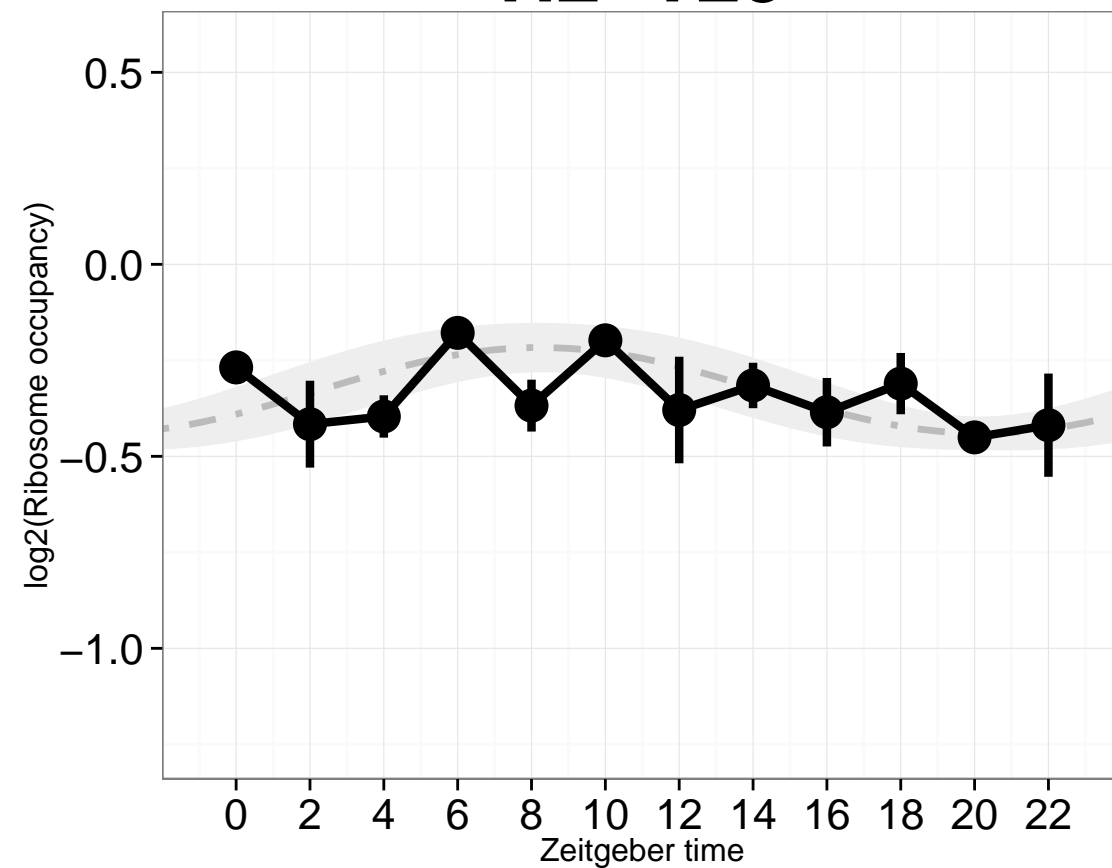

Supplement: SuppDataset_1.zip [file H2-T23_set_A.pdf › Supplemental Dataset 1/A-mRNA_nonrhyth_translation_nonrhyth/H2-T23_set_A.pdf]

# H2-T24

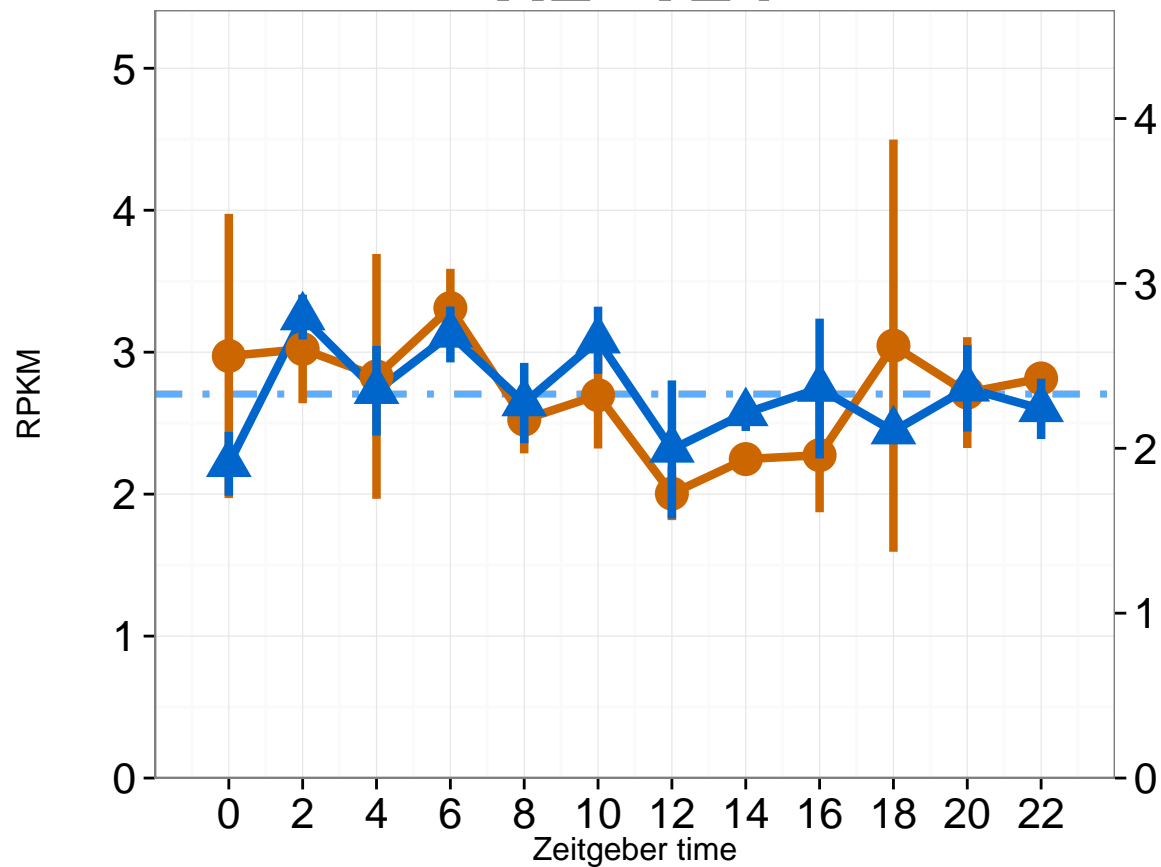

# H2-T24

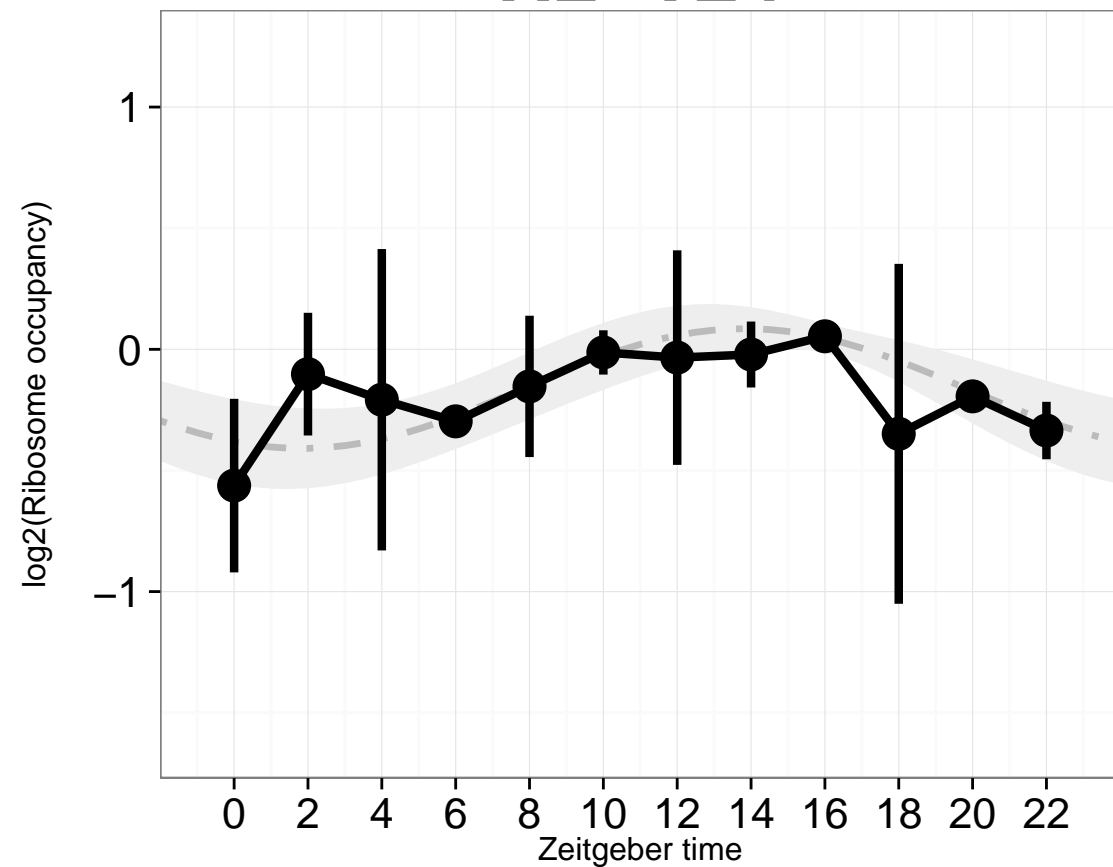

Supplement: SuppDataset_1.zip [file H2-T24_set_A.pdf › Supplemental Dataset 1/A-mRNA_nonrhyth_translation_nonrhyth/H2-T24_set_A.pdf]

## H2afj

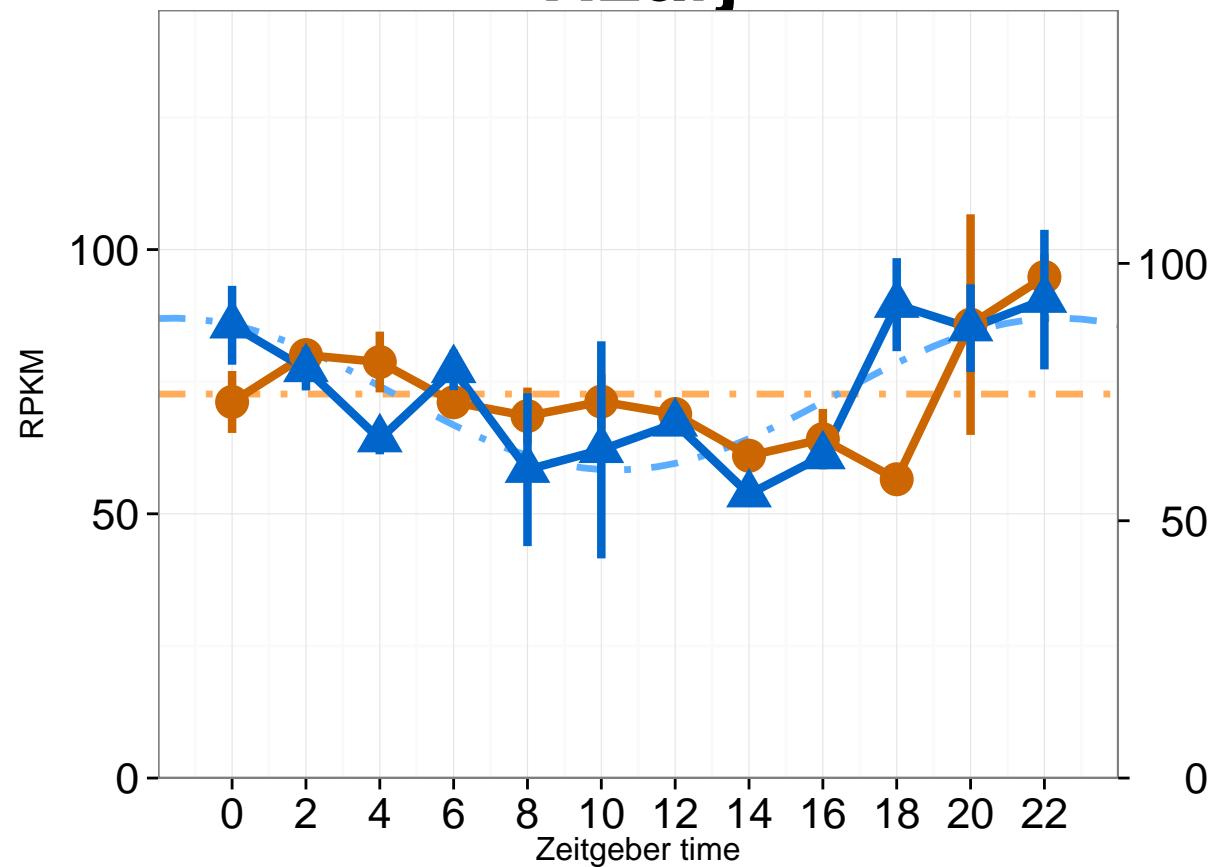

## H2afj

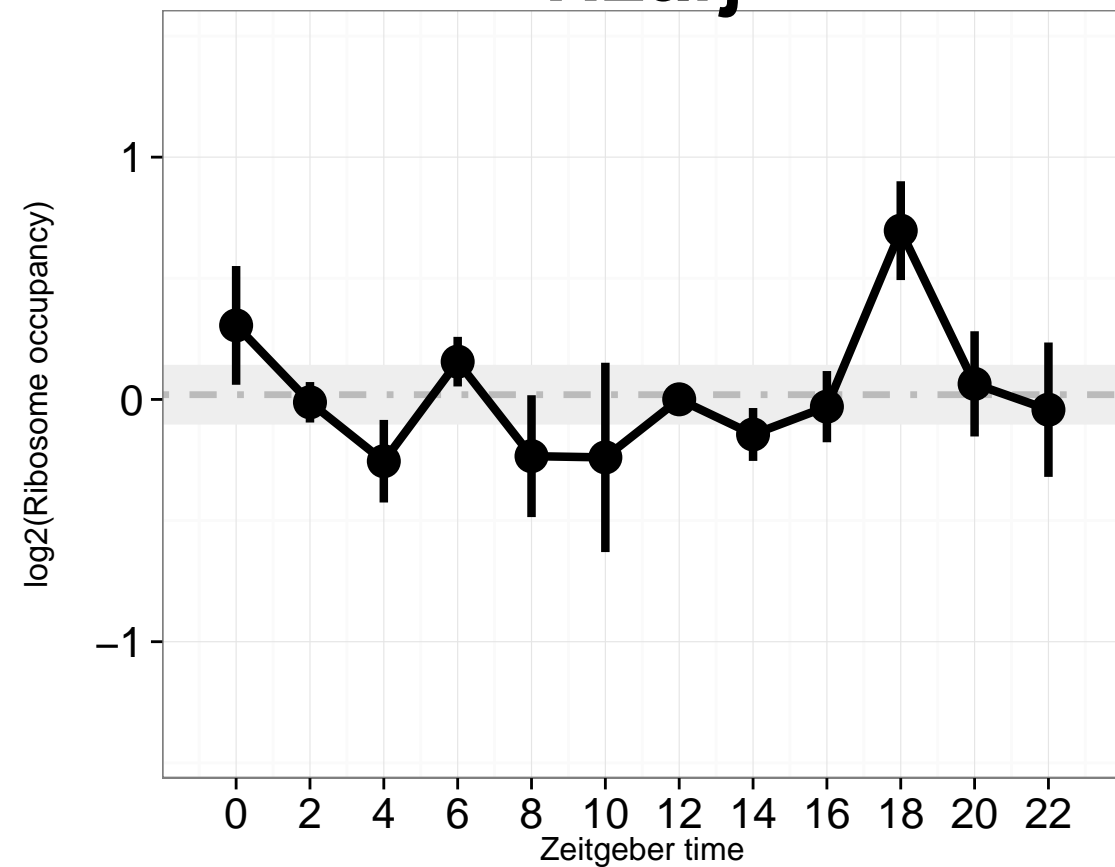

Supplement: SuppDataset_1.zip [file H2afj_set_A.pdf › Supplemental Dataset 1/A-mRNA_nonrhyth_translation_nonrhyth/H2afj_set_A.pdf]

## H2afv

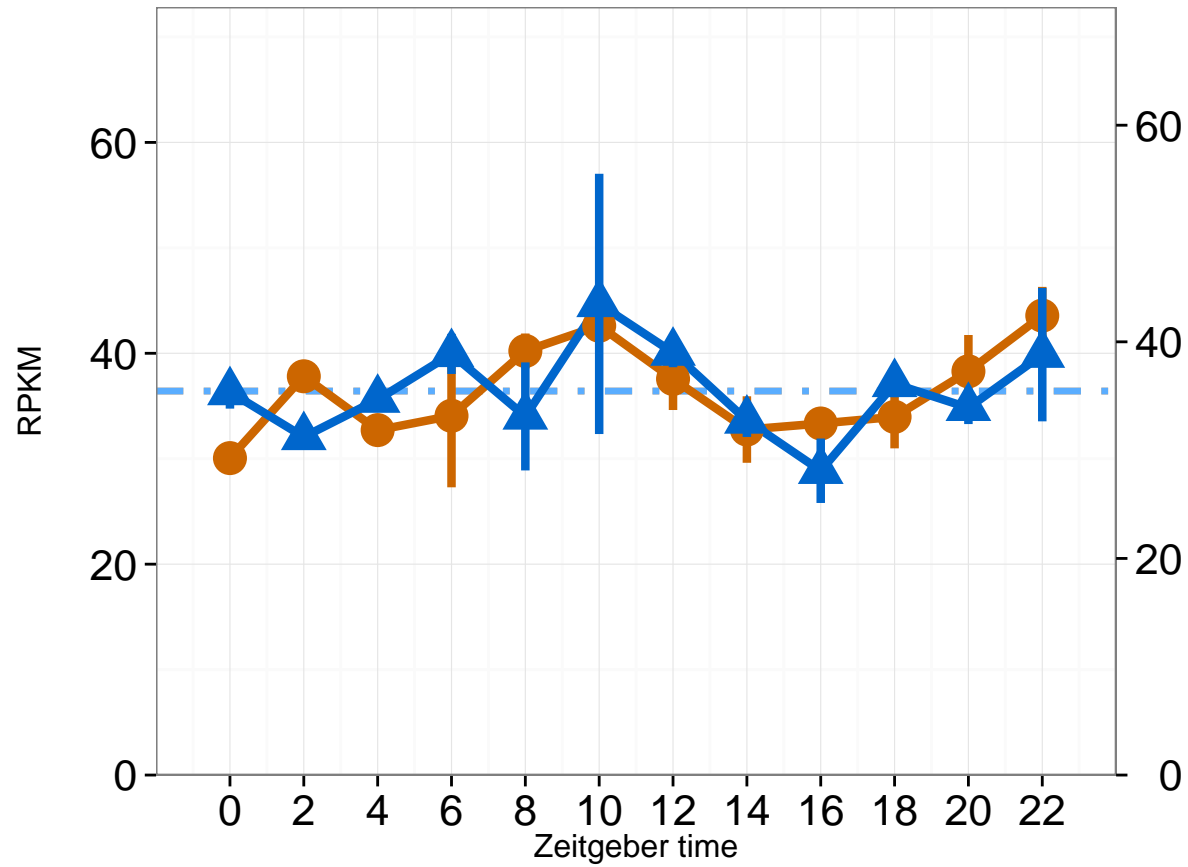

## H2afv

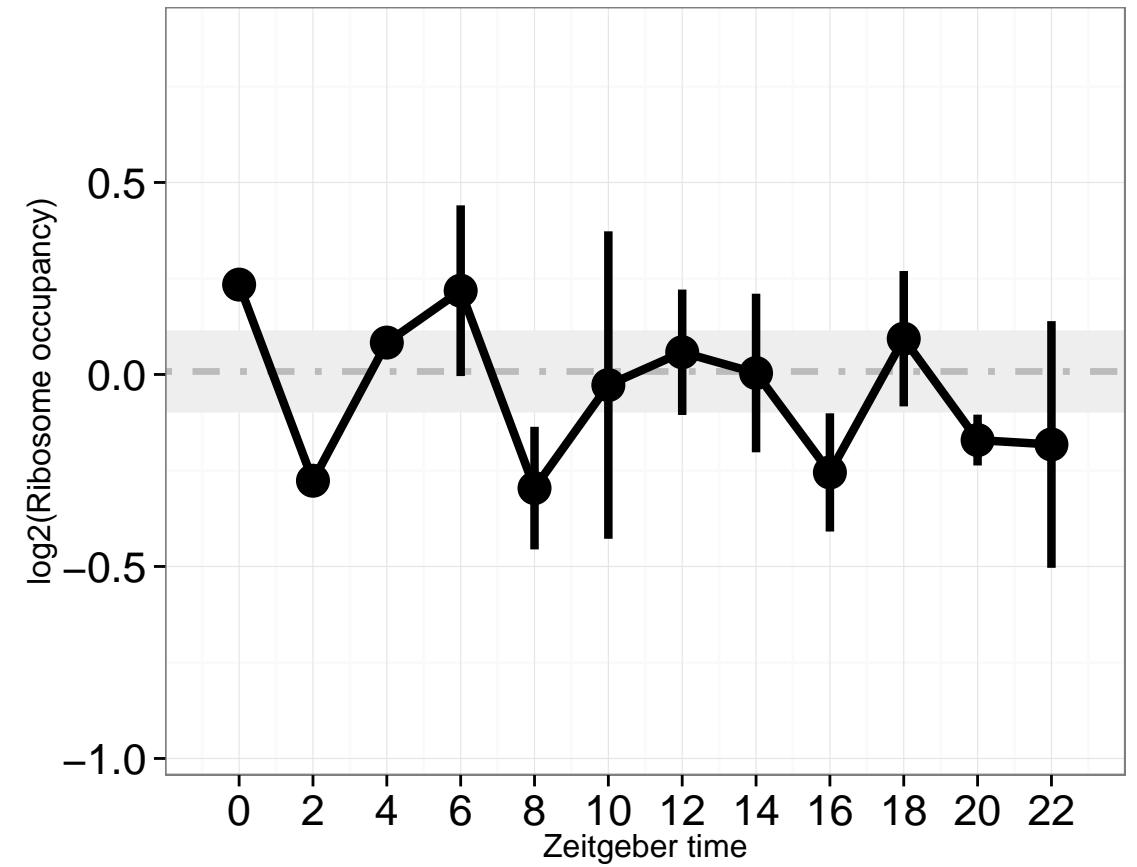

Supplement: SuppDataset_1.zip [file H2afv_set_A.pdf › Supplemental Dataset 1/A-mRNA_nonrhyth_translation_nonrhyth/H2afv_set_A.pdf]

## H2afx

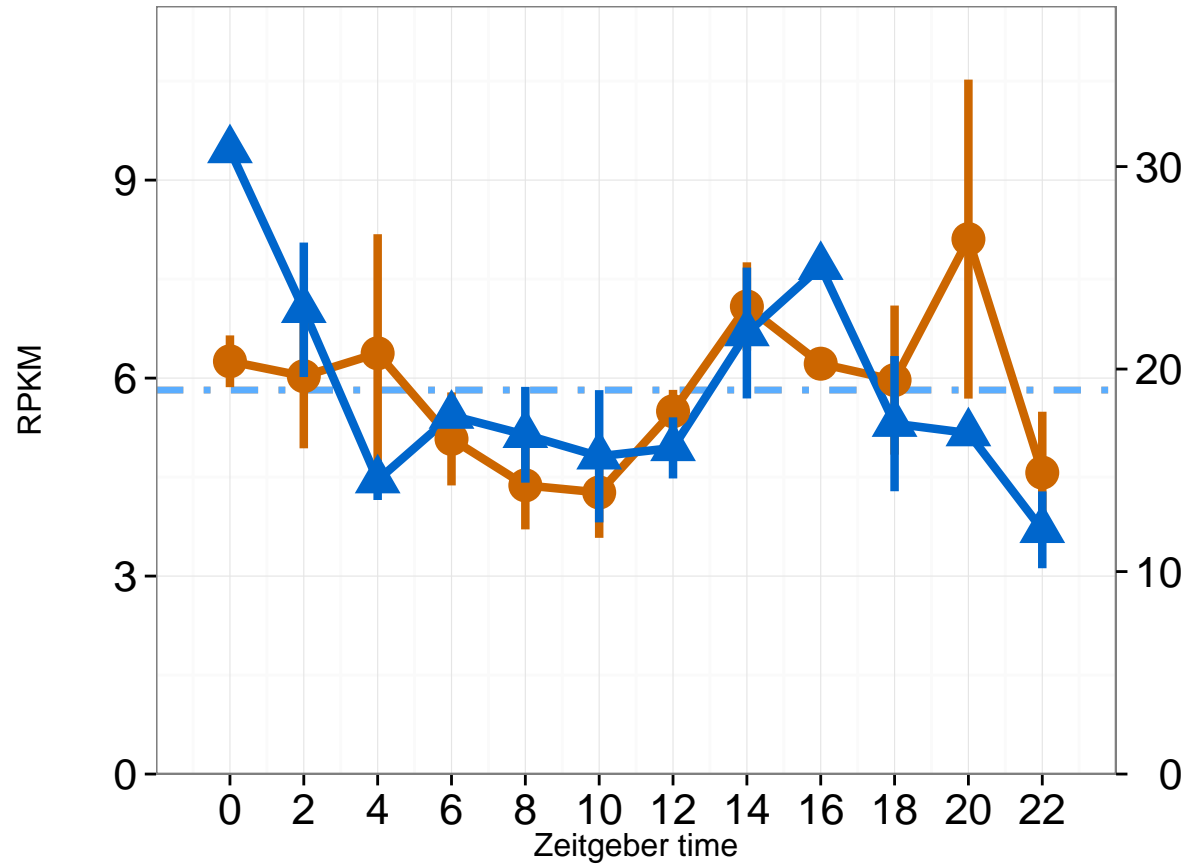

## H2afx

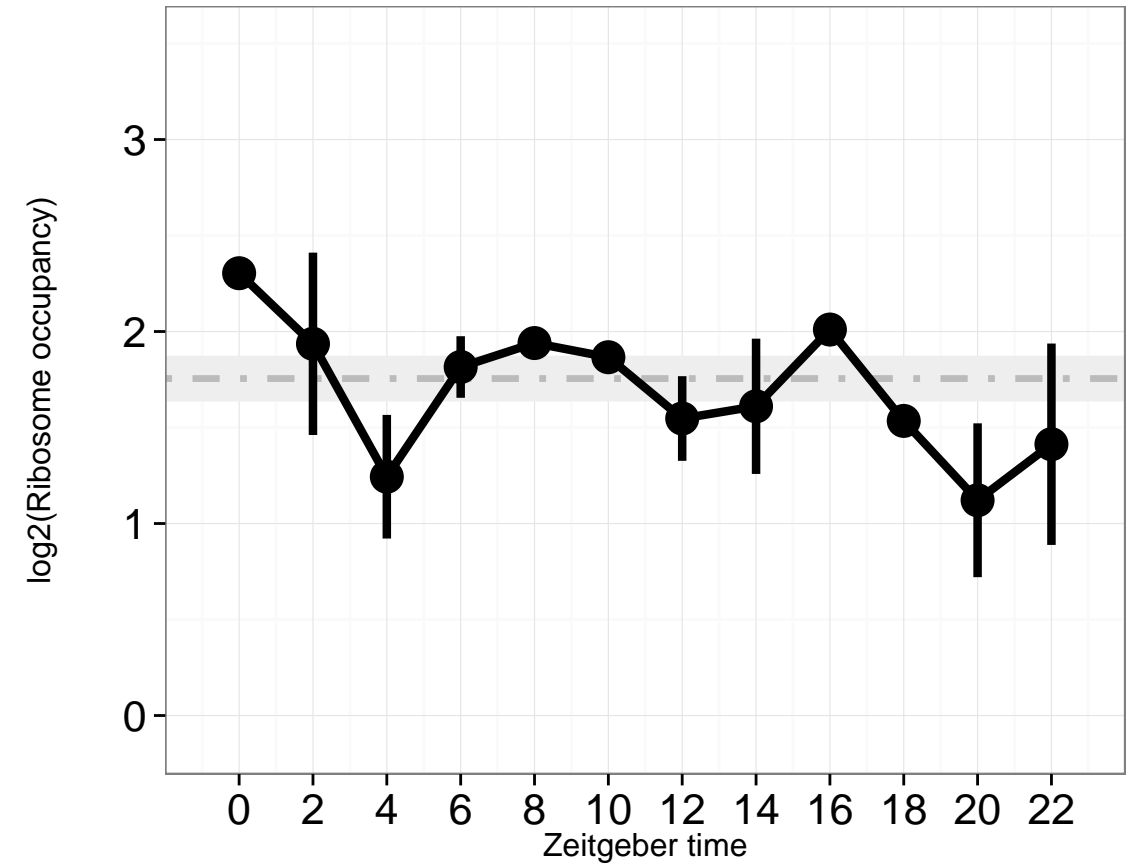

Supplement: SuppDataset_1.zip [file H2afx_set_A.pdf › Supplemental Dataset 1/A-mRNA_nonrhyth_translation_nonrhyth/H2afx_set_A.pdf]

**H2afy2 TR**

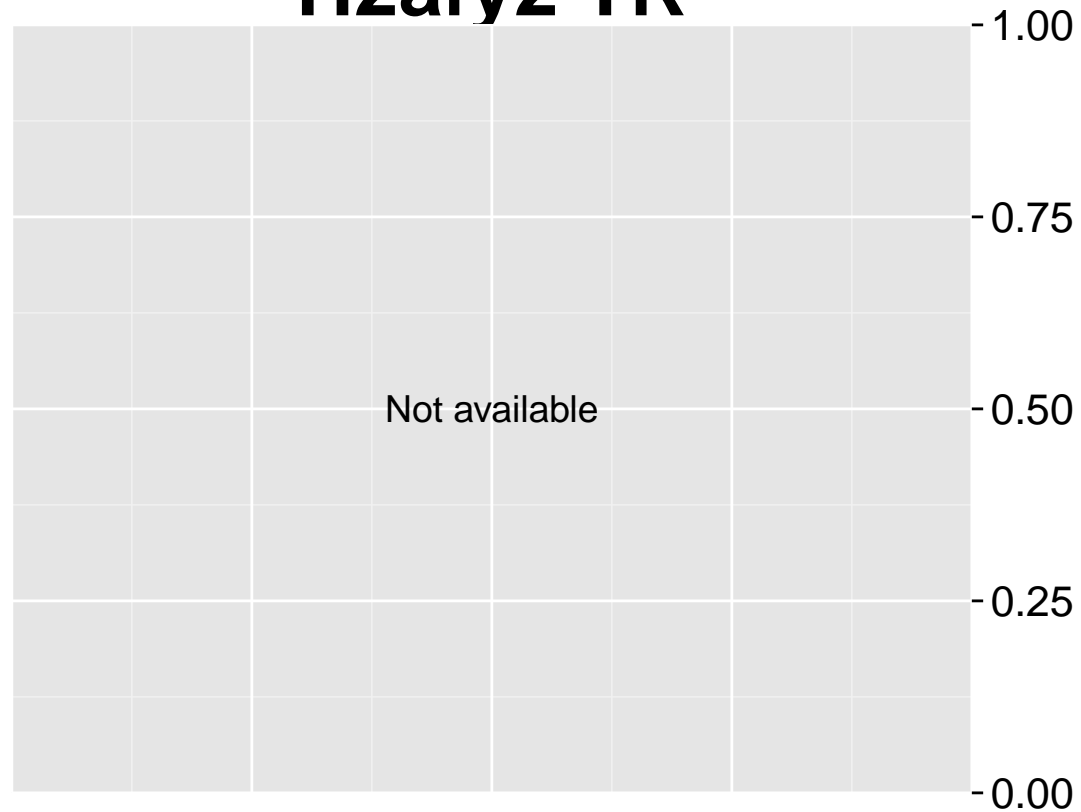

**H2afy2 log2(Ribosome occupancy**

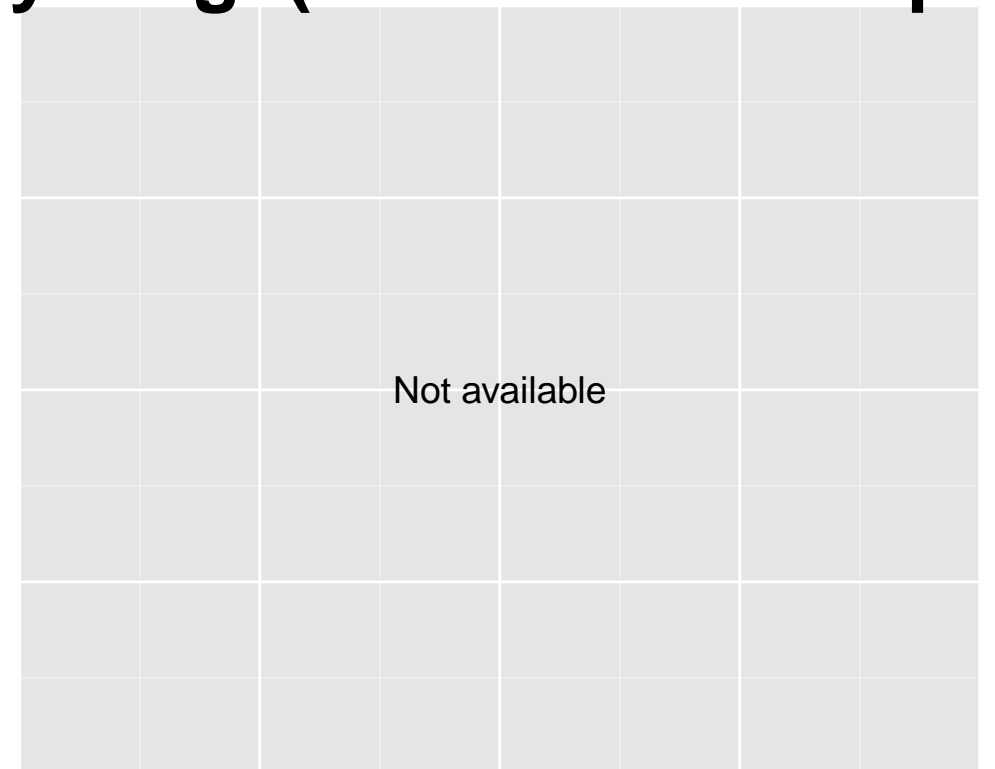

Supplement: SuppDataset_1.zip [file H2afy2_set_A.pdf › Supplemental Dataset 1/A-mRNA_nonrhyth_translation_nonrhyth/H2afy2_set_A.pdf]

## H2afy

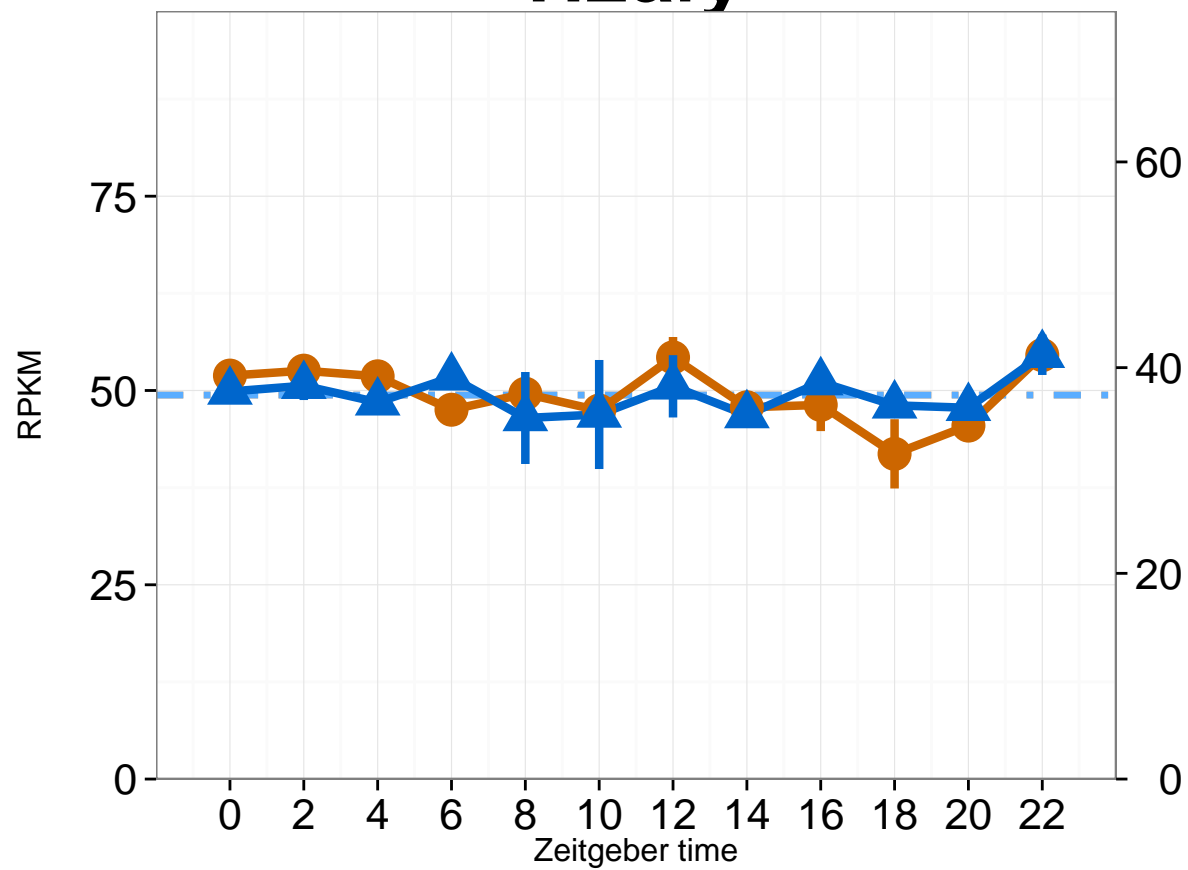

## H2afy

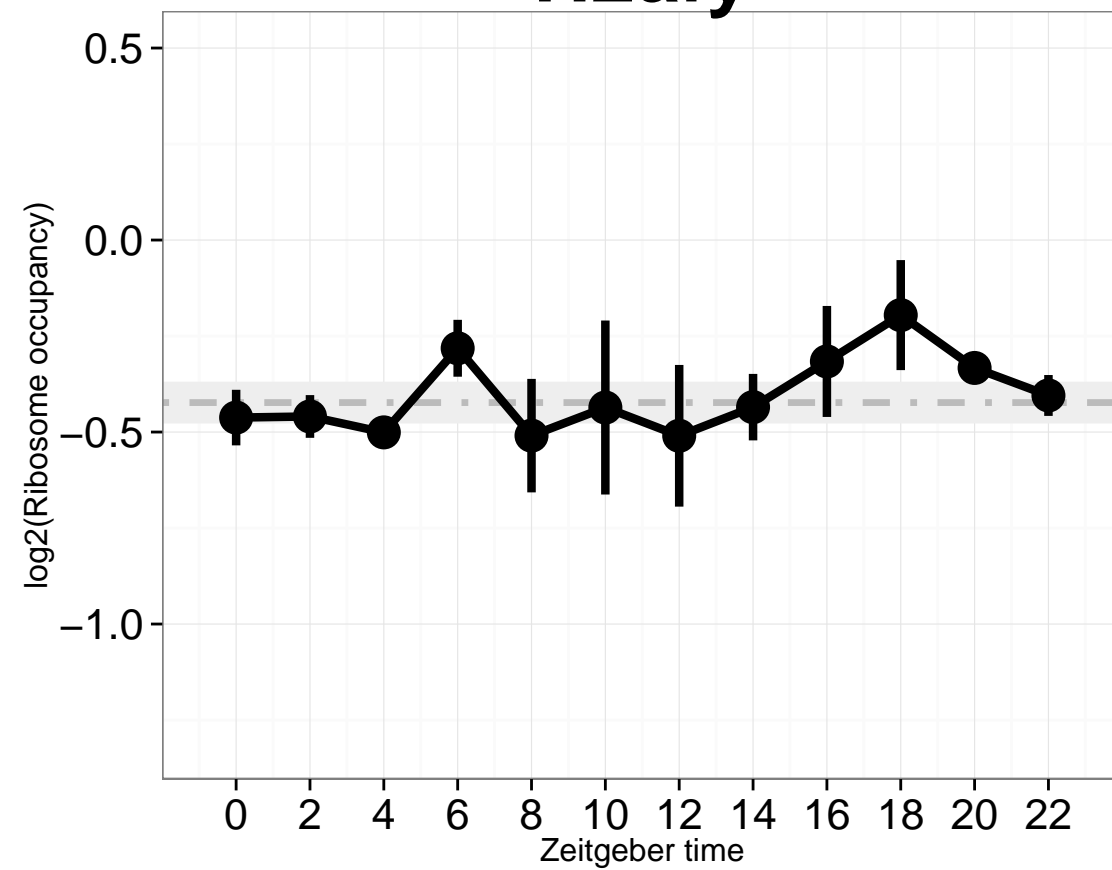

Supplement: SuppDataset_1.zip [file H2afy_set_A.pdf › Supplemental Dataset 1/A-mRNA_nonrhyth_translation_nonrhyth/H2afy_set_A.pdf]

## H2afz

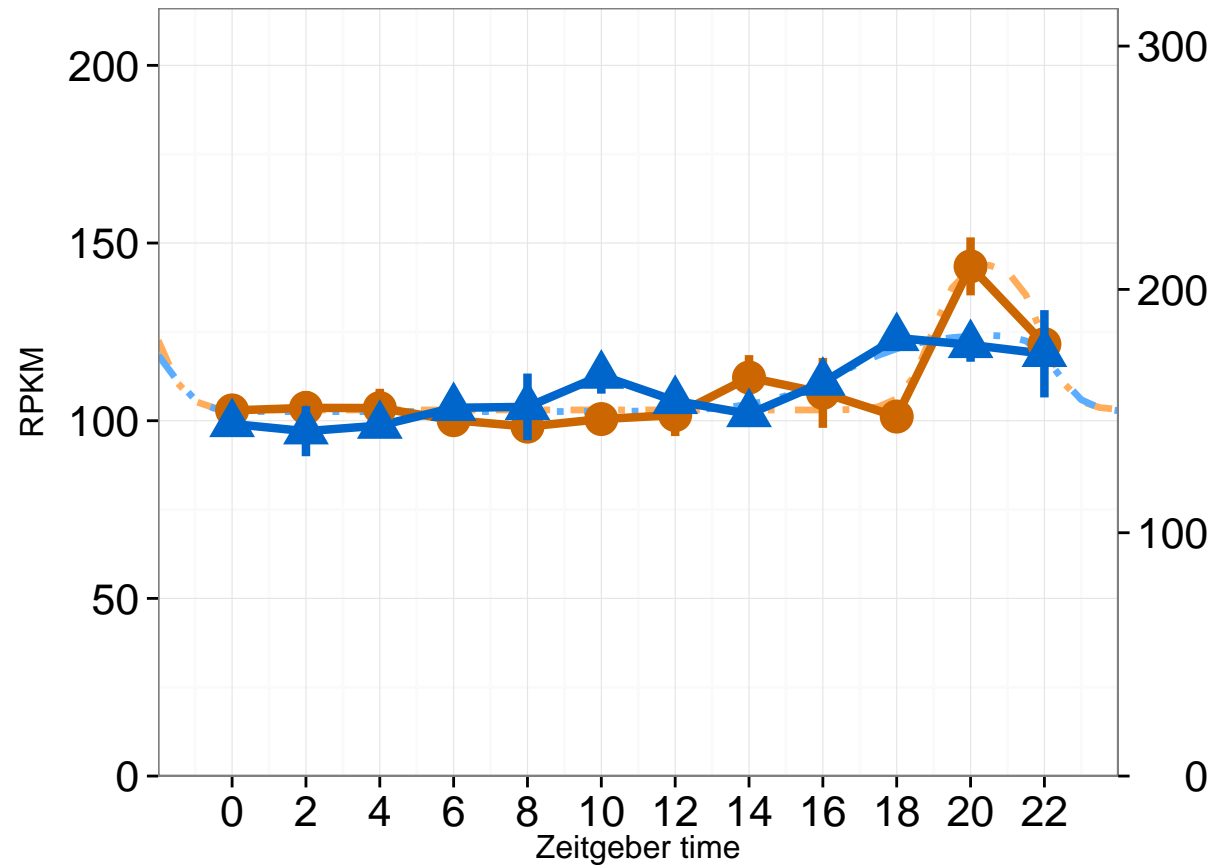

## H2afz

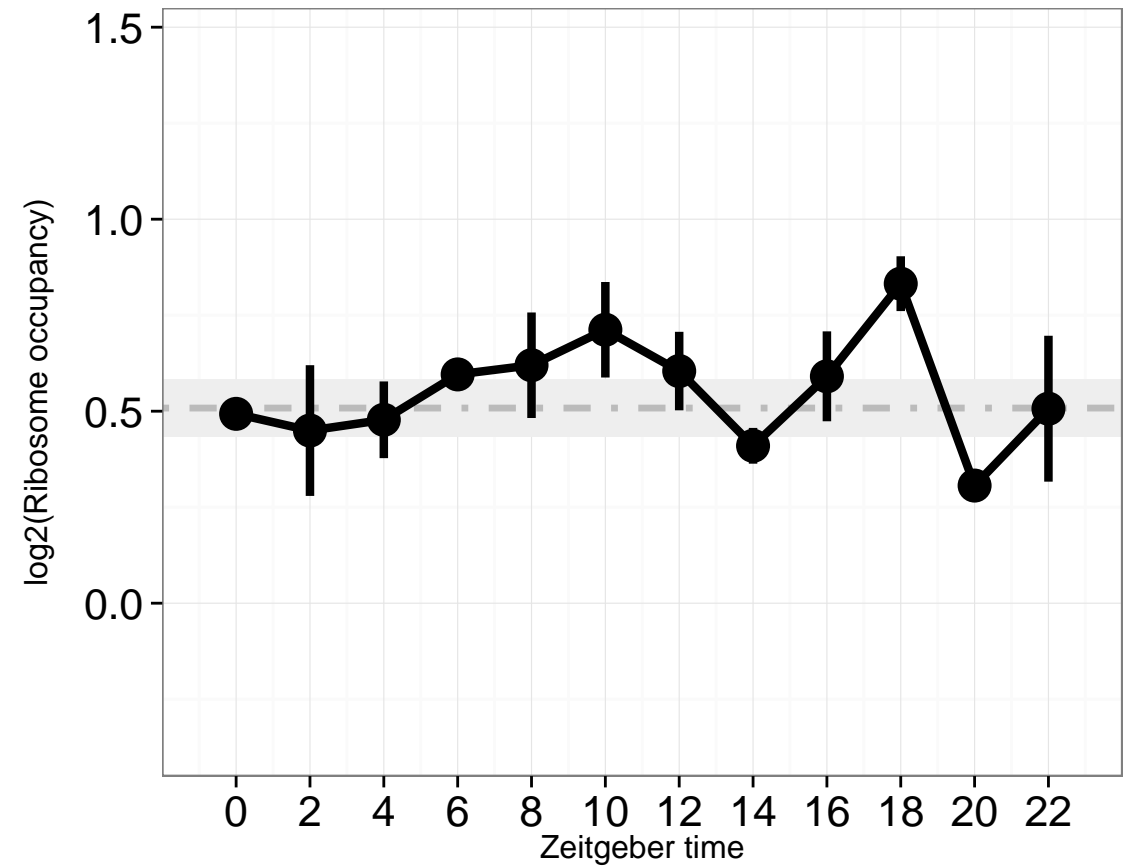

Supplement: SuppDataset_1.zip [file H2afz_set_A.pdf › Supplemental Dataset 1/A-mRNA_nonrhyth_translation_nonrhyth/H2afz_set_A.pdf]

## H3f3a

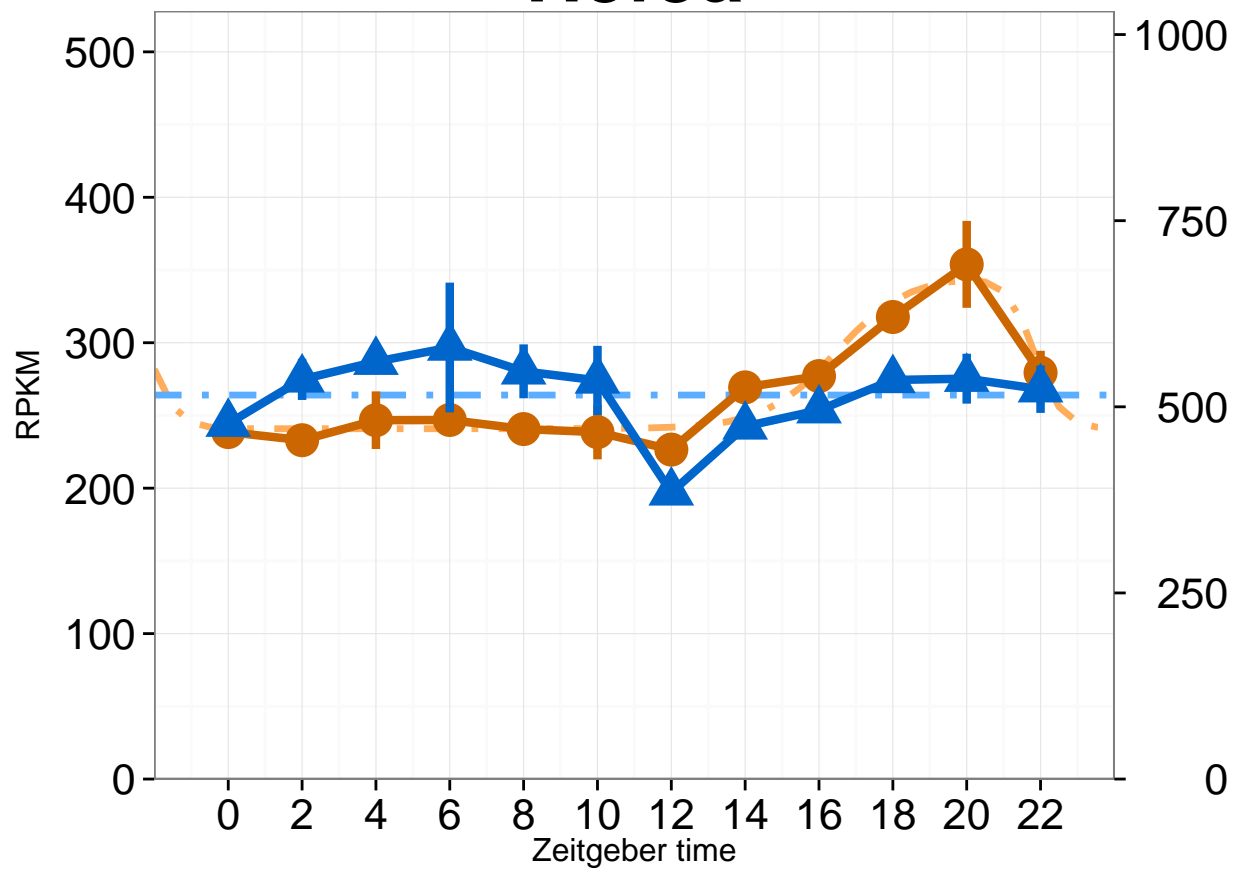

## H3f3a

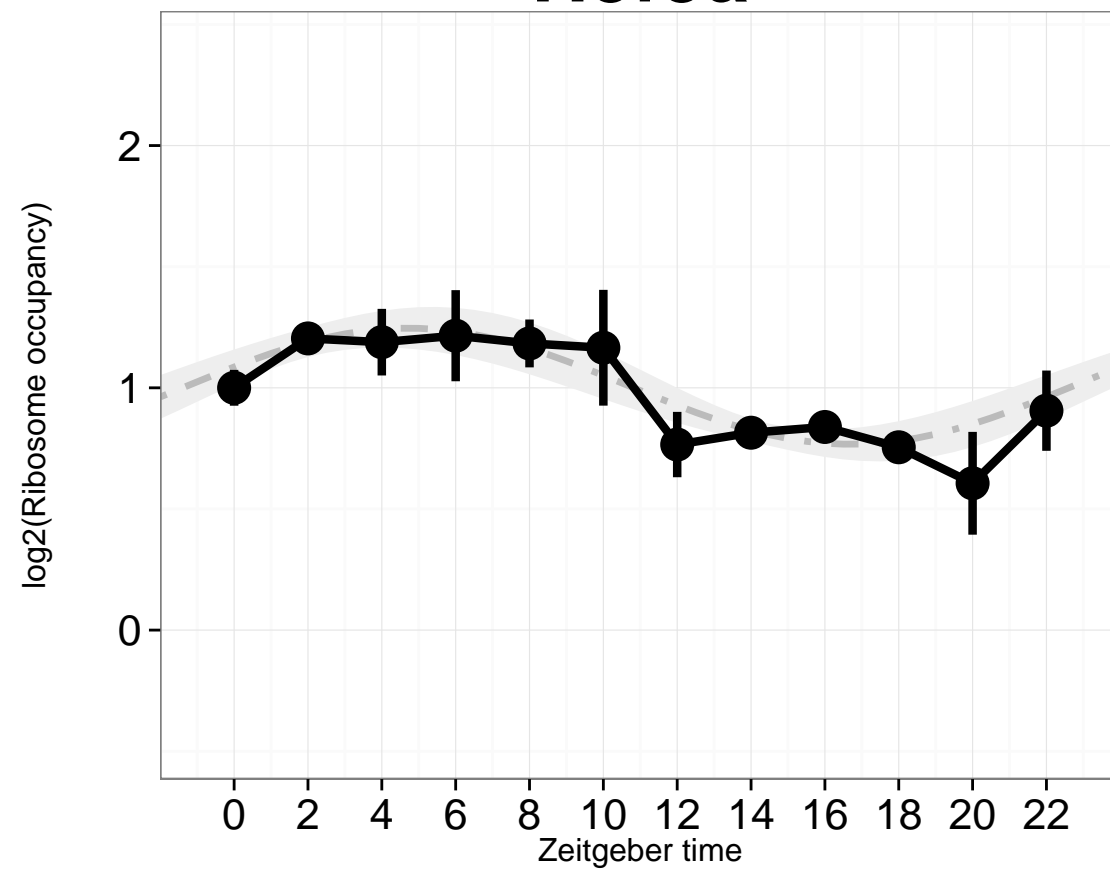

Supplement: SuppDataset_1.zip [file H3f3a_set_A.pdf › Supplemental Dataset 1/A-mRNA_nonrhyth_translation_nonrhyth/H3f3a_set_A.pdf]

# Hao

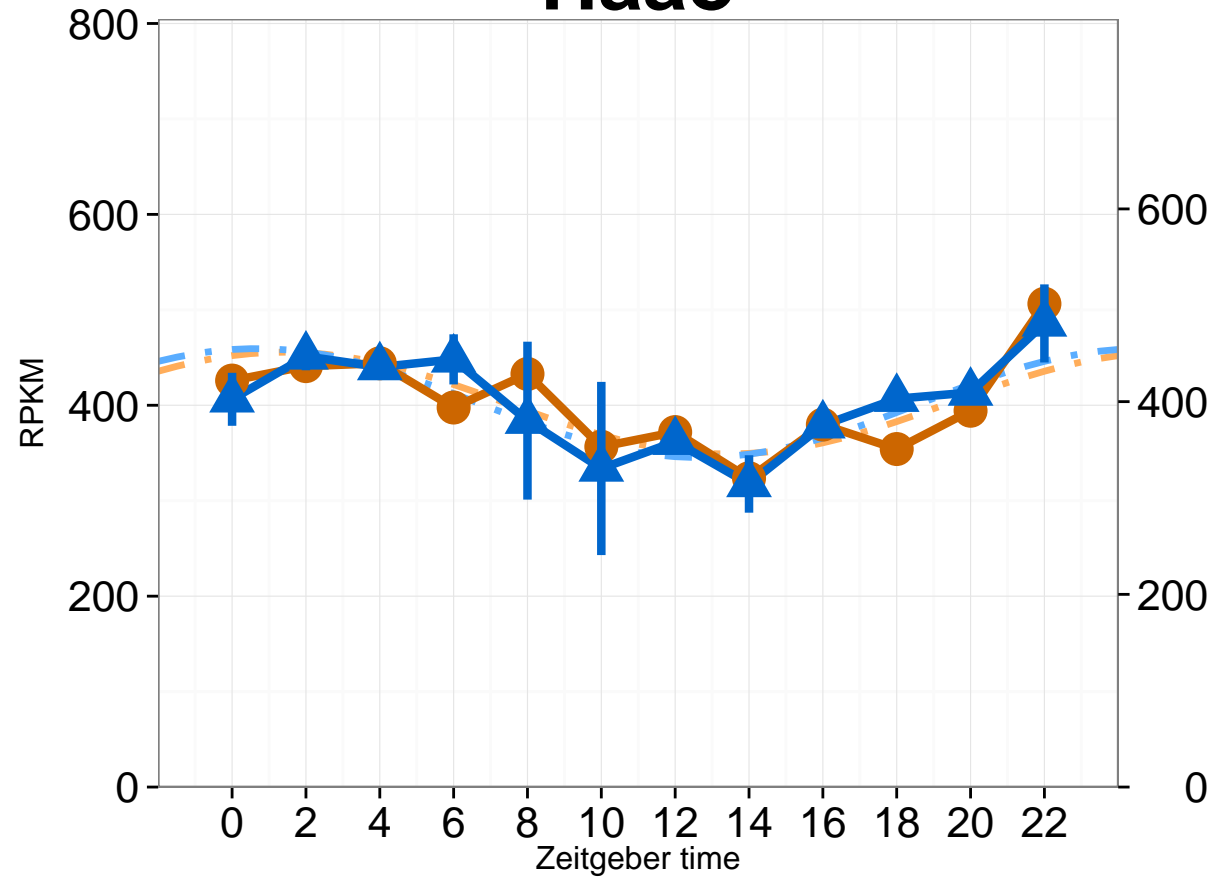

# Hao

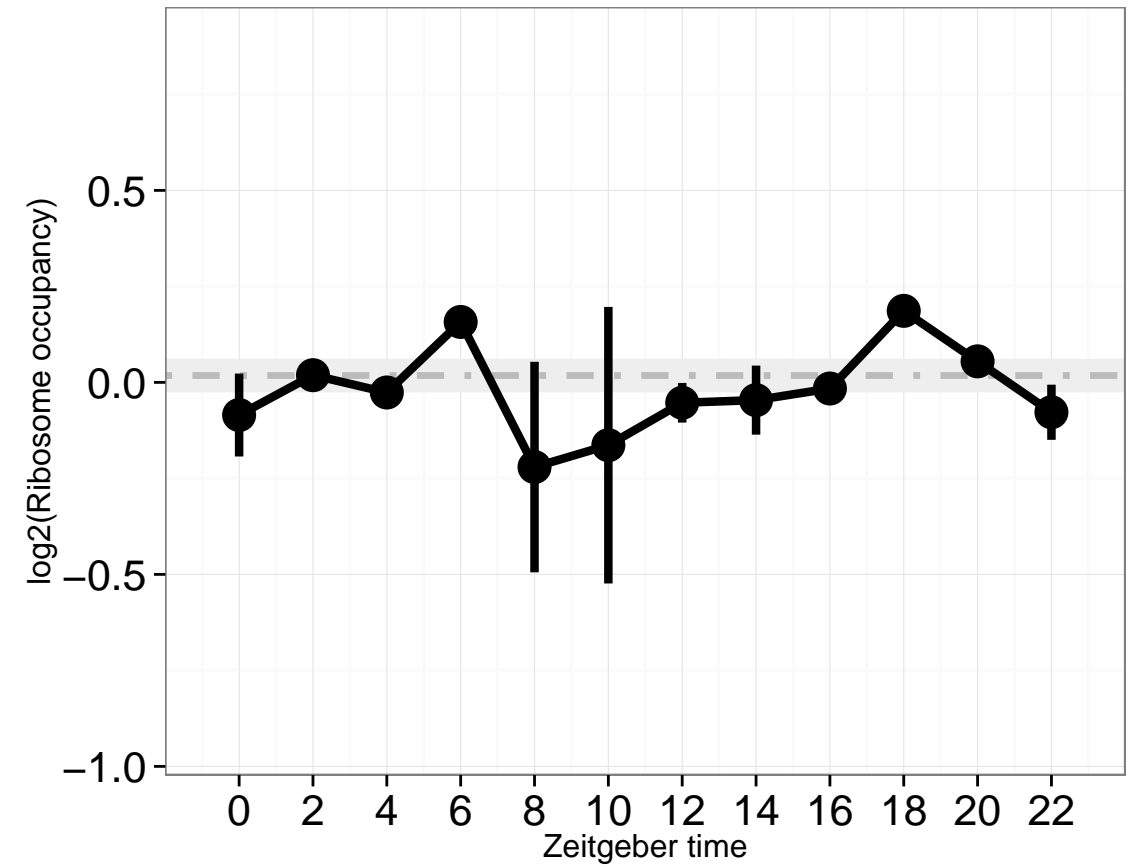

Supplement: SuppDataset_1.zip [file Haao_set_A.pdf › Supplemental Dataset 1/A-mRNA_nonrhyth_translation_nonrhyth/Haao_set_A.pdf]

## Habp2

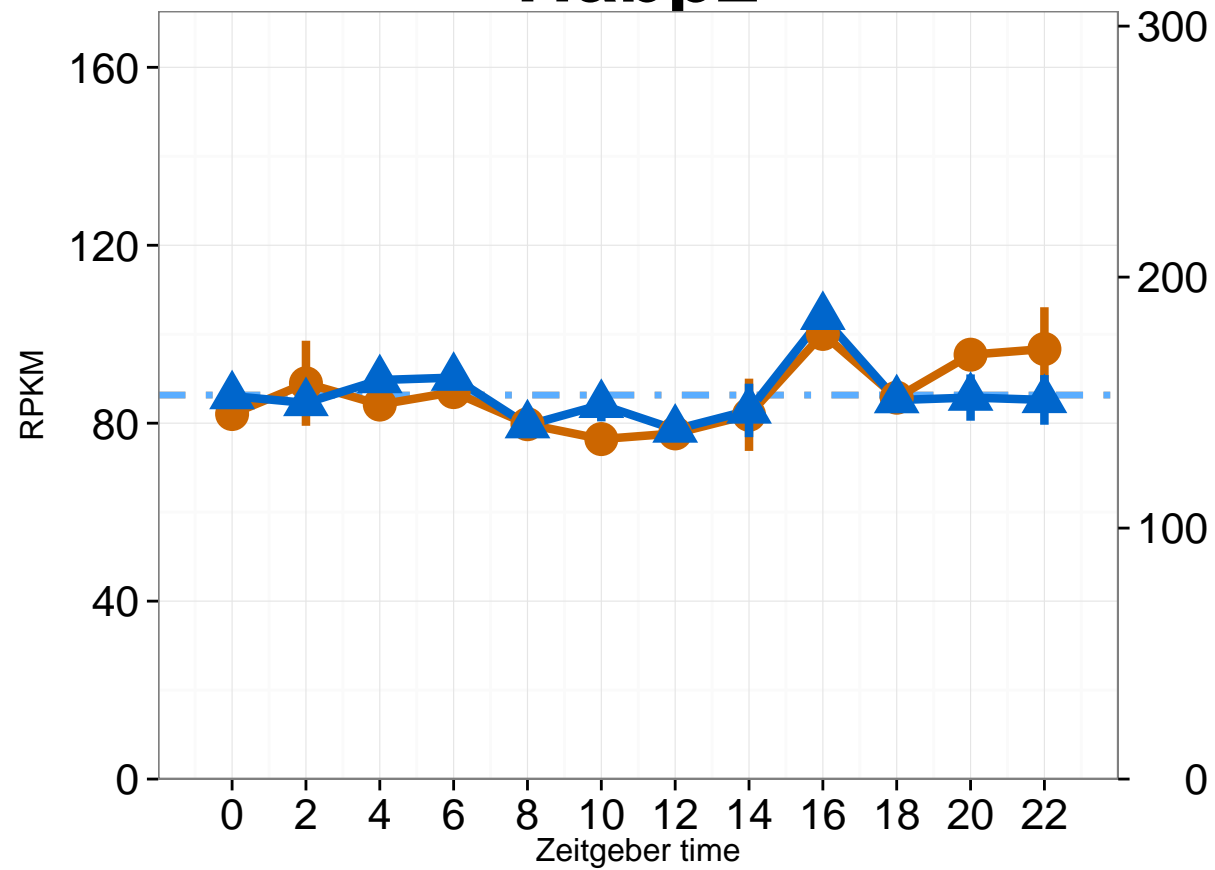

## Habp2

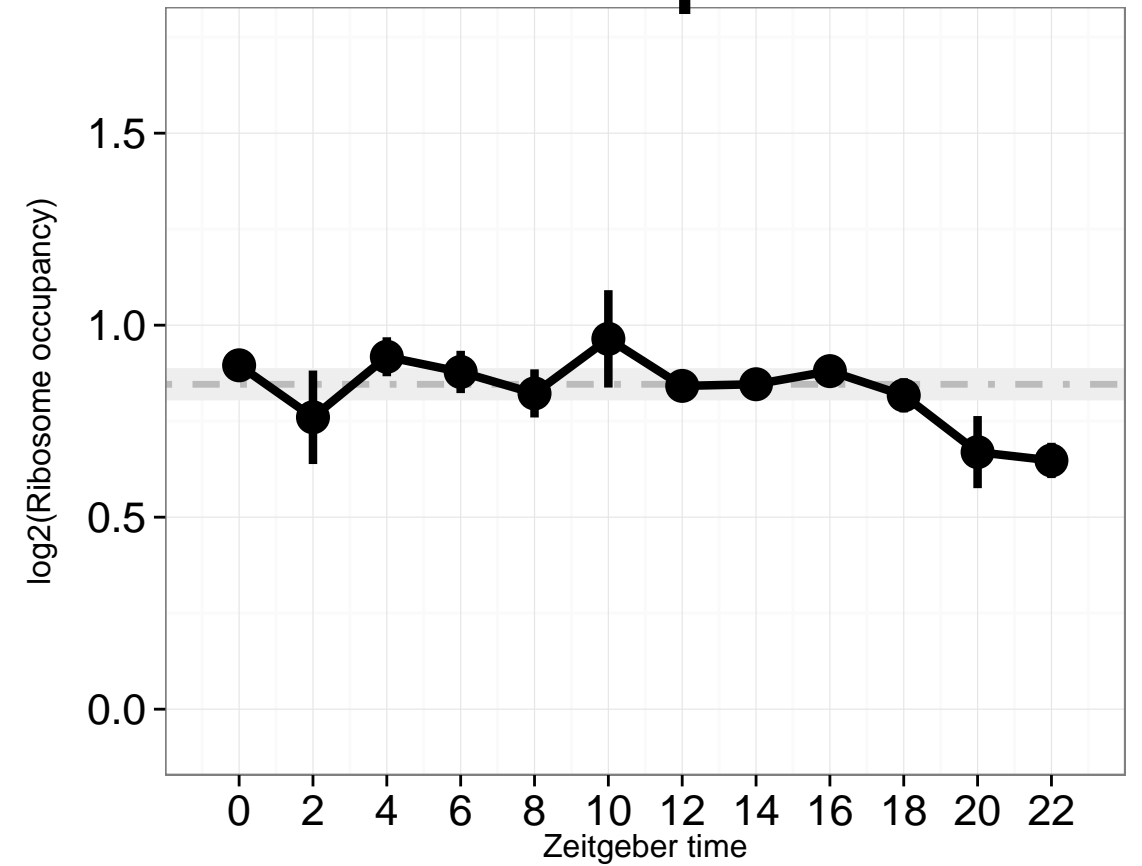

Supplement: SuppDataset_1.zip [file Habp2_set_A.pdf › Supplemental Dataset 1/A-mRNA_nonrhyth_translation_nonrhyth/Habp2_set_A.pdf]

## Habp4

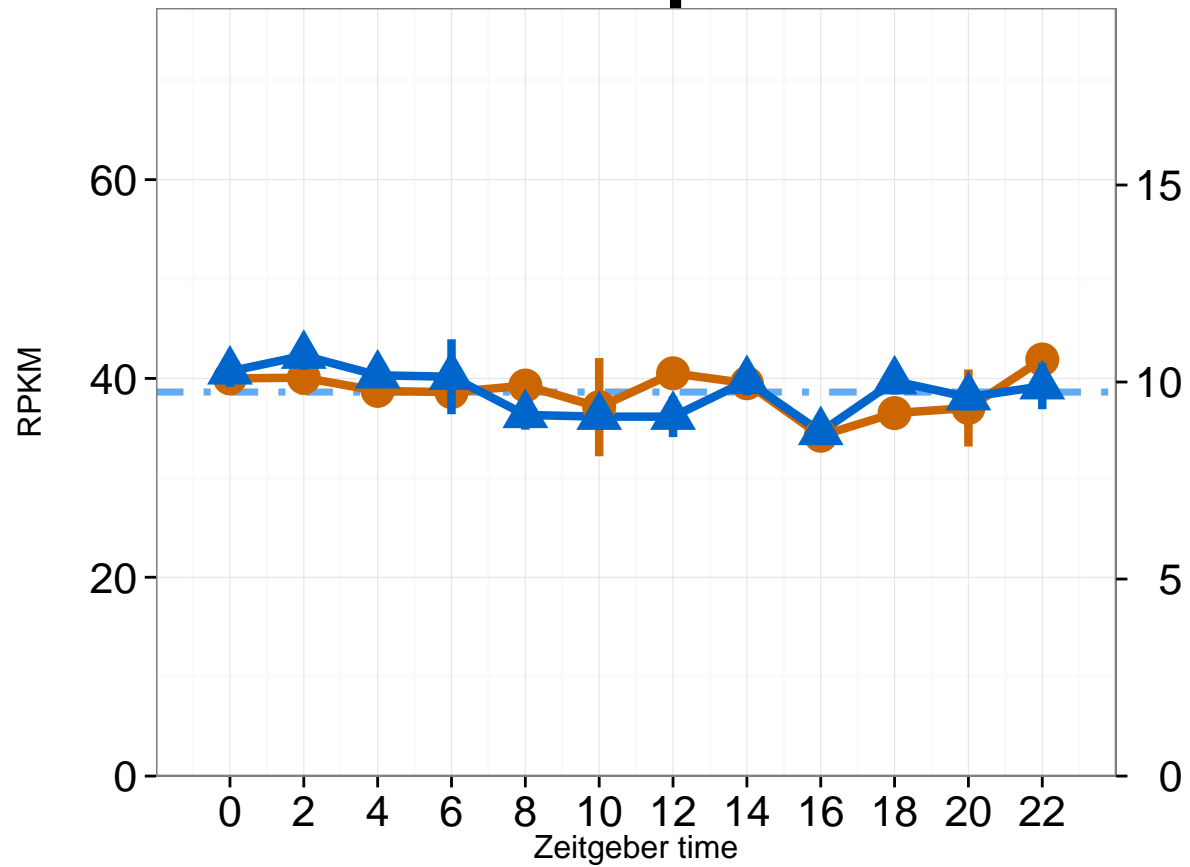

## Habp4

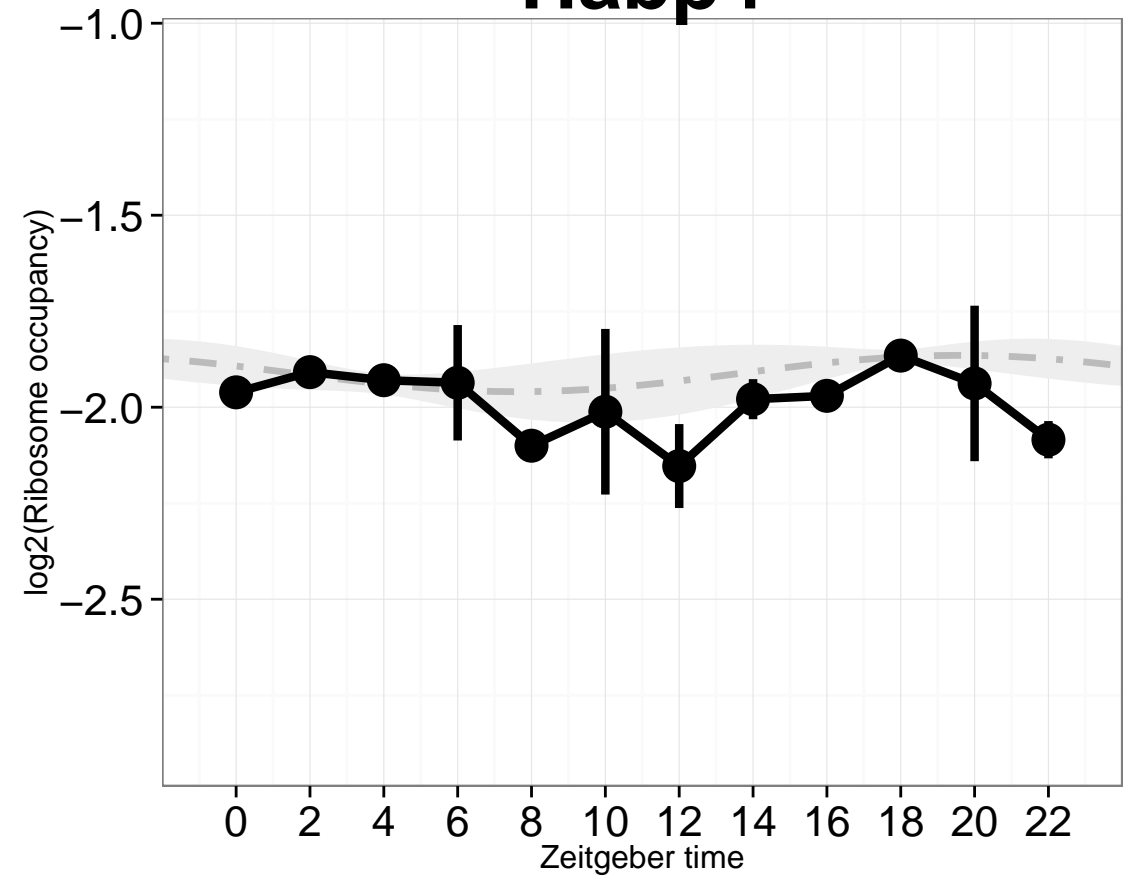

Supplement: SuppDataset_1.zip [file Habp4_set_A.pdf › Supplemental Dataset 1/A-mRNA_nonrhyth_translation_nonrhyth/Habp4_set_A.pdf]

## Hace1

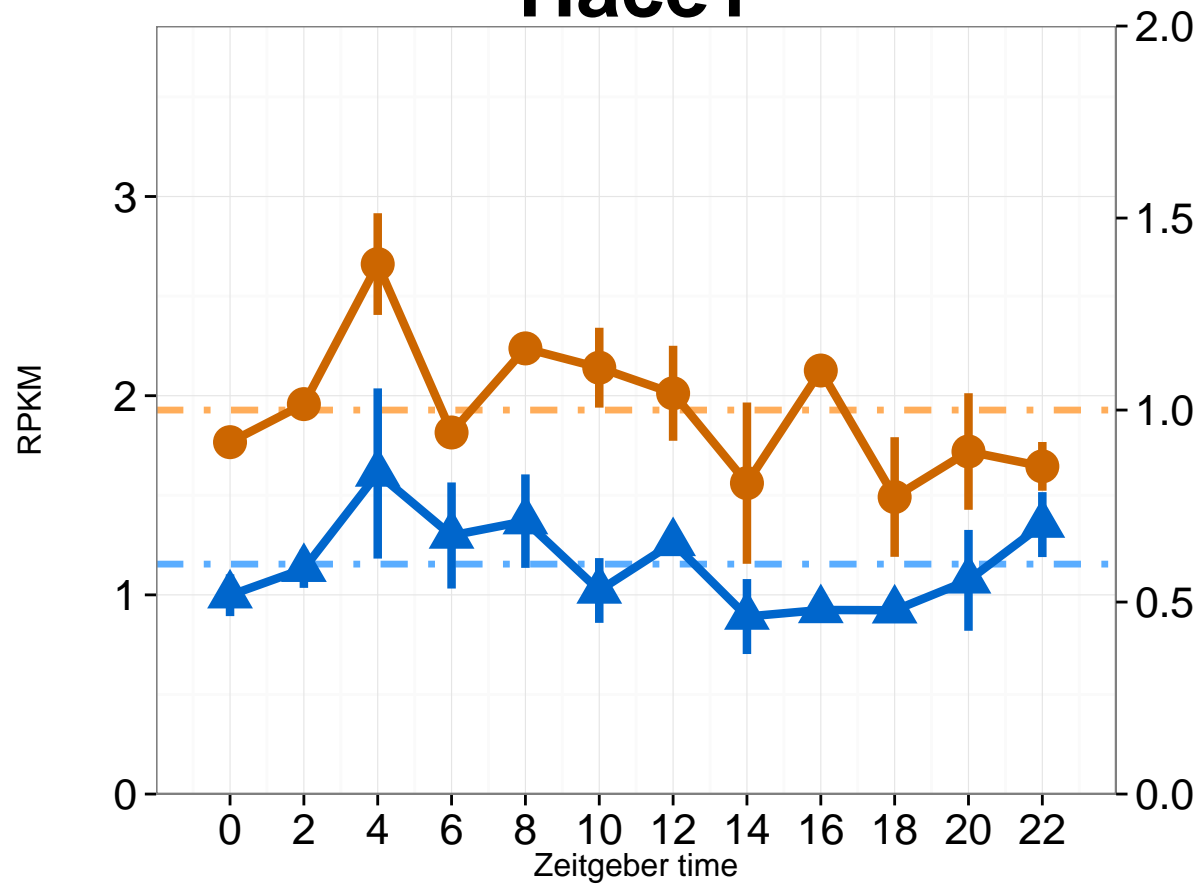

## Hace1

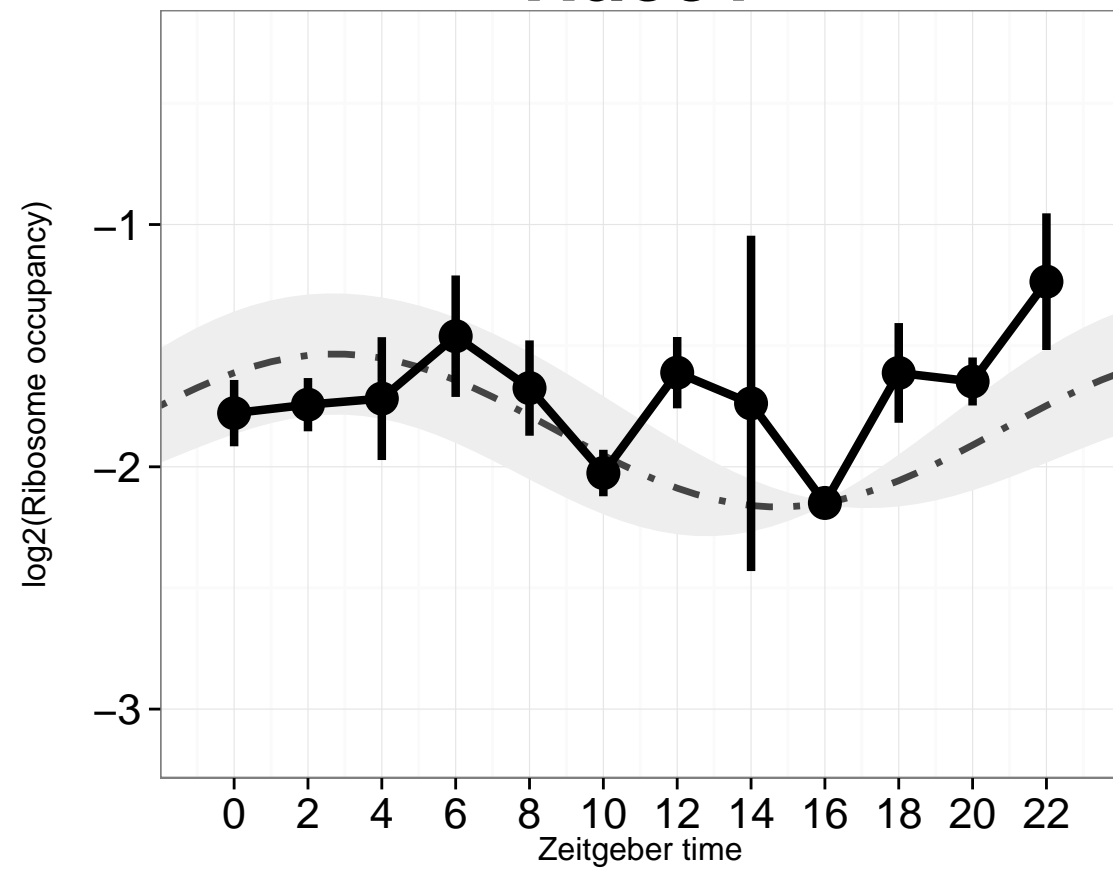

Supplement: SuppDataset_1.zip [file Hace1_set_A.pdf › Supplemental Dataset 1/A-mRNA_nonrhyth_translation_nonrhyth/Hace1_set_A.pdf]

## Hadh

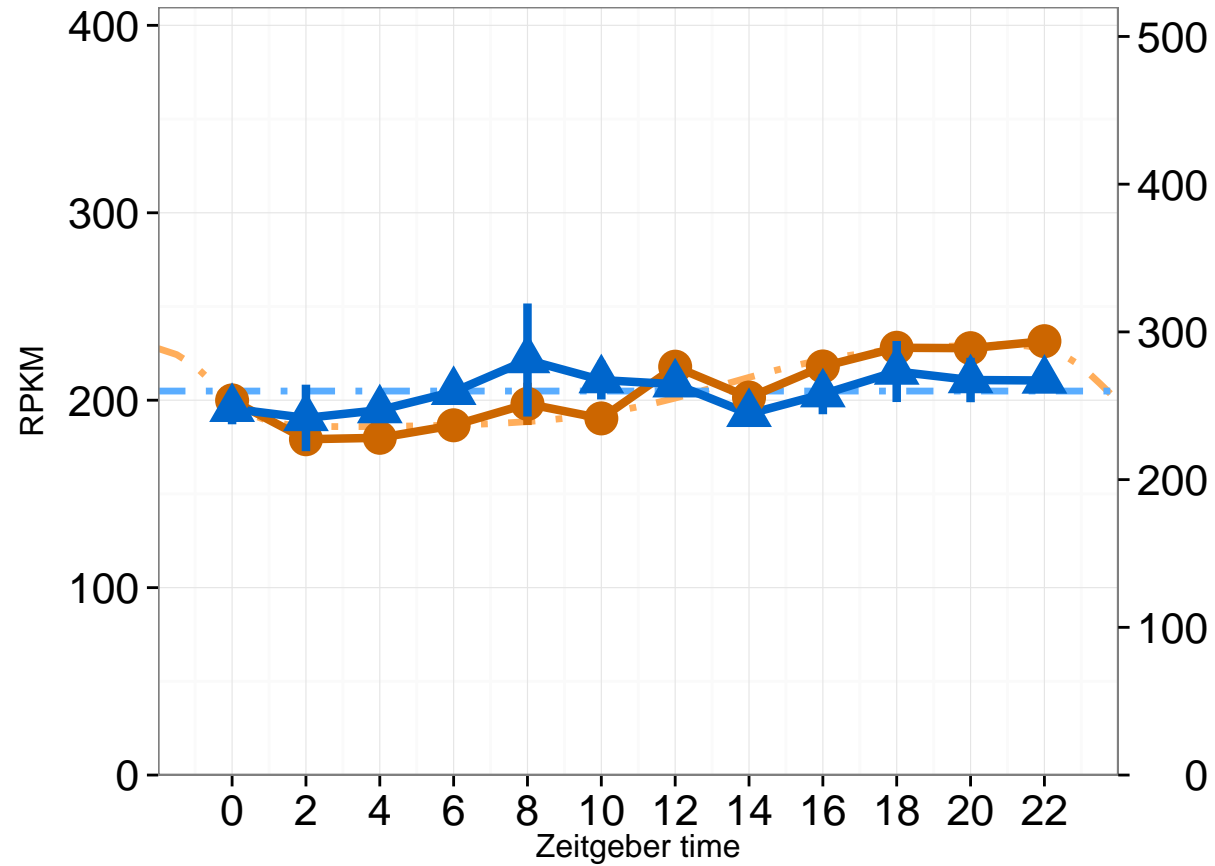

## Hadh

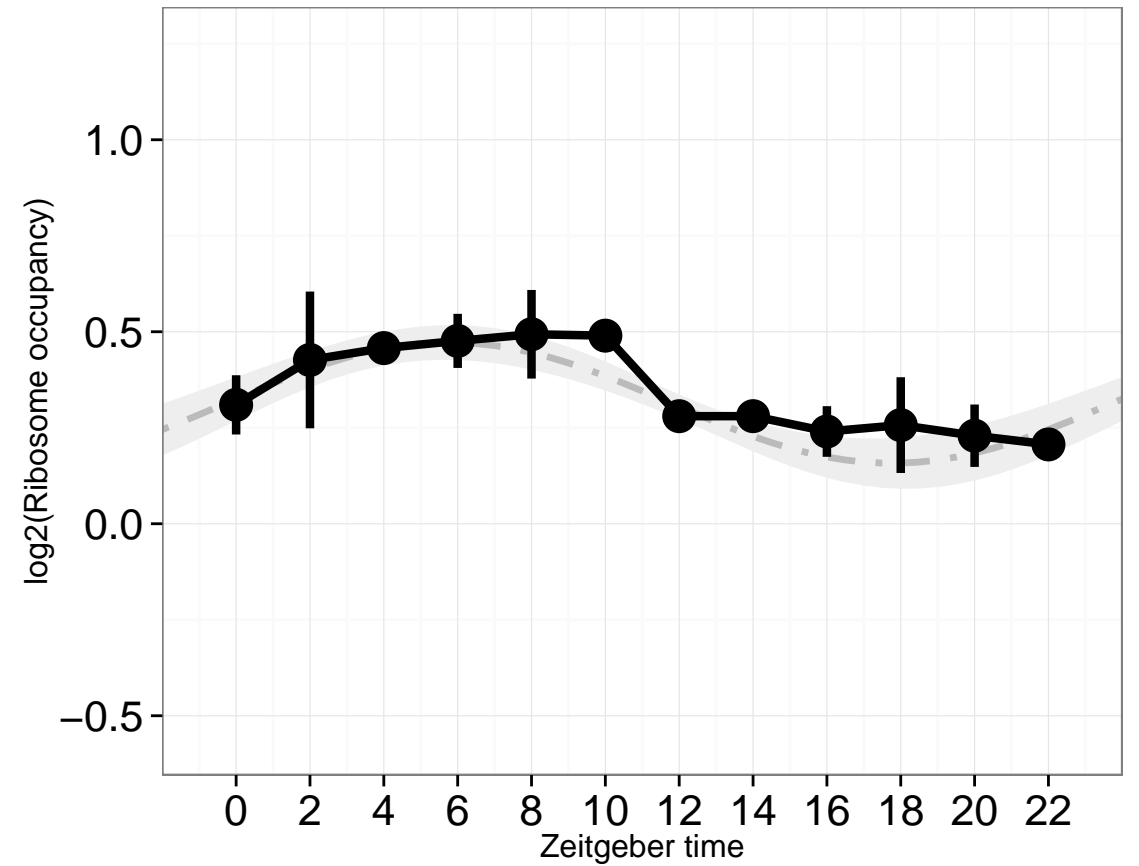

Supplement: SuppDataset_1.zip [file Hadh_set_A.pdf › Supplemental Dataset 1/A-mRNA_nonrhyth_translation_nonrhyth/Hadh_set_A.pdf]

# Hadha

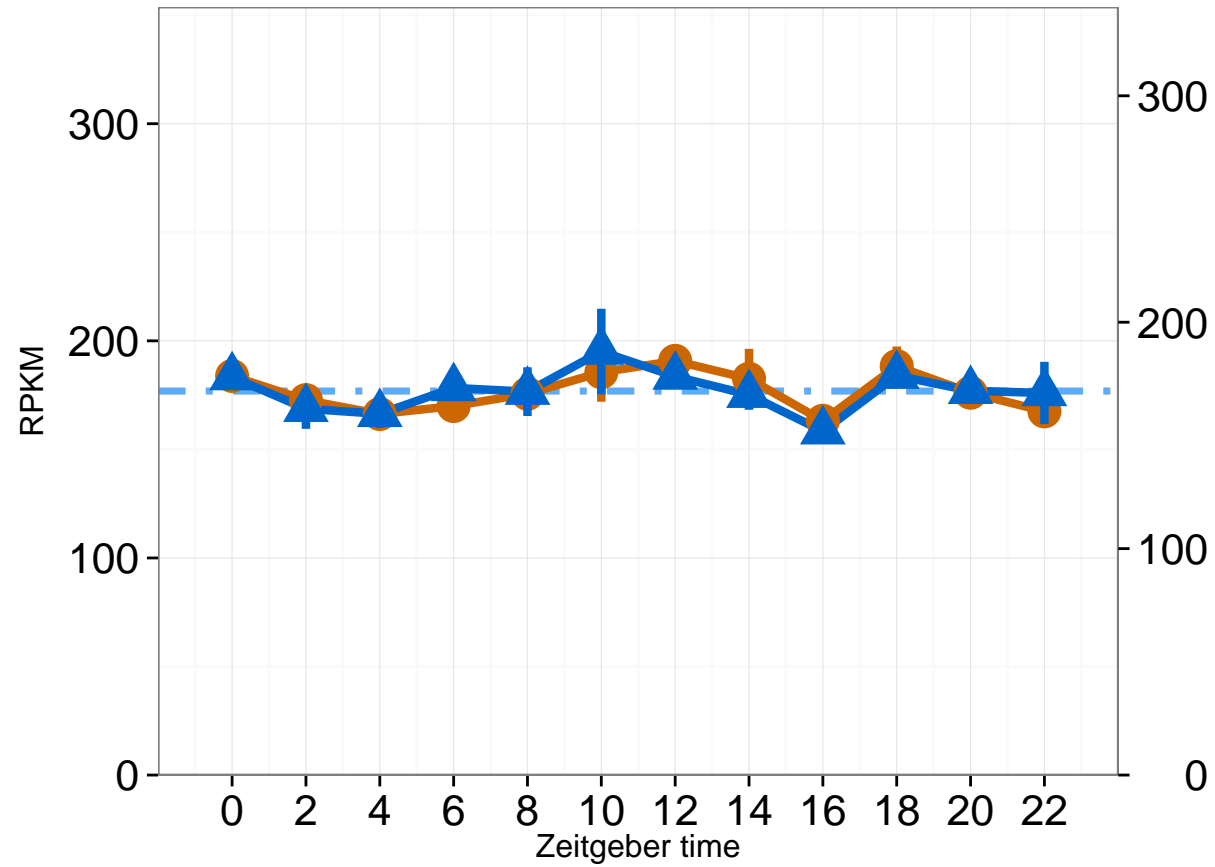

# Hadha

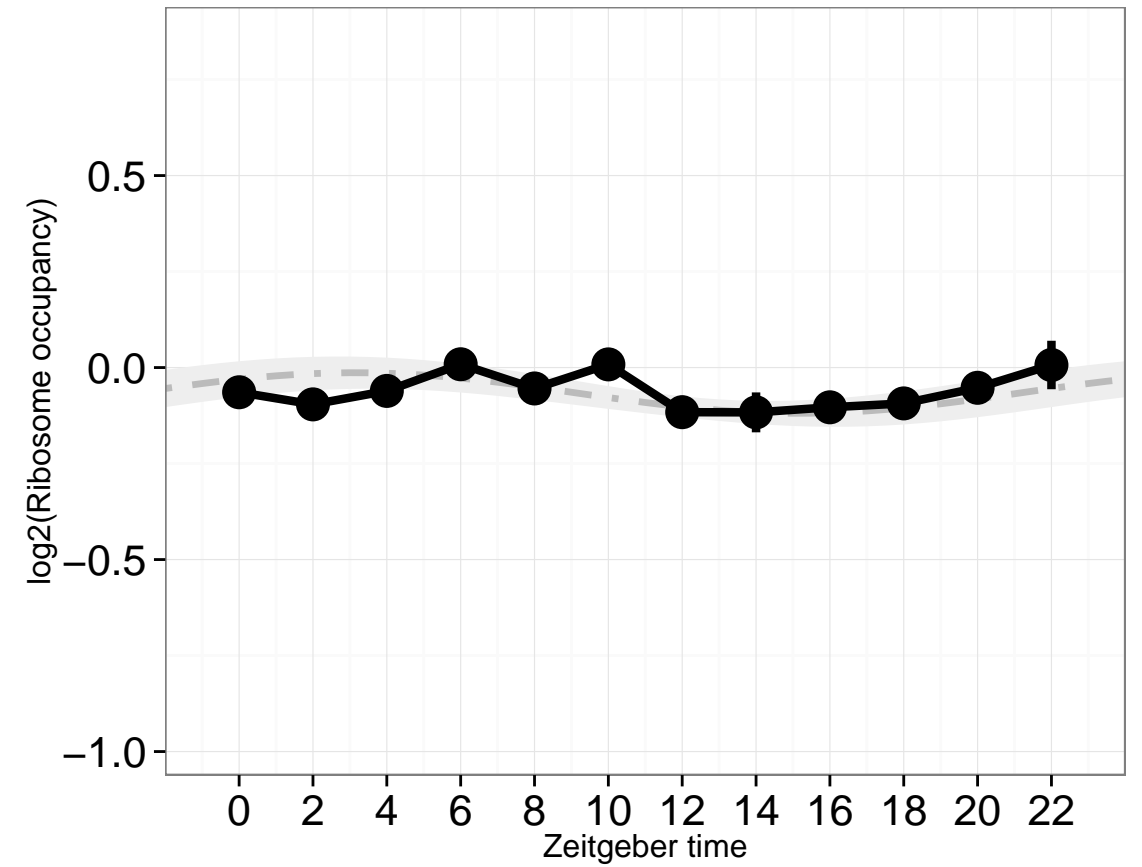

Supplement: SuppDataset_1.zip [file Hadha_set_A.pdf › Supplemental Dataset 1/A-mRNA_nonrhyth_translation_nonrhyth/Hadha_set_A.pdf]

## Hadhb

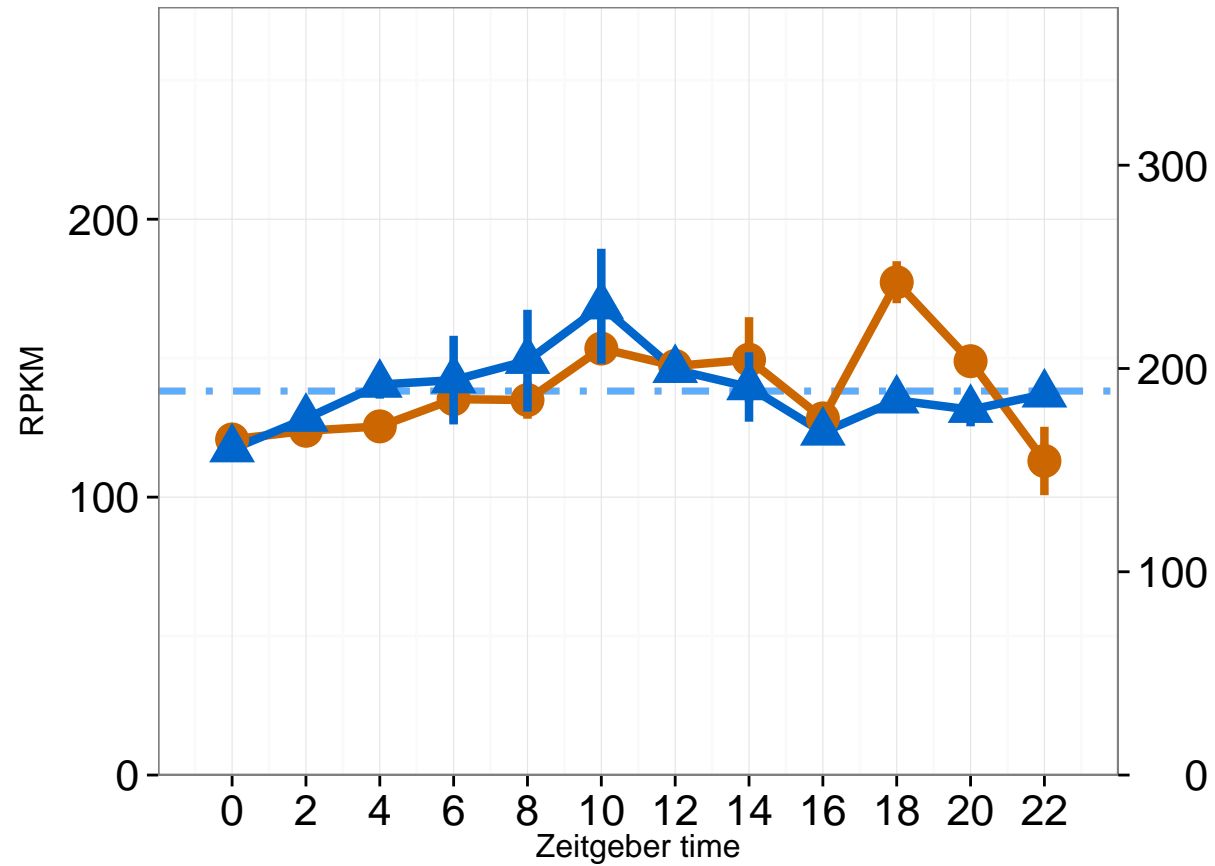

## Hadhb

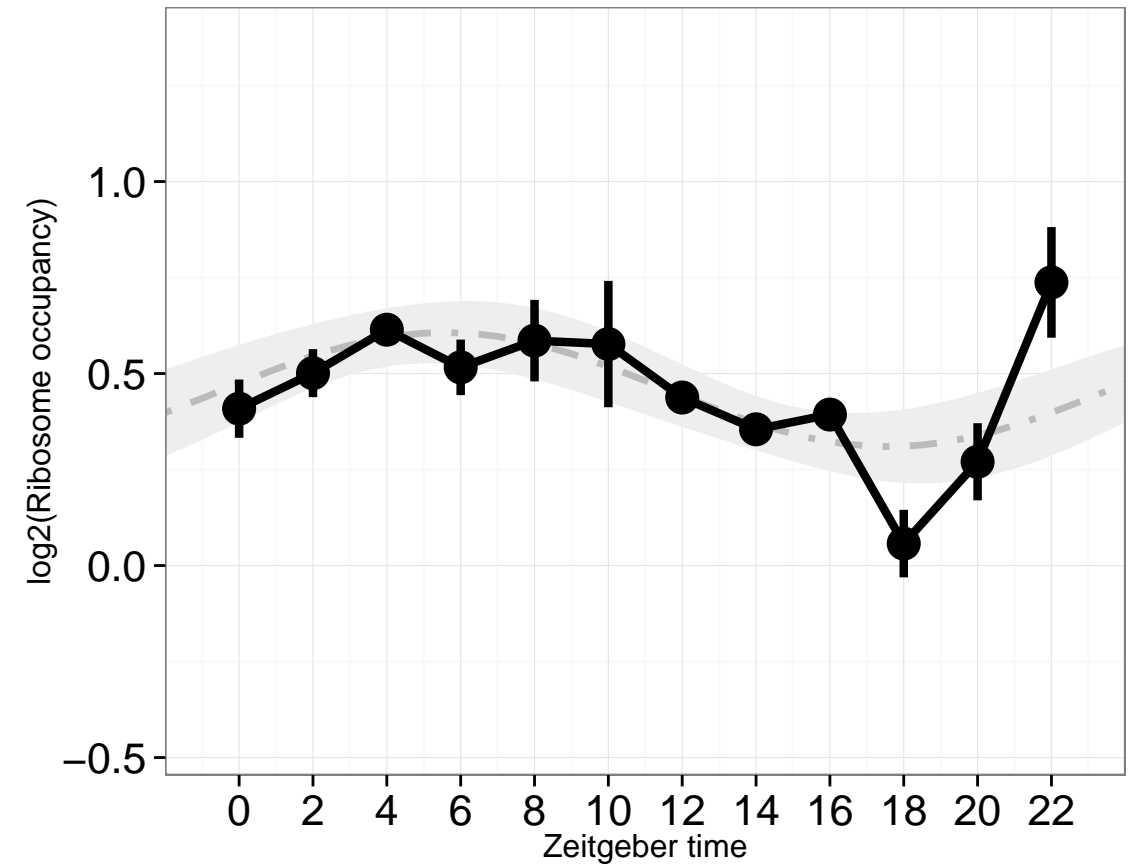

Supplement: SuppDataset_1.zip [file Hadhb_set_A.pdf › Supplemental Dataset 1/A-mRNA_nonrhyth_translation_nonrhyth/Hadhb_set_A.pdf]

## Hagh

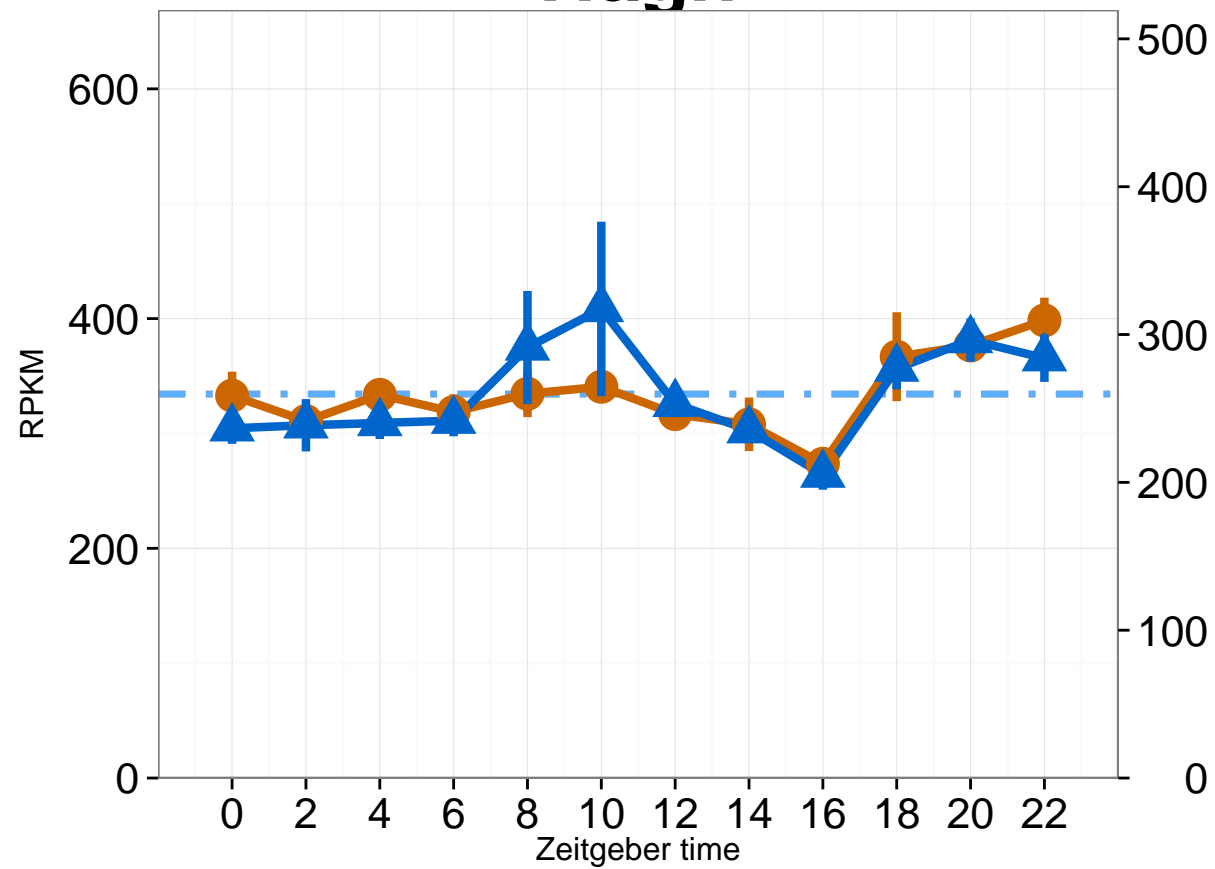

## Hagh

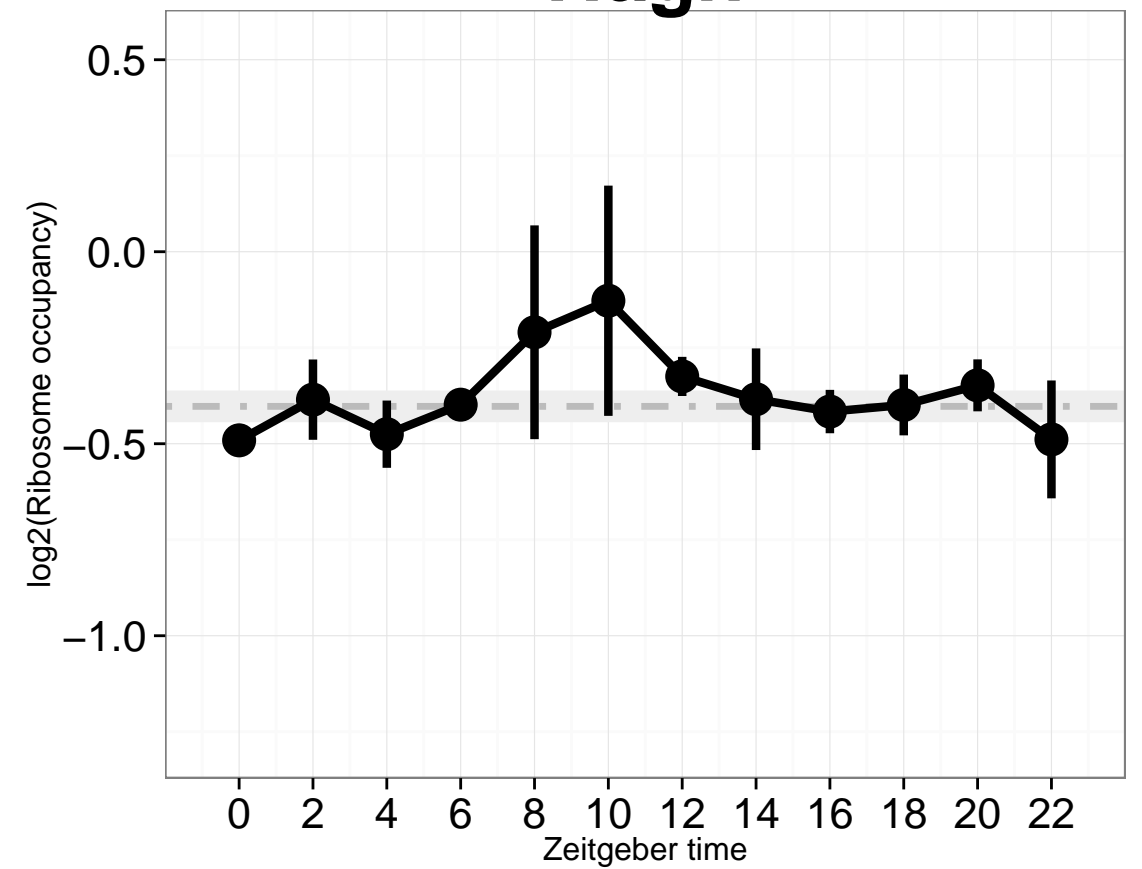

Supplement: SuppDataset_1.zip [file Hagh_set_A.pdf › Supplemental Dataset 1/A-mRNA_nonrhyth_translation_nonrhyth/Hagh_set_A.pdf]

## Hamp2

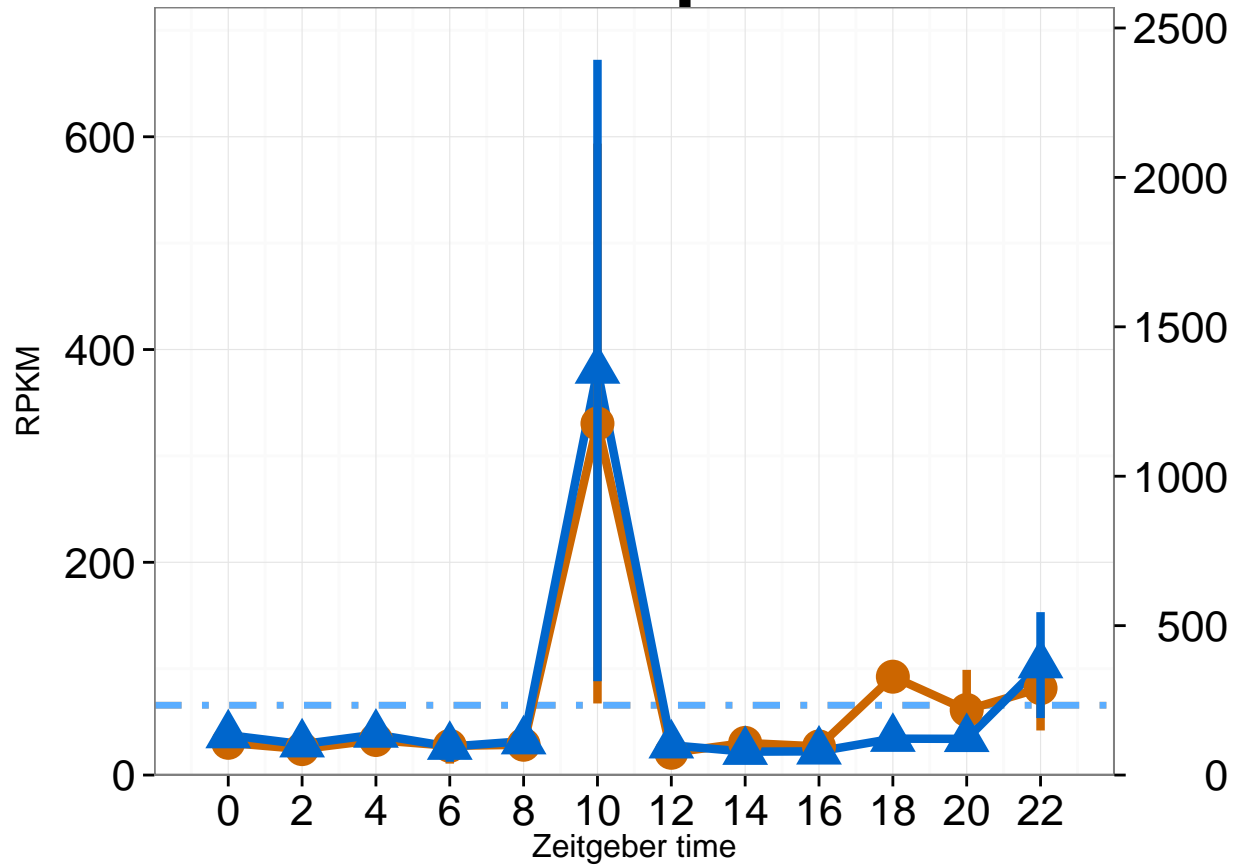

## Hamp2

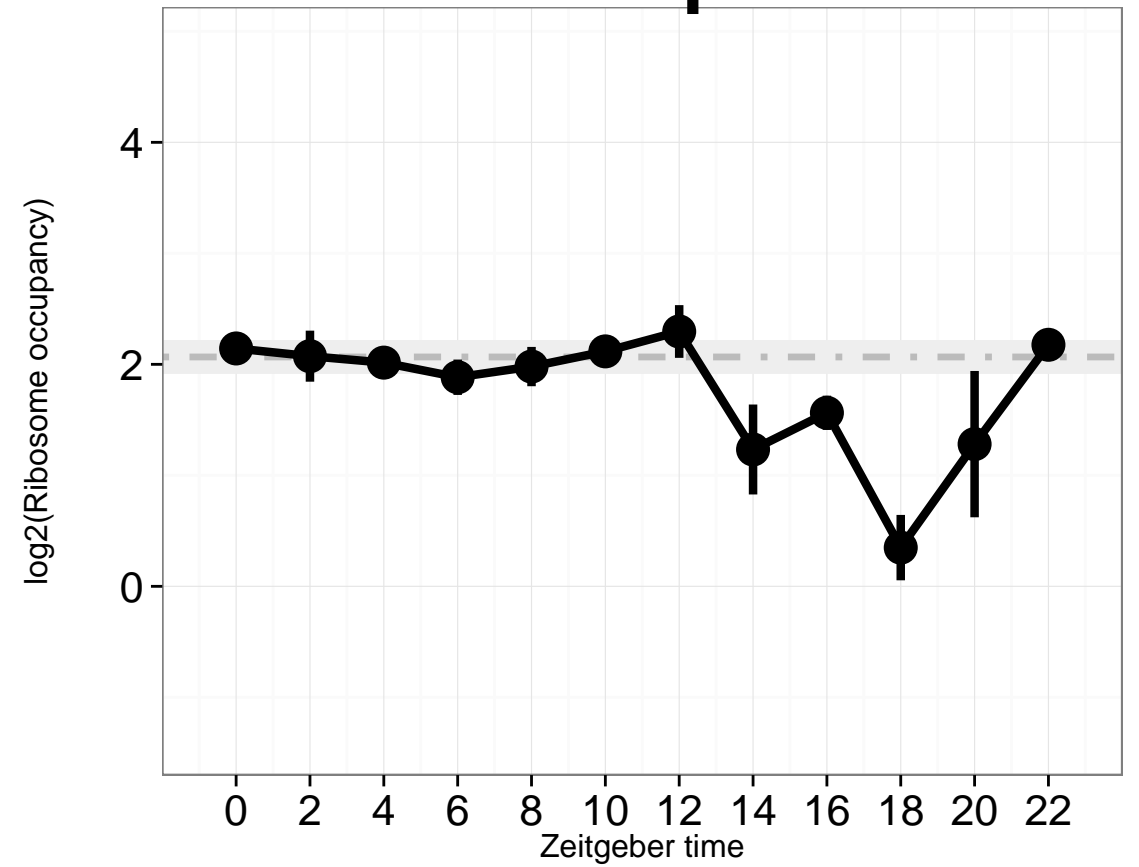

Supplement: SuppDataset_1.zip [file Hamp2_set_A.pdf › Supplemental Dataset 1/A-mRNA_nonrhyth_translation_nonrhyth/Hamp2_set_A.pdf]

# Hand2

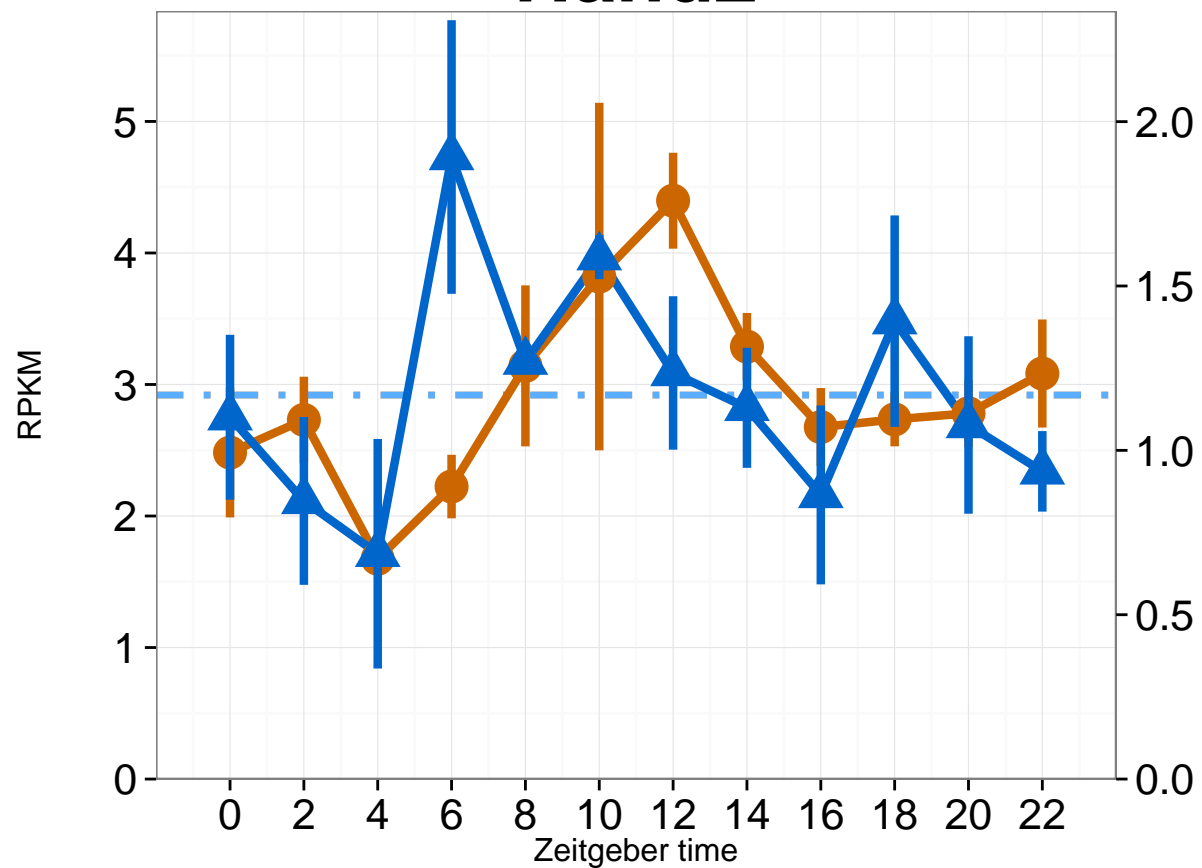

# Hand2

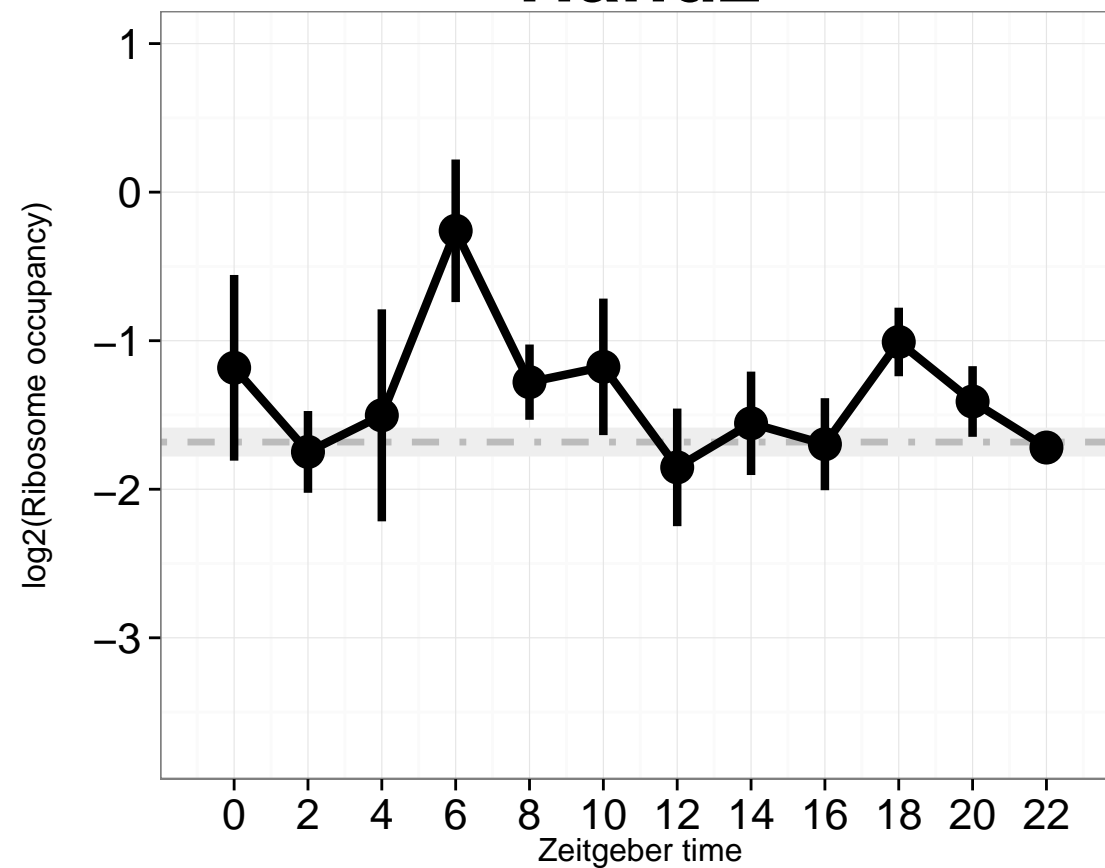

Supplement: SuppDataset_1.zip [file Hand2_set_A.pdf › Supplemental Dataset 1/A-mRNA_nonrhyth_translation_nonrhyth/Hand2_set_A.pdf]

## Hao1

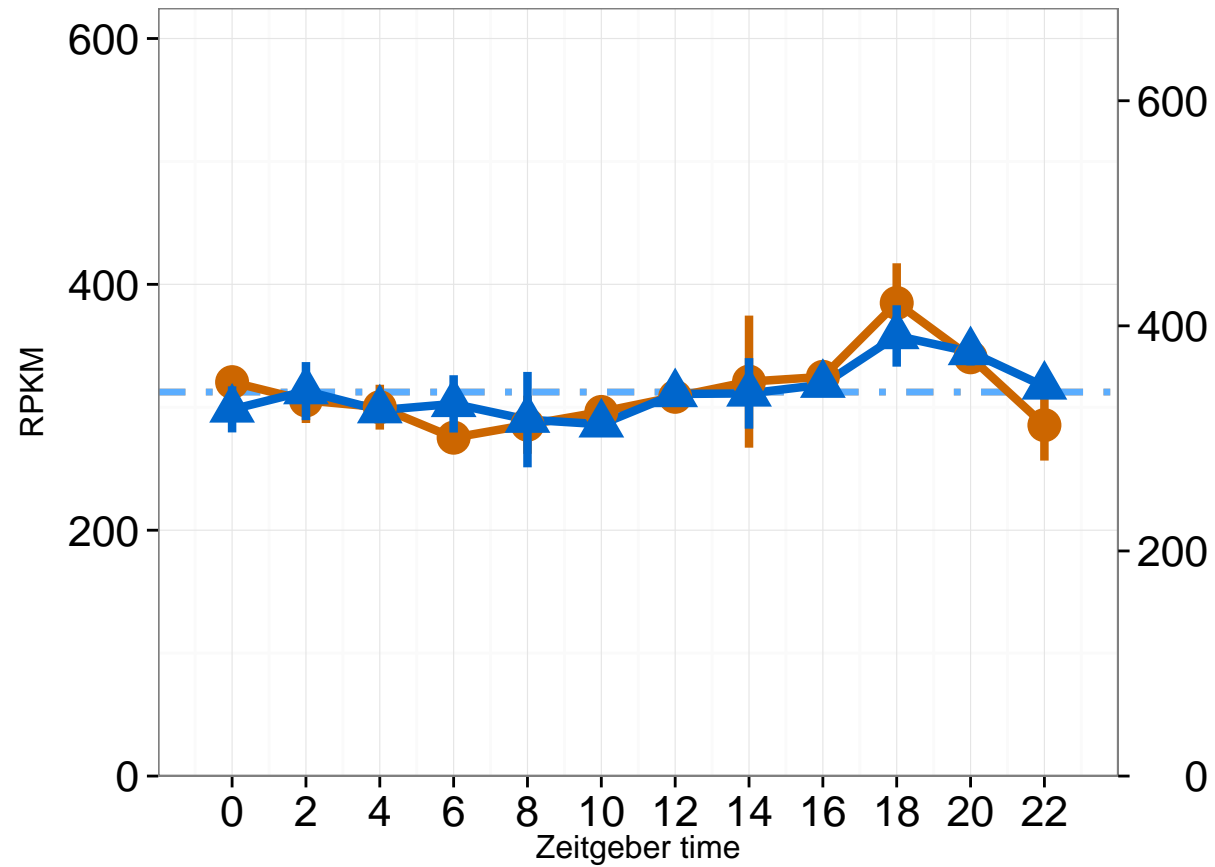

## Hao1

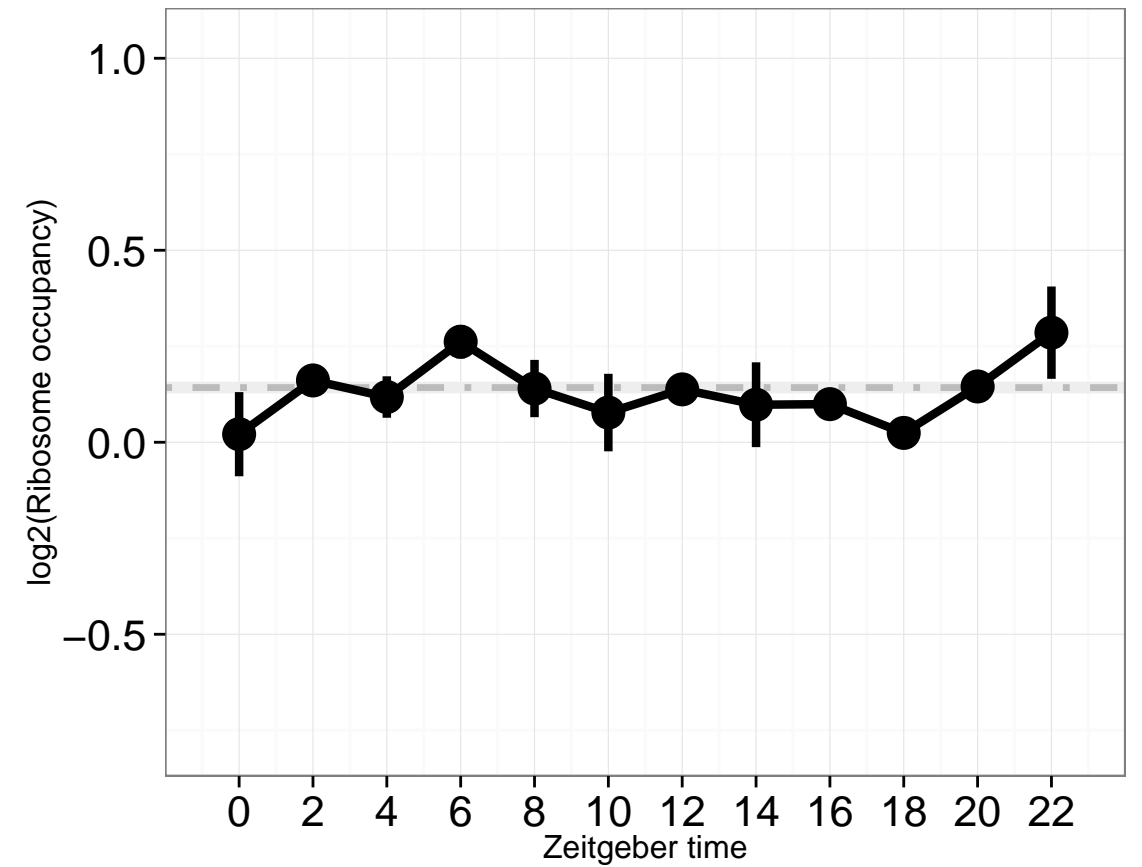

Supplement: SuppDataset_1.zip [file Hao1_set_A.pdf › Supplemental Dataset 1/A-mRNA_nonrhyth_translation_nonrhyth/Hao1_set_A.pdf]

# Hap1

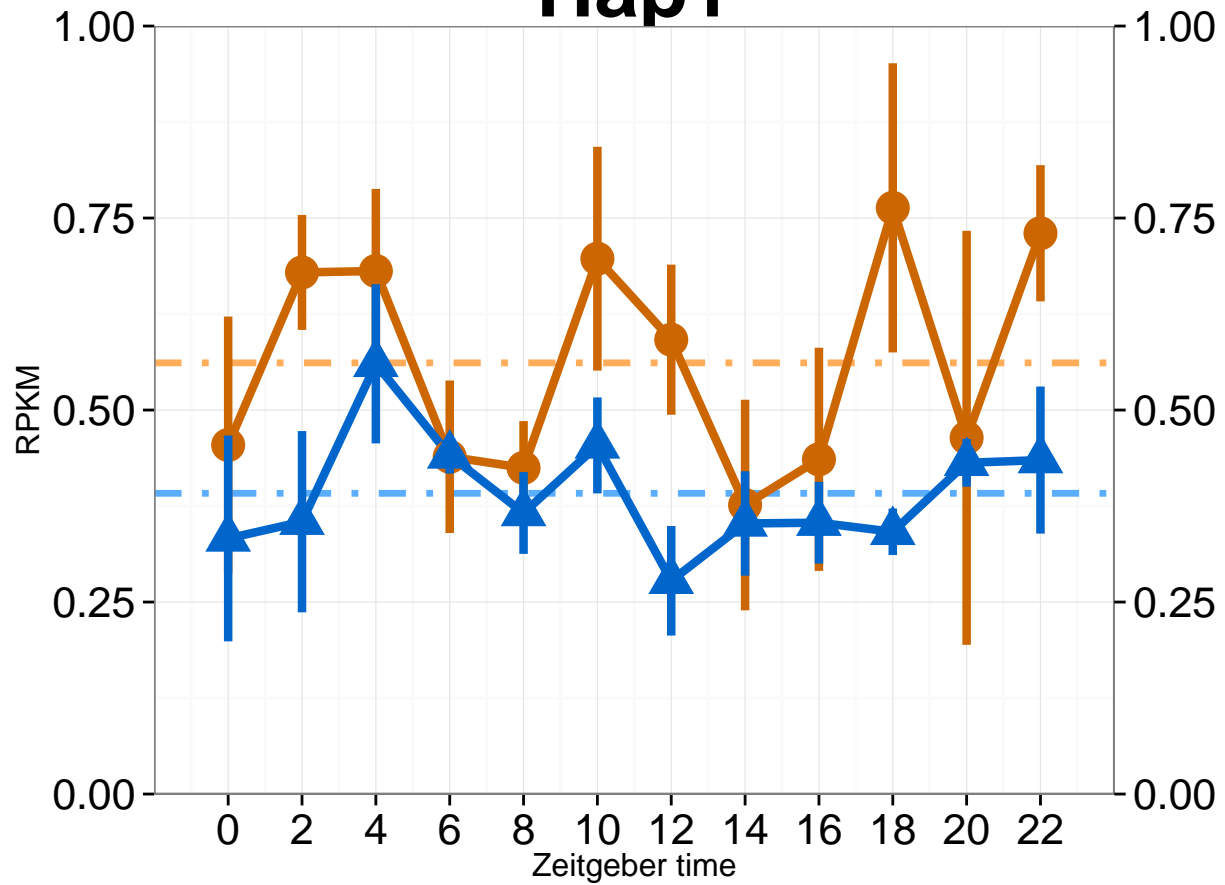

# Hap1

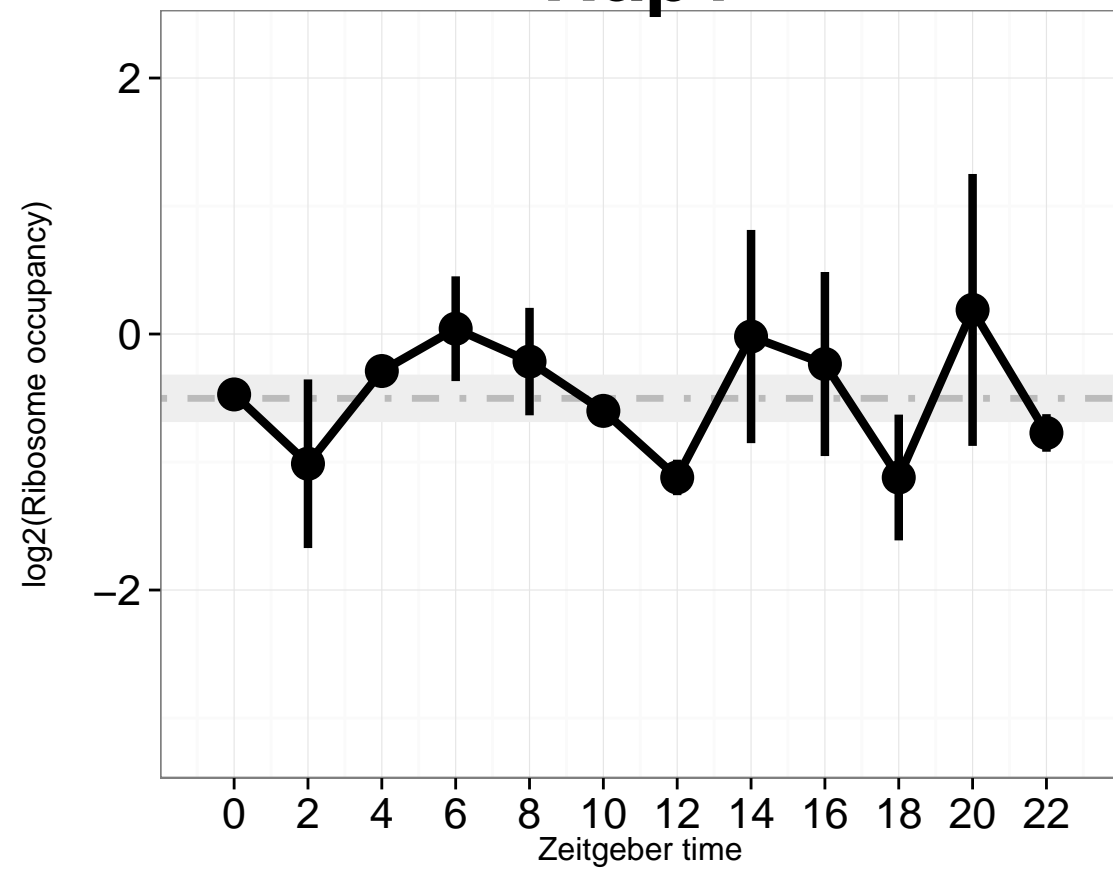

Supplement: SuppDataset_1.zip [file Hap1_set_A.pdf › Supplemental Dataset 1/A-mRNA_nonrhyth_translation_nonrhyth/Hap1_set_A.pdf]

## Harbi1

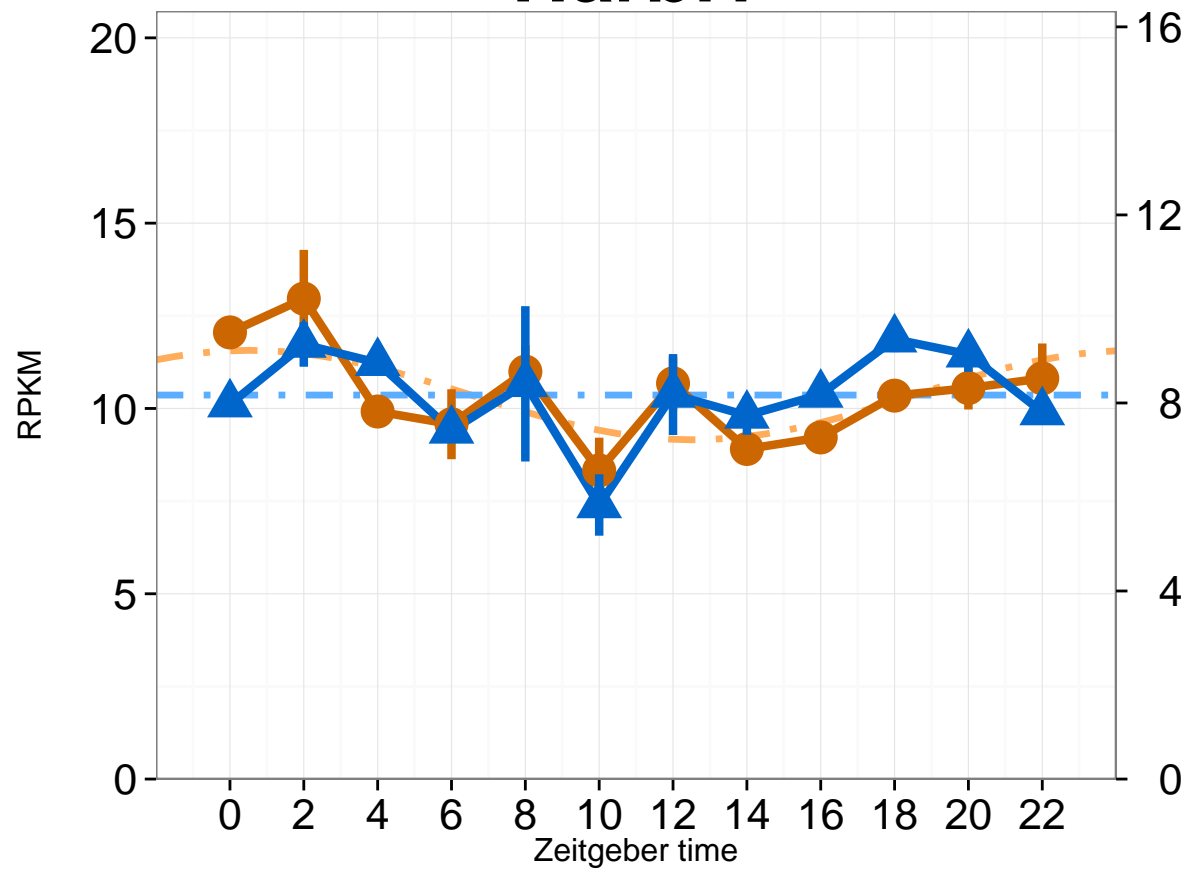

## Harbi1

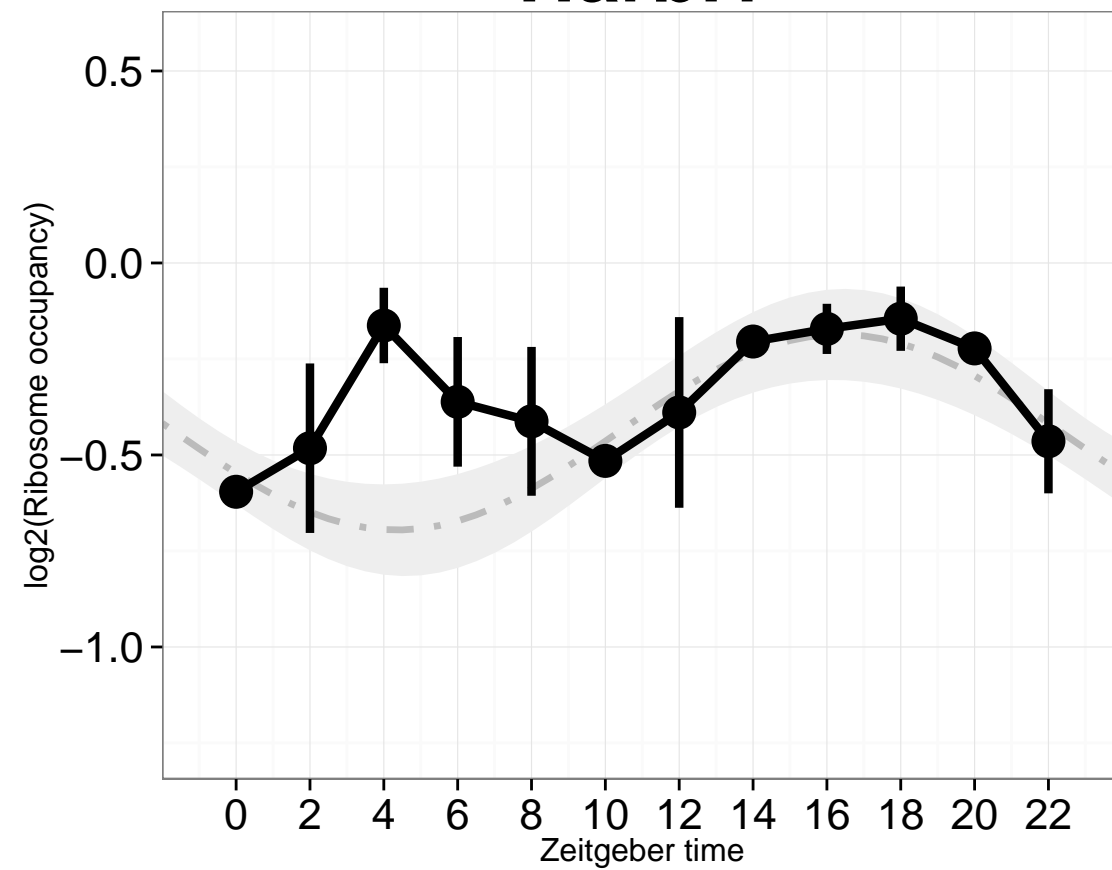

Supplement: SuppDataset_1.zip [file Harbi1_set_A.pdf › Supplemental Dataset 1/A-mRNA_nonrhyth_translation_nonrhyth/Harbi1_set_A.pdf]

## Hars2

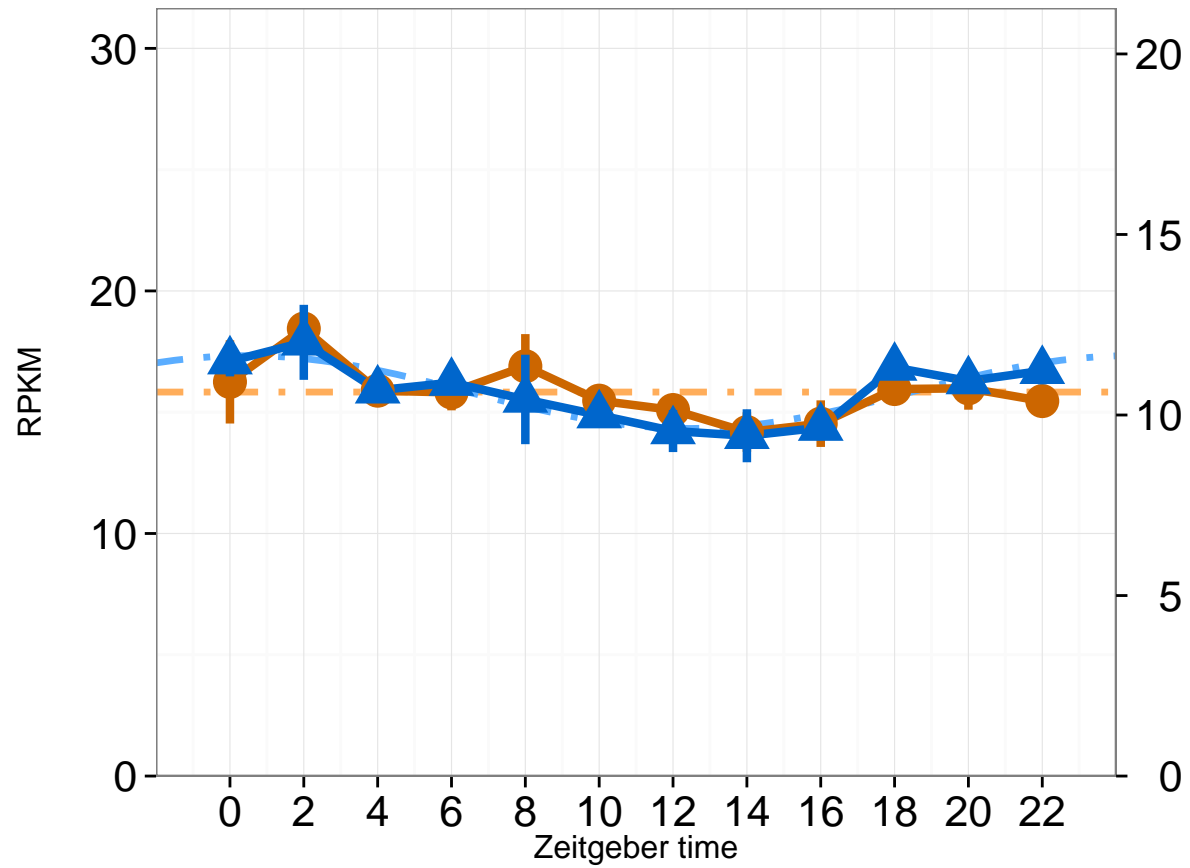

## Hars2

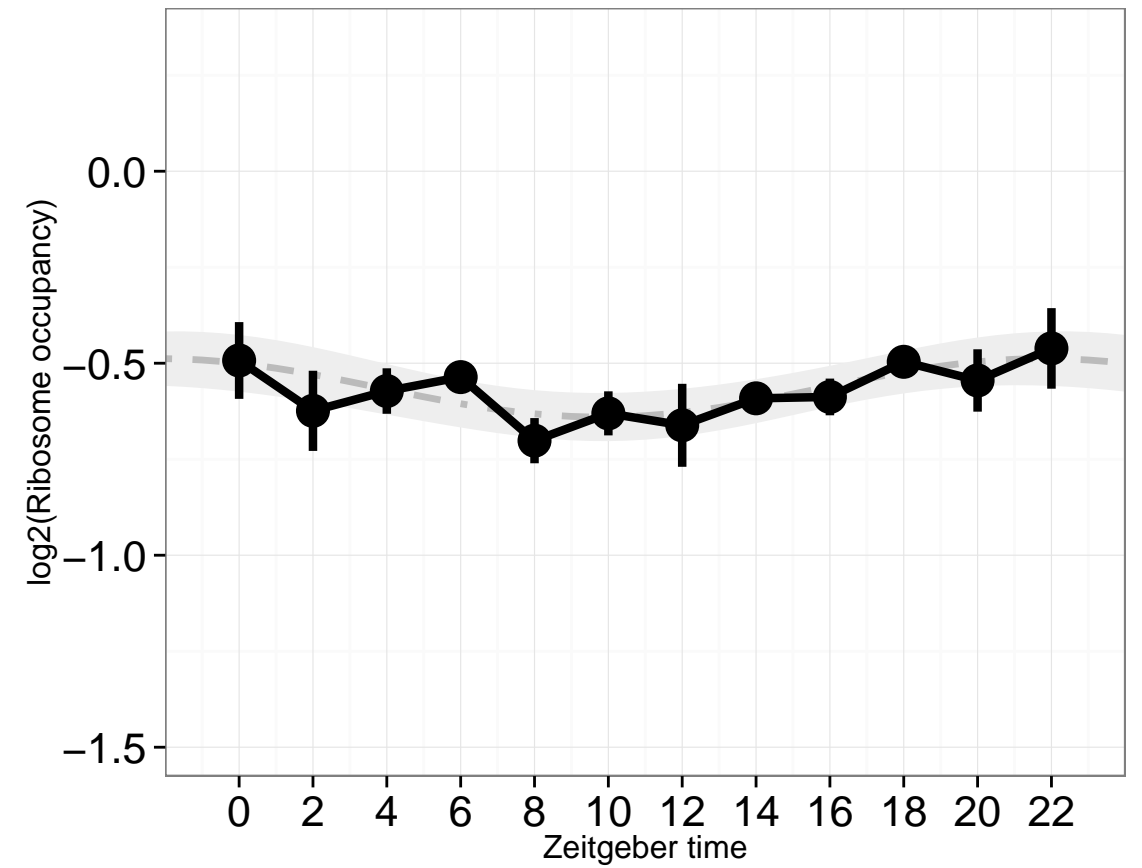

Supplement: SuppDataset_1.zip [file Hars2_set_A.pdf › Supplemental Dataset 1/A-mRNA_nonrhyth_translation_nonrhyth/Hars2_set_A.pdf]

# Hars

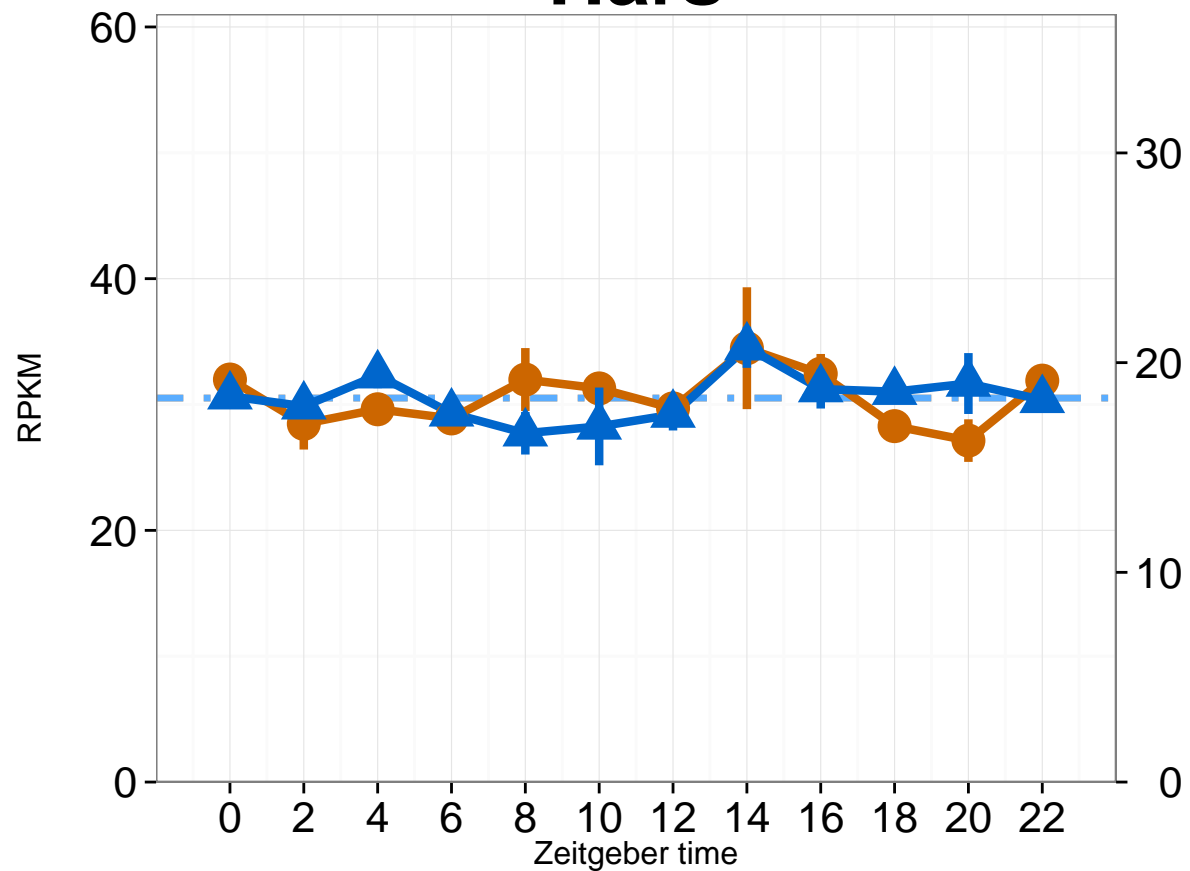

# Hars

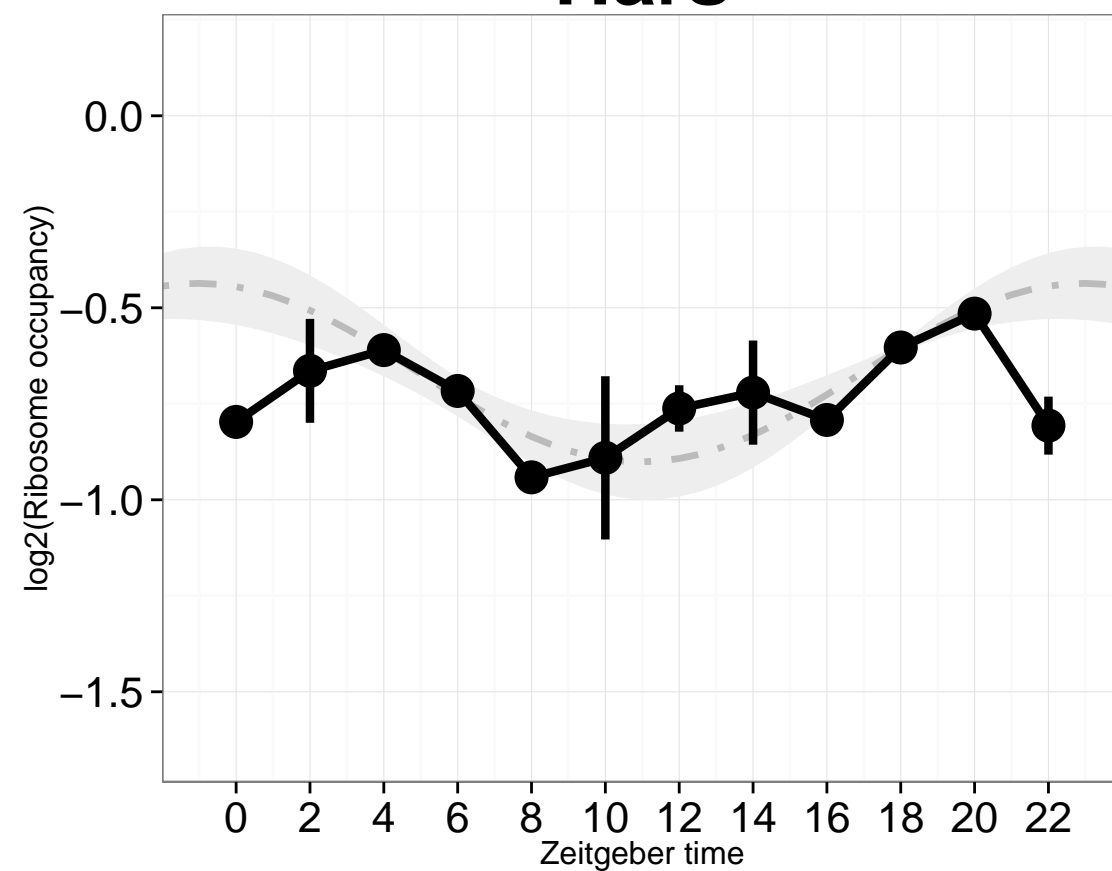

Supplement: SuppDataset_1.zip [file Hars_set_A.pdf › Supplemental Dataset 1/A-mRNA_nonrhyth_translation_nonrhyth/Hars_set_A.pdf]

# Hat1

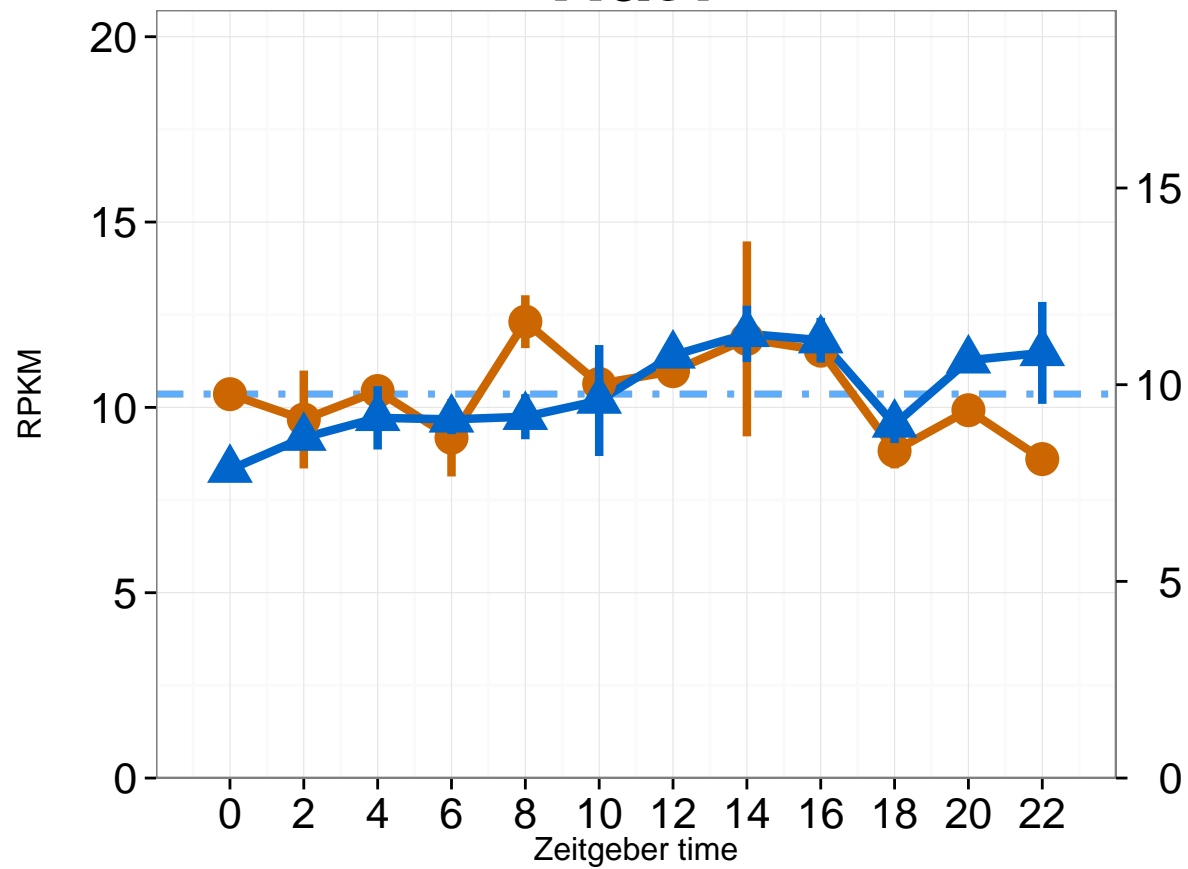

# Hat1

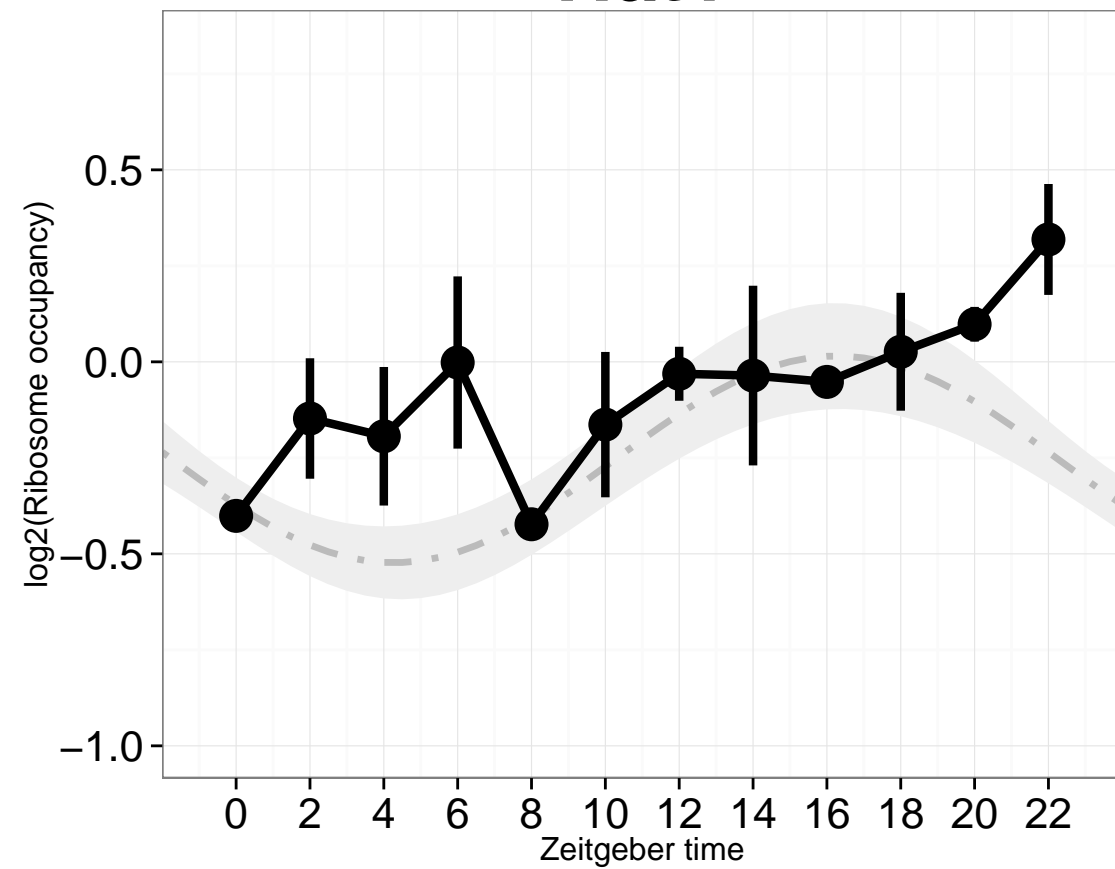

Supplement: SuppDataset_1.zip [file Hat1_set_A.pdf › Supplemental Dataset 1/A-mRNA_nonrhyth_translation_nonrhyth/Hat1_set_A.pdf]

# Haus1

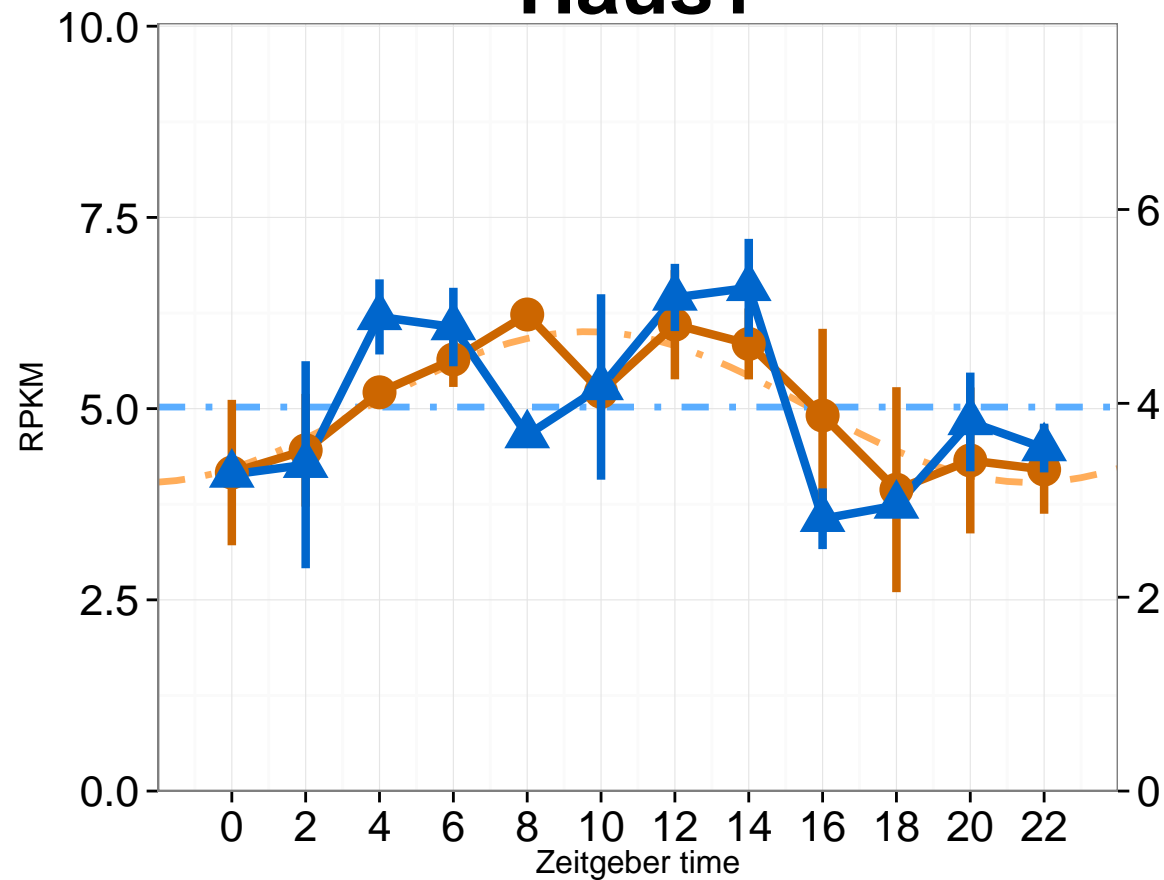

# Haus1

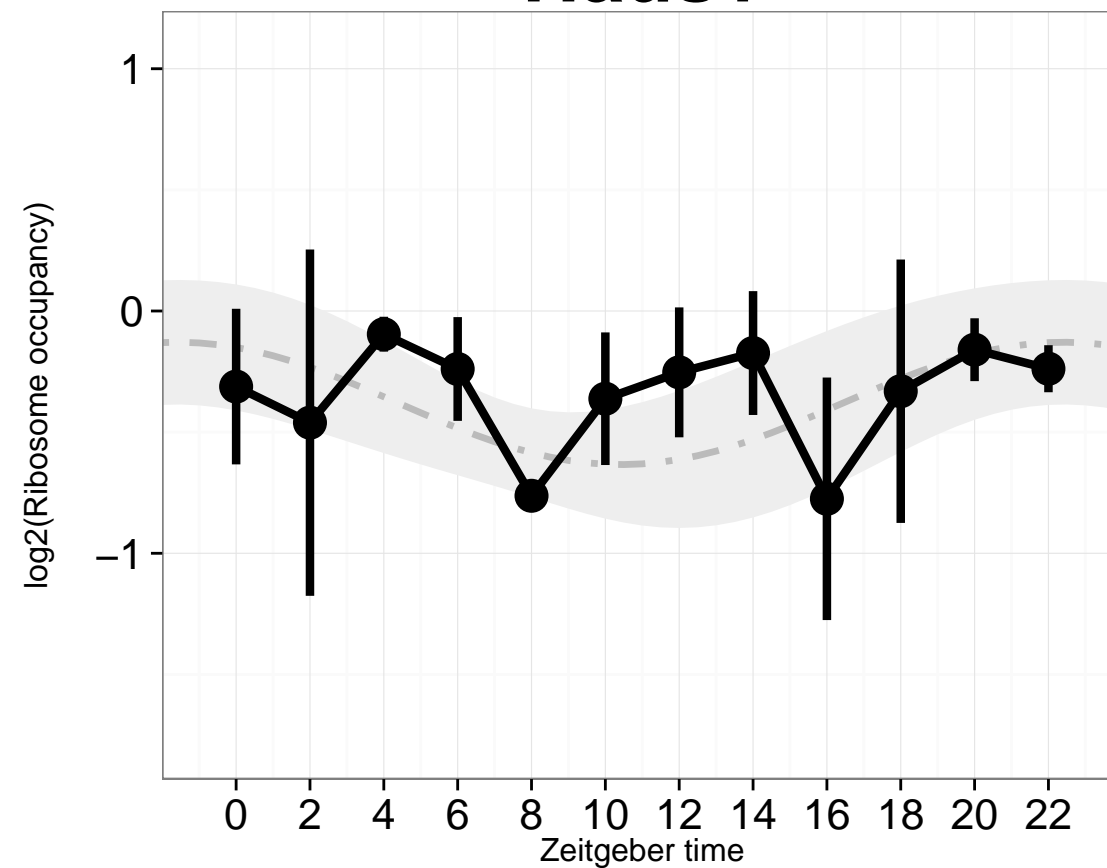

Supplement: SuppDataset_1.zip [file Haus1_set_A.pdf › Supplemental Dataset 1/A-mRNA_nonrhyth_translation_nonrhyth/Haus1_set_A.pdf]

## Haus2

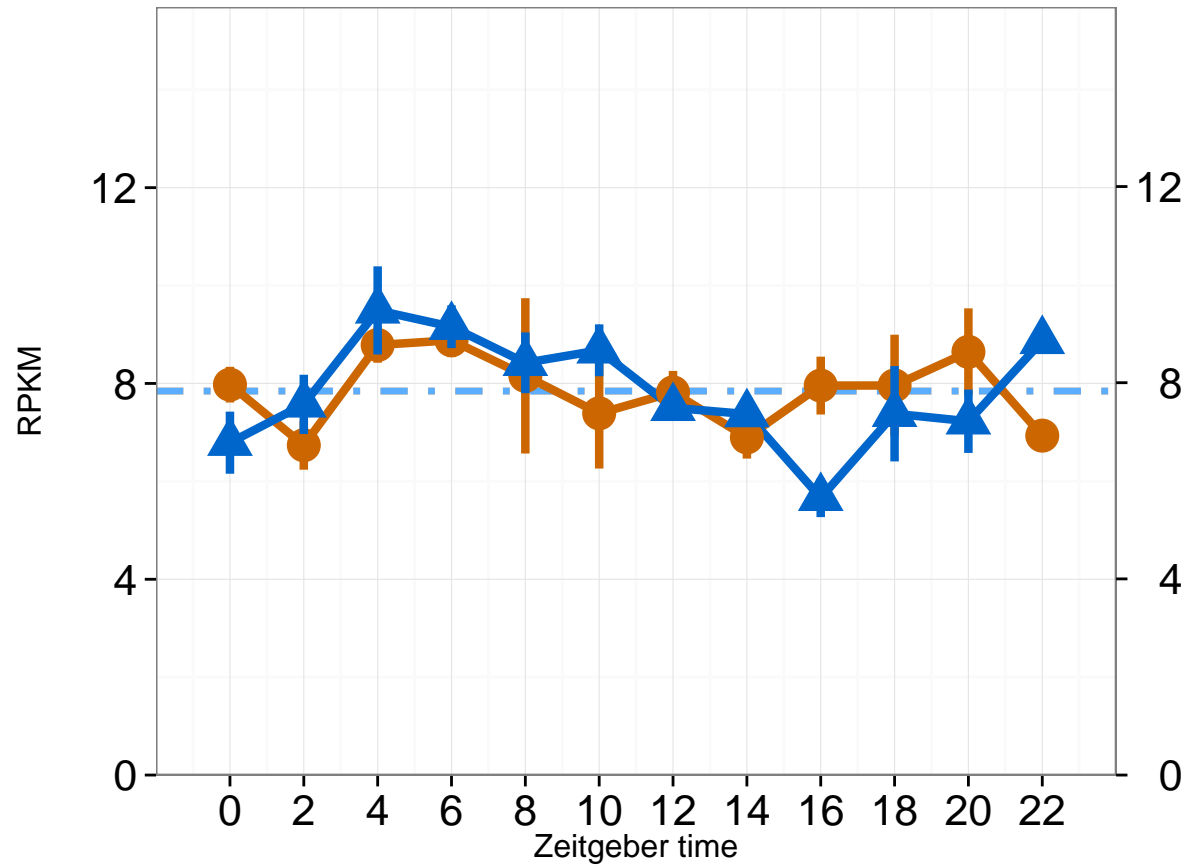

## Haus2

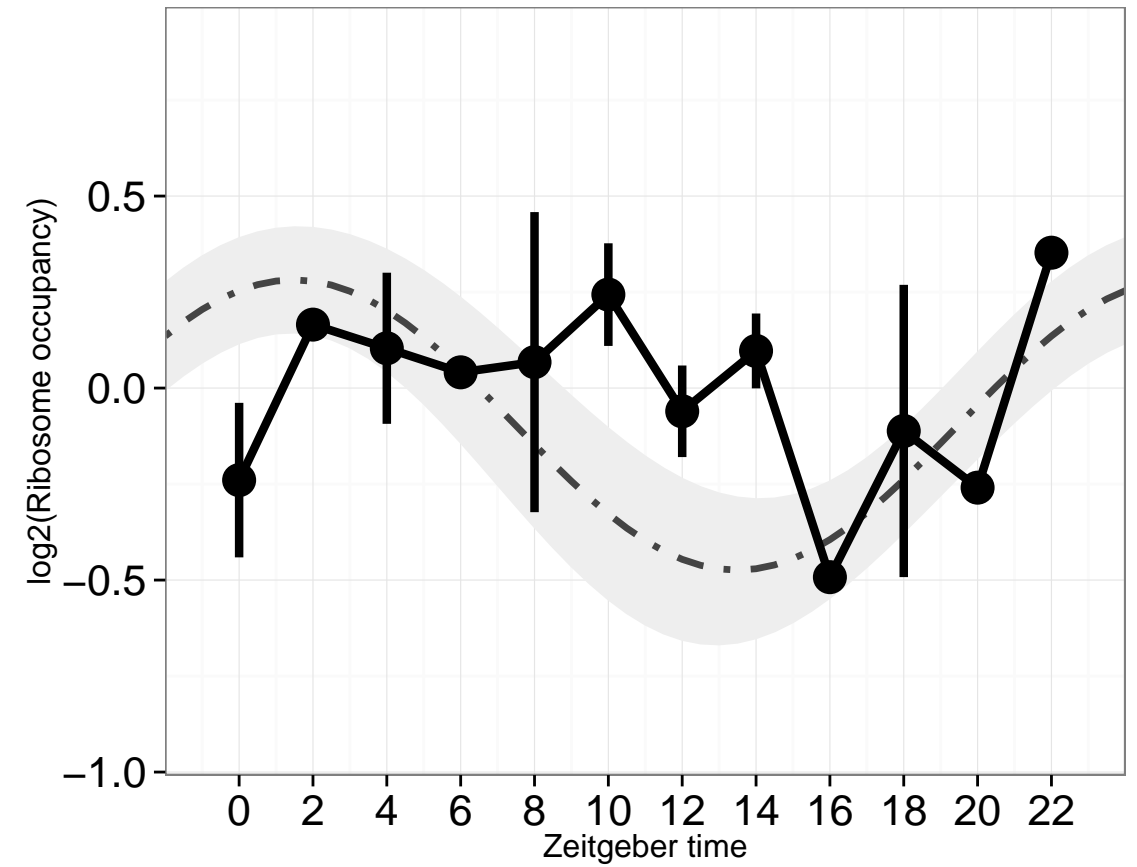

Supplement: SuppDataset_1.zip [file Haus2_set_A.pdf › Supplemental Dataset 1/A-mRNA_nonrhyth_translation_nonrhyth/Haus2_set_A.pdf]

# Haus4

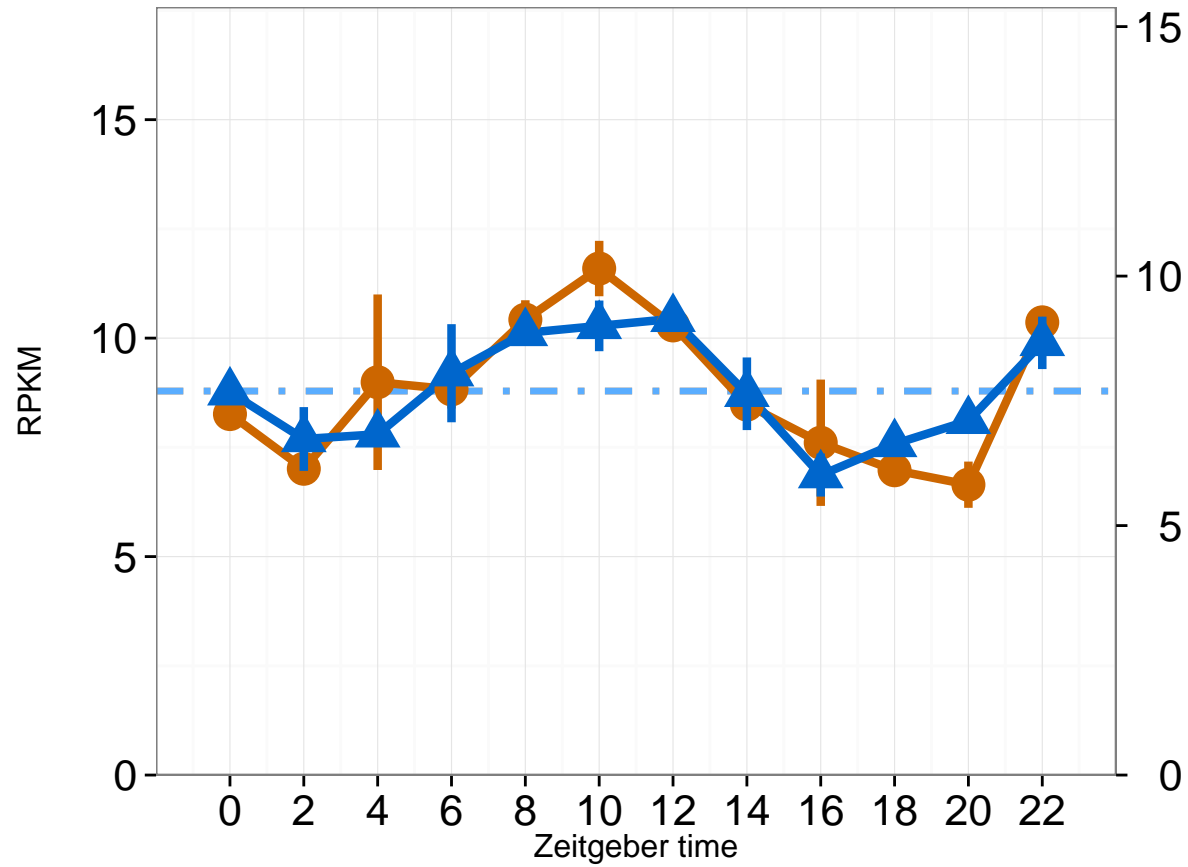

# Haus4

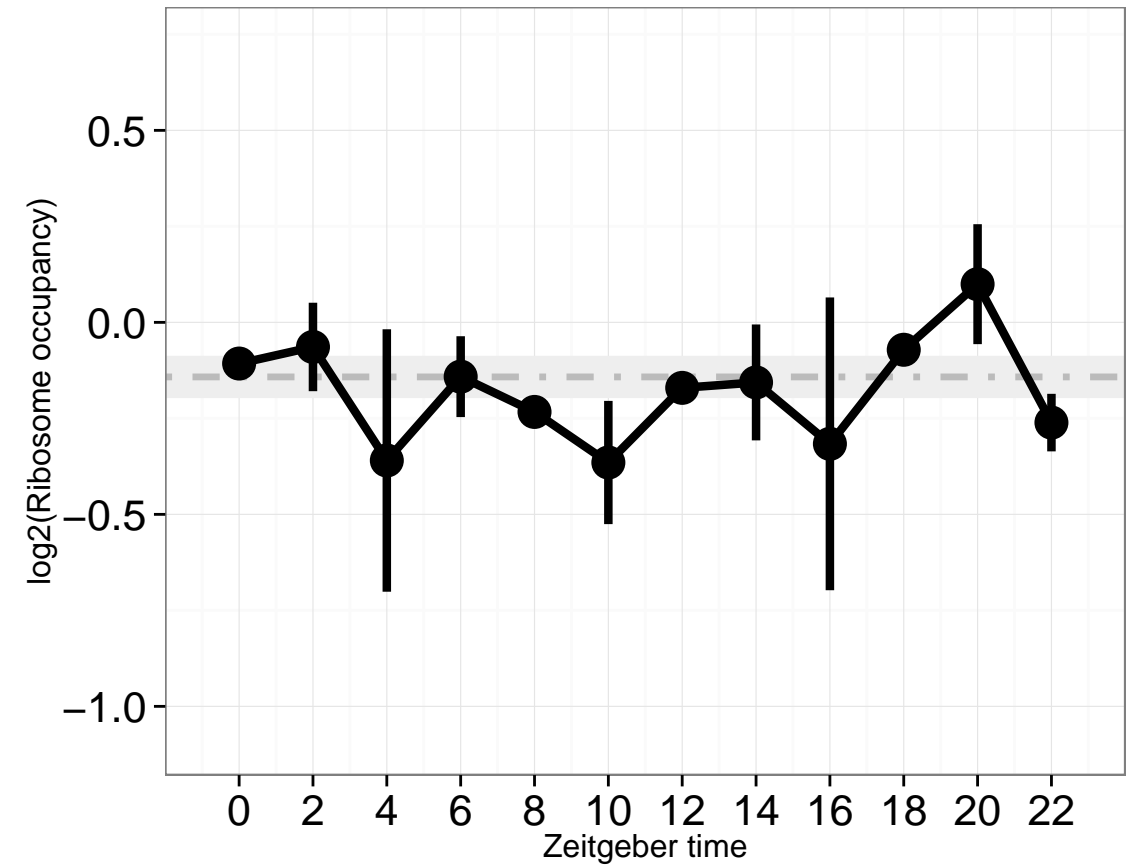

Supplement: SuppDataset_1.zip [file Haus4_set_A.pdf › Supplemental Dataset 1/A-mRNA_nonrhyth_translation_nonrhyth/Haus4_set_A.pdf]

# Haus6

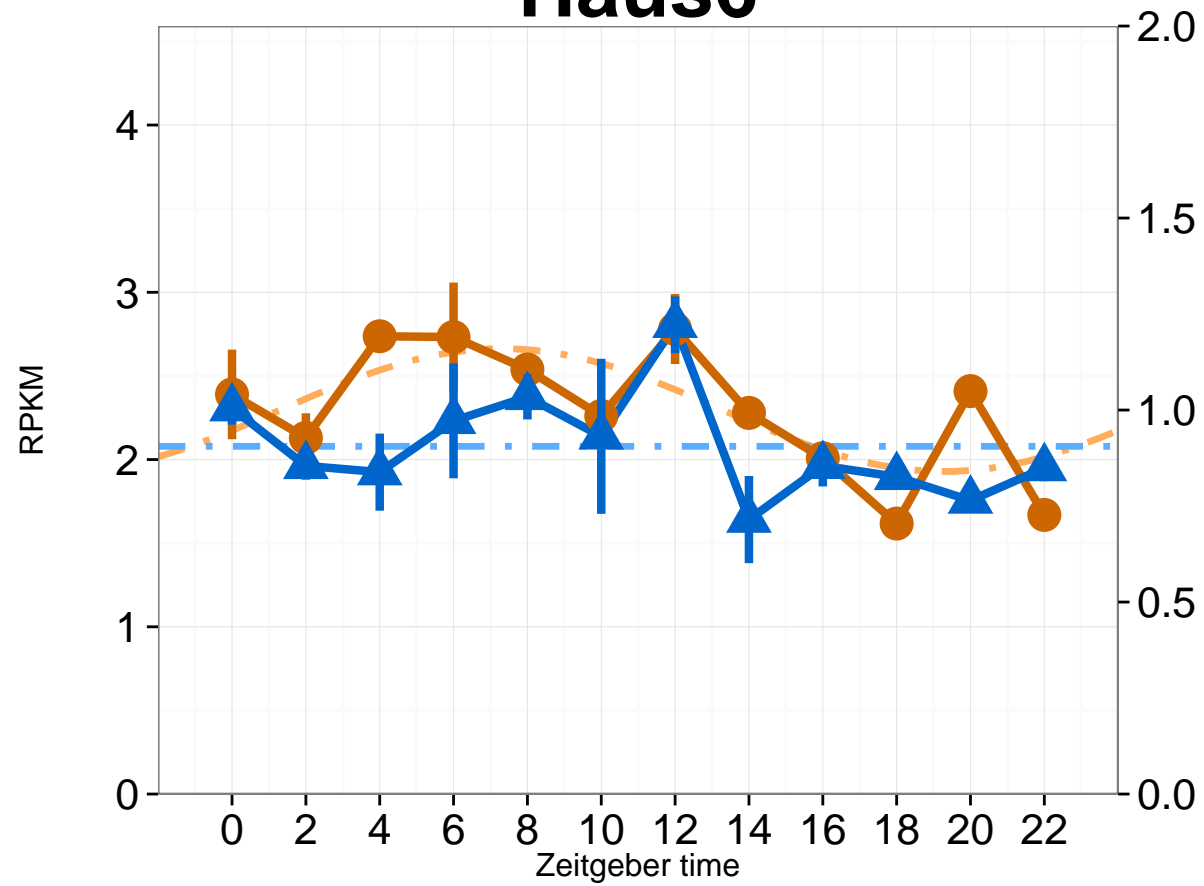

# Haus6

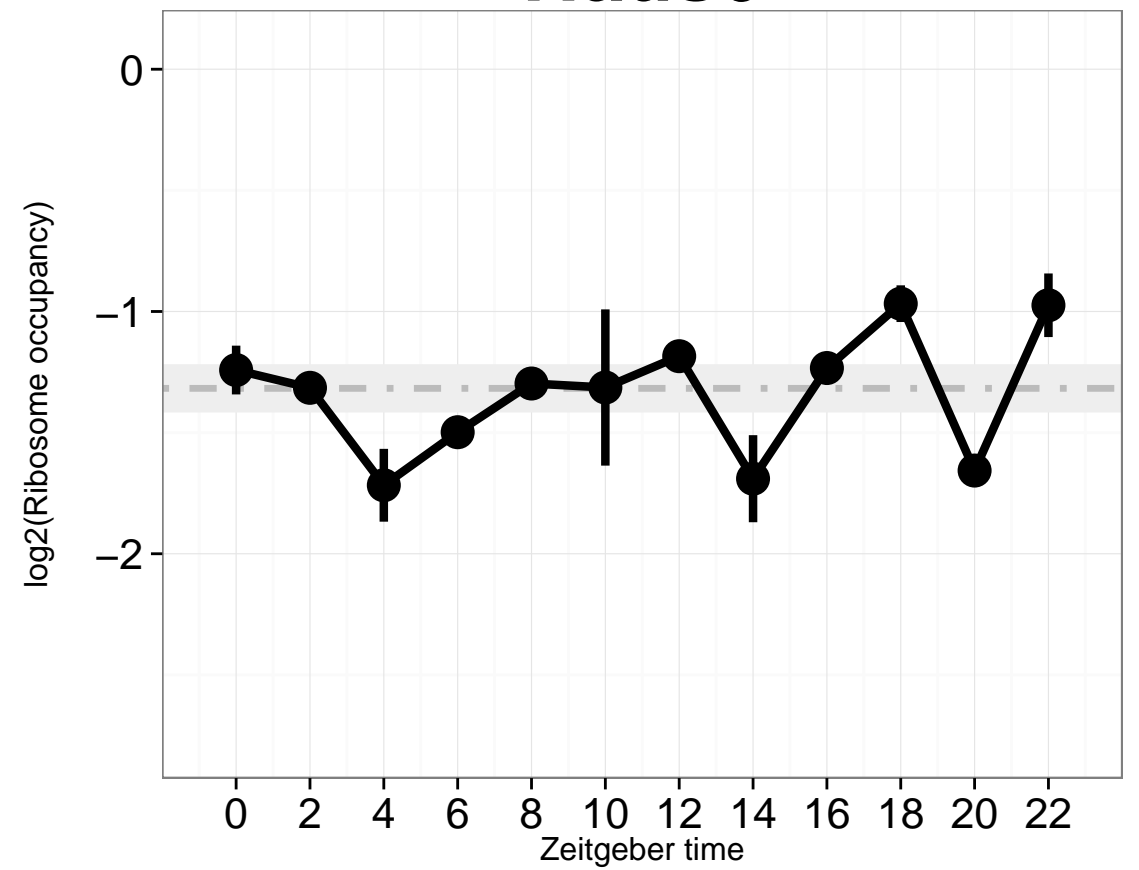

Supplement: SuppDataset_1.zip [file Haus6_set_A.pdf › Supplemental Dataset 1/A-mRNA_nonrhyth_translation_nonrhyth/Haus6_set_A.pdf]

# Haus8

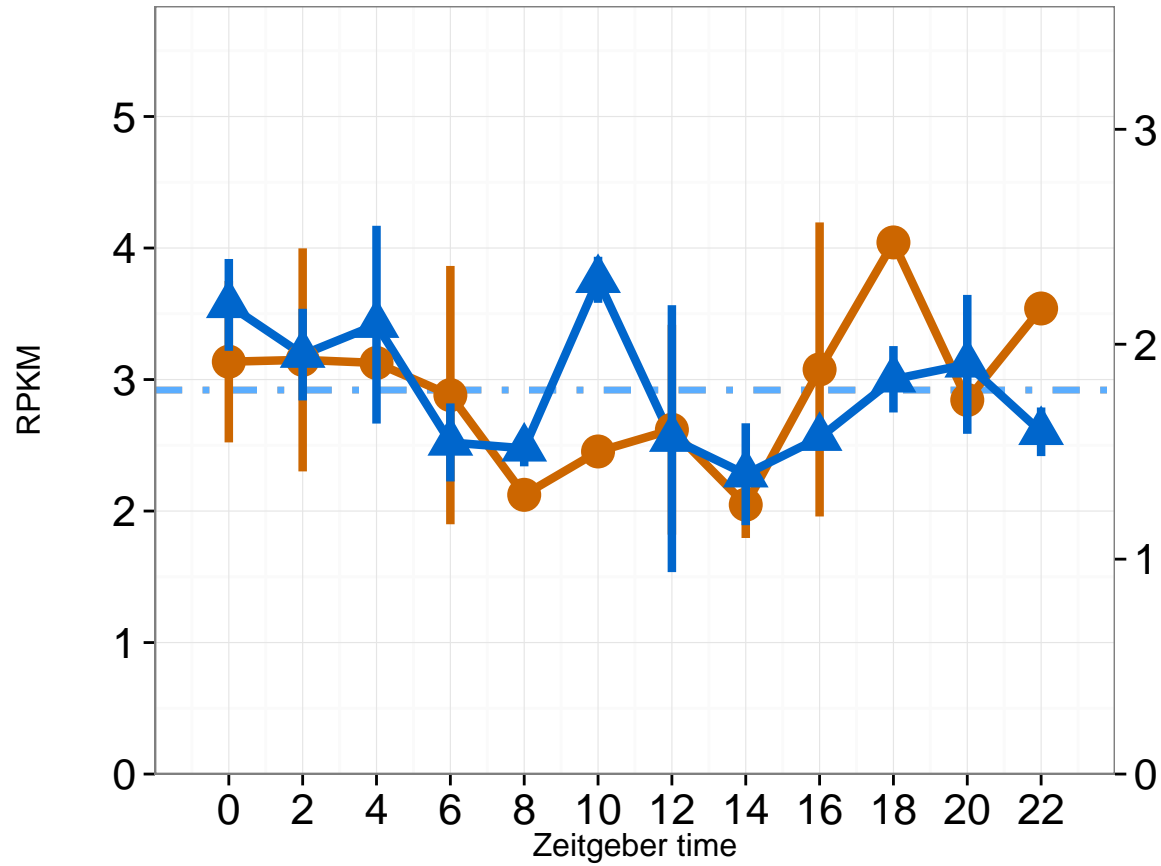

# Haus8

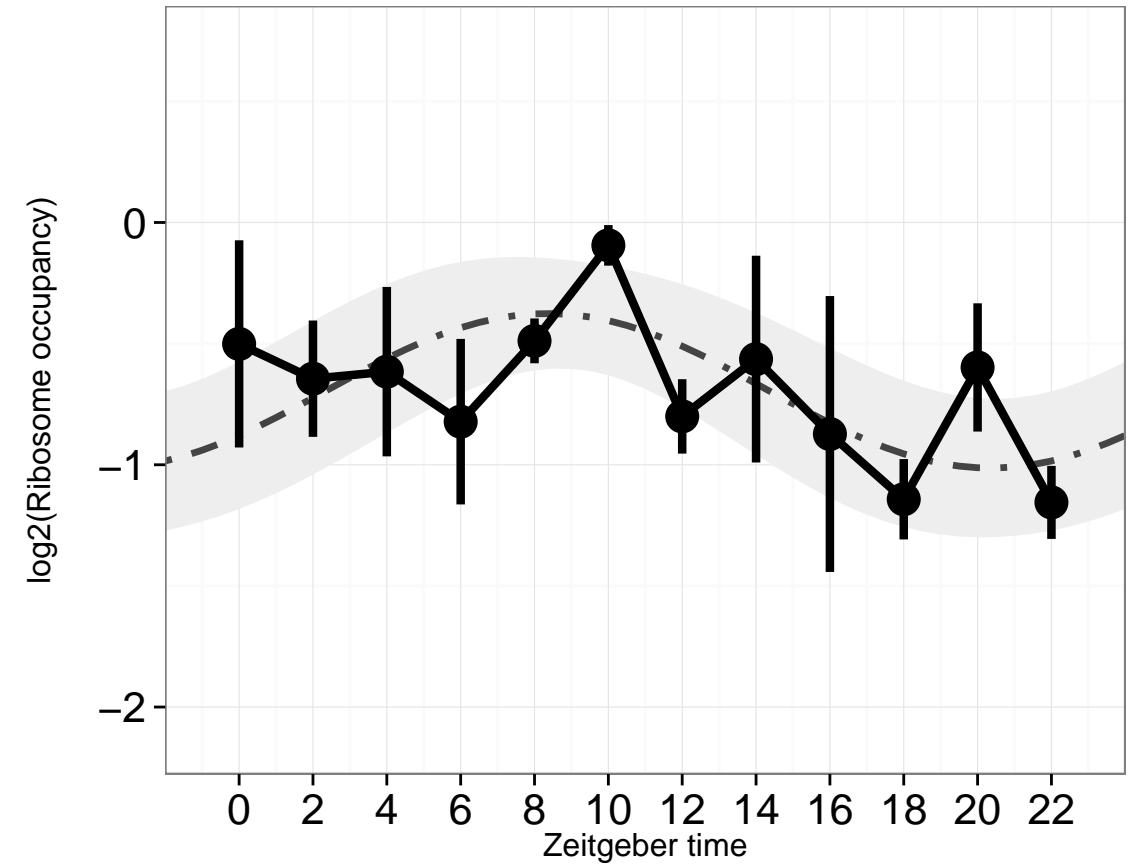

Supplement: SuppDataset_1.zip [file Haus8_set_A.pdf › Supplemental Dataset 1/A-mRNA_nonrhyth_translation_nonrhyth/Haus8_set_A.pdf]

## Hax1

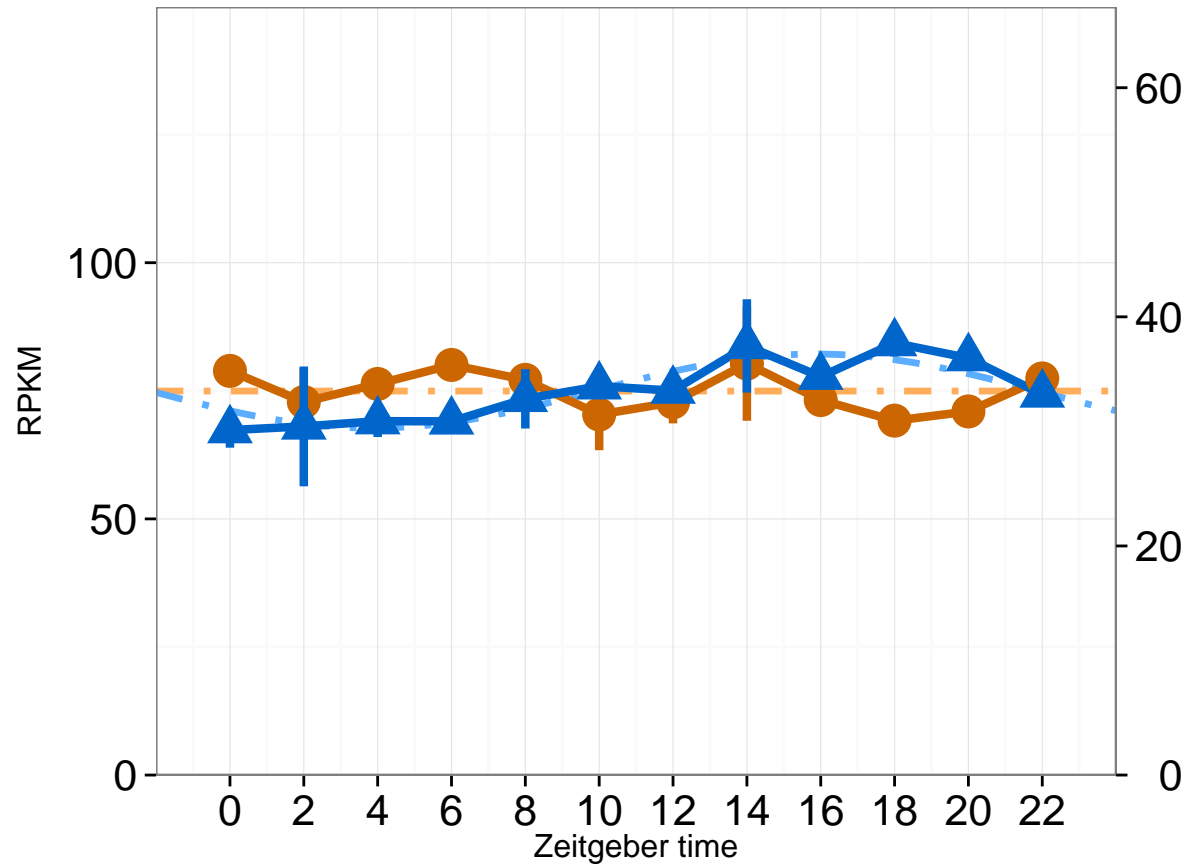

## Hax1

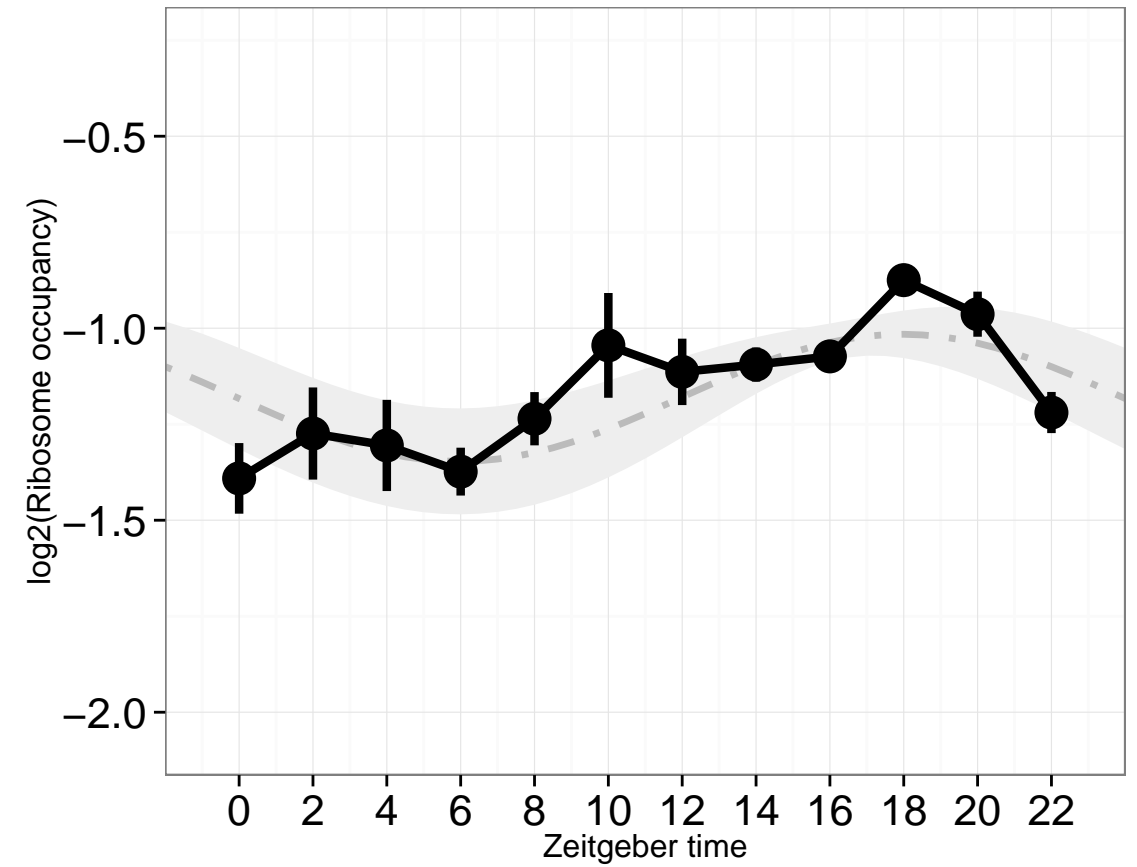

Supplement: SuppDataset_1.zip [file Hax1_set_A.pdf › Supplemental Dataset 1/A-mRNA_nonrhyth_translation_nonrhyth/Hax1_set_A.pdf]

# Hbb-bt

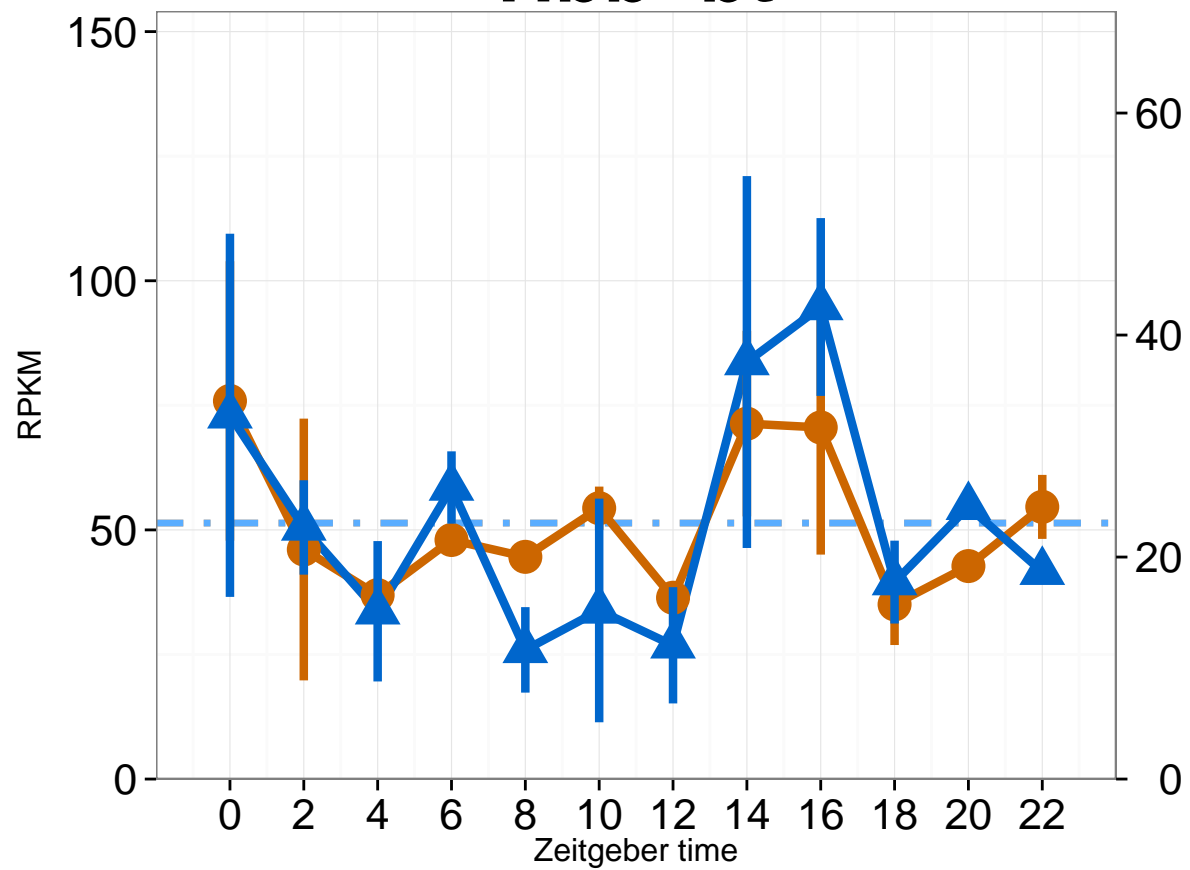

# Hbb-bt

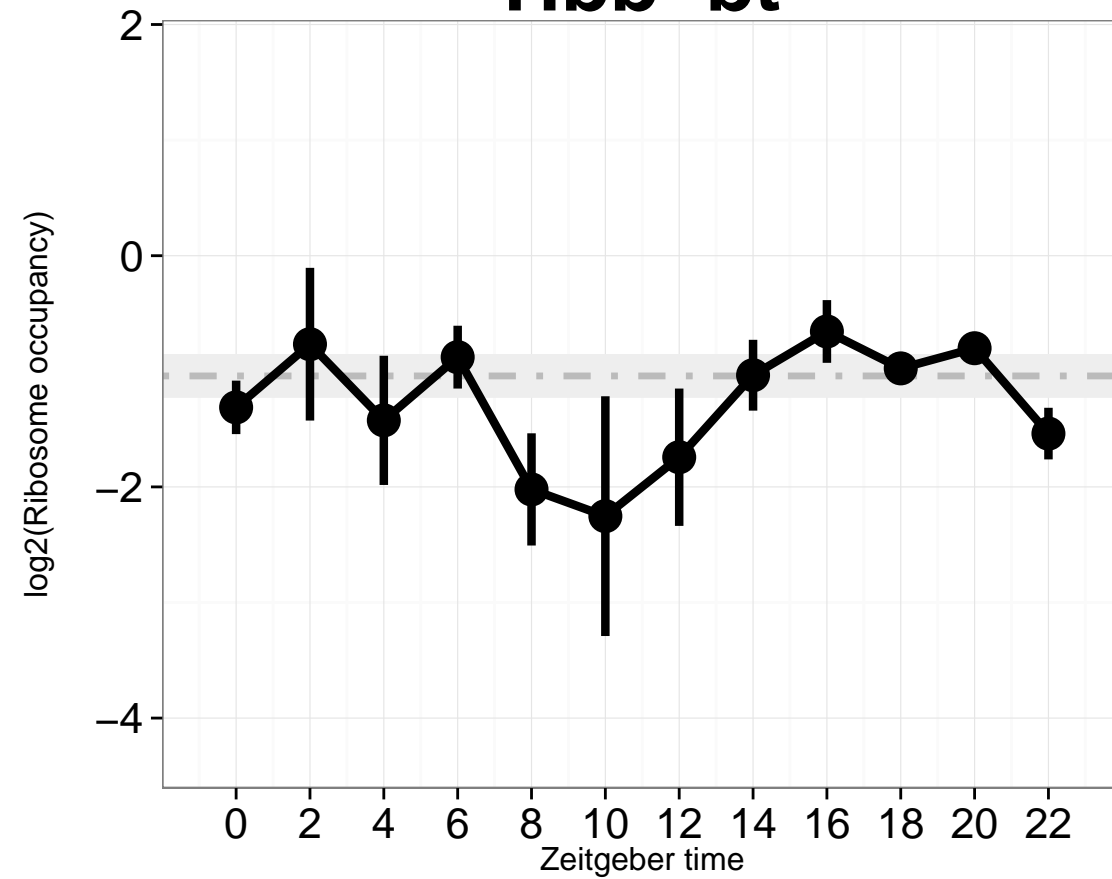

Supplement: SuppDataset_1.zip [file Hbb-bt_set_A.pdf › Supplemental Dataset 1/A-mRNA_nonrhyth_translation_nonrhyth/Hbb-bt_set_A.pdf]

## Hbp1

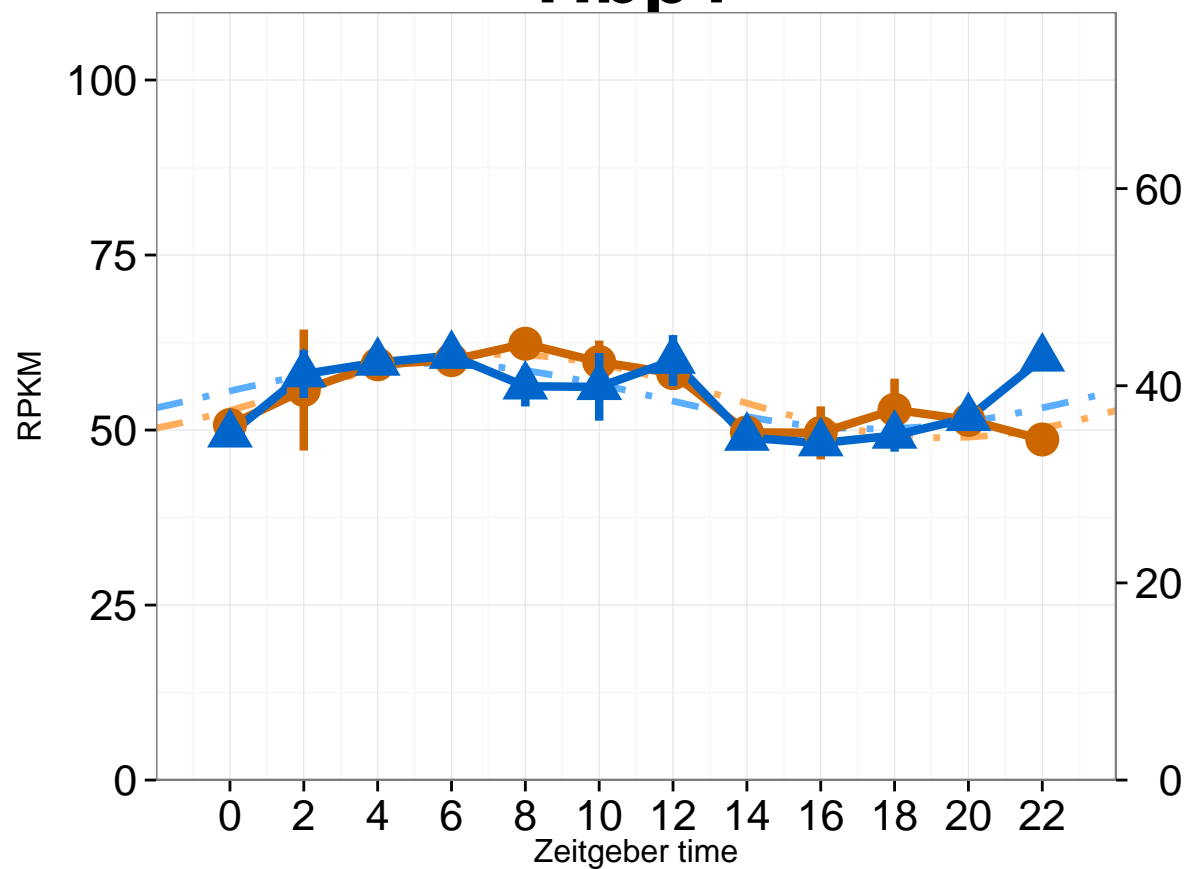

## Hbp1

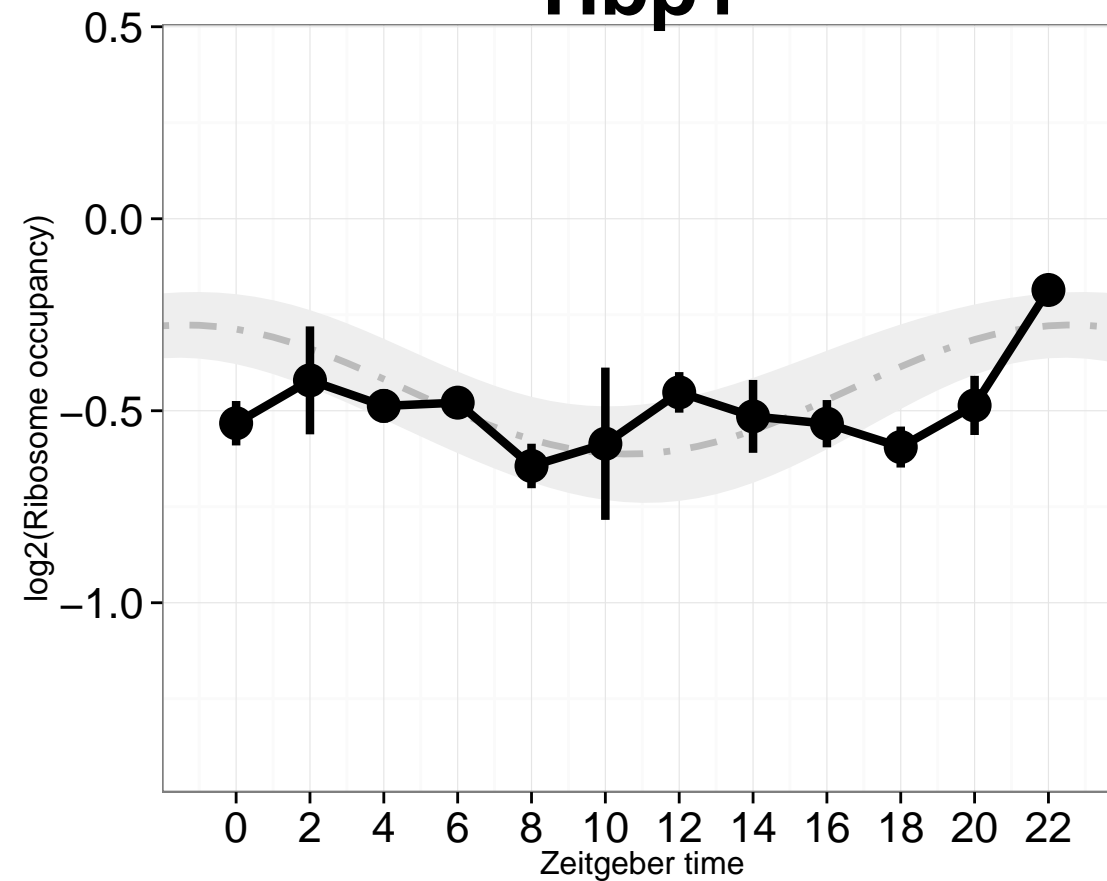

Supplement: SuppDataset_1.zip [file Hbp1_set_A.pdf › Supplemental Dataset 1/A-mRNA_nonrhyth_translation_nonrhyth/Hbp1_set_A.pdf]

## Hbs1l

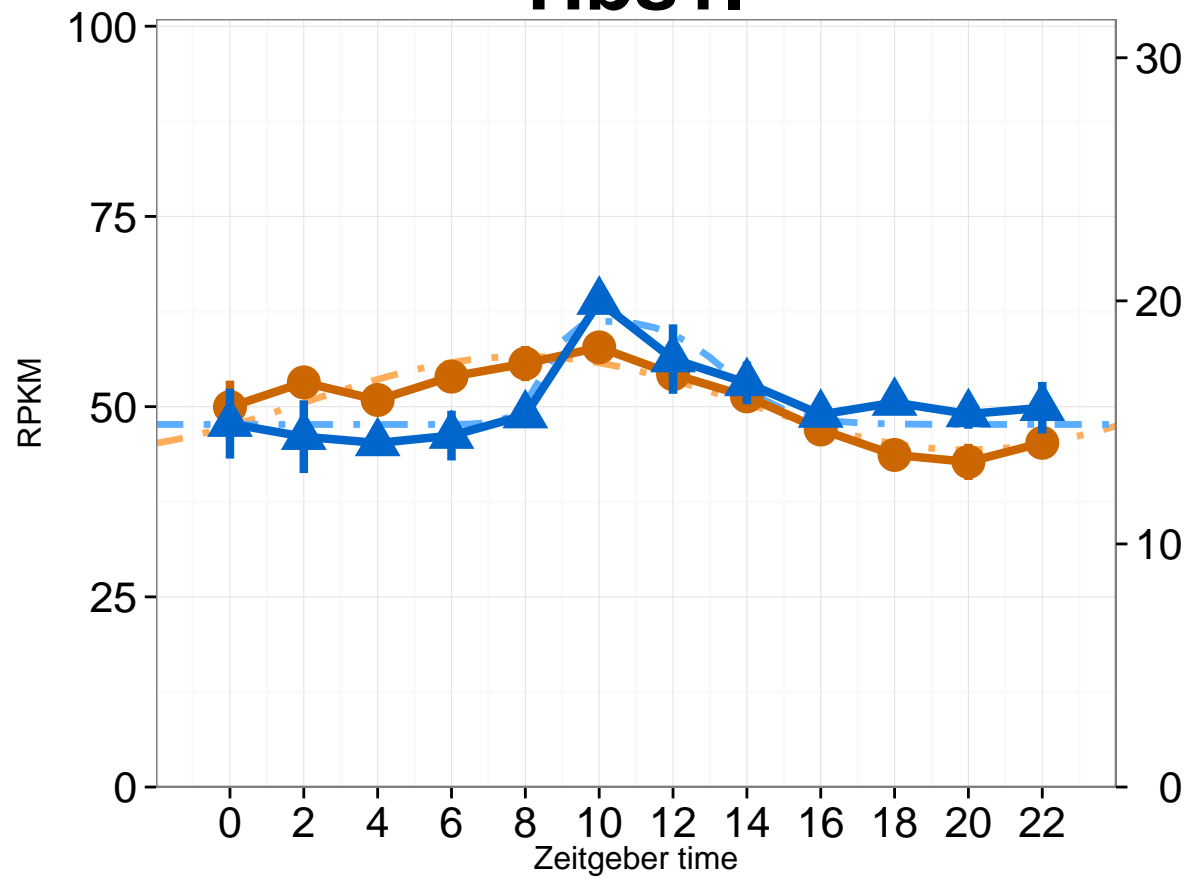

## Hbs1l

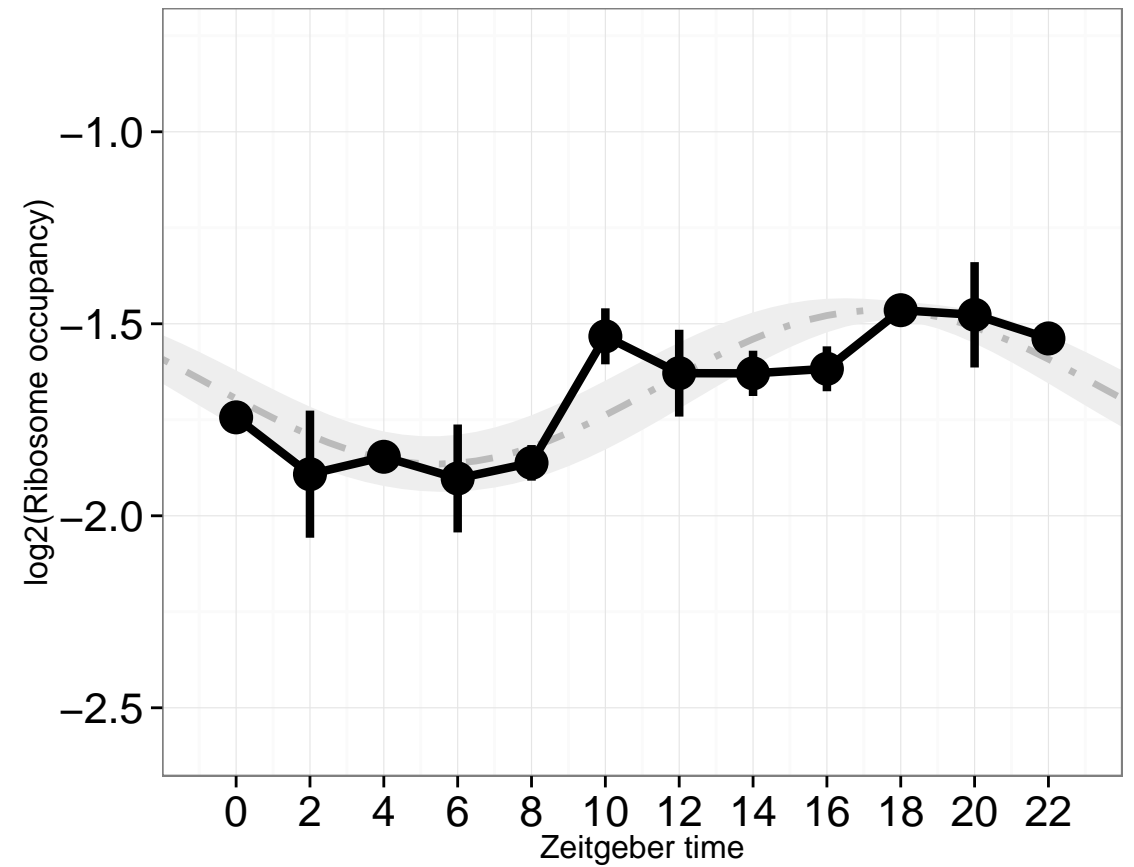

Supplement: SuppDataset_1.zip [file Hbs1l_set_A.pdf › Supplemental Dataset 1/A-mRNA_nonrhyth_translation_nonrhyth/Hbs1l_set_A.pdf]

## Hccs

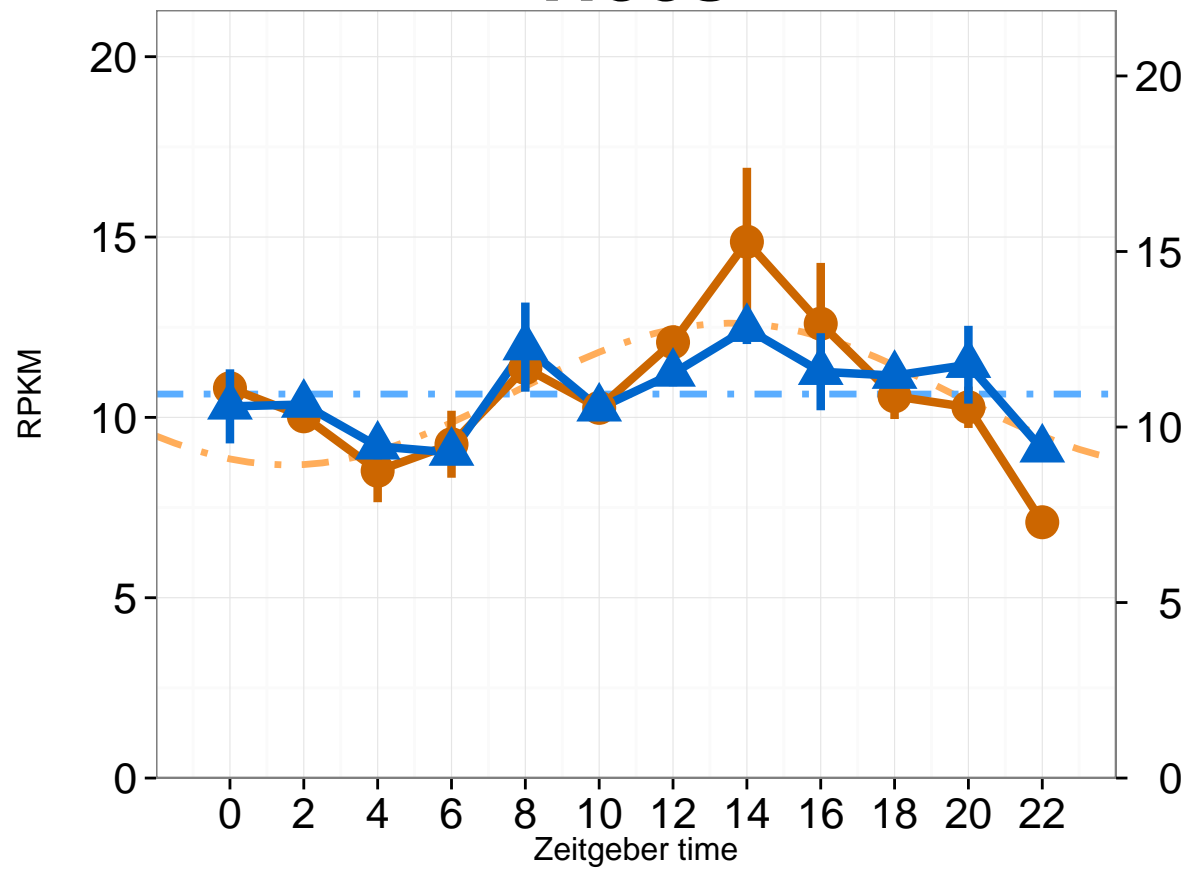

## Hccs

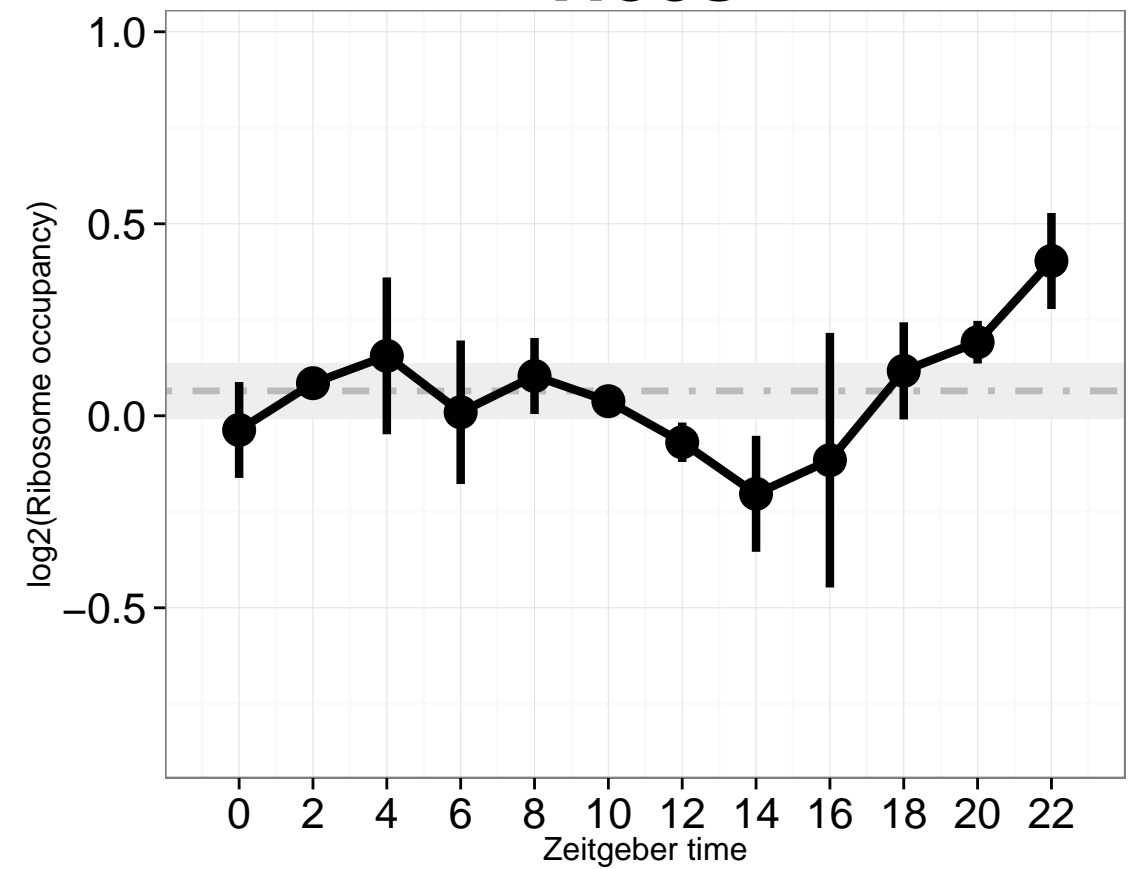

Supplement: SuppDataset_1.zip [file Hccs_set_A.pdf › Supplemental Dataset 1/A-mRNA_nonrhyth_translation_nonrhyth/Hccs_set_A.pdf]

# Hcfc1

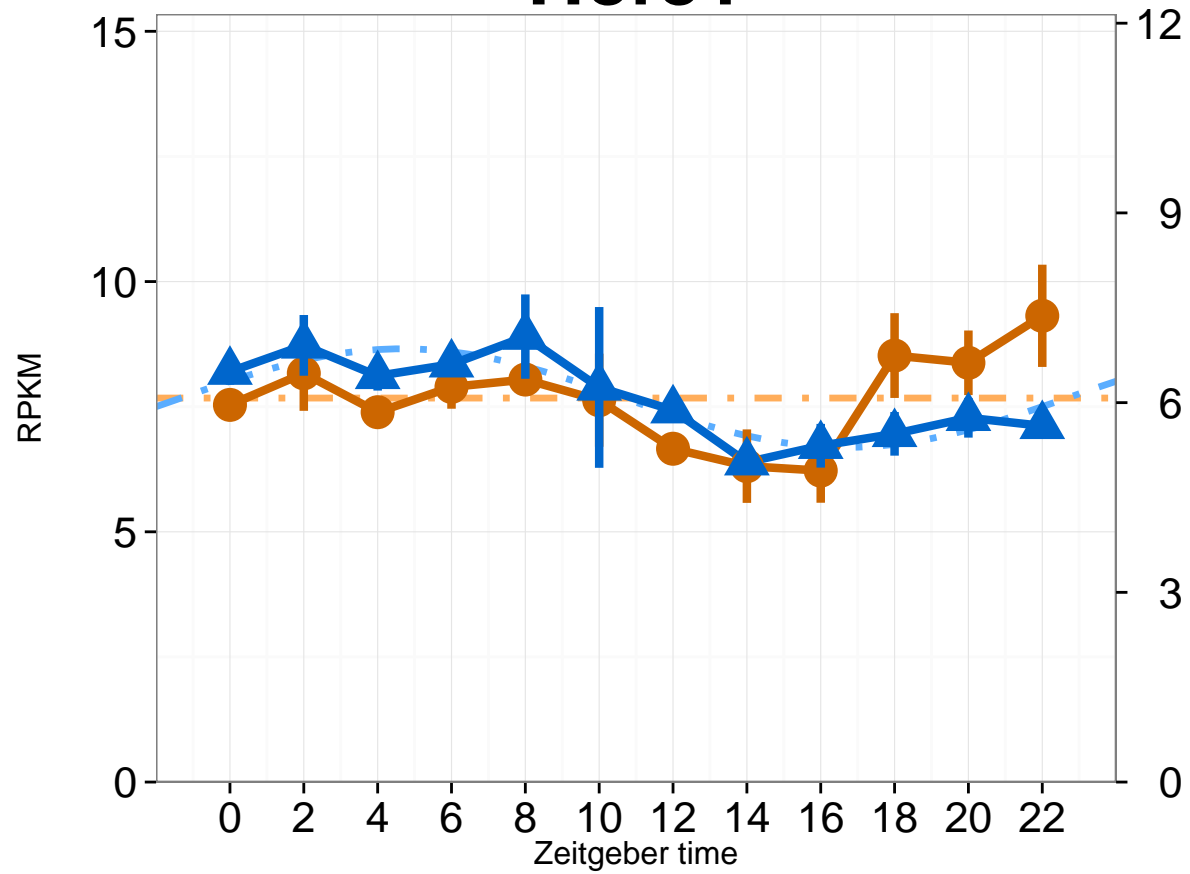

# Hcfc1

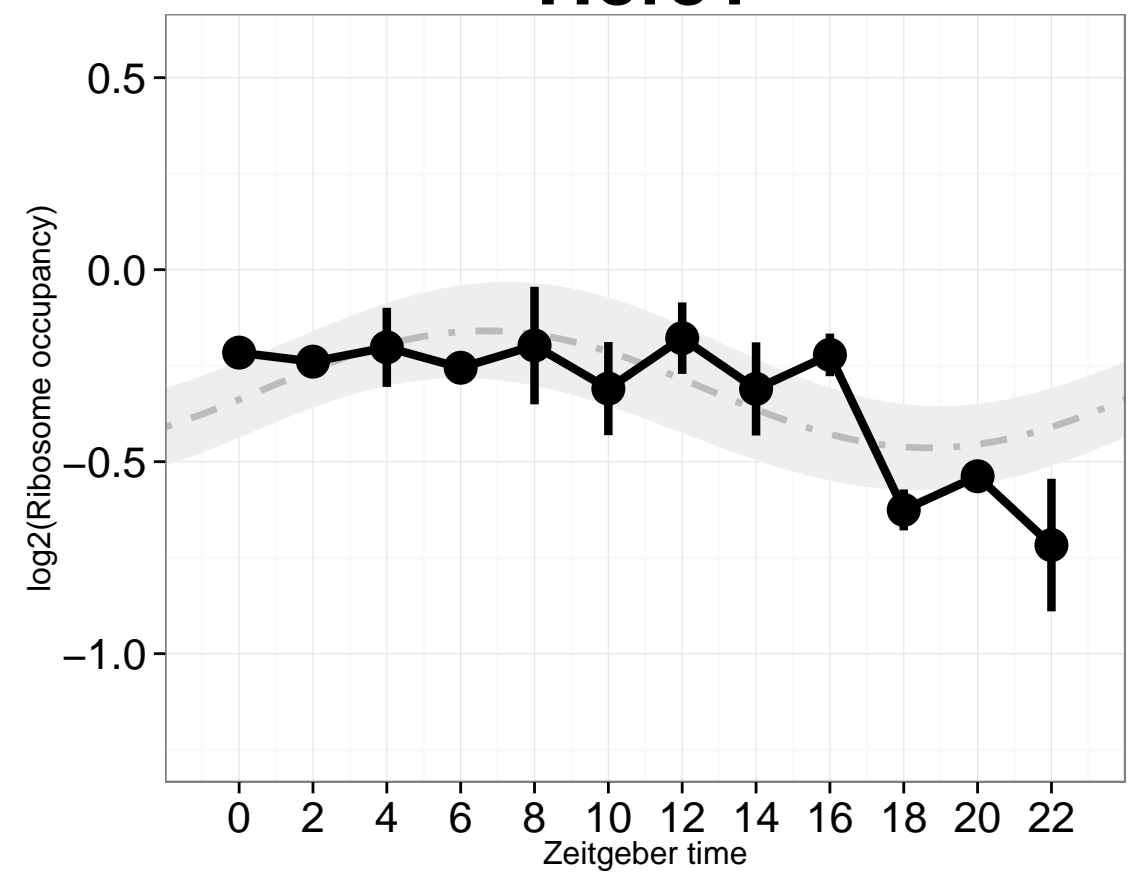

Supplement: SuppDataset_1.zip [file Hcfc1_set_A.pdf › Supplemental Dataset 1/A-mRNA_nonrhyth_translation_nonrhyth/Hcfc1_set_A.pdf]

## Hcfc2

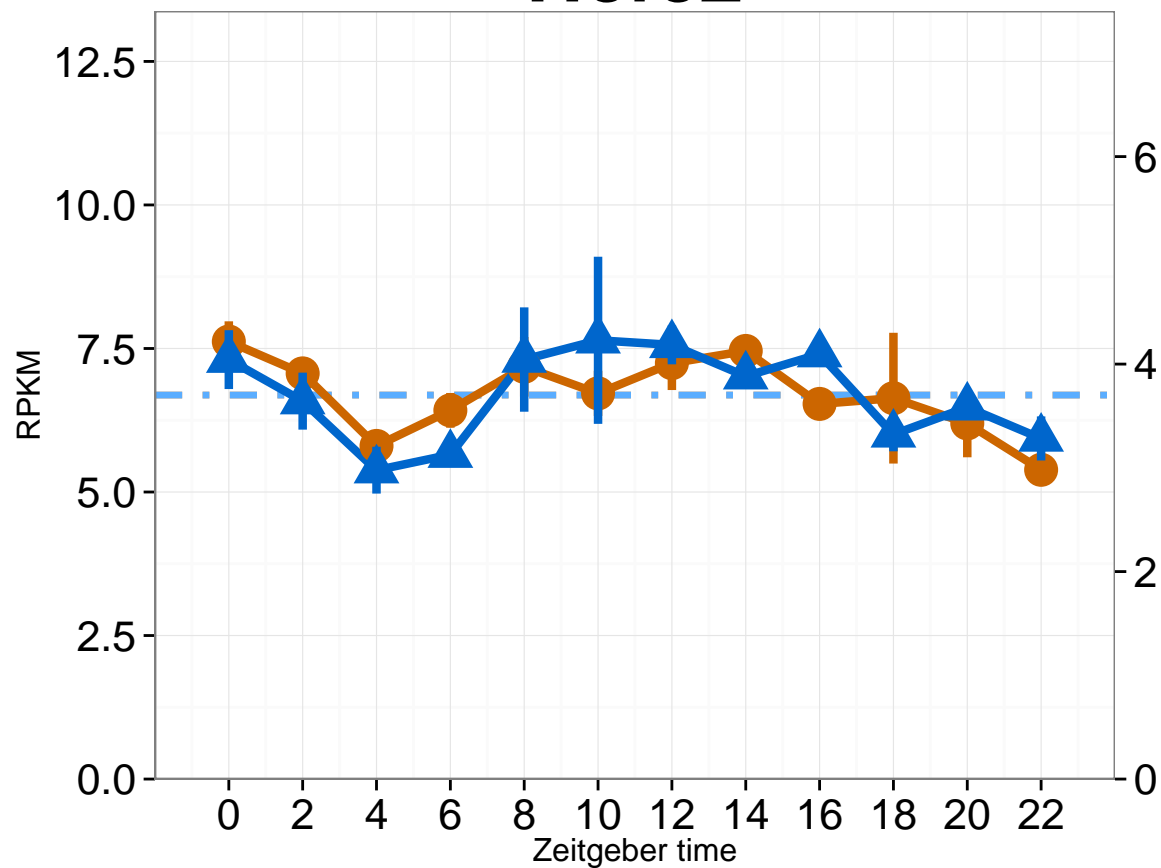

## Hcfc2

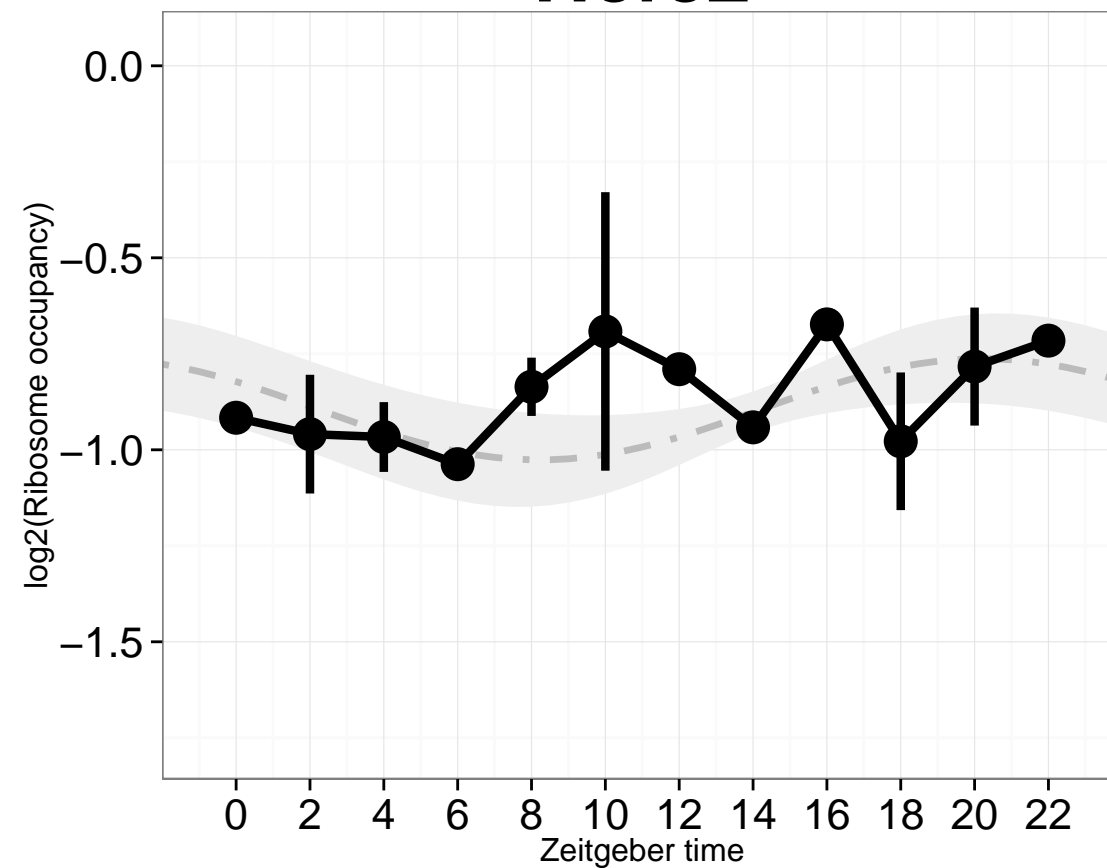

Supplement: SuppDataset_1.zip [file Hcfc2_set_A.pdf › Supplemental Dataset 1/A-mRNA_nonrhyth_translation_nonrhyth/Hcfc2_set_A.pdf]

# Hck

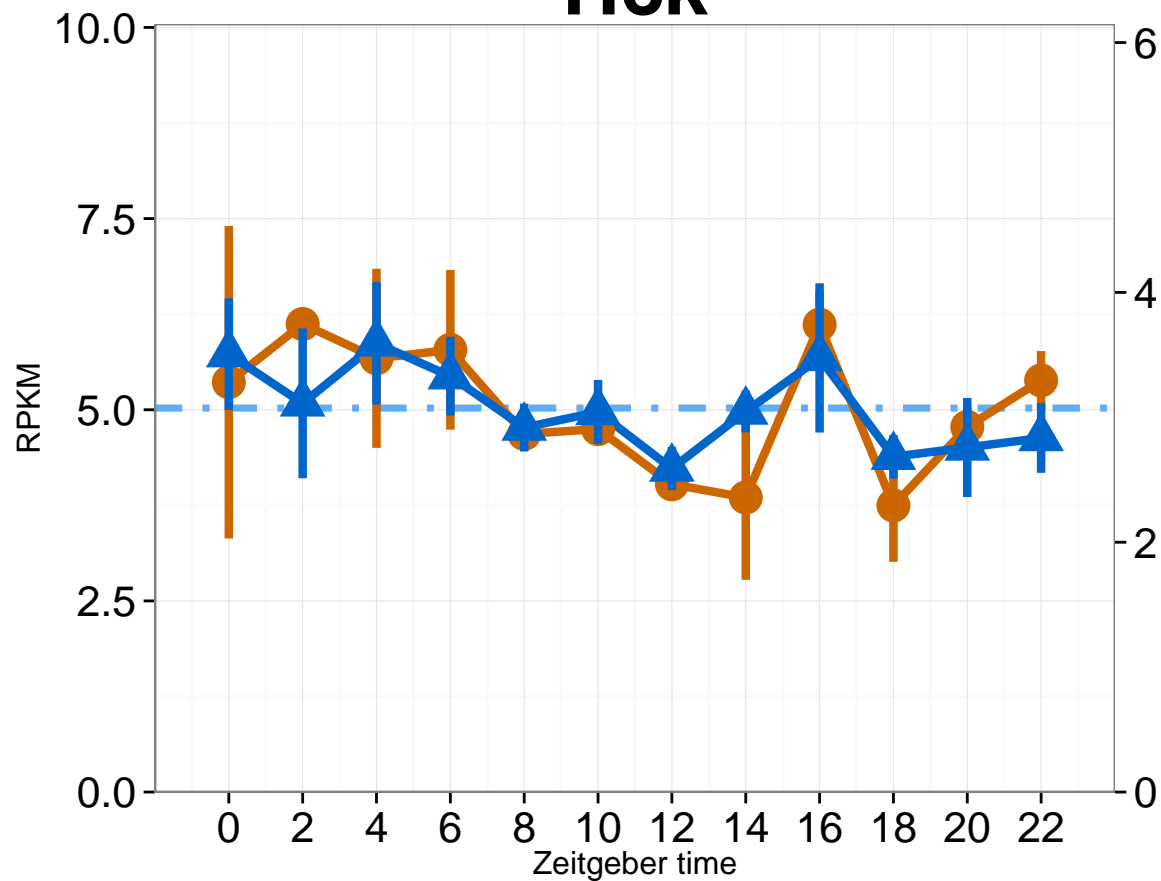

# Hck

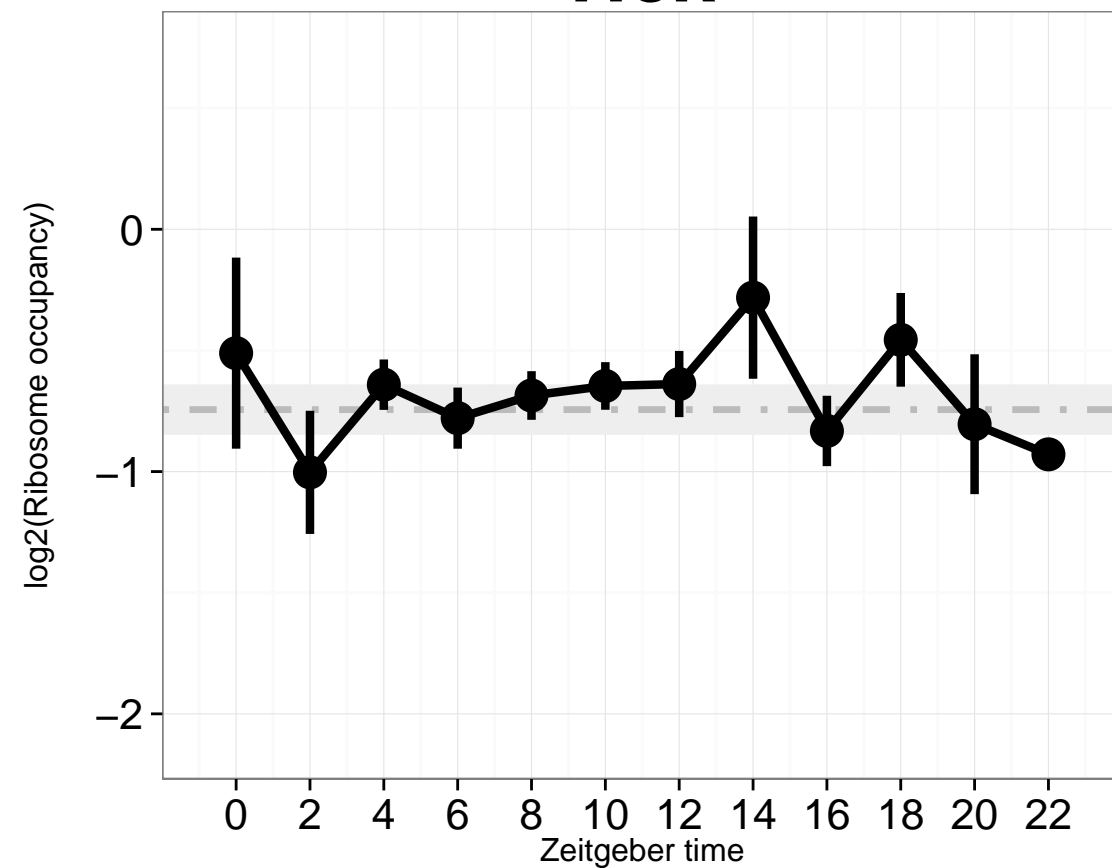

Supplement: SuppDataset_1.zip [file Hck_set_A.pdf › Supplemental Dataset 1/A-mRNA_nonrhyth_translation_nonrhyth/Hck_set_A.pdf]

## Hcls1

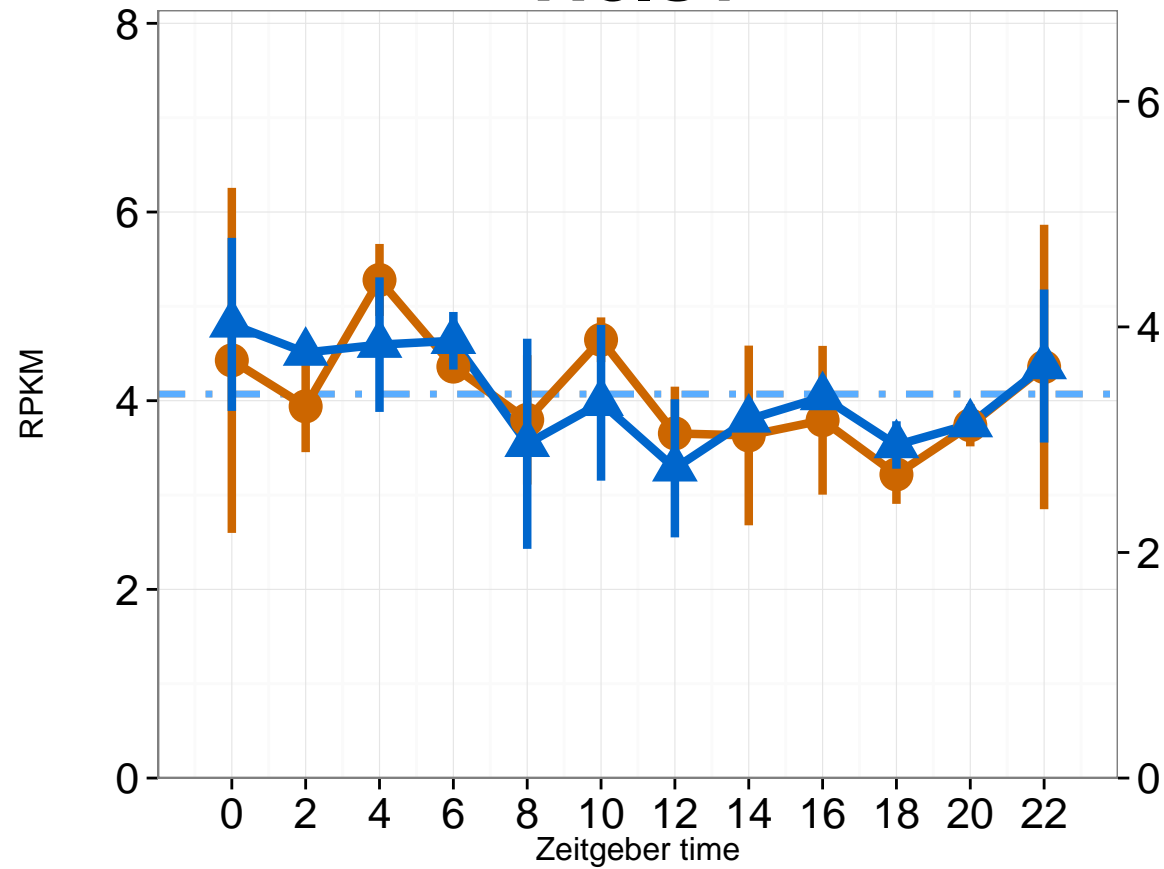

## Hcls1

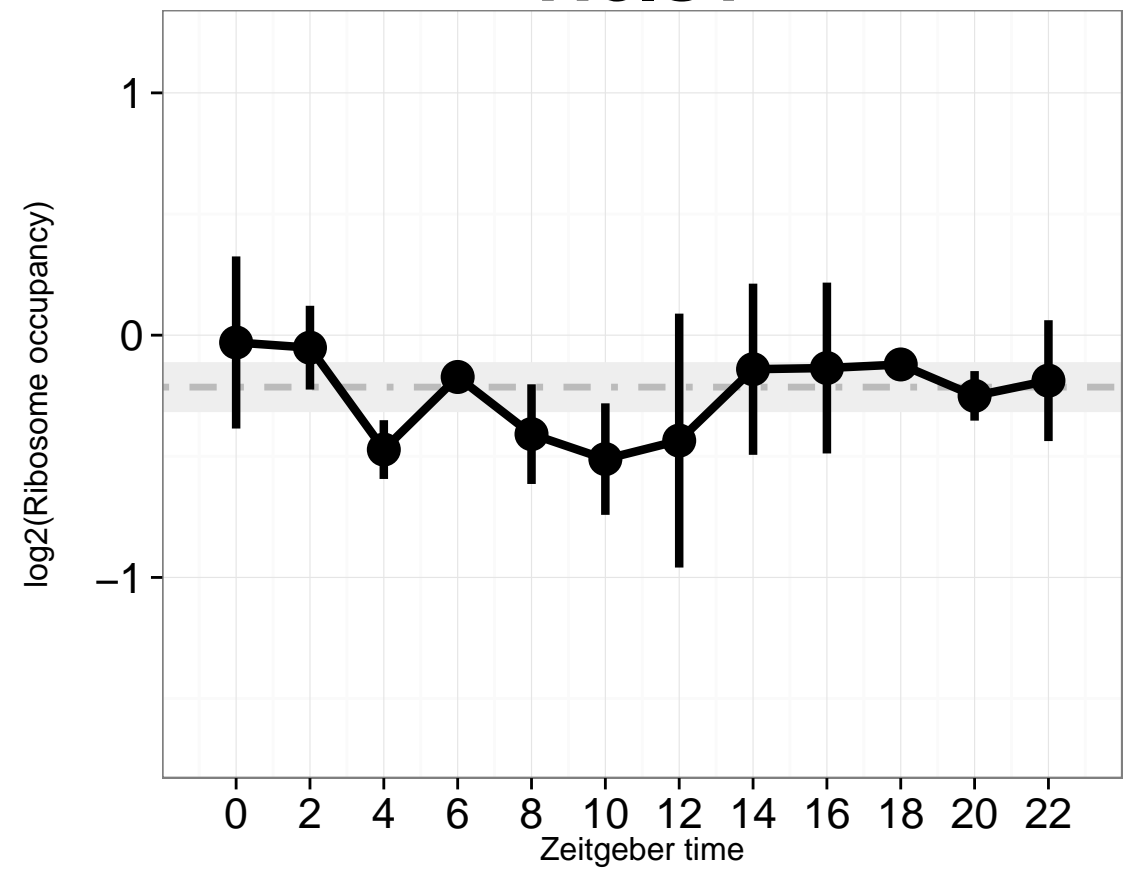

Supplement: SuppDataset_1.zip [file Hcls1_set_A.pdf › Supplemental Dataset 1/A-mRNA_nonrhyth_translation_nonrhyth/Hcls1_set_A.pdf]

## Hdac10

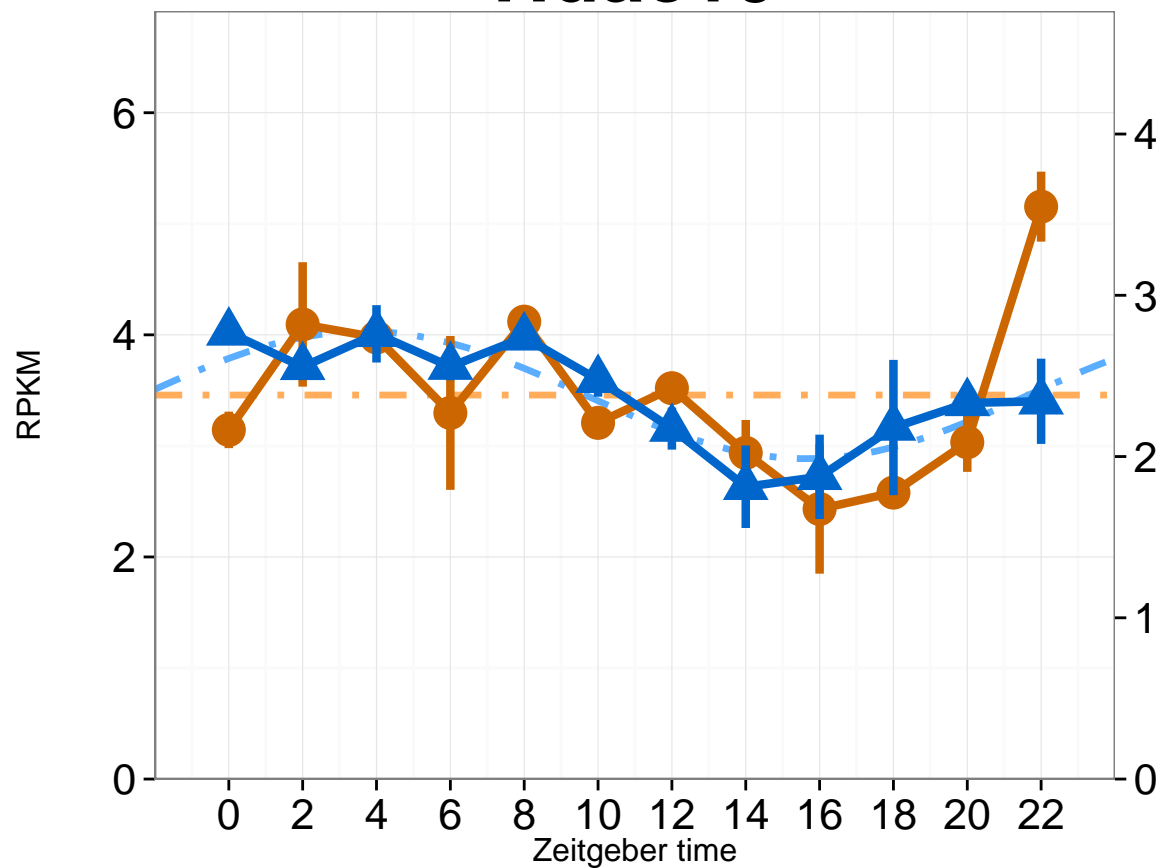

## Hdac10

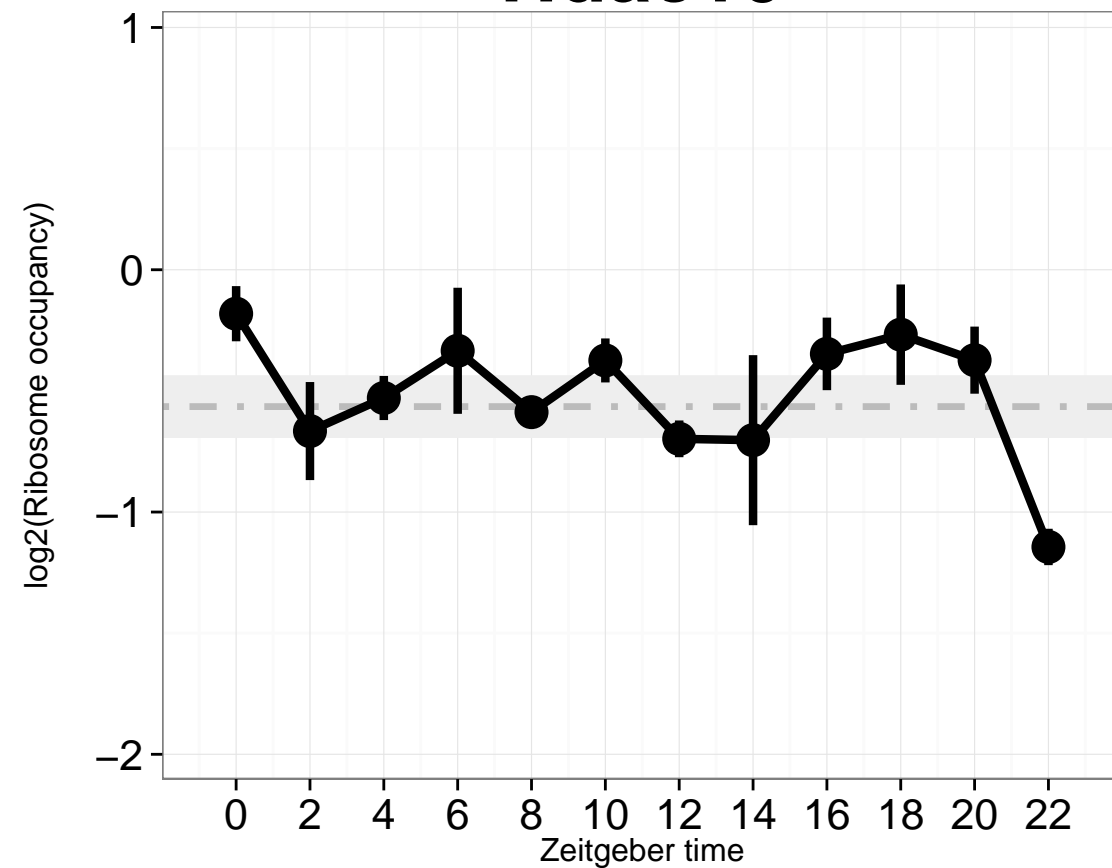

Supplement: SuppDataset_1.zip [file Hdac10_set_A.pdf › Supplemental Dataset 1/A-mRNA_nonrhyth_translation_nonrhyth/Hdac10_set_A.pdf]

## Hdac11

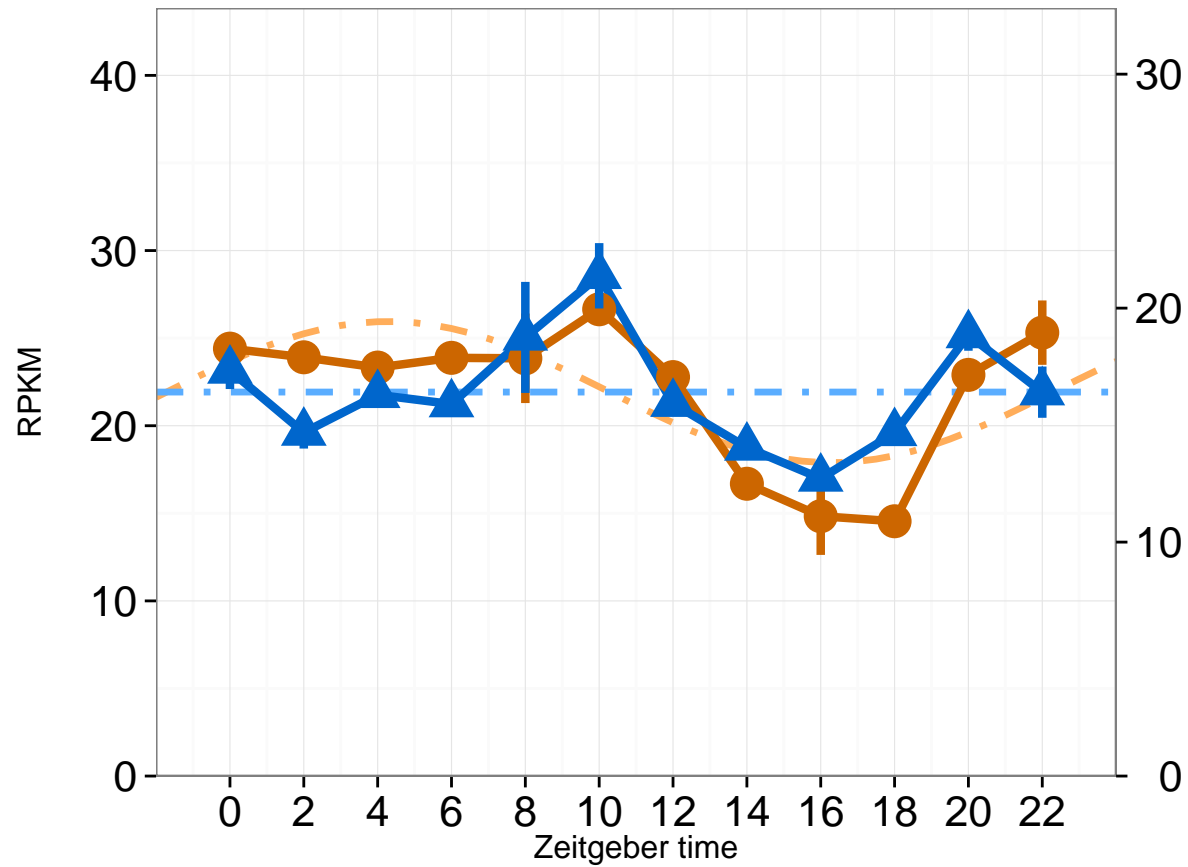

## Hdac11

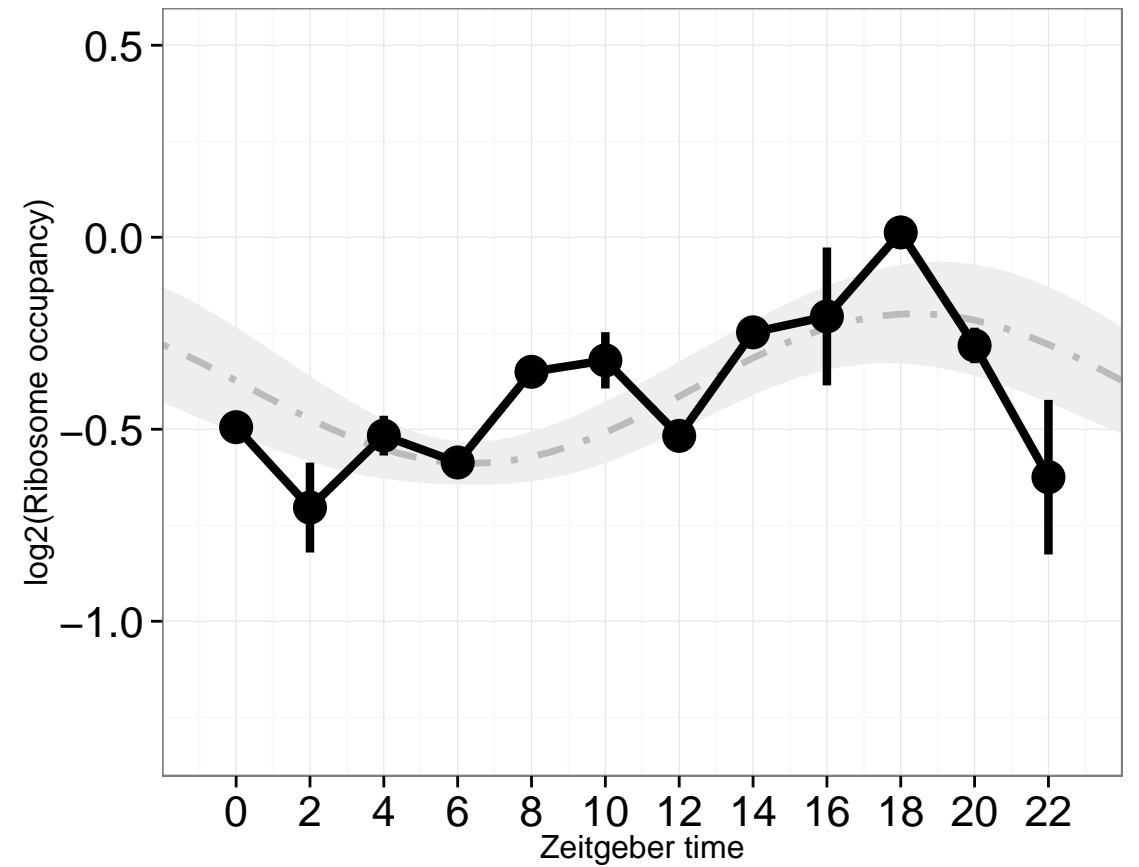

Supplement: SuppDataset_1.zip [file Hdac11_set_A.pdf › Supplemental Dataset 1/A-mRNA_nonrhyth_translation_nonrhyth/Hdac11_set_A.pdf]

## Hdac1

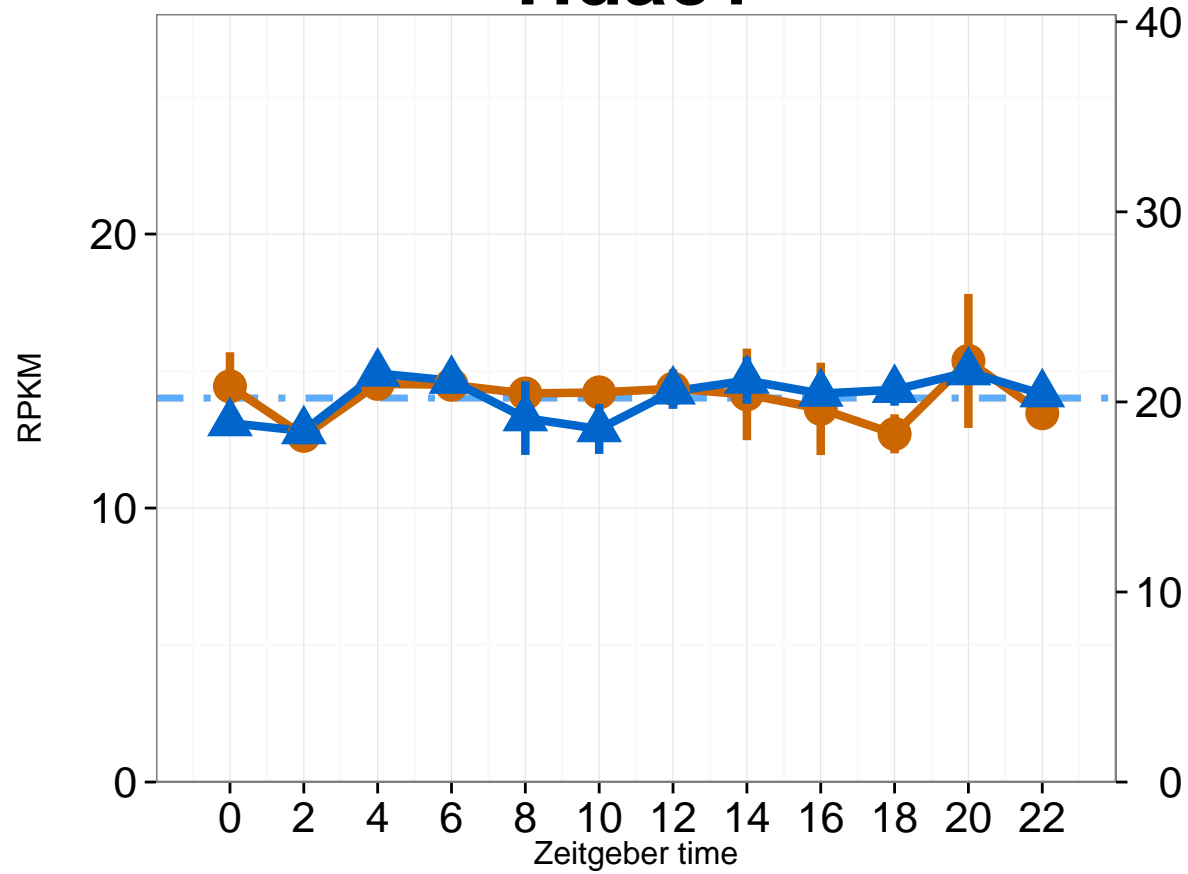

## Hdac1

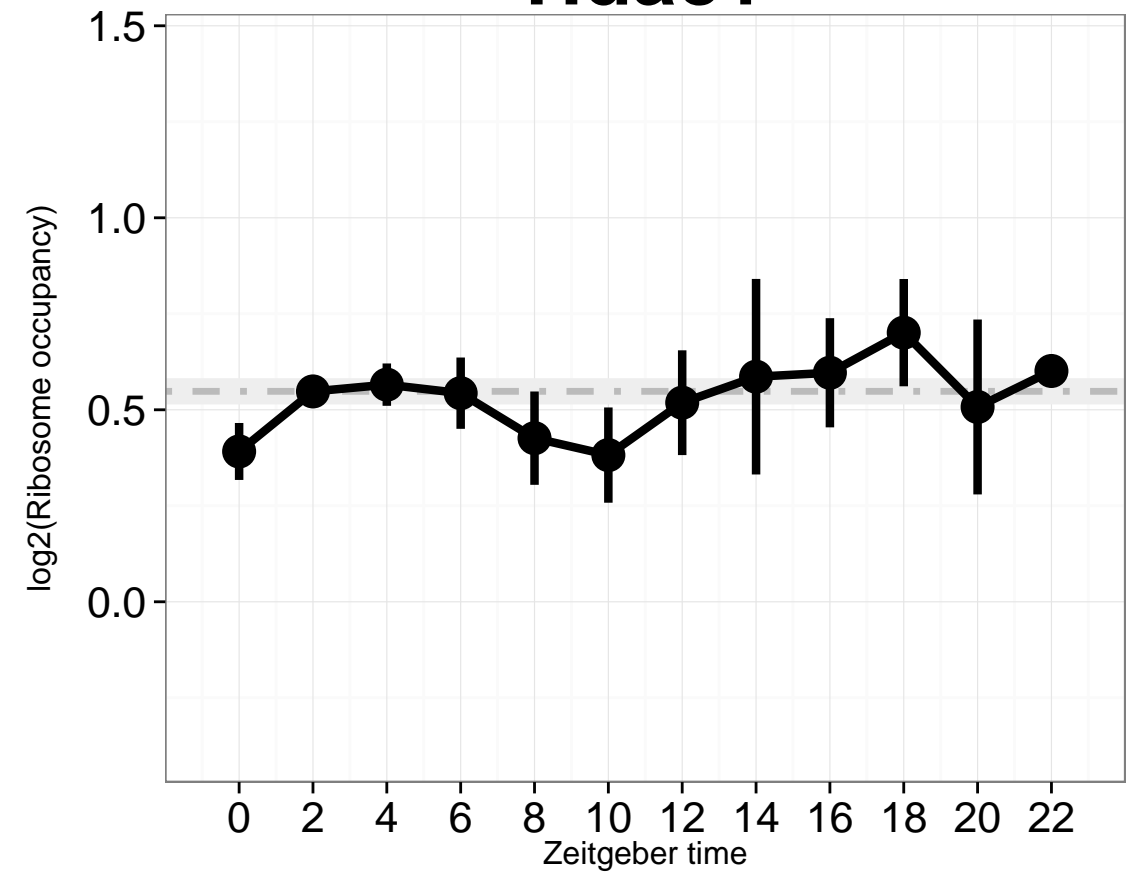

Supplement: SuppDataset_1.zip [file Hdac1_set_A.pdf › Supplemental Dataset 1/A-mRNA_nonrhyth_translation_nonrhyth/Hdac1_set_A.pdf]

## Hdac2

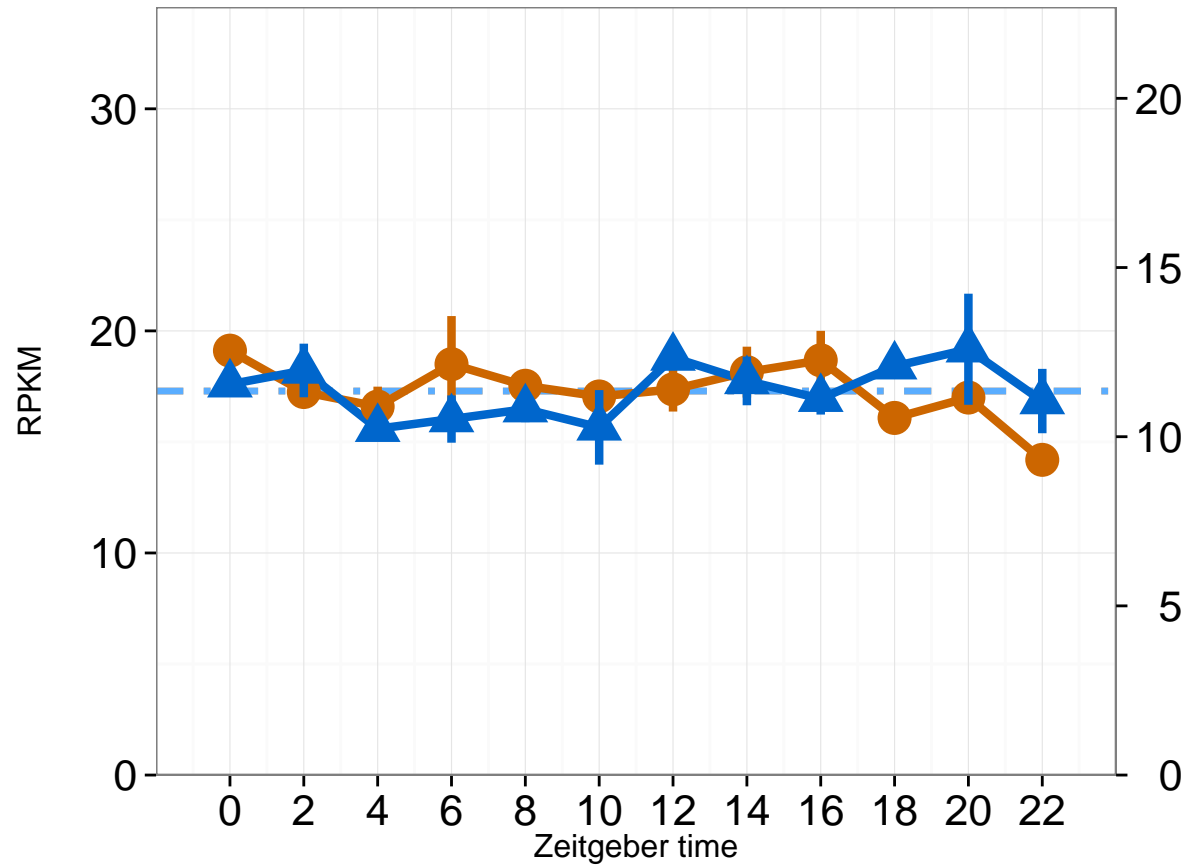

## Hdac2

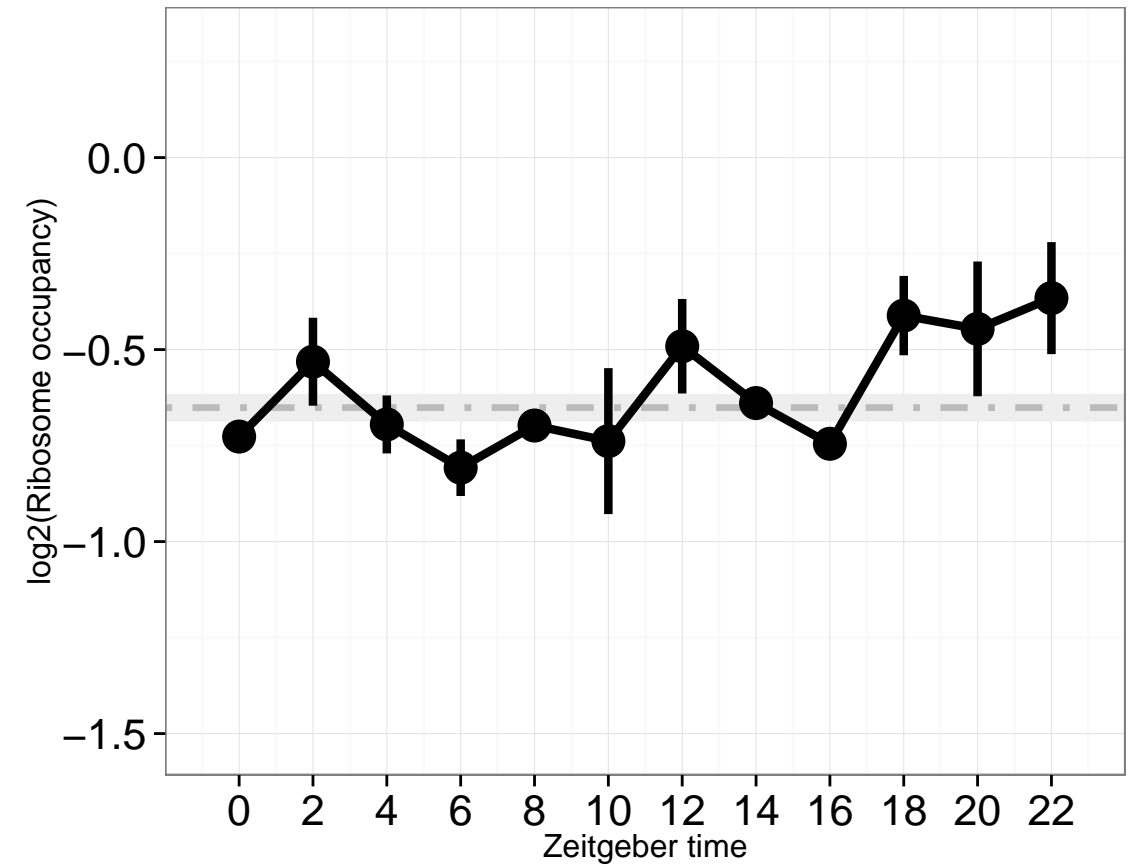

Supplement: SuppDataset_1.zip [file Hdac2_set_A.pdf › Supplemental Dataset 1/A-mRNA_nonrhyth_translation_nonrhyth/Hdac2_set_A.pdf]

## Hdac3

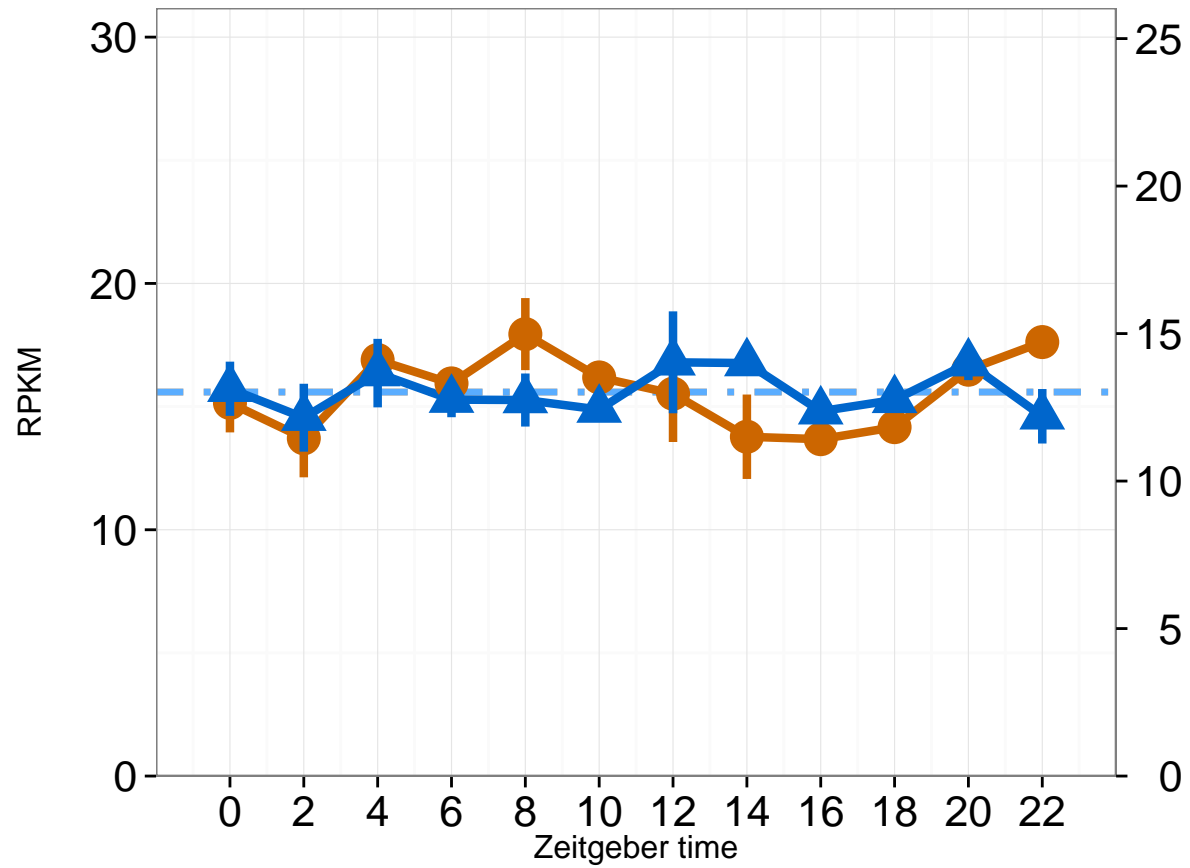

## Hdac3

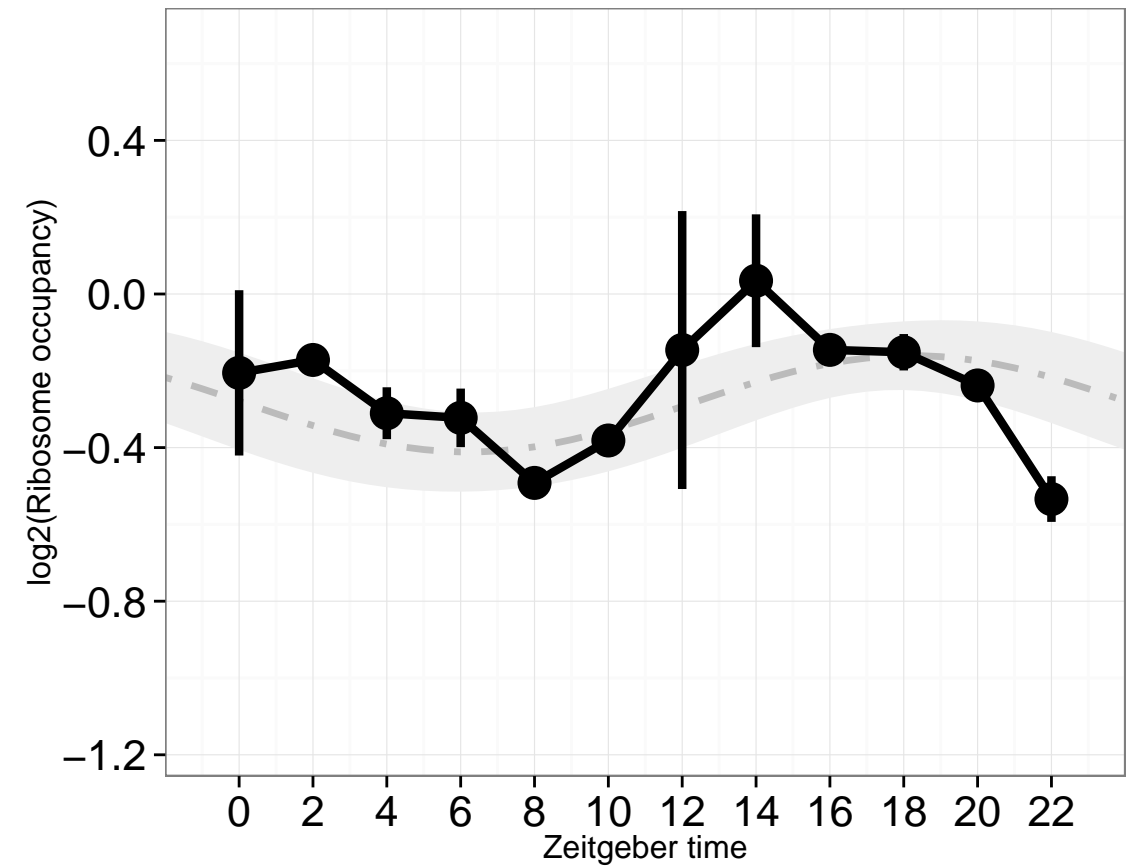

Supplement: SuppDataset_1.zip [file Hdac3_set_A.pdf › Supplemental Dataset 1/A-mRNA_nonrhyth_translation_nonrhyth/Hdac3_set_A.pdf]

# Hdac4

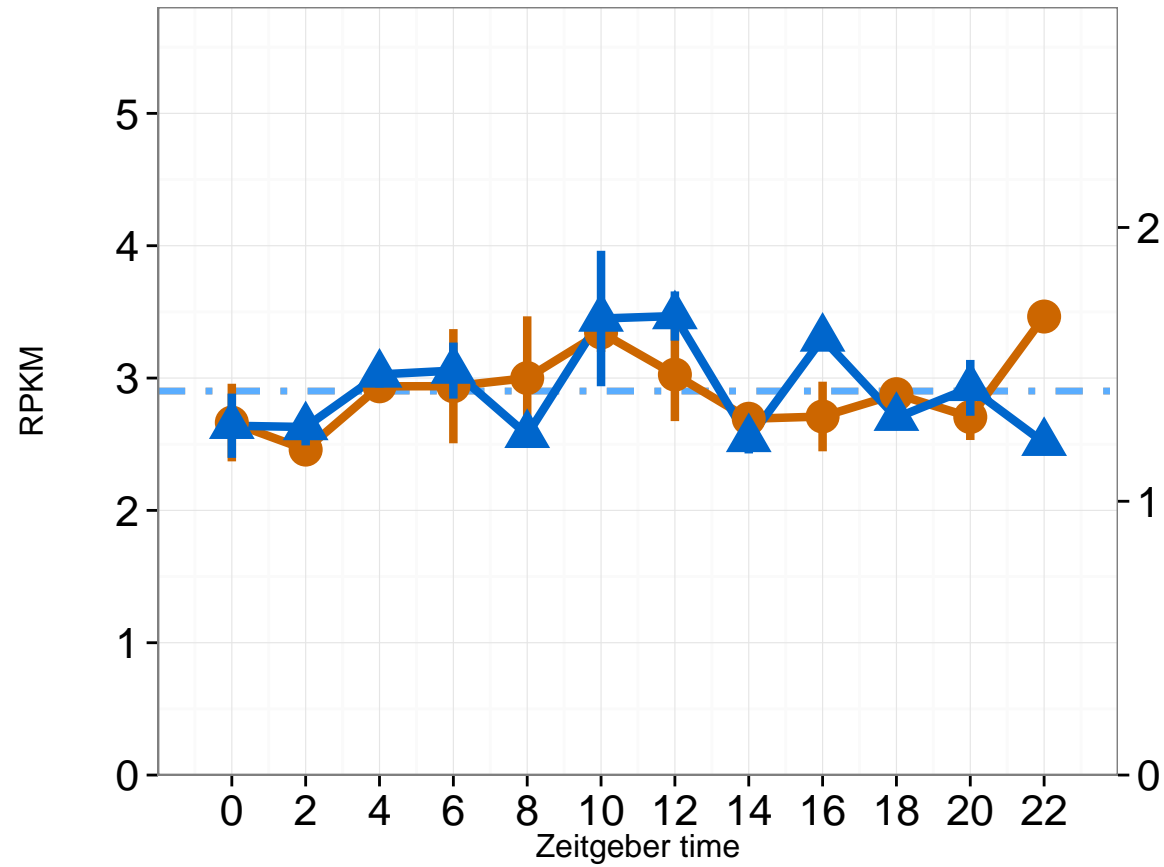

# Hdac4

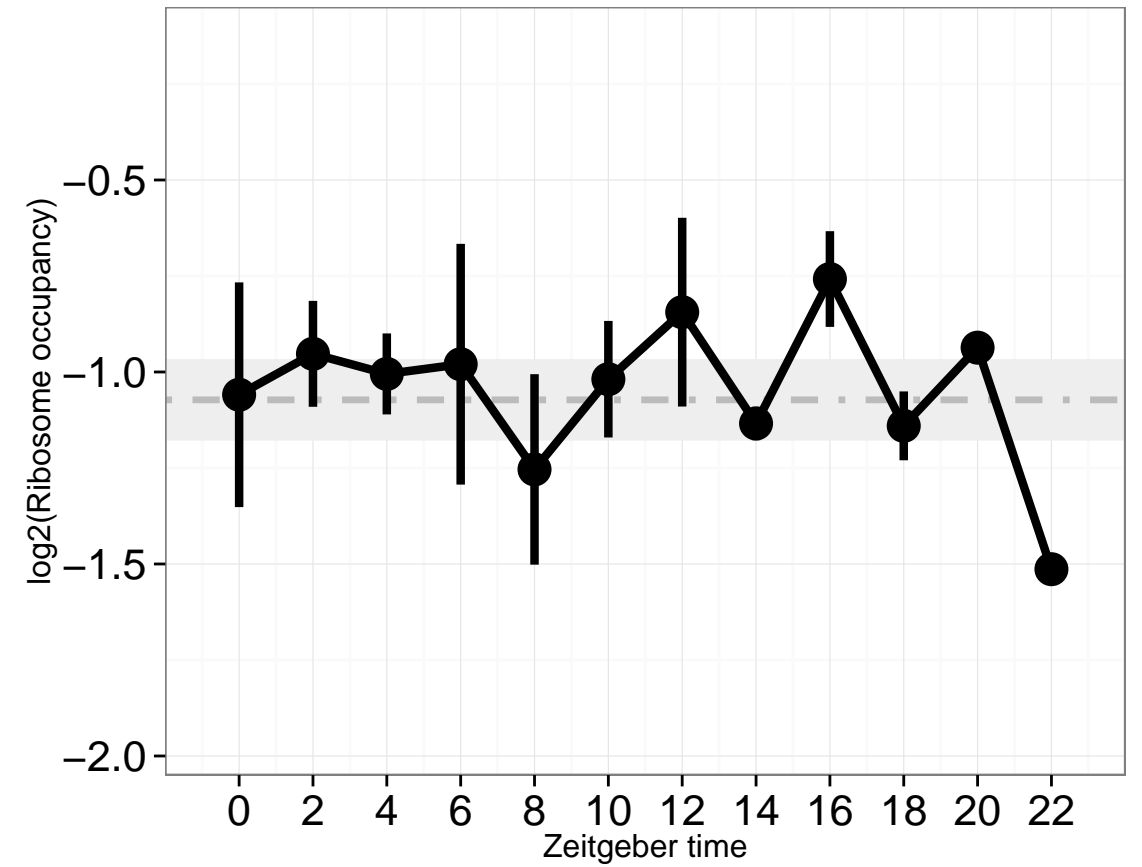

Supplement: SuppDataset_1.zip [file Hdac4_set_A.pdf › Supplemental Dataset 1/A-mRNA_nonrhyth_translation_nonrhyth/Hdac4_set_A.pdf]

## Hdac6

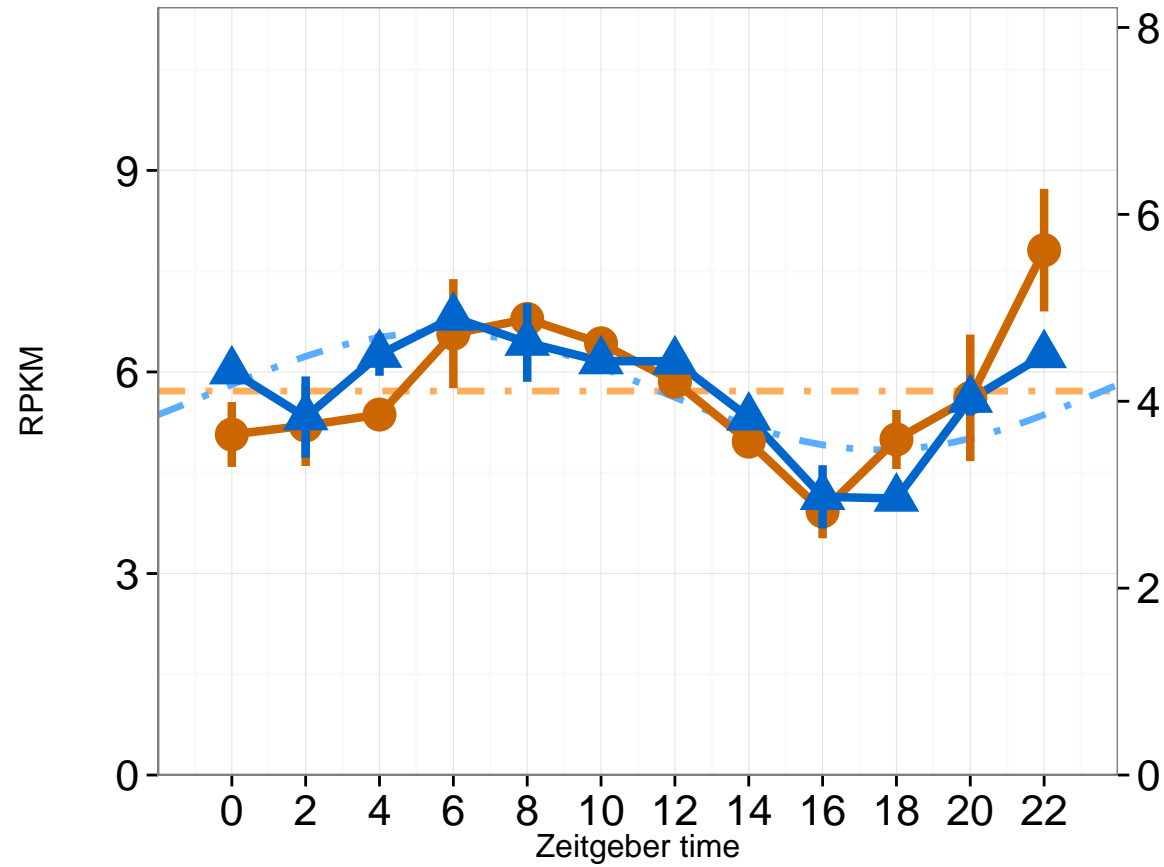

## Hdac6

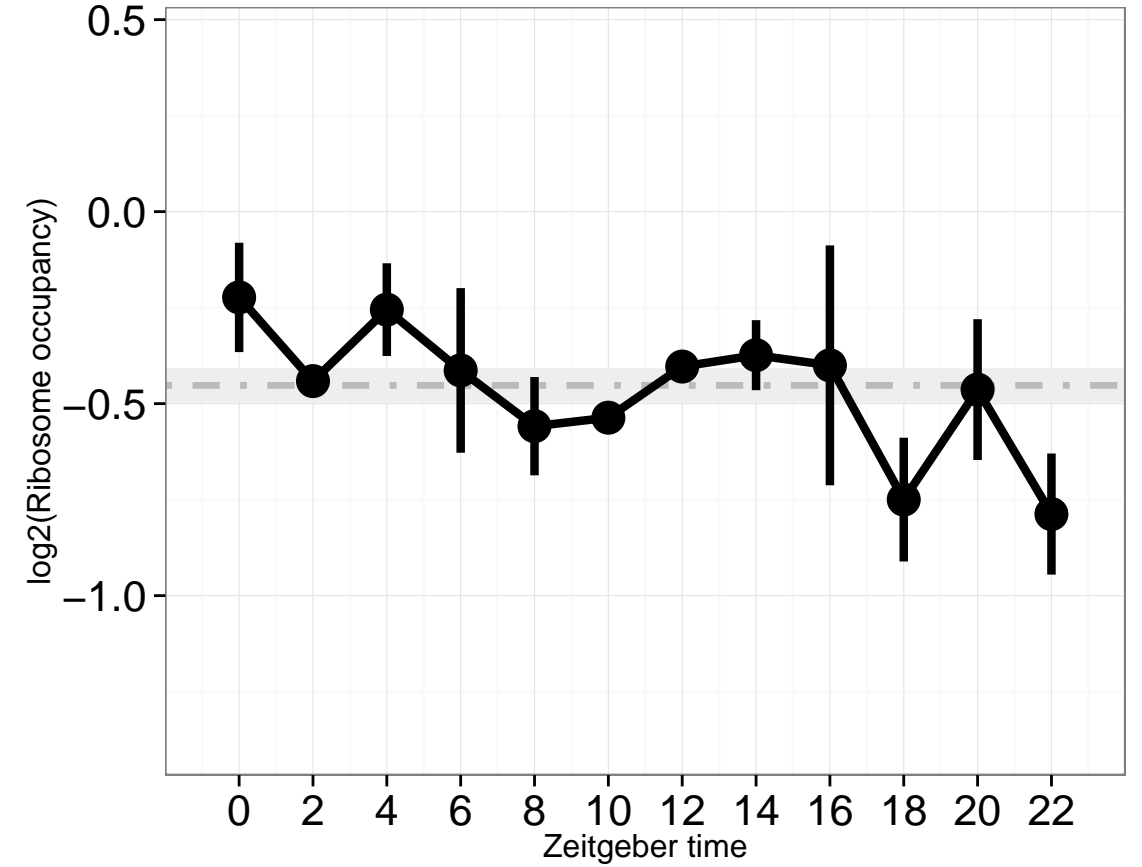

Supplement: SuppDataset_1.zip [file Hdac6_set_A.pdf › Supplemental Dataset 1/A-mRNA_nonrhyth_translation_nonrhyth/Hdac6_set_A.pdf]

## Hdac7

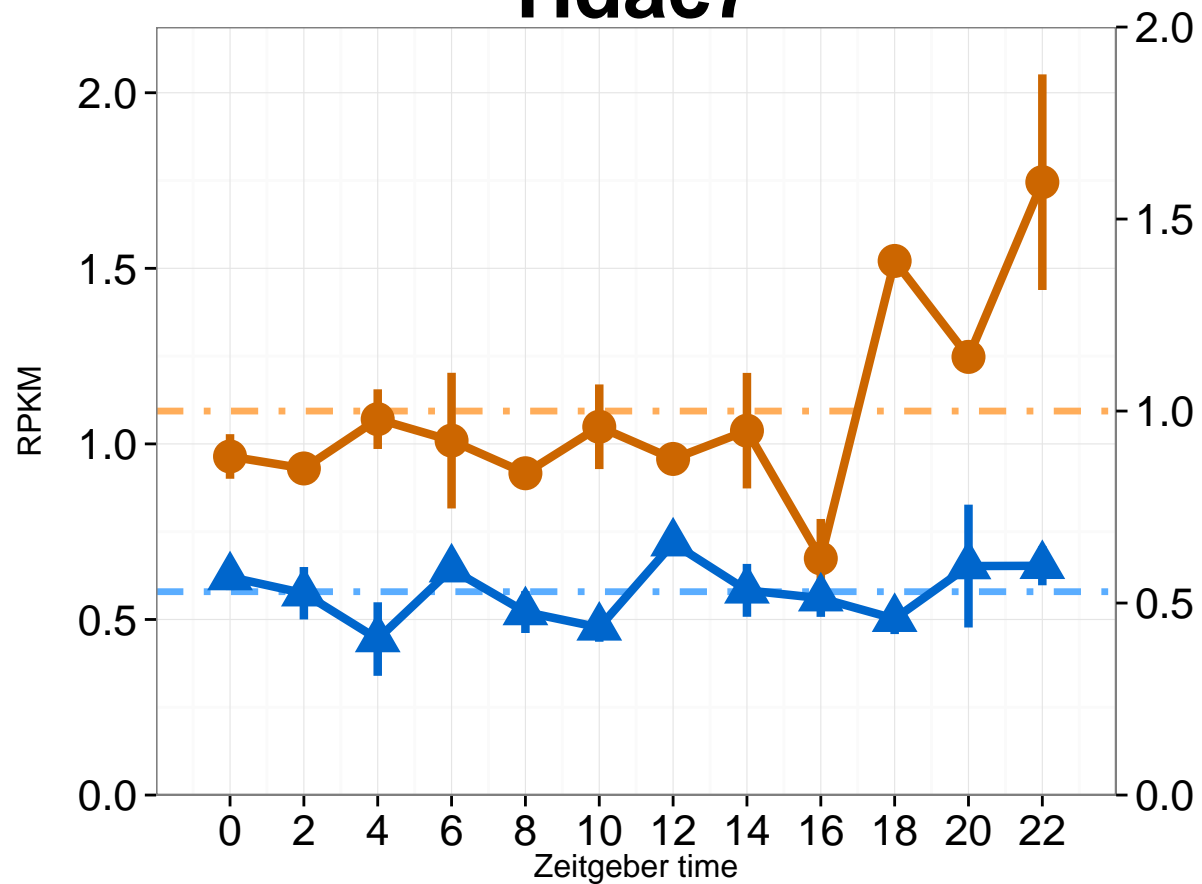

## Hdac7

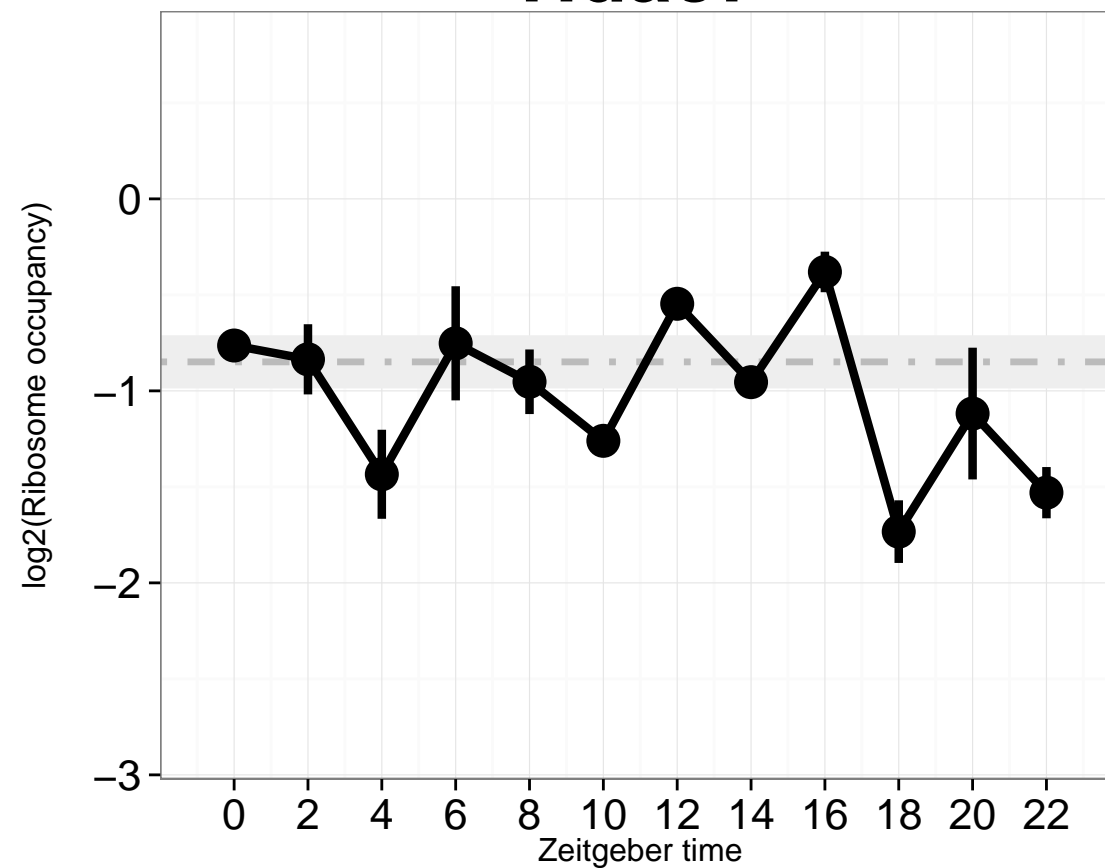

Supplement: SuppDataset_1.zip [file Hdac7_set_A.pdf › Supplemental Dataset 1/A-mRNA_nonrhyth_translation_nonrhyth/Hdac7_set_A.pdf]

## Hdac8

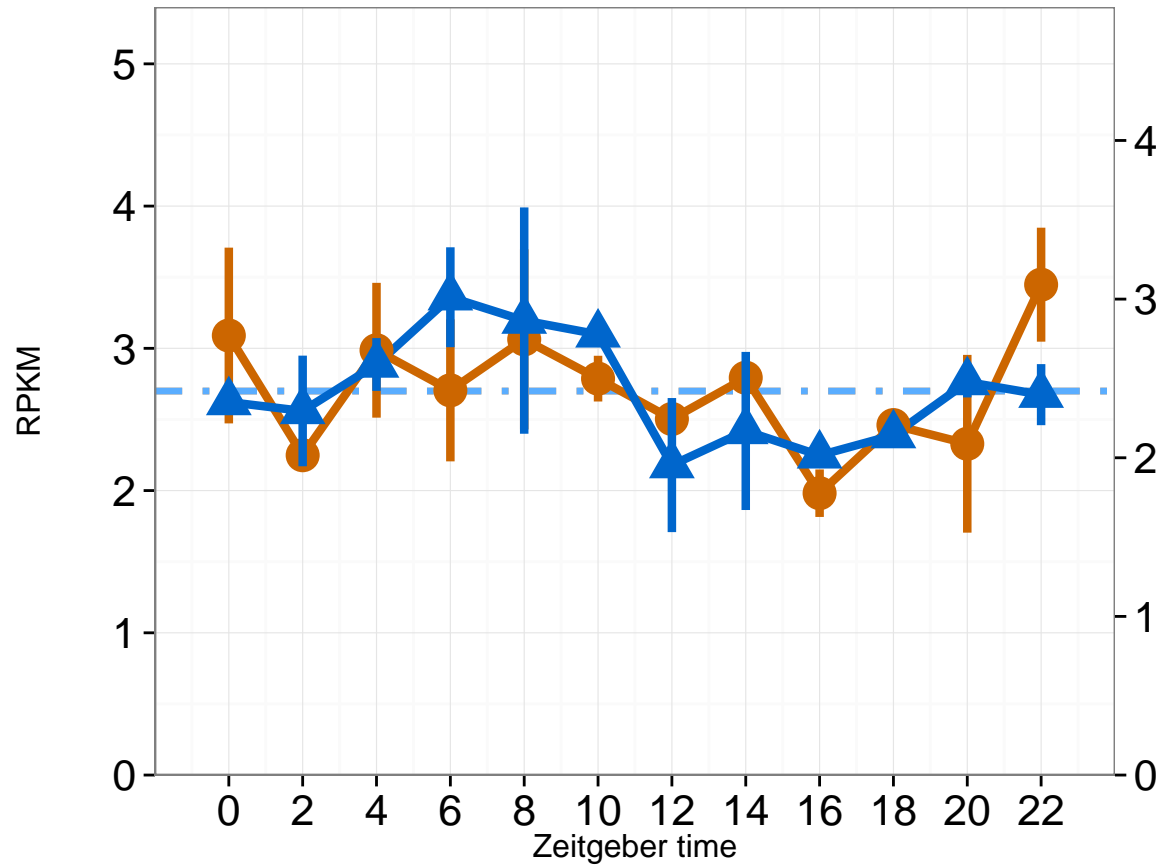

## Hdac8

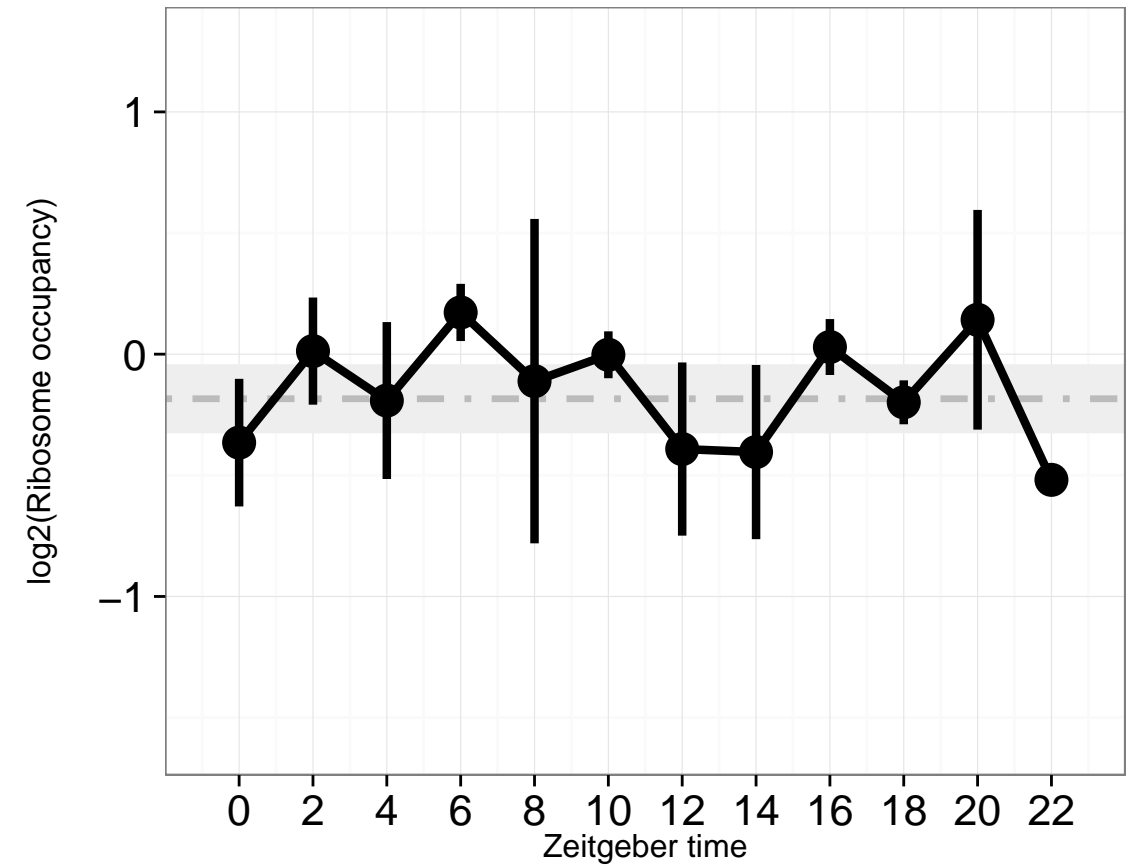

Supplement: SuppDataset_1.zip [file Hdac8_set_A.pdf › Supplemental Dataset 1/A-mRNA_nonrhyth_translation_nonrhyth/Hdac8_set_A.pdf]

## Hdac9

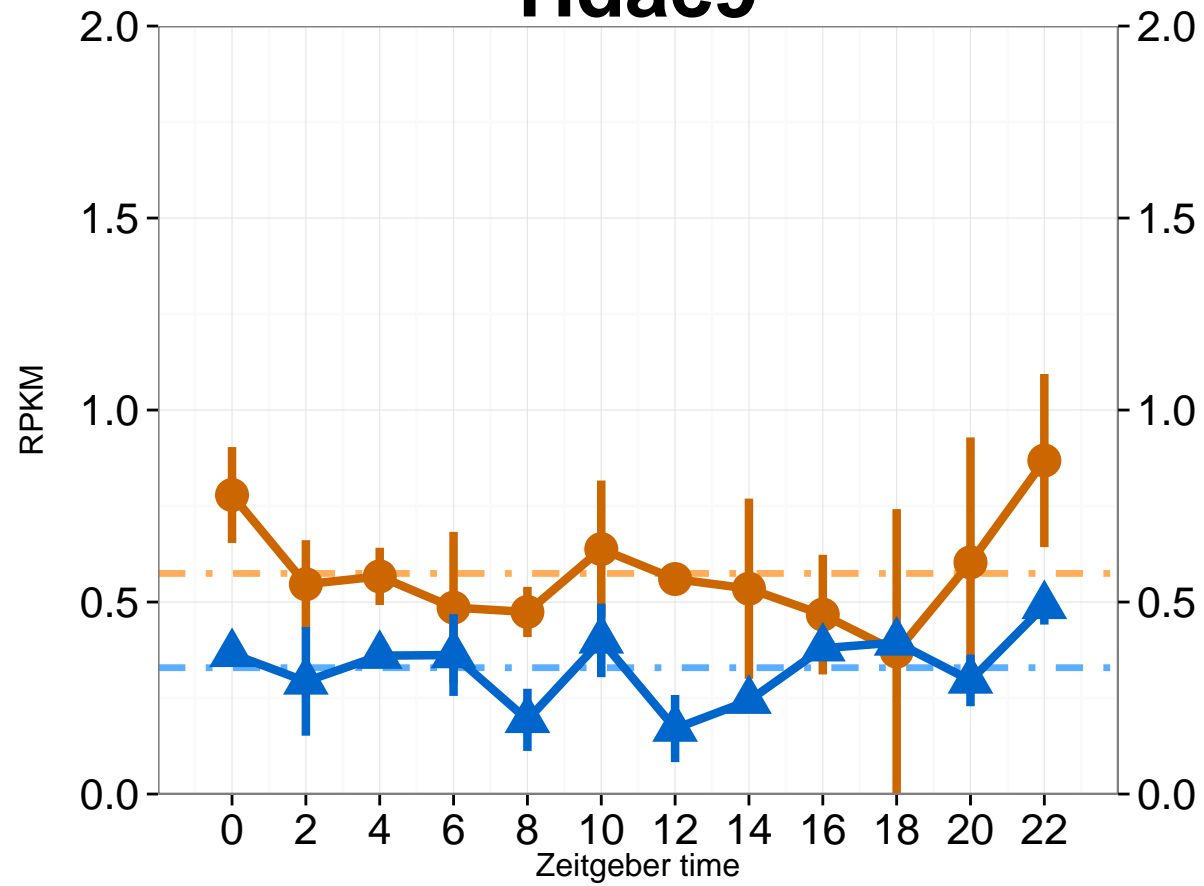

## Hdac9

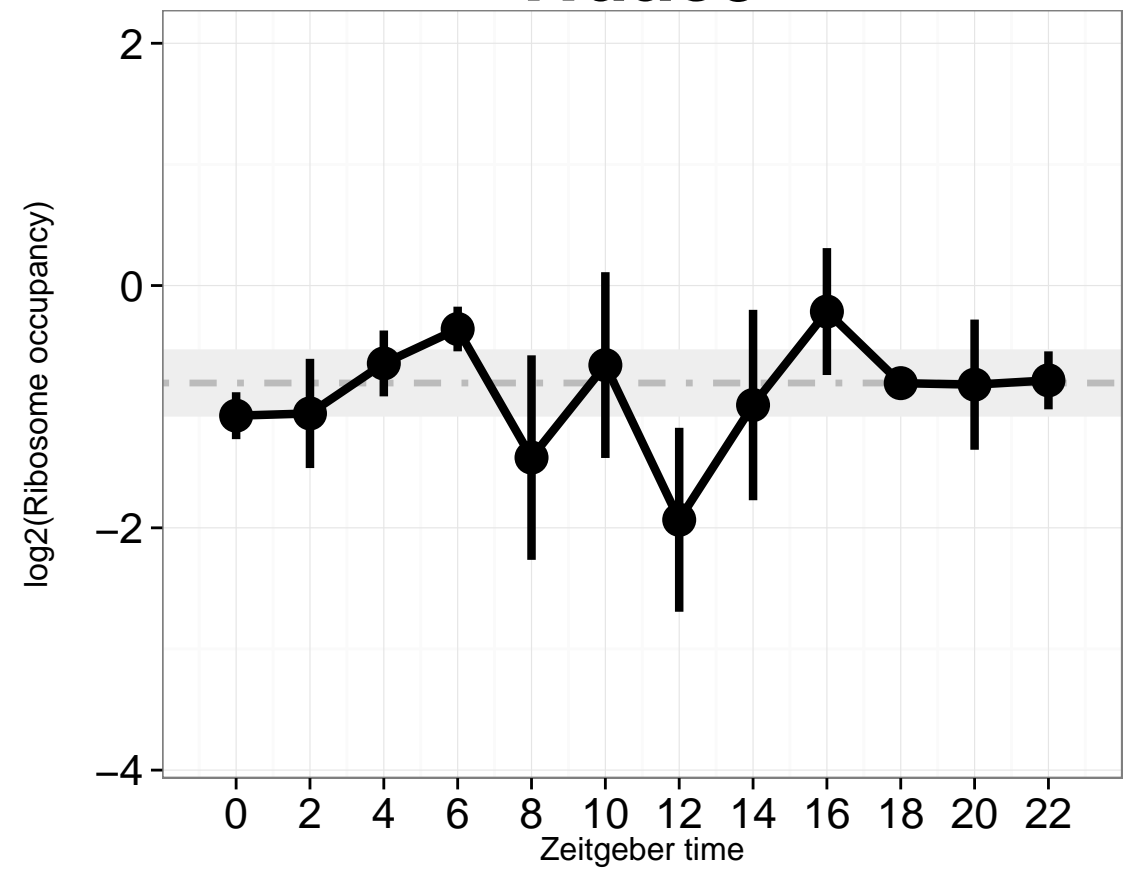

Supplement: SuppDataset_1.zip [file Hdac9_set_A.pdf › Supplemental Dataset 1/A-mRNA_nonrhyth_translation_nonrhyth/Hdac9_set_A.pdf]

## Hddc3

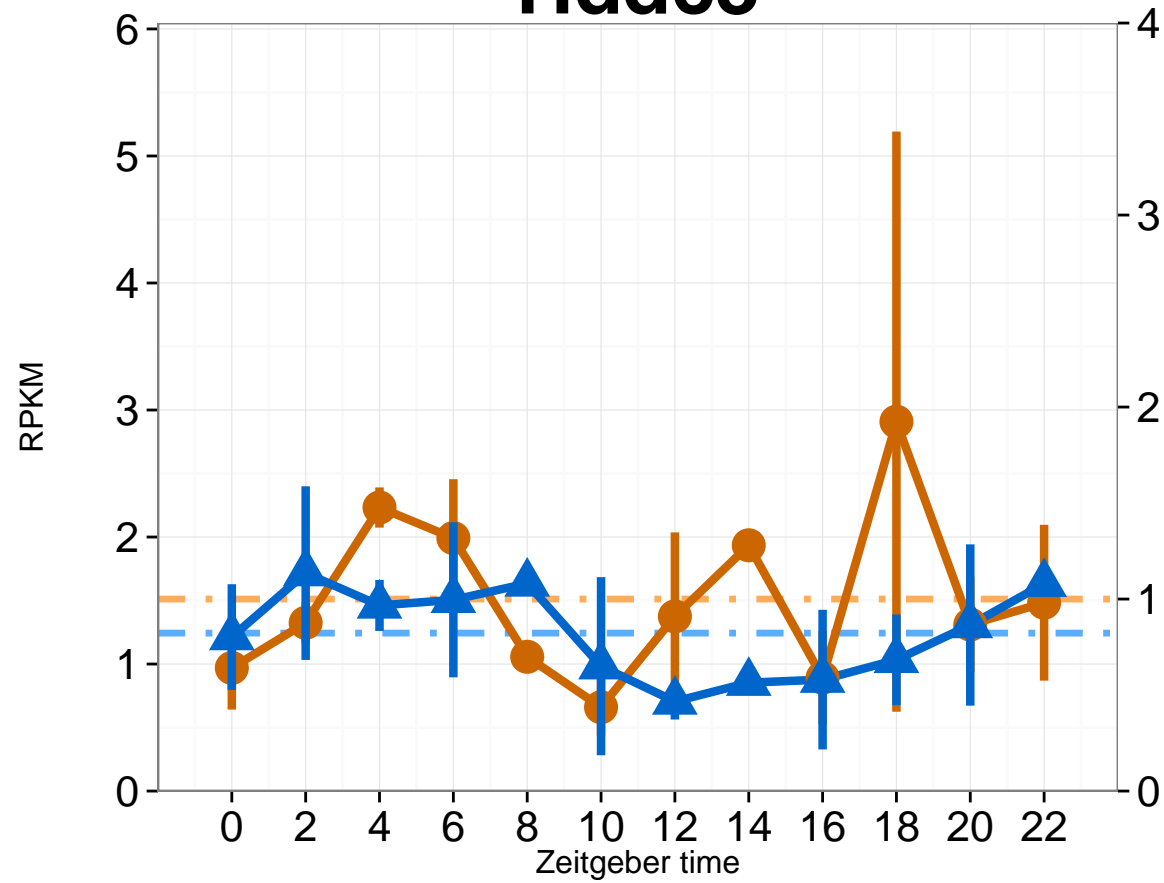

## Hddc3

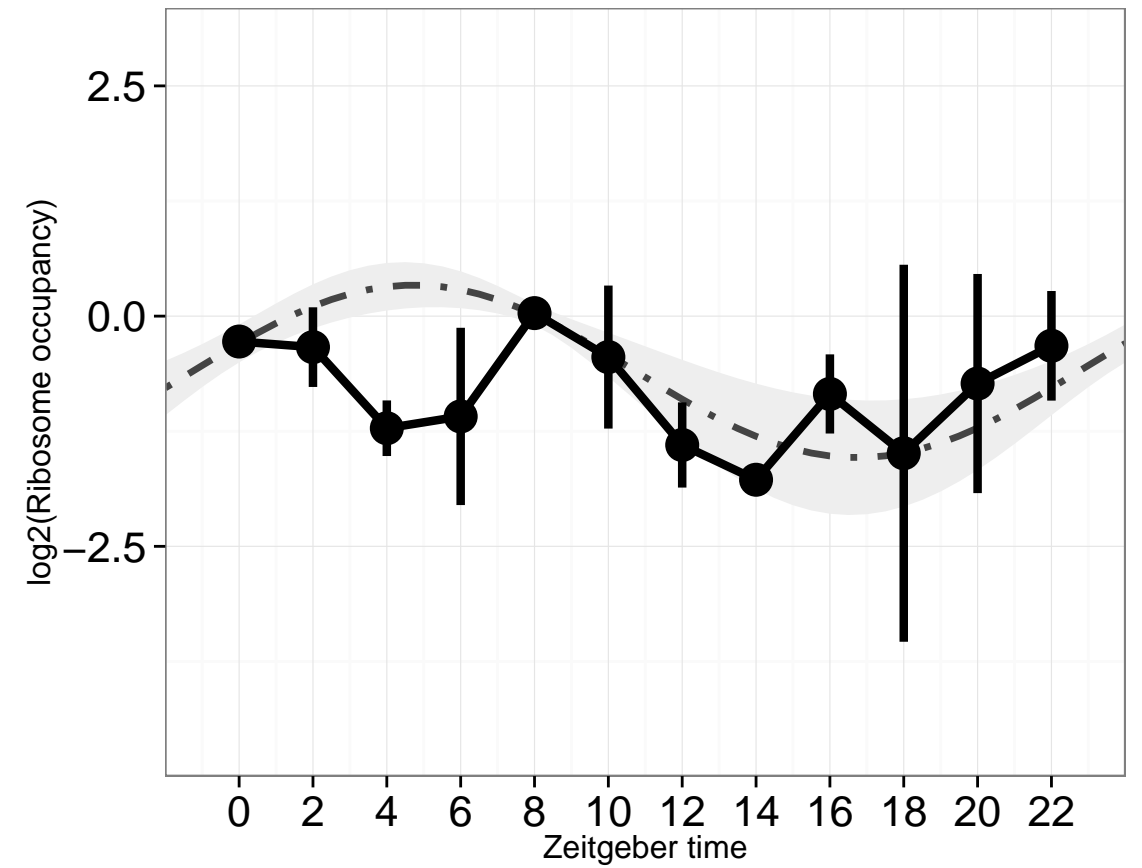

Supplement: SuppDataset_1.zip [file Hddc3_set_A.pdf › Supplemental Dataset 1/A-mRNA_nonrhyth_translation_nonrhyth/Hddc3_set_A.pdf]

## Hdgf

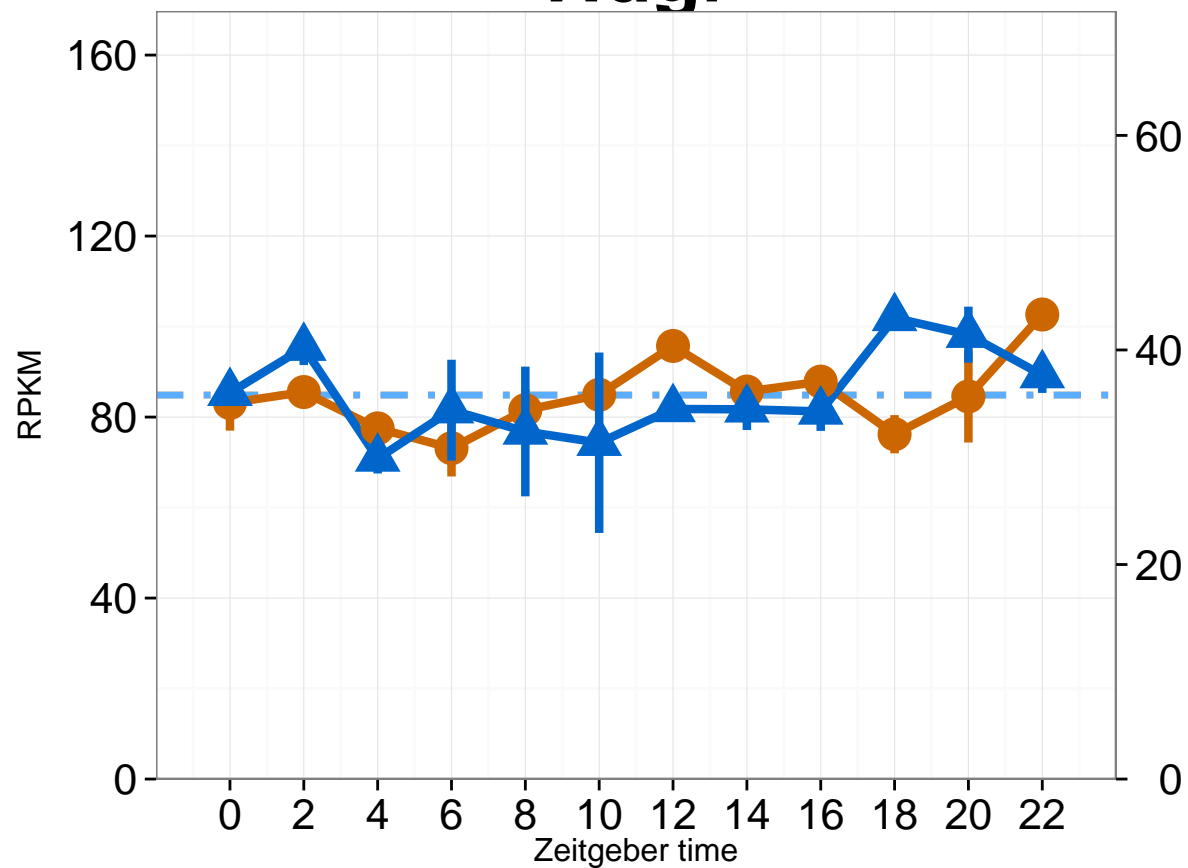

## Hdgf

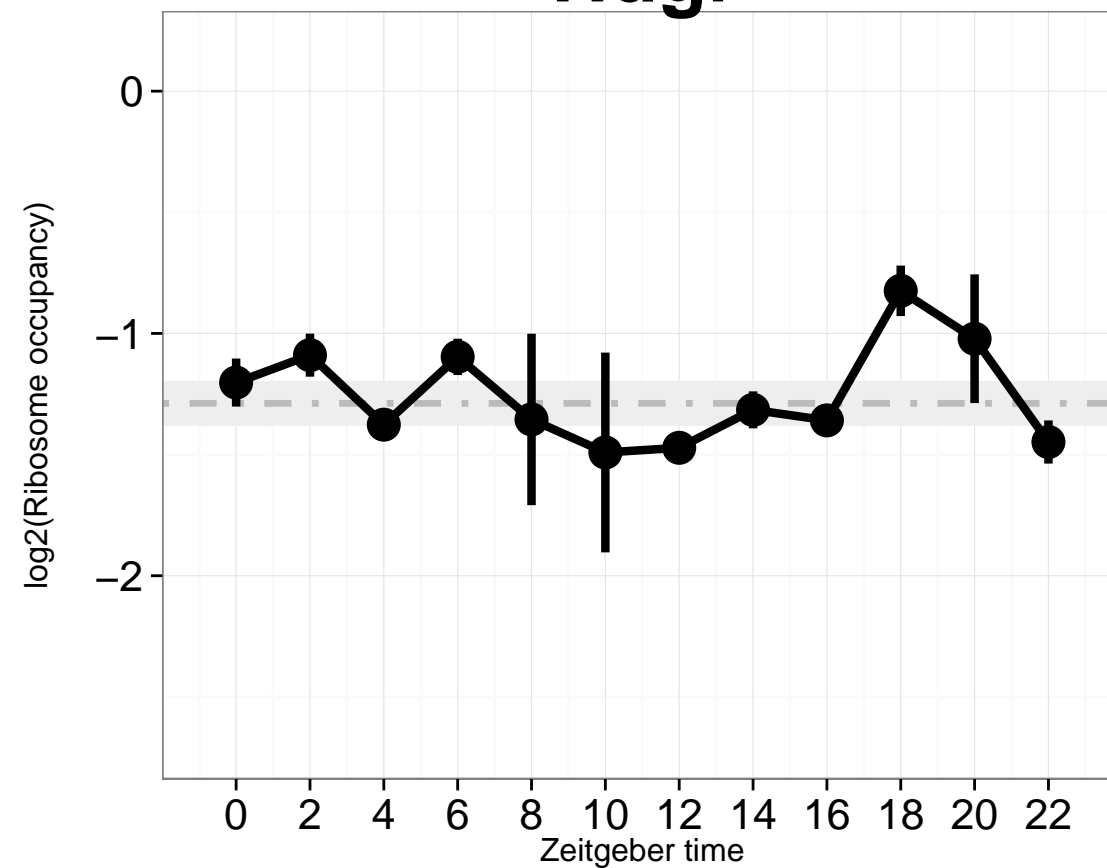

Supplement: SuppDataset_1.zip [file Hdgf_set_A.pdf › Supplemental Dataset 1/A-mRNA_nonrhyth_translation_nonrhyth/Hdgf_set_A.pdf]

## Hdgfrp2

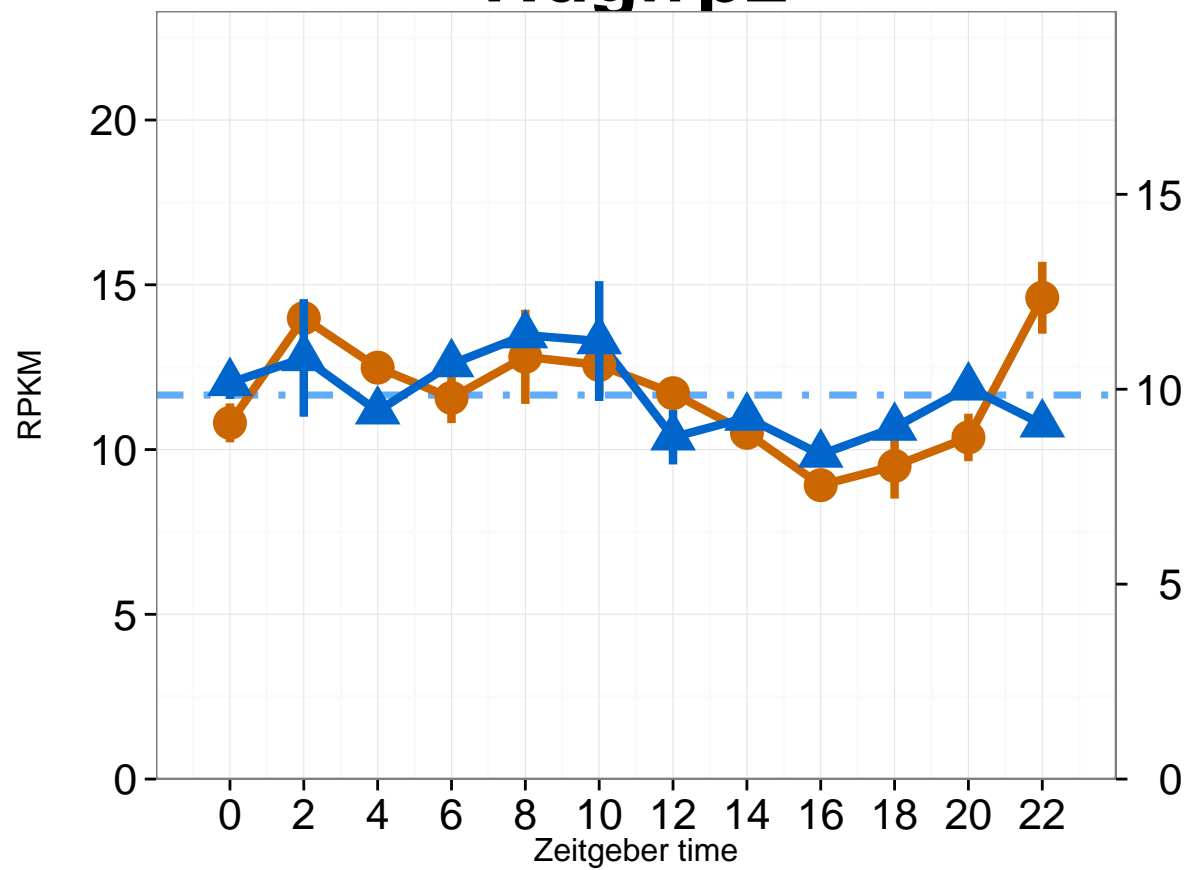

## Hdgfrp2

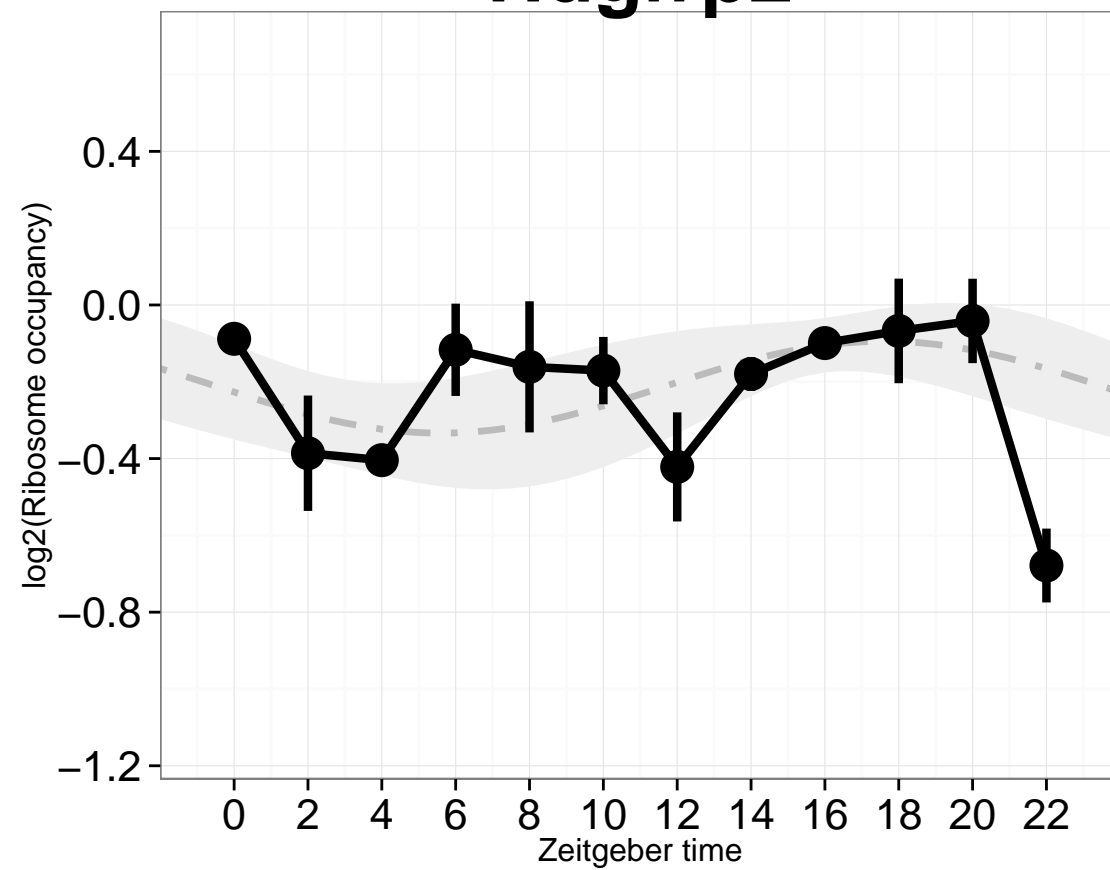

Supplement: SuppDataset_1.zip [file Hdgfrp2_set_A.pdf › Supplemental Dataset 1/A-mRNA_nonrhyth_translation_nonrhyth/Hdgfrp2_set_A.pdf]

## Hdhd2

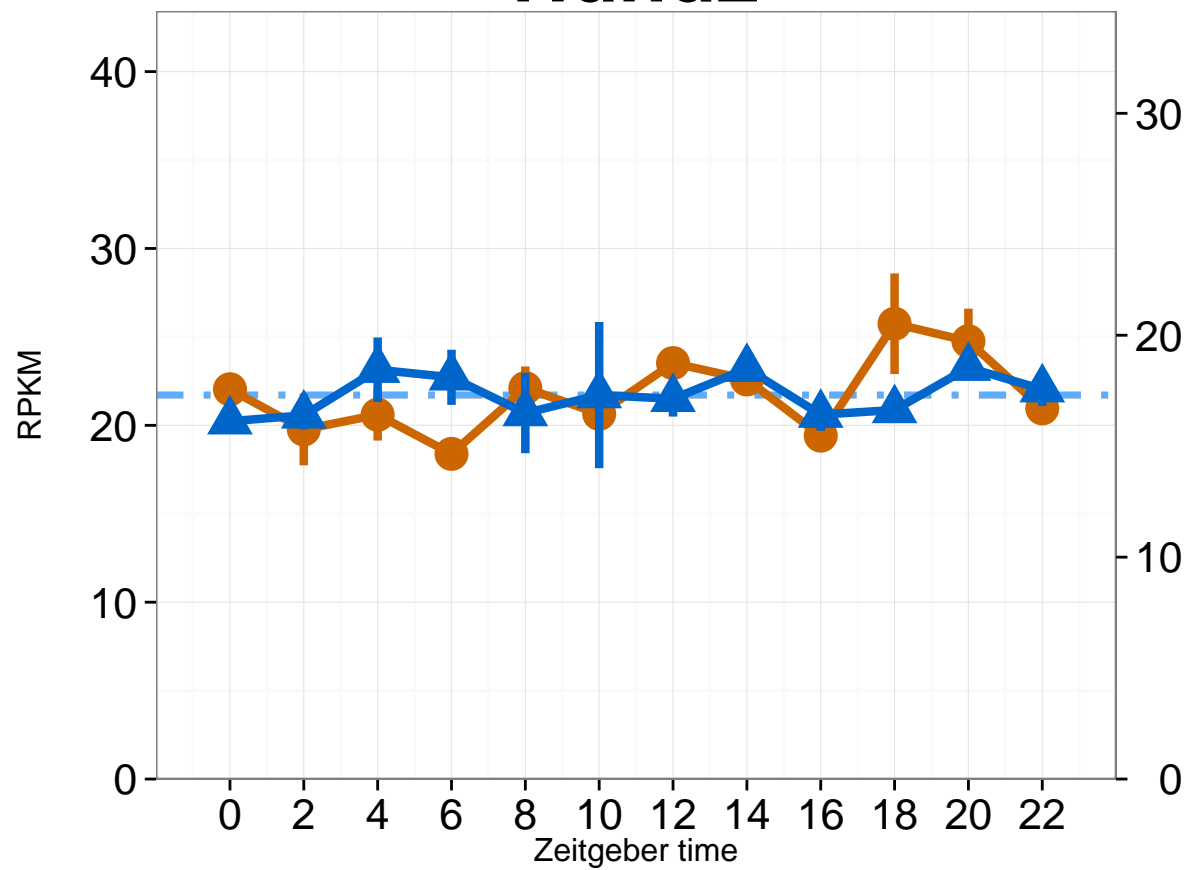

## Hdhd2

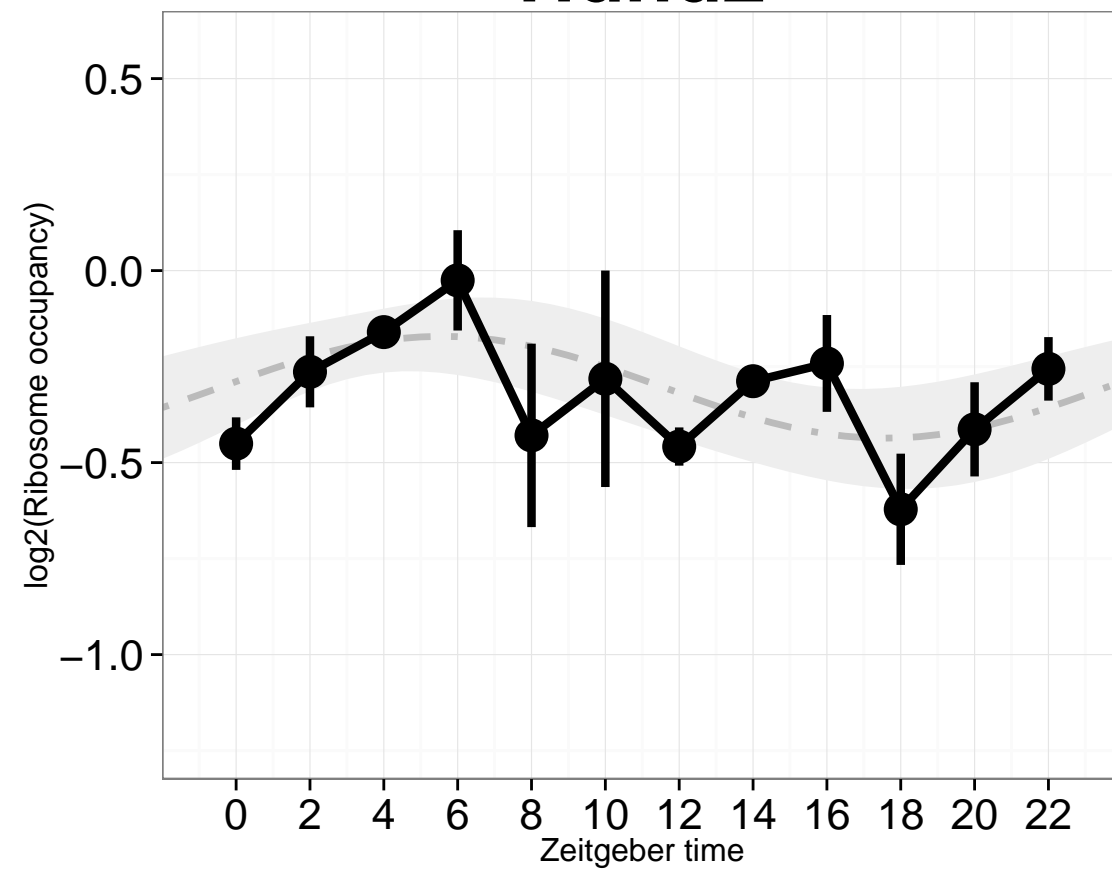

Supplement: SuppDataset_1.zip [file Hdhd2_set_A.pdf › Supplemental Dataset 1/A-mRNA_nonrhyth_translation_nonrhyth/Hdhd2_set_A.pdf]

## Hdlbp

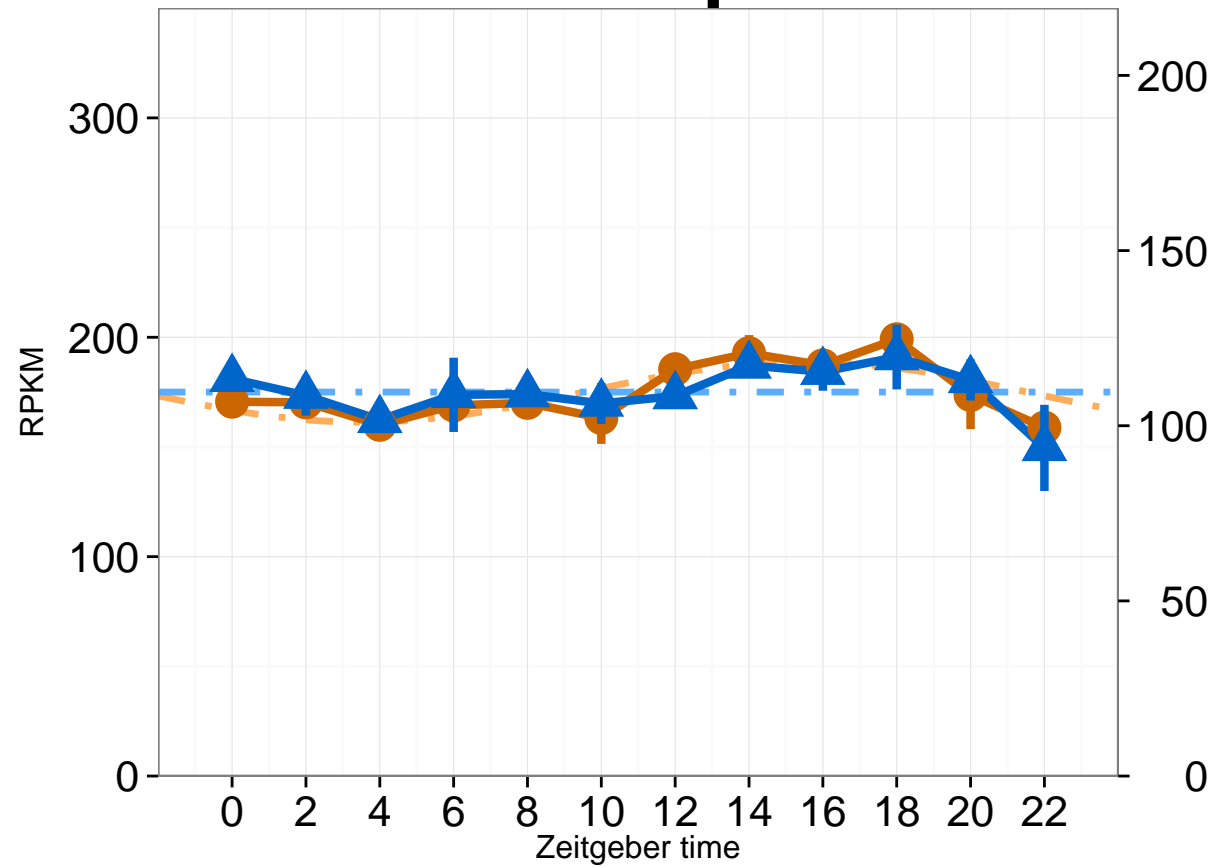

## Hdlbp

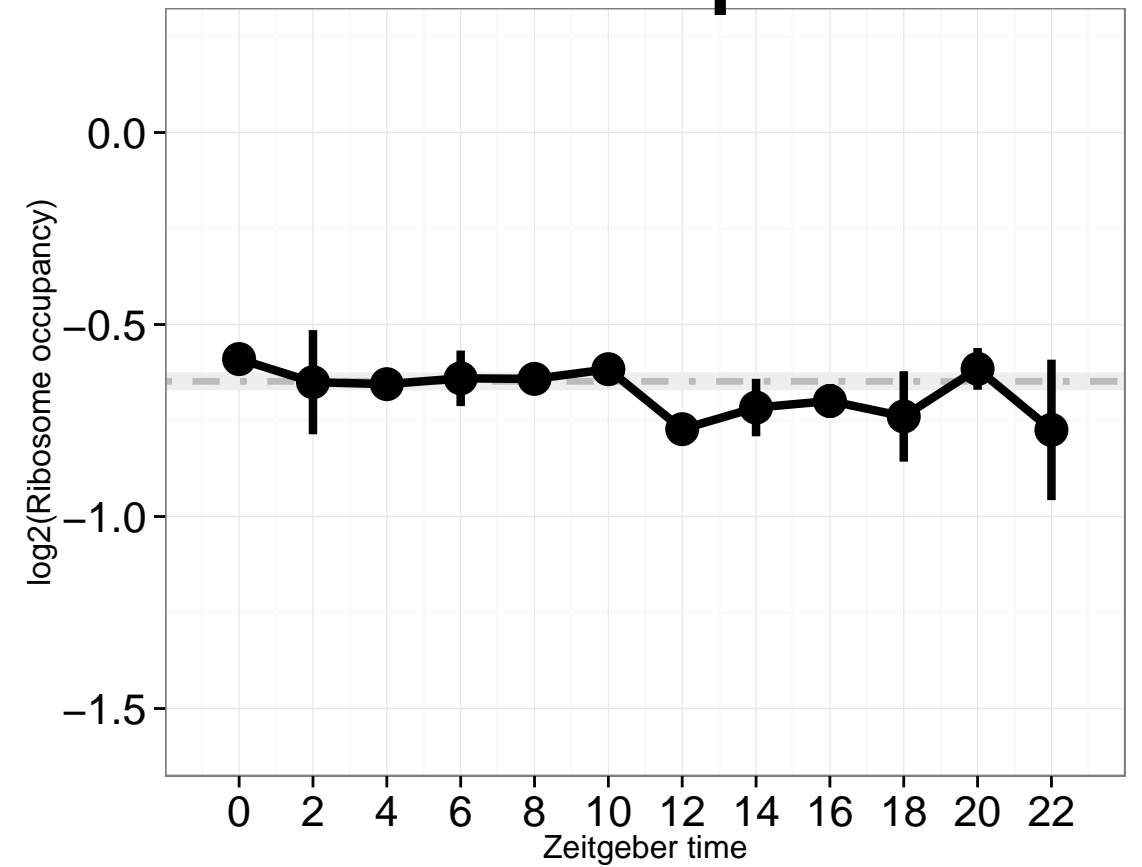

Supplement: SuppDataset_1.zip [file Hdlbp_set_A.pdf › Supplemental Dataset 1/A-mRNA_nonrhyth_translation_nonrhyth/Hdlbp_set_A.pdf]

# Heatr1

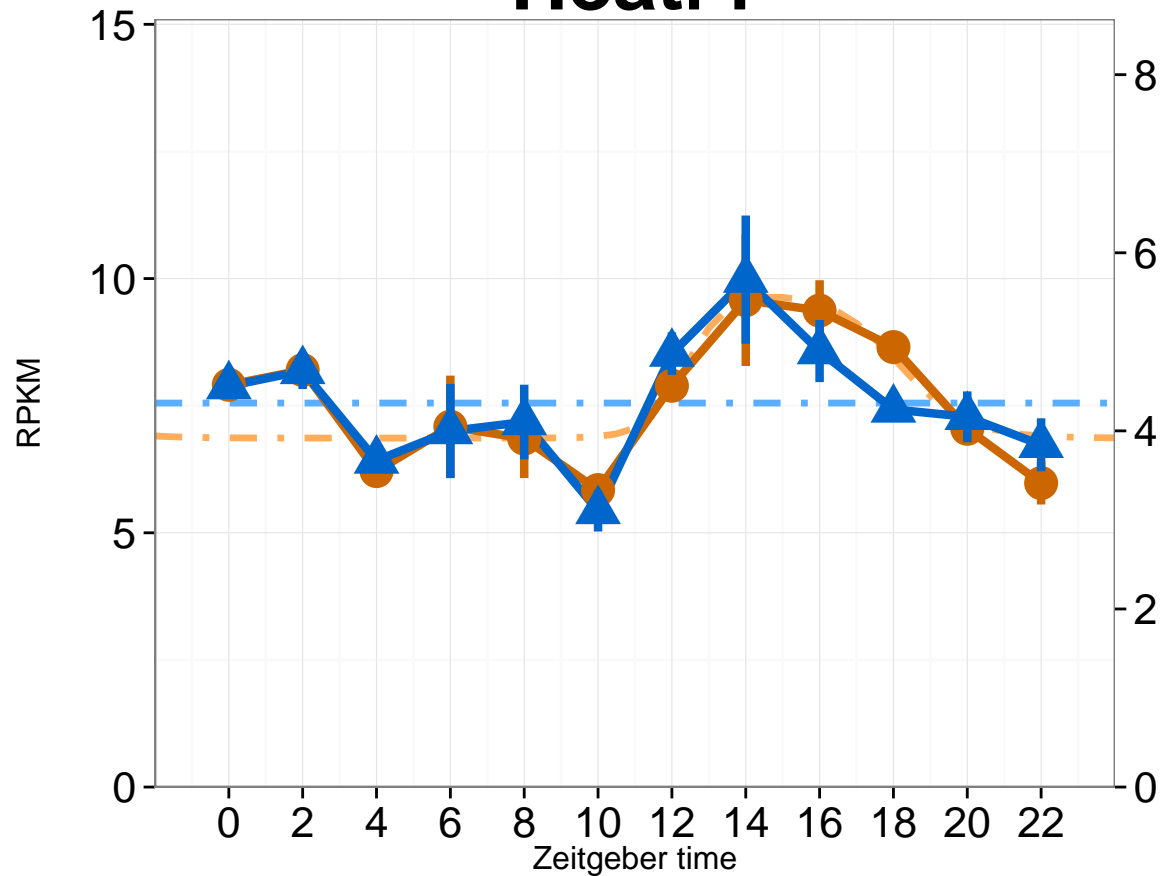

# Heatr1

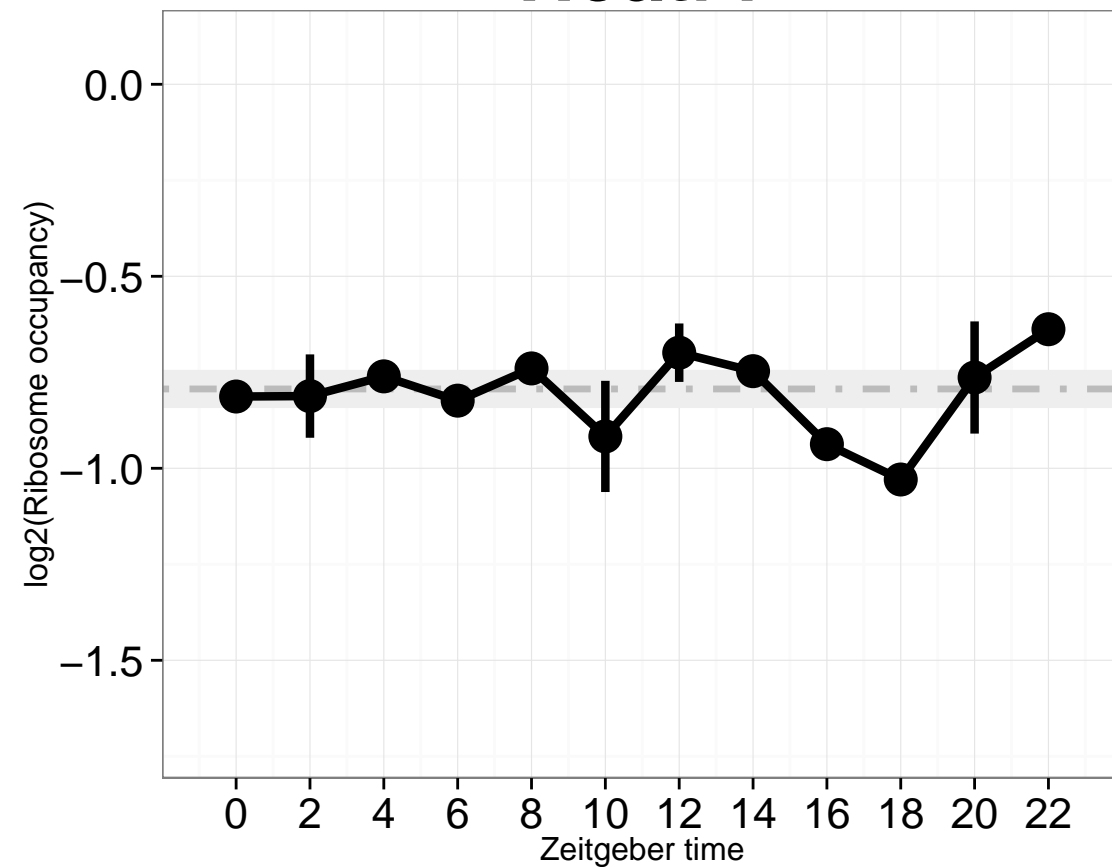

Supplement: SuppDataset_1.zip [file Heatr1_set_A.pdf › Supplemental Dataset 1/A-mRNA_nonrhyth_translation_nonrhyth/Heatr1_set_A.pdf]

# Heatr3

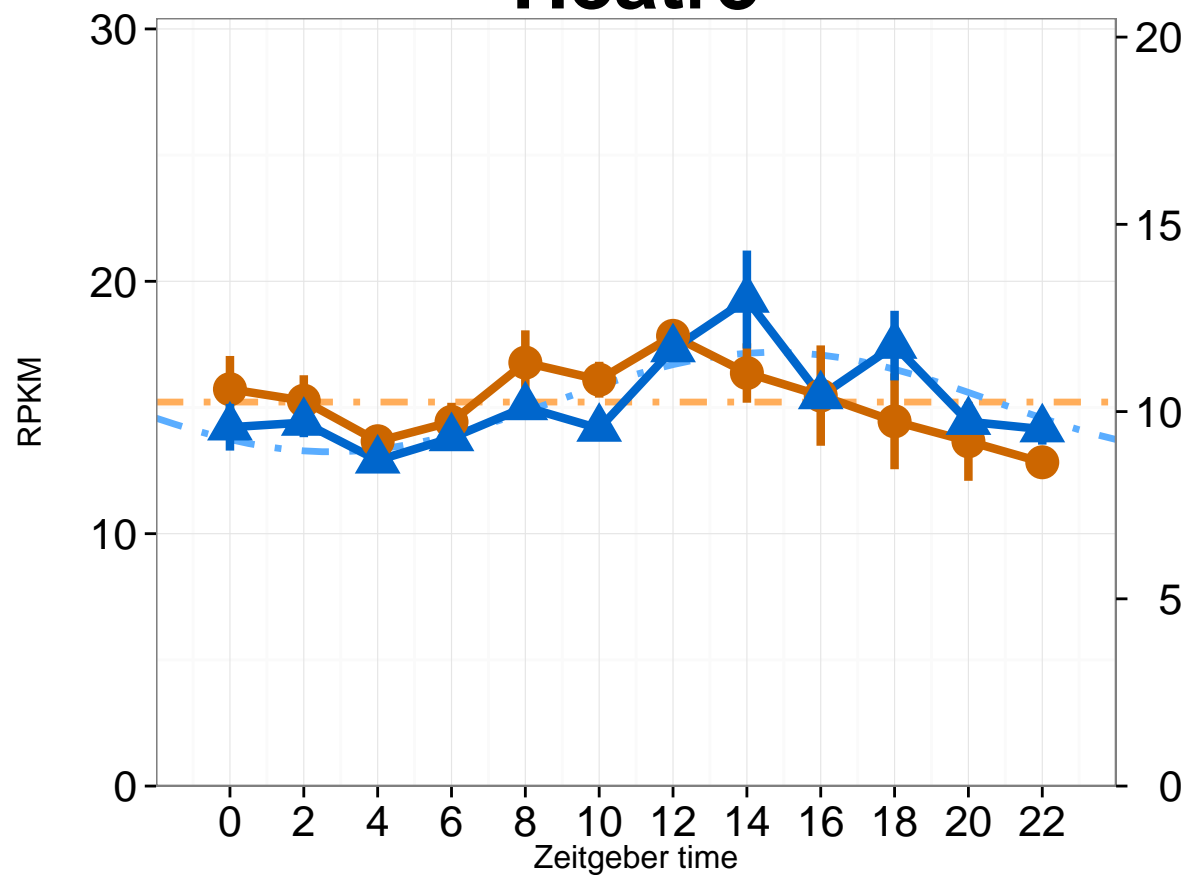

# Heatr3

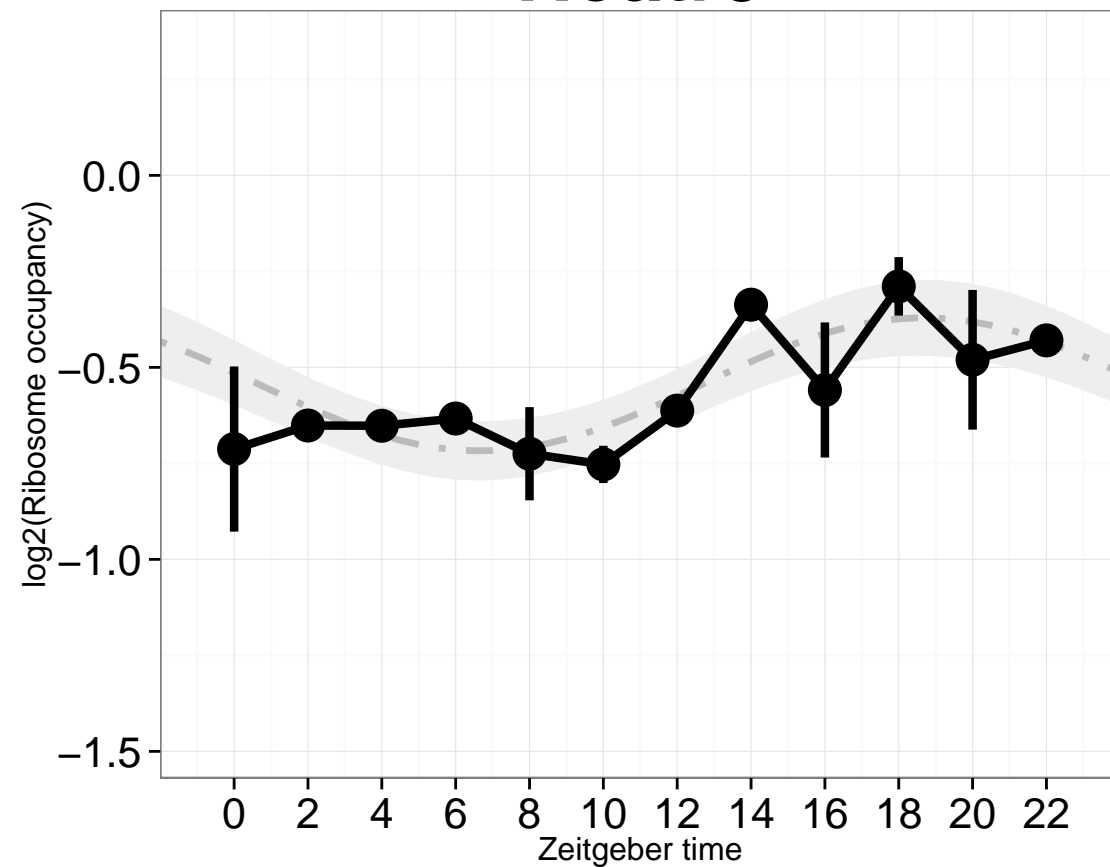

Supplement: SuppDataset_1.zip [file Heatr3_set_A.pdf › Supplemental Dataset 1/A-mRNA_nonrhyth_translation_nonrhyth/Heatr3_set_A.pdf]

# Heatr5a

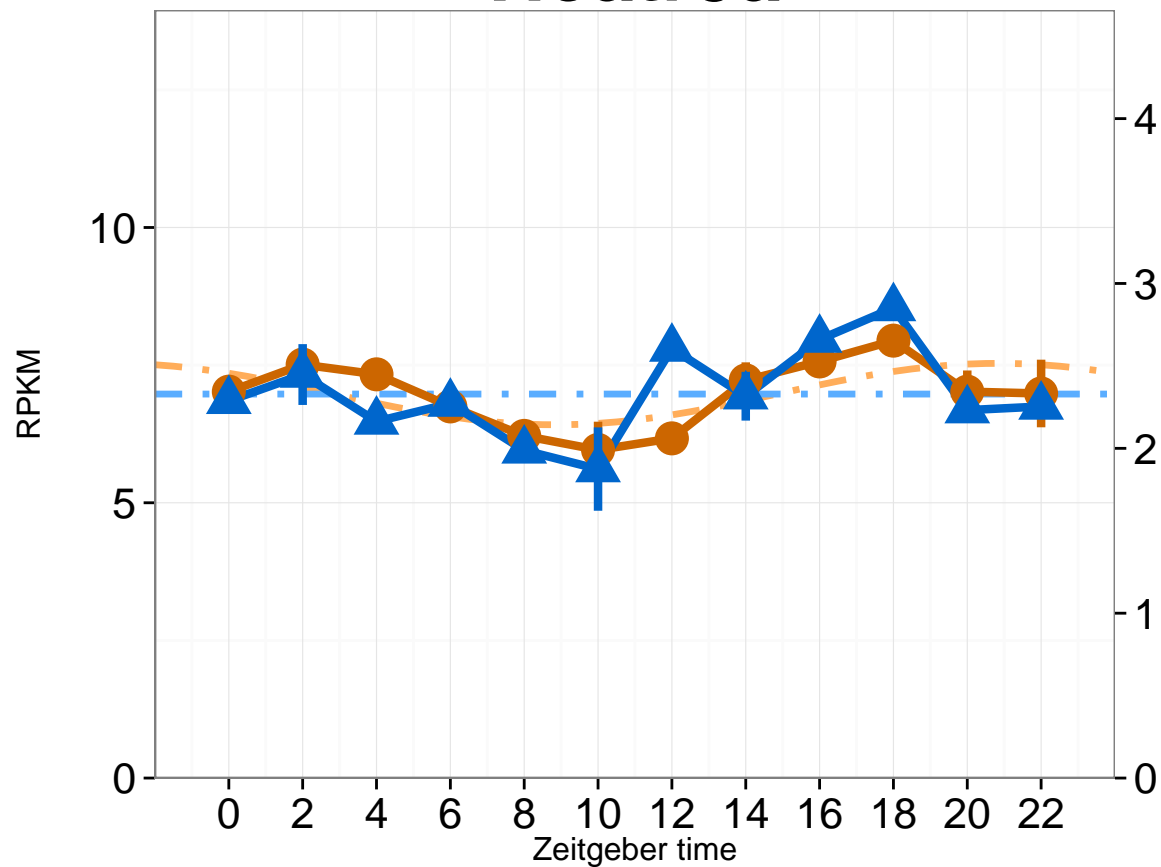

# Heatr5a

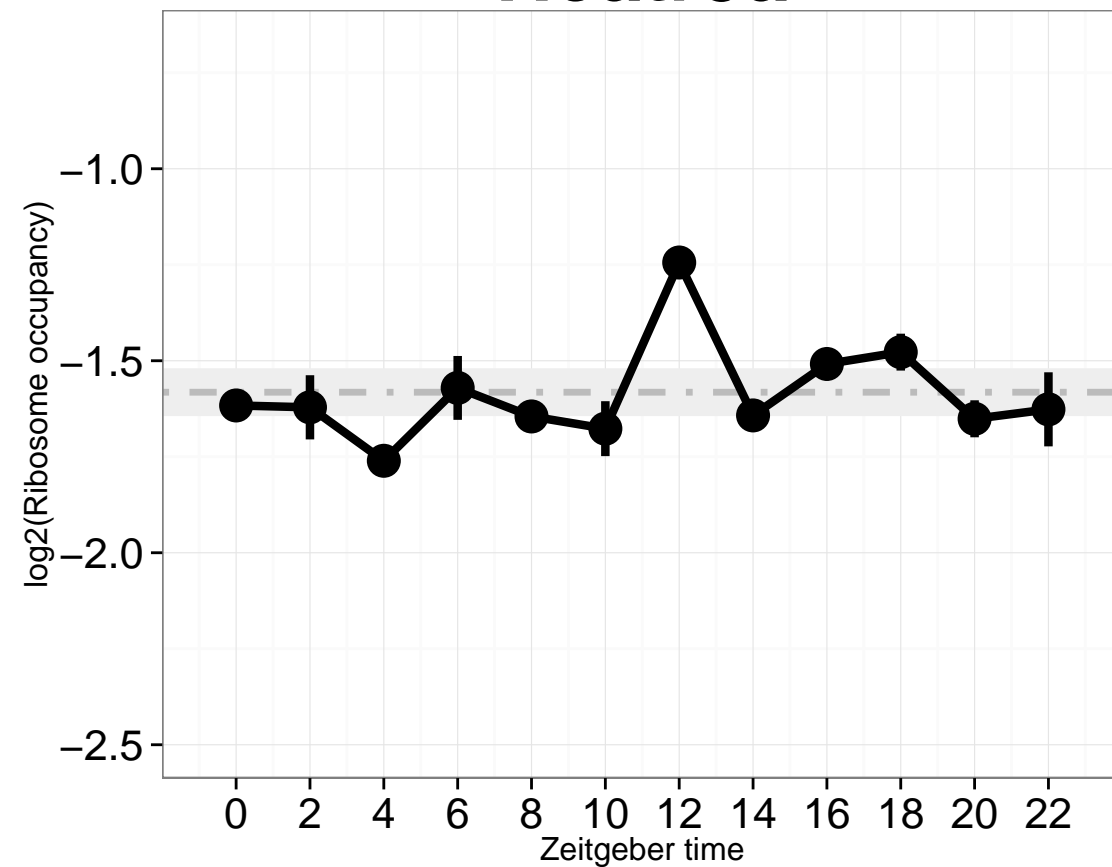

Supplement: SuppDataset_1.zip [file Heatr5a_set_A.pdf › Supplemental Dataset 1/A-mRNA_nonrhyth_translation_nonrhyth/Heatr5a_set_A.pdf]

# Heatr5b

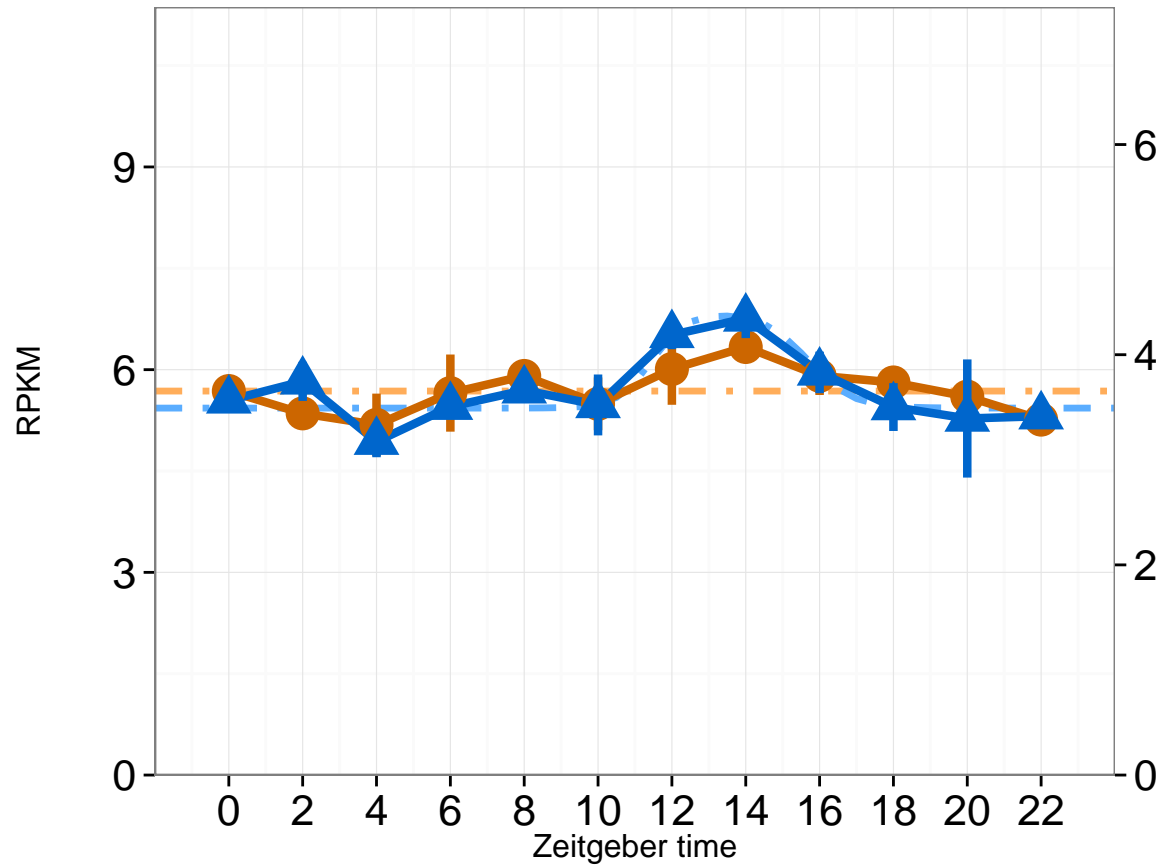

# Heatr5b

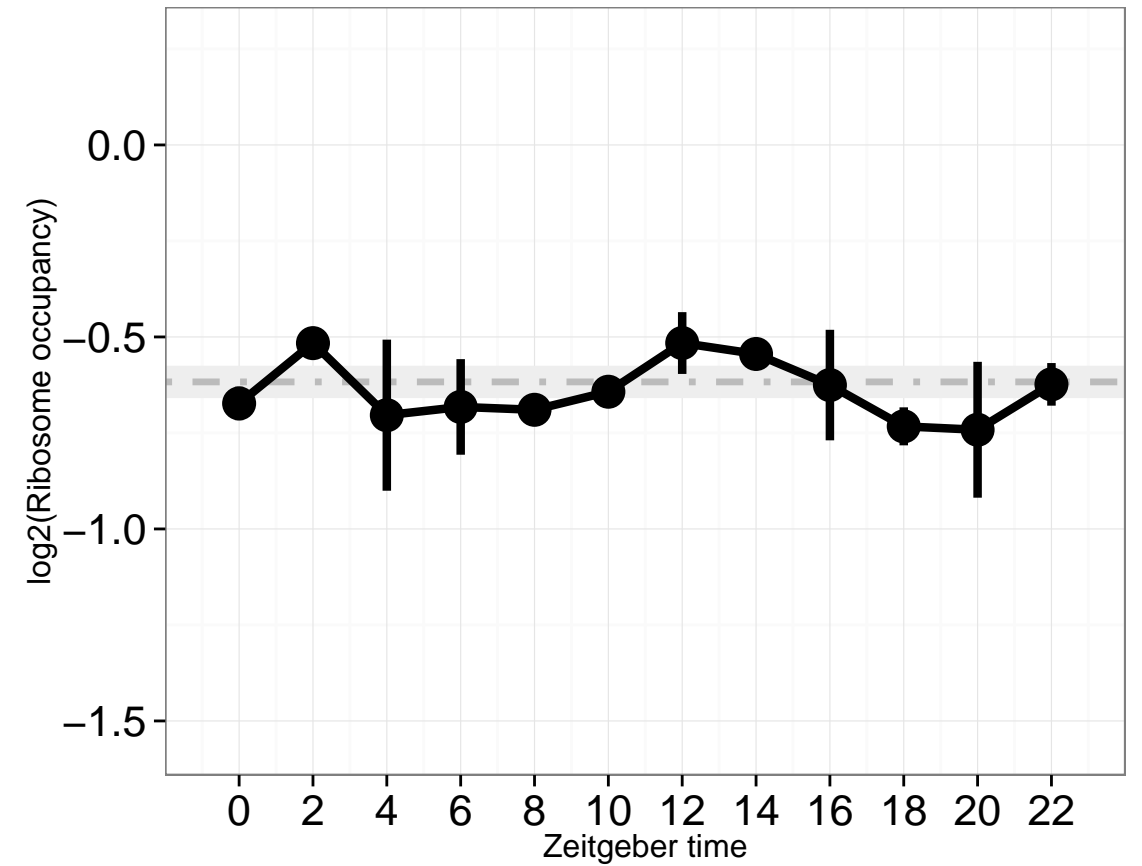

Supplement: SuppDataset_1.zip [file Heatr5b_set_A.pdf › Supplemental Dataset 1/A-mRNA_nonrhyth_translation_nonrhyth/Heatr5b_set_A.pdf]

# Heatr6

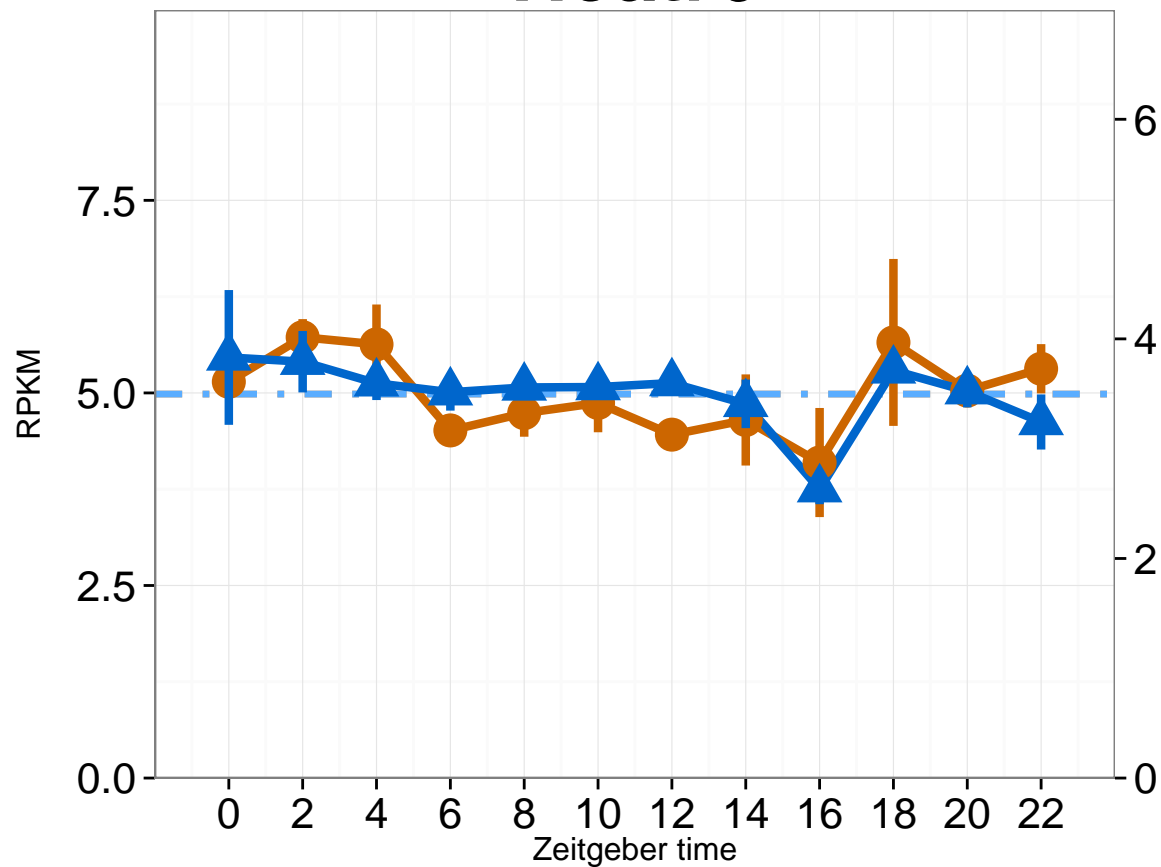

# Heatr6

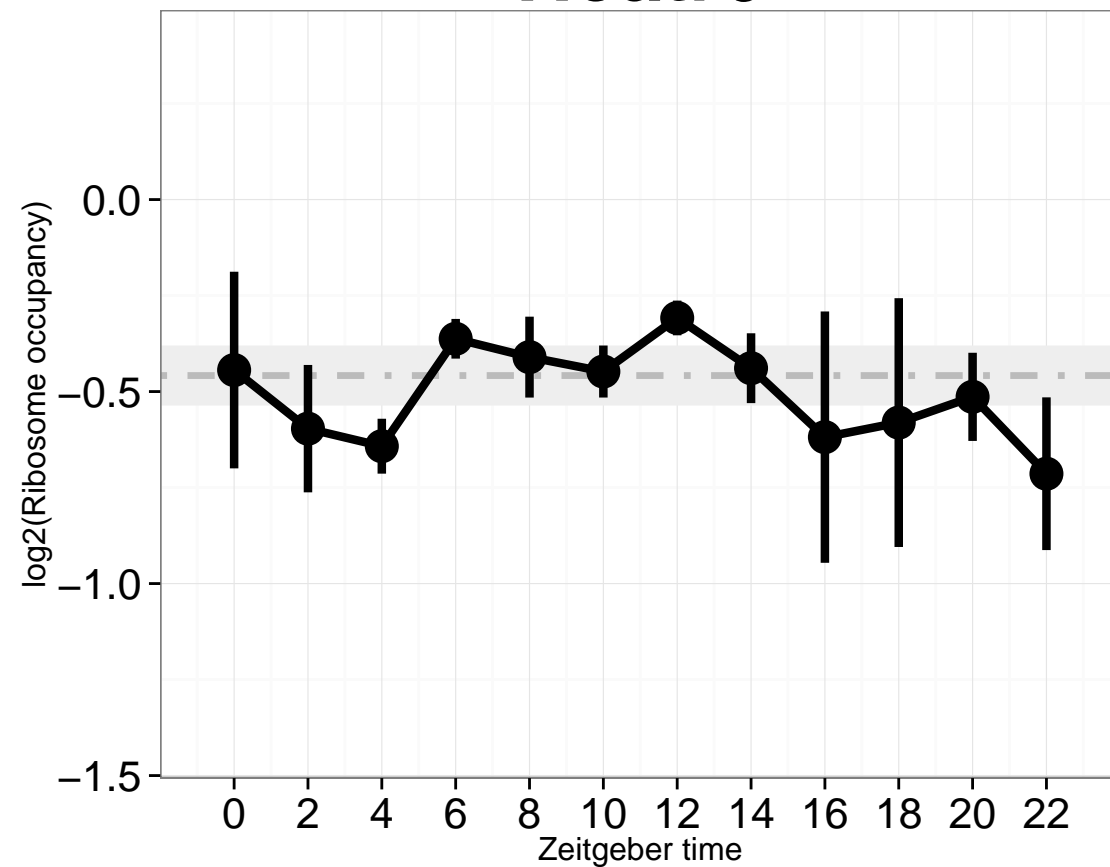

Supplement: SuppDataset_1.zip [file Heatr6_set_A.pdf › Supplemental Dataset 1/A-mRNA_nonrhyth_translation_nonrhyth/Heatr6_set_A.pdf]

## Hebp1

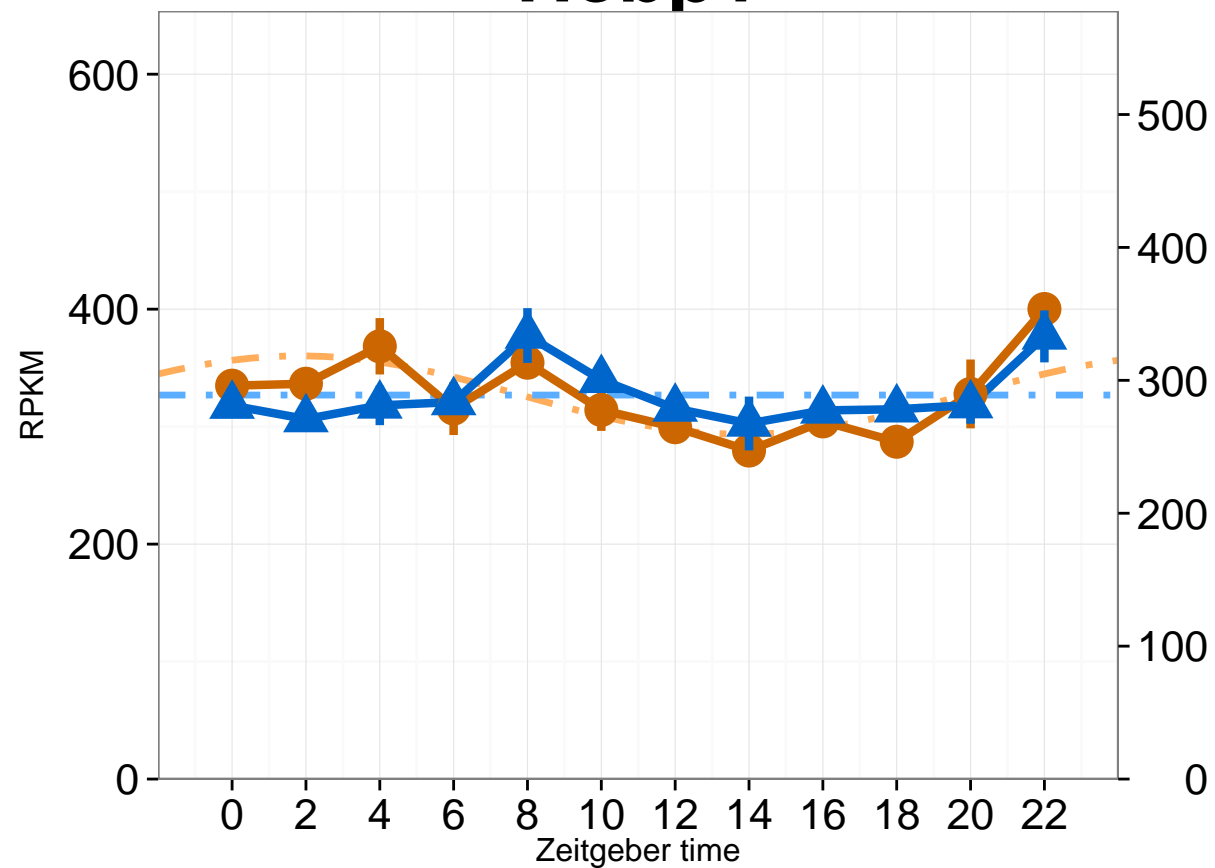

## Hebp1

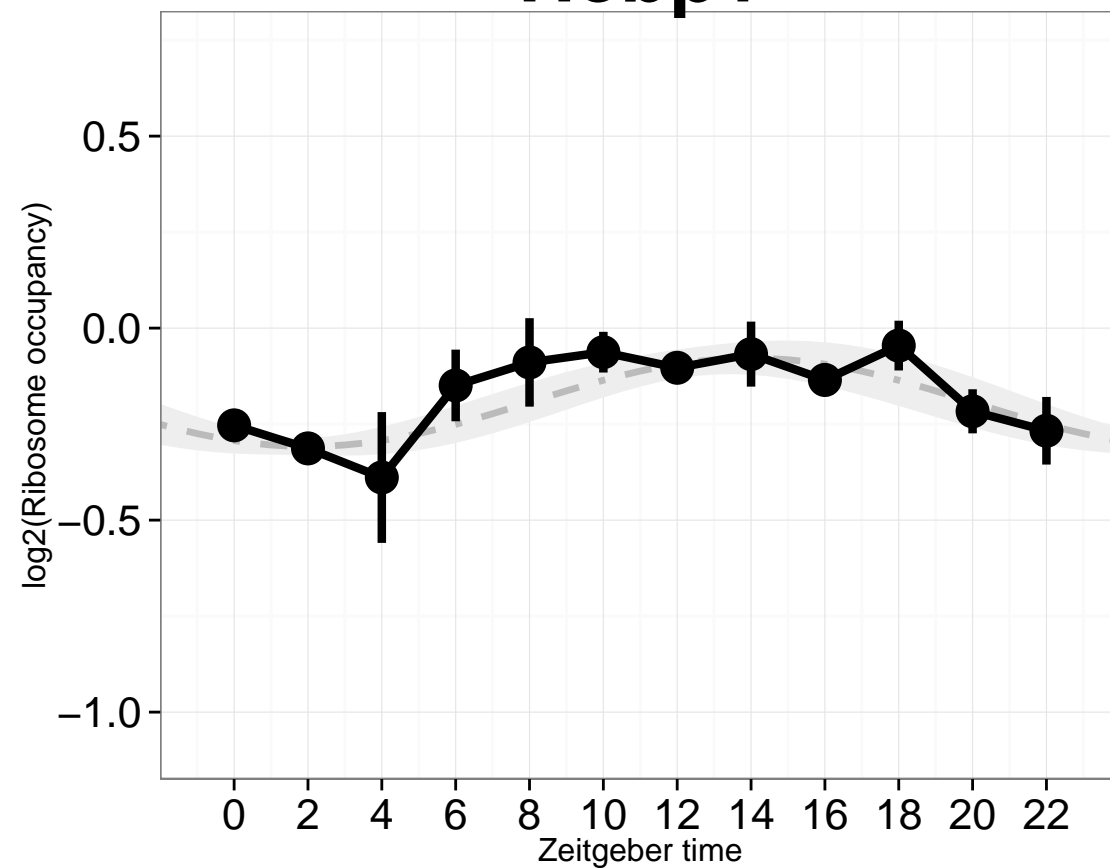

Supplement: SuppDataset_1.zip [file Hebp1_set_A.pdf › Supplemental Dataset 1/A-mRNA_nonrhyth_translation_nonrhyth/Hebp1_set_A.pdf]

## Heca

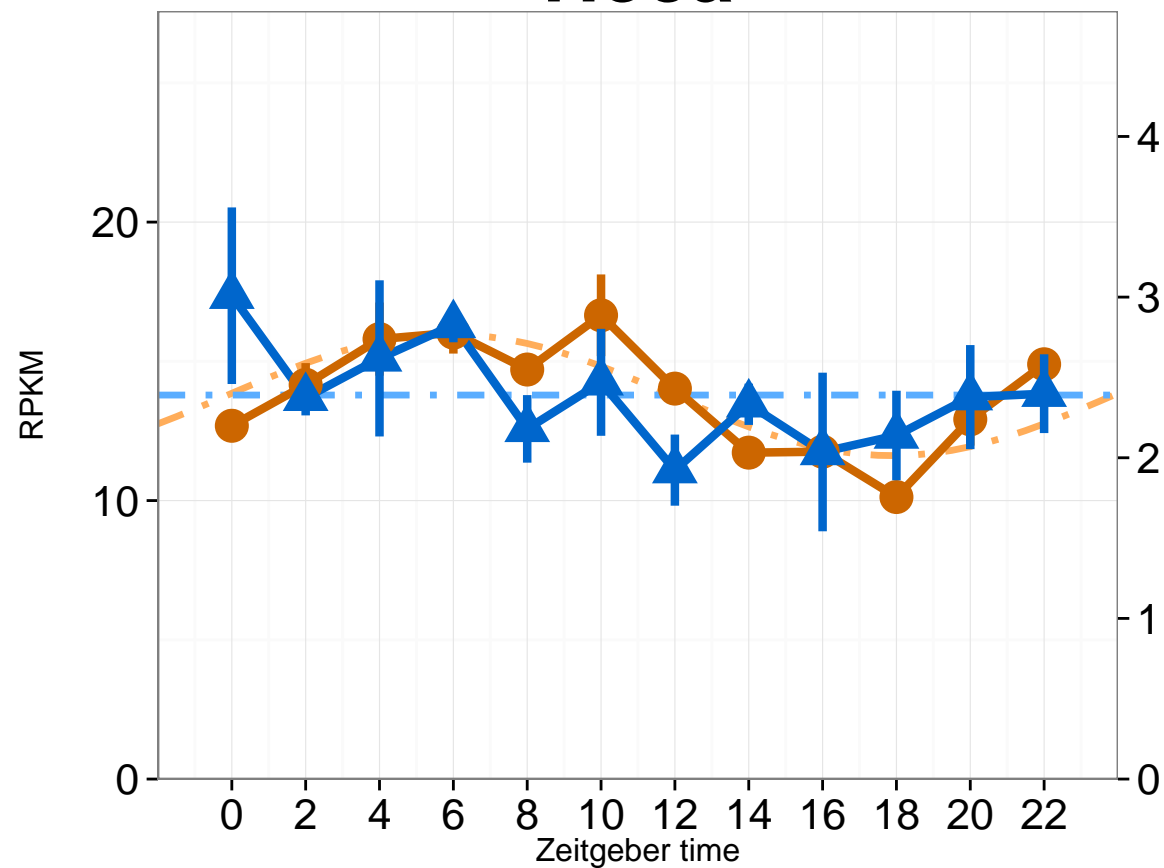

## Heca

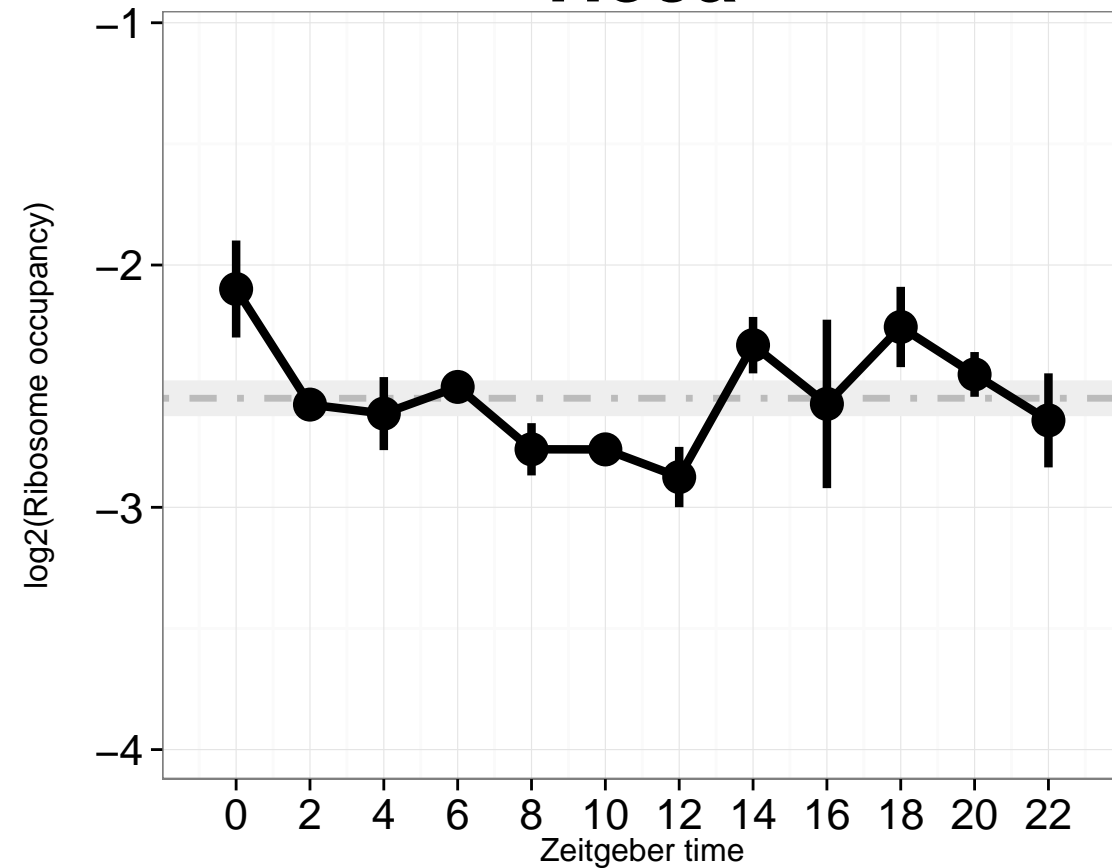

Supplement: SuppDataset_1.zip [file Heca_set_A.pdf › Supplemental Dataset 1/A-mRNA_nonrhyth_translation_nonrhyth/Heca_set_A.pdf]

## Hectd1

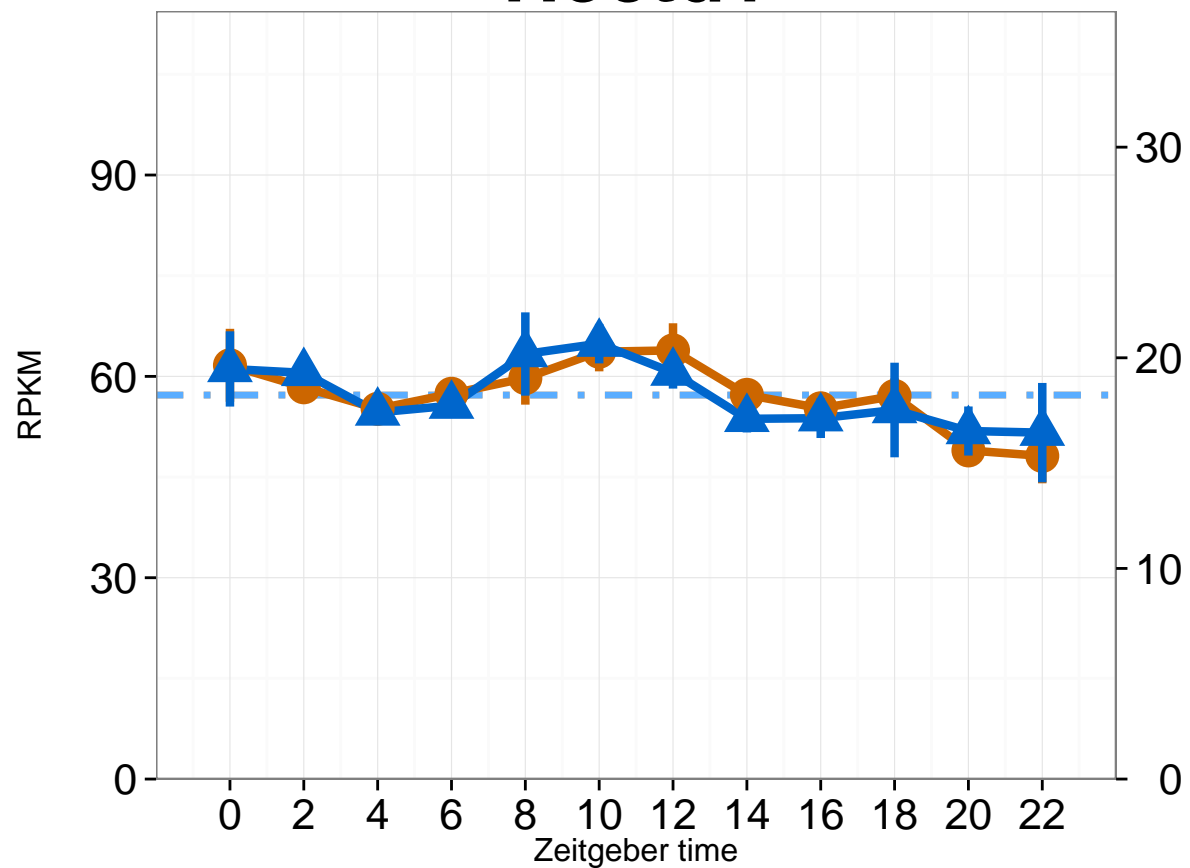

## Hectd1

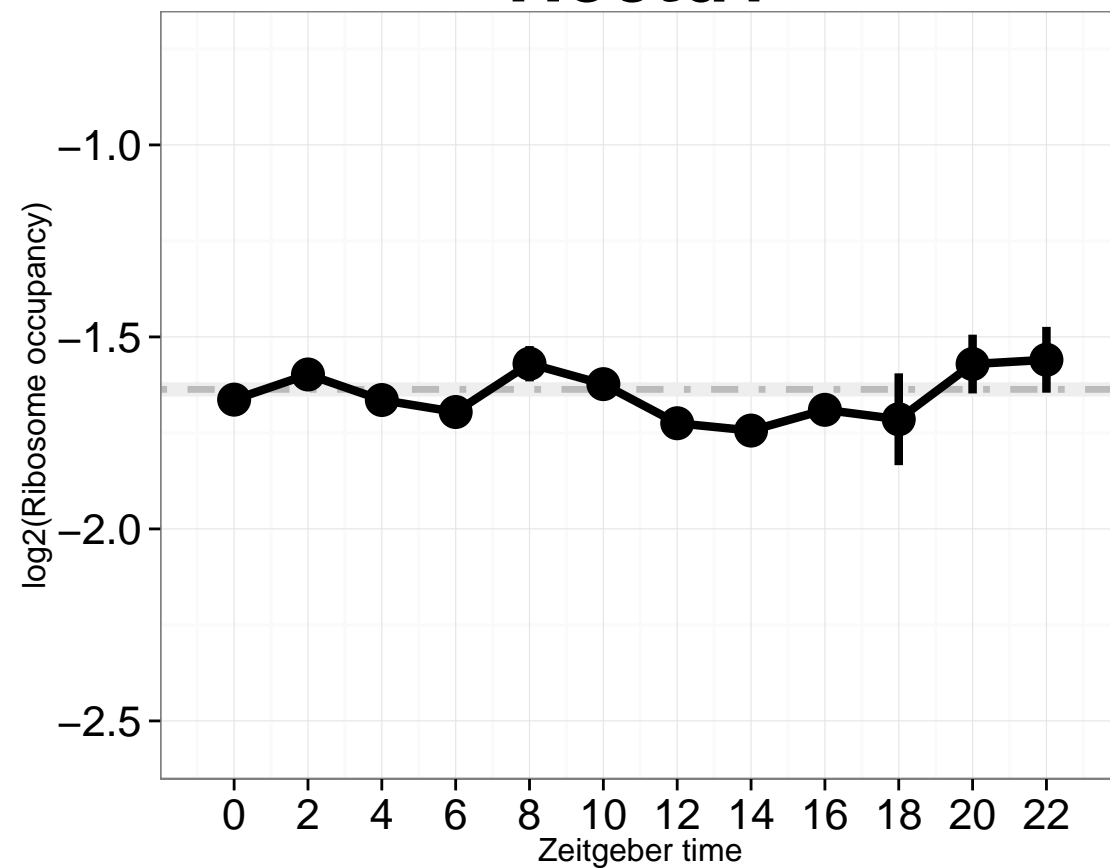

Supplement: SuppDataset_1.zip [file Hectd1_set_A.pdf › Supplemental Dataset 1/A-mRNA_nonrhyth_translation_nonrhyth/Hectd1_set_A.pdf]

# Hectd2

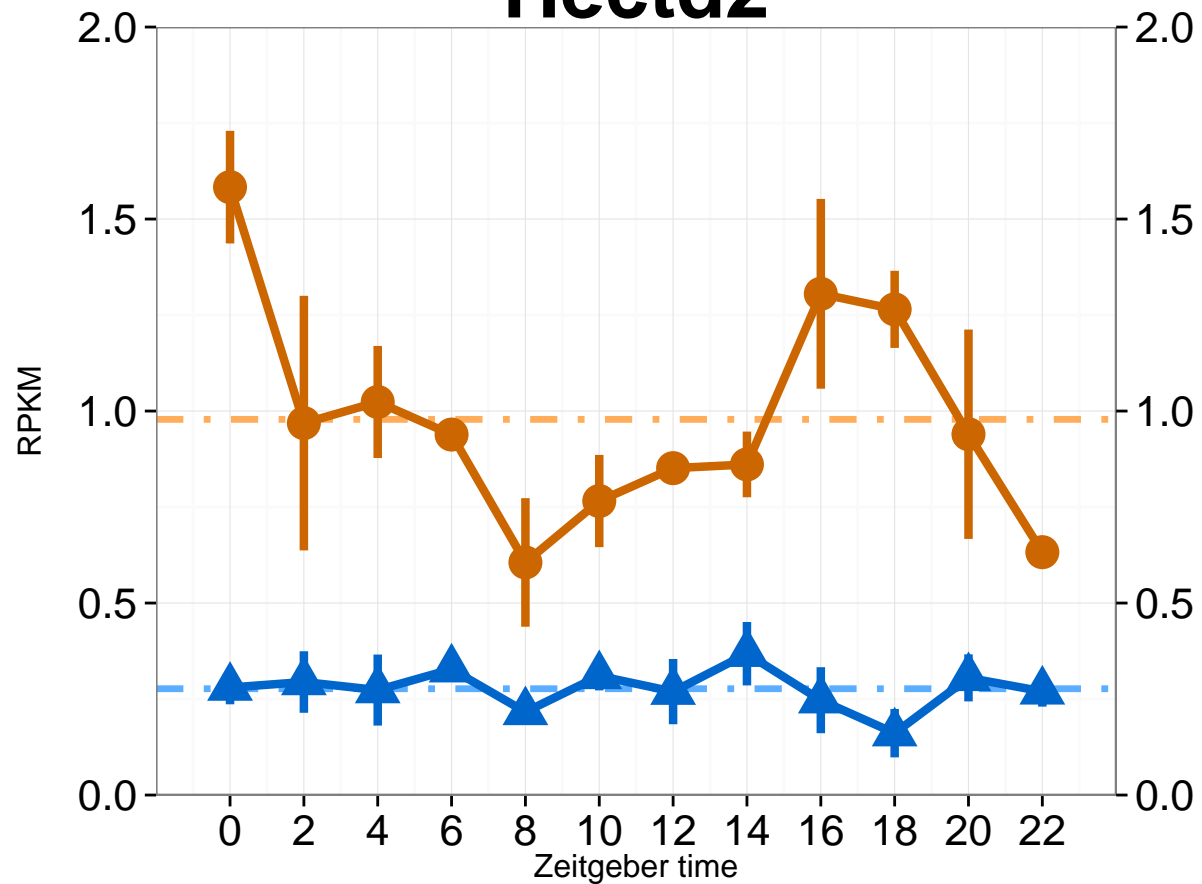

# Hectd2

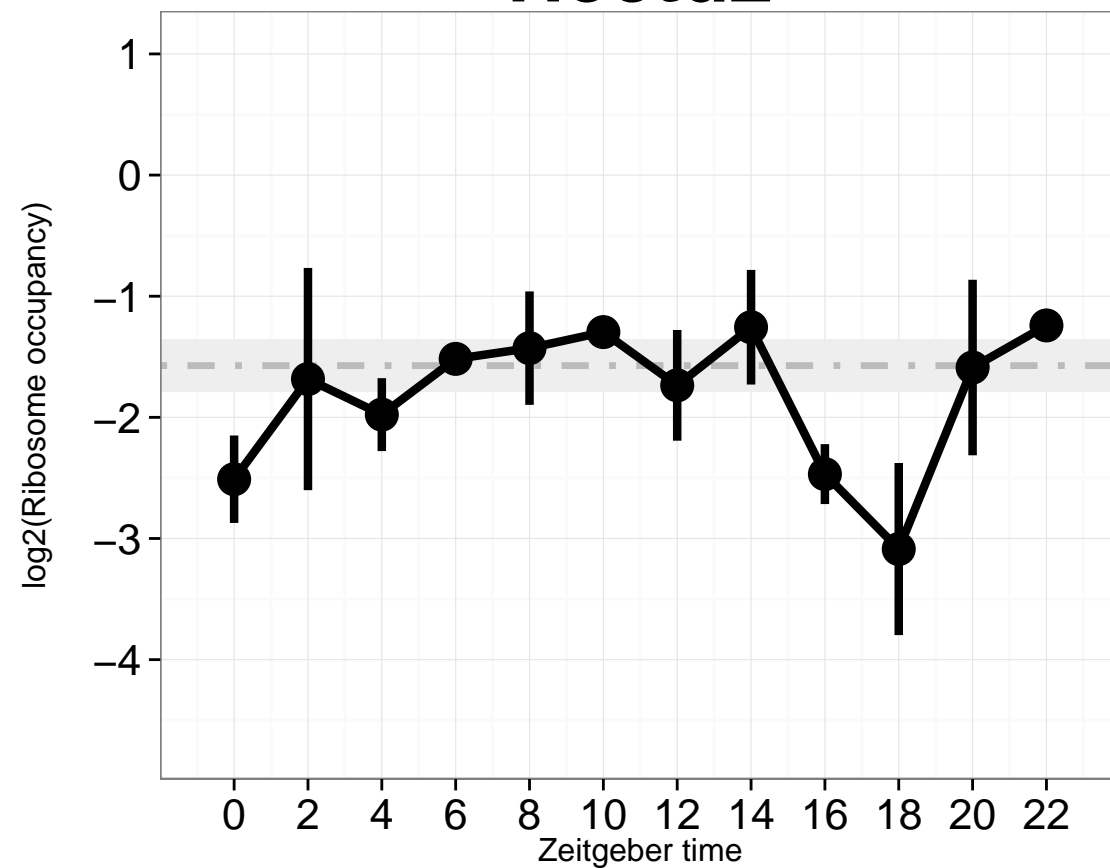

Supplement: SuppDataset_1.zip [file Hectd2_set_A.pdf › Supplemental Dataset 1/A-mRNA_nonrhyth_translation_nonrhyth/Hectd2_set_A.pdf]
