# Supplementary figures and images for: Ribosome profiling reveals the rhythmic liver translatome and circadian clock regulation by upstream open reading frames (part 34 of 113)
Source: HighWire-hosted journal article supplement (doi:10.1101/gr.195404.115), 2015-10-20

## Hectd3

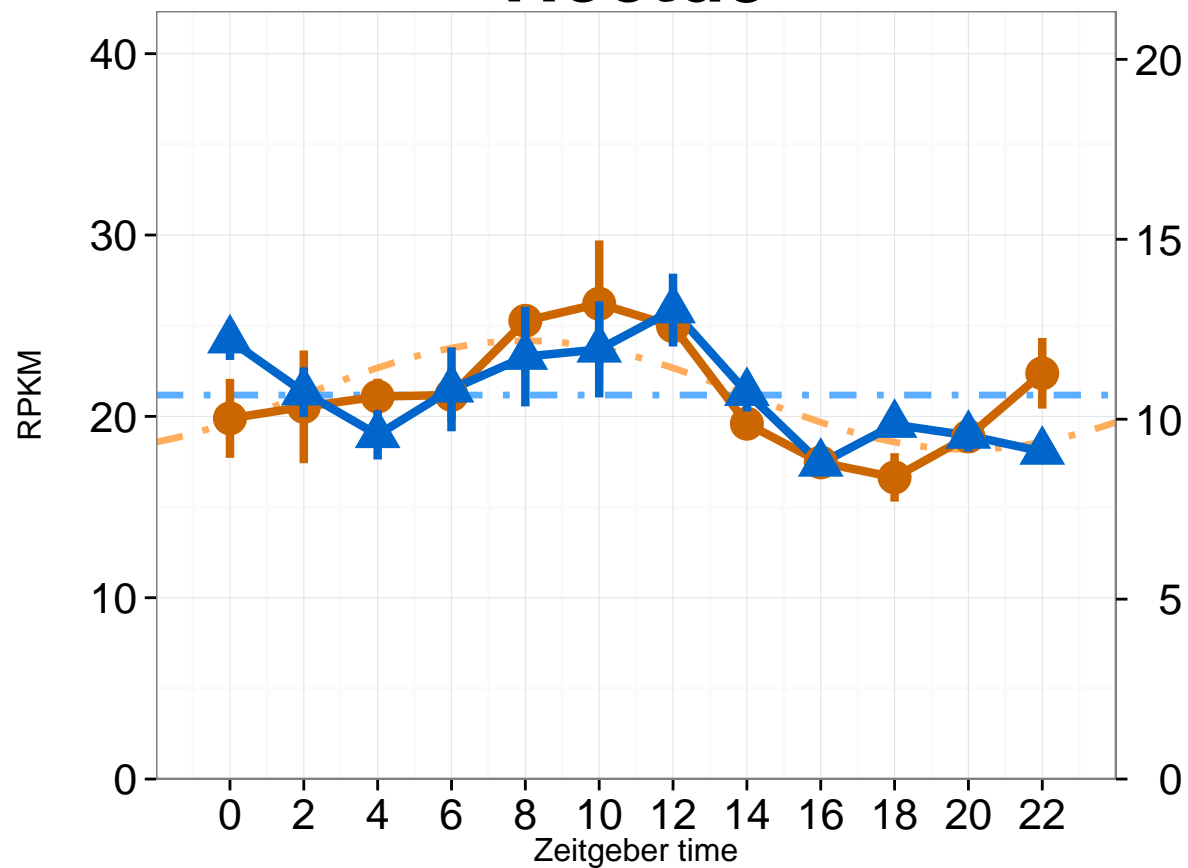

## Hectd3

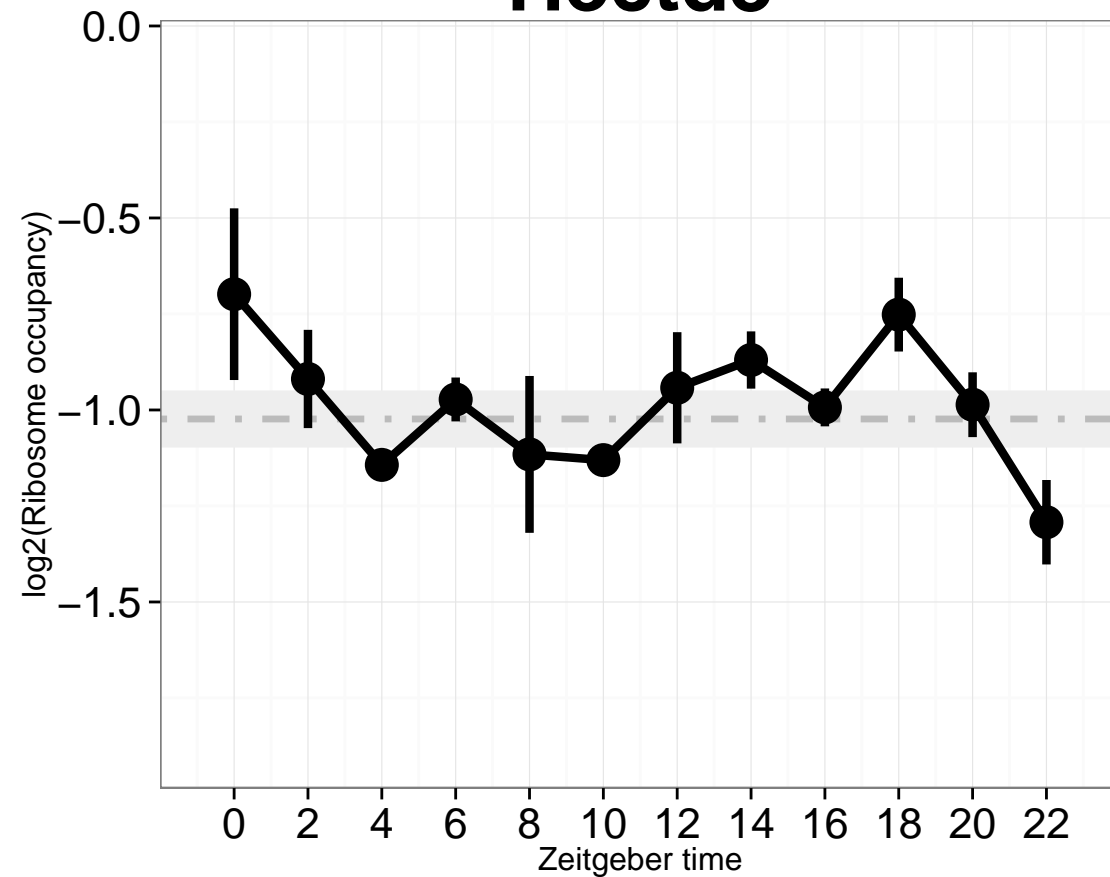

Supplement: SuppDataset_1.zip [file Hectd3_set_A.pdf › Supplemental Dataset 1/A-mRNA_nonrhyth_translation_nonrhyth/Hectd3_set_A.pdf]

## Hecw2

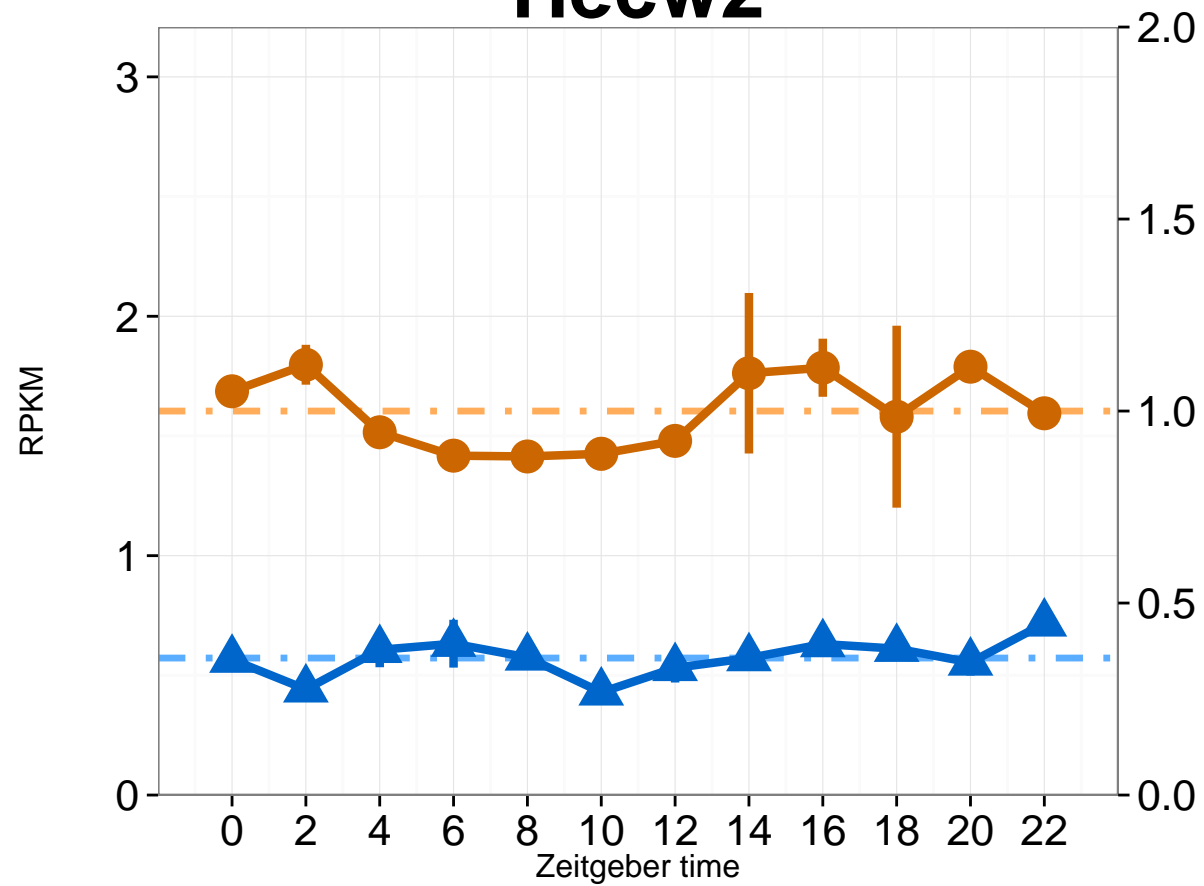

## Hecw2

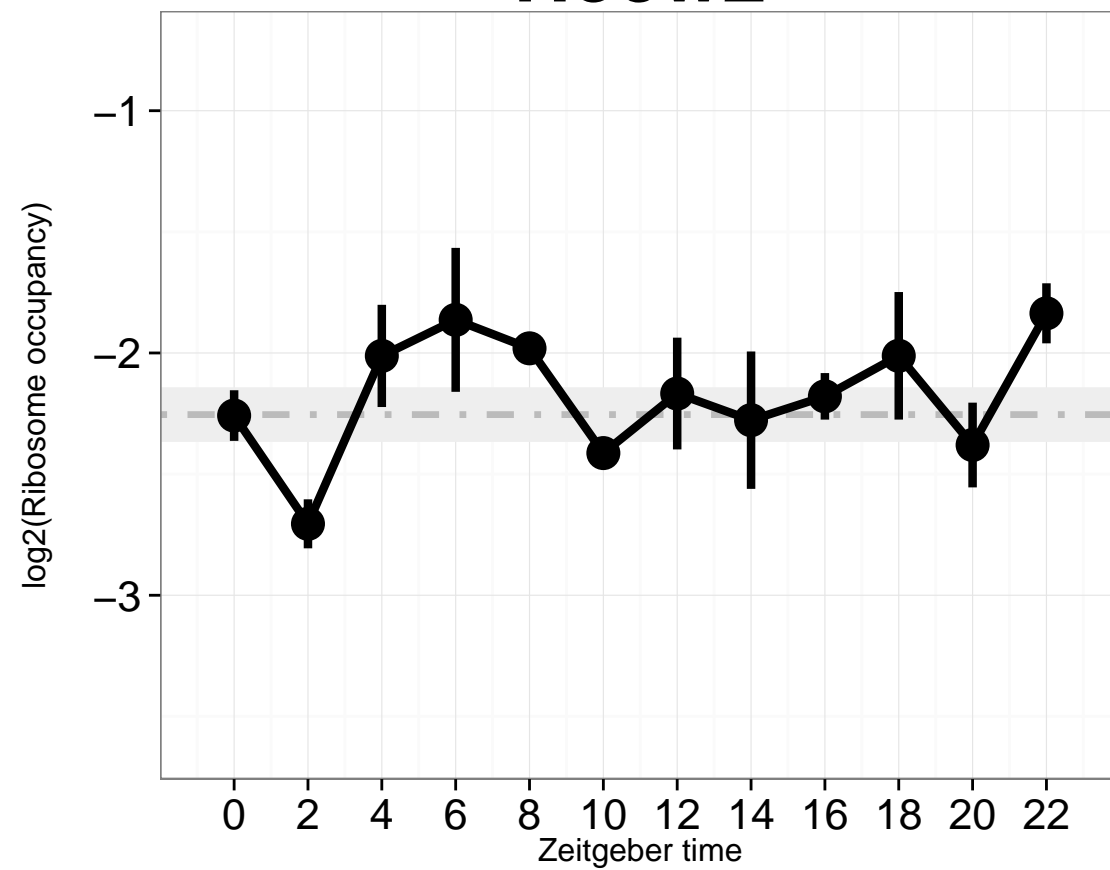

Supplement: SuppDataset_1.zip [file Hecw2_set_A.pdf › Supplemental Dataset 1/A-mRNA_nonrhyth_translation_nonrhyth/Hecw2_set_A.pdf]

# Heg1

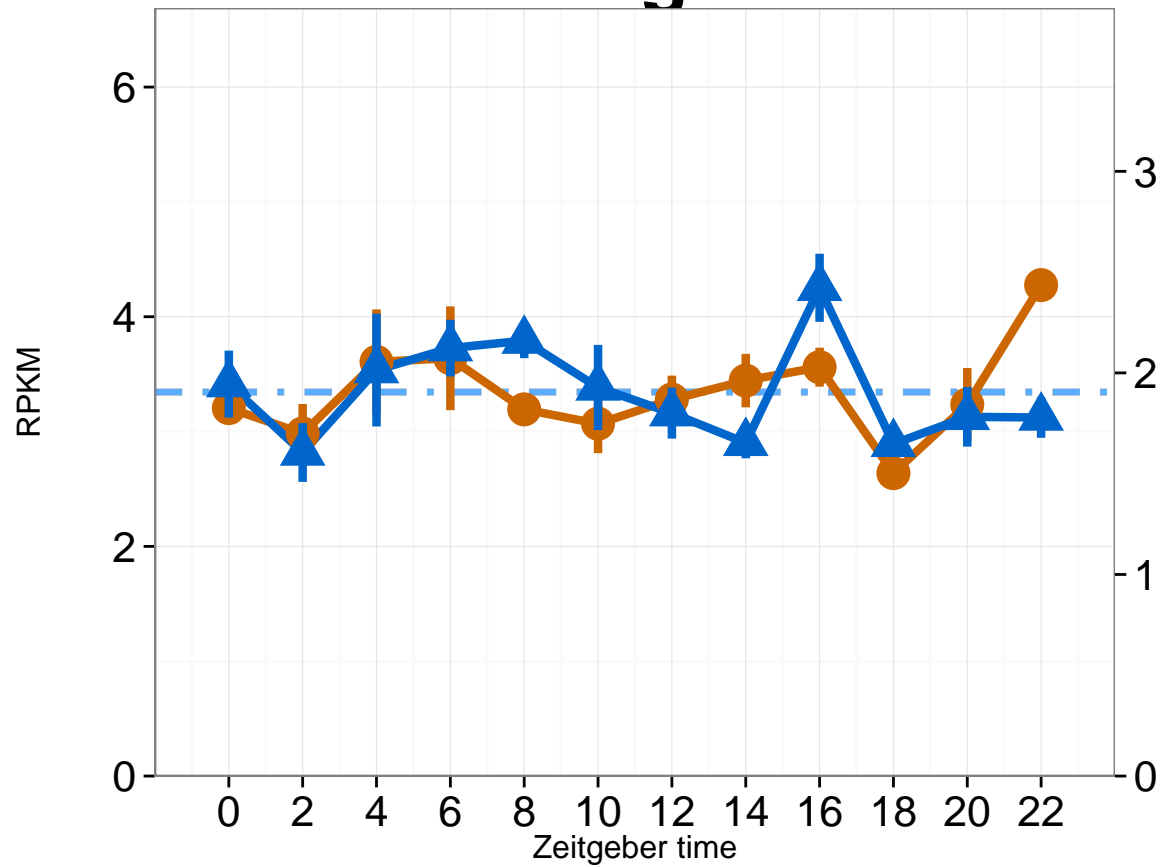

# Heg1

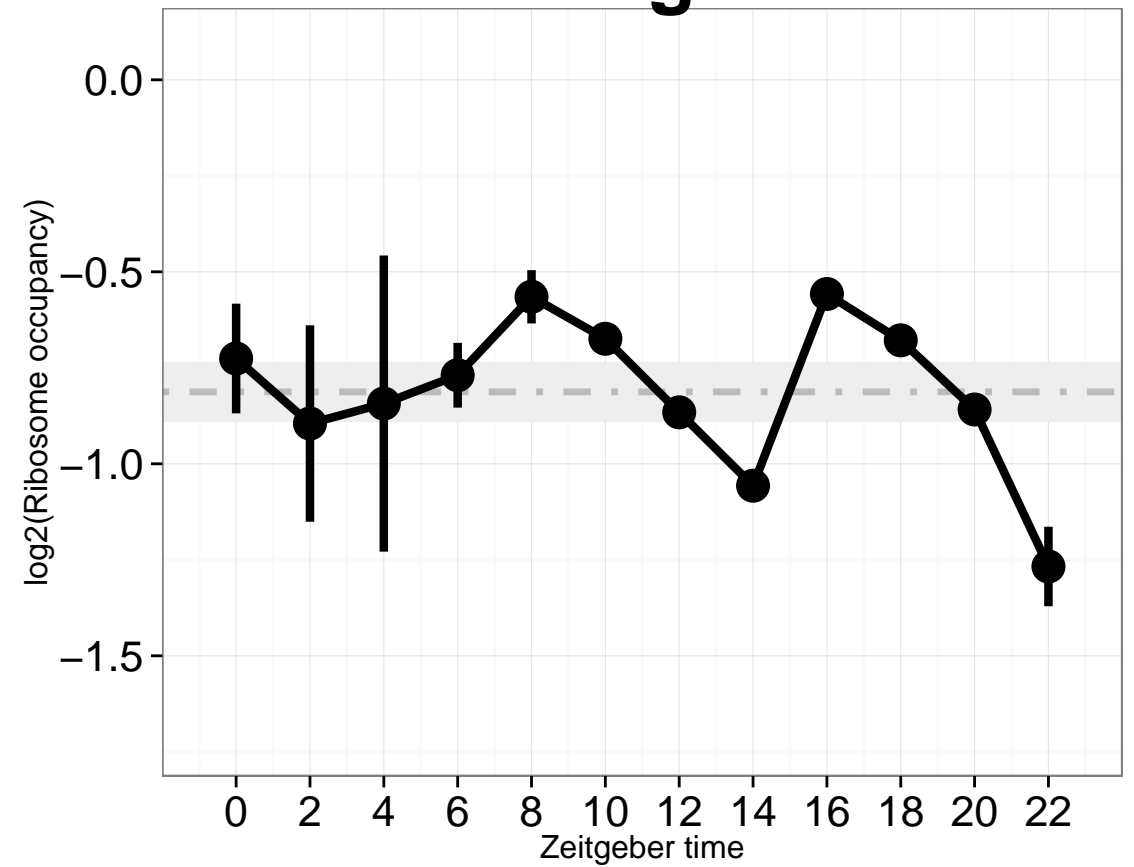

Supplement: SuppDataset_1.zip [file Heg1_set_A.pdf › Supplemental Dataset 1/A-mRNA_nonrhyth_translation_nonrhyth/Heg1_set_A.pdf]

# Helb

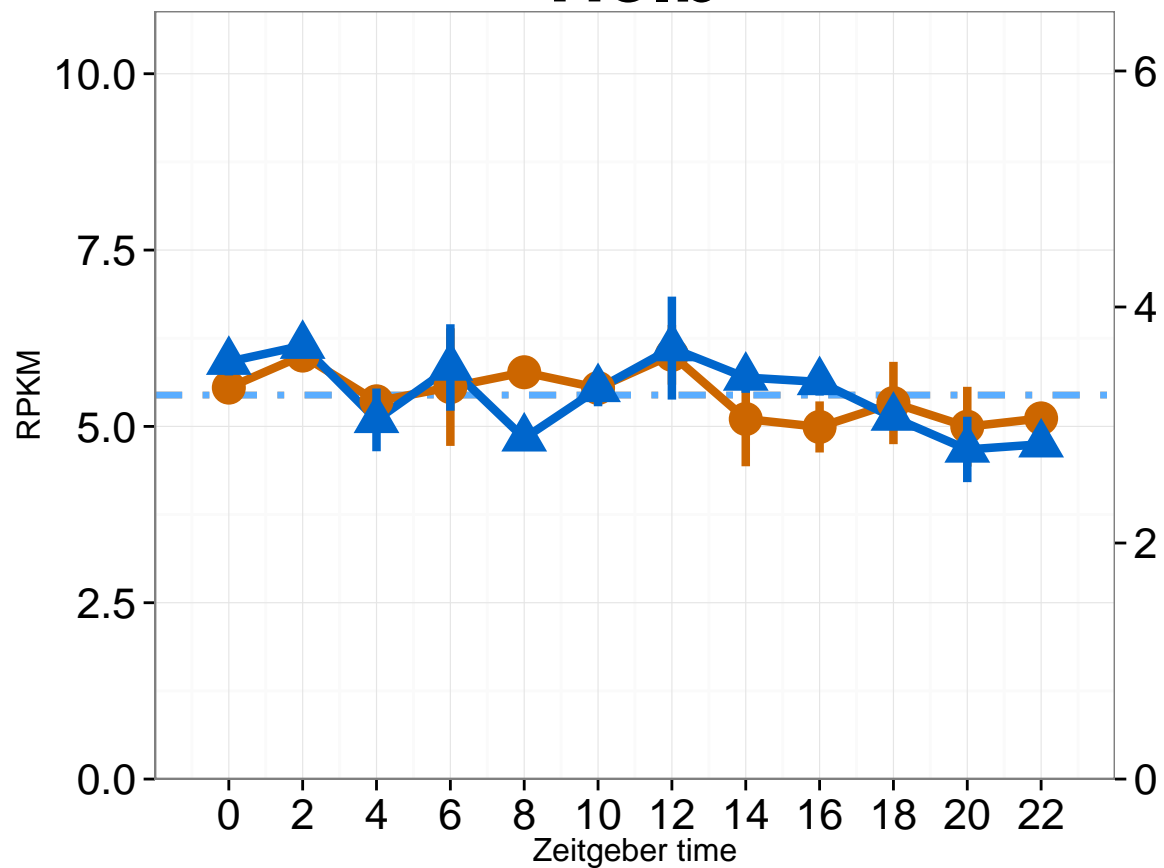

# Helb

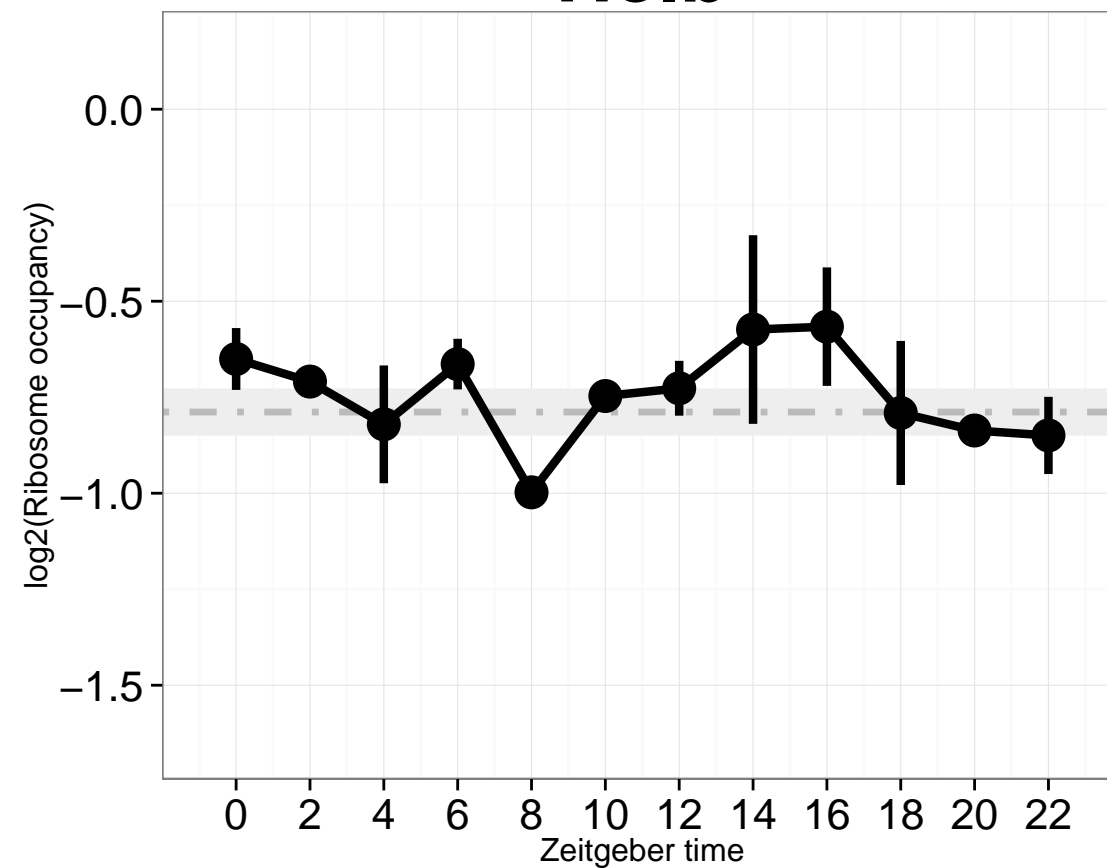

Supplement: SuppDataset_1.zip [file Helb_set_A.pdf › Supplemental Dataset 1/A-mRNA_nonrhyth_translation_nonrhyth/Helb_set_A.pdf]

## Helq

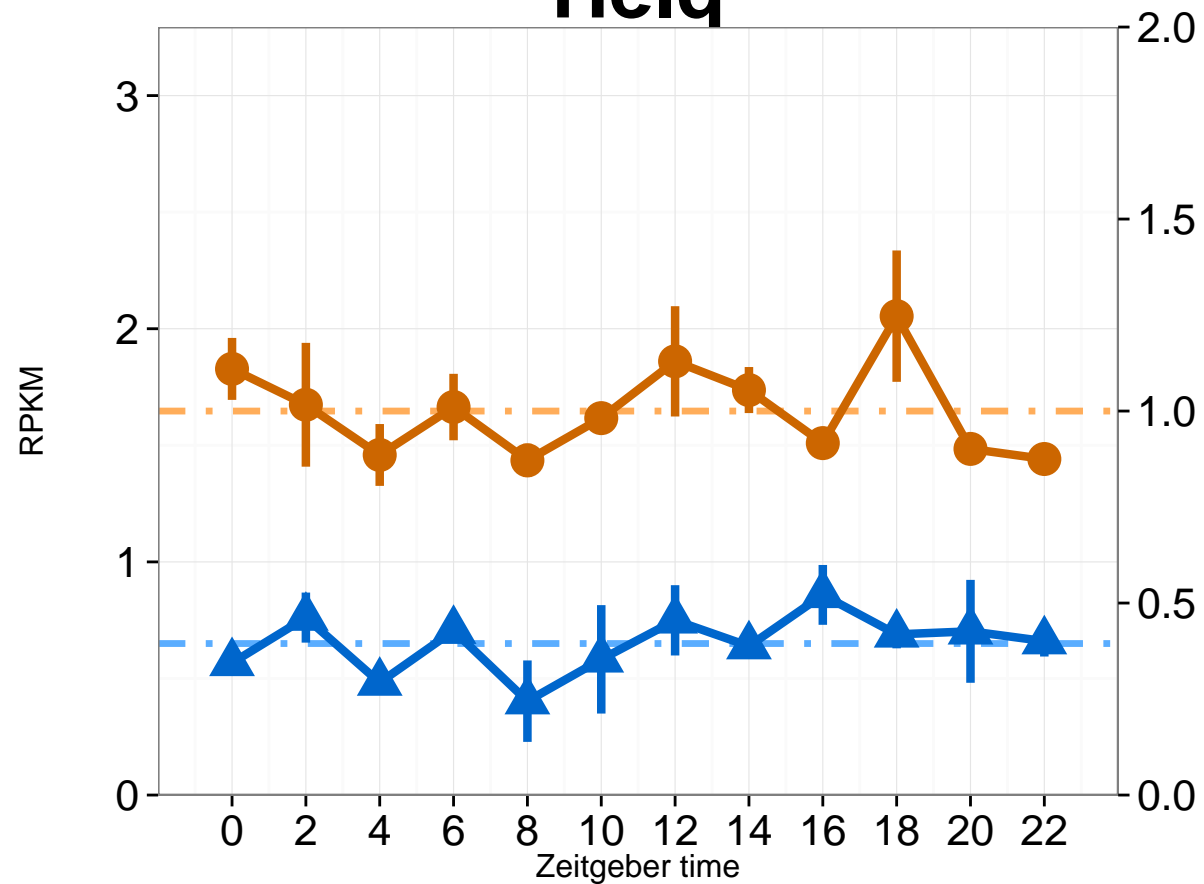

## Helq

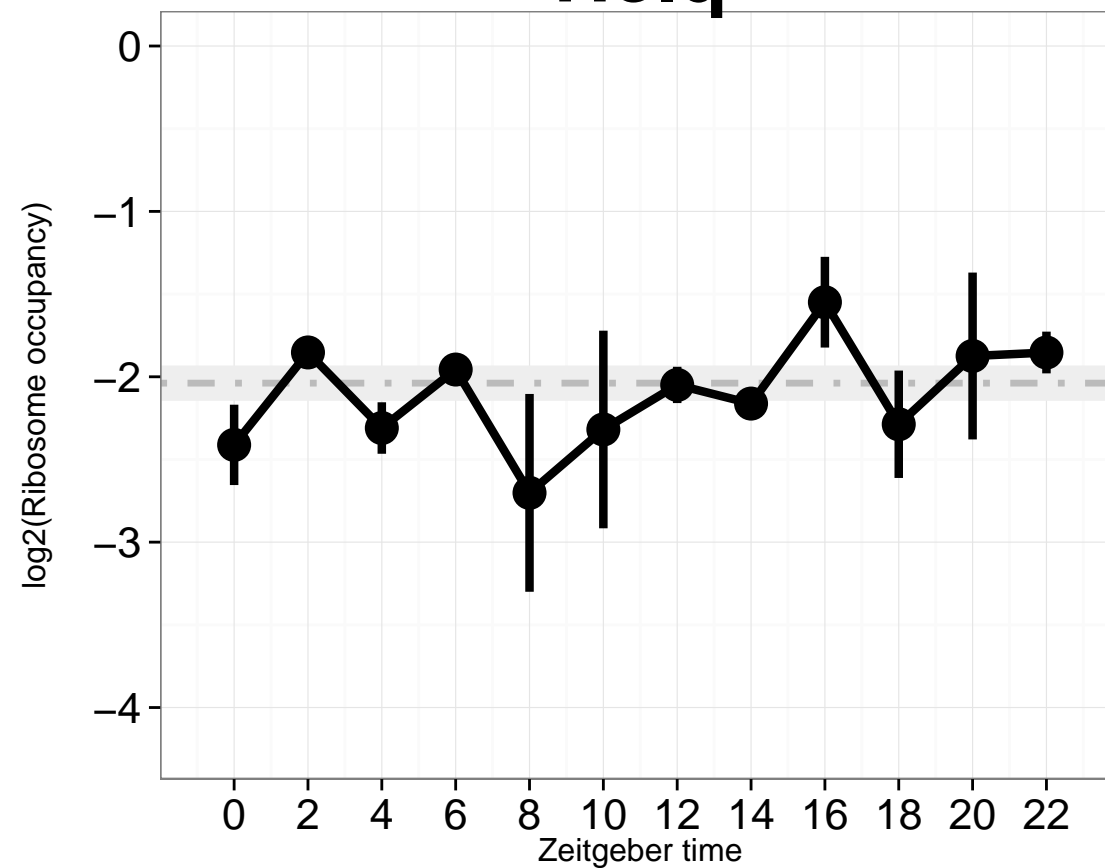

Supplement: SuppDataset_1.zip [file Helq_set_A.pdf › Supplemental Dataset 1/A-mRNA_nonrhyth_translation_nonrhyth/Helq_set_A.pdf]

# Helz

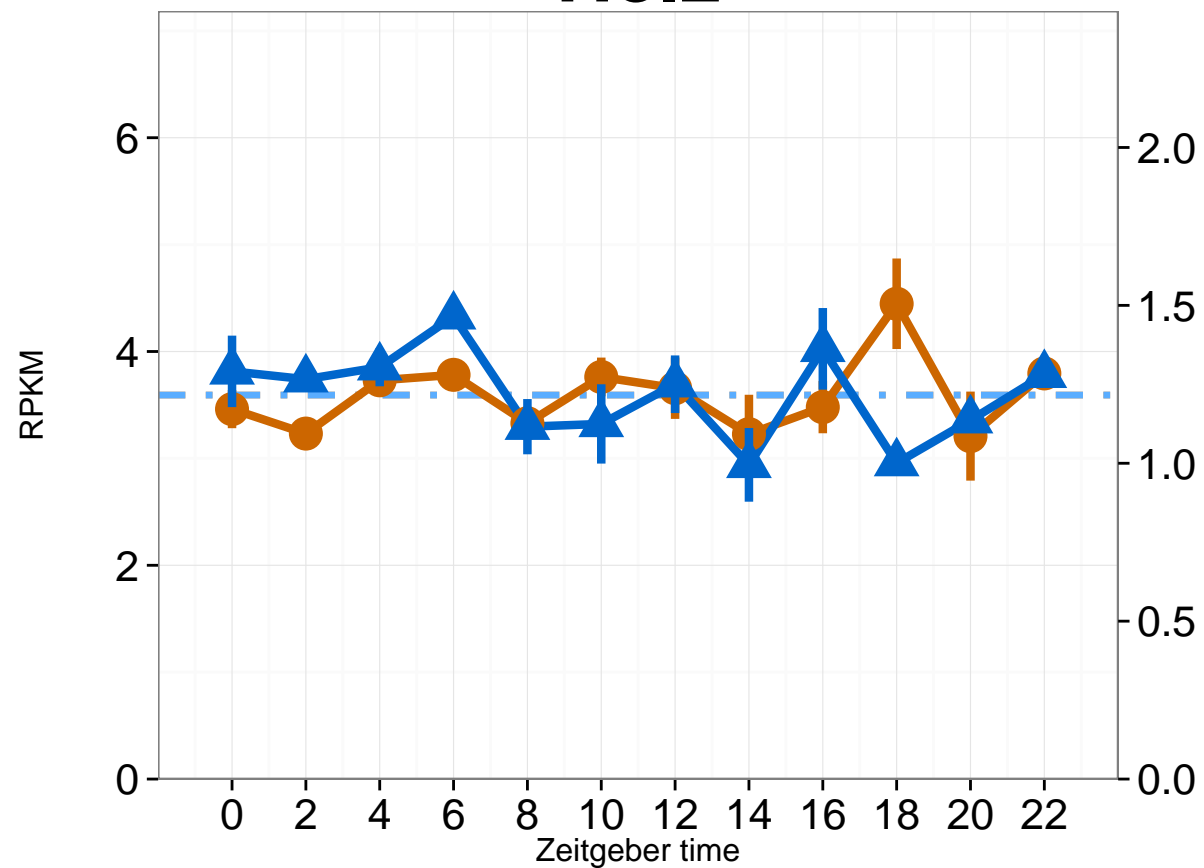

# Helz

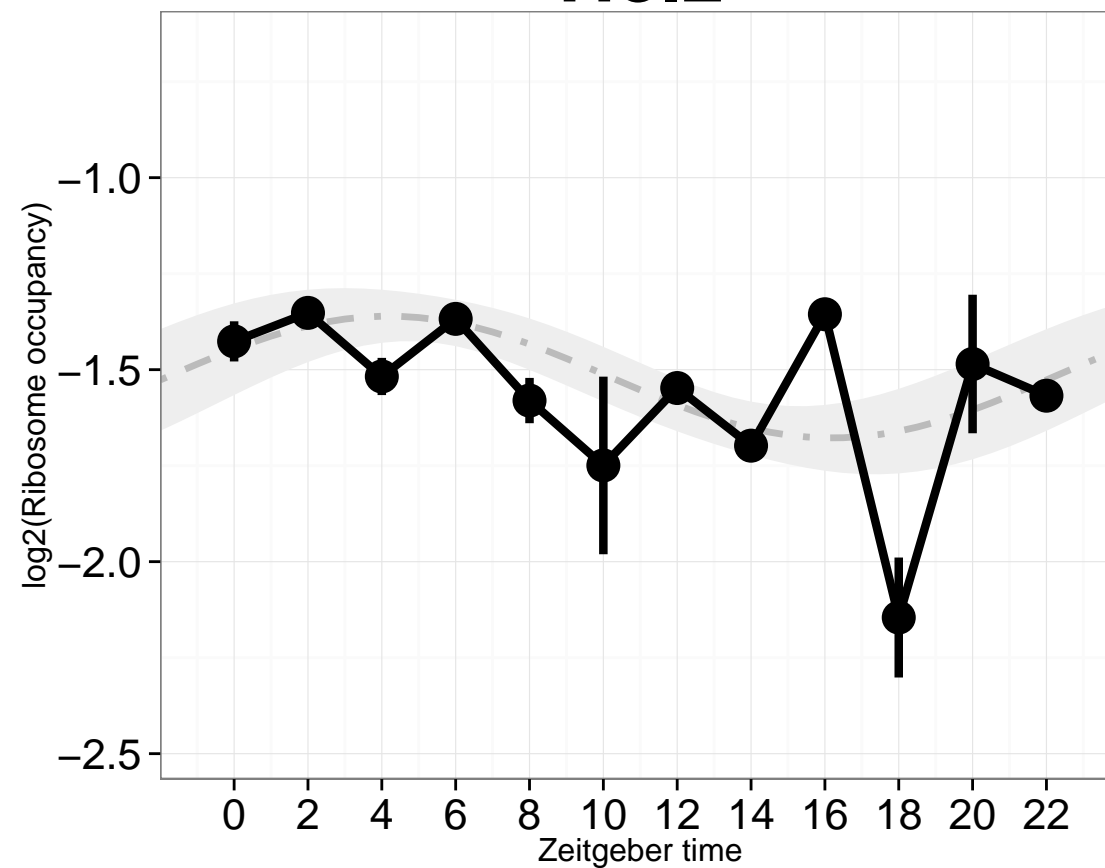

Supplement: SuppDataset_1.zip [file Helz_set_A.pdf › Supplemental Dataset 1/A-mRNA_nonrhyth_translation_nonrhyth/Helz_set_A.pdf]

# Hemk1

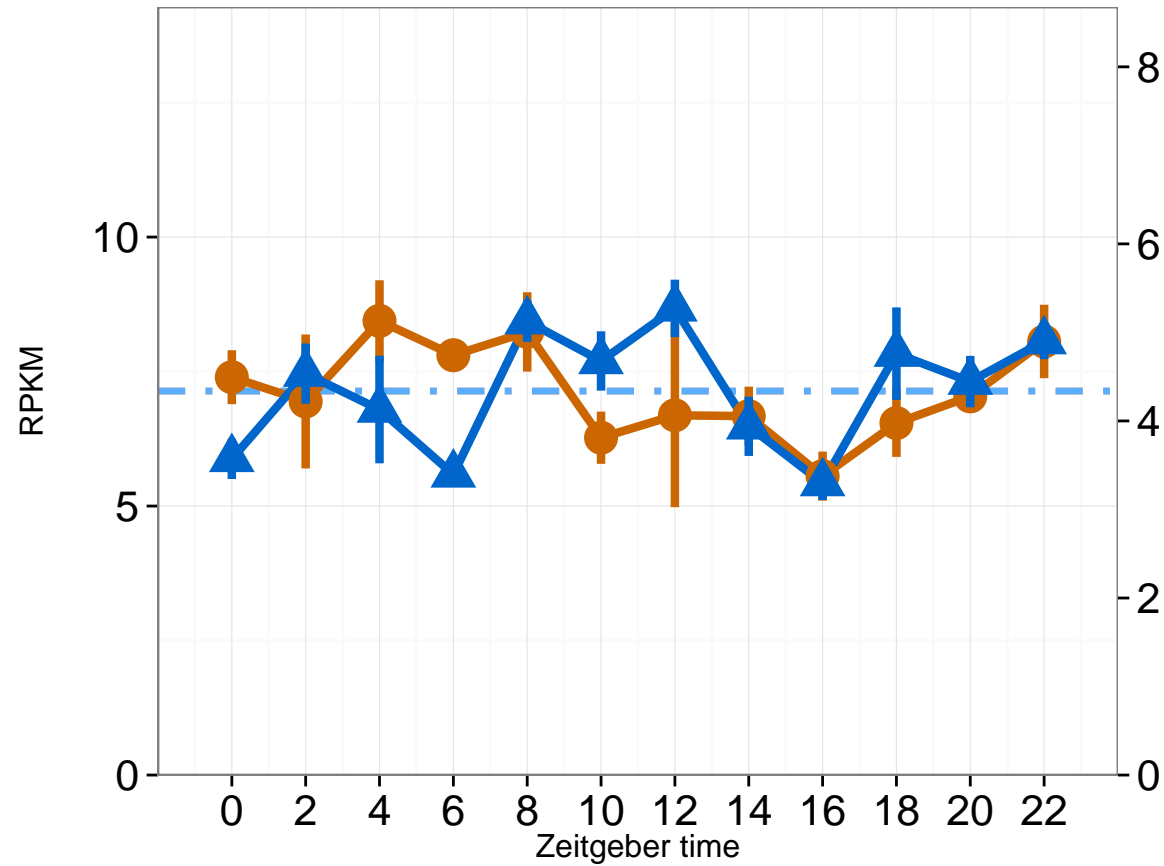

# Hemk1

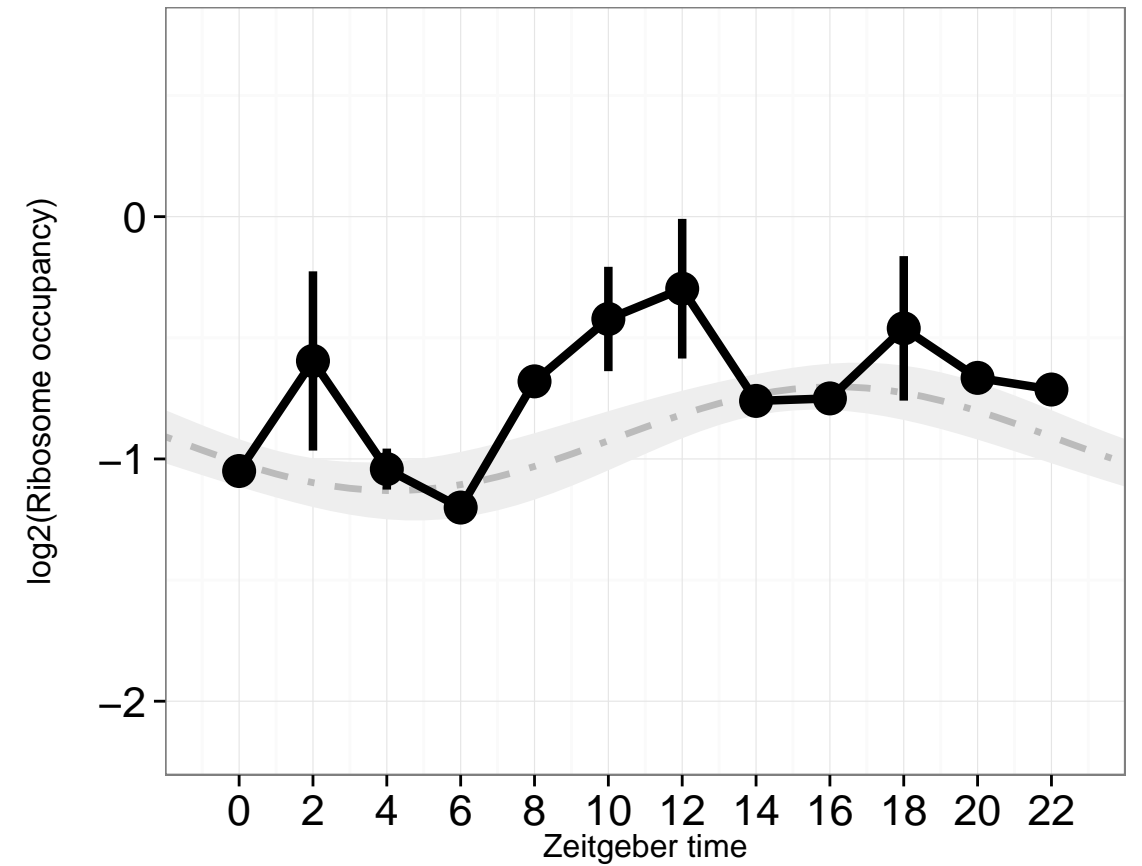

Supplement: SuppDataset_1.zip [file Hemk1_set_A.pdf › Supplemental Dataset 1/A-mRNA_nonrhyth_translation_nonrhyth/Hemk1_set_A.pdf]

## Herc2

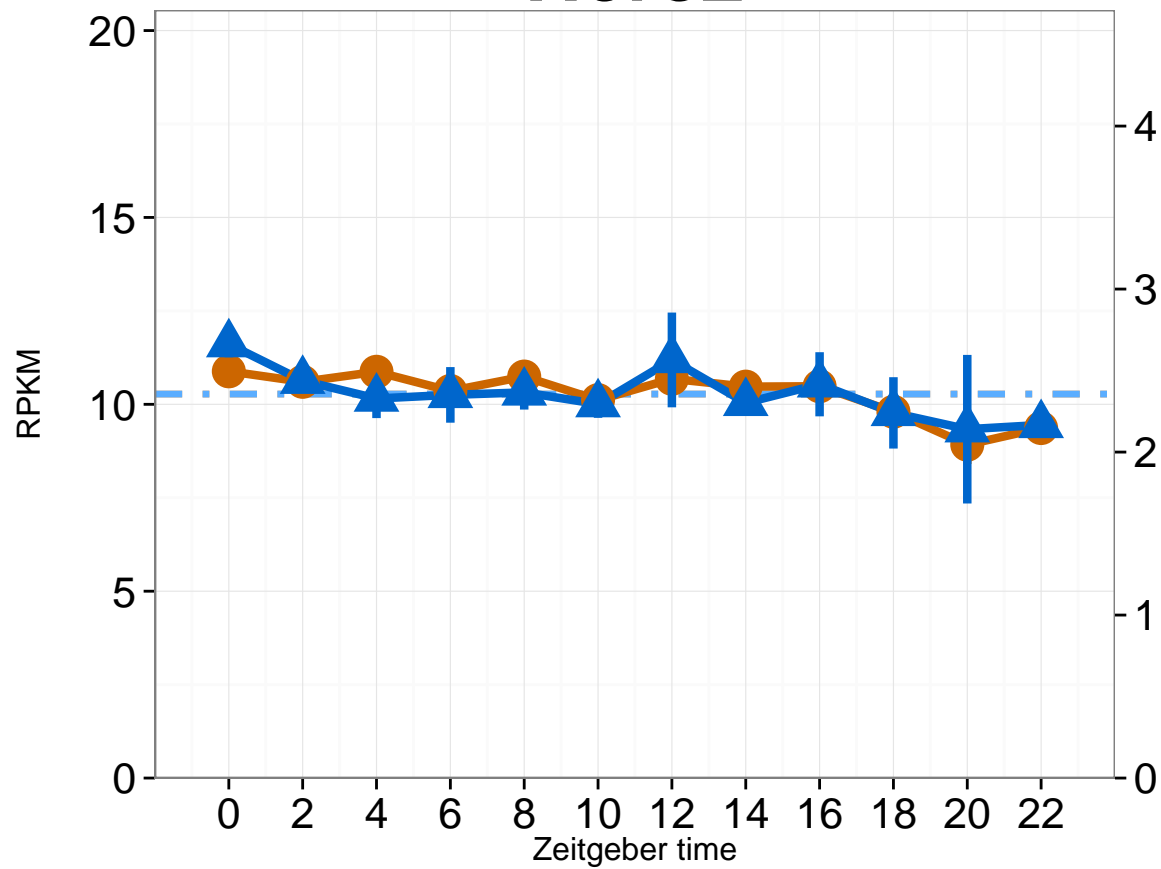

## Herc2

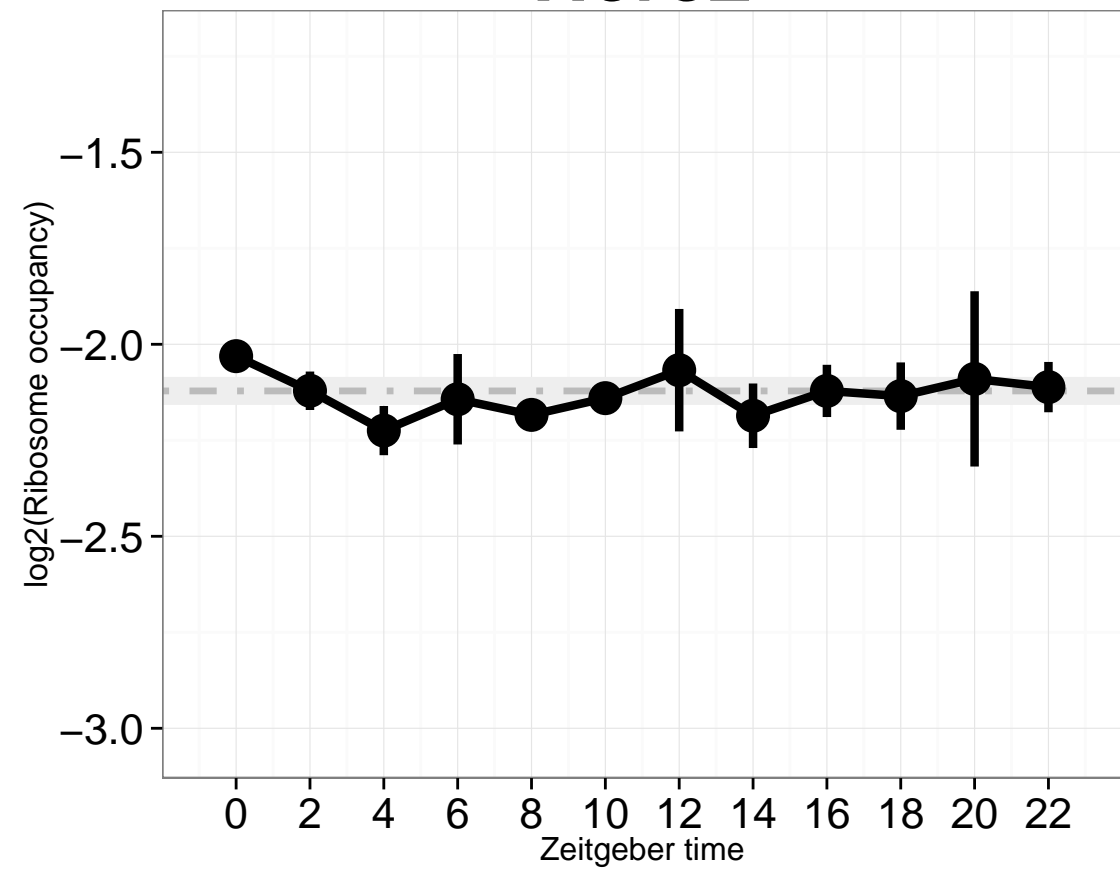

Supplement: SuppDataset_1.zip [file Herc2_set_A.pdf › Supplemental Dataset 1/A-mRNA_nonrhyth_translation_nonrhyth/Herc2_set_A.pdf]

## Herc4

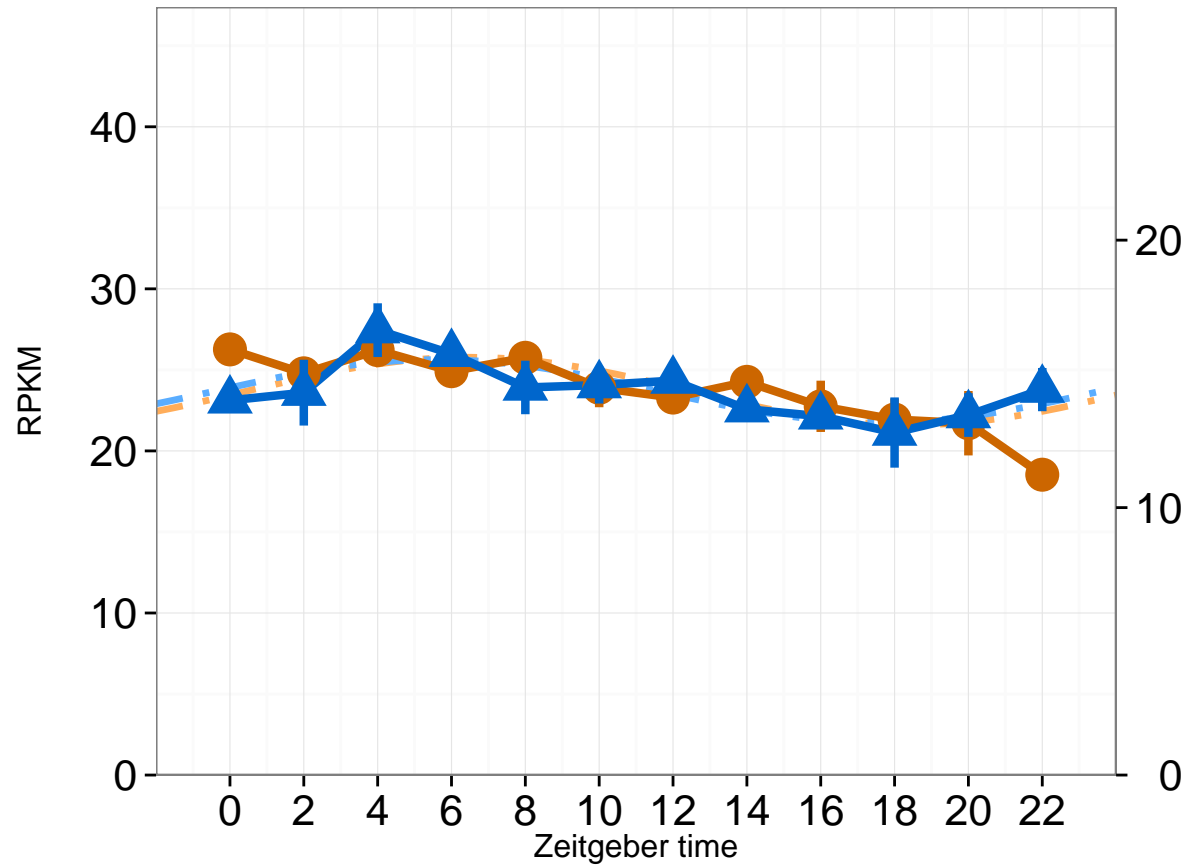

## Herc4

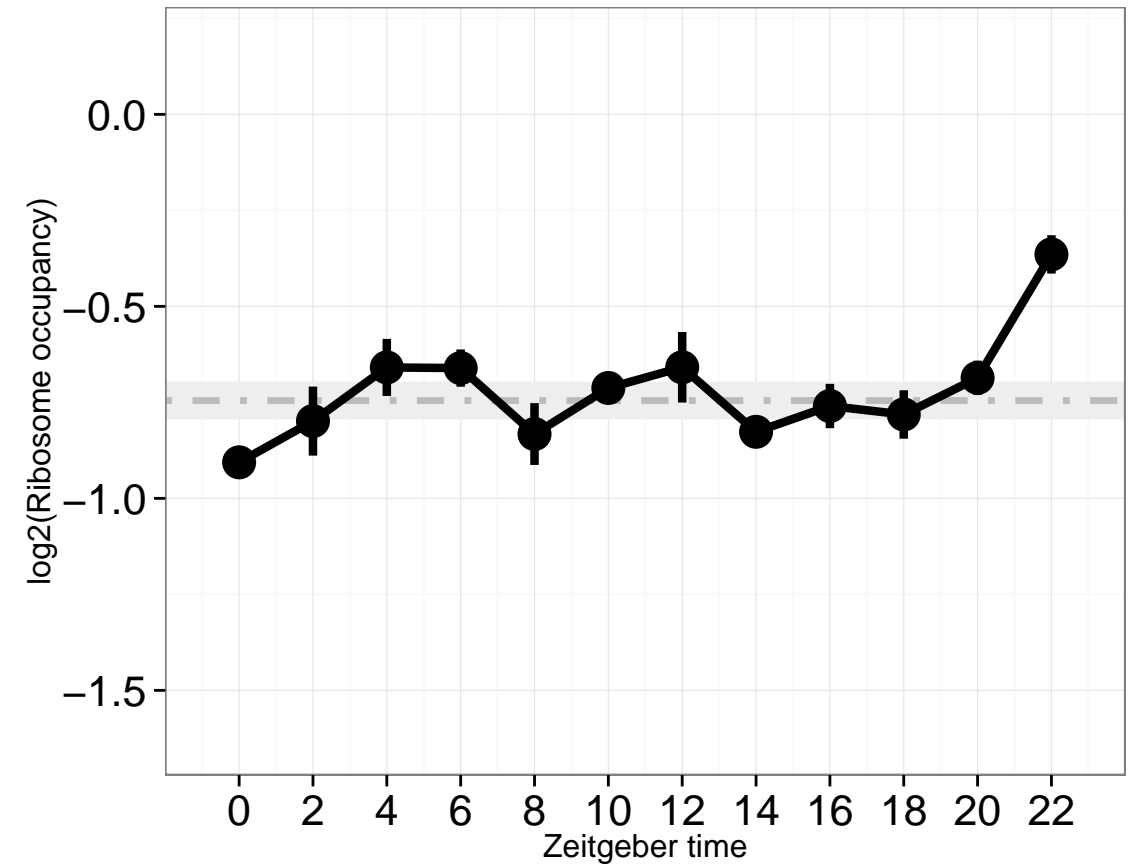

Supplement: SuppDataset_1.zip [file Herc4_set_A.pdf › Supplemental Dataset 1/A-mRNA_nonrhyth_translation_nonrhyth/Herc4_set_A.pdf]

# Herc6

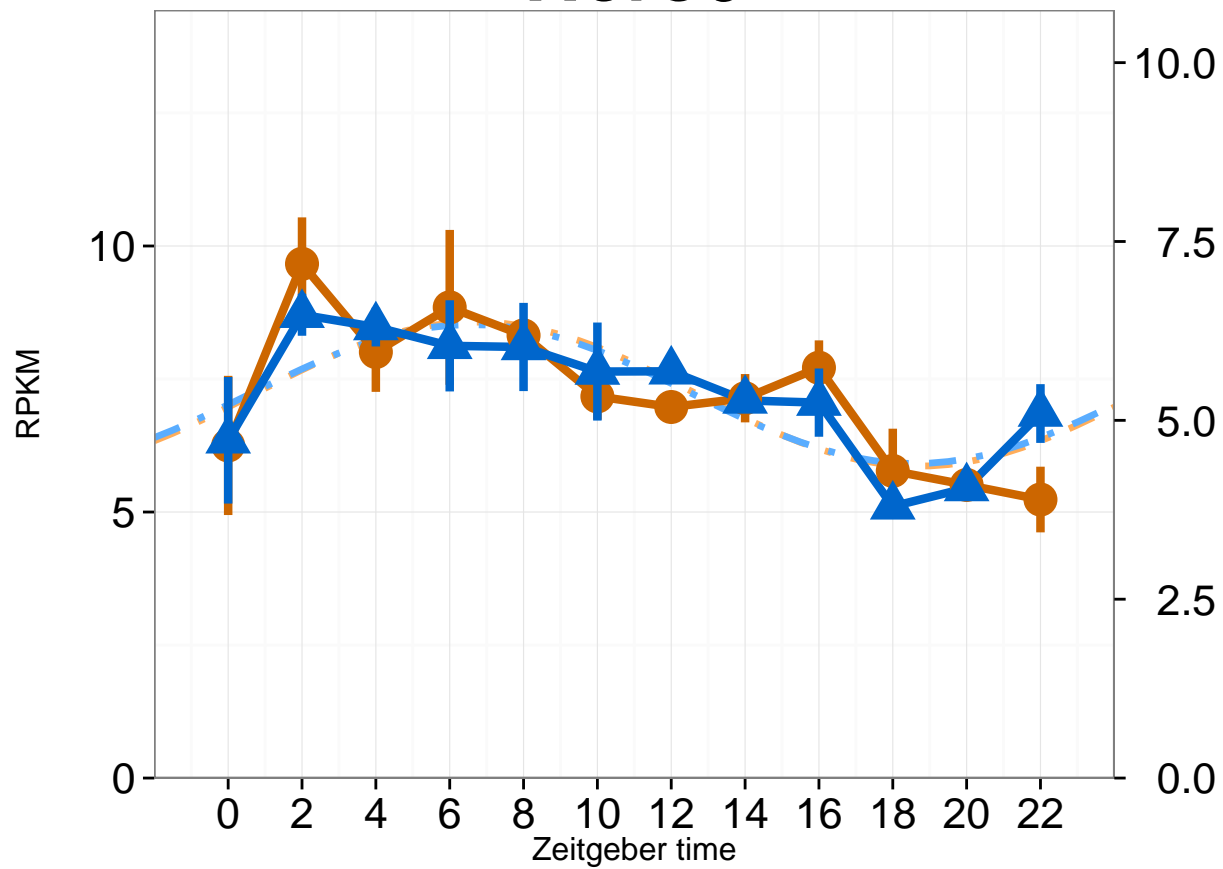

# Herc6

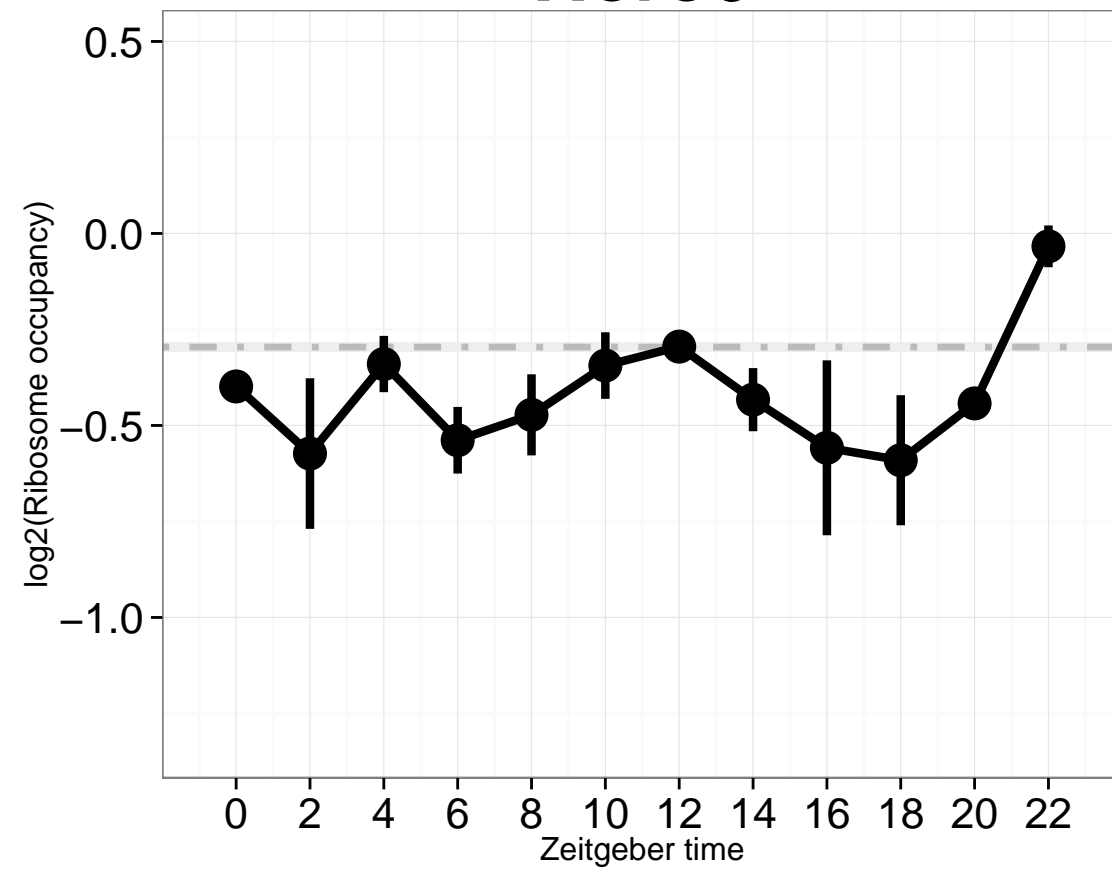

Supplement: SuppDataset_1.zip [file Herc6_set_A.pdf › Supplemental Dataset 1/A-mRNA_nonrhyth_translation_nonrhyth/Herc6_set_A.pdf]

## Herpud2

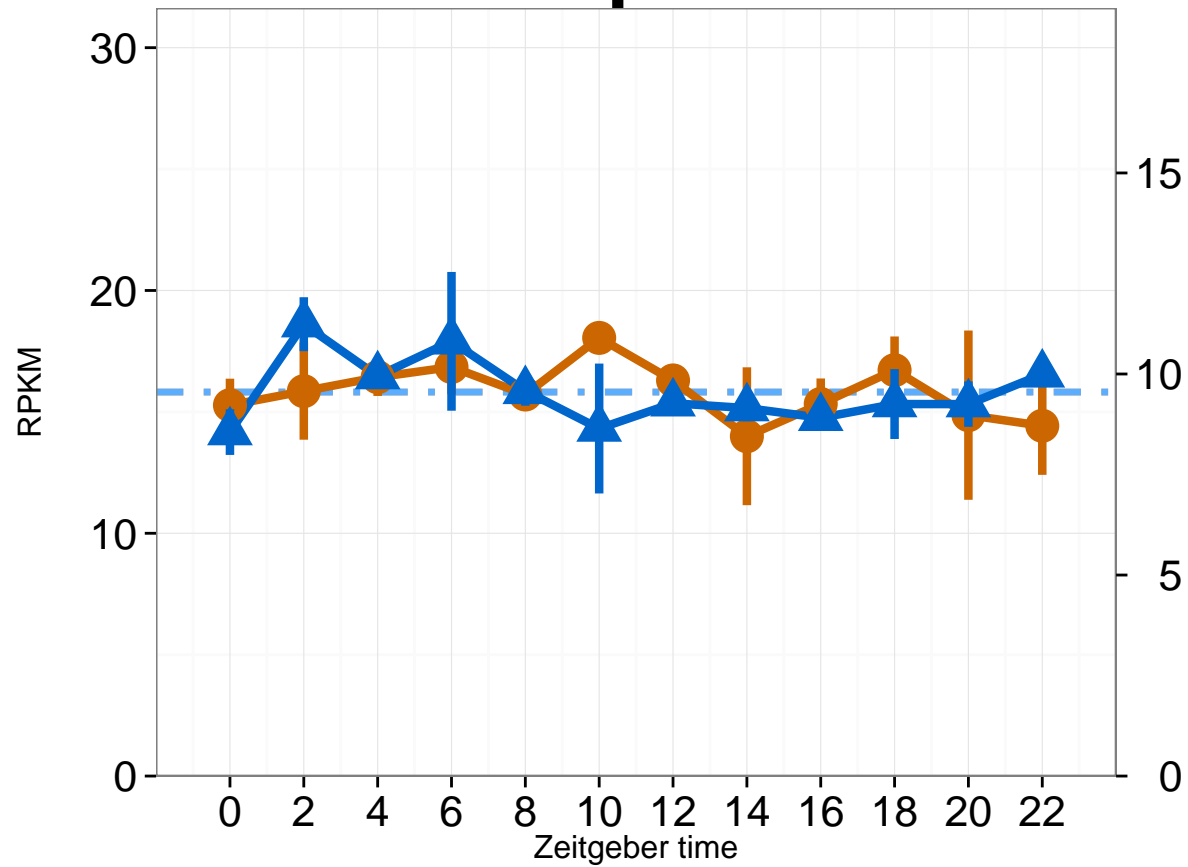

## Herpud2

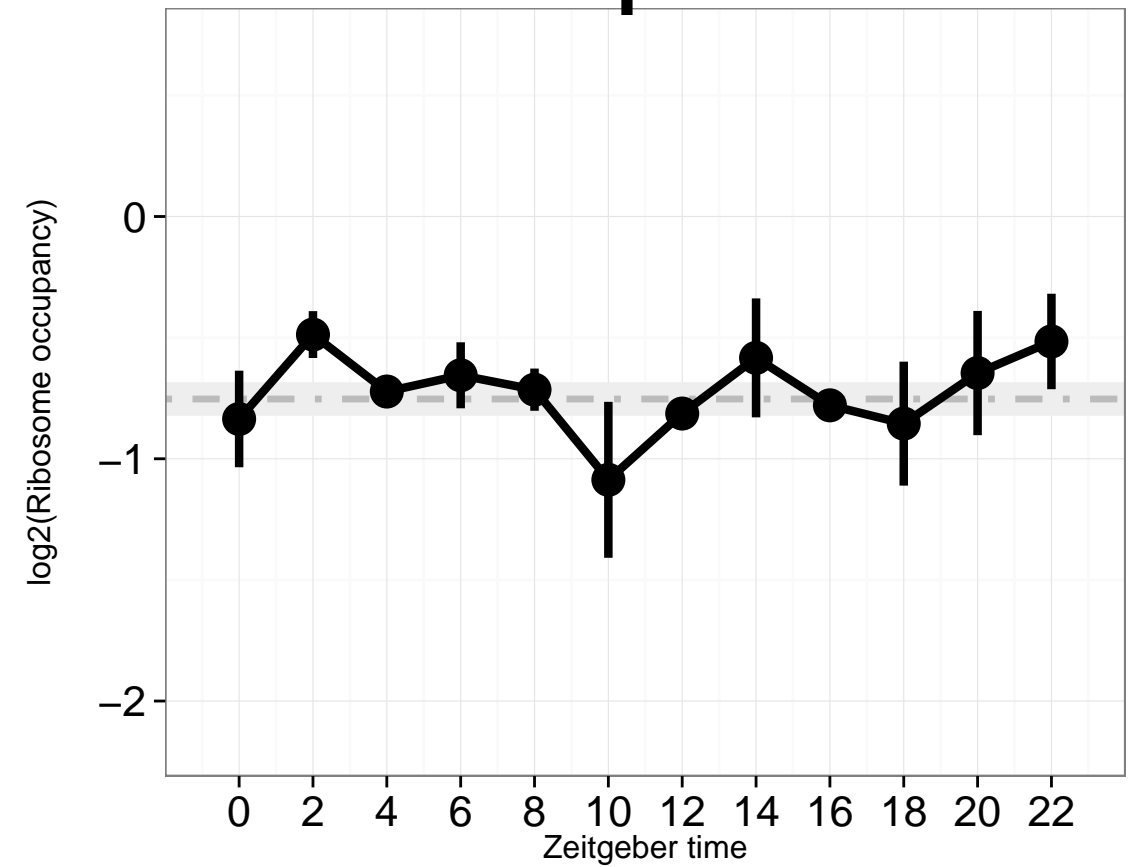

Supplement: SuppDataset_1.zip [file Herpud2_set_A.pdf › Supplemental Dataset 1/A-mRNA_nonrhyth_translation_nonrhyth/Herpud2_set_A.pdf]

## Hexa

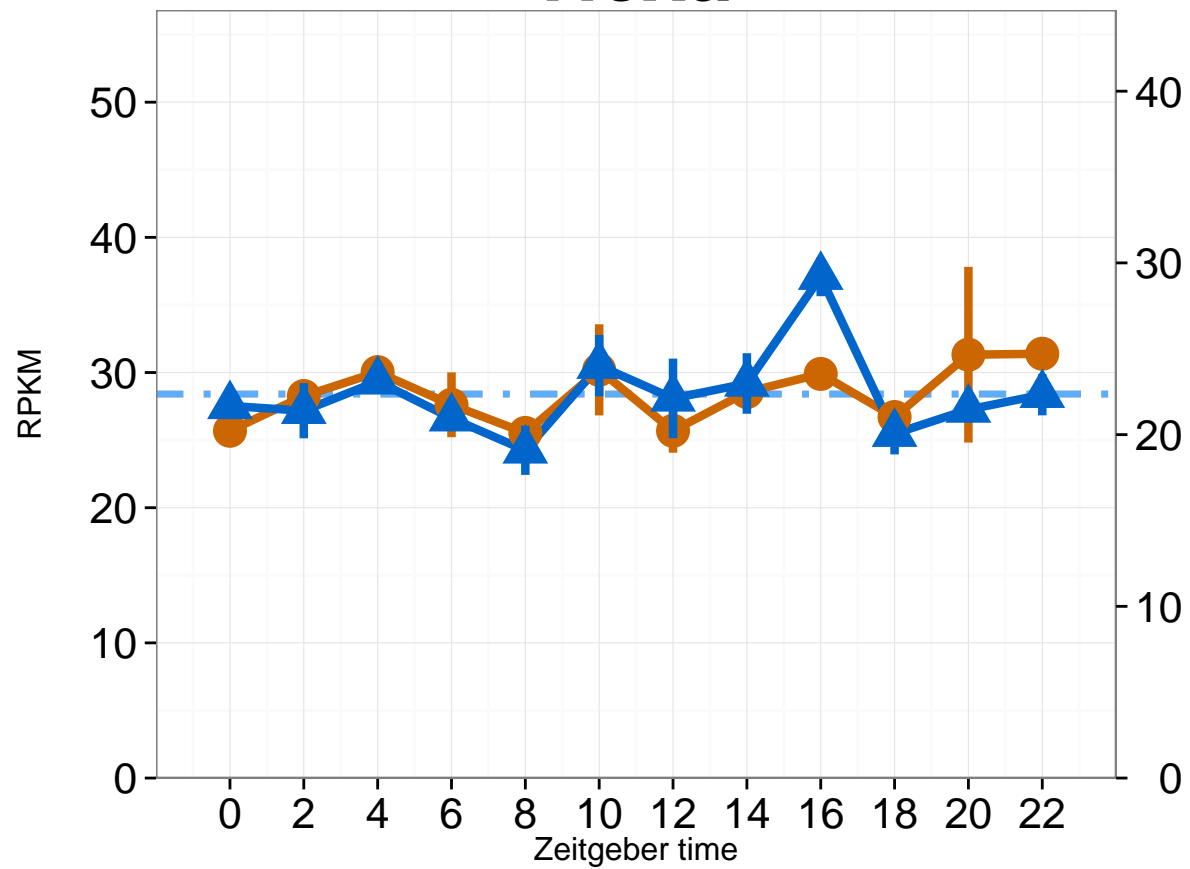

## Hexa

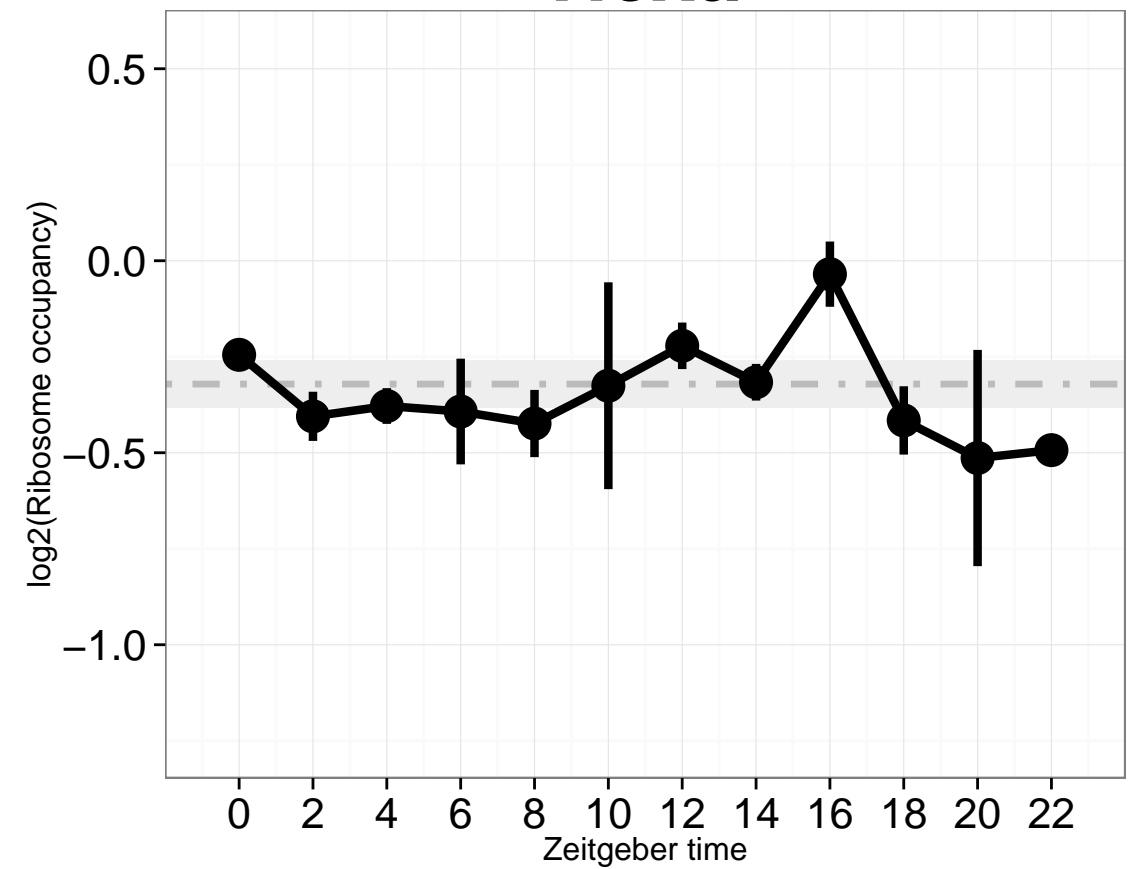

Supplement: SuppDataset_1.zip [file Hexa_set_A.pdf › Supplemental Dataset 1/A-mRNA_nonrhyth_translation_nonrhyth/Hexa_set_A.pdf]

## Hexb

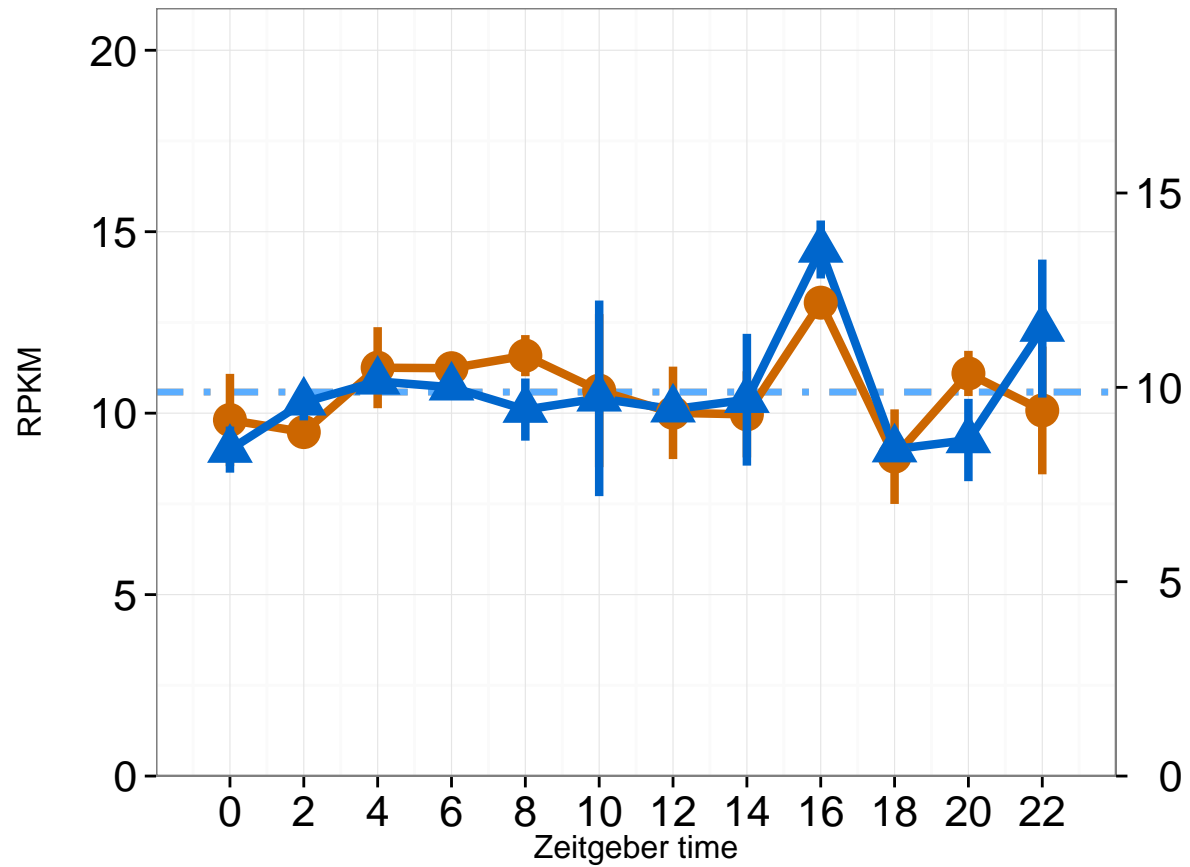

## Hexb

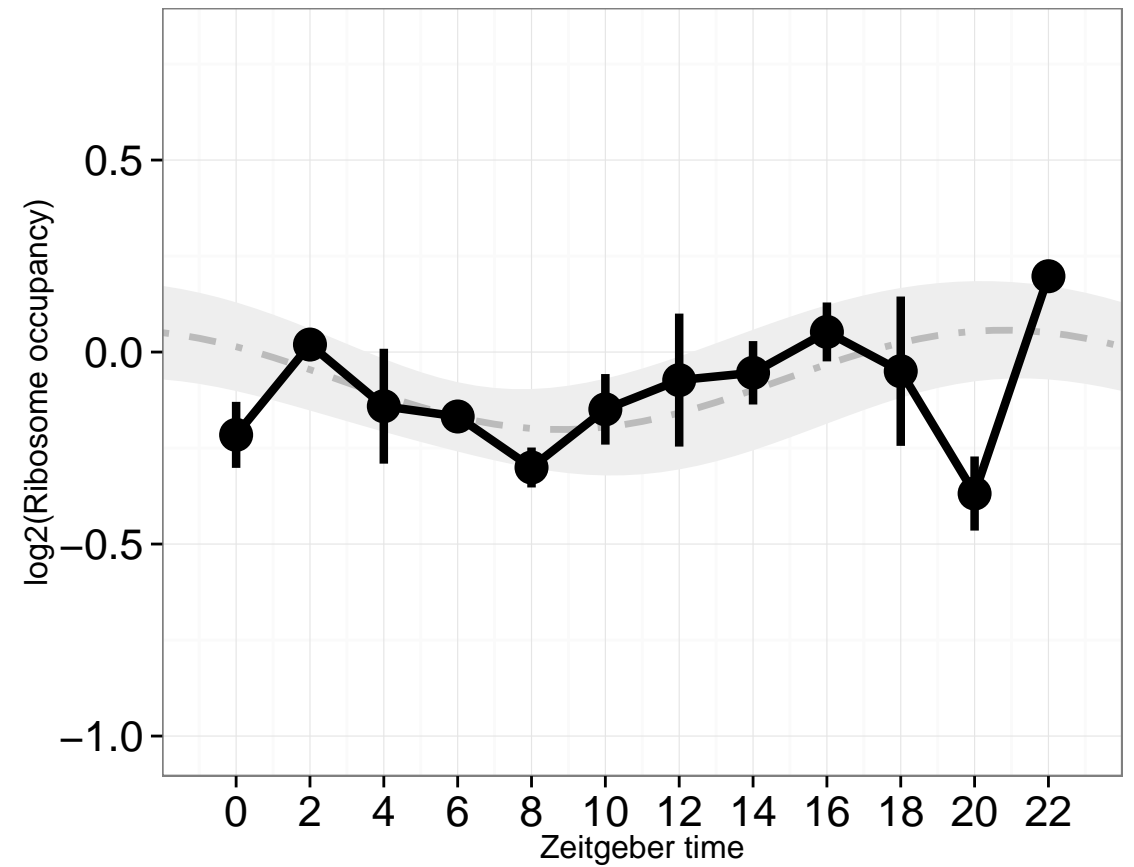

Supplement: SuppDataset_1.zip [file Hexb_set_A.pdf › Supplemental Dataset 1/A-mRNA_nonrhyth_translation_nonrhyth/Hexb_set_A.pdf]

## Hexdc

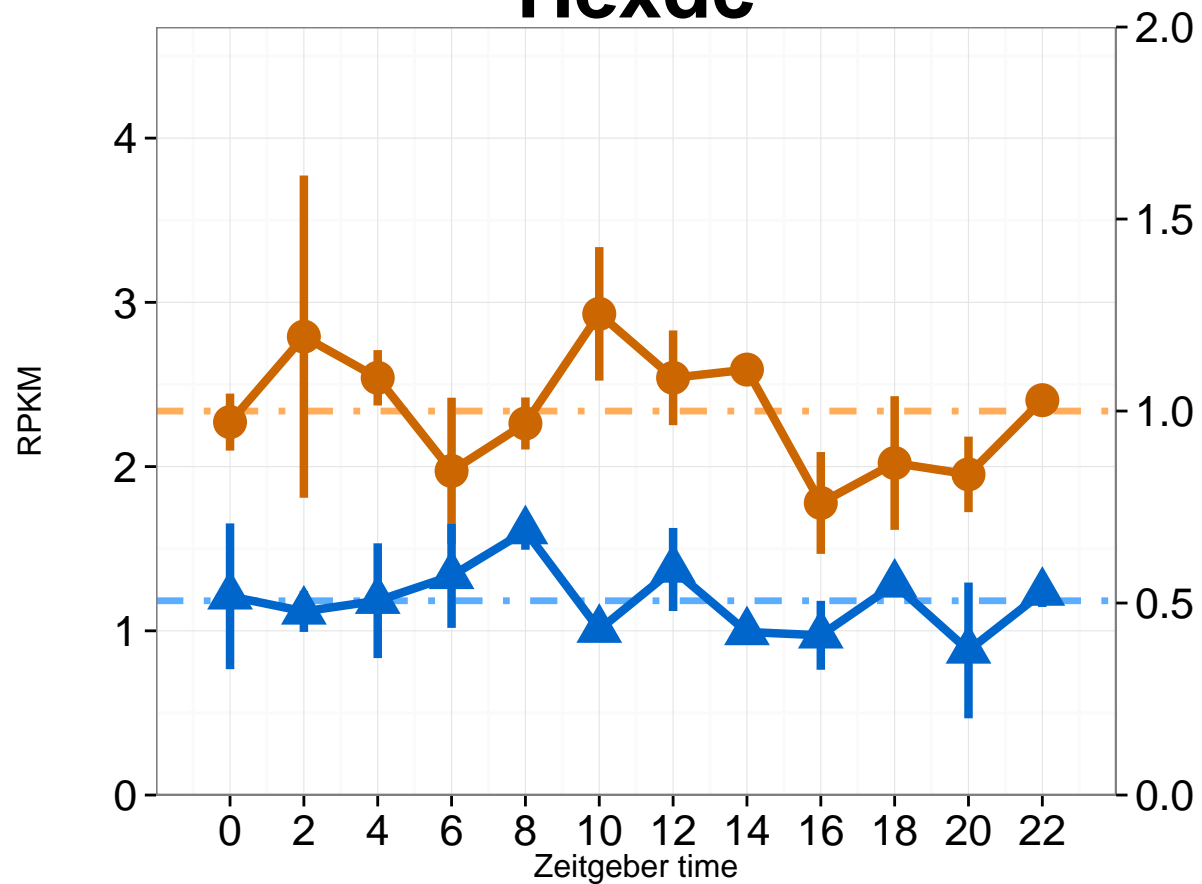

## Hexdc

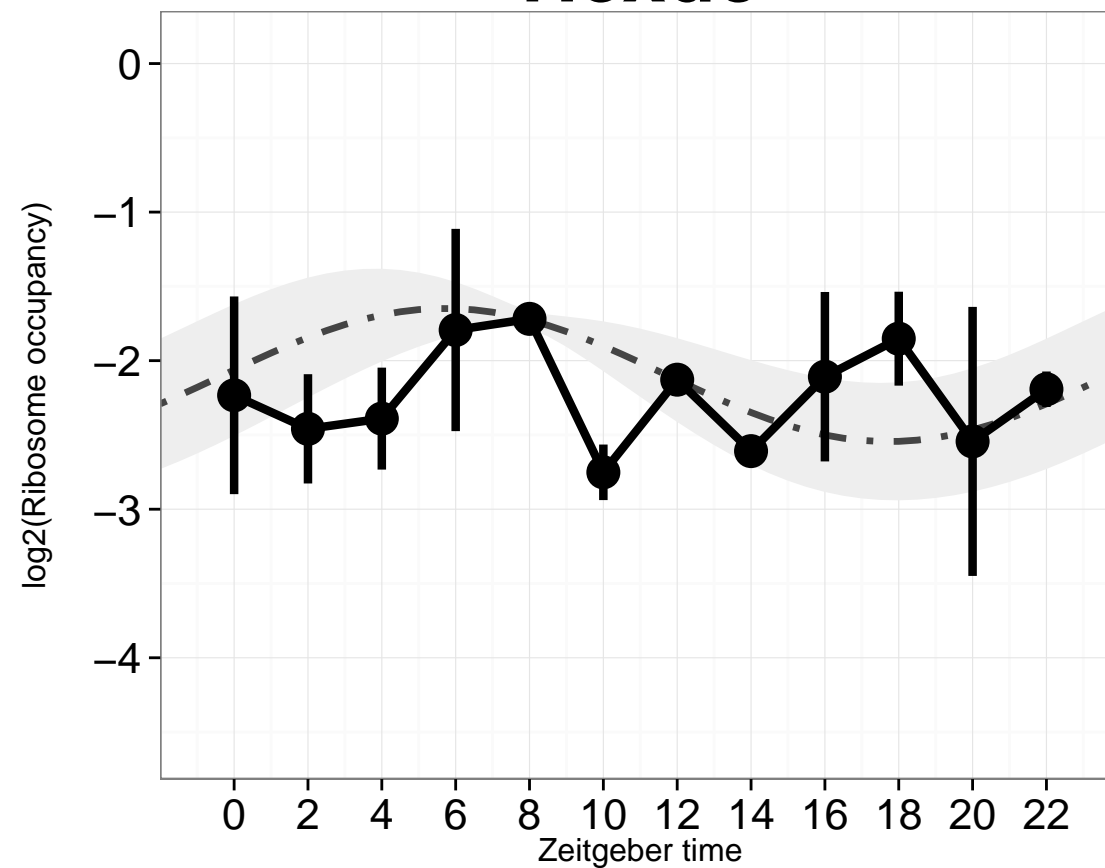

Supplement: SuppDataset_1.zip [file Hexdc_set_A.pdf › Supplemental Dataset 1/A-mRNA_nonrhyth_translation_nonrhyth/Hexdc_set_A.pdf]

## Hexim2

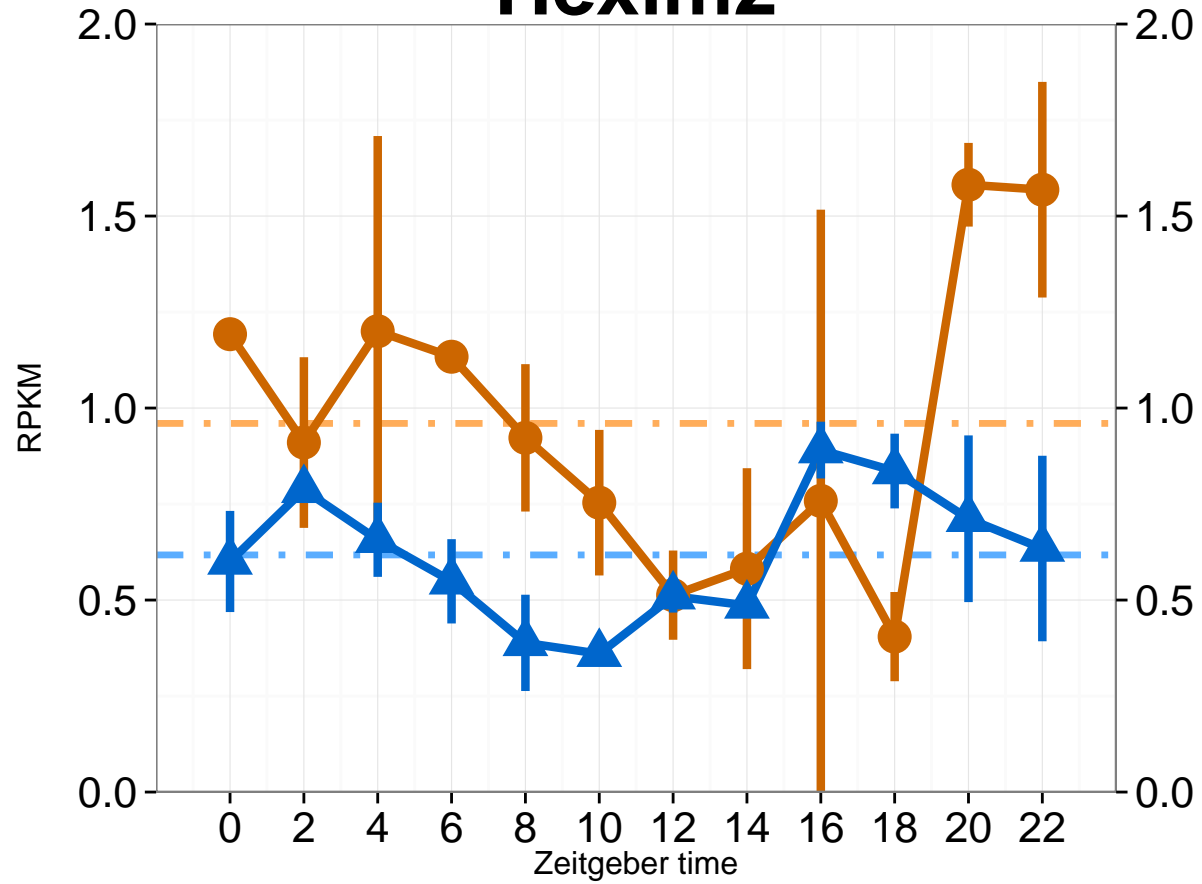

## Hexim2

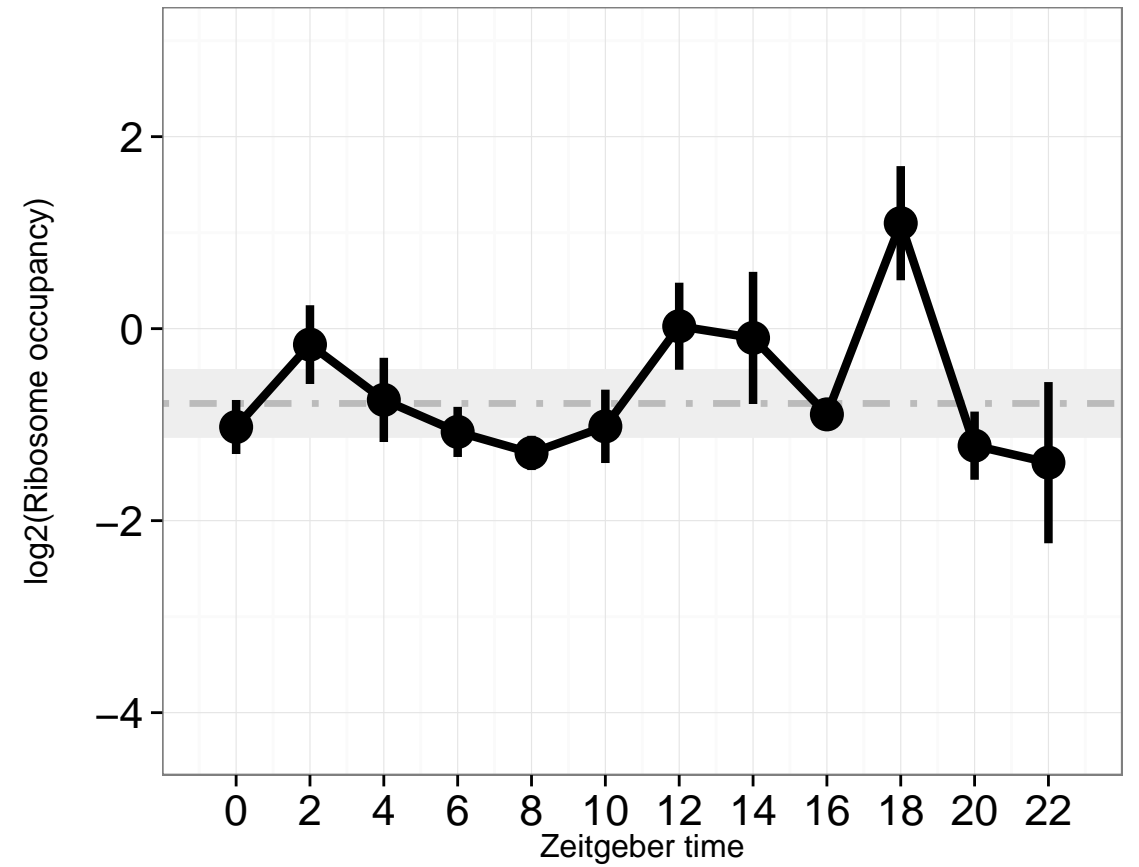

Supplement: SuppDataset_1.zip [file Hexim2_set_A.pdf › Supplemental Dataset 1/A-mRNA_nonrhyth_translation_nonrhyth/Hexim2_set_A.pdf]

## Hfe

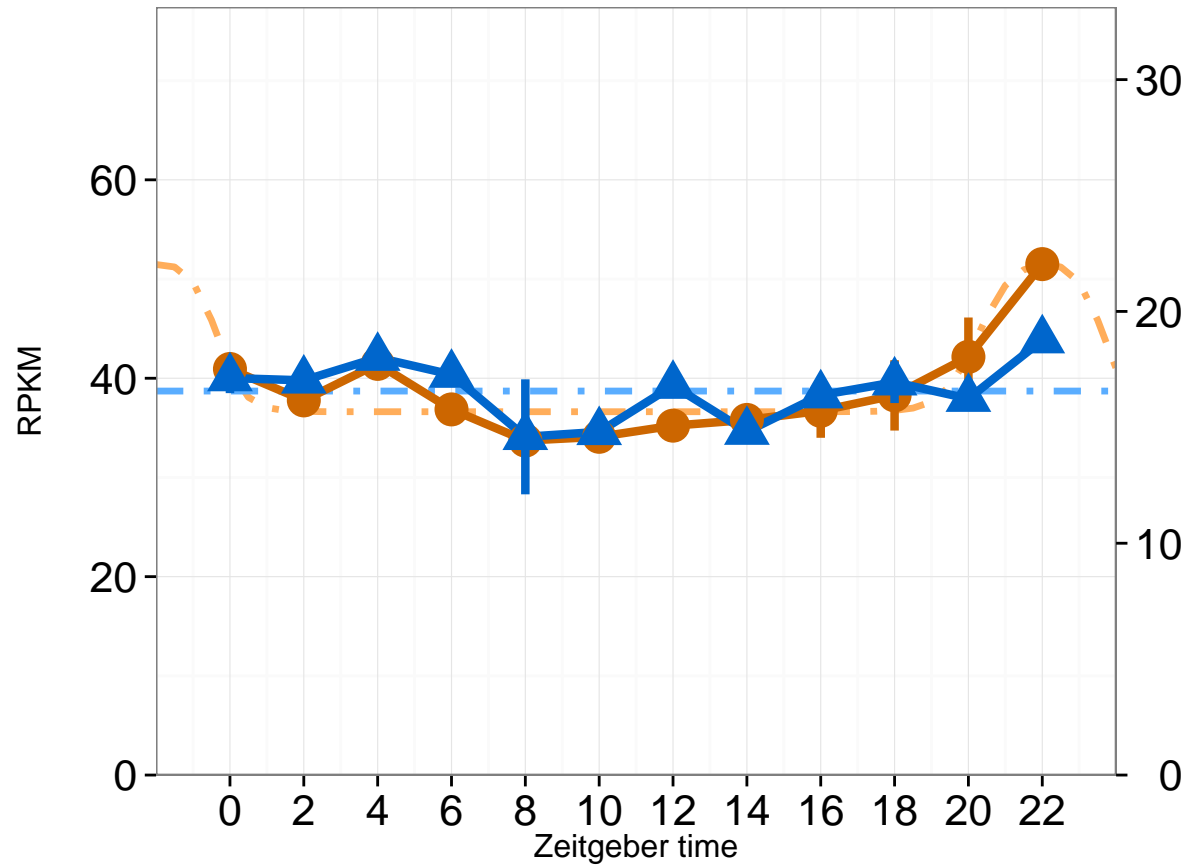

## Hfe

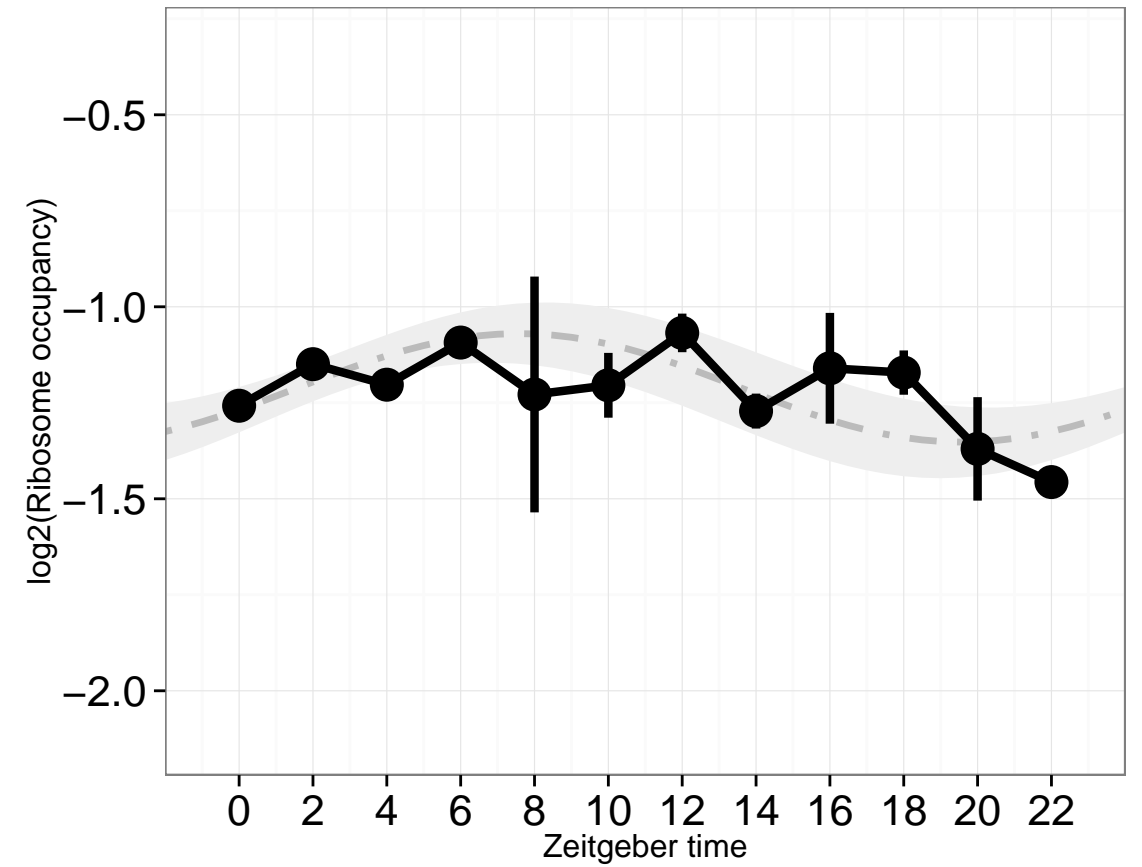

Supplement: SuppDataset_1.zip [file Hfe_set_A.pdf › Supplemental Dataset 1/A-mRNA_nonrhyth_translation_nonrhyth/Hfe_set_A.pdf]

## Hgd

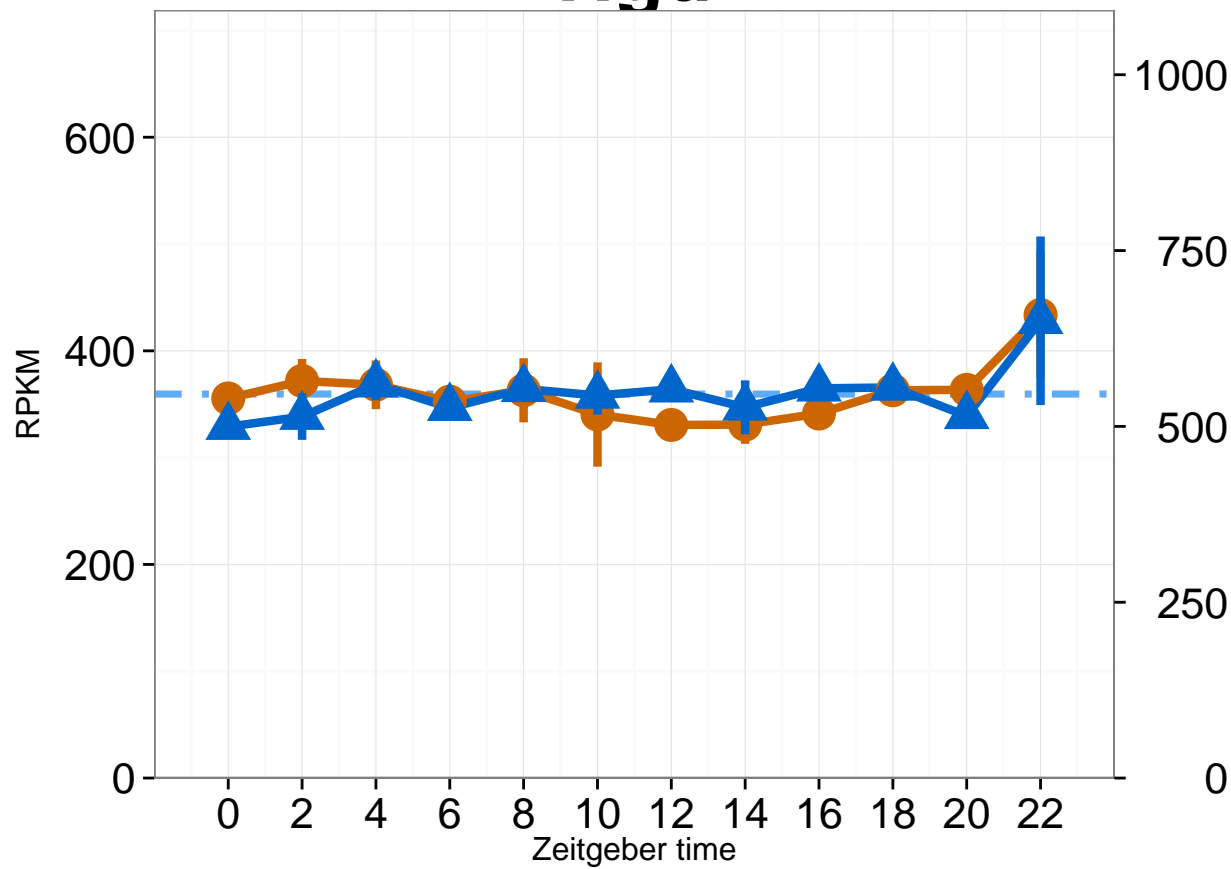

## Hgd

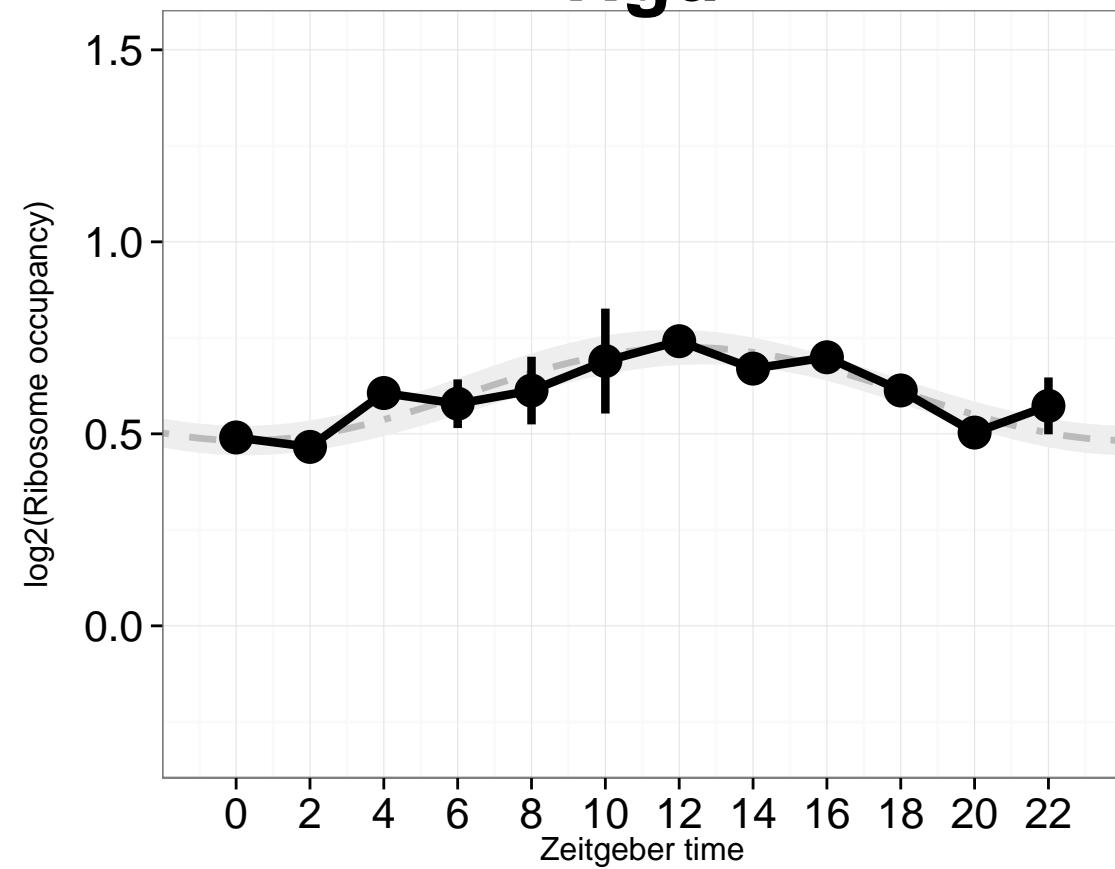

Supplement: SuppDataset_1.zip [file Hgd_set_A.pdf › Supplemental Dataset 1/A-mRNA_nonrhyth_translation_nonrhyth/Hgd_set_A.pdf]

## Hgf

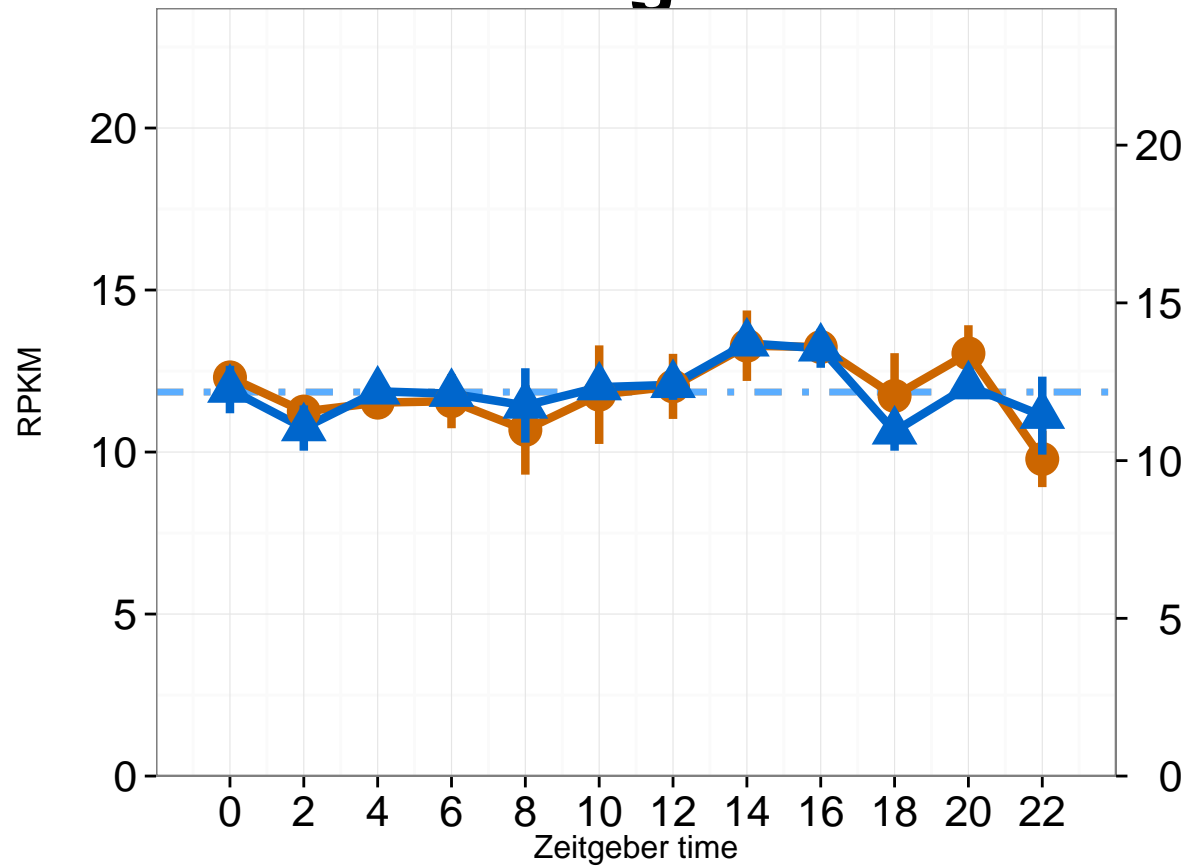

## Hgf

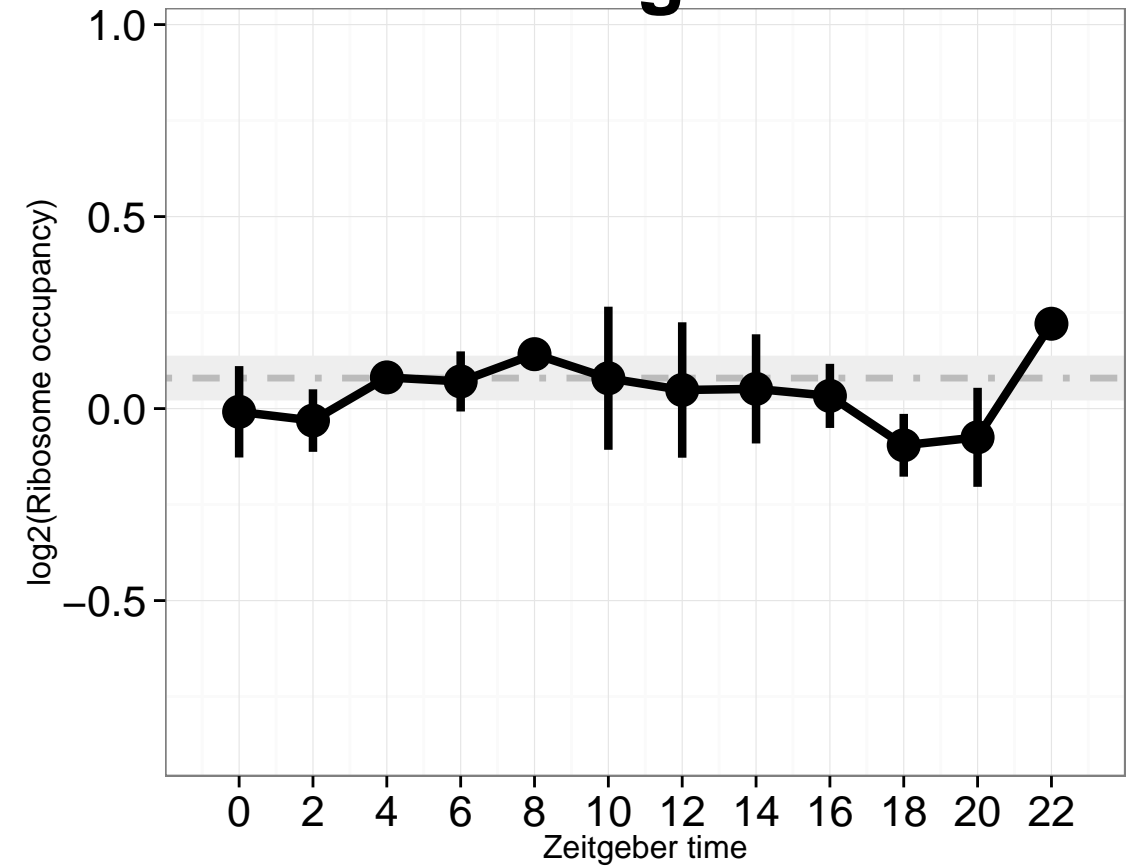

Supplement: SuppDataset_1.zip [file Hgf_set_A.pdf › Supplemental Dataset 1/A-mRNA_nonrhyth_translation_nonrhyth/Hgf_set_A.pdf]

## Hgfac

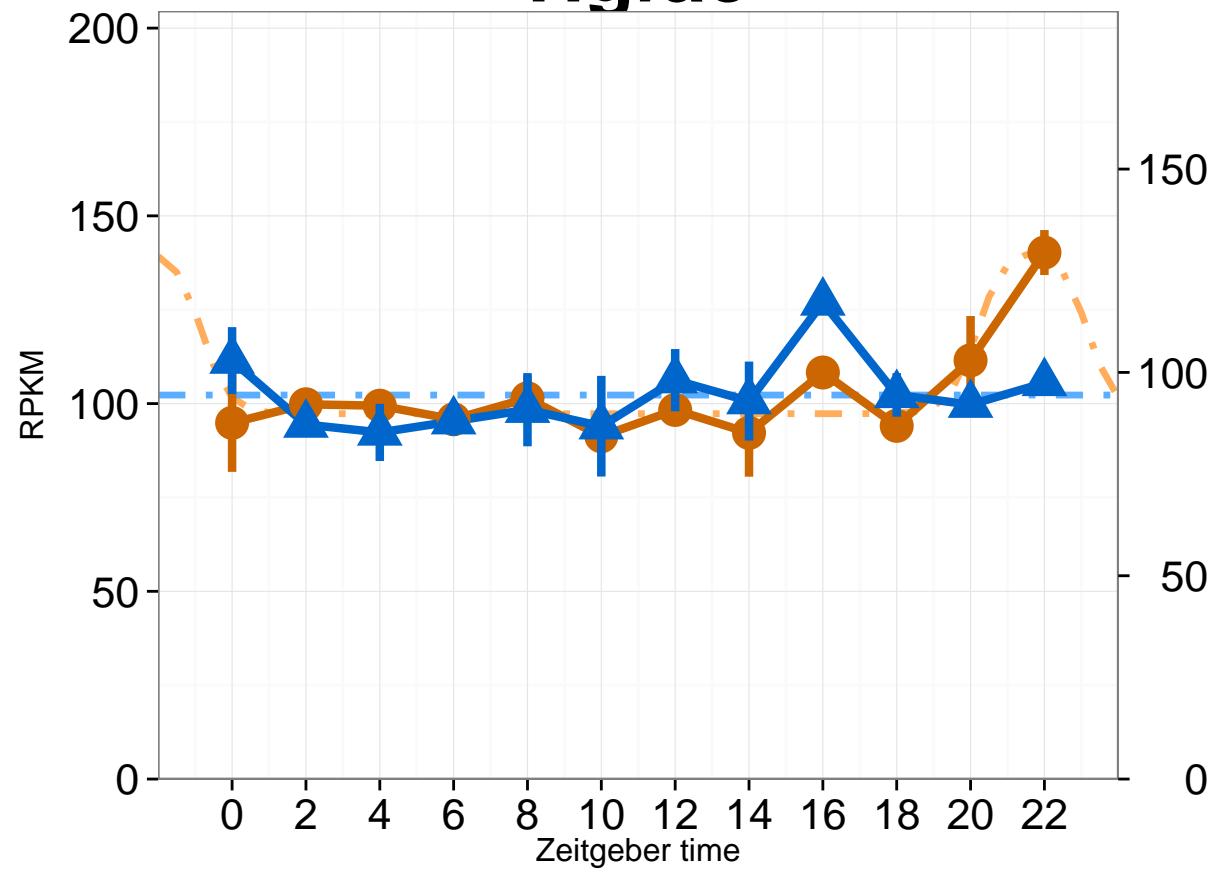

## Hgfac

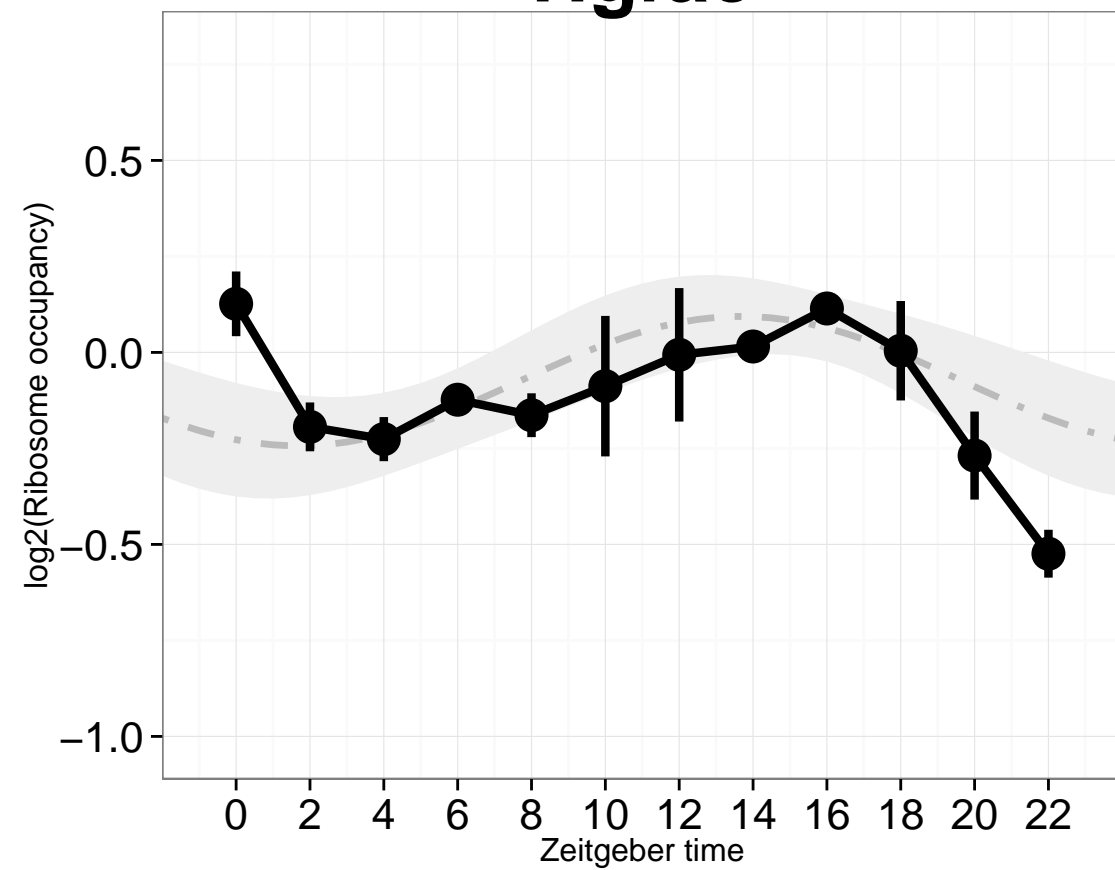

Supplement: SuppDataset_1.zip [file Hgfac_set_A.pdf › Supplemental Dataset 1/A-mRNA_nonrhyth_translation_nonrhyth/Hgfac_set_A.pdf]

## Hgs

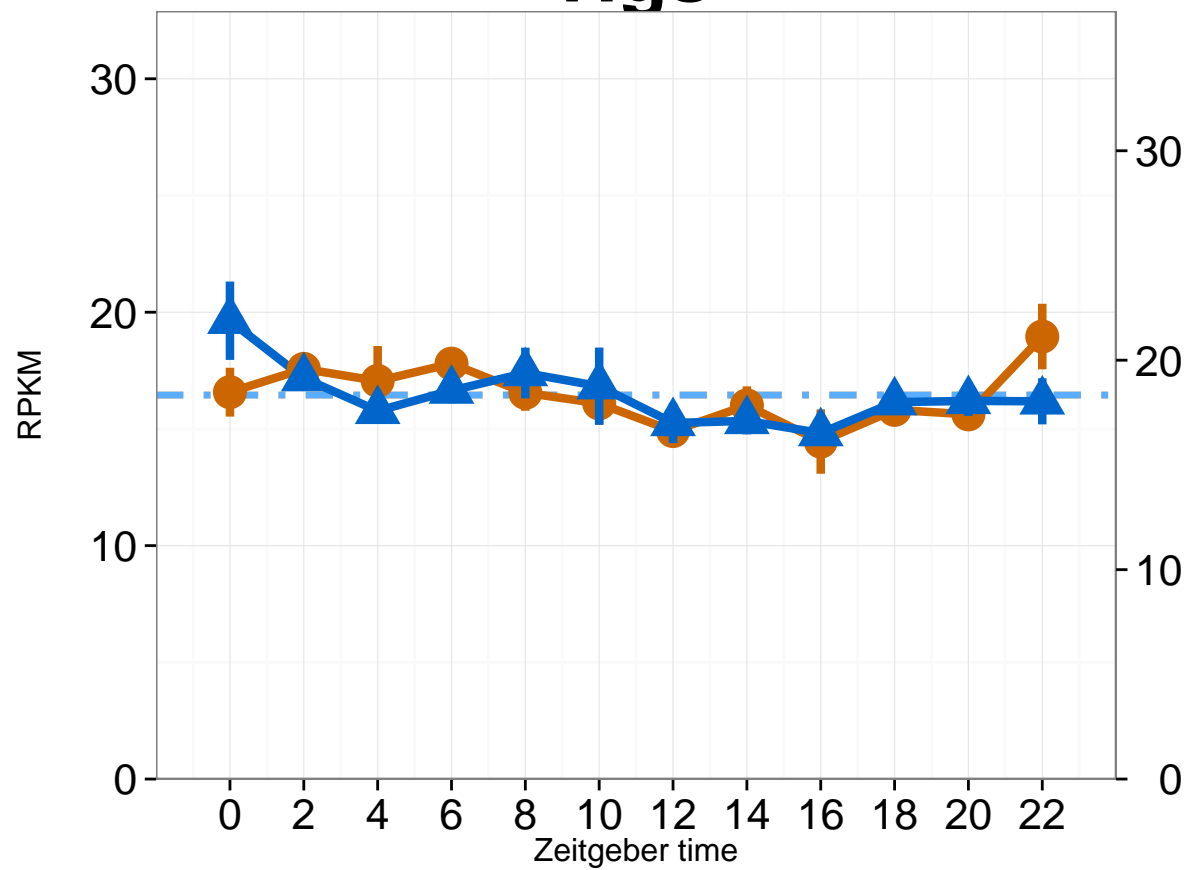

## Hgs

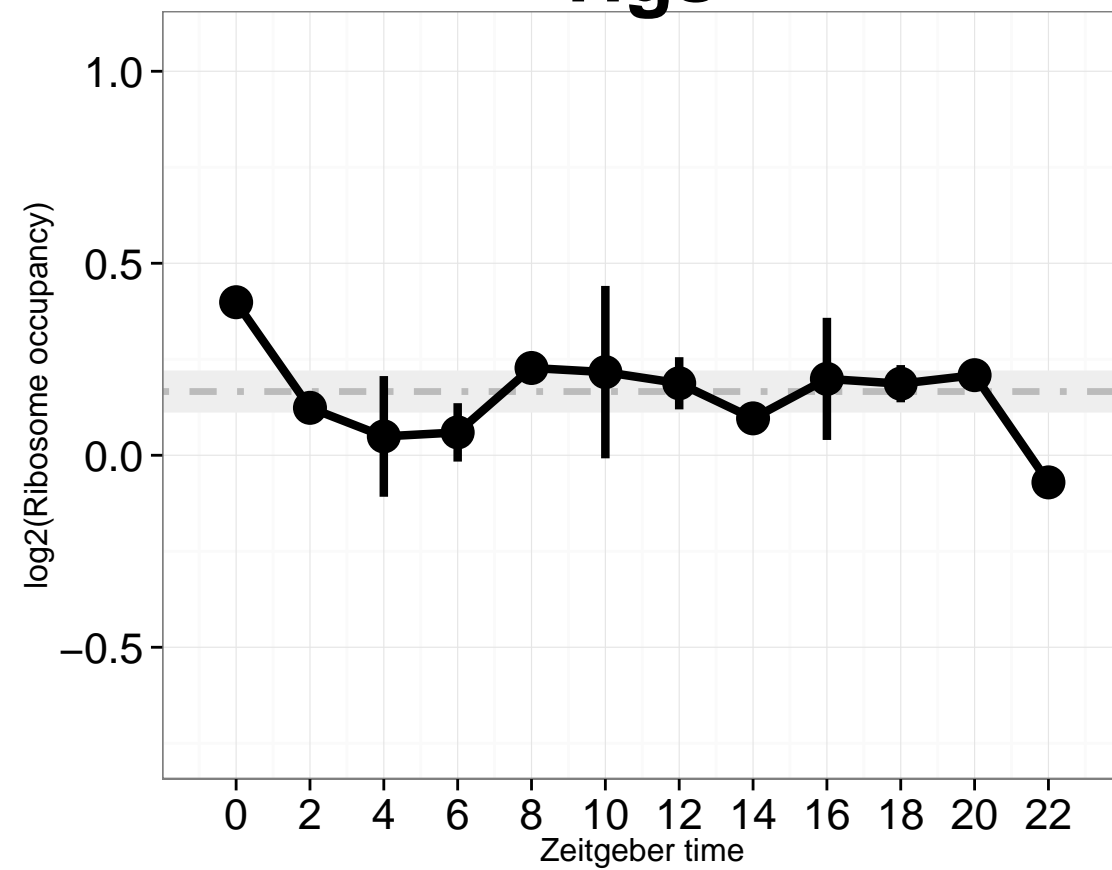

Supplement: SuppDataset_1.zip [file Hgs_set_A.pdf › Supplemental Dataset 1/A-mRNA_nonrhyth_translation_nonrhyth/Hgs_set_A.pdf]

# Hgsnat

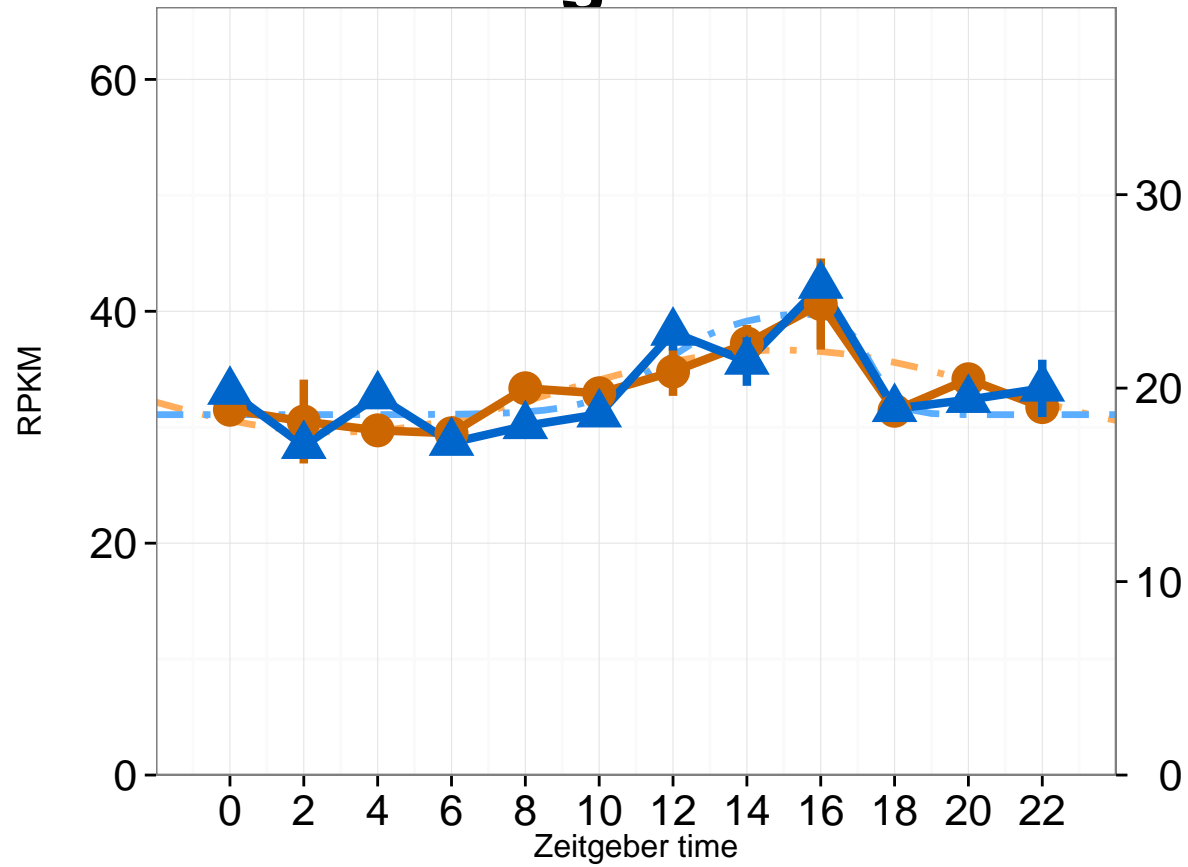

# Hgsnat

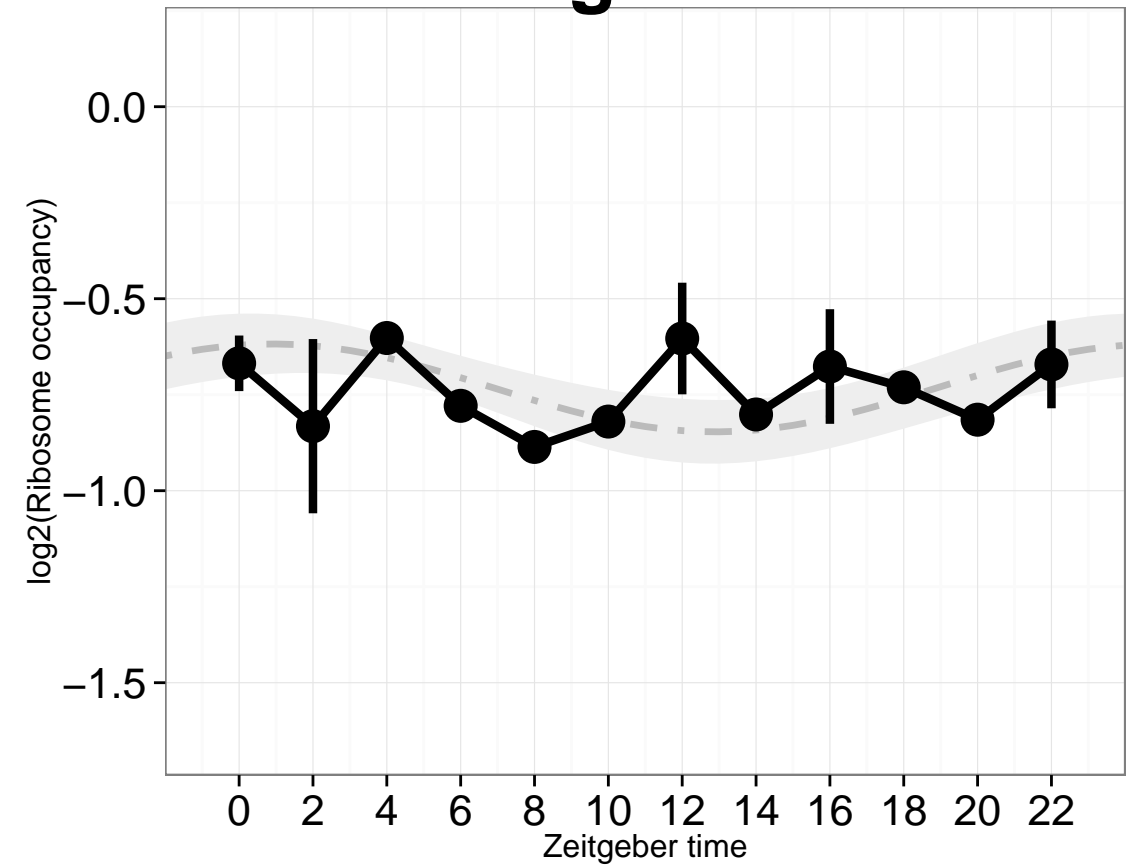

Supplement: SuppDataset_1.zip [file Hgsnat_set_A.pdf › Supplemental Dataset 1/A-mRNA_nonrhyth_translation_nonrhyth/Hgsnat_set_A.pdf]

## Hhex

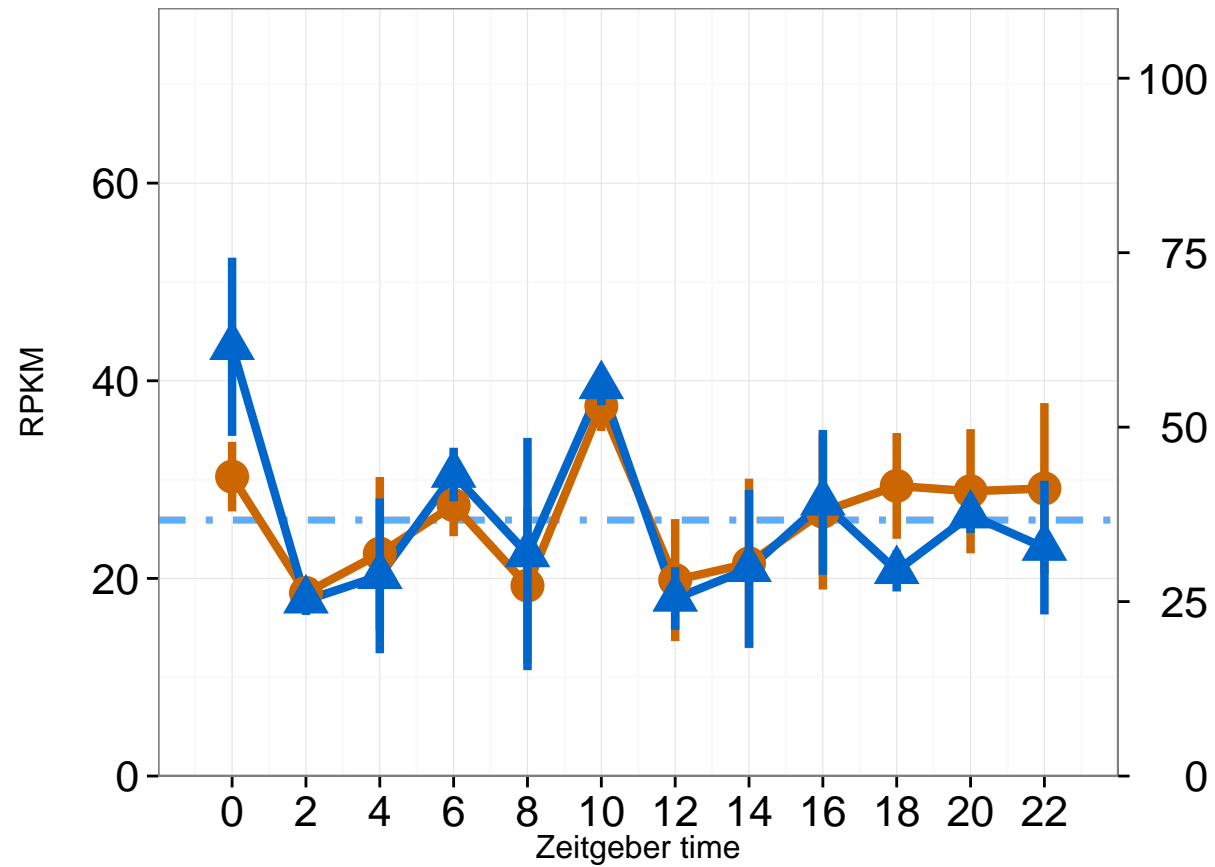

## Hhex

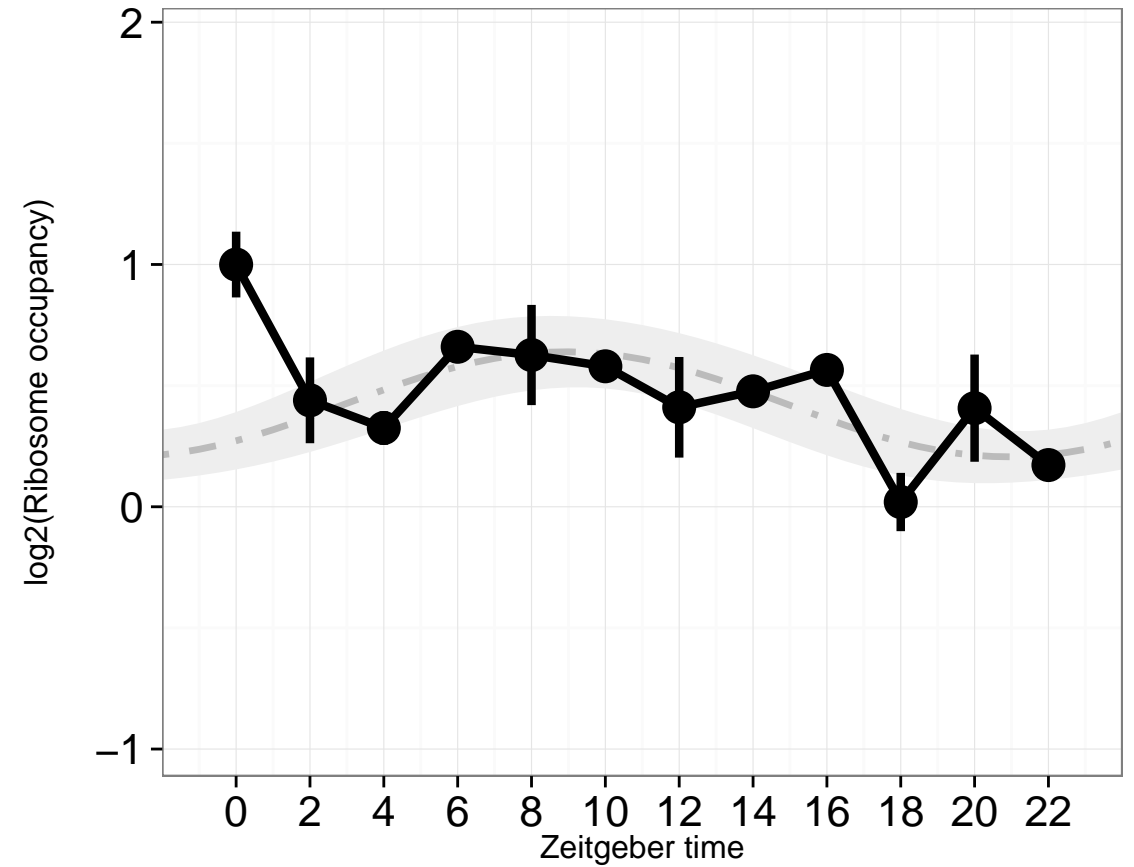

Supplement: SuppDataset_1.zip [file Hhex_set_A.pdf › Supplemental Dataset 1/A-mRNA_nonrhyth_translation_nonrhyth/Hhex_set_A.pdf]

# Hiat1

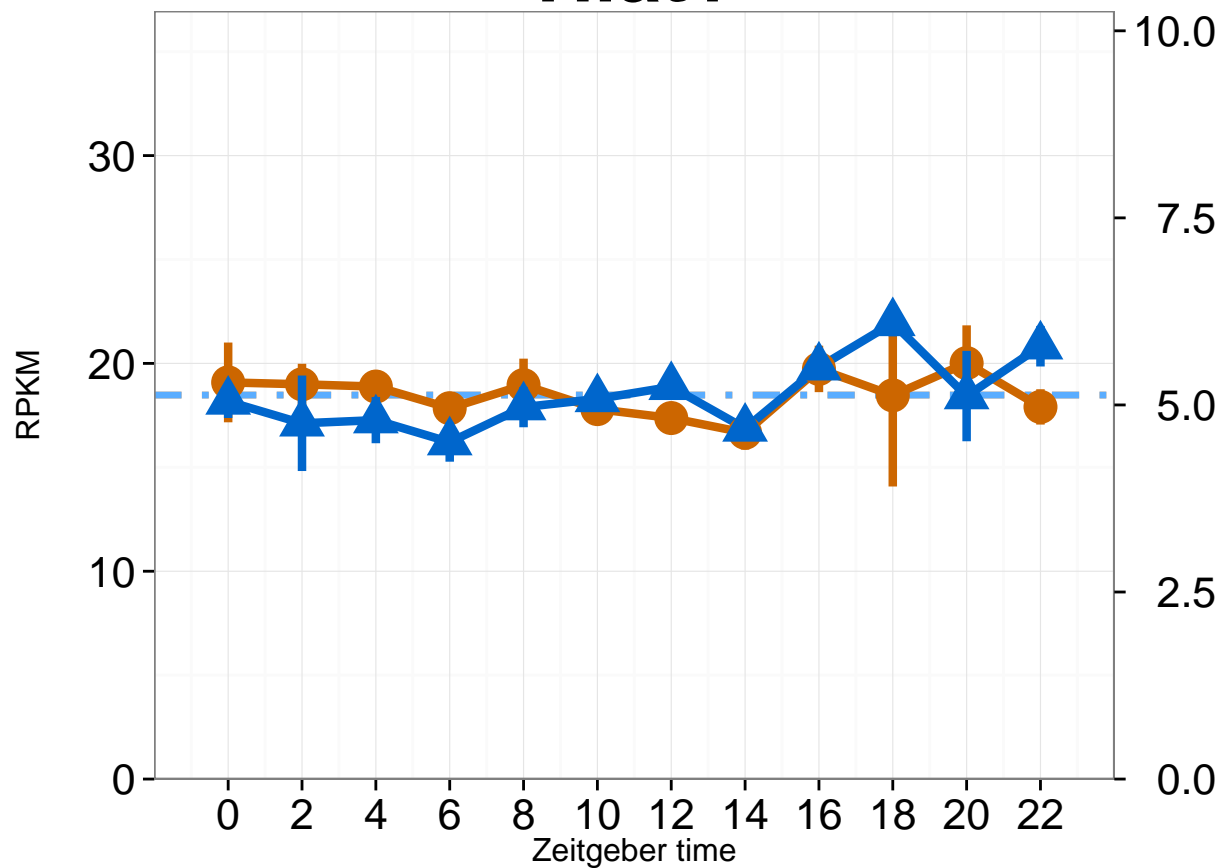

# Hiat1

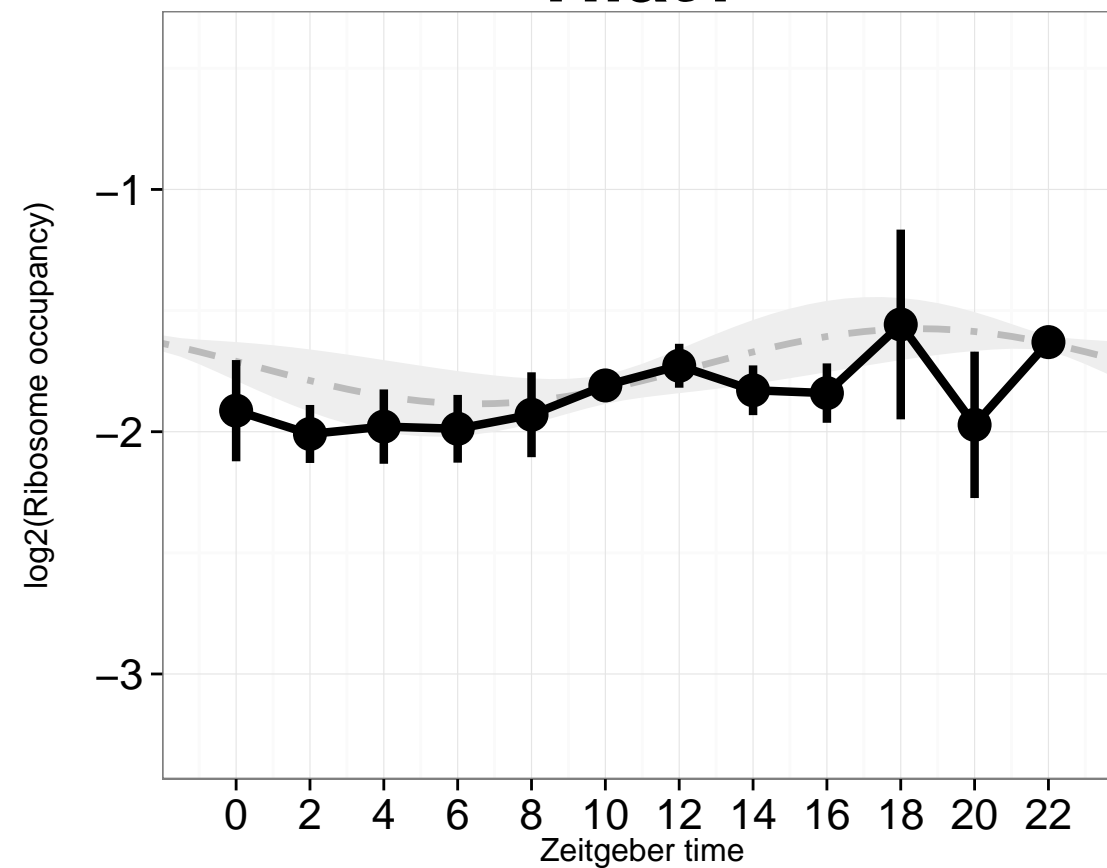

Supplement: SuppDataset_1.zip [file Hiat1_set_A.pdf › Supplemental Dataset 1/A-mRNA_nonrhyth_translation_nonrhyth/Hiat1_set_A.pdf]

## Hiatl1

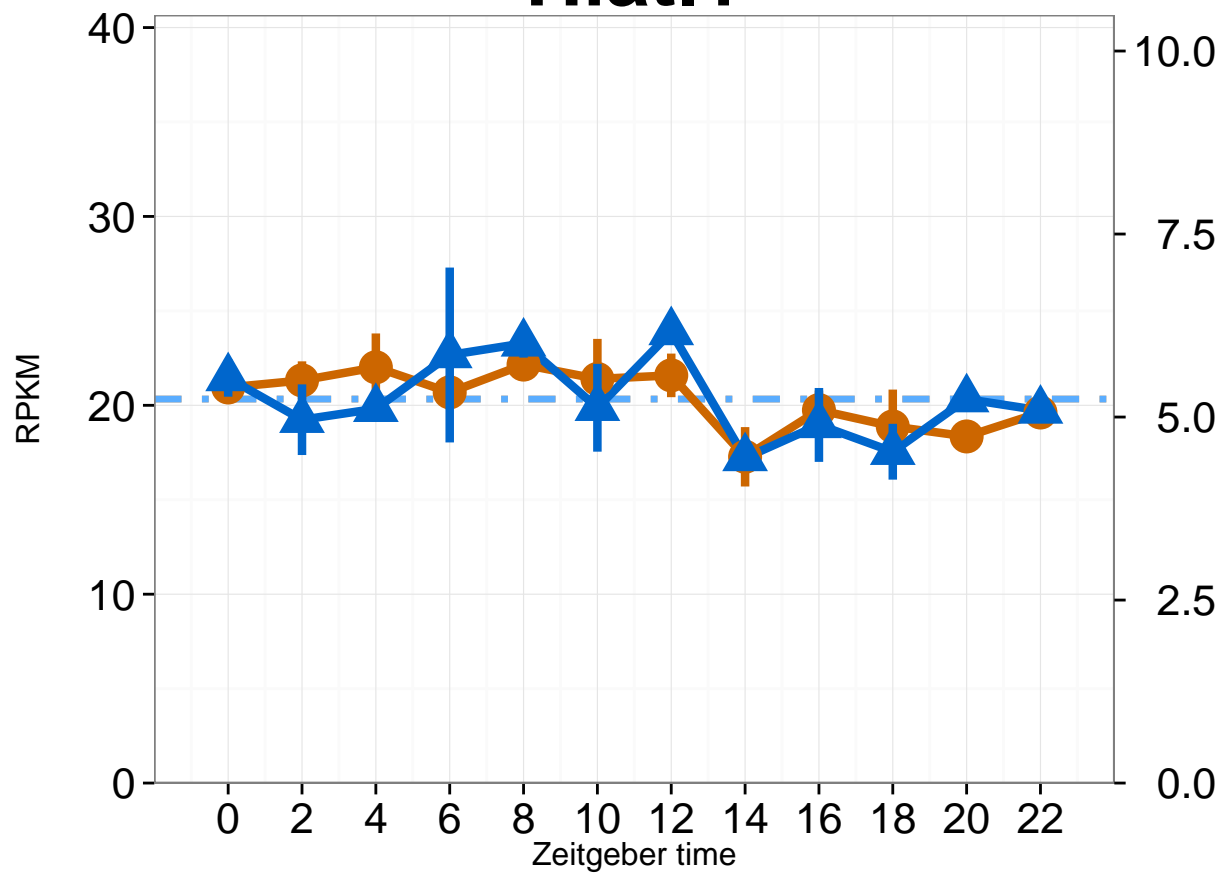

## Hiatl1

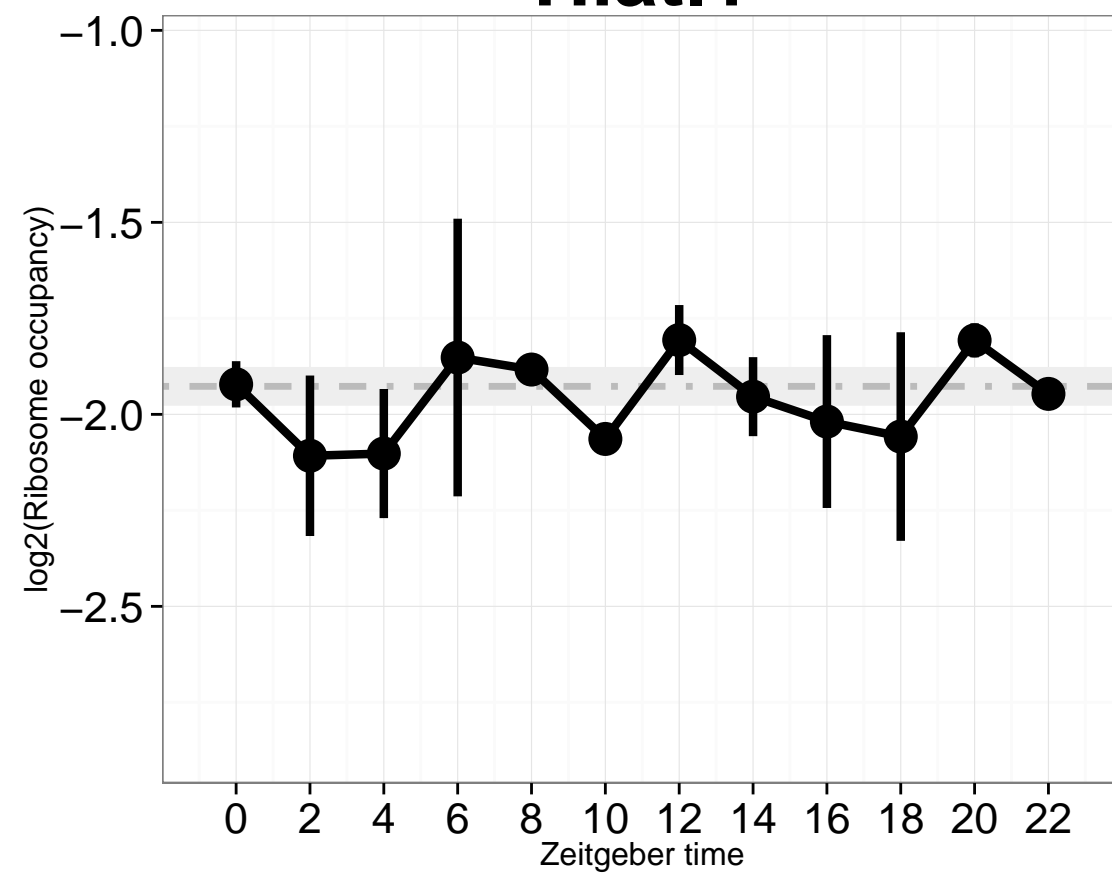

Supplement: SuppDataset_1.zip [file Hiatl1_set_A.pdf › Supplemental Dataset 1/A-mRNA_nonrhyth_translation_nonrhyth/Hiatl1_set_A.pdf]

# Hibadh

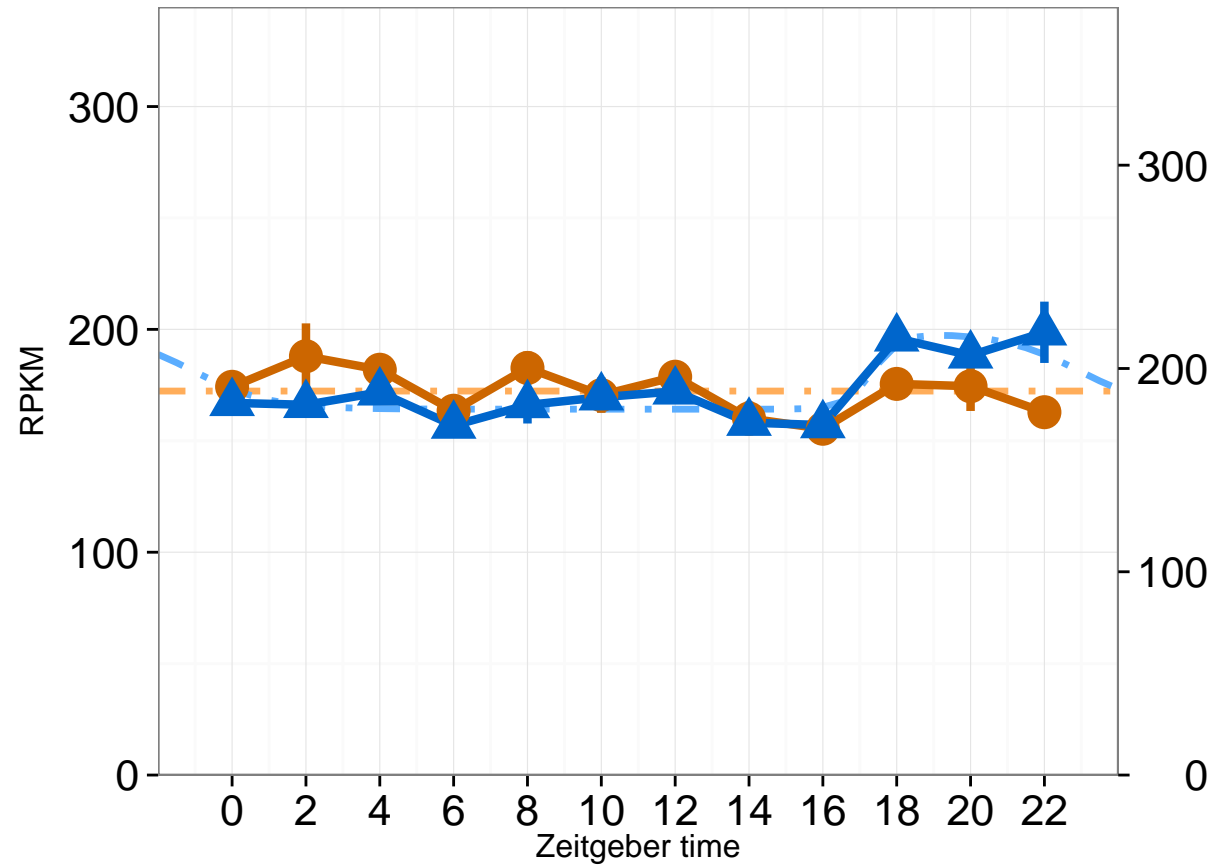

# Hibadh

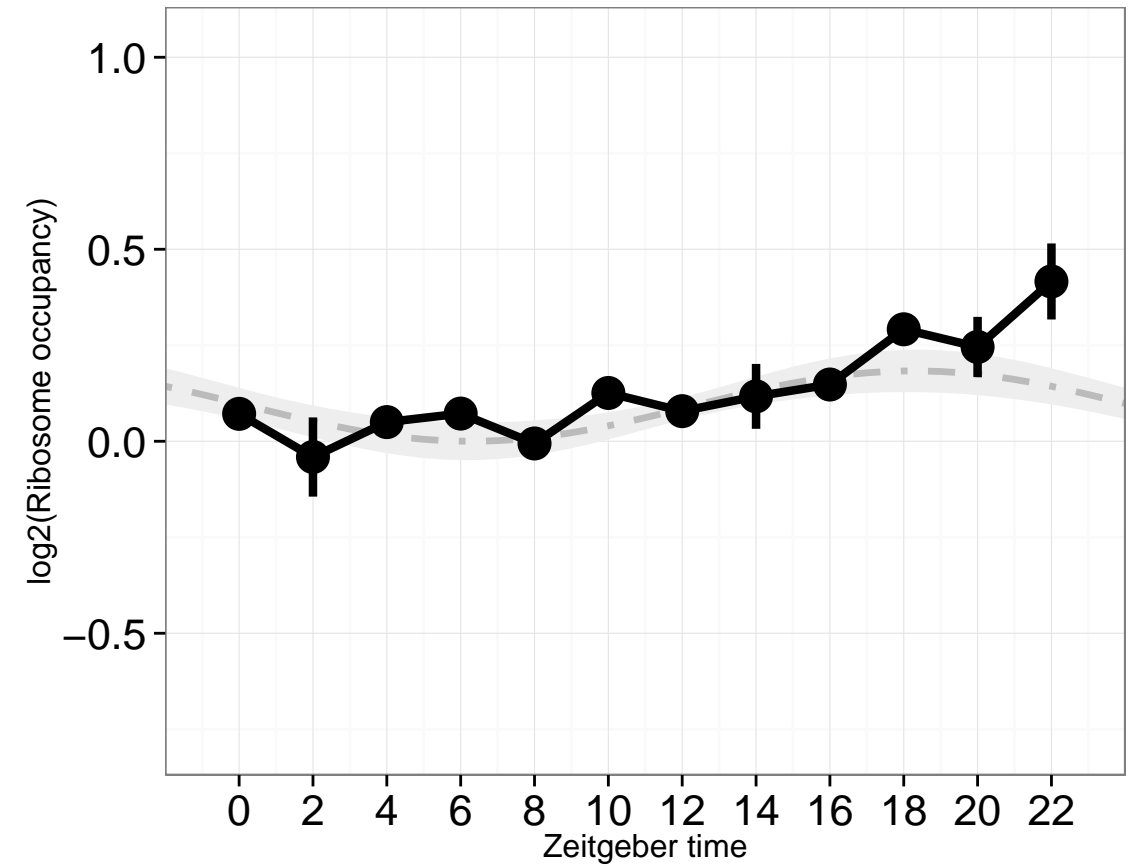

Supplement: SuppDataset_1.zip [file Hibadh_set_A.pdf › Supplemental Dataset 1/A-mRNA_nonrhyth_translation_nonrhyth/Hibadh_set_A.pdf]

## Hibch

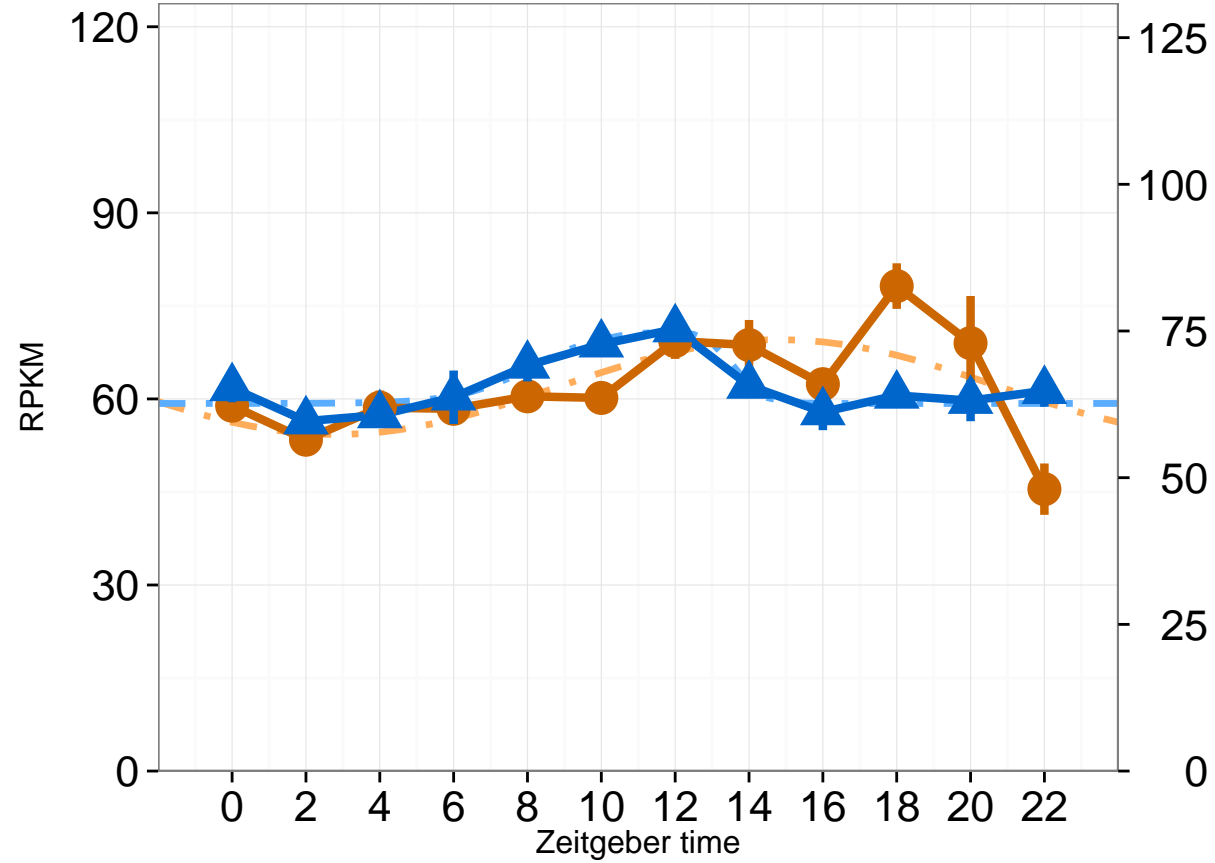

## Hibch

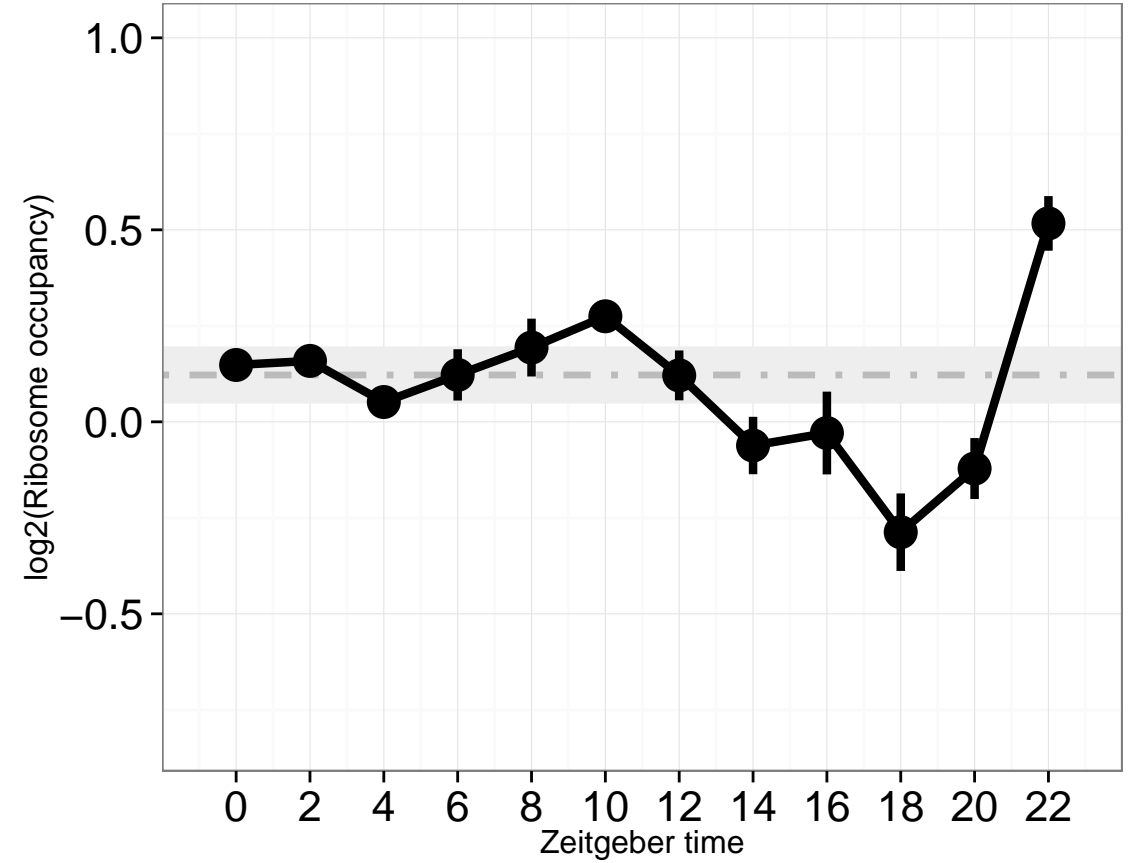

Supplement: SuppDataset_1.zip [file Hibch_set_A.pdf › Supplemental Dataset 1/A-mRNA_nonrhyth_translation_nonrhyth/Hibch_set_A.pdf]

## Hic2

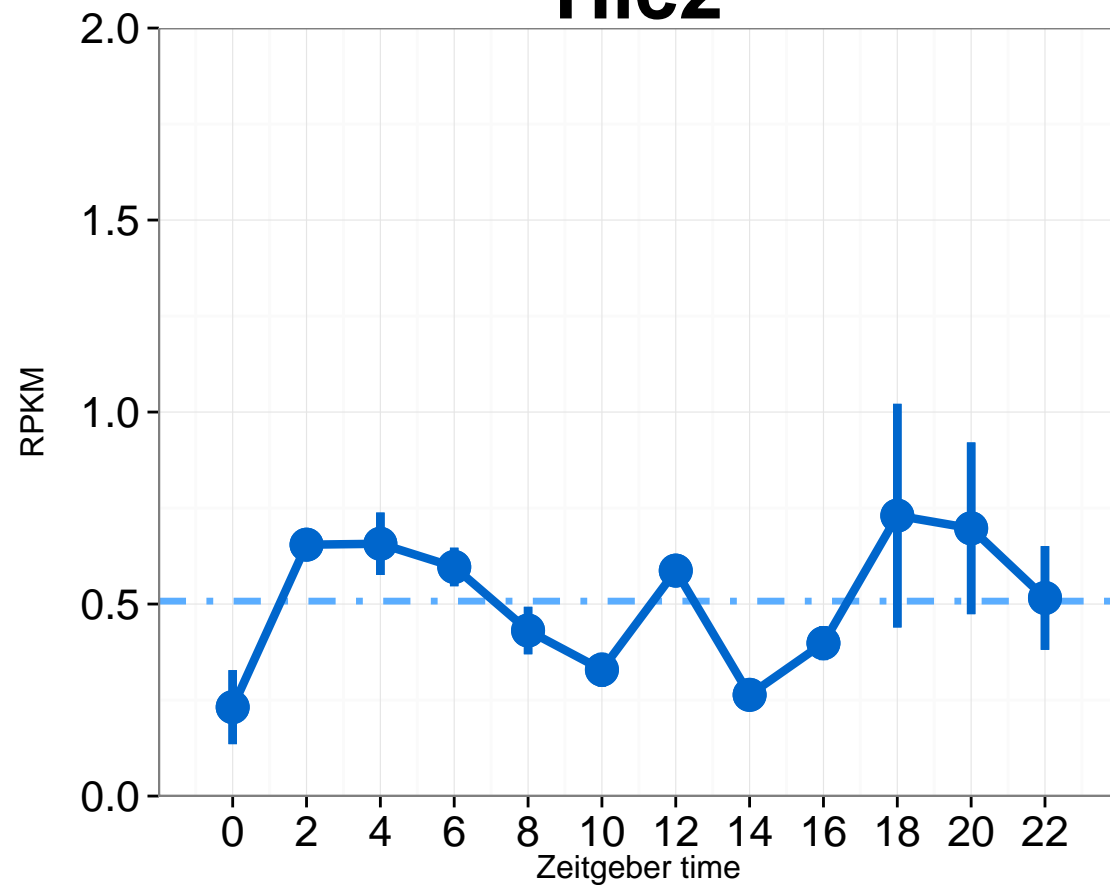

## Hic2 log2(Ribosome occupancy)

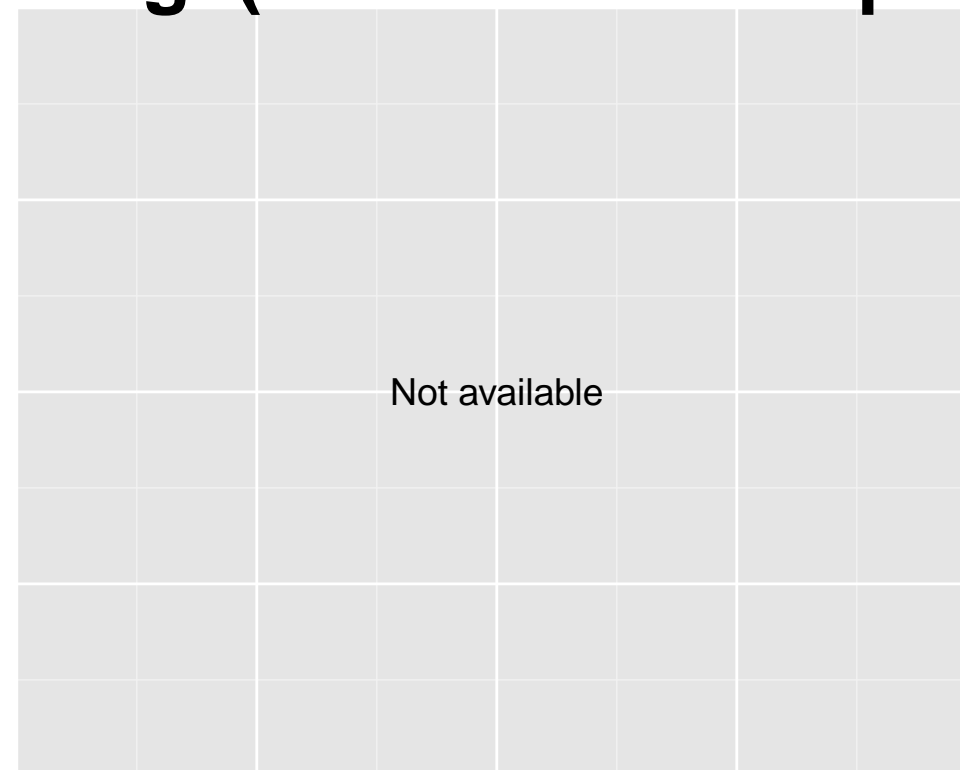

Supplement: SuppDataset_1.zip [file Hic2_set_A.pdf › Supplemental Dataset 1/A-mRNA_nonrhyth_translation_nonrhyth/Hic2_set_A.pdf]

## Hid1

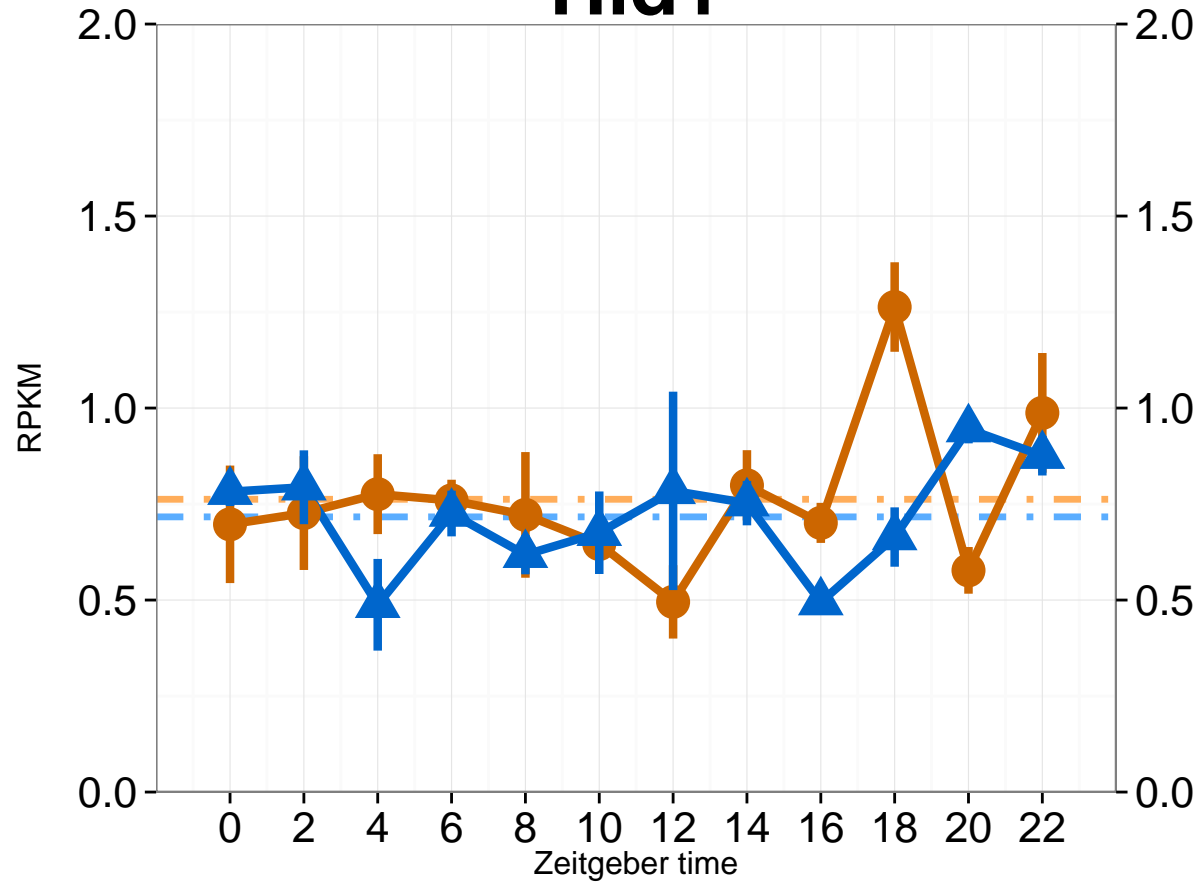

## Hid1

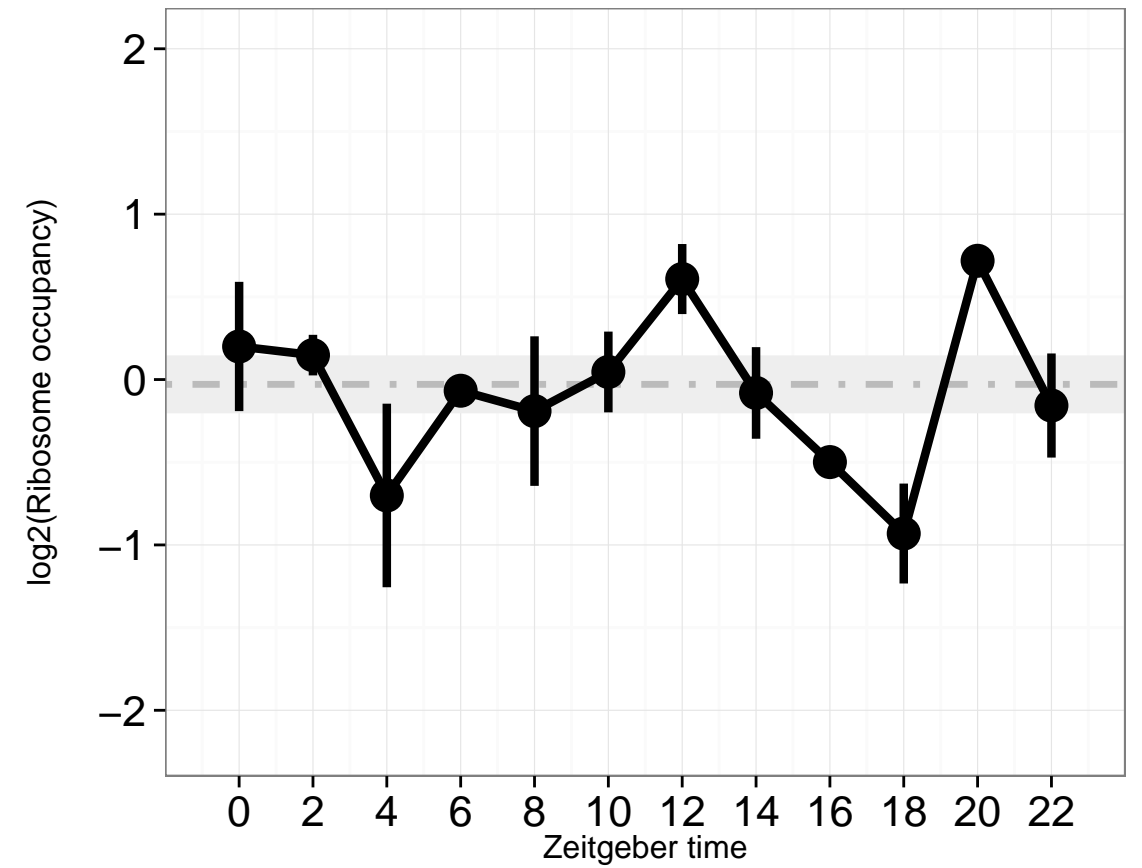

Supplement: SuppDataset_1.zip [file Hid1_set_A.pdf › Supplemental Dataset 1/A-mRNA_nonrhyth_translation_nonrhyth/Hid1_set_A.pdf]

## Hif1a

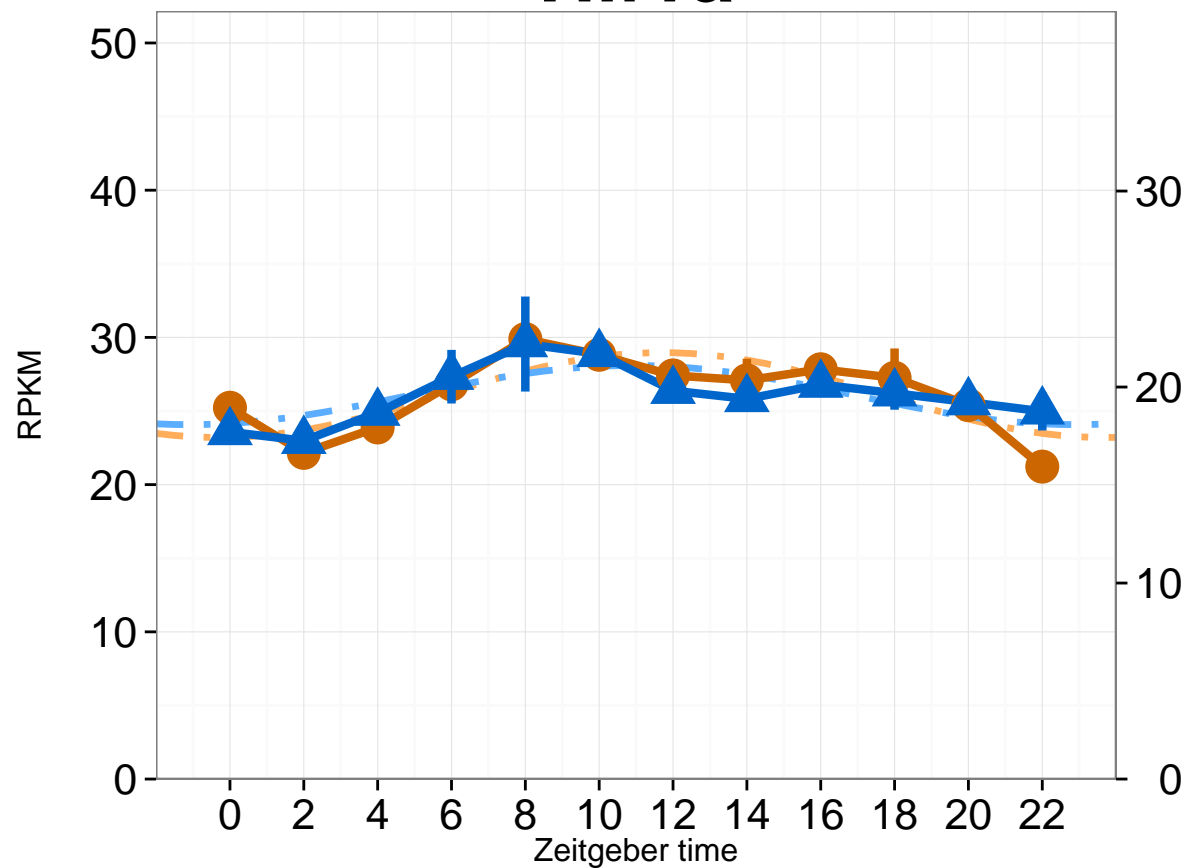

## Hif1a

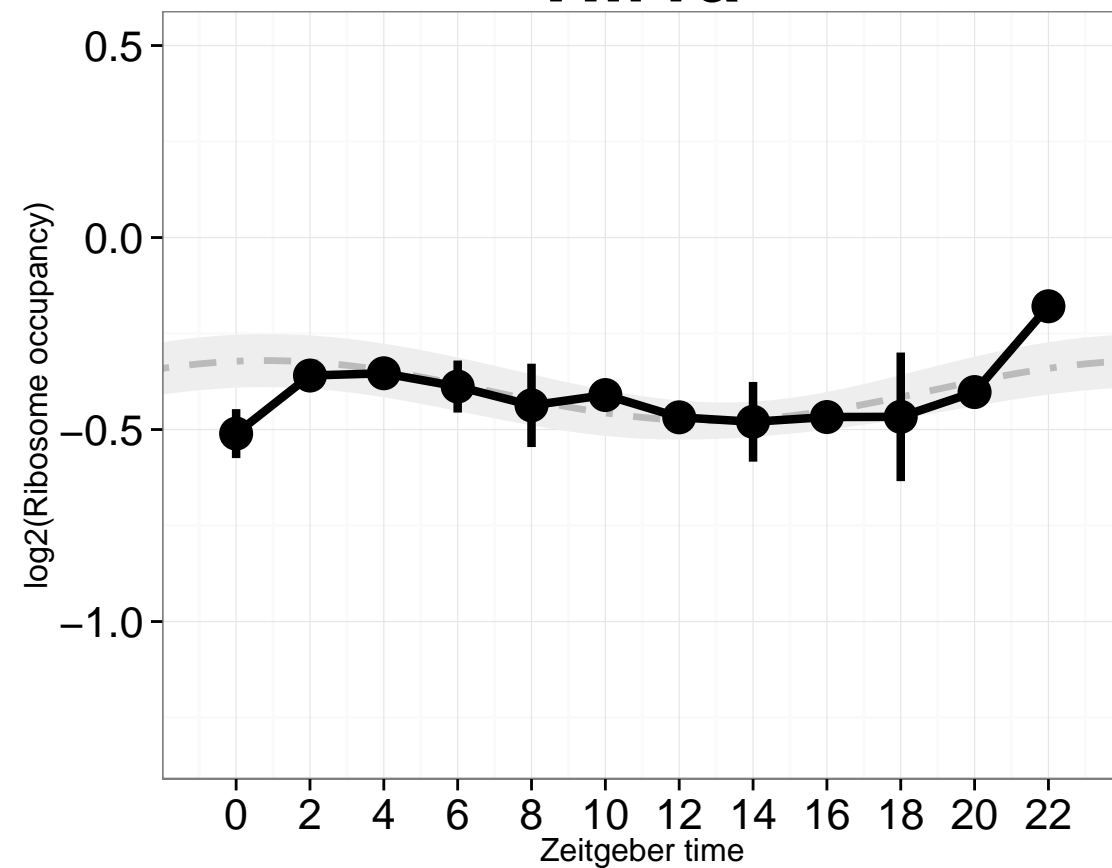

Supplement: SuppDataset_1.zip [file Hif1a_set_A.pdf › Supplemental Dataset 1/A-mRNA_nonrhyth_translation_nonrhyth/Hif1a_set_A.pdf]

## Hif1an

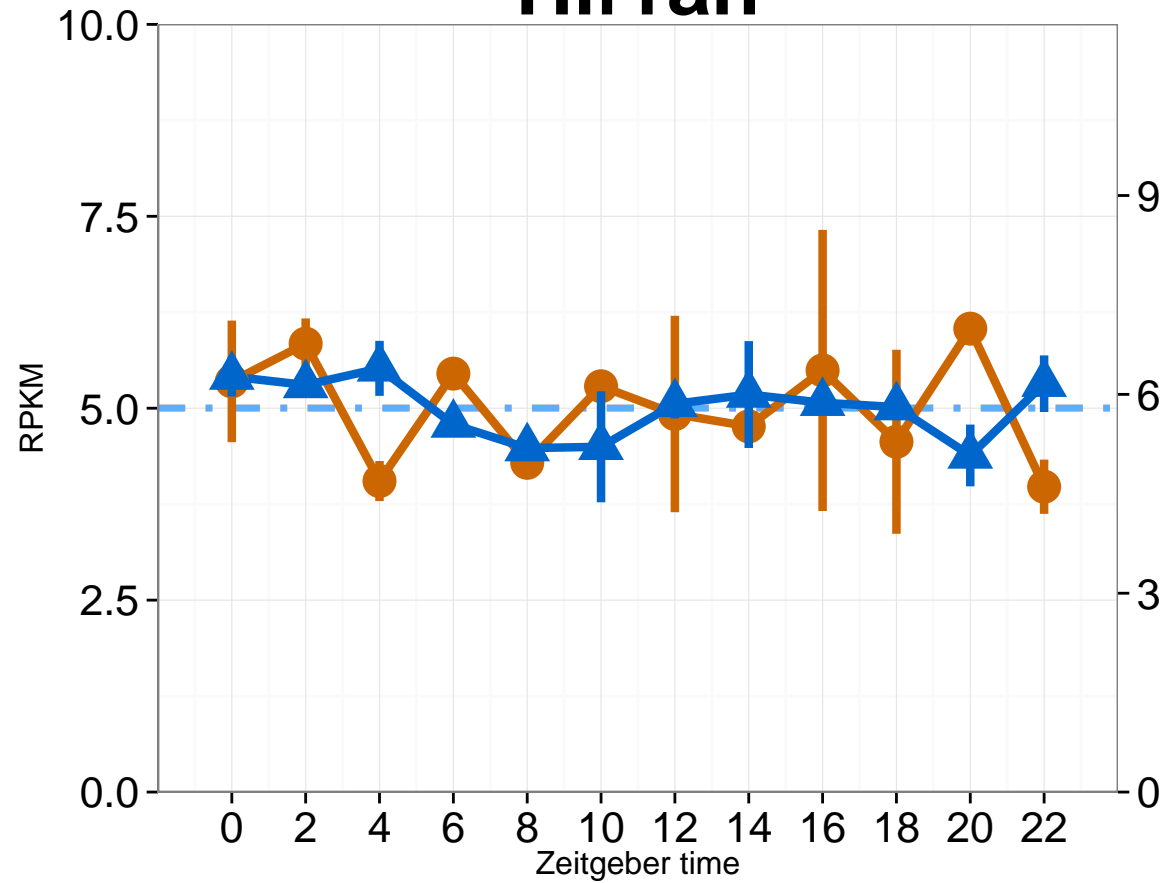

## Hif1an

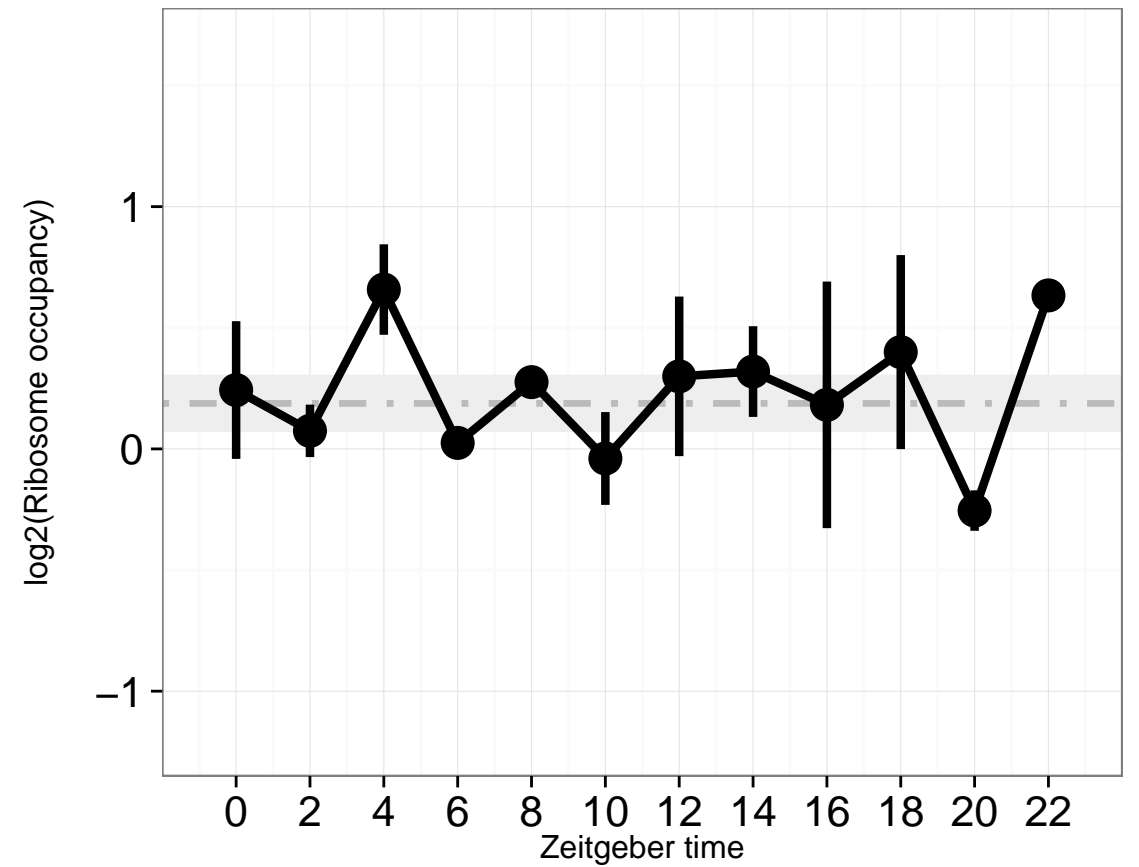

Supplement: SuppDataset_1.zip [file Hif1an_set_A.pdf › Supplemental Dataset 1/A-mRNA_nonrhyth_translation_nonrhyth/Hif1an_set_A.pdf]

# Higd1a

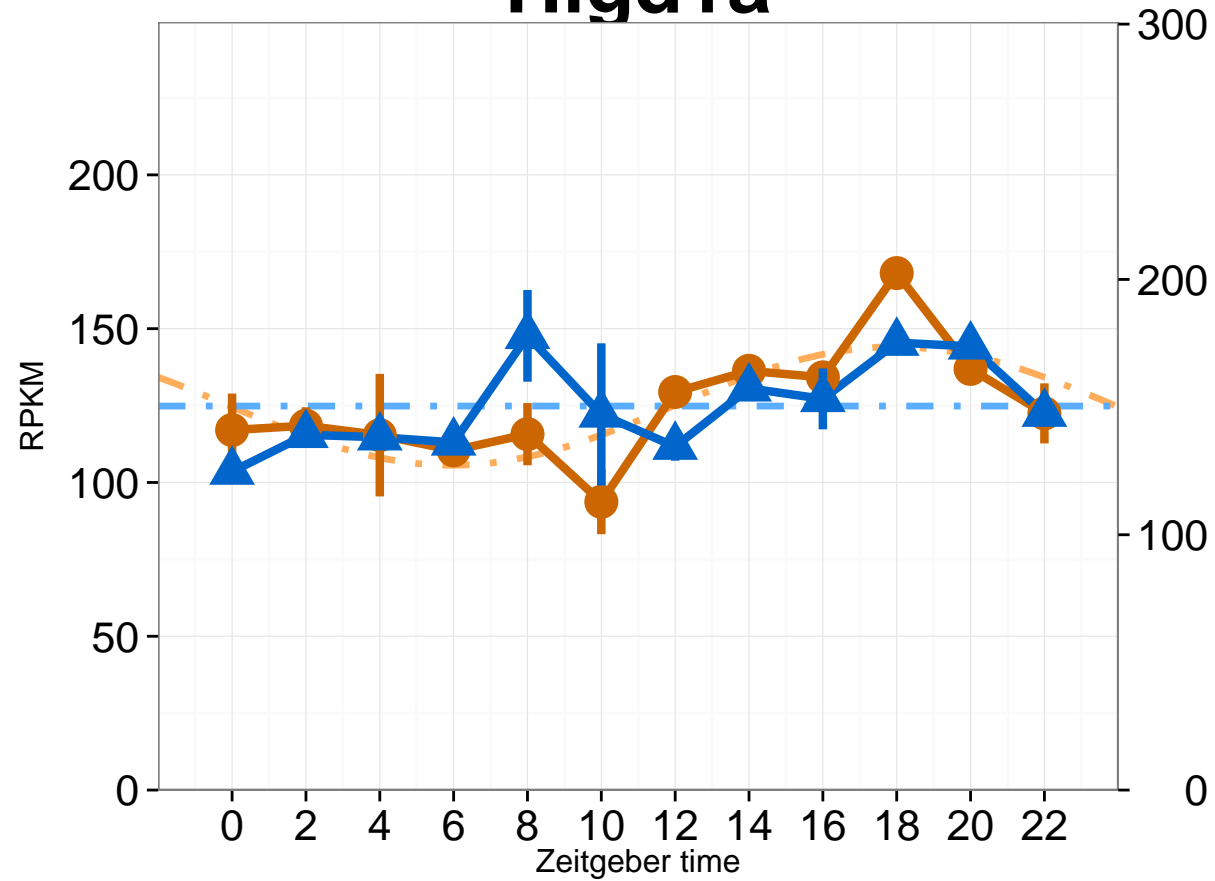

# Higd1a

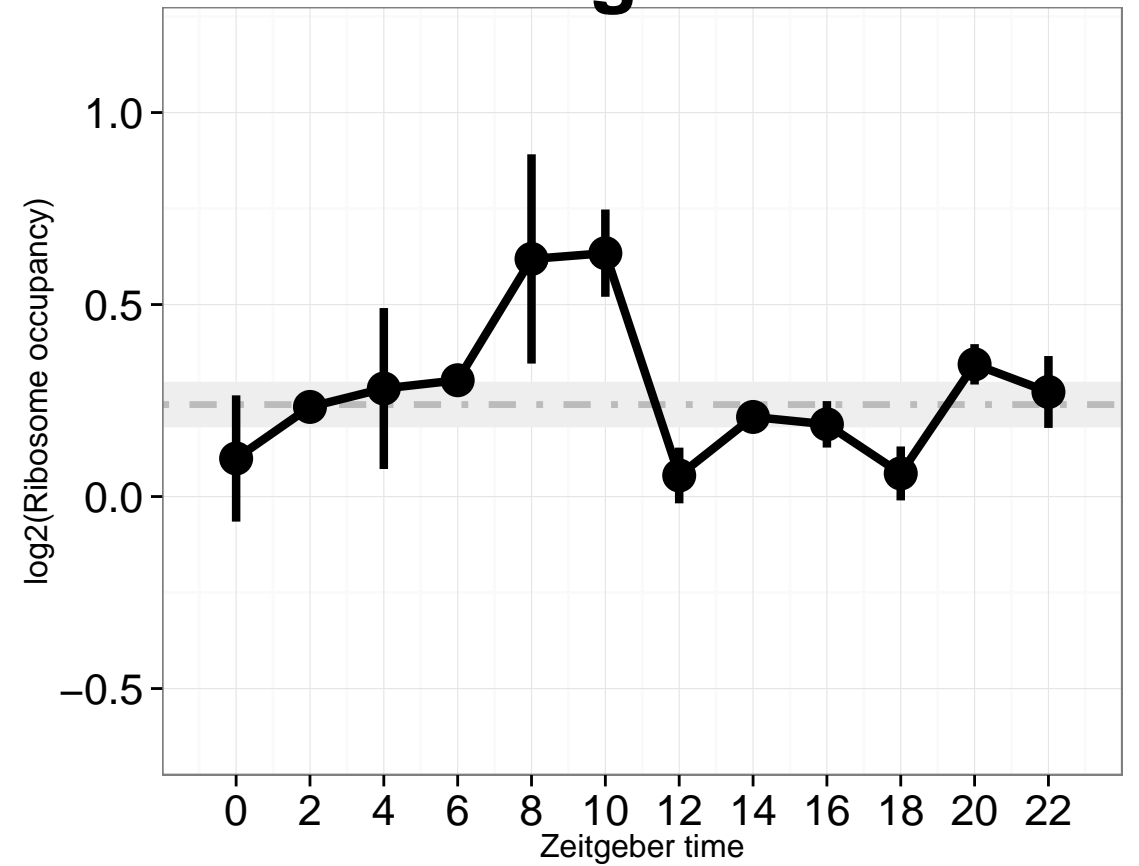

Supplement: SuppDataset_1.zip [file Higd1a_set_A.pdf › Supplemental Dataset 1/A-mRNA_nonrhyth_translation_nonrhyth/Higd1a_set_A.pdf]

# Higd2a

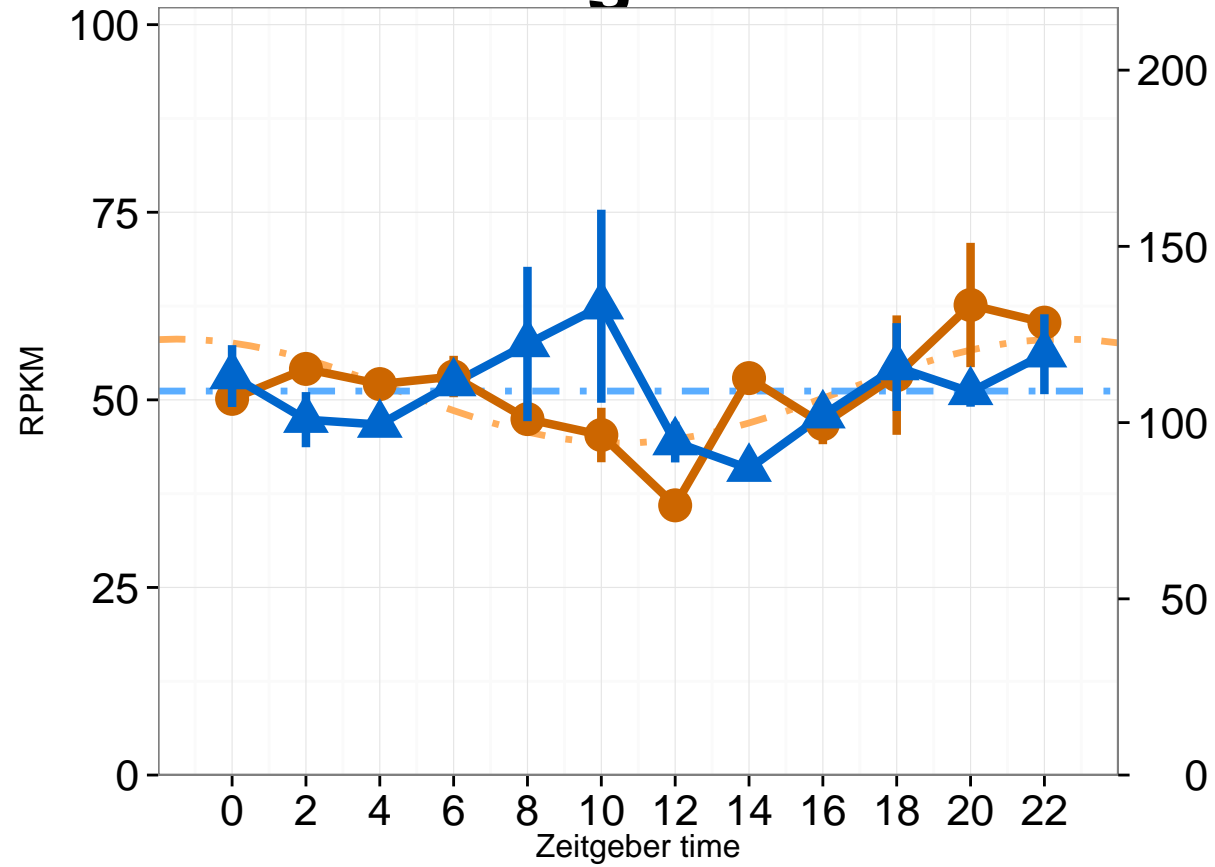

# Higd2a

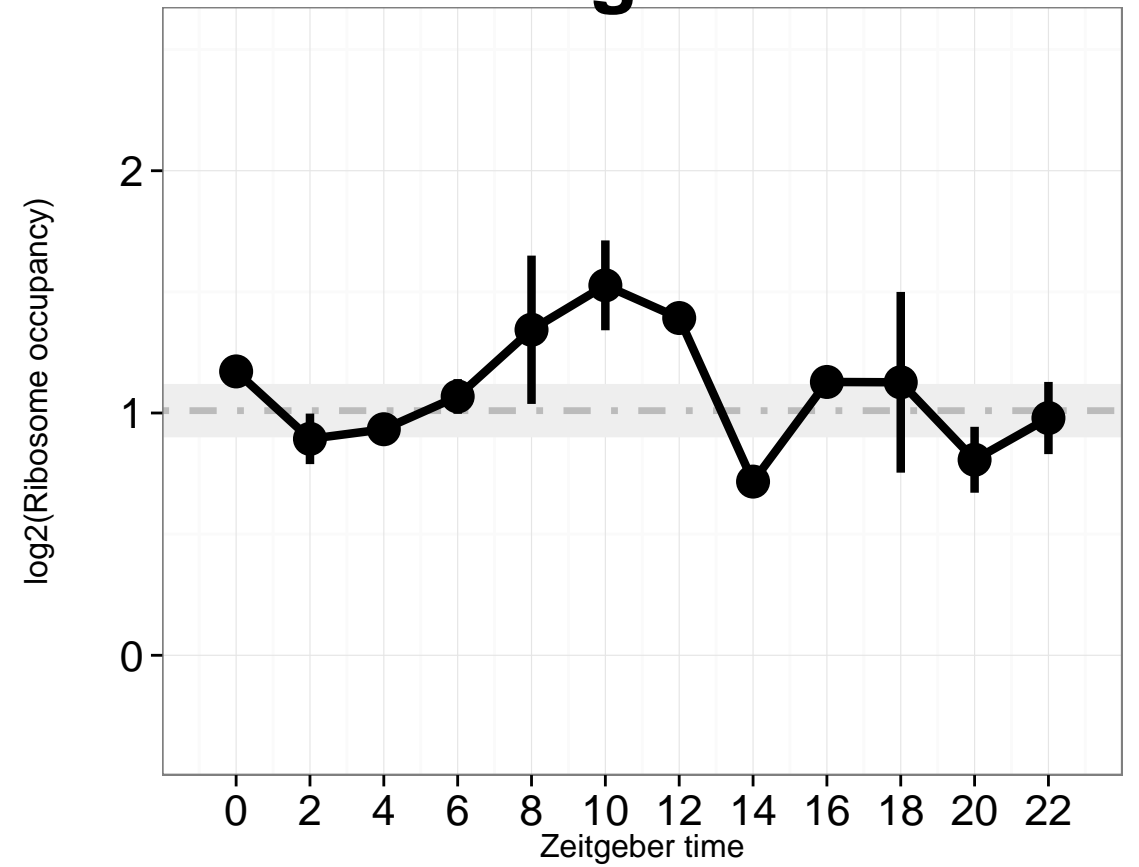

Supplement: SuppDataset_1.zip [file Higd2a_set_A.pdf › Supplemental Dataset 1/A-mRNA_nonrhyth_translation_nonrhyth/Higd2a_set_A.pdf]

## Hinfp

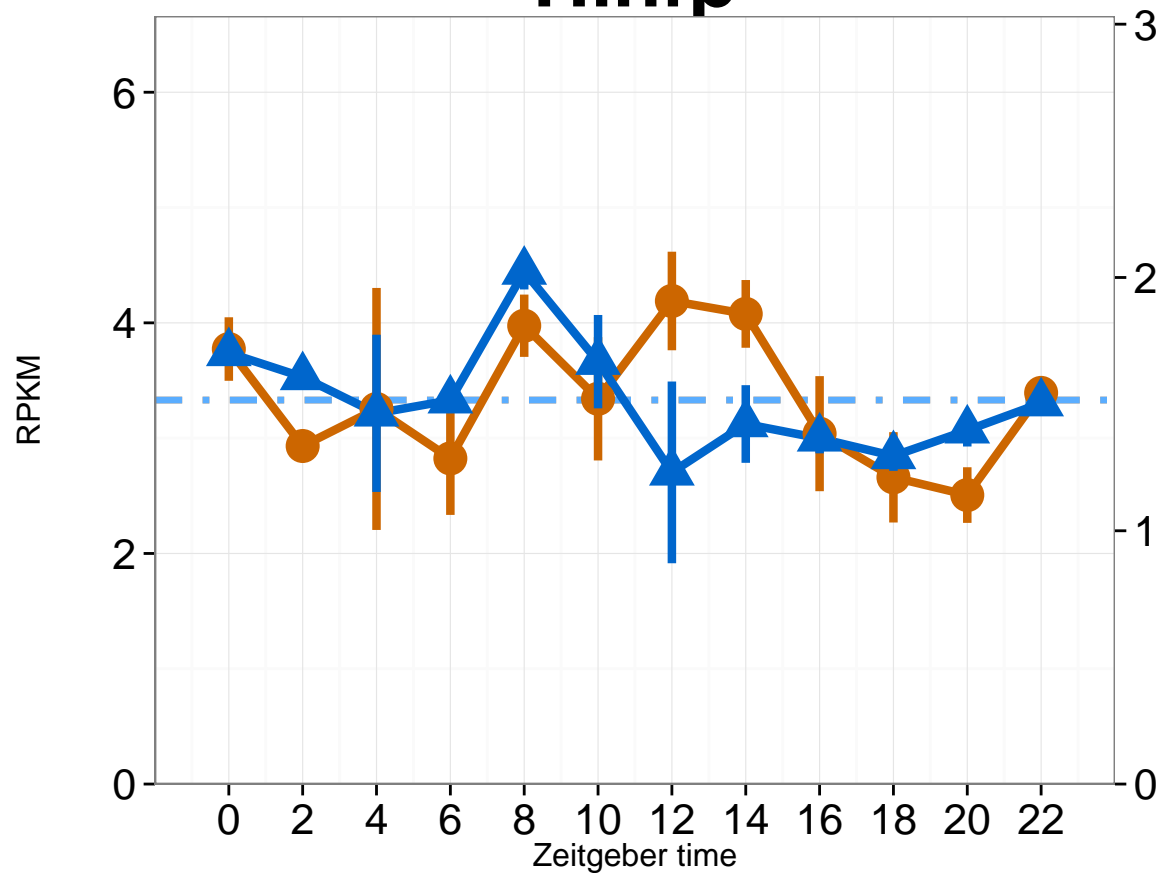

## Hinfp

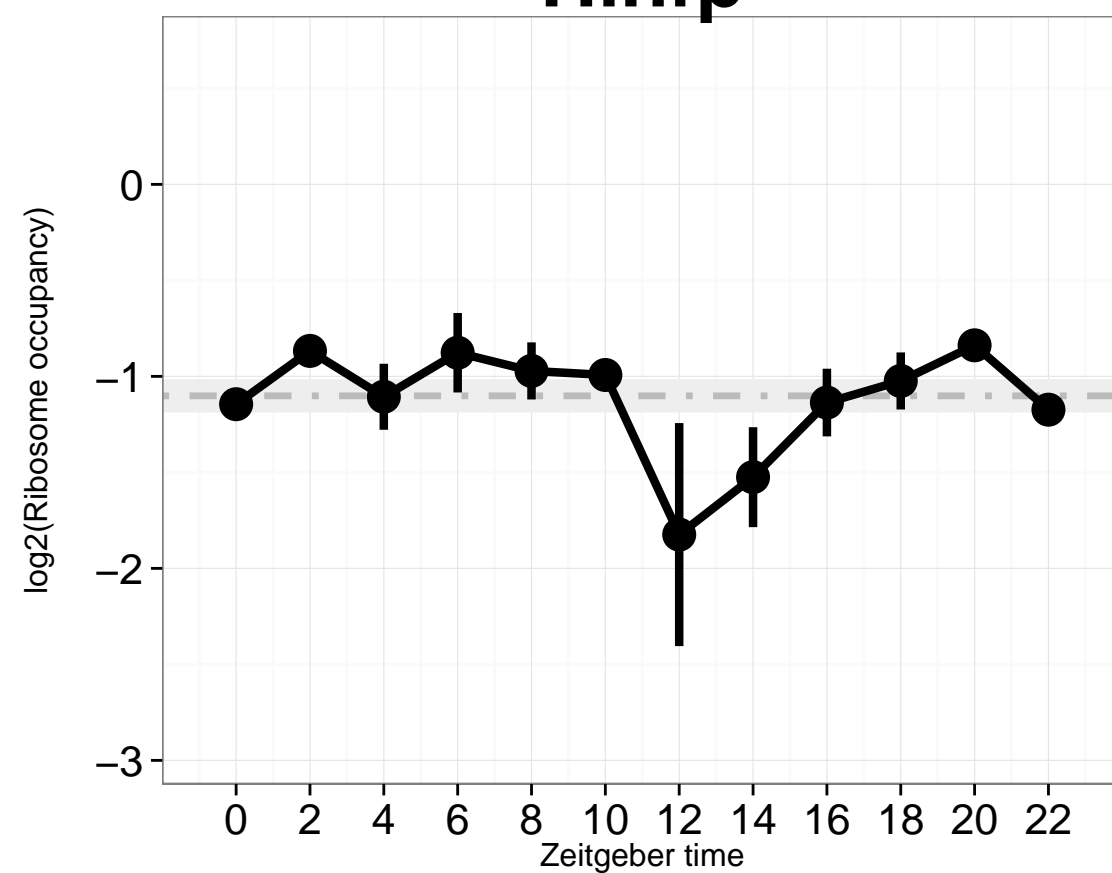

Supplement: SuppDataset_1.zip [file Hinfp_set_A.pdf › Supplemental Dataset 1/A-mRNA_nonrhyth_translation_nonrhyth/Hinfp_set_A.pdf]

## Hint1

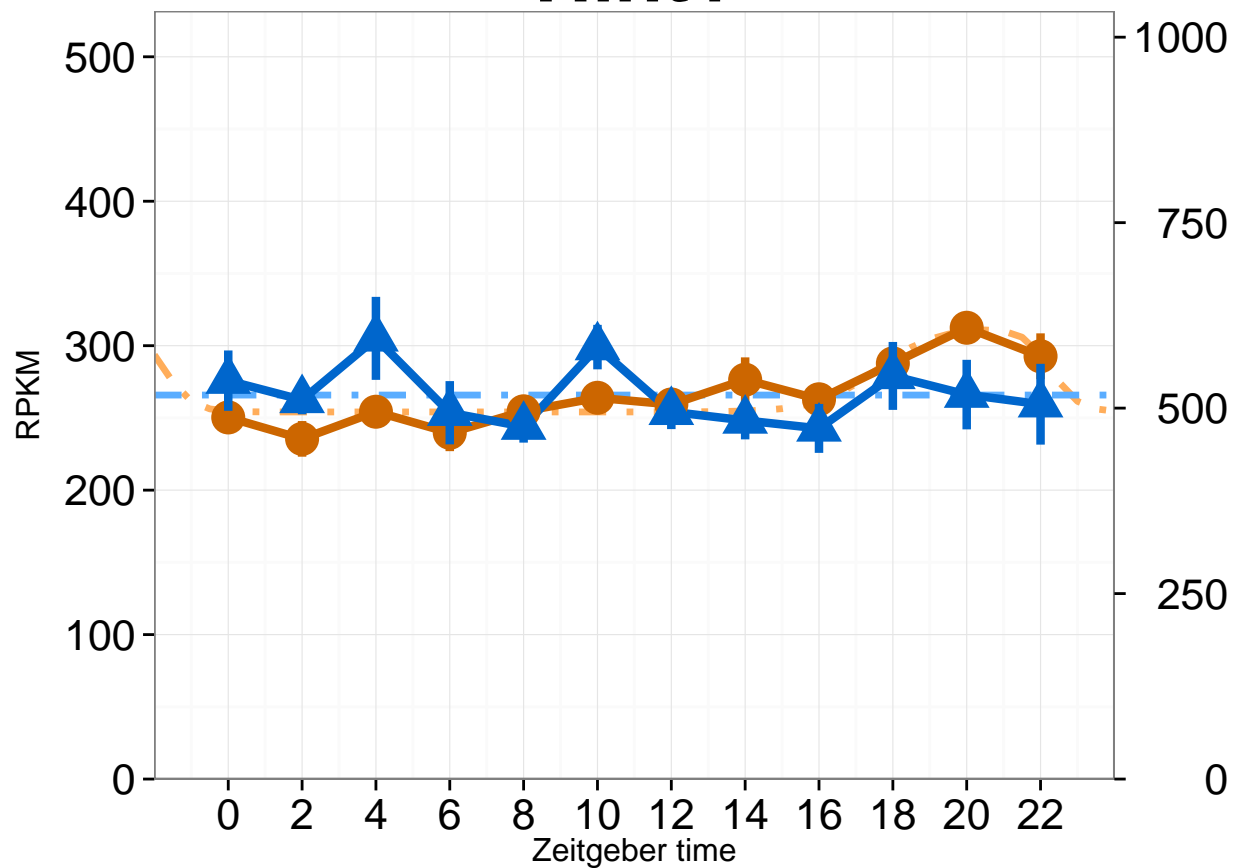

## Hint1

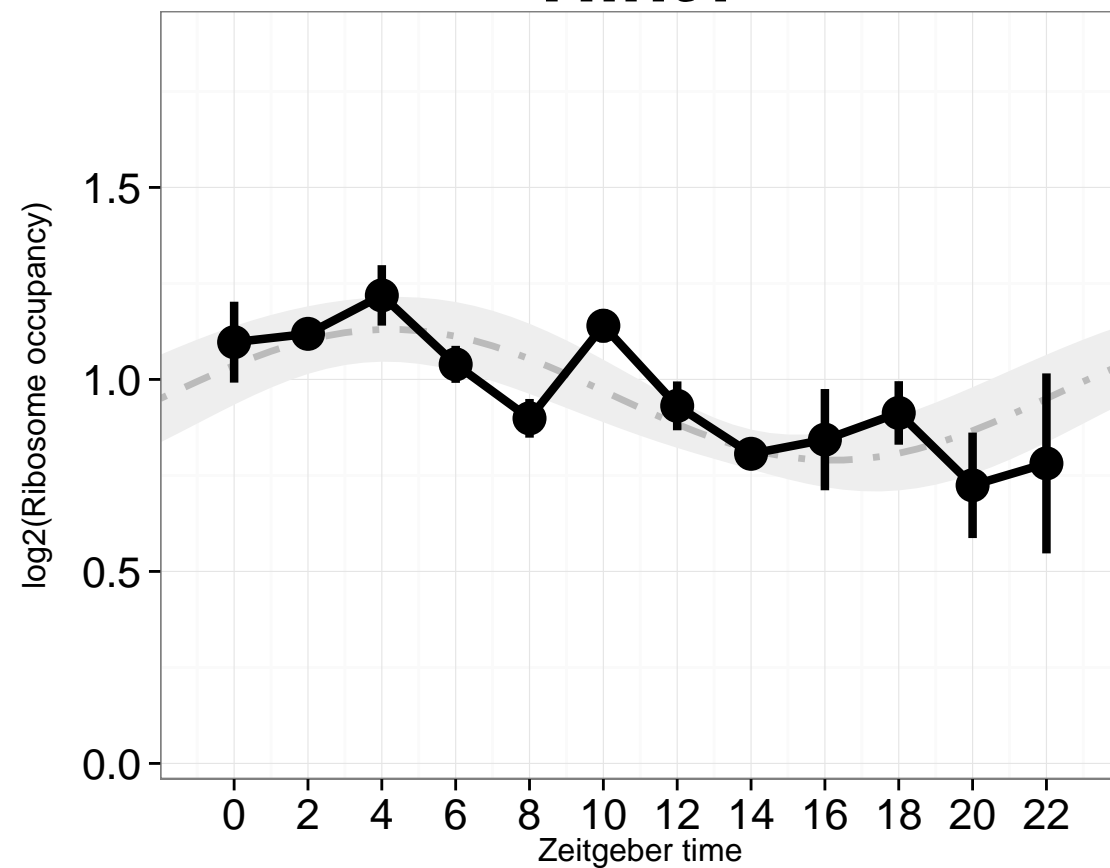

Supplement: SuppDataset_1.zip [file Hint1_set_A.pdf › Supplemental Dataset 1/A-mRNA_nonrhyth_translation_nonrhyth/Hint1_set_A.pdf]

## Hint2

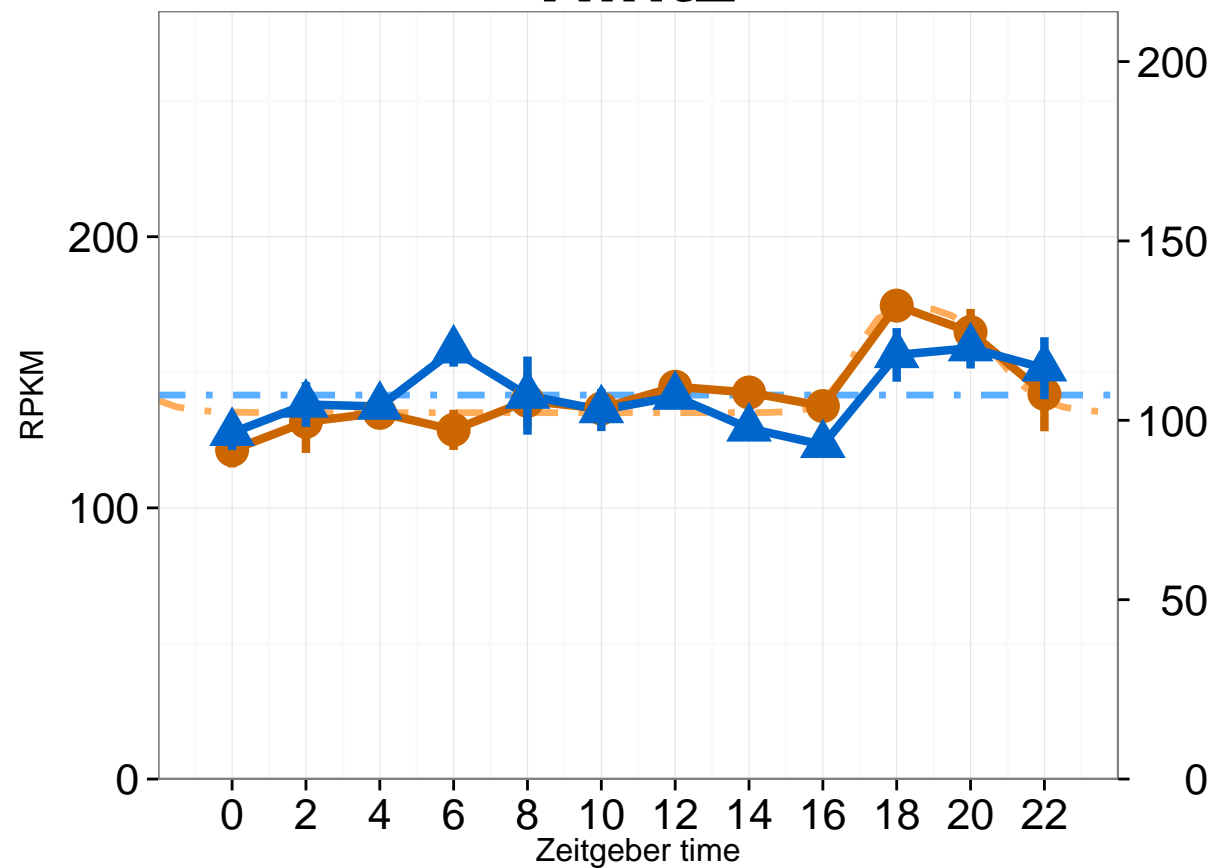

## Hint2

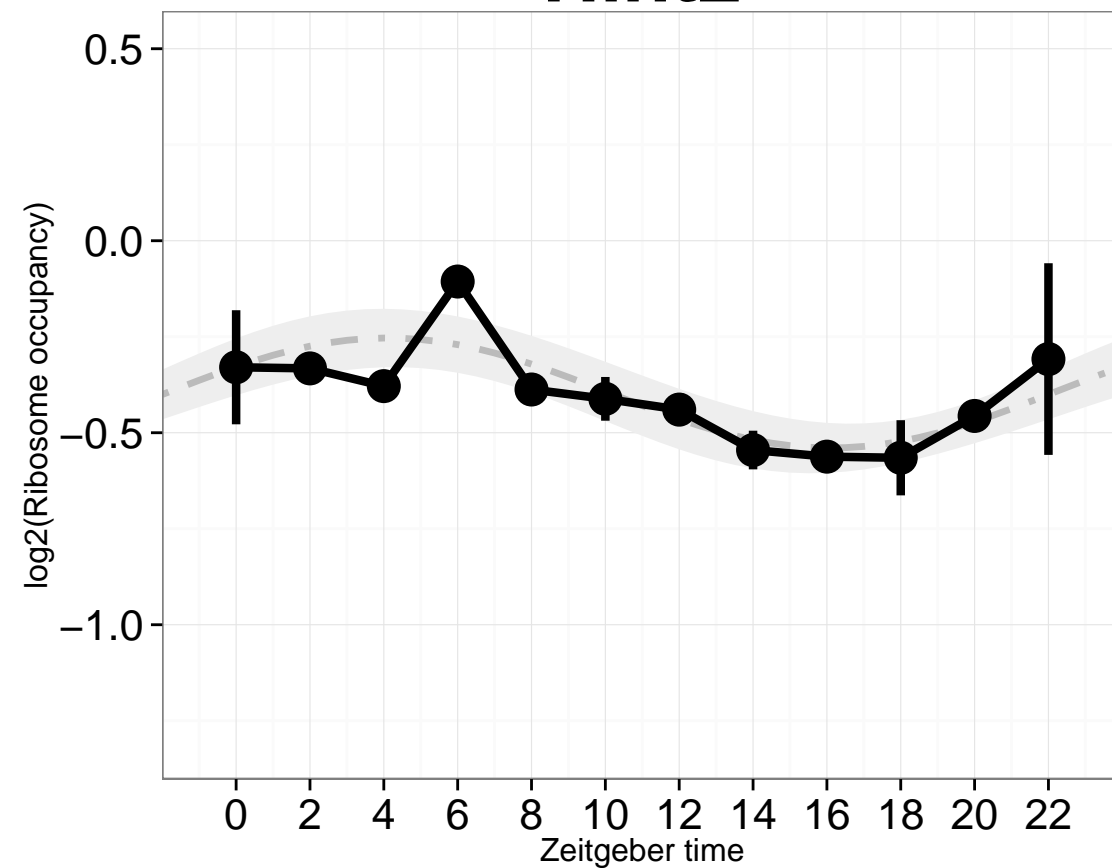

Supplement: SuppDataset_1.zip [file Hint2_set_A.pdf › Supplemental Dataset 1/A-mRNA_nonrhyth_translation_nonrhyth/Hint2_set_A.pdf]

## Hint3

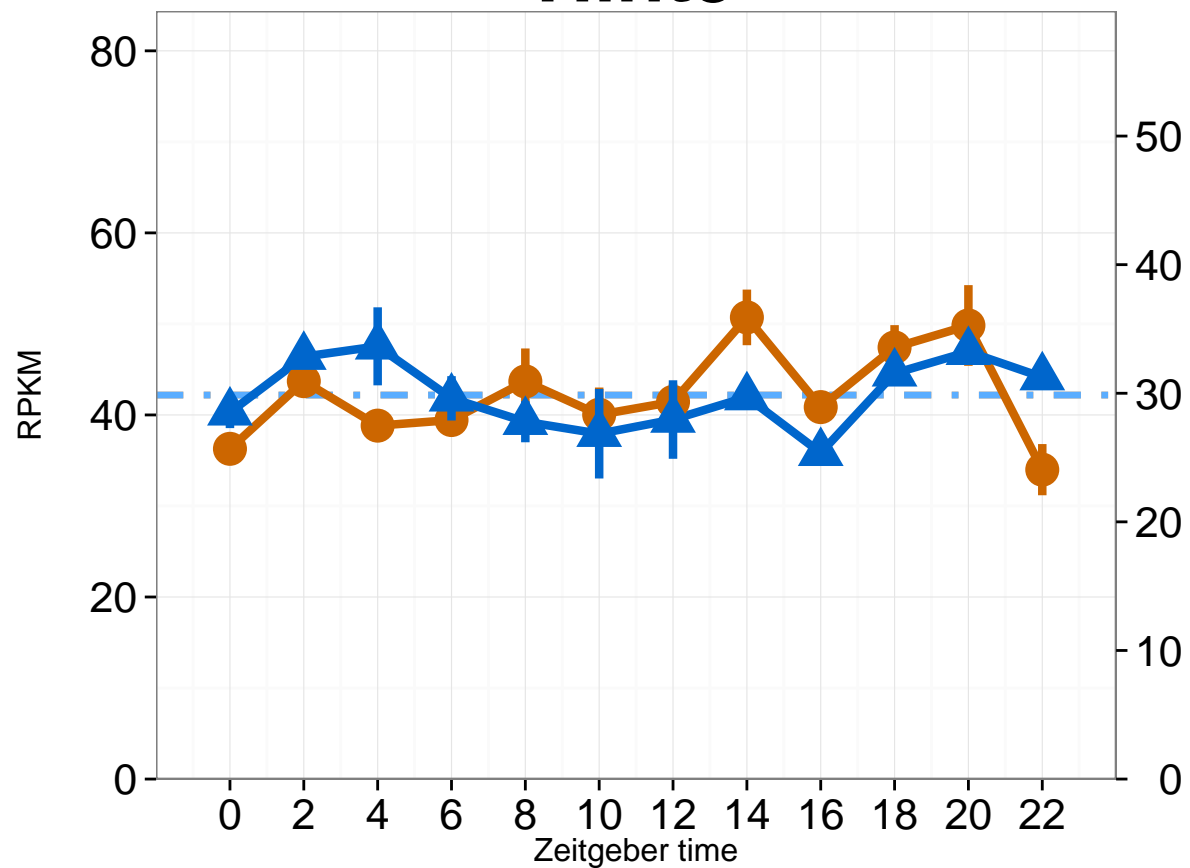

## Hint3

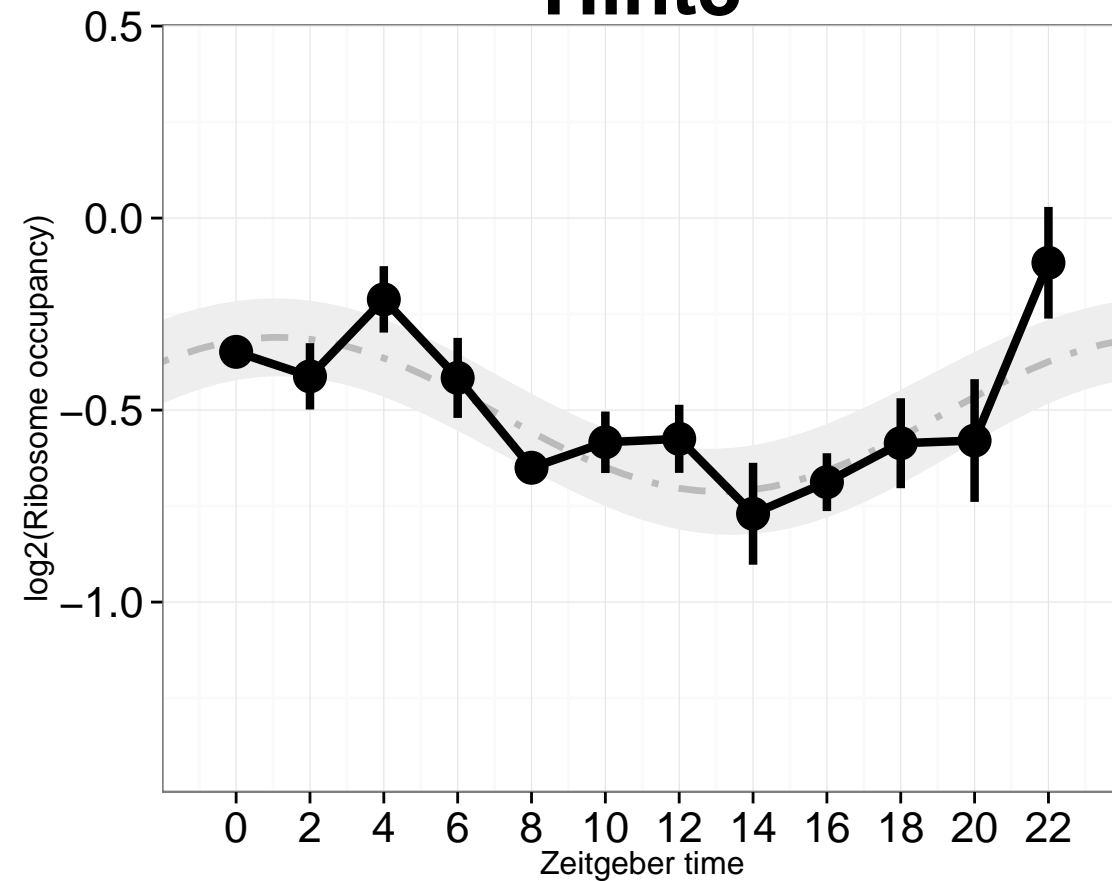

Supplement: SuppDataset_1.zip [file Hint3_set_A.pdf › Supplemental Dataset 1/A-mRNA_nonrhyth_translation_nonrhyth/Hint3_set_A.pdf]

# Hip1

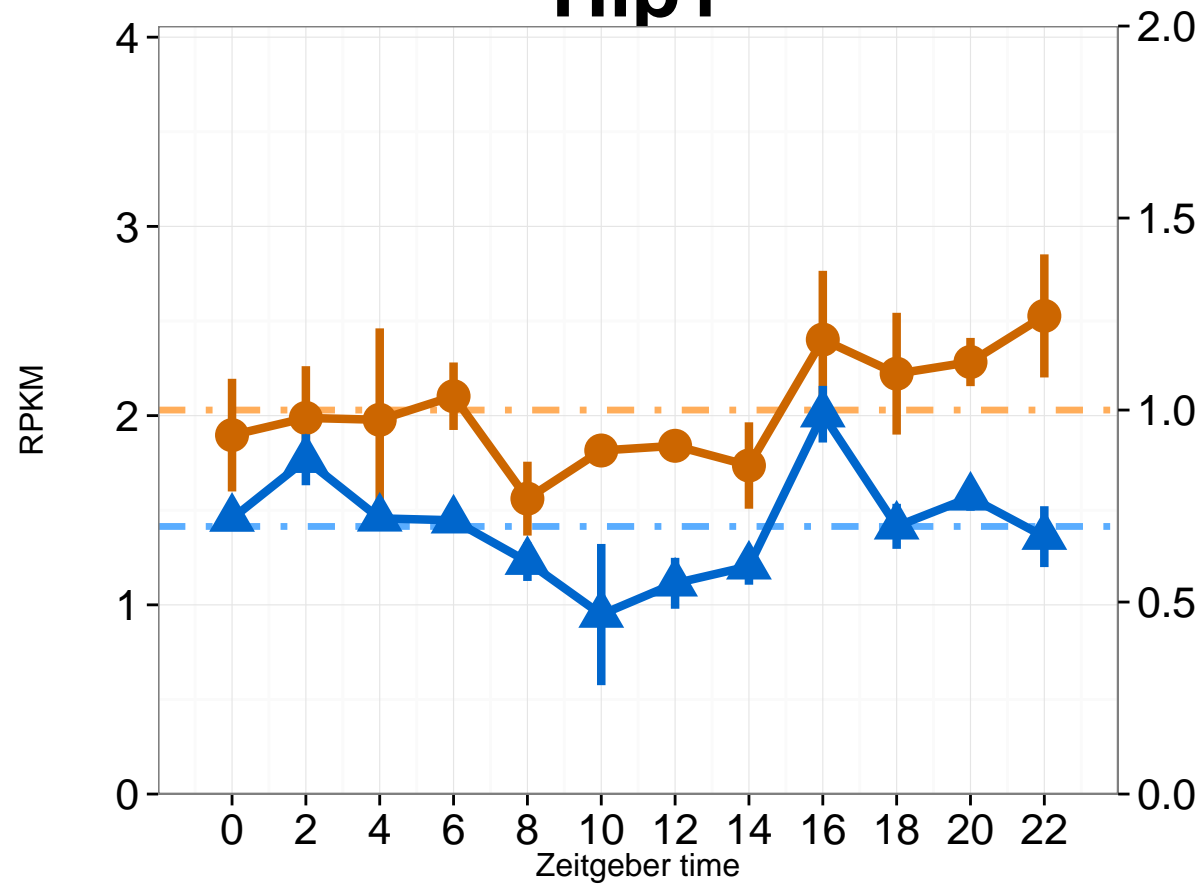

# Hip1

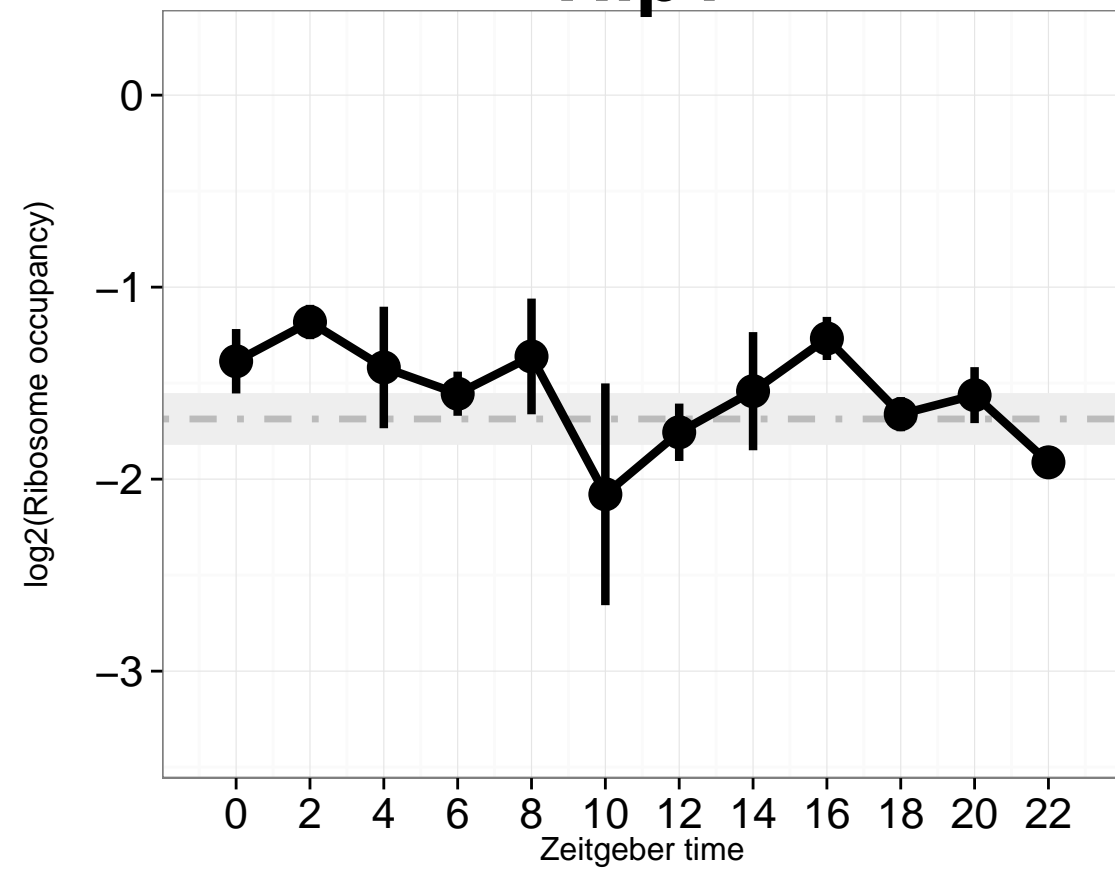

Supplement: SuppDataset_1.zip [file Hip1_set_A.pdf › Supplemental Dataset 1/A-mRNA_nonrhyth_translation_nonrhyth/Hip1_set_A.pdf]

# Hip1r

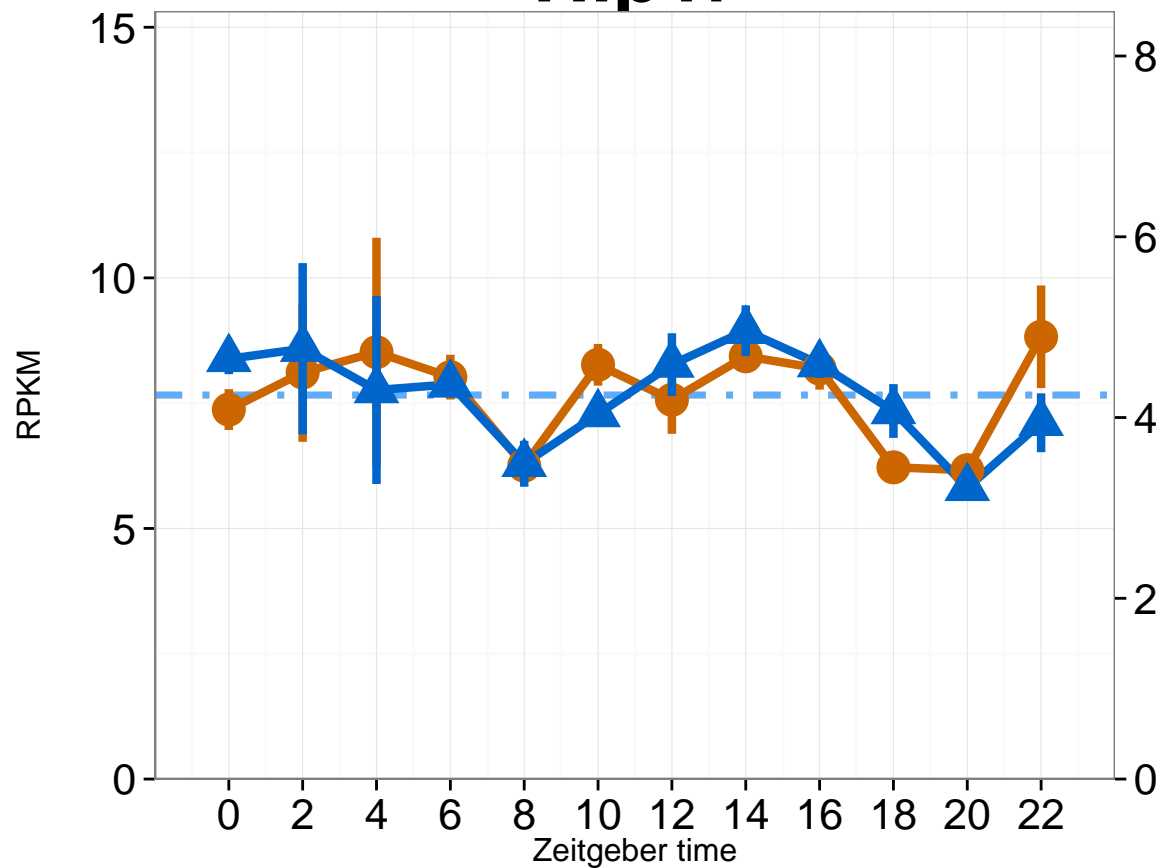

# Hip1r

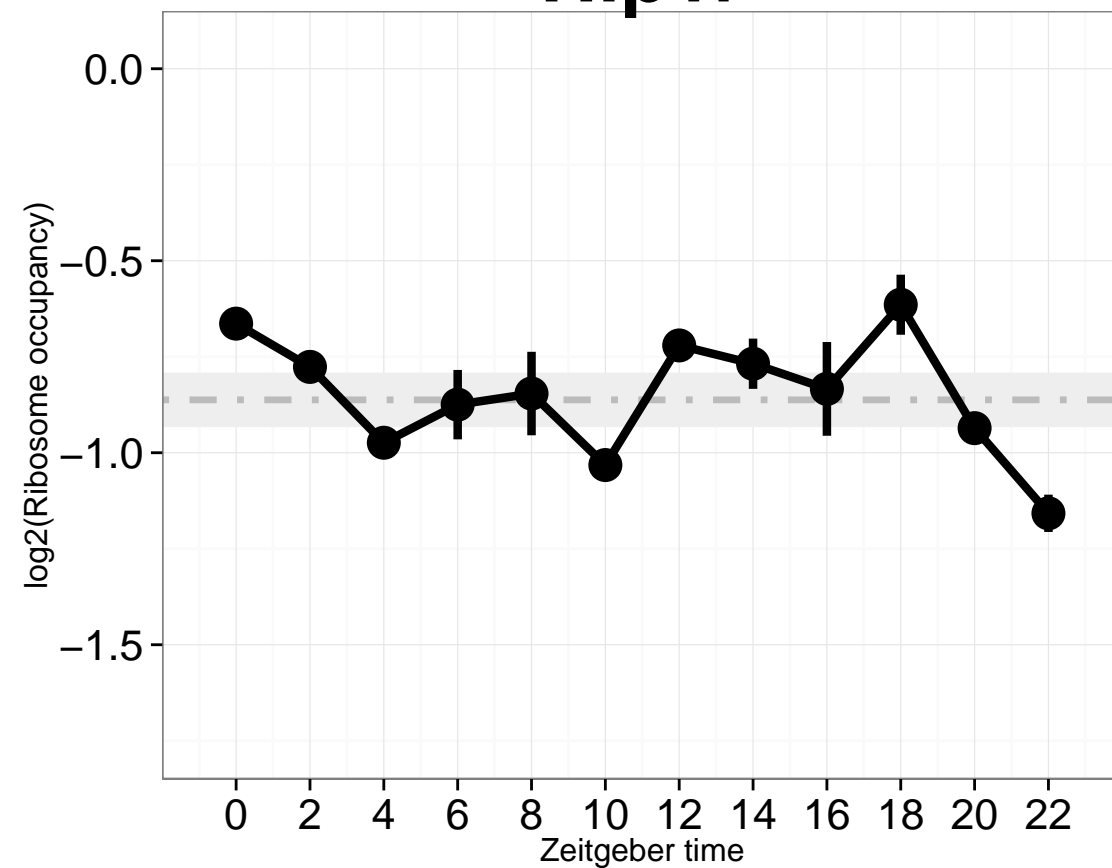

Supplement: SuppDataset_1.zip [file Hip1r_set_A.pdf › Supplemental Dataset 1/A-mRNA_nonrhyth_translation_nonrhyth/Hip1r_set_A.pdf]

## Hipk1

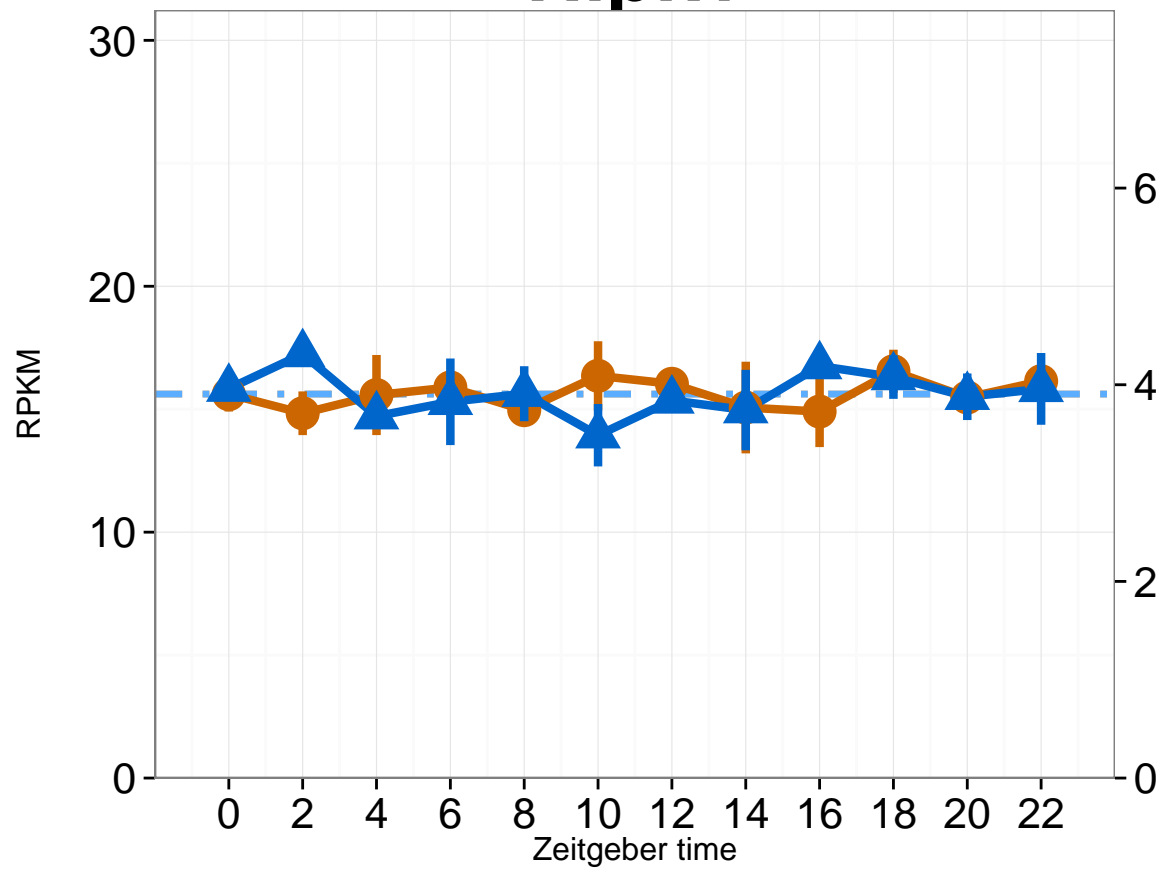

## Hipk1

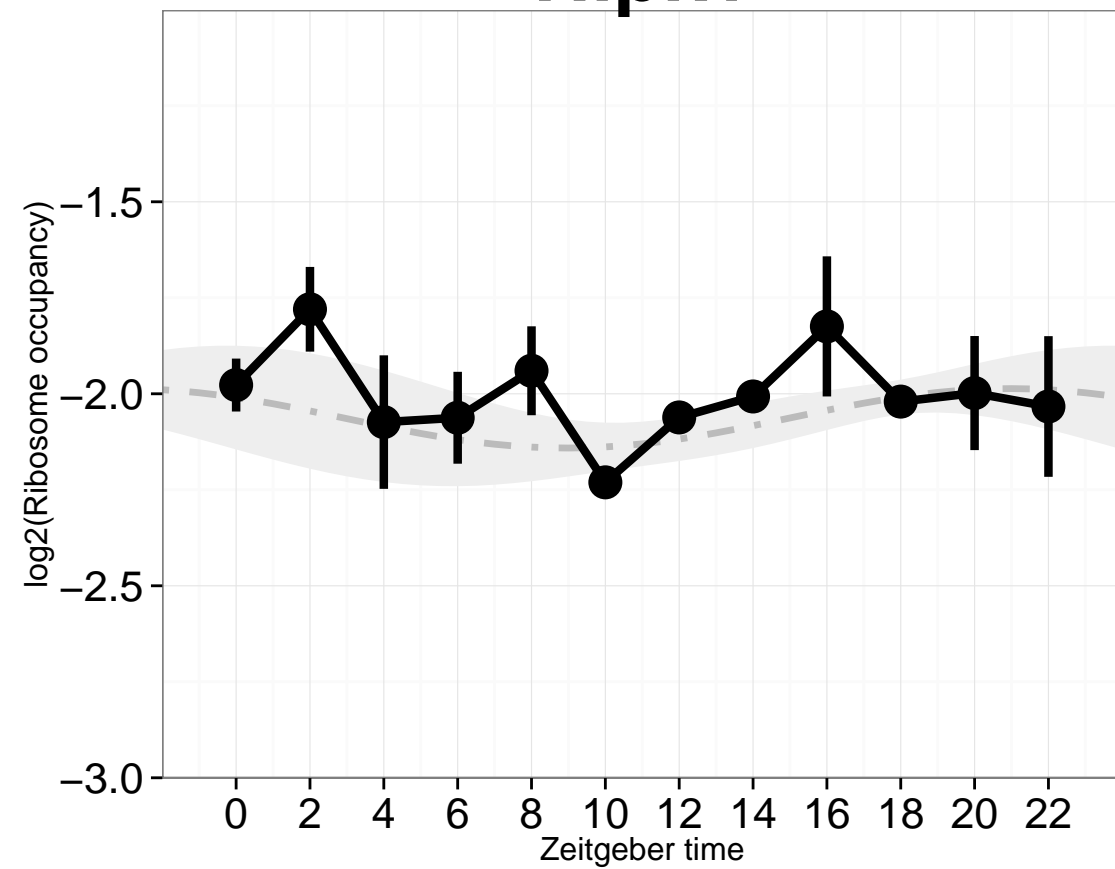

Supplement: SuppDataset_1.zip [file Hipk1_set_A.pdf › Supplemental Dataset 1/A-mRNA_nonrhyth_translation_nonrhyth/Hipk1_set_A.pdf]

## Hipk2

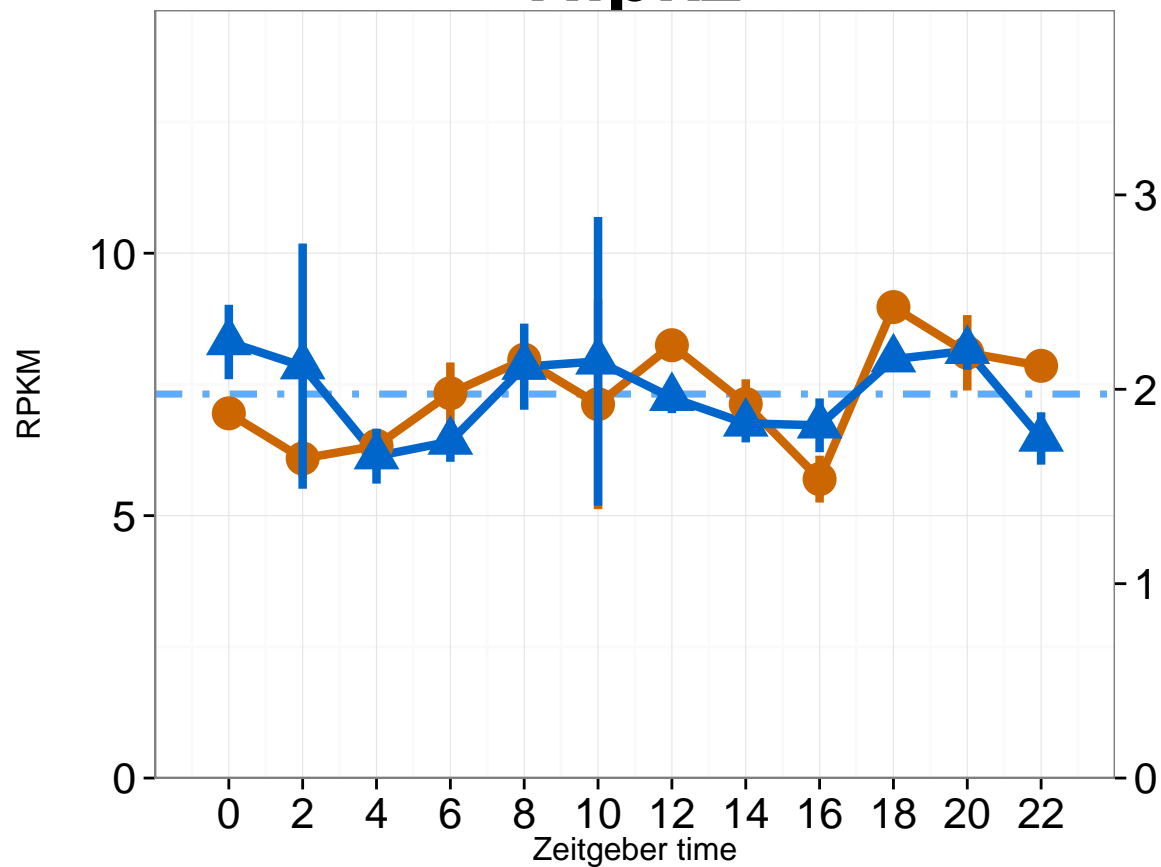

## Hipk2

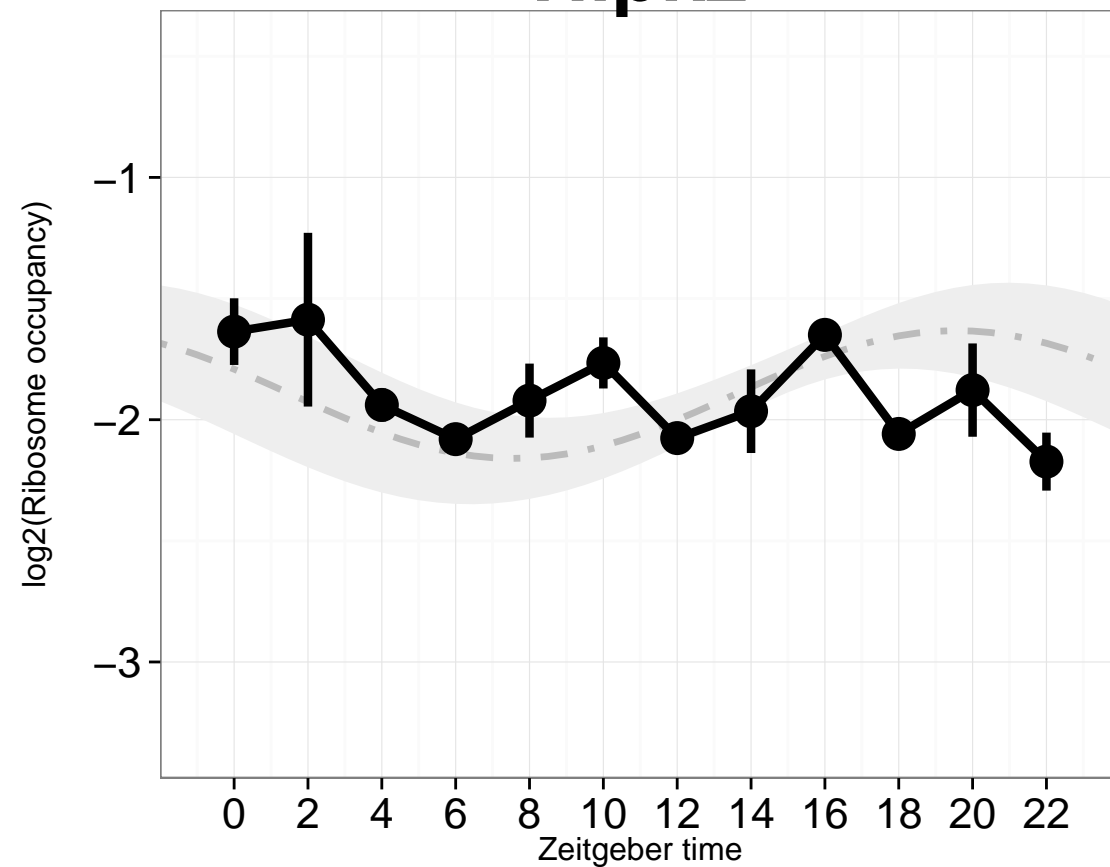

Supplement: SuppDataset_1.zip [file Hipk2_set_A.pdf › Supplemental Dataset 1/A-mRNA_nonrhyth_translation_nonrhyth/Hipk2_set_A.pdf]

## Hipk3

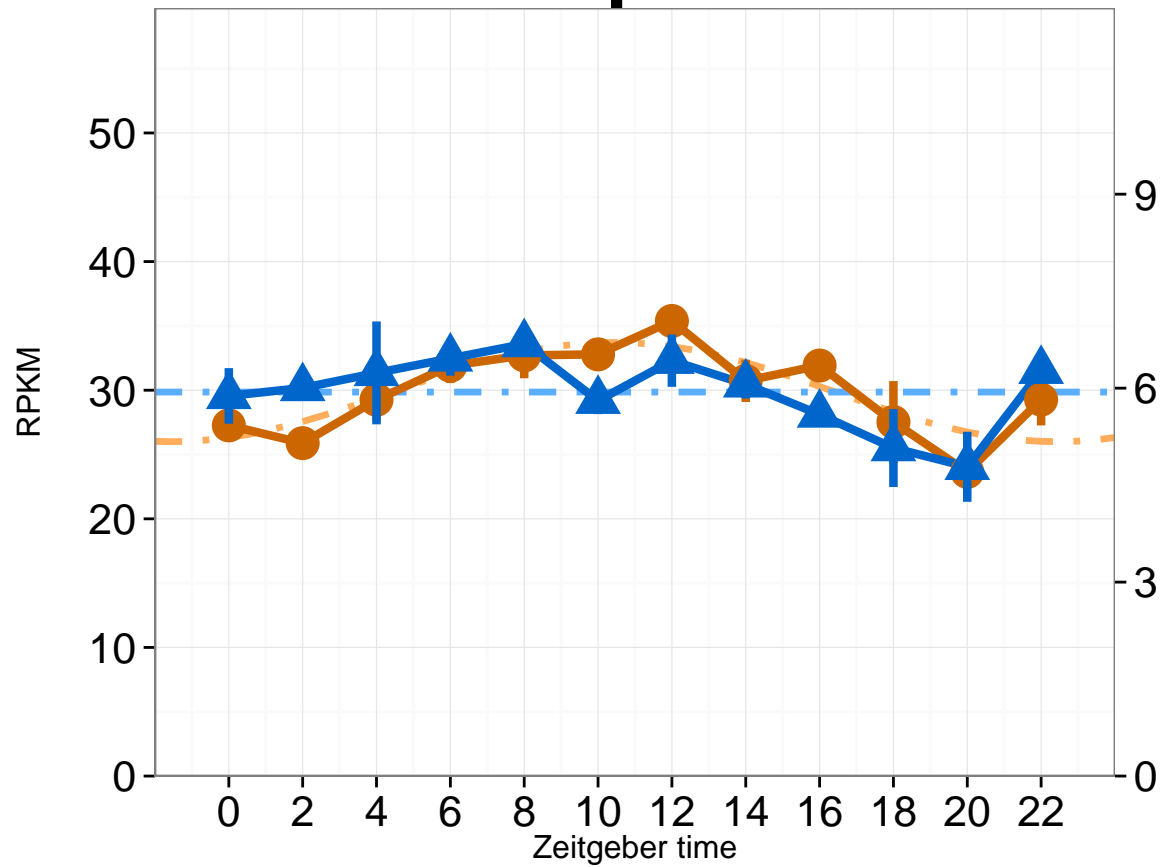

## Hipk3

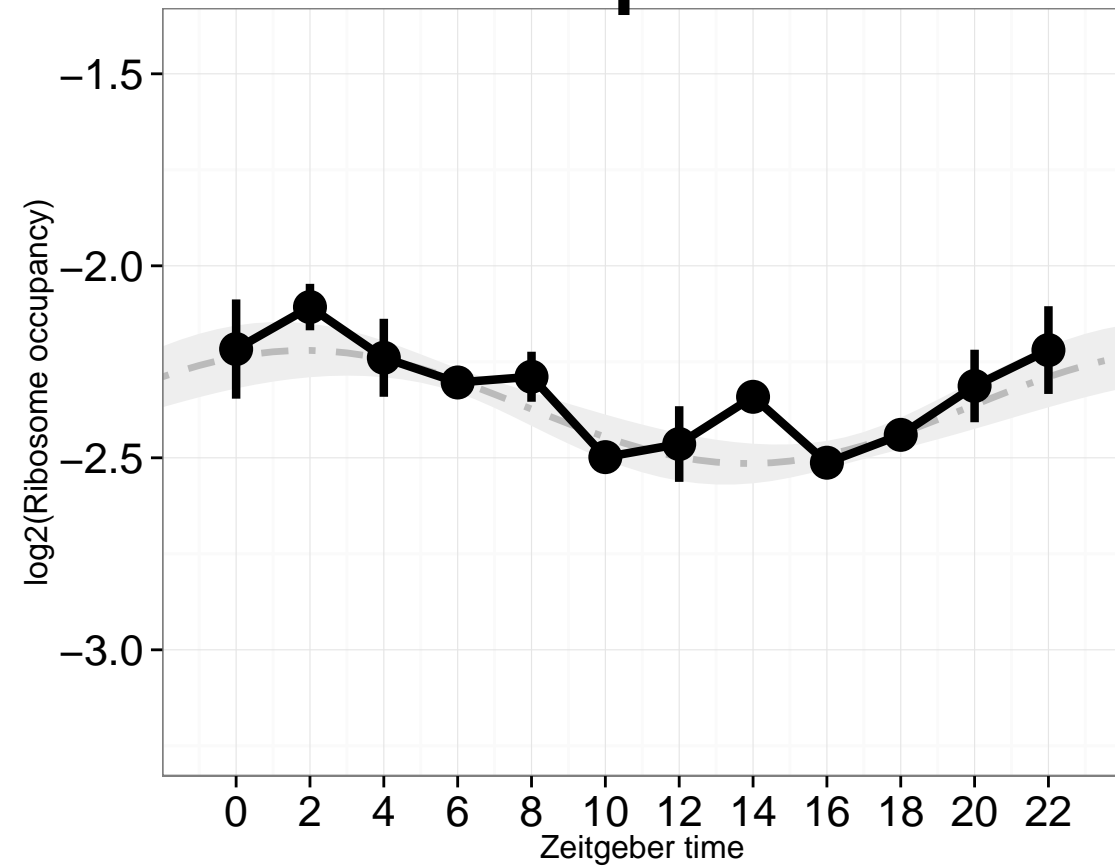

Supplement: SuppDataset_1.zip [file Hipk3_set_A.pdf › Supplemental Dataset 1/A-mRNA_nonrhyth_translation_nonrhyth/Hipk3_set_A.pdf]

## Hira

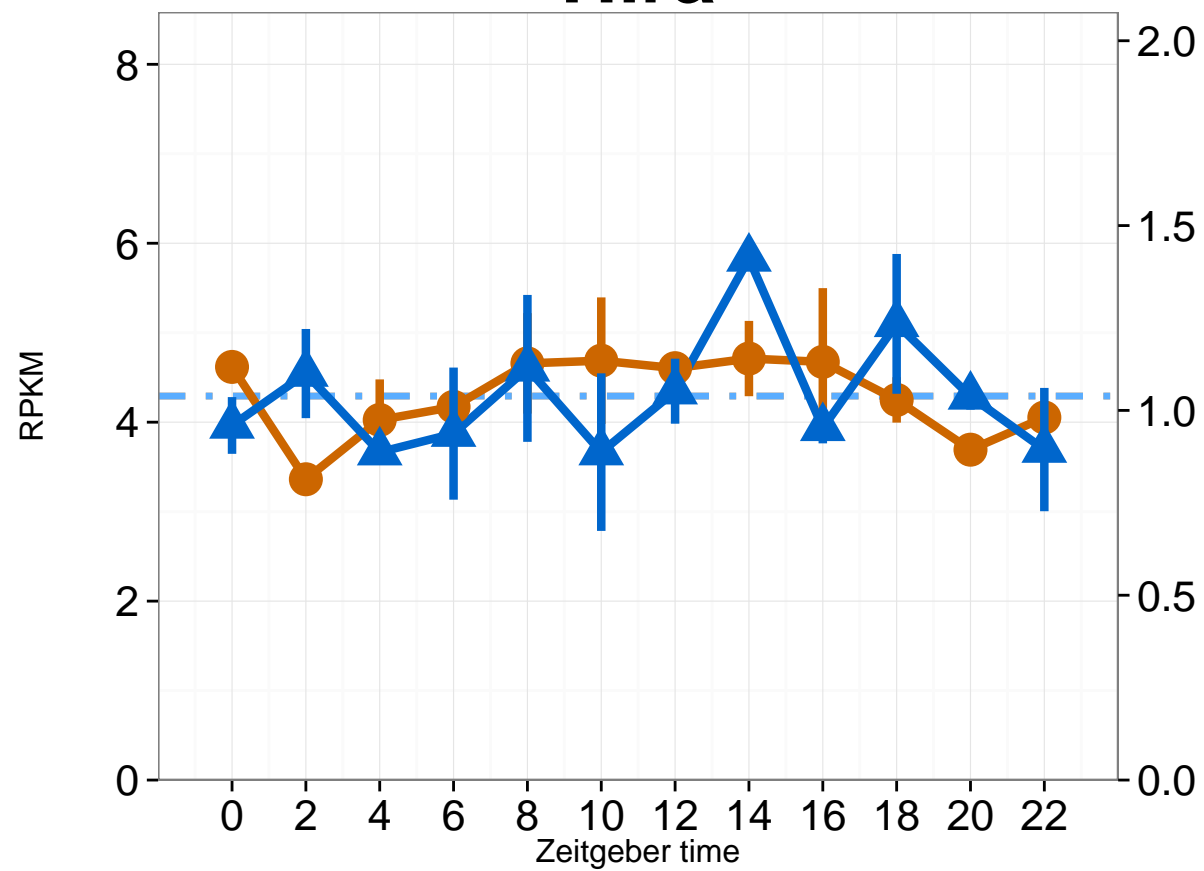

## Hira

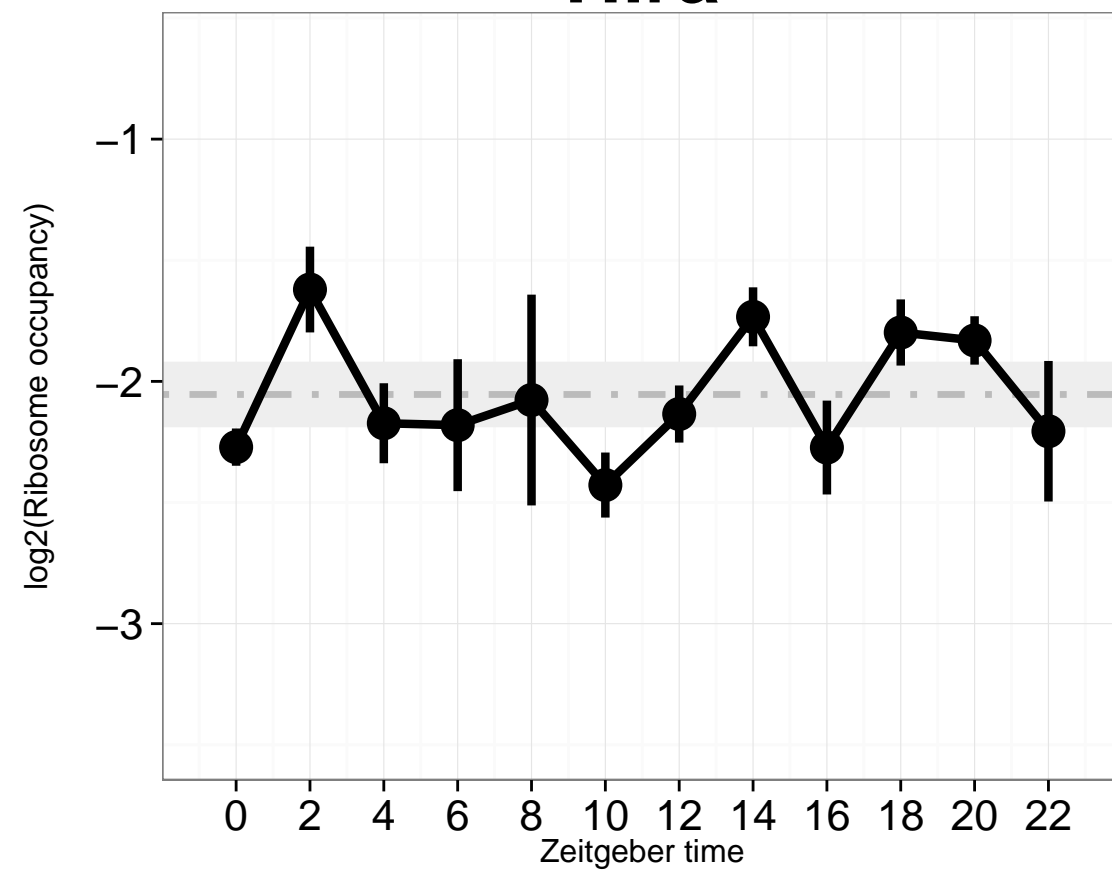

Supplement: SuppDataset_1.zip [file Hira_set_A.pdf › Supplemental Dataset 1/A-mRNA_nonrhyth_translation_nonrhyth/Hira_set_A.pdf]

## Hirip3

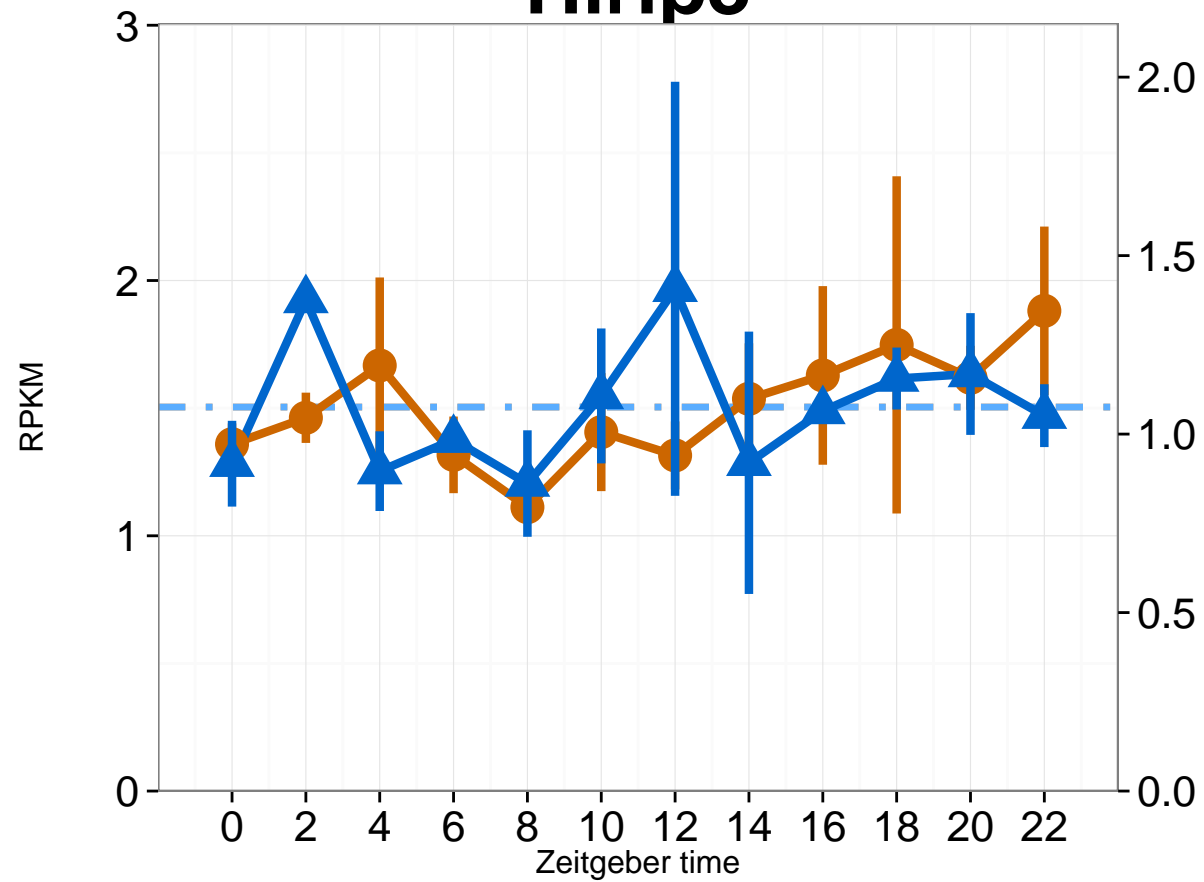

## Hirip3

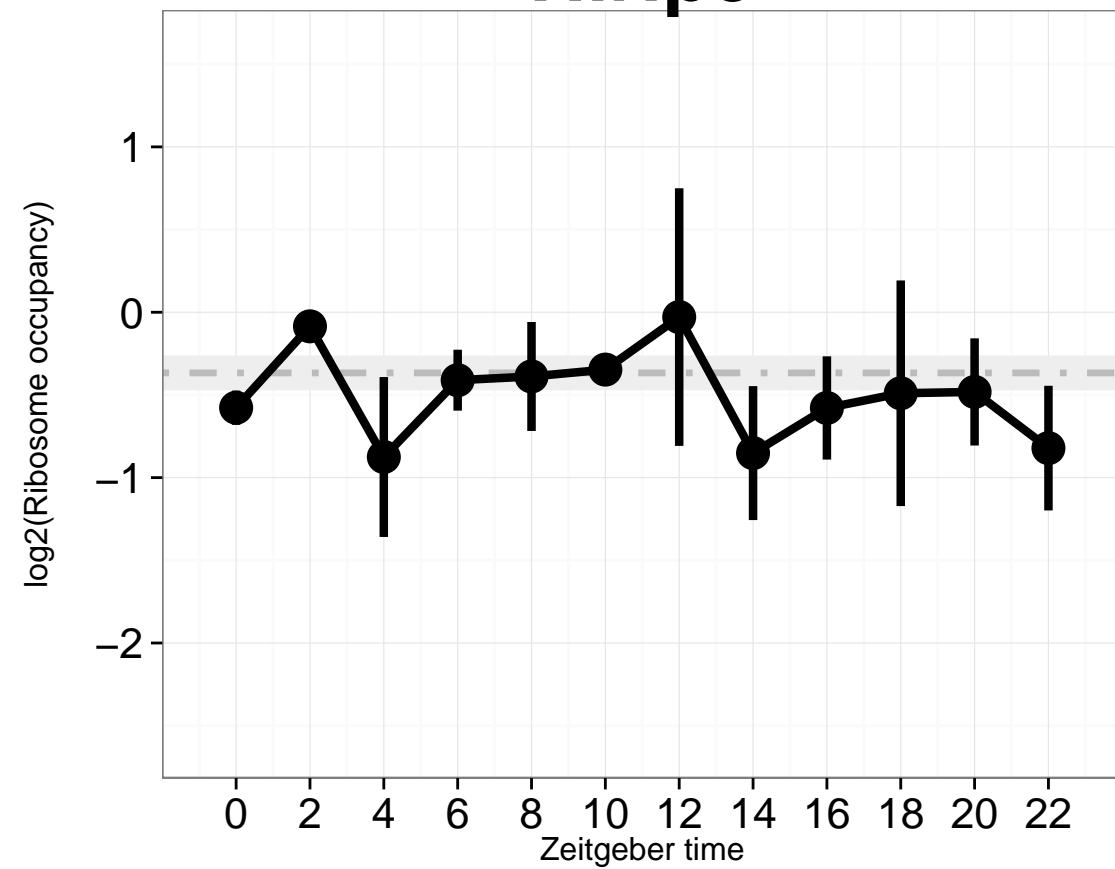

Supplement: SuppDataset_1.zip [file Hirip3_set_A.pdf › Supplemental Dataset 1/A-mRNA_nonrhyth_translation_nonrhyth/Hirip3_set_A.pdf]

# Hist1h1e

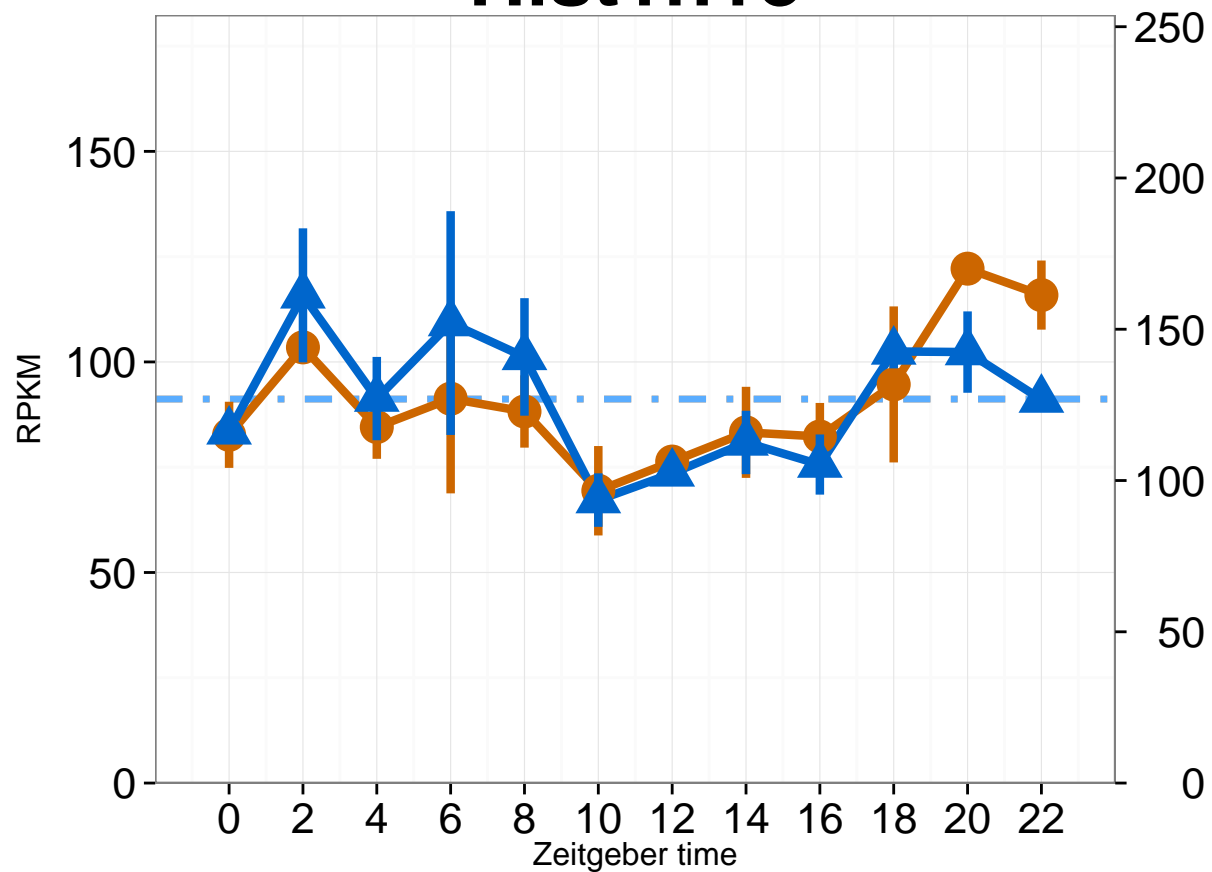

# Hist1h1e

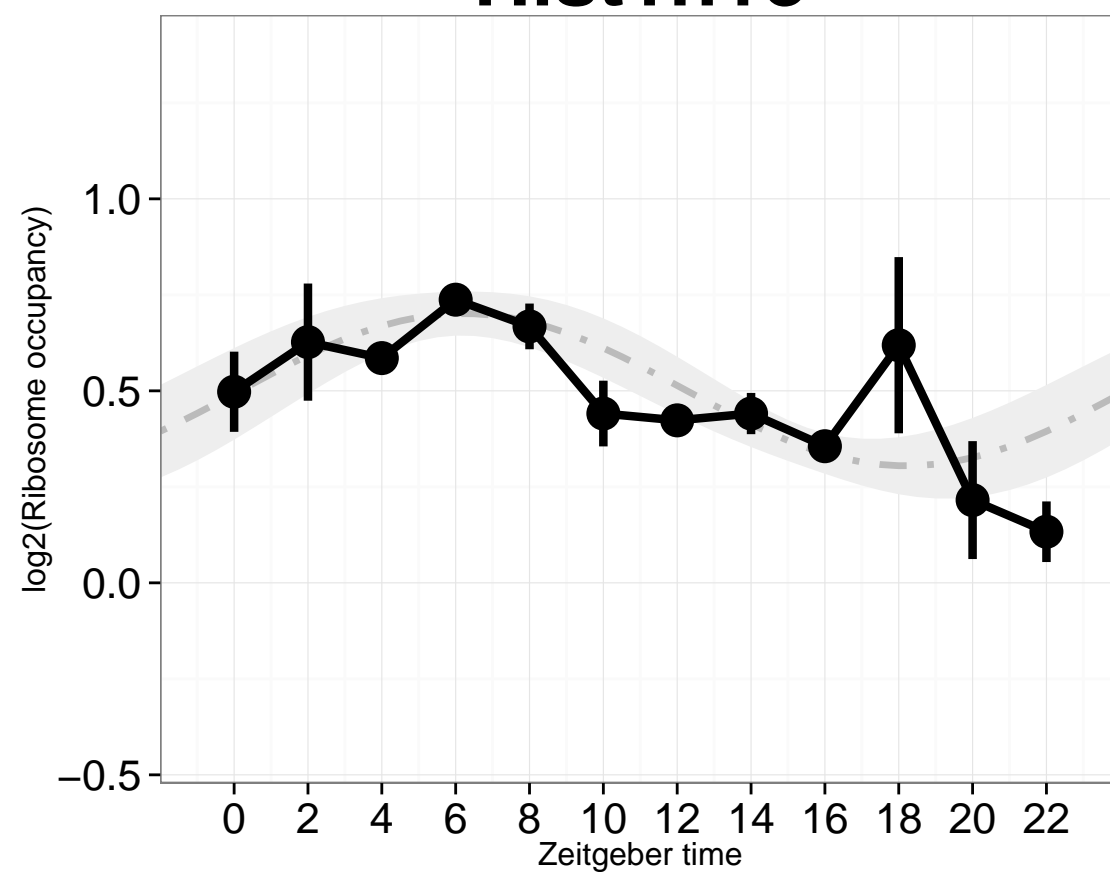

Supplement: SuppDataset_1.zip [file Hist1h1e_set_A.pdf › Supplemental Dataset 1/A-mRNA_nonrhyth_translation_nonrhyth/Hist1h1e_set_A.pdf]

# Hist1h2ab

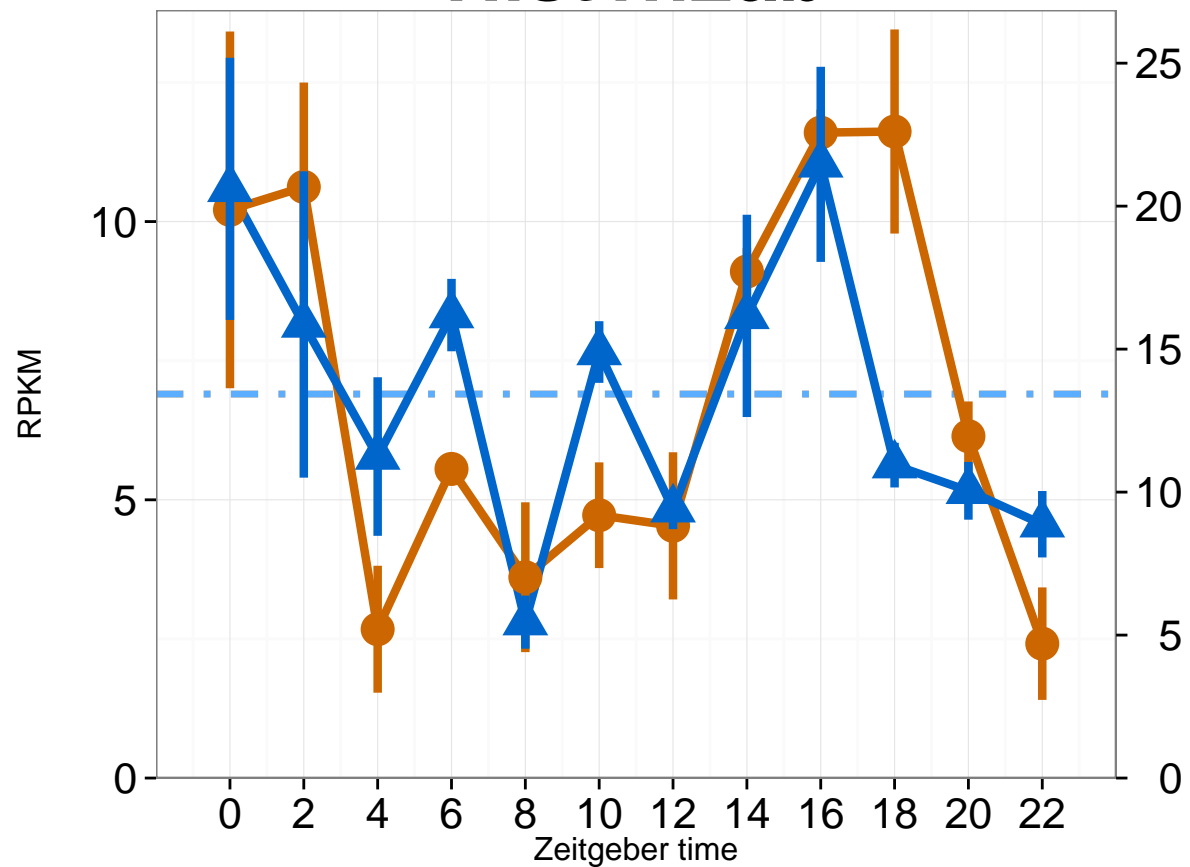

# Hist1h2ab

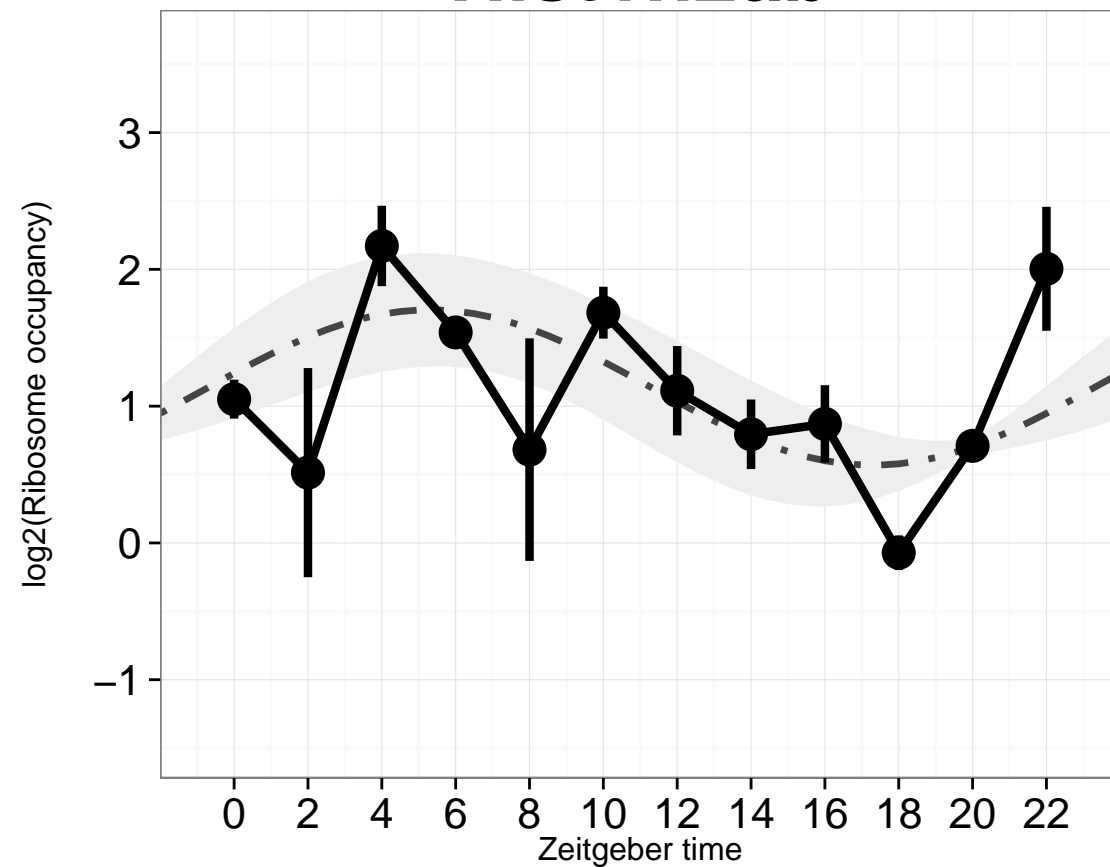

Supplement: SuppDataset_1.zip [file Hist1h2ab_set_A.pdf › Supplemental Dataset 1/A-mRNA_nonrhyth_translation_nonrhyth/Hist1h2ab_set_A.pdf]

## Hist1h2ae

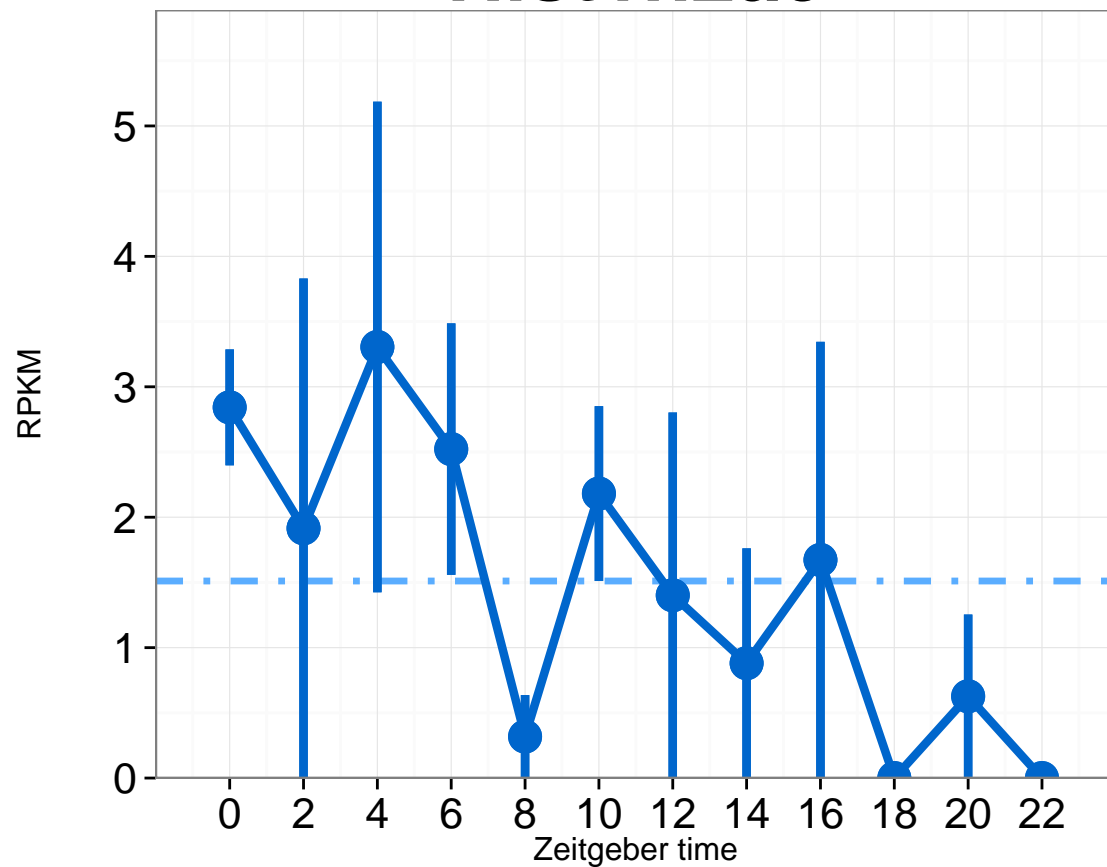

## Hist1h2ae log2(Ribosome occupancy)

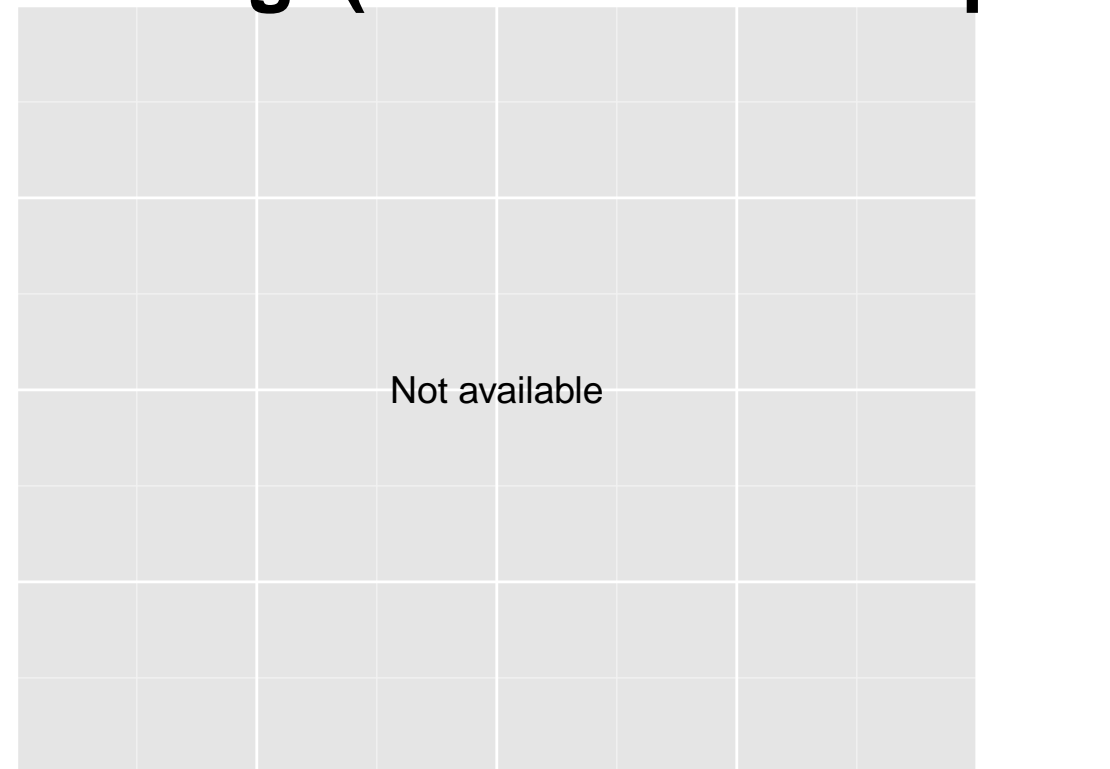

Supplement: SuppDataset_1.zip [file Hist1h2ae_set_A.pdf › Supplemental Dataset 1/A-mRNA_nonrhyth_translation_nonrhyth/Hist1h2ae_set_A.pdf]

# Hist1h2af

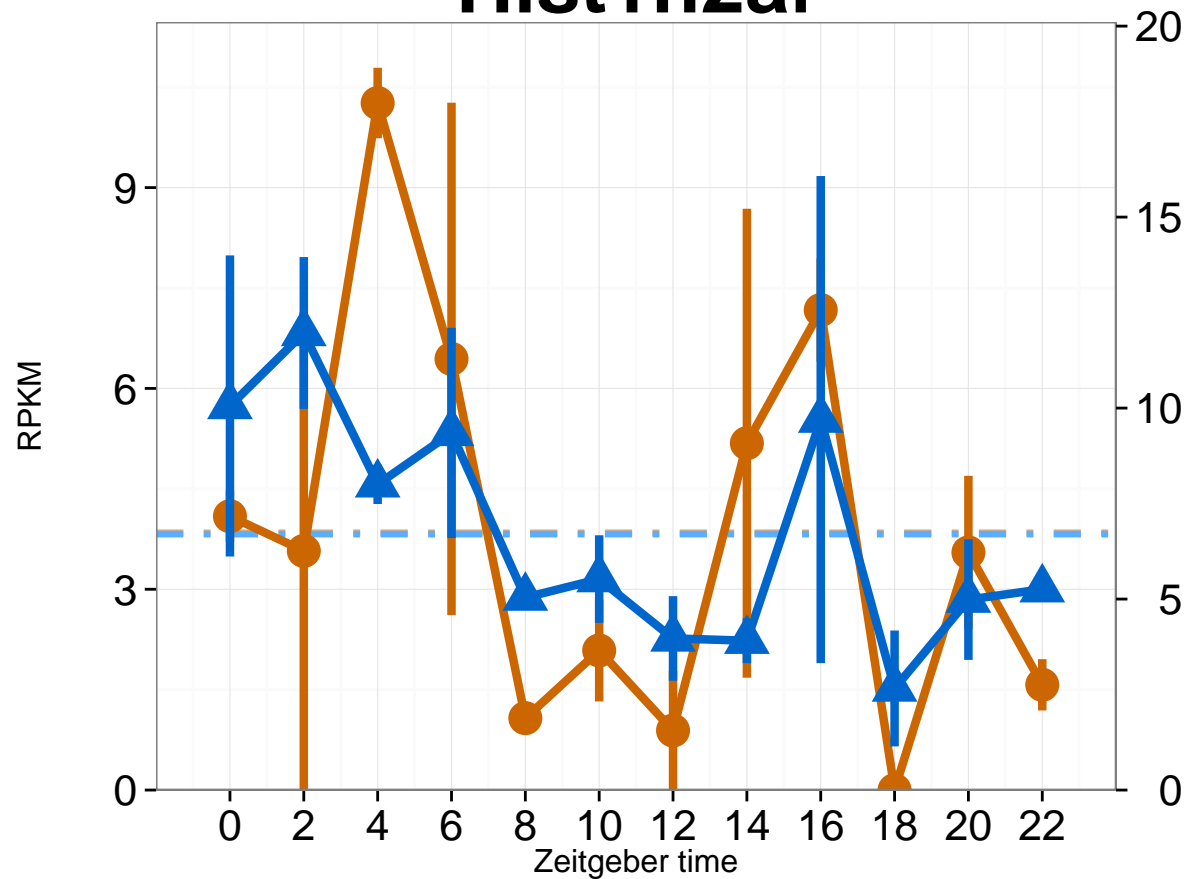

# Hist1h2af

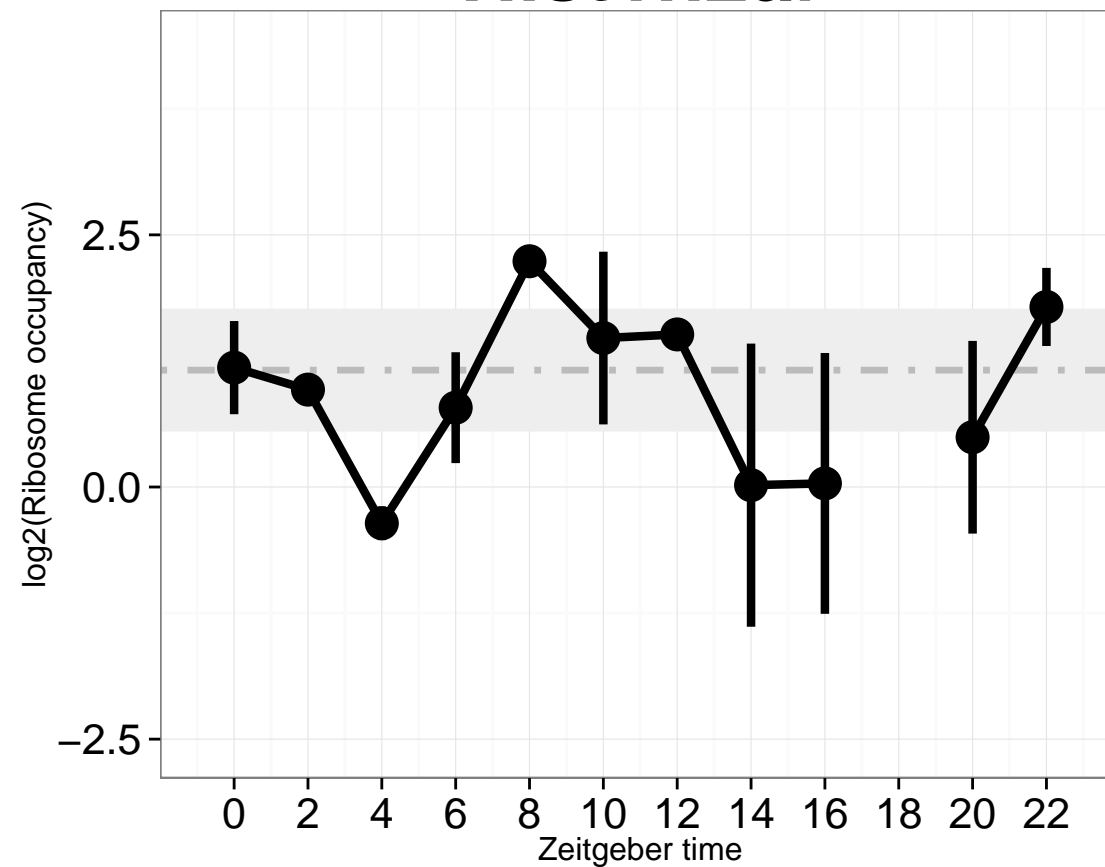

Supplement: SuppDataset_1.zip [file Hist1h2af_set_A.pdf › Supplemental Dataset 1/A-mRNA_nonrhyth_translation_nonrhyth/Hist1h2af_set_A.pdf]

# Hist1h2ak

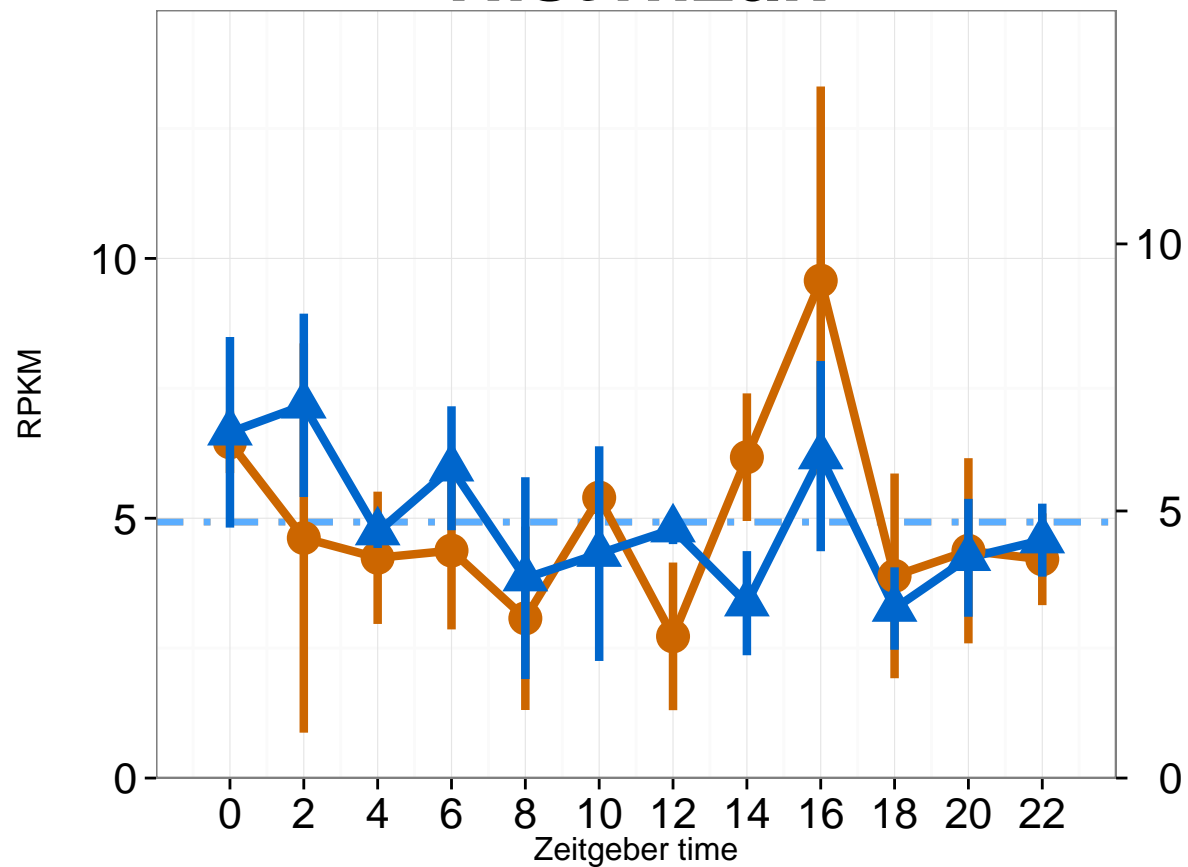

# Hist1h2ak

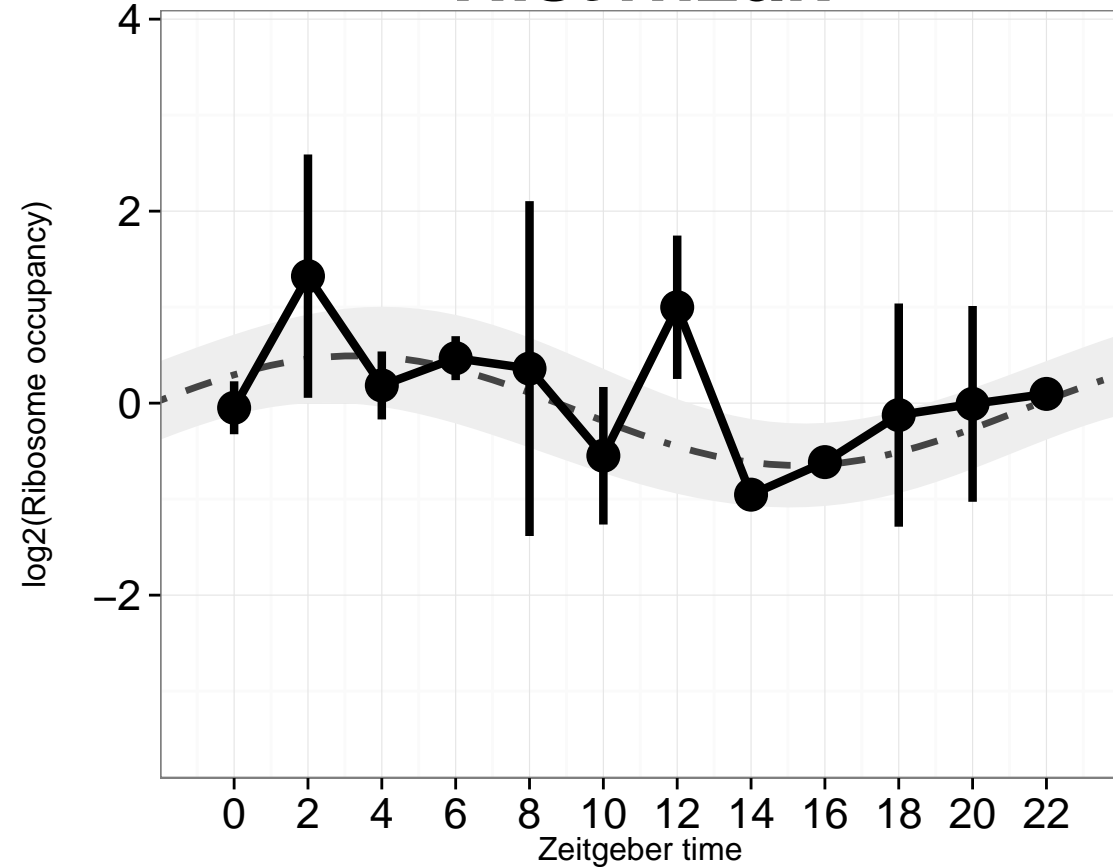

Supplement: SuppDataset_1.zip [file Hist1h2ak_set_A.pdf › Supplemental Dataset 1/A-mRNA_nonrhyth_translation_nonrhyth/Hist1h2ak_set_A.pdf]

Hist1h2ao

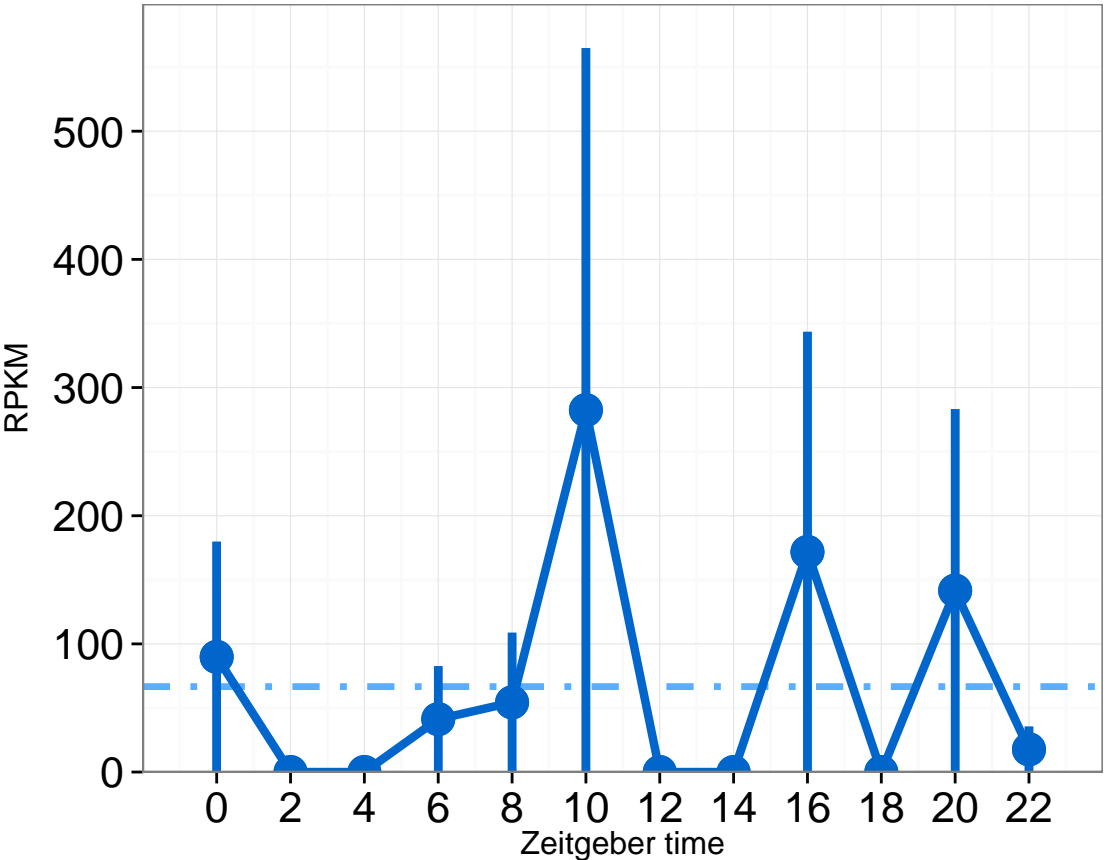

Hist1h2ao log2(Ribosome occupanc

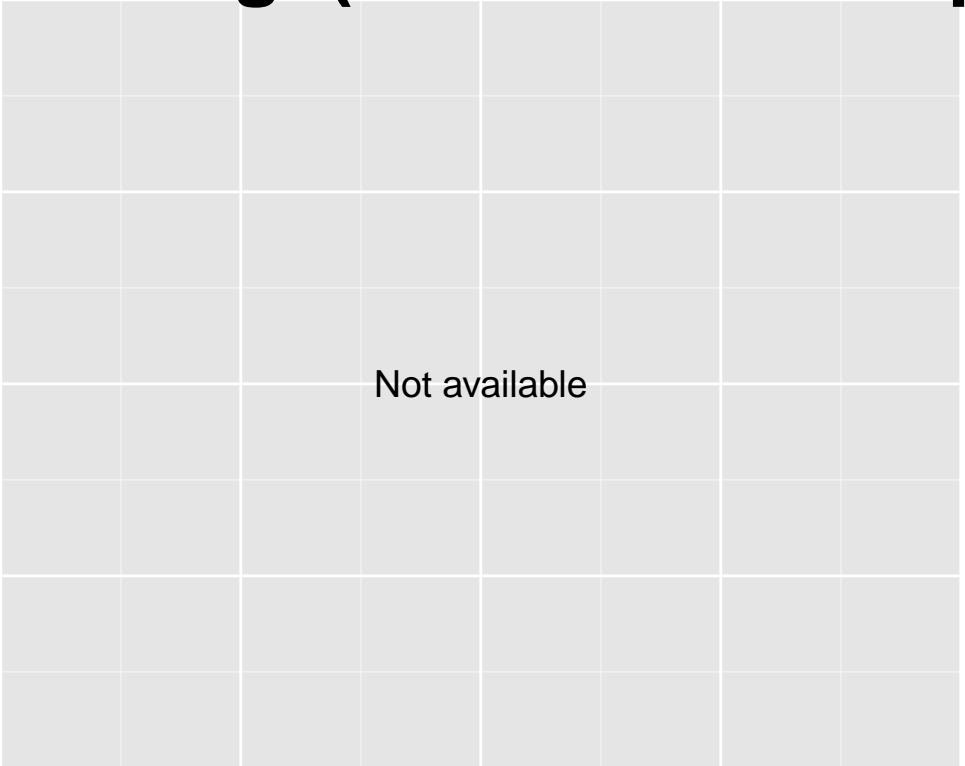

Supplement: SuppDataset_1.zip [file Hist1h2ao_set_A.pdf › Supplemental Dataset 1/A-mRNA_nonrhyth_translation_nonrhyth/Hist1h2ao_set_A.pdf]

# Hist1h2bg

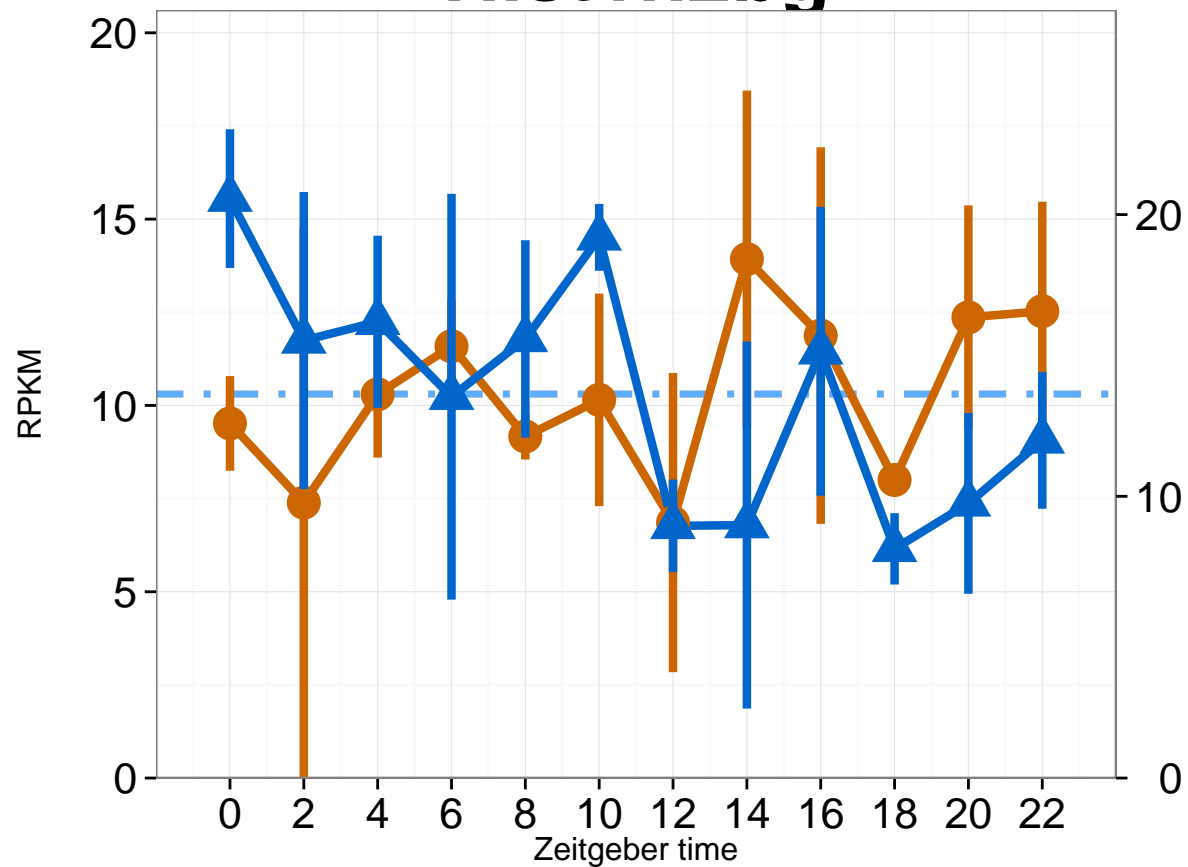

# Hist1h2bg

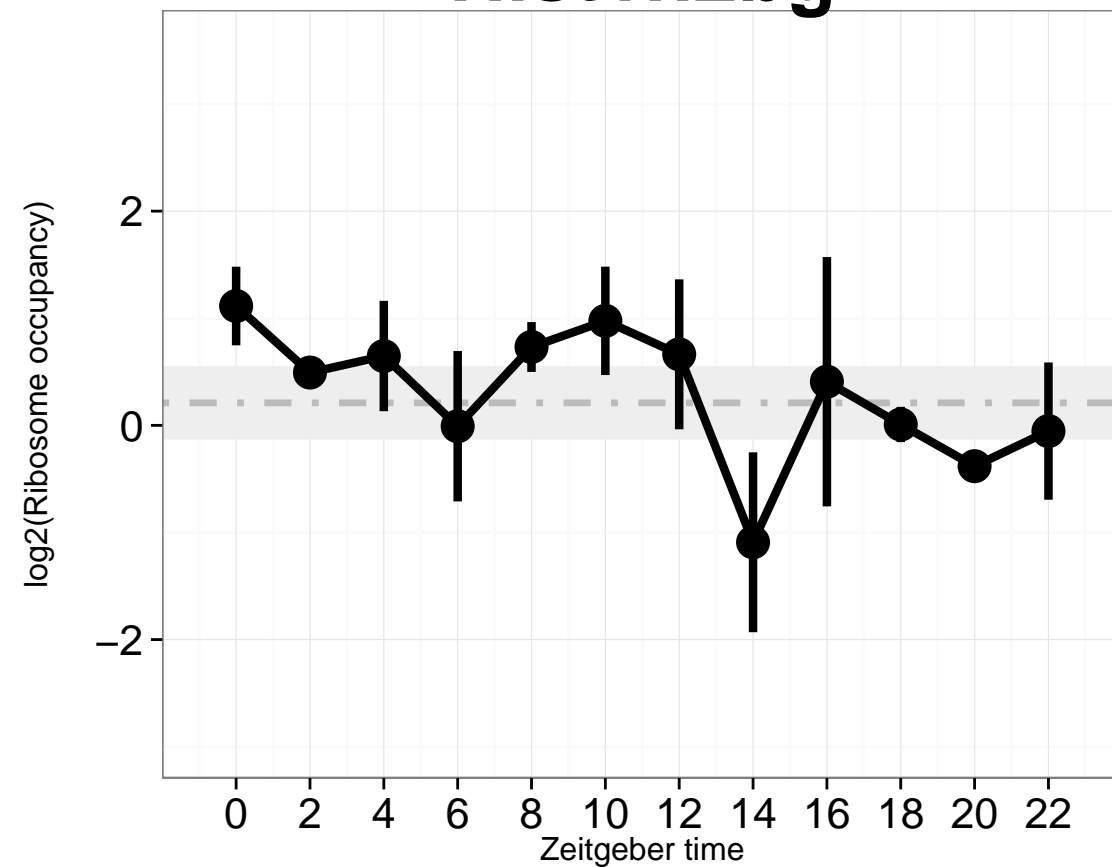

Supplement: SuppDataset_1.zip [file Hist1h2bg_set_A.pdf › Supplemental Dataset 1/A-mRNA_nonrhyth_translation_nonrhyth/Hist1h2bg_set_A.pdf]

# Hist1h2bh

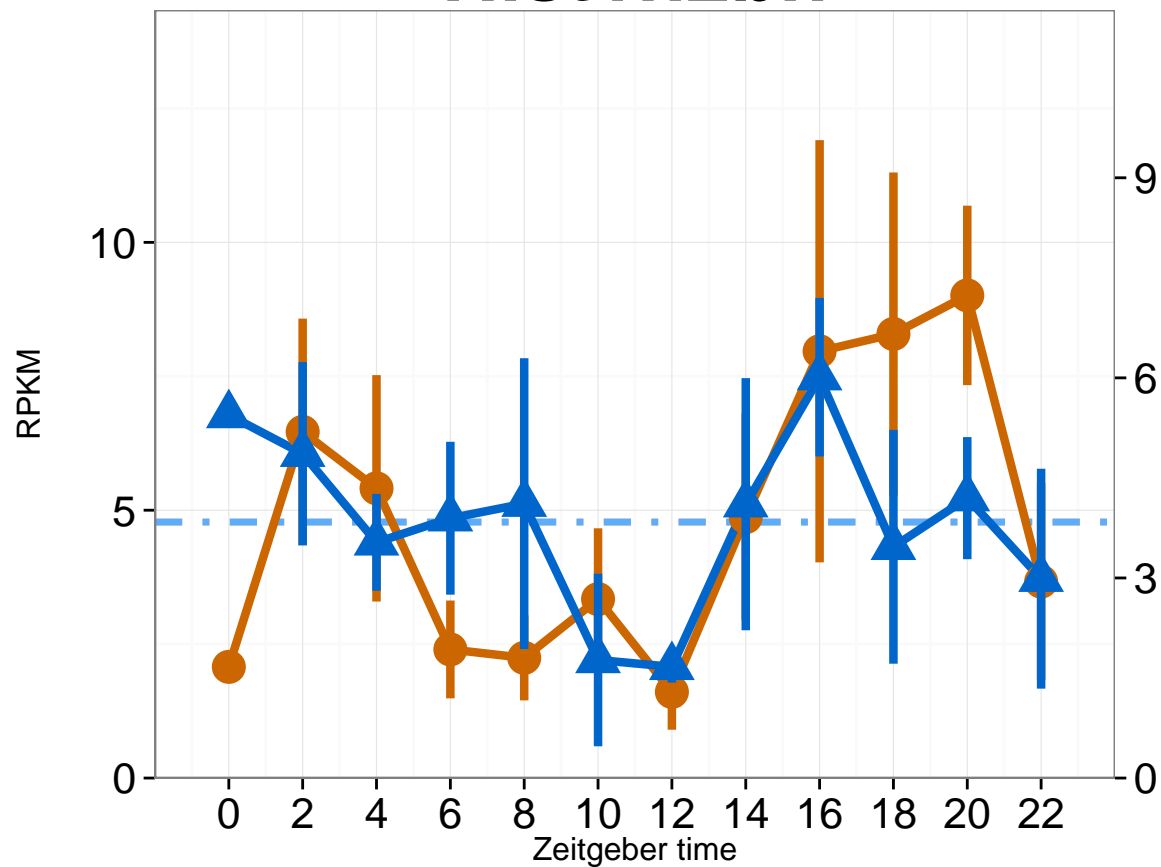

# Hist1h2bh

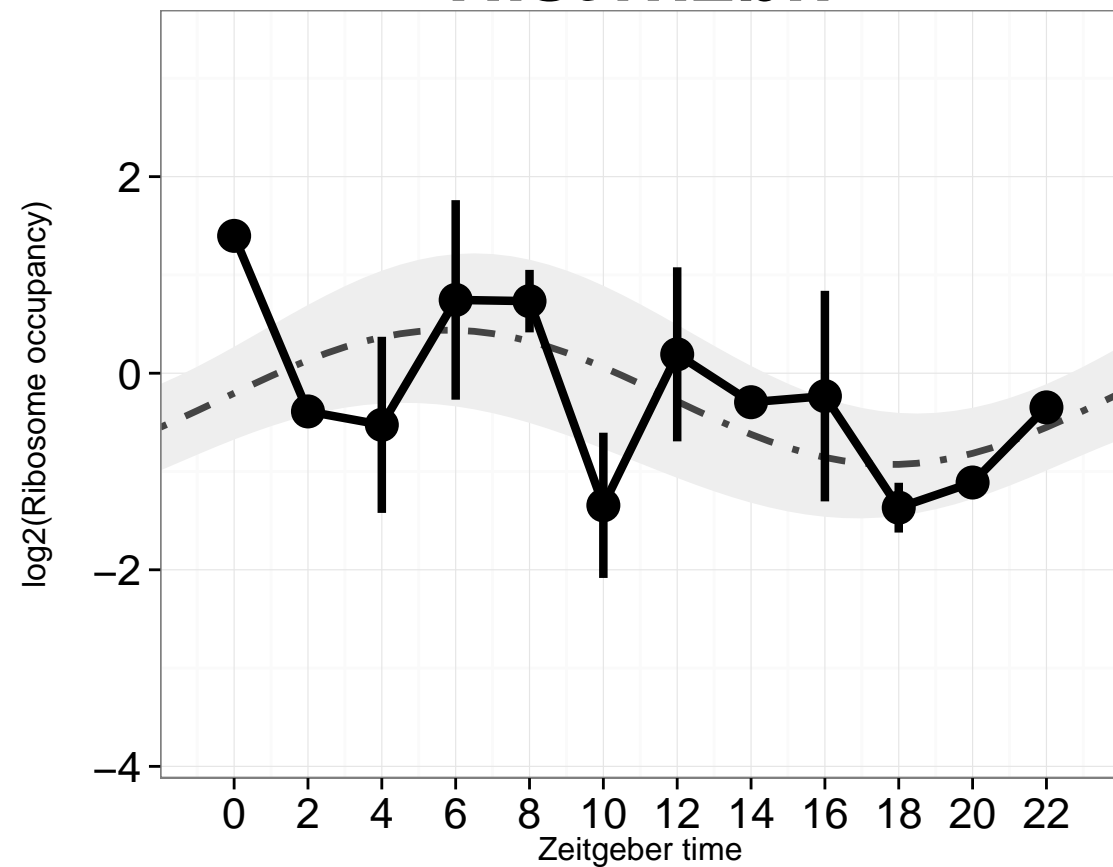

Supplement: SuppDataset_1.zip [file Hist1h2bh_set_A.pdf › Supplemental Dataset 1/A-mRNA_nonrhyth_translation_nonrhyth/Hist1h2bh_set_A.pdf]

Hist1h2bj

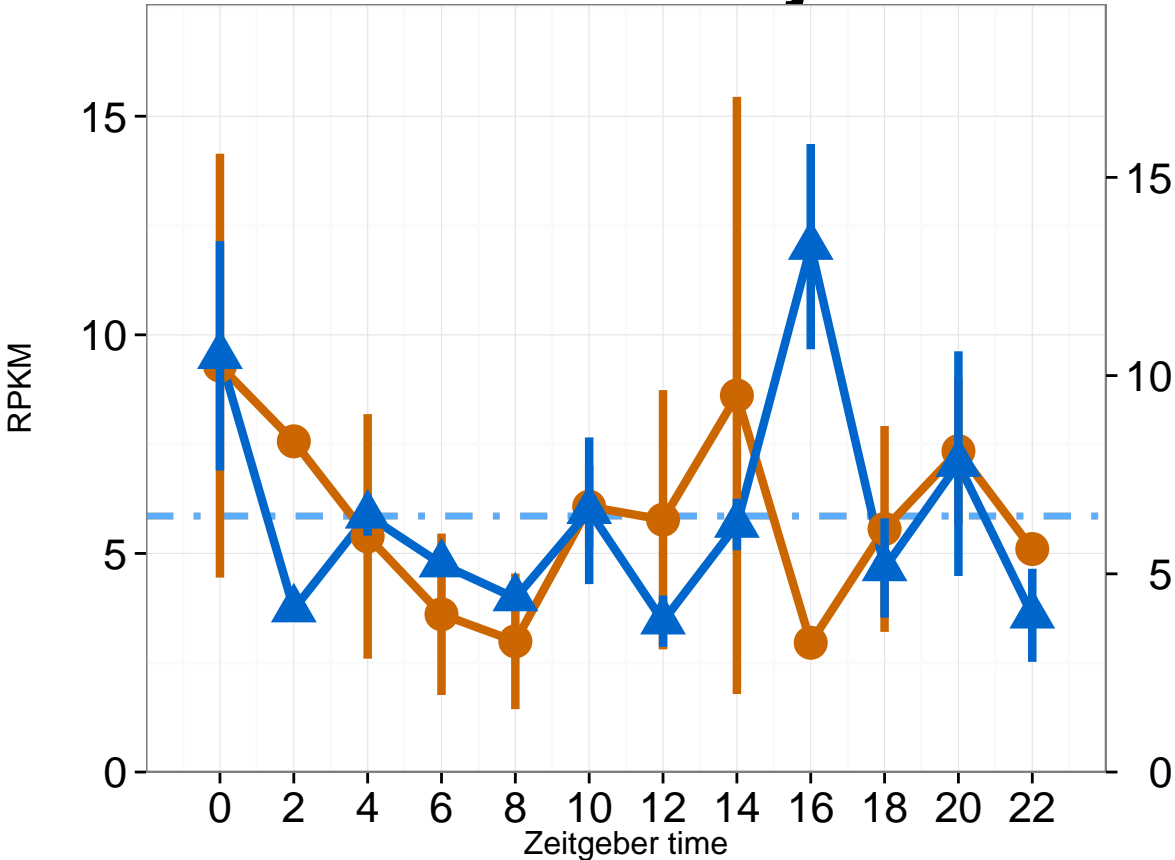

Hist1h2bj

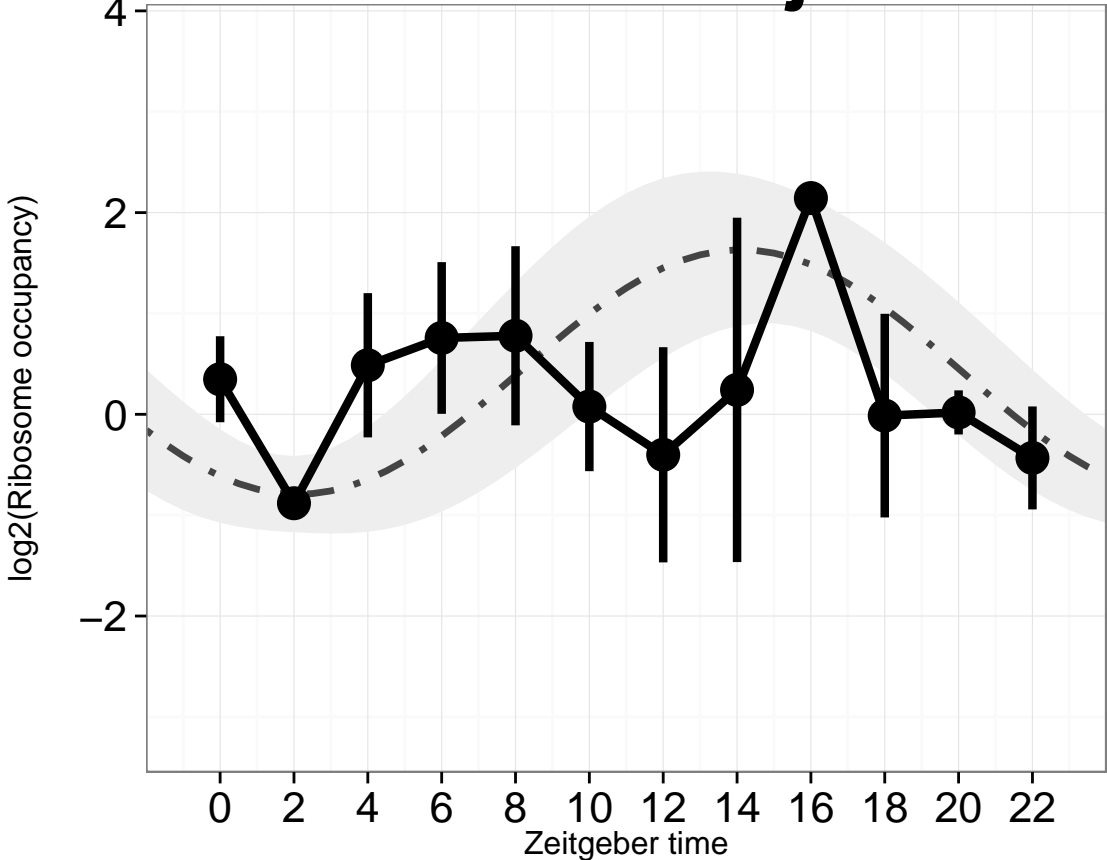

Supplement: SuppDataset_1.zip [file Hist1h2bj_set_A.pdf › Supplemental Dataset 1/A-mRNA_nonrhyth_translation_nonrhyth/Hist1h2bj_set_A.pdf]

# Hist1h2bm

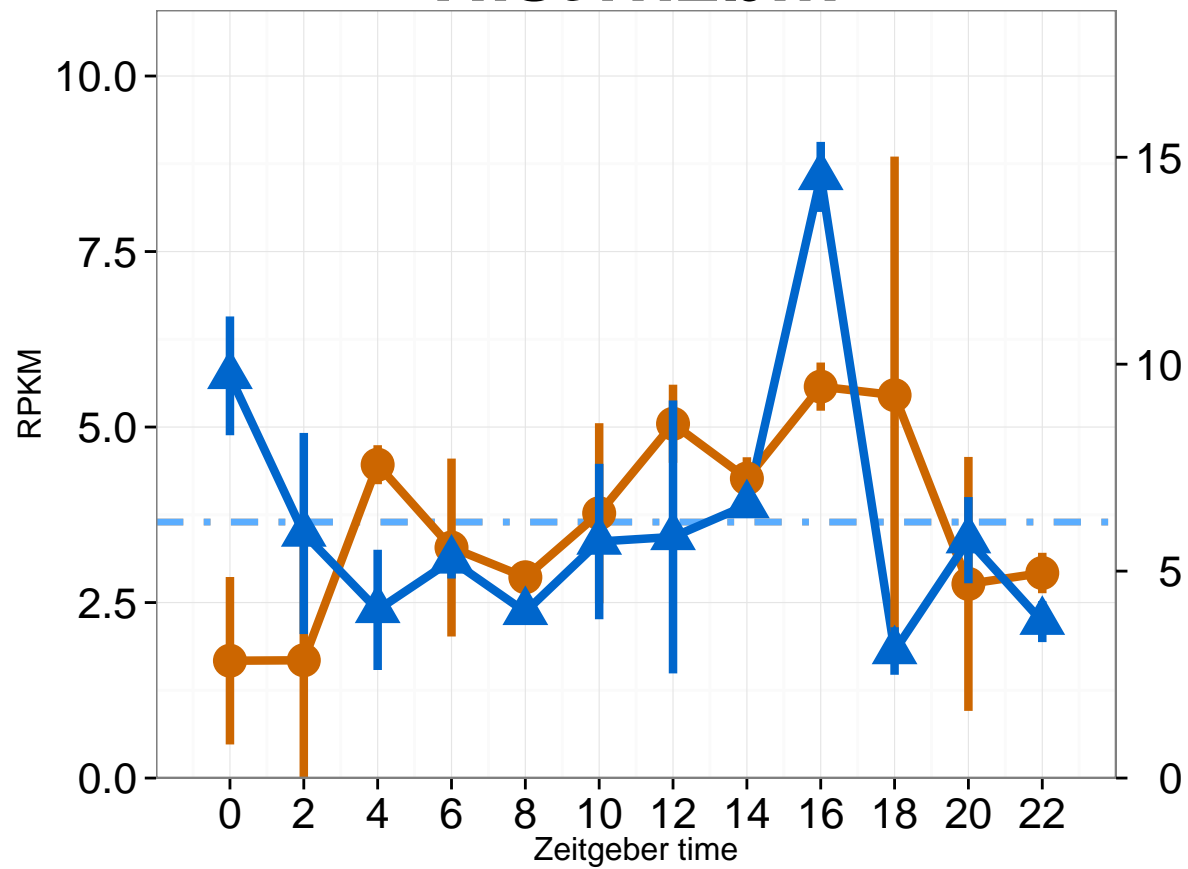

# Hist1h2bm

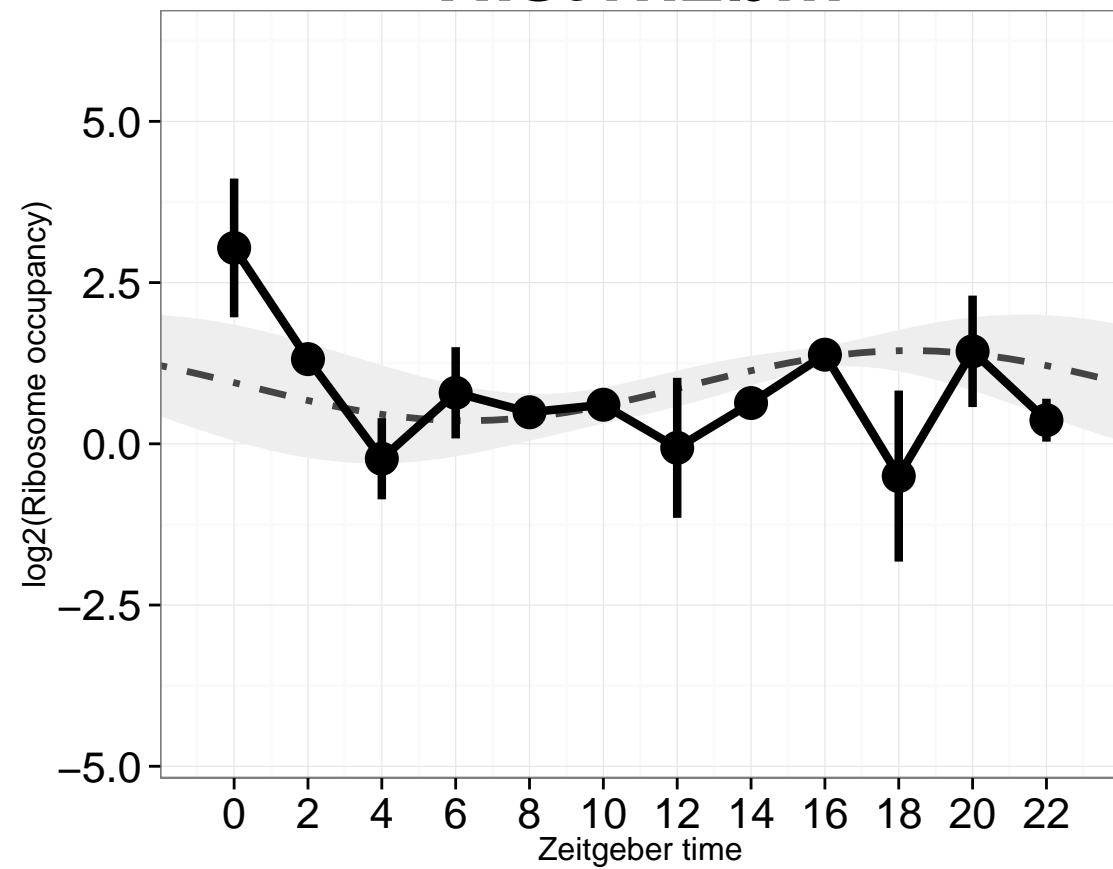

Supplement: SuppDataset_1.zip [file Hist1h2bm_set_A.pdf › Supplemental Dataset 1/A-mRNA_nonrhyth_translation_nonrhyth/Hist1h2bm_set_A.pdf]

# Hist1h3a

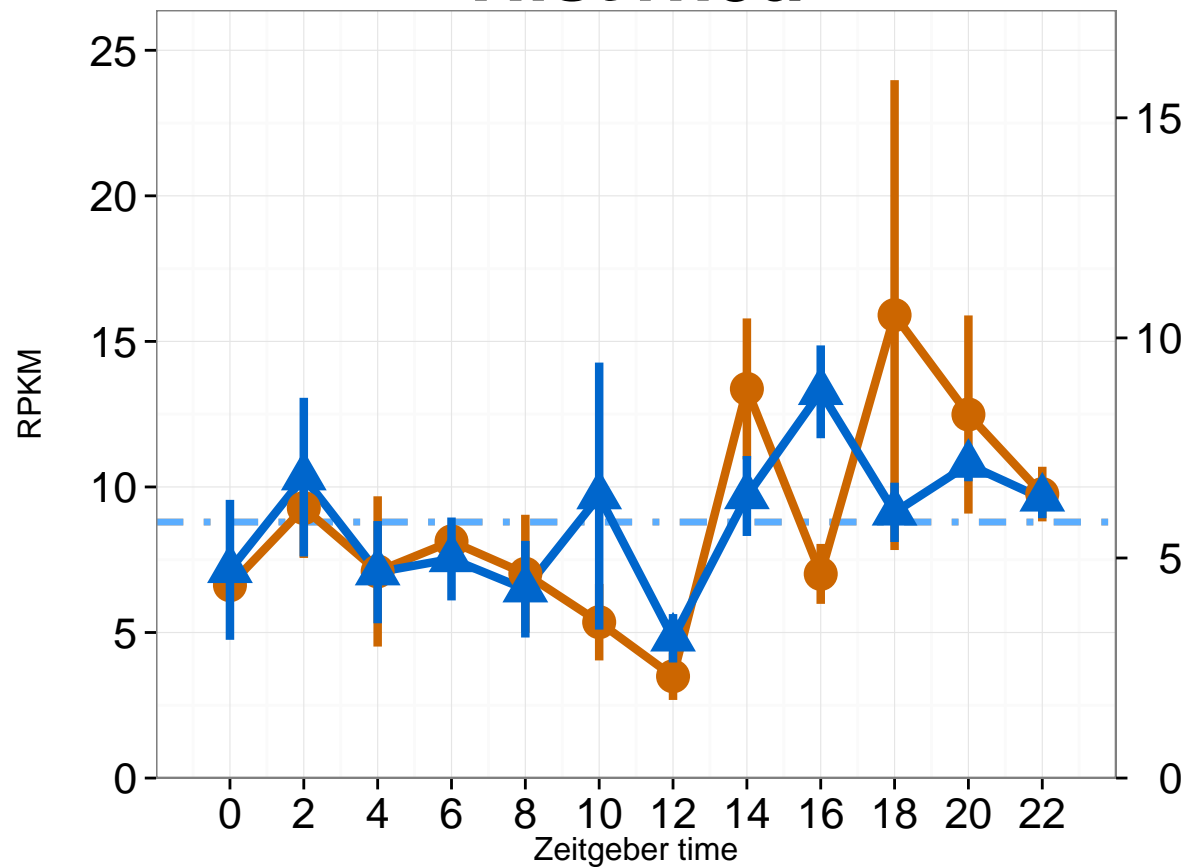

# Hist1h3a

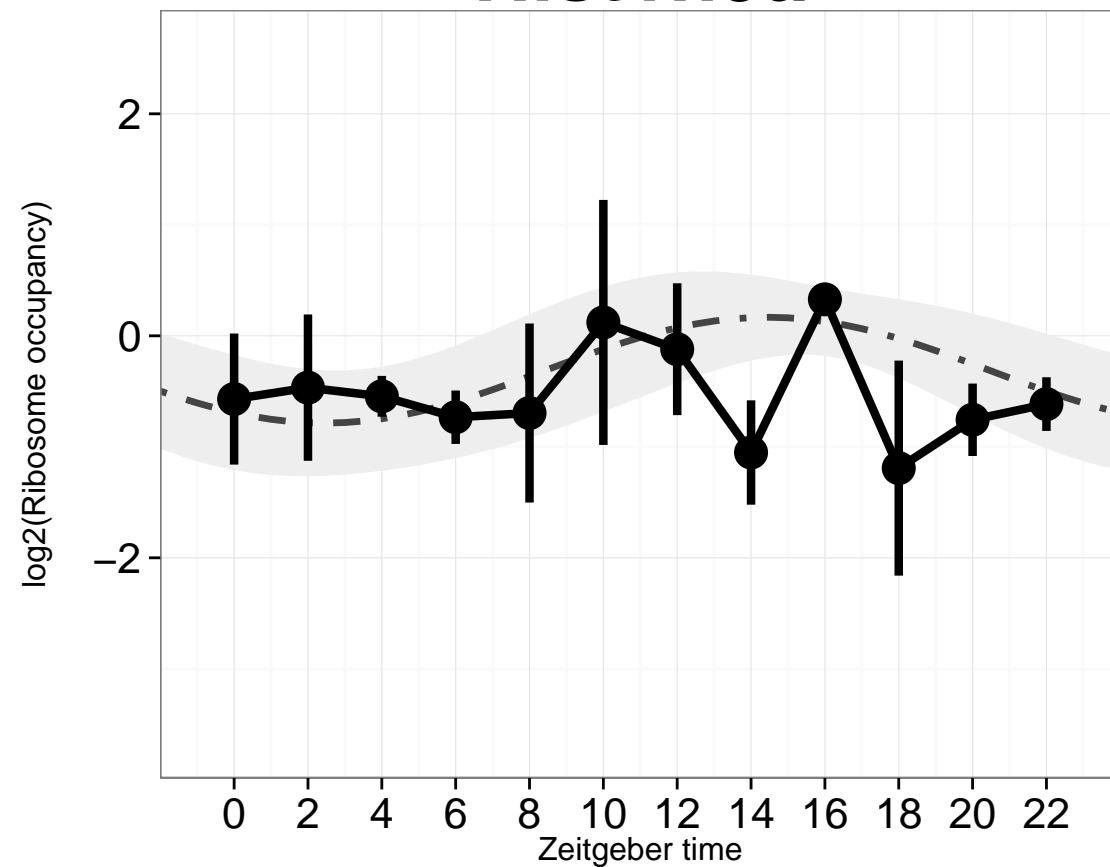

Supplement: SuppDataset_1.zip [file Hist1h3a_set_A.pdf › Supplemental Dataset 1/A-mRNA_nonrhyth_translation_nonrhyth/Hist1h3a_set_A.pdf]

# Hist1h3e

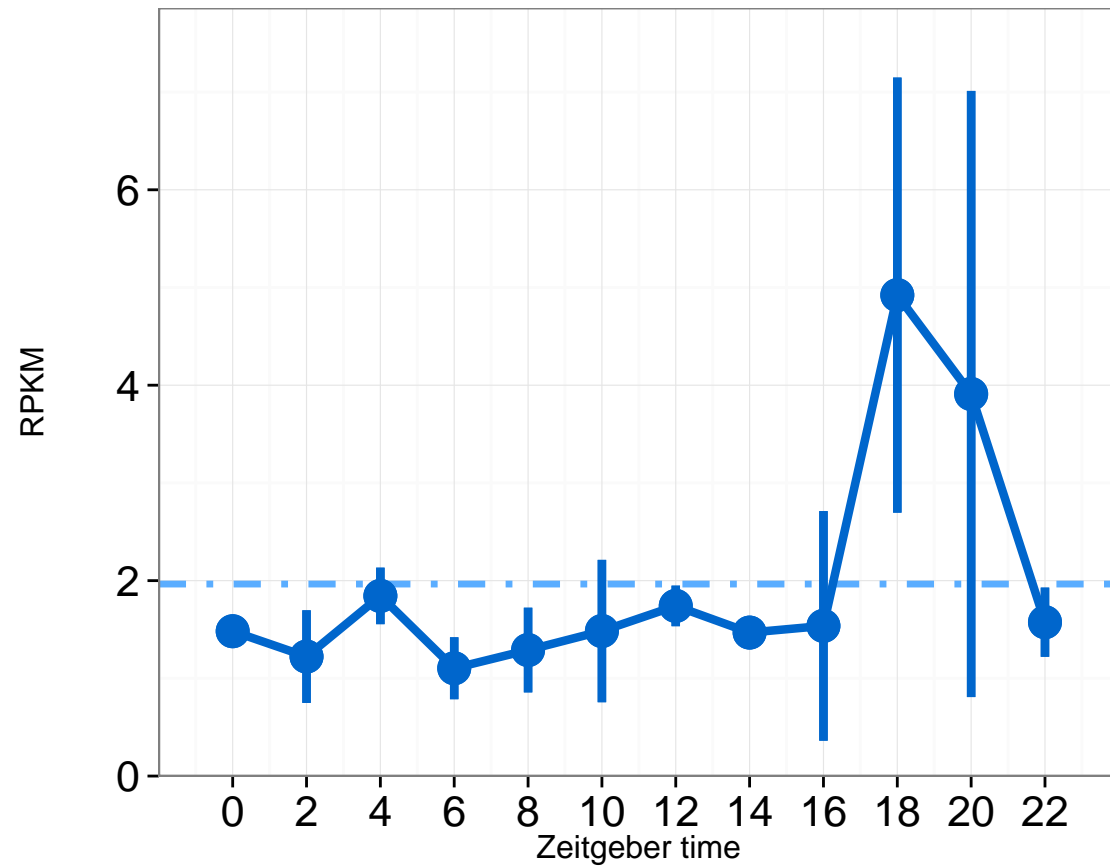

# Hist1h3e log2(Ribosome occupanc

Supplement: SuppDataset_1.zip [file Hist1h3e_set_A.pdf › Supplemental Dataset 1/A-mRNA_nonrhyth_translation_nonrhyth/Hist1h3e_set_A.pdf]

# Hist1h3i

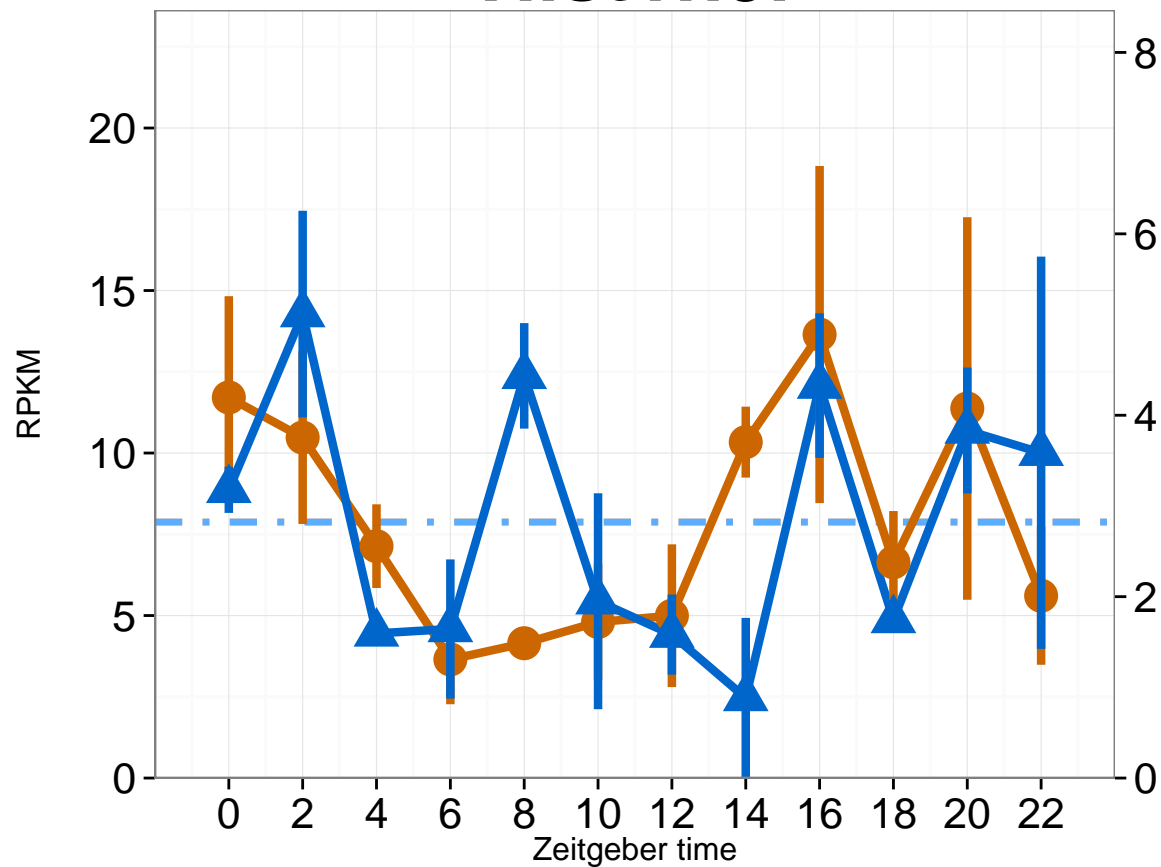

# Hist1h3i

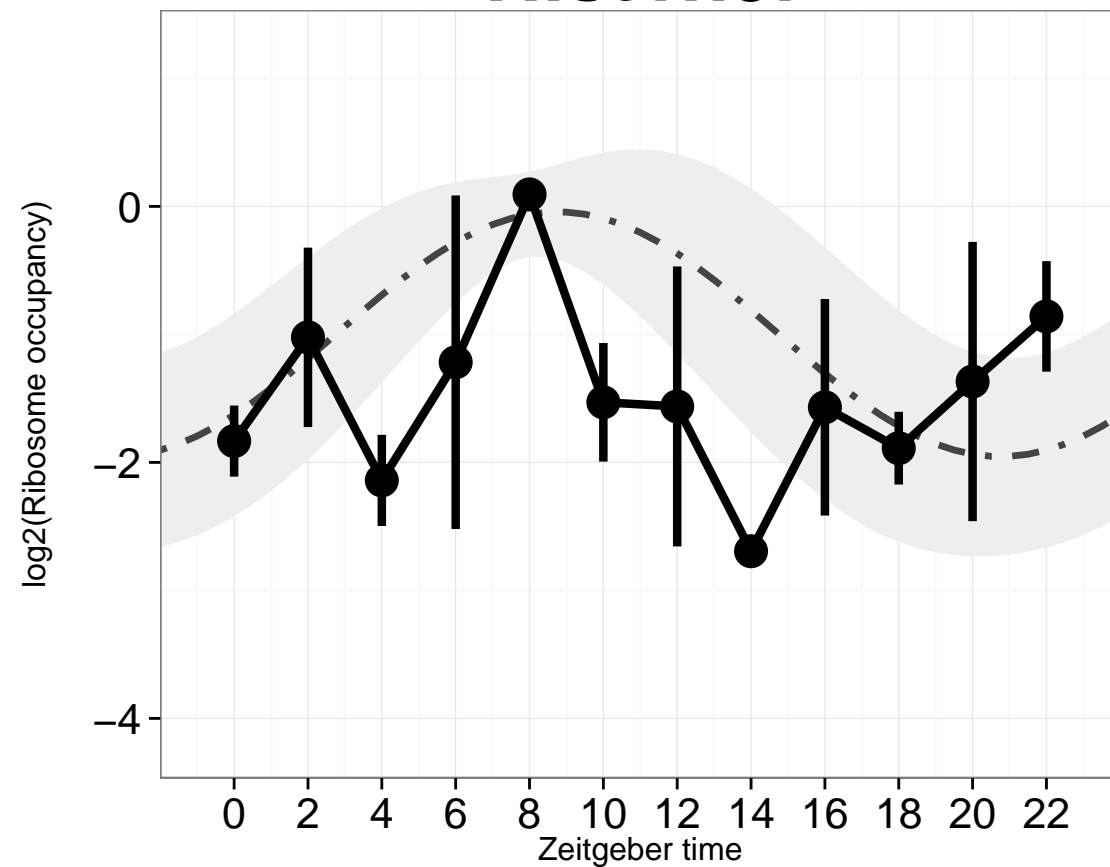

Supplement: SuppDataset_1.zip [file Hist1h3i_set_A.pdf › Supplemental Dataset 1/A-mRNA_nonrhyth_translation_nonrhyth/Hist1h3i_set_A.pdf]

# Hist1h4f

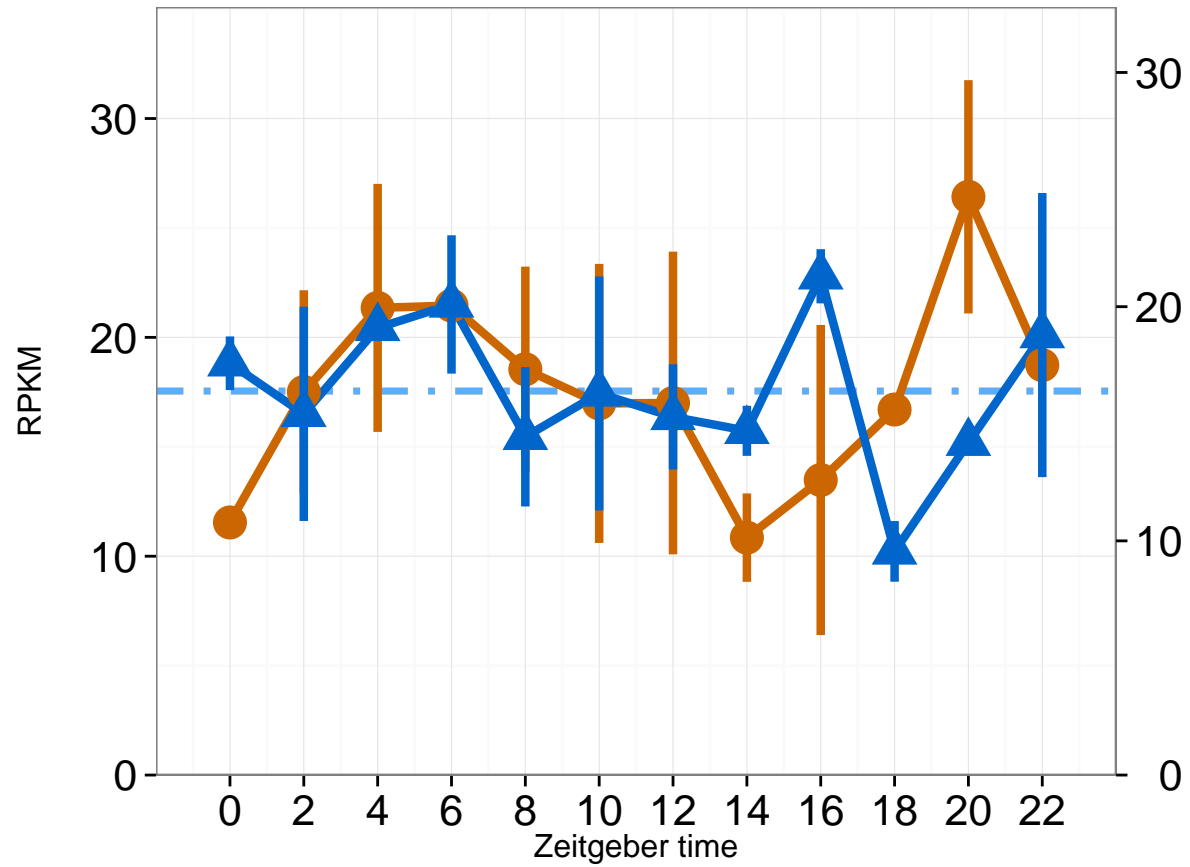

# Hist1h4f

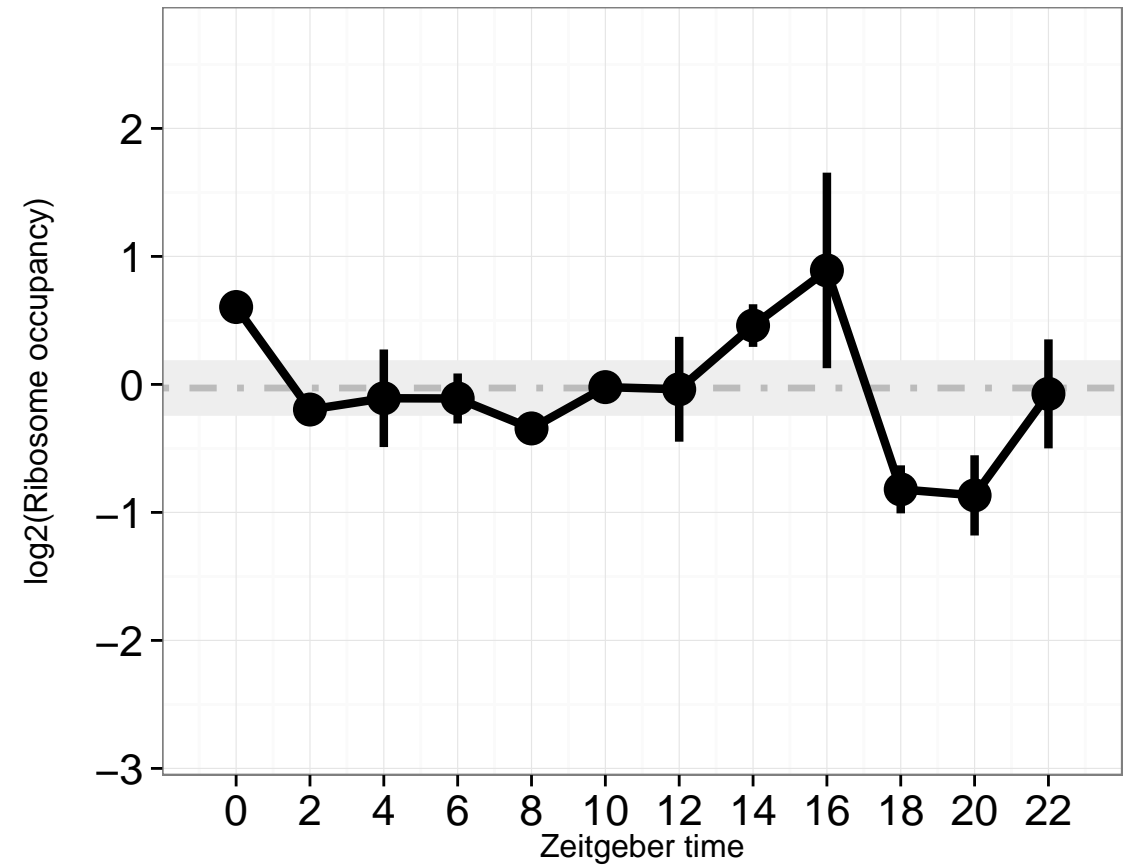

Supplement: SuppDataset_1.zip [file Hist1h4f_set_A.pdf › Supplemental Dataset 1/A-mRNA_nonrhyth_translation_nonrhyth/Hist1h4f_set_A.pdf]

## Hist1h4i

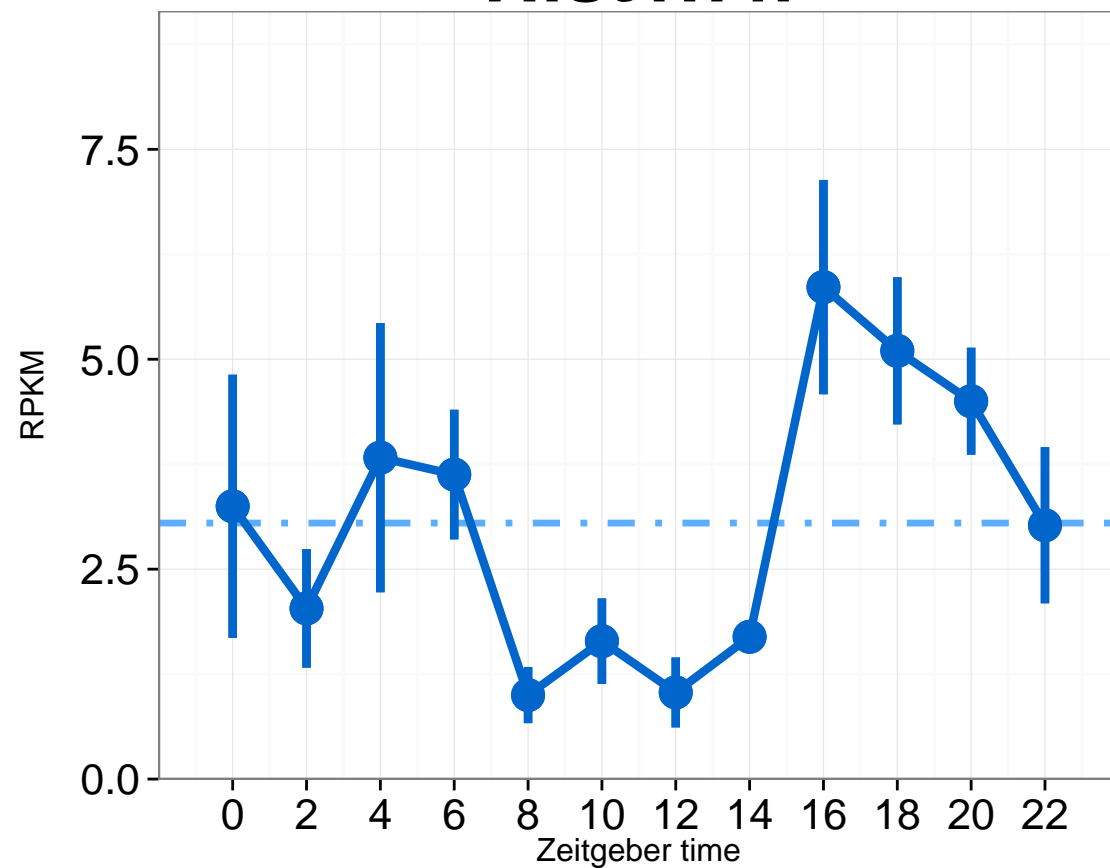

## Hist1h4i log2(Ribosome occupanc

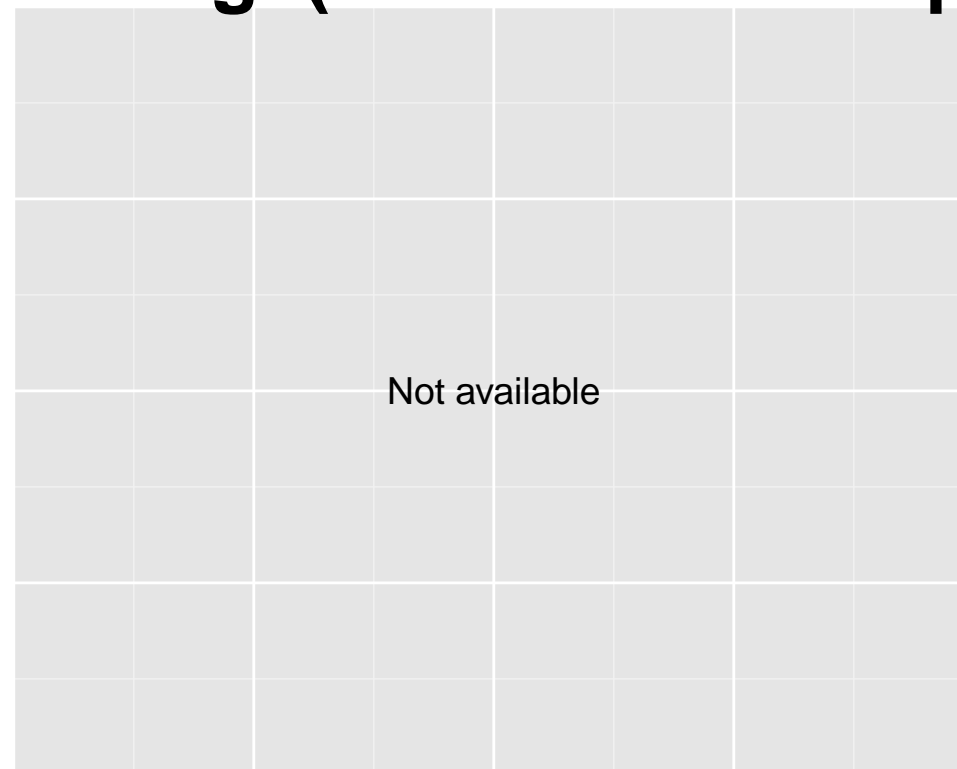

Supplement: SuppDataset_1.zip [file Hist1h4i_set_A.pdf › Supplemental Dataset 1/A-mRNA_nonrhyth_translation_nonrhyth/Hist1h4i_set_A.pdf]

# Hist2h2ab

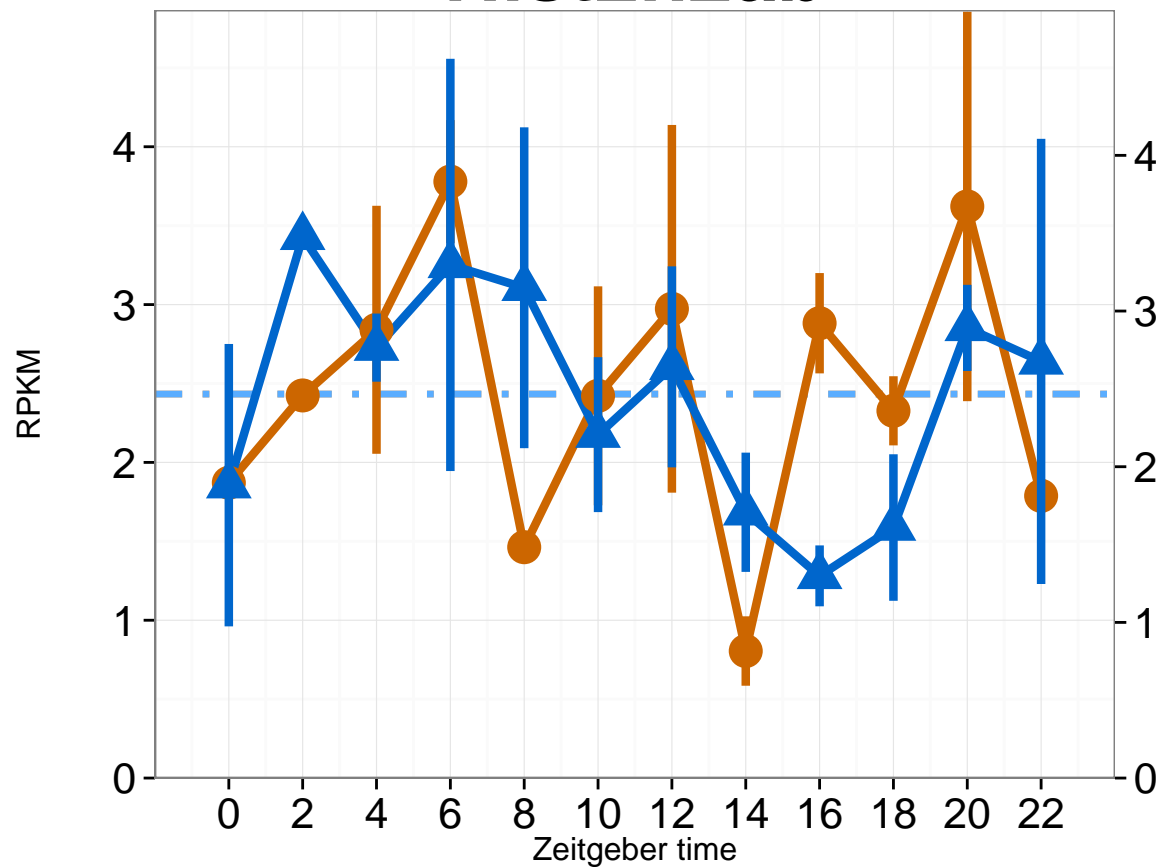

# Hist2h2ab

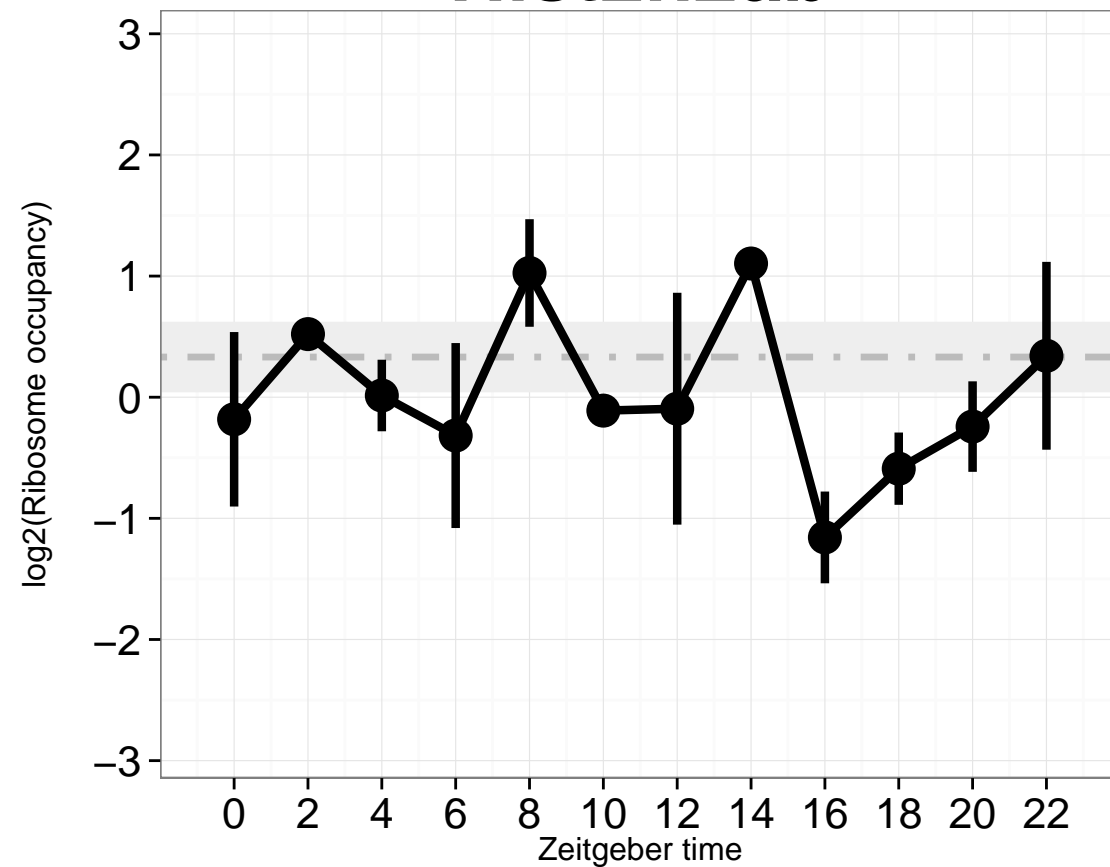

Supplement: SuppDataset_1.zip [file Hist2h2ab_set_A.pdf › Supplemental Dataset 1/A-mRNA_nonrhyth_translation_nonrhyth/Hist2h2ab_set_A.pdf]

# Hist2h2ac

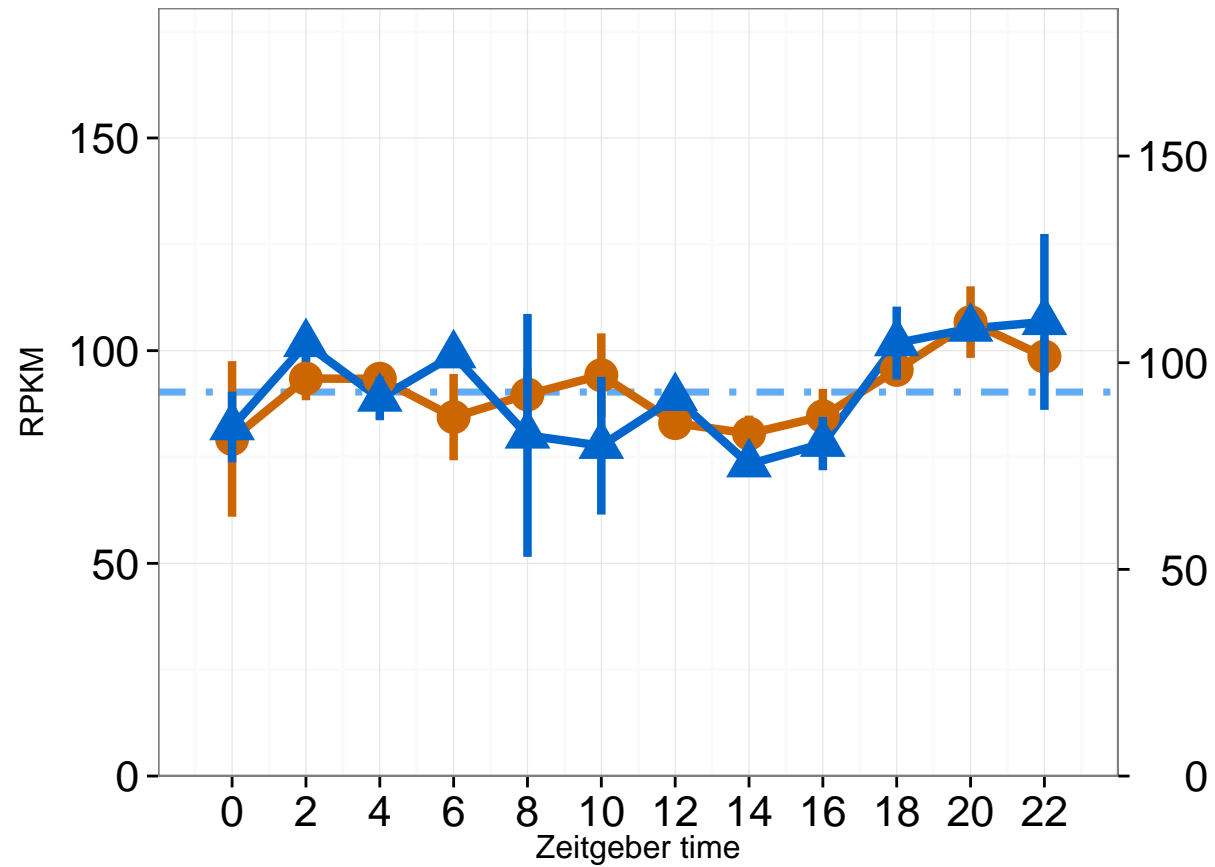

# Hist2h2ac

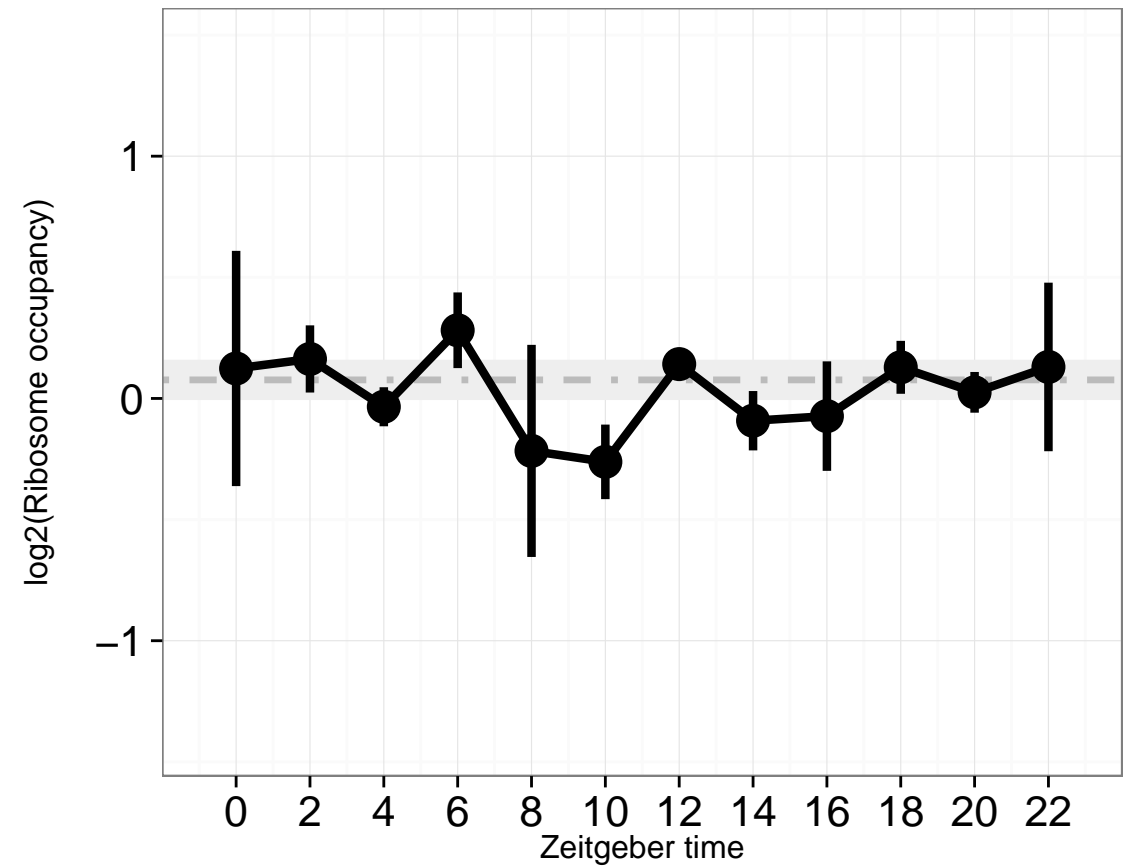

Supplement: SuppDataset_1.zip [file Hist2h2ac_set_A.pdf › Supplemental Dataset 1/A-mRNA_nonrhyth_translation_nonrhyth/Hist2h2ac_set_A.pdf]

# Hist2h3b

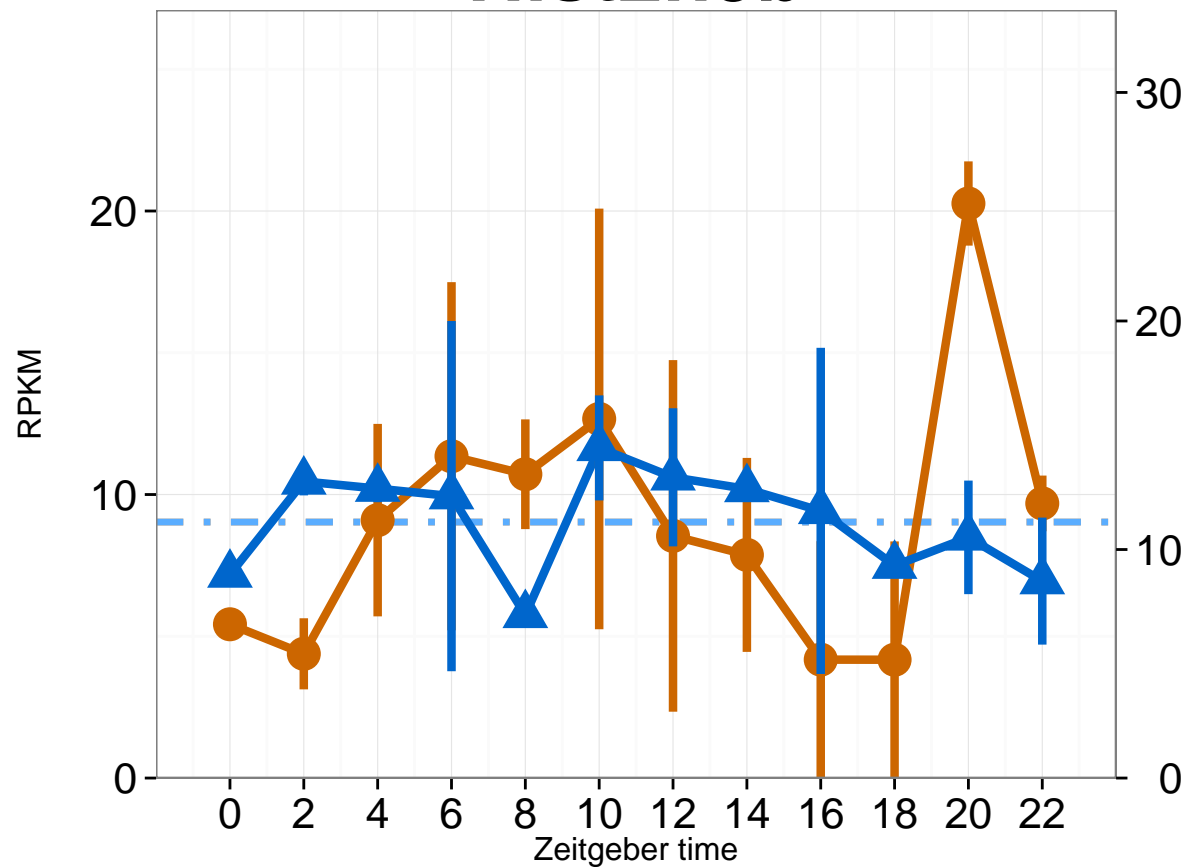

# Hist2h3b

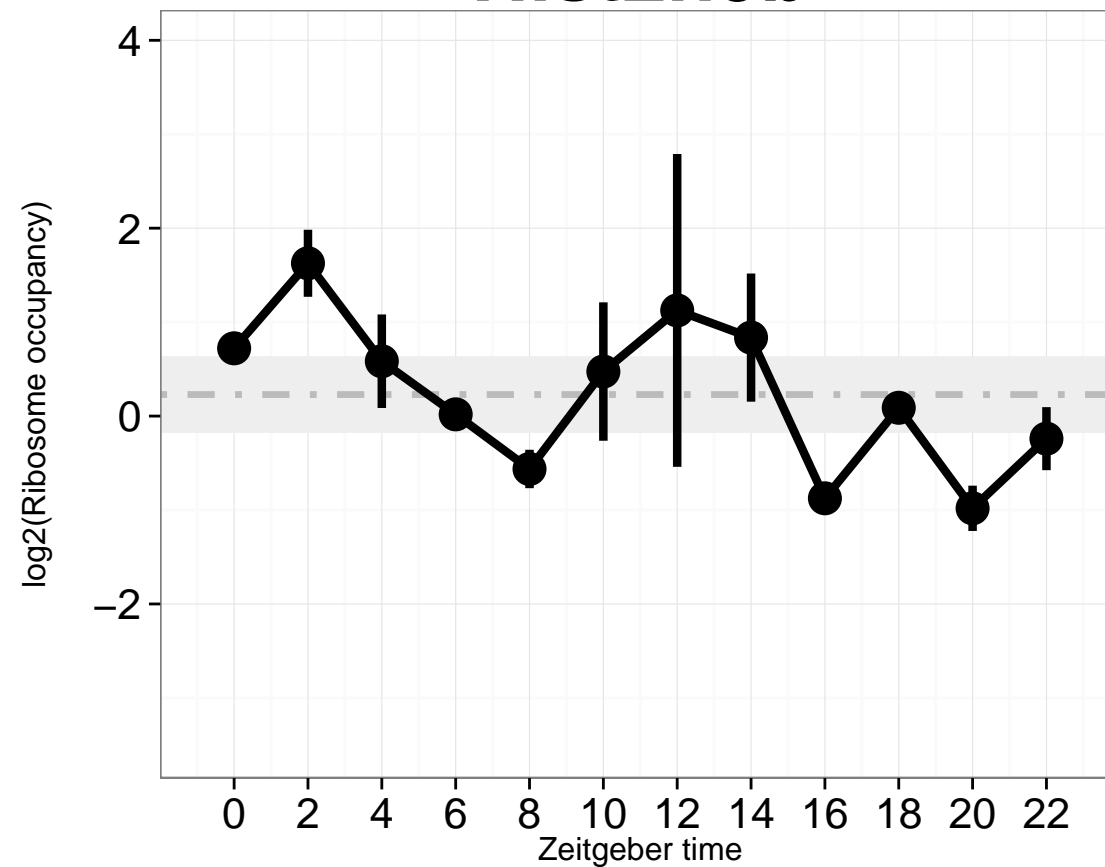

Supplement: SuppDataset_1.zip [file Hist2h3b_set_A.pdf › Supplemental Dataset 1/A-mRNA_nonrhyth_translation_nonrhyth/Hist2h3b_set_A.pdf]

# Hist3h2a

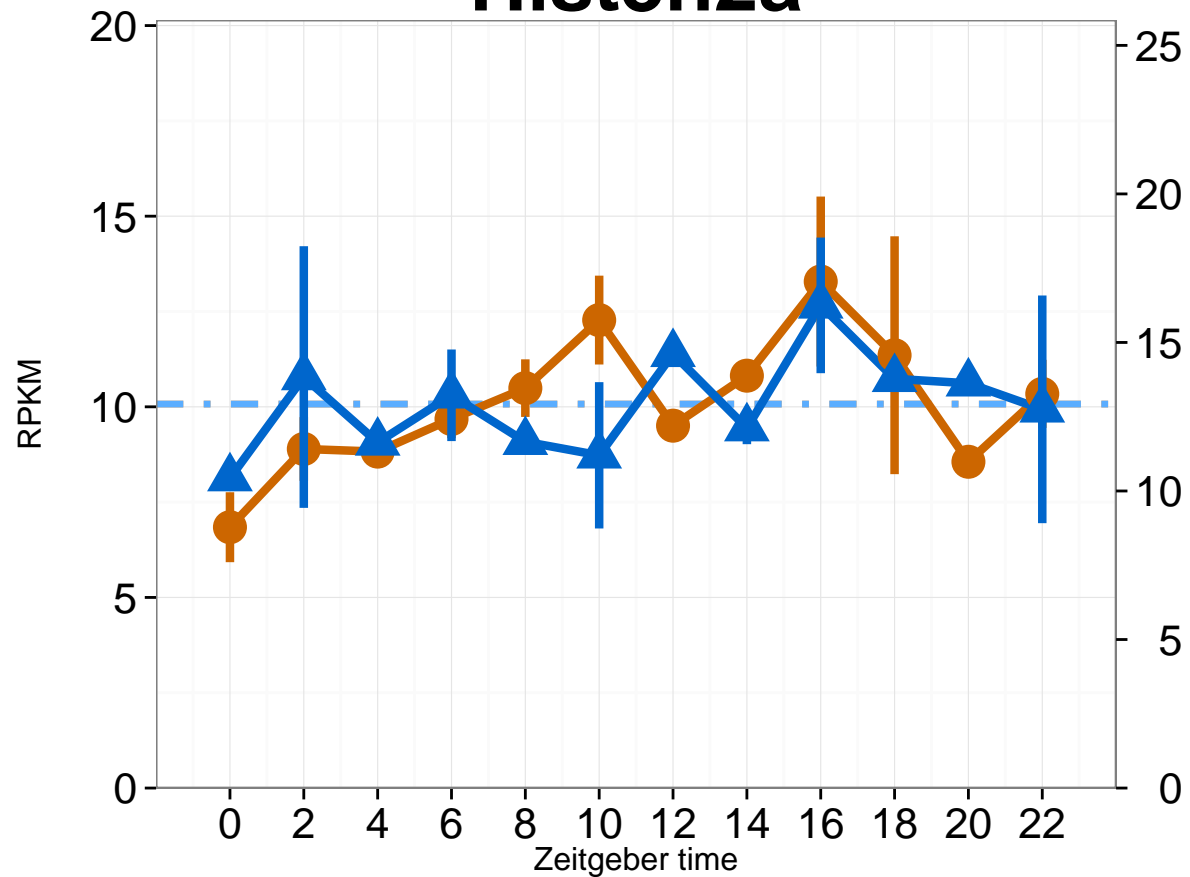

# Hist3h2a

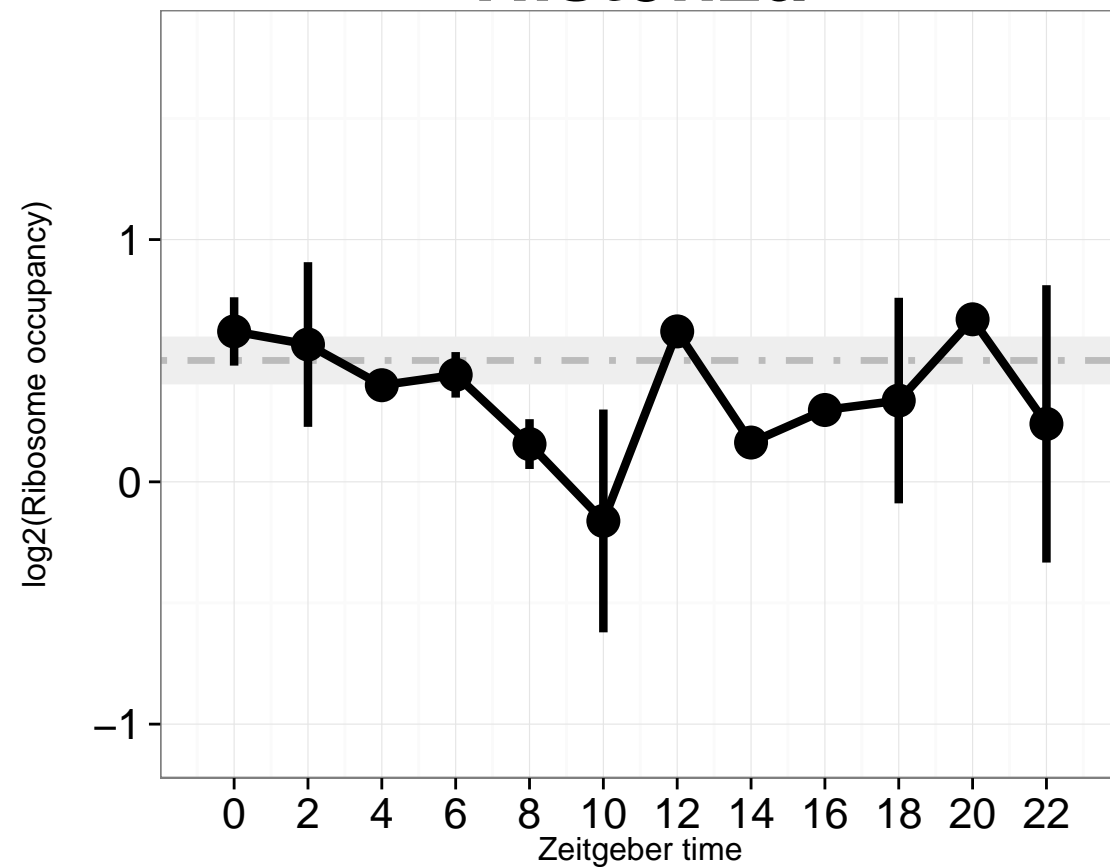

Supplement: SuppDataset_1.zip [file Hist3h2a_set_A.pdf › Supplemental Dataset 1/A-mRNA_nonrhyth_translation_nonrhyth/Hist3h2a_set_A.pdf]

# Hivep1

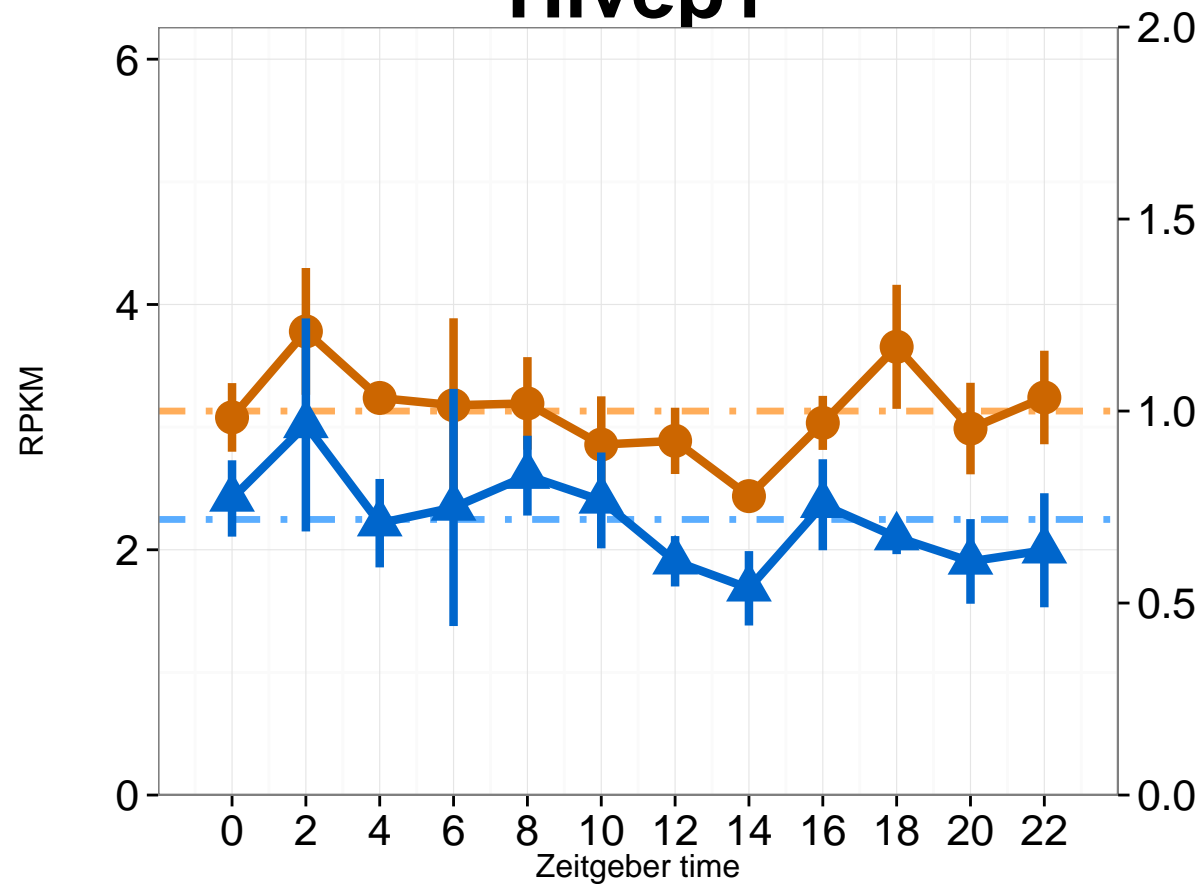

# Hivep1

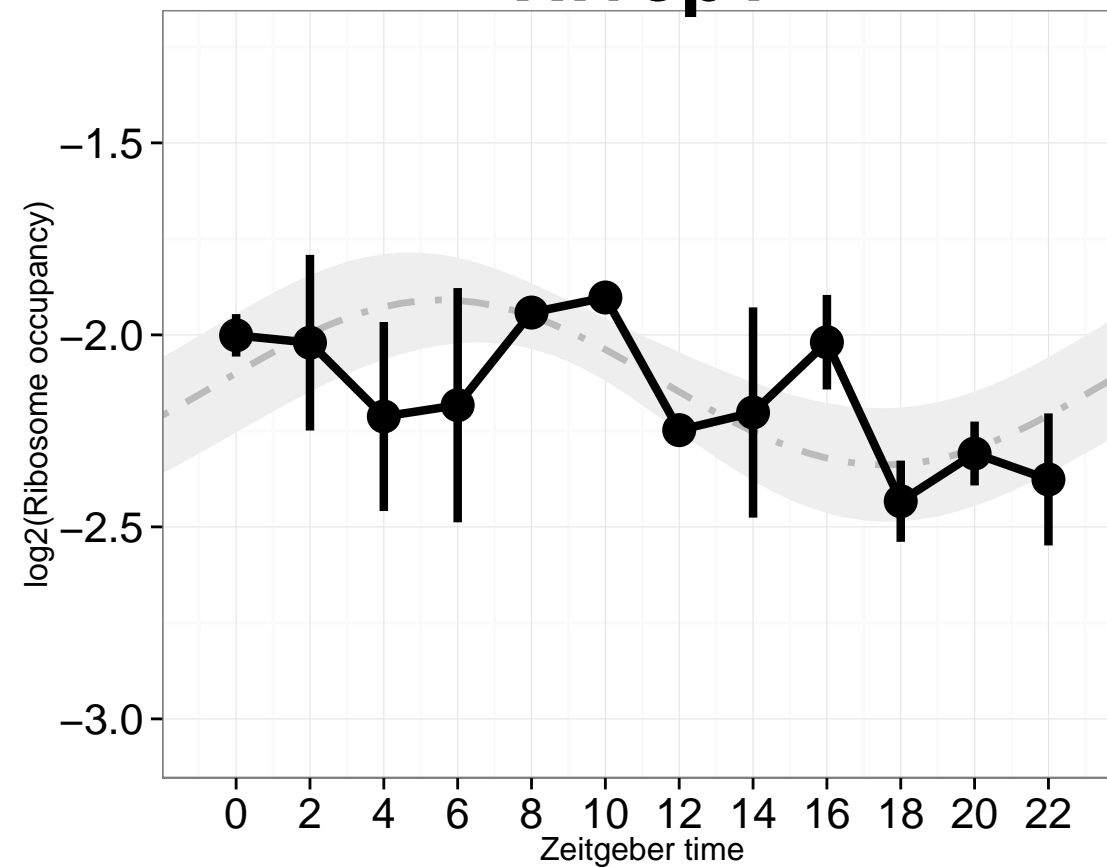

Supplement: SuppDataset_1.zip [file Hivep1_set_A.pdf › Supplemental Dataset 1/A-mRNA_nonrhyth_translation_nonrhyth/Hivep1_set_A.pdf]

## Hivep2

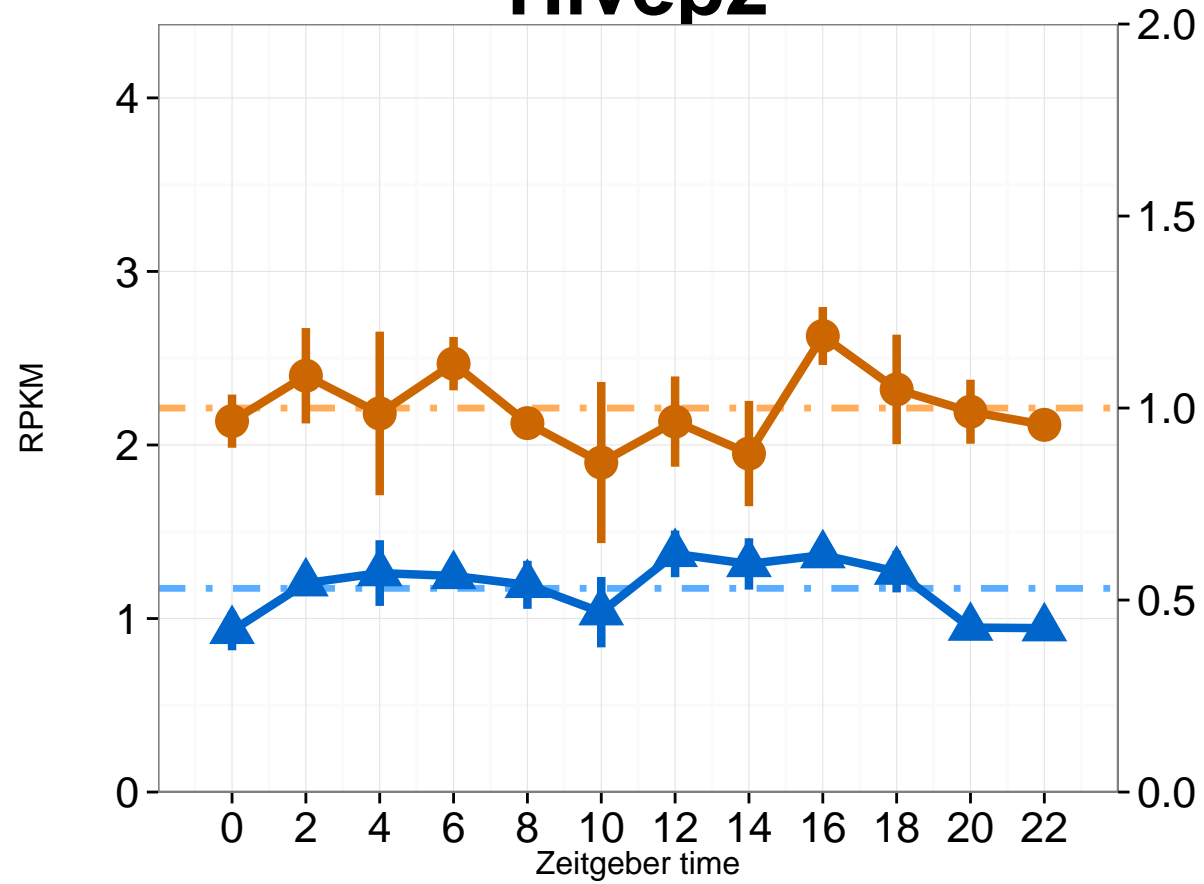

## Hivep2

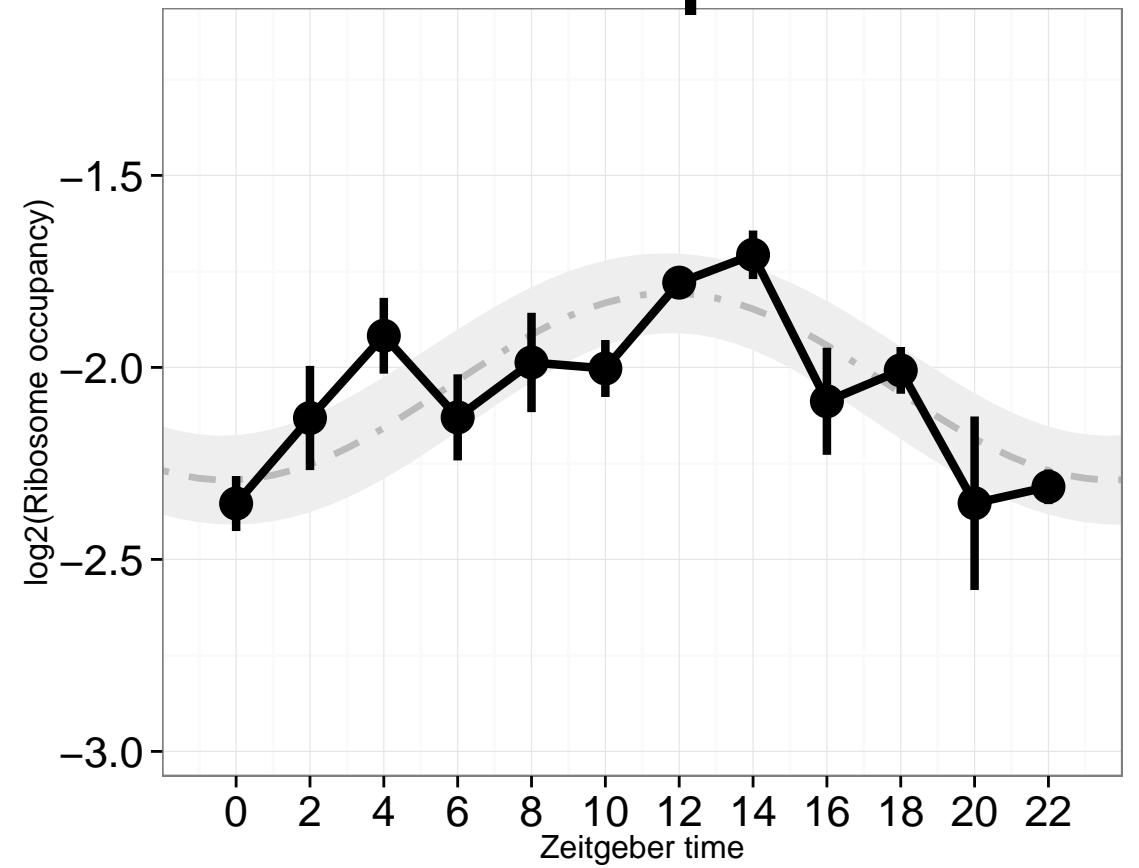

Supplement: SuppDataset_1.zip [file Hivep2_set_A.pdf › Supplemental Dataset 1/A-mRNA_nonrhyth_translation_nonrhyth/Hivep2_set_A.pdf]

# Hjurp

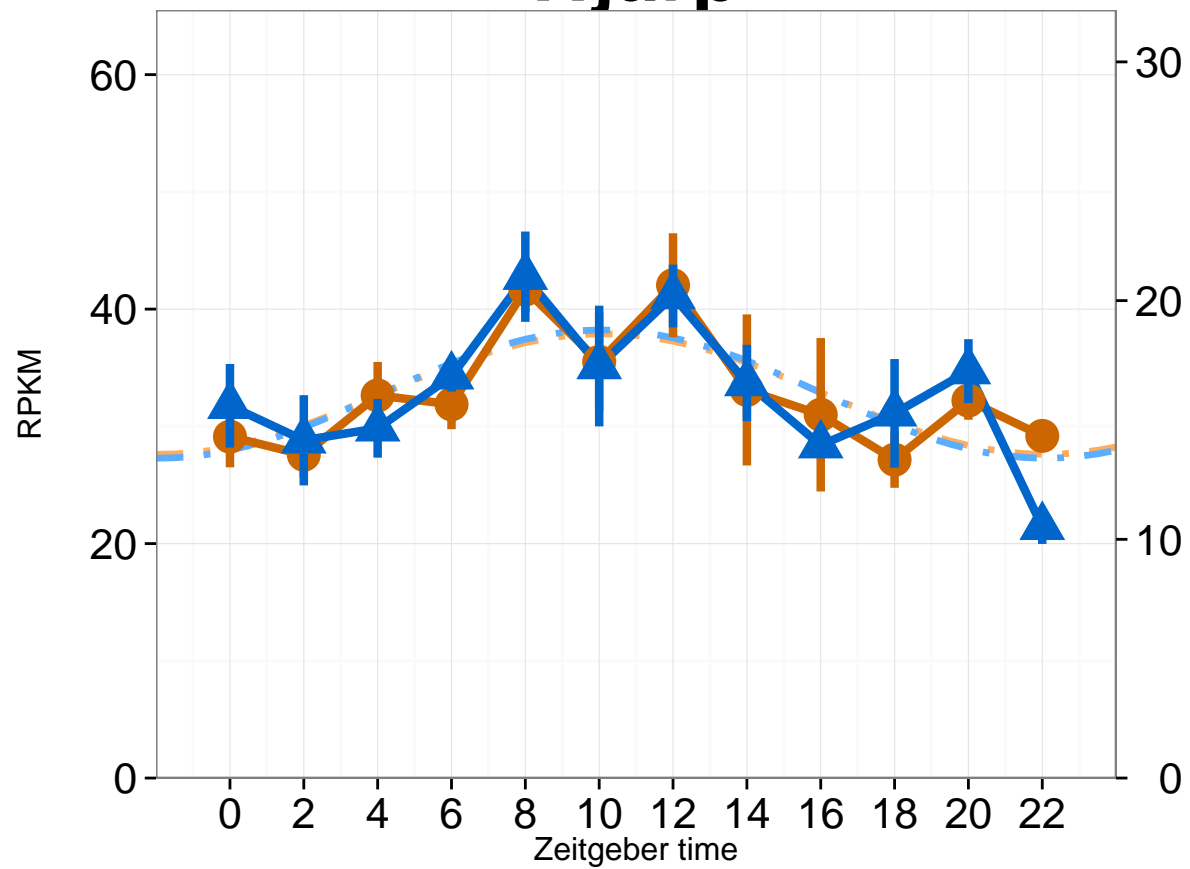

# Hjurp

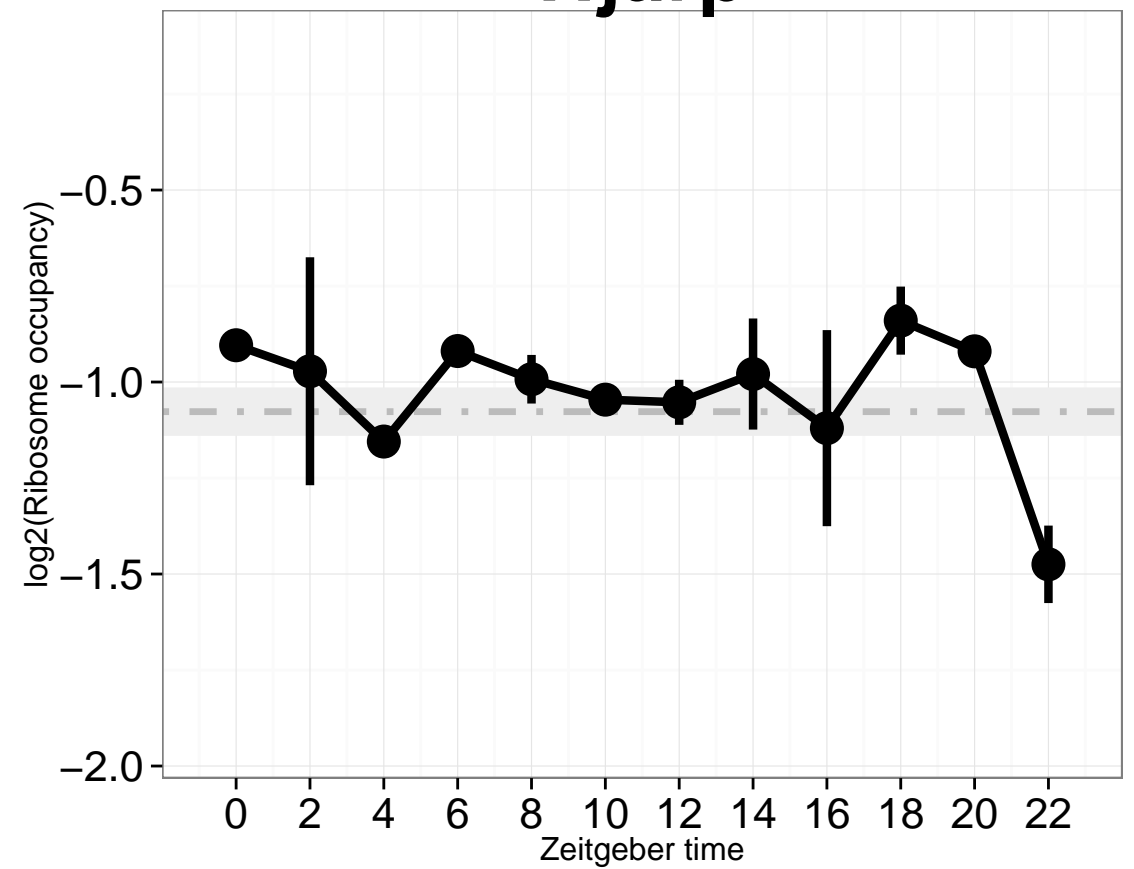

Supplement: SuppDataset_1.zip [file Hjurp_set_A.pdf › Supplemental Dataset 1/A-mRNA_nonrhyth_translation_nonrhyth/Hjurp_set_A.pdf]

# Hk1

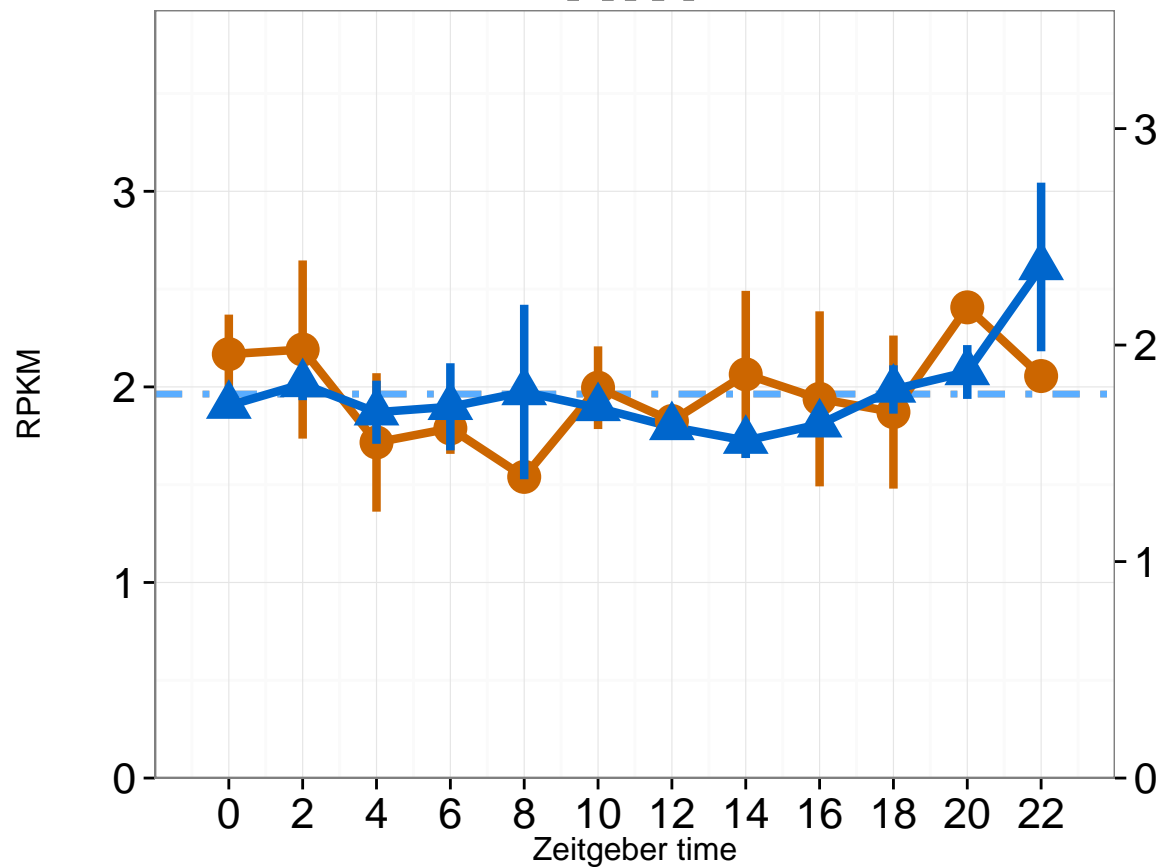

# Hk1

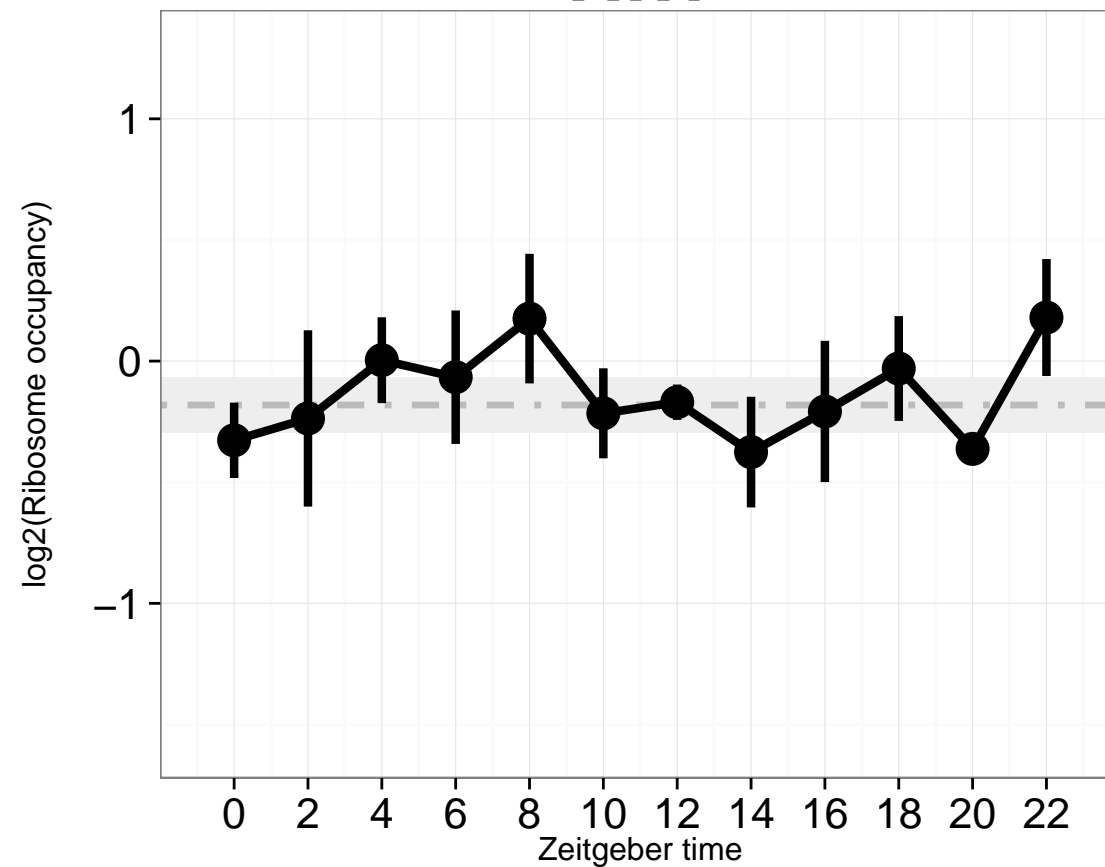

Supplement: SuppDataset_1.zip [file Hk1_set_A.pdf › Supplemental Dataset 1/A-mRNA_nonrhyth_translation_nonrhyth/Hk1_set_A.pdf]

## Hk2

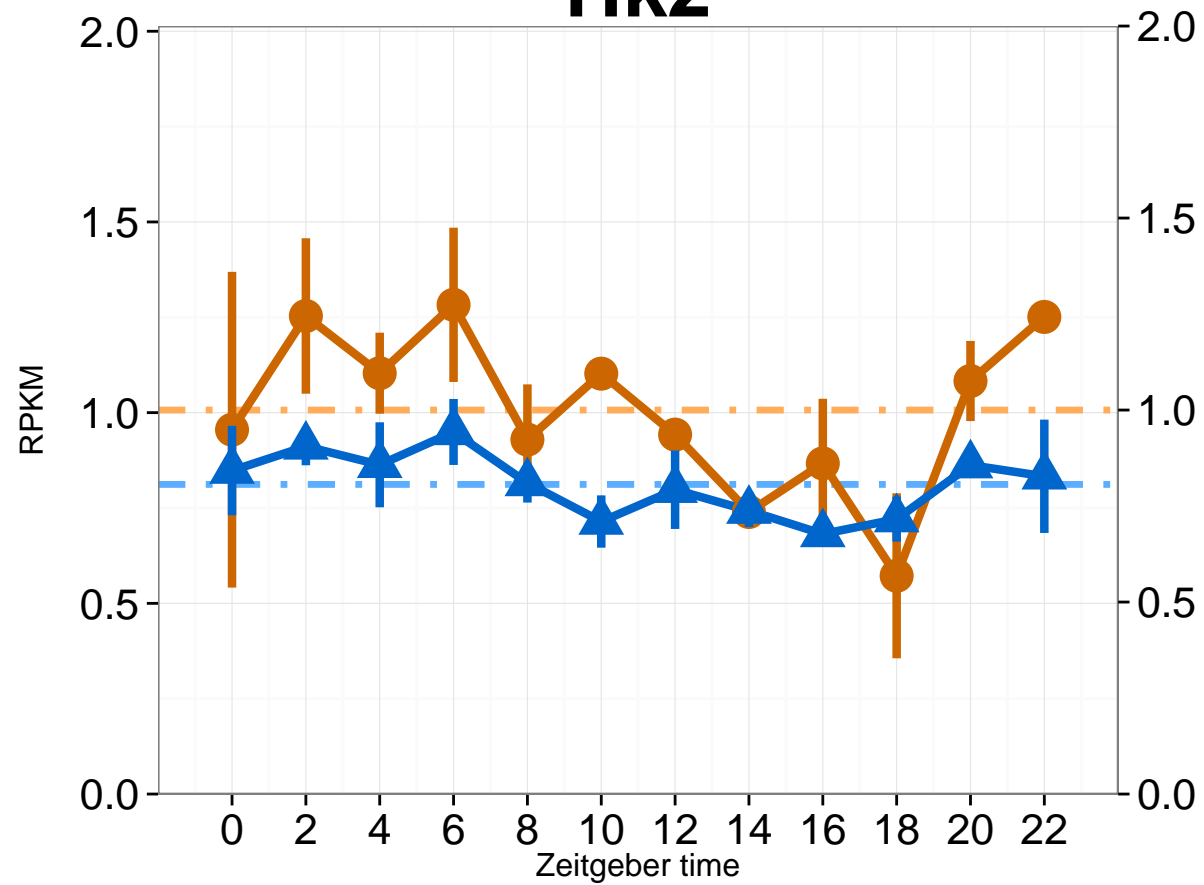

## Hk2

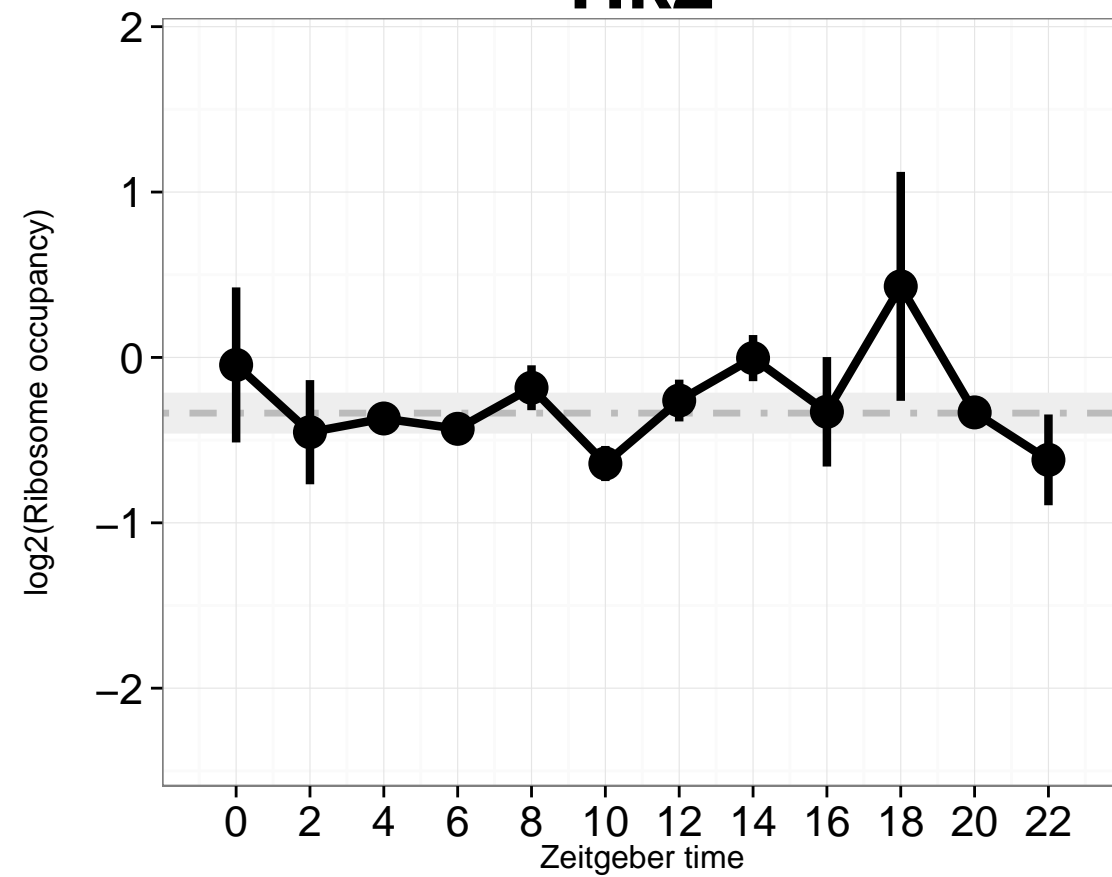

Supplement: SuppDataset_1.zip [file Hk2_set_A.pdf › Supplemental Dataset 1/A-mRNA_nonrhyth_translation_nonrhyth/Hk2_set_A.pdf]

## Hk3

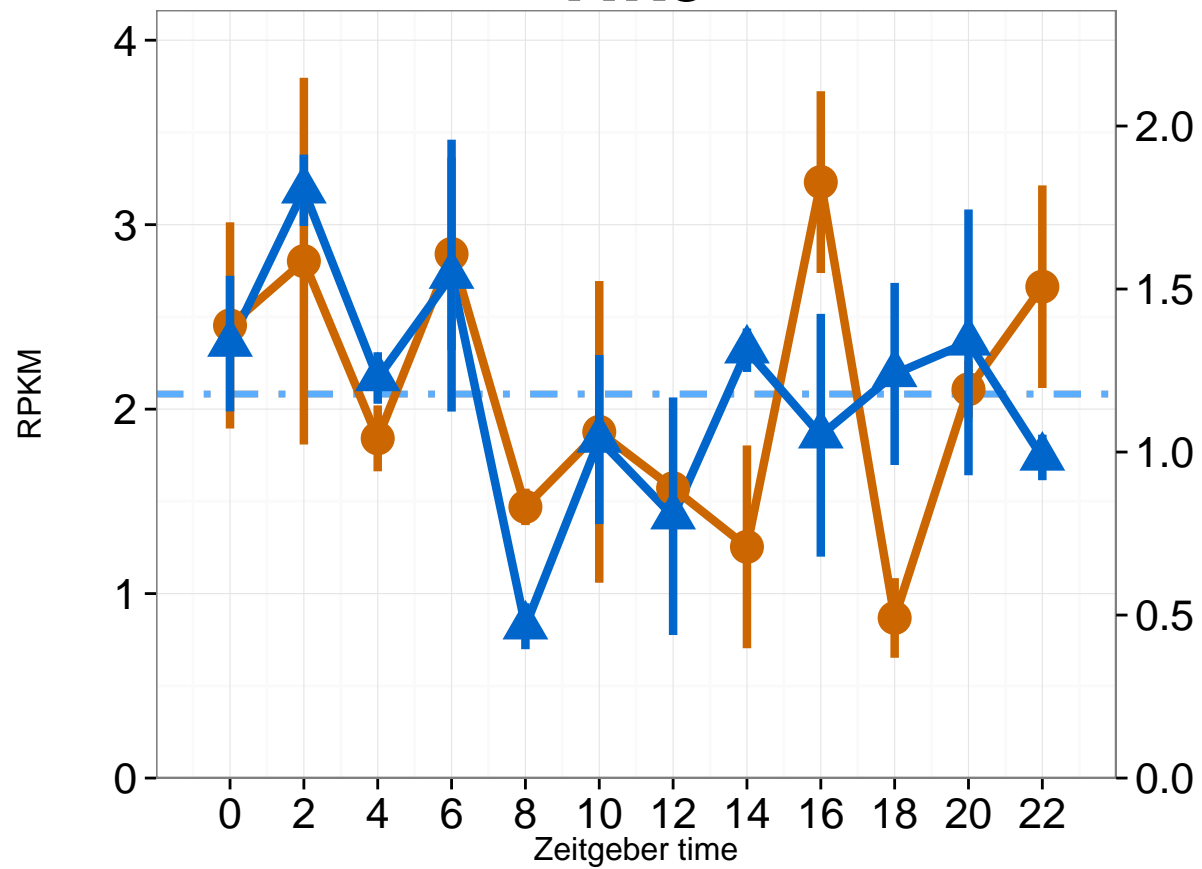

## Hk3

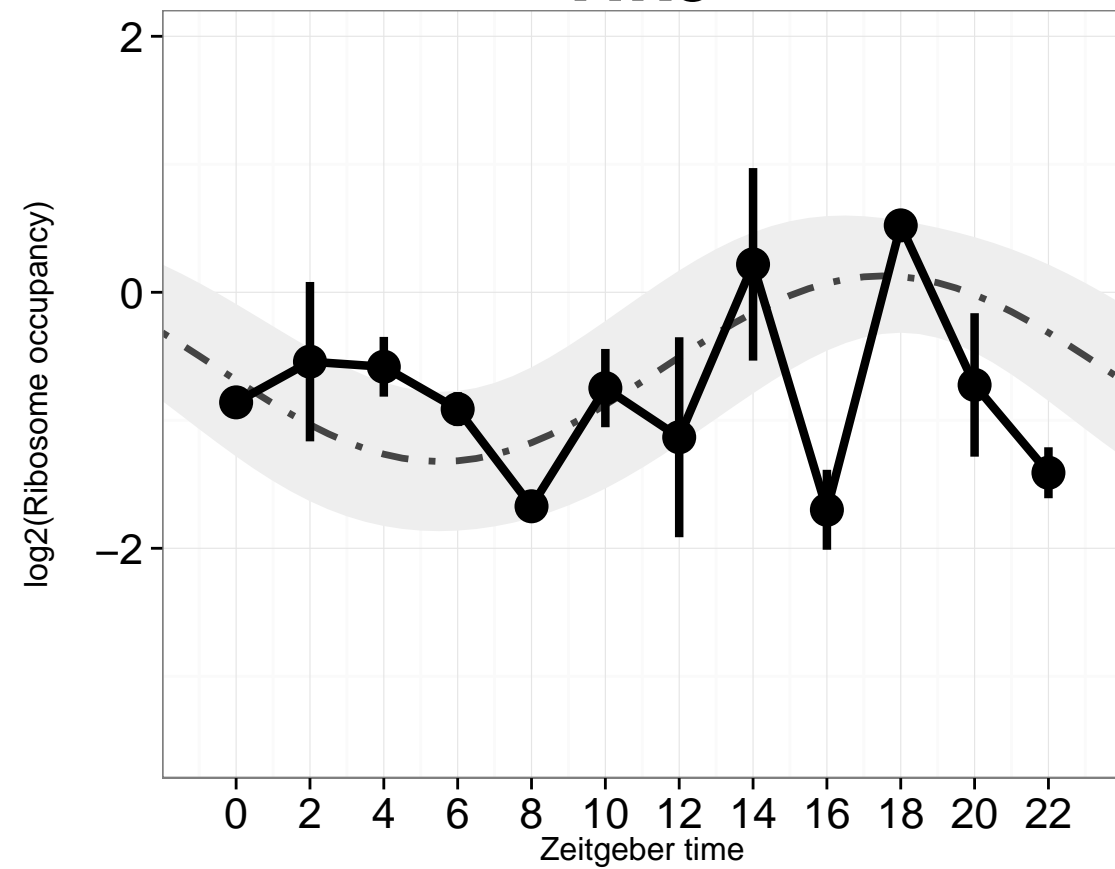

Supplement: SuppDataset_1.zip [file Hk3_set_A.pdf › Supplemental Dataset 1/A-mRNA_nonrhyth_translation_nonrhyth/Hk3_set_A.pdf]

# Hlcs

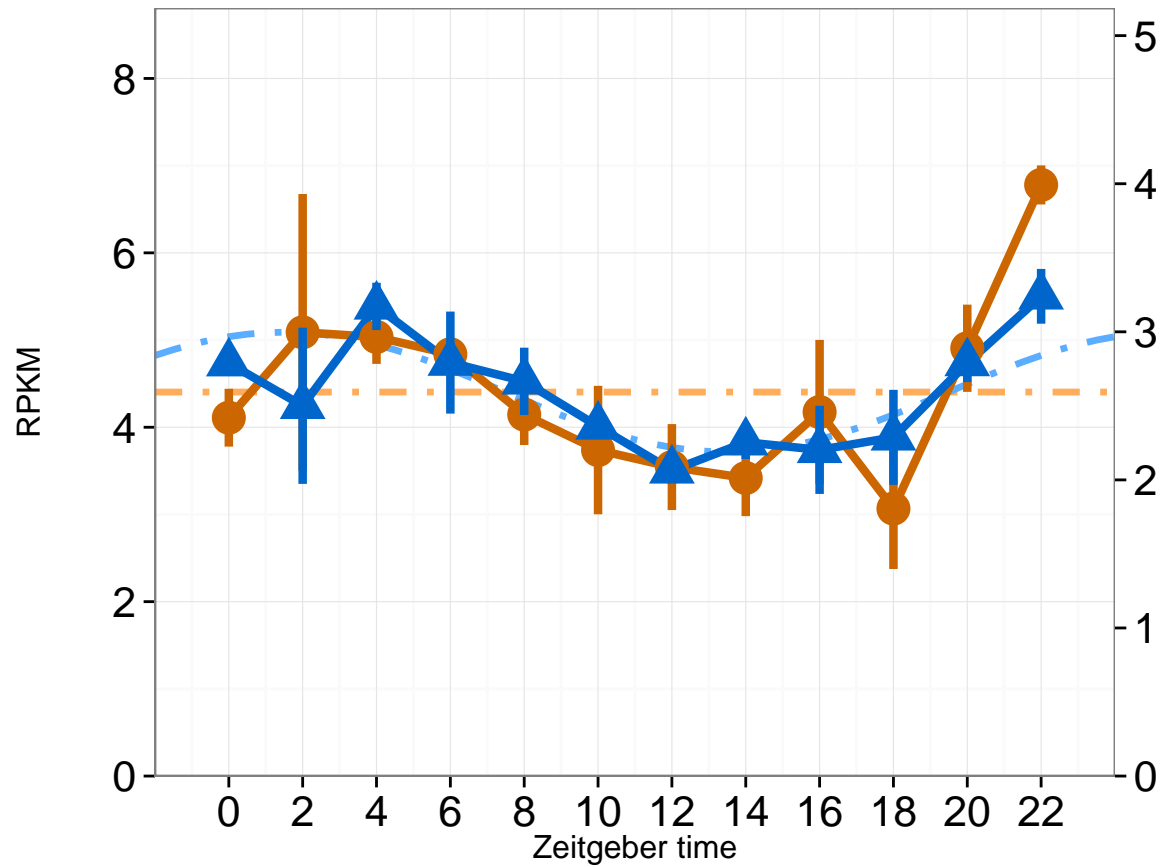

# Hlcs

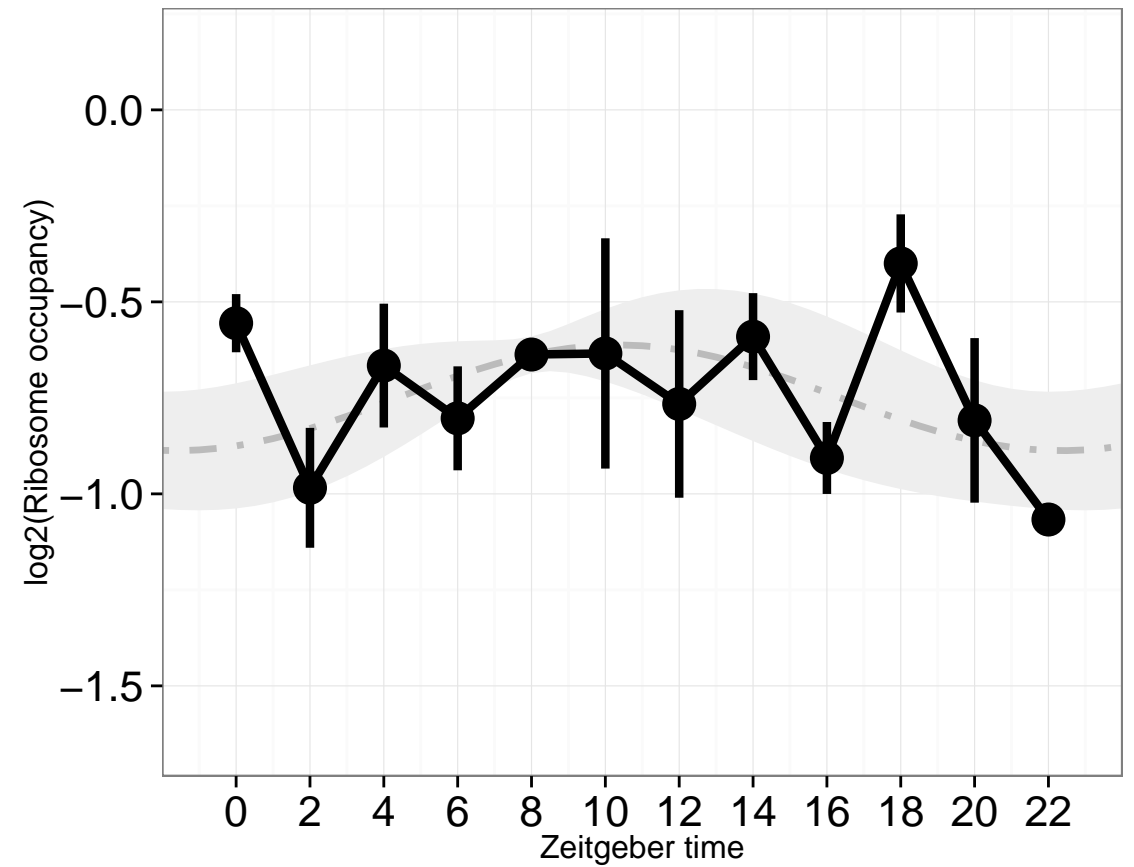

Supplement: SuppDataset_1.zip [file Hlcs_set_A.pdf › Supplemental Dataset 1/A-mRNA_nonrhyth_translation_nonrhyth/Hlcs_set_A.pdf]

## Hltf

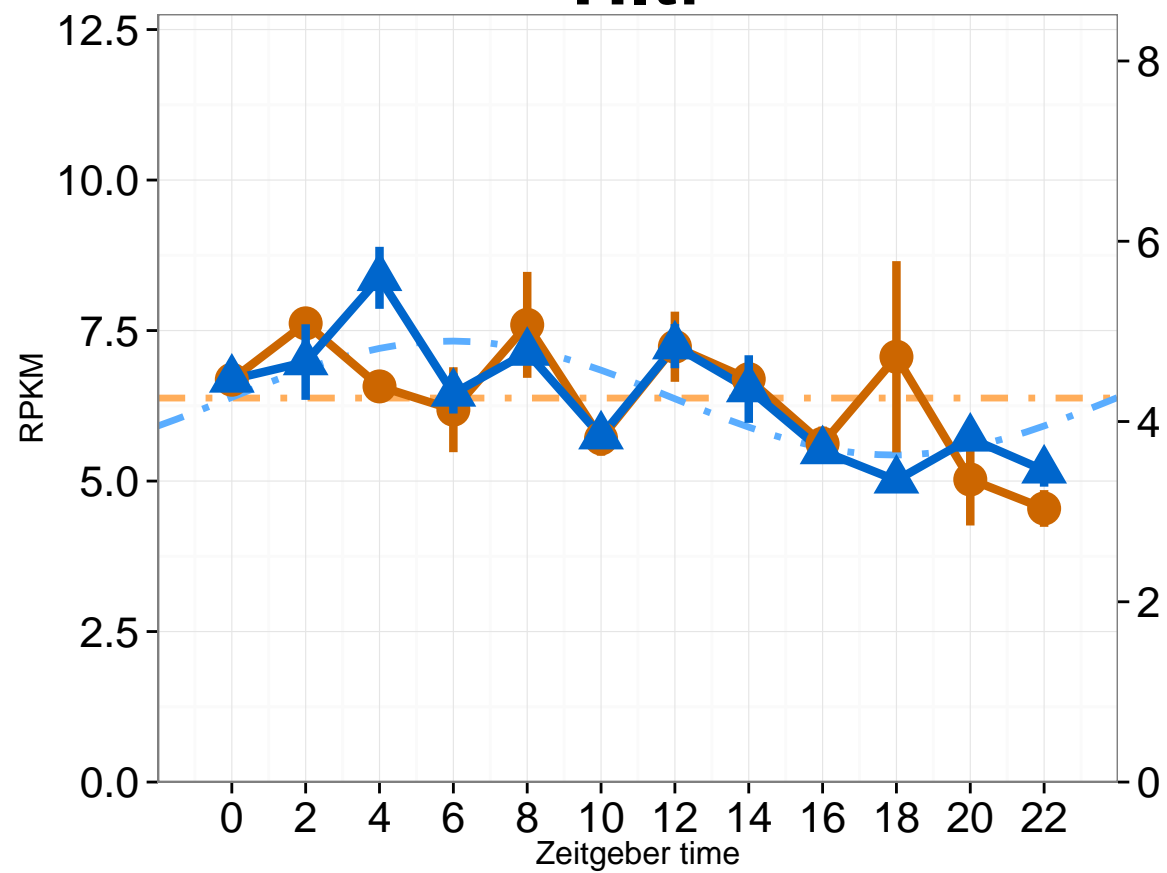

## Hltf

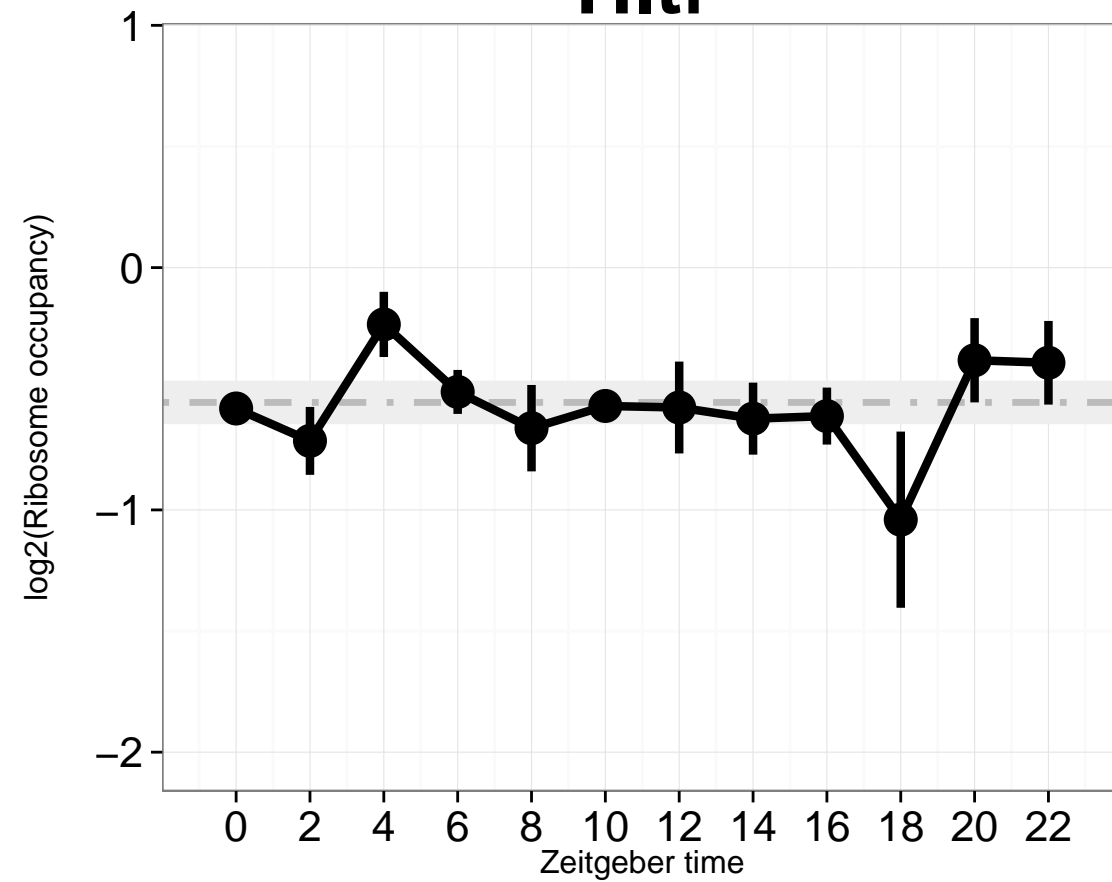

Supplement: SuppDataset_1.zip [file Hltf_set_A.pdf › Supplemental Dataset 1/A-mRNA_nonrhyth_translation_nonrhyth/Hltf_set_A.pdf]

# Hlx

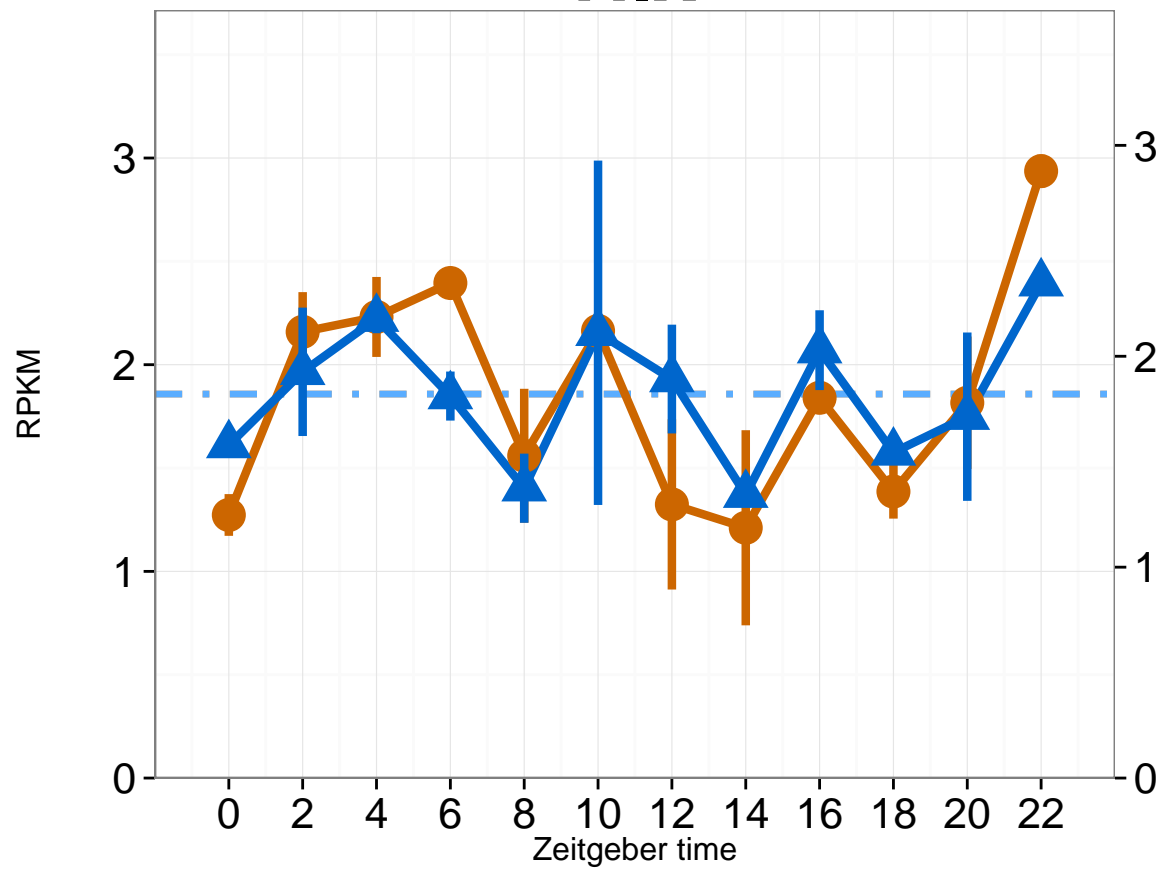

# Hlx

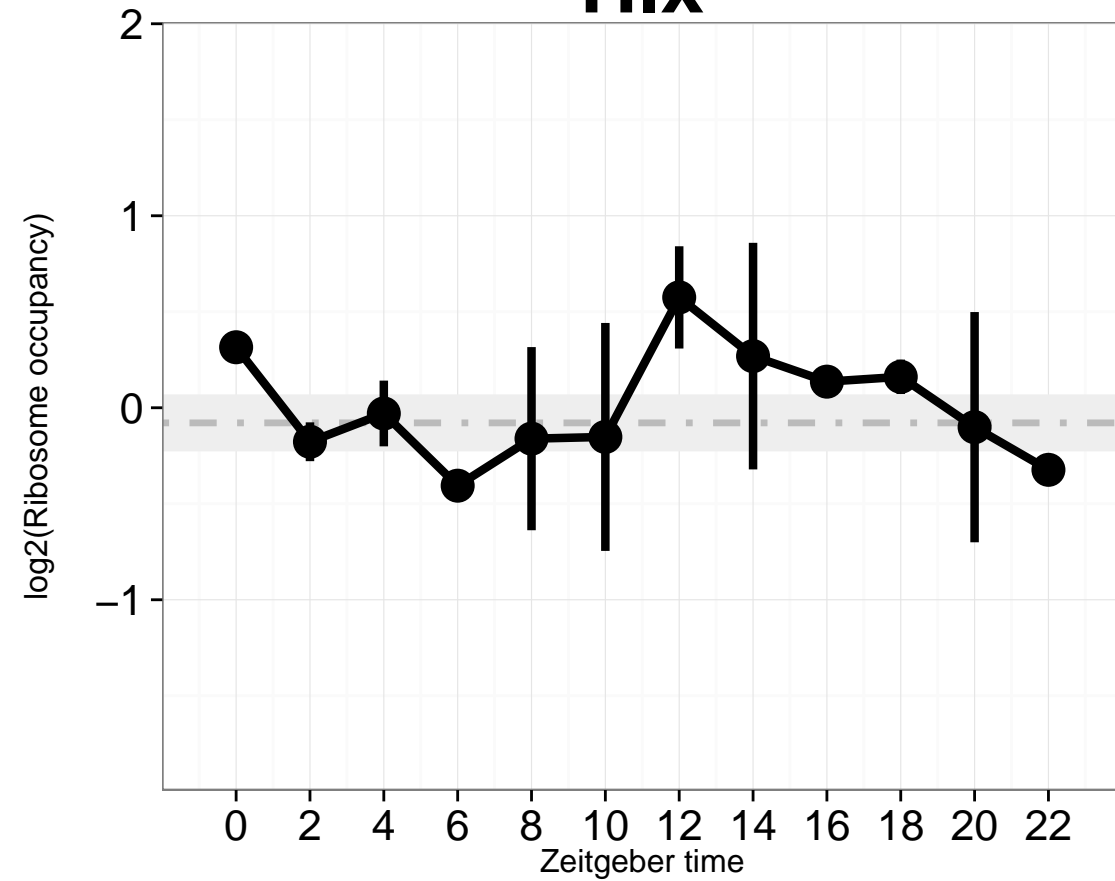

Supplement: SuppDataset_1.zip [file Hlx_set_A.pdf › Supplemental Dataset 1/A-mRNA_nonrhyth_translation_nonrhyth/Hlx_set_A.pdf]

# Hmbox1

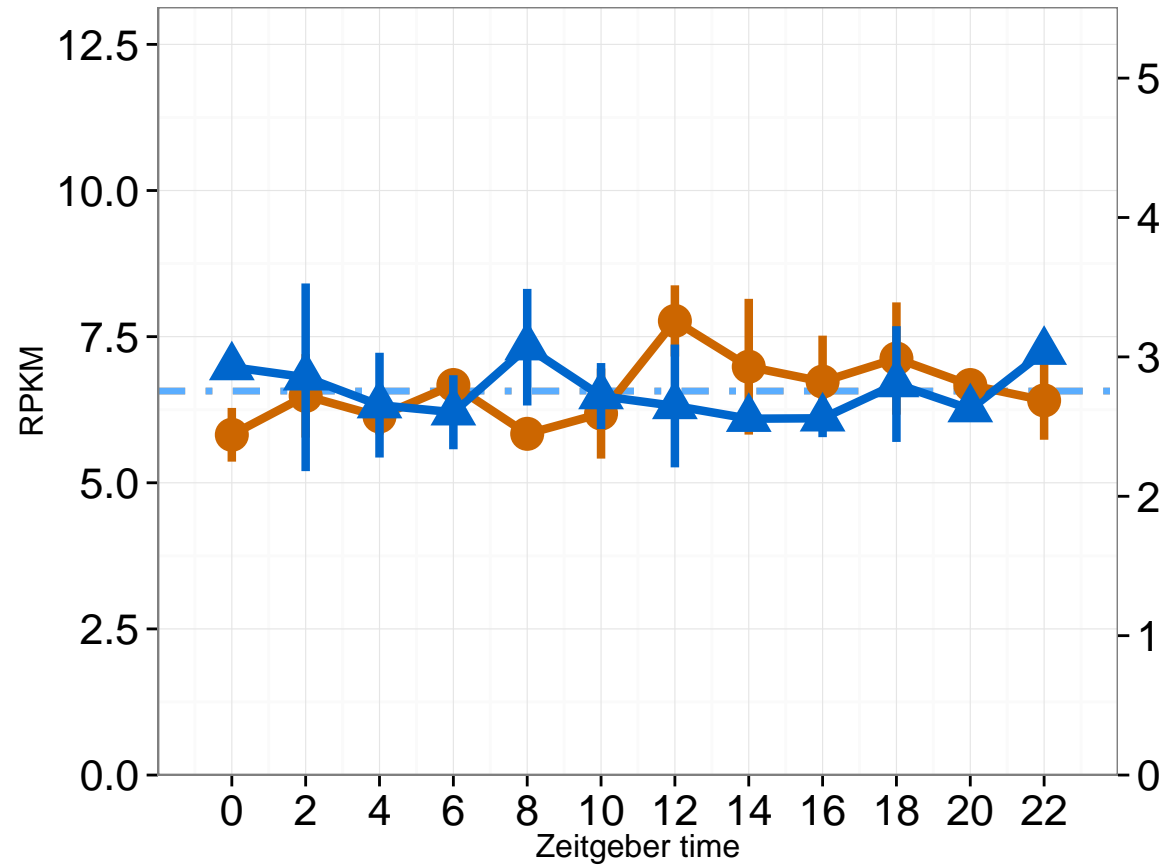

# Hmbox1

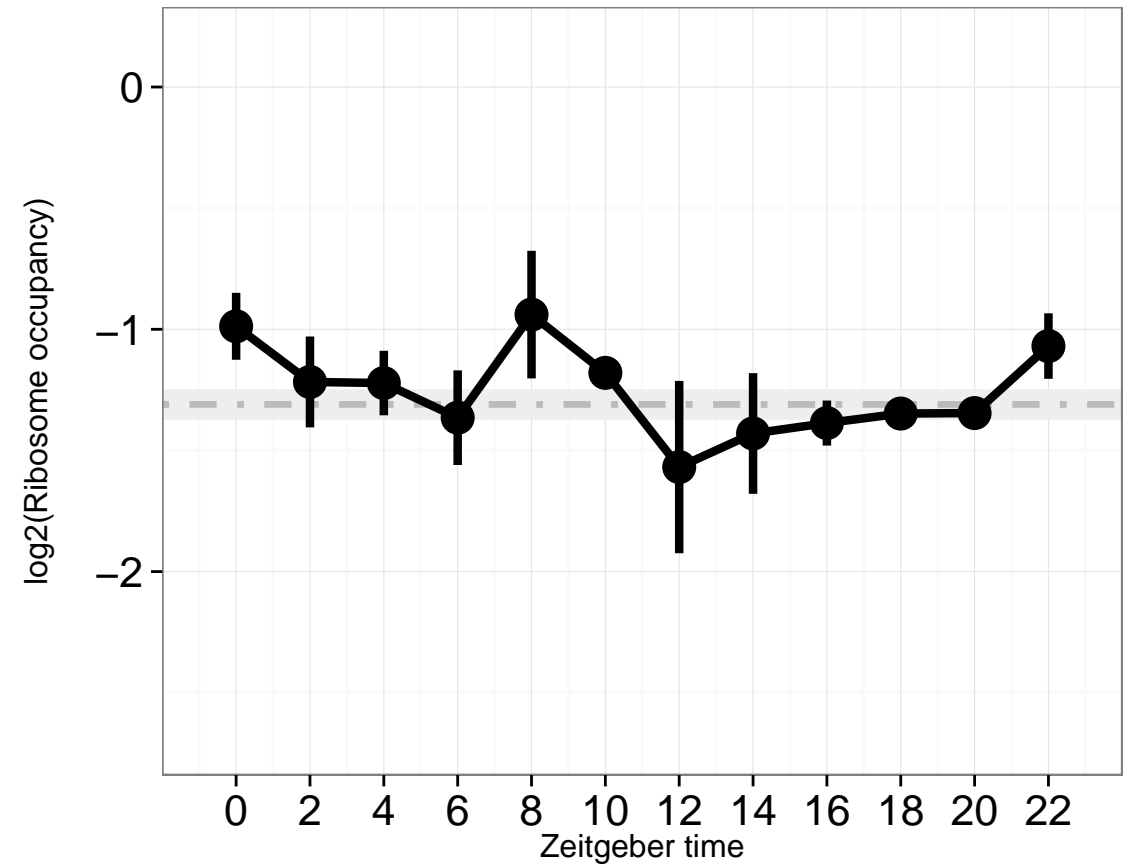

Supplement: SuppDataset_1.zip [file Hmbox1_set_A.pdf › Supplemental Dataset 1/A-mRNA_nonrhyth_translation_nonrhyth/Hmbox1_set_A.pdf]

## Hmbs

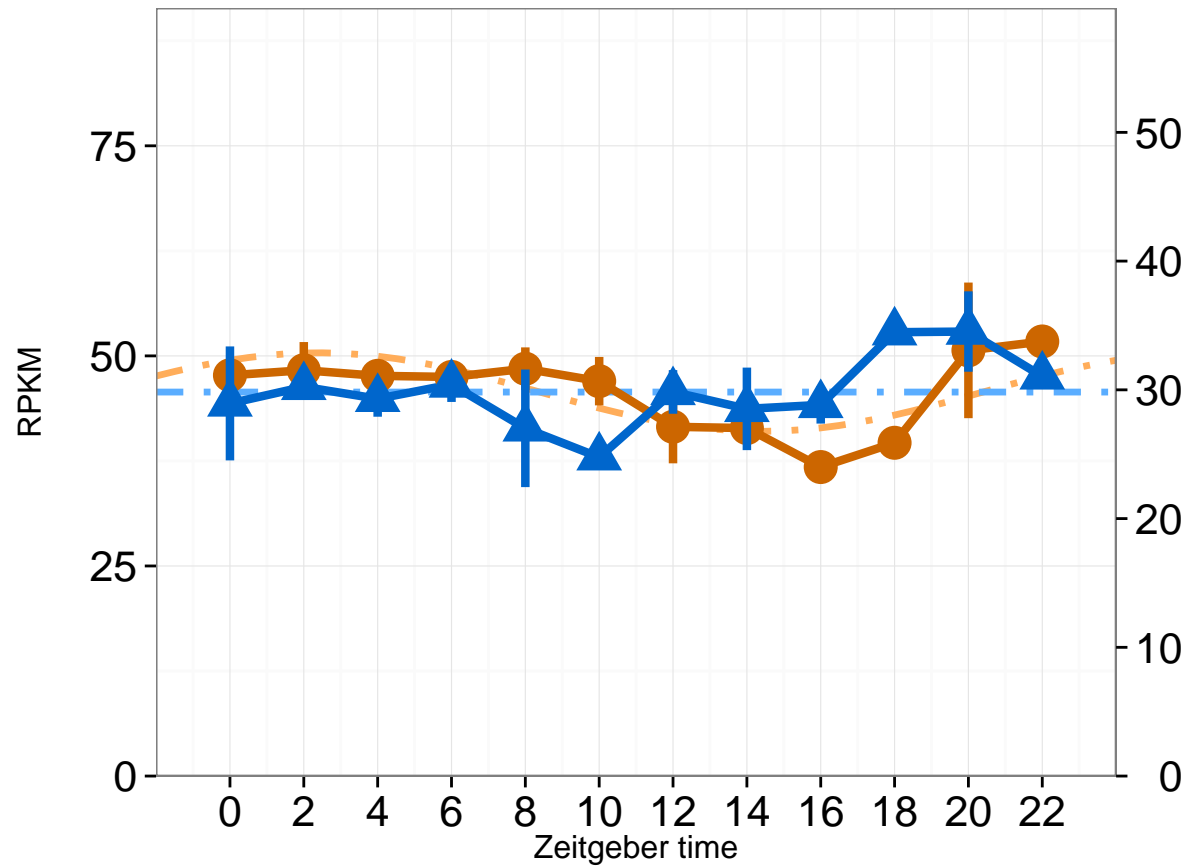

## Hmbs

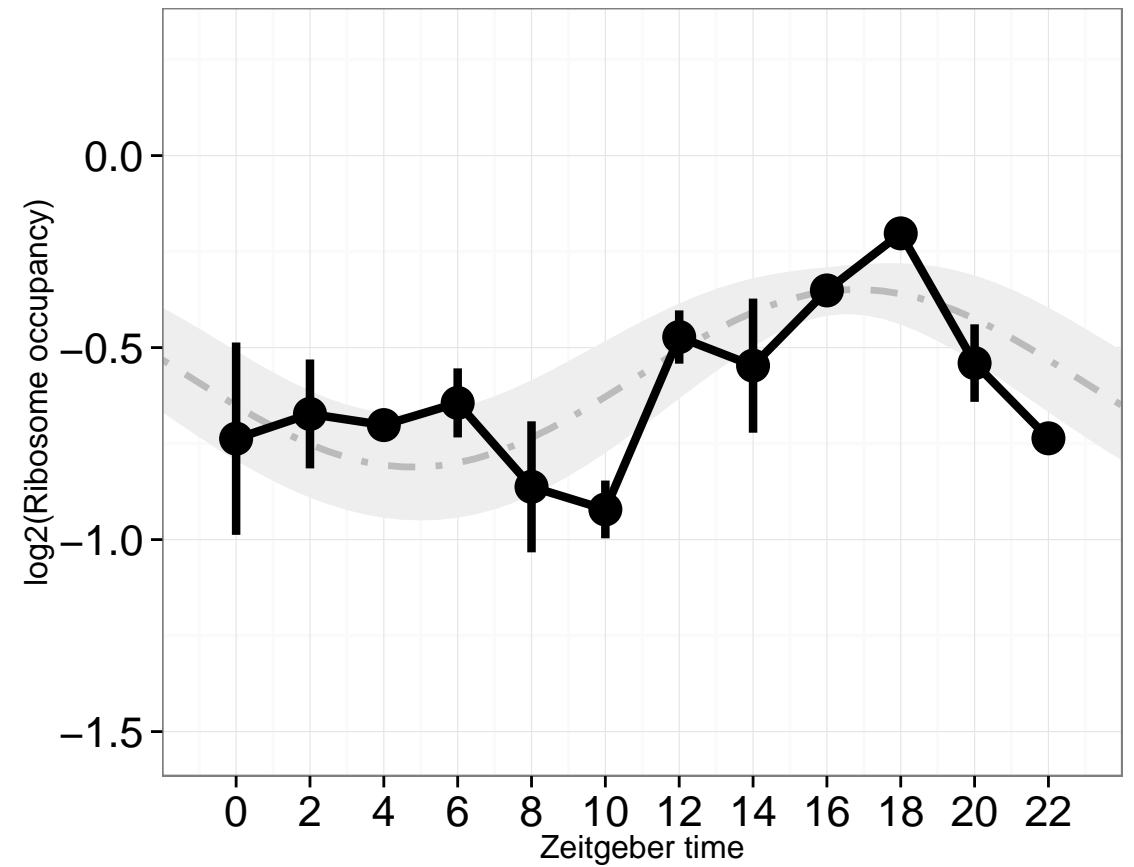

Supplement: SuppDataset_1.zip [file Hmbs_set_A.pdf › Supplemental Dataset 1/A-mRNA_nonrhyth_translation_nonrhyth/Hmbs_set_A.pdf]

## Hmces

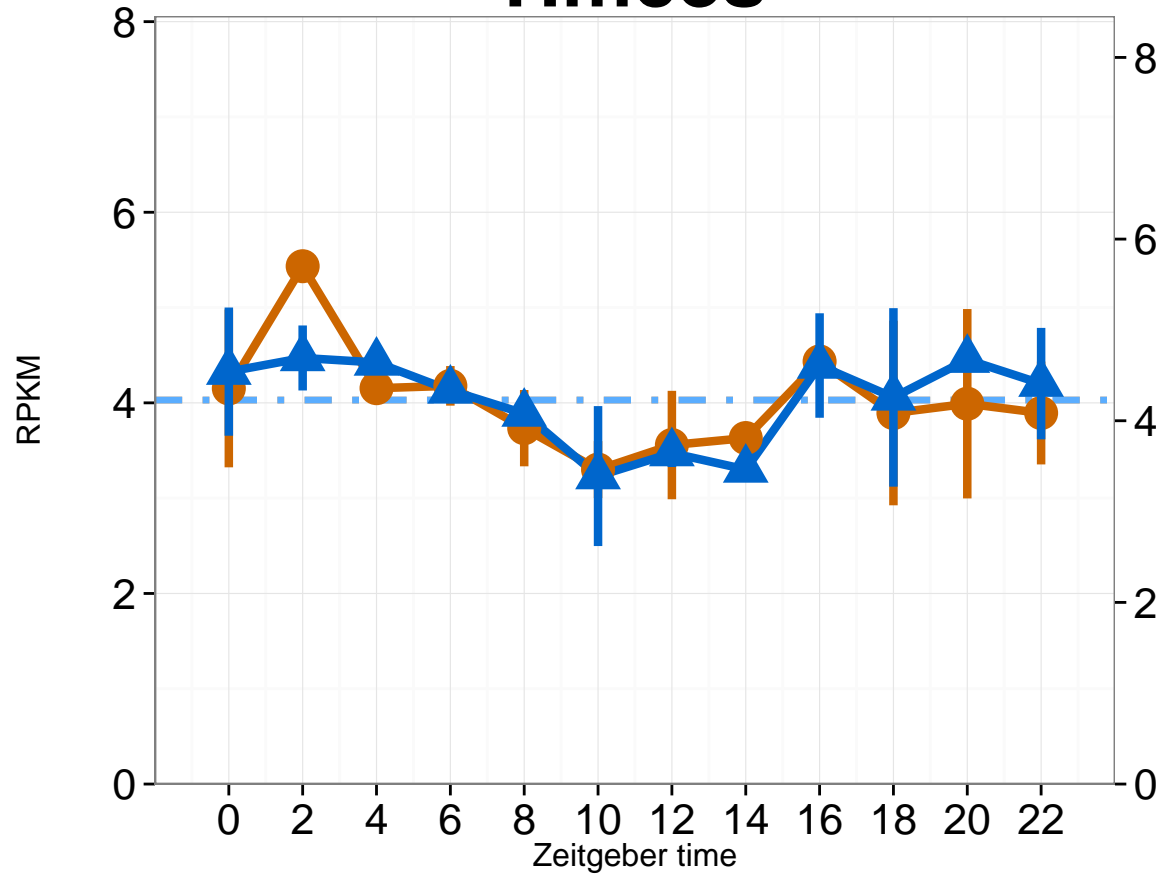

## Hmces

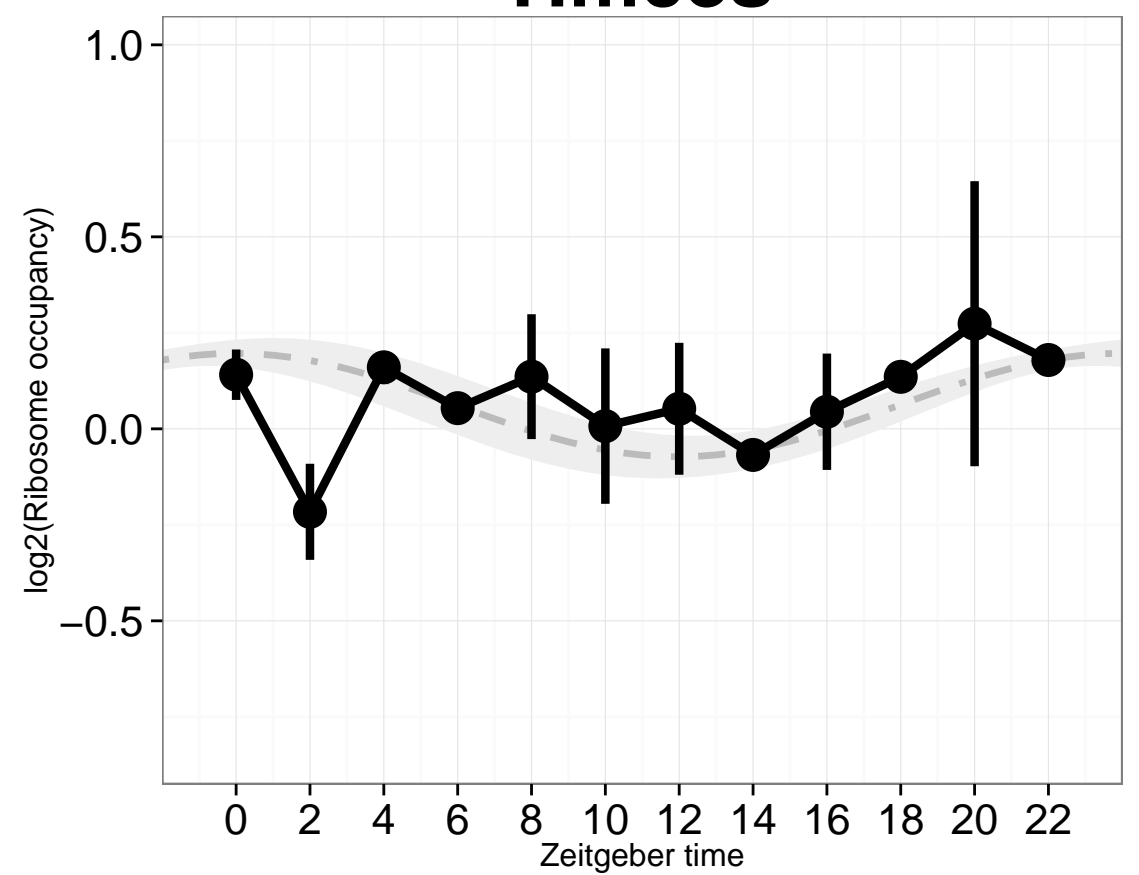

Supplement: SuppDataset_1.zip [file Hmces_set_A.pdf › Supplemental Dataset 1/A-mRNA_nonrhyth_translation_nonrhyth/Hmces_set_A.pdf]

# Hmcn1

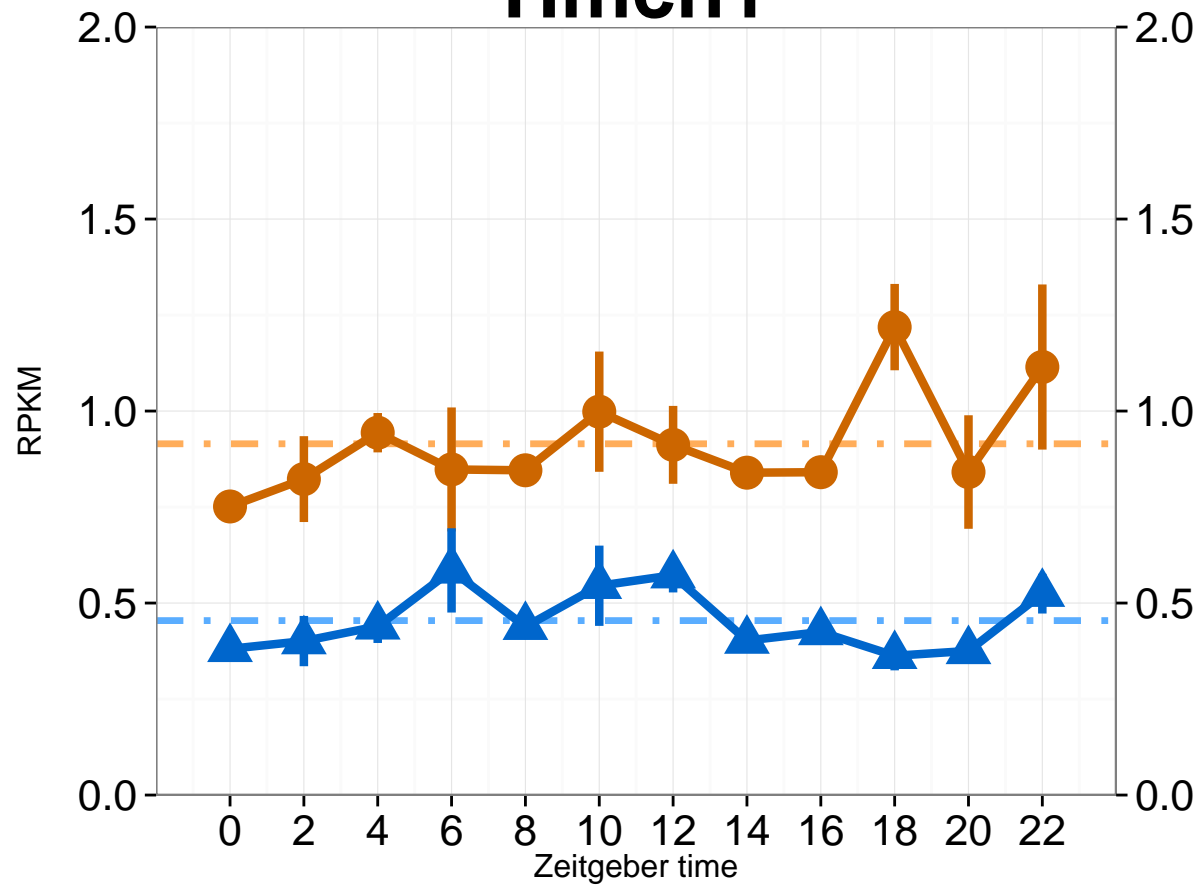

# Hmcn1

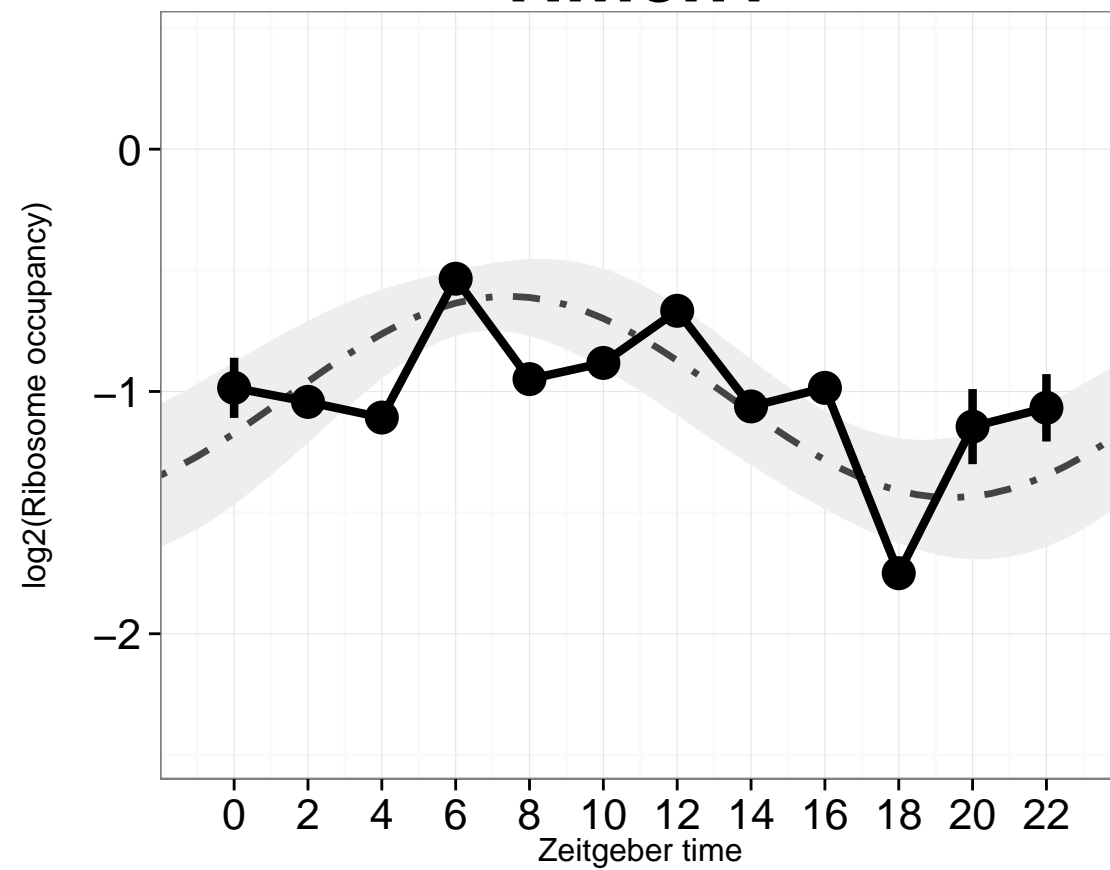

Supplement: SuppDataset_1.zip [file Hmcn1_set_A.pdf › Supplemental Dataset 1/A-mRNA_nonrhyth_translation_nonrhyth/Hmcn1_set_A.pdf]

# Hmg20a

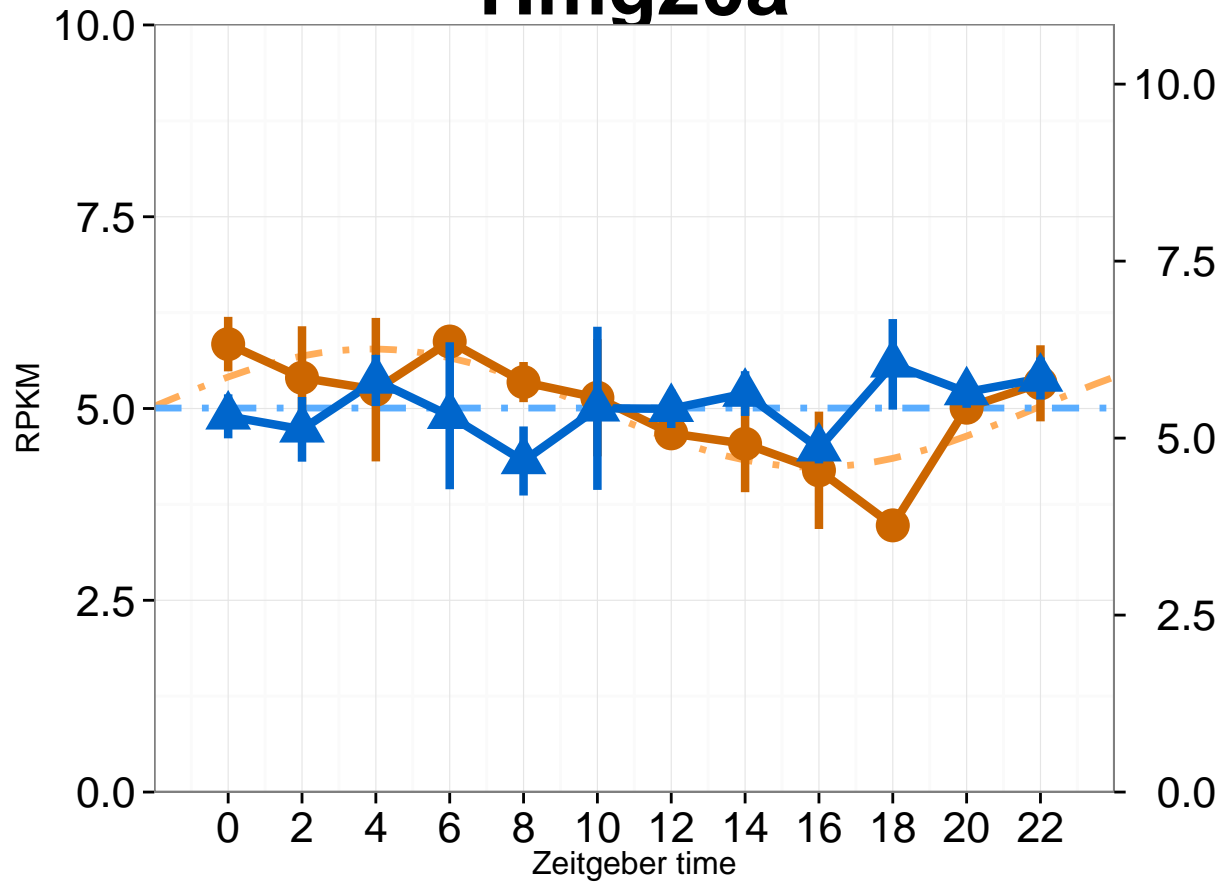

# Hmg20a

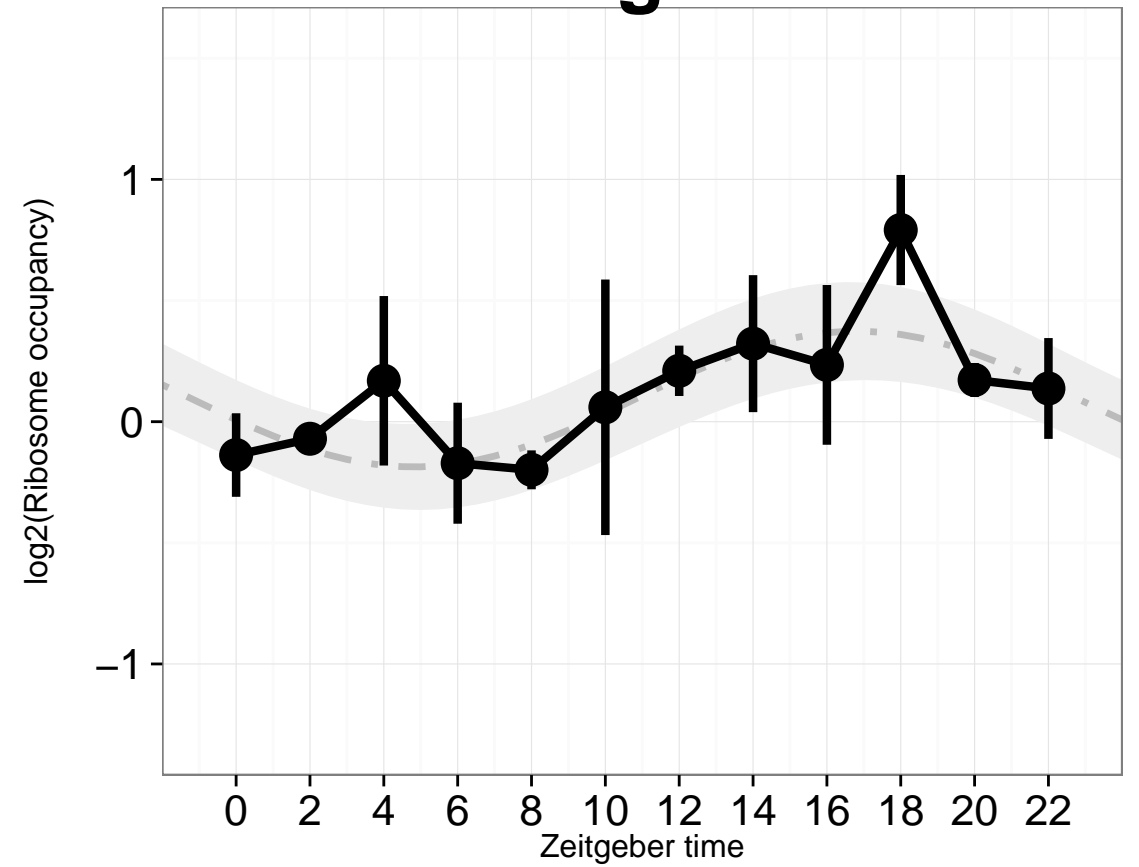

Supplement: SuppDataset_1.zip [file Hmg20a_set_A.pdf › Supplemental Dataset 1/A-mRNA_nonrhyth_translation_nonrhyth/Hmg20a_set_A.pdf]

# Hmg20b

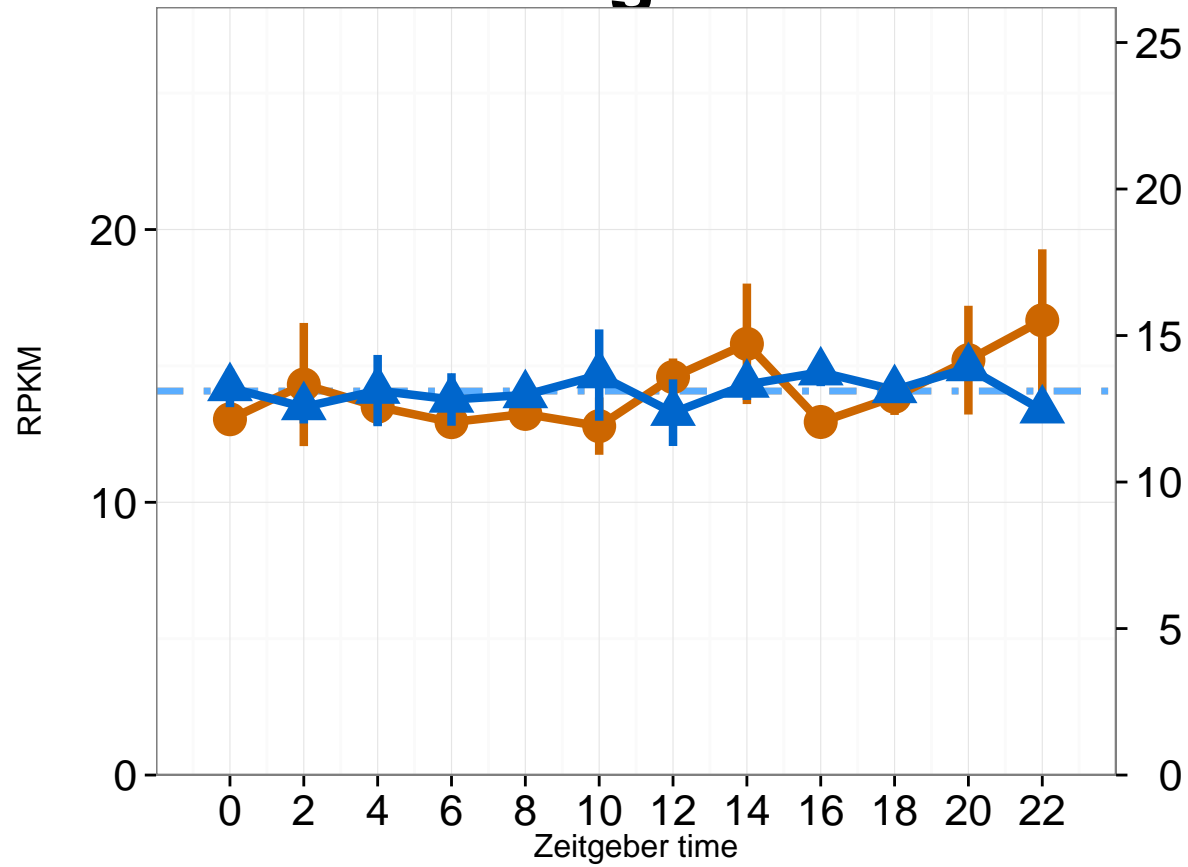

# Hmg20b

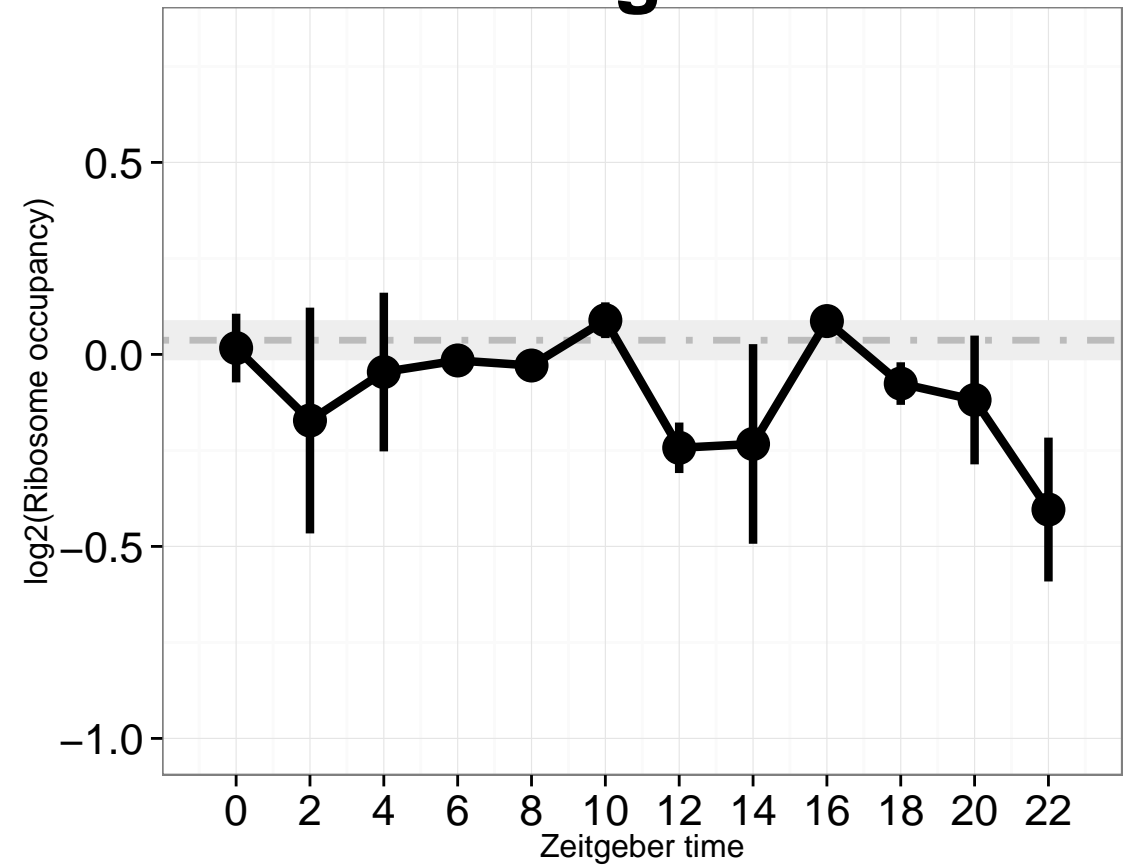

Supplement: SuppDataset_1.zip [file Hmg20b_set_A.pdf › Supplemental Dataset 1/A-mRNA_nonrhyth_translation_nonrhyth/Hmg20b_set_A.pdf]

# Hmgcl

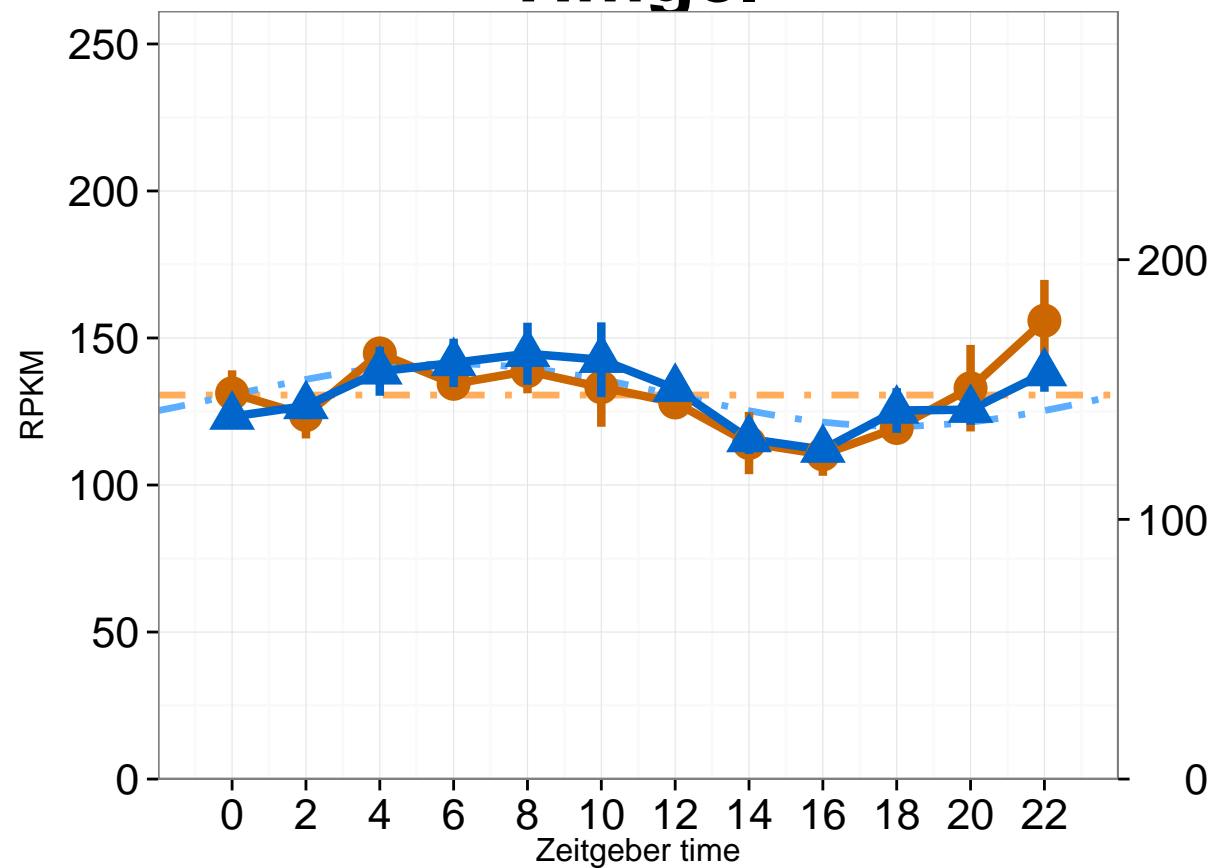

# Hmgcl

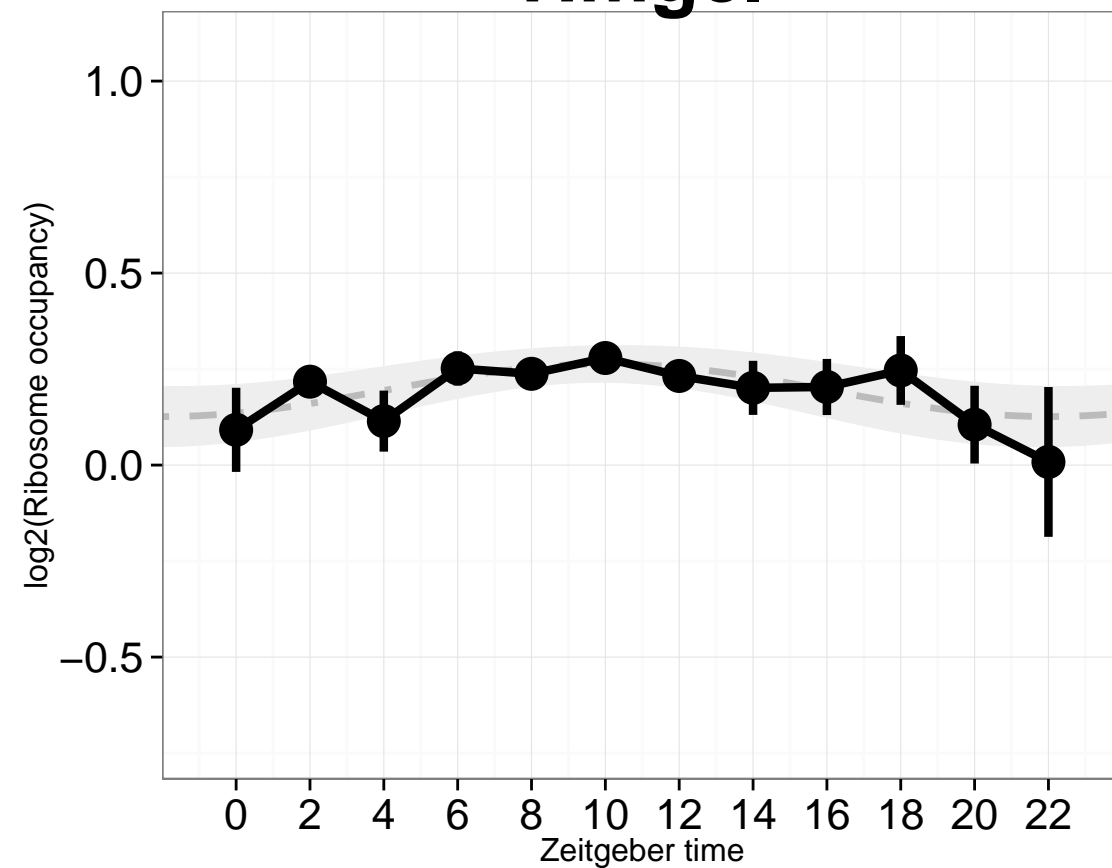

Supplement: SuppDataset_1.zip [file Hmgcl_set_A.pdf › Supplemental Dataset 1/A-mRNA_nonrhyth_translation_nonrhyth/Hmgcl_set_A.pdf]

## Hmgcs2

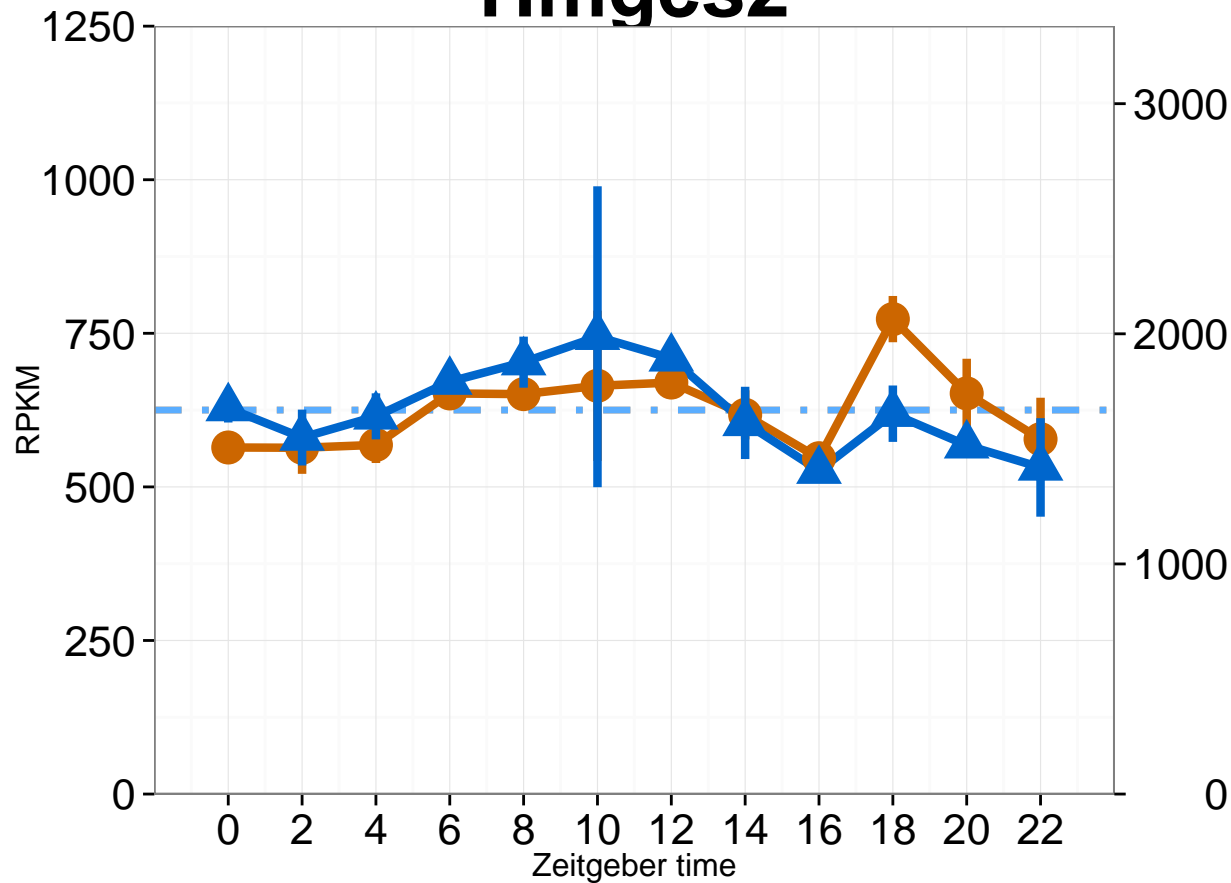

## Hmgcs2

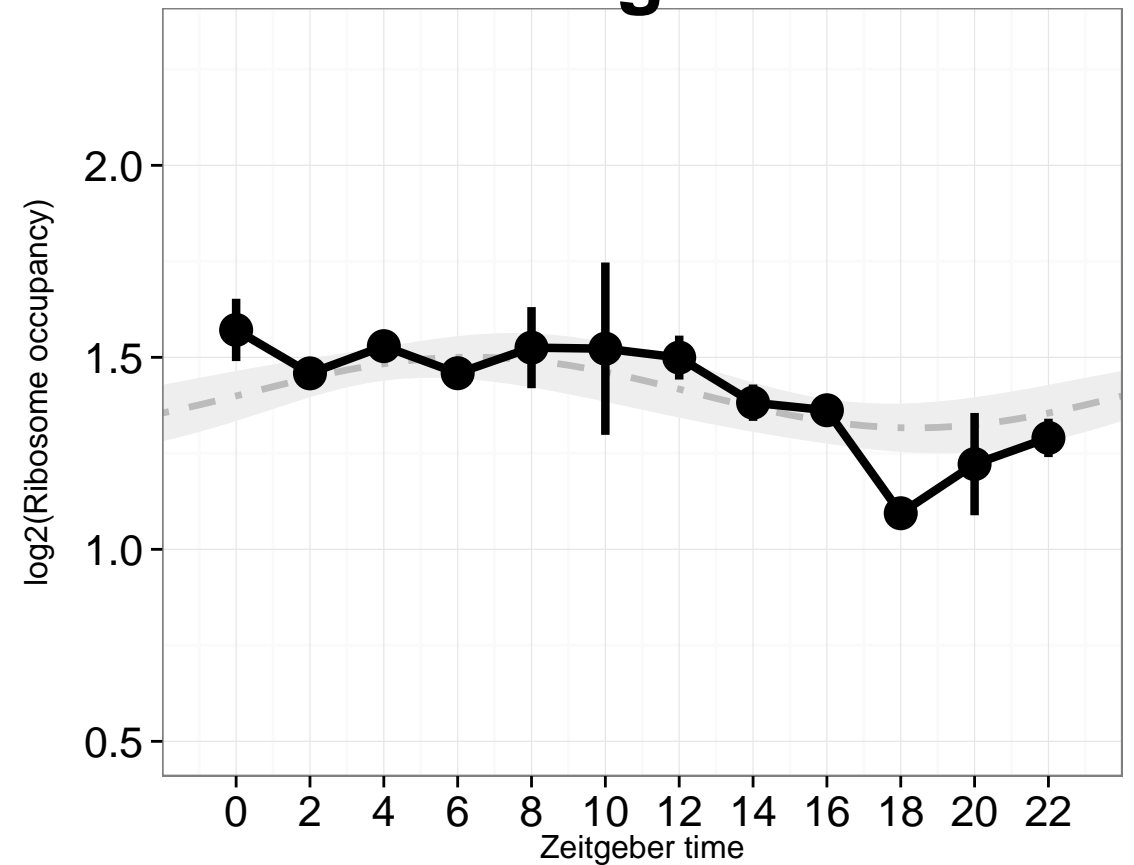

Supplement: SuppDataset_1.zip [file Hmgcs2_set_A.pdf › Supplemental Dataset 1/A-mRNA_nonrhyth_translation_nonrhyth/Hmgcs2_set_A.pdf]

# Hmgn1

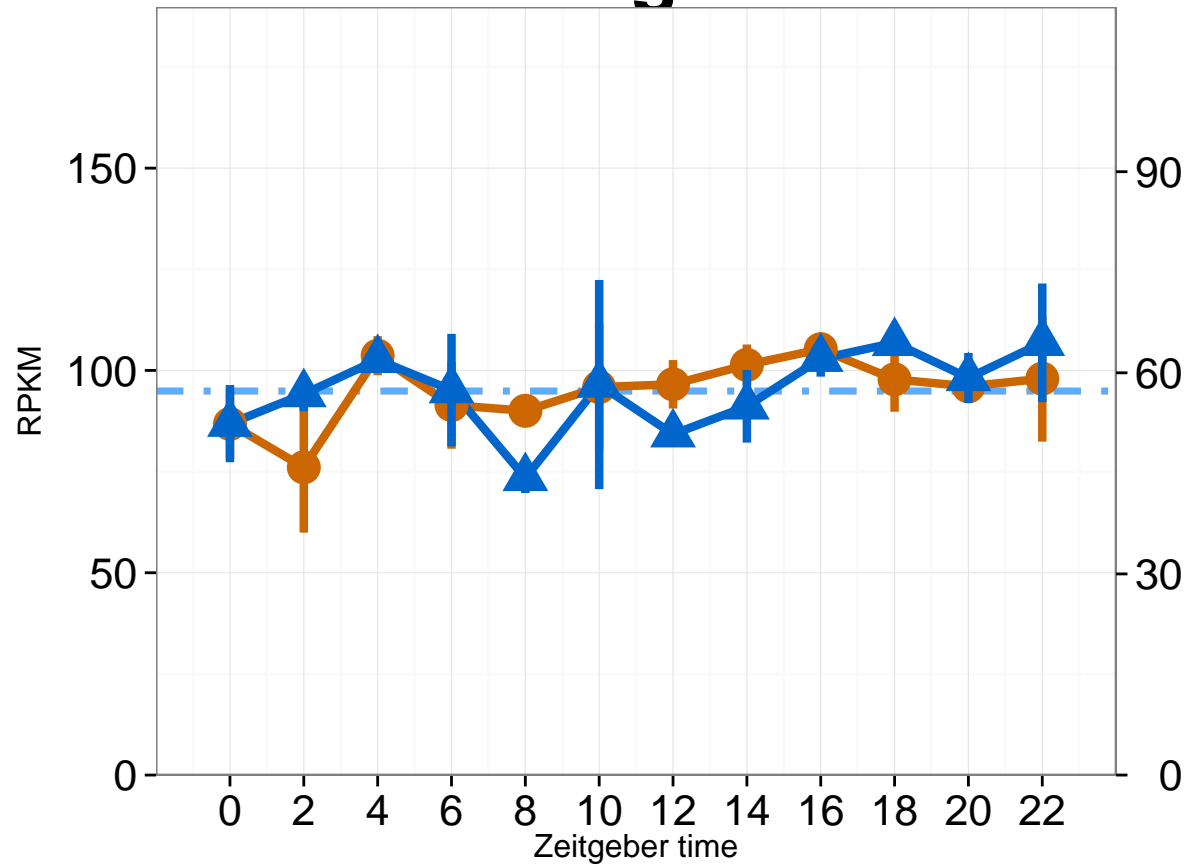

# Hmgn1

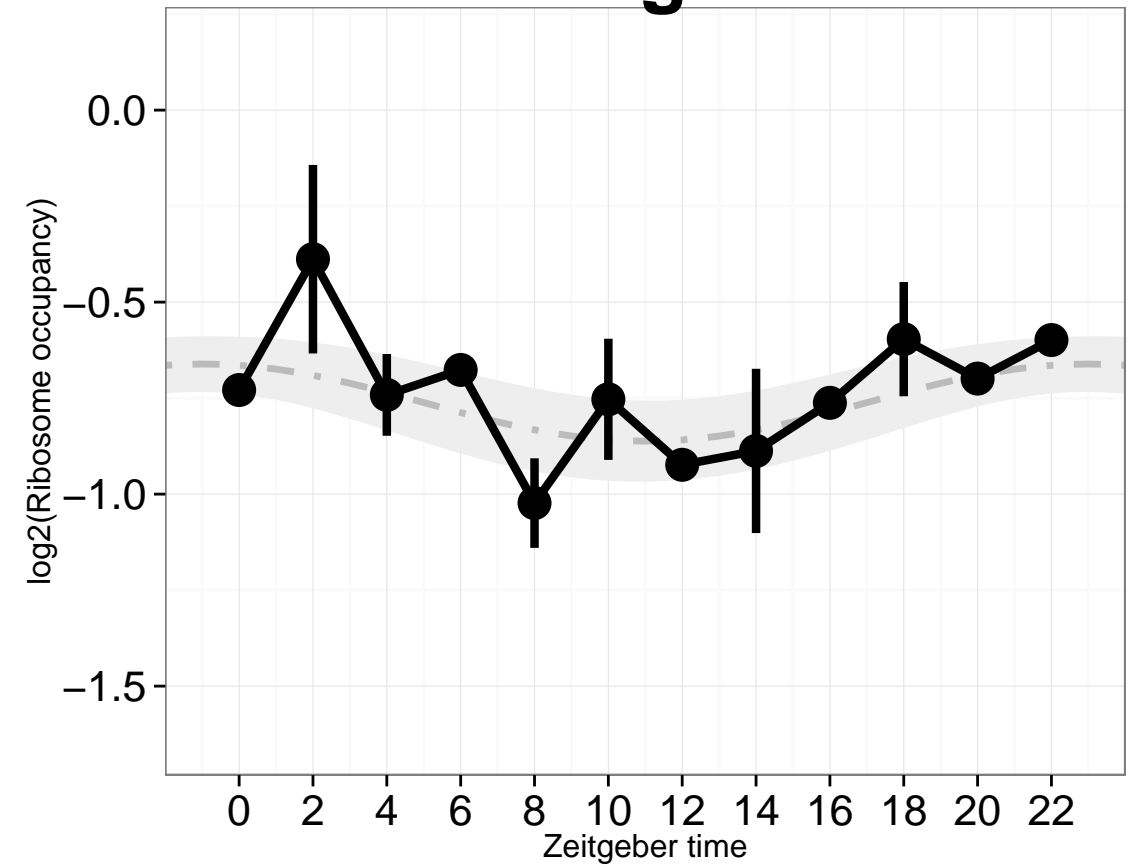

Supplement: SuppDataset_1.zip [file Hmgn1_set_A.pdf › Supplemental Dataset 1/A-mRNA_nonrhyth_translation_nonrhyth/Hmgn1_set_A.pdf]

## Hmgn2

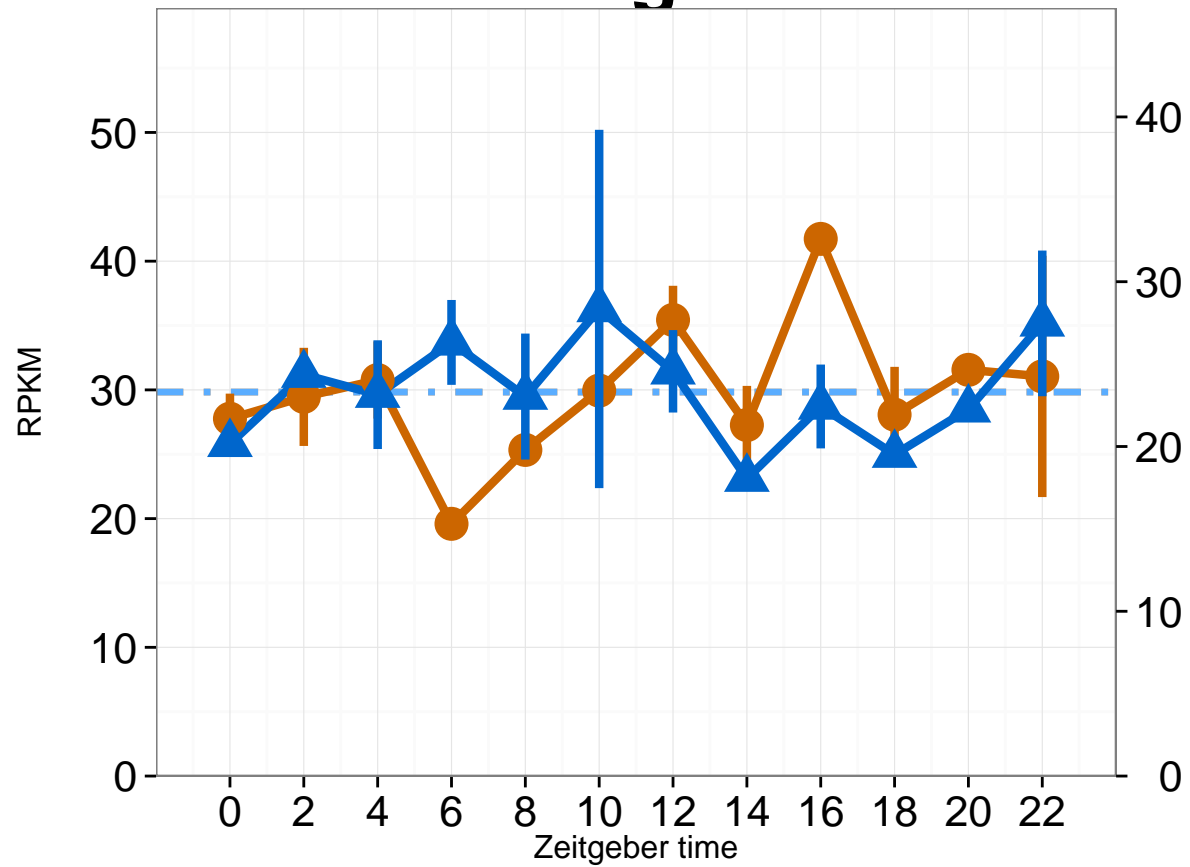

## Hmgn2

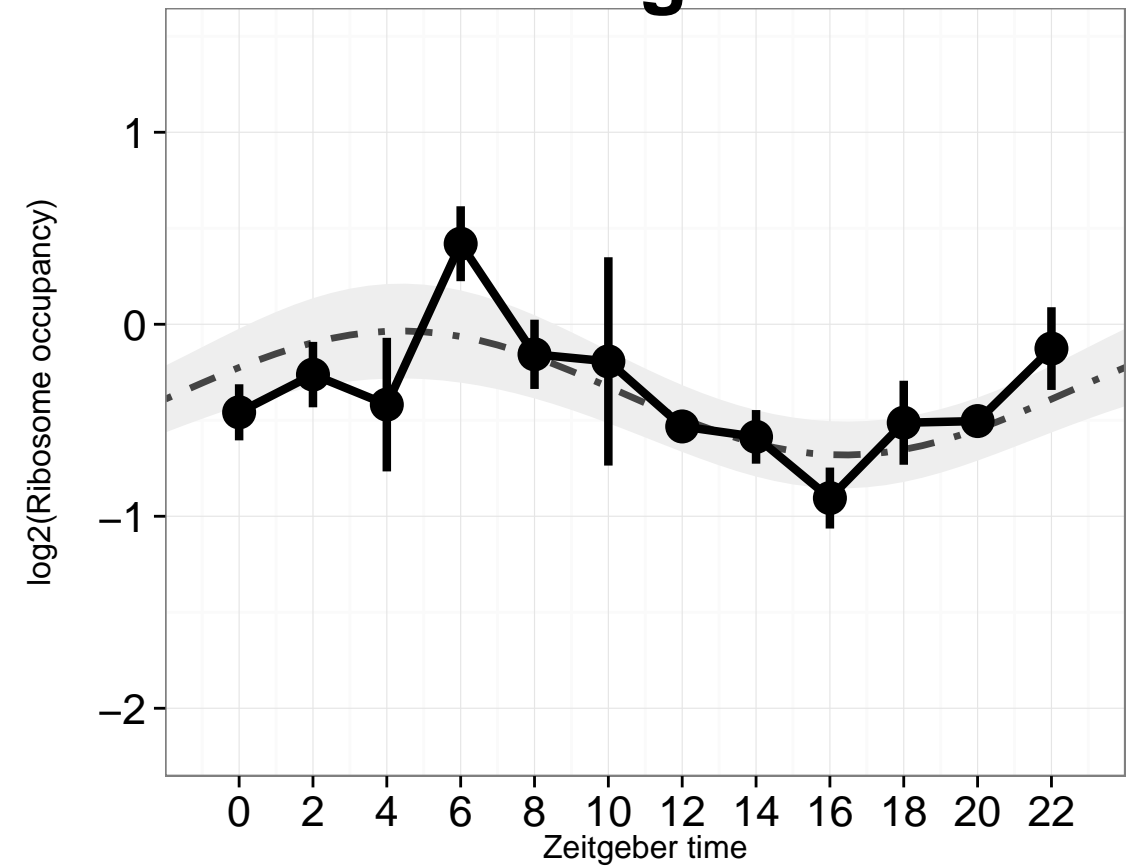

Supplement: SuppDataset_1.zip [file Hmgn2_set_A.pdf › Supplemental Dataset 1/A-mRNA_nonrhyth_translation_nonrhyth/Hmgn2_set_A.pdf]

# Hmgxb3

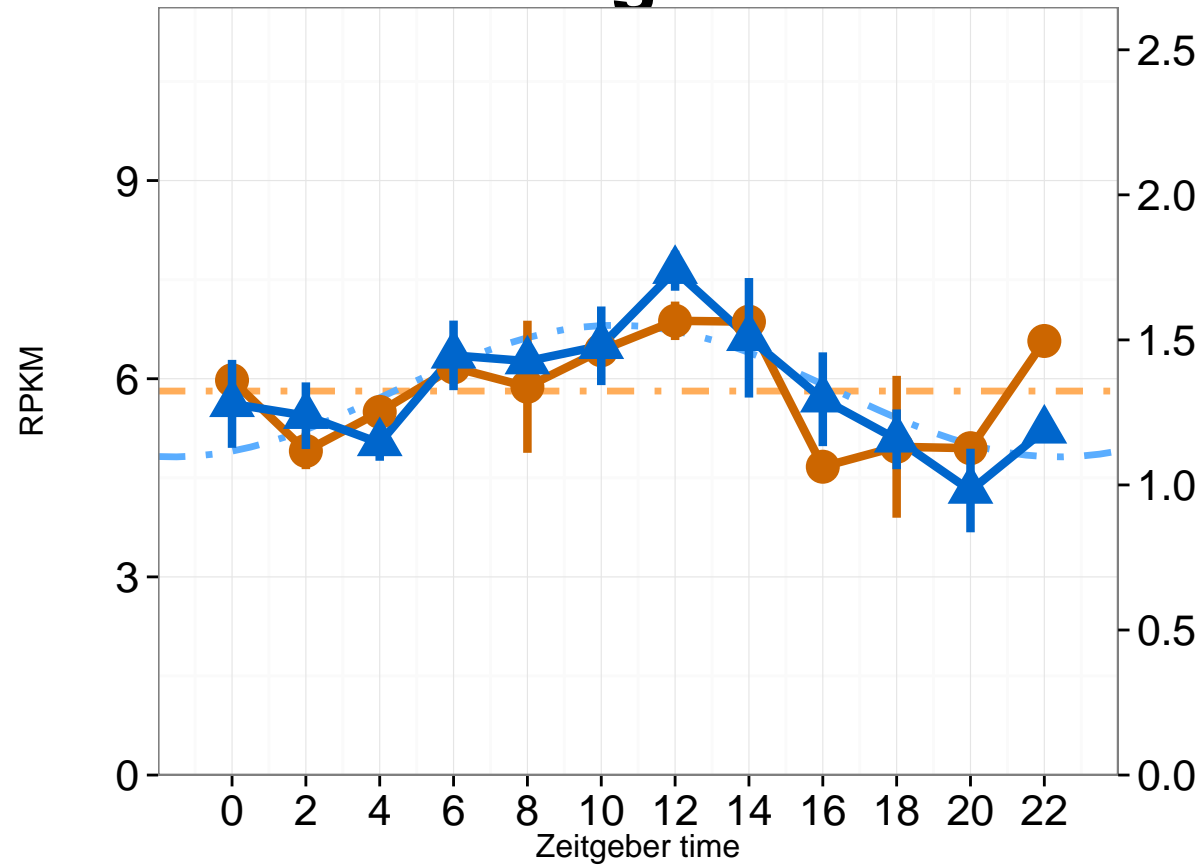

# Hmgxb3

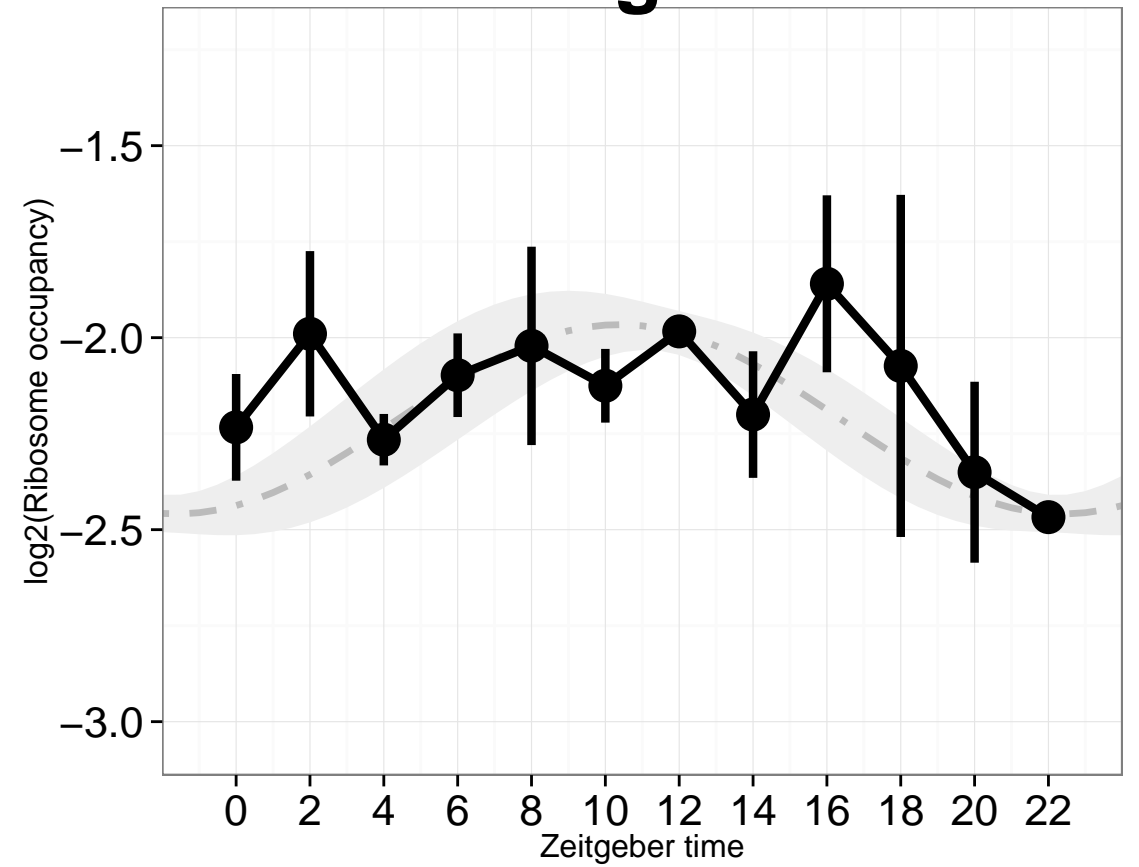

Supplement: SuppDataset_1.zip [file Hmgxb3_set_A.pdf › Supplemental Dataset 1/A-mRNA_nonrhyth_translation_nonrhyth/Hmgxb3_set_A.pdf]

# Hmha1

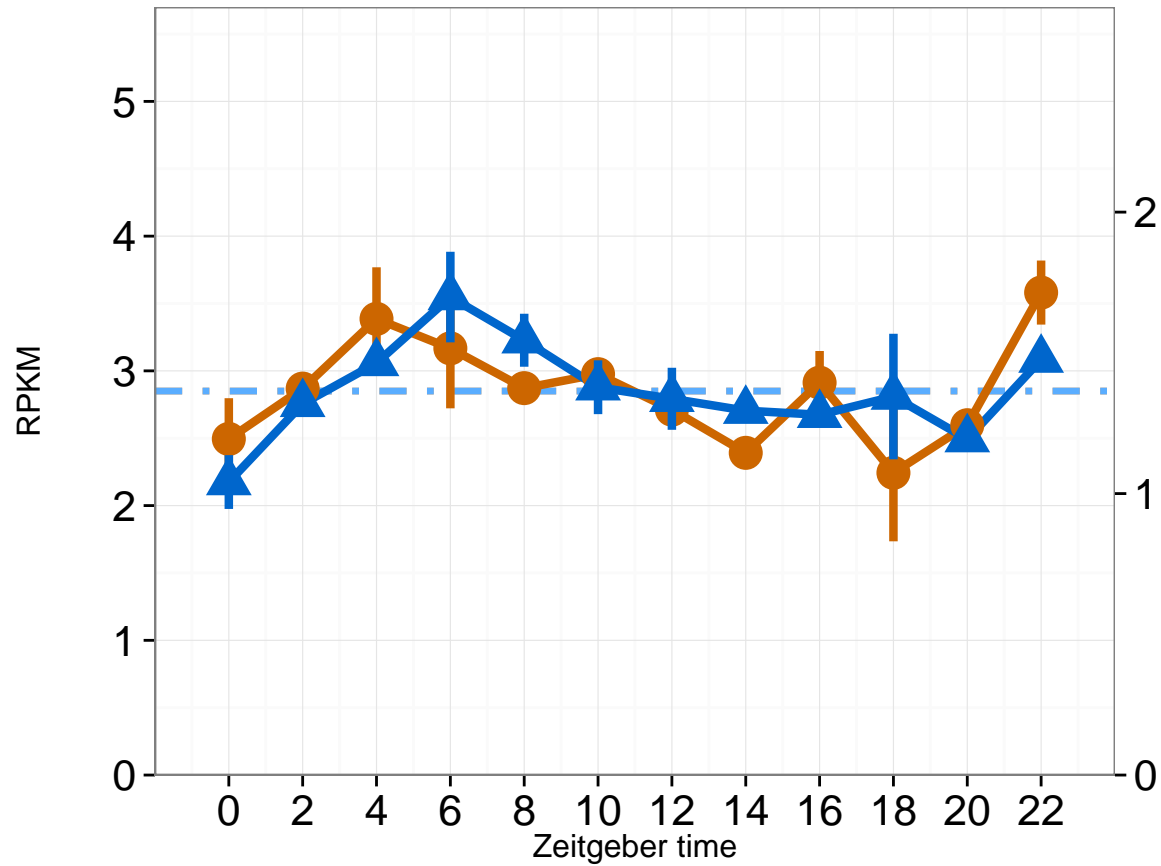

# Hmha1

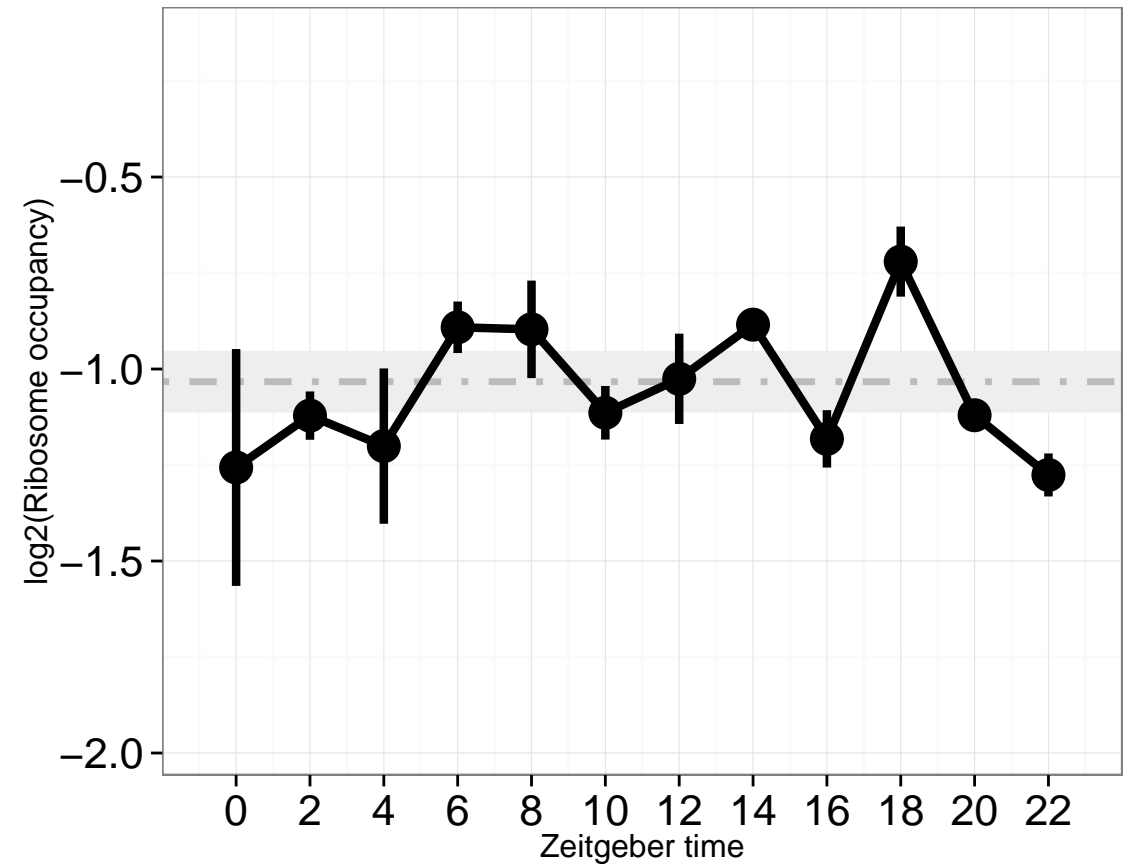

Supplement: SuppDataset_1.zip [file Hmha1_set_A.pdf › Supplemental Dataset 1/A-mRNA_nonrhyth_translation_nonrhyth/Hmha1_set_A.pdf]

# Hmmr

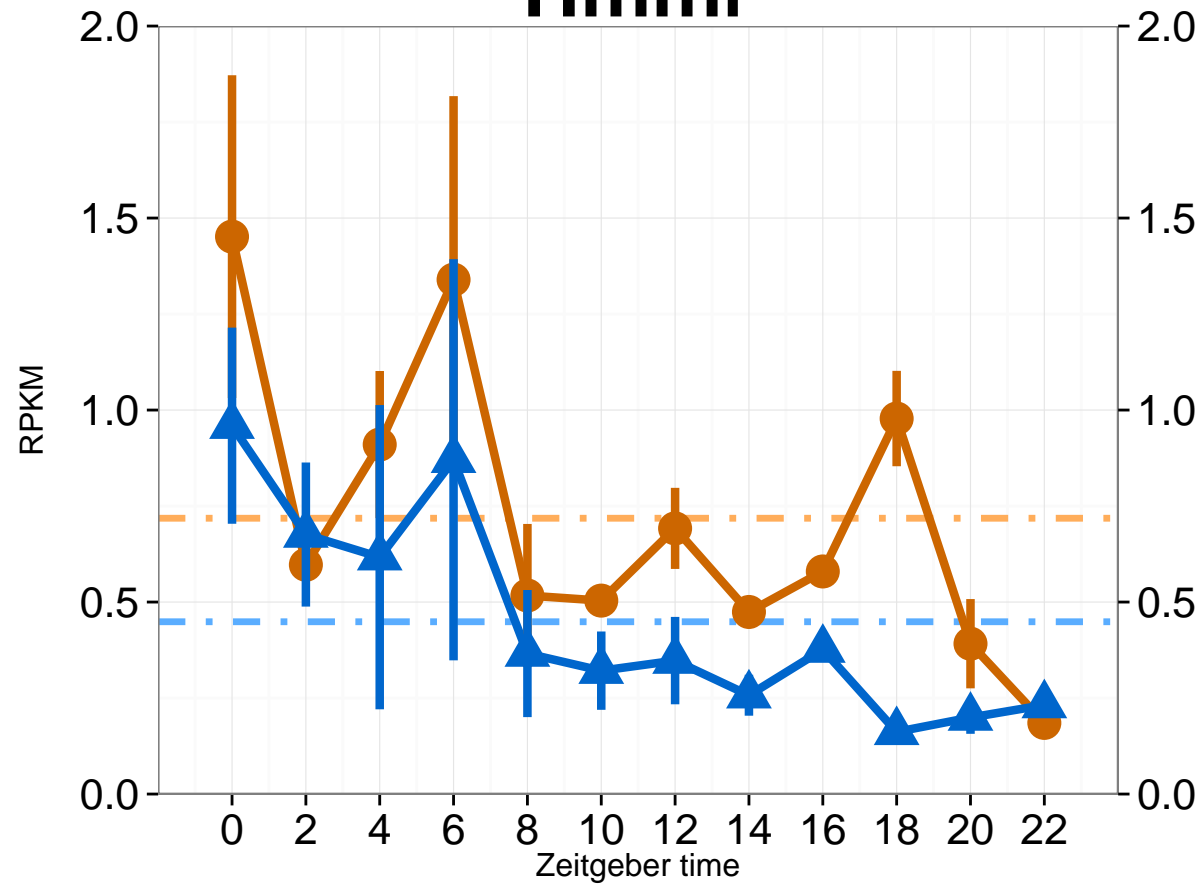

# Hmmr

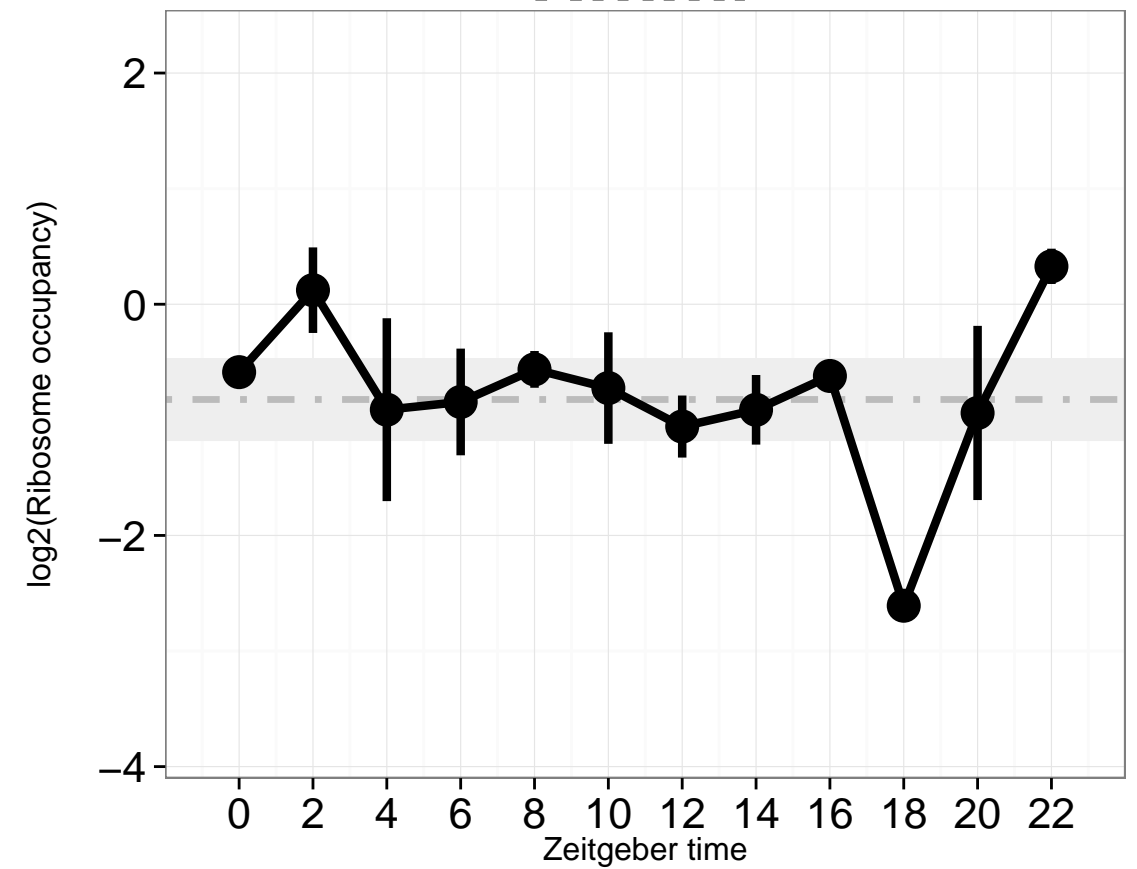

Supplement: SuppDataset_1.zip [file Hmmr_set_A.pdf › Supplemental Dataset 1/A-mRNA_nonrhyth_translation_nonrhyth/Hmmr_set_A.pdf]

## Hmox1

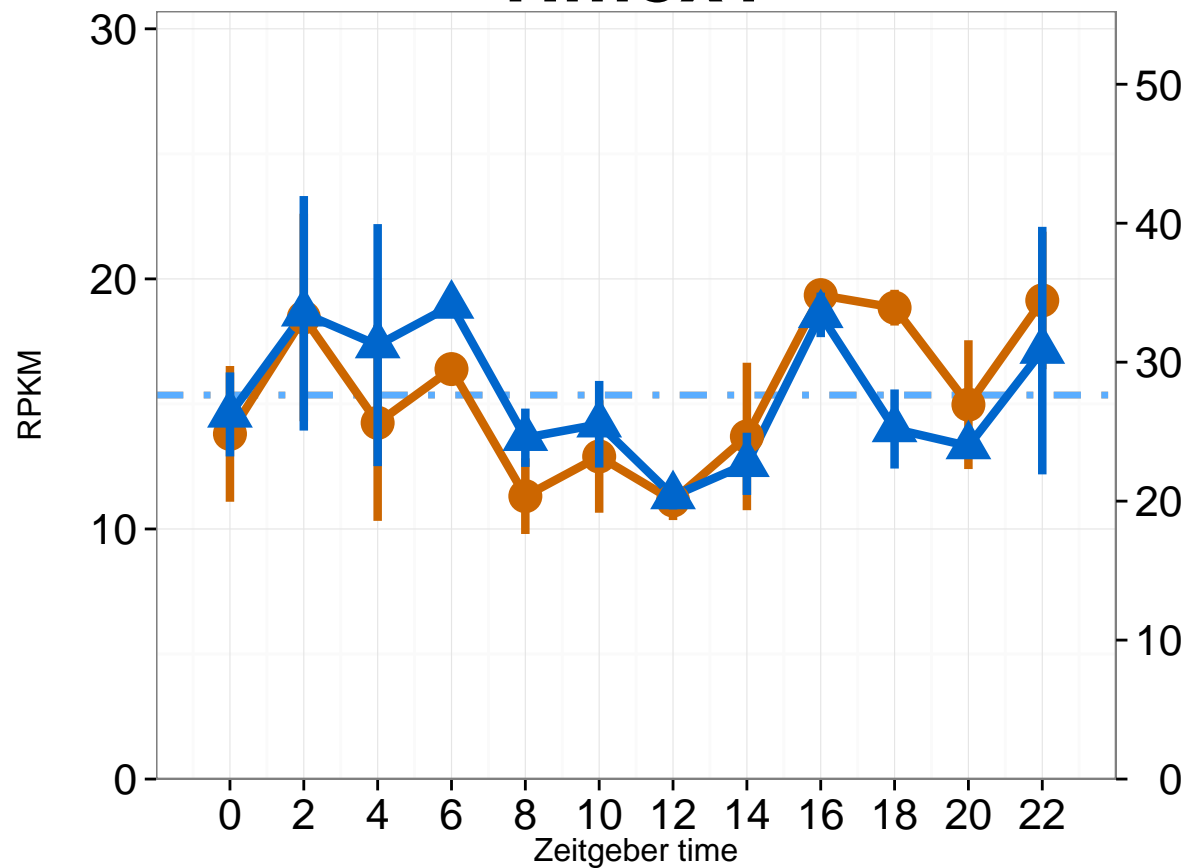

## Hmox1

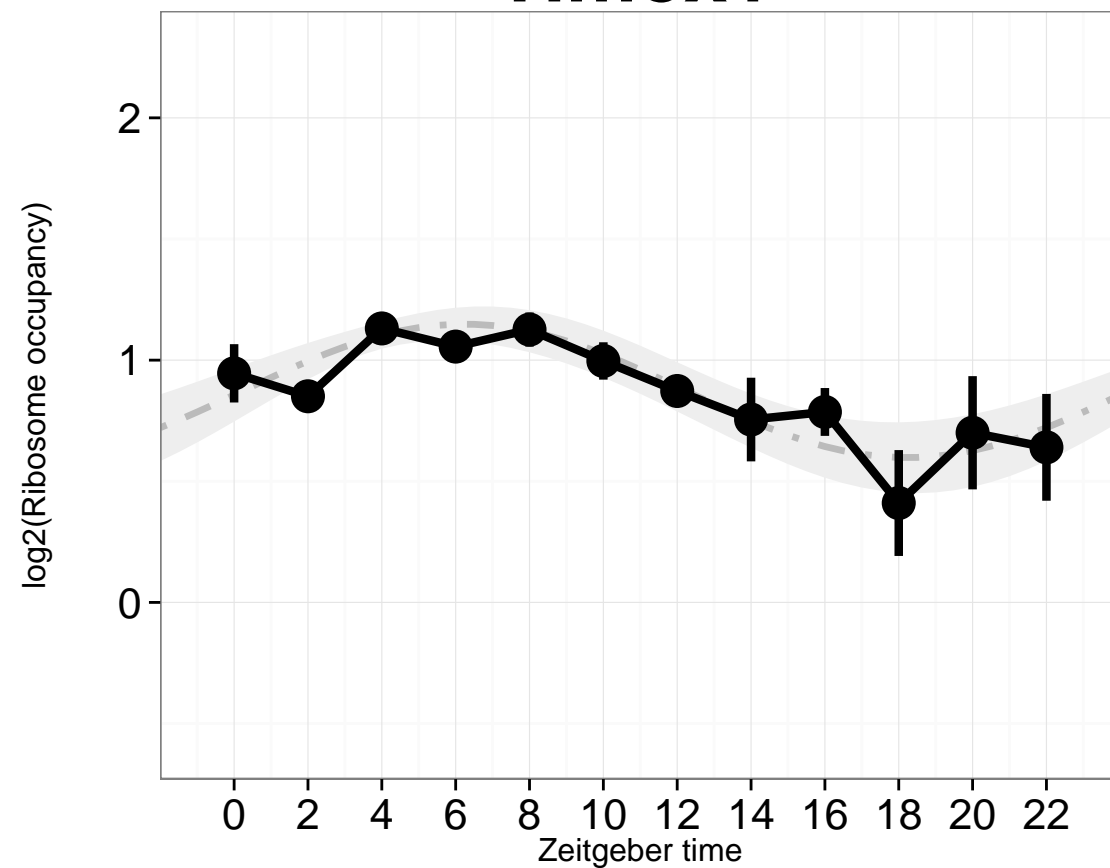

Supplement: SuppDataset_1.zip [file Hmox1_set_A.pdf › Supplemental Dataset 1/A-mRNA_nonrhyth_translation_nonrhyth/Hmox1_set_A.pdf]

## Hmox2

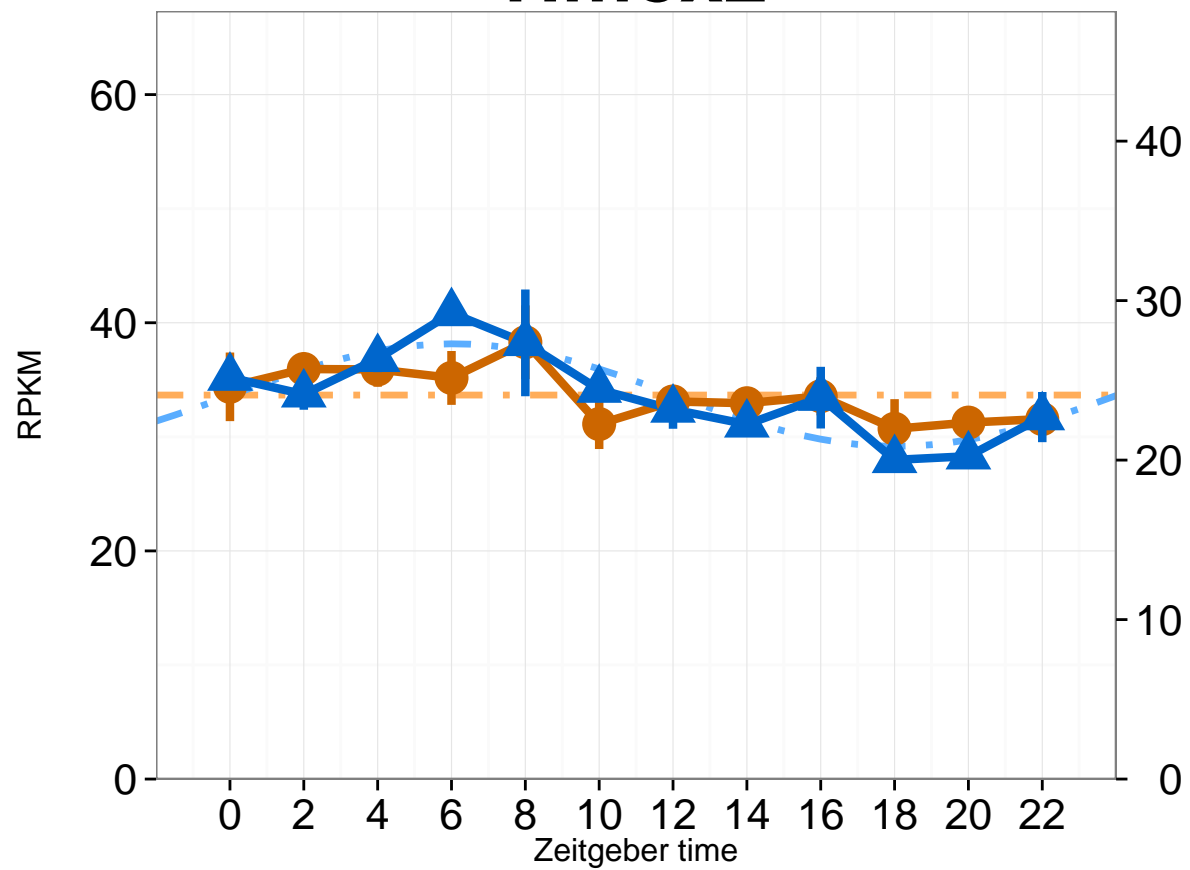

## Hmox2

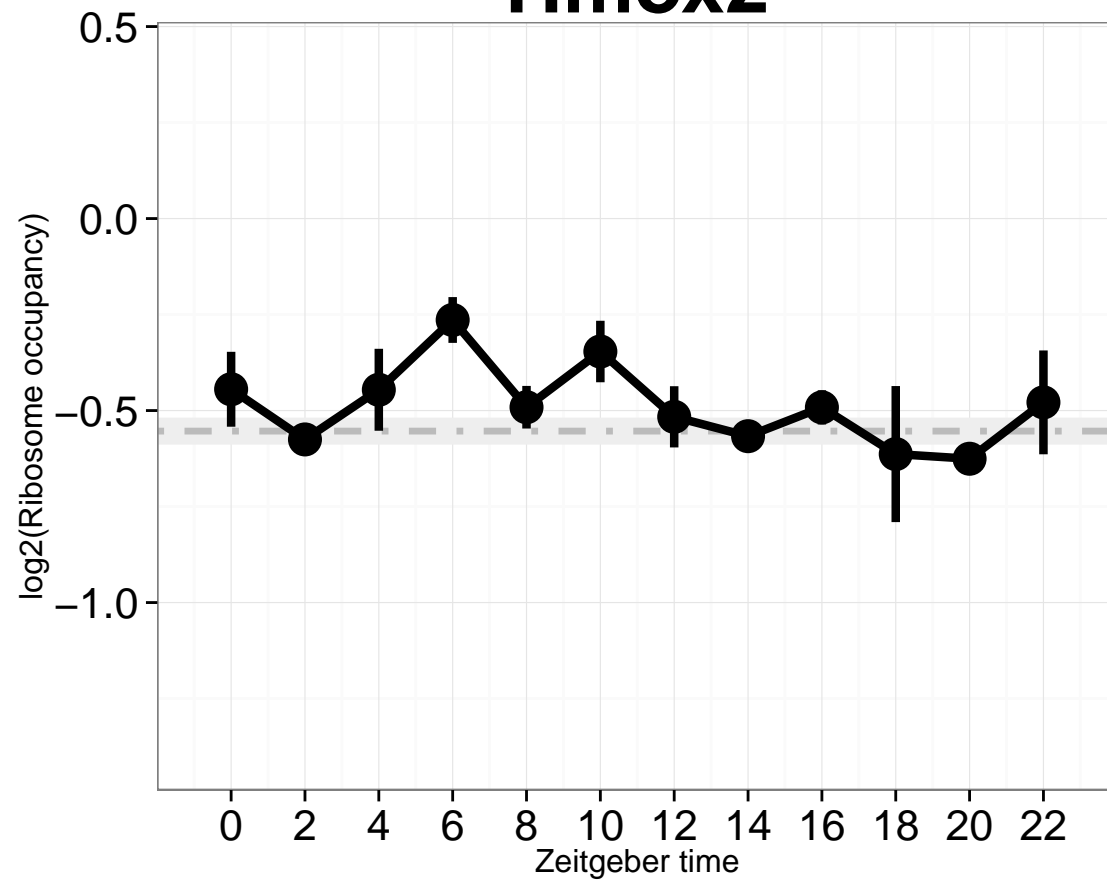

Supplement: SuppDataset_1.zip [file Hmox2_set_A.pdf › Supplemental Dataset 1/A-mRNA_nonrhyth_translation_nonrhyth/Hmox2_set_A.pdf]

# Hn1

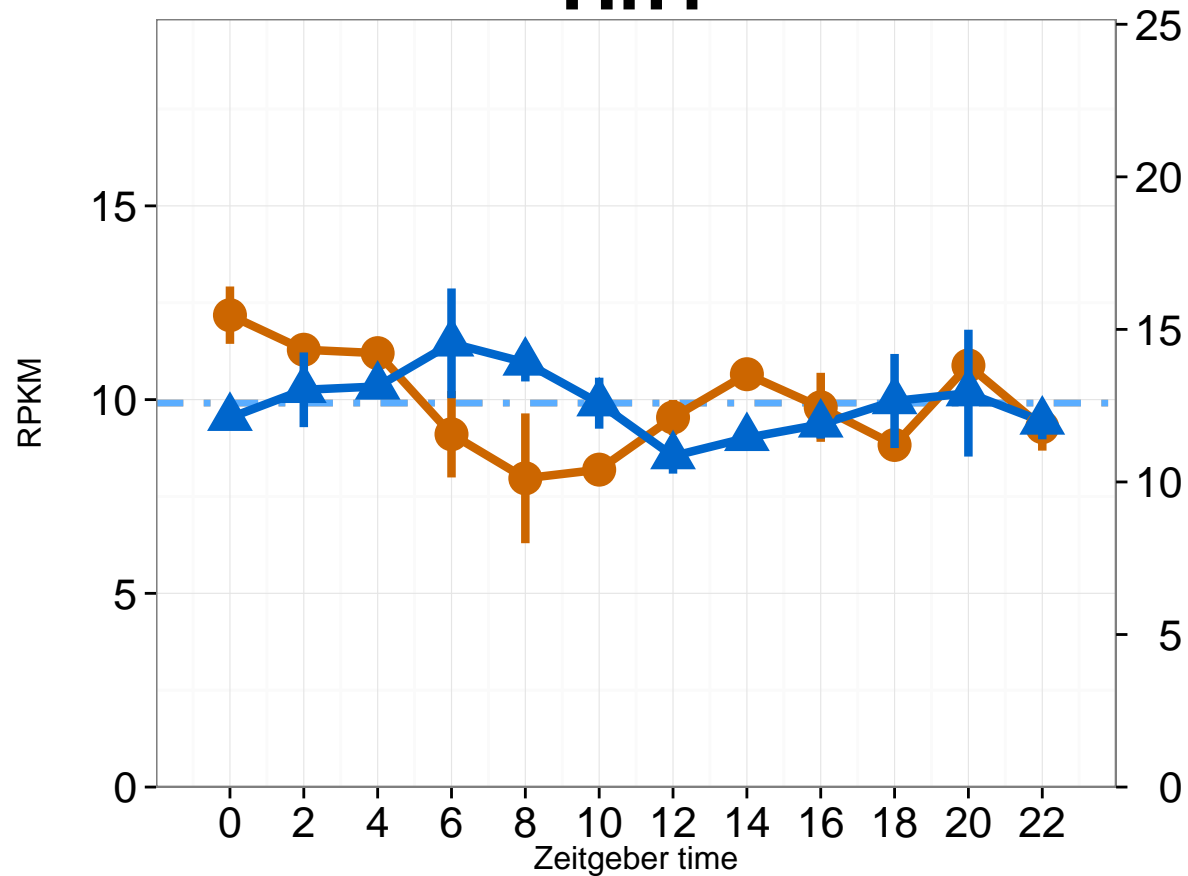

# Hn1

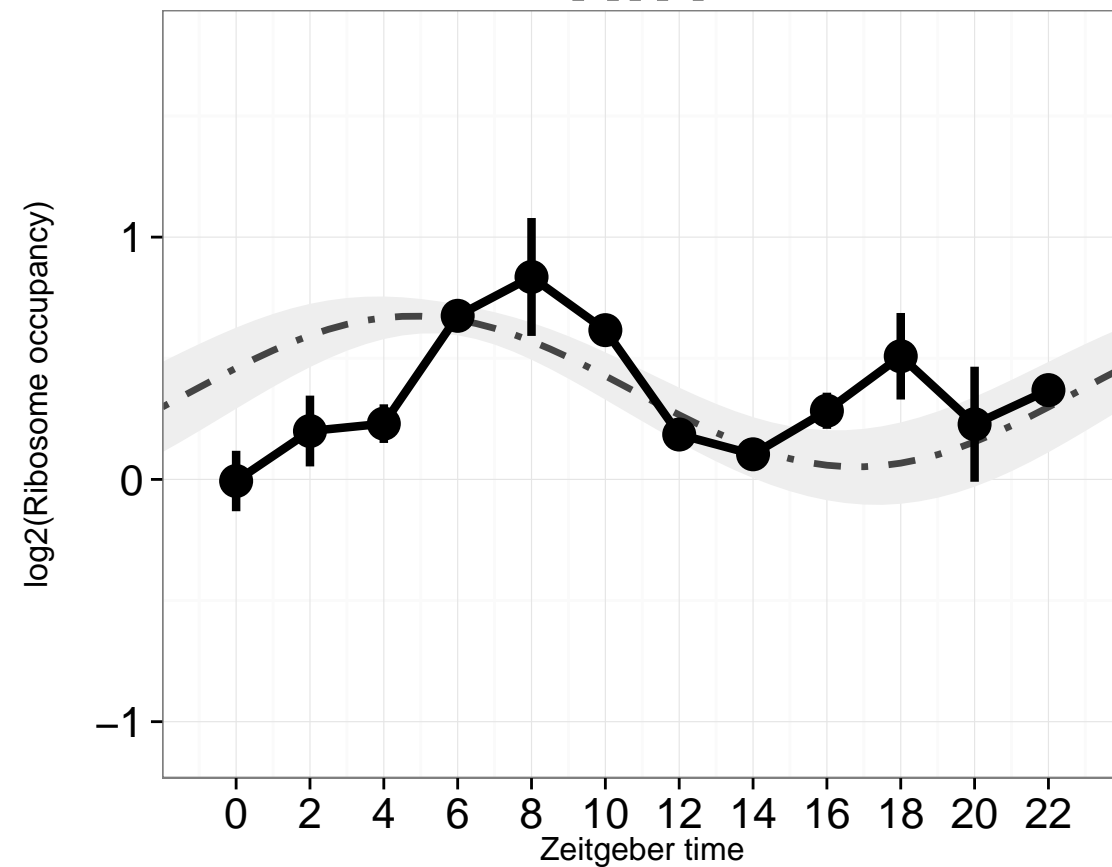

Supplement: SuppDataset_1.zip [file Hn1_set_A.pdf › Supplemental Dataset 1/A-mRNA_nonrhyth_translation_nonrhyth/Hn1_set_A.pdf]

# Hnf1a

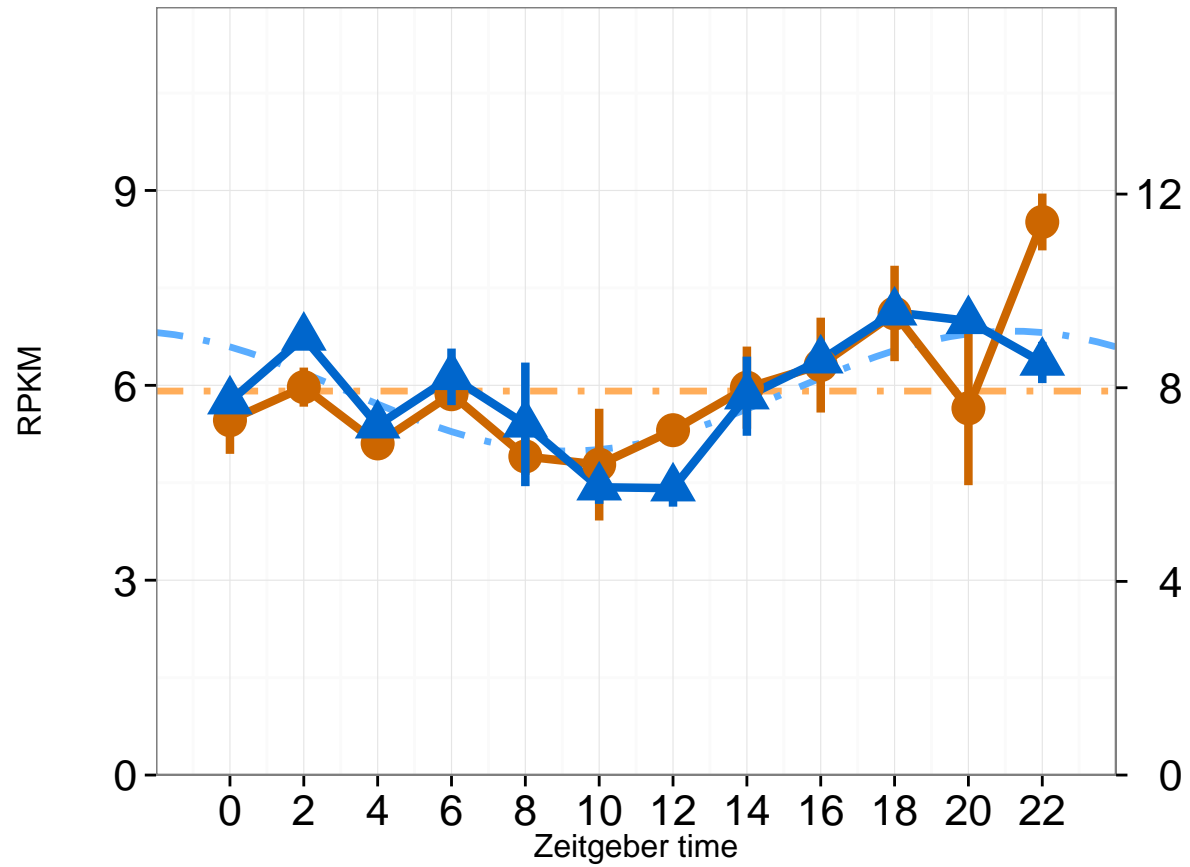

# Hnf1a

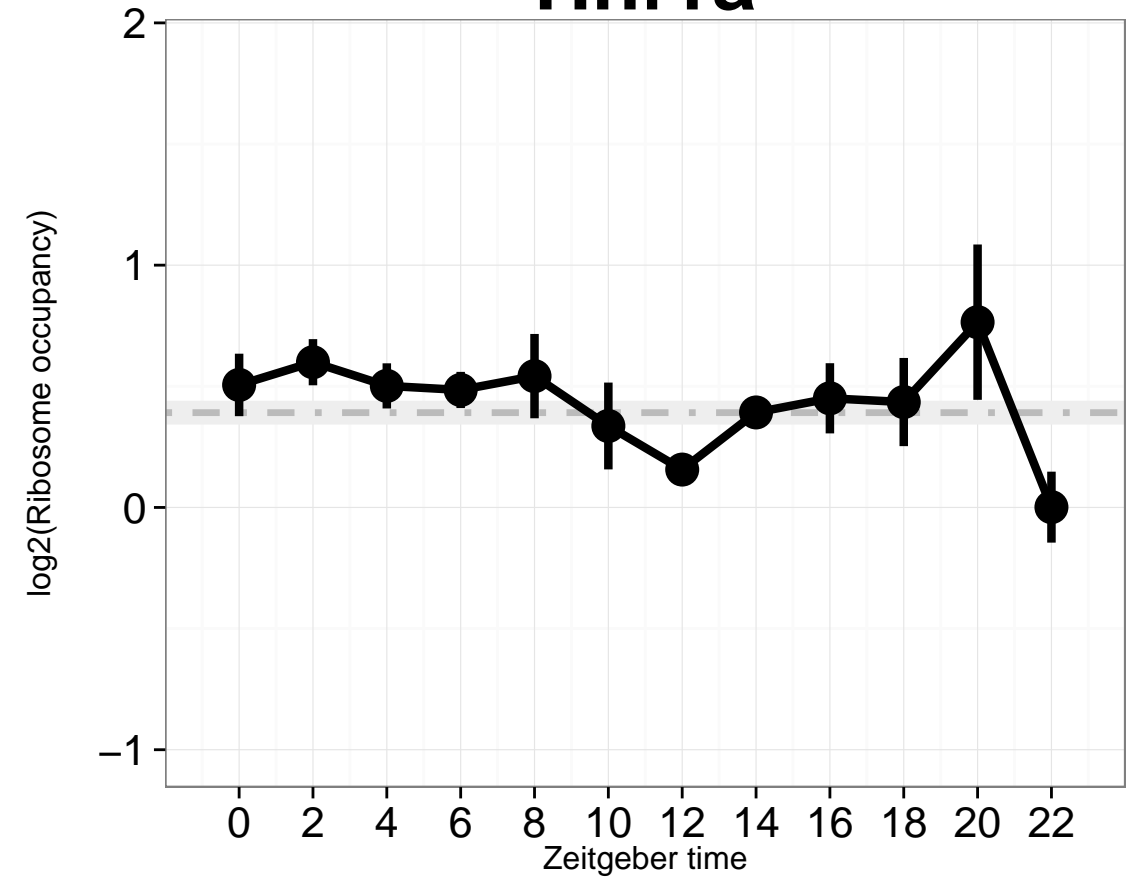

Supplement: SuppDataset_1.zip [file Hnf1a_set_A.pdf › Supplemental Dataset 1/A-mRNA_nonrhyth_translation_nonrhyth/Hnf1a_set_A.pdf]

# Hnf4a

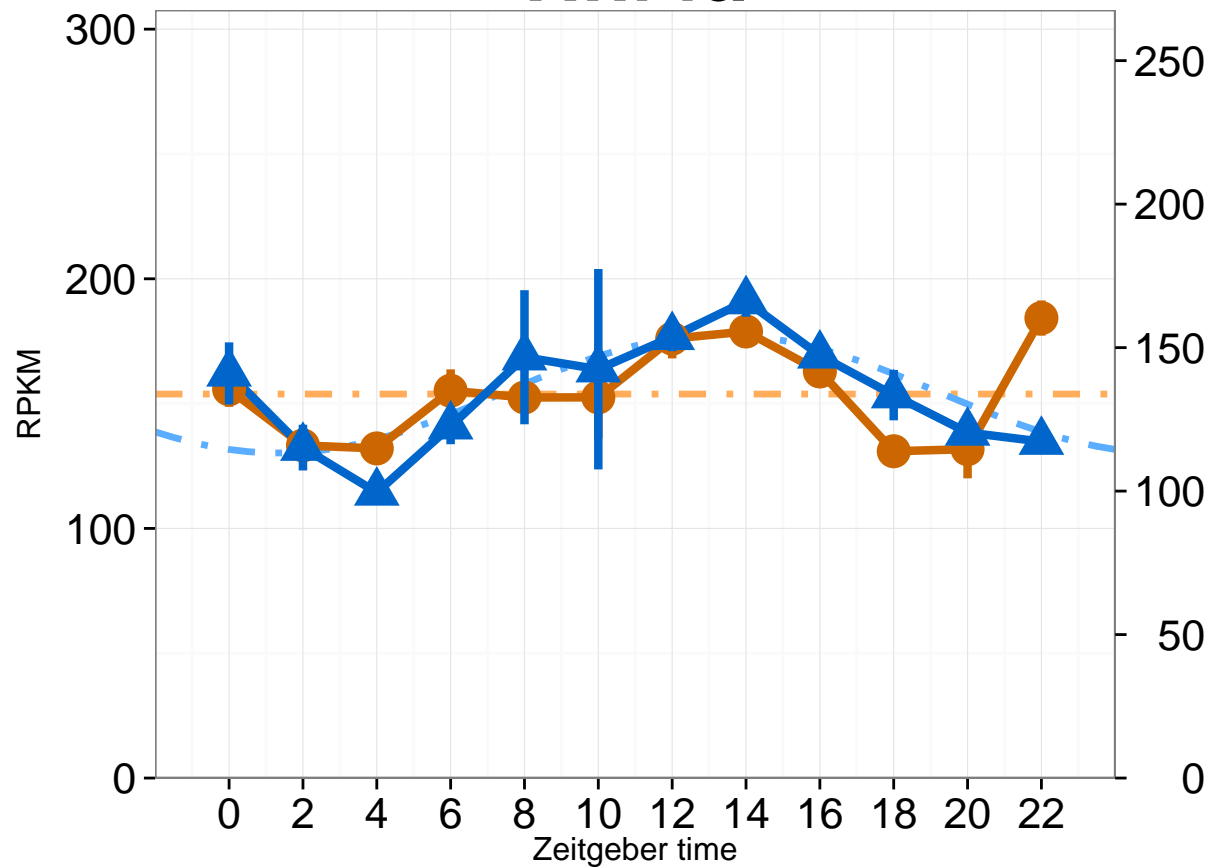

# Hnf4a

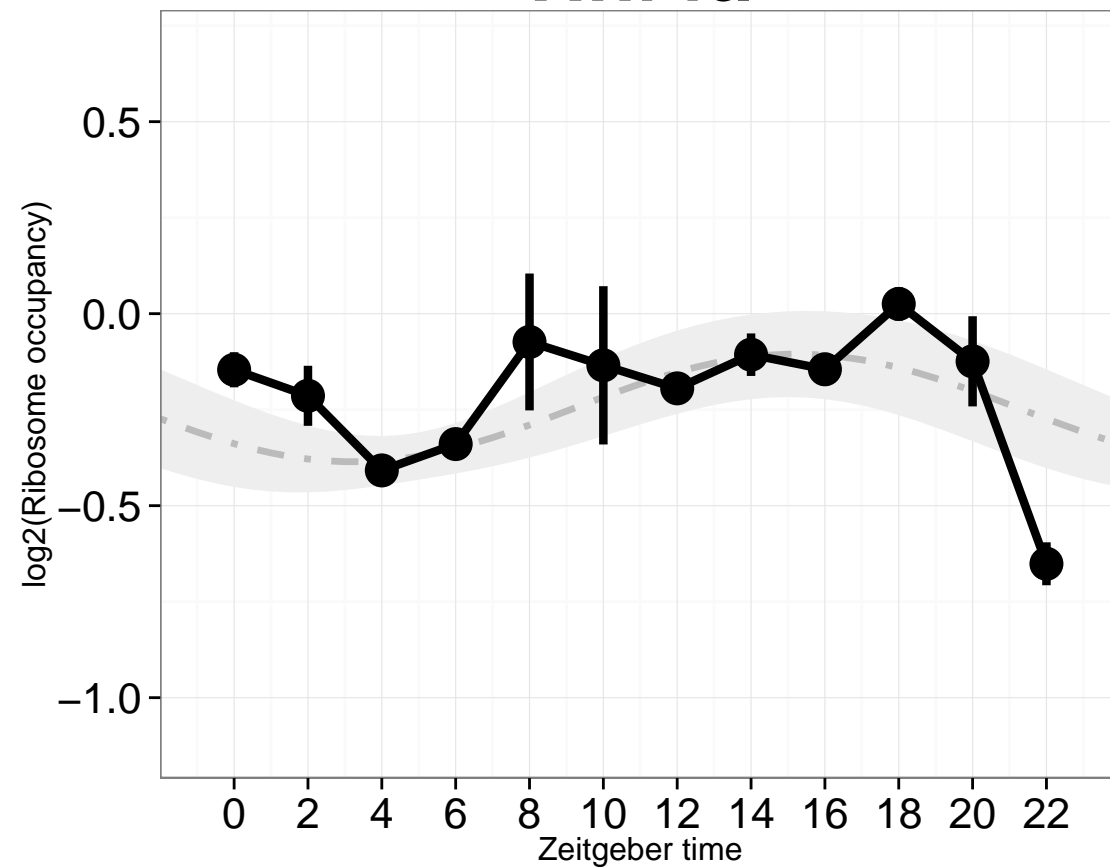

Supplement: SuppDataset_1.zip [file Hnf4a_set_A.pdf › Supplemental Dataset 1/A-mRNA_nonrhyth_translation_nonrhyth/Hnf4a_set_A.pdf]

## Hnrnpa1

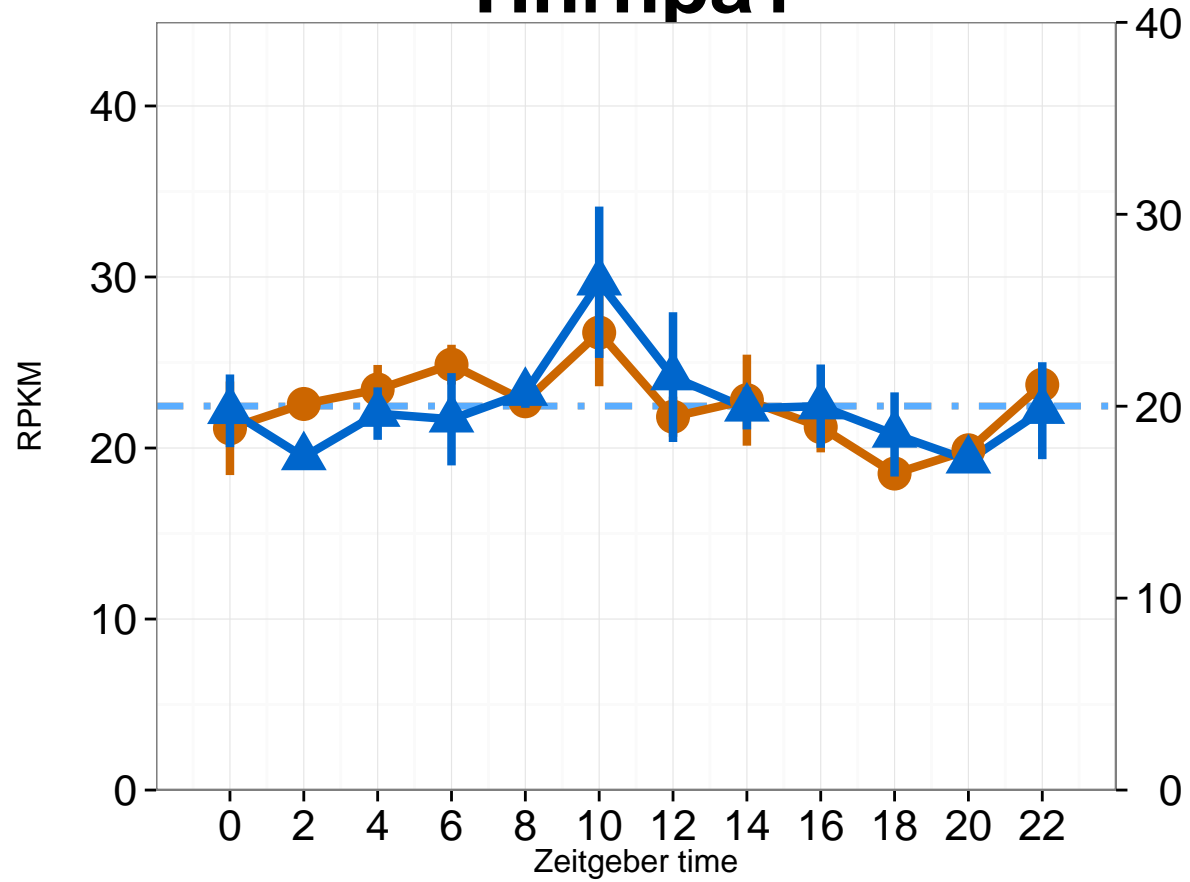

## Hnrnpa1

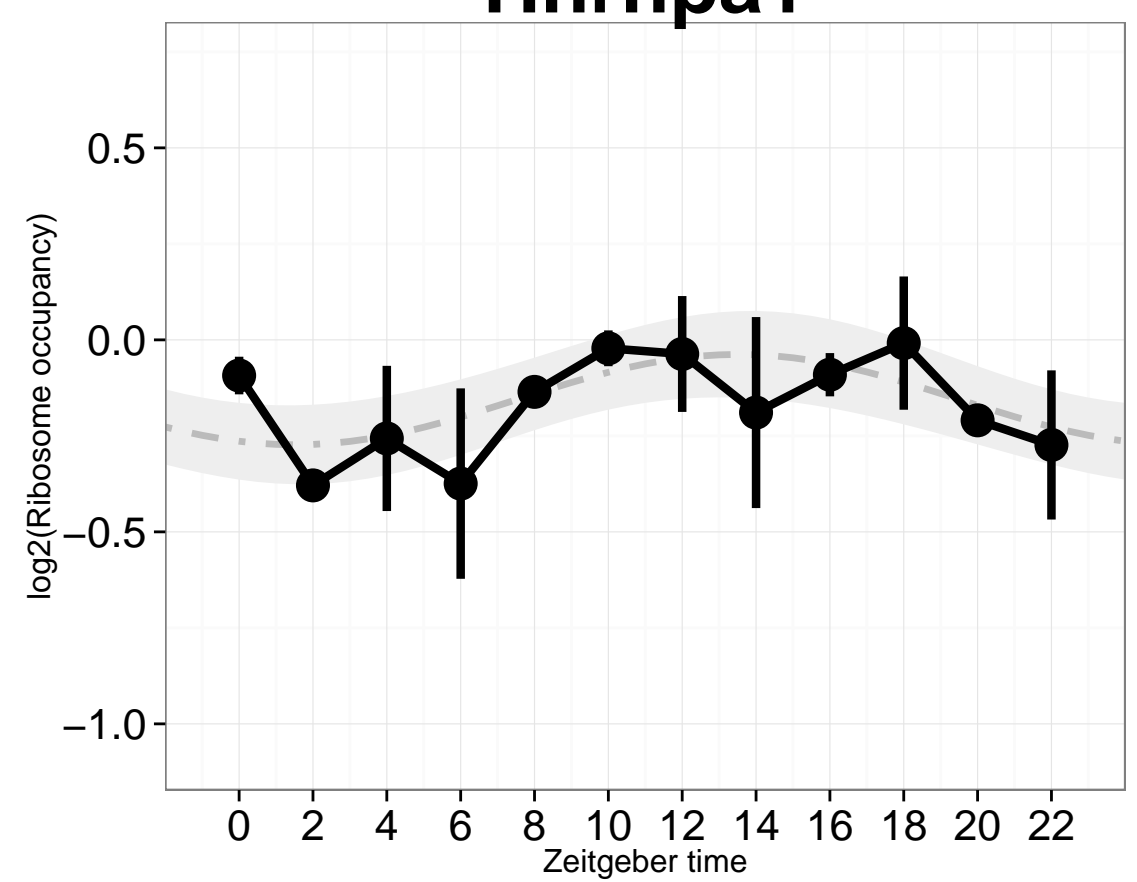

Supplement: SuppDataset_1.zip [file Hnrnpa1_set_A.pdf › Supplemental Dataset 1/A-mRNA_nonrhyth_translation_nonrhyth/Hnrnpa1_set_A.pdf]

# Hnrnpa2b1

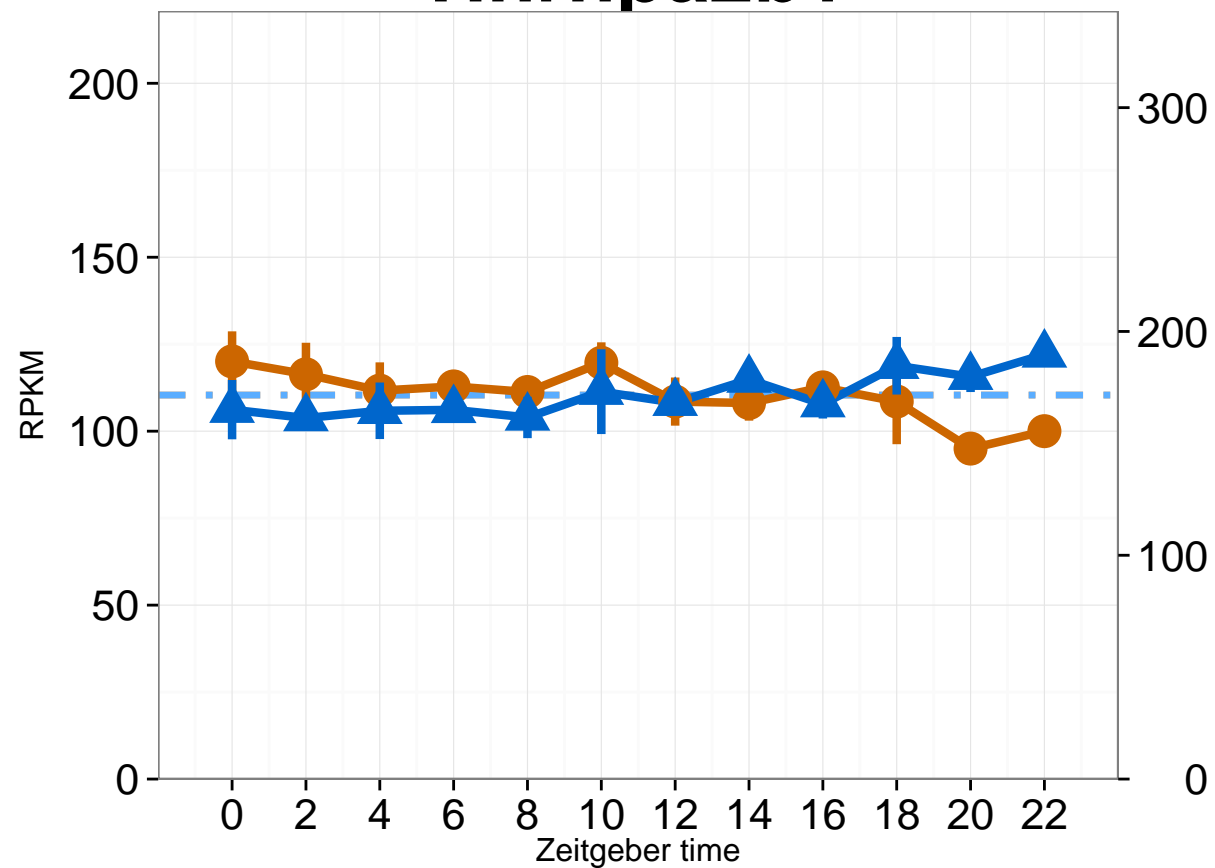

# Hnrnpa2b1

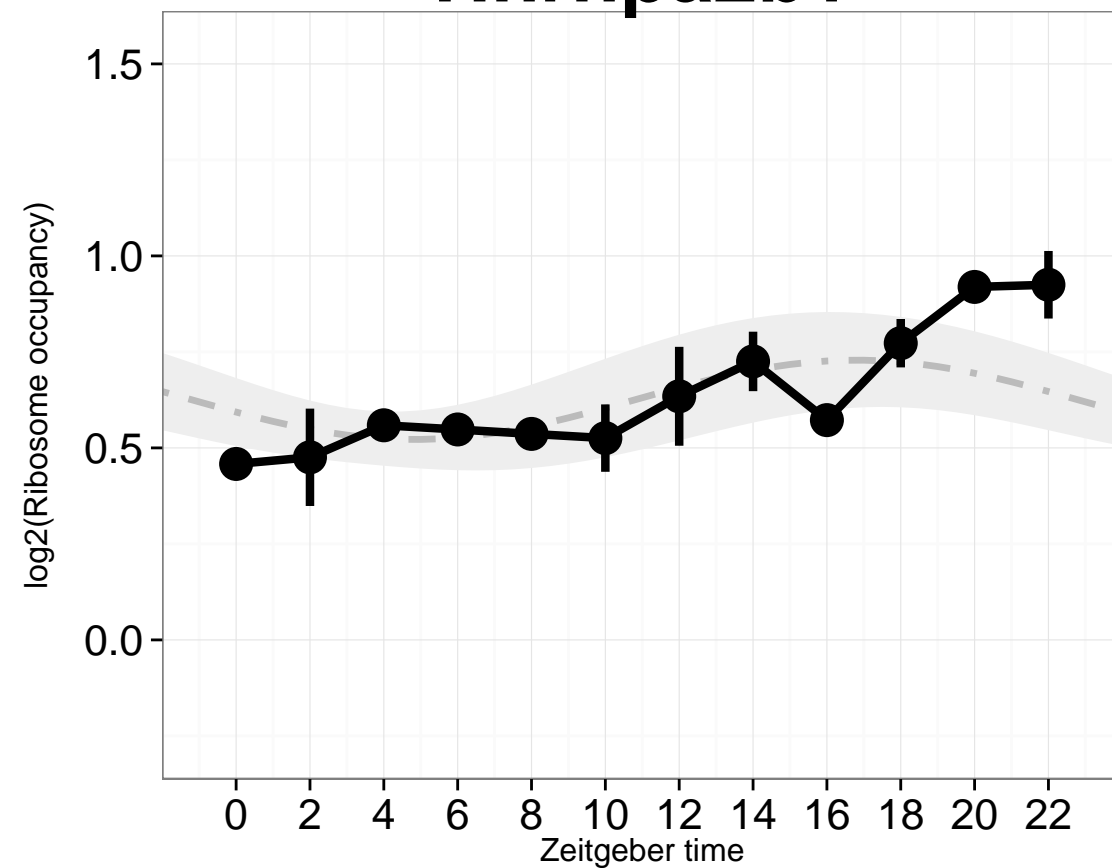

Supplement: SuppDataset_1.zip [file Hnrnpa2b1_set_A.pdf › Supplemental Dataset 1/A-mRNA_nonrhyth_translation_nonrhyth/Hnrnpa2b1_set_A.pdf]

# Hnrnpa3

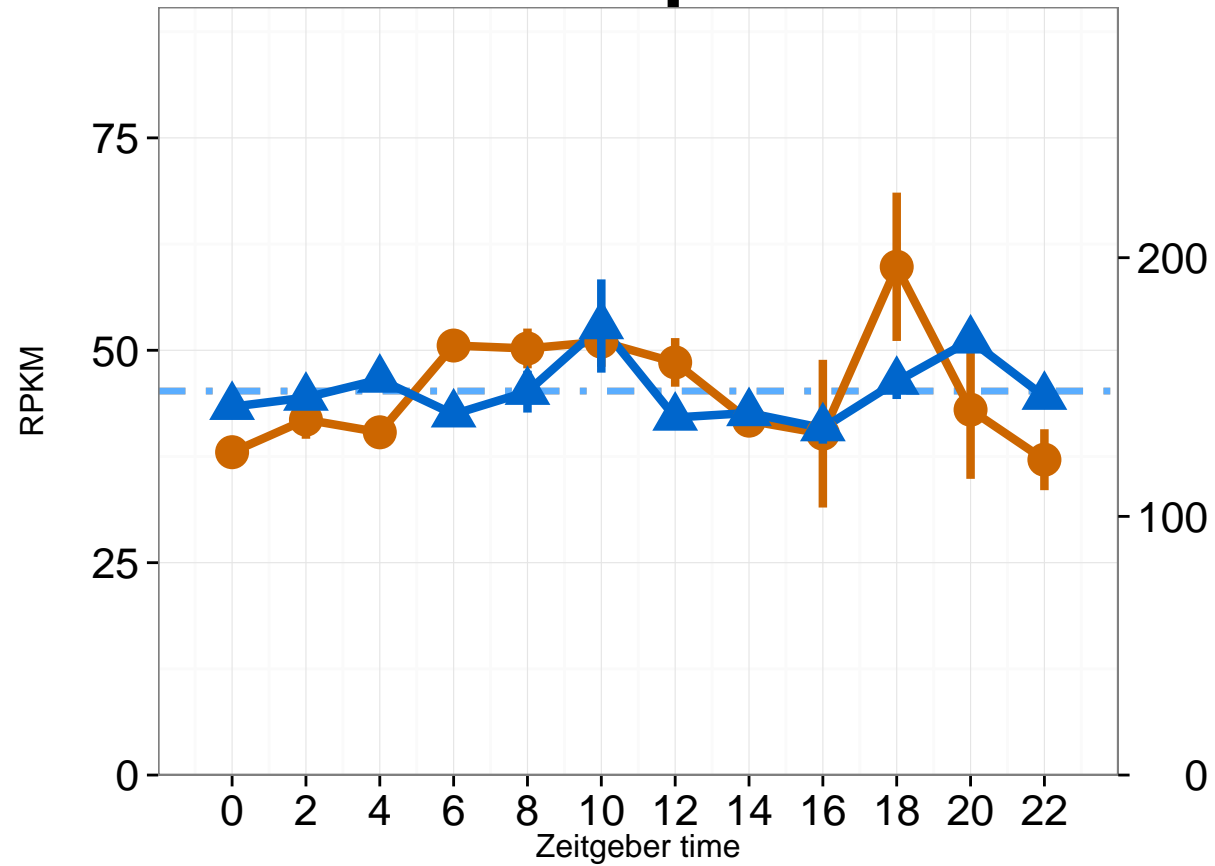

# Hnrnpa3

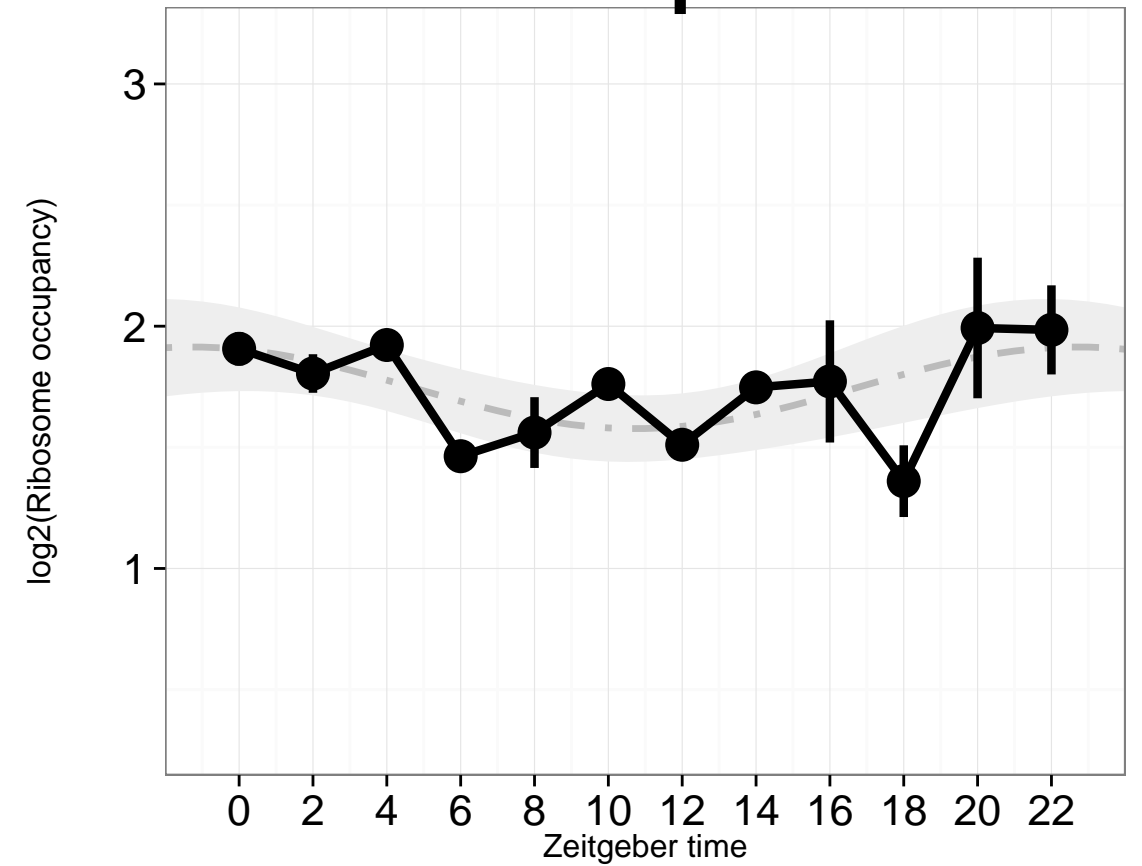

Supplement: SuppDataset_1.zip [file Hnrnpa3_set_A.pdf › Supplemental Dataset 1/A-mRNA_nonrhyth_translation_nonrhyth/Hnrnpa3_set_A.pdf]

## Hnrnpab

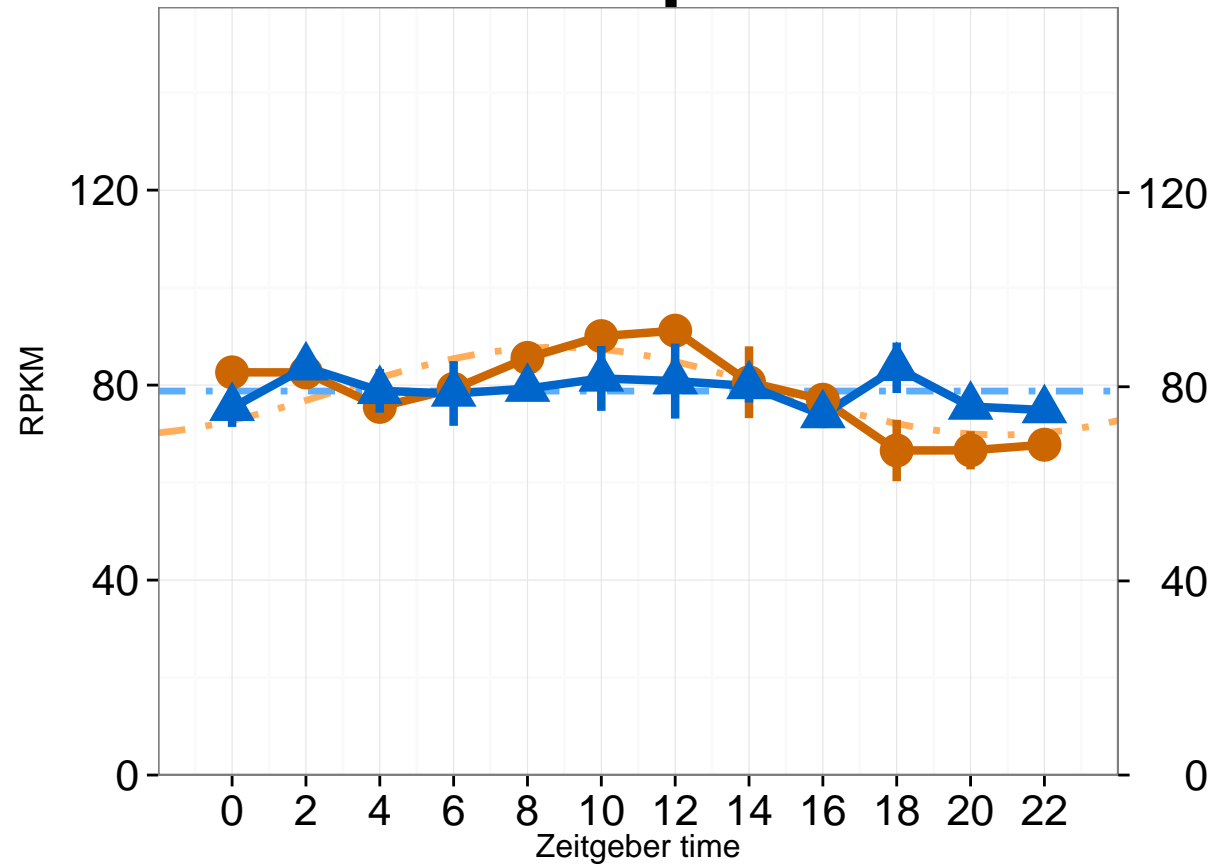

## Hnrnpab

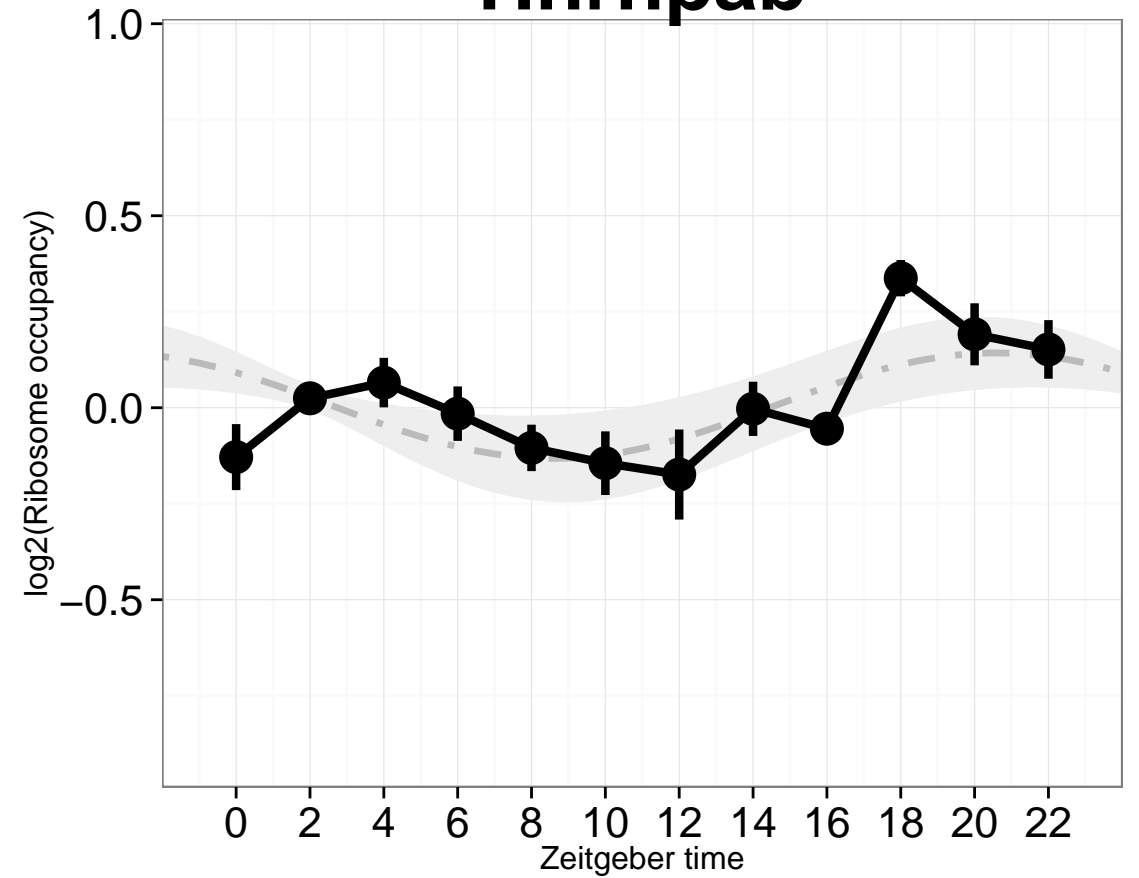

Supplement: SuppDataset_1.zip [file Hnrnpab_set_A.pdf › Supplemental Dataset 1/A-mRNA_nonrhyth_translation_nonrhyth/Hnrnpab_set_A.pdf]

## Hnrnpf

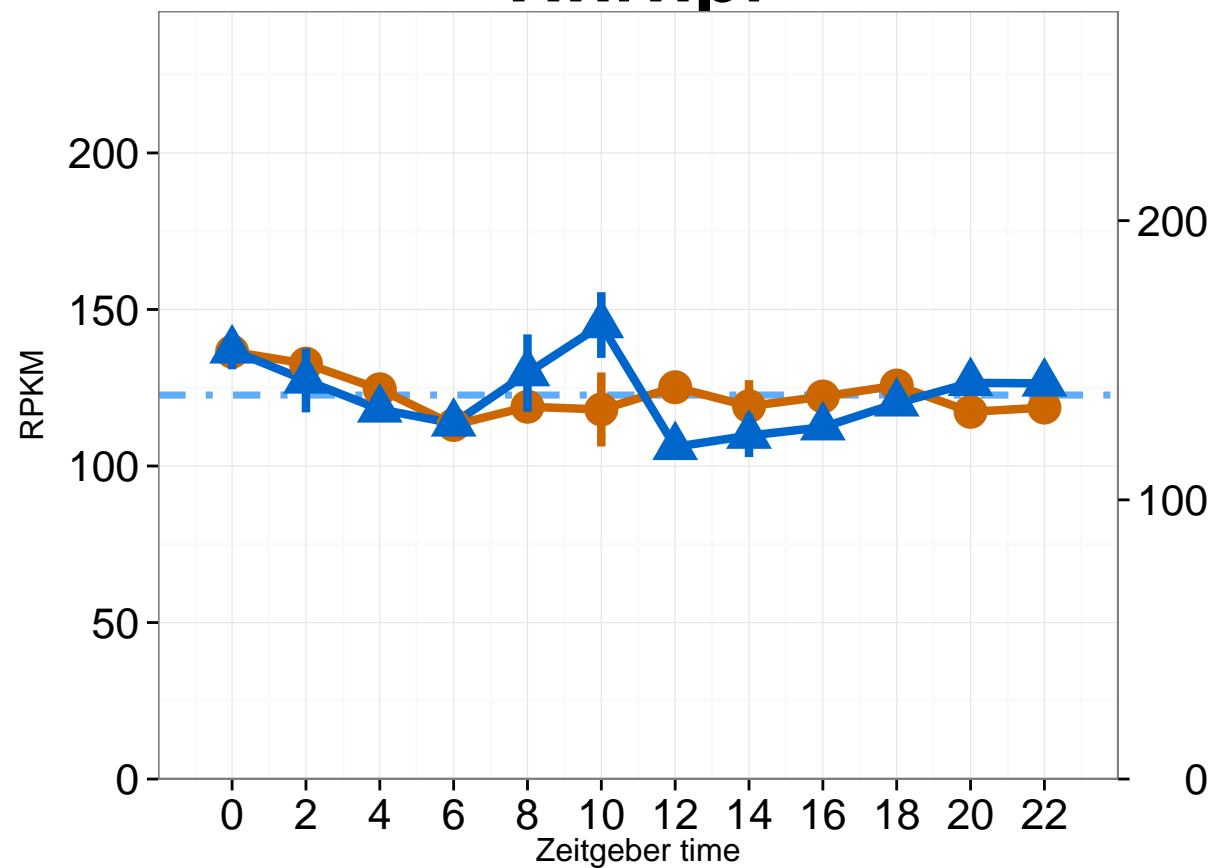

## Hnrnpf

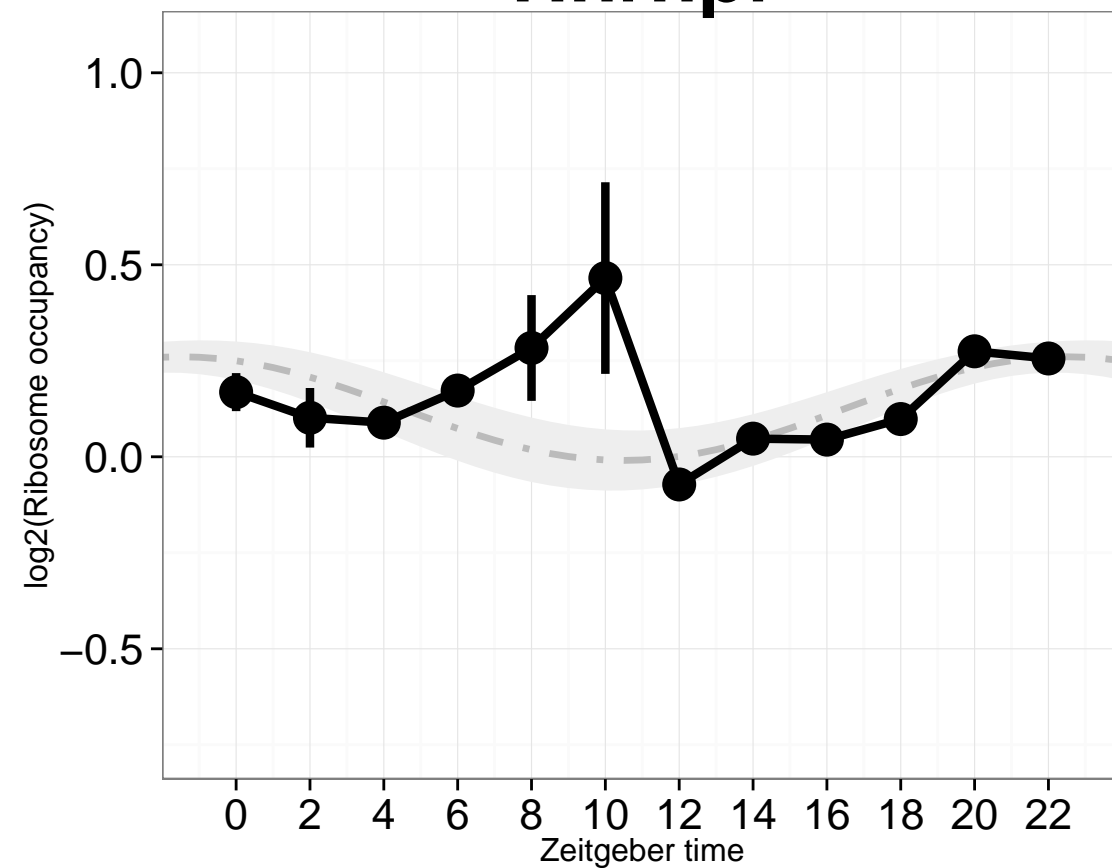

Supplement: SuppDataset_1.zip [file Hnrnpf_set_A.pdf › Supplemental Dataset 1/A-mRNA_nonrhyth_translation_nonrhyth/Hnrnpf_set_A.pdf]

# Hnrrnph1

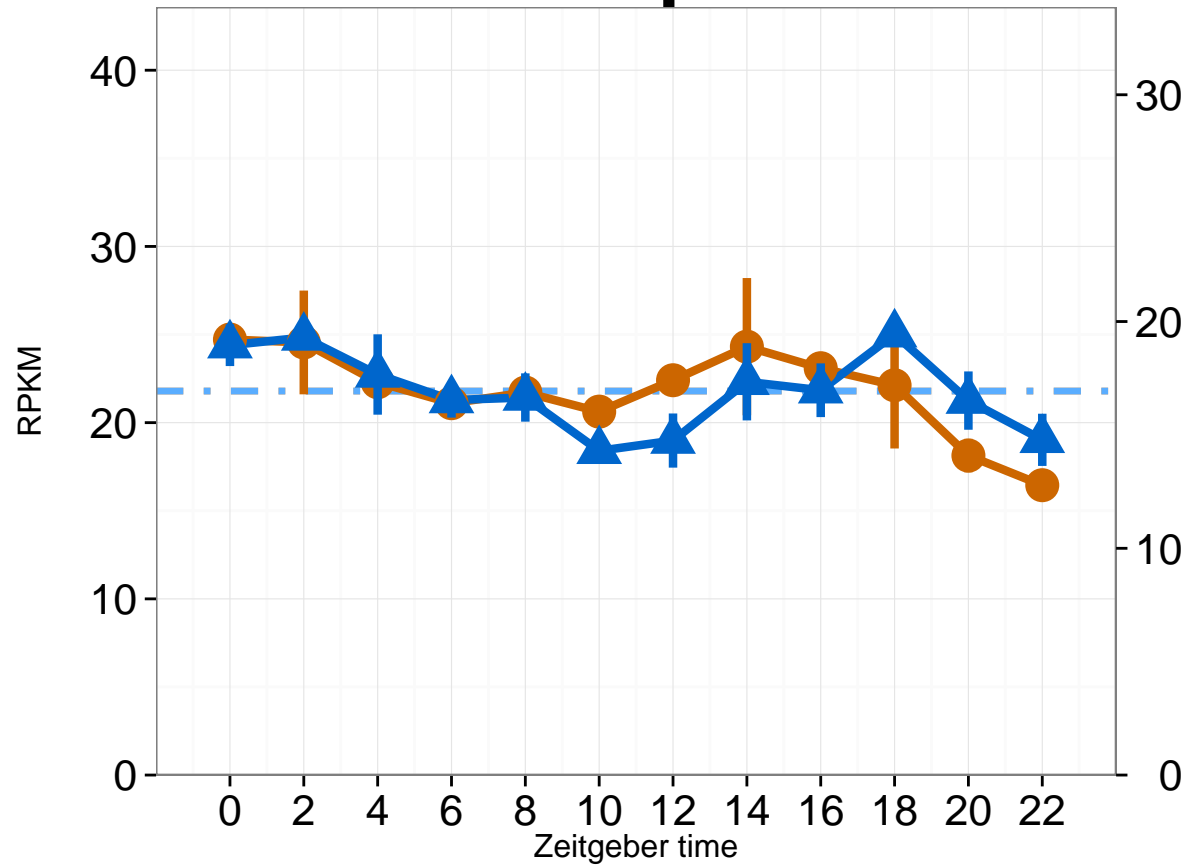

# Hnrrnph1

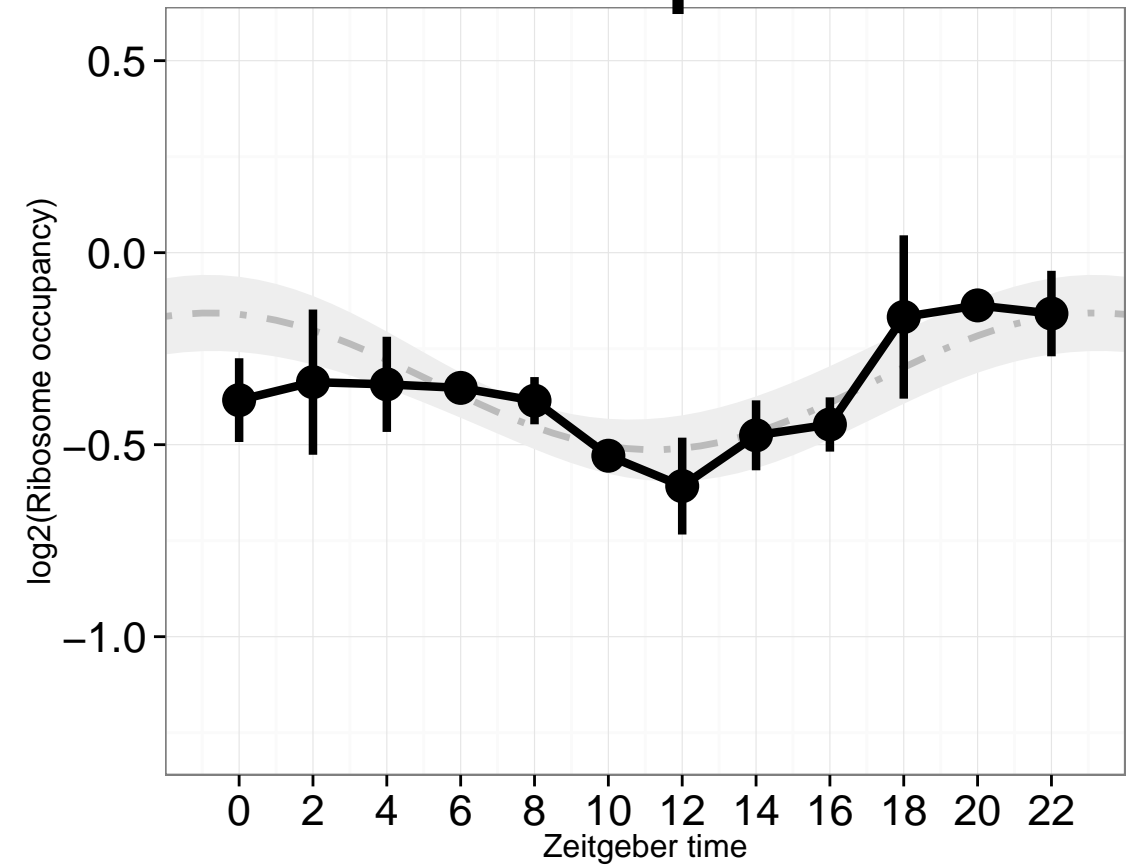

Supplement: SuppDataset_1.zip [file Hnrnph1_set_A.pdf › Supplemental Dataset 1/A-mRNA_nonrhyth_translation_nonrhyth/Hnrnph1_set_A.pdf]

## Hnrnph2

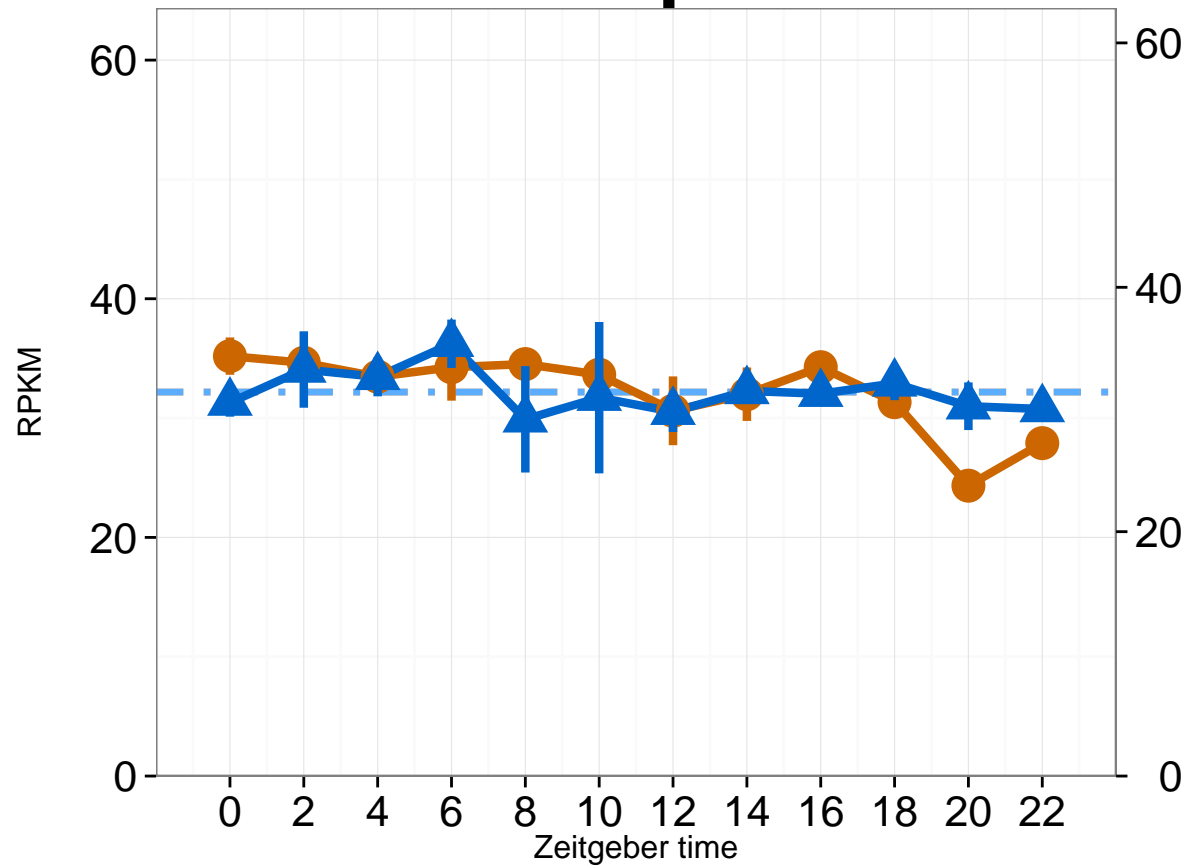

## Hnrnph2

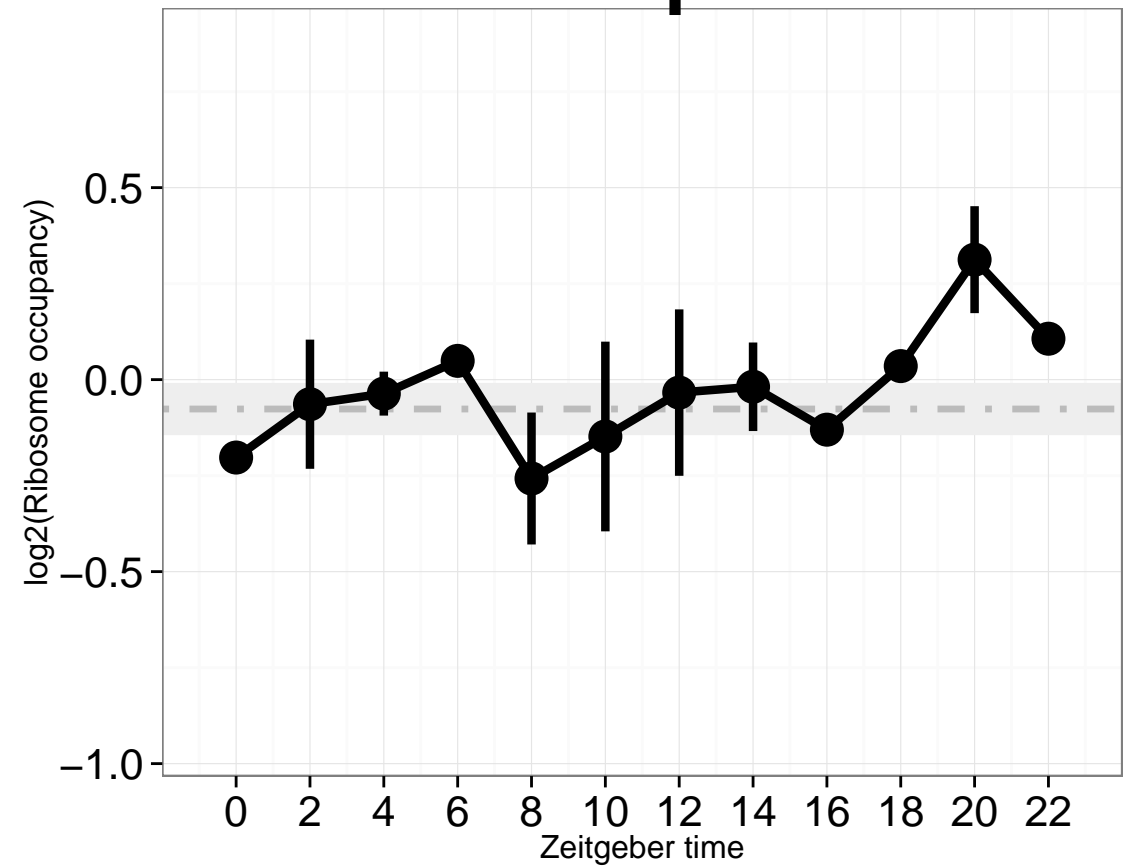

Supplement: SuppDataset_1.zip [file Hnrnph2_set_A.pdf › Supplemental Dataset 1/A-mRNA_nonrhyth_translation_nonrhyth/Hnrnph2_set_A.pdf]

## Hnrnpk

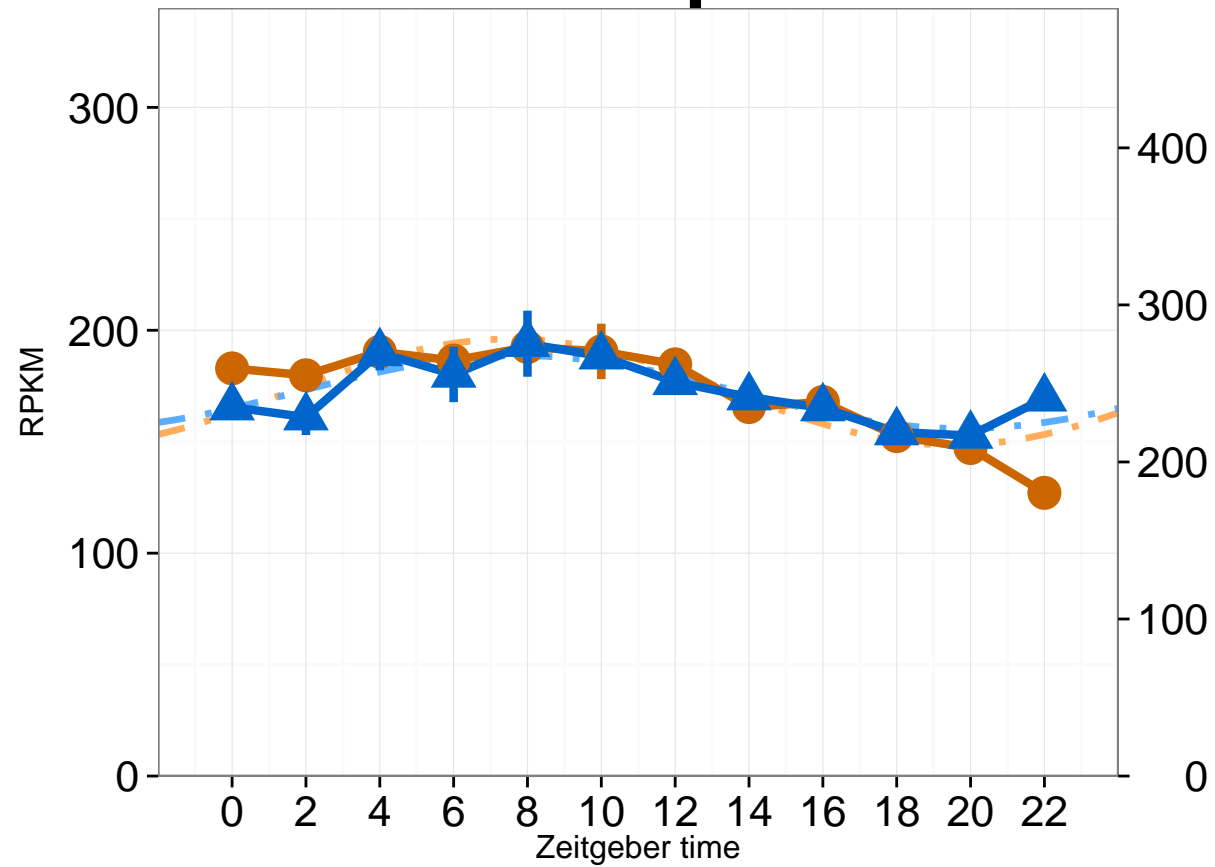

## Hnrnpk

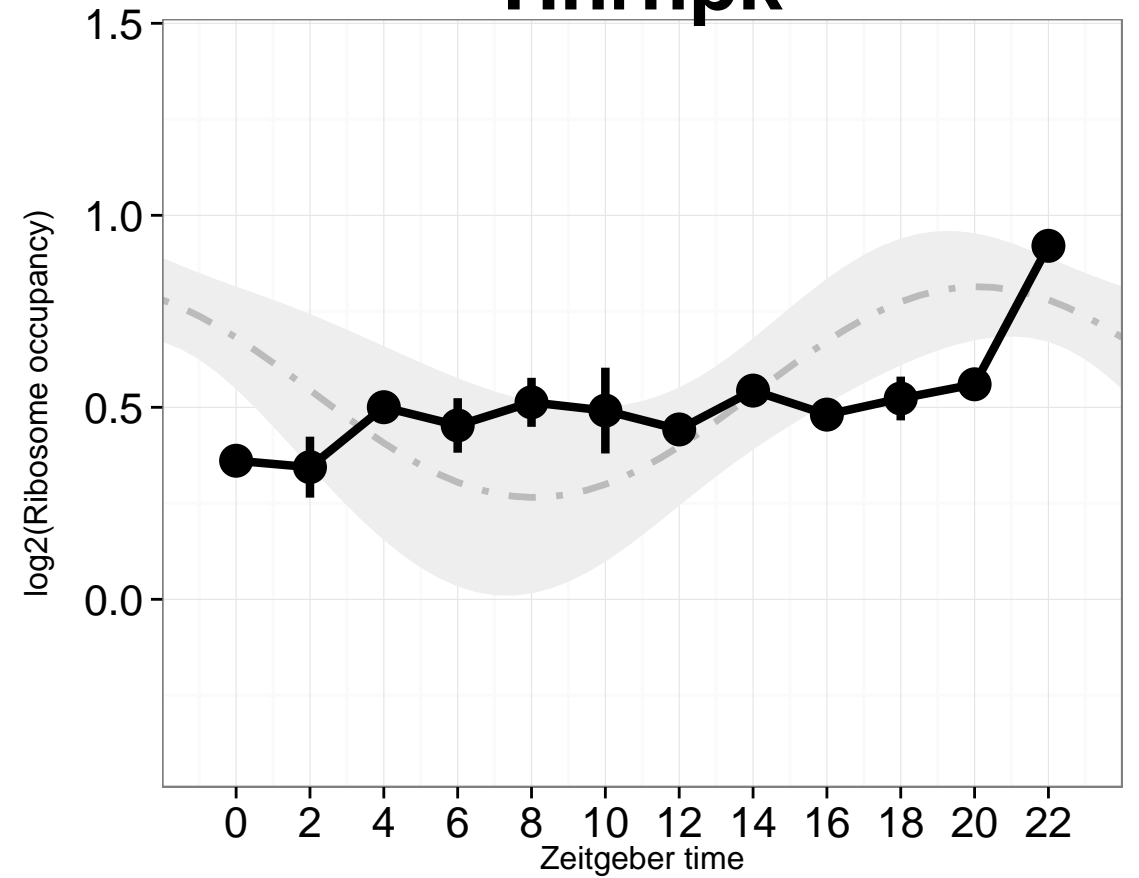

Supplement: SuppDataset_1.zip [file Hnrnpk_set_A.pdf › Supplemental Dataset 1/A-mRNA_nonrhyth_translation_nonrhyth/Hnrnpk_set_A.pdf]

# HnrnpII

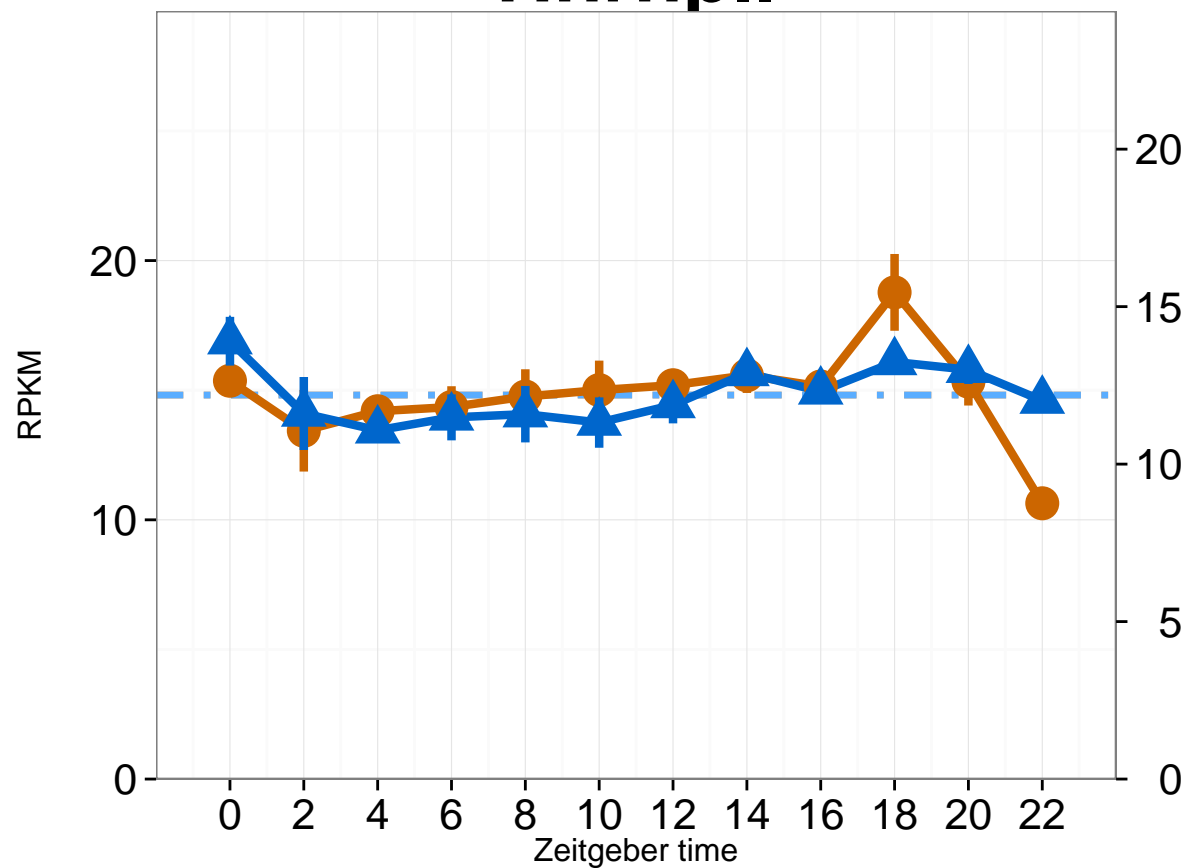

# HnrnpII

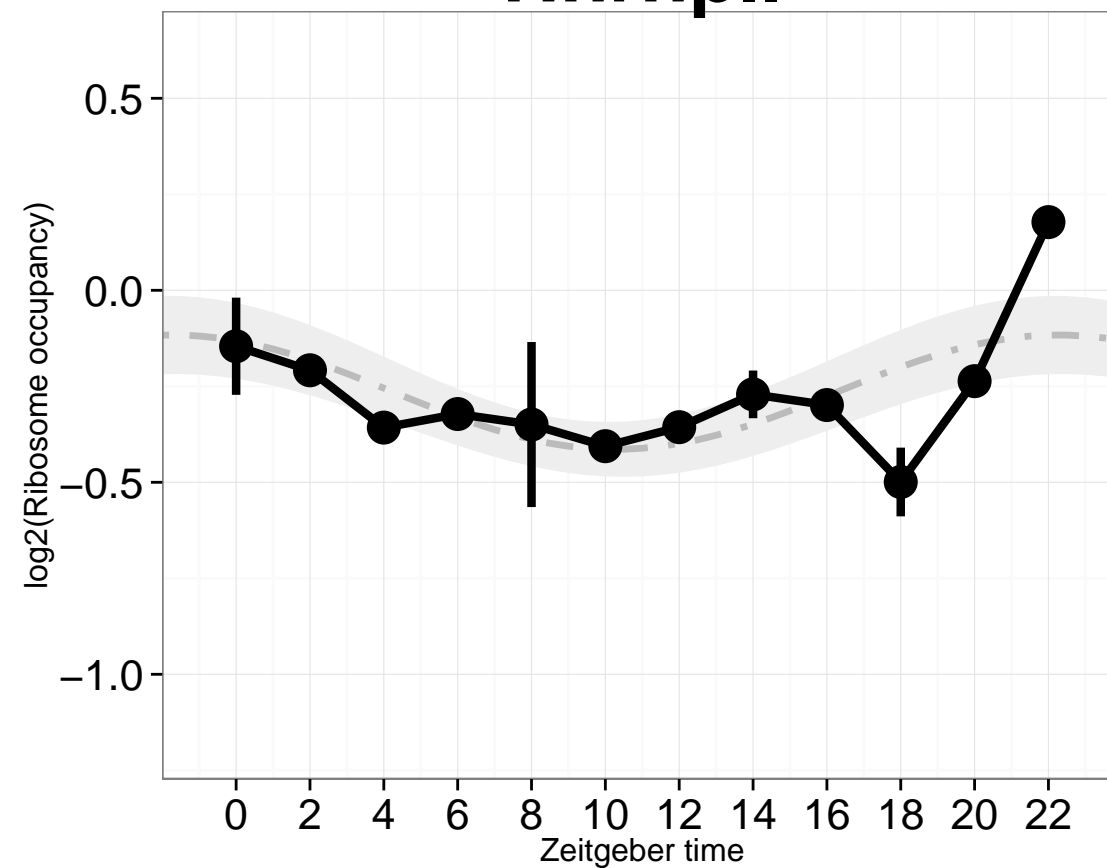

Supplement: SuppDataset_1.zip [file Hnrnpll_set_A.pdf › Supplemental Dataset 1/A-mRNA_nonrhyth_translation_nonrhyth/Hnrnpll_set_A.pdf]

## Hnrnpm

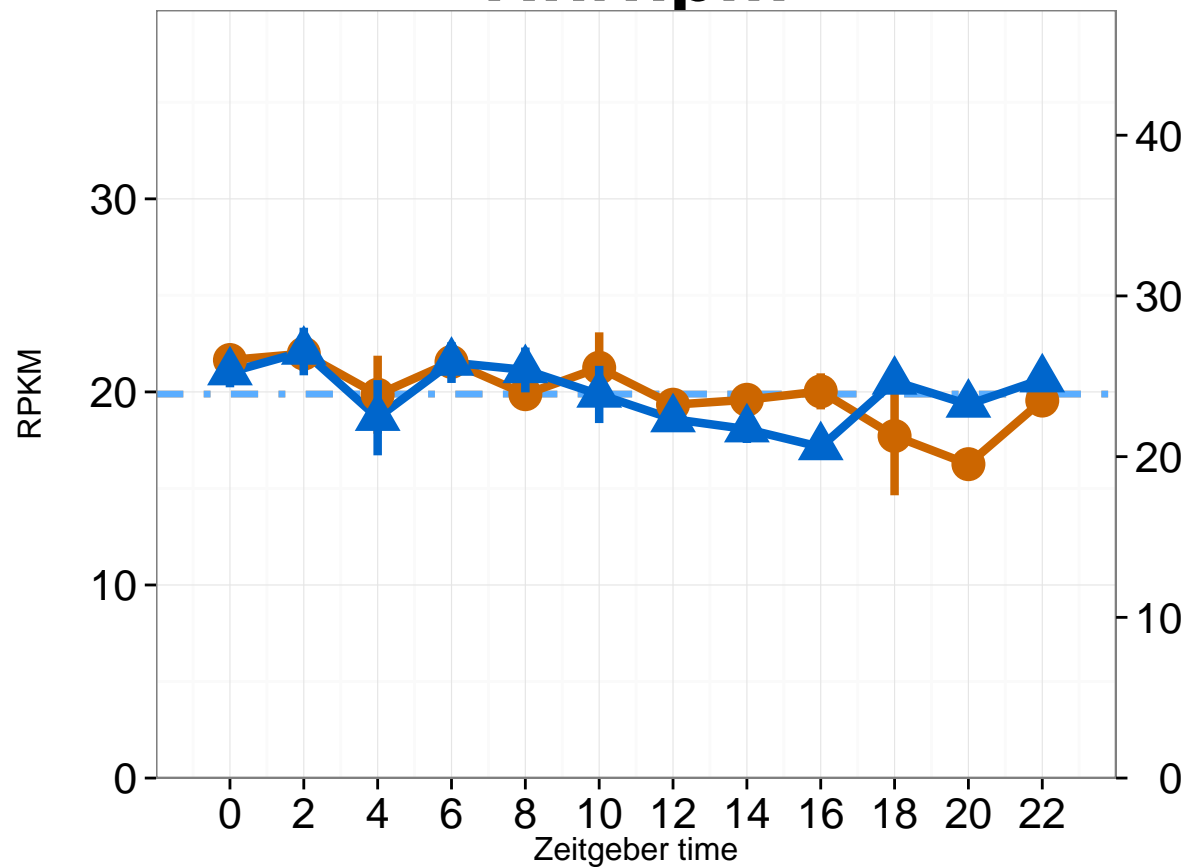

## Hnrnpm

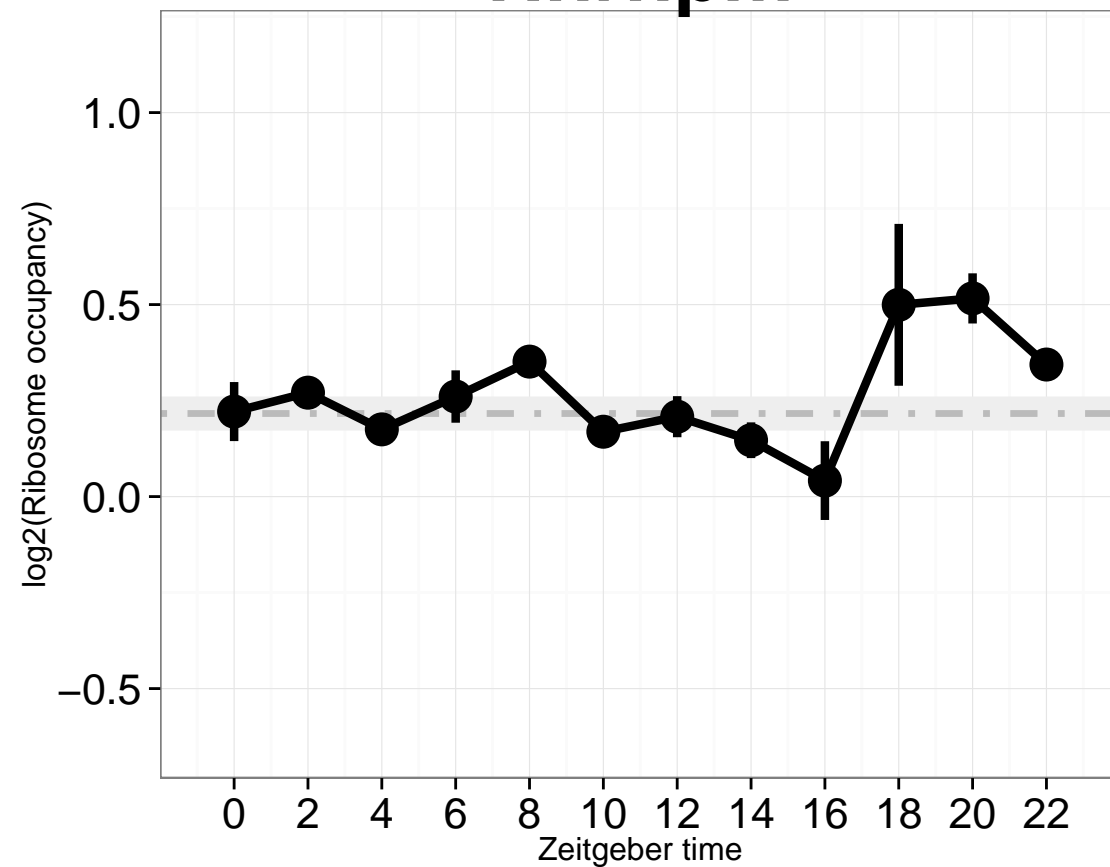

Supplement: SuppDataset_1.zip [file Hnrnpm_set_A.pdf › Supplemental Dataset 1/A-mRNA_nonrhyth_translation_nonrhyth/Hnrnpm_set_A.pdf]

## Hnrrnpr

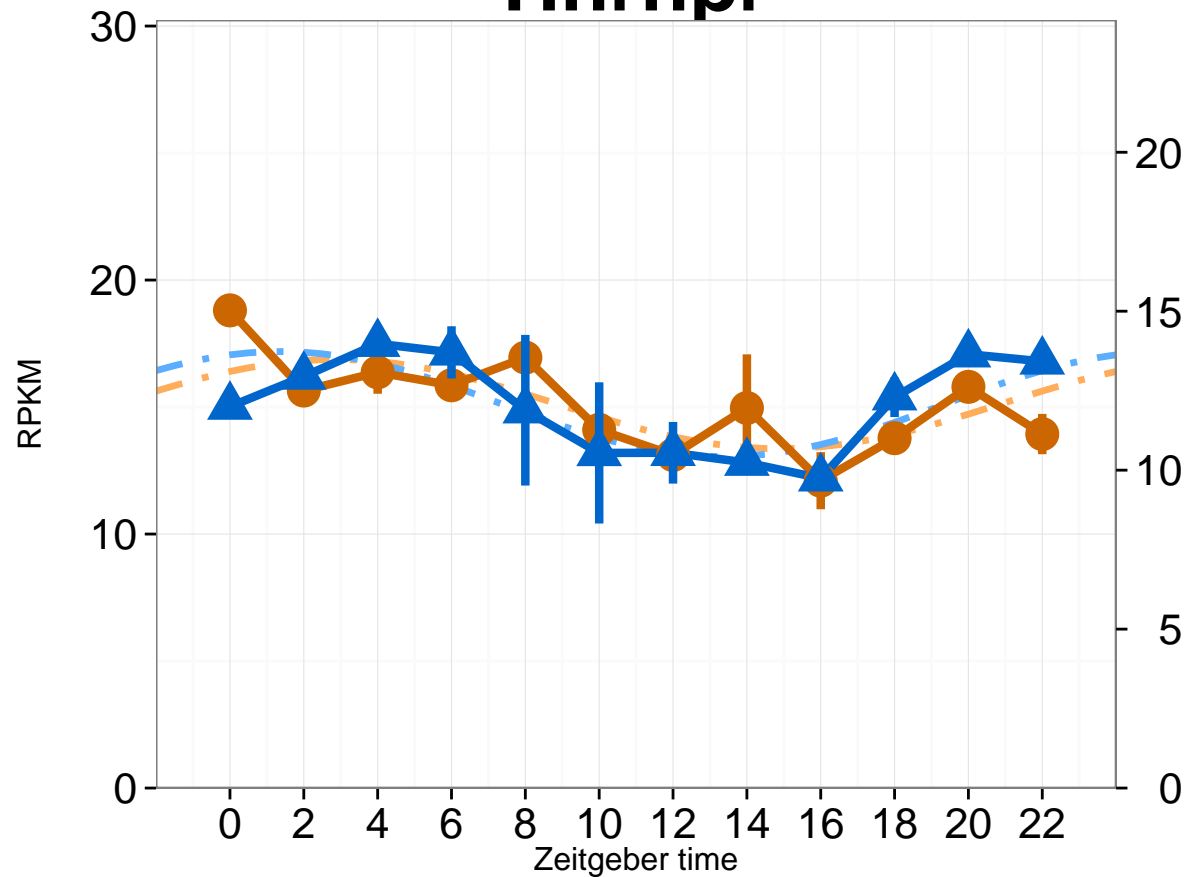

## Hnrrnpr

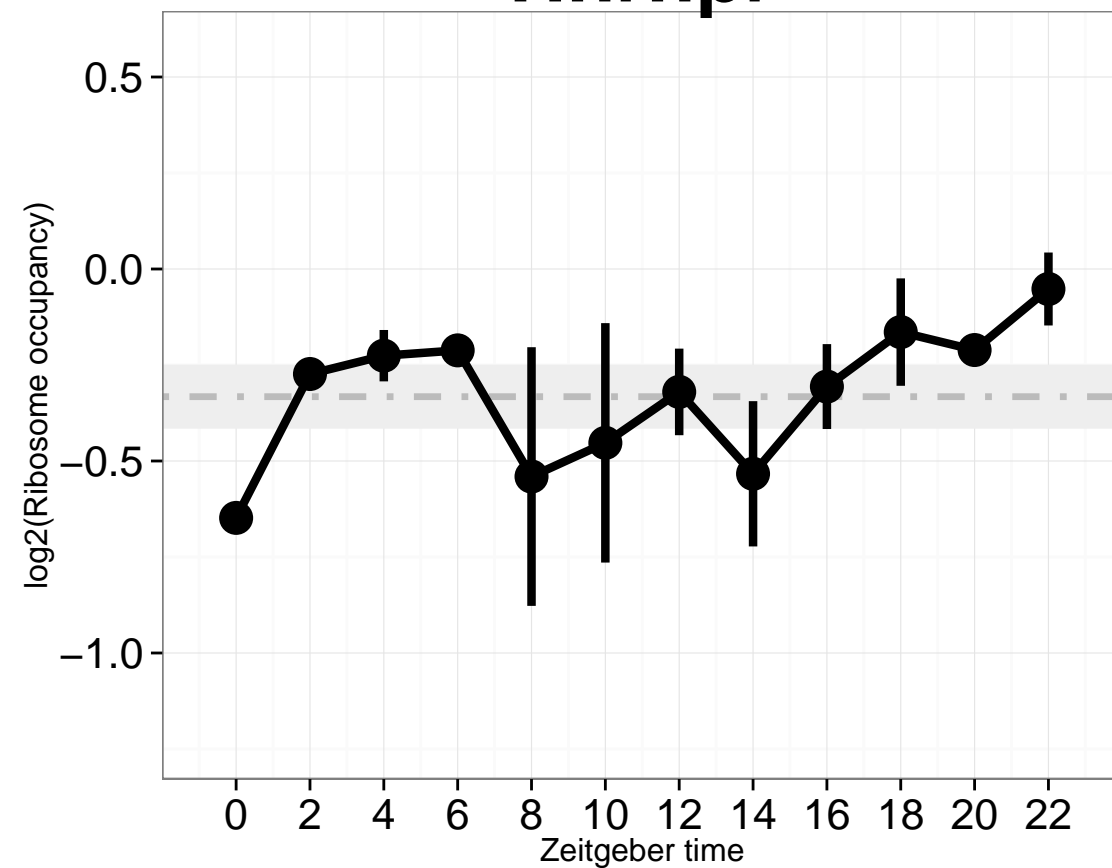

Supplement: SuppDataset_1.zip [file Hnrnpr_set_A.pdf › Supplemental Dataset 1/A-mRNA_nonrhyth_translation_nonrhyth/Hnrnpr_set_A.pdf]
