# Supplementary figures and images for: Ribosome profiling reveals the rhythmic liver translatome and circadian clock regulation by upstream open reading frames (part 35 of 113)
Source: HighWire-hosted journal article supplement (doi:10.1101/gr.195404.115), 2015-10-20

## Hnrnpu

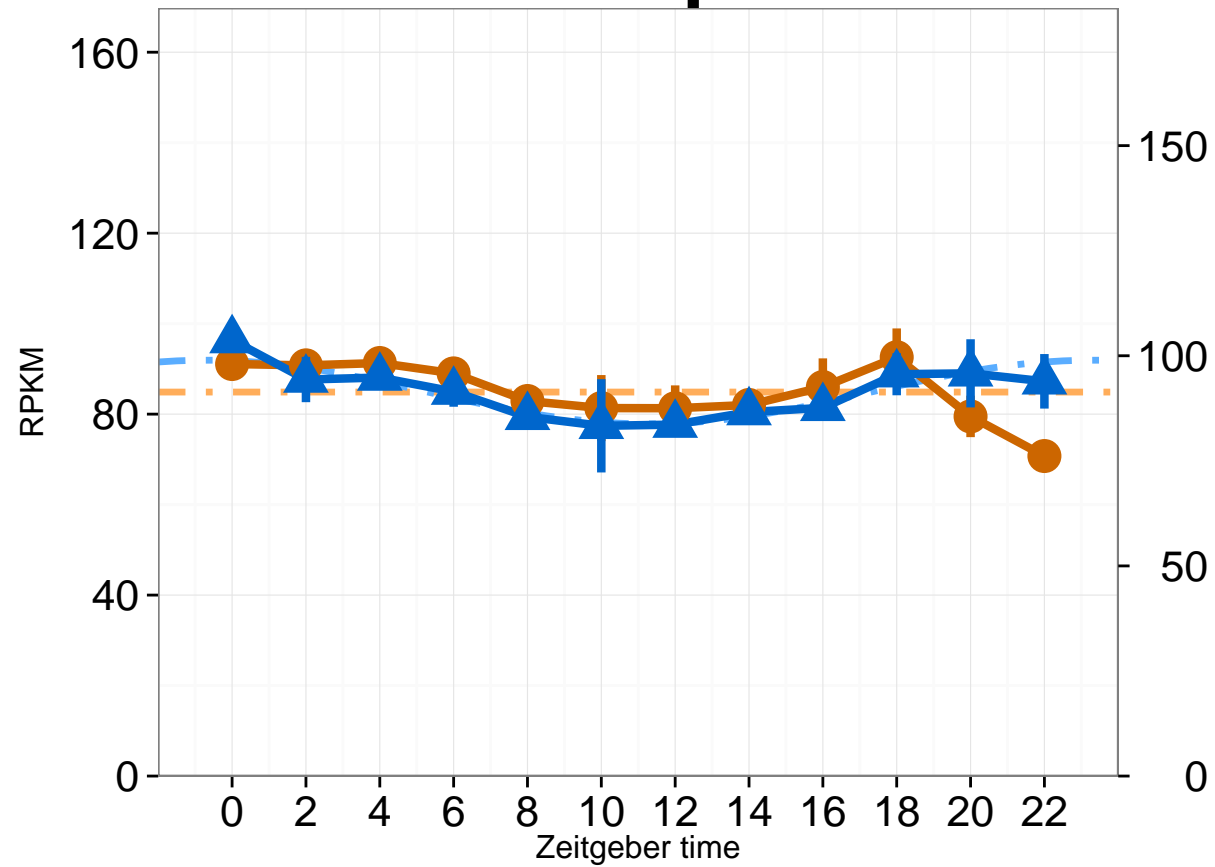

## Hnrnpu

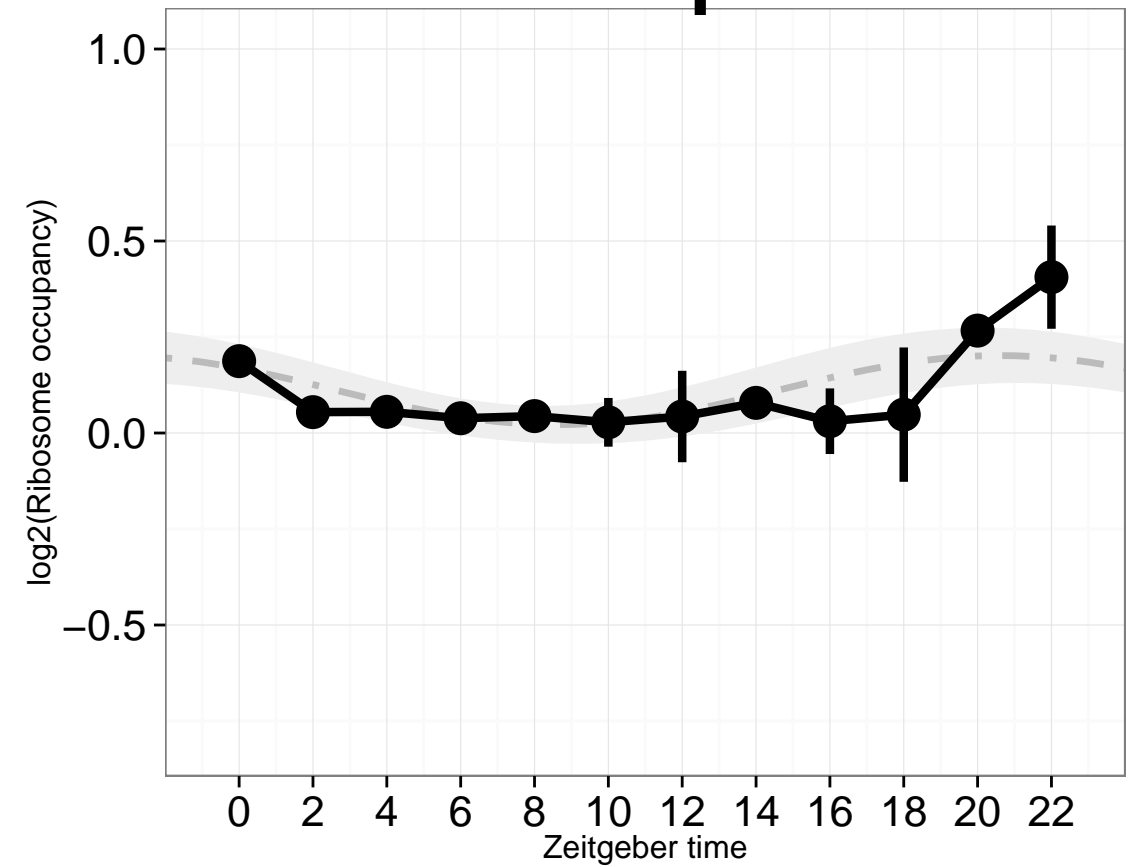

Supplement: SuppDataset_1.zip [file Hnrnpu_set_A.pdf › Supplemental Dataset 1/A-mRNA_nonrhyth_translation_nonrhyth/Hnrnpu_set_A.pdf]

# Hnrnpul1

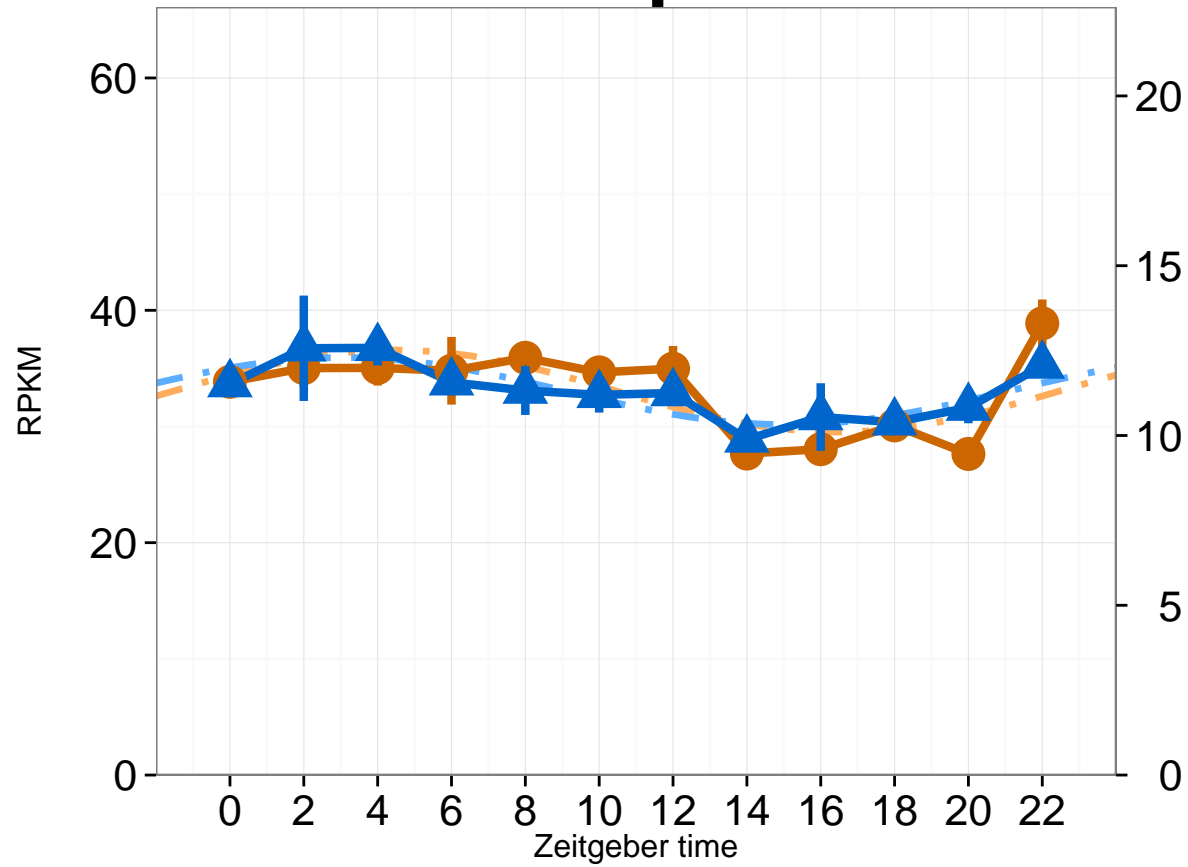

# Hnrnpul1

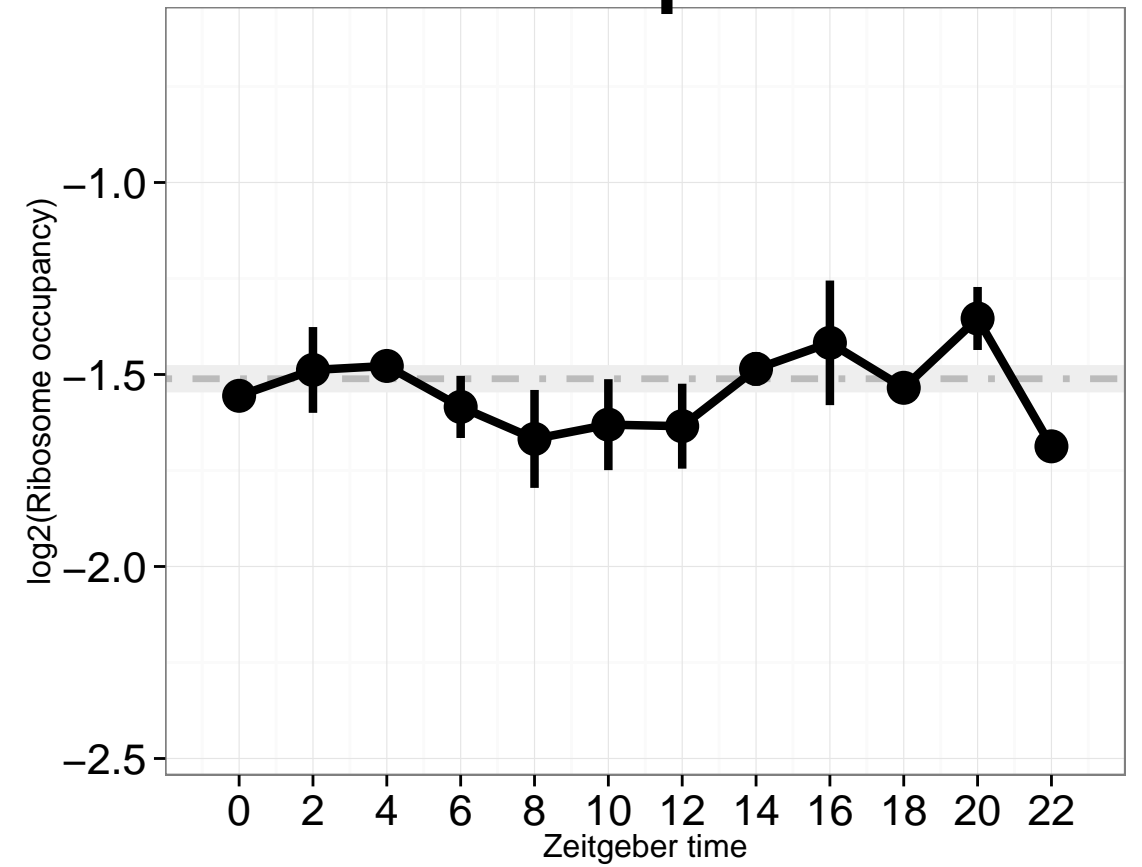

Supplement: SuppDataset_1.zip [file Hnrnpul1_set_A.pdf › Supplemental Dataset 1/A-mRNA_nonrhyth_translation_nonrhyth/Hnrnpul1_set_A.pdf]

## Hnrnpul2

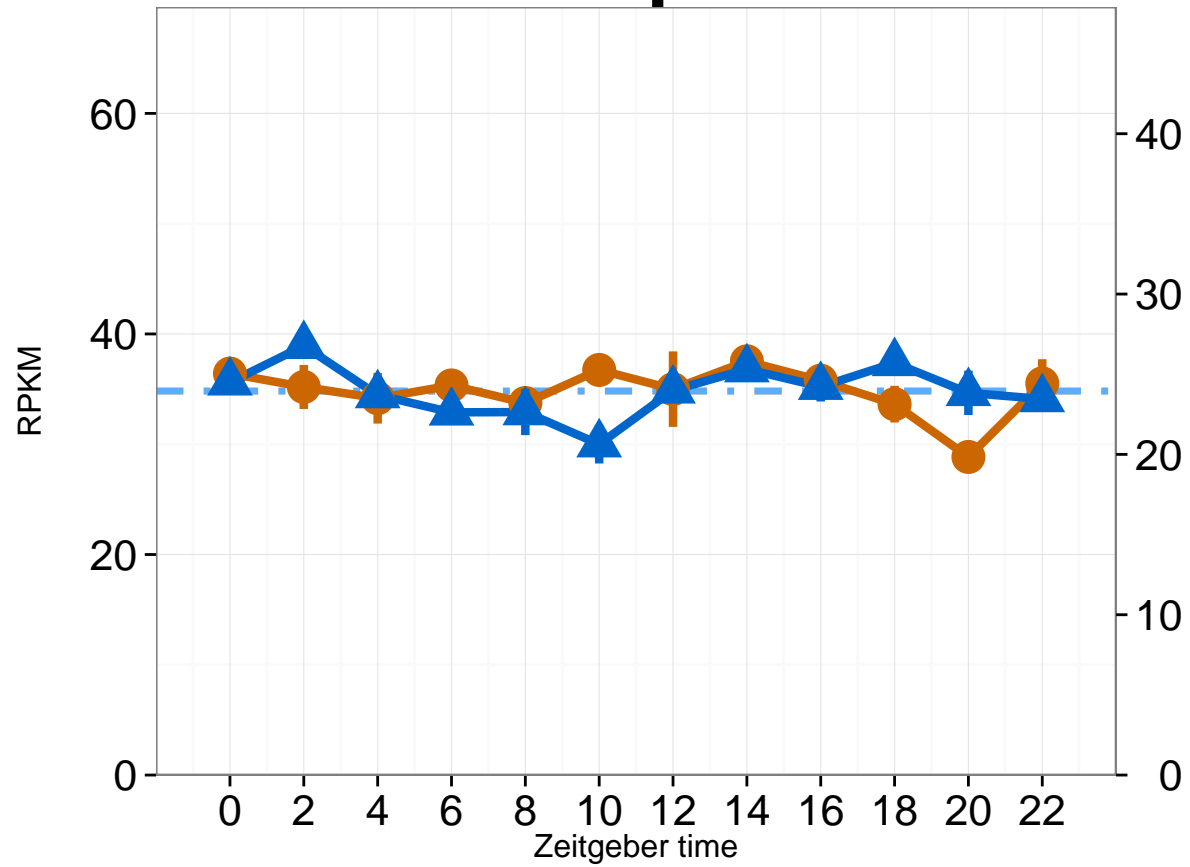

## Hnrnpul2

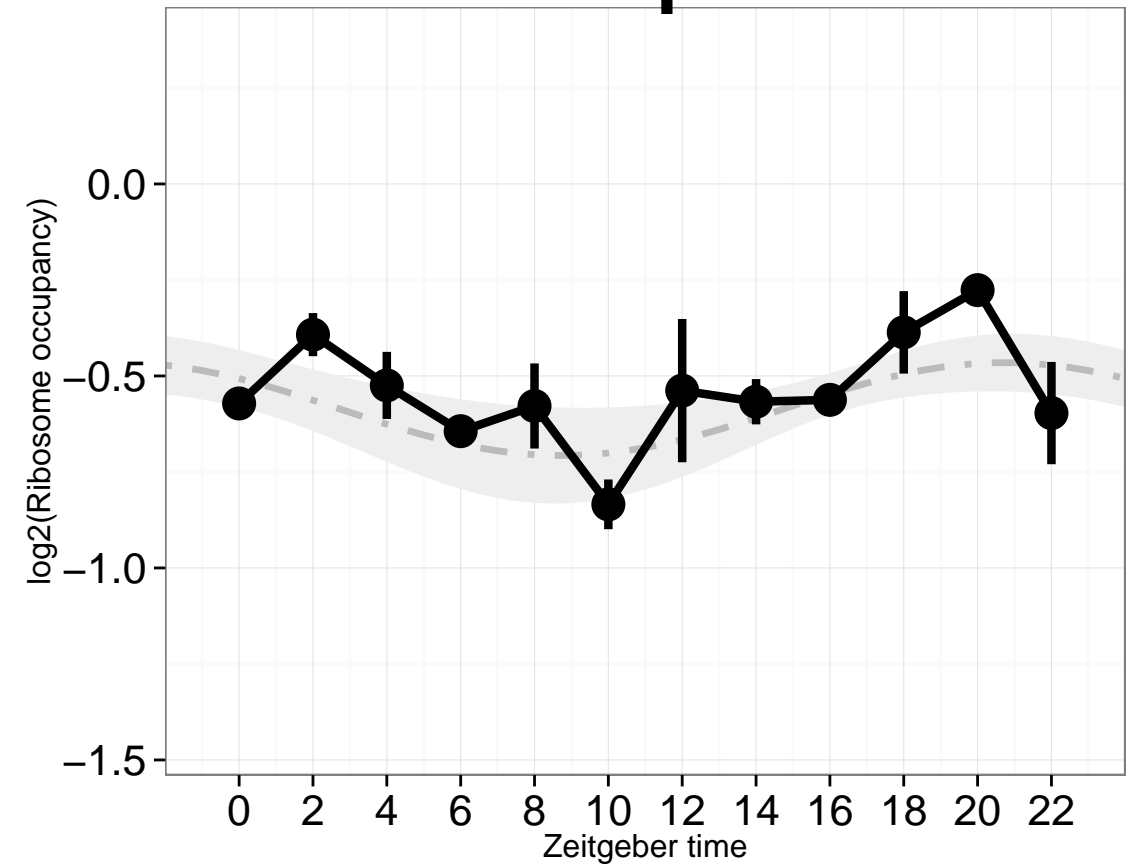

Supplement: SuppDataset_1.zip [file Hnrnpul2_set_A.pdf › Supplemental Dataset 1/A-mRNA_nonrhyth_translation_nonrhyth/Hnrnpul2_set_A.pdf]

# Homer1

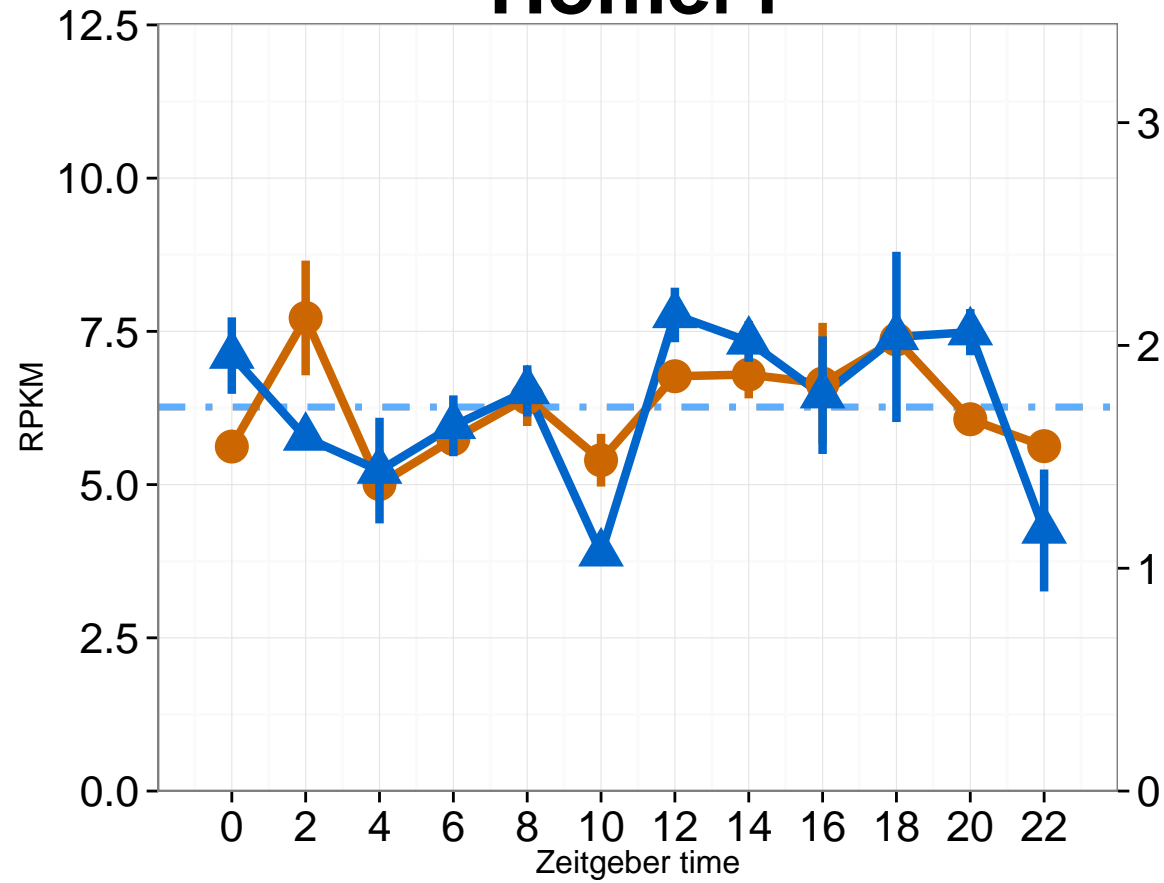

# Homer1

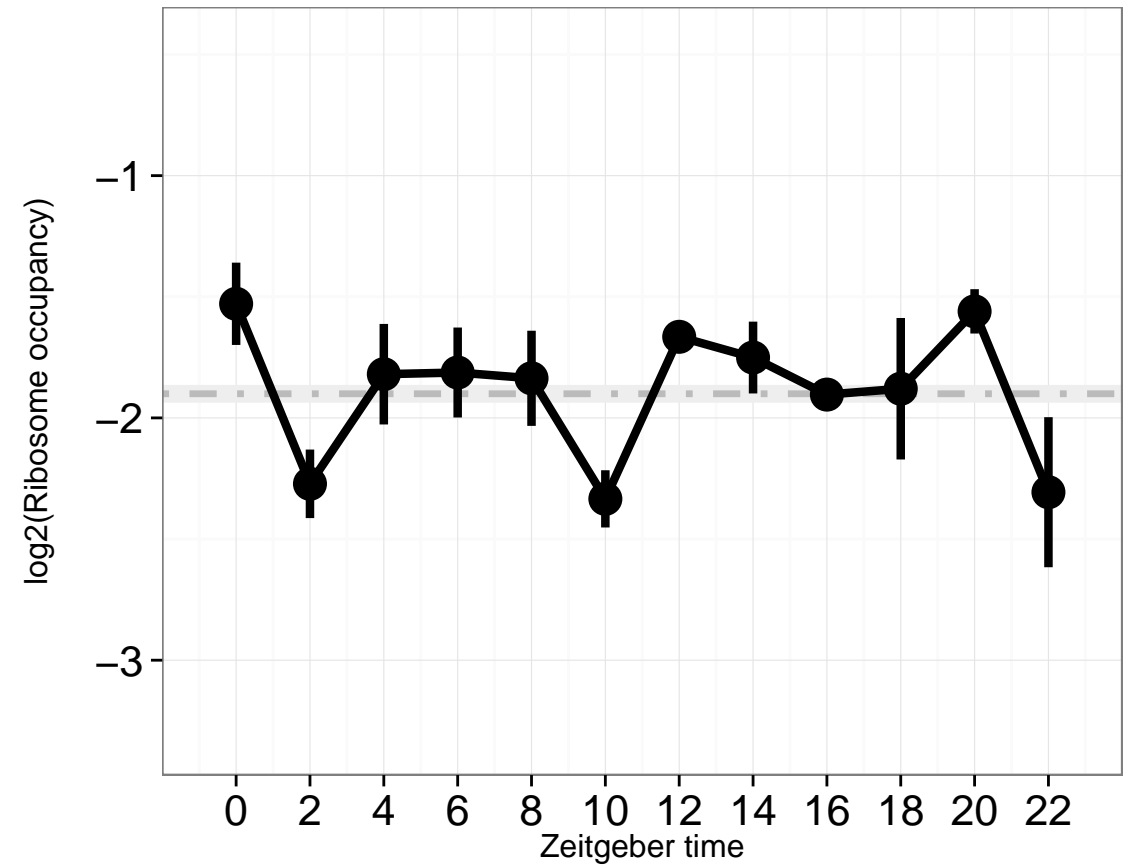

Supplement: SuppDataset_1.zip [file Homer1_set_A.pdf › Supplemental Dataset 1/A-mRNA_nonrhyth_translation_nonrhyth/Homer1_set_A.pdf]

Homer3

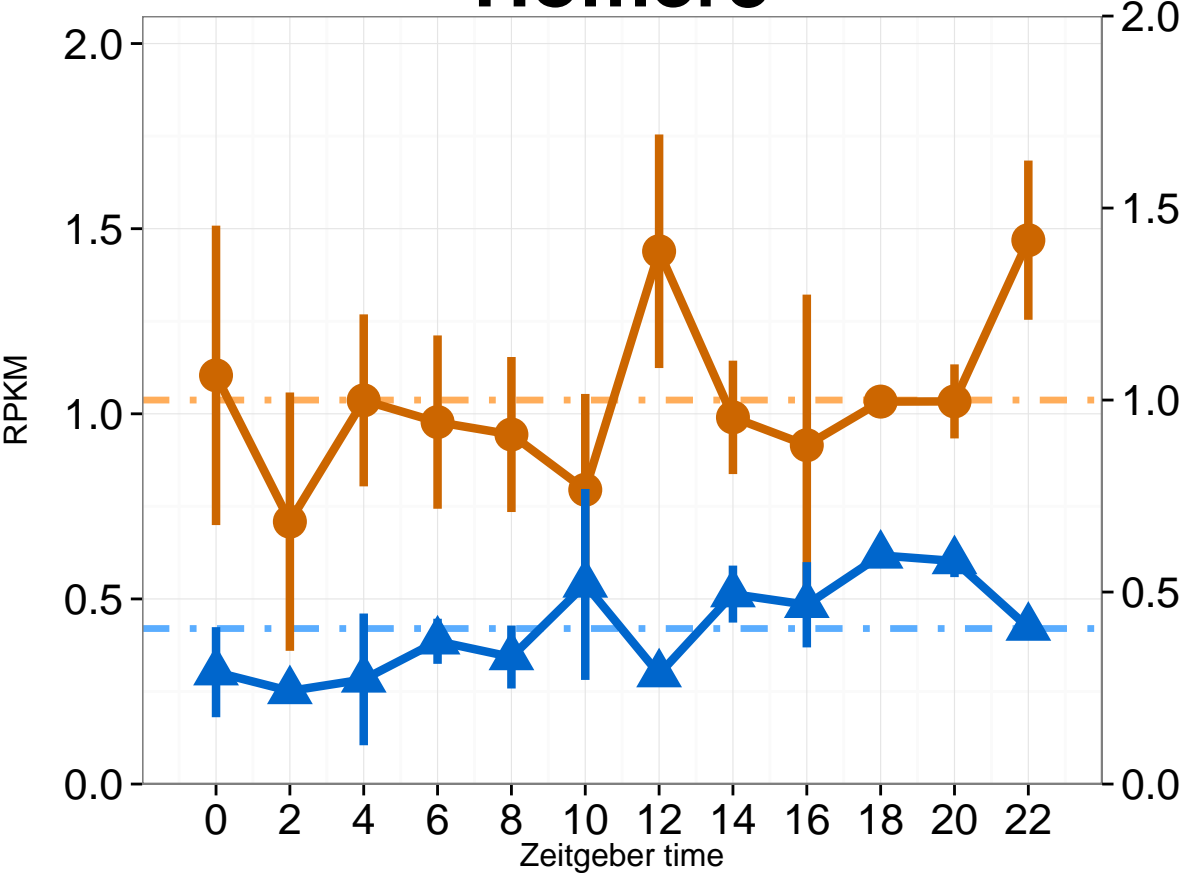

Homer3

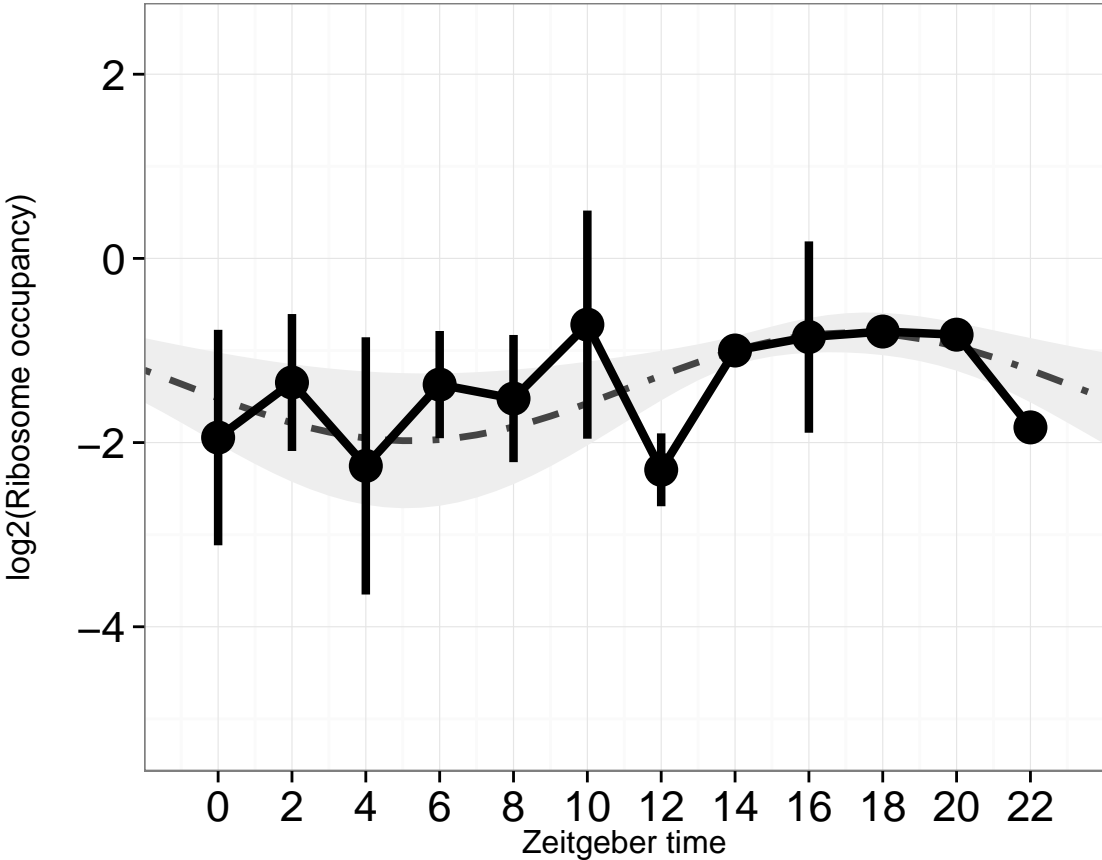

Supplement: SuppDataset_1.zip [file Homer3_set_A.pdf › Supplemental Dataset 1/A-mRNA_nonrhyth_translation_nonrhyth/Homer3_set_A.pdf]

# Homez

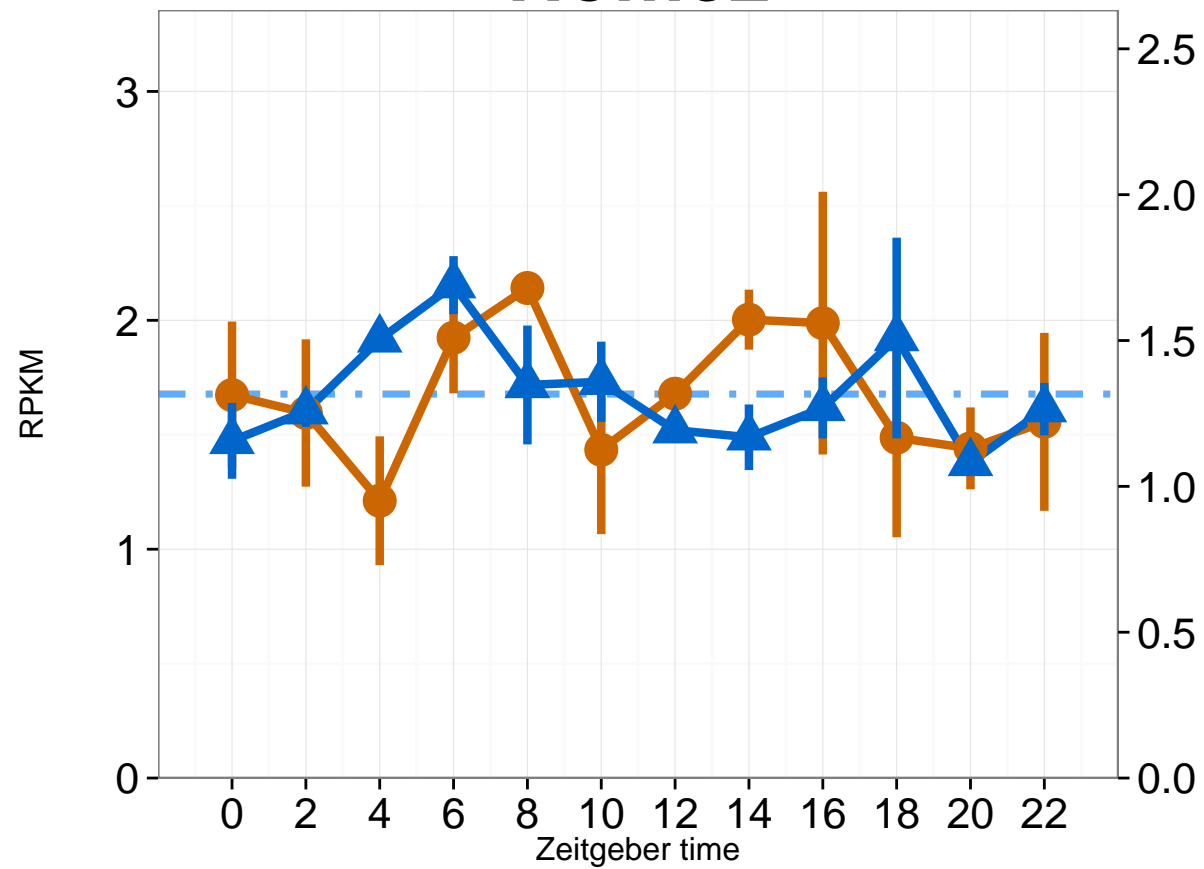

# Homez

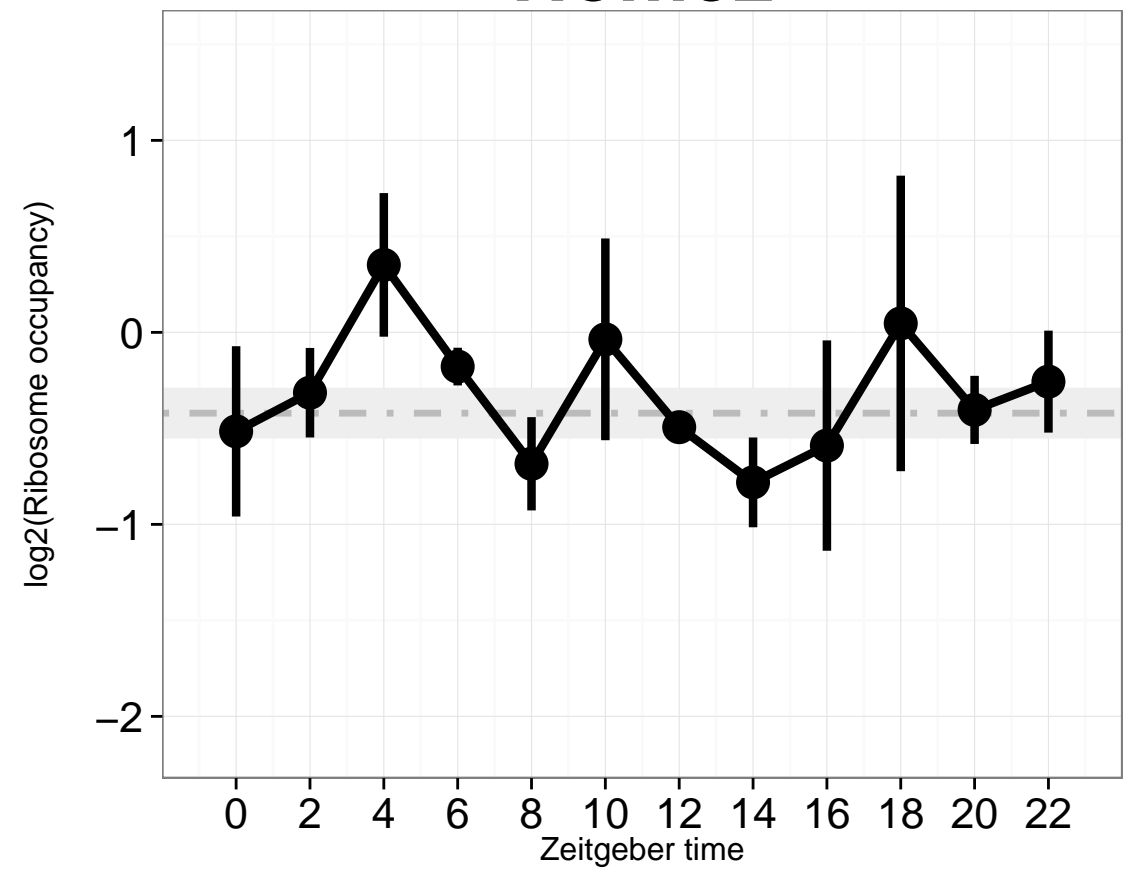

Supplement: SuppDataset_1.zip [file Homez_set_A.pdf › Supplemental Dataset 1/A-mRNA_nonrhyth_translation_nonrhyth/Homez_set_A.pdf]

## Hook3

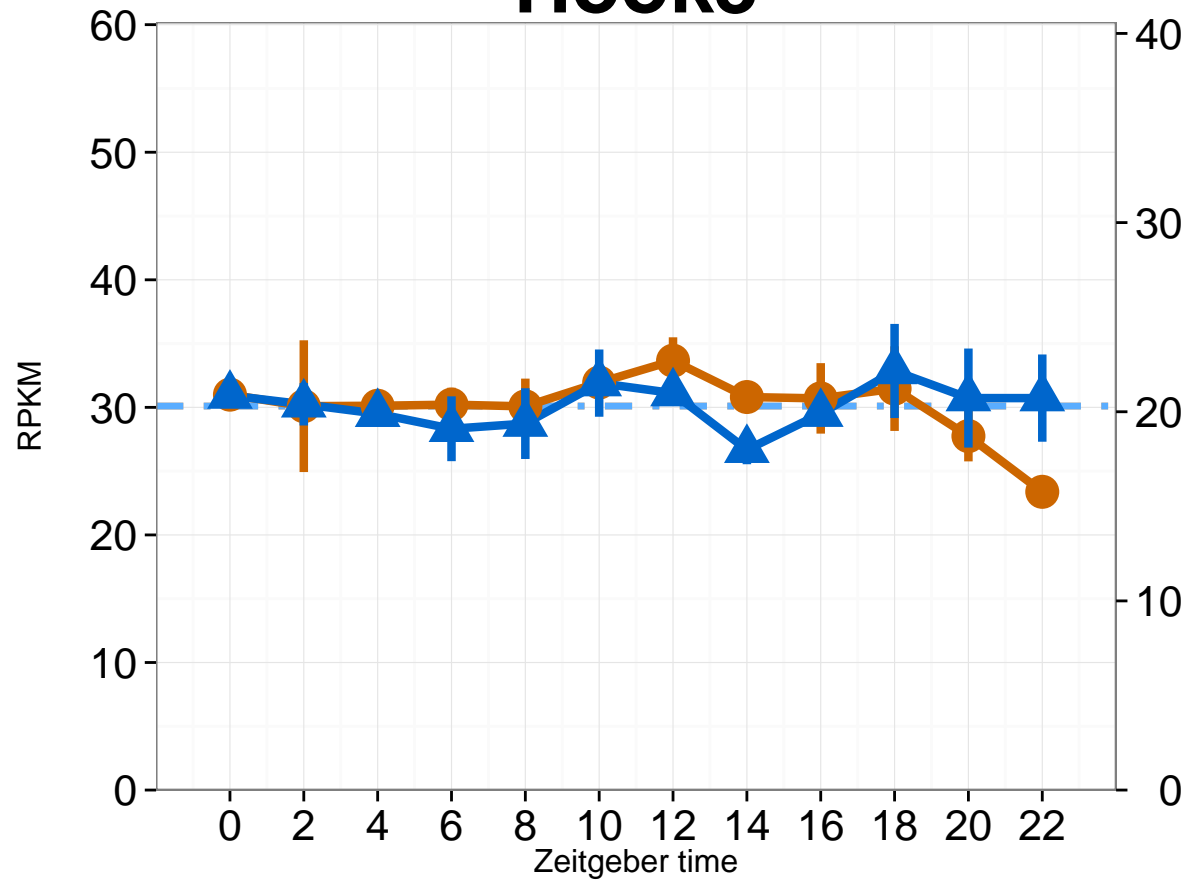

## Hook3

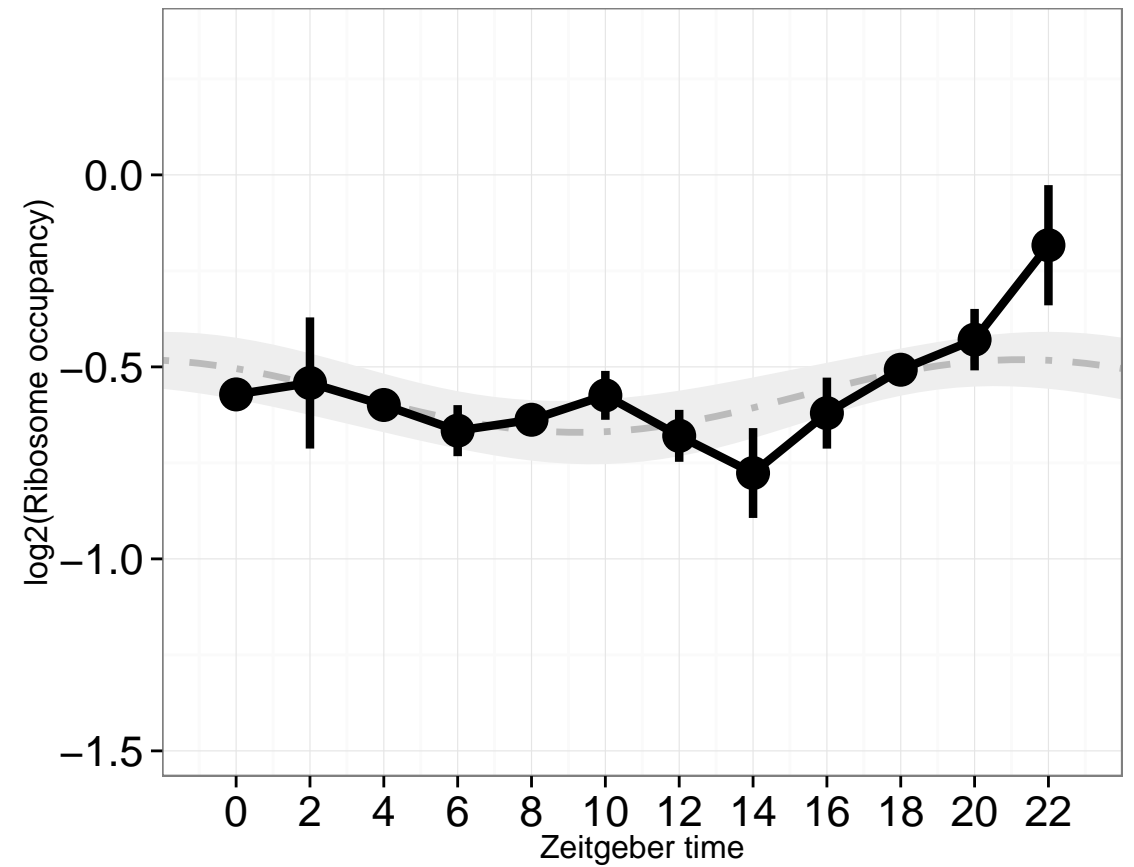

Supplement: SuppDataset_1.zip [file Hook3_set_A.pdf › Supplemental Dataset 1/A-mRNA_nonrhyth_translation_nonrhyth/Hook3_set_A.pdf]

## Hopx

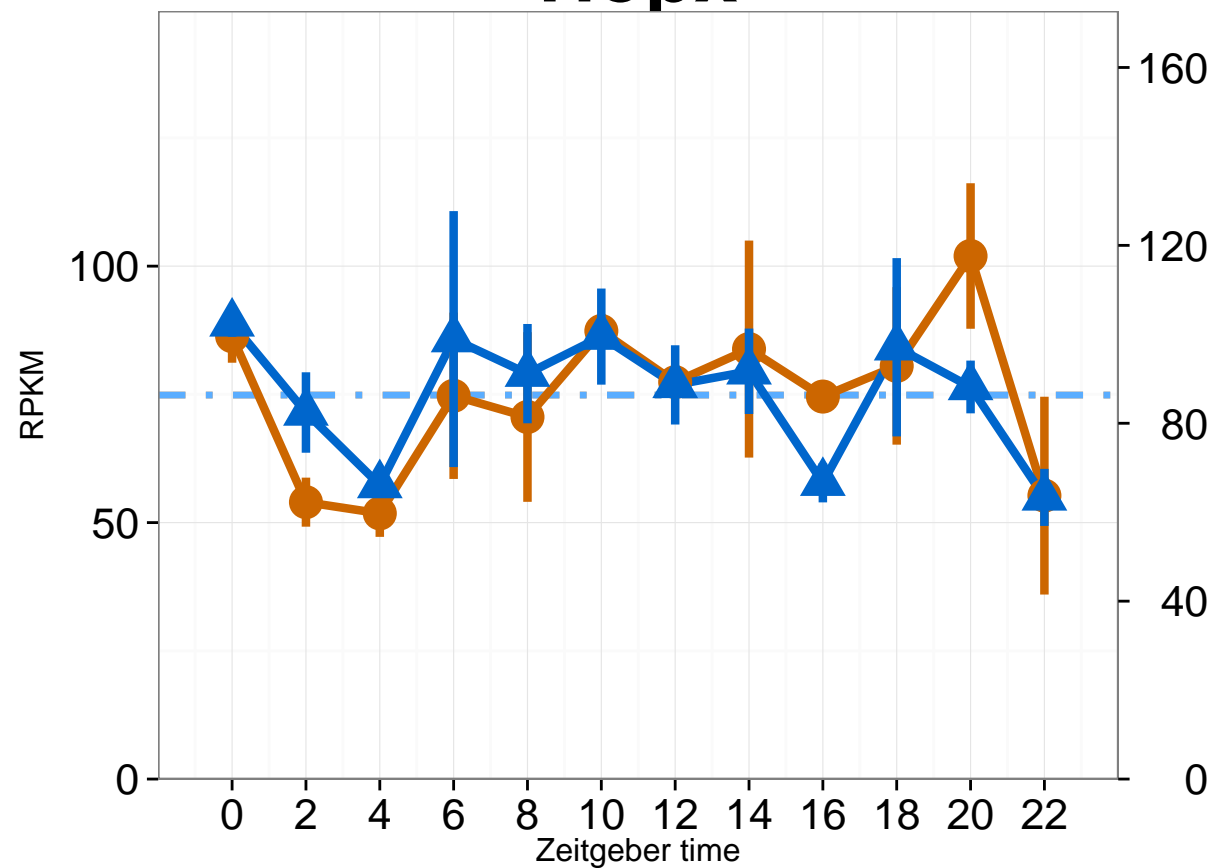

## Hopx

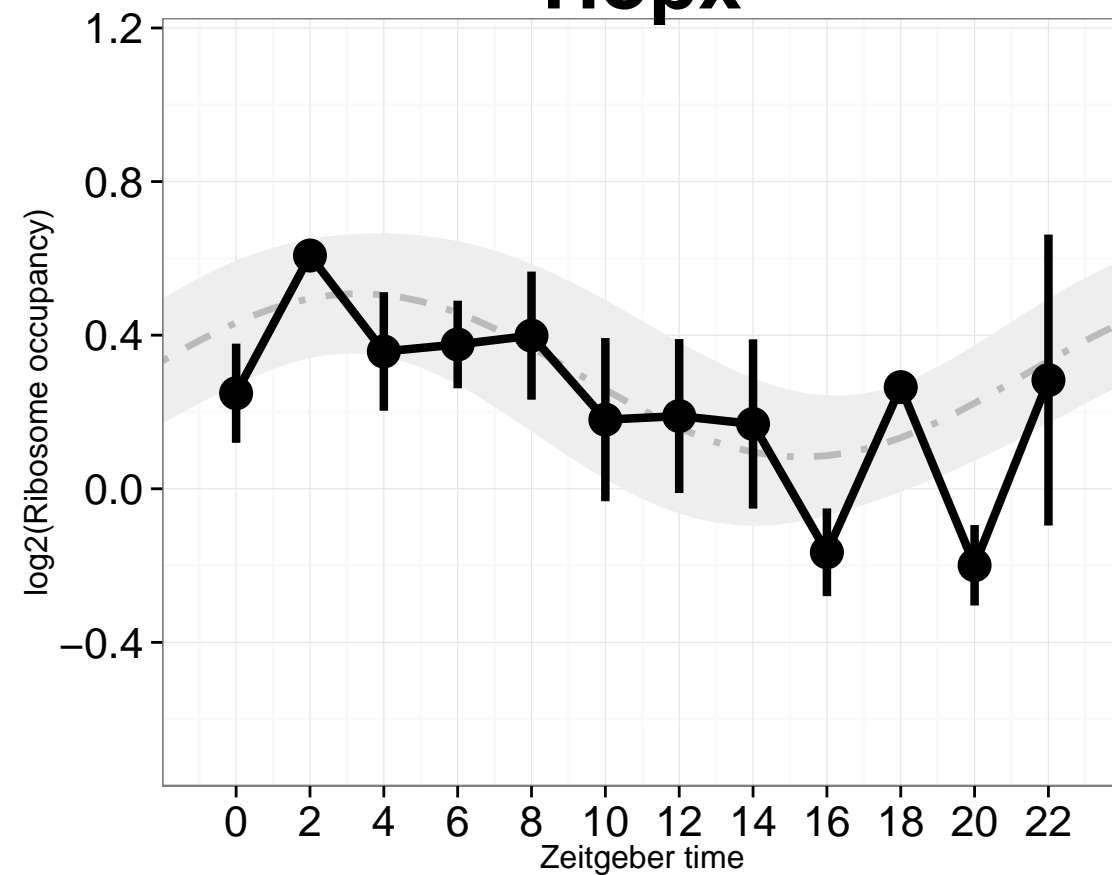

Supplement: SuppDataset_1.zip [file Hopx_set_A.pdf › Supplemental Dataset 1/A-mRNA_nonrhyth_translation_nonrhyth/Hopx_set_A.pdf]

## Hp1bp3

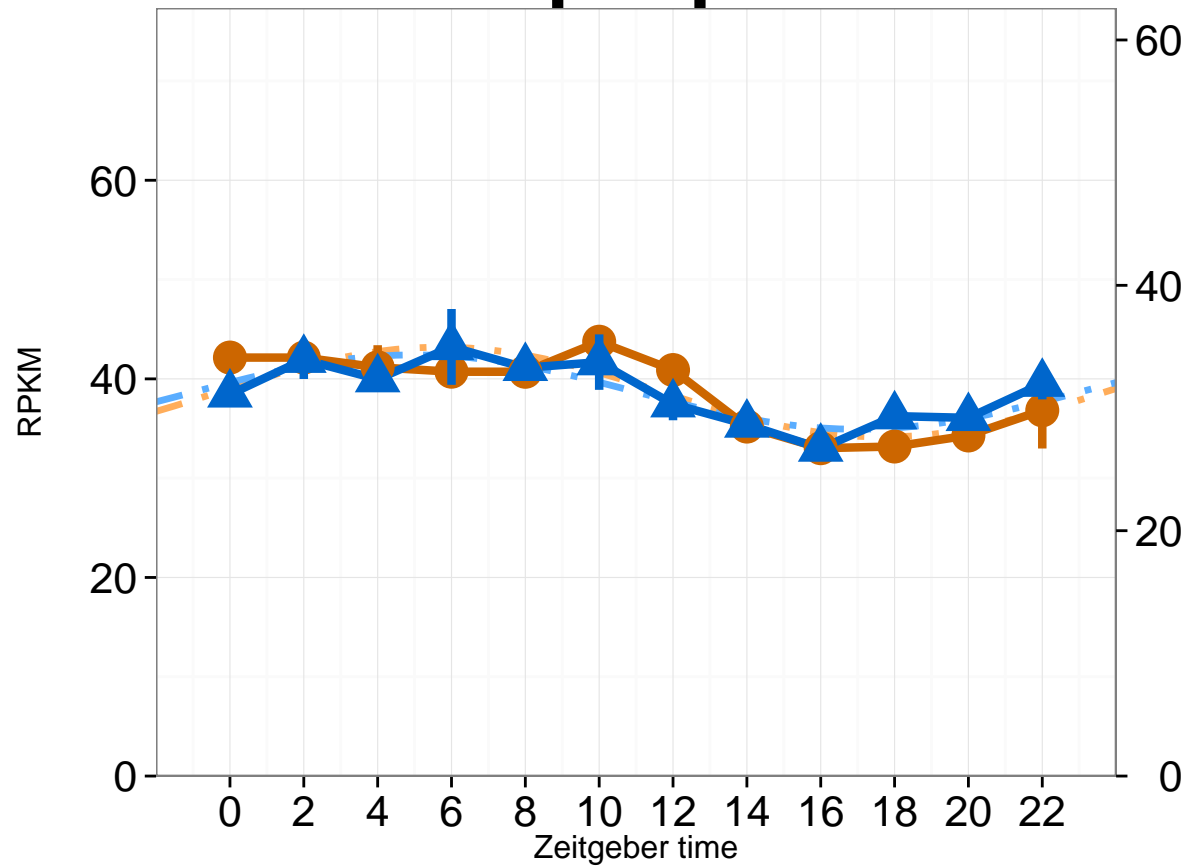

## Hp1bp3

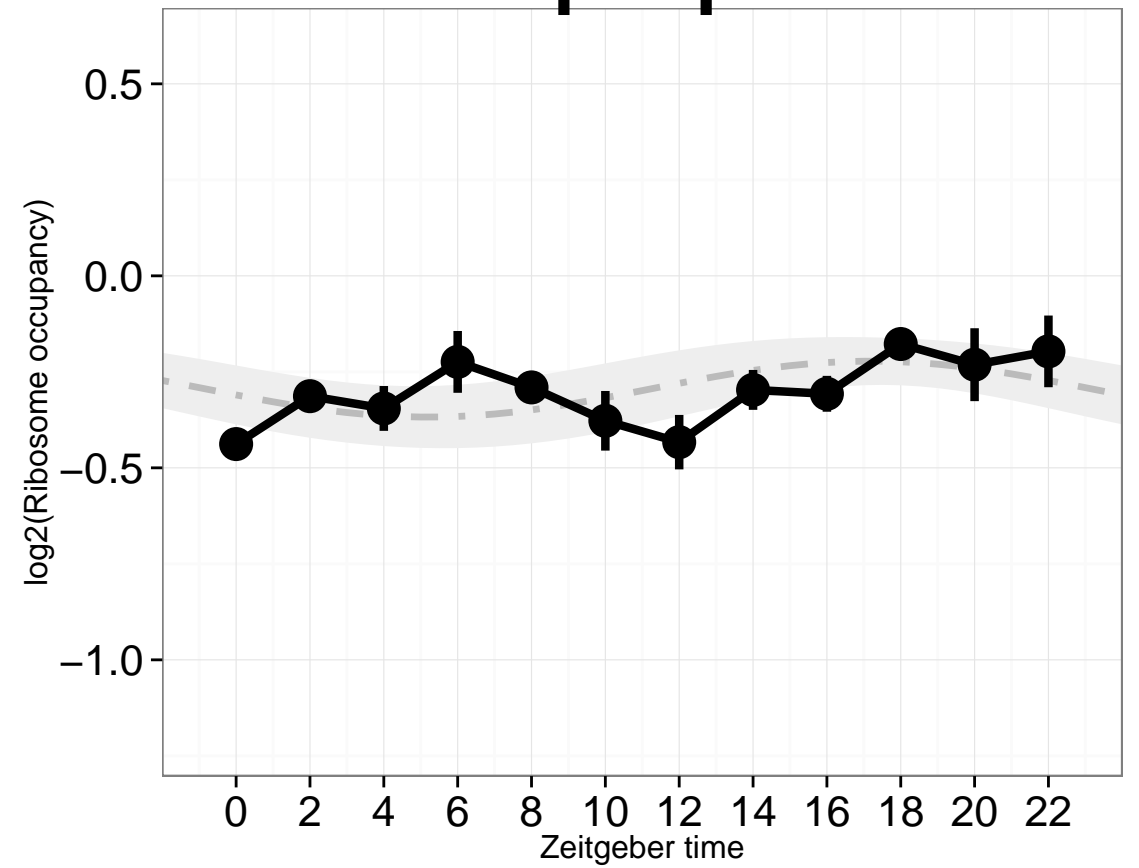

Supplement: SuppDataset_1.zip [file Hp1bp3_set_A.pdf › Supplemental Dataset 1/A-mRNA_nonrhyth_translation_nonrhyth/Hp1bp3_set_A.pdf]

## Hpcal1

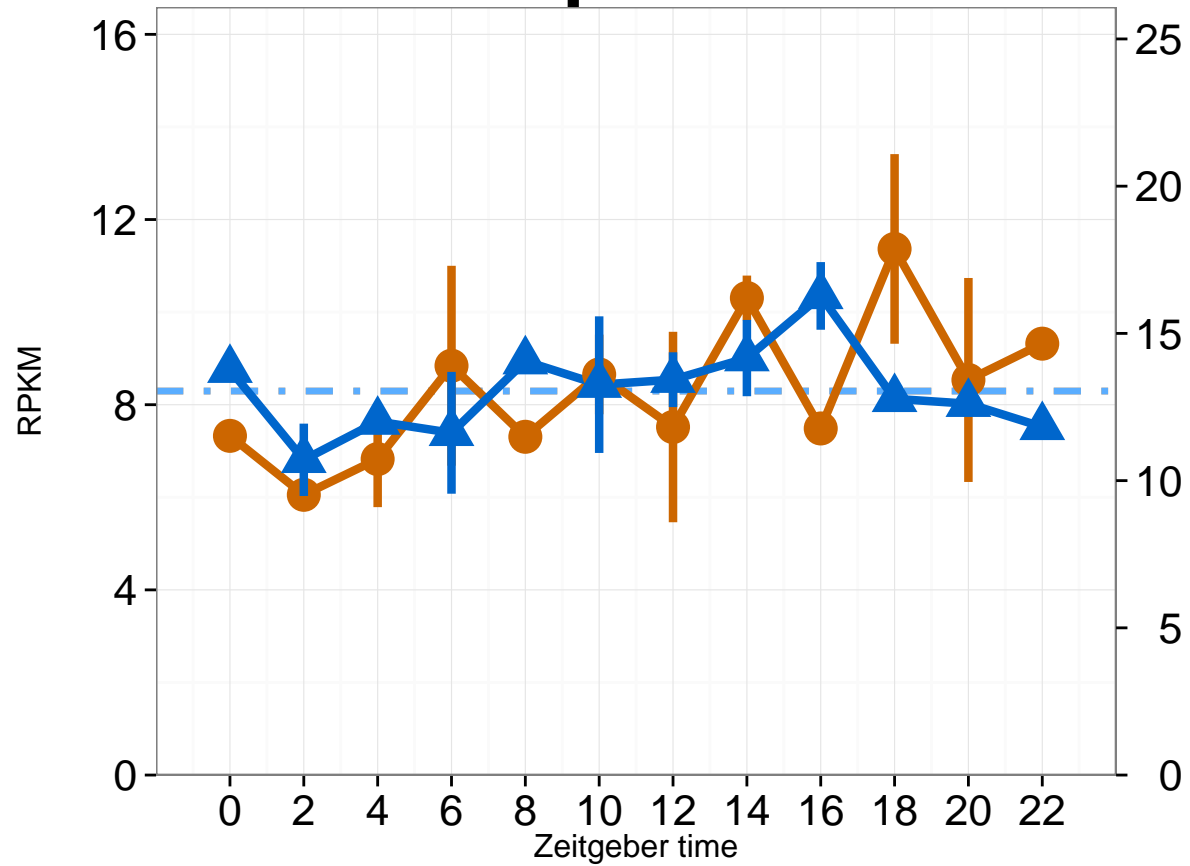

## Hpcal1

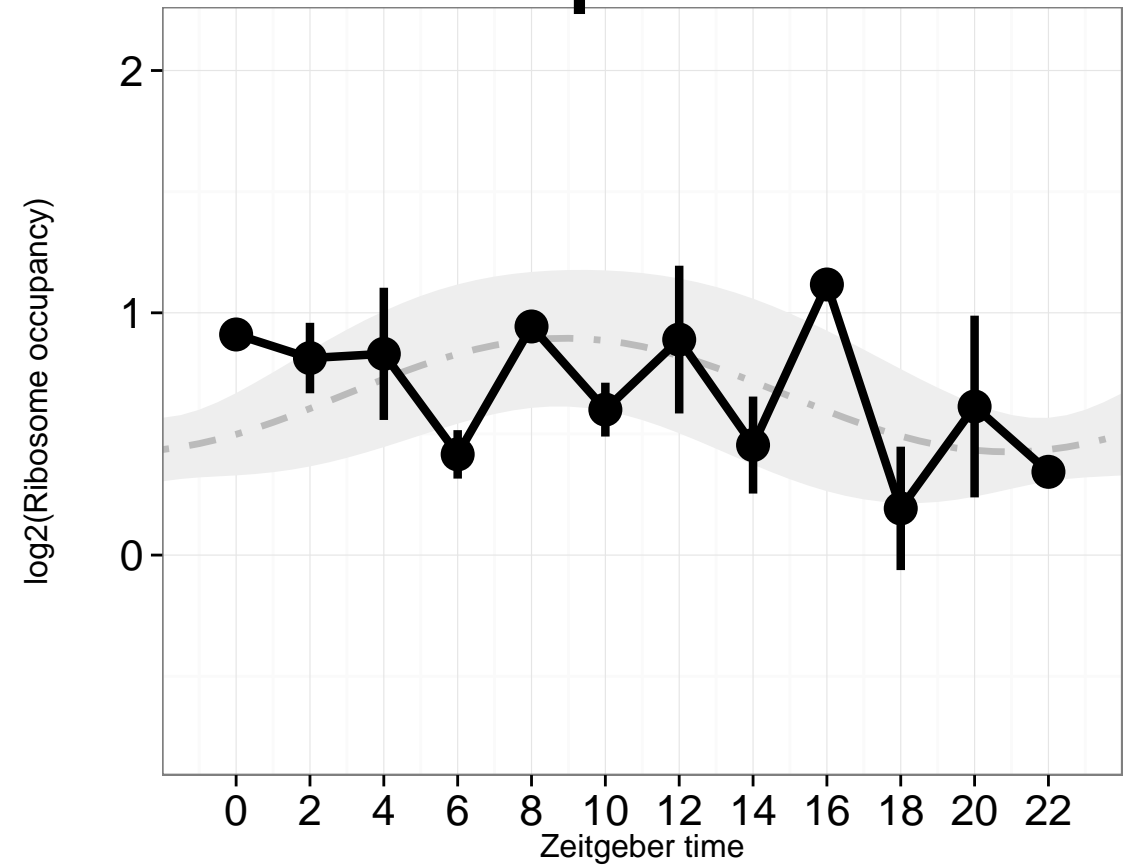

Supplement: SuppDataset_1.zip [file Hpcal1_set_A.pdf › Supplemental Dataset 1/A-mRNA_nonrhyth_translation_nonrhyth/Hpcal1_set_A.pdf]

## Hpd

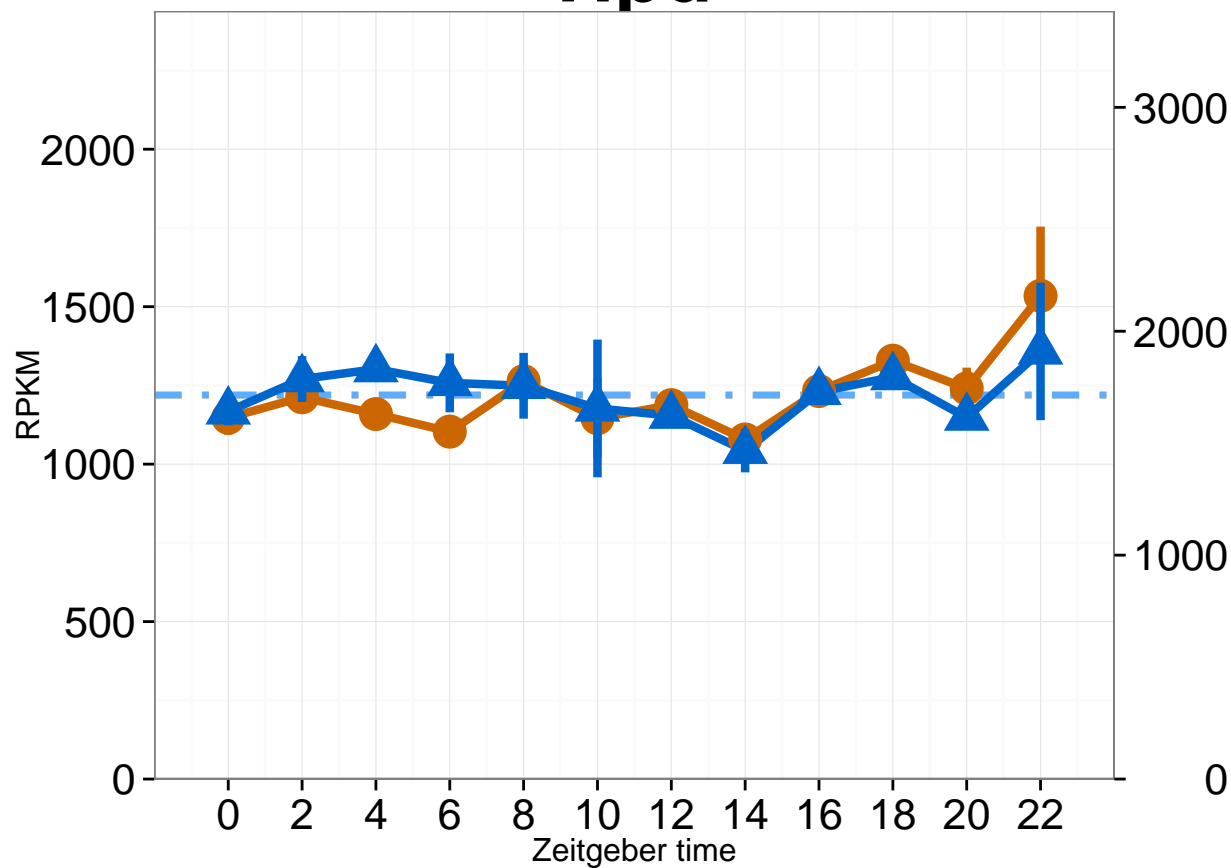

## Hpd

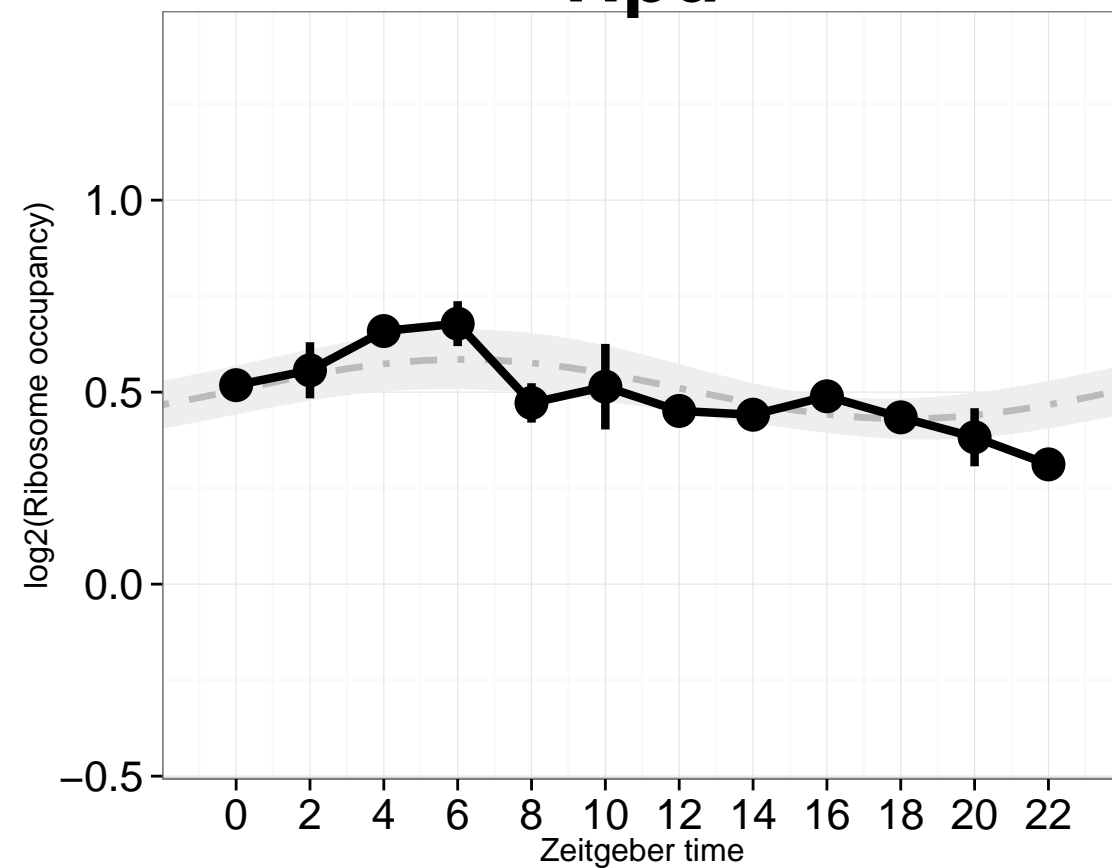

Supplement: SuppDataset_1.zip [file Hpd_set_A.pdf › Supplemental Dataset 1/A-mRNA_nonrhyth_translation_nonrhyth/Hpd_set_A.pdf]

# Hpgd

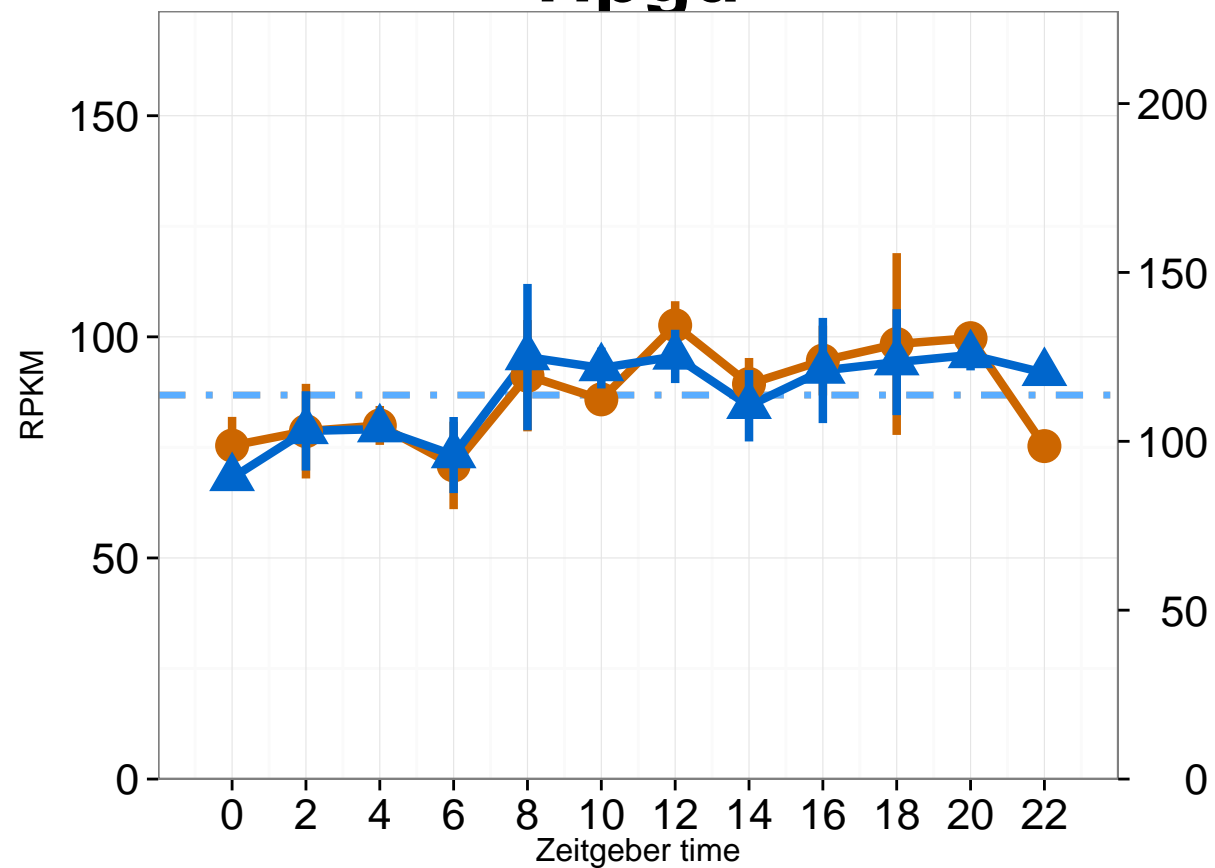

# Hpgd

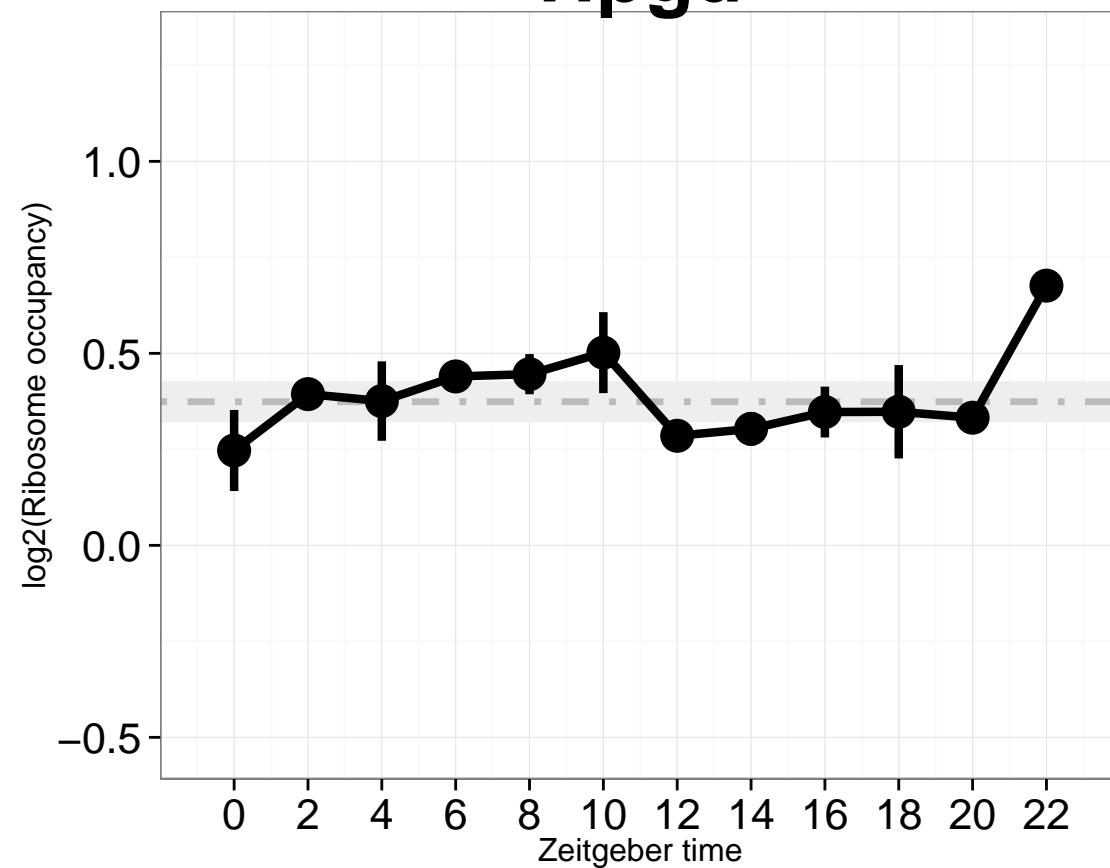

Supplement: SuppDataset_1.zip [file Hpgd_set_A.pdf › Supplemental Dataset 1/A-mRNA_nonrhyth_translation_nonrhyth/Hpgd_set_A.pdf]

## Hpn

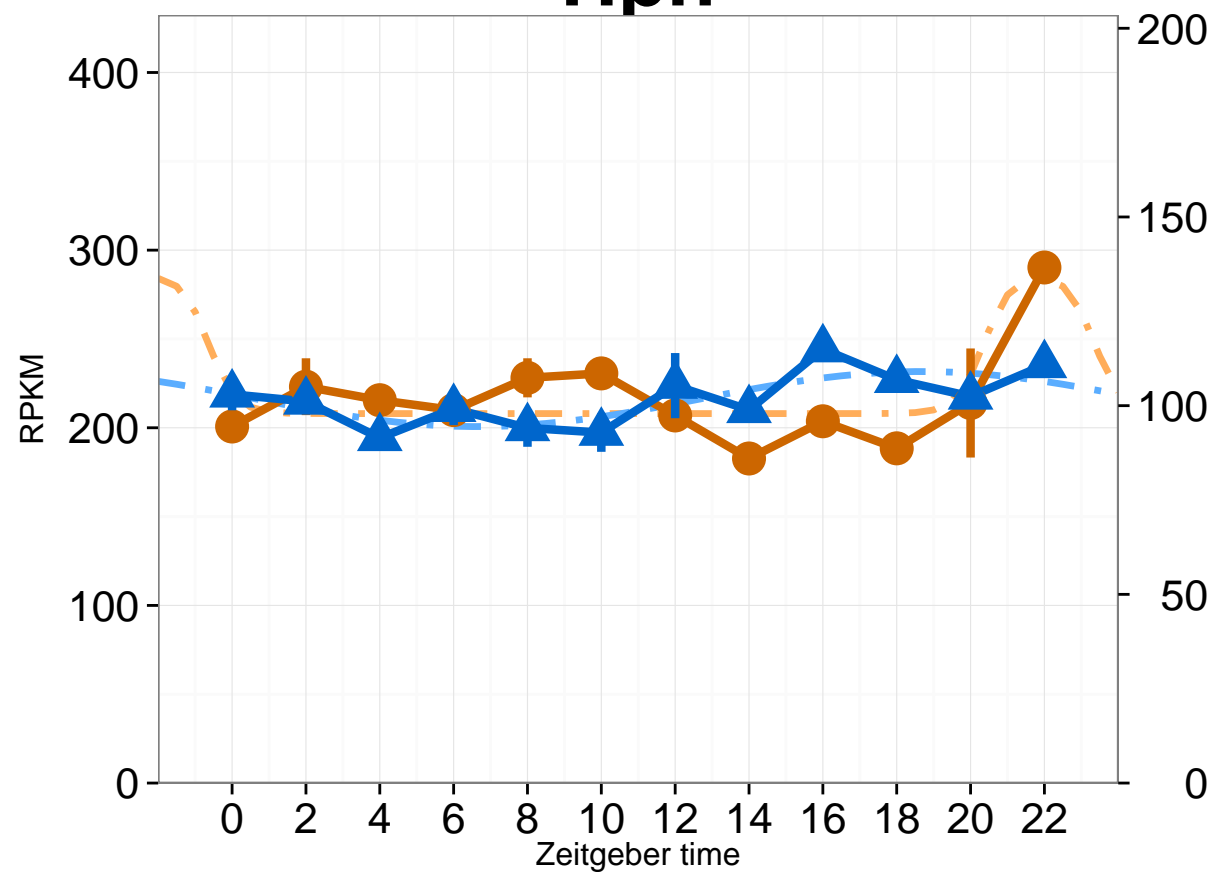

## Hpn

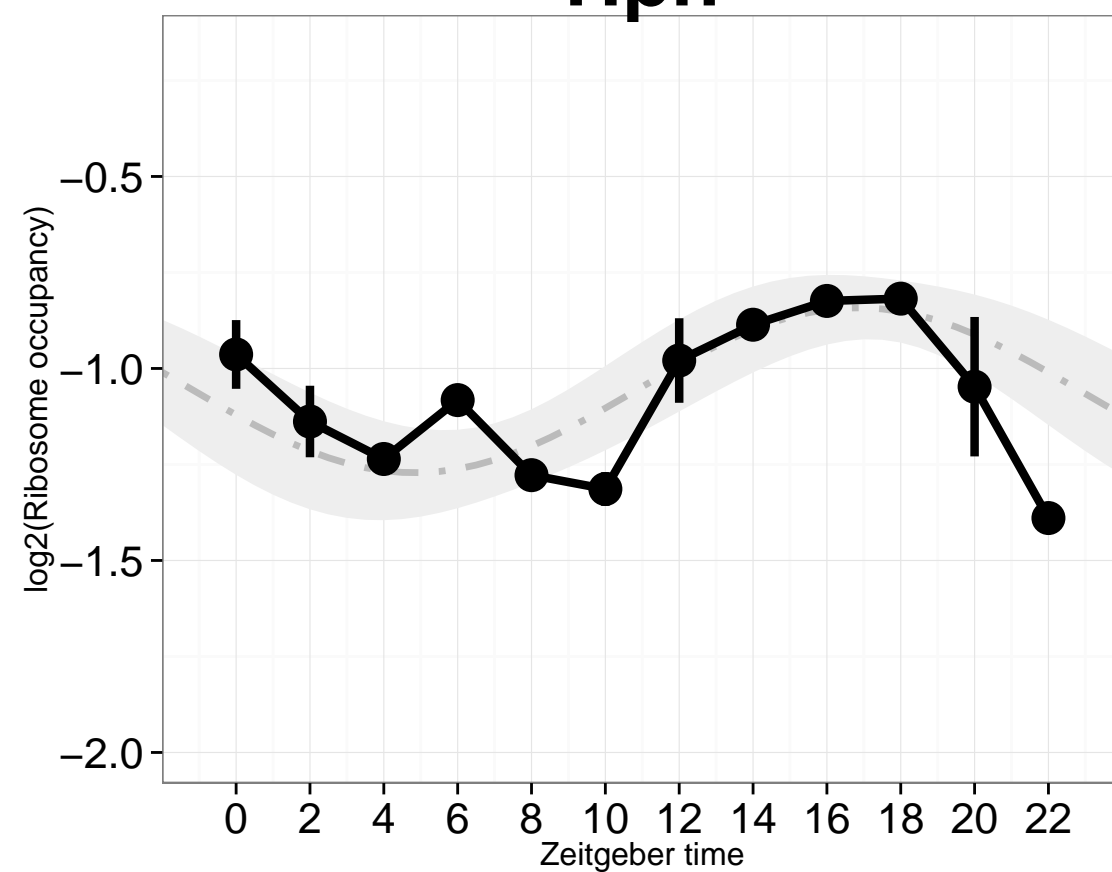

Supplement: SuppDataset_1.zip [file Hpn_set_A.pdf › Supplemental Dataset 1/A-mRNA_nonrhyth_translation_nonrhyth/Hpn_set_A.pdf]

## Hprt

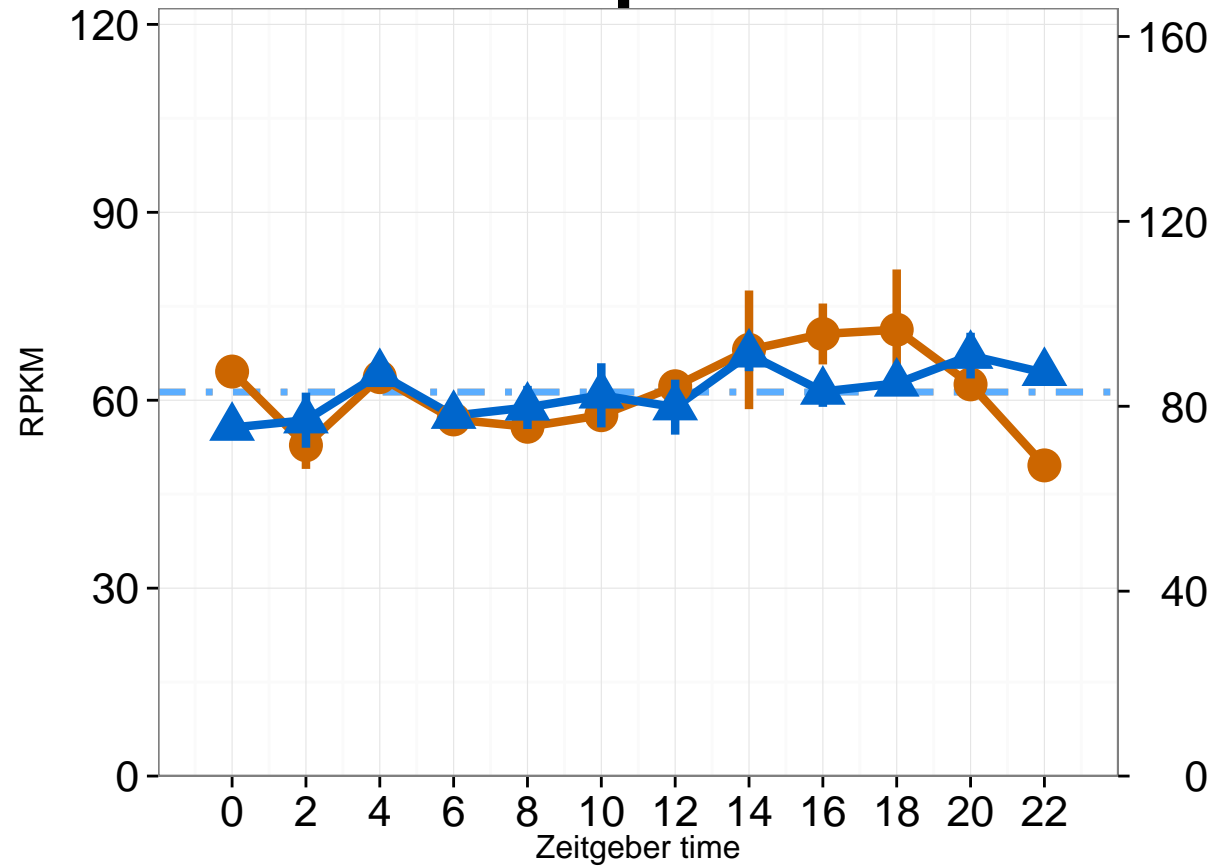

## Hprt

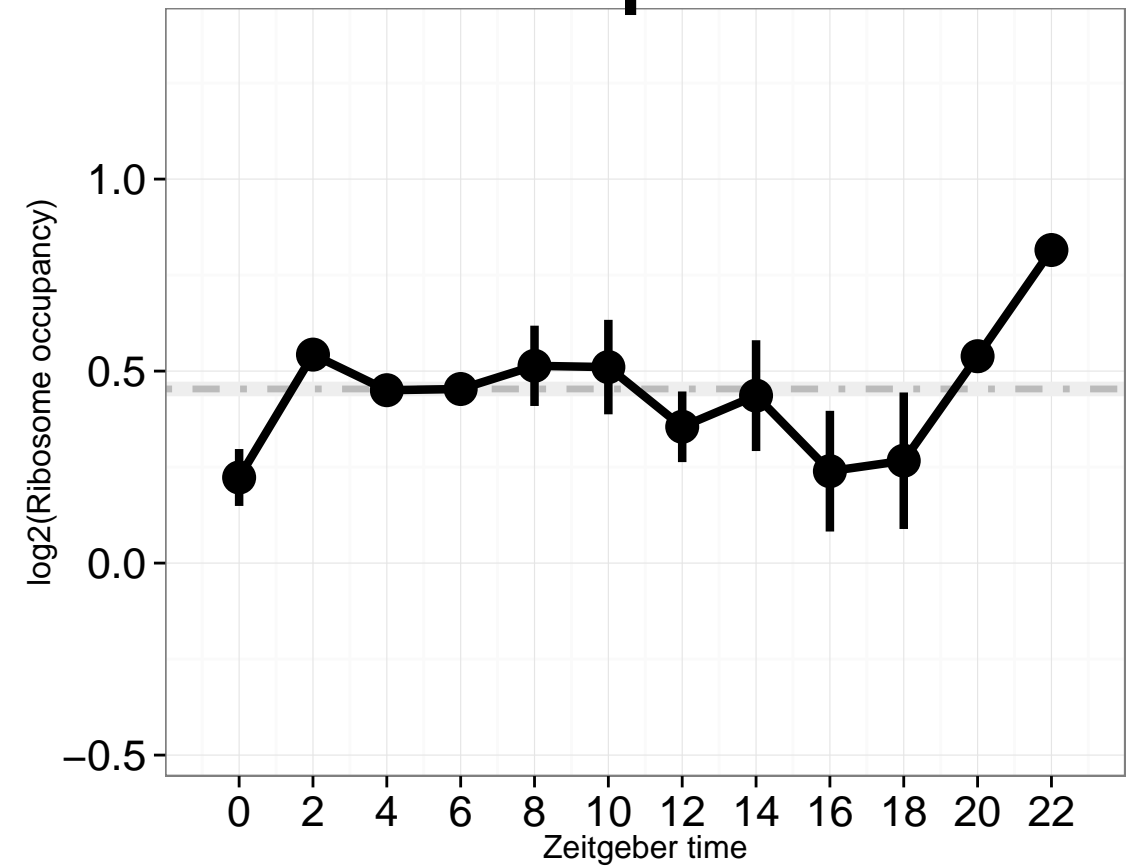

Supplement: SuppDataset_1.zip [file Hprt_set_A.pdf › Supplemental Dataset 1/A-mRNA_nonrhyth_translation_nonrhyth/Hprt_set_A.pdf]

## Hps3

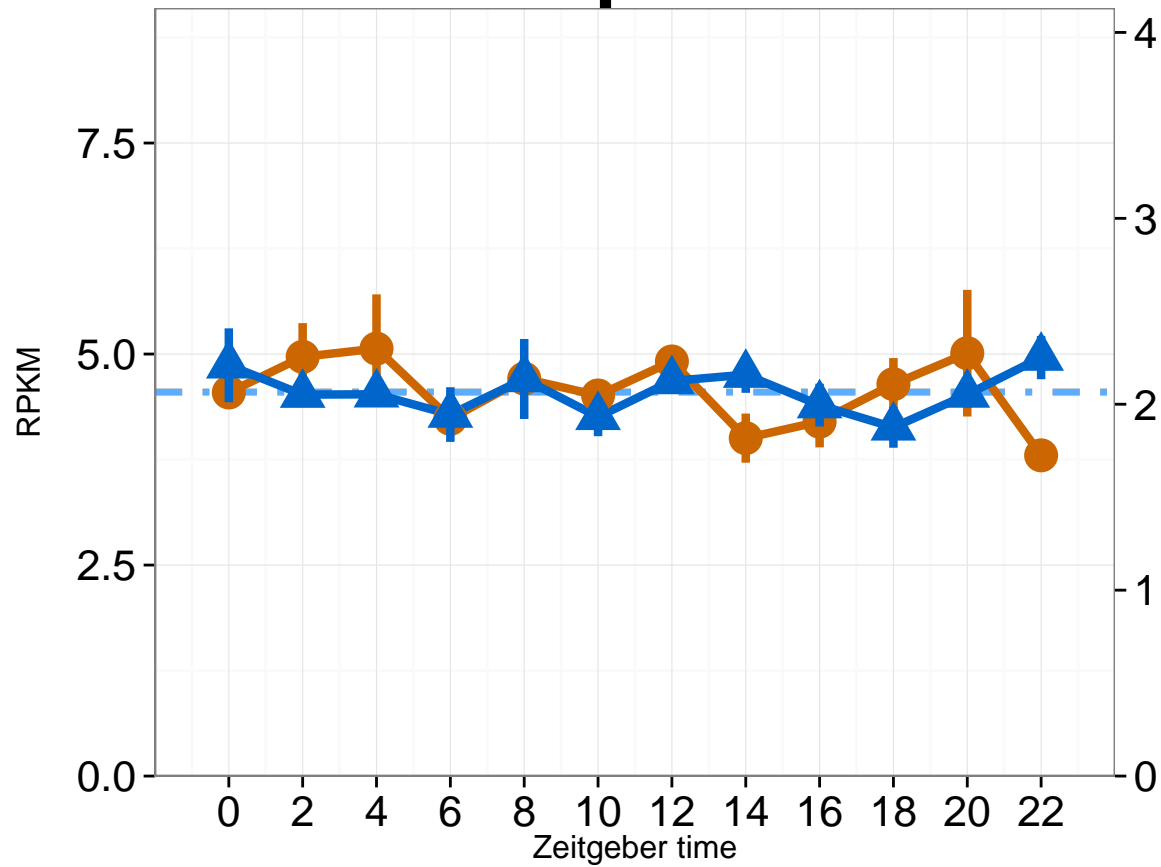

## Hps3

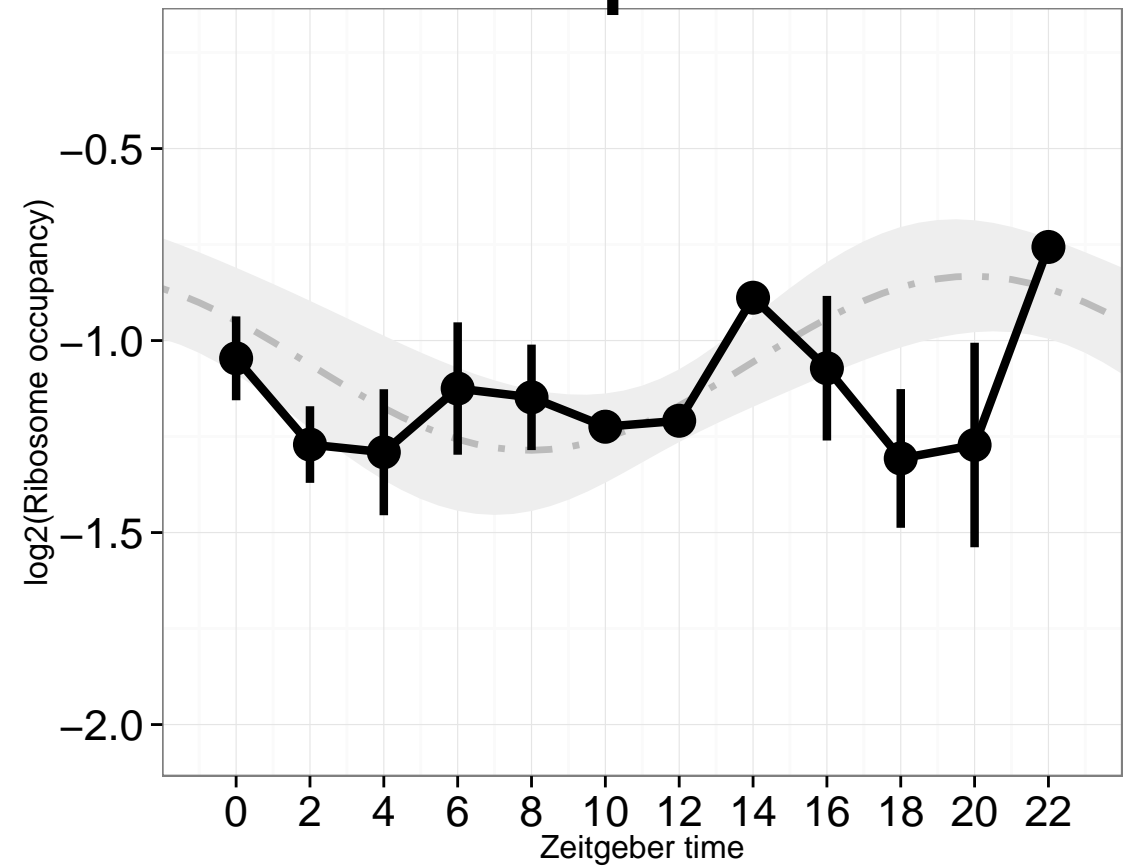

Supplement: SuppDataset_1.zip [file Hps3_set_A.pdf › Supplemental Dataset 1/A-mRNA_nonrhyth_translation_nonrhyth/Hps3_set_A.pdf]

# Hps5

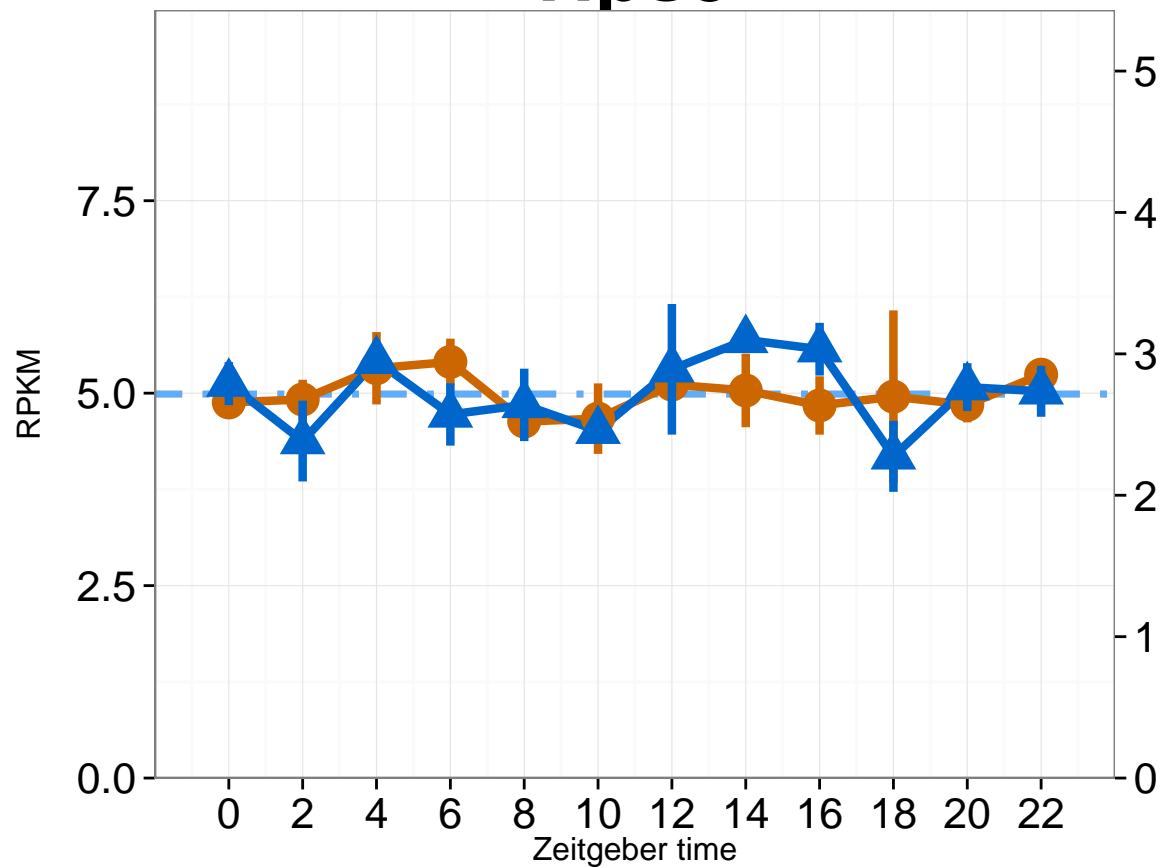

# Hps5

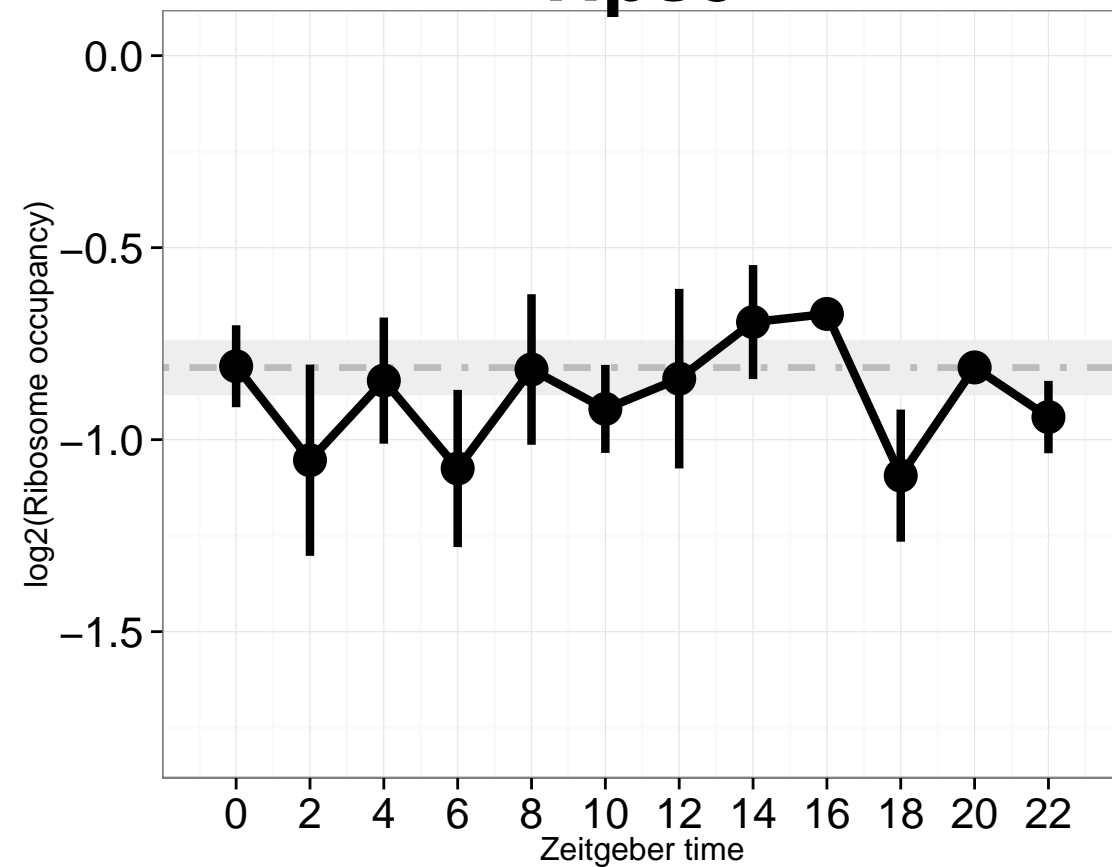

Supplement: SuppDataset_1.zip [file Hps5_set_A.pdf › Supplemental Dataset 1/A-mRNA_nonrhyth_translation_nonrhyth/Hps5_set_A.pdf]

## Hps6

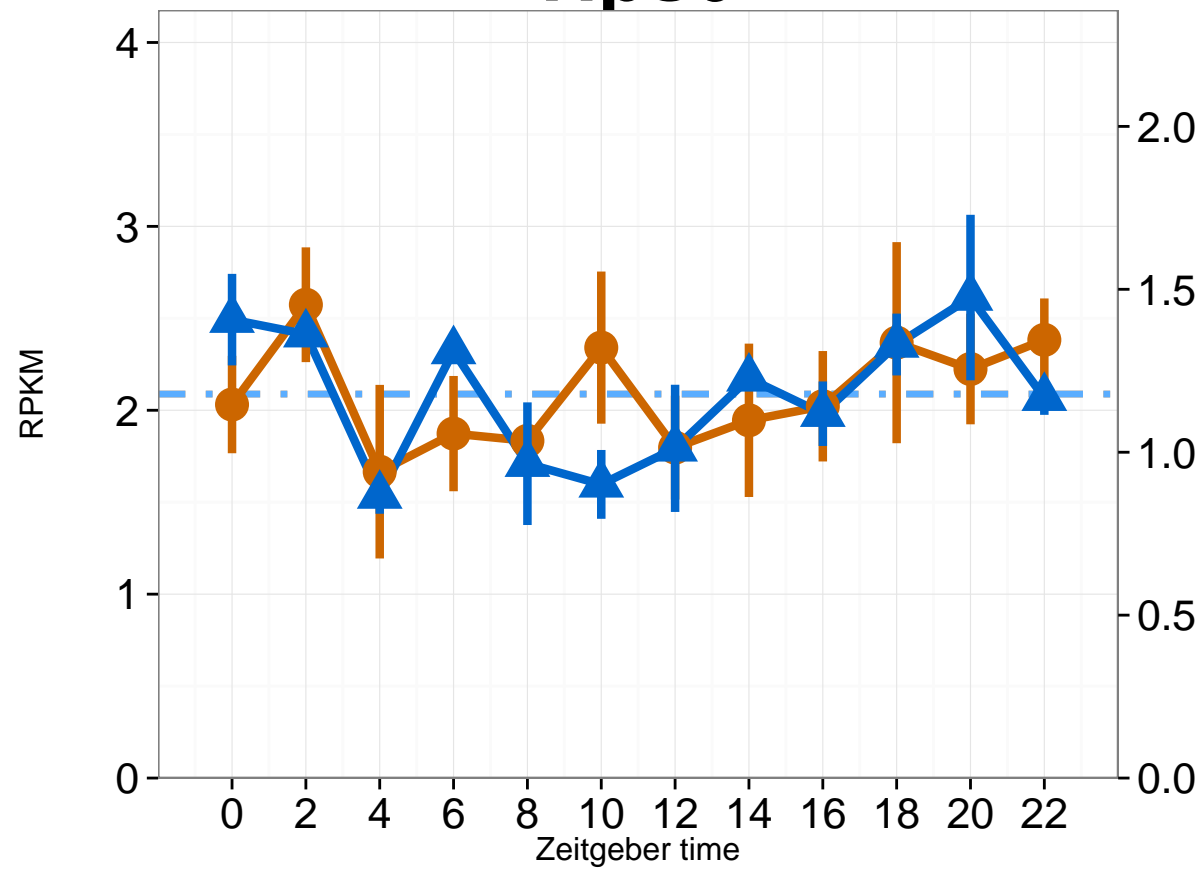

## Hps6

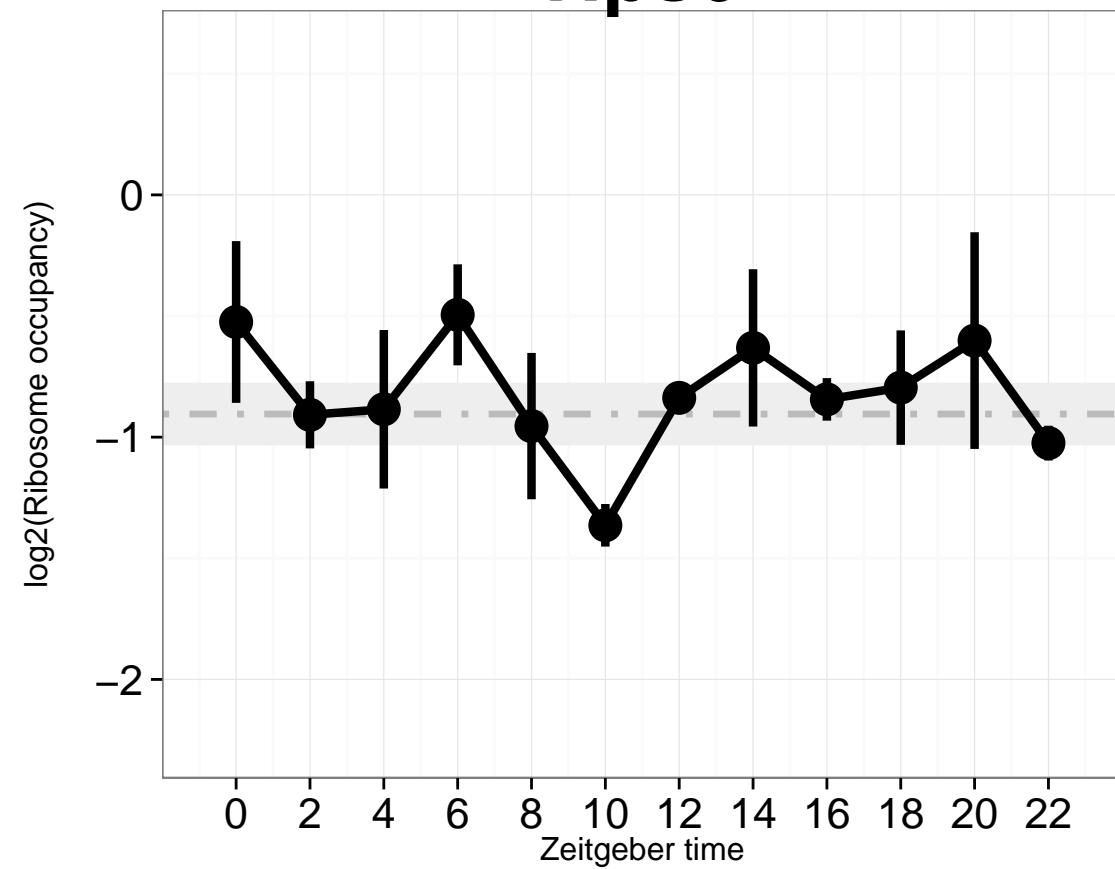

Supplement: SuppDataset_1.zip [file Hps6_set_A.pdf › Supplemental Dataset 1/A-mRNA_nonrhyth_translation_nonrhyth/Hps6_set_A.pdf]

## Hpse

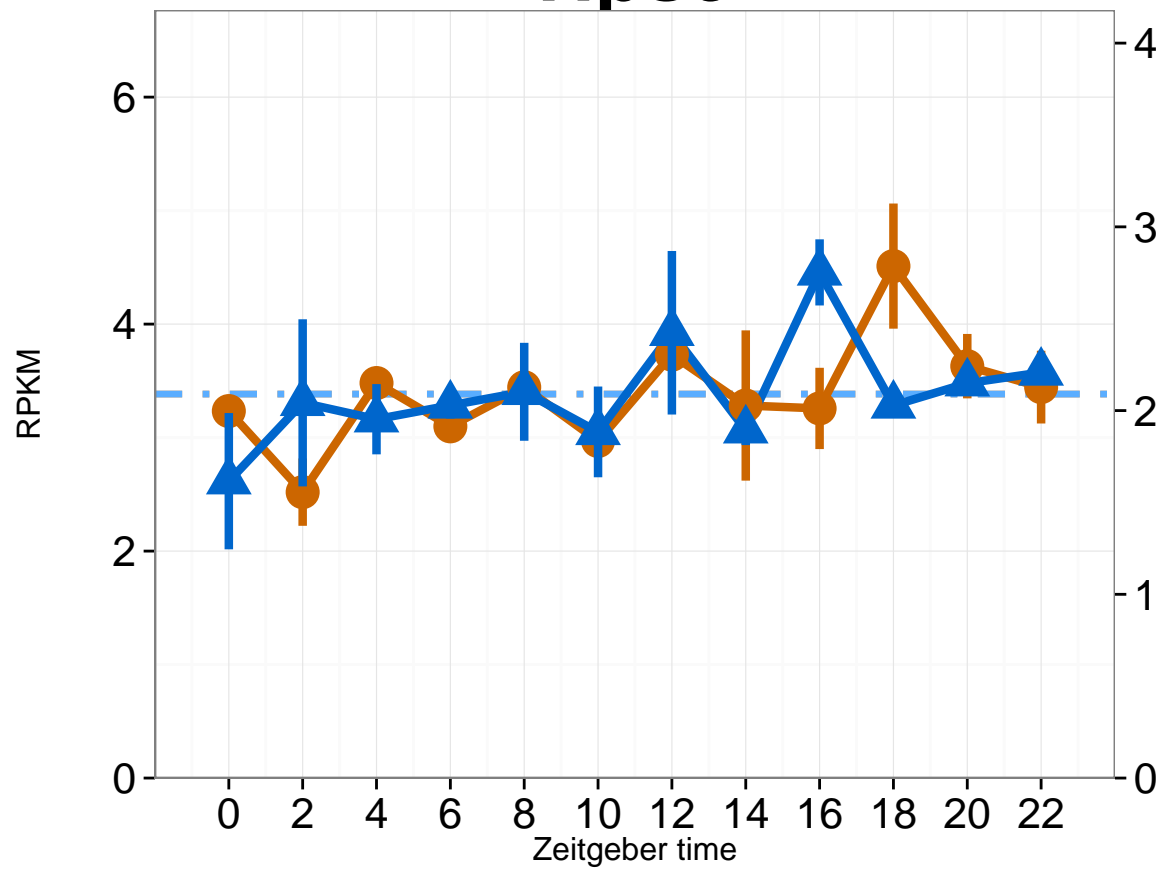

## Hpse

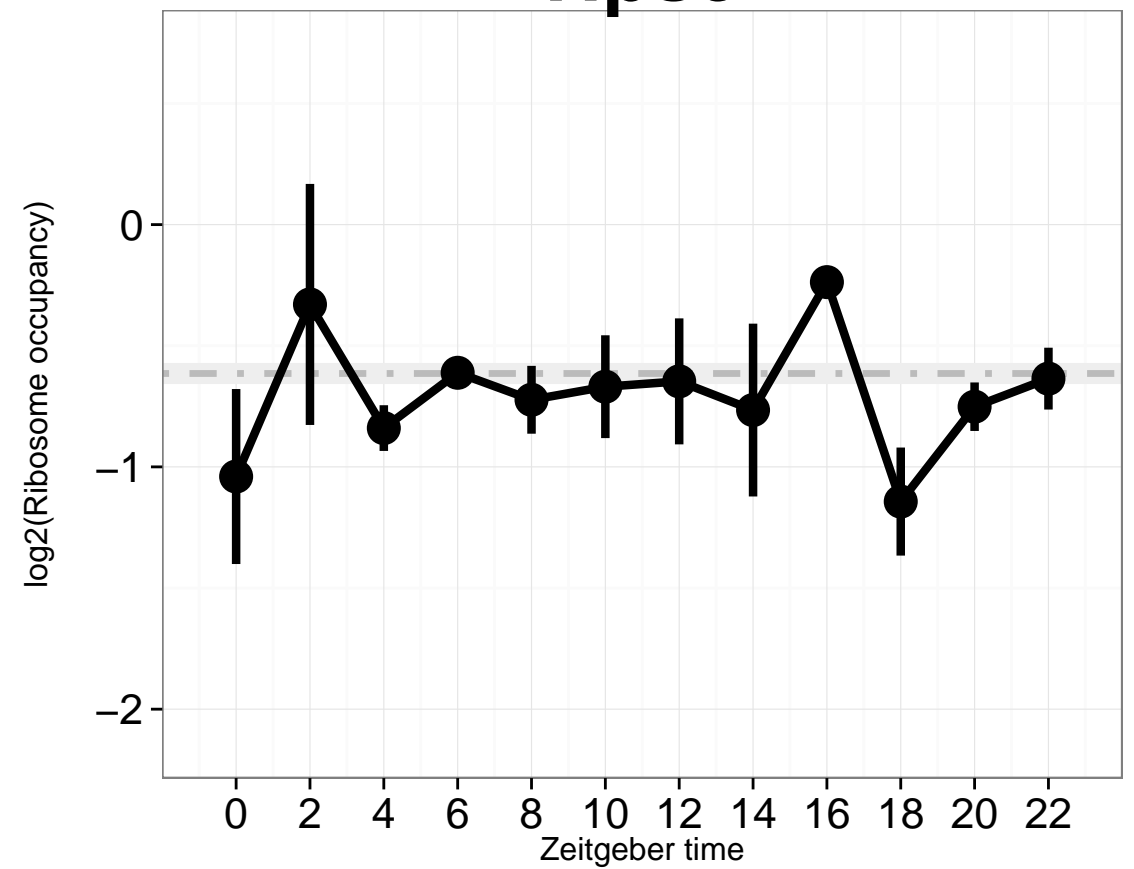

Supplement: SuppDataset_1.zip [file Hpse_set_A.pdf › Supplemental Dataset 1/A-mRNA_nonrhyth_translation_nonrhyth/Hpse_set_A.pdf]

## Hras

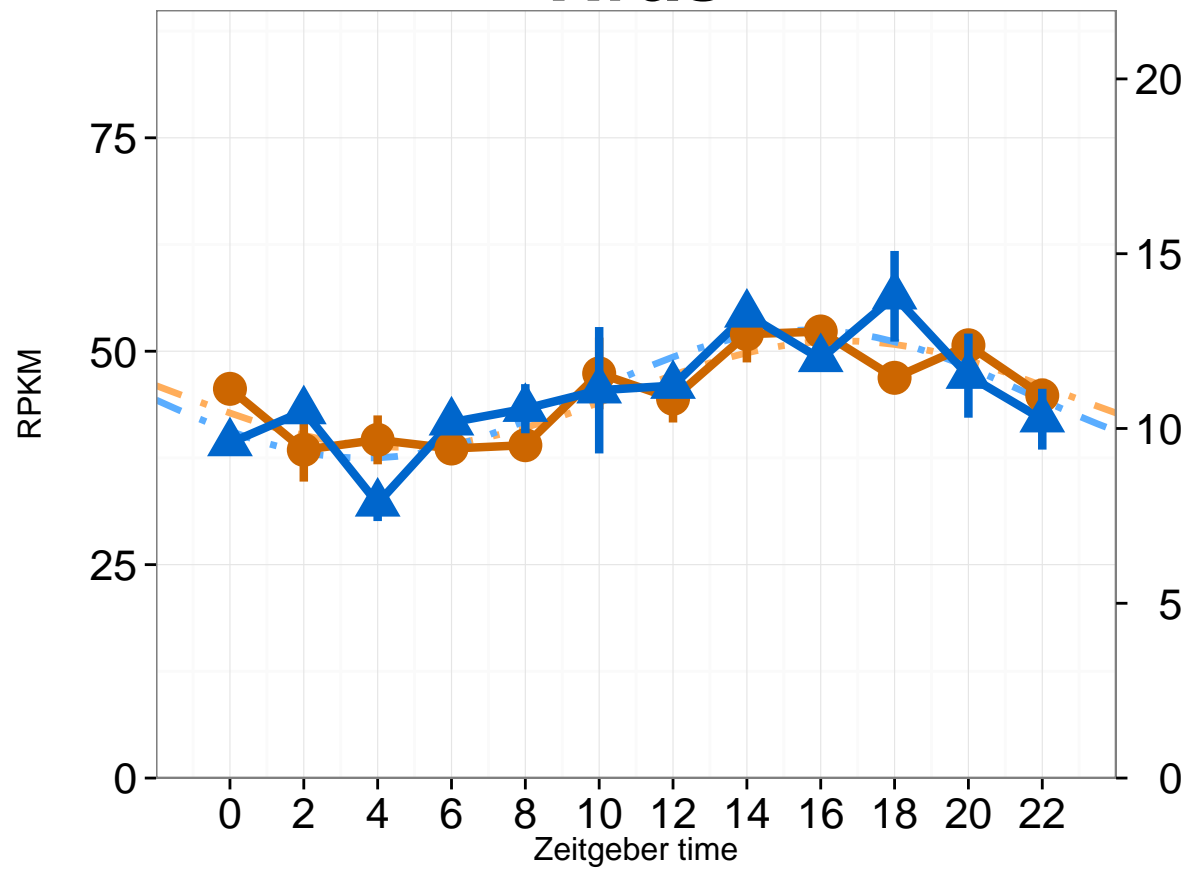

## Hras

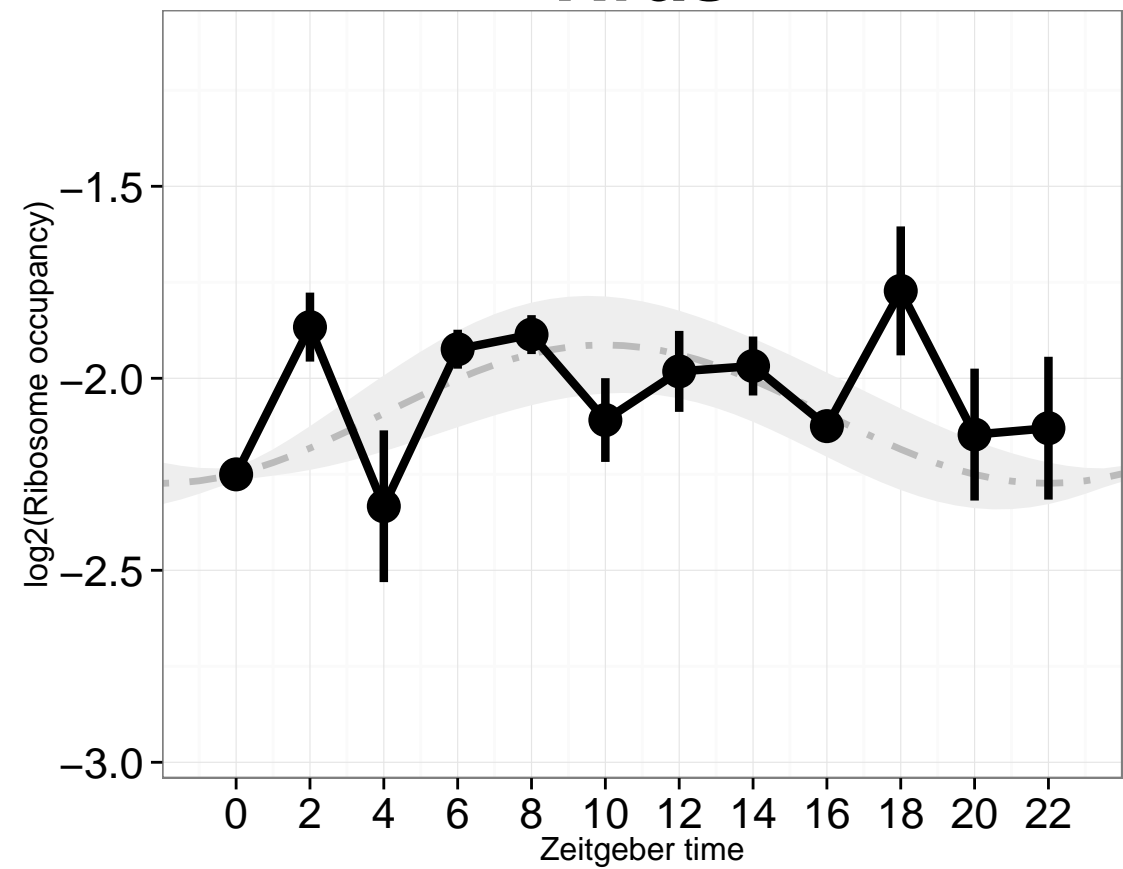

Supplement: SuppDataset_1.zip [file Hras_set_A.pdf › Supplemental Dataset 1/A-mRNA_nonrhyth_translation_nonrhyth/Hras_set_A.pdf]

# Hrsp12

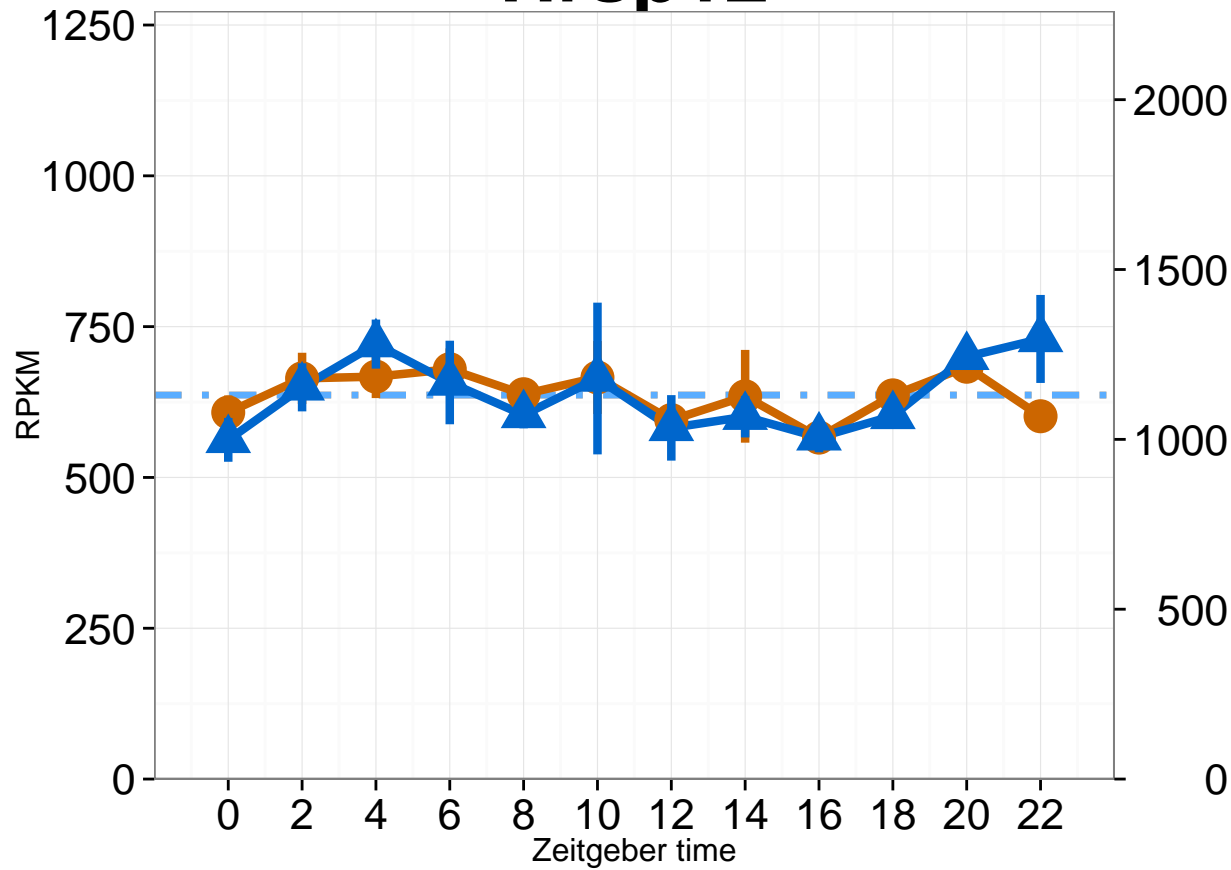

# Hrsp12

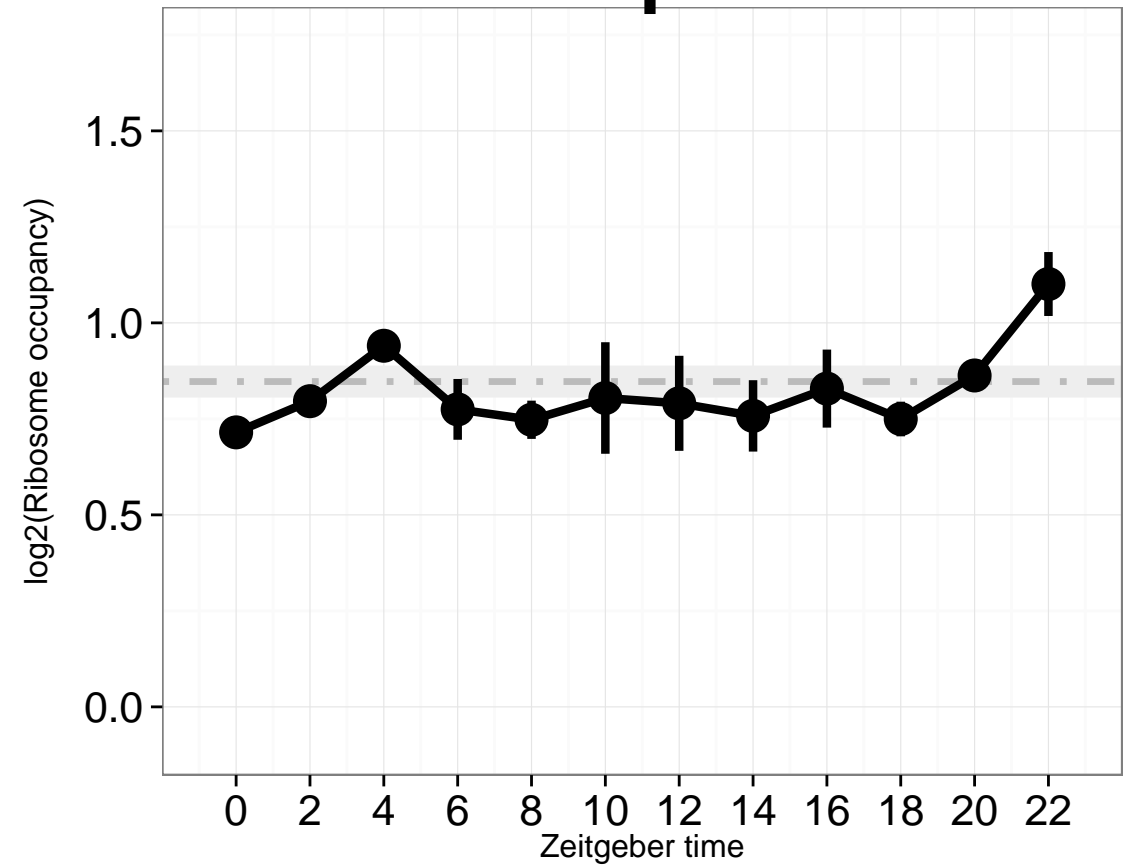

Supplement: SuppDataset_1.zip [file Hrsp12_set_A.pdf › Supplemental Dataset 1/A-mRNA_nonrhyth_translation_nonrhyth/Hrsp12_set_A.pdf]

# Hs2st1

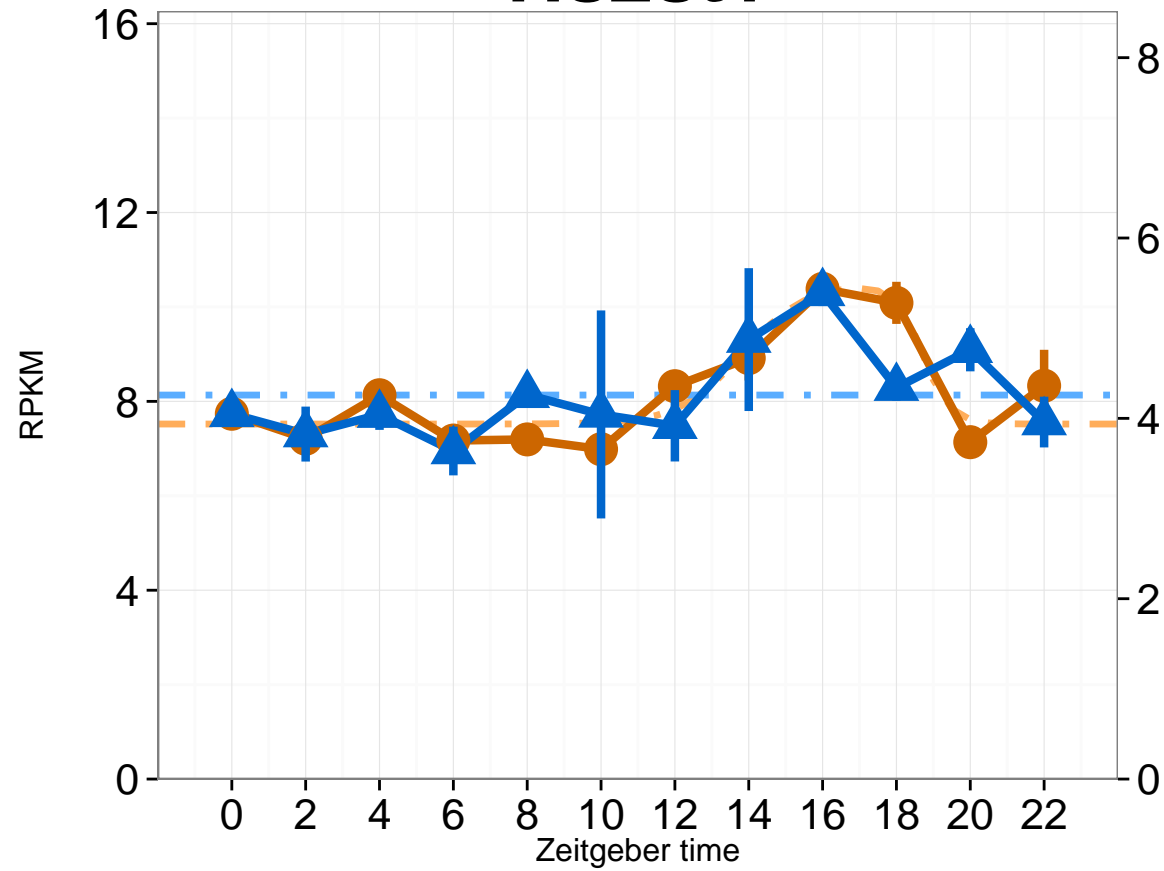

# Hs2st1

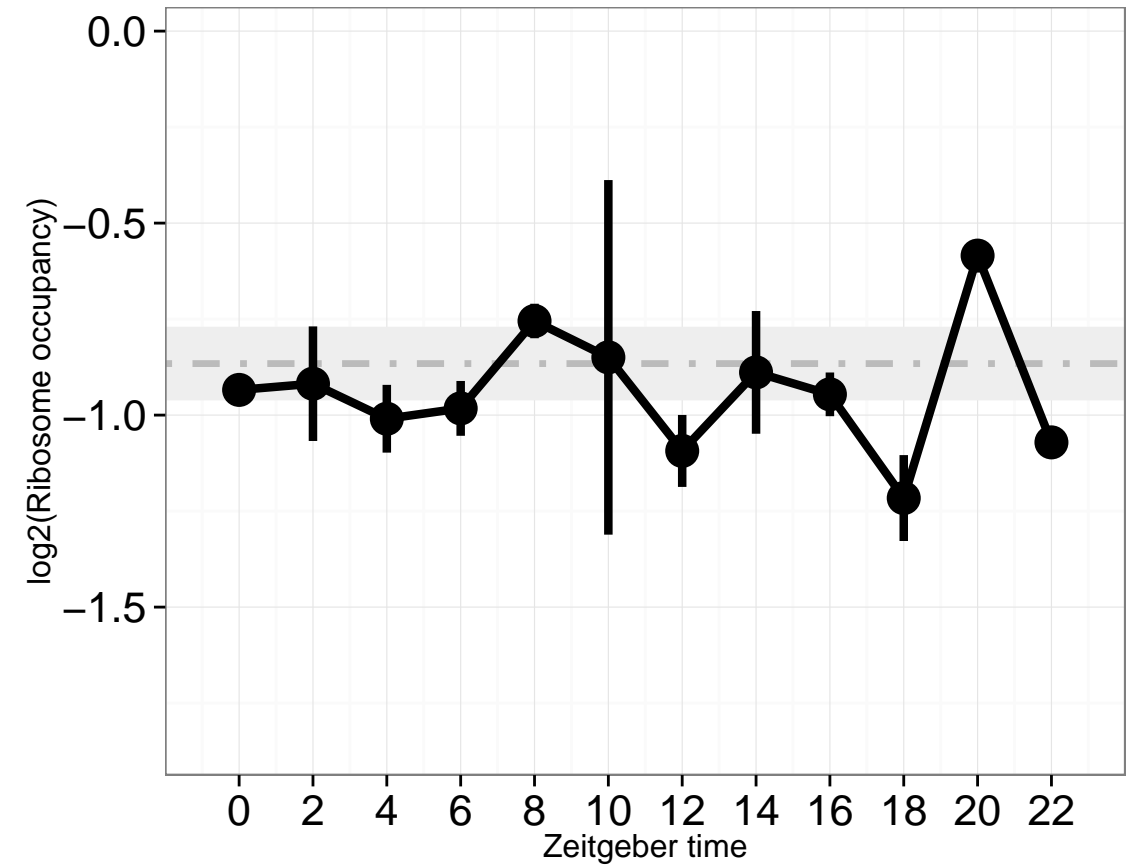

Supplement: SuppDataset_1.zip [file Hs2st1_set_A.pdf › Supplemental Dataset 1/A-mRNA_nonrhyth_translation_nonrhyth/Hs2st1_set_A.pdf]

# Hs3st3b1

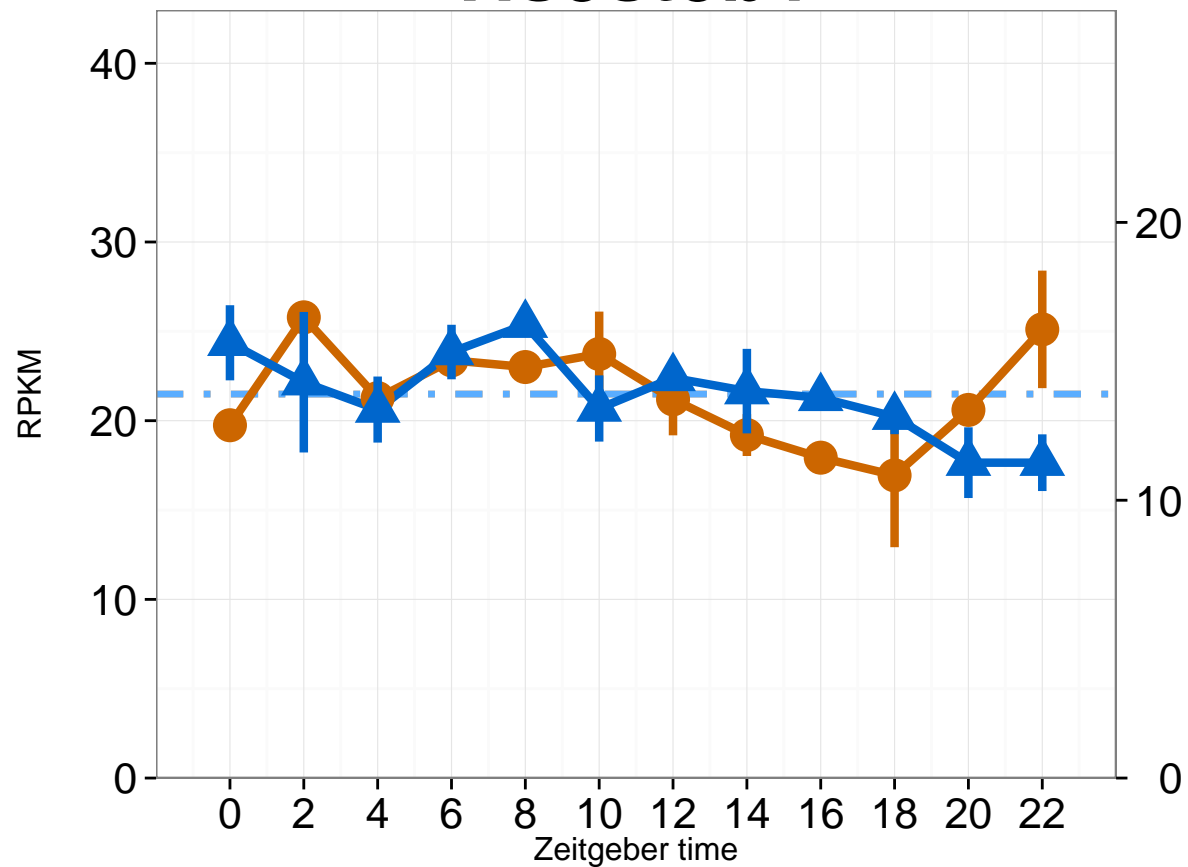

# Hs3st3b1

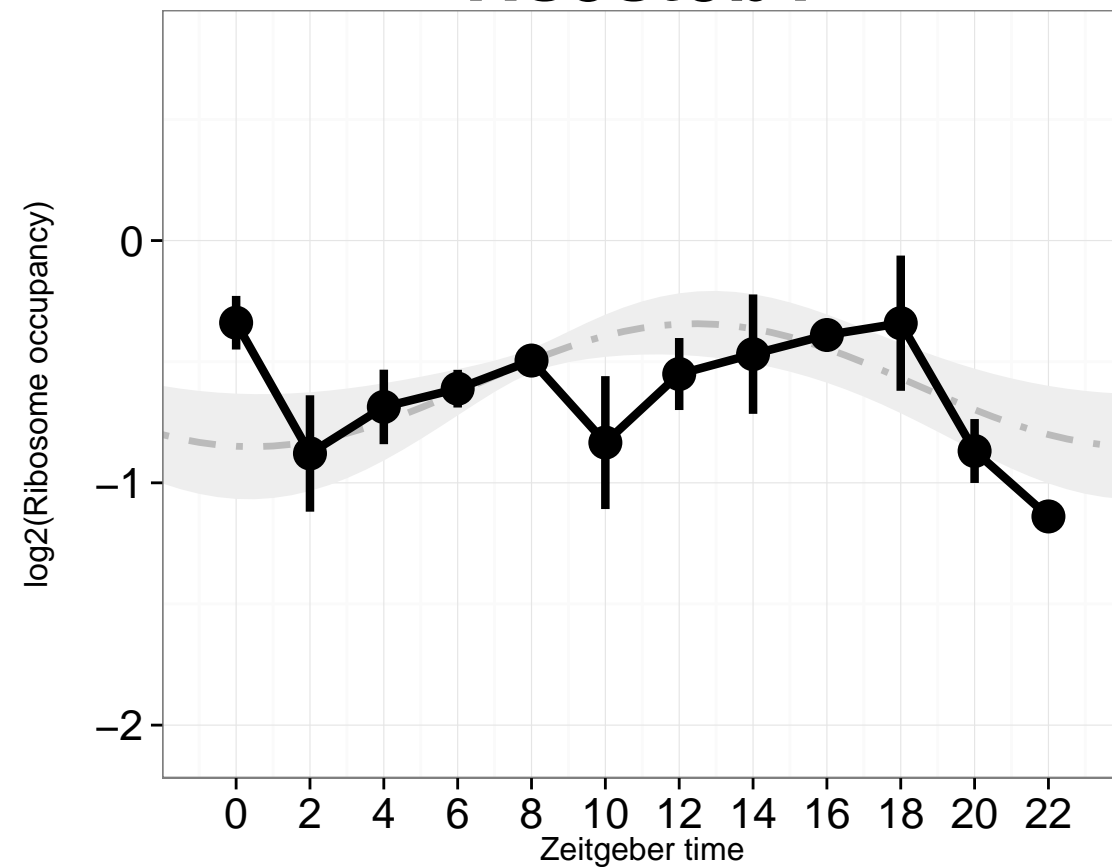

Supplement: SuppDataset_1.zip [file Hs3st3b1_set_A.pdf › Supplemental Dataset 1/A-mRNA_nonrhyth_translation_nonrhyth/Hs3st3b1_set_A.pdf]

## Hs3st6

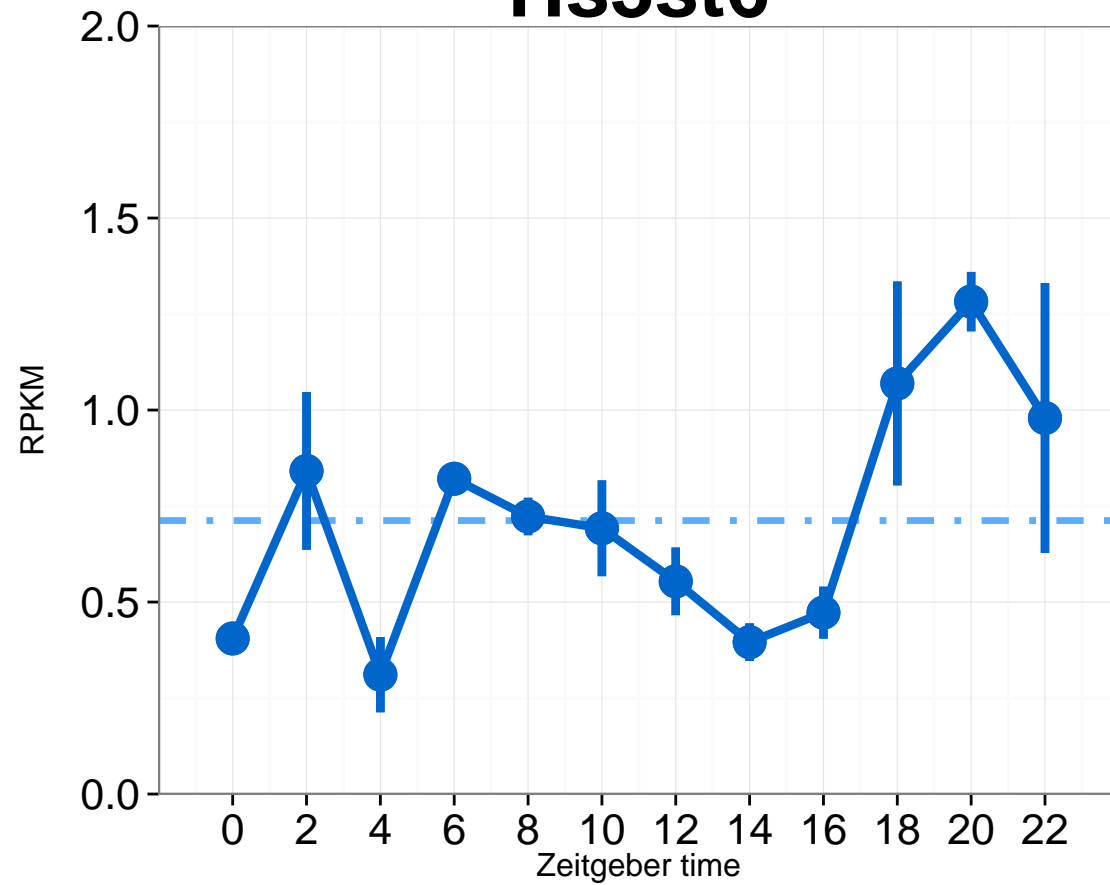

## Hs3st6 log2(Ribosome occupancy

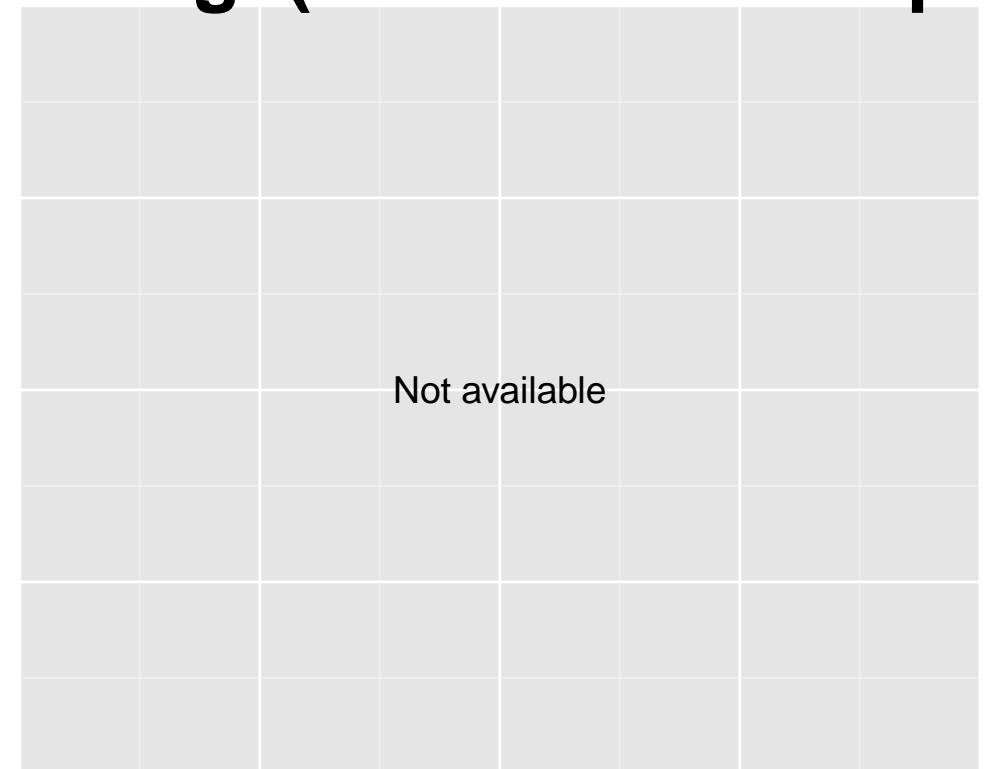

Supplement: SuppDataset_1.zip [file Hs3st6_set_A.pdf › Supplemental Dataset 1/A-mRNA_nonrhyth_translation_nonrhyth/Hs3st6_set_A.pdf]

# Hs6st1

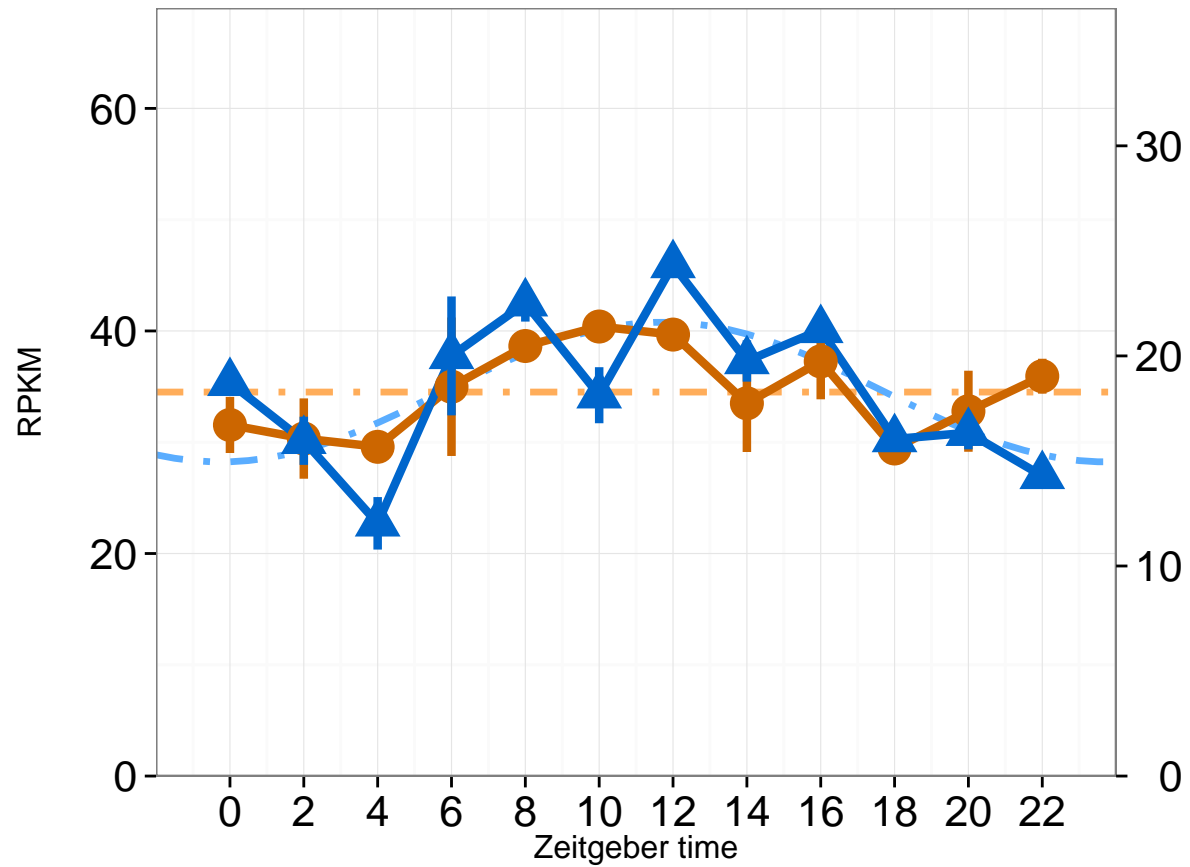

# Hs6st1

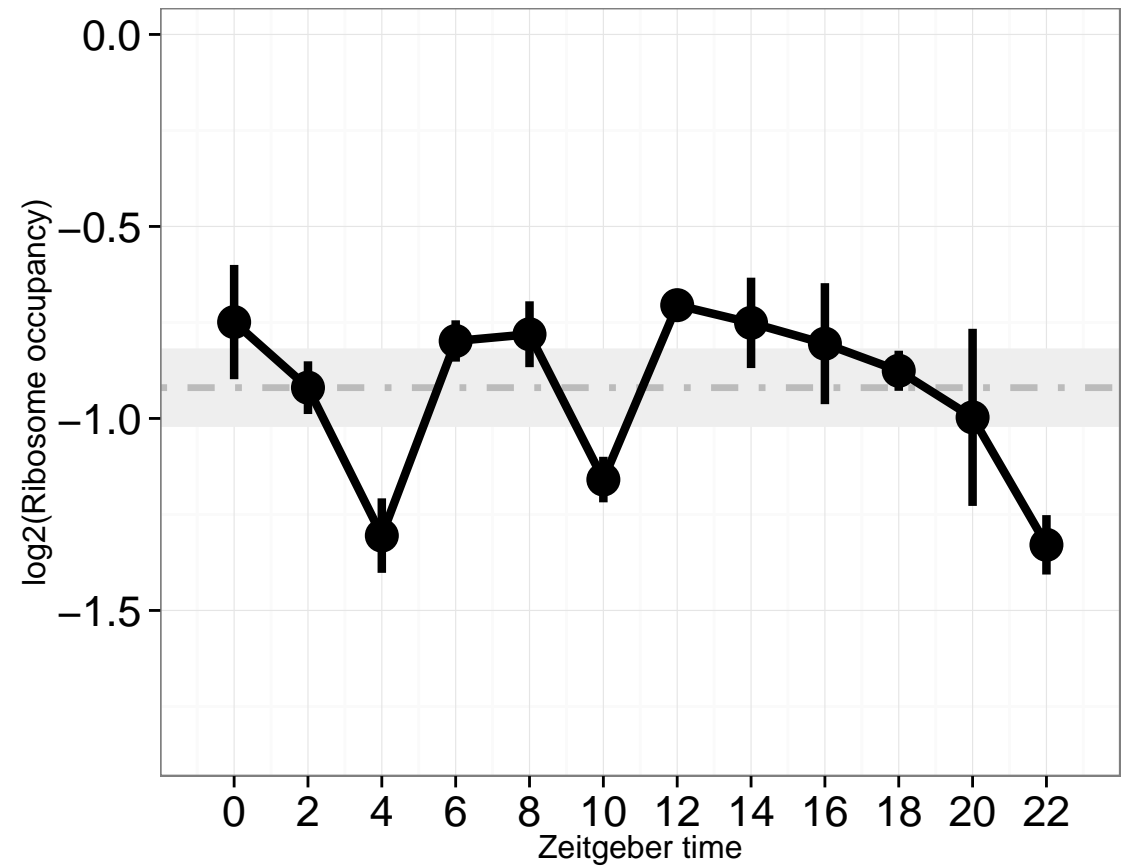

Supplement: SuppDataset_1.zip [file Hs6st1_set_A.pdf › Supplemental Dataset 1/A-mRNA_nonrhyth_translation_nonrhyth/Hs6st1_set_A.pdf]

# Hsbp1

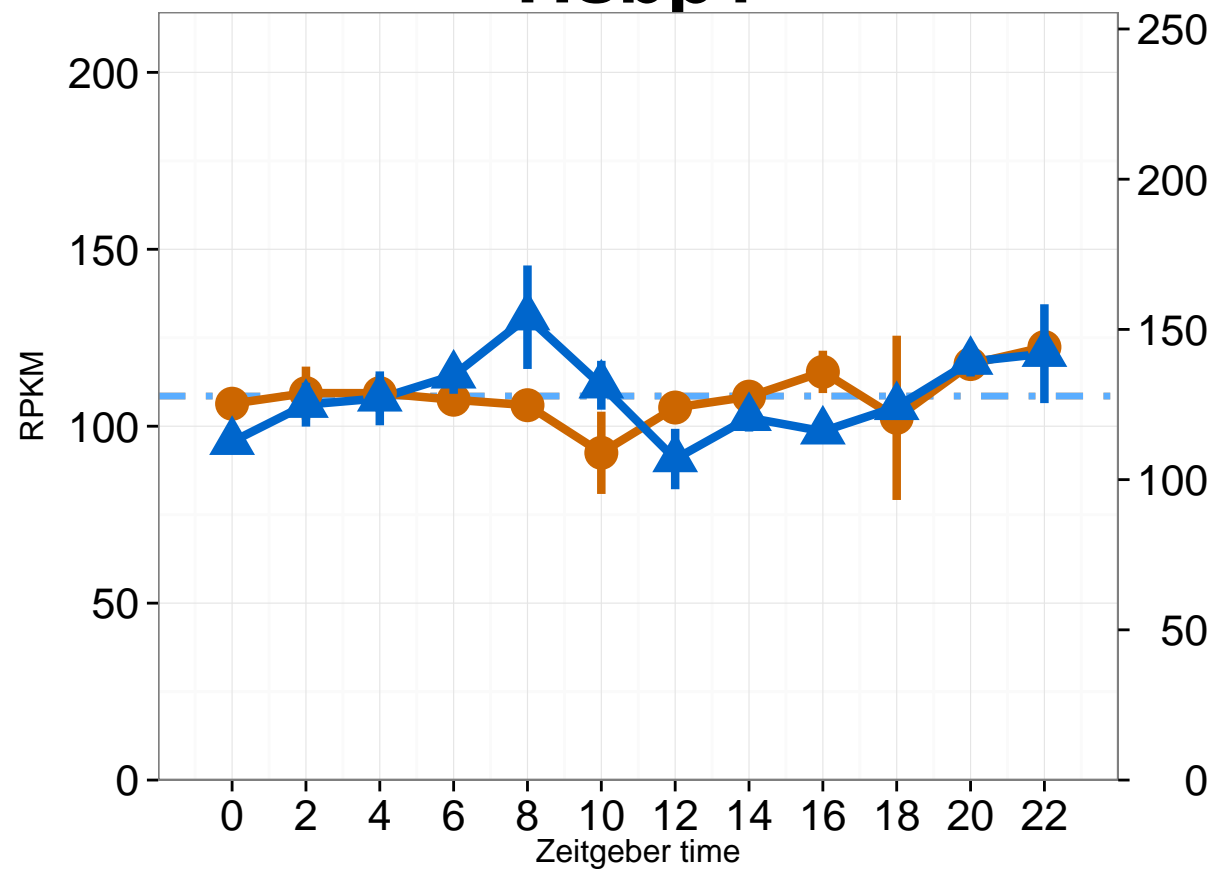

# Hsbp1

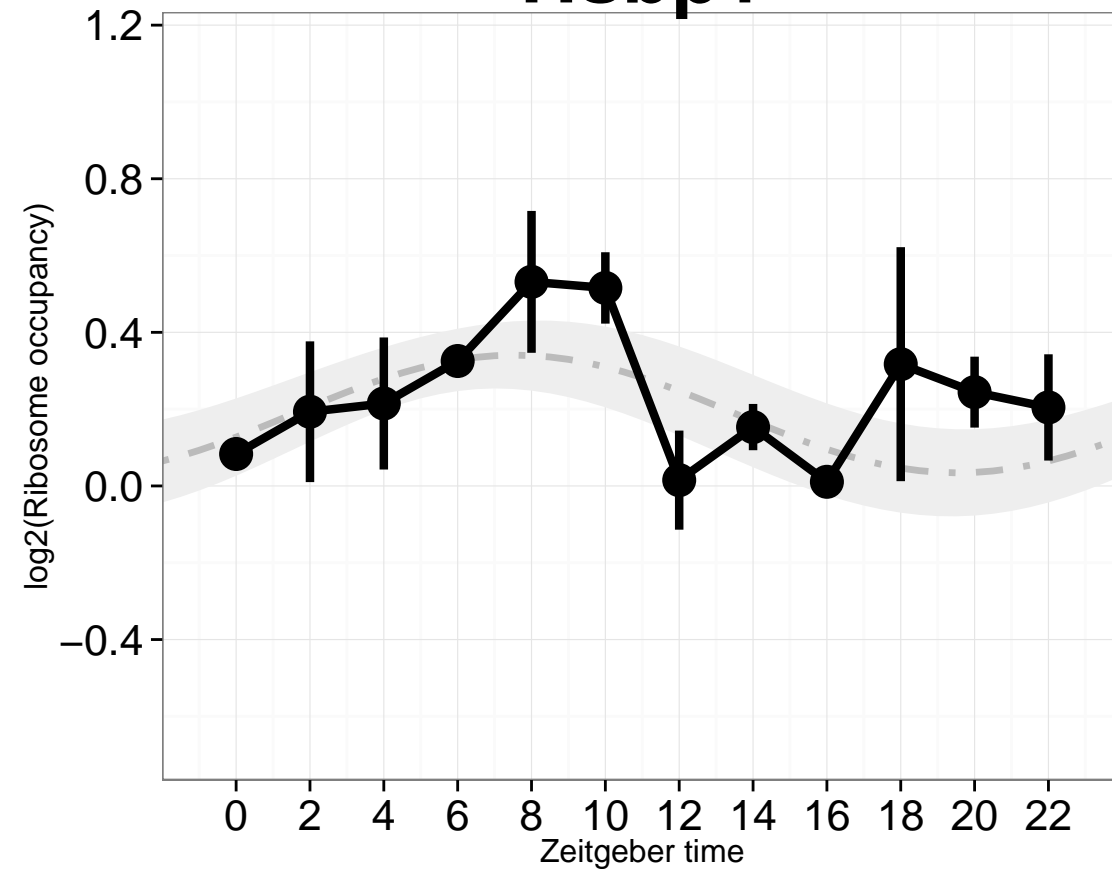

Supplement: SuppDataset_1.zip [file Hsbp1_set_A.pdf › Supplemental Dataset 1/A-mRNA_nonrhyth_translation_nonrhyth/Hsbp1_set_A.pdf]

## Hscb

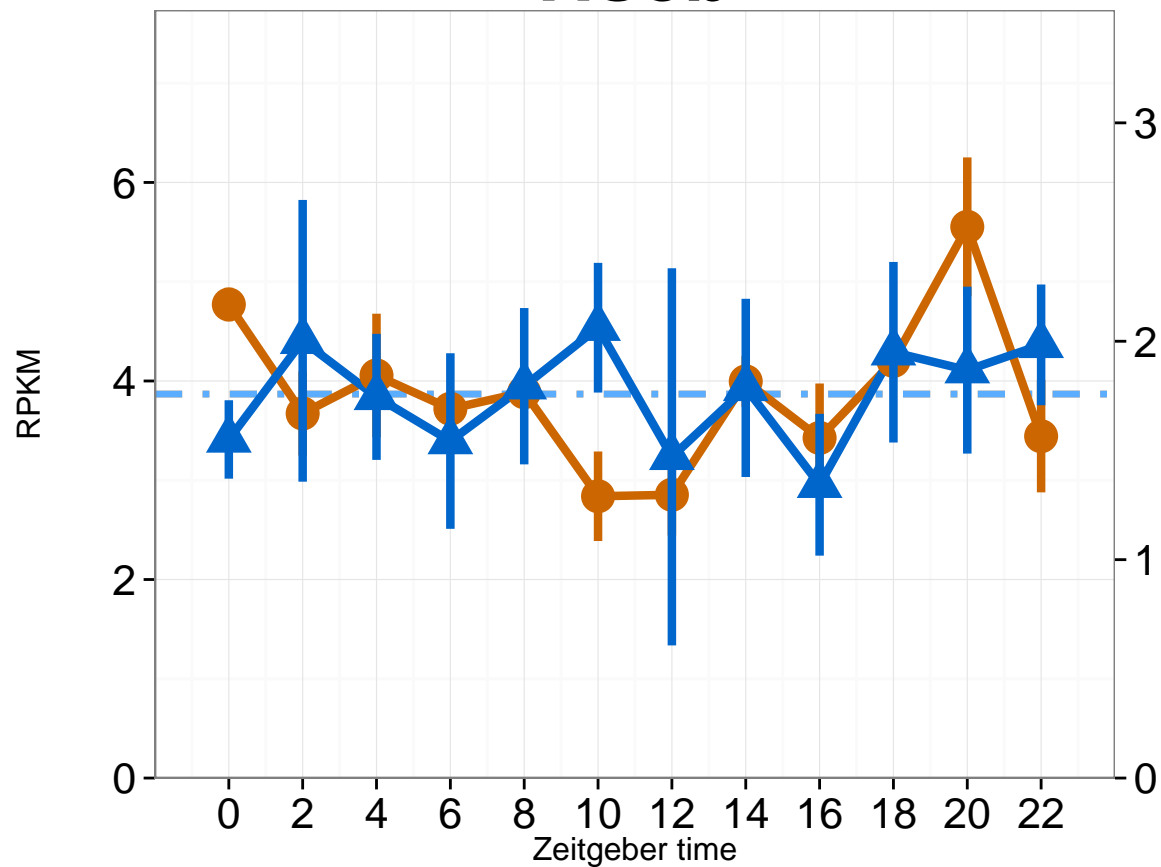

## Hscb

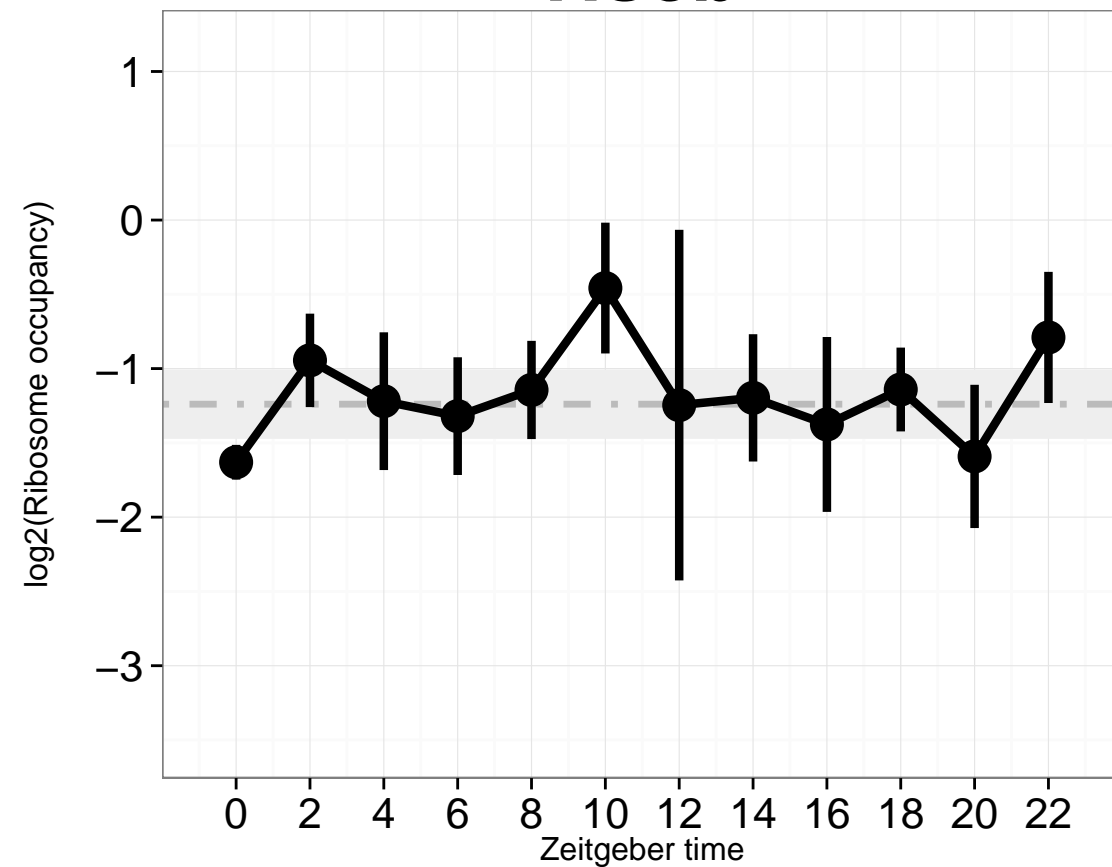

Supplement: SuppDataset_1.zip [file Hscb_set_A.pdf › Supplemental Dataset 1/A-mRNA_nonrhyth_translation_nonrhyth/Hscb_set_A.pdf]

# Hsd11b1

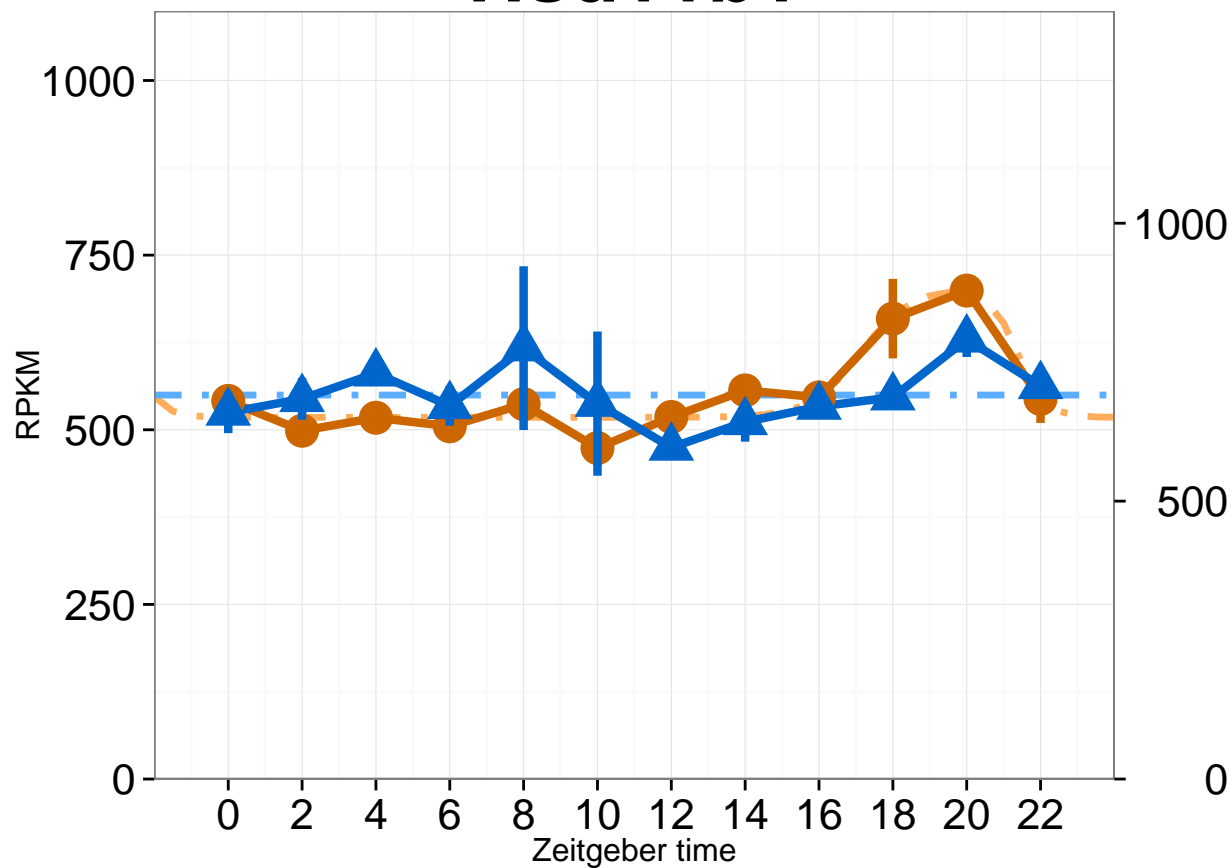

# Hsd11b1

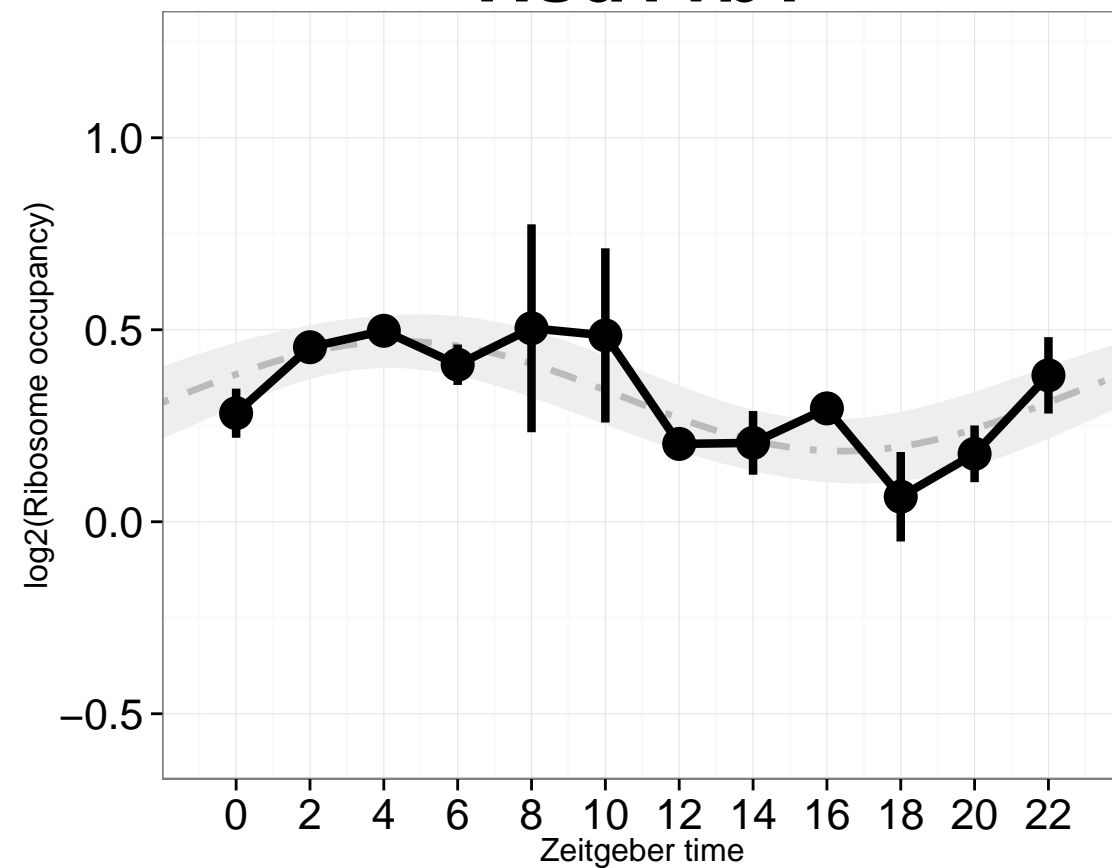

Supplement: SuppDataset_1.zip [file Hsd11b1_set_A.pdf › Supplemental Dataset 1/A-mRNA_nonrhyth_translation_nonrhyth/Hsd11b1_set_A.pdf]

# Hsd17b10

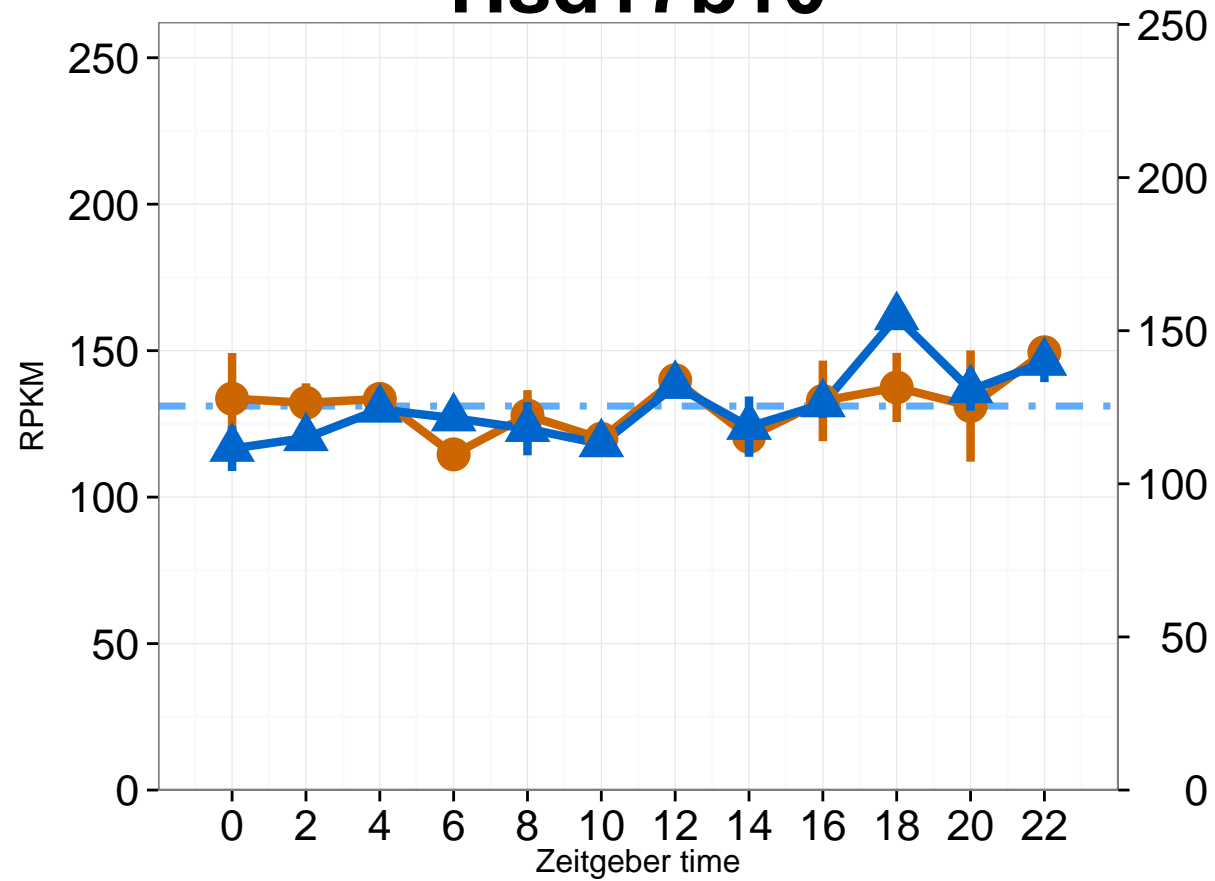

# Hsd17b10

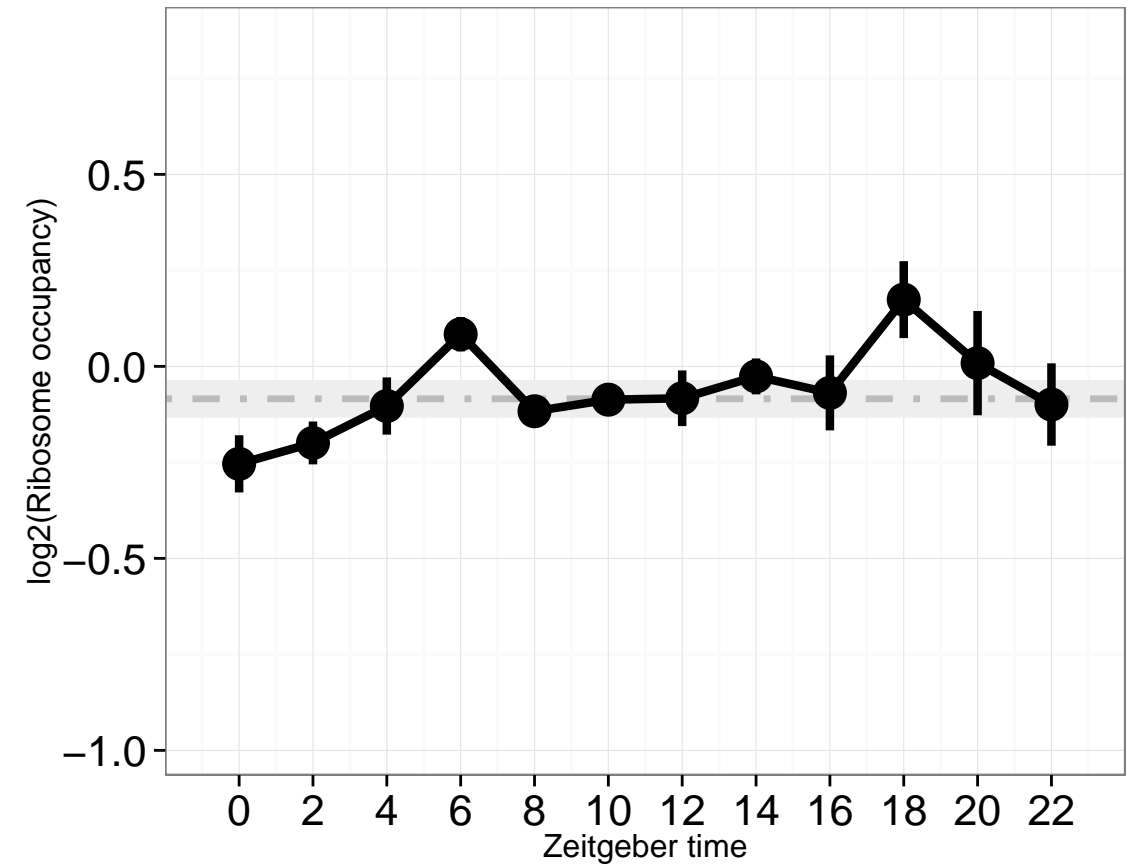

Supplement: SuppDataset_1.zip [file Hsd17b10_set_A.pdf › Supplemental Dataset 1/A-mRNA_nonrhyth_translation_nonrhyth/Hsd17b10_set_A.pdf]

# Hsd17b11

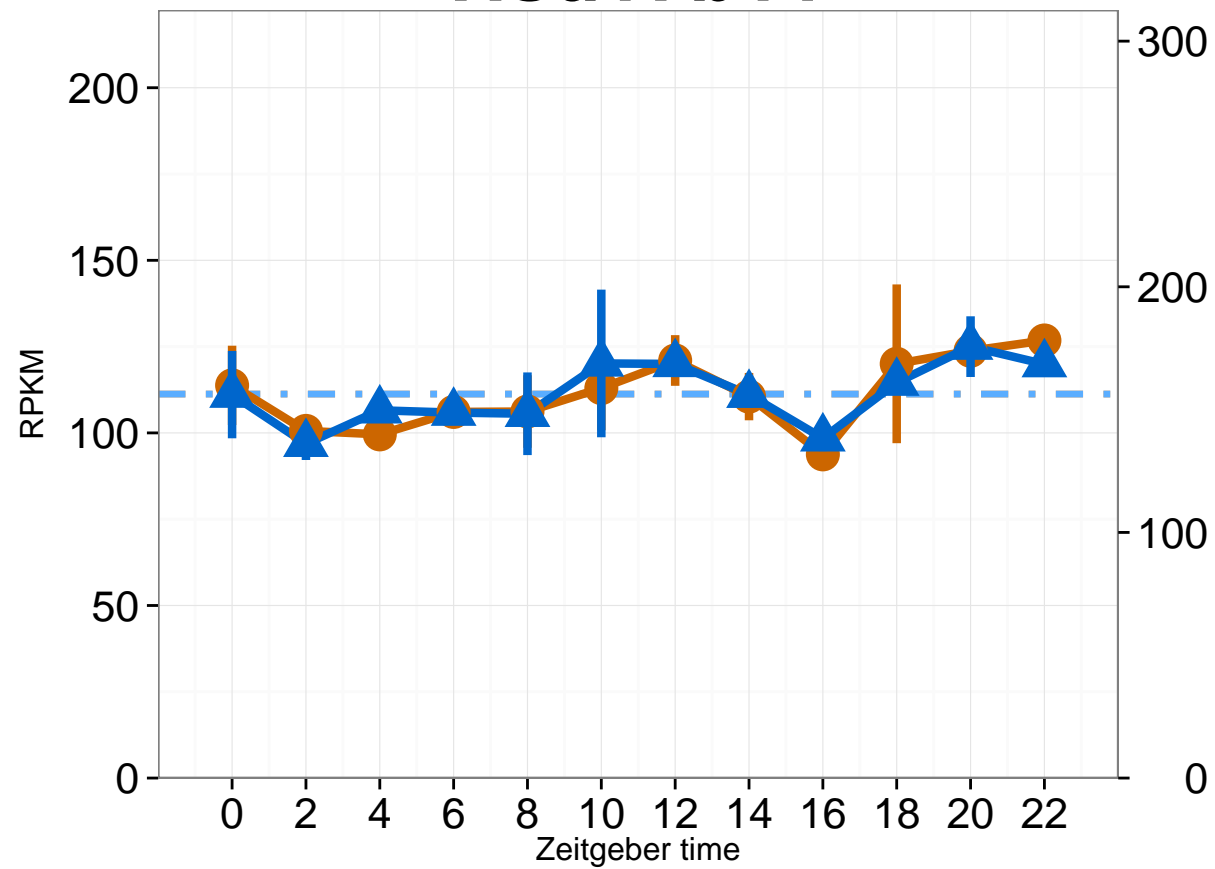

# Hsd17b11

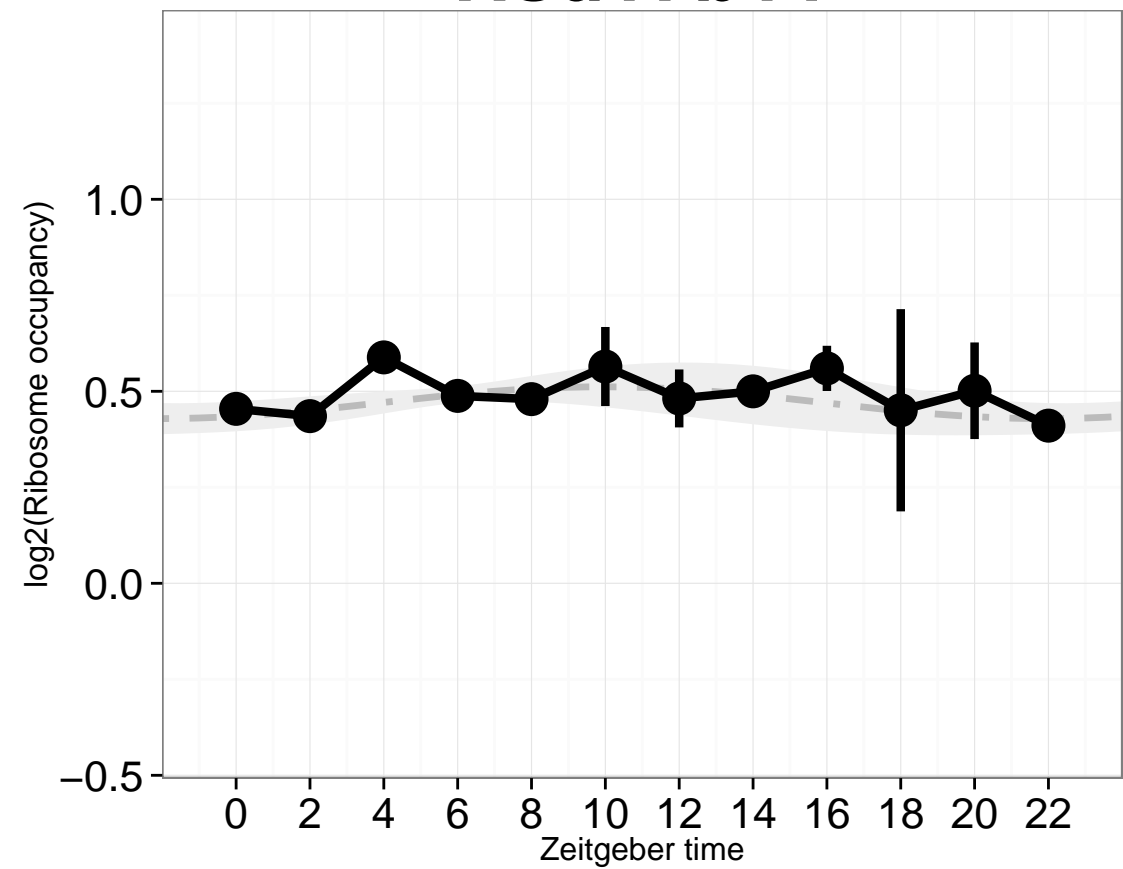

Supplement: SuppDataset_1.zip [file Hsd17b11_set_A.pdf › Supplemental Dataset 1/A-mRNA_nonrhyth_translation_nonrhyth/Hsd17b11_set_A.pdf]

## Hsd17b12

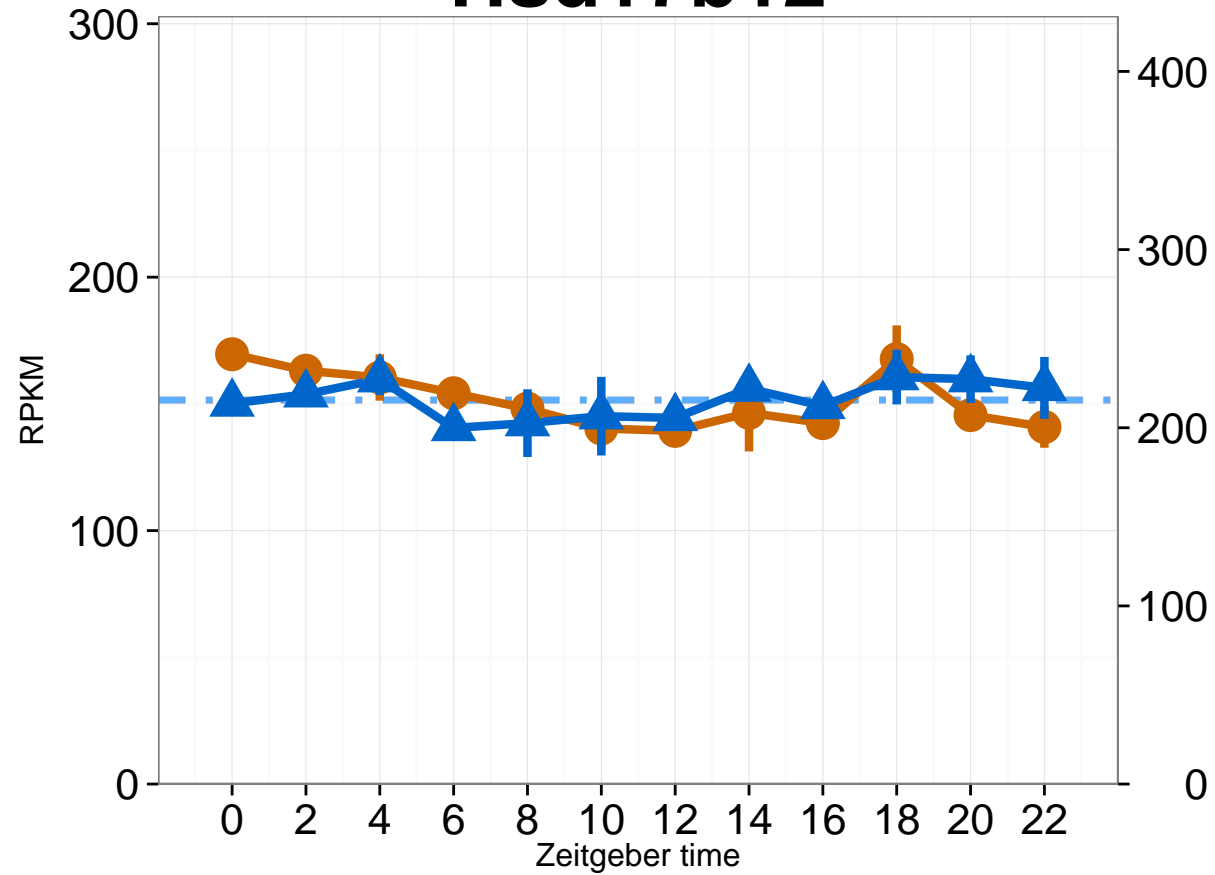

## Hsd17b12

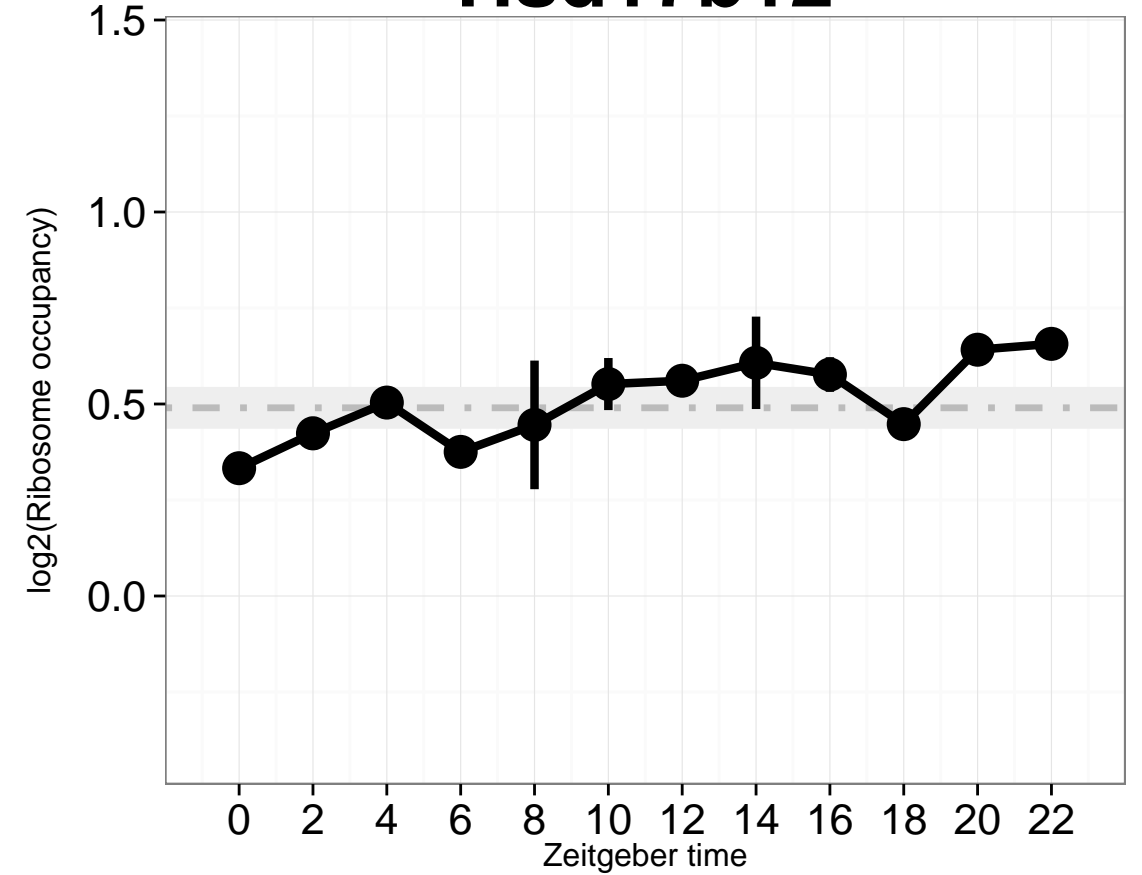

Supplement: SuppDataset_1.zip [file Hsd17b12_set_A.pdf › Supplemental Dataset 1/A-mRNA_nonrhyth_translation_nonrhyth/Hsd17b12_set_A.pdf]

## Hsd17b13

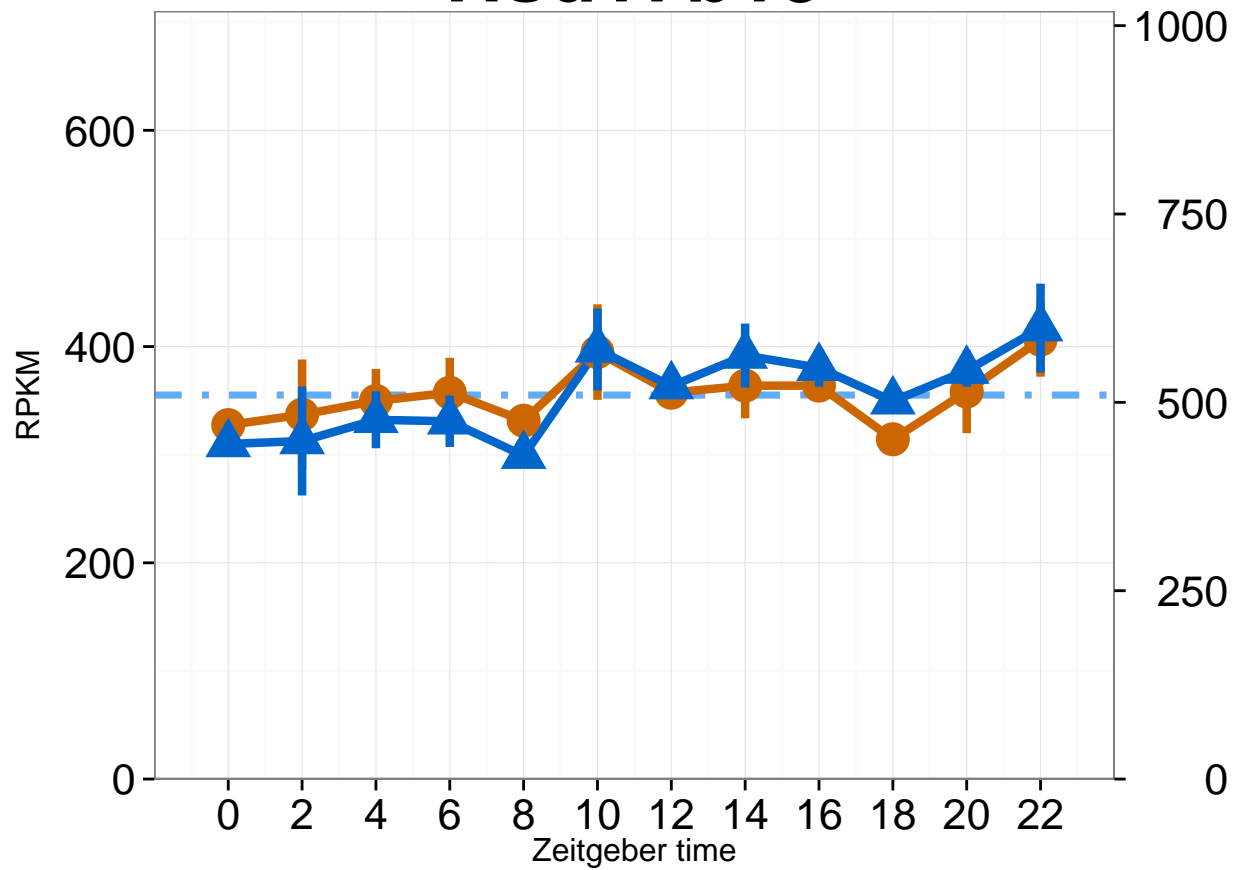

## Hsd17b13

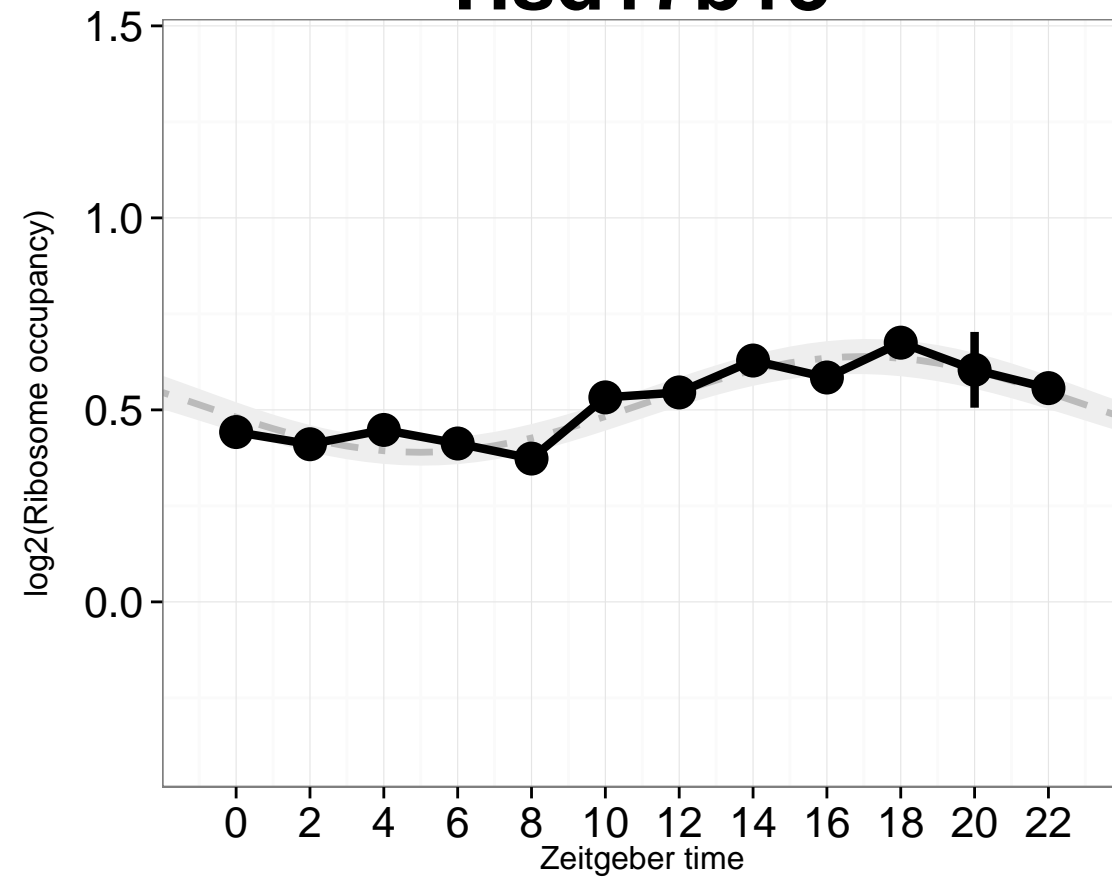

Supplement: SuppDataset_1.zip [file Hsd17b13_set_A.pdf › Supplemental Dataset 1/A-mRNA_nonrhyth_translation_nonrhyth/Hsd17b13_set_A.pdf]

## Hsd17b4

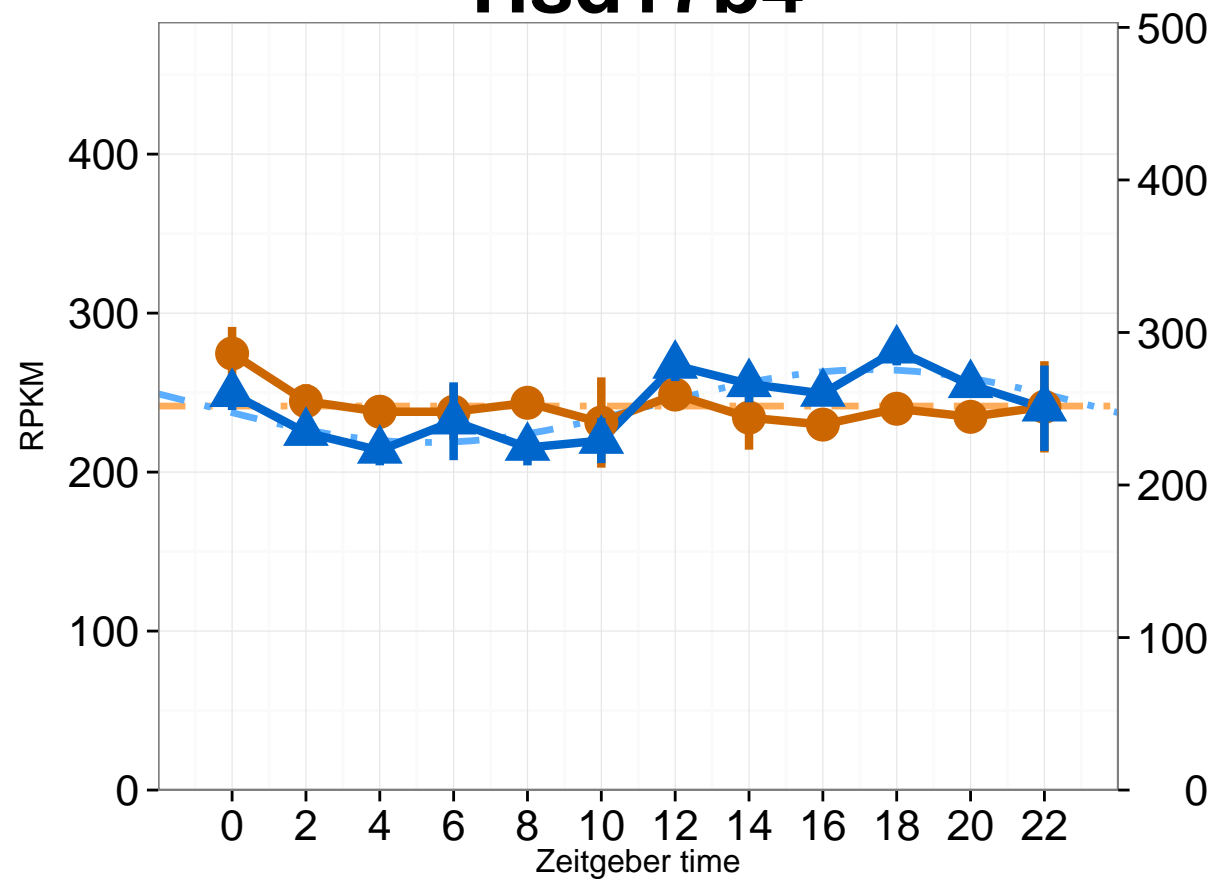

## Hsd17b4

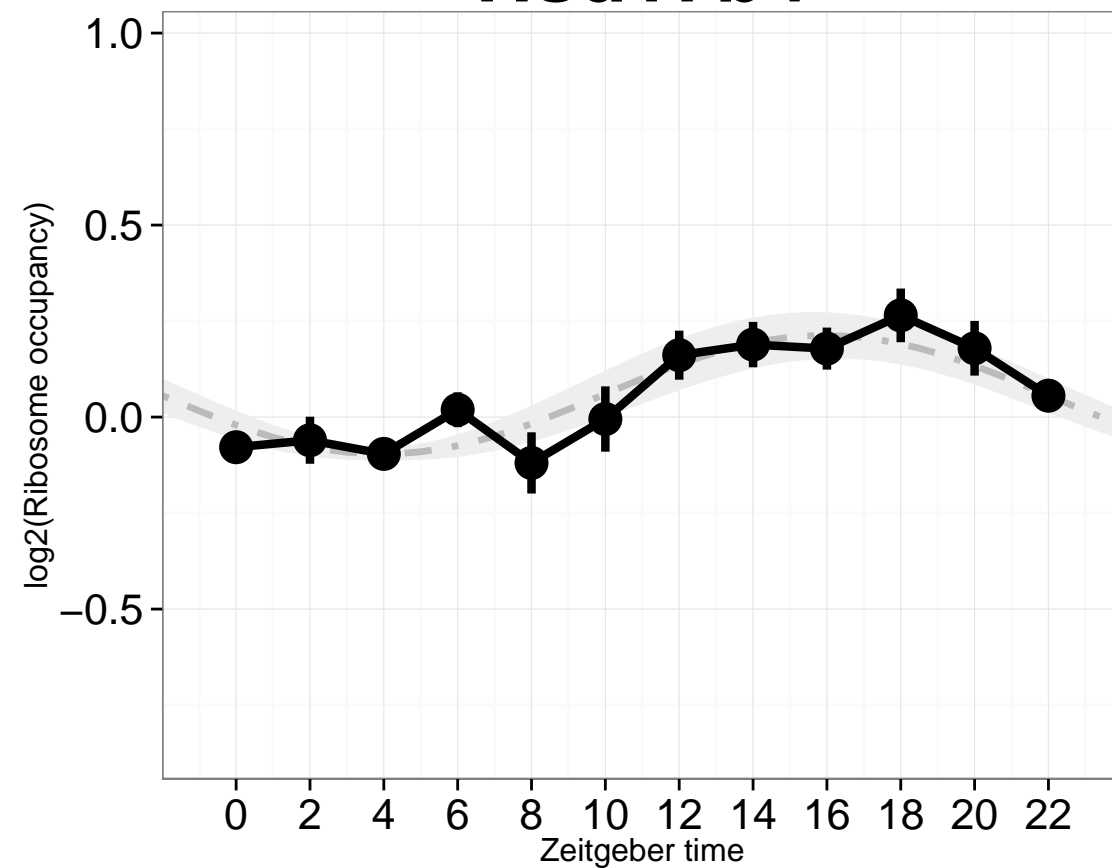

Supplement: SuppDataset_1.zip [file Hsd17b4_set_A.pdf › Supplemental Dataset 1/A-mRNA_nonrhyth_translation_nonrhyth/Hsd17b4_set_A.pdf]

## Hsd17b7

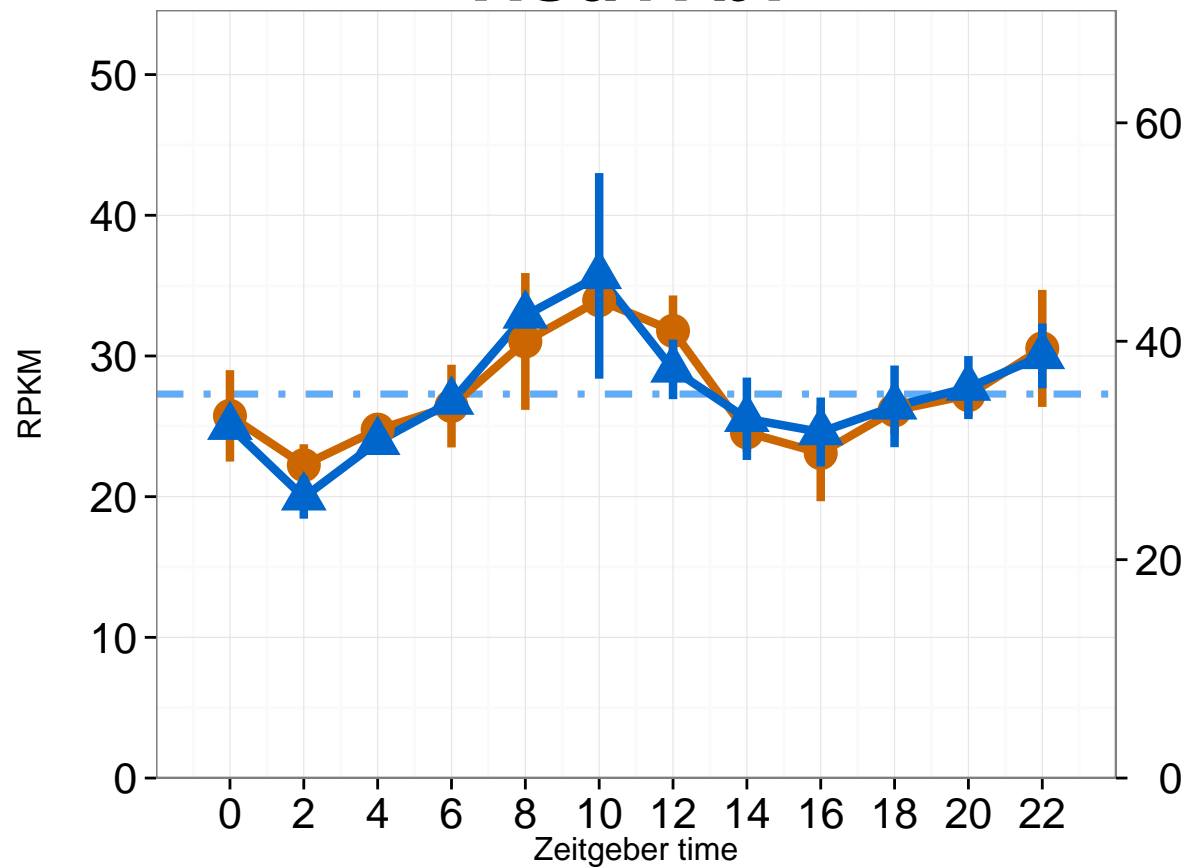

## Hsd17b7

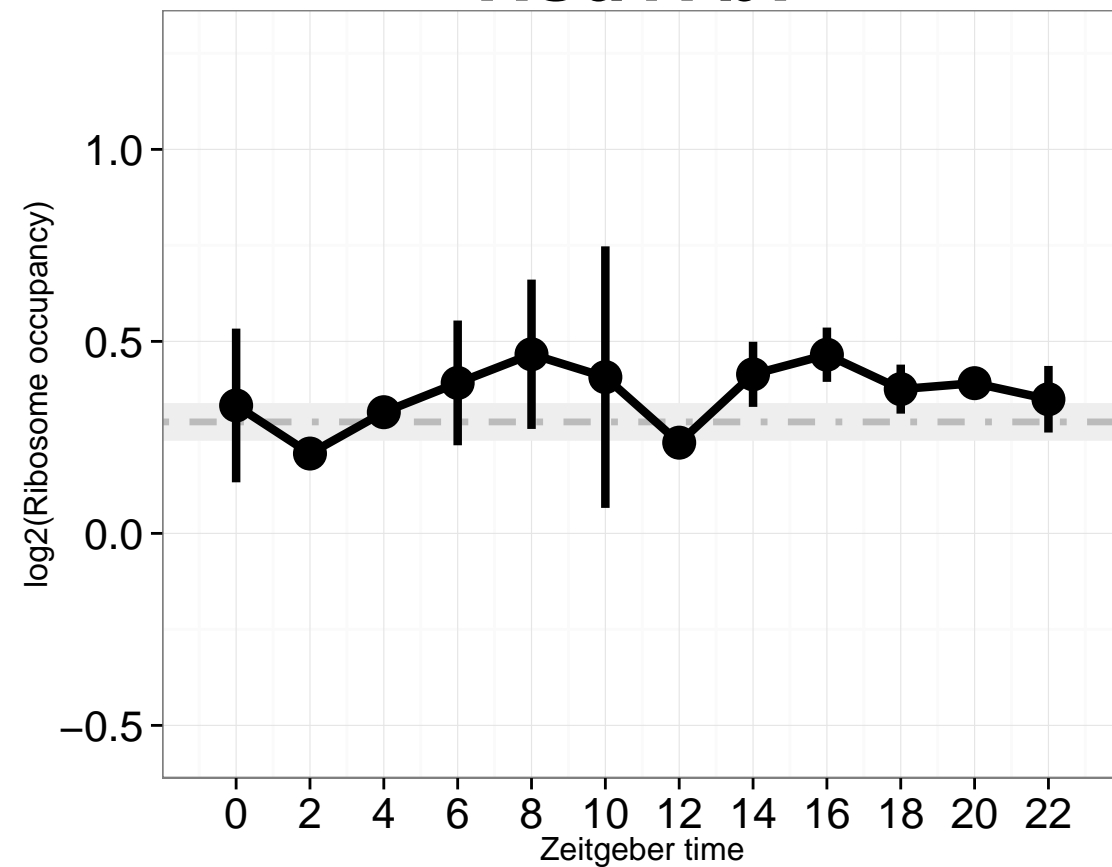

Supplement: SuppDataset_1.zip [file Hsd17b7_set_A.pdf › Supplemental Dataset 1/A-mRNA_nonrhyth_translation_nonrhyth/Hsd17b7_set_A.pdf]

## Hsd3b2

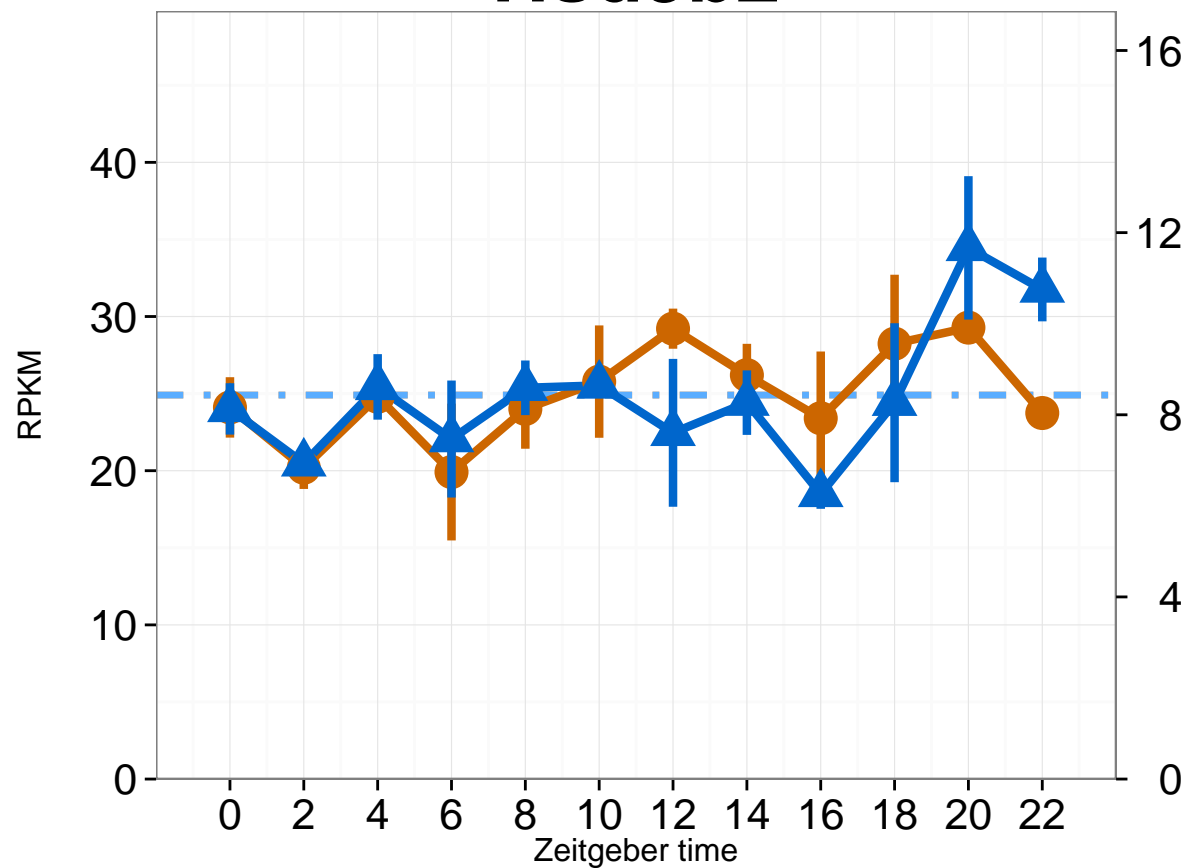

## Hsd3b2

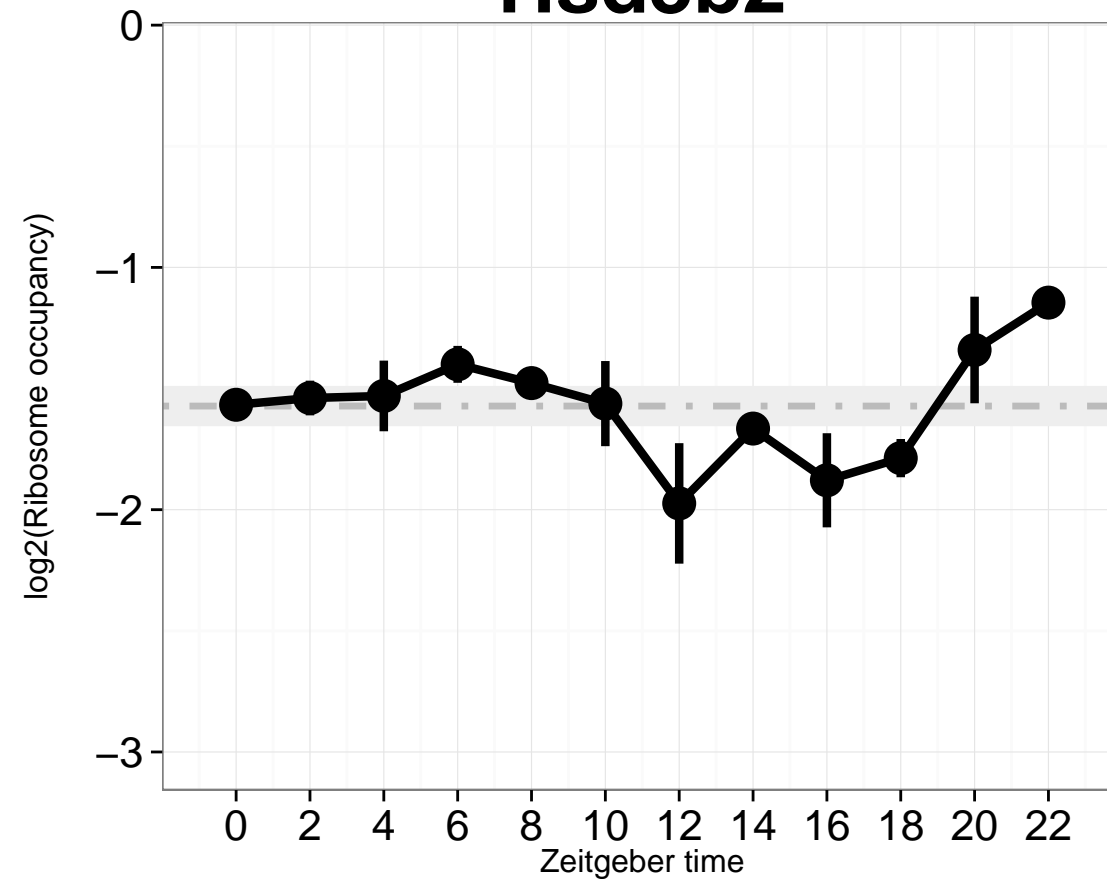

Supplement: SuppDataset_1.zip [file Hsd3b2_set_A.pdf › Supplemental Dataset 1/A-mRNA_nonrhyth_translation_nonrhyth/Hsd3b2_set_A.pdf]

## Hsd3b3

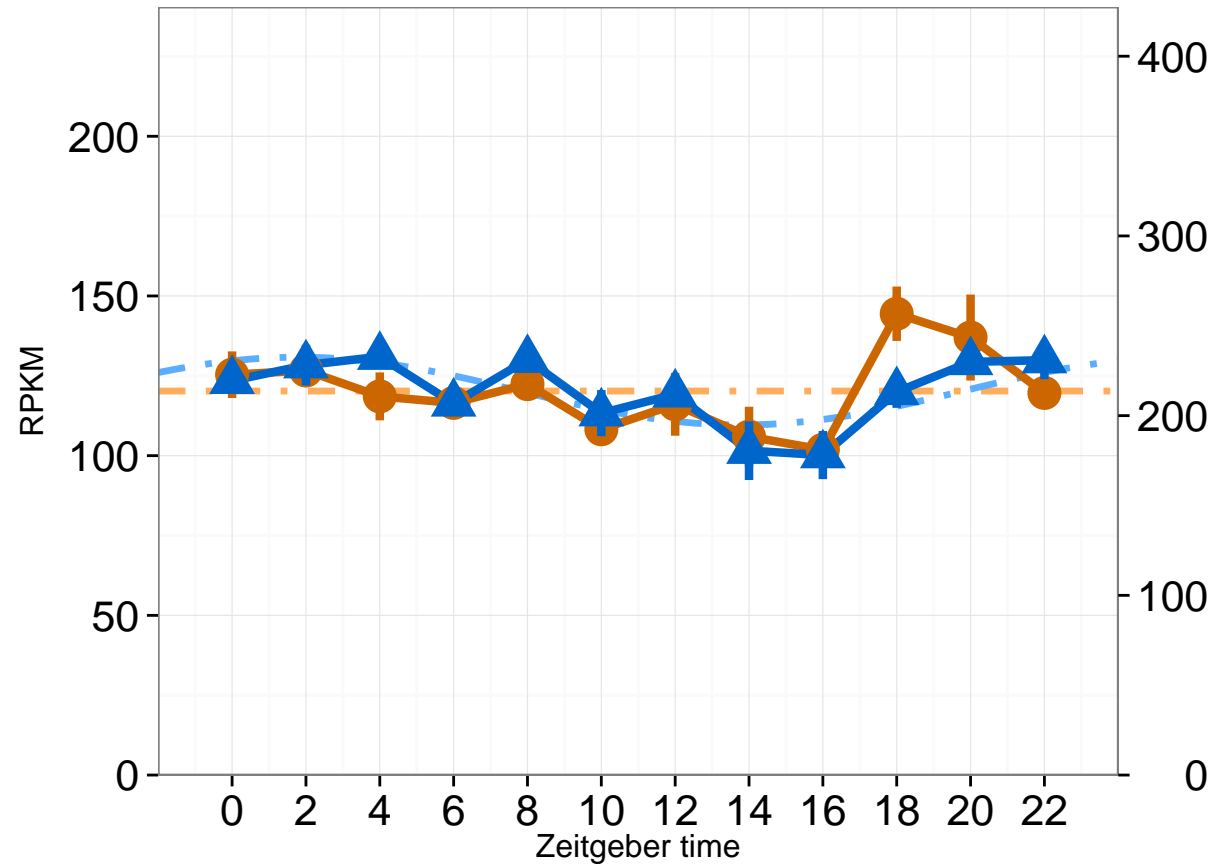

## Hsd3b3

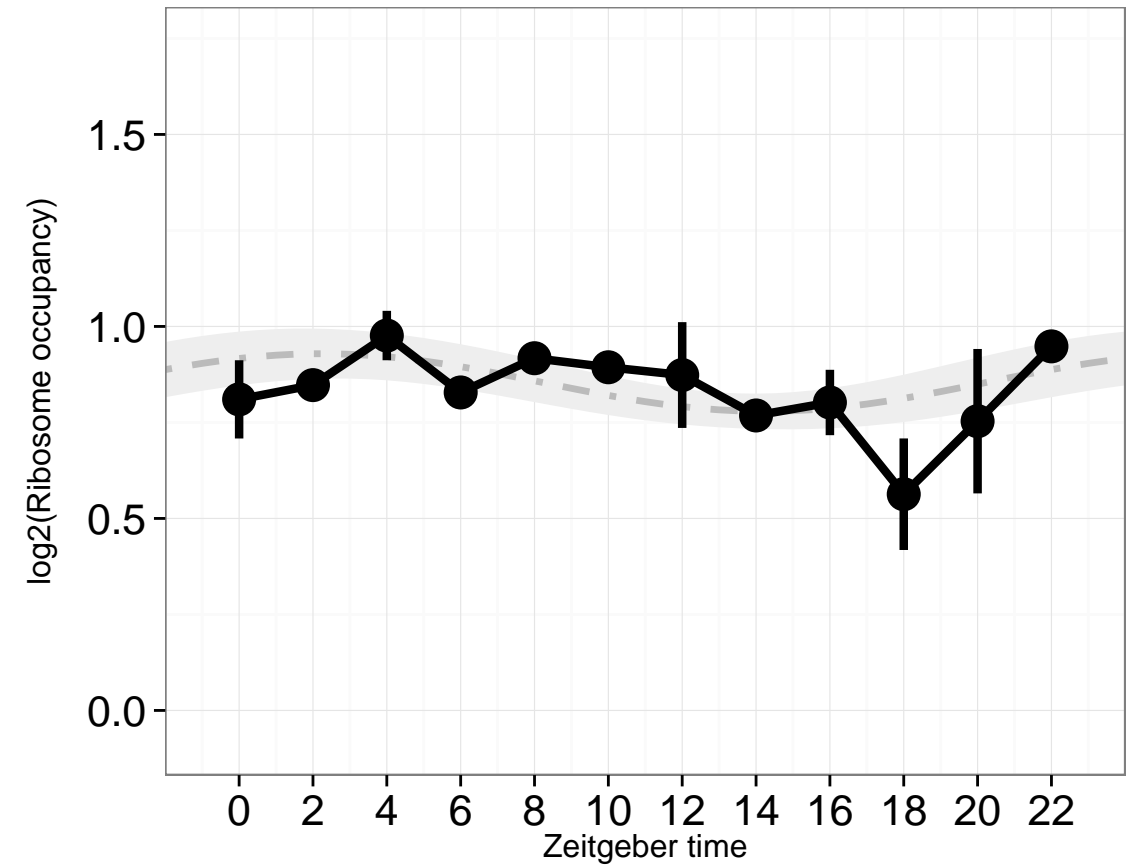

Supplement: SuppDataset_1.zip [file Hsd3b3_set_A.pdf › Supplemental Dataset 1/A-mRNA_nonrhyth_translation_nonrhyth/Hsd3b3_set_A.pdf]

## Hsd11

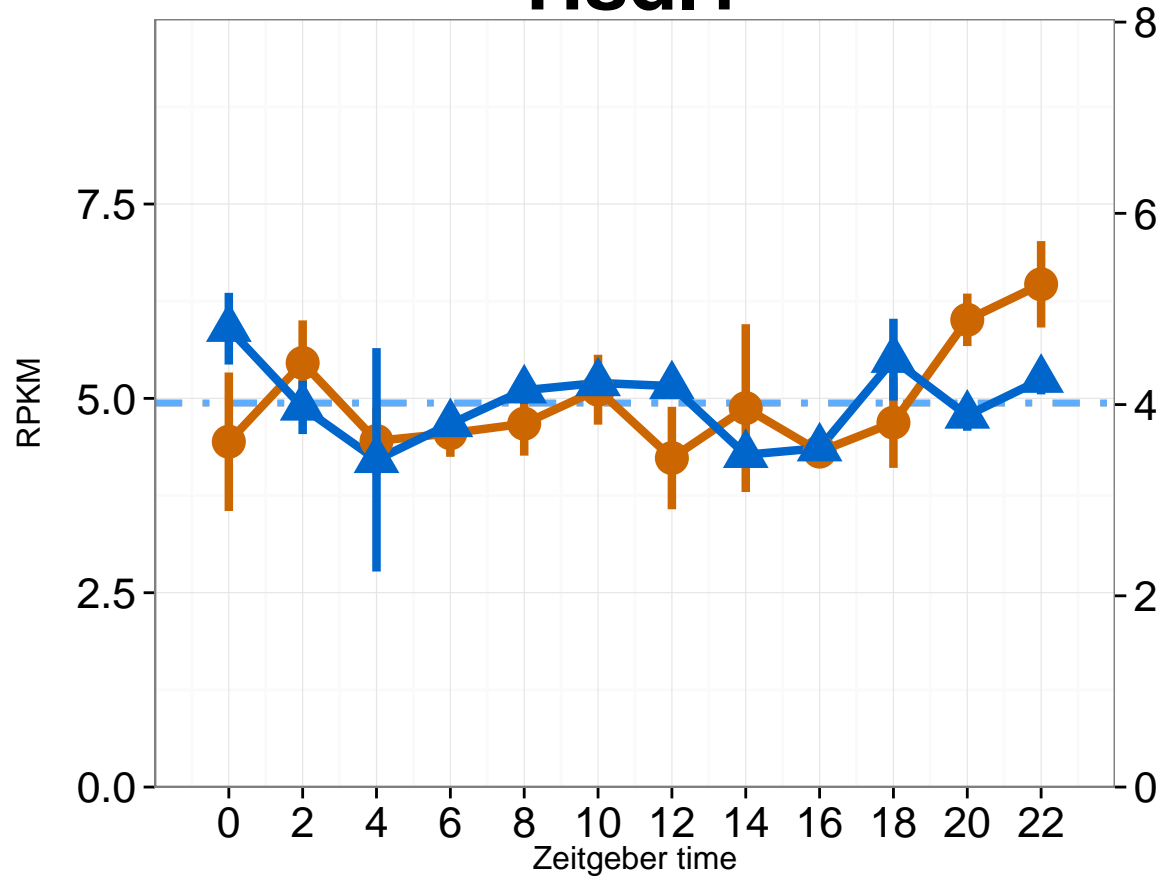

## Hsd11

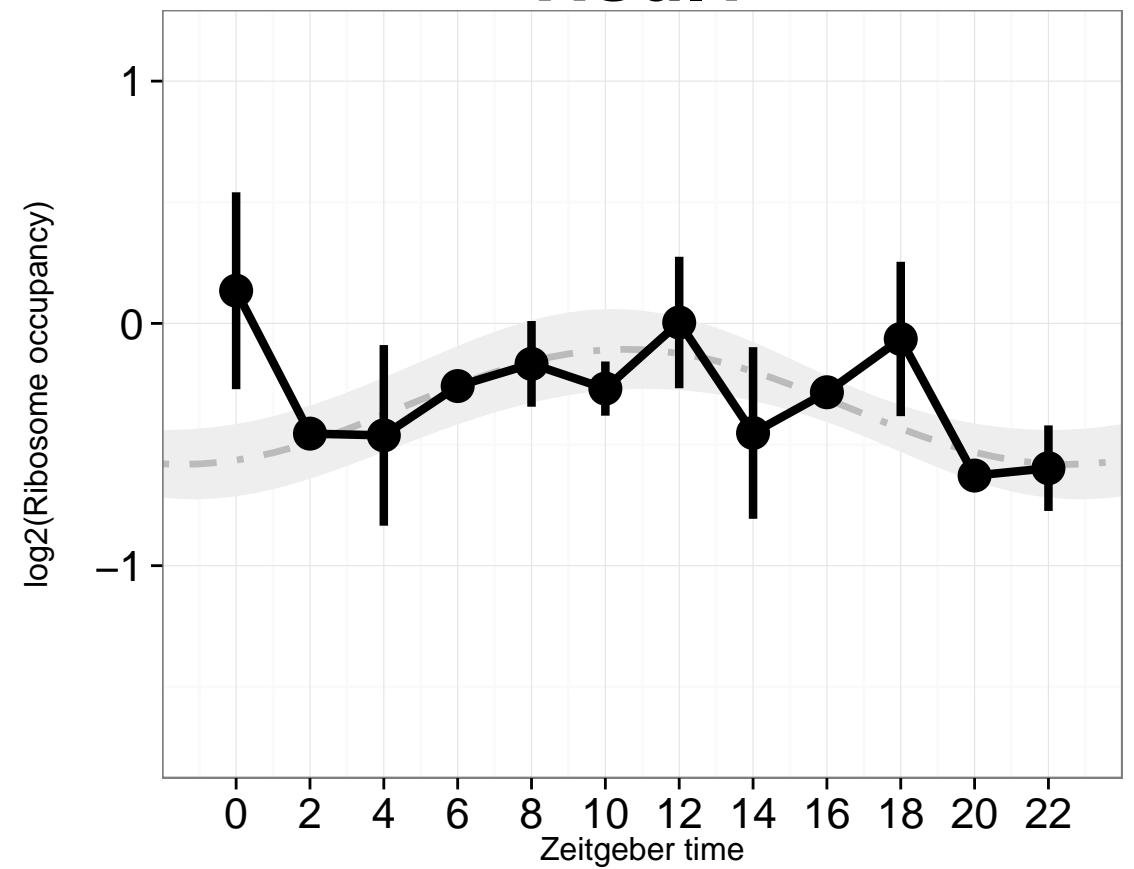

Supplement: SuppDataset_1.zip [file Hsdl1_set_A.pdf › Supplemental Dataset 1/A-mRNA_nonrhyth_translation_nonrhyth/Hsdl1_set_A.pdf]

## HsdI2

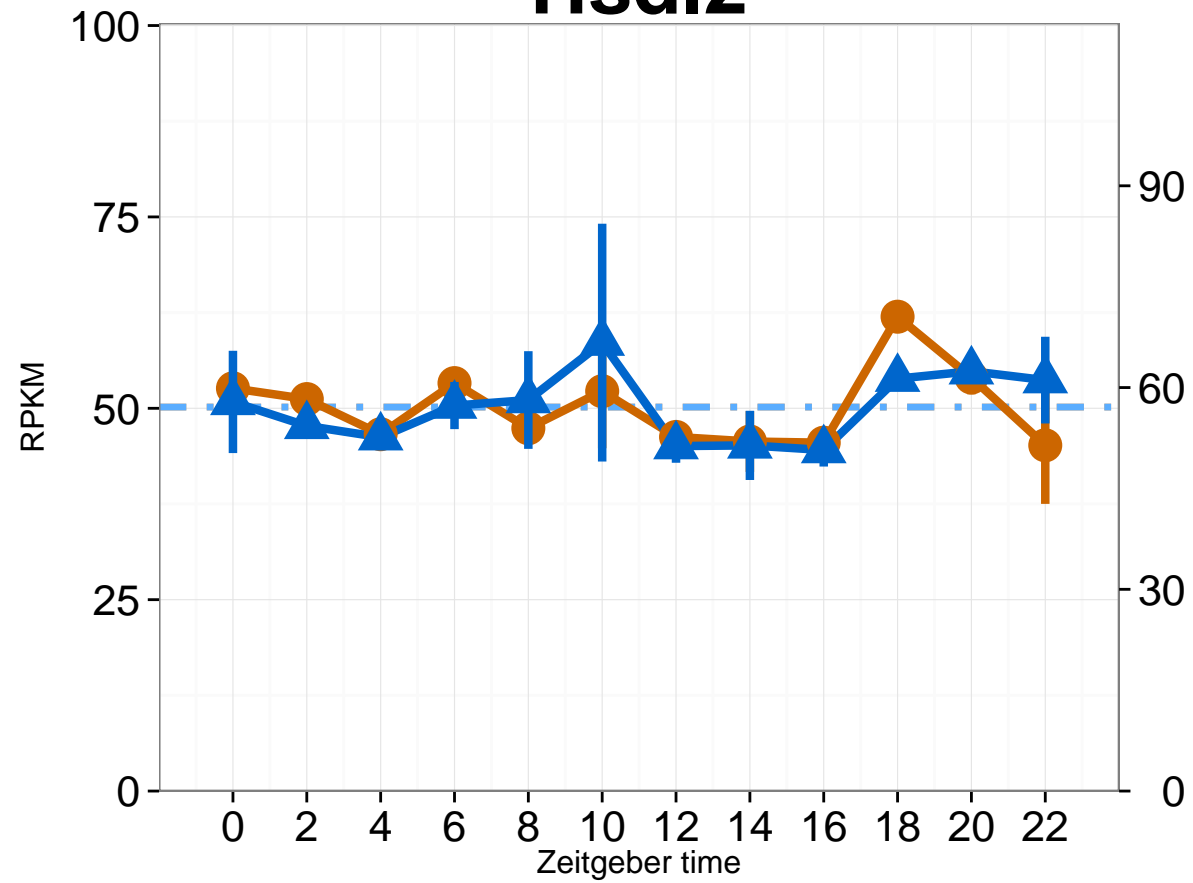

## HsdI2

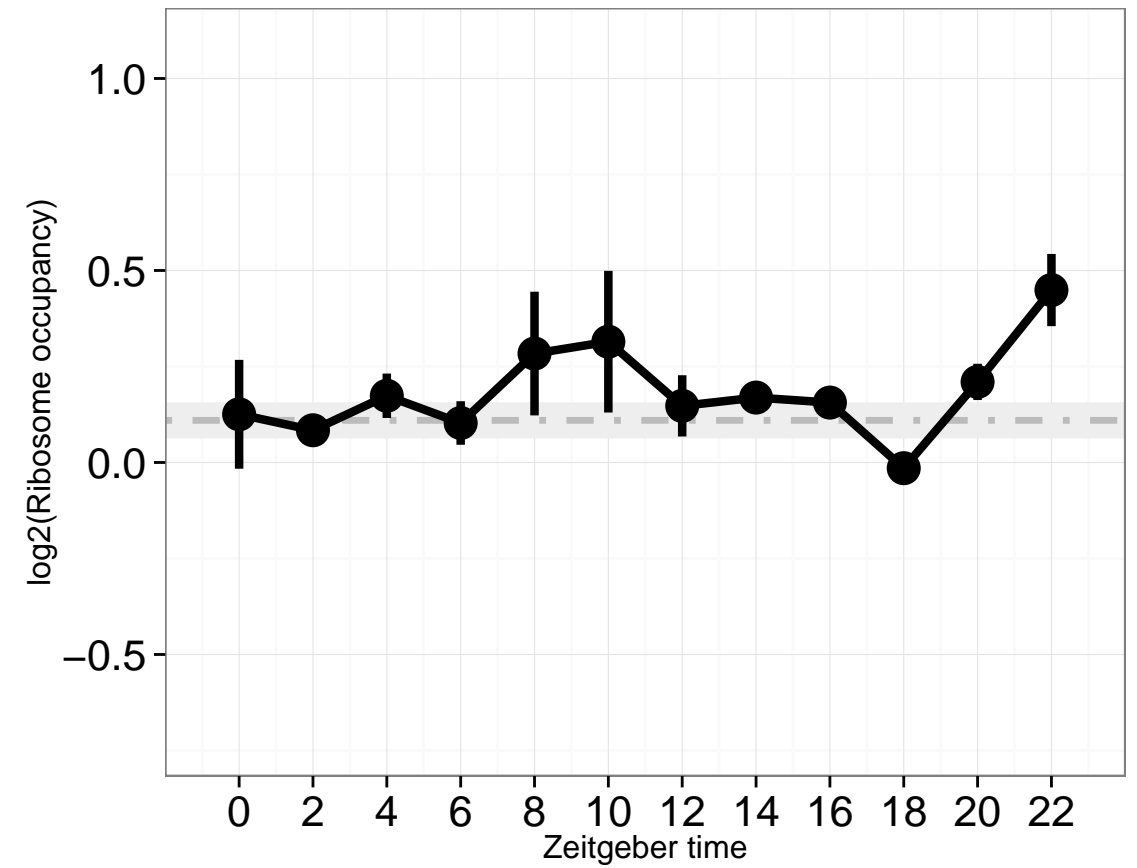

Supplement: SuppDataset_1.zip [file Hsdl2_set_A.pdf › Supplemental Dataset 1/A-mRNA_nonrhyth_translation_nonrhyth/Hsdl2_set_A.pdf]

## Hsf2

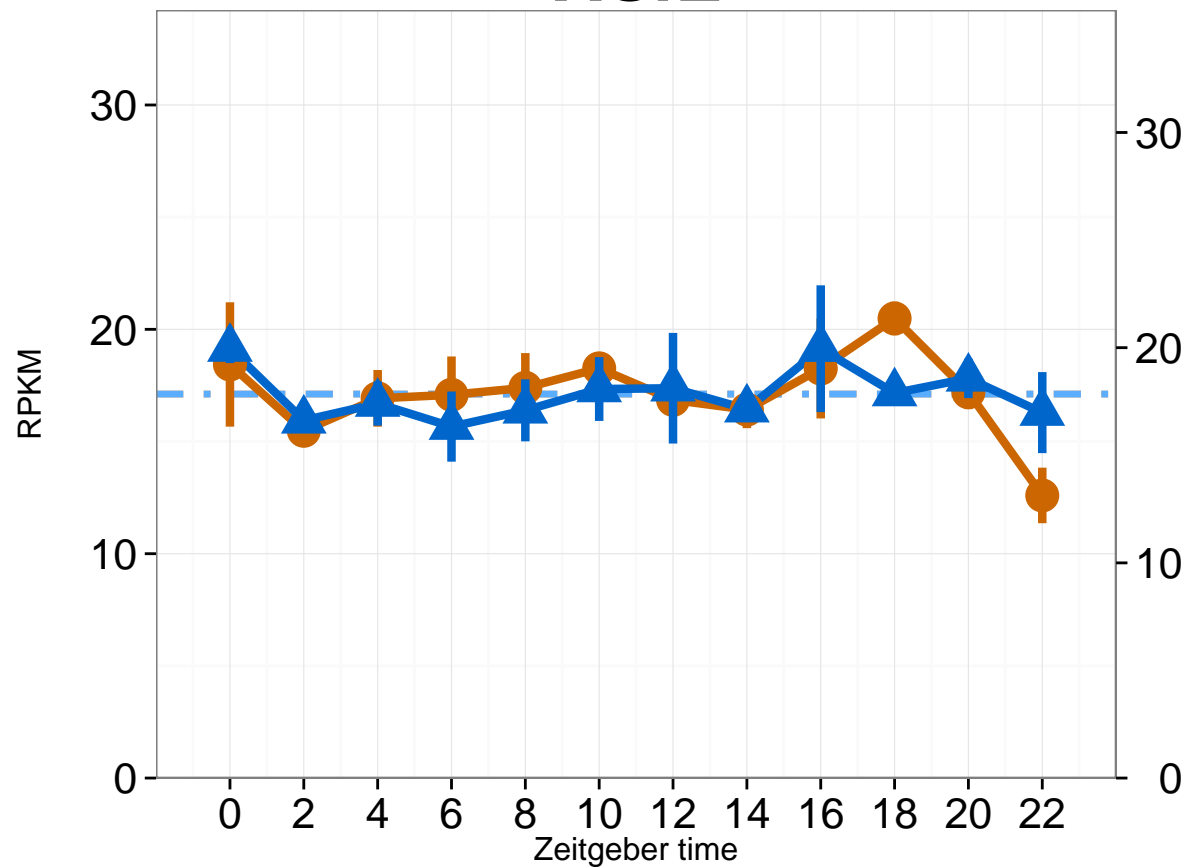

## Hsf2

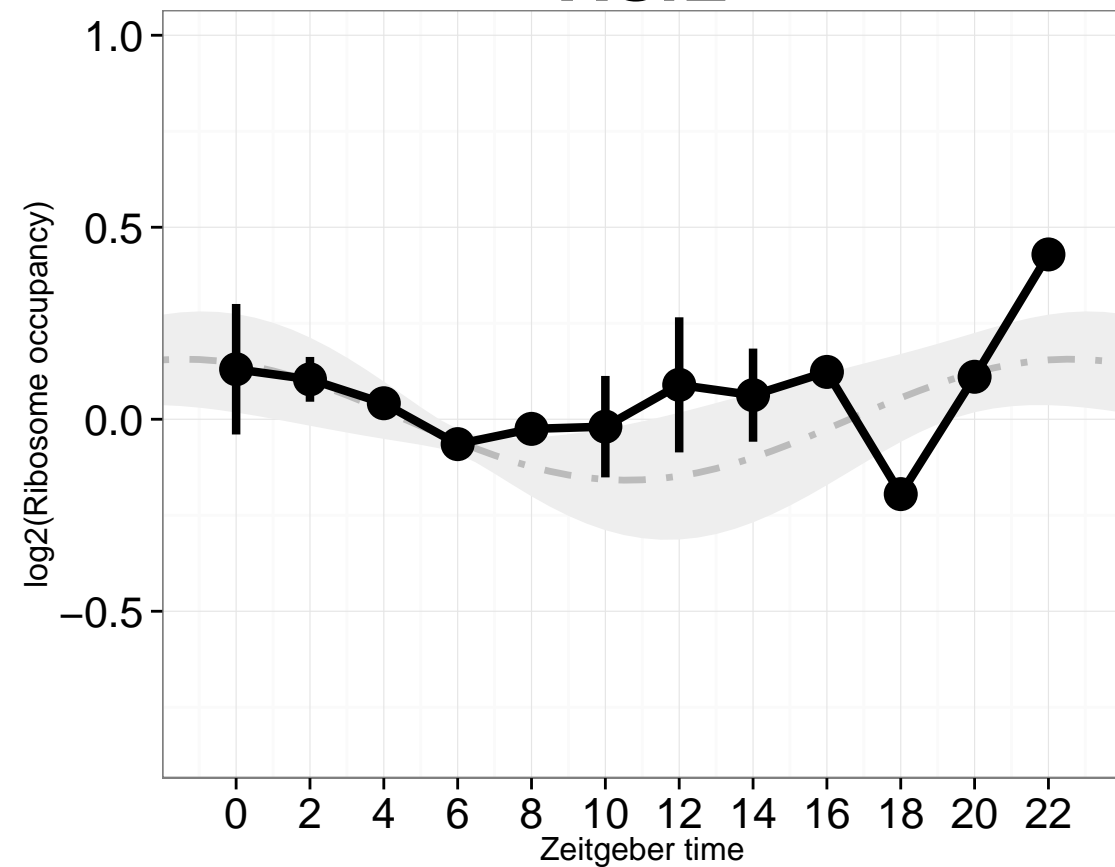

Supplement: SuppDataset_1.zip [file Hsf2_set_A.pdf › Supplemental Dataset 1/A-mRNA_nonrhyth_translation_nonrhyth/Hsf2_set_A.pdf]

## Hsf4

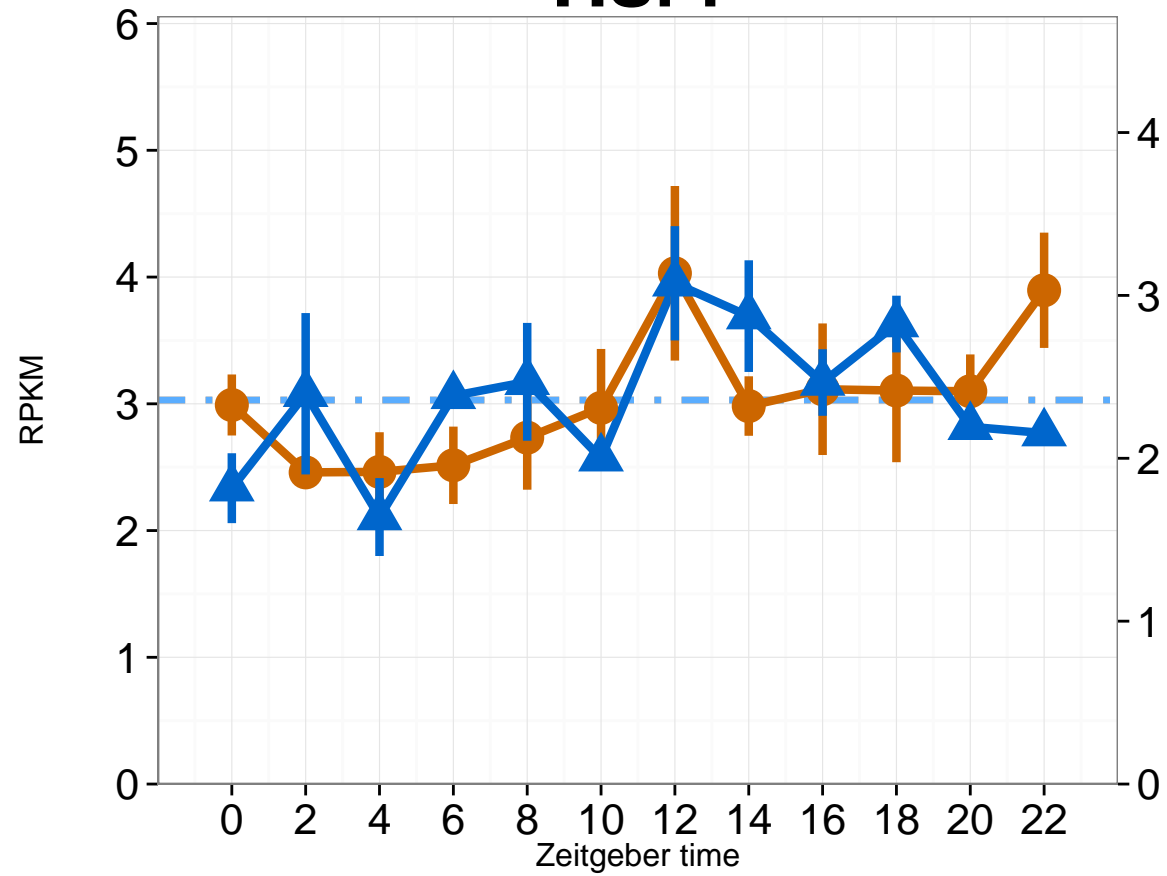

## Hsf4

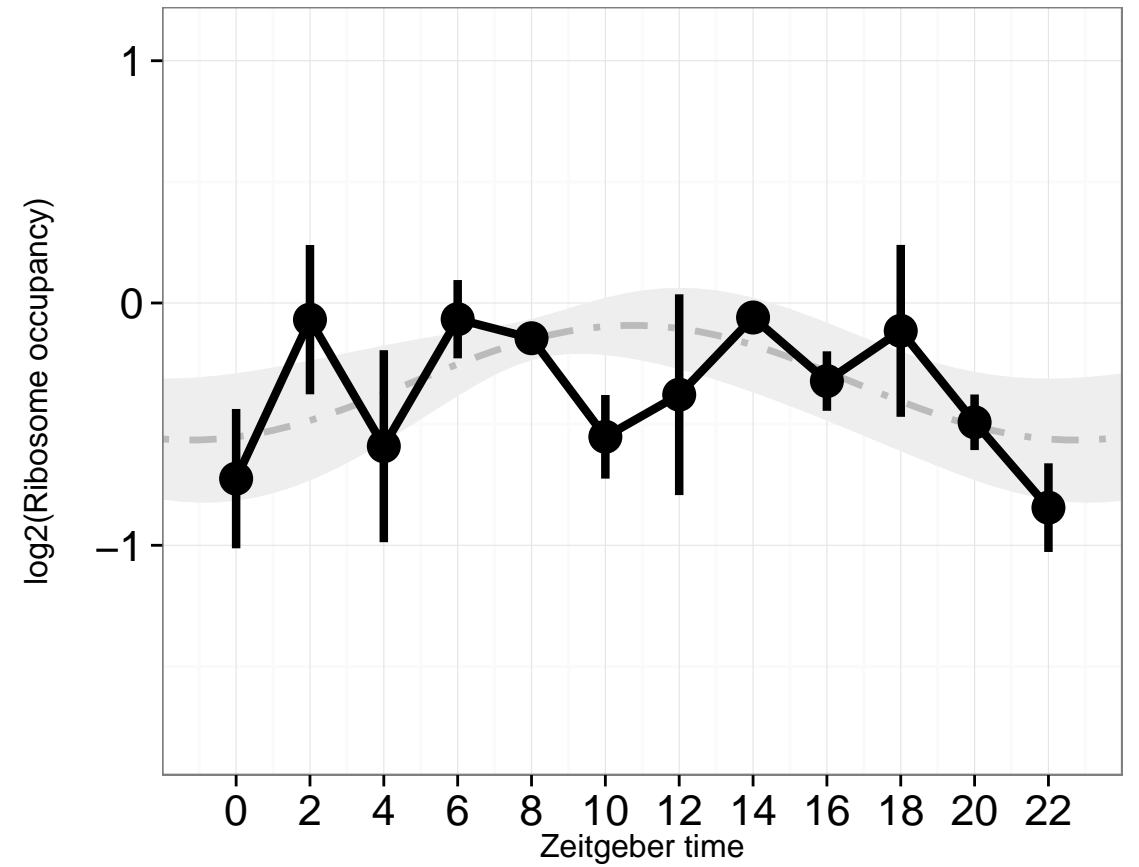

Supplement: SuppDataset_1.zip [file Hsf4_set_A.pdf › Supplemental Dataset 1/A-mRNA_nonrhyth_translation_nonrhyth/Hsf4_set_A.pdf]

# Hsp90b1

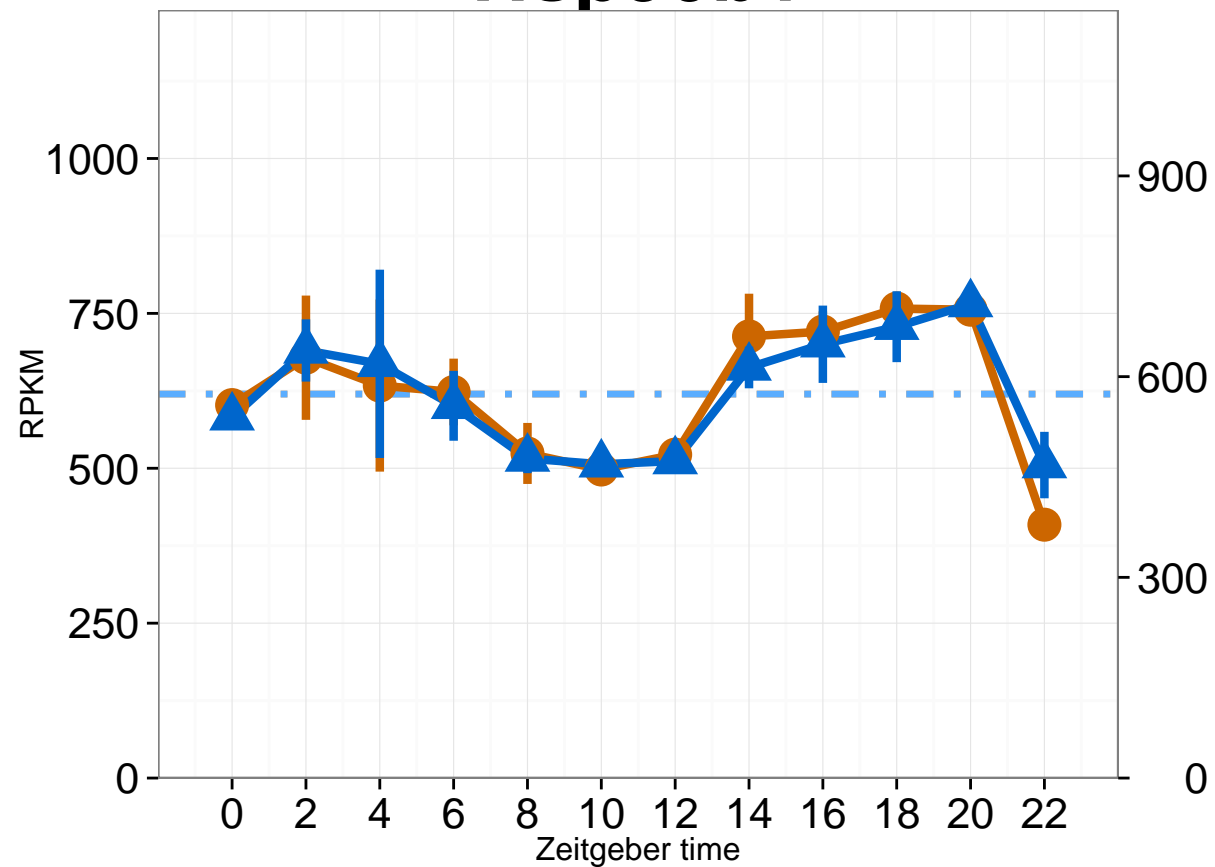

# Hsp90b1

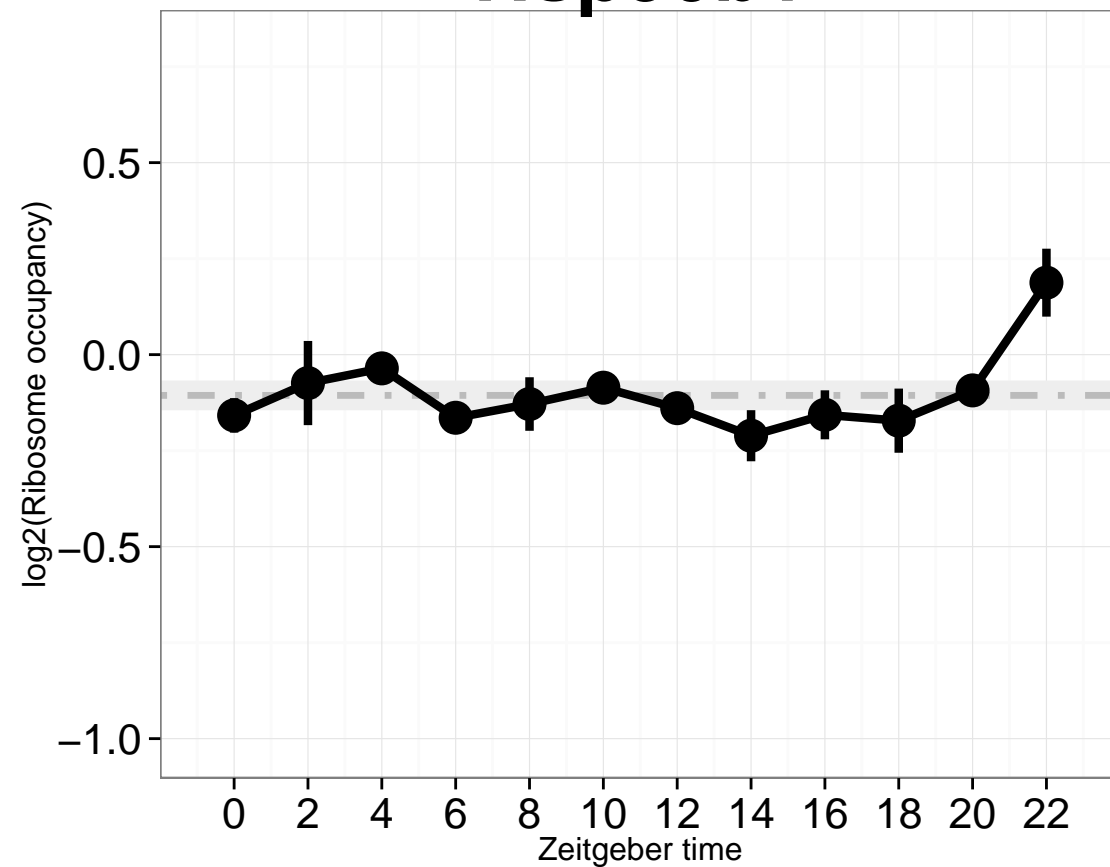

Supplement: SuppDataset_1.zip [file Hsp90b1_set_A.pdf › Supplemental Dataset 1/A-mRNA_nonrhyth_translation_nonrhyth/Hsp90b1_set_A.pdf]

# Hspa12b

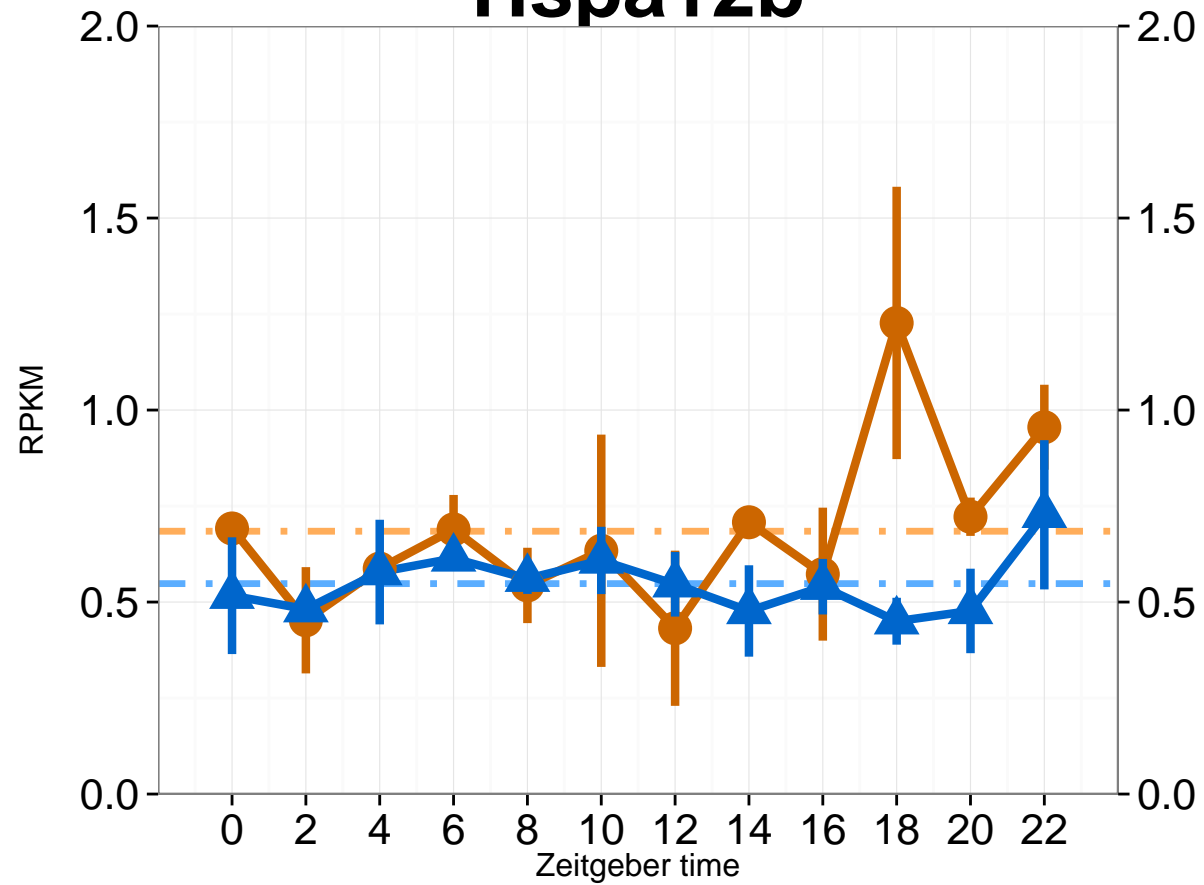

# Hspa12b

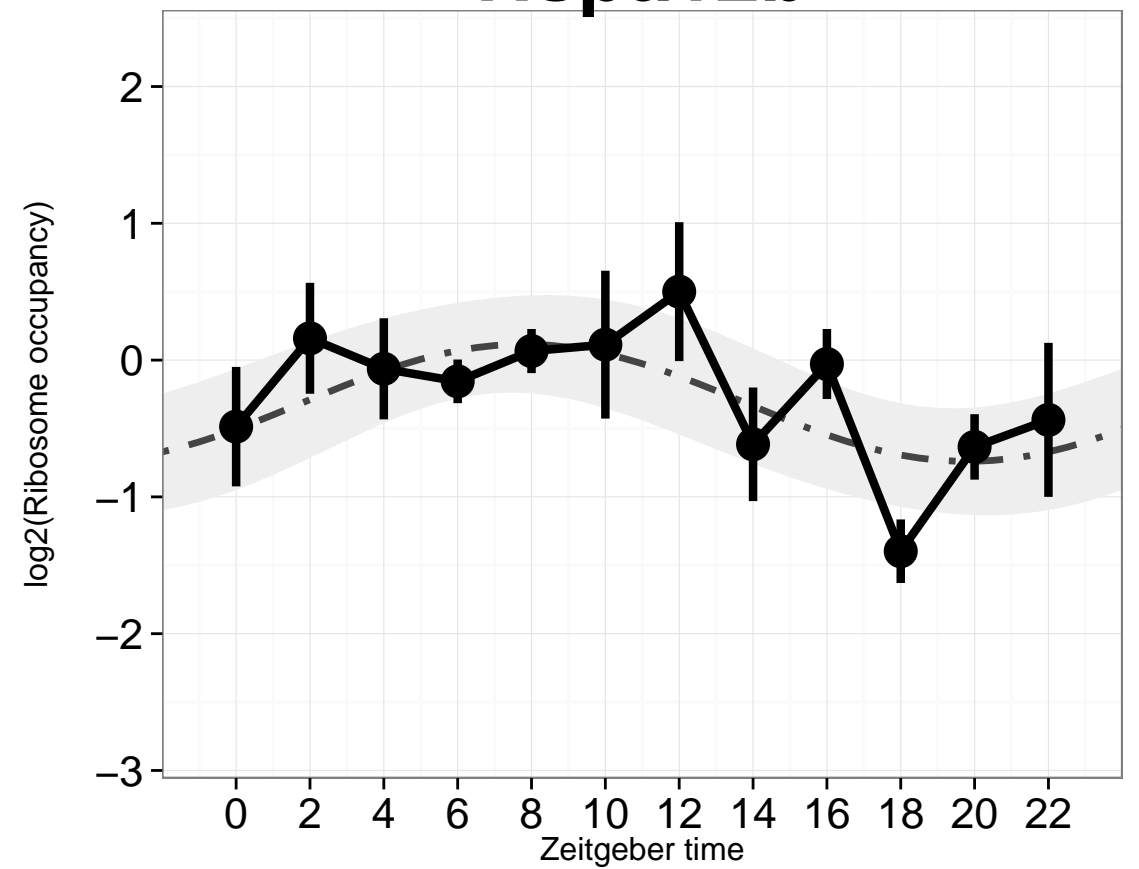

Supplement: SuppDataset_1.zip [file Hspa12b_set_A.pdf › Supplemental Dataset 1/A-mRNA_nonrhyth_translation_nonrhyth/Hspa12b_set_A.pdf]

# Hspa13

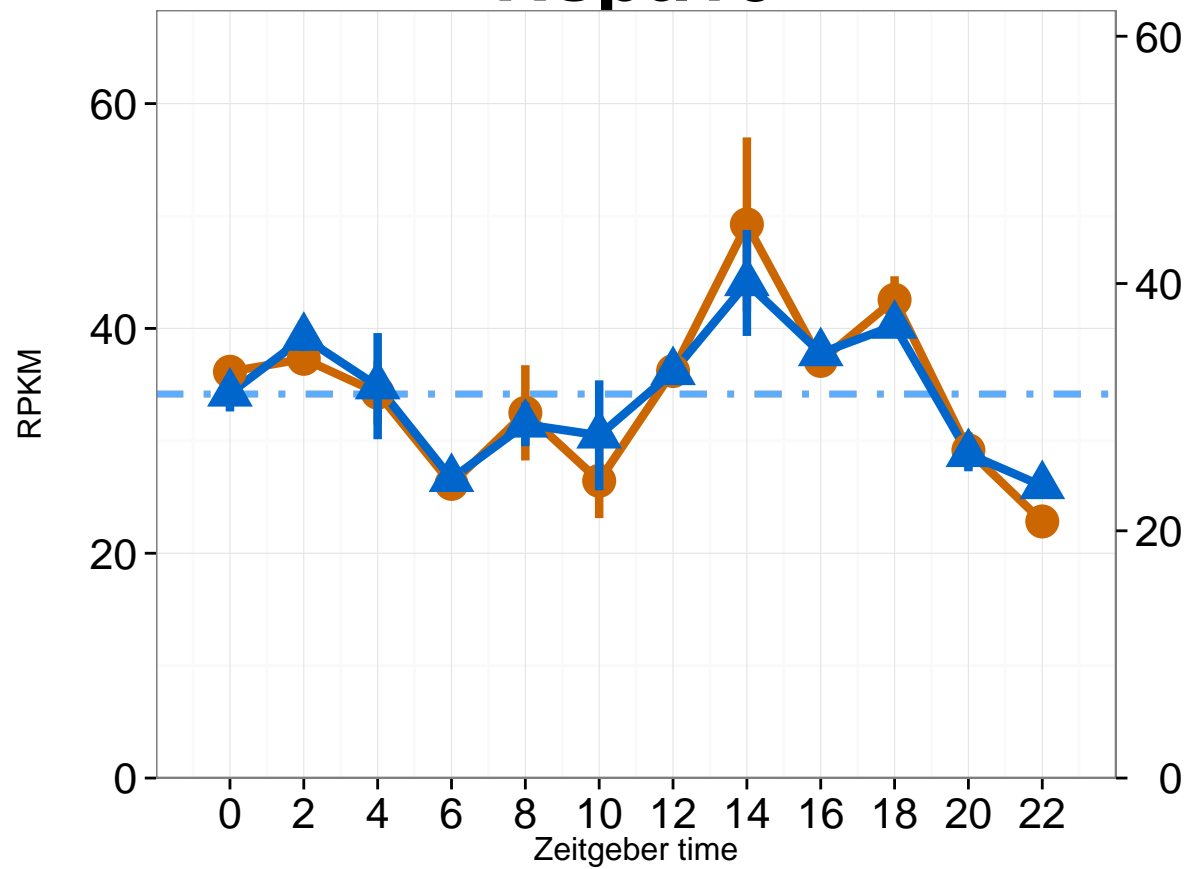

# Hspa13

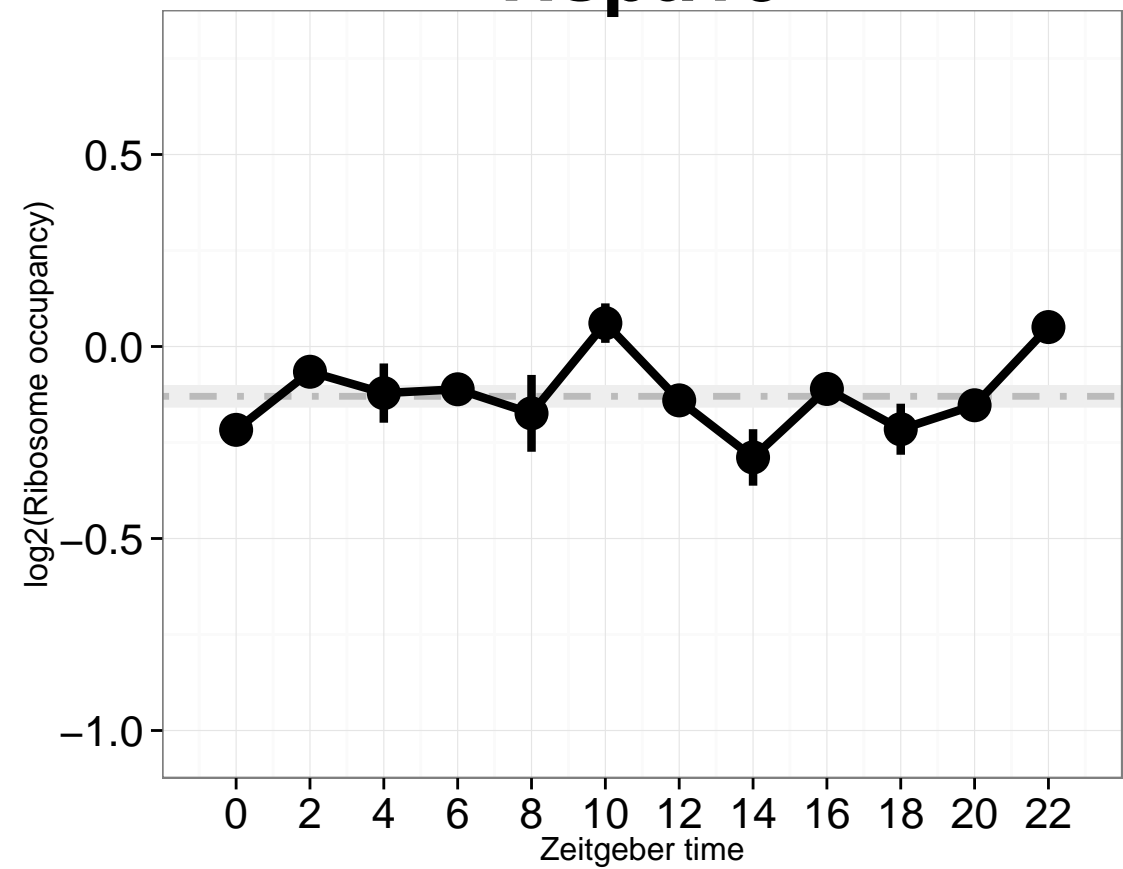

Supplement: SuppDataset_1.zip [file Hspa13_set_A.pdf › Supplemental Dataset 1/A-mRNA_nonrhyth_translation_nonrhyth/Hspa13_set_A.pdf]

# Hspa14

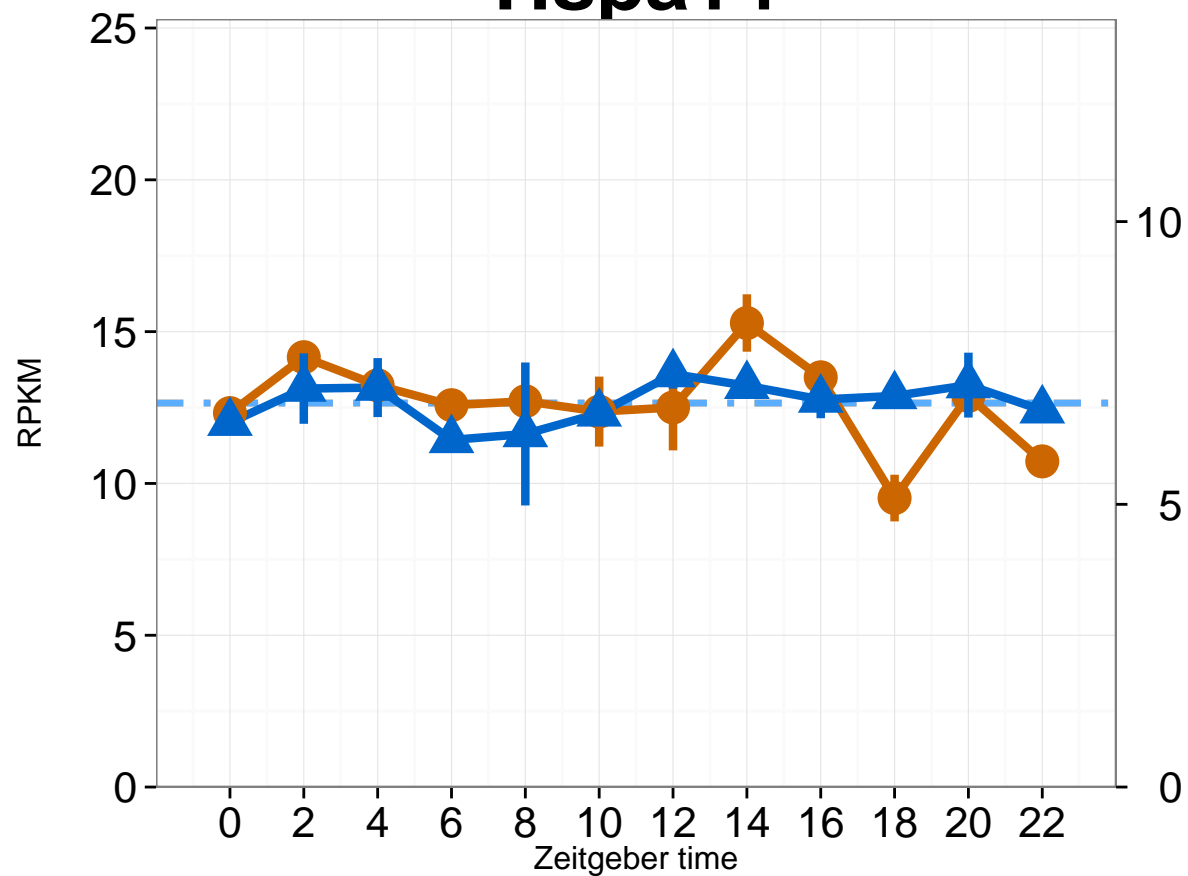

# Hspa14

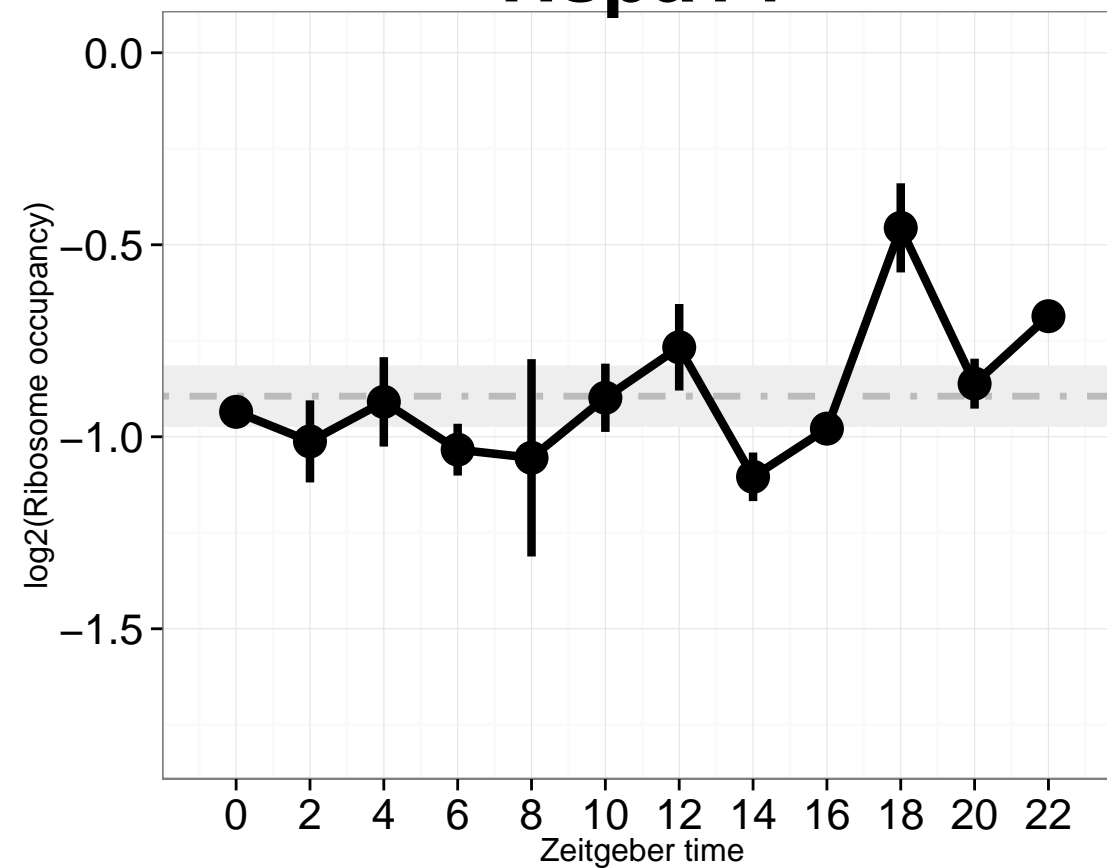

Supplement: SuppDataset_1.zip [file Hspa14_set_A.pdf › Supplemental Dataset 1/A-mRNA_nonrhyth_translation_nonrhyth/Hspa14_set_A.pdf]

# Hspa4

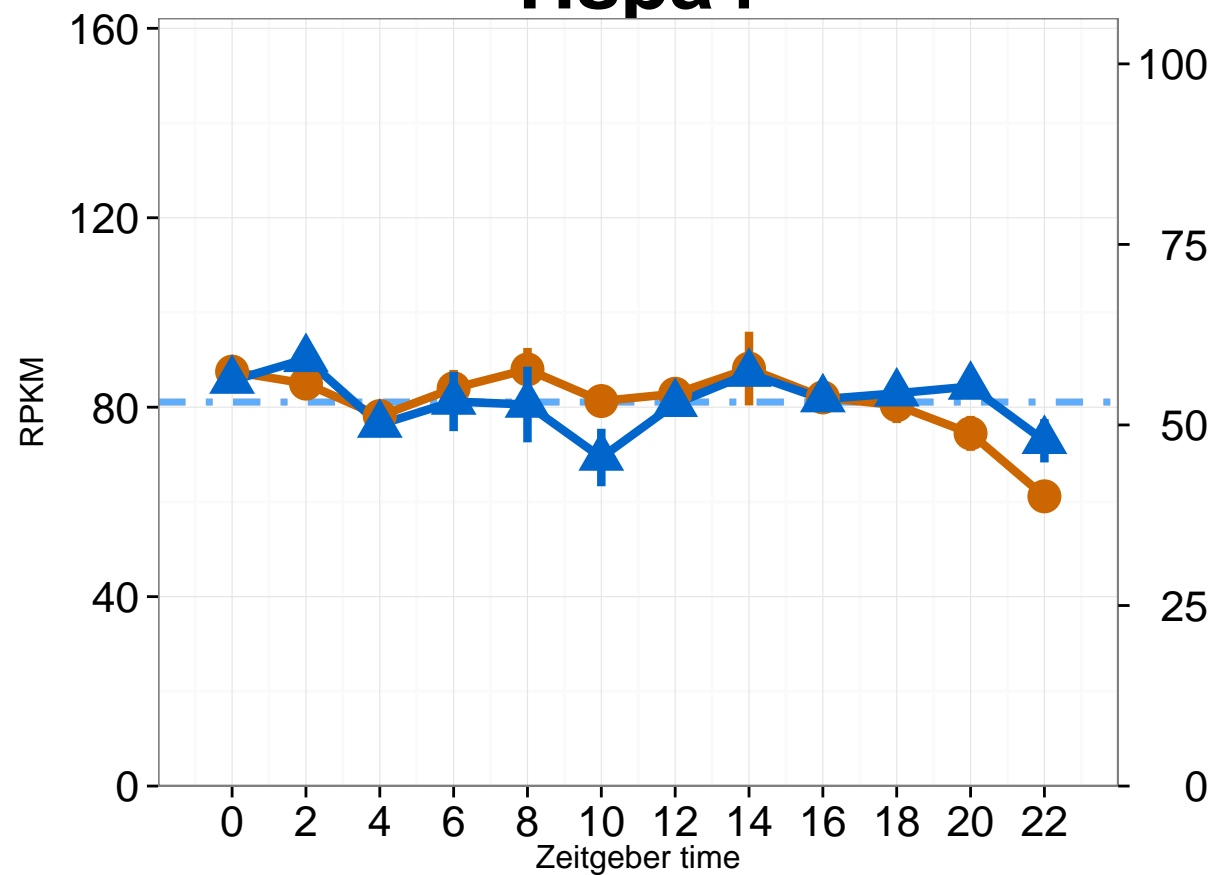

# Hspa4

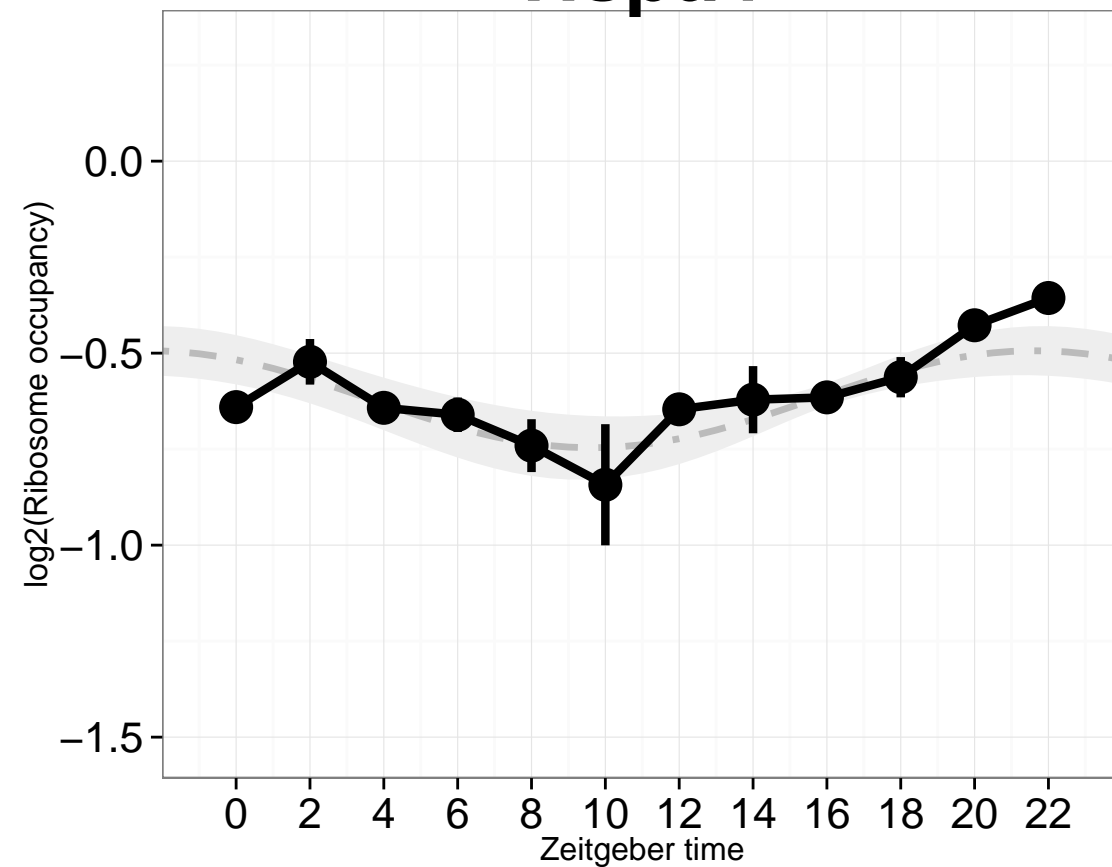

Supplement: SuppDataset_1.zip [file Hspa4_set_A.pdf › Supplemental Dataset 1/A-mRNA_nonrhyth_translation_nonrhyth/Hspa4_set_A.pdf]

# Hspa5

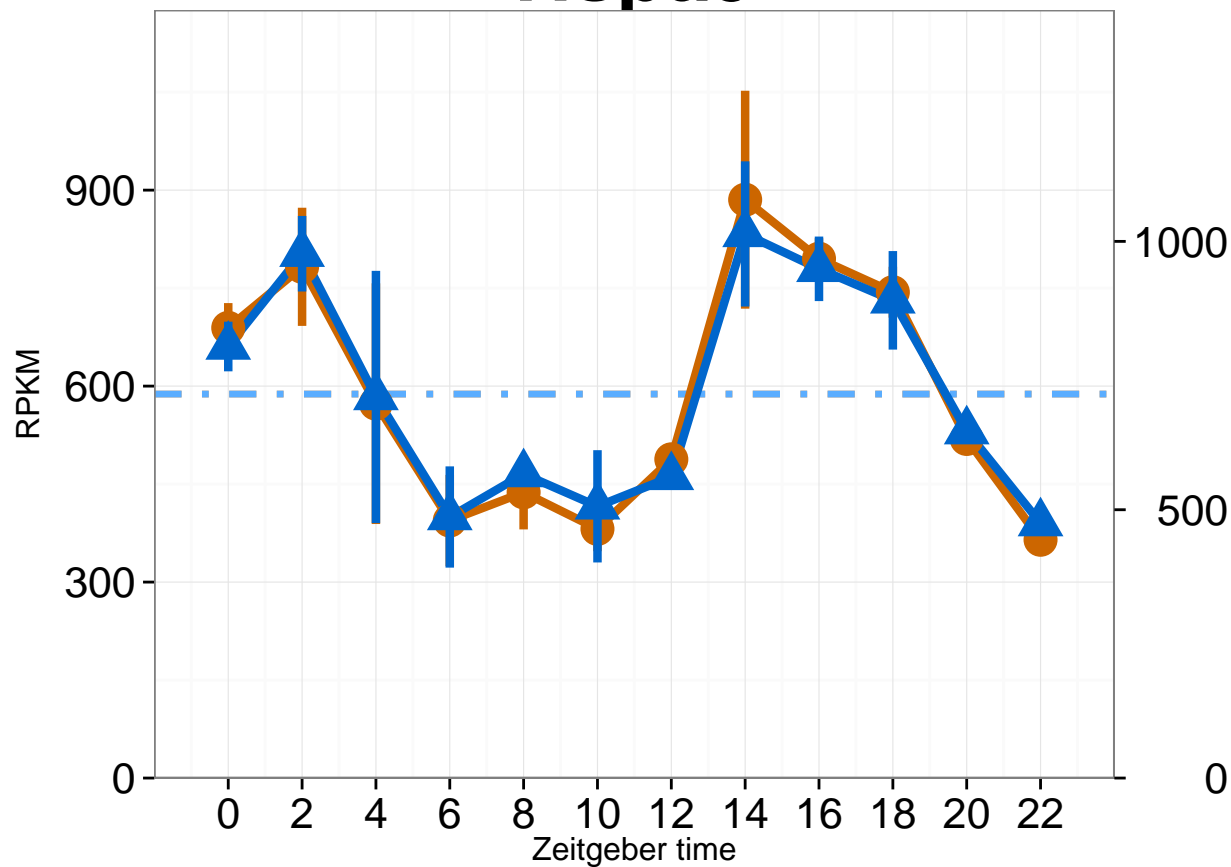

# Hspa5

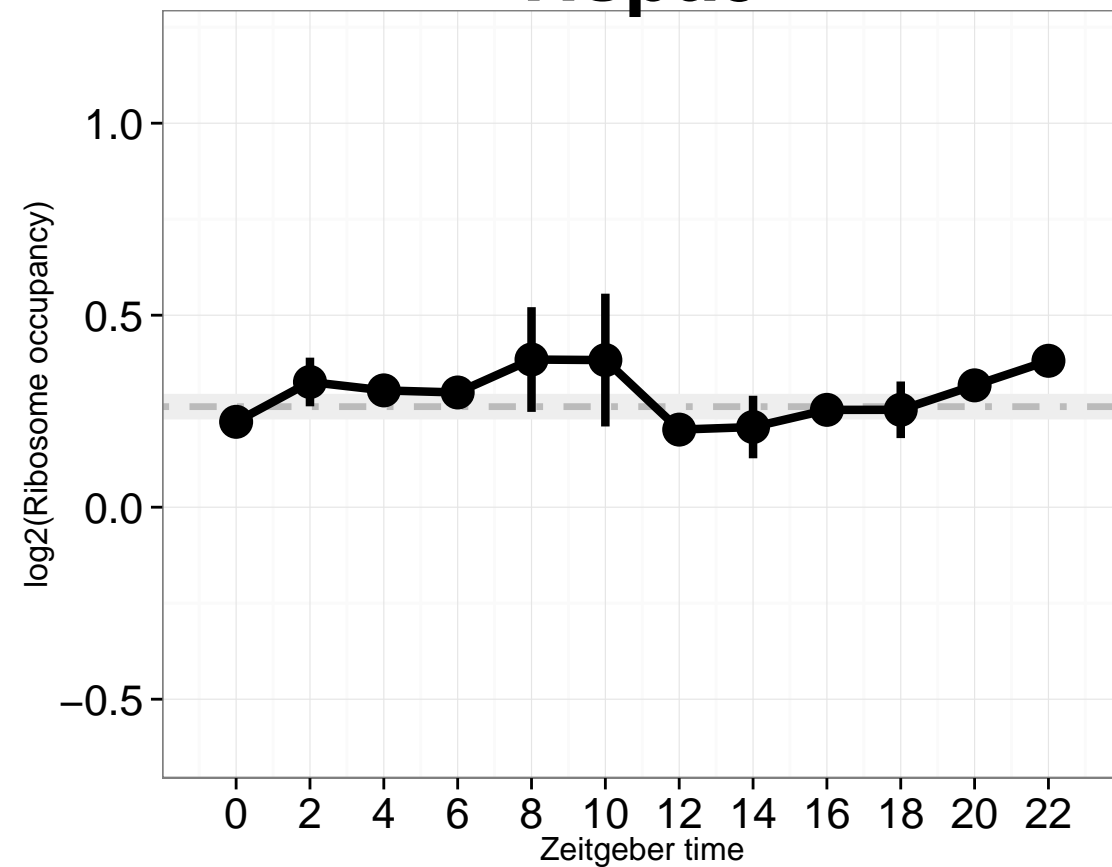

Supplement: SuppDataset_1.zip [file Hspa5_set_A.pdf › Supplemental Dataset 1/A-mRNA_nonrhyth_translation_nonrhyth/Hspa5_set_A.pdf]

# Hspa9

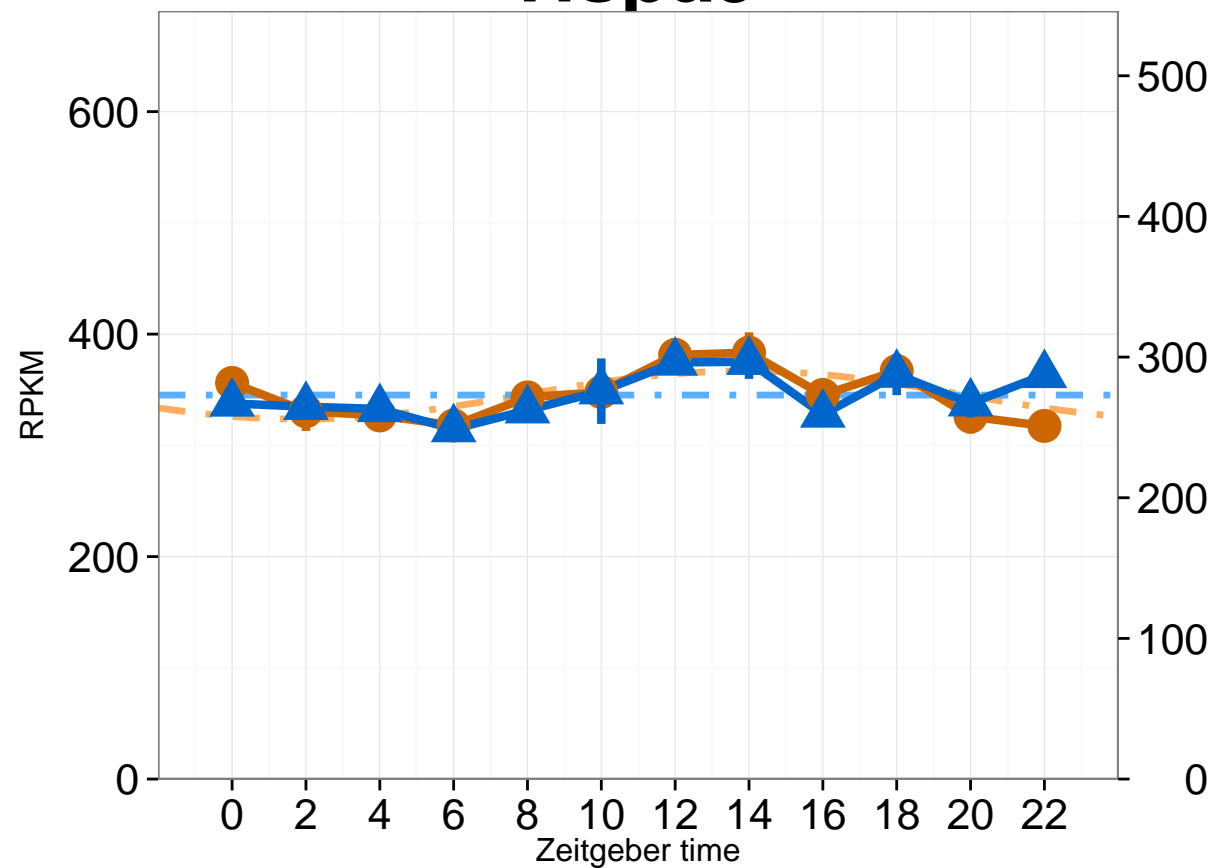

# Hspa9

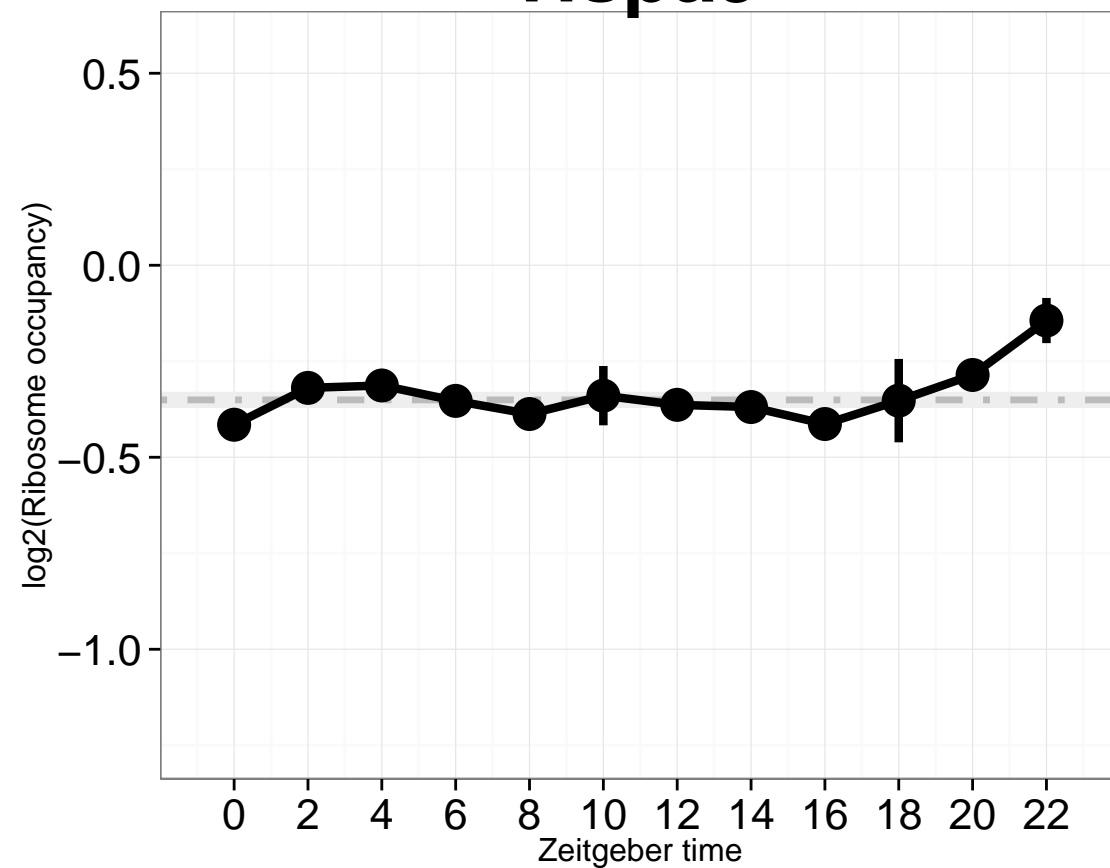

Supplement: SuppDataset_1.zip [file Hspa9_set_A.pdf › Supplemental Dataset 1/A-mRNA_nonrhyth_translation_nonrhyth/Hspa9_set_A.pdf]

## Hspd1

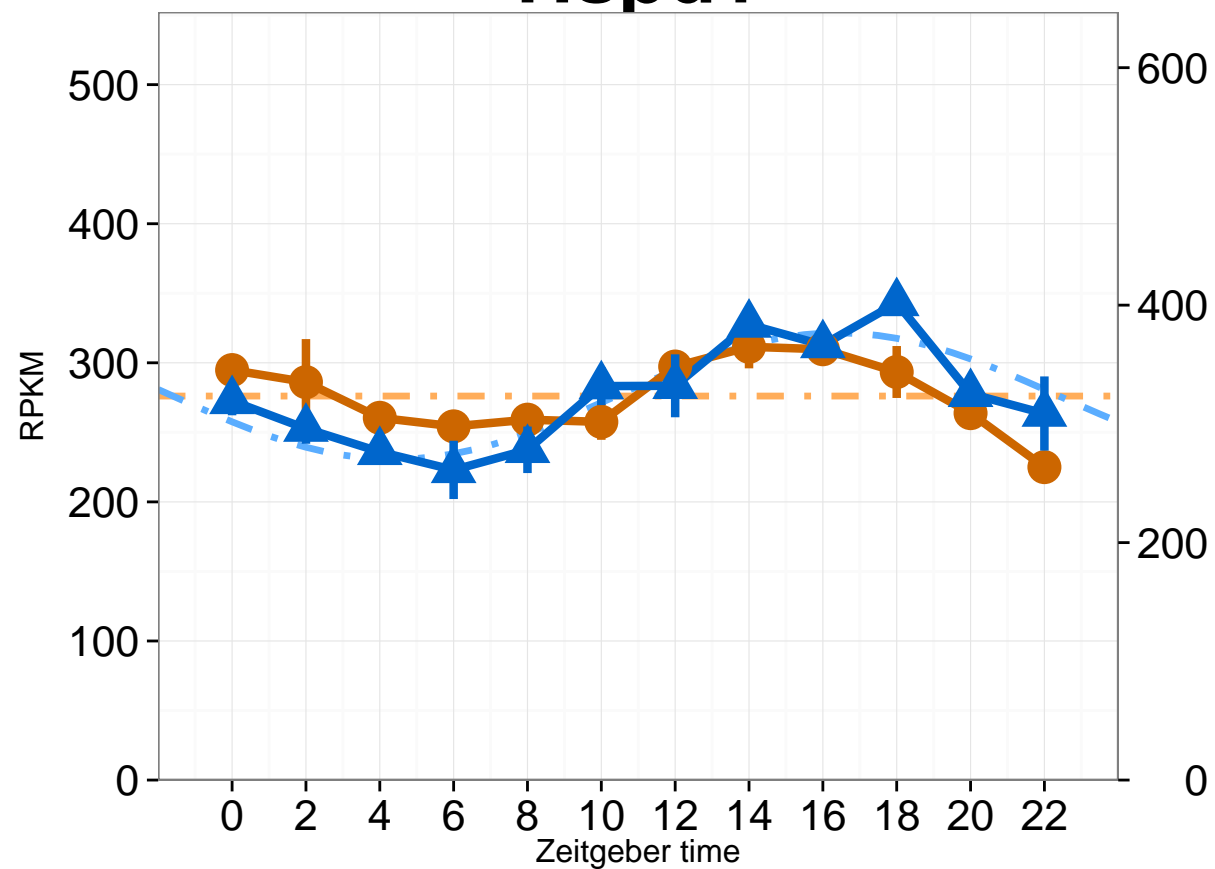

## Hspd1

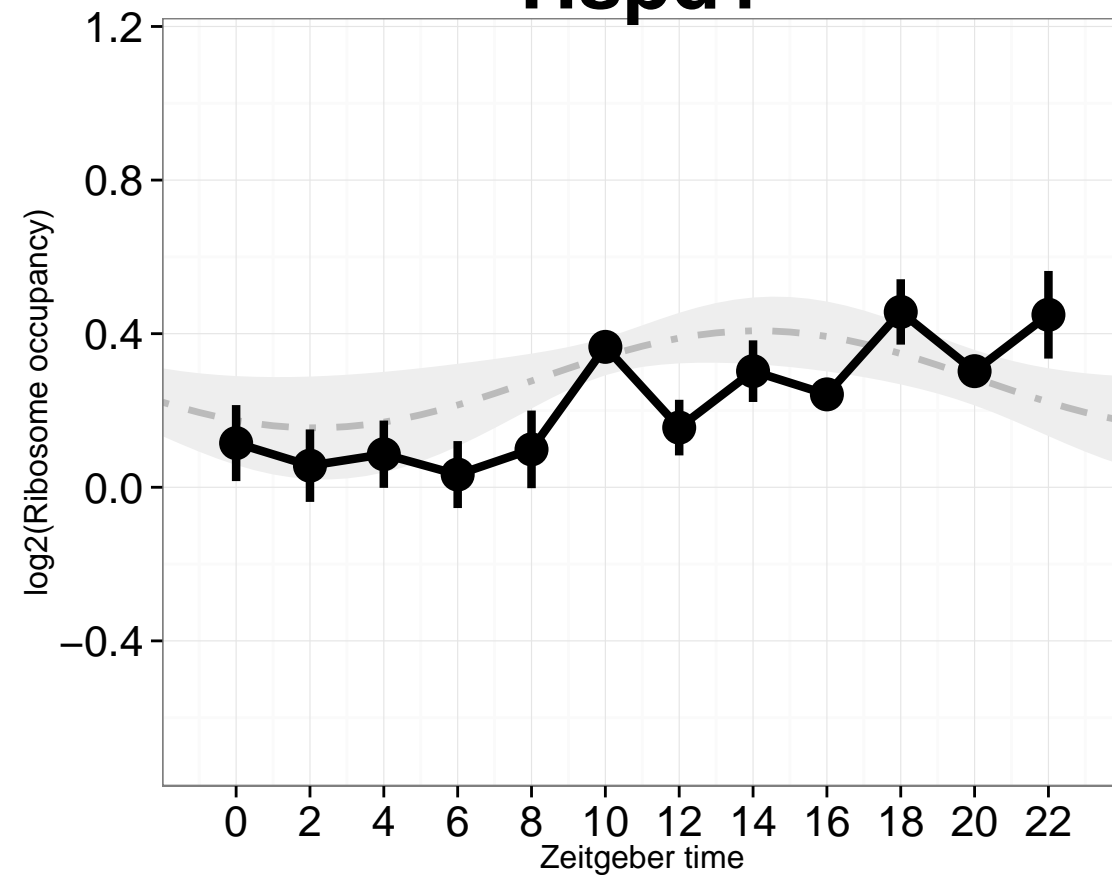

Supplement: SuppDataset_1.zip [file Hspd1_set_A.pdf › Supplemental Dataset 1/A-mRNA_nonrhyth_translation_nonrhyth/Hspd1_set_A.pdf]

# Hspe1

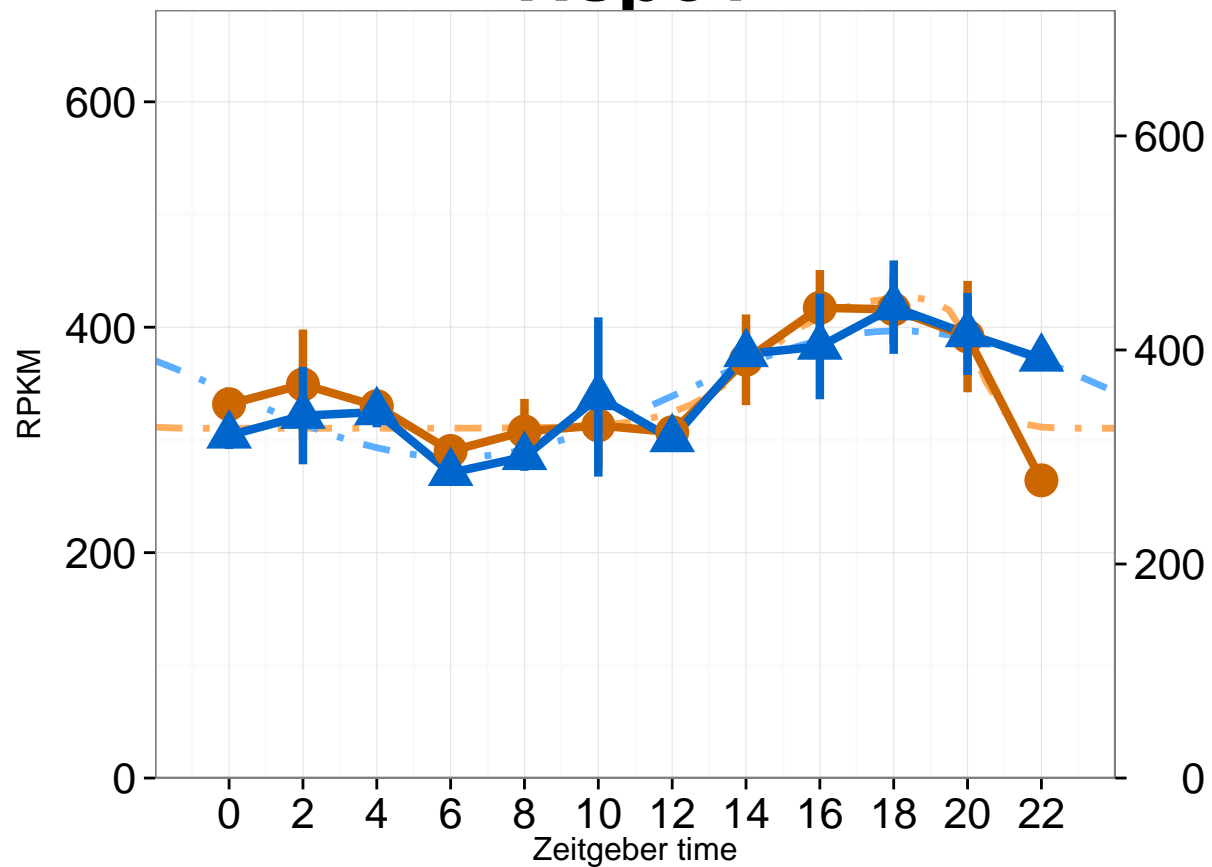

# Hspe1

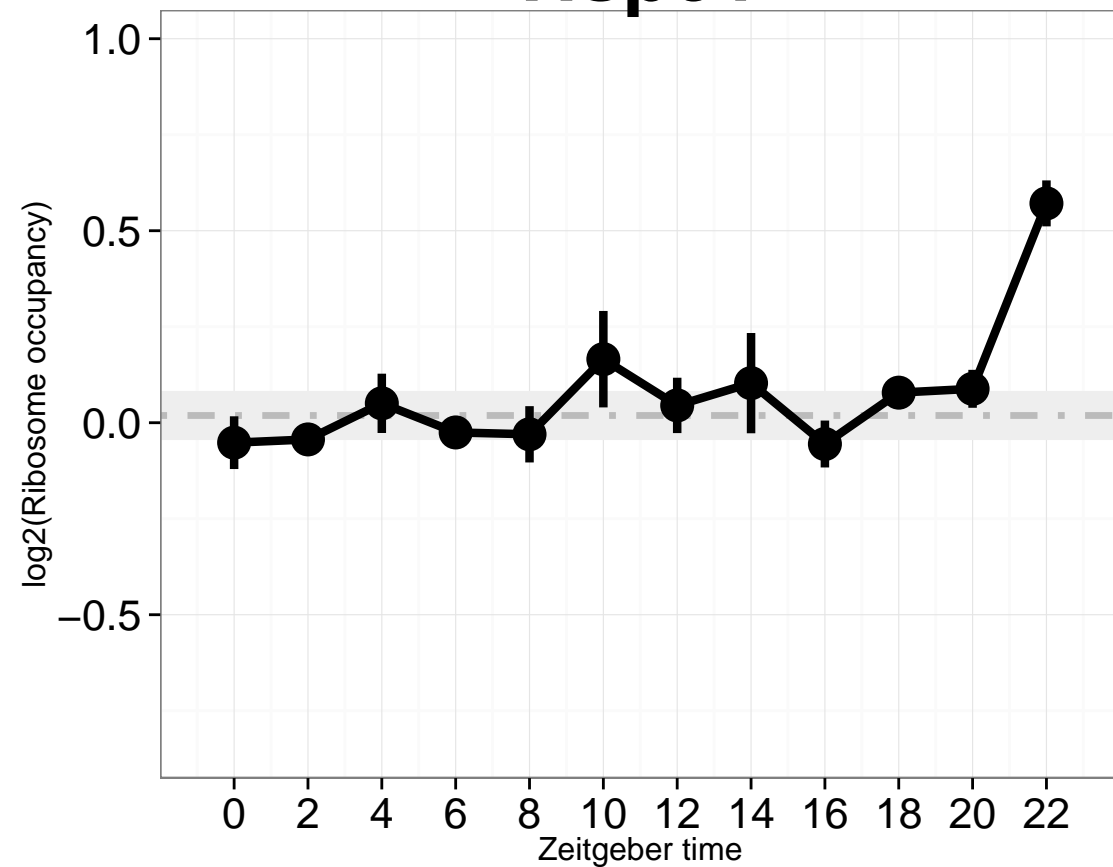

Supplement: SuppDataset_1.zip [file Hspe1_set_A.pdf › Supplemental Dataset 1/A-mRNA_nonrhyth_translation_nonrhyth/Hspe1_set_A.pdf]

## Htati2

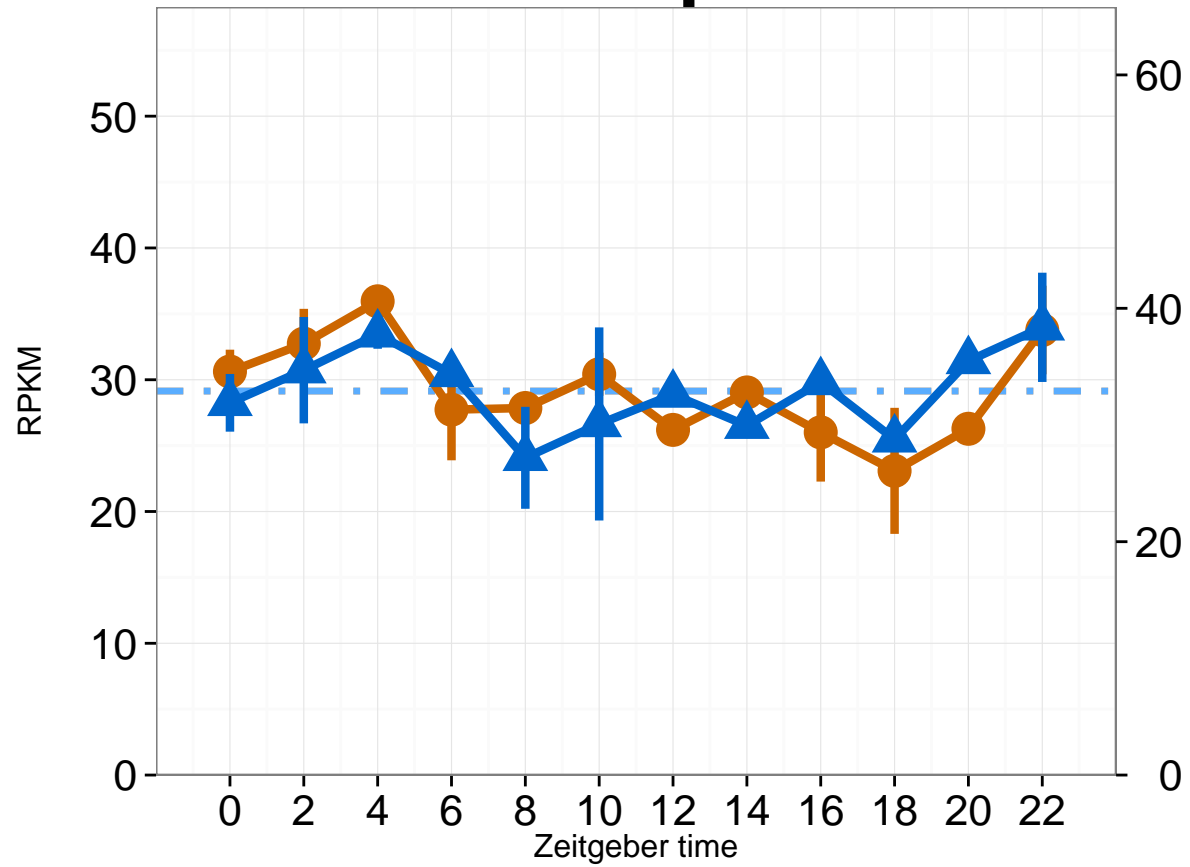

## Htati2

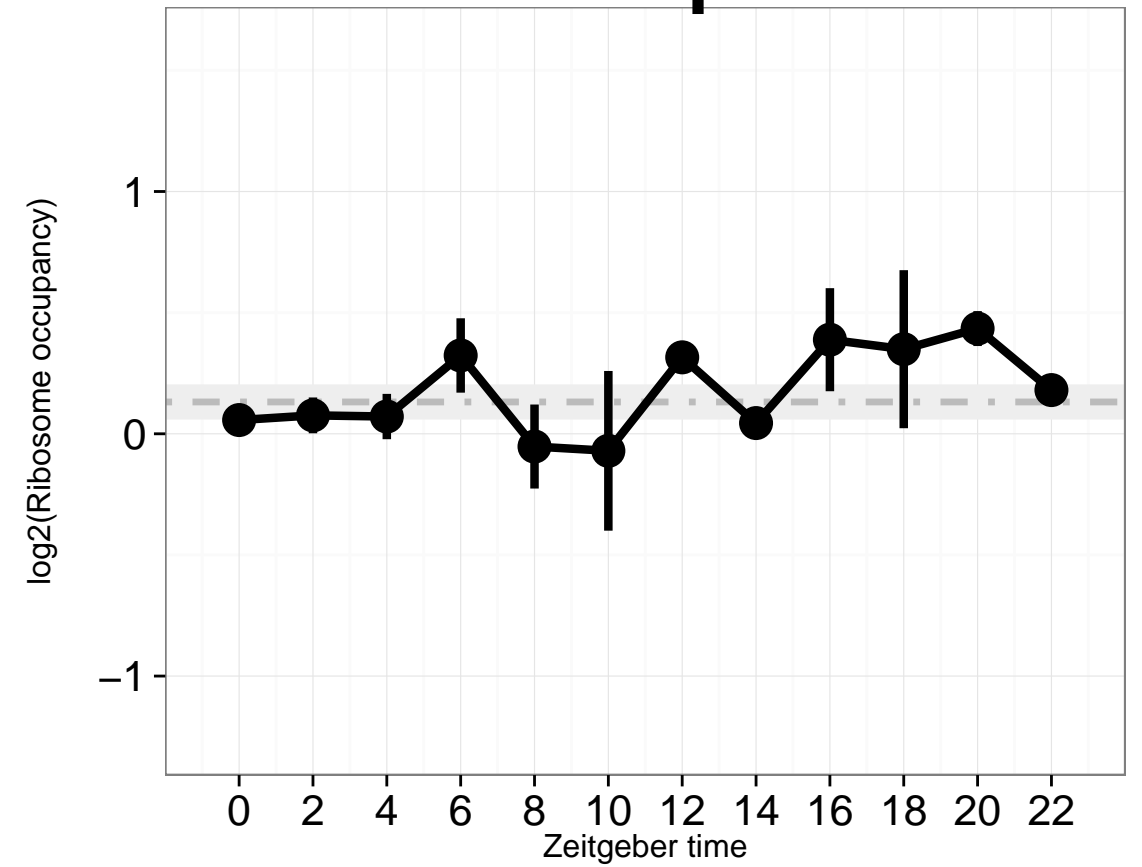

Supplement: SuppDataset_1.zip [file Htatip2_set_A.pdf › Supplemental Dataset 1/A-mRNA_nonrhyth_translation_nonrhyth/Htatip2_set_A.pdf]

# Htatsf1

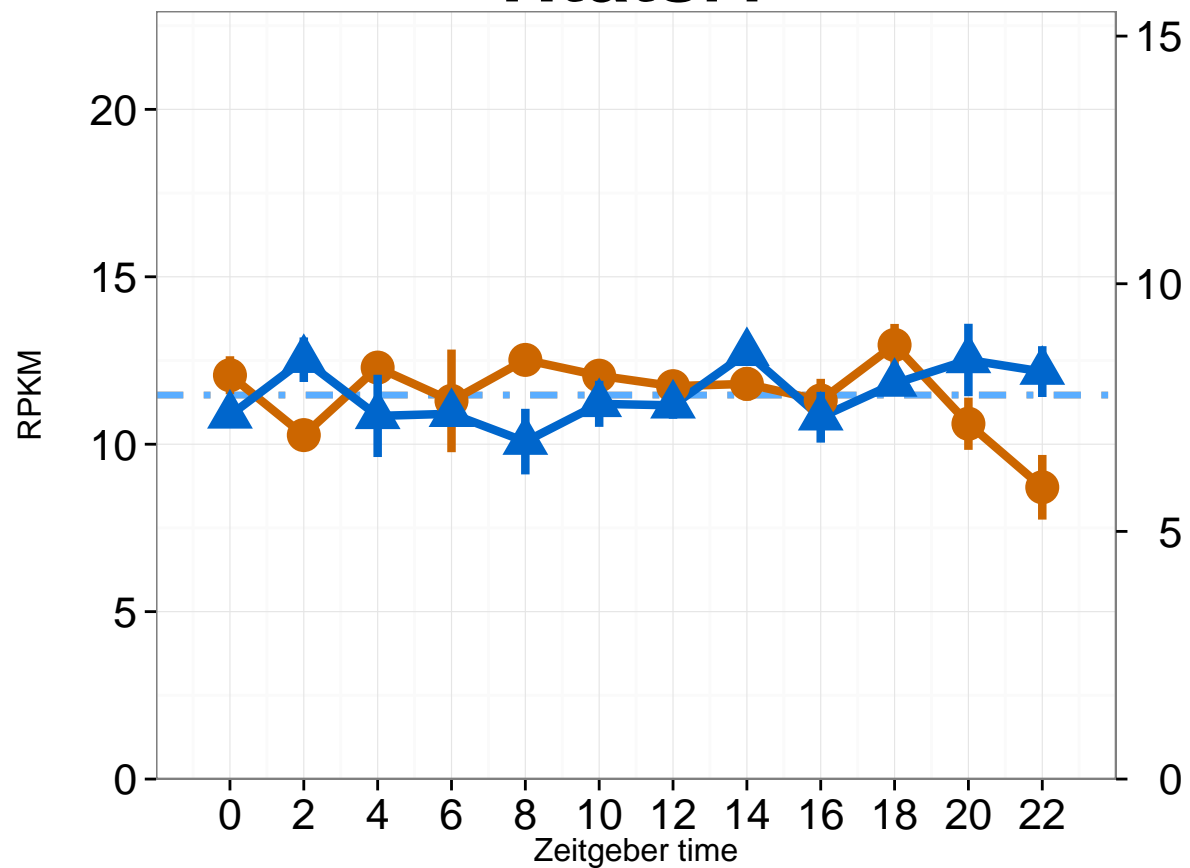

# Htatsf1

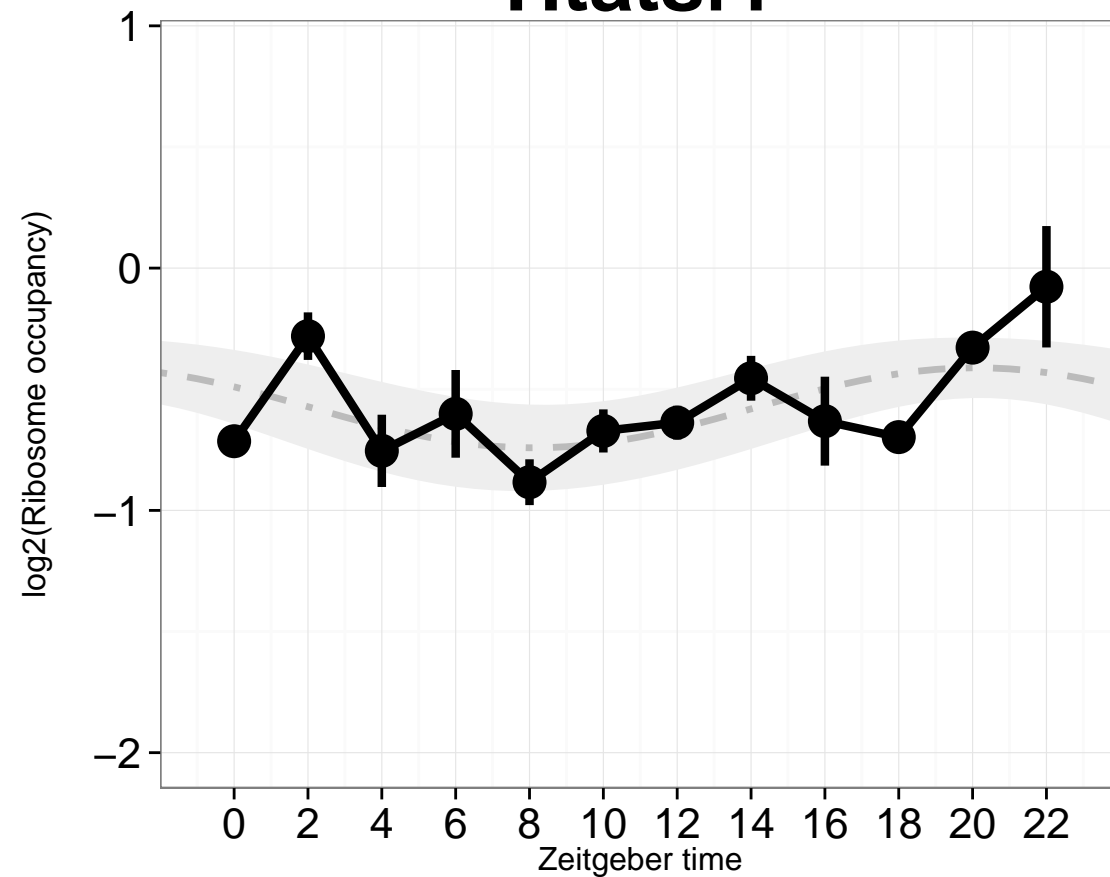

Supplement: SuppDataset_1.zip [file Htatsf1_set_A.pdf › Supplemental Dataset 1/A-mRNA_nonrhyth_translation_nonrhyth/Htatsf1_set_A.pdf]

# Htra1

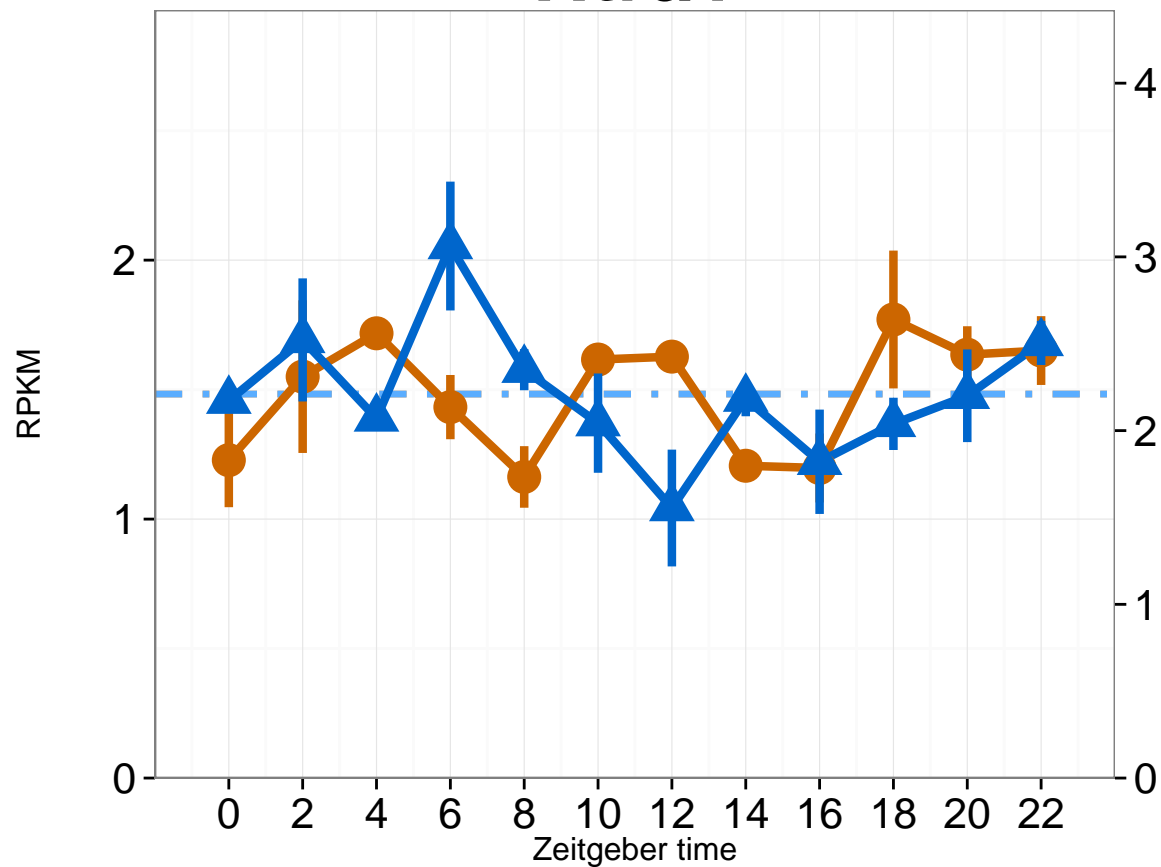

# Htra1

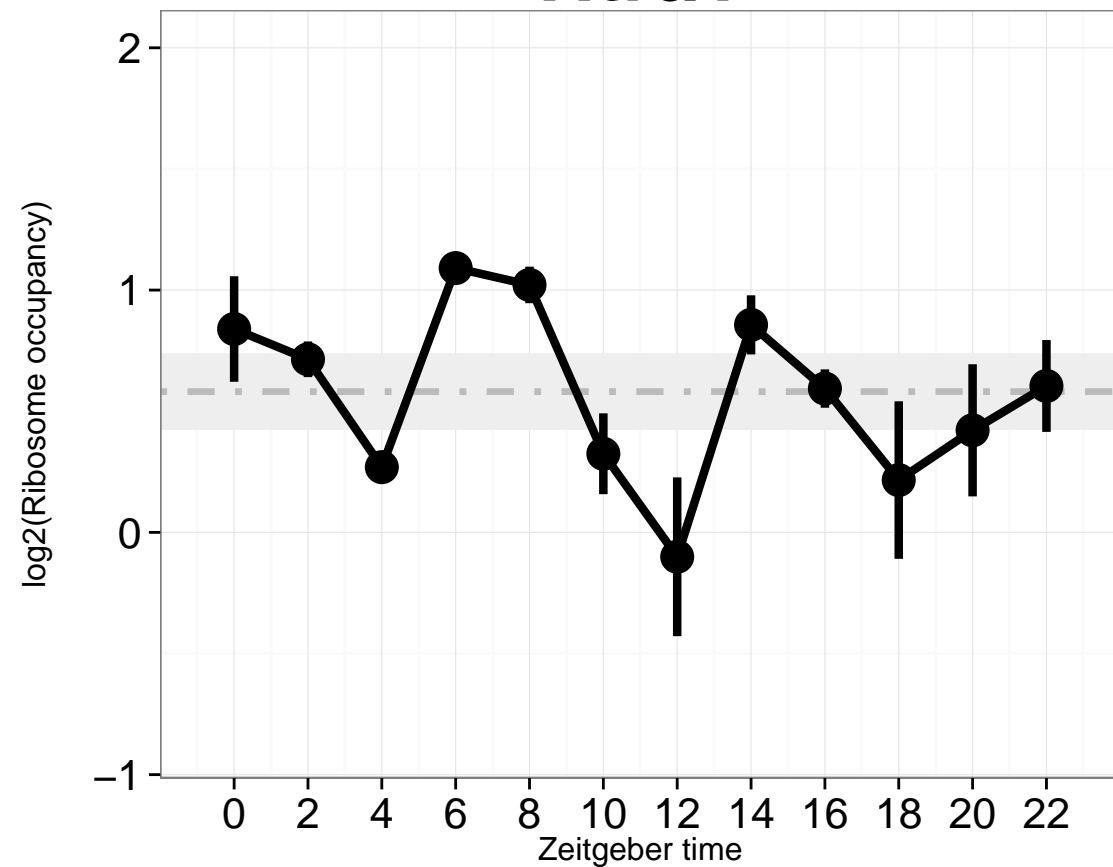

Supplement: SuppDataset_1.zip [file Htra1_set_A.pdf › Supplemental Dataset 1/A-mRNA_nonrhyth_translation_nonrhyth/Htra1_set_A.pdf]

## Htra2

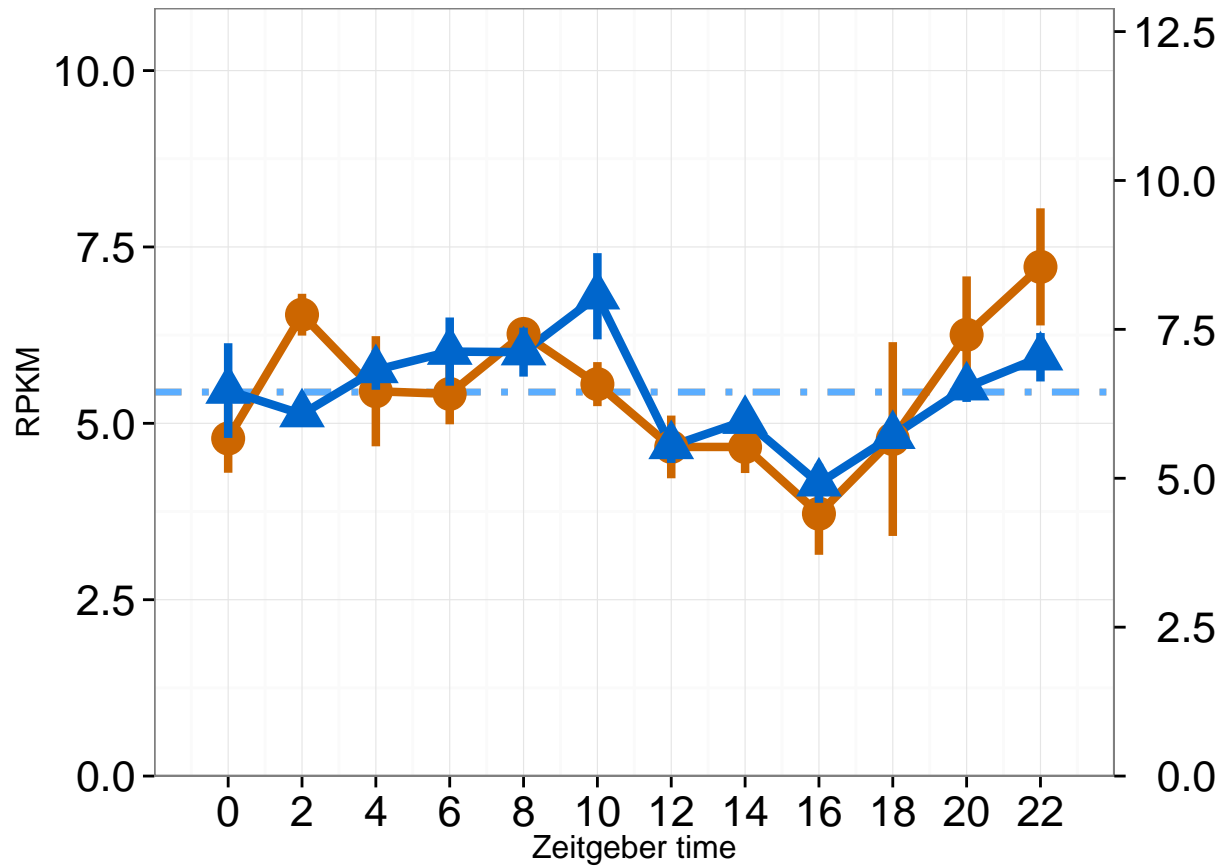

## Htra2

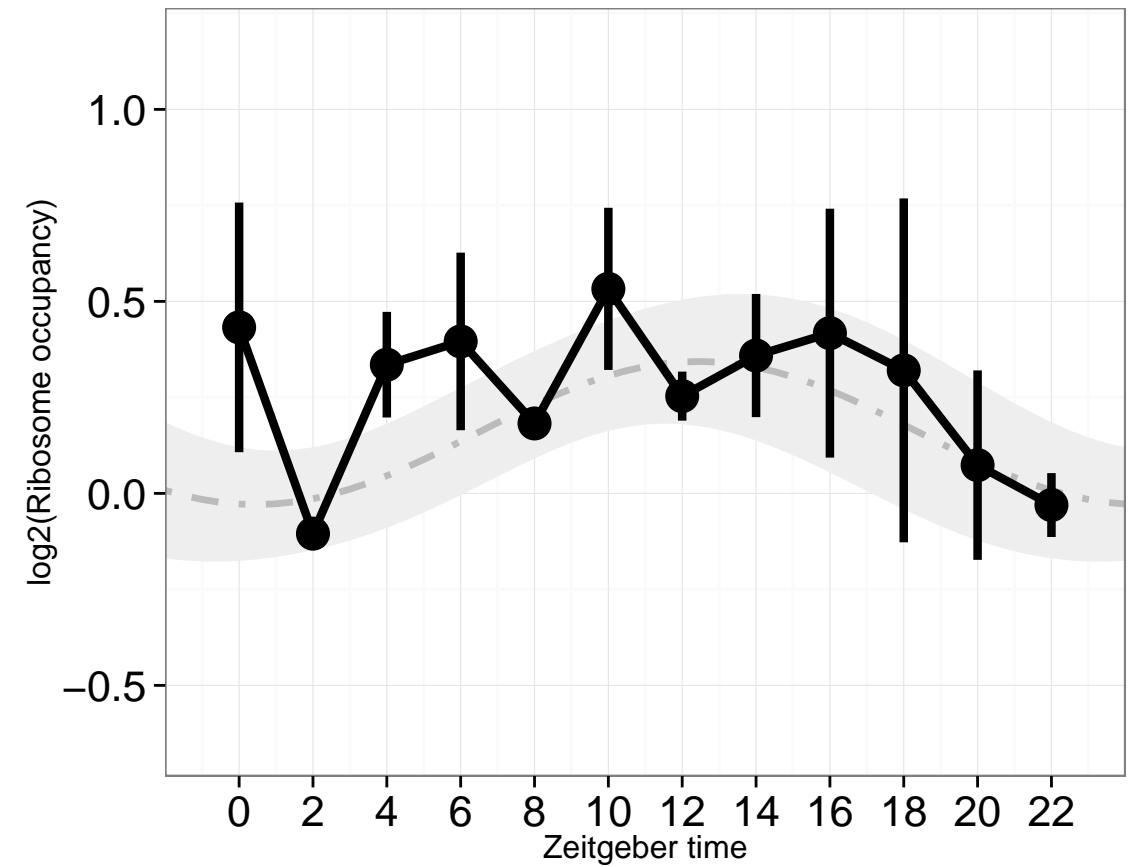

Supplement: SuppDataset_1.zip [file Htra2_set_A.pdf › Supplemental Dataset 1/A-mRNA_nonrhyth_translation_nonrhyth/Htra2_set_A.pdf]

# Htt

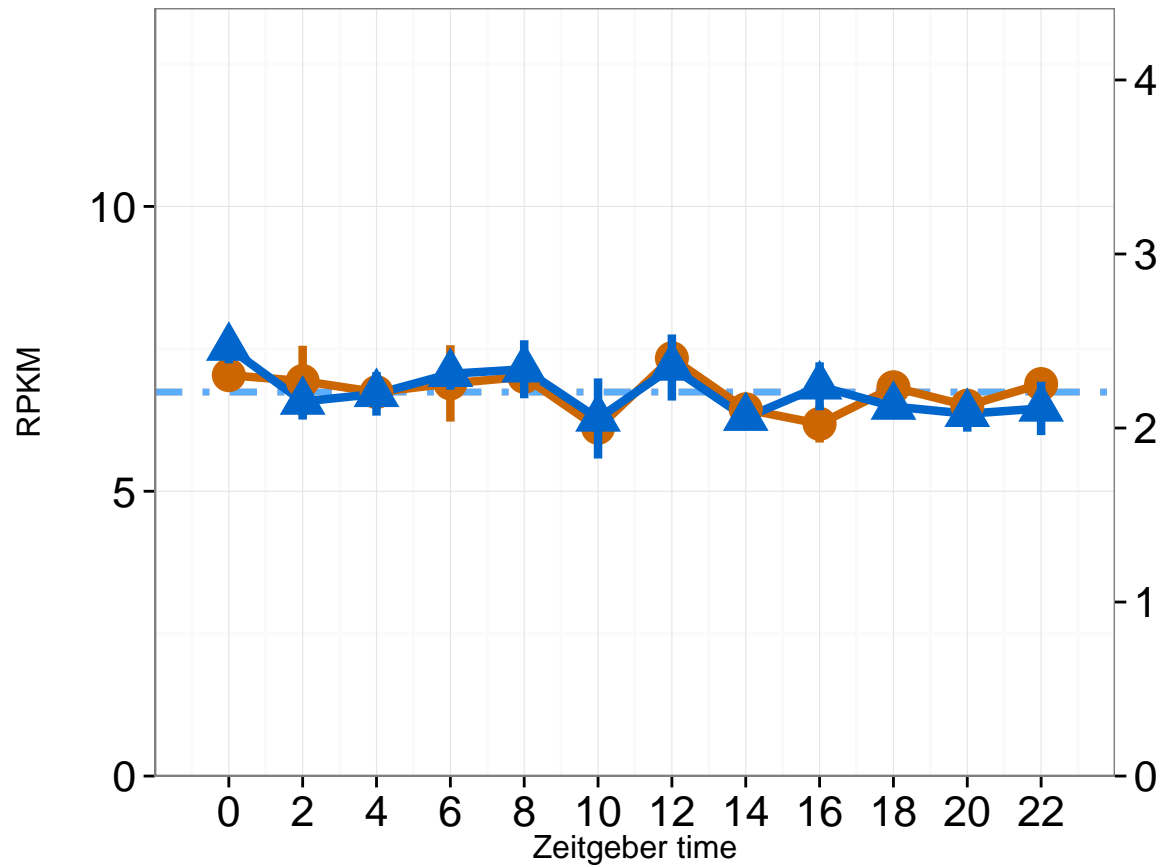

# Htt

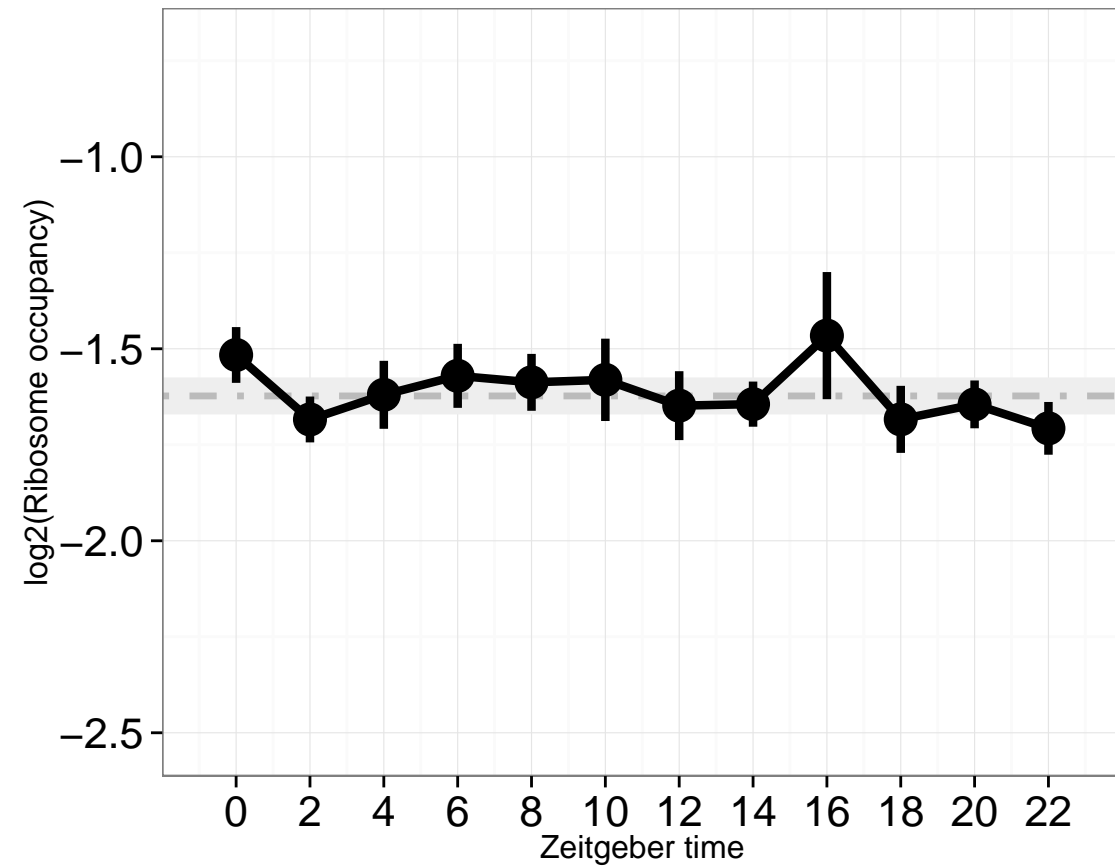

Supplement: SuppDataset_1.zip [file Htt_set_A.pdf › Supplemental Dataset 1/A-mRNA_nonrhyth_translation_nonrhyth/Htt_set_A.pdf]

# Huwe1

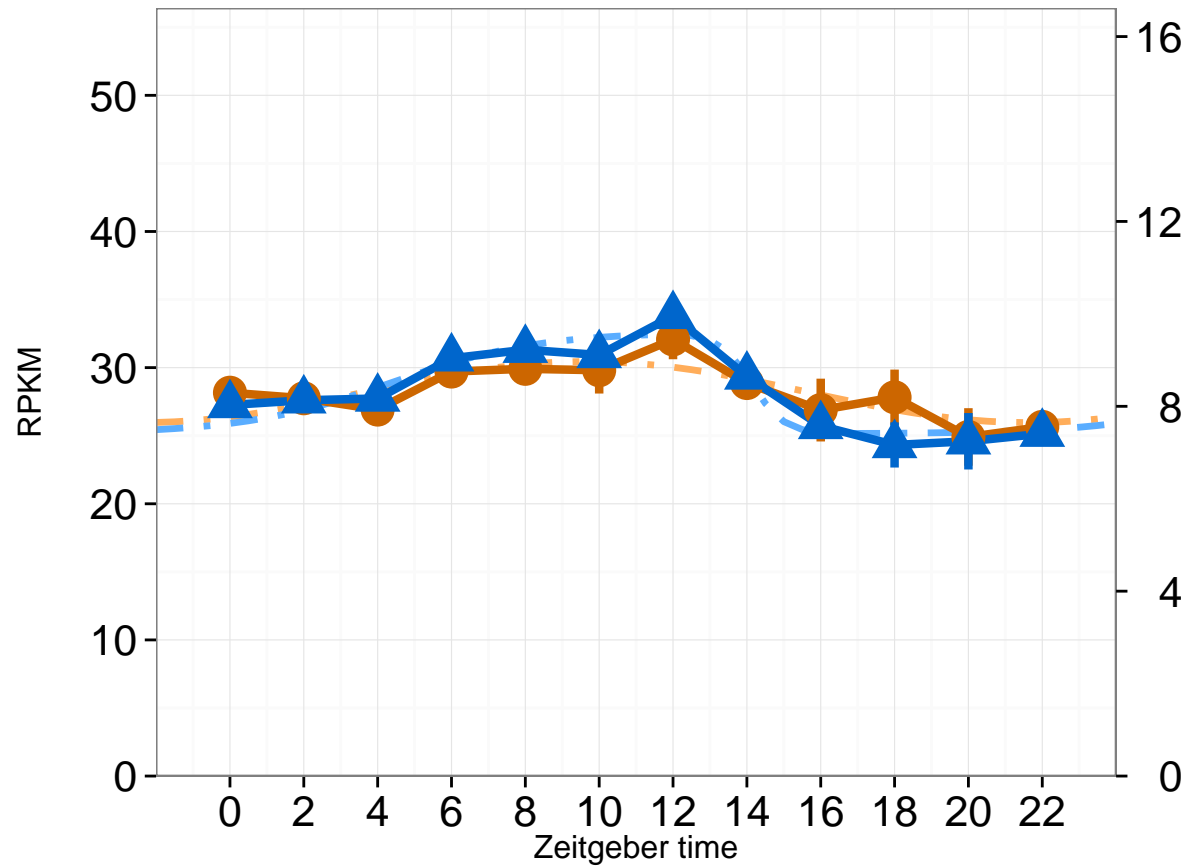

# Huwe1

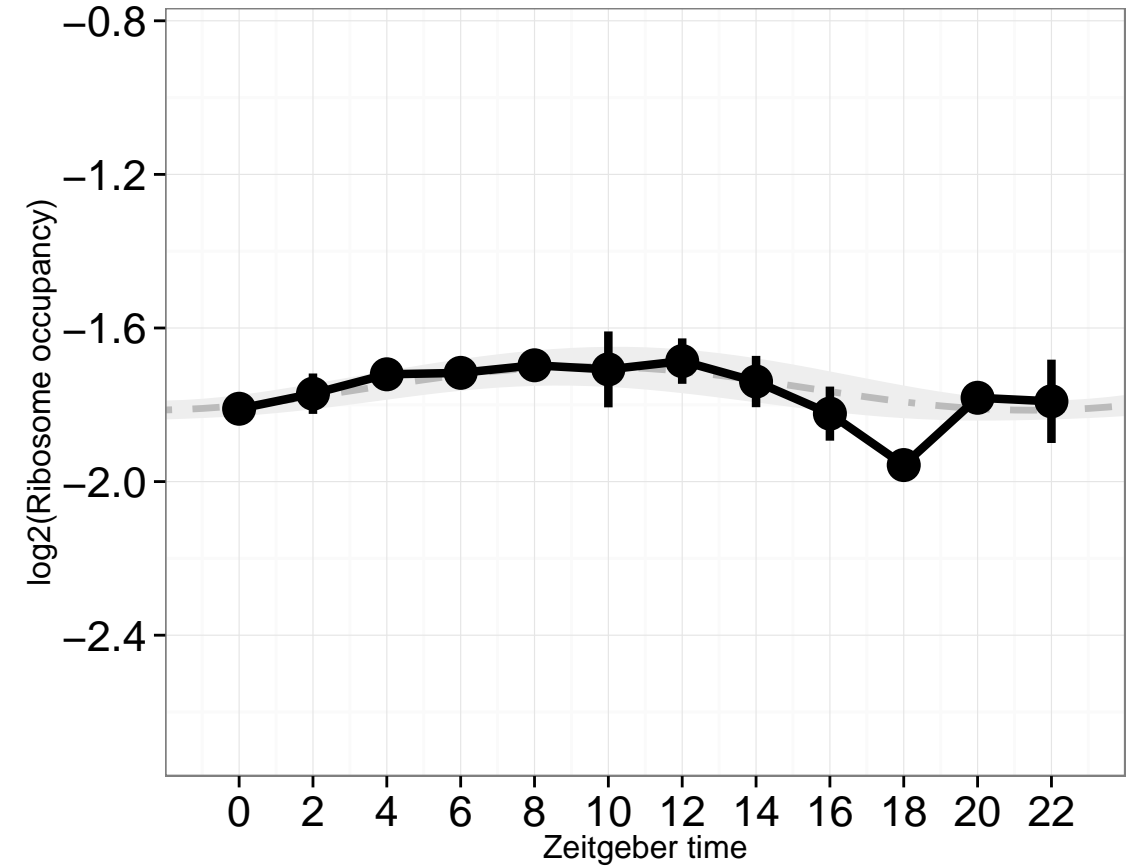

Supplement: SuppDataset_1.zip [file Huwe1_set_A.pdf › Supplemental Dataset 1/A-mRNA_nonrhyth_translation_nonrhyth/Huwe1_set_A.pdf]

# Hvcn1

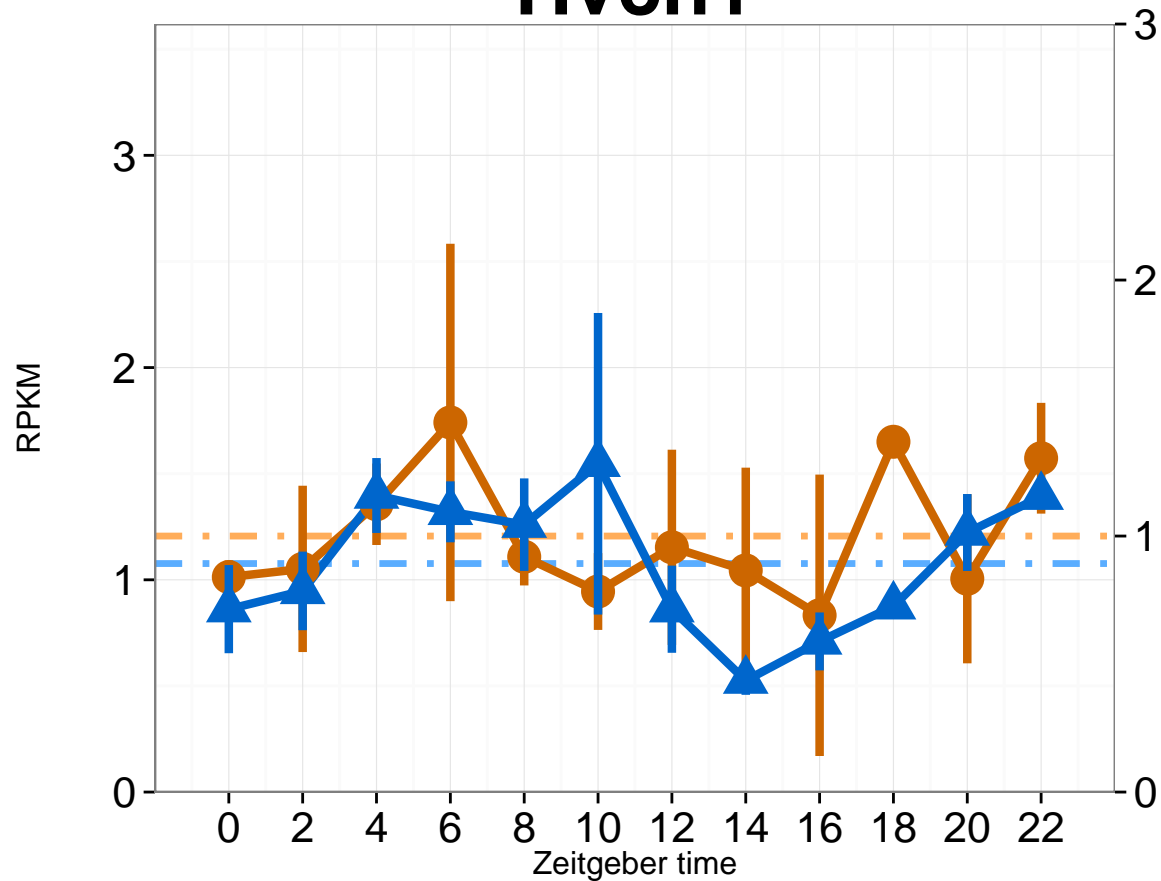

# Hvcn1

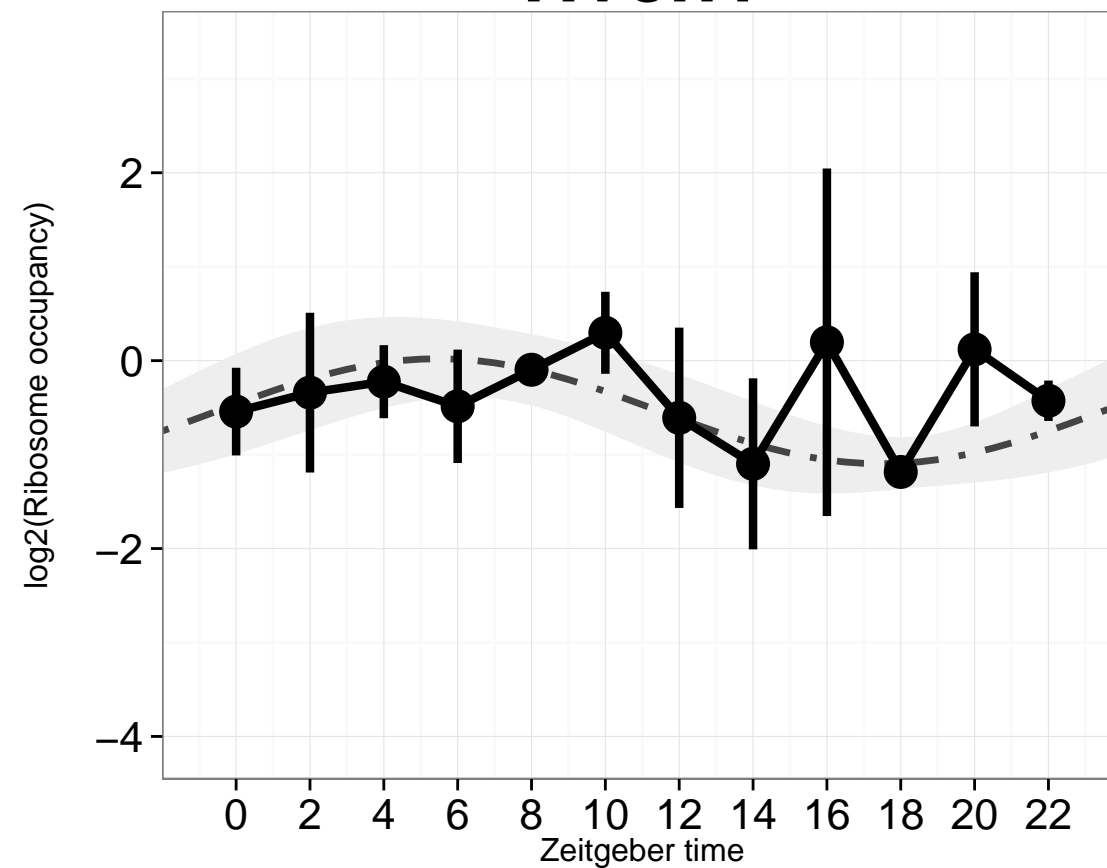

Supplement: SuppDataset_1.zip [file Hvcn1_set_A.pdf › Supplemental Dataset 1/A-mRNA_nonrhyth_translation_nonrhyth/Hvcn1_set_A.pdf]

## Hyal2

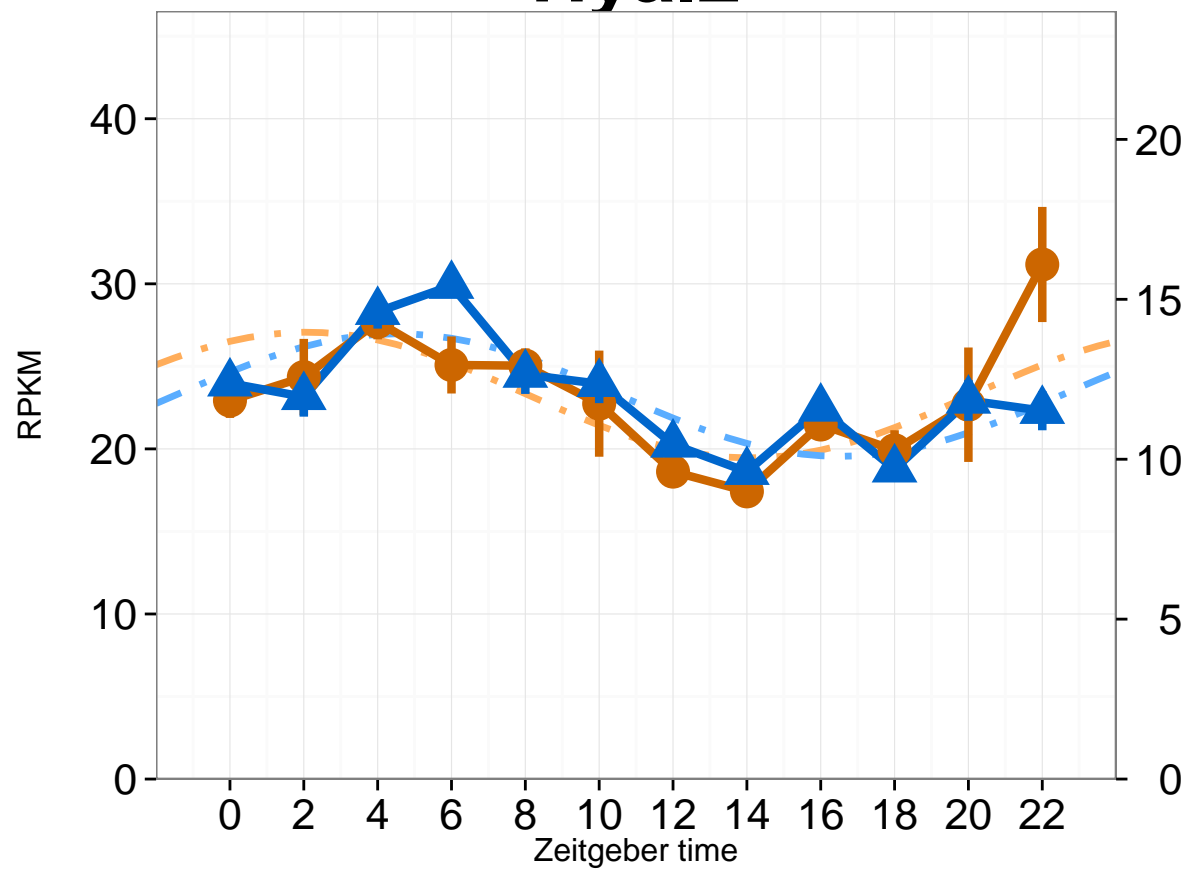

## Hyal2

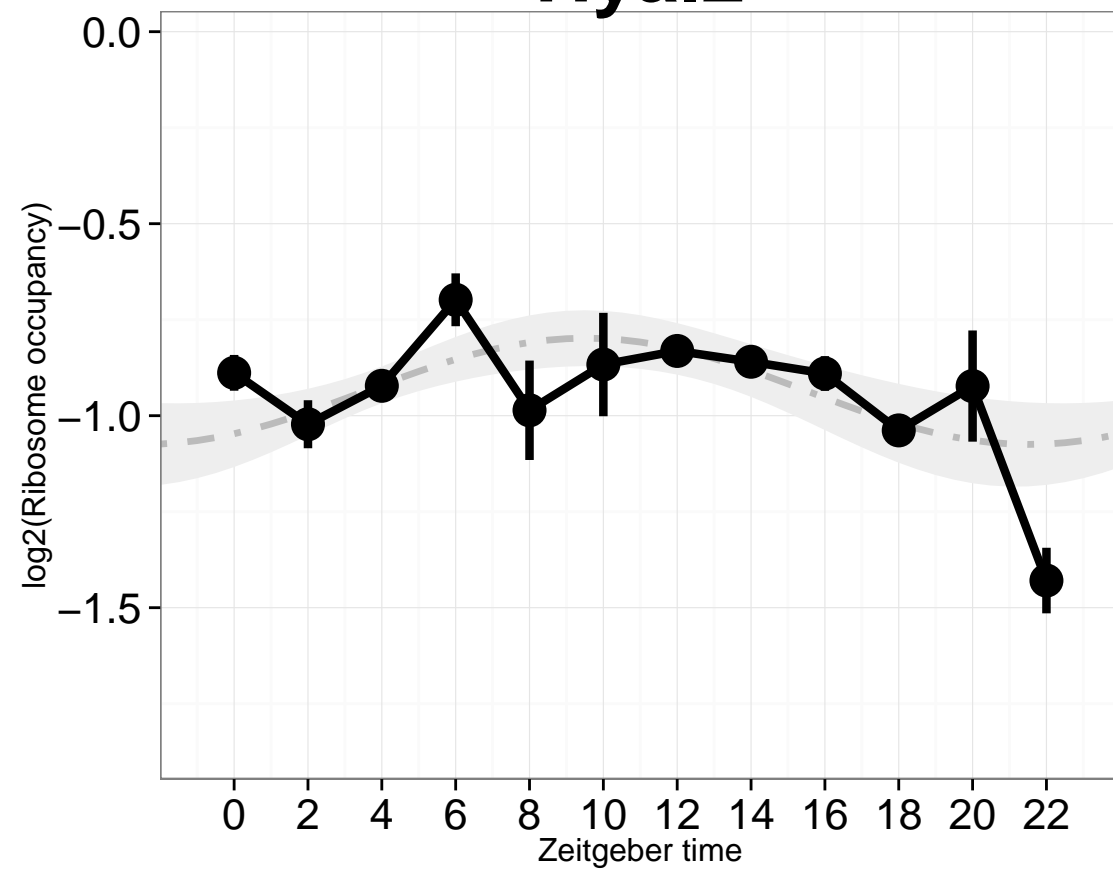

Supplement: SuppDataset_1.zip [file Hyal2_set_A.pdf › Supplemental Dataset 1/A-mRNA_nonrhyth_translation_nonrhyth/Hyal2_set_A.pdf]

## Hyls1

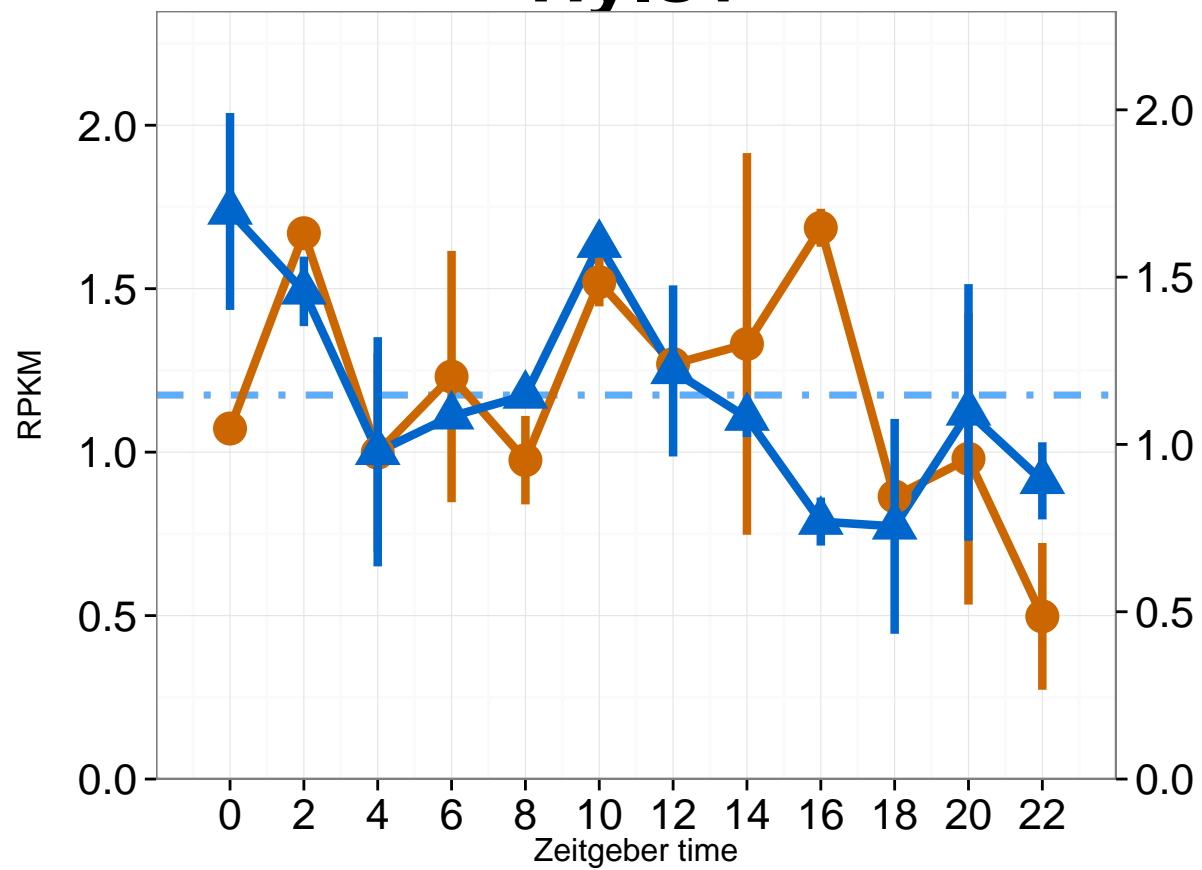

## Hyls1

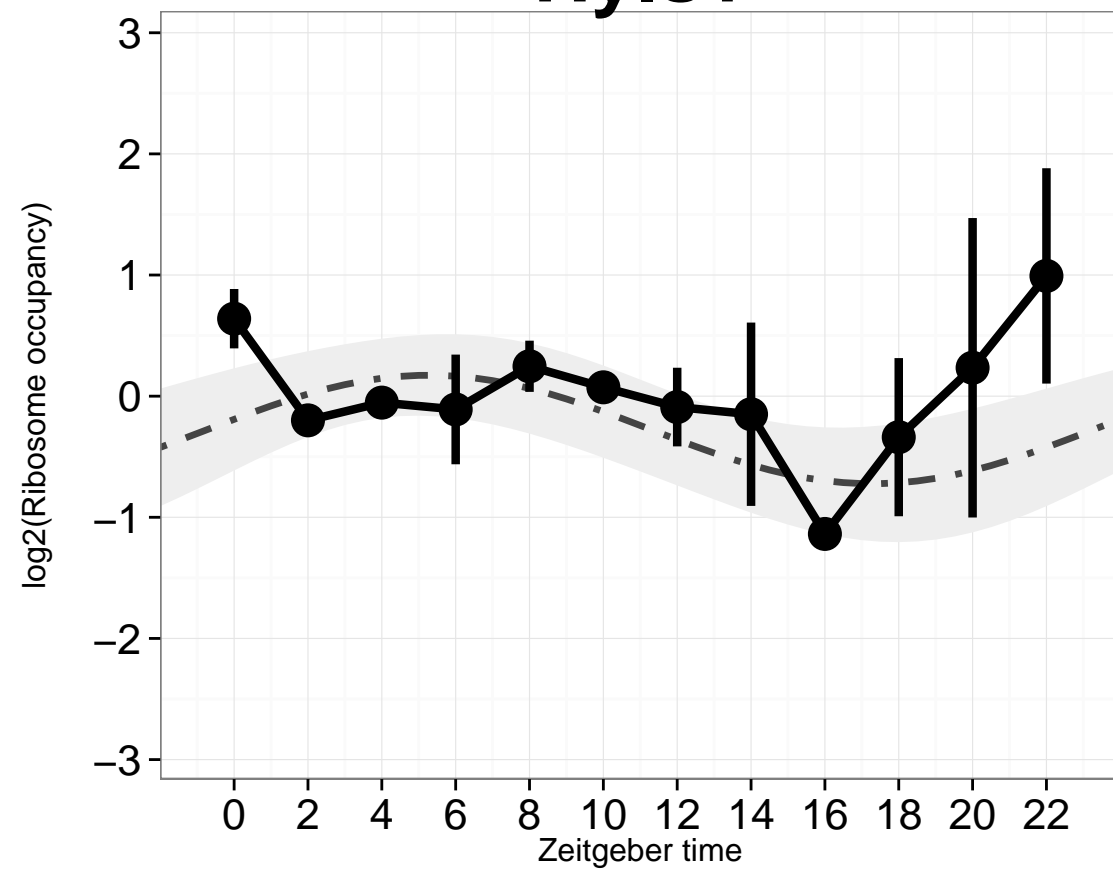

Supplement: SuppDataset_1.zip [file Hyls1_set_A.pdf › Supplemental Dataset 1/A-mRNA_nonrhyth_translation_nonrhyth/Hyls1_set_A.pdf]

## Hyou1

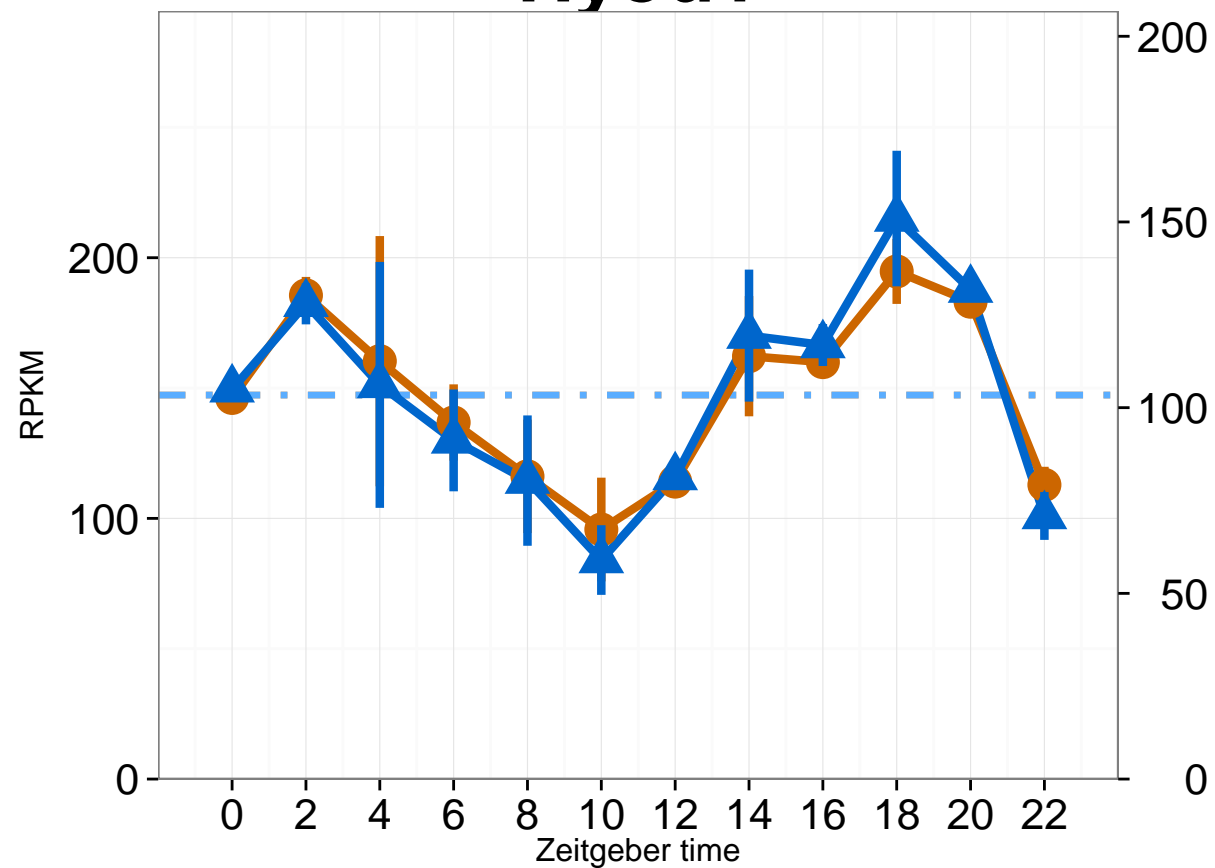

## Hyou1

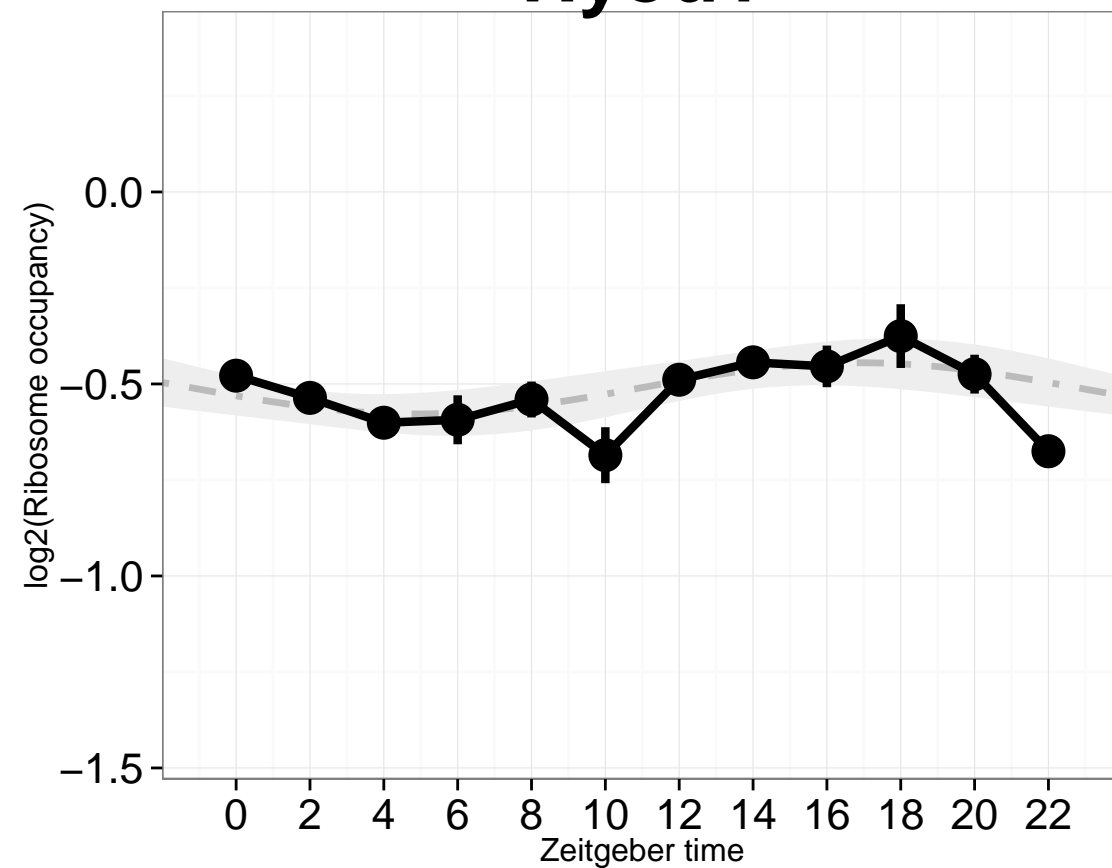

Supplement: SuppDataset_1.zip [file Hyou1_set_A.pdf › Supplemental Dataset 1/A-mRNA_nonrhyth_translation_nonrhyth/Hyou1_set_A.pdf]

# lah1

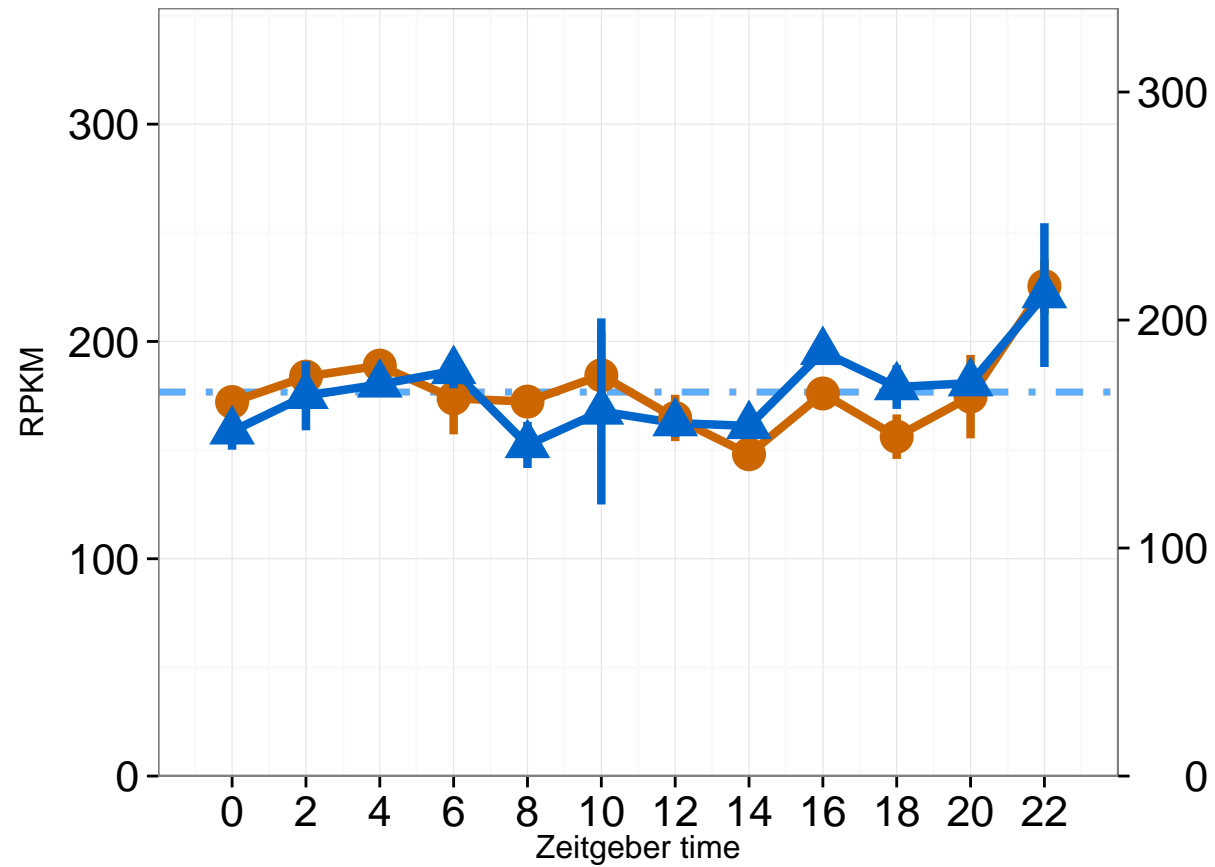

# lah1

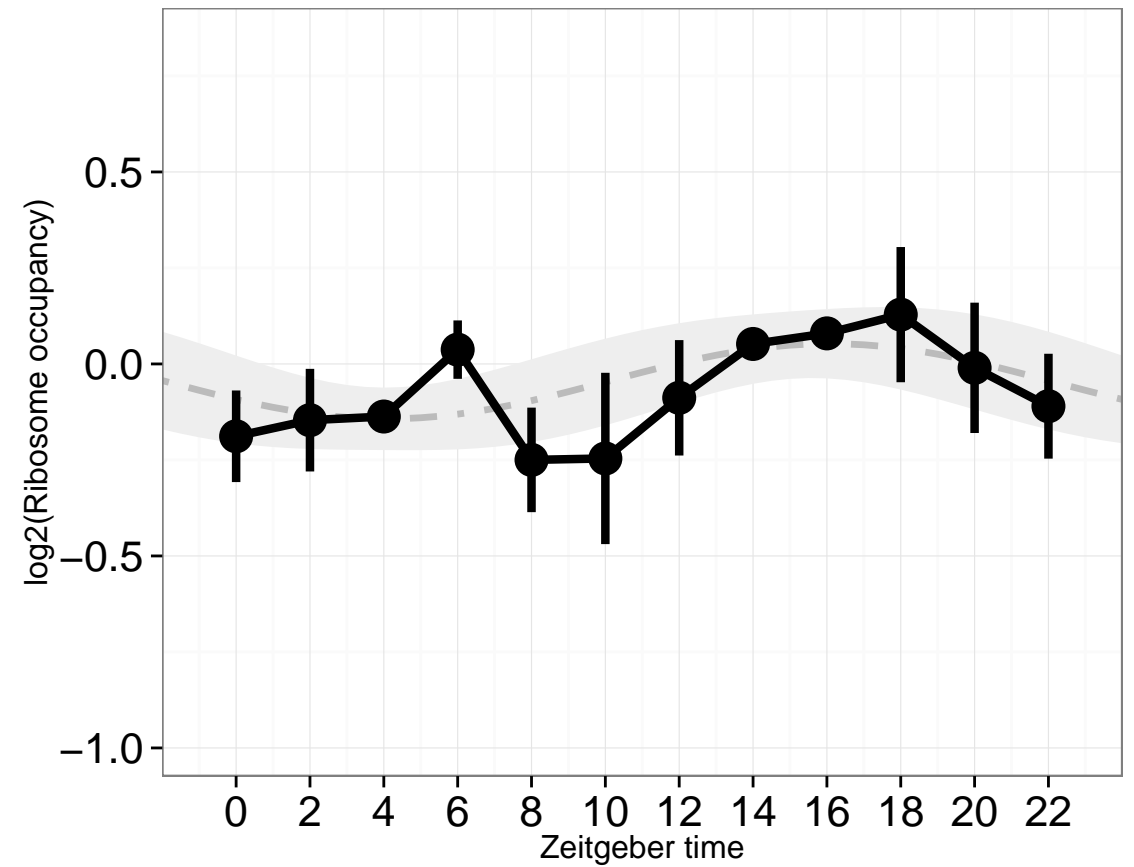

Supplement: SuppDataset_1.zip [file Iah1_set_A.pdf › Supplemental Dataset 1/A-mRNA_nonrhyth_translation_nonrhyth/Iah1_set_A.pdf]

## lars2

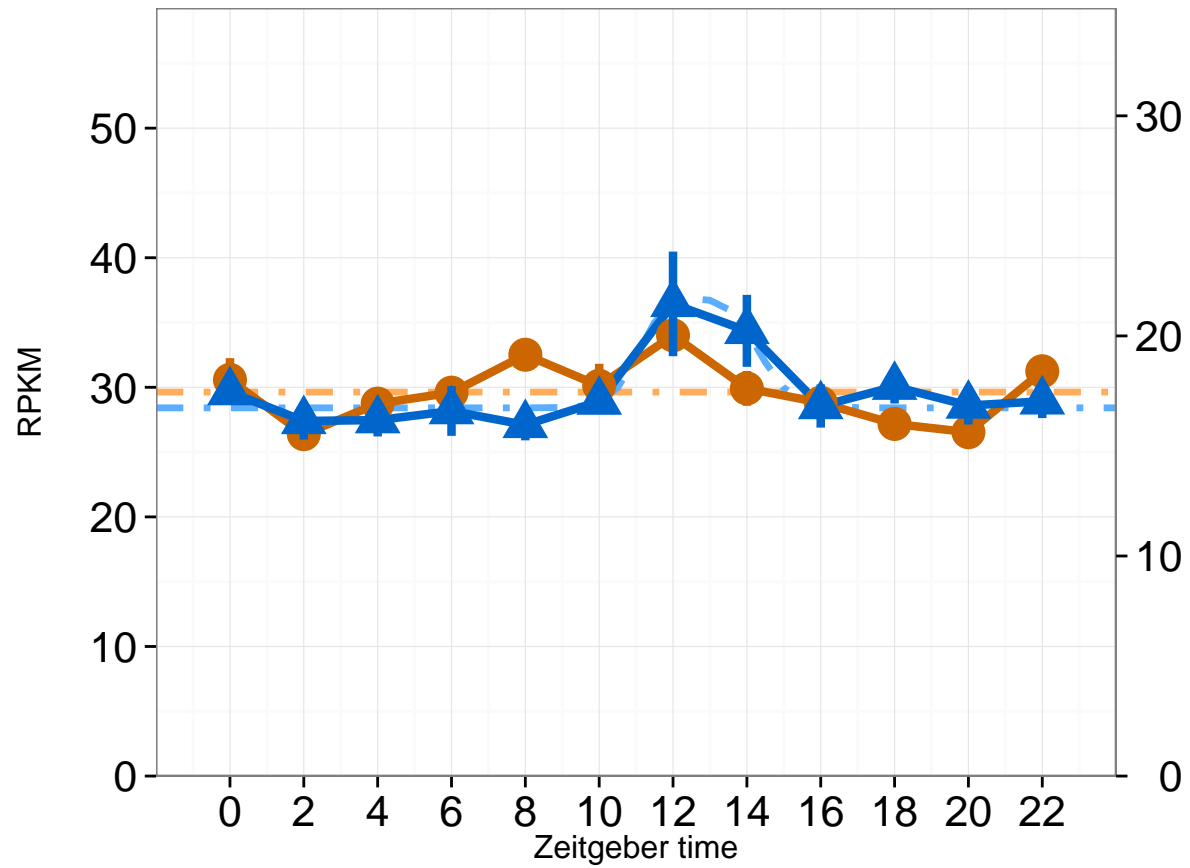

## lars2

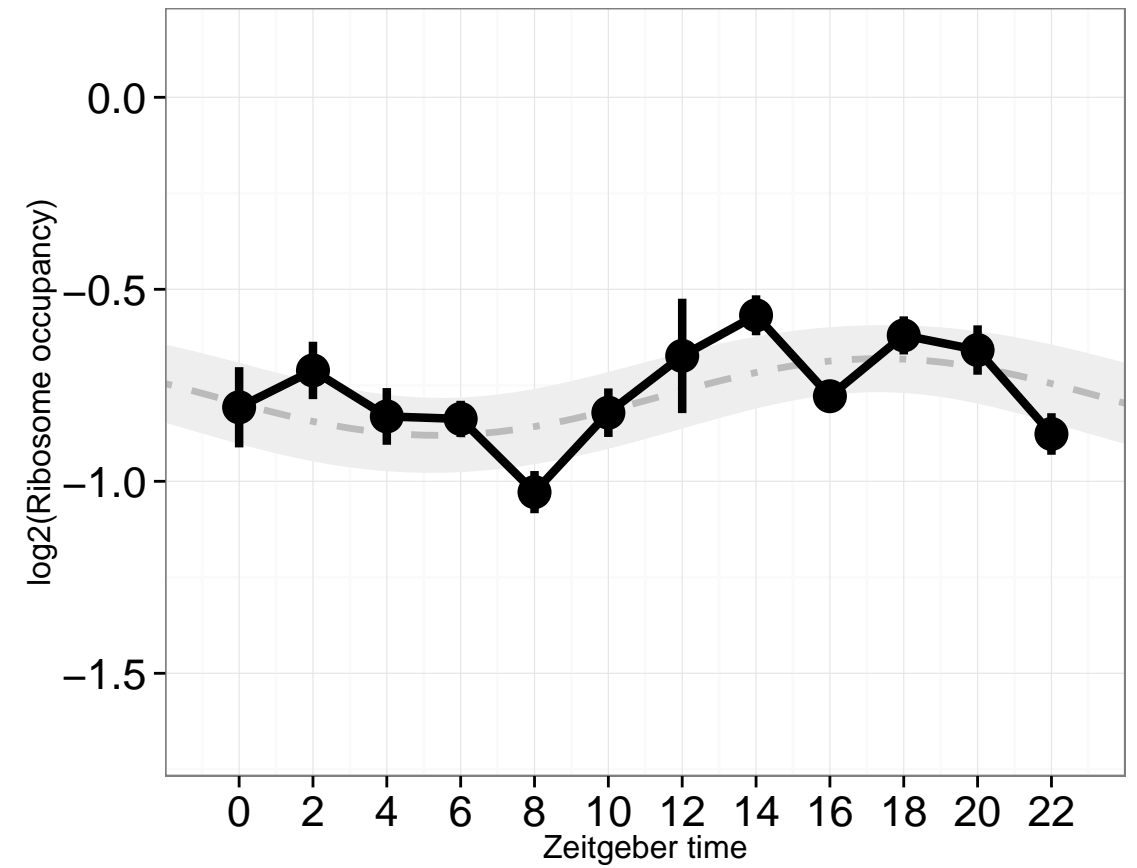

Supplement: SuppDataset_1.zip [file Iars2_set_A.pdf › Supplemental Dataset 1/A-mRNA_nonrhyth_translation_nonrhyth/Iars2_set_A.pdf]

# lars

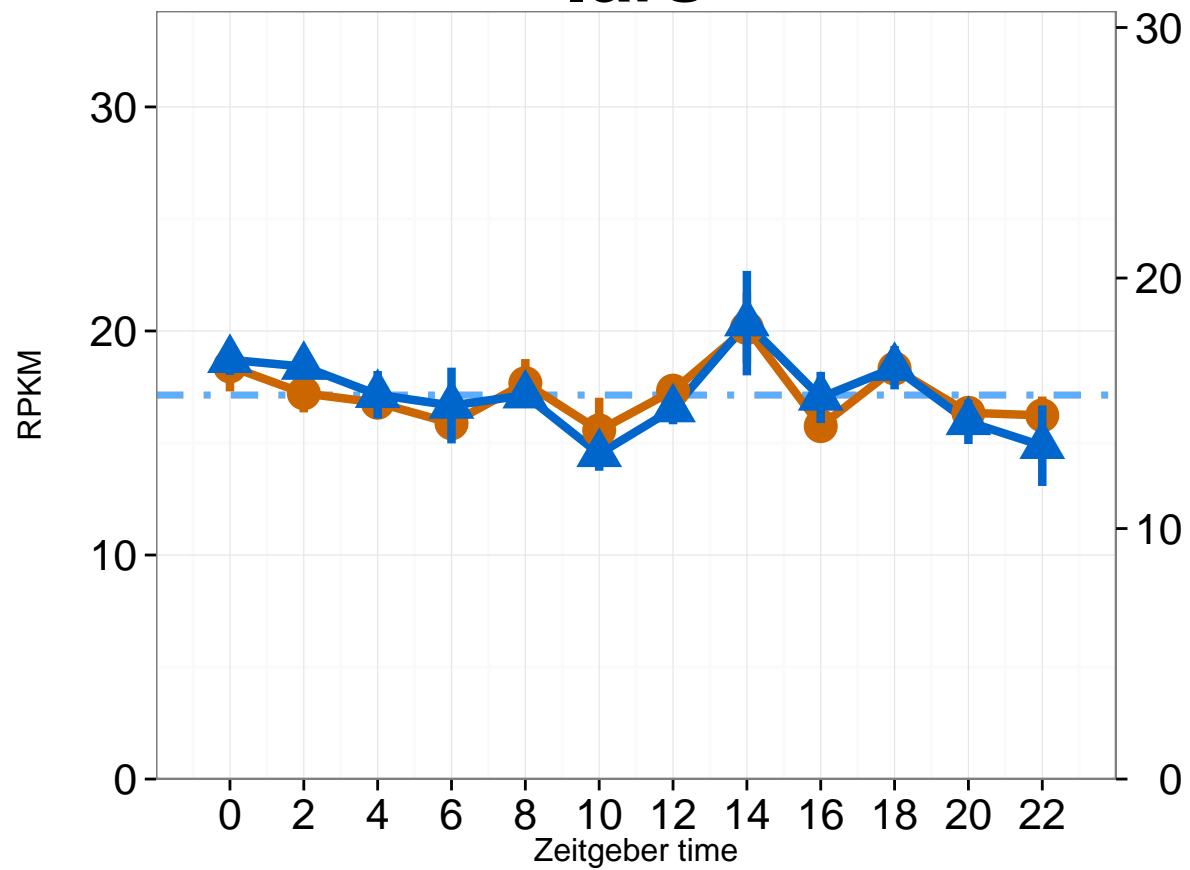

# lars

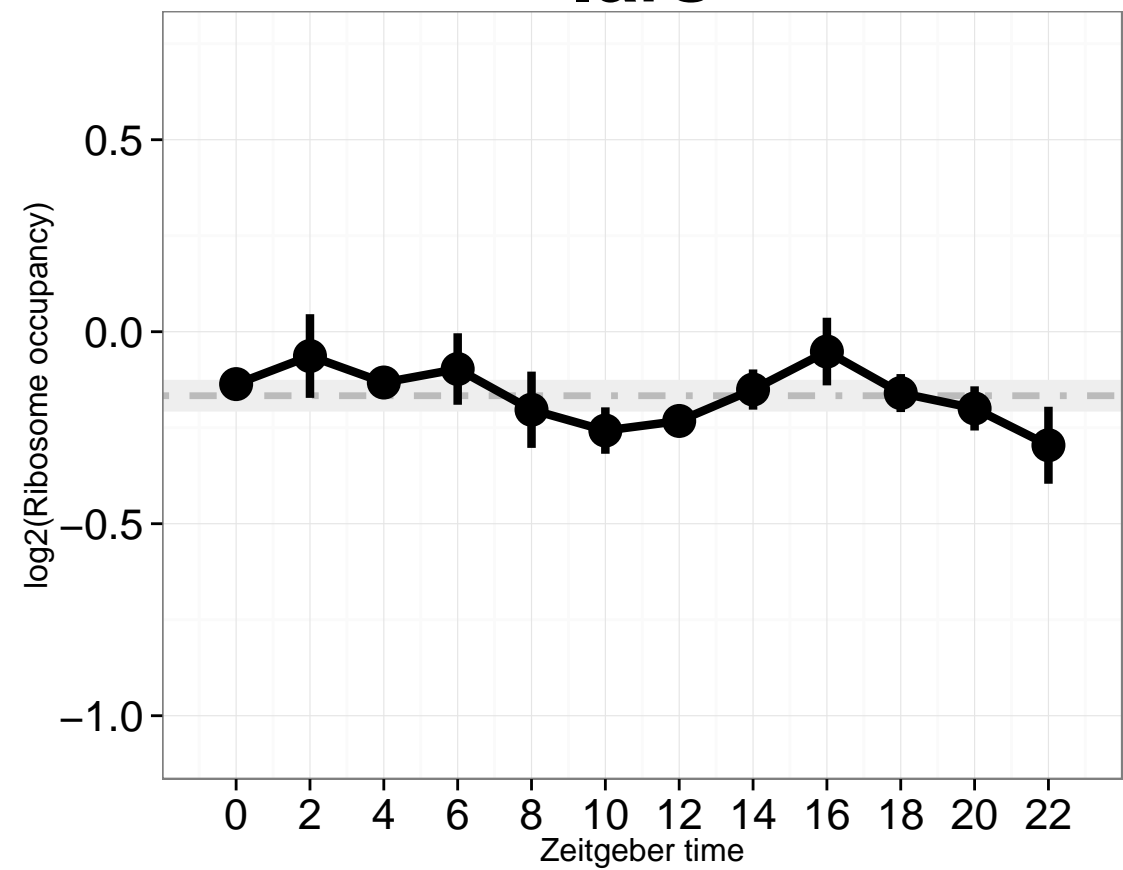

Supplement: SuppDataset_1.zip [file Iars_set_A.pdf › Supplemental Dataset 1/A-mRNA_nonrhyth_translation_nonrhyth/Iars_set_A.pdf]

## Ibtk

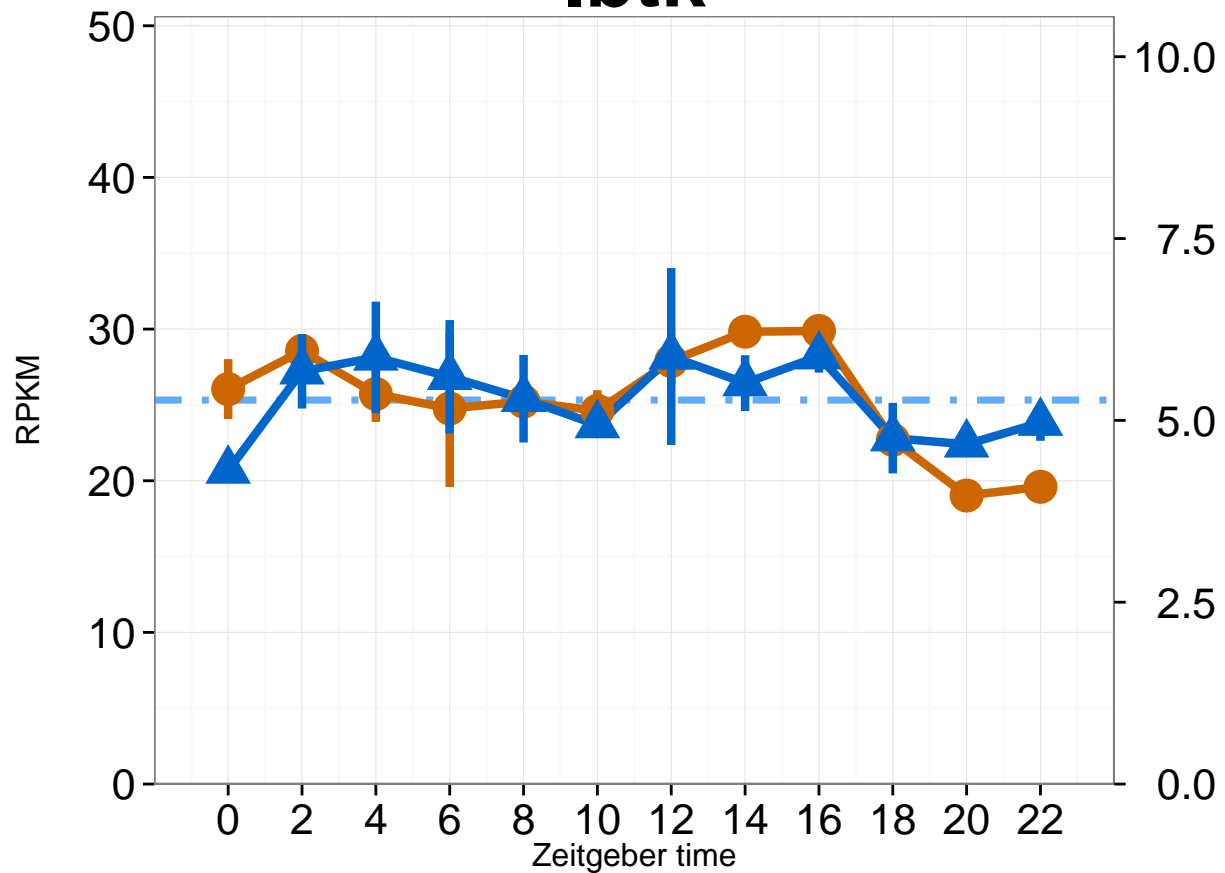

## Ibtk

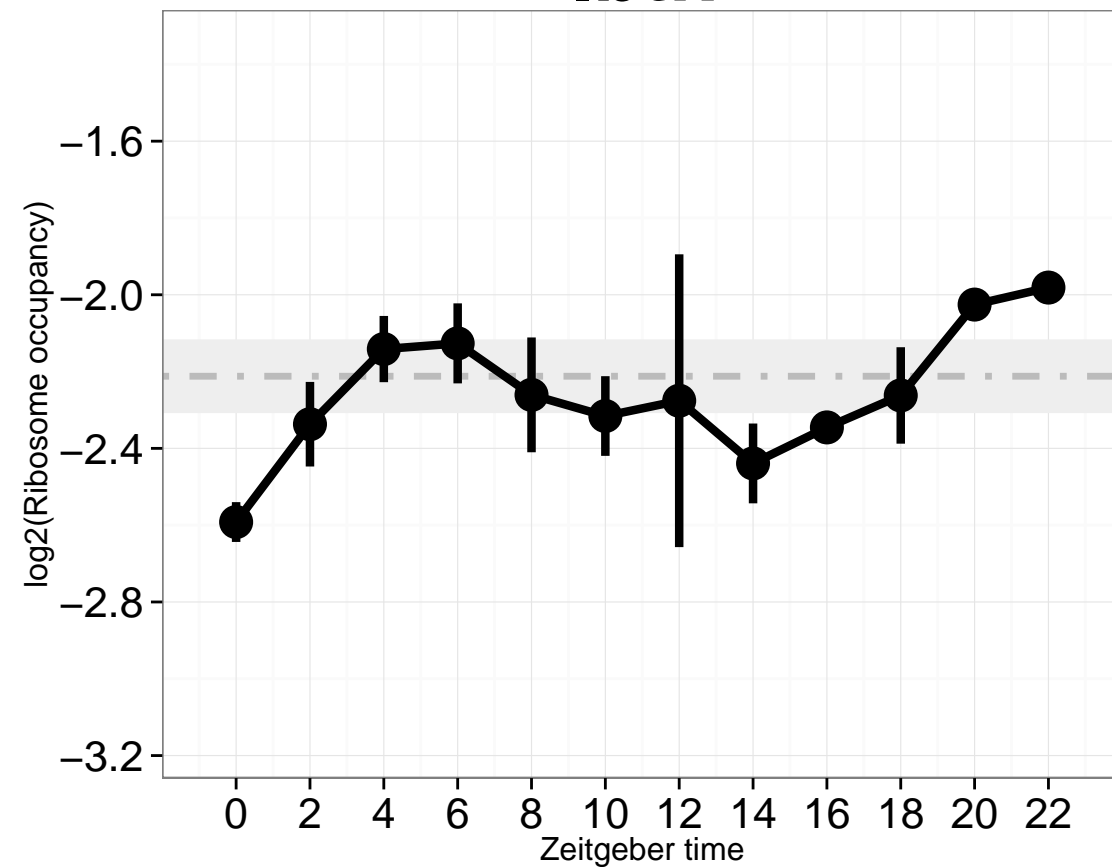

Supplement: SuppDataset_1.zip [file Ibtk_set_A.pdf › Supplemental Dataset 1/A-mRNA_nonrhyth_translation_nonrhyth/Ibtk_set_A.pdf]

# Ica1

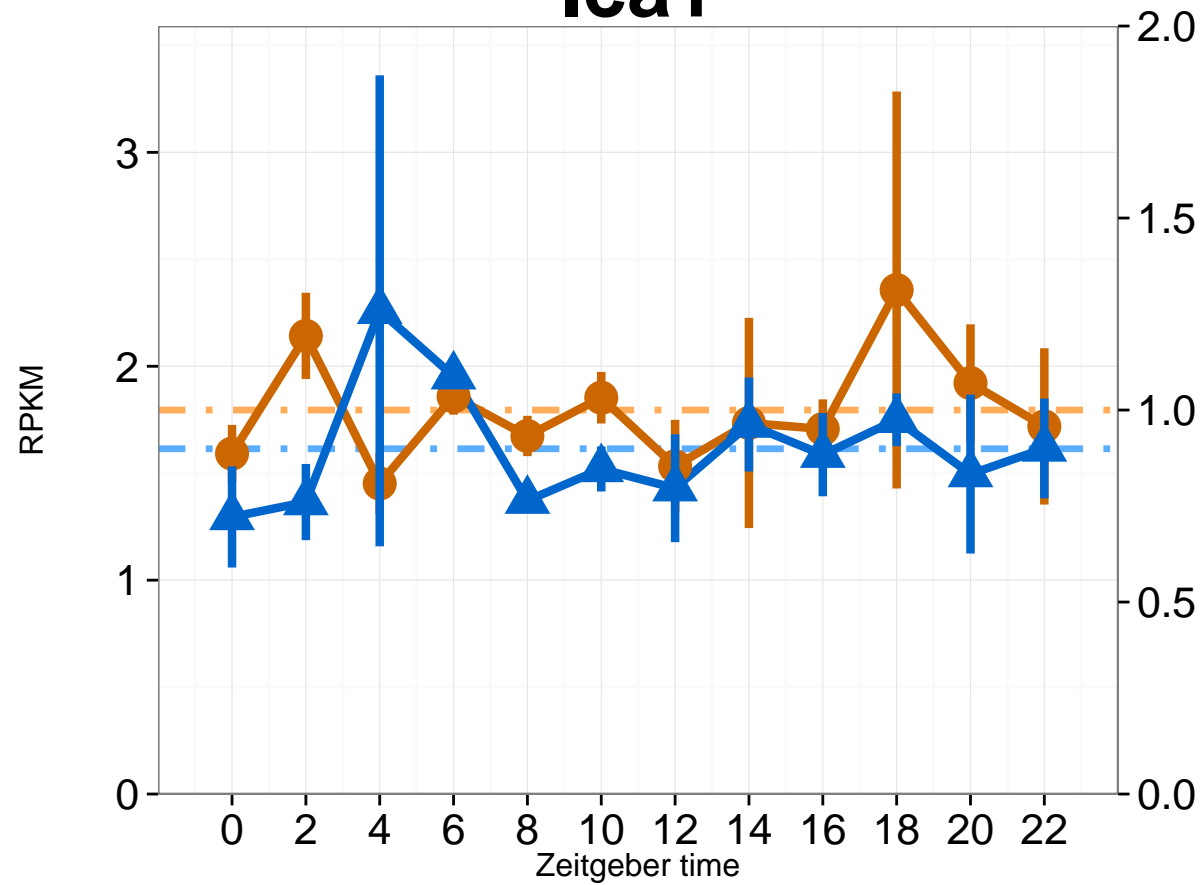

# Ica1

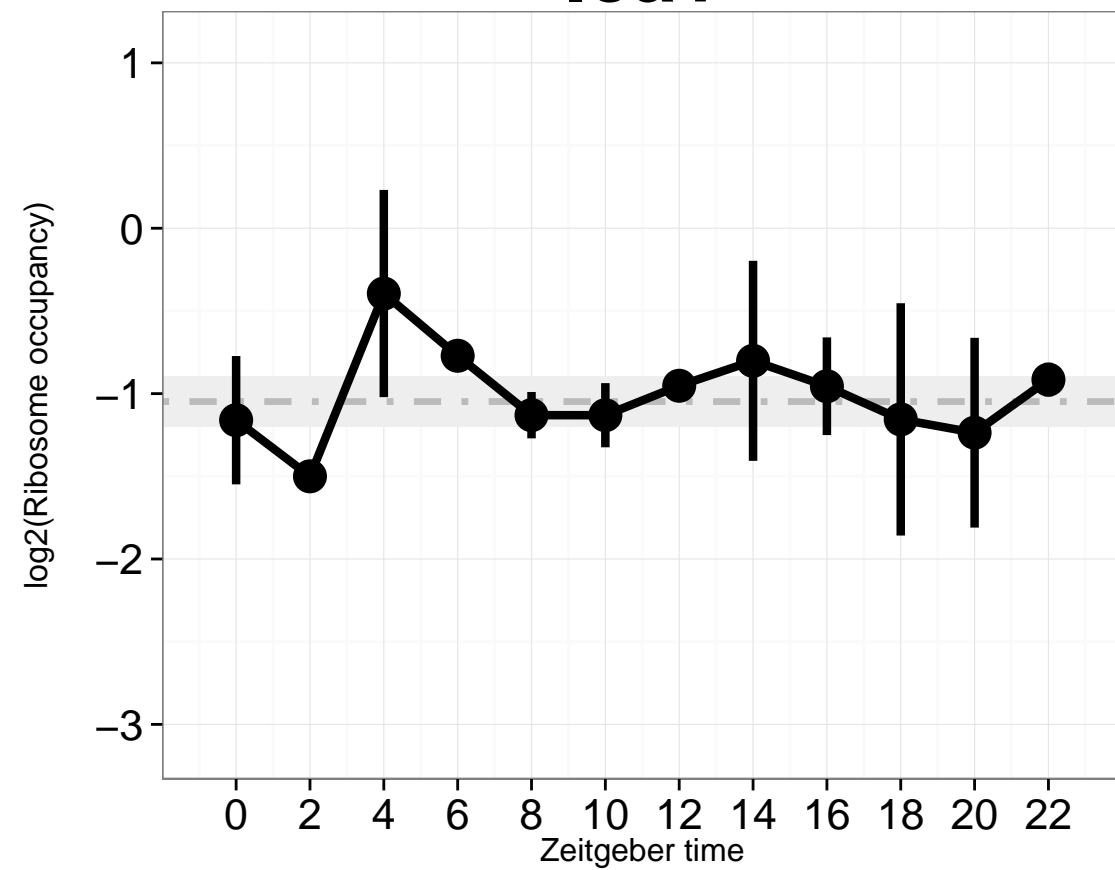

Supplement: SuppDataset_1.zip [file Ica1_set_A.pdf › Supplemental Dataset 1/A-mRNA_nonrhyth_translation_nonrhyth/Ica1_set_A.pdf]

# Icam1

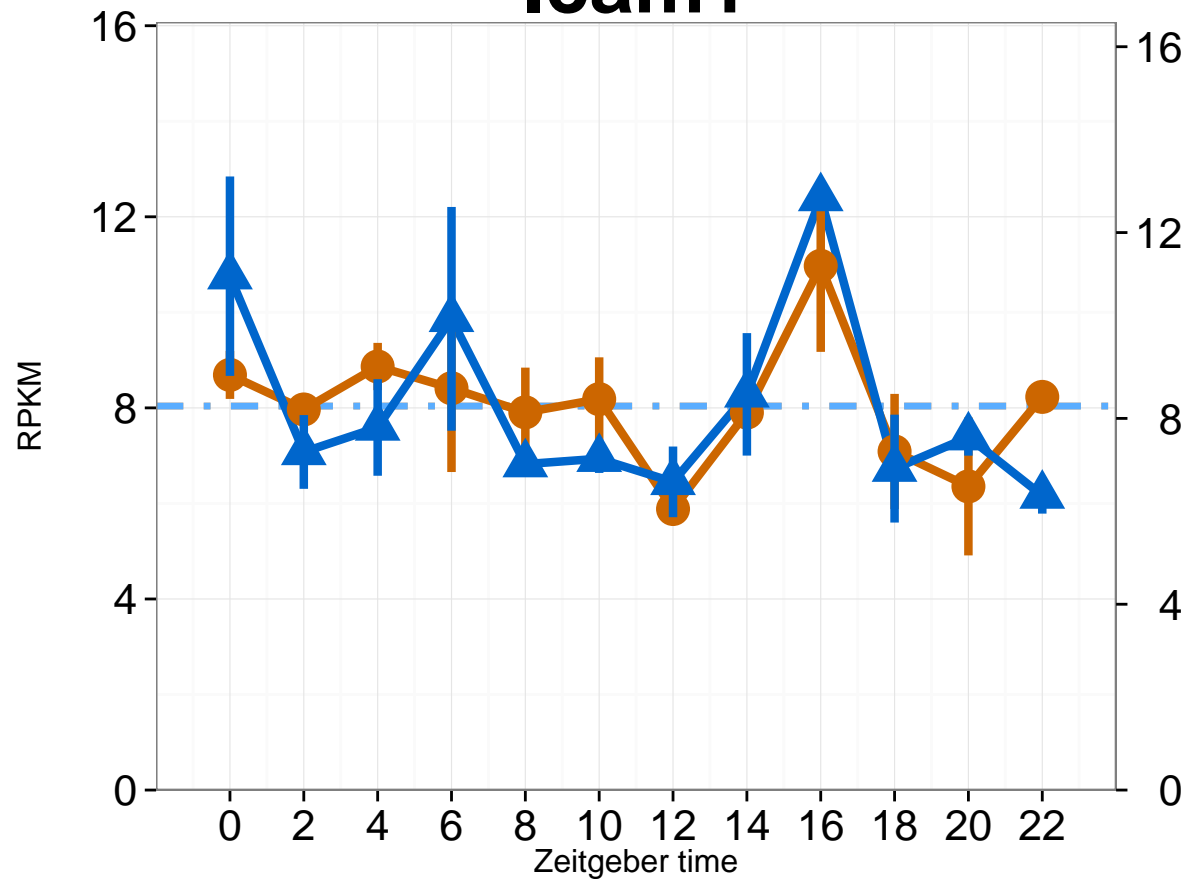

# Icam1

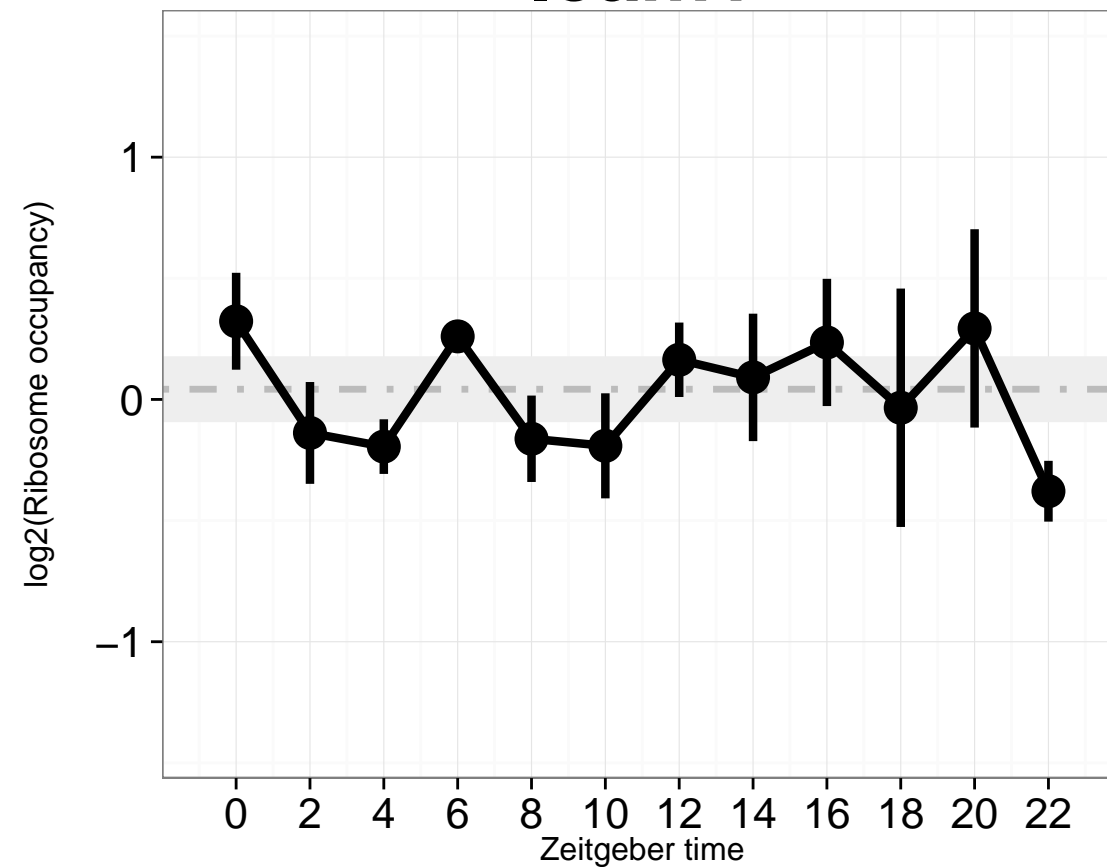

Supplement: SuppDataset_1.zip [file Icam1_set_A.pdf › Supplemental Dataset 1/A-mRNA_nonrhyth_translation_nonrhyth/Icam1_set_A.pdf]

# Icam2

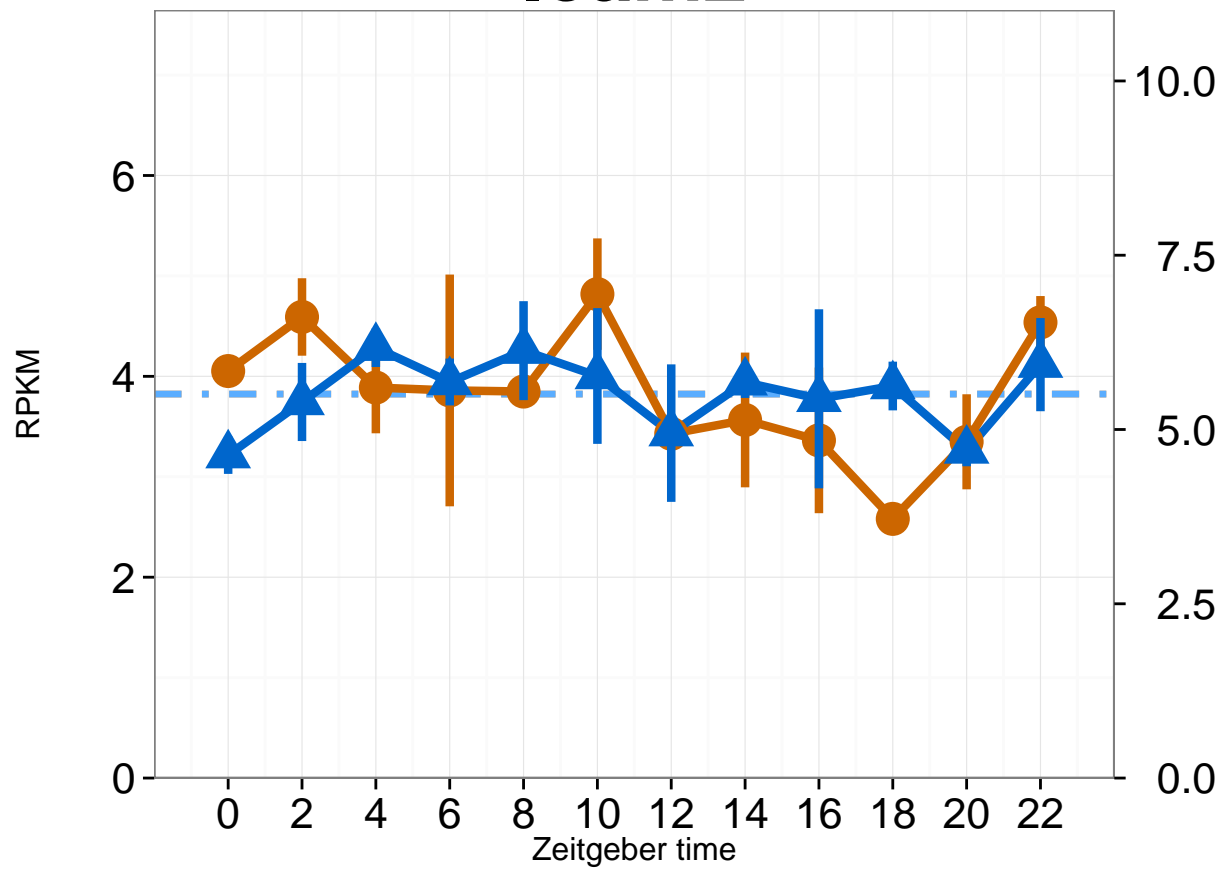

# Icam2

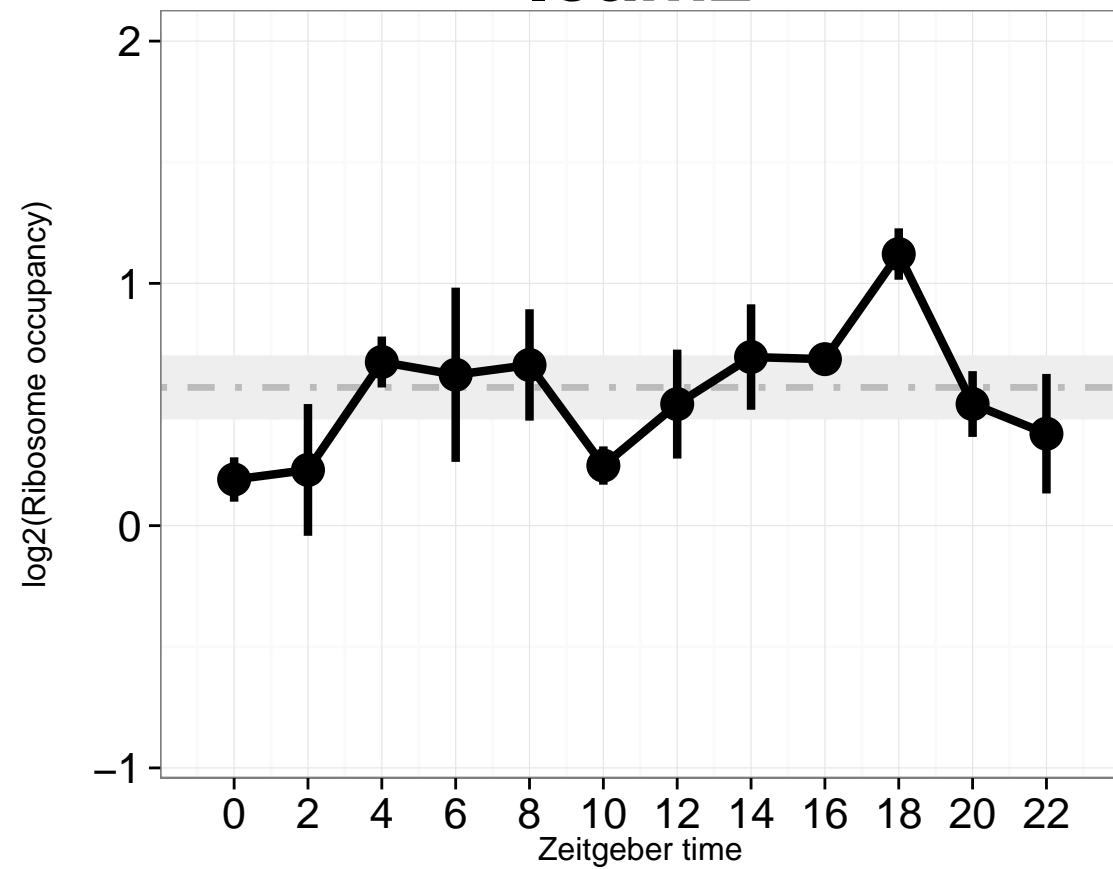

Supplement: SuppDataset_1.zip [file Icam2_set_A.pdf › Supplemental Dataset 1/A-mRNA_nonrhyth_translation_nonrhyth/Icam2_set_A.pdf]

# Ick

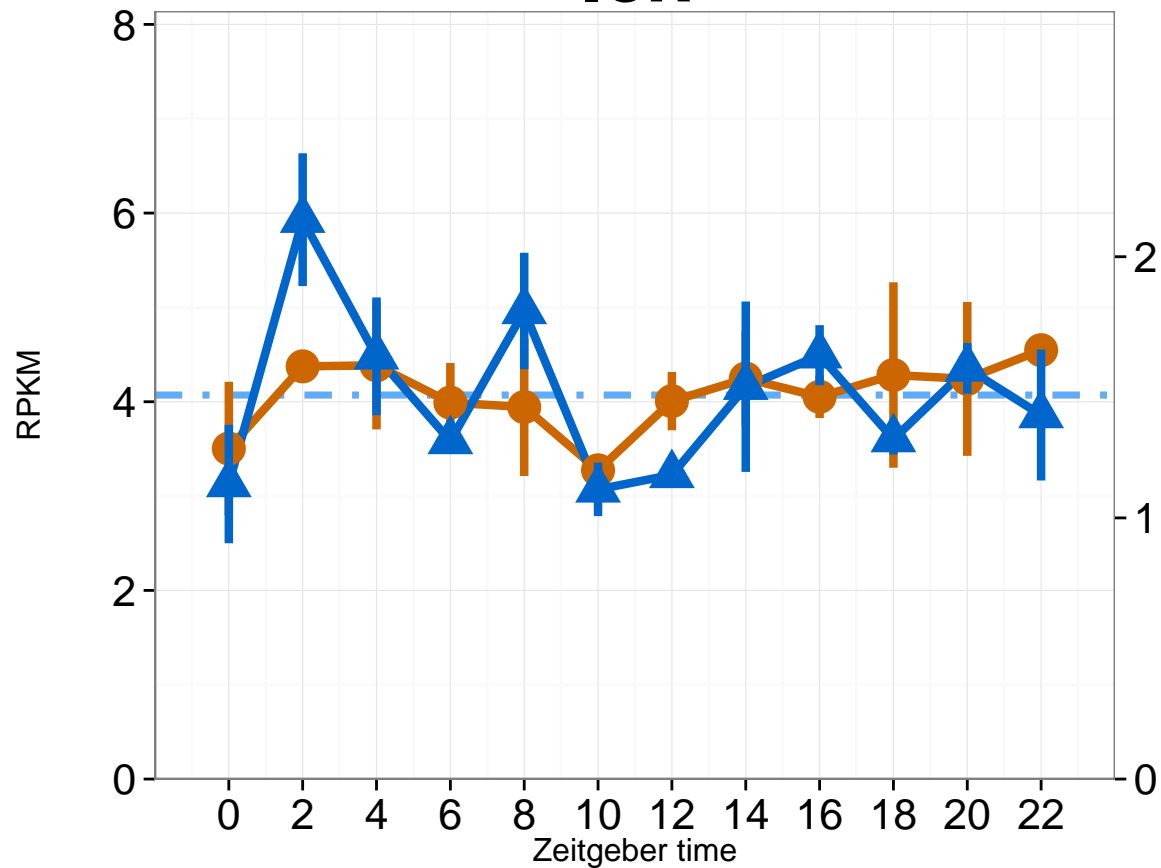

# Ick

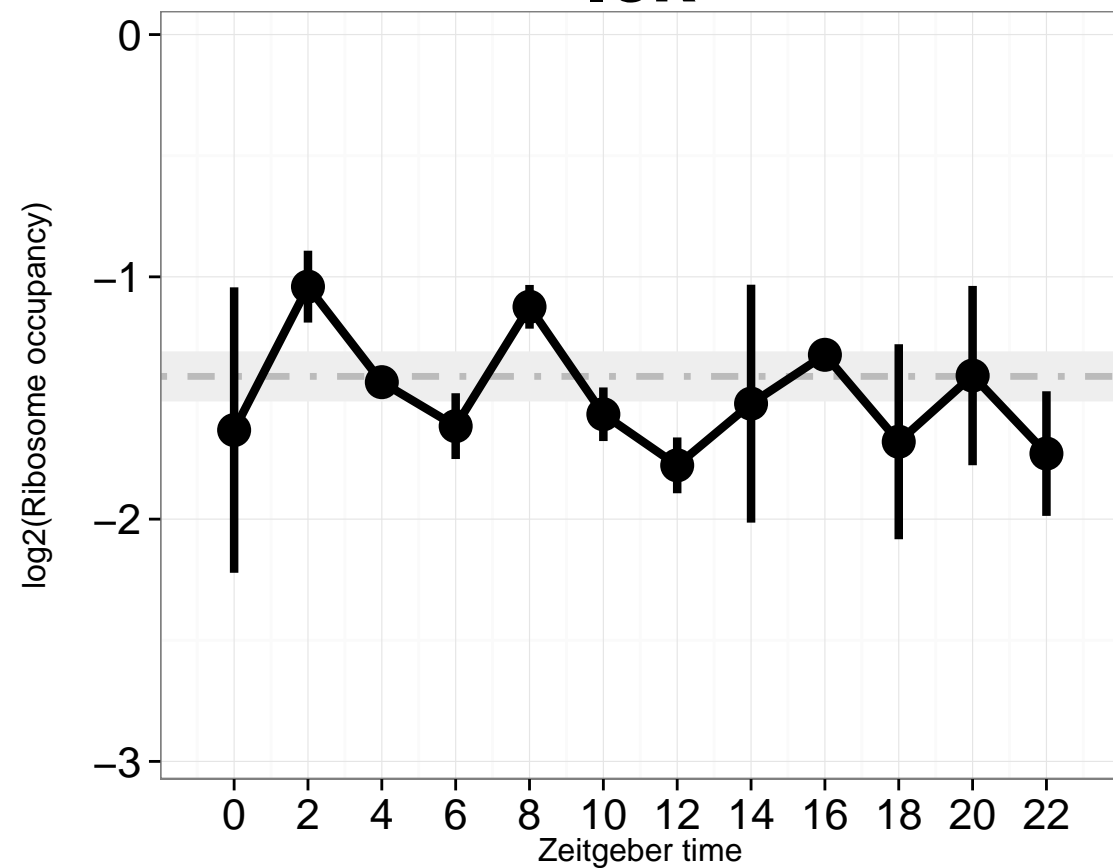

Supplement: SuppDataset_1.zip [file Ick_set_A.pdf › Supplemental Dataset 1/A-mRNA_nonrhyth_translation_nonrhyth/Ick_set_A.pdf]

## lcmt

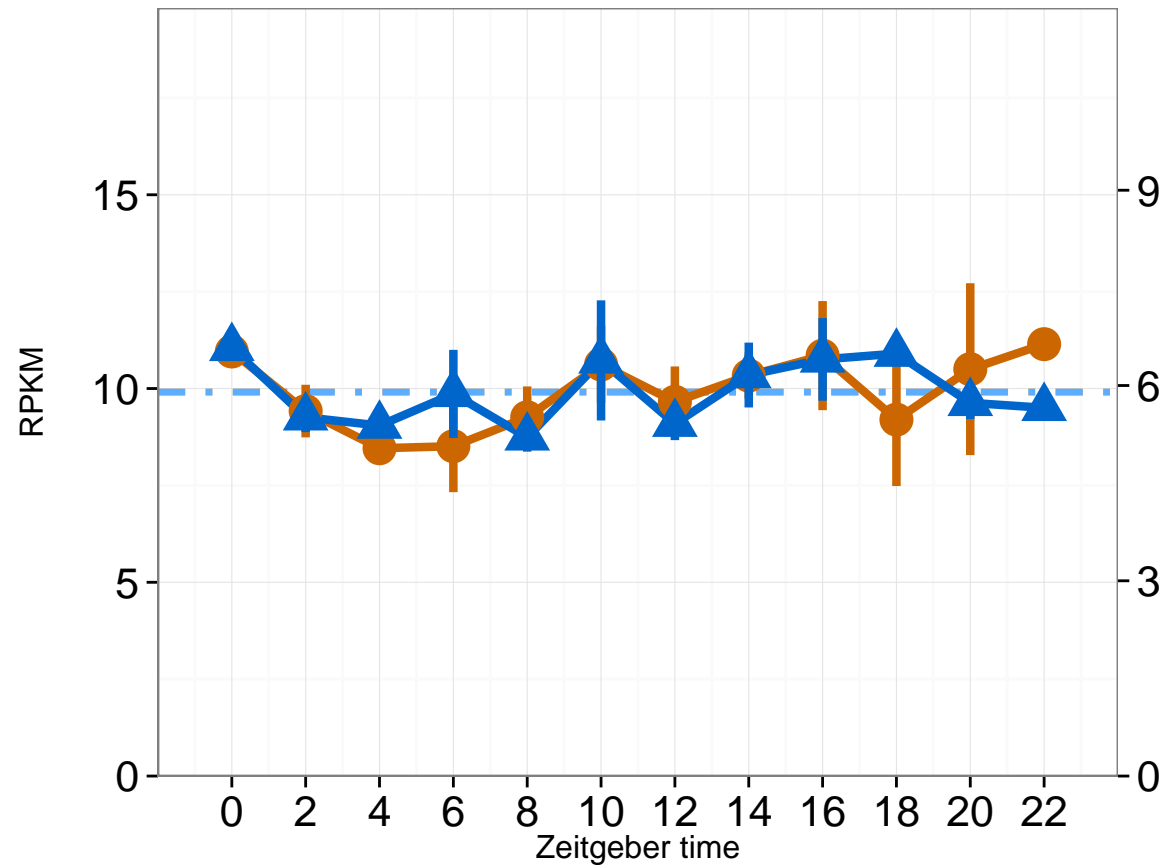

## lcmt

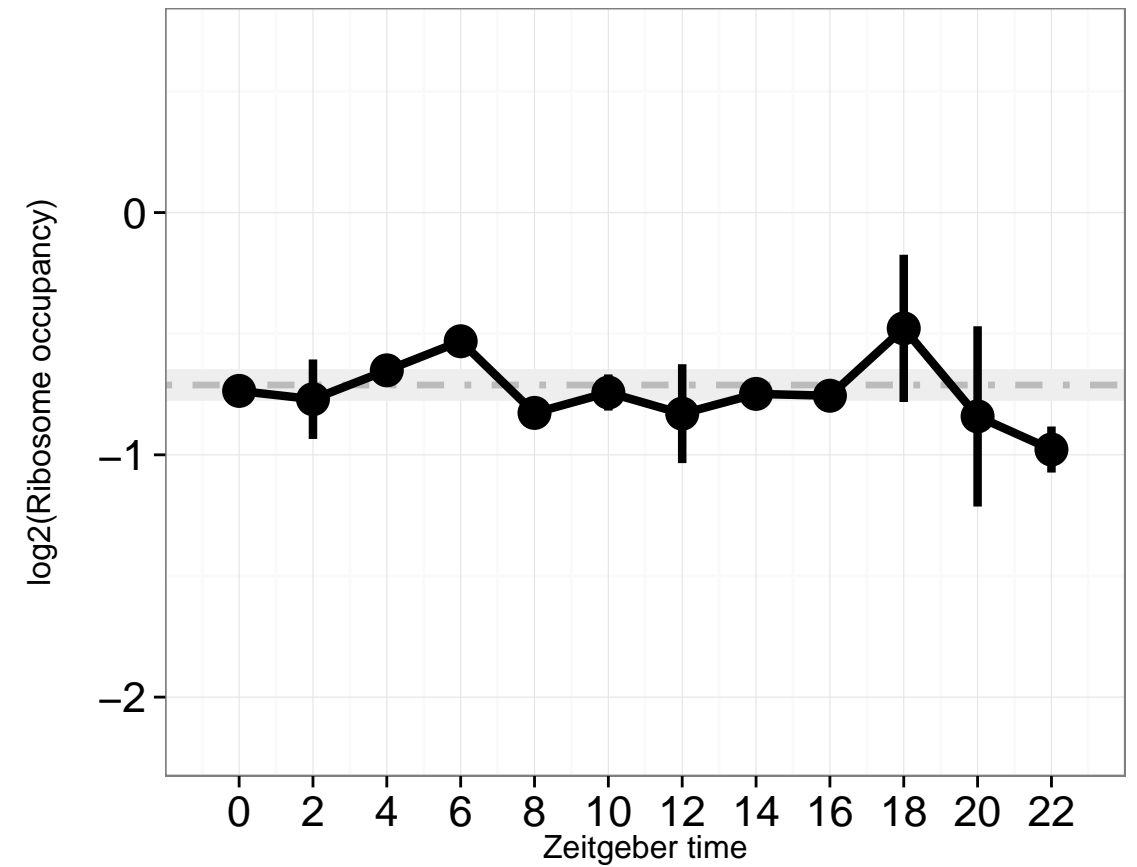

Supplement: SuppDataset_1.zip [file Icmt_set_A.pdf › Supplemental Dataset 1/A-mRNA_nonrhyth_translation_nonrhyth/Icmt_set_A.pdf]

## Icos TR

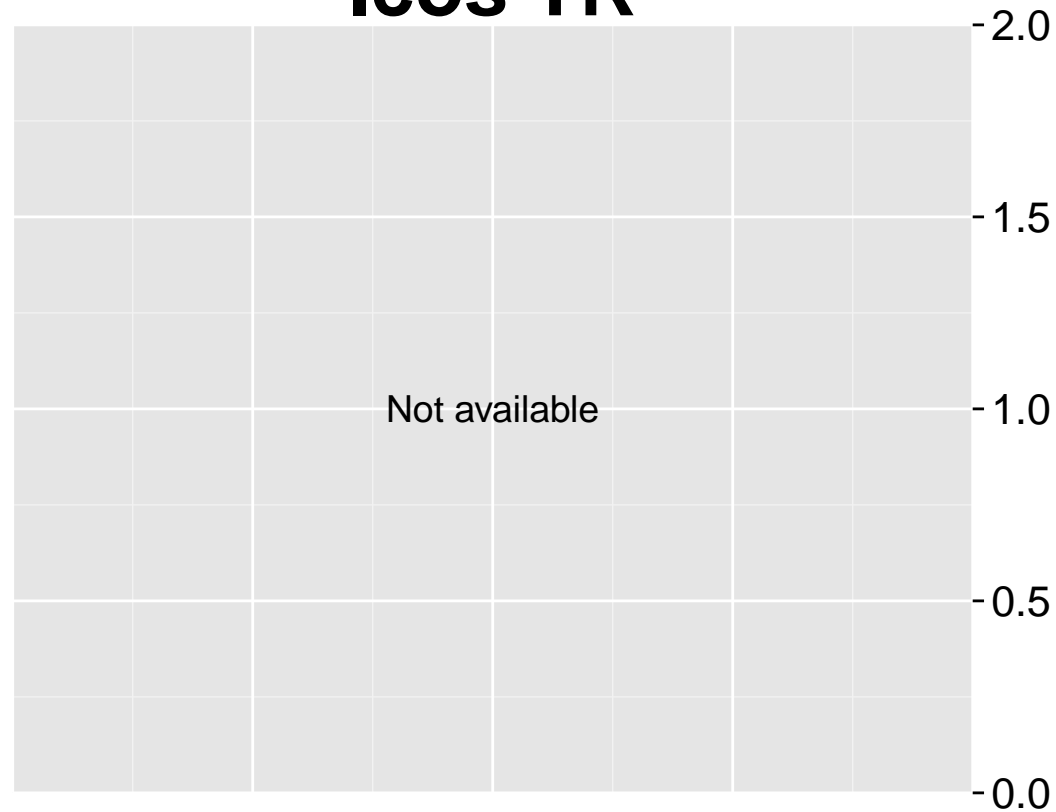

## Icos log2(Ribosome occupancy)

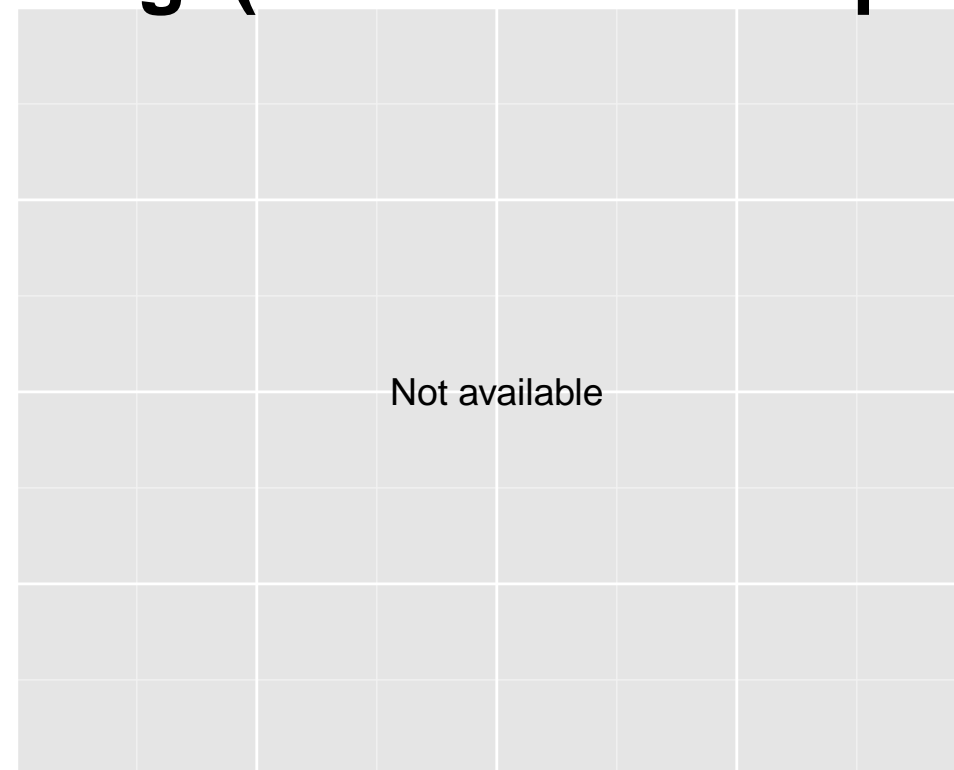

Supplement: SuppDataset_1.zip [file Icos_set_A.pdf › Supplemental Dataset 1/A-mRNA_nonrhyth_translation_nonrhyth/Icos_set_A.pdf]

## Ict1

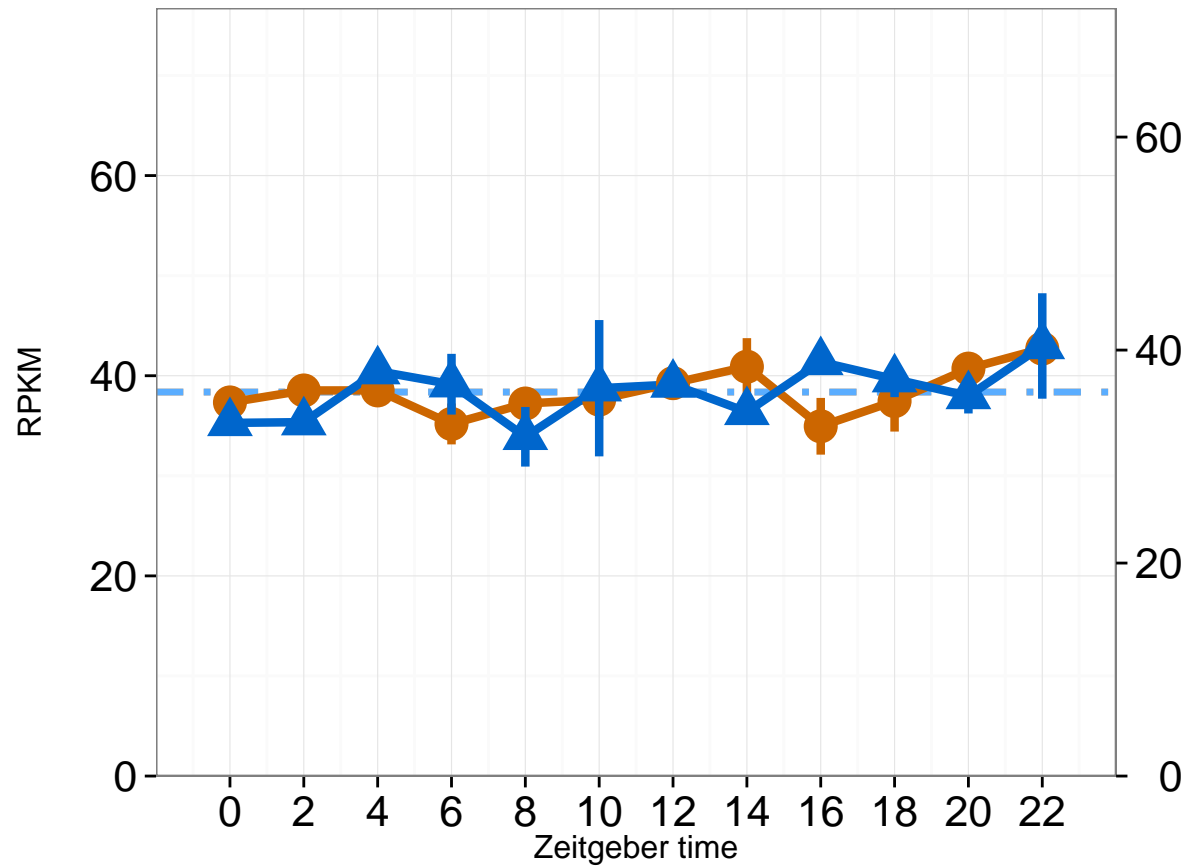

## Ict1

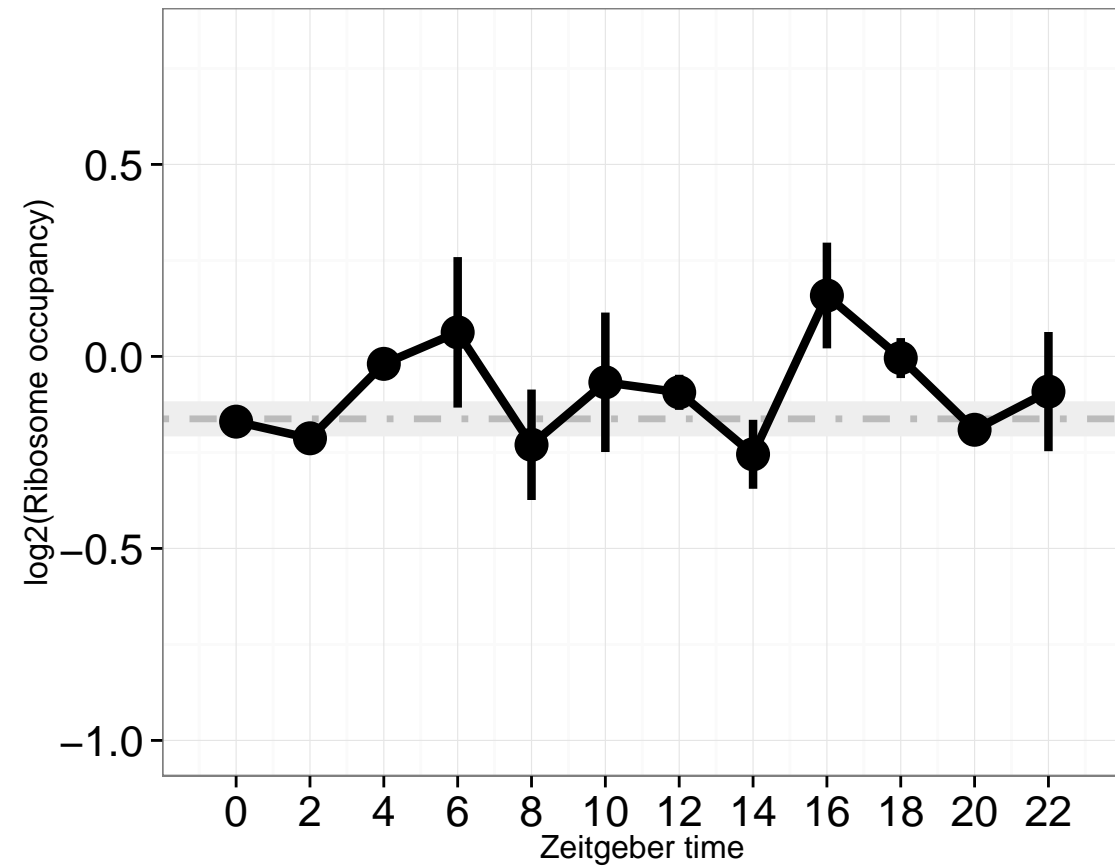

Supplement: SuppDataset_1.zip [file Ict1_set_A.pdf › Supplemental Dataset 1/A-mRNA_nonrhyth_translation_nonrhyth/Ict1_set_A.pdf]

Id1

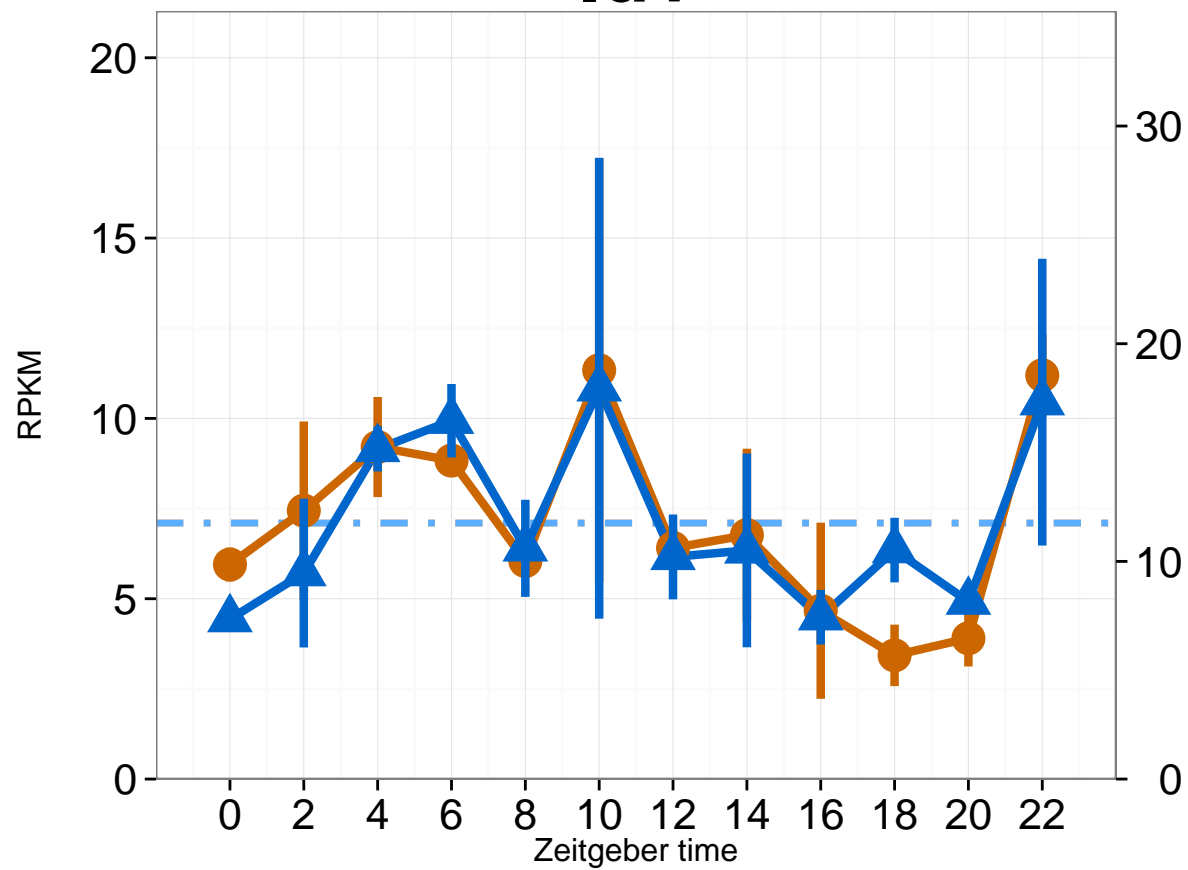

Id1

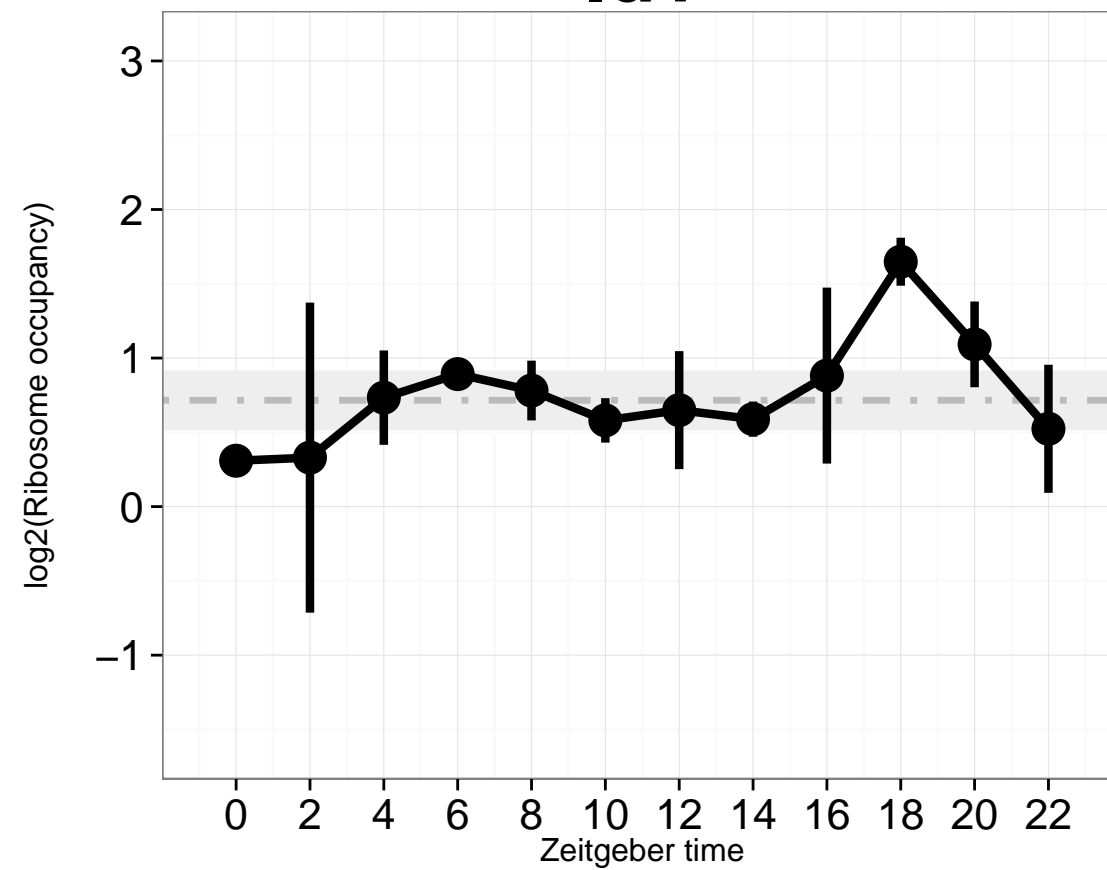

Supplement: SuppDataset_1.zip [file Id1_set_A.pdf › Supplemental Dataset 1/A-mRNA_nonrhyth_translation_nonrhyth/Id1_set_A.pdf]

# Id3

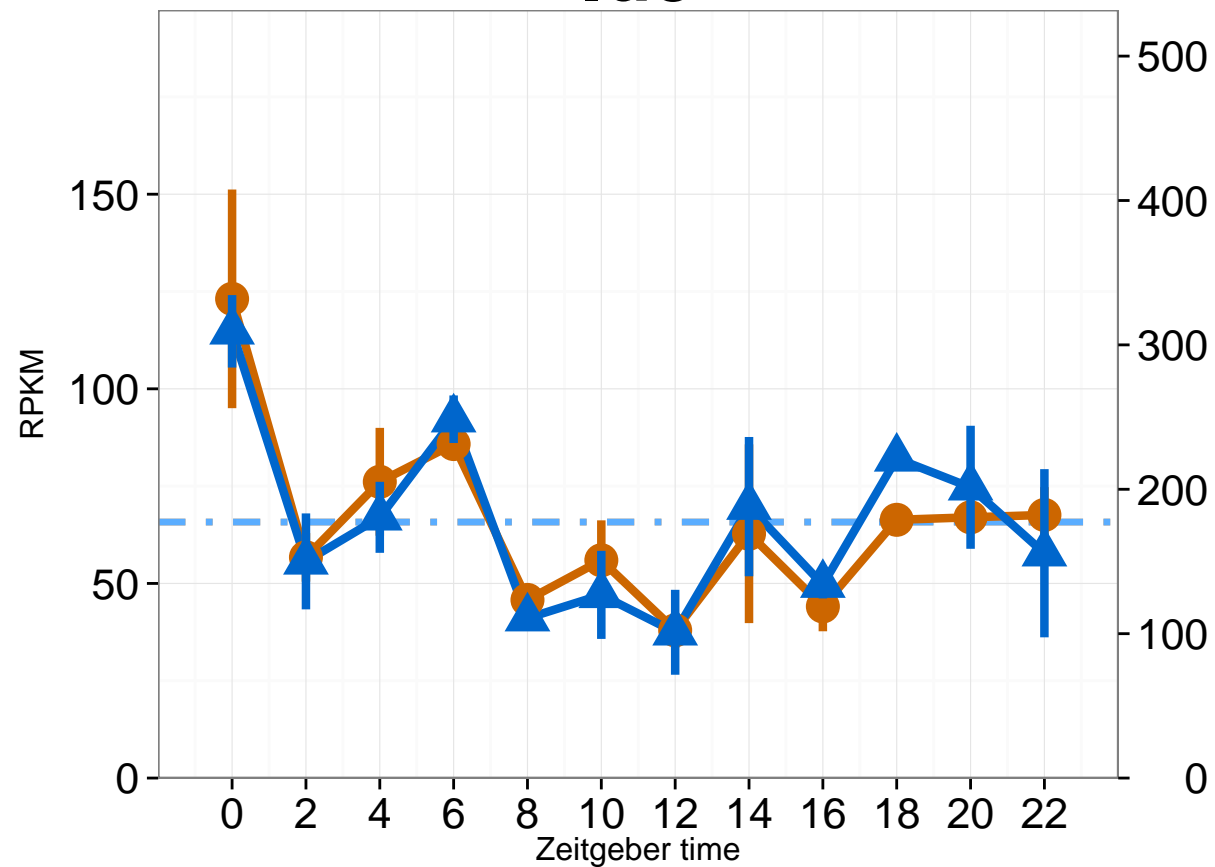

# Id3

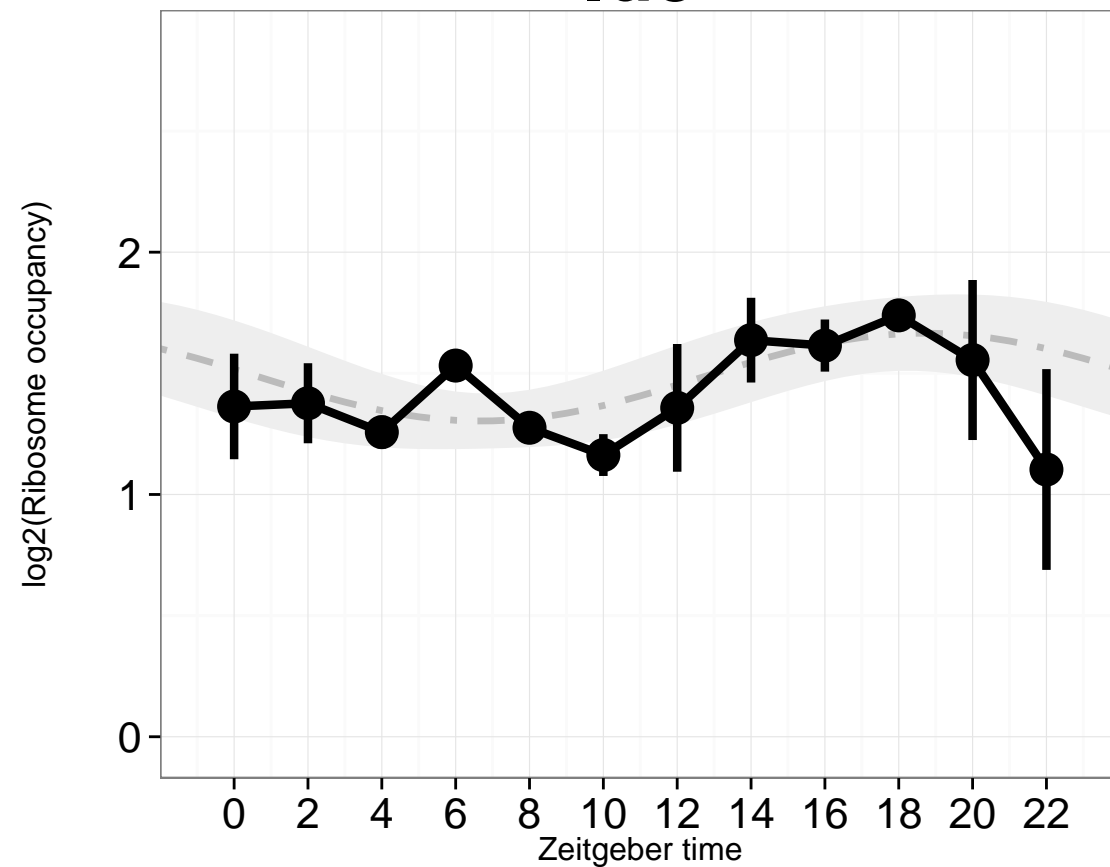

Supplement: SuppDataset_1.zip [file Id3_set_A.pdf › Supplemental Dataset 1/A-mRNA_nonrhyth_translation_nonrhyth/Id3_set_A.pdf]

## Idh1

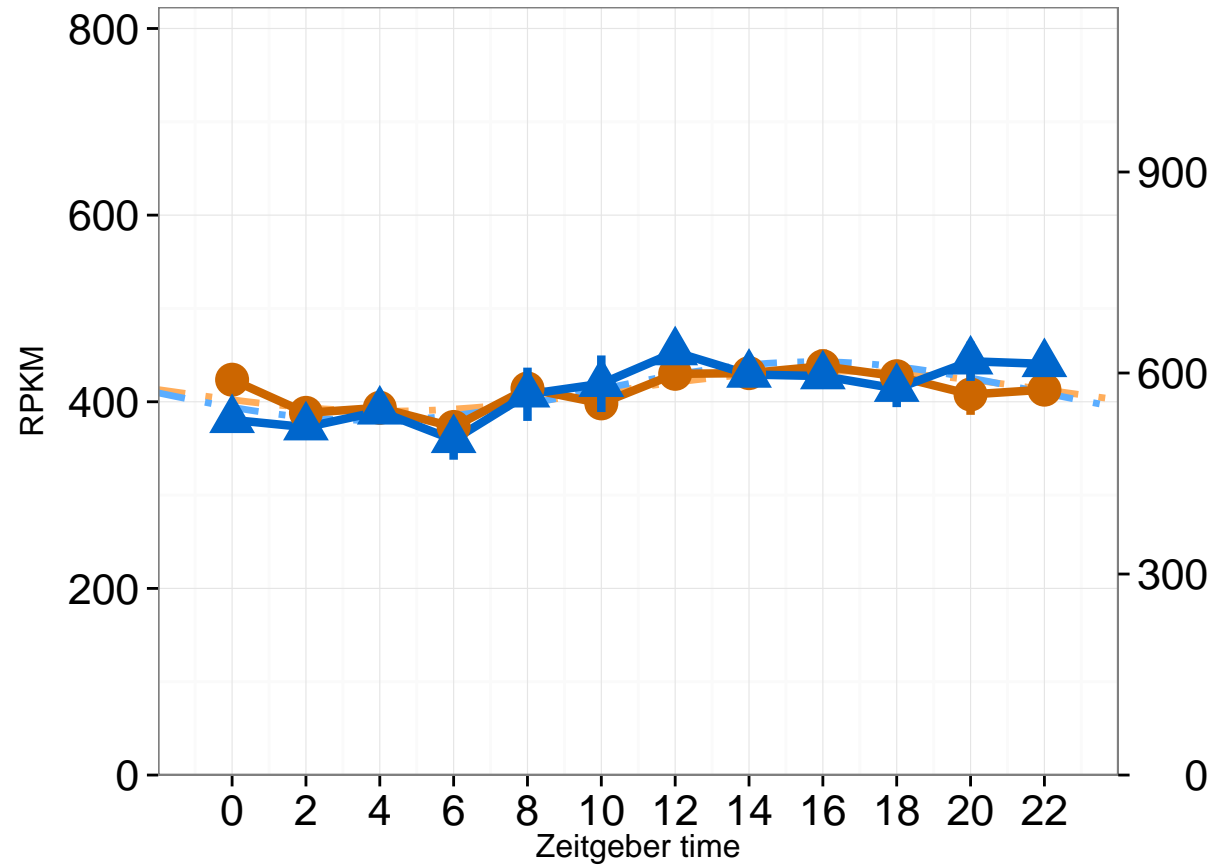

## Idh1

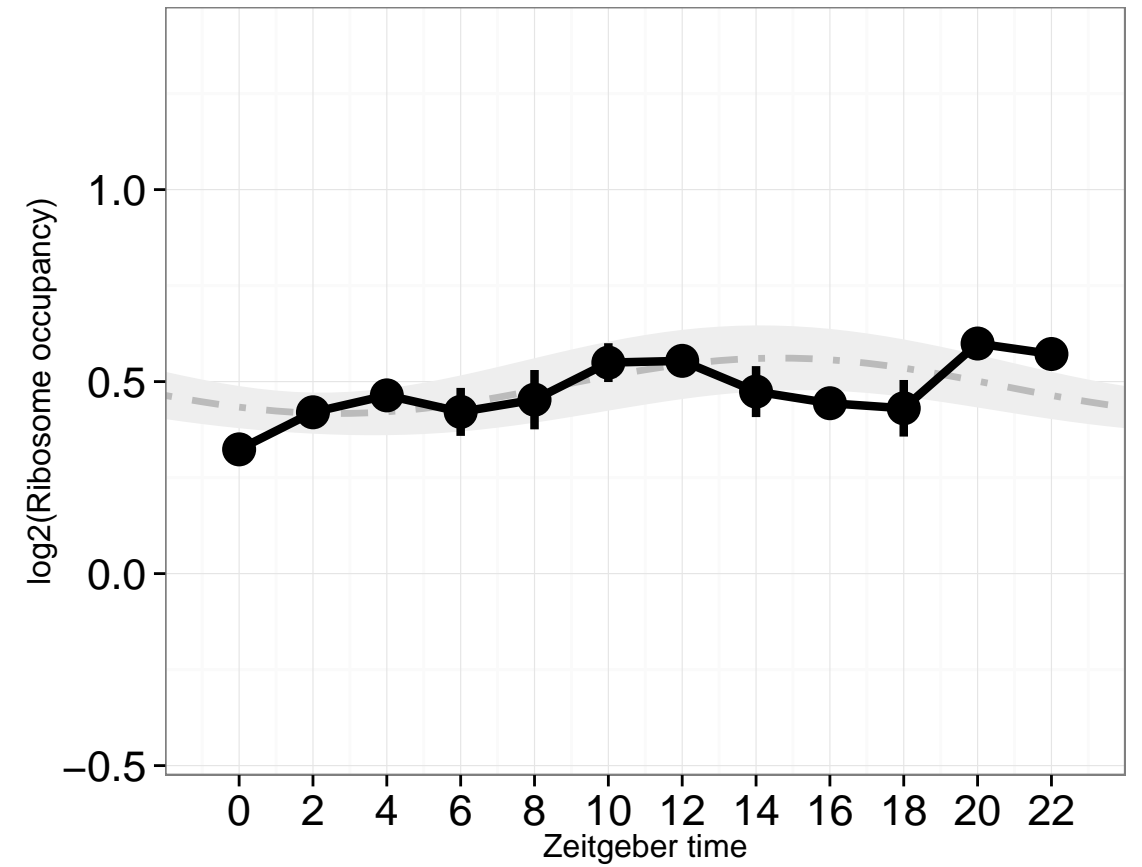

Supplement: SuppDataset_1.zip [file Idh1_set_A.pdf › Supplemental Dataset 1/A-mRNA_nonrhyth_translation_nonrhyth/Idh1_set_A.pdf]

## Idh2

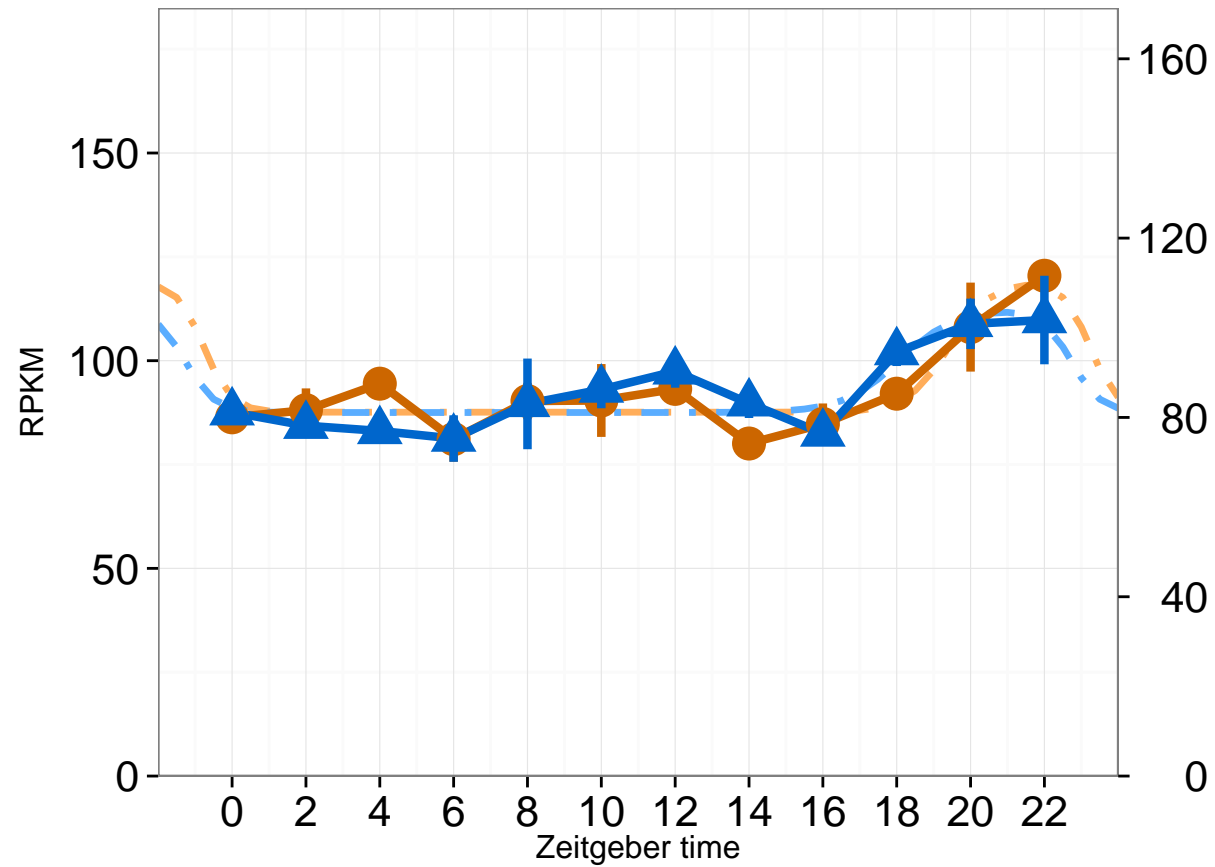

## Idh2

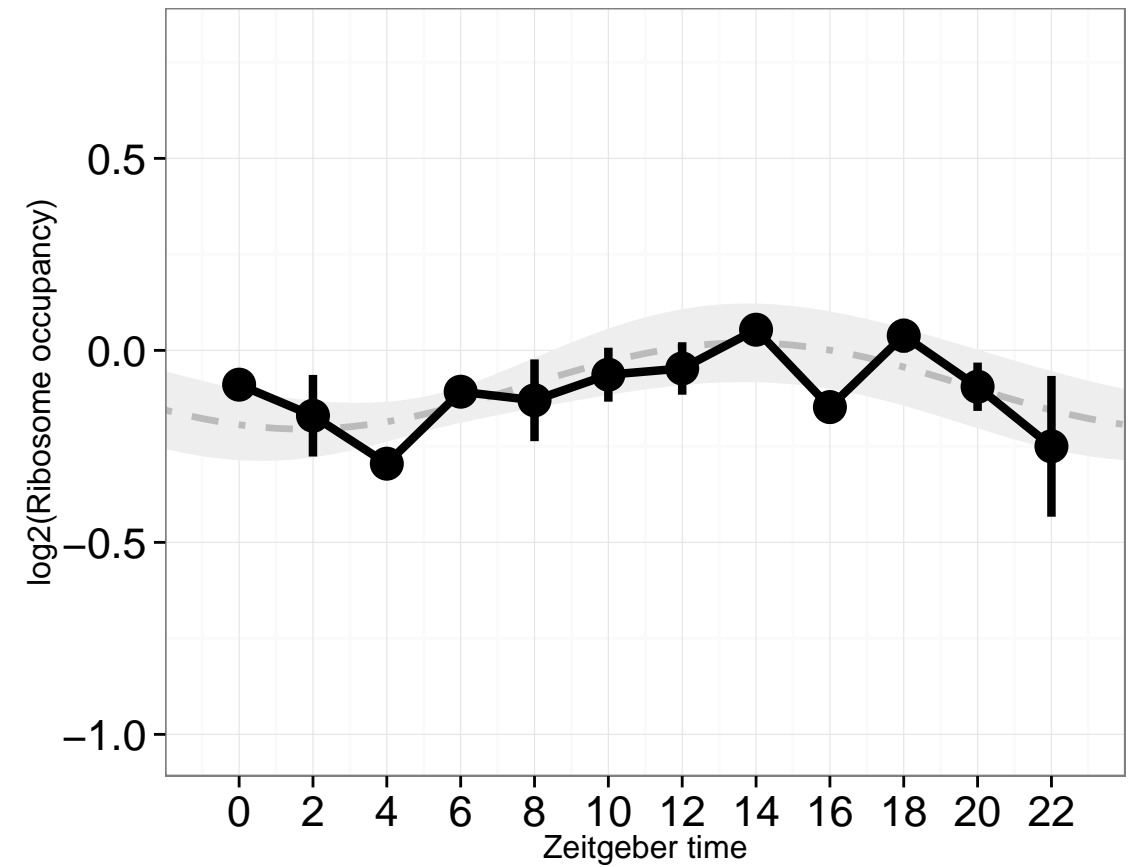

Supplement: SuppDataset_1.zip [file Idh2_set_A.pdf › Supplemental Dataset 1/A-mRNA_nonrhyth_translation_nonrhyth/Idh2_set_A.pdf]

# Idh3a

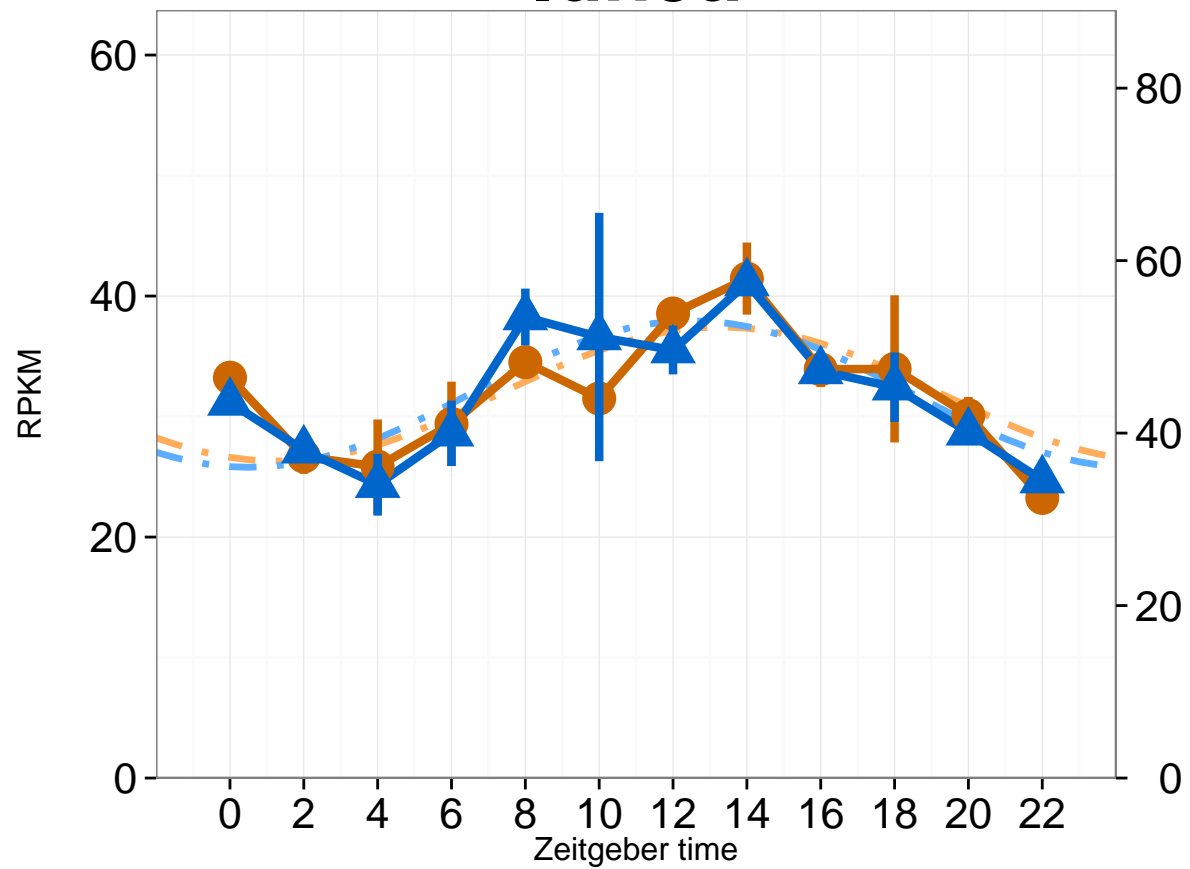

# Idh3a

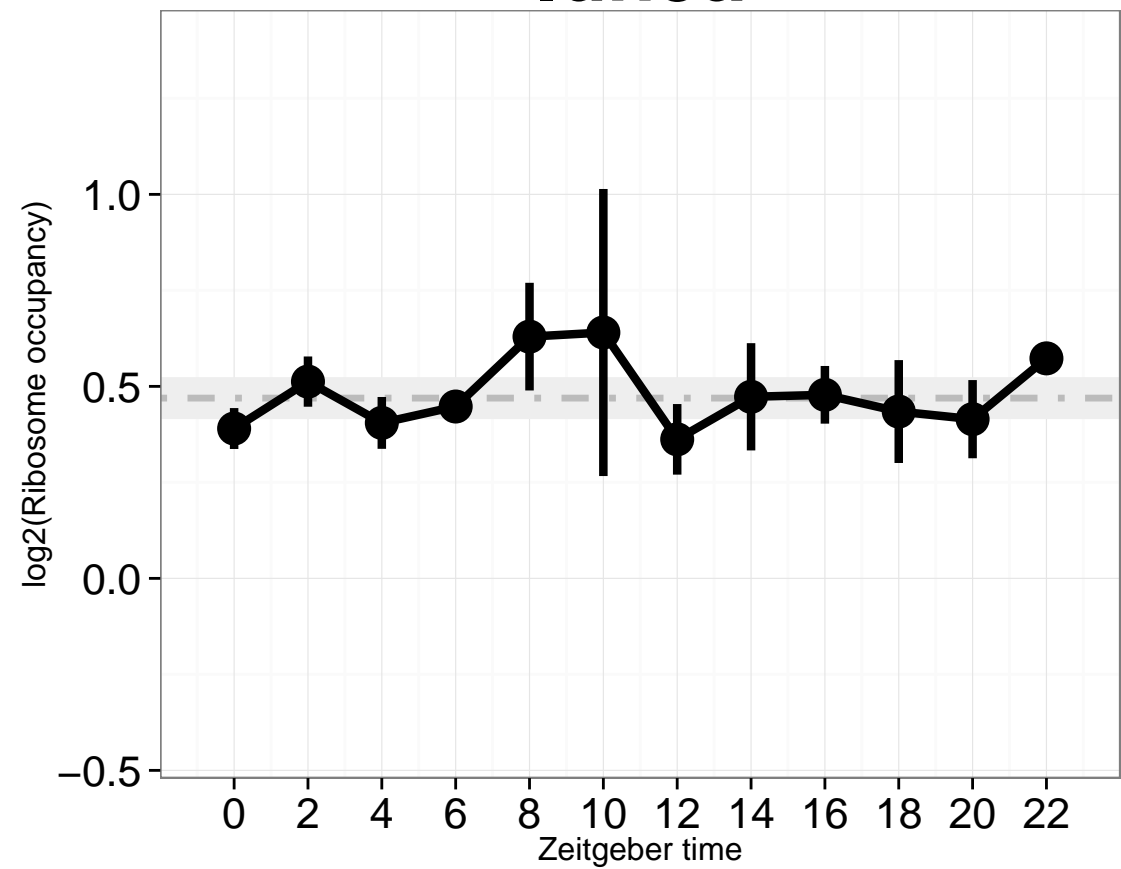

Supplement: SuppDataset_1.zip [file Idh3a_set_A.pdf › Supplemental Dataset 1/A-mRNA_nonrhyth_translation_nonrhyth/Idh3a_set_A.pdf]

# Idh3b

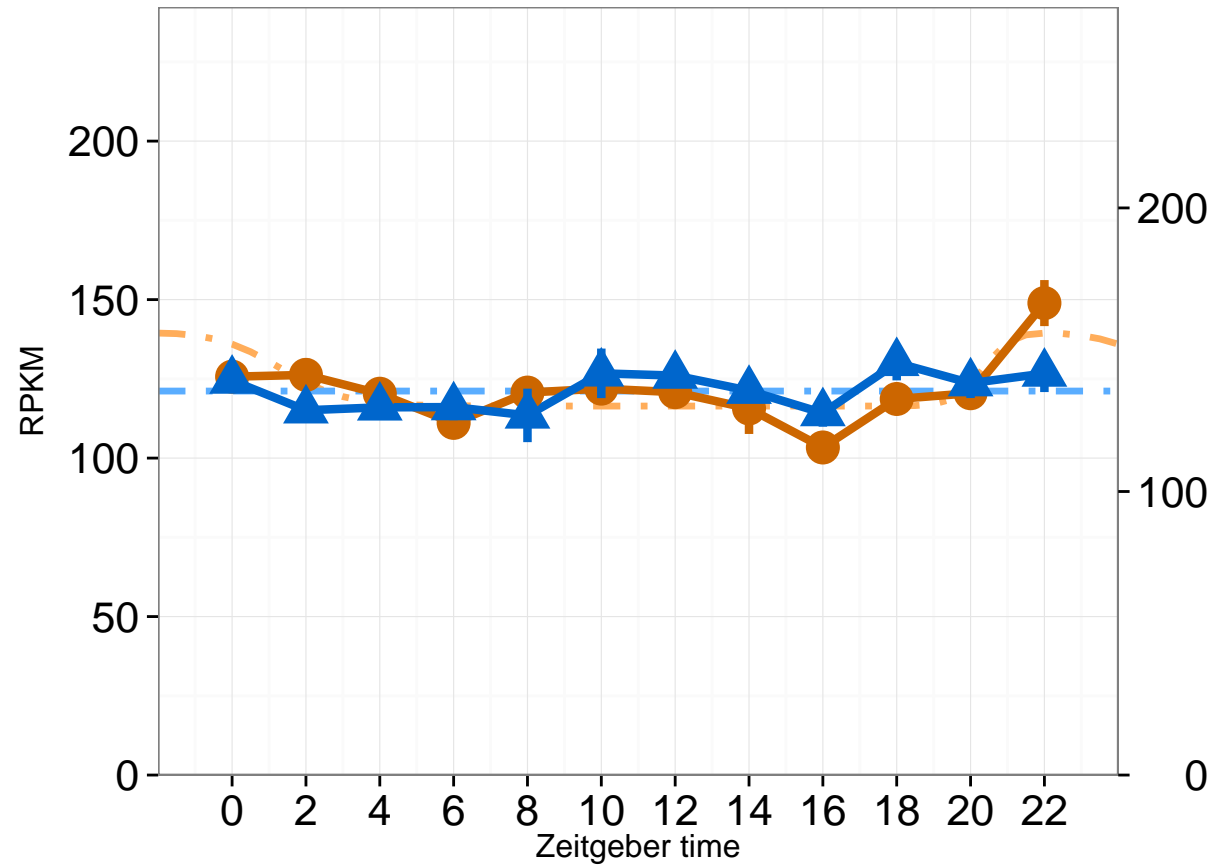

# Idh3b

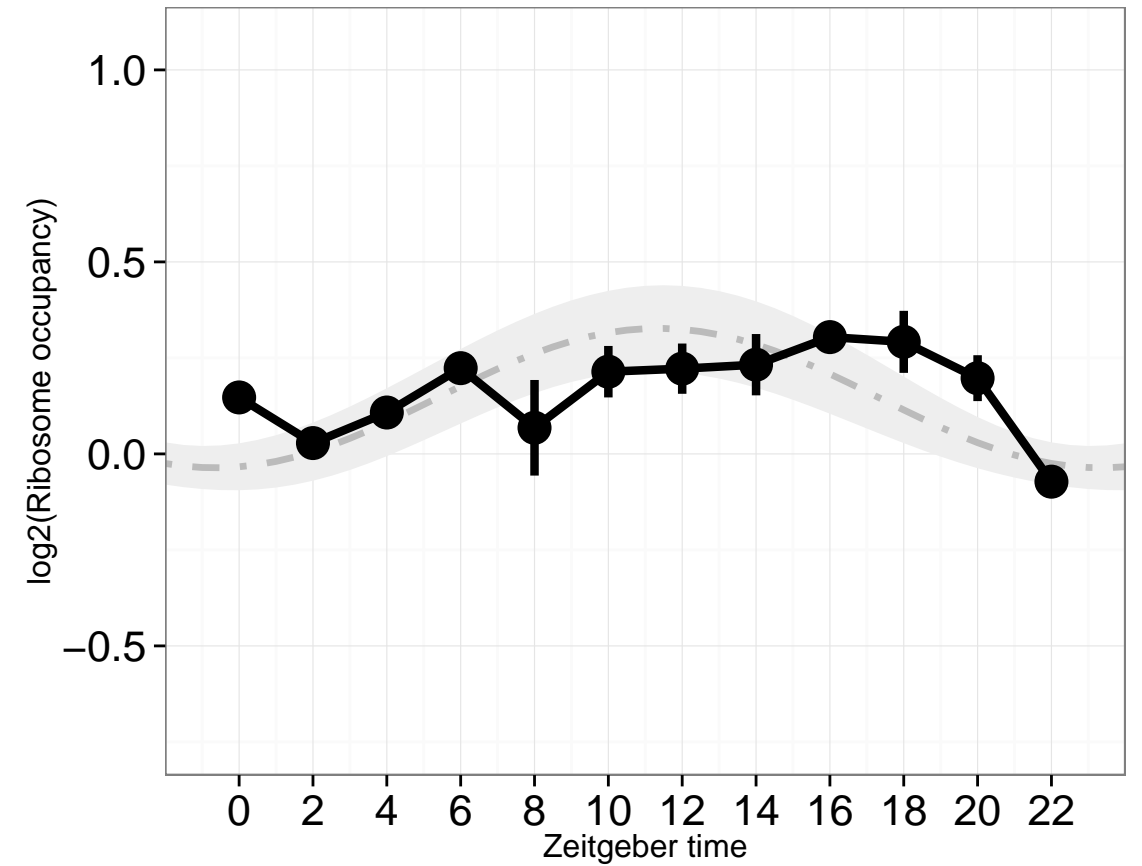

Supplement: SuppDataset_1.zip [file Idh3b_set_A.pdf › Supplemental Dataset 1/A-mRNA_nonrhyth_translation_nonrhyth/Idh3b_set_A.pdf]

# Idh3g

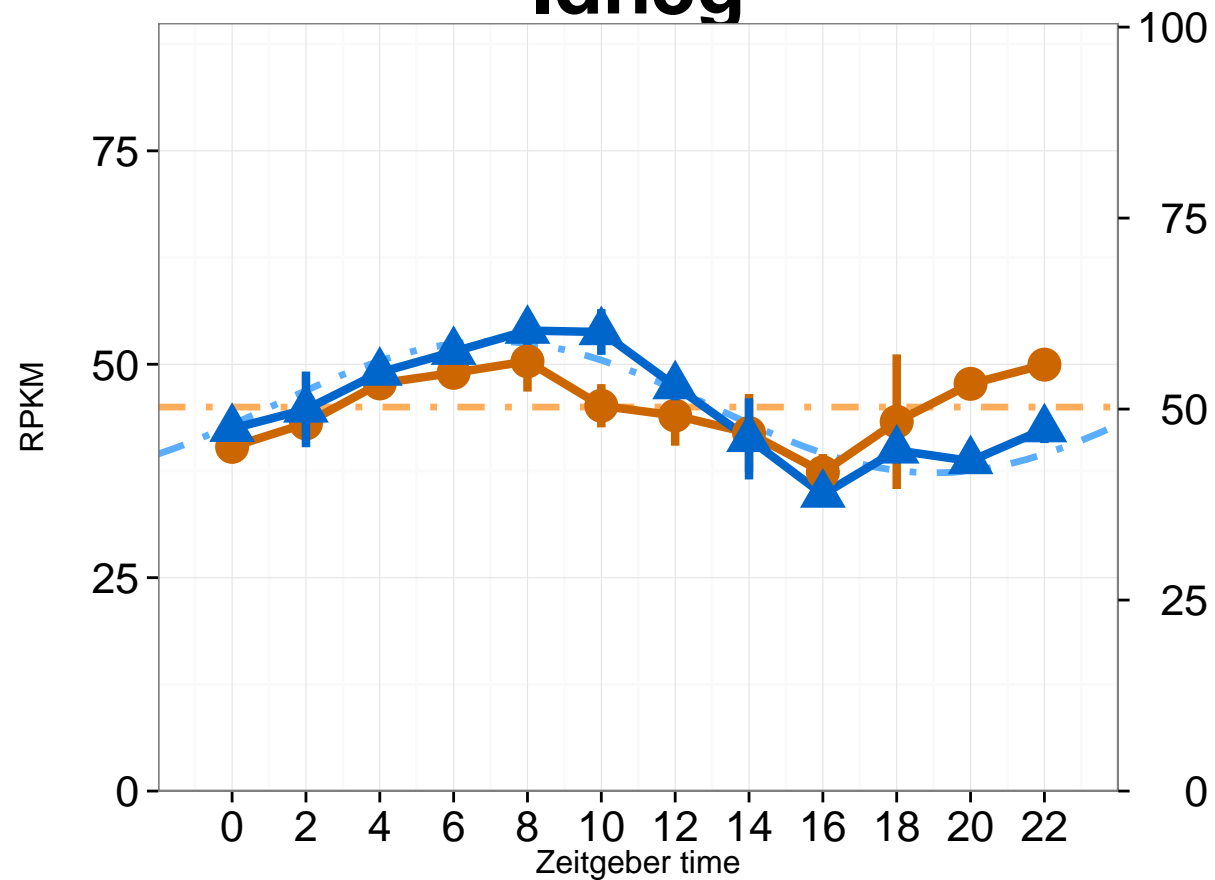

# Idh3g

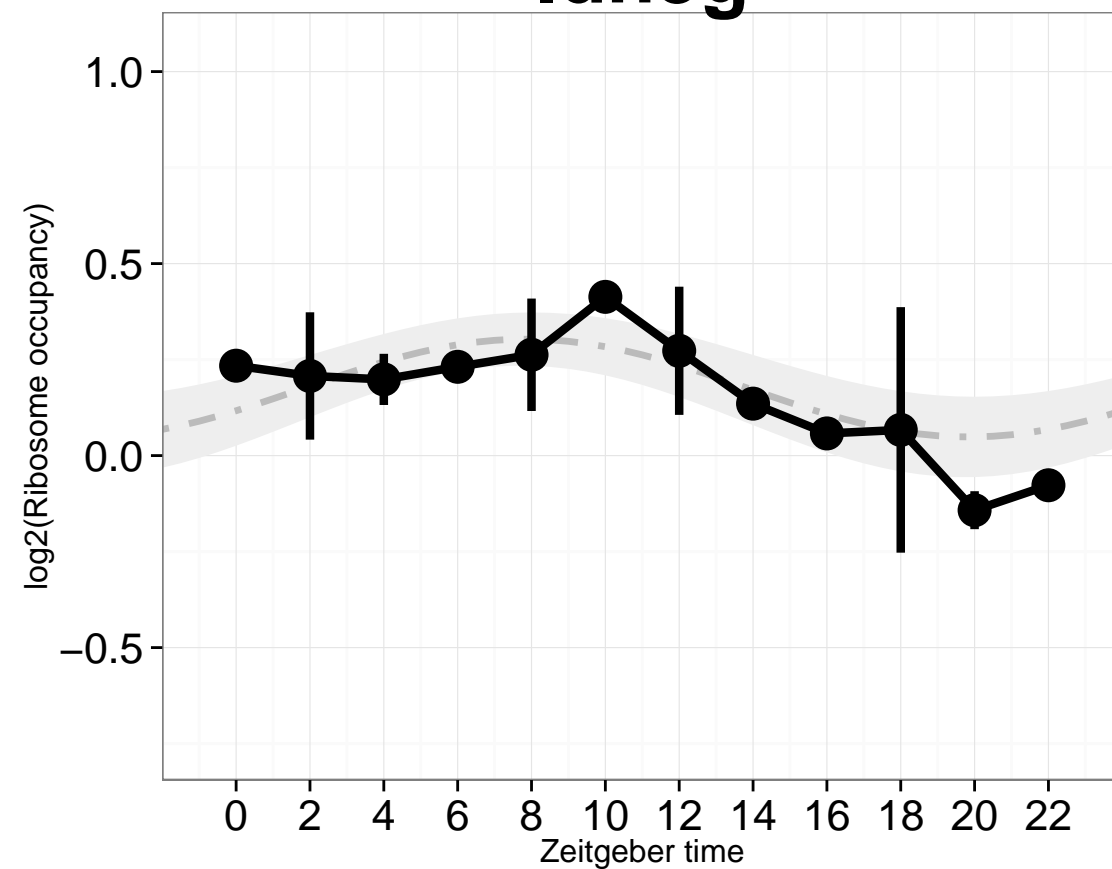

Supplement: SuppDataset_1.zip [file Idh3g_set_A.pdf › Supplemental Dataset 1/A-mRNA_nonrhyth_translation_nonrhyth/Idh3g_set_A.pdf]

## Idi1

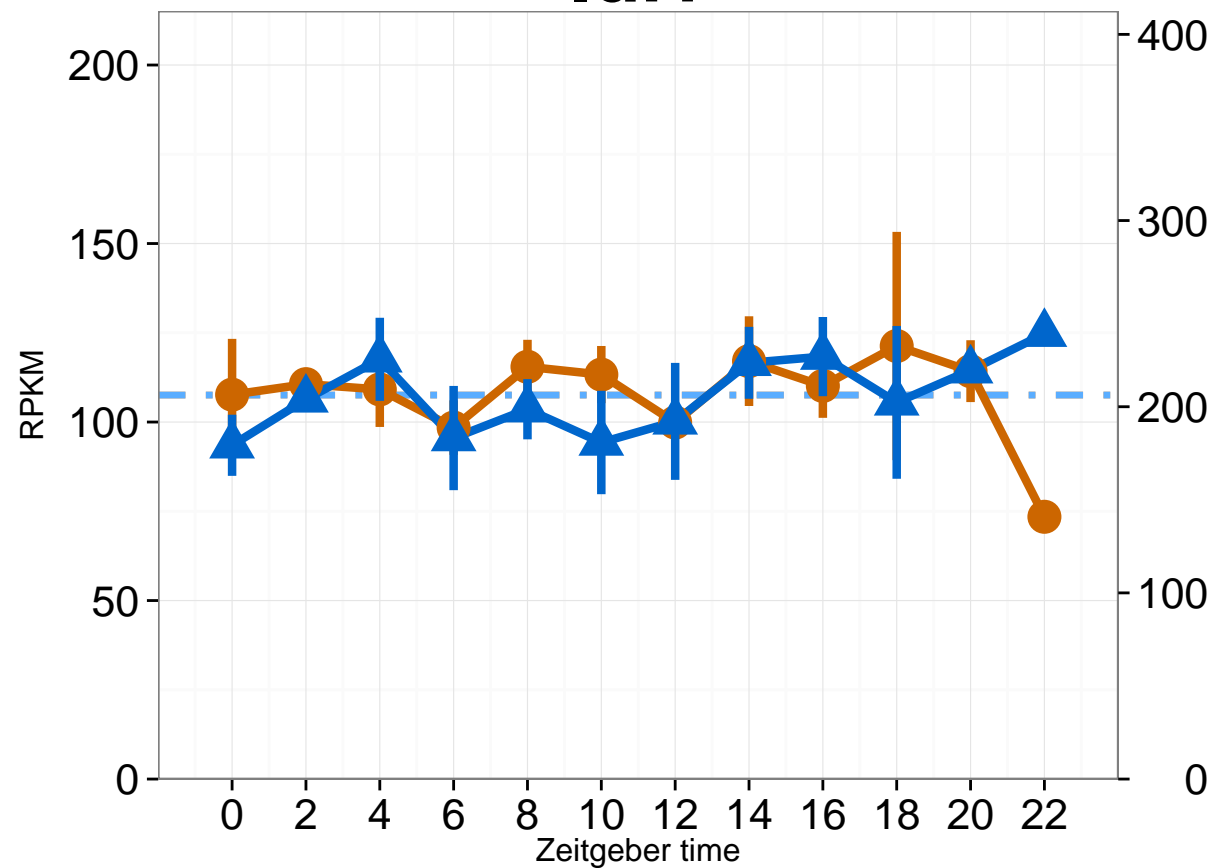

## Idi1

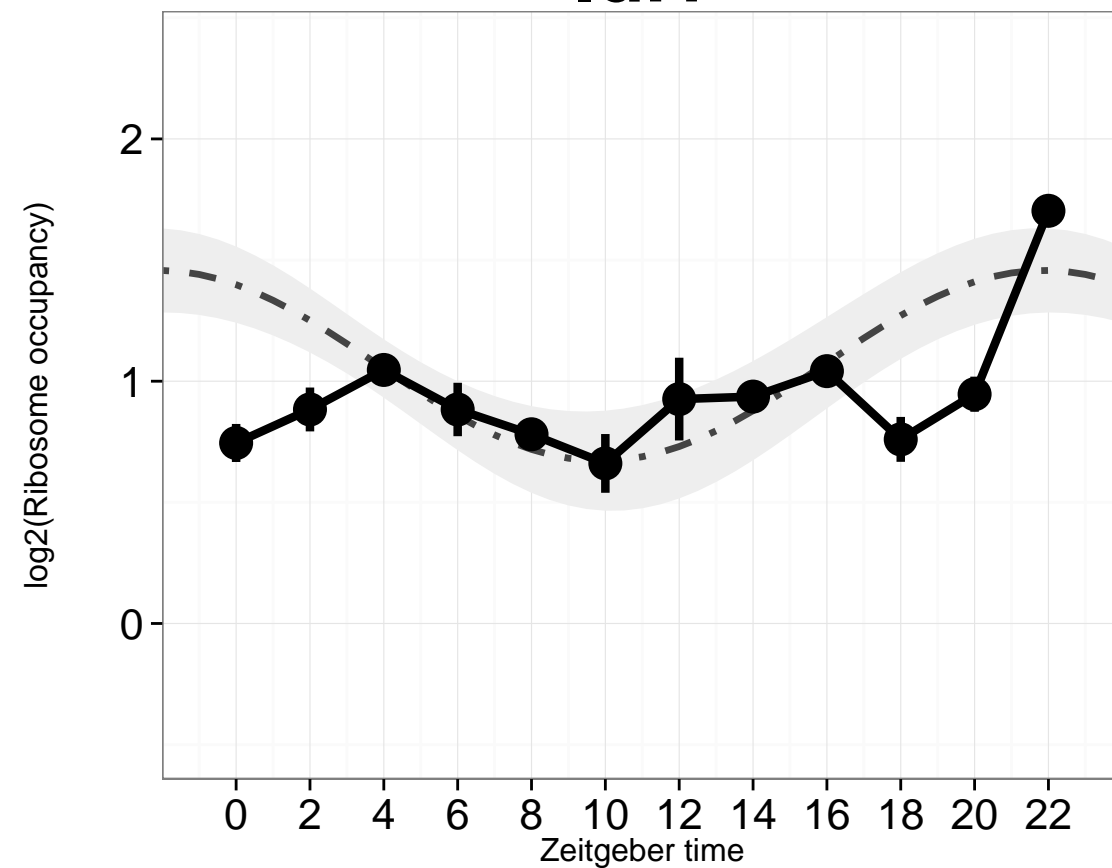

Supplement: SuppDataset_1.zip [file Idi1_set_A.pdf › Supplemental Dataset 1/A-mRNA_nonrhyth_translation_nonrhyth/Idi1_set_A.pdf]

## Idnk

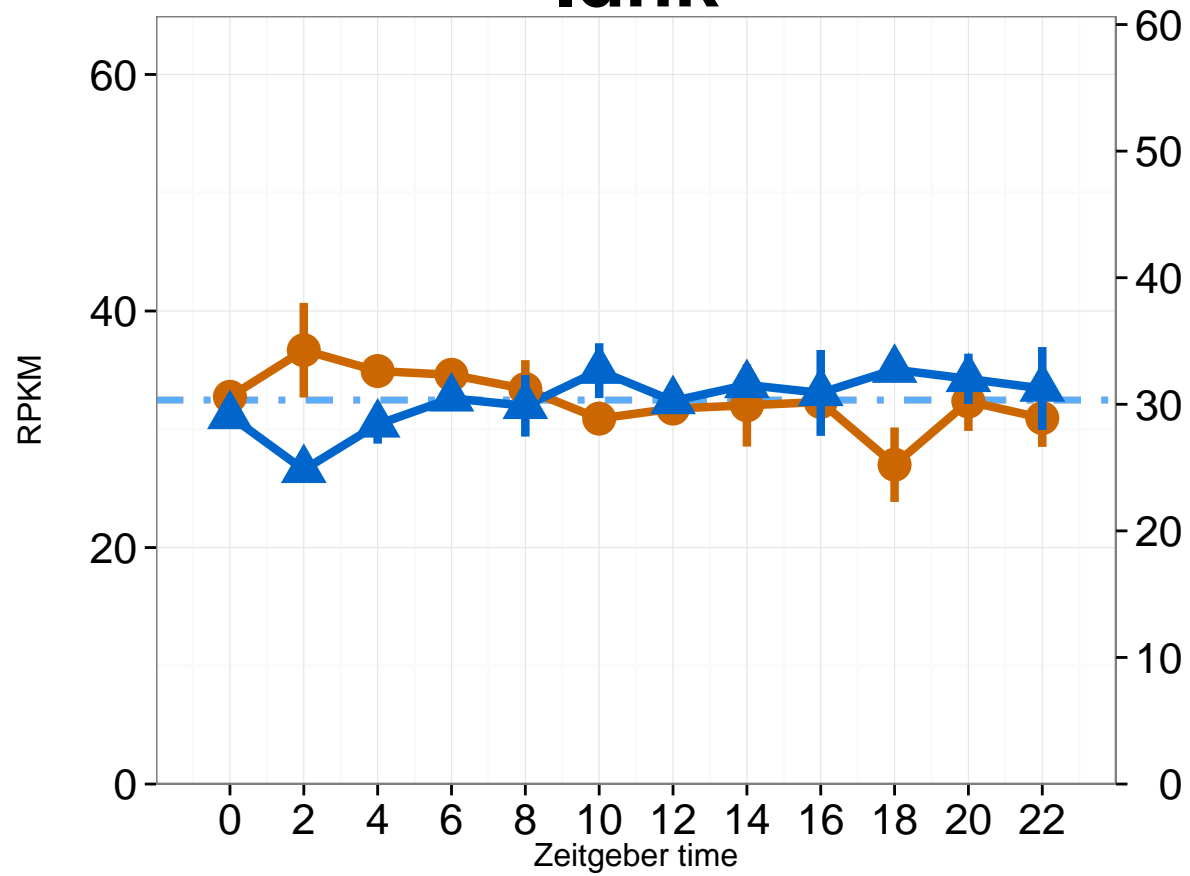

## Idnk

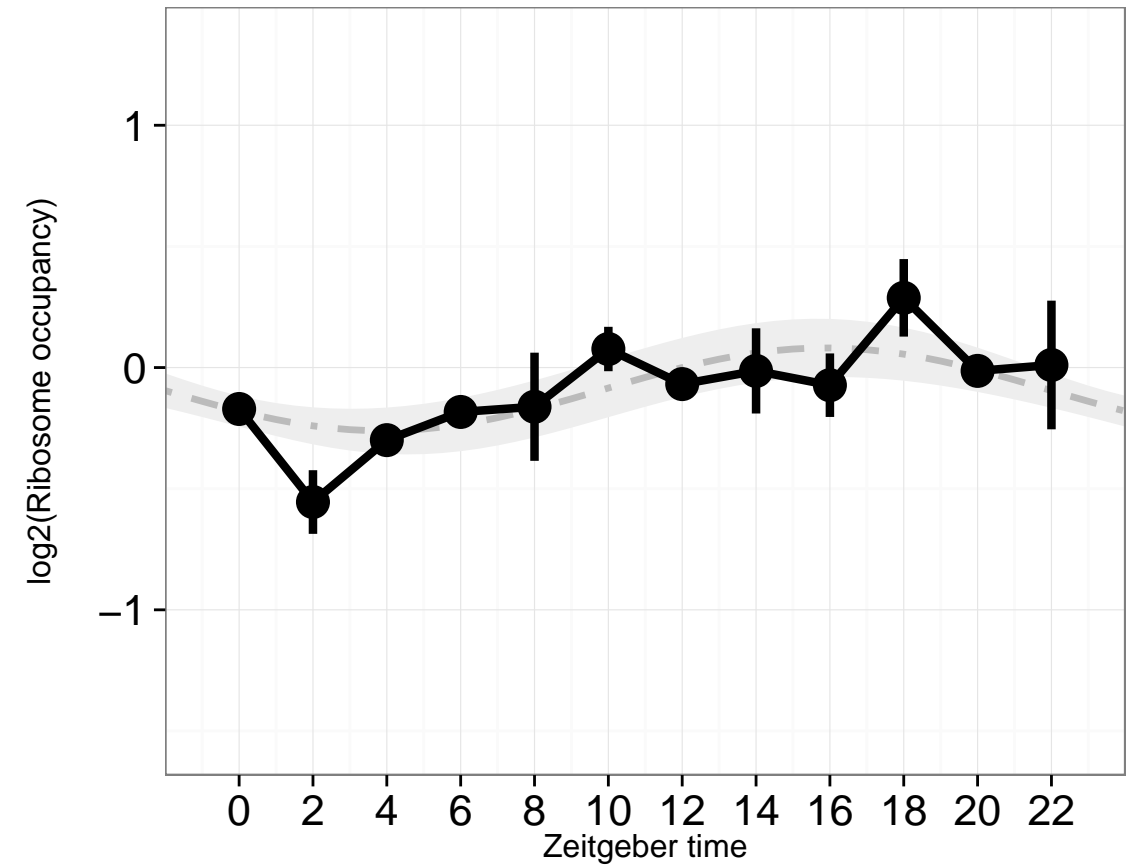

Supplement: SuppDataset_1.zip [file Idnk_set_A.pdf › Supplemental Dataset 1/A-mRNA_nonrhyth_translation_nonrhyth/Idnk_set_A.pdf]

# ler3ip1

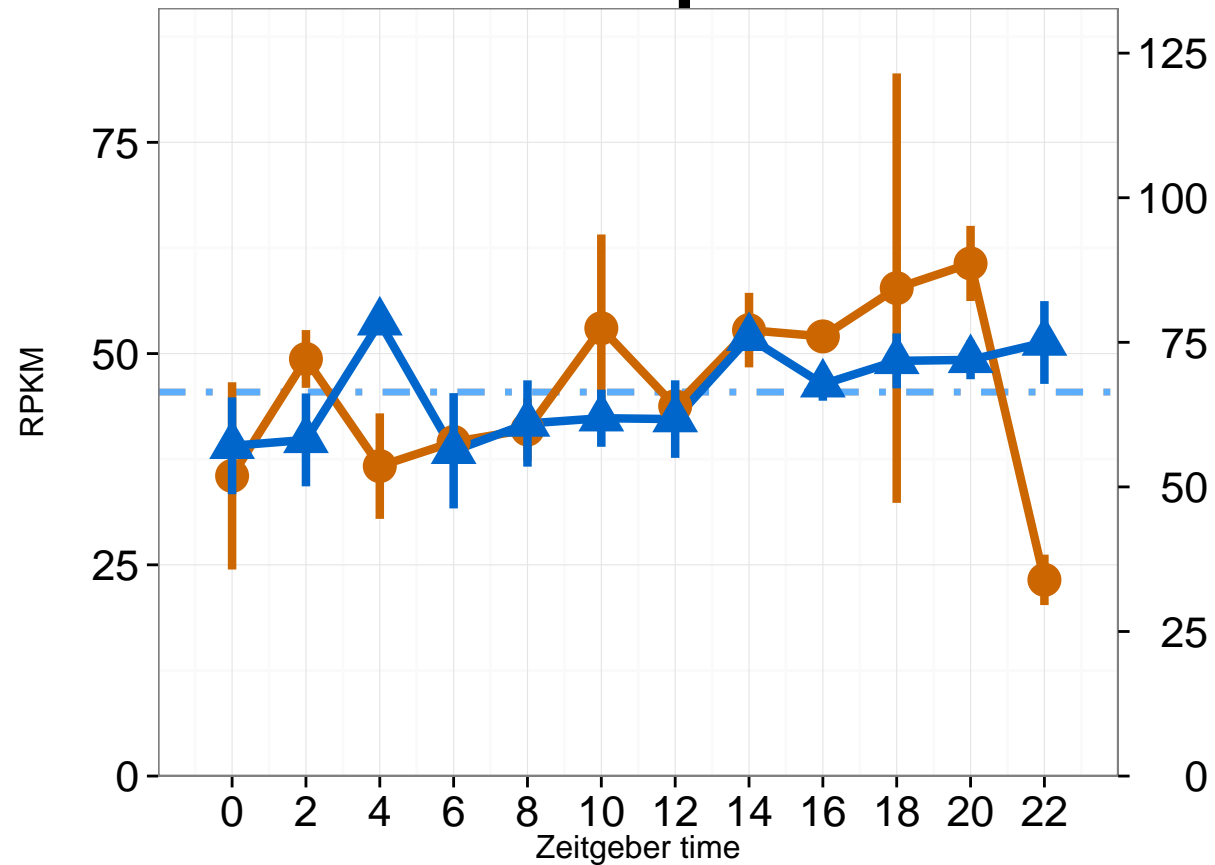

# ler3ip1

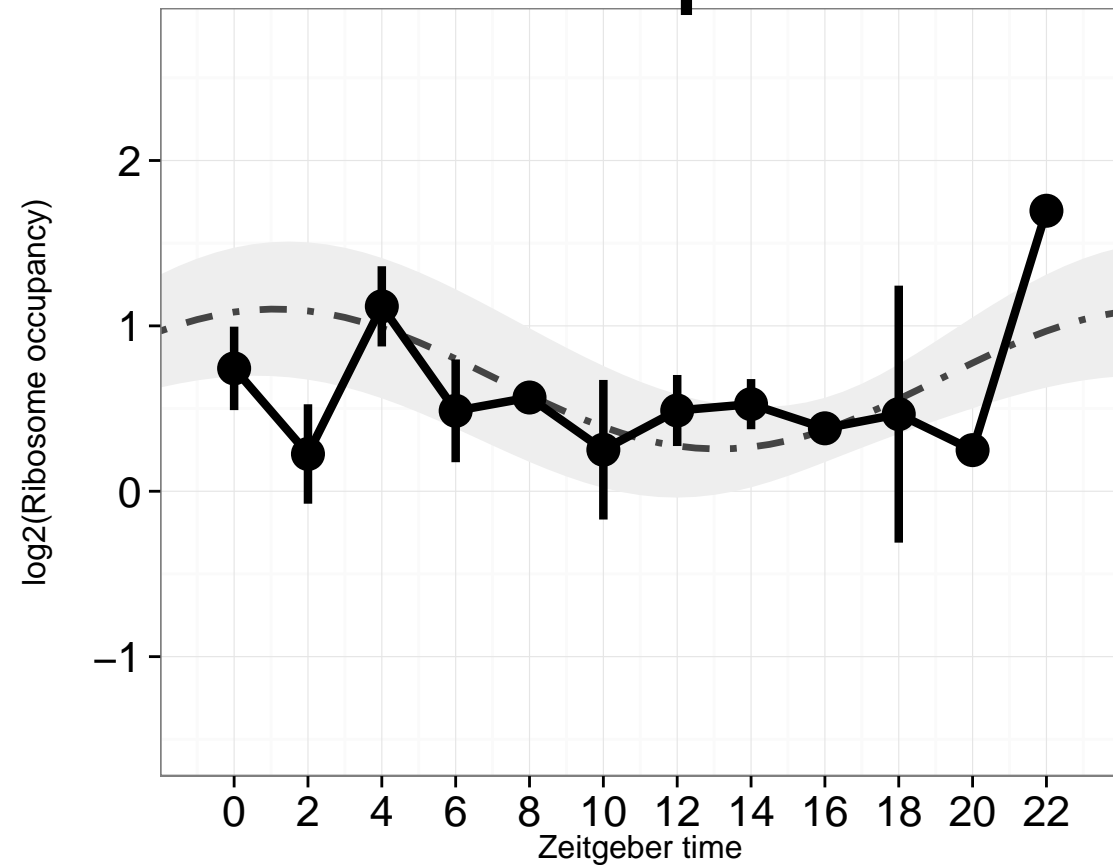

Supplement: SuppDataset_1.zip [file Ier3ip1_set_A.pdf › Supplemental Dataset 1/A-mRNA_nonrhyth_translation_nonrhyth/Ier3ip1_set_A.pdf]

# ler5l

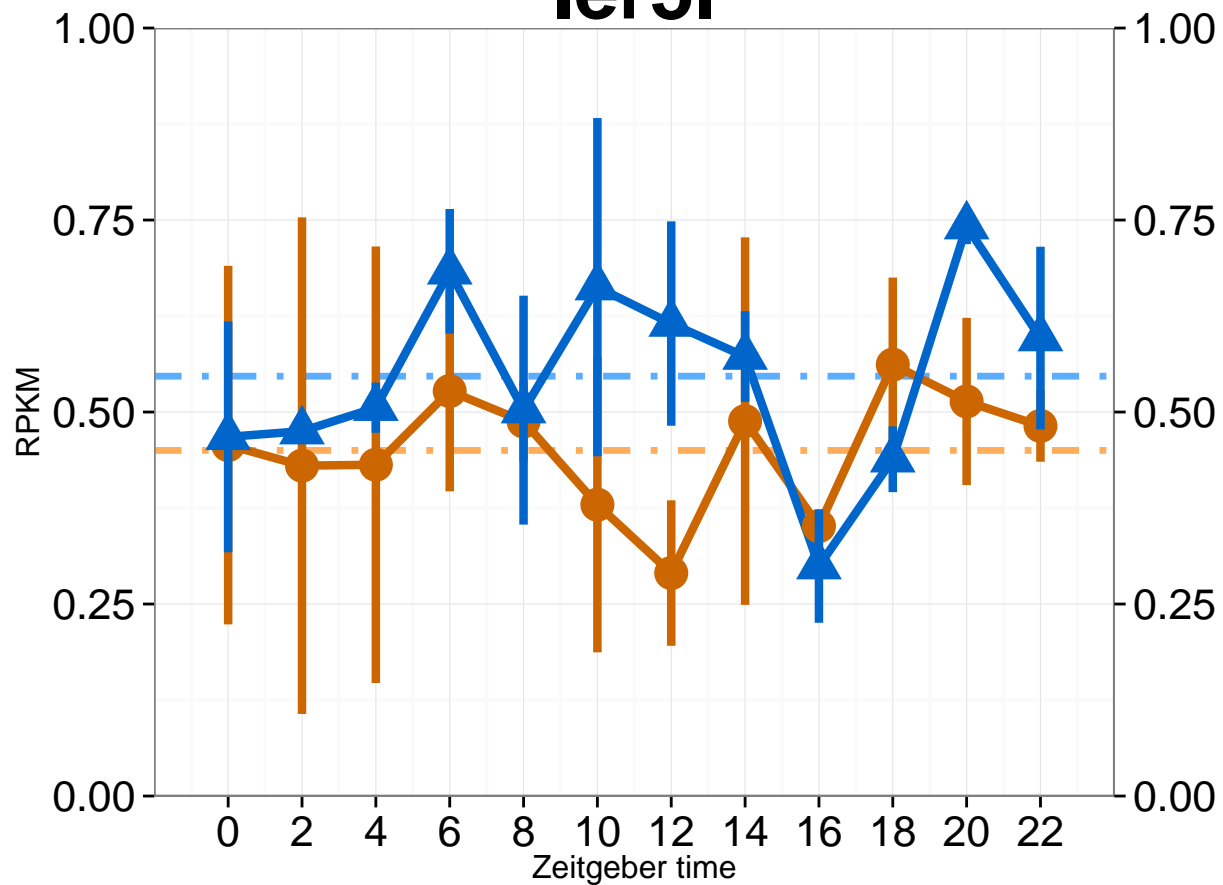

# ler5l

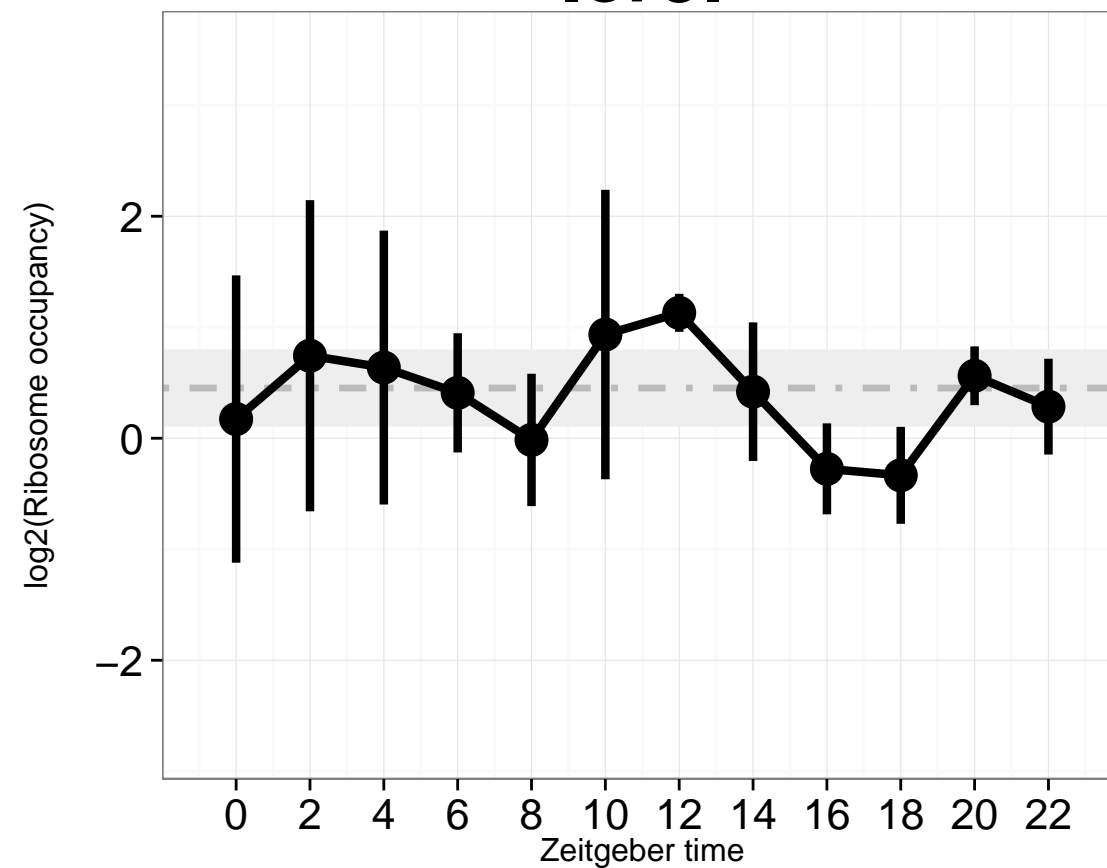

Supplement: SuppDataset_1.zip [file Ier5l_set_A.pdf › Supplemental Dataset 1/A-mRNA_nonrhyth_translation_nonrhyth/Ier5l_set_A.pdf]

# Iffo1

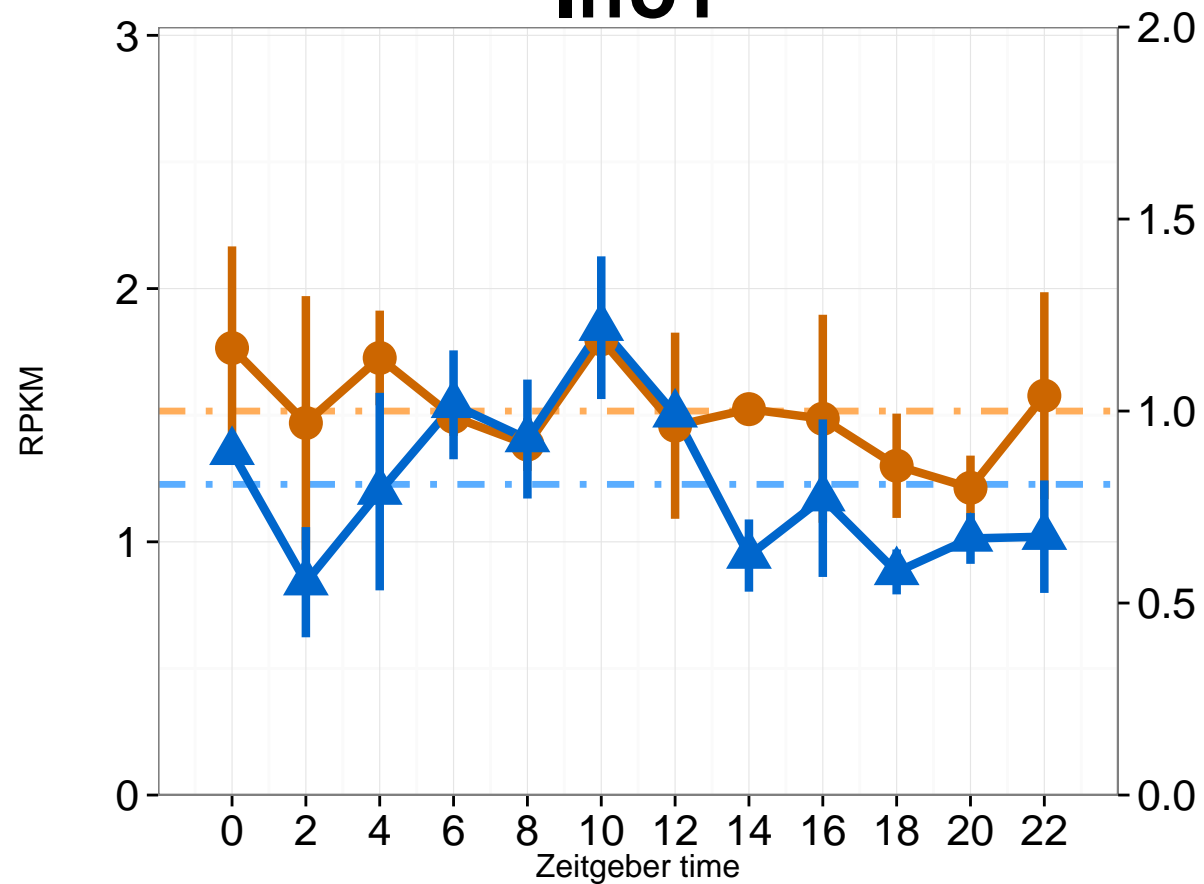

# Iffo1

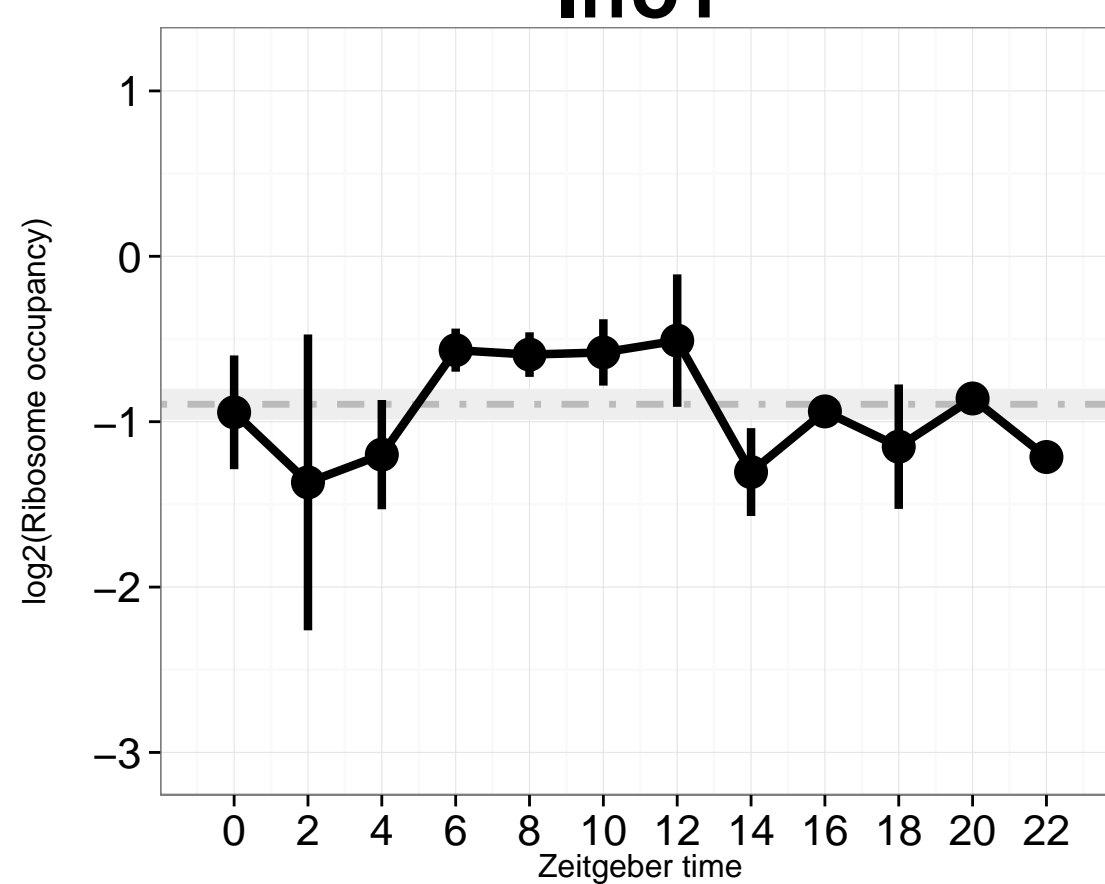

Supplement: SuppDataset_1.zip [file Iffo1_set_A.pdf › Supplemental Dataset 1/A-mRNA_nonrhyth_translation_nonrhyth/Iffo1_set_A.pdf]

## Ifi203

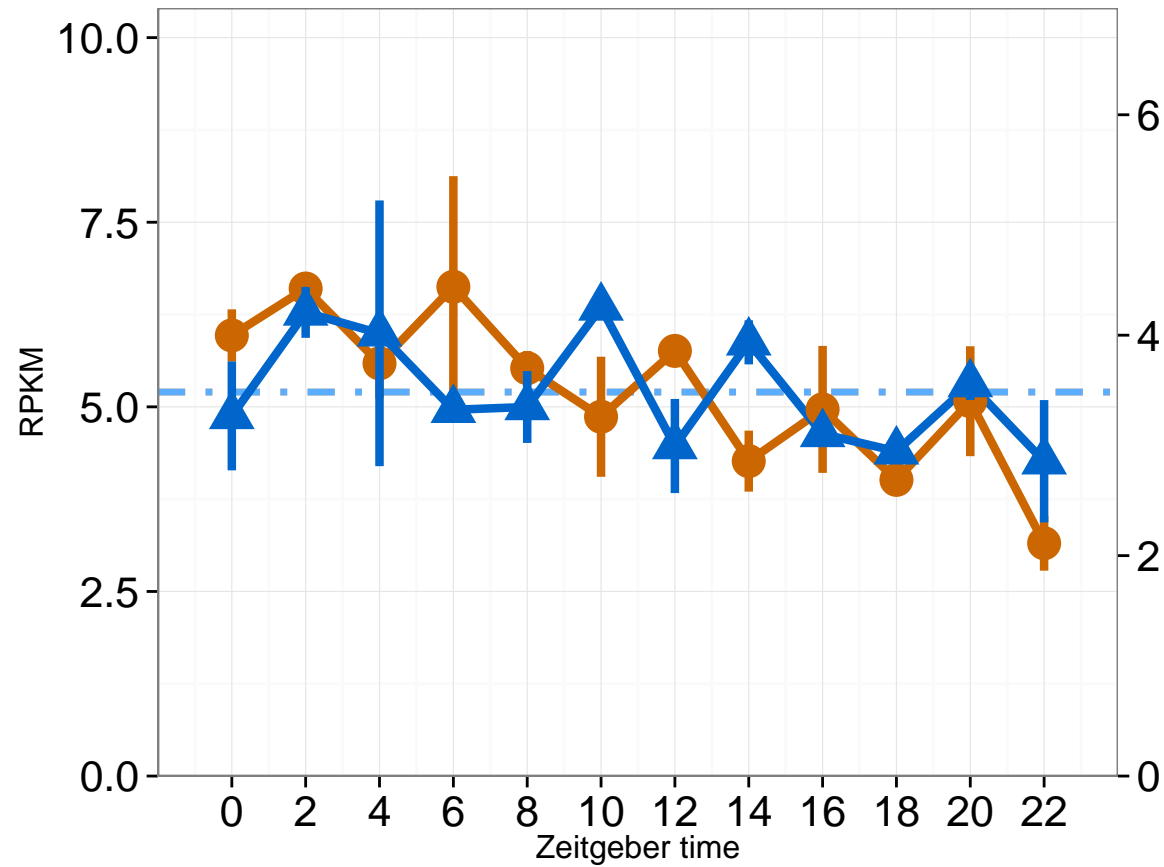

## Ifi203

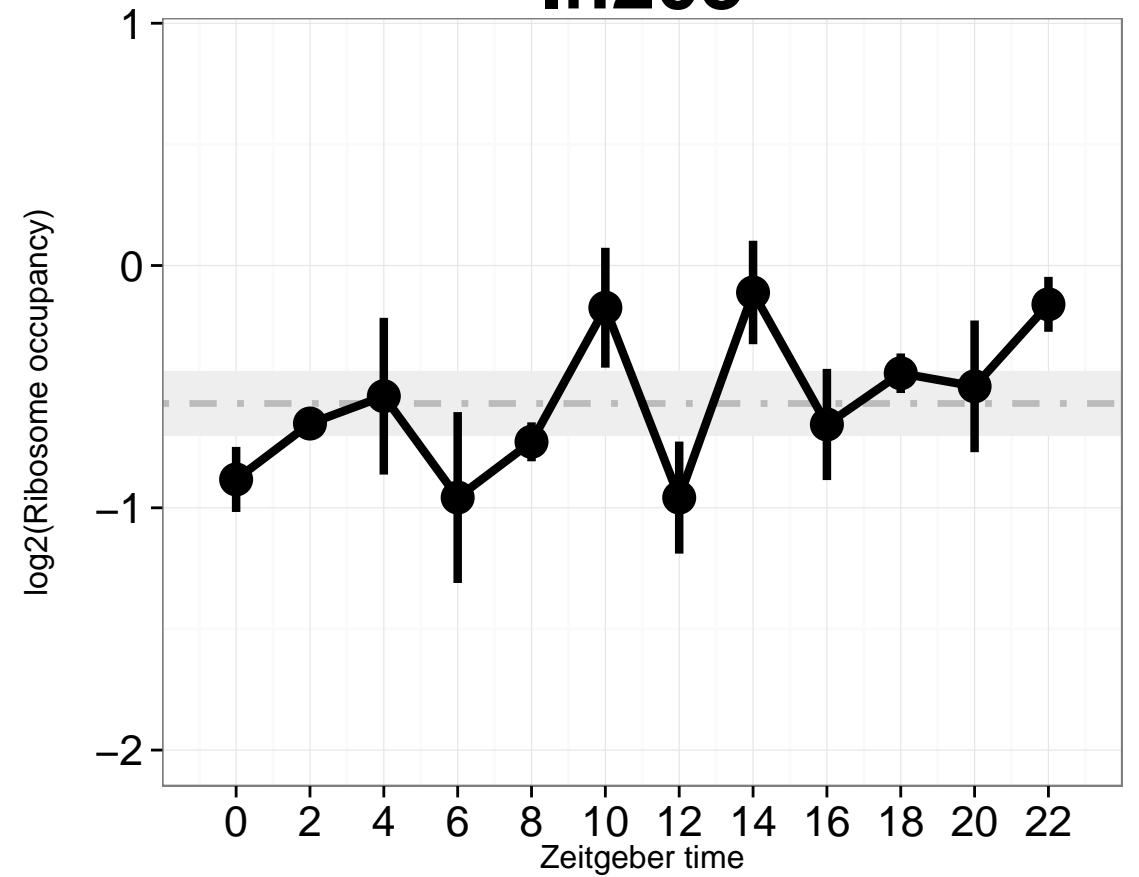

Supplement: SuppDataset_1.zip [file Ifi203_set_A.pdf › Supplemental Dataset 1/A-mRNA_nonrhyth_translation_nonrhyth/Ifi203_set_A.pdf]

## Ifi205

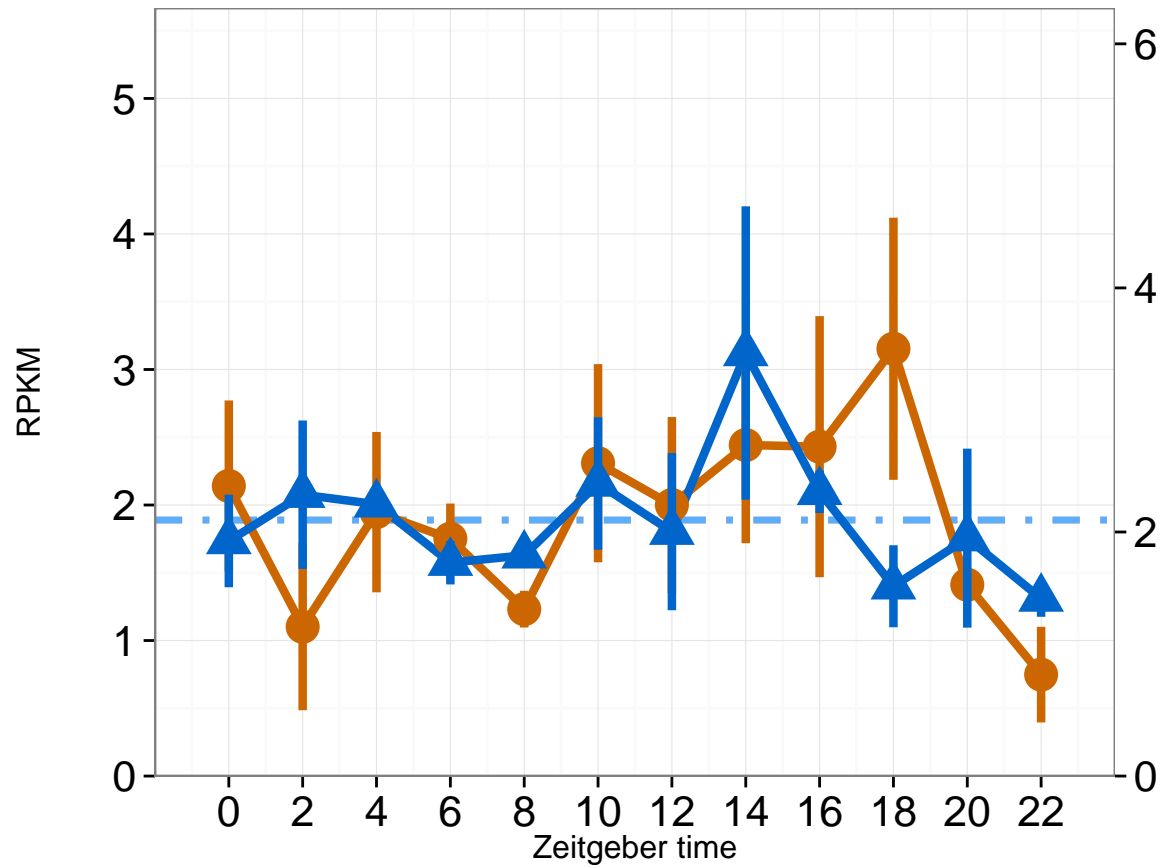

## Ifi205

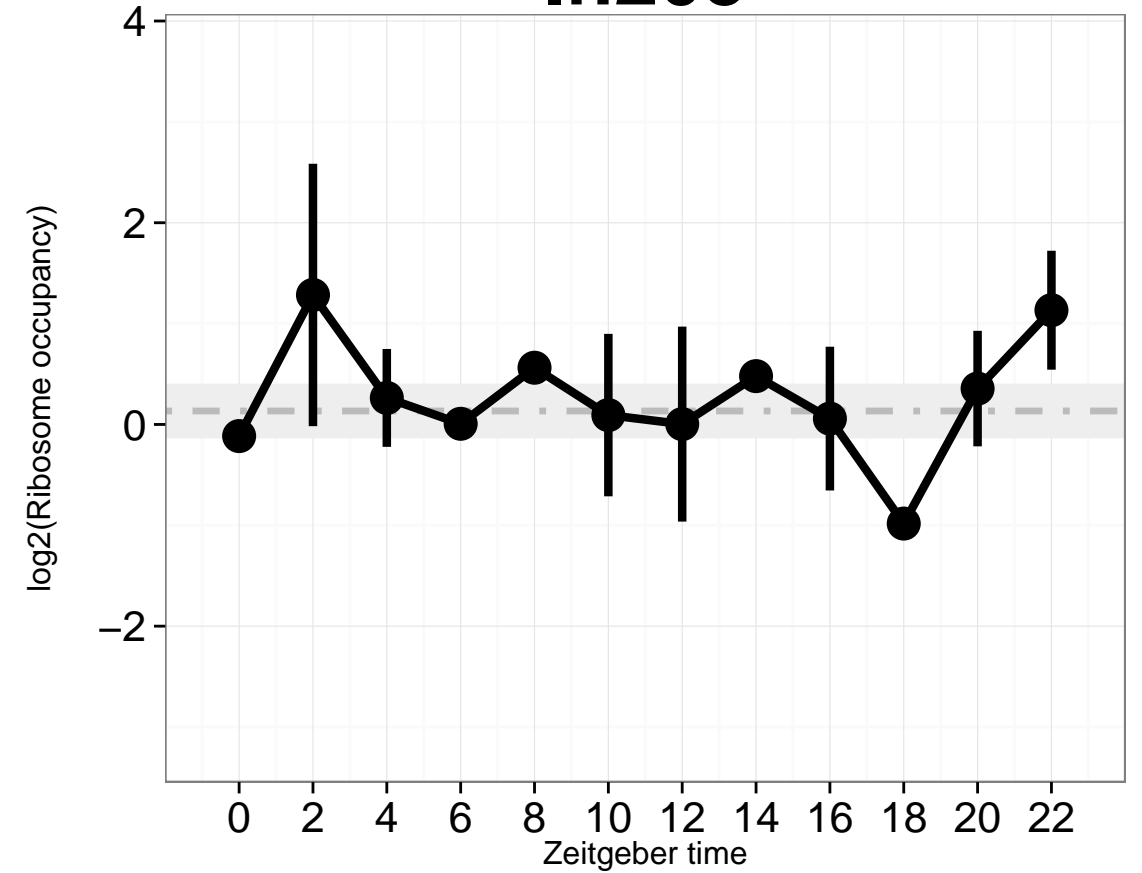

Supplement: SuppDataset_1.zip [file Ifi205_set_A.pdf › Supplemental Dataset 1/A-mRNA_nonrhyth_translation_nonrhyth/Ifi205_set_A.pdf]

# Ifi27l2a

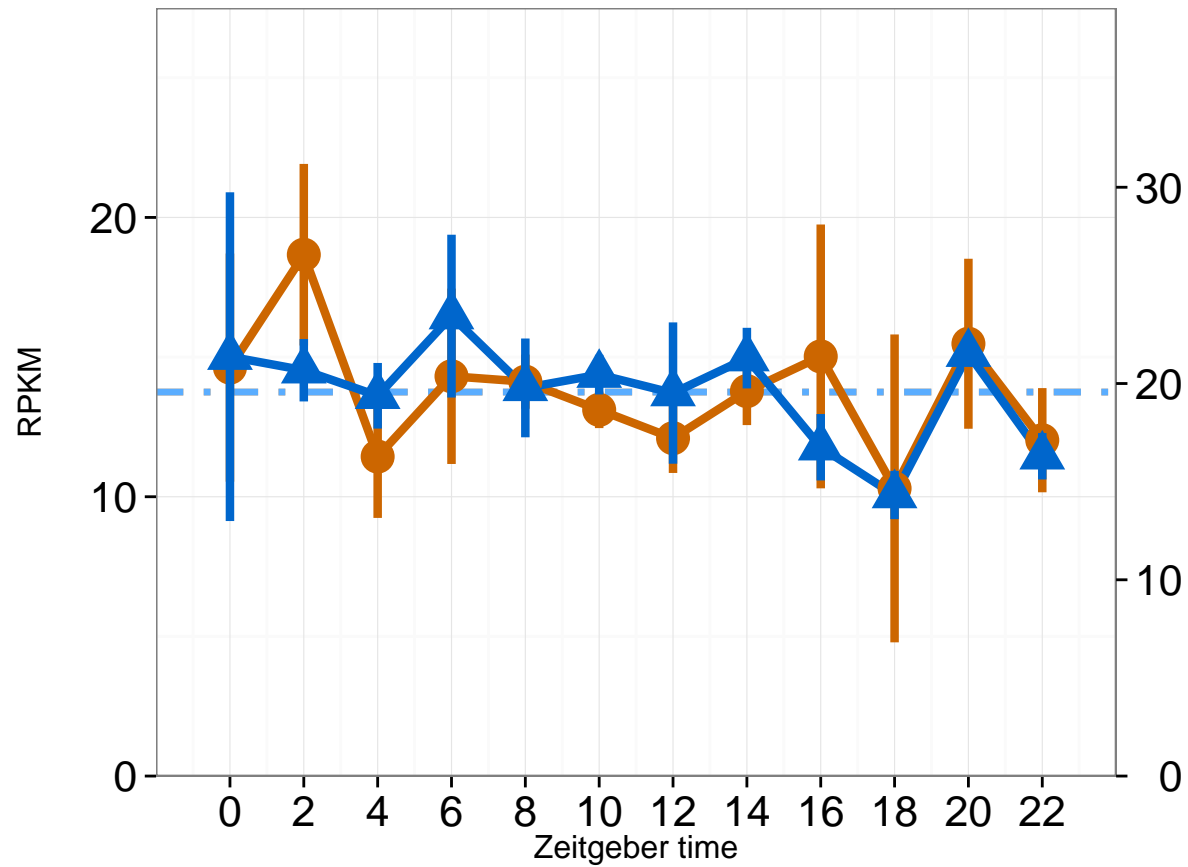

# Ifi27l2a

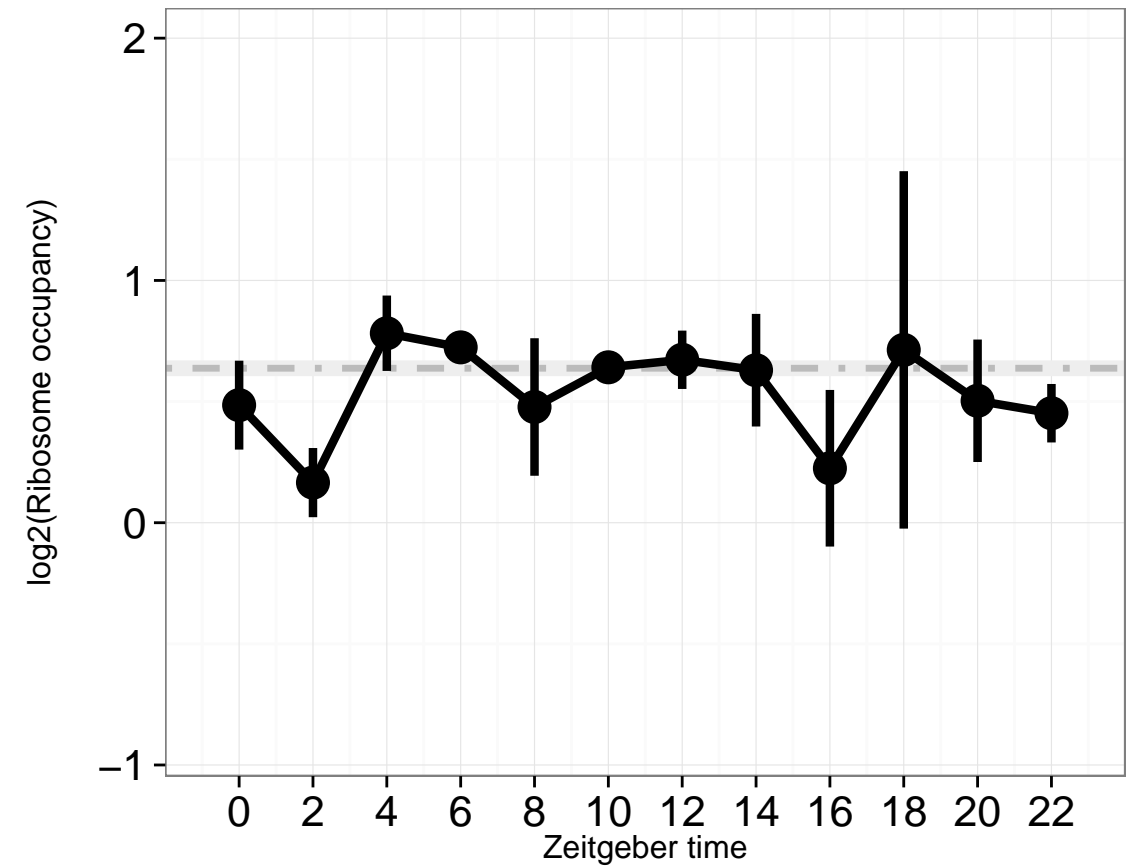

Supplement: SuppDataset_1.zip [file Ifi27l2a_set_A.pdf › Supplemental Dataset 1/A-mRNA_nonrhyth_translation_nonrhyth/Ifi27l2a_set_A.pdf]

# lfi27l2b

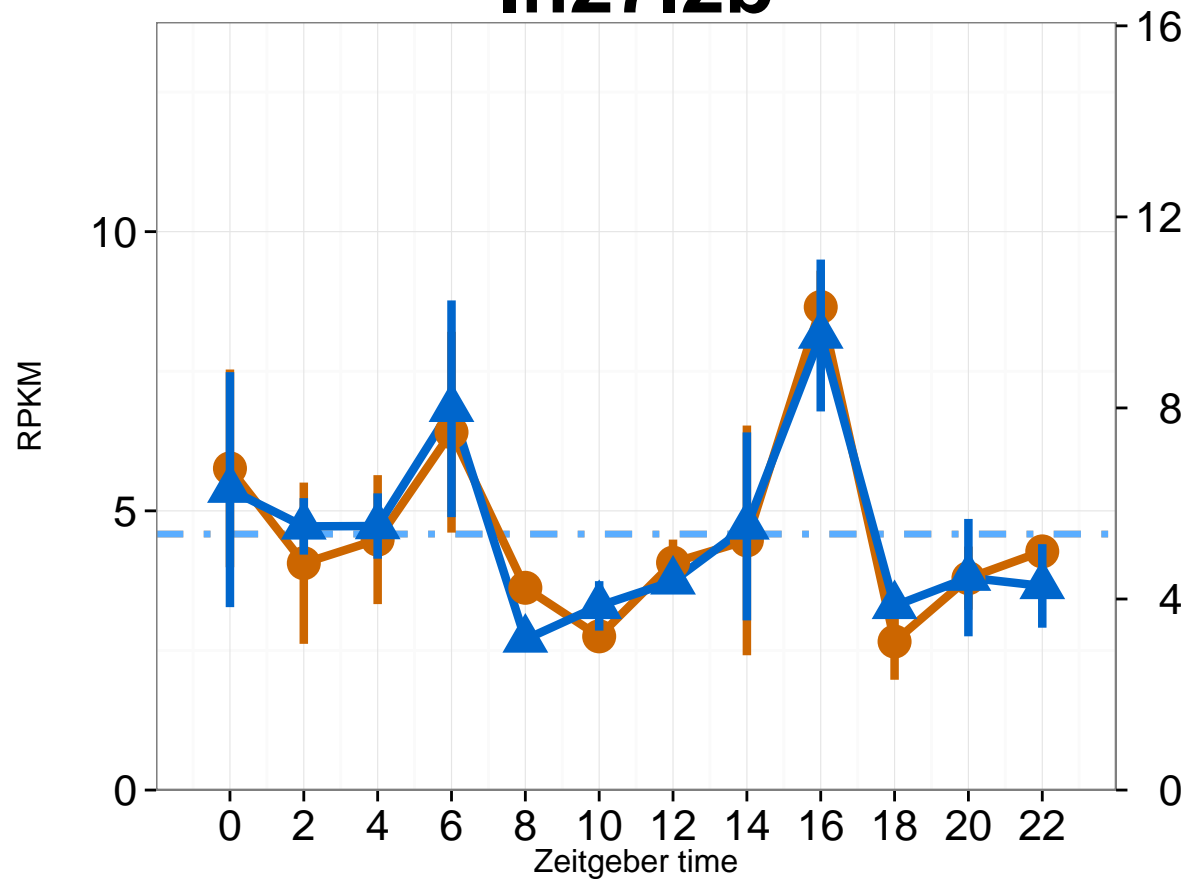

# lfi27l2b

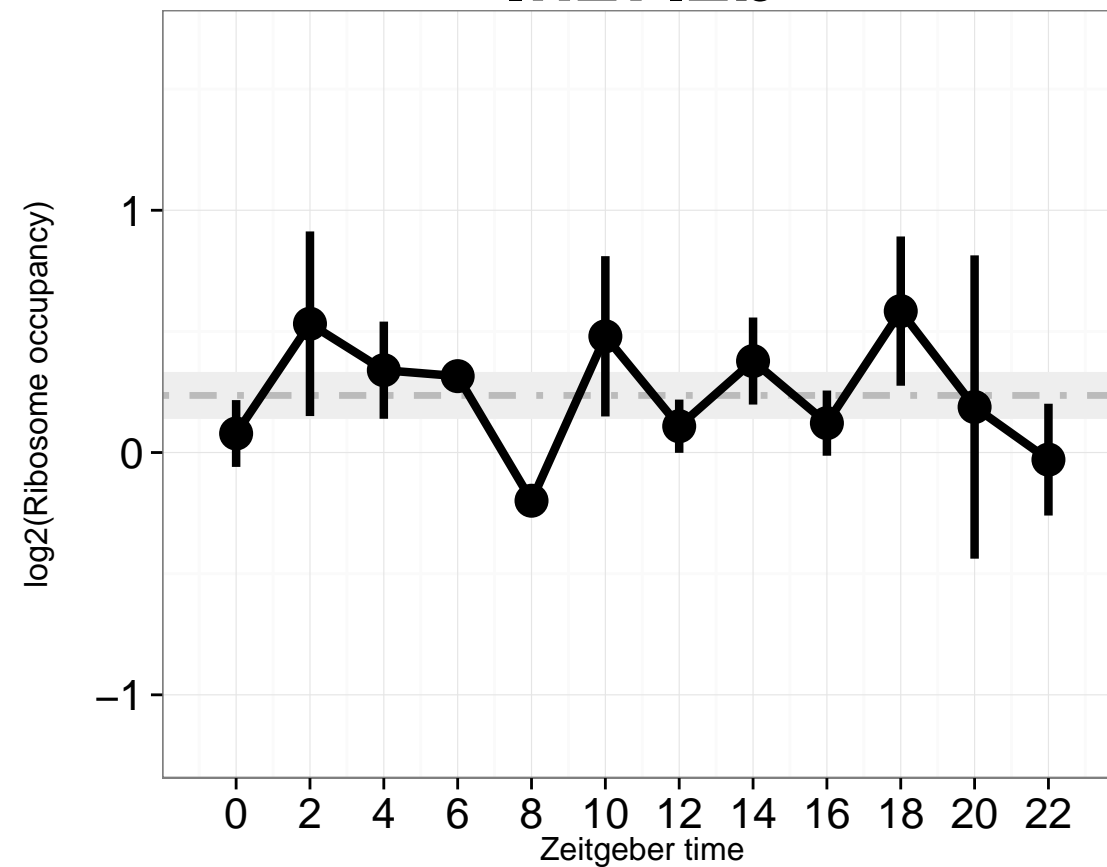

Supplement: SuppDataset_1.zip [file Ifi27l2b_set_A.pdf › Supplemental Dataset 1/A-mRNA_nonrhyth_translation_nonrhyth/Ifi27l2b_set_A.pdf]

## lfi30

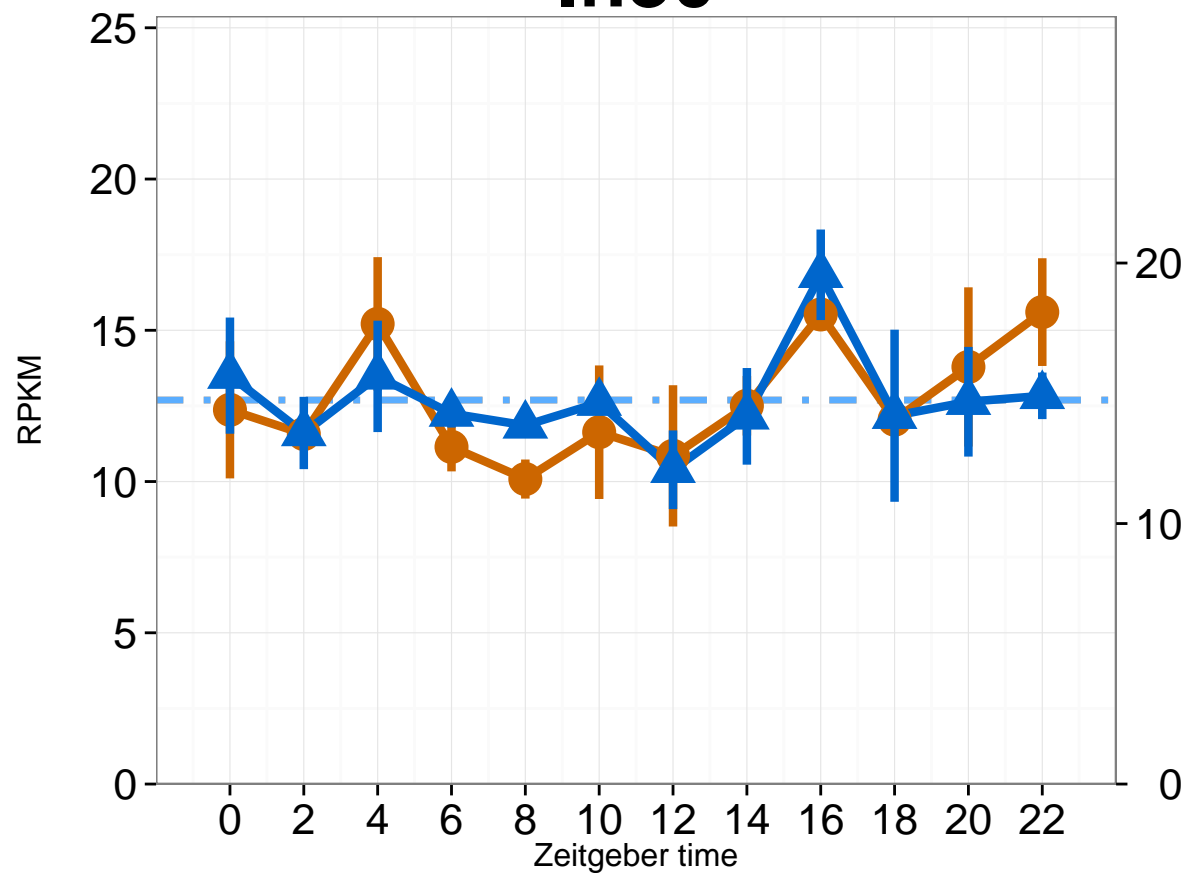

## lfi30

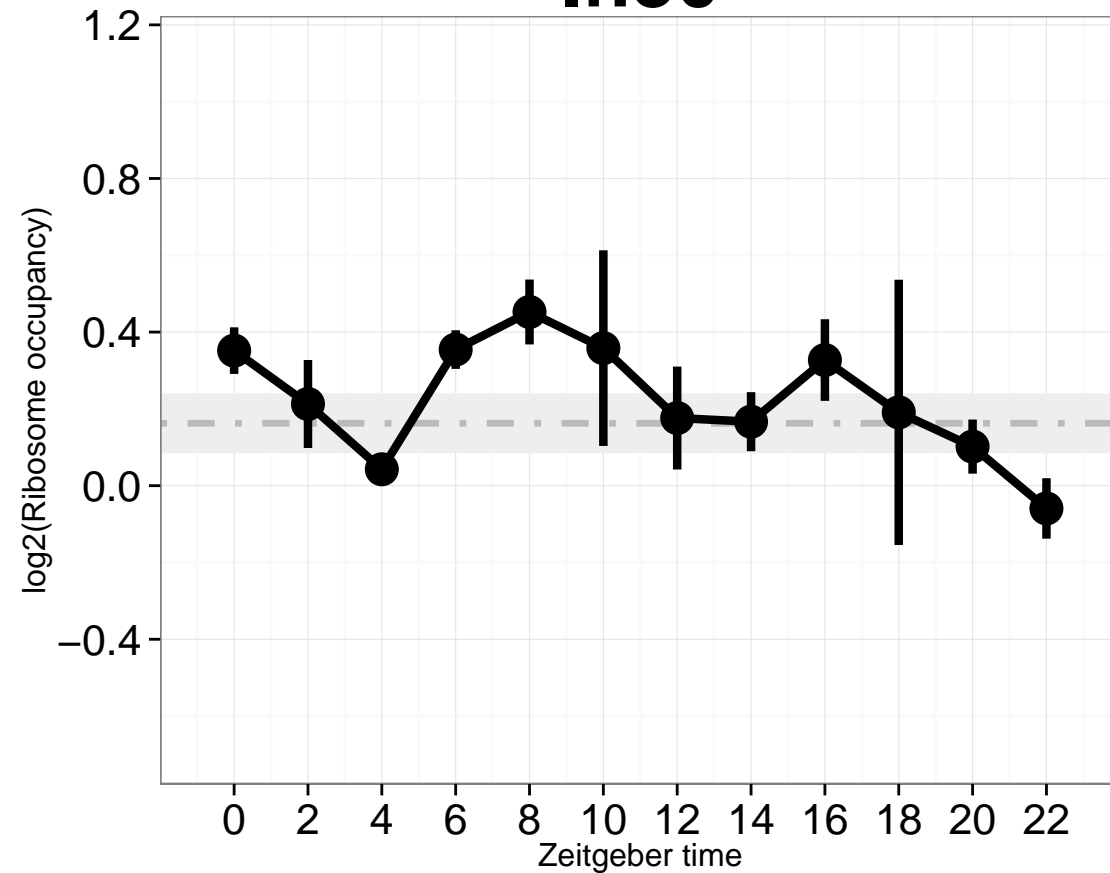

Supplement: SuppDataset_1.zip [file Ifi30_set_A.pdf › Supplemental Dataset 1/A-mRNA_nonrhyth_translation_nonrhyth/Ifi30_set_A.pdf]

## lfi35

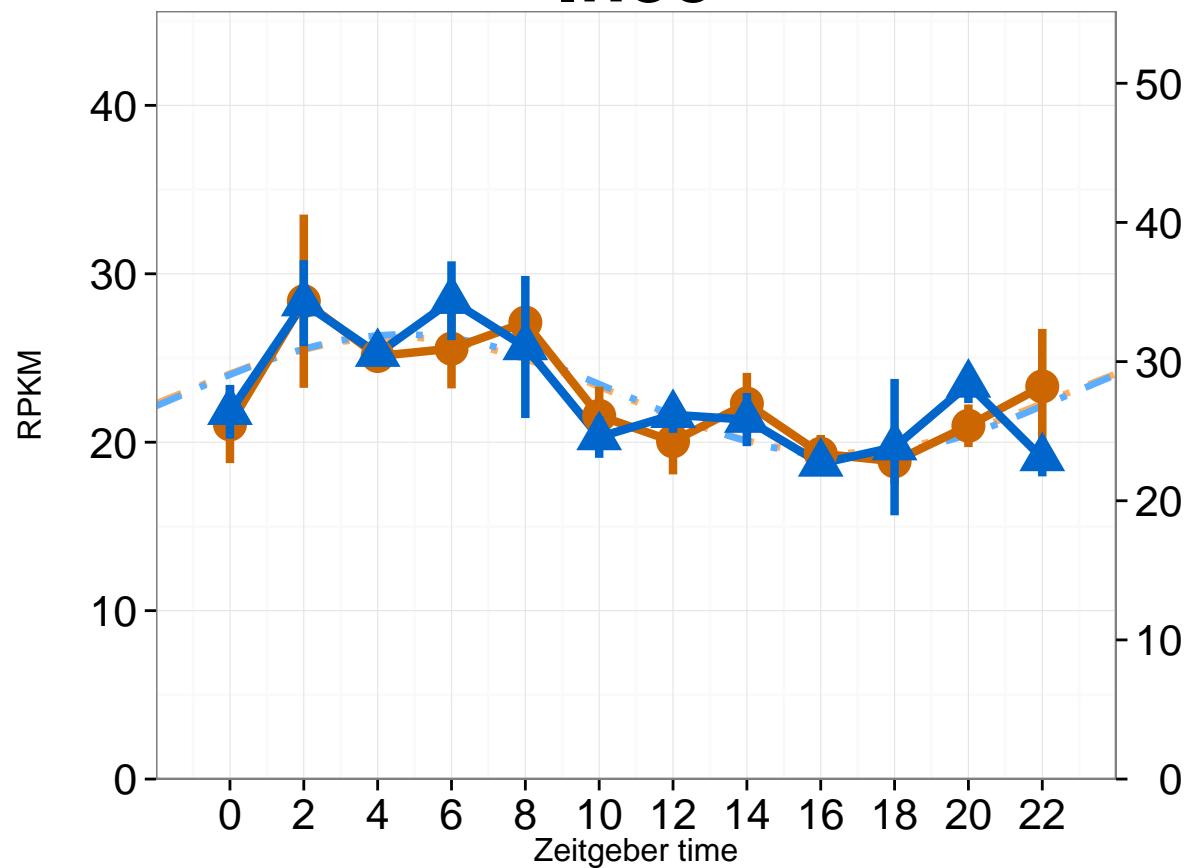

## lfi35

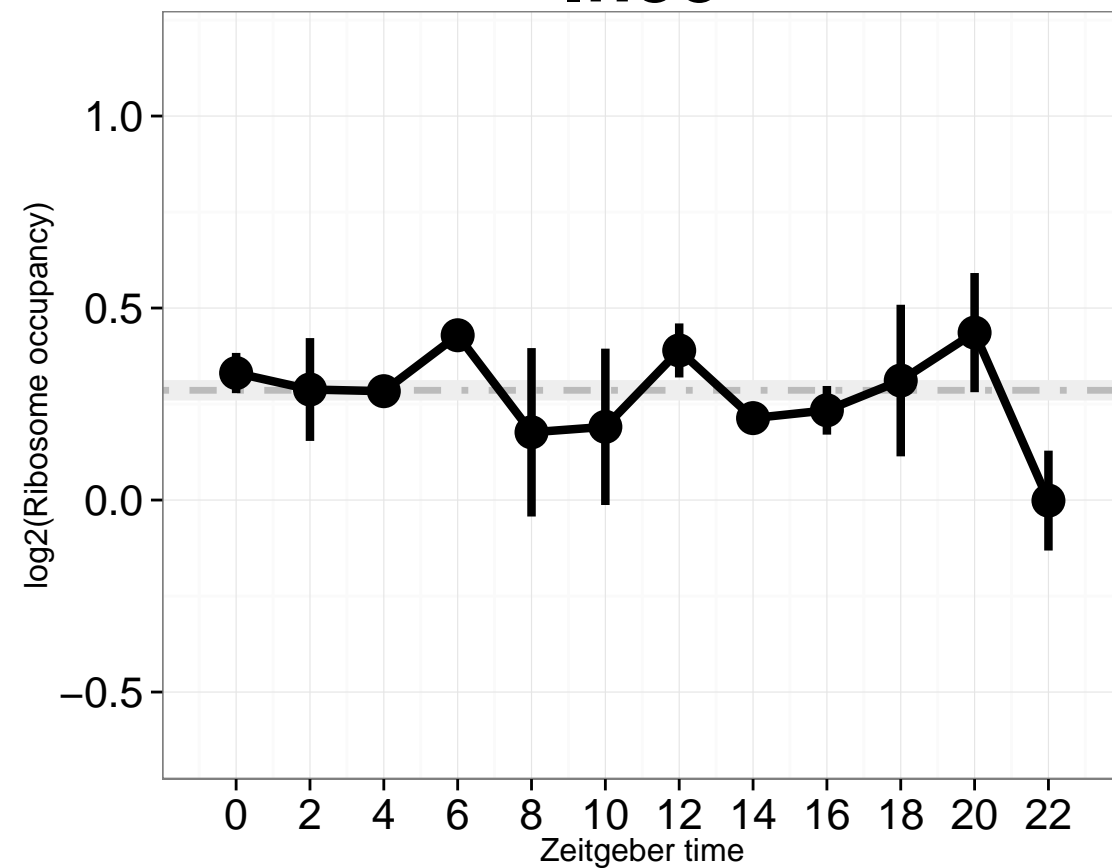

Supplement: SuppDataset_1.zip [file Ifi35_set_A.pdf › Supplemental Dataset 1/A-mRNA_nonrhyth_translation_nonrhyth/Ifi35_set_A.pdf]

# Ifitm3

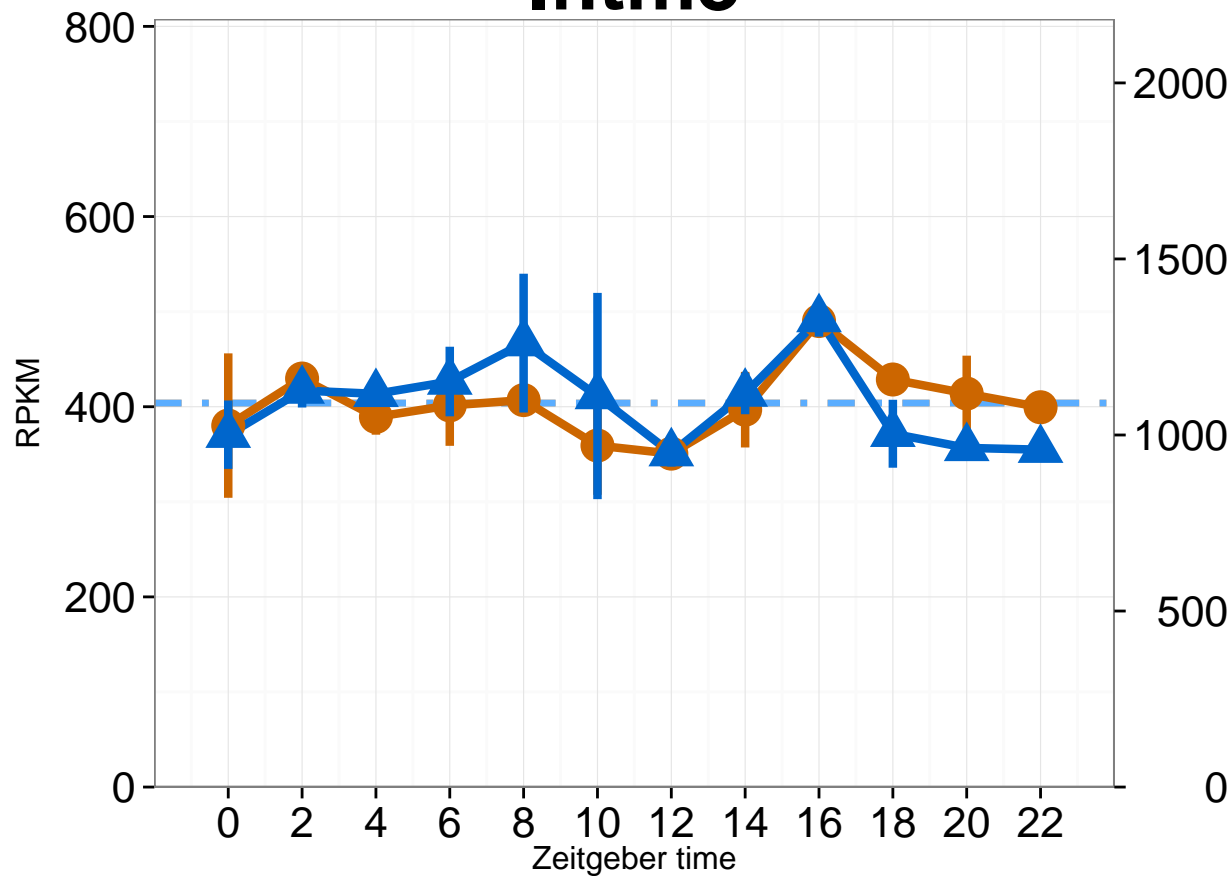

# Ifitm3

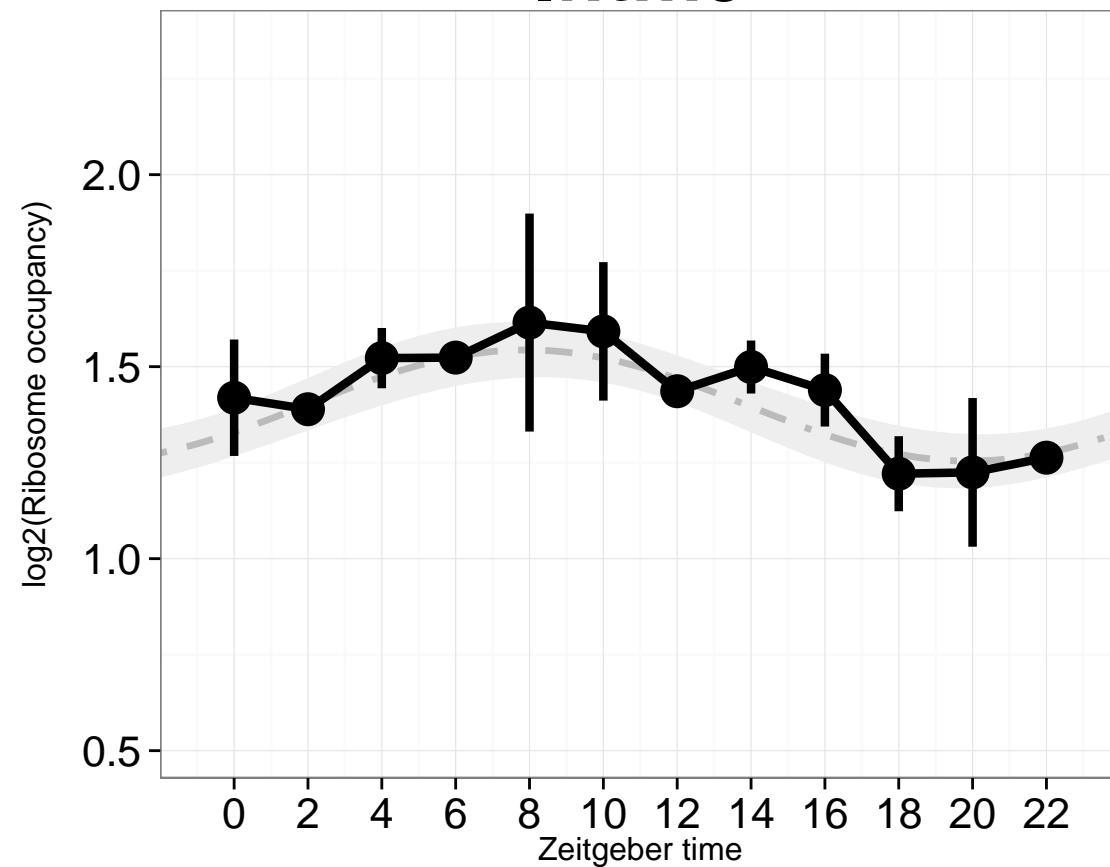

Supplement: SuppDataset_1.zip [file Ifitm3_set_A.pdf › Supplemental Dataset 1/A-mRNA_nonrhyth_translation_nonrhyth/Ifitm3_set_A.pdf]

# Ifnar1

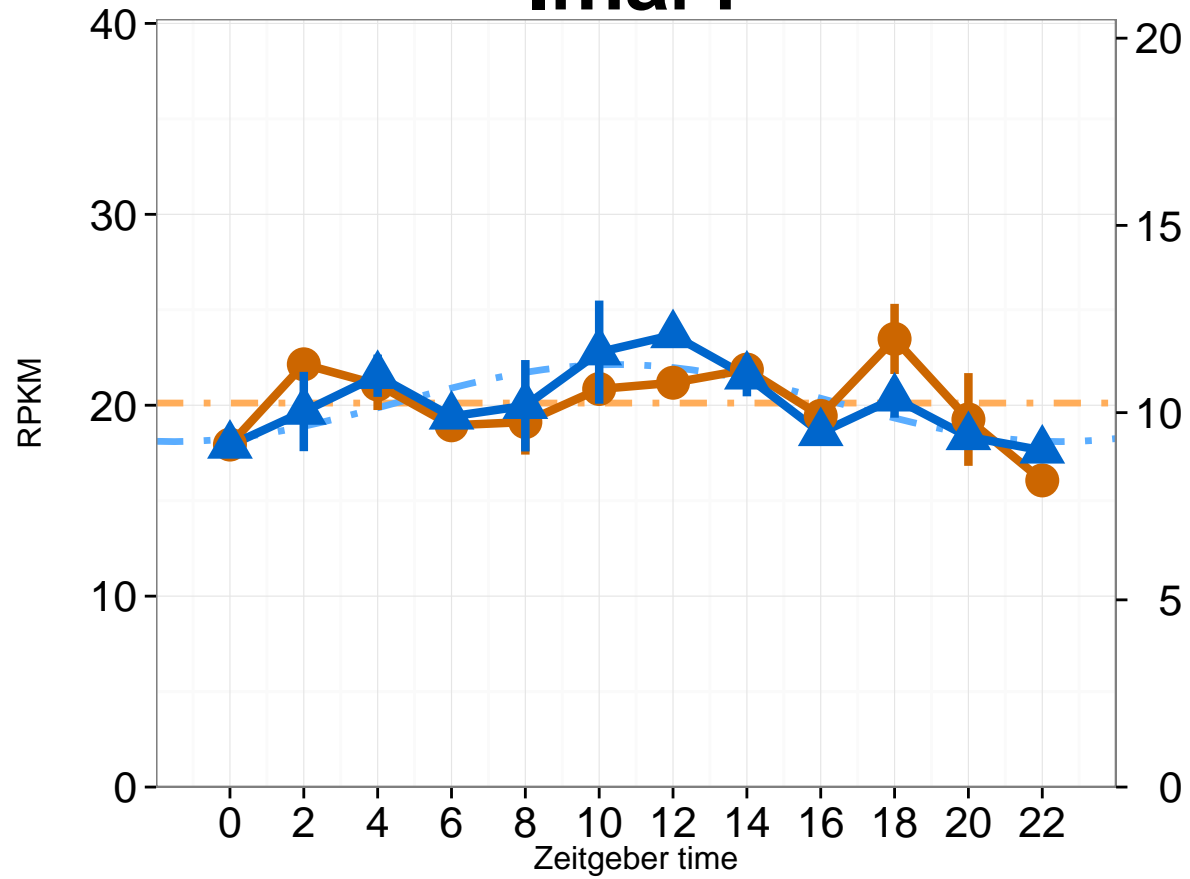

# Ifnar1

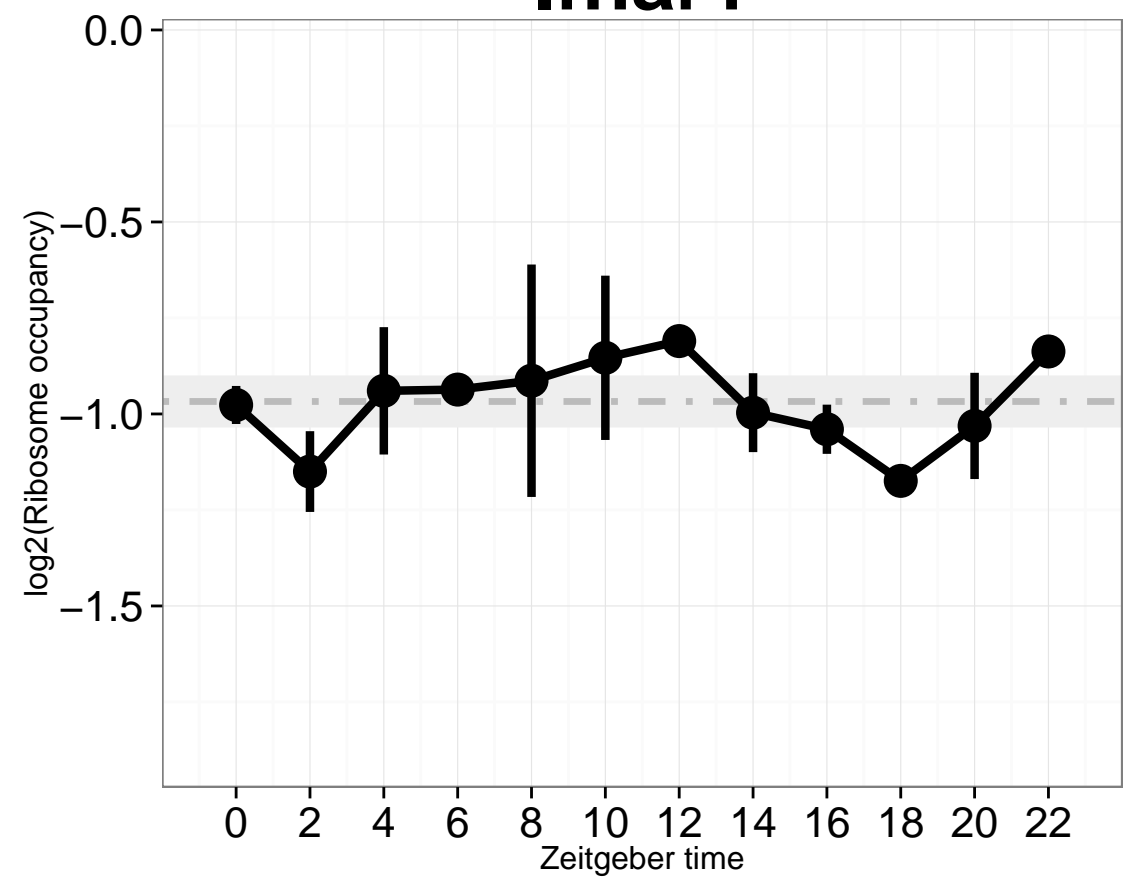

Supplement: SuppDataset_1.zip [file Ifnar1_set_A.pdf › Supplemental Dataset 1/A-mRNA_nonrhyth_translation_nonrhyth/Ifnar1_set_A.pdf]

## Ifnar2

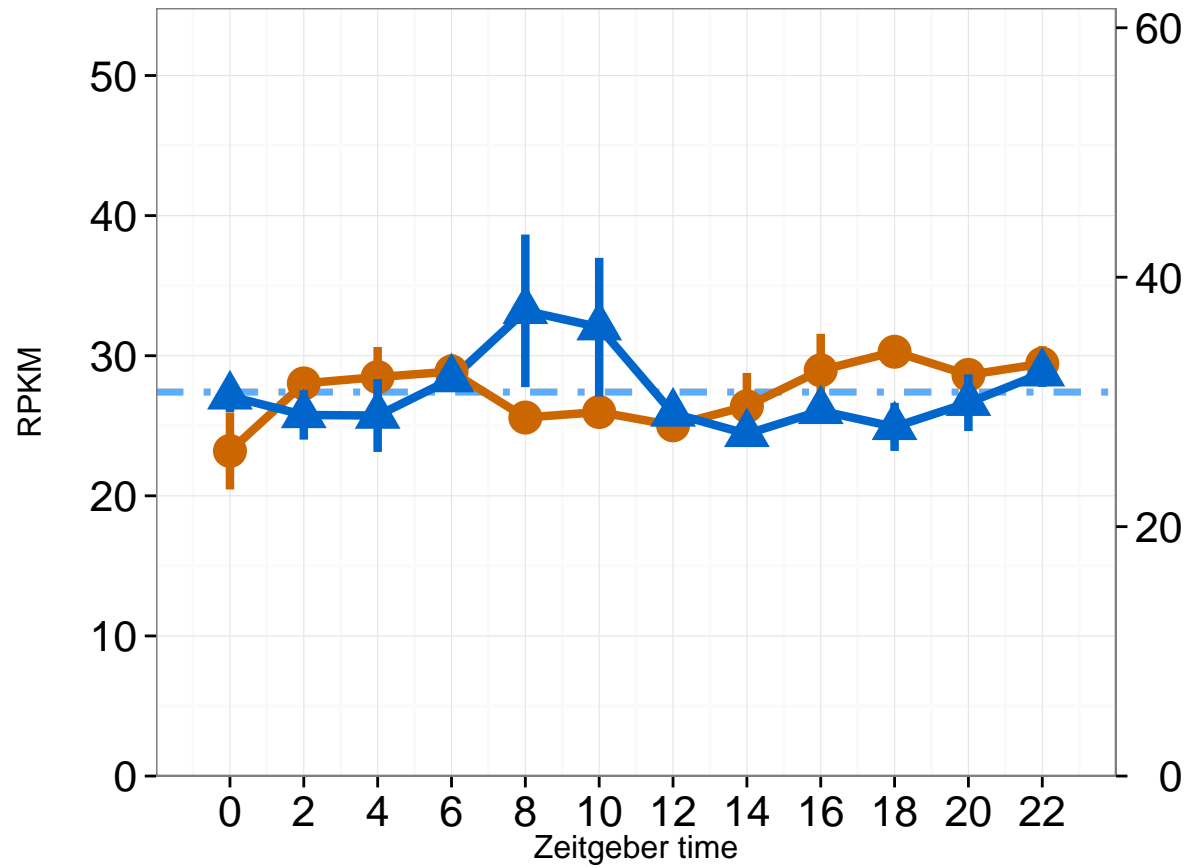

## Ifnar2

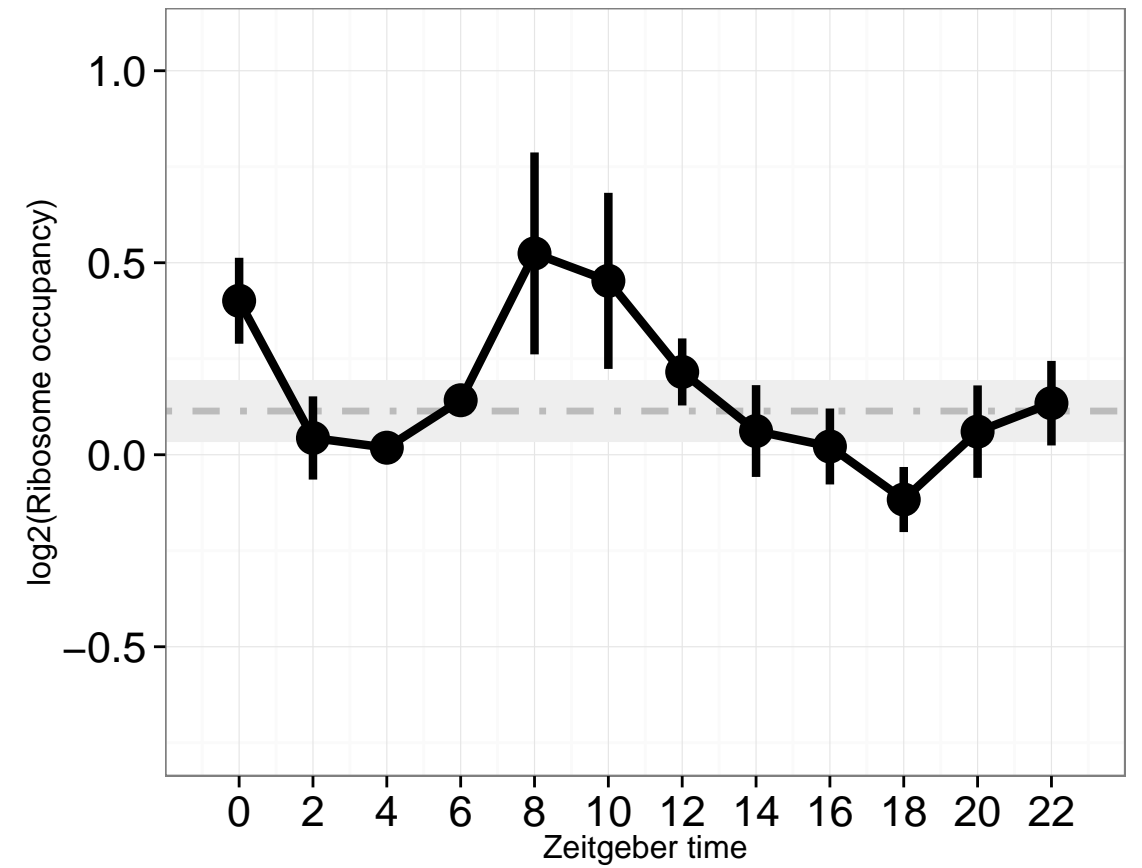

Supplement: SuppDataset_1.zip [file Ifnar2_set_A.pdf › Supplemental Dataset 1/A-mRNA_nonrhyth_translation_nonrhyth/Ifnar2_set_A.pdf]

# Ifngr1

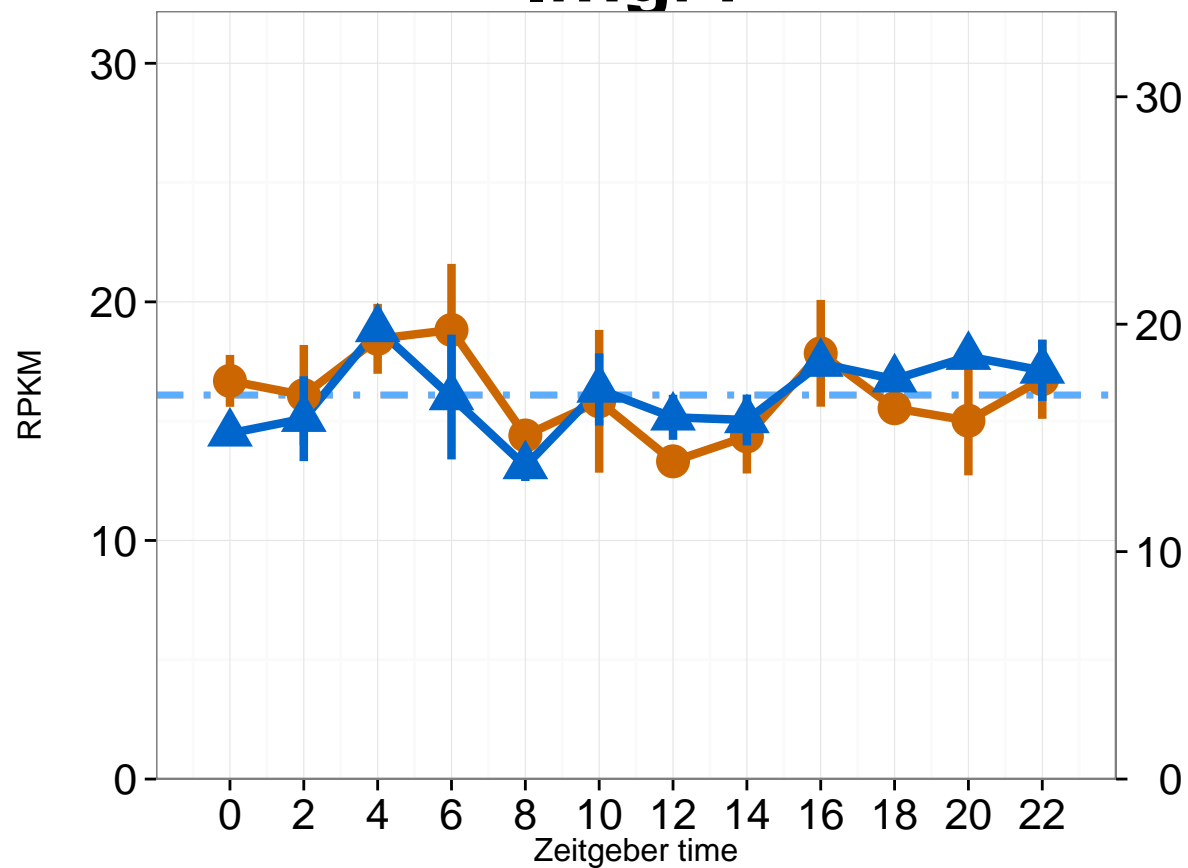

# Ifngr1

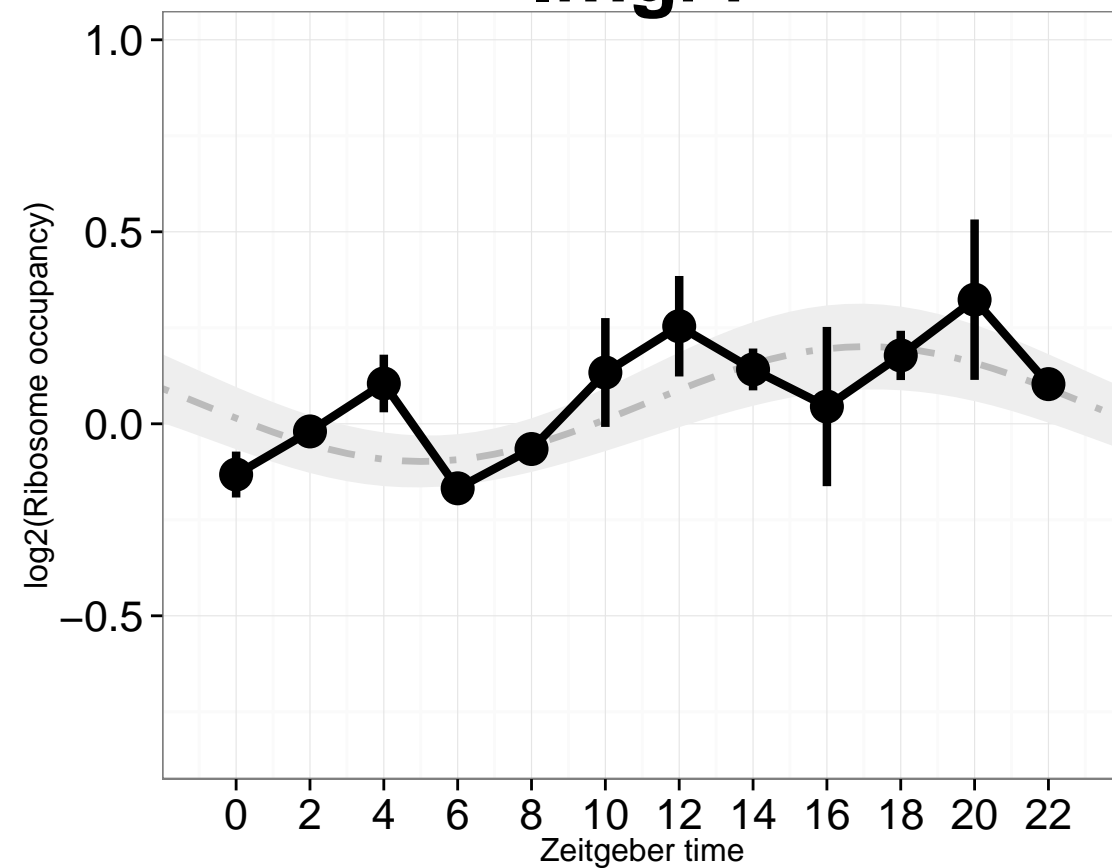

Supplement: SuppDataset_1.zip [file Ifngr1_set_A.pdf › Supplemental Dataset 1/A-mRNA_nonrhyth_translation_nonrhyth/Ifngr1_set_A.pdf]

# Ifngr2

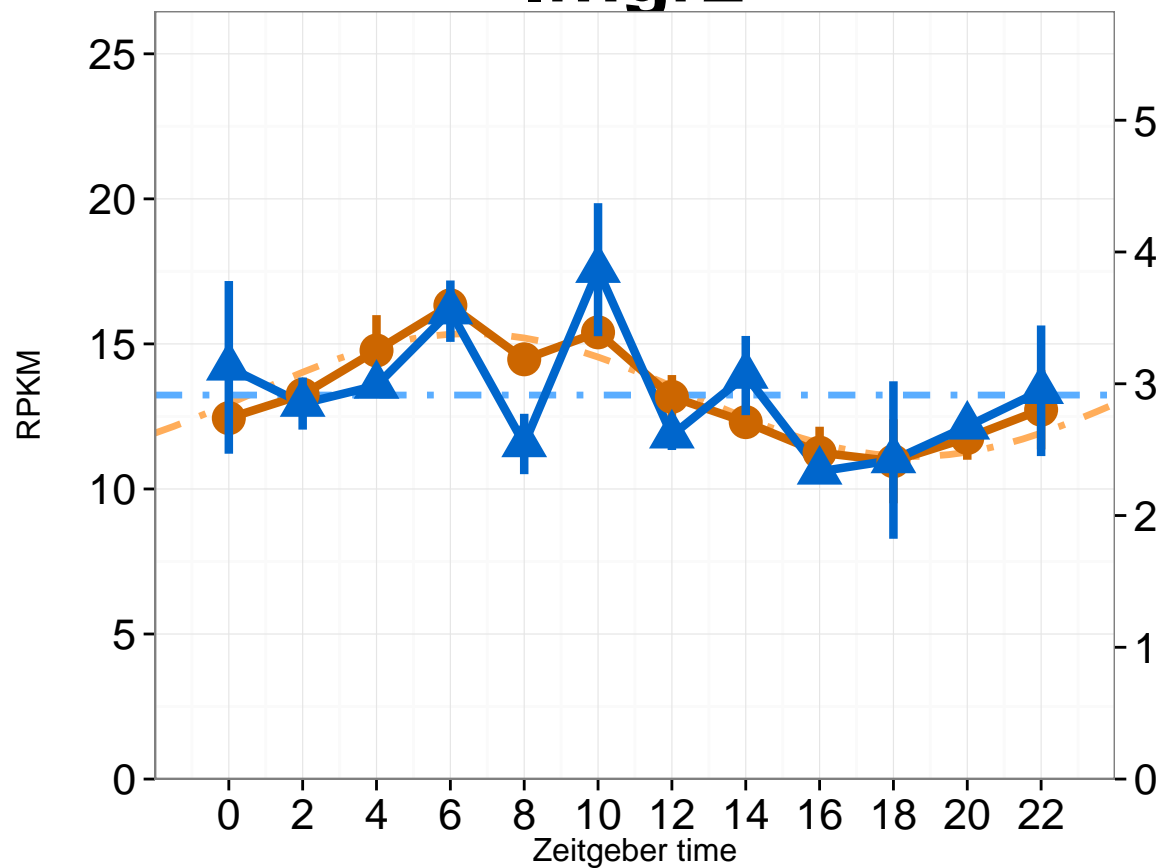

# Ifngr2

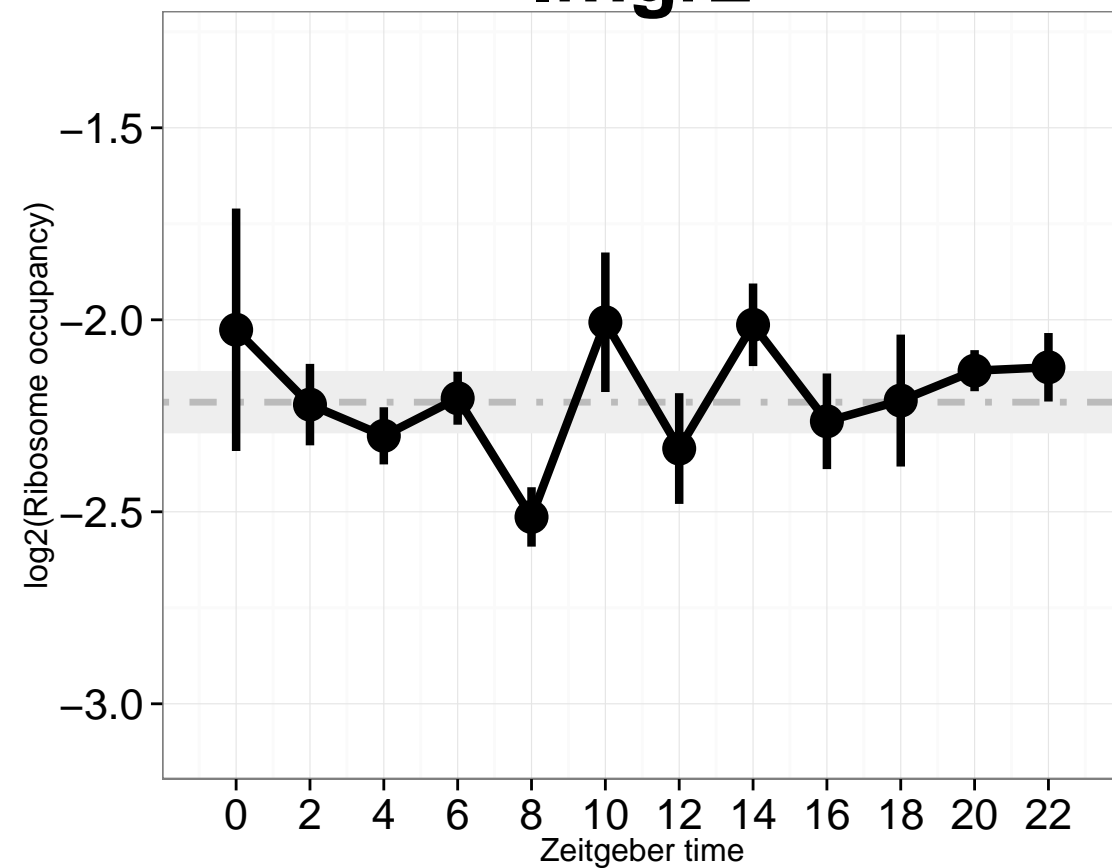

Supplement: SuppDataset_1.zip [file Ifngr2_set_A.pdf › Supplemental Dataset 1/A-mRNA_nonrhyth_translation_nonrhyth/Ifngr2_set_A.pdf]

# lfrd2

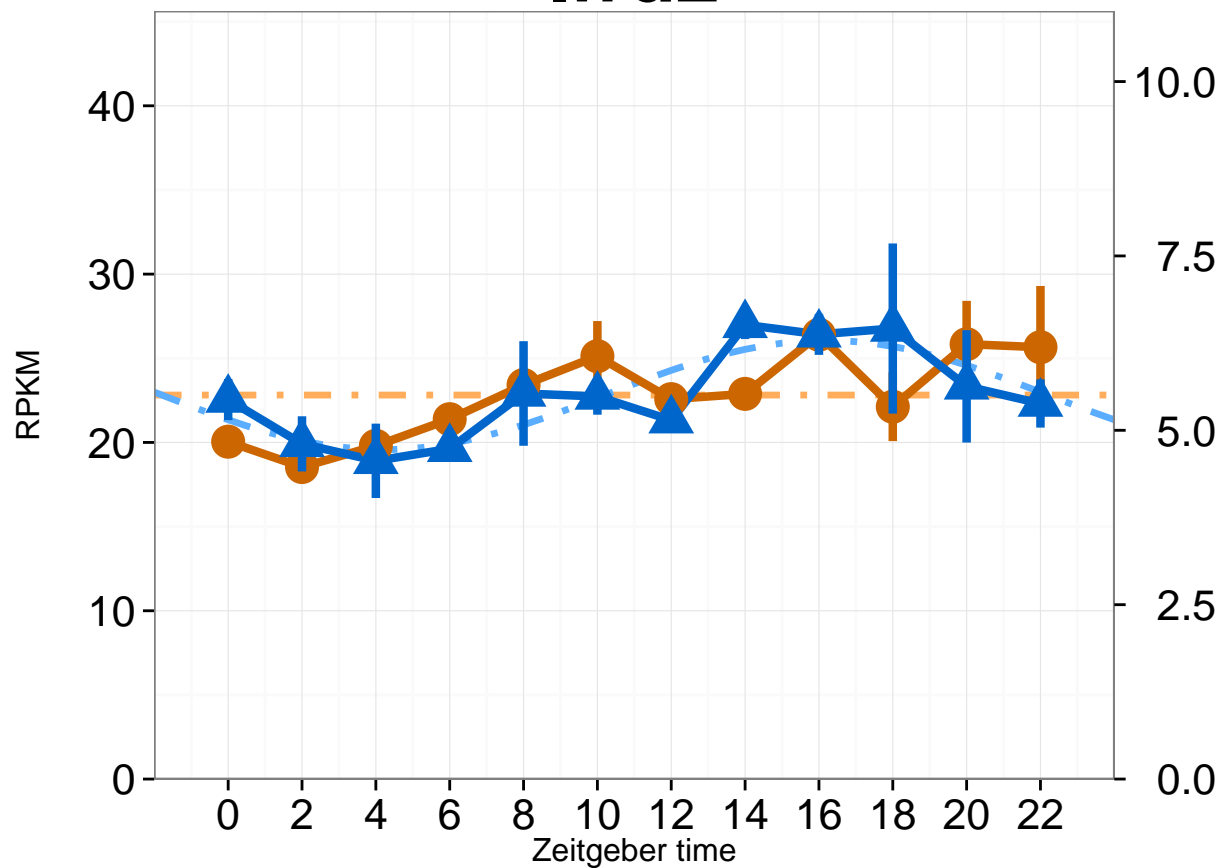

# lfrd2

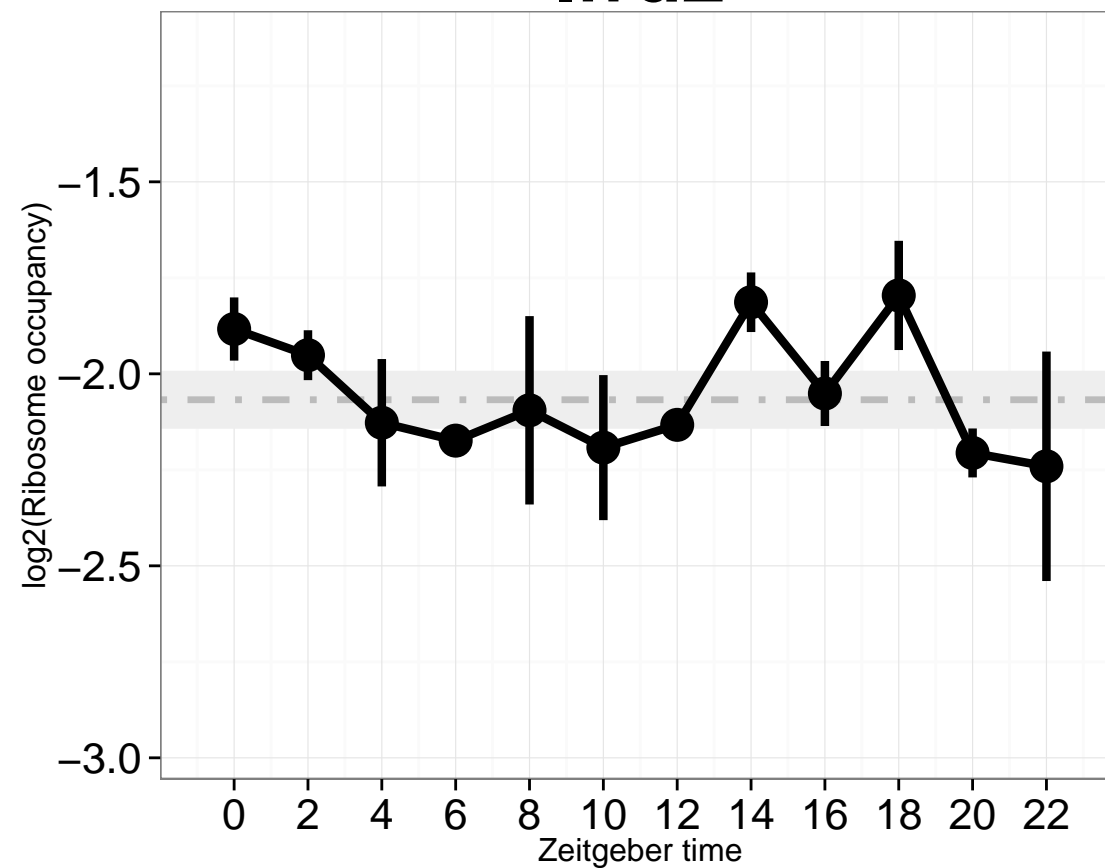

Supplement: SuppDataset_1.zip [file Ifrd2_set_A.pdf › Supplemental Dataset 1/A-mRNA_nonrhyth_translation_nonrhyth/Ifrd2_set_A.pdf]

# Ift140

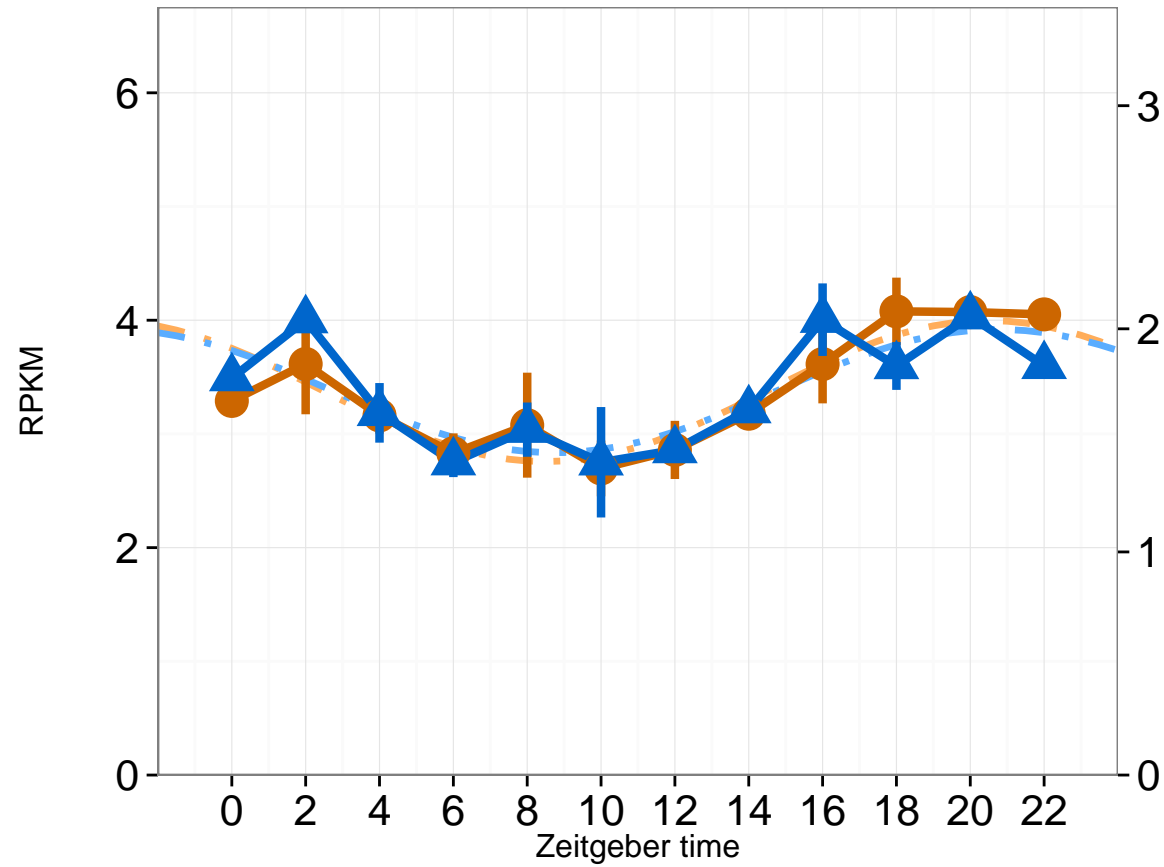

# Ift140

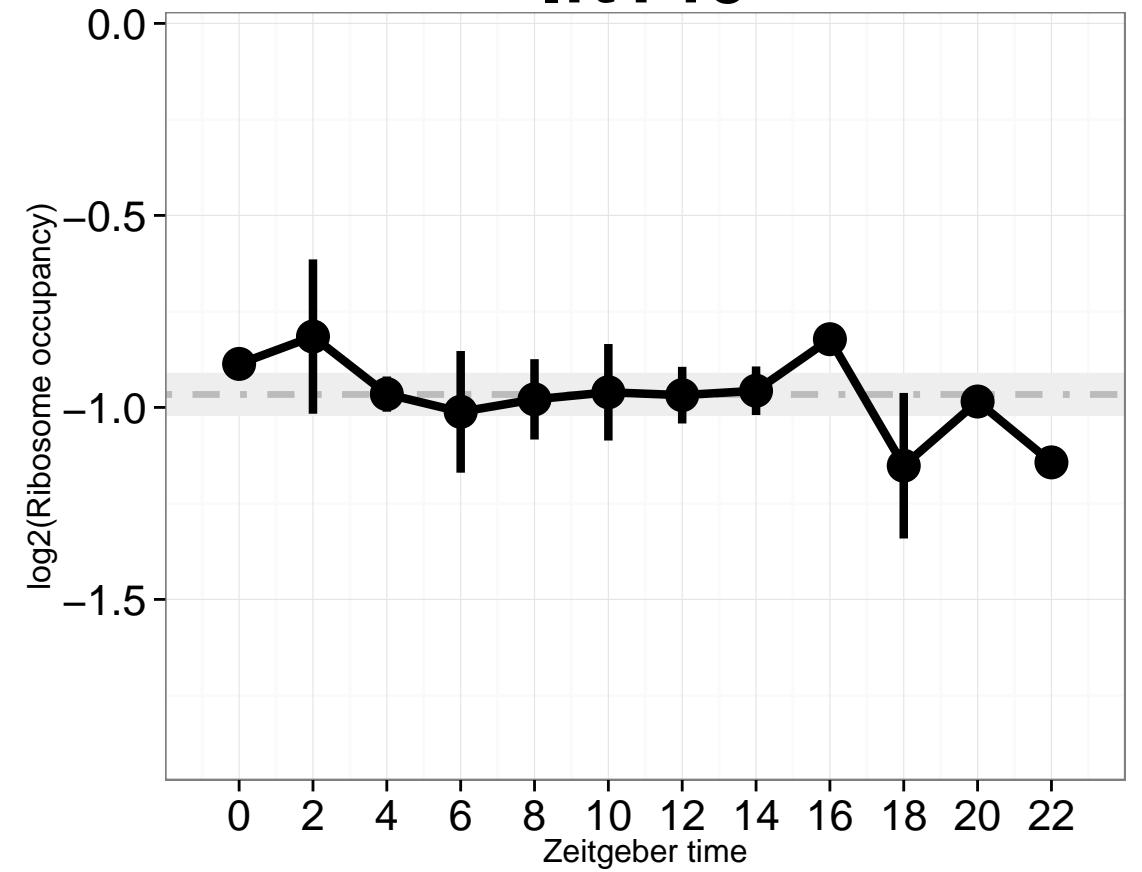

Supplement: SuppDataset_1.zip [file Ift140_set_A.pdf › Supplemental Dataset 1/A-mRNA_nonrhyth_translation_nonrhyth/Ift140_set_A.pdf]

# Ift172

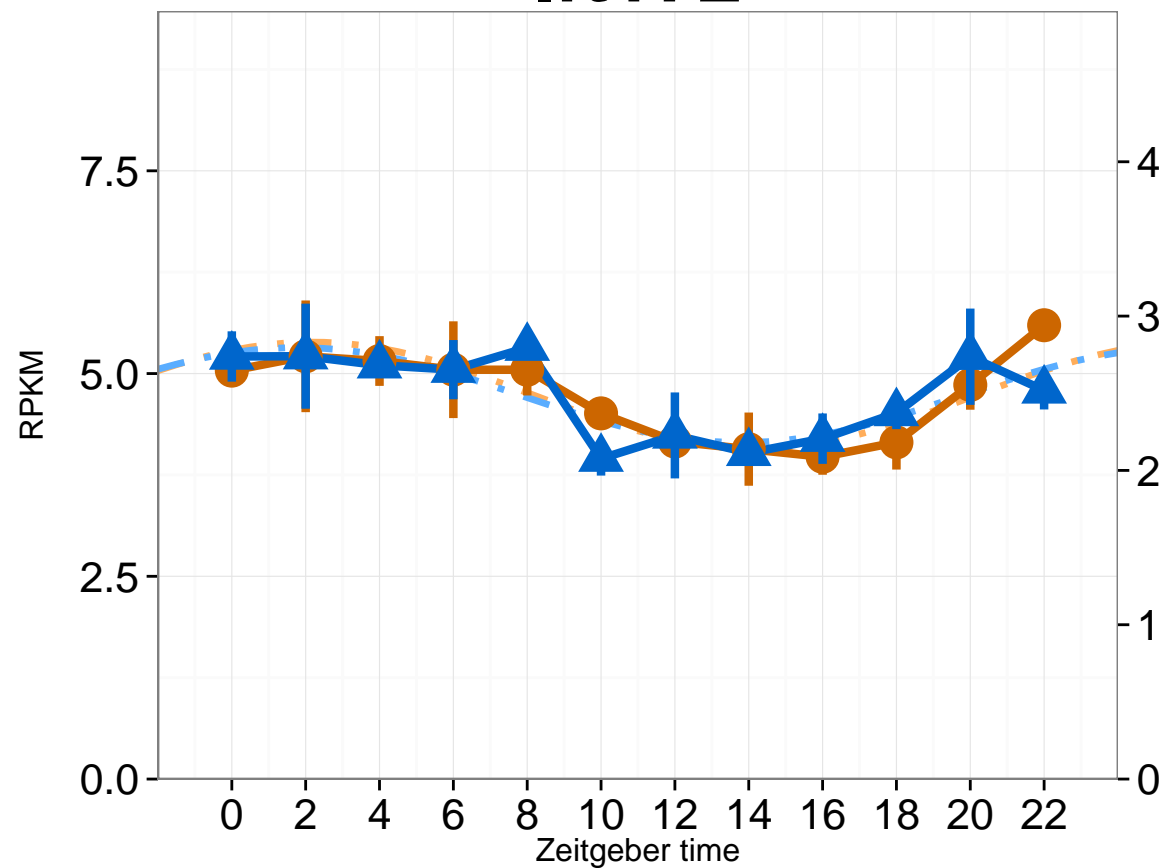

# Ift172

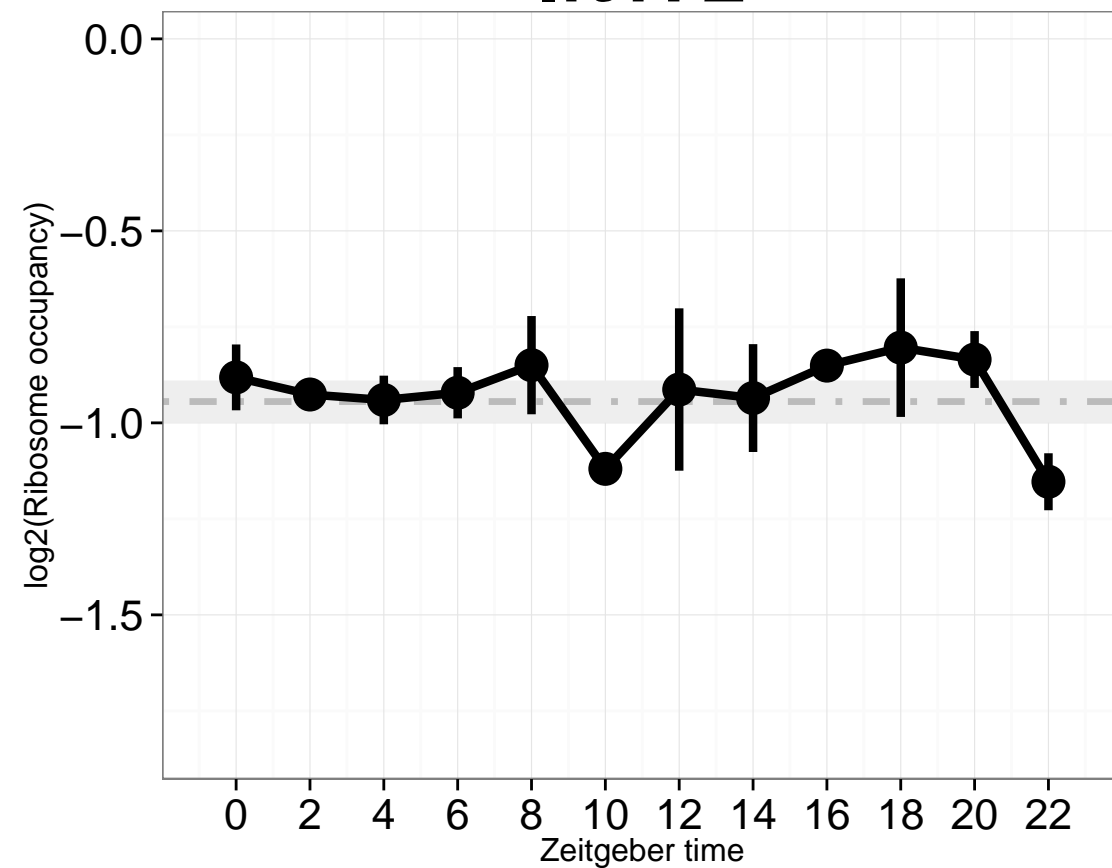

Supplement: SuppDataset_1.zip [file Ift172_set_A.pdf › Supplemental Dataset 1/A-mRNA_nonrhyth_translation_nonrhyth/Ift172_set_A.pdf]

# Ift20

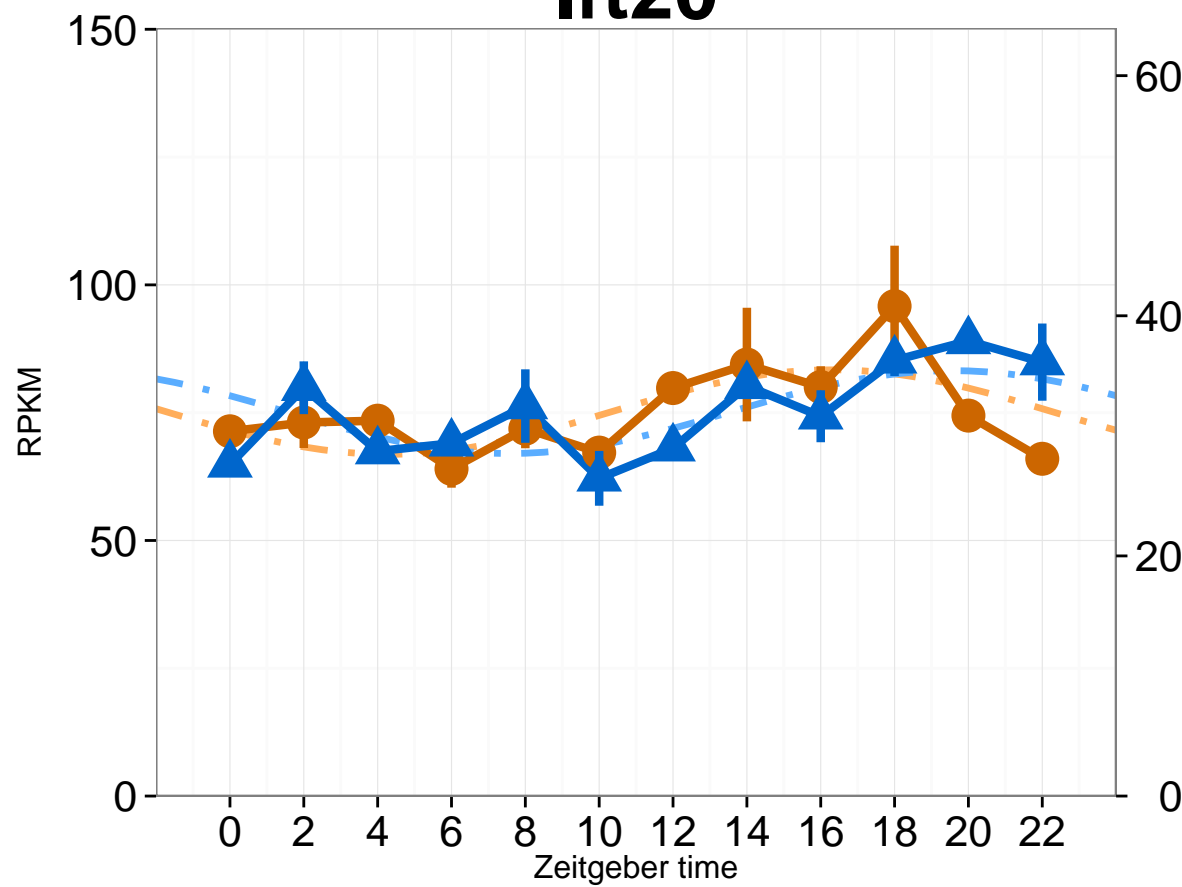

# Ift20

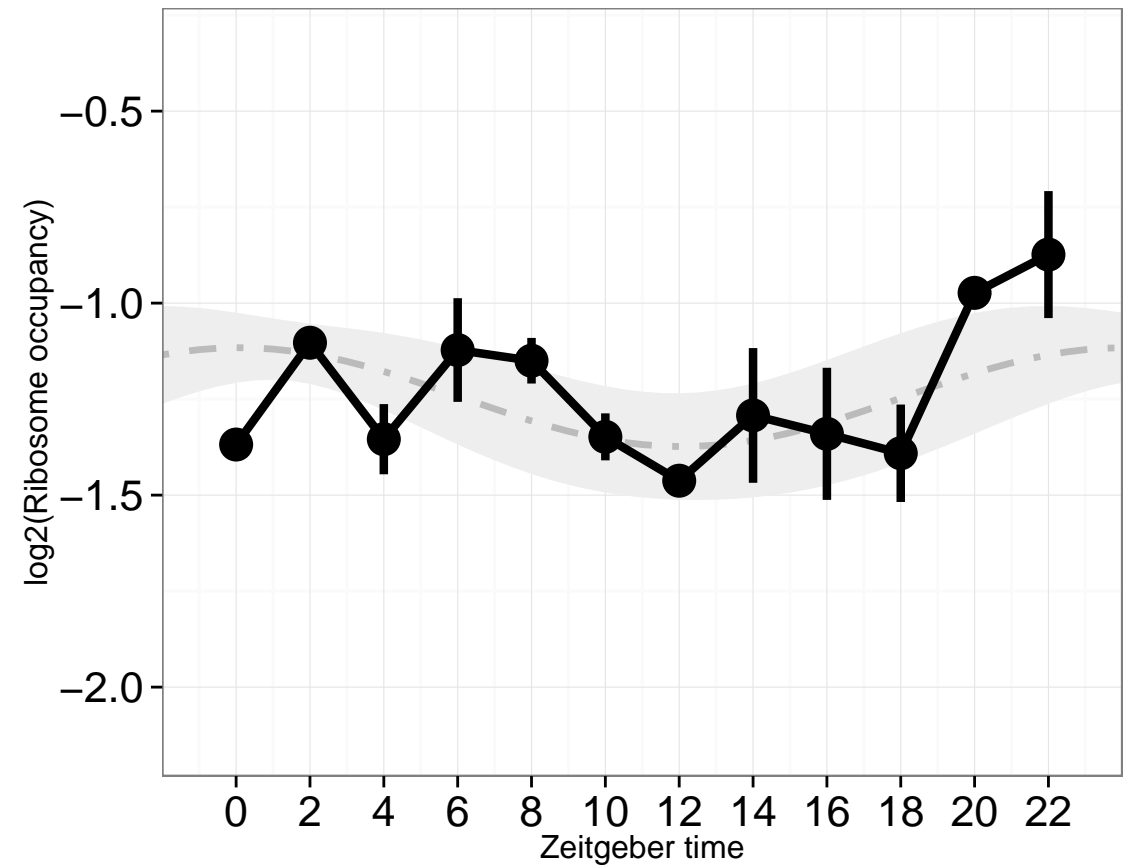

Supplement: SuppDataset_1.zip [file Ift20_set_A.pdf › Supplemental Dataset 1/A-mRNA_nonrhyth_translation_nonrhyth/Ift20_set_A.pdf]

# Ift27

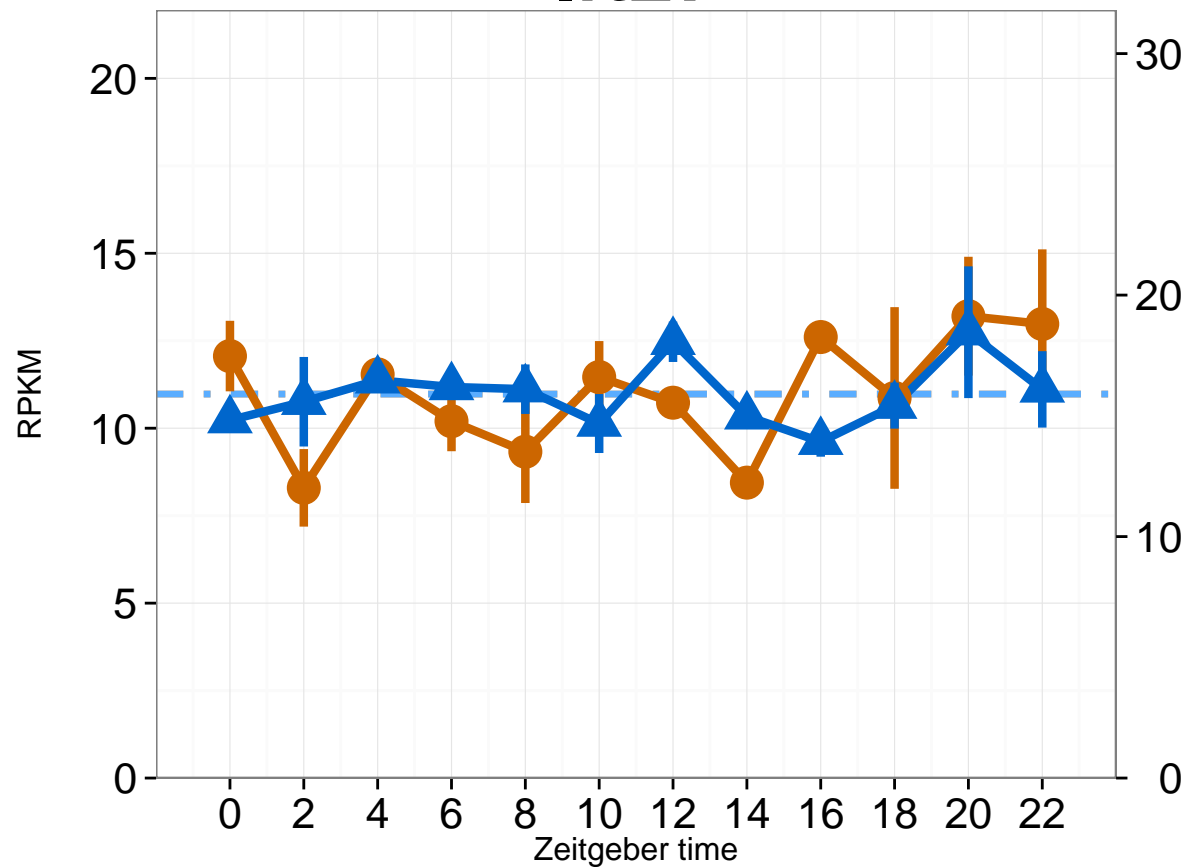

# Ift27

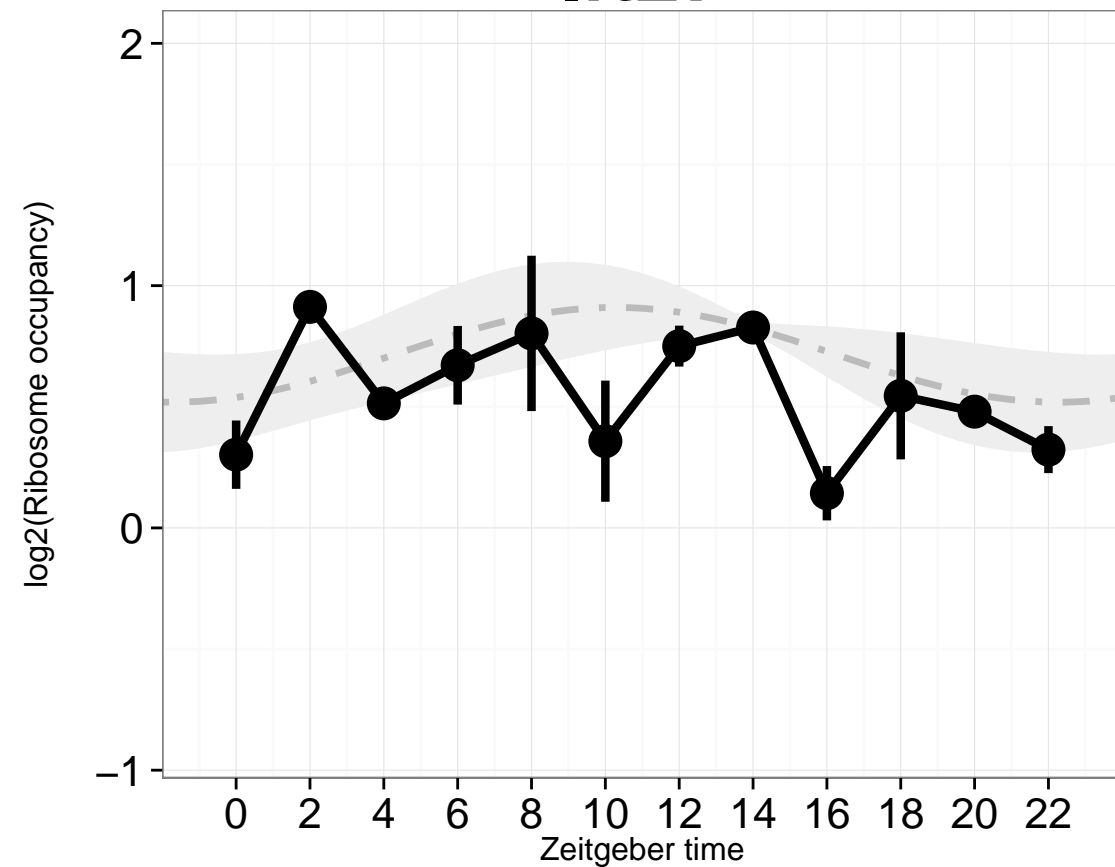

Supplement: SuppDataset_1.zip [file Ift27_set_A.pdf › Supplemental Dataset 1/A-mRNA_nonrhyth_translation_nonrhyth/Ift27_set_A.pdf]

# Ift43

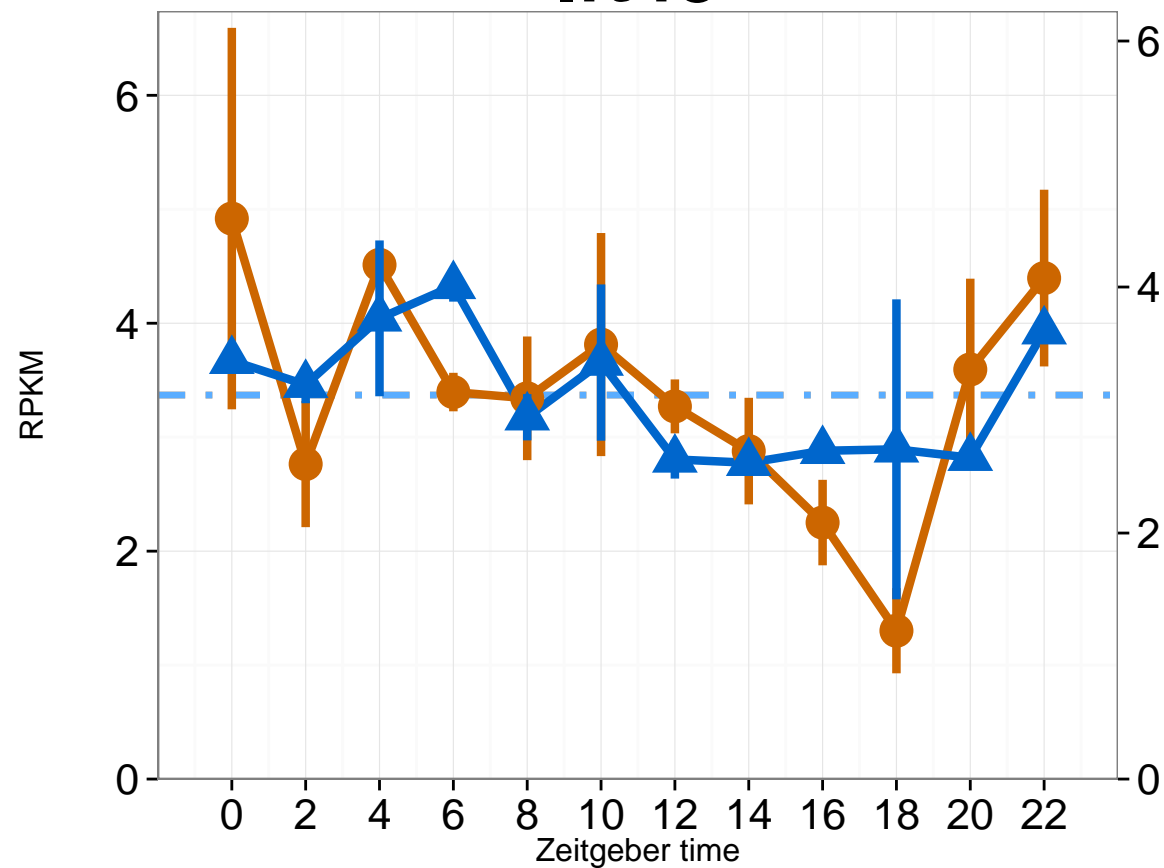

# Ift43

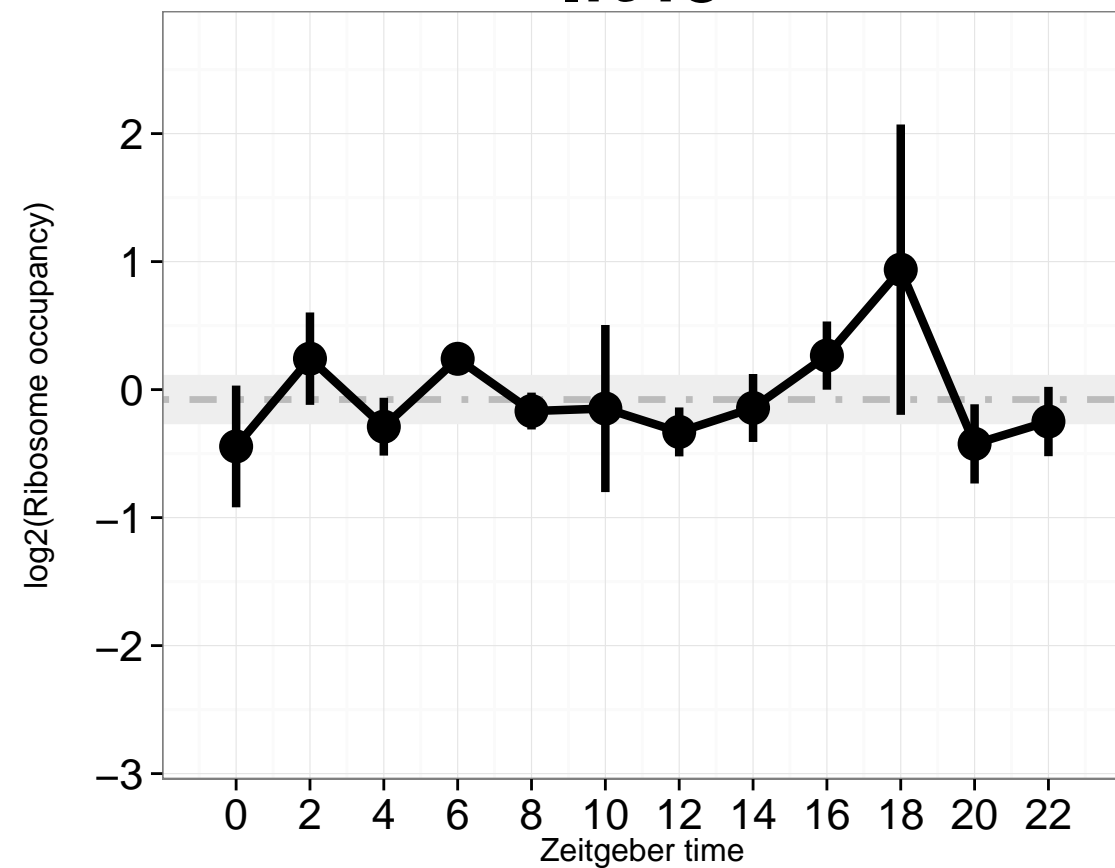

Supplement: SuppDataset_1.zip [file Ift43_set_A.pdf › Supplemental Dataset 1/A-mRNA_nonrhyth_translation_nonrhyth/Ift43_set_A.pdf]

## Ift52

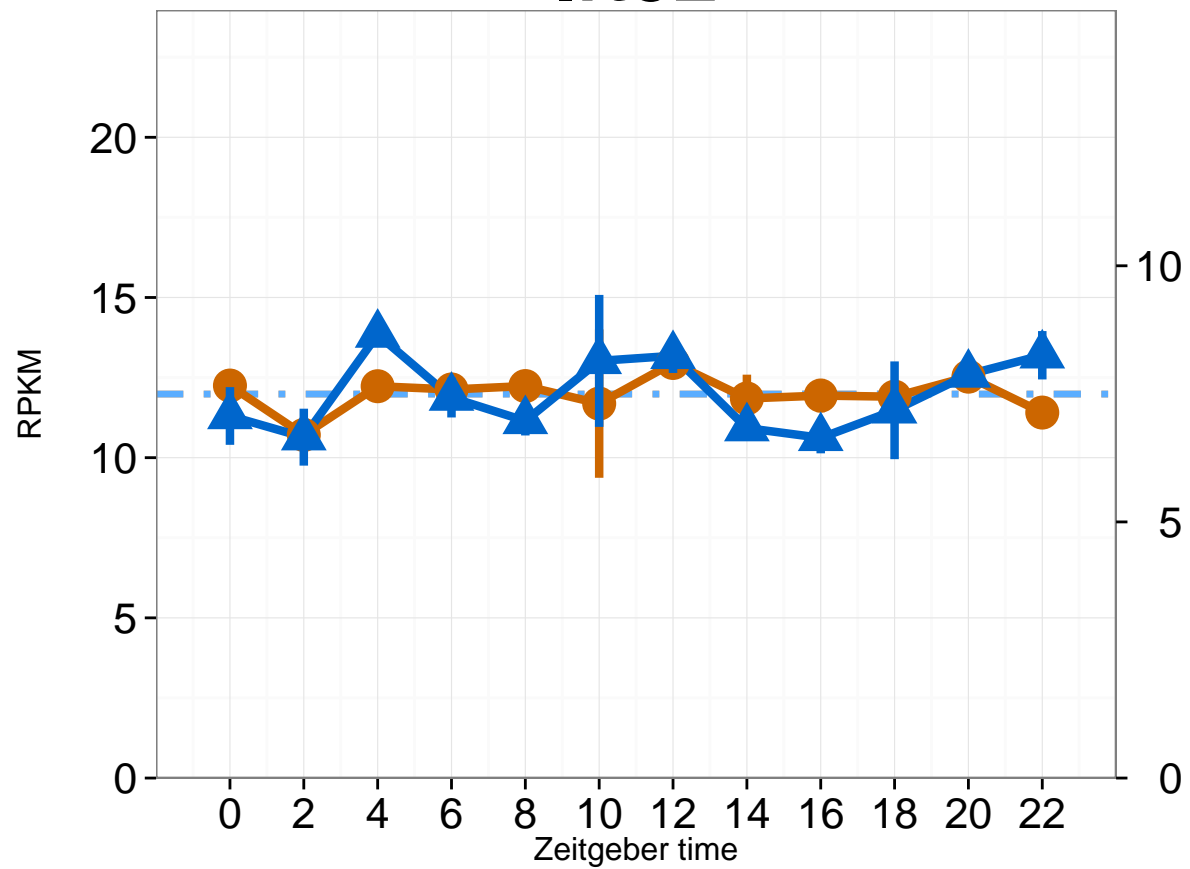

## Ift52

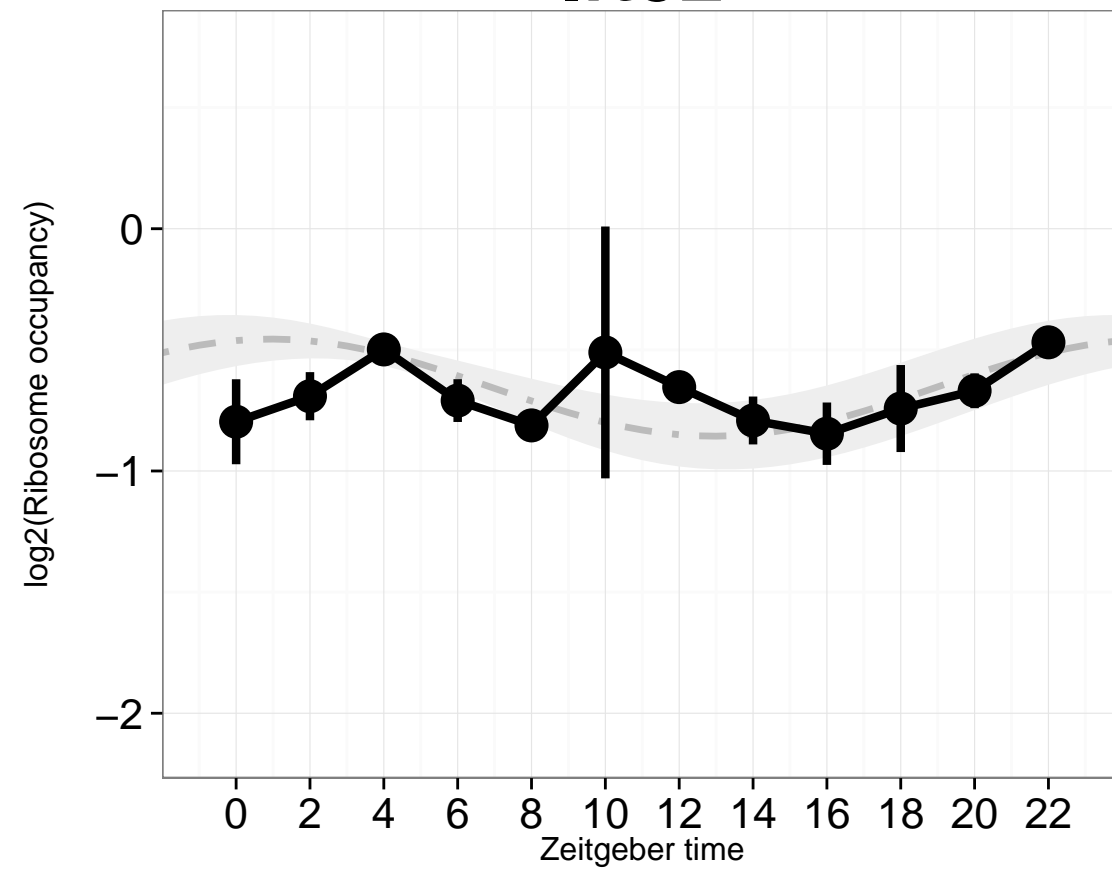

Supplement: SuppDataset_1.zip [file Ift52_set_A.pdf › Supplemental Dataset 1/A-mRNA_nonrhyth_translation_nonrhyth/Ift52_set_A.pdf]

# Ift74

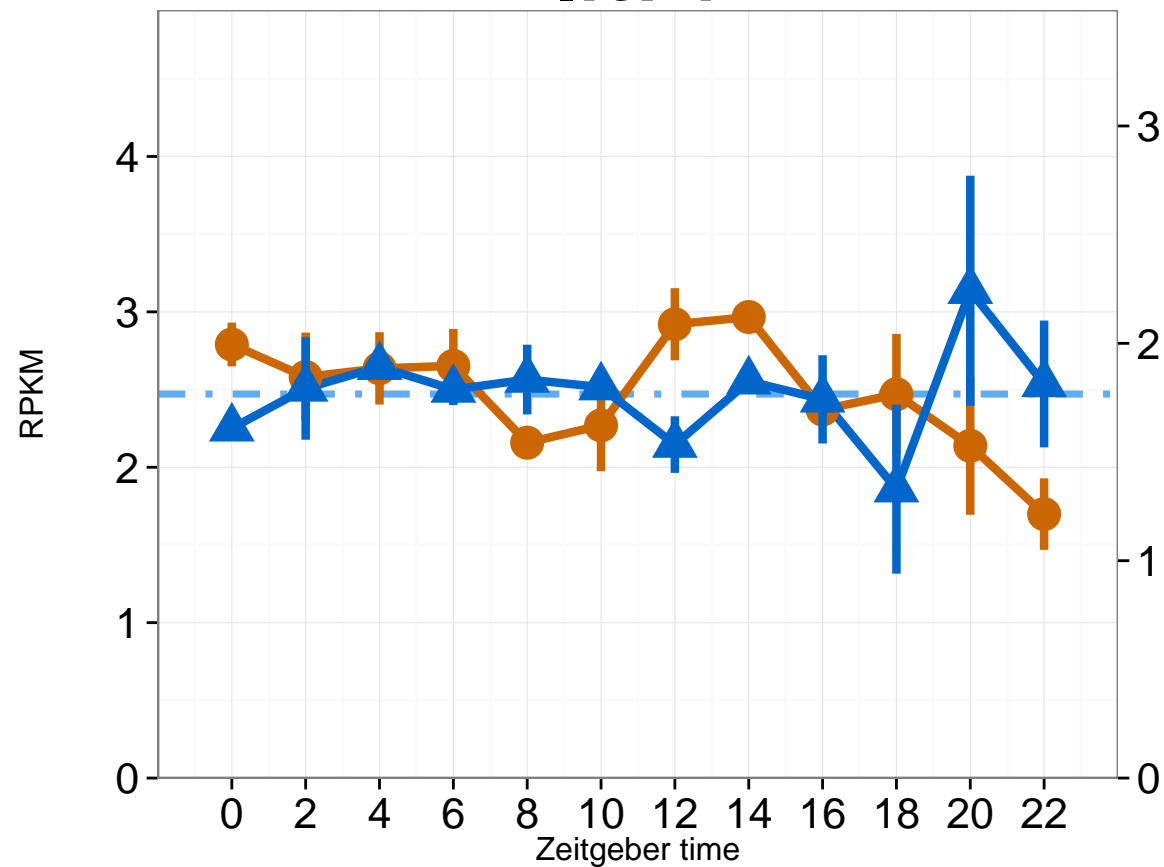

# Ift74

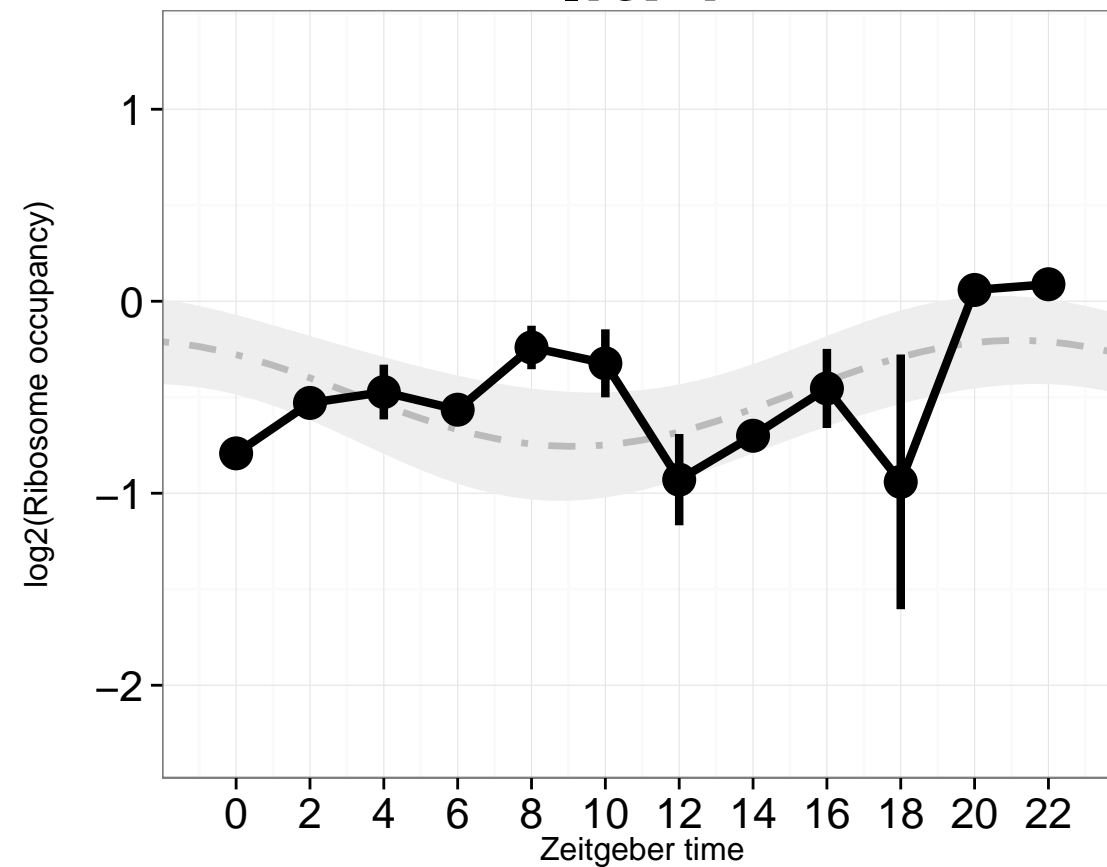

Supplement: SuppDataset_1.zip [file Ift74_set_A.pdf › Supplemental Dataset 1/A-mRNA_nonrhyth_translation_nonrhyth/Ift74_set_A.pdf]
