# Supplementary figures and images for: Ribosome profiling reveals the rhythmic liver translatome and circadian clock regulation by upstream open reading frames (part 107 of 113)
Source: HighWire-hosted journal article supplement (doi:10.1101/gr.195404.115), 2015-10-20

## Ifit3

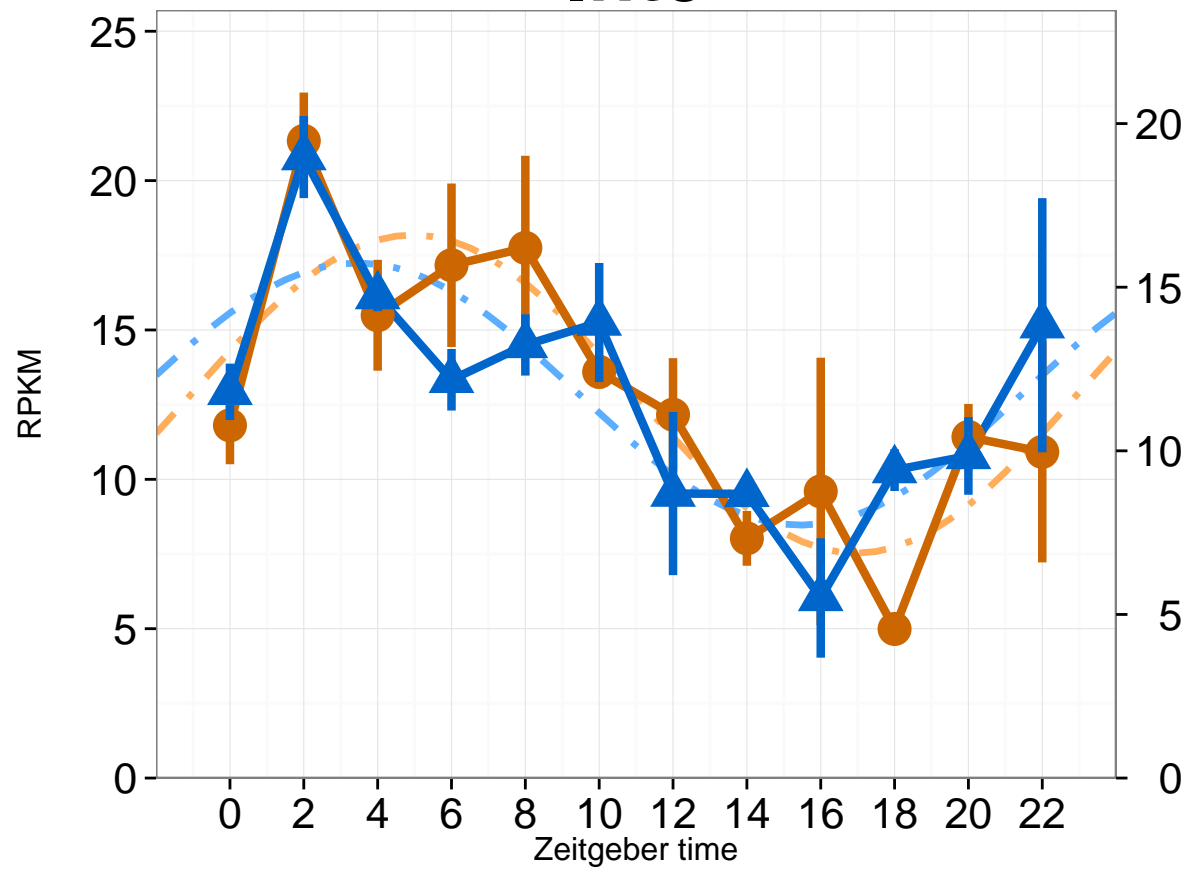

## Ifit3

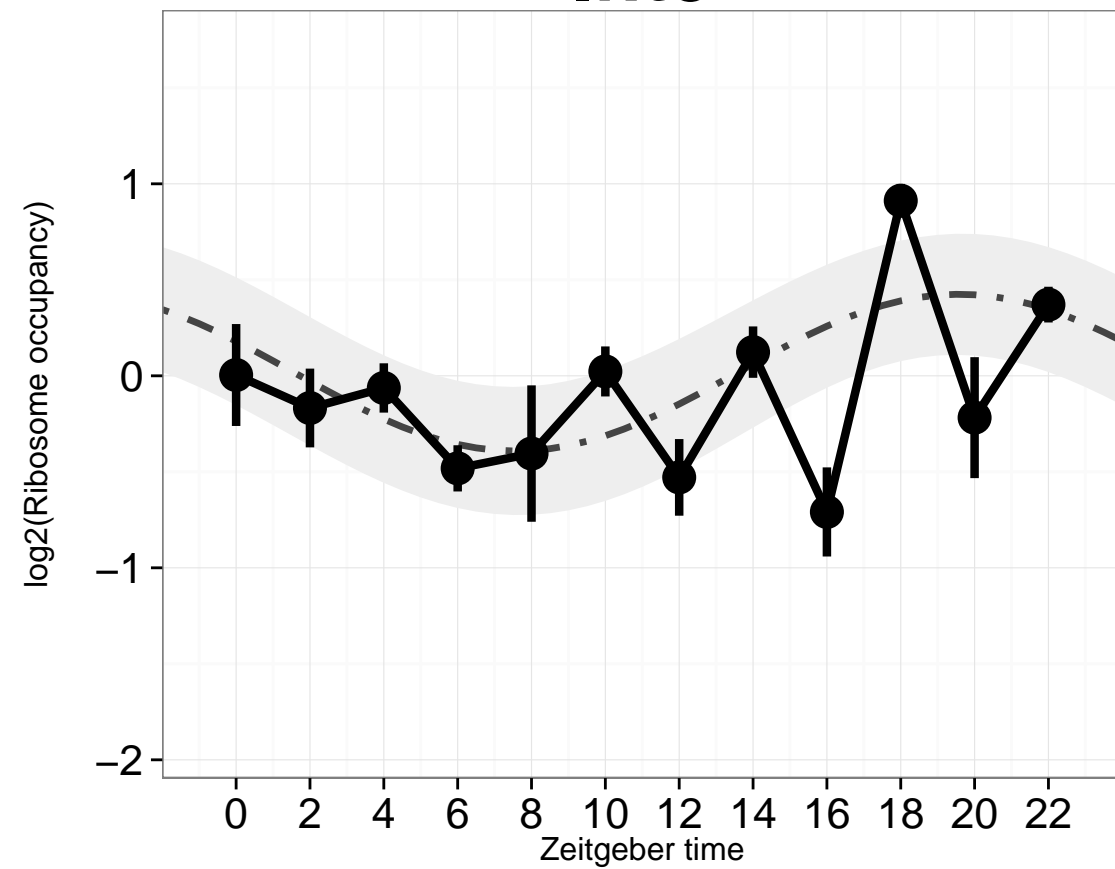

Supplement: SuppDataset_1.zip [file Ifit3_set_D.pdf › Supplemental Dataset 1/D-mRNA_rhythm_translation_rhyth/Ifit3_set_D.pdf]

# Ifitm2

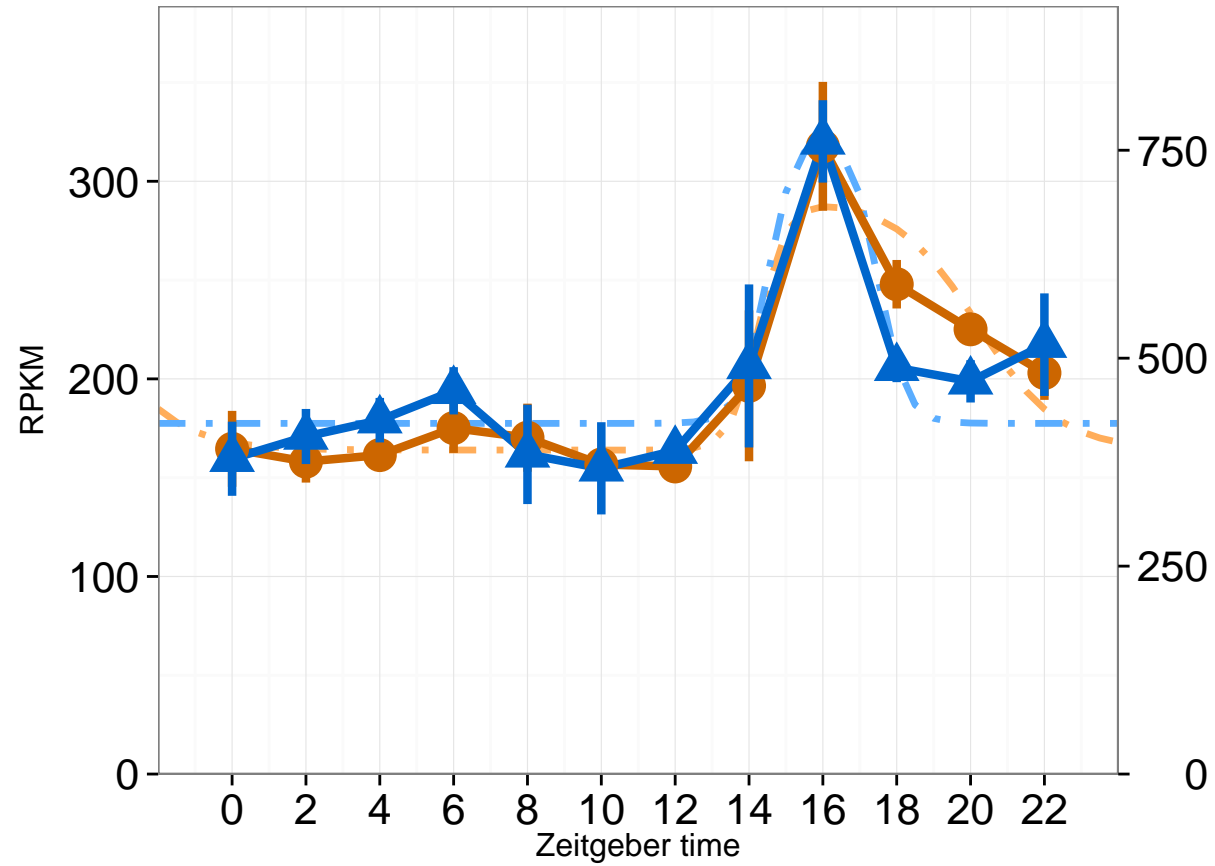

# Ifitm2

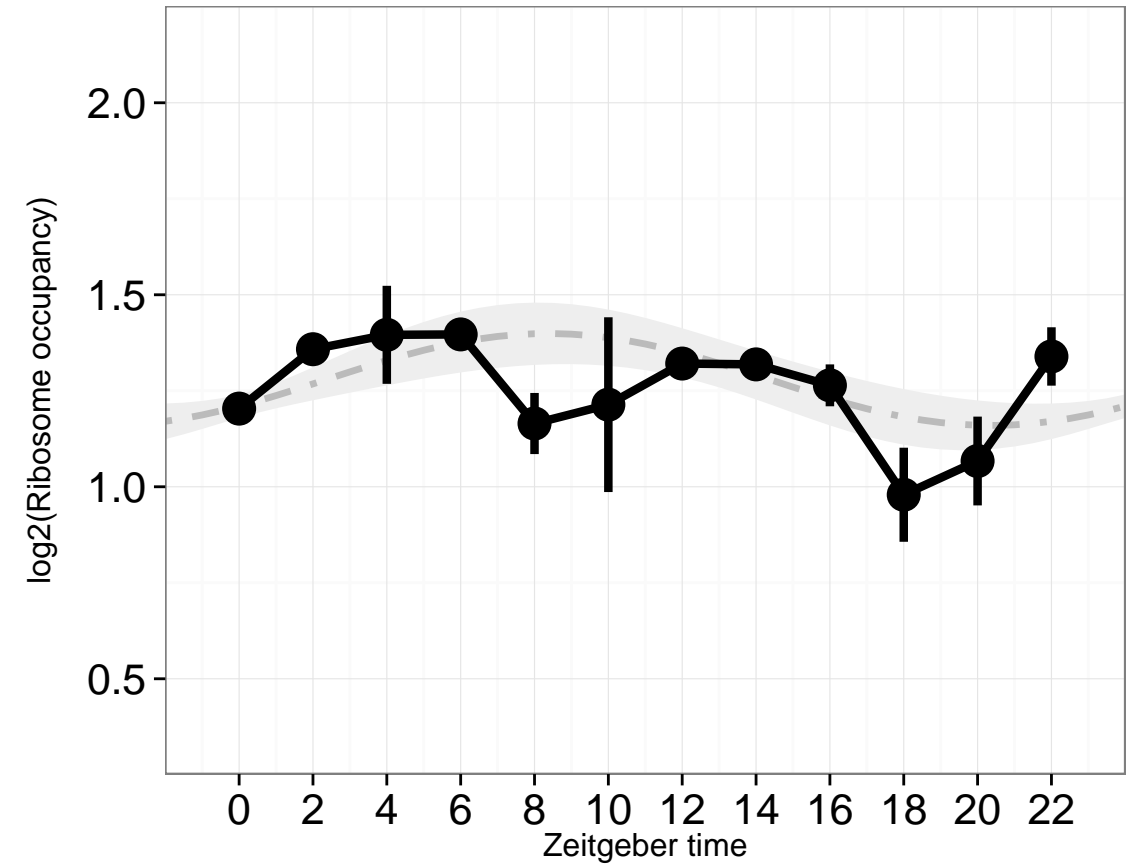

Supplement: SuppDataset_1.zip [file Ifitm2_set_D.pdf › Supplemental Dataset 1/D-mRNA_rhythm_translation_rhyth/Ifitm2_set_D.pdf]

# lfrd1

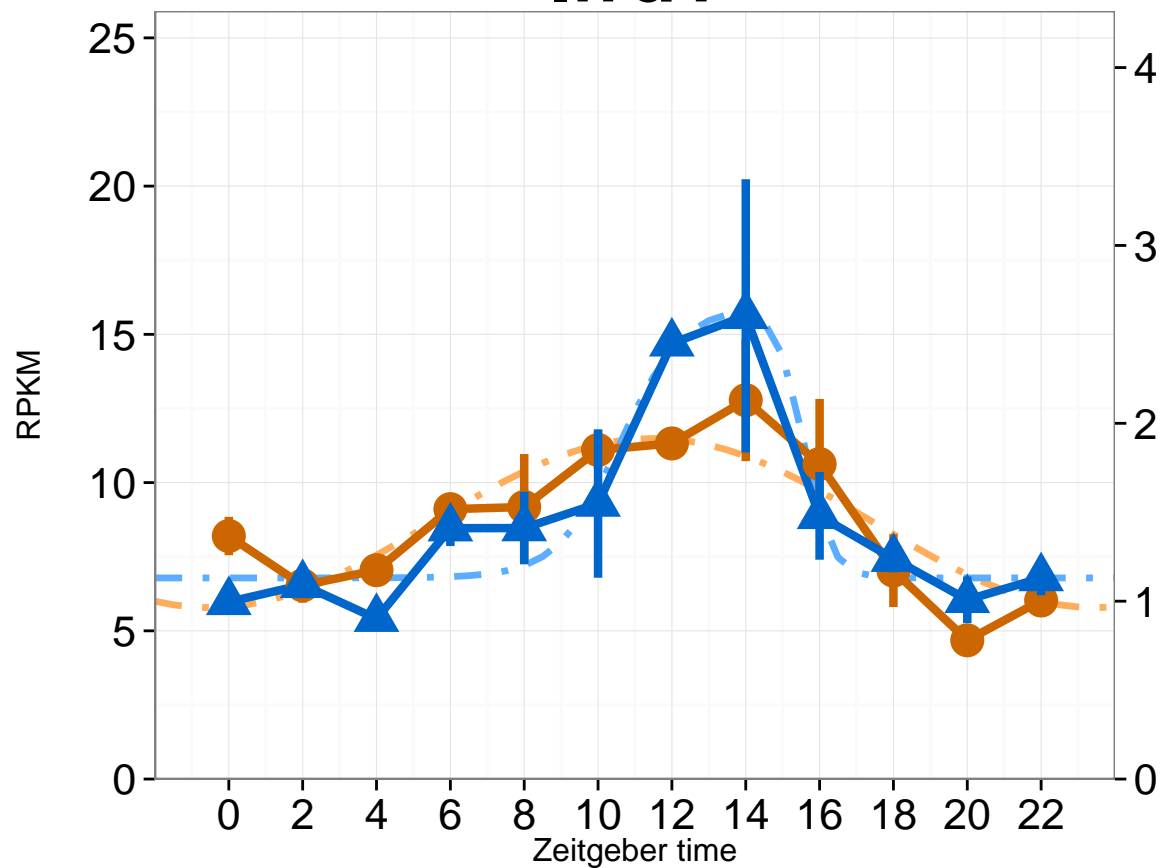

# lfrd1

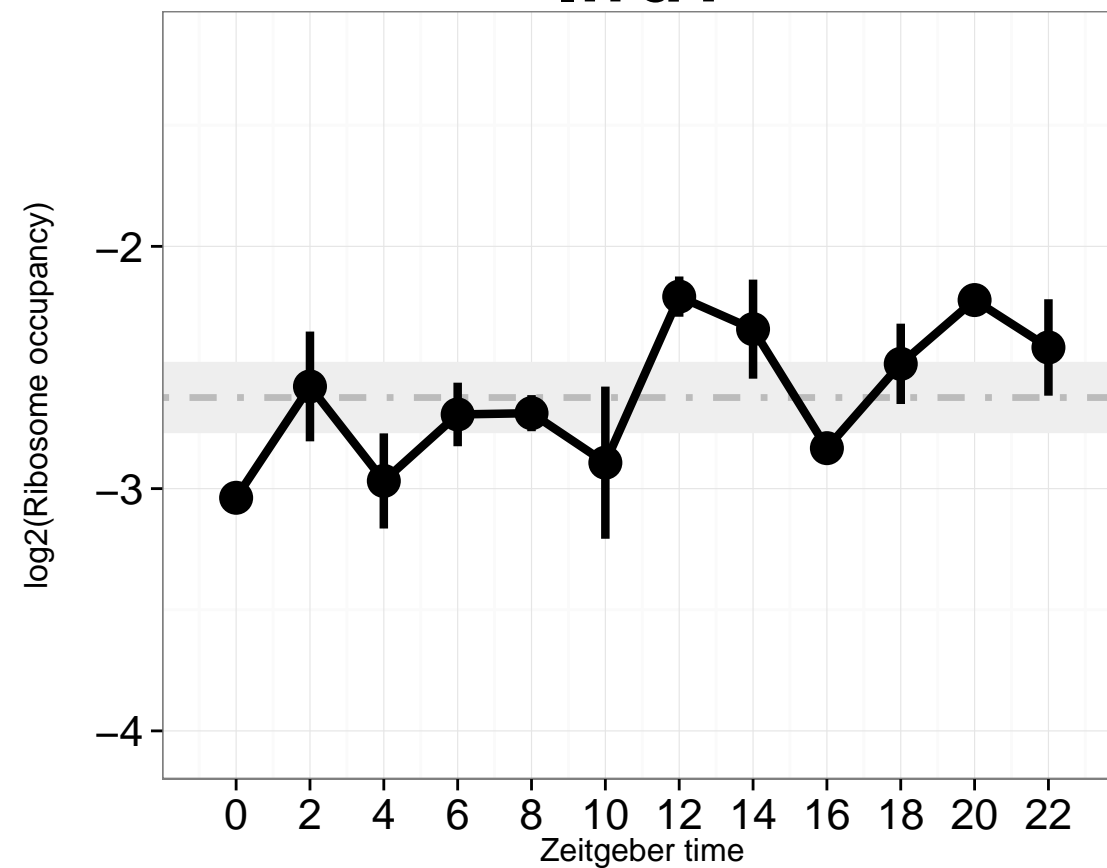

Supplement: SuppDataset_1.zip [file Ifrd1_set_D.pdf › Supplemental Dataset 1/D-mRNA_rhythm_translation_rhyth/Ifrd1_set_D.pdf]

**ligp1**

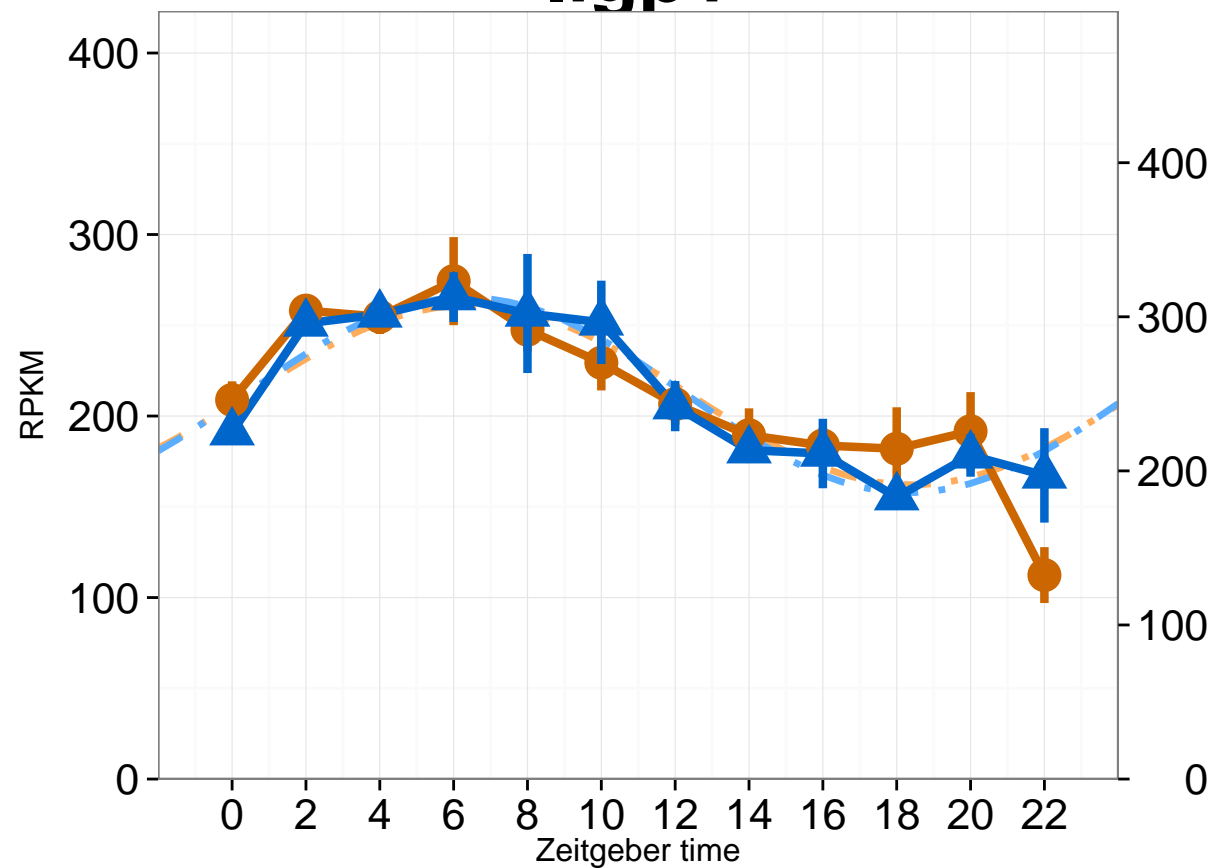

**ligp1**

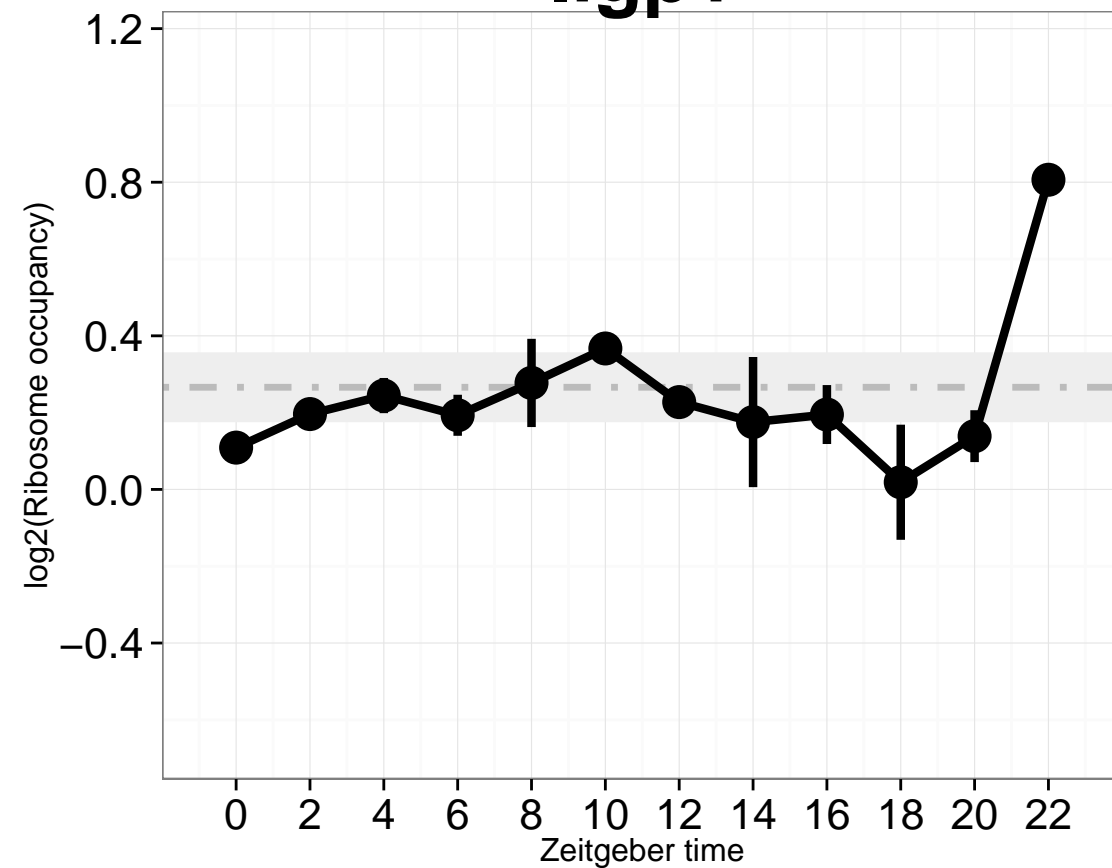

Supplement: SuppDataset_1.zip [file Iigp1_set_D.pdf › Supplemental Dataset 1/D-mRNA_rhythm_translation_rhyth/Iigp1_set_D.pdf]

## Il11ra1

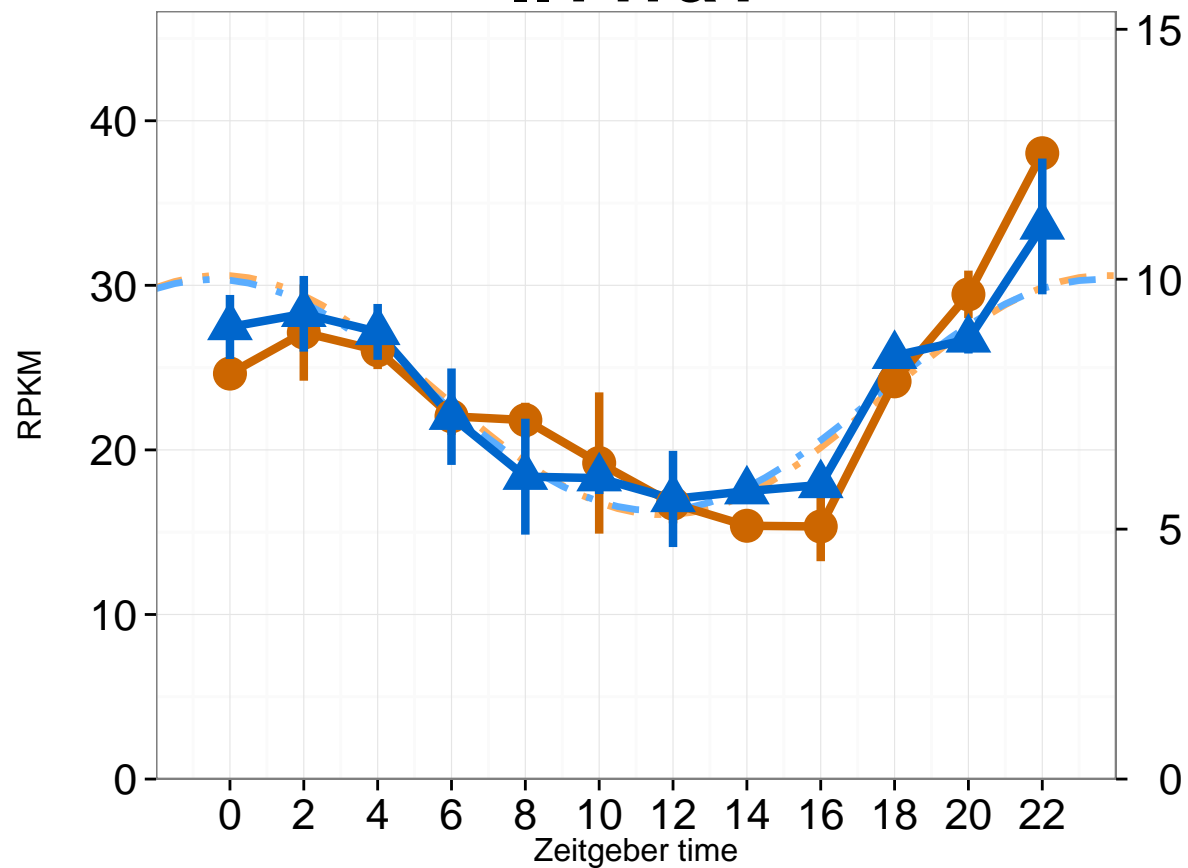

## Il11ra1

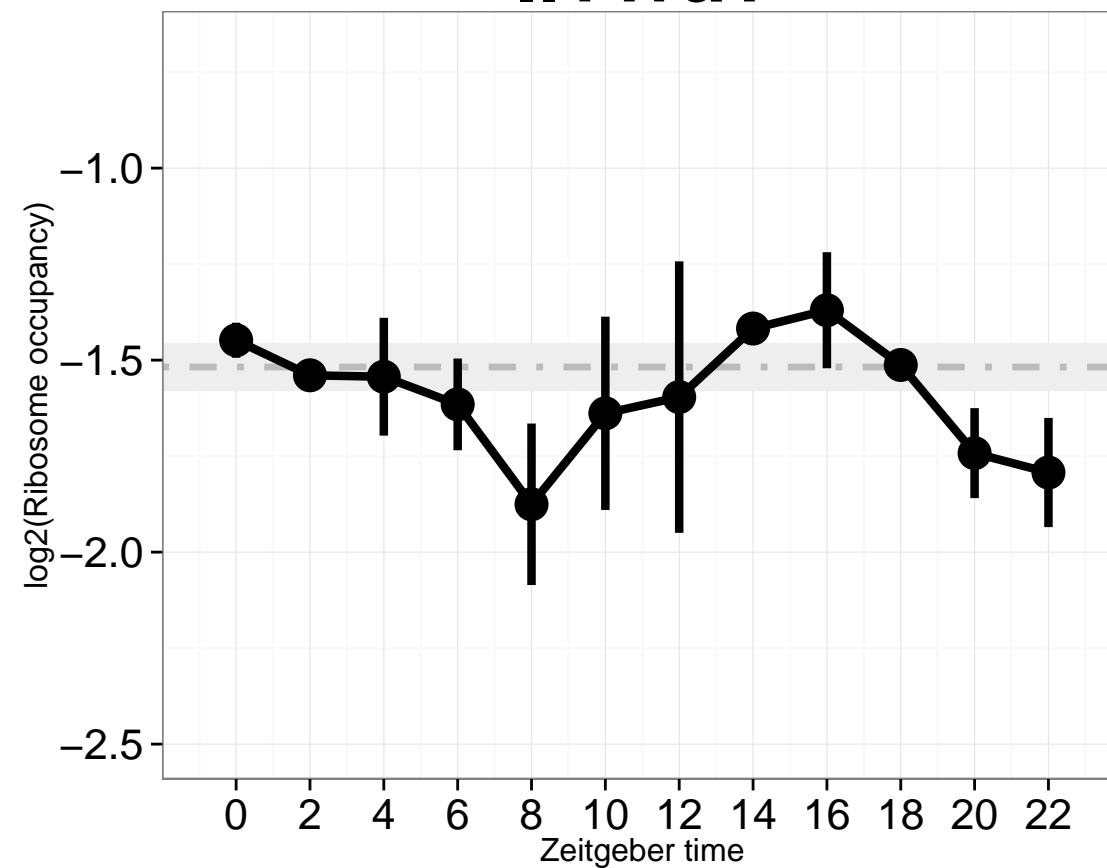

Supplement: SuppDataset_1.zip [file Il11ra1_set_D.pdf › Supplemental Dataset 1/D-mRNA_rhythm_translation_rhyth/Il11ra1_set_D.pdf]

# Il15ra

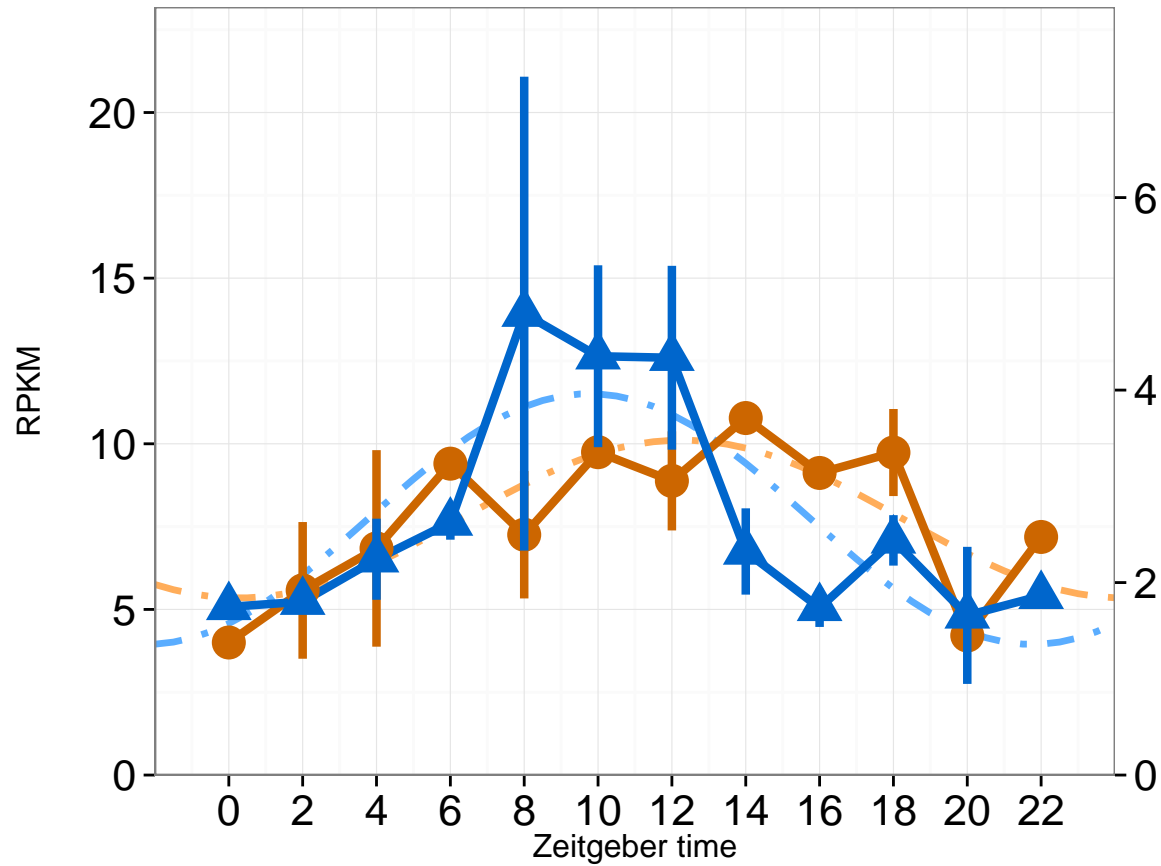

# Il15ra

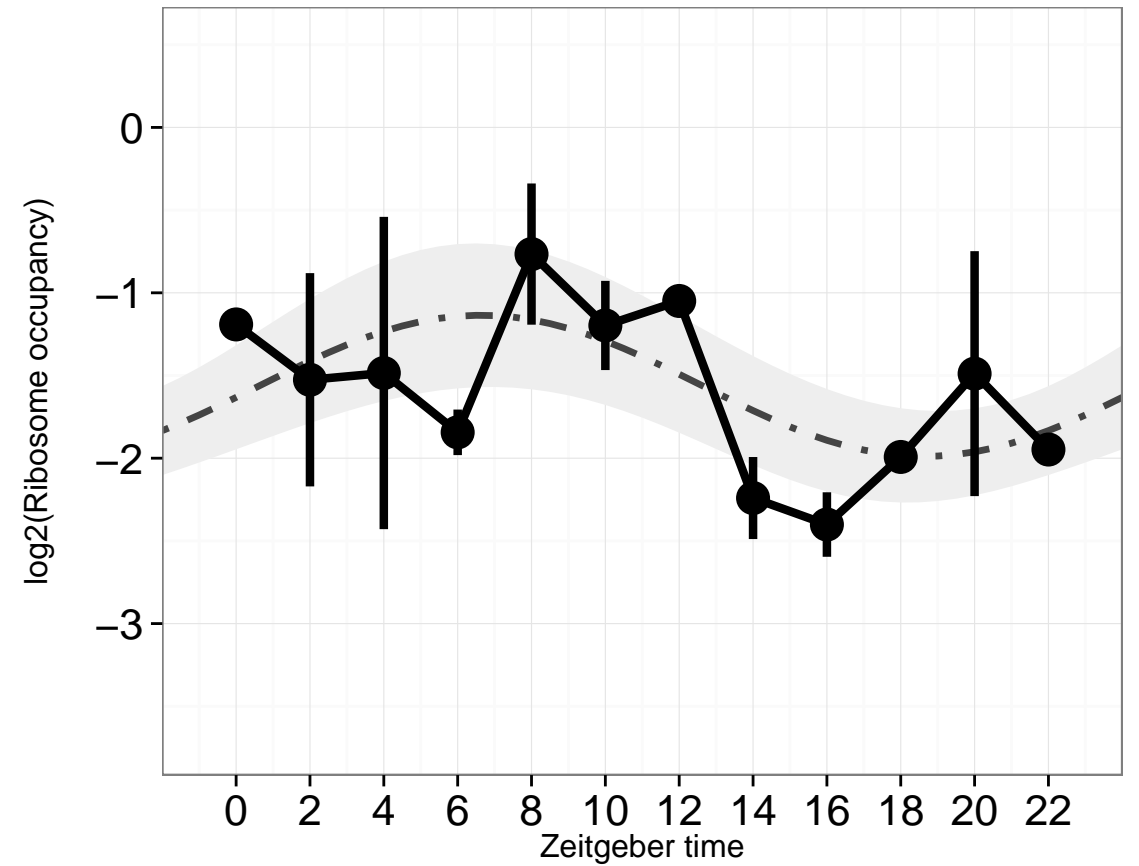

Supplement: SuppDataset_1.zip [file Il15ra_set_D.pdf › Supplemental Dataset 1/D-mRNA_rhythm_translation_rhyth/Il15ra_set_D.pdf]

**Il1r1**

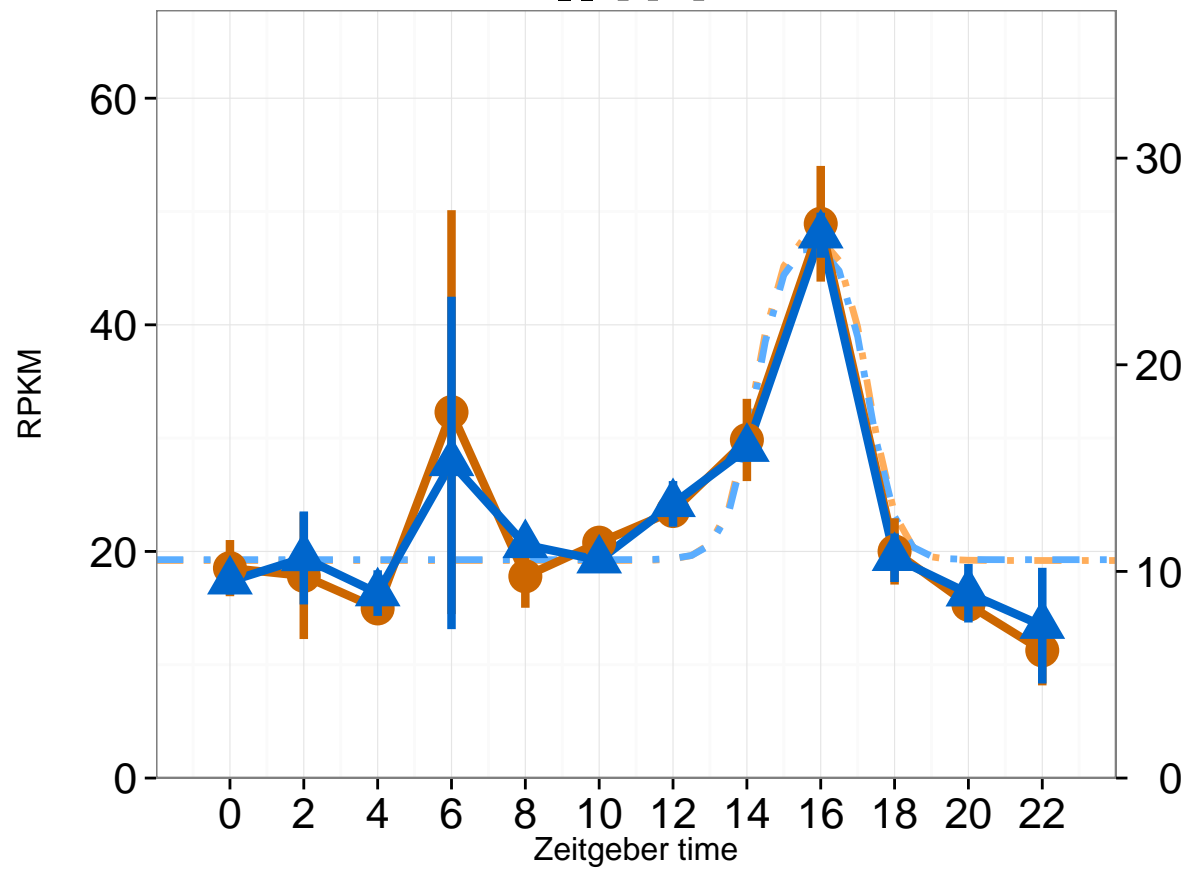

**Il1r1**

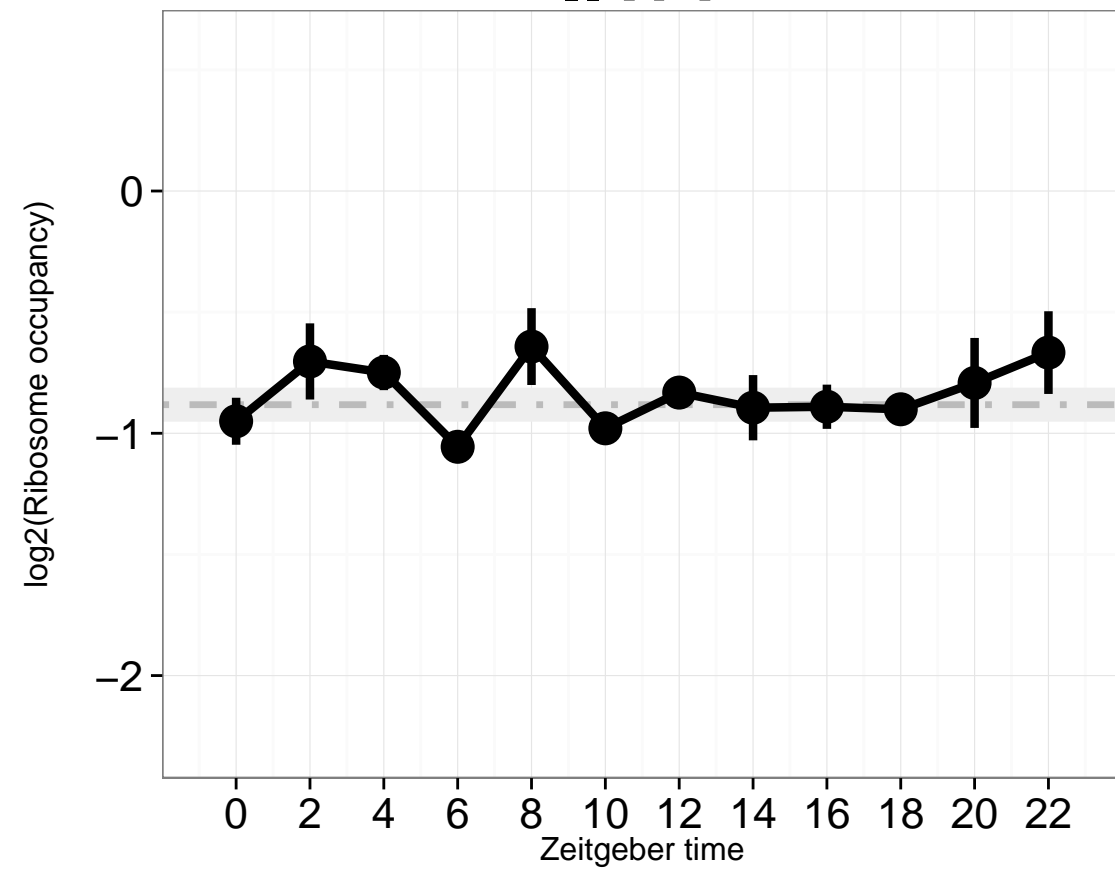

Supplement: SuppDataset_1.zip [file Il1r1_set_D.pdf › Supplemental Dataset 1/D-mRNA_rhythm_translation_rhyth/Il1r1_set_D.pdf]

## Il4ra

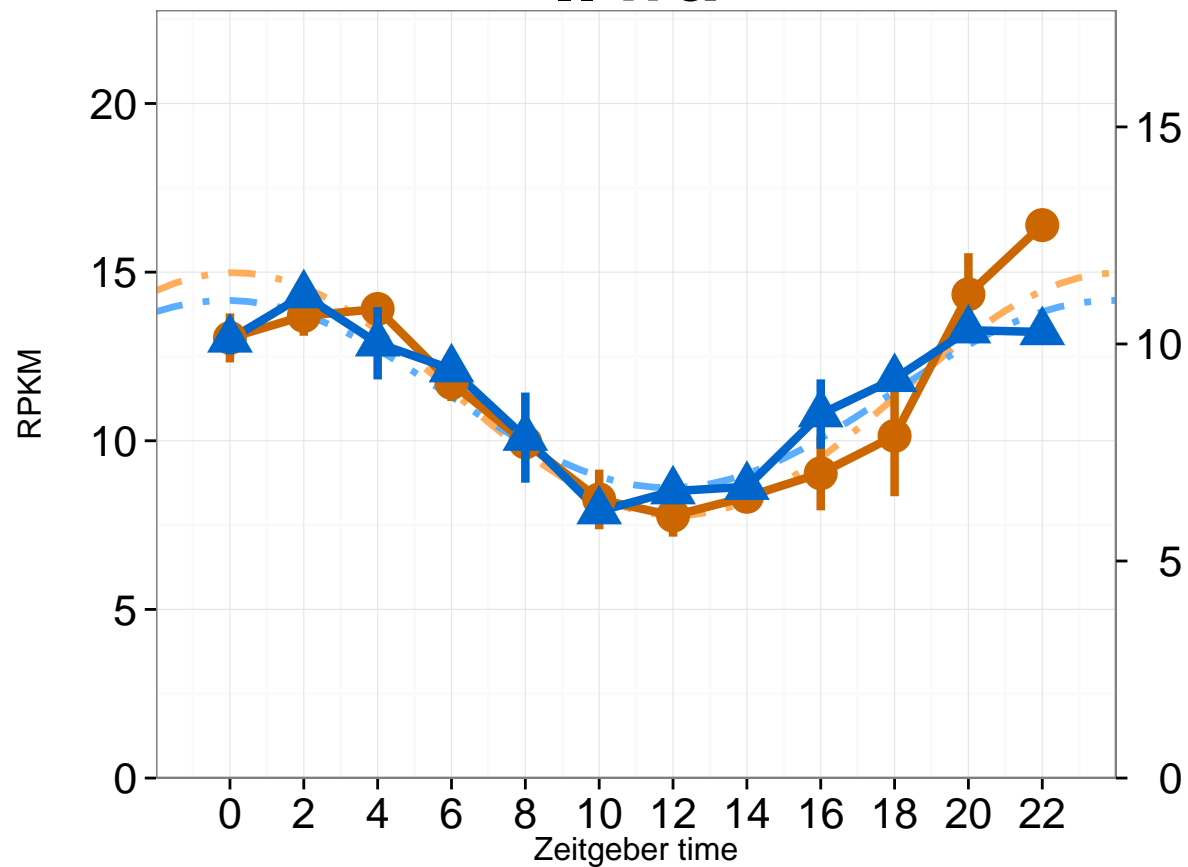

## Il4ra

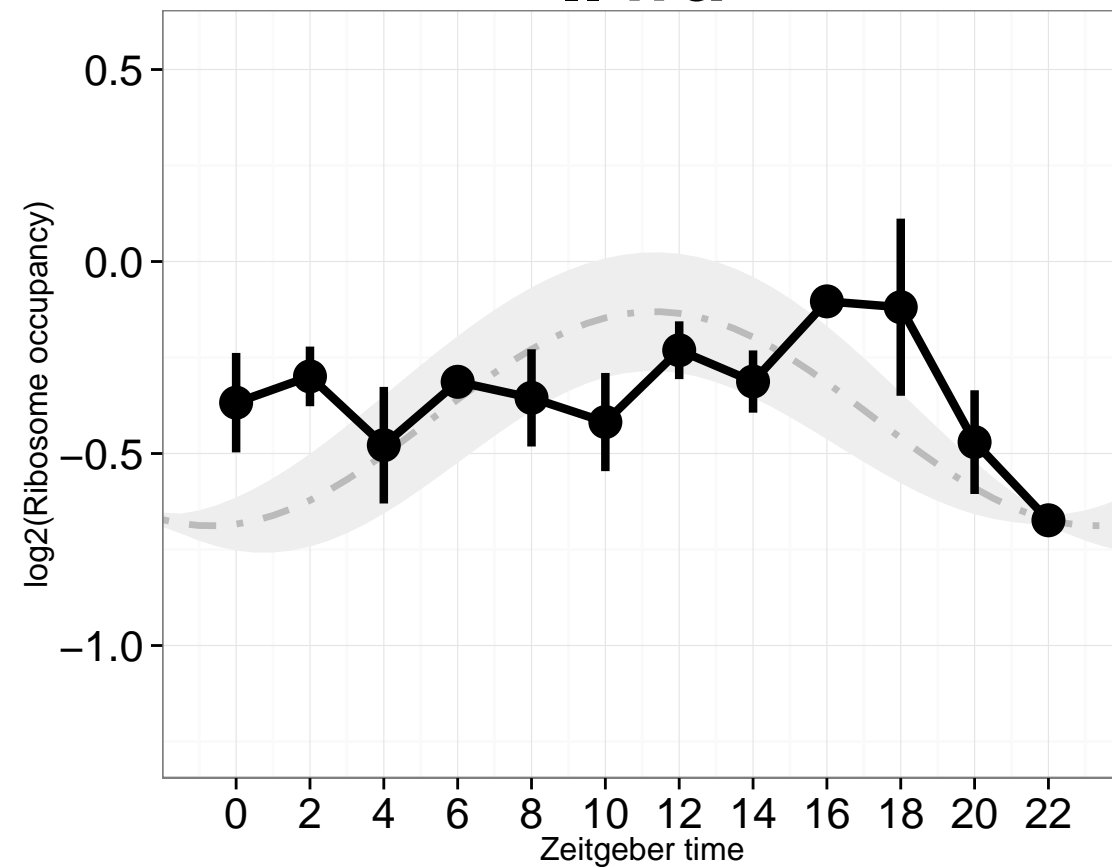

Supplement: SuppDataset_1.zip [file Il4ra_set_D.pdf › Supplemental Dataset 1/D-mRNA_rhythm_translation_rhyth/Il4ra_set_D.pdf]

# Il6ra

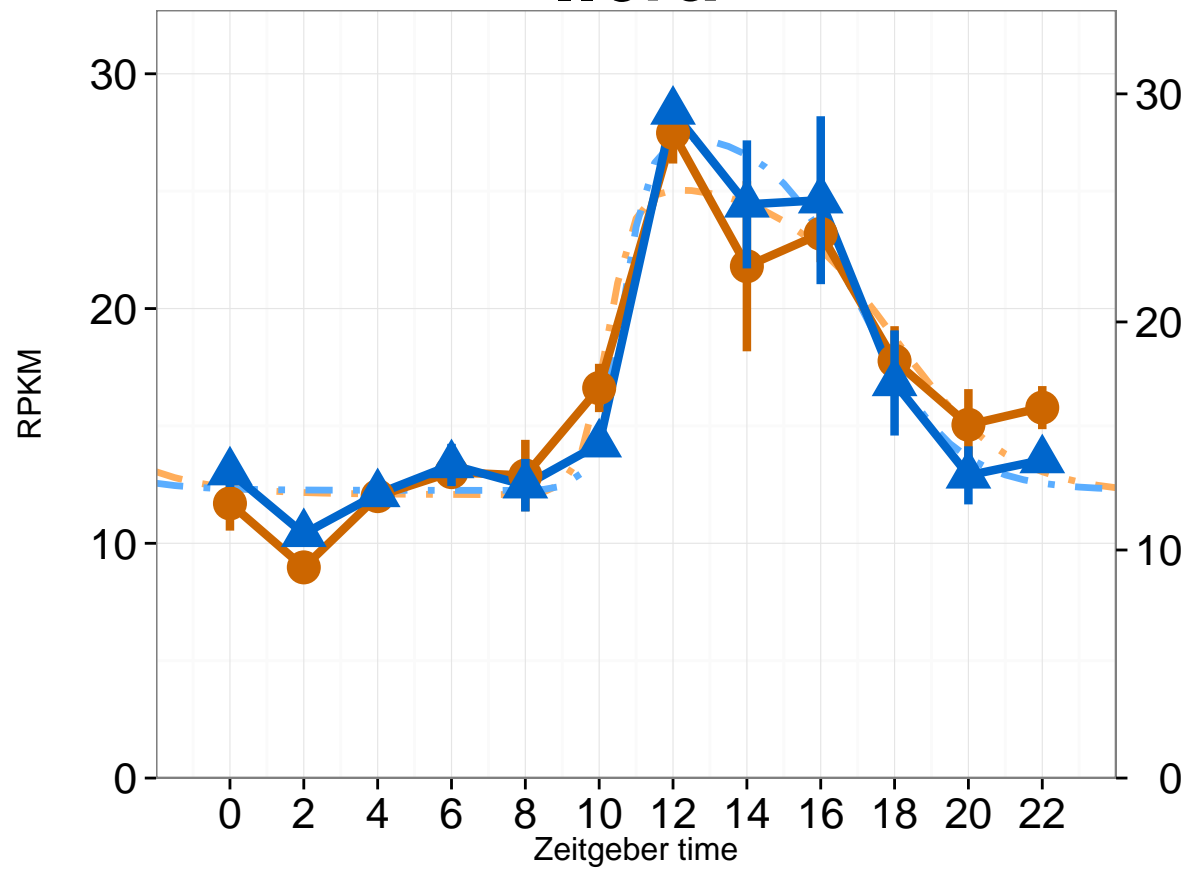

# Il6ra

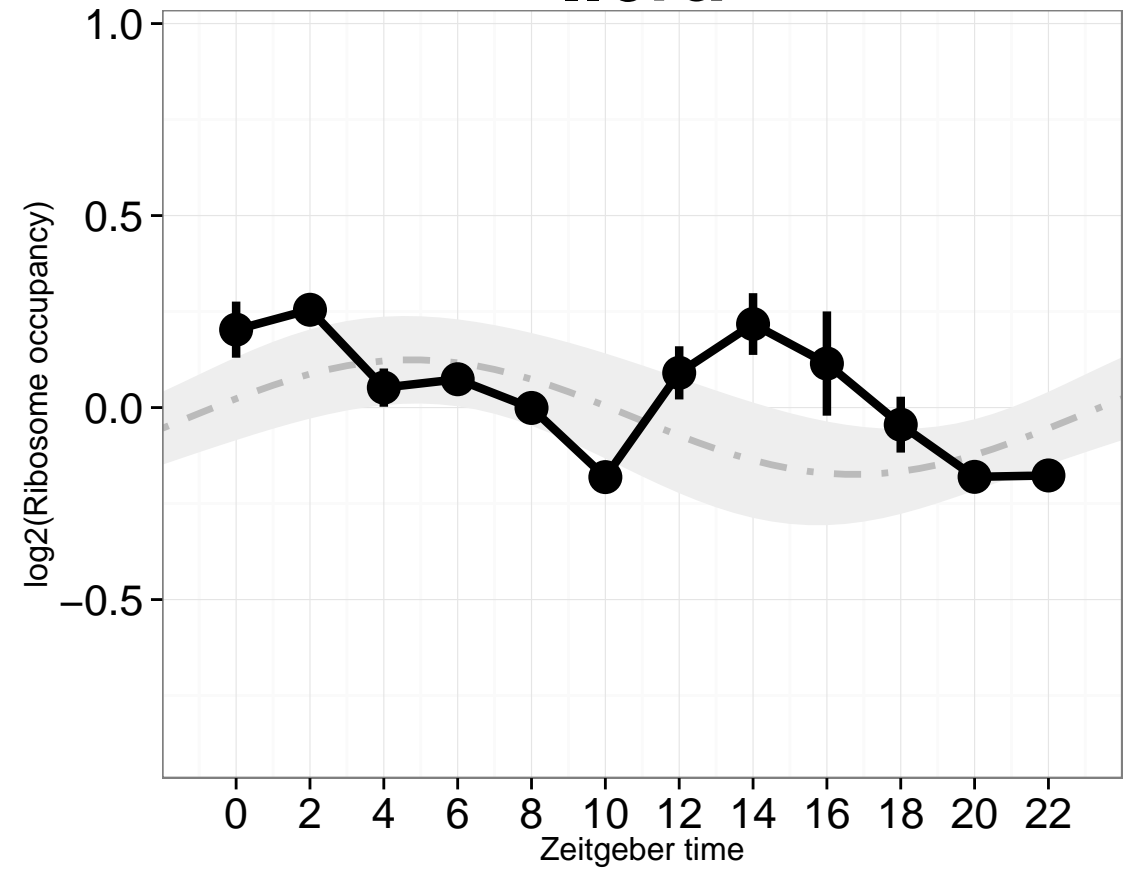

Supplement: SuppDataset_1.zip [file Il6ra_set_D.pdf › Supplemental Dataset 1/D-mRNA_rhythm_translation_rhyth/Il6ra_set_D.pdf]

# Inca1

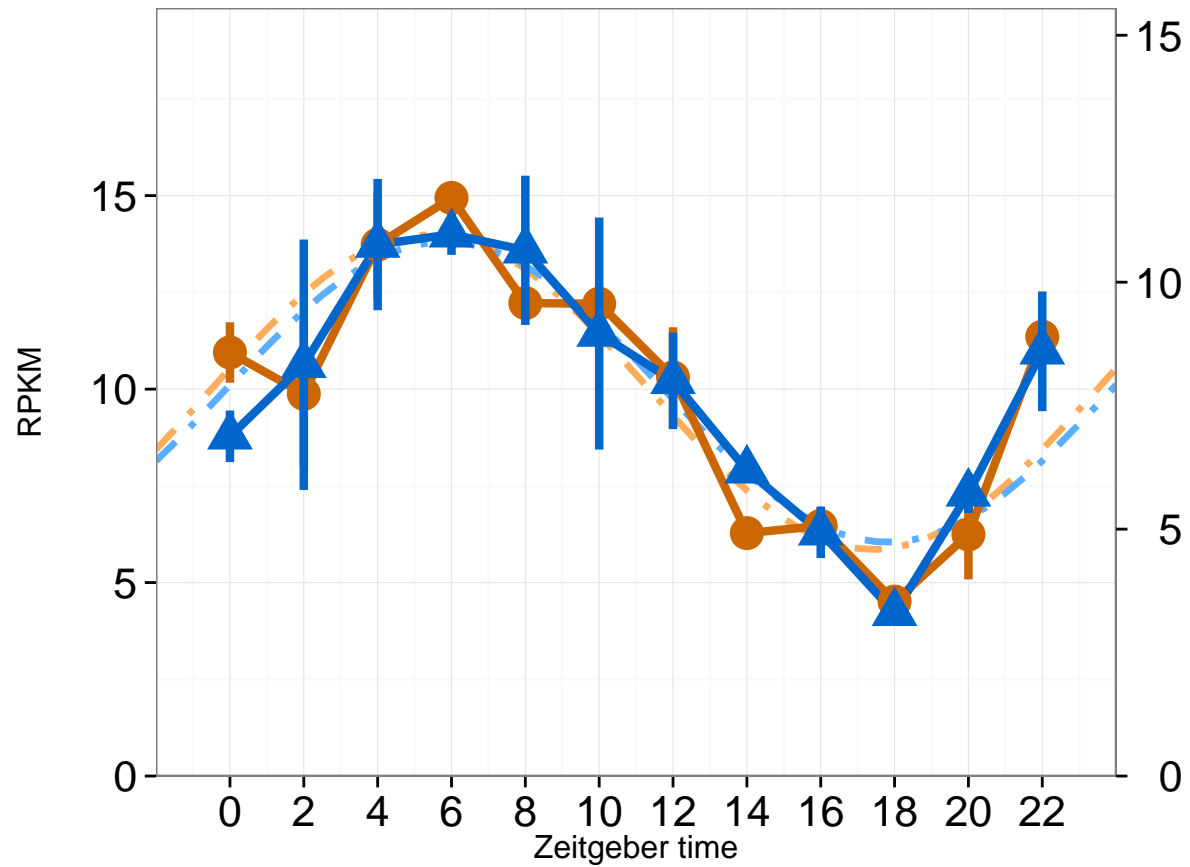

# Inca1

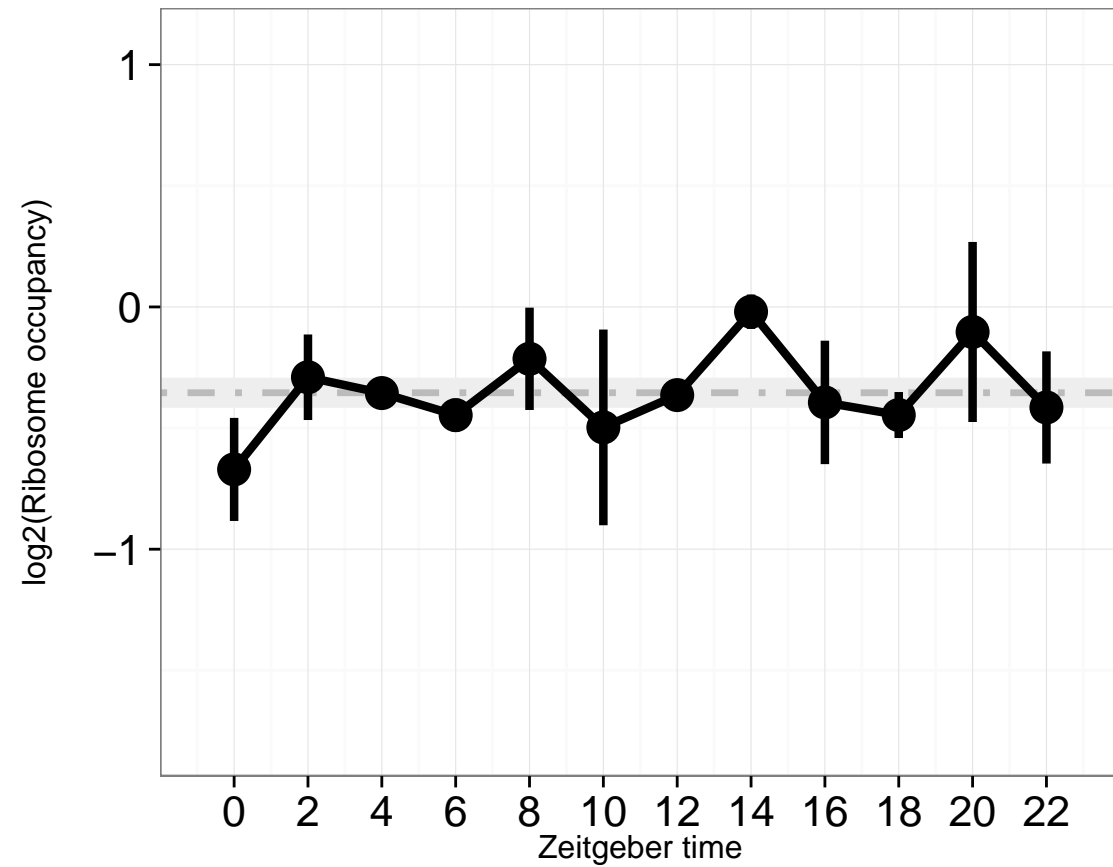

Supplement: SuppDataset_1.zip [file Inca1_set_D.pdf › Supplemental Dataset 1/D-mRNA_rhythm_translation_rhyth/Inca1_set_D.pdf]

## Inhba

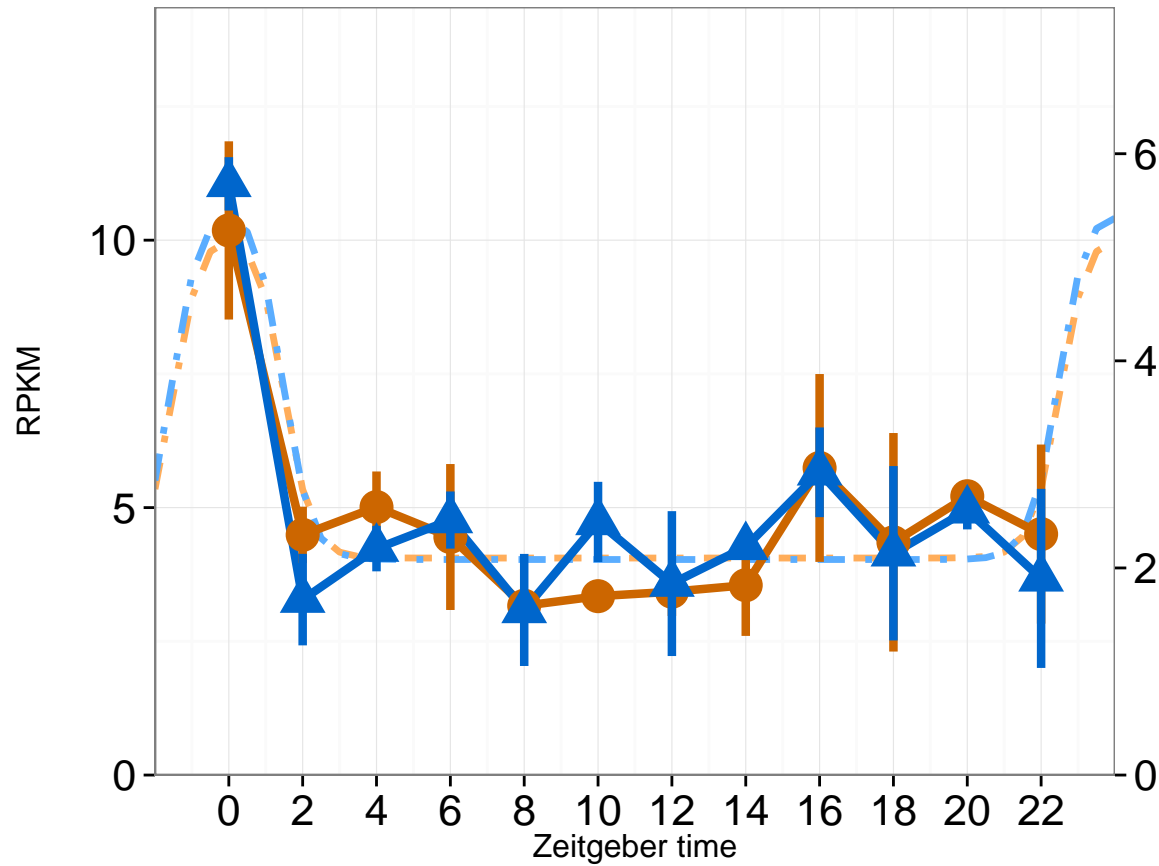

## Inhba

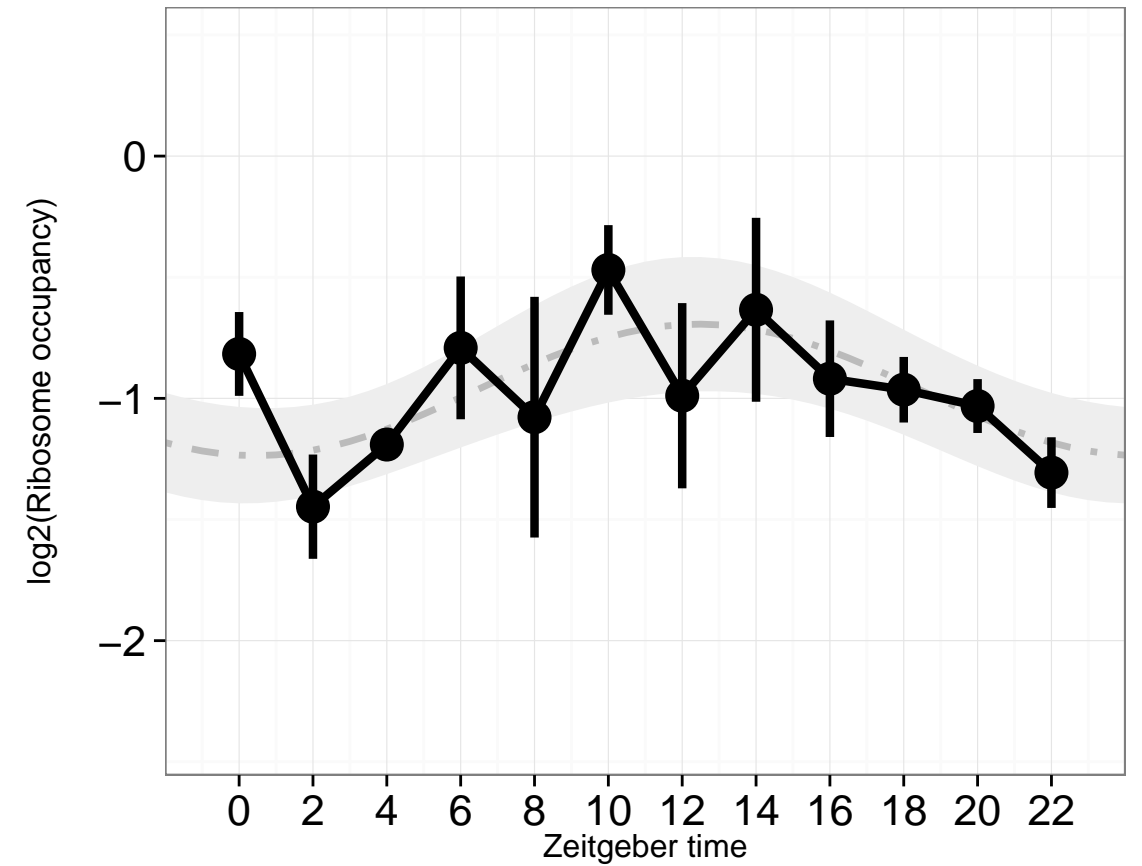

Supplement: SuppDataset_1.zip [file Inhba_set_D.pdf › Supplemental Dataset 1/D-mRNA_rhythm_translation_rhyth/Inhba_set_D.pdf]

## Ino80

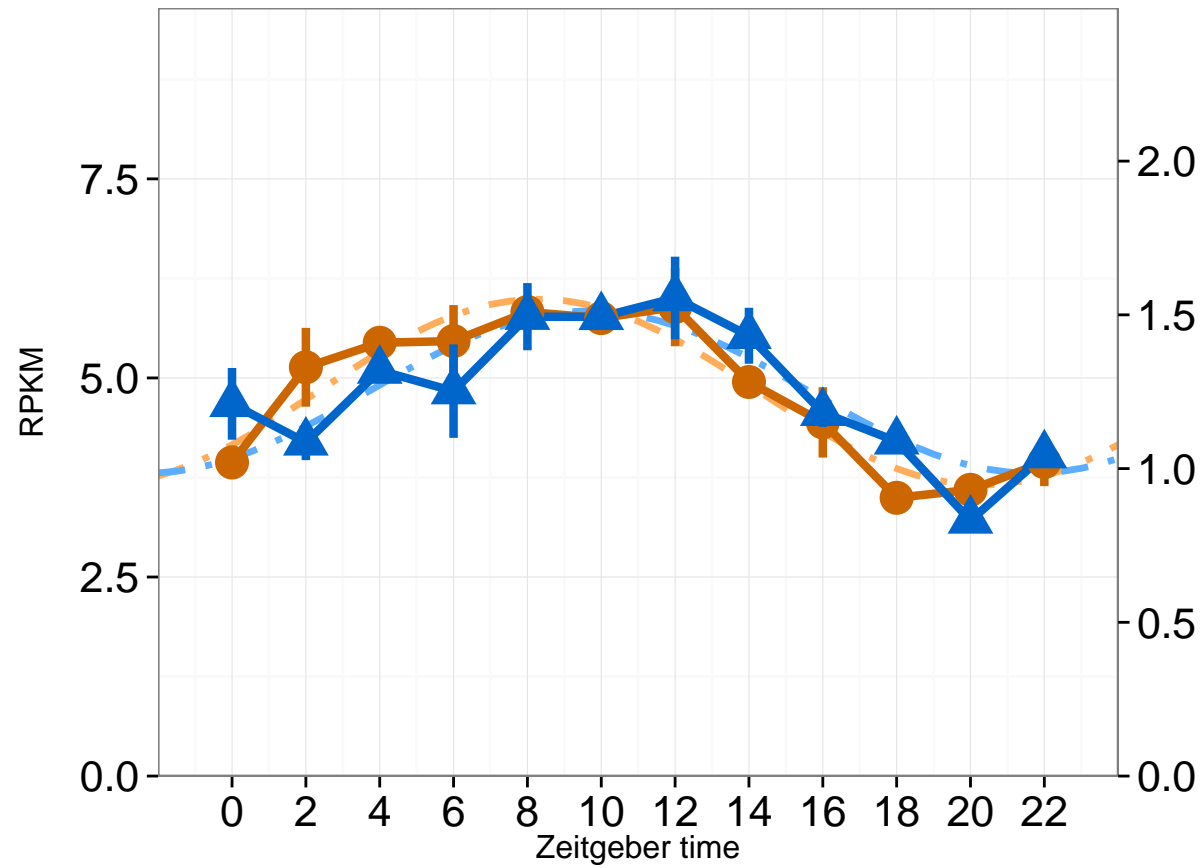

## Ino80

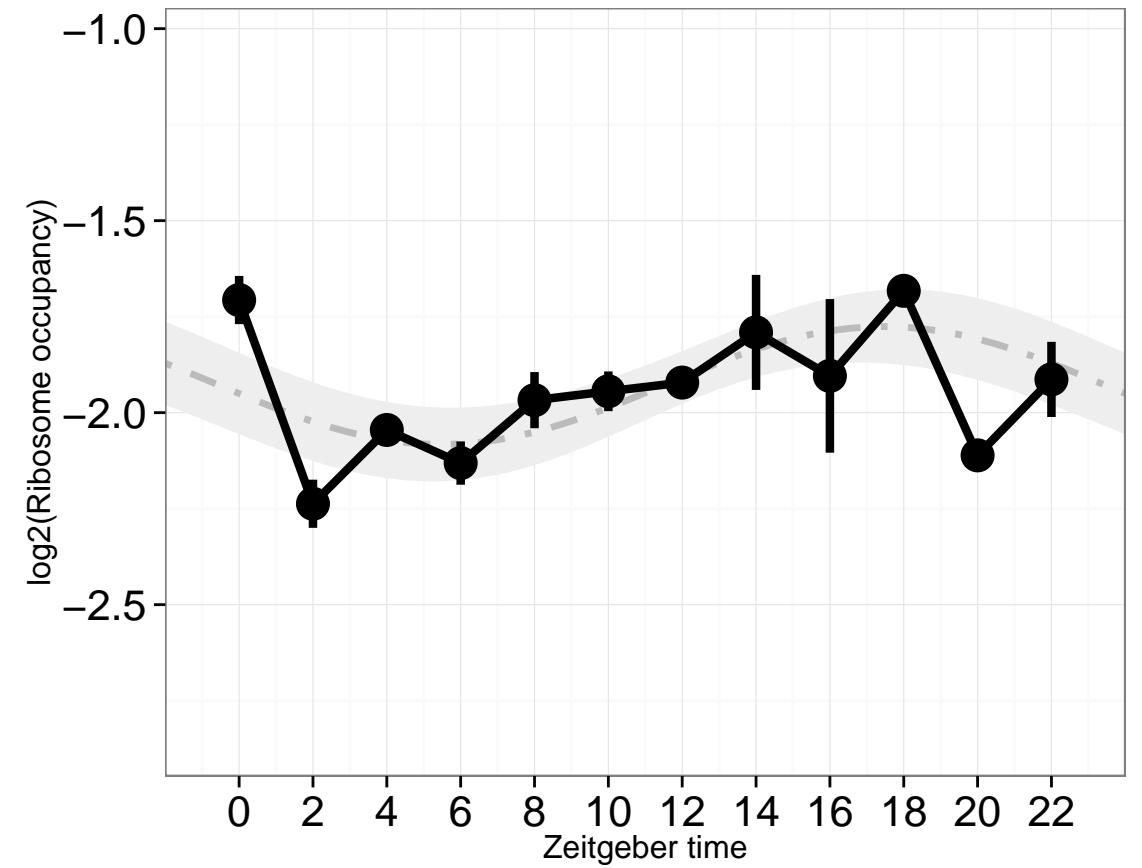

Supplement: SuppDataset_1.zip [file Ino80_set_D.pdf › Supplemental Dataset 1/D-mRNA_rhythm_translation_rhyth/Ino80_set_D.pdf]

## Insc

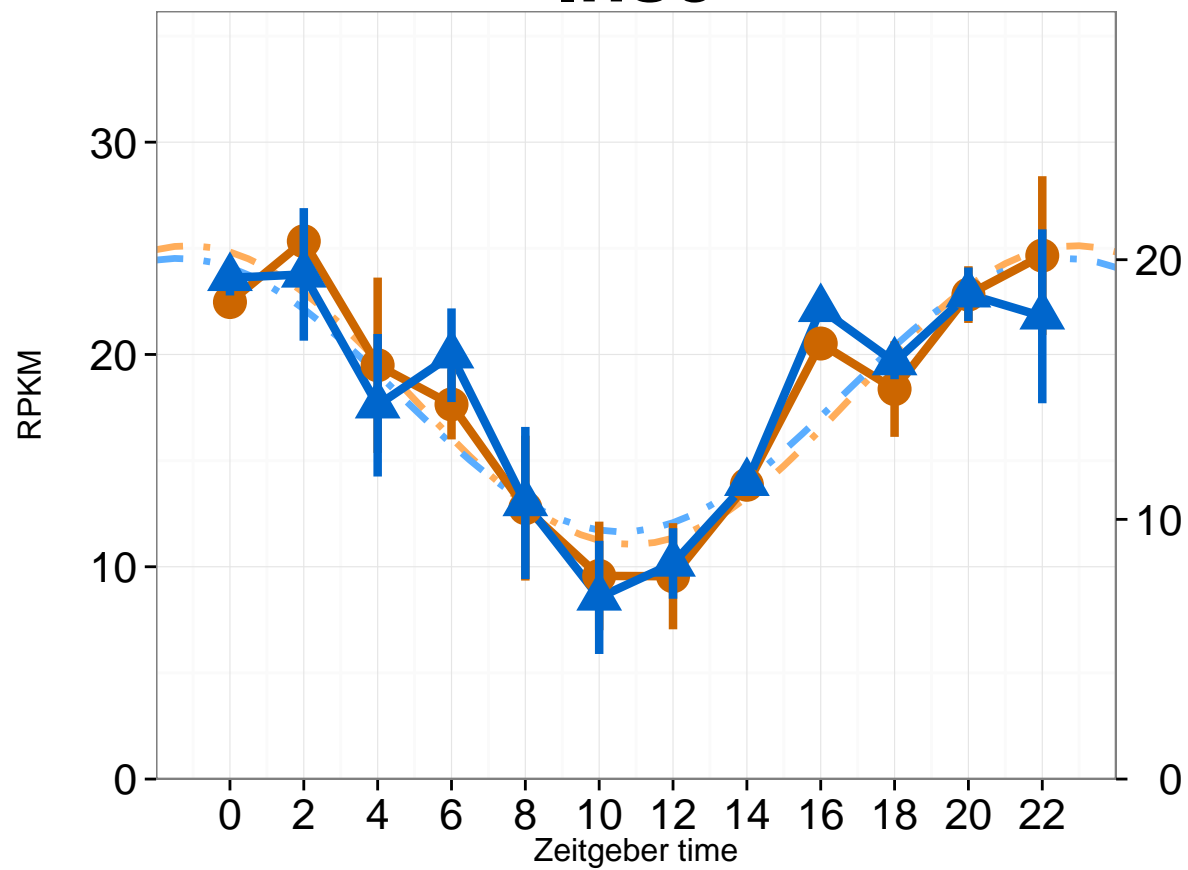

## Insc

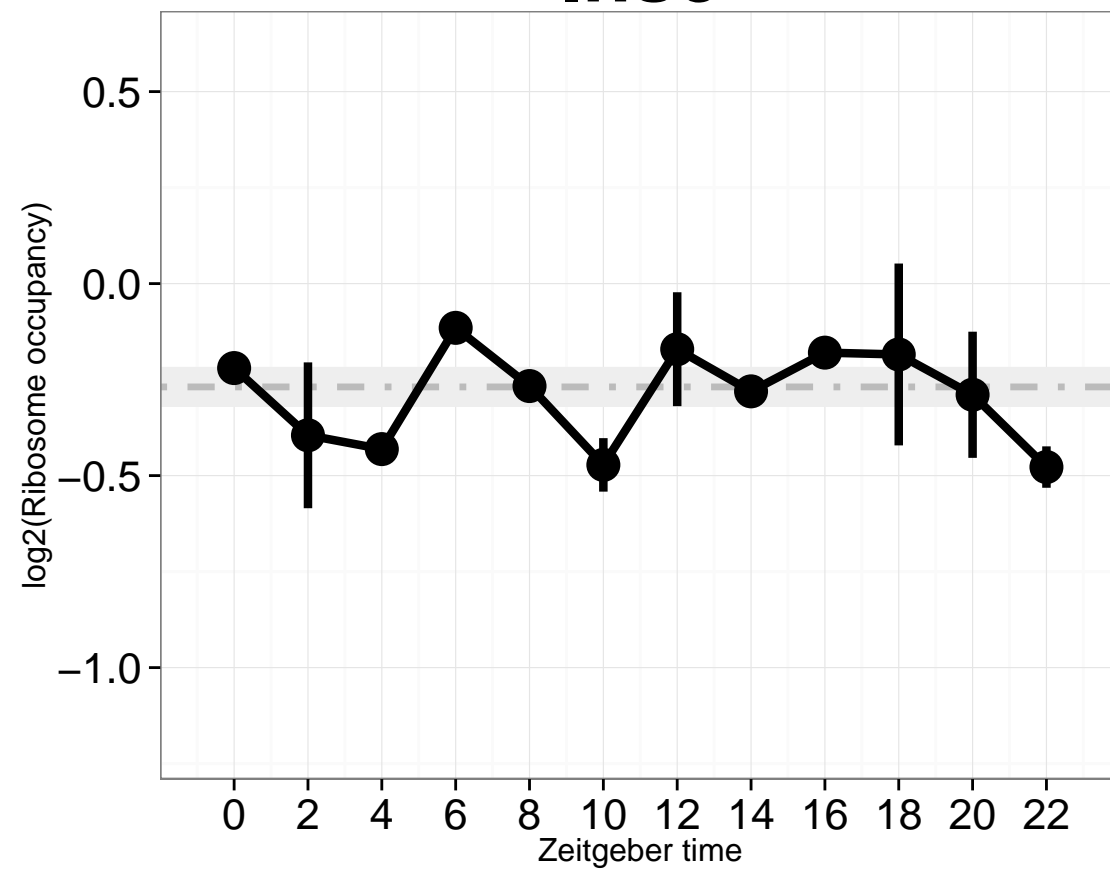

Supplement: SuppDataset_1.zip [file Insc_set_D.pdf › Supplemental Dataset 1/D-mRNA_rhythm_translation_rhyth/Insc_set_D.pdf]

## Insig2

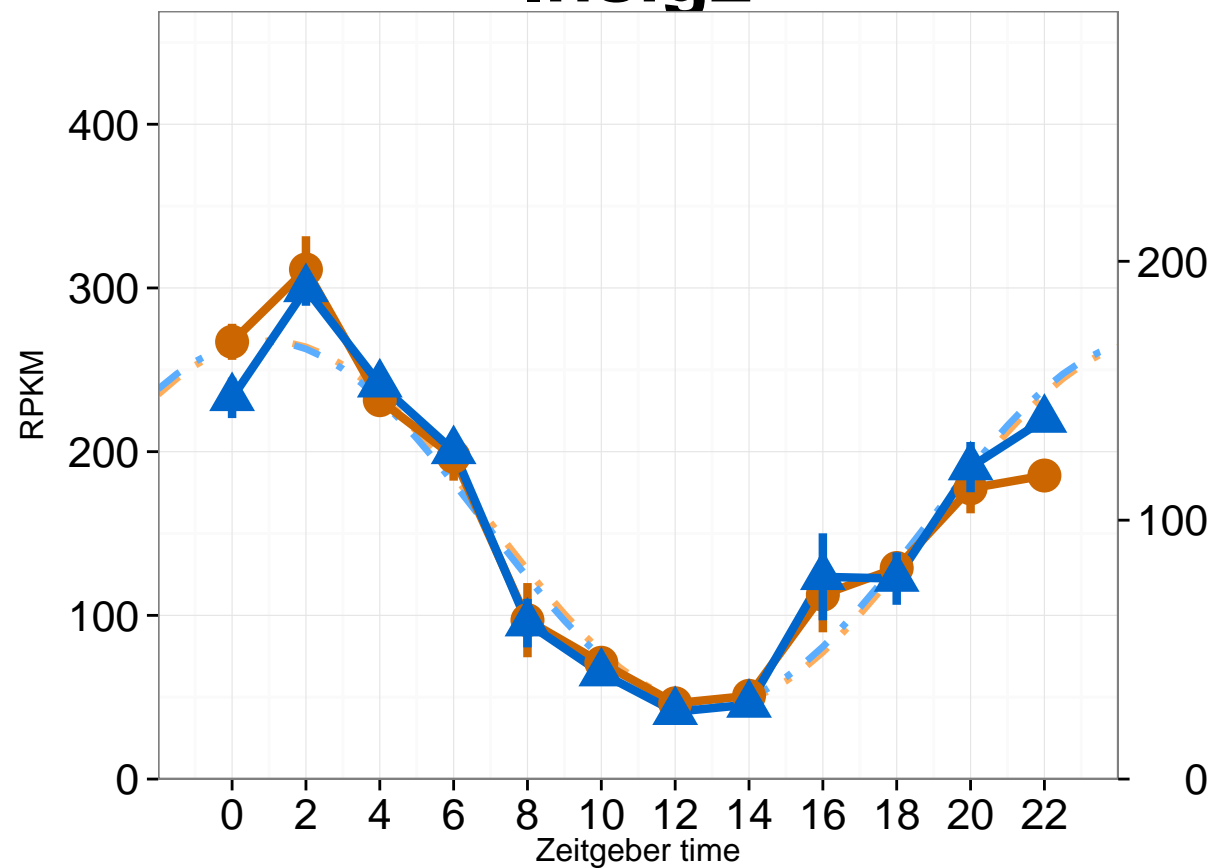

## Insig2

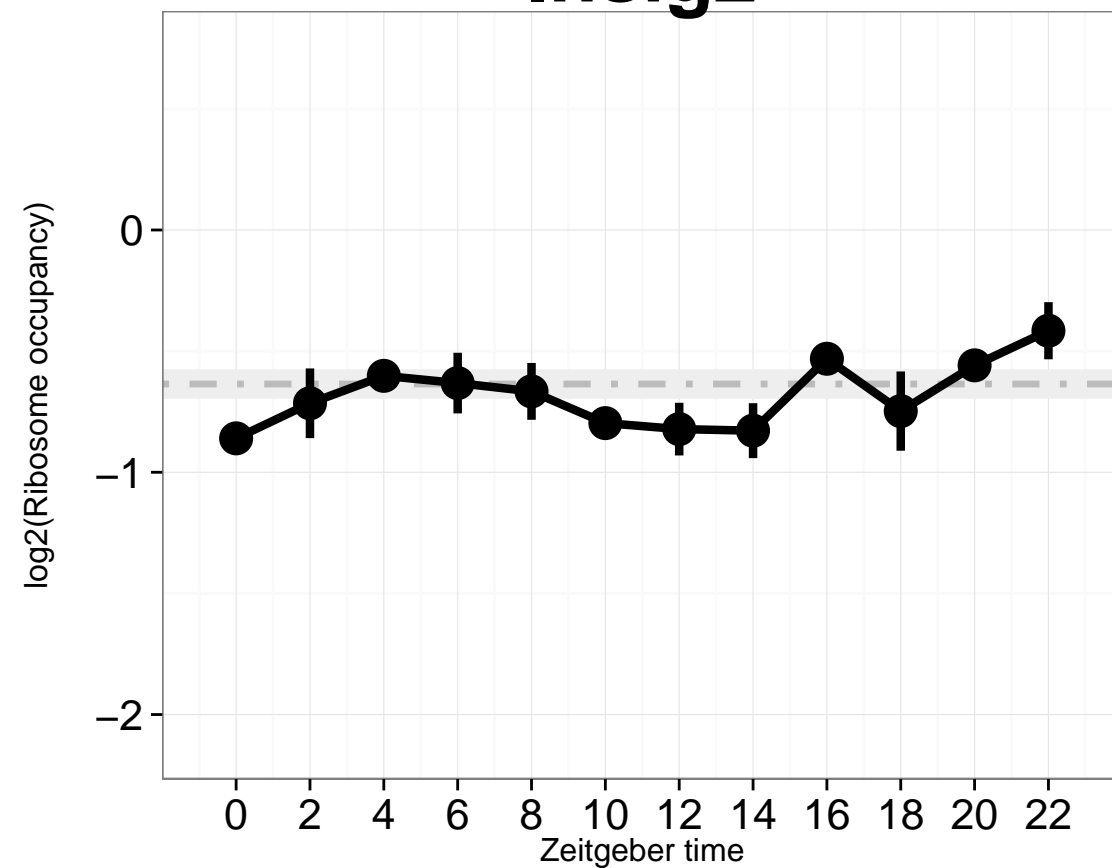

Supplement: SuppDataset_1.zip [file Insig2_set_D.pdf › Supplemental Dataset 1/D-mRNA_rhythm_translation_rhyth/Insig2_set_D.pdf]

# Ints2

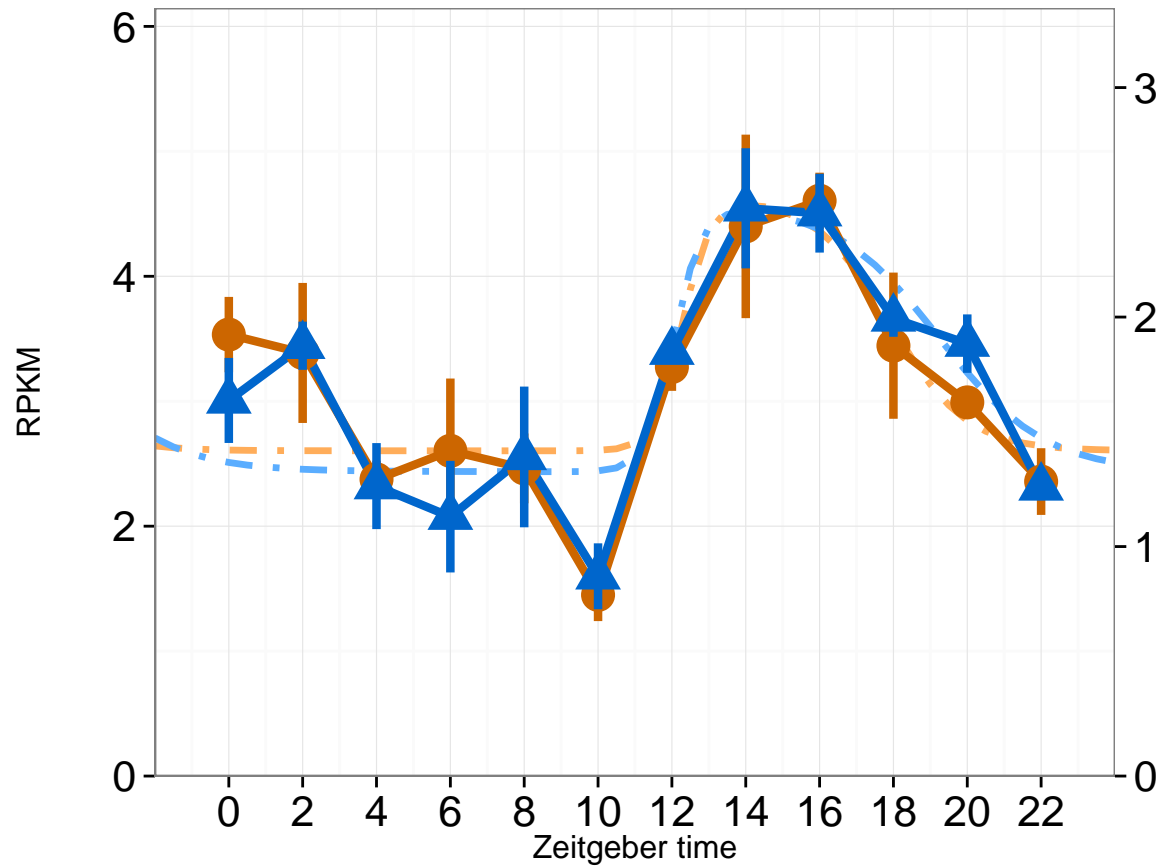

# Ints2

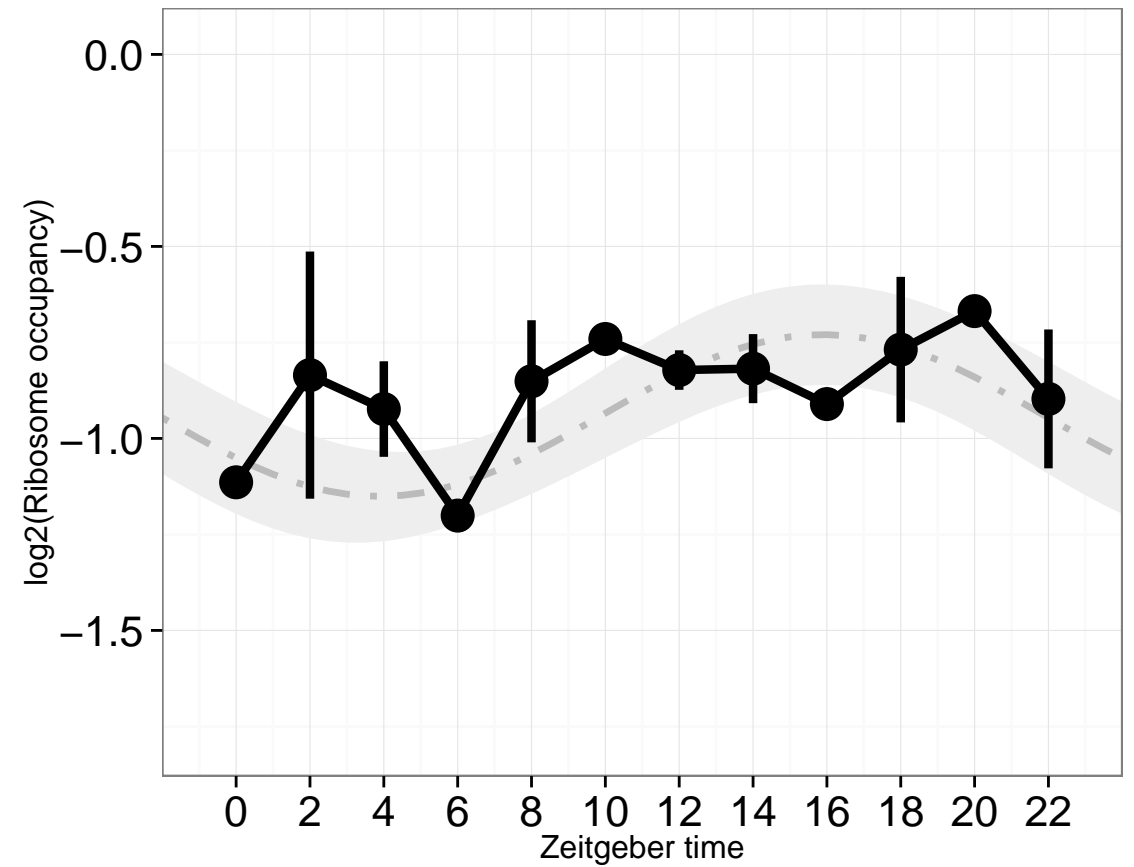

Supplement: SuppDataset_1.zip [file Ints2_set_D.pdf › Supplemental Dataset 1/D-mRNA_rhythm_translation_rhyth/Ints2_set_D.pdf]

## Invs

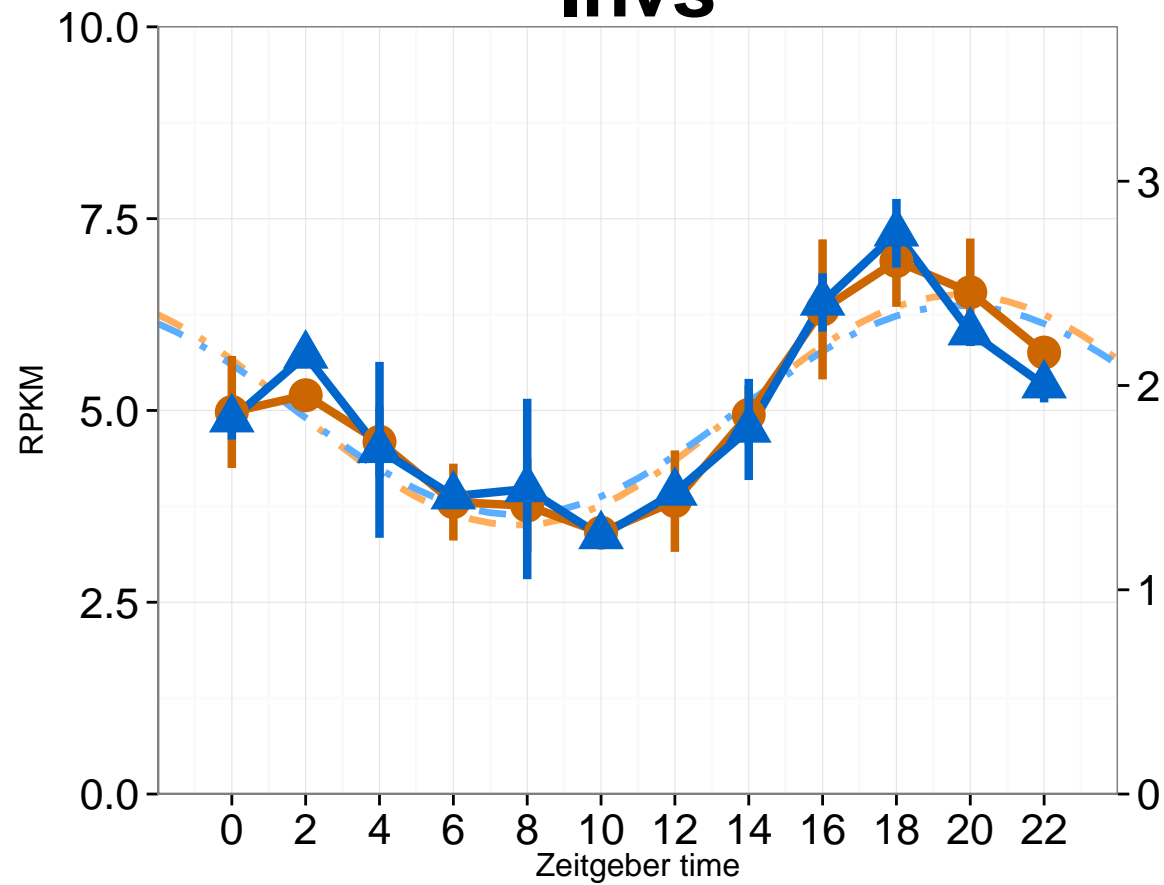

## Invs

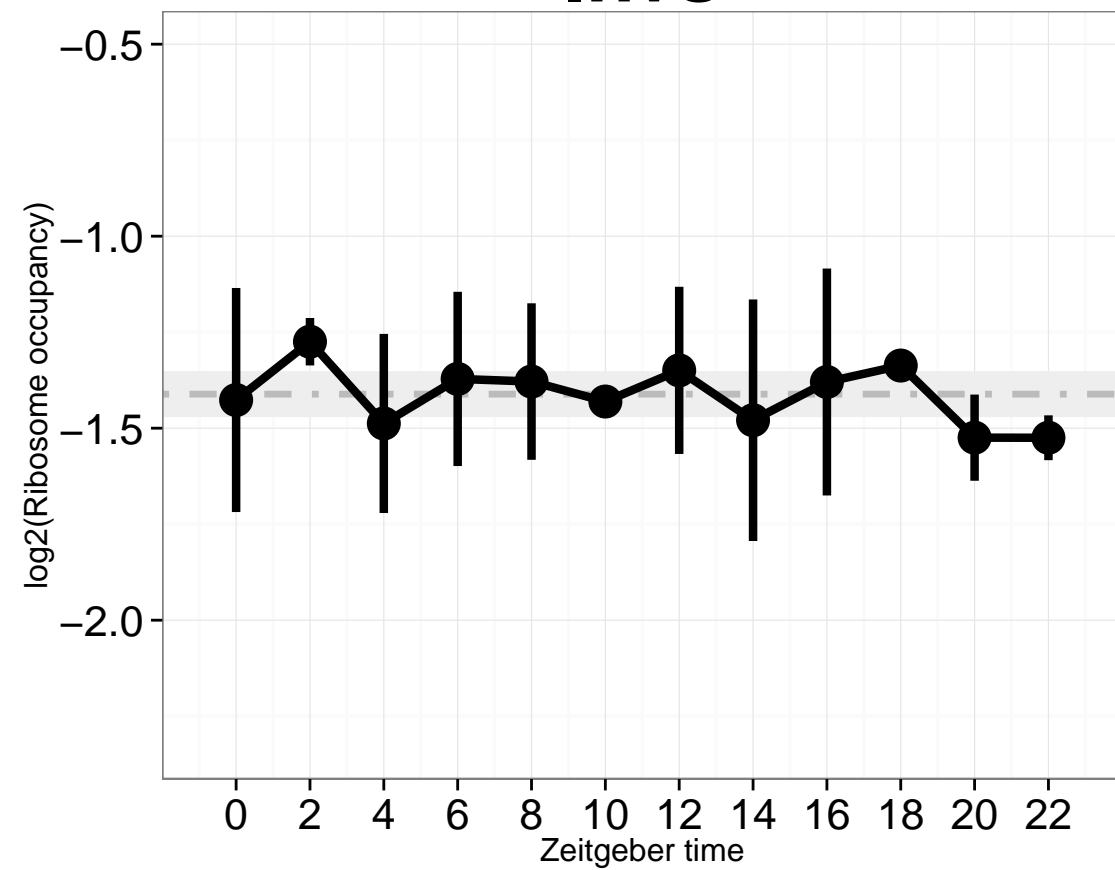

Supplement: SuppDataset_1.zip [file Invs_set_D.pdf › Supplemental Dataset 1/D-mRNA_rhythm_translation_rhyth/Invs_set_D.pdf]

## Ipo7

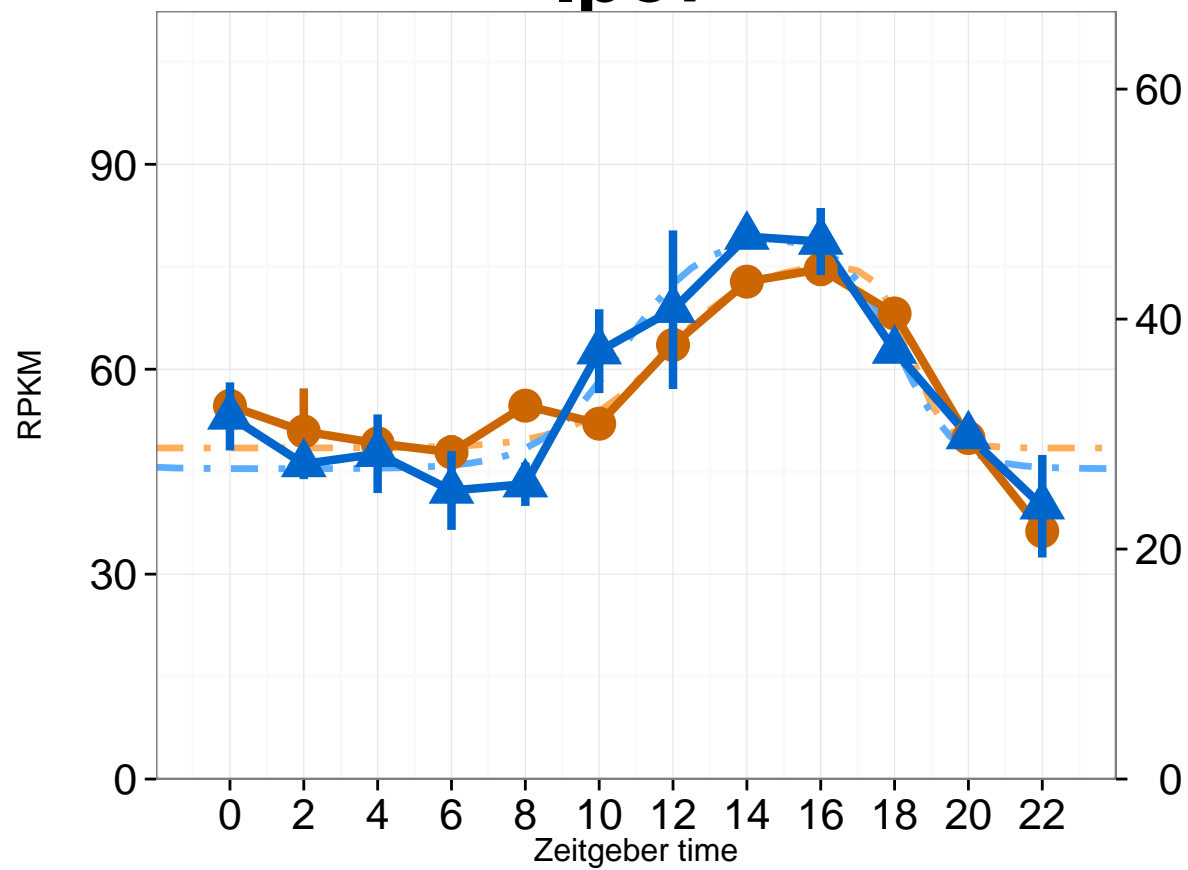

## Ipo7

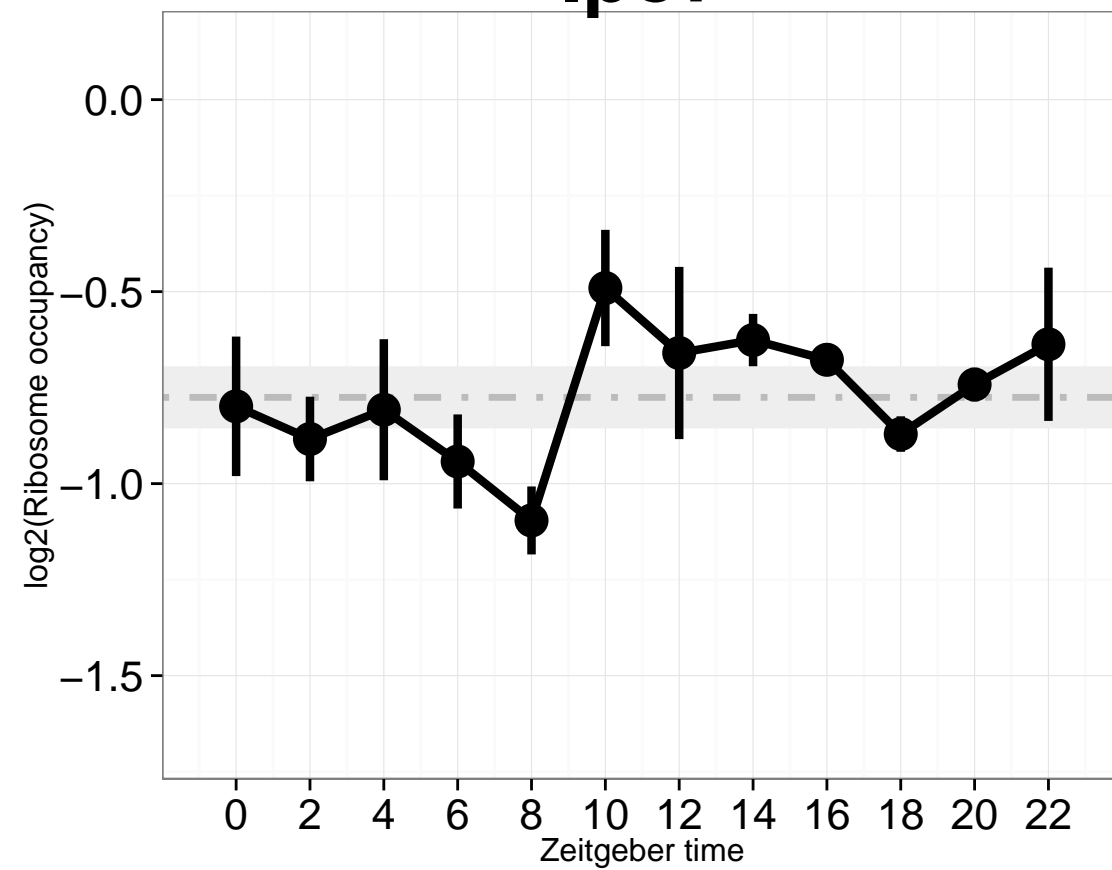

Supplement: SuppDataset_1.zip [file Ipo7_set_D.pdf › Supplemental Dataset 1/D-mRNA_rhythm_translation_rhyth/Ipo7_set_D.pdf]

## Irf5

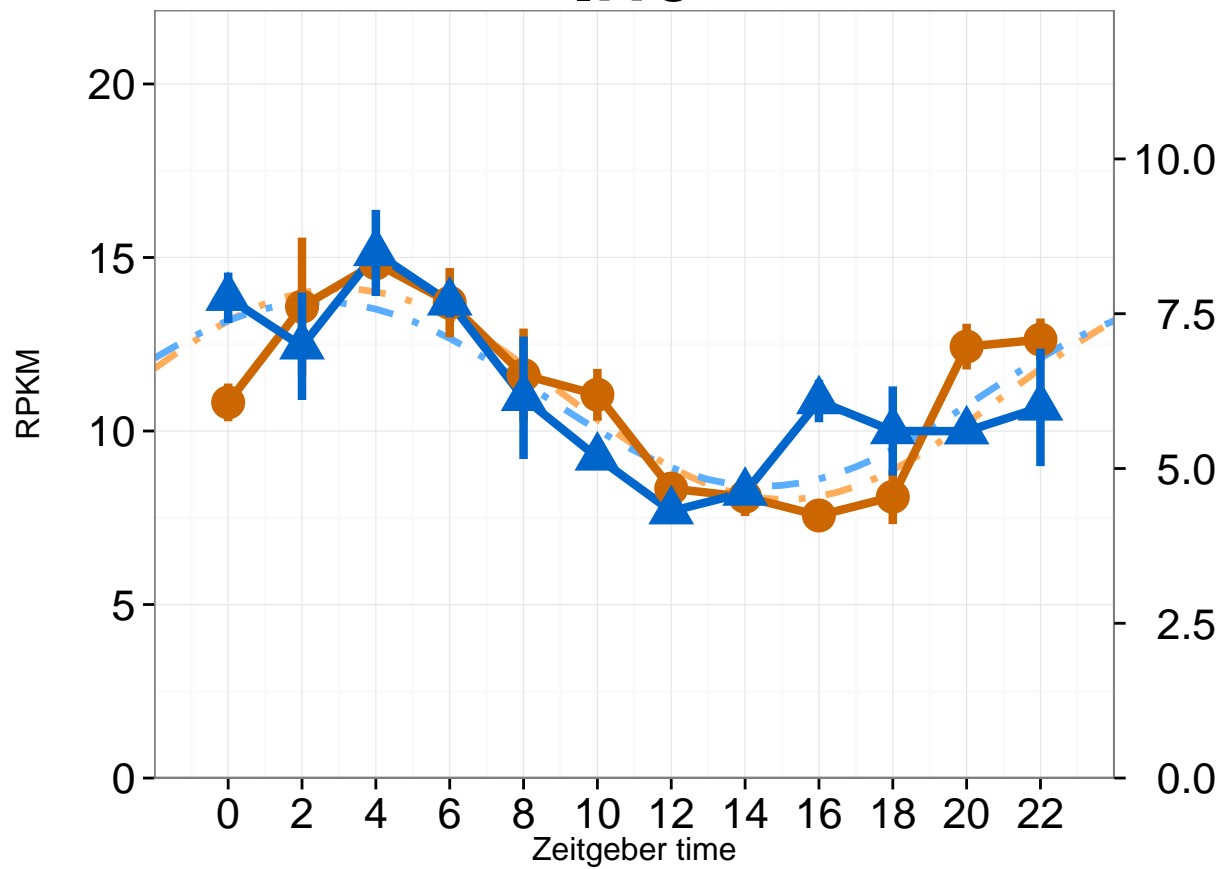

## Irf5

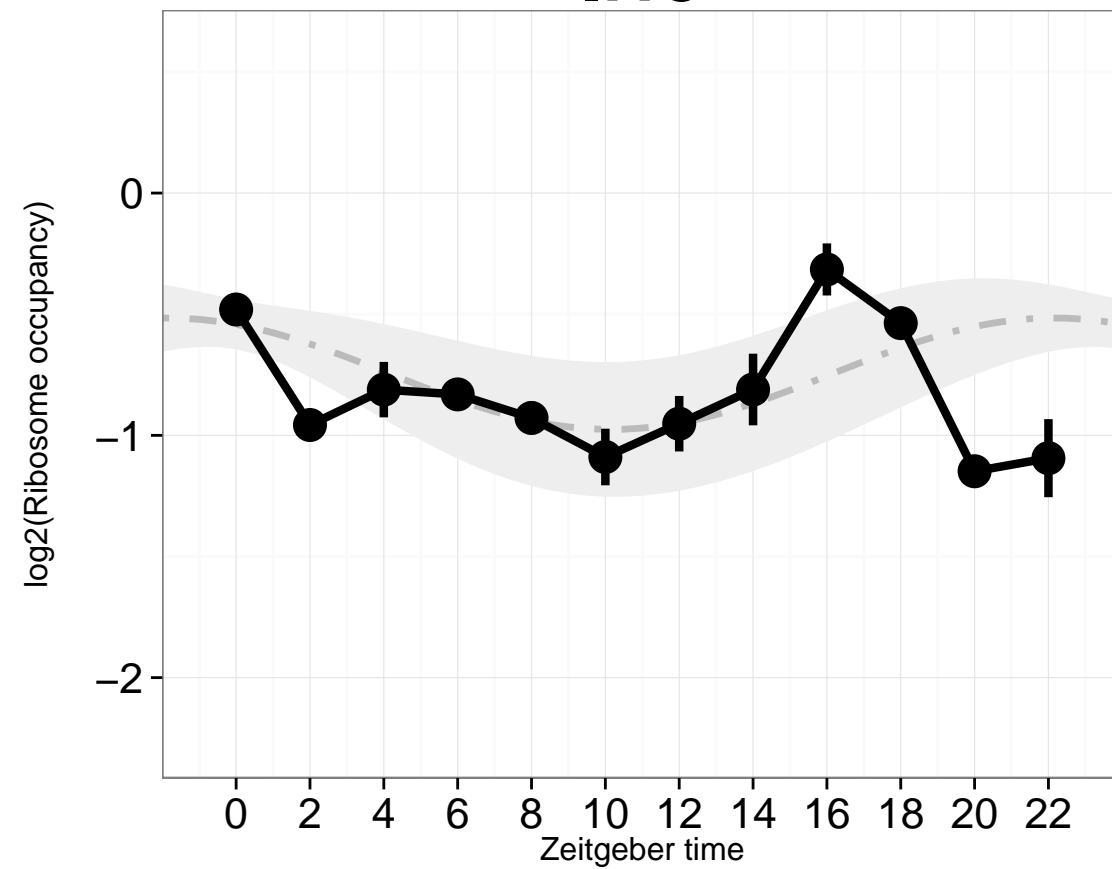

Supplement: SuppDataset_1.zip [file Irf5_set_D.pdf › Supplemental Dataset 1/D-mRNA_rhythm_translation_rhyth/Irf5_set_D.pdf]

## Irf6

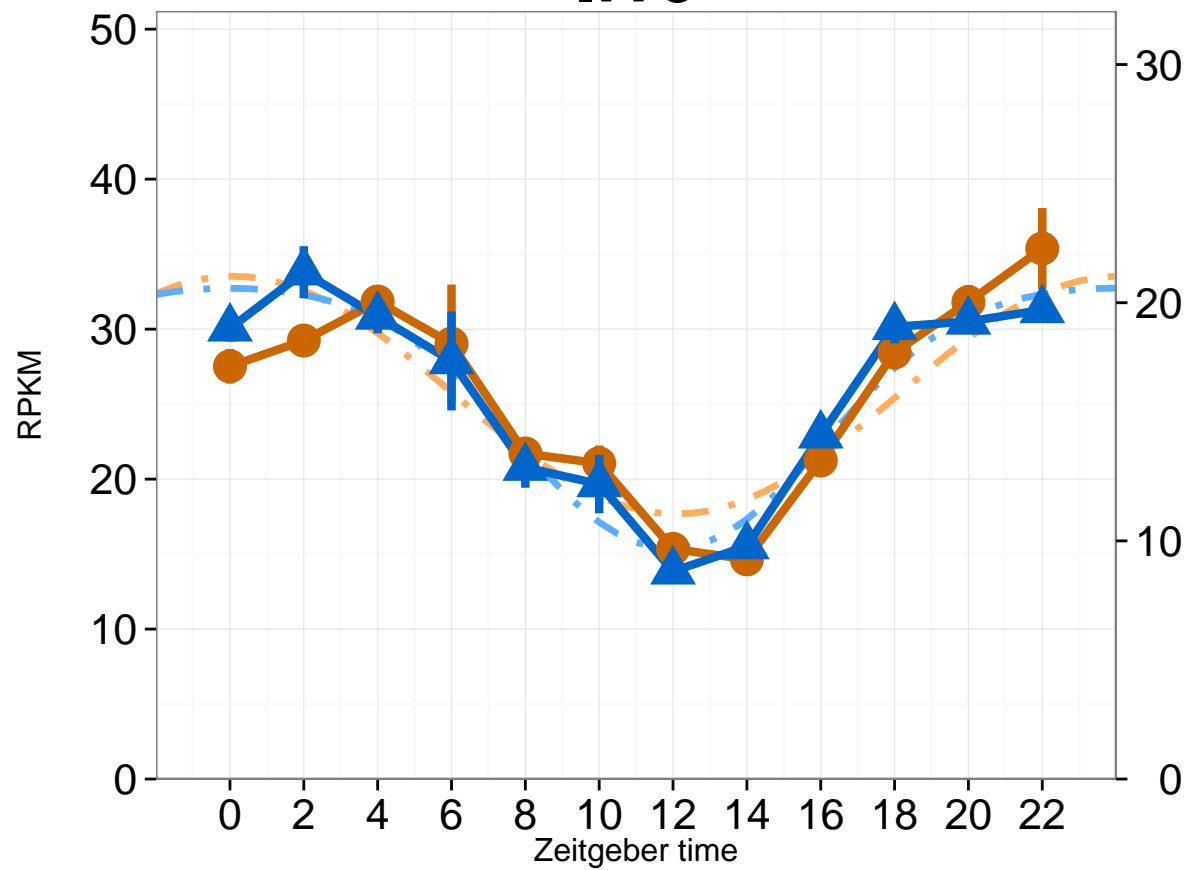

## Irf6

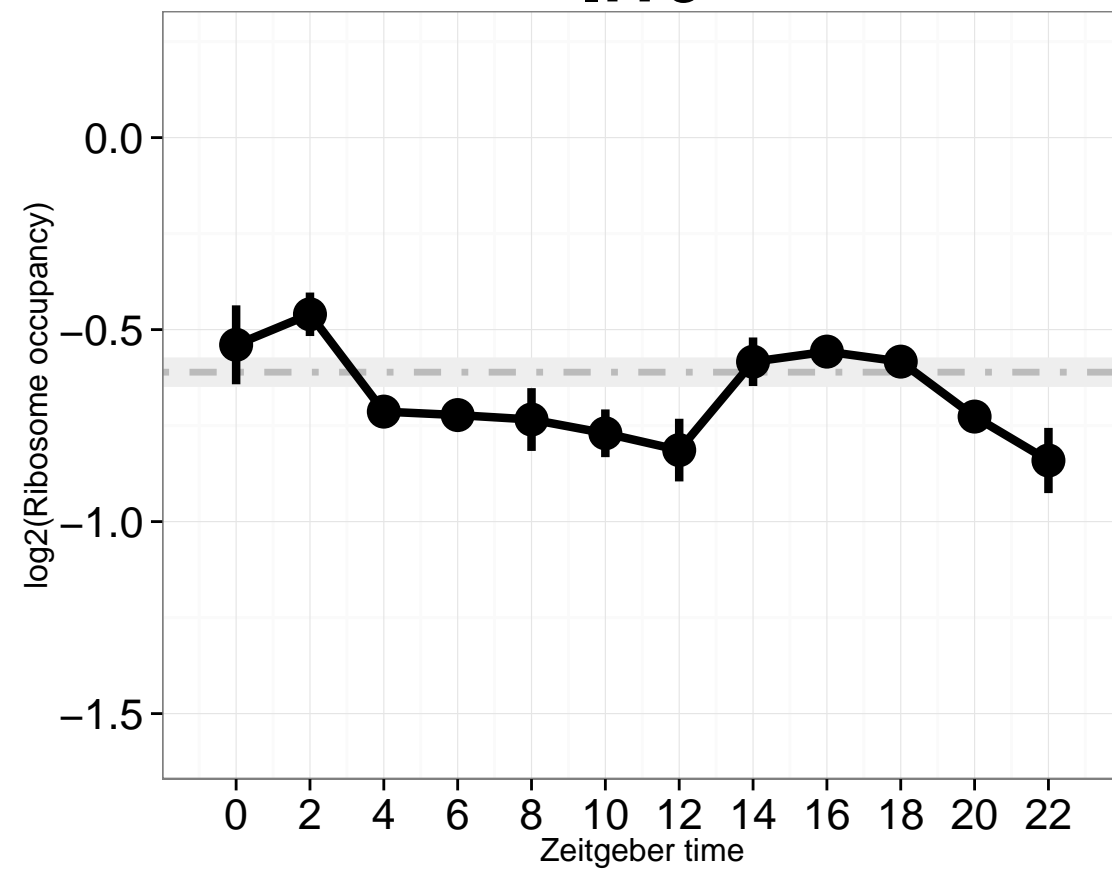

Supplement: SuppDataset_1.zip [file Irf6_set_D.pdf › Supplemental Dataset 1/D-mRNA_rhythm_translation_rhyth/Irf6_set_D.pdf]

# Irgm2

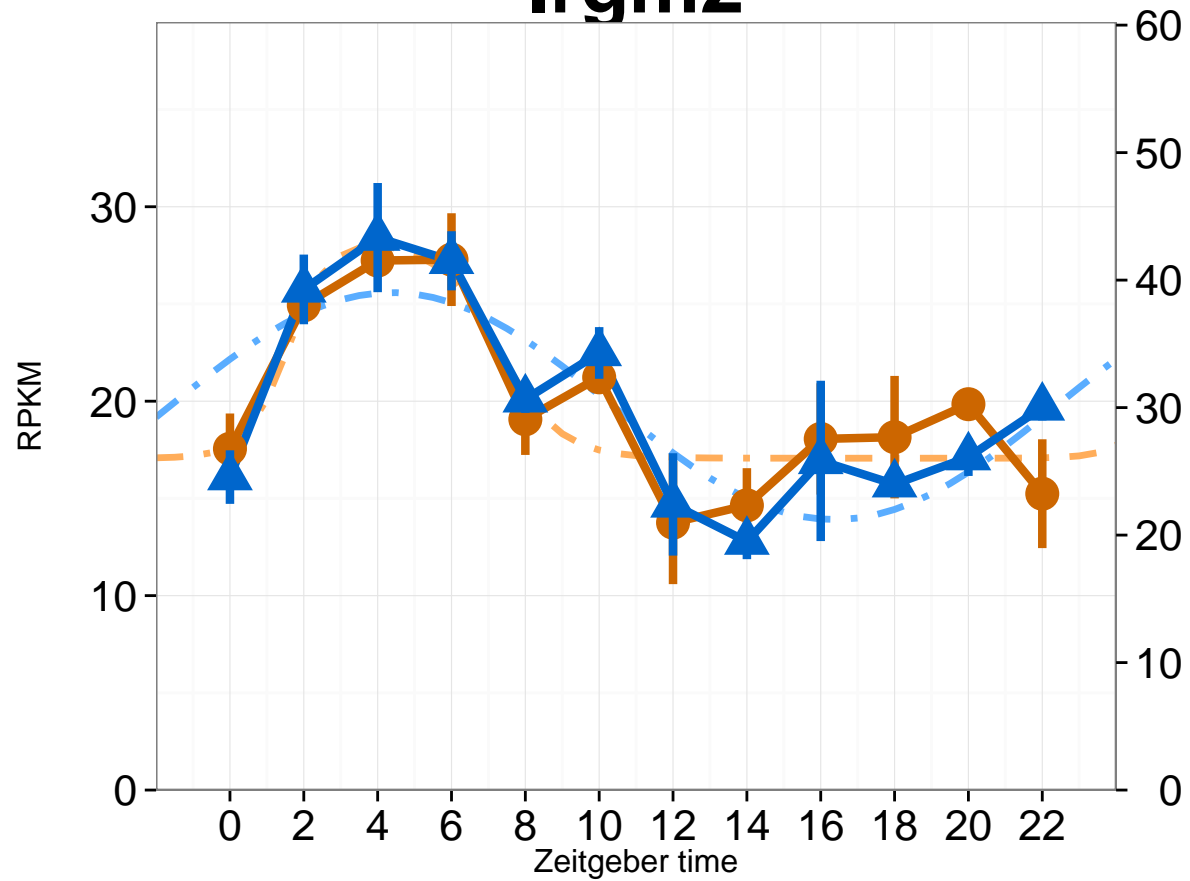

# Irgm2

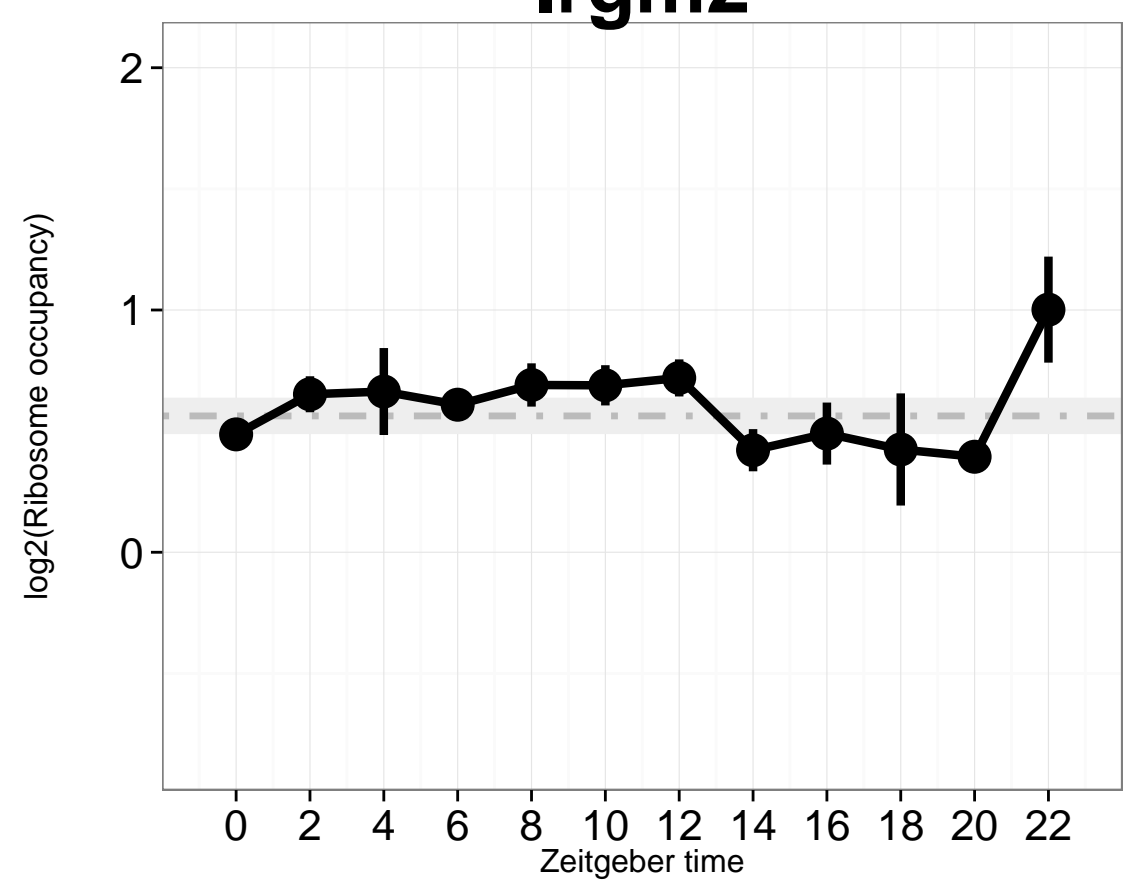

Supplement: SuppDataset_1.zip [file Irgm2_set_D.pdf › Supplemental Dataset 1/D-mRNA_rhythm_translation_rhyth/Irgm2_set_D.pdf]

# Irs1

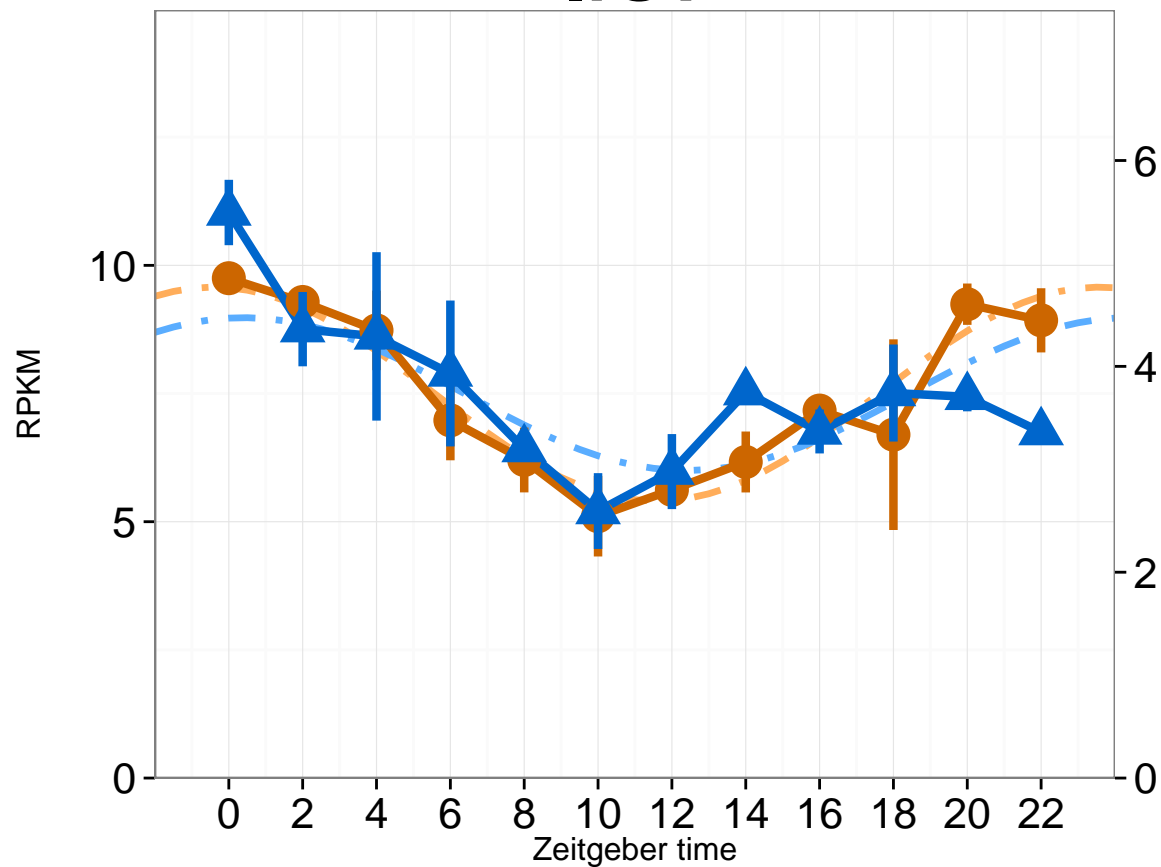

# Irs1

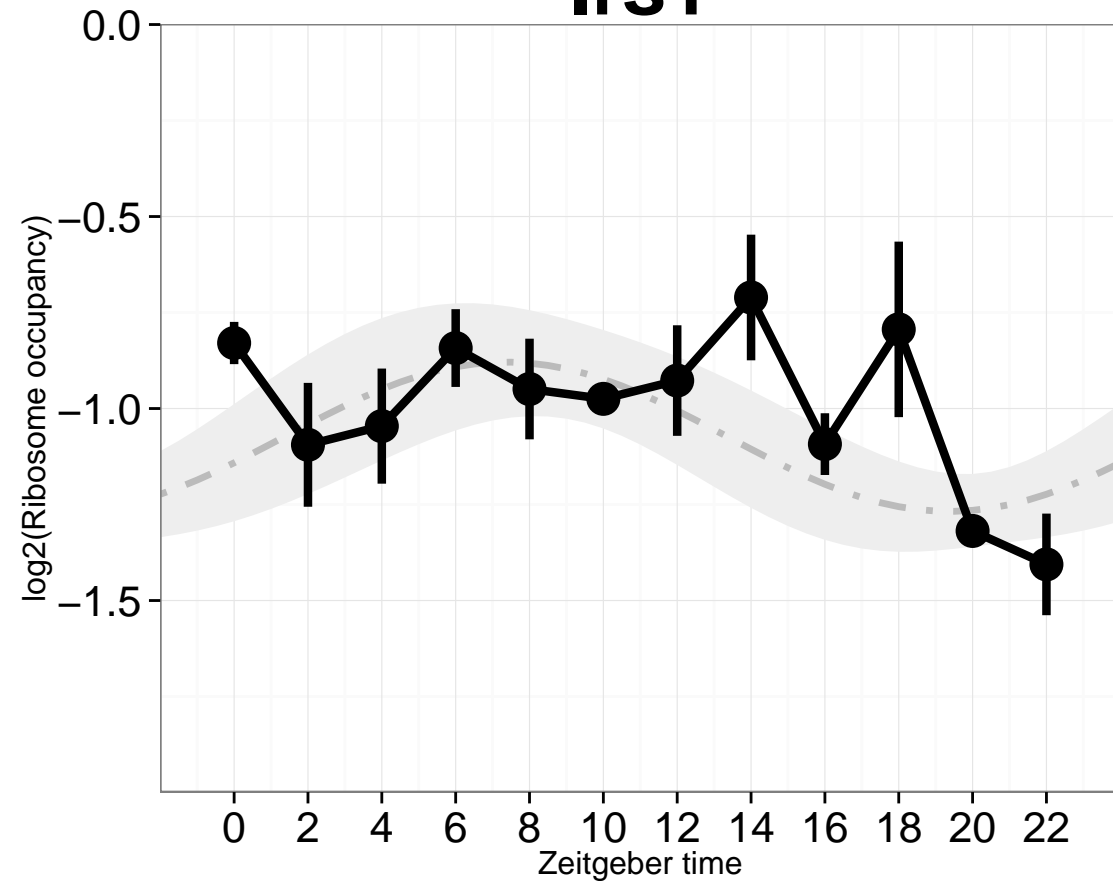

Supplement: SuppDataset_1.zip [file Irs1_set_D.pdf › Supplemental Dataset 1/D-mRNA_rhythm_translation_rhyth/Irs1_set_D.pdf]

## Irs2

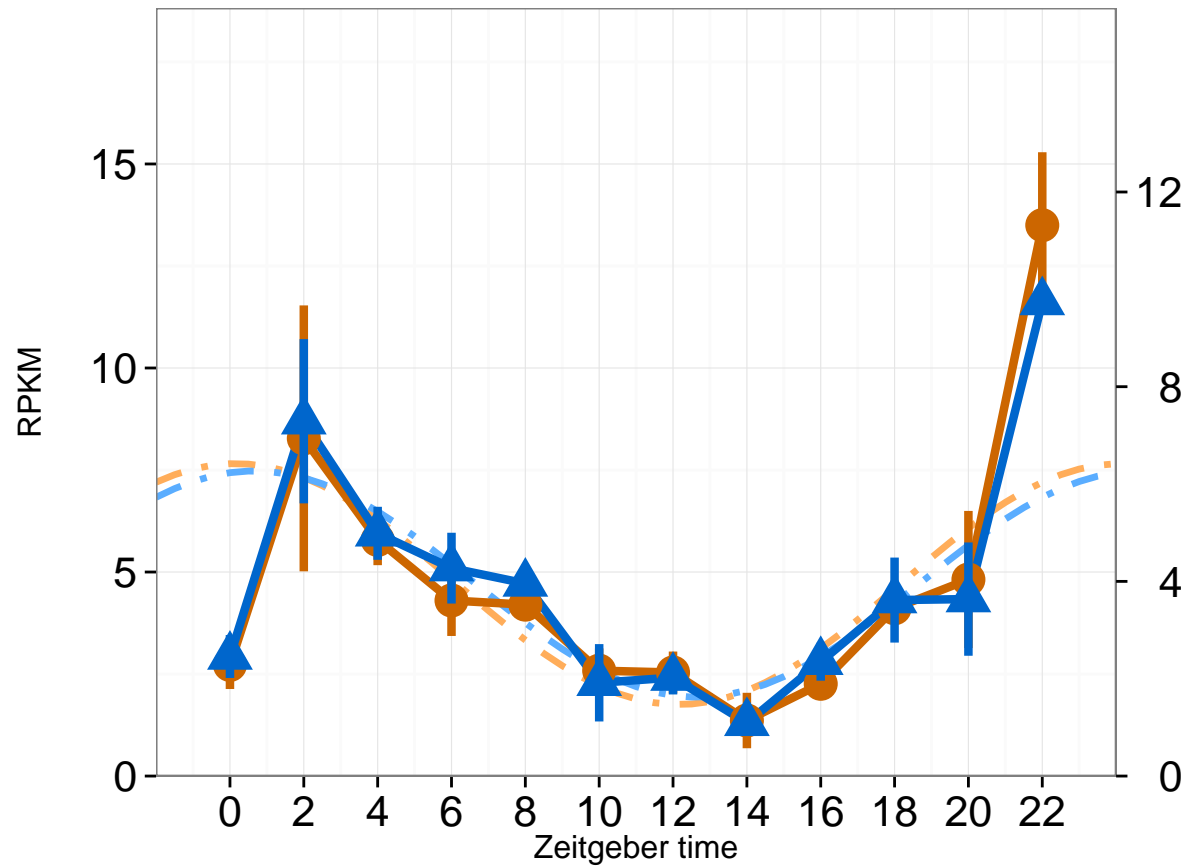

## Irs2

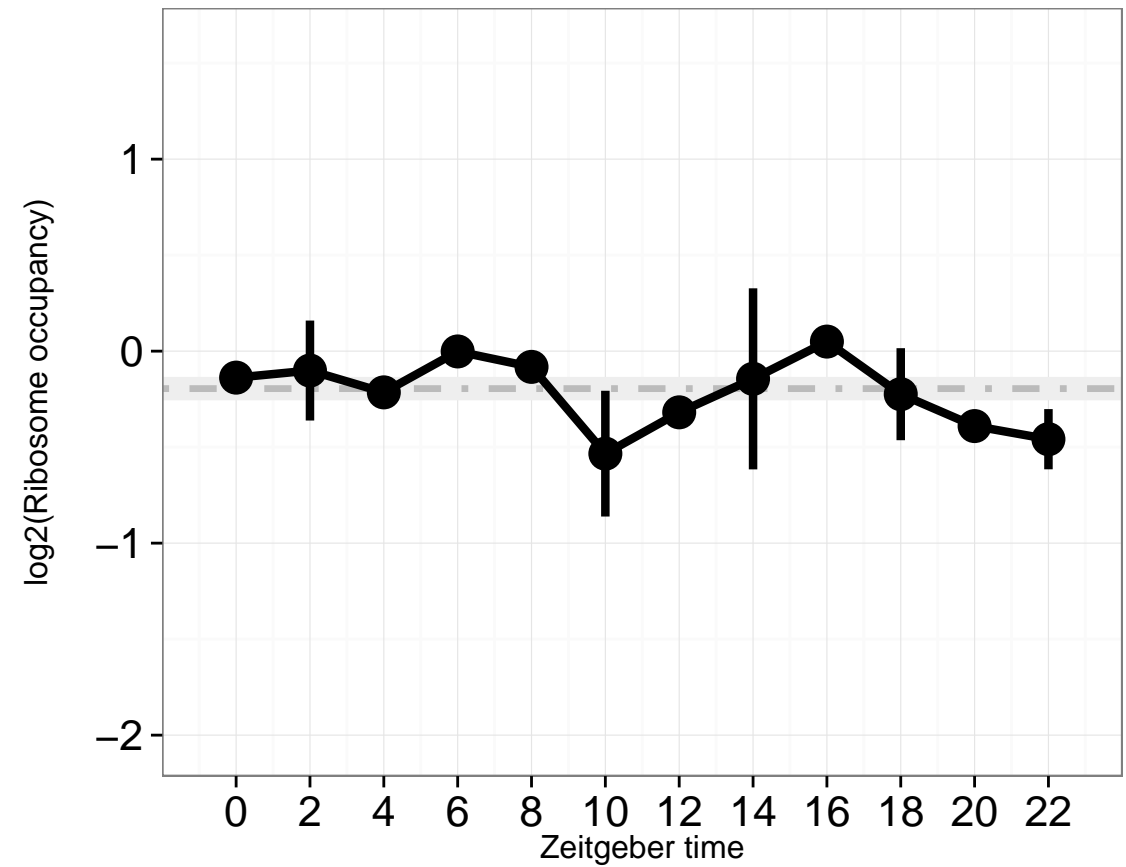

Supplement: SuppDataset_1.zip [file Irs2_set_D.pdf › Supplemental Dataset 1/D-mRNA_rhythm_translation_rhyth/Irs2_set_D.pdf]

## Isg15

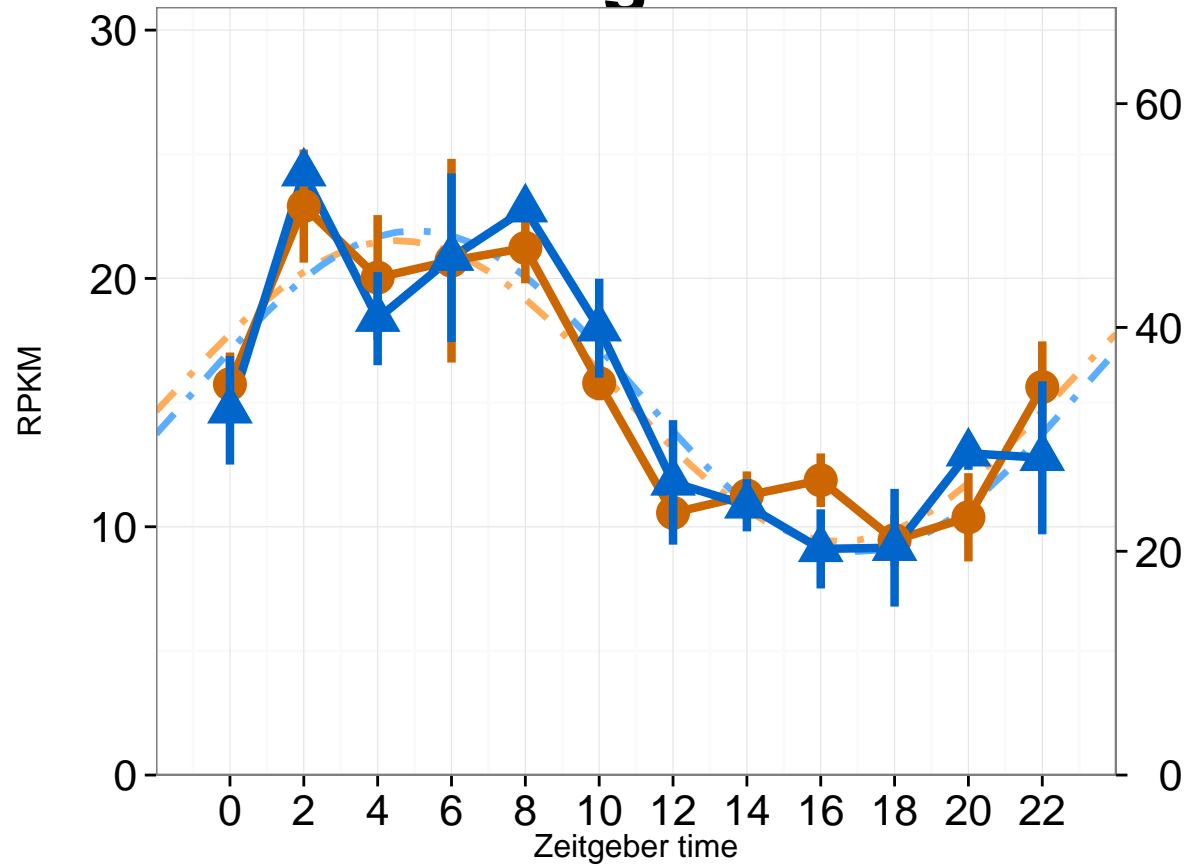

## Isg15

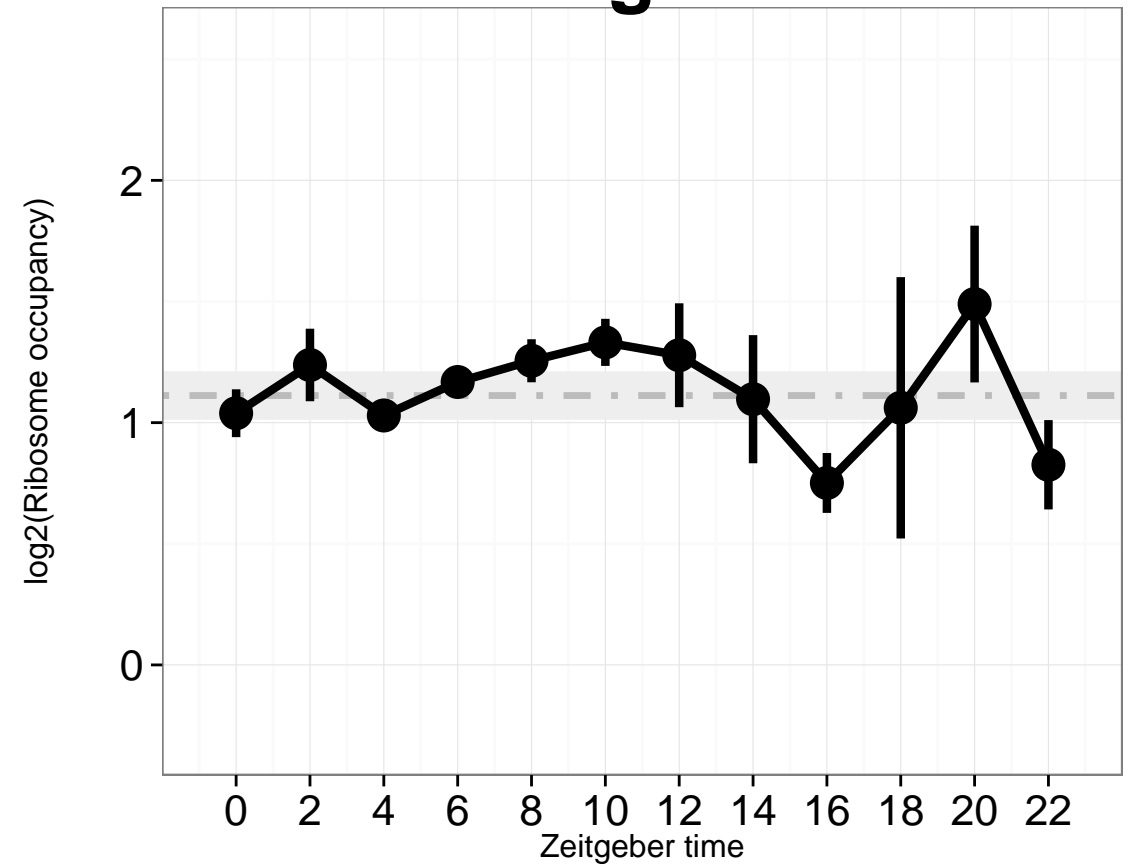

Supplement: SuppDataset_1.zip [file Isg15_set_D.pdf › Supplemental Dataset 1/D-mRNA_rhythm_translation_rhyth/Isg15_set_D.pdf]

# Isyna1

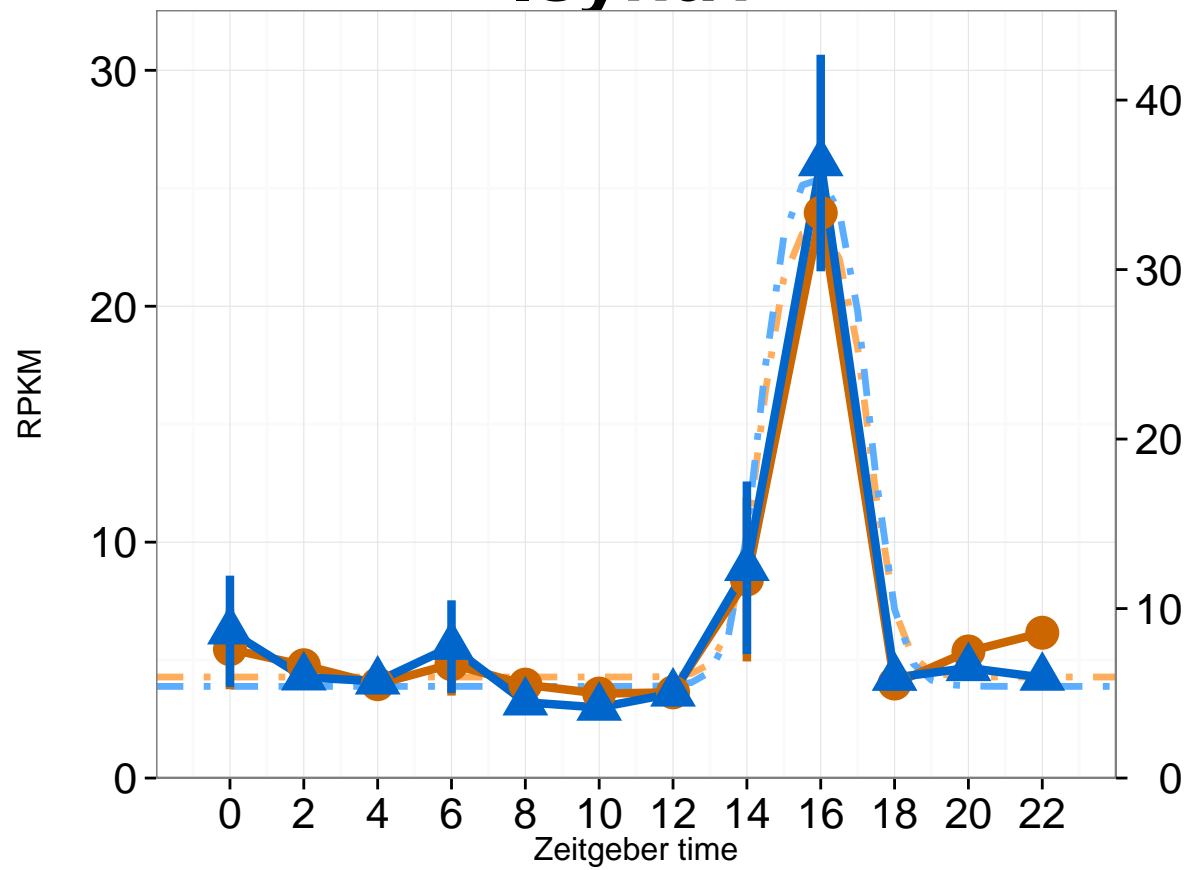

# Isyna1

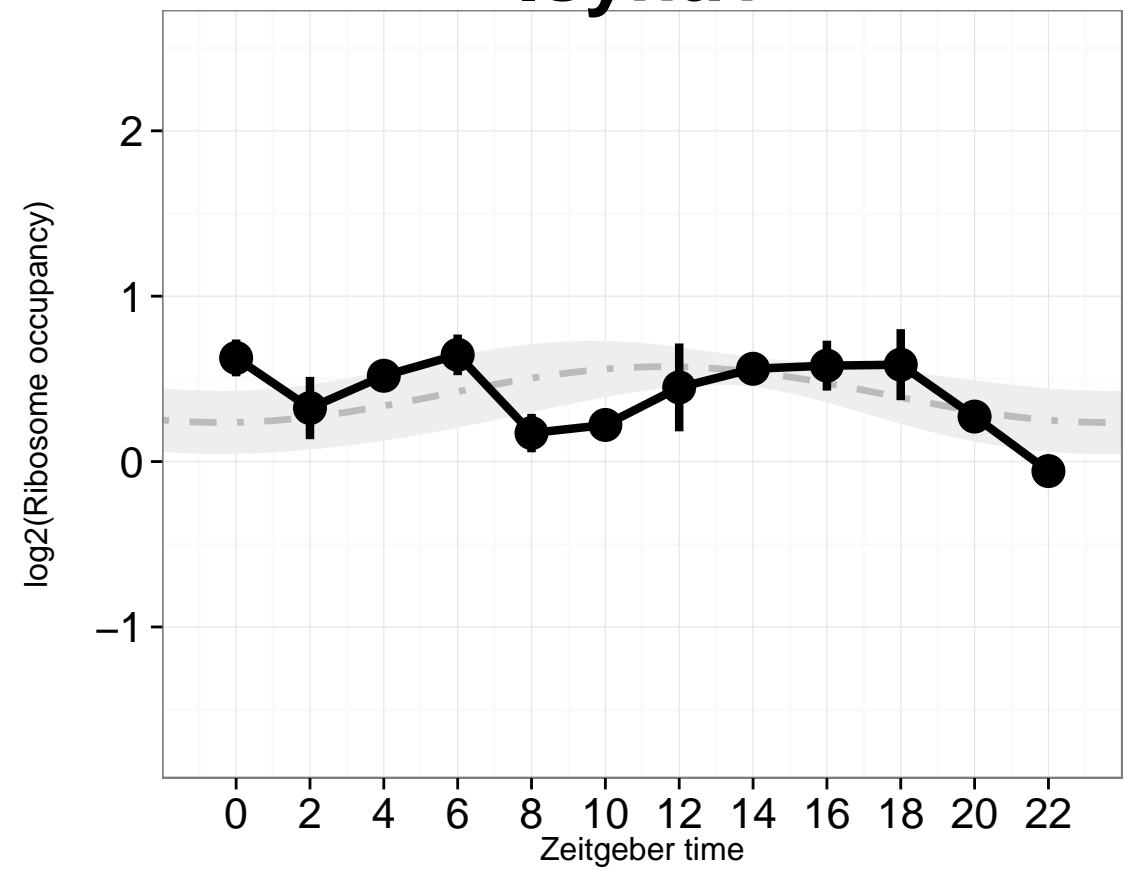

Supplement: SuppDataset_1.zip [file Isyna1_set_D.pdf › Supplemental Dataset 1/D-mRNA_rhythm_translation_rhyth/Isyna1_set_D.pdf]

# Itga5

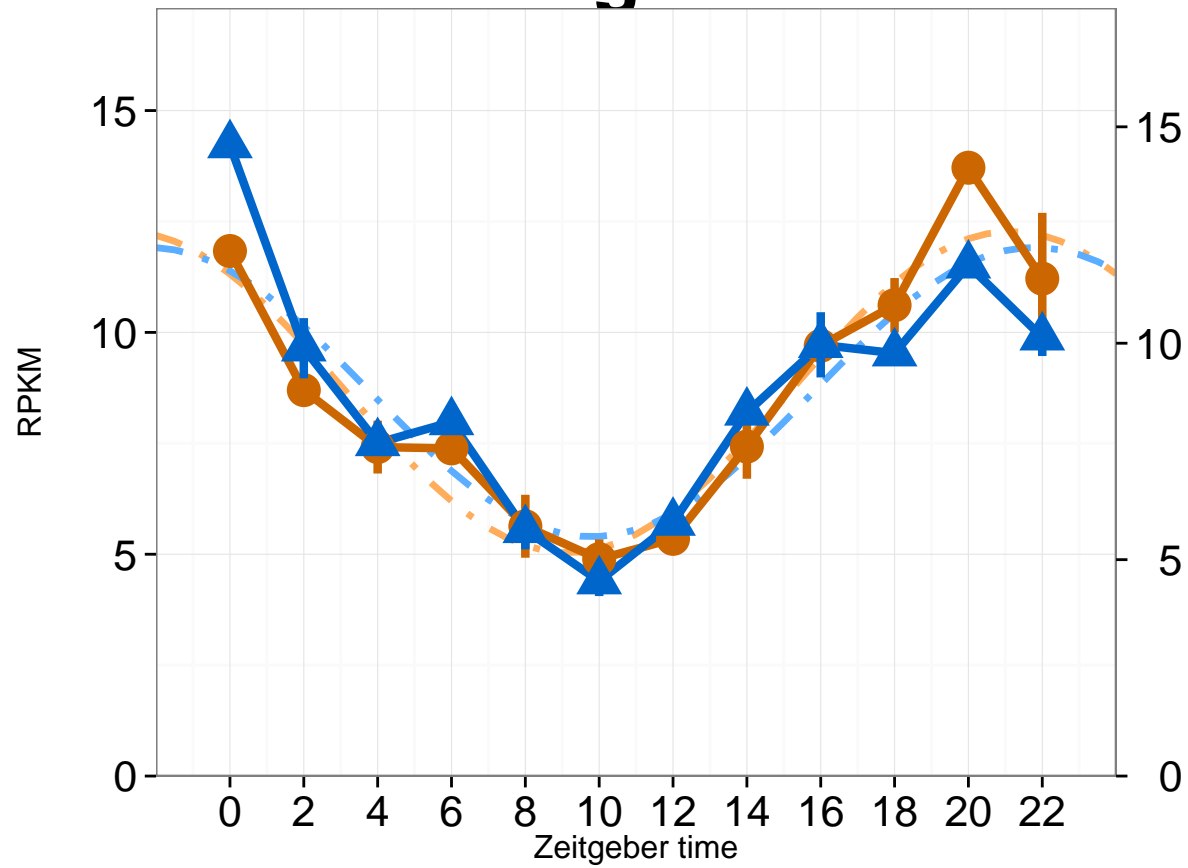

# Itga5

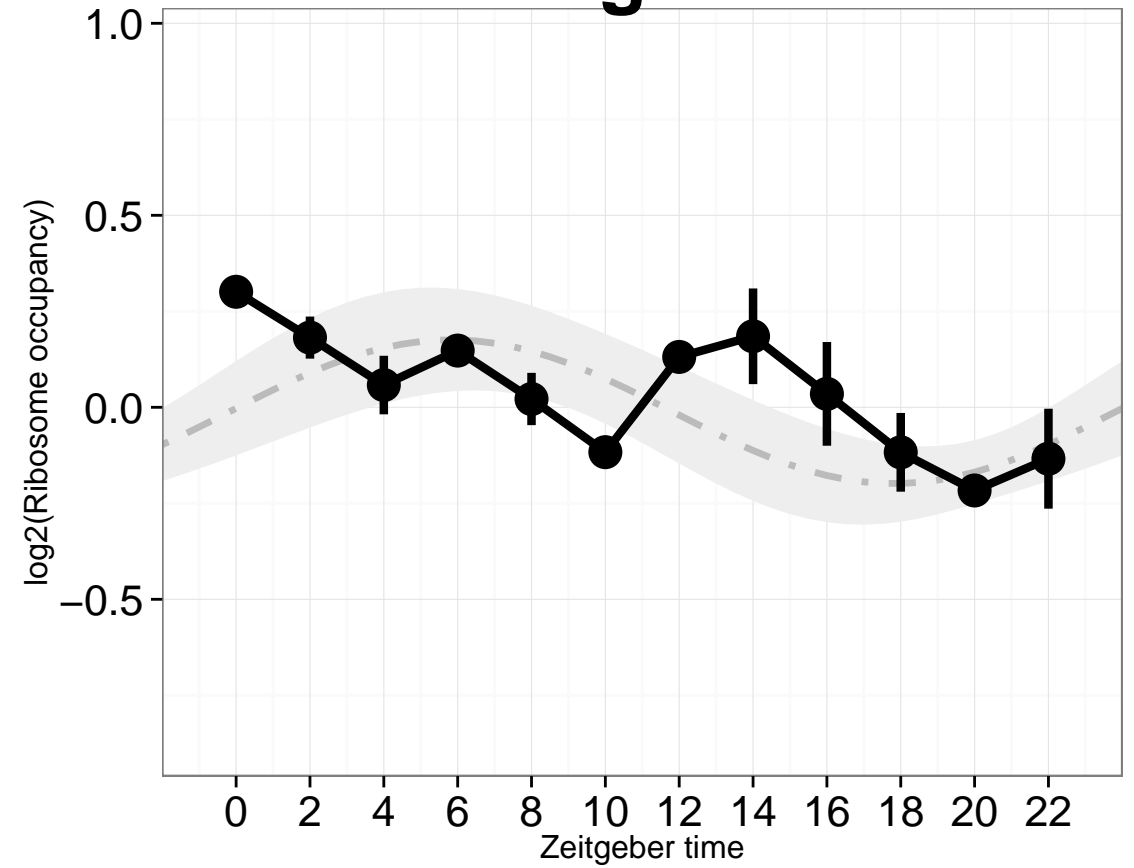

Supplement: SuppDataset_1.zip [file Itga5_set_D.pdf › Supplemental Dataset 1/D-mRNA_rhythm_translation_rhyth/Itga5_set_D.pdf]

# Itga8

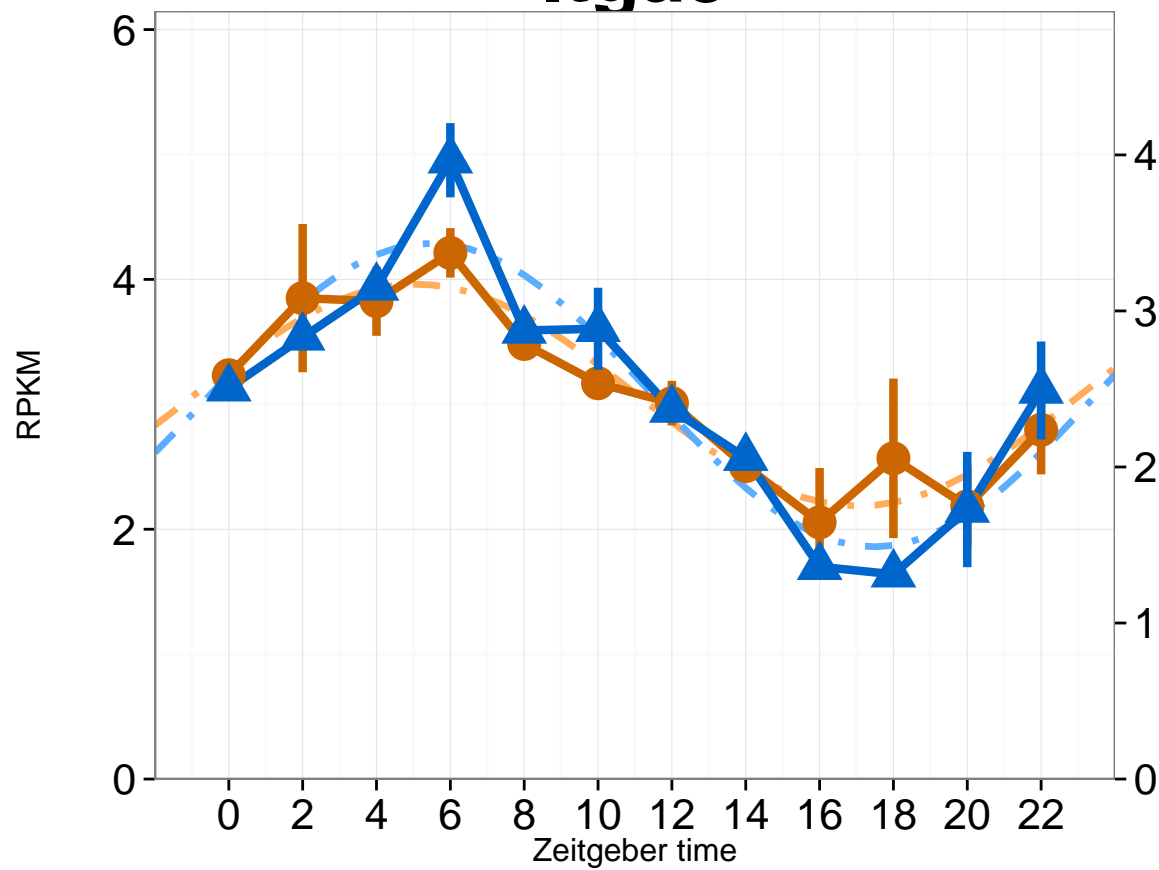

# Itga8

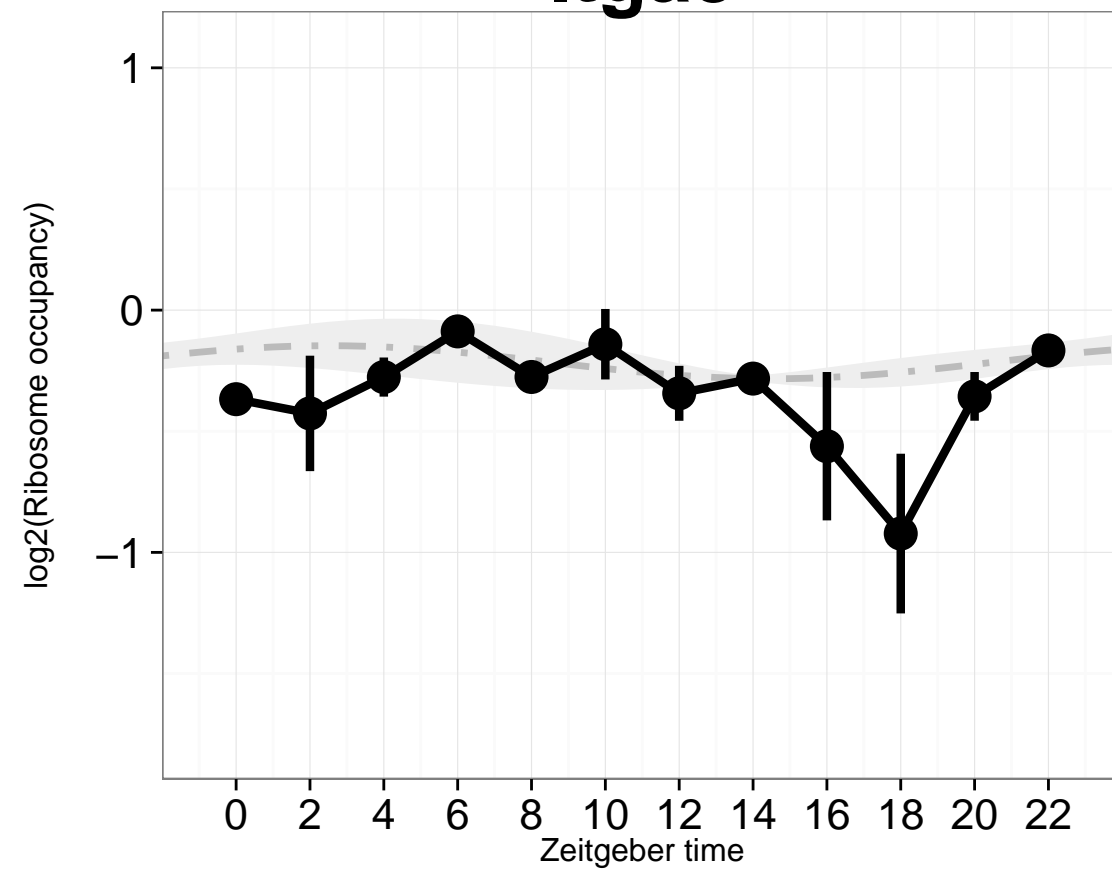

Supplement: SuppDataset_1.zip [file Itga8_set_D.pdf › Supplemental Dataset 1/D-mRNA_rhythm_translation_rhyth/Itga8_set_D.pdf]

## Itih3

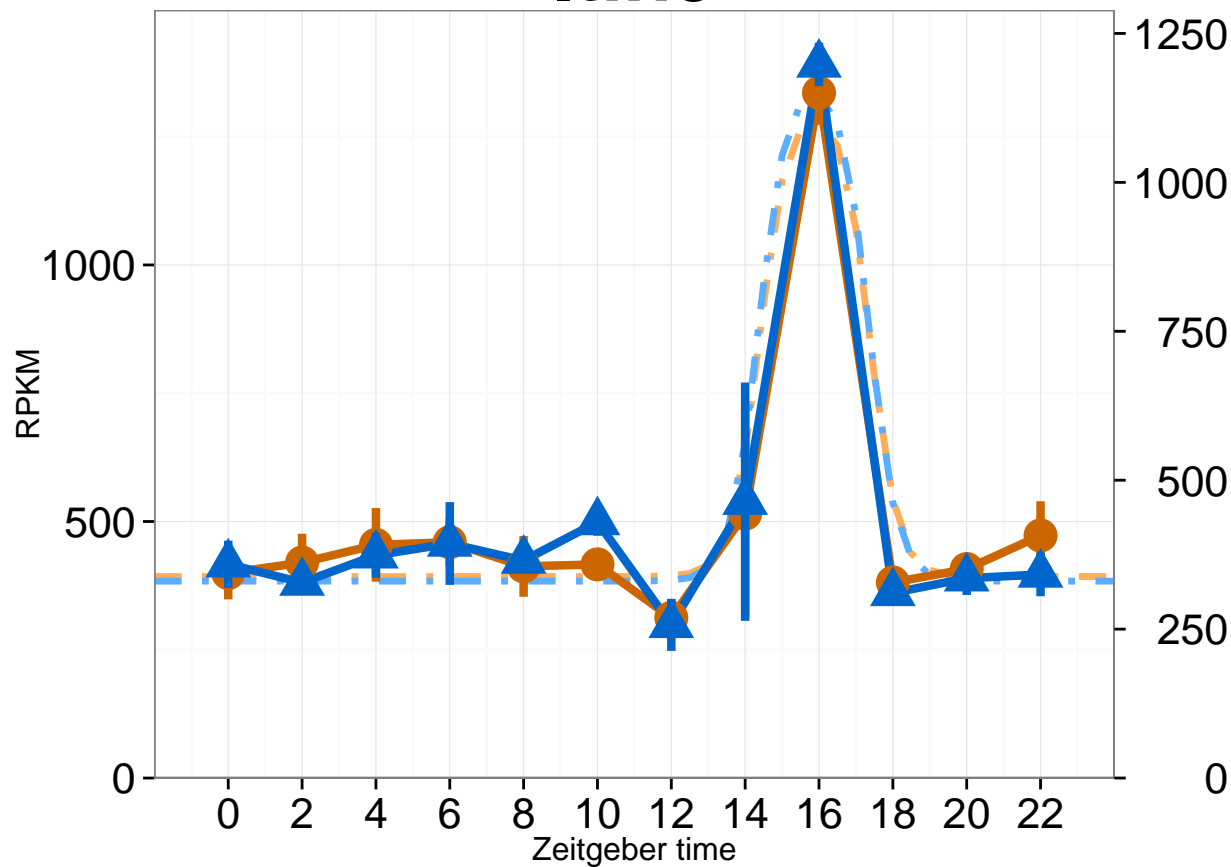

## Itih3

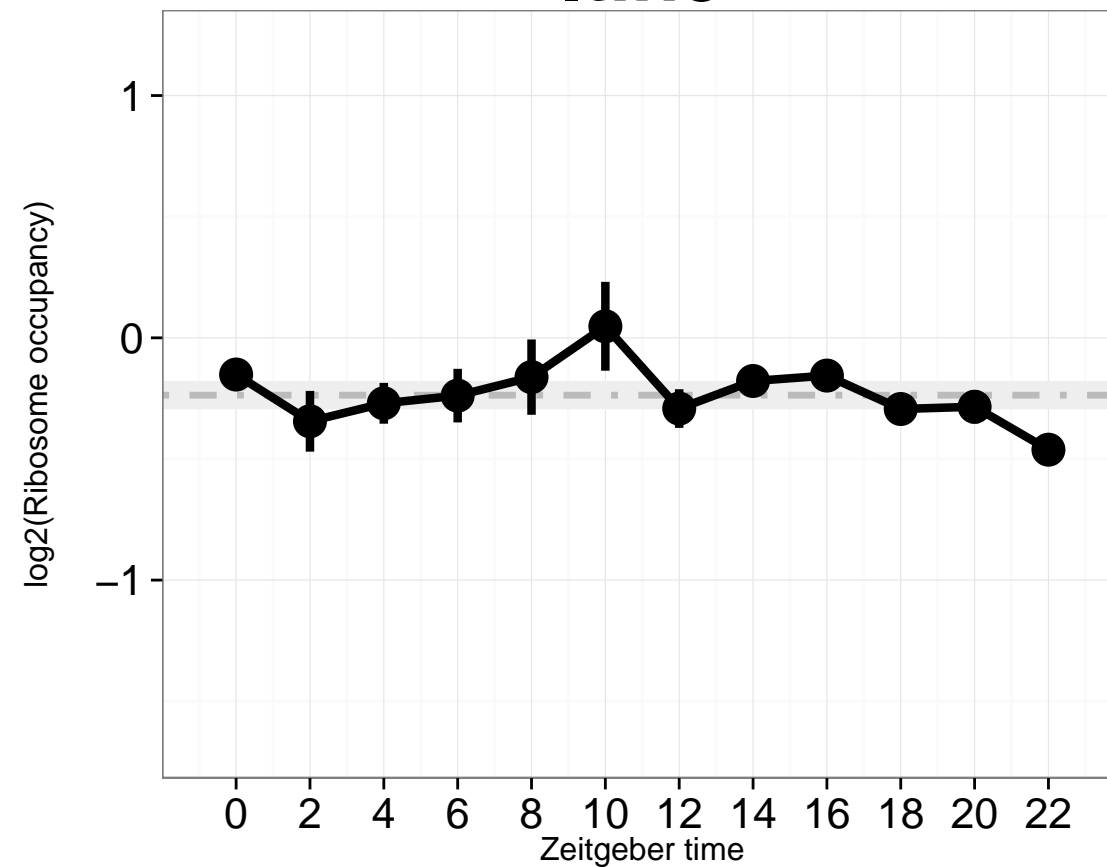

Supplement: SuppDataset_1.zip [file Itih3_set_D.pdf › Supplemental Dataset 1/D-mRNA_rhythm_translation_rhyth/Itih3_set_D.pdf]

## Itih4

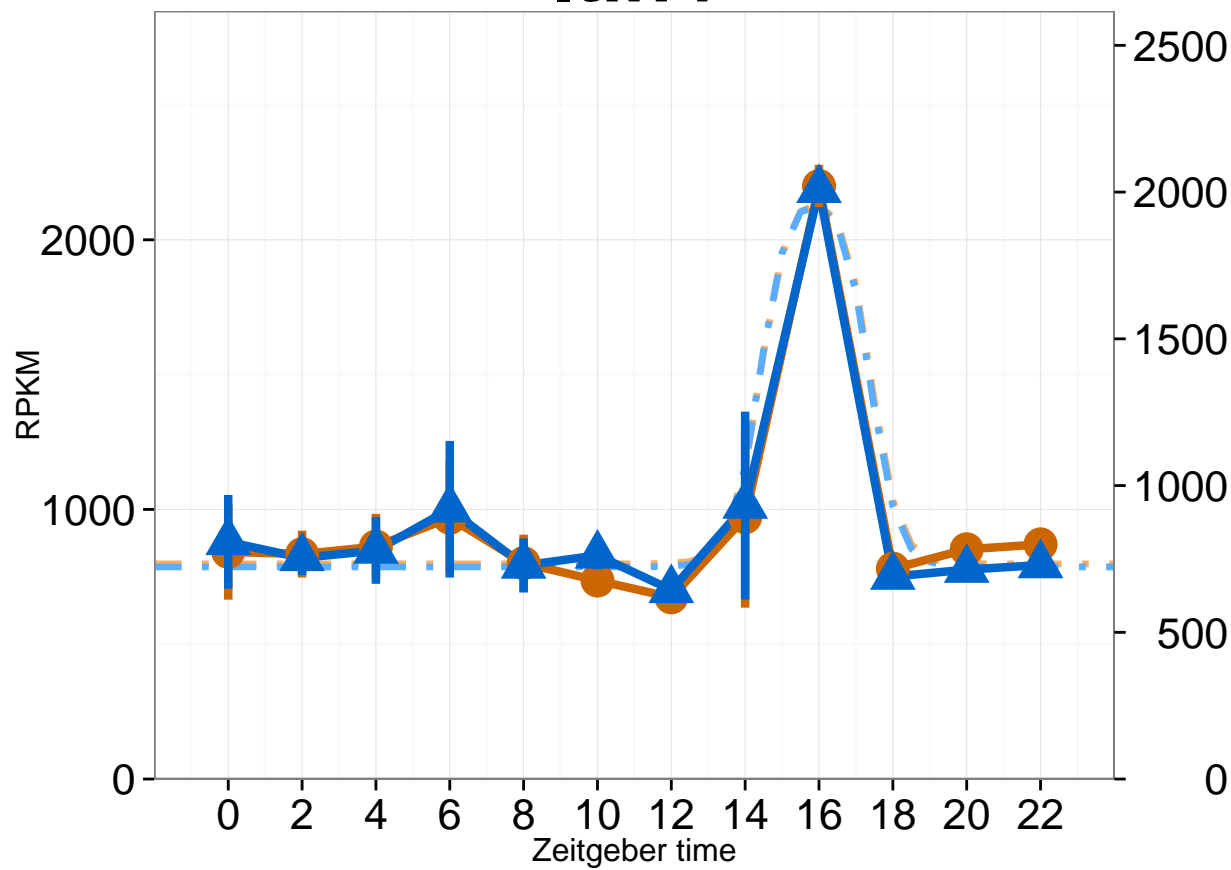

## Itih4

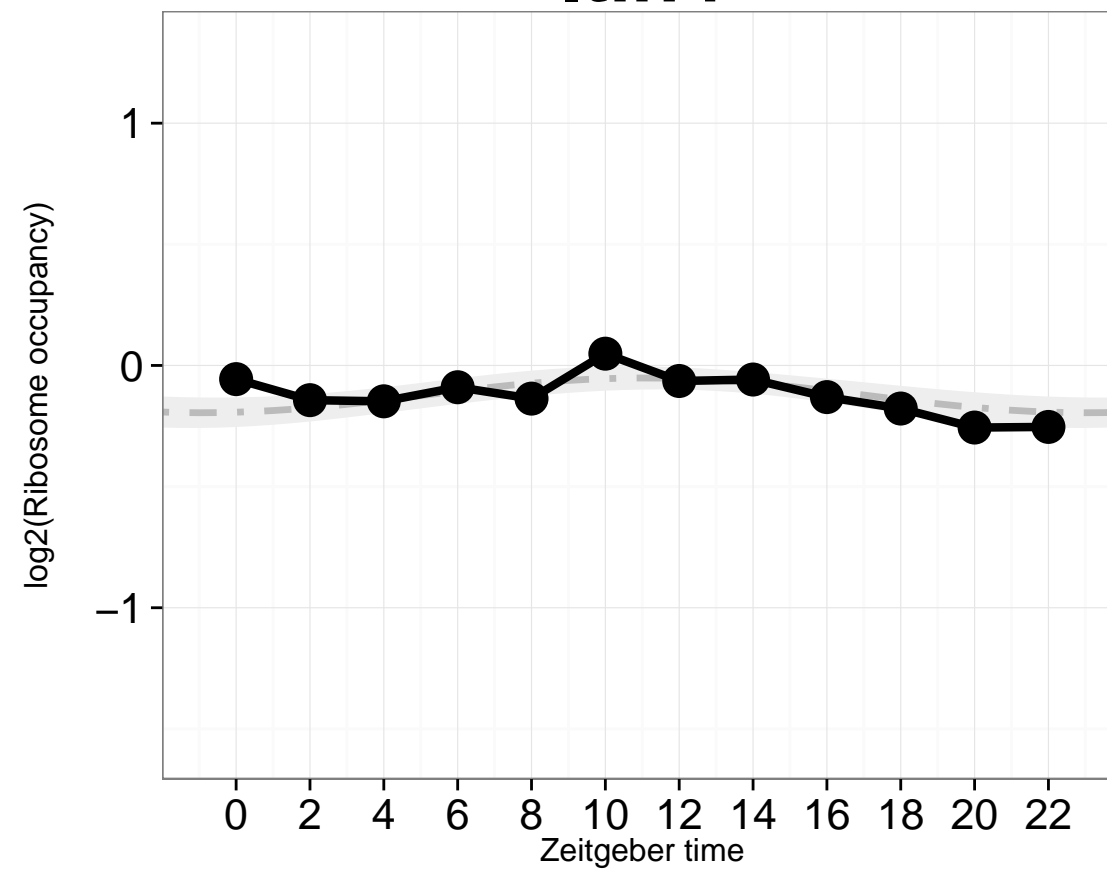

Supplement: SuppDataset_1.zip [file Itih4_set_D.pdf › Supplemental Dataset 1/D-mRNA_rhythm_translation_rhyth/Itih4_set_D.pdf]

## ltpk1

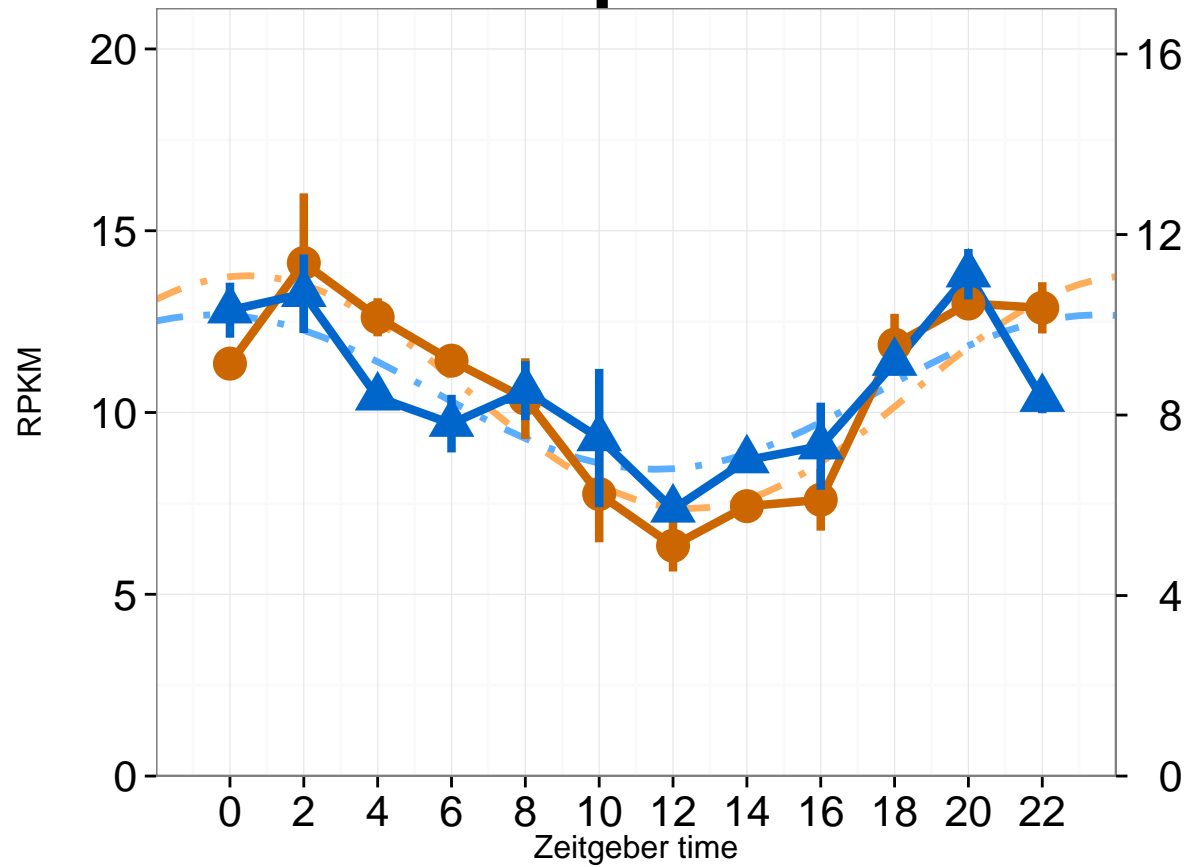

## ltpk1

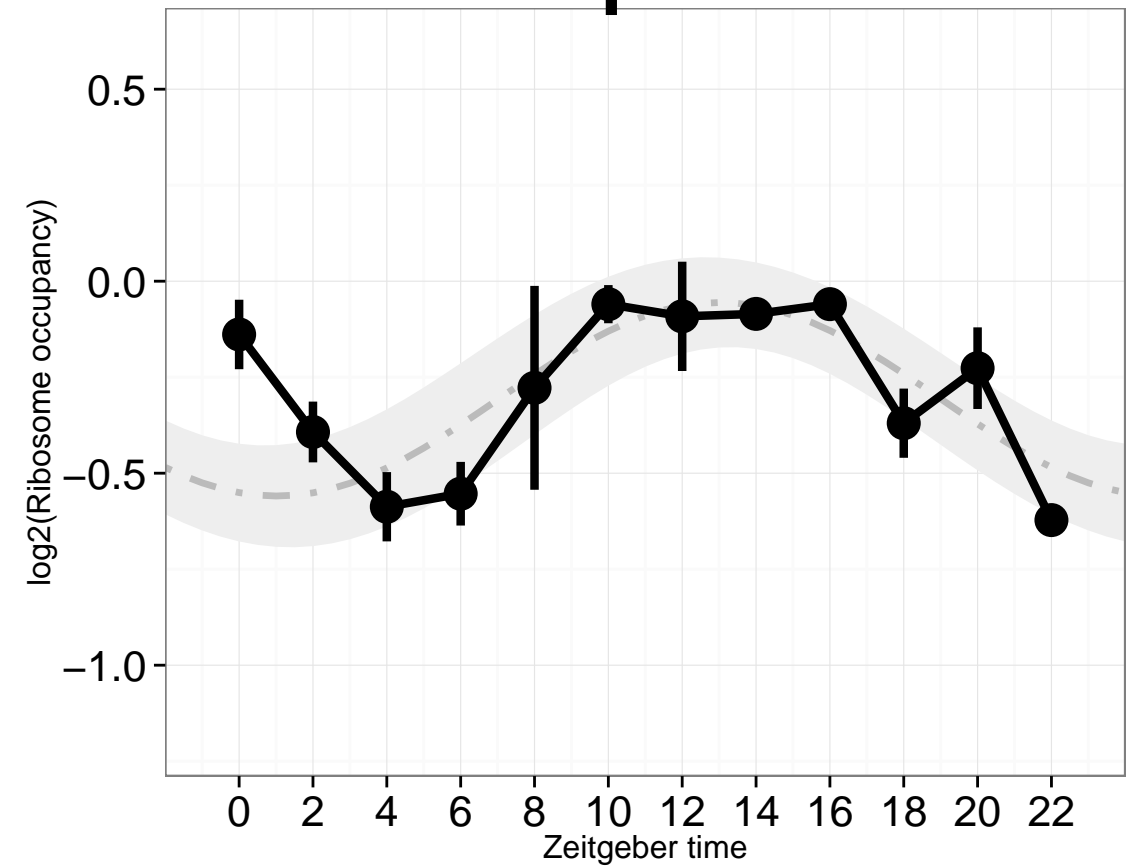

Supplement: SuppDataset_1.zip [file Itpk1_set_D.pdf › Supplemental Dataset 1/D-mRNA_rhythm_translation_rhyth/Itpk1_set_D.pdf]

# lvns1abp

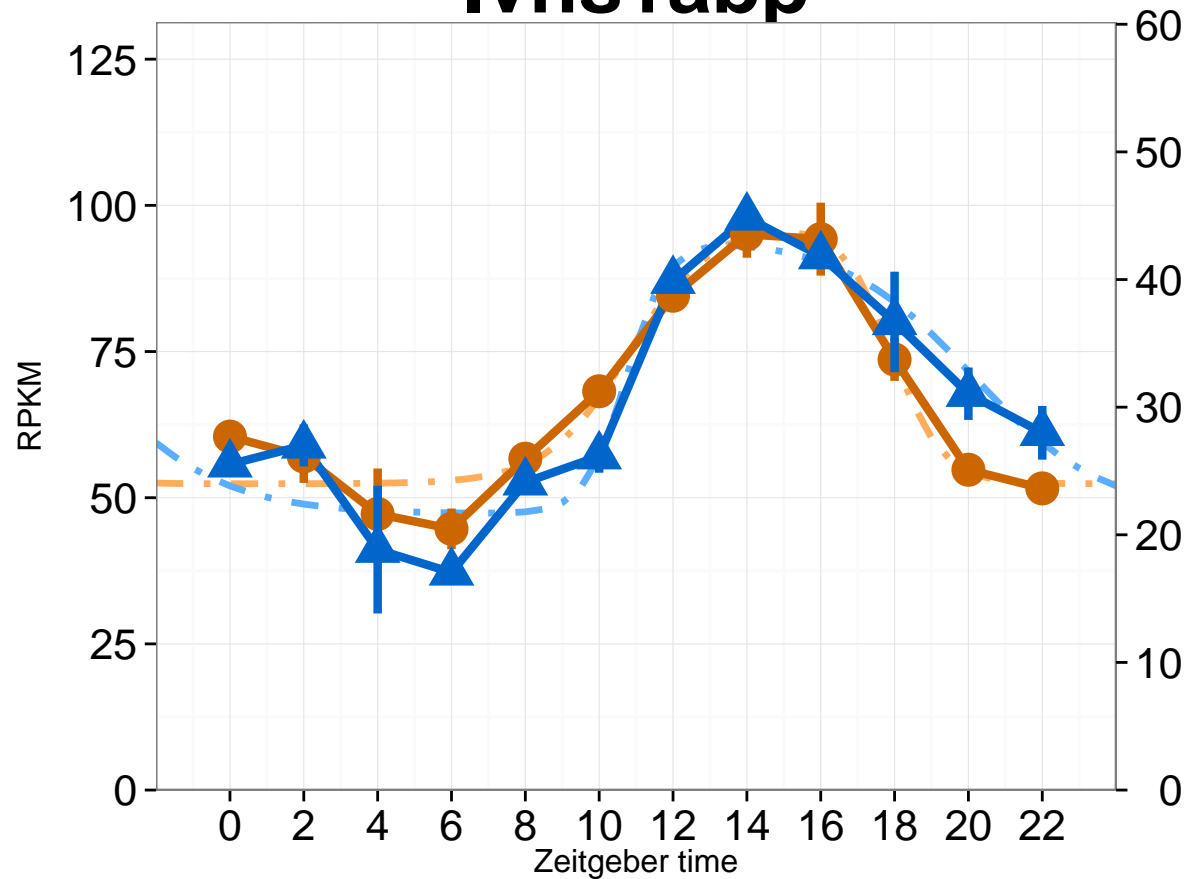

# lvns1abp

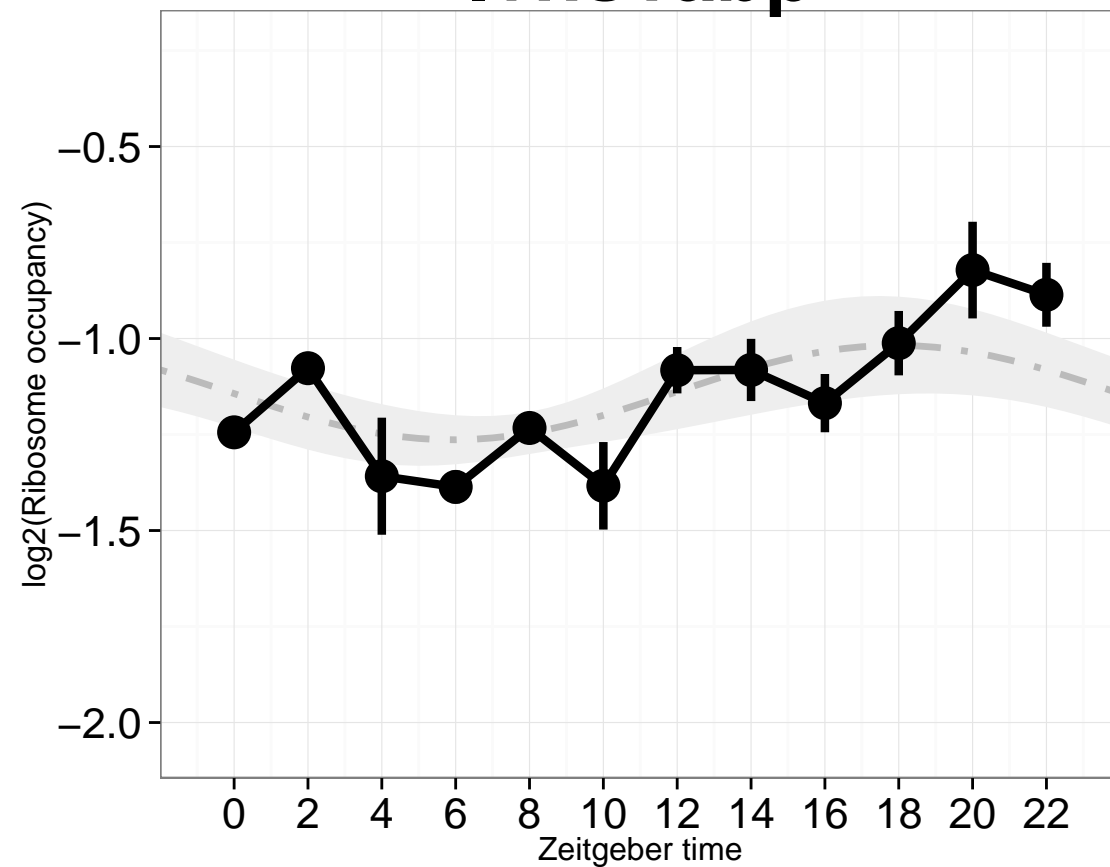

Supplement: SuppDataset_1.zip [file Ivns1abp_set_D.pdf › Supplemental Dataset 1/D-mRNA_rhythm_translation_rhyth/Ivns1abp_set_D.pdf]

## Jam2

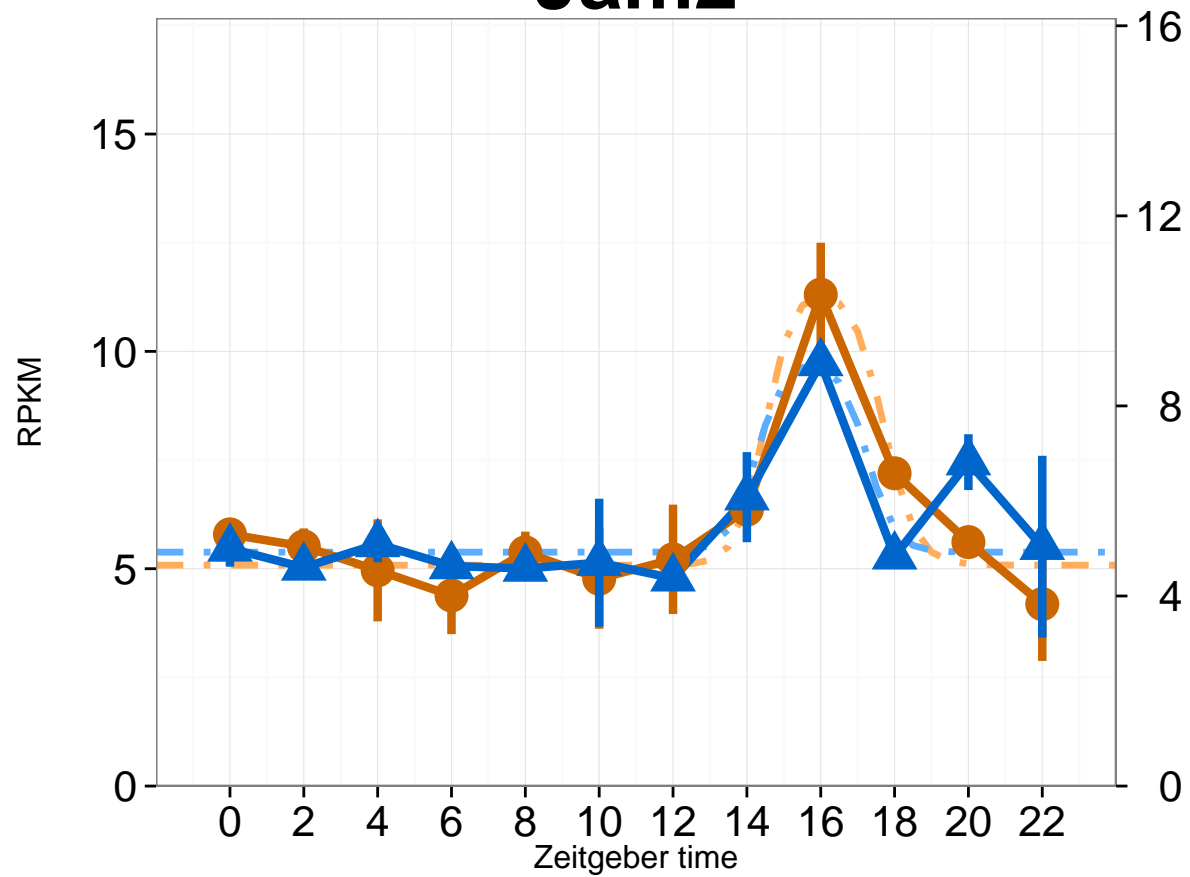

## Jam2

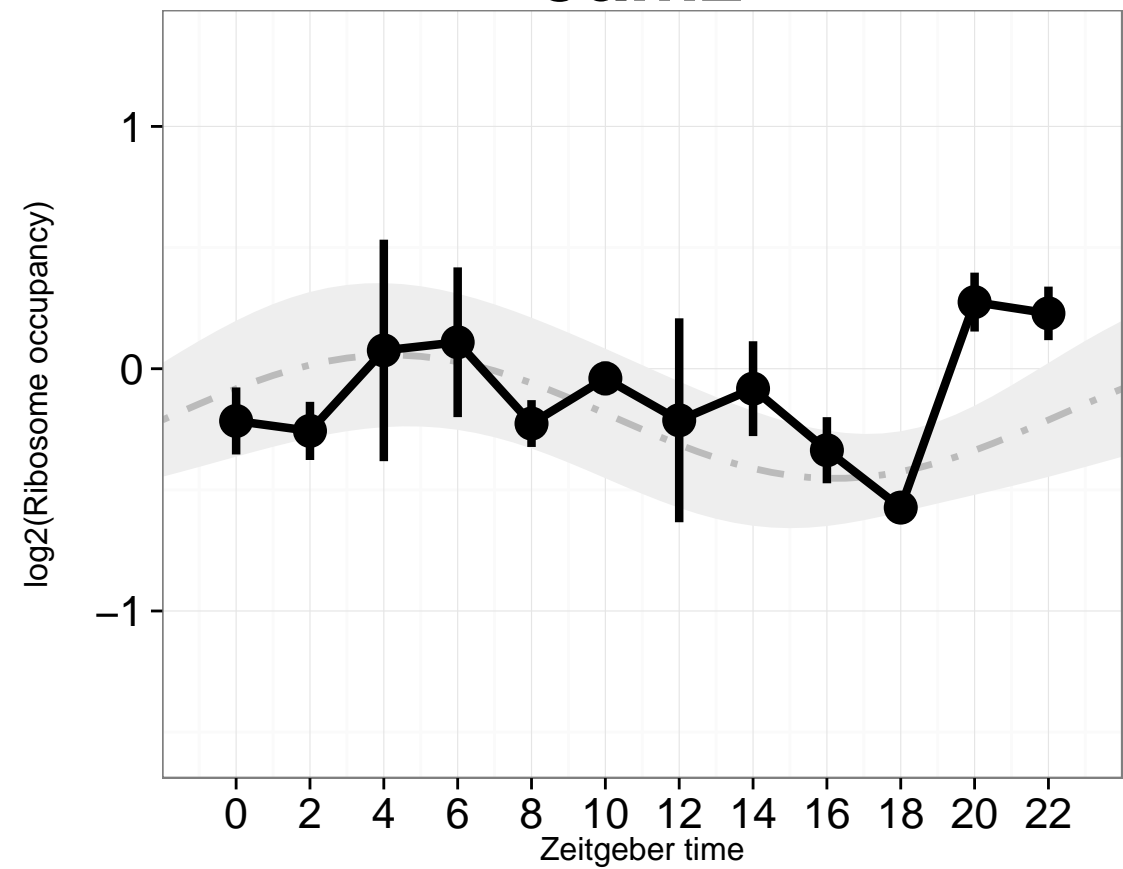

Supplement: SuppDataset_1.zip [file Jam2_set_D.pdf › Supplemental Dataset 1/D-mRNA_rhythm_translation_rhyth/Jam2_set_D.pdf]

## Junb

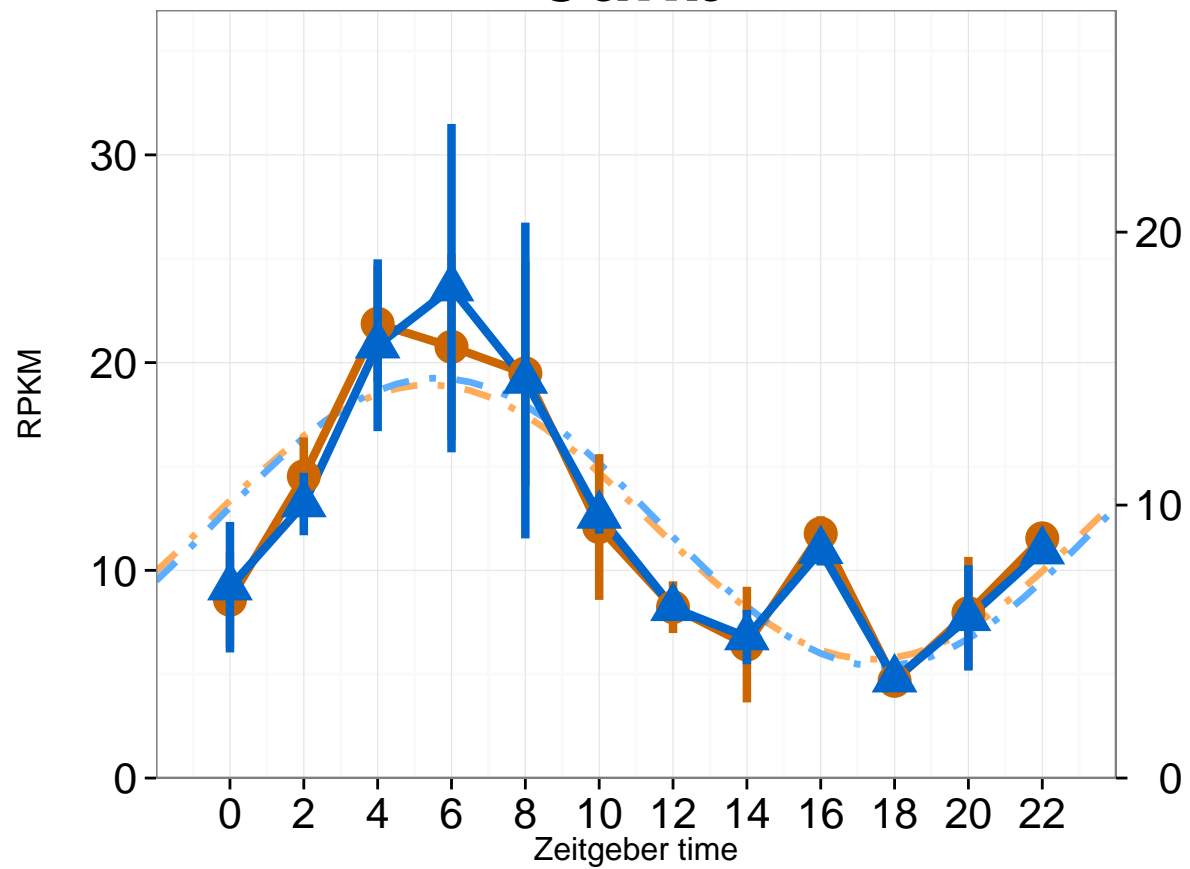

## Junb

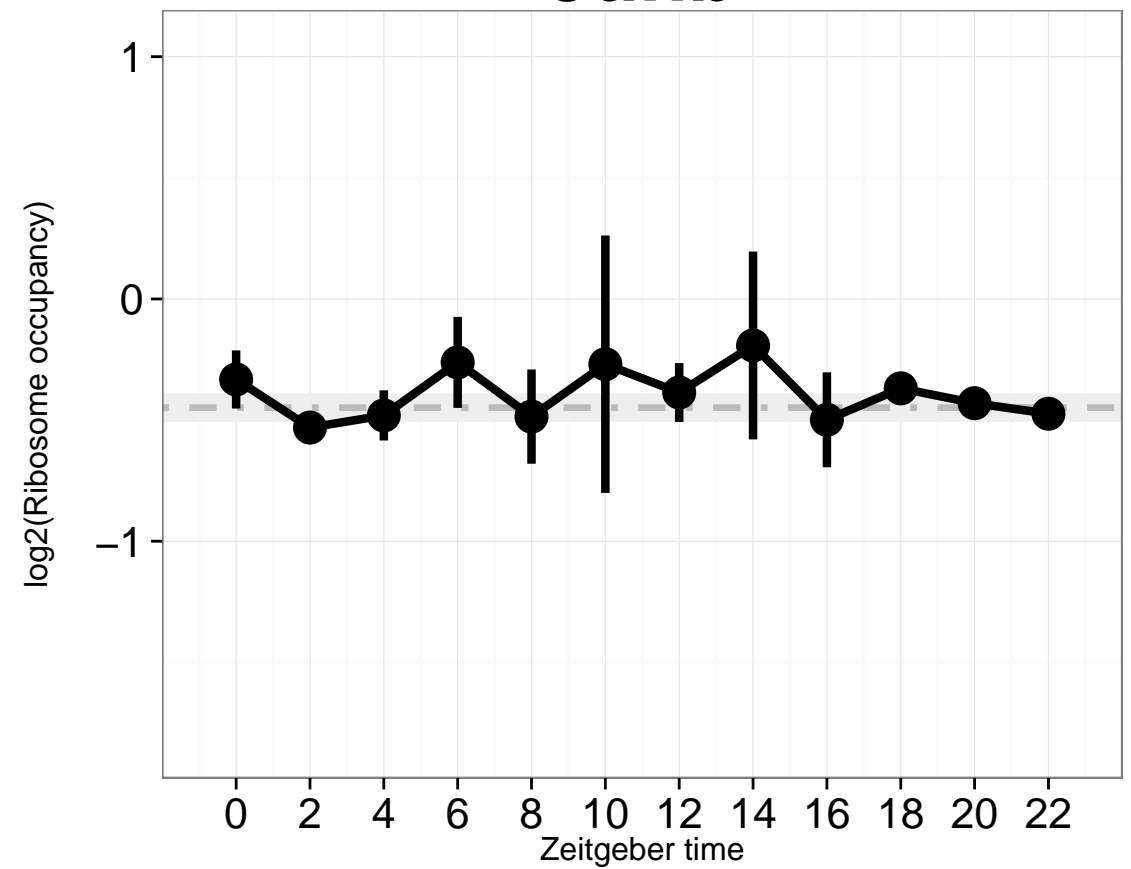

Supplement: SuppDataset_1.zip [file Junb_set_D.pdf › Supplemental Dataset 1/D-mRNA_rhythm_translation_rhyth/Junb_set_D.pdf]

# Kbtbd8

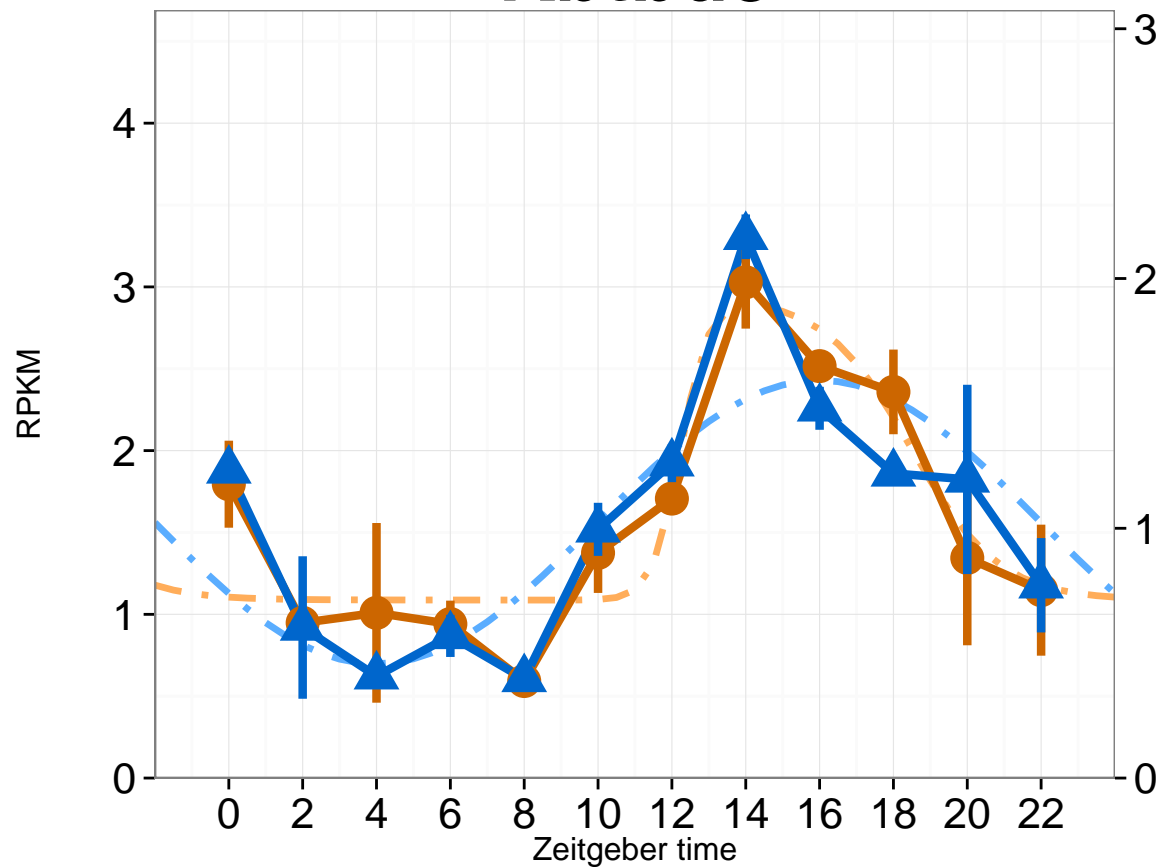

# Kbtbd8

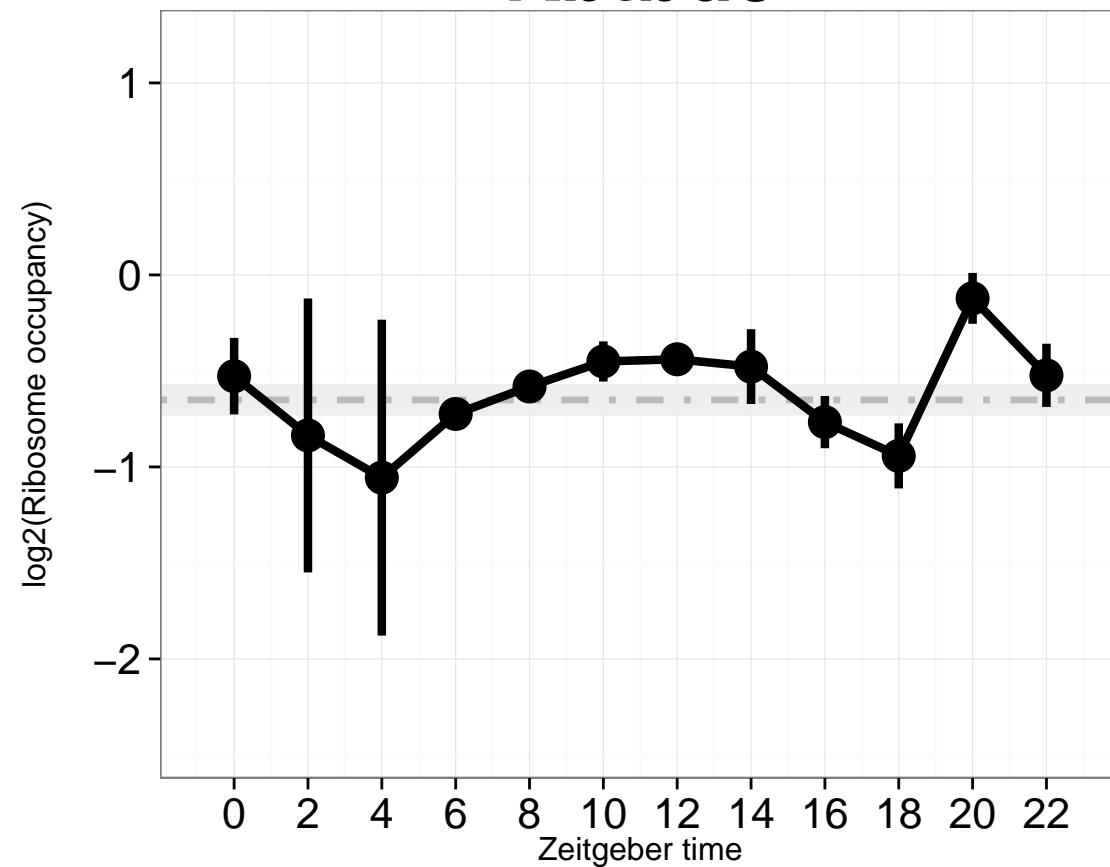

Supplement: SuppDataset_1.zip [file Kbtbd8_set_D.pdf › Supplemental Dataset 1/D-mRNA_rhythm_translation_rhyth/Kbtbd8_set_D.pdf]

## Kcnk5

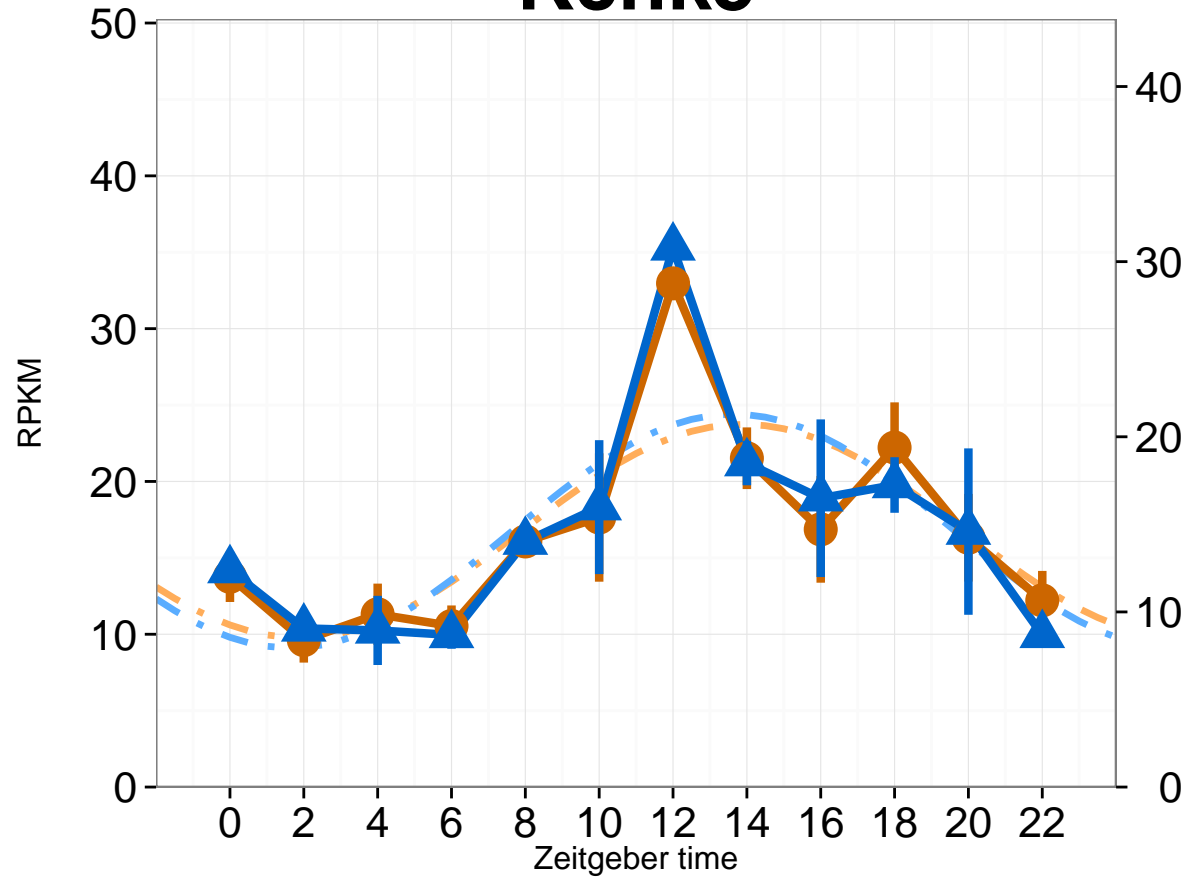

## Kcnk5

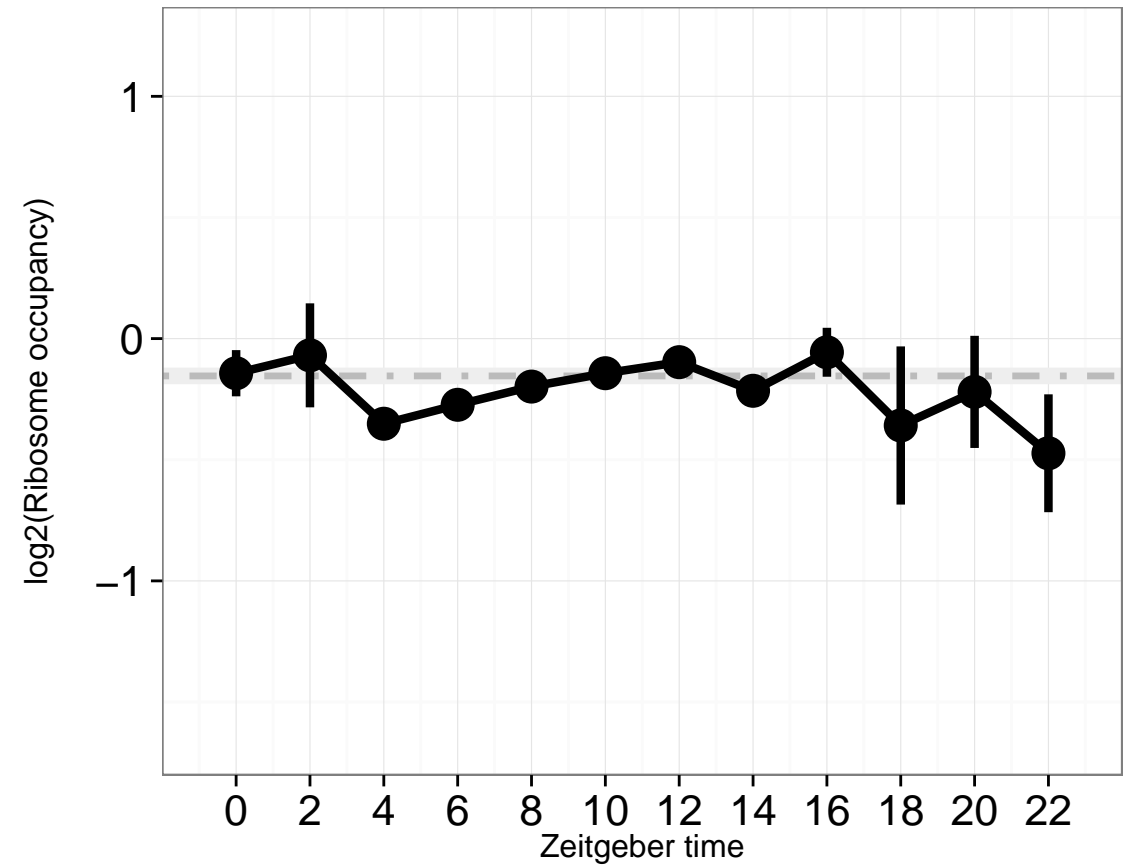

Supplement: SuppDataset_1.zip [file Kcnk5_set_D.pdf › Supplemental Dataset 1/D-mRNA_rhythm_translation_rhyth/Kcnk5_set_D.pdf]

# Kdm3a

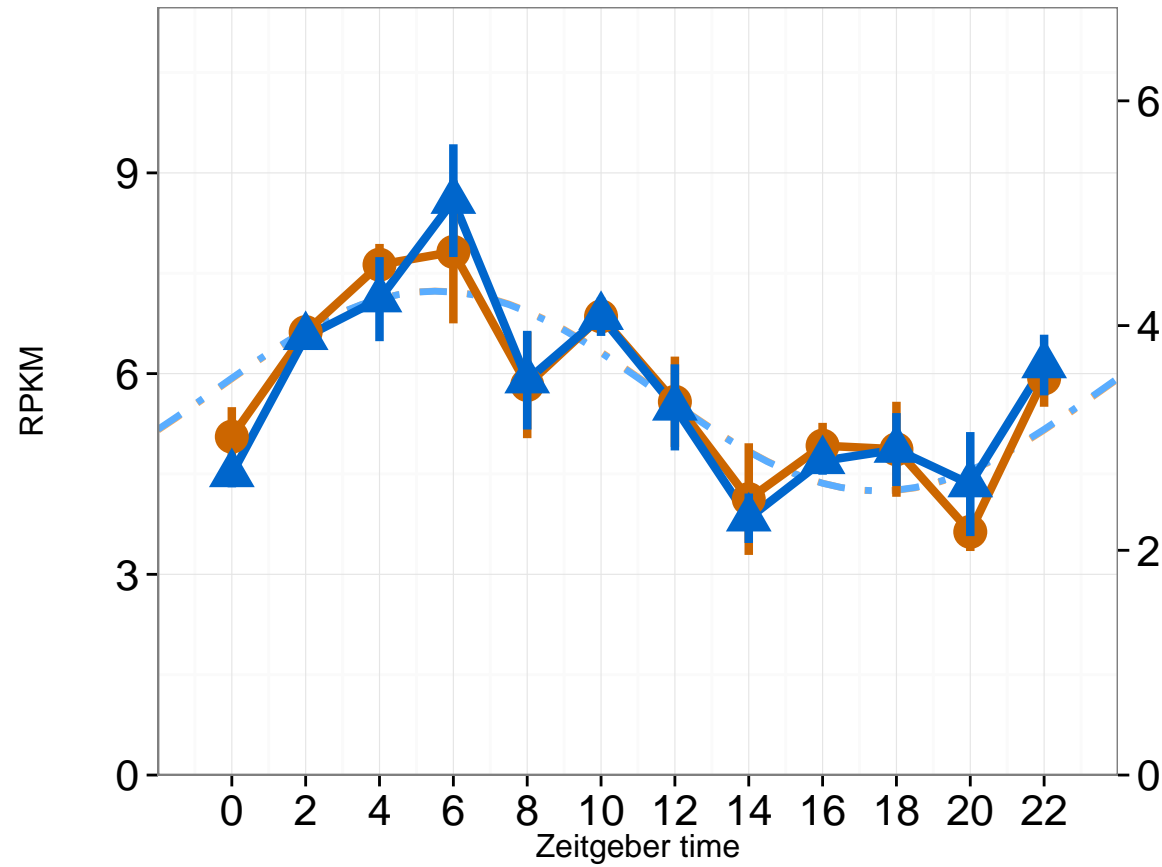

# Kdm3a

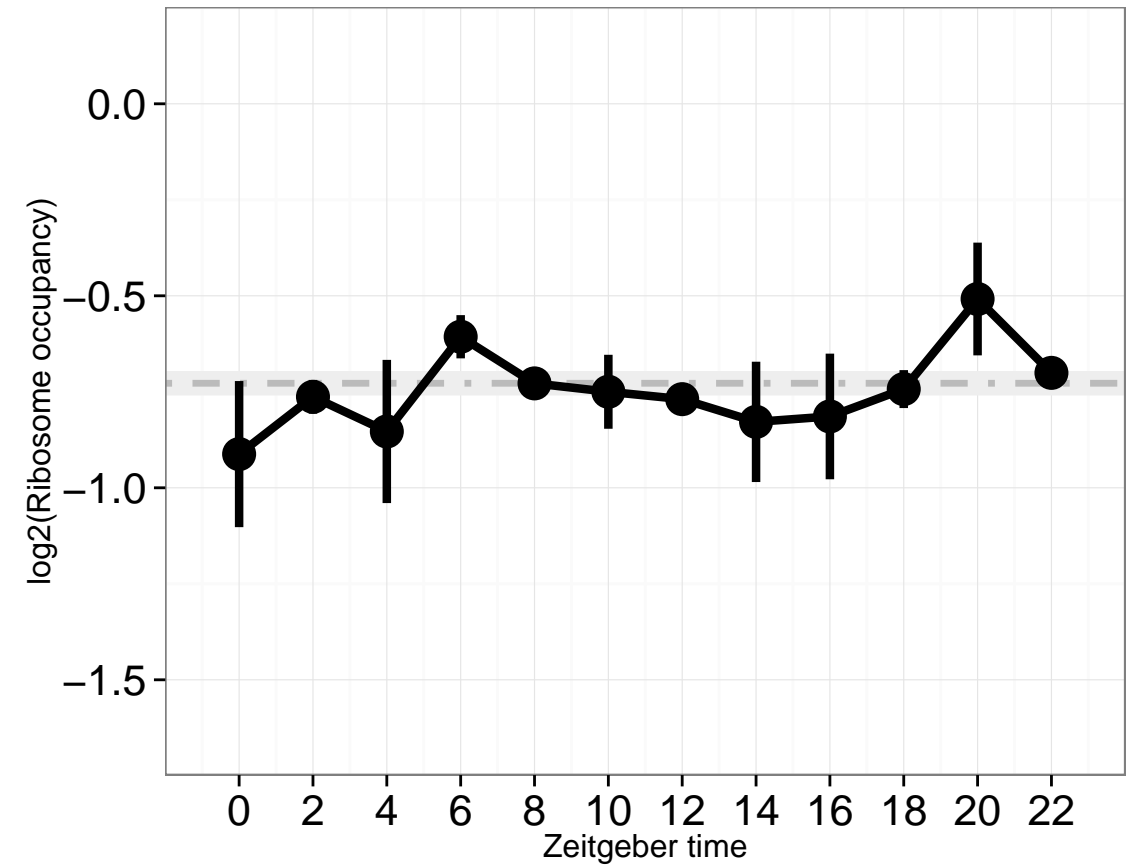

Supplement: SuppDataset_1.zip [file Kdm3a_set_D.pdf › Supplemental Dataset 1/D-mRNA_rhythm_translation_rhyth/Kdm3a_set_D.pdf]

## Khk

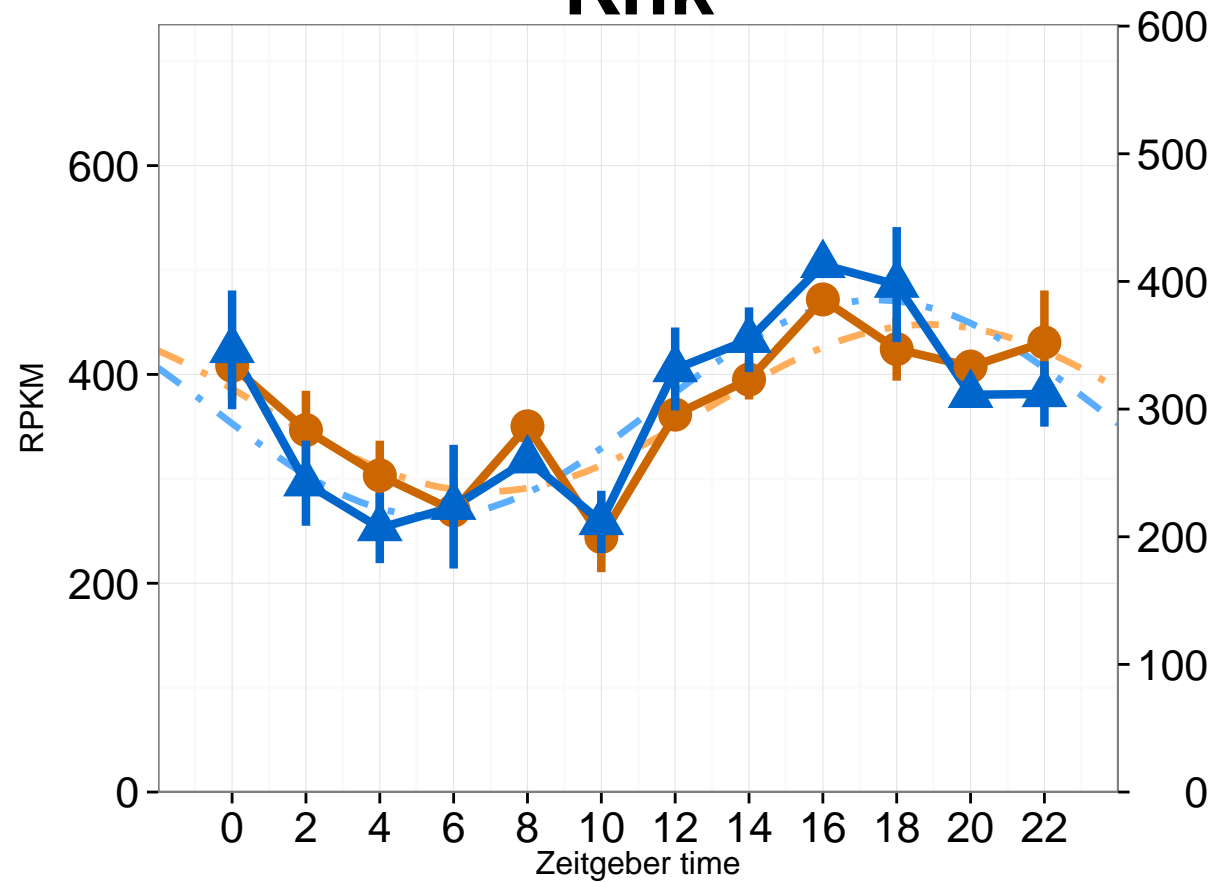

## Khk

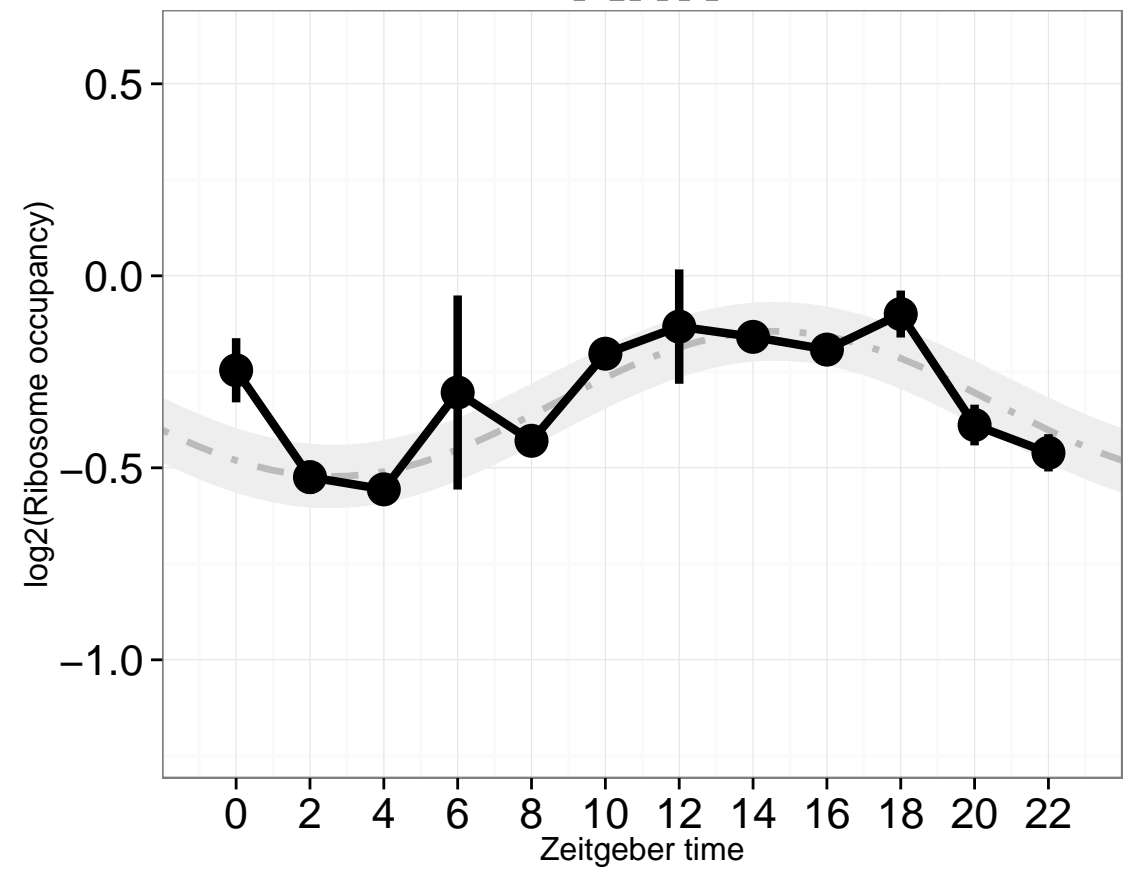

Supplement: SuppDataset_1.zip [file Khk_set_D.pdf › Supplemental Dataset 1/D-mRNA_rhythm_translation_rhyth/Khk_set_D.pdf]

## Khнын

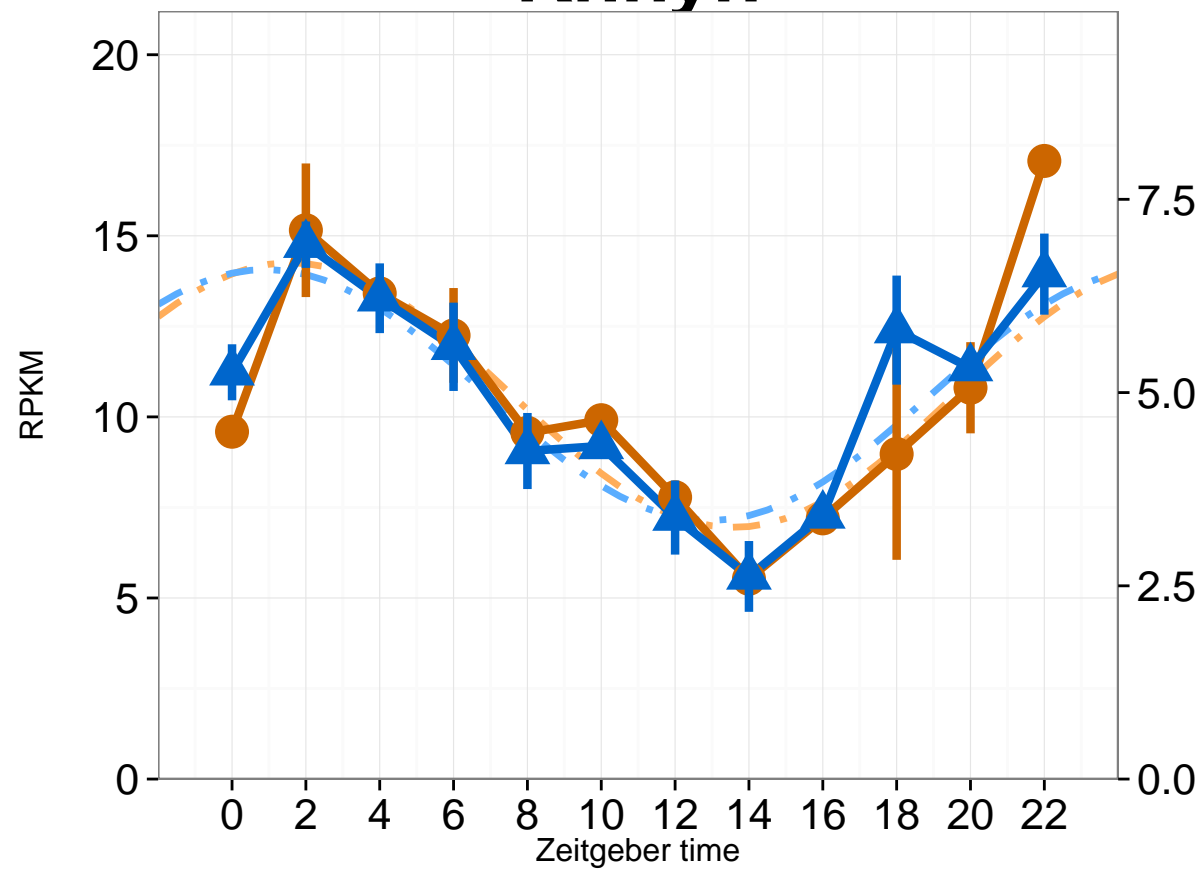

## Khнын

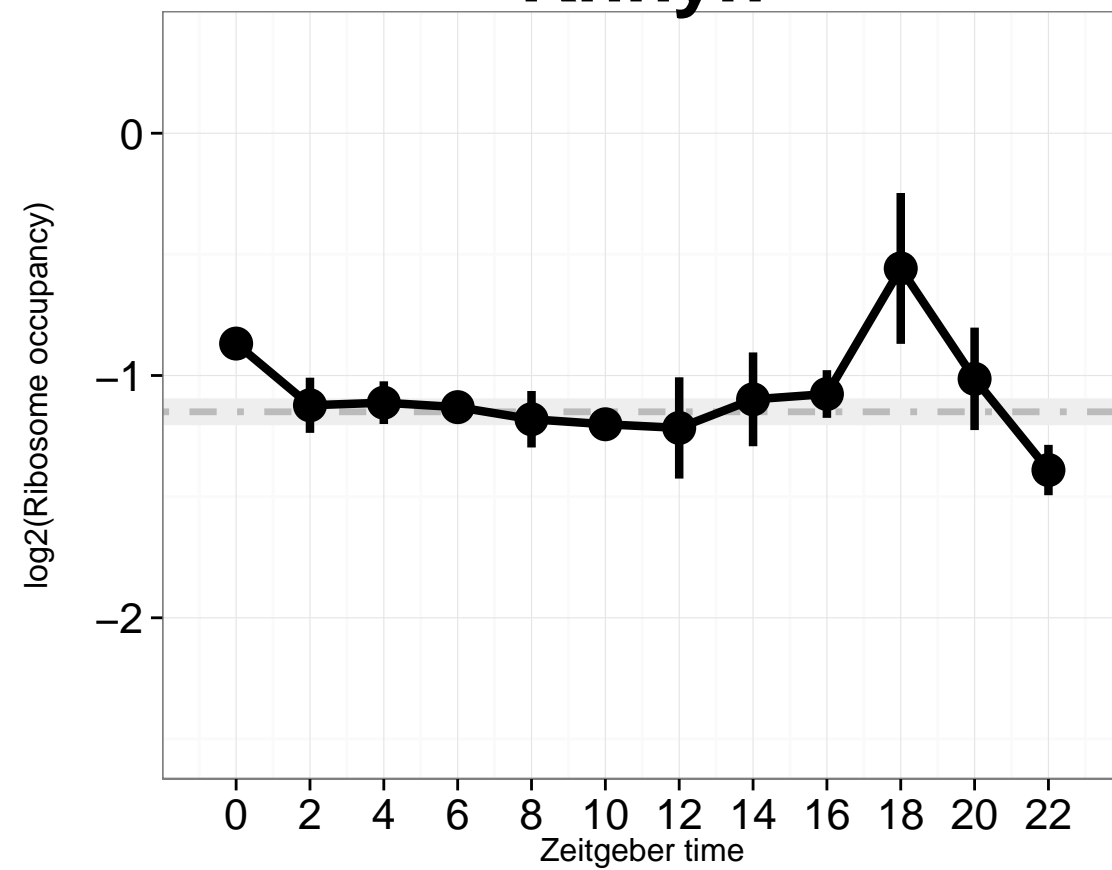

Supplement: SuppDataset_1.zip [file Khnyn_set_D.pdf › Supplemental Dataset 1/D-mRNA_rhythm_translation_rhyth/Khnyn_set_D.pdf]

## Kifc3

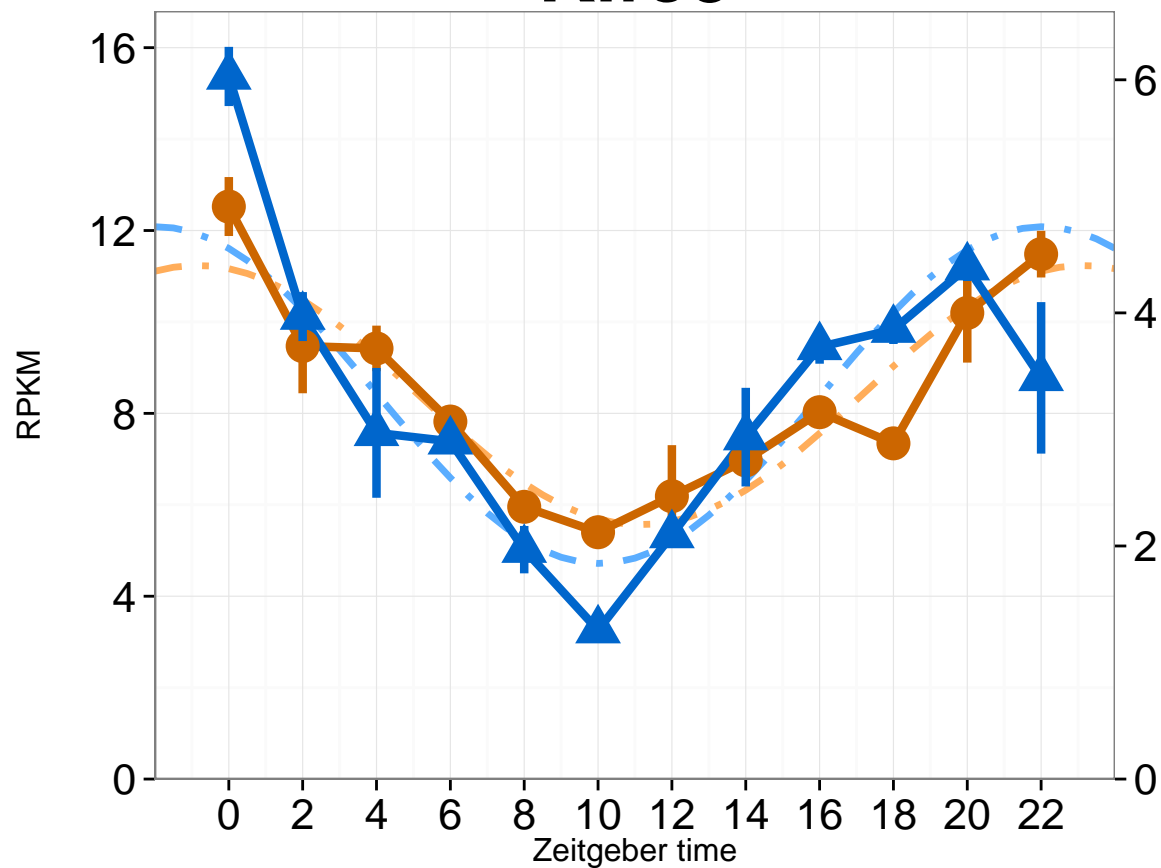

## Kifc3

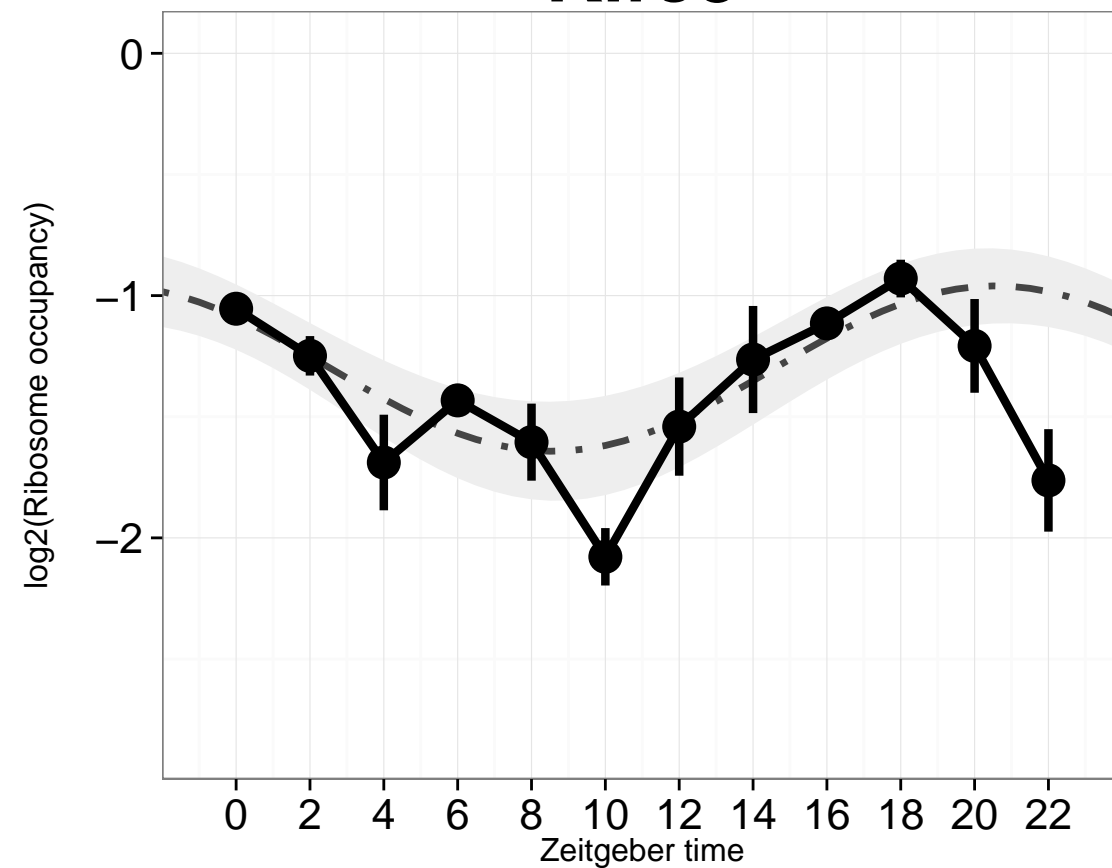

Supplement: SuppDataset_1.zip [file Kifc3_set_D.pdf › Supplemental Dataset 1/D-mRNA_rhythm_translation_rhyth/Kifc3_set_D.pdf]

## Klb

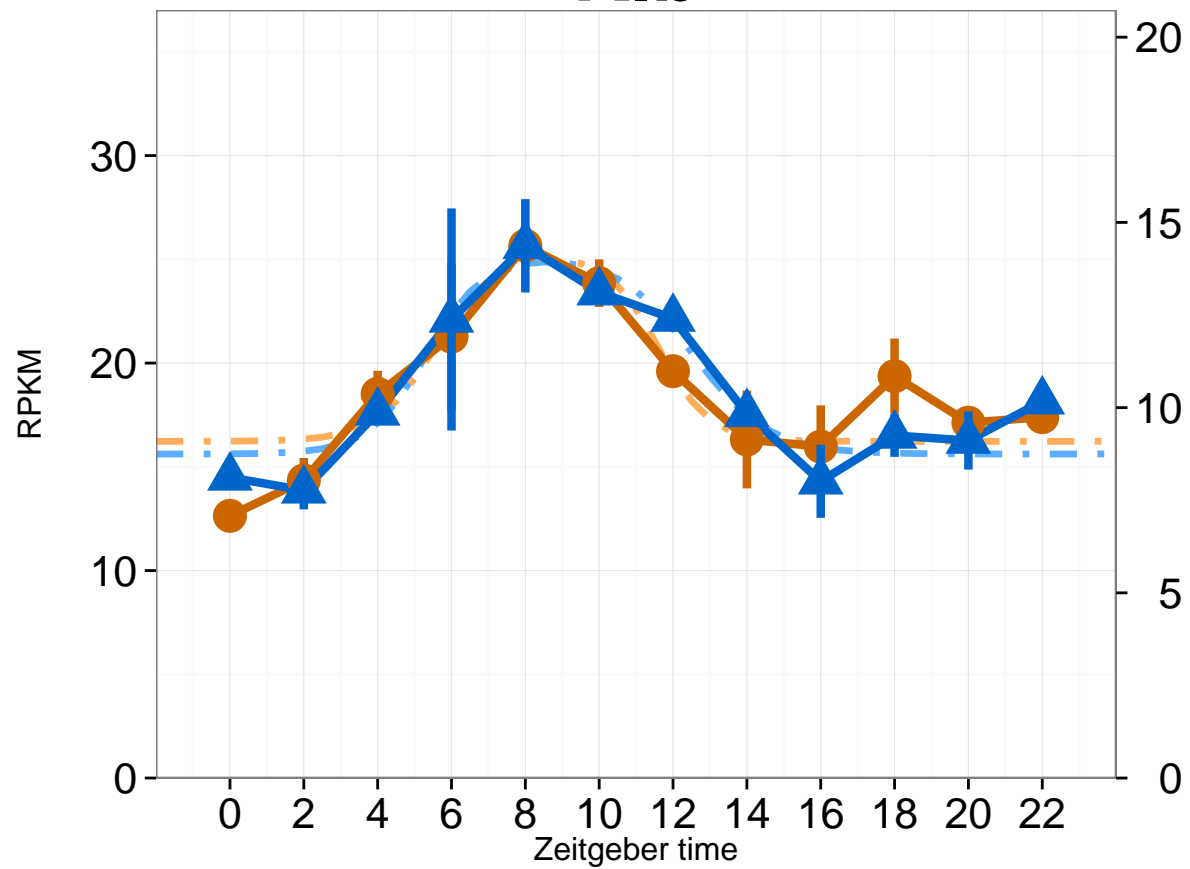

## Klb

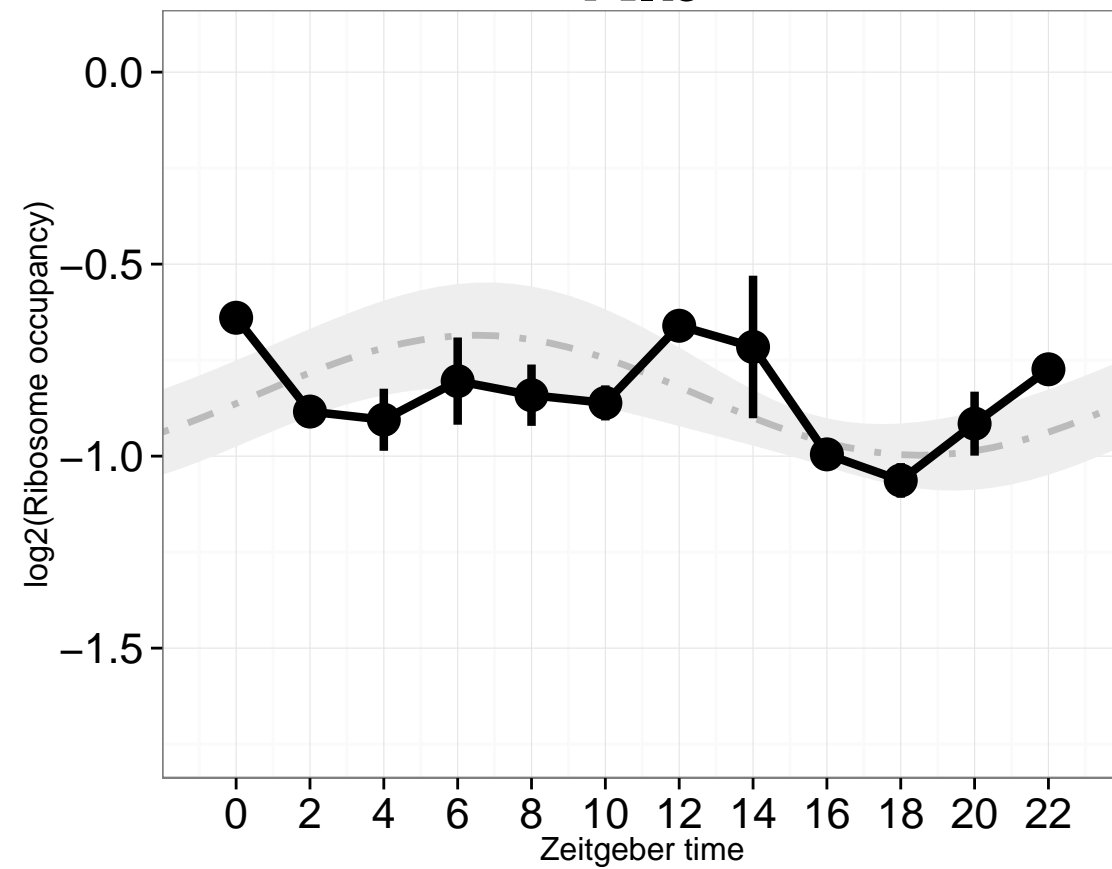

Supplement: SuppDataset_1.zip [file Klb_set_D.pdf › Supplemental Dataset 1/D-mRNA_rhythm_translation_rhyth/Klb_set_D.pdf]

## Klf10

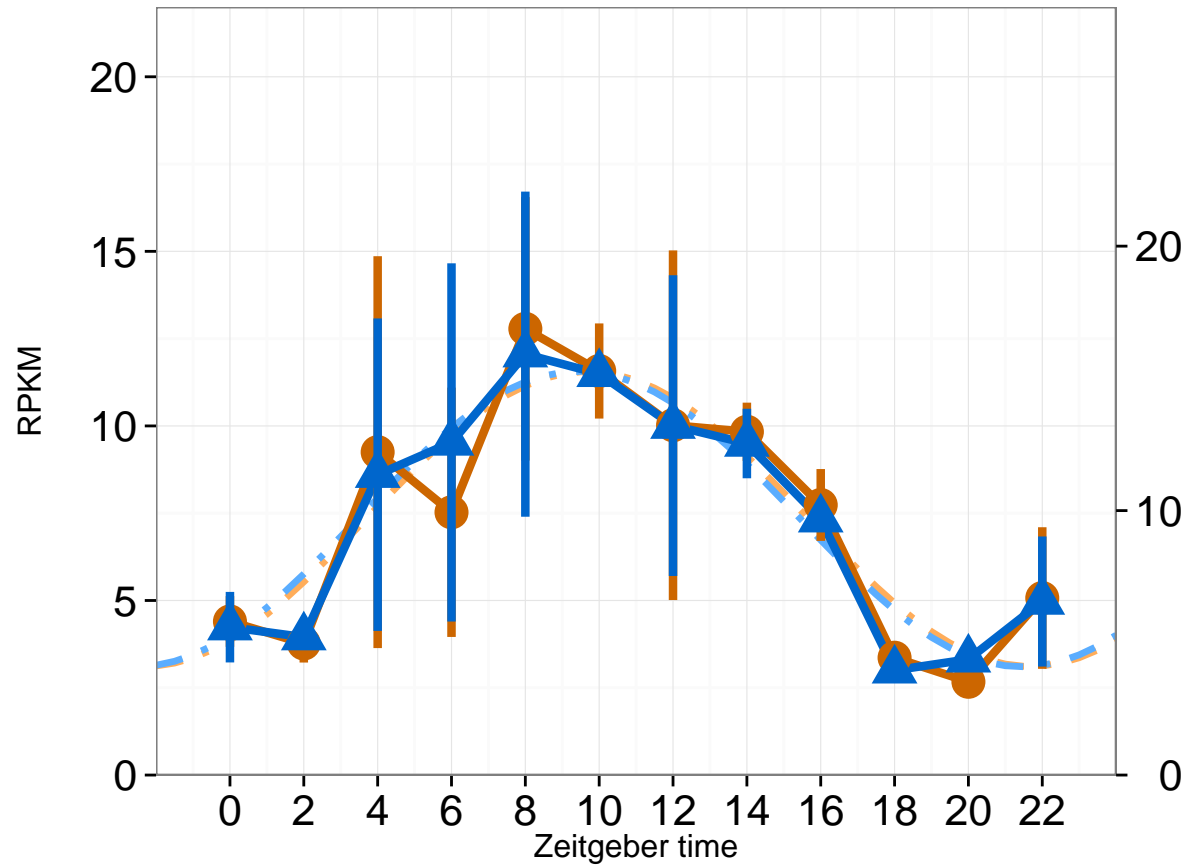

## Klf10

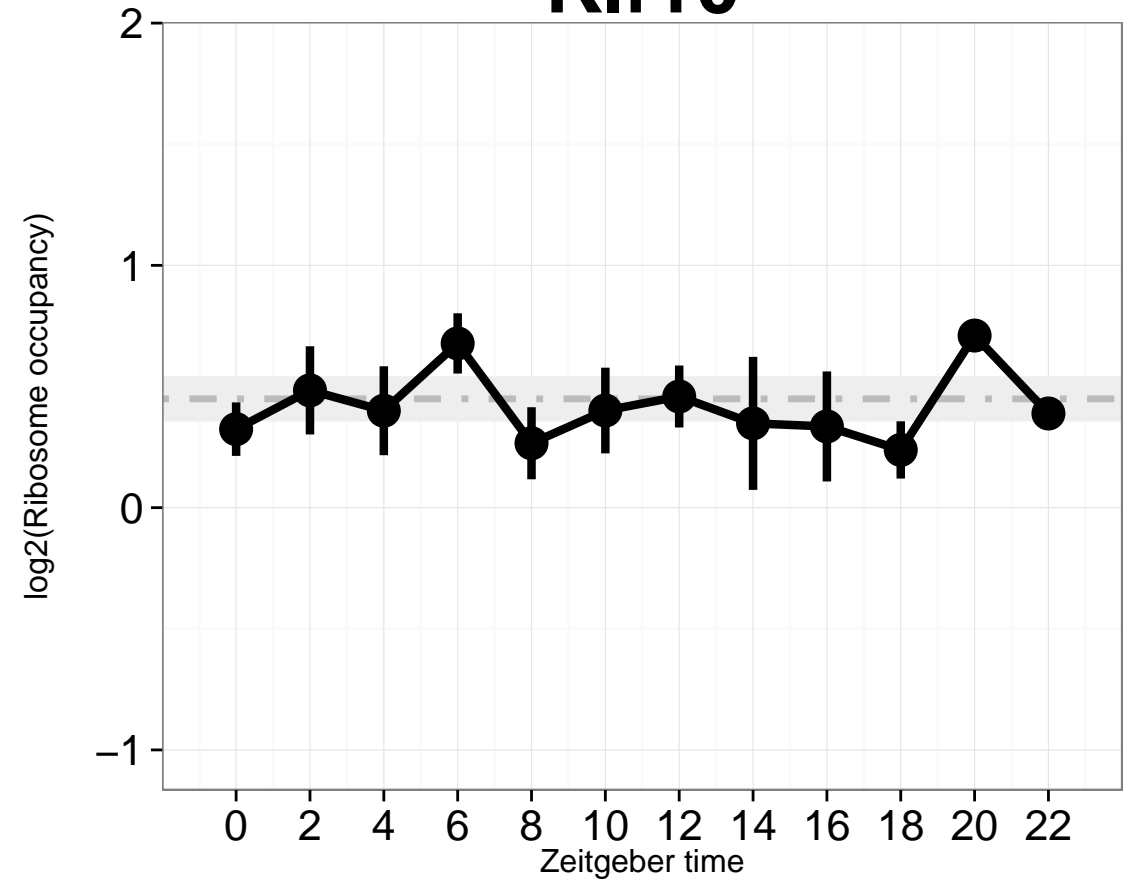

Supplement: SuppDataset_1.zip [file Klf10_set_D.pdf › Supplemental Dataset 1/D-mRNA_rhythm_translation_rhyth/Klf10_set_D.pdf]

## Klf13

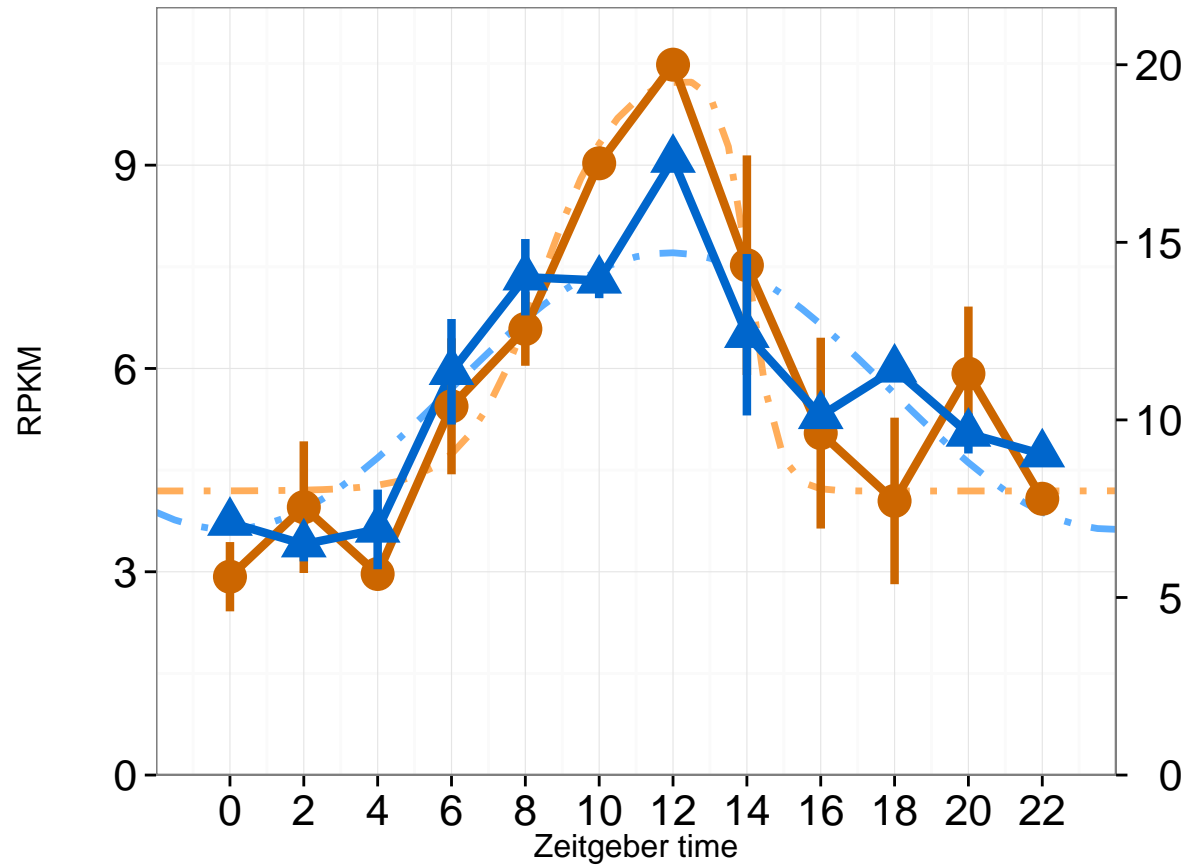

## Klf13

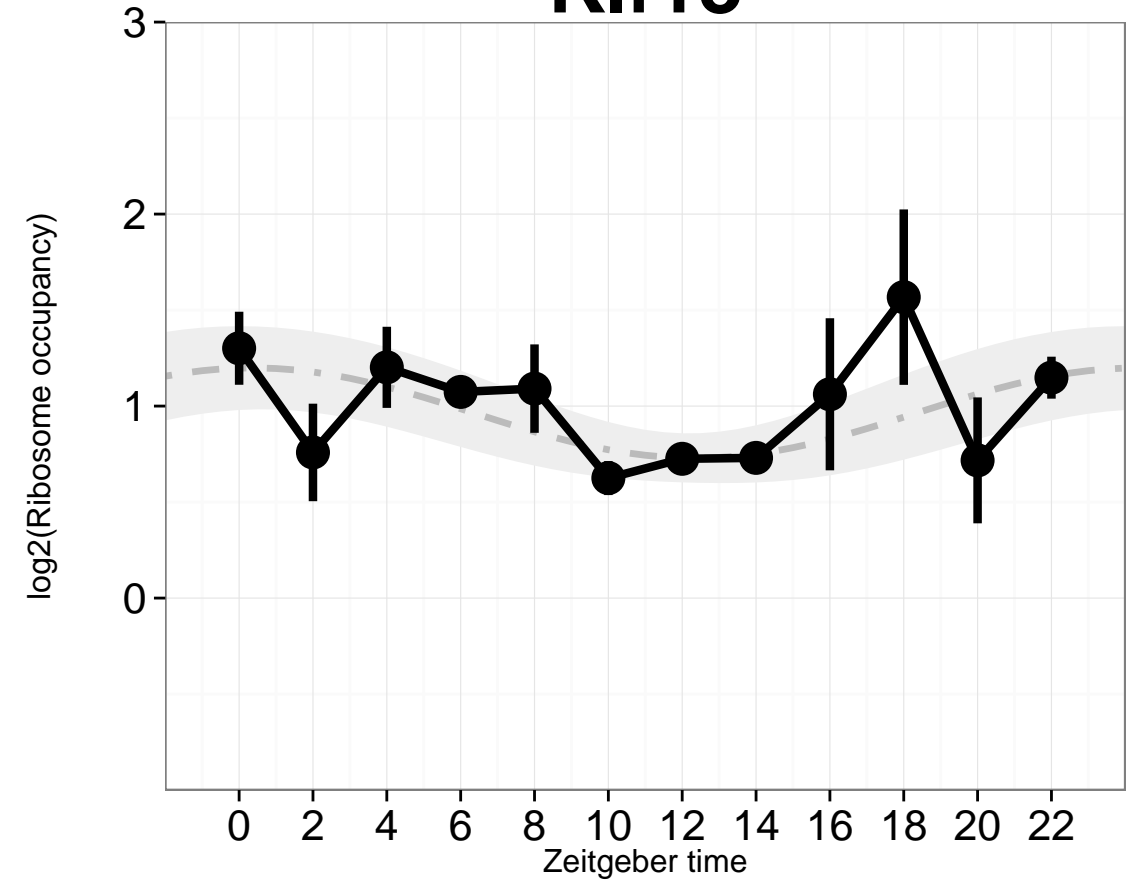

Supplement: SuppDataset_1.zip [file Klf13_set_D.pdf › Supplemental Dataset 1/D-mRNA_rhythm_translation_rhyth/Klf13_set_D.pdf]

## Klf9

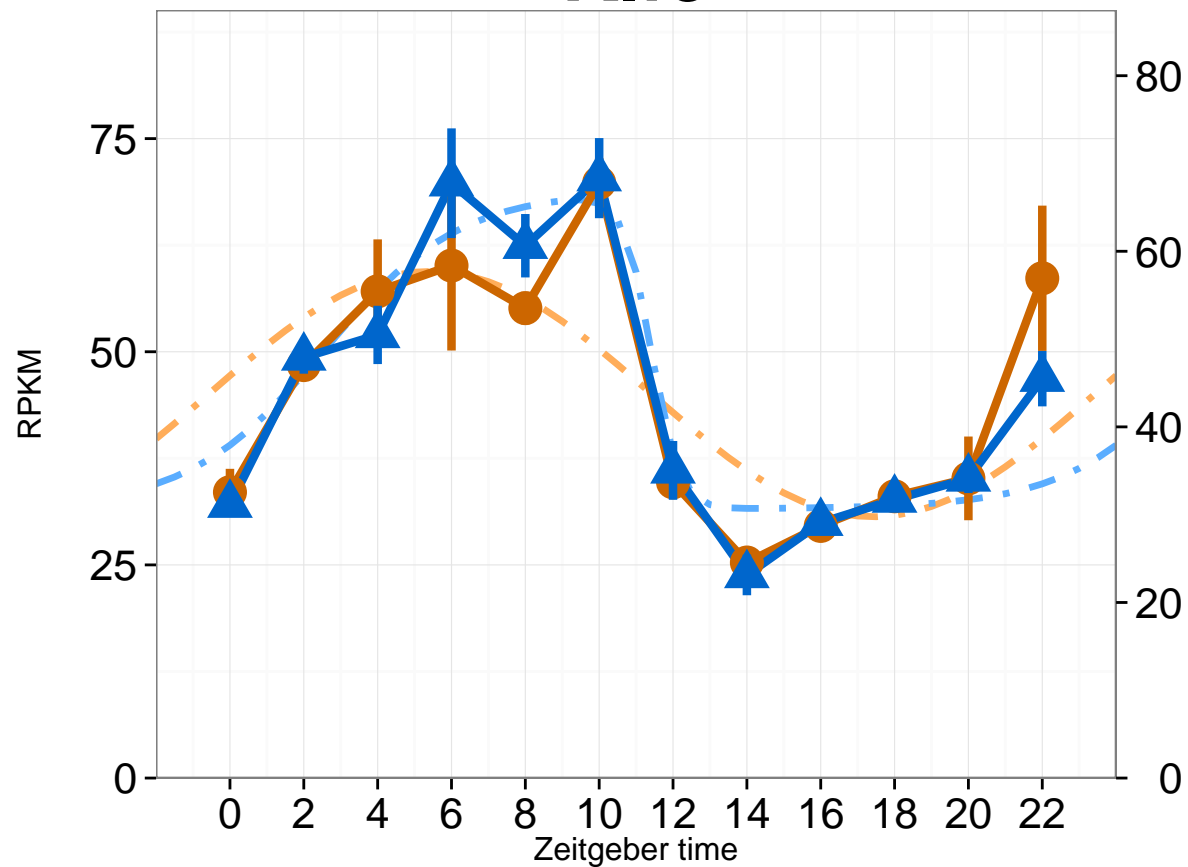

## Klf9

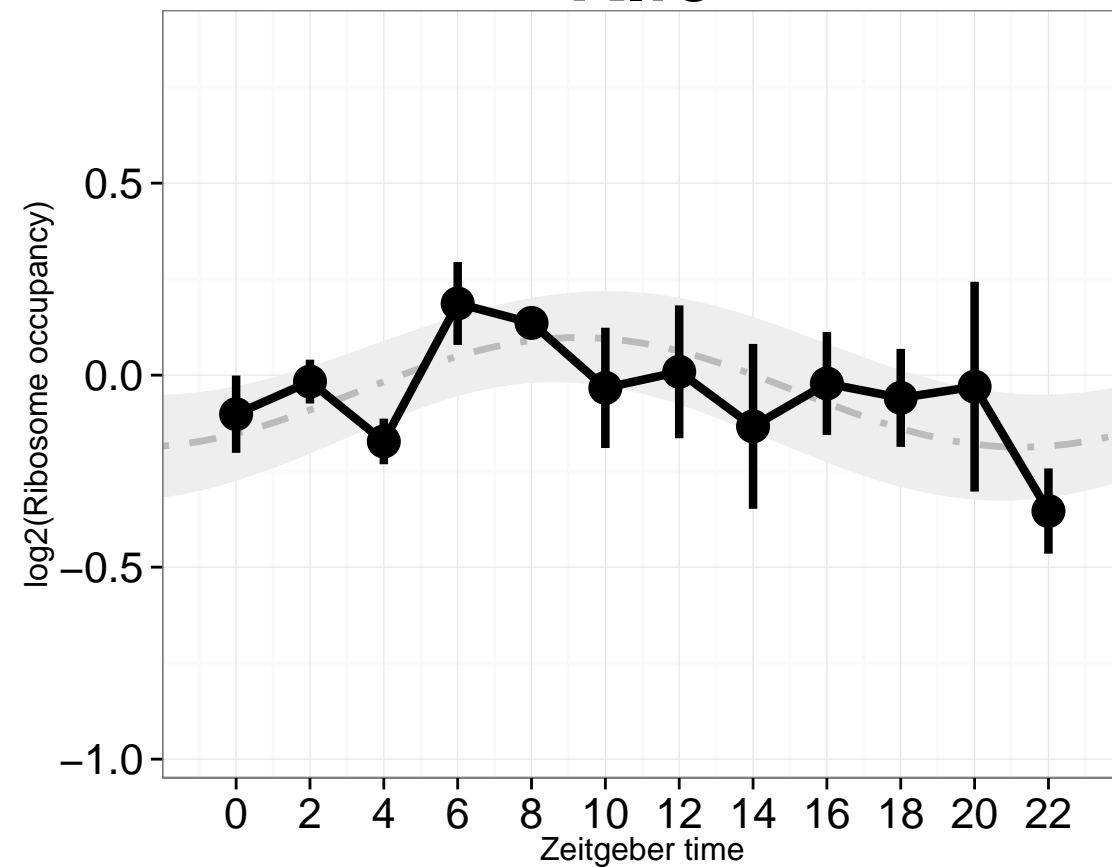

Supplement: SuppDataset_1.zip [file Klf9_set_D.pdf › Supplemental Dataset 1/D-mRNA_rhythm_translation_rhyth/Klf9_set_D.pdf]

## KlhI21

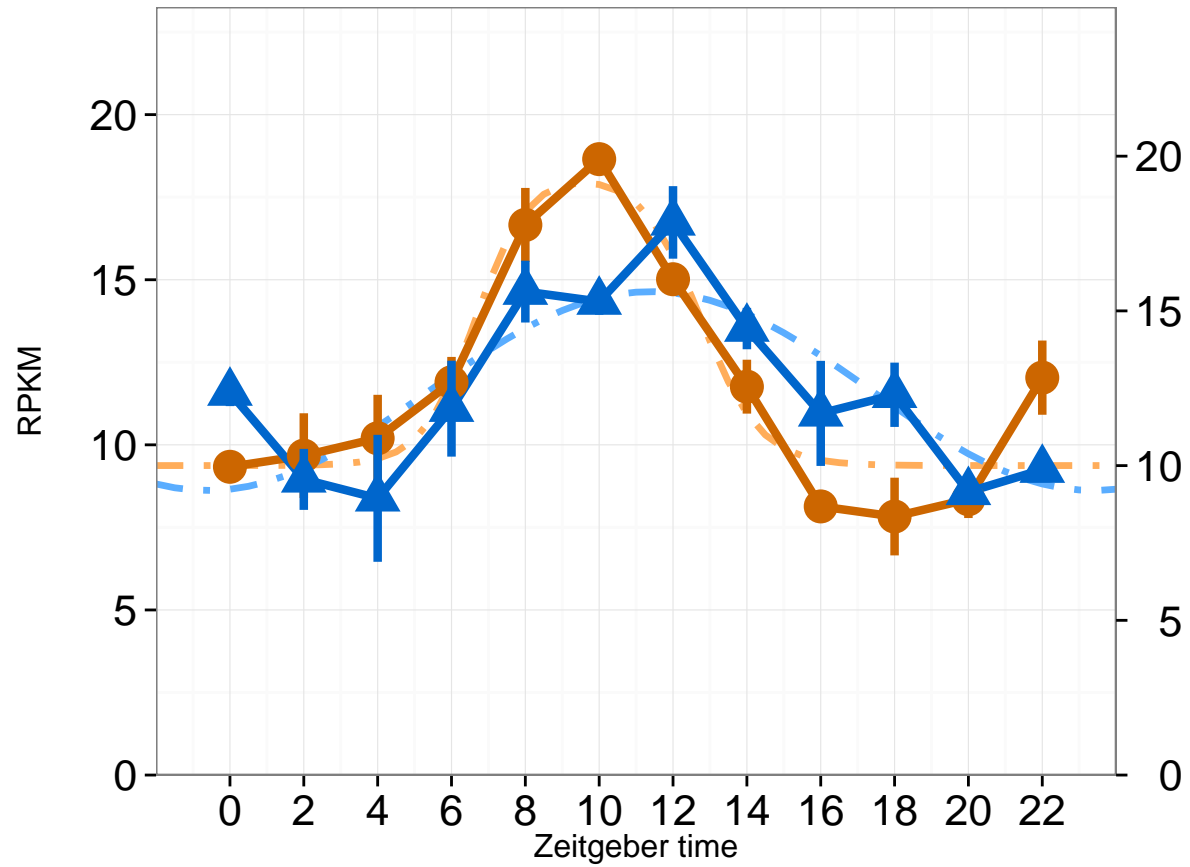

## KlhI21

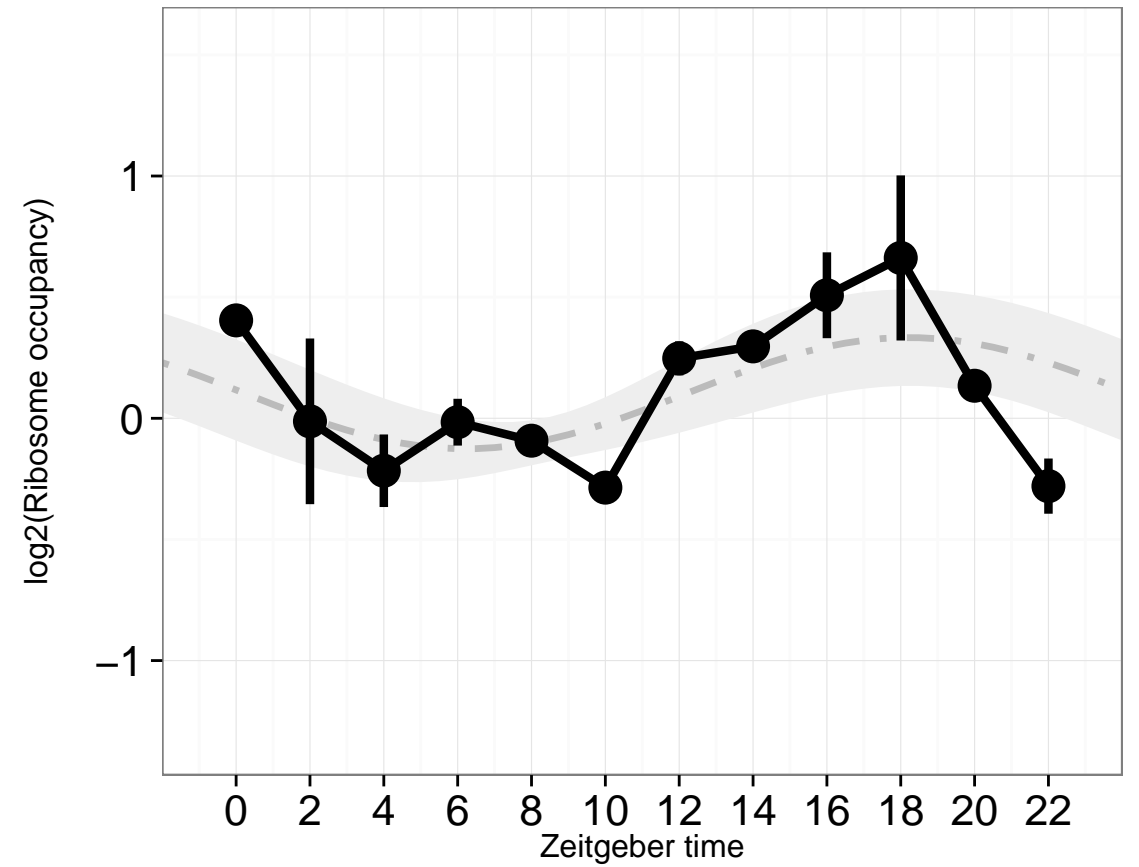

Supplement: SuppDataset_1.zip [file Klhl21_set_D.pdf › Supplemental Dataset 1/D-mRNA_rhythm_translation_rhyth/Klhl21_set_D.pdf]

## KlhI24

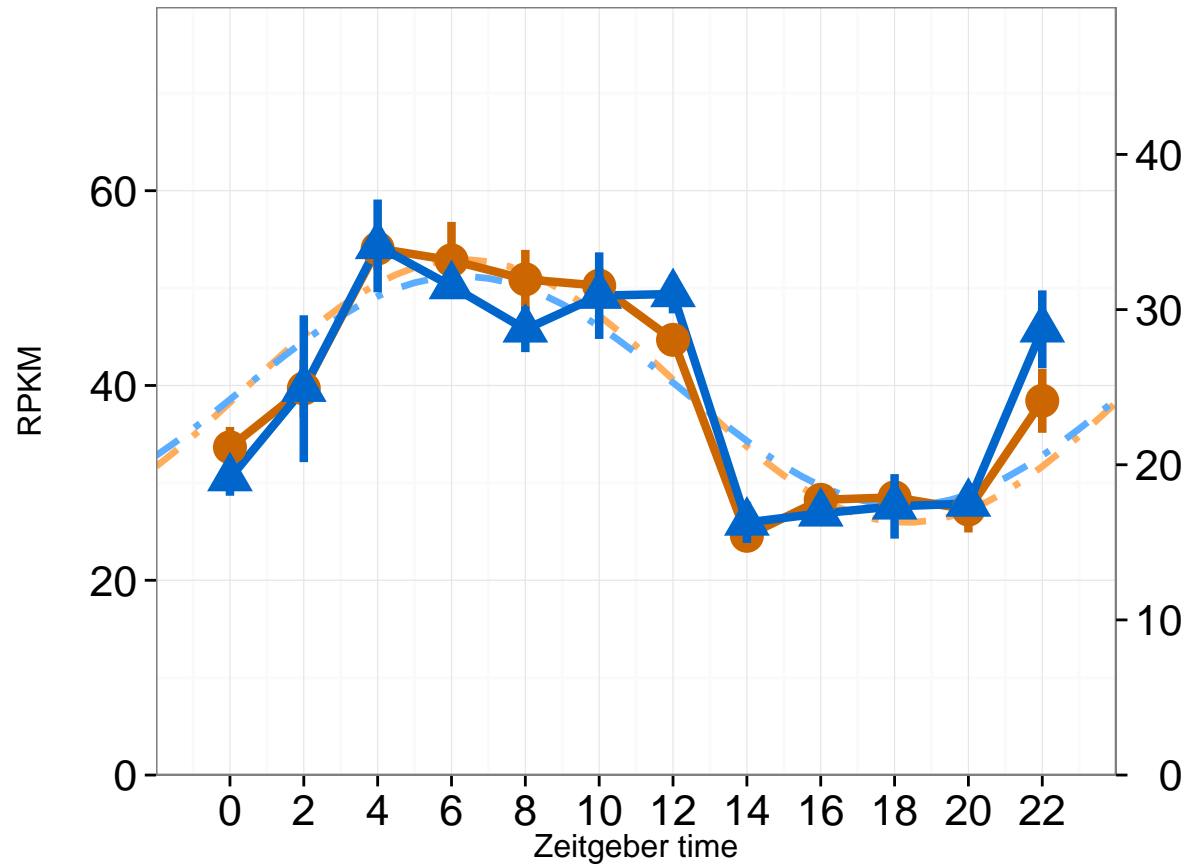

## KlhI24

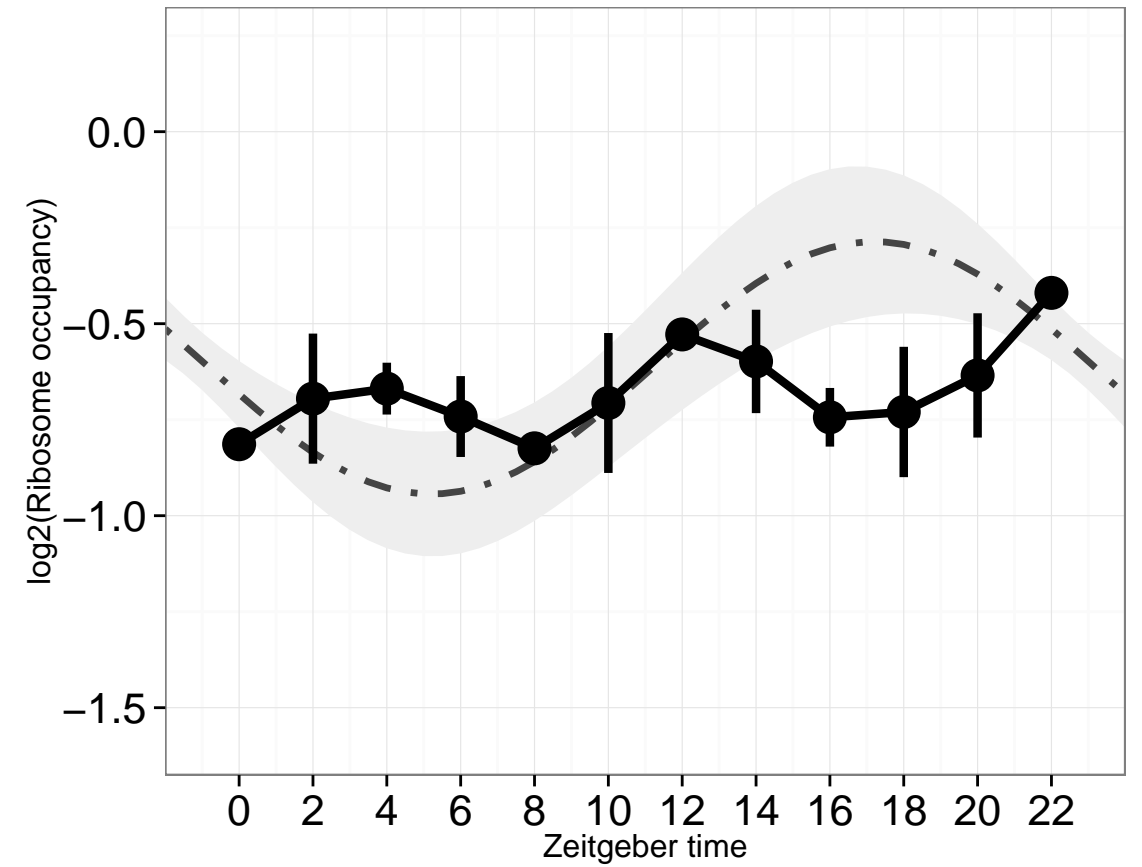

Supplement: SuppDataset_1.zip [file Klhl24_set_D.pdf › Supplemental Dataset 1/D-mRNA_rhythm_translation_rhyth/Klhl24_set_D.pdf]

## KIhI25

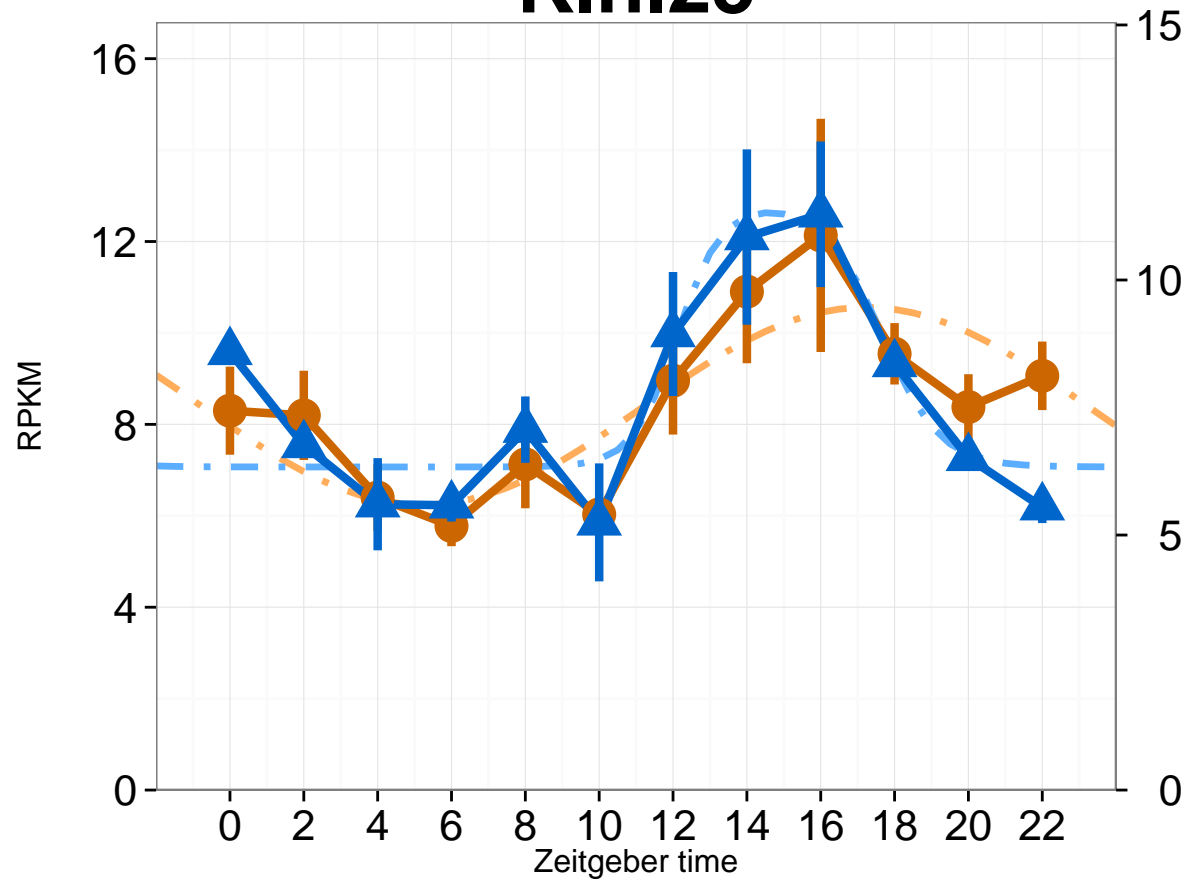

## KIhI25

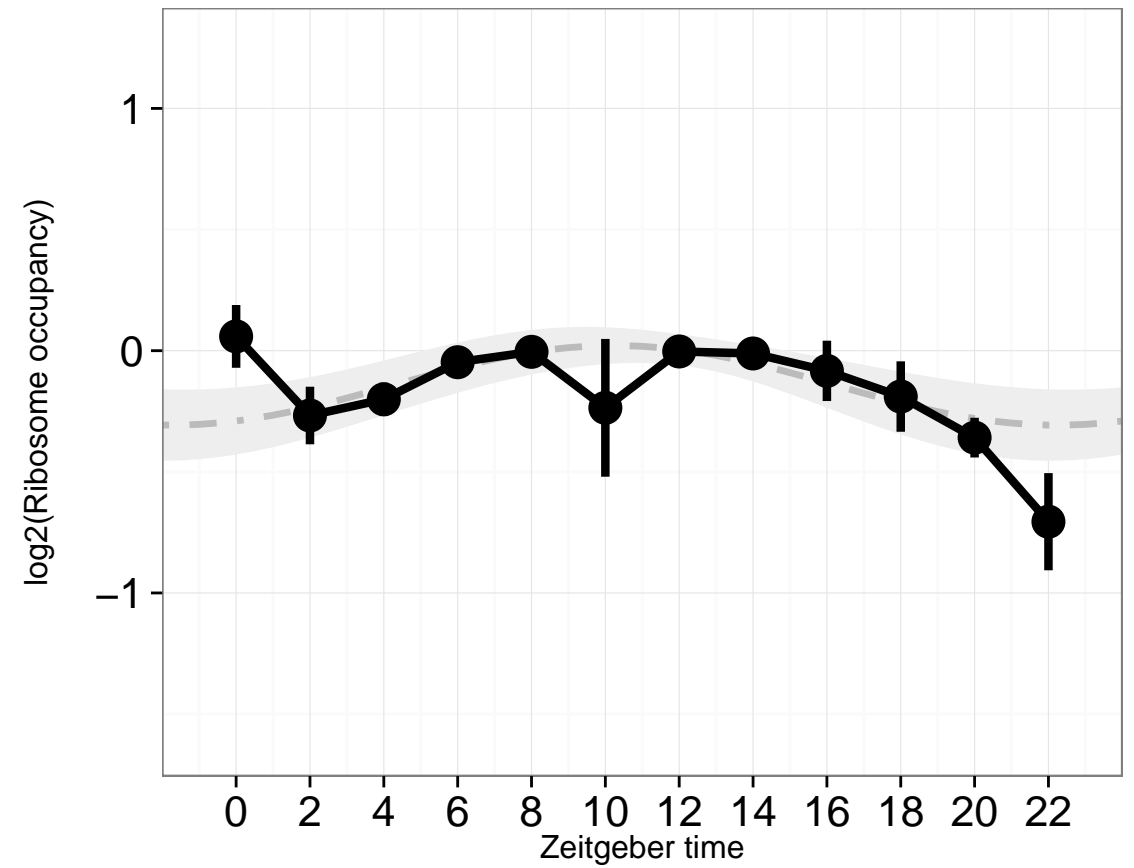

Supplement: SuppDataset_1.zip [file Klhl25_set_D.pdf › Supplemental Dataset 1/D-mRNA_rhythm_translation_rhyth/Klhl25_set_D.pdf]

## KIhI26

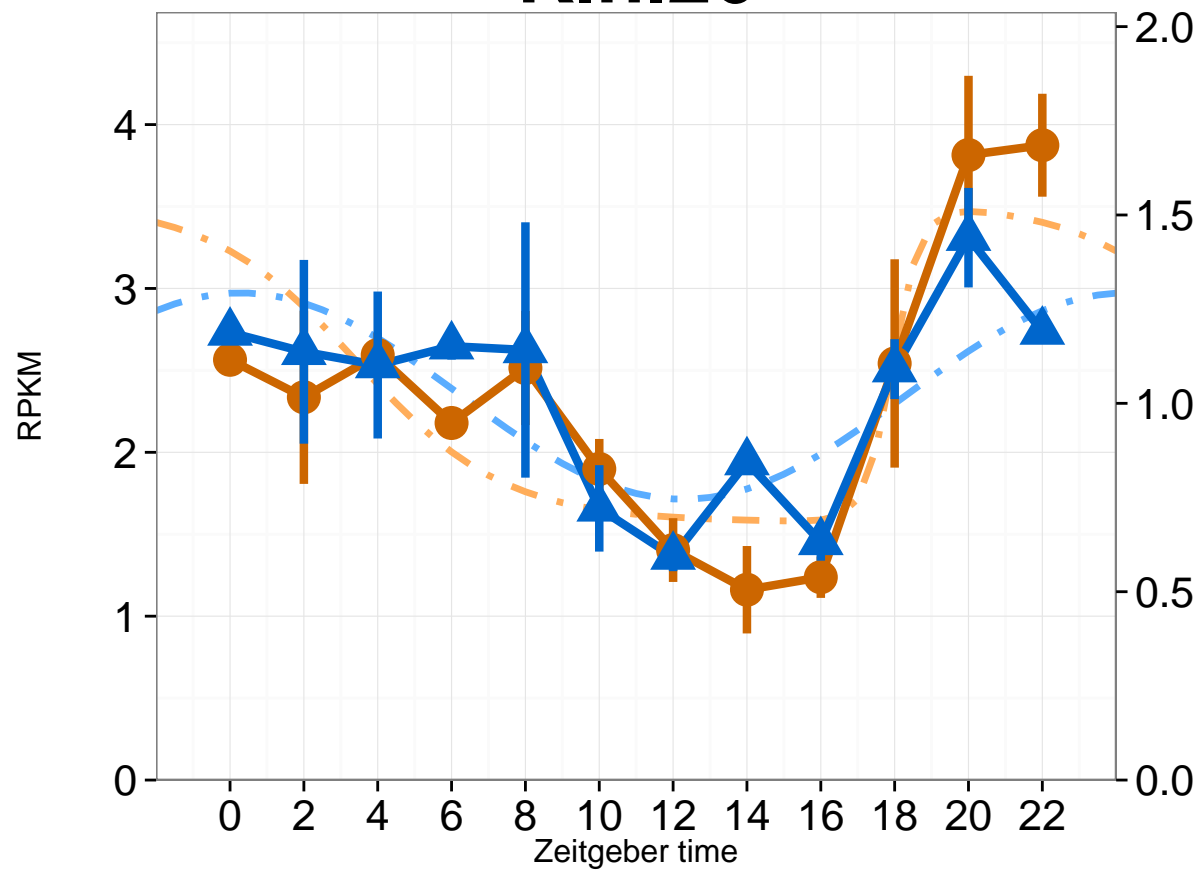

## KIhI26

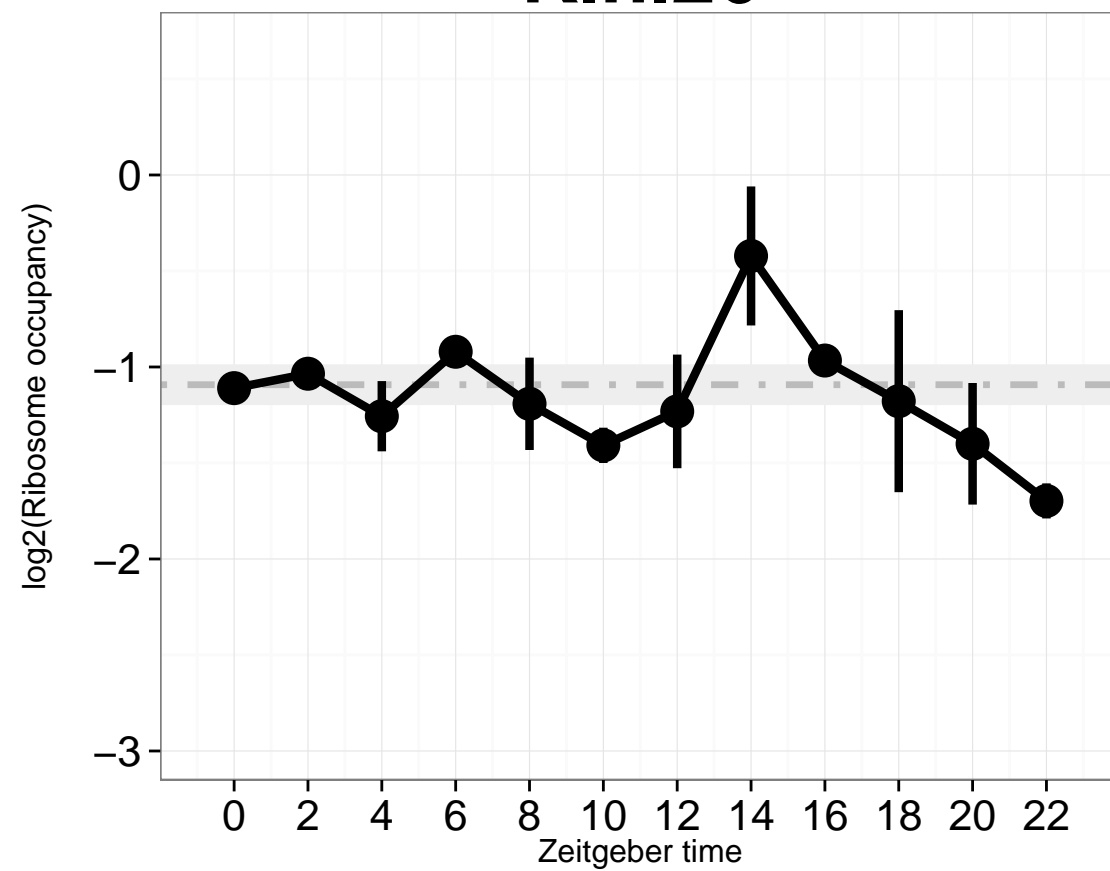

Supplement: SuppDataset_1.zip [file Klhl26_set_D.pdf › Supplemental Dataset 1/D-mRNA_rhythm_translation_rhyth/Klhl26_set_D.pdf]

## Klhl8

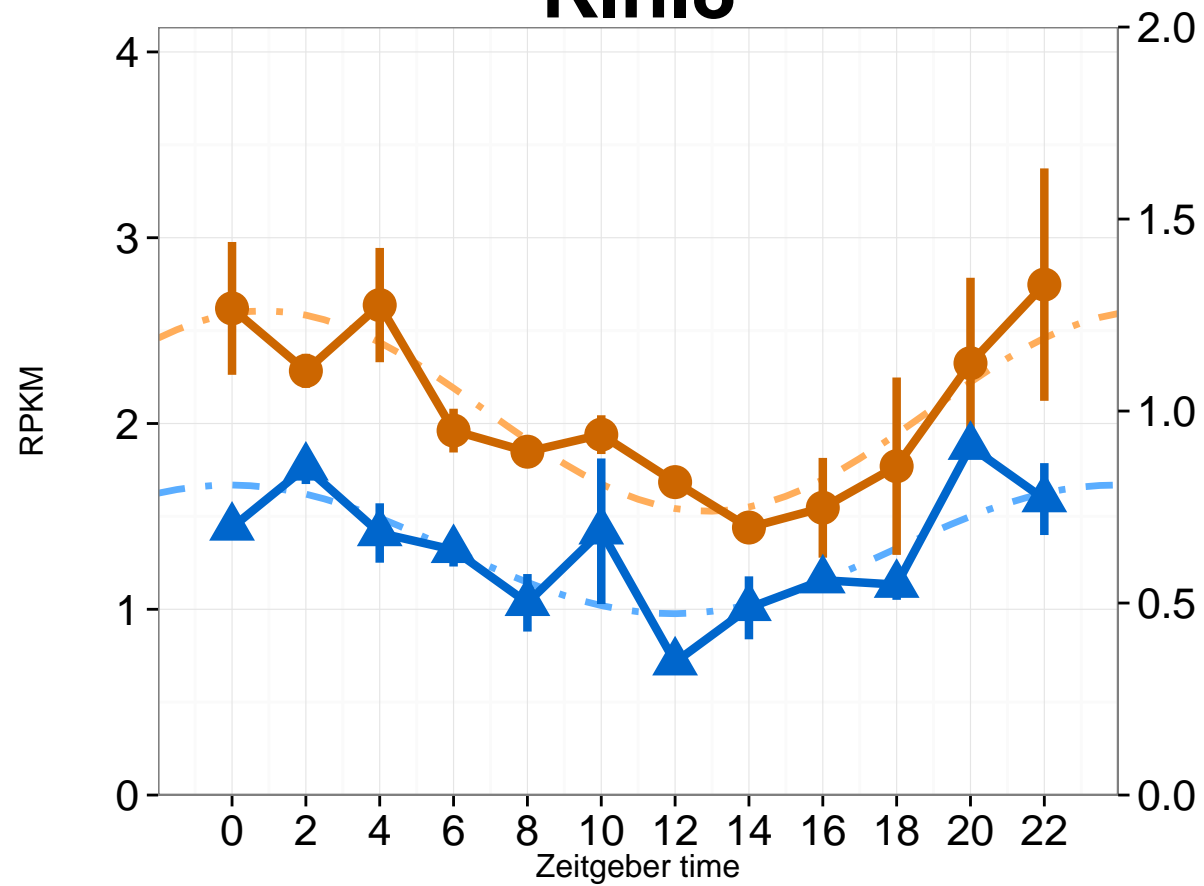

## Klhl8

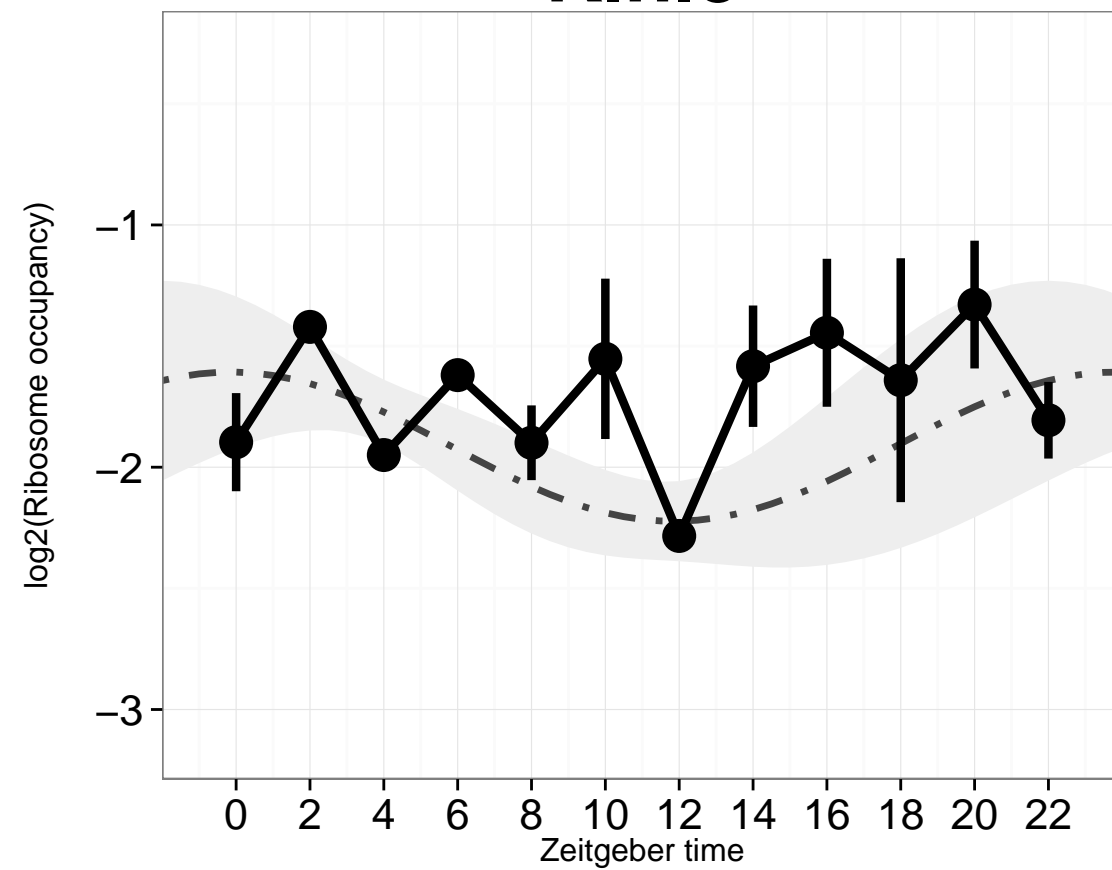

Supplement: SuppDataset_1.zip [file Klhl8_set_D.pdf › Supplemental Dataset 1/D-mRNA_rhythm_translation_rhyth/Klhl8_set_D.pdf]

## Kng1

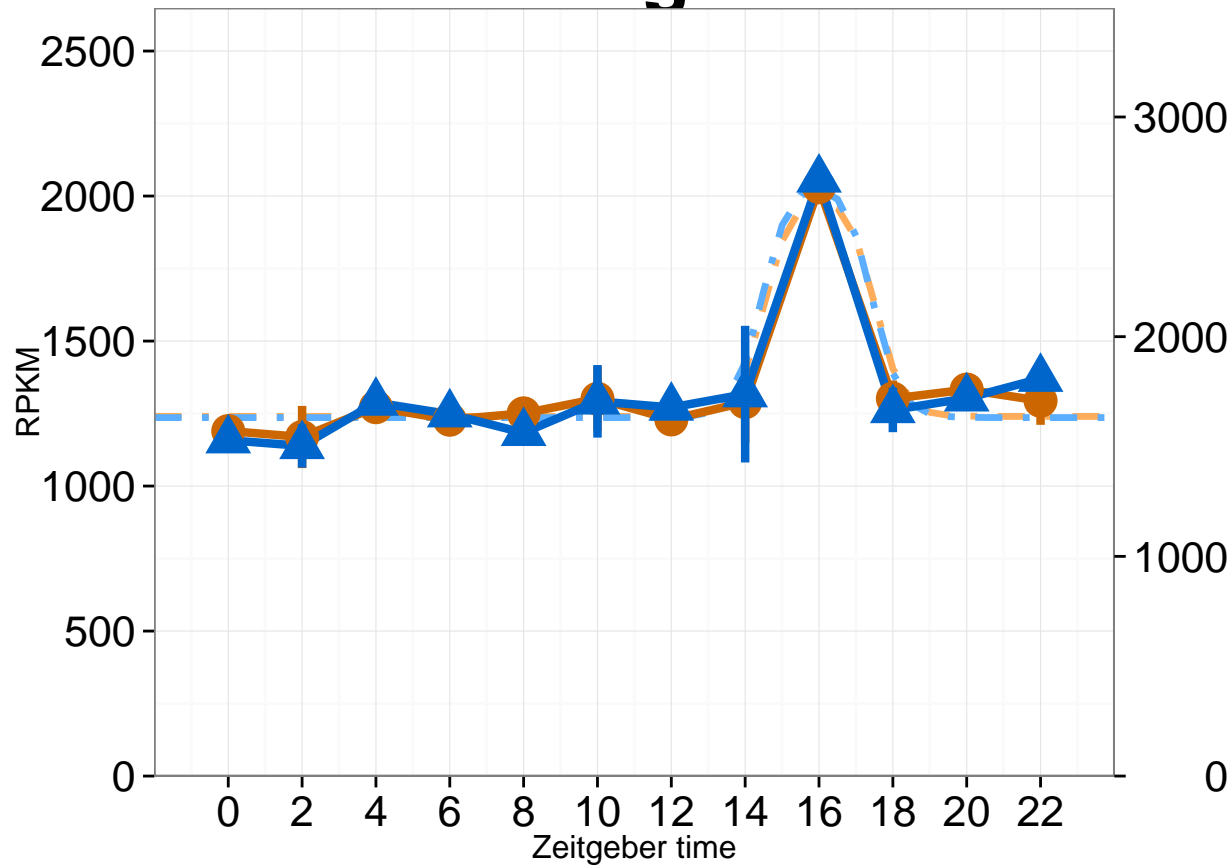

## Kng1

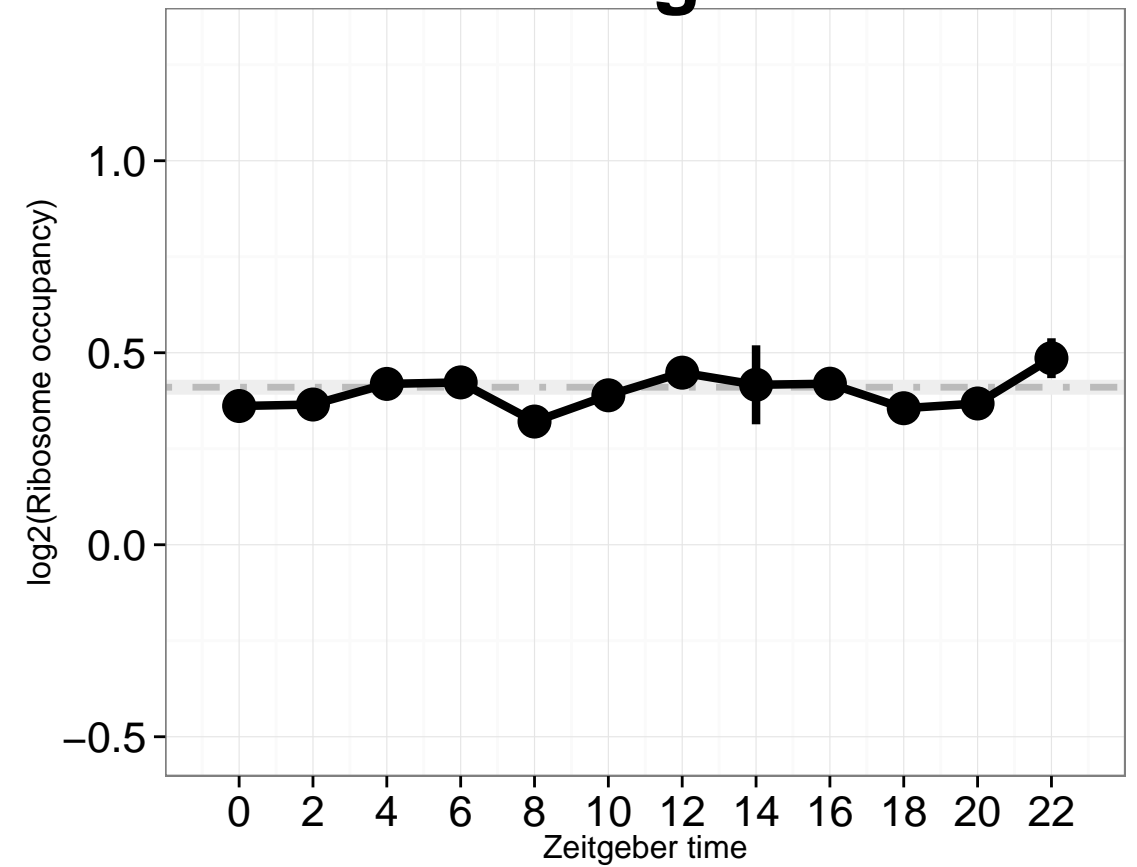

Supplement: SuppDataset_1.zip [file Kng1_set_D.pdf › Supplemental Dataset 1/D-mRNA_rhythm_translation_rhyth/Kng1_set_D.pdf]

## Kynu

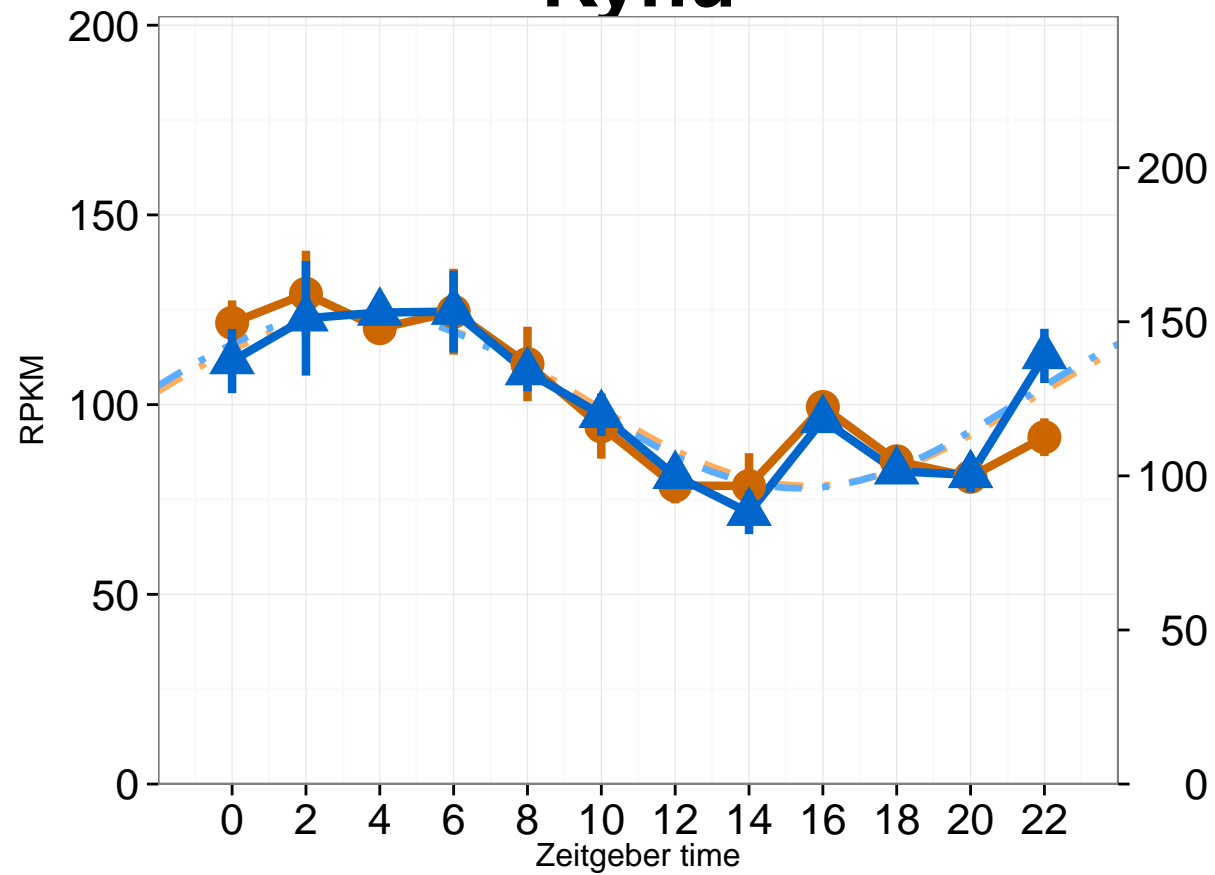

## Kynu

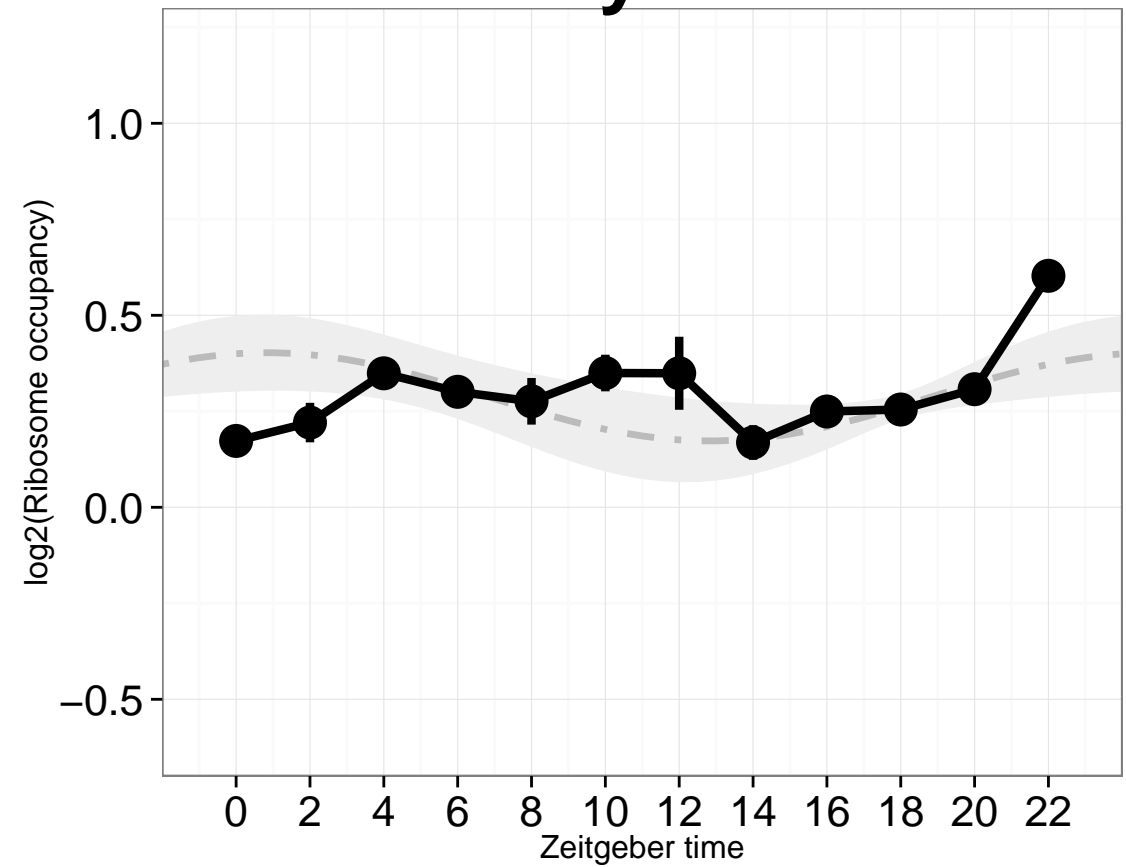

Supplement: SuppDataset_1.zip [file Kynu_set_D.pdf › Supplemental Dataset 1/D-mRNA_rhythm_translation_rhyth/Kynu_set_D.pdf]

# L3mbtl3

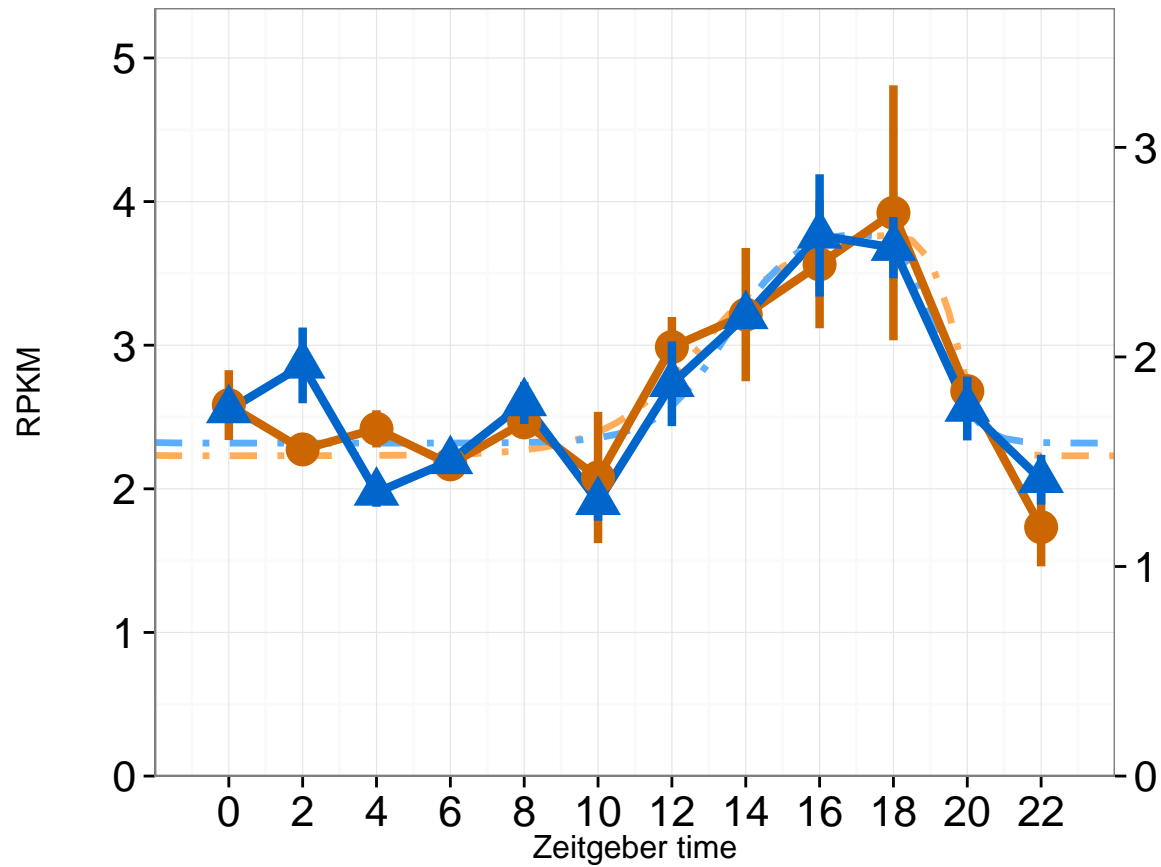

# L3mbtl3

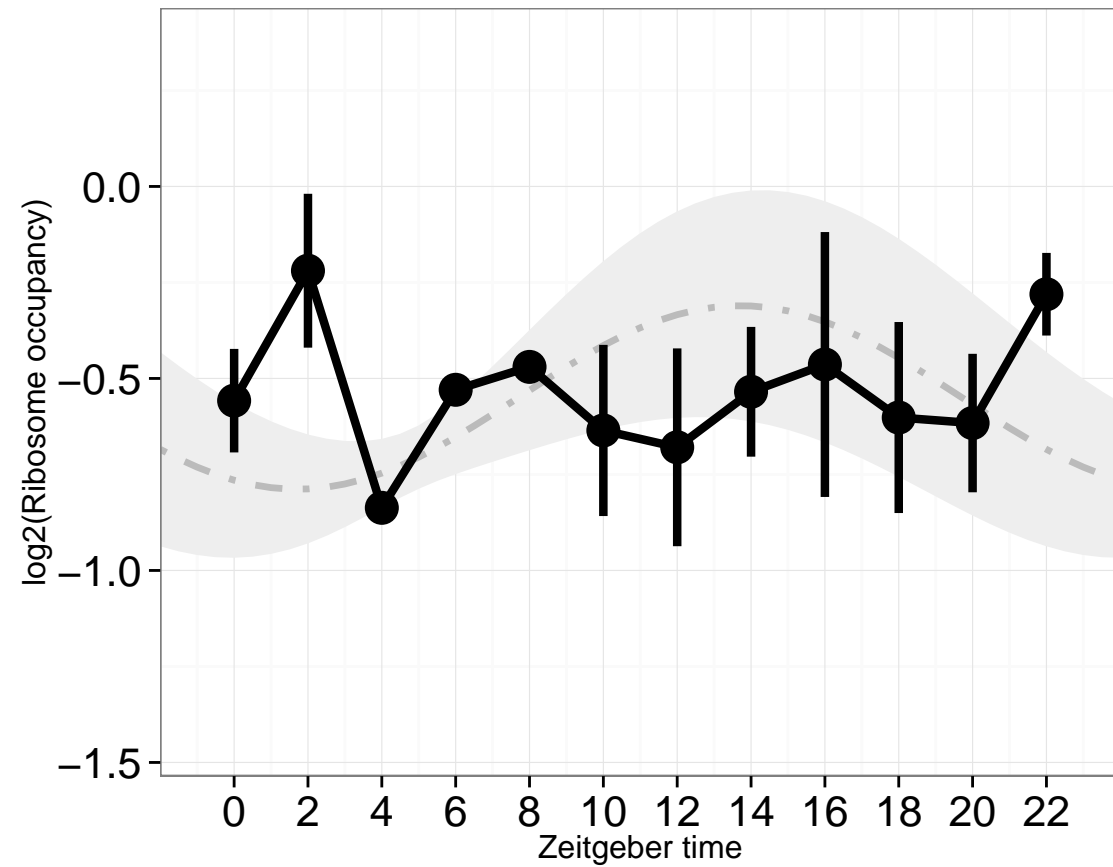

Supplement: SuppDataset_1.zip [file L3mbtl3_set_D.pdf › Supplemental Dataset 1/D-mRNA_rhythm_translation_rhyth/L3mbtl3_set_D.pdf]

## Lacc1

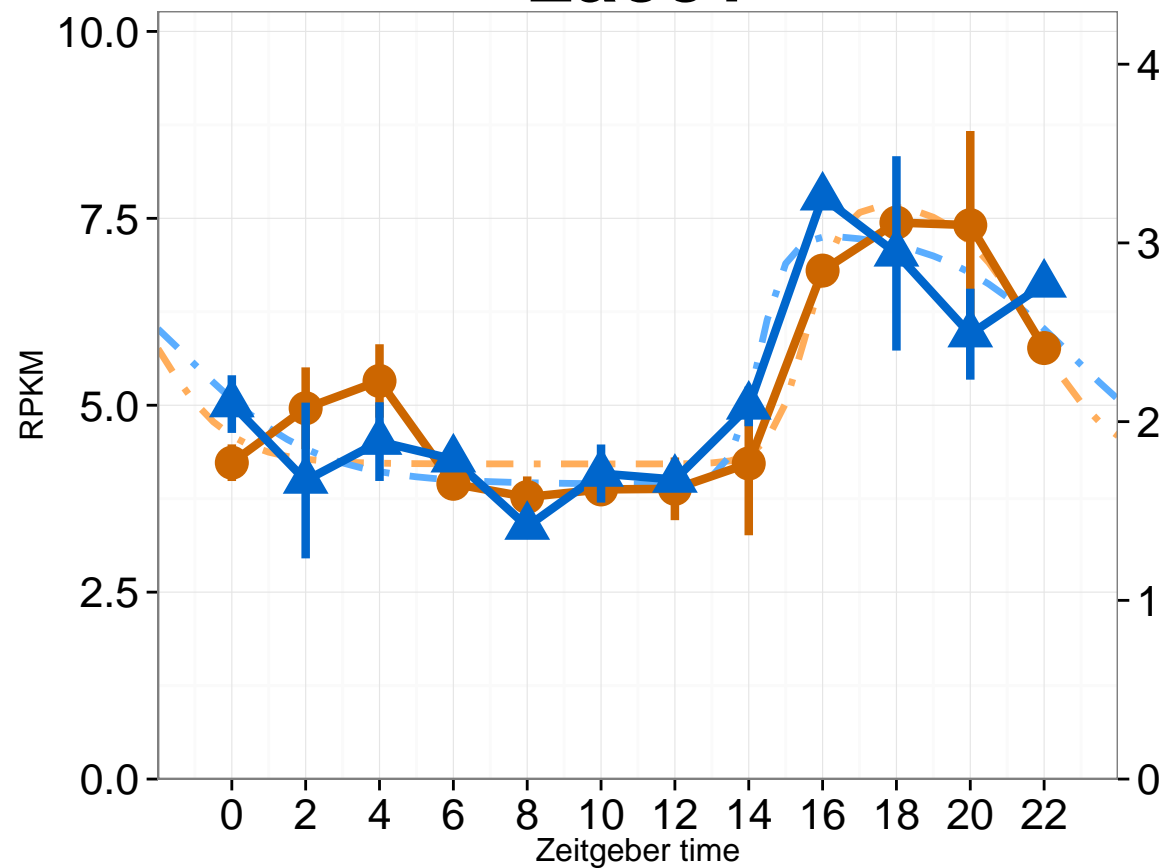

## Lacc1

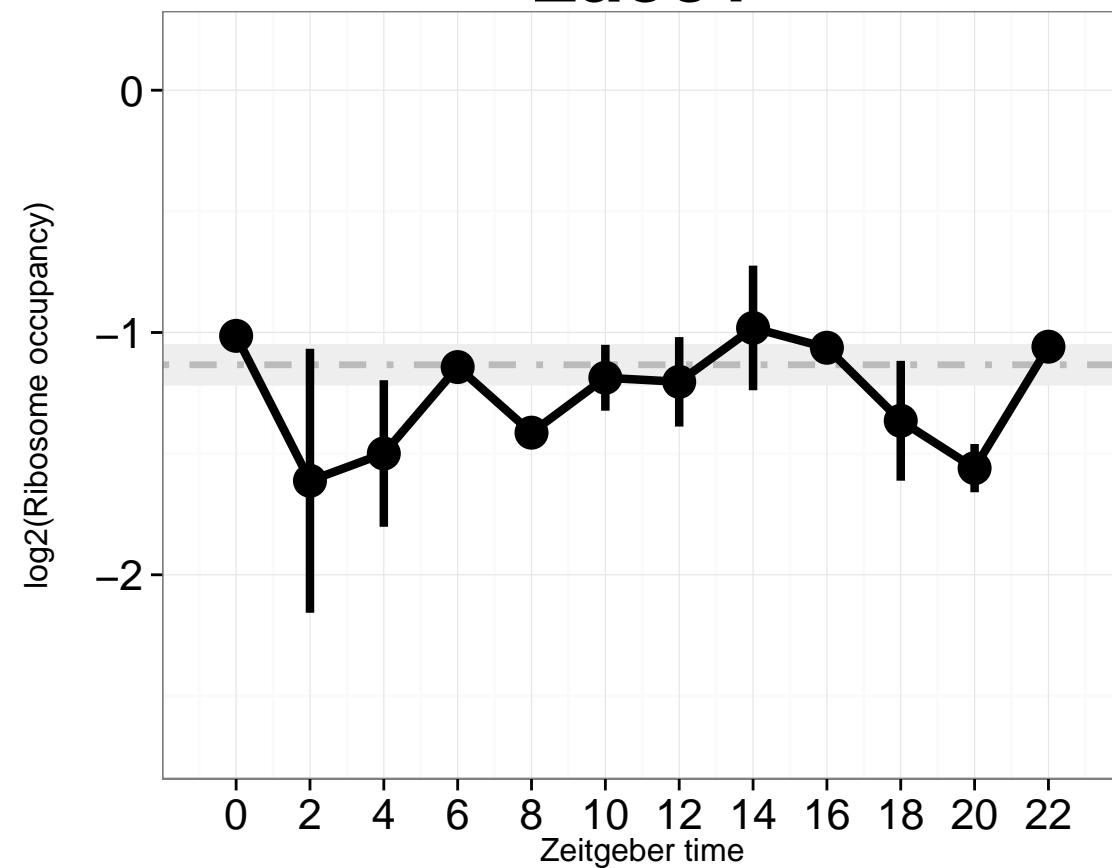

Supplement: SuppDataset_1.zip [file Lacc1_set_D.pdf › Supplemental Dataset 1/D-mRNA_rhythm_translation_rhyth/Lacc1_set_D.pdf]

## Lad1

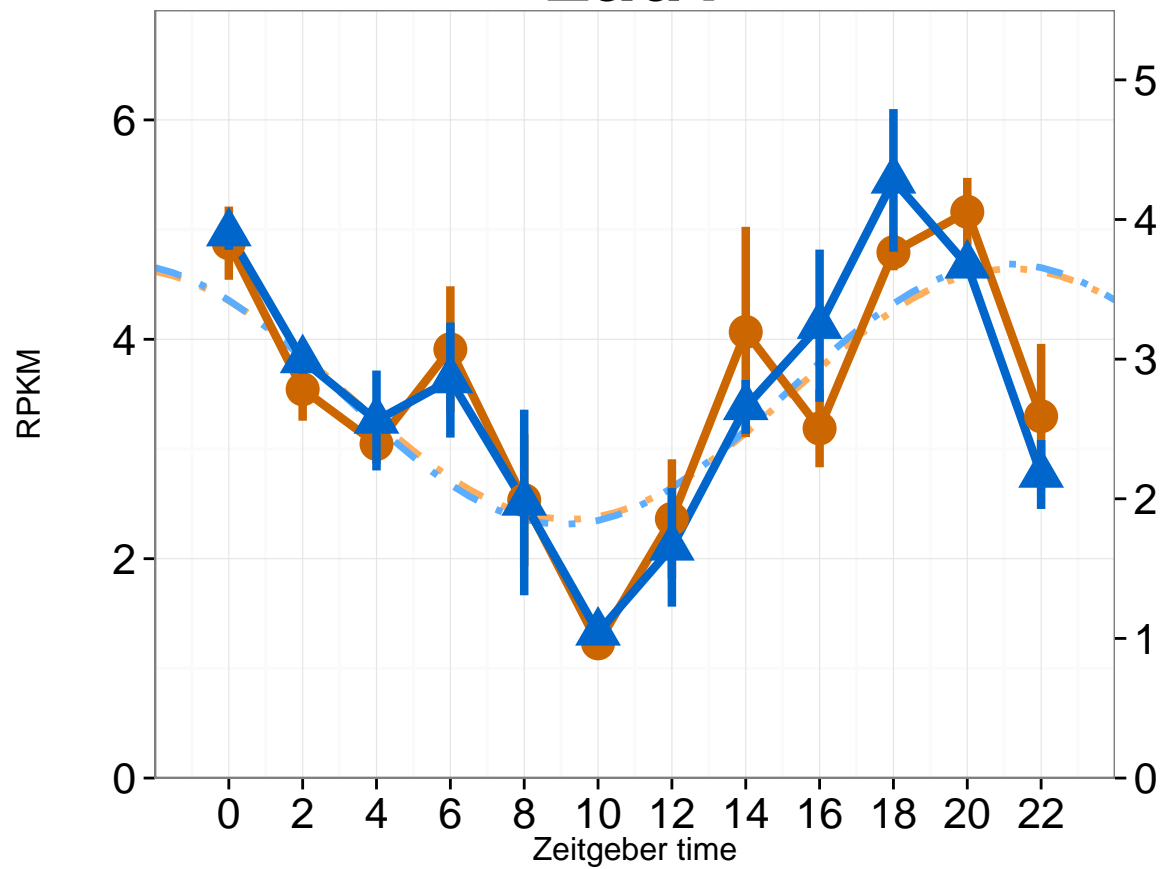

## Lad1

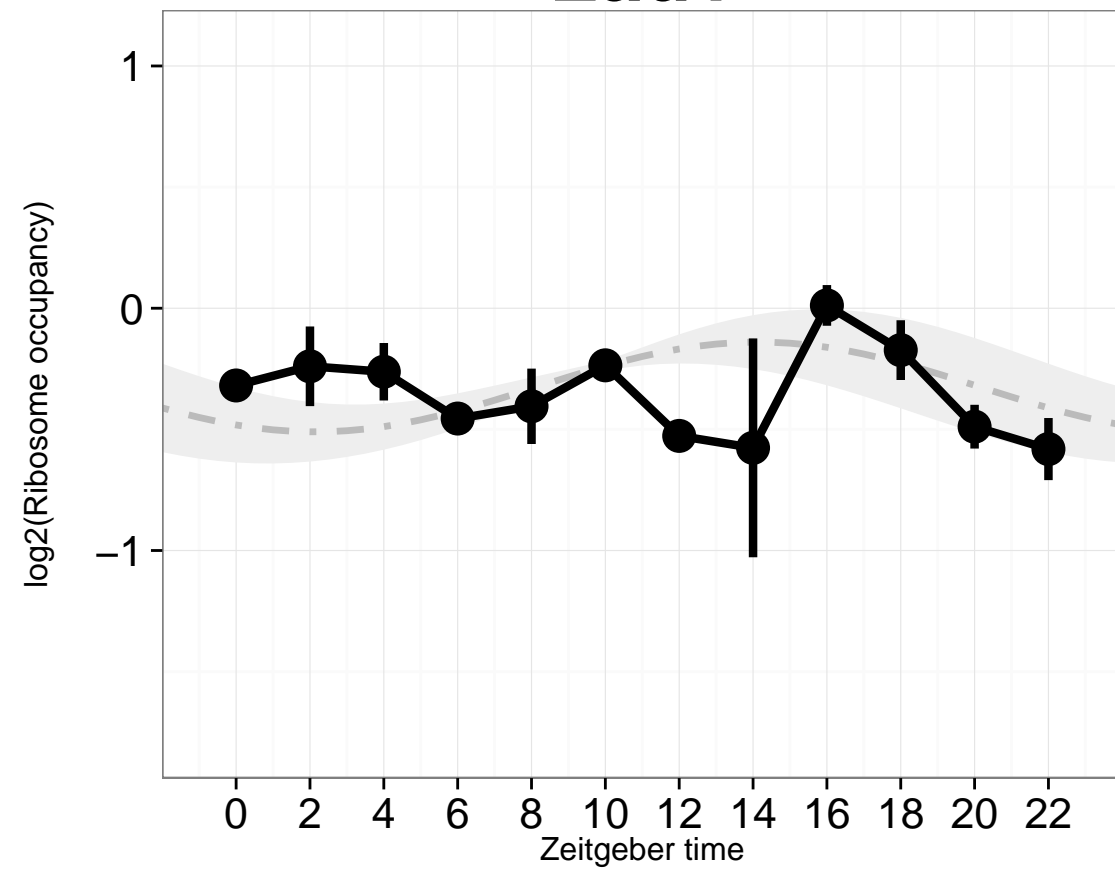

Supplement: SuppDataset_1.zip [file Lad1_set_D.pdf › Supplemental Dataset 1/D-mRNA_rhythm_translation_rhyth/Lad1_set_D.pdf]

# Lag3

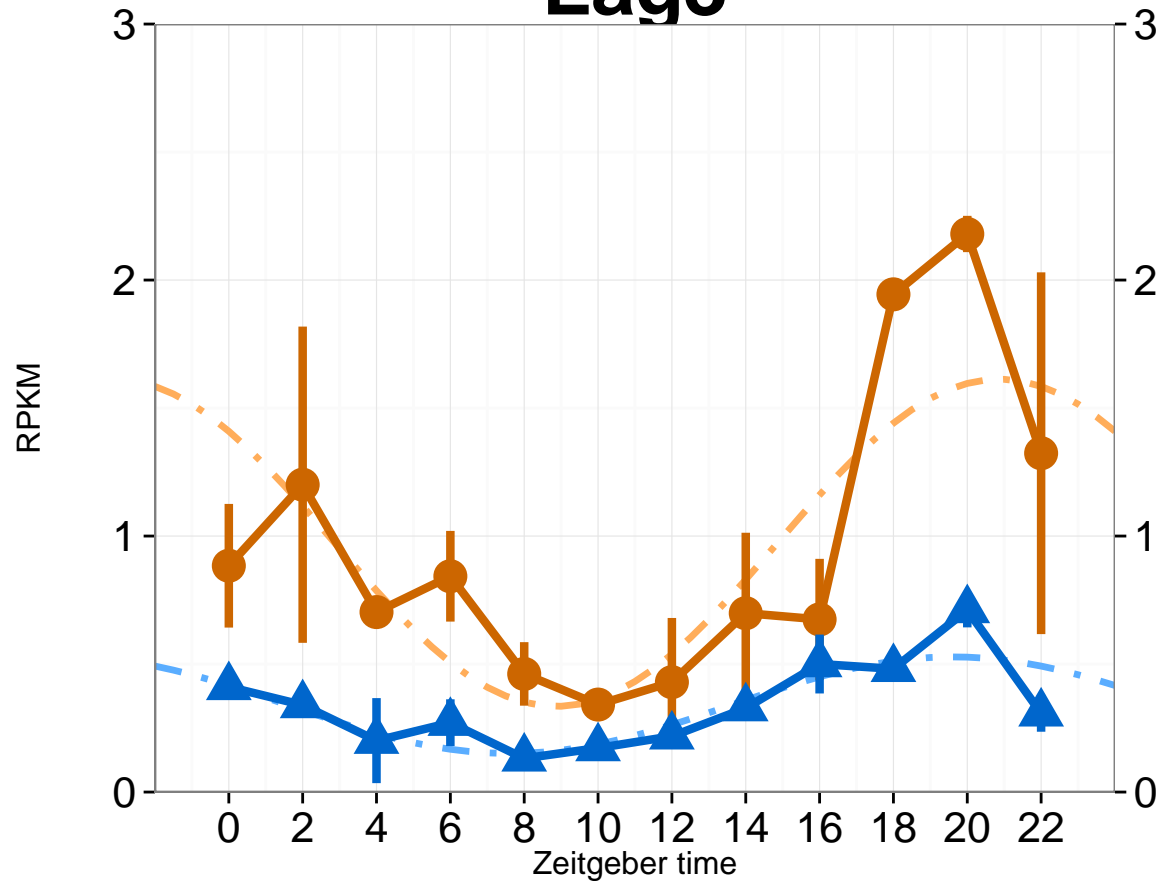

# Lag3

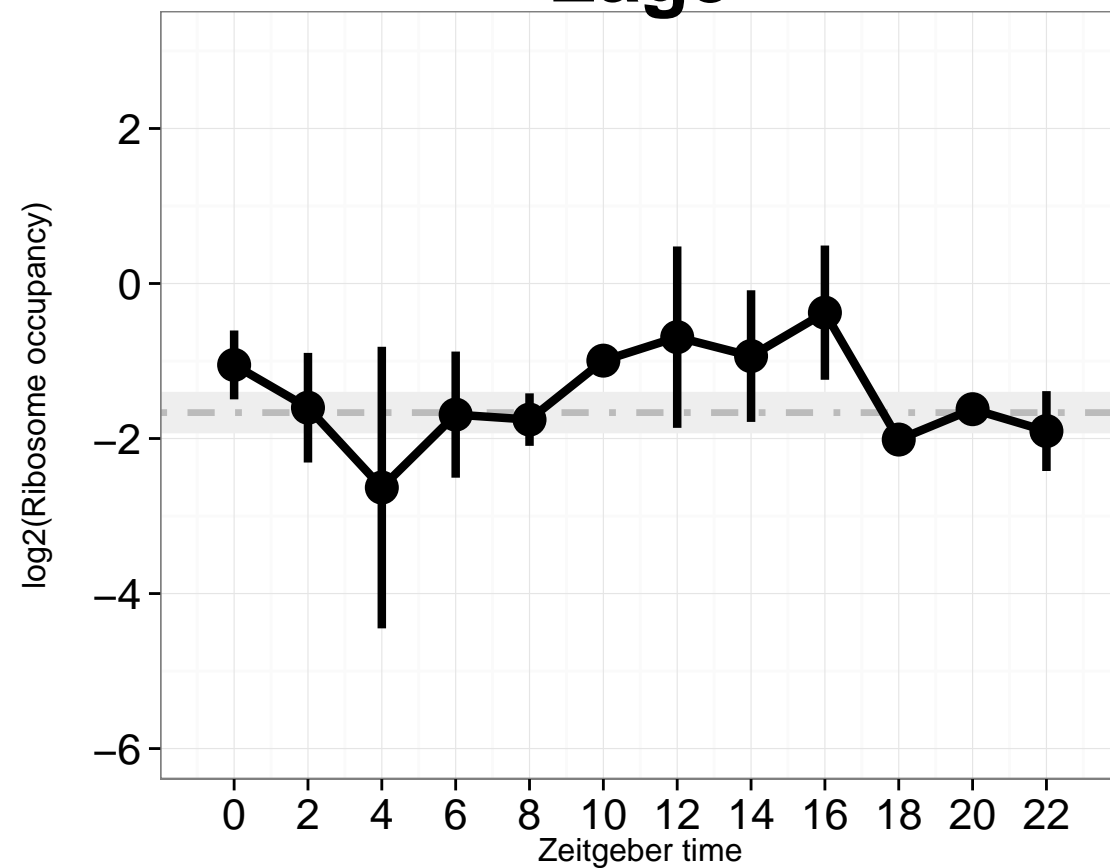

Supplement: SuppDataset_1.zip [file Lag3_set_D.pdf › Supplemental Dataset 1/D-mRNA_rhythm_translation_rhyth/Lag3_set_D.pdf]

# Larp1

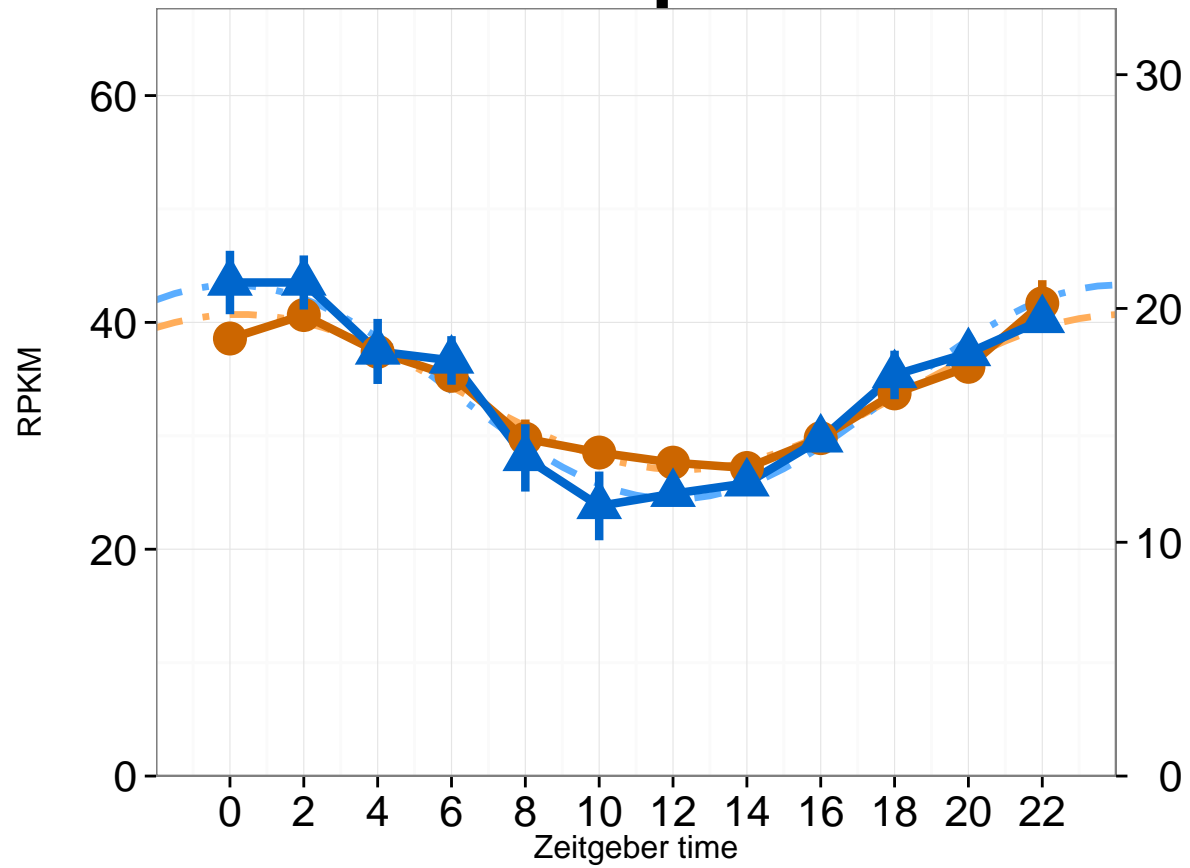

# Larp1

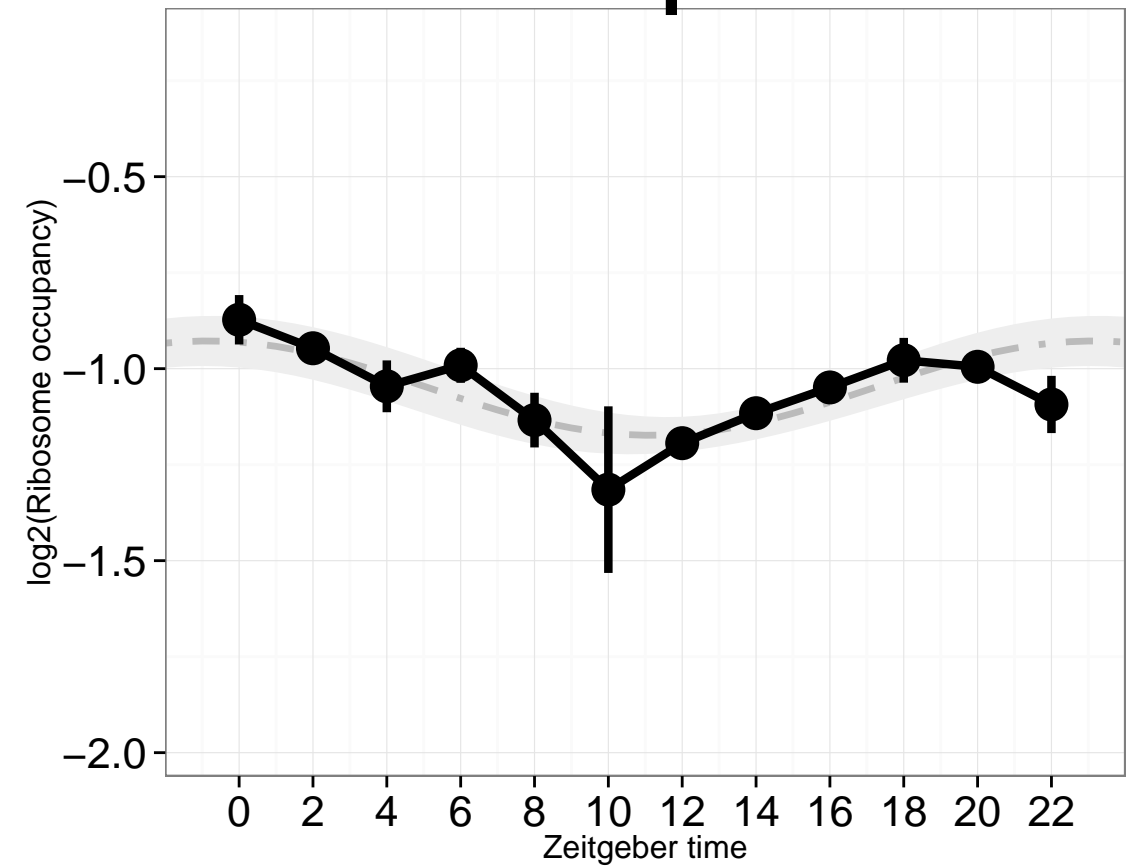

Supplement: SuppDataset_1.zip [file Larp1_set_D.pdf › Supplemental Dataset 1/D-mRNA_rhythm_translation_rhyth/Larp1_set_D.pdf]

## Lasp1

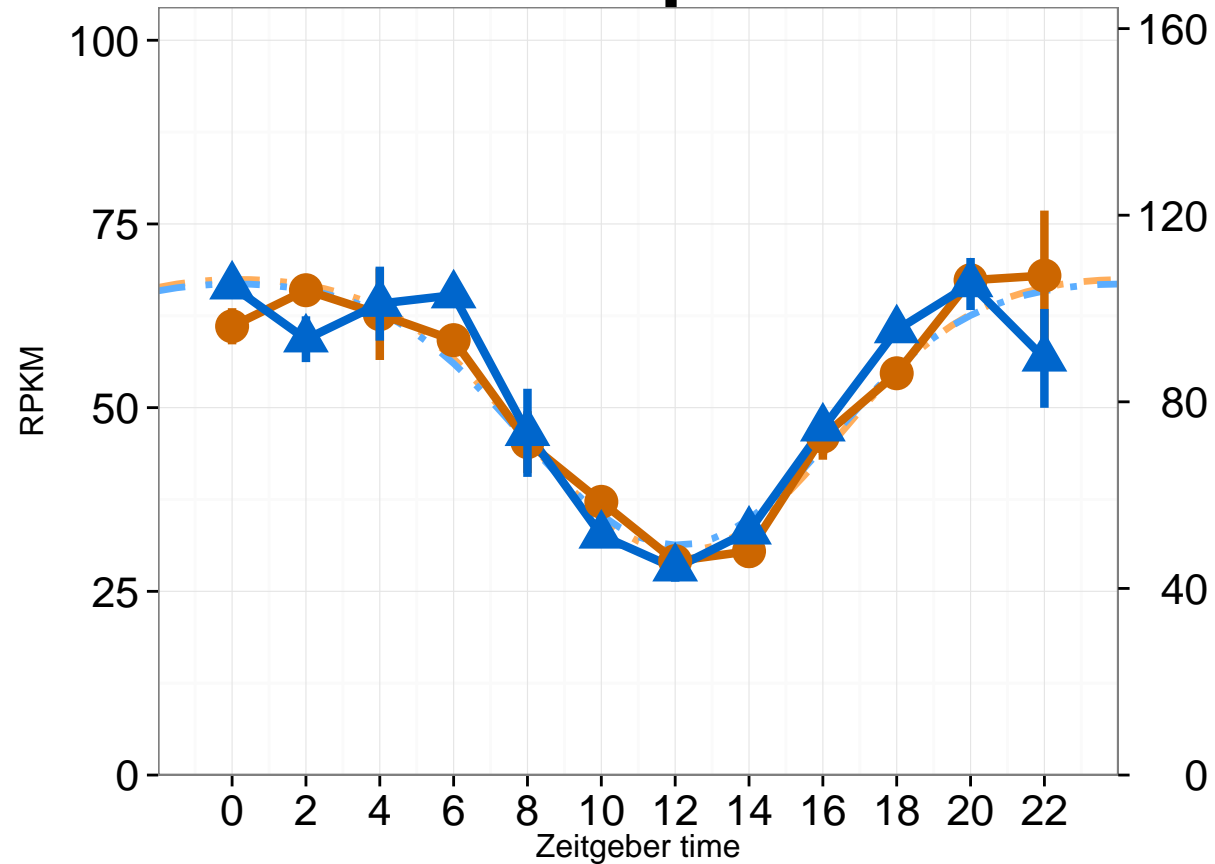

## Lasp1

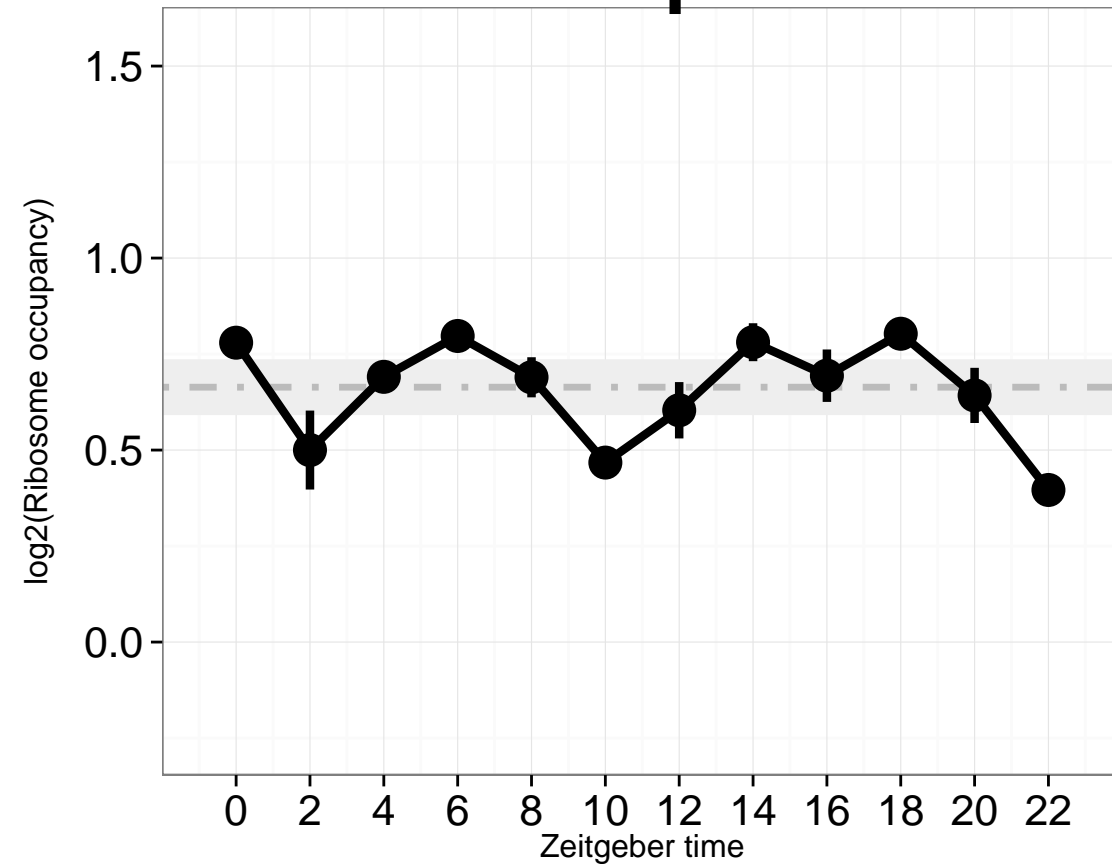

Supplement: SuppDataset_1.zip [file Lasp1_set_D.pdf › Supplemental Dataset 1/D-mRNA_rhythm_translation_rhyth/Lasp1_set_D.pdf]

## Lcn2

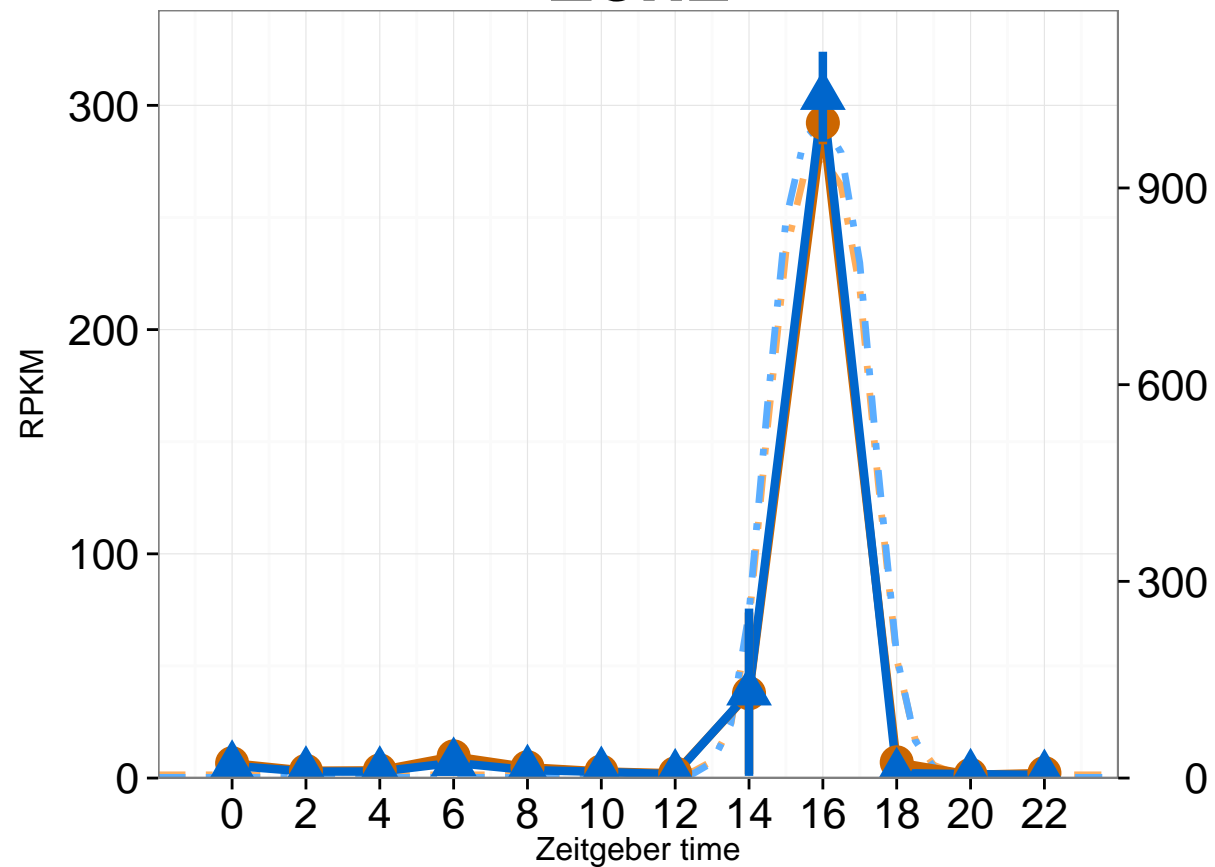

## Lcn2

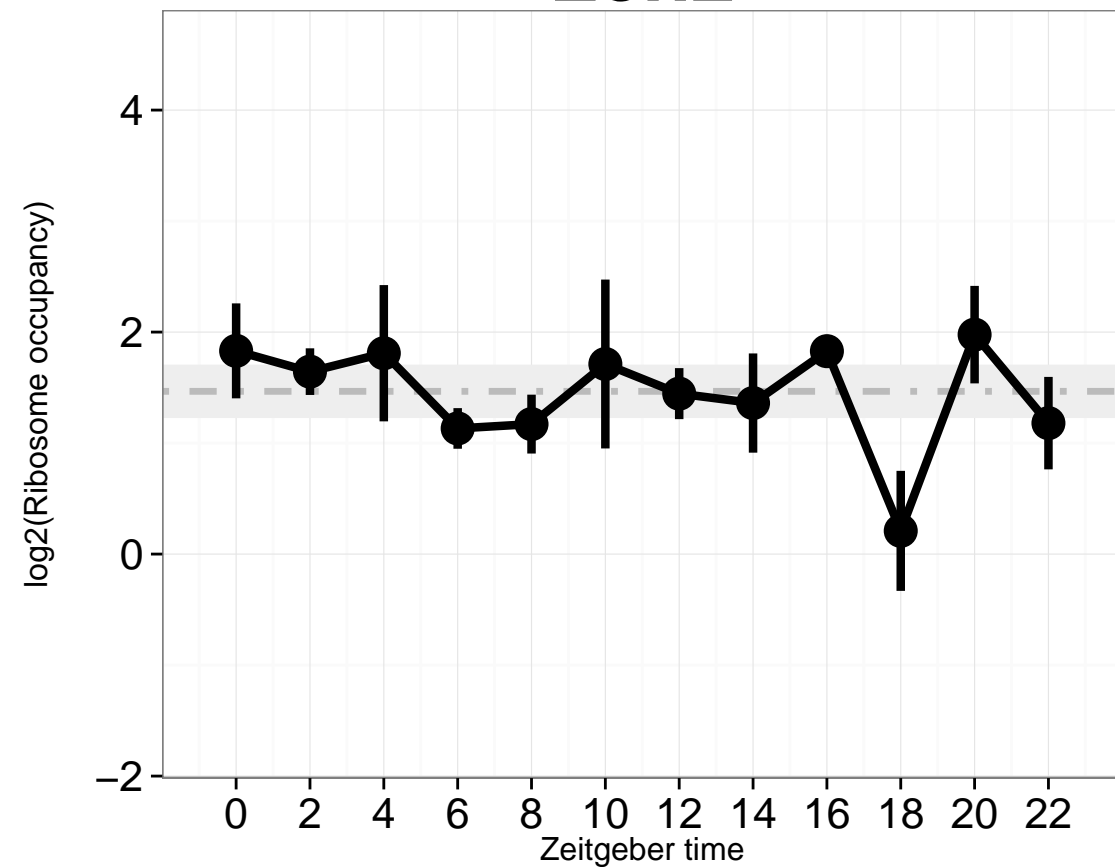

Supplement: SuppDataset_1.zip [file Lcn2_set_D.pdf › Supplemental Dataset 1/D-mRNA_rhythm_translation_rhyth/Lcn2_set_D.pdf]

# Lcp2

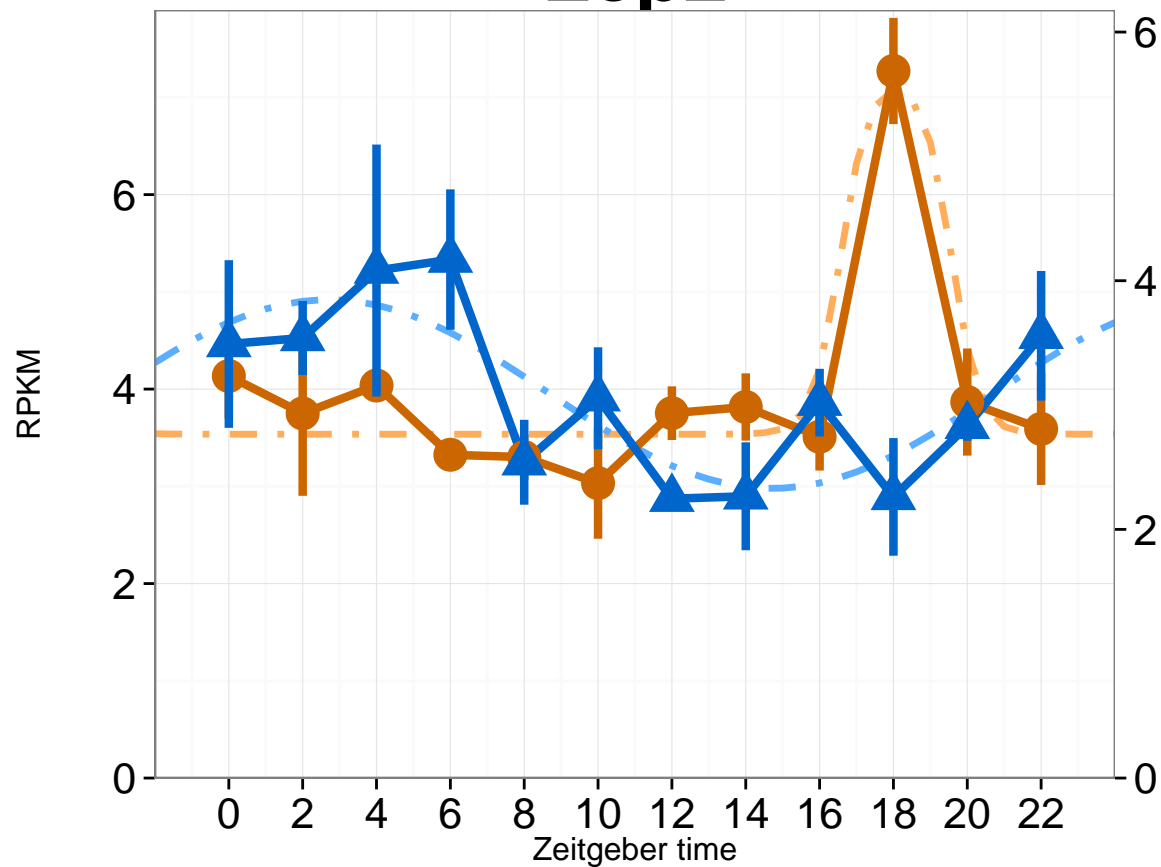

# Lcp2

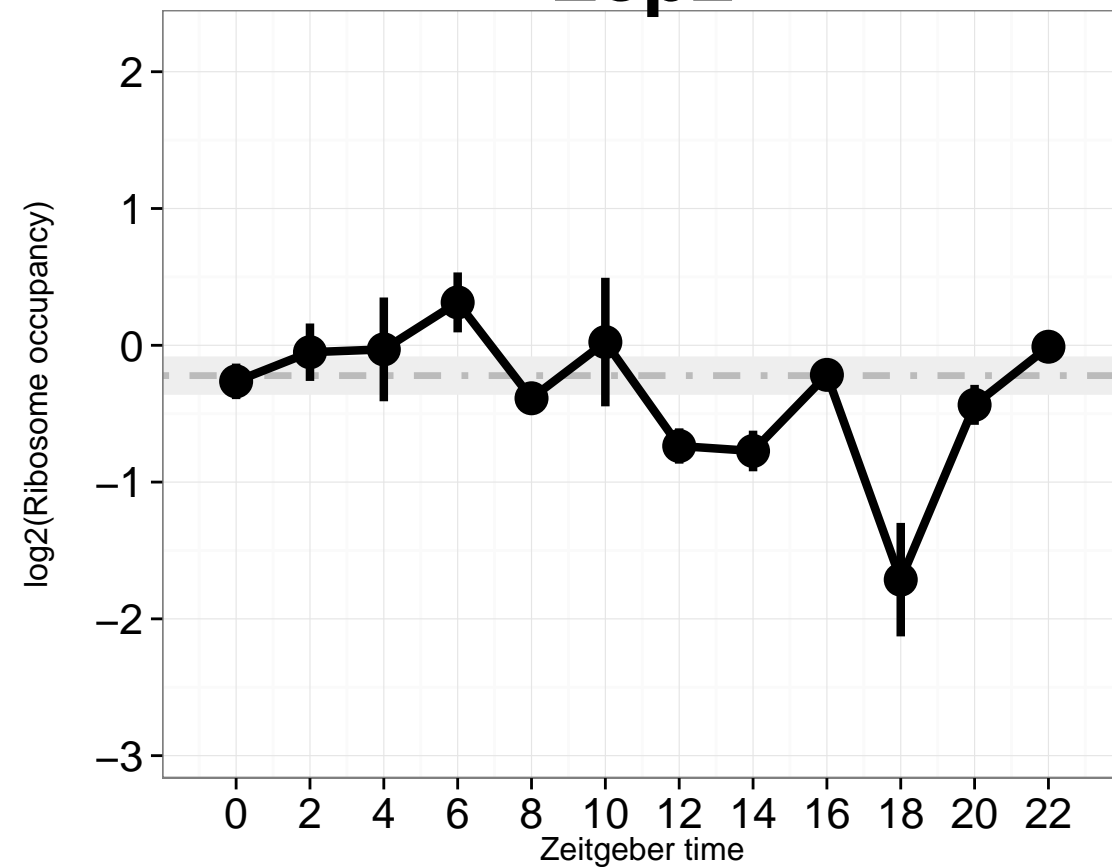

Supplement: SuppDataset_1.zip [file Lcp2_set_D.pdf › Supplemental Dataset 1/D-mRNA_rhythm_translation_rhyth/Lcp2_set_D.pdf]

# LdIrad4

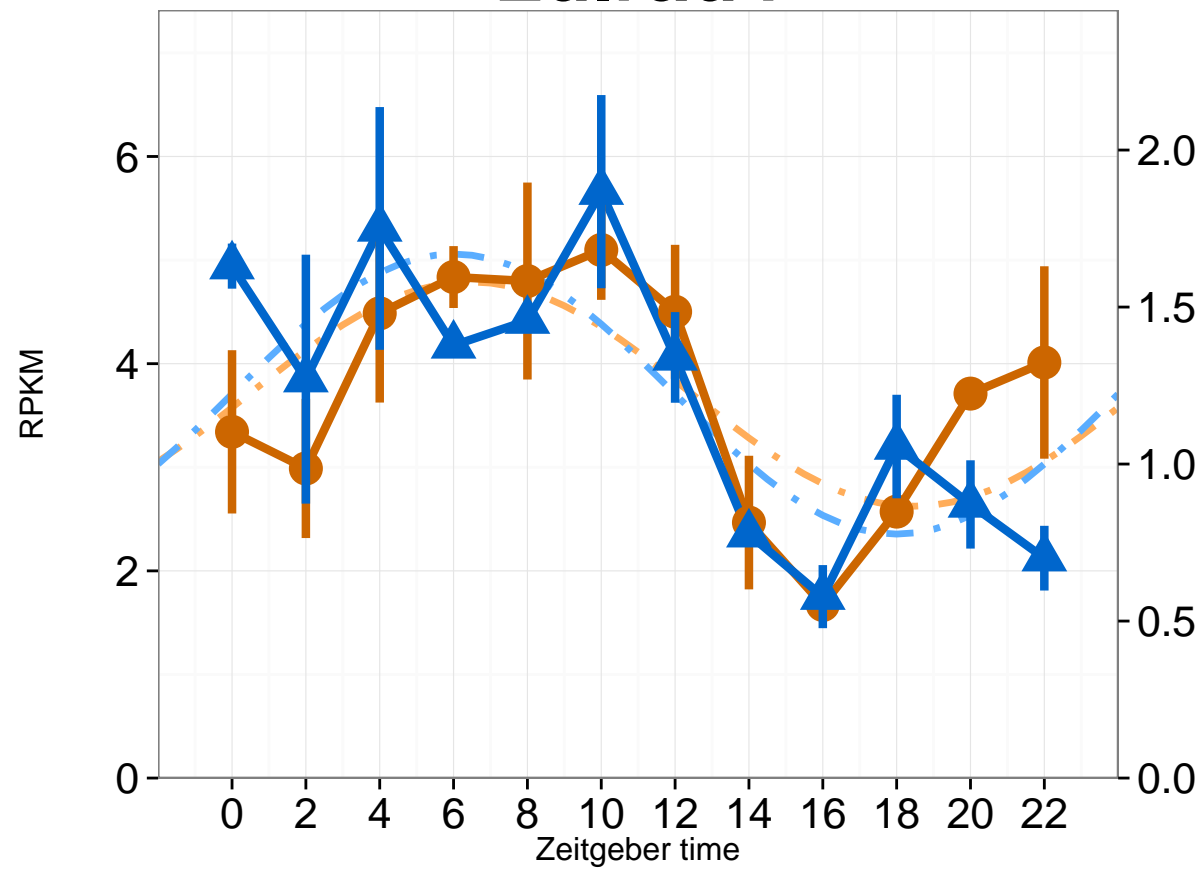

# LdIrad4

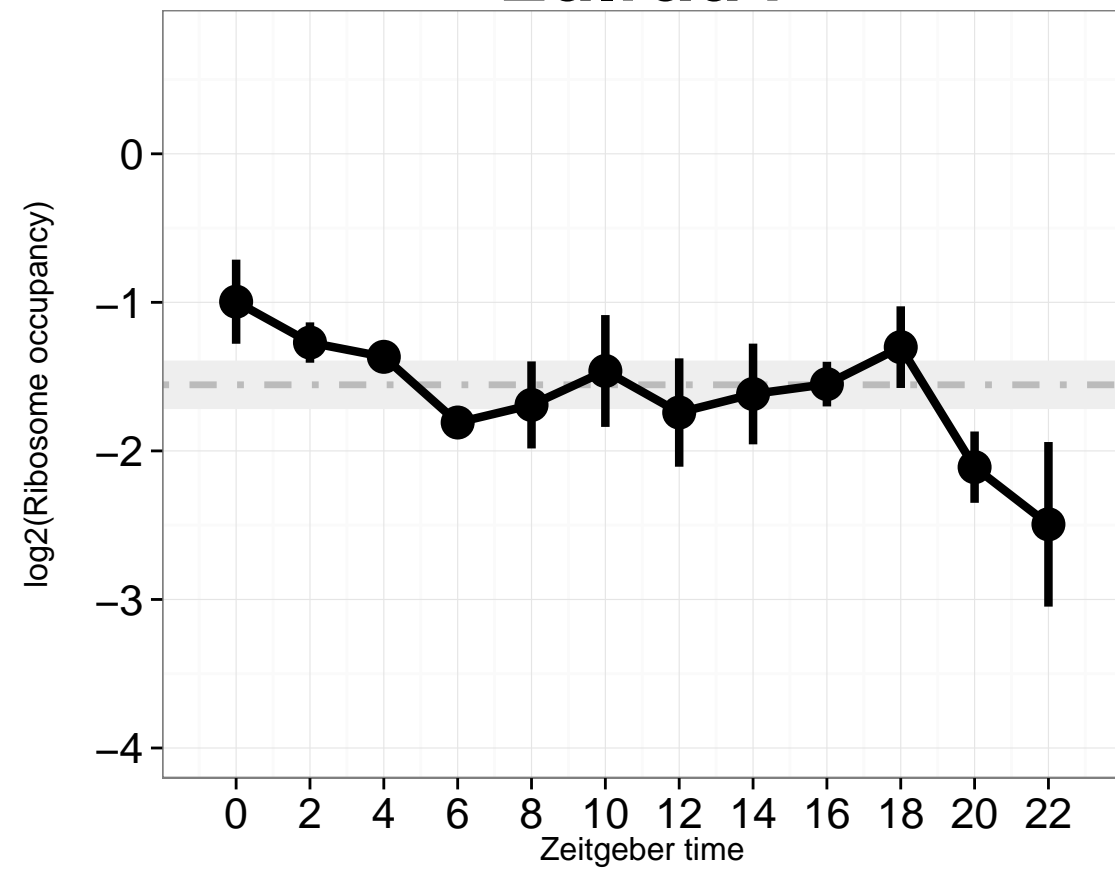

Supplement: SuppDataset_1.zip [file Ldlrad4_set_D.pdf › Supplemental Dataset 1/D-mRNA_rhythm_translation_rhyth/Ldlrad4_set_D.pdf]

## Leap2

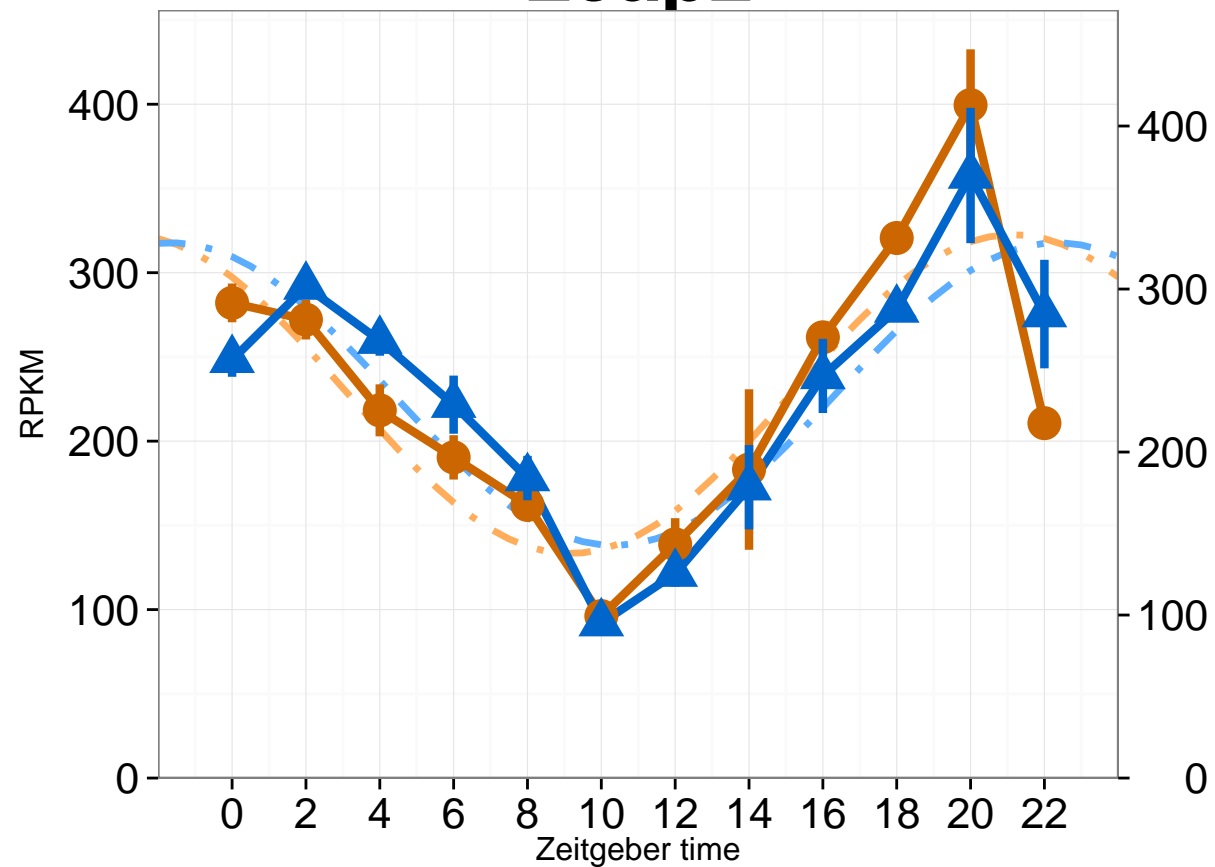

## Leap2

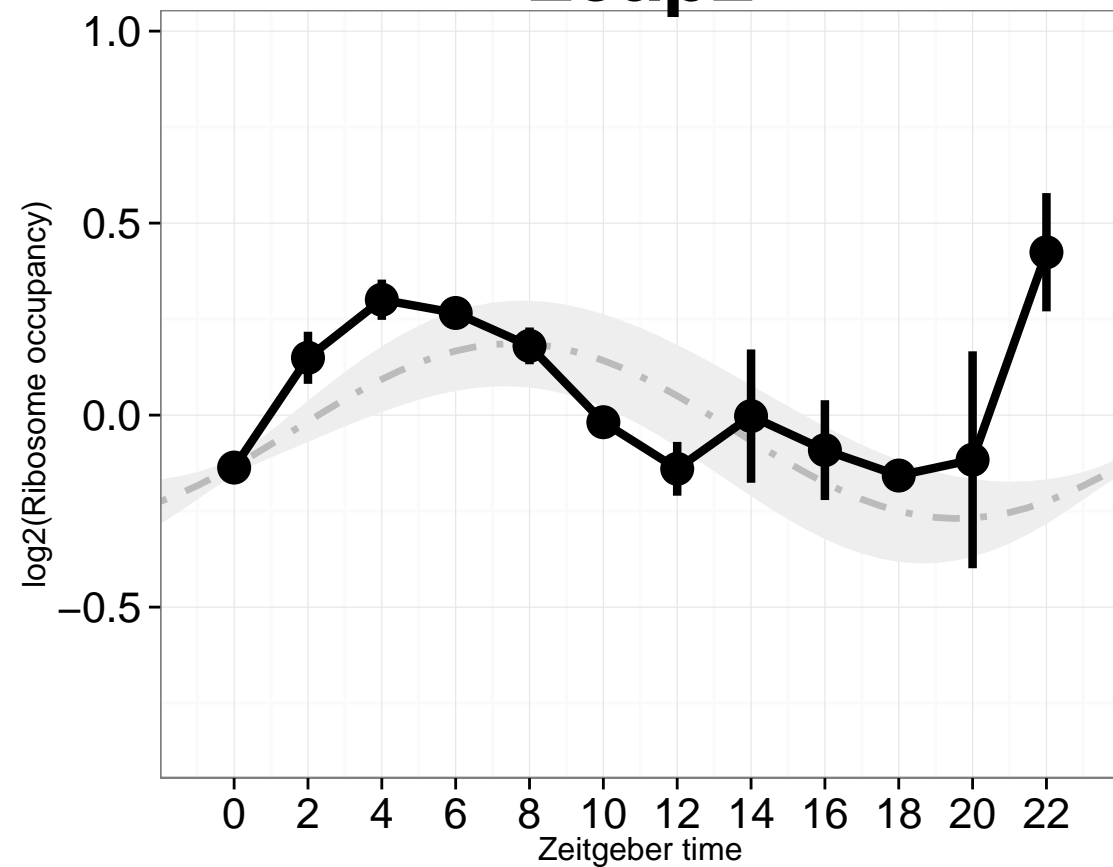

Supplement: SuppDataset_1.zip [file Leap2_set_D.pdf › Supplemental Dataset 1/D-mRNA_rhythm_translation_rhyth/Leap2_set_D.pdf]

# Lect1

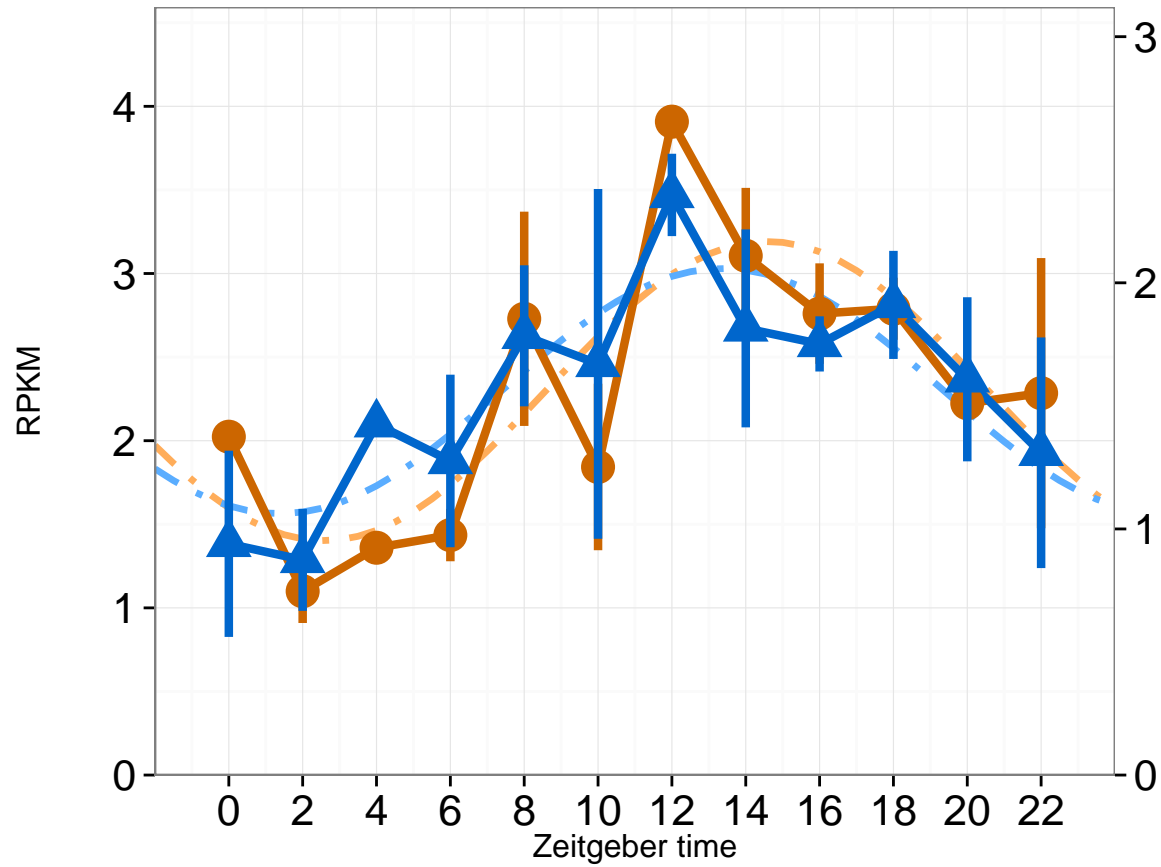

# Lect1

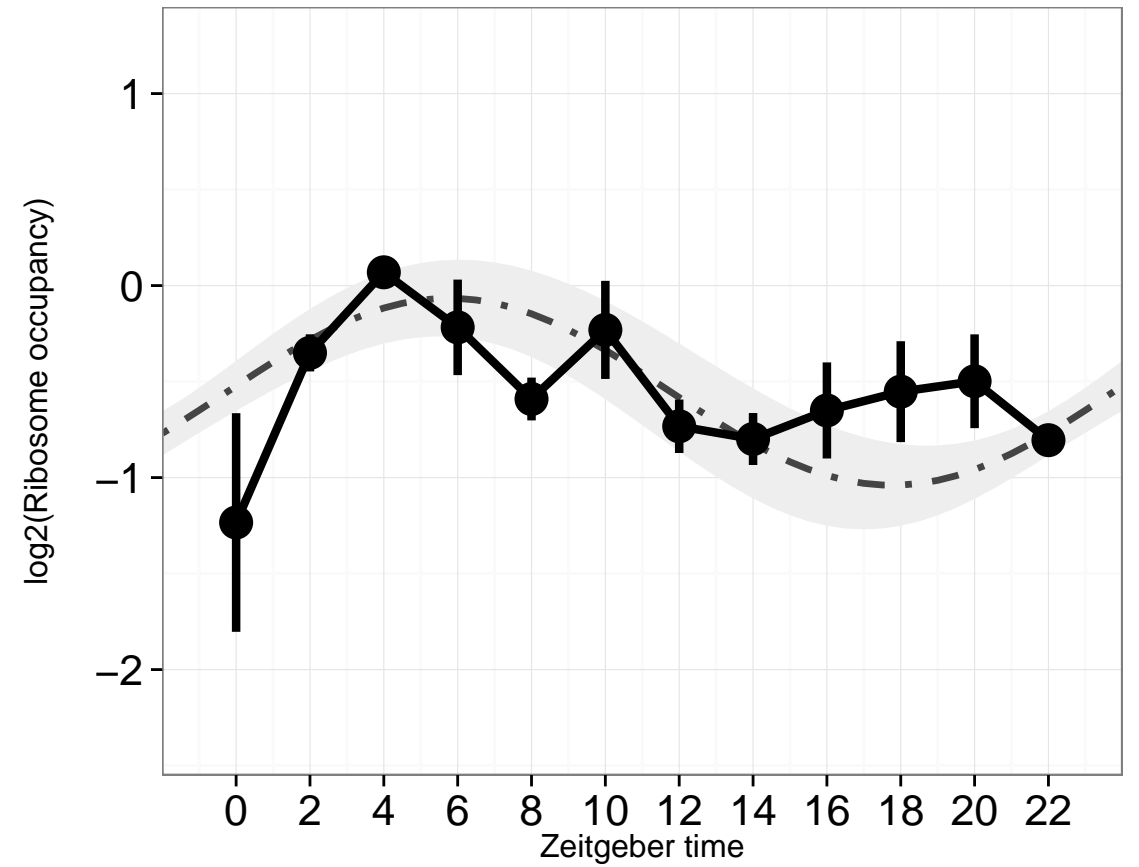

Supplement: SuppDataset_1.zip [file Lect1_set_D.pdf › Supplemental Dataset 1/D-mRNA_rhythm_translation_rhyth/Lect1_set_D.pdf]

# Leng8

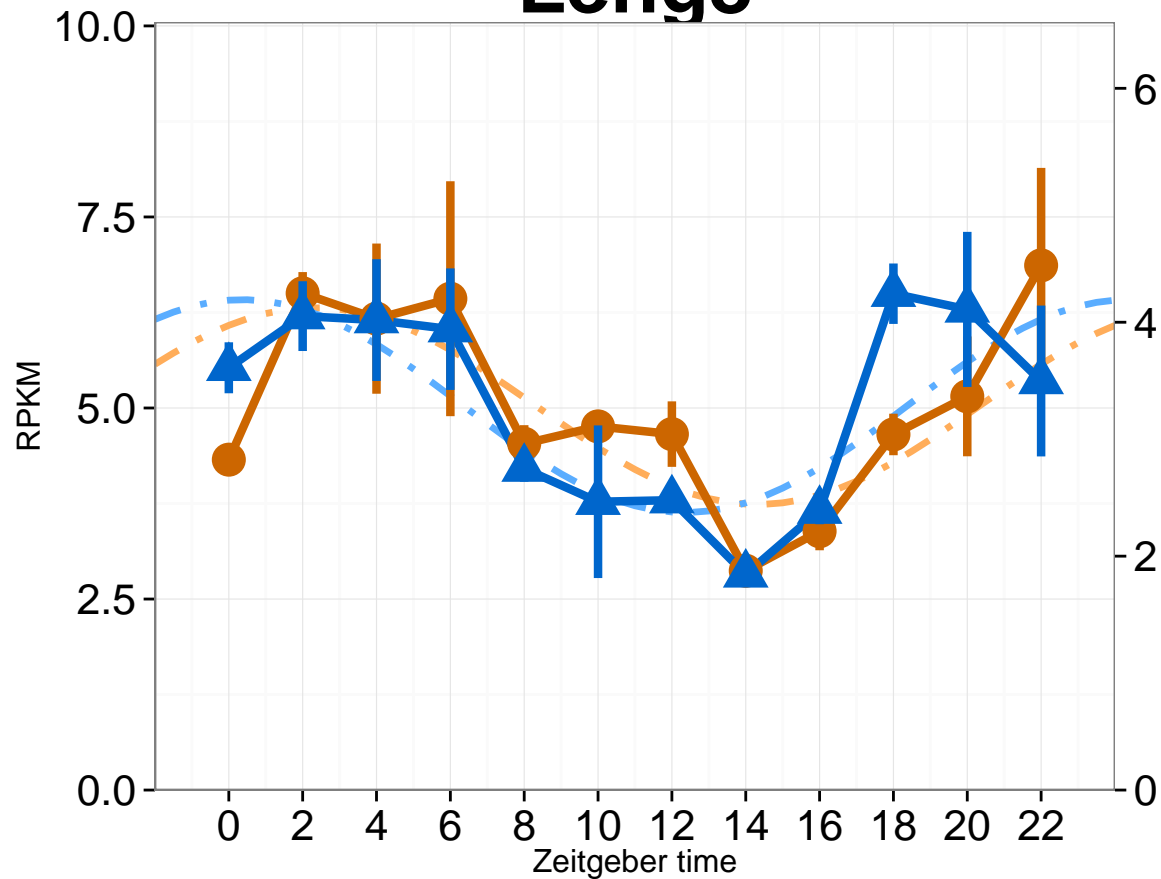

# Leng8

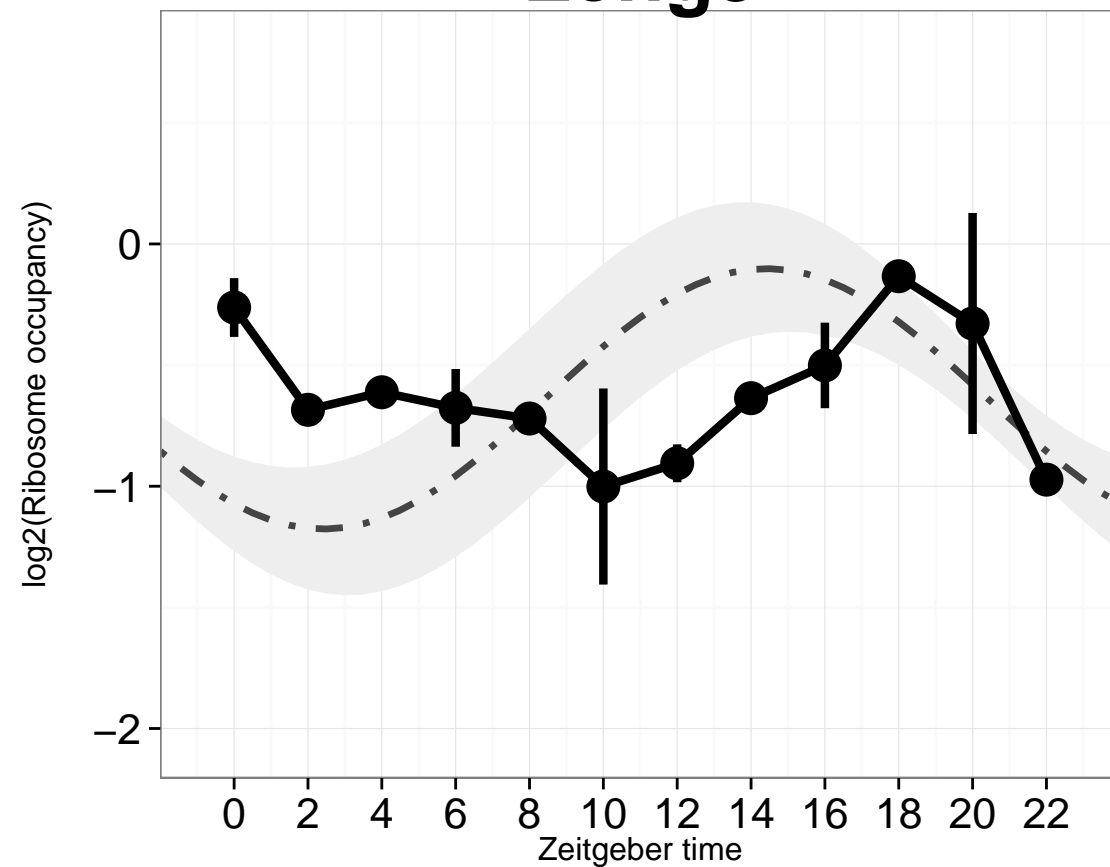

Supplement: SuppDataset_1.zip [file Leng8_set_D.pdf › Supplemental Dataset 1/D-mRNA_rhythm_translation_rhyth/Leng8_set_D.pdf]

## Leo1

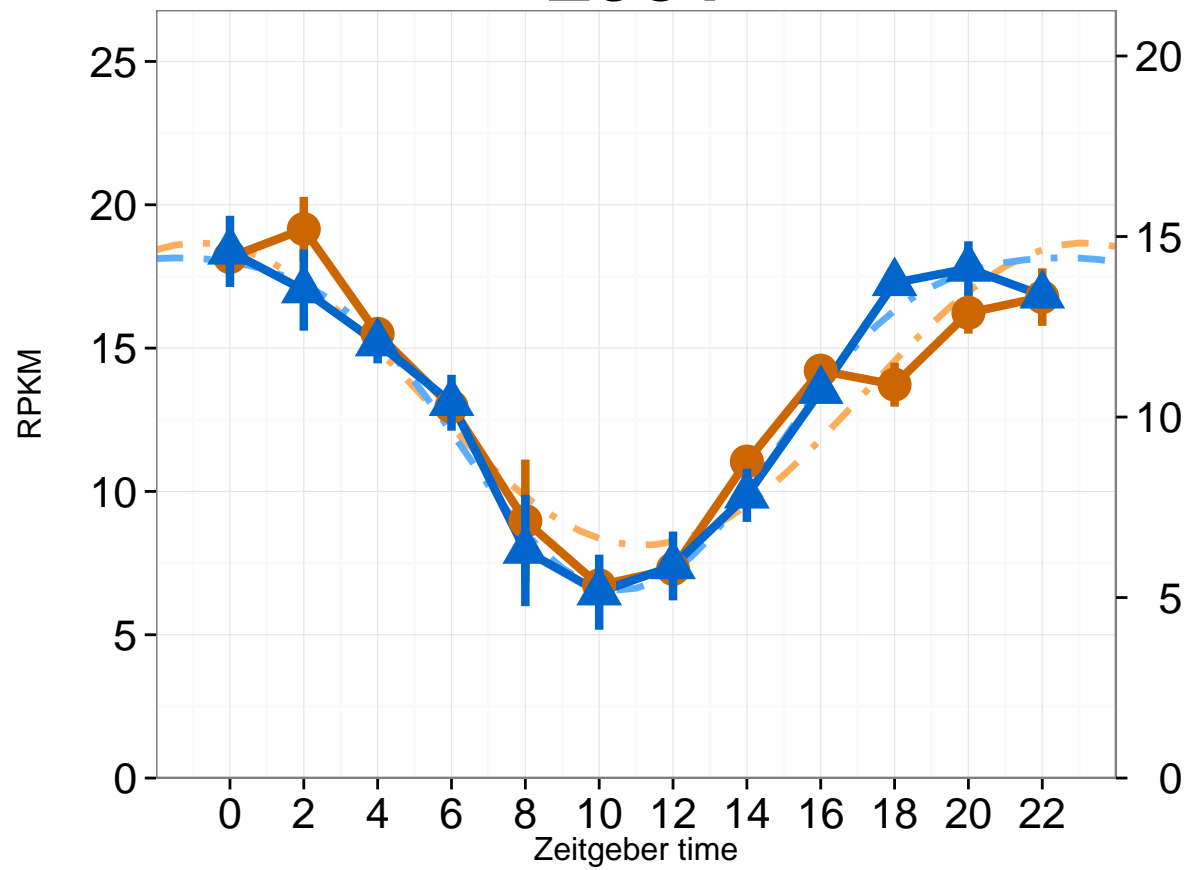

## Leo1

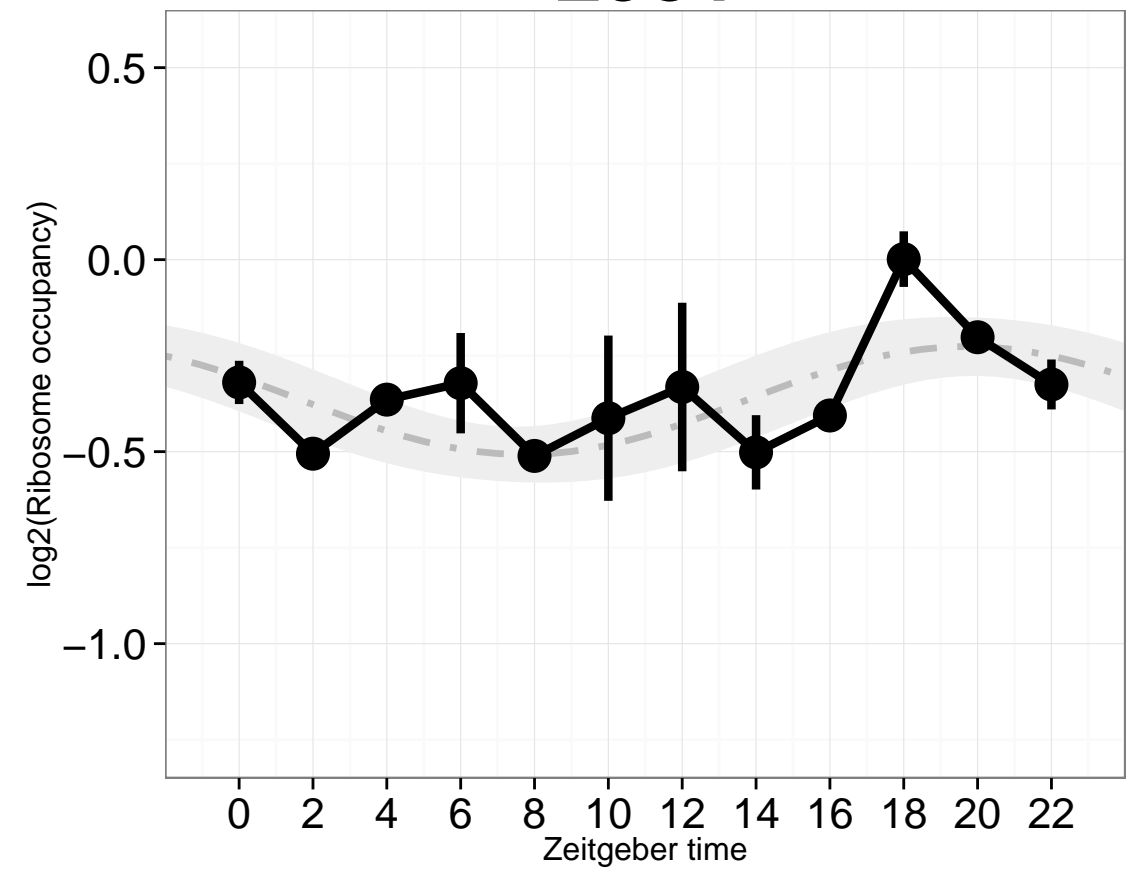

Supplement: SuppDataset_1.zip [file Leo1_set_D.pdf › Supplemental Dataset 1/D-mRNA_rhythm_translation_rhyth/Leo1_set_D.pdf]

## Lgals9

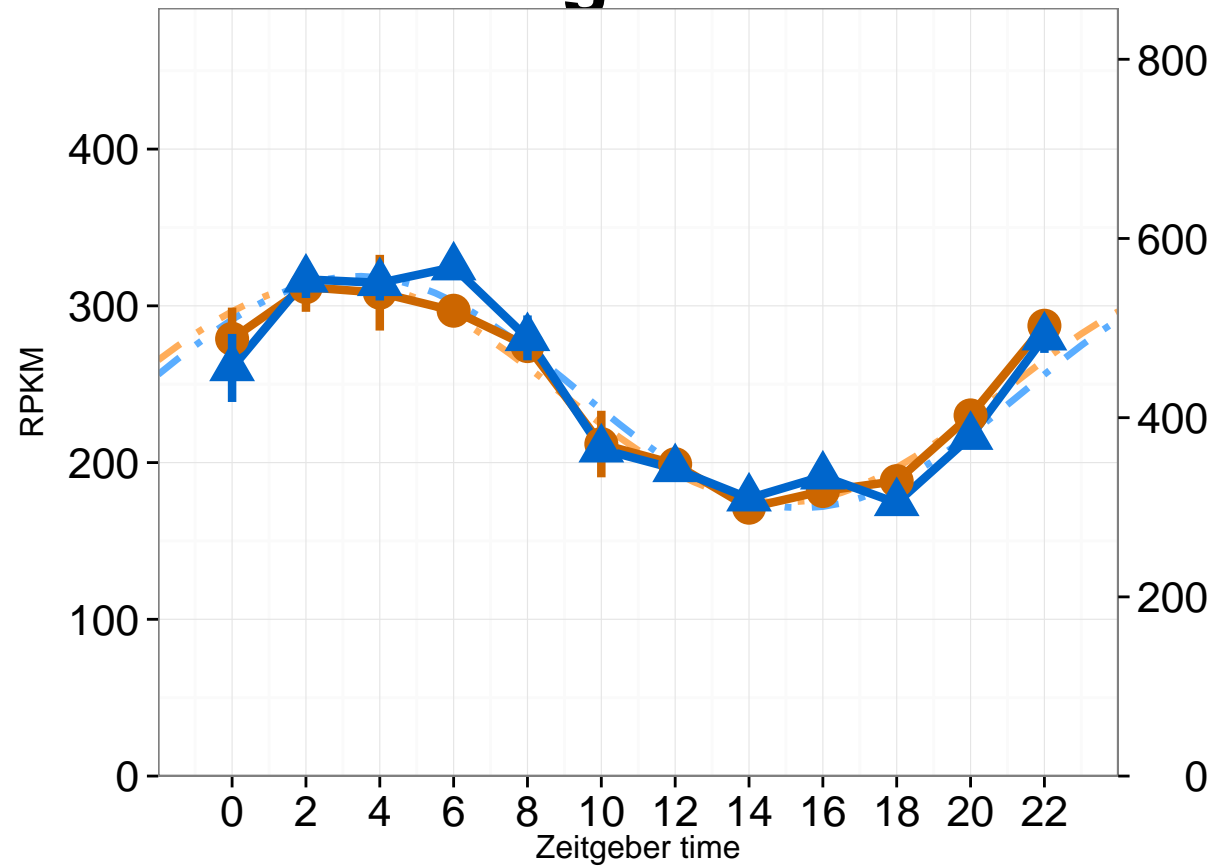

## Lgals9

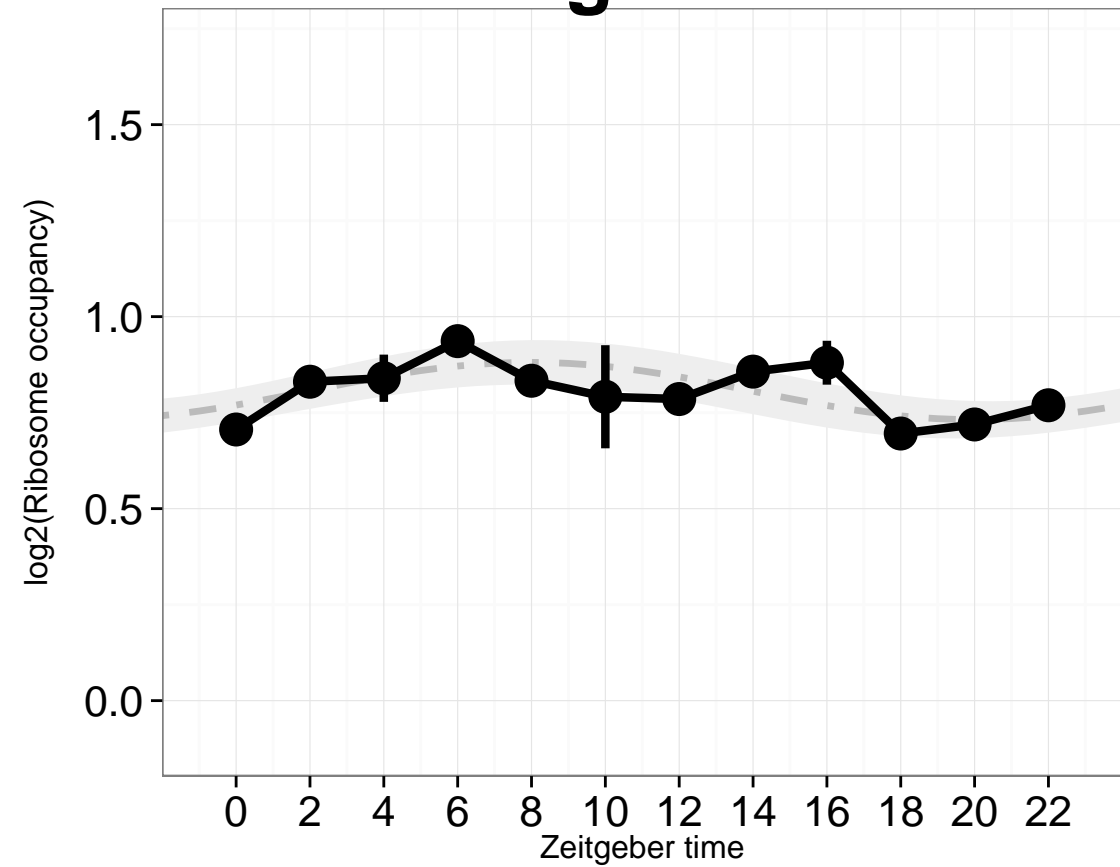

Supplement: SuppDataset_1.zip [file Lgals9_set_D.pdf › Supplemental Dataset 1/D-mRNA_rhythm_translation_rhyth/Lgals9_set_D.pdf]

## Lgalsl

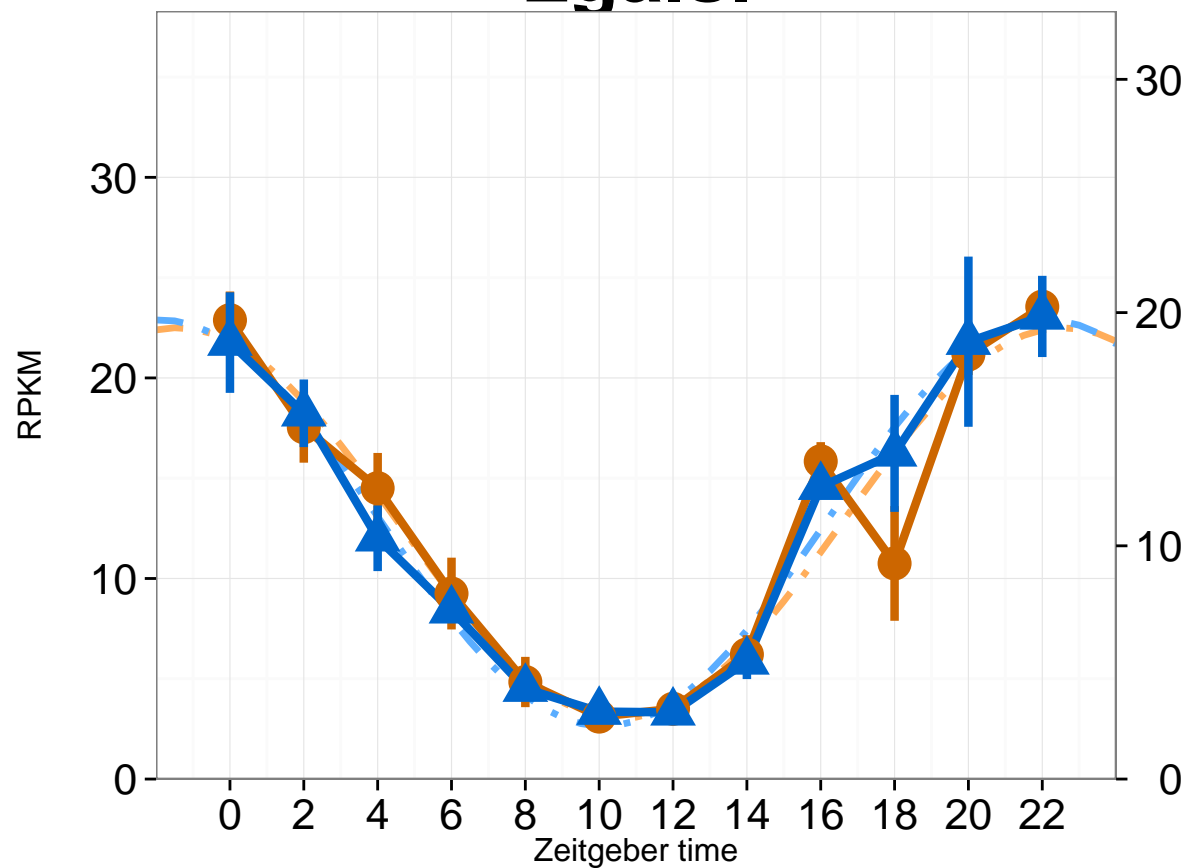

## Lgalsl

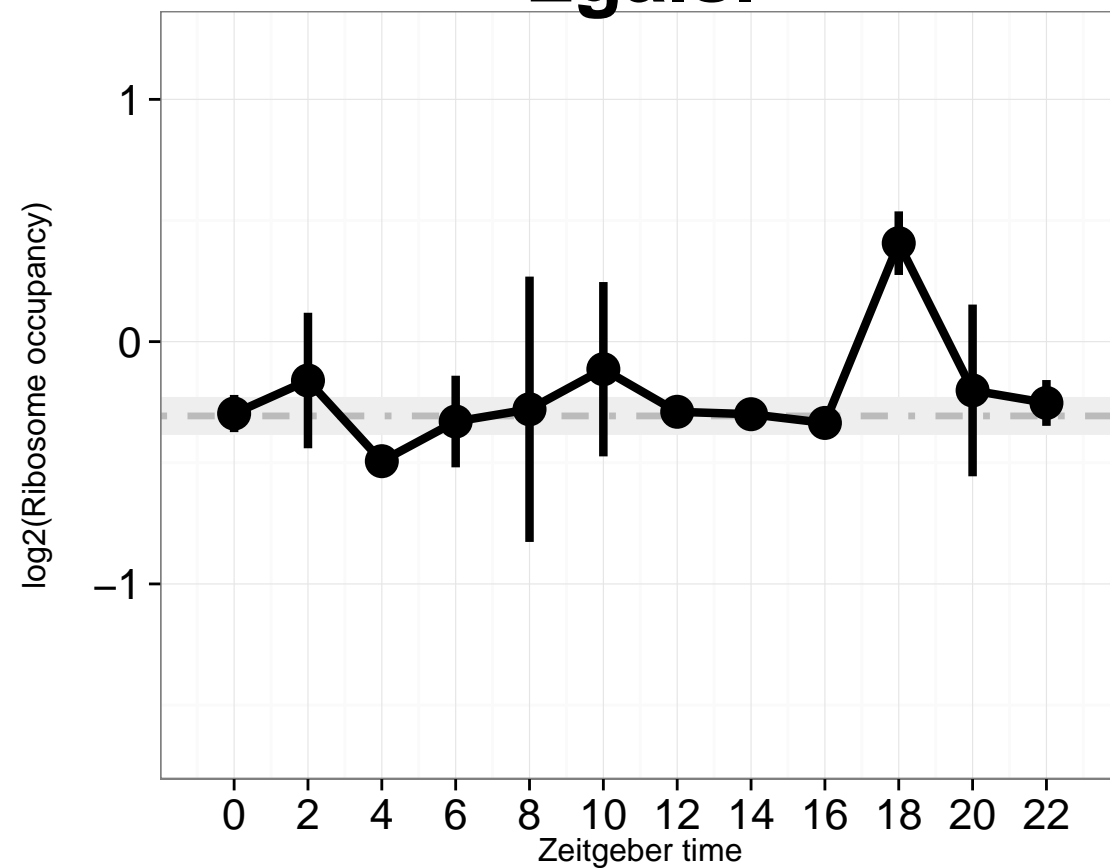

Supplement: SuppDataset_1.zip [file Lgalsl_set_D.pdf › Supplemental Dataset 1/D-mRNA_rhythm_translation_rhyth/Lgalsl_set_D.pdf]

## Lgr5

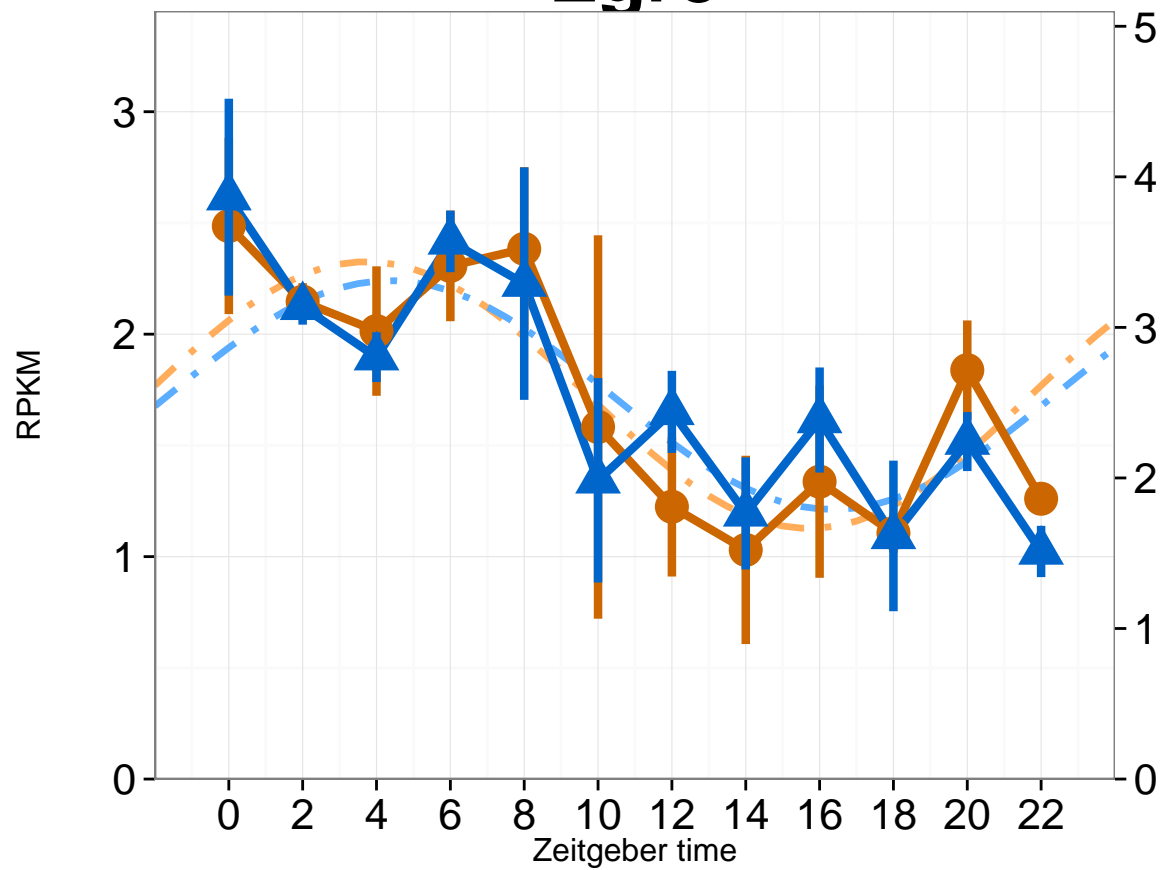

## Lgr5

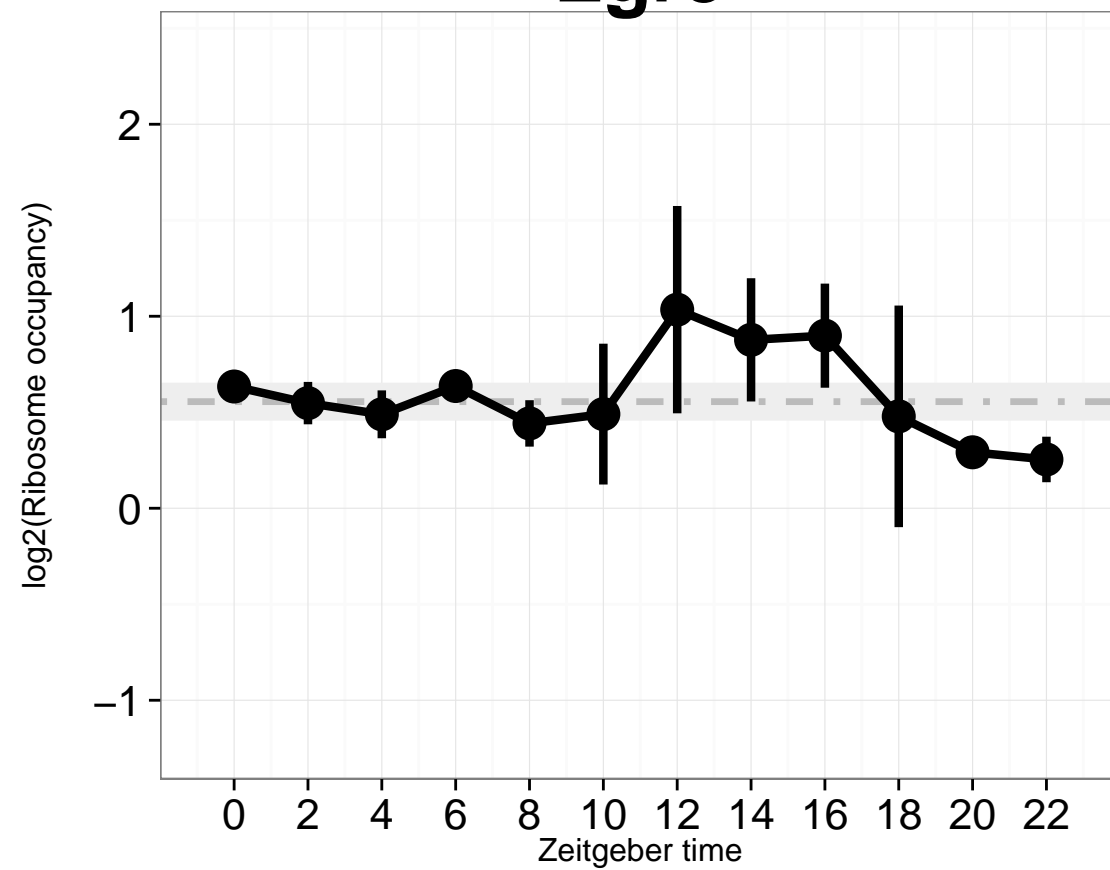

Supplement: SuppDataset_1.zip [file Lgr5_set_D.pdf › Supplemental Dataset 1/D-mRNA_rhythm_translation_rhyth/Lgr5_set_D.pdf]

## Lhpp

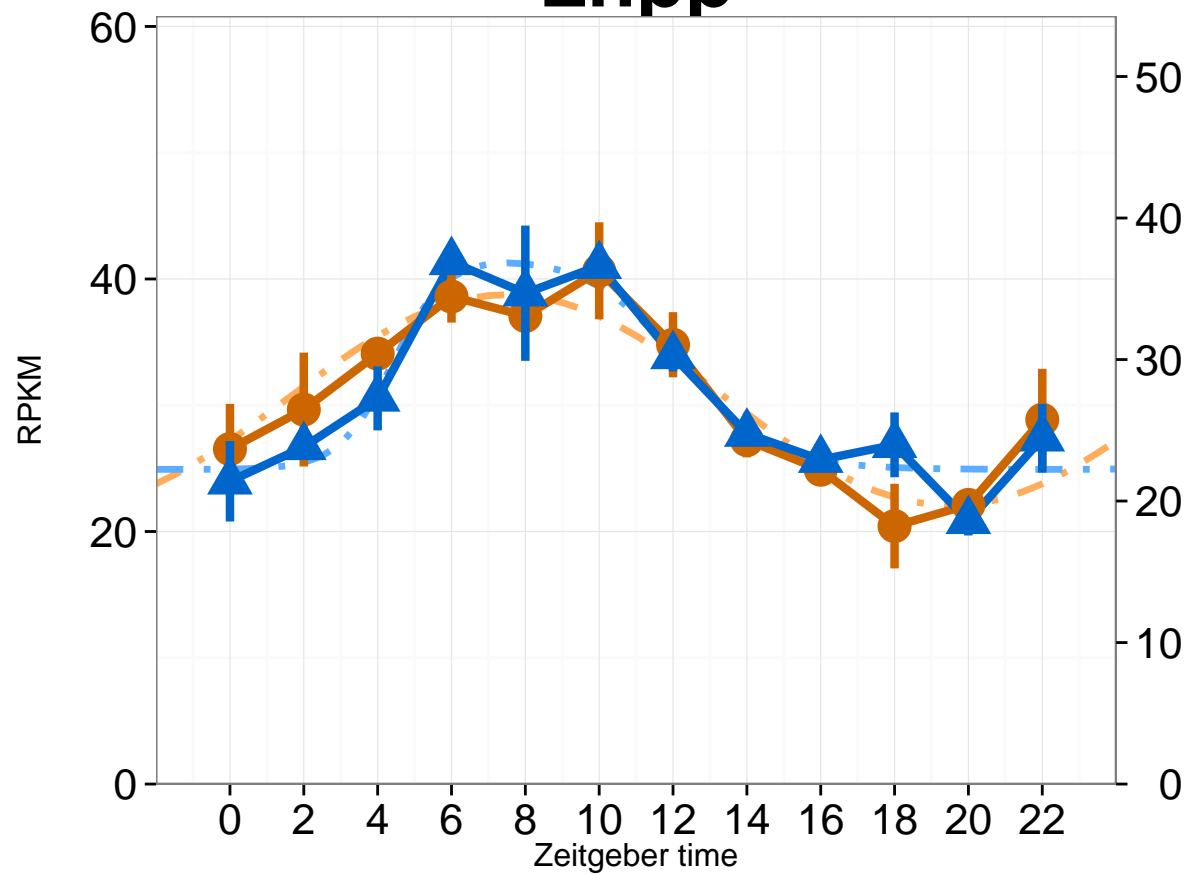

## Lhpp

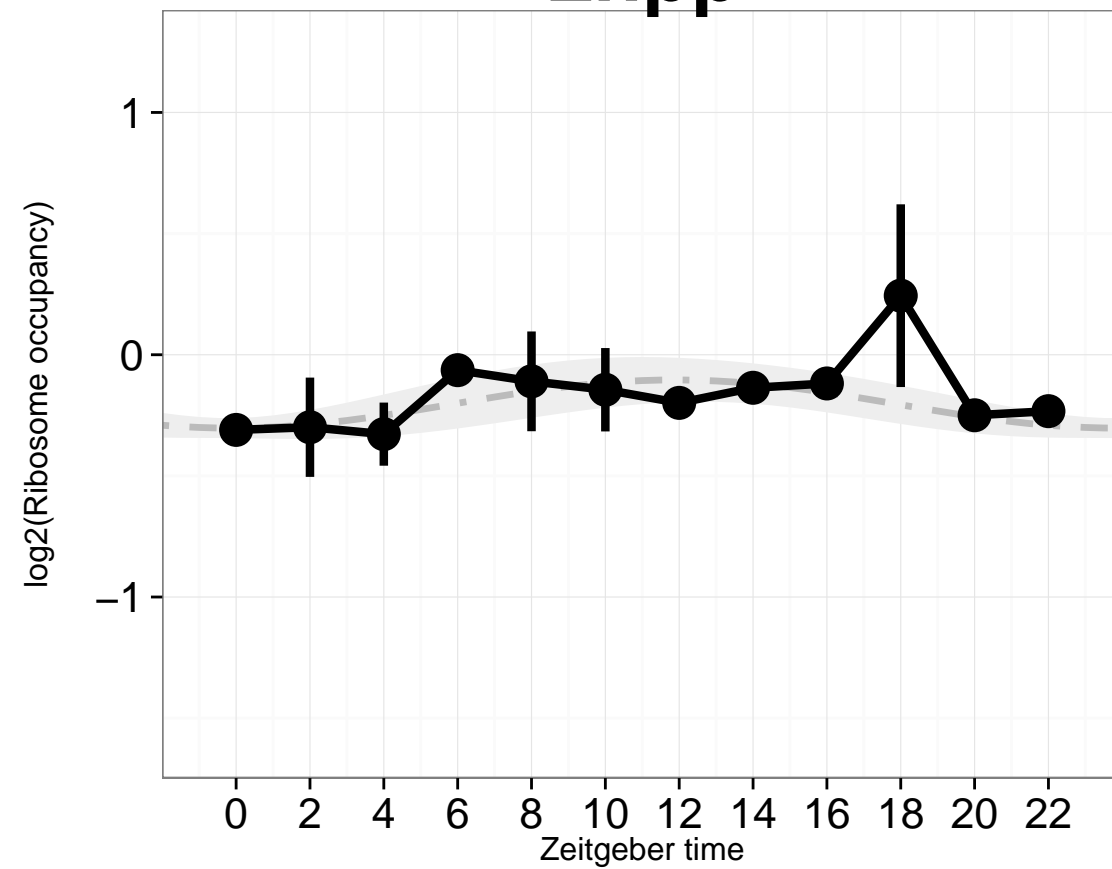

Supplement: SuppDataset_1.zip [file Lhpp_set_D.pdf › Supplemental Dataset 1/D-mRNA_rhythm_translation_rhyth/Lhpp_set_D.pdf]

## Lin9

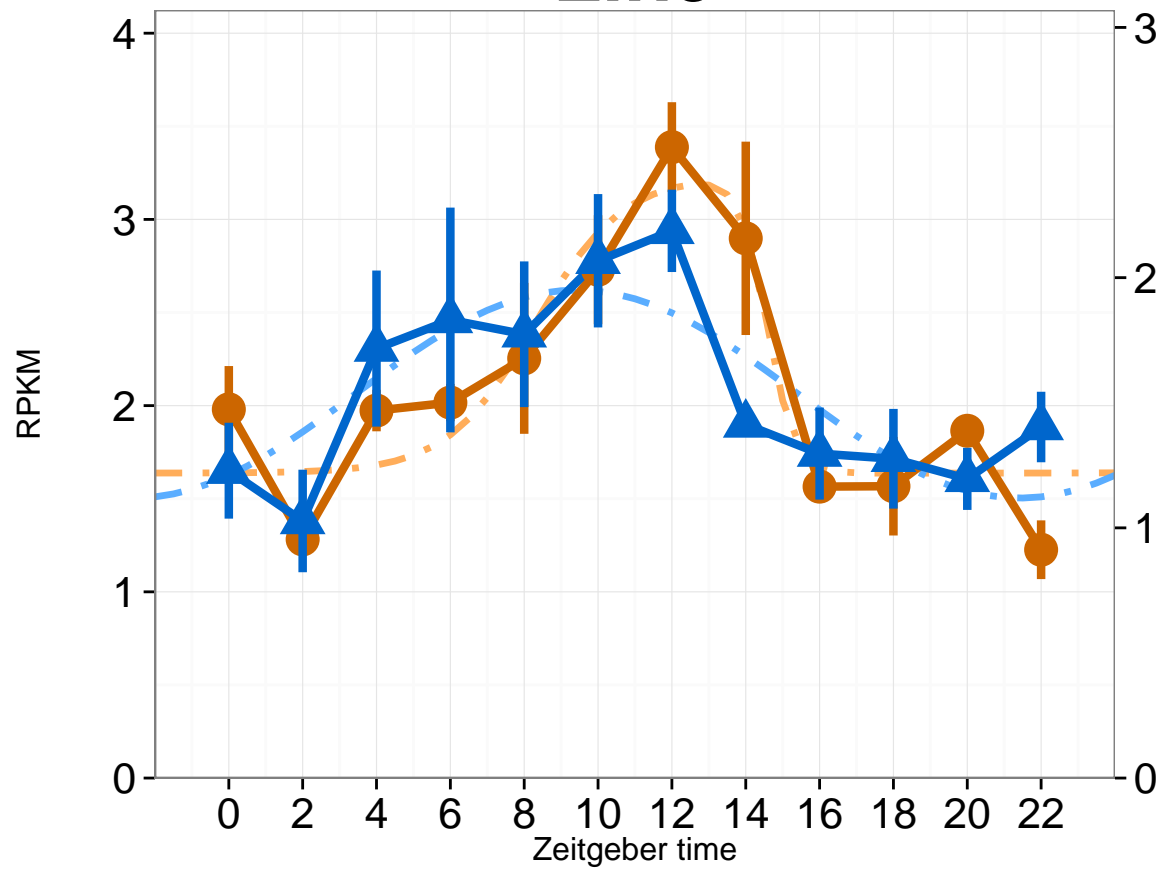

## Lin9

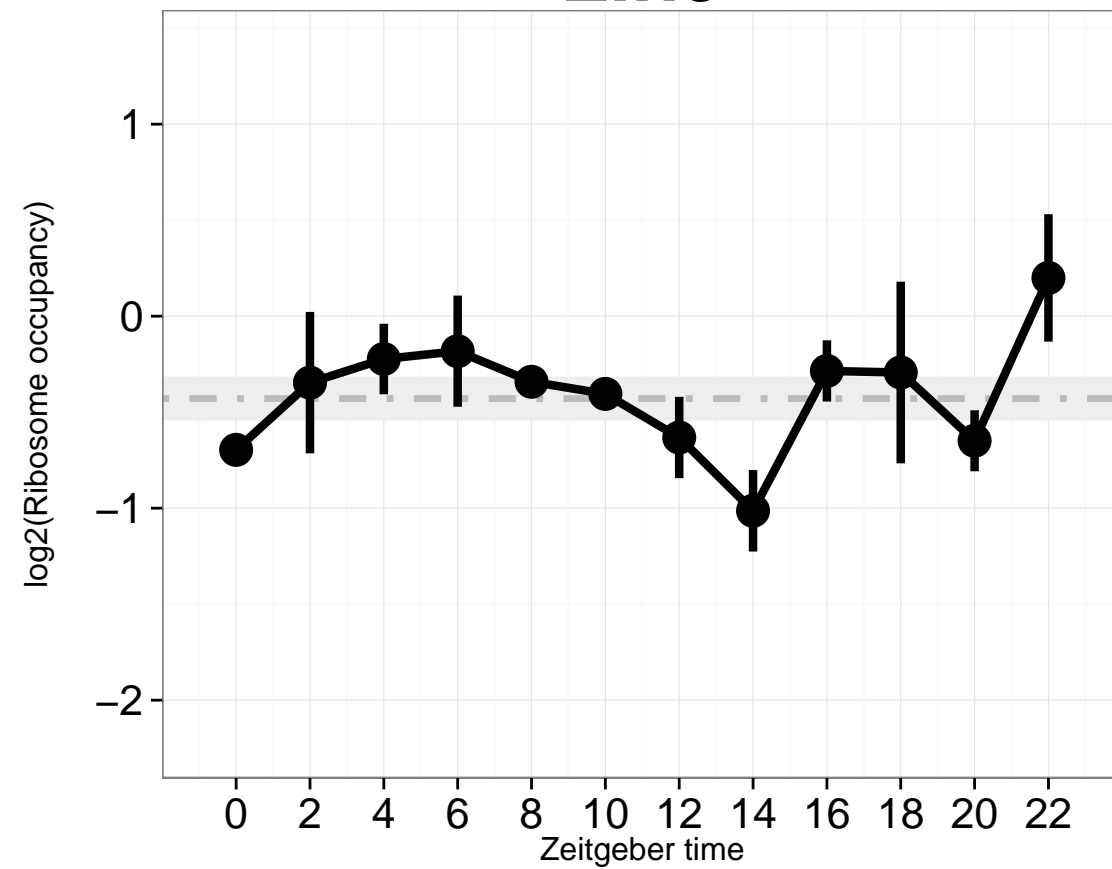

Supplement: SuppDataset_1.zip [file Lin9_set_D.pdf › Supplemental Dataset 1/D-mRNA_rhythm_translation_rhyth/Lin9_set_D.pdf]

## Lipa

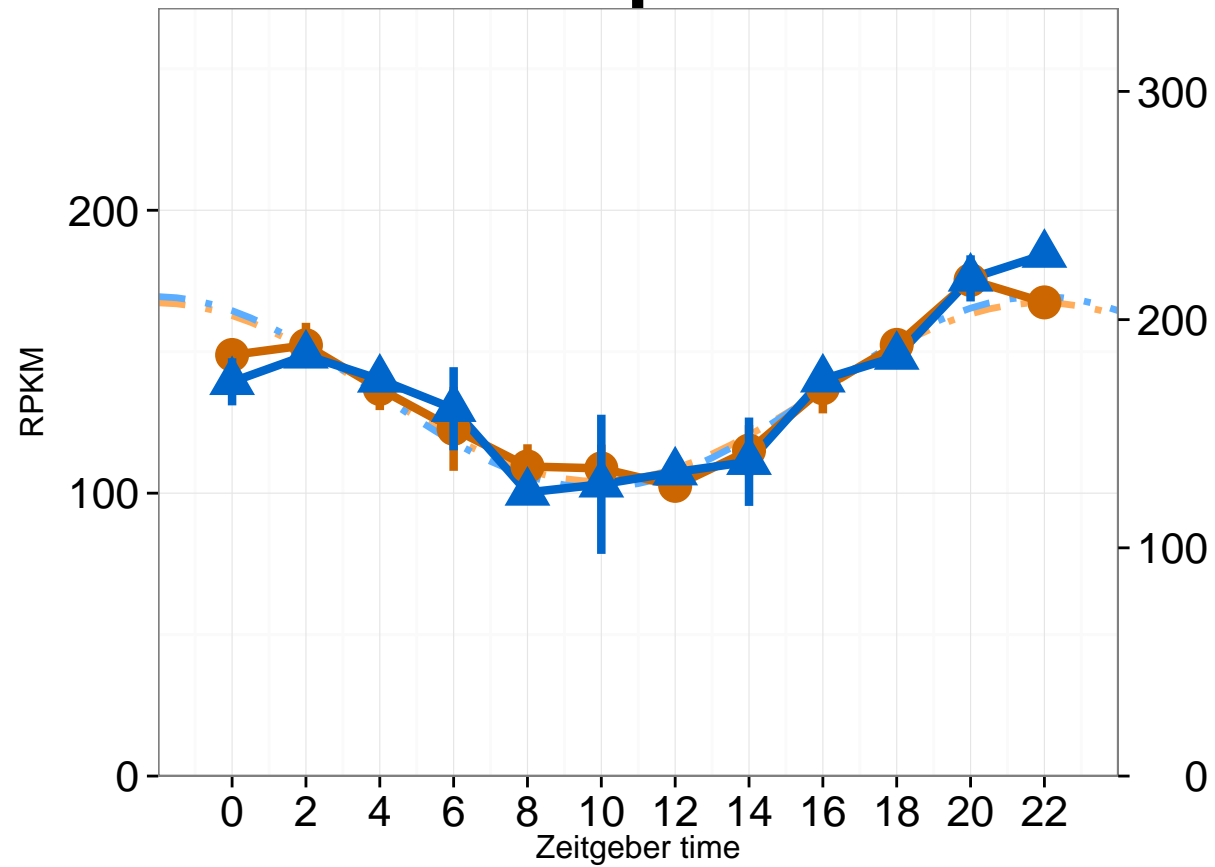

## Lipa

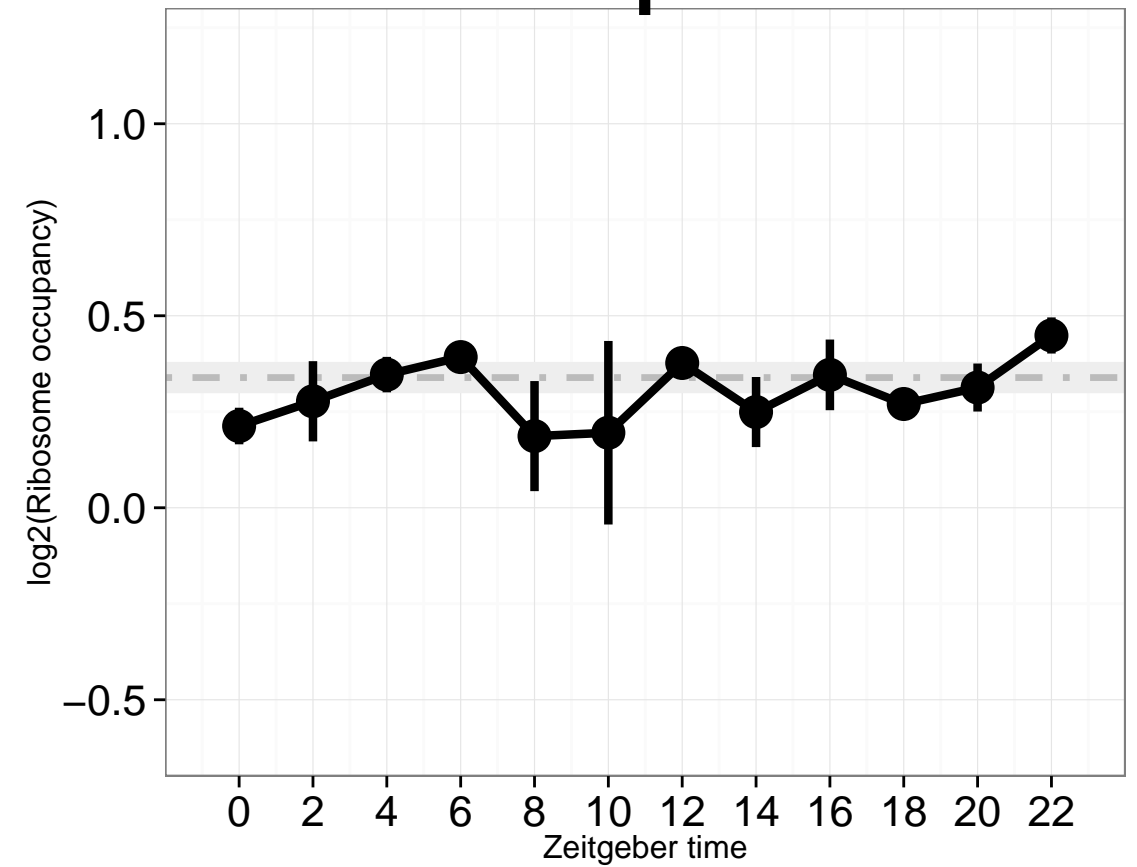

Supplement: SuppDataset_1.zip [file Lipa_set_D.pdf › Supplemental Dataset 1/D-mRNA_rhythm_translation_rhyth/Lipa_set_D.pdf]

# Lipg

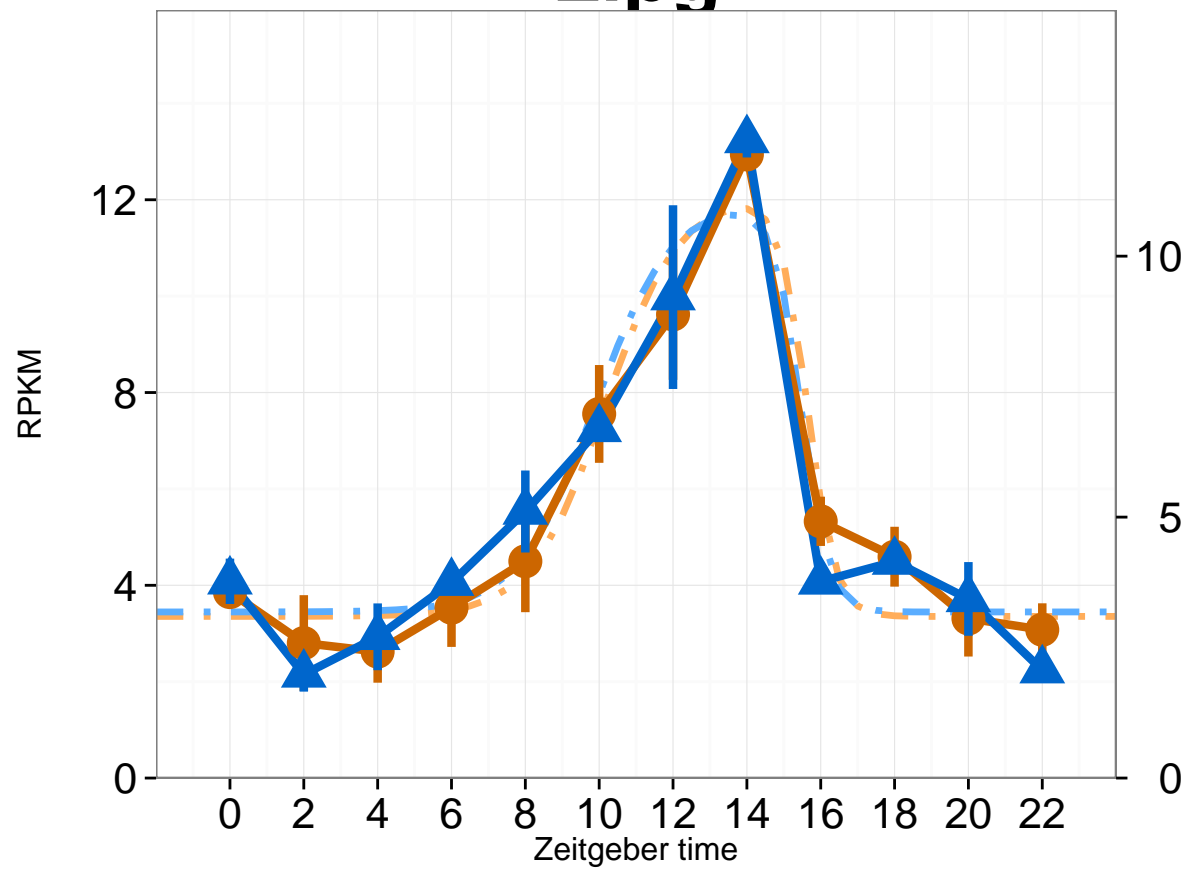

# Lipg

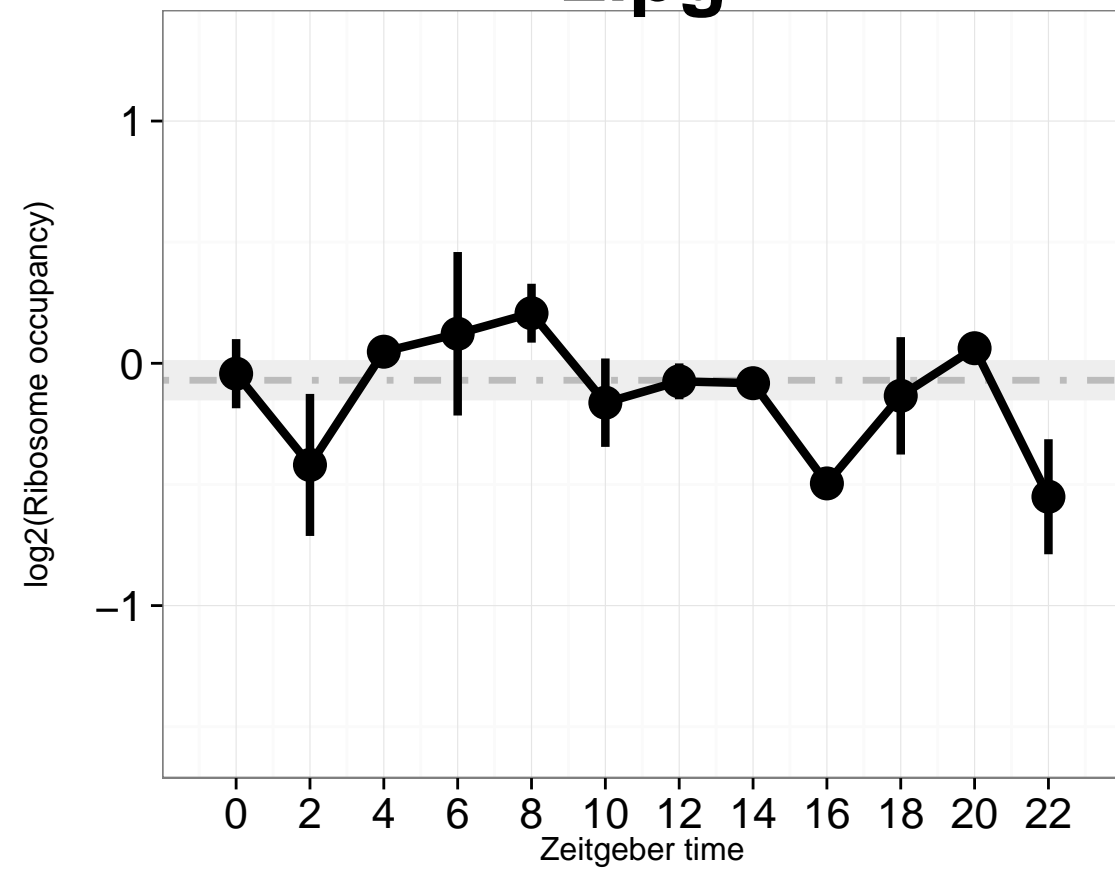

Supplement: SuppDataset_1.zip [file Lipg_set_D.pdf › Supplemental Dataset 1/D-mRNA_rhythm_translation_rhyth/Lipg_set_D.pdf]

## Llg12

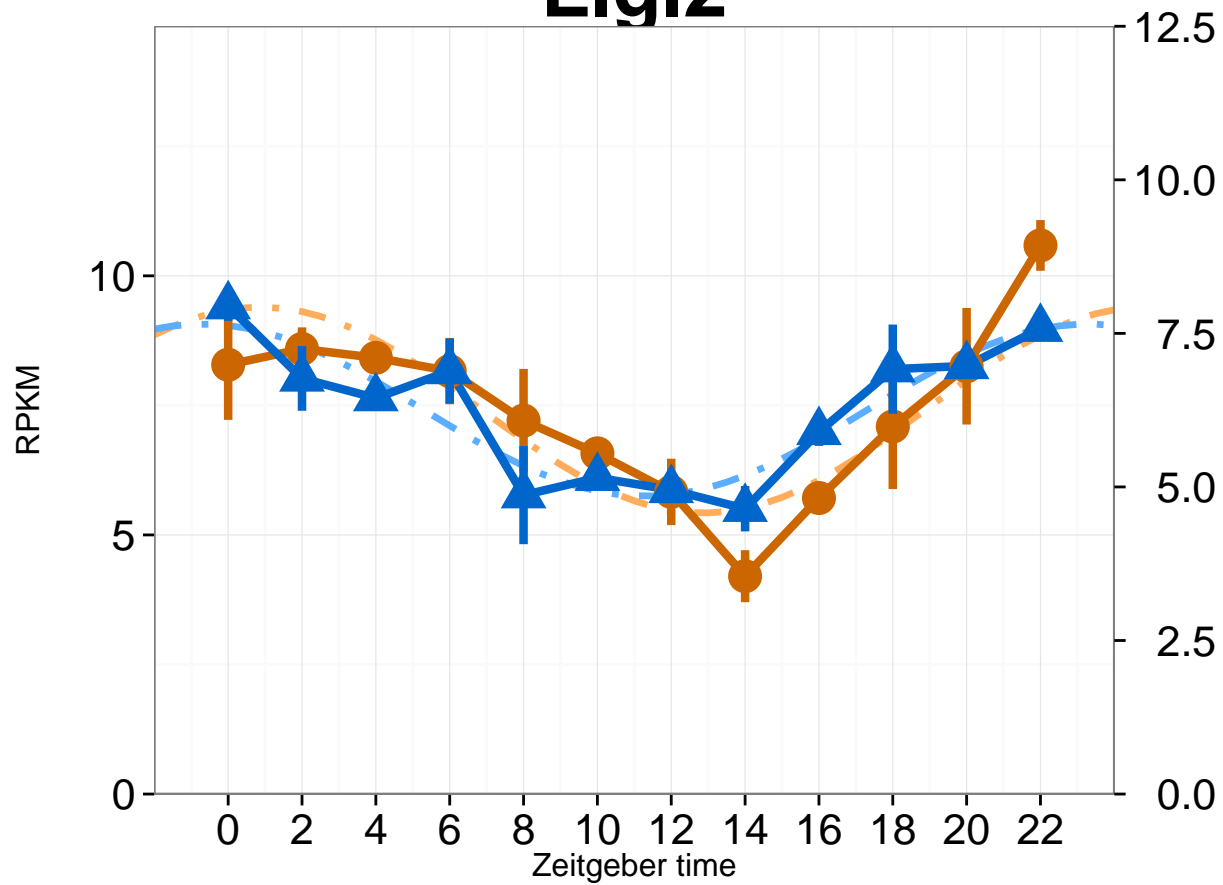

## Llg12

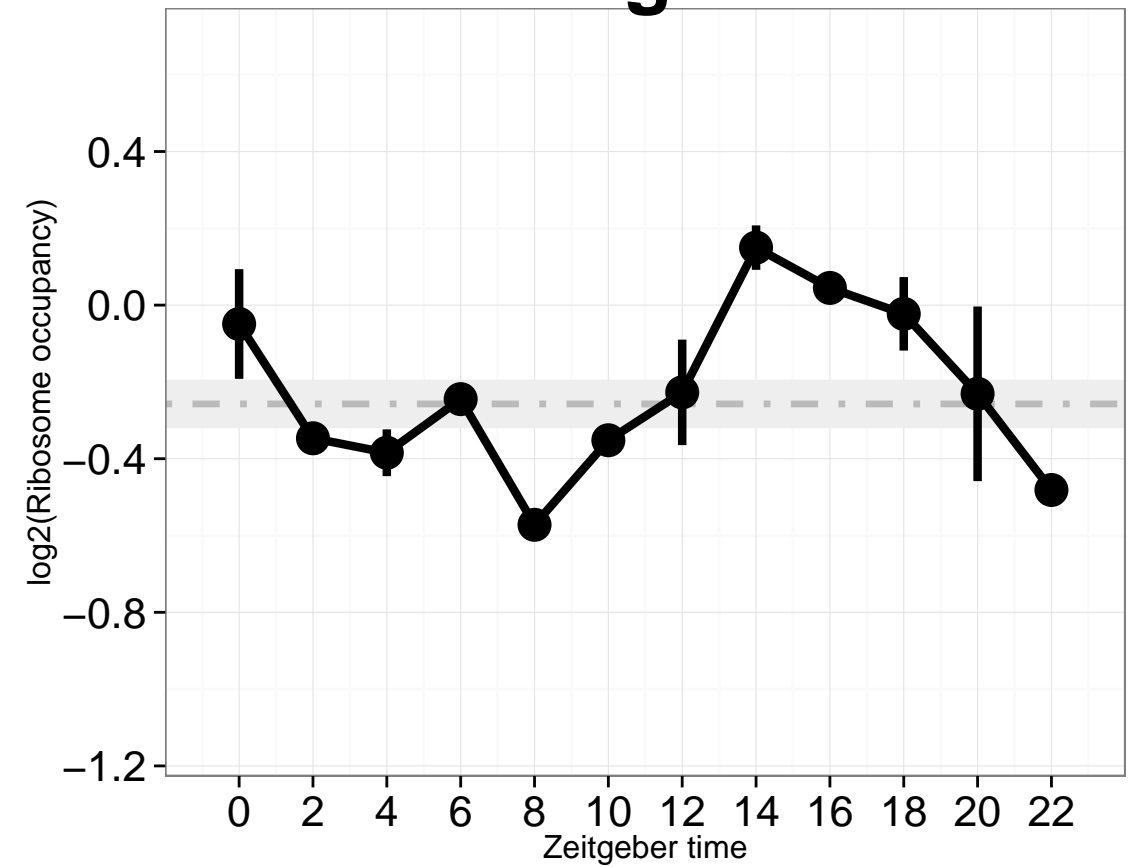

Supplement: SuppDataset_1.zip [file Llgl2_set_D.pdf › Supplemental Dataset 1/D-mRNA_rhythm_translation_rhyth/Llgl2_set_D.pdf]

## Ln timer

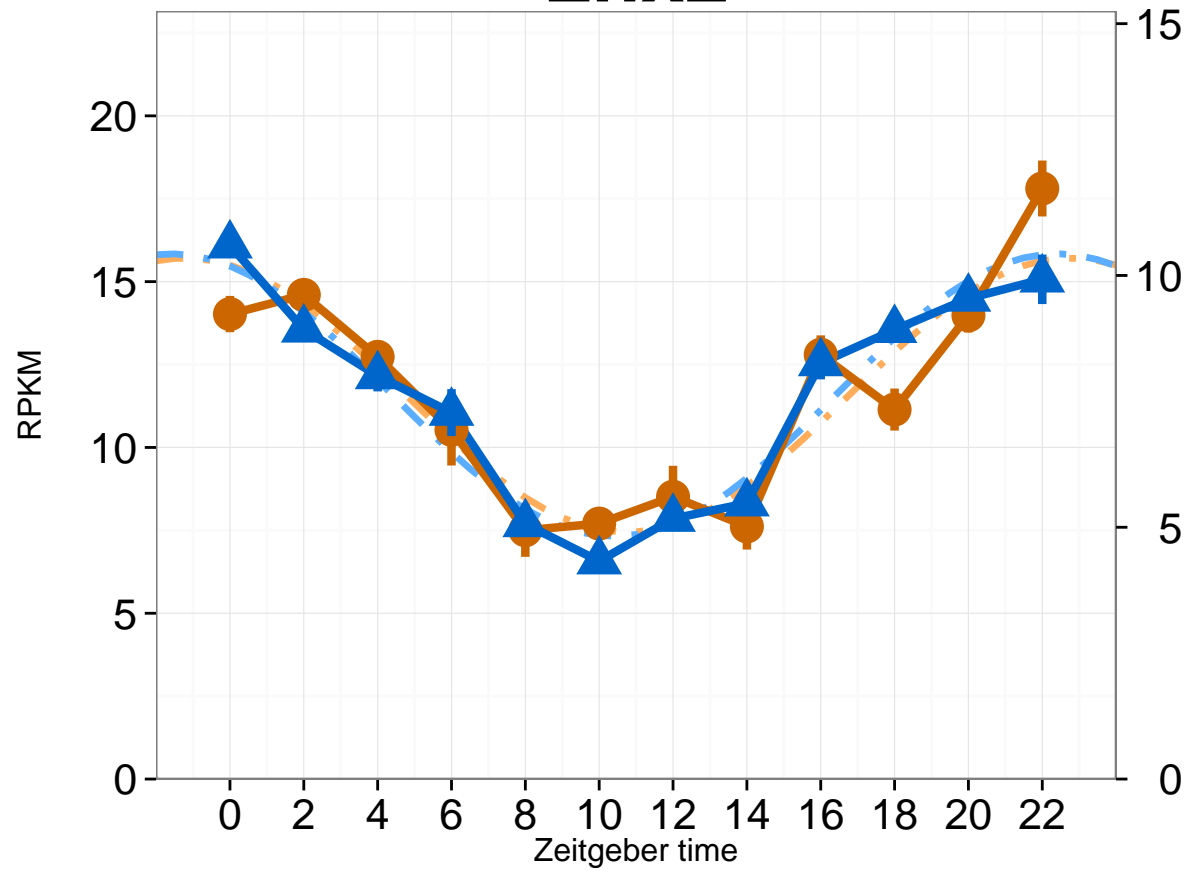

## Ln timer

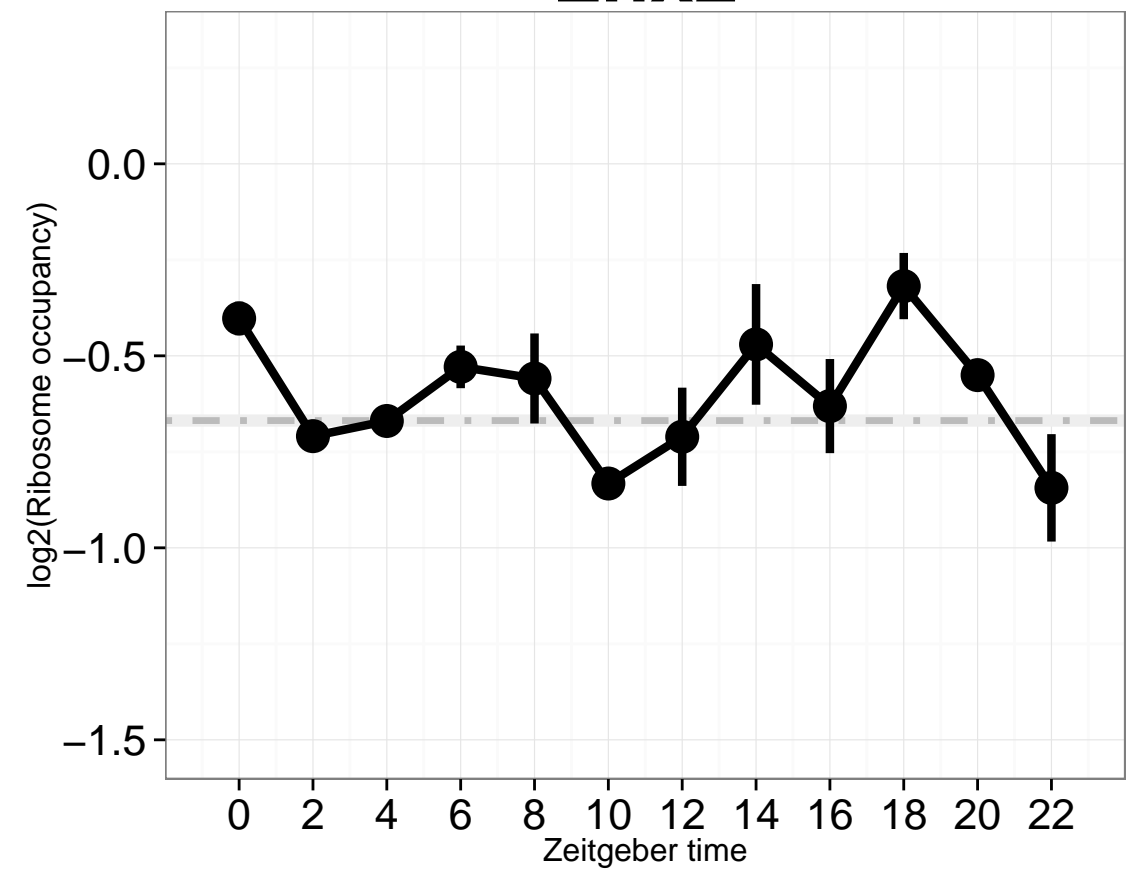

Supplement: SuppDataset_1.zip [file Lnx2_set_D.pdf › Supplemental Dataset 1/D-mRNA_rhythm_translation_rhyth/Lnx2_set_D.pdf]

## Lonp2

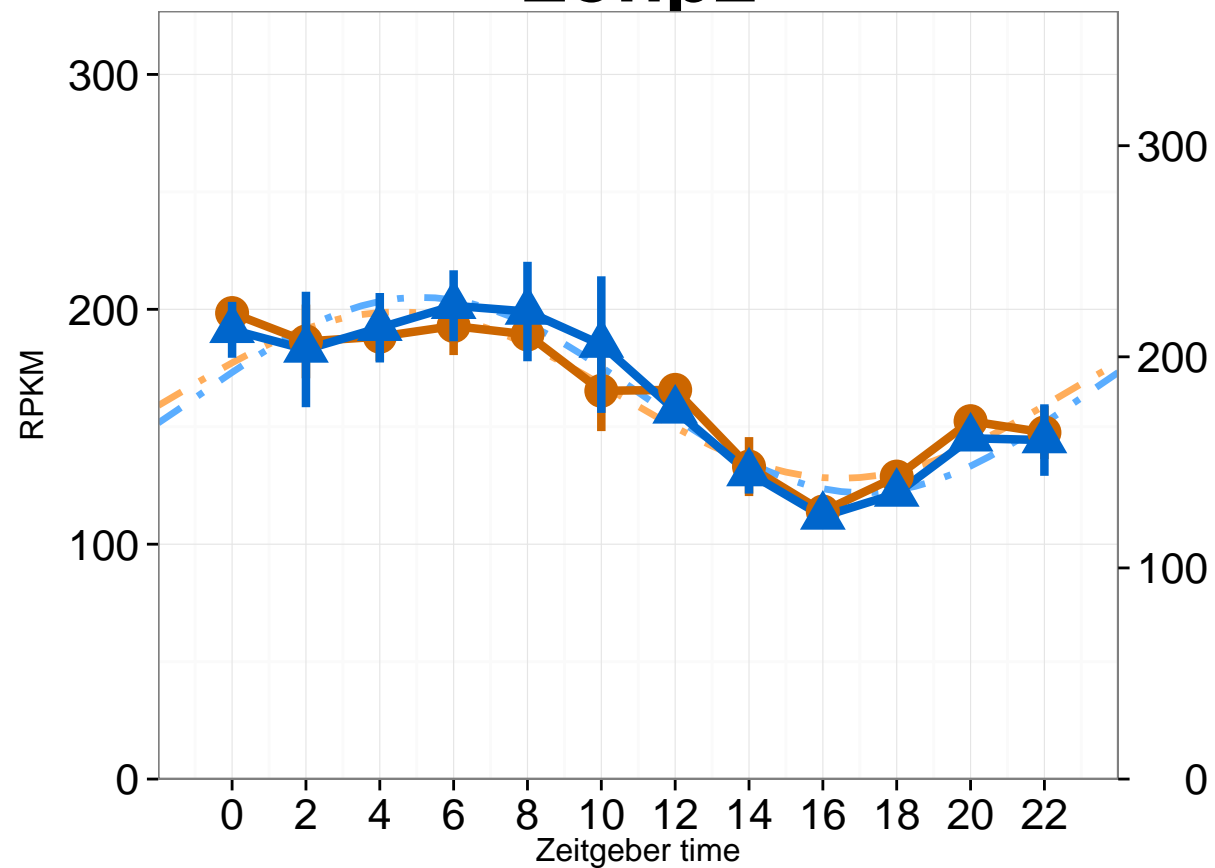

## Lonp2

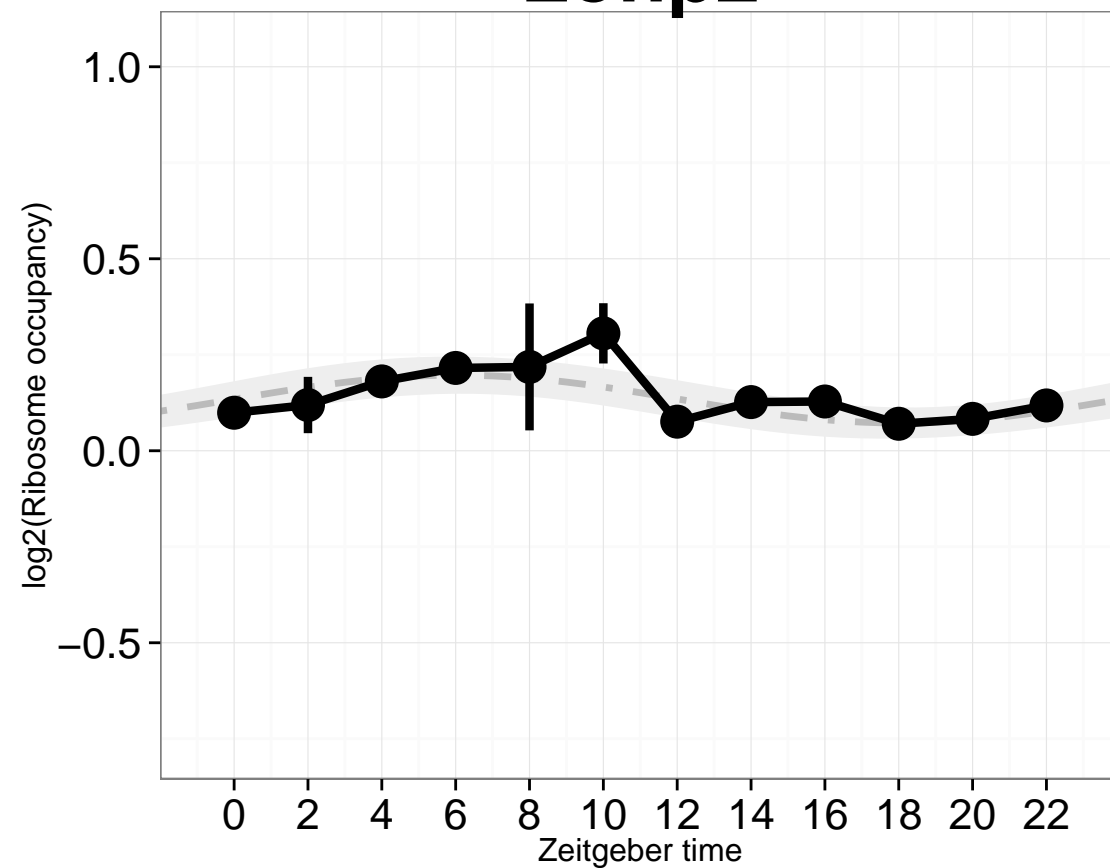

Supplement: SuppDataset_1.zip [file Lonp2_set_D.pdf › Supplemental Dataset 1/D-mRNA_rhythm_translation_rhyth/Lonp2_set_D.pdf]

# Lonrf1

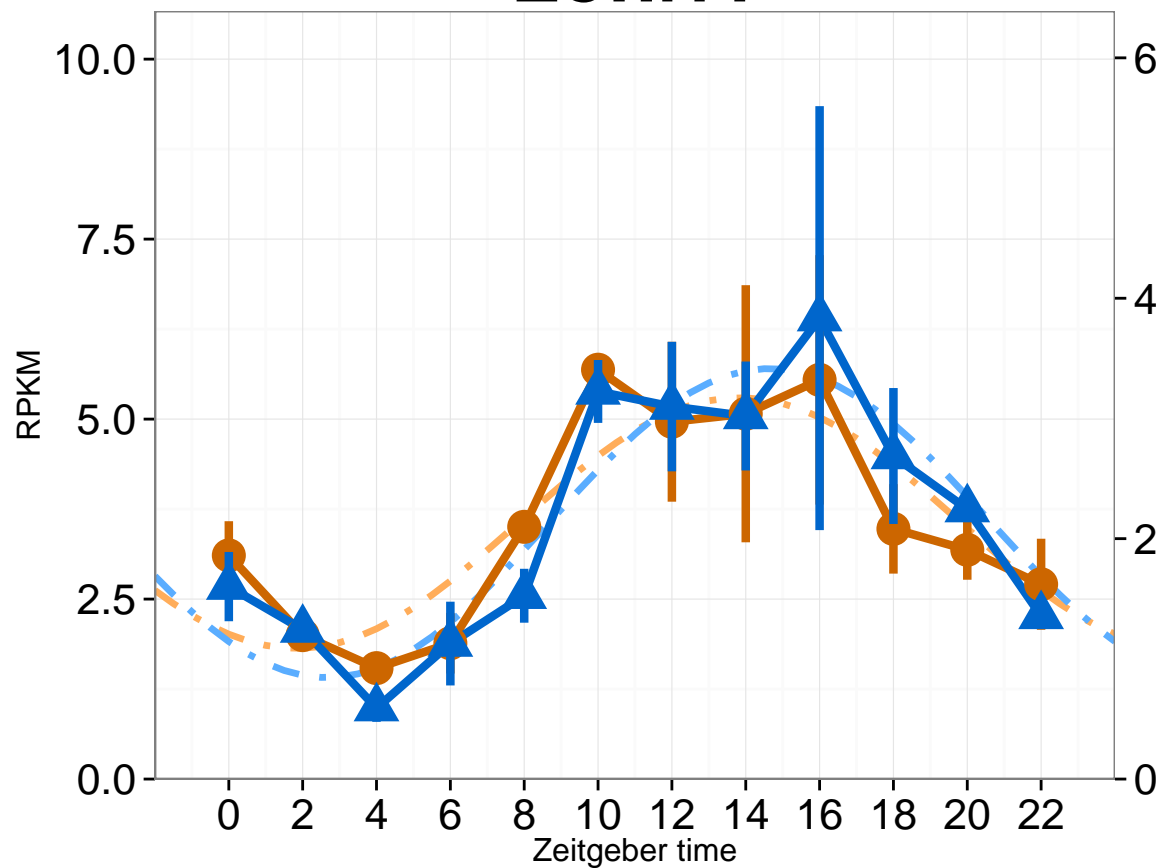

# Lonrf1

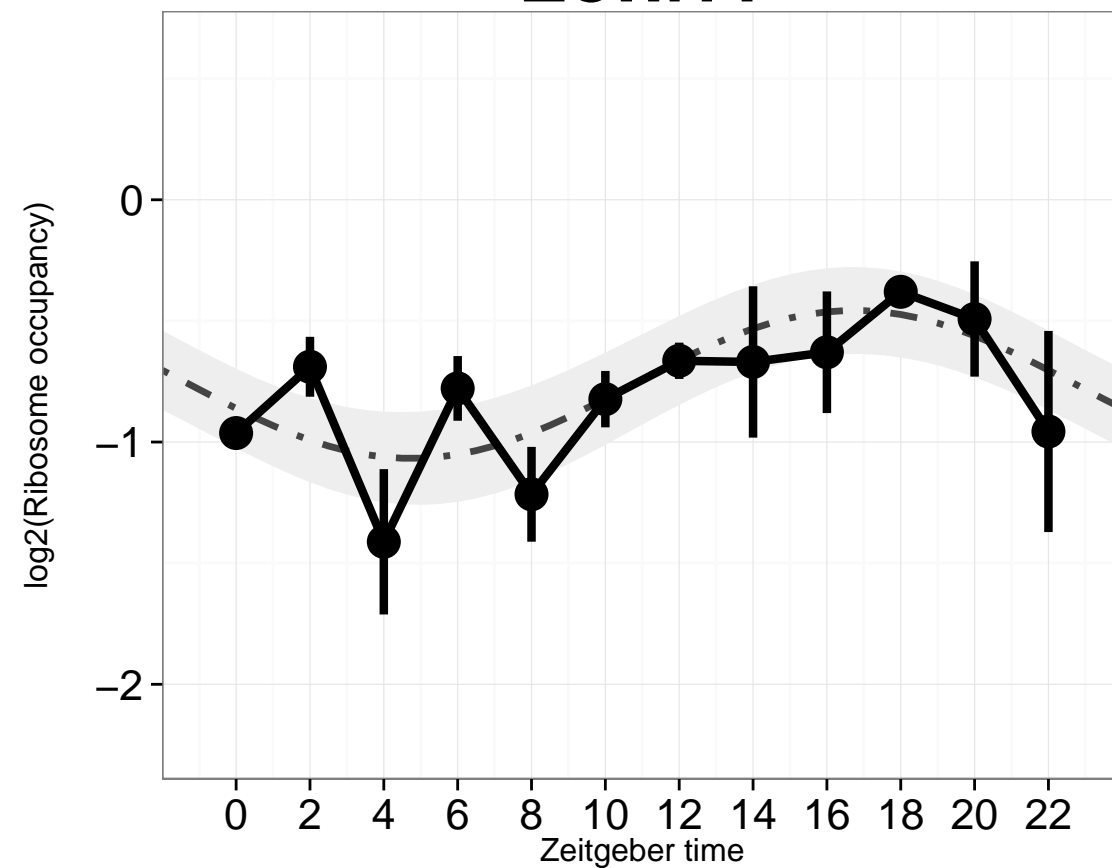

Supplement: SuppDataset_1.zip [file Lonrf1_set_D.pdf › Supplemental Dataset 1/D-mRNA_rhythm_translation_rhyth/Lonrf1_set_D.pdf]

## Lox11

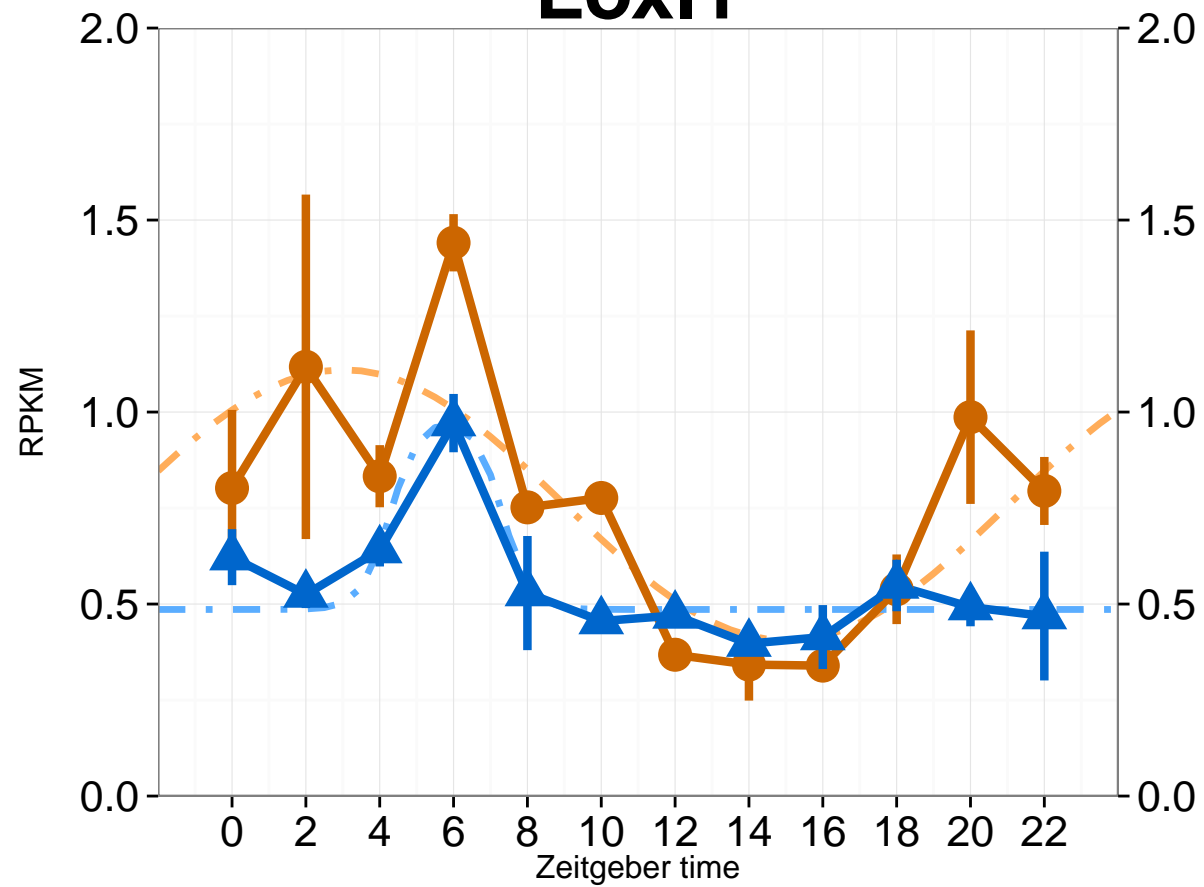

## Lox11

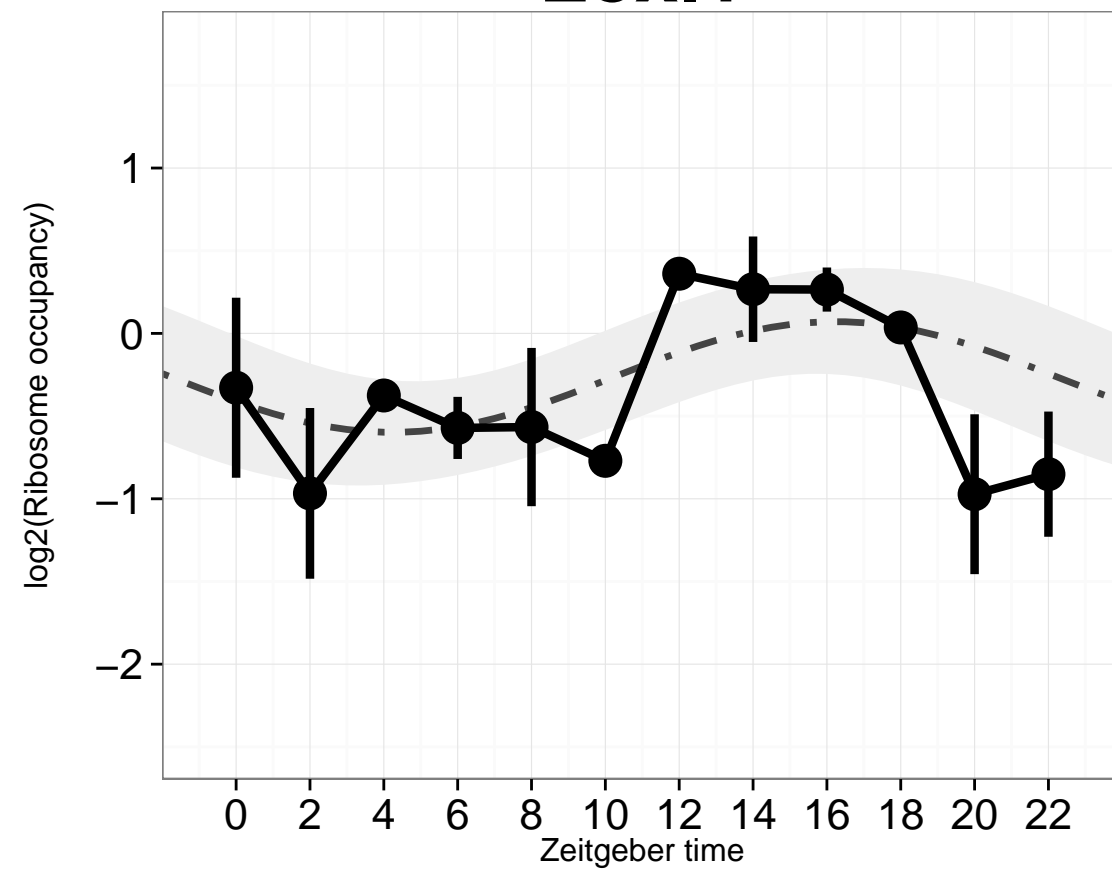

Supplement: SuppDataset_1.zip [file Loxl1_set_D.pdf › Supplemental Dataset 1/D-mRNA_rhythm_translation_rhyth/Loxl1_set_D.pdf]

## LoxI4

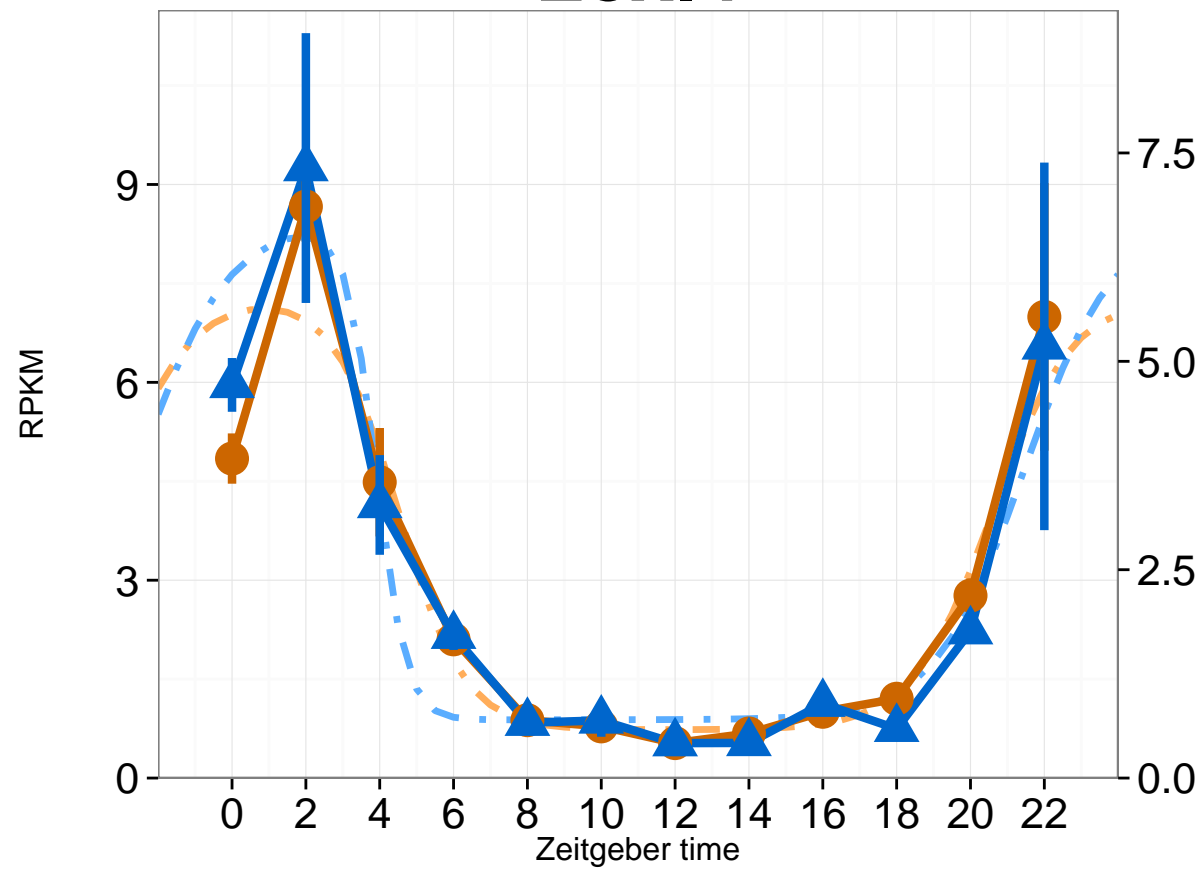

## LoxI4

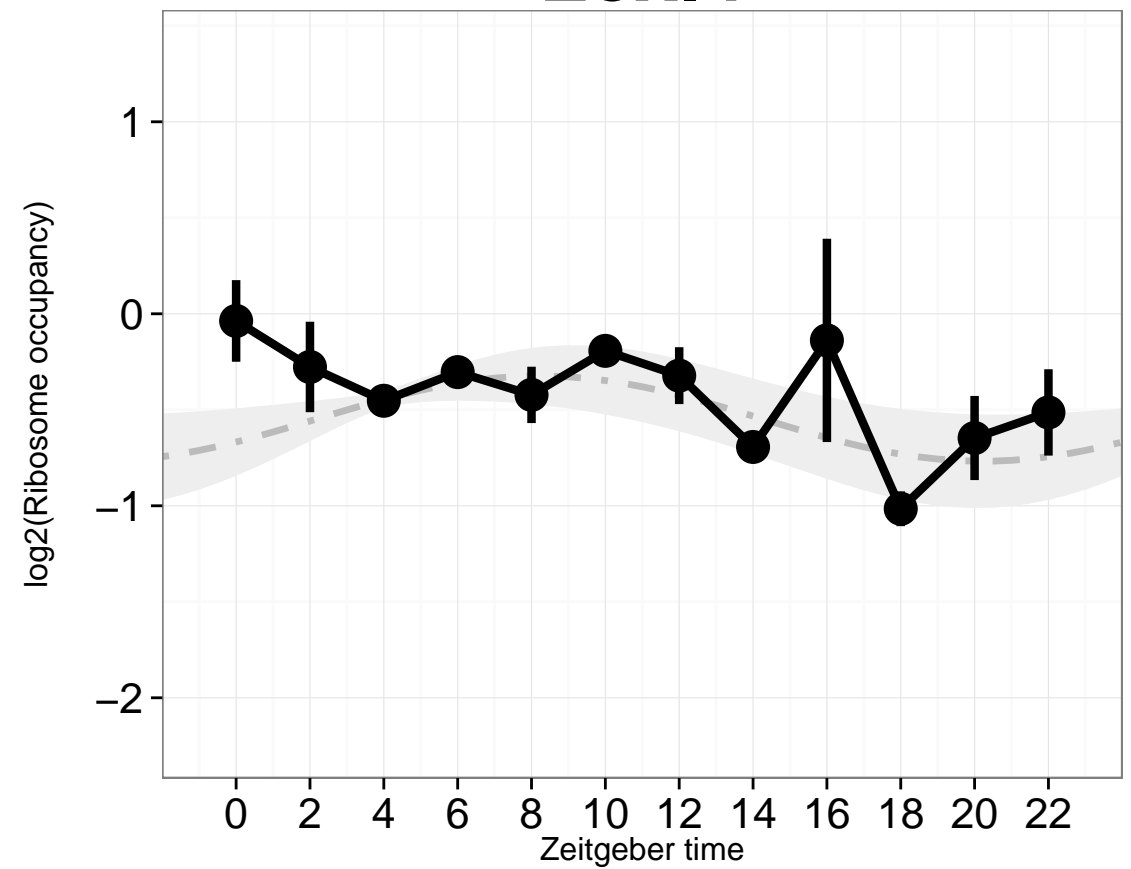

Supplement: SuppDataset_1.zip [file Loxl4_set_D.pdf › Supplemental Dataset 1/D-mRNA_rhythm_translation_rhyth/Loxl4_set_D.pdf]

# Lpgat1

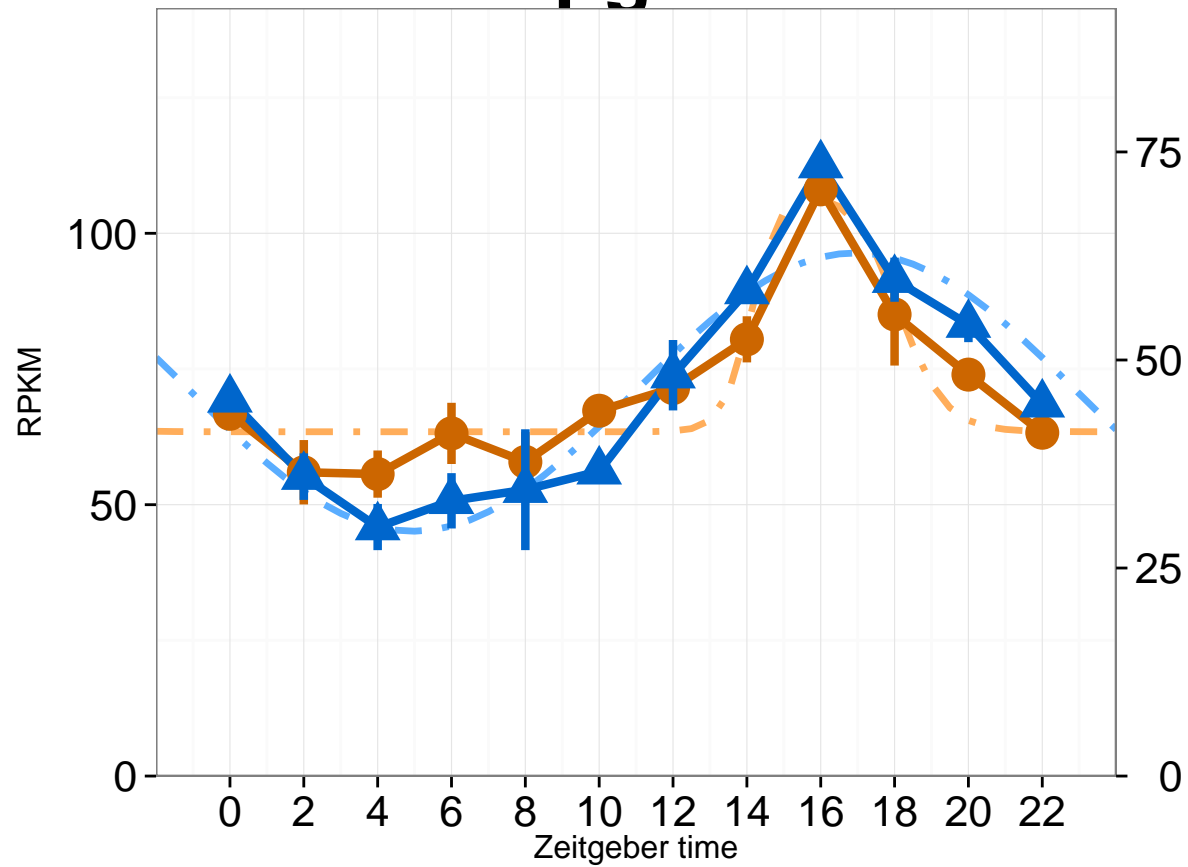

# Lpgat1

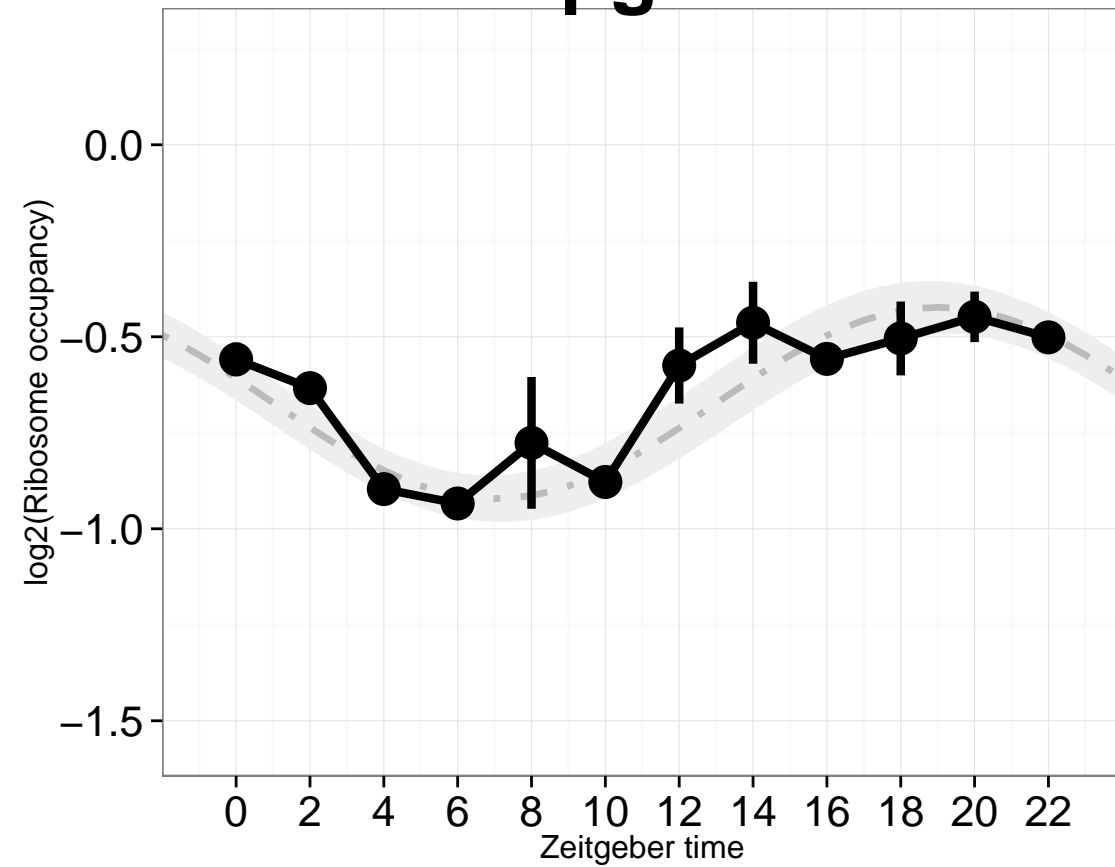

Supplement: SuppDataset_1.zip [file Lpgat1_set_D.pdf › Supplemental Dataset 1/D-mRNA_rhythm_translation_rhyth/Lpgat1_set_D.pdf]

# Lpin1

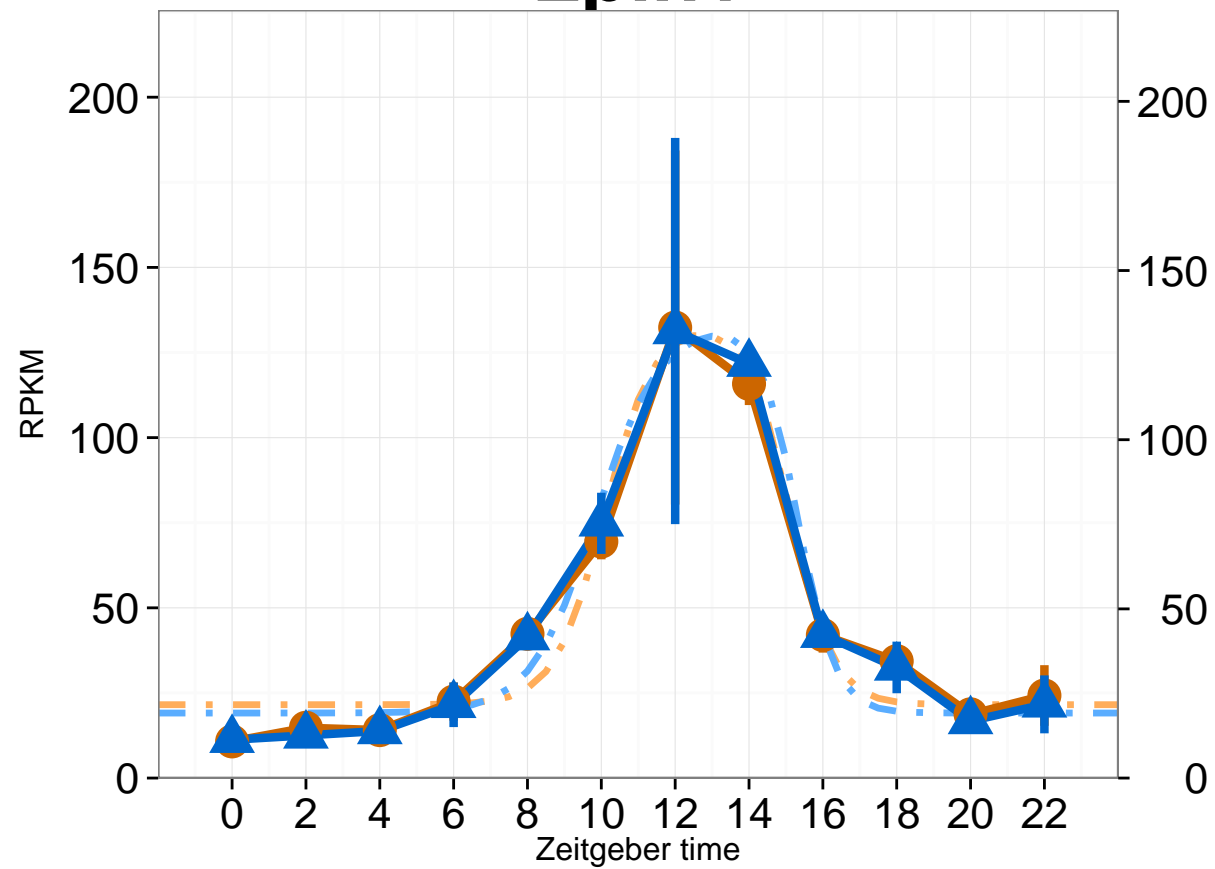

# Lpin1

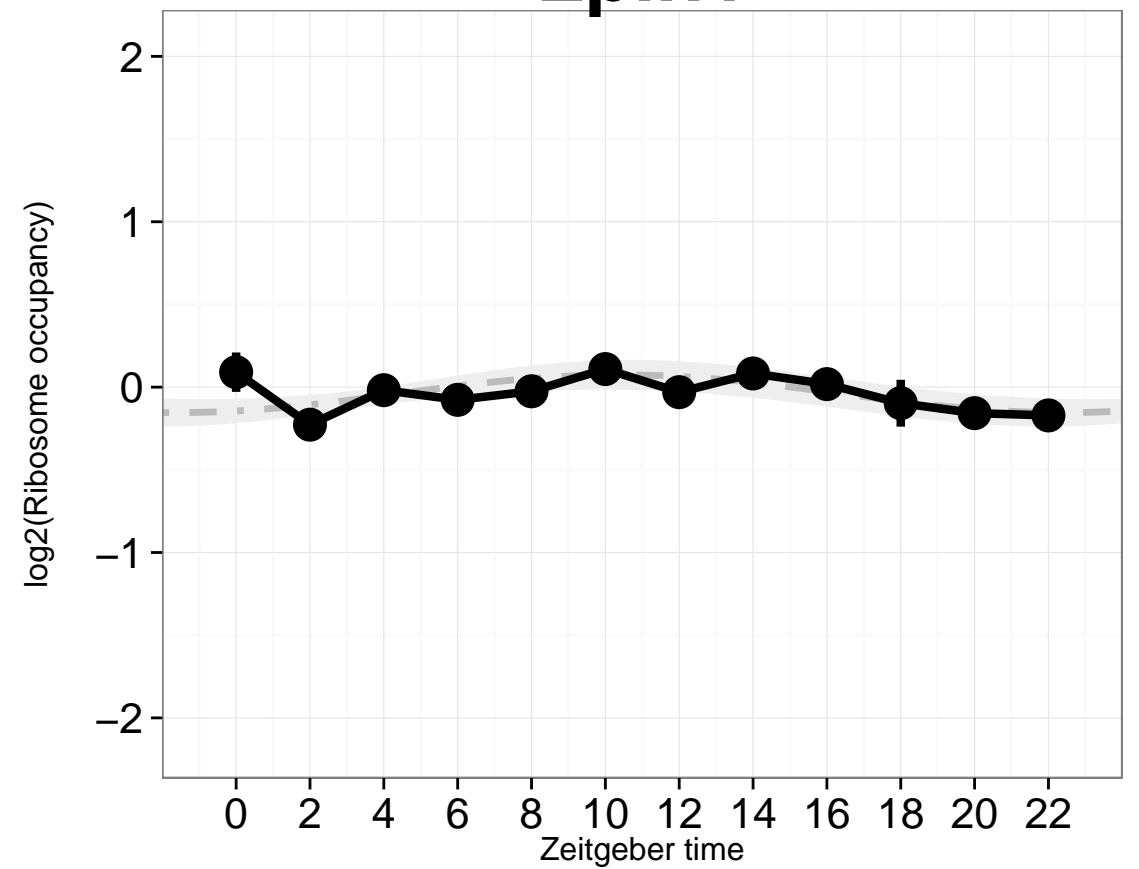

Supplement: SuppDataset_1.zip [file Lpin1_set_D.pdf › Supplemental Dataset 1/D-mRNA_rhythm_translation_rhyth/Lpin1_set_D.pdf]

# Lpin2

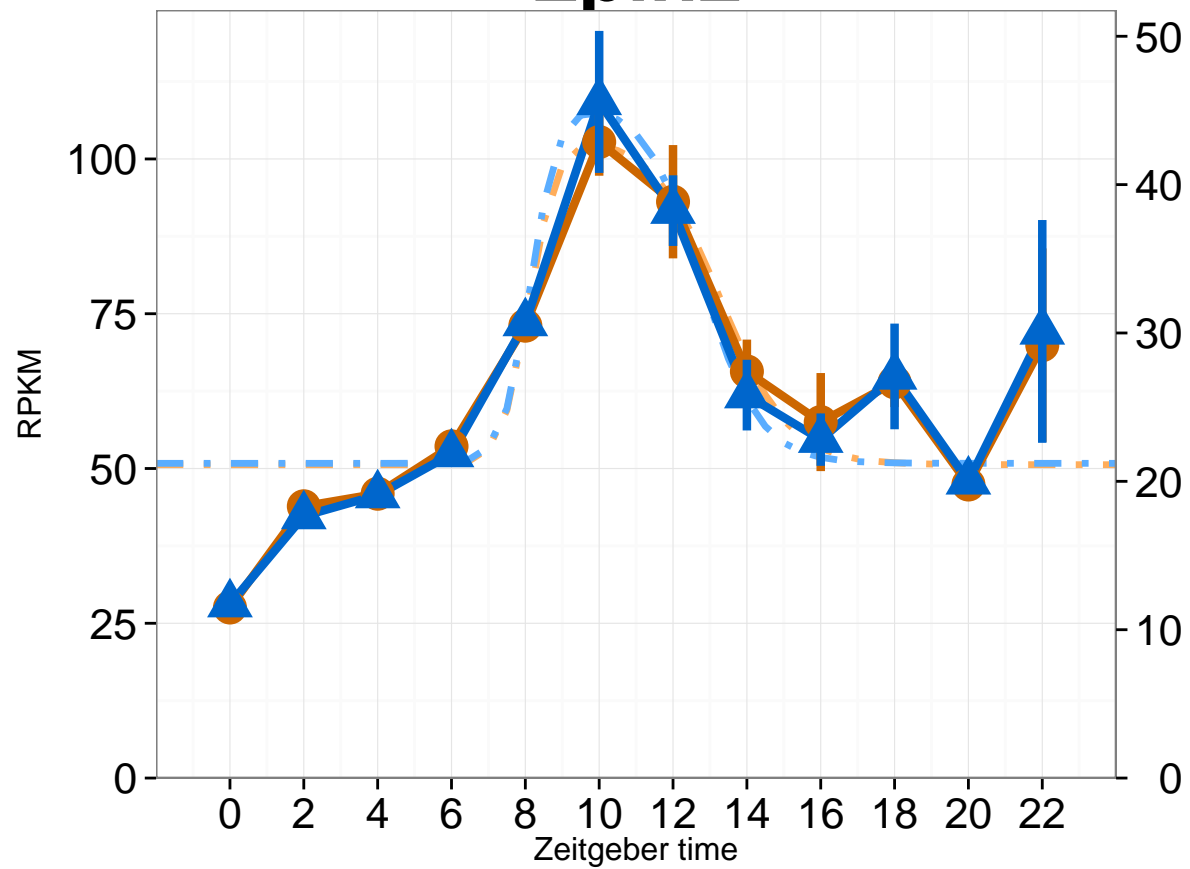

# Lpin2

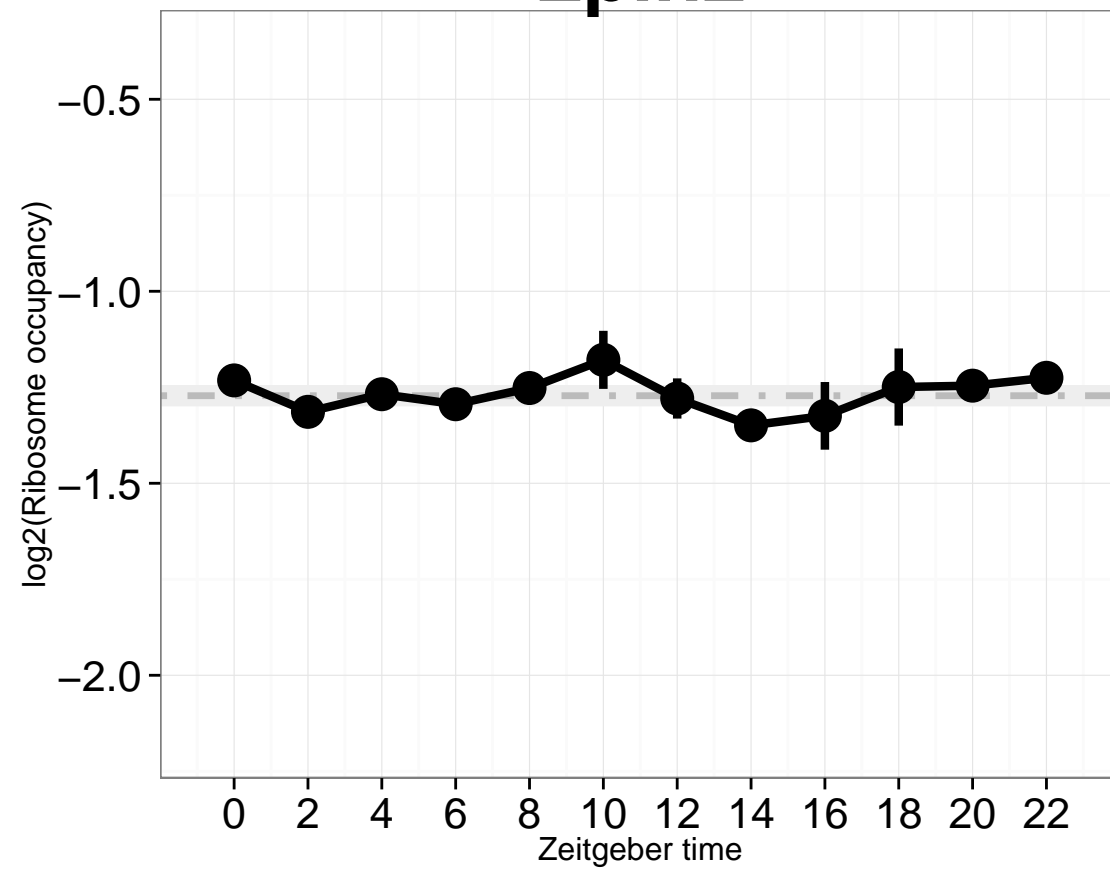

Supplement: SuppDataset_1.zip [file Lpin2_set_D.pdf › Supplemental Dataset 1/D-mRNA_rhythm_translation_rhyth/Lpin2_set_D.pdf]

## Lpl

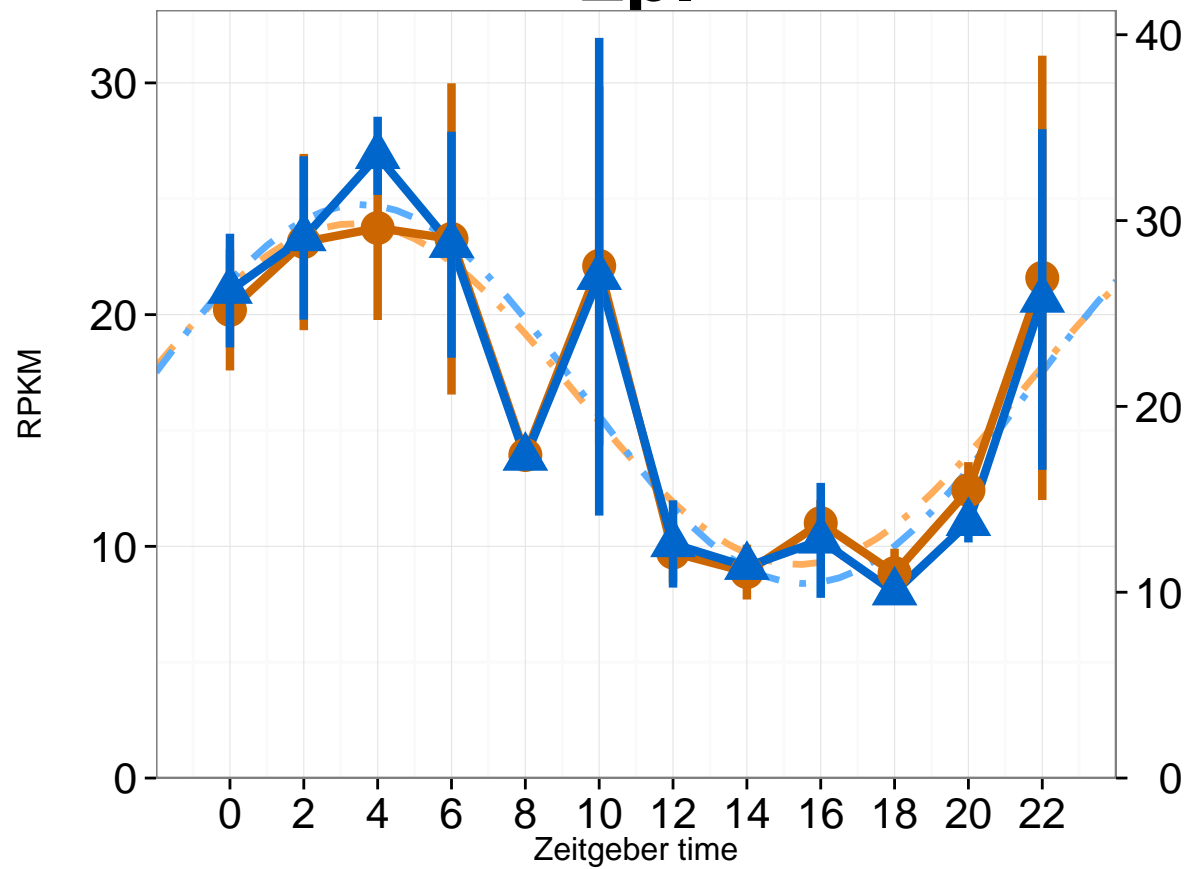

## Lpl

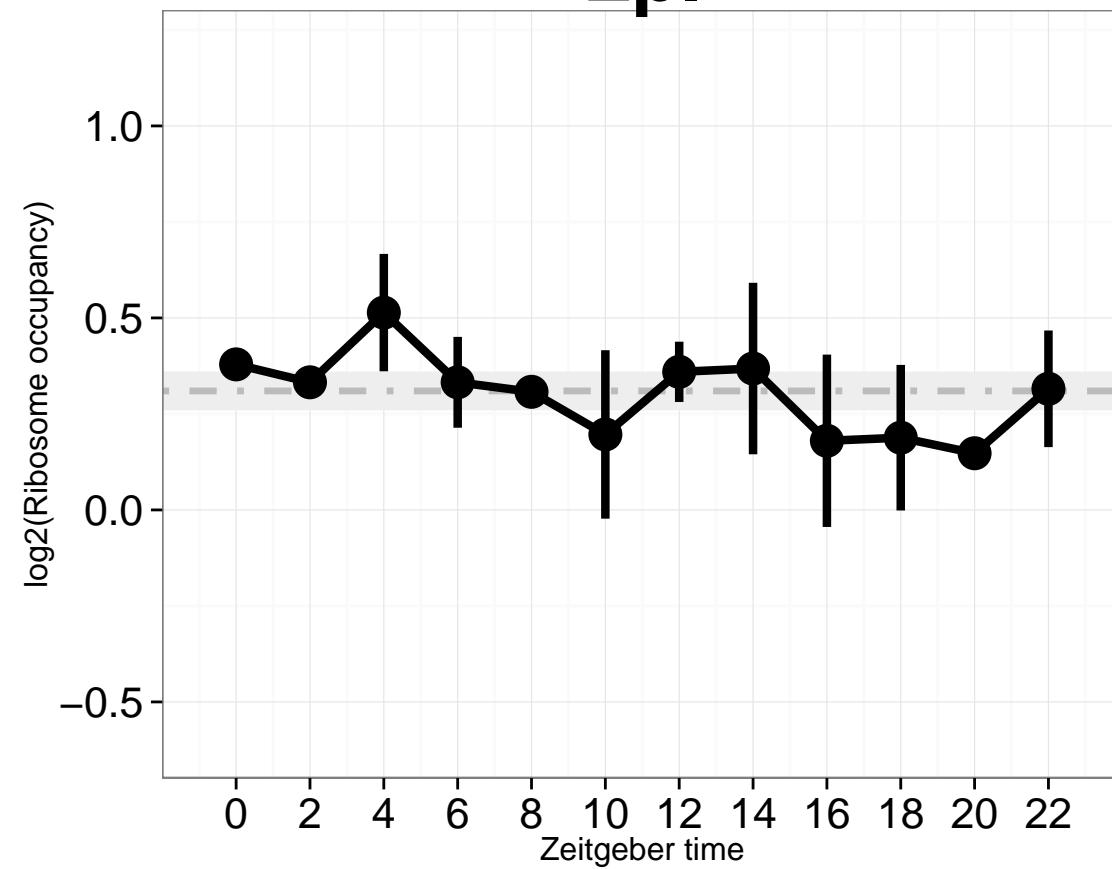

Supplement: SuppDataset_1.zip [file Lpl_set_D.pdf › Supplemental Dataset 1/D-mRNA_rhythm_translation_rhyth/Lpl_set_D.pdf]

# Lrfn3

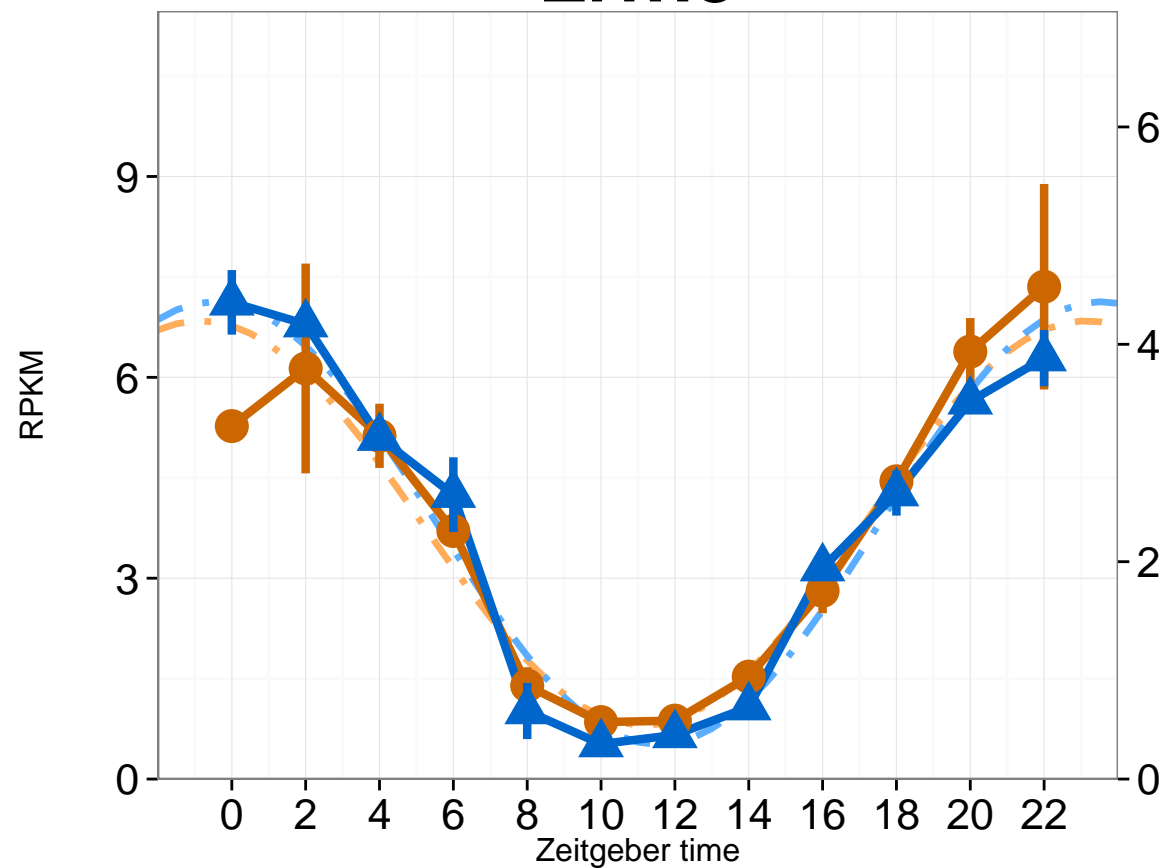

# Lrfn3

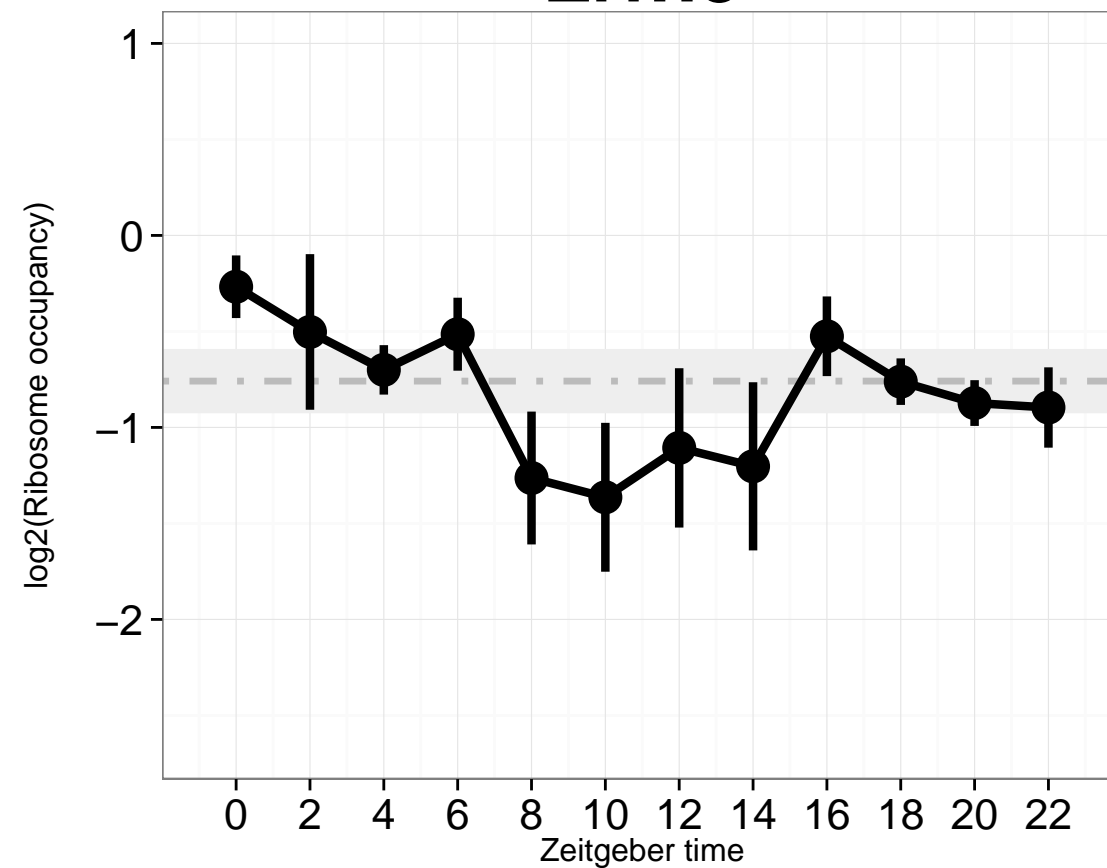

Supplement: SuppDataset_1.zip [file Lrfn3_set_D.pdf › Supplemental Dataset 1/D-mRNA_rhythm_translation_rhyth/Lrfn3_set_D.pdf]

# Lrg1

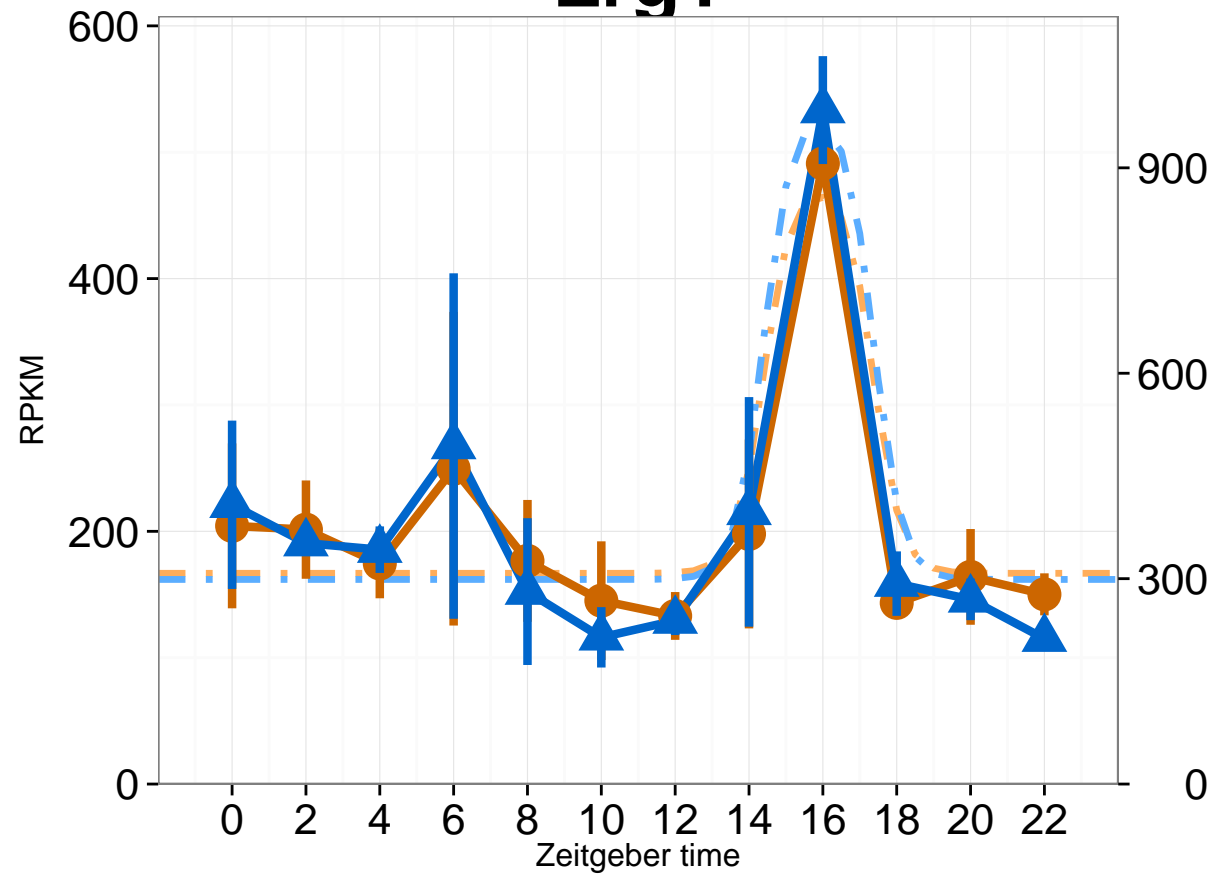

# Lrg1

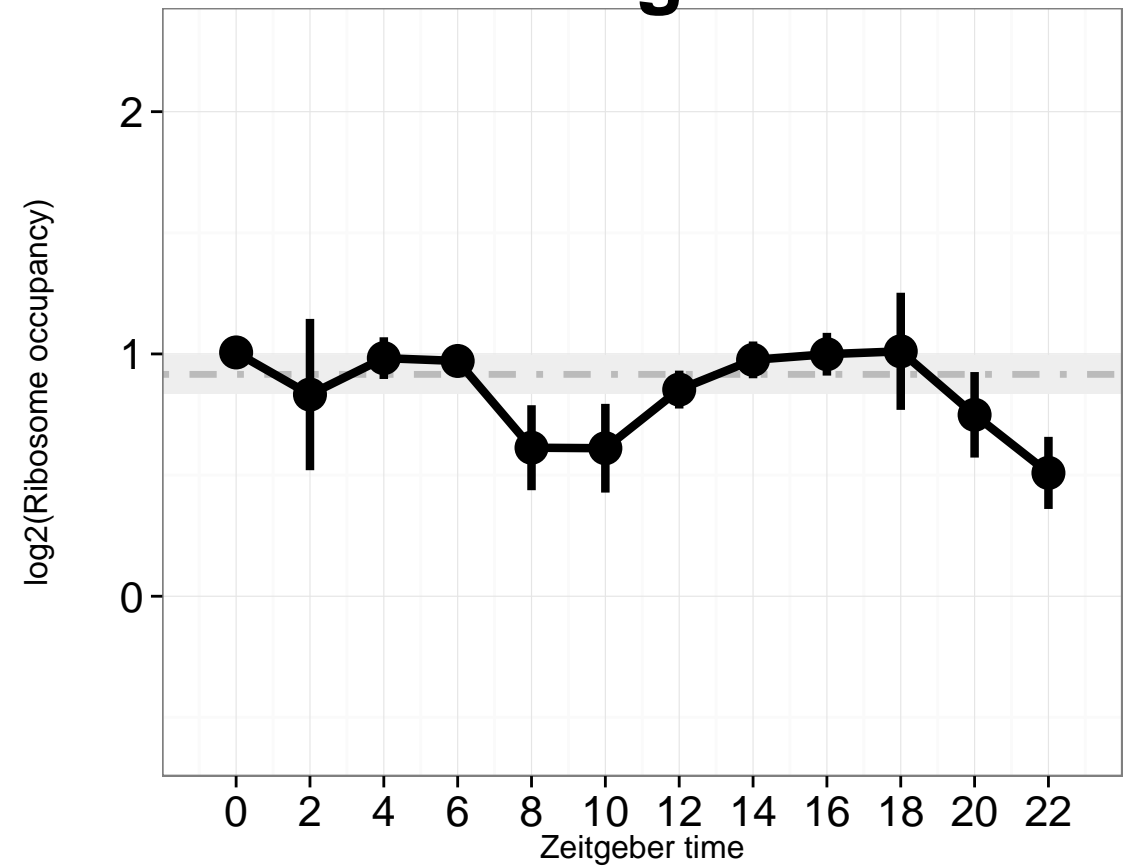

Supplement: SuppDataset_1.zip [file Lrg1_set_D.pdf › Supplemental Dataset 1/D-mRNA_rhythm_translation_rhyth/Lrg1_set_D.pdf]

## Lrp4

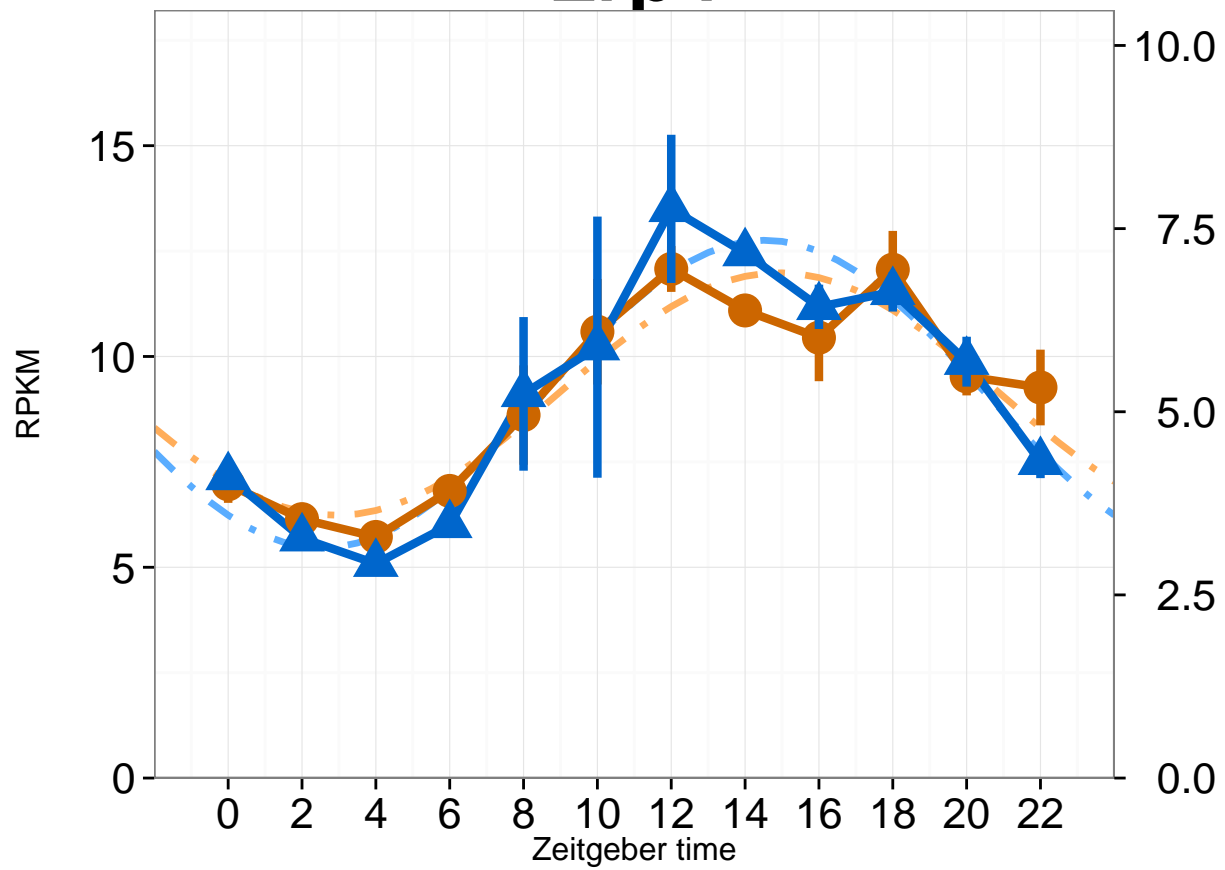

## Lrp4

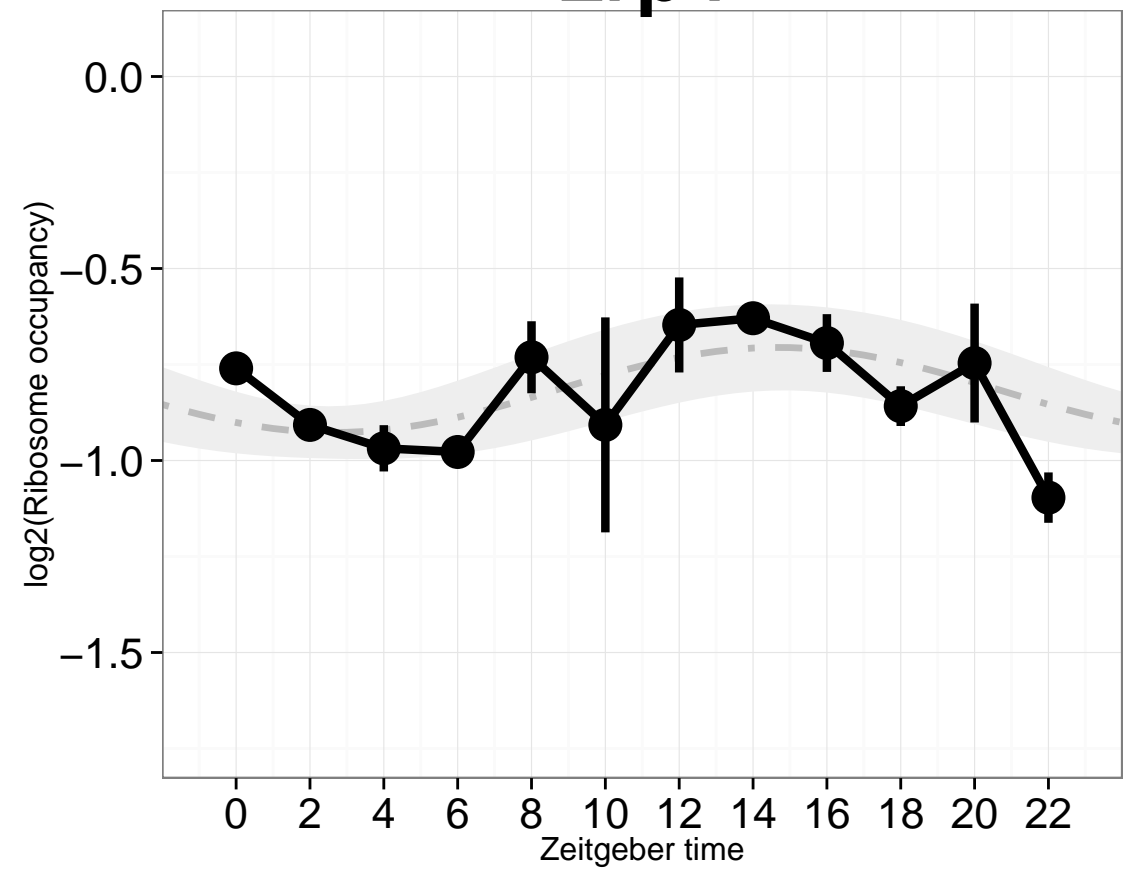

Supplement: SuppDataset_1.zip [file Lrp4_set_D.pdf › Supplemental Dataset 1/D-mRNA_rhythm_translation_rhyth/Lrp4_set_D.pdf]

# Lrp5

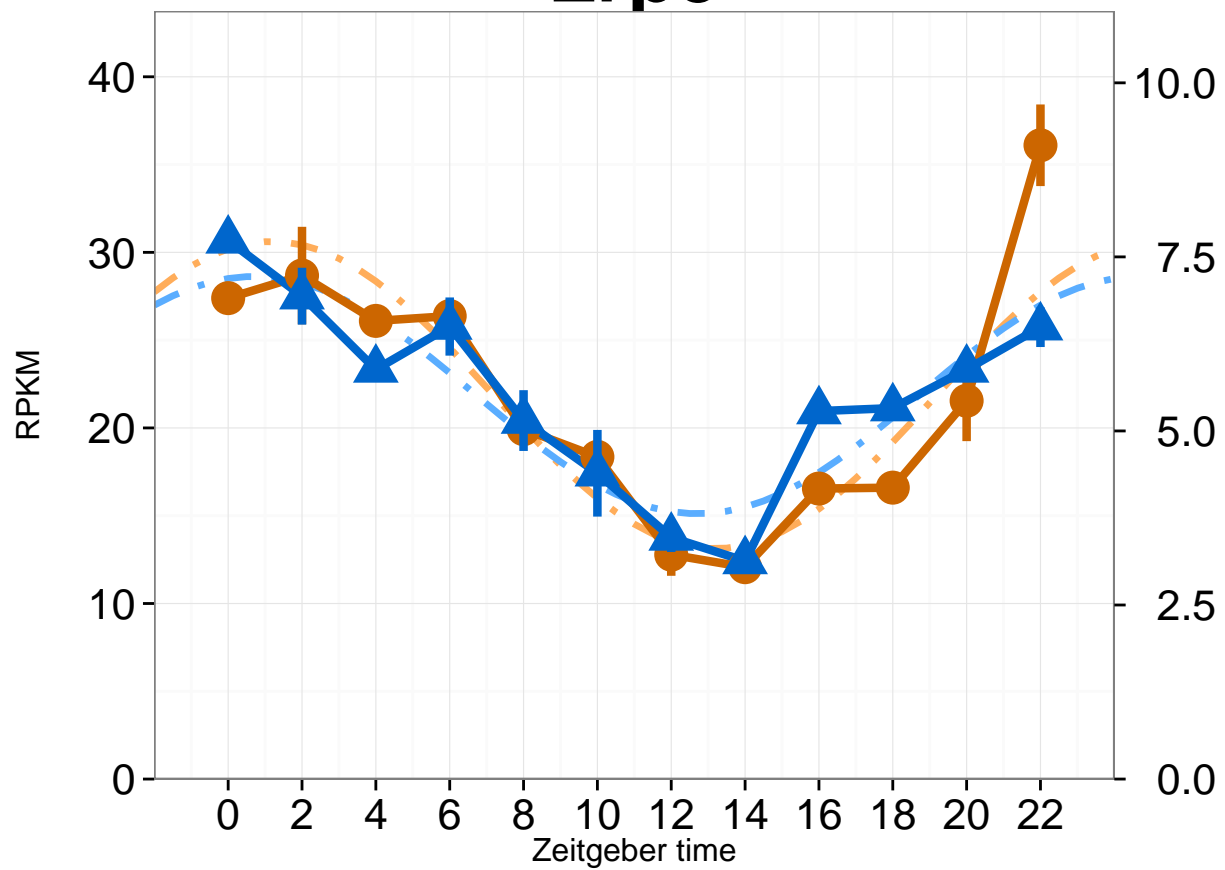

# Lrp5

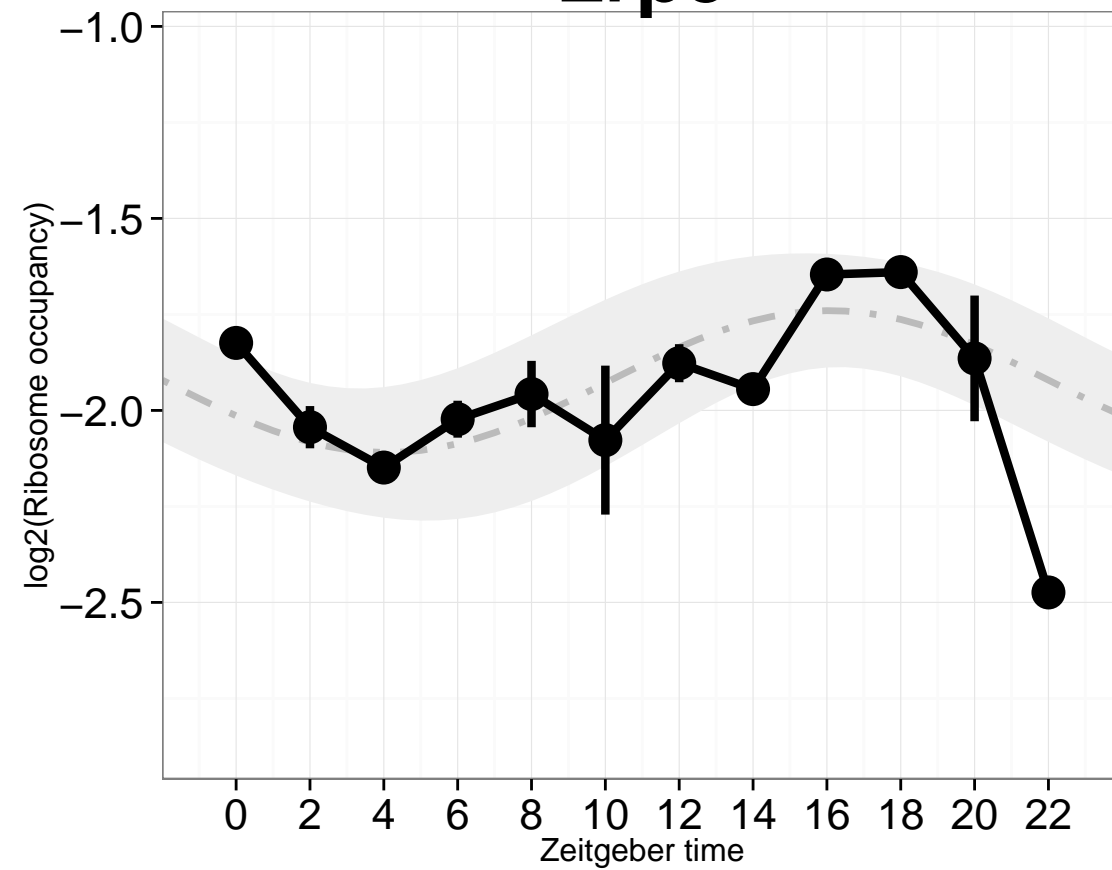

Supplement: SuppDataset_1.zip [file Lrp5_set_D.pdf › Supplemental Dataset 1/D-mRNA_rhythm_translation_rhyth/Lrp5_set_D.pdf]

# Lrrc28

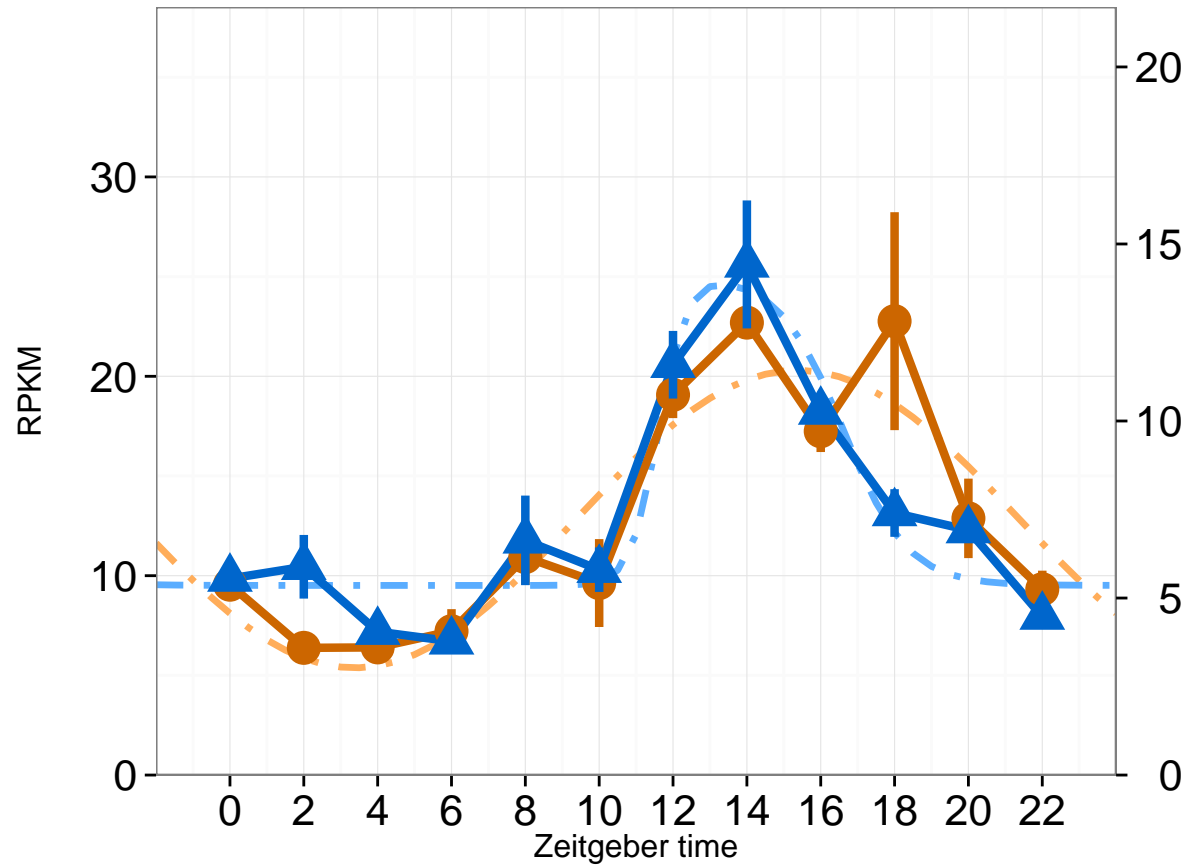

# Lrrc28

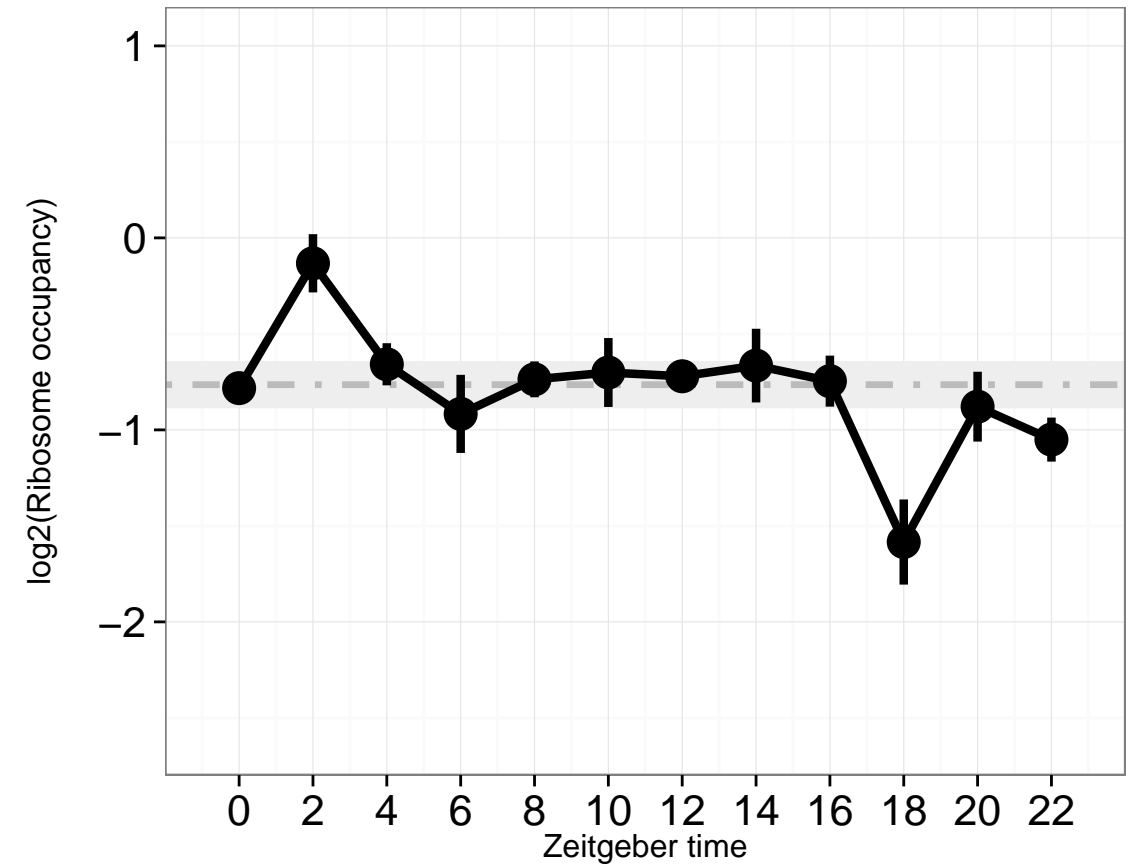

Supplement: SuppDataset_1.zip [file Lrrc28_set_D.pdf › Supplemental Dataset 1/D-mRNA_rhythm_translation_rhyth/Lrrc28_set_D.pdf]

## Lrrc3

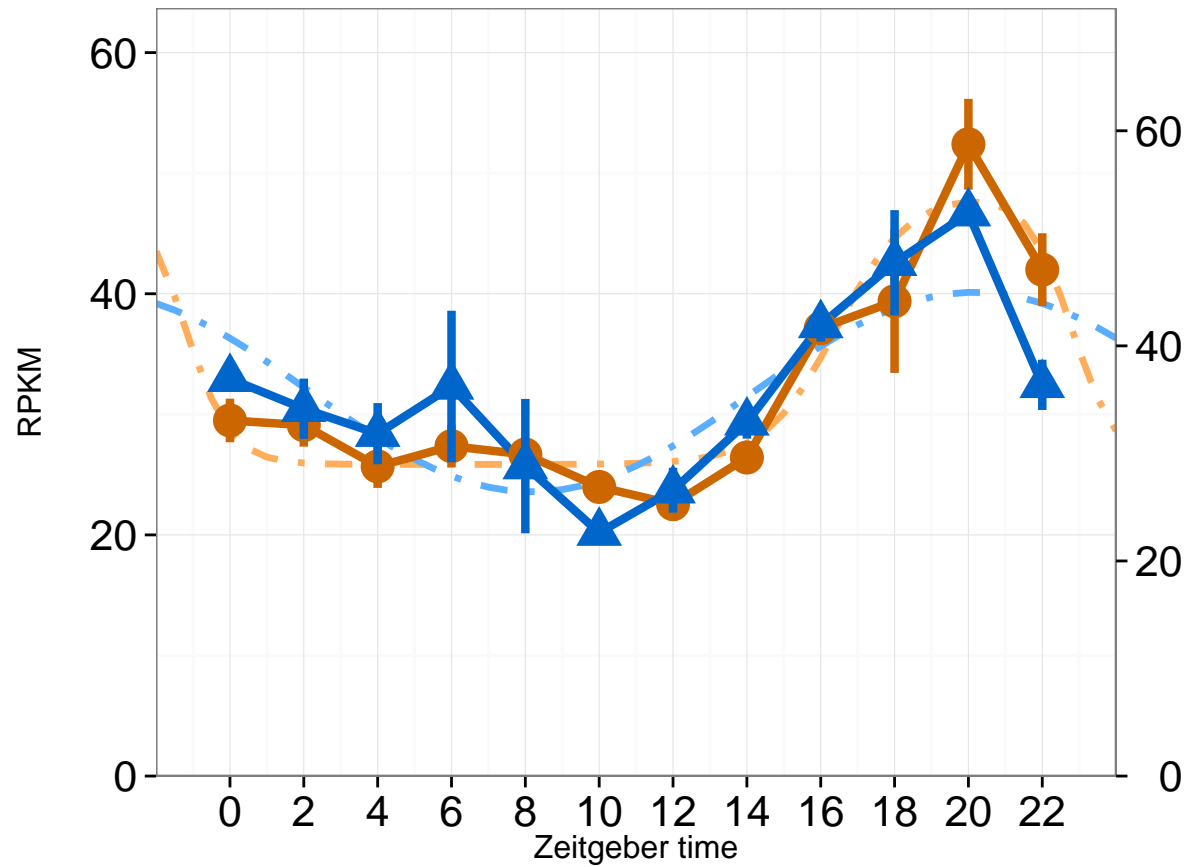

## Lrrc3

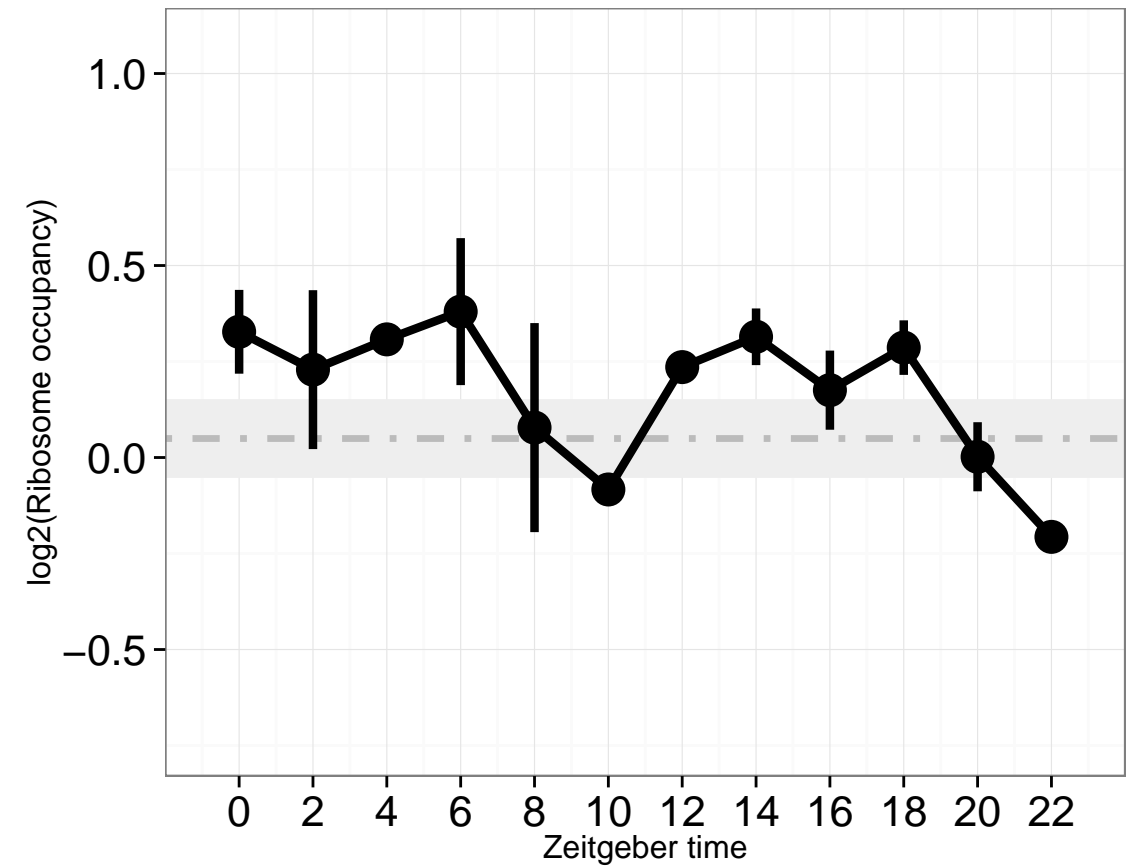

Supplement: SuppDataset_1.zip [file Lrrc3_set_D.pdf › Supplemental Dataset 1/D-mRNA_rhythm_translation_rhyth/Lrrc3_set_D.pdf]

# Lrrc8d

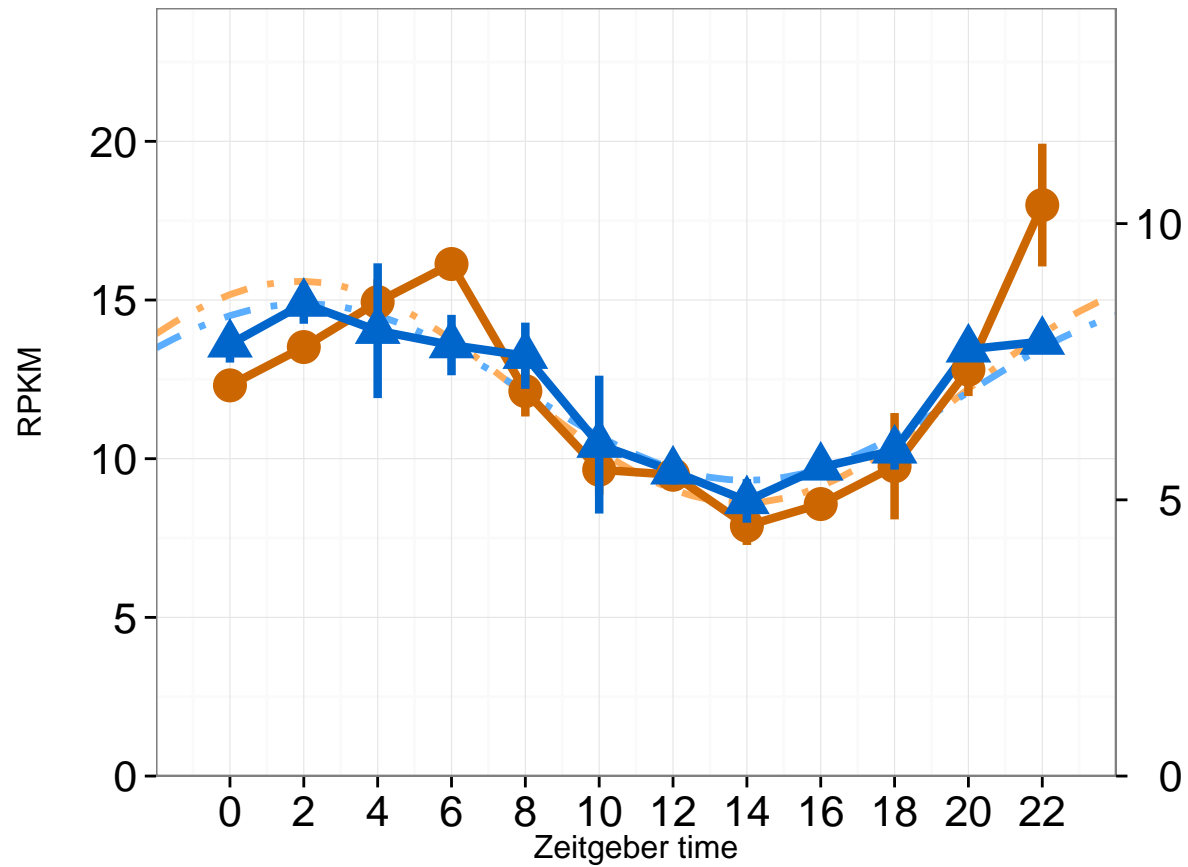

# Lrrc8d

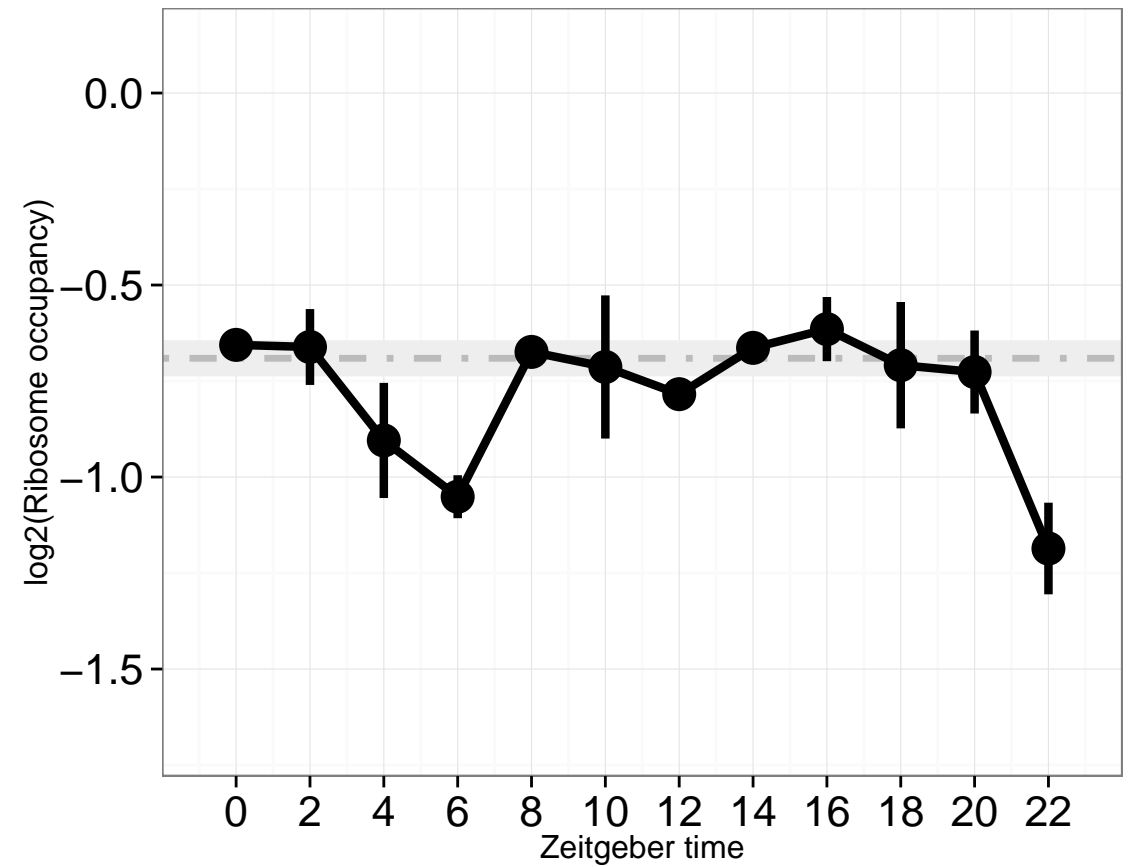

Supplement: SuppDataset_1.zip [file Lrrc8d_set_D.pdf › Supplemental Dataset 1/D-mRNA_rhythm_translation_rhyth/Lrrc8d_set_D.pdf]

## Lsr

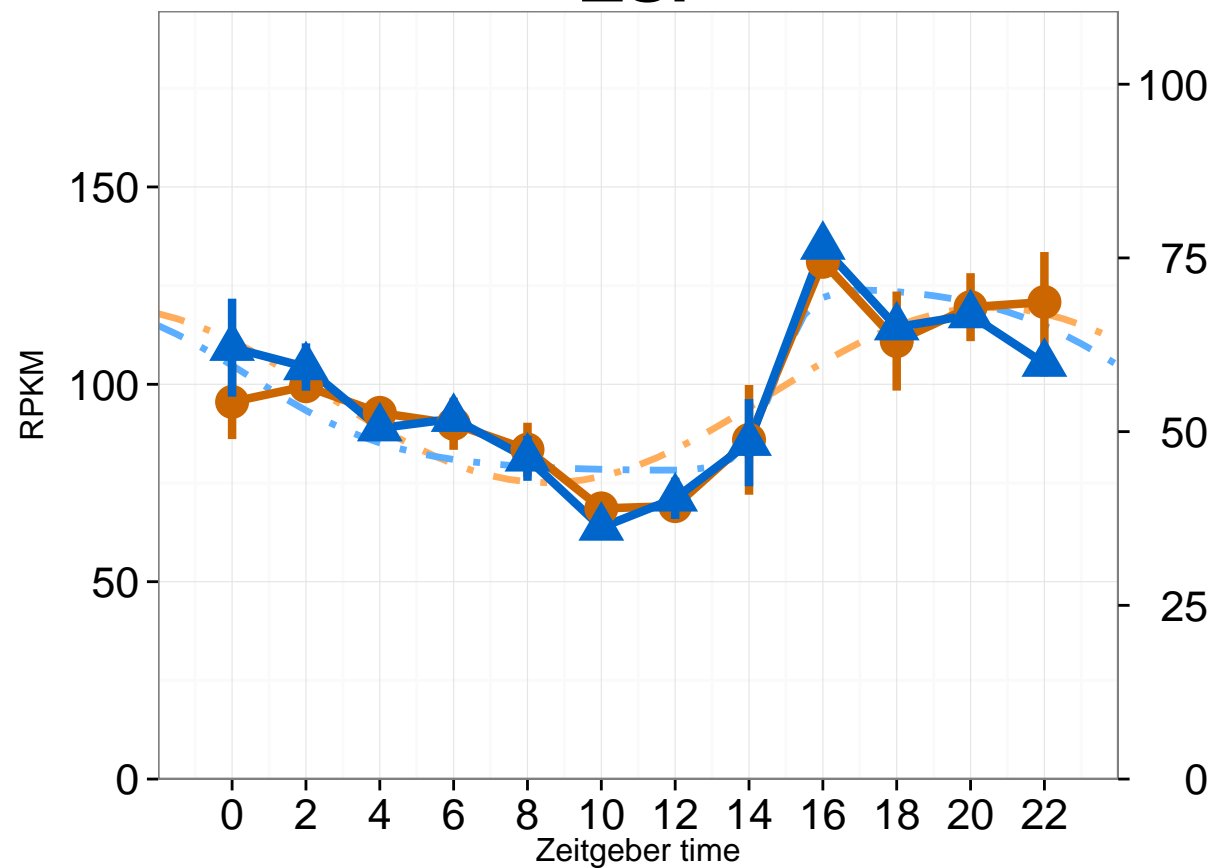

## Lsr

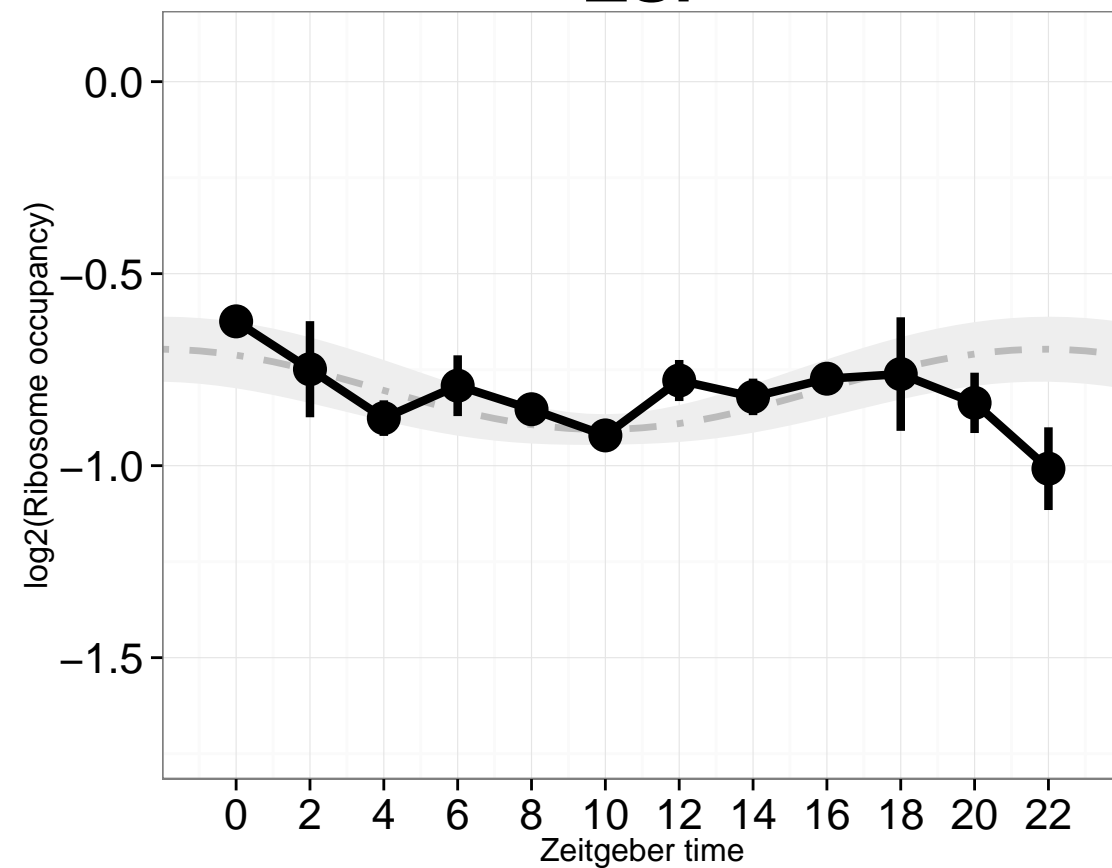

Supplement: SuppDataset_1.zip [file Lsr_set_D.pdf › Supplemental Dataset 1/D-mRNA_rhythm_translation_rhyth/Lsr_set_D.pdf]

## Lss

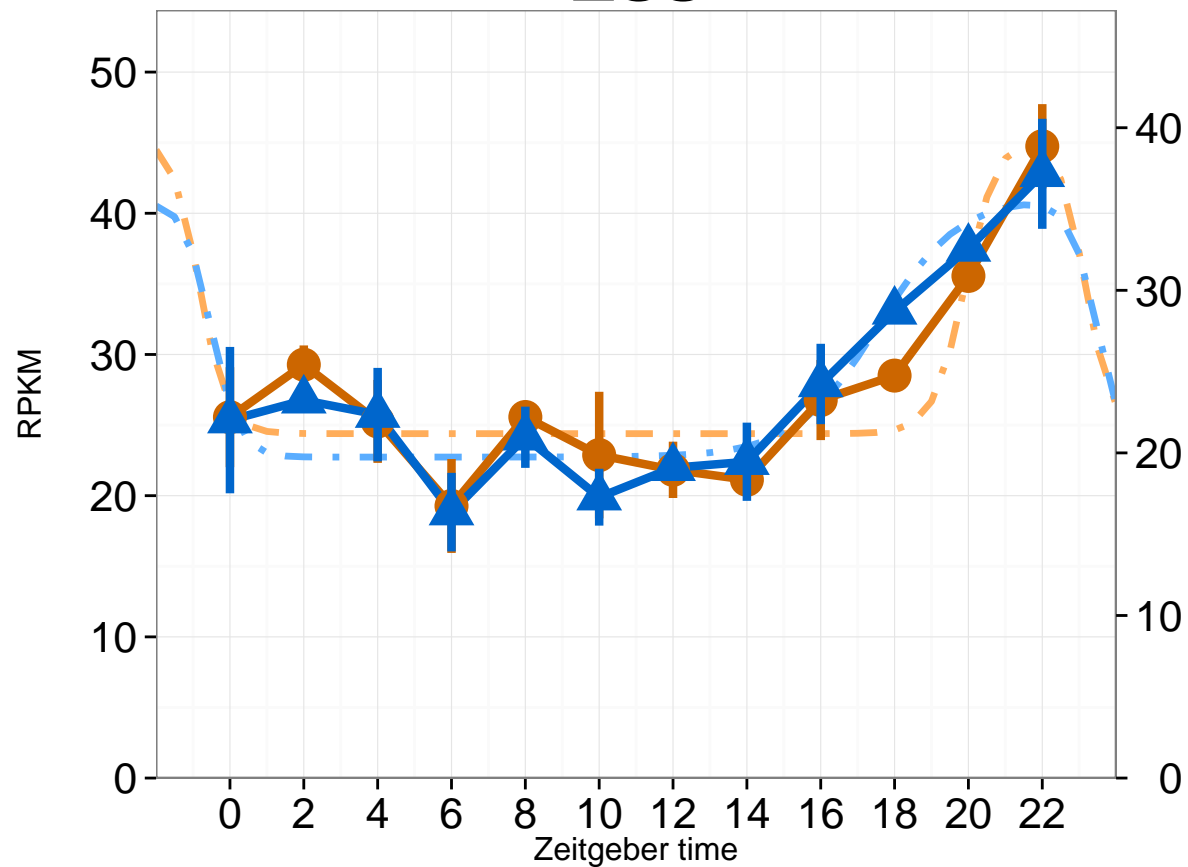

## Lss

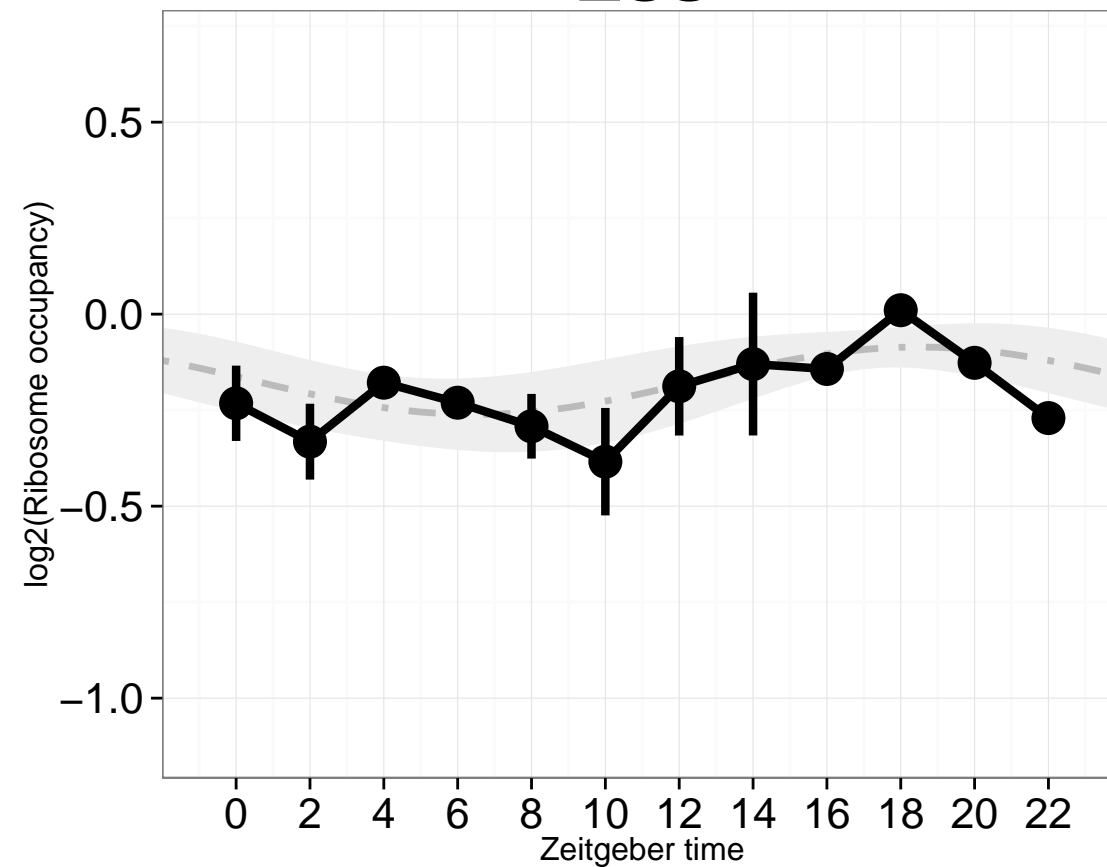

Supplement: SuppDataset_1.zip [file Lss_set_D.pdf › Supplemental Dataset 1/D-mRNA_rhythm_translation_rhyth/Lss_set_D.pdf]

## Ly75

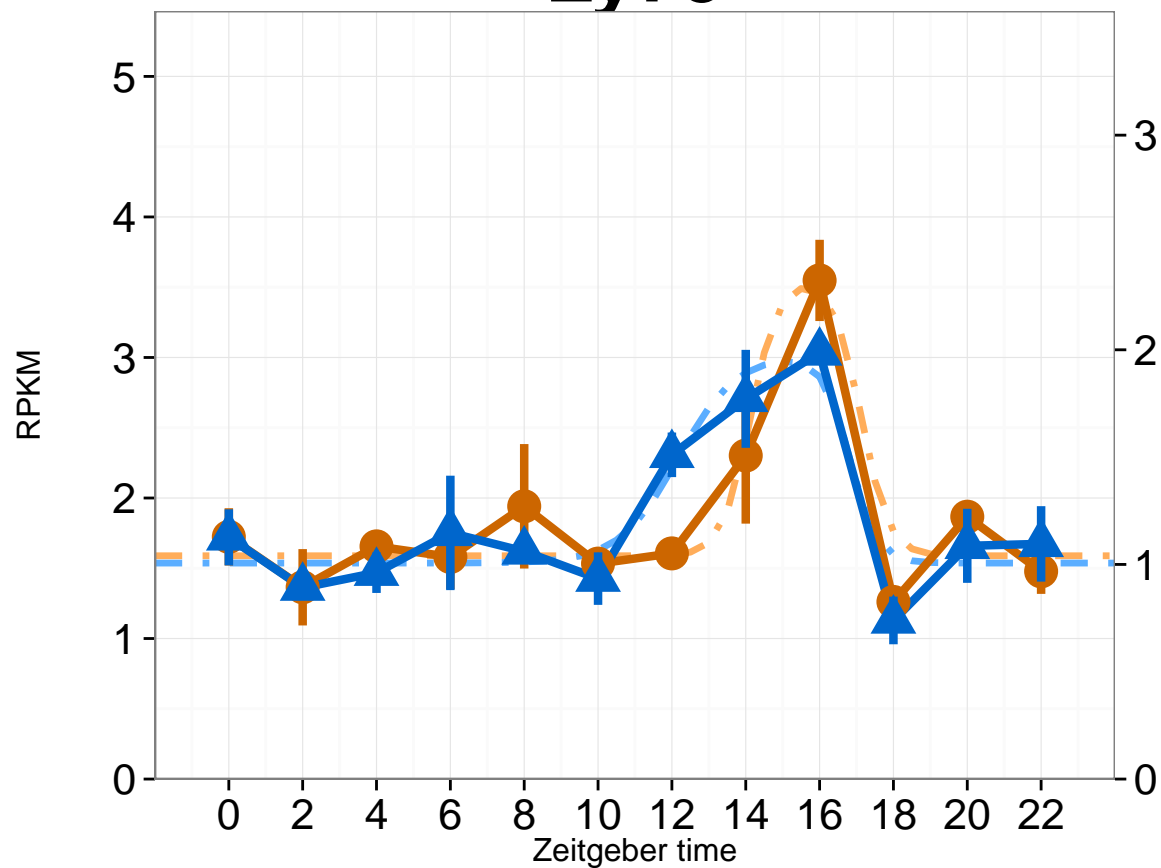

## Ly75

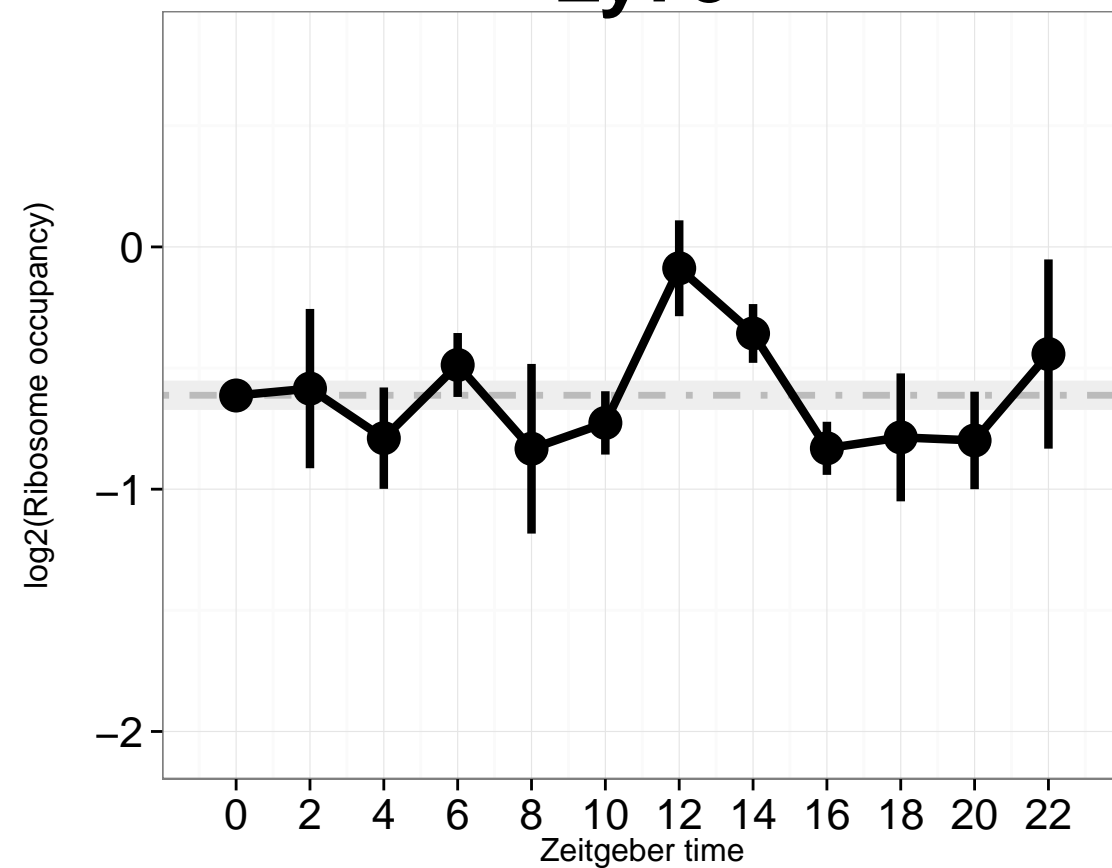

Supplement: SuppDataset_1.zip [file Ly75_set_D.pdf › Supplemental Dataset 1/D-mRNA_rhythm_translation_rhyth/Ly75_set_D.pdf]

# Lysmd3

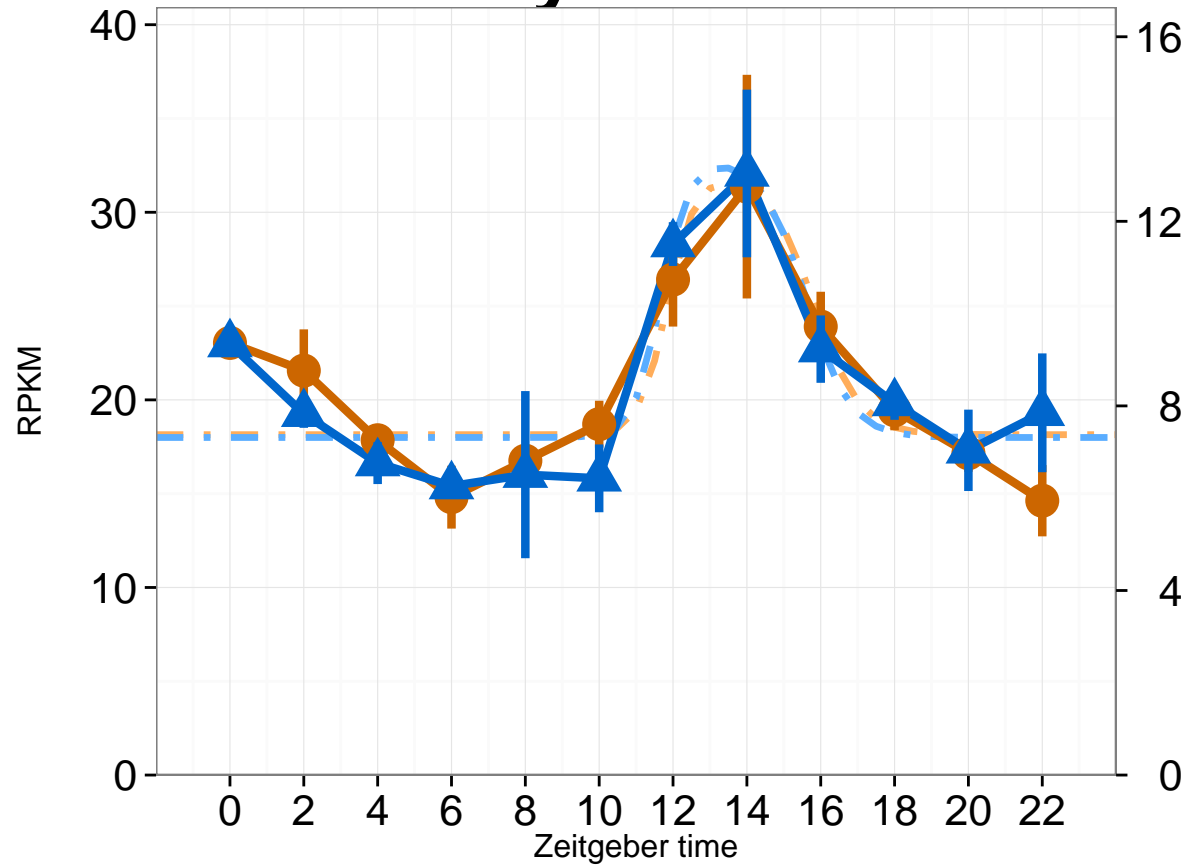

# Lysmd3

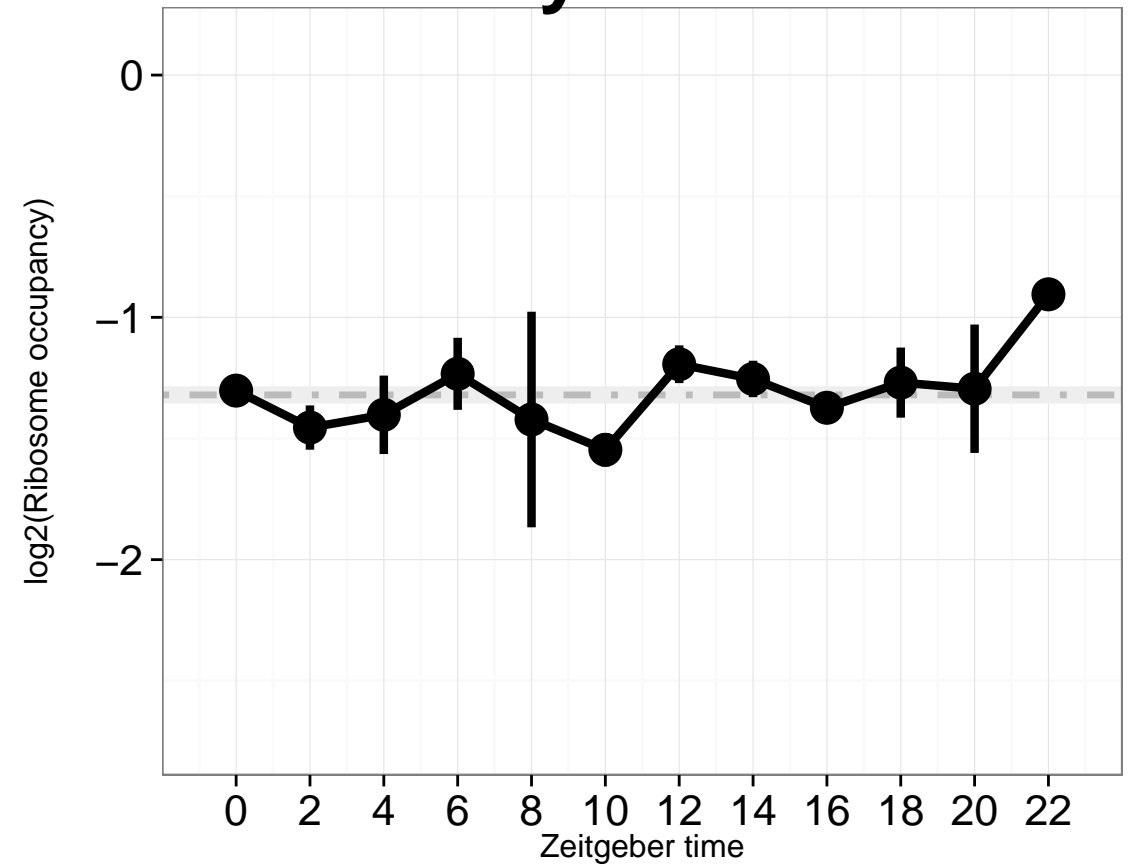

Supplement: SuppDataset_1.zip [file Lysmd3_set_D.pdf › Supplemental Dataset 1/D-mRNA_rhythm_translation_rhyth/Lysmd3_set_D.pdf]

## Mad2l2

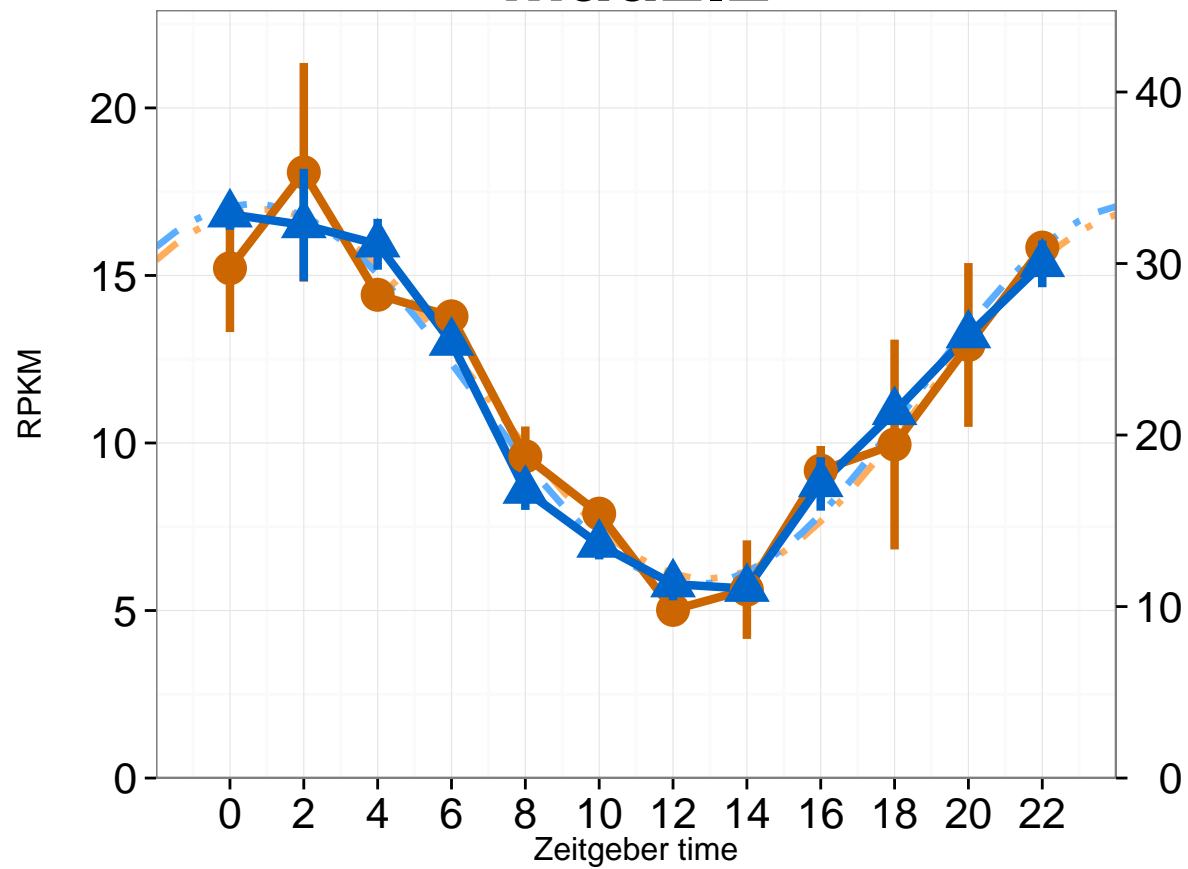

## Mad2l2

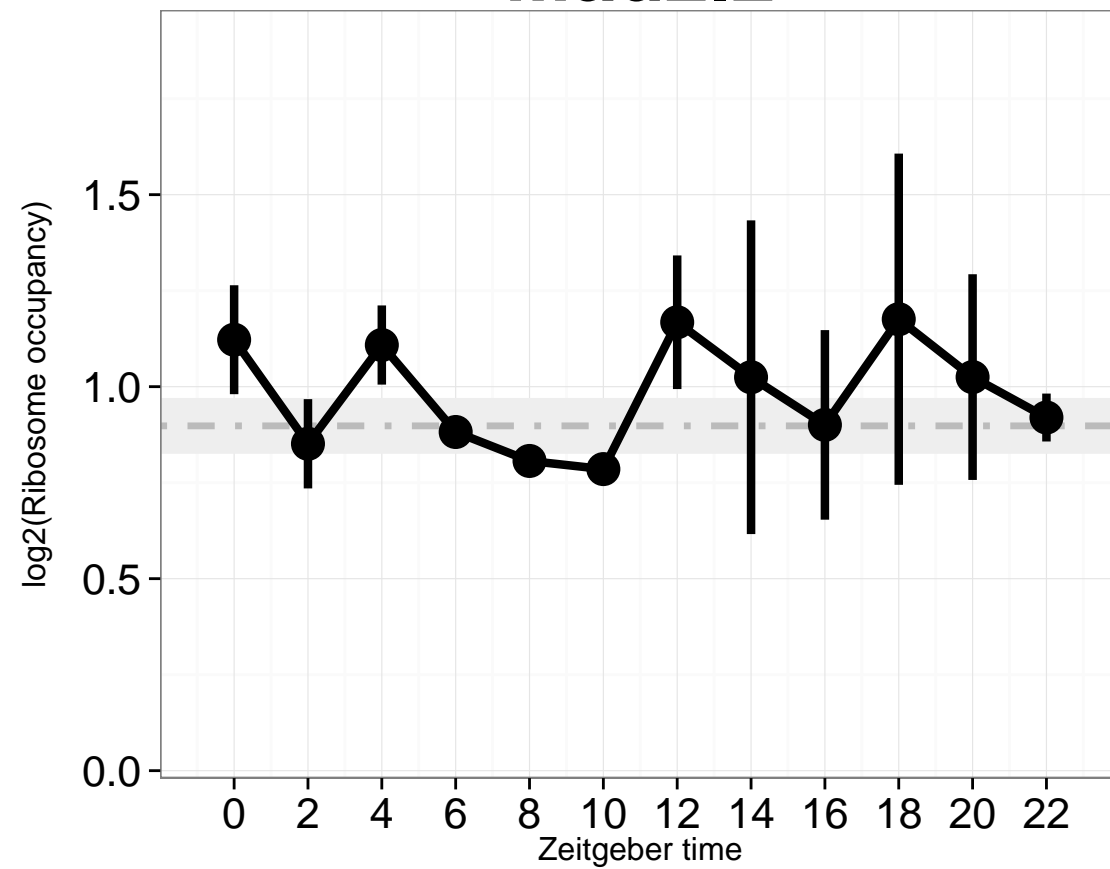

Supplement: SuppDataset_1.zip [file Mad2l2_set_D.pdf › Supplemental Dataset 1/D-mRNA_rhythm_translation_rhyth/Mad2l2_set_D.pdf]

## Maff

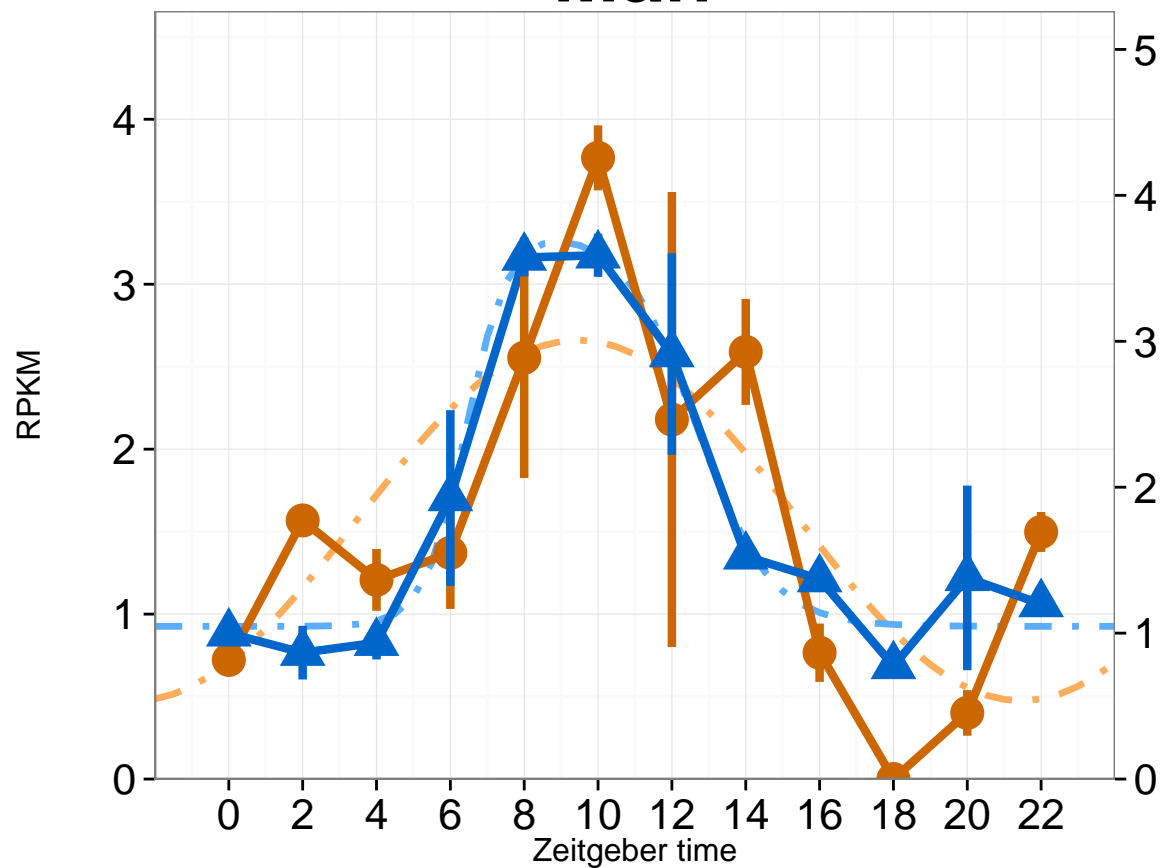

## Maff

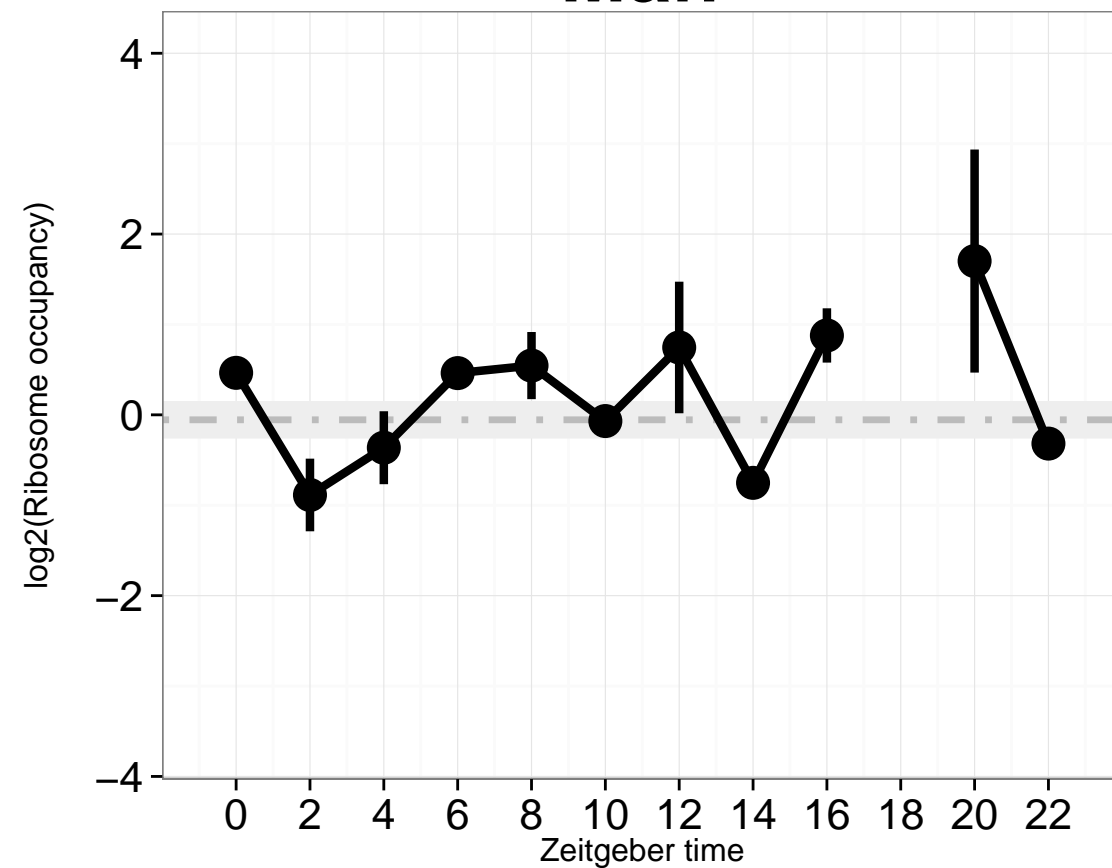

Supplement: SuppDataset_1.zip [file Maff_set_D.pdf › Supplemental Dataset 1/D-mRNA_rhythm_translation_rhyth/Maff_set_D.pdf]

# Magix

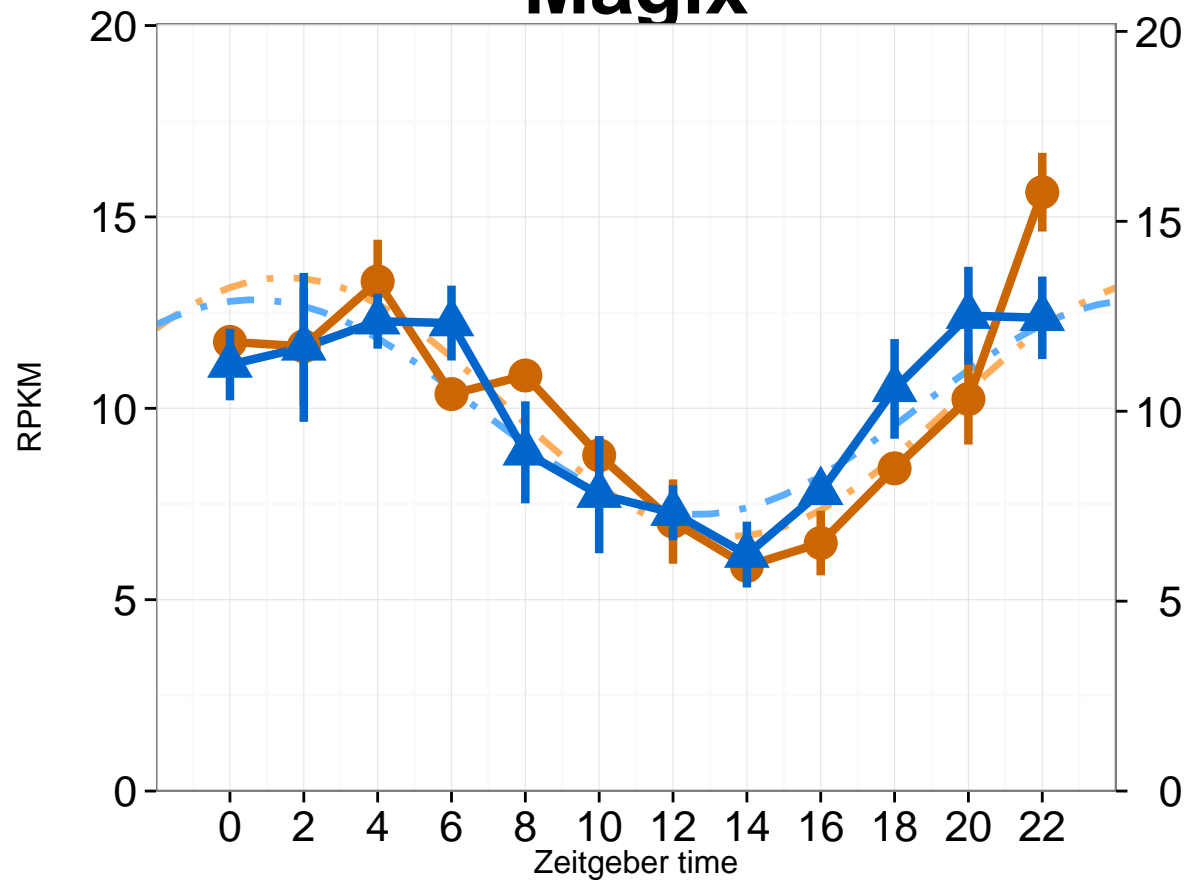

# Magix

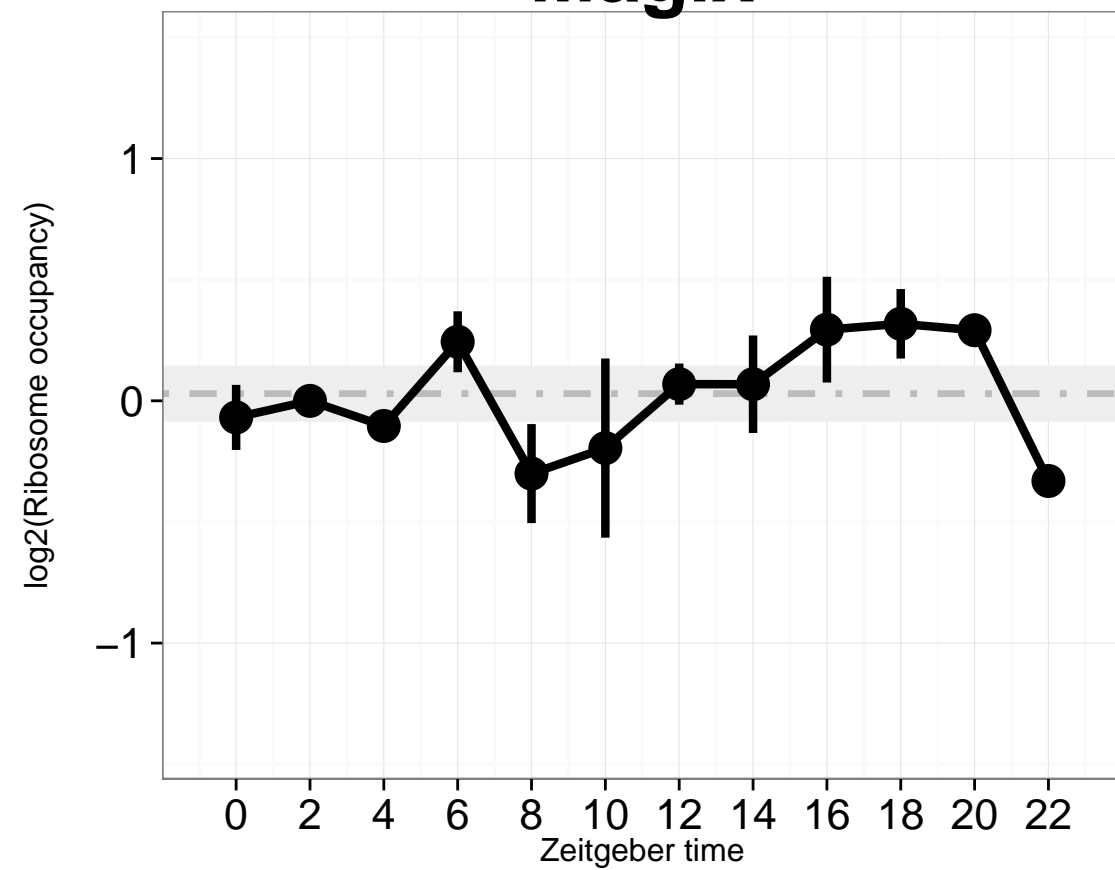

Supplement: SuppDataset_1.zip [file Magix_set_D.pdf › Supplemental Dataset 1/D-mRNA_rhythm_translation_rhyth/Magix_set_D.pdf]

## Mal2

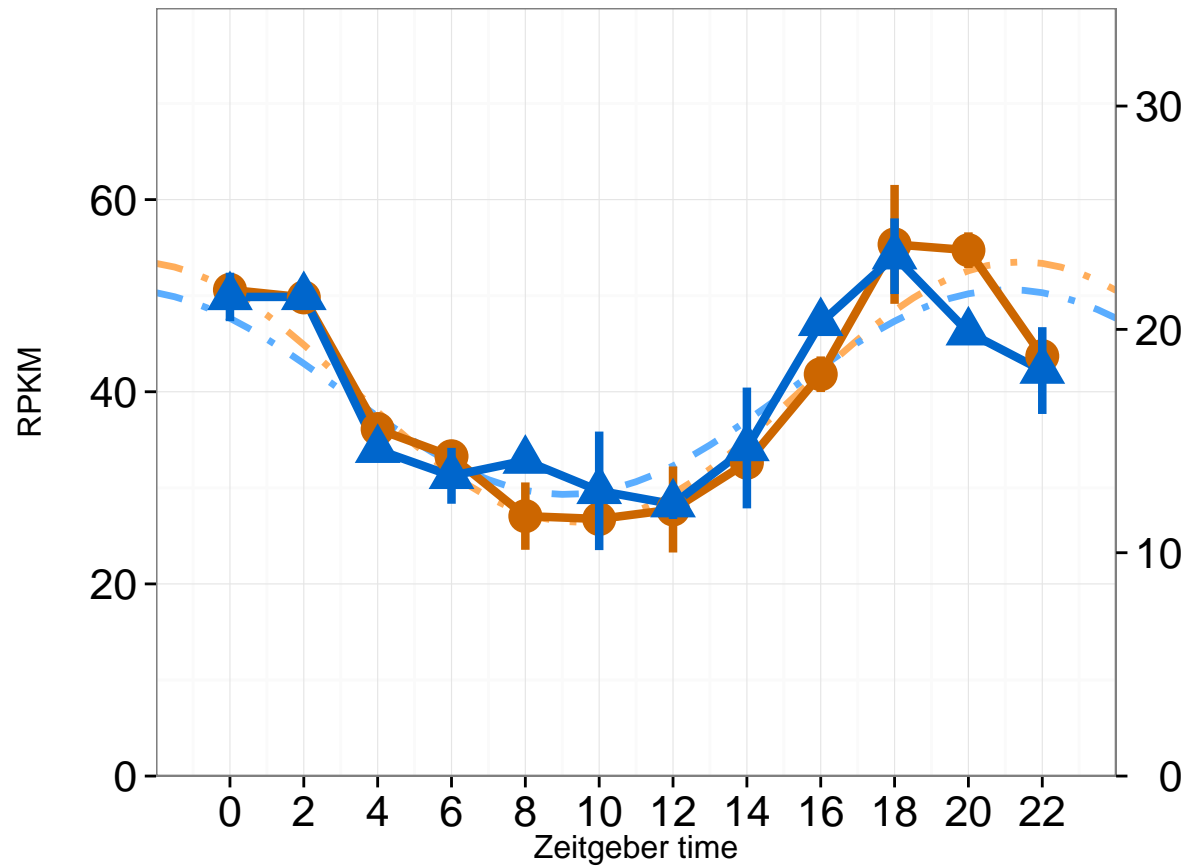

## Mal2

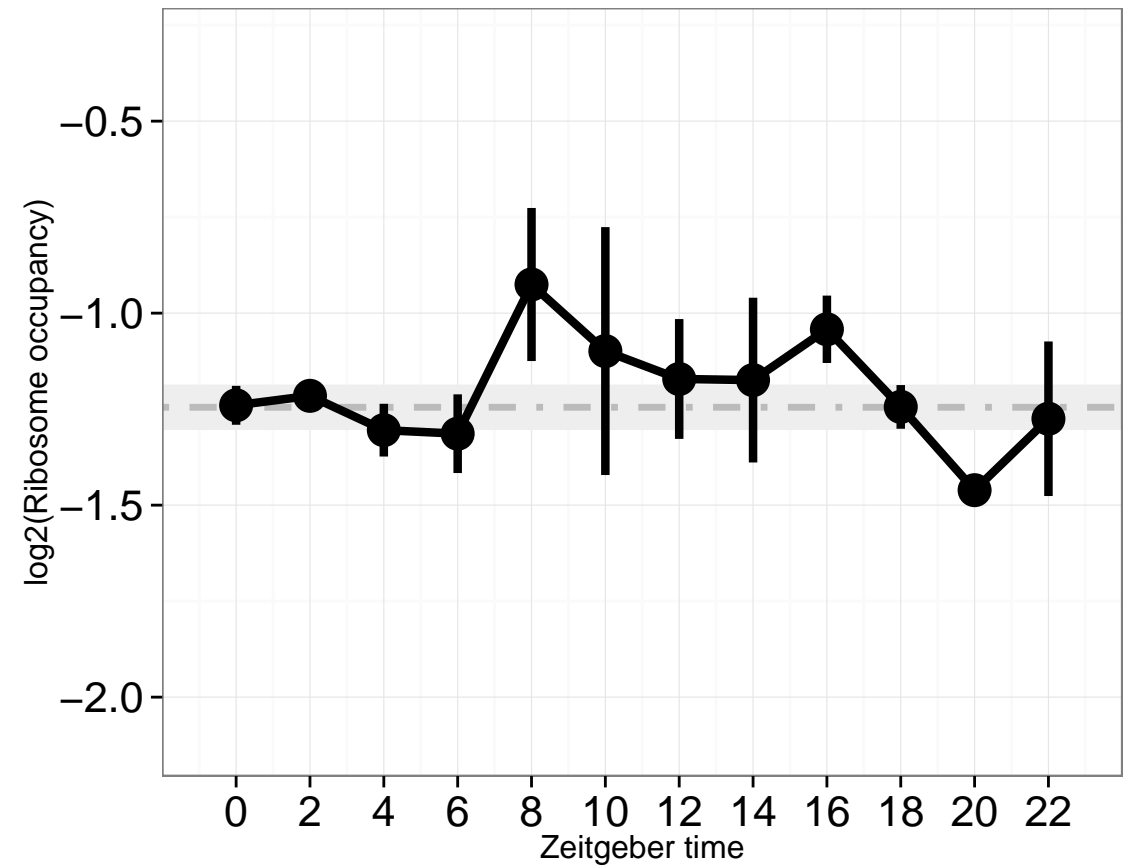

Supplement: SuppDataset_1.zip [file Mal2_set_D.pdf › Supplemental Dataset 1/D-mRNA_rhythm_translation_rhyth/Mal2_set_D.pdf]

# Man2a1

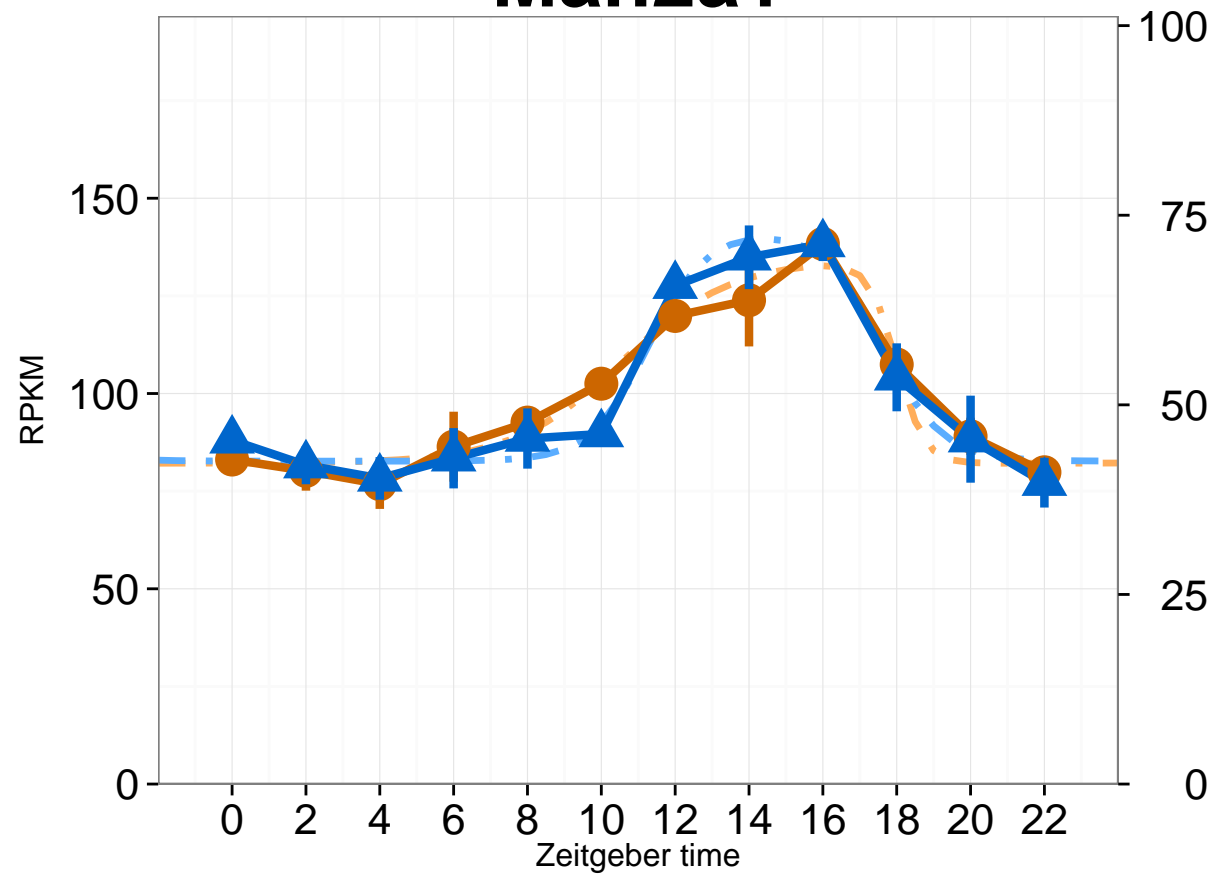

# Man2a1

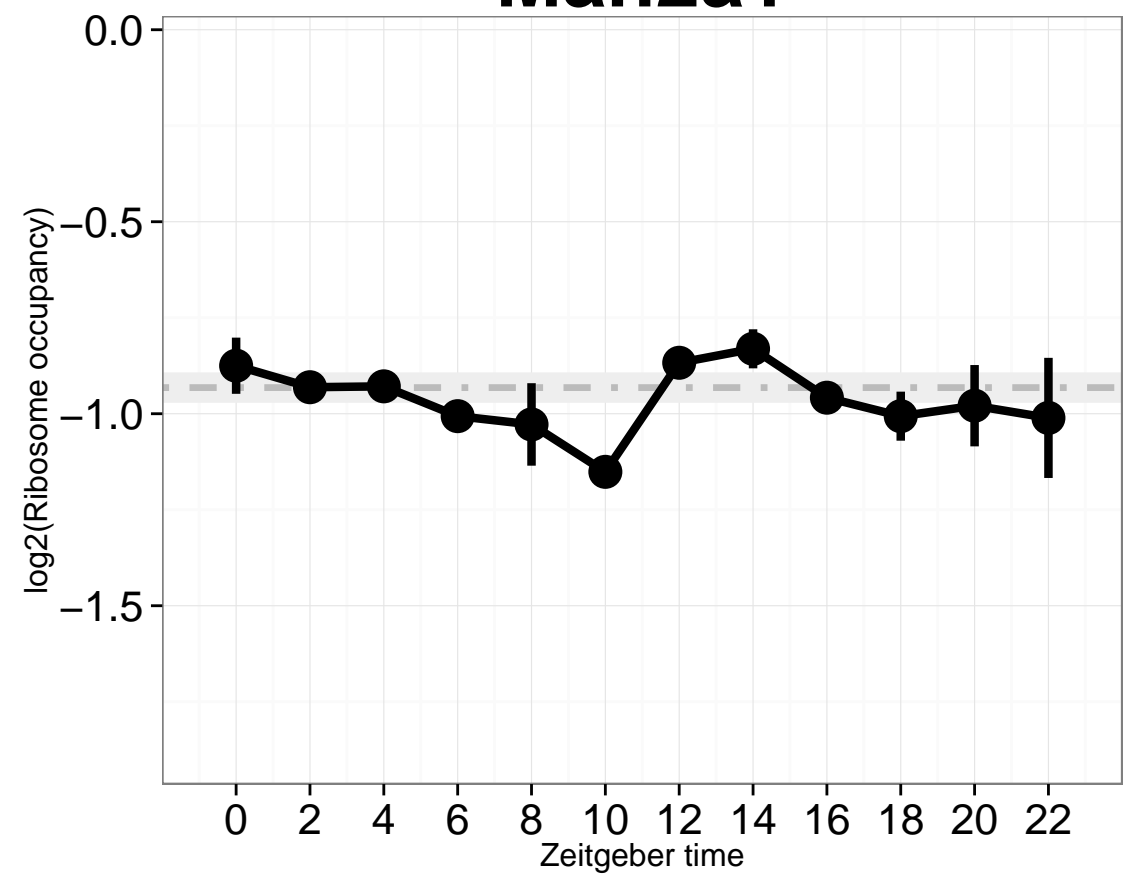

Supplement: SuppDataset_1.zip [file Man2a1_set_D.pdf › Supplemental Dataset 1/D-mRNA_rhythm_translation_rhyth/Man2a1_set_D.pdf]

# Map2k3

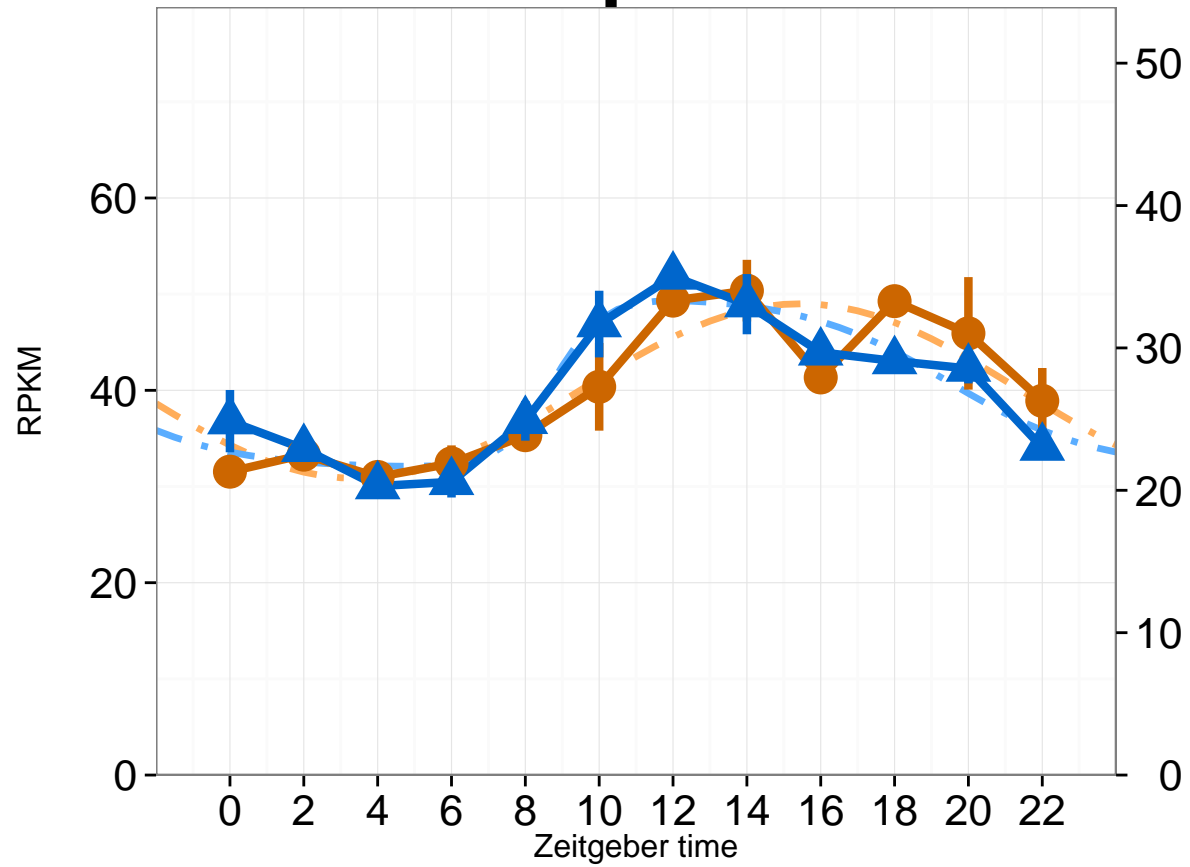

# Map2k3

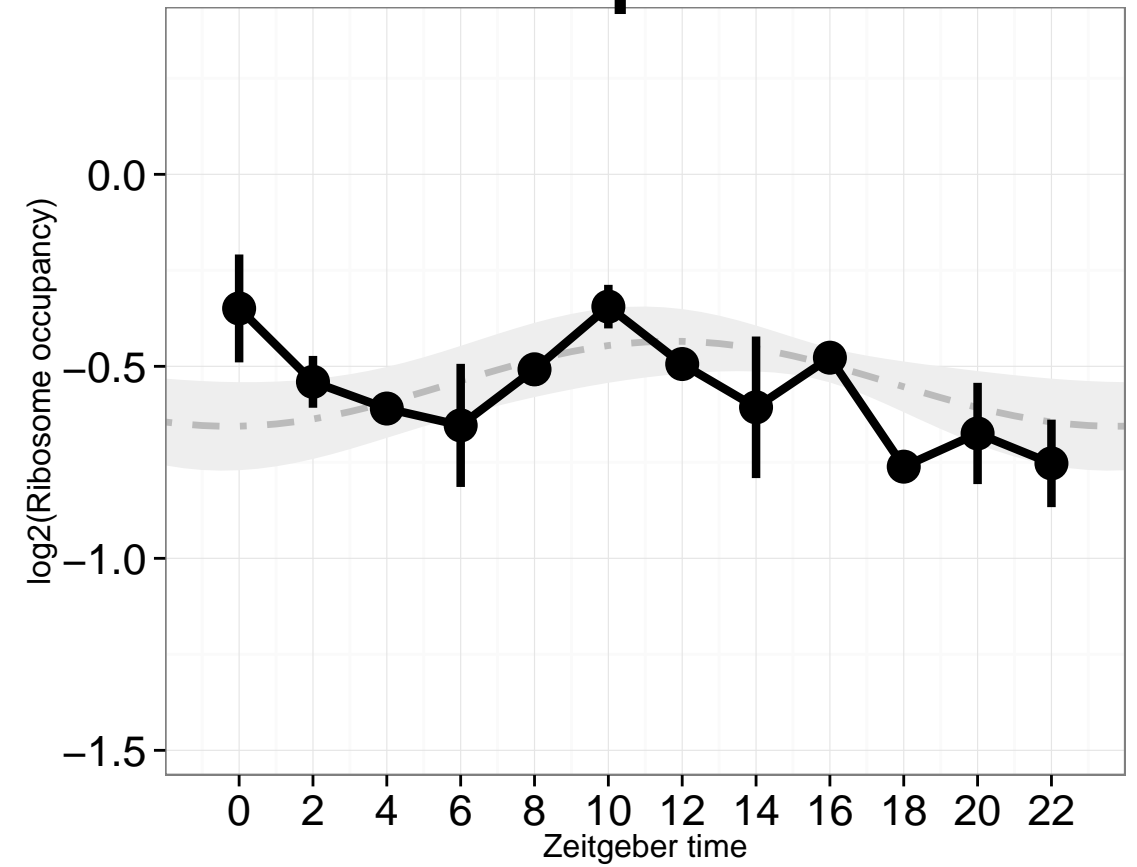

Supplement: SuppDataset_1.zip [file Map2k3_set_D.pdf › Supplemental Dataset 1/D-mRNA_rhythm_translation_rhyth/Map2k3_set_D.pdf]

# Map2k6

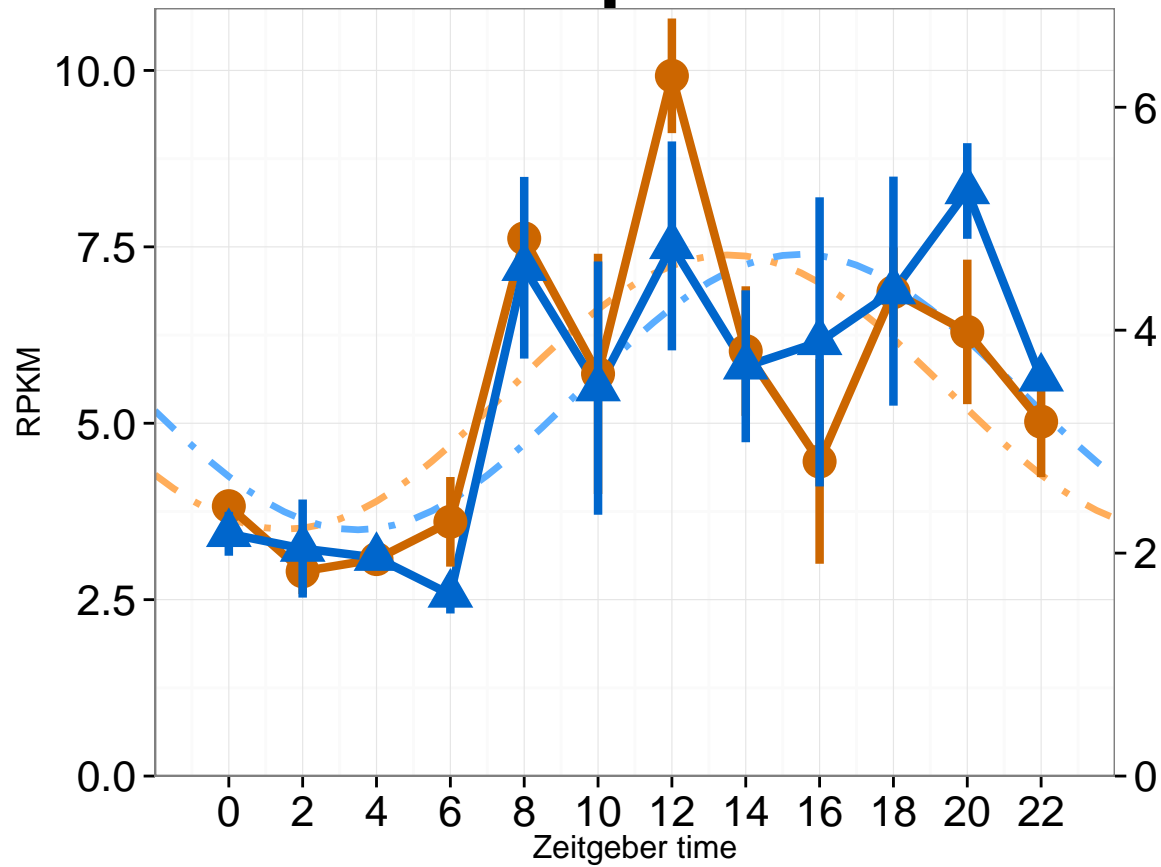

# Map2k6

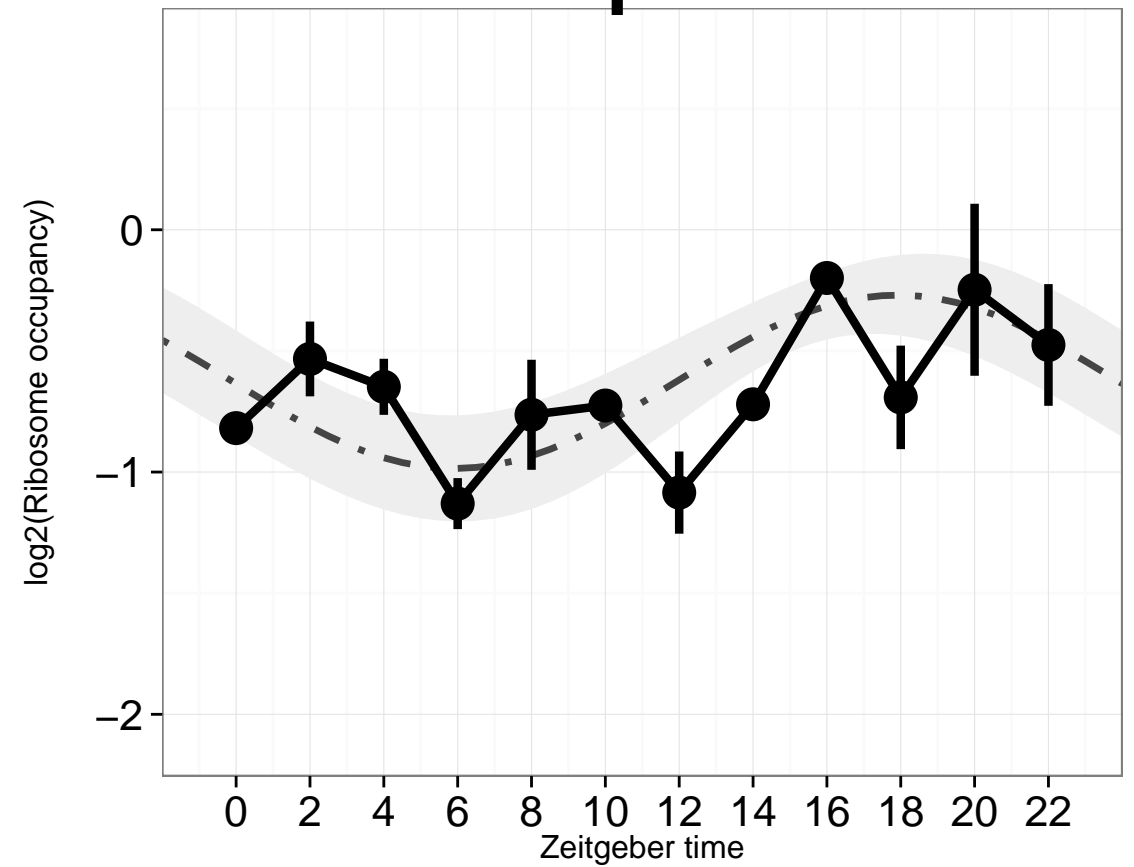

Supplement: SuppDataset_1.zip [file Map2k6_set_D.pdf › Supplemental Dataset 1/D-mRNA_rhythm_translation_rhyth/Map2k6_set_D.pdf]

# Map3k6

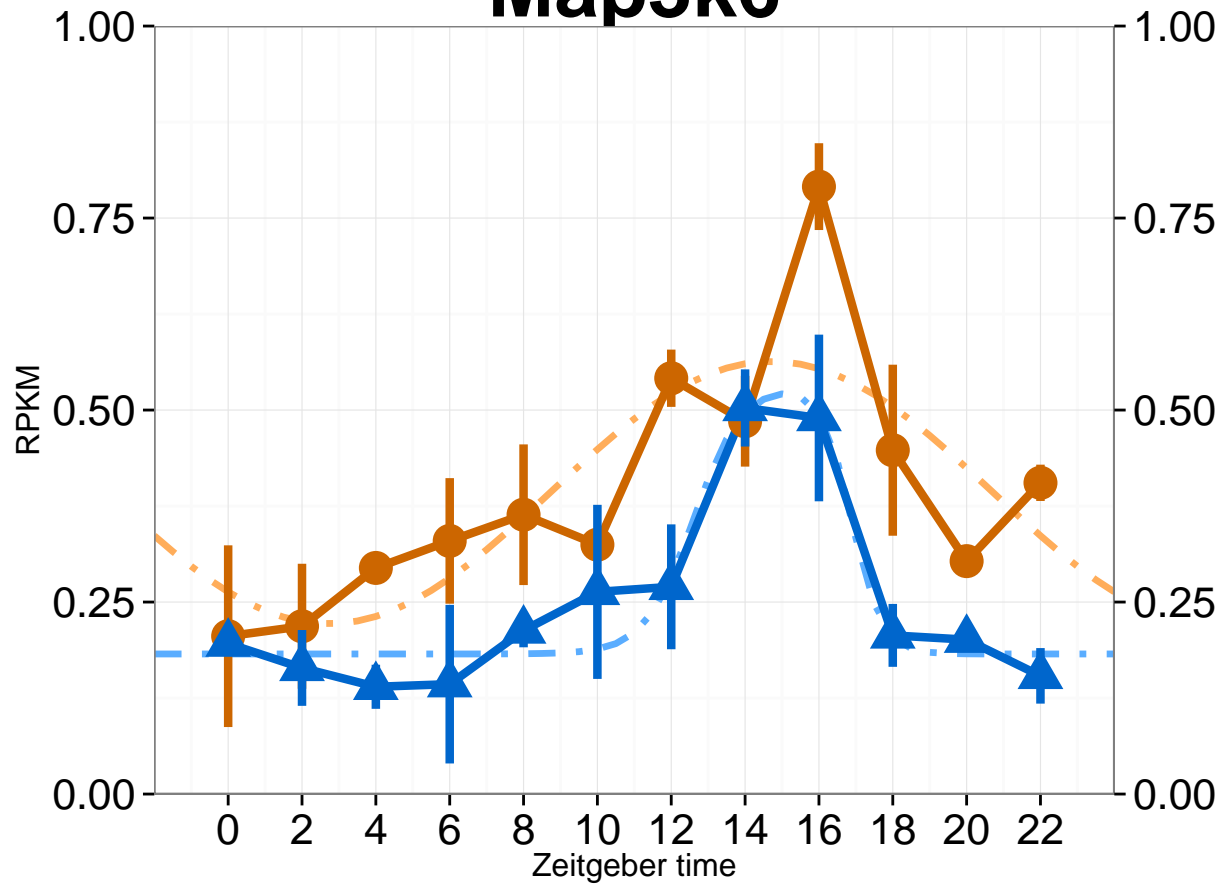

# Map3k6

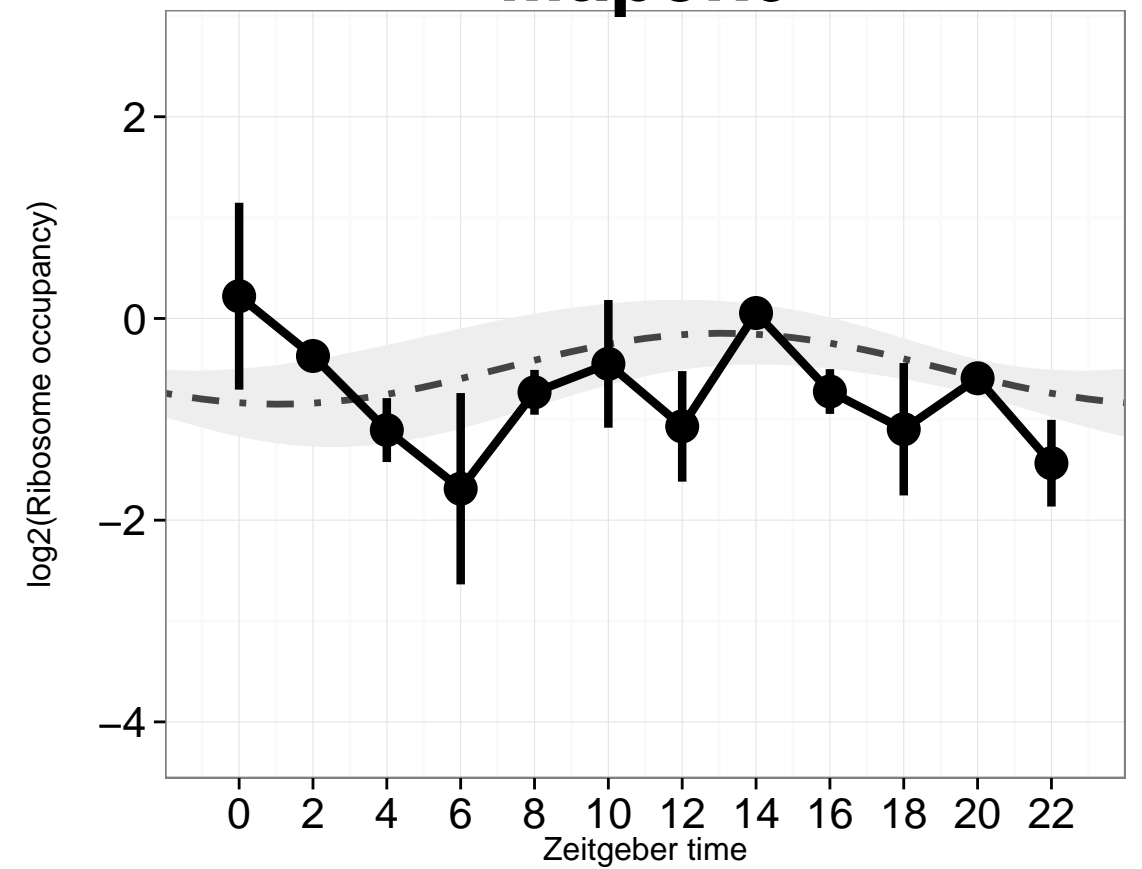

Supplement: SuppDataset_1.zip [file Map3k6_set_D.pdf › Supplemental Dataset 1/D-mRNA_rhythm_translation_rhyth/Map3k6_set_D.pdf]

# Map4k4

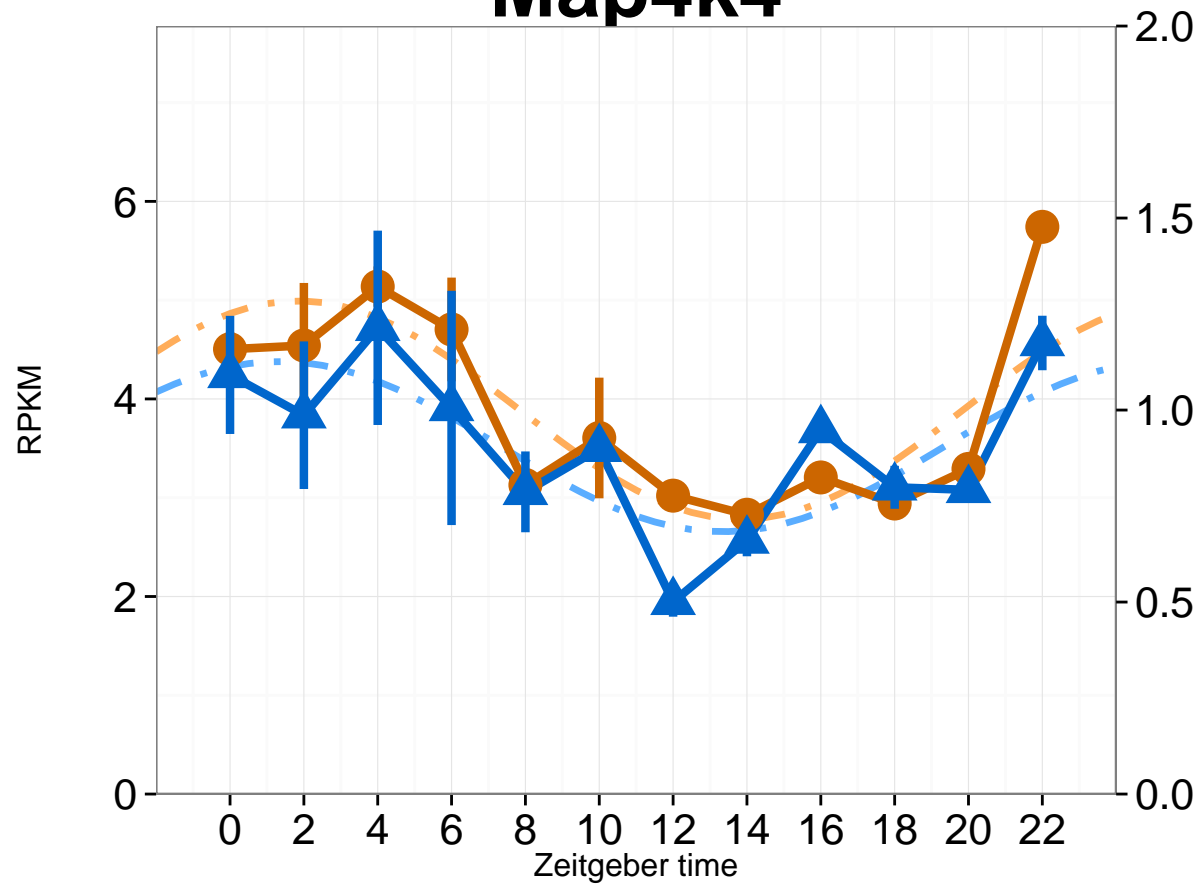

# Map4k4

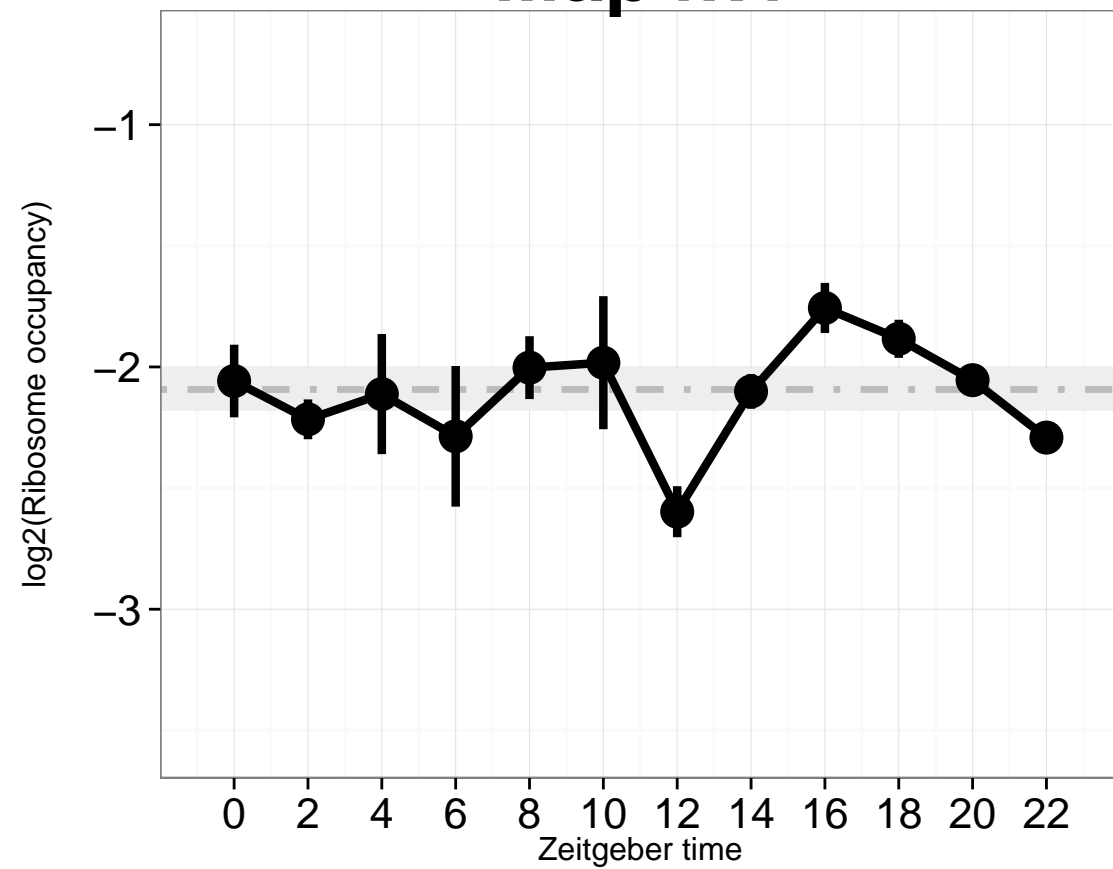

Supplement: SuppDataset_1.zip [file Map4k4_set_D.pdf › Supplemental Dataset 1/D-mRNA_rhythm_translation_rhyth/Map4k4_set_D.pdf]

# Mapk15

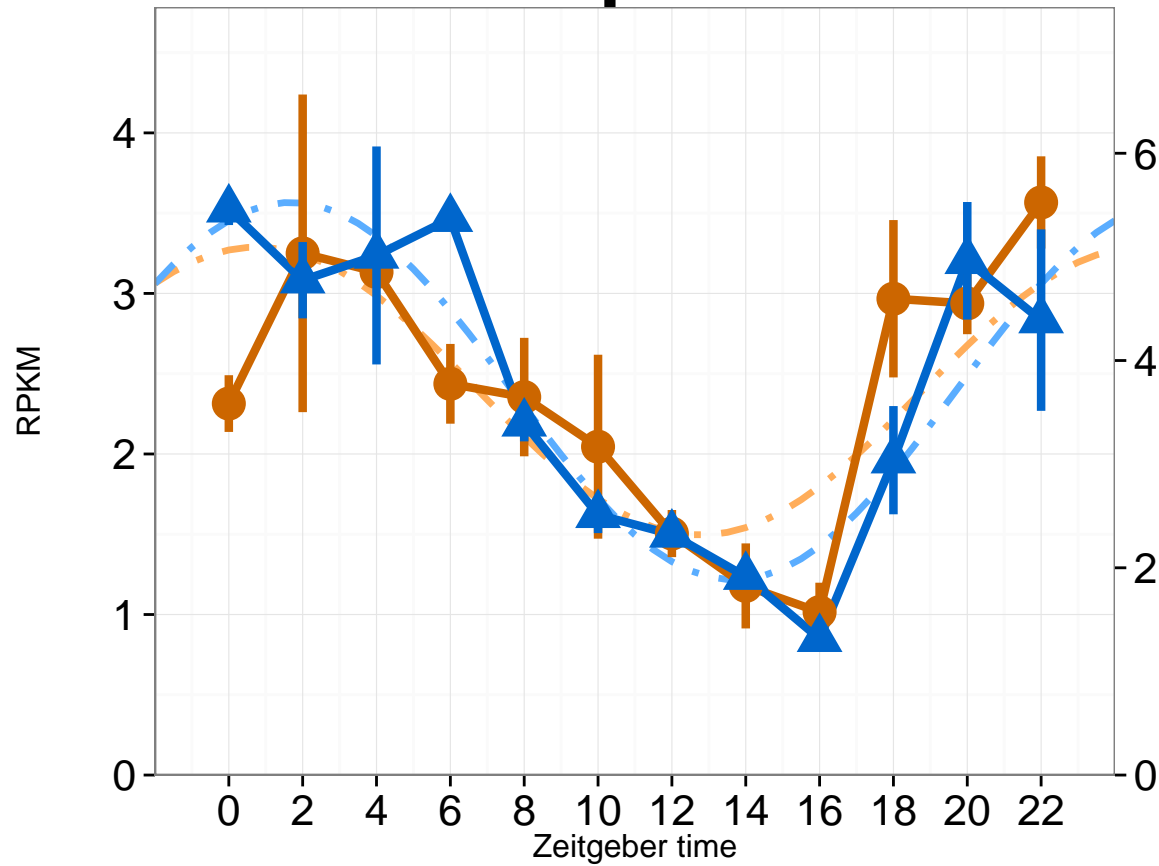

# Mapk15

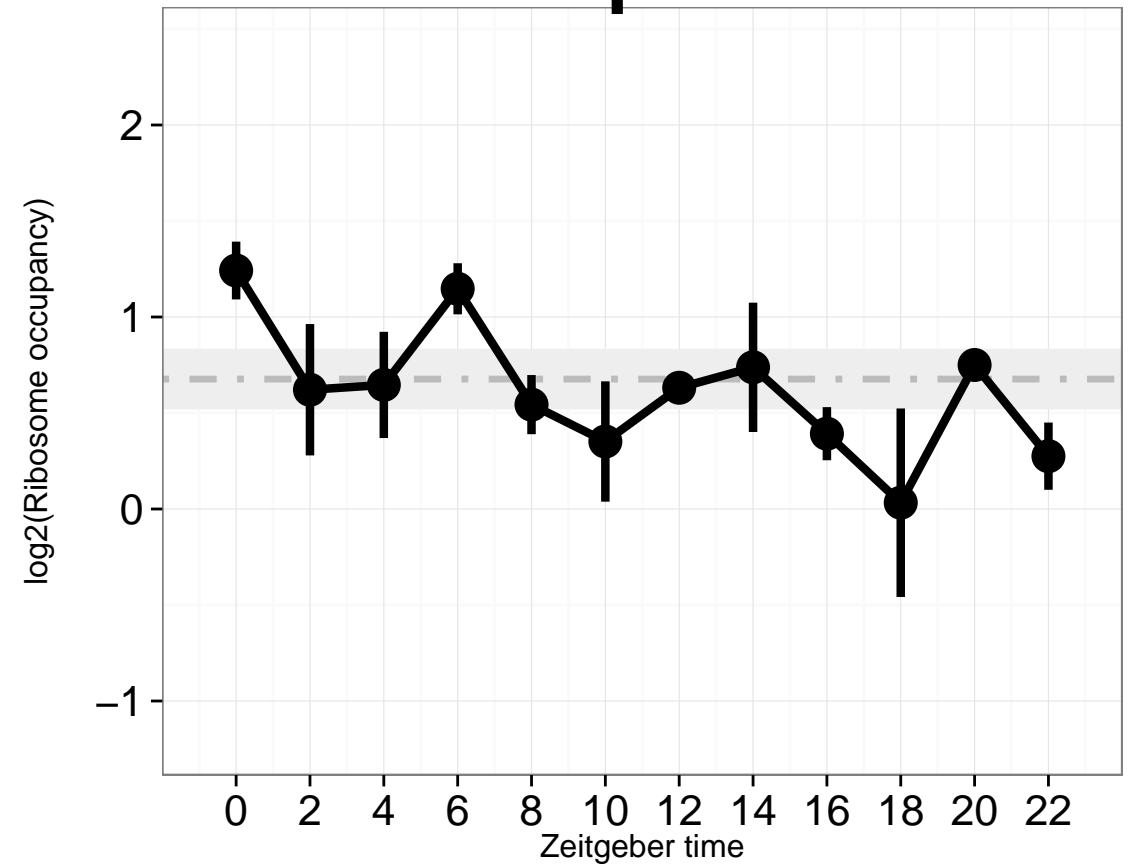

Supplement: SuppDataset_1.zip [file Mapk15_set_D.pdf › Supplemental Dataset 1/D-mRNA_rhythm_translation_rhyth/Mapk15_set_D.pdf]
