# Supplementary figures and images for: Ribosome profiling reveals the rhythmic liver translatome and circadian clock regulation by upstream open reading frames (part 36 of 113)
Source: HighWire-hosted journal article supplement (doi:10.1101/gr.195404.115), 2015-10-20

# Ift80

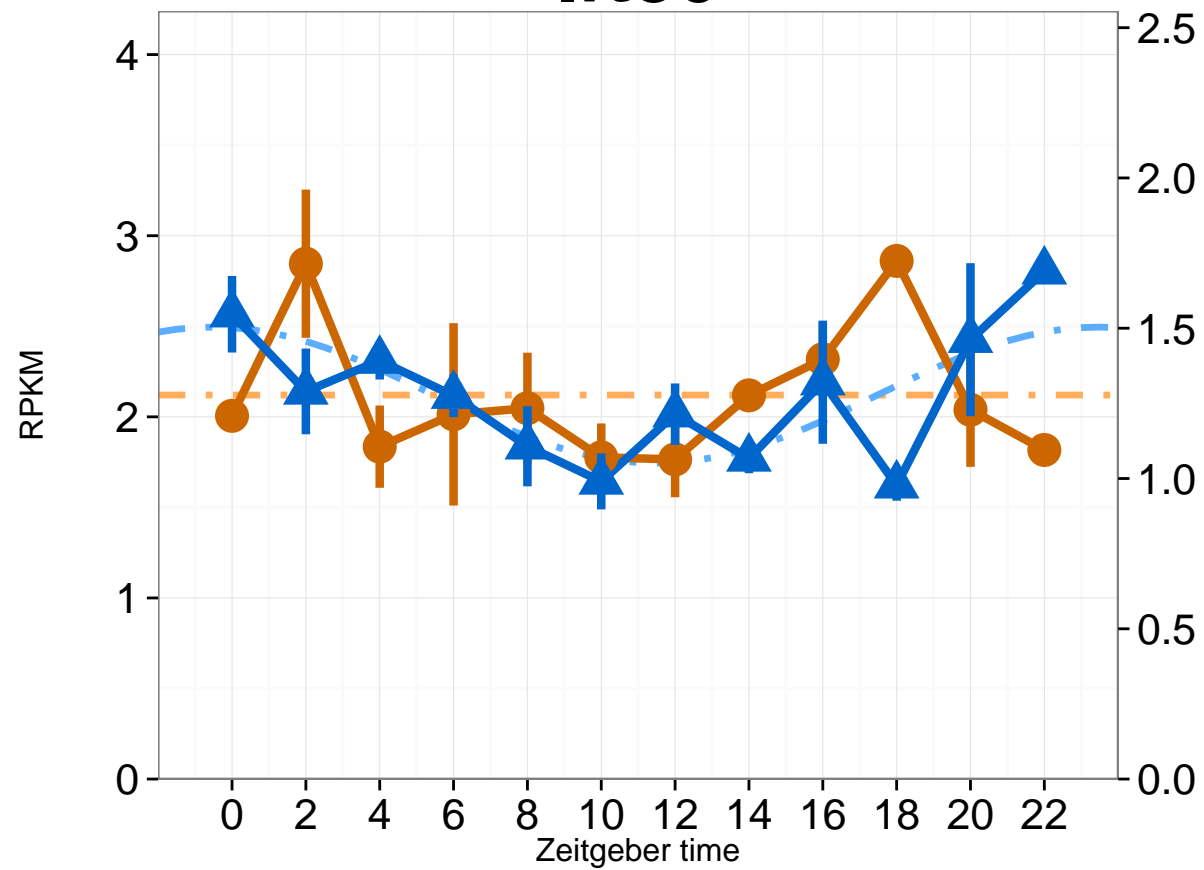

# Ift80

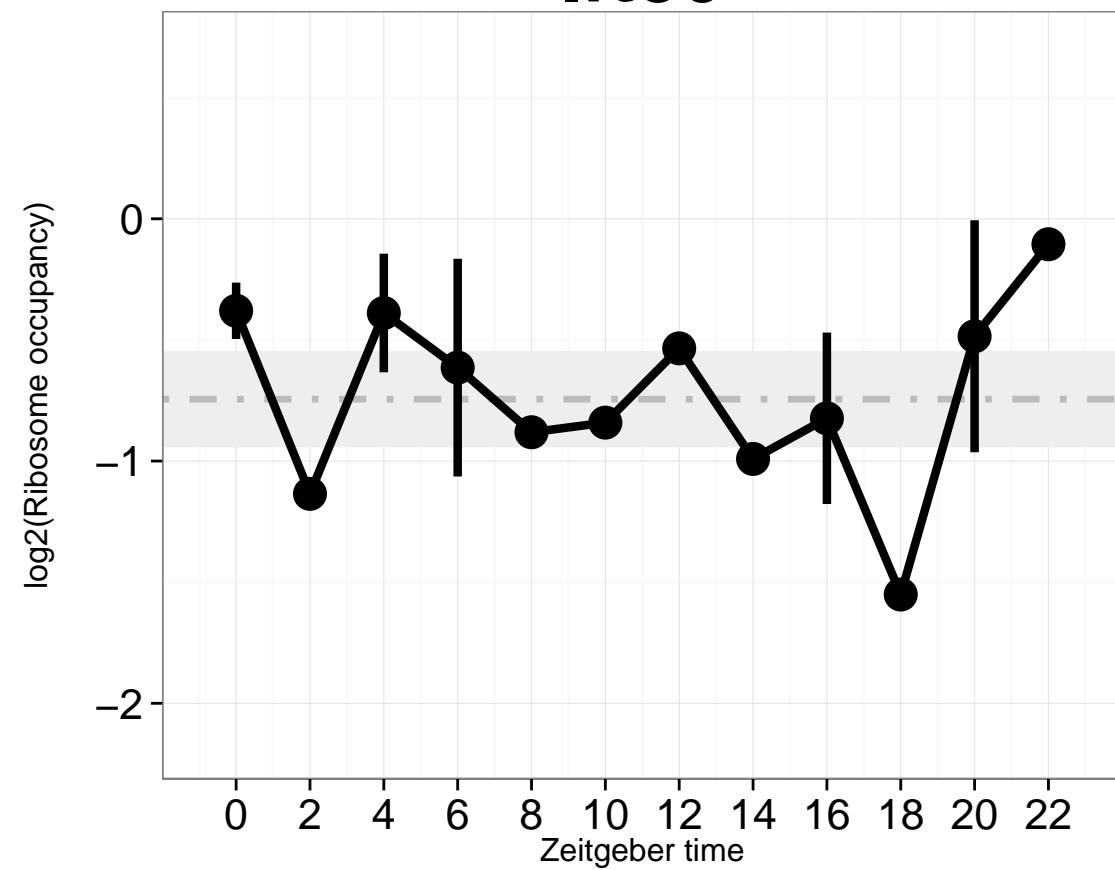

Supplement: SuppDataset_1.zip [file Ift80_set_A.pdf › Supplemental Dataset 1/A-mRNA_nonrhyth_translation_nonrhyth/Ift80_set_A.pdf]

## Ift88

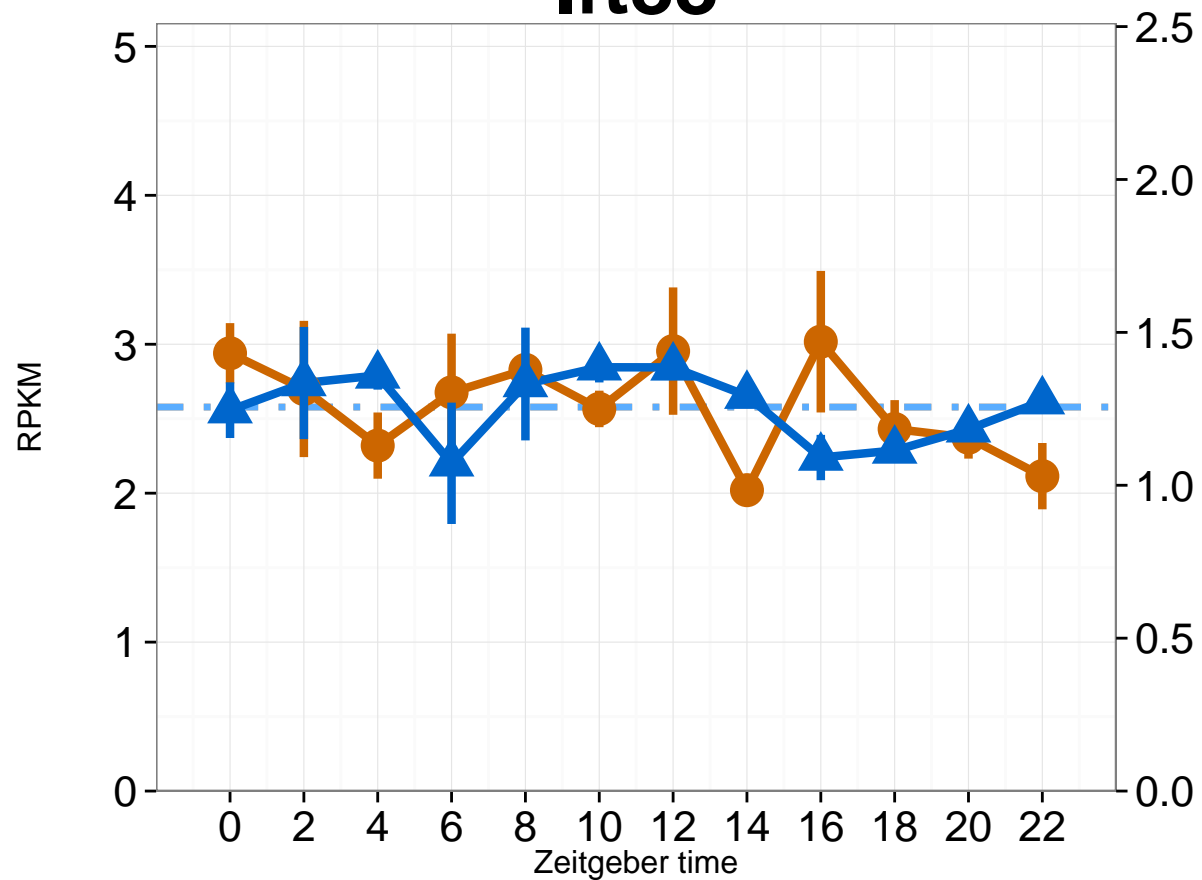

## Ift88

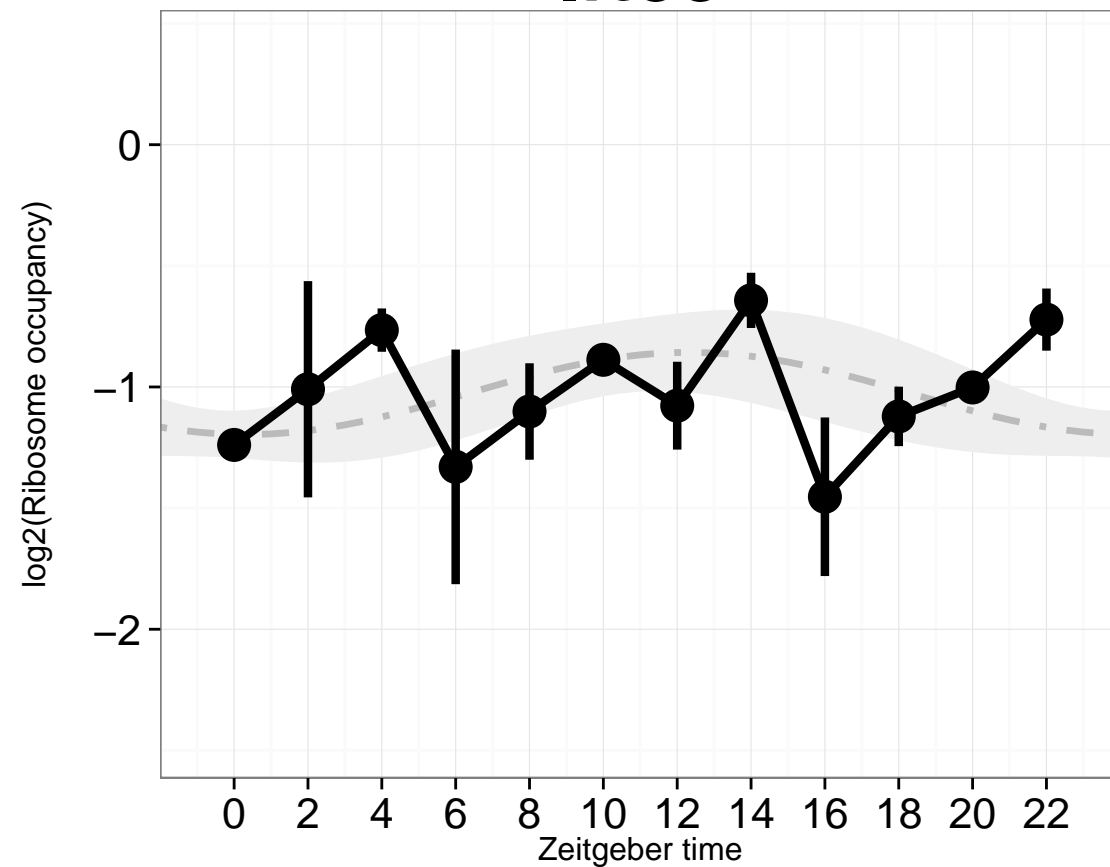

Supplement: SuppDataset_1.zip [file Ift88_set_A.pdf › Supplemental Dataset 1/A-mRNA_nonrhyth_translation_nonrhyth/Ift88_set_A.pdf]

# Igbp1

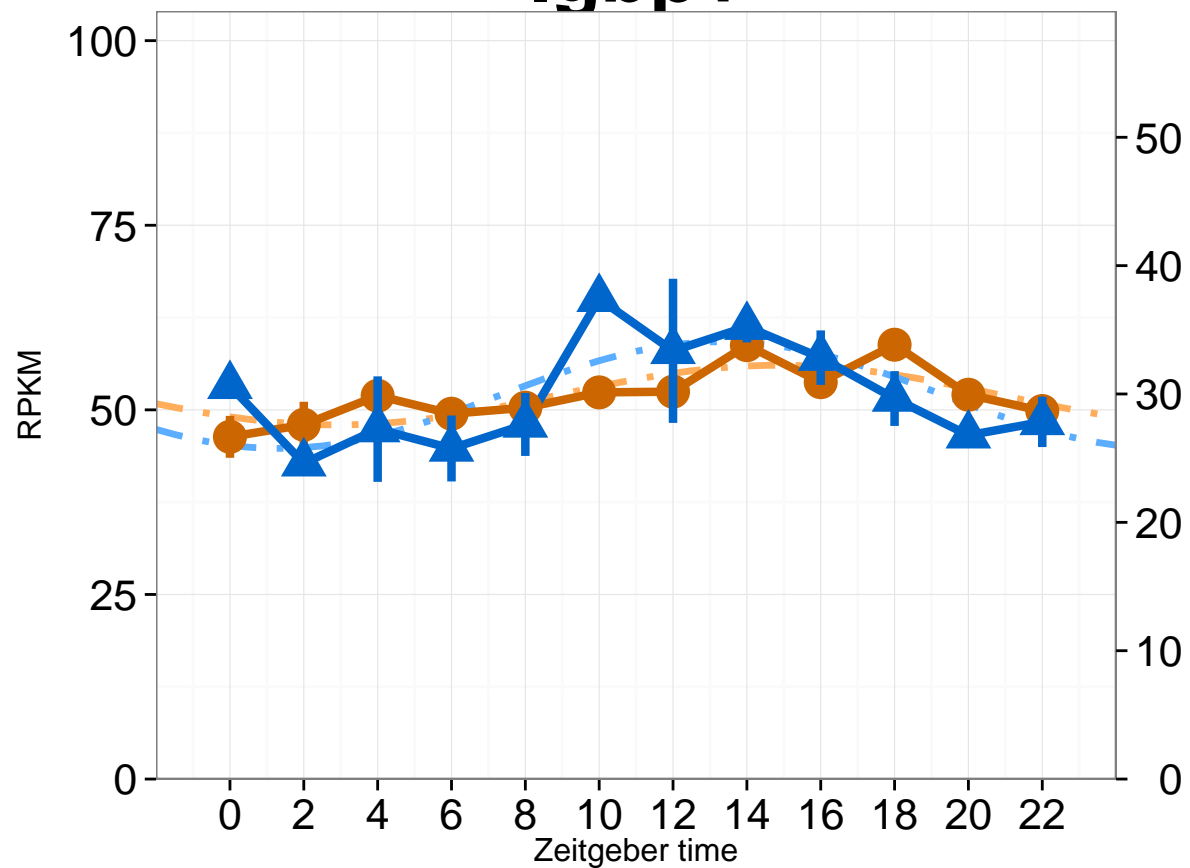

# Igbp1

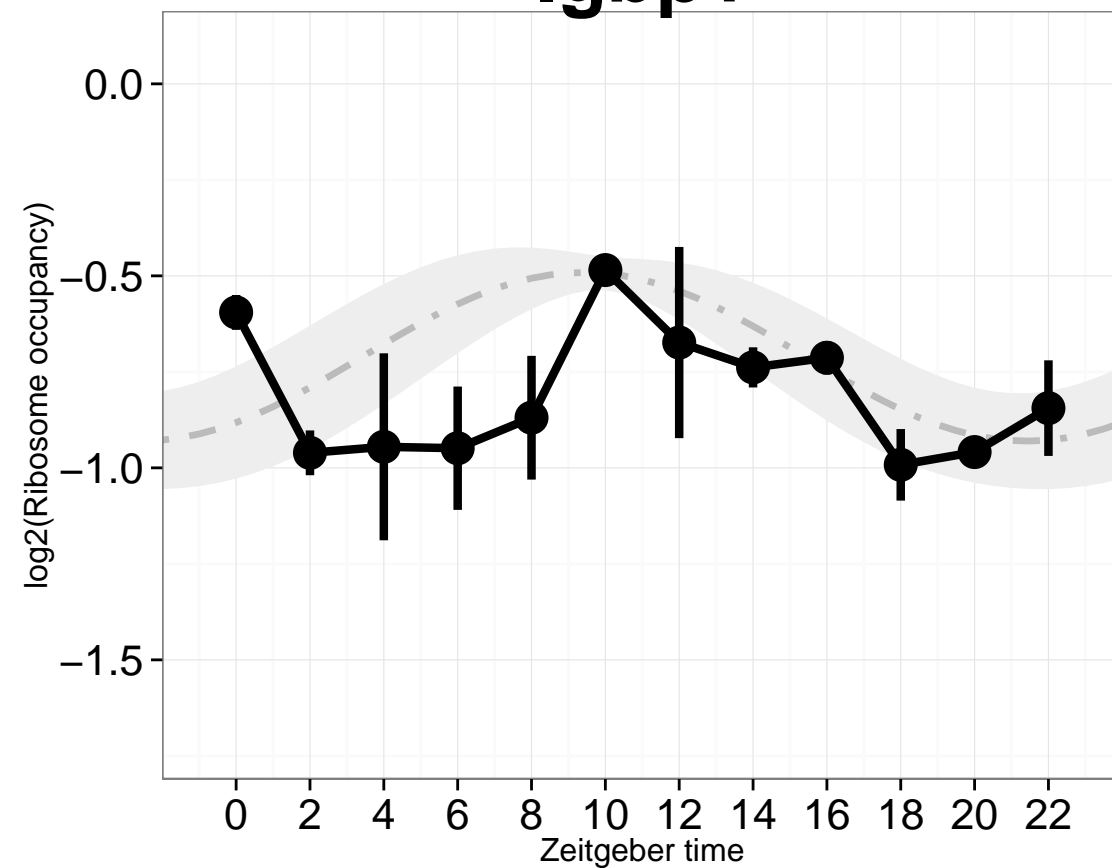

Supplement: SuppDataset_1.zip [file Igbp1_set_A.pdf › Supplemental Dataset 1/A-mRNA_nonrhyth_translation_nonrhyth/Igbp1_set_A.pdf]

# Igf1

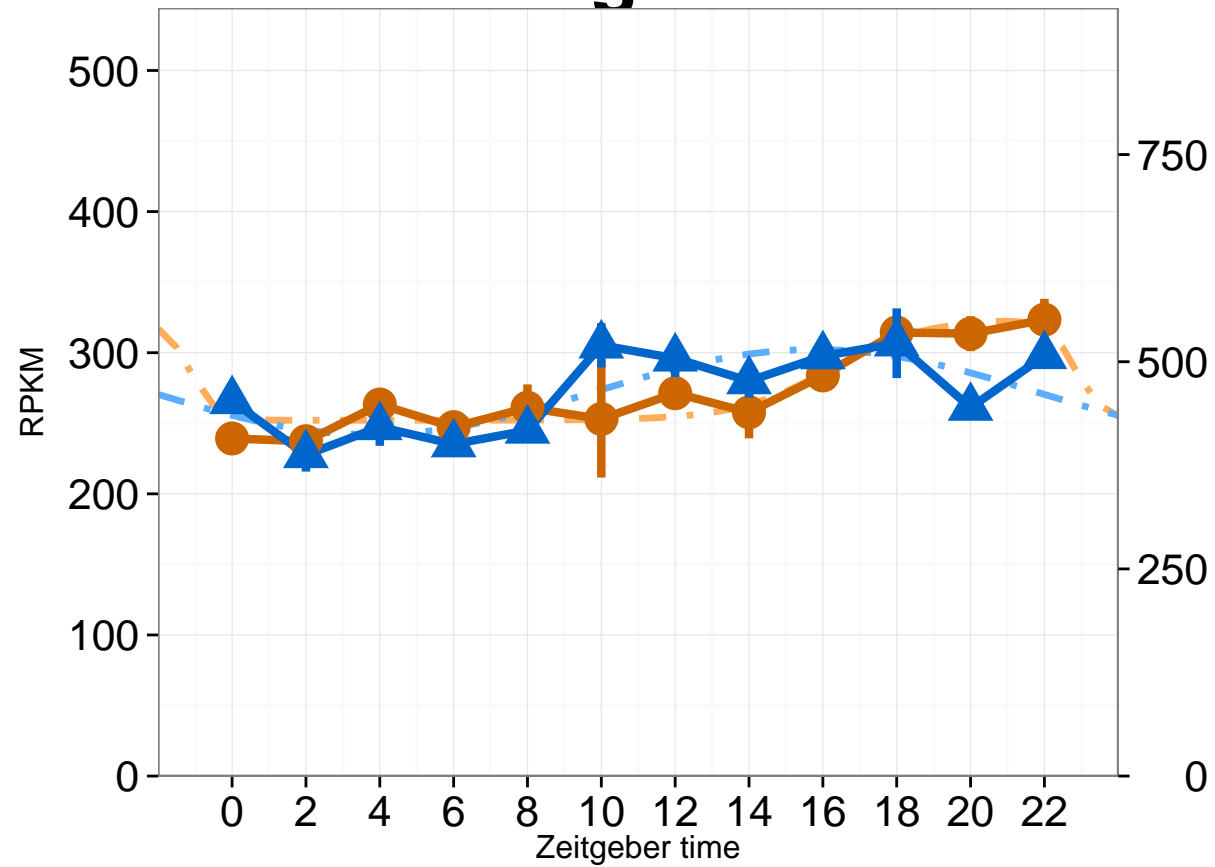

# Igf1

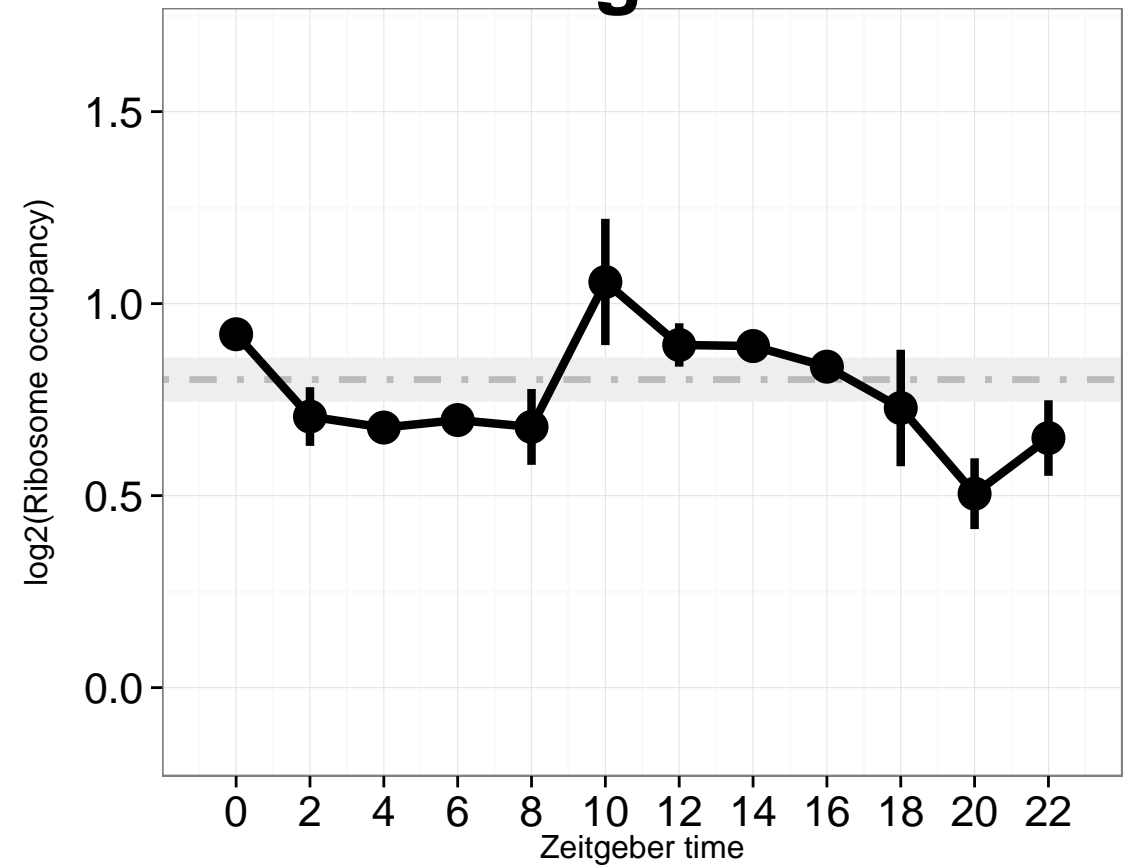

Supplement: SuppDataset_1.zip [file Igf1_set_A.pdf › Supplemental Dataset 1/A-mRNA_nonrhyth_translation_nonrhyth/Igf1_set_A.pdf]

# Igf1r

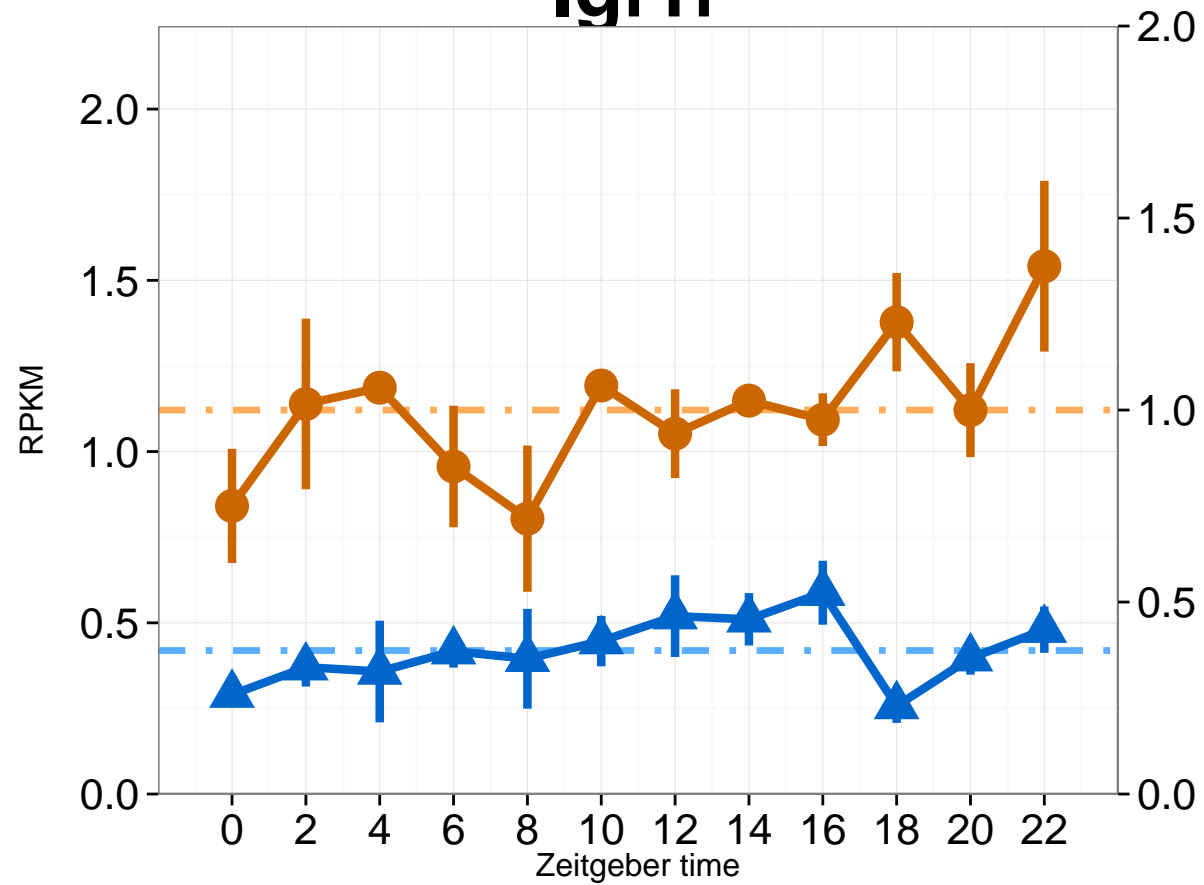

# Igf1r

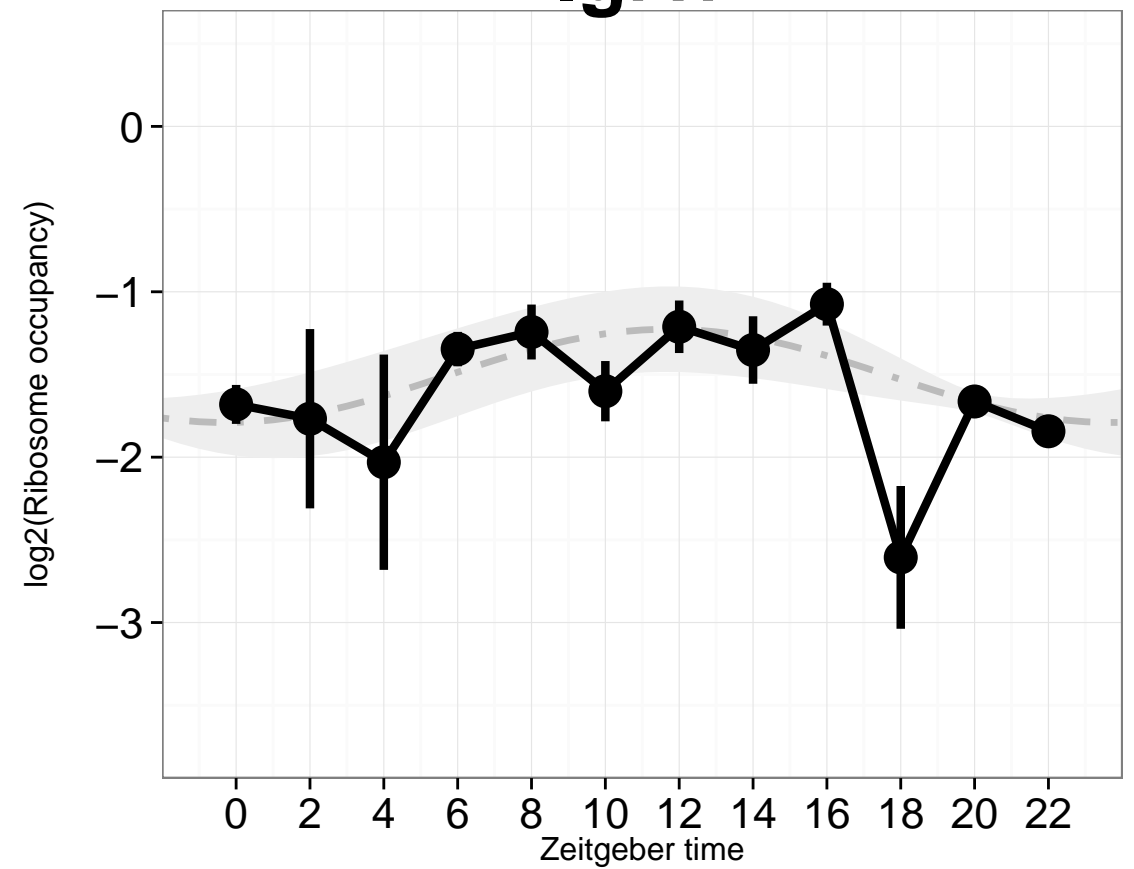

Supplement: SuppDataset_1.zip [file Igf1r_set_A.pdf › Supplemental Dataset 1/A-mRNA_nonrhyth_translation_nonrhyth/Igf1r_set_A.pdf]

# Igf2bp2

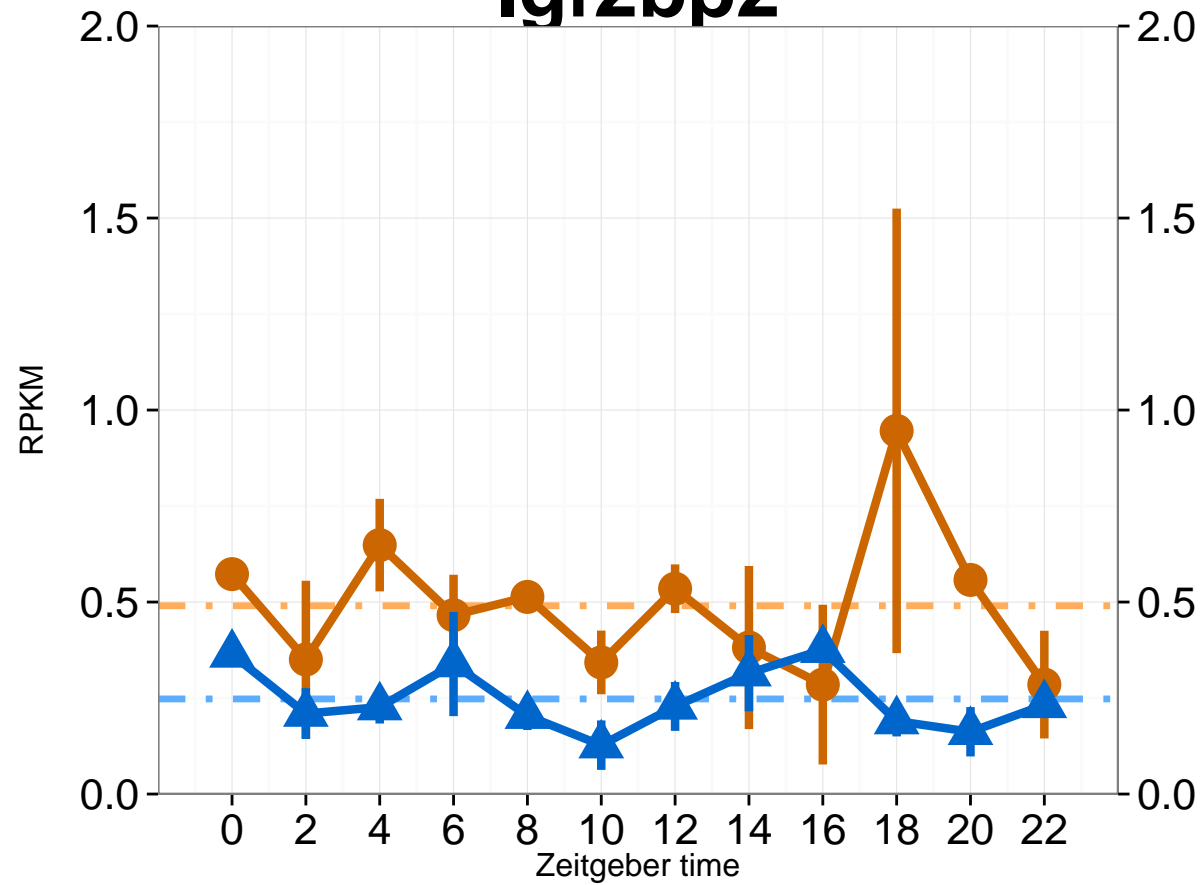

# Igf2bp2

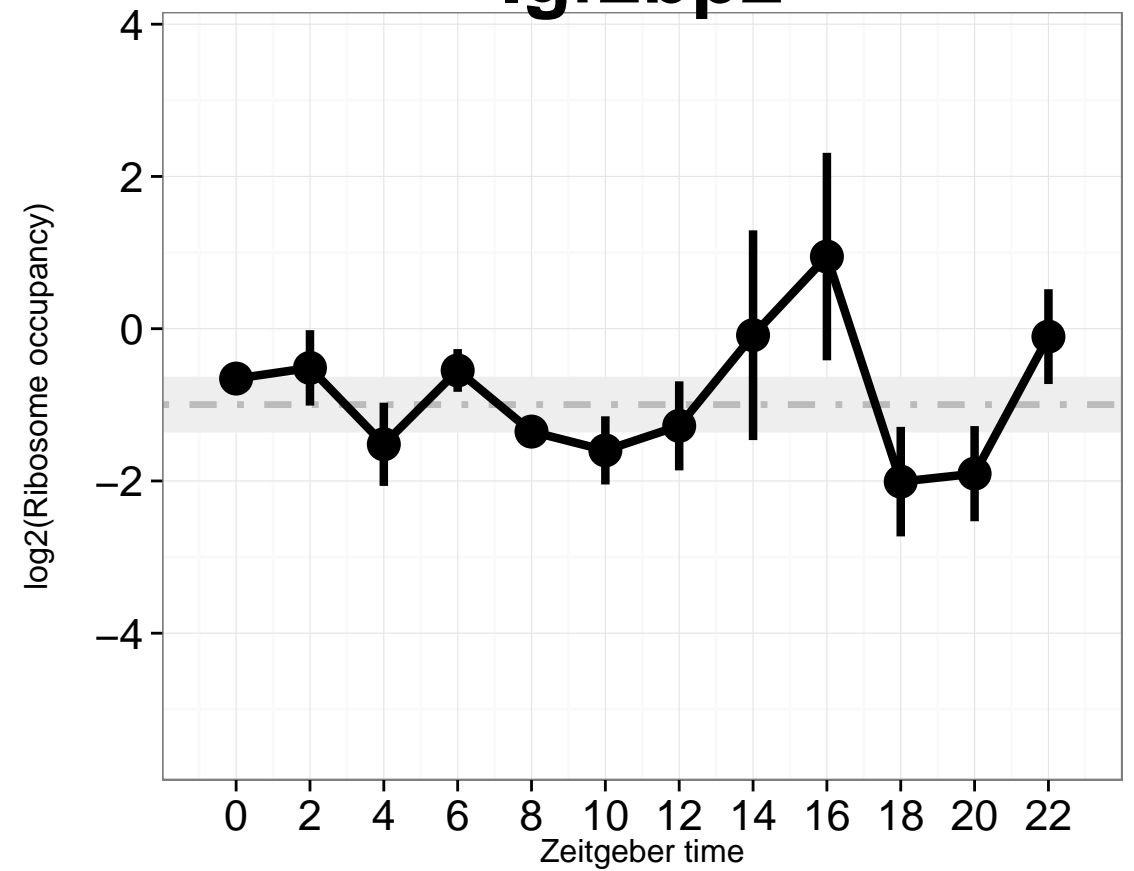

Supplement: SuppDataset_1.zip [file Igf2bp2_set_A.pdf › Supplemental Dataset 1/A-mRNA_nonrhyth_translation_nonrhyth/Igf2bp2_set_A.pdf]

# Igf2r

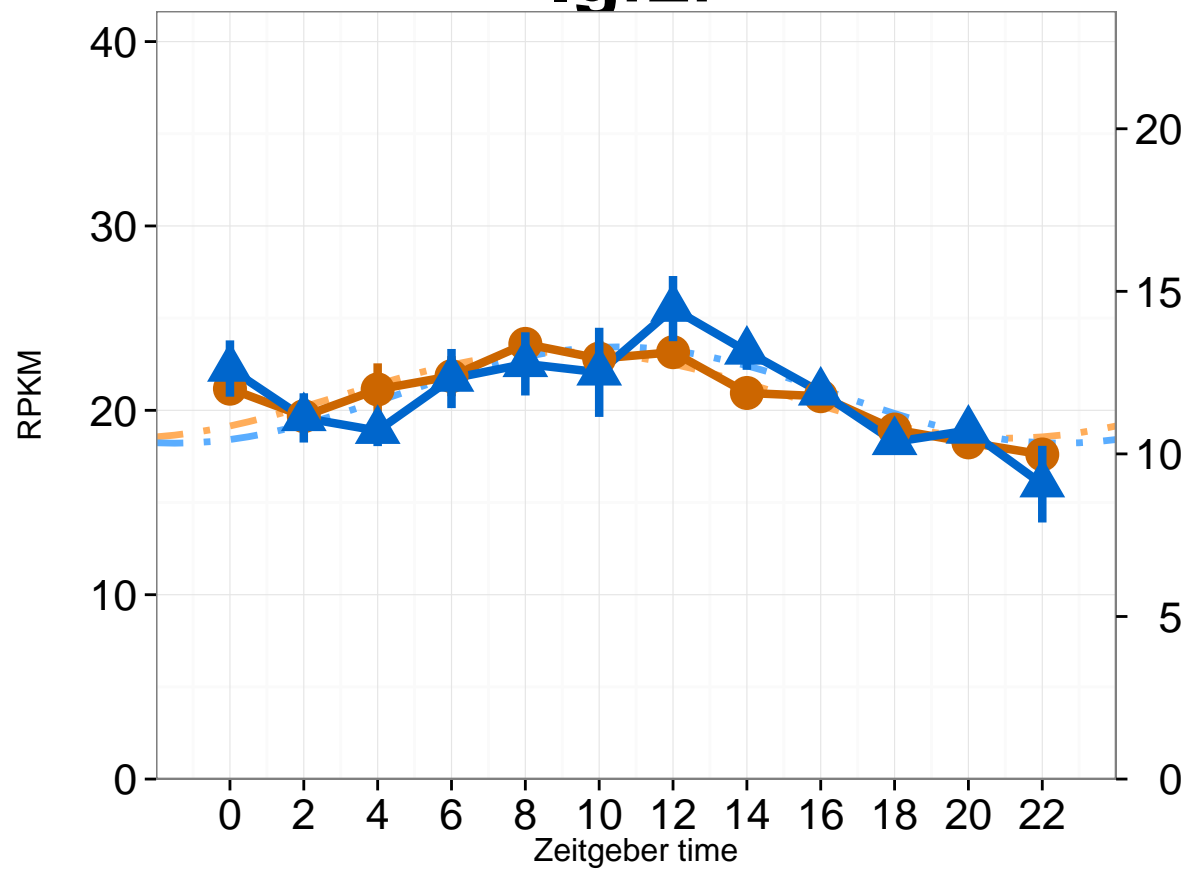

# Igf2r

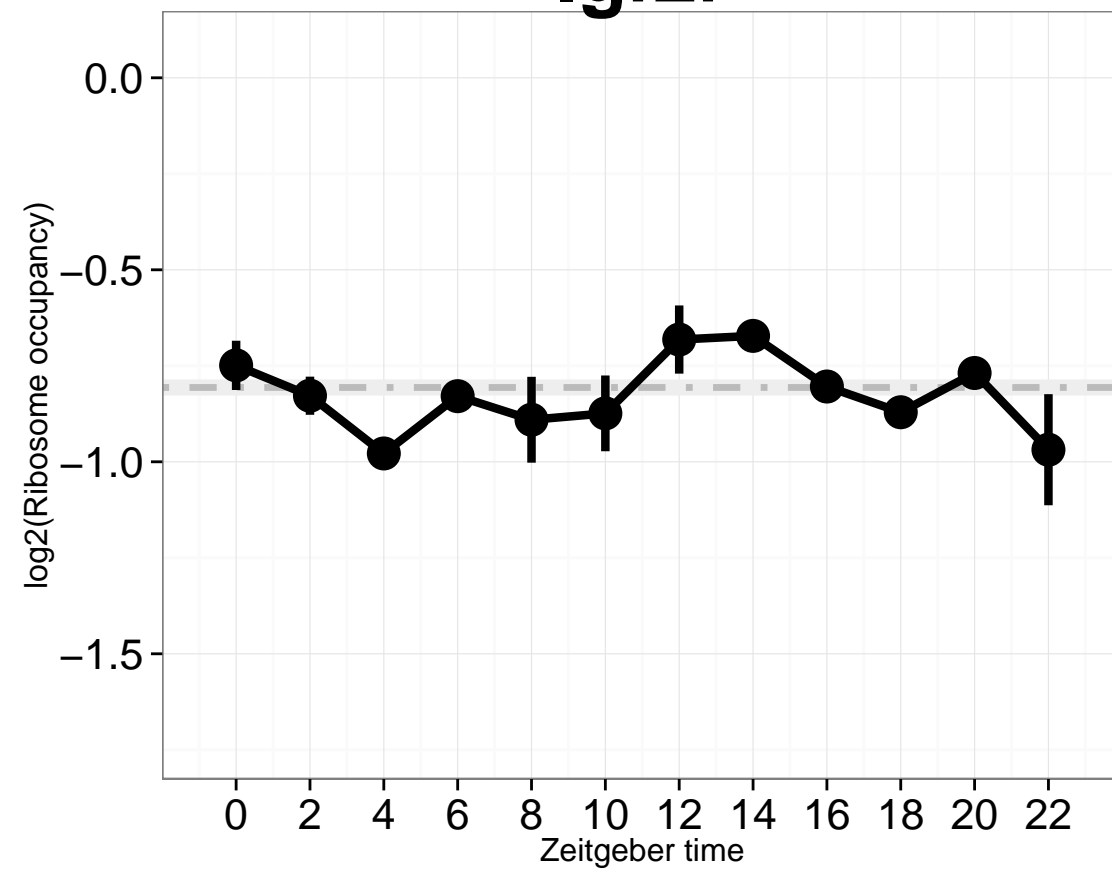

Supplement: SuppDataset_1.zip [file Igf2r_set_A.pdf › Supplemental Dataset 1/A-mRNA_nonrhyth_translation_nonrhyth/Igf2r_set_A.pdf]

# Igfbp1

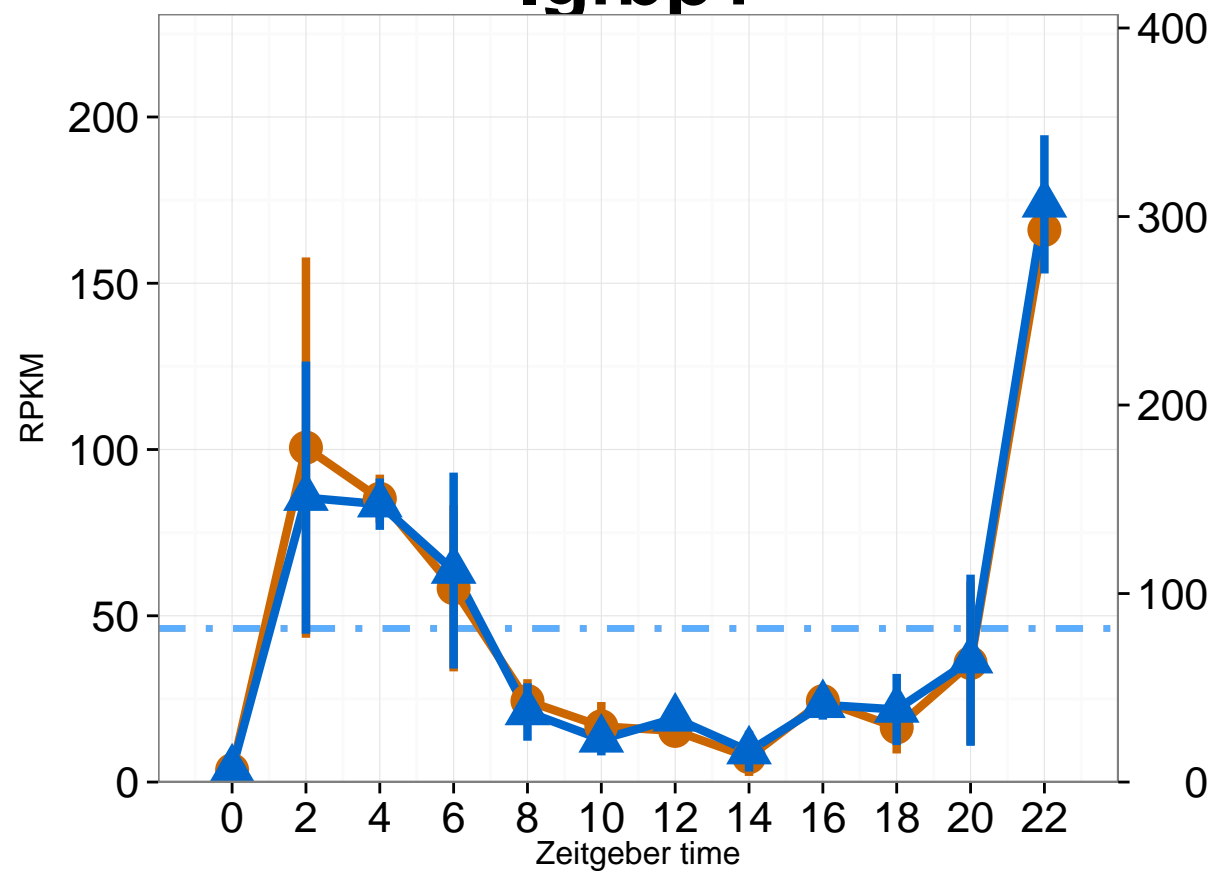

# Igfbp1

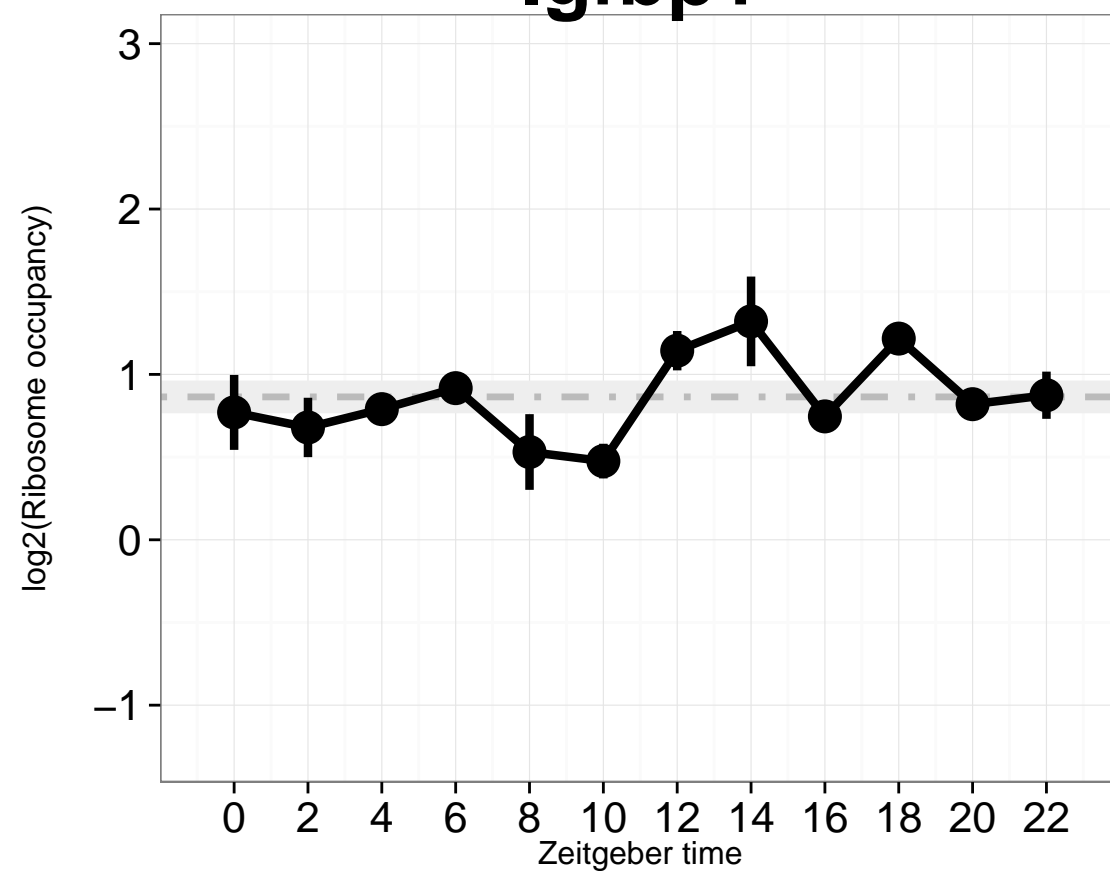

Supplement: SuppDataset_1.zip [file Igfbp1_set_A.pdf › Supplemental Dataset 1/A-mRNA_nonrhyth_translation_nonrhyth/Igfbp1_set_A.pdf]

# Igfbp2

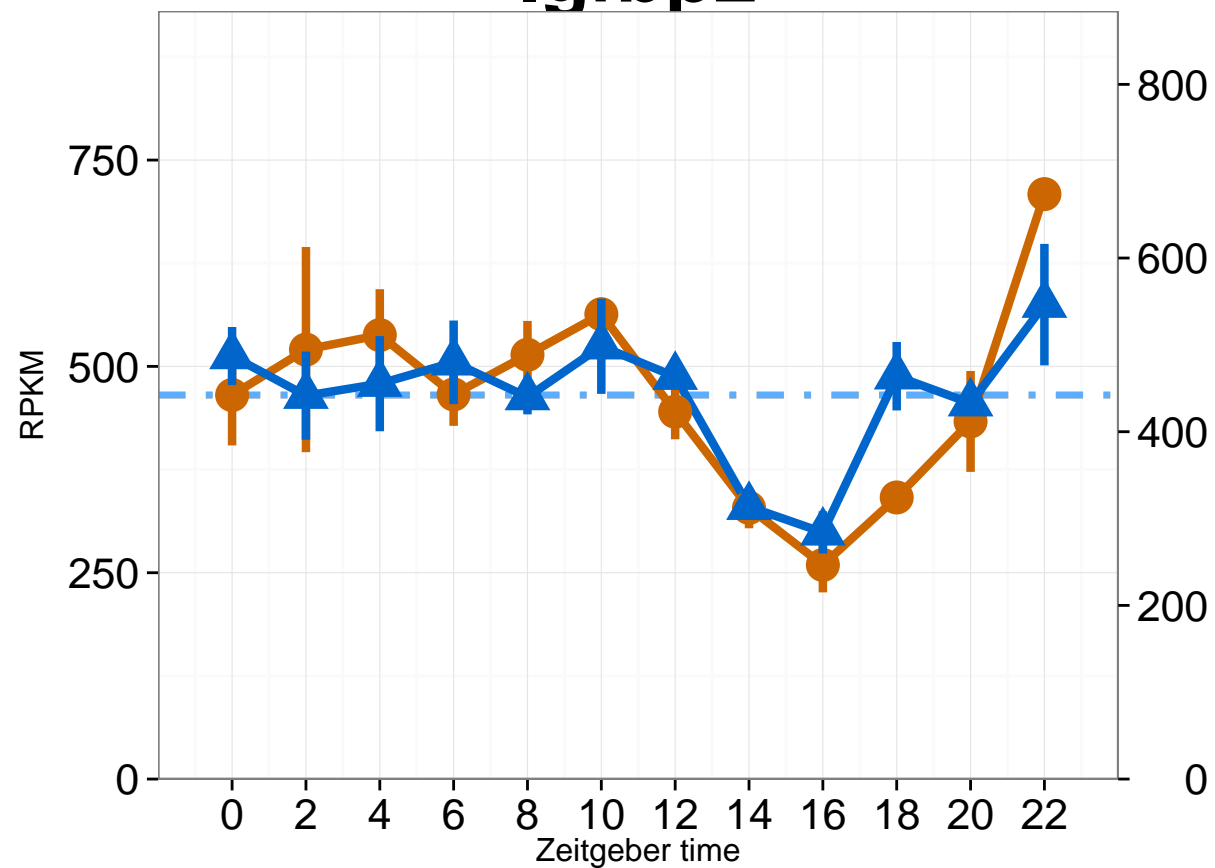

# Igfbp2

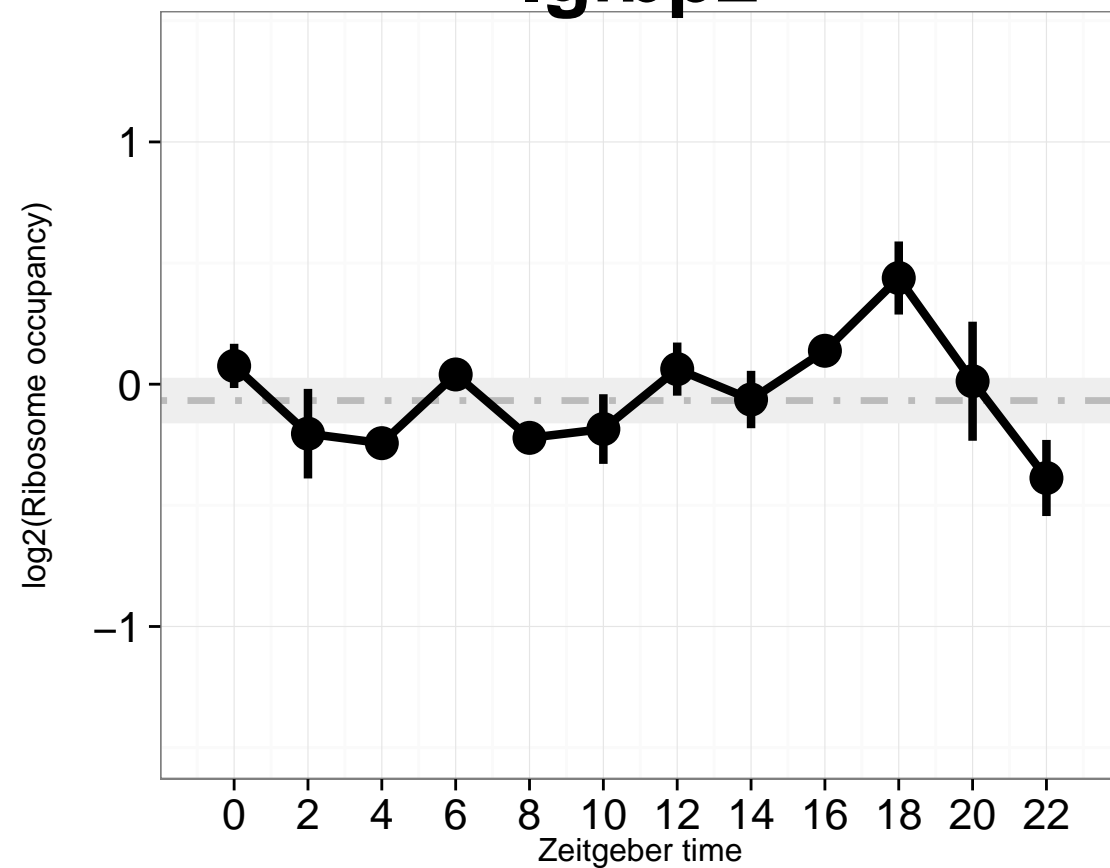

Supplement: SuppDataset_1.zip [file Igfbp2_set_A.pdf › Supplemental Dataset 1/A-mRNA_nonrhyth_translation_nonrhyth/Igfbp2_set_A.pdf]

# Igfbp3

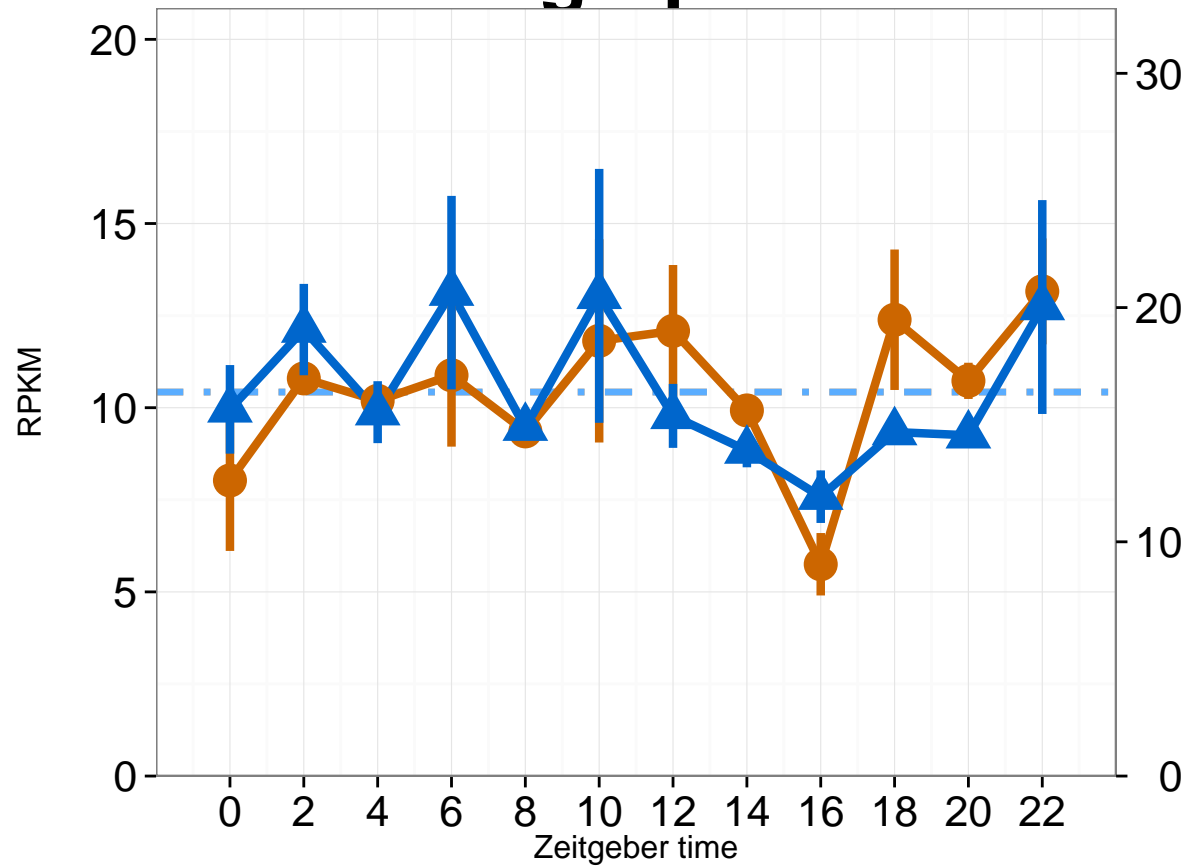

# Igfbp3

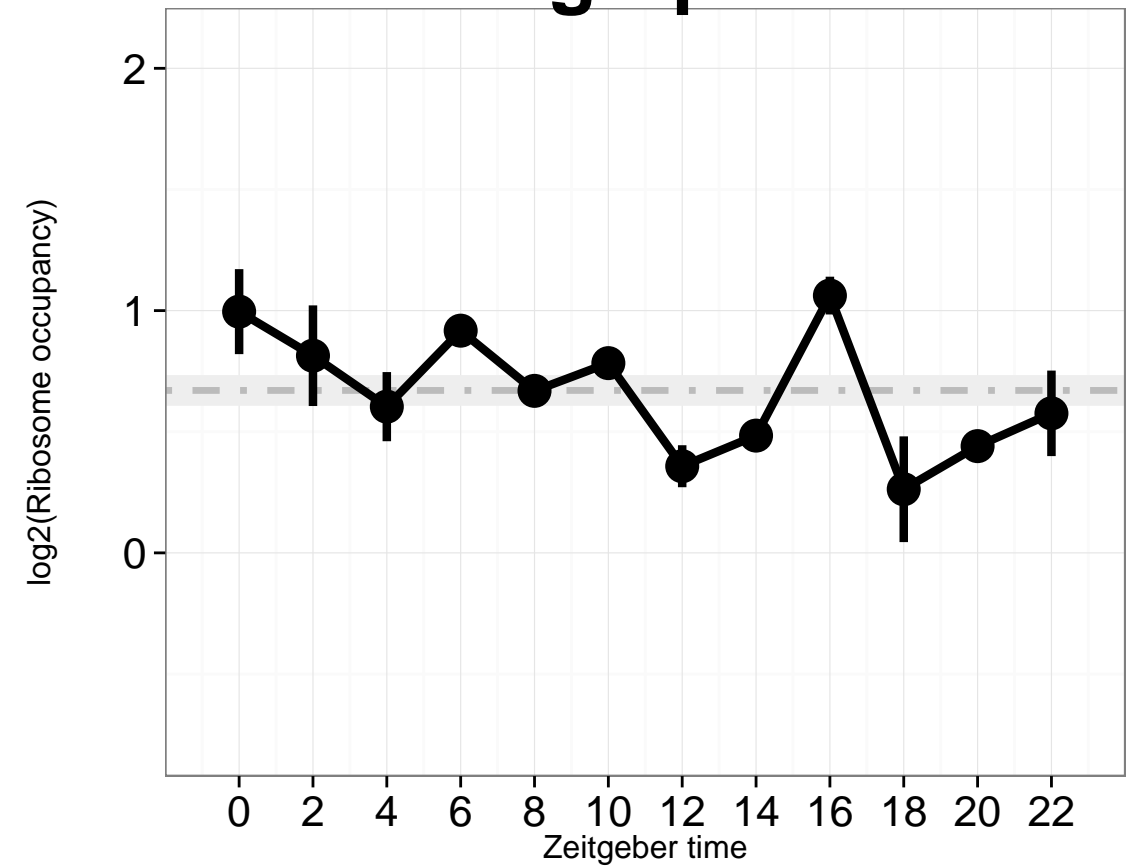

Supplement: SuppDataset_1.zip [file Igfbp3_set_A.pdf › Supplemental Dataset 1/A-mRNA_nonrhyth_translation_nonrhyth/Igfbp3_set_A.pdf]

# Igfbp4

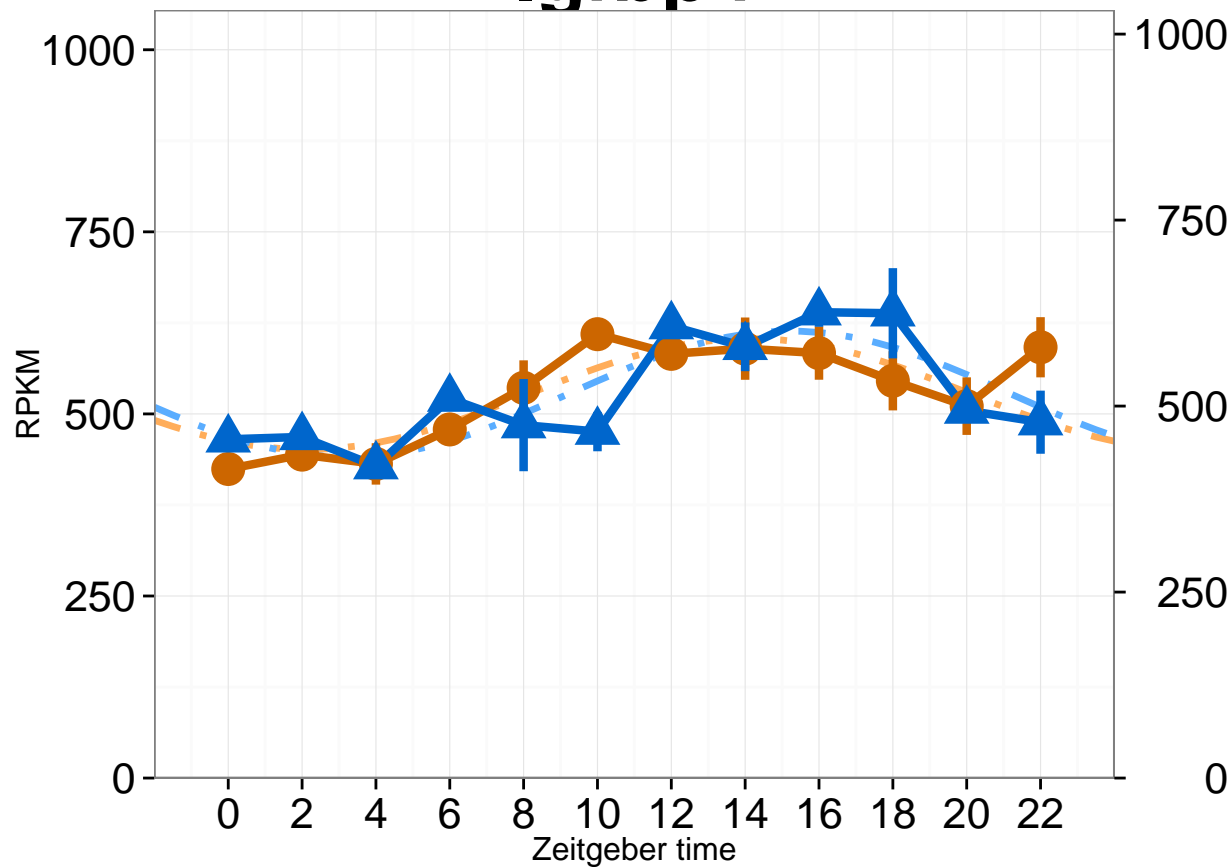

# Igfbp4

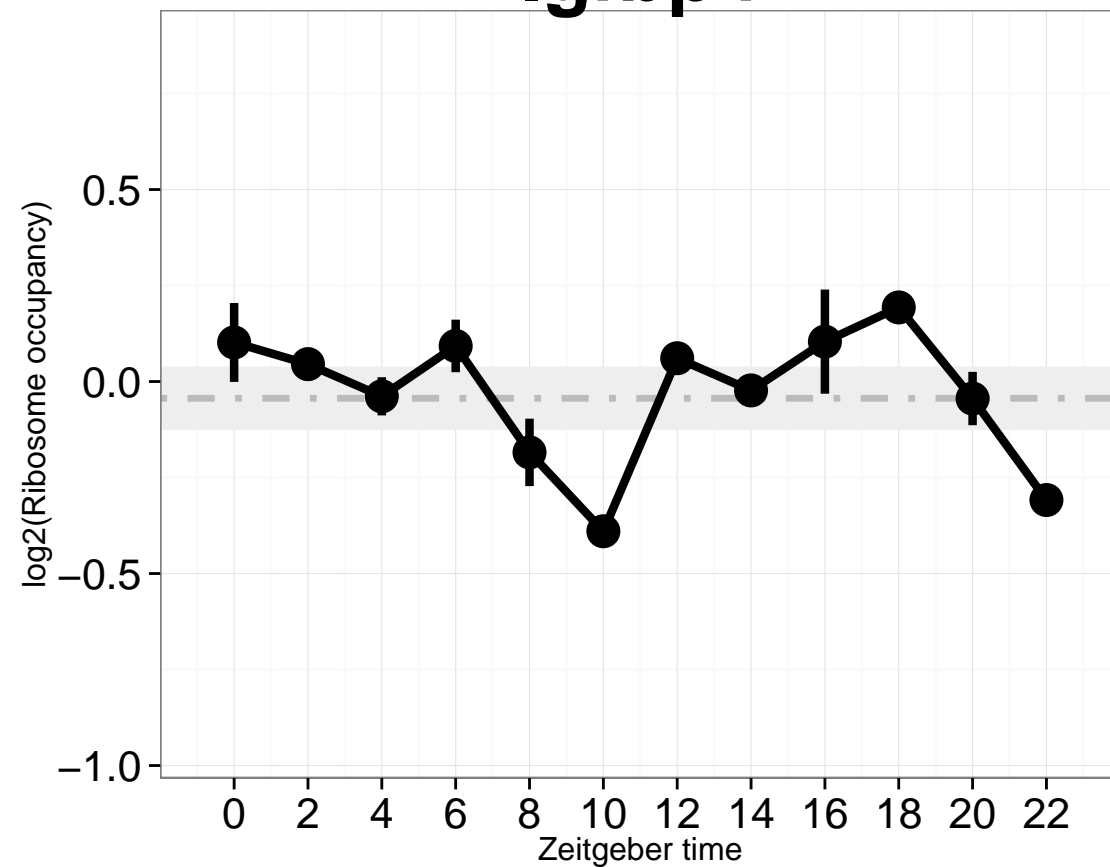

Supplement: SuppDataset_1.zip [file Igfbp4_set_A.pdf › Supplemental Dataset 1/A-mRNA_nonrhyth_translation_nonrhyth/Igfbp4_set_A.pdf]

# Igfbp6

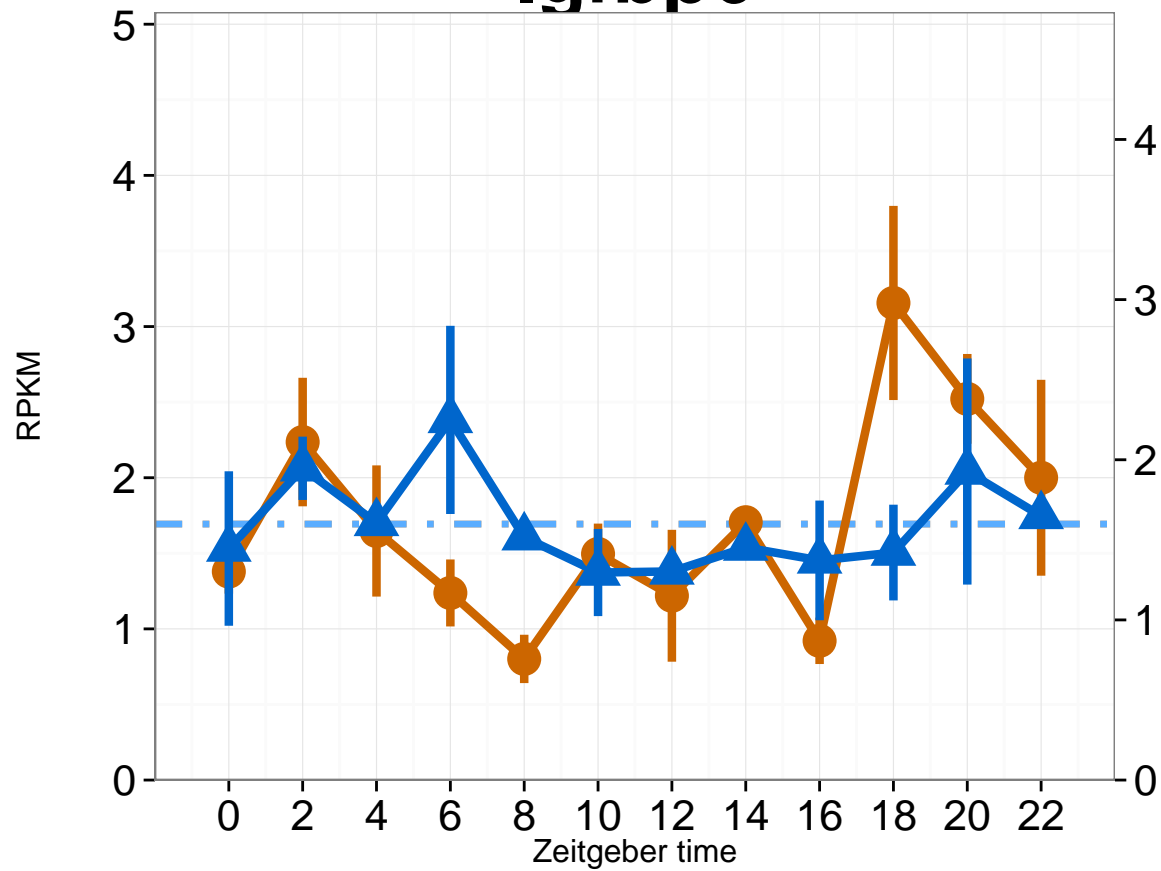

# Igfbp6

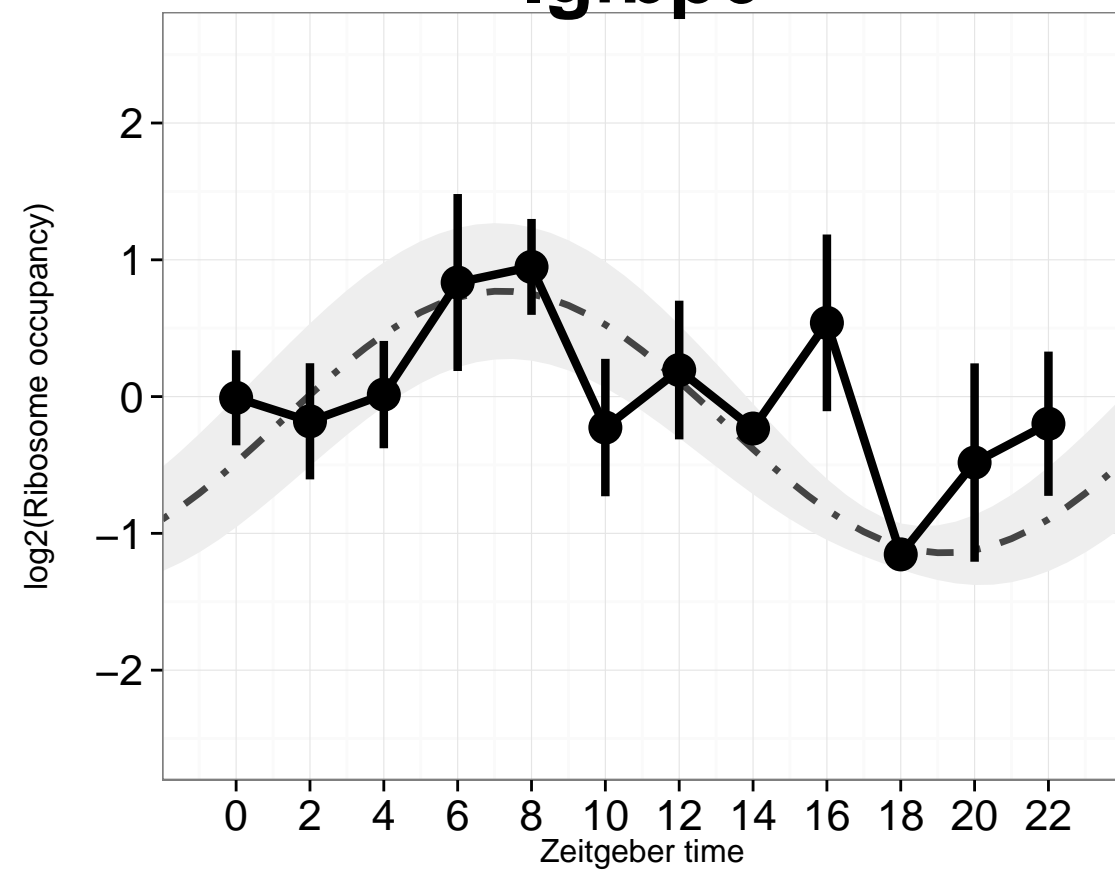

Supplement: SuppDataset_1.zip [file Igfbp6_set_A.pdf › Supplemental Dataset 1/A-mRNA_nonrhyth_translation_nonrhyth/Igfbp6_set_A.pdf]

## Igfbp7

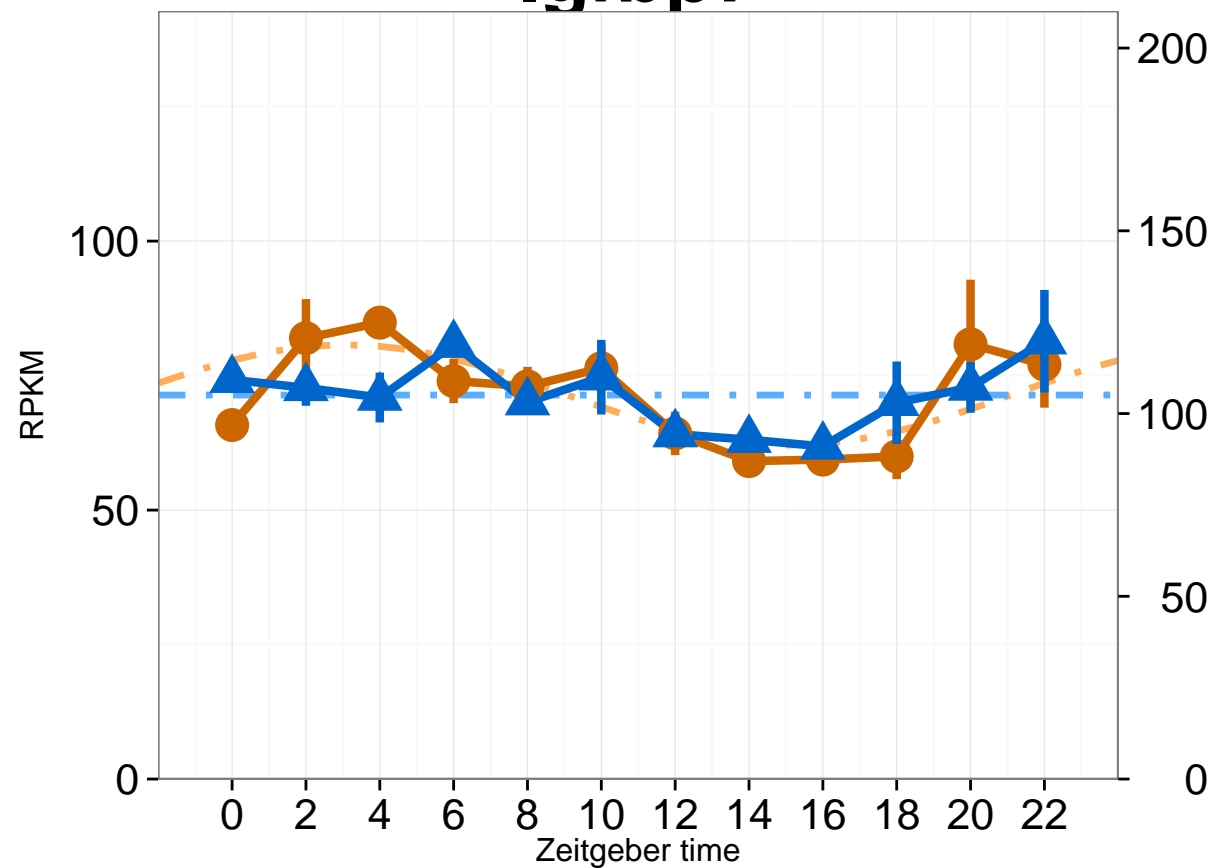

## Igfbp7

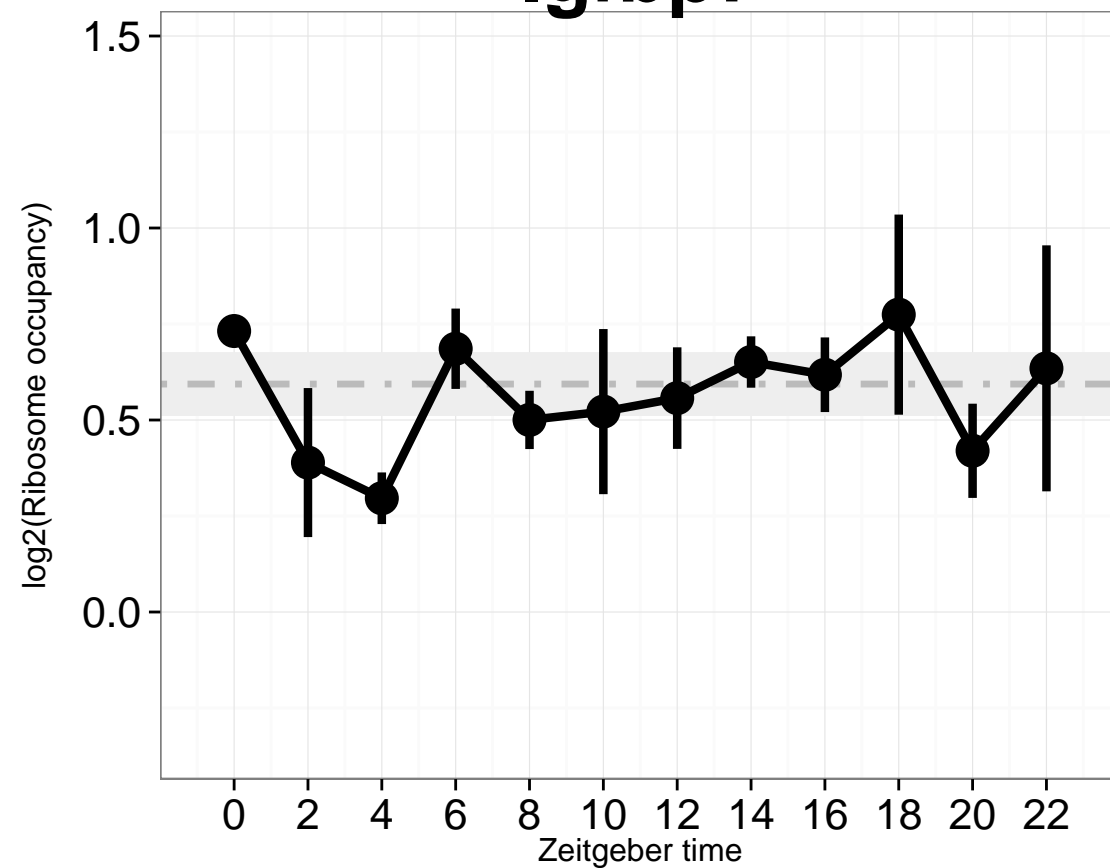

Supplement: SuppDataset_1.zip [file Igfbp7_set_A.pdf › Supplemental Dataset 1/A-mRNA_nonrhyth_translation_nonrhyth/Igfbp7_set_A.pdf]

## Ighmbp2

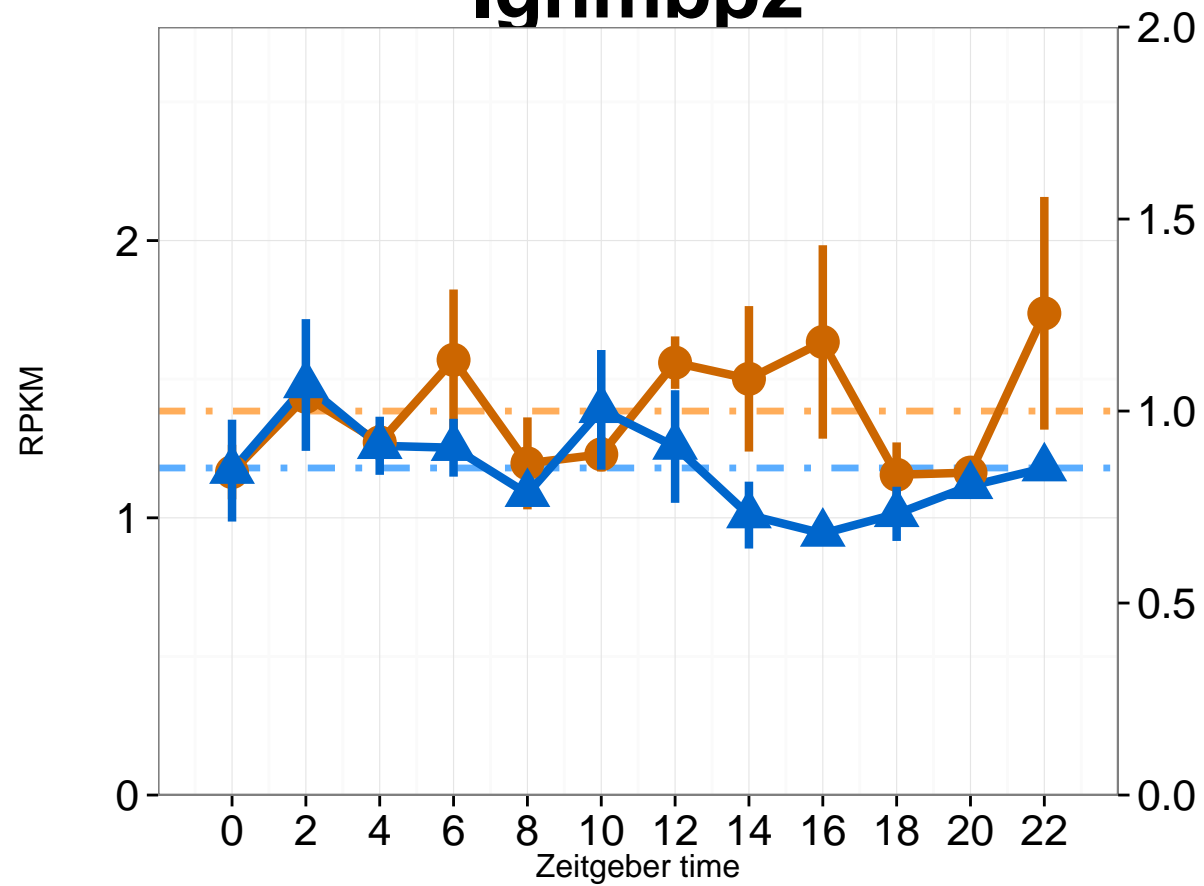

## Ighmbp2

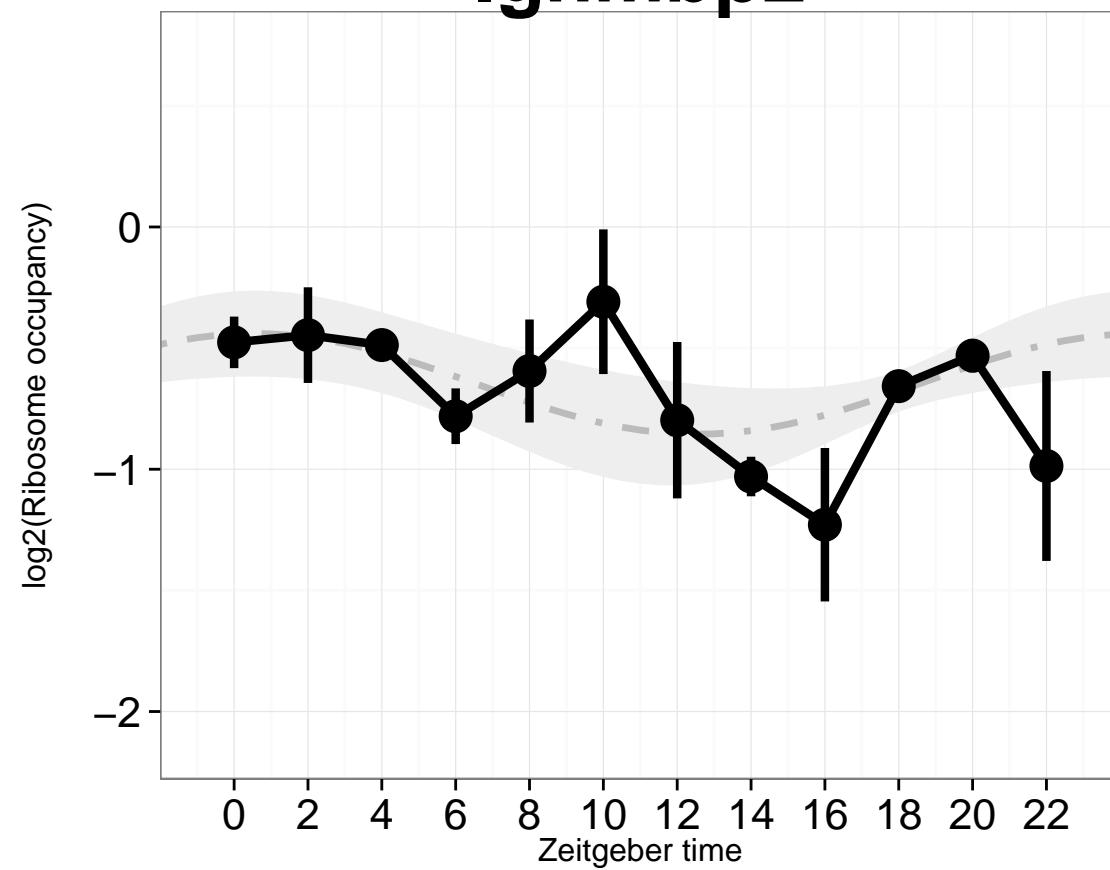

Supplement: SuppDataset_1.zip [file Ighmbp2_set_A.pdf › Supplemental Dataset 1/A-mRNA_nonrhyth_translation_nonrhyth/Ighmbp2_set_A.pdf]

Igj

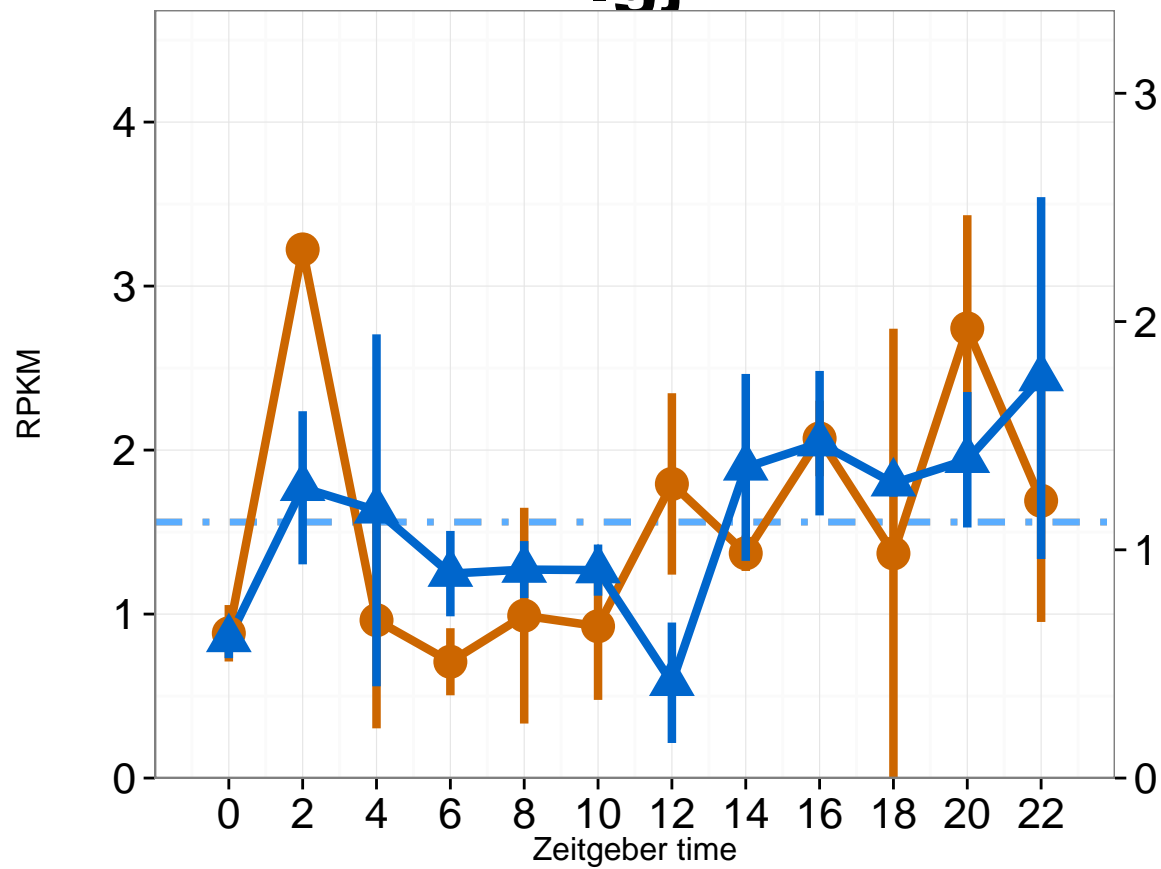

Igj

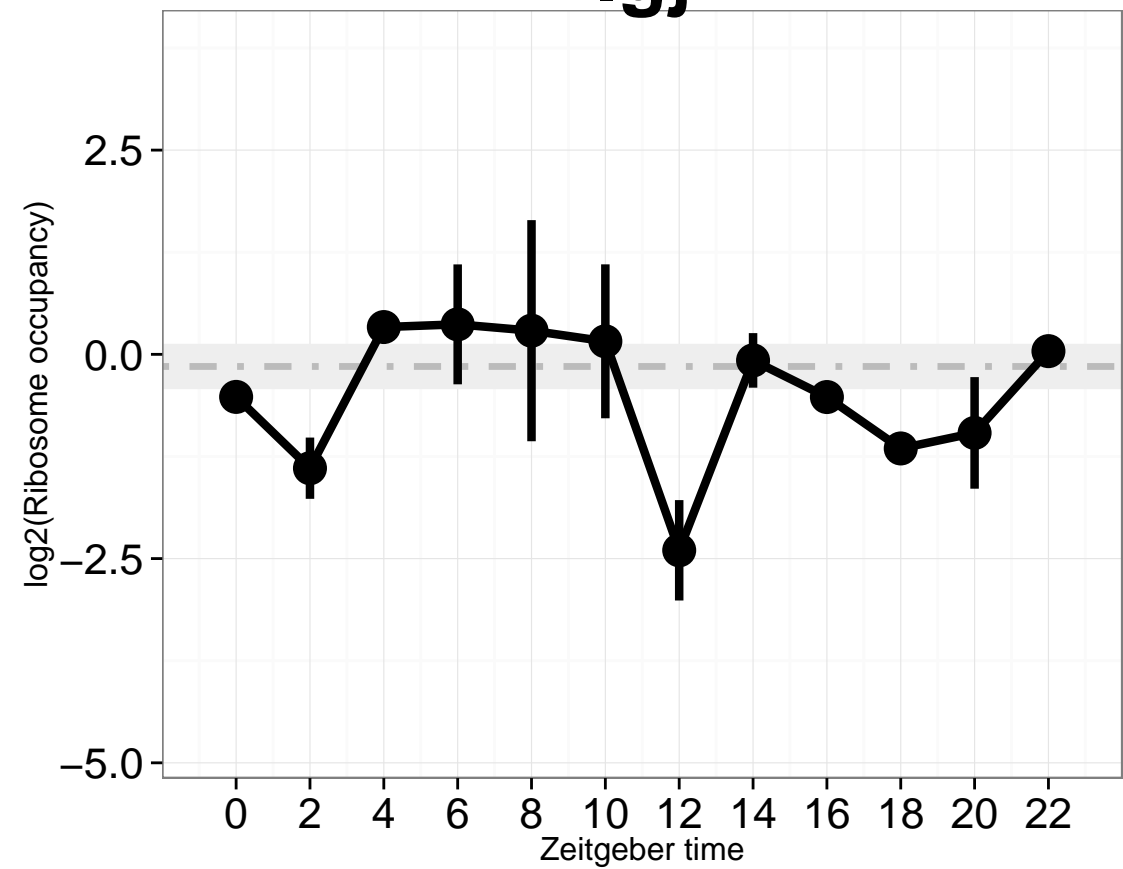

Supplement: SuppDataset_1.zip [file Igj_set_A.pdf › Supplemental Dataset 1/A-mRNA_nonrhyth_translation_nonrhyth/Igj_set_A.pdf]

# Igsf10

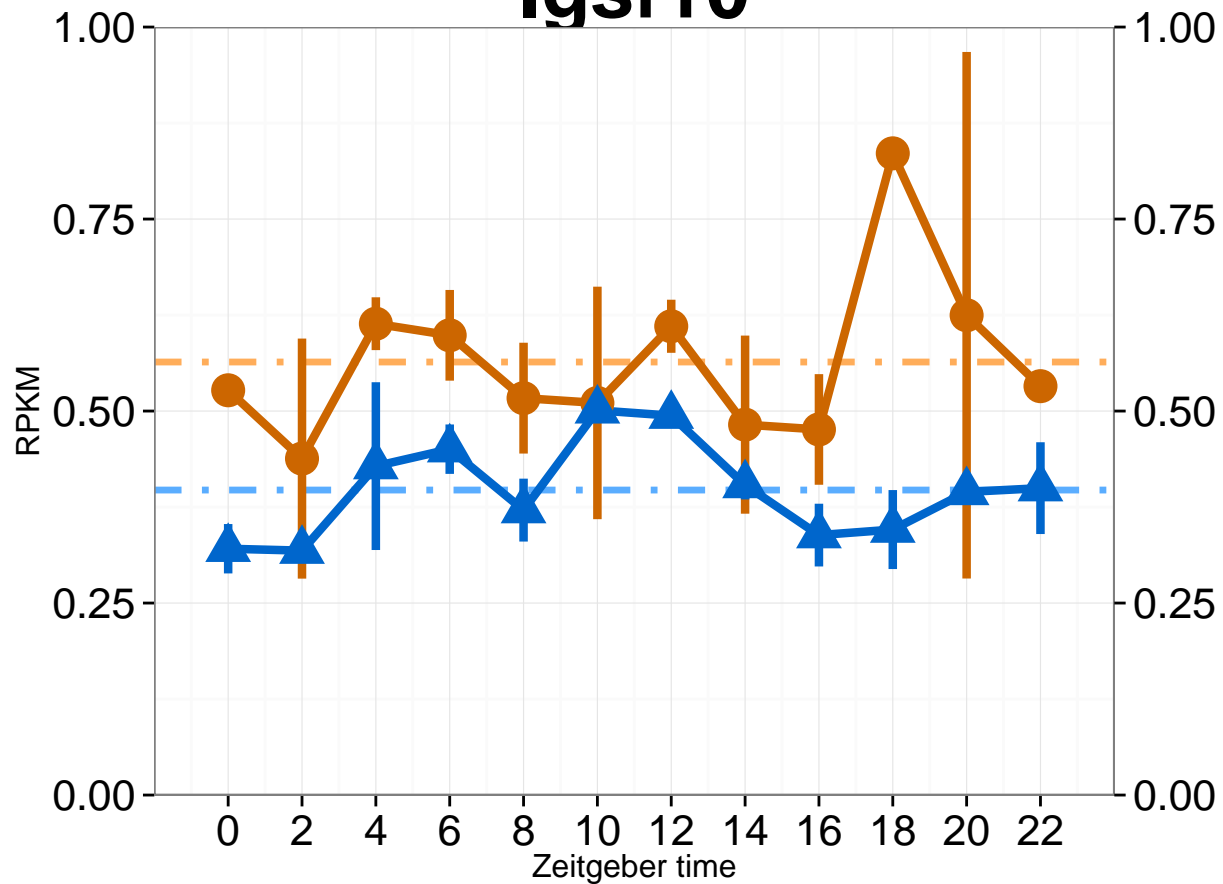

# Igsf10

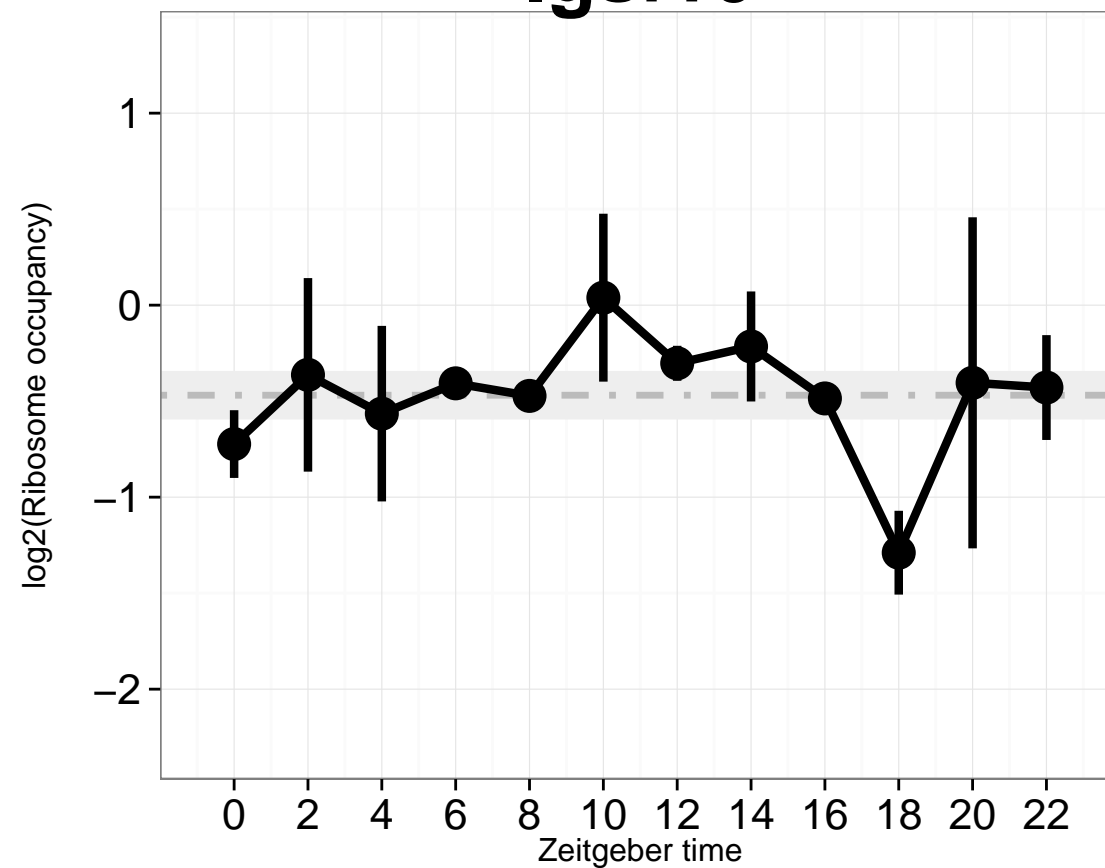

Supplement: SuppDataset_1.zip [file Igsf10_set_A.pdf › Supplemental Dataset 1/A-mRNA_nonrhyth_translation_nonrhyth/Igsf10_set_A.pdf]

Igsf11

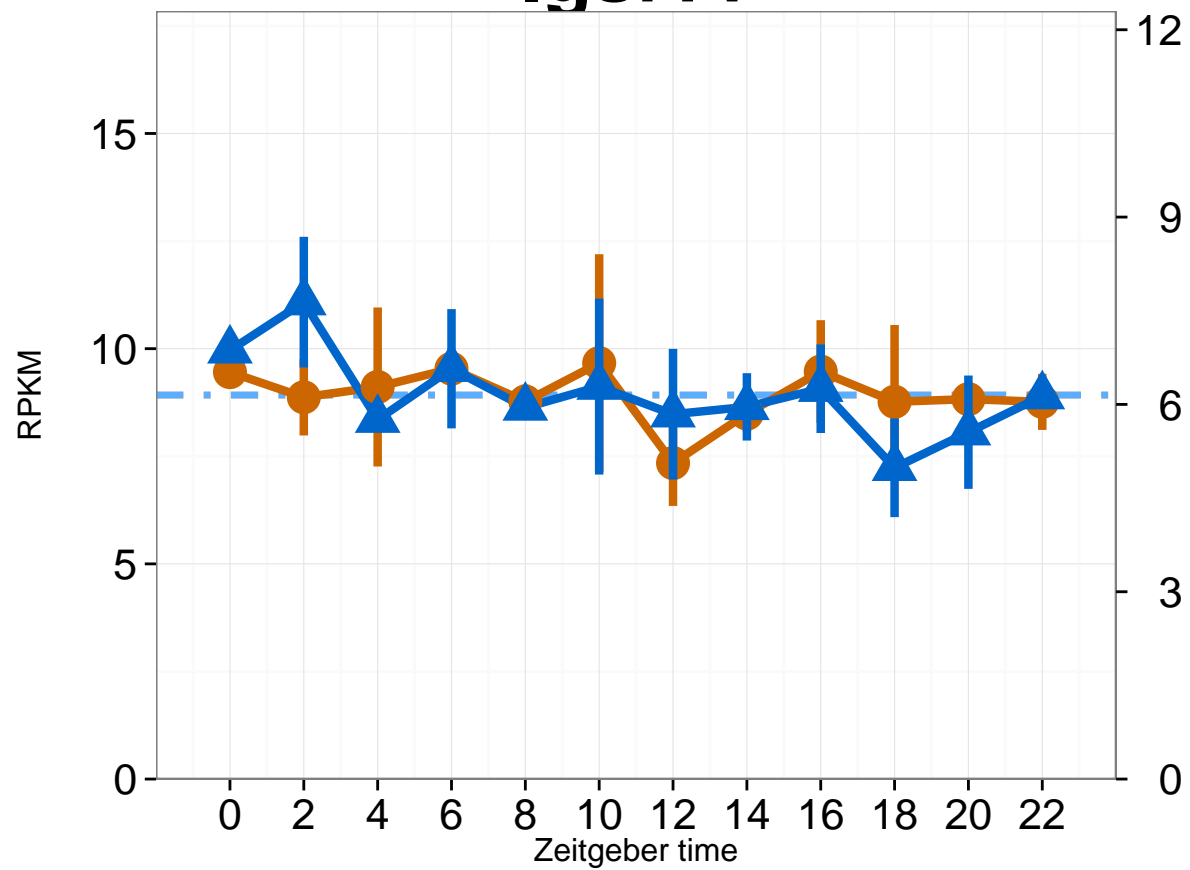

Igsf11

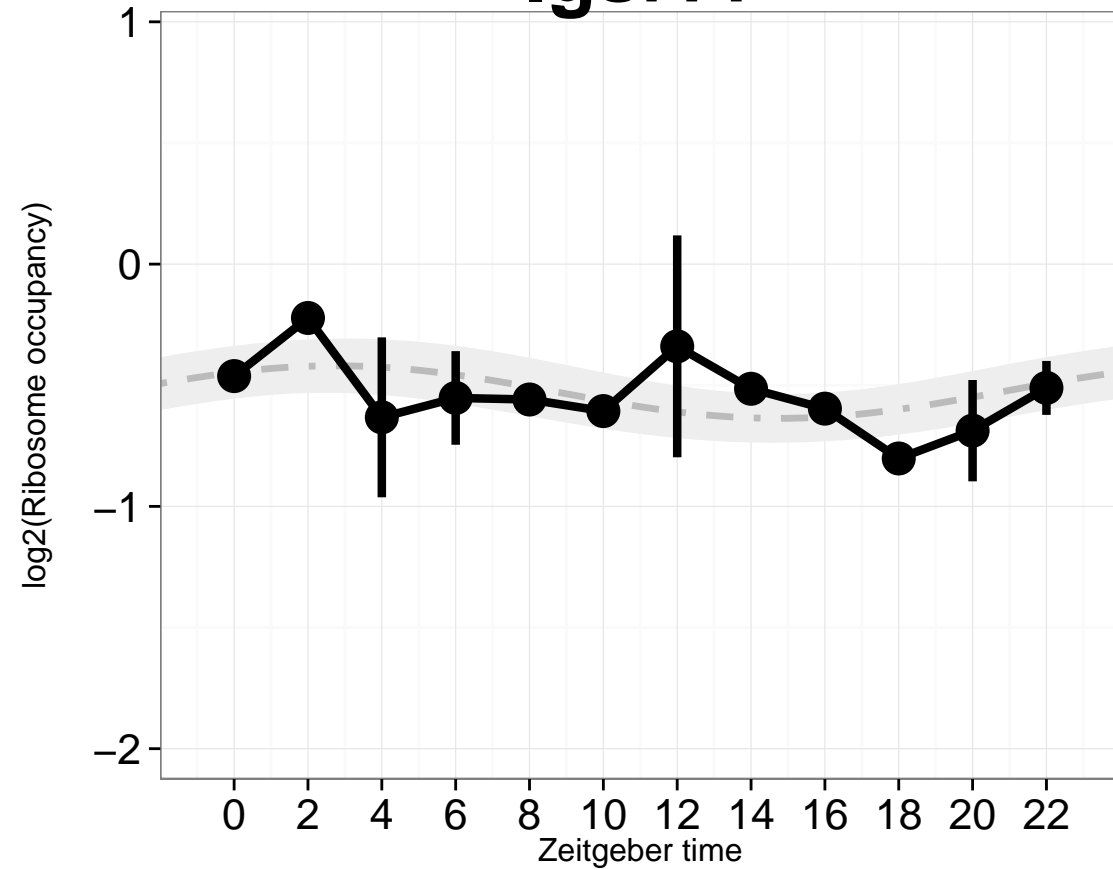

Supplement: SuppDataset_1.zip [file Igsf11_set_A.pdf › Supplemental Dataset 1/A-mRNA_nonrhyth_translation_nonrhyth/Igsf11_set_A.pdf]

## Igsf3

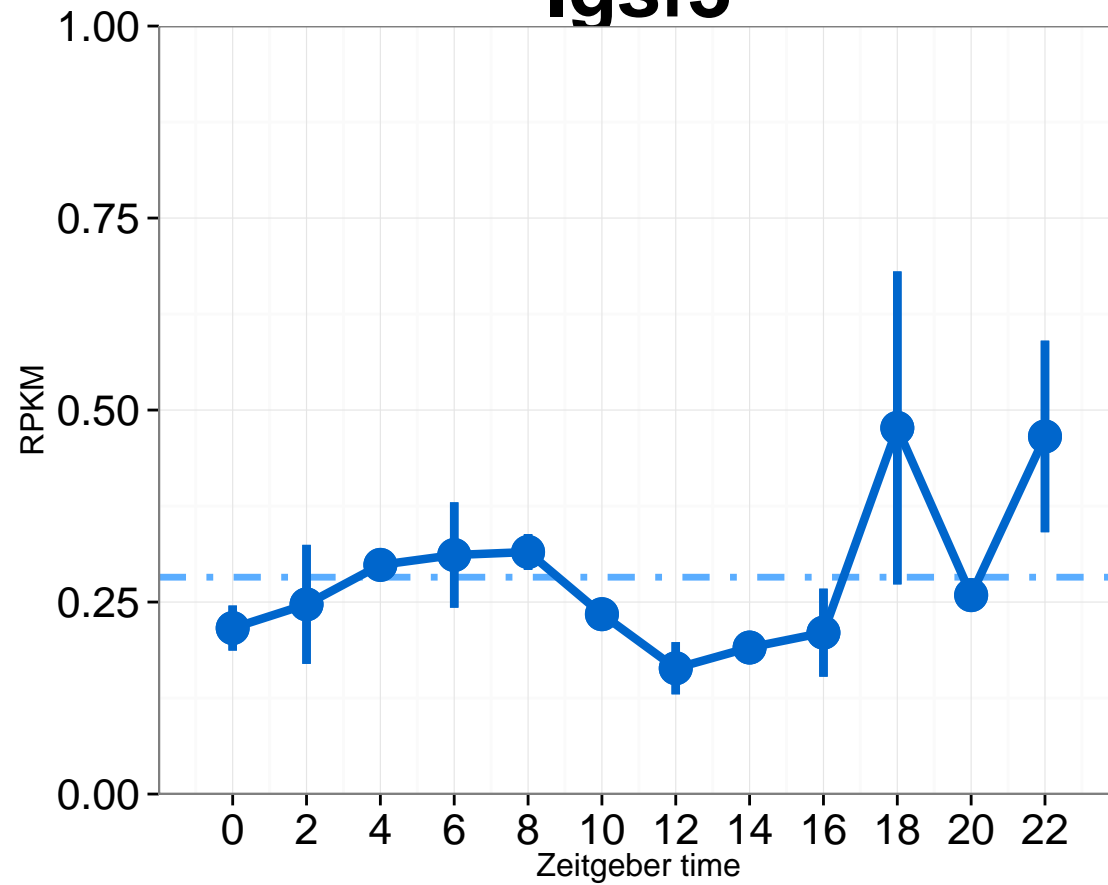

## Igsf3 log2(Ribosome occupancy)

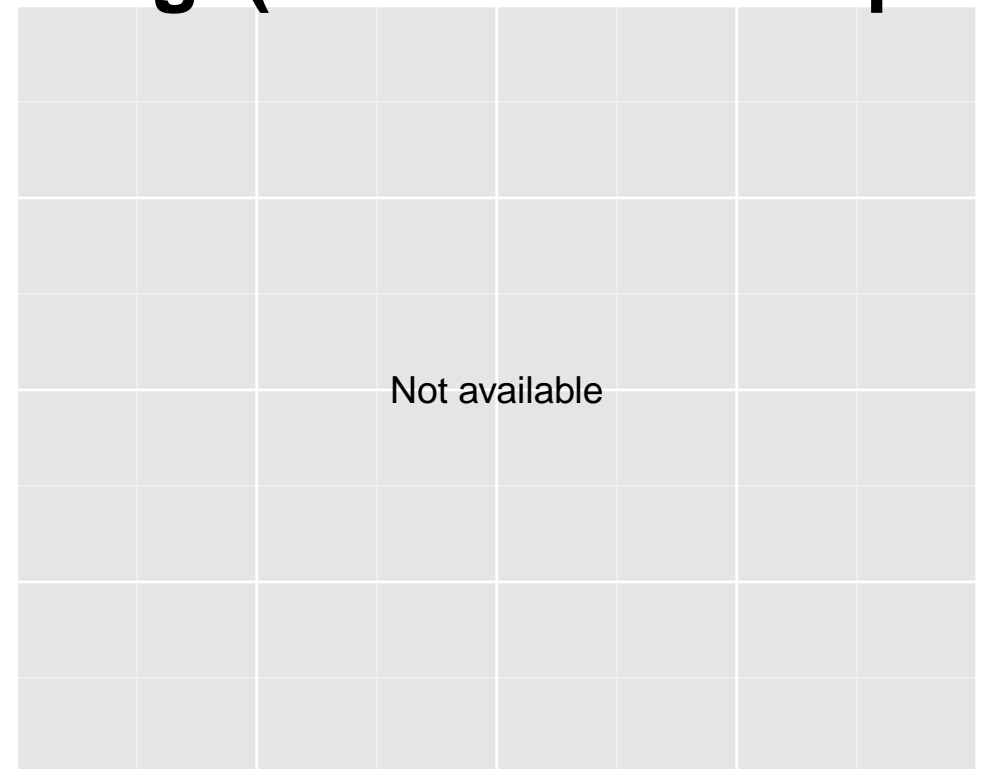

Supplement: SuppDataset_1.zip [file Igsf3_set_A.pdf › Supplemental Dataset 1/A-mRNA_nonrhyth_translation_nonrhyth/Igsf3_set_A.pdf]

# Igsf5

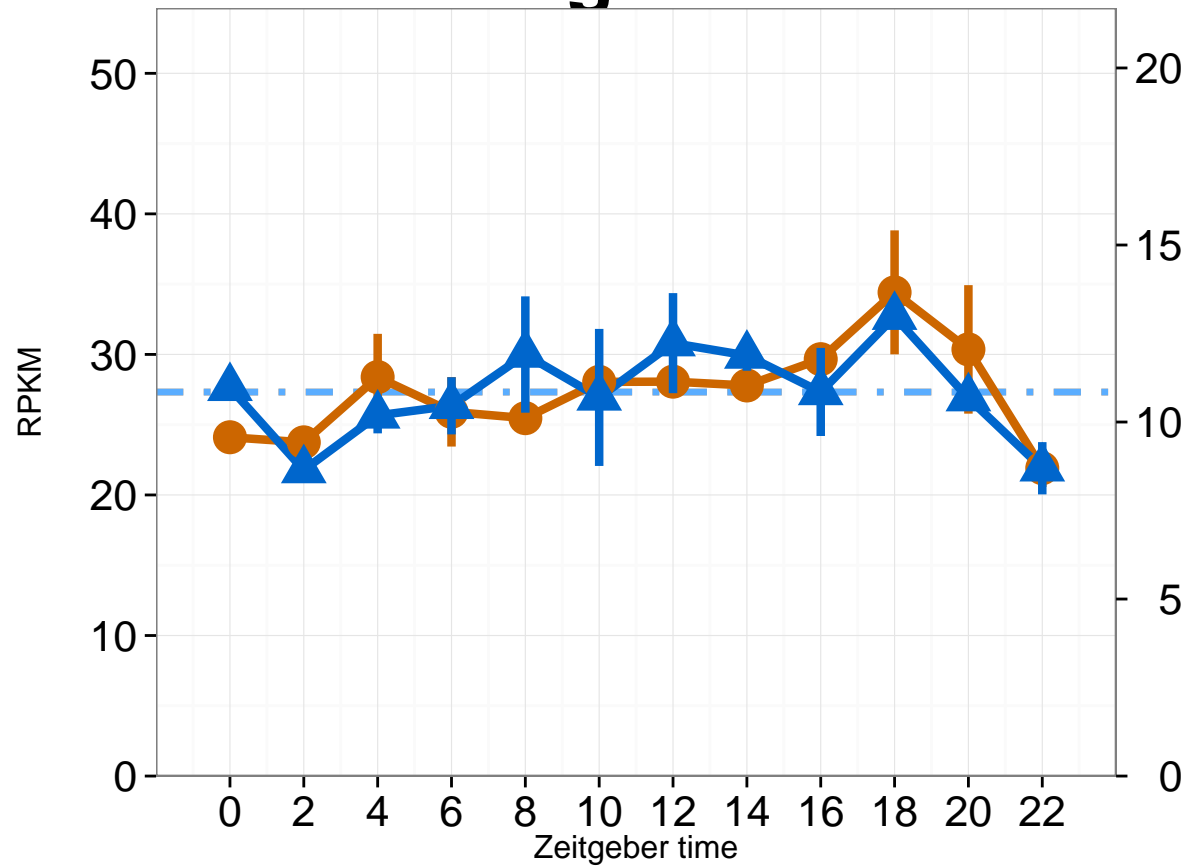

# Igsf5

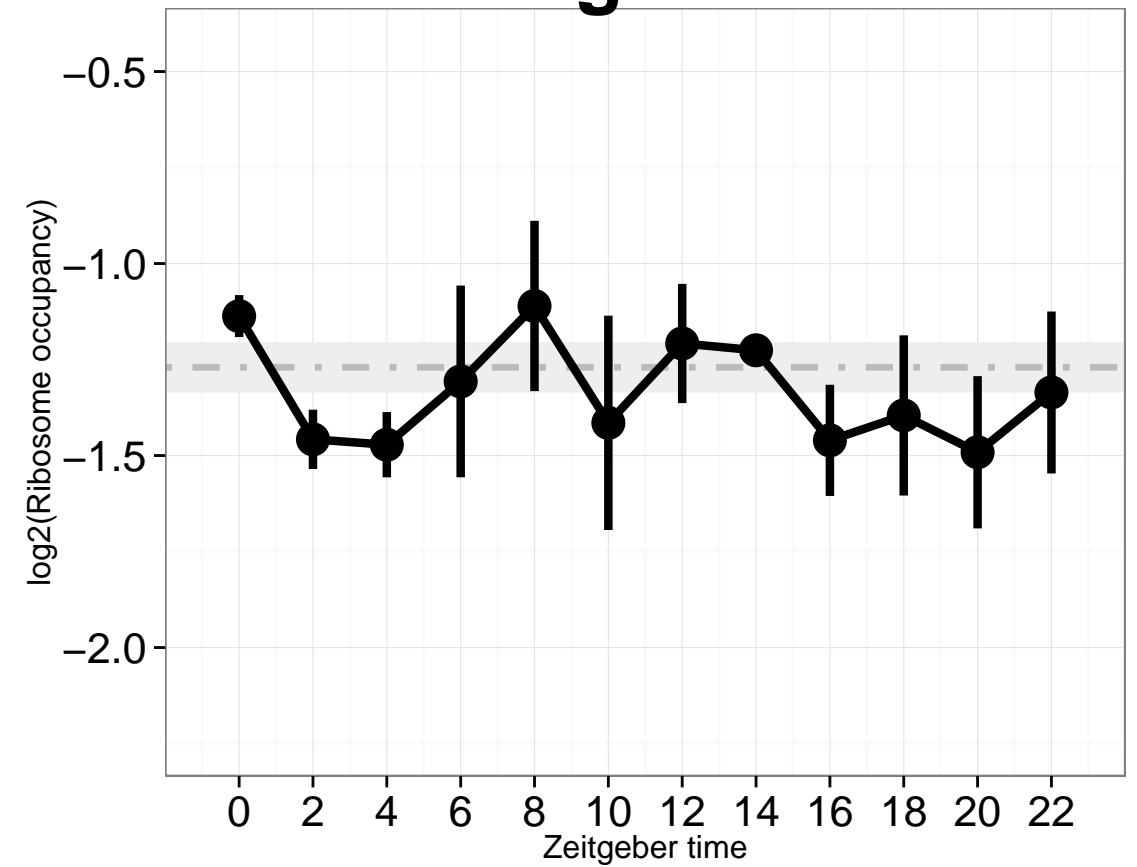

Supplement: SuppDataset_1.zip [file Igsf5_set_A.pdf › Supplemental Dataset 1/A-mRNA_nonrhyth_translation_nonrhyth/Igsf5_set_A.pdf]

# Igsf6

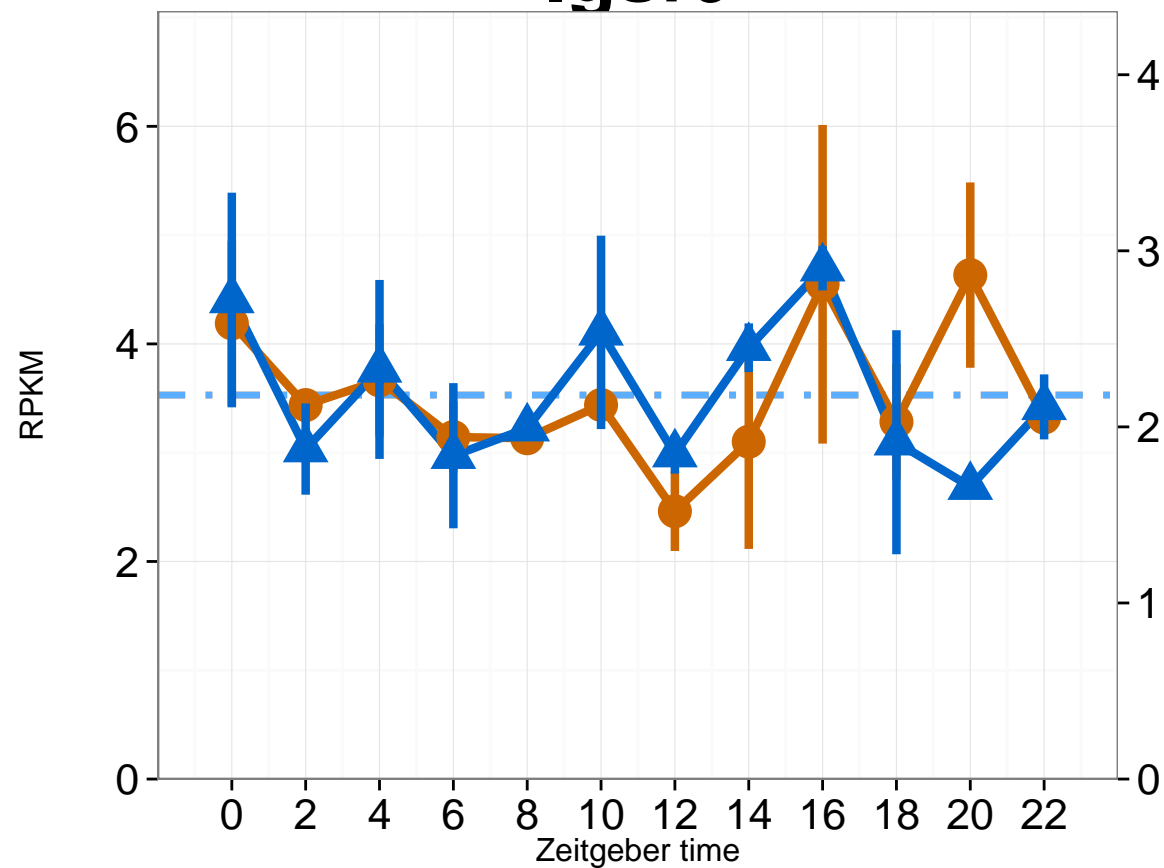

# Igsf6

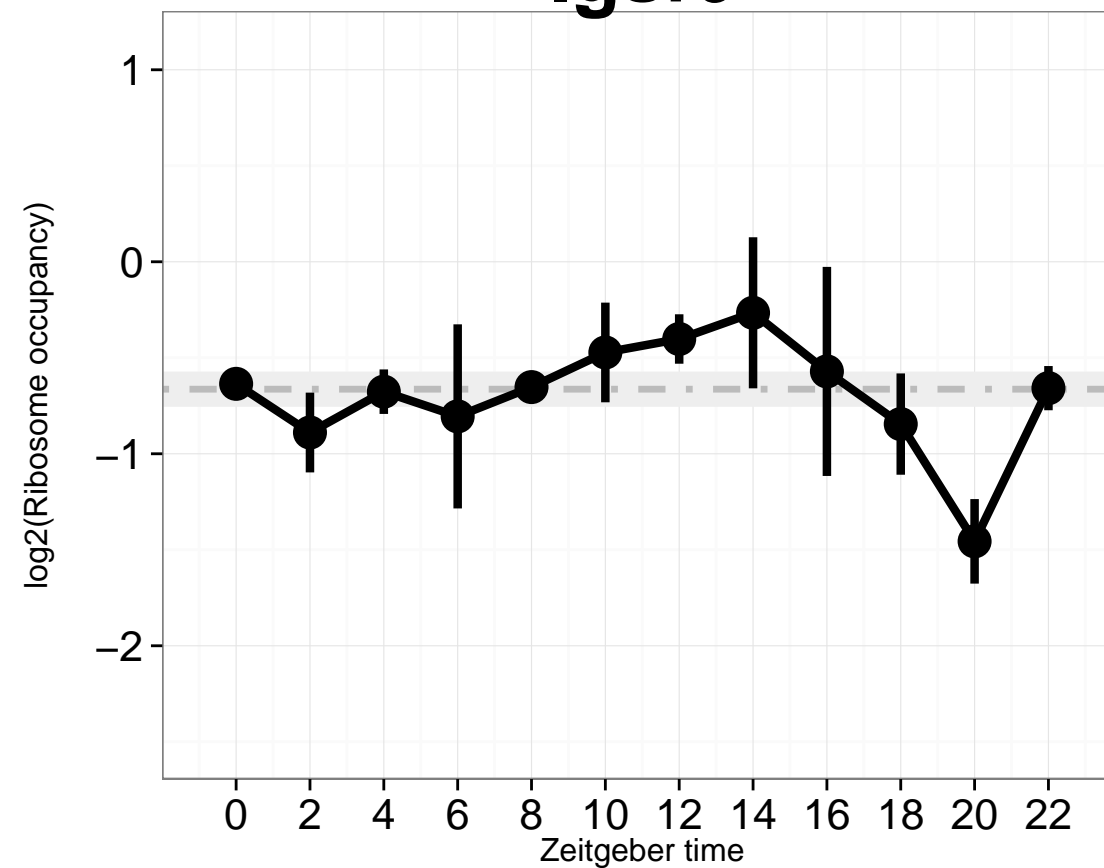

Supplement: SuppDataset_1.zip [file Igsf6_set_A.pdf › Supplemental Dataset 1/A-mRNA_nonrhyth_translation_nonrhyth/Igsf6_set_A.pdf]

## Igtp

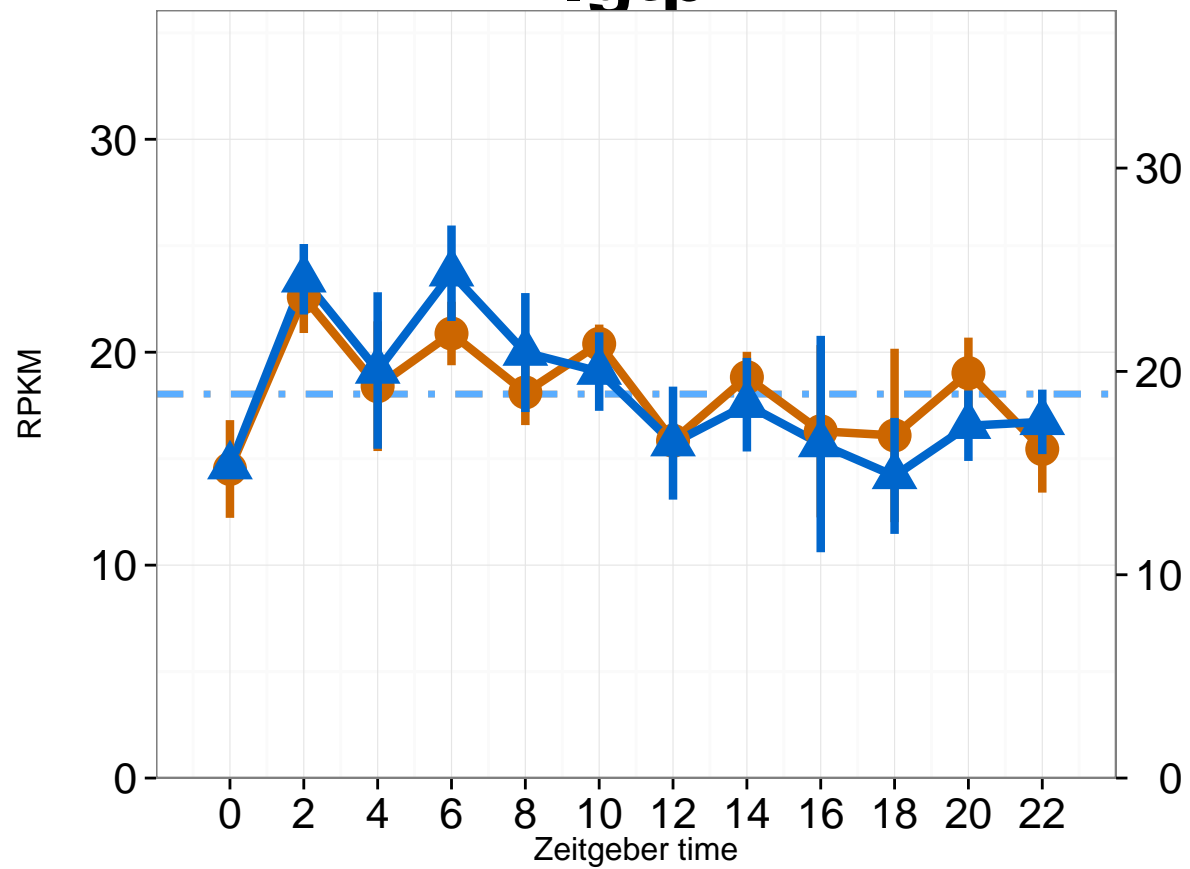

## Igtp

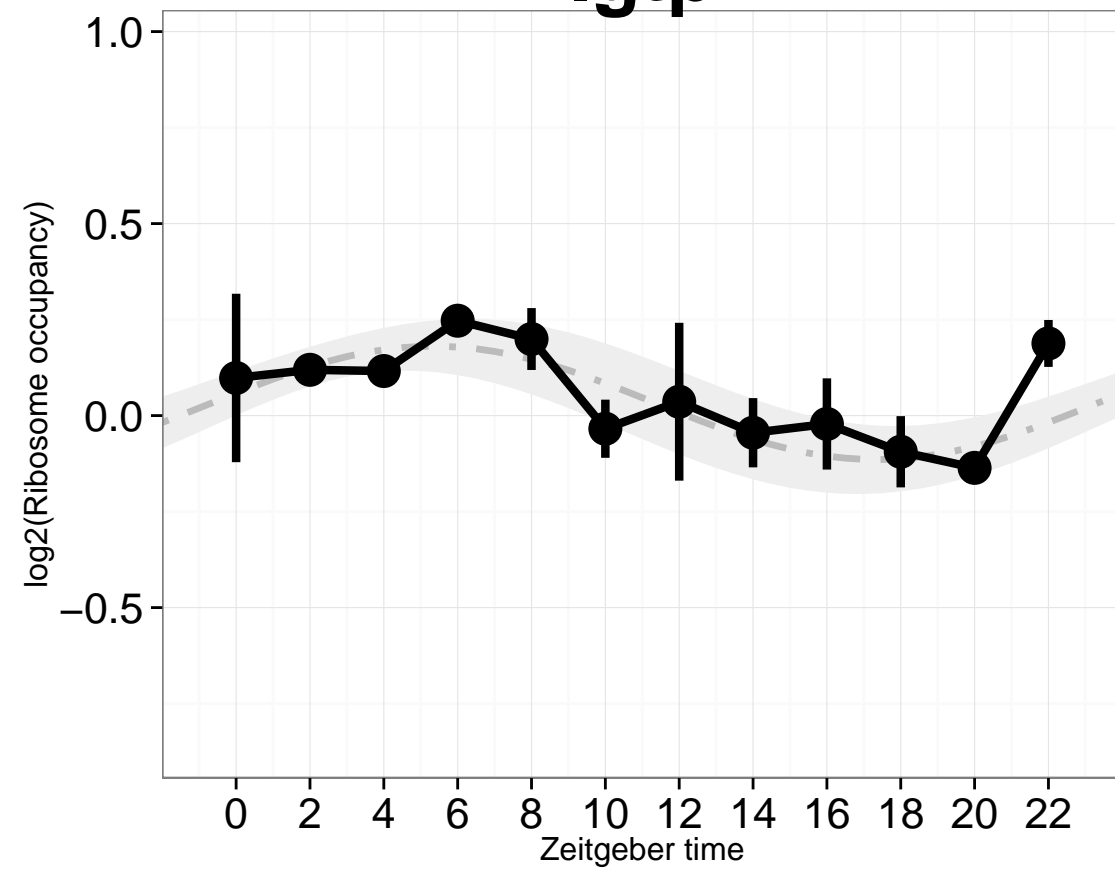

Supplement: SuppDataset_1.zip [file Igtp_set_A.pdf › Supplemental Dataset 1/A-mRNA_nonrhyth_translation_nonrhyth/Igtp_set_A.pdf]

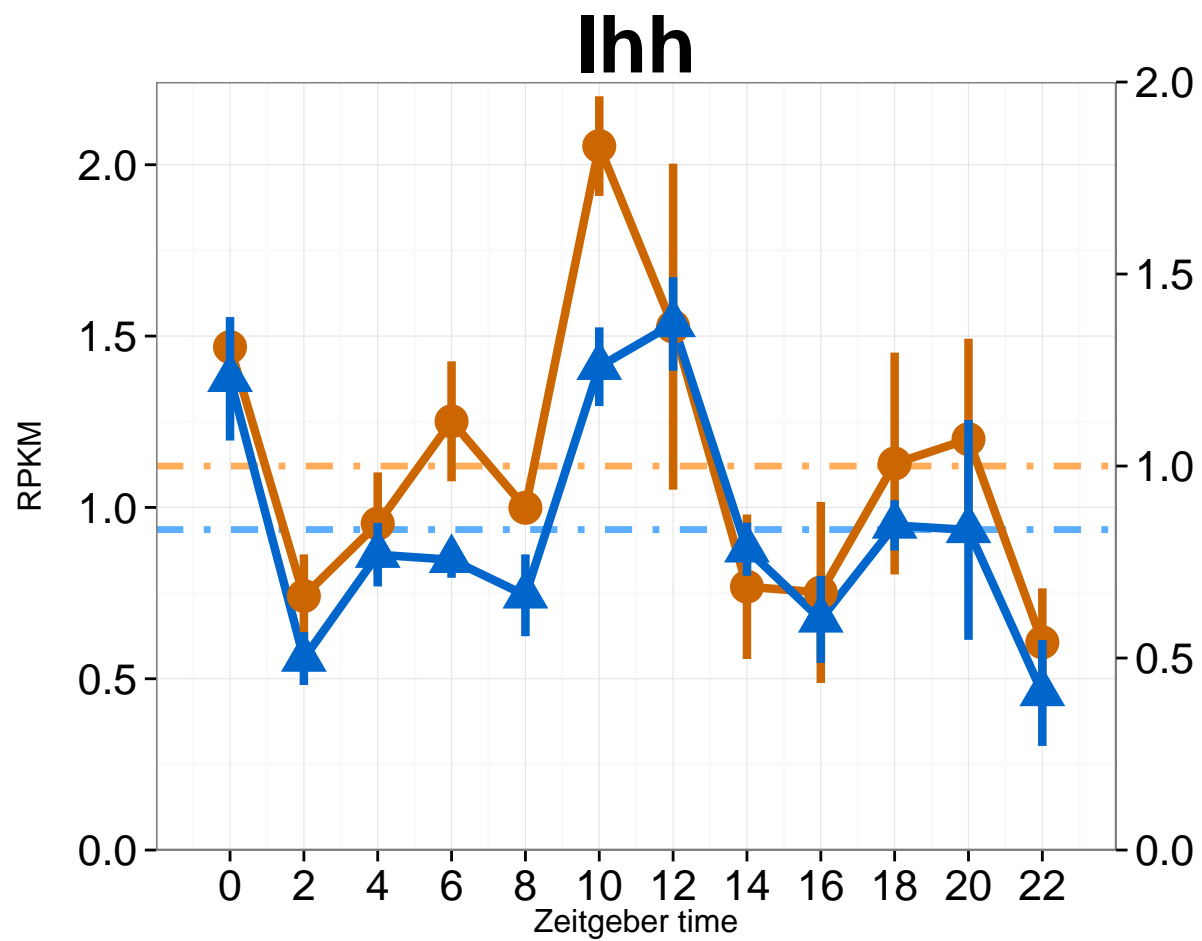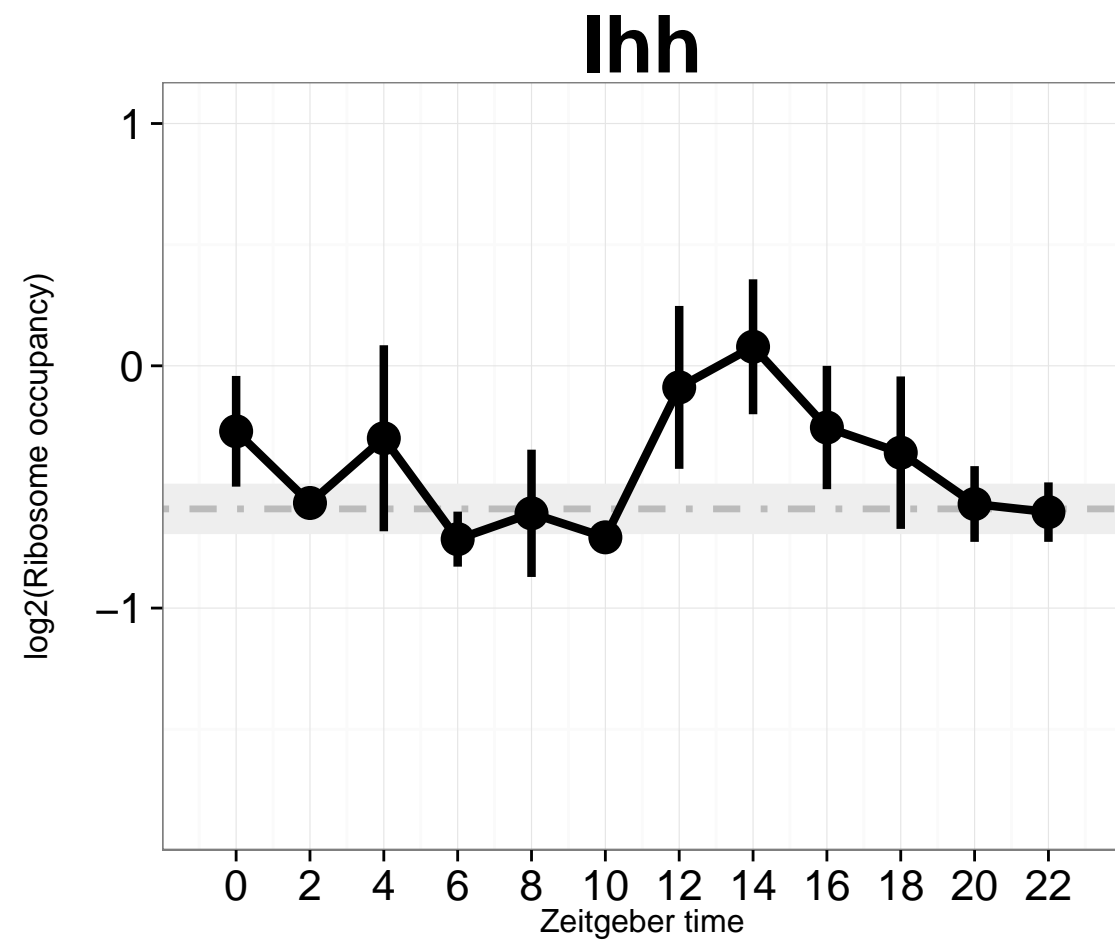

Supplement: SuppDataset_1.zip [file Ihh_set_A.pdf › Supplemental Dataset 1/A-mRNA_nonrhyth_translation_nonrhyth/Ihh_set_A.pdf]

**Ik**

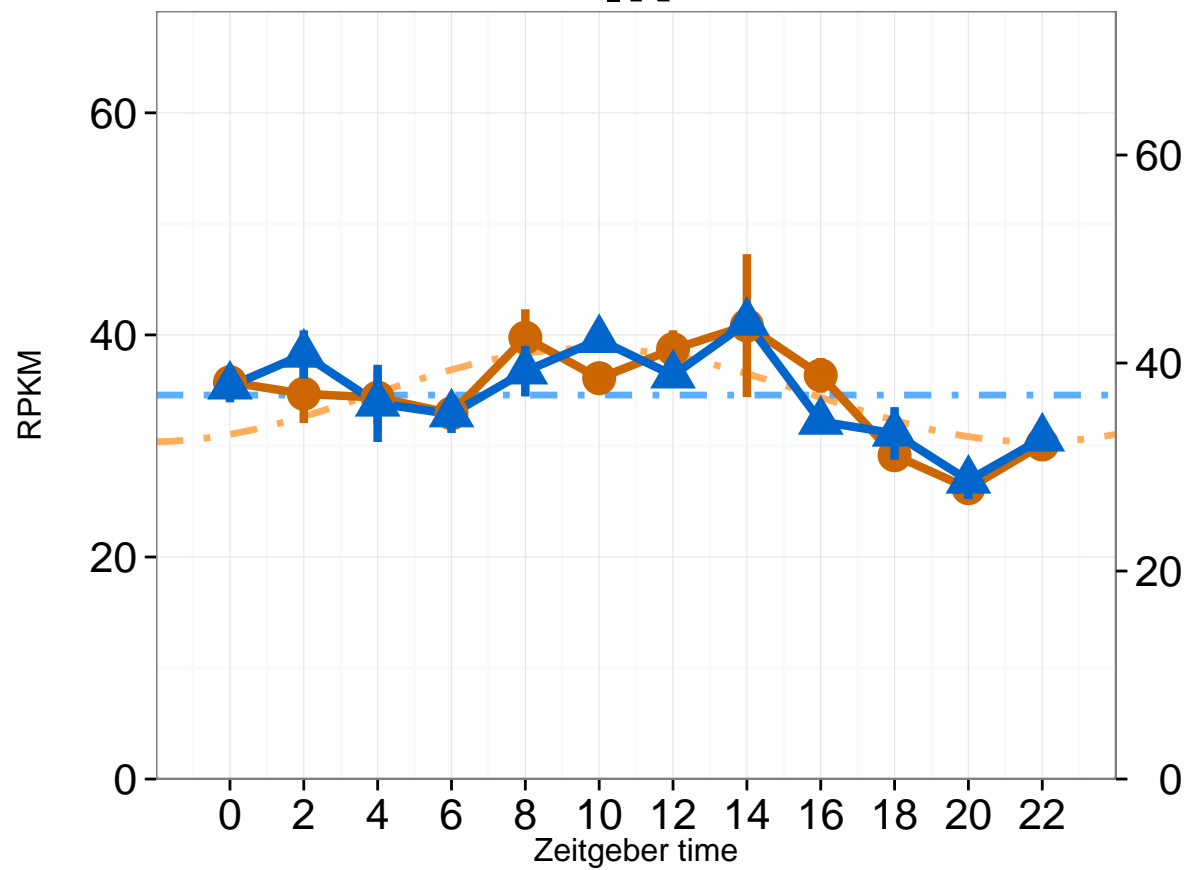

**Ik**

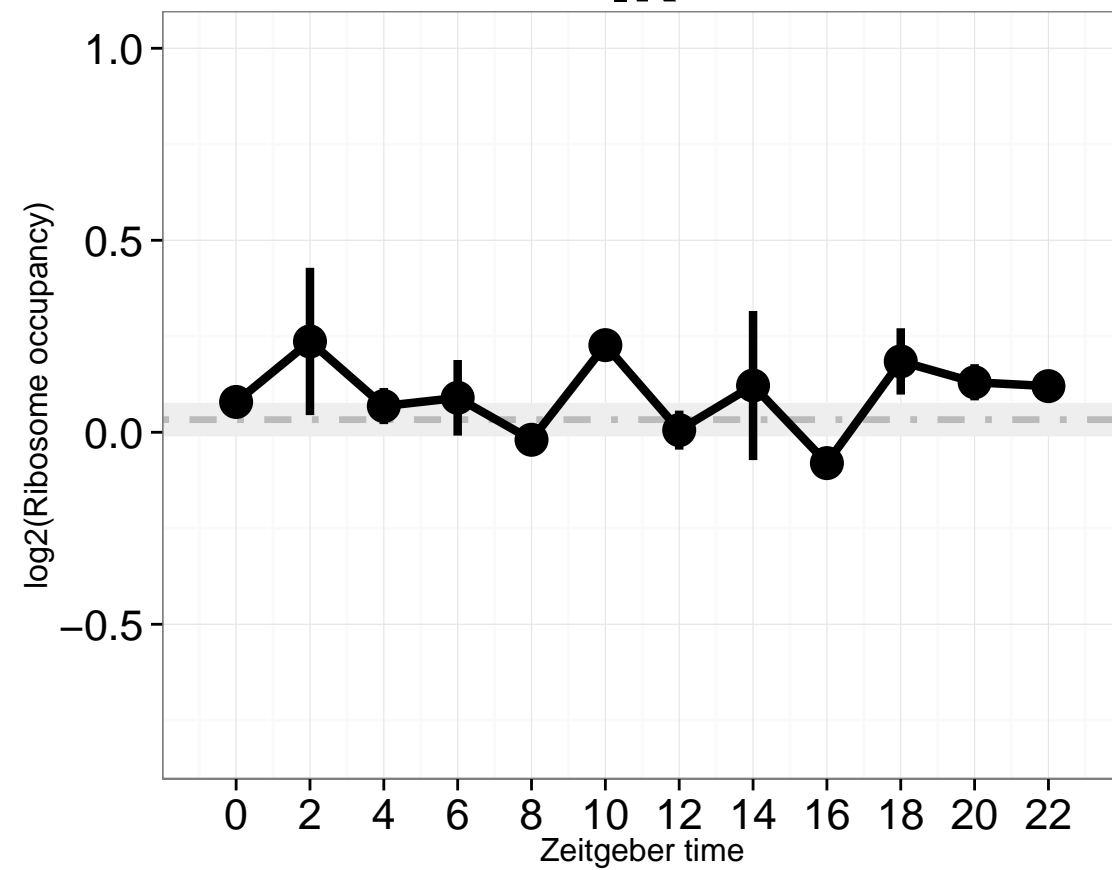

Supplement: SuppDataset_1.zip [file Ik_set_A.pdf › Supplemental Dataset 1/A-mRNA_nonrhyth_translation_nonrhyth/Ik_set_A.pdf]

## Ikbip

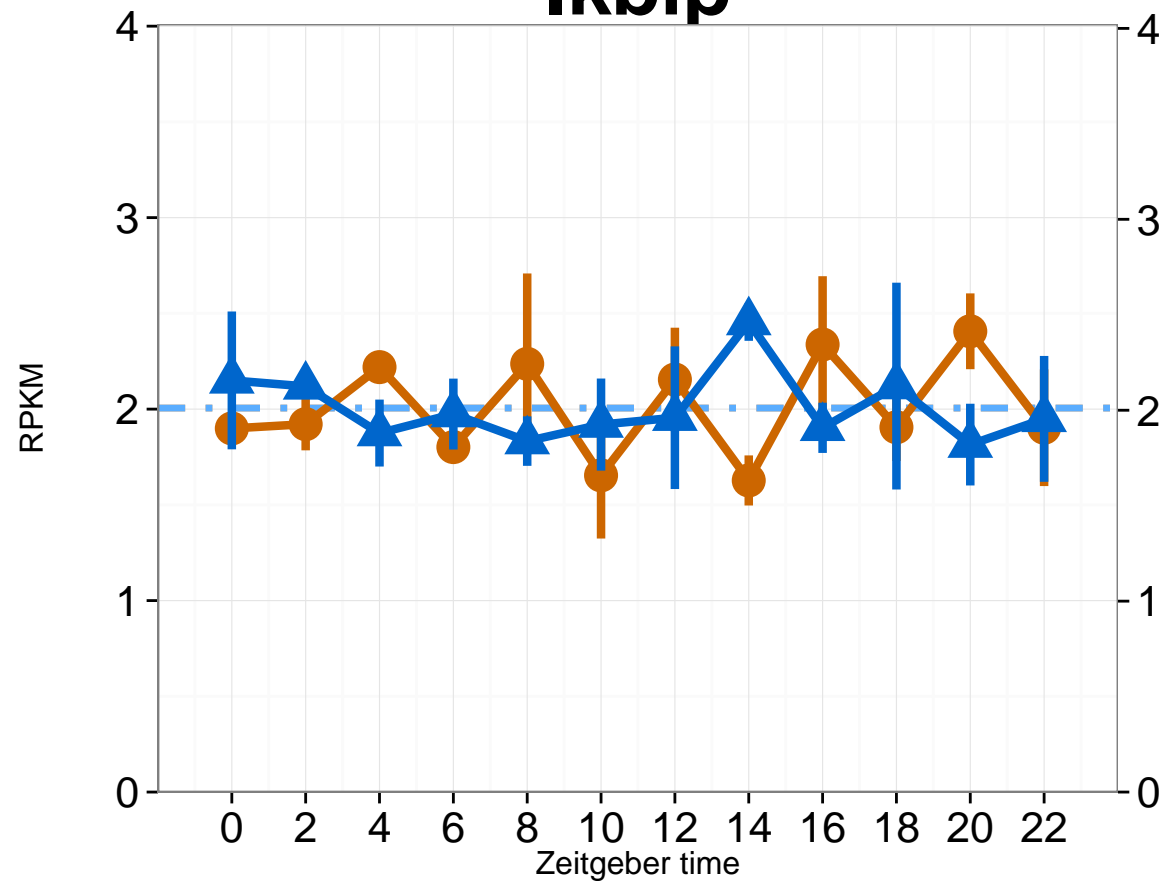

## Ikbip

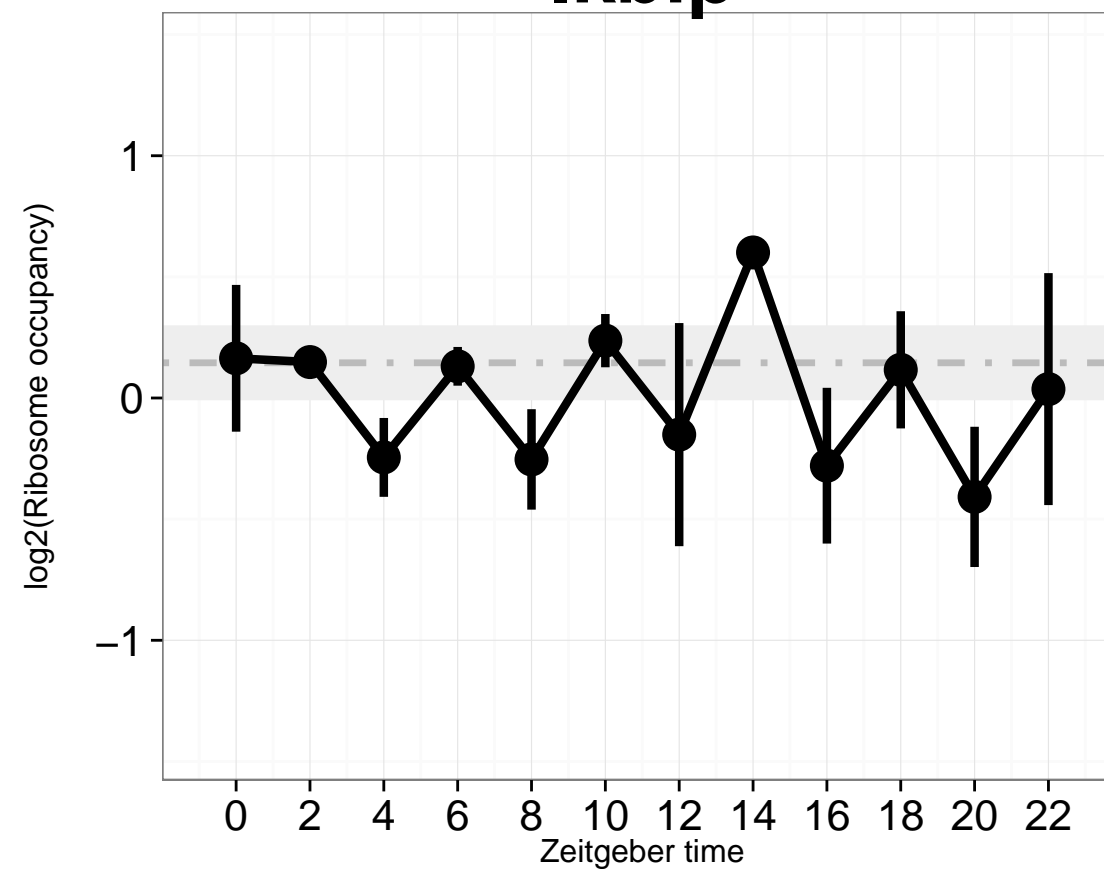

Supplement: SuppDataset_1.zip [file Ikbip_set_A.pdf › Supplemental Dataset 1/A-mRNA_nonrhyth_translation_nonrhyth/Ikbip_set_A.pdf]

## Ikbkap

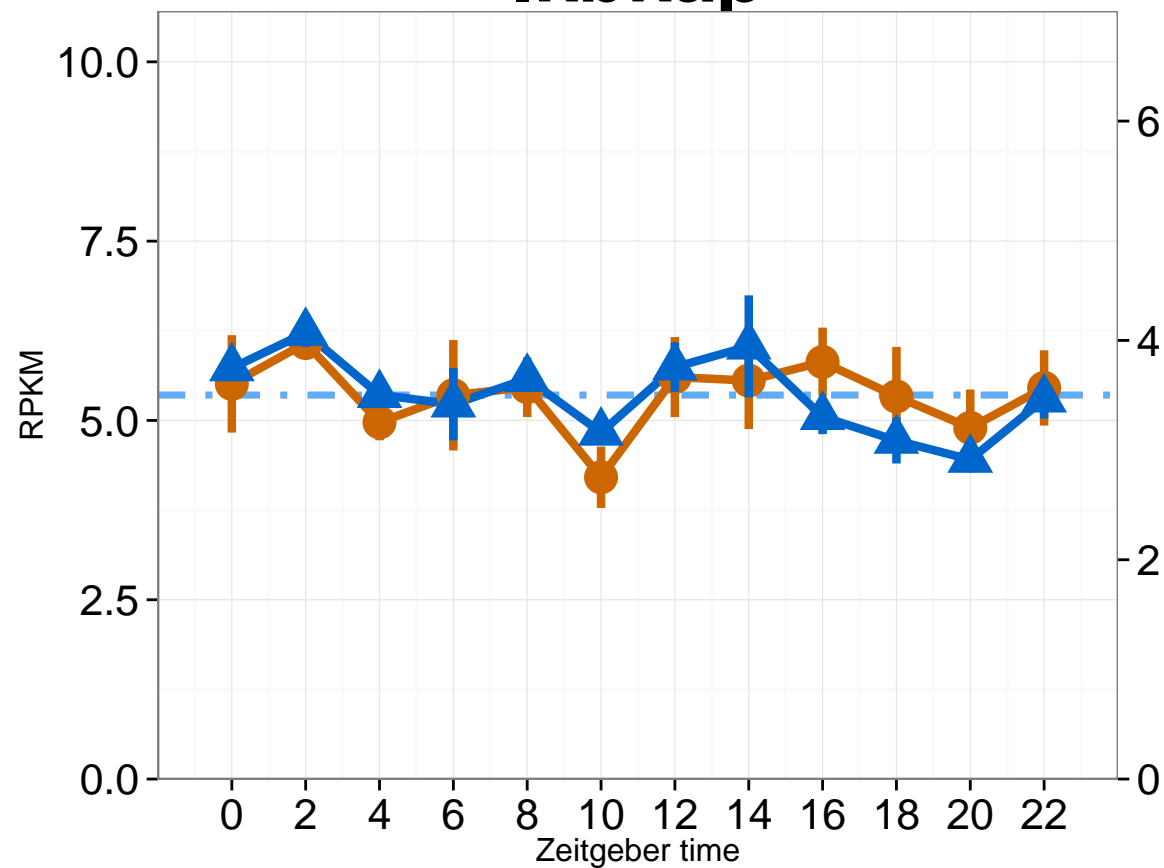

## Ikbkap

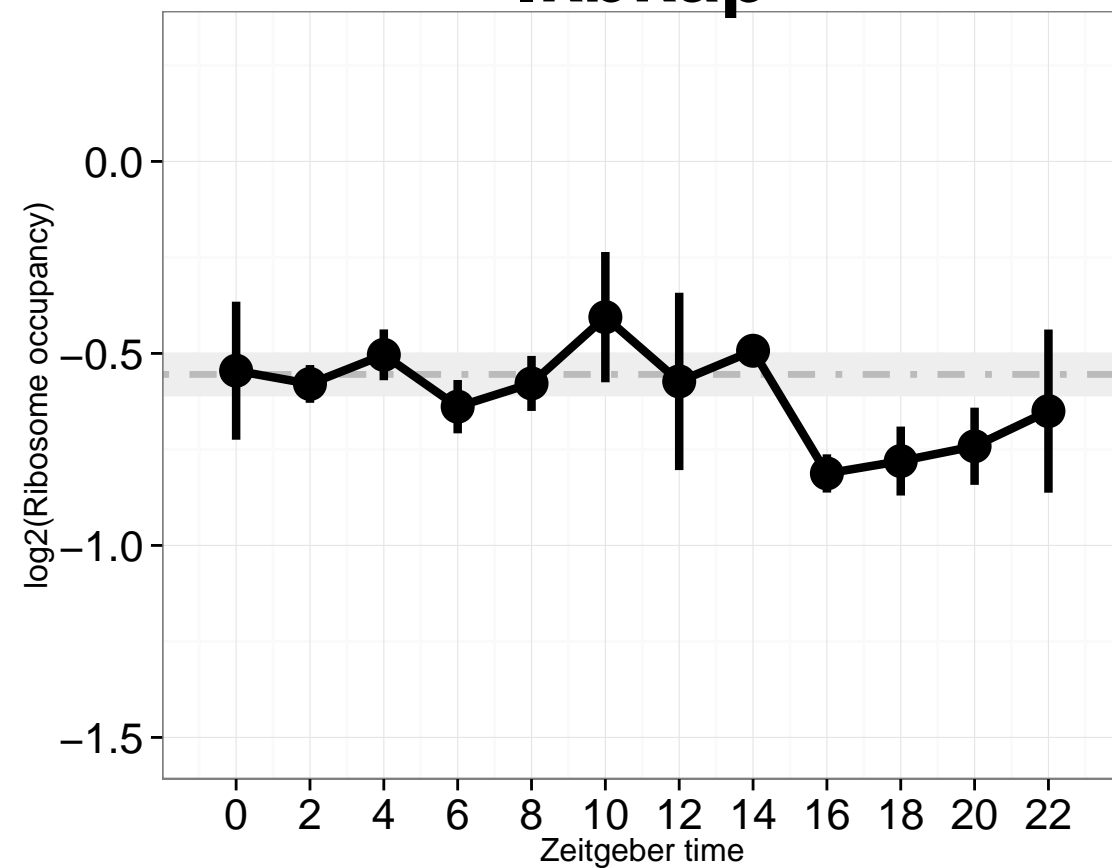

Supplement: SuppDataset_1.zip [file Ikbkap_set_A.pdf › Supplemental Dataset 1/A-mRNA_nonrhyth_translation_nonrhyth/Ikbkap_set_A.pdf]

# Ikbkb

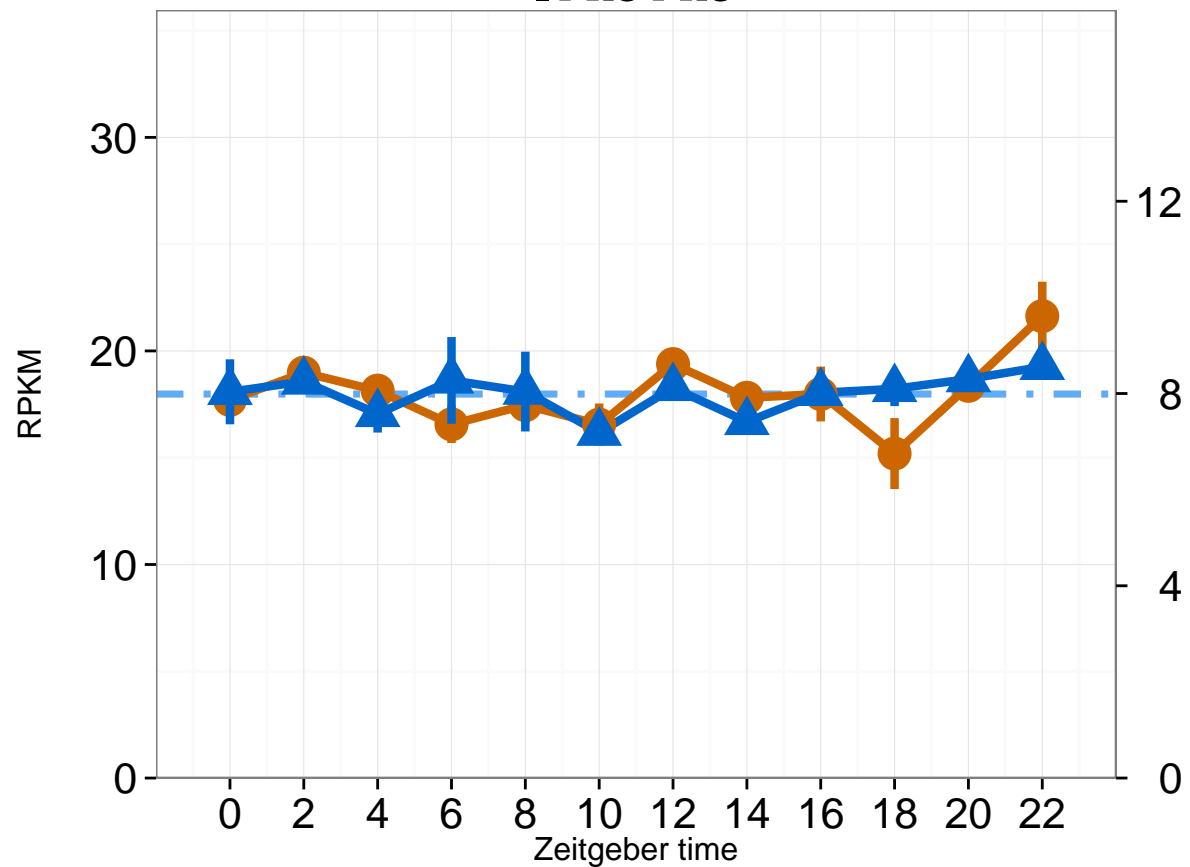

# Ikbkb

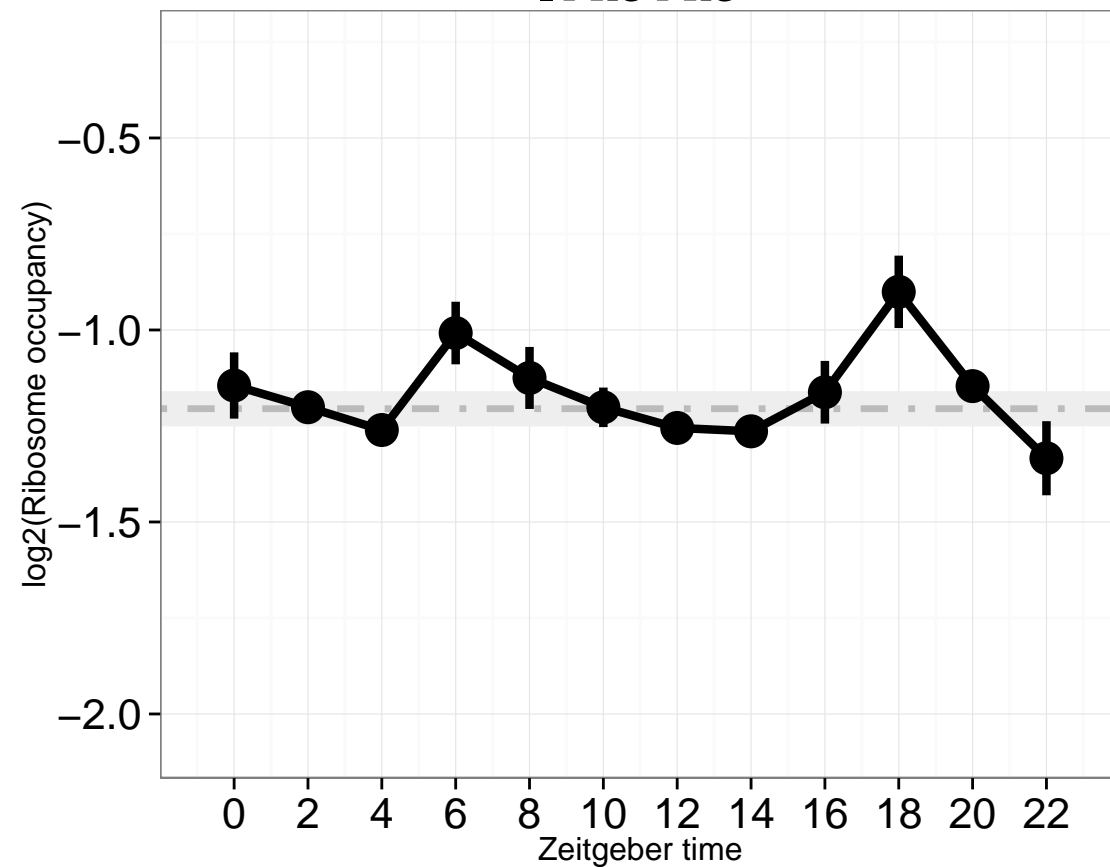

Supplement: SuppDataset_1.zip [file Ikbkb_set_A.pdf › Supplemental Dataset 1/A-mRNA_nonrhyth_translation_nonrhyth/Ikbkb_set_A.pdf]

## Ikbke

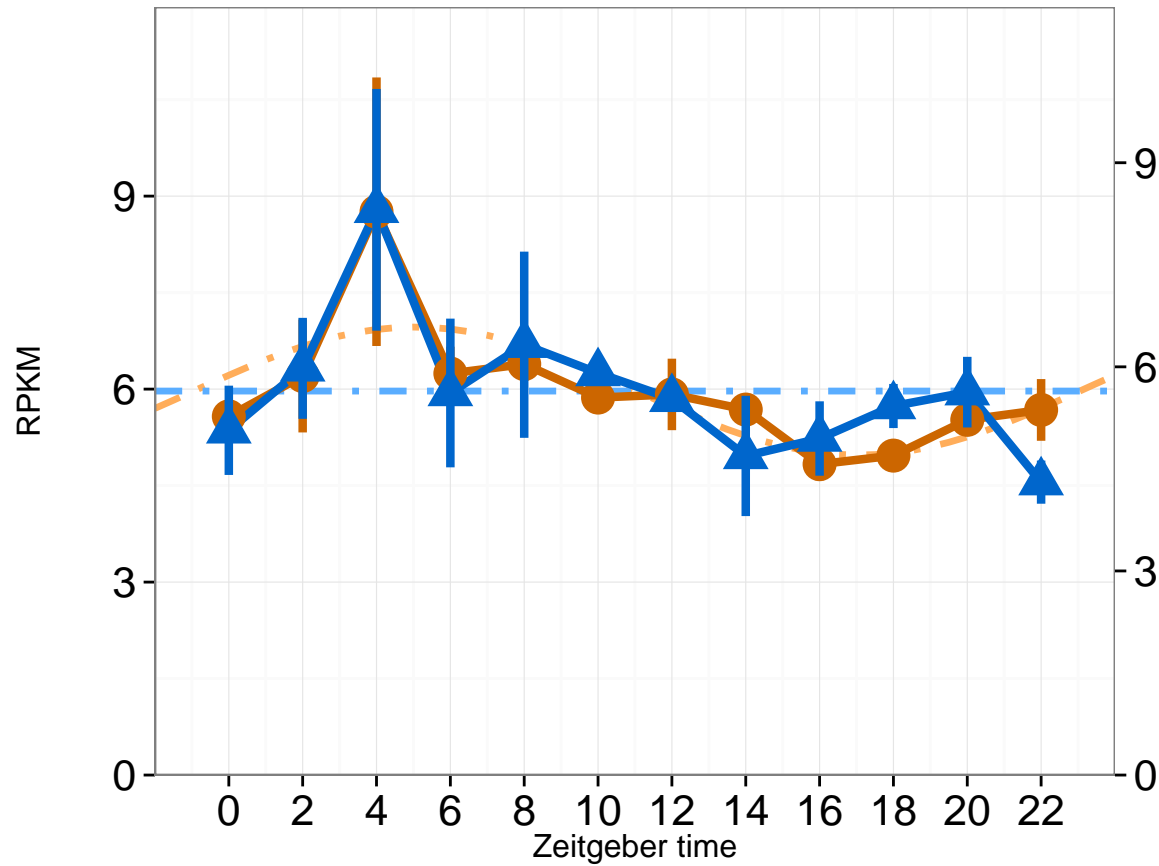

## Ikbke

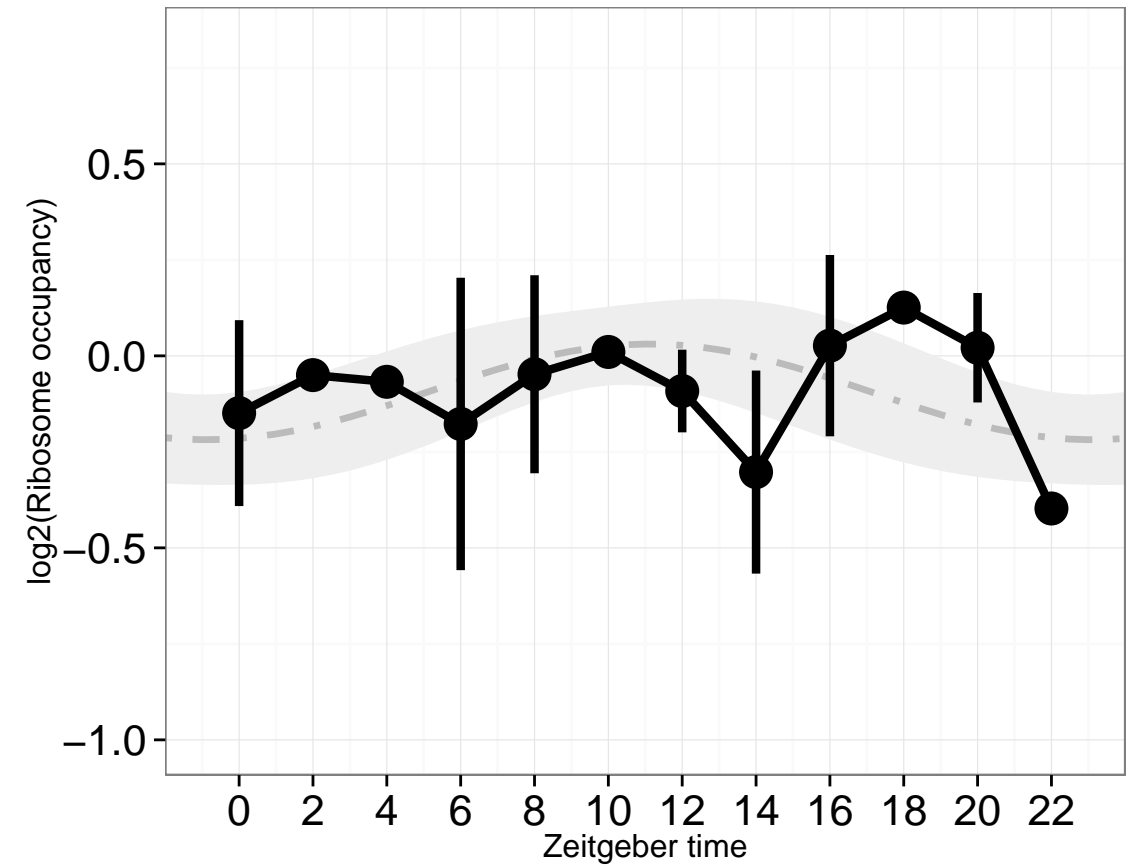

Supplement: SuppDataset_1.zip [file Ikbke_set_A.pdf › Supplemental Dataset 1/A-mRNA_nonrhyth_translation_nonrhyth/Ikbke_set_A.pdf]

## Ikbkg

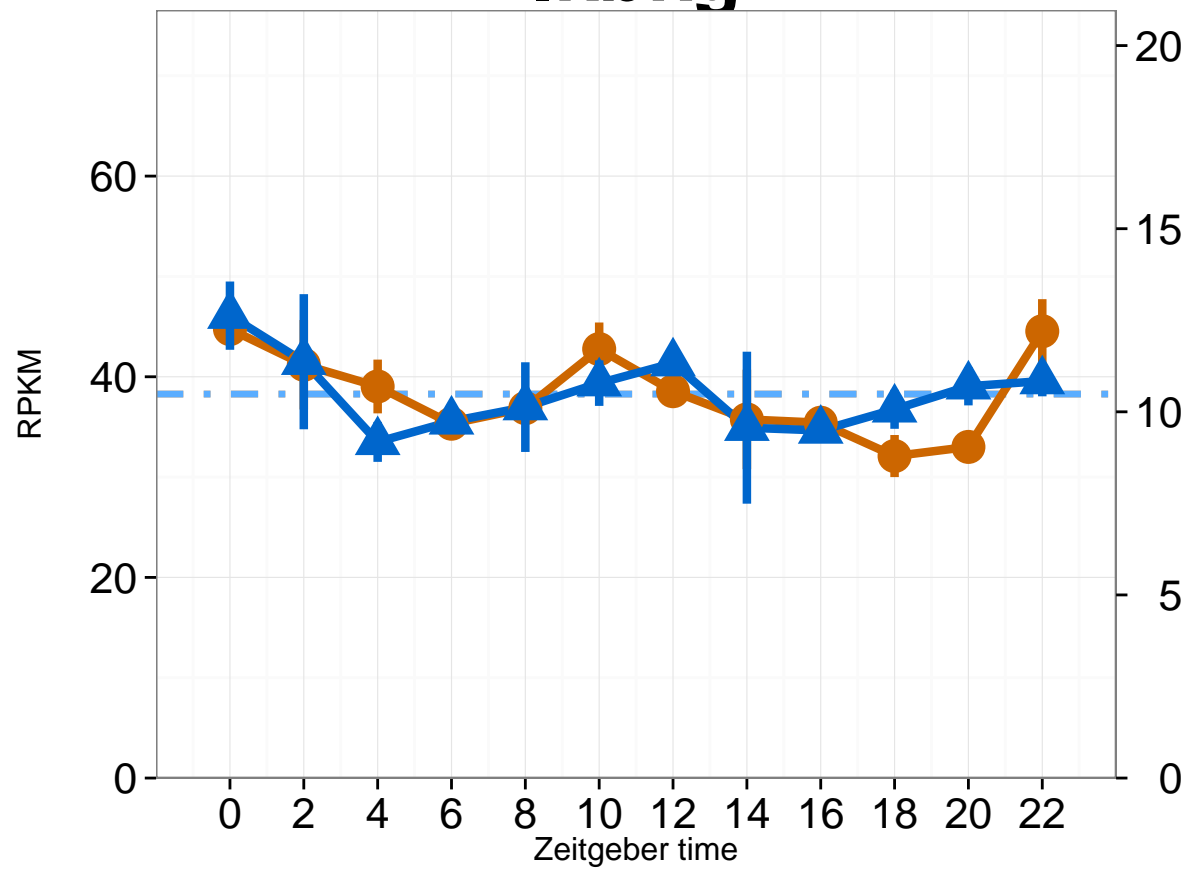

## Ikbkg

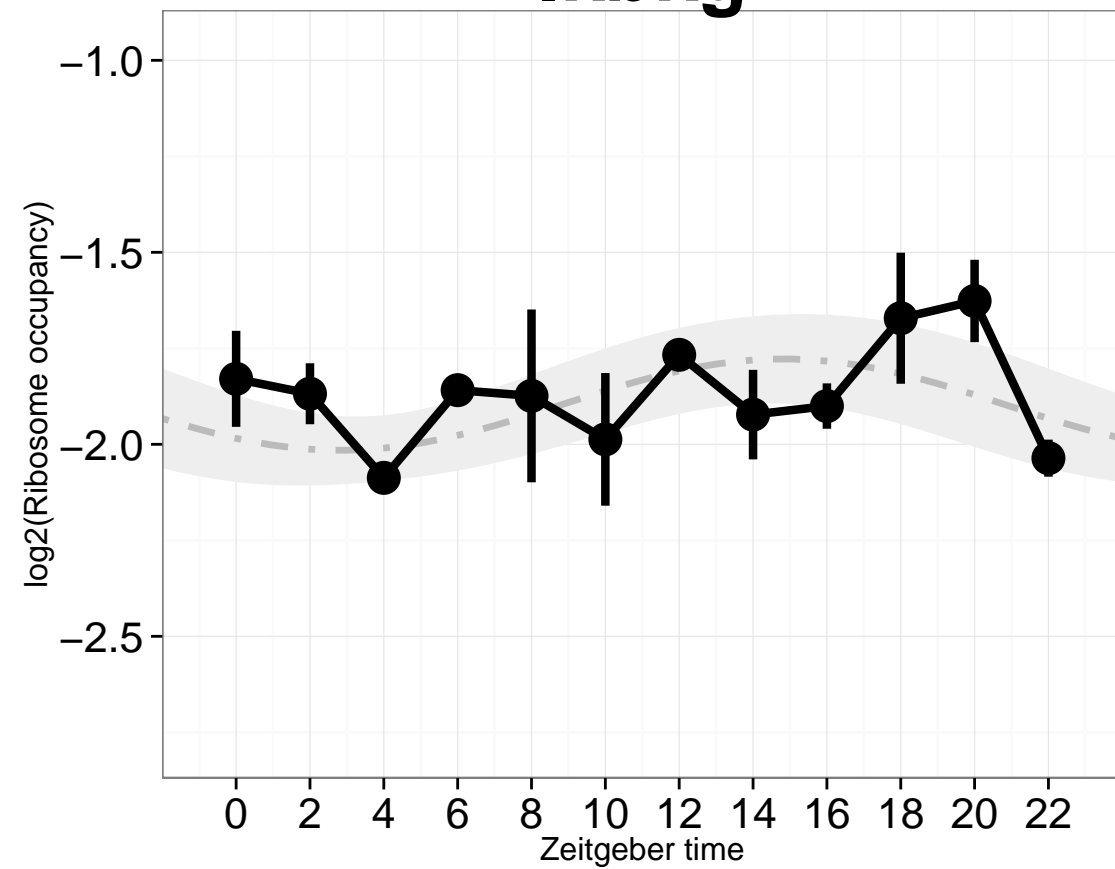

Supplement: SuppDataset_1.zip [file Ikbkg_set_A.pdf › Supplemental Dataset 1/A-mRNA_nonrhyth_translation_nonrhyth/Ikbkg_set_A.pdf]

# lkzf1

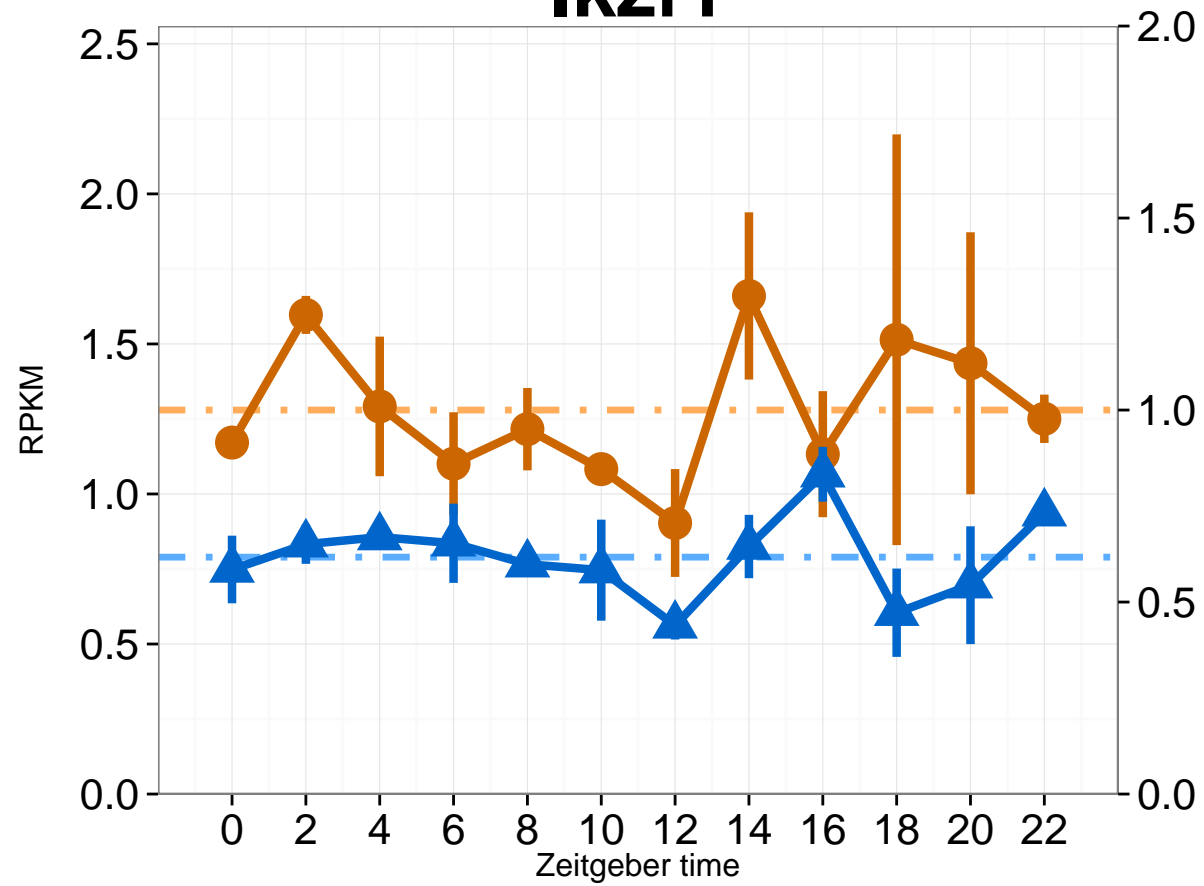

# lkzf1

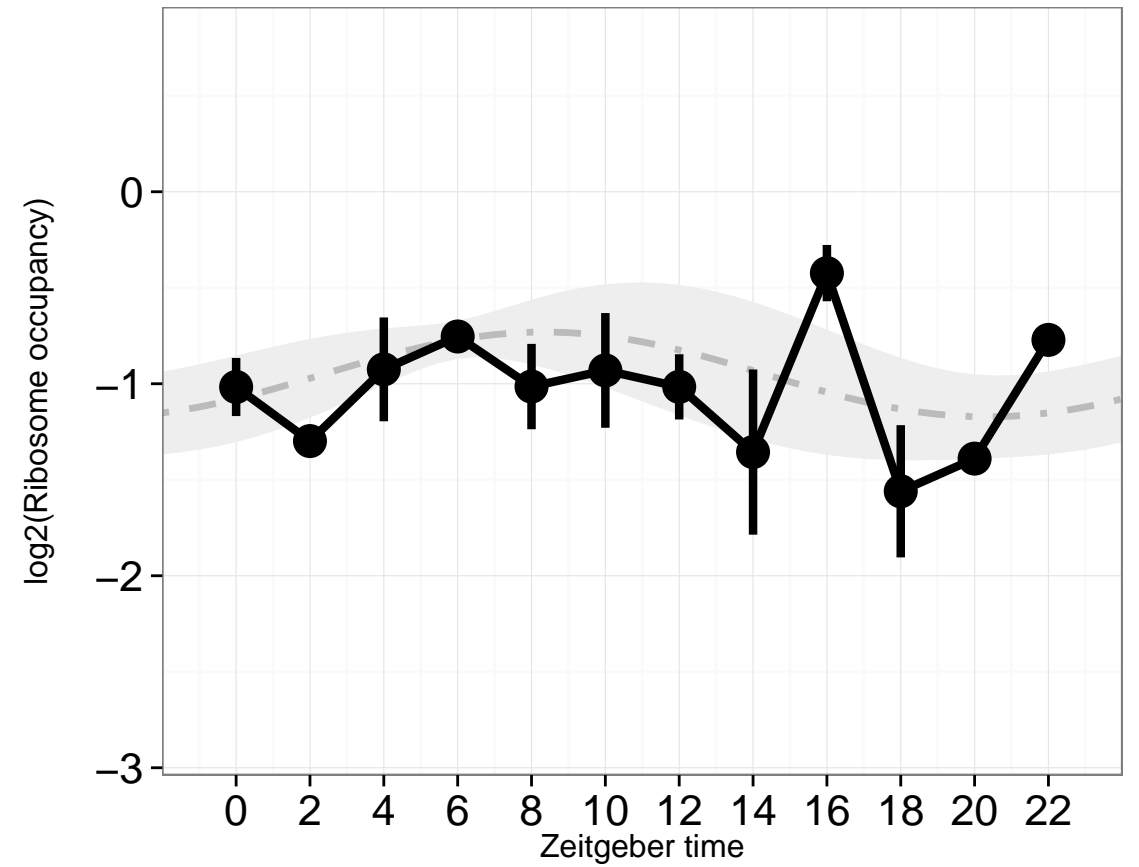

Supplement: SuppDataset_1.zip [file Ikzf1_set_A.pdf › Supplemental Dataset 1/A-mRNA_nonrhyth_translation_nonrhyth/Ikzf1_set_A.pdf]

## Ikzf4

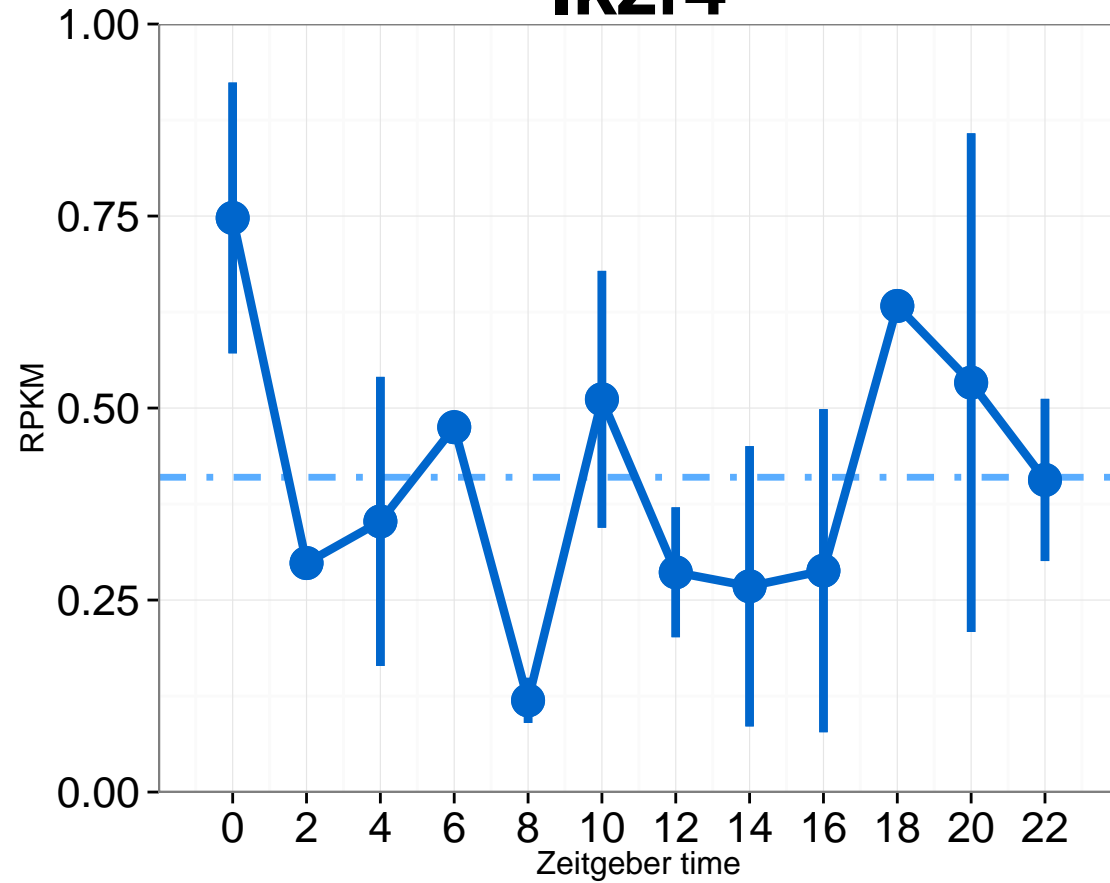

## Ikzf4 log2(Ribosome occupancy)

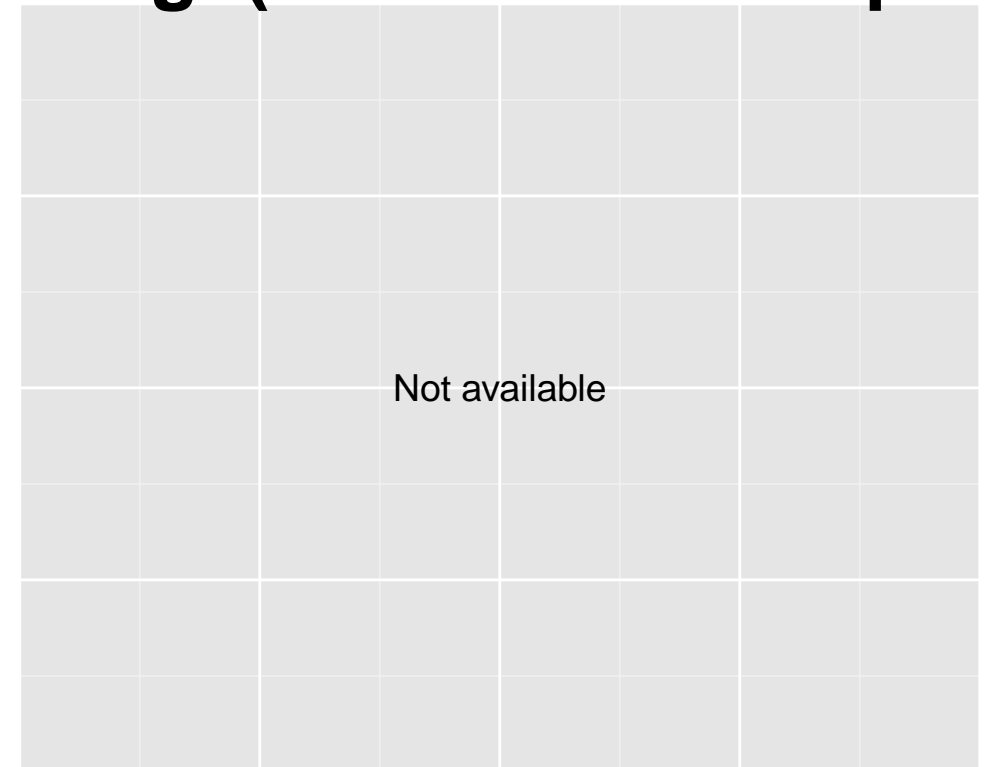

Supplement: SuppDataset_1.zip [file Ikzf4_set_A.pdf › Supplemental Dataset 1/A-mRNA_nonrhyth_translation_nonrhyth/Ikzf4_set_A.pdf]

## Ikzf5

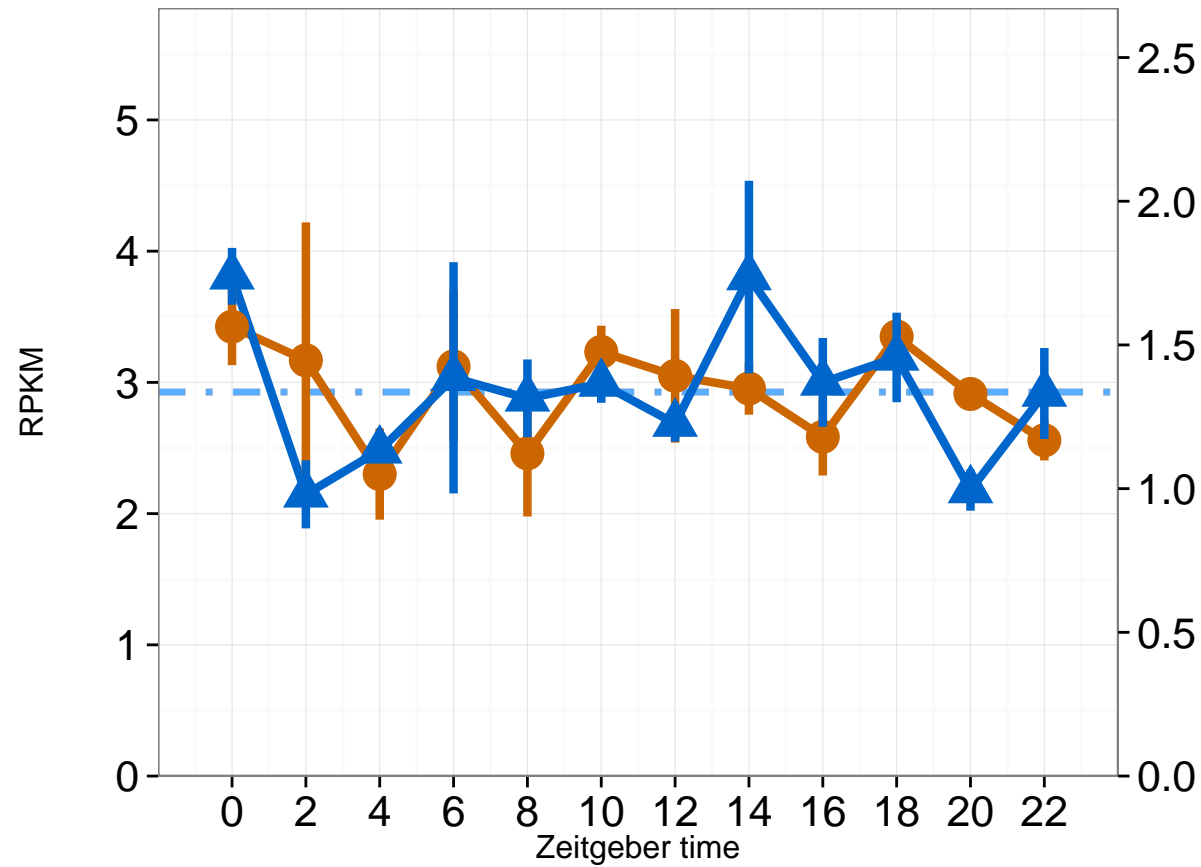

## Ikzf5

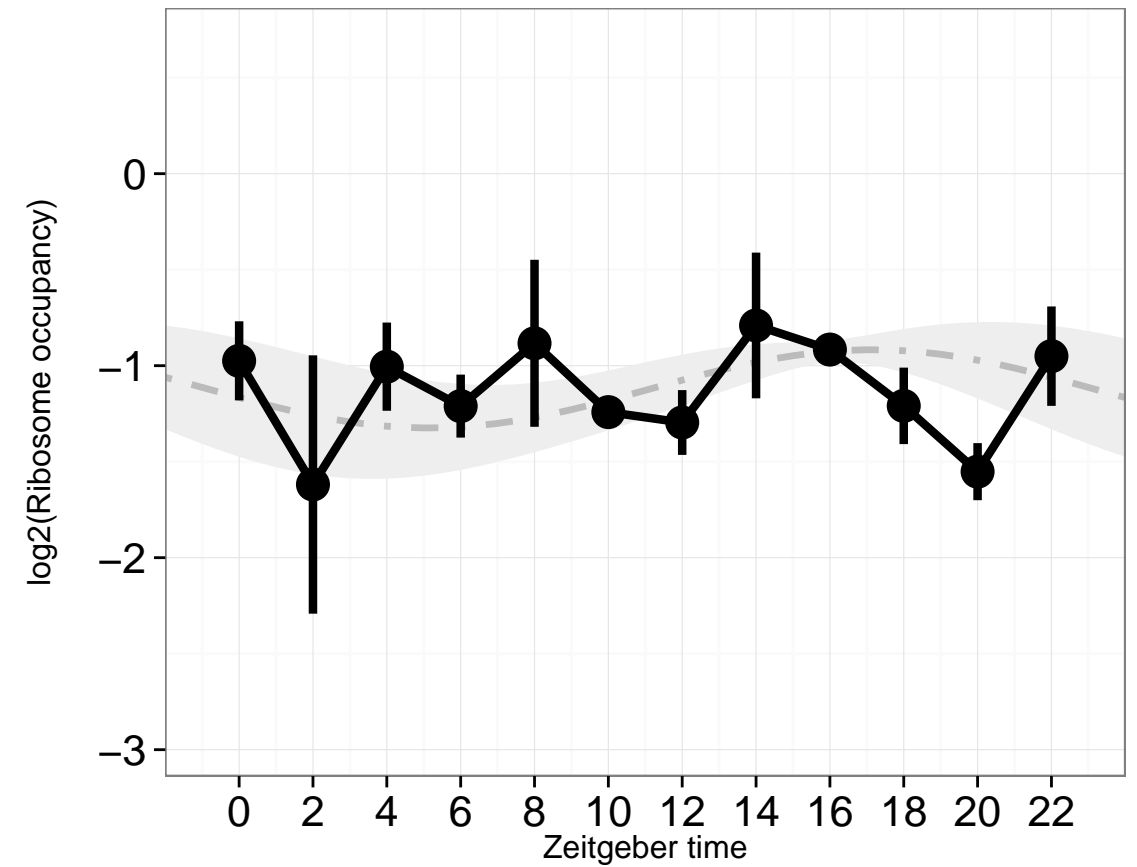

Supplement: SuppDataset_1.zip [file Ikzf5_set_A.pdf › Supplemental Dataset 1/A-mRNA_nonrhyth_translation_nonrhyth/Ikzf5_set_A.pdf]

# Il10ra

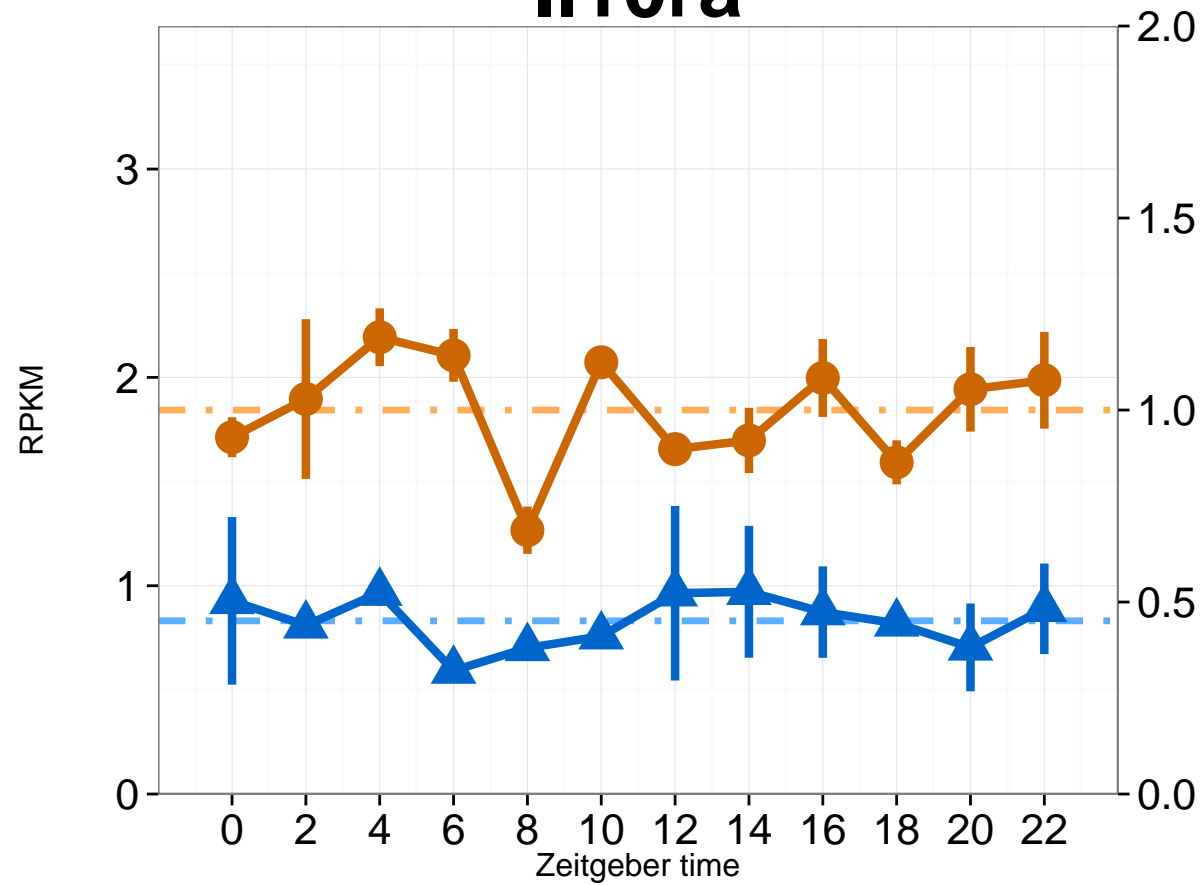

# Il10ra

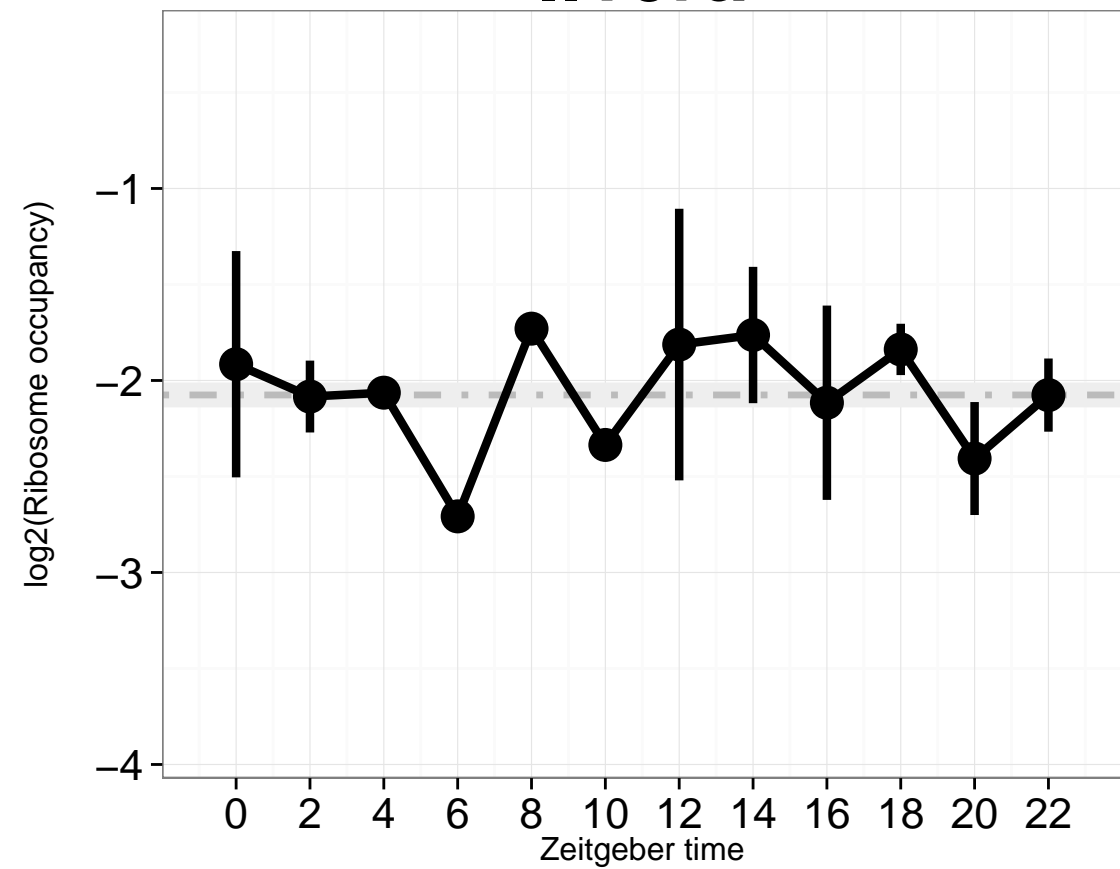

Supplement: SuppDataset_1.zip [file Il10ra_set_A.pdf › Supplemental Dataset 1/A-mRNA_nonrhyth_translation_nonrhyth/Il10ra_set_A.pdf]

# Il10rb

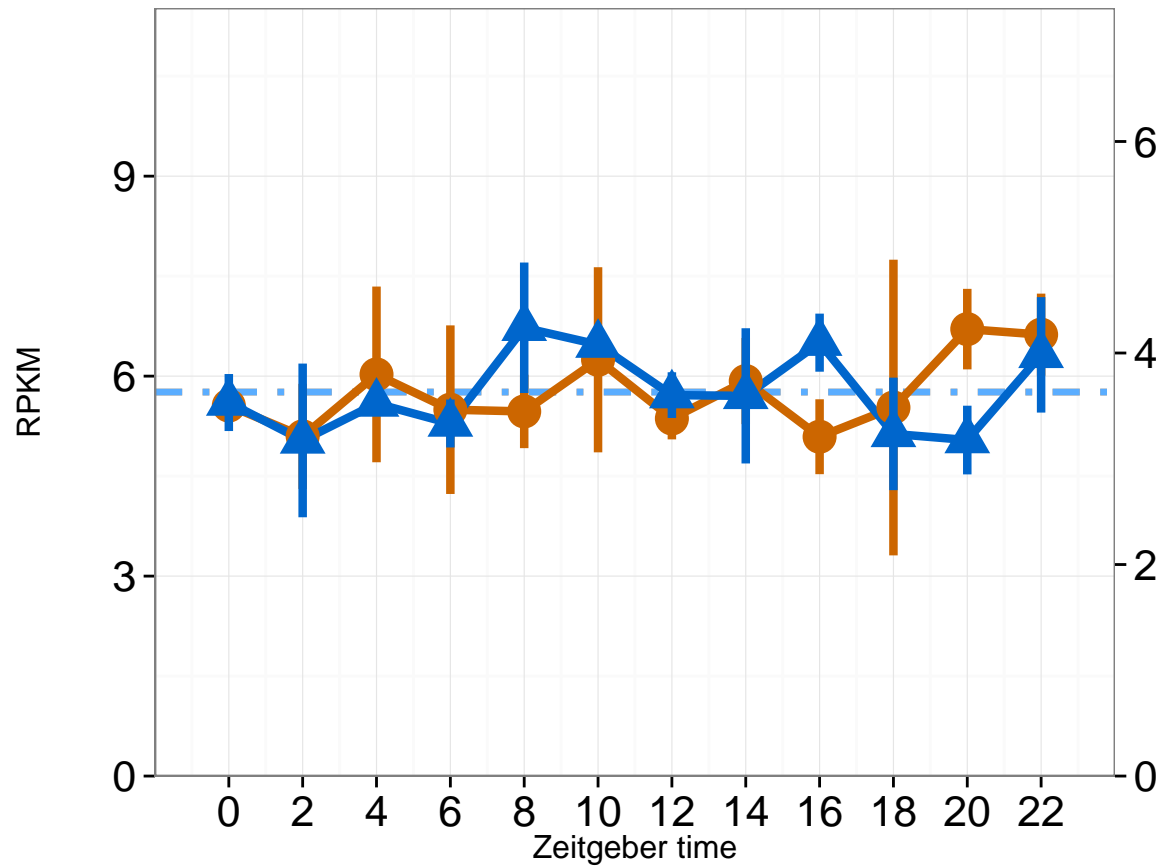

# Il10rb

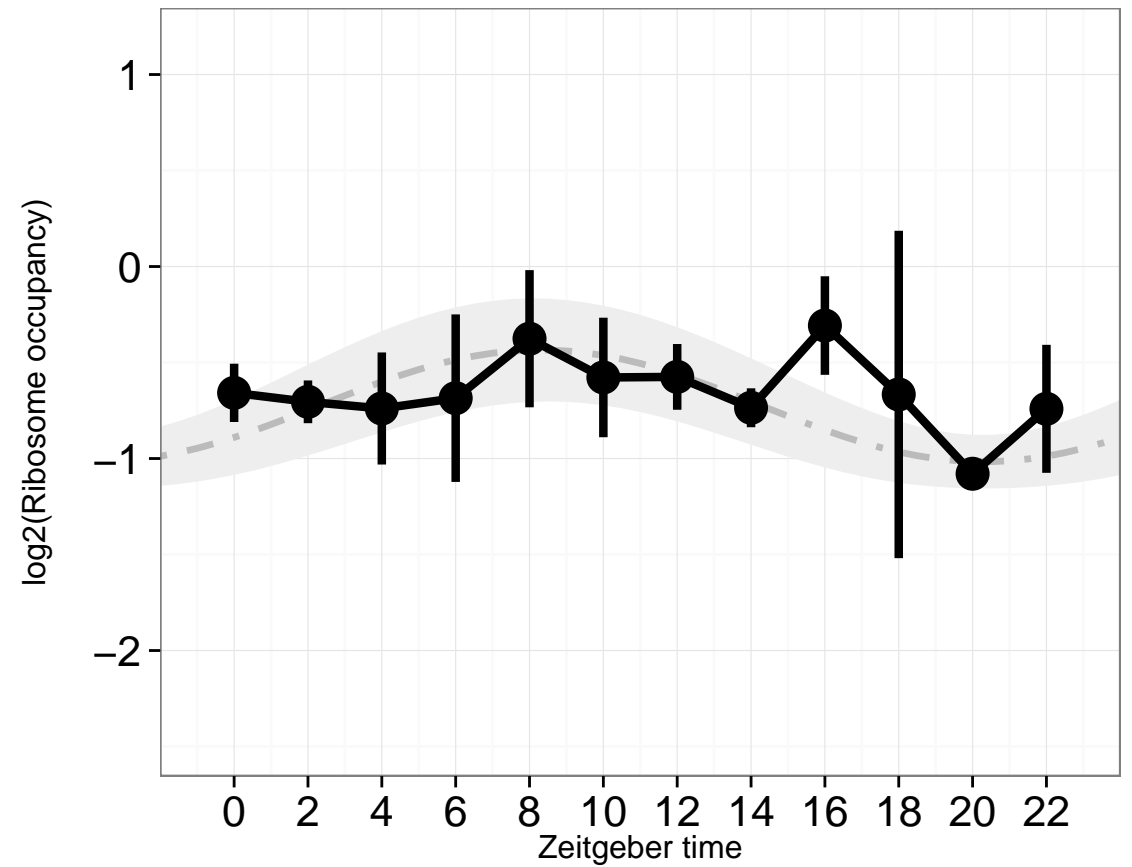

Supplement: SuppDataset_1.zip [file Il10rb_set_A.pdf › Supplemental Dataset 1/A-mRNA_nonrhyth_translation_nonrhyth/Il10rb_set_A.pdf]

## Il13ra1

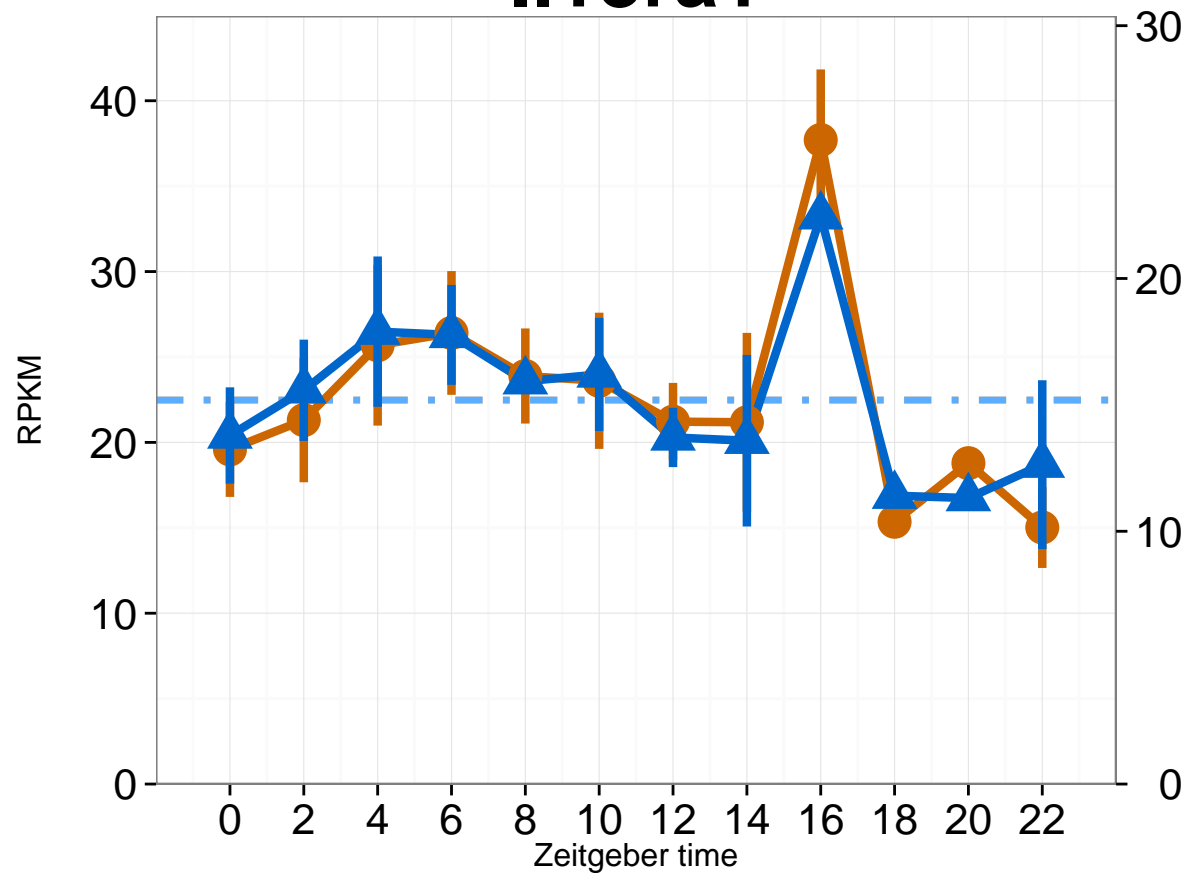

## Il13ra1

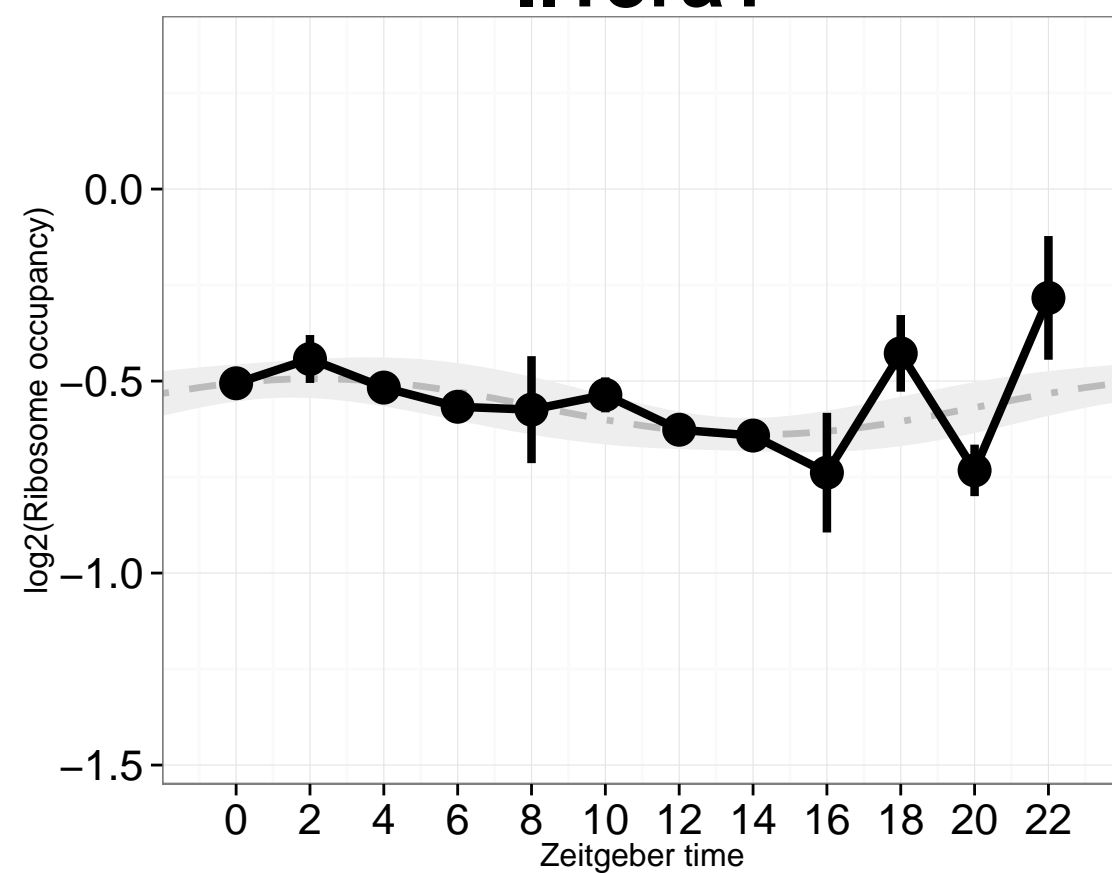

Supplement: SuppDataset_1.zip [file Il13ra1_set_A.pdf › Supplemental Dataset 1/A-mRNA_nonrhyth_translation_nonrhyth/Il13ra1_set_A.pdf]

## Il17rb

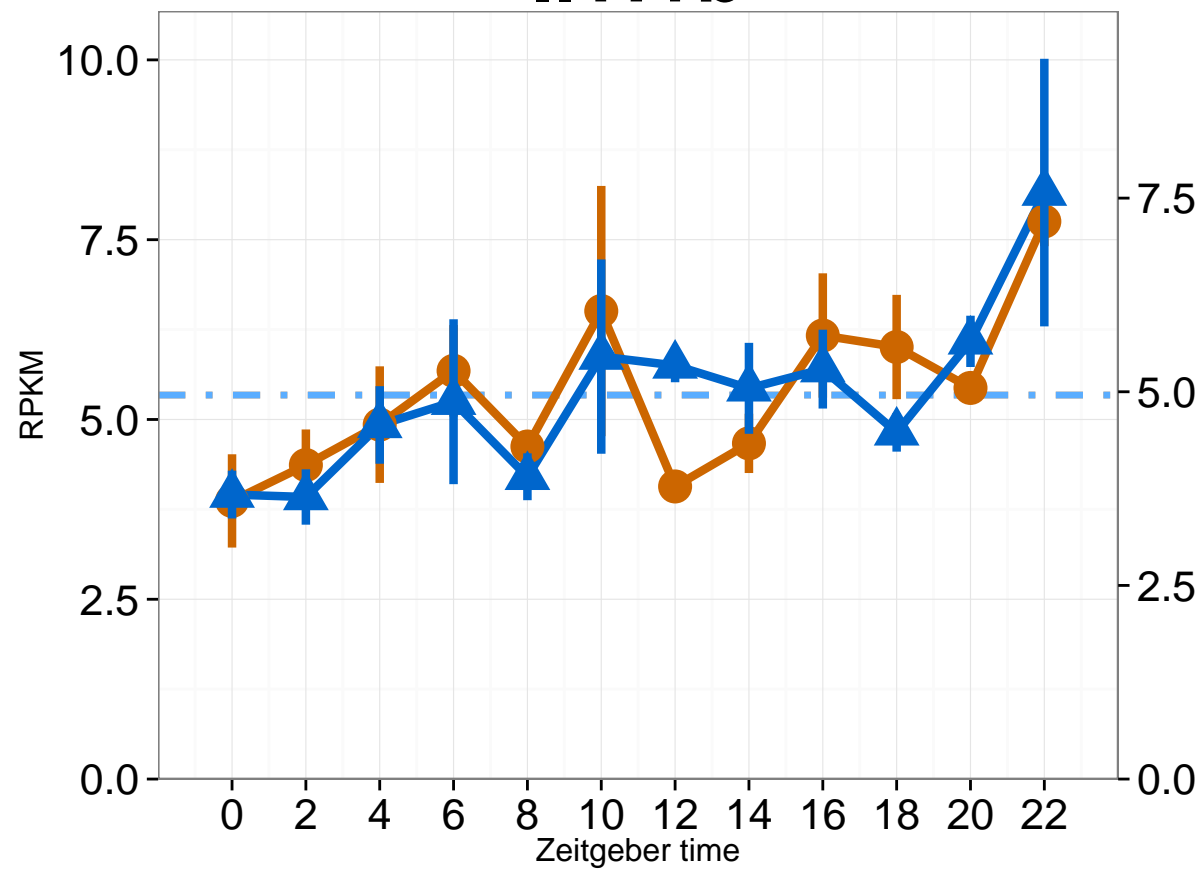

## Il17rb

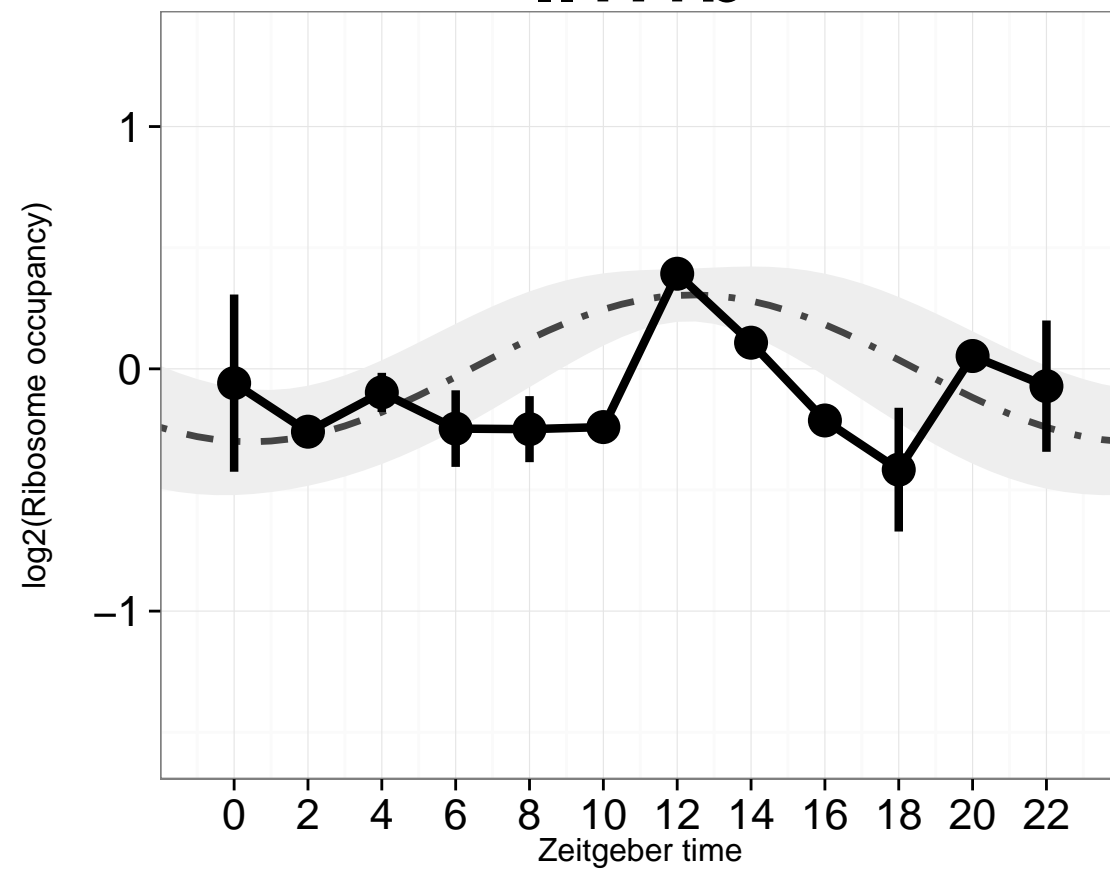

Supplement: SuppDataset_1.zip [file Il17rb_set_A.pdf › Supplemental Dataset 1/A-mRNA_nonrhyth_translation_nonrhyth/Il17rb_set_A.pdf]

## Il17rd

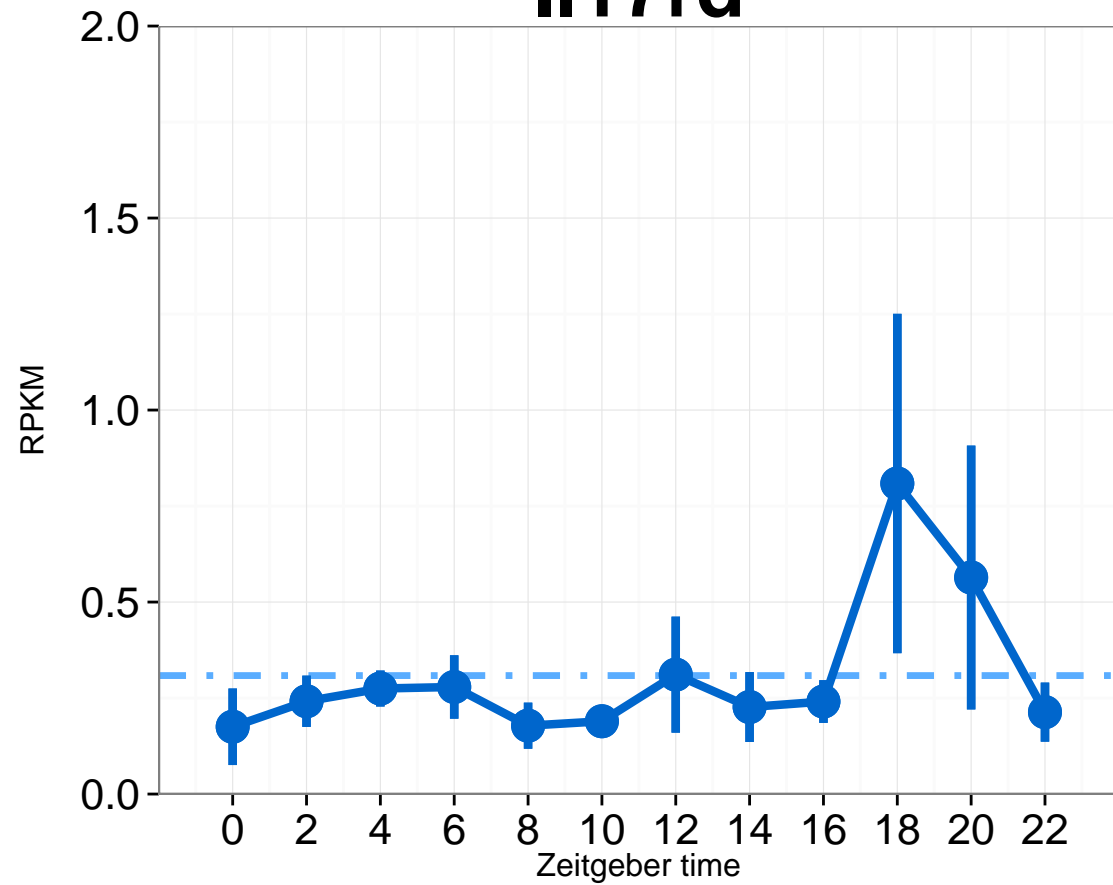

## Il17rd log2(Ribosome occupancy)

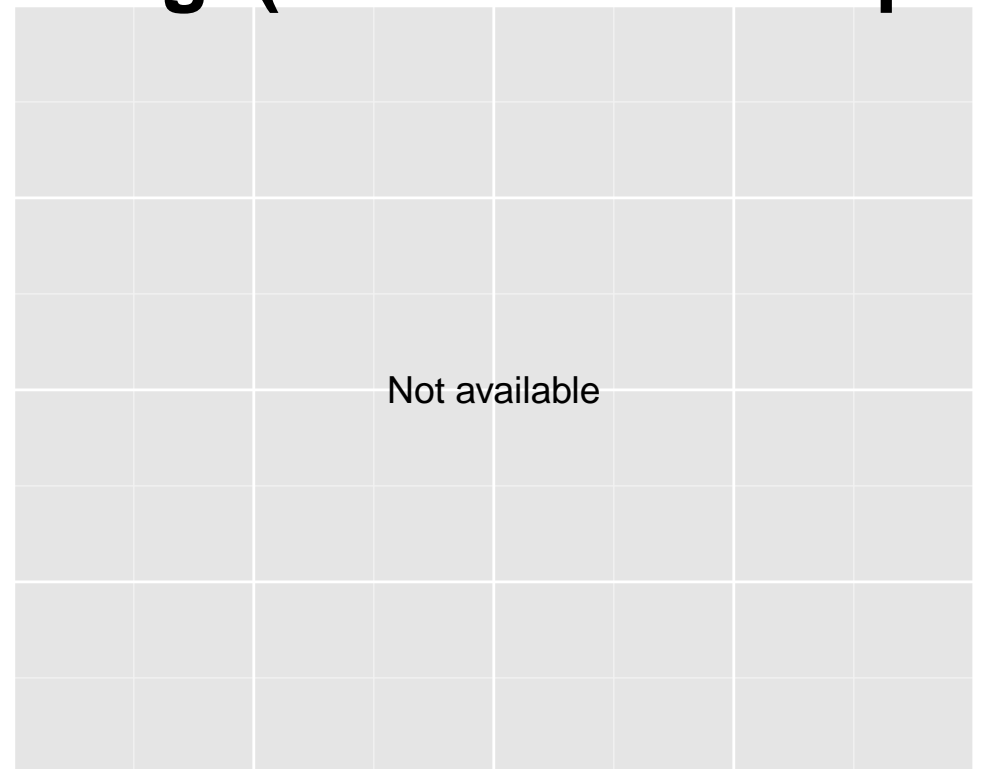

Supplement: SuppDataset_1.zip [file Il17rd_set_A.pdf › Supplemental Dataset 1/A-mRNA_nonrhyth_translation_nonrhyth/Il17rd_set_A.pdf]

# II18

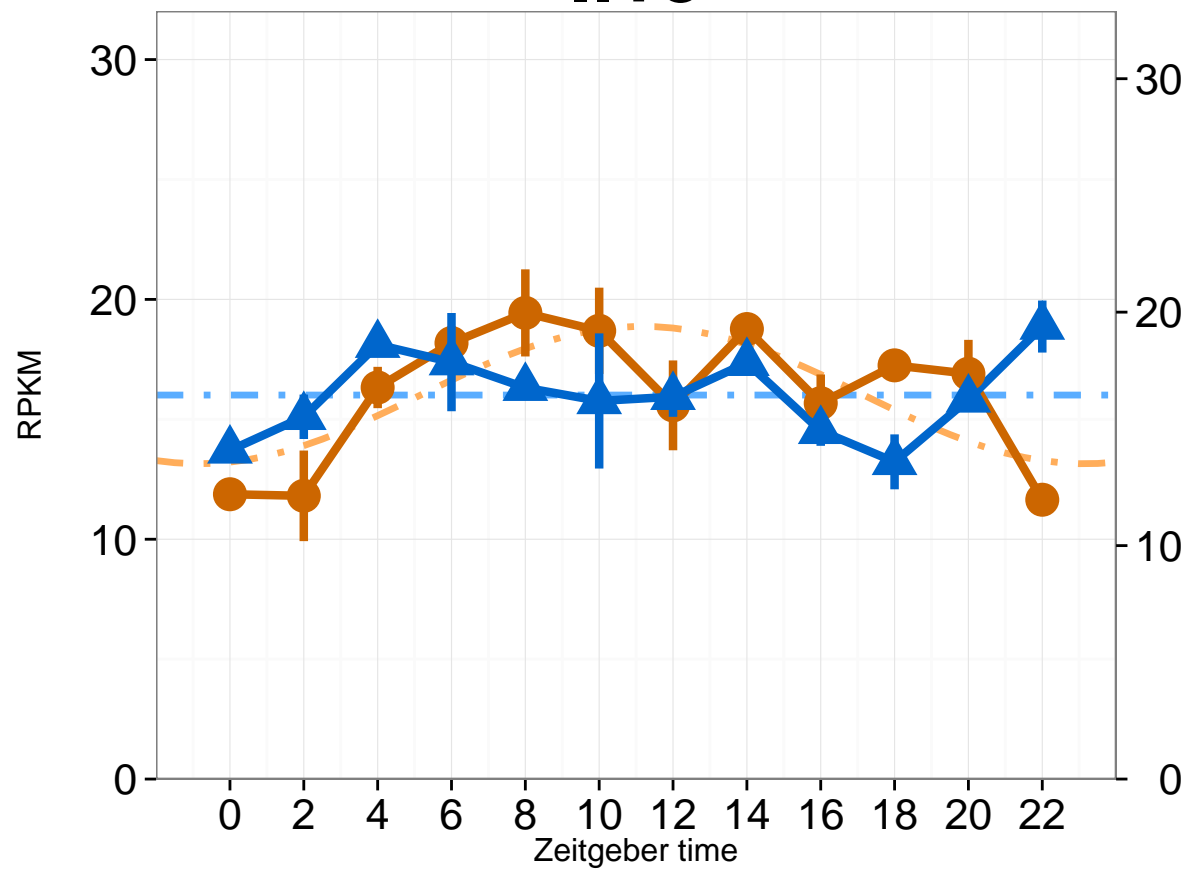

# II18

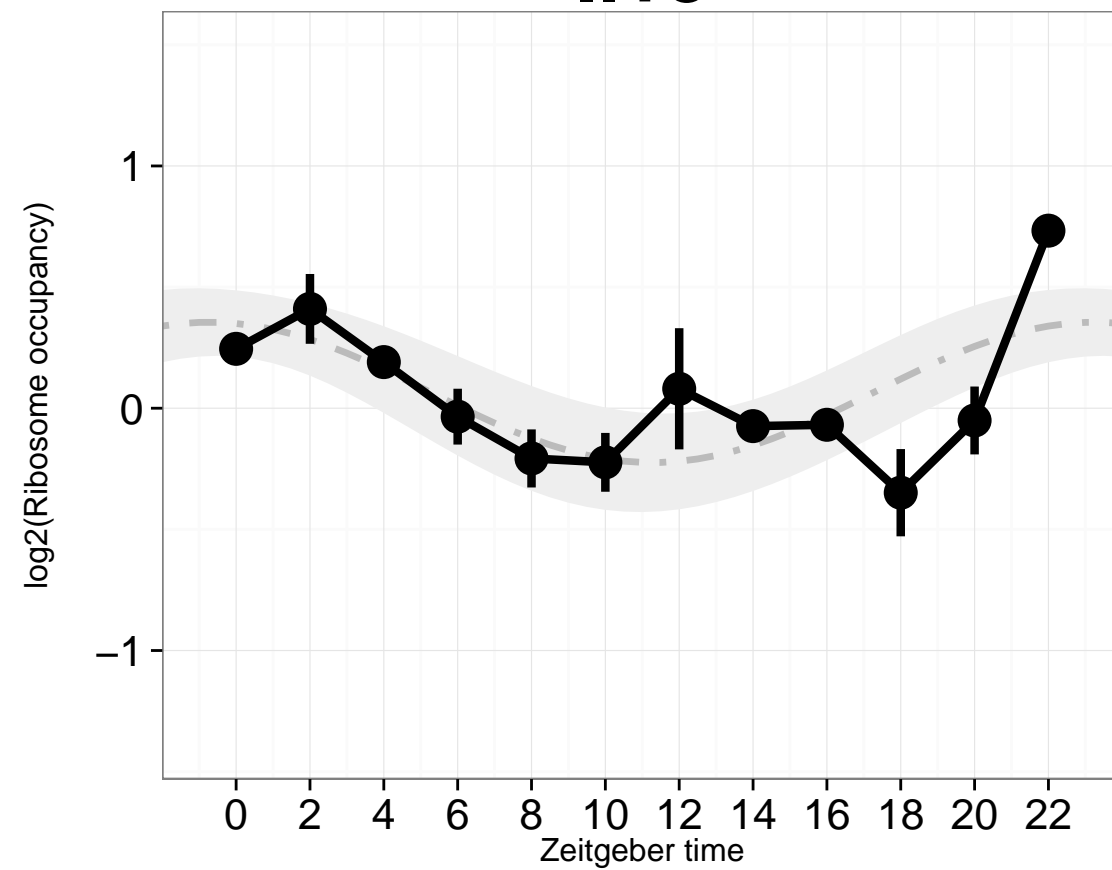

Supplement: SuppDataset_1.zip [file Il18_set_A.pdf › Supplemental Dataset 1/A-mRNA_nonrhyth_translation_nonrhyth/Il18_set_A.pdf]

## Il18bp

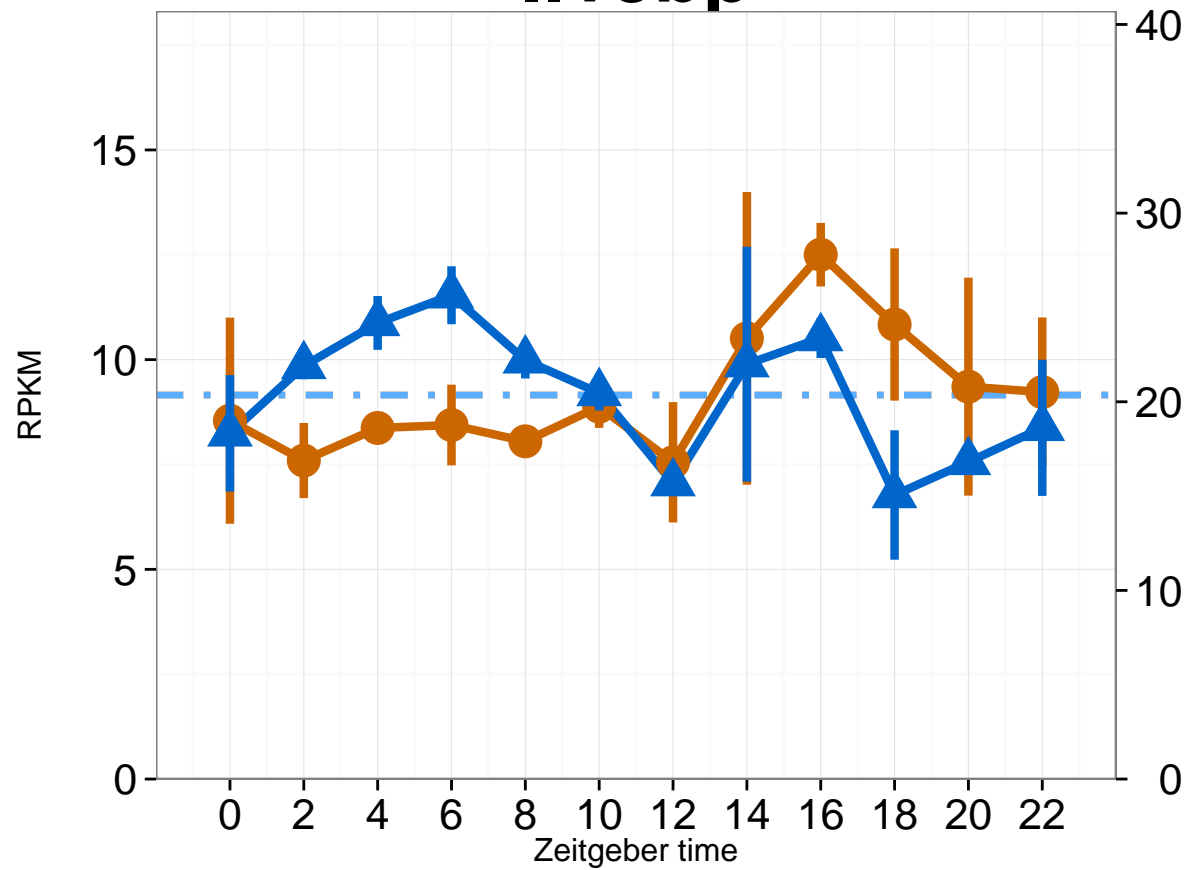

## Il18bp

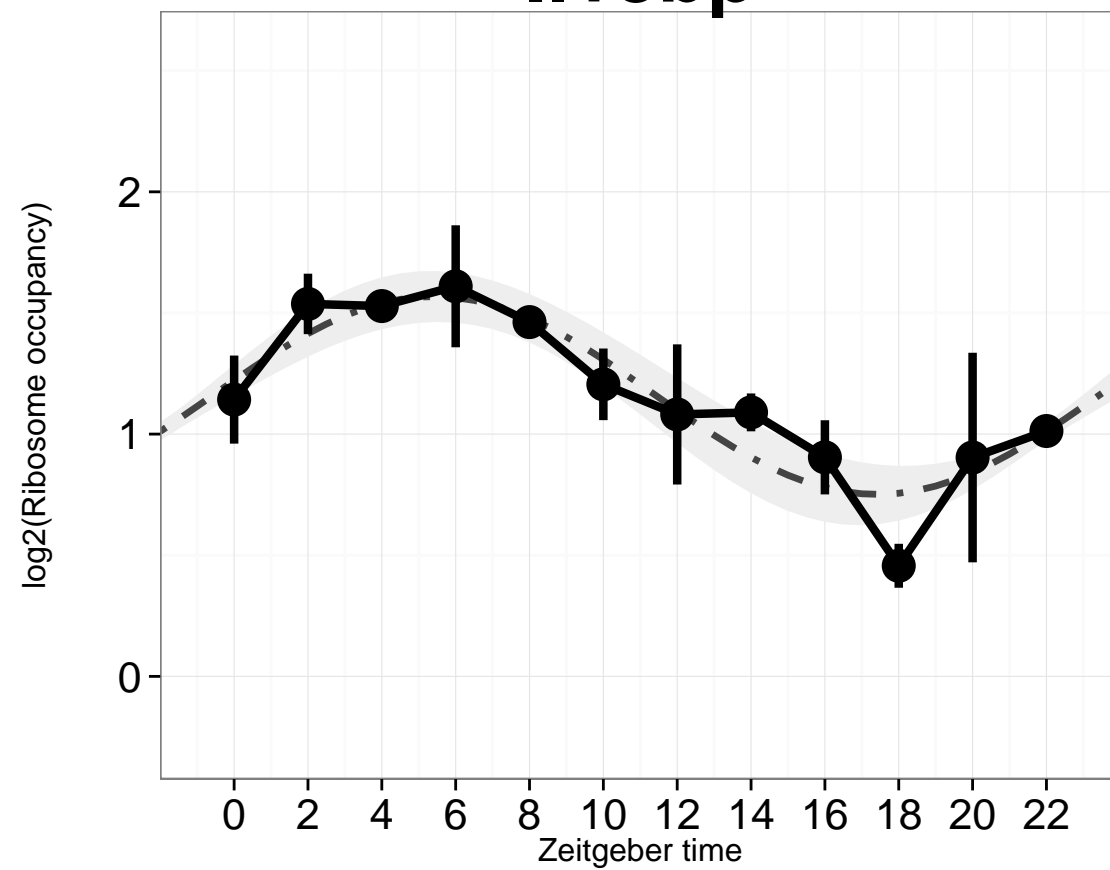

Supplement: SuppDataset_1.zip [file Il18bp_set_A.pdf › Supplemental Dataset 1/A-mRNA_nonrhyth_translation_nonrhyth/Il18bp_set_A.pdf]

## Il1a

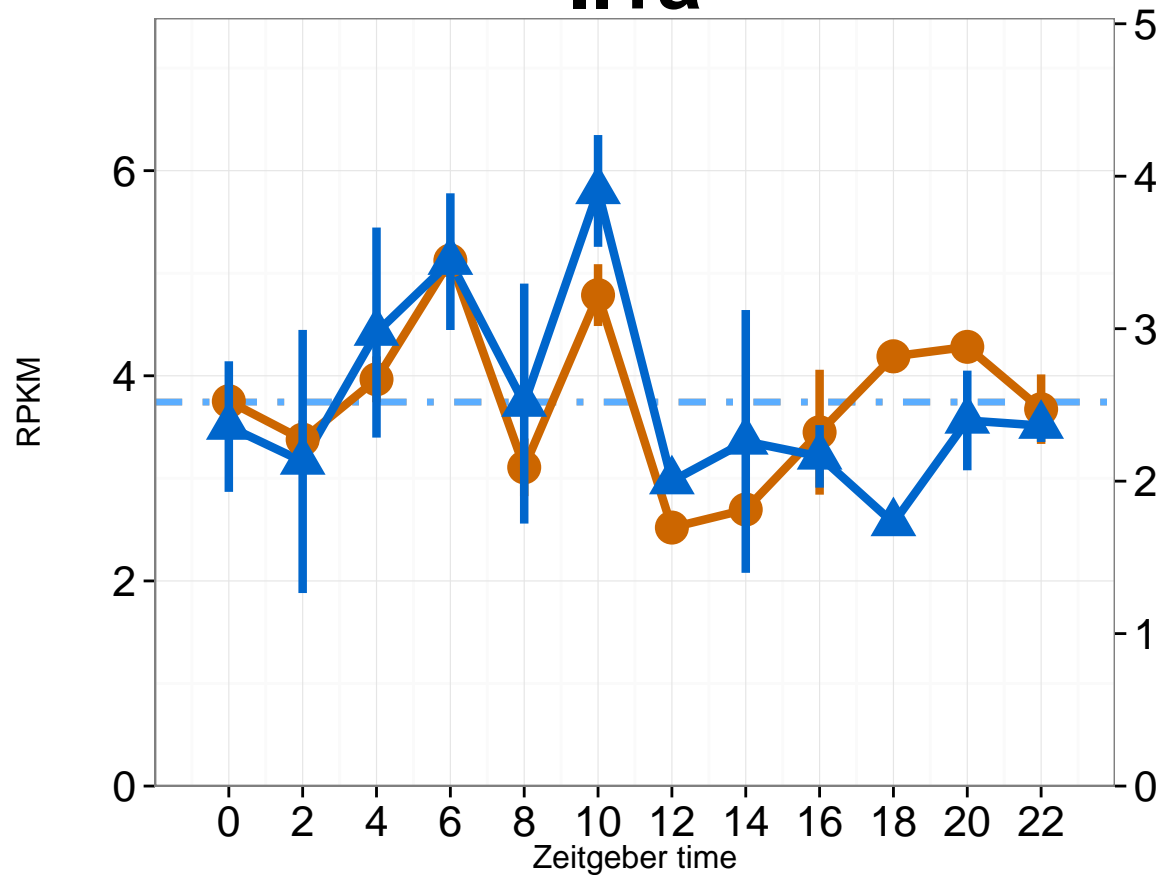

## Il1a

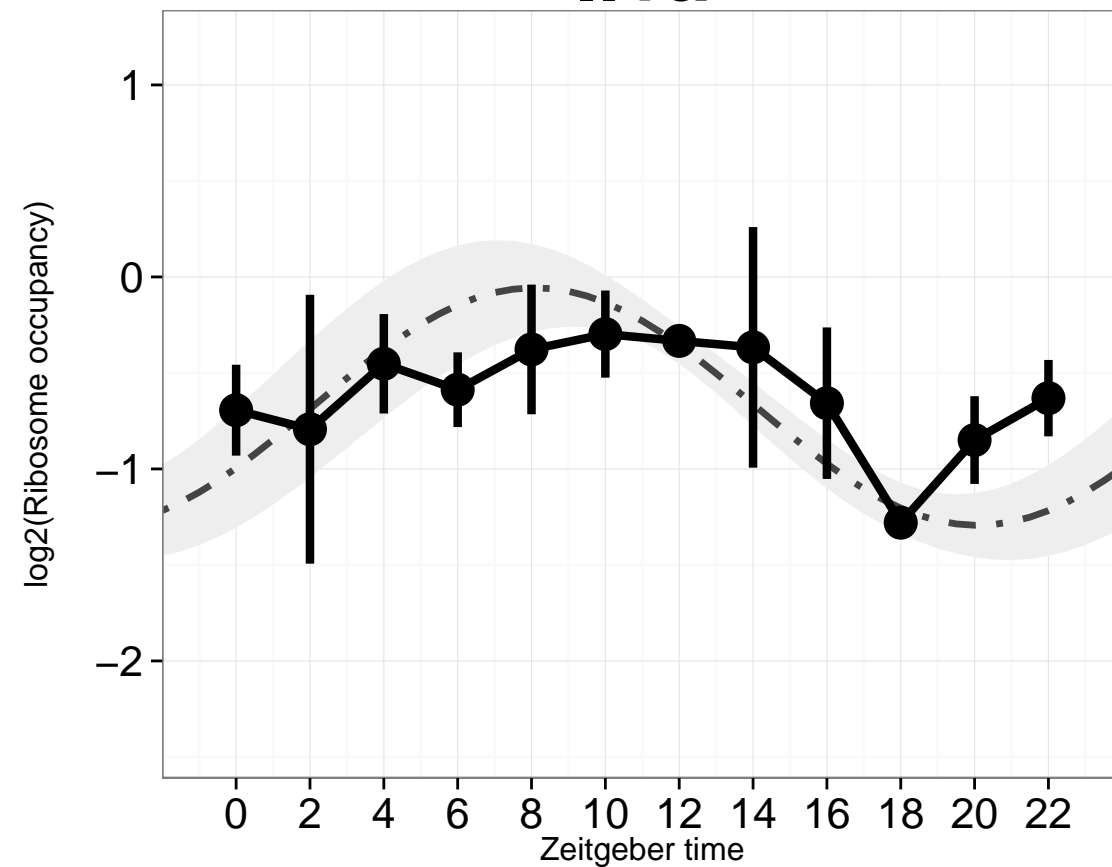

Supplement: SuppDataset_1.zip [file Il1a_set_A.pdf › Supplemental Dataset 1/A-mRNA_nonrhyth_translation_nonrhyth/Il1a_set_A.pdf]

# II1b

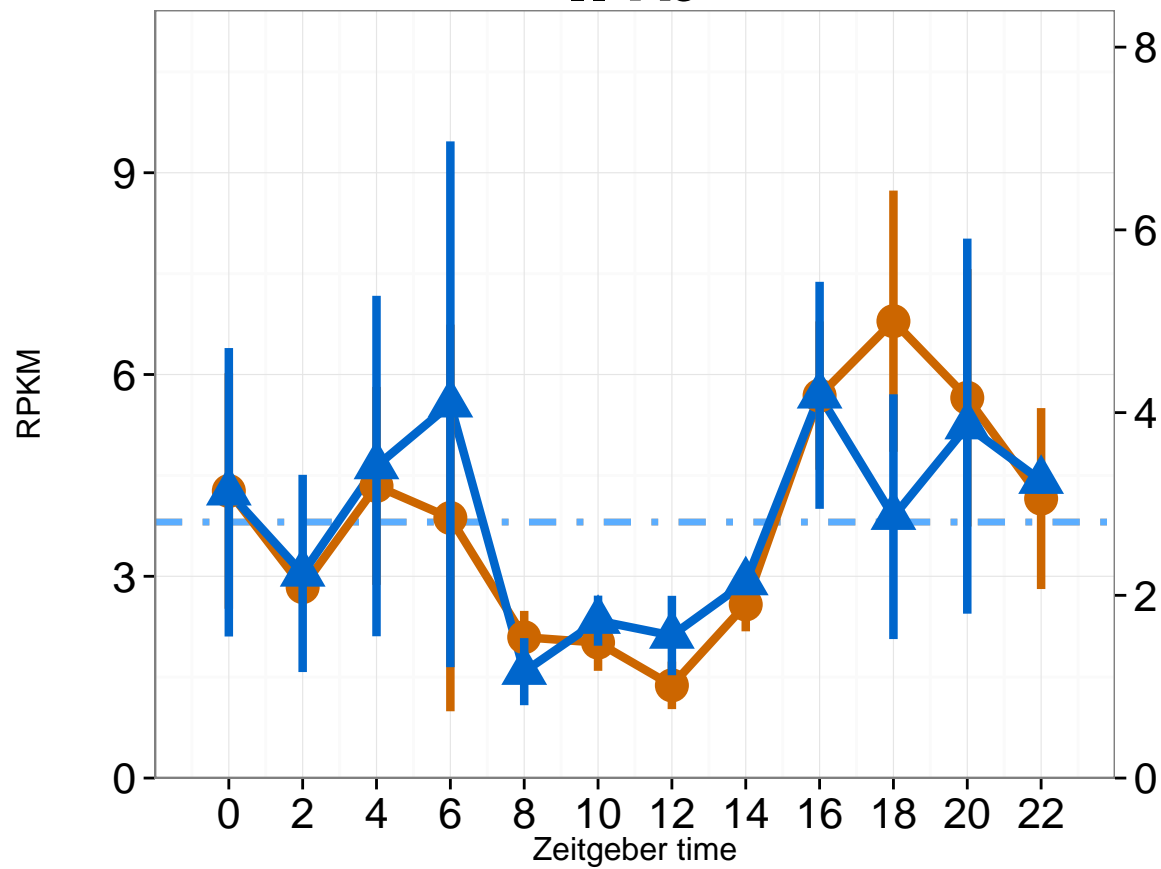

# II1b

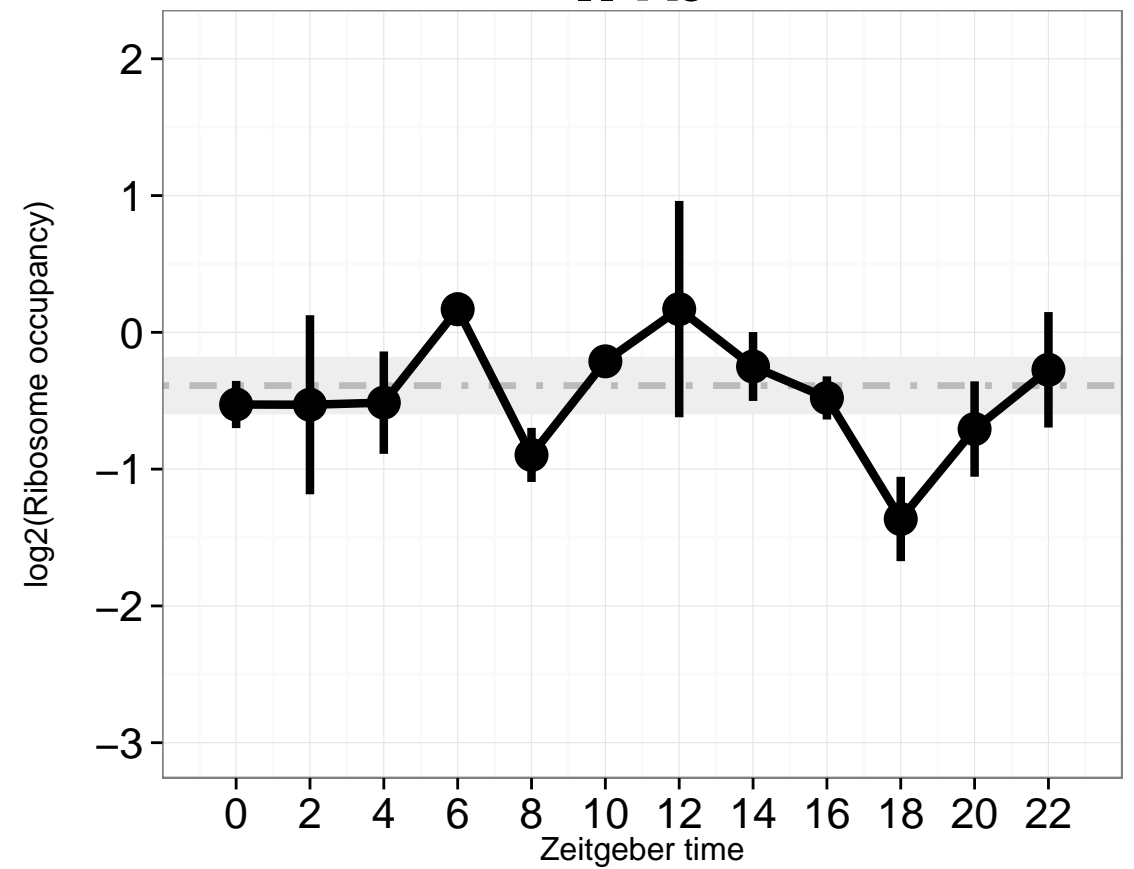

Supplement: SuppDataset_1.zip [file Il1b_set_A.pdf › Supplemental Dataset 1/A-mRNA_nonrhyth_translation_nonrhyth/Il1b_set_A.pdf]

# Il1rap

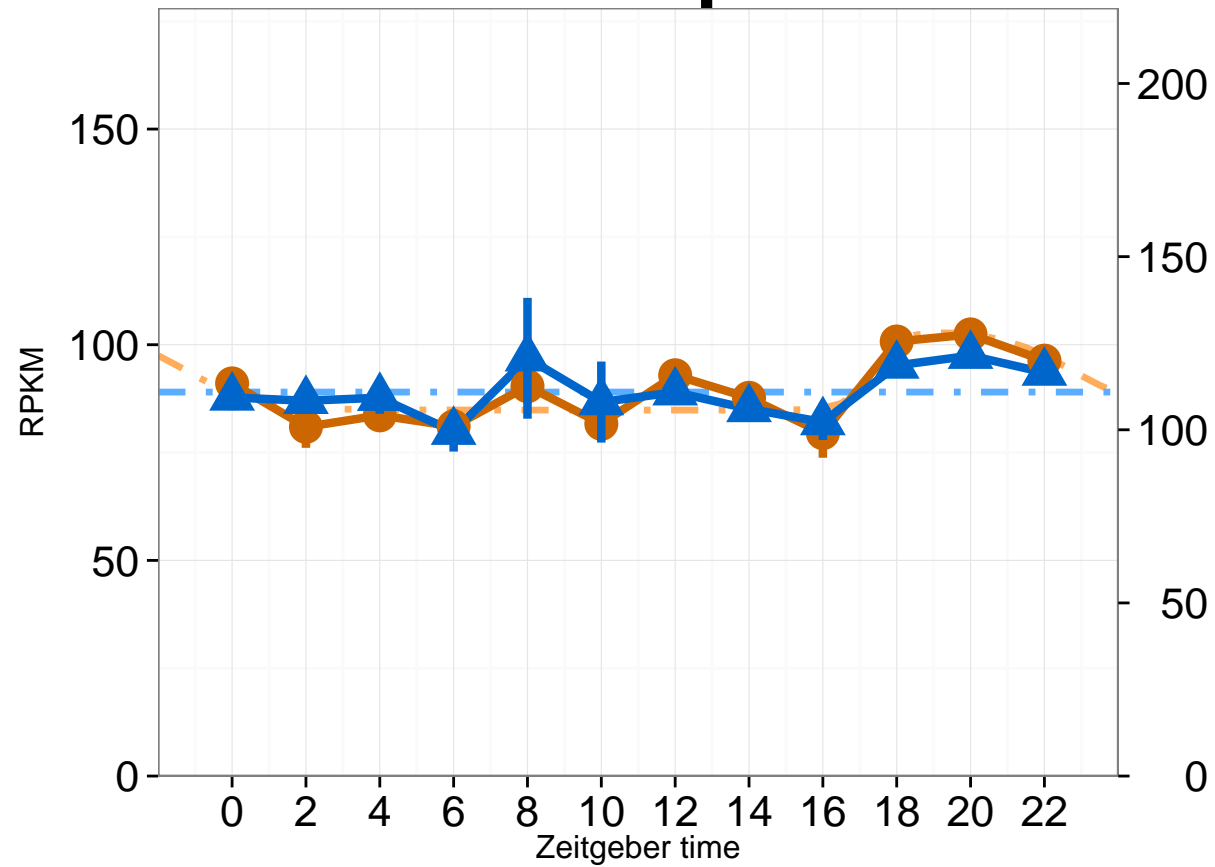

# Il1rap

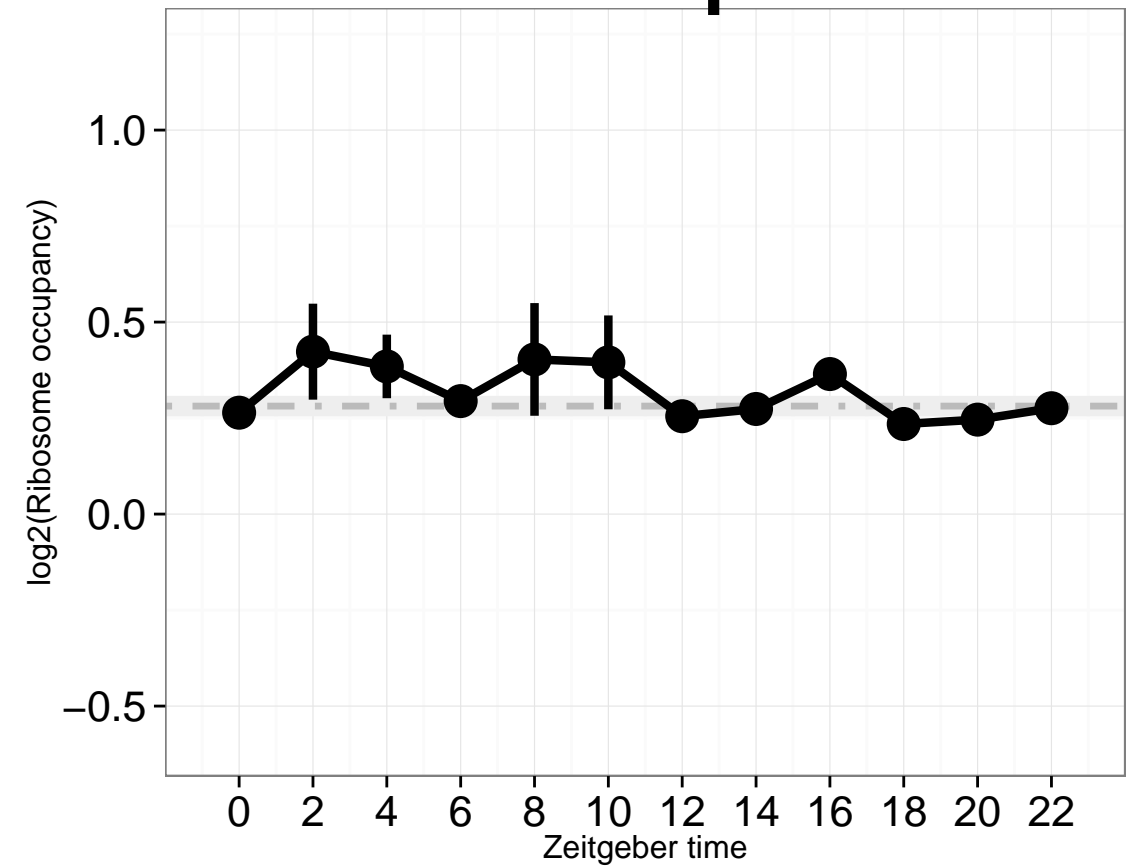

Supplement: SuppDataset_1.zip [file Il1rap_set_A.pdf › Supplemental Dataset 1/A-mRNA_nonrhyth_translation_nonrhyth/Il1rap_set_A.pdf]

## Il1rn

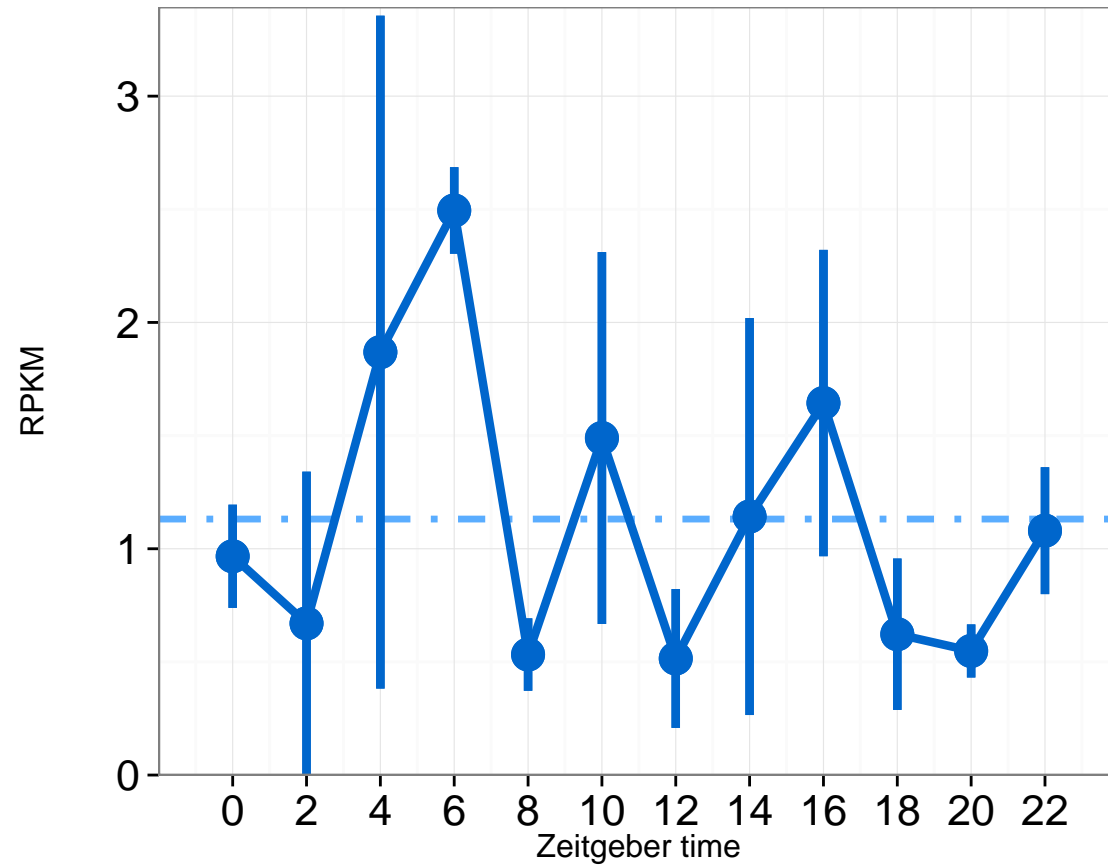

## Il1rn log2(Ribosome occupancy)

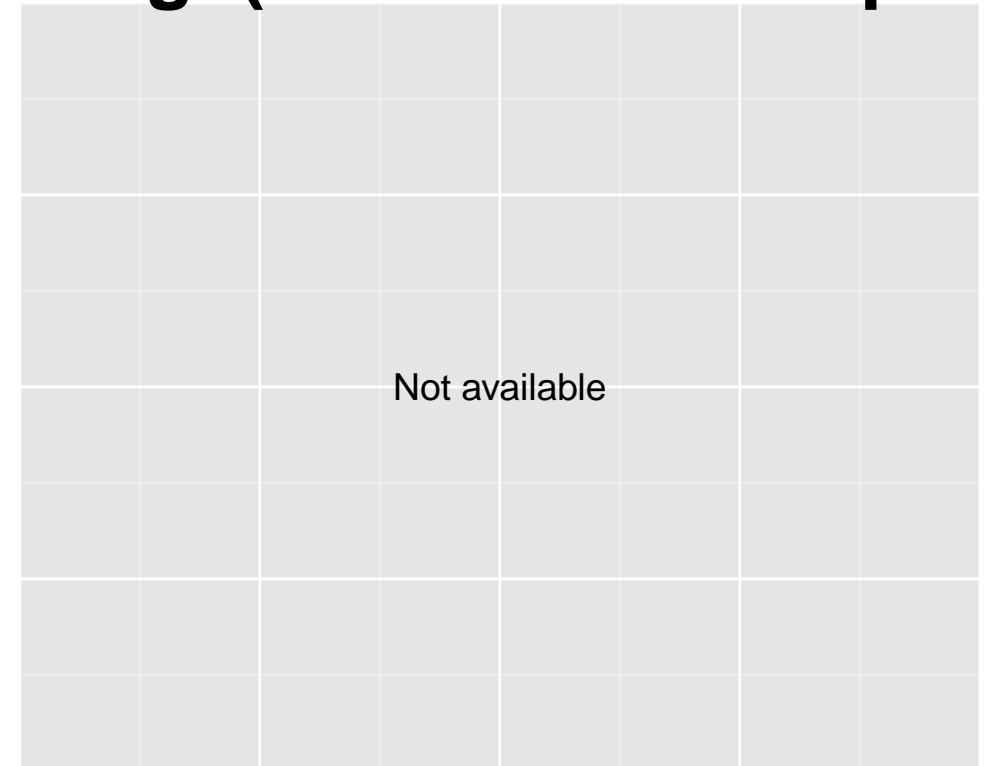

Supplement: SuppDataset_1.zip [file Il1rn_set_A.pdf › Supplemental Dataset 1/A-mRNA_nonrhyth_translation_nonrhyth/Il1rn_set_A.pdf]

# Il22ra1

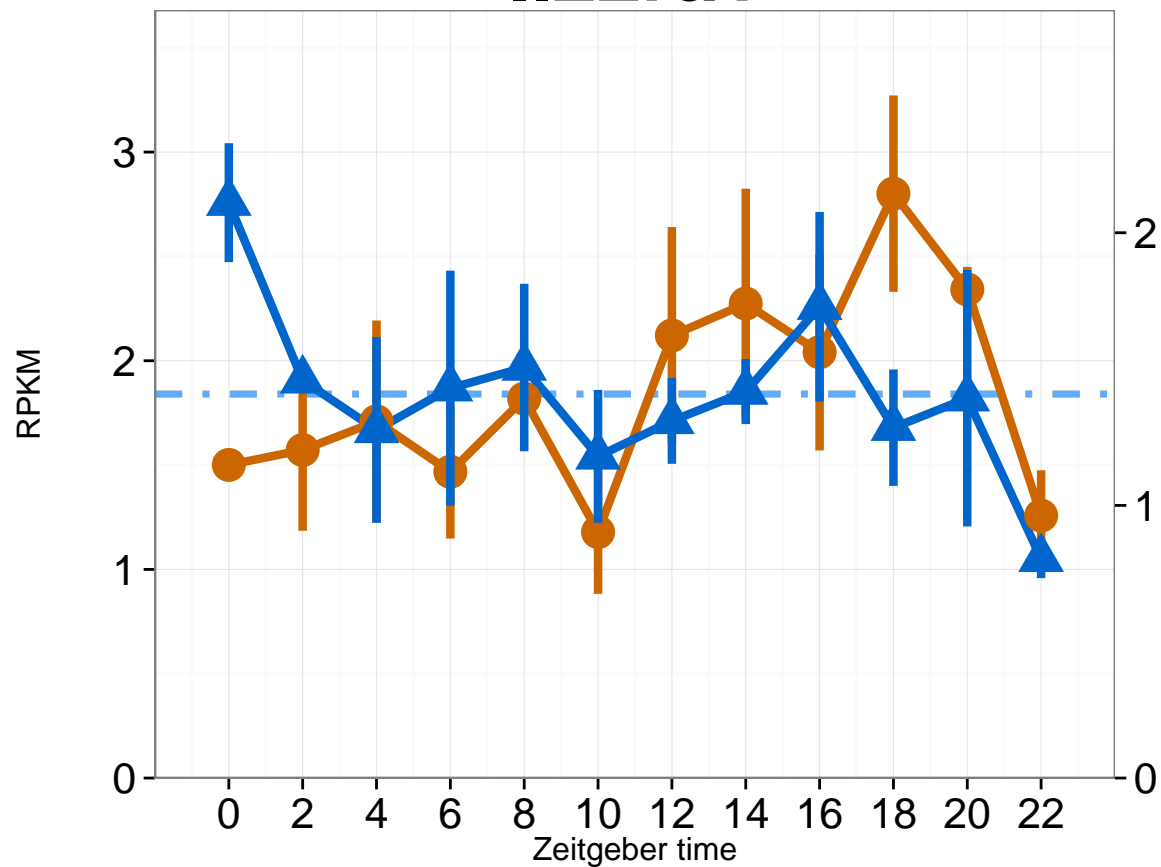

# Il22ra1

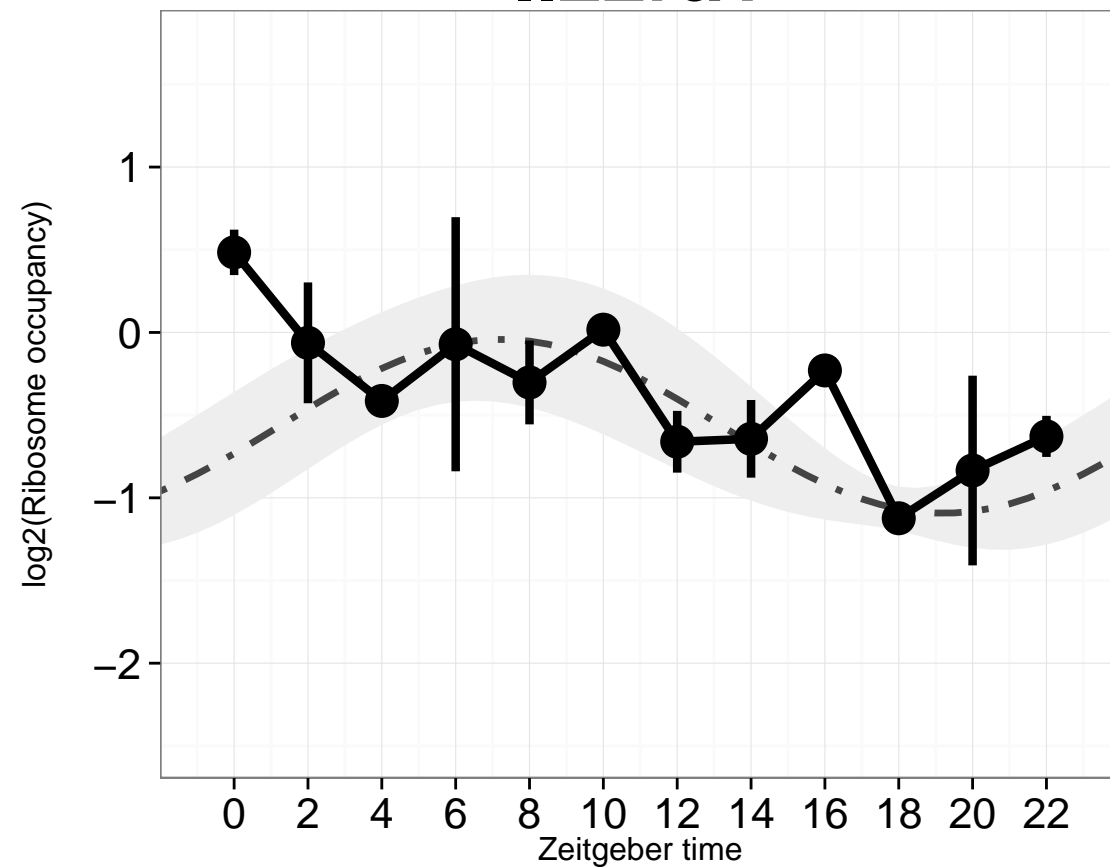

Supplement: SuppDataset_1.zip [file Il22ra1_set_A.pdf › Supplemental Dataset 1/A-mRNA_nonrhyth_translation_nonrhyth/Il22ra1_set_A.pdf]

# Il27ra

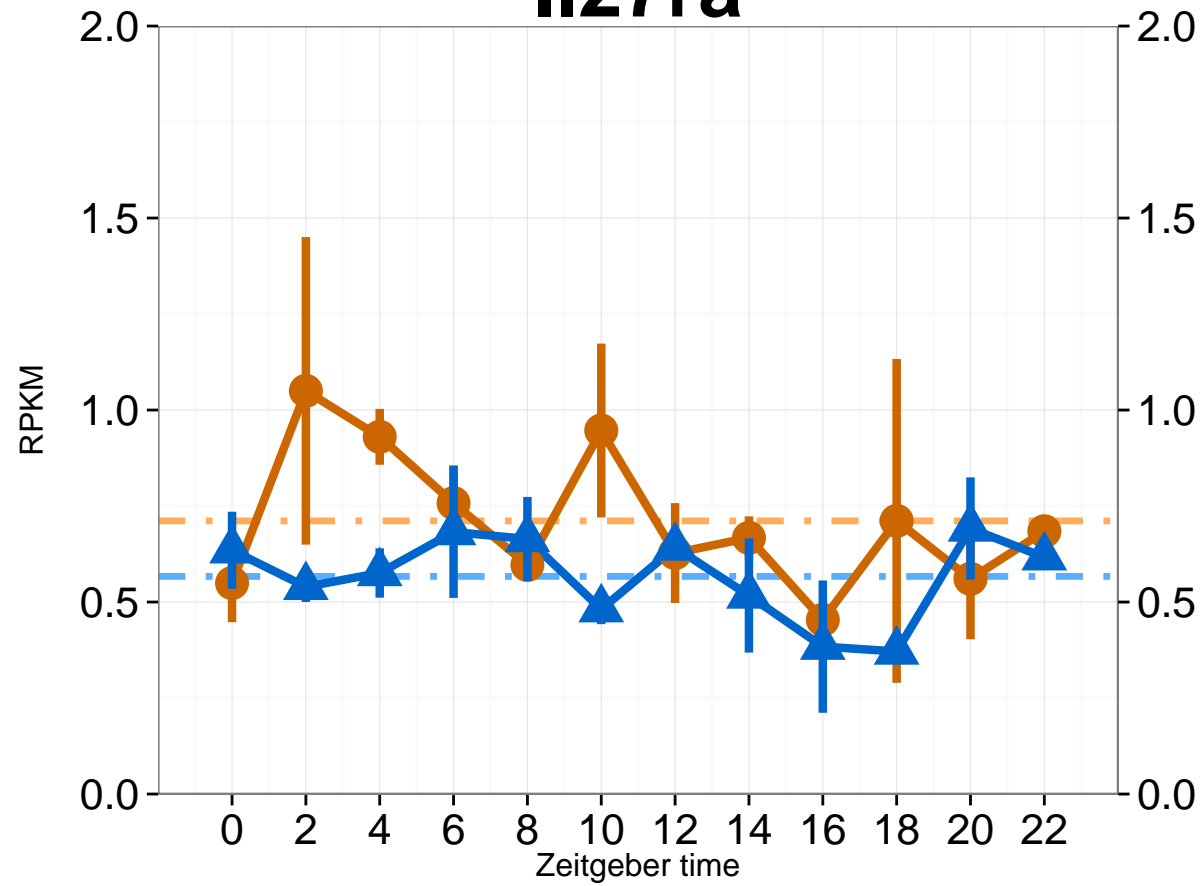

# Il27ra

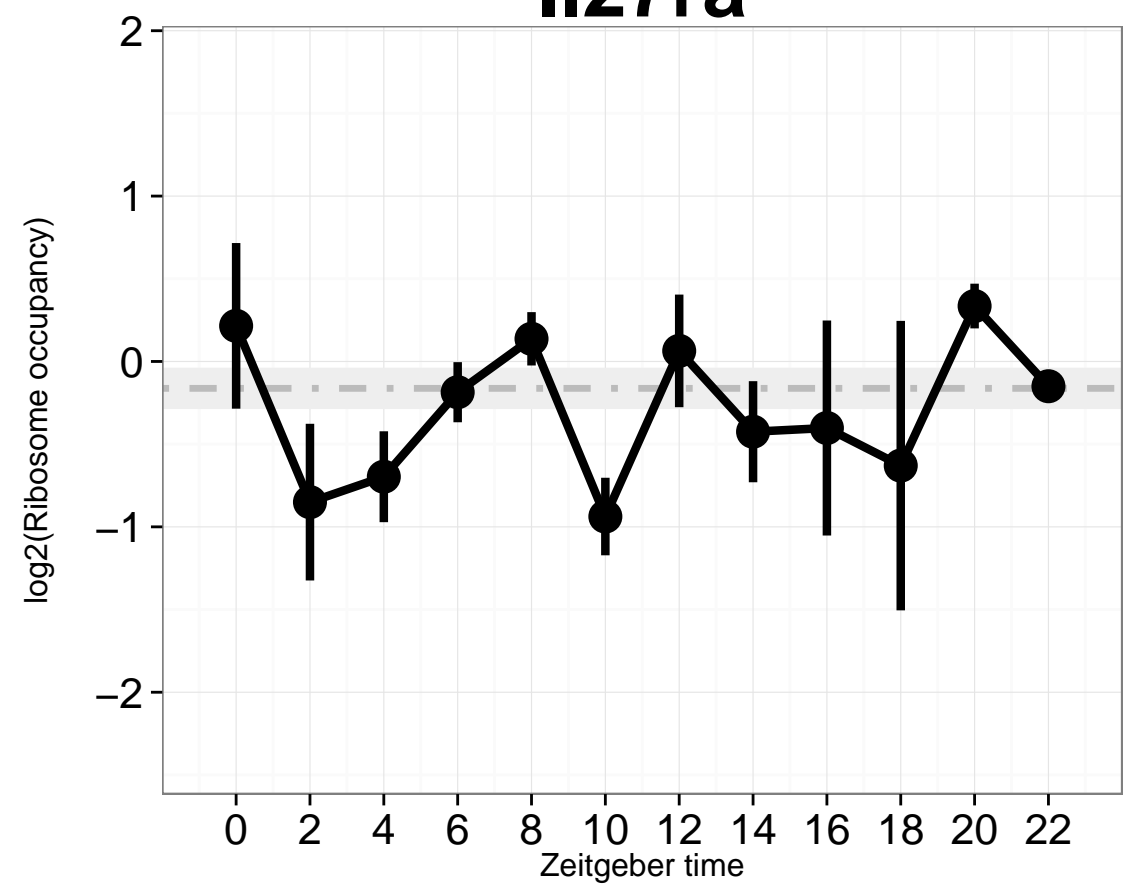

Supplement: SuppDataset_1.zip [file Il27ra_set_A.pdf › Supplemental Dataset 1/A-mRNA_nonrhyth_translation_nonrhyth/Il27ra_set_A.pdf]

## Il2rb

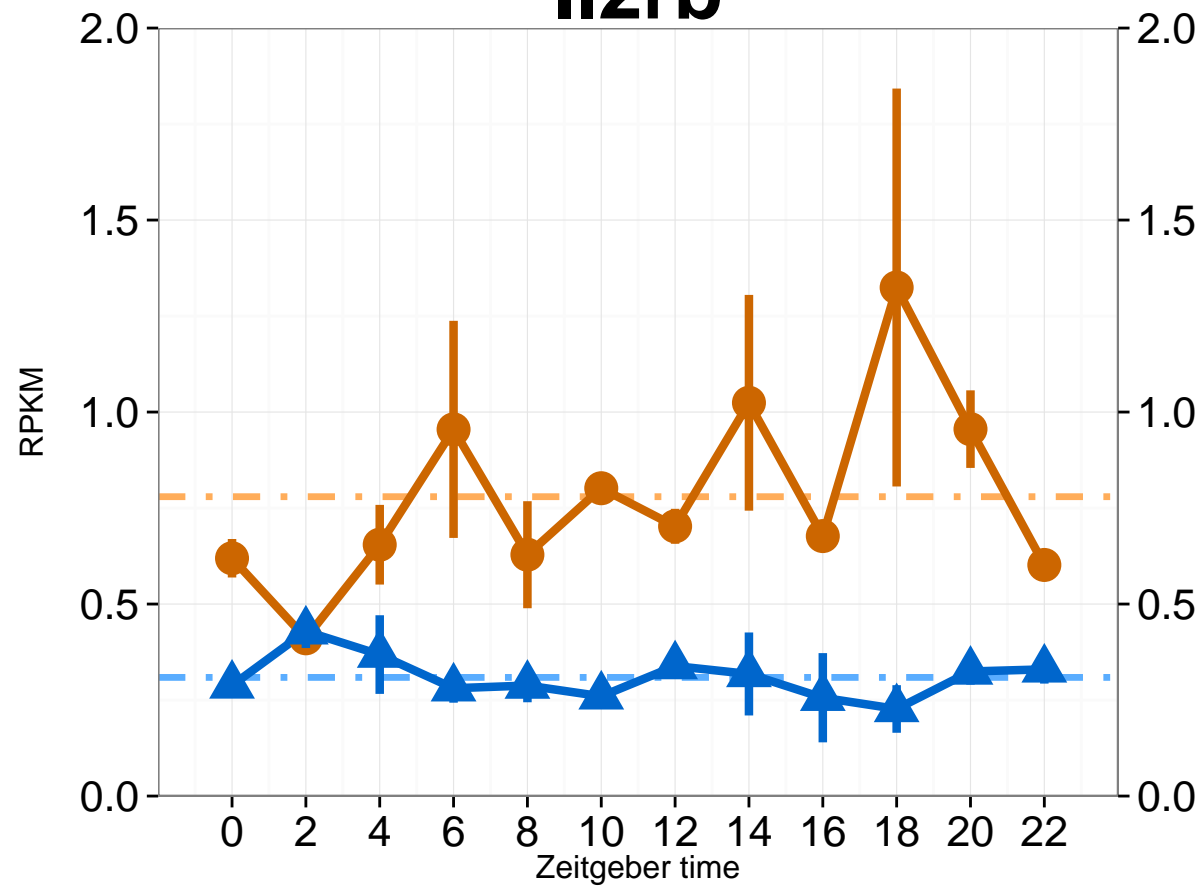

## Il2rb

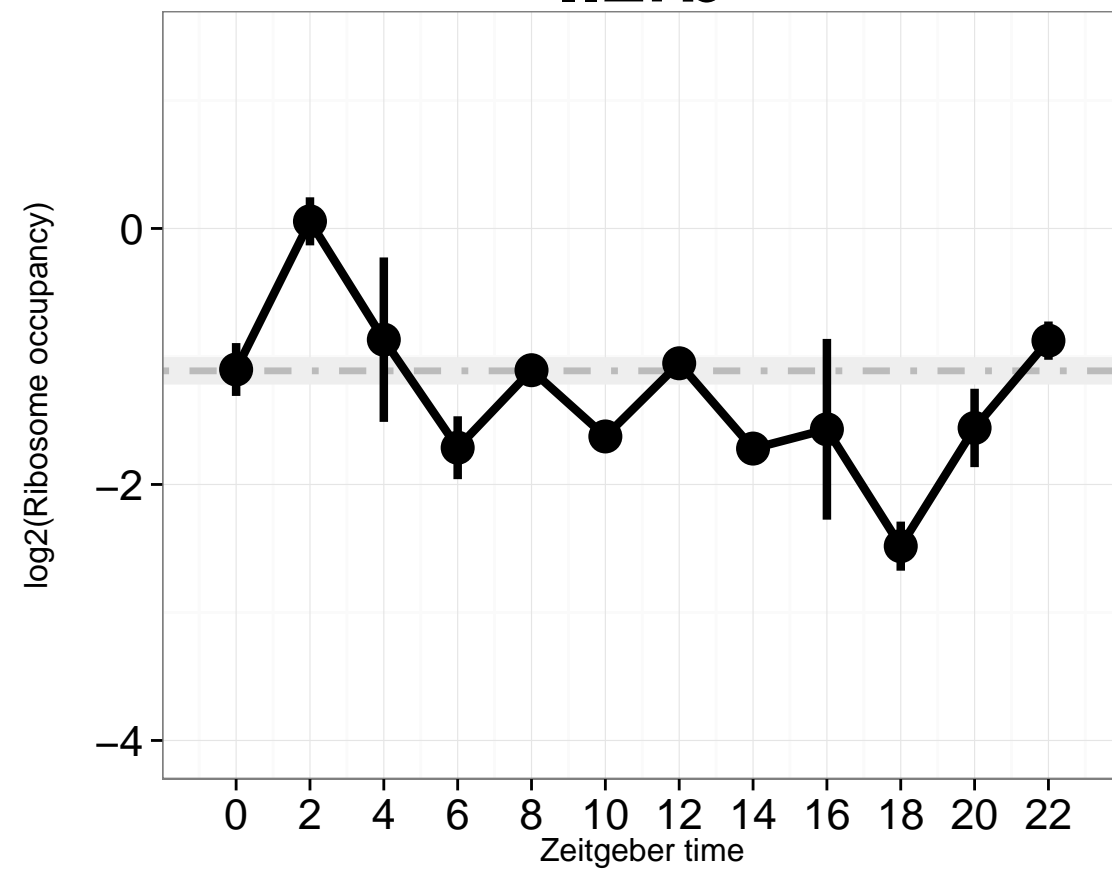

Supplement: SuppDataset_1.zip [file Il2rb_set_A.pdf › Supplemental Dataset 1/A-mRNA_nonrhyth_translation_nonrhyth/Il2rb_set_A.pdf]

# Il2rg

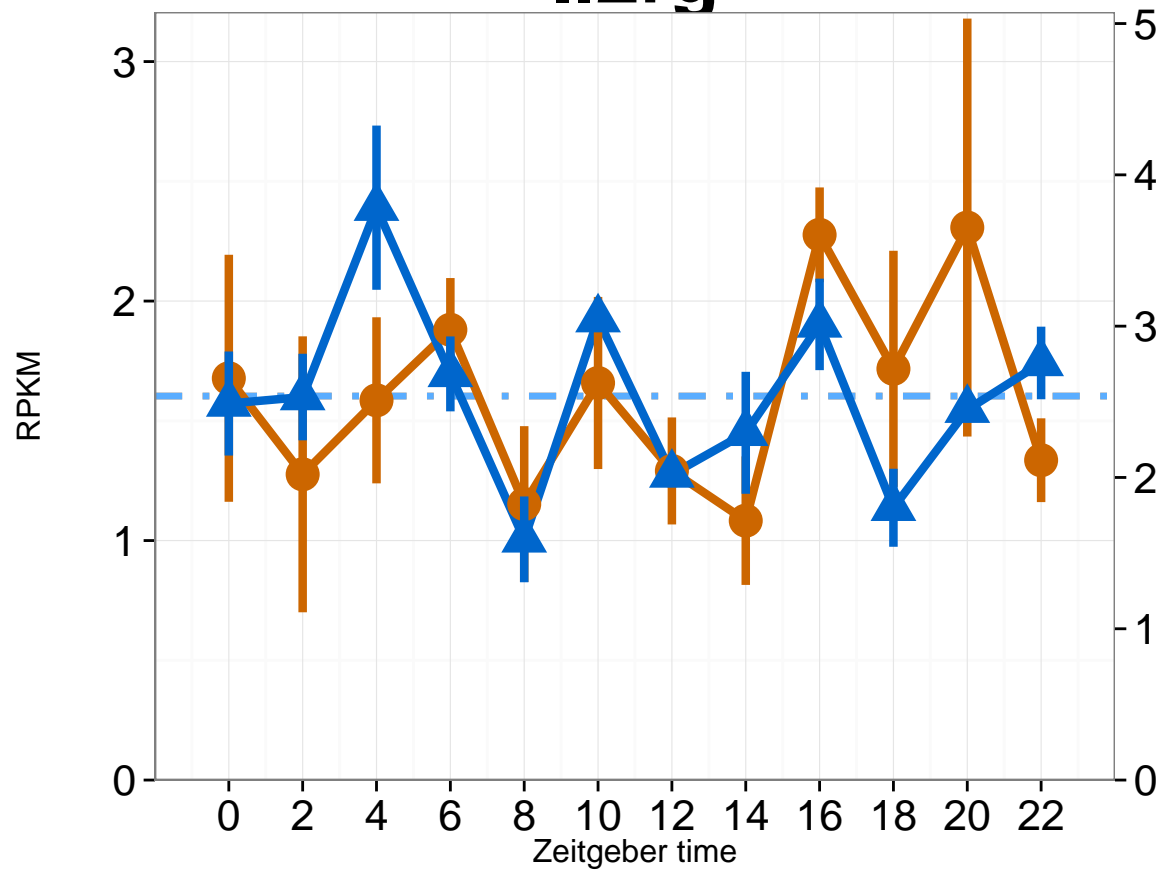

# Il2rg

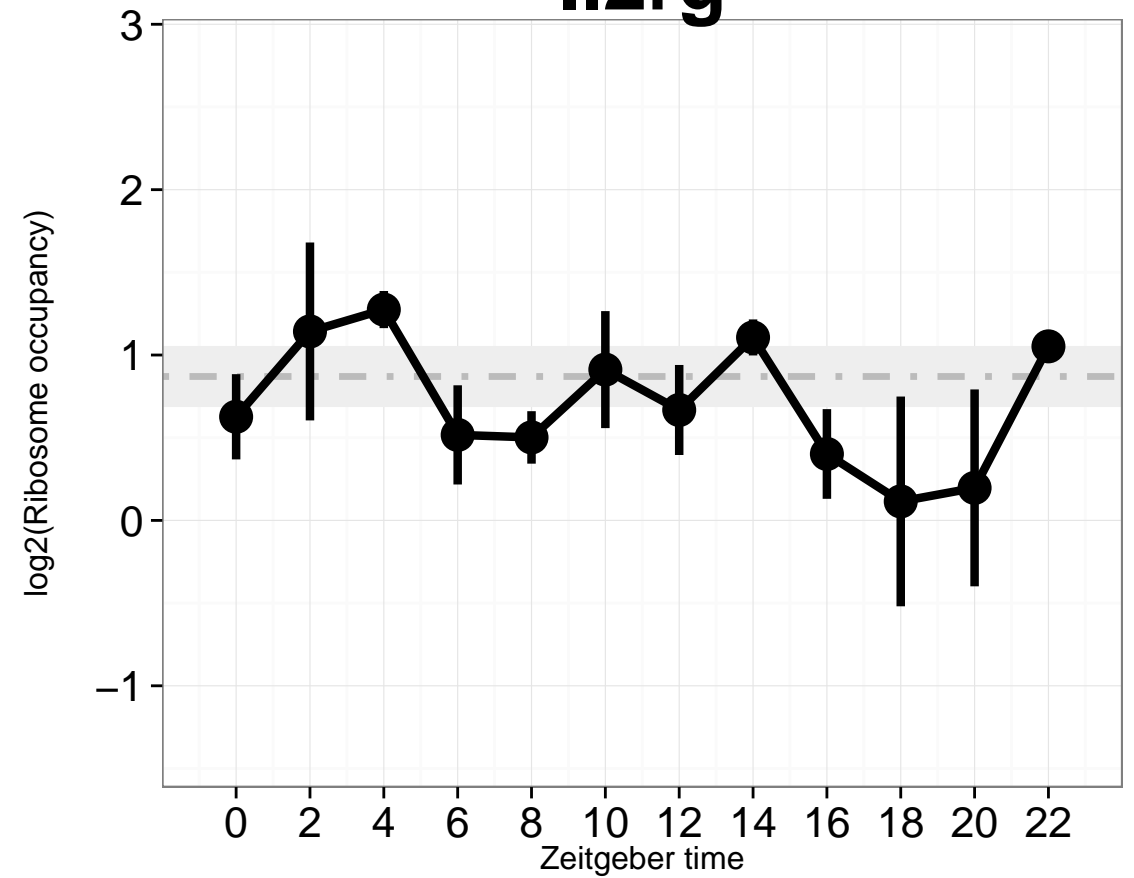

Supplement: SuppDataset_1.zip [file Il2rg_set_A.pdf › Supplemental Dataset 1/A-mRNA_nonrhyth_translation_nonrhyth/Il2rg_set_A.pdf]

# II33

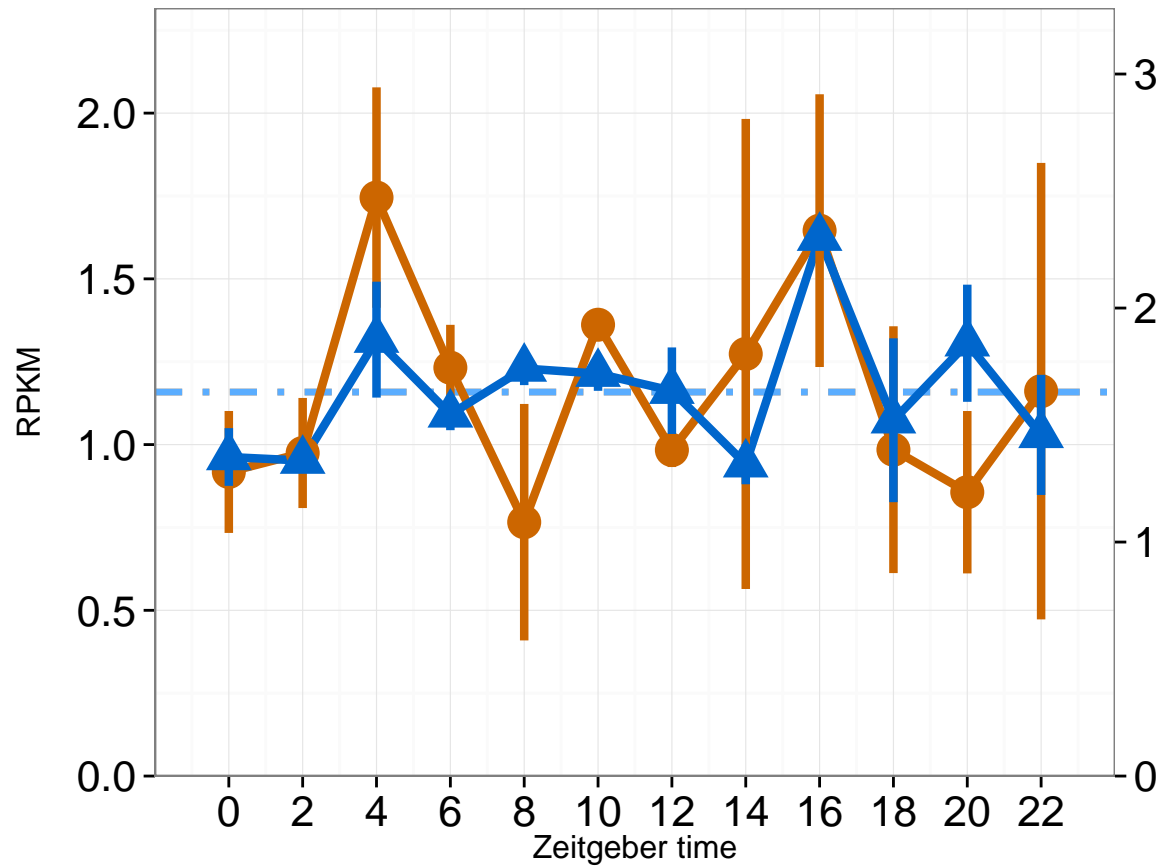

# II33

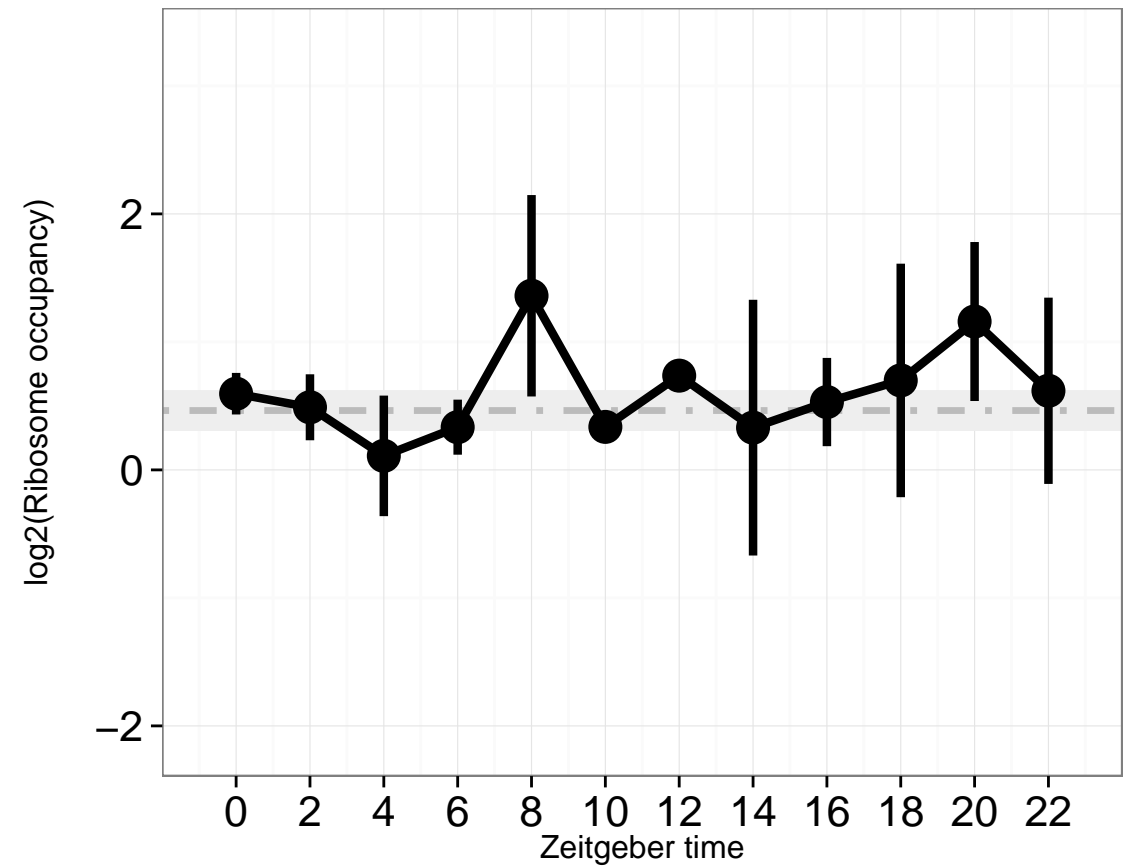

Supplement: SuppDataset_1.zip [file Il33_set_A.pdf › Supplemental Dataset 1/A-mRNA_nonrhyth_translation_nonrhyth/Il33_set_A.pdf]

## II34

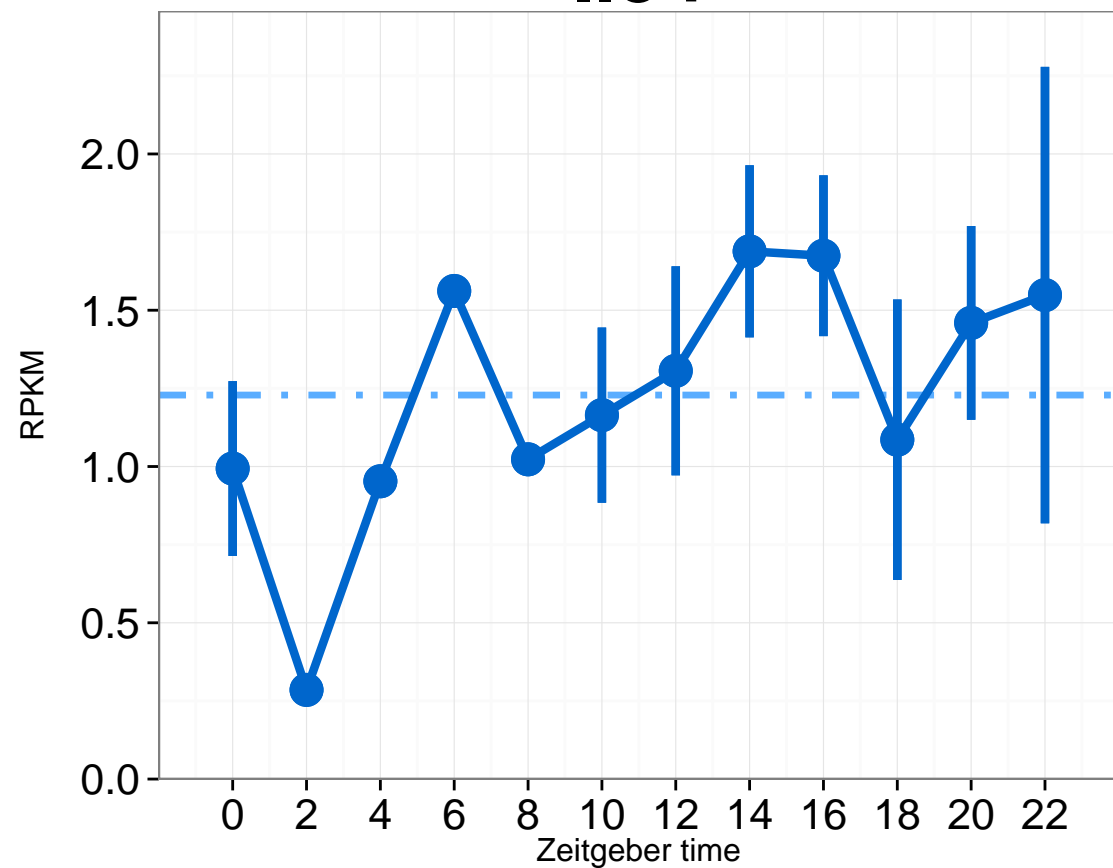

## II34 log2(Ribosome occupancy)

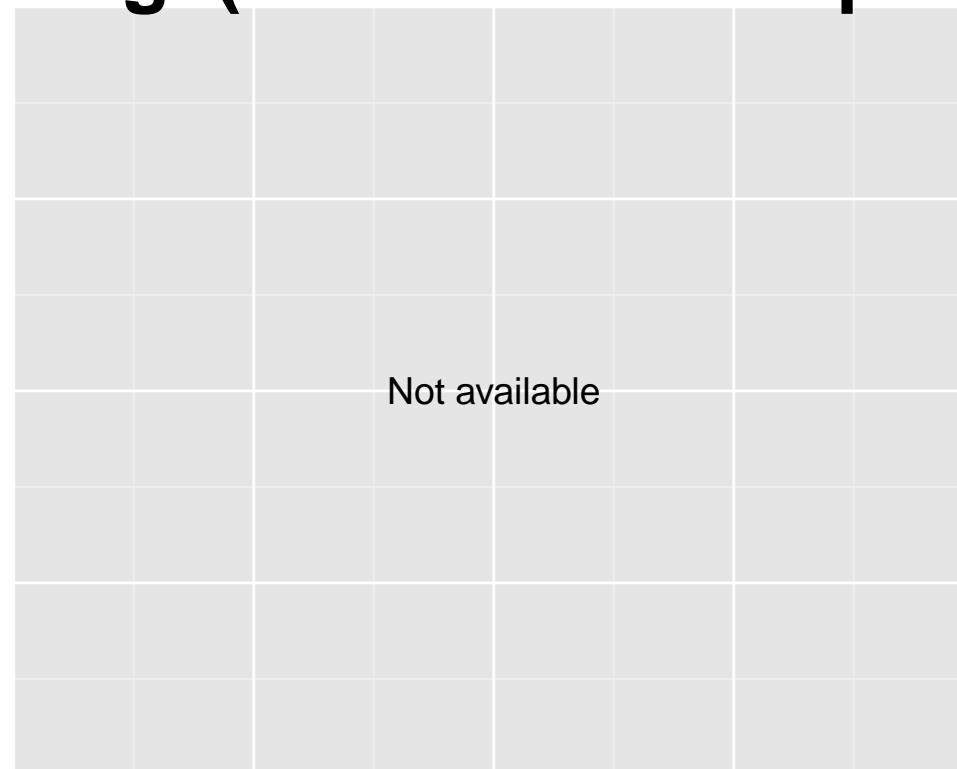

Supplement: SuppDataset_1.zip [file Il34_set_A.pdf › Supplemental Dataset 1/A-mRNA_nonrhyth_translation_nonrhyth/Il34_set_A.pdf]

# Il3ra

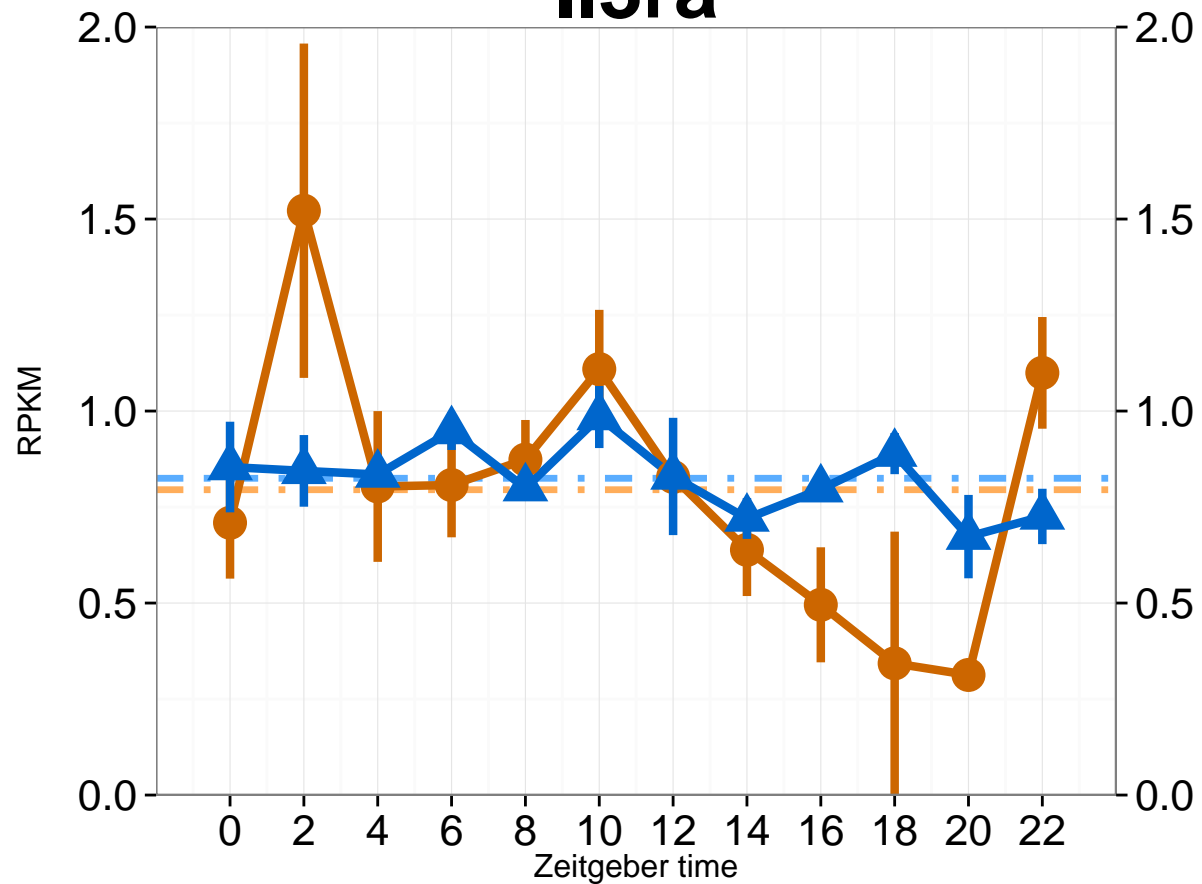

# Il3ra

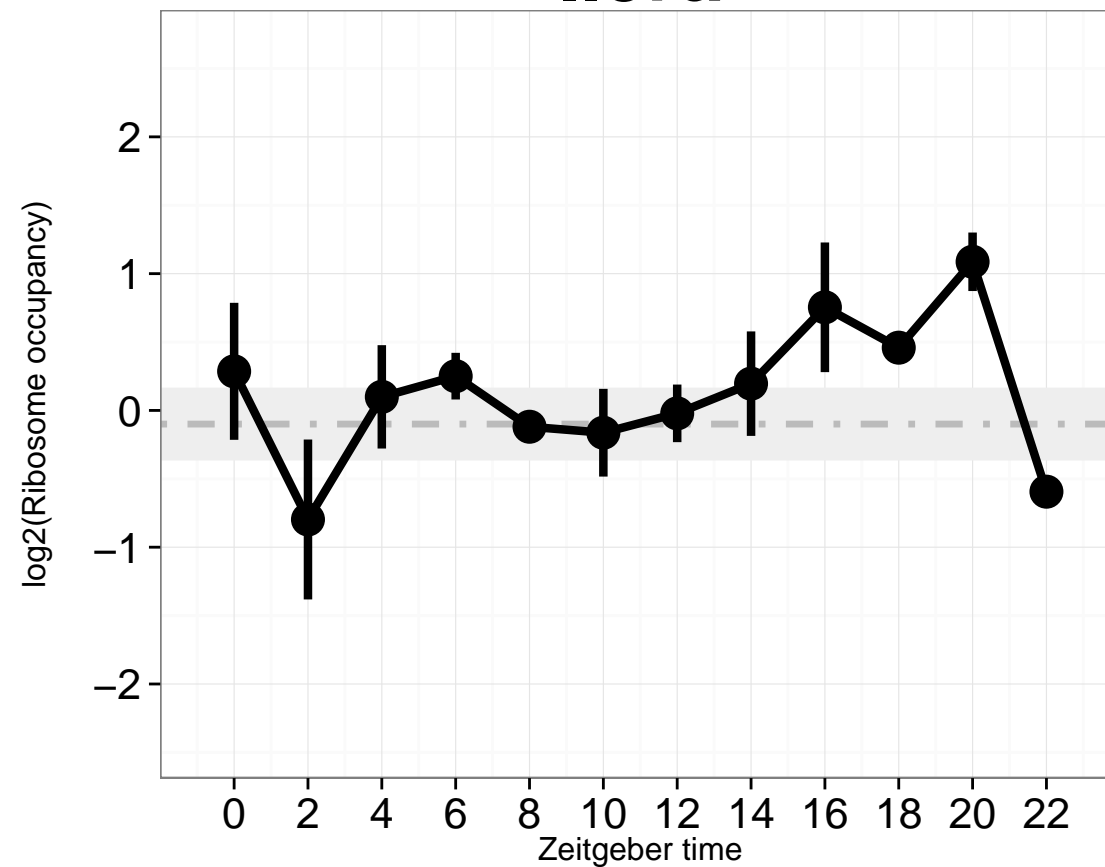

Supplement: SuppDataset_1.zip [file Il3ra_set_A.pdf › Supplemental Dataset 1/A-mRNA_nonrhyth_translation_nonrhyth/Il3ra_set_A.pdf]

## Il6st

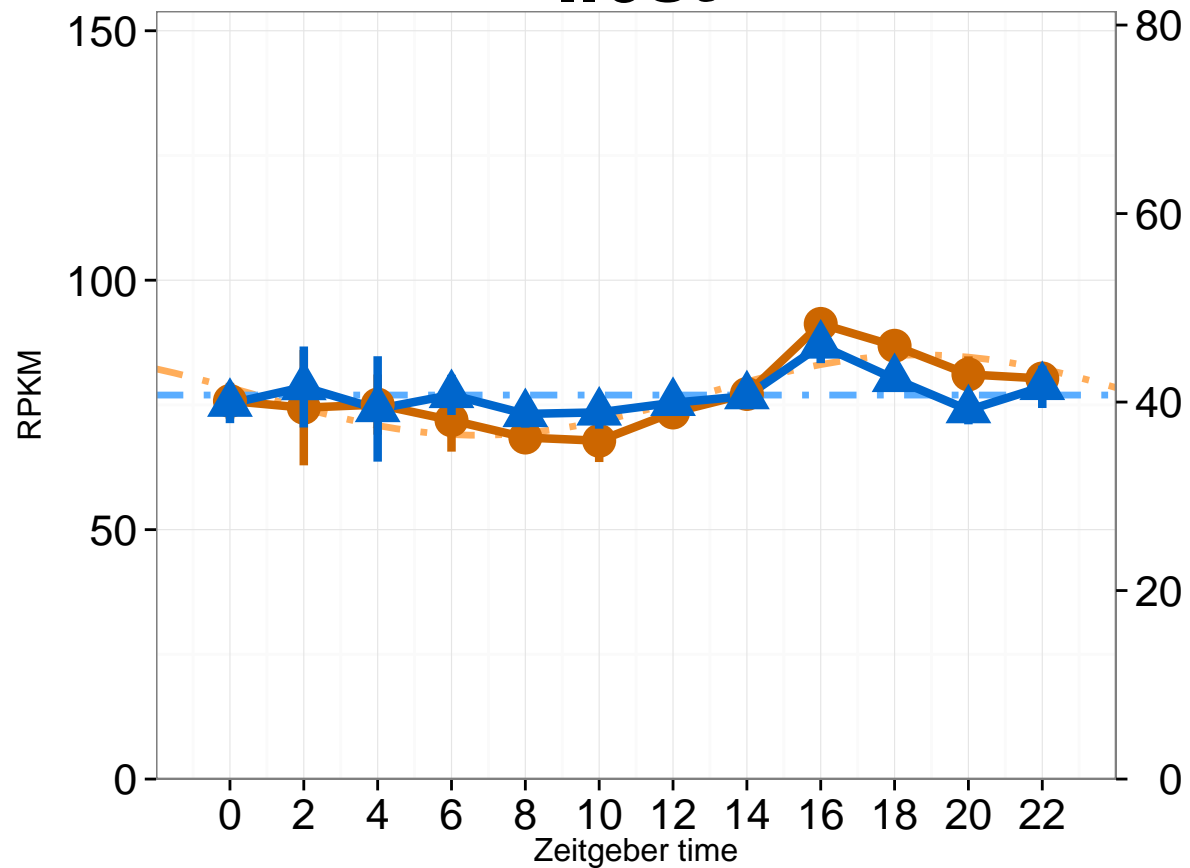

## Il6st

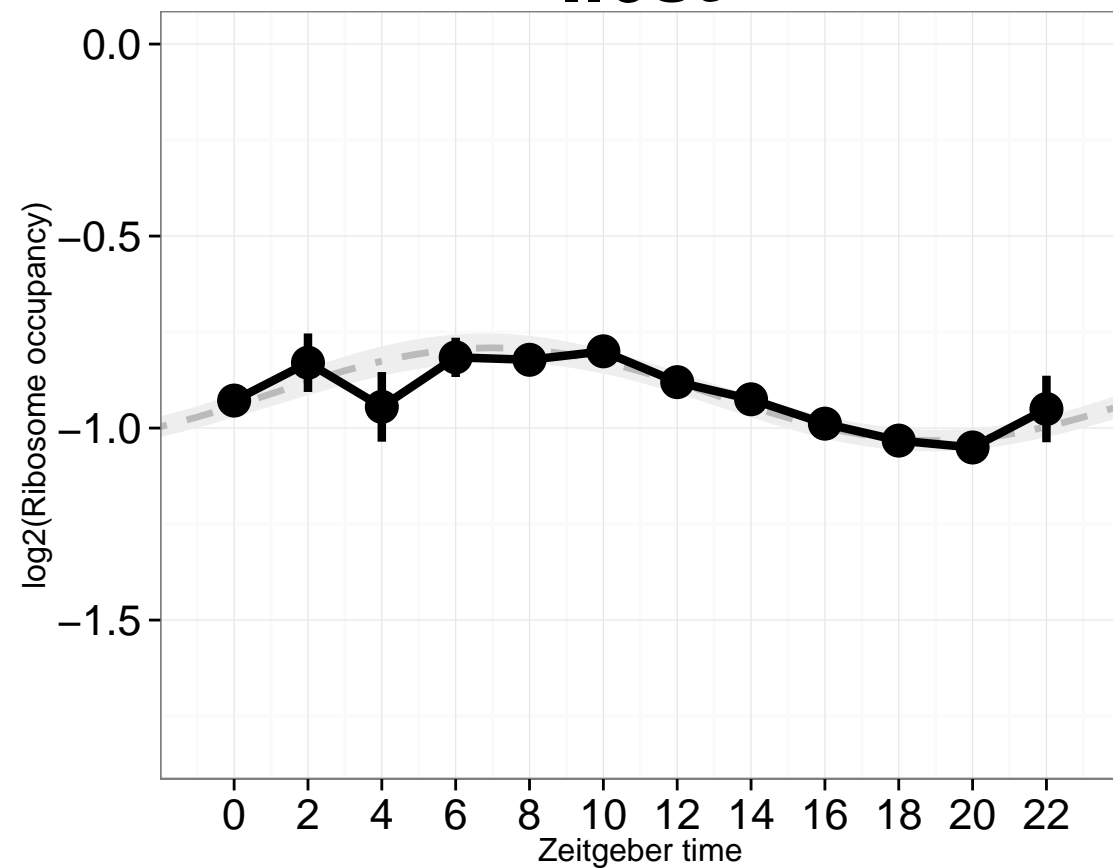

Supplement: SuppDataset_1.zip [file Il6st_set_A.pdf › Supplemental Dataset 1/A-mRNA_nonrhyth_translation_nonrhyth/Il6st_set_A.pdf]

# Ildr2

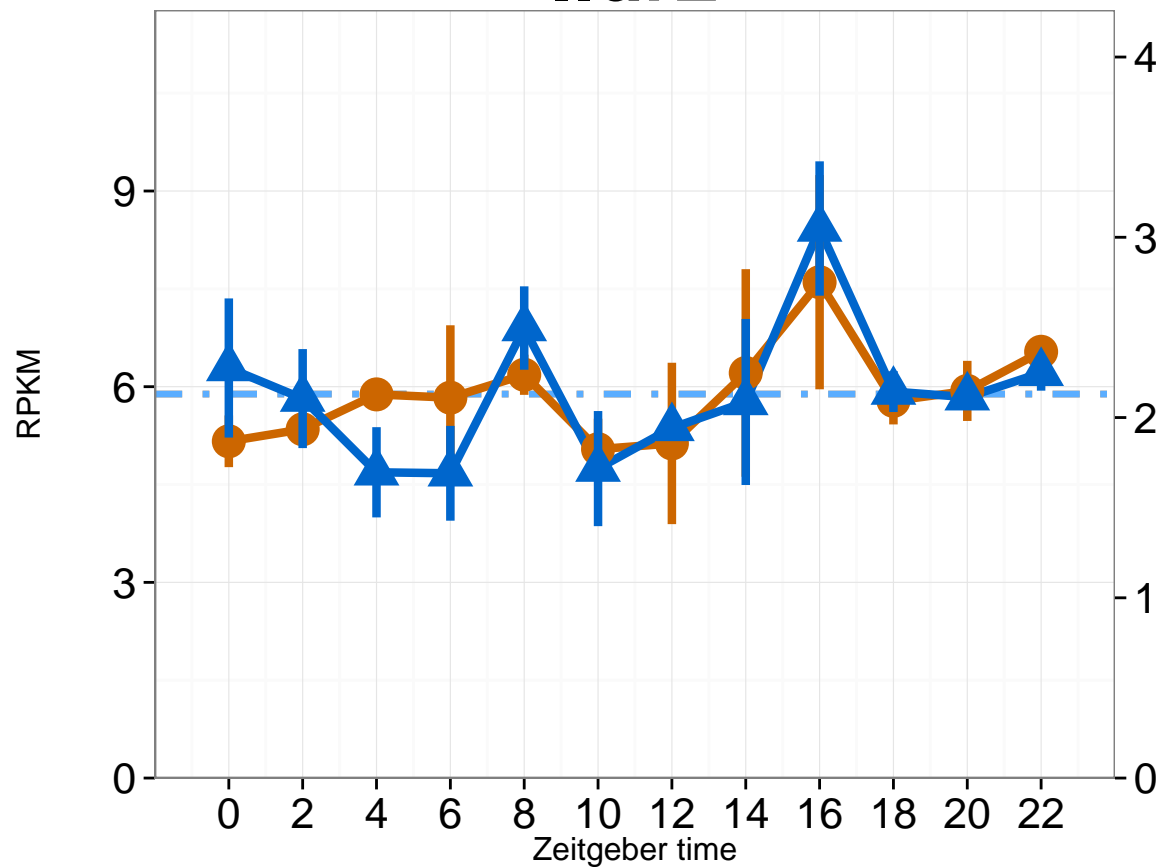

# Ildr2

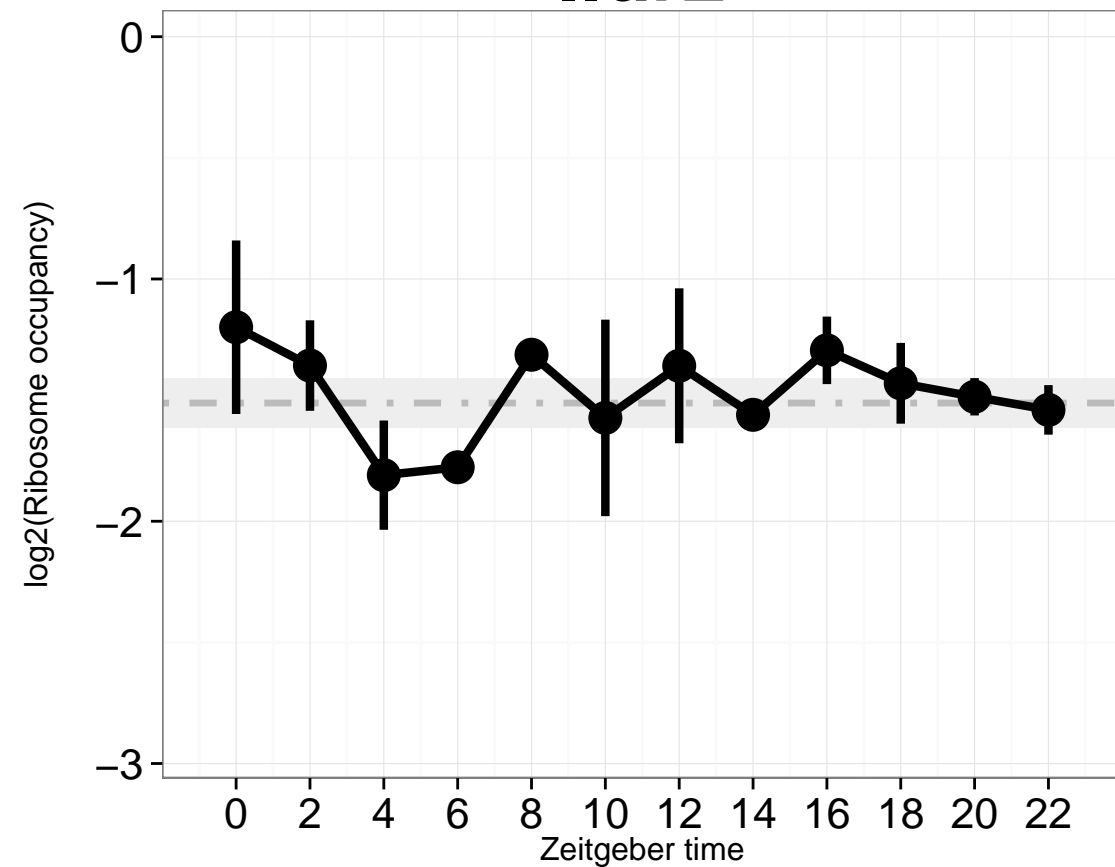

Supplement: SuppDataset_1.zip [file Ildr2_set_A.pdf › Supplemental Dataset 1/A-mRNA_nonrhyth_translation_nonrhyth/Ildr2_set_A.pdf]

## Ilf2

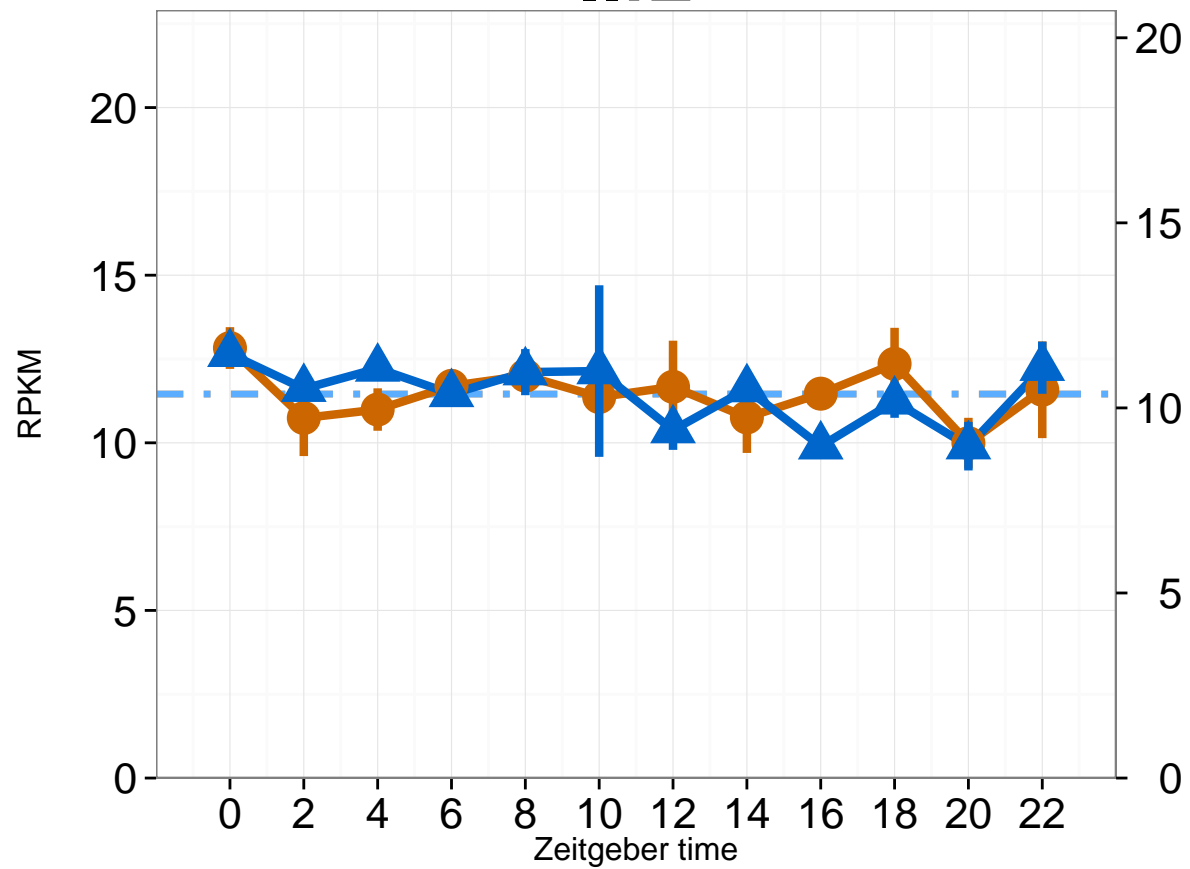

## Ilf2

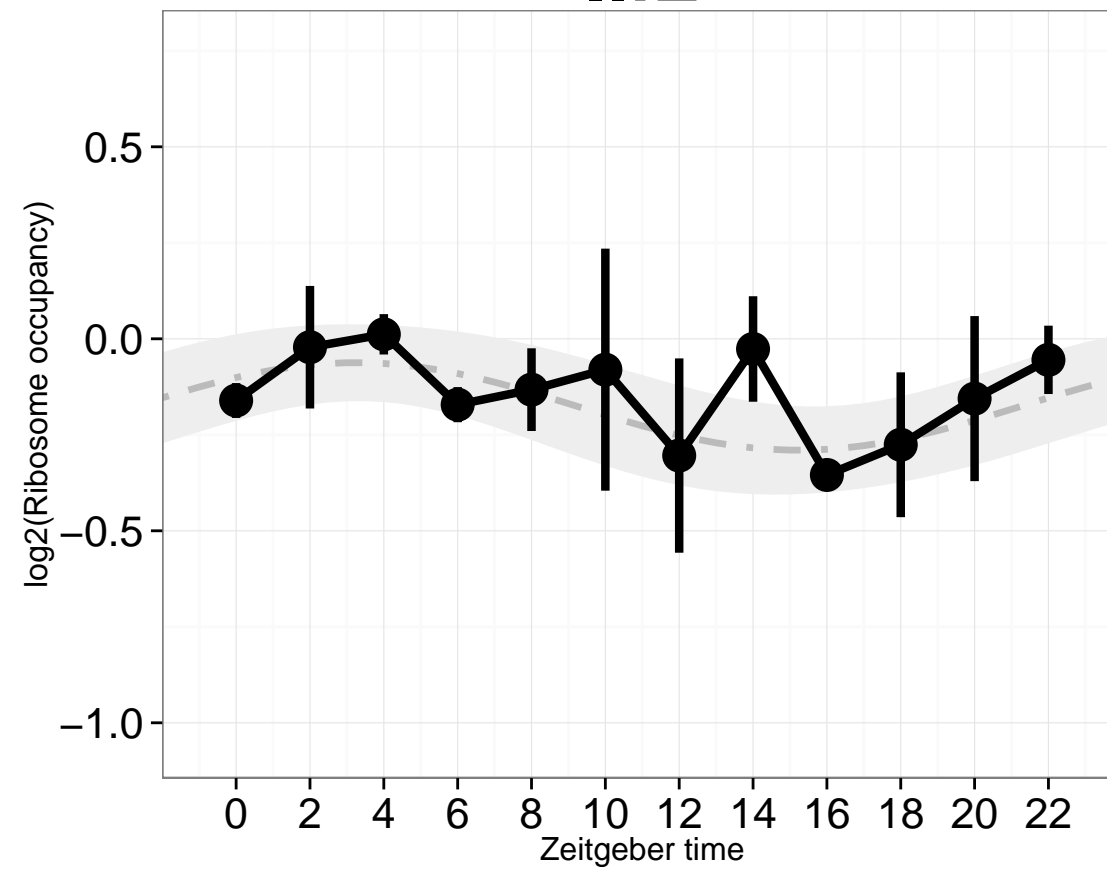

Supplement: SuppDataset_1.zip [file Ilf2_set_A.pdf › Supplemental Dataset 1/A-mRNA_nonrhyth_translation_nonrhyth/Ilf2_set_A.pdf]

## Ilf3

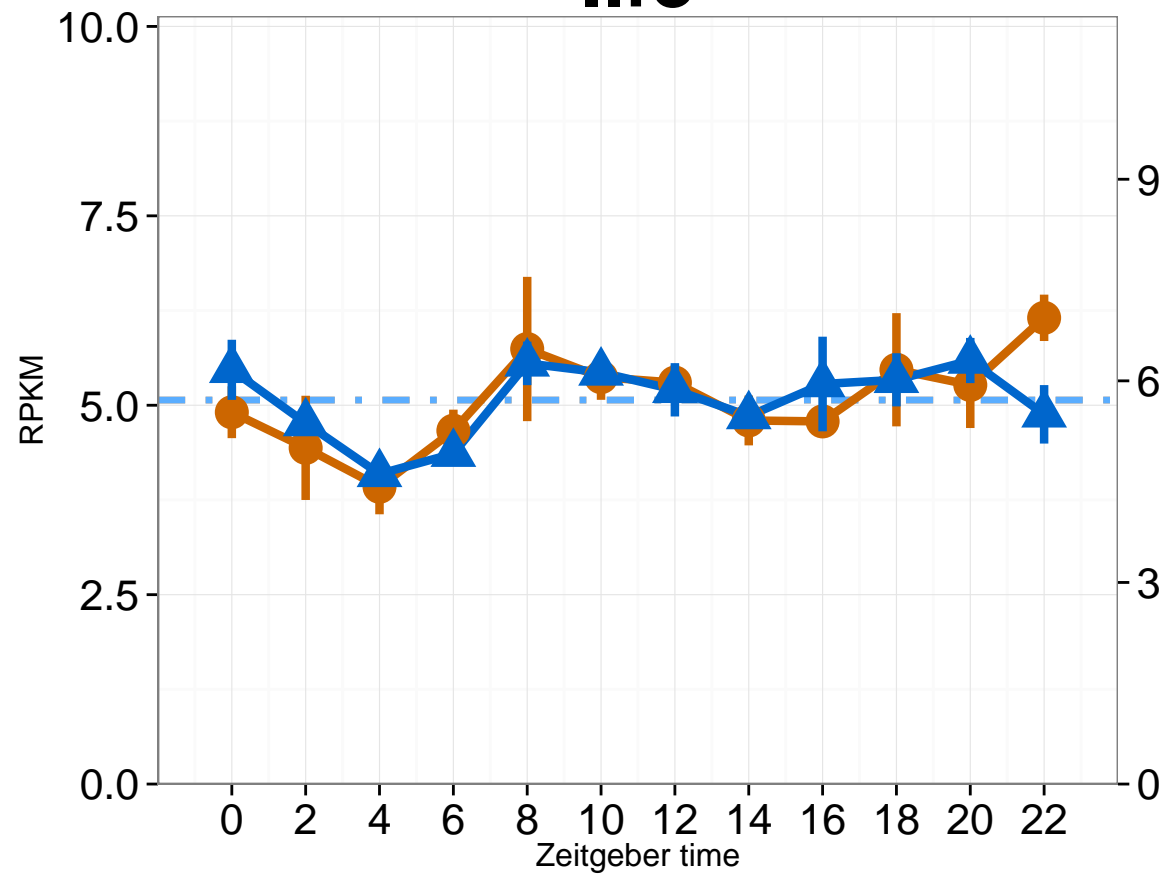

## Ilf3

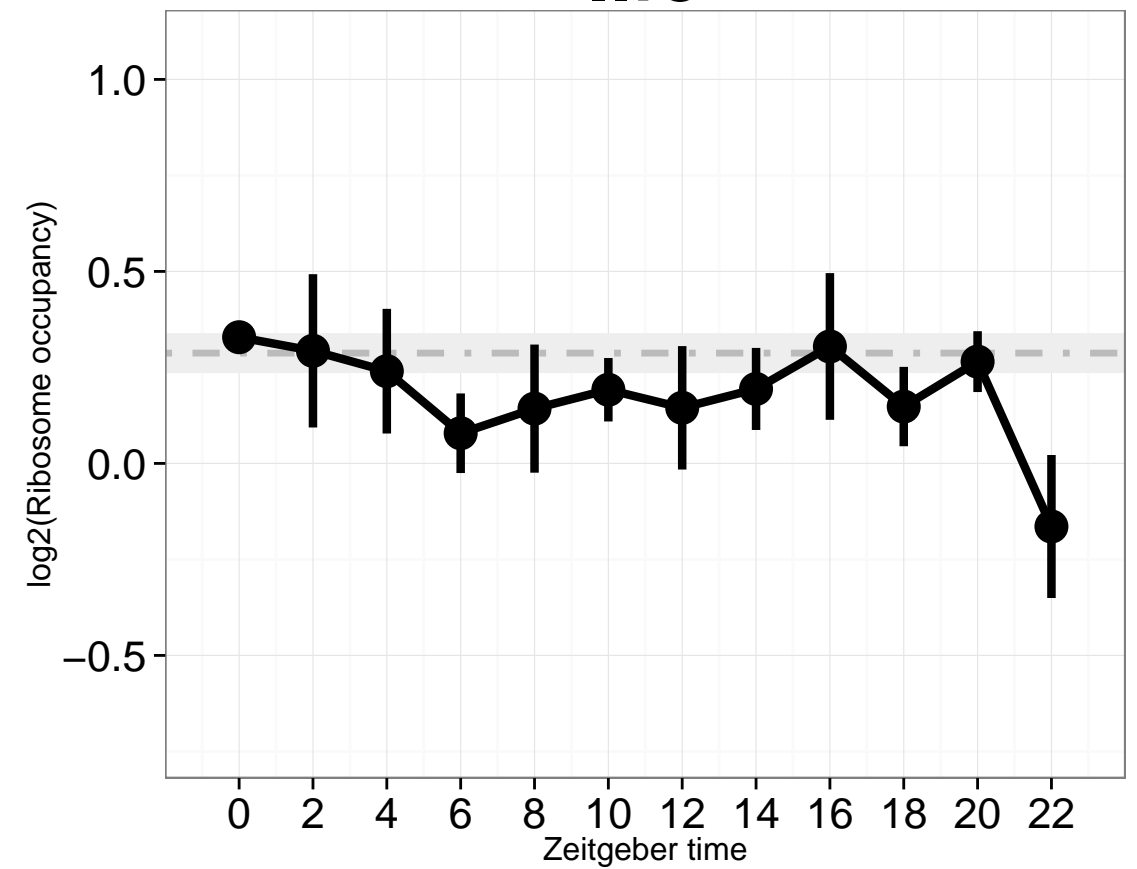

Supplement: SuppDataset_1.zip [file Ilf3_set_A.pdf › Supplemental Dataset 1/A-mRNA_nonrhyth_translation_nonrhyth/Ilf3_set_A.pdf]

**Ilk**

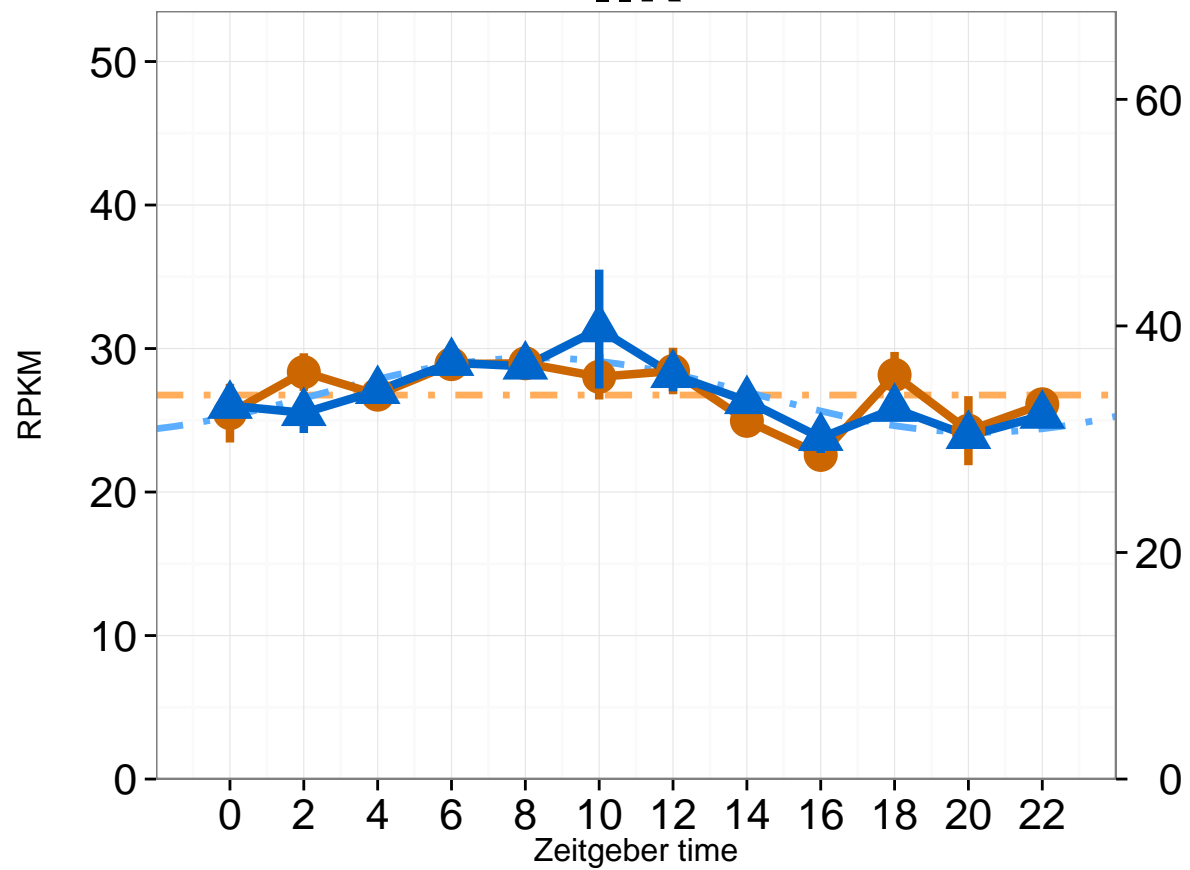

**Ilk**

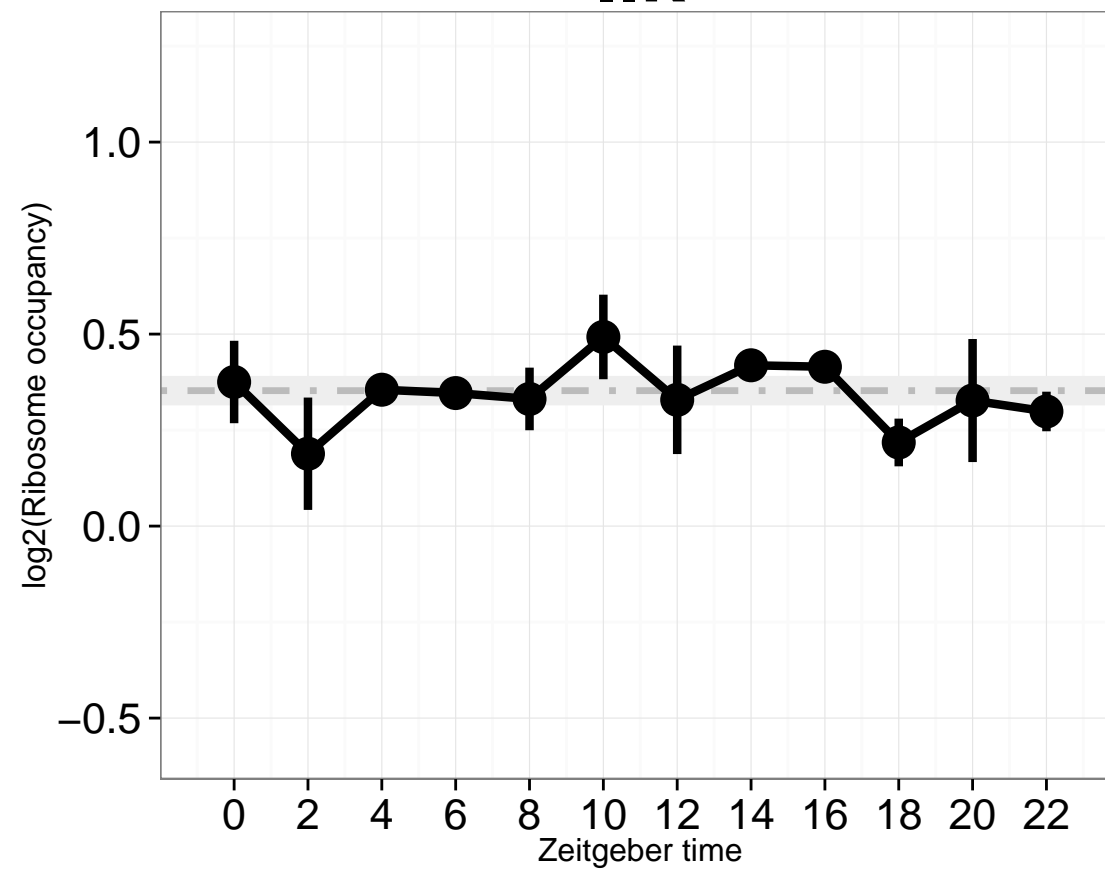

Supplement: SuppDataset_1.zip [file Ilk_set_A.pdf › Supplemental Dataset 1/A-mRNA_nonrhyth_translation_nonrhyth/Ilk_set_A.pdf]

## Ilkap

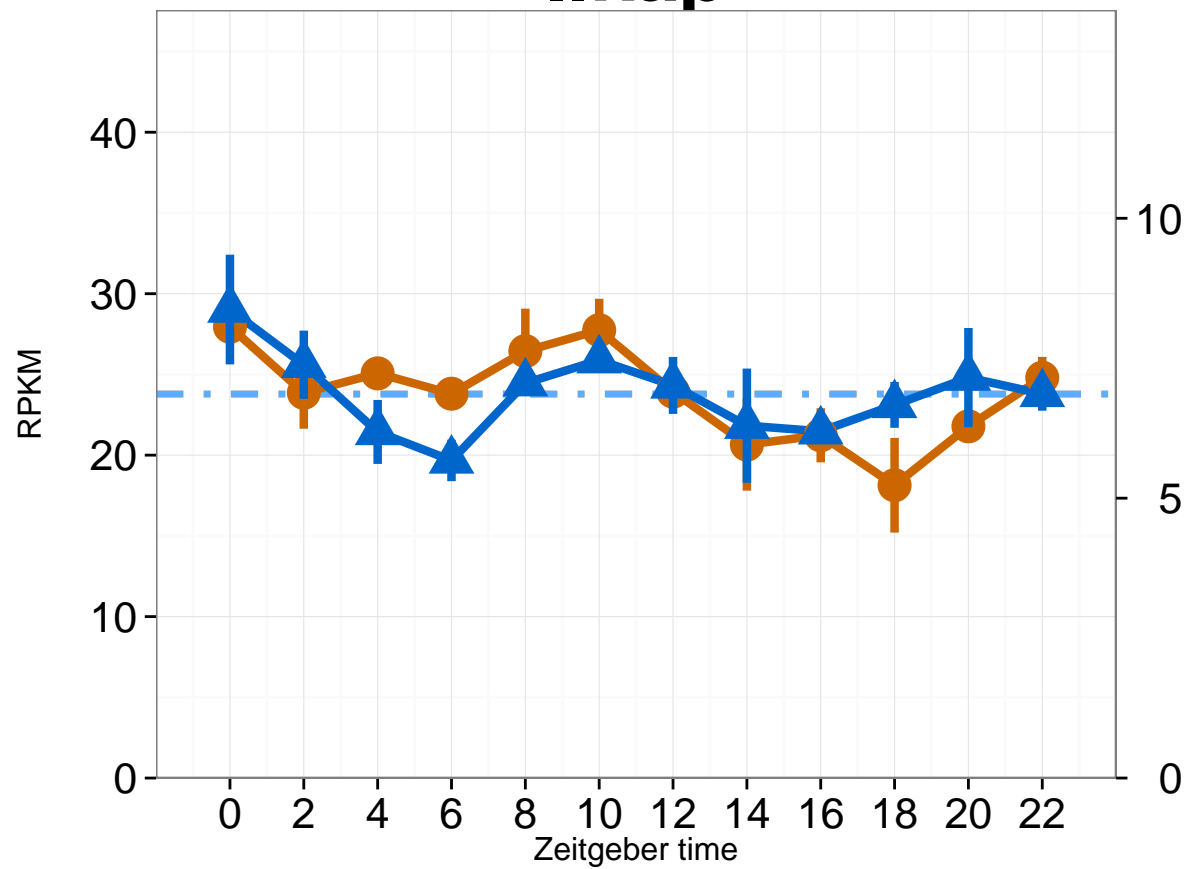

## Ilkap

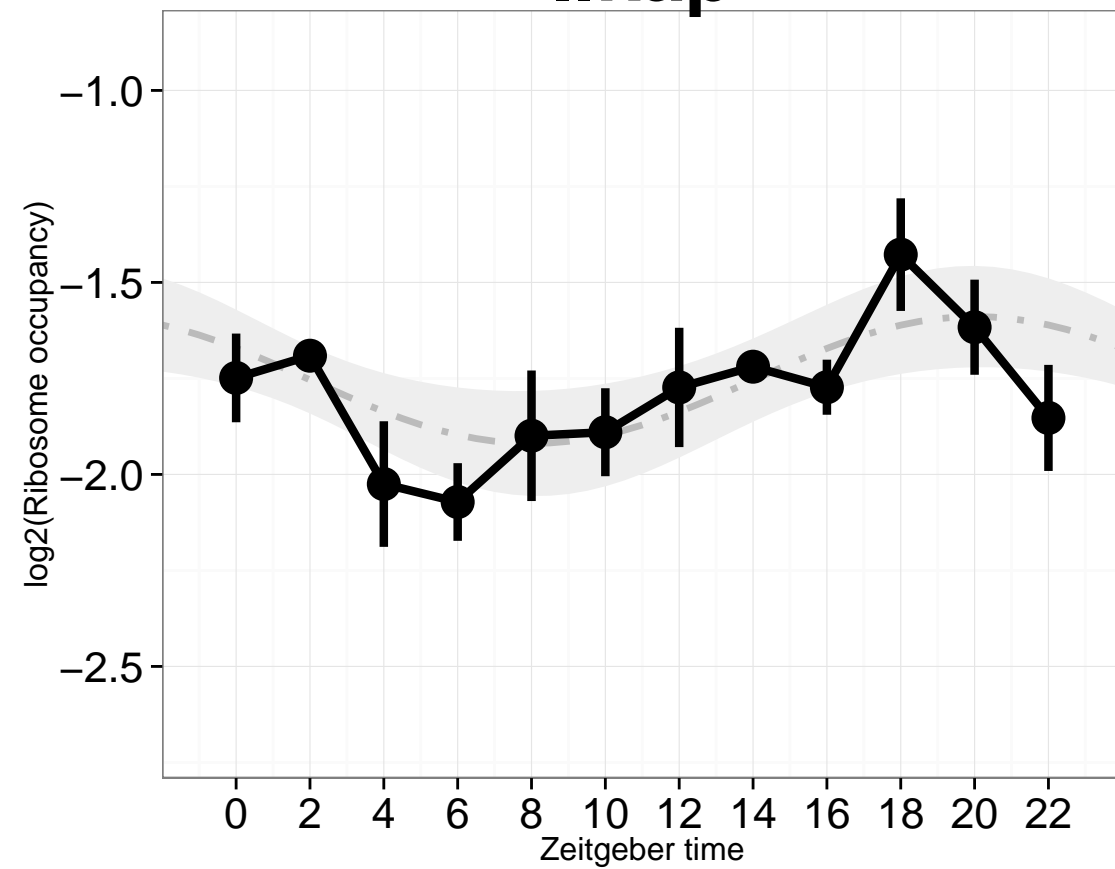

Supplement: SuppDataset_1.zip [file Ilkap_set_A.pdf › Supplemental Dataset 1/A-mRNA_nonrhyth_translation_nonrhyth/Ilkap_set_A.pdf]

**Ilvbl**

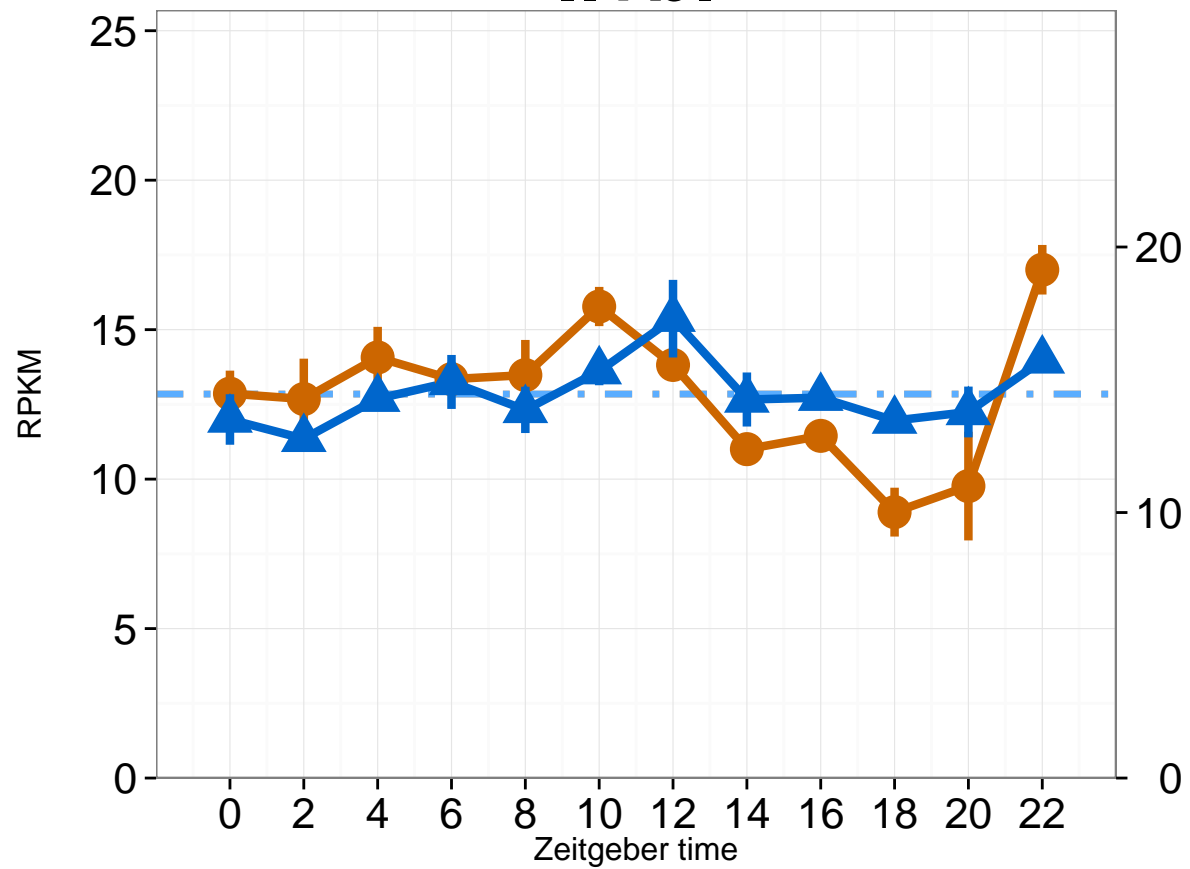

**Ilvbl**

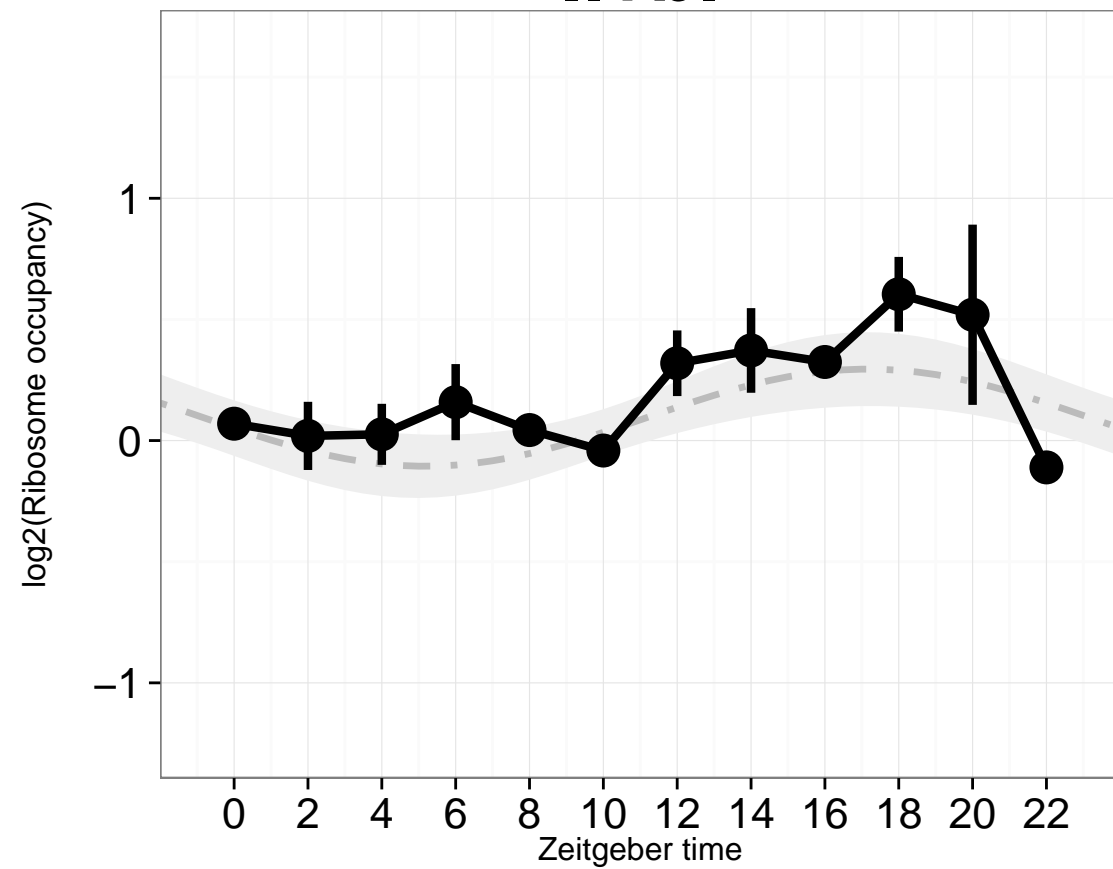

Supplement: SuppDataset_1.zip [file Ilvbl_set_A.pdf › Supplemental Dataset 1/A-mRNA_nonrhyth_translation_nonrhyth/Ilvbl_set_A.pdf]

## Immp1l

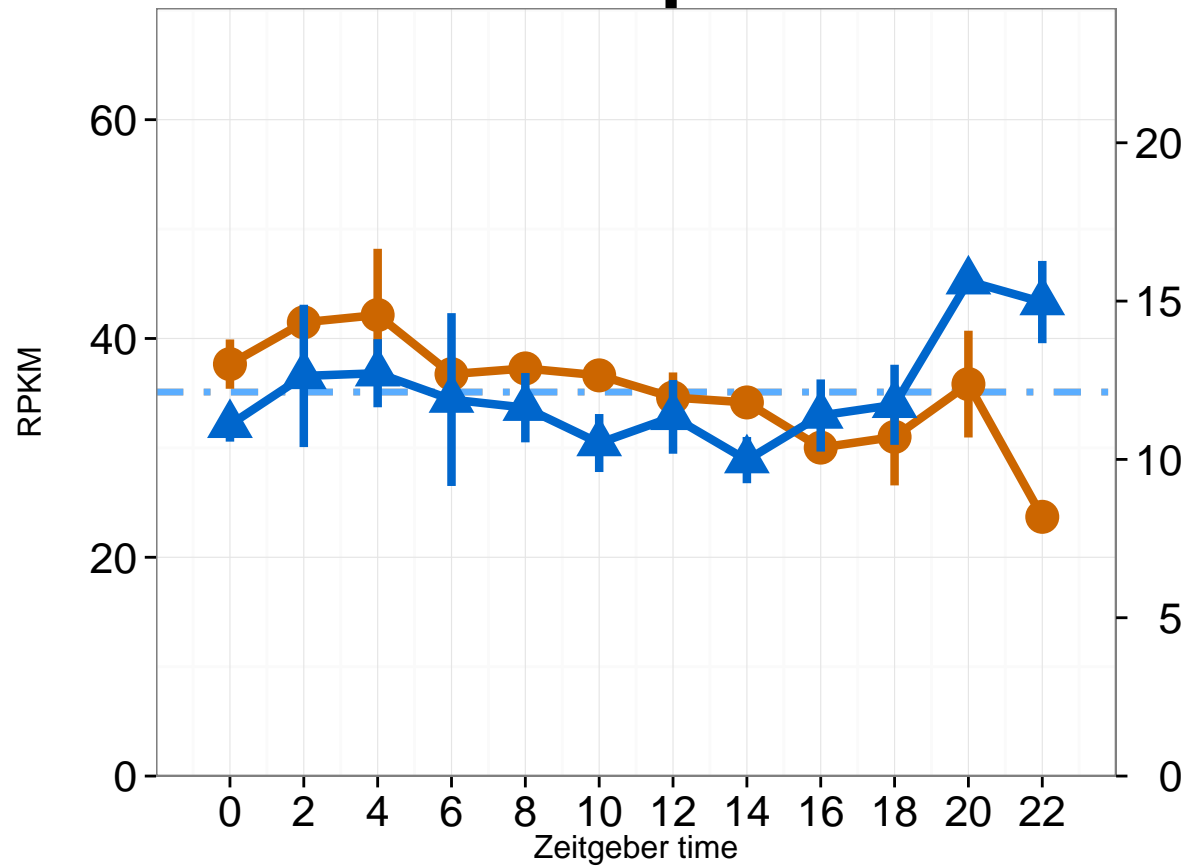

## Immp1l

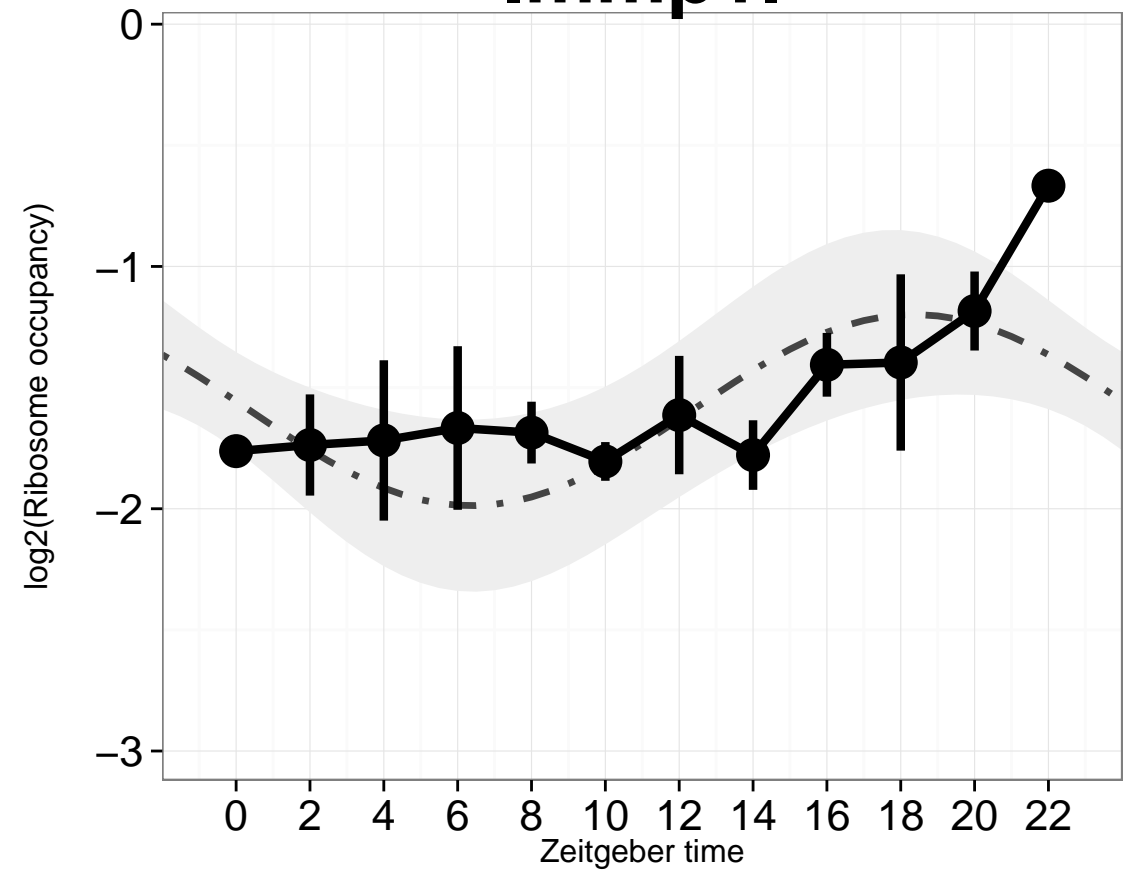

Supplement: SuppDataset_1.zip [file Immp1l_set_A.pdf › Supplemental Dataset 1/A-mRNA_nonrhyth_translation_nonrhyth/Immp1l_set_A.pdf]

## Immp2l

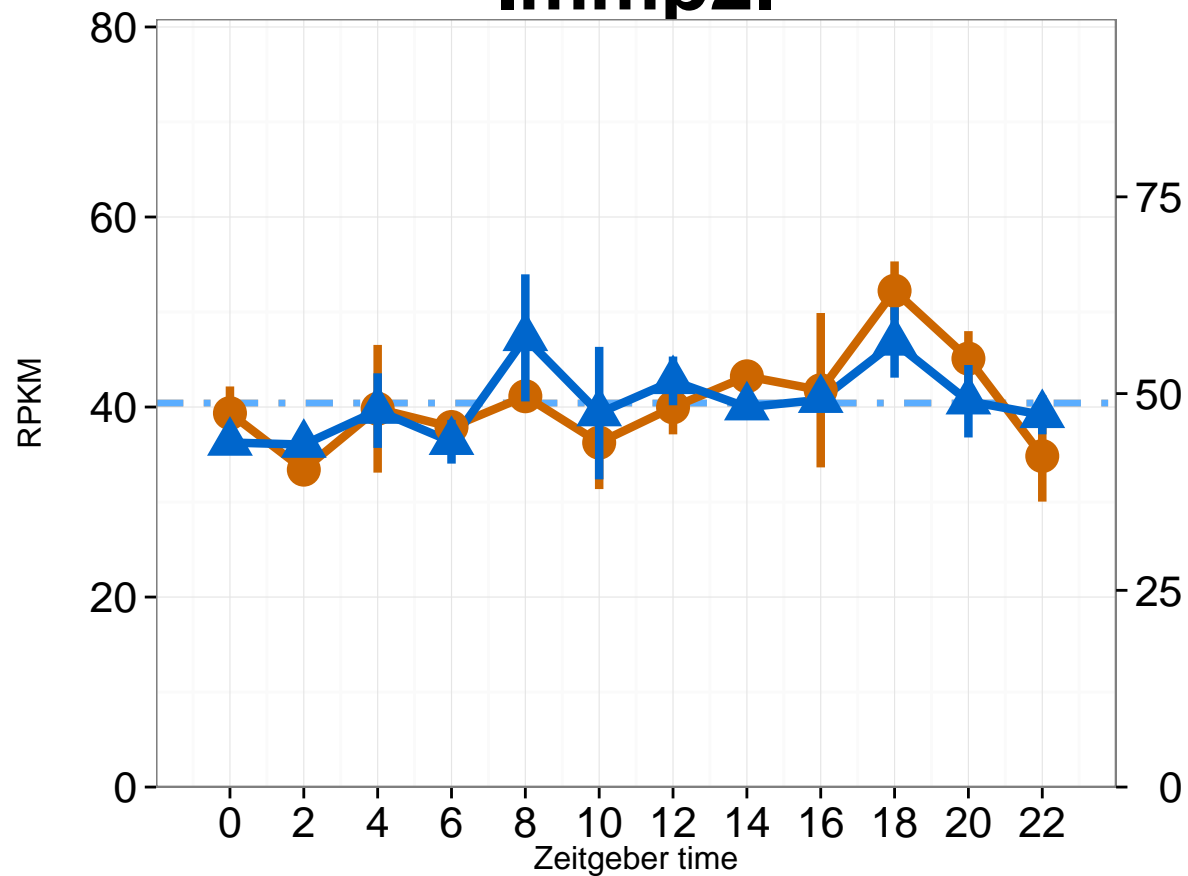

## Immp2l

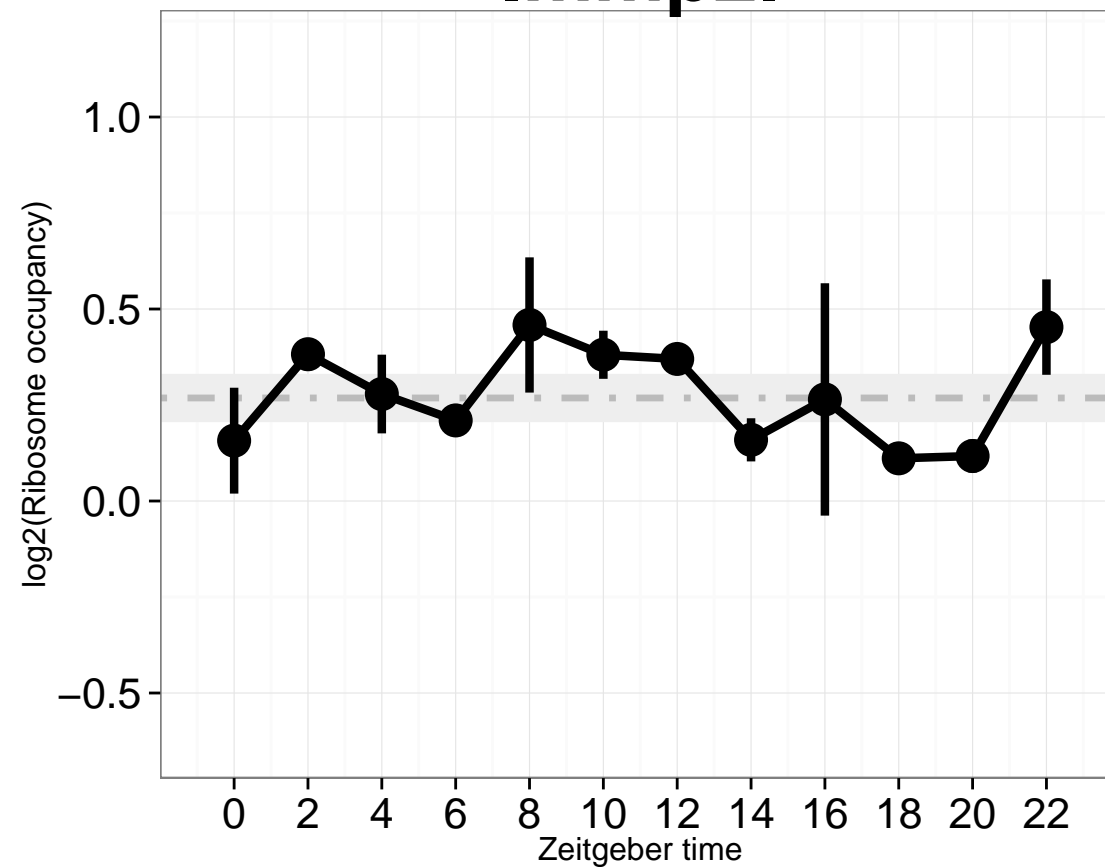

Supplement: SuppDataset_1.zip [file Immp2l_set_A.pdf › Supplemental Dataset 1/A-mRNA_nonrhyth_translation_nonrhyth/Immp2l_set_A.pdf]

## Immt

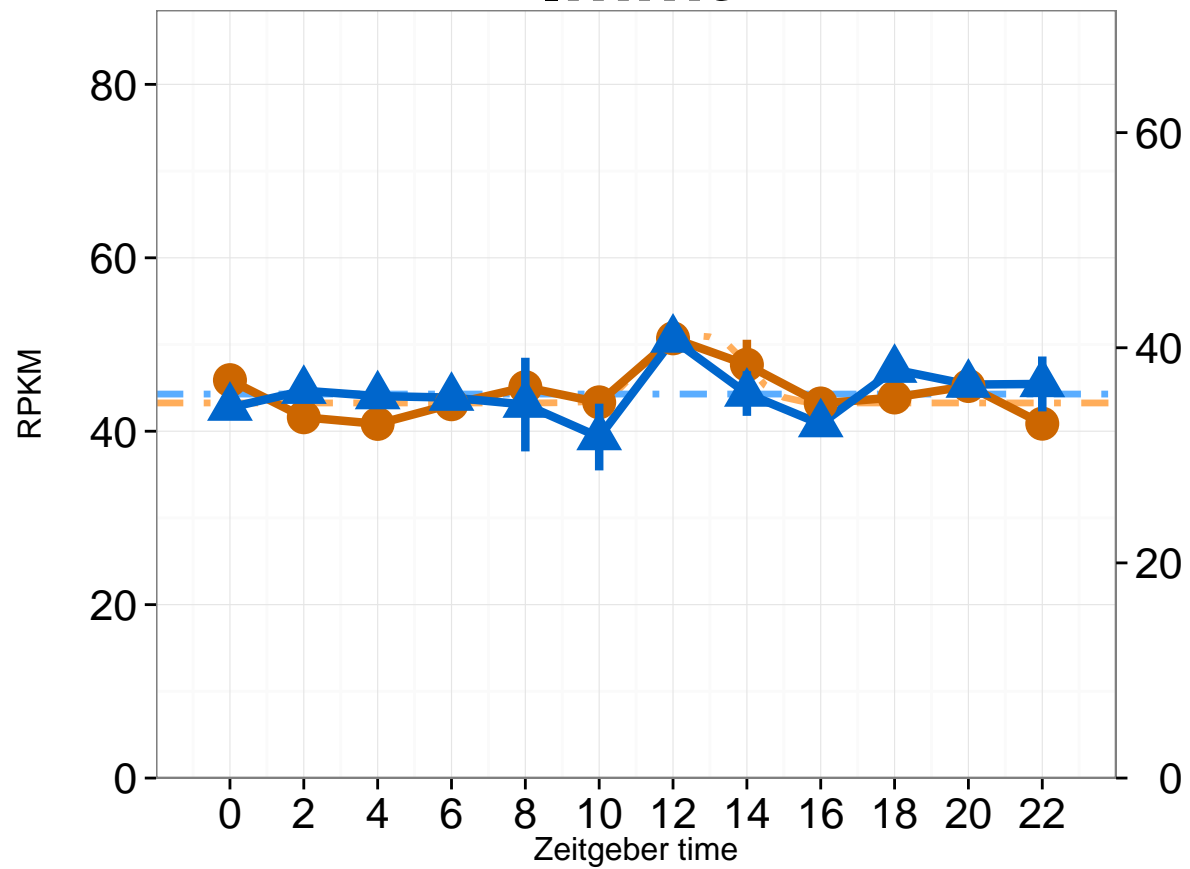

## Immt

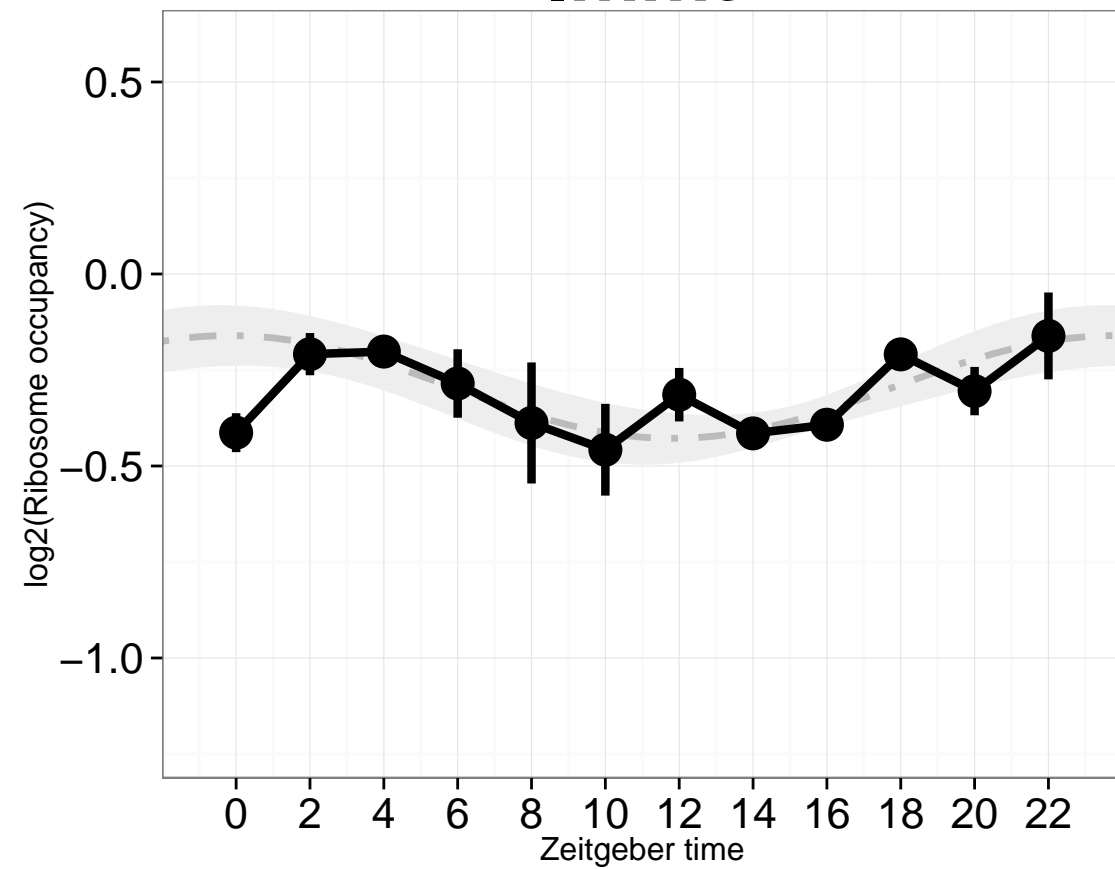

Supplement: SuppDataset_1.zip [file Immt_set_A.pdf › Supplemental Dataset 1/A-mRNA_nonrhyth_translation_nonrhyth/Immt_set_A.pdf]

## Imp3

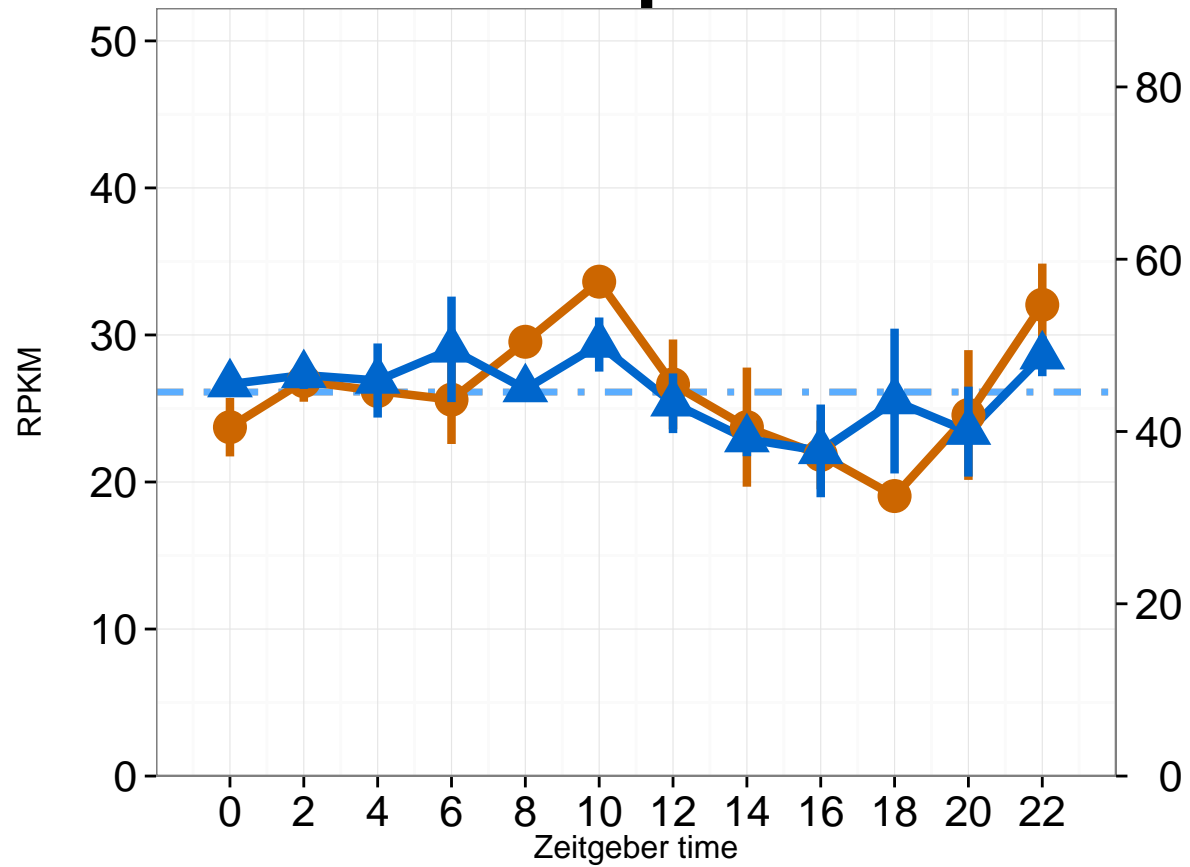

## Imp3

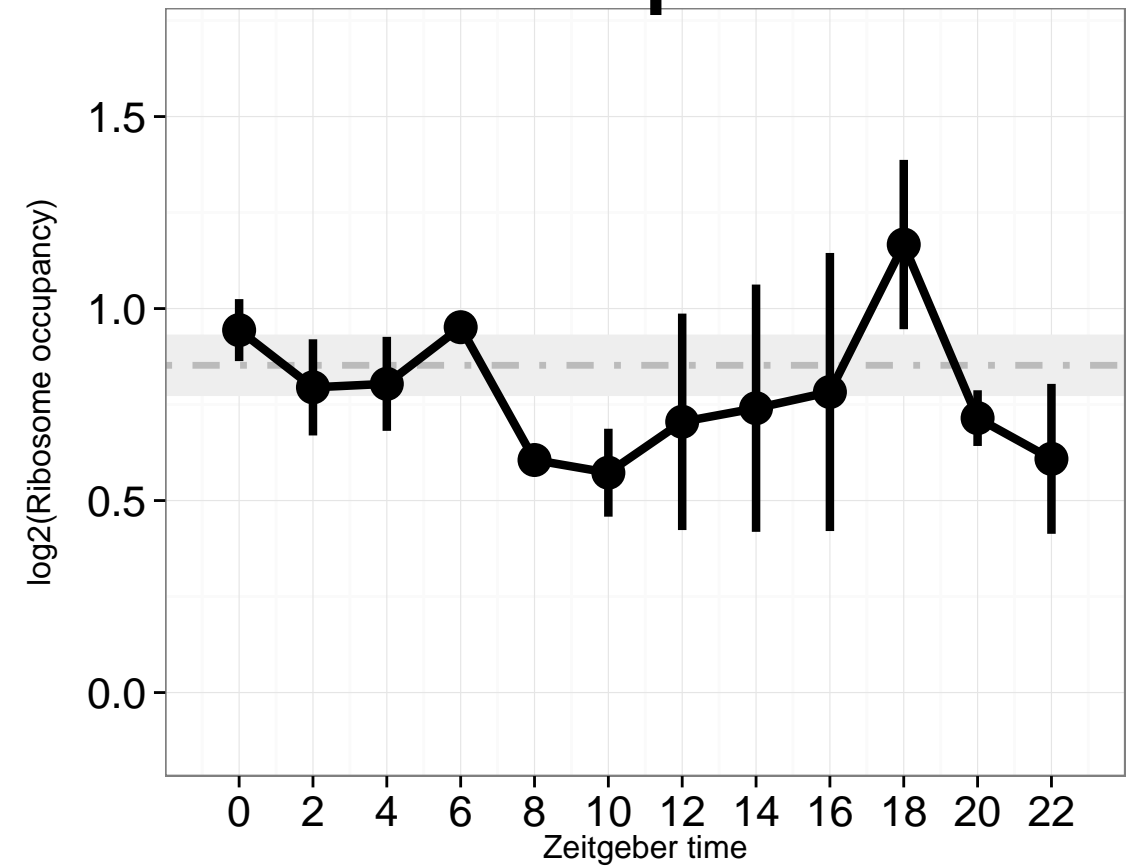

Supplement: SuppDataset_1.zip [file Imp3_set_A.pdf › Supplemental Dataset 1/A-mRNA_nonrhyth_translation_nonrhyth/Imp3_set_A.pdf]

# Imp4

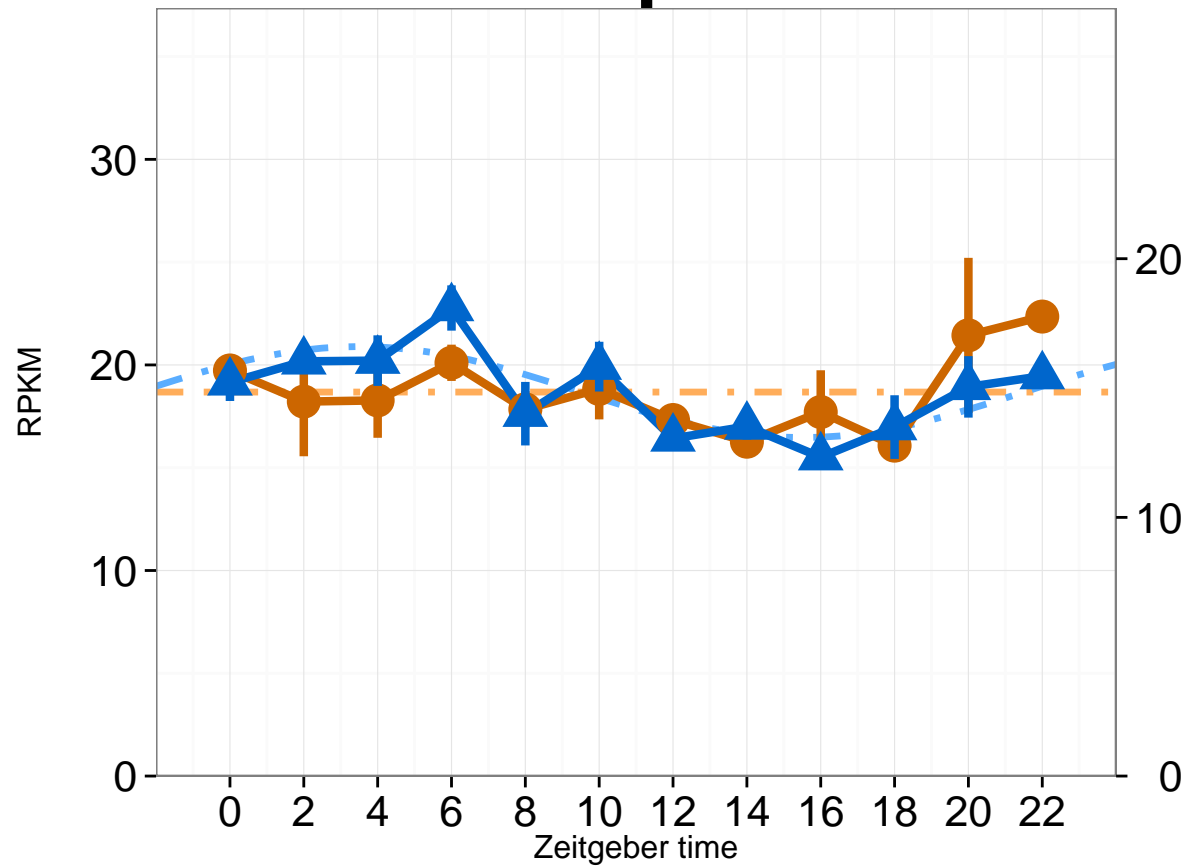

# Imp4

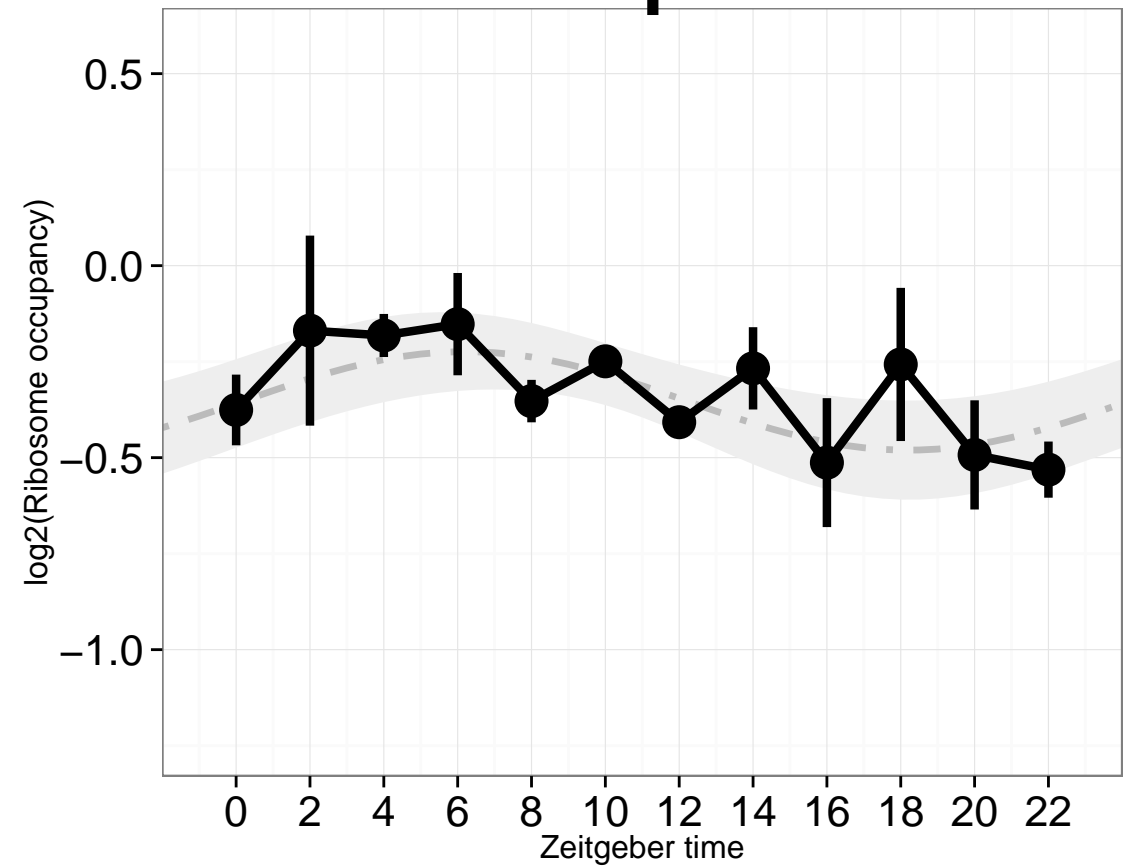

Supplement: SuppDataset_1.zip [file Imp4_set_A.pdf › Supplemental Dataset 1/A-mRNA_nonrhyth_translation_nonrhyth/Imp4_set_A.pdf]

# Impa1

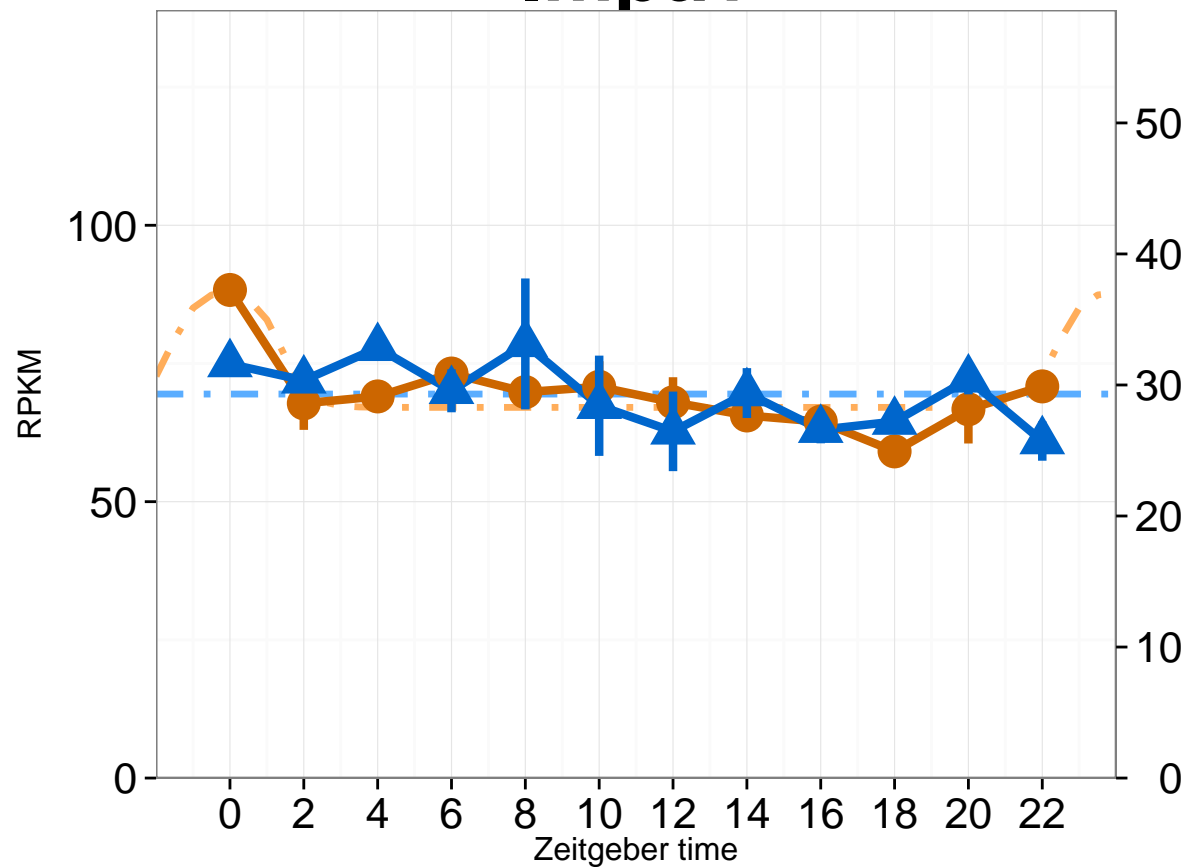

# Impa1

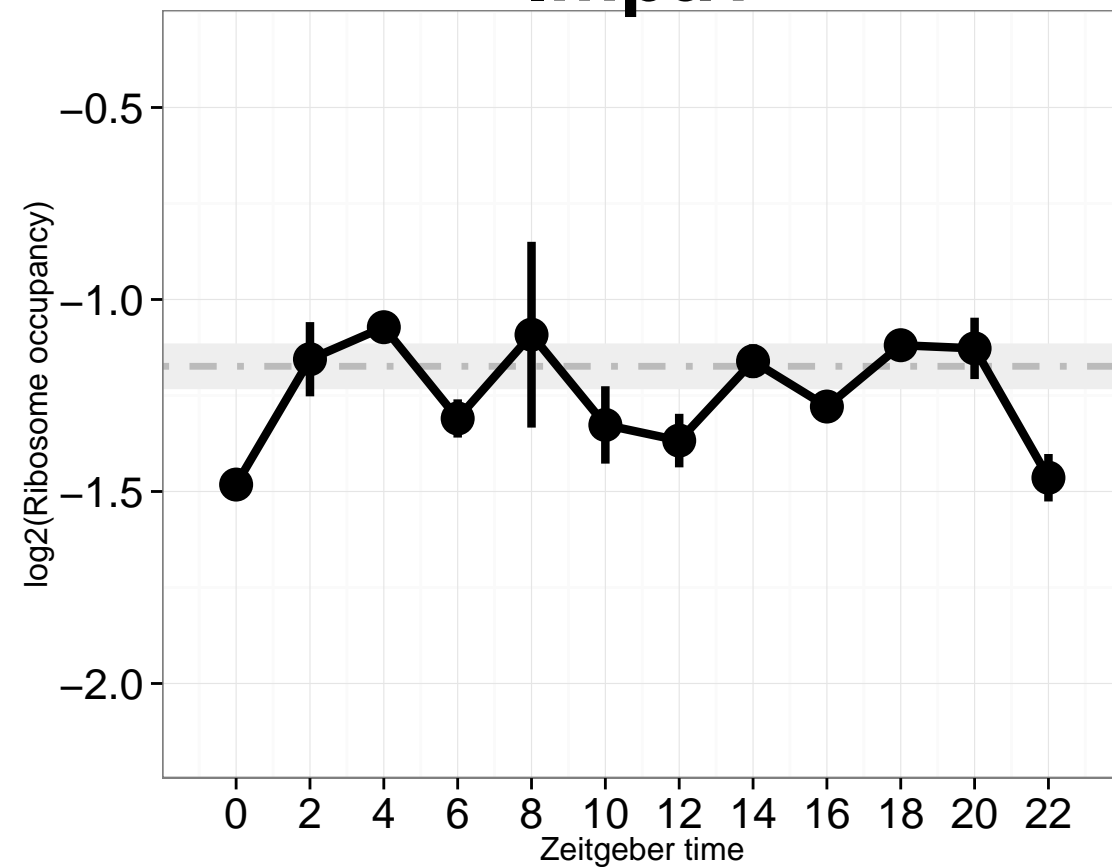

Supplement: SuppDataset_1.zip [file Impa1_set_A.pdf › Supplemental Dataset 1/A-mRNA_nonrhyth_translation_nonrhyth/Impa1_set_A.pdf]

# Impa2

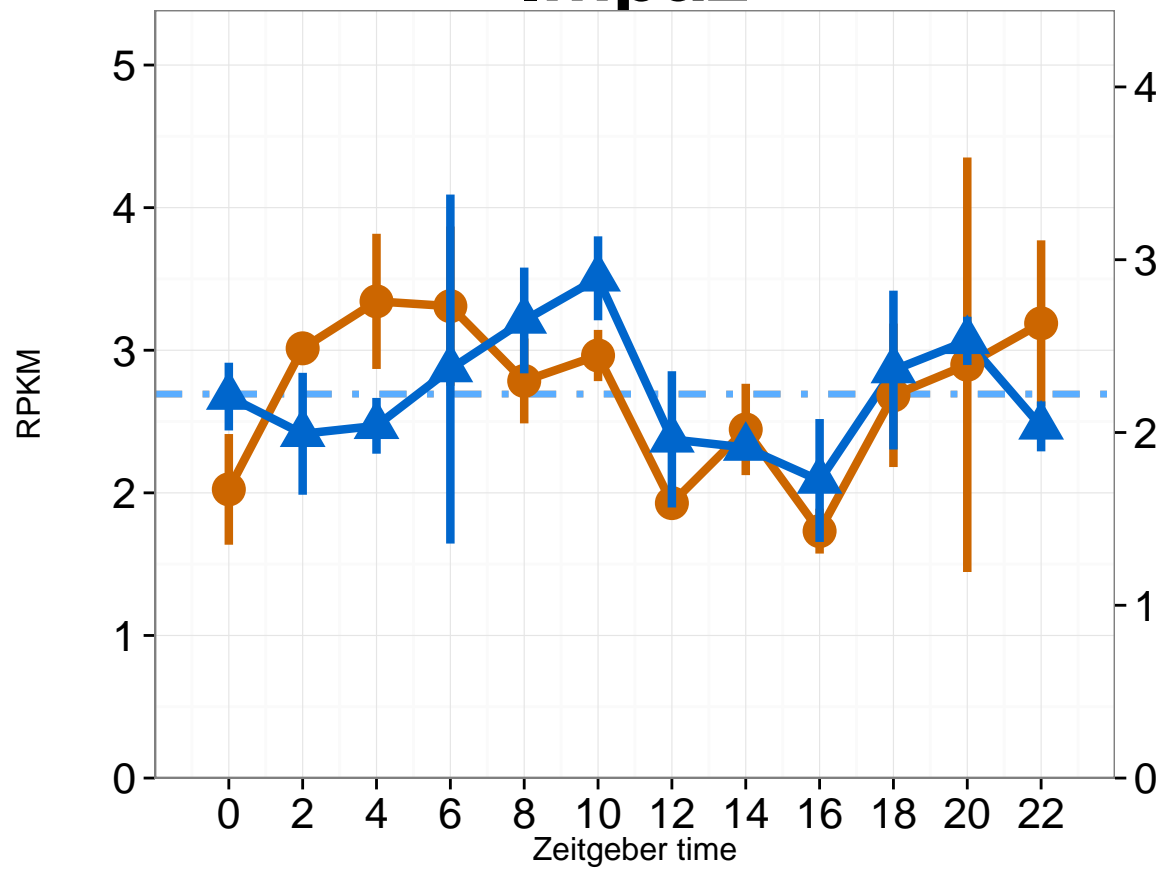

# Impa2

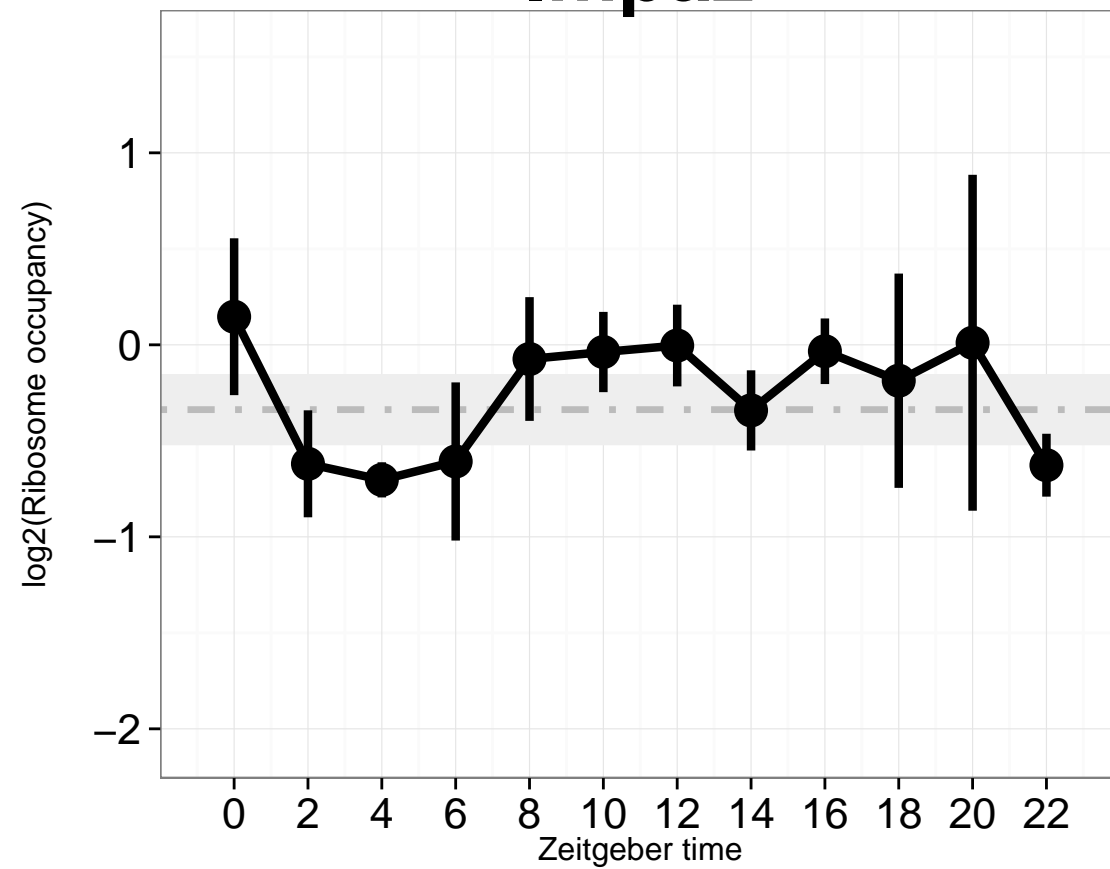

Supplement: SuppDataset_1.zip [file Impa2_set_A.pdf › Supplemental Dataset 1/A-mRNA_nonrhyth_translation_nonrhyth/Impa2_set_A.pdf]

## Impact

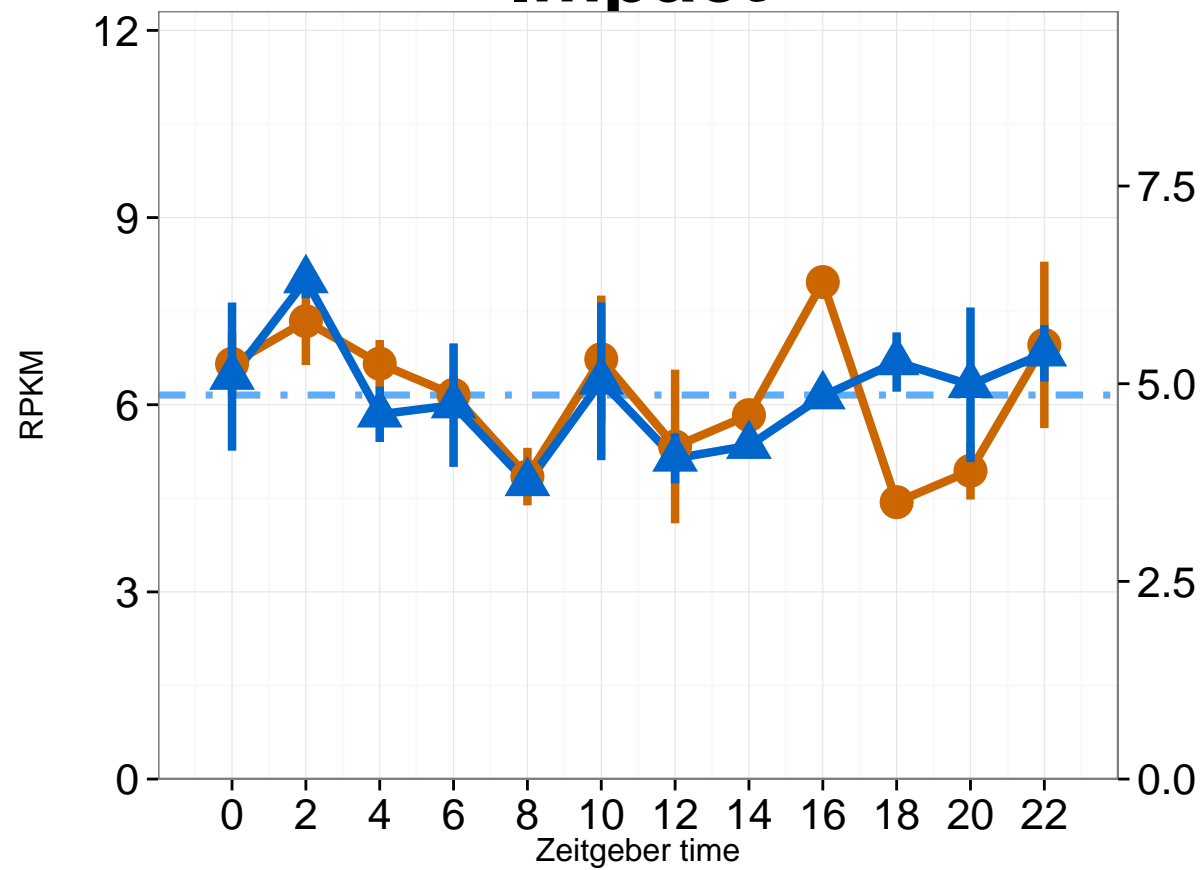

## Impact

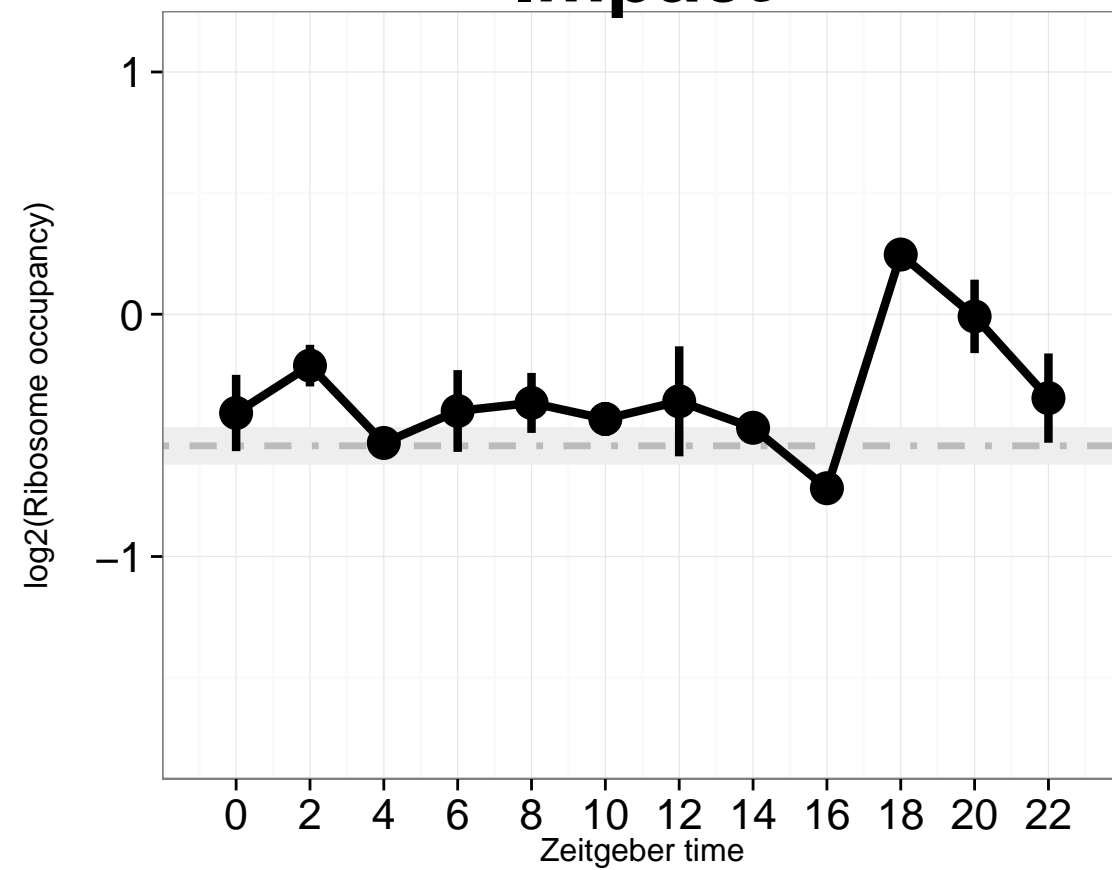

Supplement: SuppDataset_1.zip [file Impact_set_A.pdf › Supplemental Dataset 1/A-mRNA_nonrhyth_translation_nonrhyth/Impact_set_A.pdf]

# Impad1

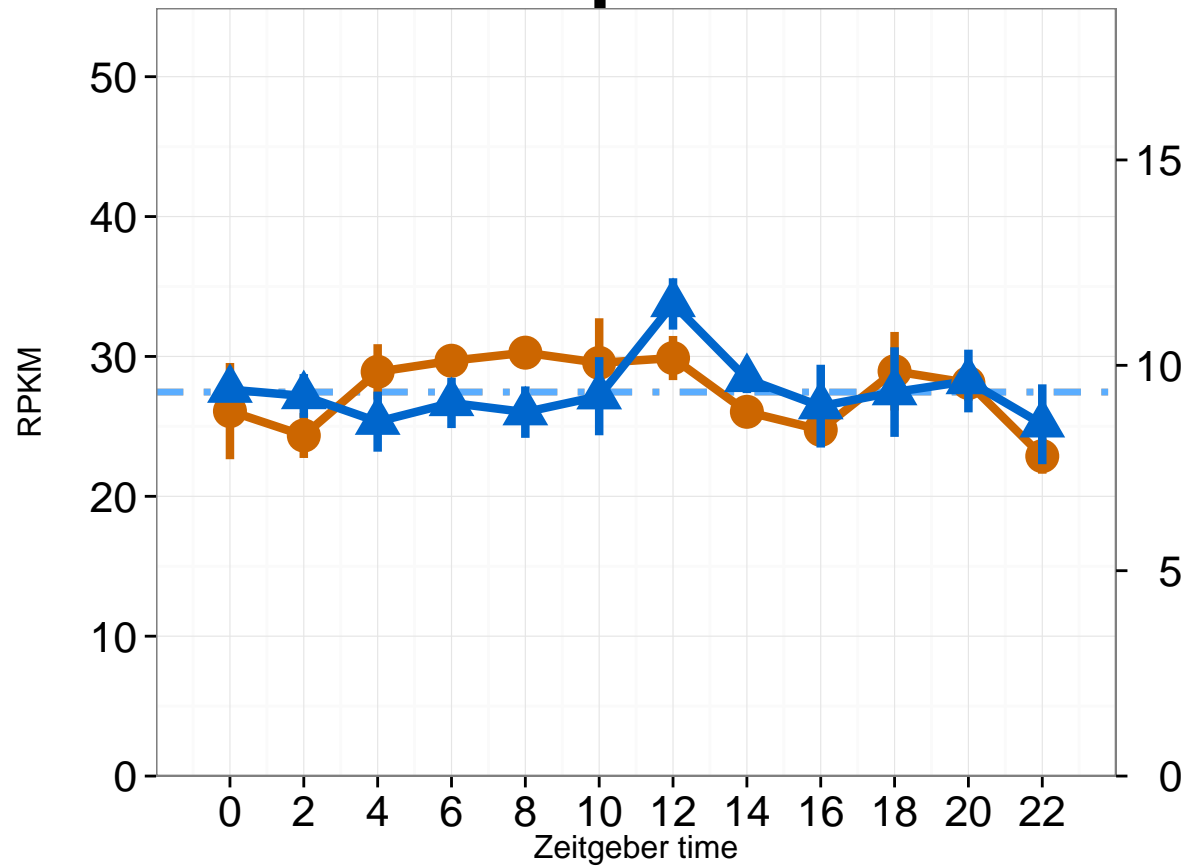

# Impad1

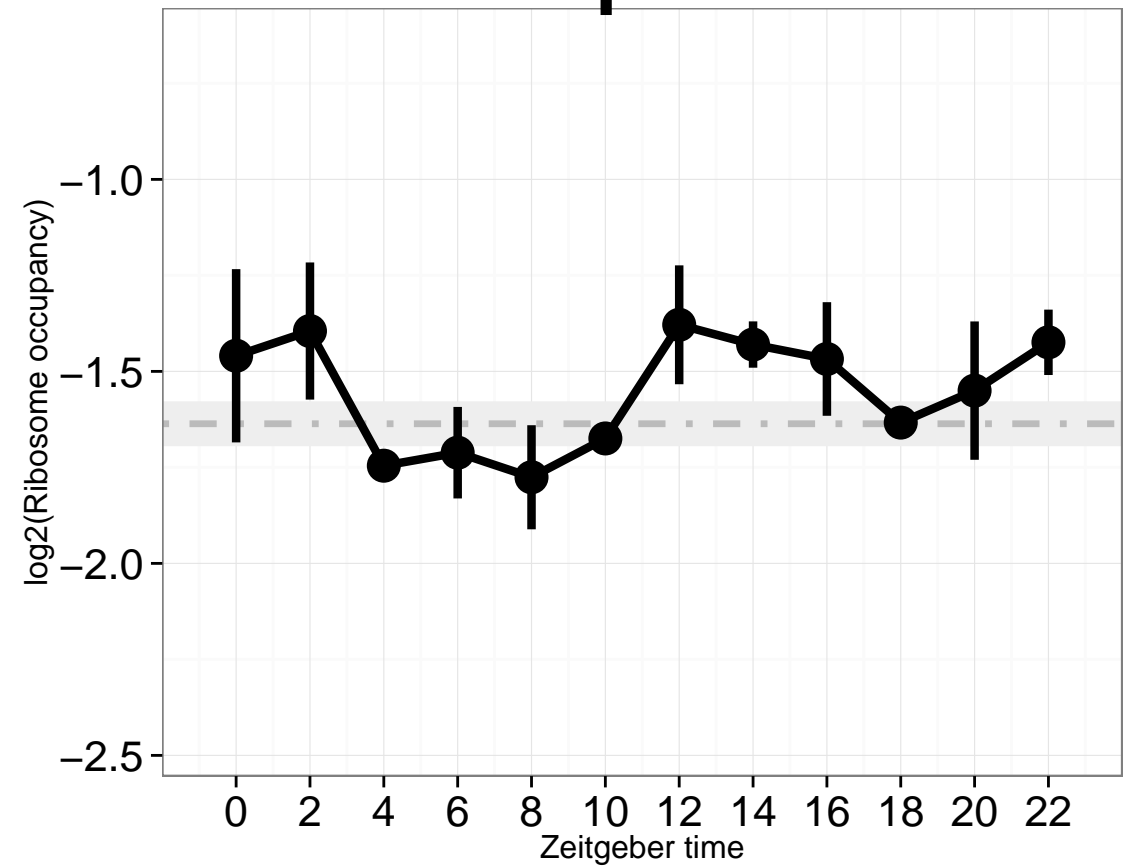

Supplement: SuppDataset_1.zip [file Impad1_set_A.pdf › Supplemental Dataset 1/A-mRNA_nonrhyth_translation_nonrhyth/Impad1_set_A.pdf]

## Impdh1

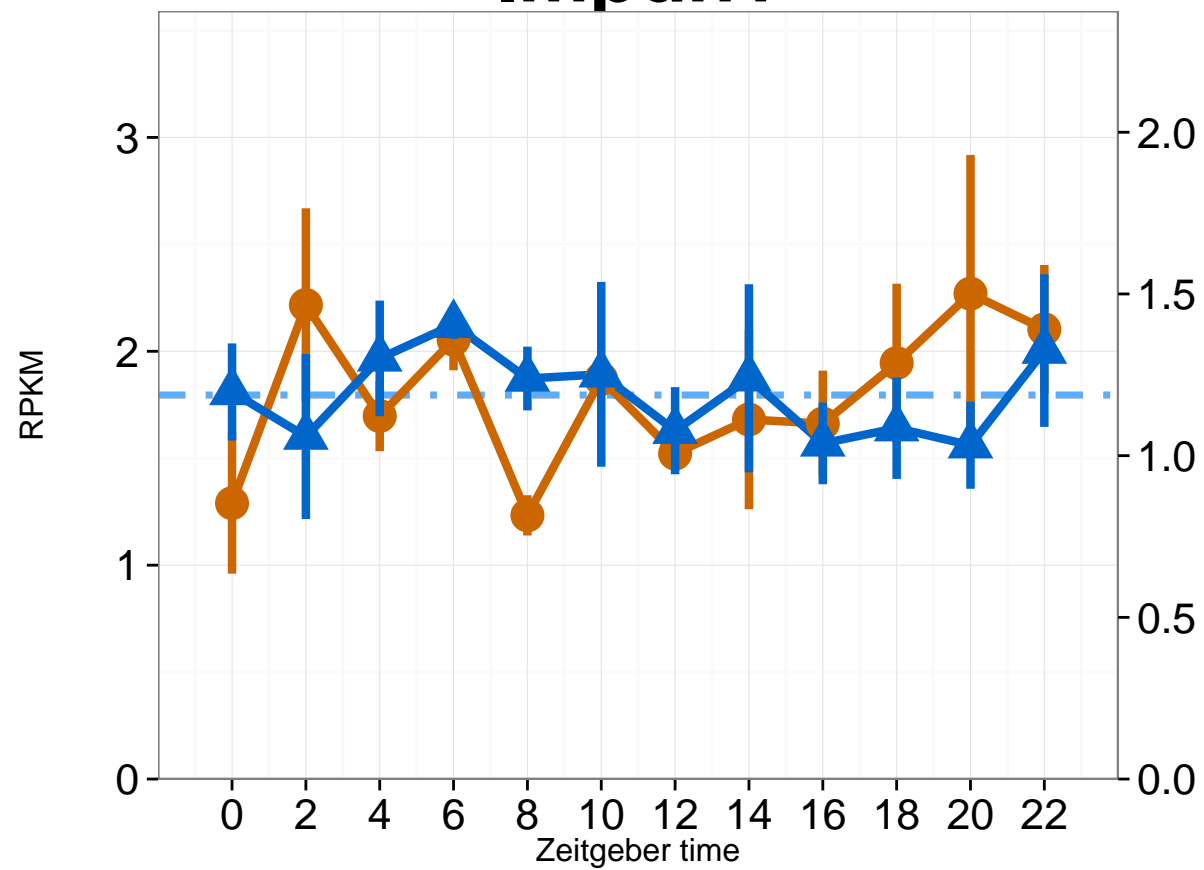

## Impdh1

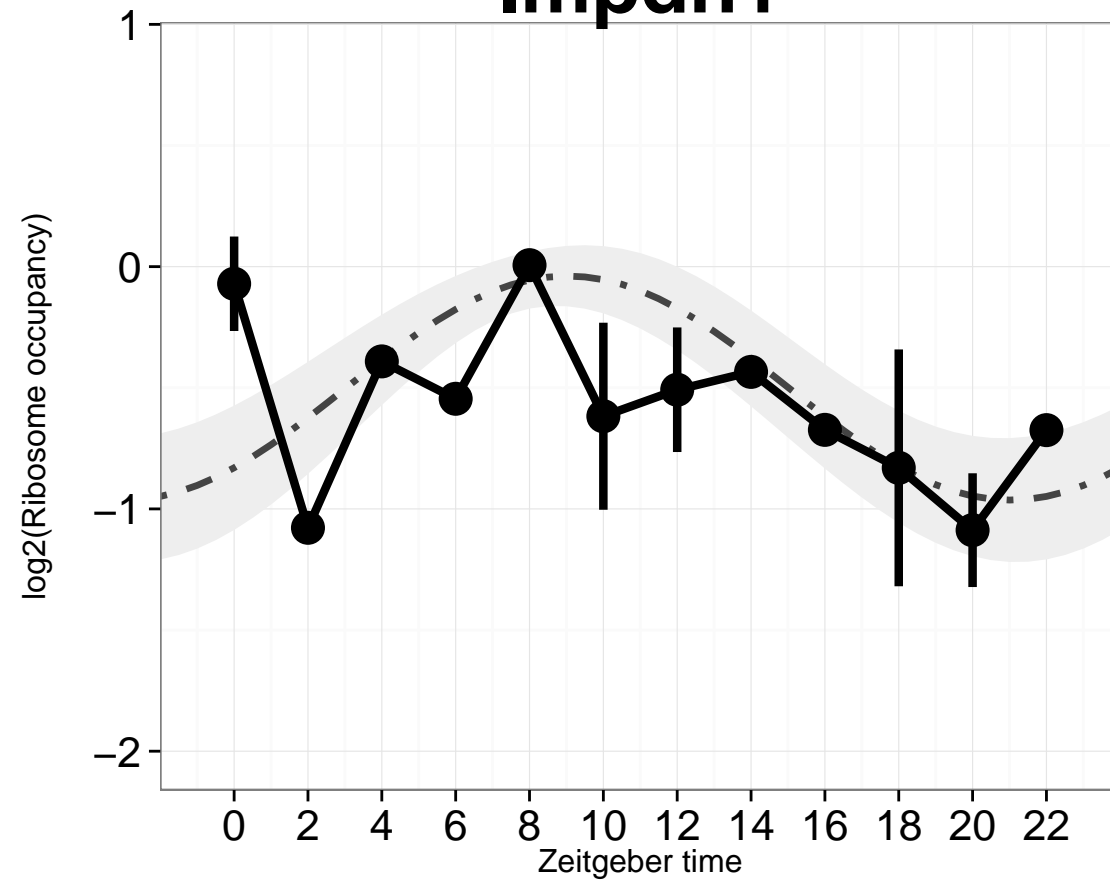

Supplement: SuppDataset_1.zip [file Impdh1_set_A.pdf › Supplemental Dataset 1/A-mRNA_nonrhyth_translation_nonrhyth/Impdh1_set_A.pdf]

## Impdh2

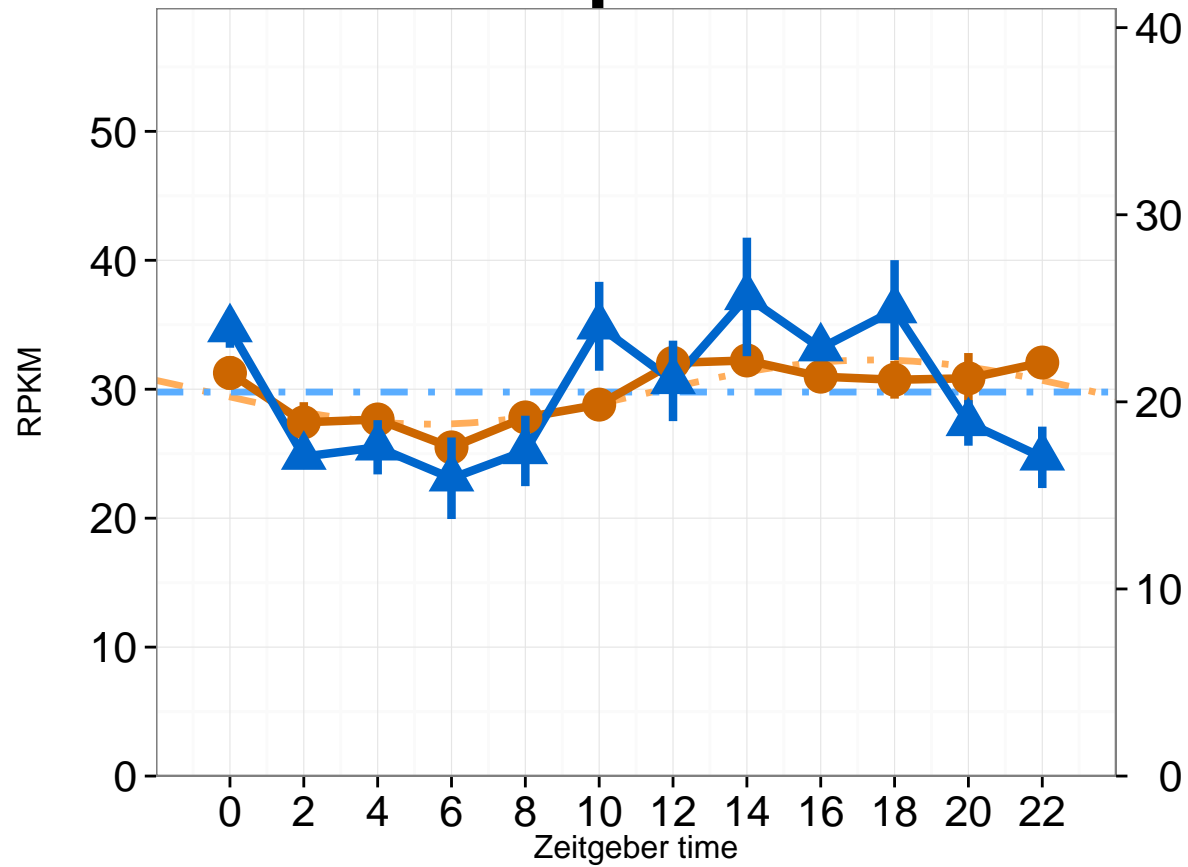

## Impdh2

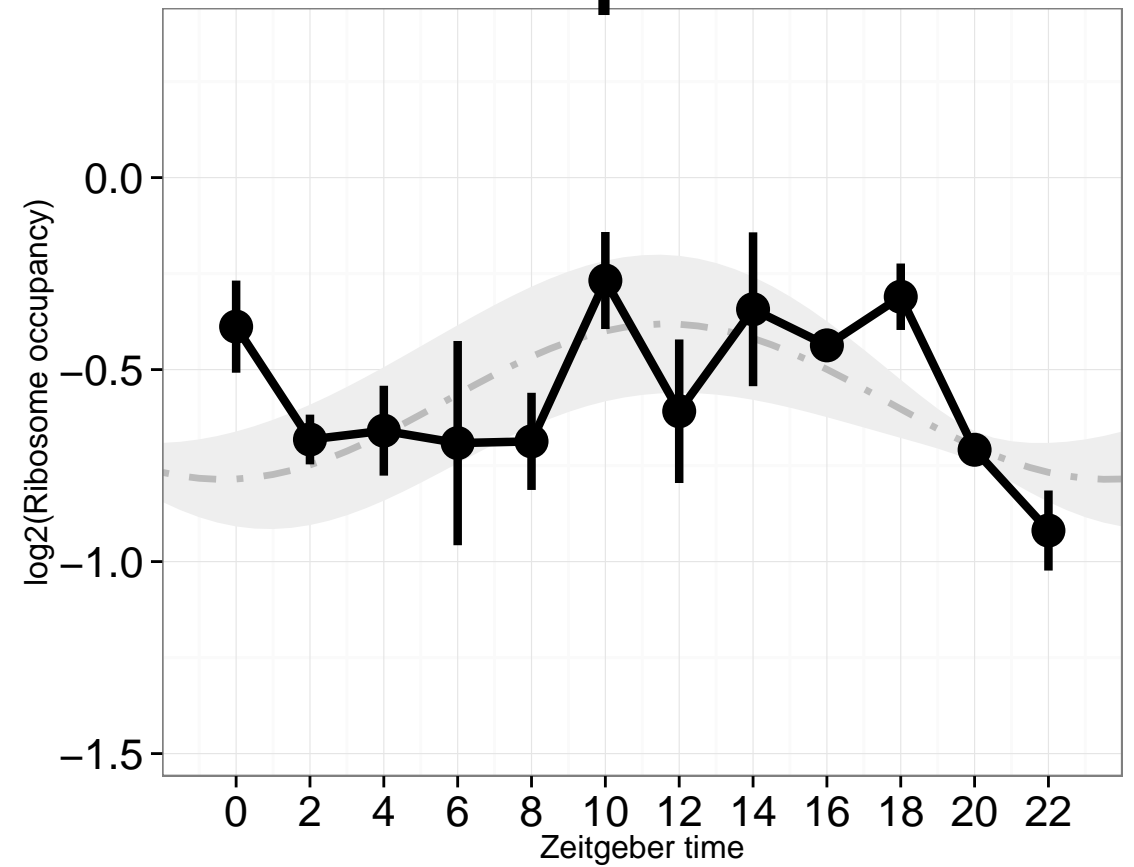

Supplement: SuppDataset_1.zip [file Impdh2_set_A.pdf › Supplemental Dataset 1/A-mRNA_nonrhyth_translation_nonrhyth/Impdh2_set_A.pdf]

# Impg2

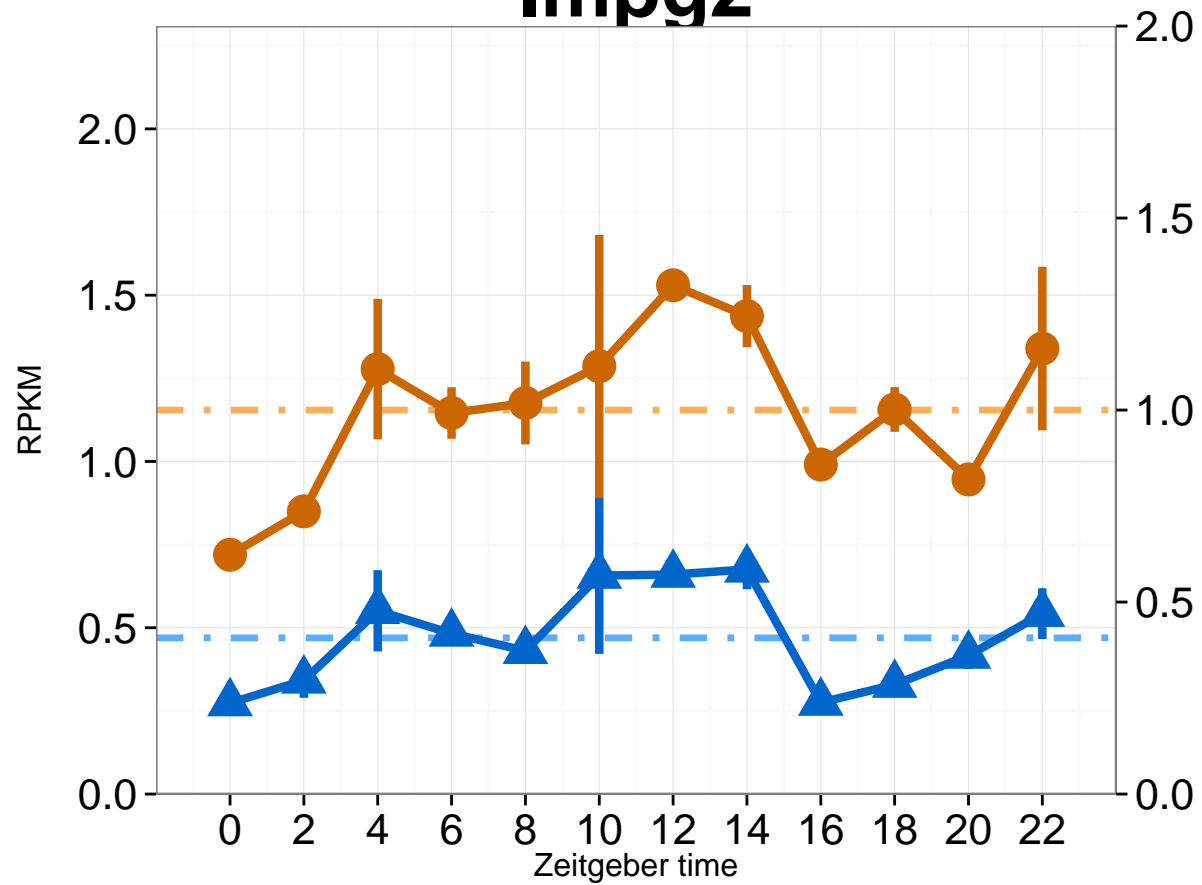

# Impg2

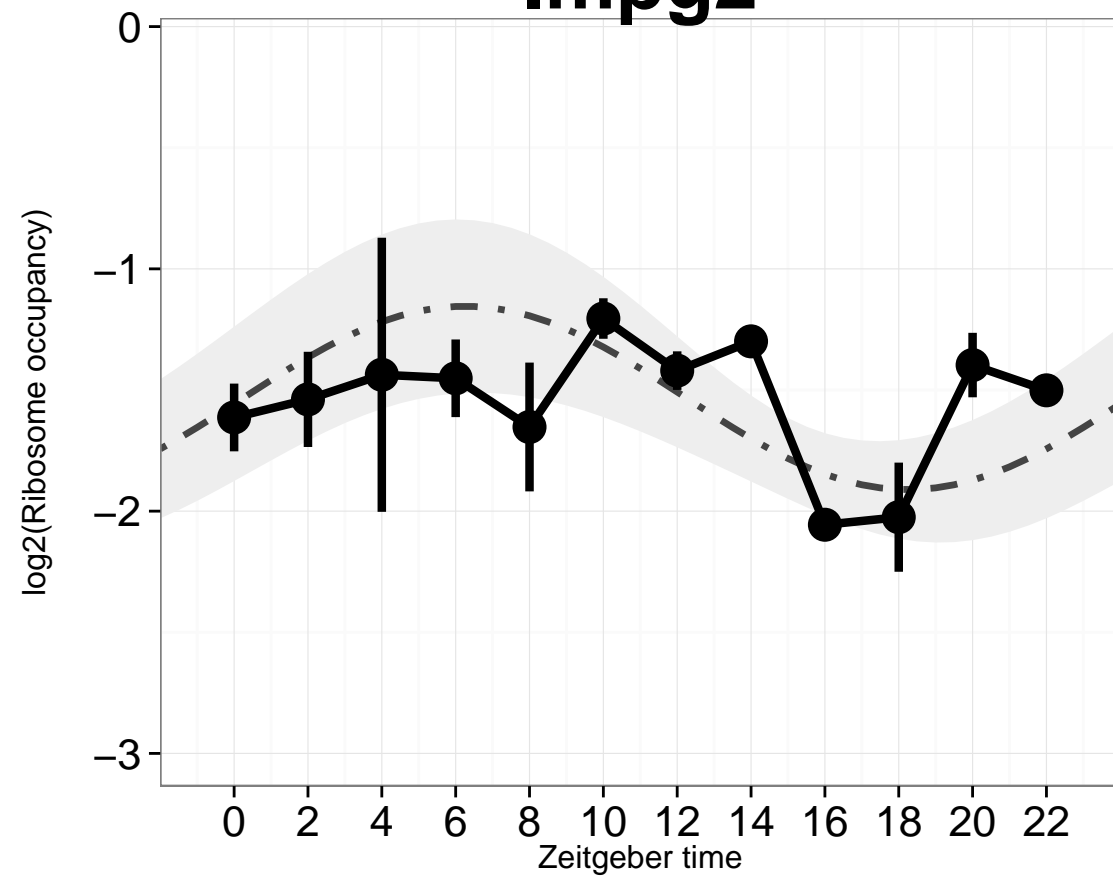

Supplement: SuppDataset_1.zip [file Impg2_set_A.pdf › Supplemental Dataset 1/A-mRNA_nonrhyth_translation_nonrhyth/Impg2_set_A.pdf]

## Inadl

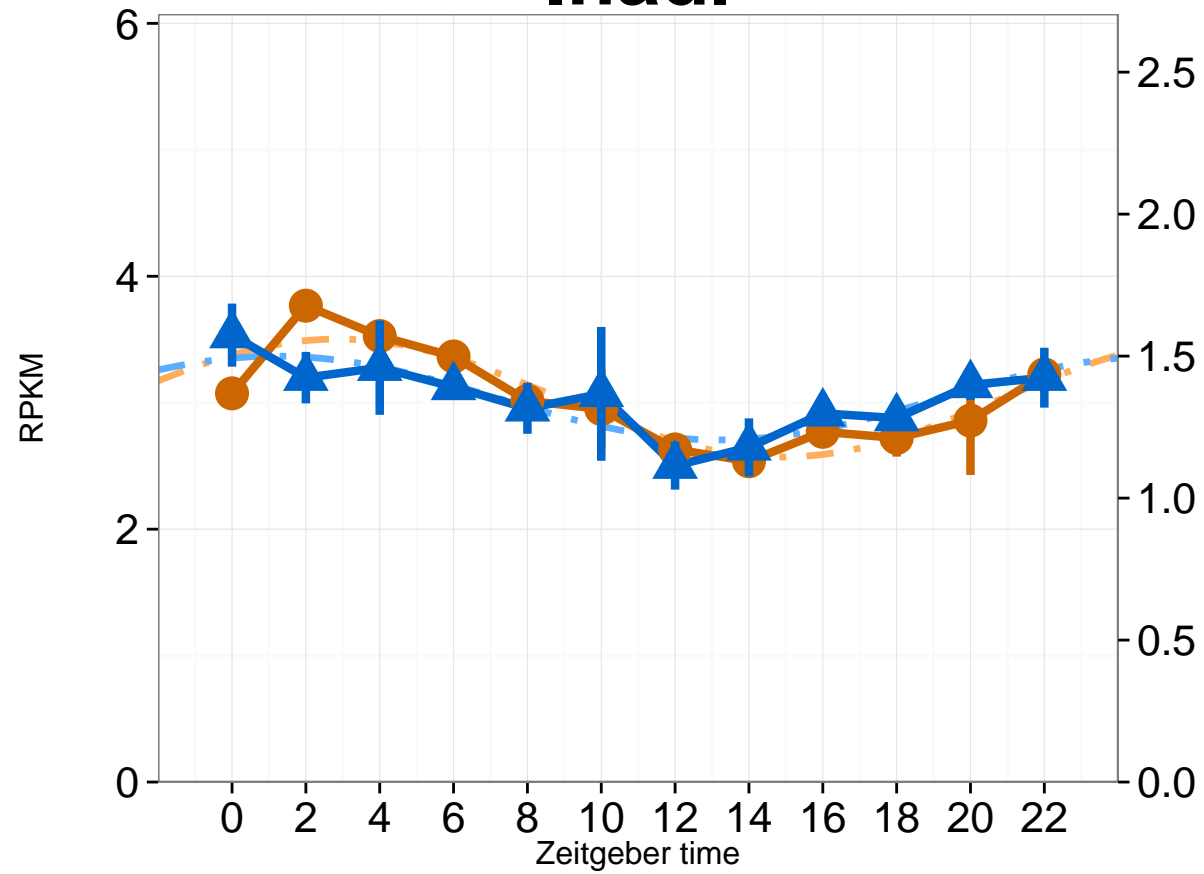

## Inadl

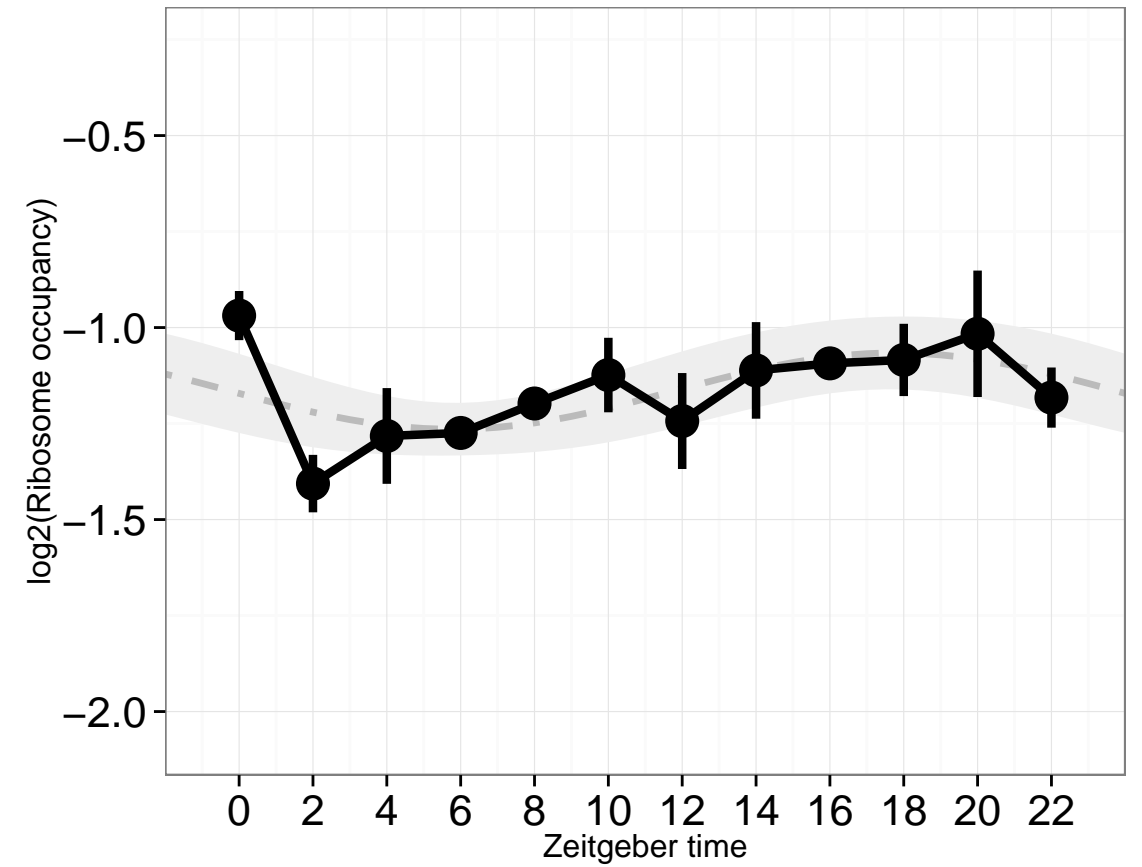

Supplement: SuppDataset_1.zip [file Inadl_set_A.pdf › Supplemental Dataset 1/A-mRNA_nonrhyth_translation_nonrhyth/Inadl_set_A.pdf]

## Incenp

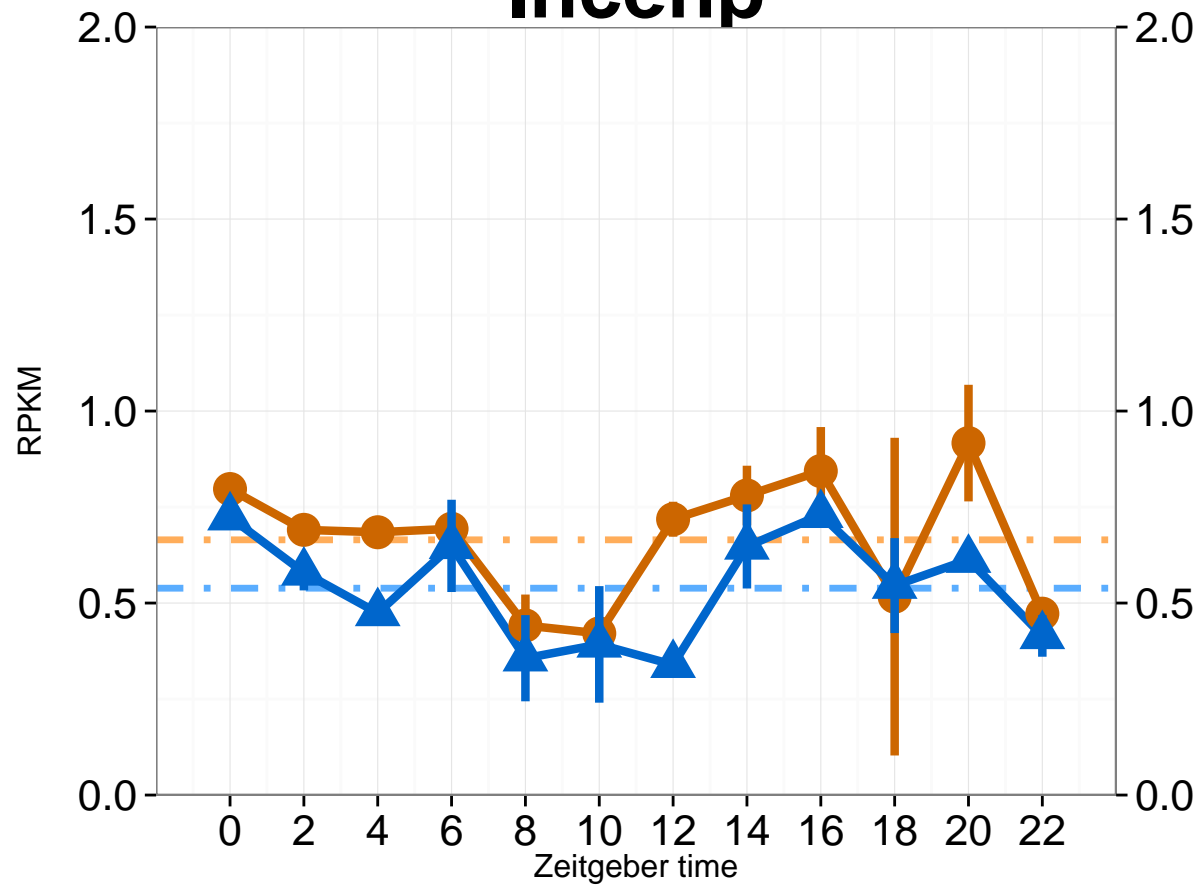

## Incenp

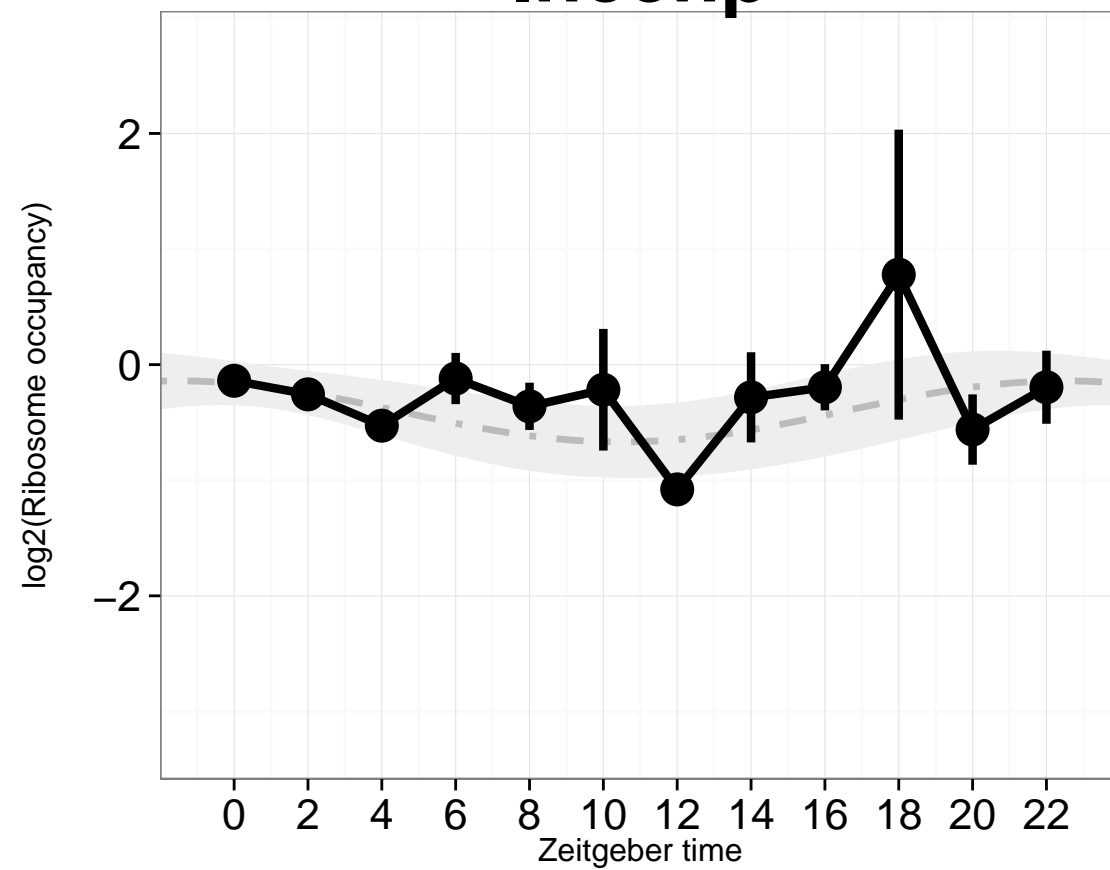

Supplement: SuppDataset_1.zip [file Incenp_set_A.pdf › Supplemental Dataset 1/A-mRNA_nonrhyth_translation_nonrhyth/Incenp_set_A.pdf]

## Inf2

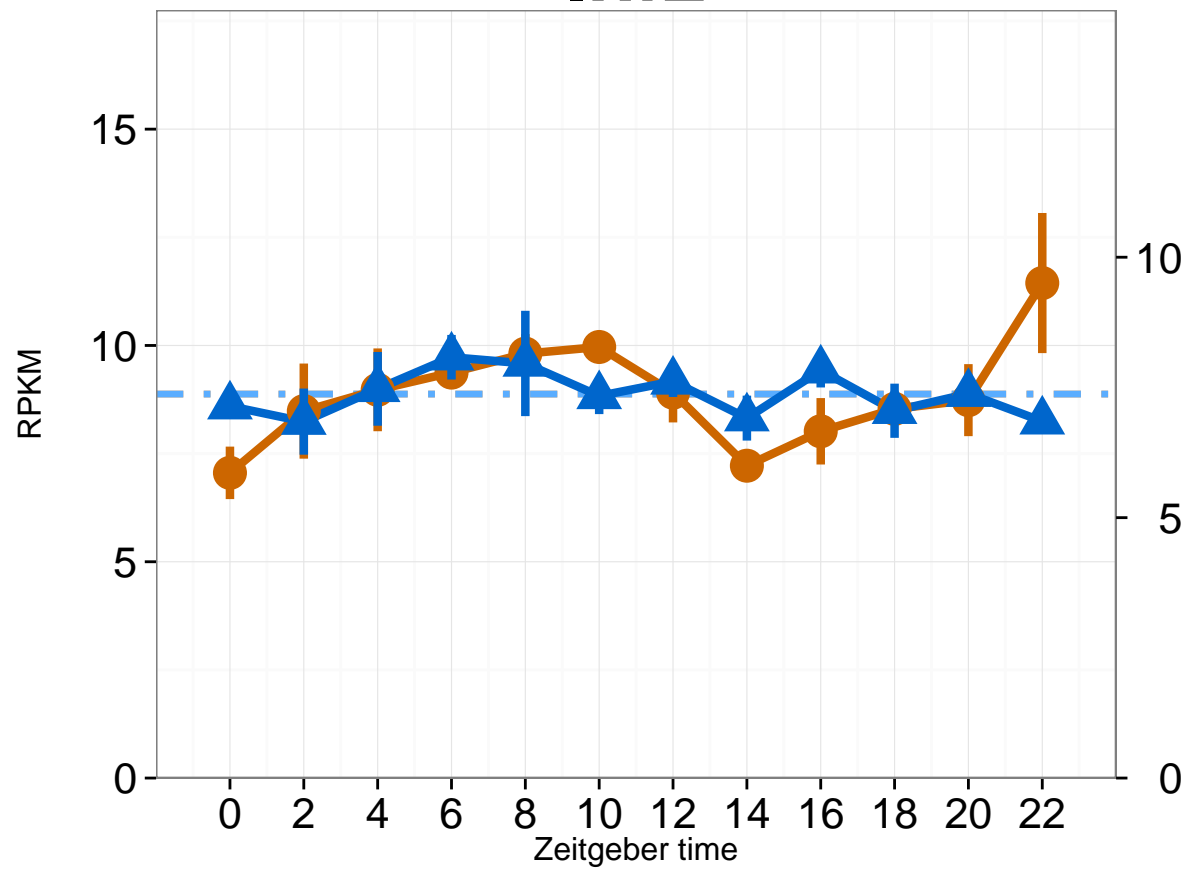

## Inf2

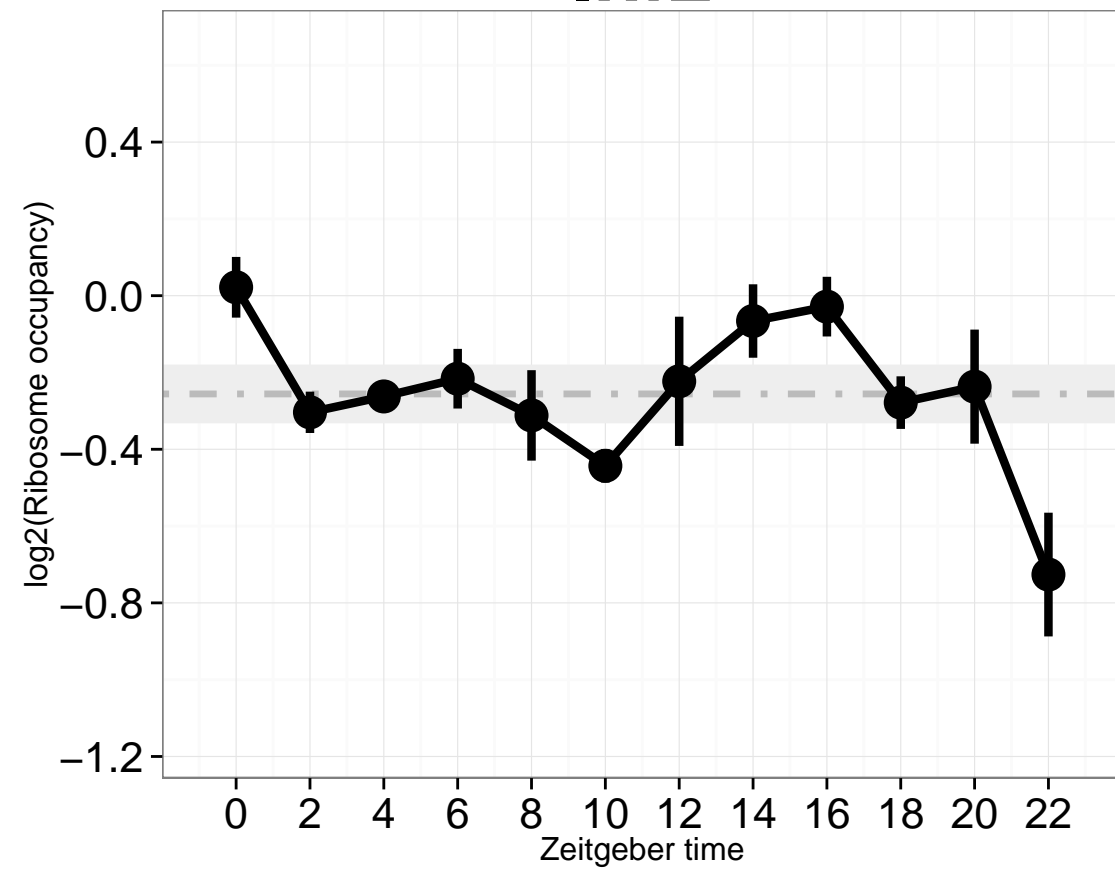

Supplement: SuppDataset_1.zip [file Inf2_set_A.pdf › Supplemental Dataset 1/A-mRNA_nonrhyth_translation_nonrhyth/Inf2_set_A.pdf]

## Ing2

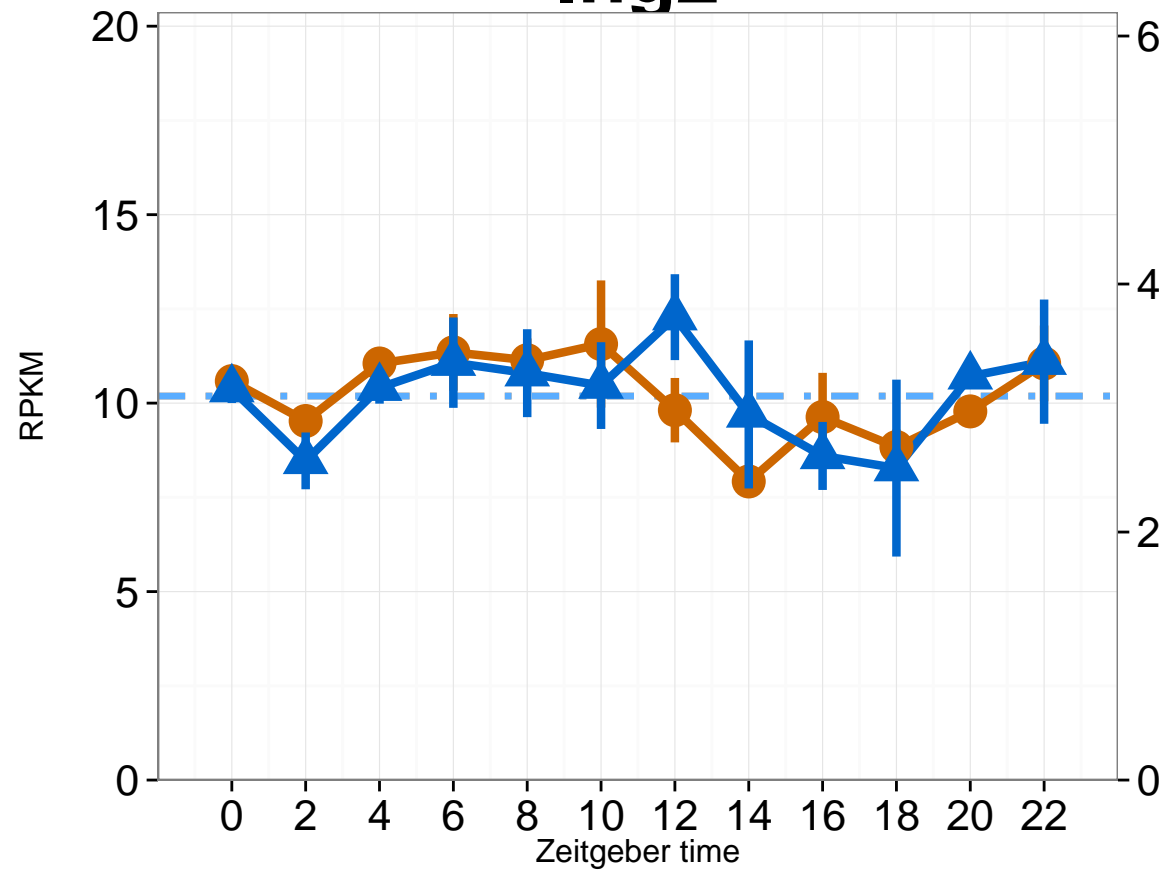

## Ing2

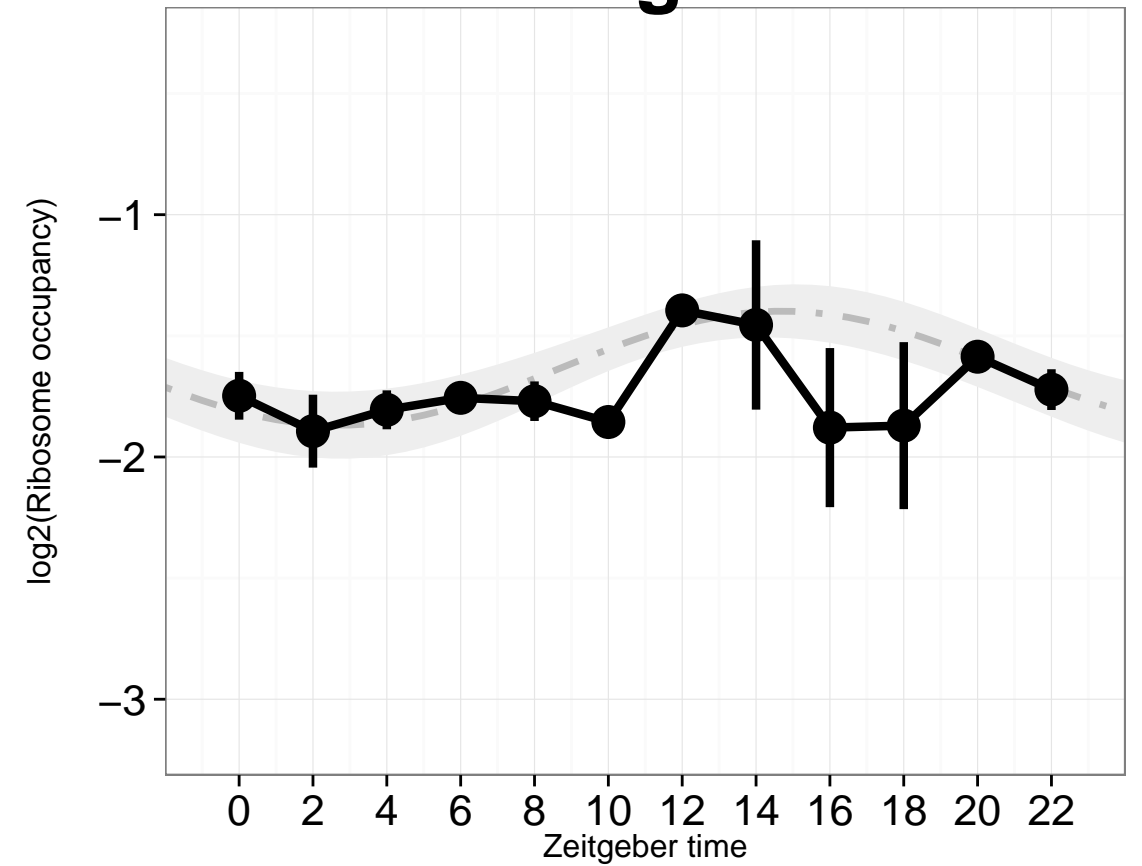

Supplement: SuppDataset_1.zip [file Ing2_set_A.pdf › Supplemental Dataset 1/A-mRNA_nonrhyth_translation_nonrhyth/Ing2_set_A.pdf]

## Ing3

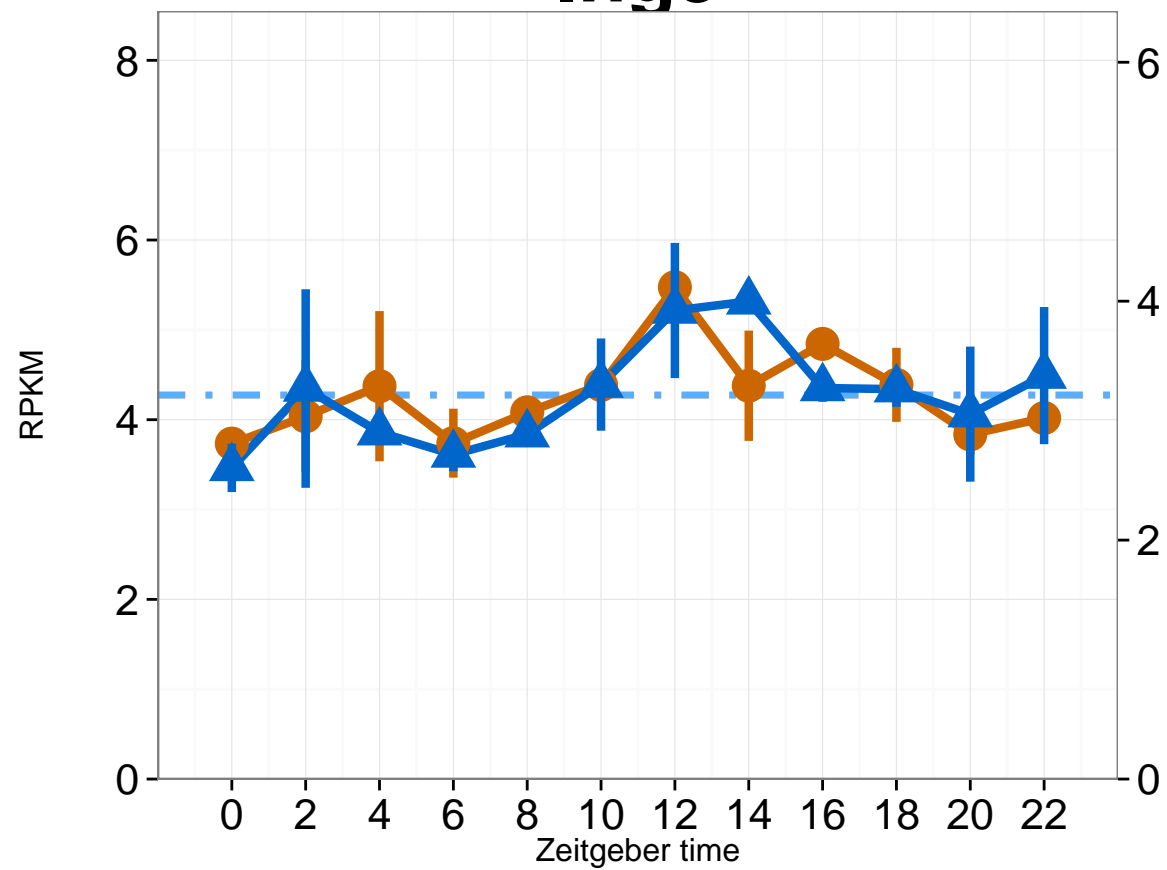

## Ing3

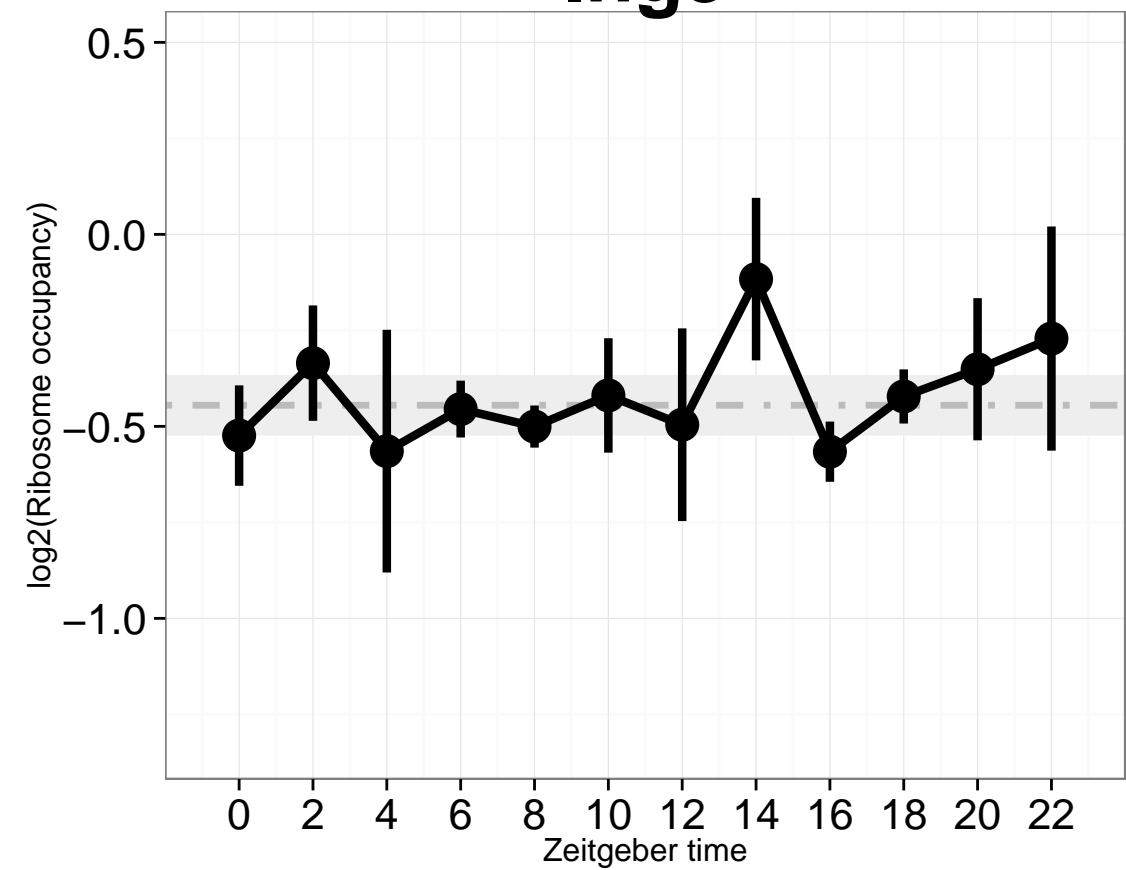

Supplement: SuppDataset_1.zip [file Ing3_set_A.pdf › Supplemental Dataset 1/A-mRNA_nonrhyth_translation_nonrhyth/Ing3_set_A.pdf]

## Ing5

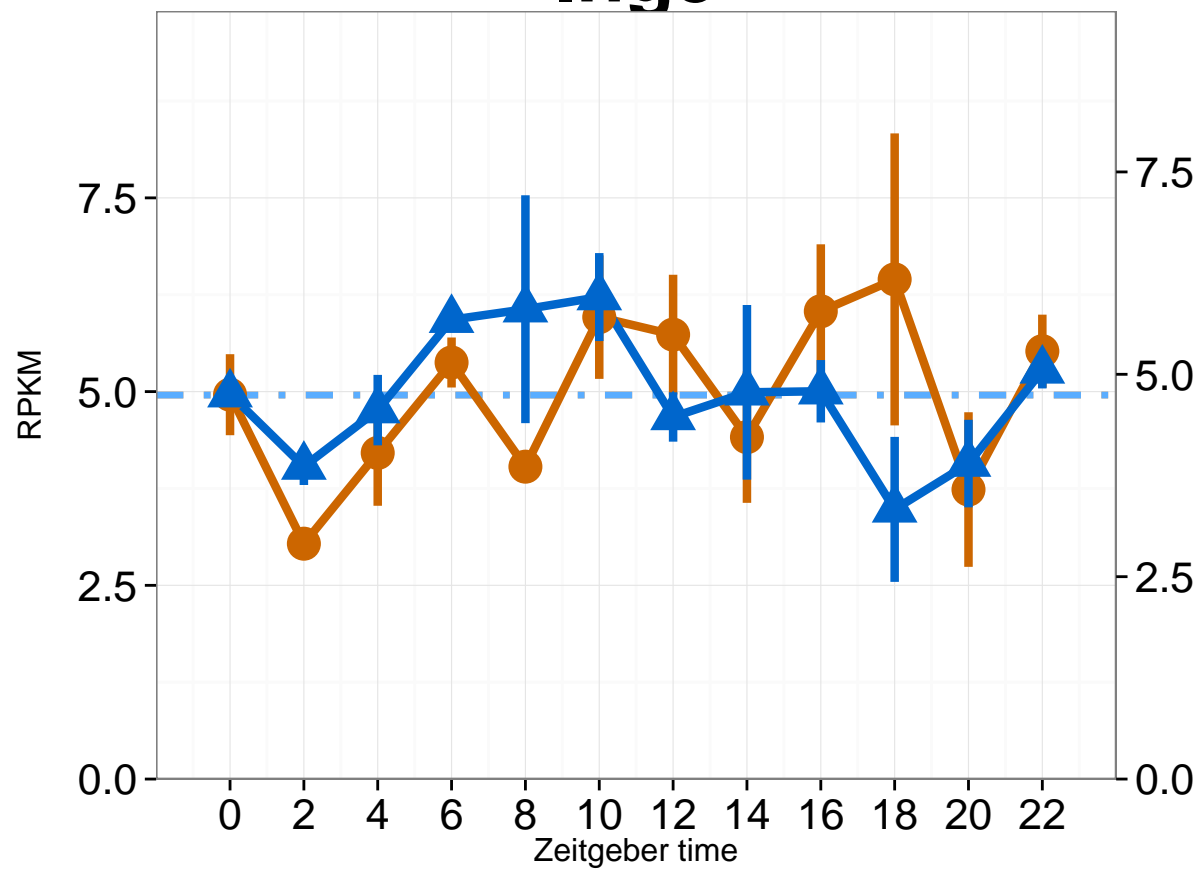

## Ing5

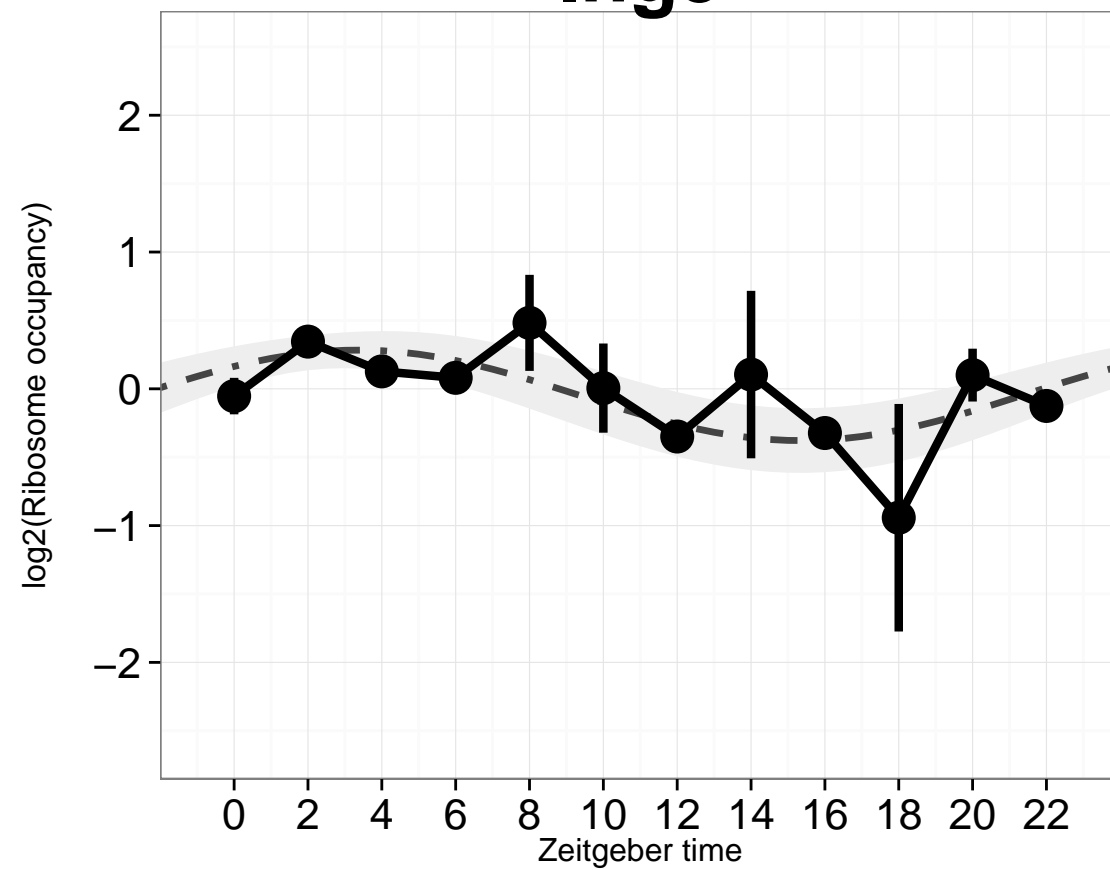

Supplement: SuppDataset_1.zip [file Ing5_set_A.pdf › Supplemental Dataset 1/A-mRNA_nonrhyth_translation_nonrhyth/Ing5_set_A.pdf]

**Inhbb TR**

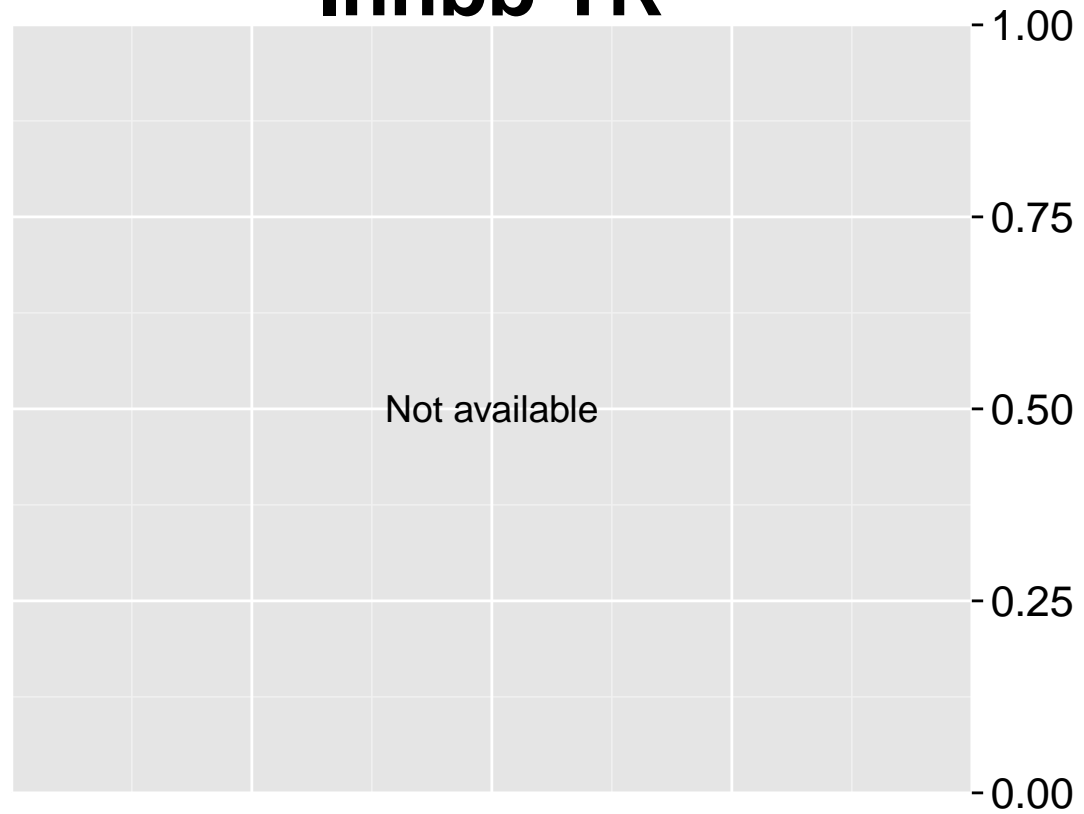

**Inhbb log2(Ribosome occupancy)**

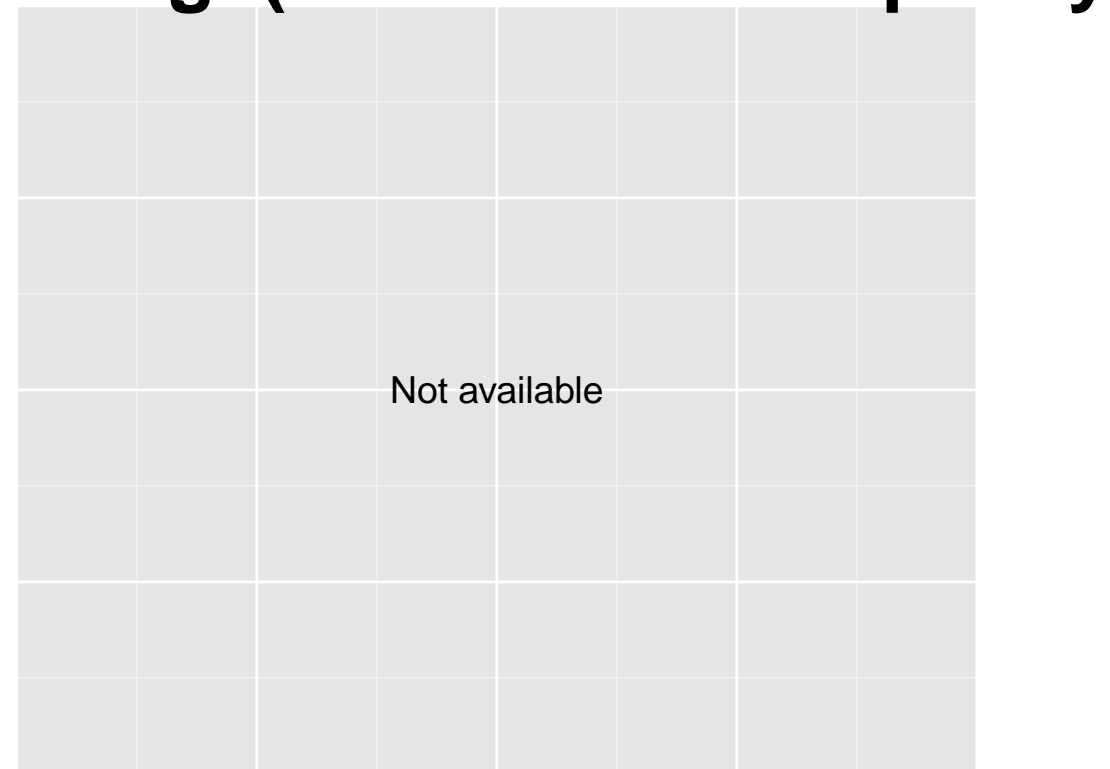

Supplement: SuppDataset_1.zip [file Inhbb_set_A.pdf › Supplemental Dataset 1/A-mRNA_nonrhyth_translation_nonrhyth/Inhbb_set_A.pdf]

## Inhbc

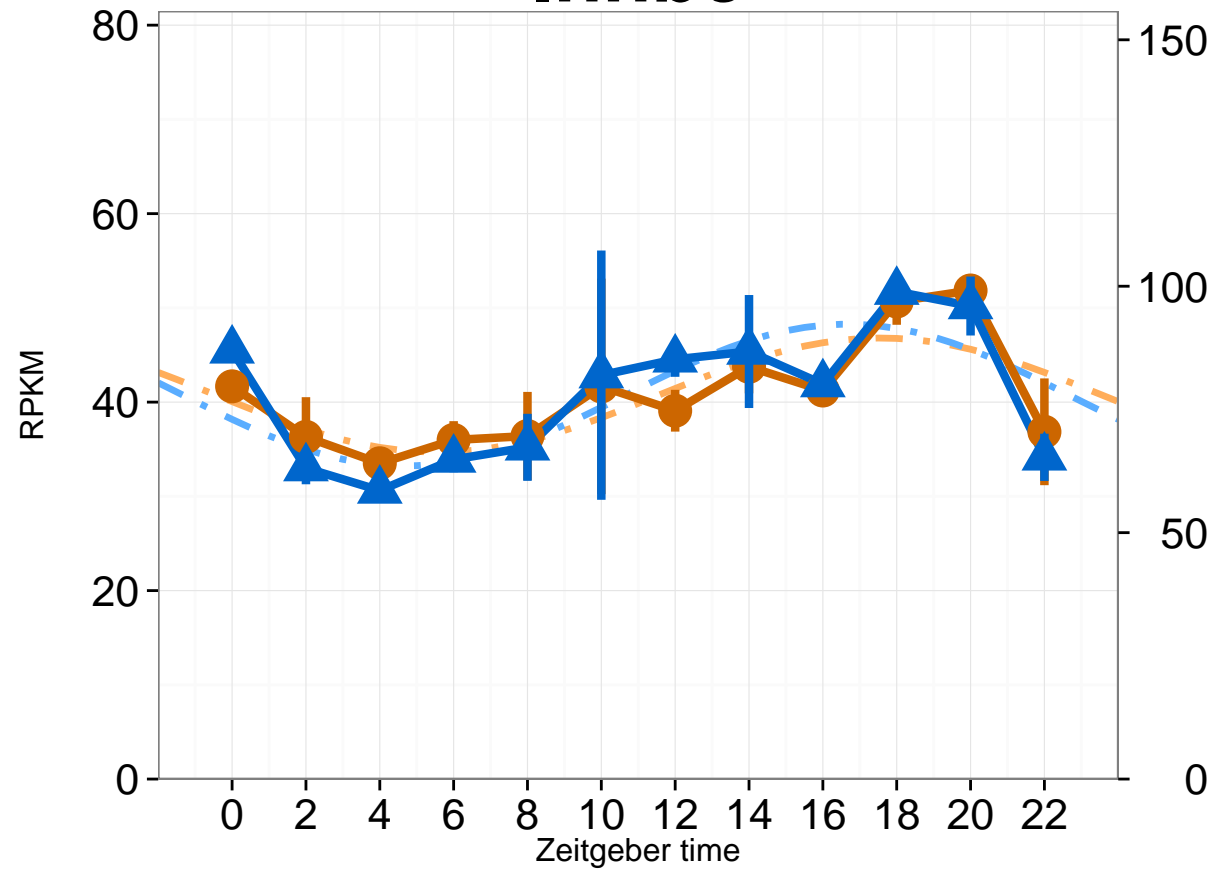

## Inhbc

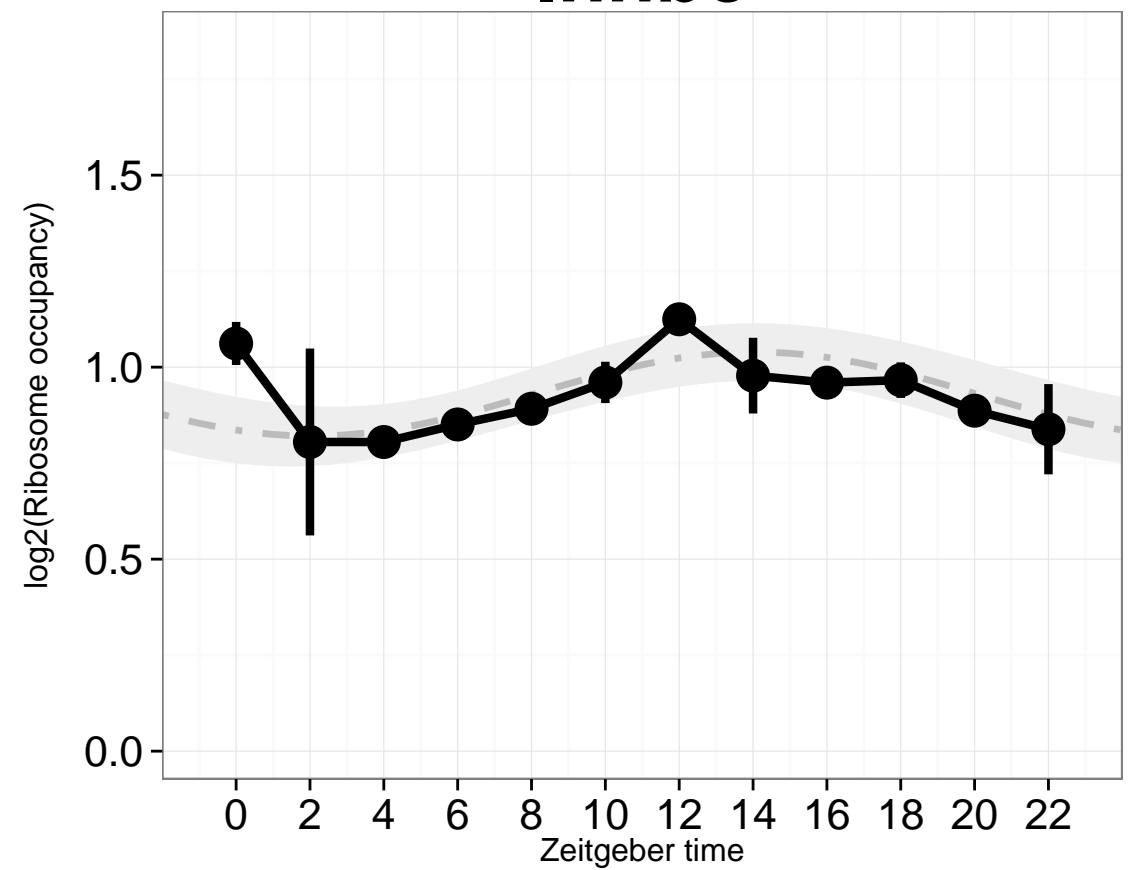

Supplement: SuppDataset_1.zip [file Inhbc_set_A.pdf › Supplemental Dataset 1/A-mRNA_nonrhyth_translation_nonrhyth/Inhbc_set_A.pdf]

## Inhbe

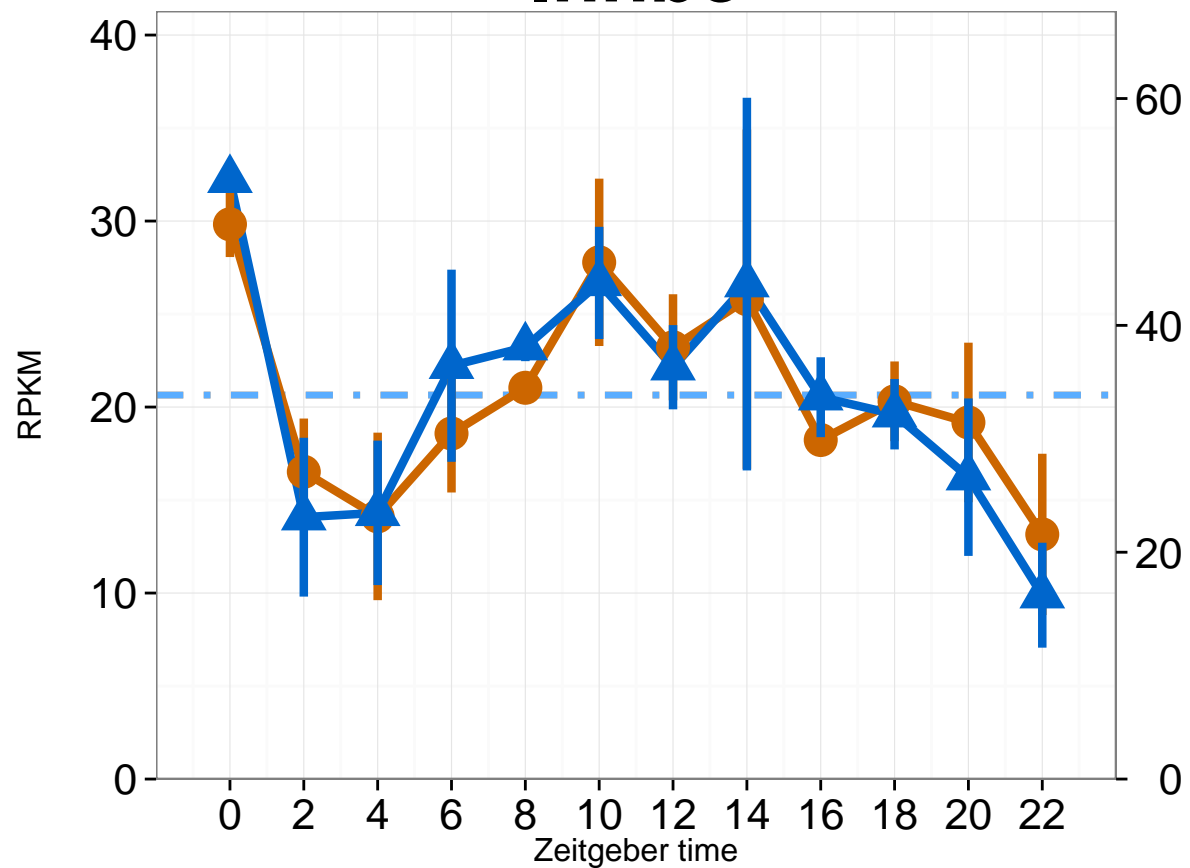

## Inhbe

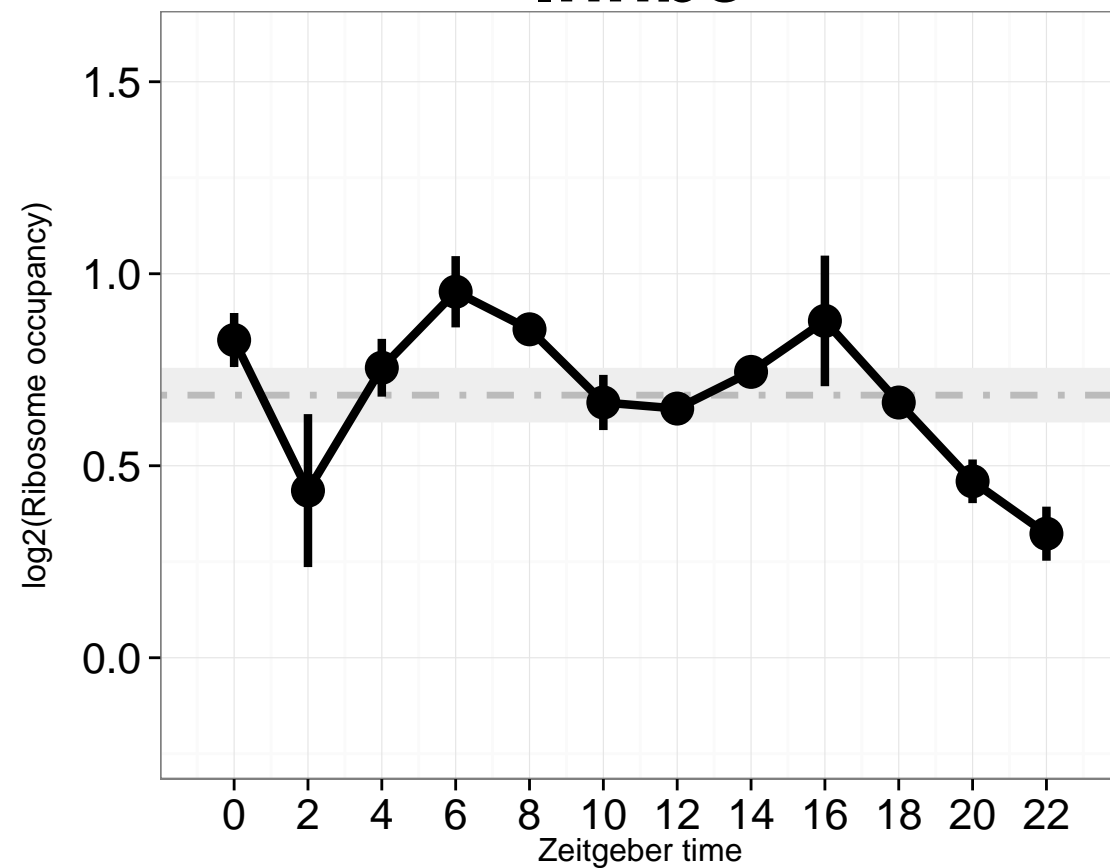

Supplement: SuppDataset_1.zip [file Inhbe_set_A.pdf › Supplemental Dataset 1/A-mRNA_nonrhyth_translation_nonrhyth/Inhbe_set_A.pdf]

## Ino80b

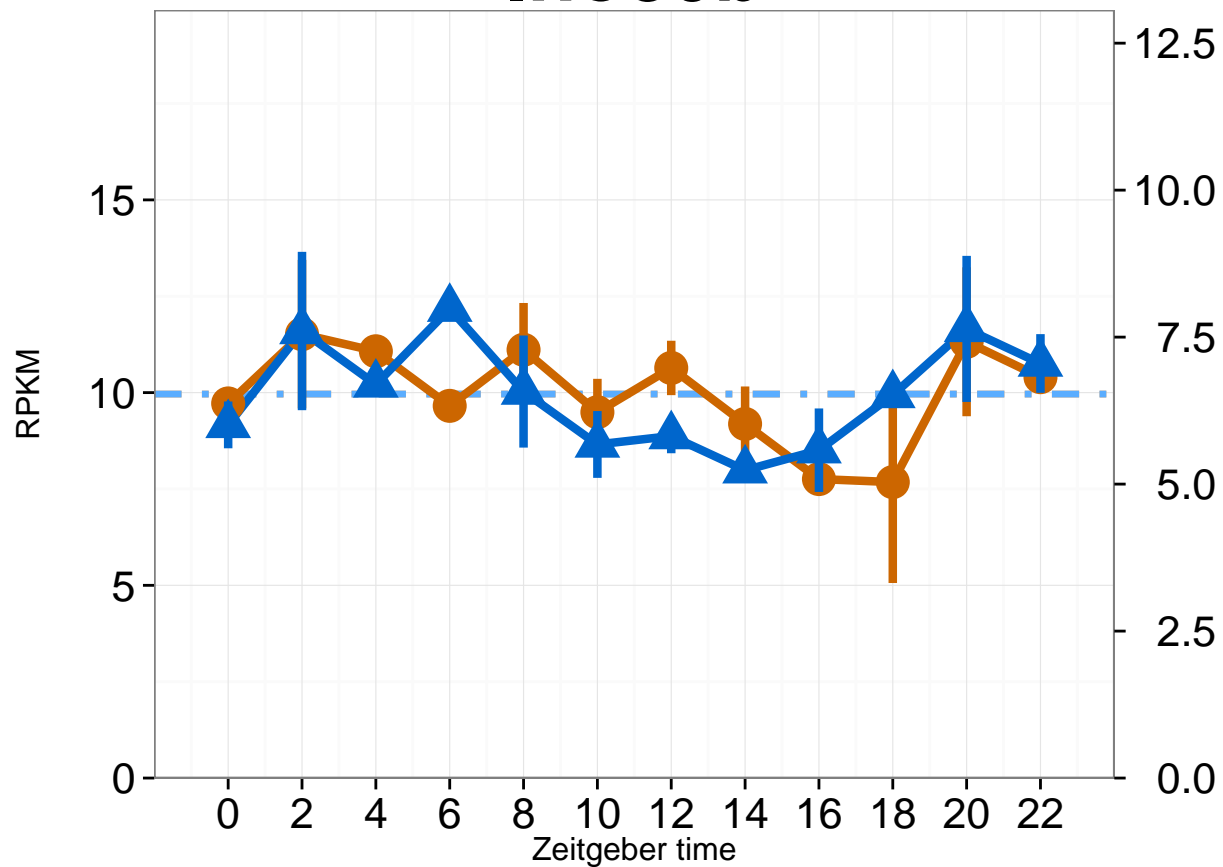

## Ino80b

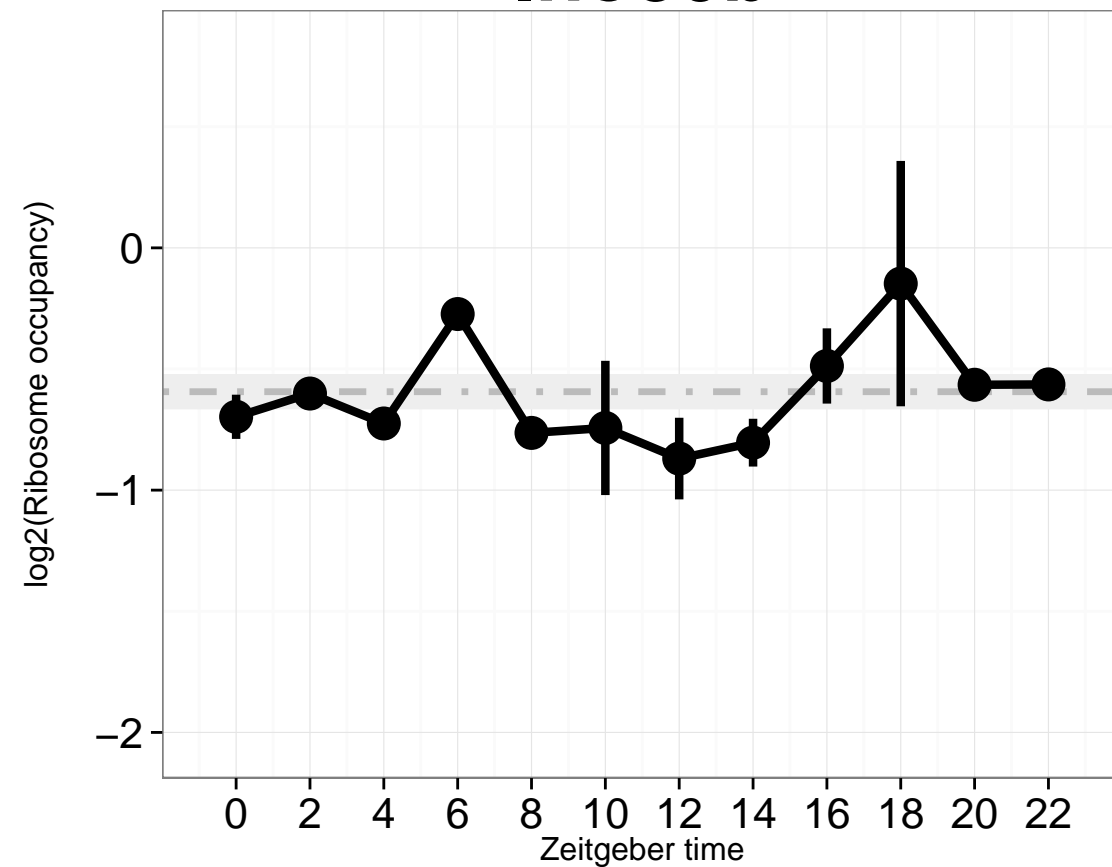

Supplement: SuppDataset_1.zip [file Ino80b_set_A.pdf › Supplemental Dataset 1/A-mRNA_nonrhyth_translation_nonrhyth/Ino80b_set_A.pdf]

# Ino80c

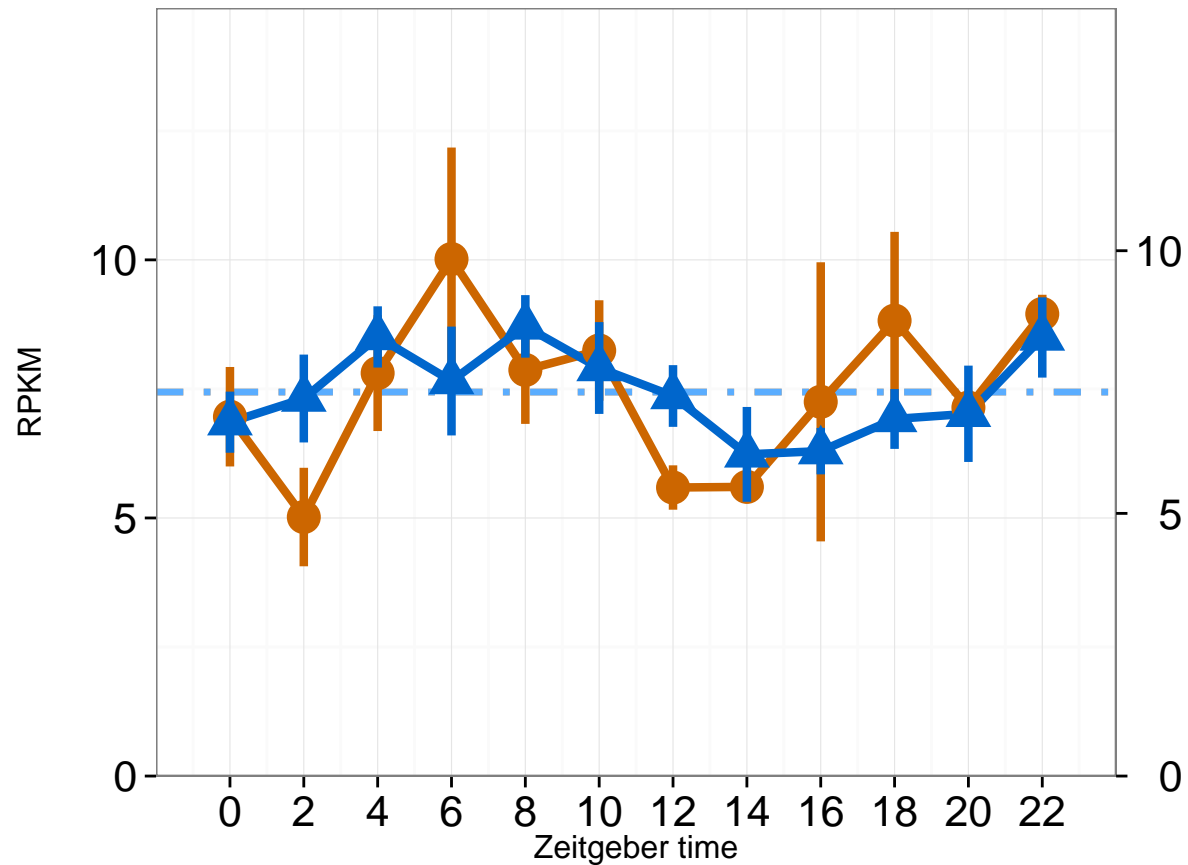

# Ino80c

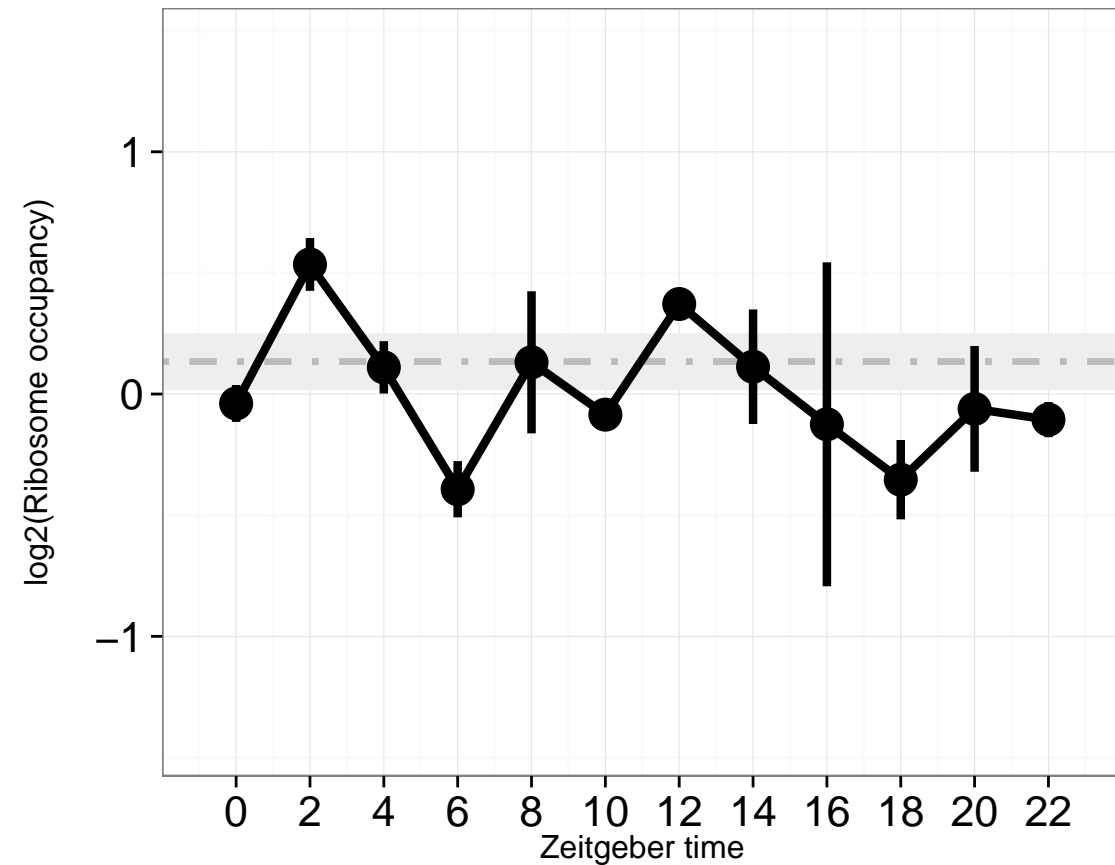

Supplement: SuppDataset_1.zip [file Ino80c_set_A.pdf › Supplemental Dataset 1/A-mRNA_nonrhyth_translation_nonrhyth/Ino80c_set_A.pdf]

## Ino80d

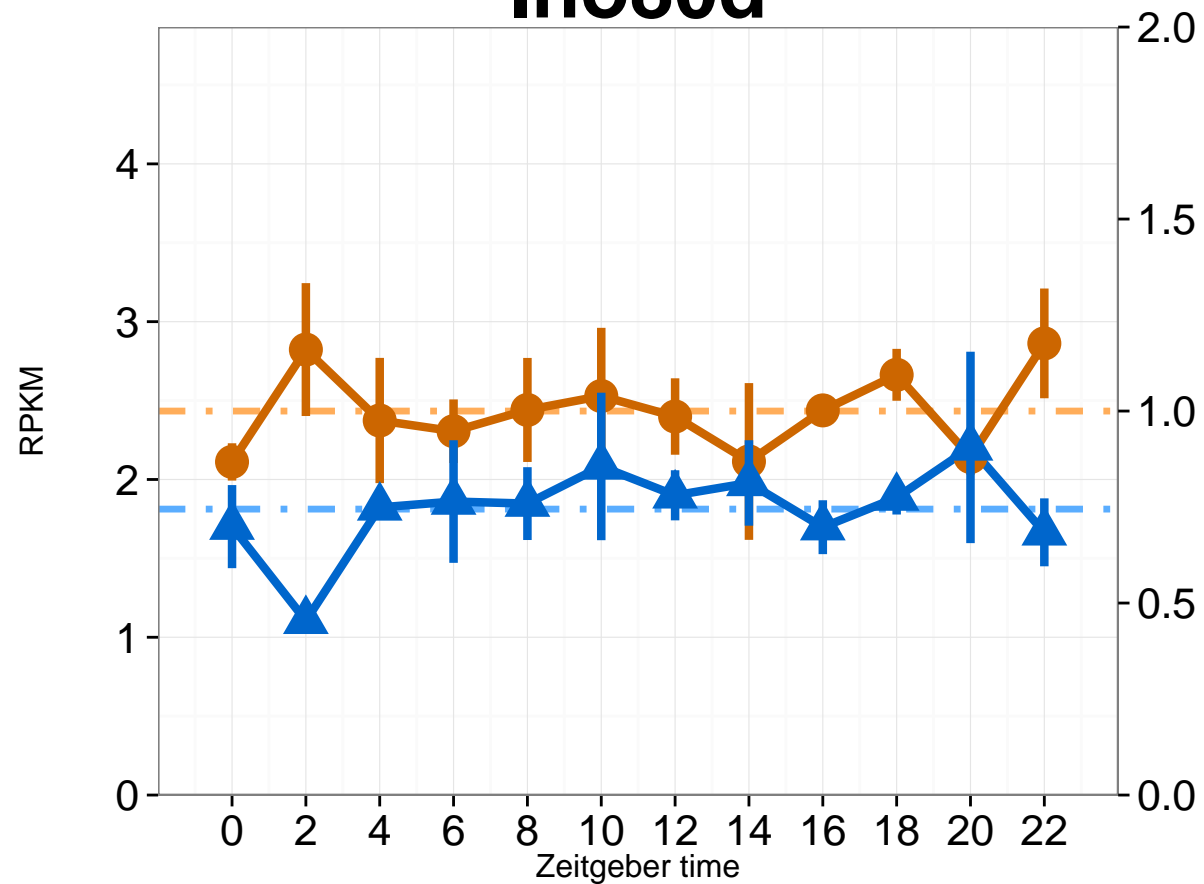

## Ino80d

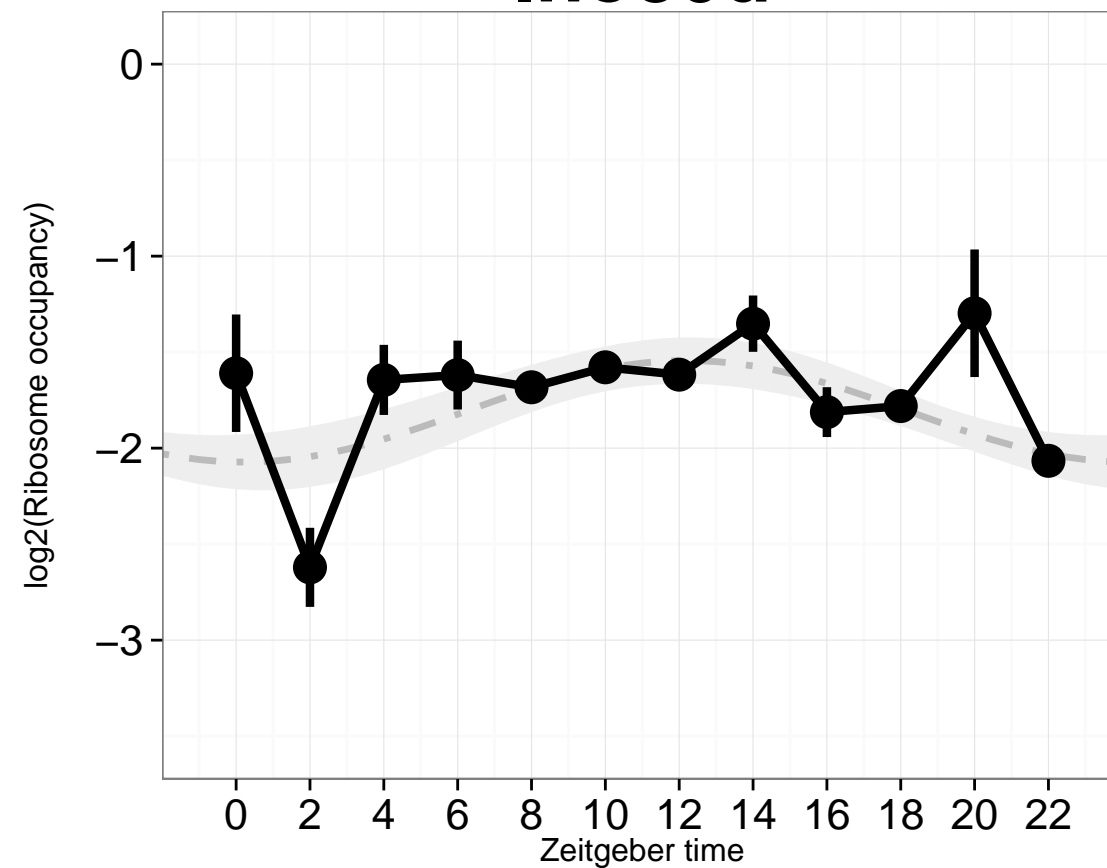

Supplement: SuppDataset_1.zip [file Ino80d_set_A.pdf › Supplemental Dataset 1/A-mRNA_nonrhyth_translation_nonrhyth/Ino80d_set_A.pdf]

# Inpp1

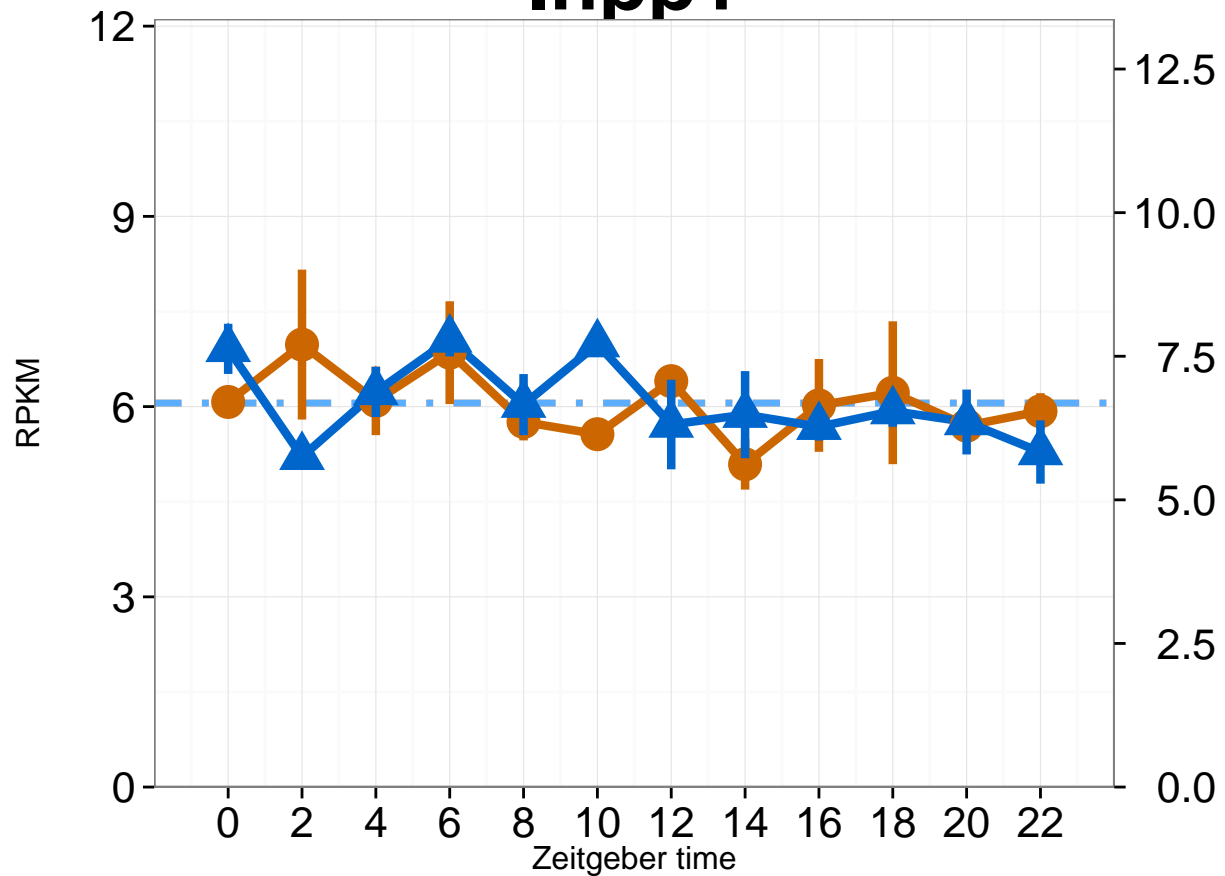

# Inpp1

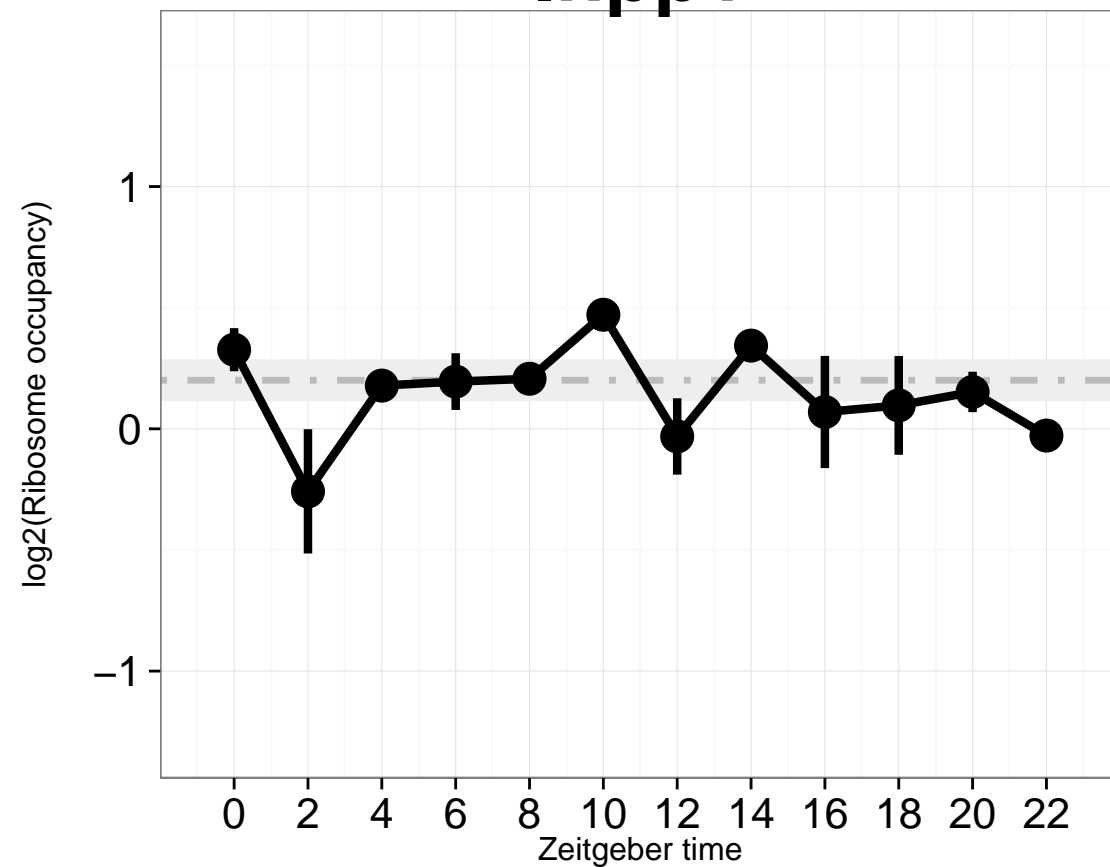

Supplement: SuppDataset_1.zip [file Inpp1_set_A.pdf › Supplemental Dataset 1/A-mRNA_nonrhyth_translation_nonrhyth/Inpp1_set_A.pdf]

# Inpp4a

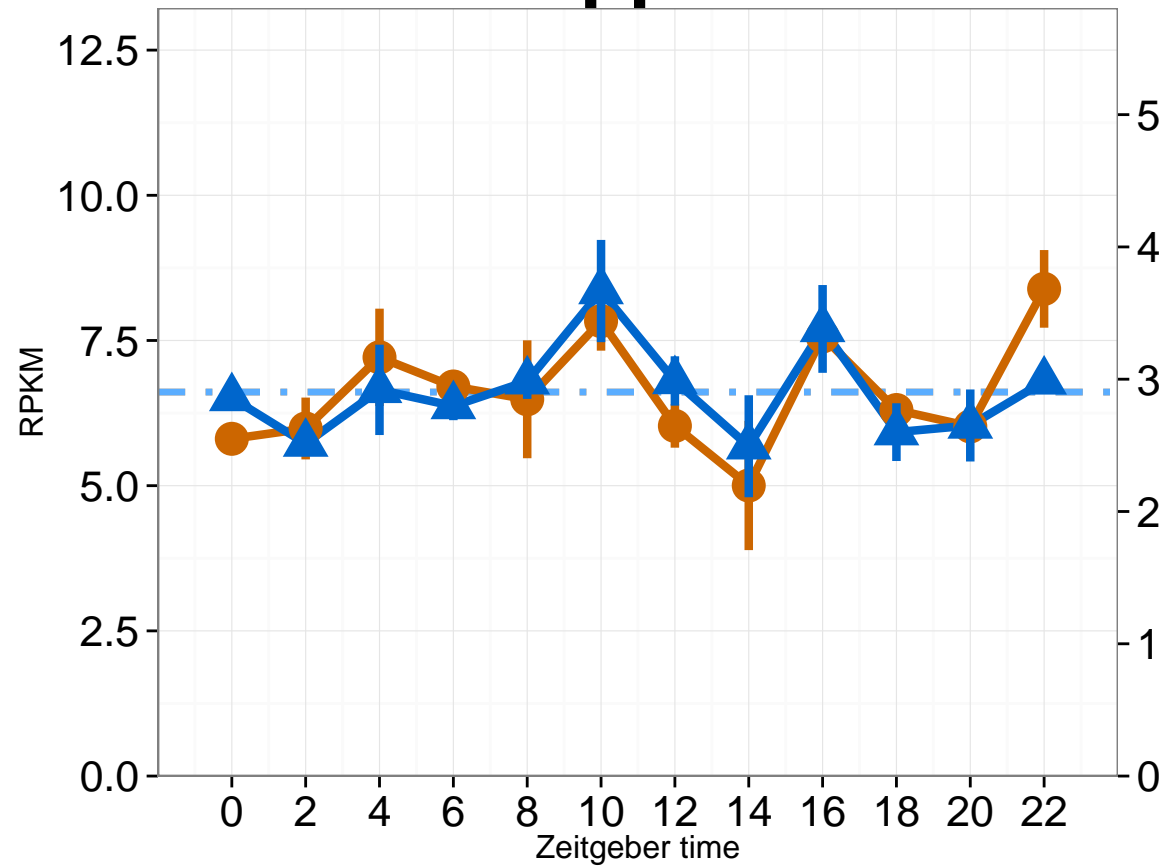

# Inpp4a

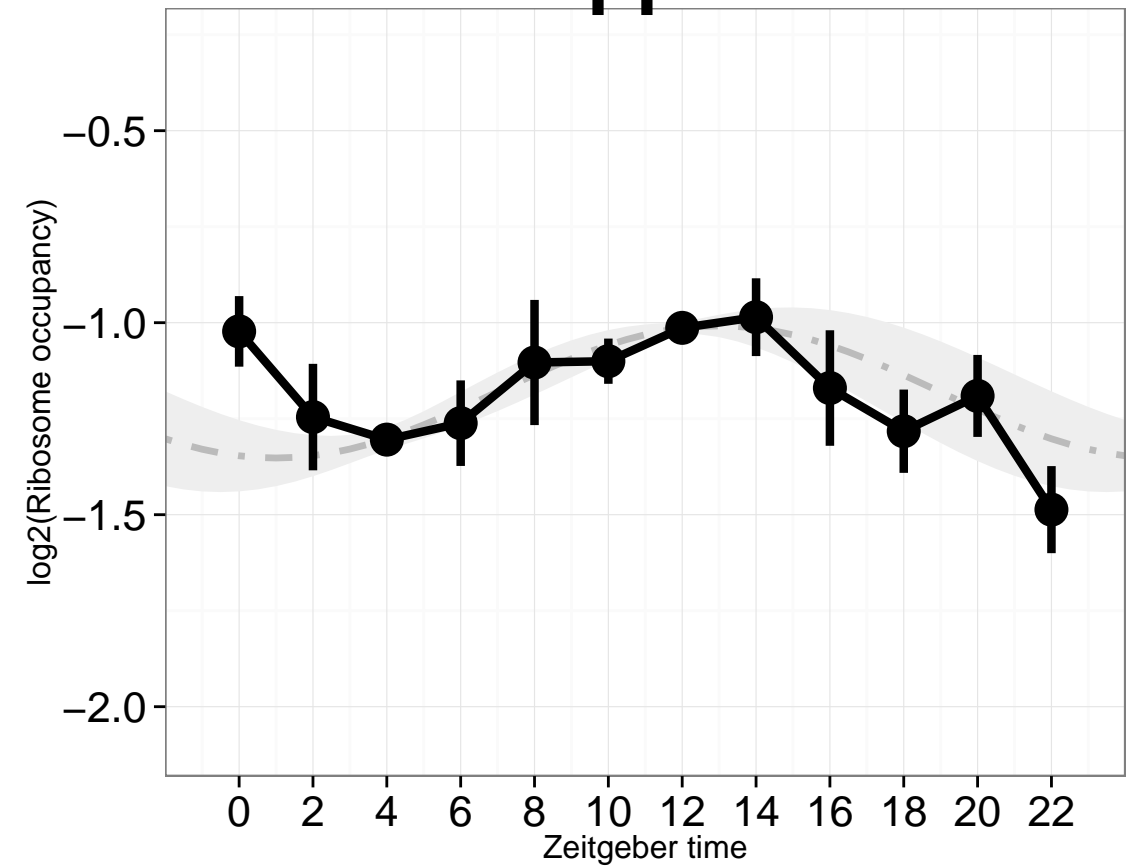

Supplement: SuppDataset_1.zip [file Inpp4a_set_A.pdf › Supplemental Dataset 1/A-mRNA_nonrhyth_translation_nonrhyth/Inpp4a_set_A.pdf]

# Inpp5a

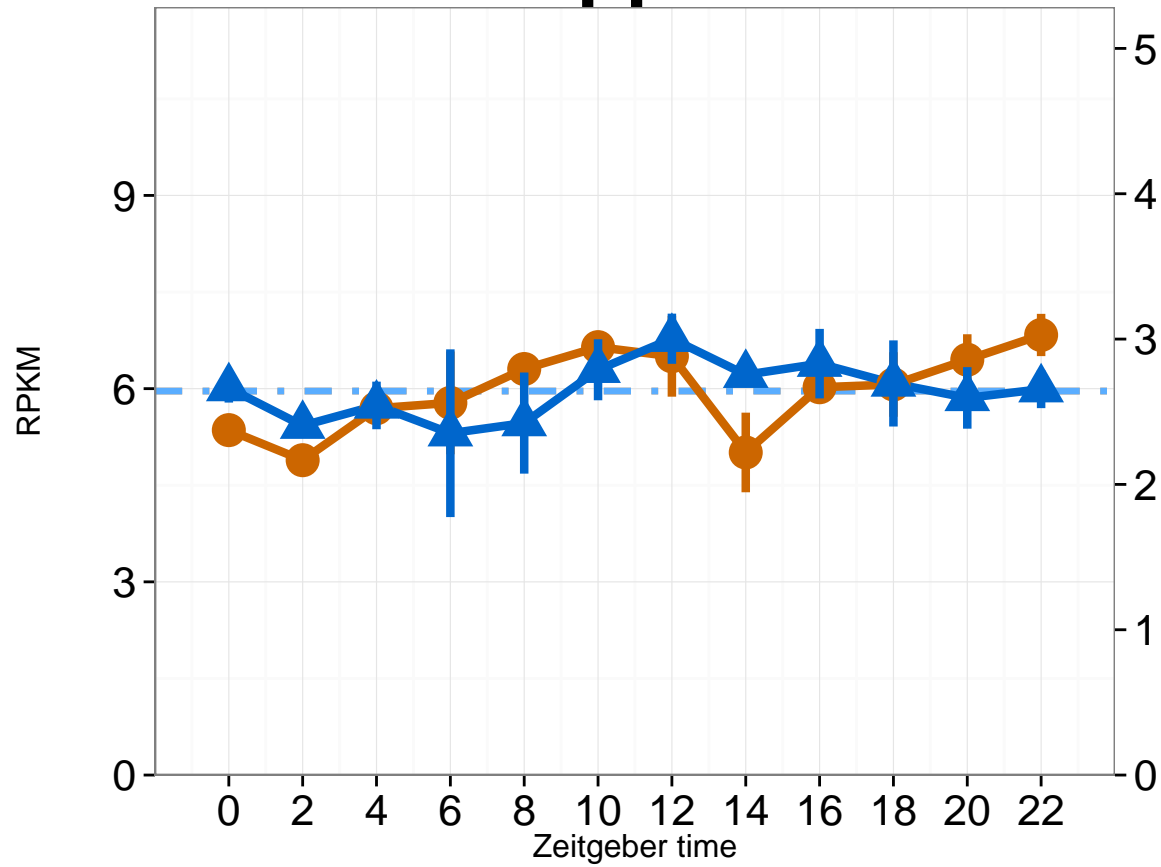

# Inpp5a

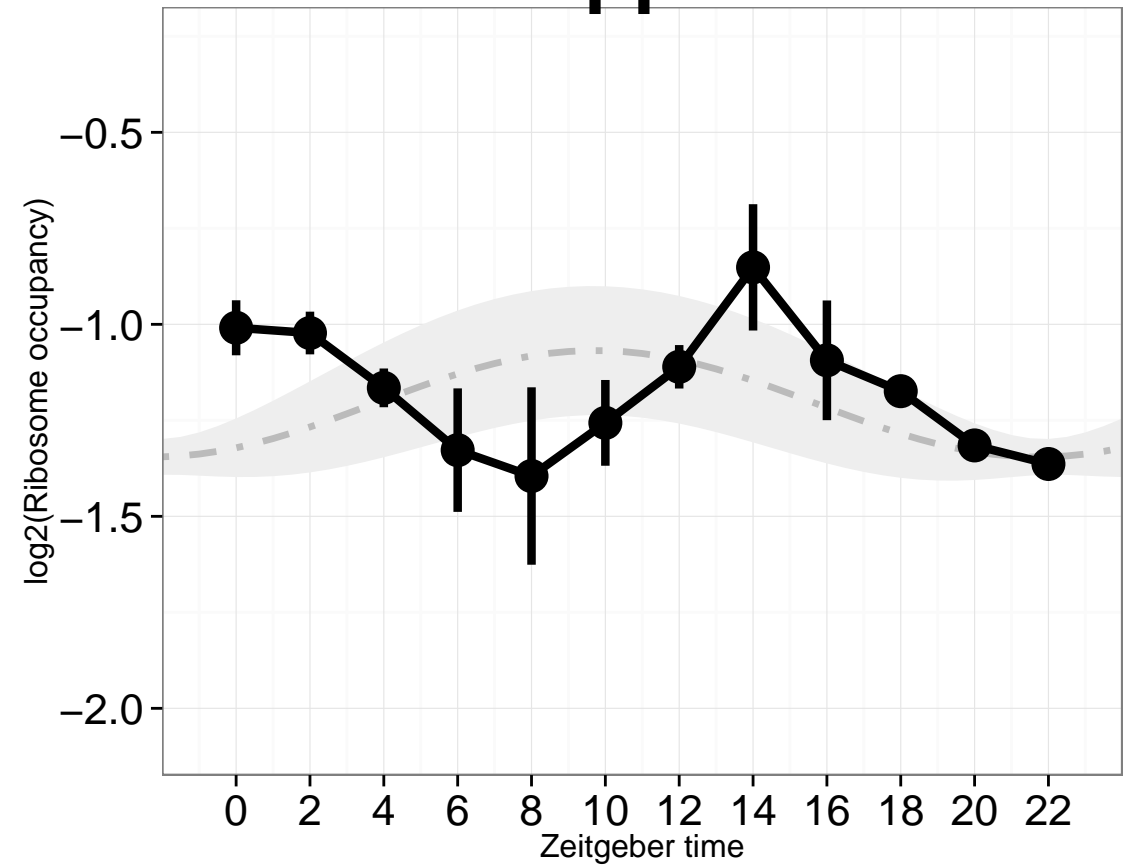

Supplement: SuppDataset_1.zip [file Inpp5a_set_A.pdf › Supplemental Dataset 1/A-mRNA_nonrhyth_translation_nonrhyth/Inpp5a_set_A.pdf]

## Inpp5b

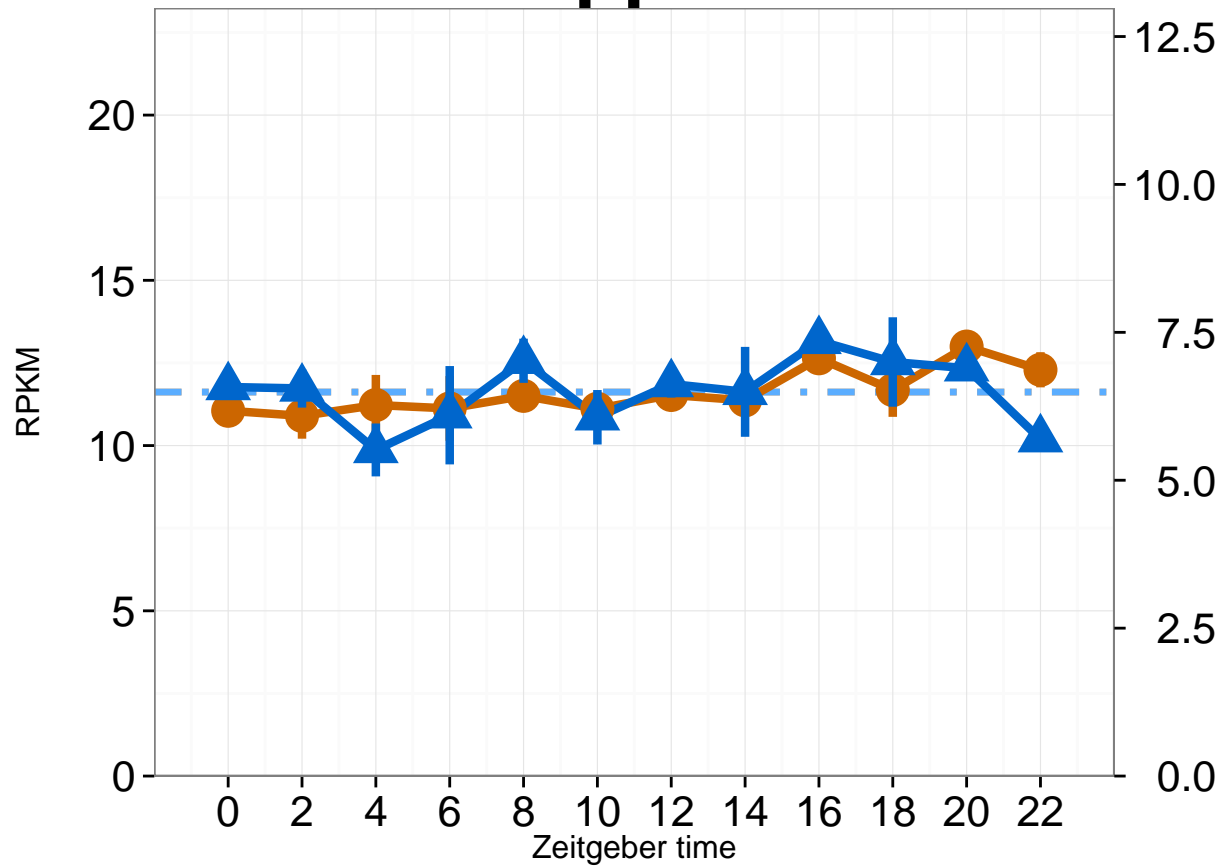

## Inpp5b

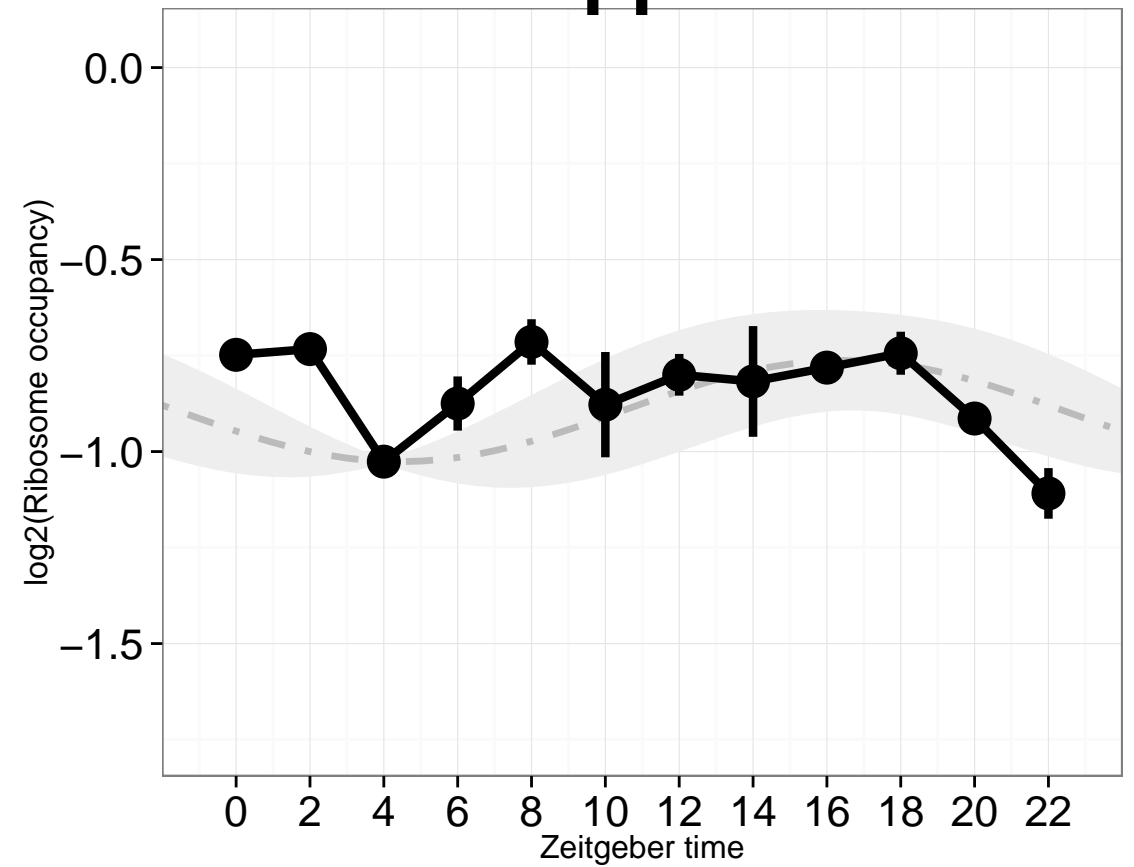

Supplement: SuppDataset_1.zip [file Inpp5b_set_A.pdf › Supplemental Dataset 1/A-mRNA_nonrhyth_translation_nonrhyth/Inpp5b_set_A.pdf]

# Inpp5d

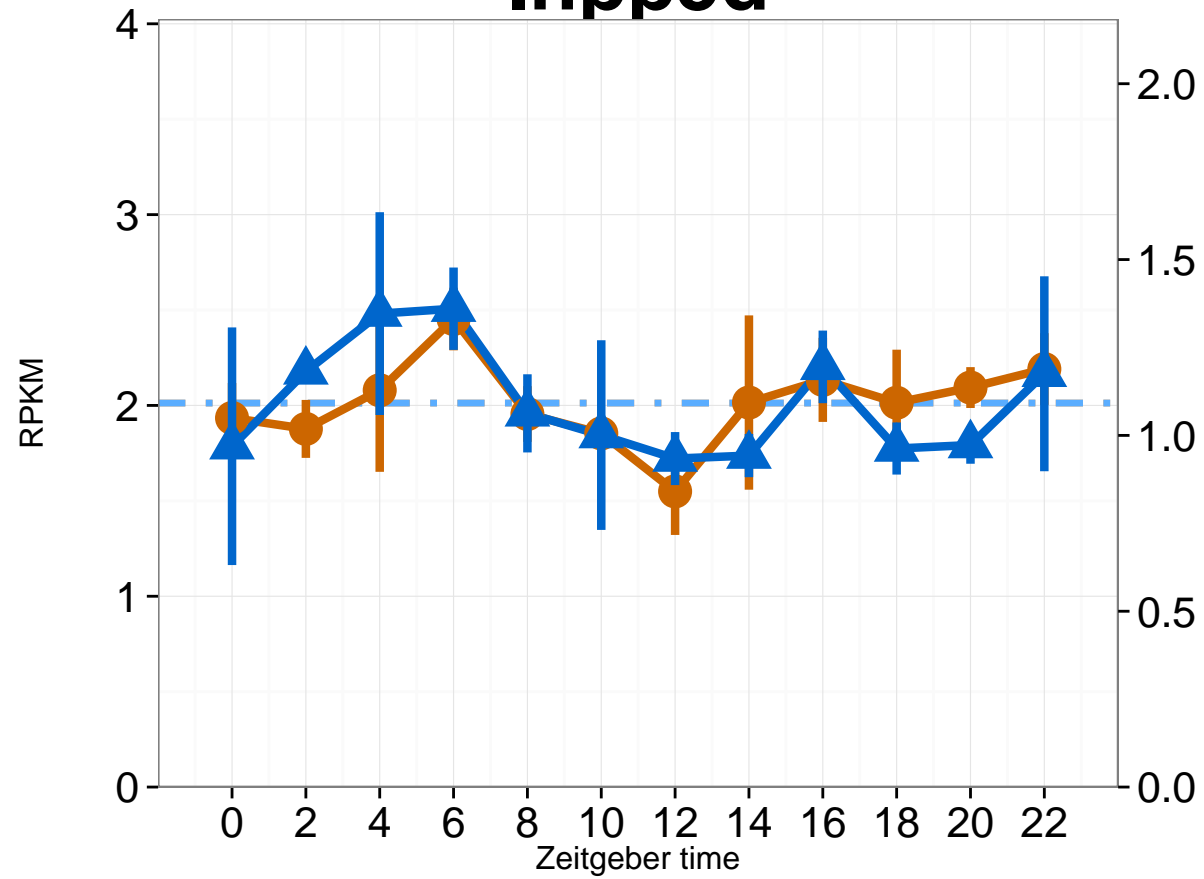

# Inpp5d

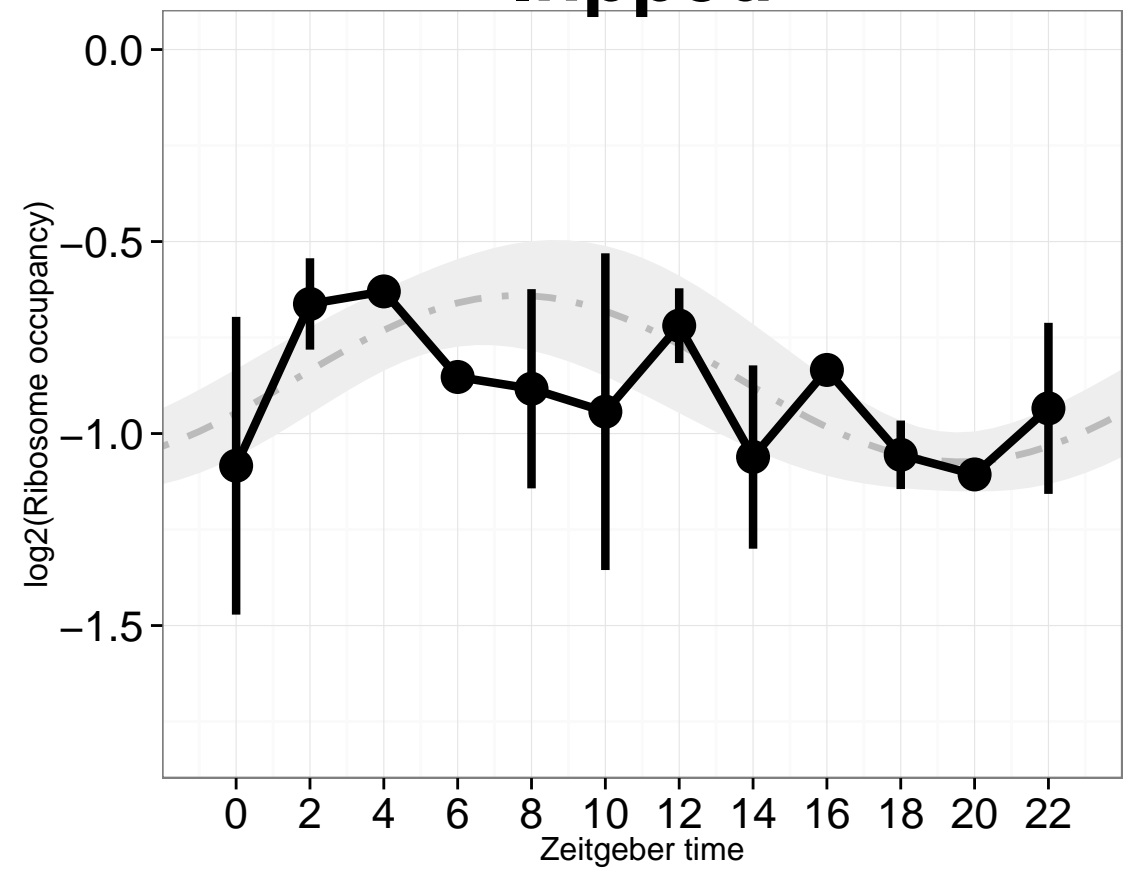

Supplement: SuppDataset_1.zip [file Inpp5d_set_A.pdf › Supplemental Dataset 1/A-mRNA_nonrhyth_translation_nonrhyth/Inpp5d_set_A.pdf]

# Inpp5f

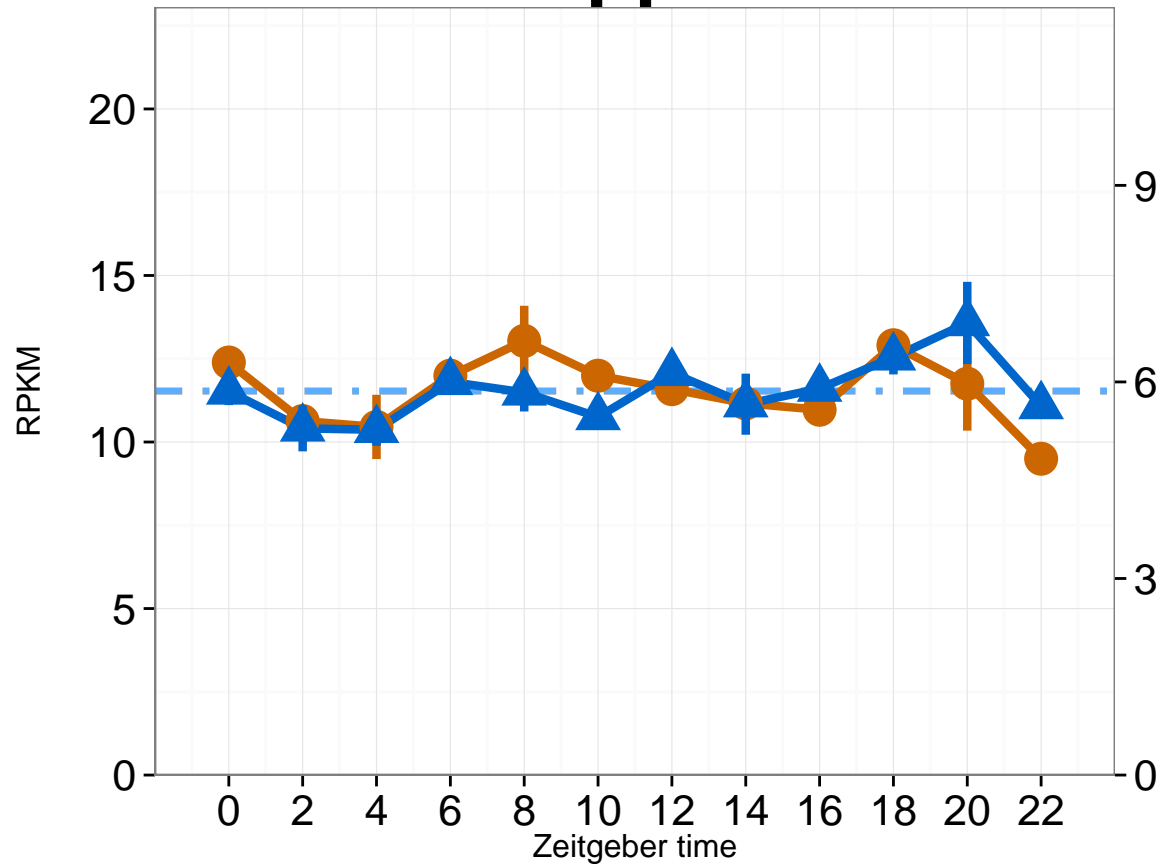

# Inpp5f

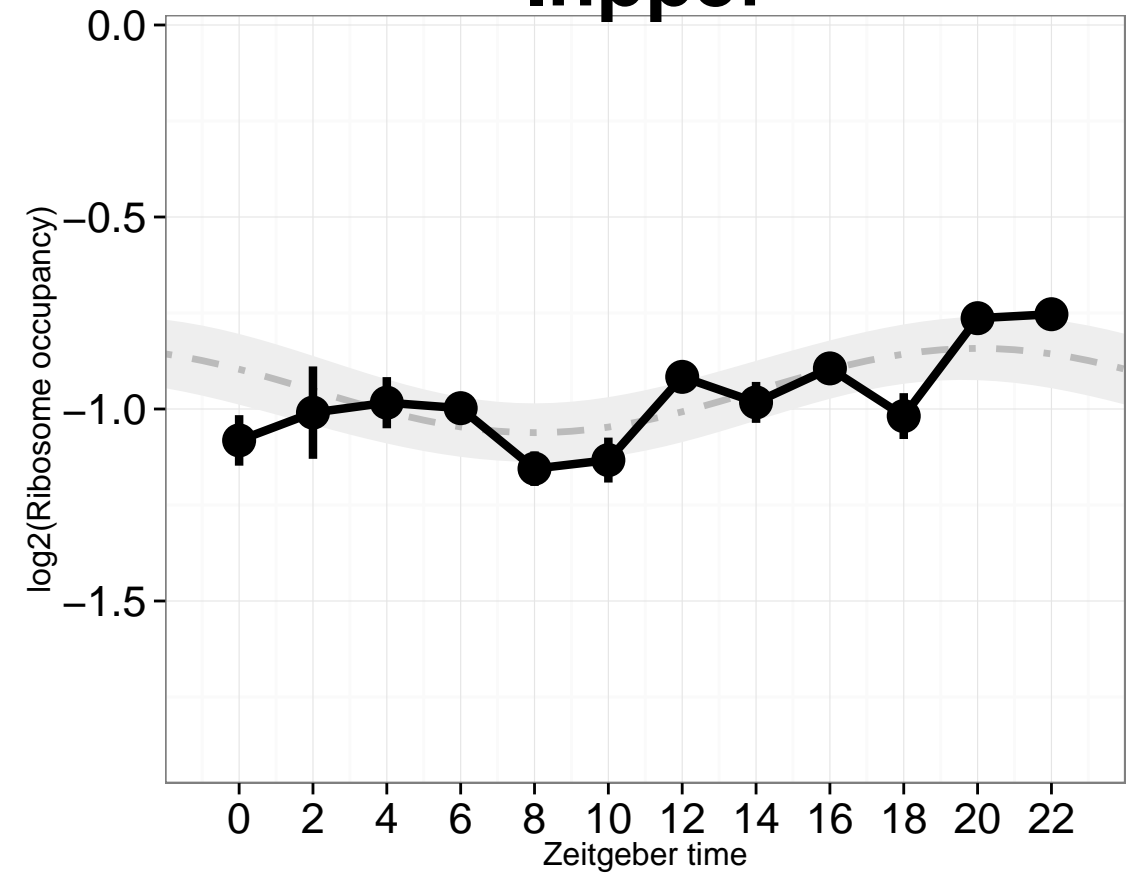

Supplement: SuppDataset_1.zip [file Inpp5f_set_A.pdf › Supplemental Dataset 1/A-mRNA_nonrhyth_translation_nonrhyth/Inpp5f_set_A.pdf]

# Inpp1

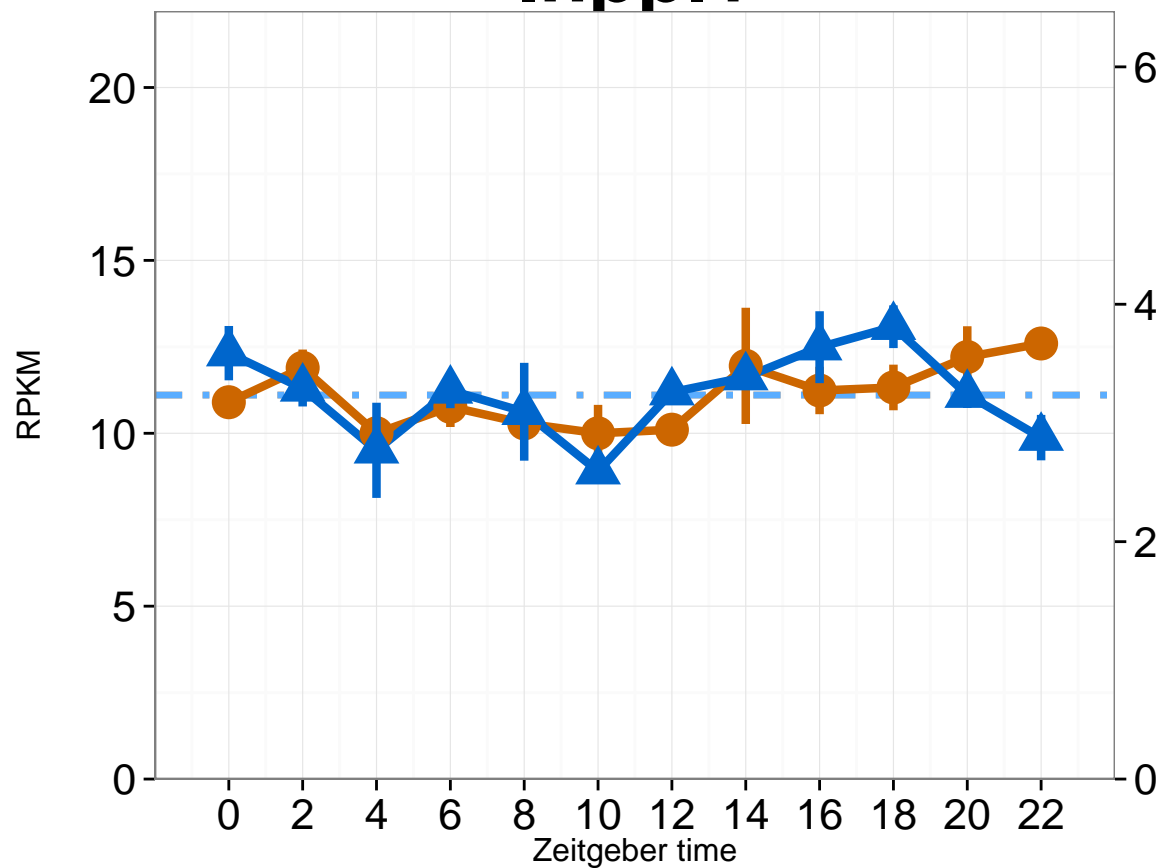

# Inpp1

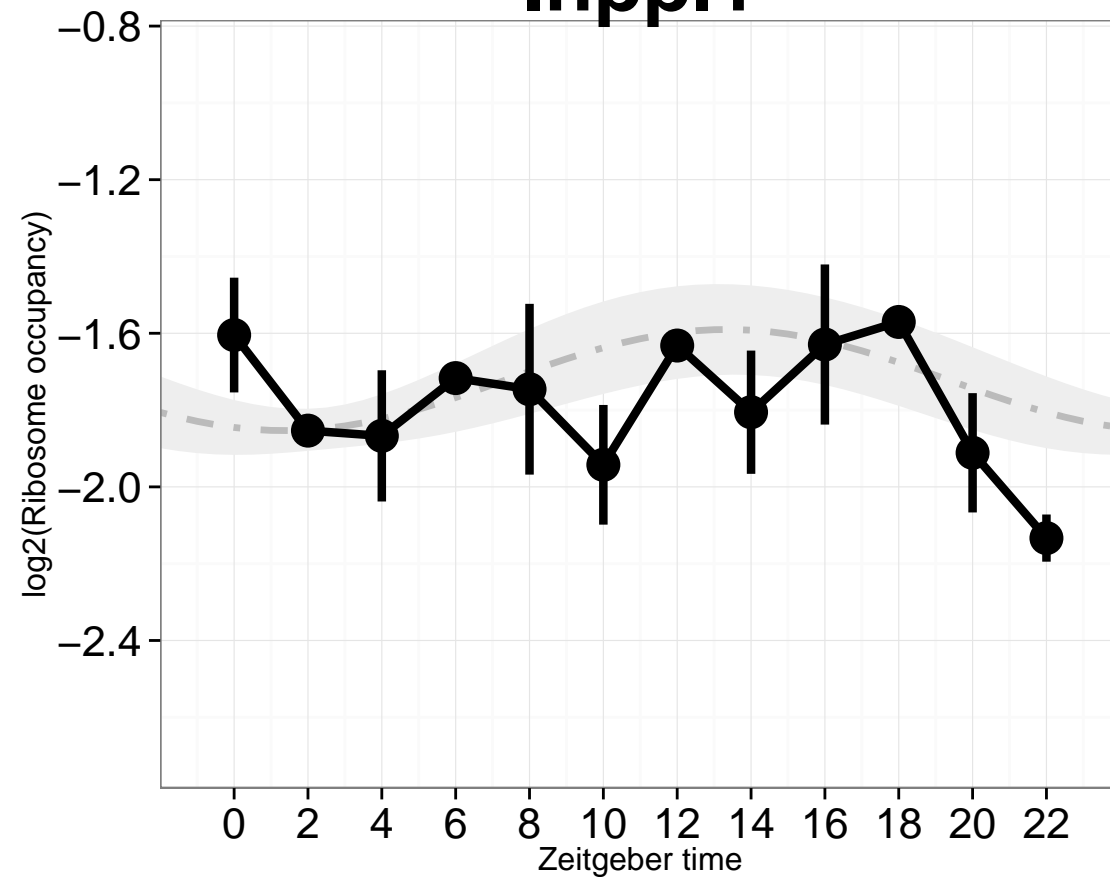

Supplement: SuppDataset_1.zip [file Inppl1_set_A.pdf › Supplemental Dataset 1/A-mRNA_nonrhyth_translation_nonrhyth/Inppl1_set_A.pdf]

## Insr

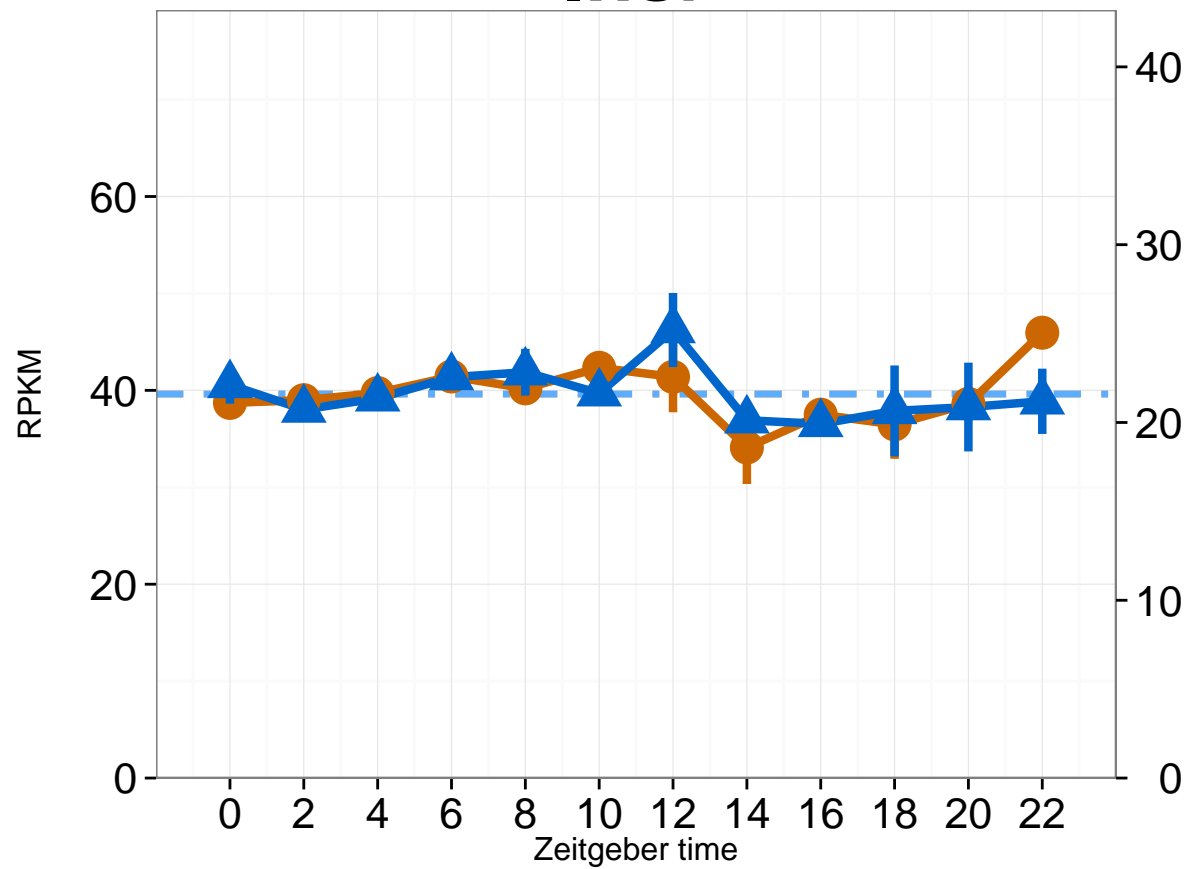

## Insr

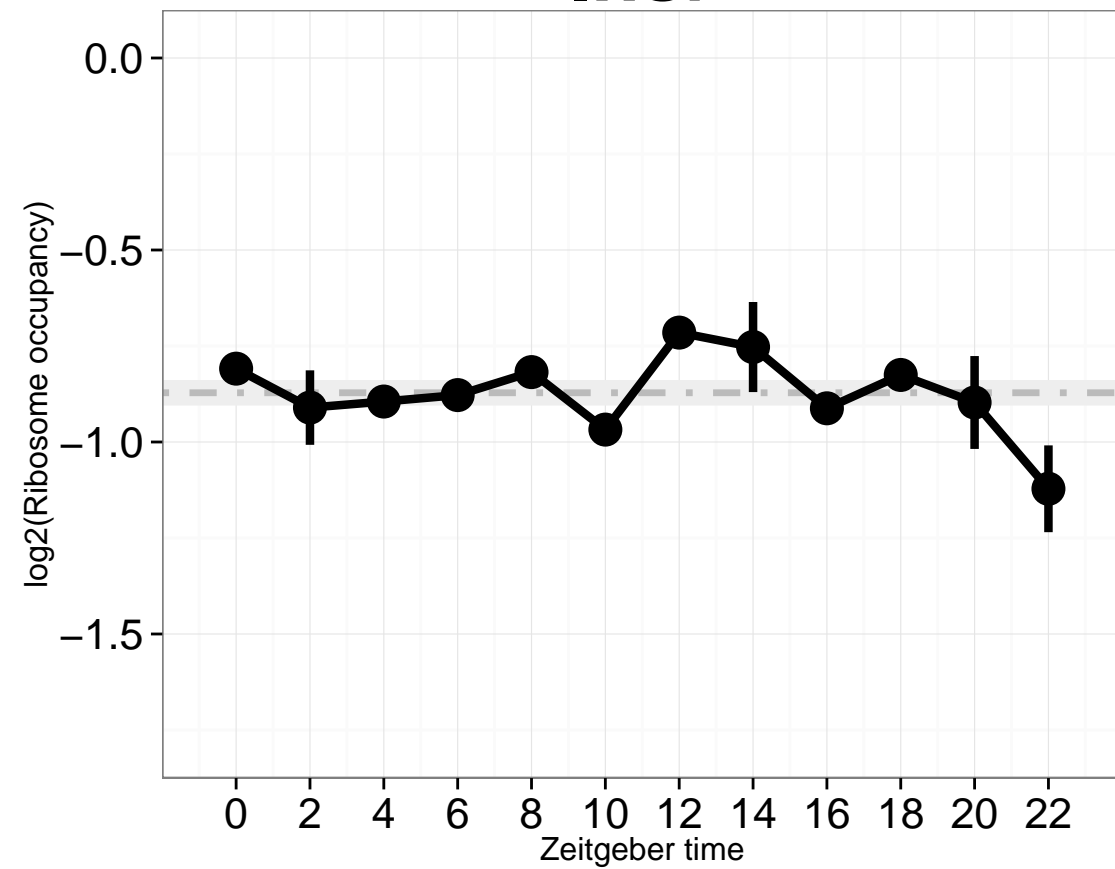

Supplement: SuppDataset_1.zip [file Insr_set_A.pdf › Supplemental Dataset 1/A-mRNA_nonrhyth_translation_nonrhyth/Insr_set_A.pdf]

# Ints10

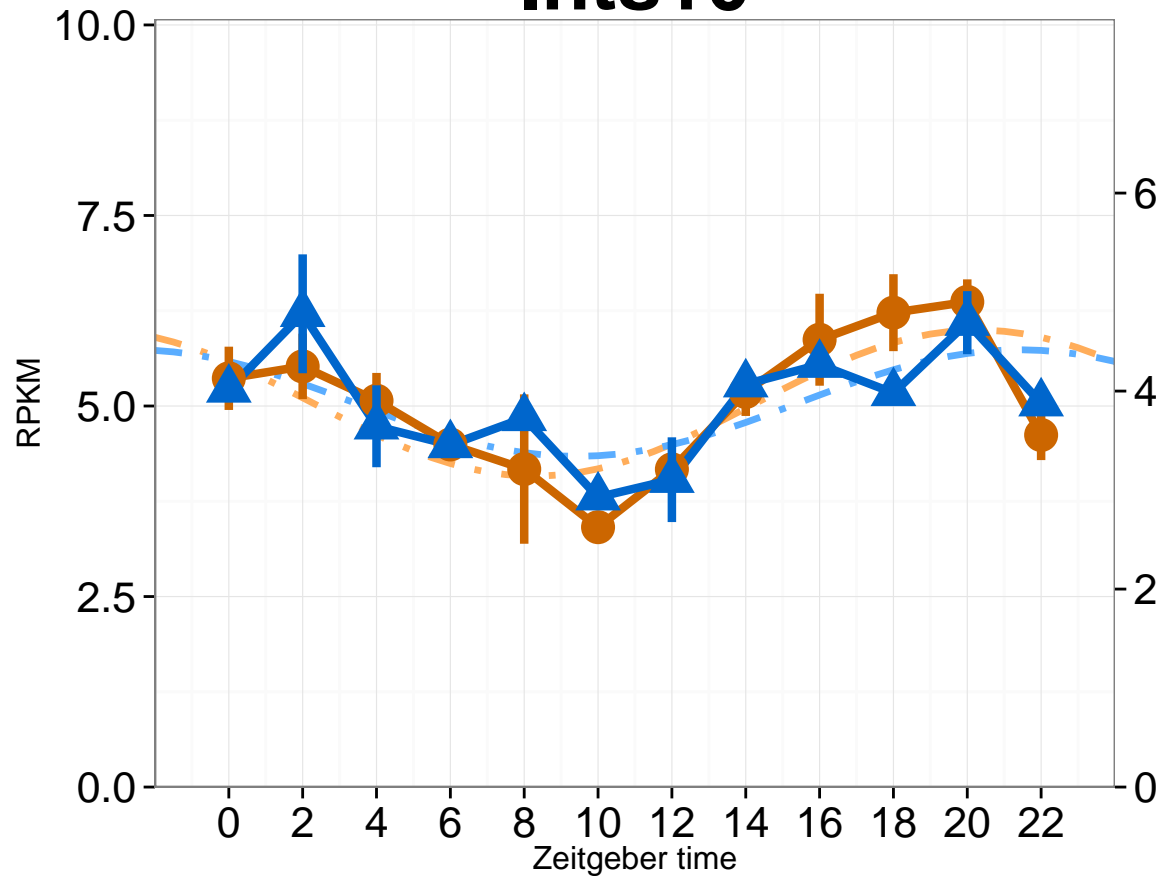

# Ints10

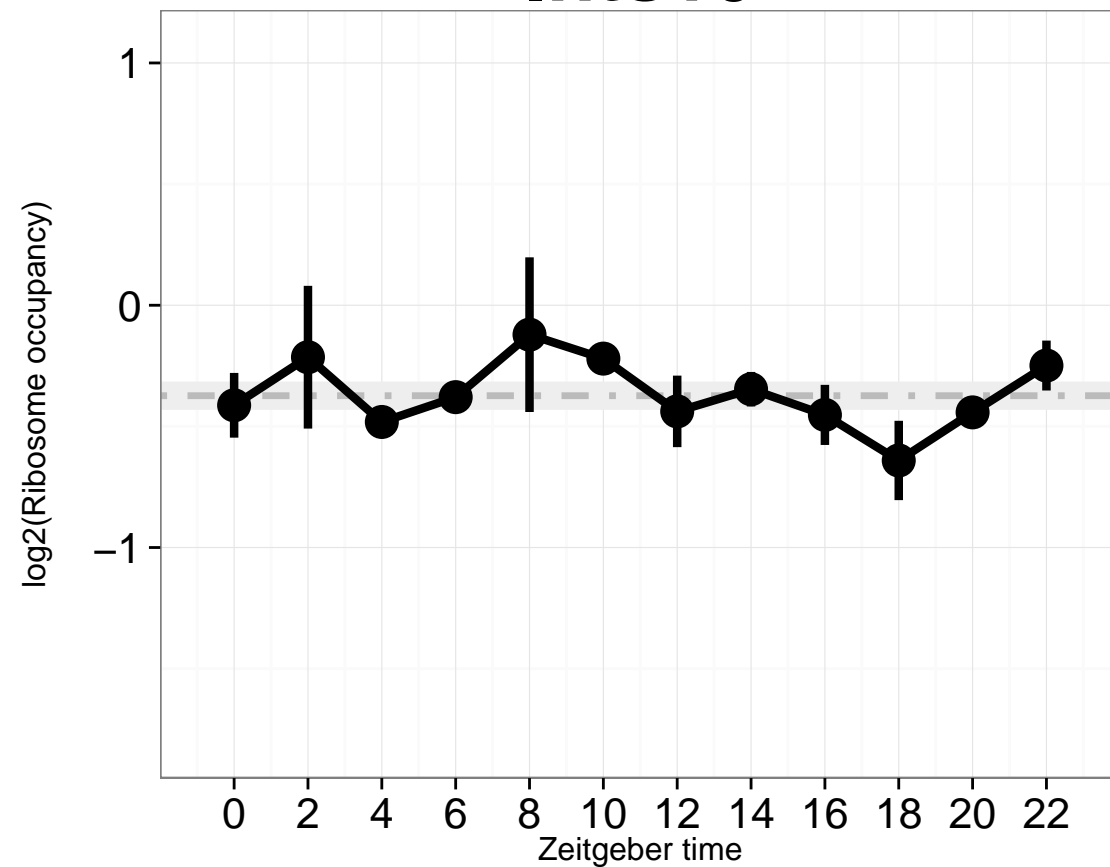

Supplement: SuppDataset_1.zip [file Ints10_set_A.pdf › Supplemental Dataset 1/A-mRNA_nonrhyth_translation_nonrhyth/Ints10_set_A.pdf]

# Ints12

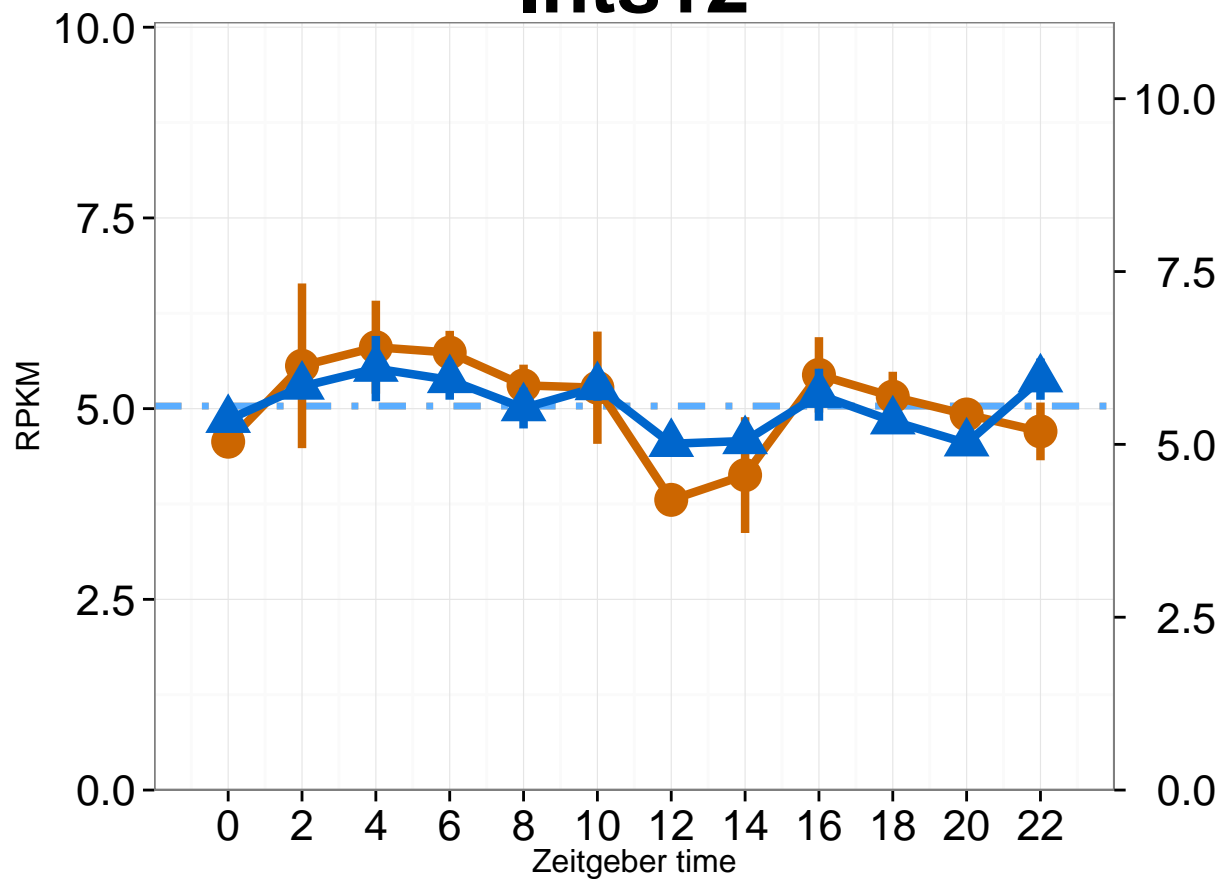

# Ints12

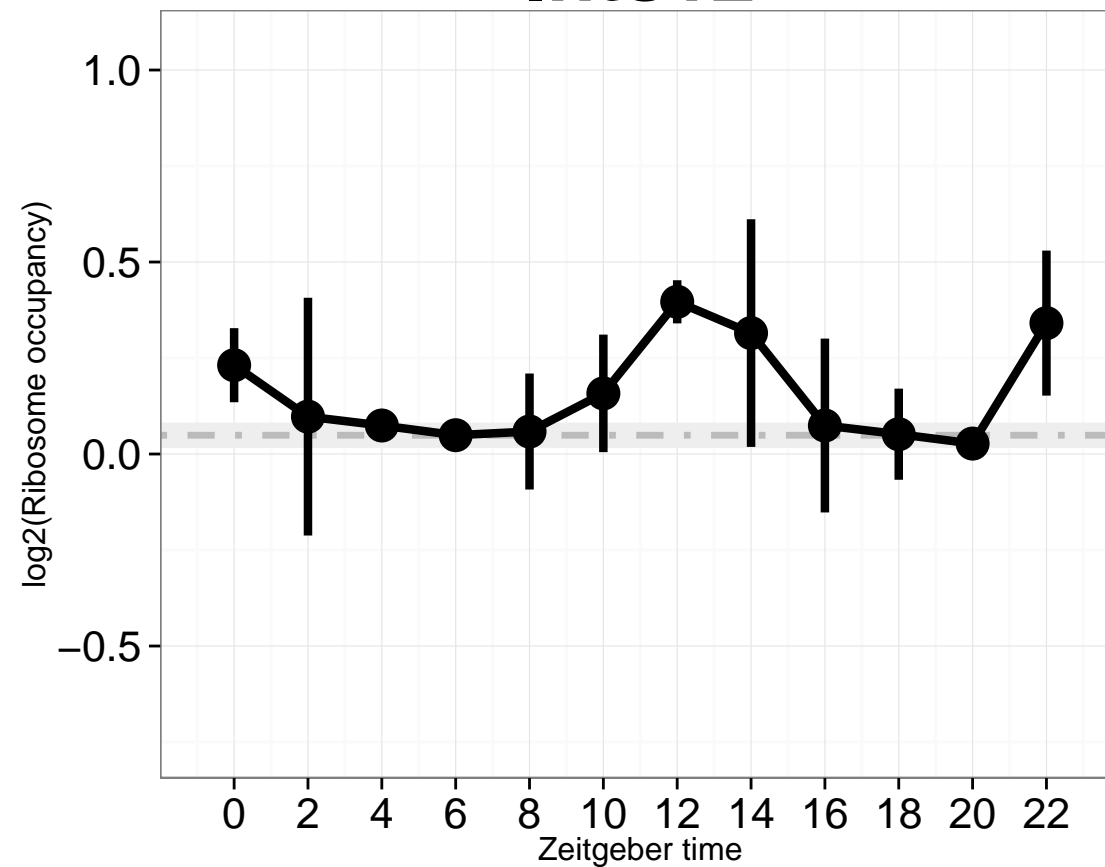

Supplement: SuppDataset_1.zip [file Ints12_set_A.pdf › Supplemental Dataset 1/A-mRNA_nonrhyth_translation_nonrhyth/Ints12_set_A.pdf]

# Ints1

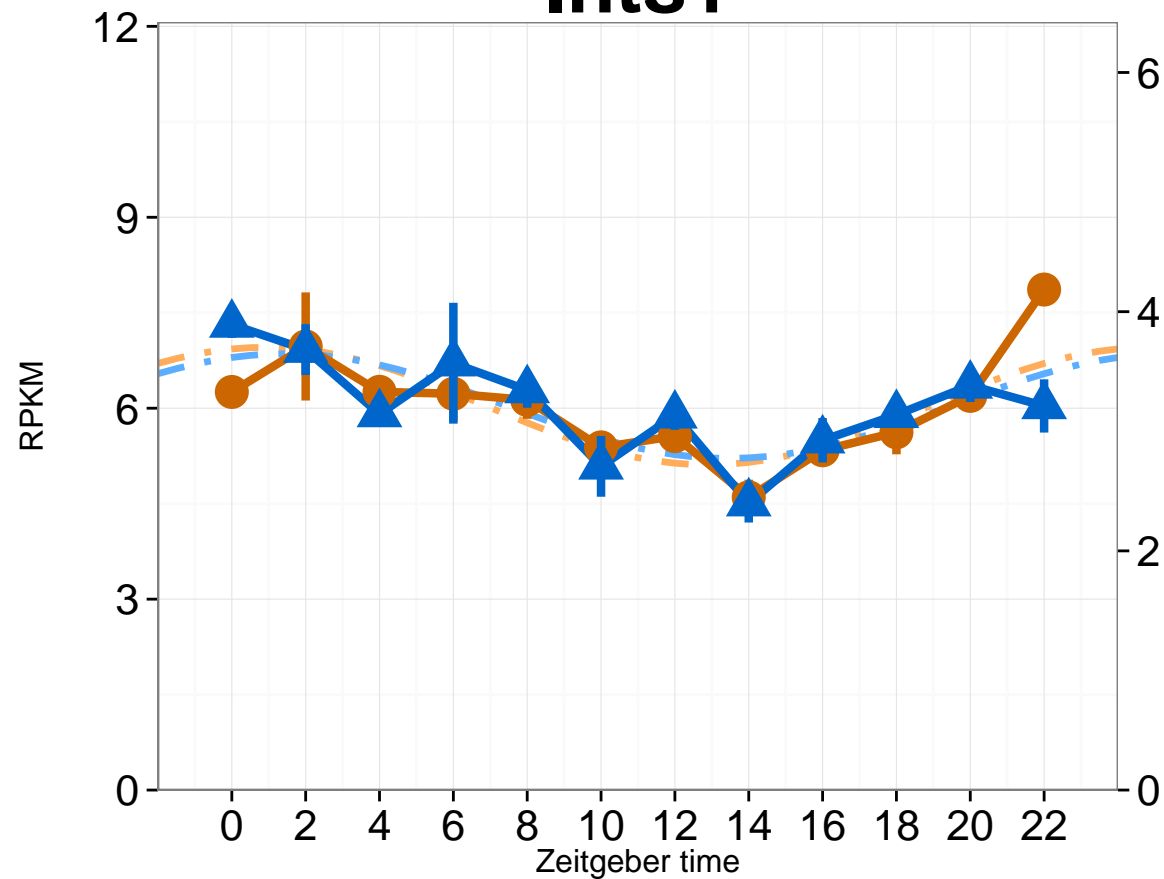

# Ints1

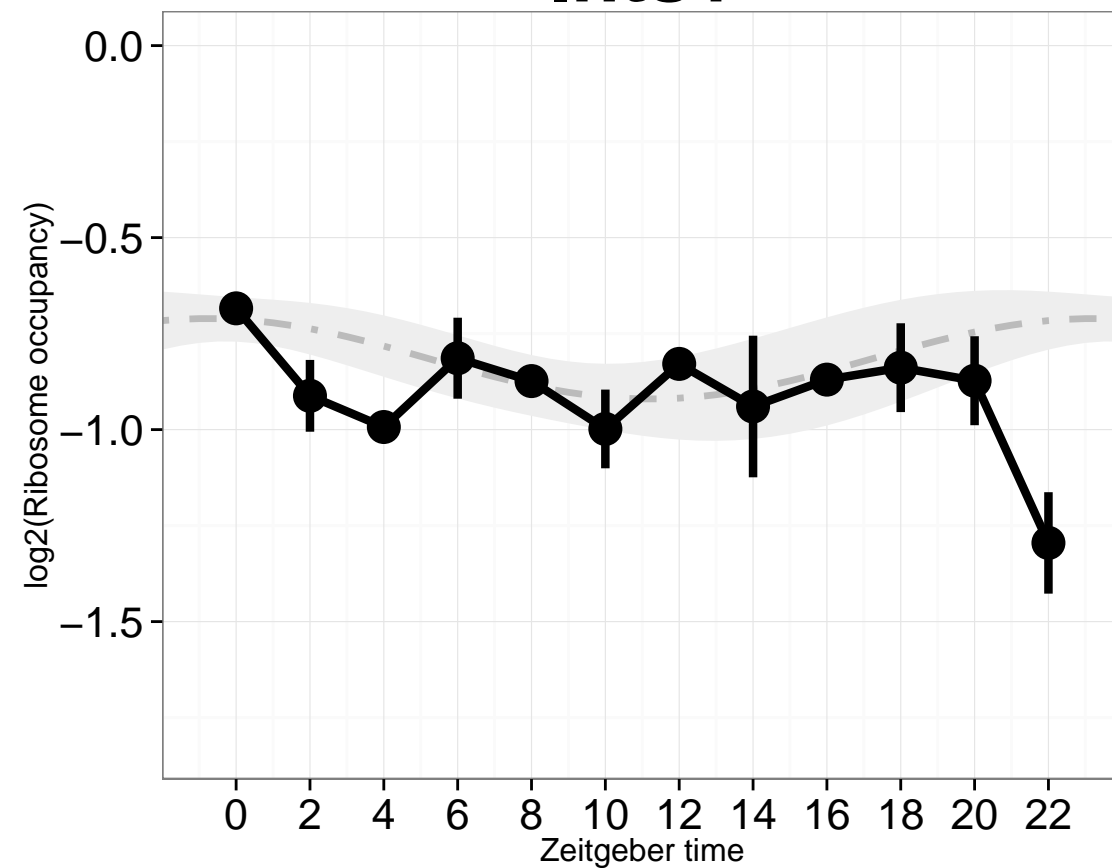

Supplement: SuppDataset_1.zip [file Ints1_set_A.pdf › Supplemental Dataset 1/A-mRNA_nonrhyth_translation_nonrhyth/Ints1_set_A.pdf]

# Ints3

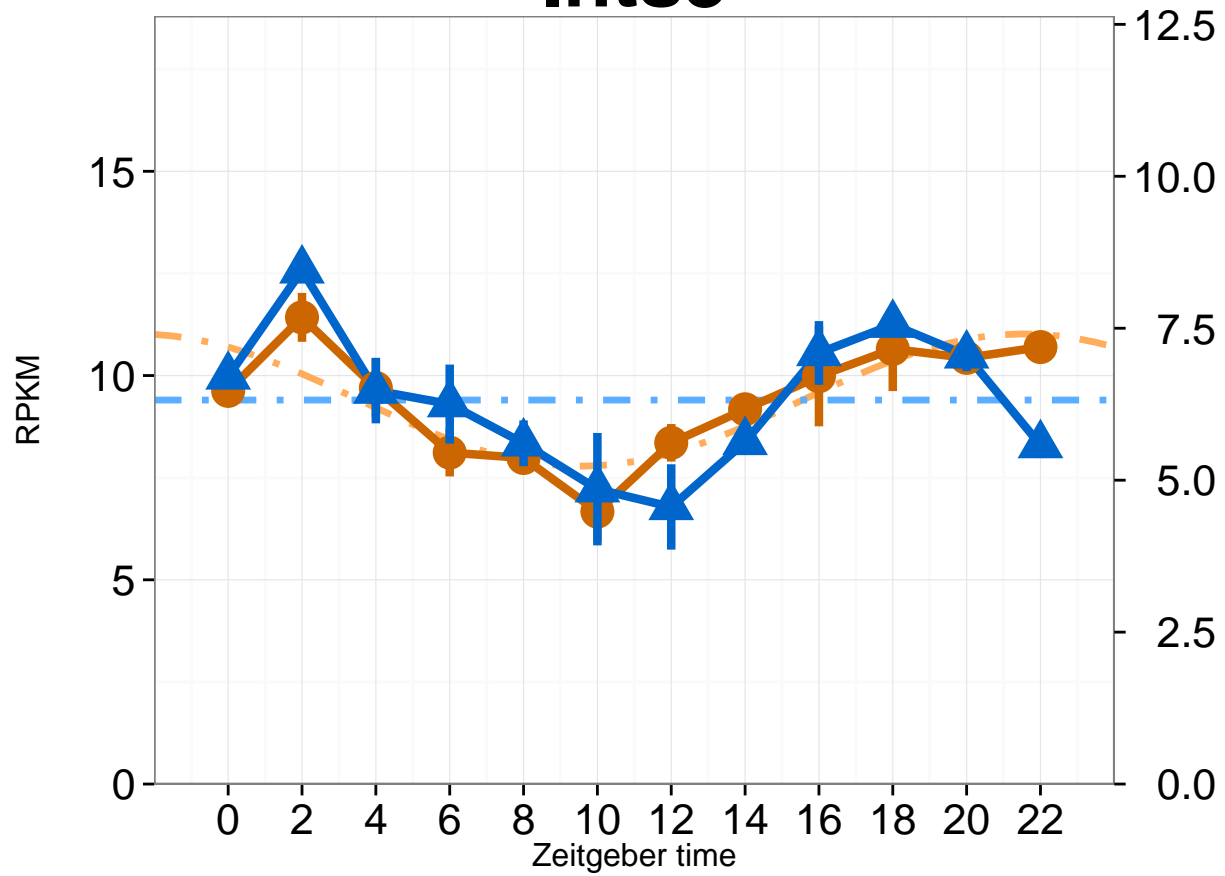

# Ints3

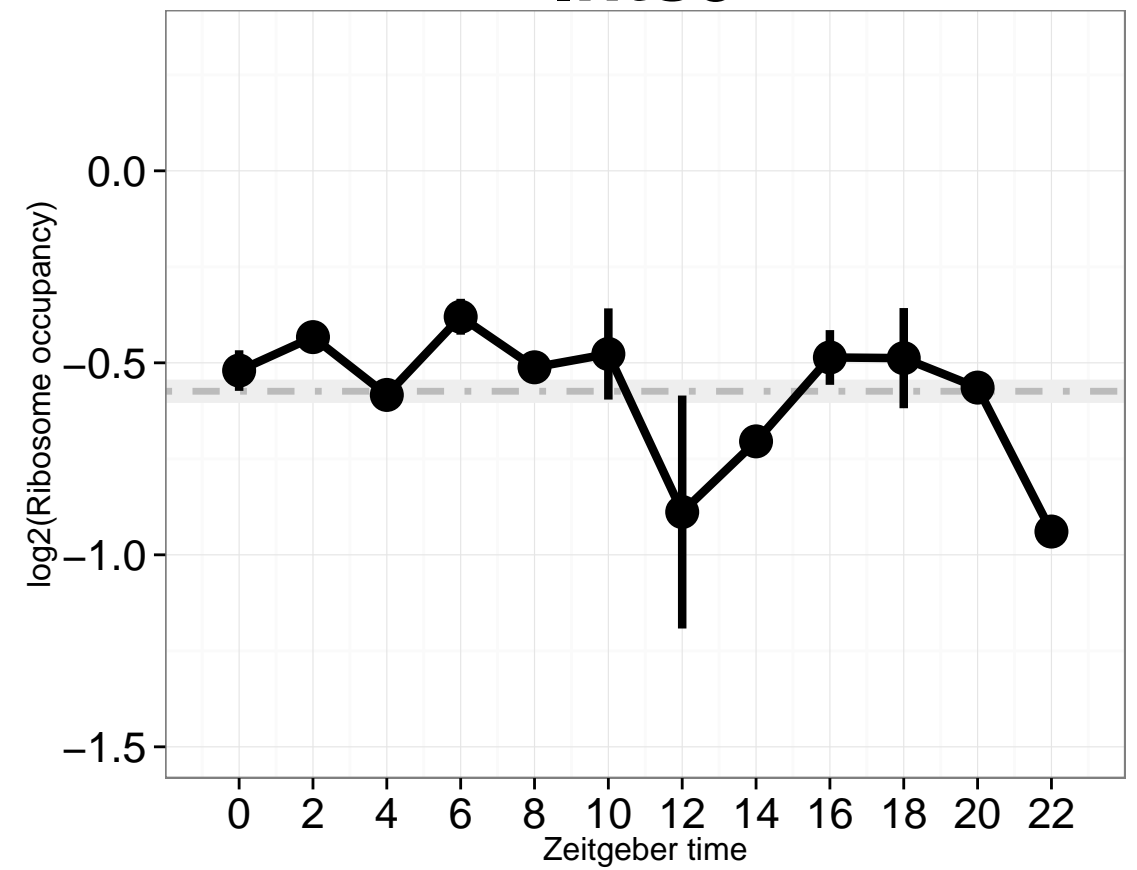

Supplement: SuppDataset_1.zip [file Ints3_set_A.pdf › Supplemental Dataset 1/A-mRNA_nonrhyth_translation_nonrhyth/Ints3_set_A.pdf]

# Ints4

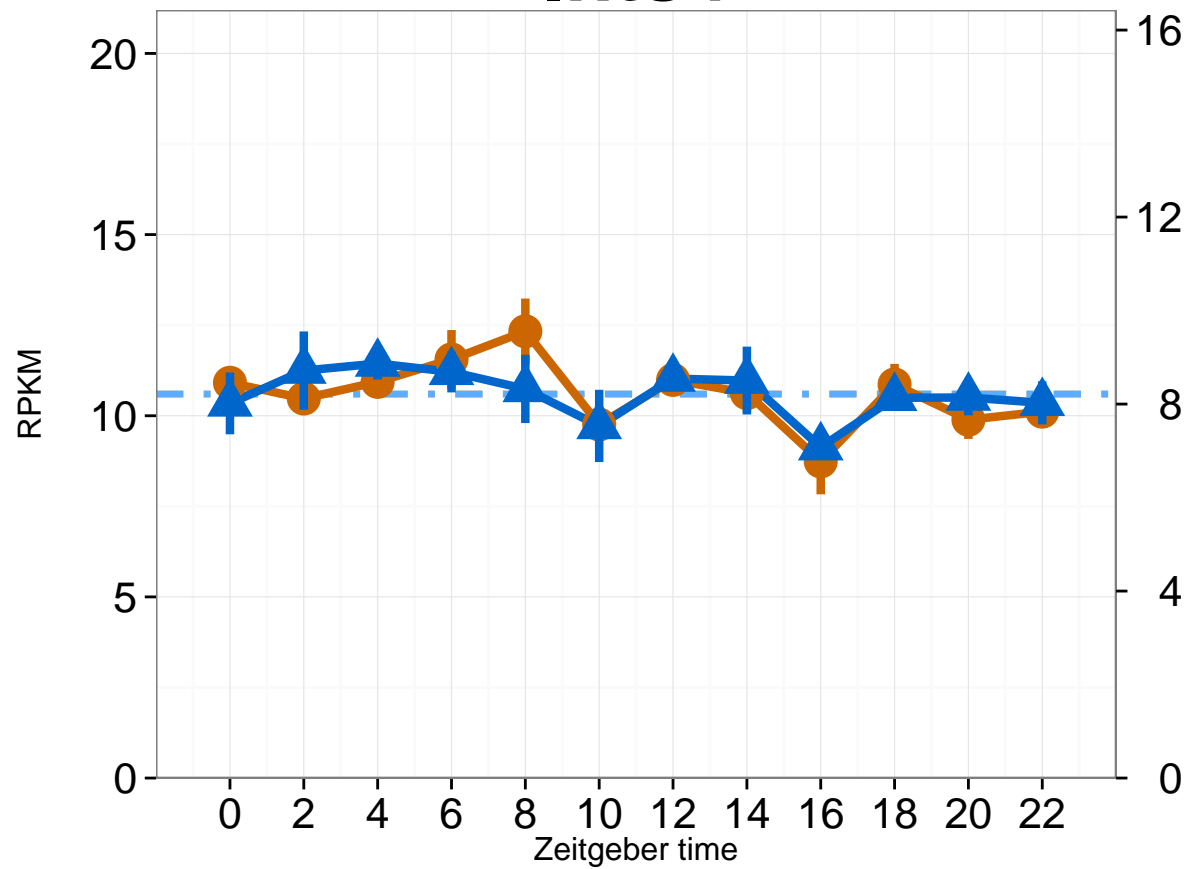

# Ints4

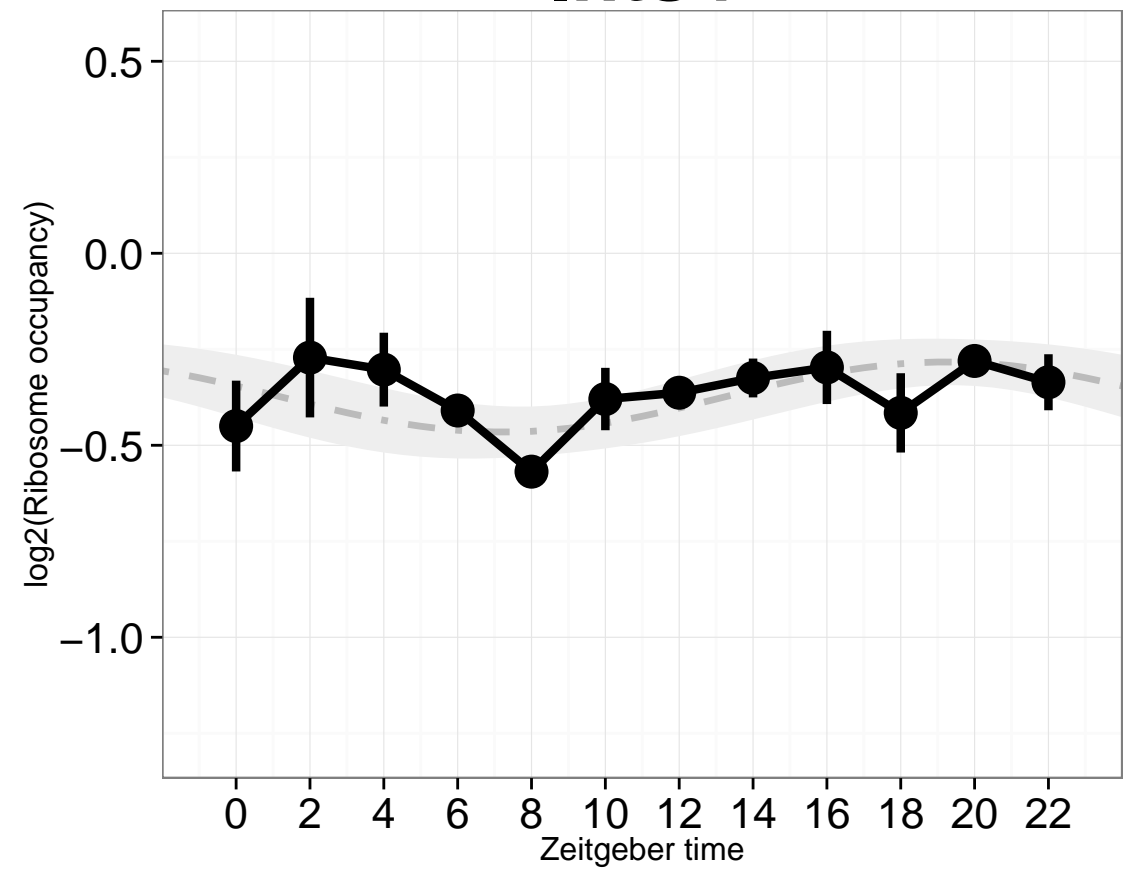

Supplement: SuppDataset_1.zip [file Ints4_set_A.pdf › Supplemental Dataset 1/A-mRNA_nonrhyth_translation_nonrhyth/Ints4_set_A.pdf]

# Ints5

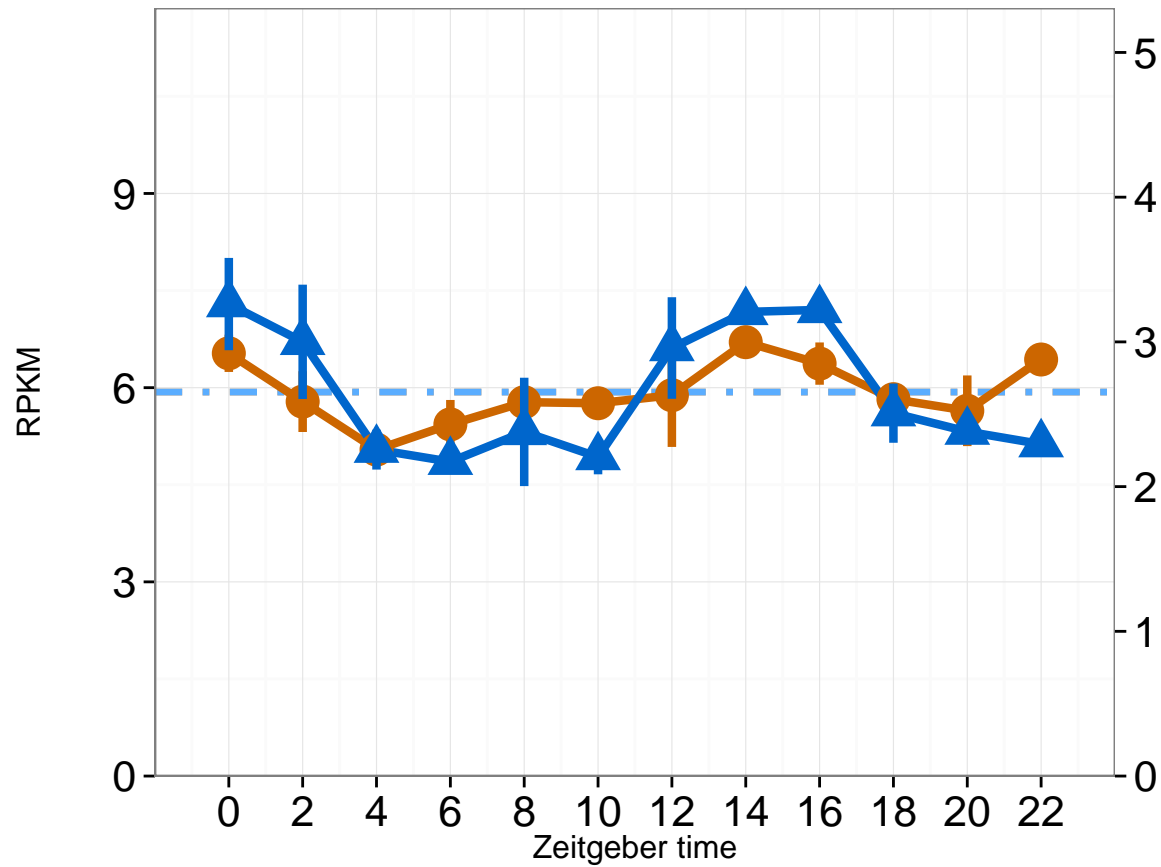

# Ints5

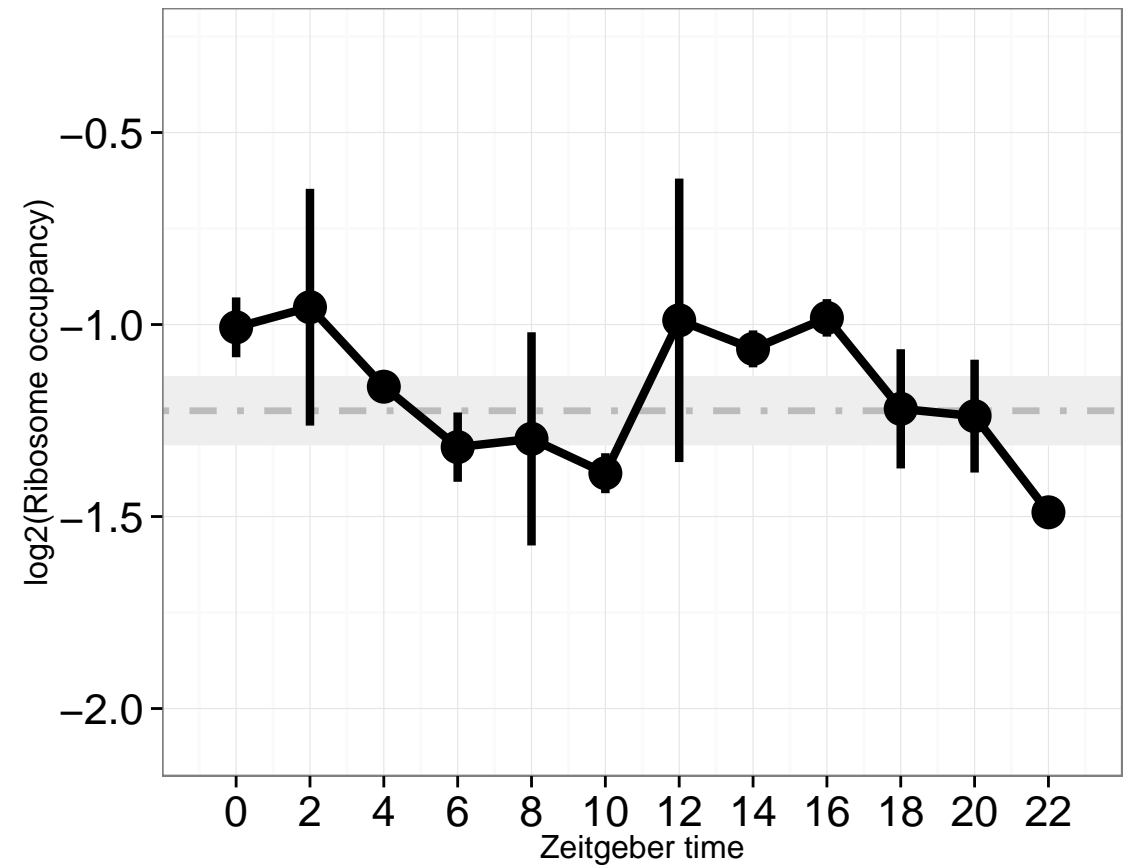

Supplement: SuppDataset_1.zip [file Ints5_set_A.pdf › Supplemental Dataset 1/A-mRNA_nonrhyth_translation_nonrhyth/Ints5_set_A.pdf]

# Ints6

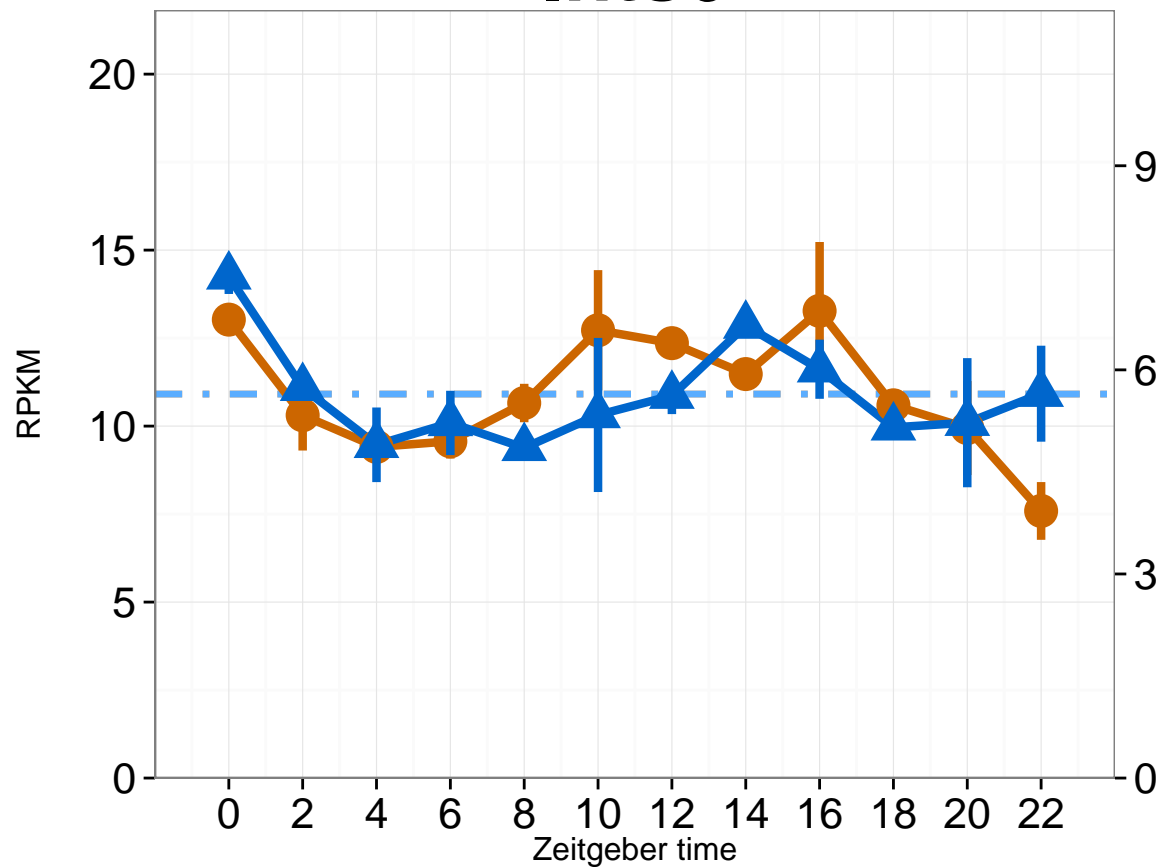

# Ints6

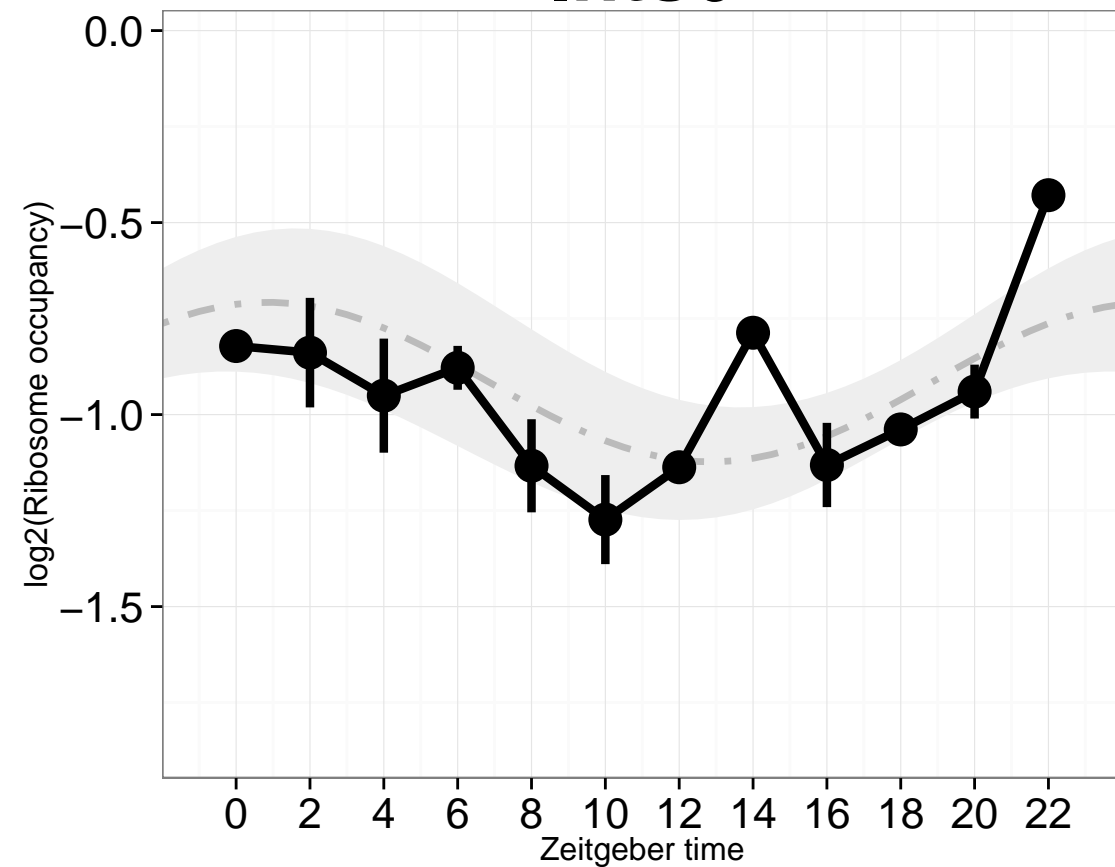

Supplement: SuppDataset_1.zip [file Ints6_set_A.pdf › Supplemental Dataset 1/A-mRNA_nonrhyth_translation_nonrhyth/Ints6_set_A.pdf]

# Ints7

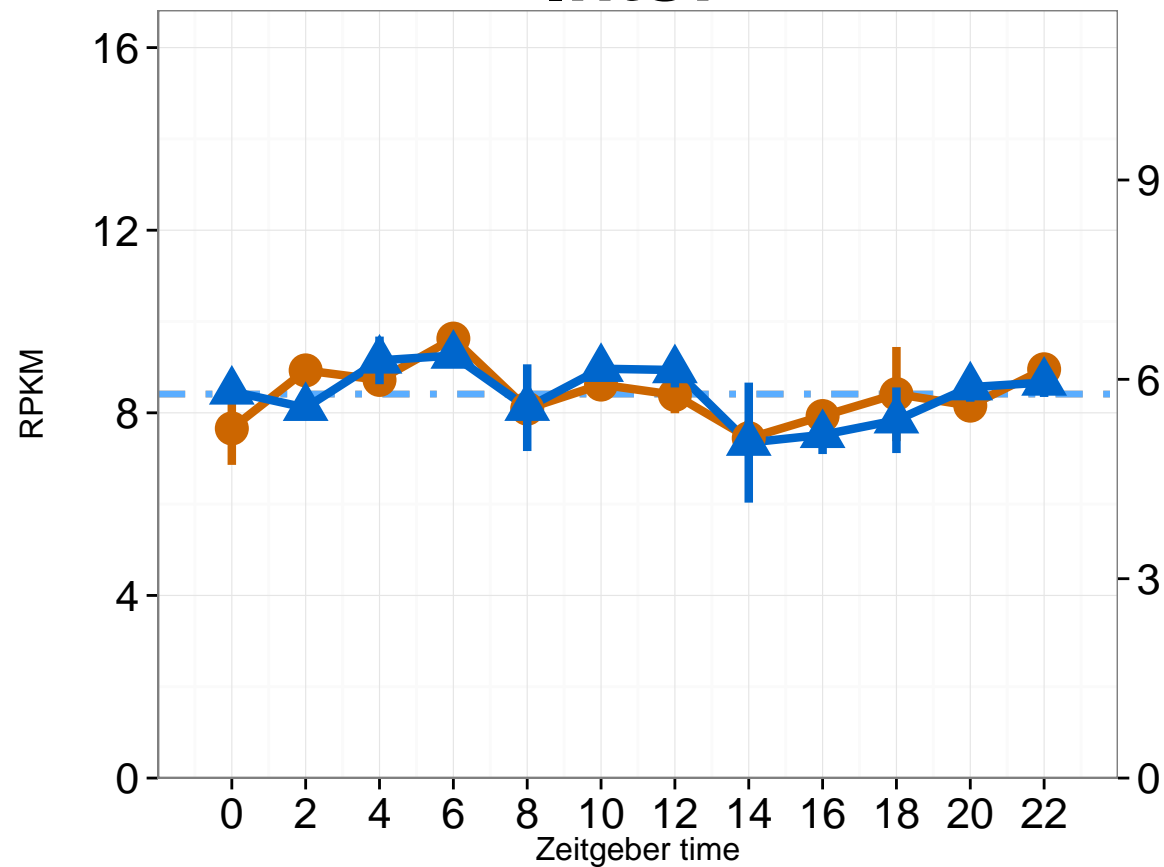

# Ints7

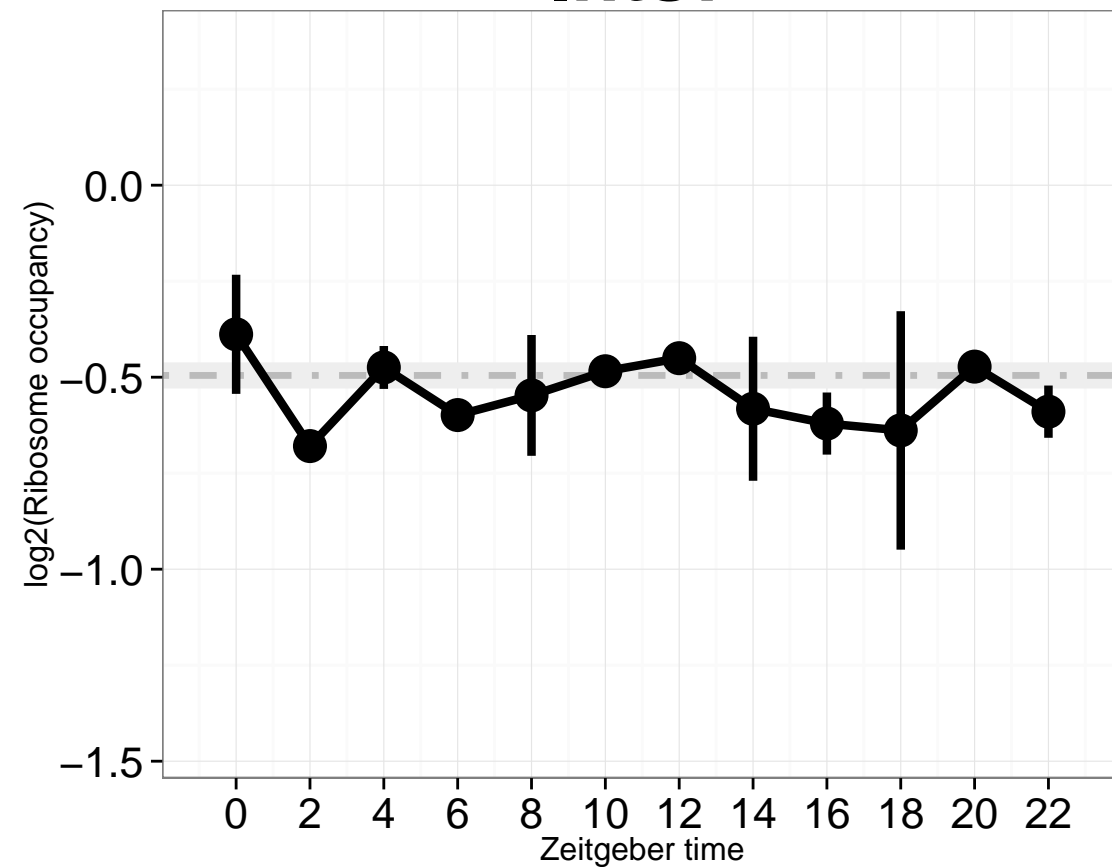

Supplement: SuppDataset_1.zip [file Ints7_set_A.pdf › Supplemental Dataset 1/A-mRNA_nonrhyth_translation_nonrhyth/Ints7_set_A.pdf]

# Ints8

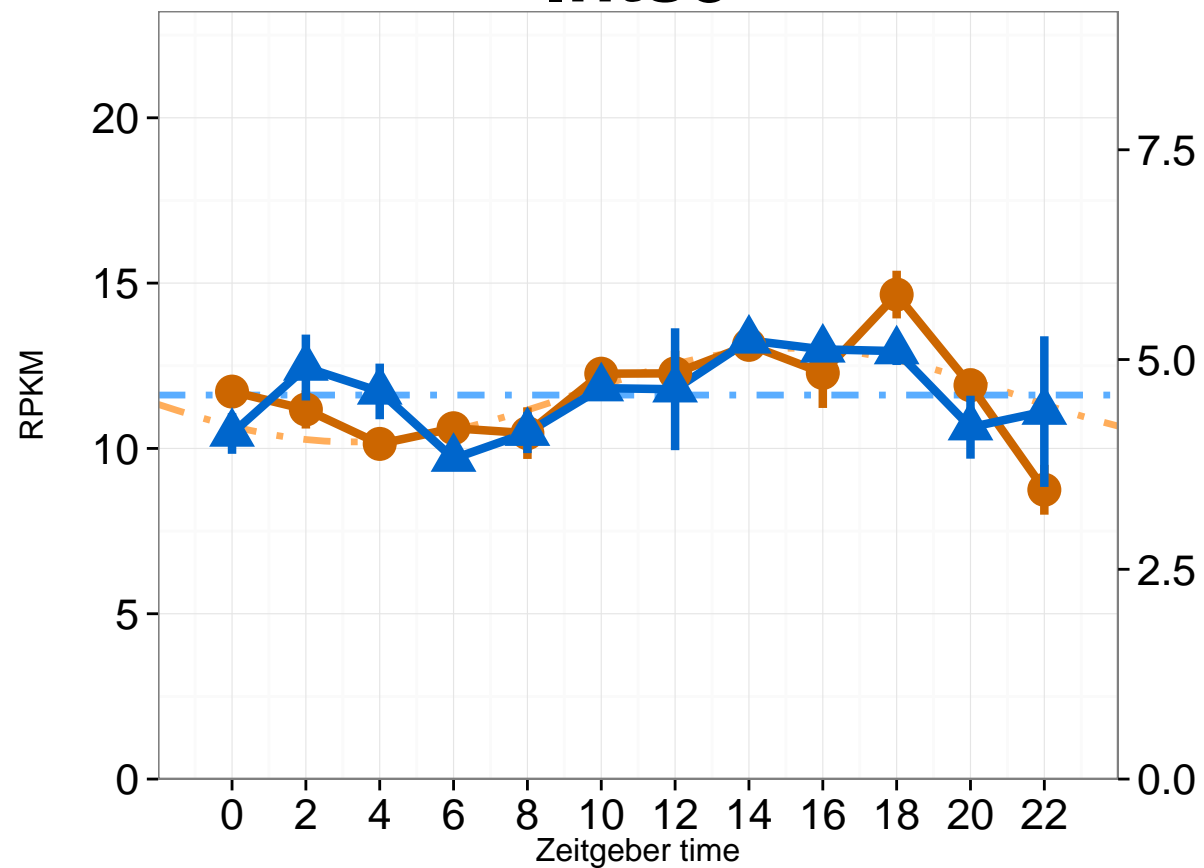

# Ints8

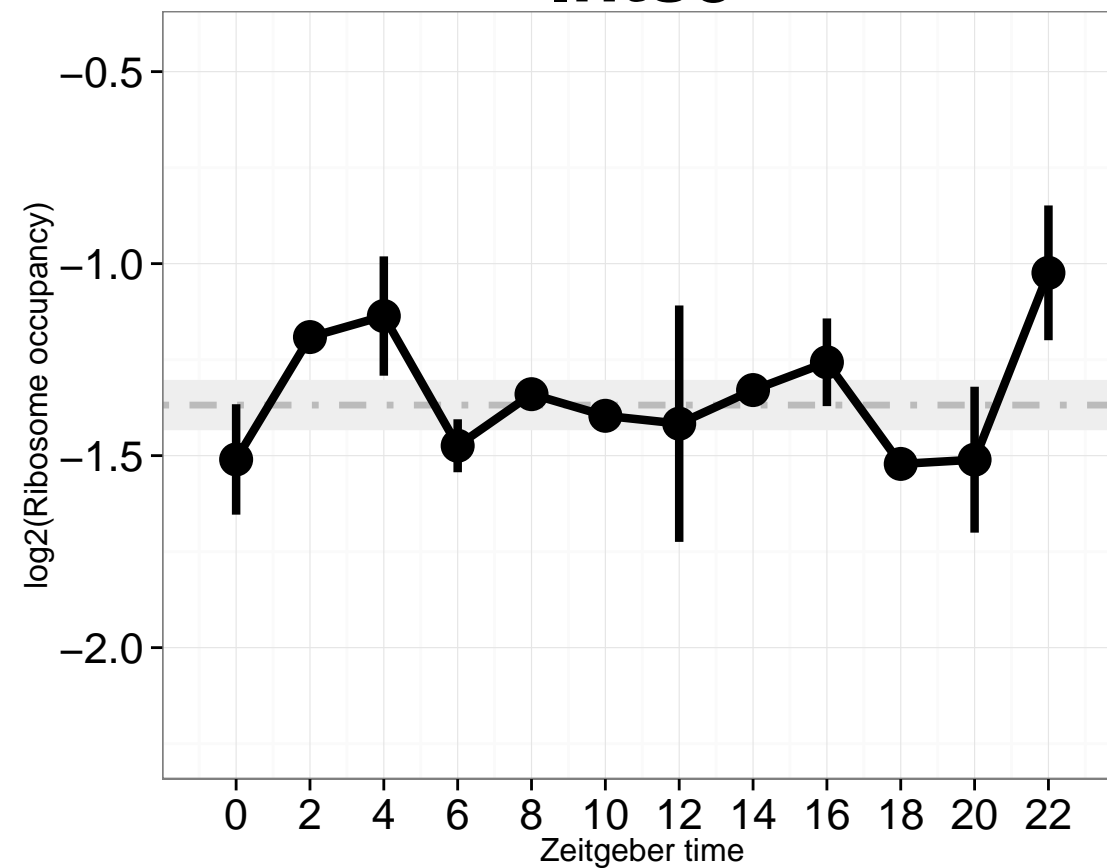

Supplement: SuppDataset_1.zip [file Ints8_set_A.pdf › Supplemental Dataset 1/A-mRNA_nonrhyth_translation_nonrhyth/Ints8_set_A.pdf]

## Ints9

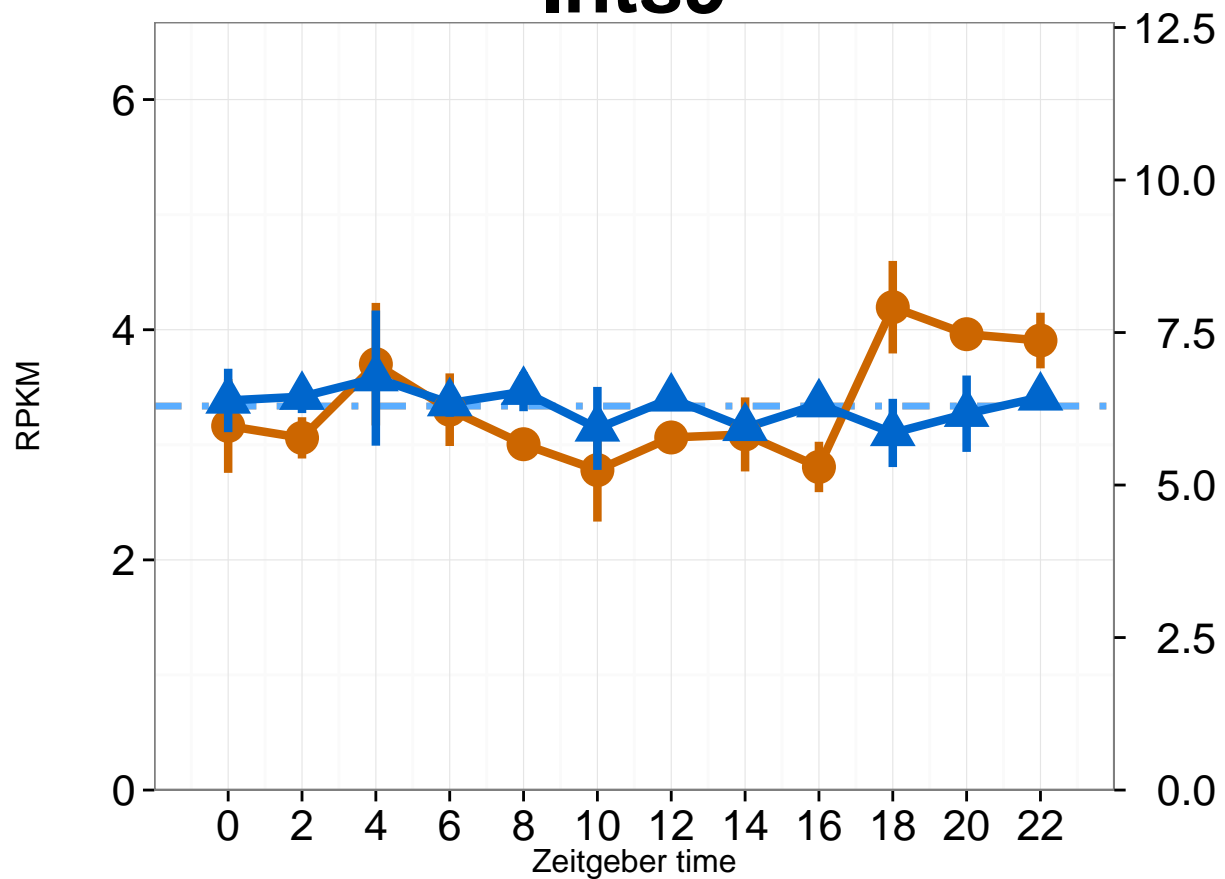

## Ints9

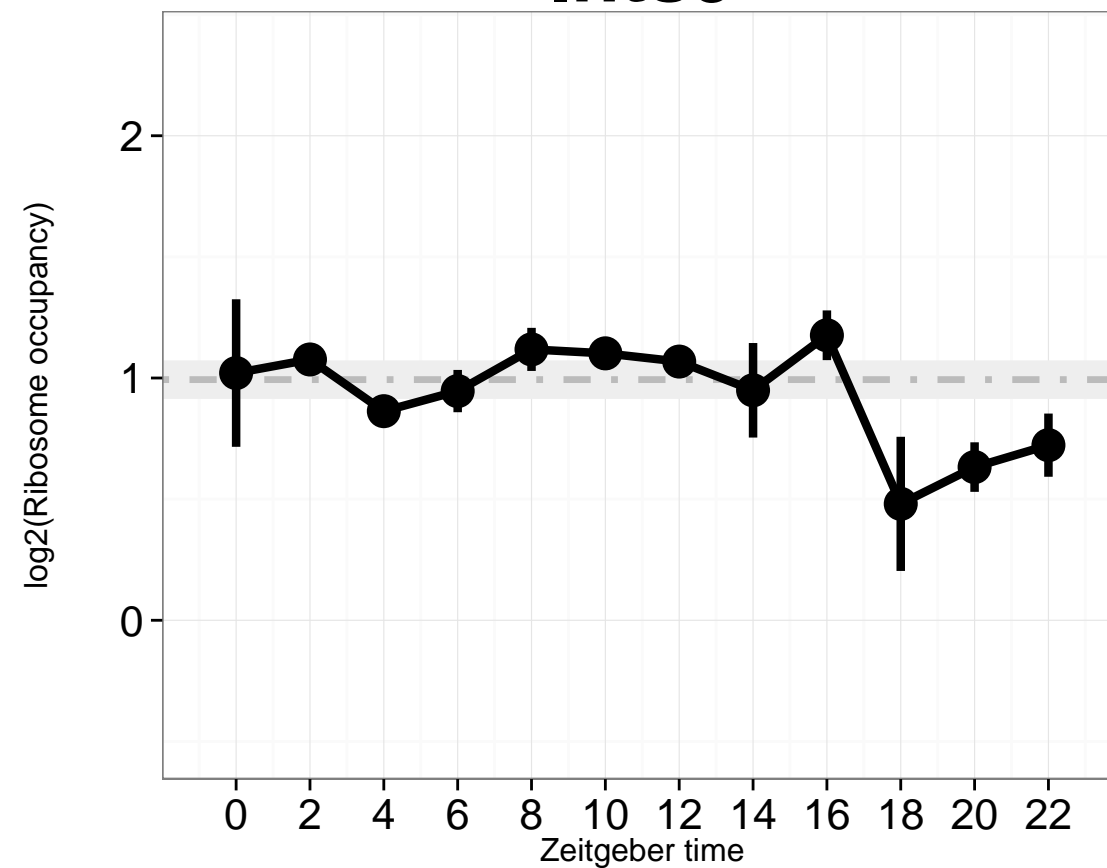

Supplement: SuppDataset_1.zip [file Ints9_set_A.pdf › Supplemental Dataset 1/A-mRNA_nonrhyth_translation_nonrhyth/Ints9_set_A.pdf]

# Ip6k1

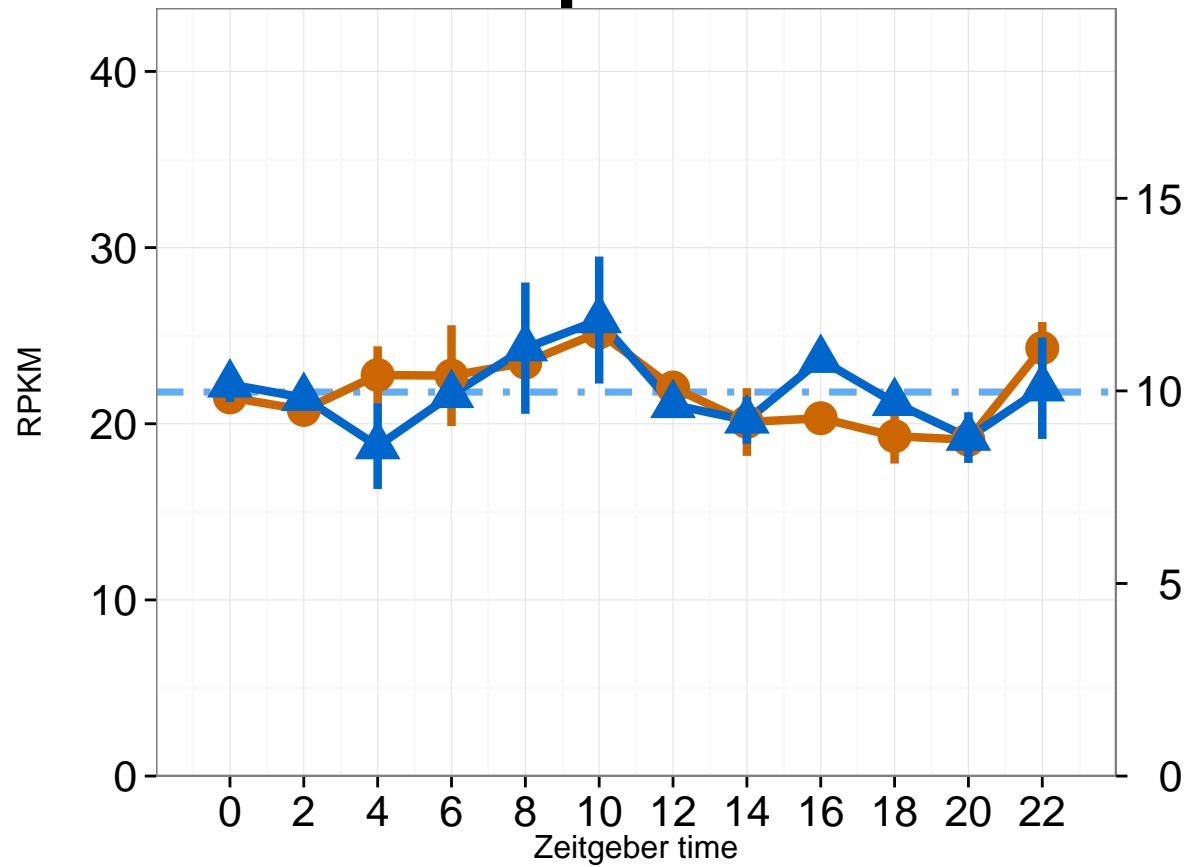

# Ip6k1

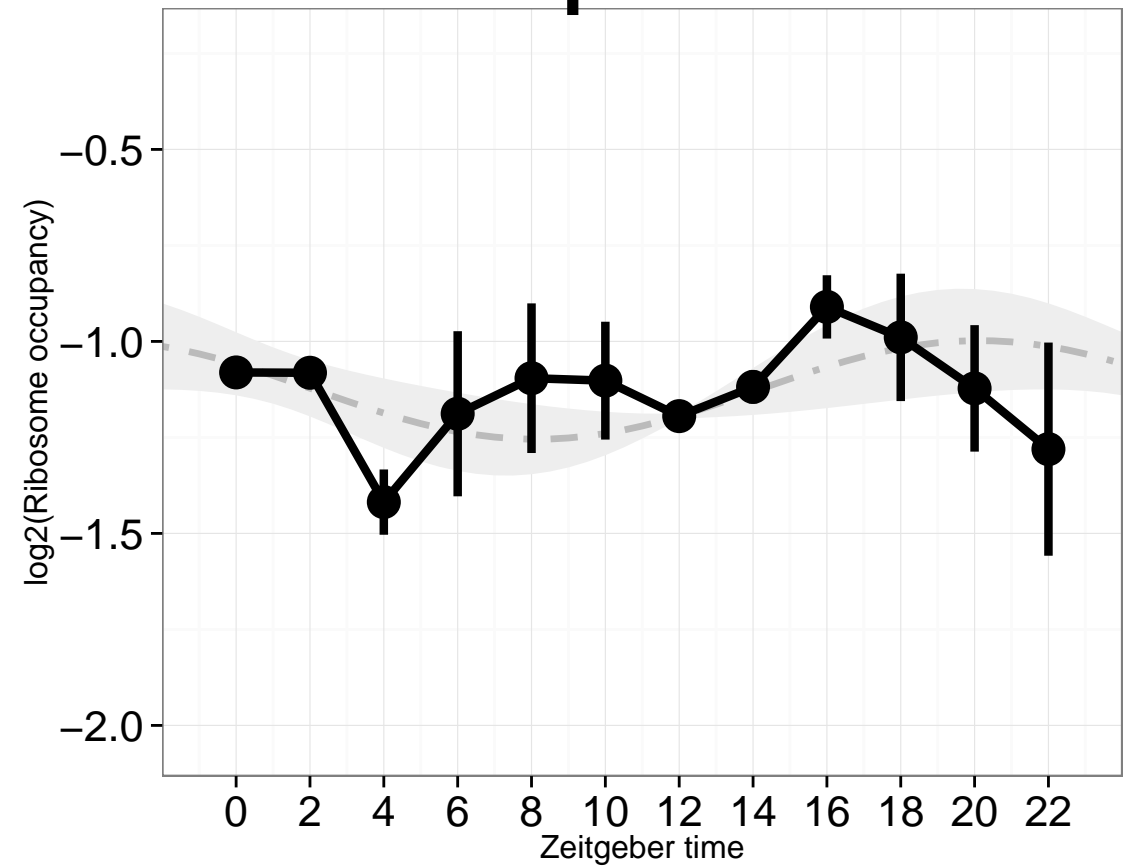

Supplement: SuppDataset_1.zip [file Ip6k1_set_A.pdf › Supplemental Dataset 1/A-mRNA_nonrhyth_translation_nonrhyth/Ip6k1_set_A.pdf]

# Ip6k2

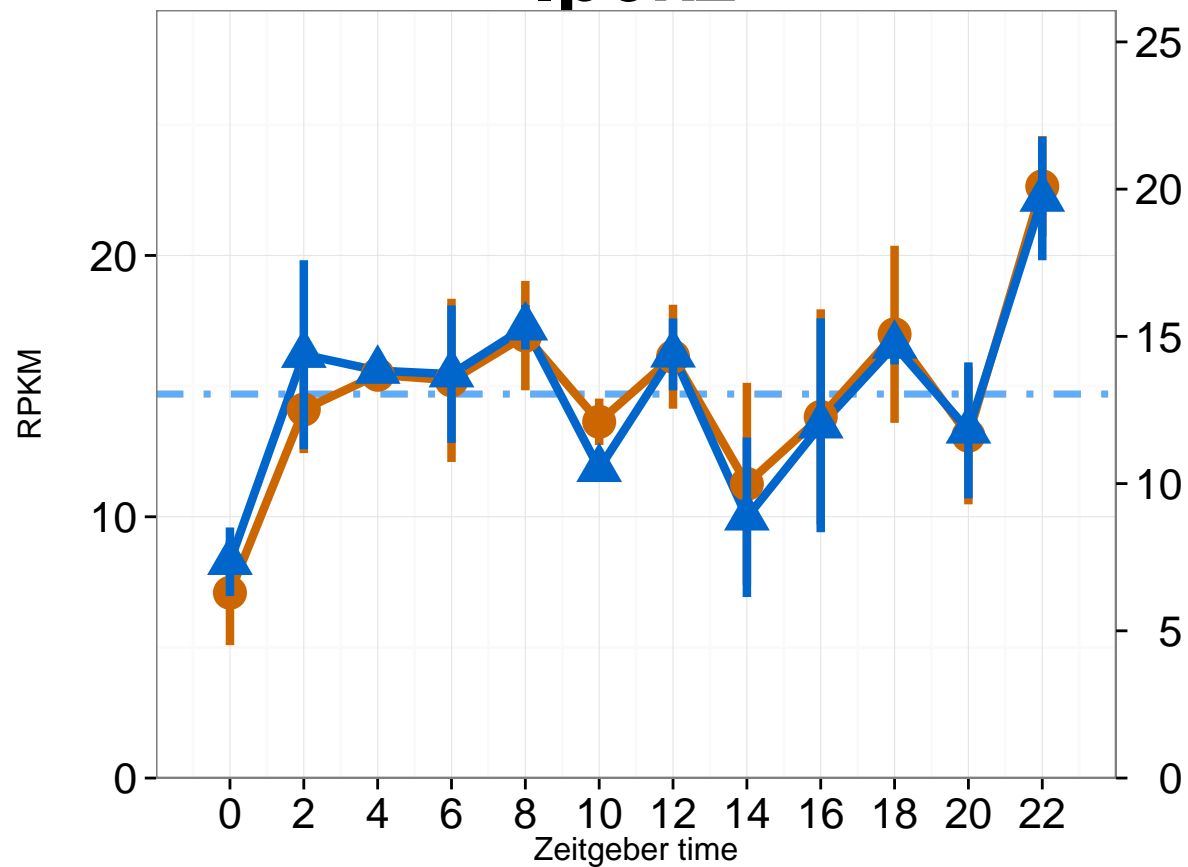

# Ip6k2

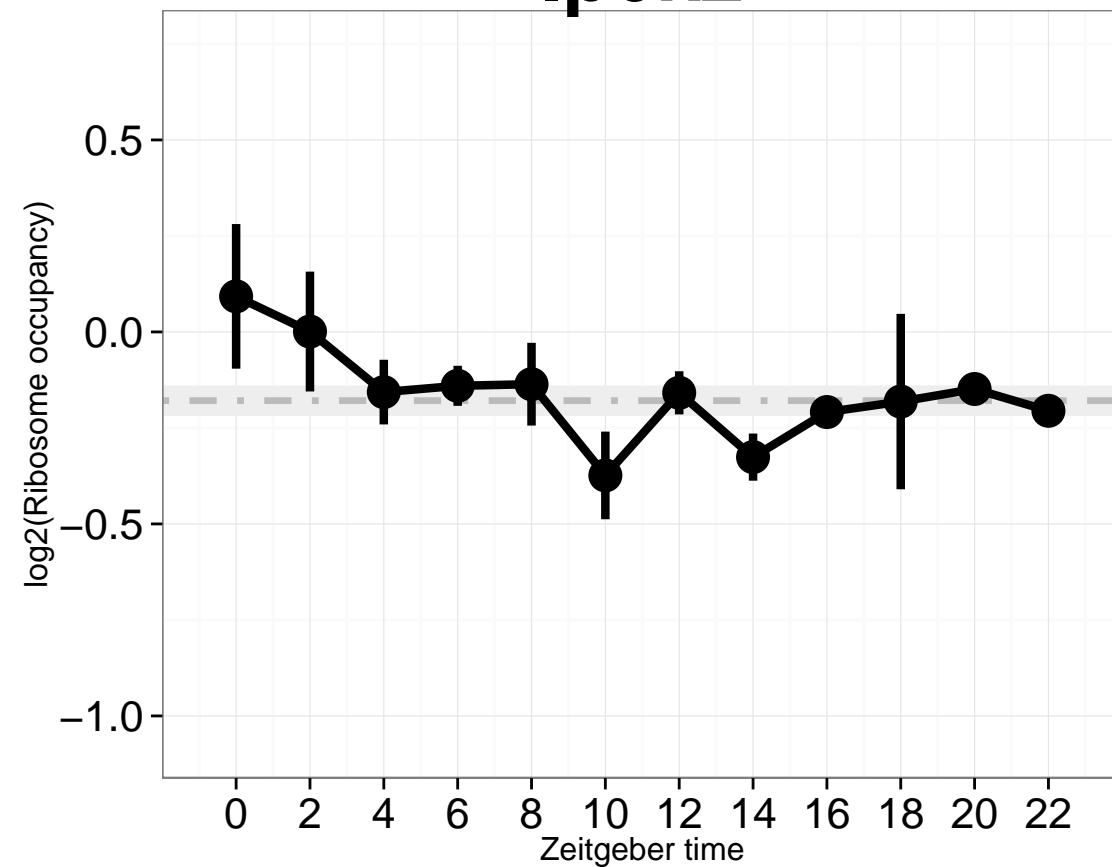

Supplement: SuppDataset_1.zip [file Ip6k2_set_A.pdf › Supplemental Dataset 1/A-mRNA_nonrhyth_translation_nonrhyth/Ip6k2_set_A.pdf]
