# Supplementary figures and images for: Ribosome profiling reveals the rhythmic liver translatome and circadian clock regulation by upstream open reading frames (part 37 of 113)
Source: HighWire-hosted journal article supplement (doi:10.1101/gr.195404.115), 2015-10-20

## lpmk

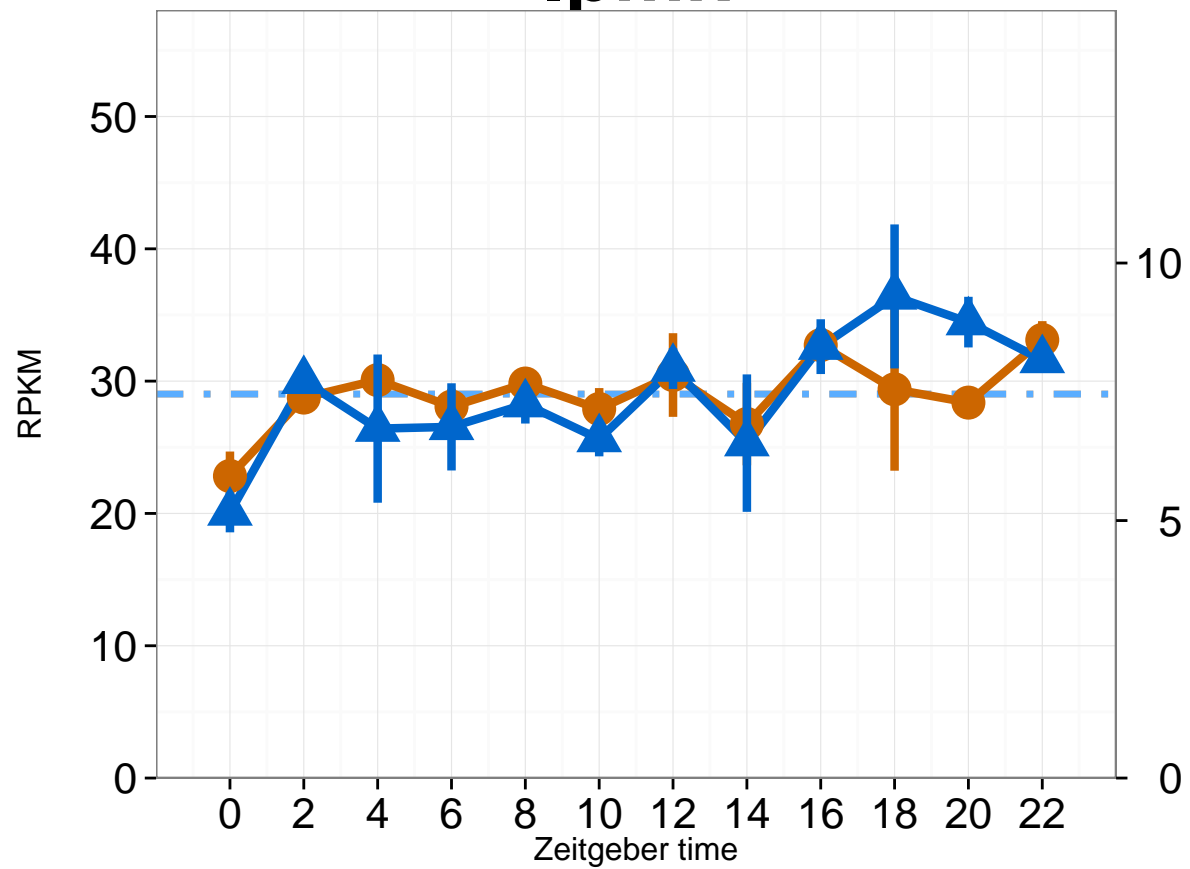

## lpmk

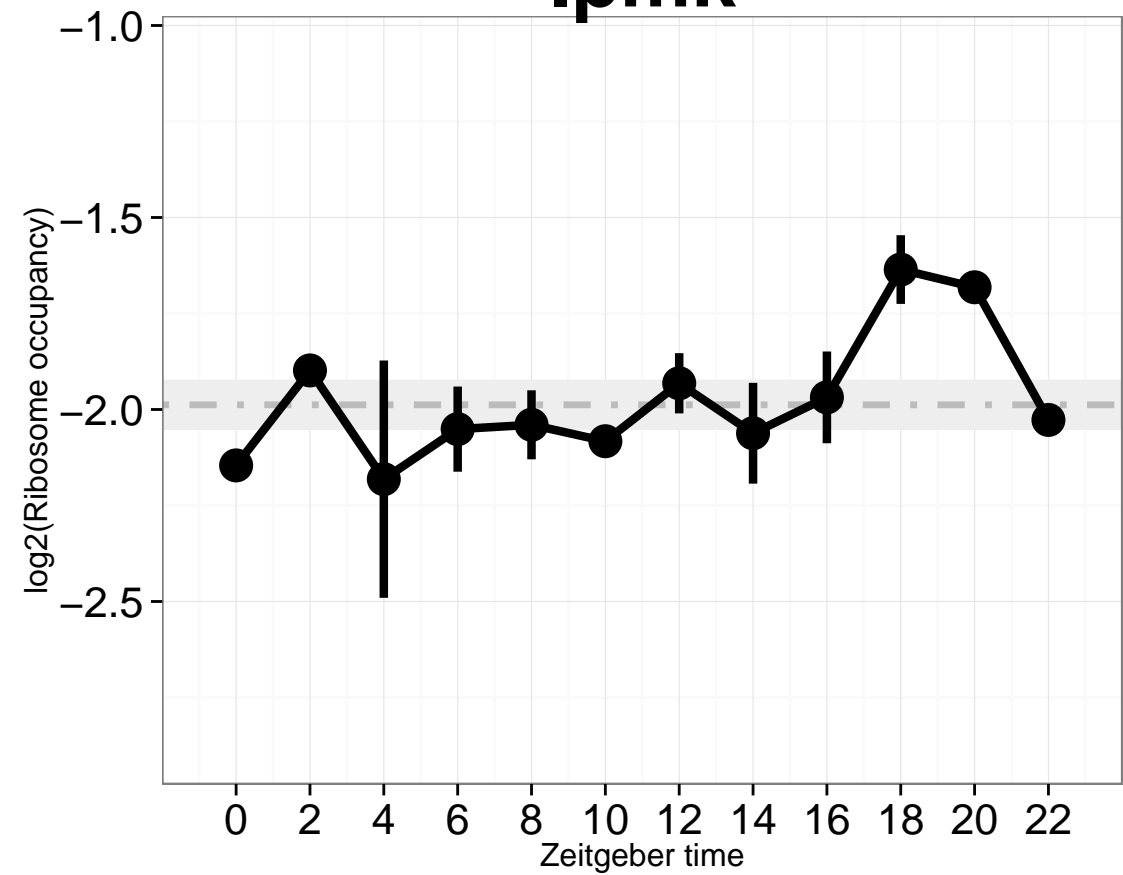

Supplement: SuppDataset_1.zip [file Ipmk_set_A.pdf › Supplemental Dataset 1/A-mRNA_nonrhyth_translation_nonrhyth/Ipmk_set_A.pdf]

## Ipo11

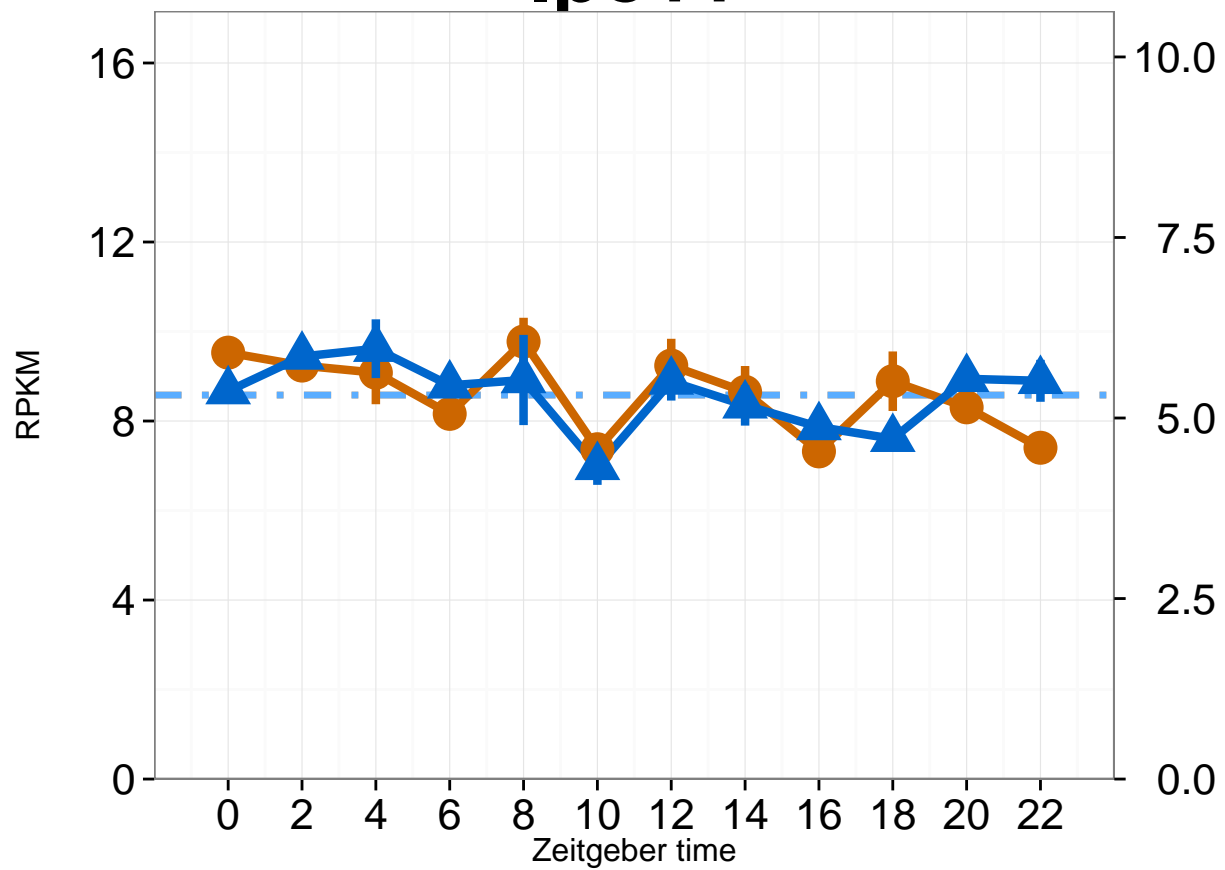

## Ipo11

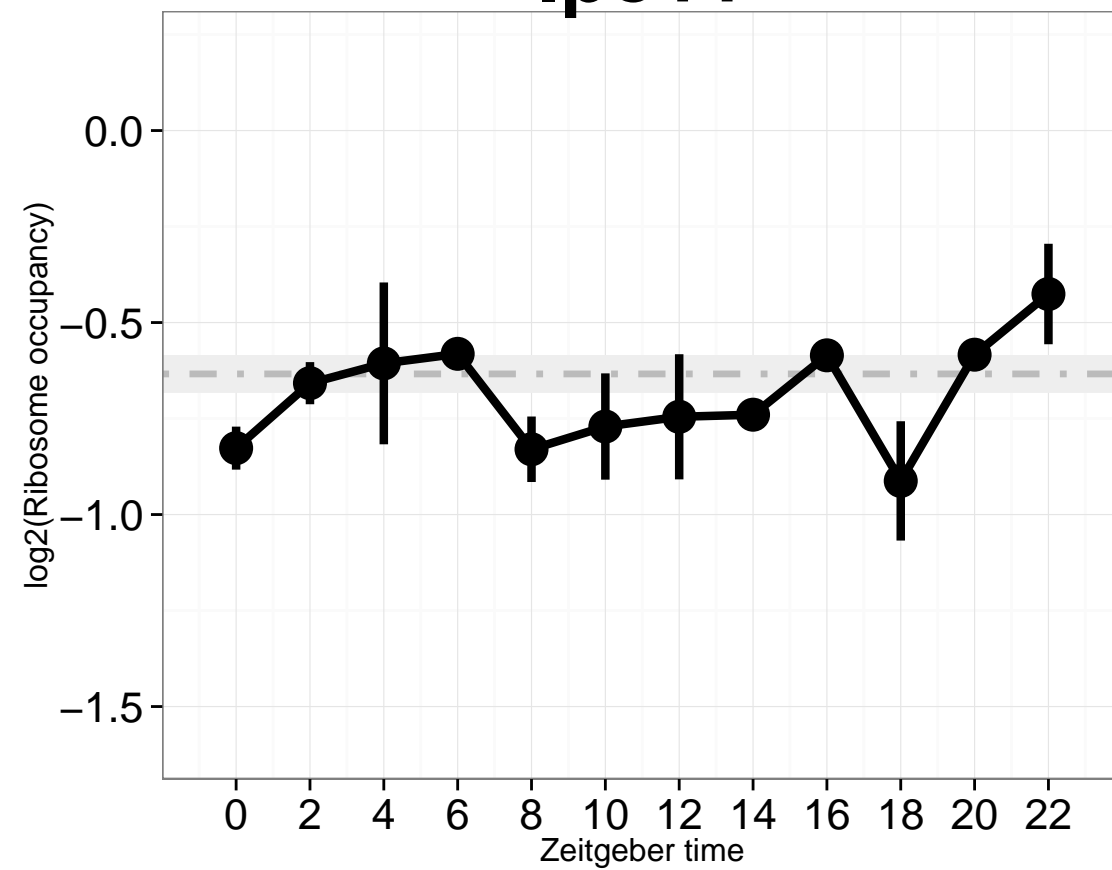

Supplement: SuppDataset_1.zip [file Ipo11_set_A.pdf › Supplemental Dataset 1/A-mRNA_nonrhyth_translation_nonrhyth/Ipo11_set_A.pdf]

# Ipo13

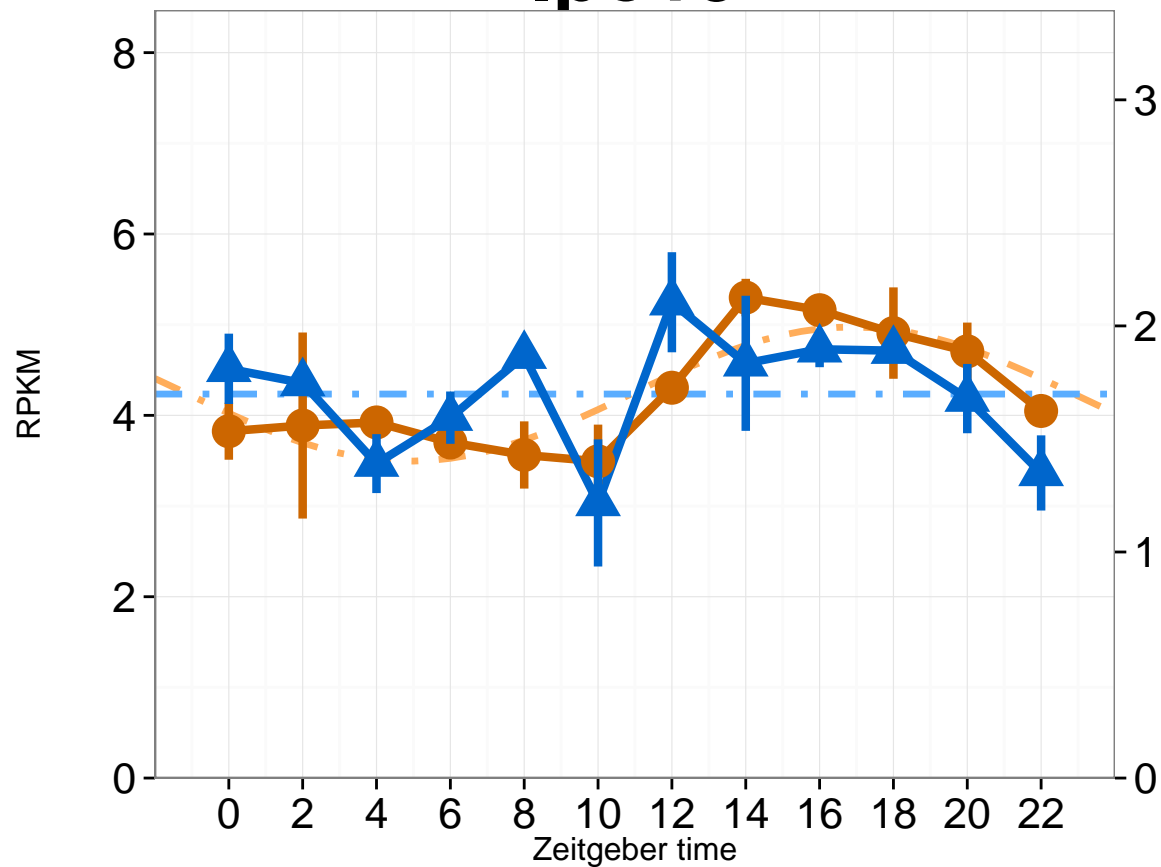

# Ipo13

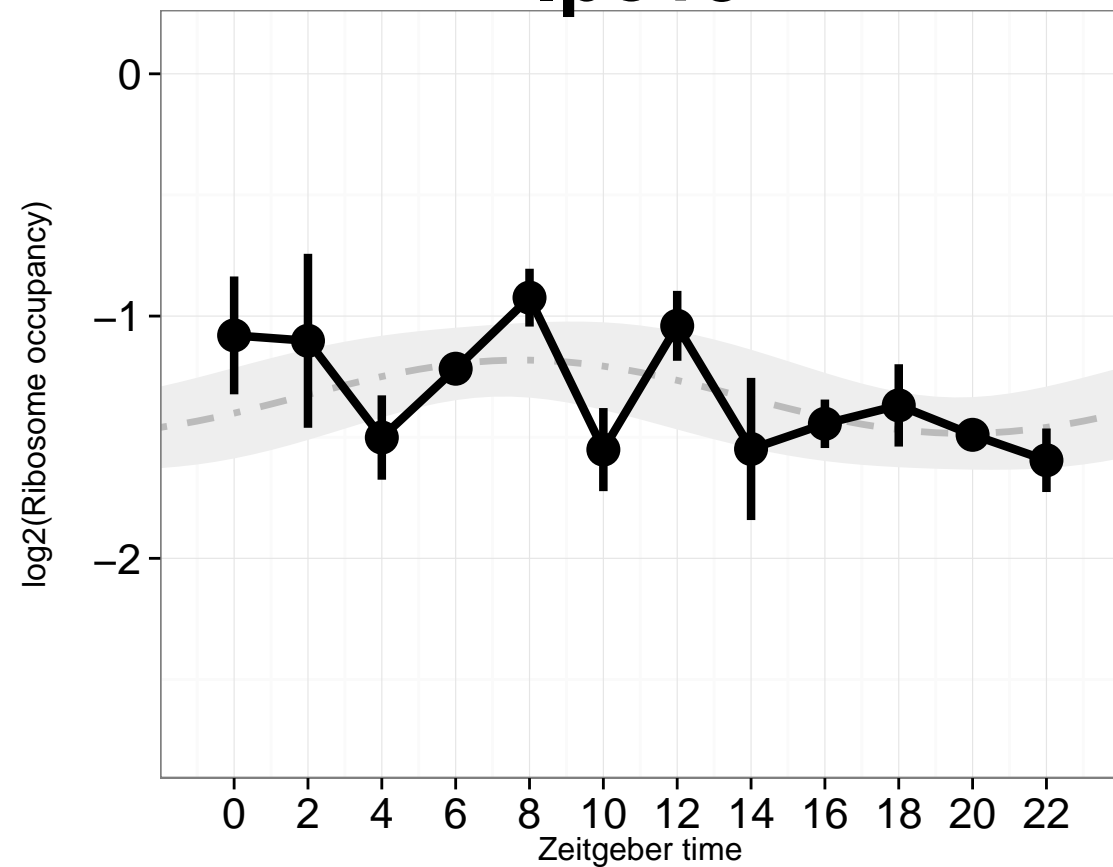

Supplement: SuppDataset_1.zip [file Ipo13_set_A.pdf › Supplemental Dataset 1/A-mRNA_nonrhyth_translation_nonrhyth/Ipo13_set_A.pdf]

## Ipo4

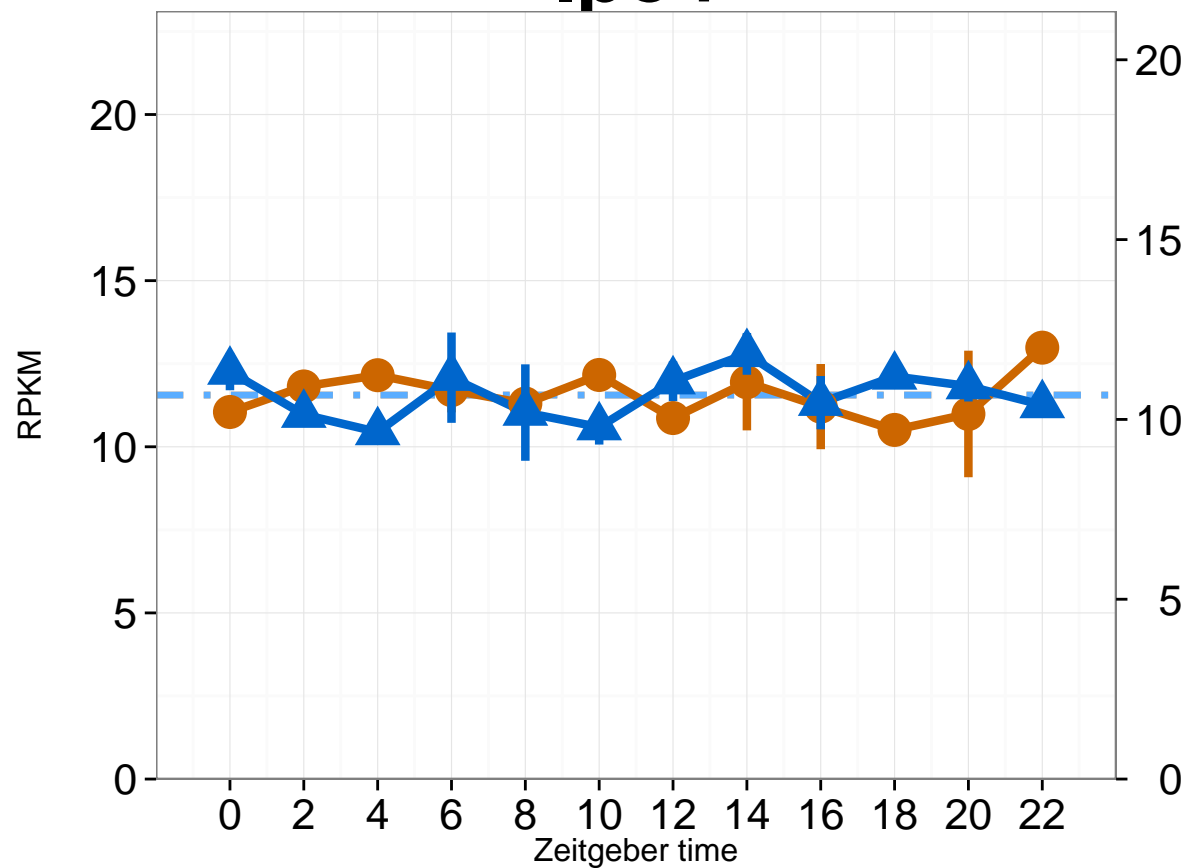

## Ipo4

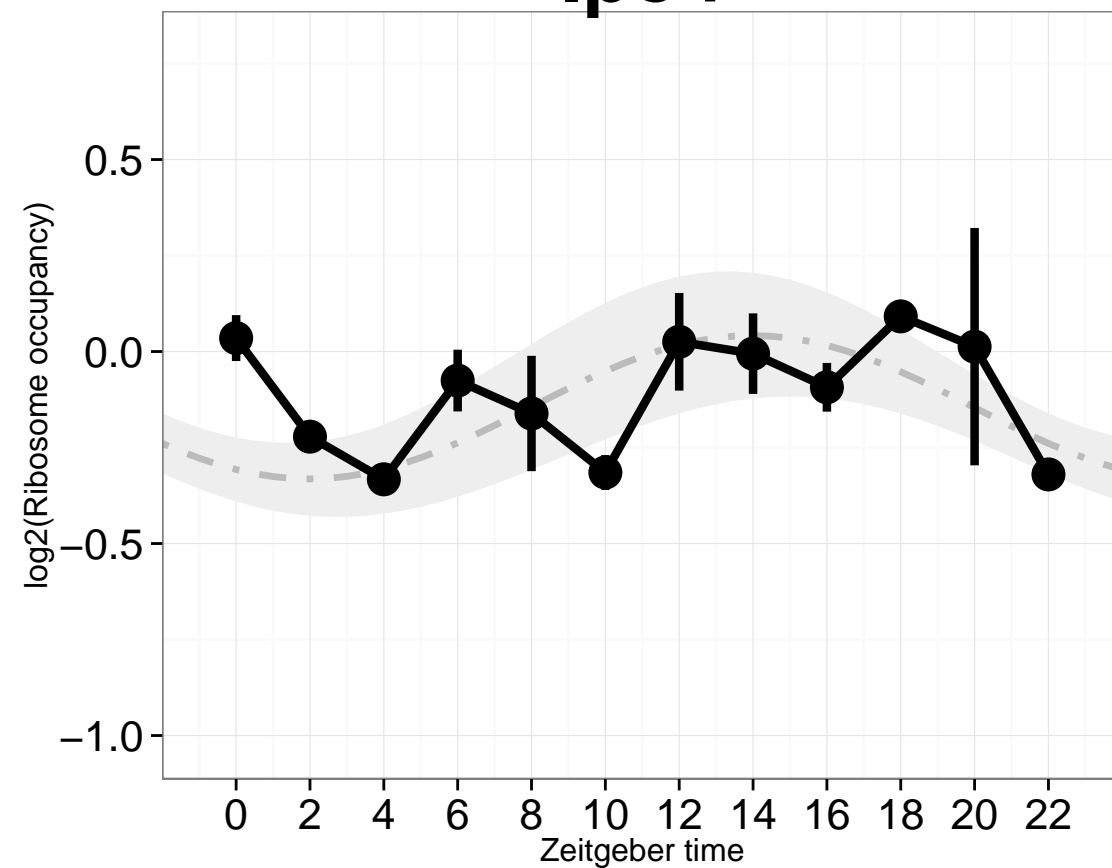

Supplement: SuppDataset_1.zip [file Ipo4_set_A.pdf › Supplemental Dataset 1/A-mRNA_nonrhyth_translation_nonrhyth/Ipo4_set_A.pdf]

## Ipo8

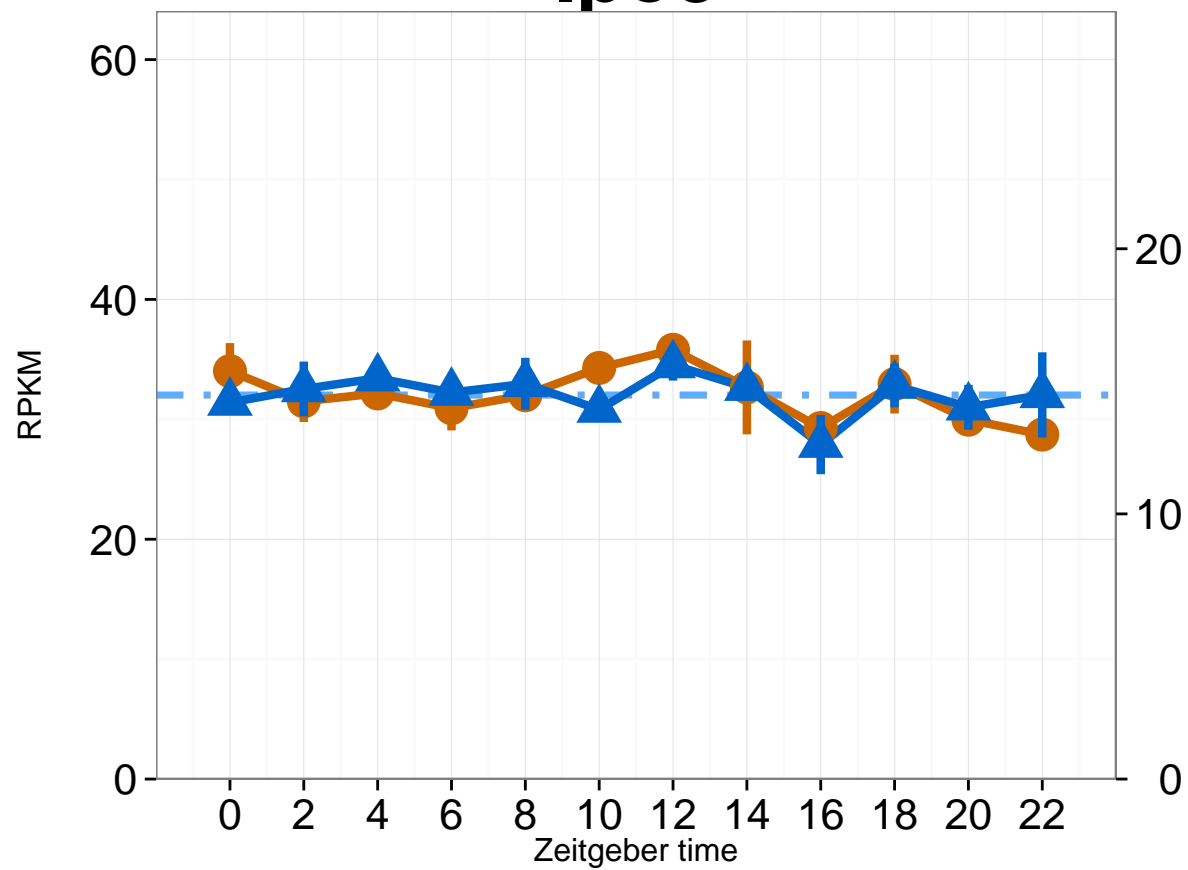

## Ipo8

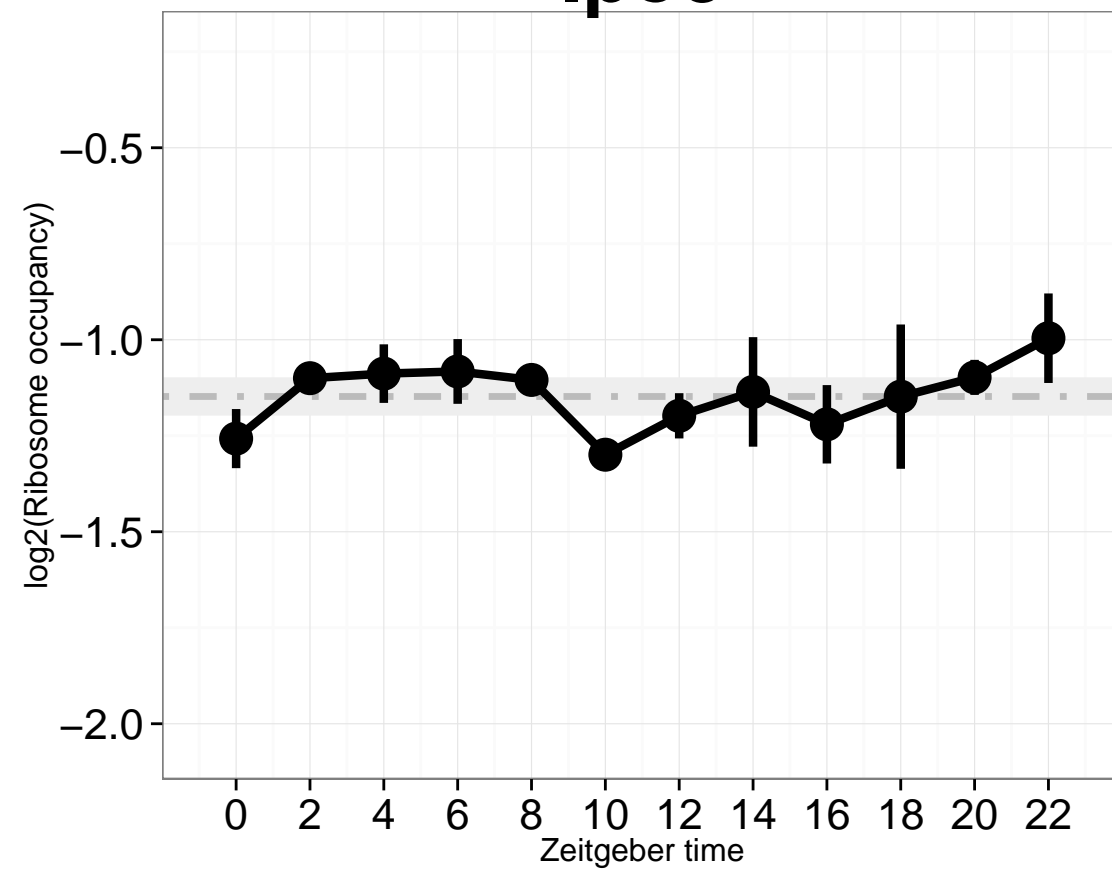

Supplement: SuppDataset_1.zip [file Ipo8_set_A.pdf › Supplemental Dataset 1/A-mRNA_nonrhyth_translation_nonrhyth/Ipo8_set_A.pdf]

## Ipo9

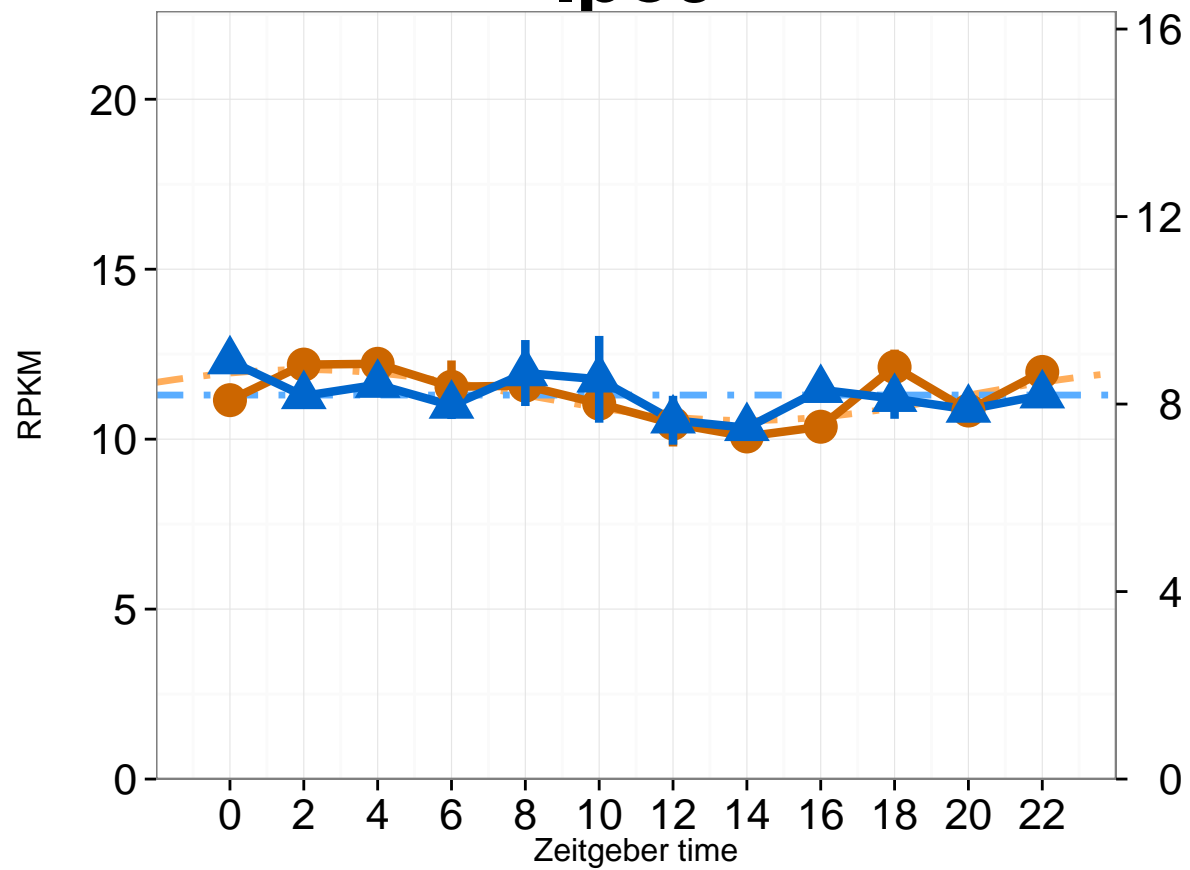

## Ipo9

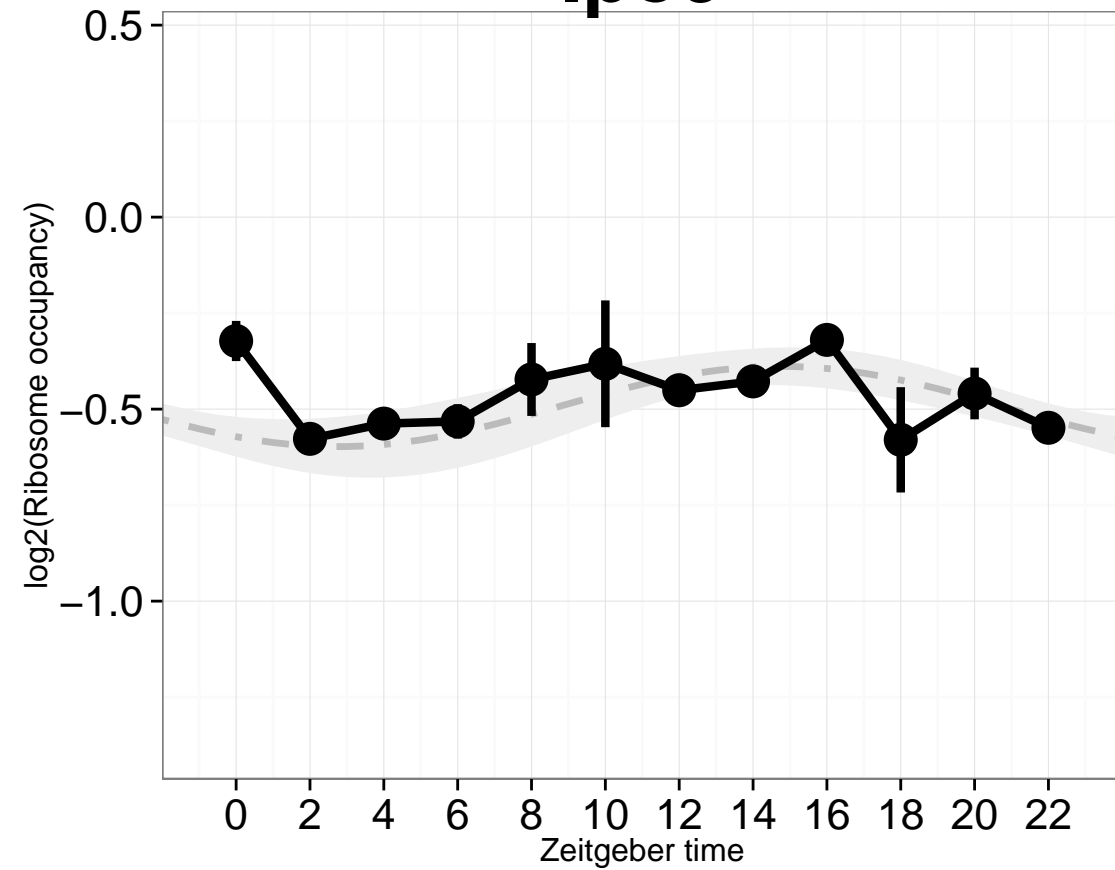

Supplement: SuppDataset_1.zip [file Ipo9_set_A.pdf › Supplemental Dataset 1/A-mRNA_nonrhyth_translation_nonrhyth/Ipo9_set_A.pdf]

**lpp**

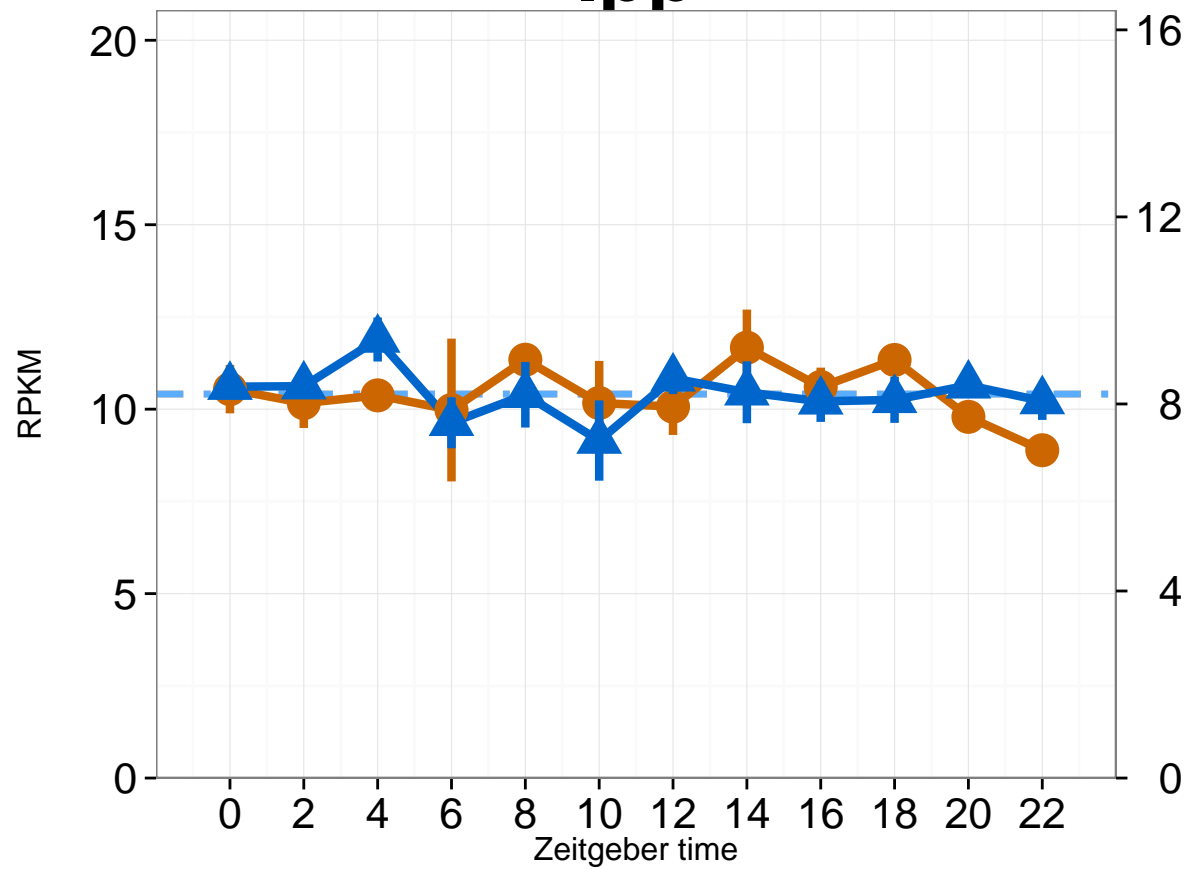

**lpp**

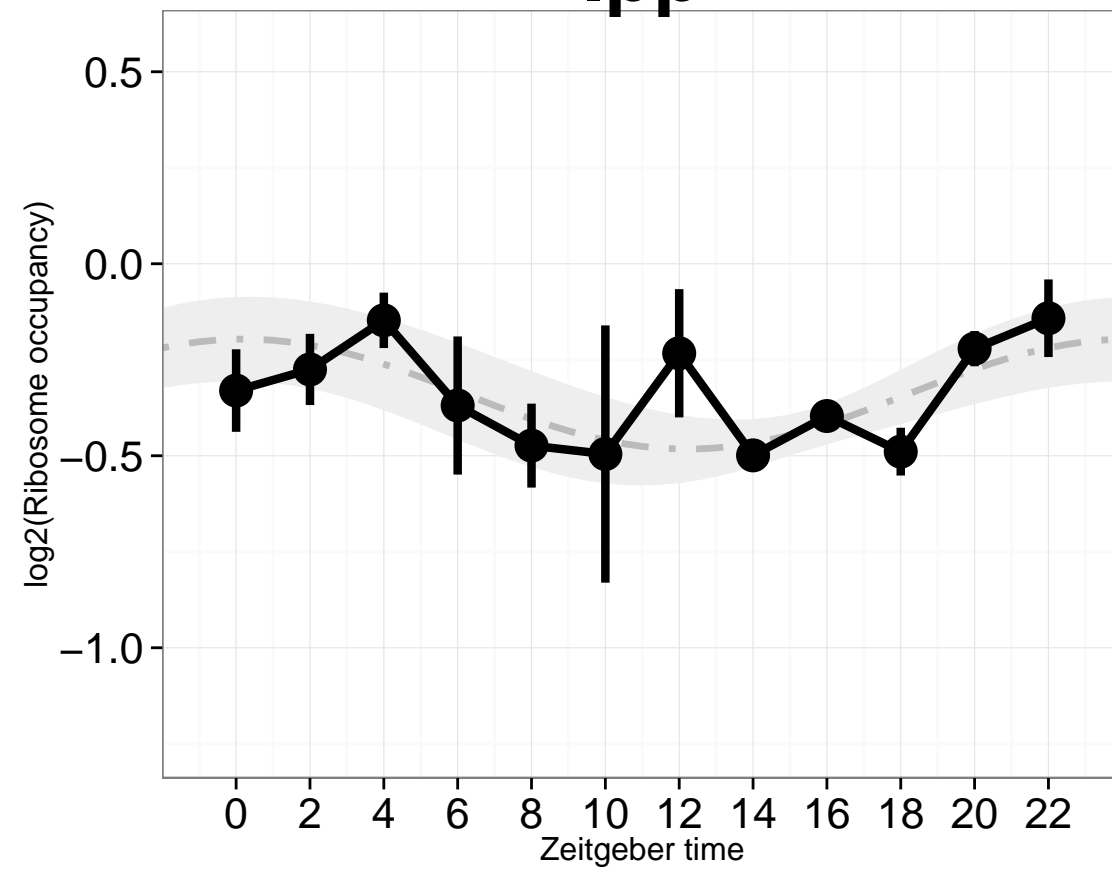

Supplement: SuppDataset_1.zip [file Ipp_set_A.pdf › Supplemental Dataset 1/A-mRNA_nonrhyth_translation_nonrhyth/Ipp_set_A.pdf]

# lqcb1

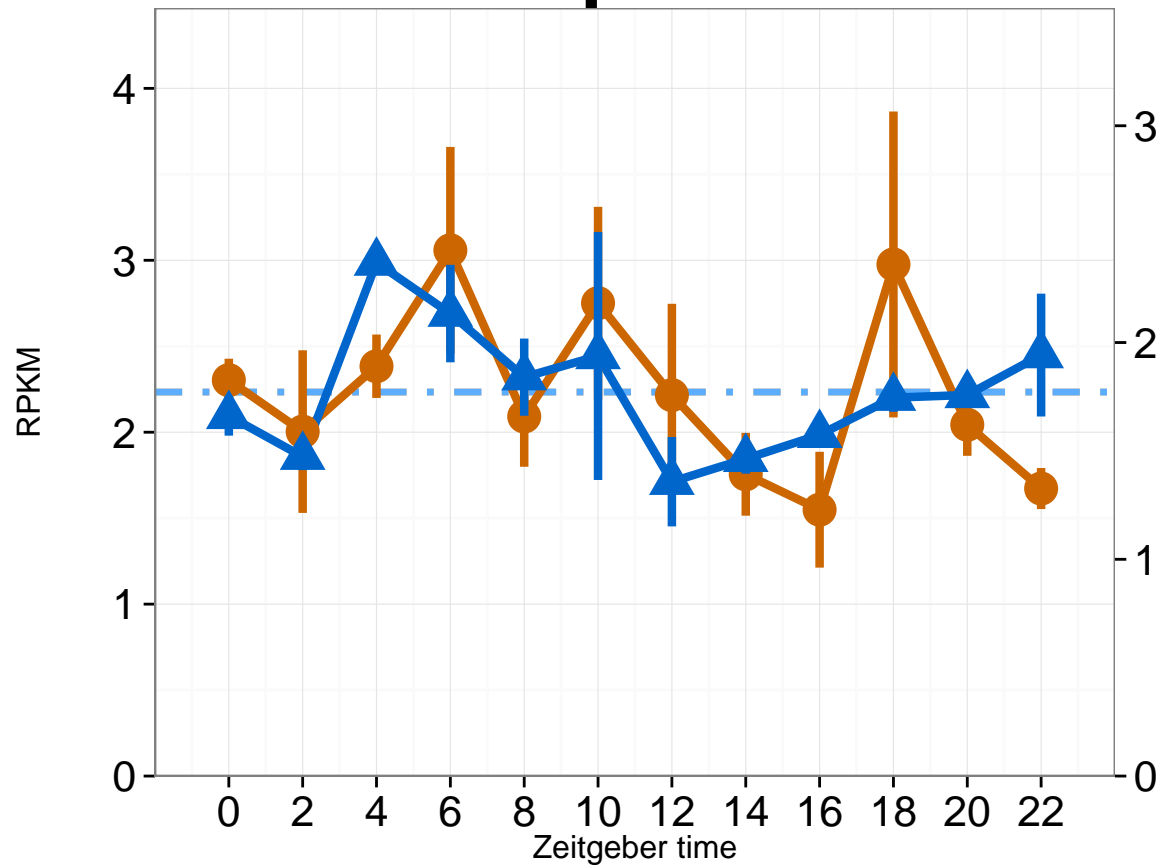

# lqcb1

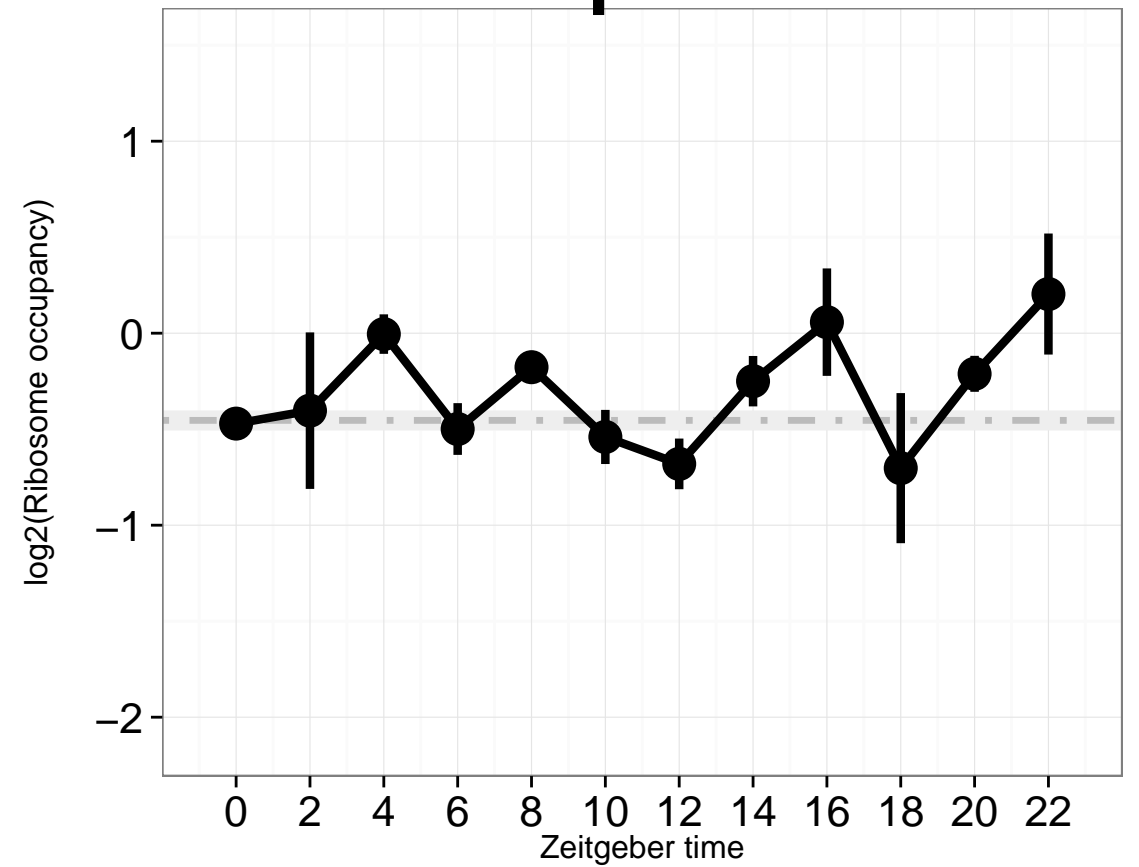

Supplement: SuppDataset_1.zip [file Iqcb1_set_A.pdf › Supplemental Dataset 1/A-mRNA_nonrhyth_translation_nonrhyth/Iqcb1_set_A.pdf]

## lqcc

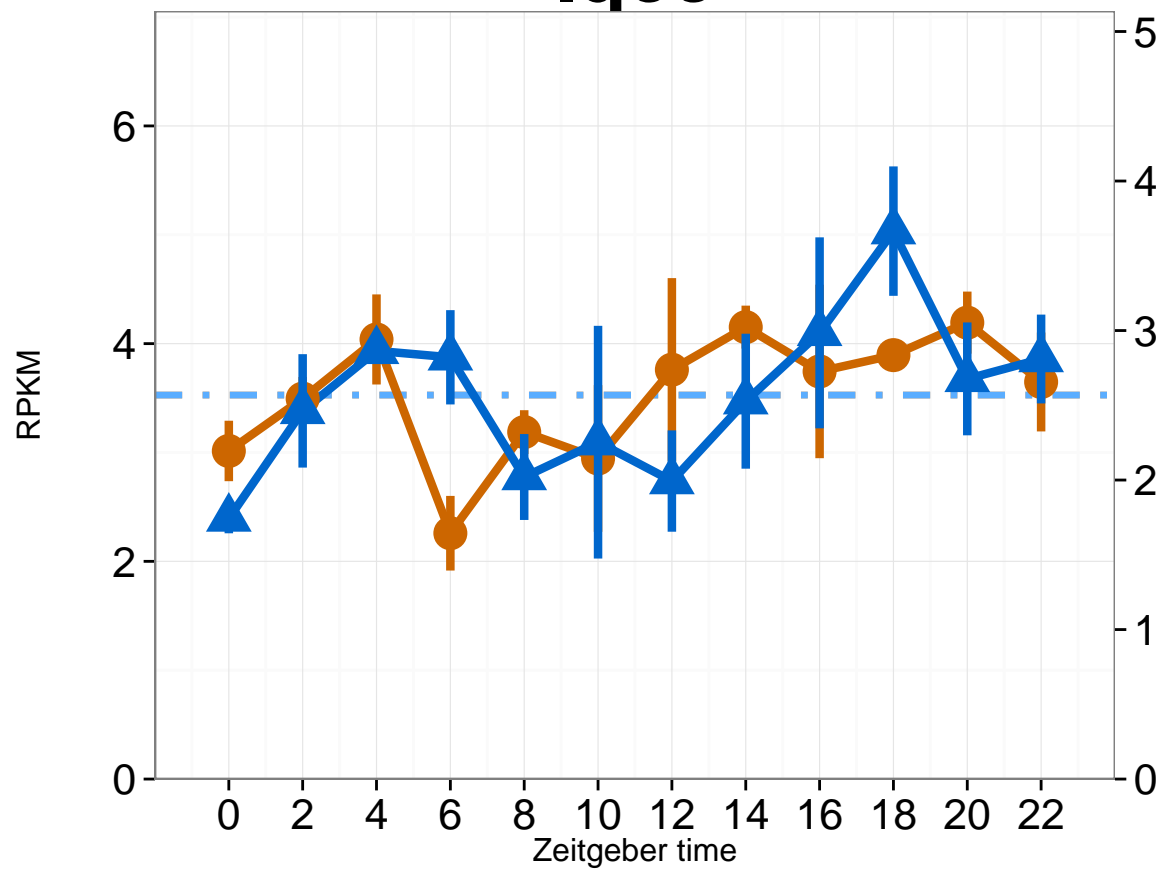

## lqcc

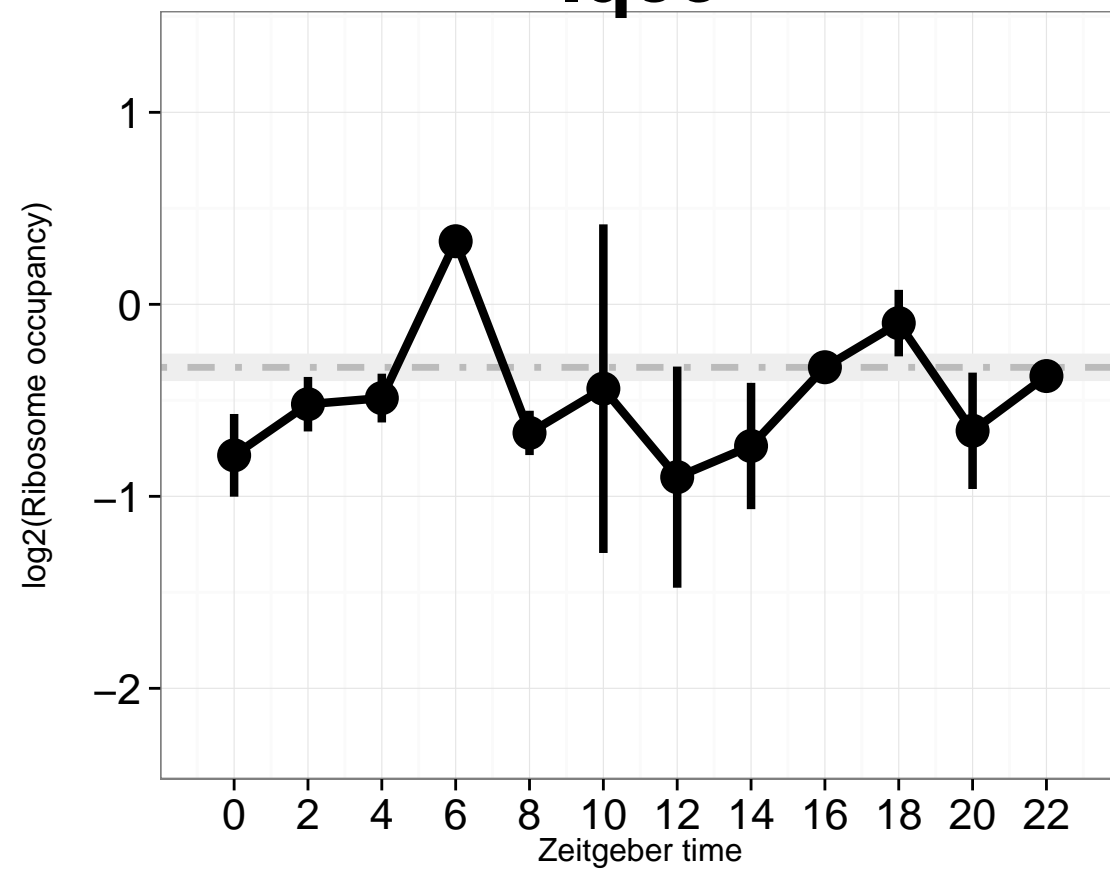

Supplement: SuppDataset_1.zip [file Iqcc_set_A.pdf › Supplemental Dataset 1/A-mRNA_nonrhyth_translation_nonrhyth/Iqcc_set_A.pdf]

## lqce

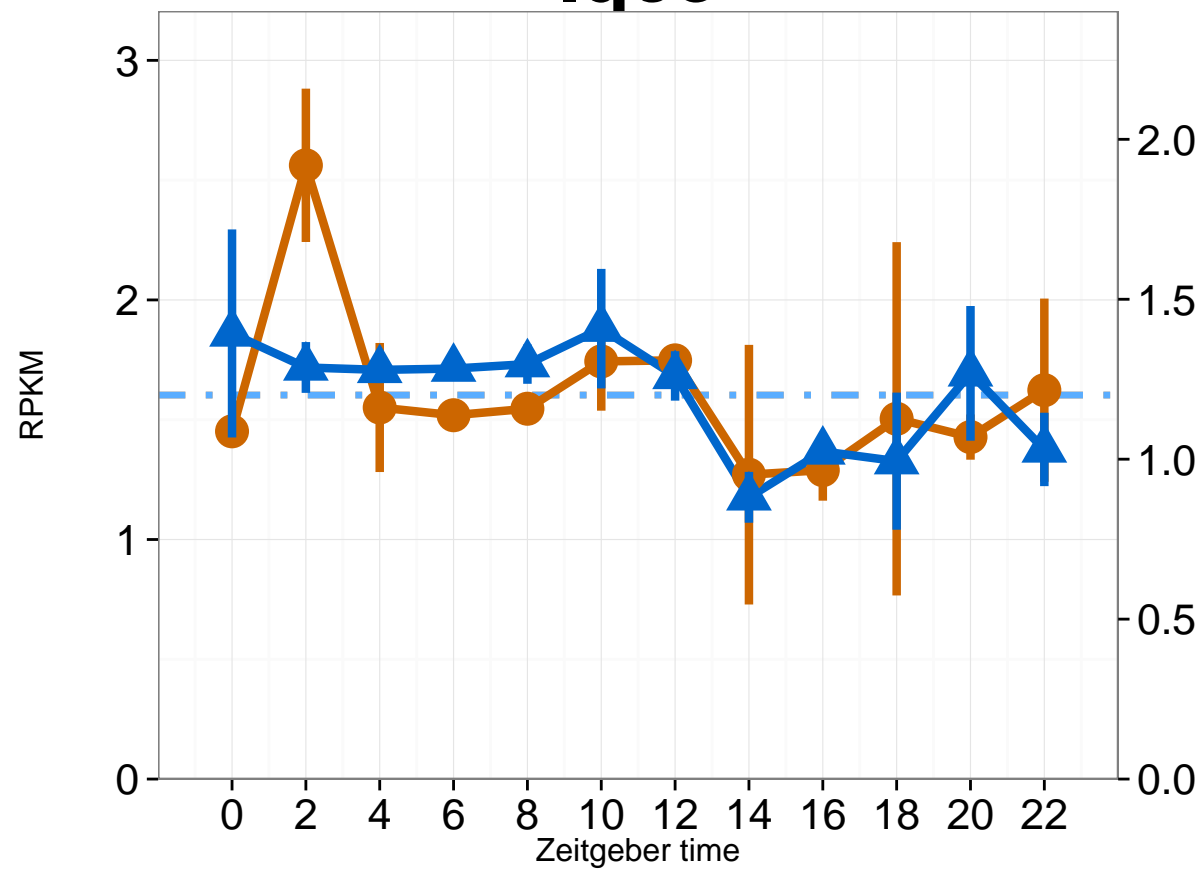

## lqce

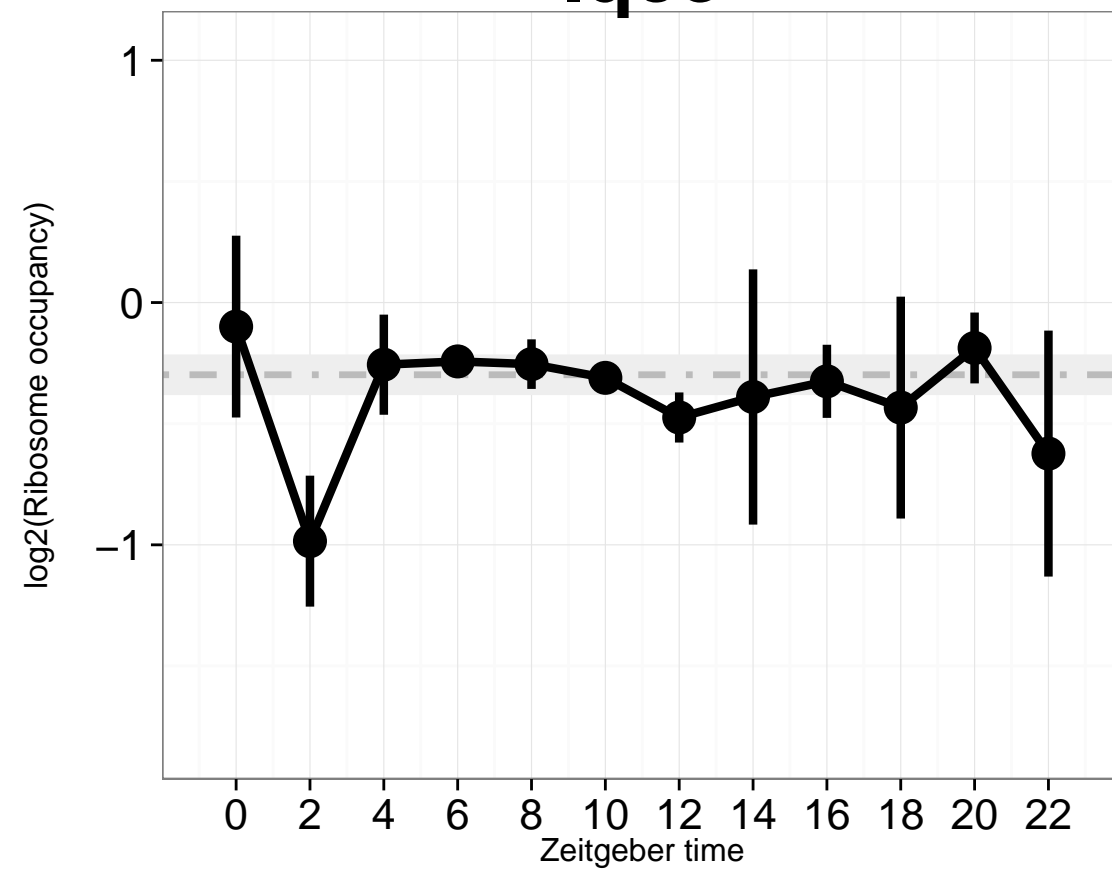

Supplement: SuppDataset_1.zip [file Iqce_set_A.pdf › Supplemental Dataset 1/A-mRNA_nonrhyth_translation_nonrhyth/Iqce_set_A.pdf]

# lqgap1

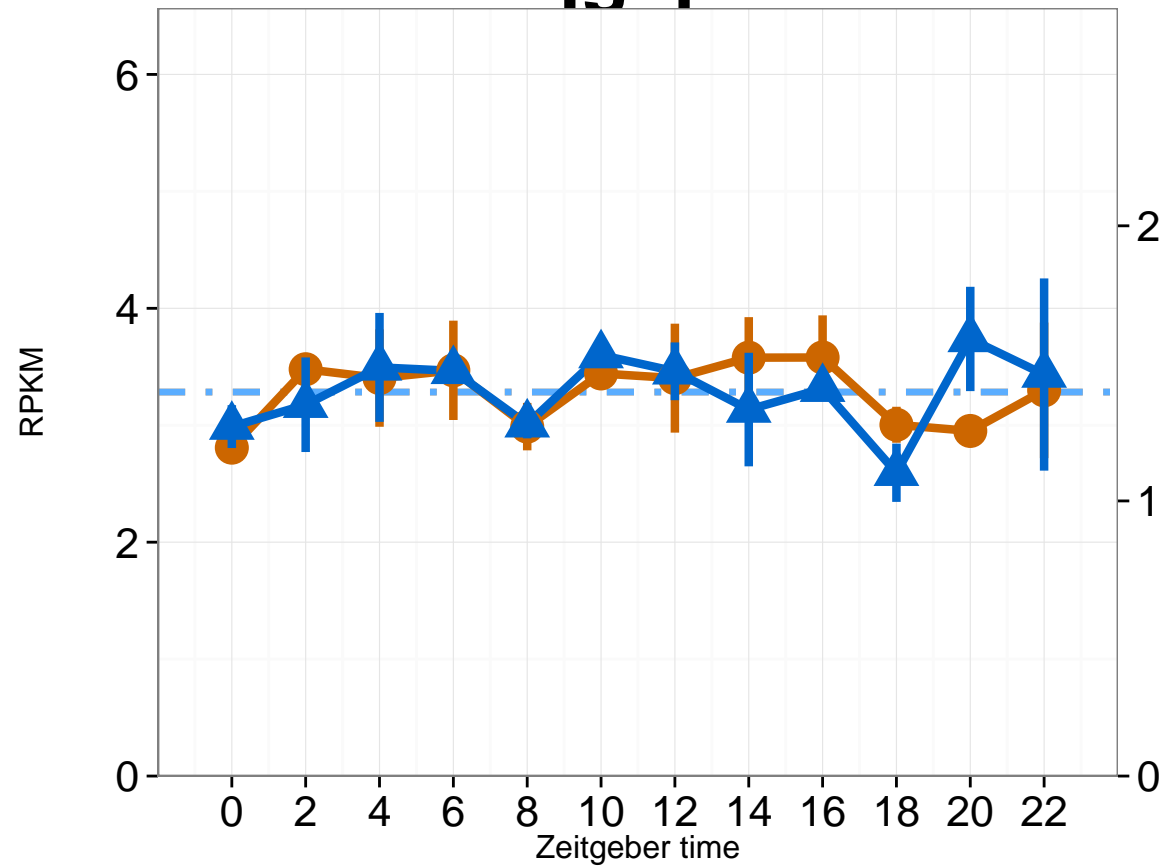

# lqgap1

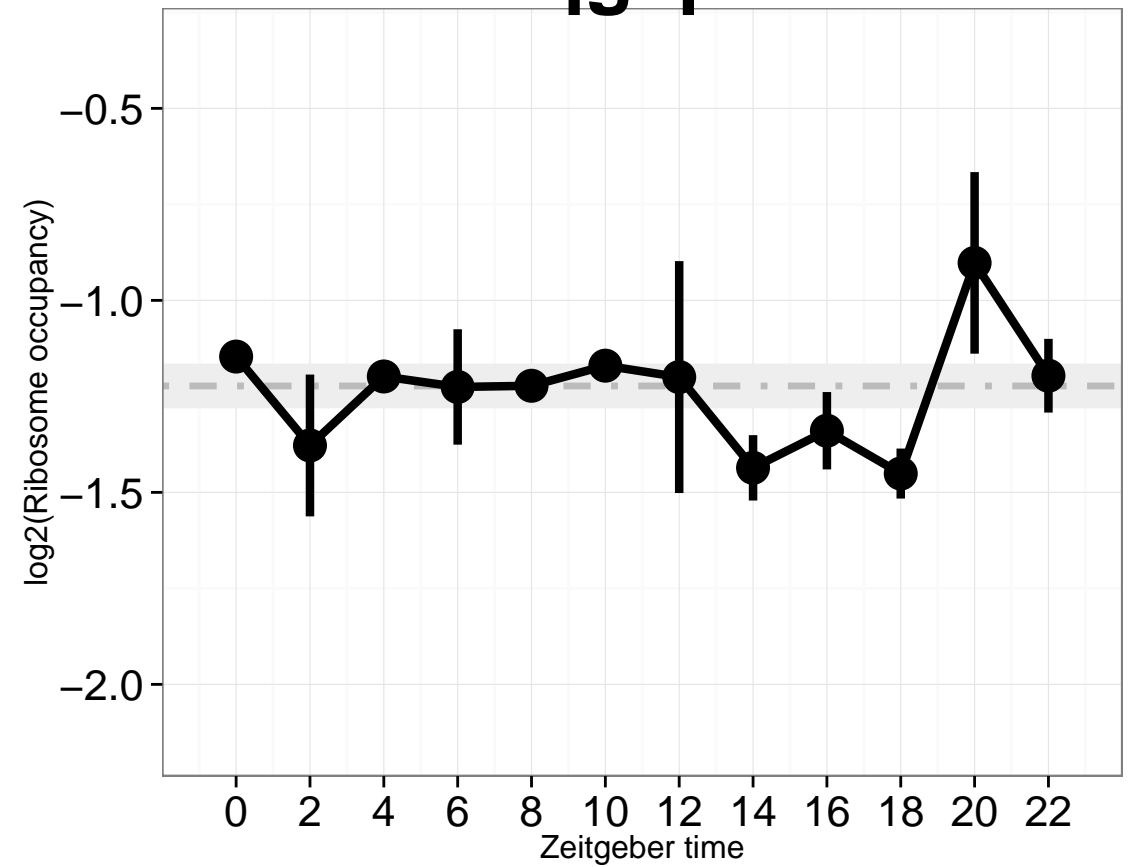

Supplement: SuppDataset_1.zip [file Iqgap1_set_A.pdf › Supplemental Dataset 1/A-mRNA_nonrhyth_translation_nonrhyth/Iqgap1_set_A.pdf]

## lqgap2

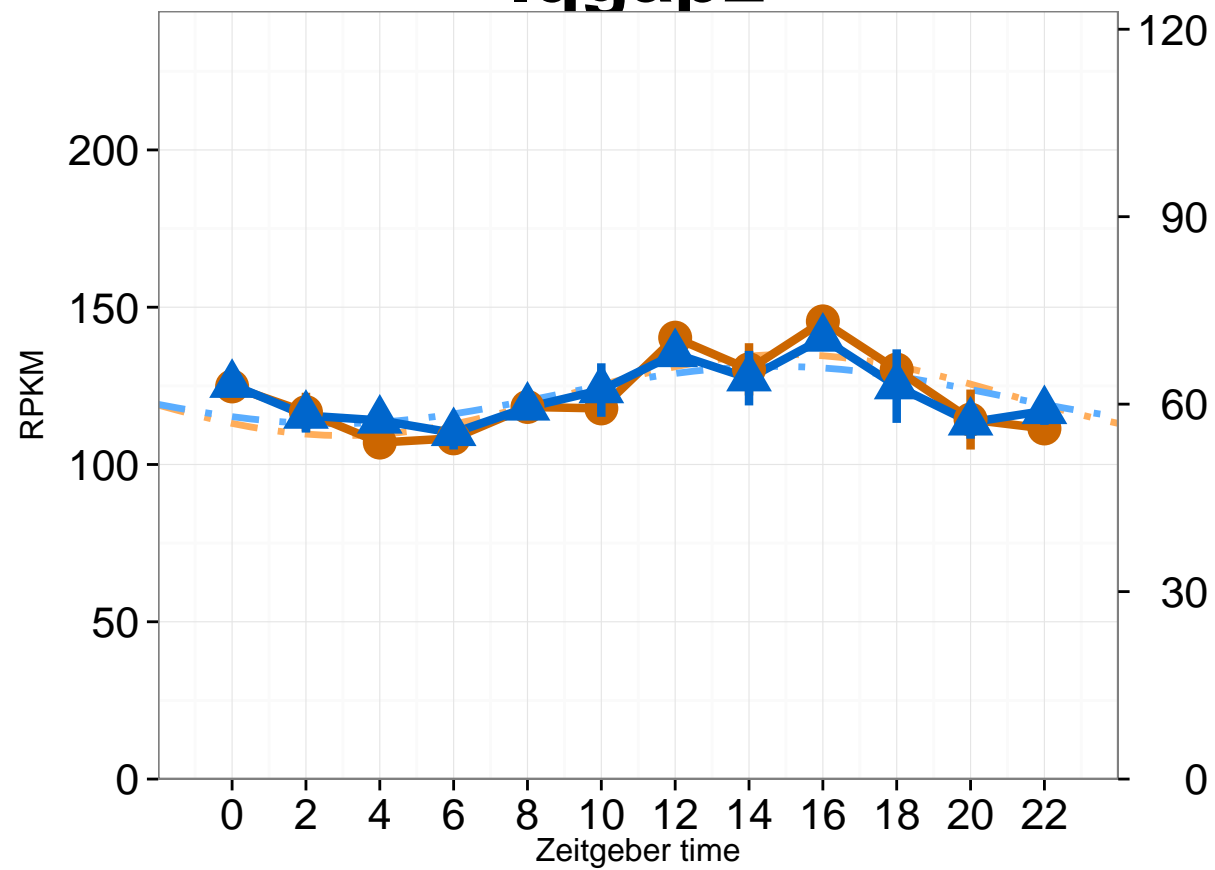

## lqgap2

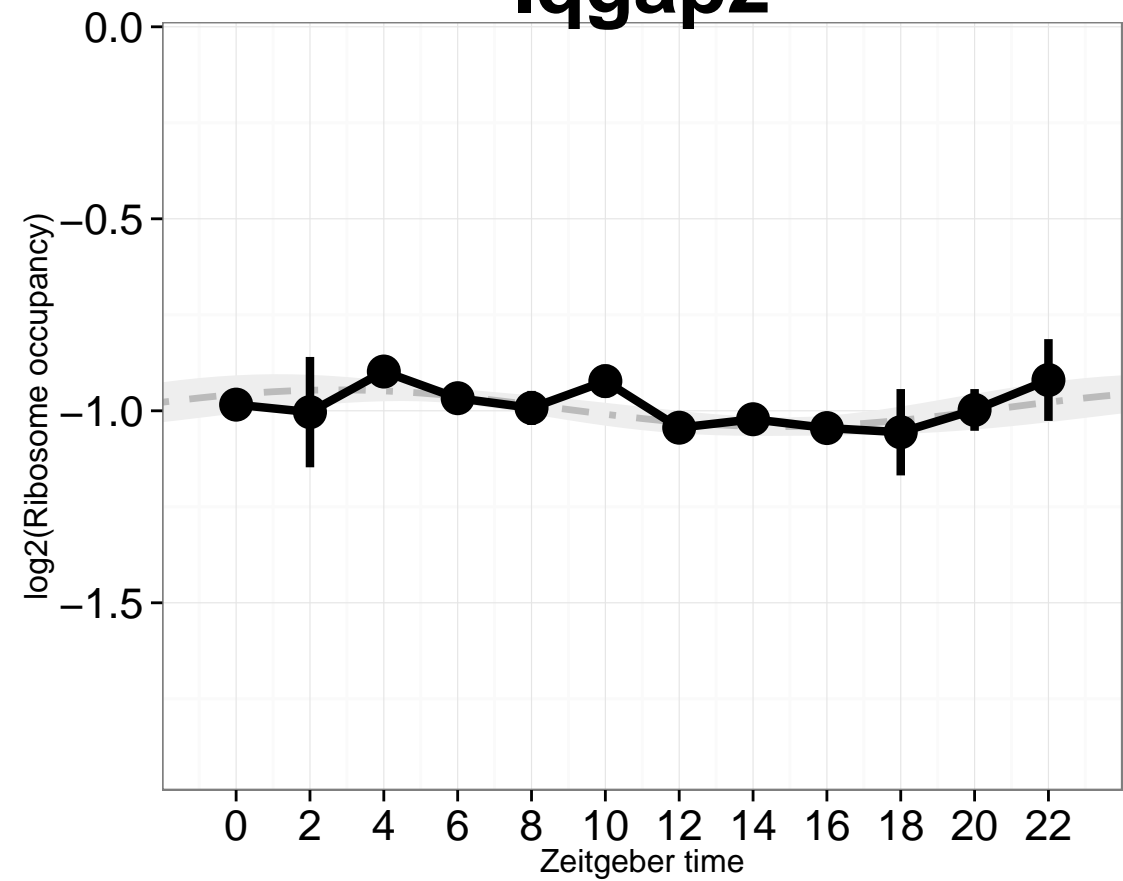

Supplement: SuppDataset_1.zip [file Iqgap2_set_A.pdf › Supplemental Dataset 1/A-mRNA_nonrhyth_translation_nonrhyth/Iqgap2_set_A.pdf]

## lqsec1

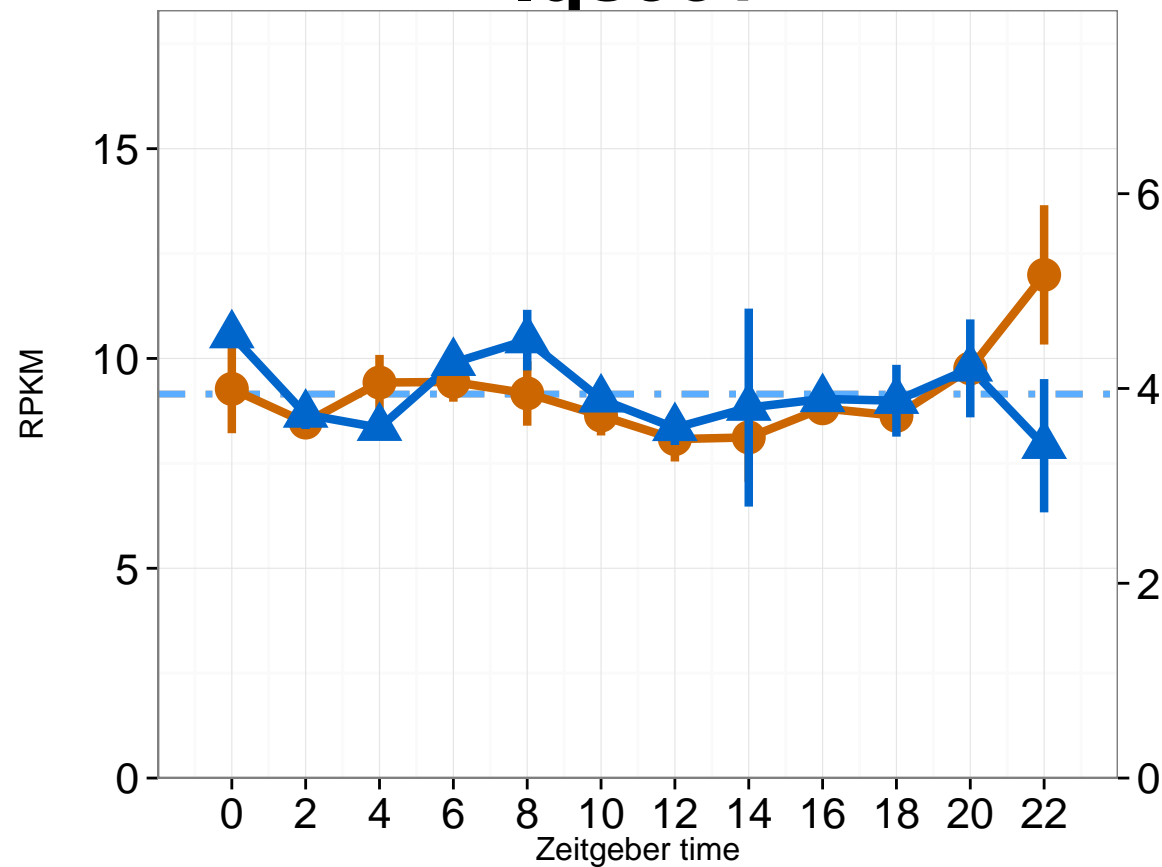

## lqsec1

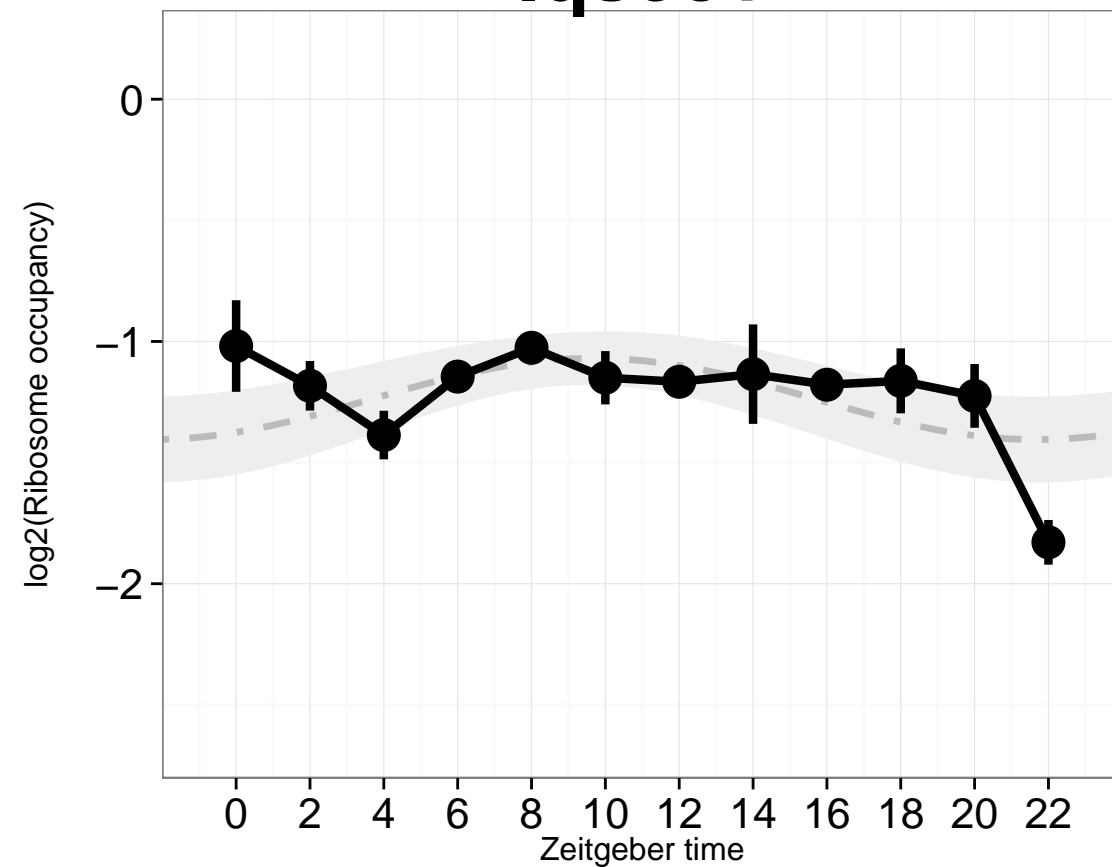

Supplement: SuppDataset_1.zip [file Iqsec1_set_A.pdf › Supplemental Dataset 1/A-mRNA_nonrhyth_translation_nonrhyth/Iqsec1_set_A.pdf]

# lqsec2

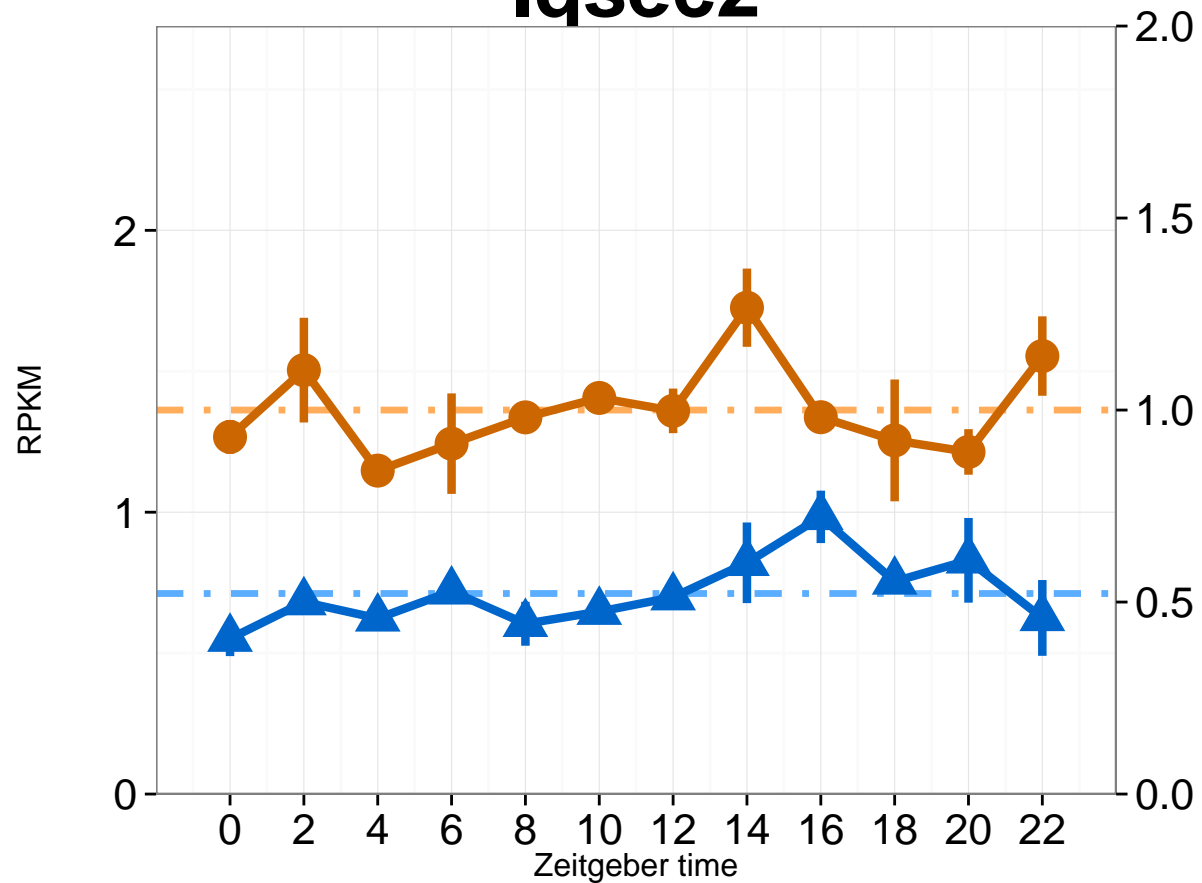

# lqsec2

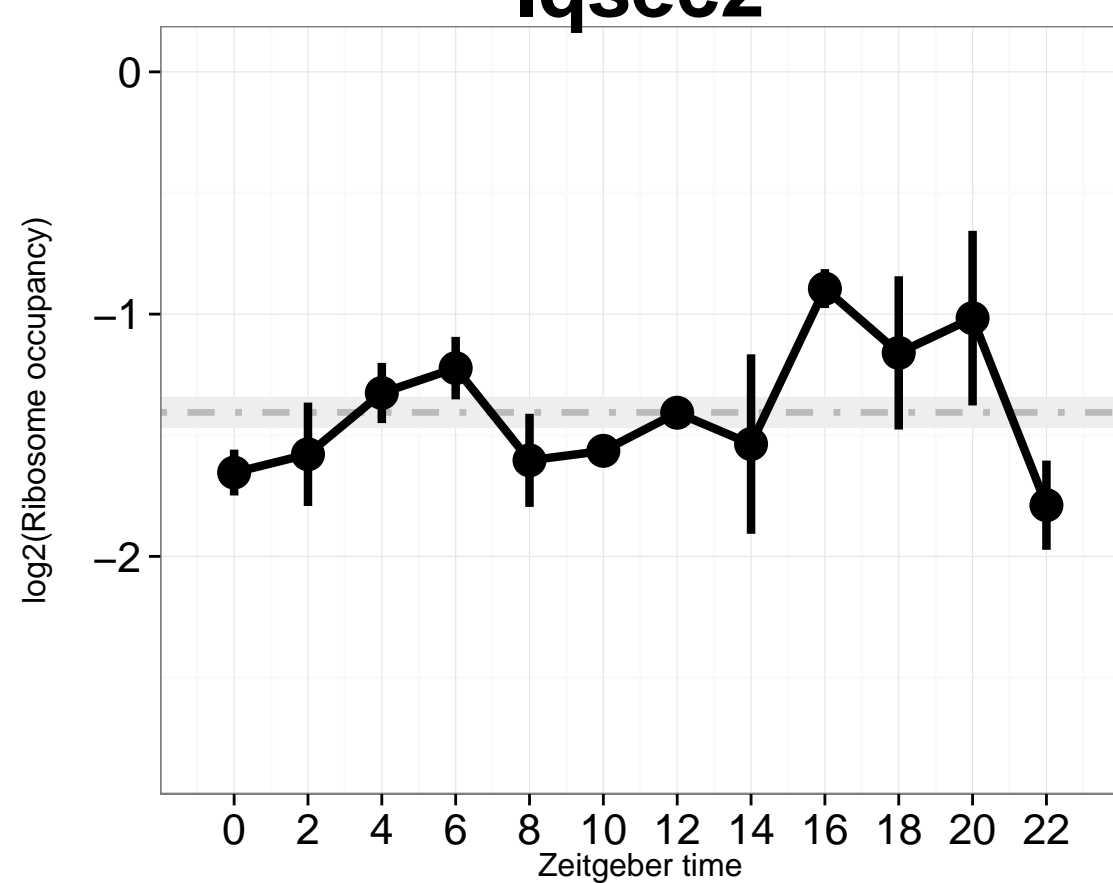

Supplement: SuppDataset_1.zip [file Iqsec2_set_A.pdf › Supplemental Dataset 1/A-mRNA_nonrhyth_translation_nonrhyth/Iqsec2_set_A.pdf]

## Irak1

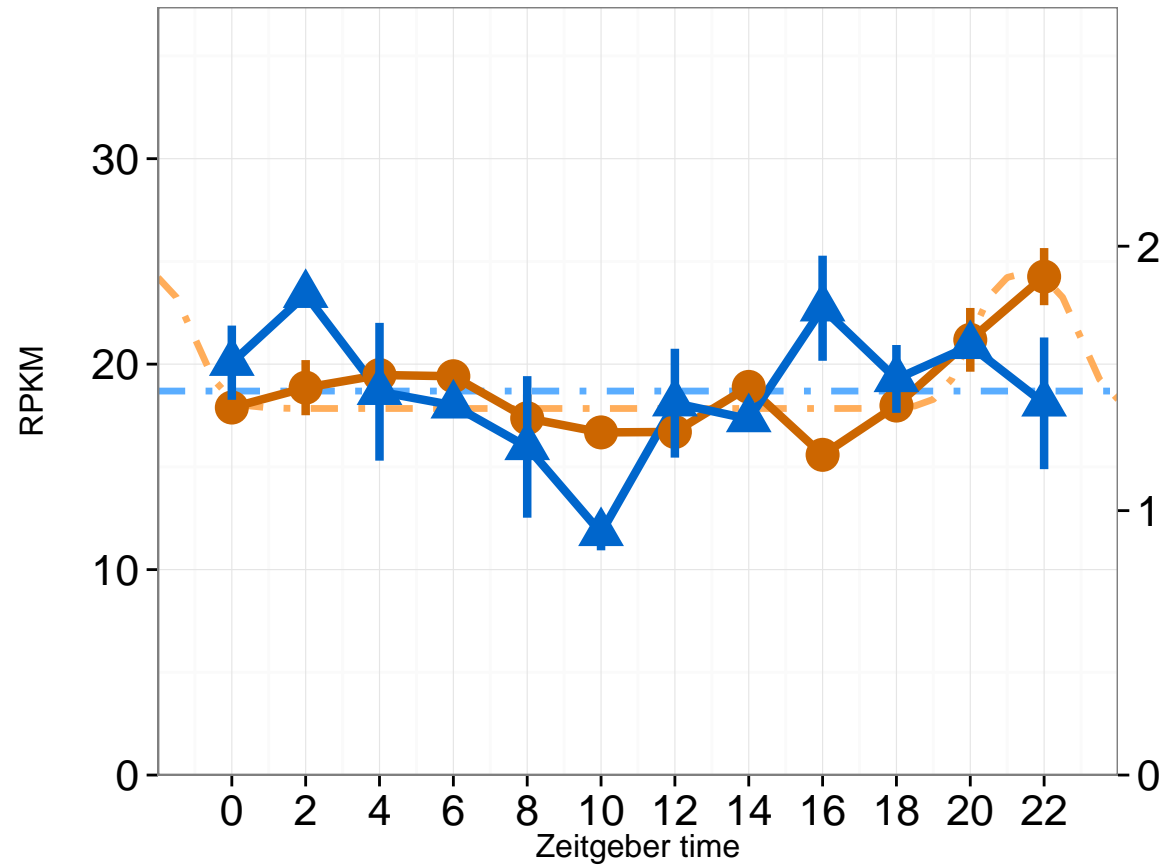

## Irak1

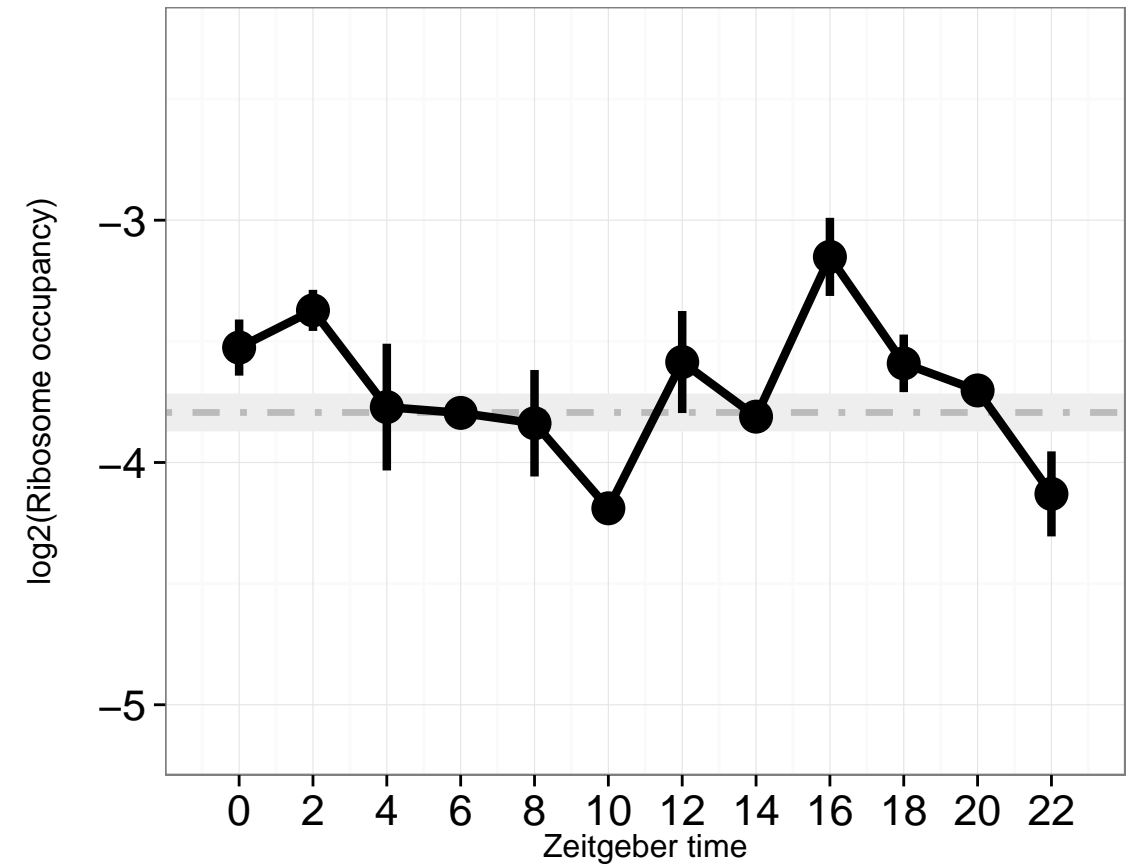

Supplement: SuppDataset_1.zip [file Irak1_set_A.pdf › Supplemental Dataset 1/A-mRNA_nonrhyth_translation_nonrhyth/Irak1_set_A.pdf]

## Irak2

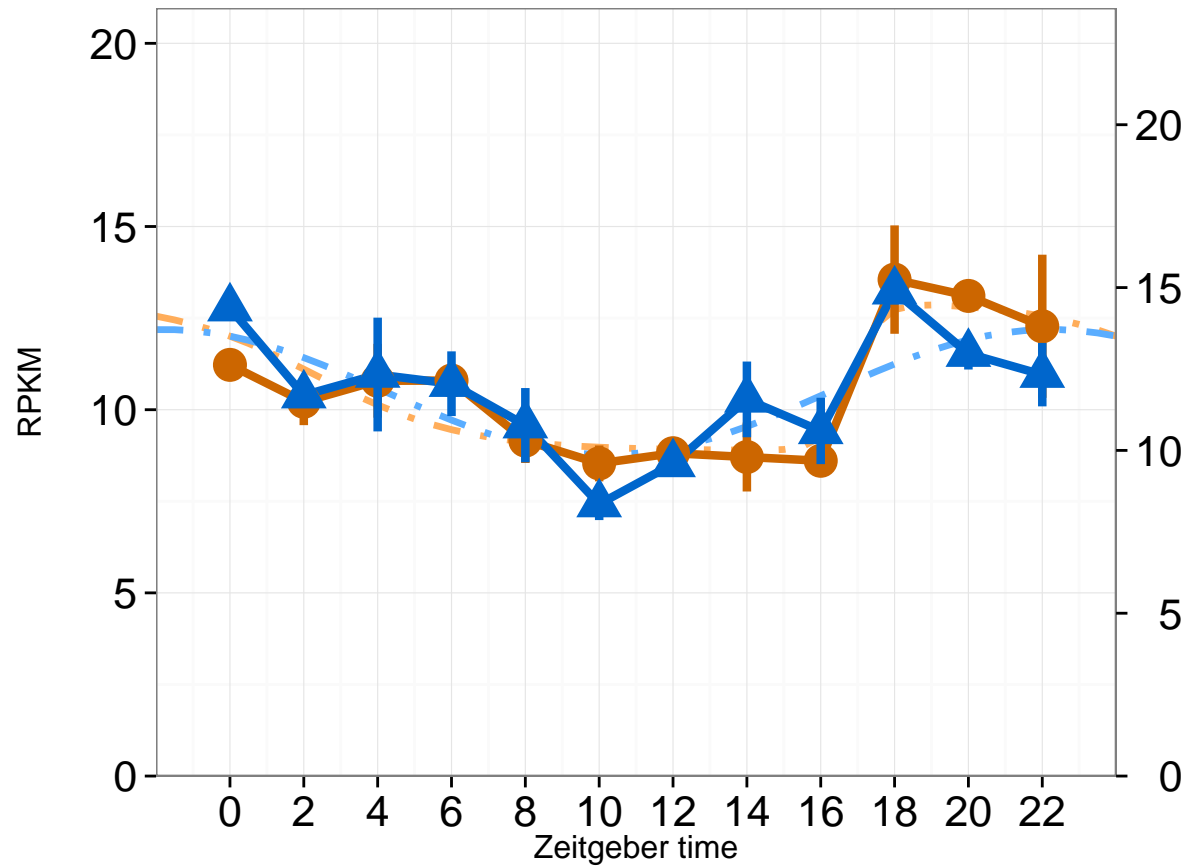

## Irak2

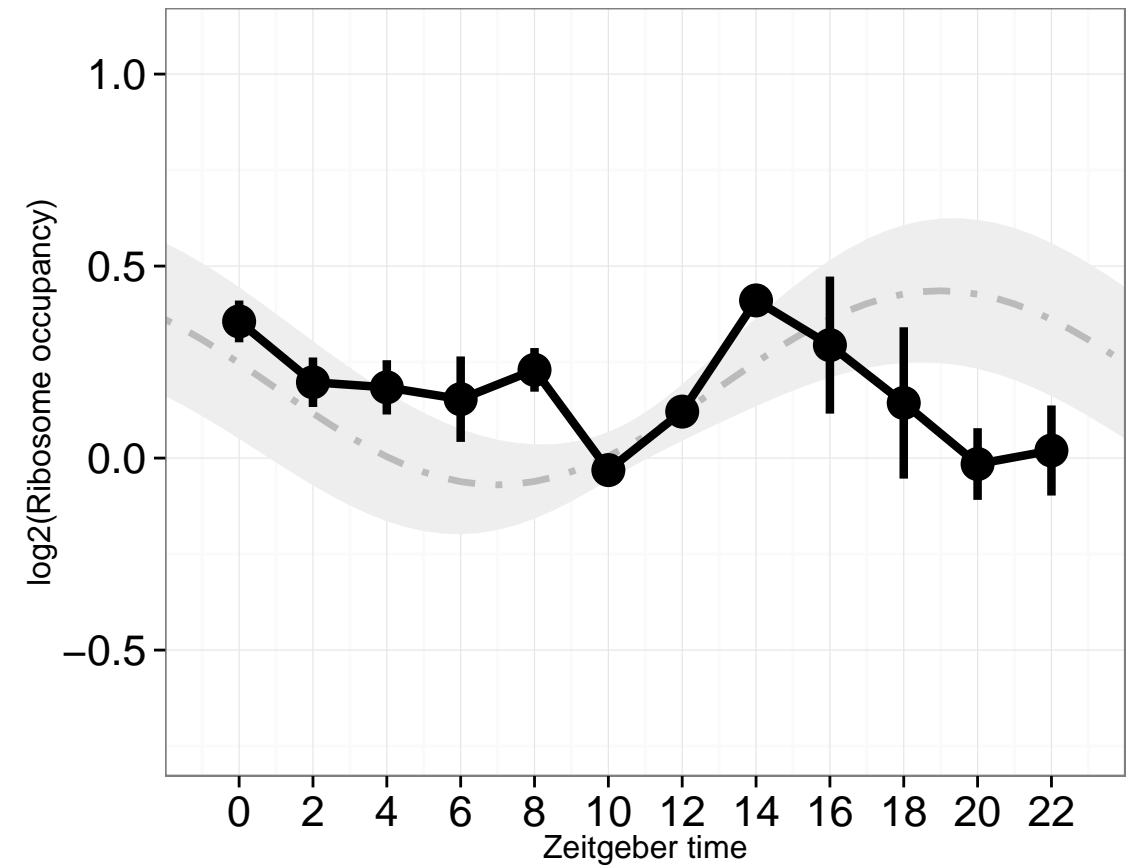

Supplement: SuppDataset_1.zip [file Irak2_set_A.pdf › Supplemental Dataset 1/A-mRNA_nonrhyth_translation_nonrhyth/Irak2_set_A.pdf]

## Irak3

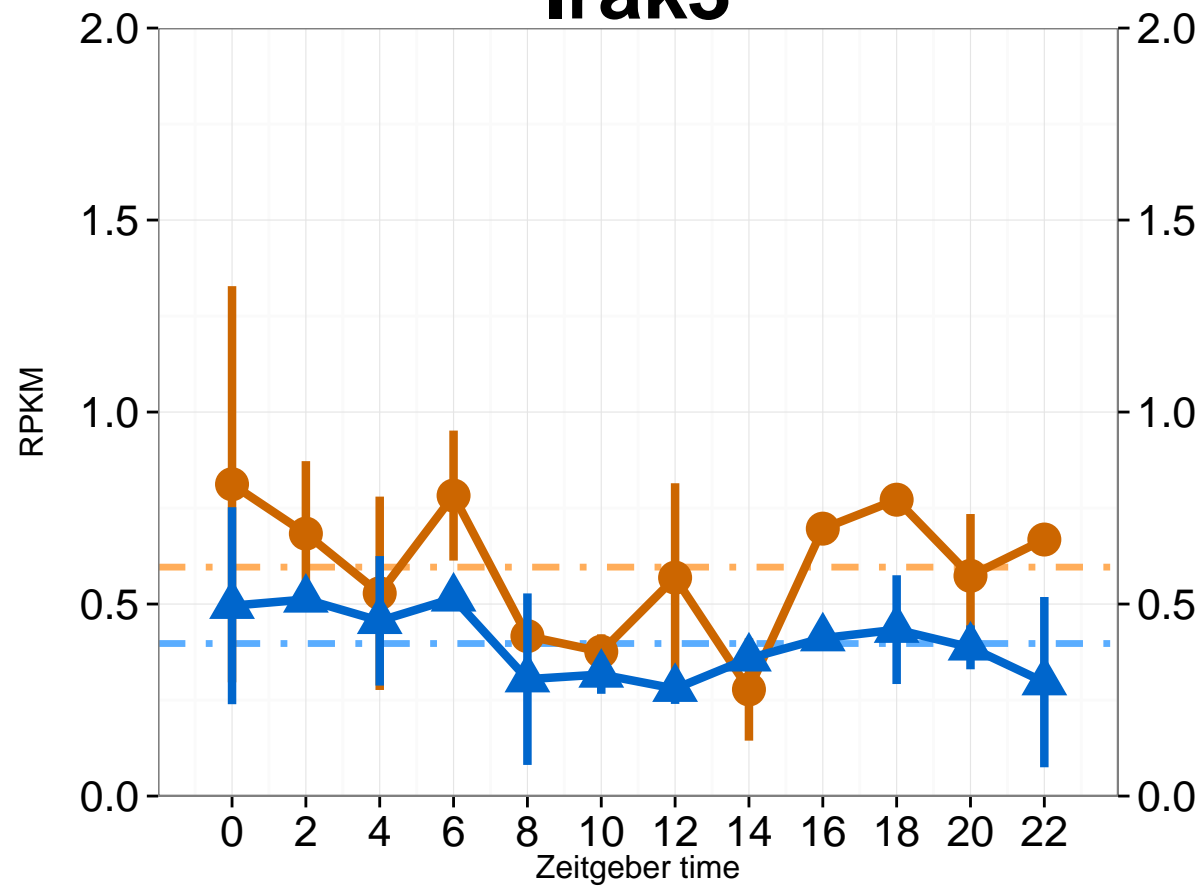

## Irak3

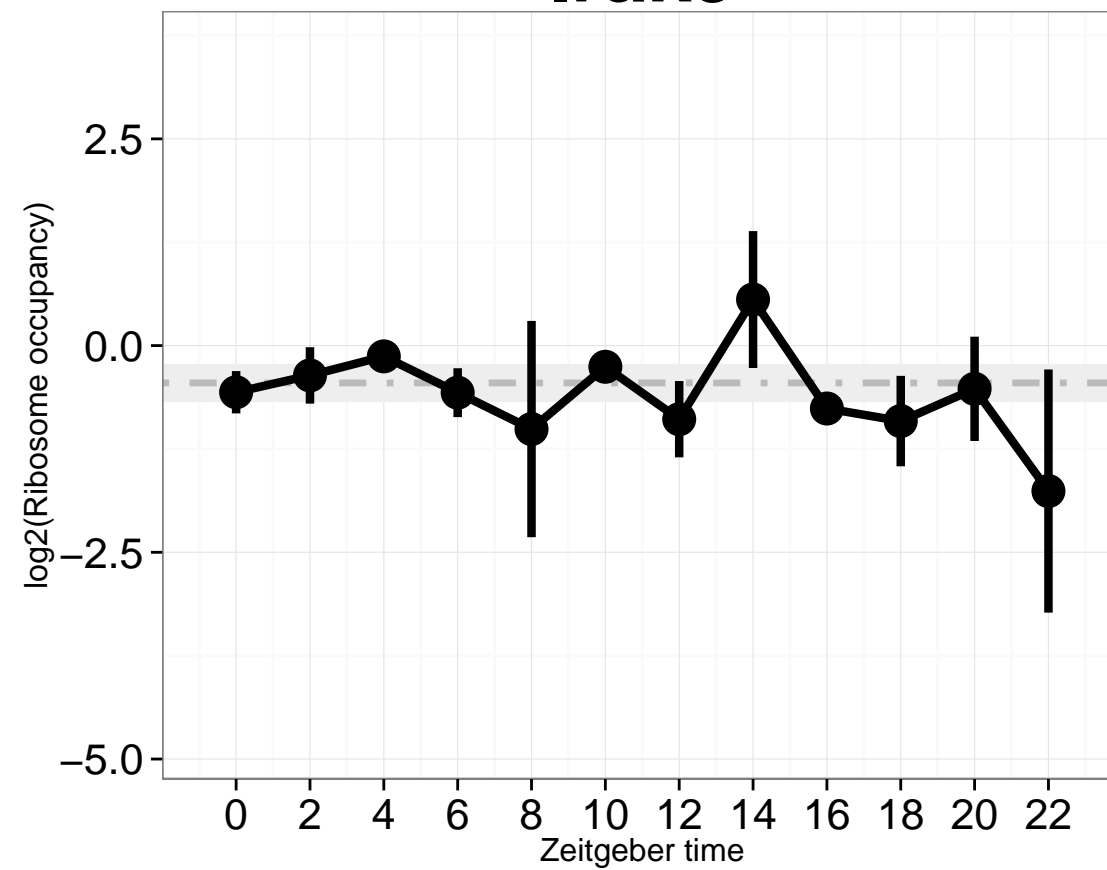

Supplement: SuppDataset_1.zip [file Irak3_set_A.pdf › Supplemental Dataset 1/A-mRNA_nonrhyth_translation_nonrhyth/Irak3_set_A.pdf]

## Irak4

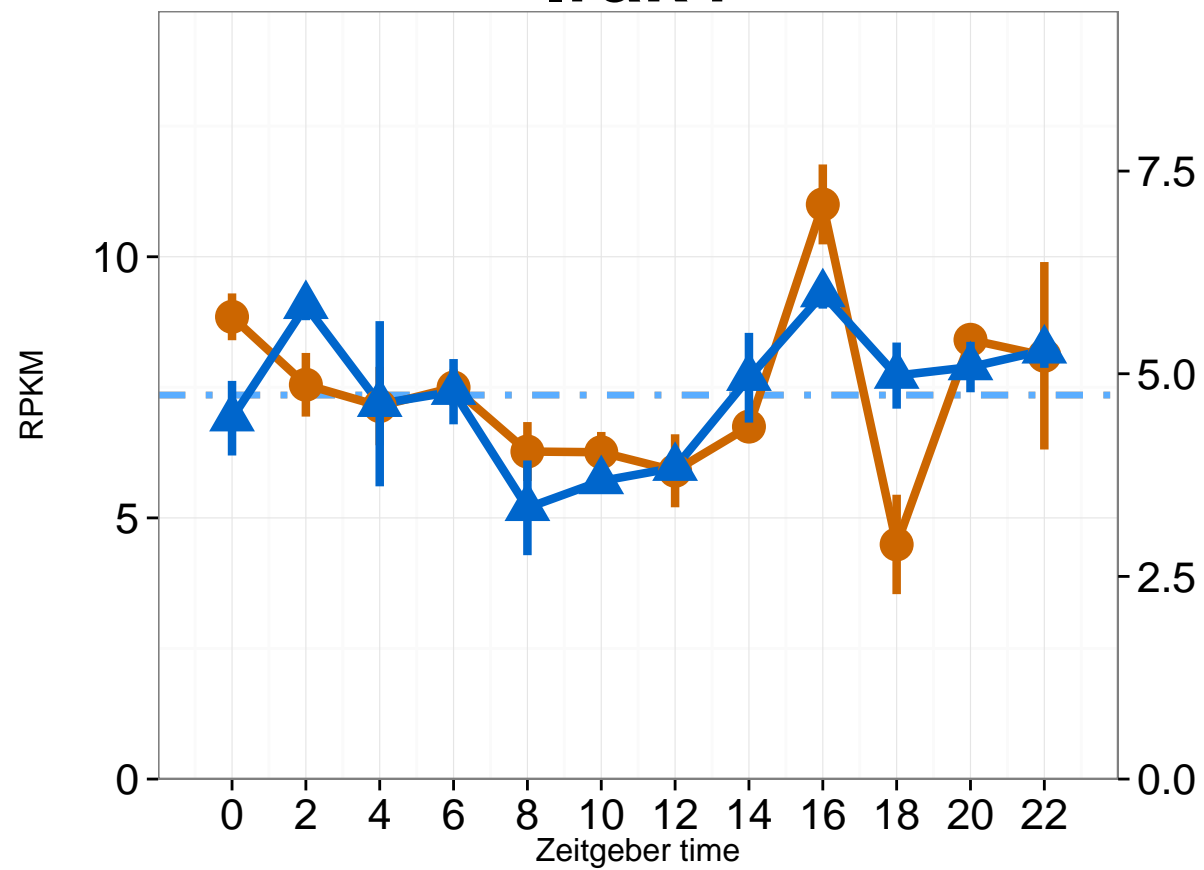

## Irak4

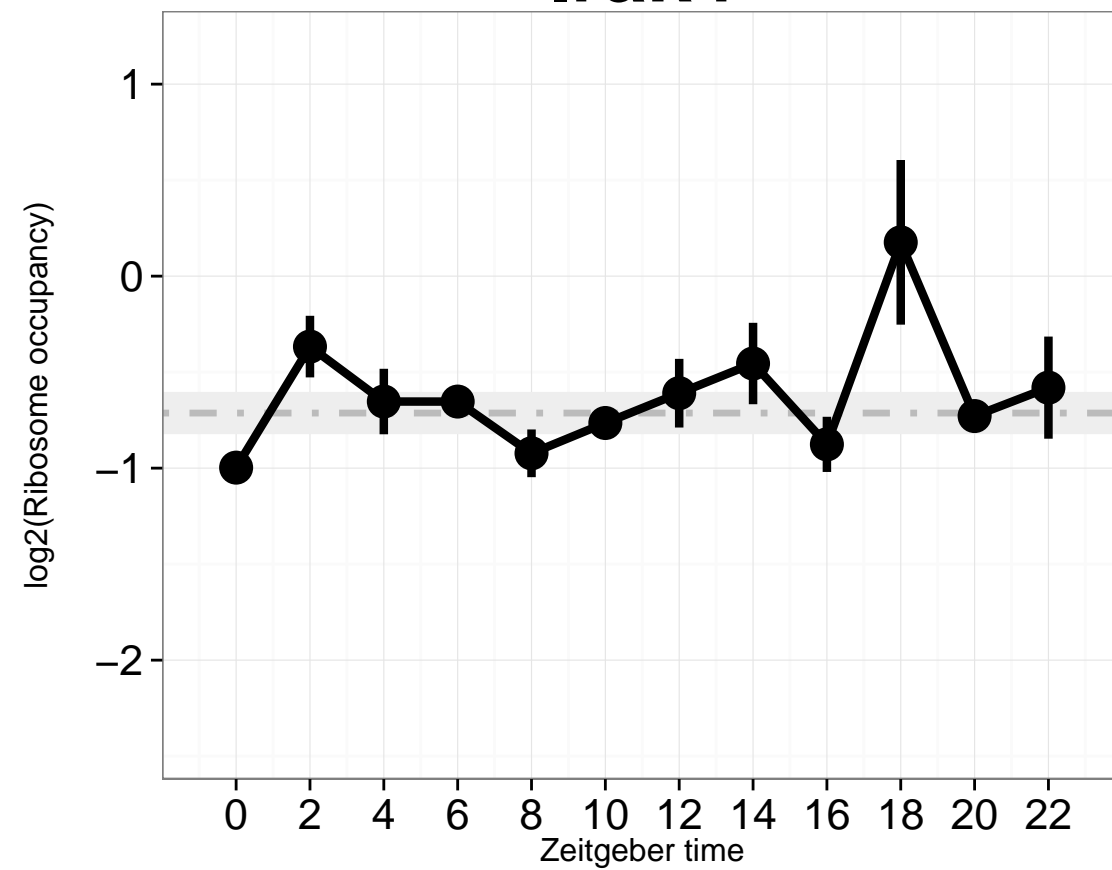

Supplement: SuppDataset_1.zip [file Irak4_set_A.pdf › Supplemental Dataset 1/A-mRNA_nonrhyth_translation_nonrhyth/Irak4_set_A.pdf]

## Ireb2

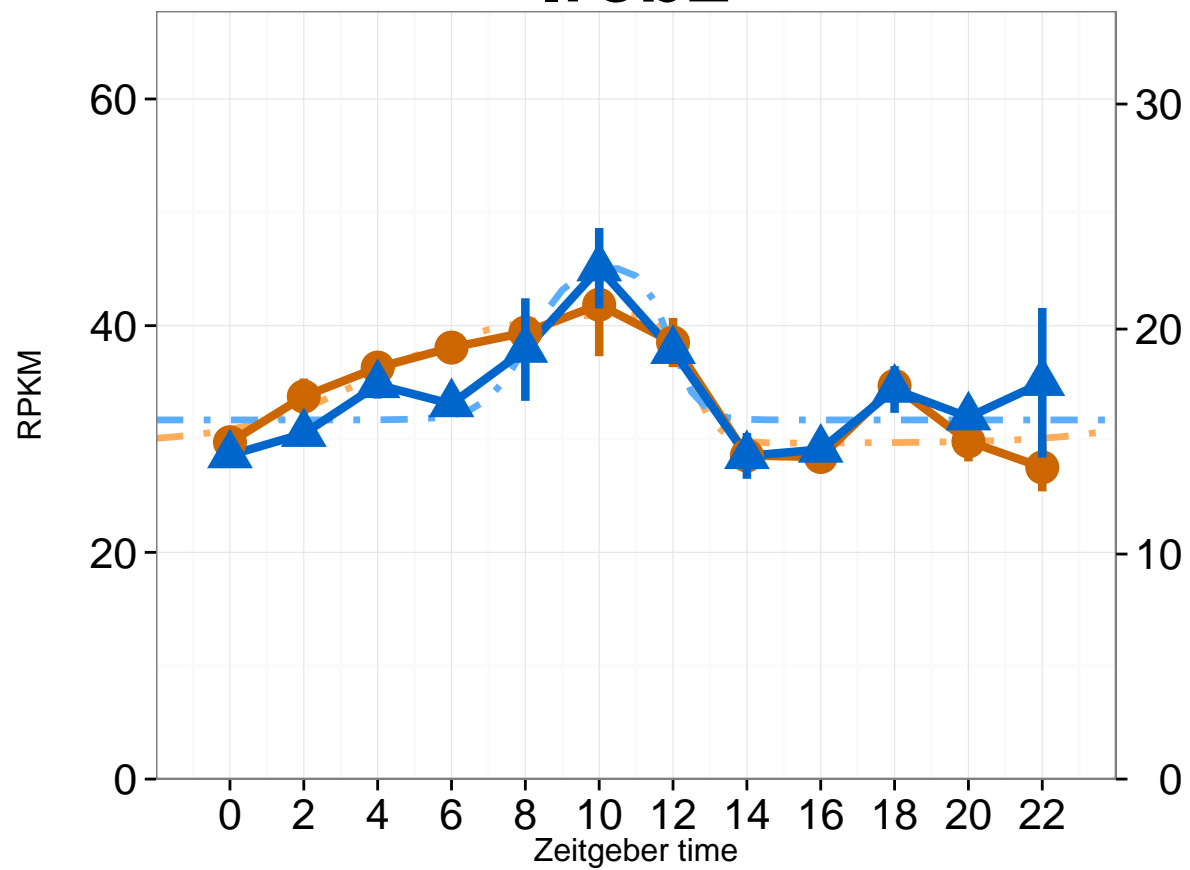

## Ireb2

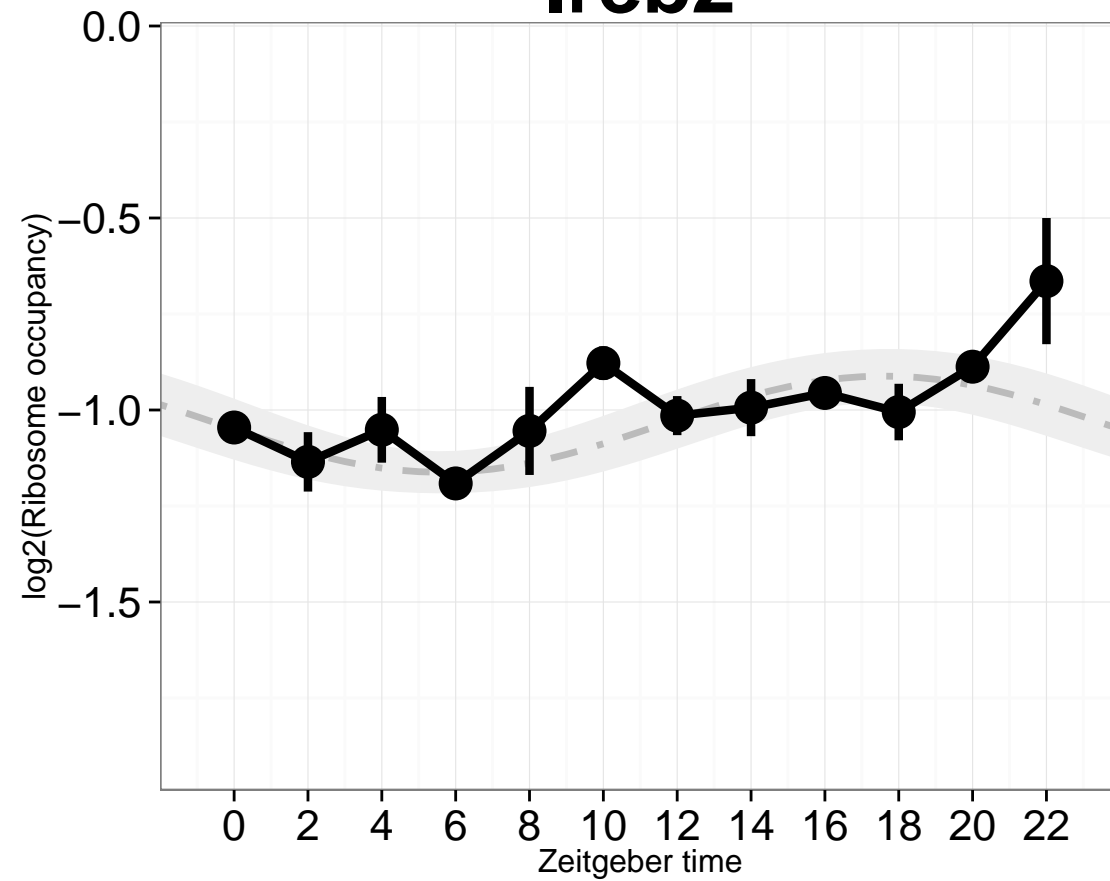

Supplement: SuppDataset_1.zip [file Ireb2_set_A.pdf › Supplemental Dataset 1/A-mRNA_nonrhyth_translation_nonrhyth/Ireb2_set_A.pdf]

## Irf1

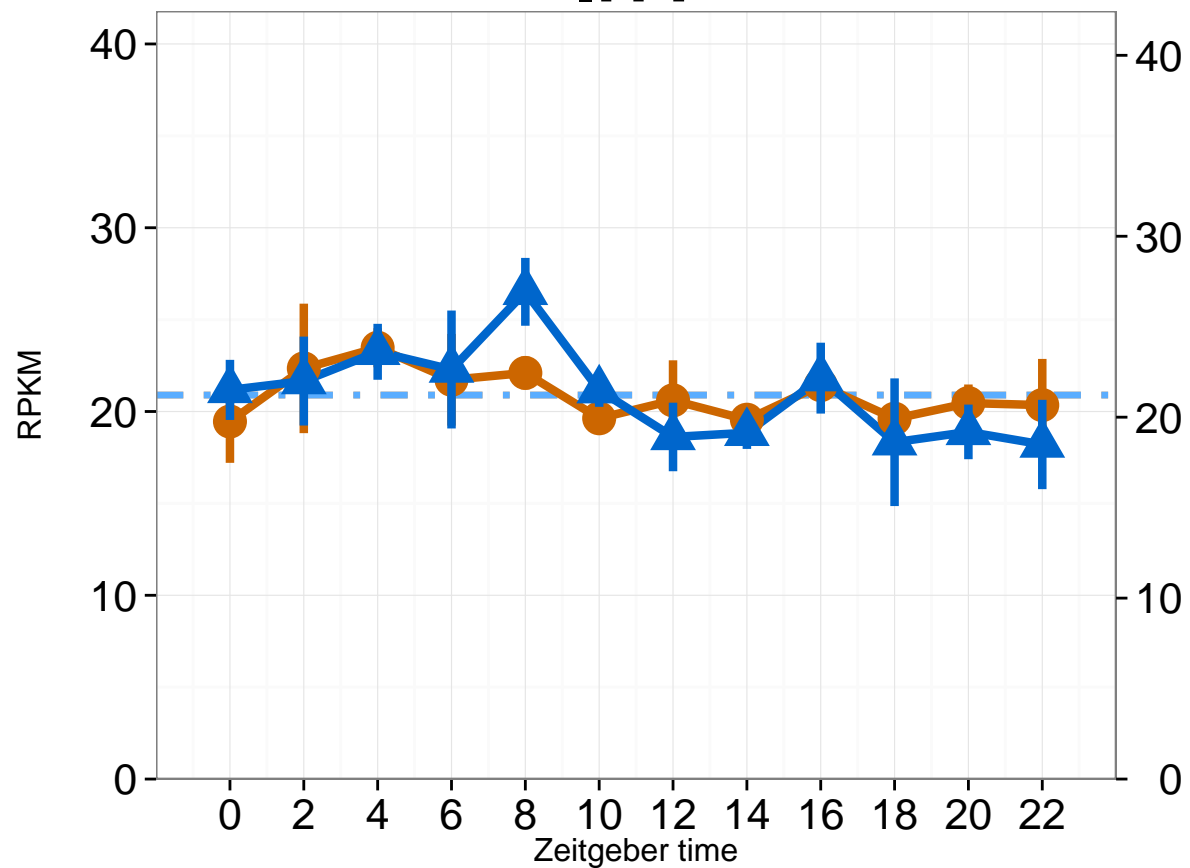

## Irf1

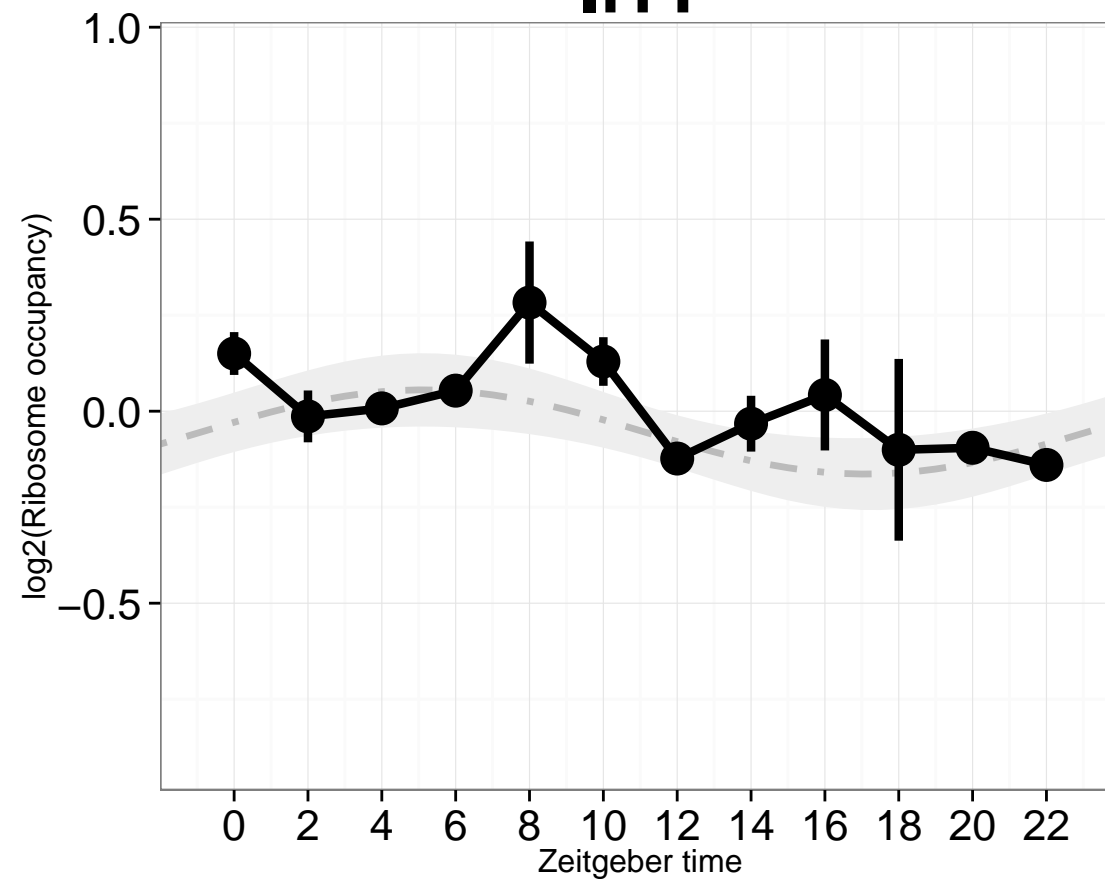

Supplement: SuppDataset_1.zip [file Irf1_set_A.pdf › Supplemental Dataset 1/A-mRNA_nonrhyth_translation_nonrhyth/Irf1_set_A.pdf]

## Irf2

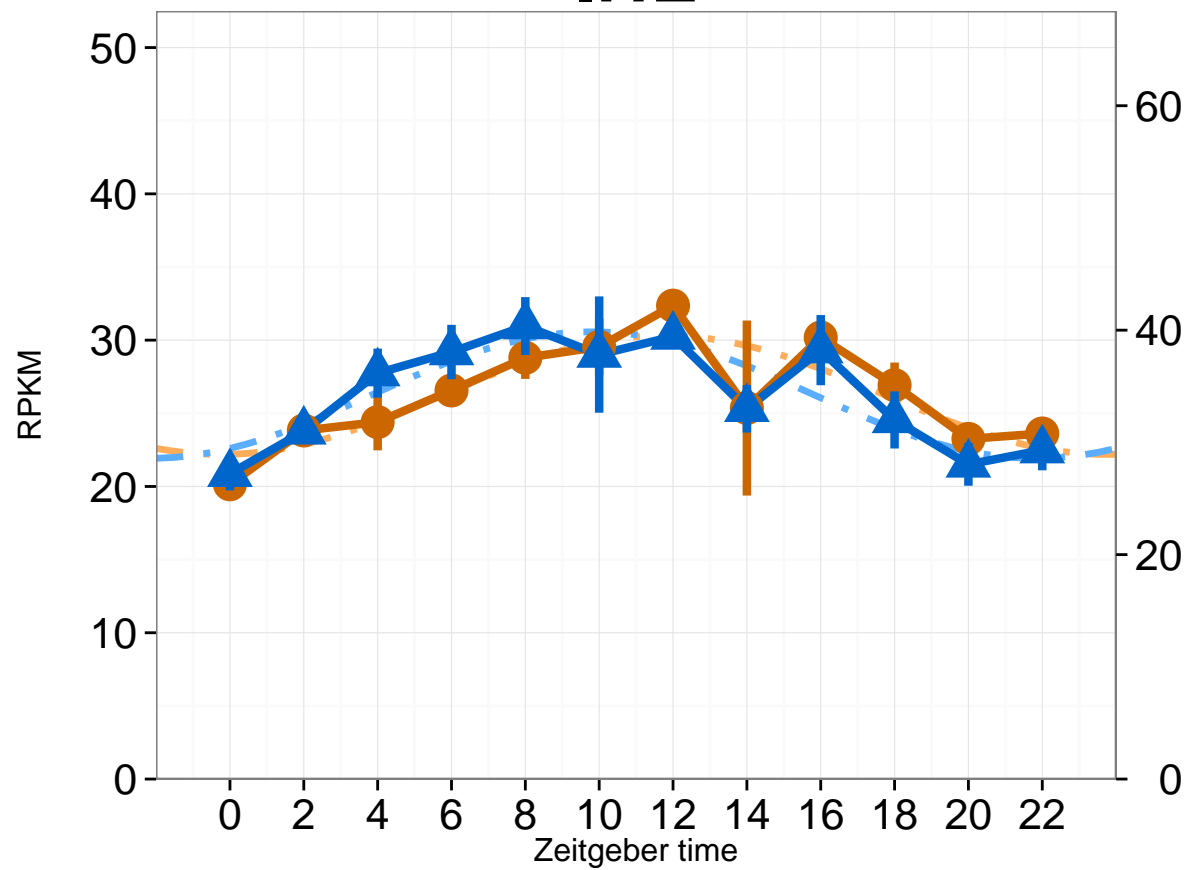

## Irf2

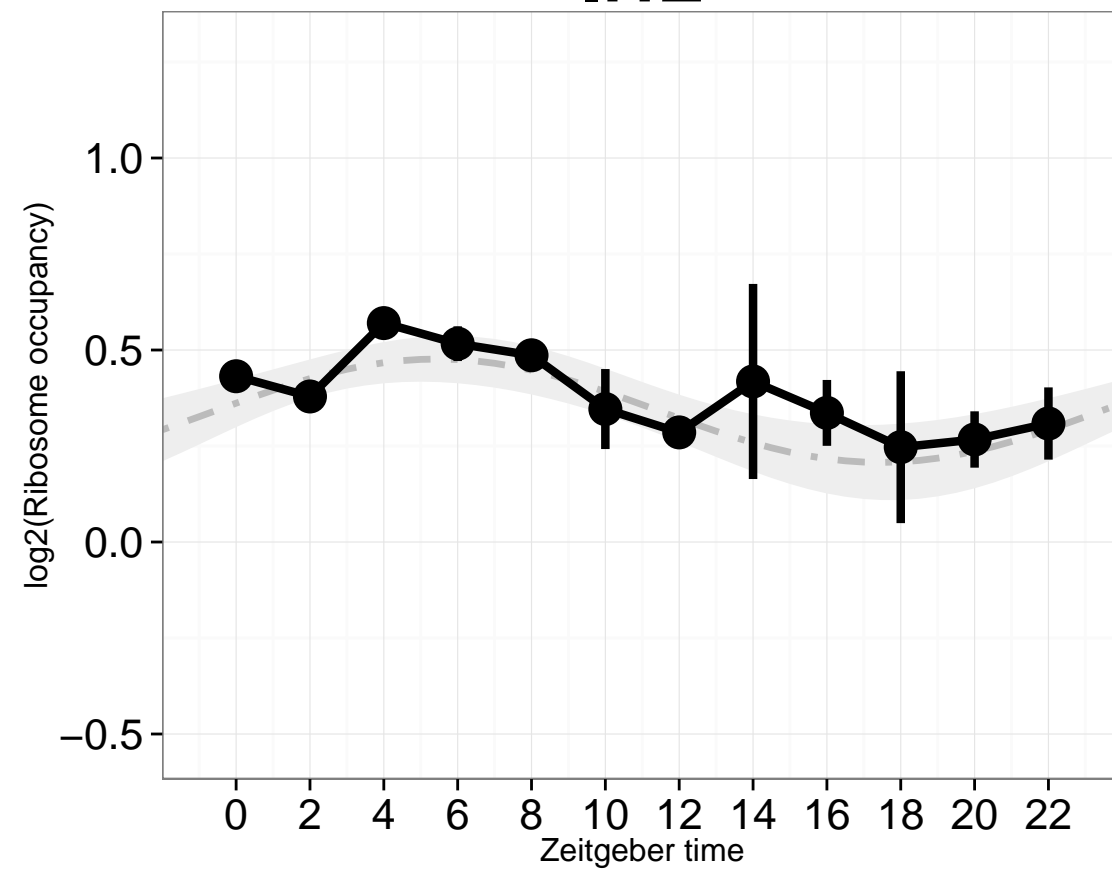

Supplement: SuppDataset_1.zip [file Irf2_set_A.pdf › Supplemental Dataset 1/A-mRNA_nonrhyth_translation_nonrhyth/Irf2_set_A.pdf]

# Irf2bp1

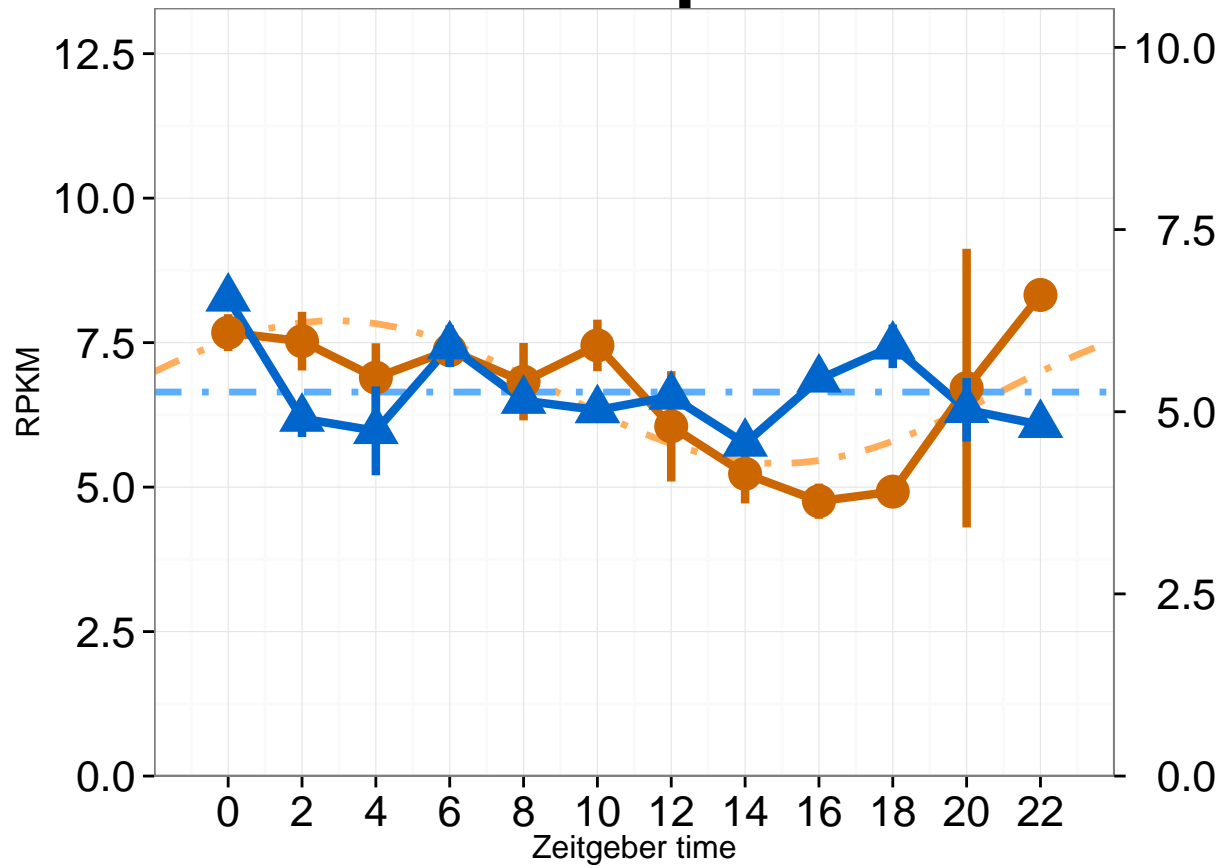

# Irf2bp1

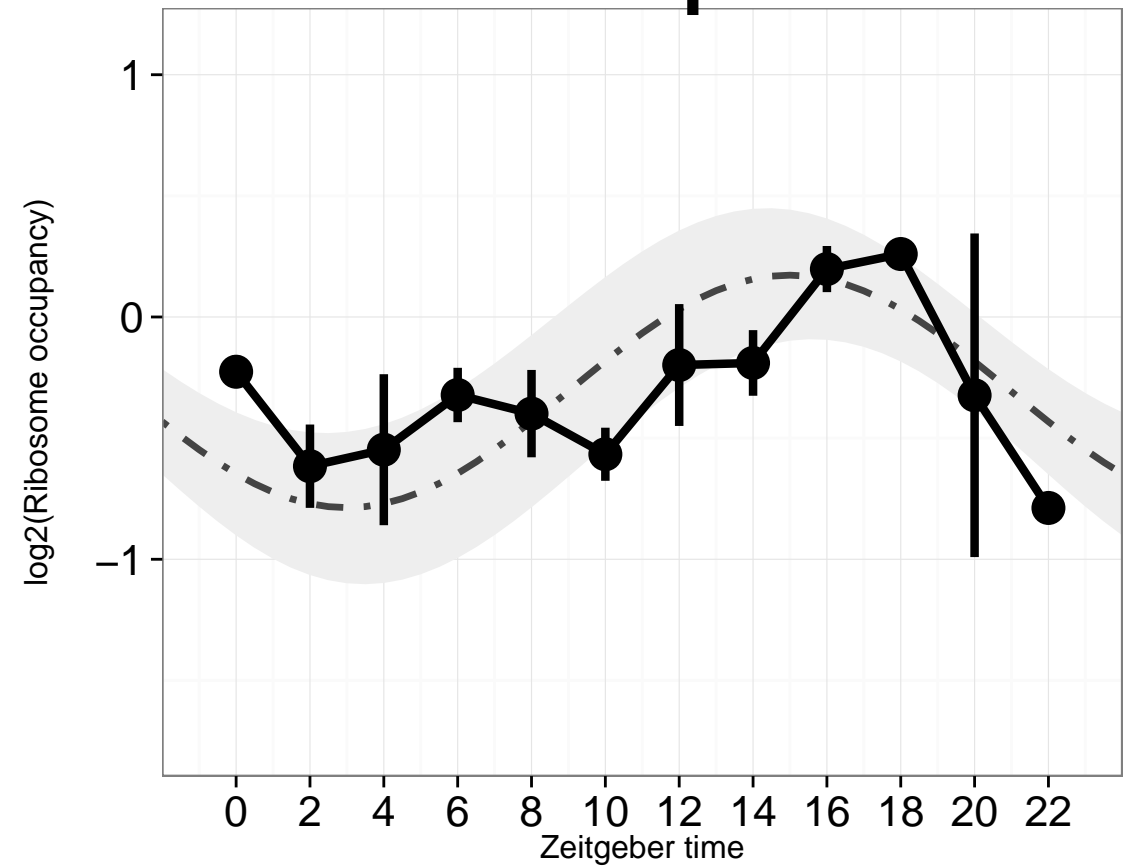

Supplement: SuppDataset_1.zip [file Irf2bp1_set_A.pdf › Supplemental Dataset 1/A-mRNA_nonrhyth_translation_nonrhyth/Irf2bp1_set_A.pdf]

# Irf2bpl

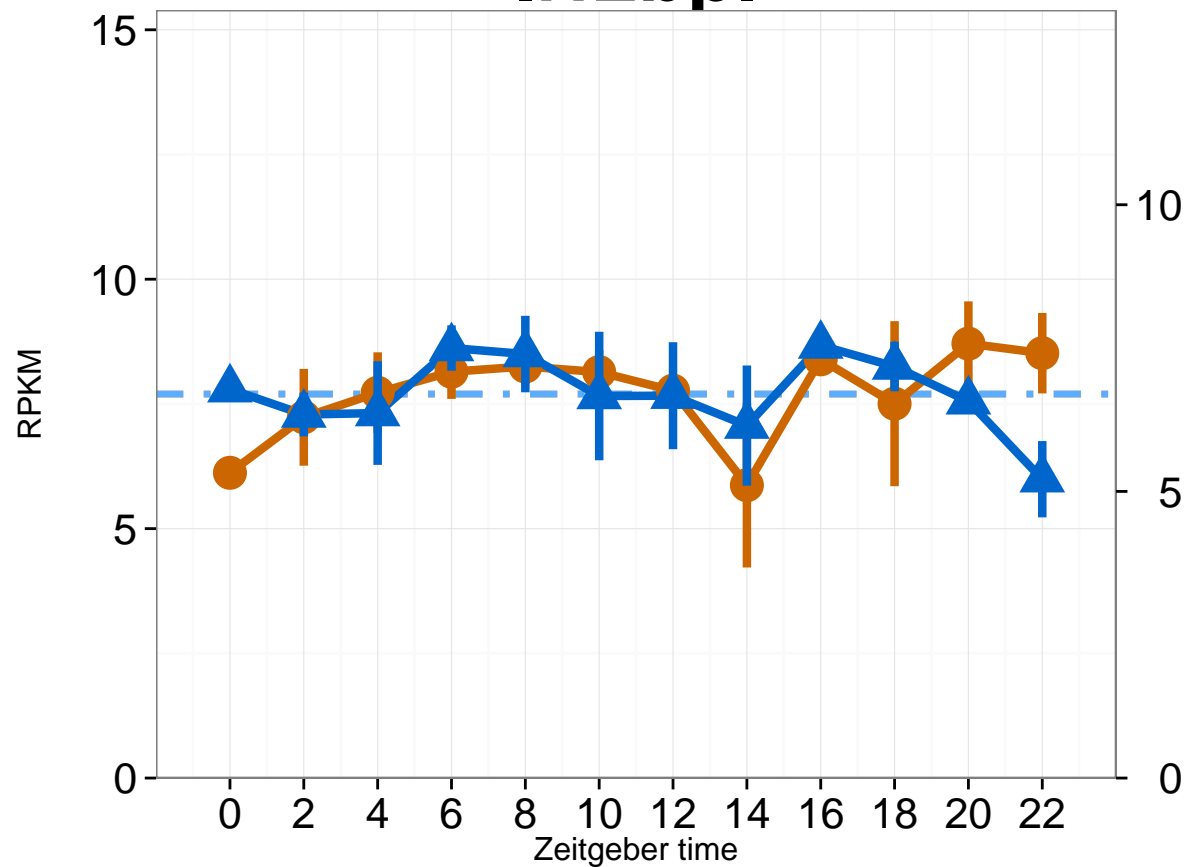

# Irf2bpl

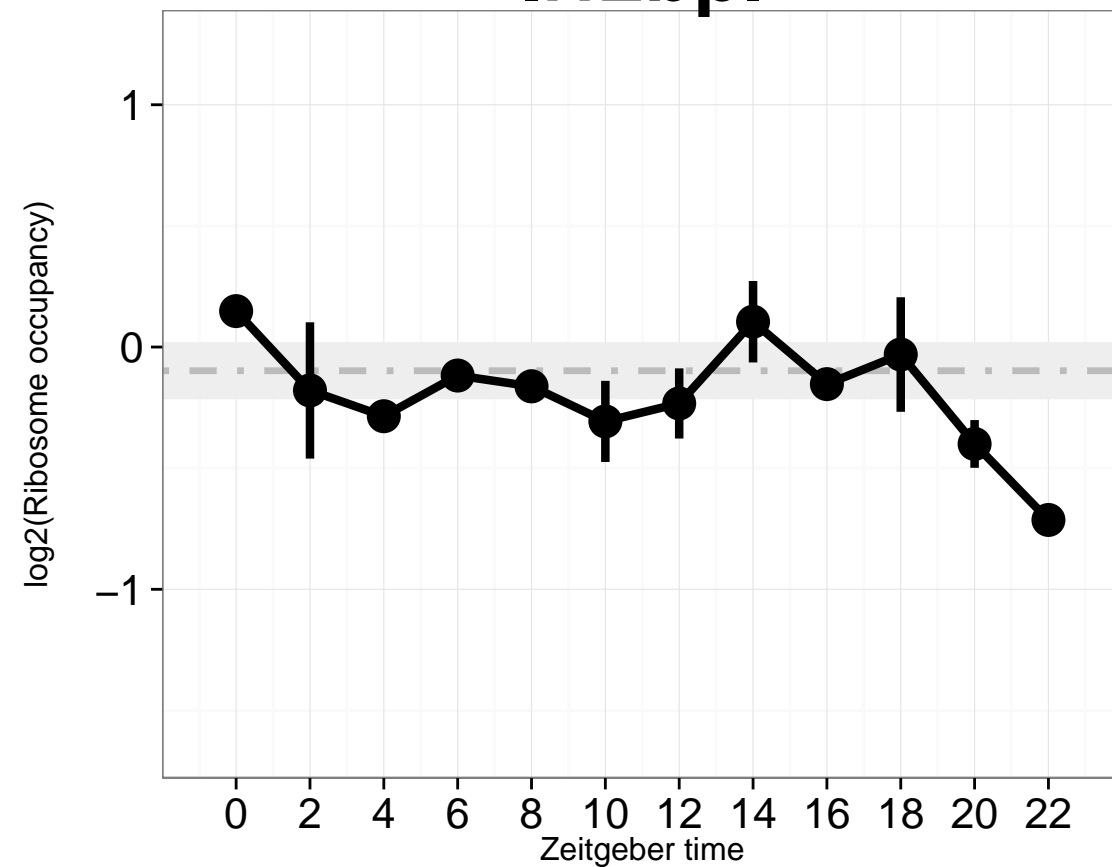

Supplement: SuppDataset_1.zip [file Irf2bpl_set_A.pdf › Supplemental Dataset 1/A-mRNA_nonrhyth_translation_nonrhyth/Irf2bpl_set_A.pdf]

## Irf3

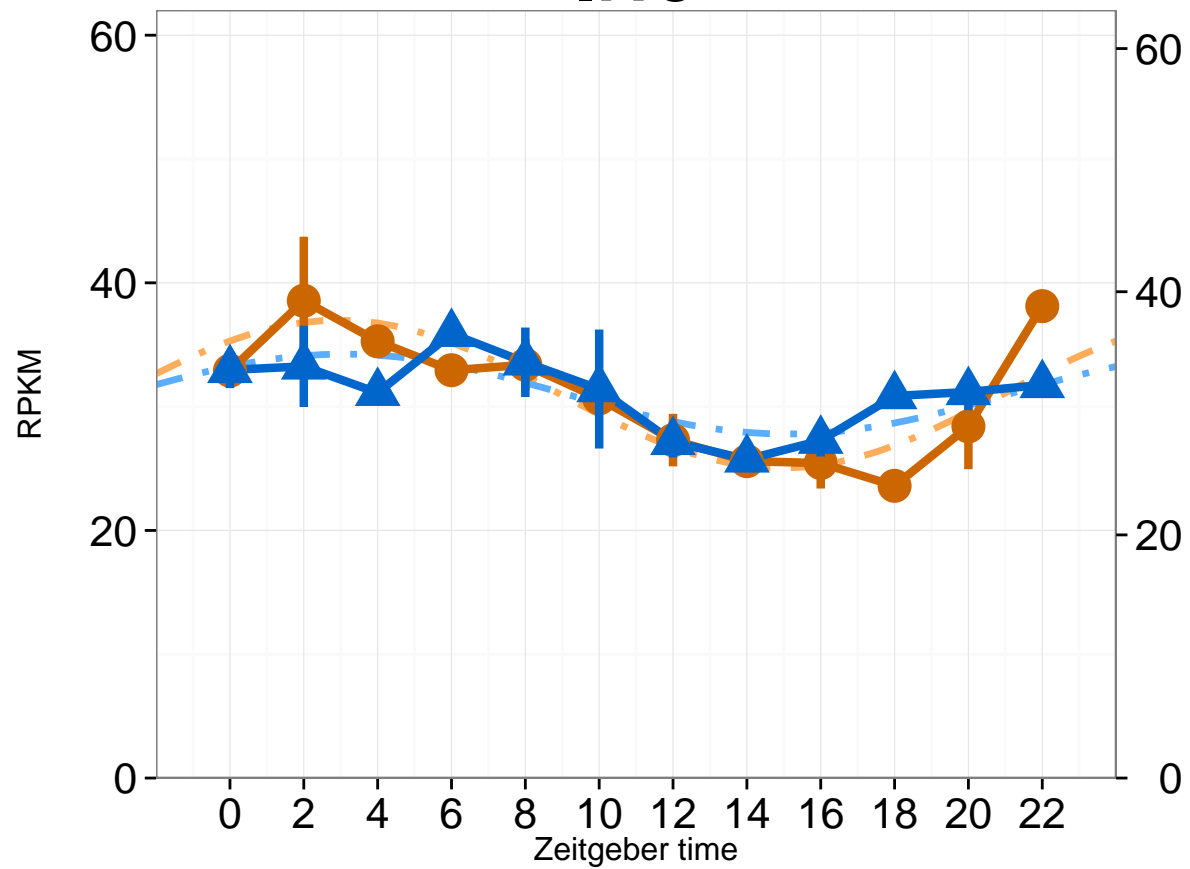

## Irf3

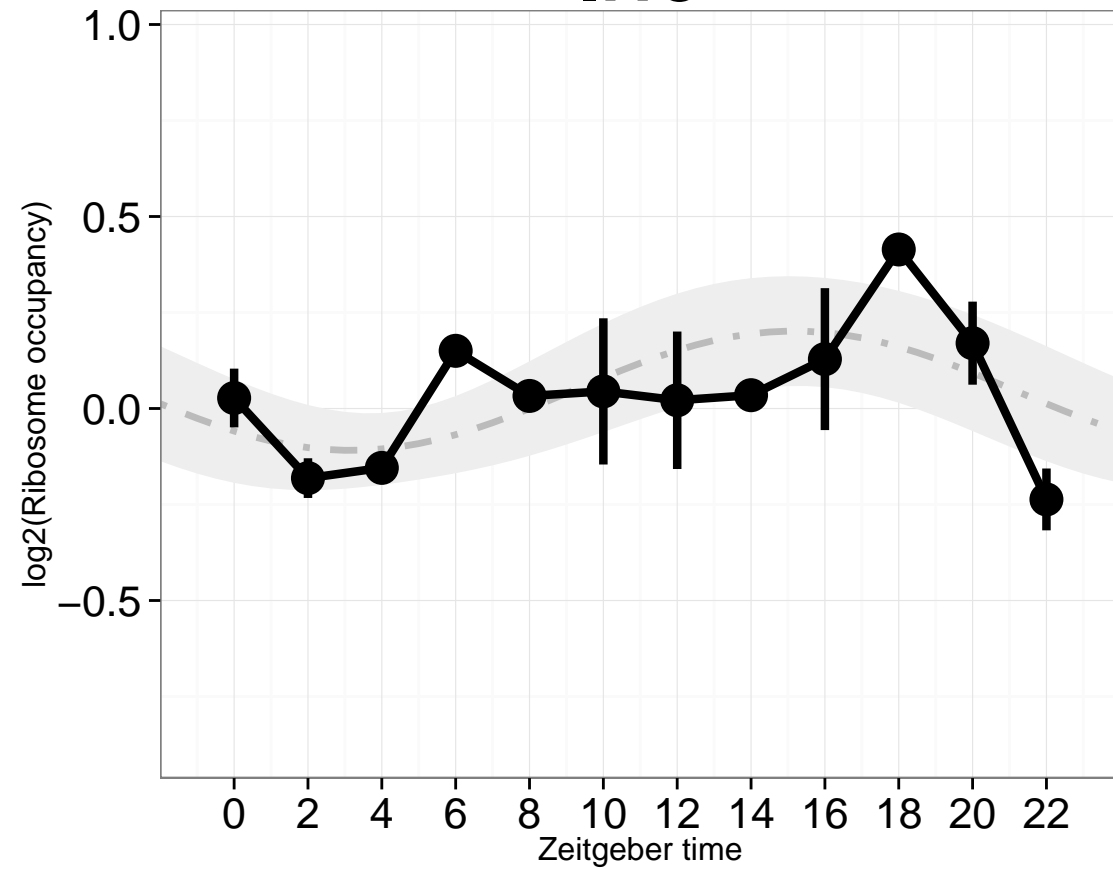

Supplement: SuppDataset_1.zip [file Irf3_set_A.pdf › Supplemental Dataset 1/A-mRNA_nonrhyth_translation_nonrhyth/Irf3_set_A.pdf]

## Isca1

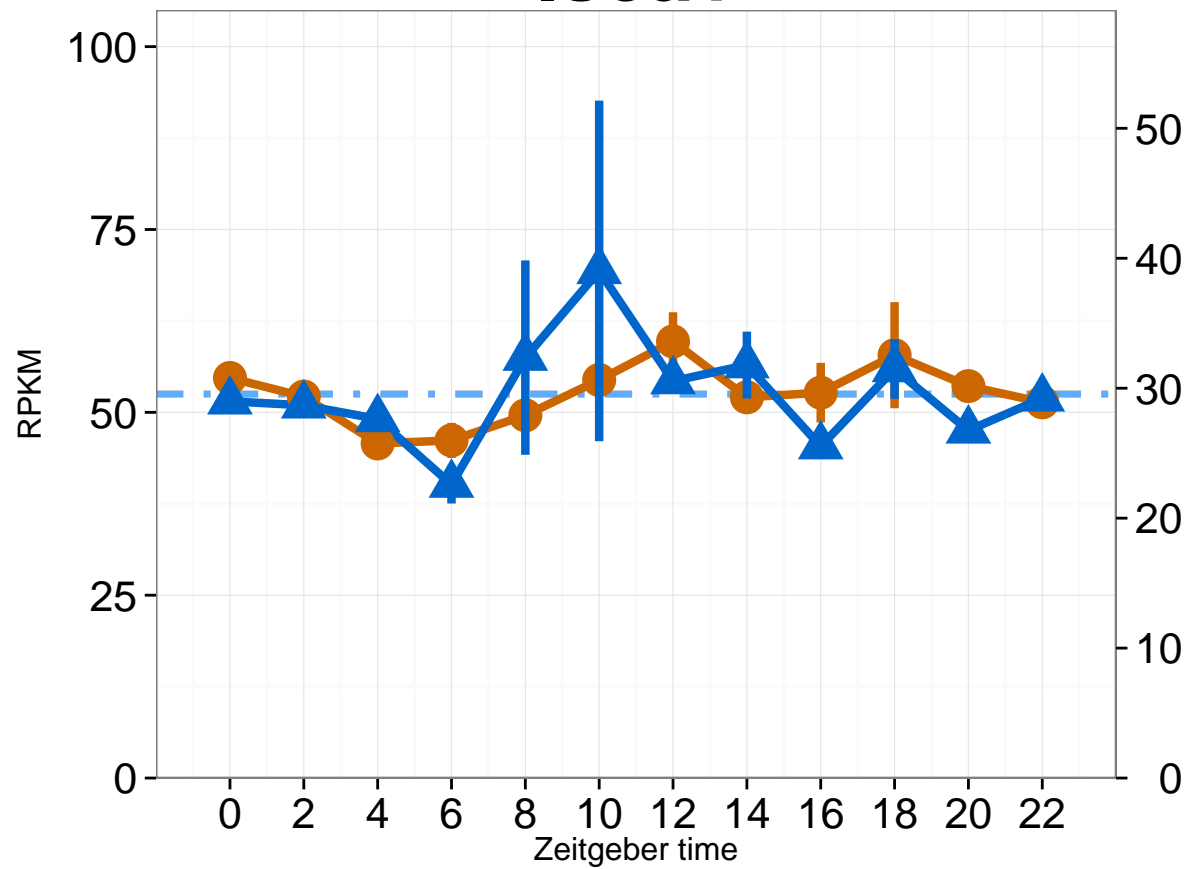

## Isca1

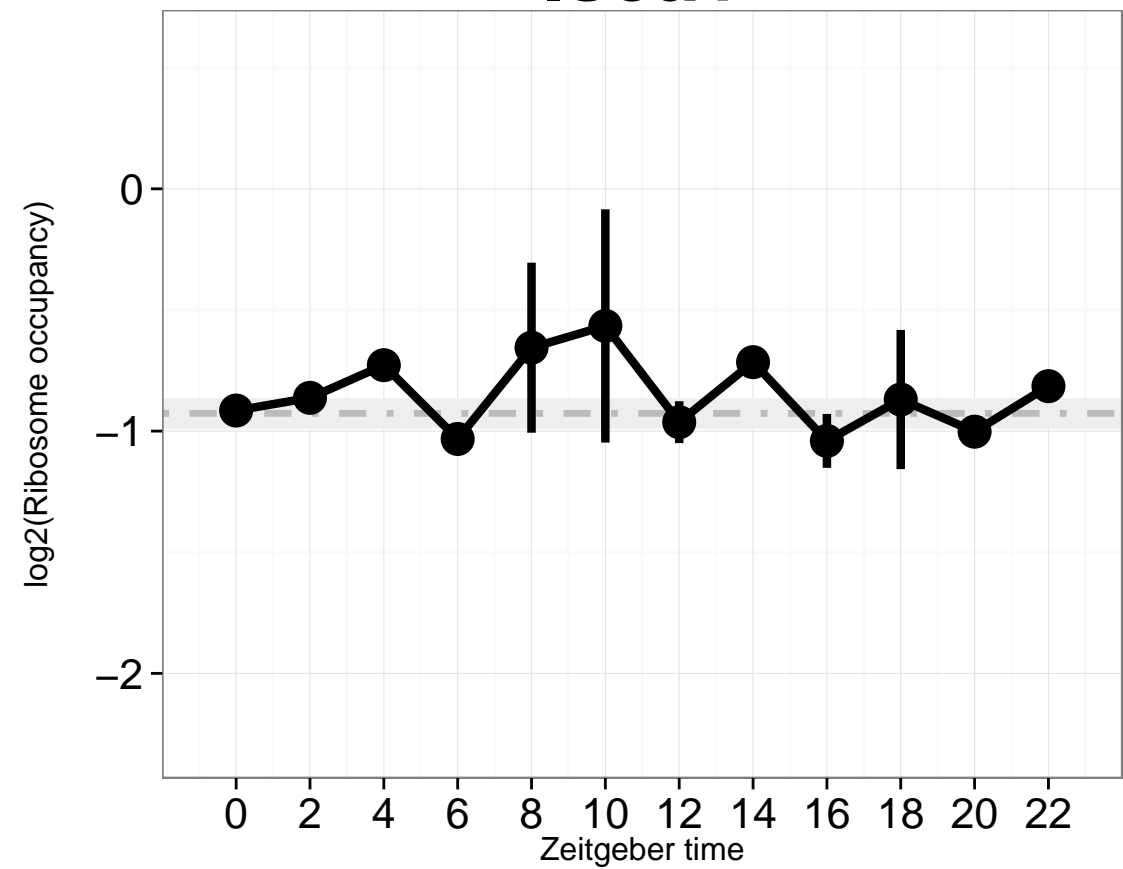

Supplement: SuppDataset_1.zip [file Isca1_set_A.pdf › Supplemental Dataset 1/A-mRNA_nonrhyth_translation_nonrhyth/Isca1_set_A.pdf]

## Isca2

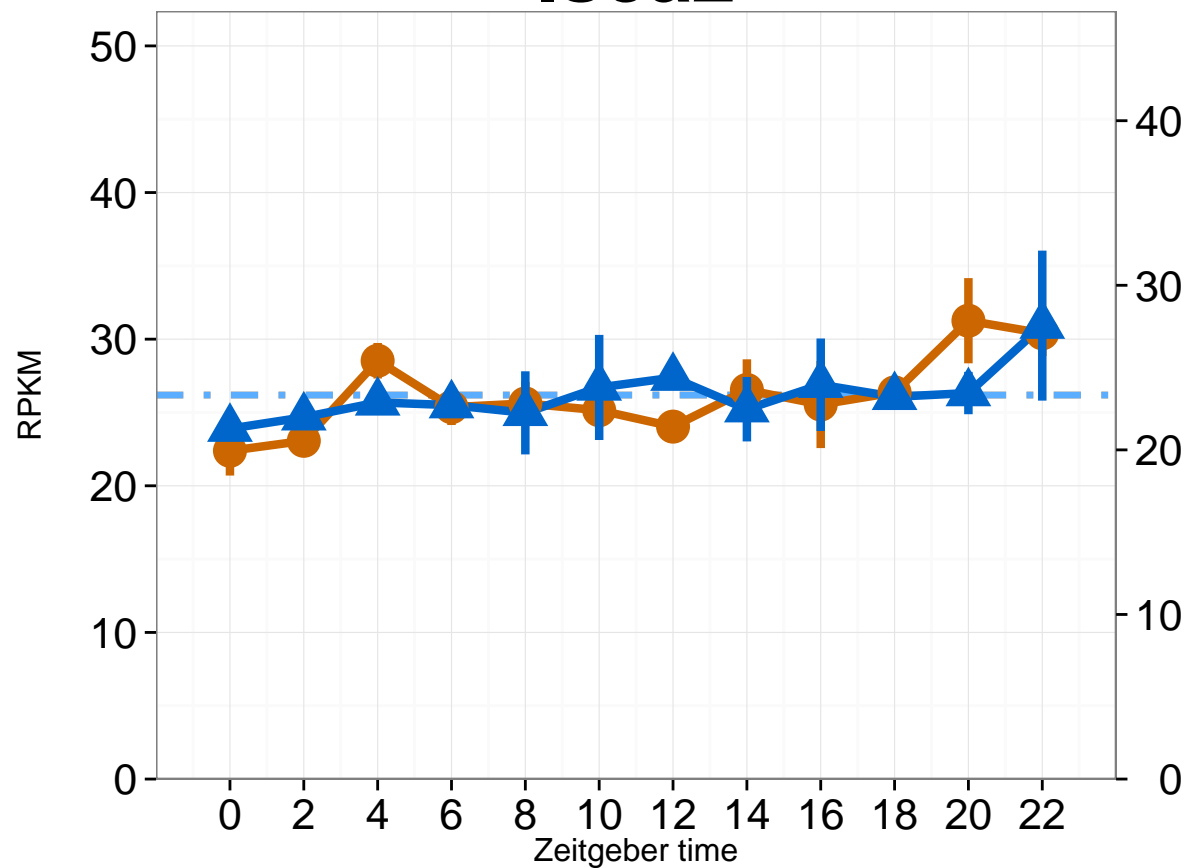

## Isca2

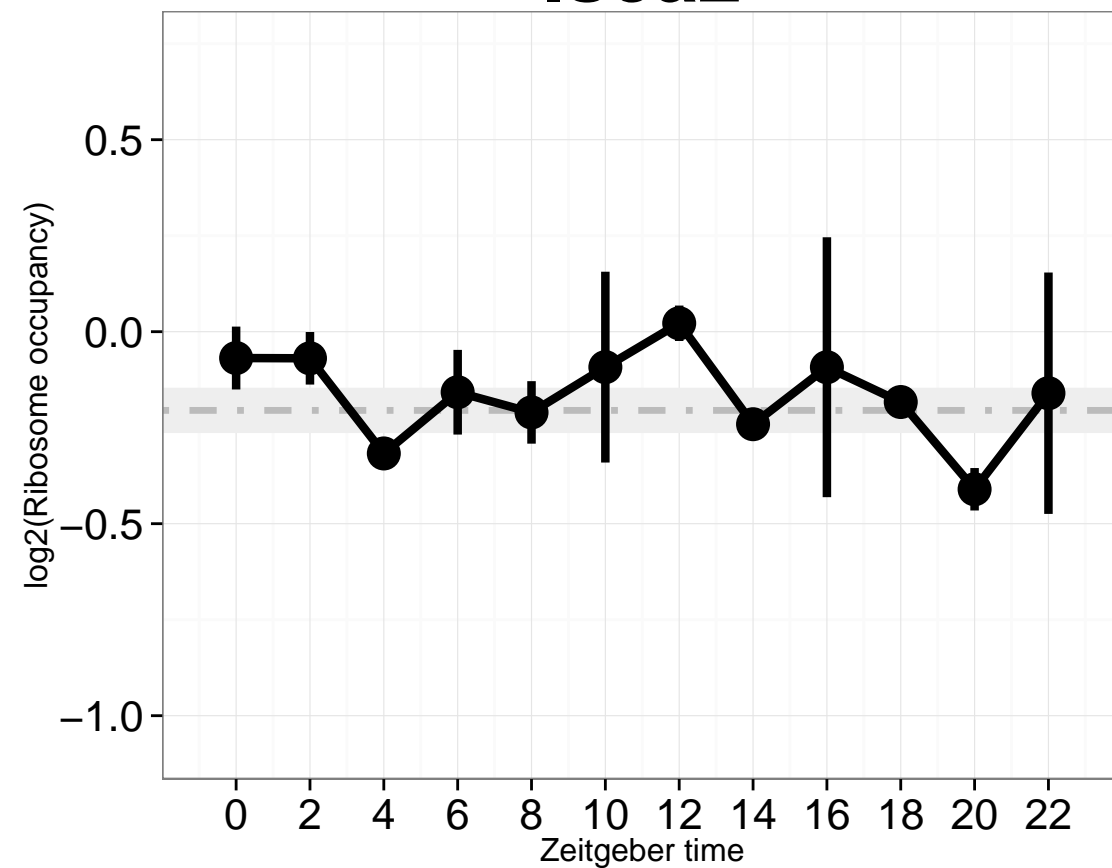

Supplement: SuppDataset_1.zip [file Isca2_set_A.pdf › Supplemental Dataset 1/A-mRNA_nonrhyth_translation_nonrhyth/Isca2_set_A.pdf]

## Iscu

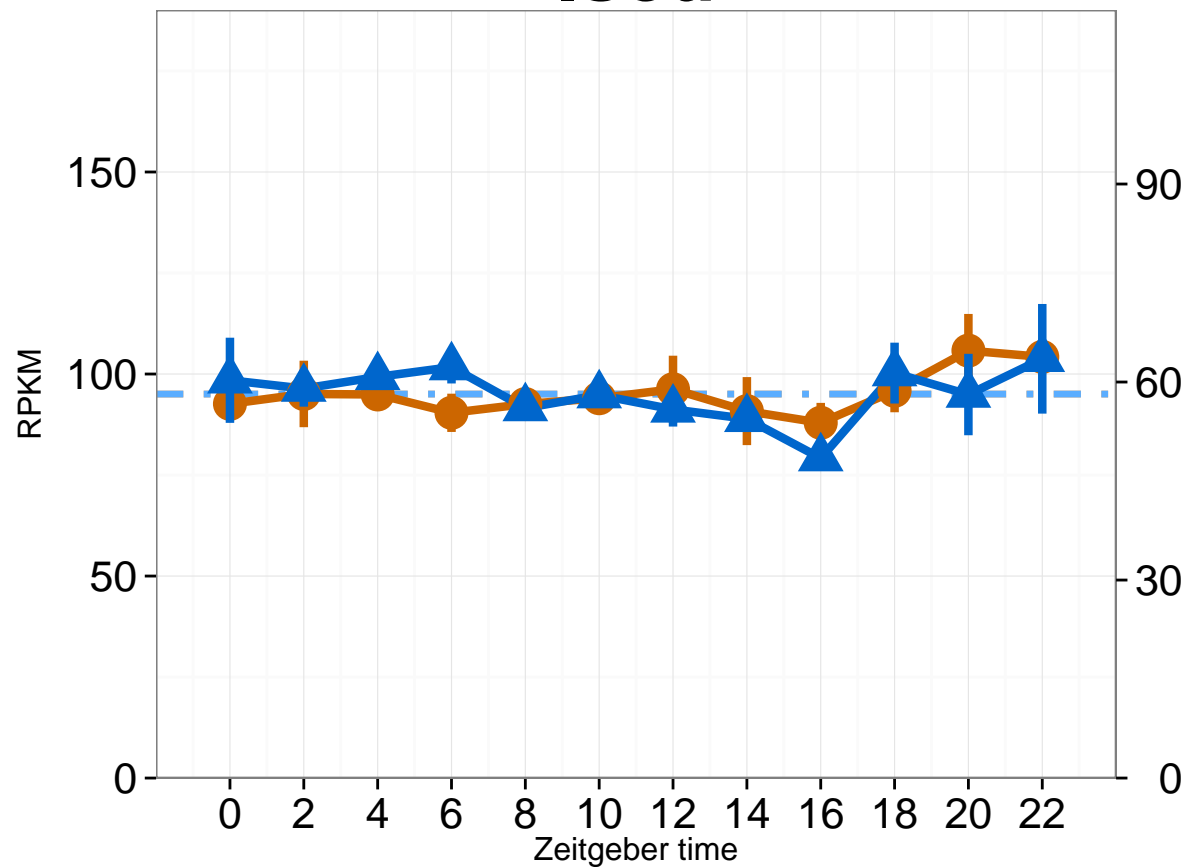

## Iscu

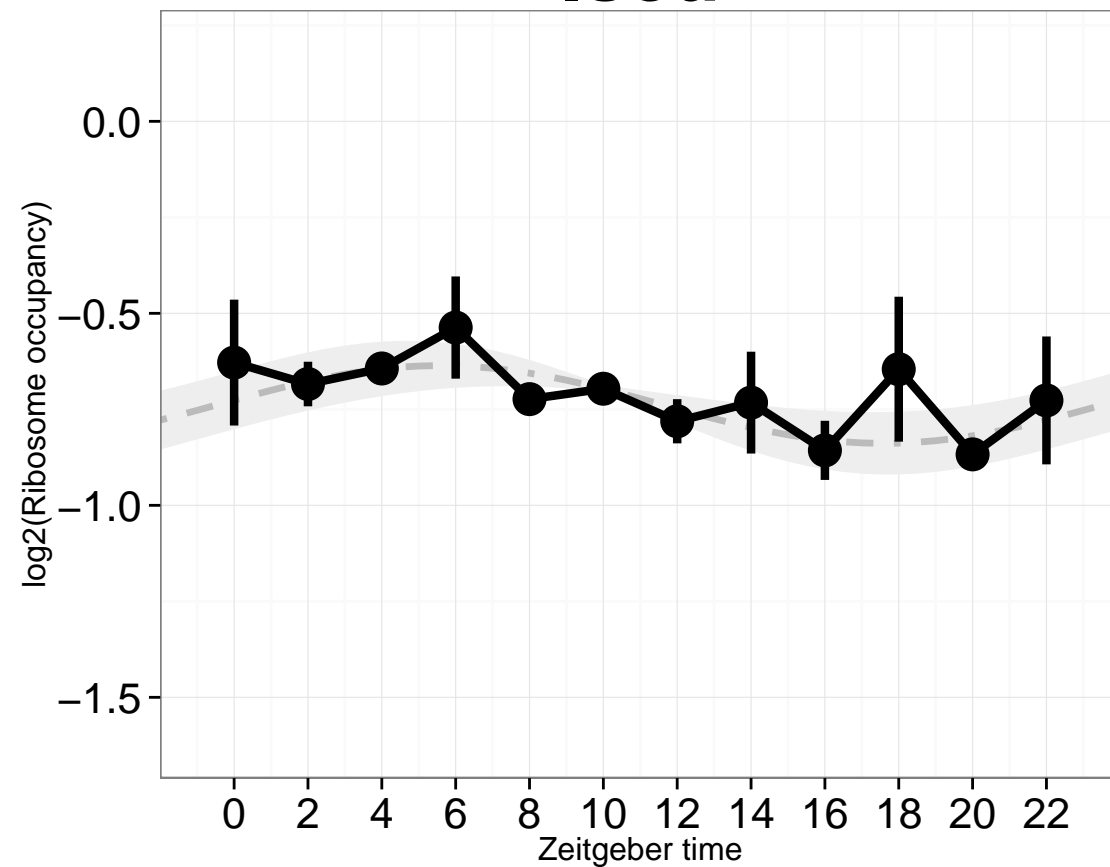

Supplement: SuppDataset_1.zip [file Iscu_set_A.pdf › Supplemental Dataset 1/A-mRNA_nonrhyth_translation_nonrhyth/Iscu_set_A.pdf]

# lsg20

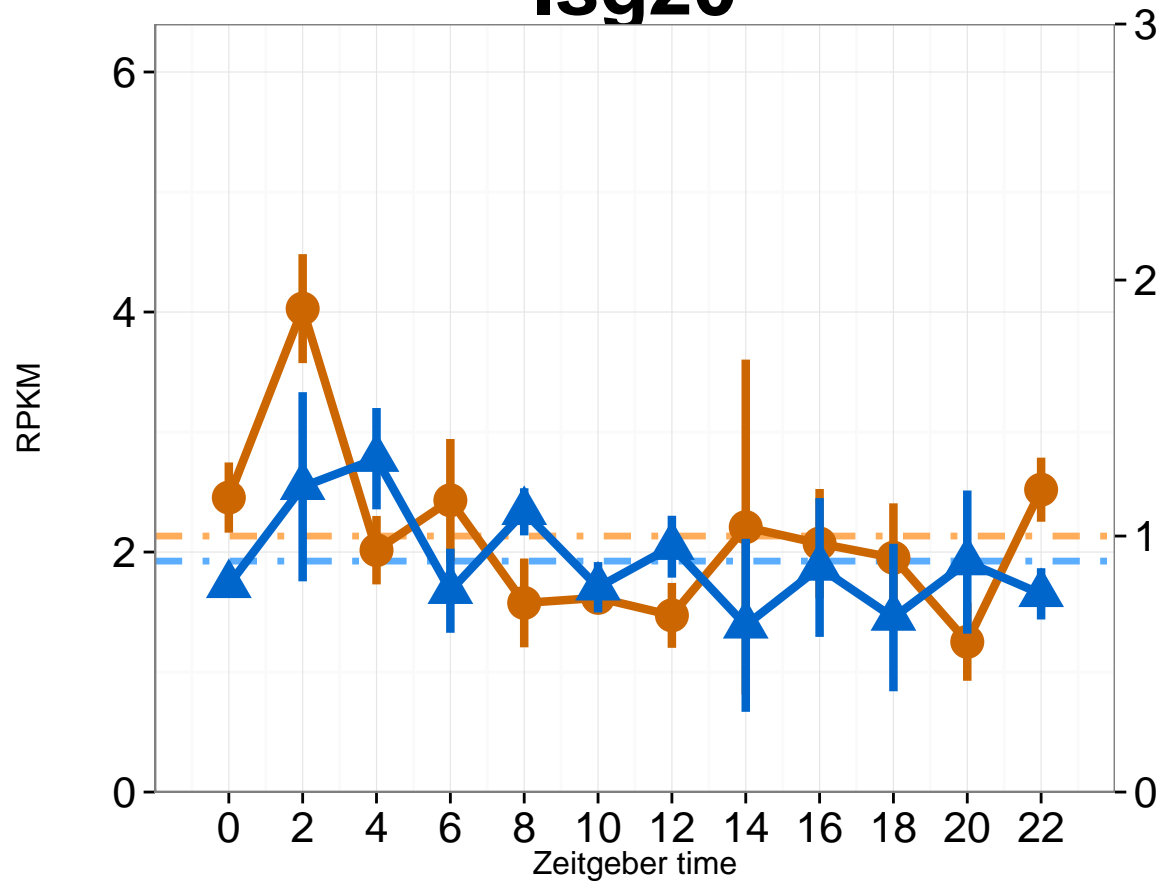

# lsg20

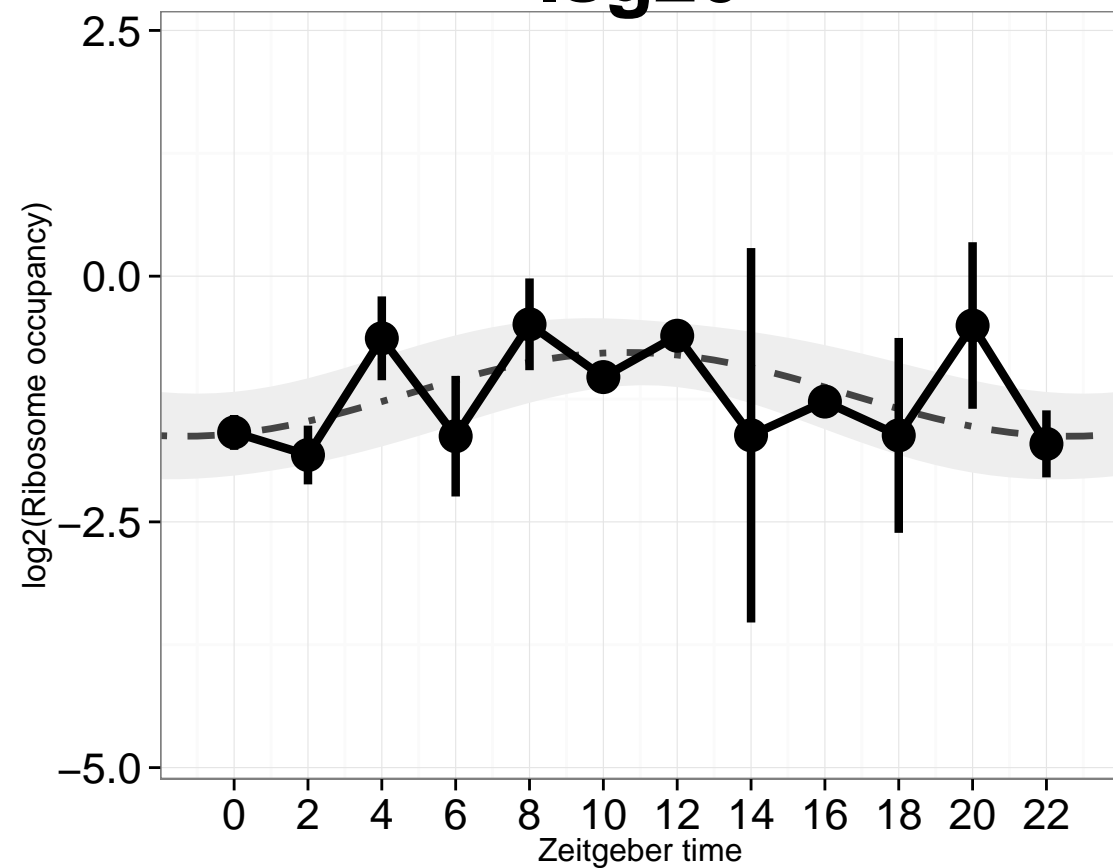

Supplement: SuppDataset_1.zip [file Isg20_set_A.pdf › Supplemental Dataset 1/A-mRNA_nonrhyth_translation_nonrhyth/Isg20_set_A.pdf]

# Isg20l2

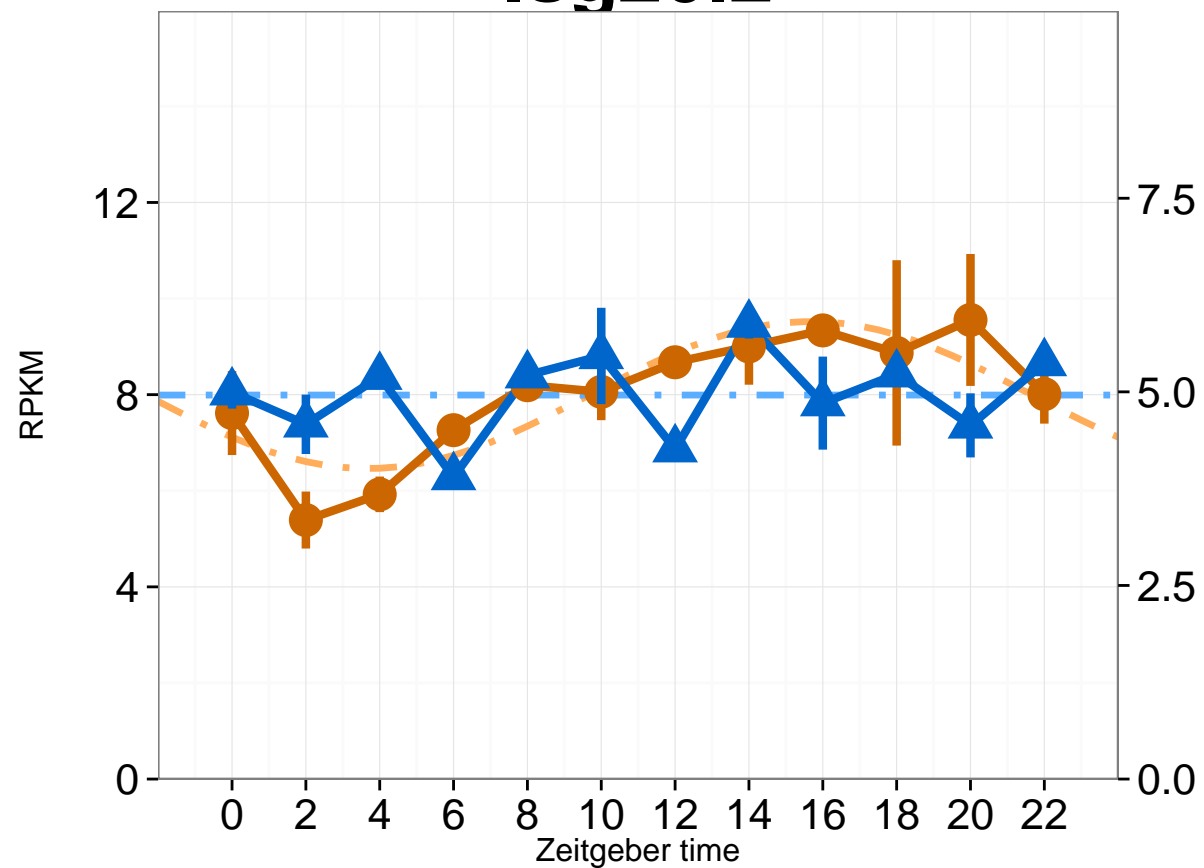

# Isg20l2

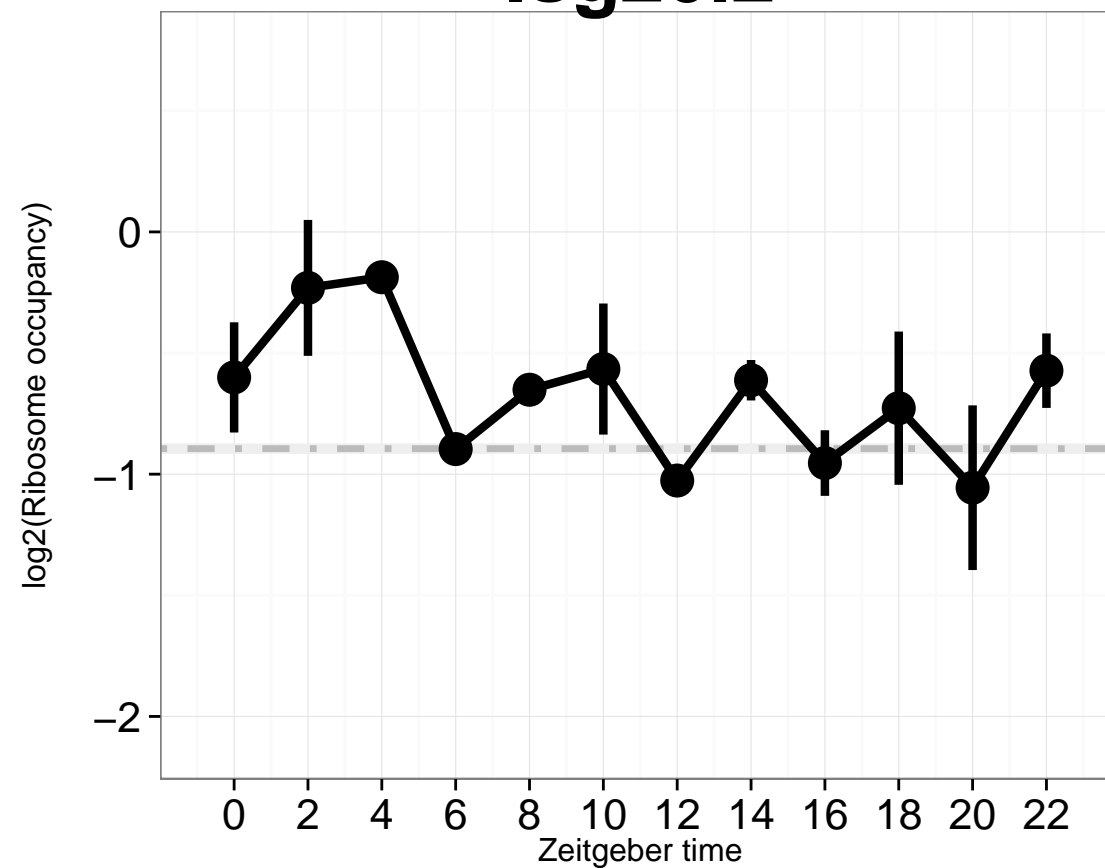

Supplement: SuppDataset_1.zip [file Isg20l2_set_A.pdf › Supplemental Dataset 1/A-mRNA_nonrhyth_translation_nonrhyth/Isg20l2_set_A.pdf]

## IsIr

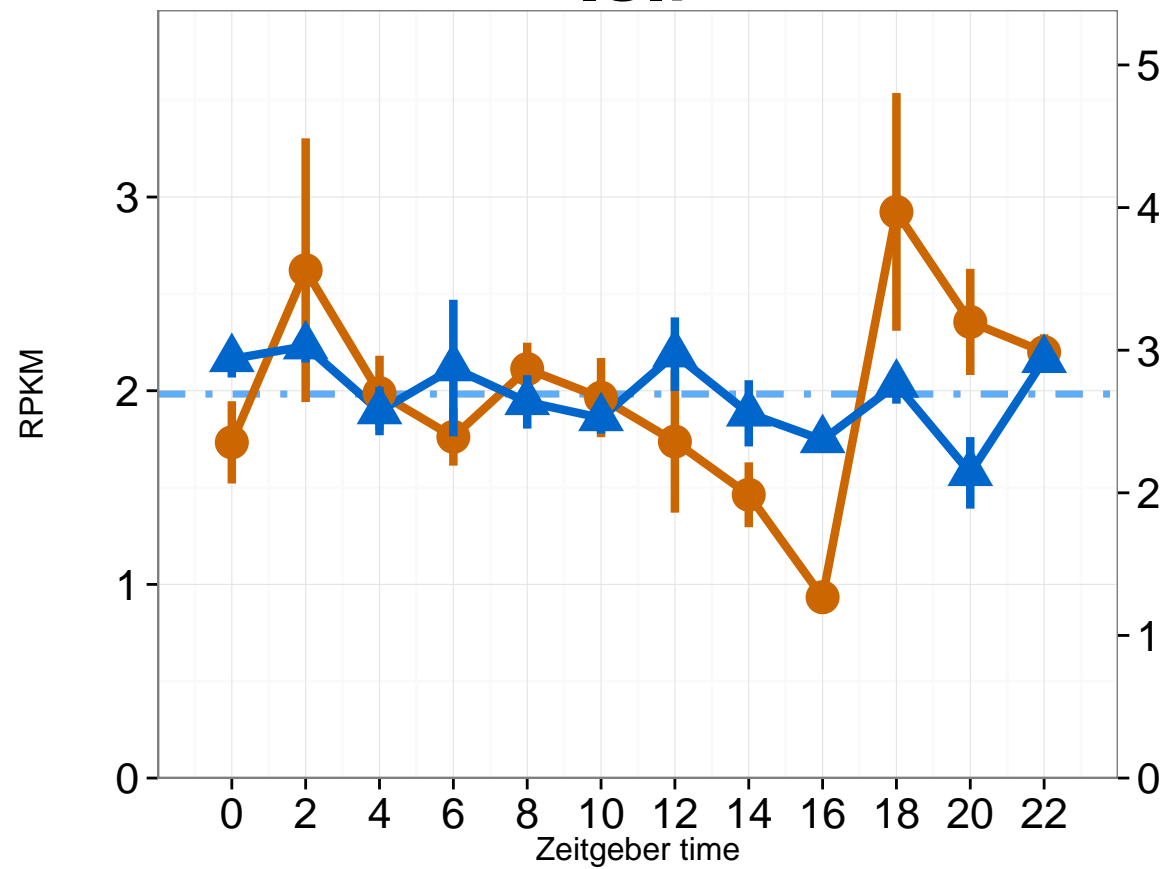

## IsIr

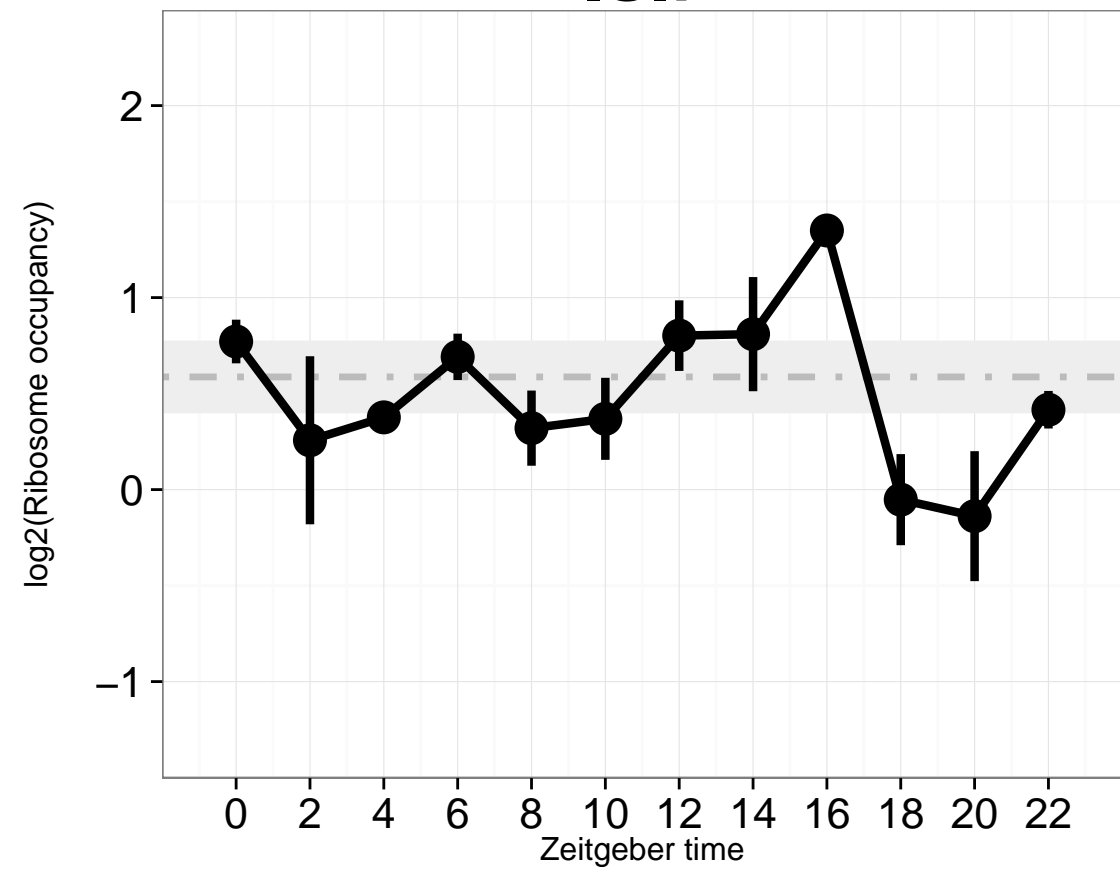

Supplement: SuppDataset_1.zip [file Islr_set_A.pdf › Supplemental Dataset 1/A-mRNA_nonrhyth_translation_nonrhyth/Islr_set_A.pdf]

## Isoc1

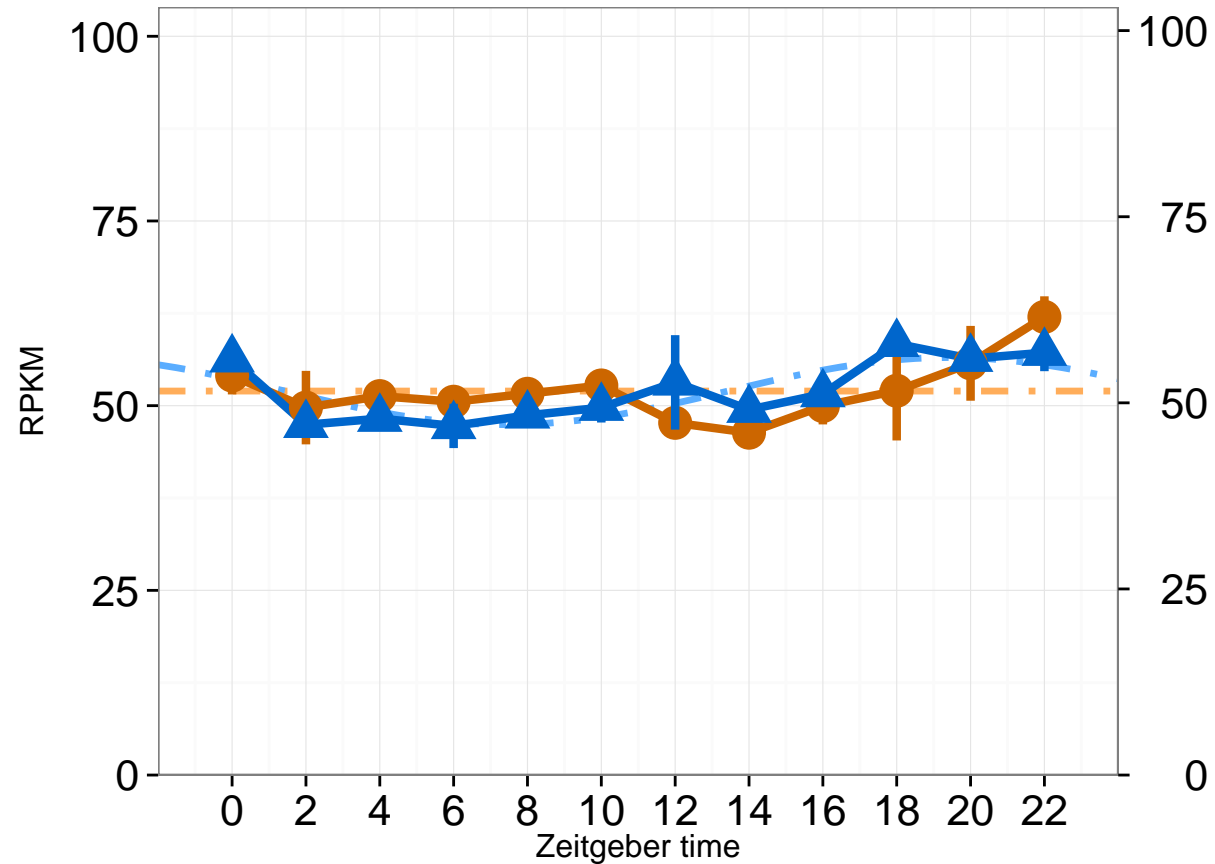

## Isoc1

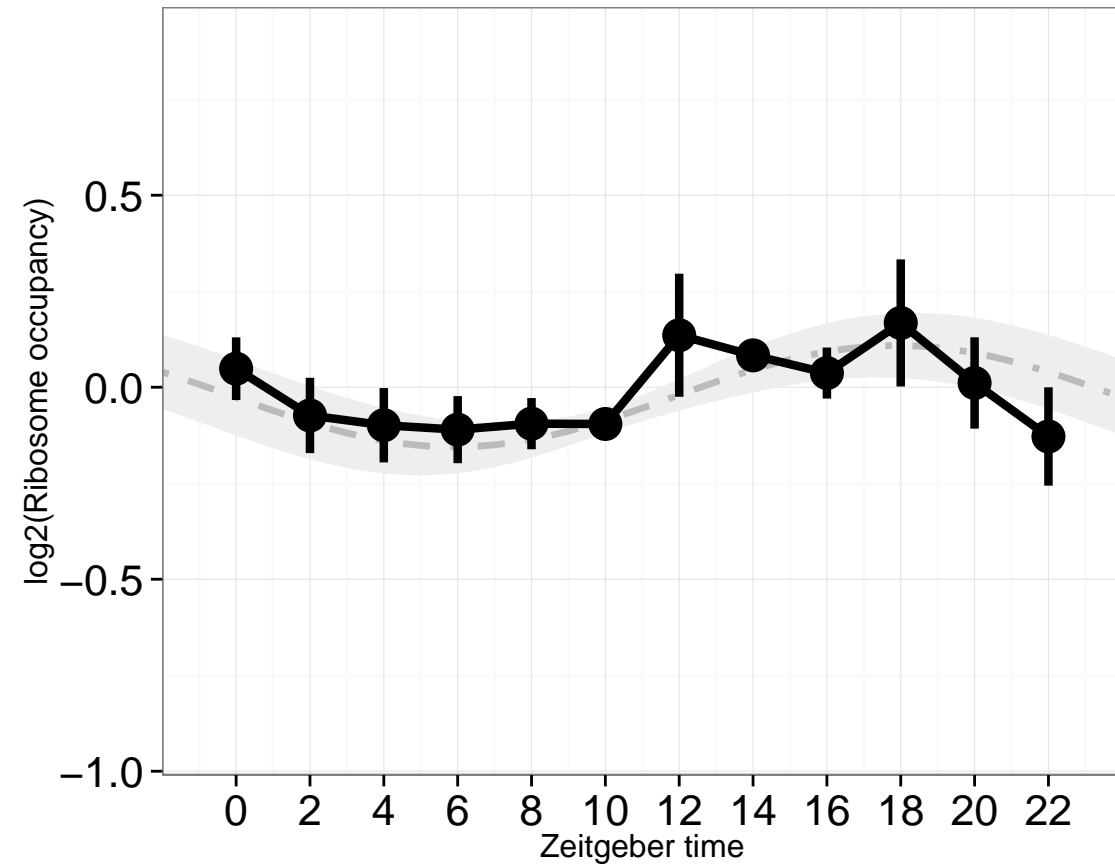

Supplement: SuppDataset_1.zip [file Isoc1_set_A.pdf › Supplemental Dataset 1/A-mRNA_nonrhyth_translation_nonrhyth/Isoc1_set_A.pdf]

## lspd

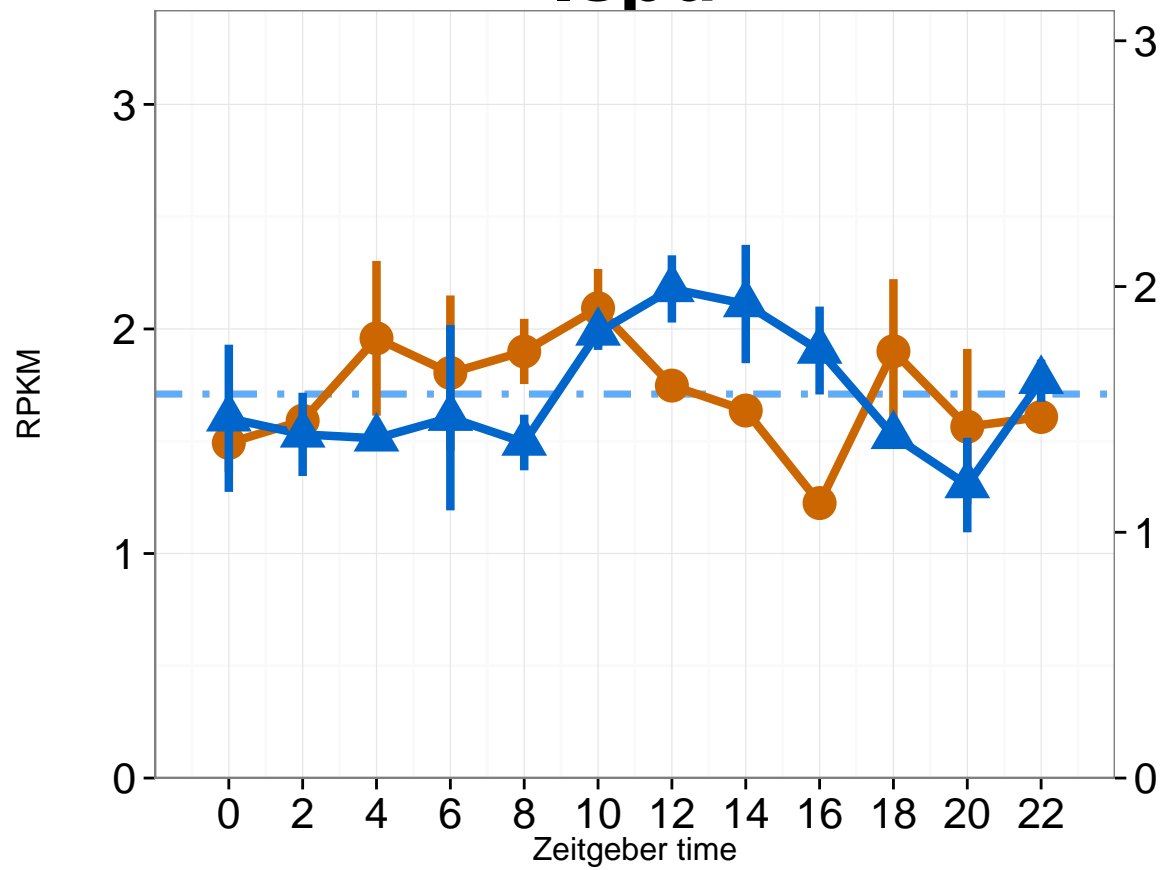

## lspd

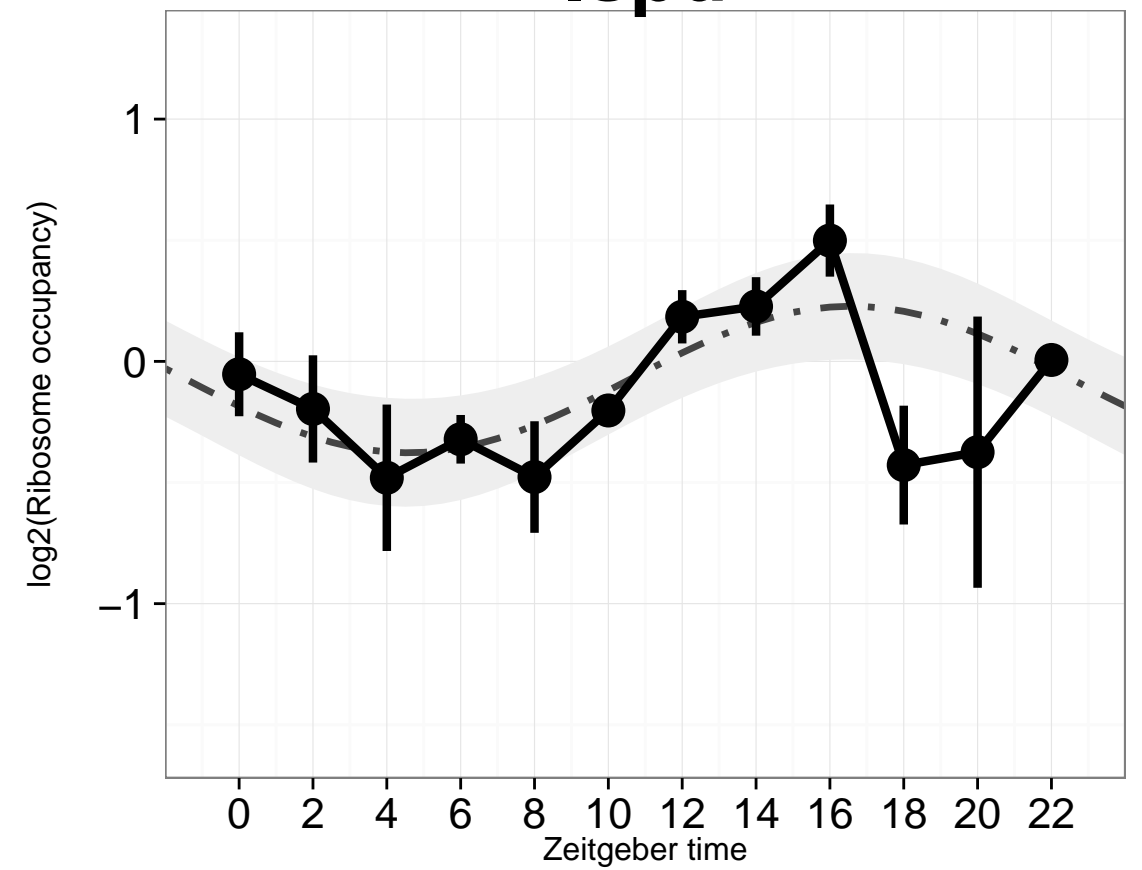

Supplement: SuppDataset_1.zip [file Ispd_set_A.pdf › Supplemental Dataset 1/A-mRNA_nonrhyth_translation_nonrhyth/Ispd_set_A.pdf]

# Ist1

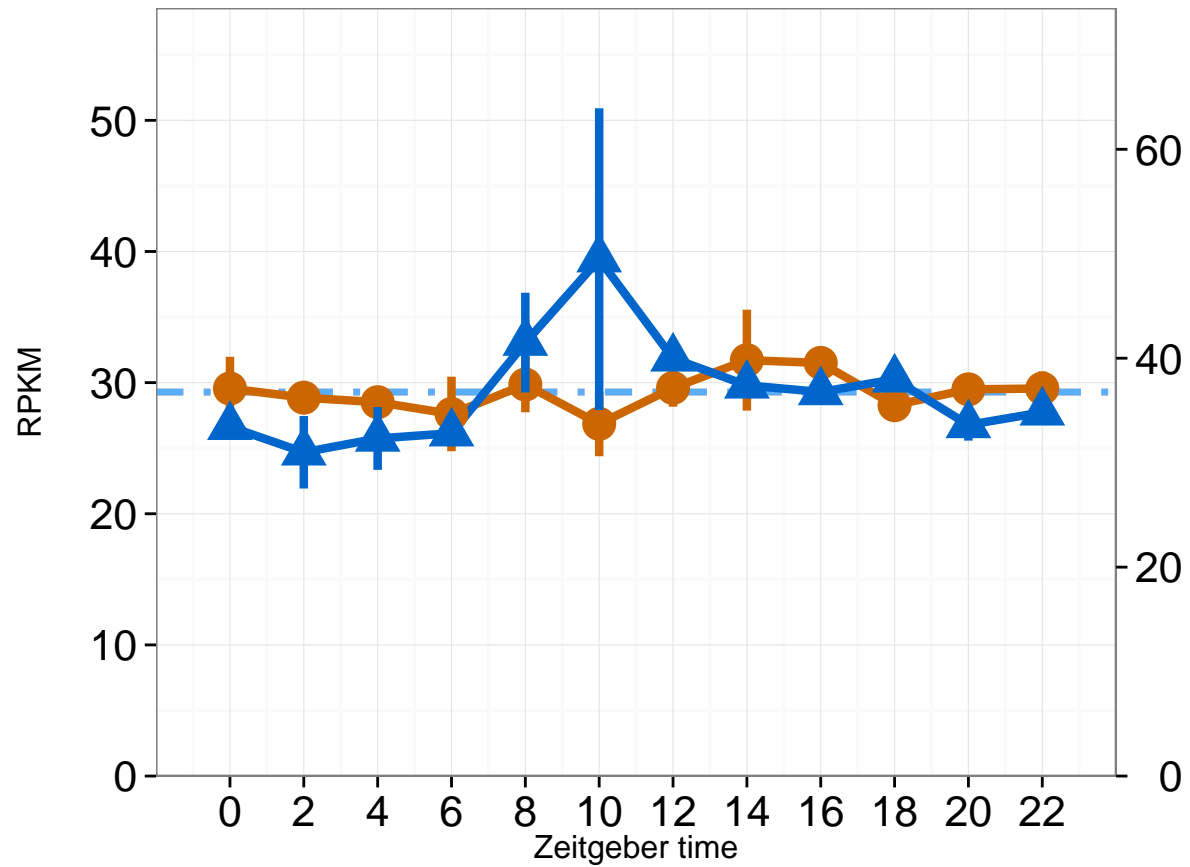

# Ist1

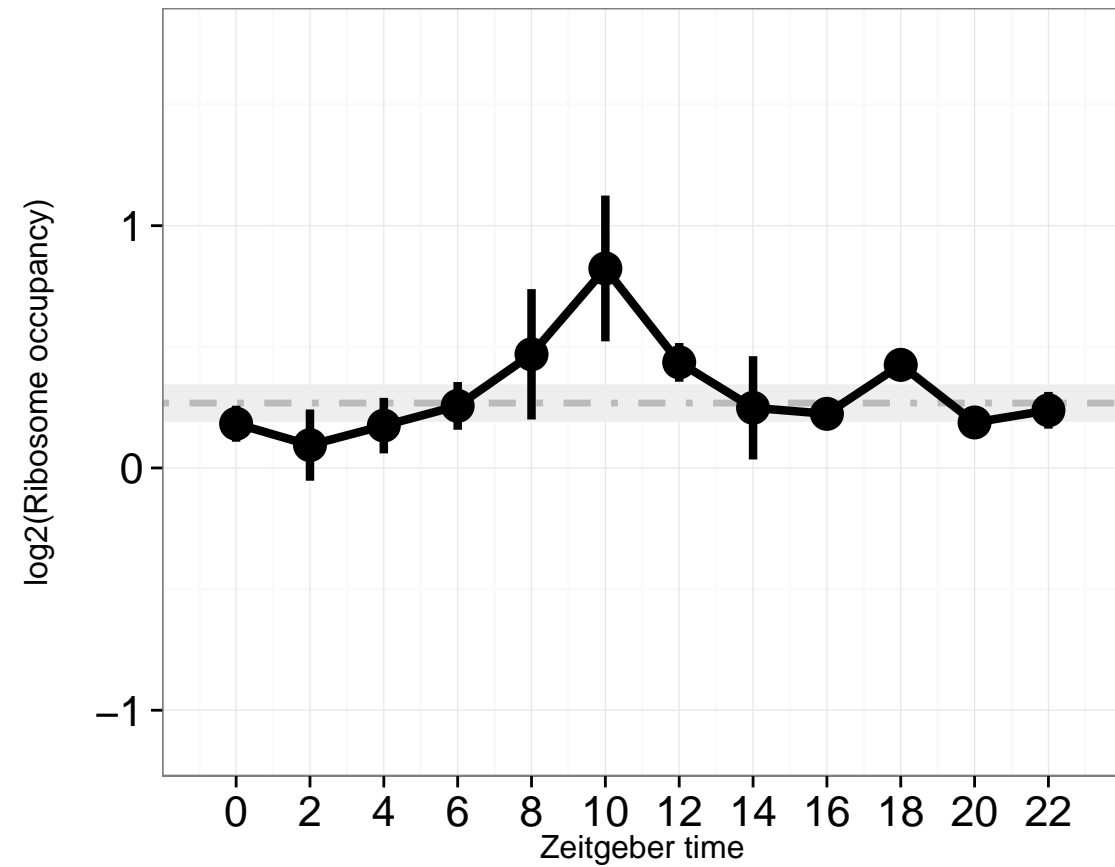

Supplement: SuppDataset_1.zip [file Ist1_set_A.pdf › Supplemental Dataset 1/A-mRNA_nonrhyth_translation_nonrhyth/Ist1_set_A.pdf]

## Isy1

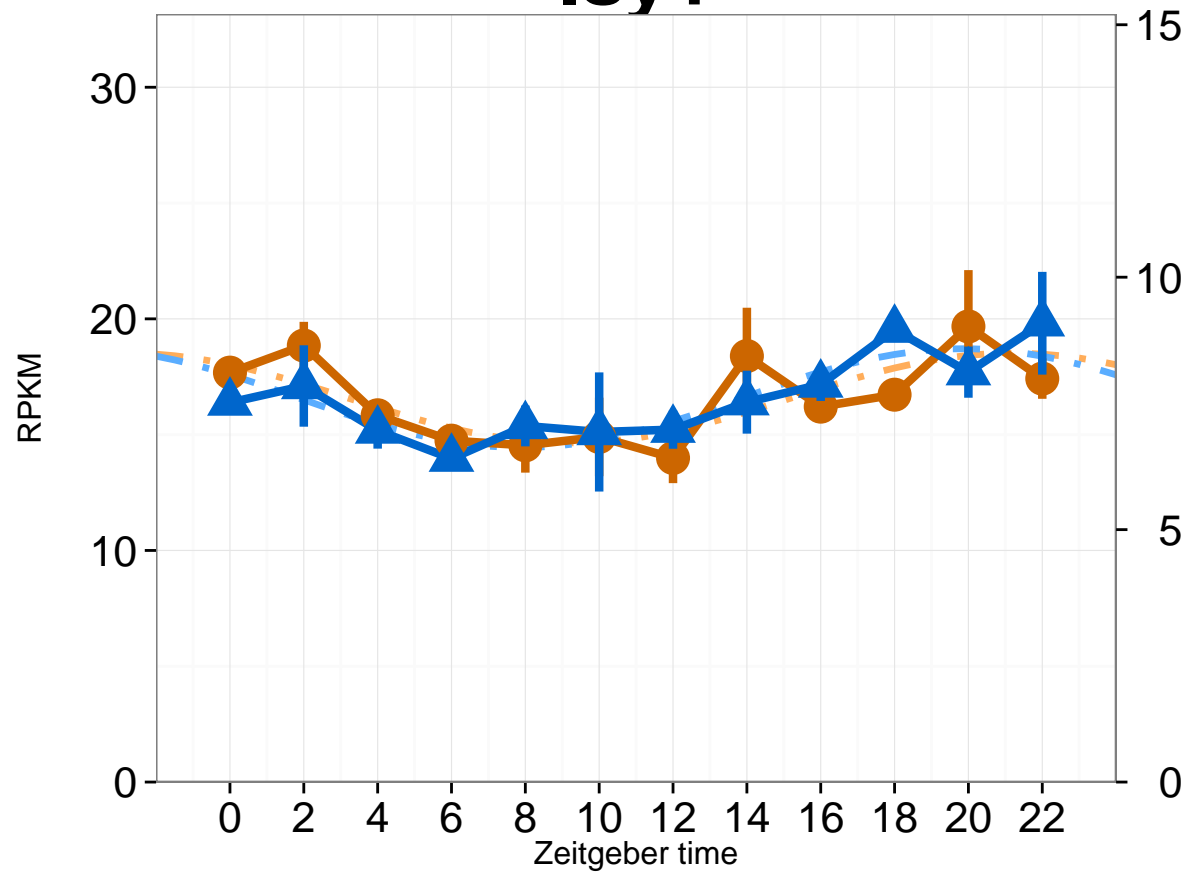

## Isy1

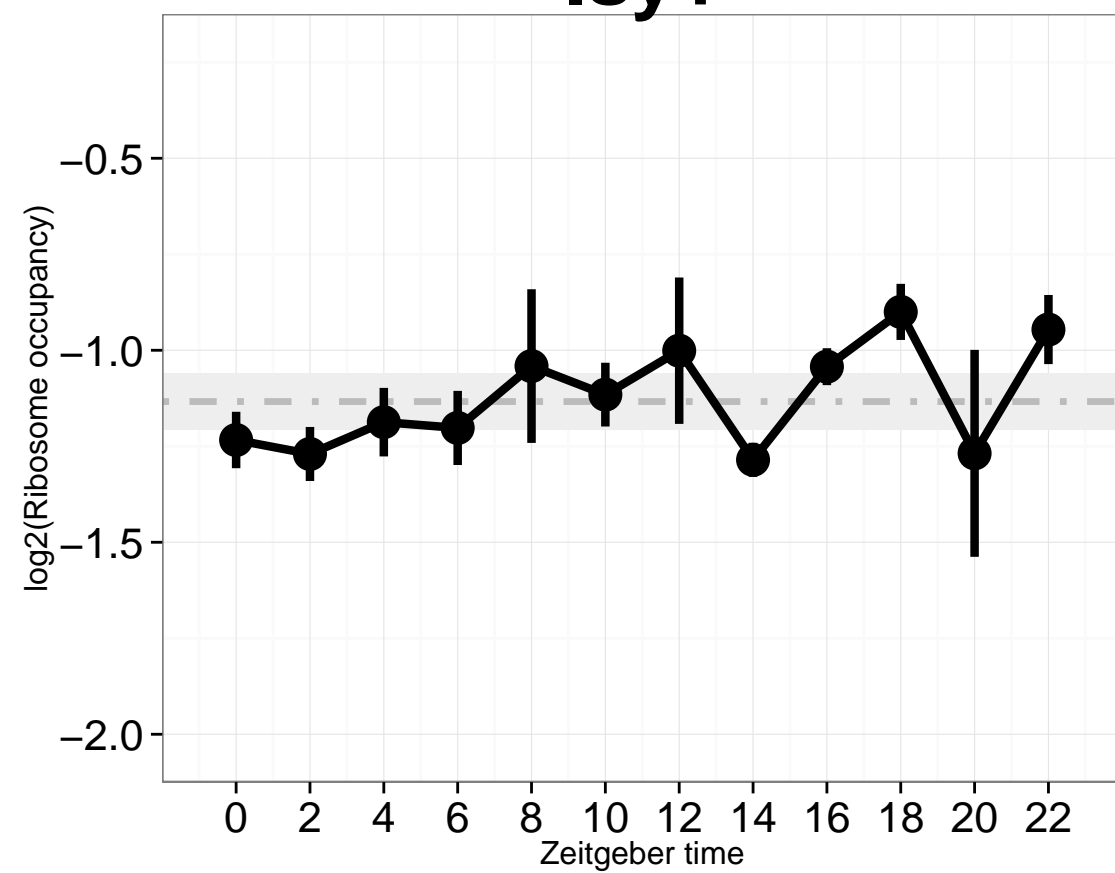

Supplement: SuppDataset_1.zip [file Isy1_set_A.pdf › Supplemental Dataset 1/A-mRNA_nonrhyth_translation_nonrhyth/Isy1_set_A.pdf]

# Itch

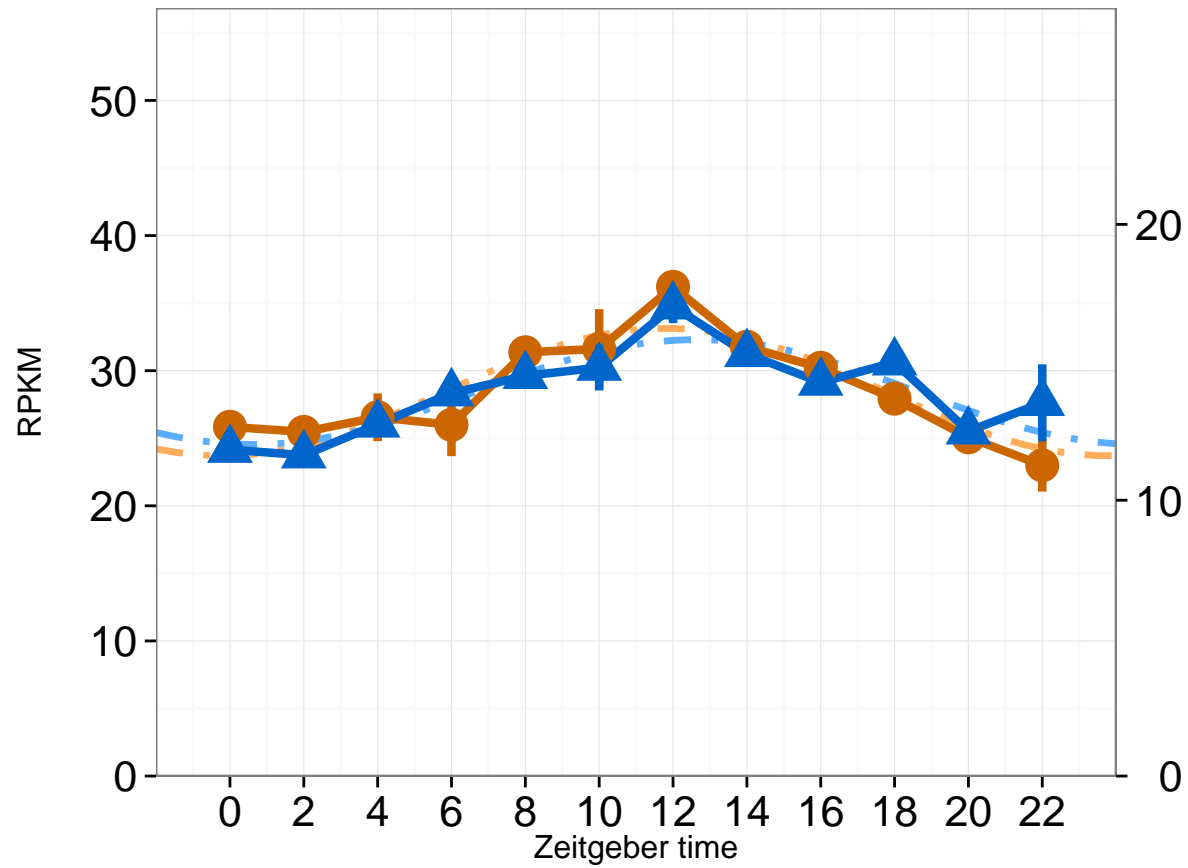

# Itch

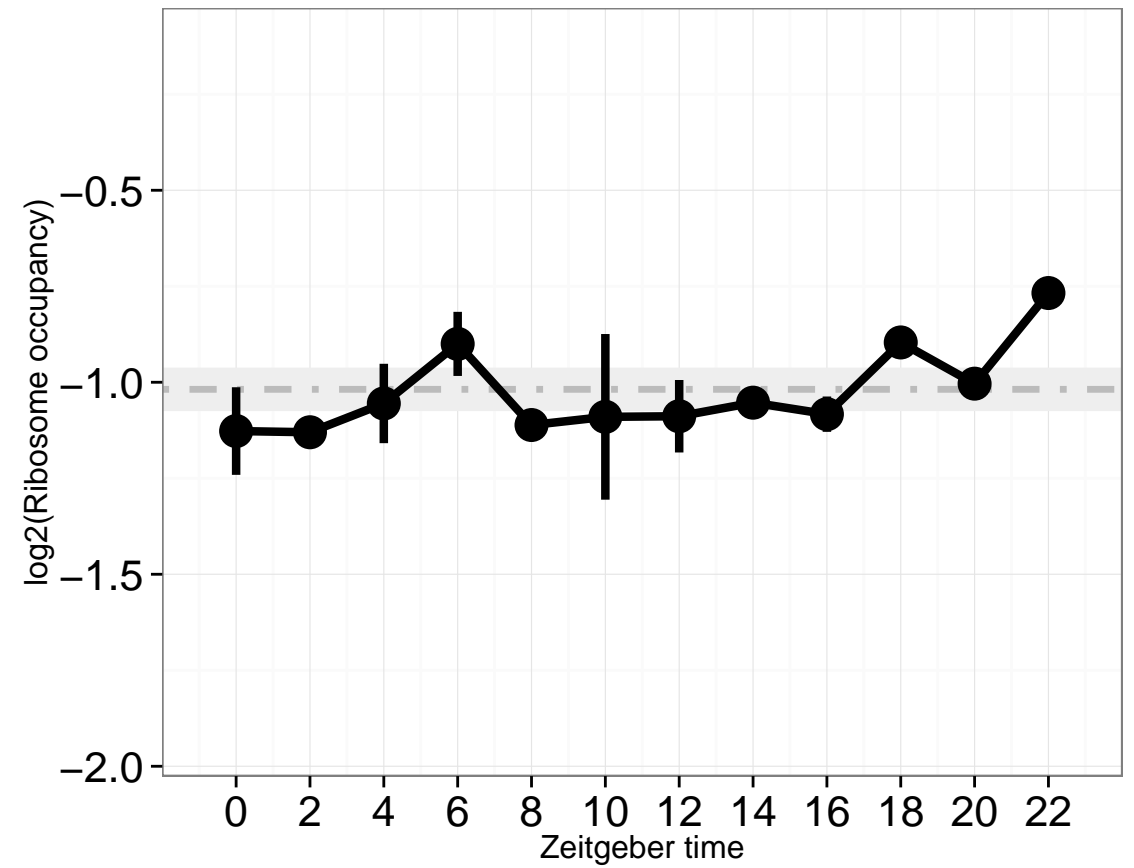

Supplement: SuppDataset_1.zip [file Itch_set_A.pdf › Supplemental Dataset 1/A-mRNA_nonrhyth_translation_nonrhyth/Itch_set_A.pdf]

# Itfg1

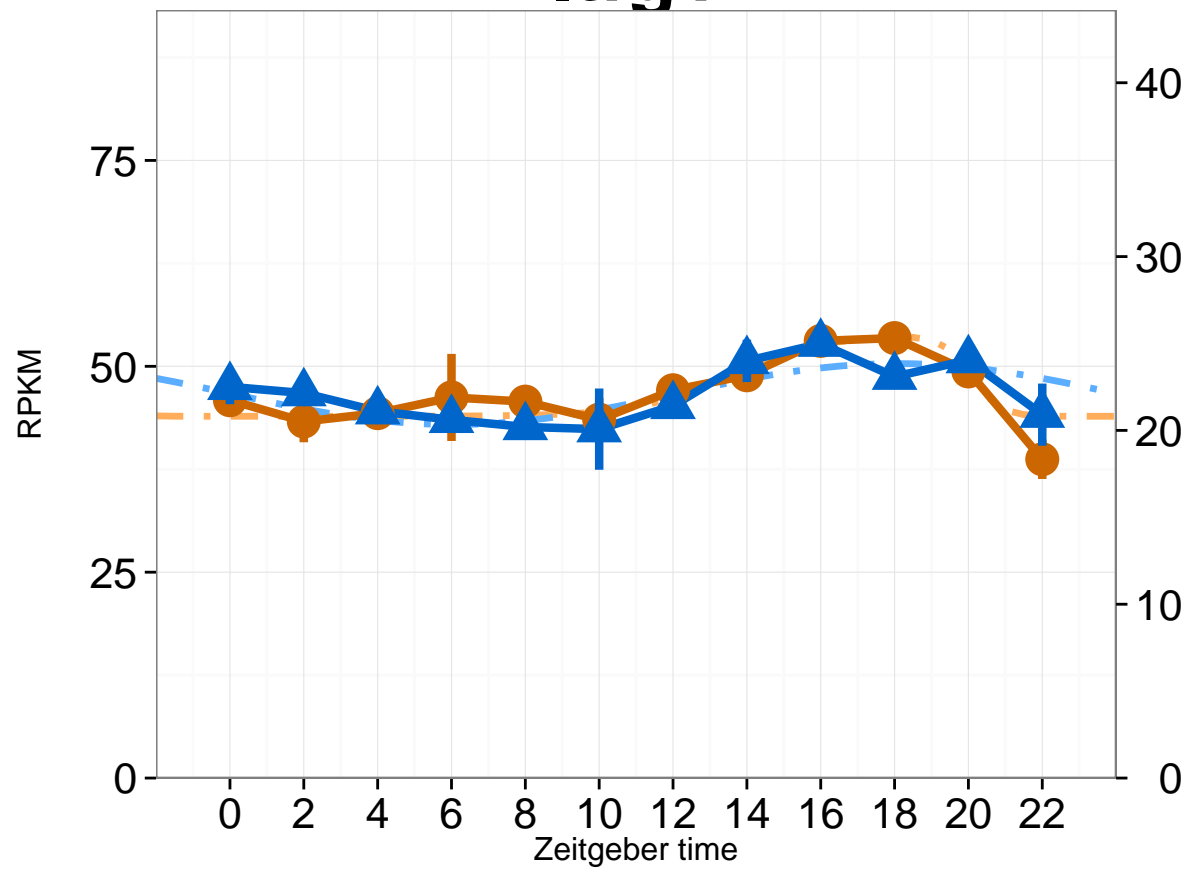

# Itfg1

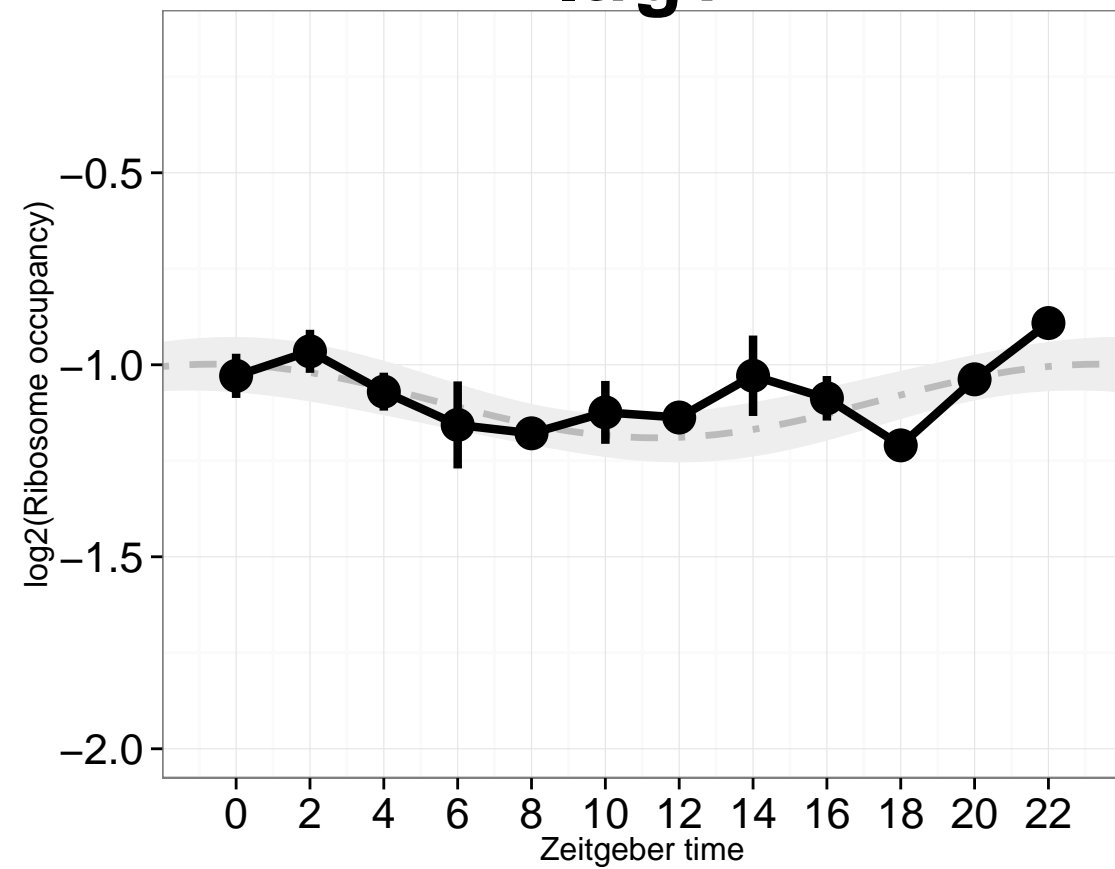

Supplement: SuppDataset_1.zip [file Itfg1_set_A.pdf › Supplemental Dataset 1/A-mRNA_nonrhyth_translation_nonrhyth/Itfg1_set_A.pdf]

# Itfg2

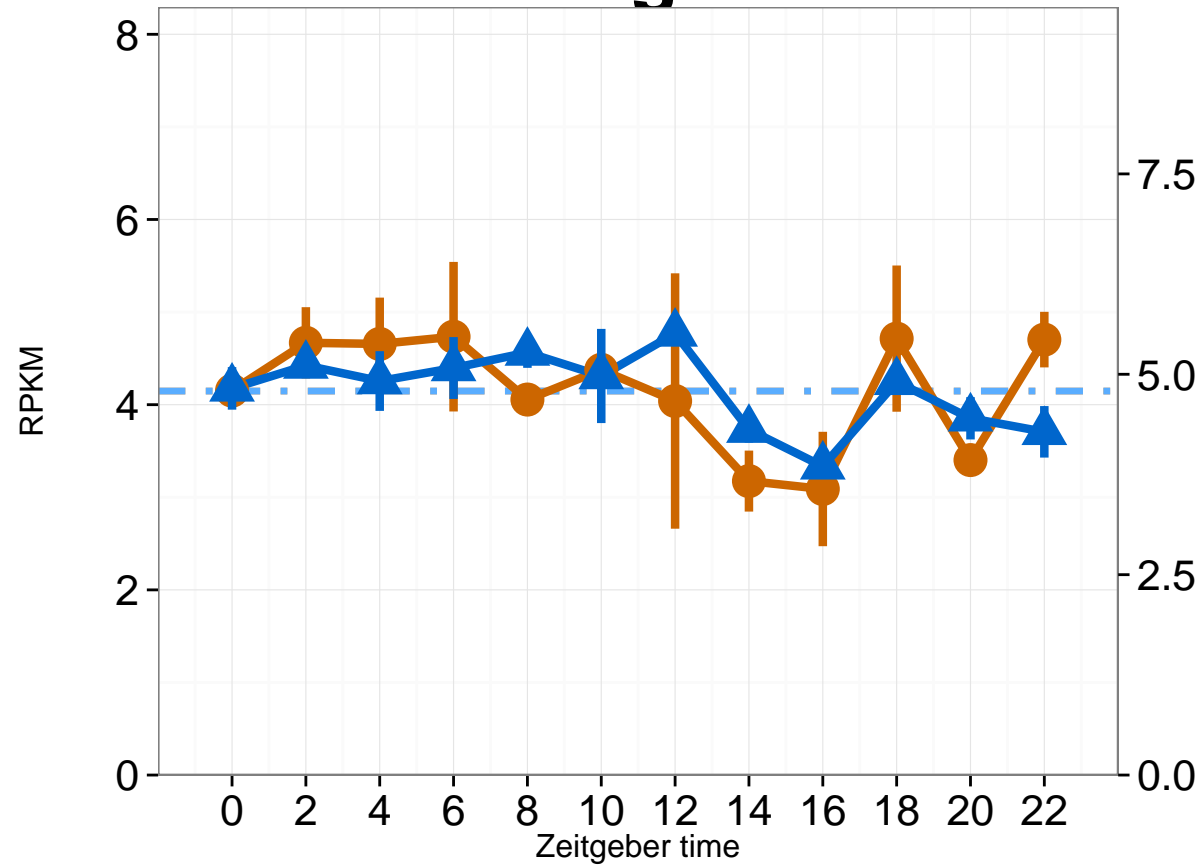

# Itfg2

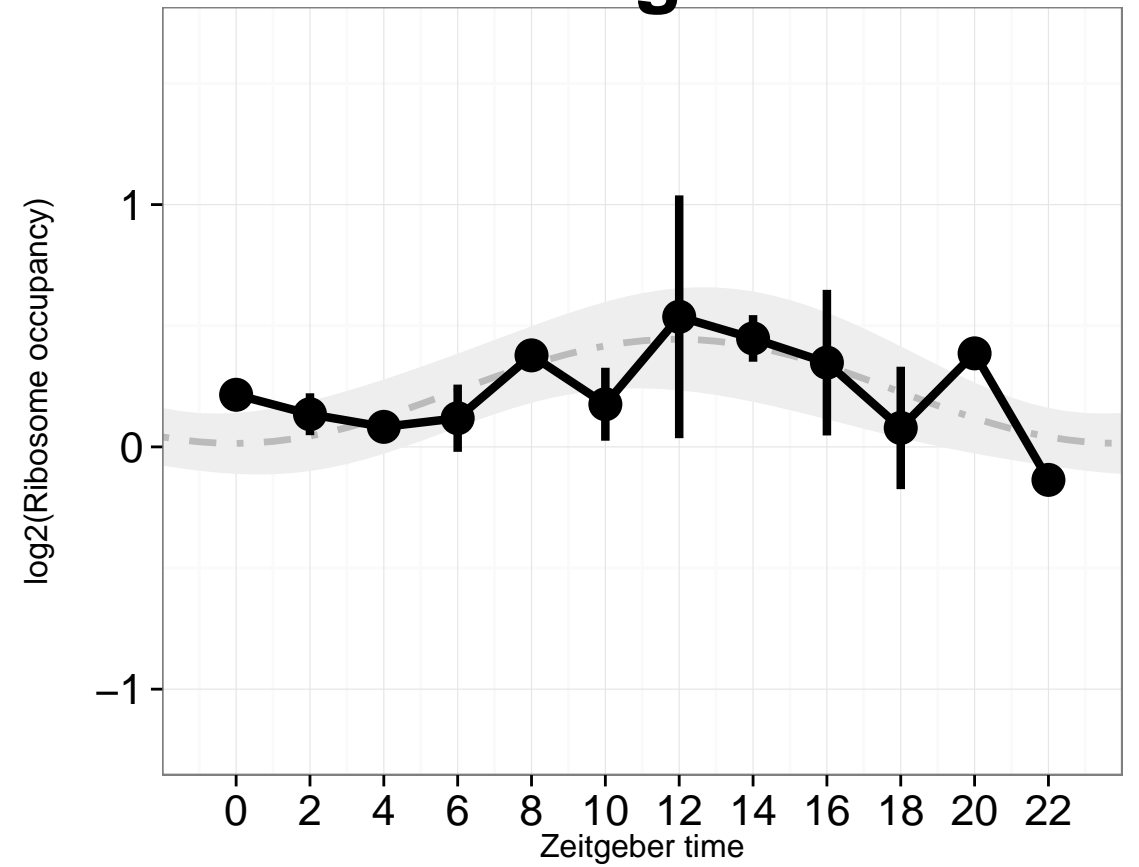

Supplement: SuppDataset_1.zip [file Itfg2_set_A.pdf › Supplemental Dataset 1/A-mRNA_nonrhyth_translation_nonrhyth/Itfg2_set_A.pdf]

# Itfg3

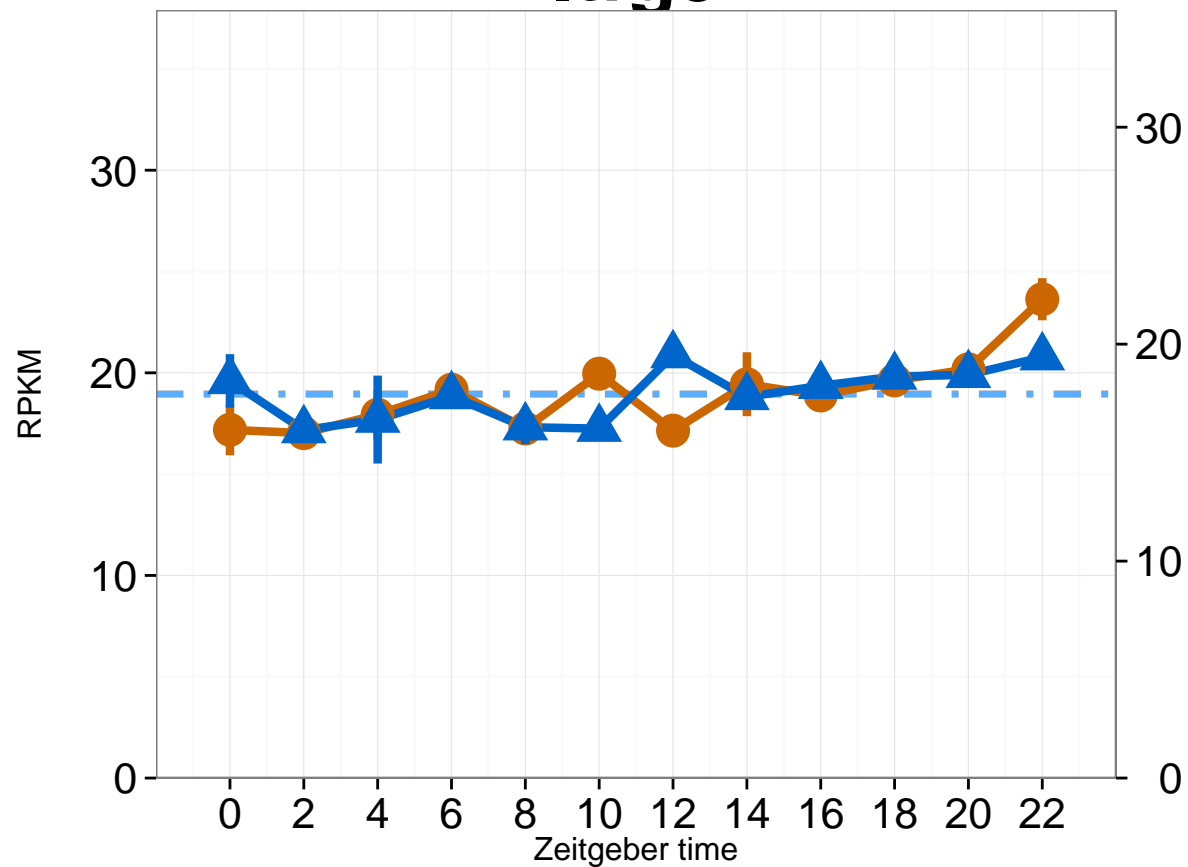

# Itfg3

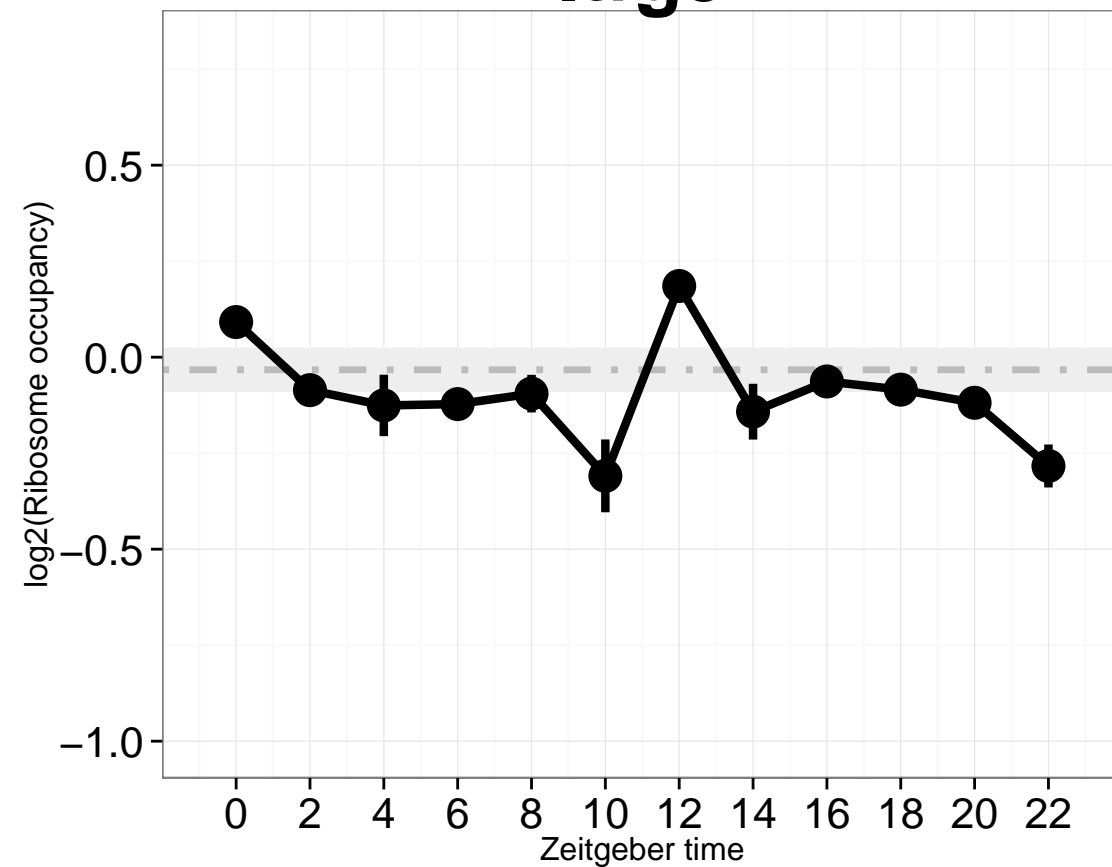

Supplement: SuppDataset_1.zip [file Itfg3_set_A.pdf › Supplemental Dataset 1/A-mRNA_nonrhyth_translation_nonrhyth/Itfg3_set_A.pdf]

# Itga1

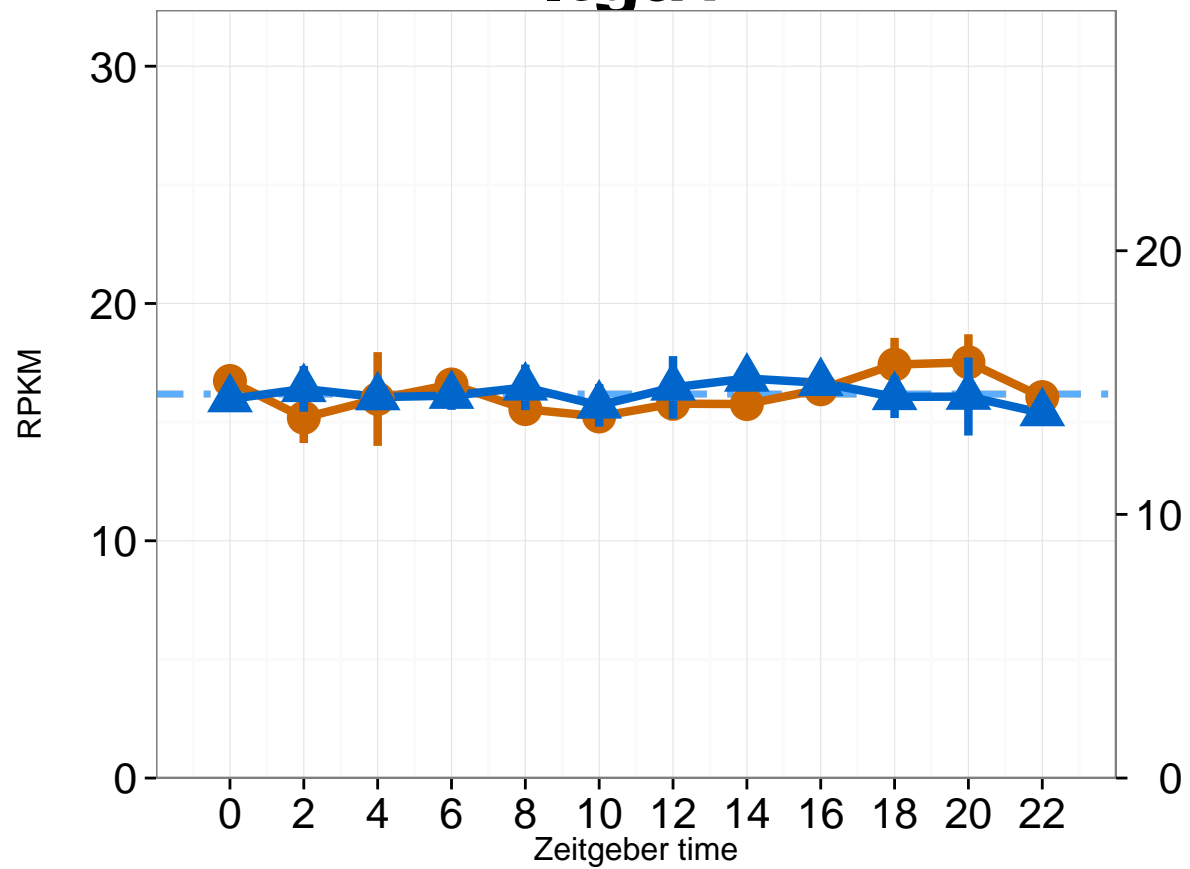

# Itga1

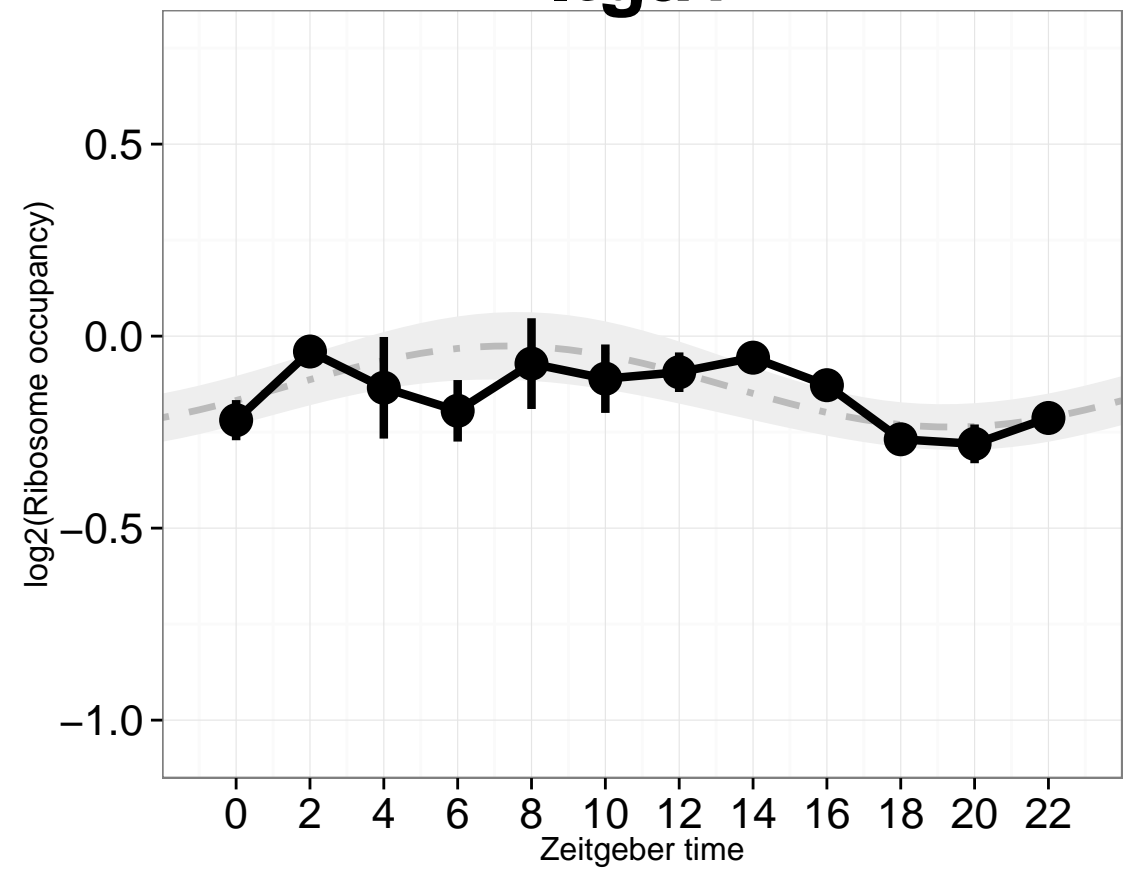

Supplement: SuppDataset_1.zip [file Itga1_set_A.pdf › Supplemental Dataset 1/A-mRNA_nonrhyth_translation_nonrhyth/Itga1_set_A.pdf]

# Itga2b

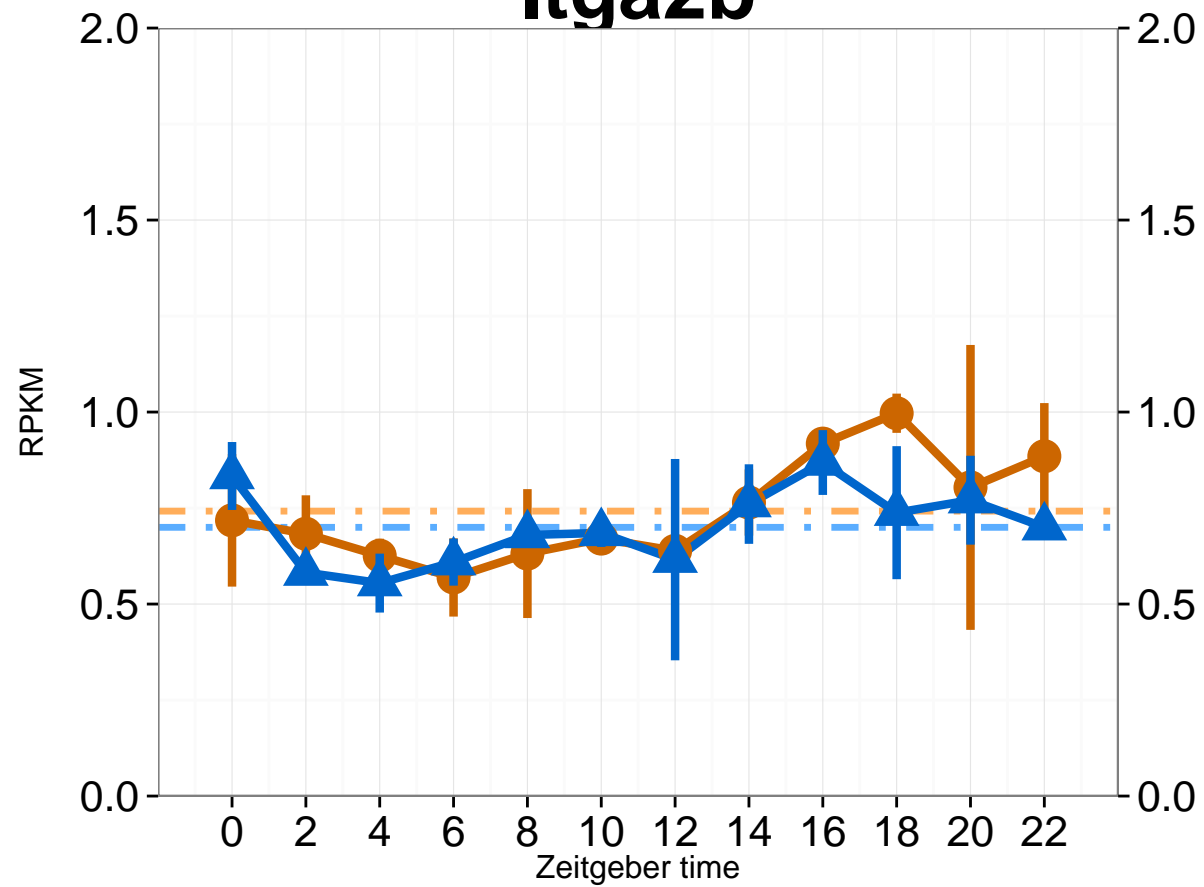

# Itga2b

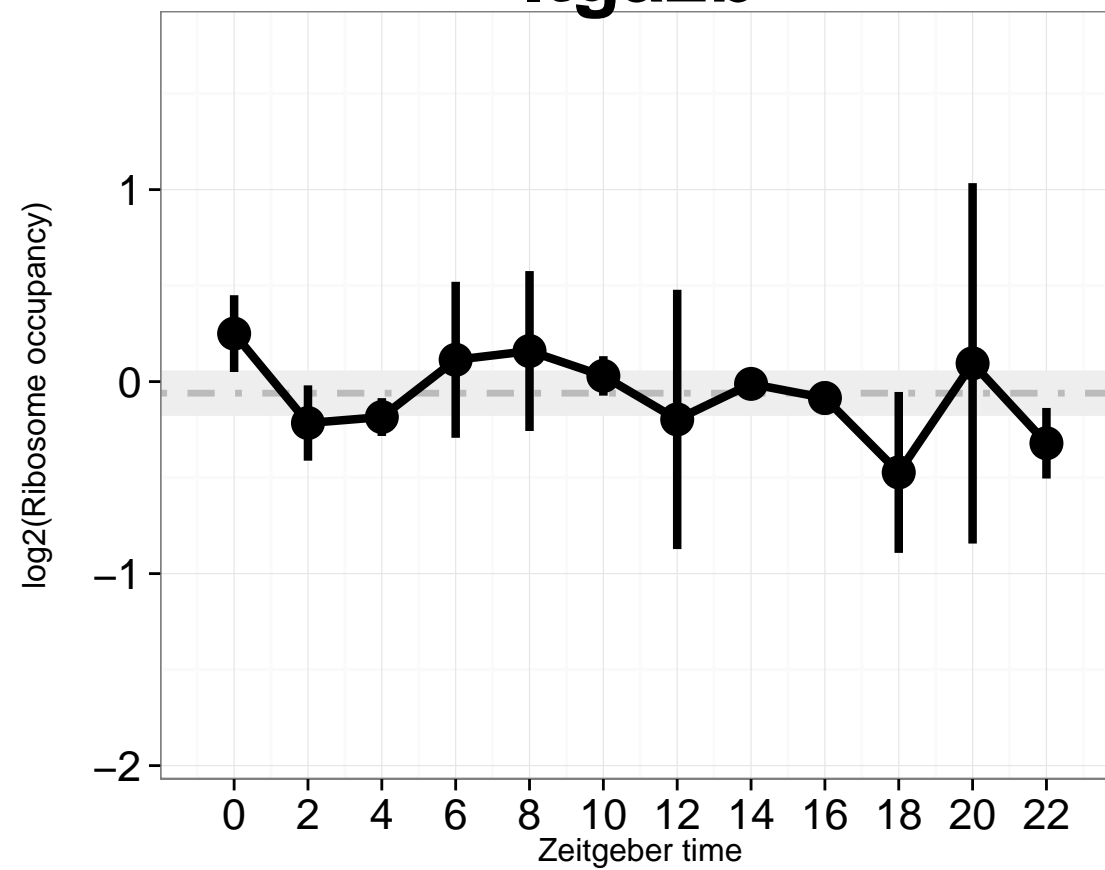

Supplement: SuppDataset_1.zip [file Itga2b_set_A.pdf › Supplemental Dataset 1/A-mRNA_nonrhyth_translation_nonrhyth/Itga2b_set_A.pdf]

# Itga4

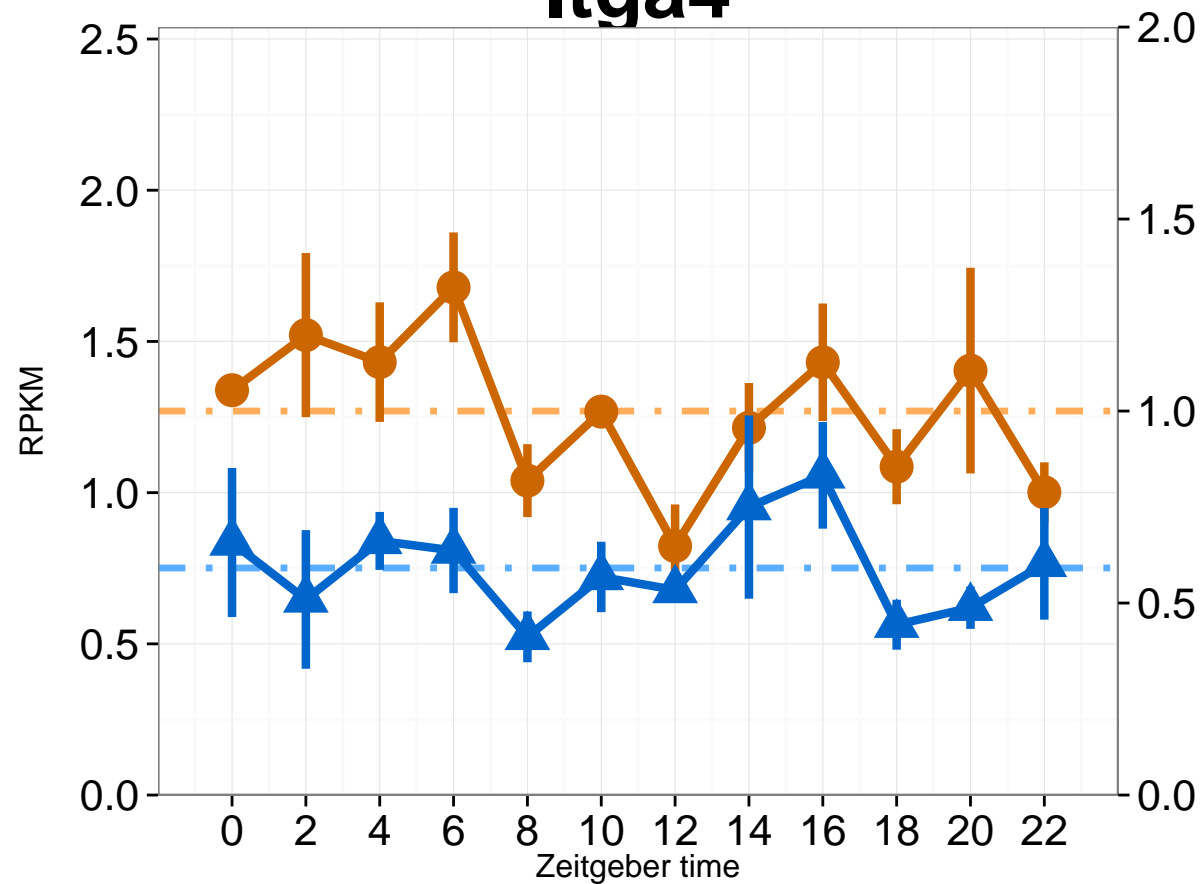

# Itga4

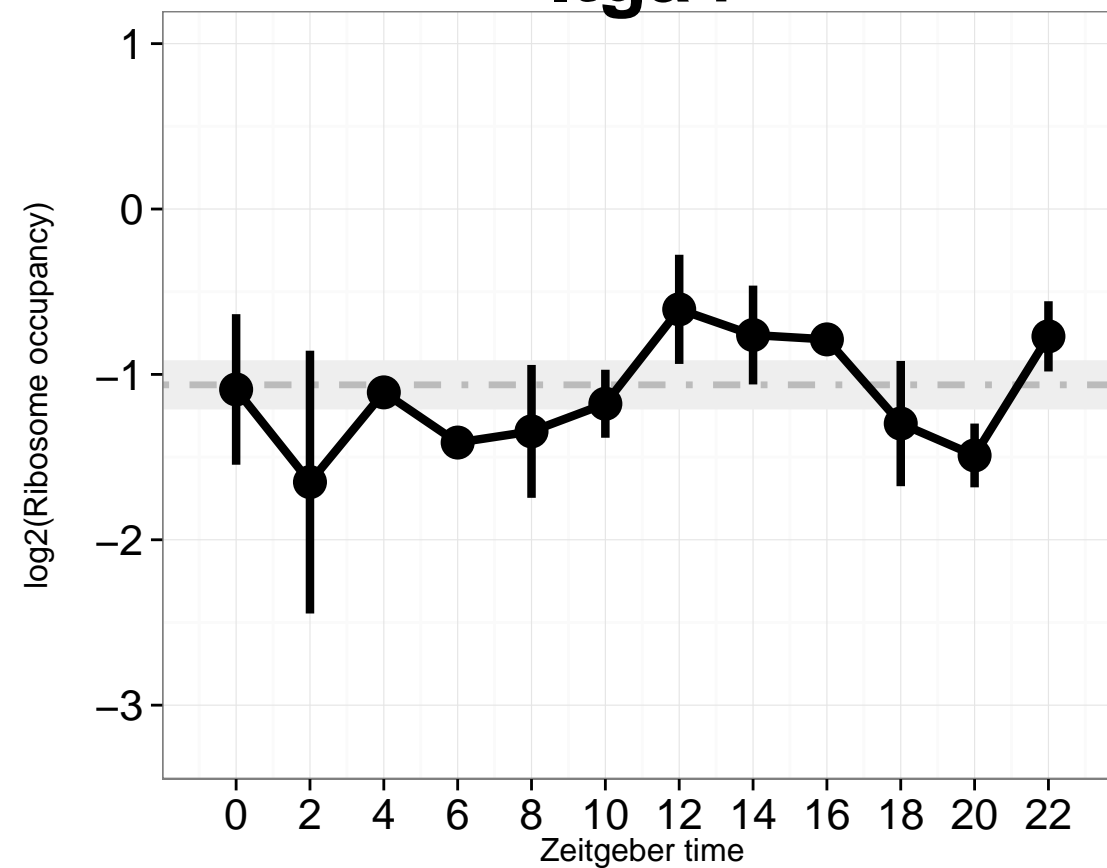

Supplement: SuppDataset_1.zip [file Itga4_set_A.pdf › Supplemental Dataset 1/A-mRNA_nonrhyth_translation_nonrhyth/Itga4_set_A.pdf]

# Itga6

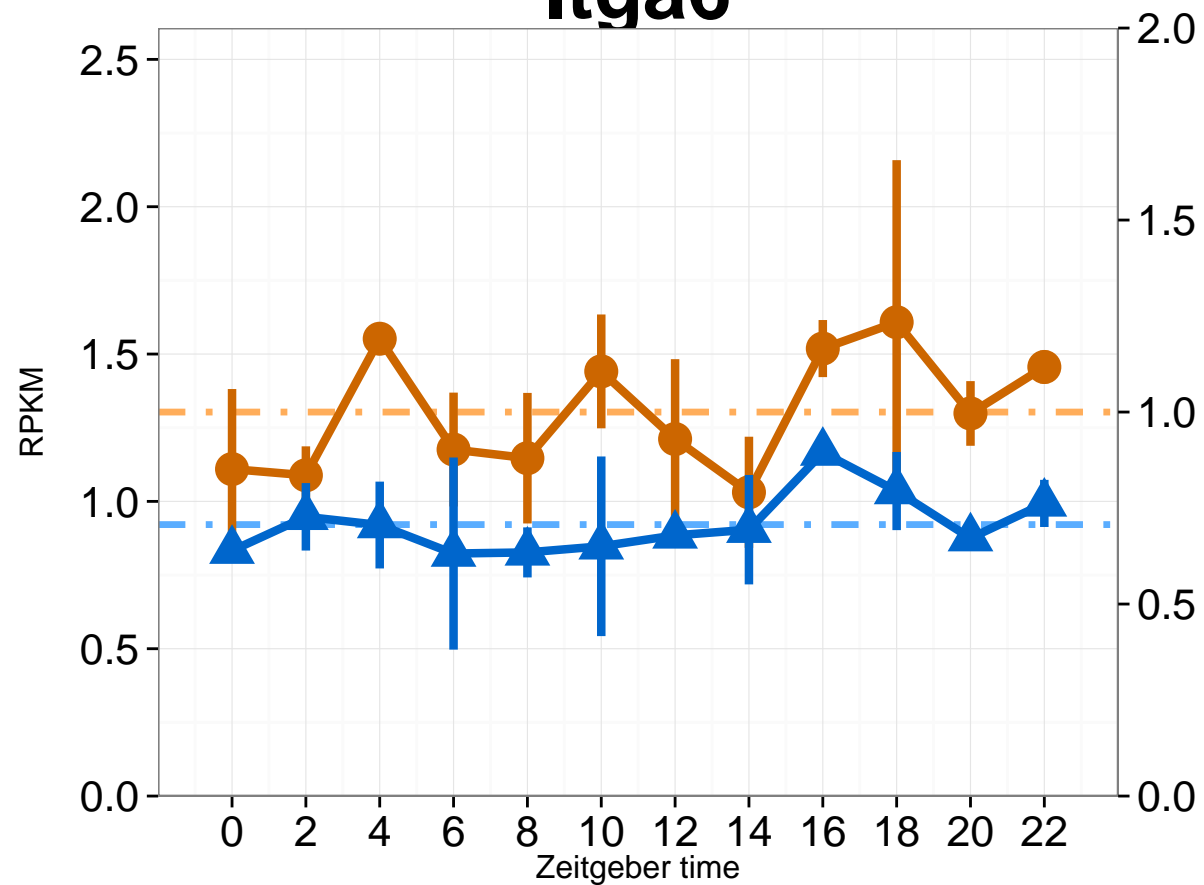

# Itga6

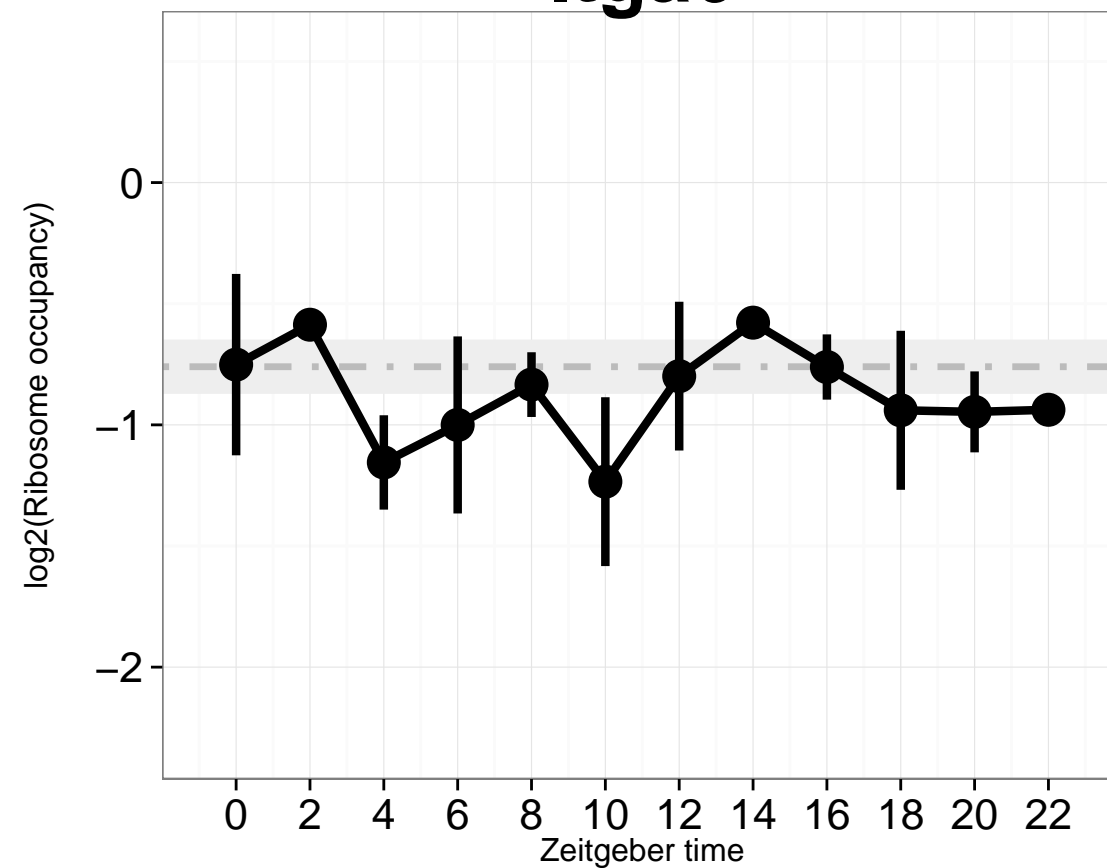

Supplement: SuppDataset_1.zip [file Itga6_set_A.pdf › Supplemental Dataset 1/A-mRNA_nonrhyth_translation_nonrhyth/Itga6_set_A.pdf]

# Itga7

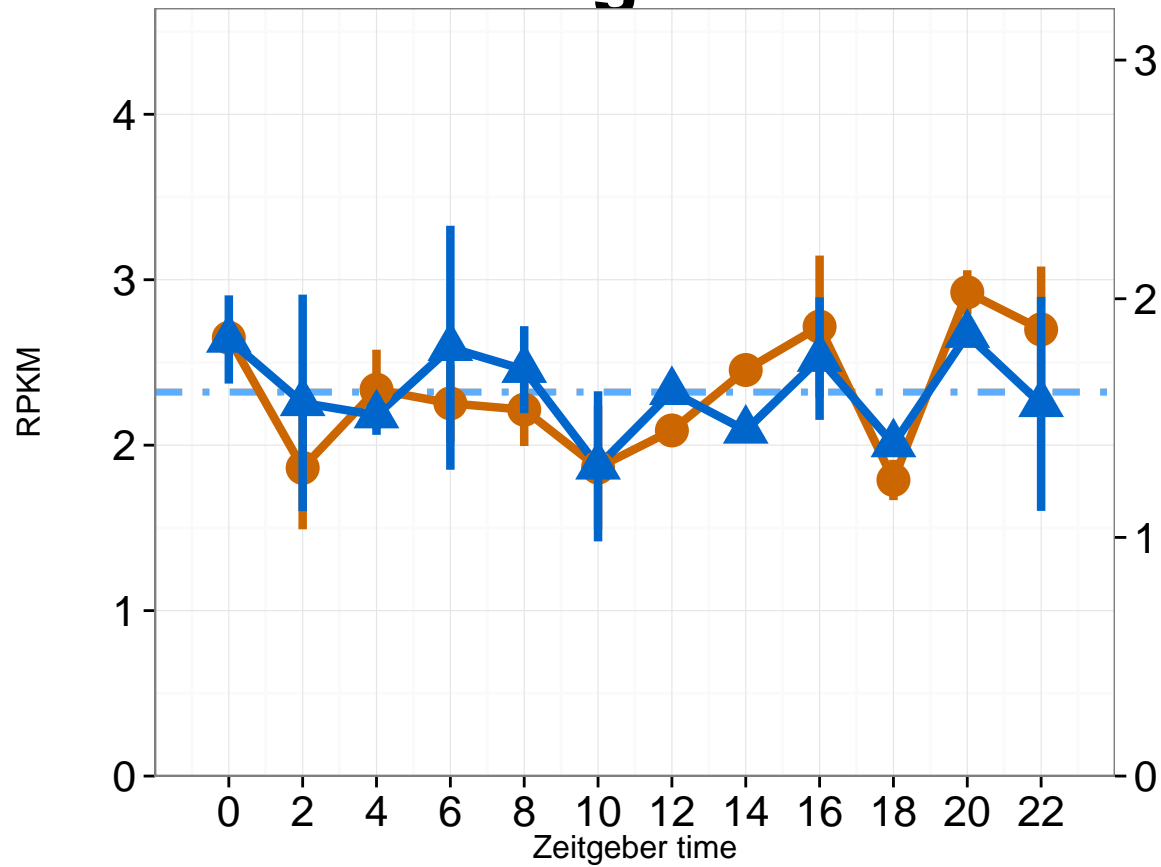

# Itga7

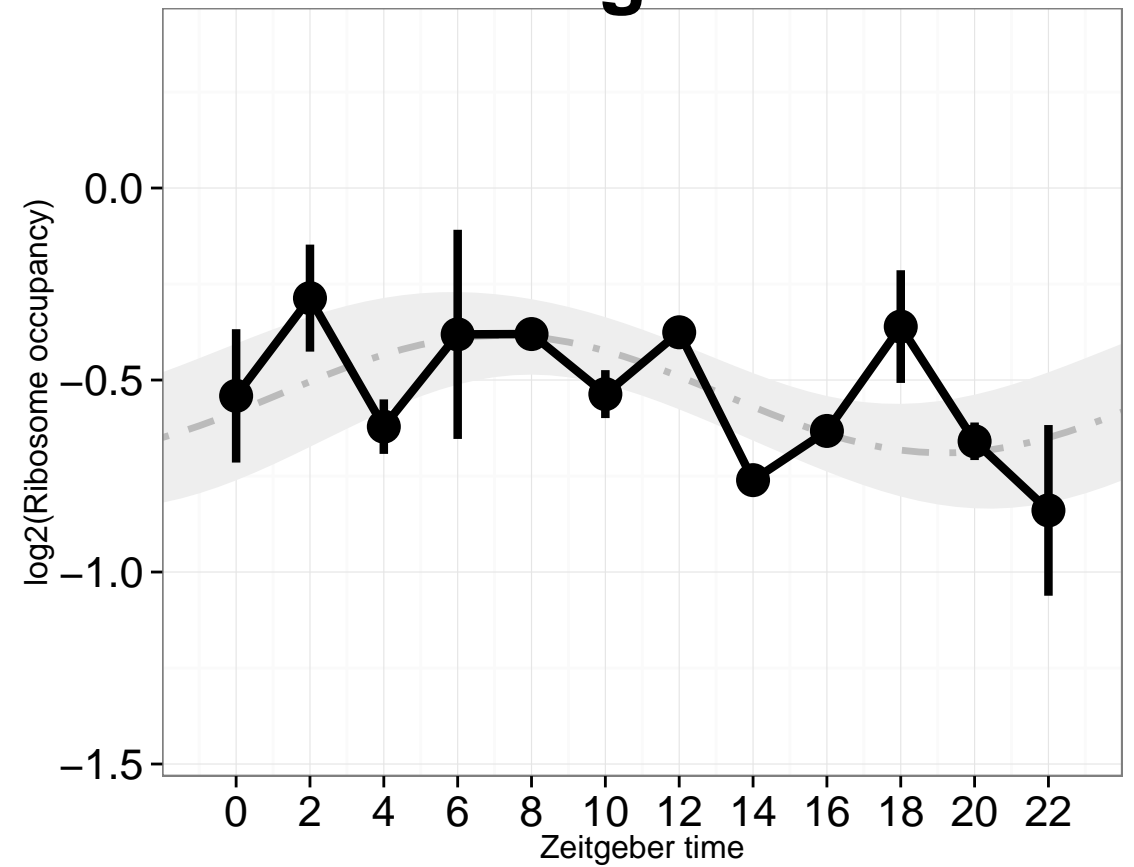

Supplement: SuppDataset_1.zip [file Itga7_set_A.pdf › Supplemental Dataset 1/A-mRNA_nonrhyth_translation_nonrhyth/Itga7_set_A.pdf]

# Itga9

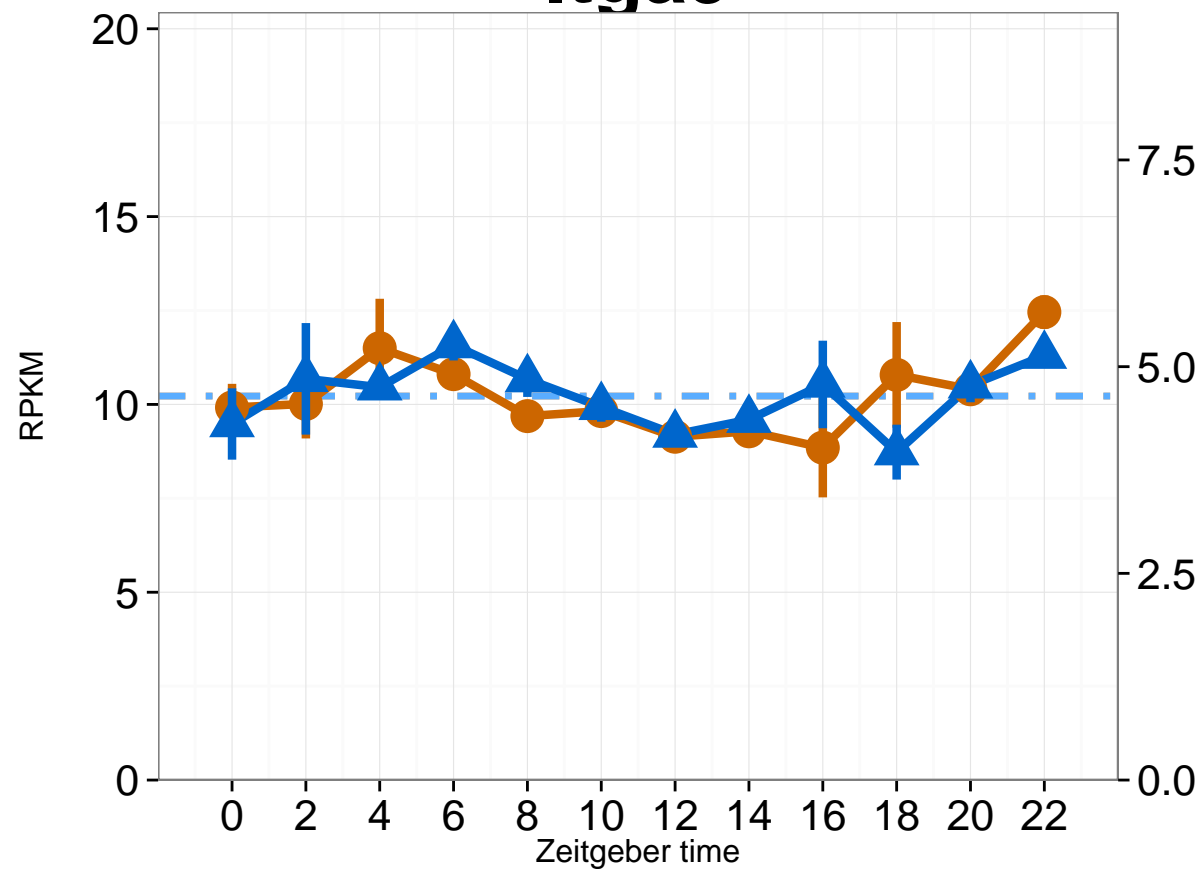

# Itga9

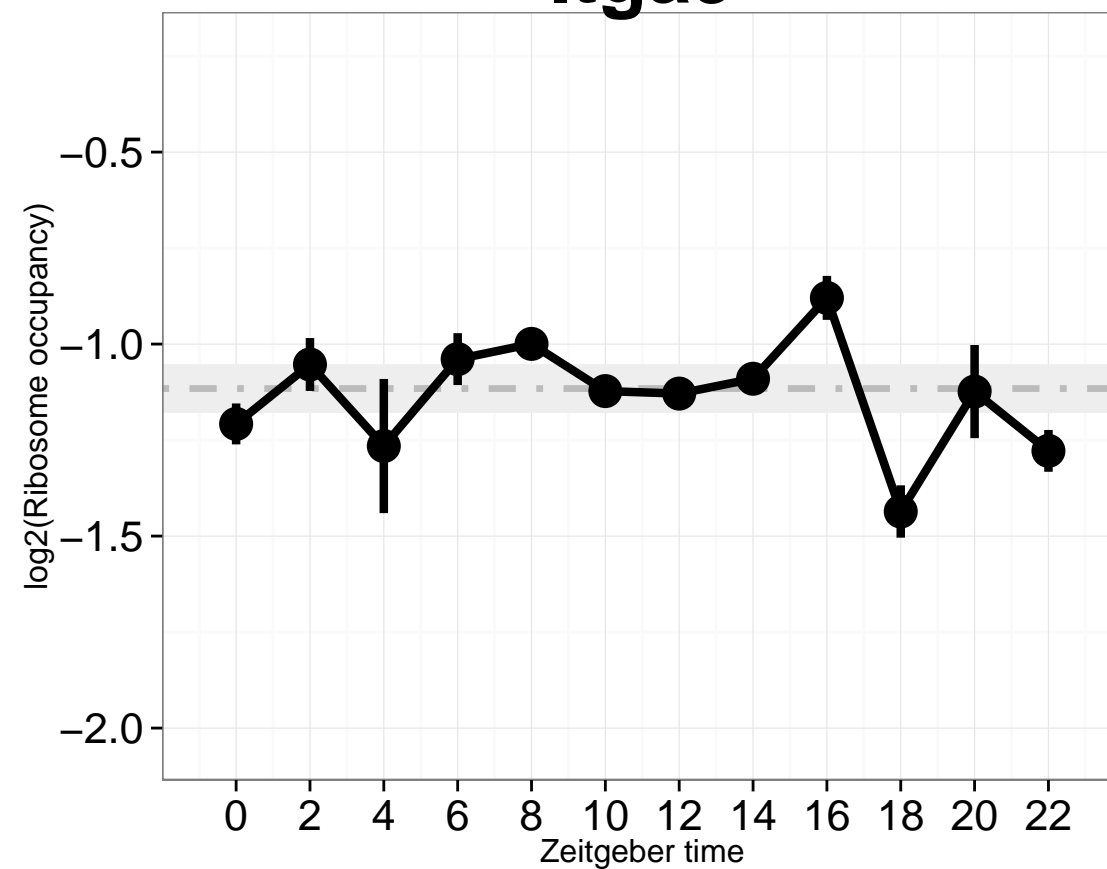

Supplement: SuppDataset_1.zip [file Itga9_set_A.pdf › Supplemental Dataset 1/A-mRNA_nonrhyth_translation_nonrhyth/Itga9_set_A.pdf]

## Itgae

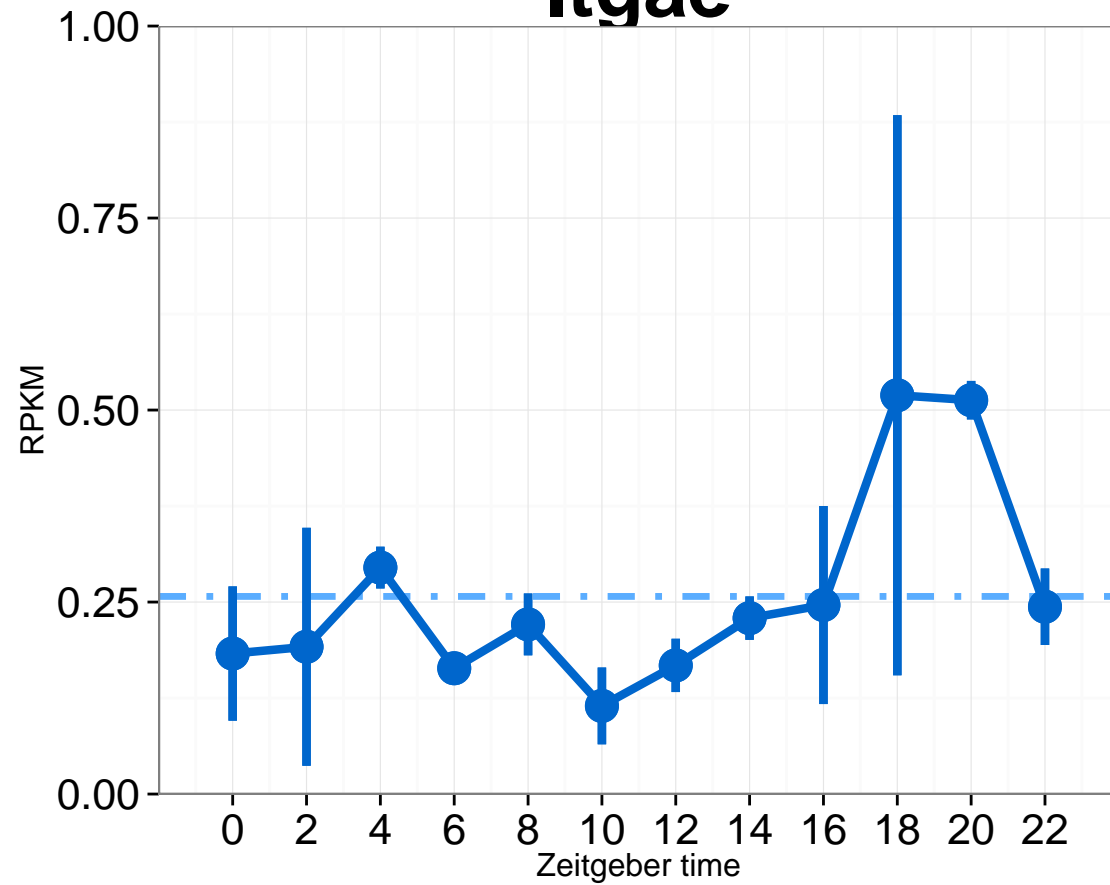

## Itgae log2(Ribosome occupancy)

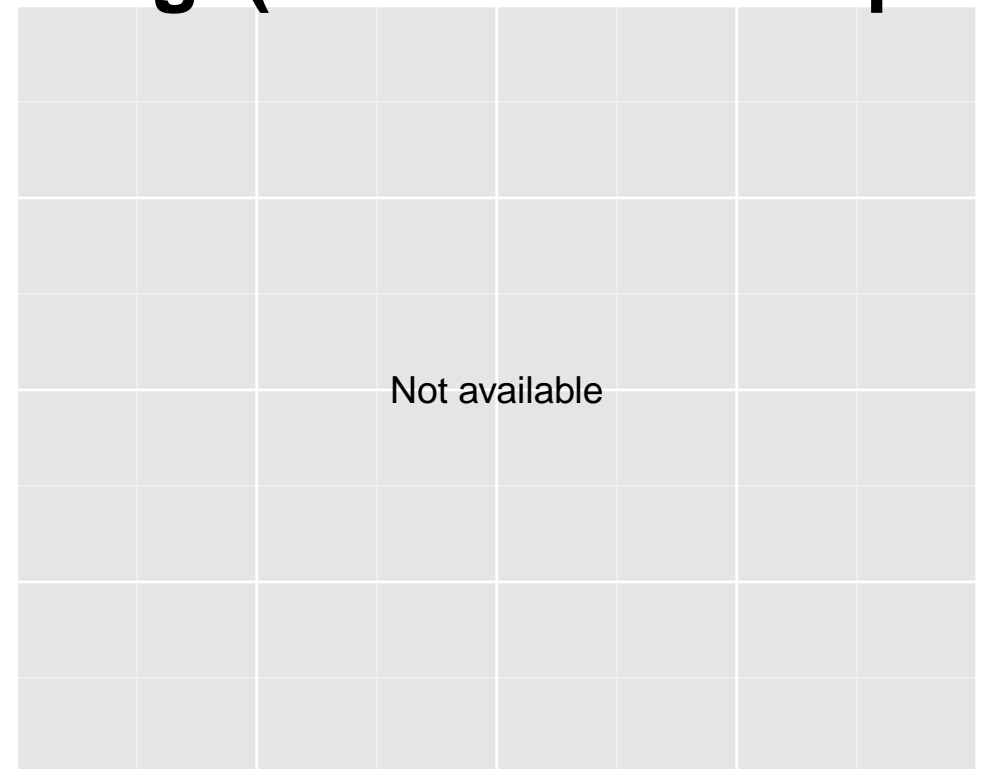

Supplement: SuppDataset_1.zip [file Itgae_set_A.pdf › Supplemental Dataset 1/A-mRNA_nonrhyth_translation_nonrhyth/Itgae_set_A.pdf]

## Itgal

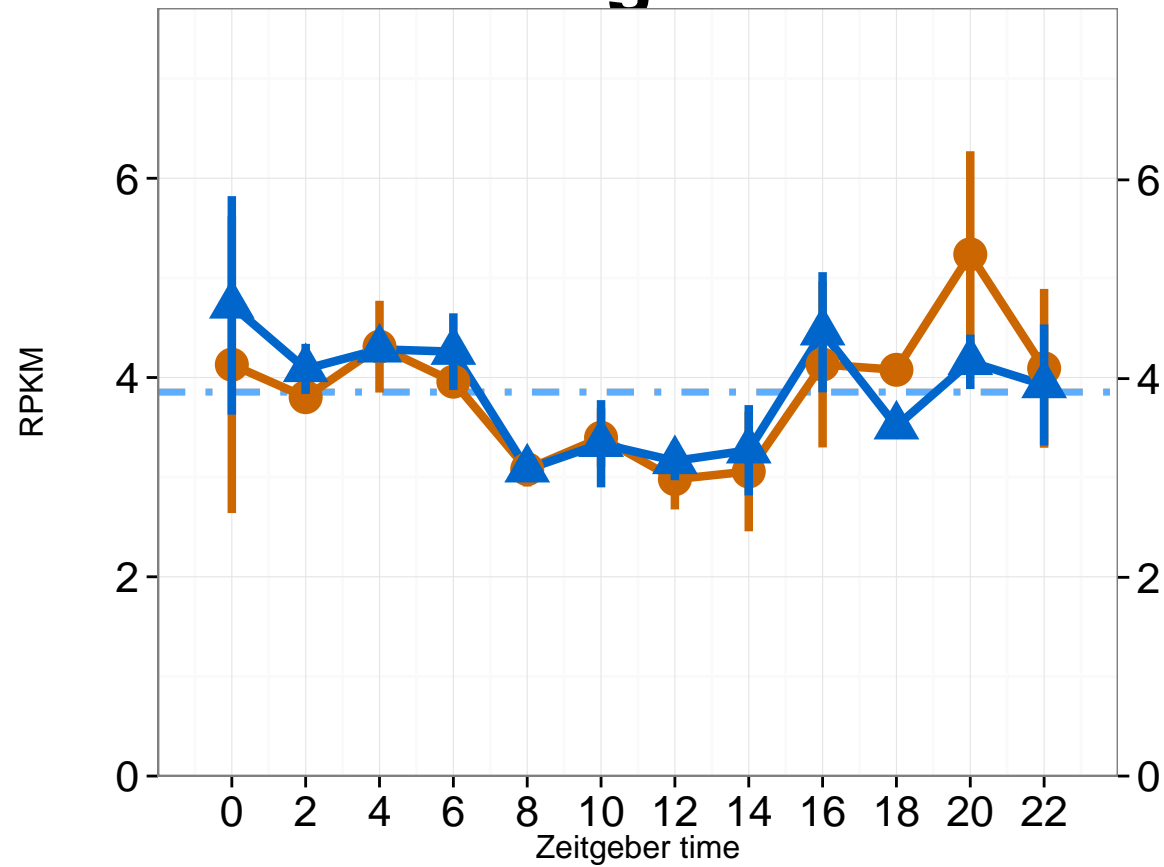

## Itgal

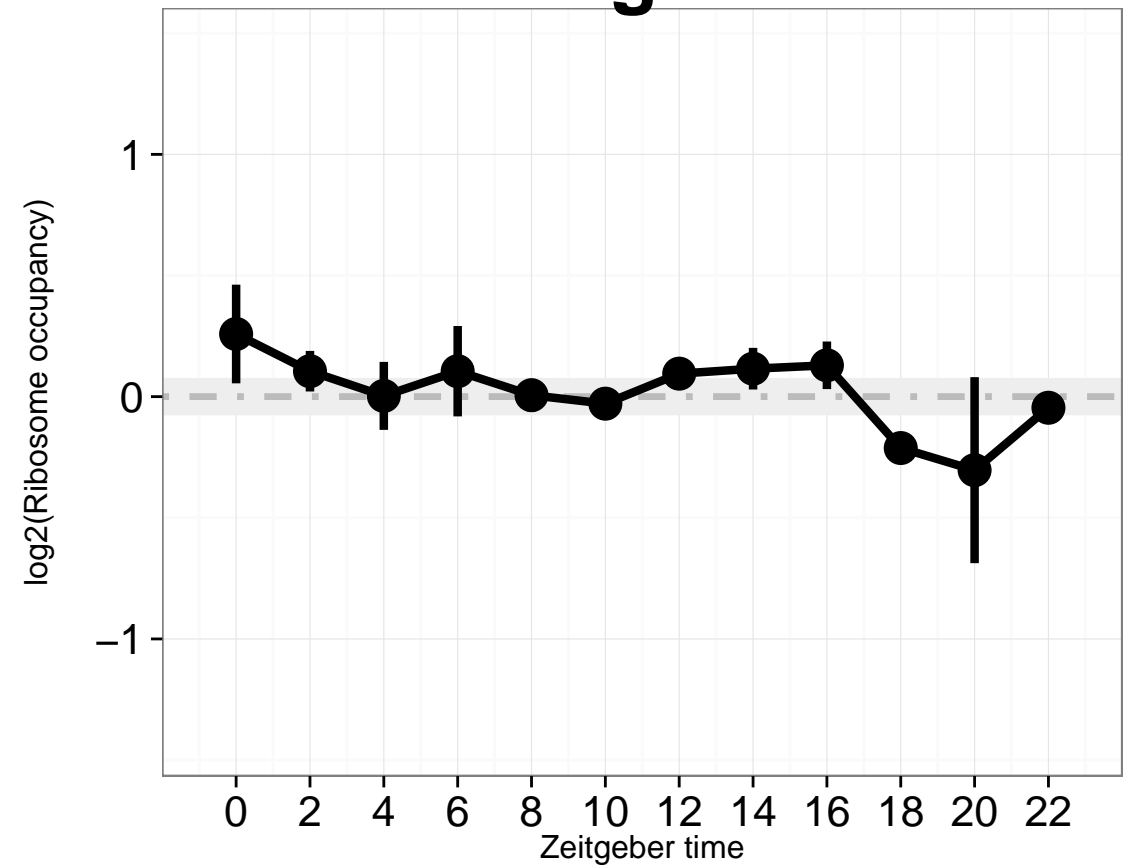

Supplement: SuppDataset_1.zip [file Itgal_set_A.pdf › Supplemental Dataset 1/A-mRNA_nonrhyth_translation_nonrhyth/Itgal_set_A.pdf]

## Itgav

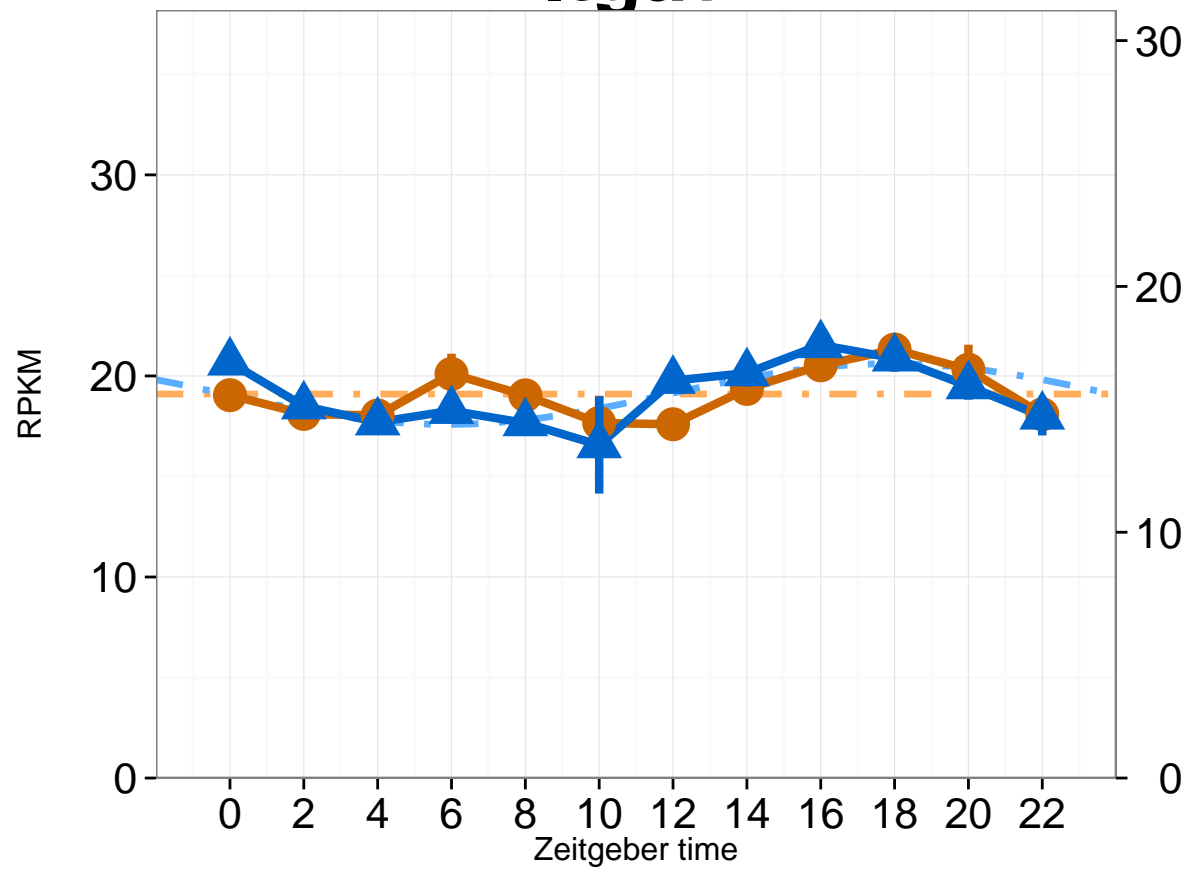

## Itgav

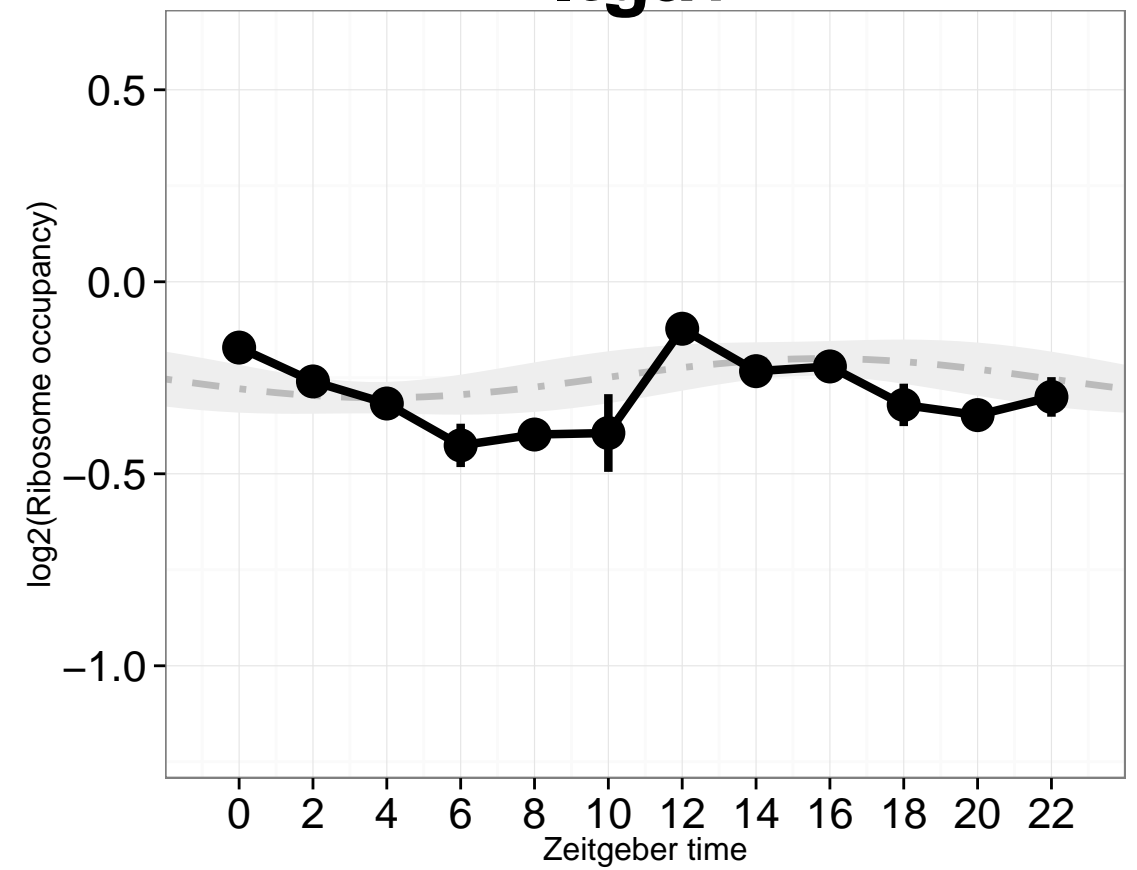

Supplement: SuppDataset_1.zip [file Itgav_set_A.pdf › Supplemental Dataset 1/A-mRNA_nonrhyth_translation_nonrhyth/Itgav_set_A.pdf]

# Itgax

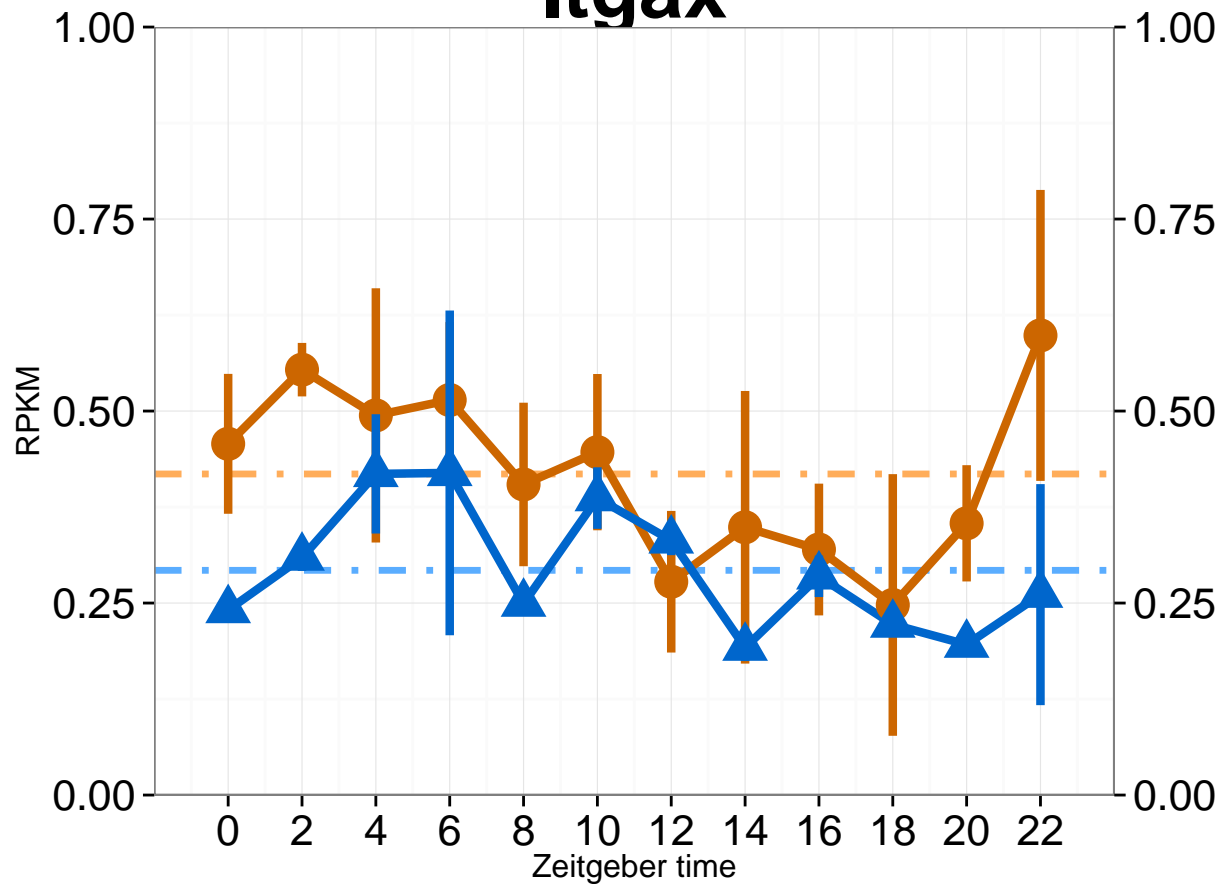

# Itgax

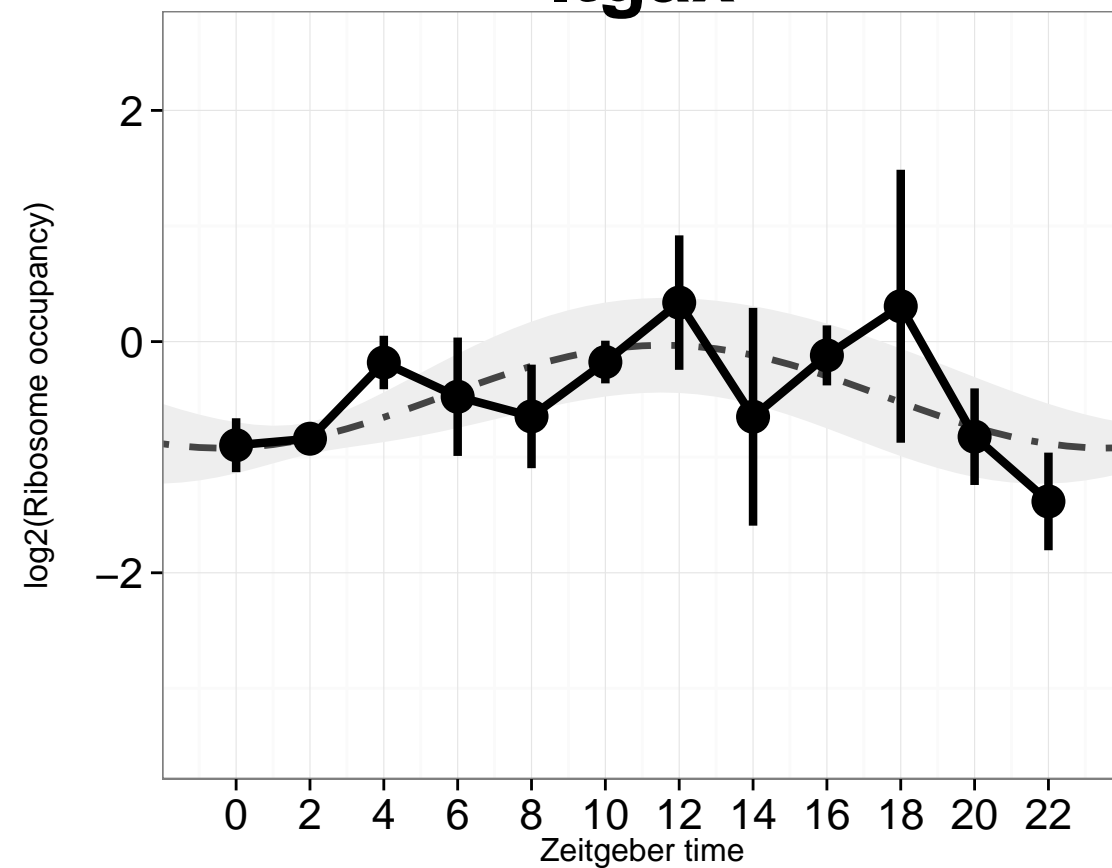

Supplement: SuppDataset_1.zip [file Itgax_set_A.pdf › Supplemental Dataset 1/A-mRNA_nonrhyth_translation_nonrhyth/Itgax_set_A.pdf]

# Itgb1

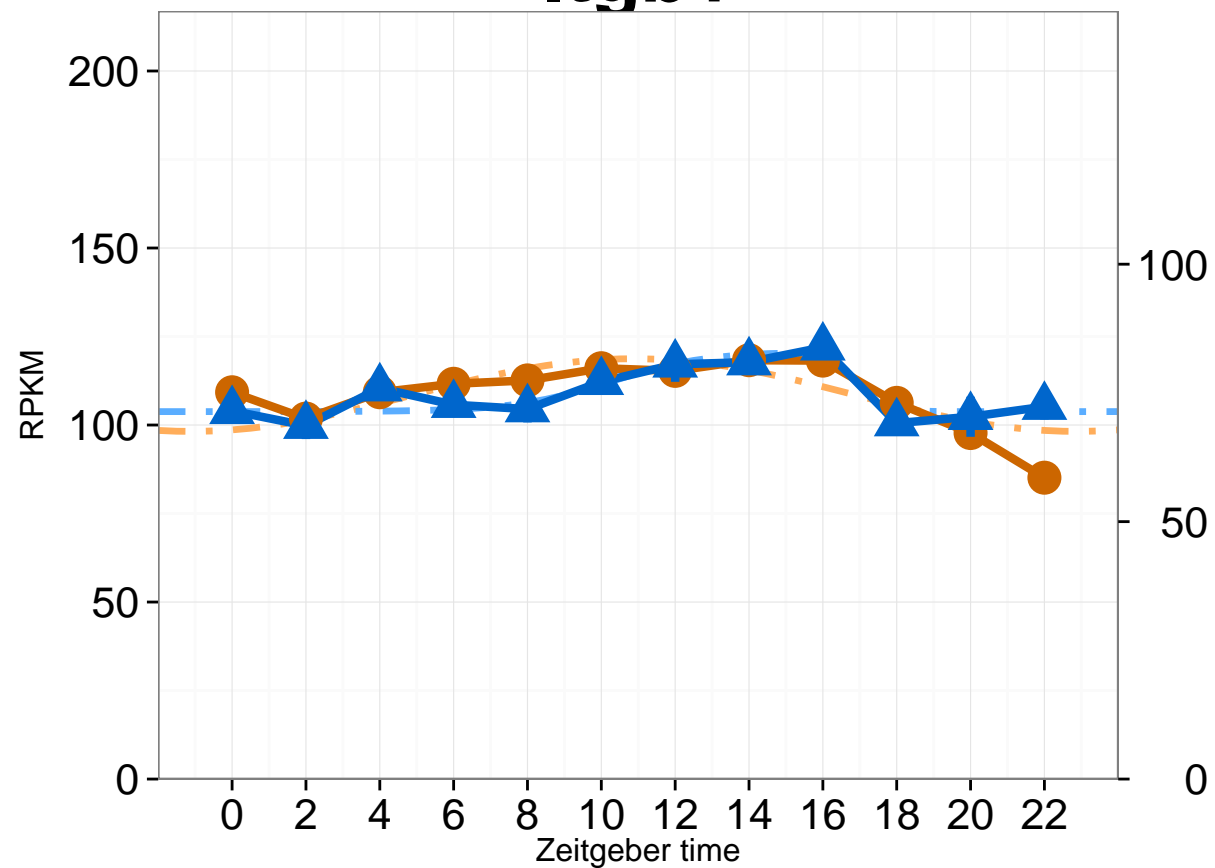

# Itgb1

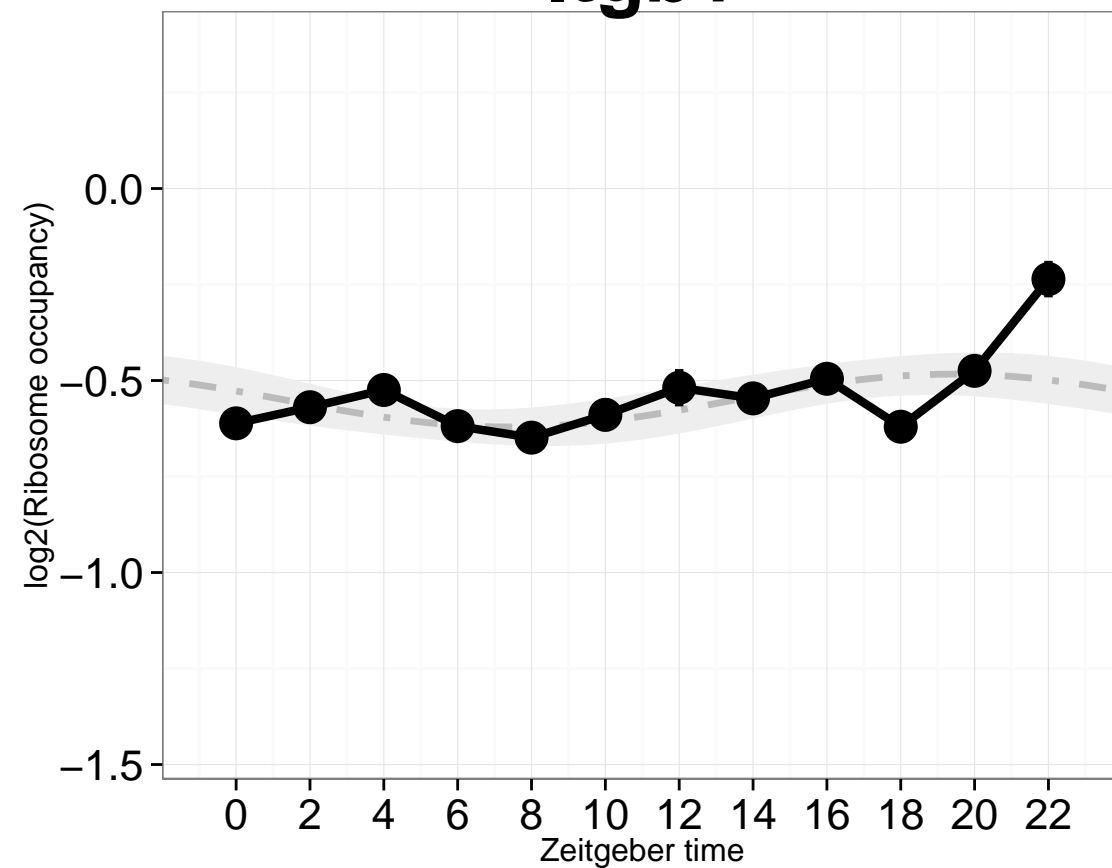

Supplement: SuppDataset_1.zip [file Itgb1_set_A.pdf › Supplemental Dataset 1/A-mRNA_nonrhyth_translation_nonrhyth/Itgb1_set_A.pdf]

**Itgb1bp1**

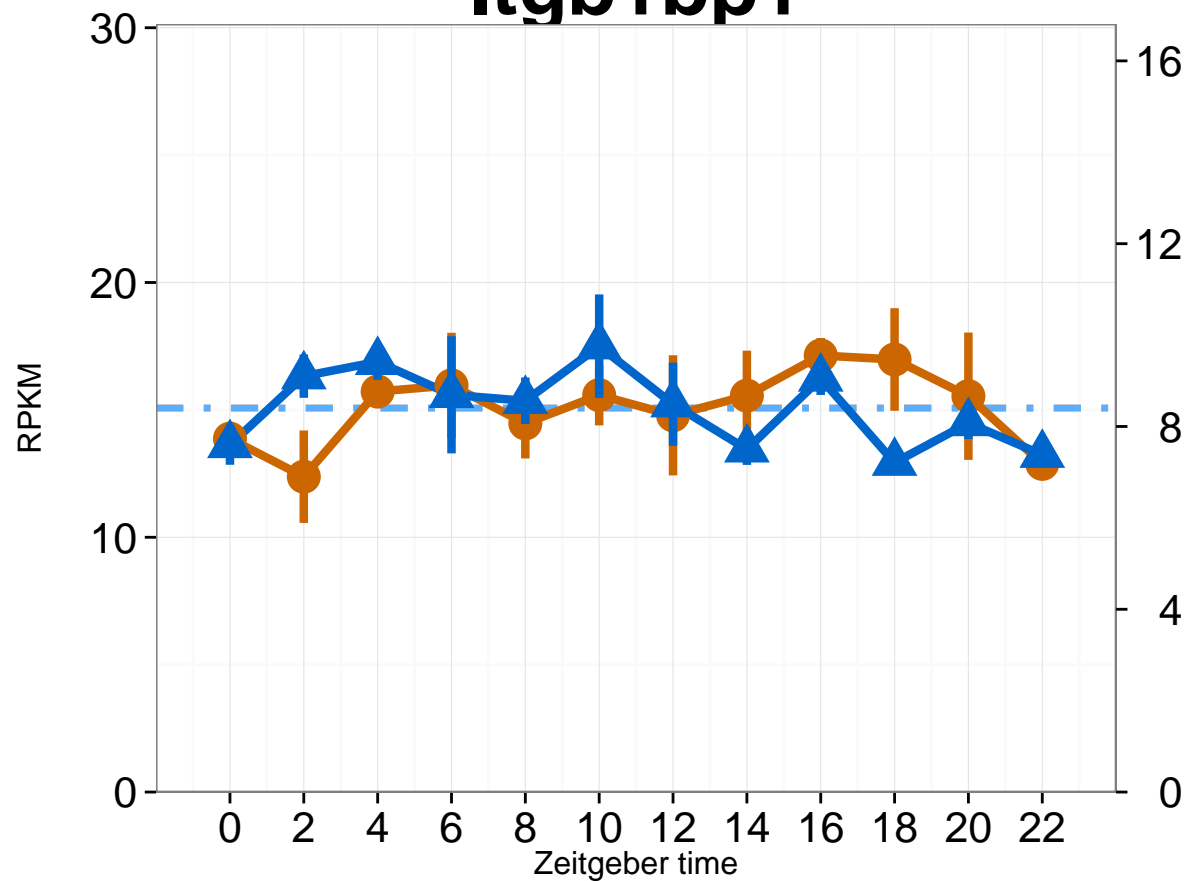

**Itgb1bp1**

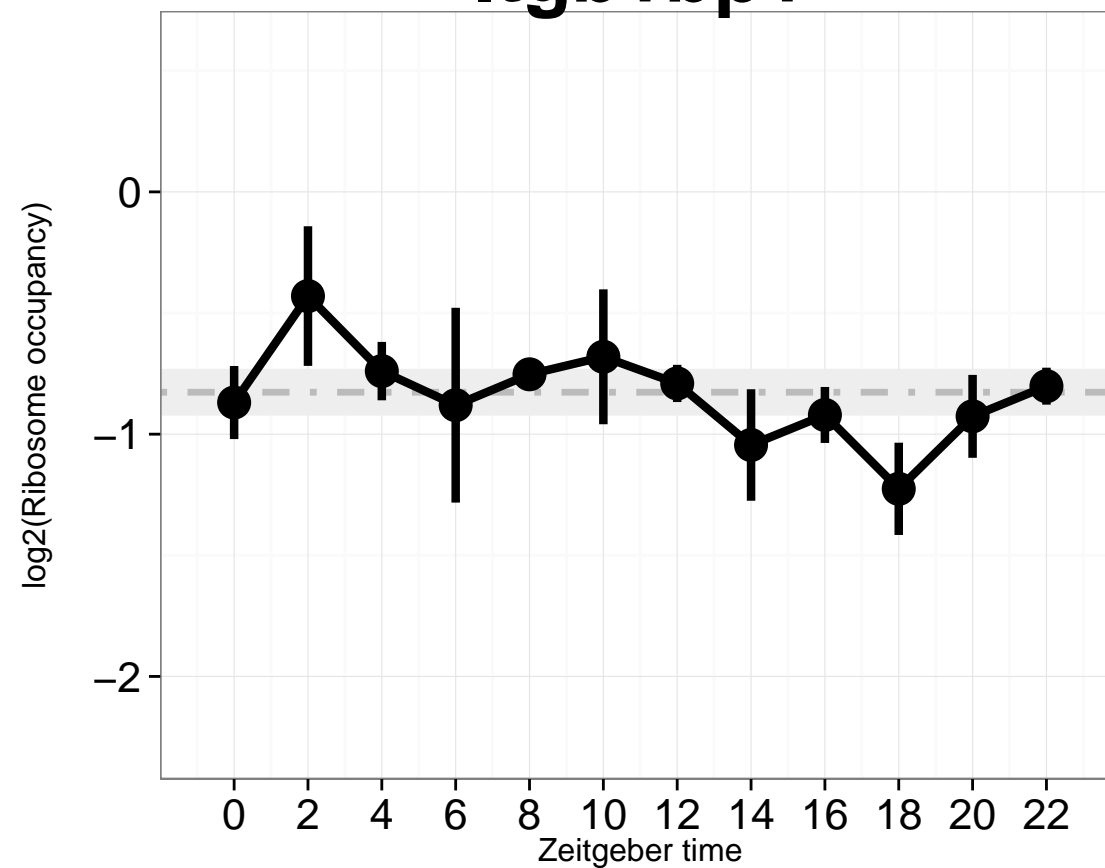

Supplement: SuppDataset_1.zip [file Itgb1bp1_set_A.pdf › Supplemental Dataset 1/A-mRNA_nonrhyth_translation_nonrhyth/Itgb1bp1_set_A.pdf]

# Itgb2

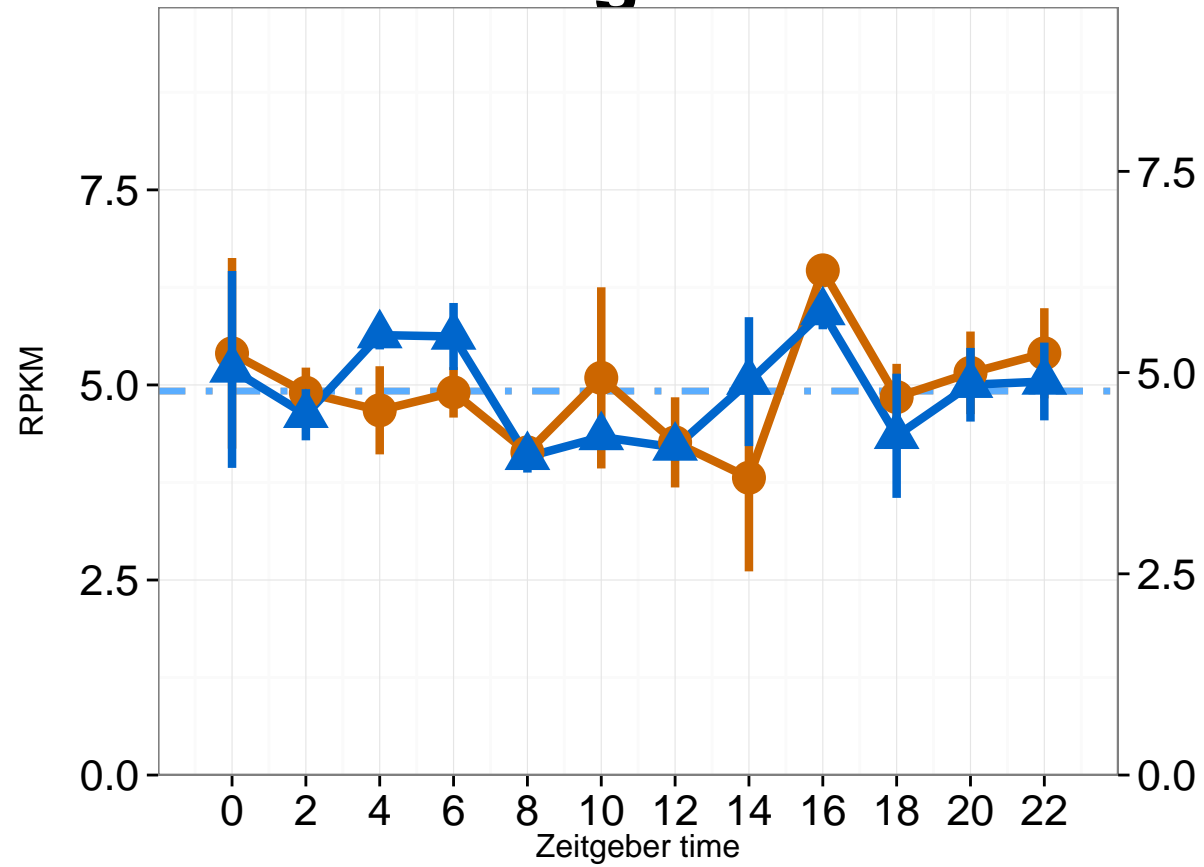

# Itgb2

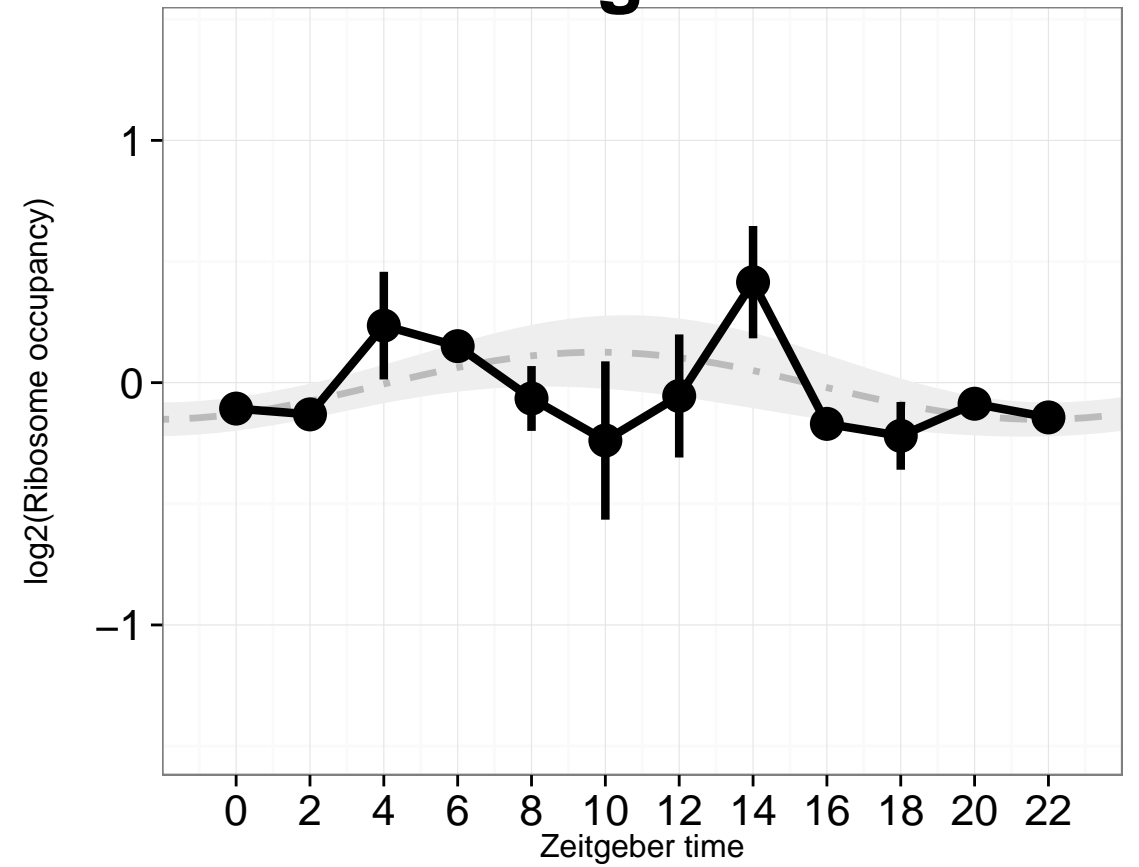

Supplement: SuppDataset_1.zip [file Itgb2_set_A.pdf › Supplemental Dataset 1/A-mRNA_nonrhyth_translation_nonrhyth/Itgb2_set_A.pdf]

# Itgb3

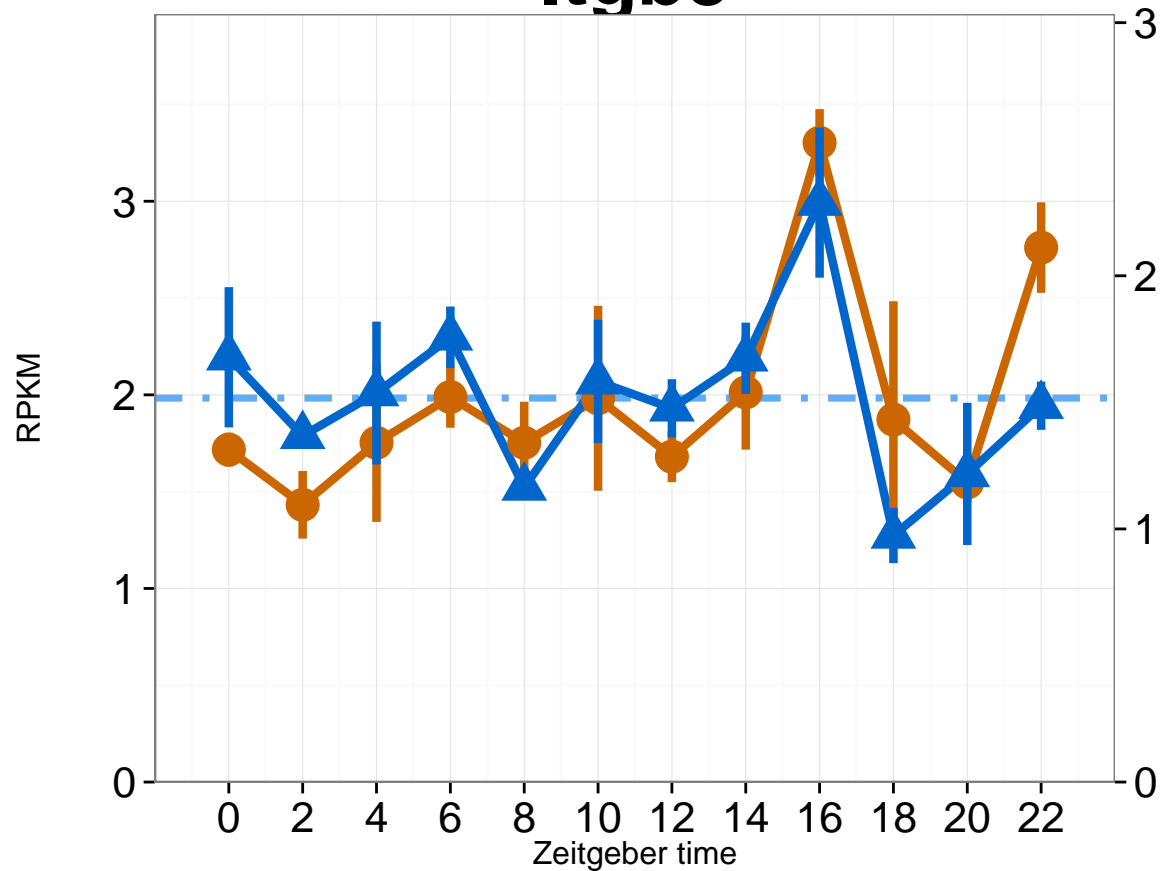

# Itgb3

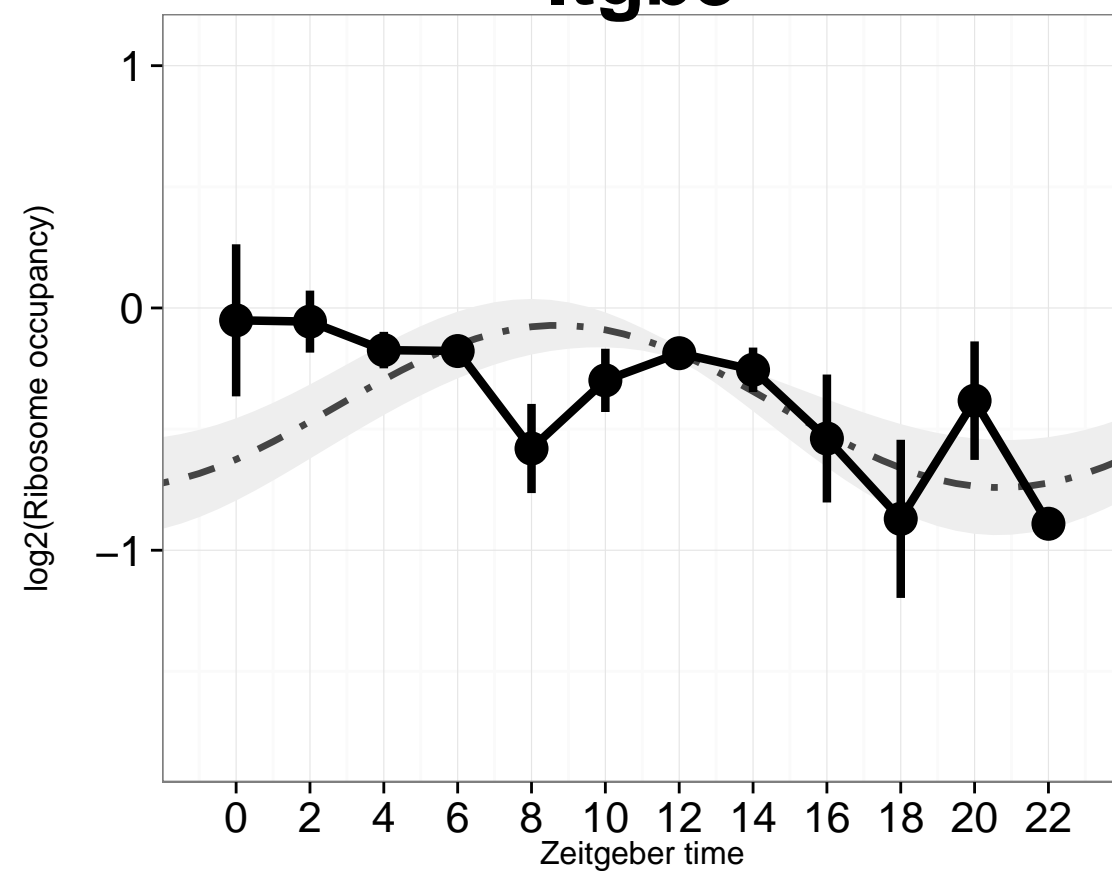

Supplement: SuppDataset_1.zip [file Itgb3_set_A.pdf › Supplemental Dataset 1/A-mRNA_nonrhyth_translation_nonrhyth/Itgb3_set_A.pdf]

# Itgb3bp

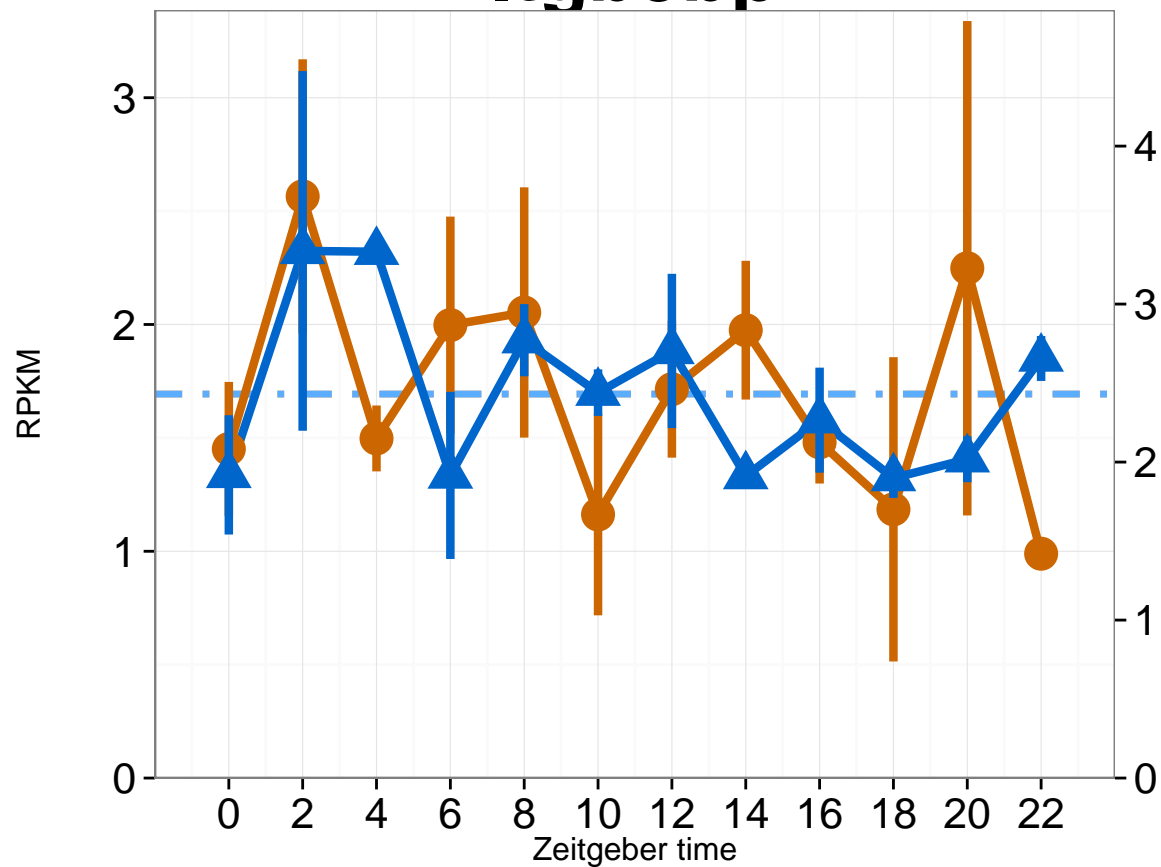

# Itgb3bp

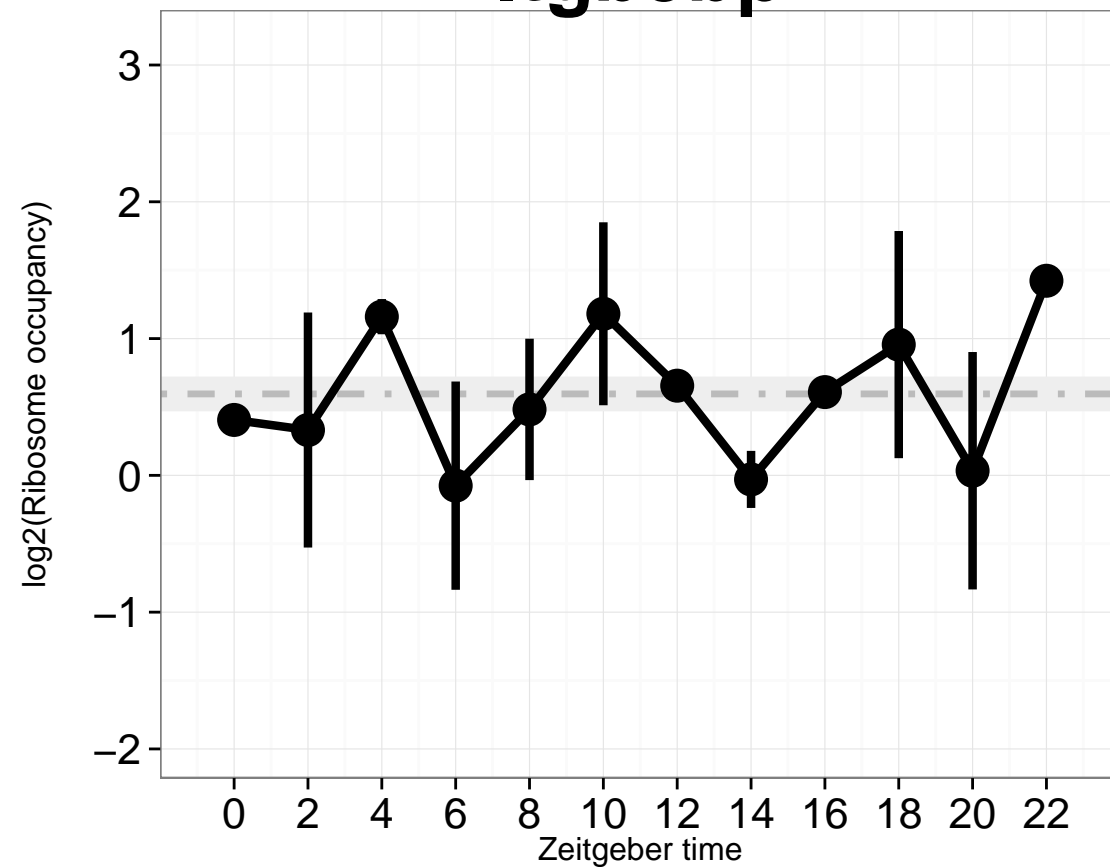

Supplement: SuppDataset_1.zip [file Itgb3bp_set_A.pdf › Supplemental Dataset 1/A-mRNA_nonrhyth_translation_nonrhyth/Itgb3bp_set_A.pdf]

# Itgb7

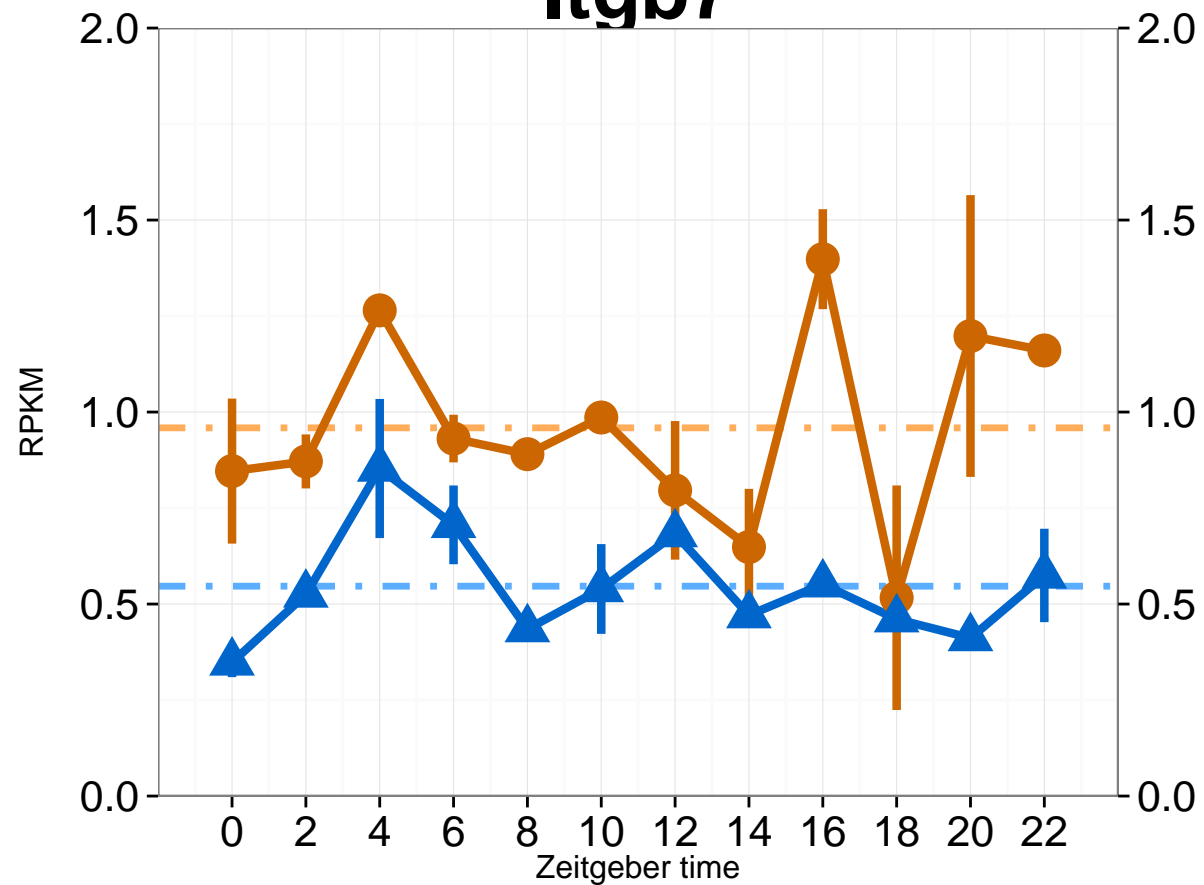

# Itgb7

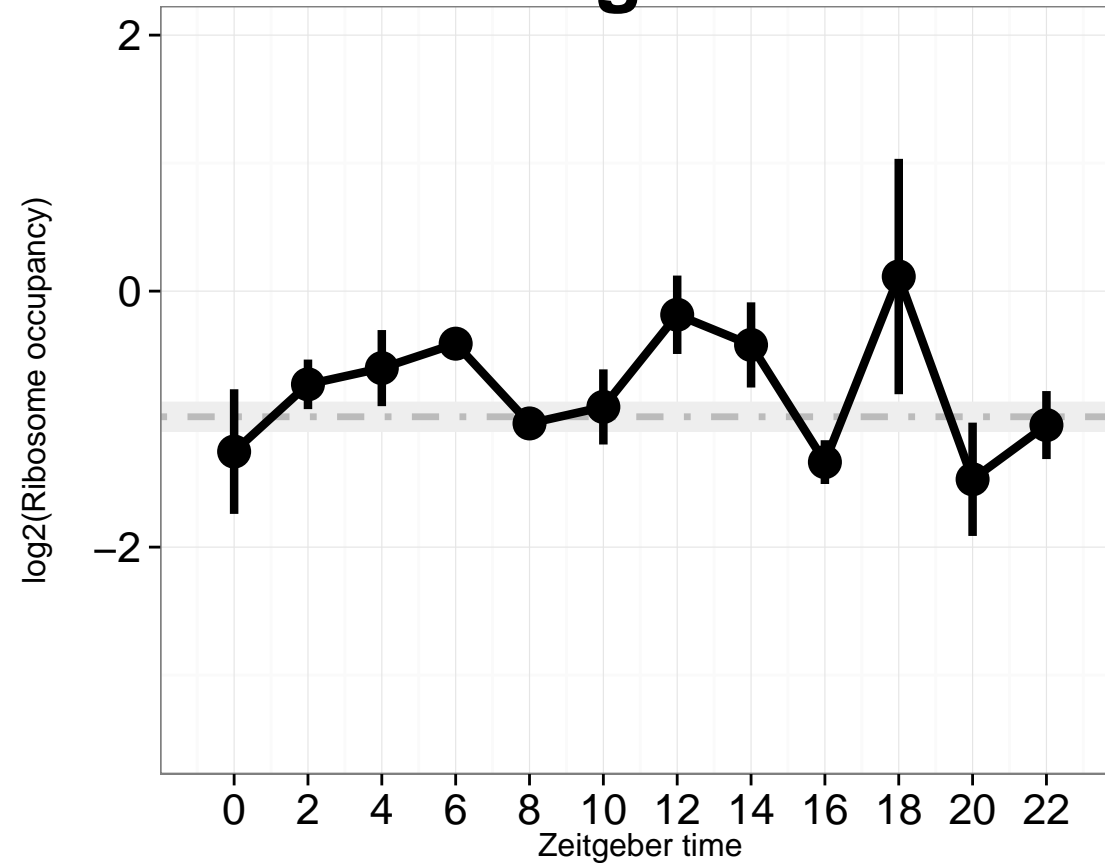

Supplement: SuppDataset_1.zip [file Itgb7_set_A.pdf › Supplemental Dataset 1/A-mRNA_nonrhyth_translation_nonrhyth/Itgb7_set_A.pdf]

## Itih1

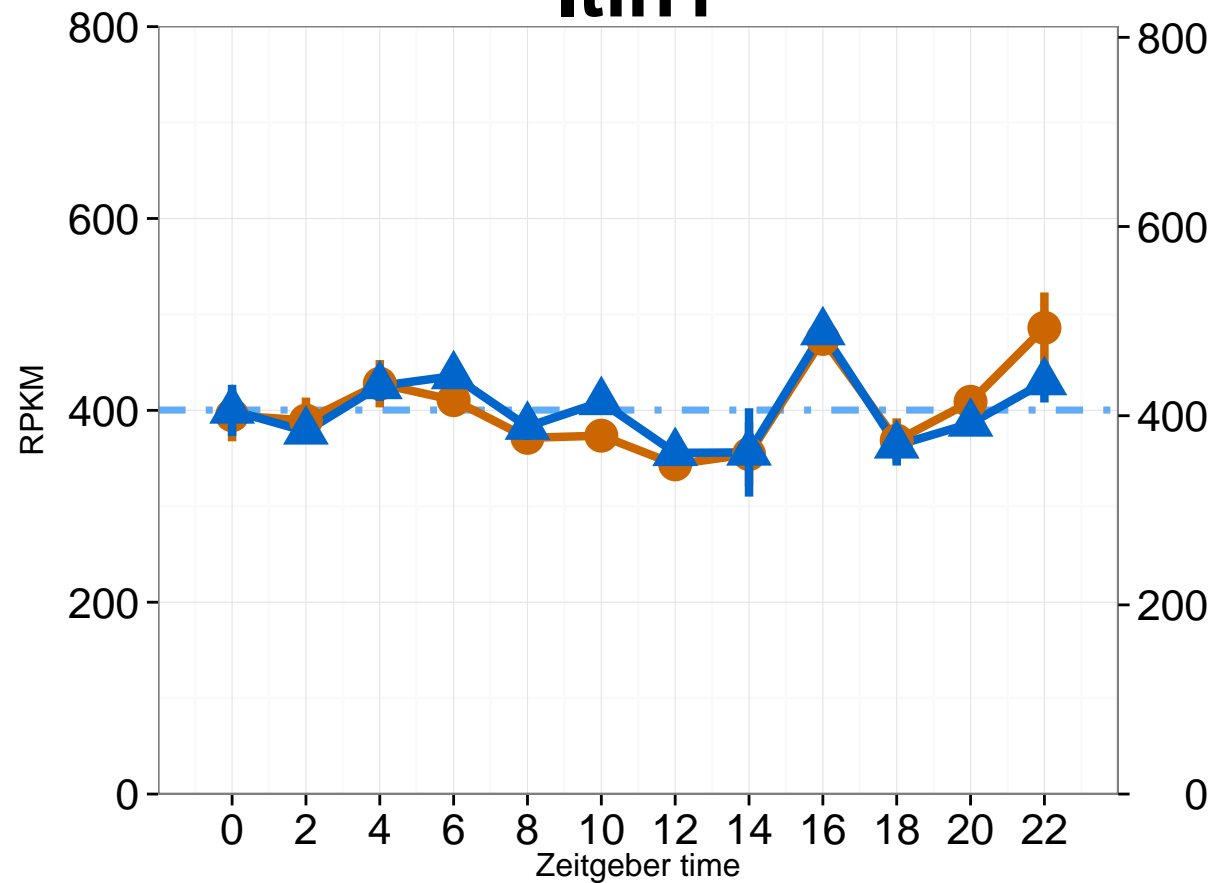

## Itih1

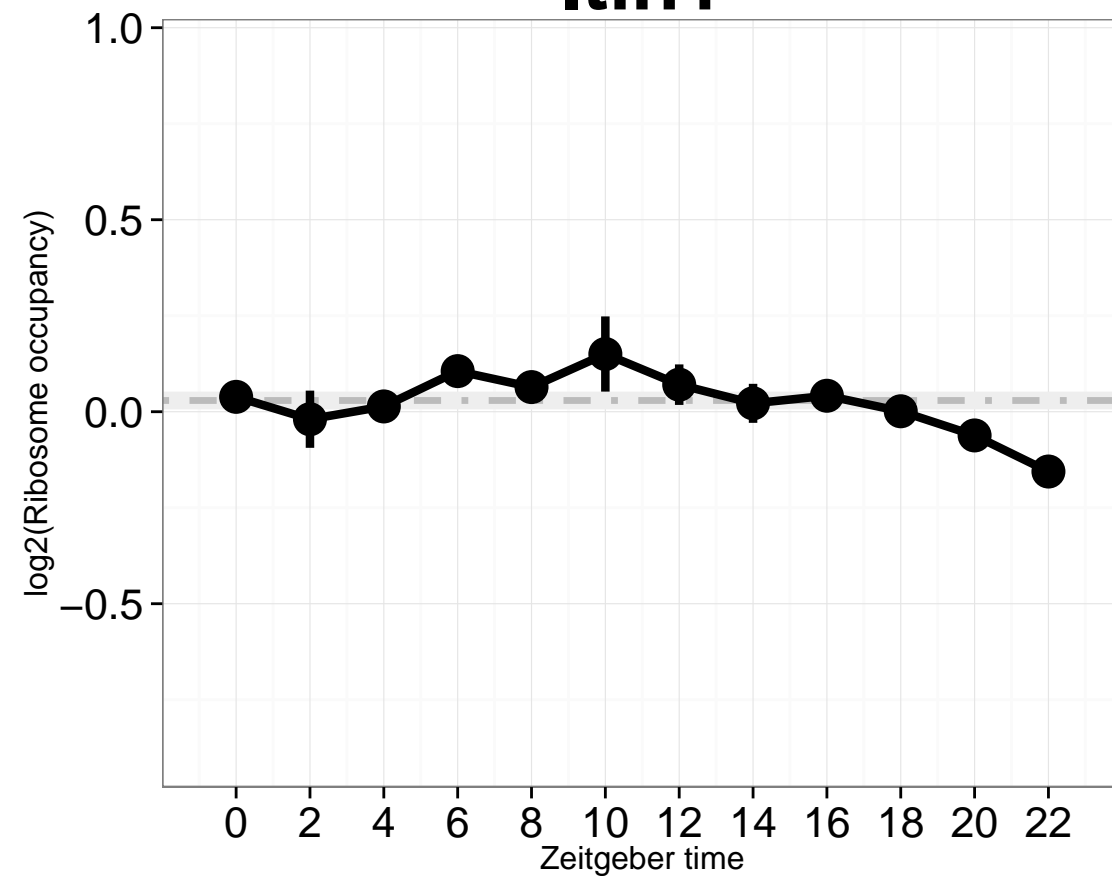

Supplement: SuppDataset_1.zip [file Itih1_set_A.pdf › Supplemental Dataset 1/A-mRNA_nonrhyth_translation_nonrhyth/Itih1_set_A.pdf]

## Itih2

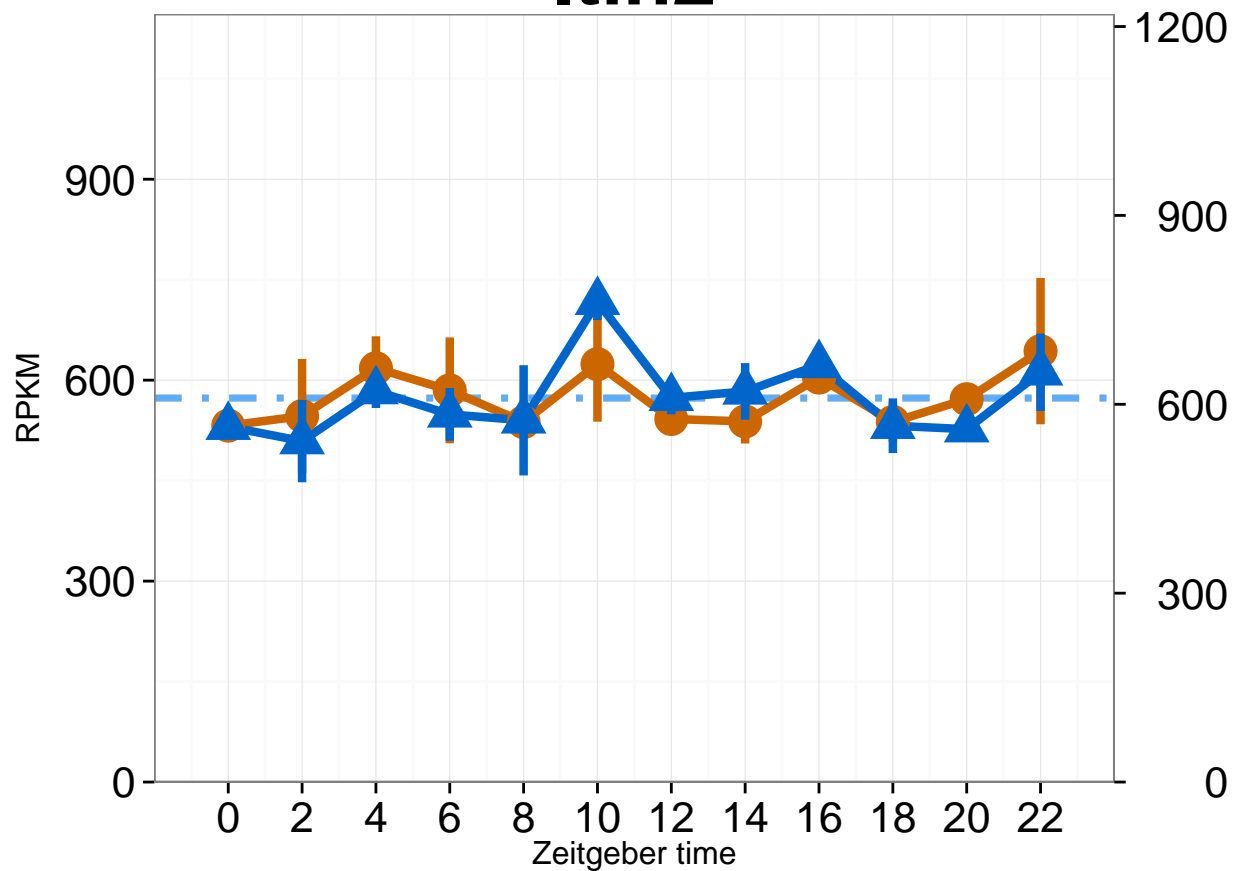

## Itih2

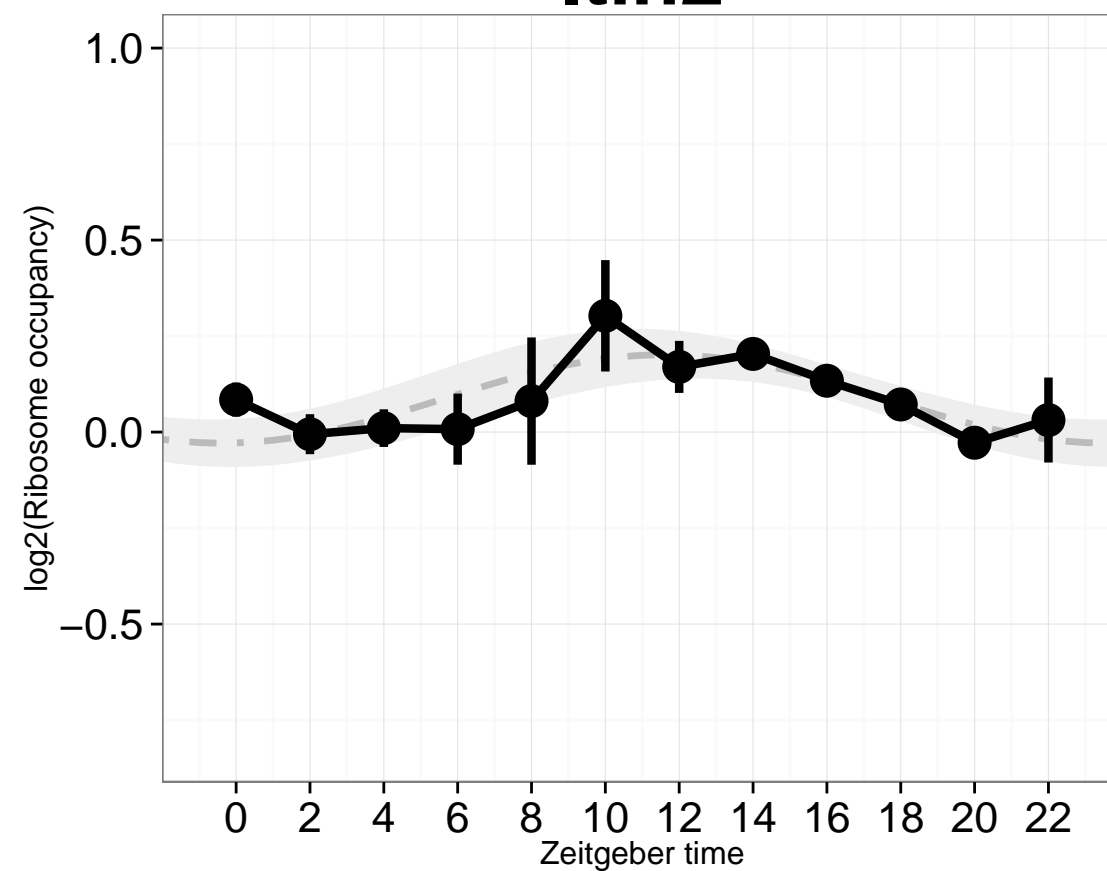

Supplement: SuppDataset_1.zip [file Itih2_set_A.pdf › Supplemental Dataset 1/A-mRNA_nonrhyth_translation_nonrhyth/Itih2_set_A.pdf]

## Itih5

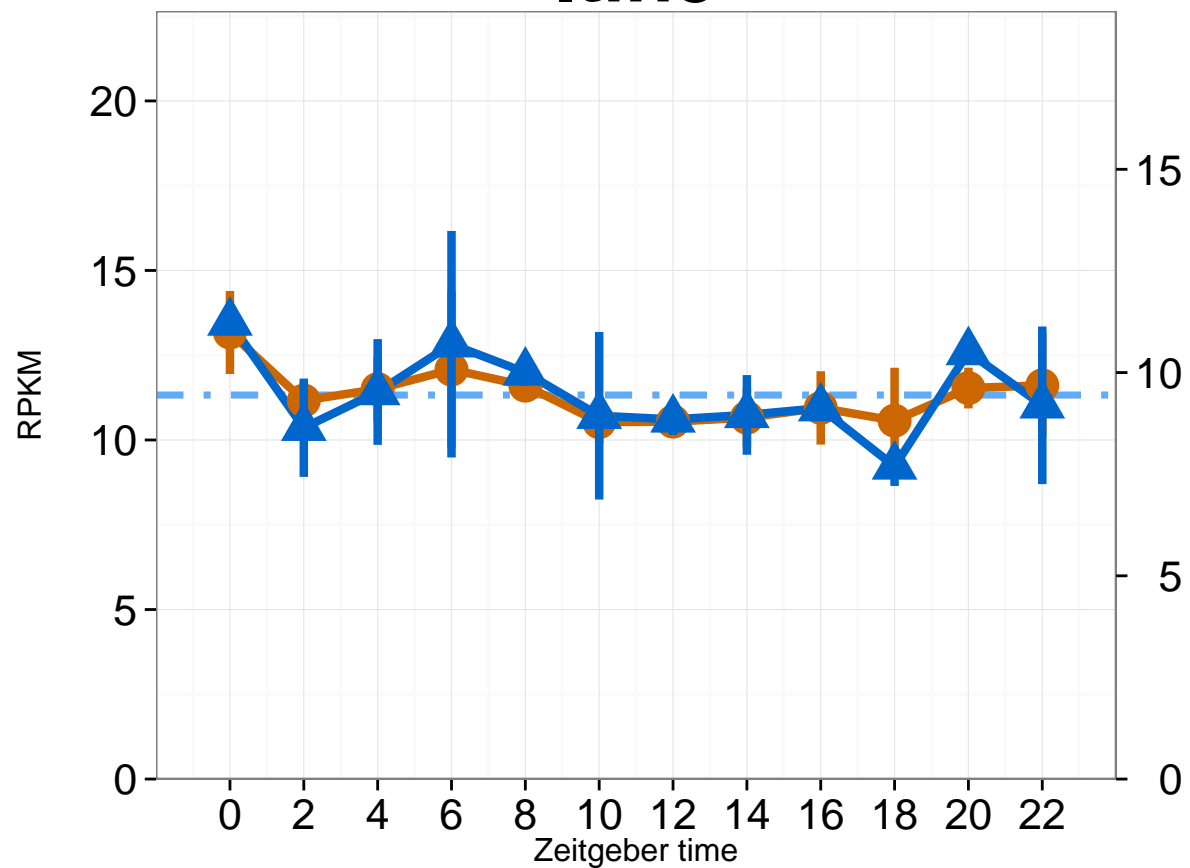

## Itih5

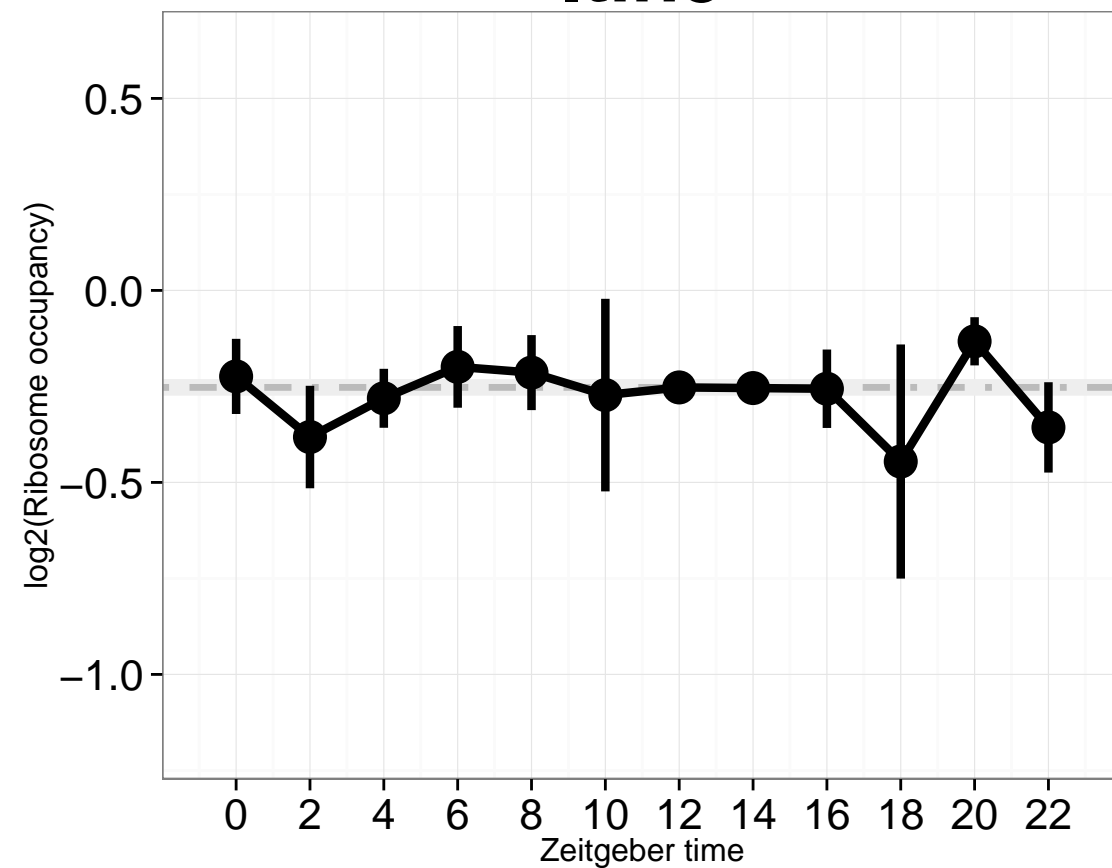

Supplement: SuppDataset_1.zip [file Itih5_set_A.pdf › Supplemental Dataset 1/A-mRNA_nonrhyth_translation_nonrhyth/Itih5_set_A.pdf]

# Itm2a

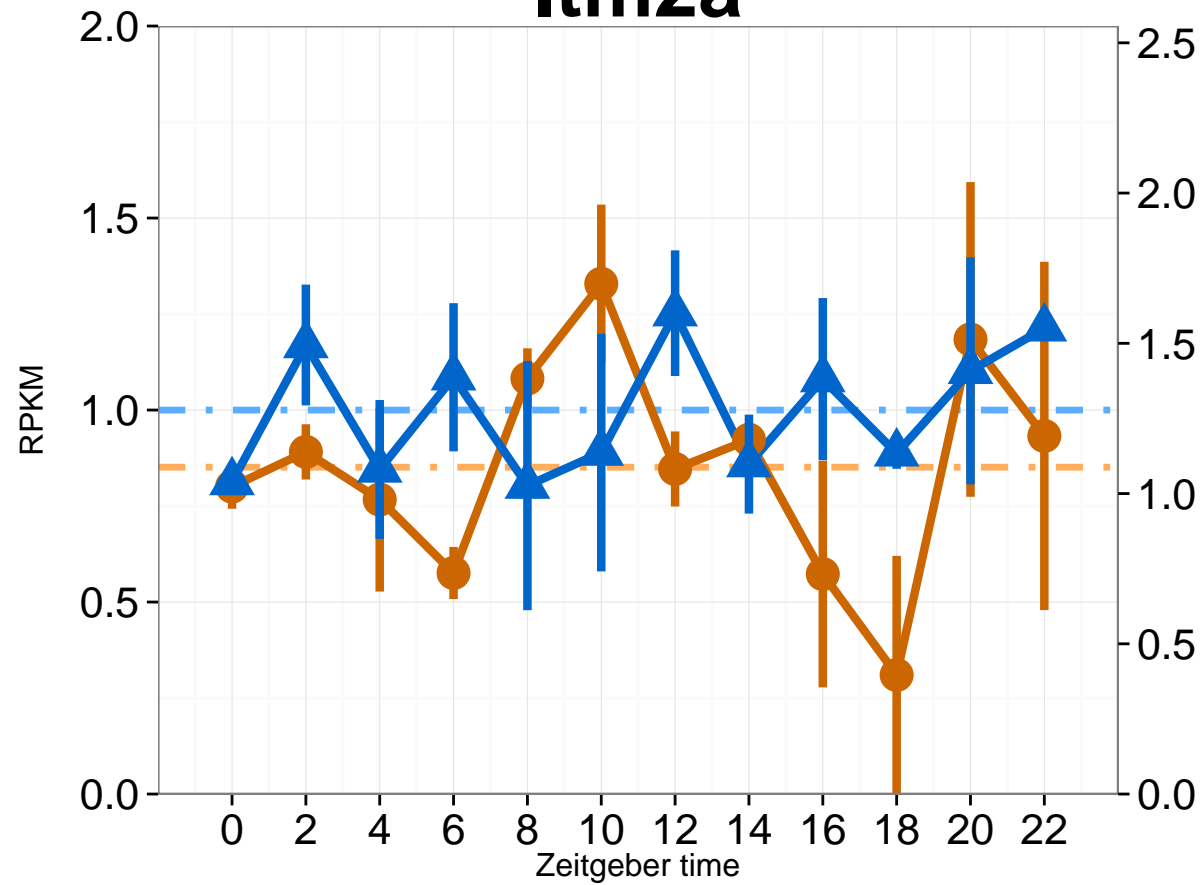

# Itm2a

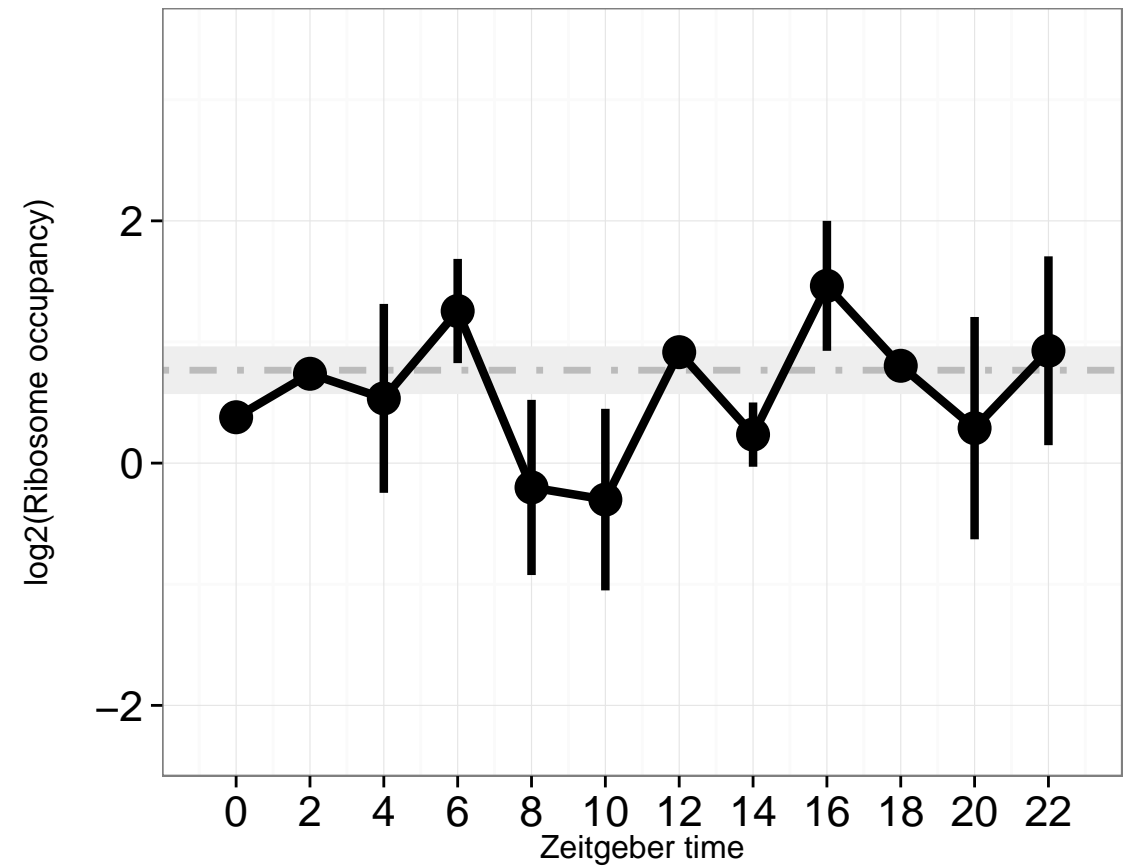

Supplement: SuppDataset_1.zip [file Itm2a_set_A.pdf › Supplemental Dataset 1/A-mRNA_nonrhyth_translation_nonrhyth/Itm2a_set_A.pdf]

# Itm2b

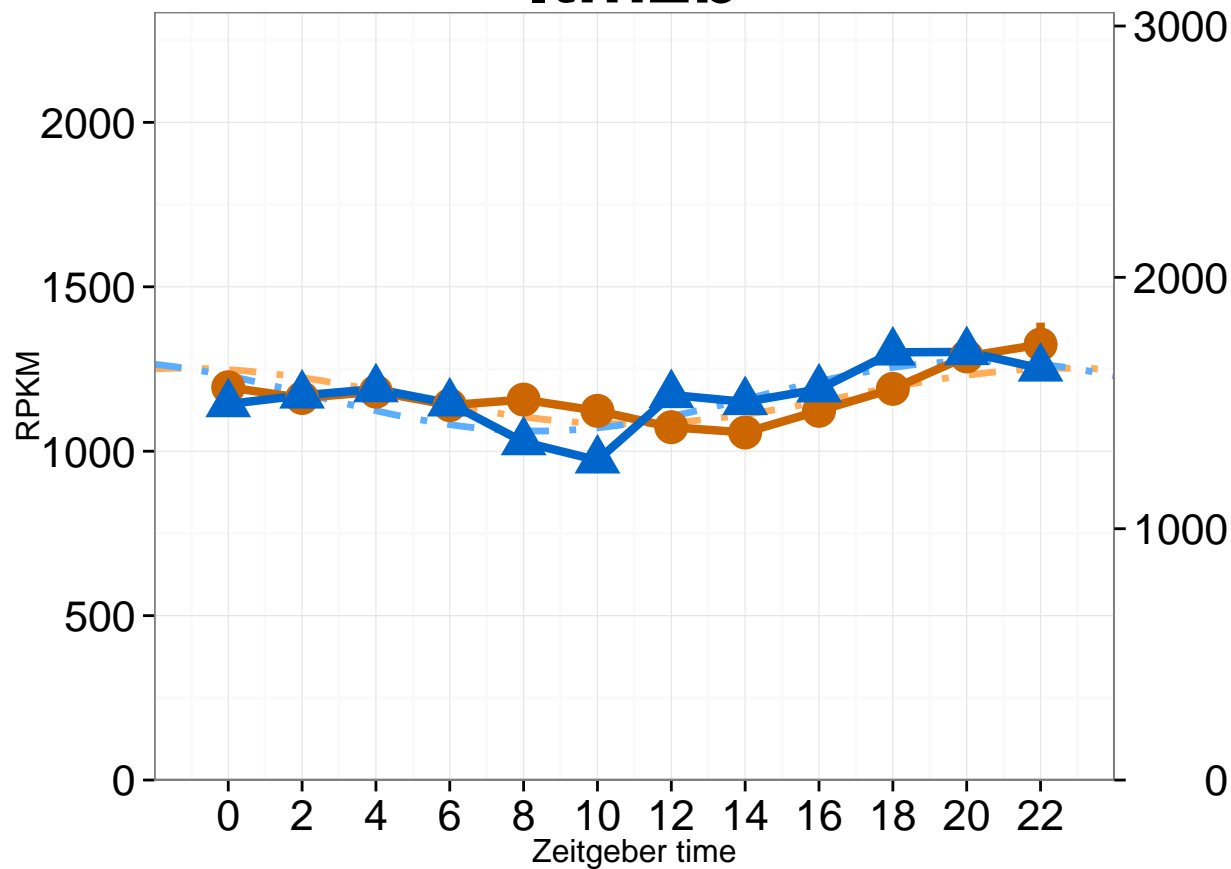

# Itm2b

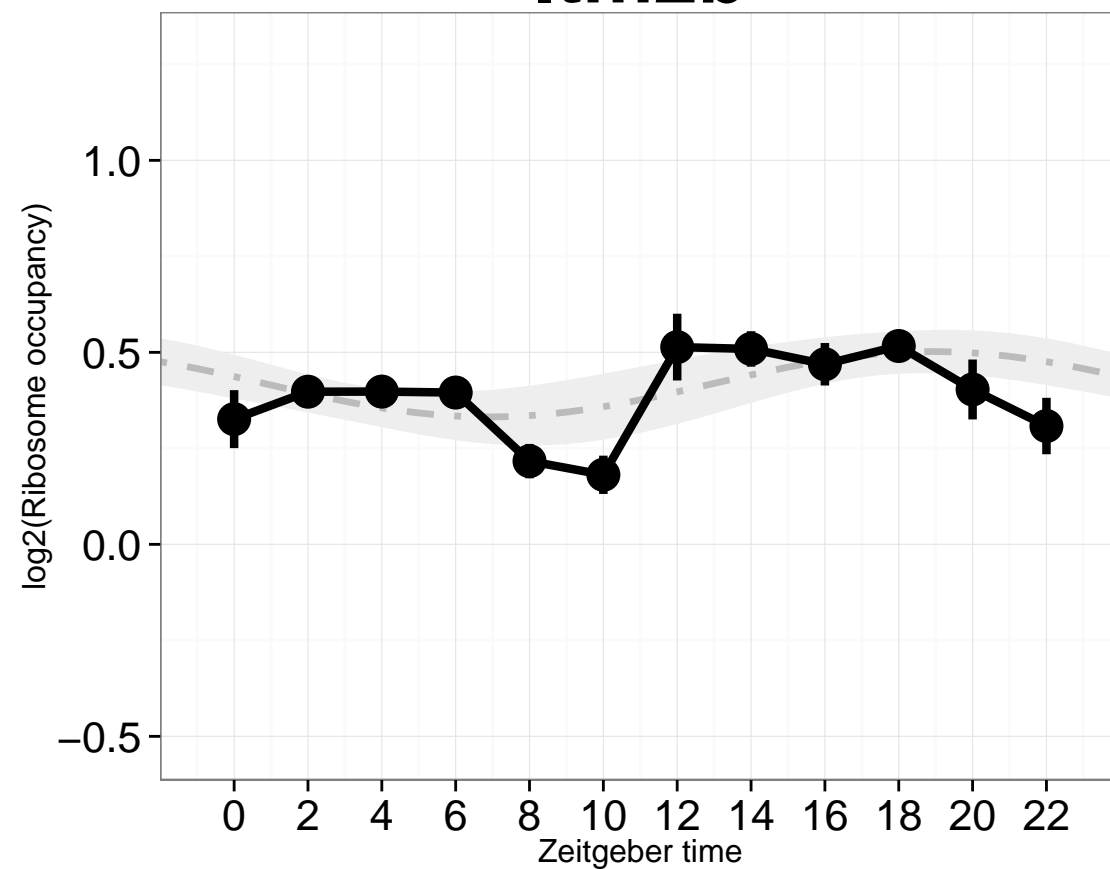

Supplement: SuppDataset_1.zip [file Itm2b_set_A.pdf › Supplemental Dataset 1/A-mRNA_nonrhyth_translation_nonrhyth/Itm2b_set_A.pdf]

# Itm2c

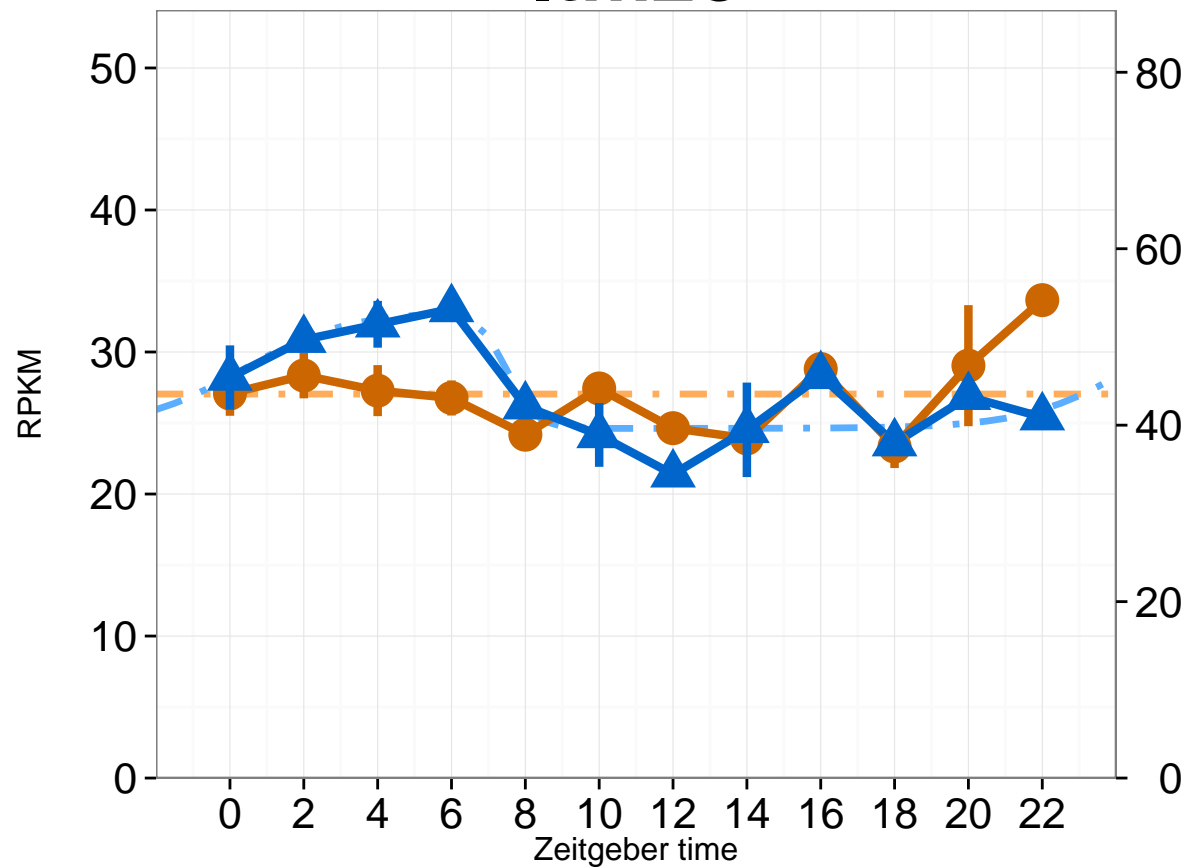

# Itm2c

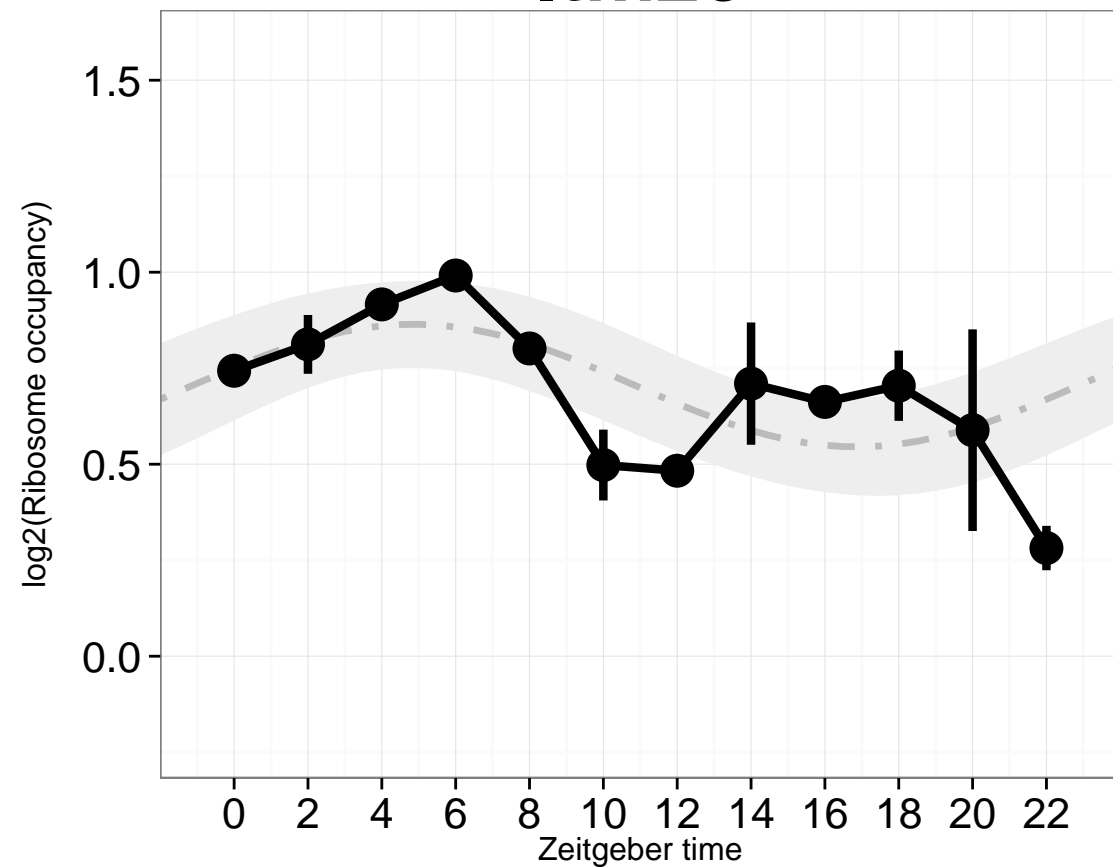

Supplement: SuppDataset_1.zip [file Itm2c_set_A.pdf › Supplemental Dataset 1/A-mRNA_nonrhyth_translation_nonrhyth/Itm2c_set_A.pdf]

## Itpa

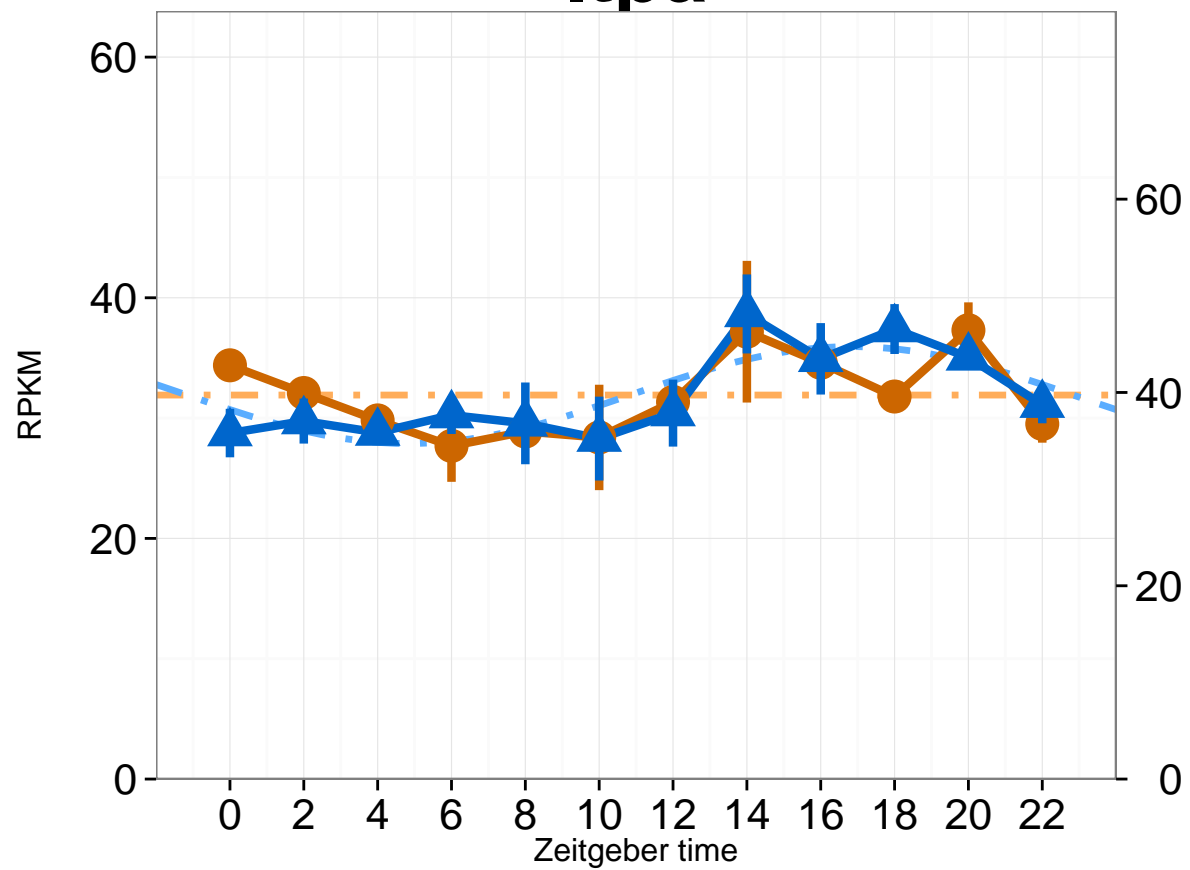

## Itpa

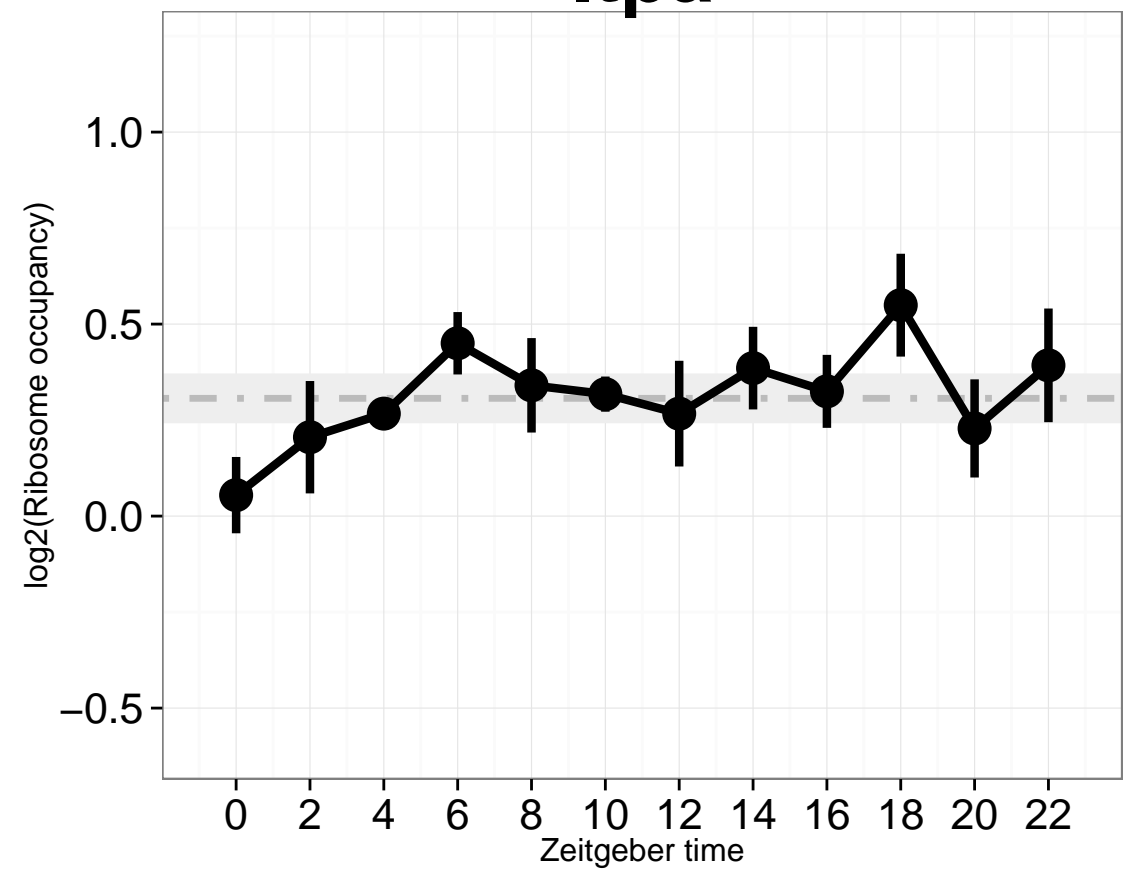

Supplement: SuppDataset_1.zip [file Itpa_set_A.pdf › Supplemental Dataset 1/A-mRNA_nonrhyth_translation_nonrhyth/Itpa_set_A.pdf]

# Itpka

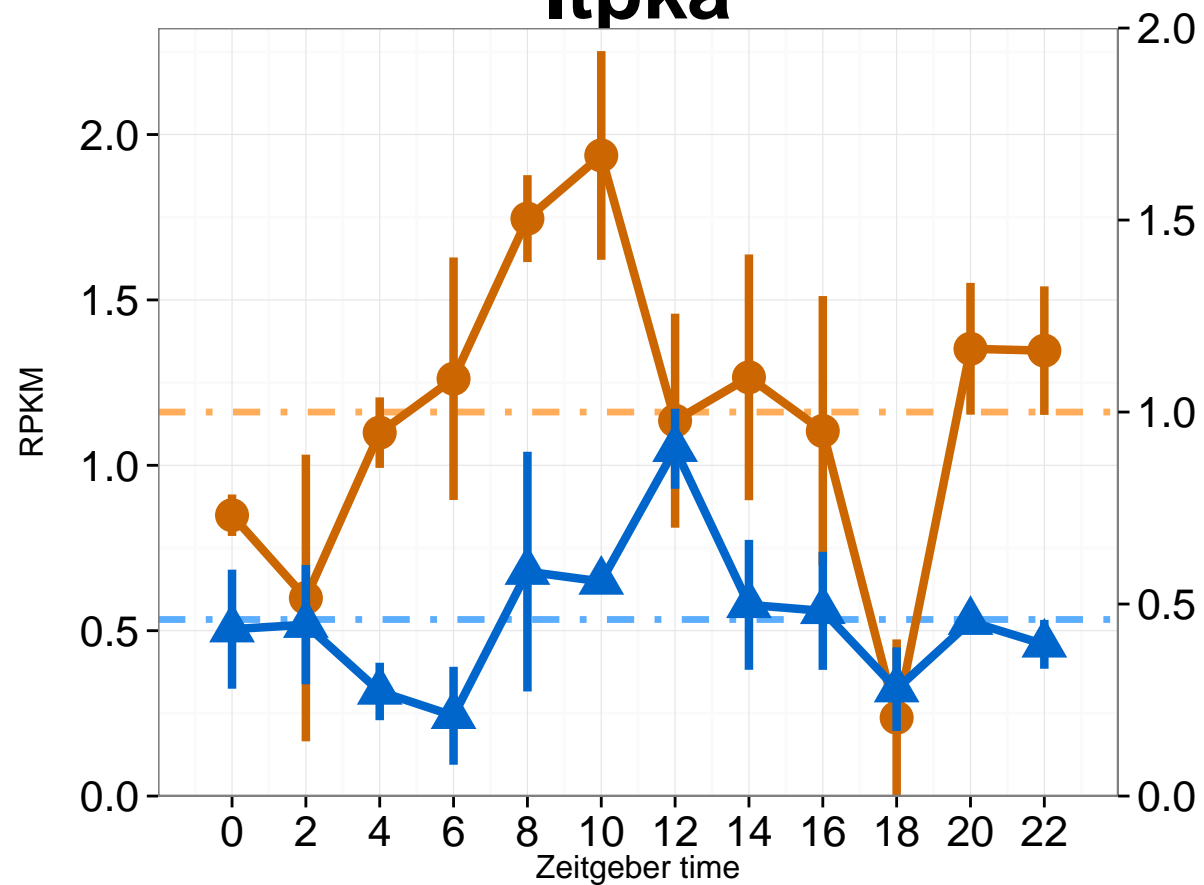

# Itpka

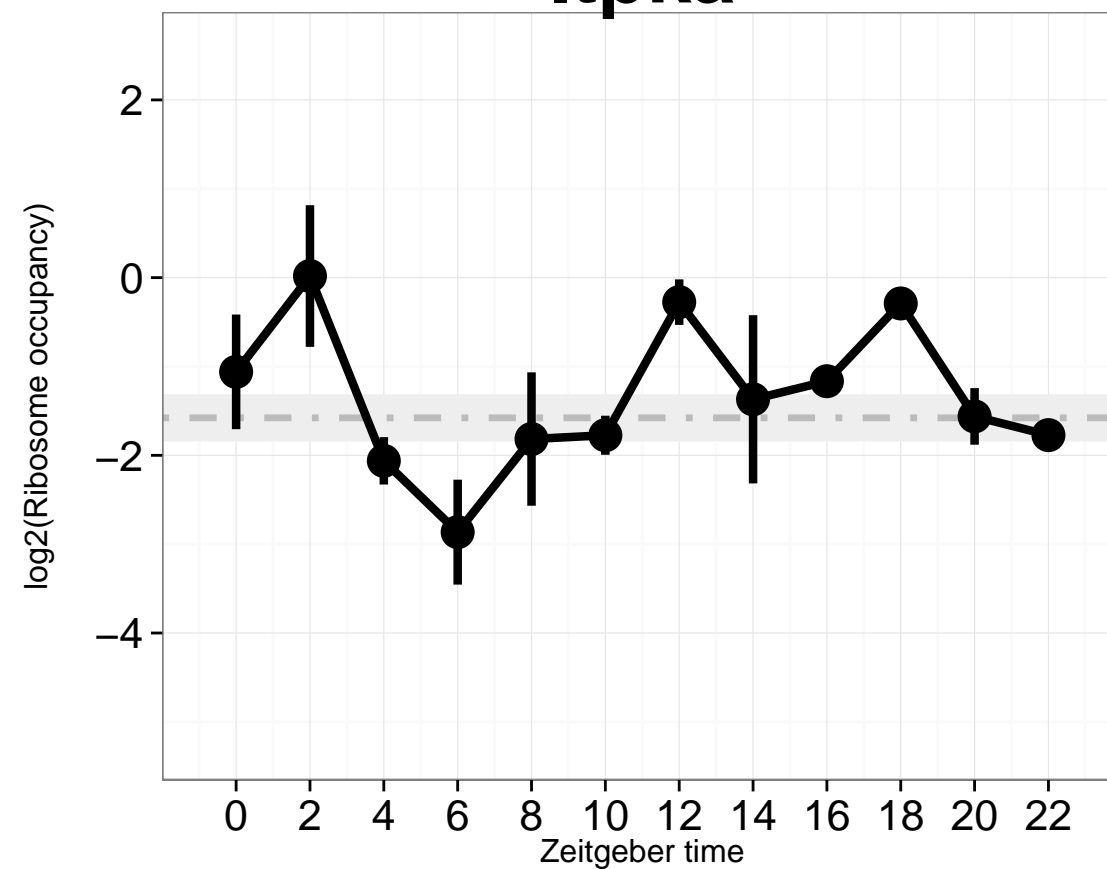

Supplement: SuppDataset_1.zip [file Itpka_set_A.pdf › Supplemental Dataset 1/A-mRNA_nonrhyth_translation_nonrhyth/Itpka_set_A.pdf]

# ltpkc

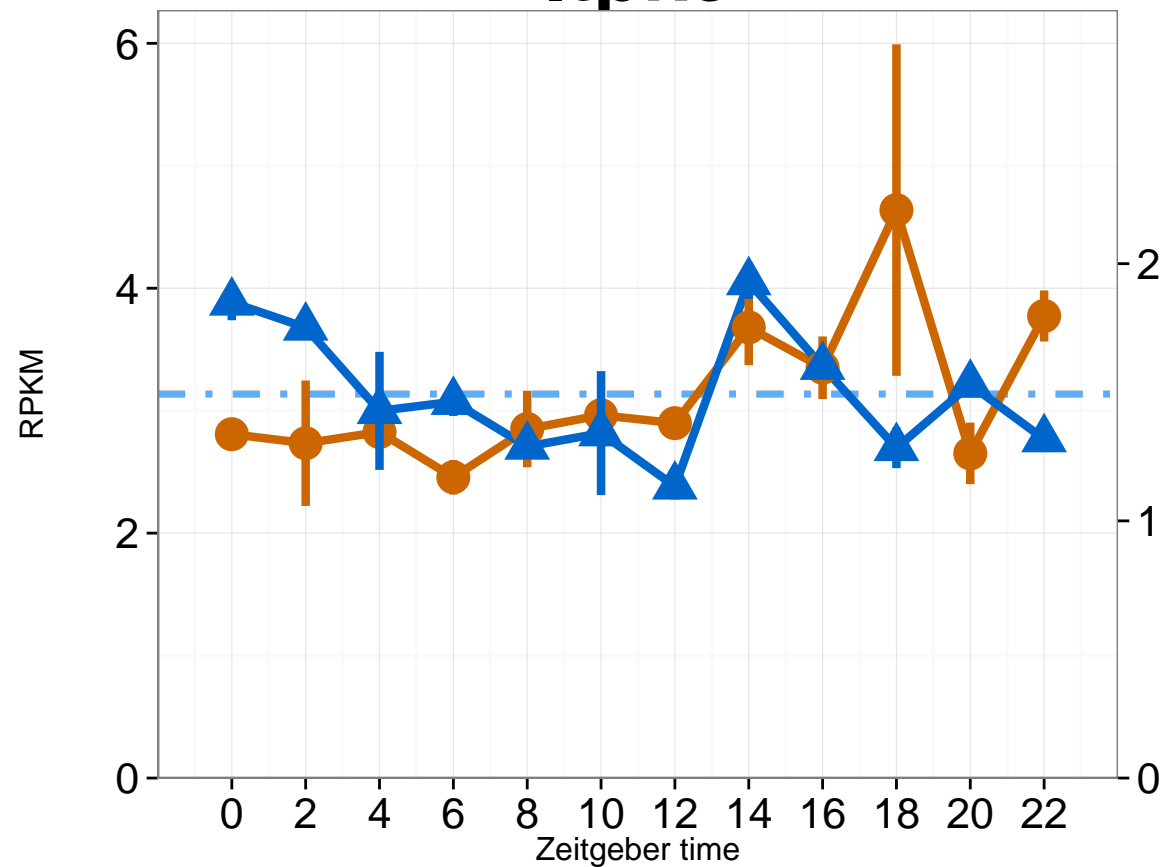

# ltpkc

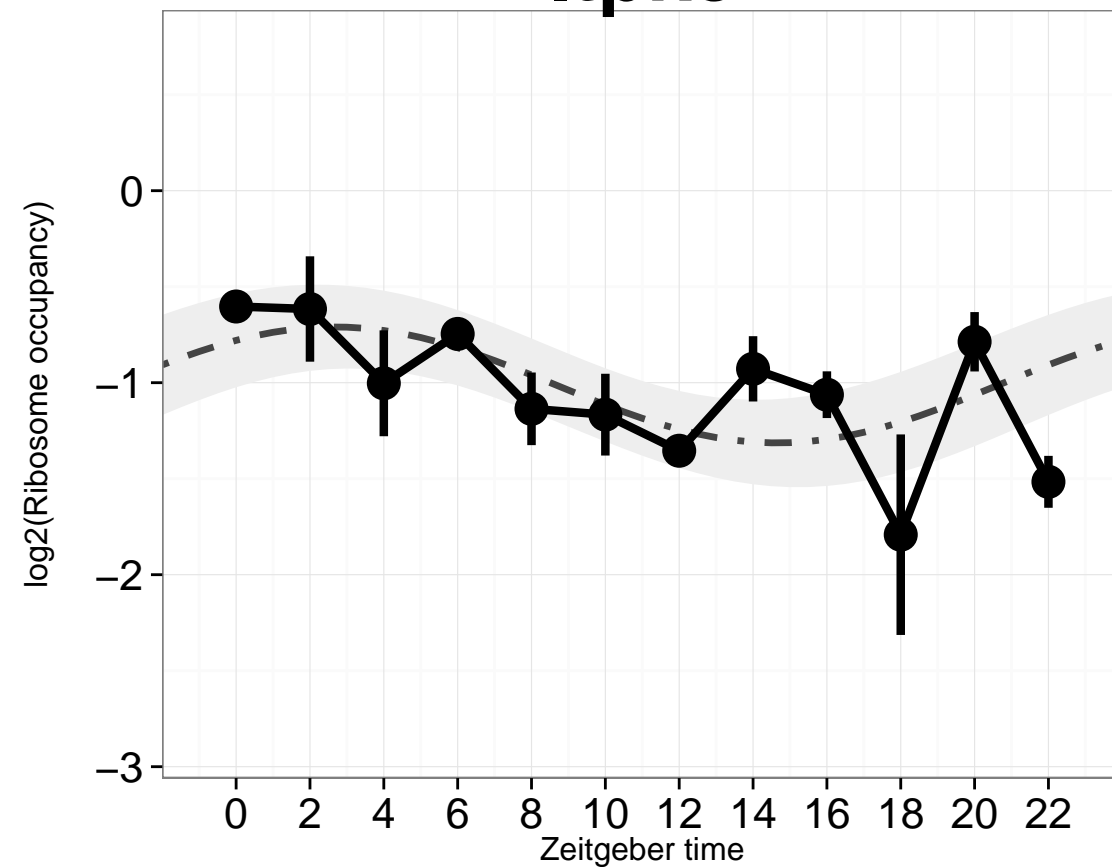

Supplement: SuppDataset_1.zip [file Itpkc_set_A.pdf › Supplemental Dataset 1/A-mRNA_nonrhyth_translation_nonrhyth/Itpkc_set_A.pdf]

**Itpr2**

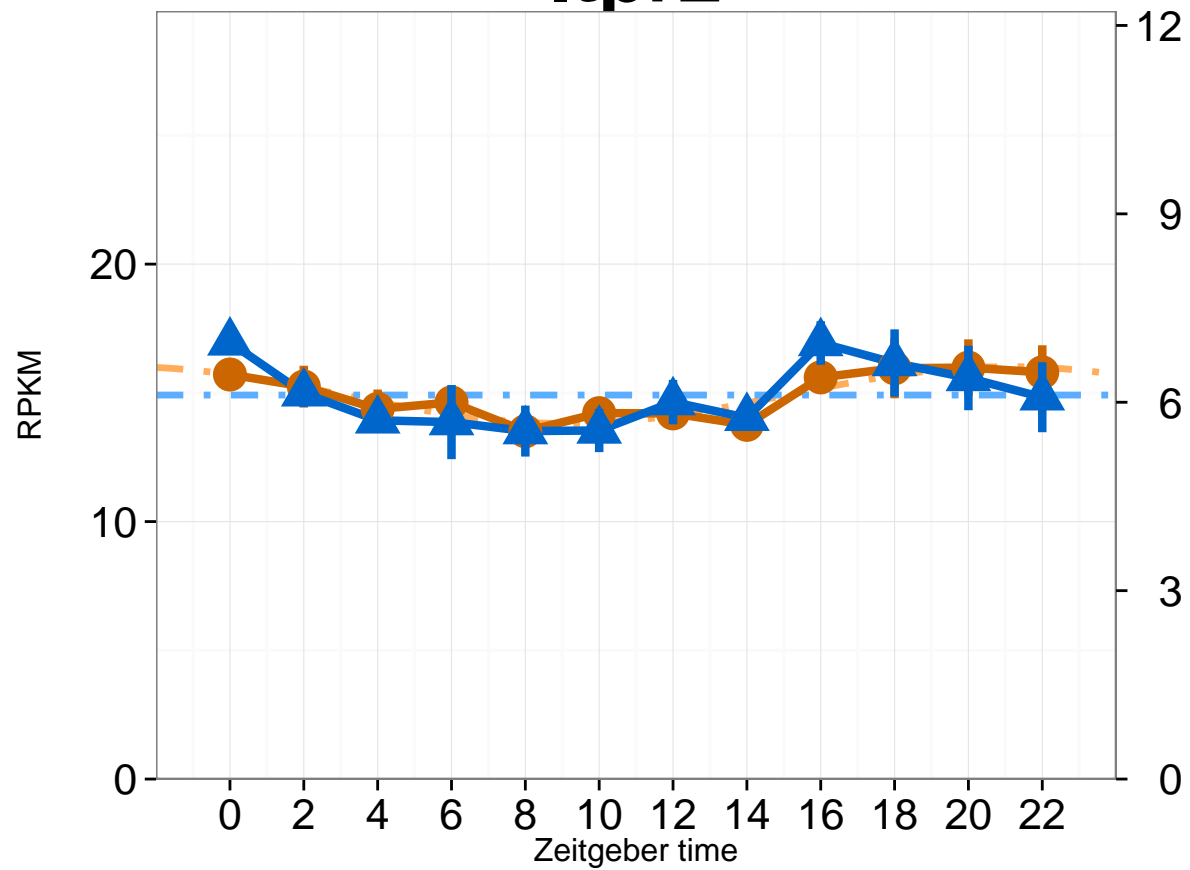

**Itpr2**

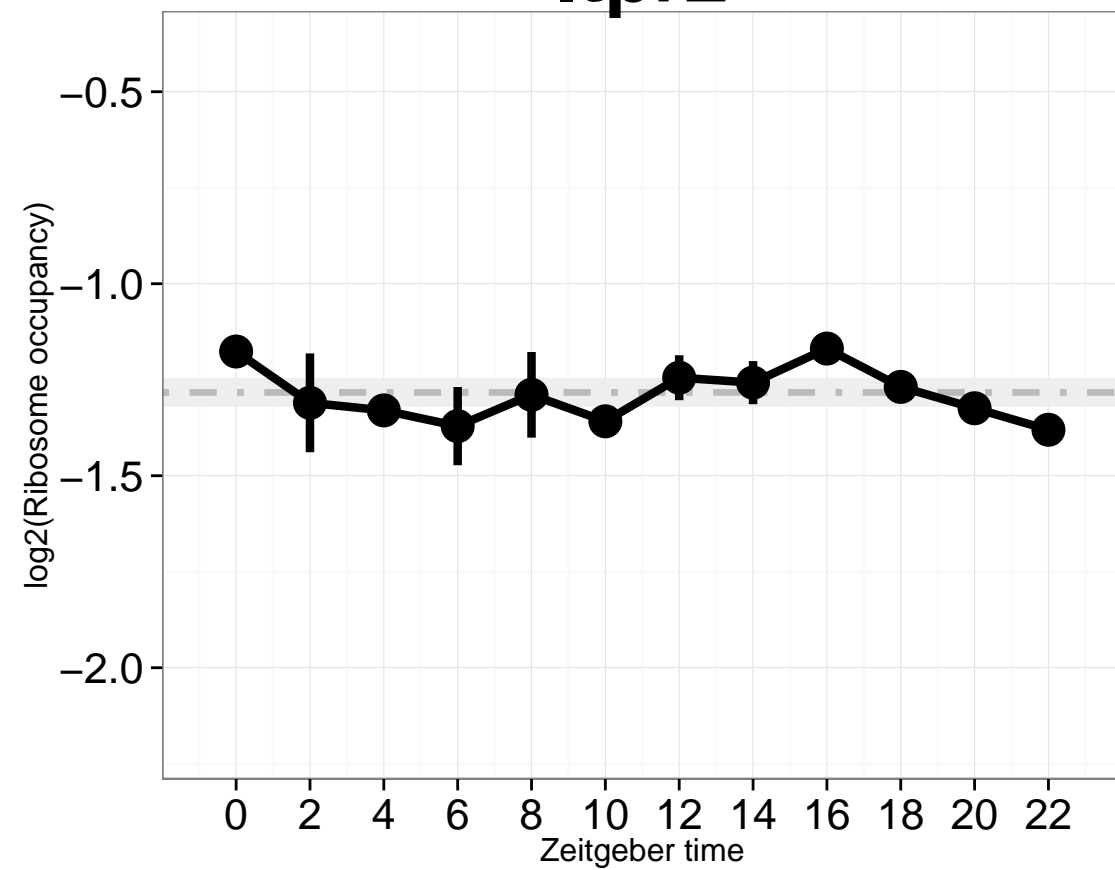

Supplement: SuppDataset_1.zip [file Itpr2_set_A.pdf › Supplemental Dataset 1/A-mRNA_nonrhyth_translation_nonrhyth/Itpr2_set_A.pdf]

# Itpr3

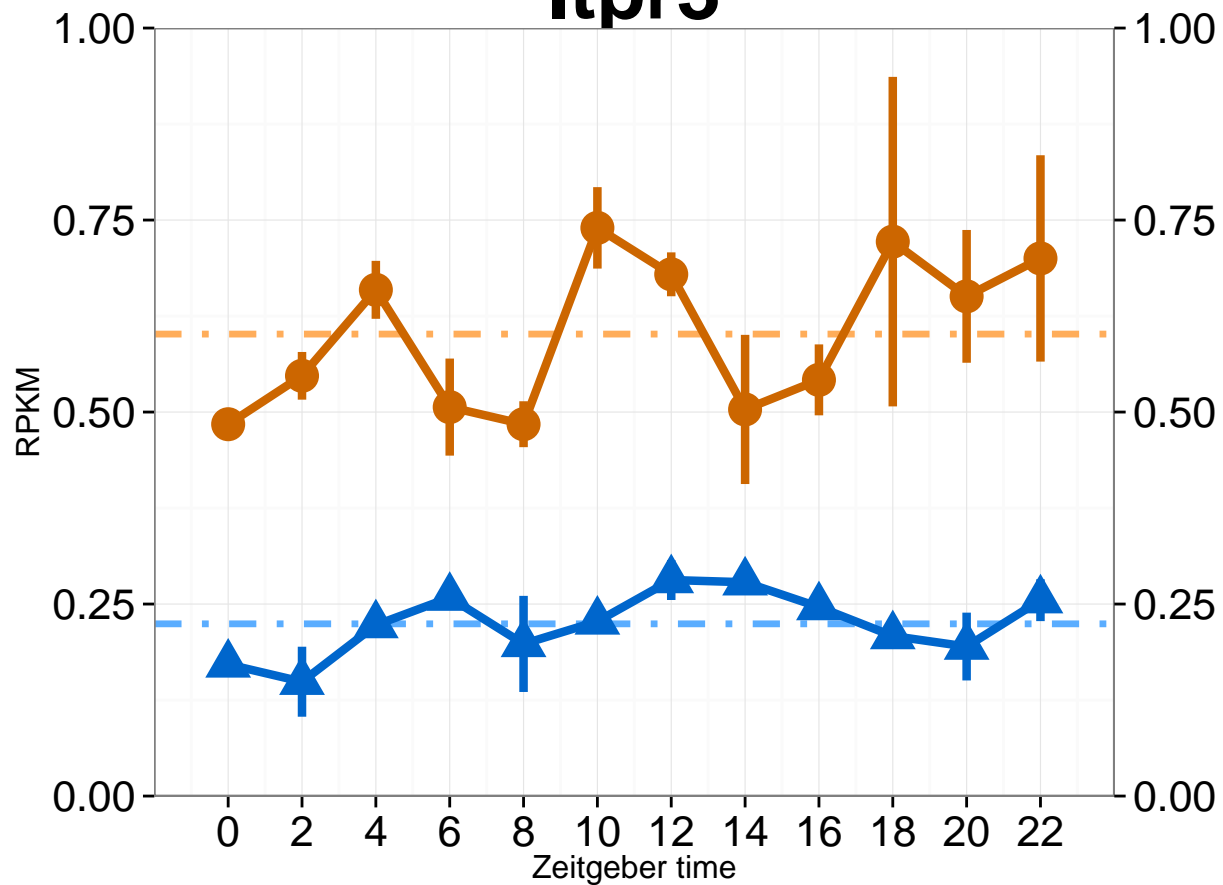

# Itpr3

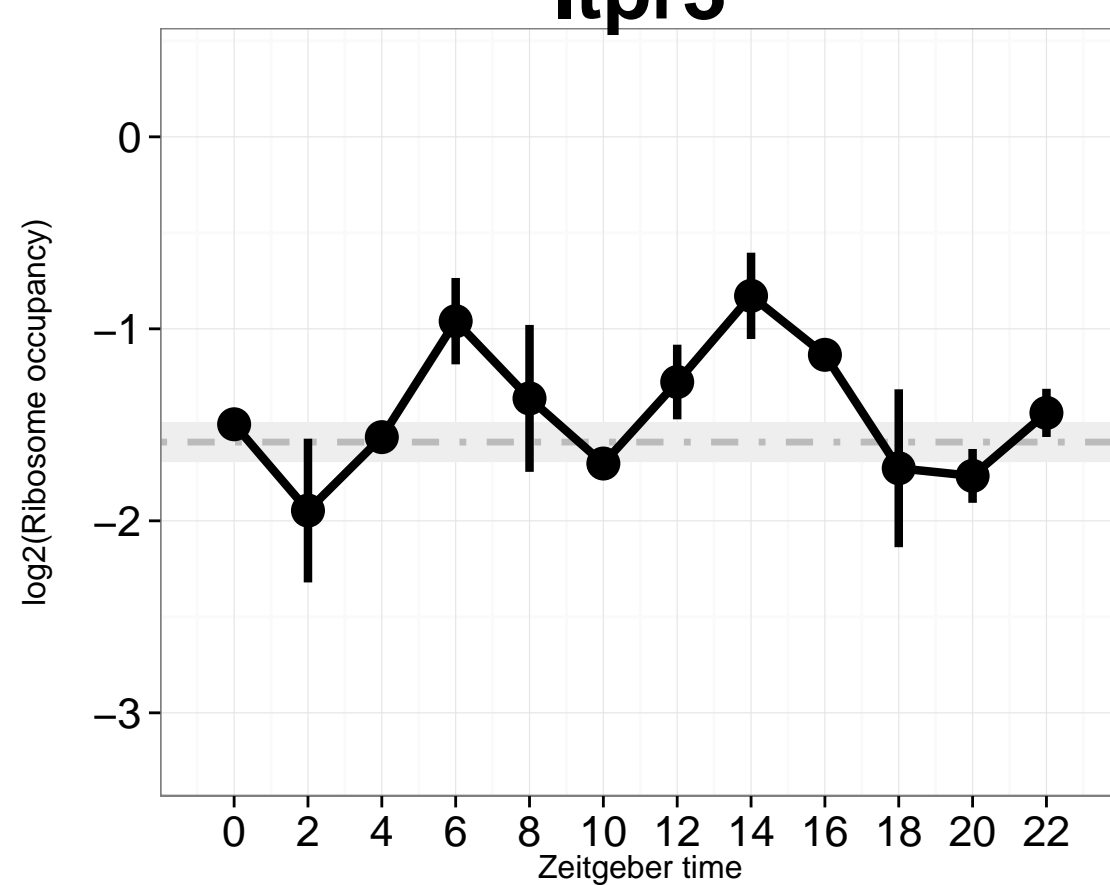

Supplement: SuppDataset_1.zip [file Itpr3_set_A.pdf › Supplemental Dataset 1/A-mRNA_nonrhyth_translation_nonrhyth/Itpr3_set_A.pdf]

# Itprip

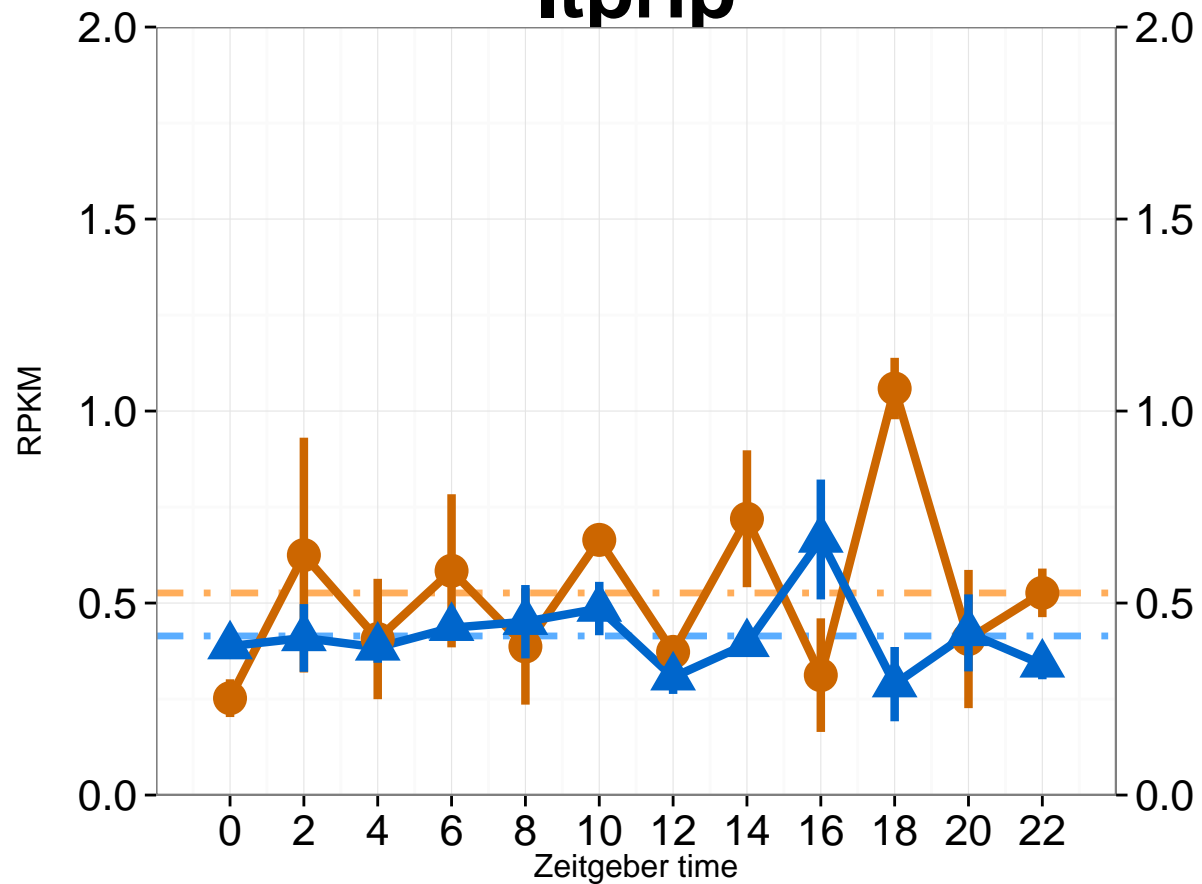

# Itprip

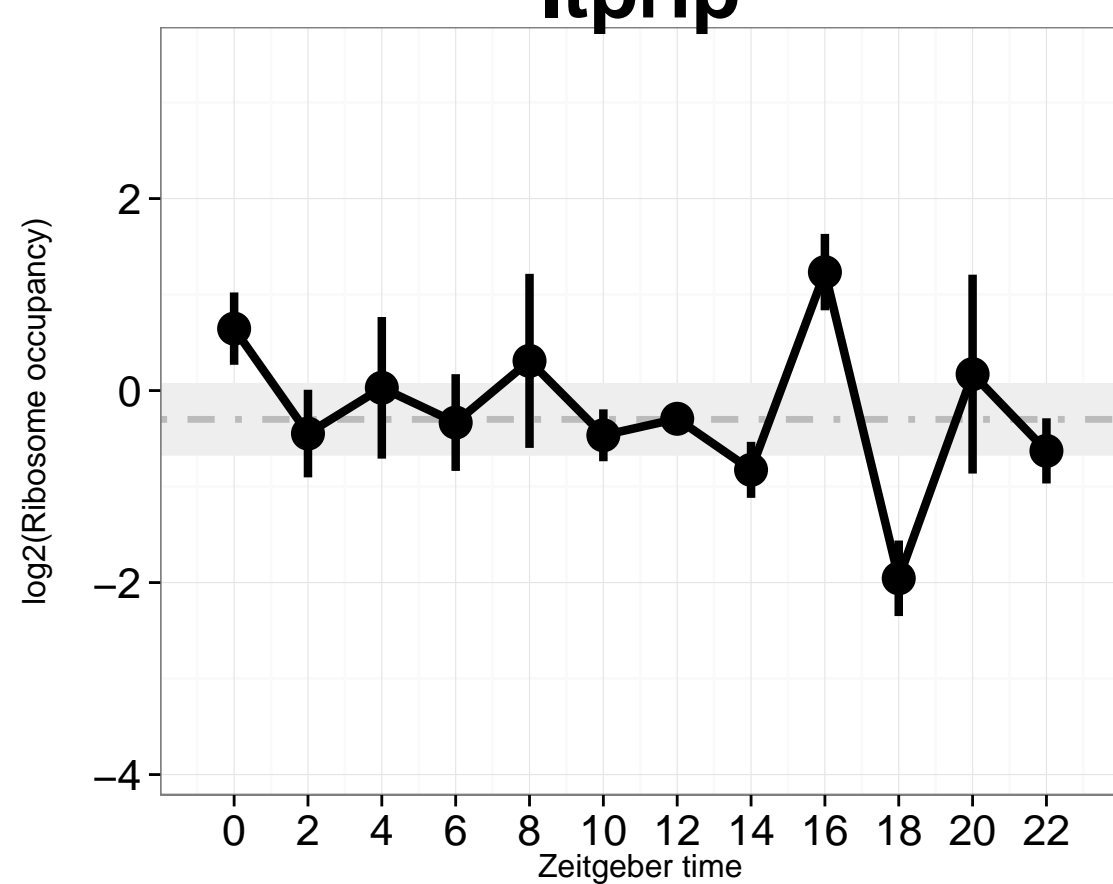

Supplement: SuppDataset_1.zip [file Itprip_set_A.pdf › Supplemental Dataset 1/A-mRNA_nonrhyth_translation_nonrhyth/Itprip_set_A.pdf]

# Itpripl1

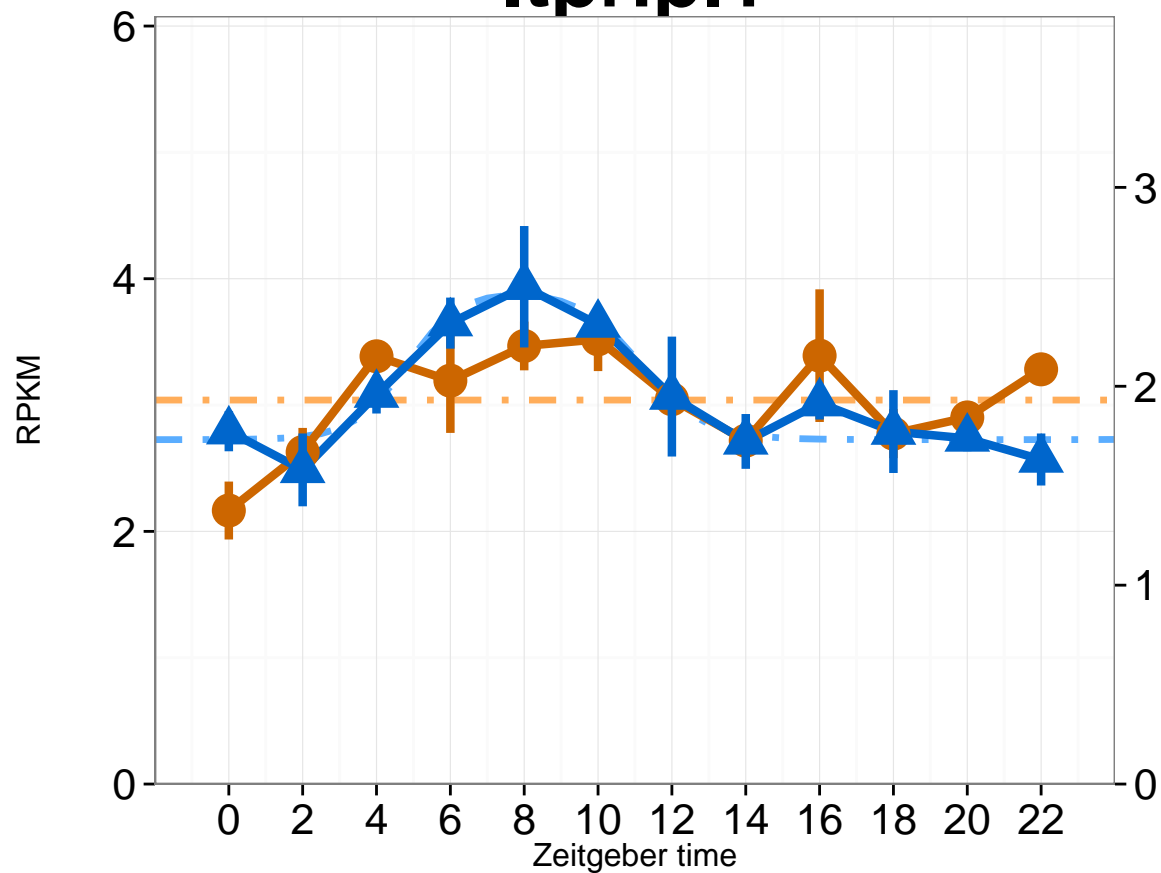

# Itpripl1

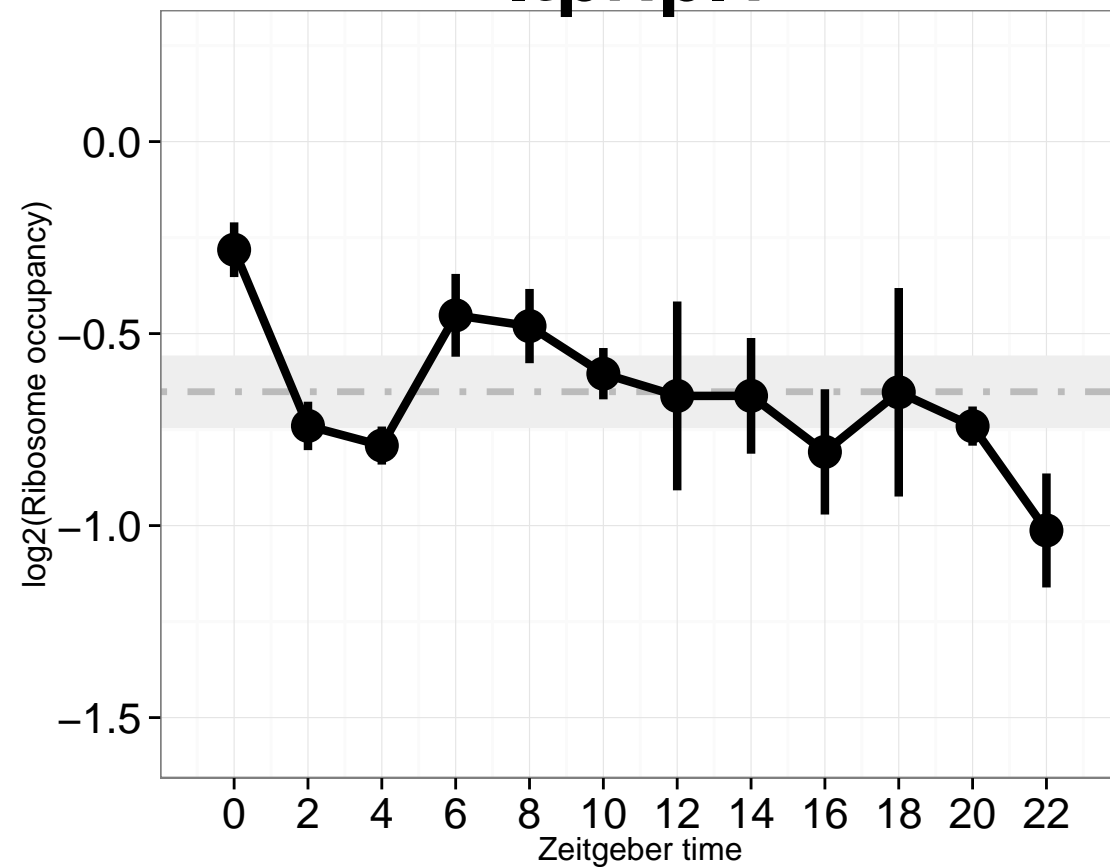

Supplement: SuppDataset_1.zip [file Itpripl1_set_A.pdf › Supplemental Dataset 1/A-mRNA_nonrhyth_translation_nonrhyth/Itpripl1_set_A.pdf]

## Itpripl2

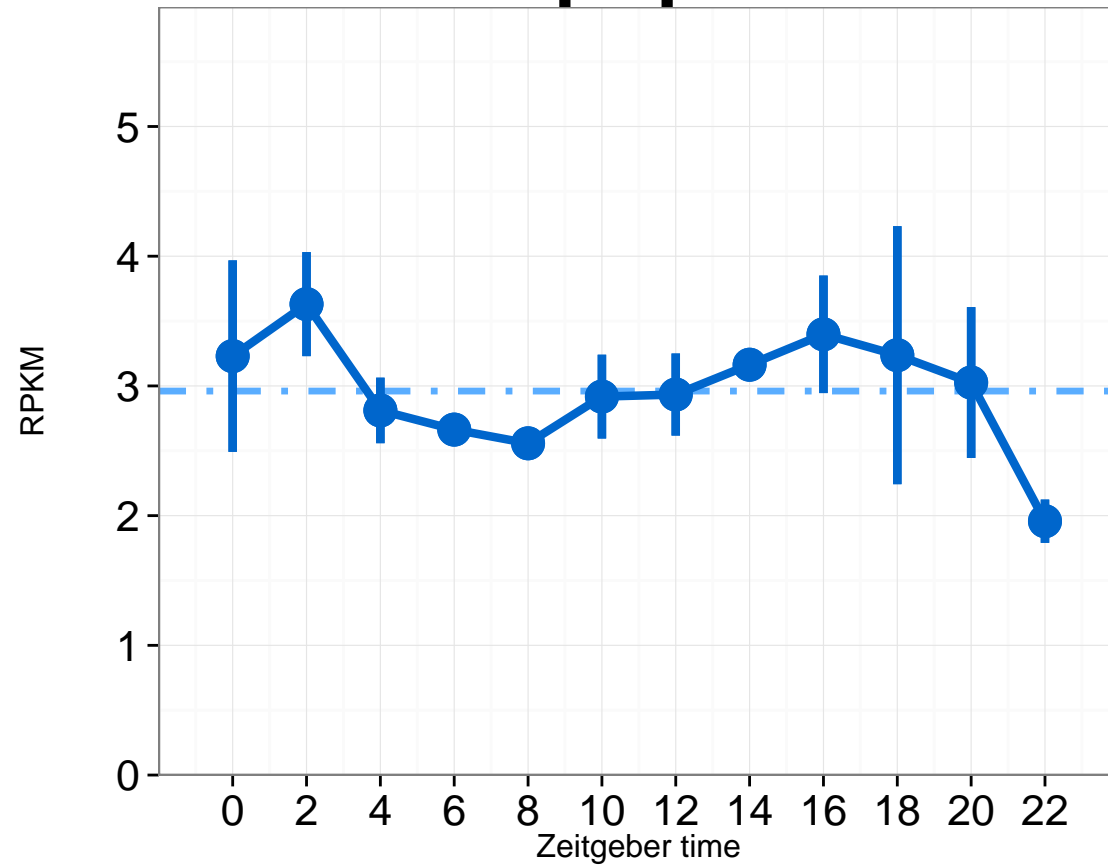

## Itpripl2 log2(Ribosome occupancy

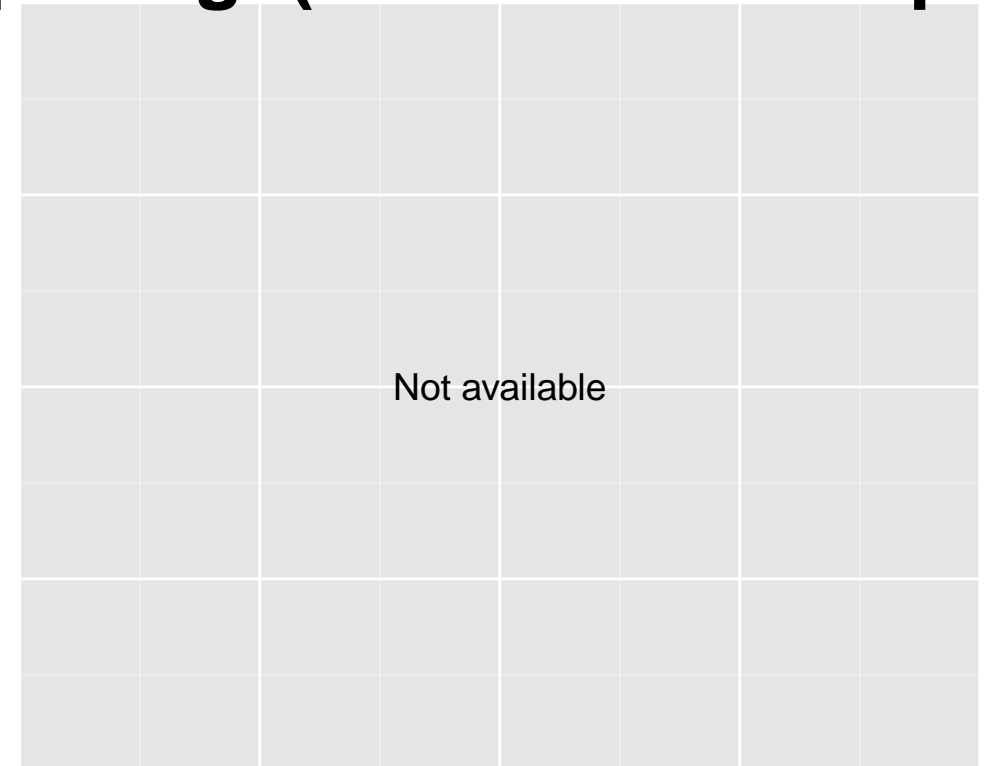

Supplement: SuppDataset_1.zip [file Itpripl2_set_A.pdf › Supplemental Dataset 1/A-mRNA_nonrhyth_translation_nonrhyth/Itpripl2_set_A.pdf]

# Itsn1

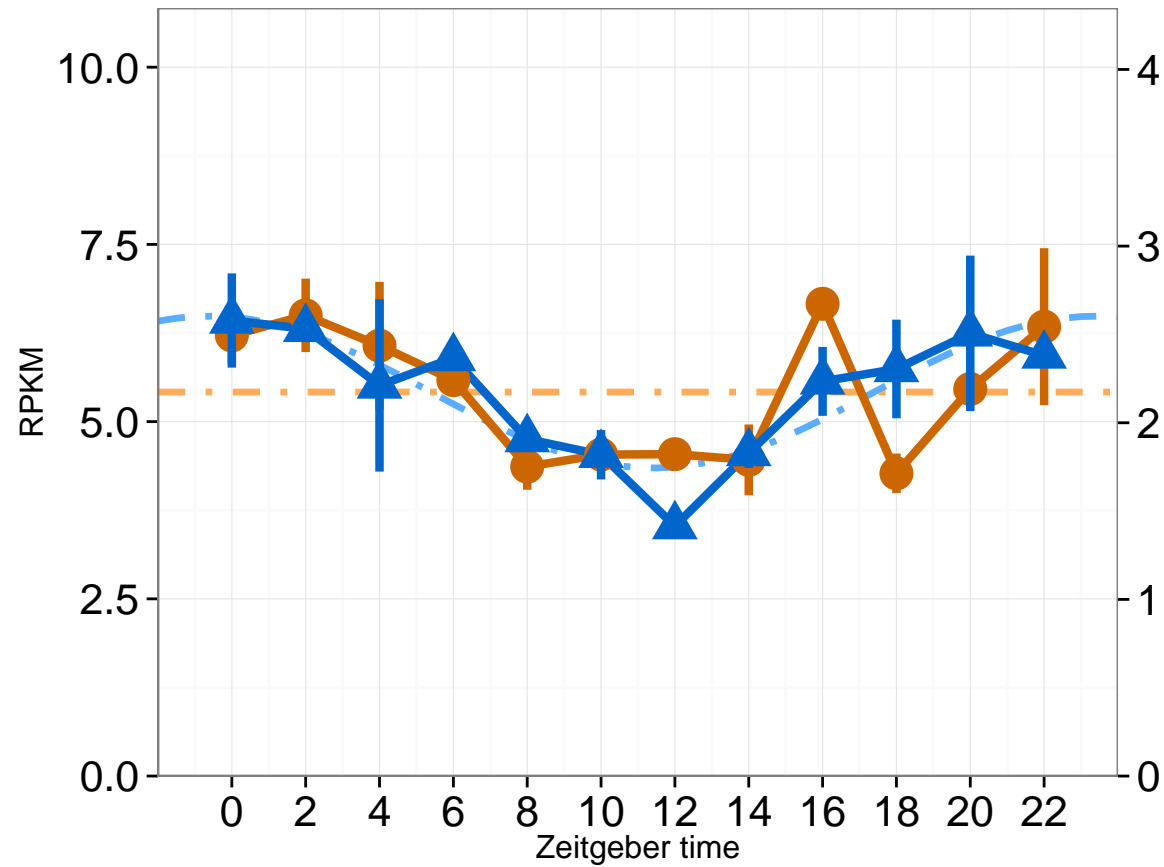

# Itsn1

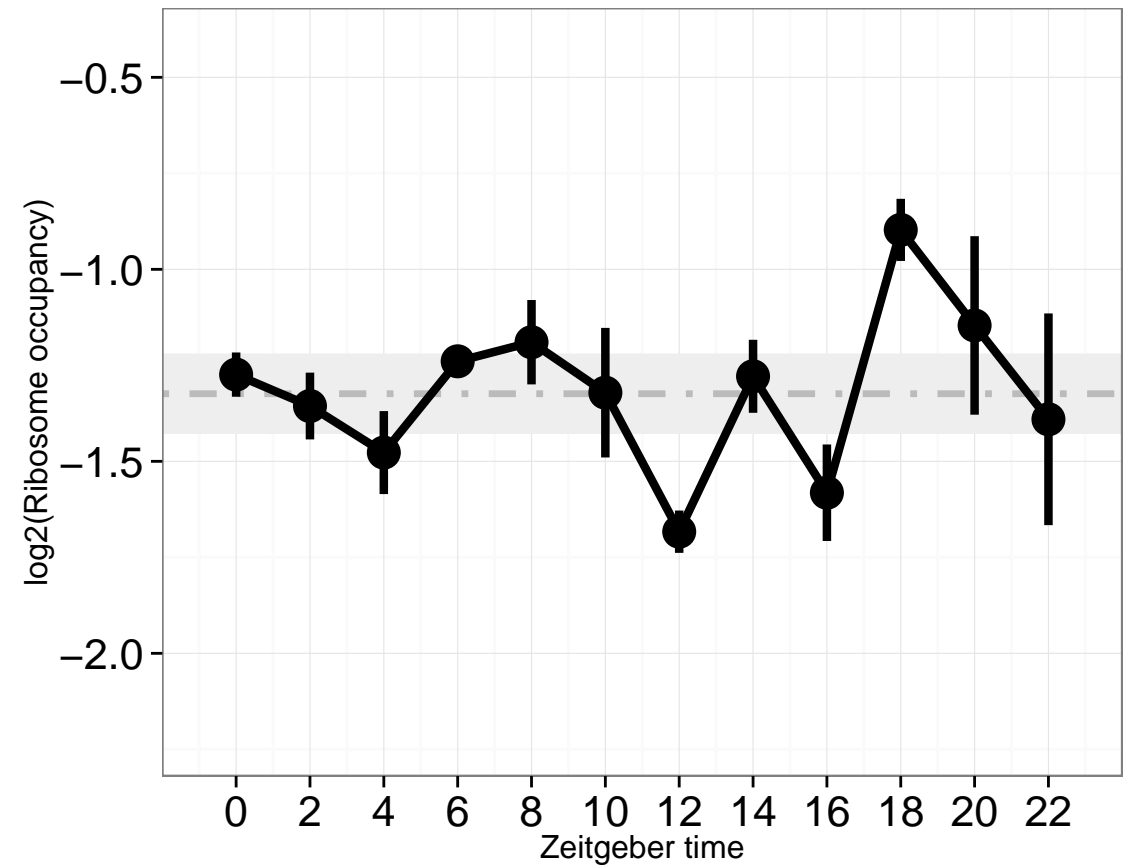

Supplement: SuppDataset_1.zip [file Itsn1_set_A.pdf › Supplemental Dataset 1/A-mRNA_nonrhyth_translation_nonrhyth/Itsn1_set_A.pdf]

# Itsn2

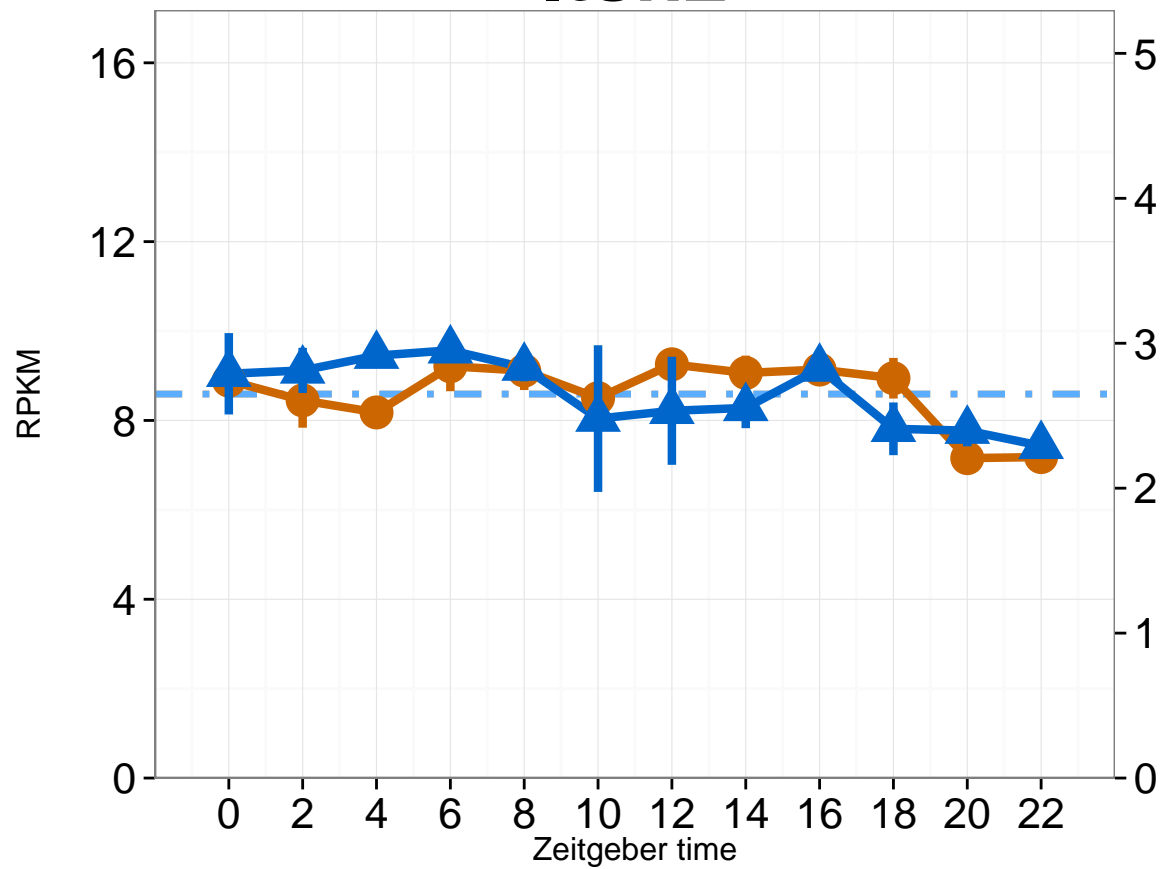

# Itsn2

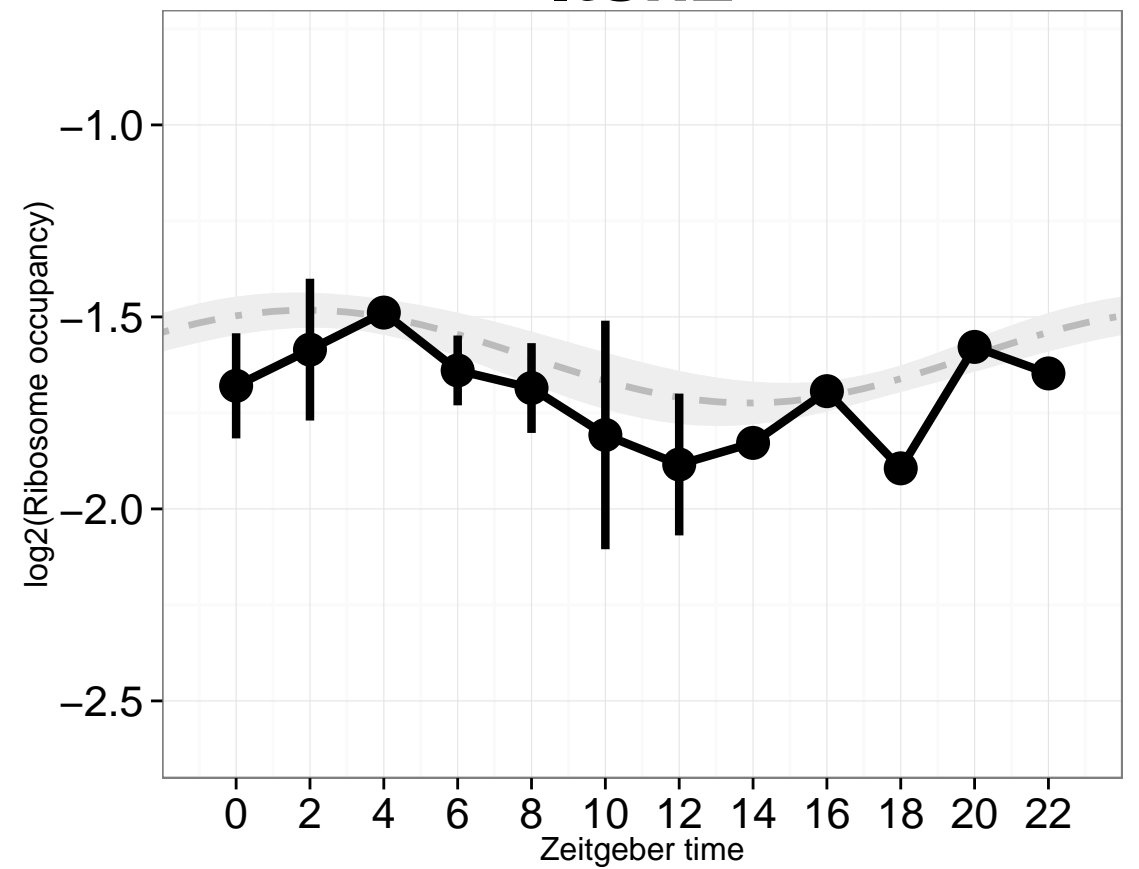

Supplement: SuppDataset_1.zip [file Itsn2_set_A.pdf › Supplemental Dataset 1/A-mRNA_nonrhyth_translation_nonrhyth/Itsn2_set_A.pdf]

## lvd

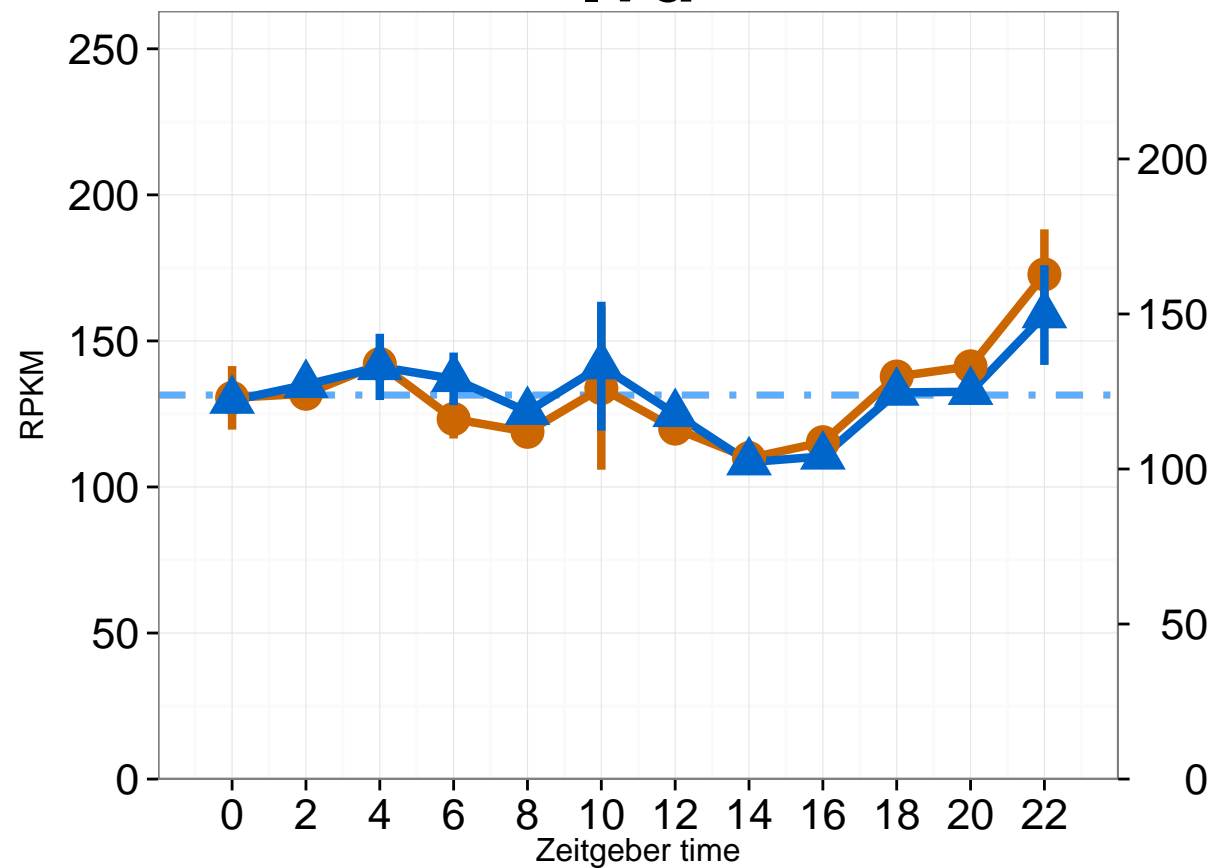

## lvd

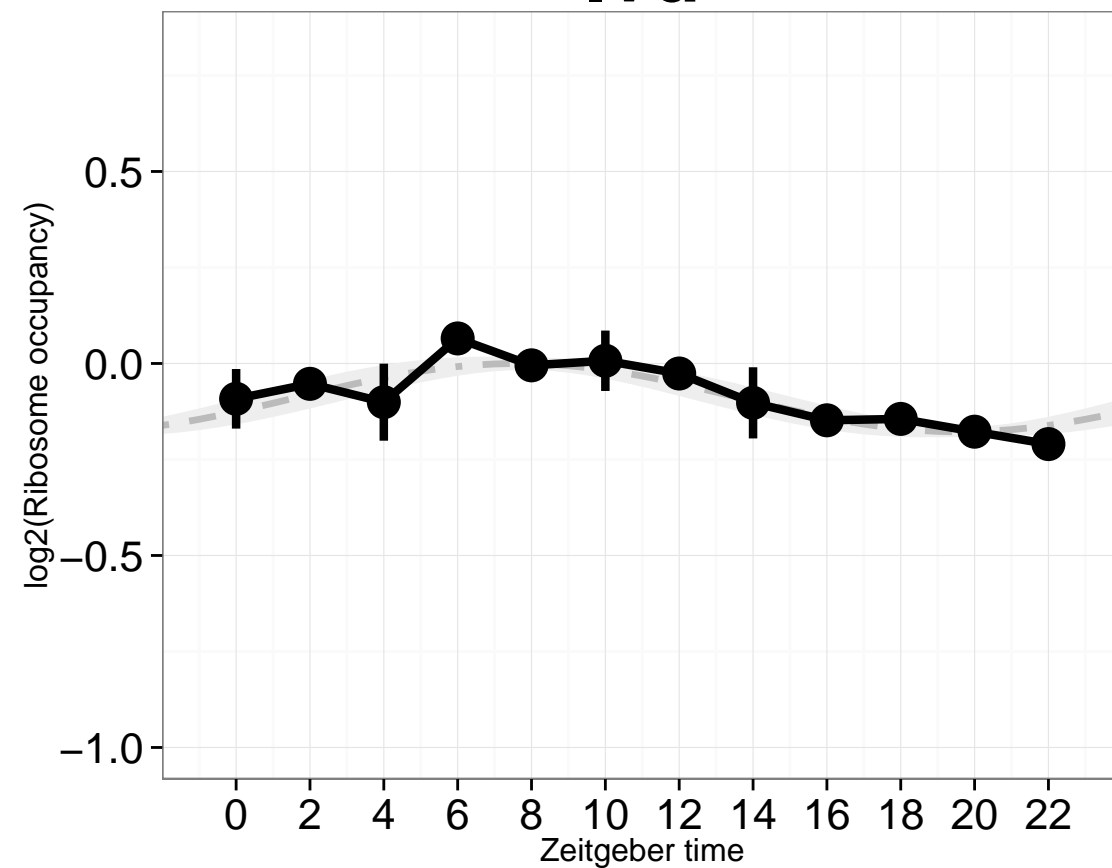

Supplement: SuppDataset_1.zip [file Ivd_set_A.pdf › Supplemental Dataset 1/A-mRNA_nonrhyth_translation_nonrhyth/Ivd_set_A.pdf]

# lws1

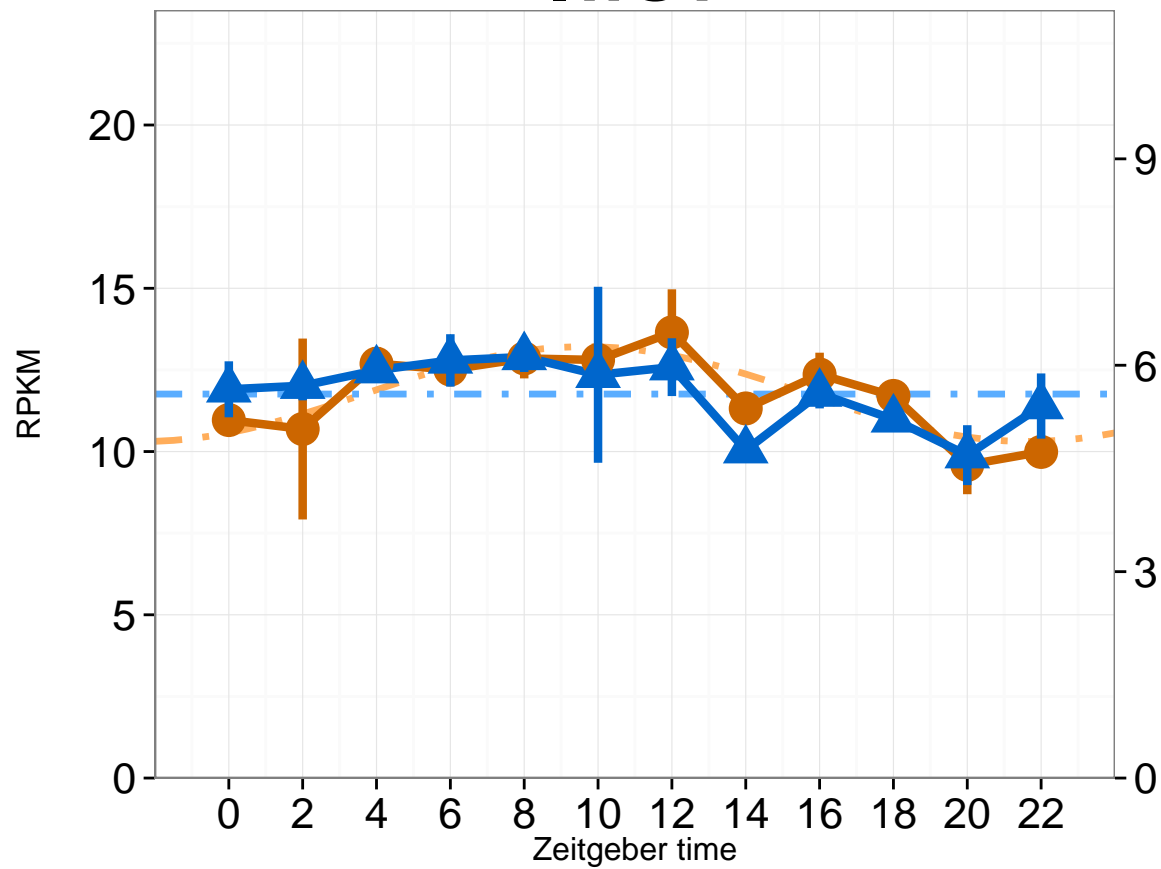

# lws1

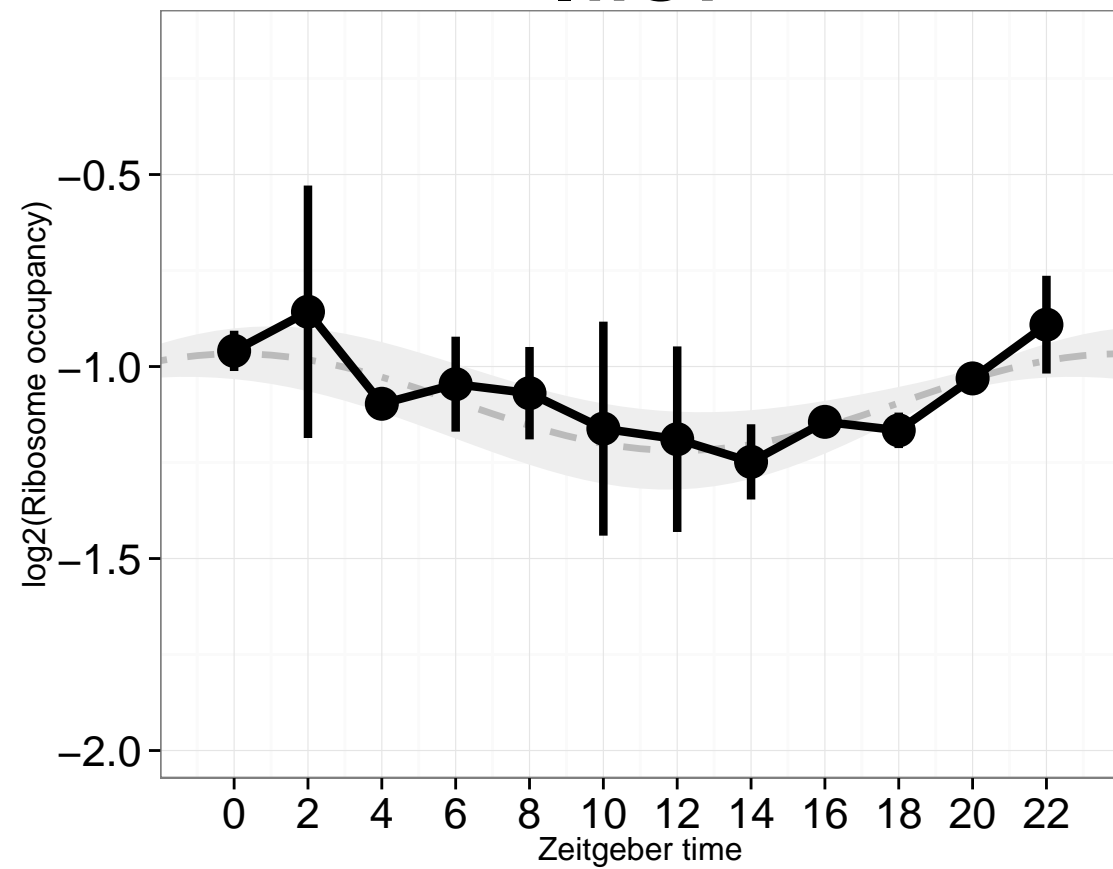

Supplement: SuppDataset_1.zip [file Iws1_set_A.pdf › Supplemental Dataset 1/A-mRNA_nonrhyth_translation_nonrhyth/Iws1_set_A.pdf]

**lyd**

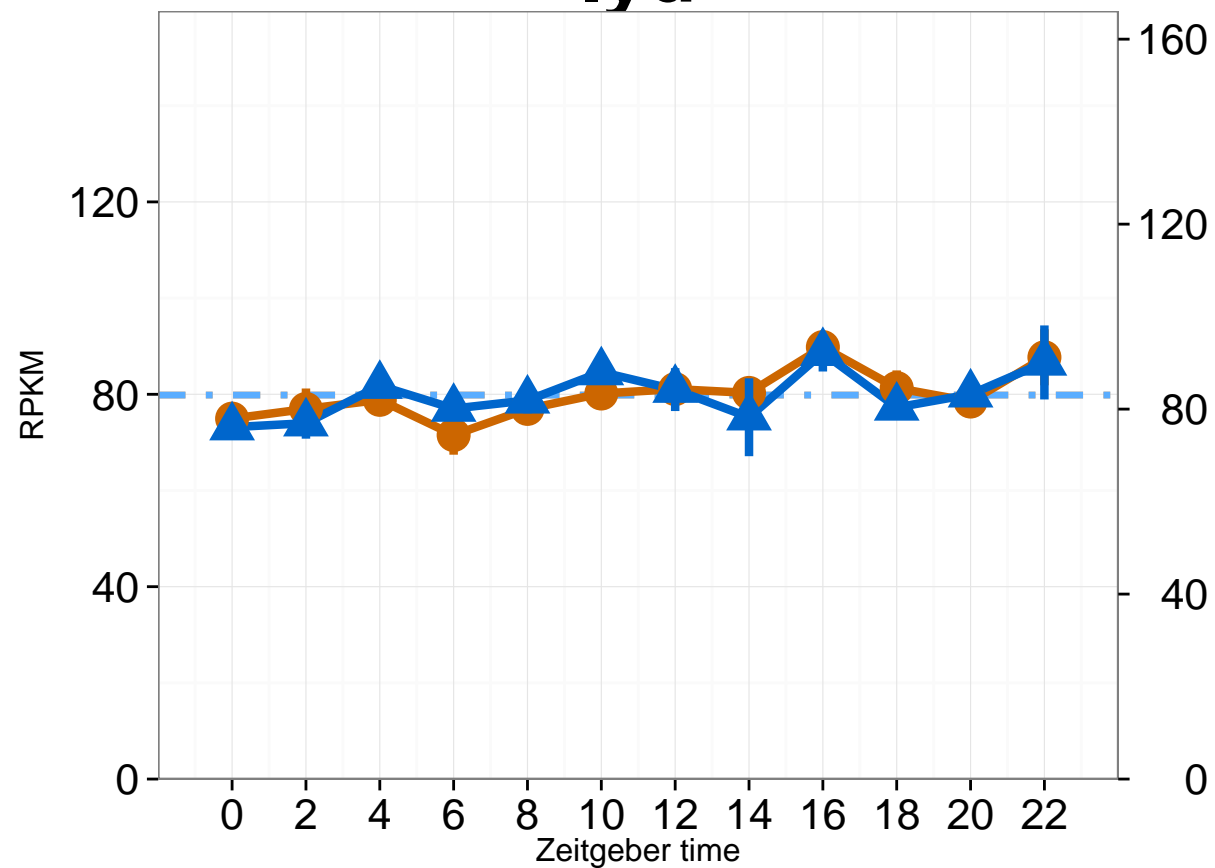

**lyd**

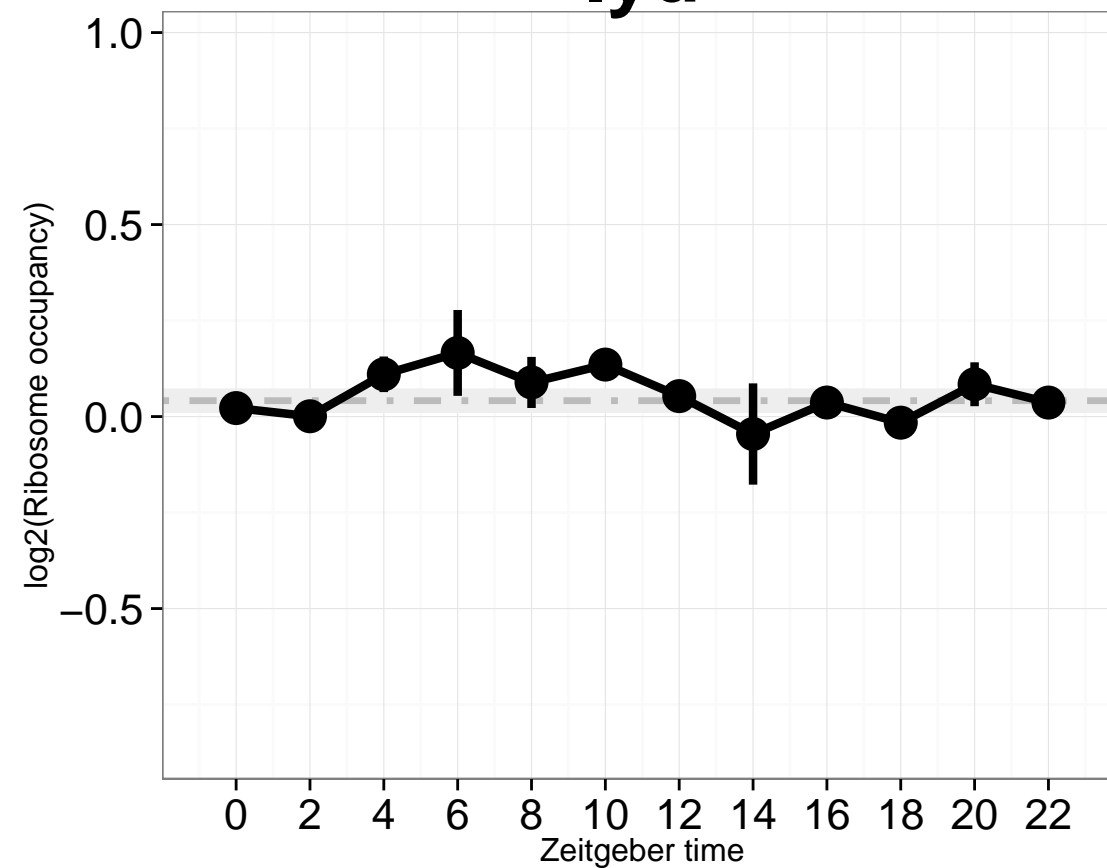

Supplement: SuppDataset_1.zip [file Iyd_set_A.pdf › Supplemental Dataset 1/A-mRNA_nonrhyth_translation_nonrhyth/Iyd_set_A.pdf]

# Izumo4

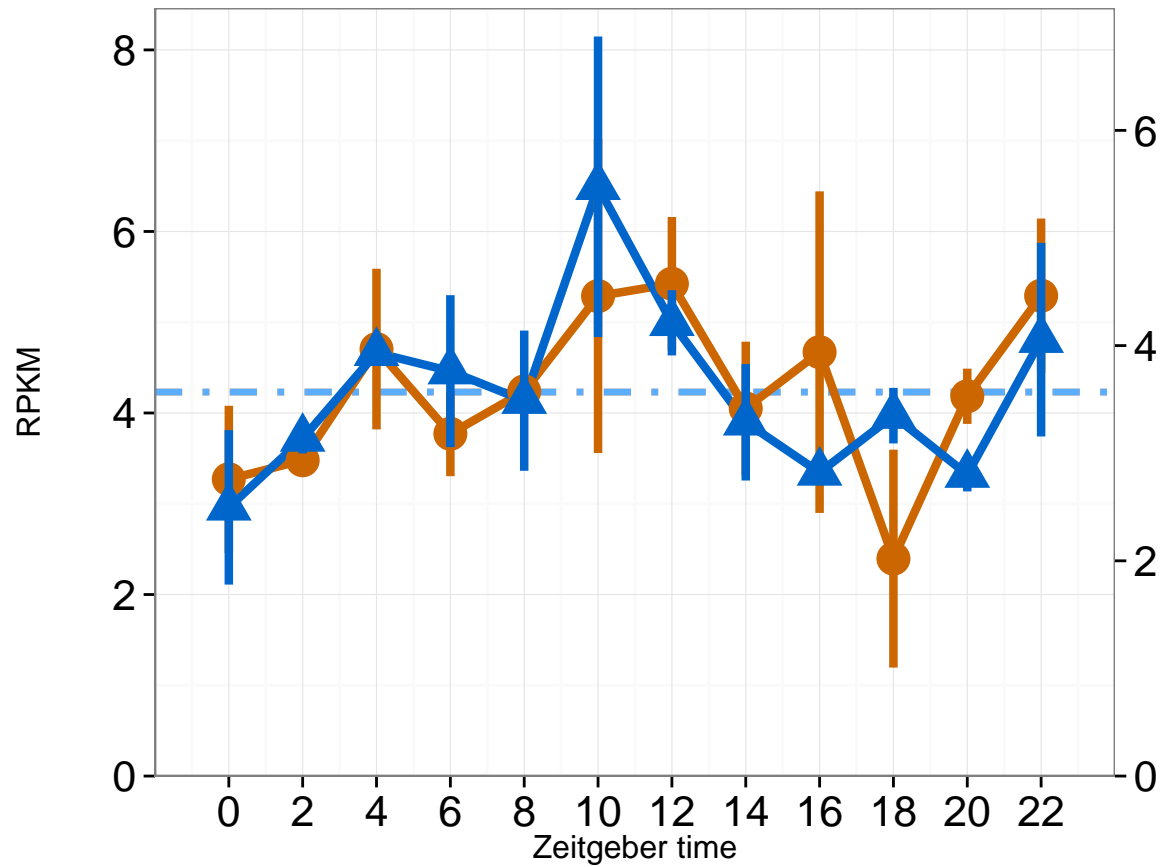

# Izumo4

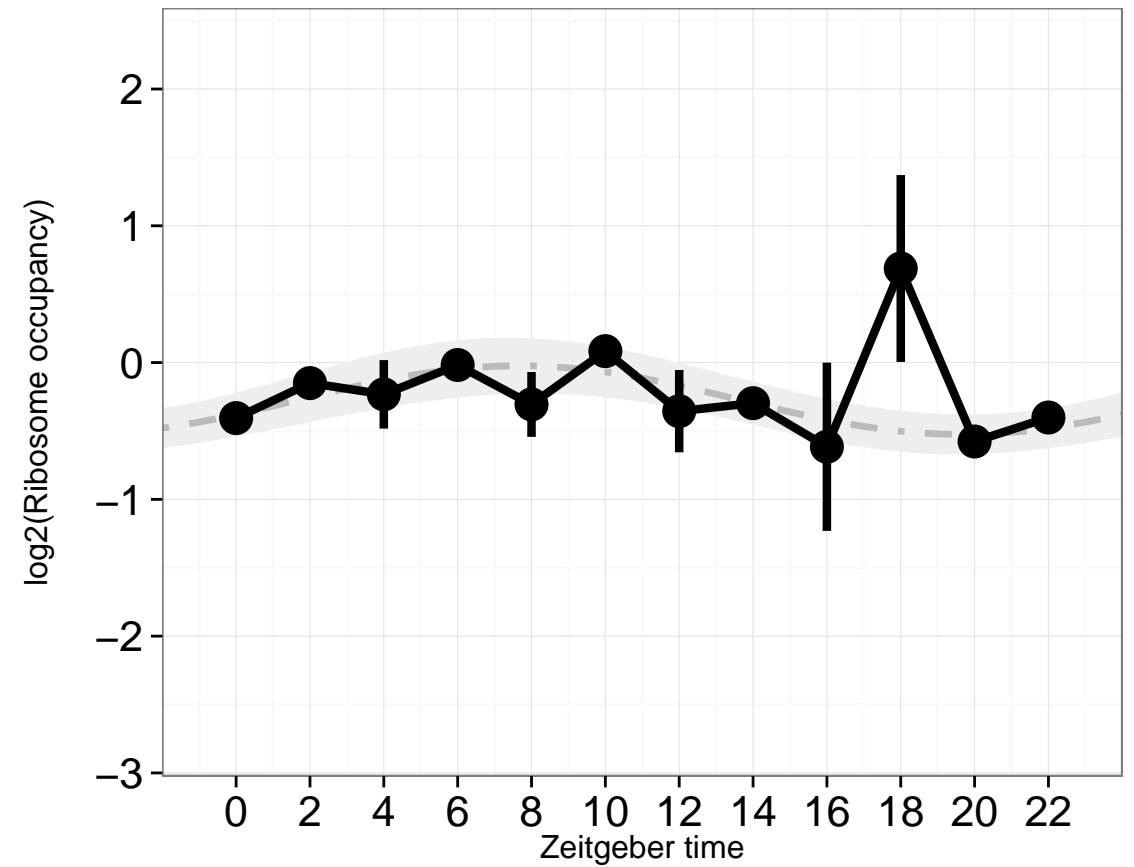

Supplement: SuppDataset_1.zip [file Izumo4_set_A.pdf › Supplemental Dataset 1/A-mRNA_nonrhyth_translation_nonrhyth/Izumo4_set_A.pdf]

# Jag1

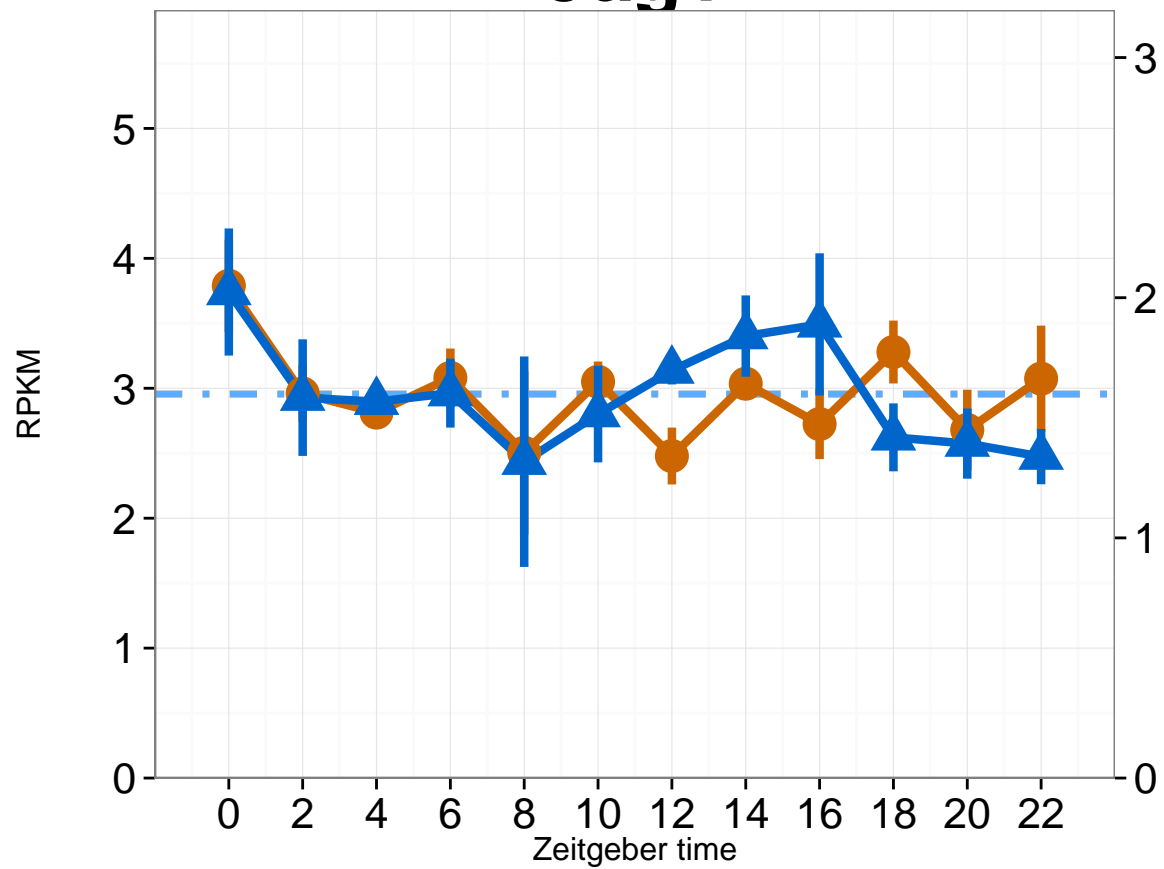

# Jag1

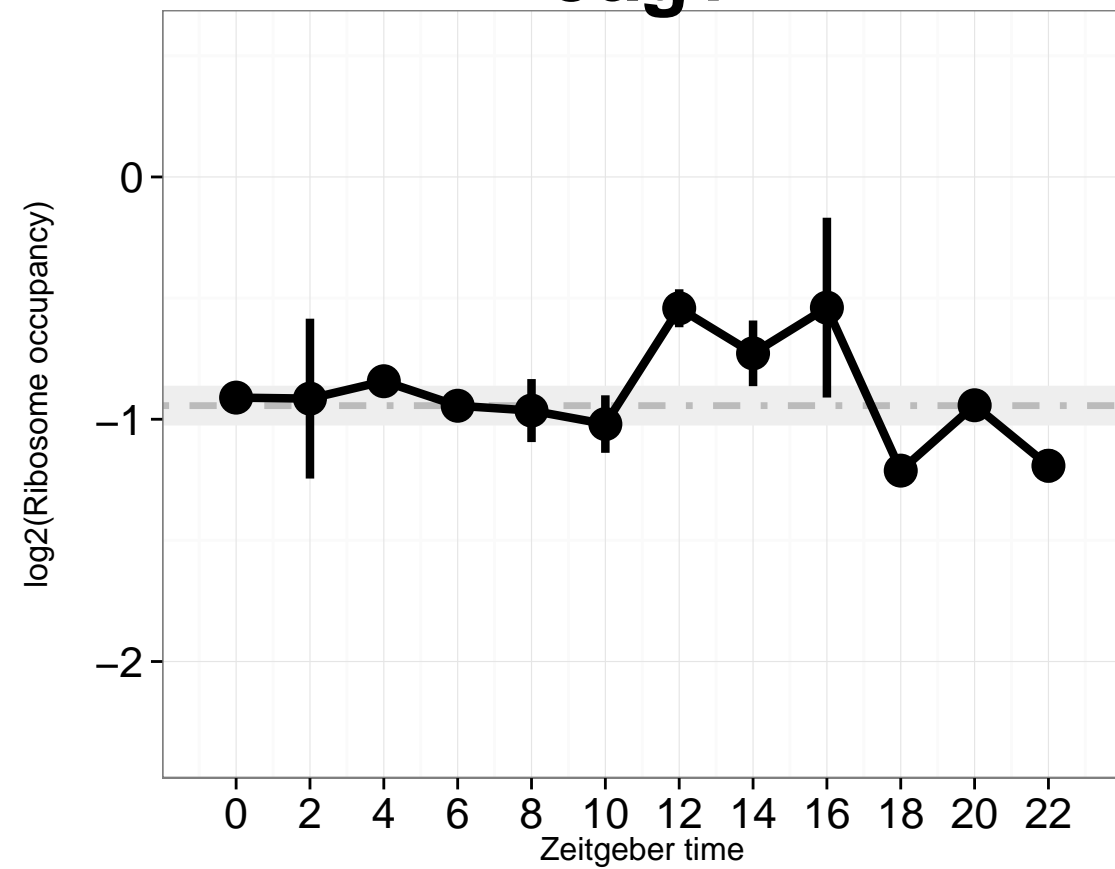

Supplement: SuppDataset_1.zip [file Jag1_set_A.pdf › Supplemental Dataset 1/A-mRNA_nonrhyth_translation_nonrhyth/Jag1_set_A.pdf]

# Jagn1

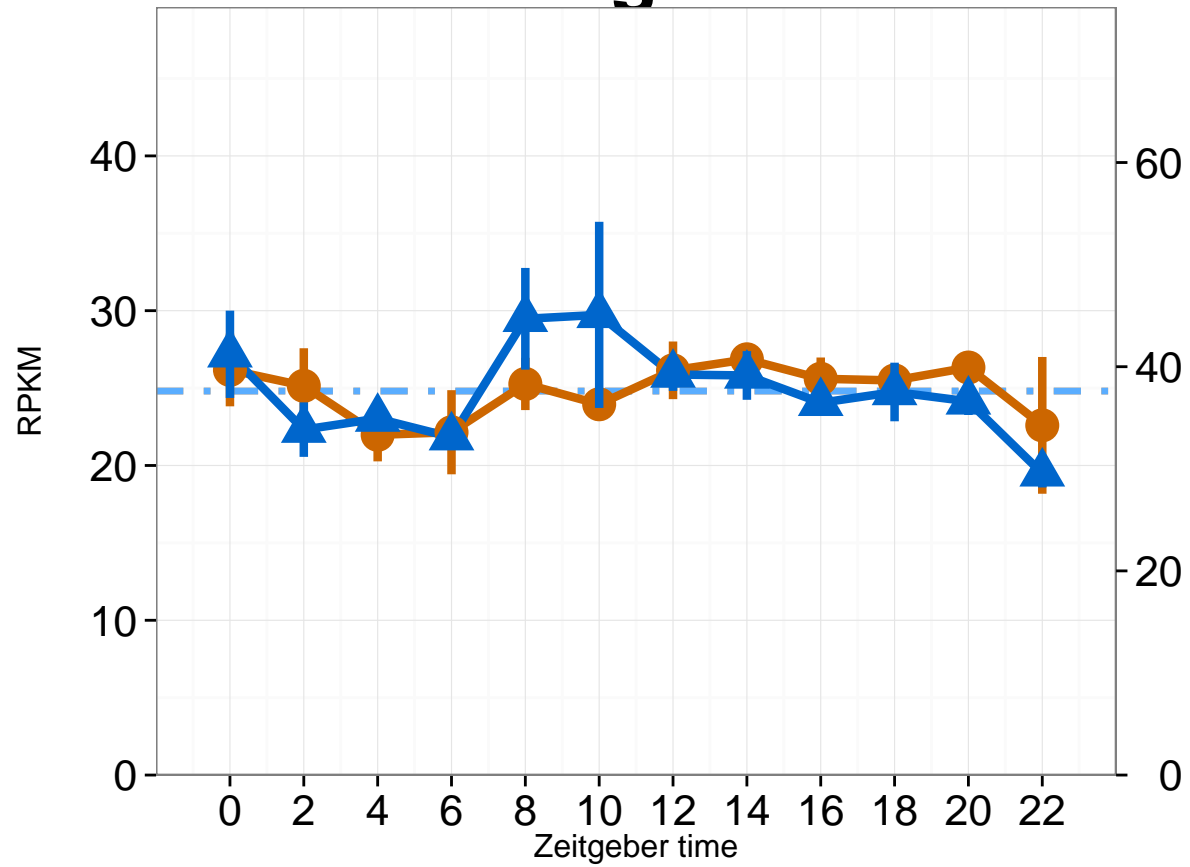

# Jagn1

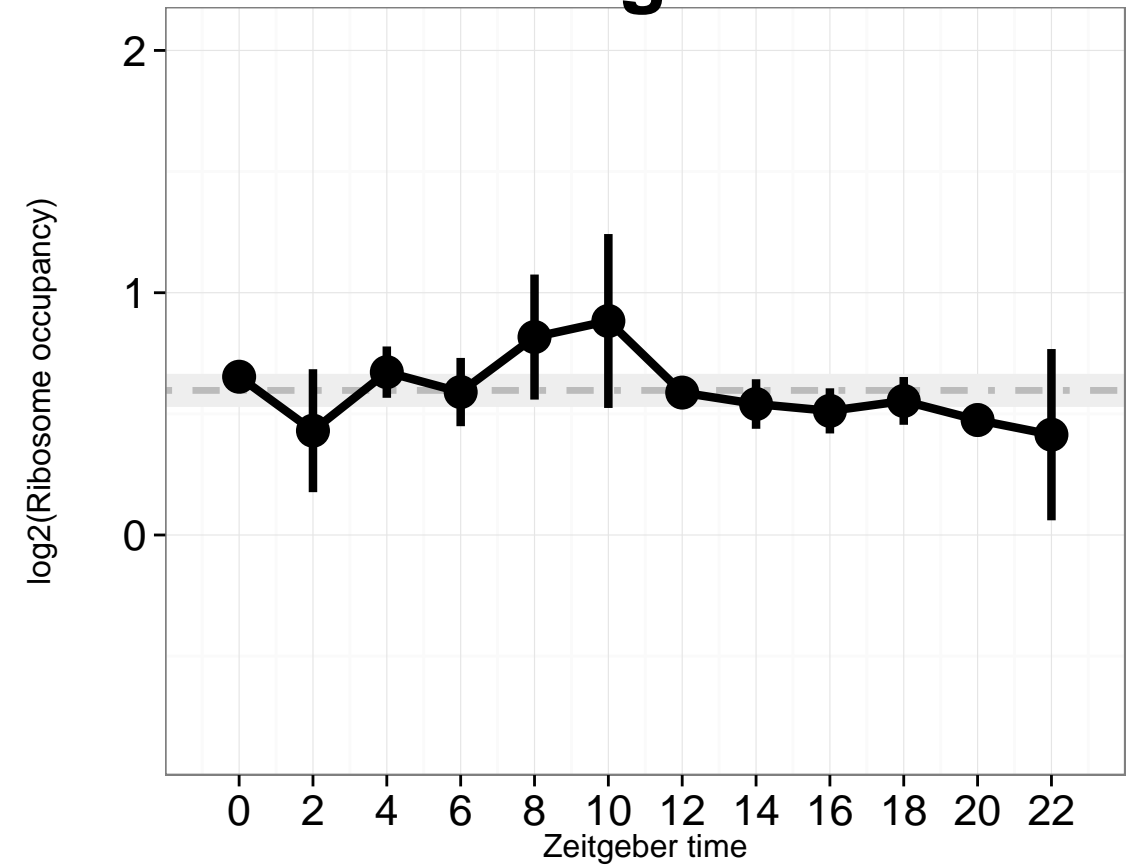

Supplement: SuppDataset_1.zip [file Jagn1_set_A.pdf › Supplemental Dataset 1/A-mRNA_nonrhyth_translation_nonrhyth/Jagn1_set_A.pdf]

## Jak1

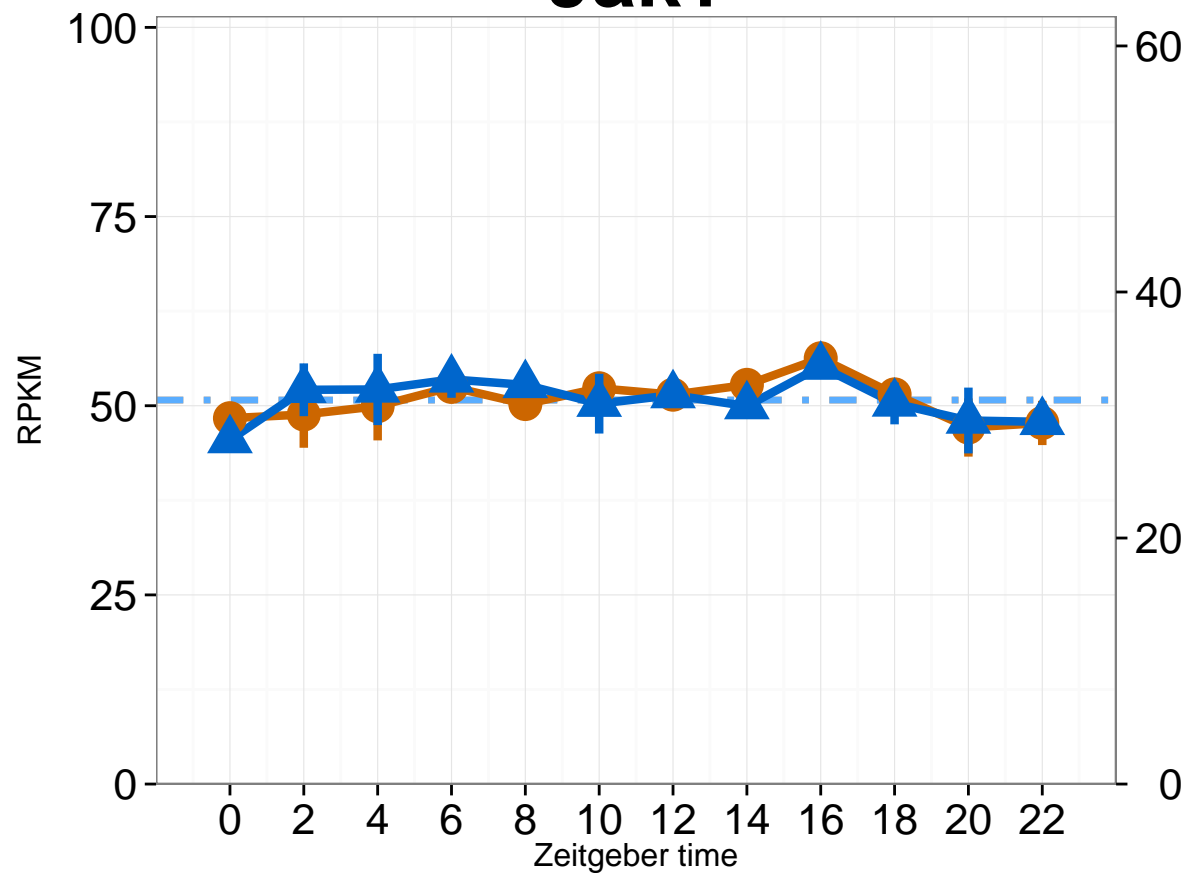

## Jak1

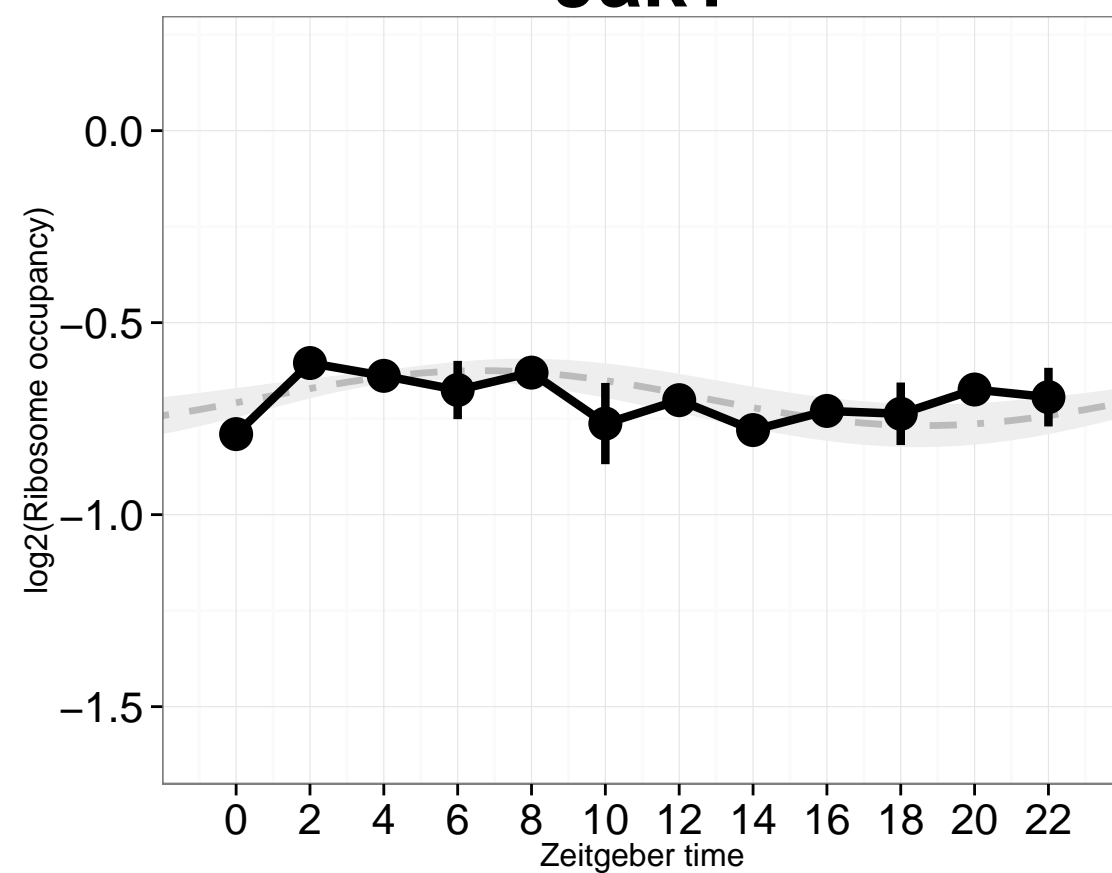

Supplement: SuppDataset_1.zip [file Jak1_set_A.pdf › Supplemental Dataset 1/A-mRNA_nonrhyth_translation_nonrhyth/Jak1_set_A.pdf]

## Jak2

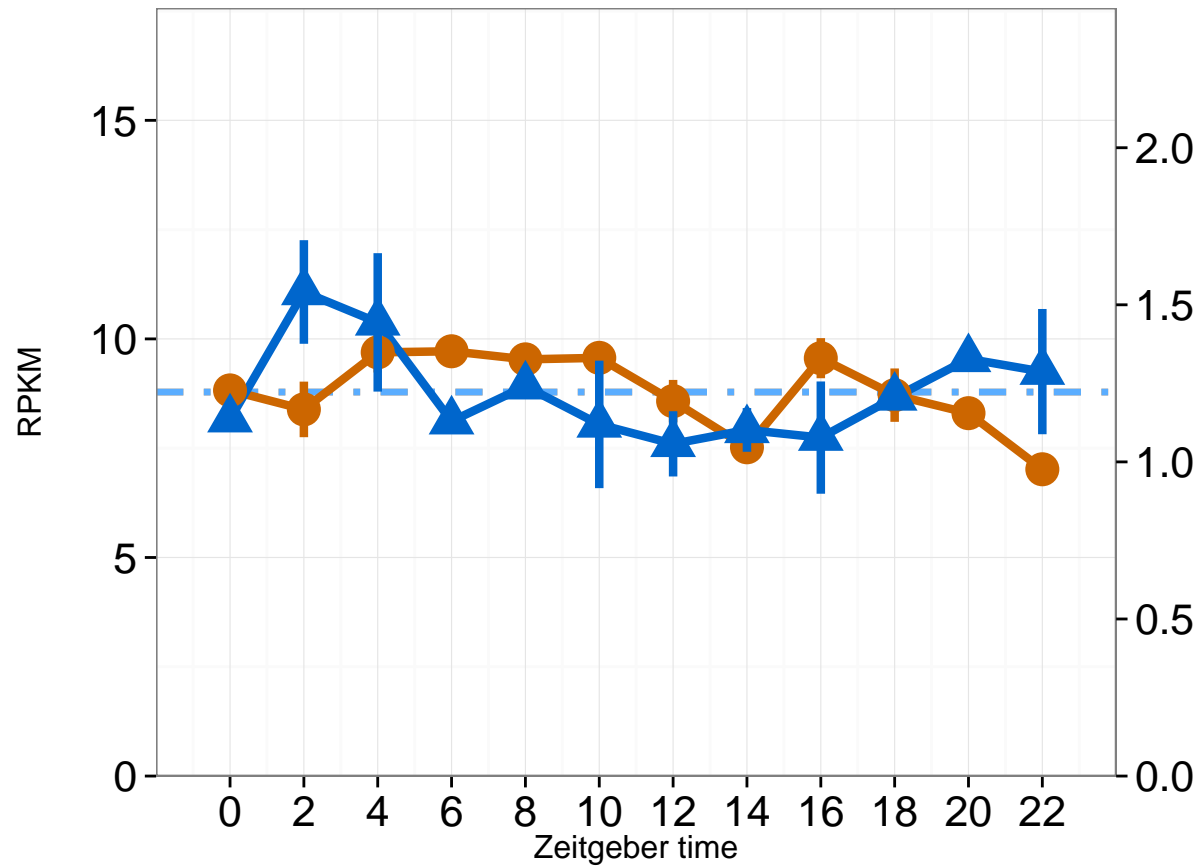

## Jak2

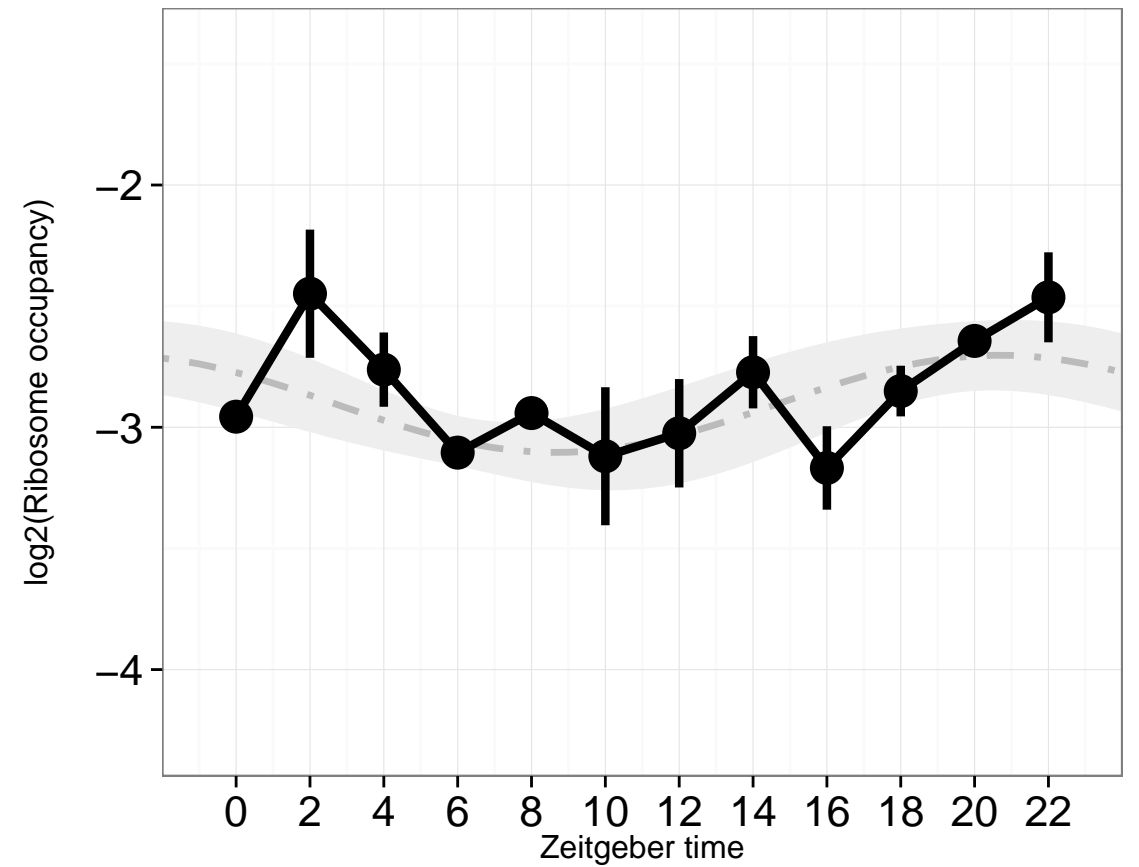

Supplement: SuppDataset_1.zip [file Jak2_set_A.pdf › Supplemental Dataset 1/A-mRNA_nonrhyth_translation_nonrhyth/Jak2_set_A.pdf]

## Jak3

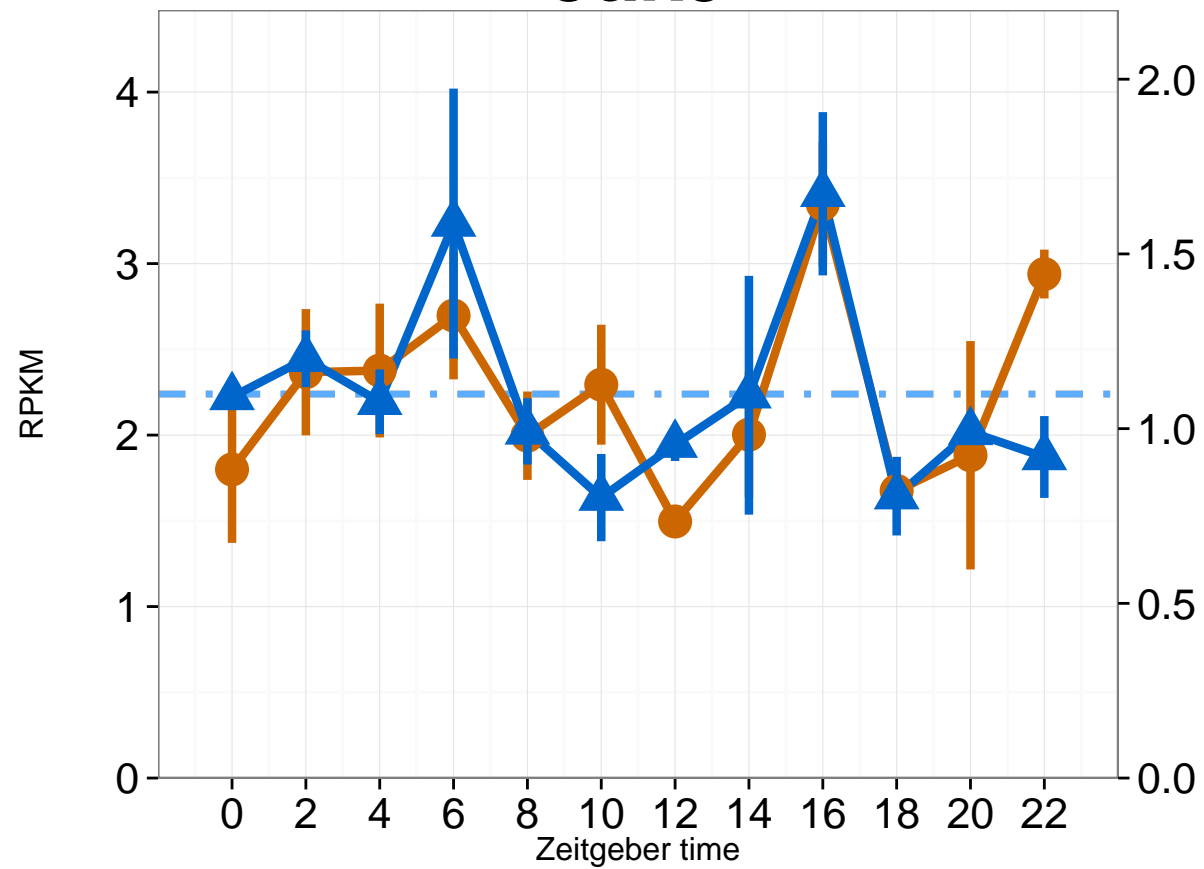

## Jak3

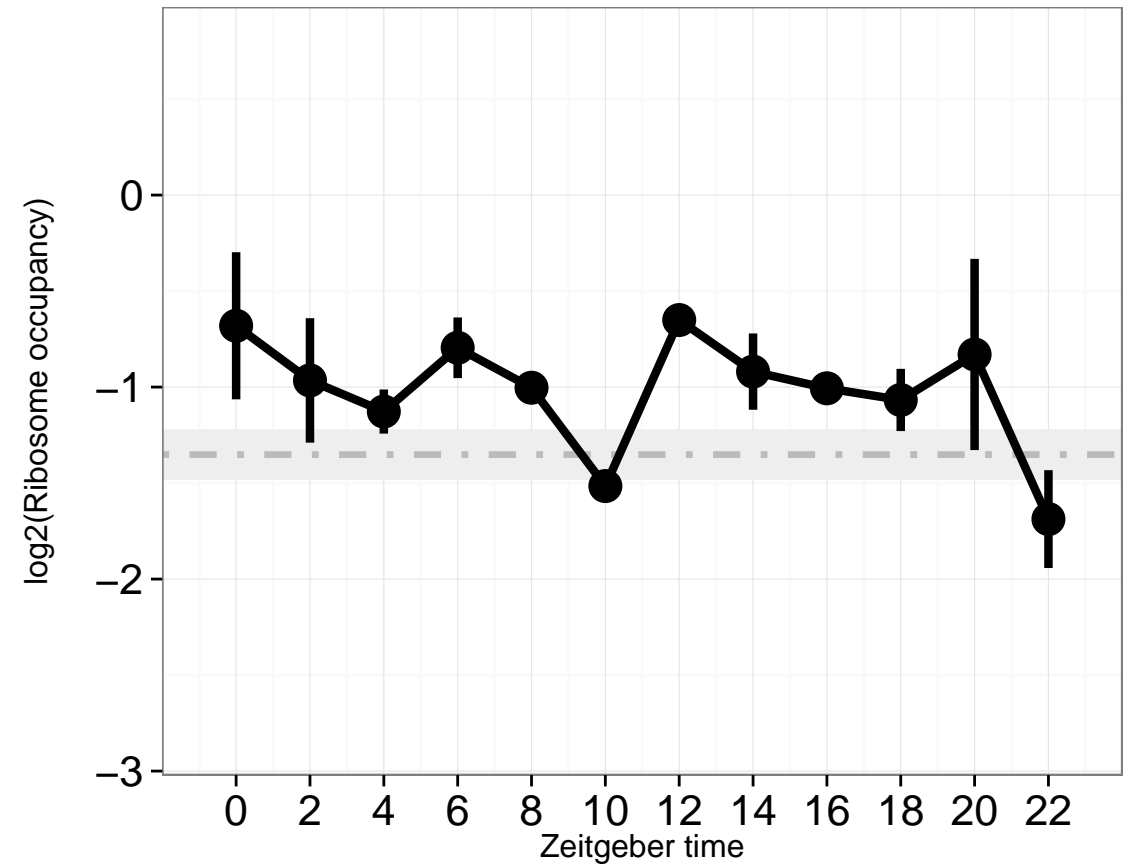

Supplement: SuppDataset_1.zip [file Jak3_set_A.pdf › Supplemental Dataset 1/A-mRNA_nonrhyth_translation_nonrhyth/Jak3_set_A.pdf]

## Jarid2

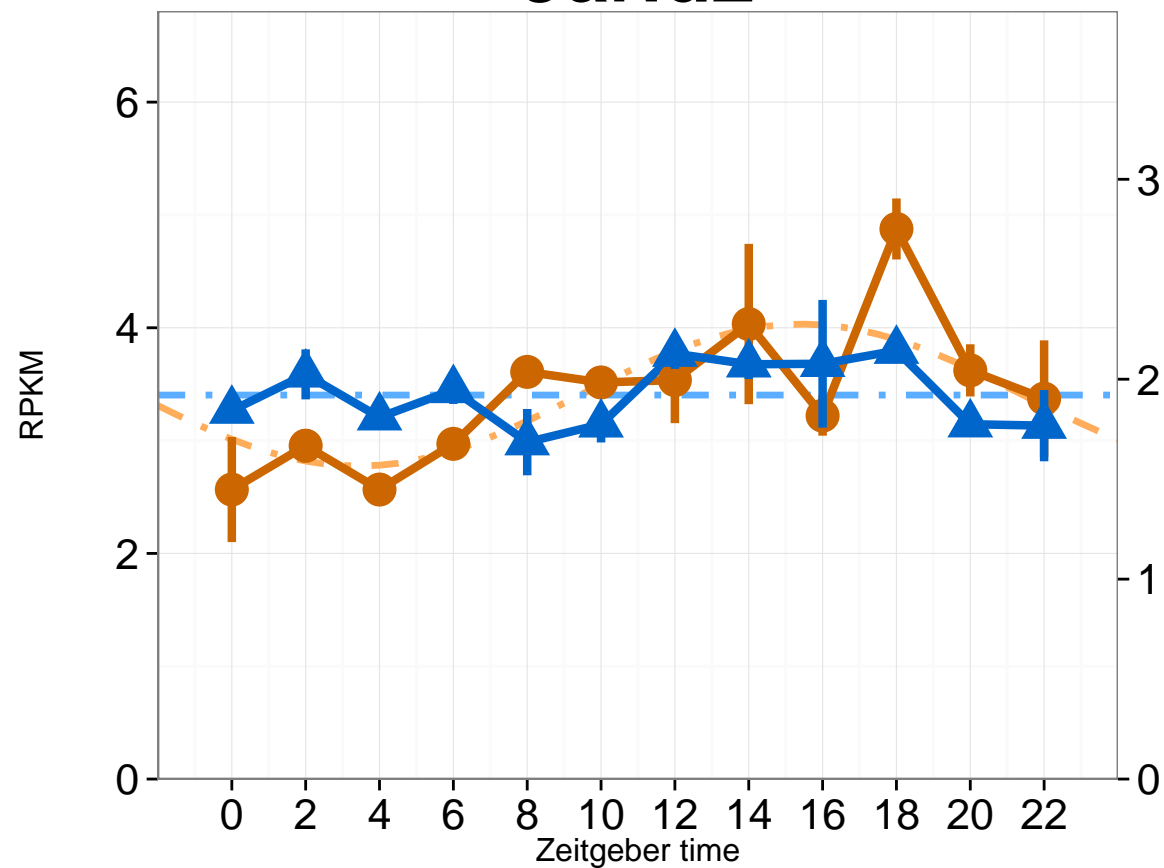

## Jarid2

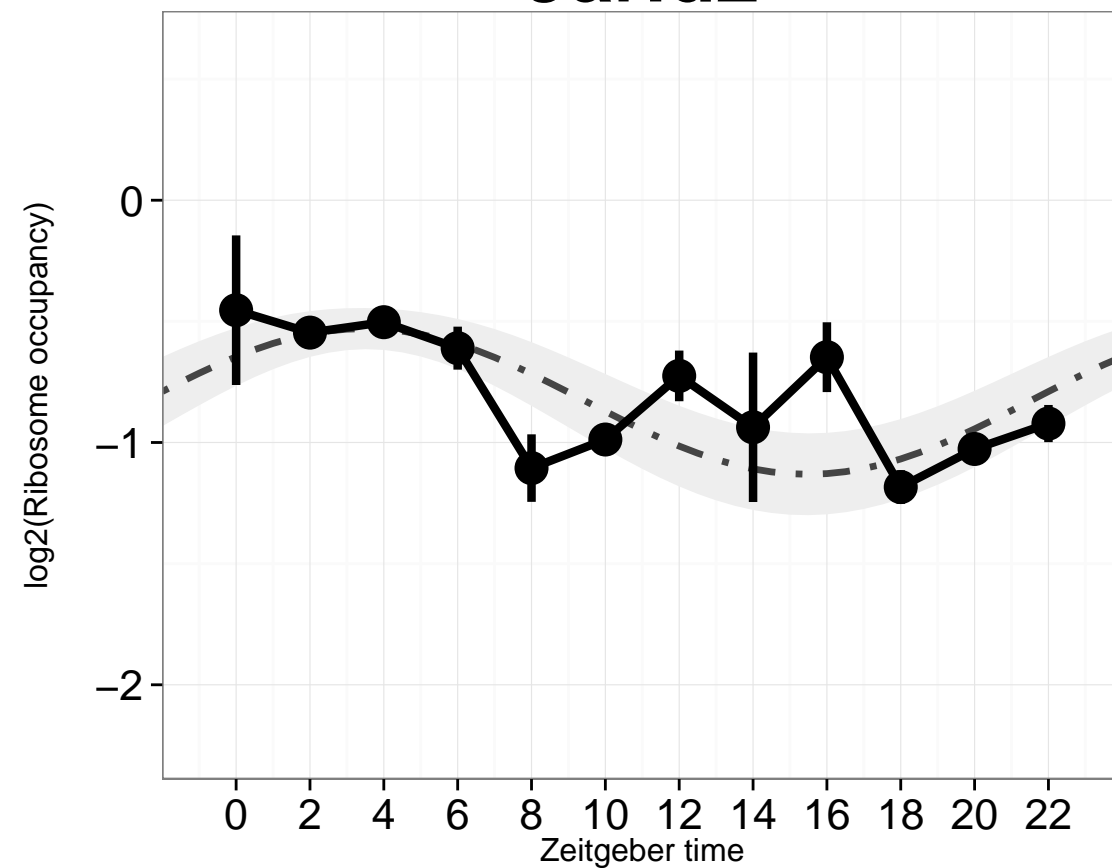

Supplement: SuppDataset_1.zip [file Jarid2_set_A.pdf › Supplemental Dataset 1/A-mRNA_nonrhyth_translation_nonrhyth/Jarid2_set_A.pdf]

## Jdp2

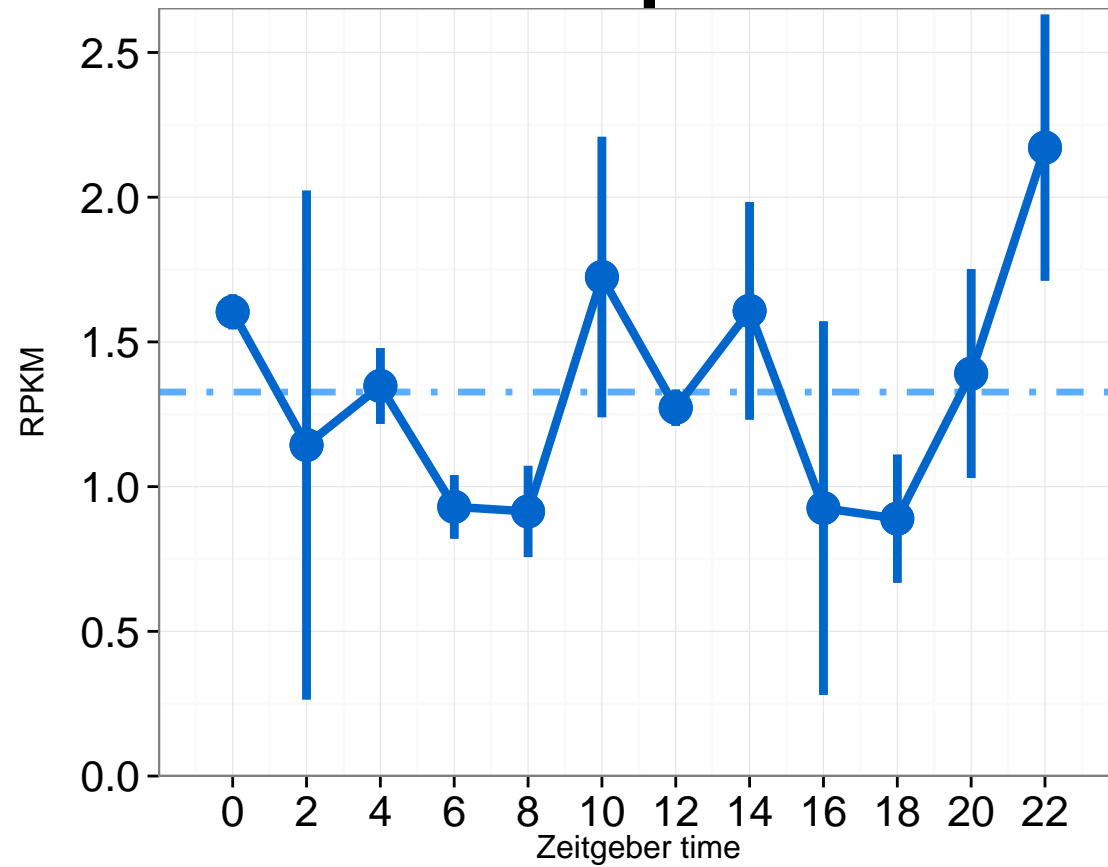

## Jdp2 log2(Ribosome occupancy)

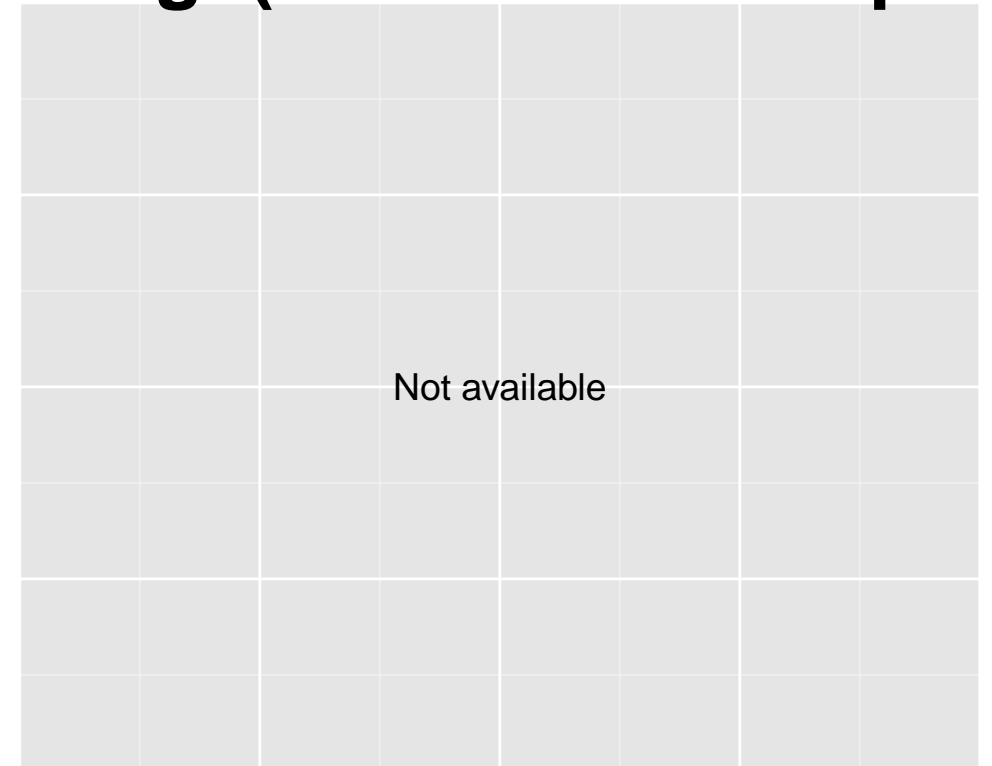

Supplement: SuppDataset_1.zip [file Jdp2_set_A.pdf › Supplemental Dataset 1/A-mRNA_nonrhyth_translation_nonrhyth/Jdp2_set_A.pdf]

## Jkamp

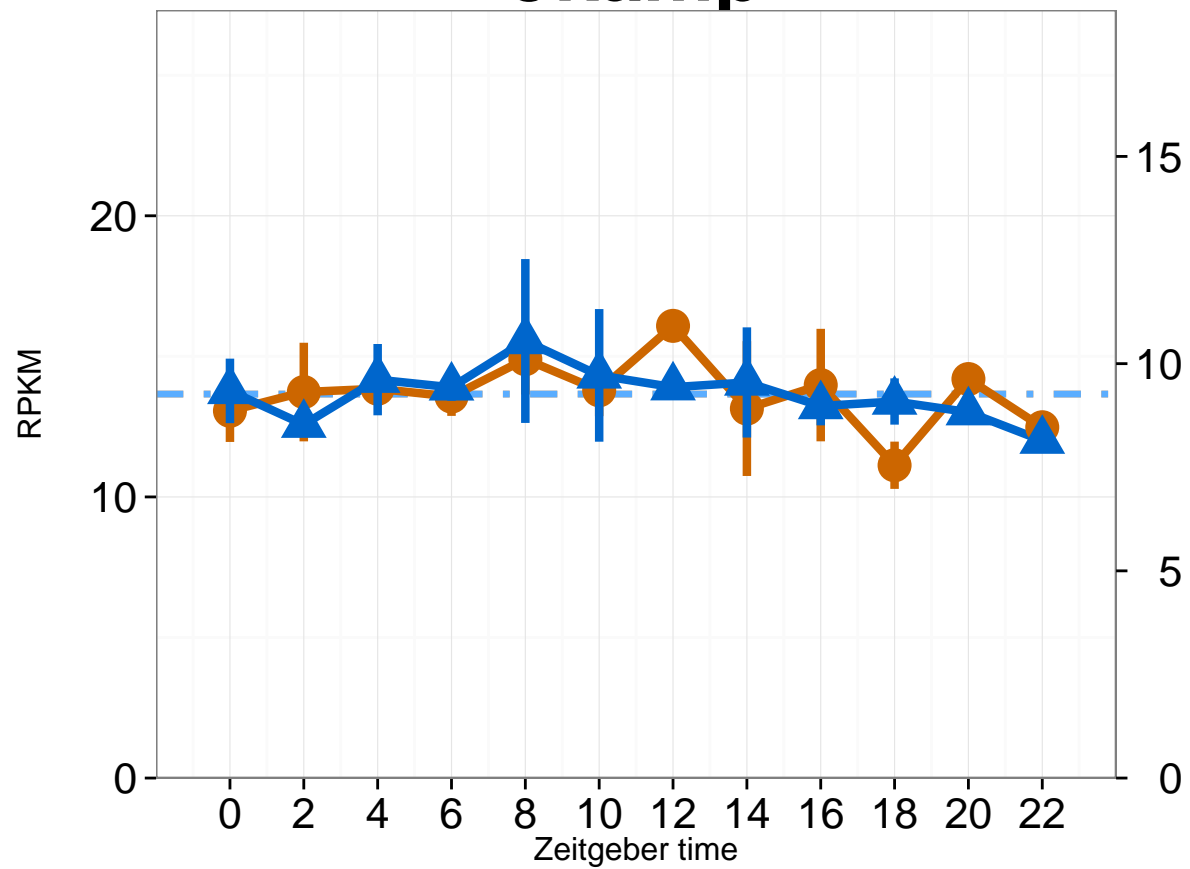

## Jkamp

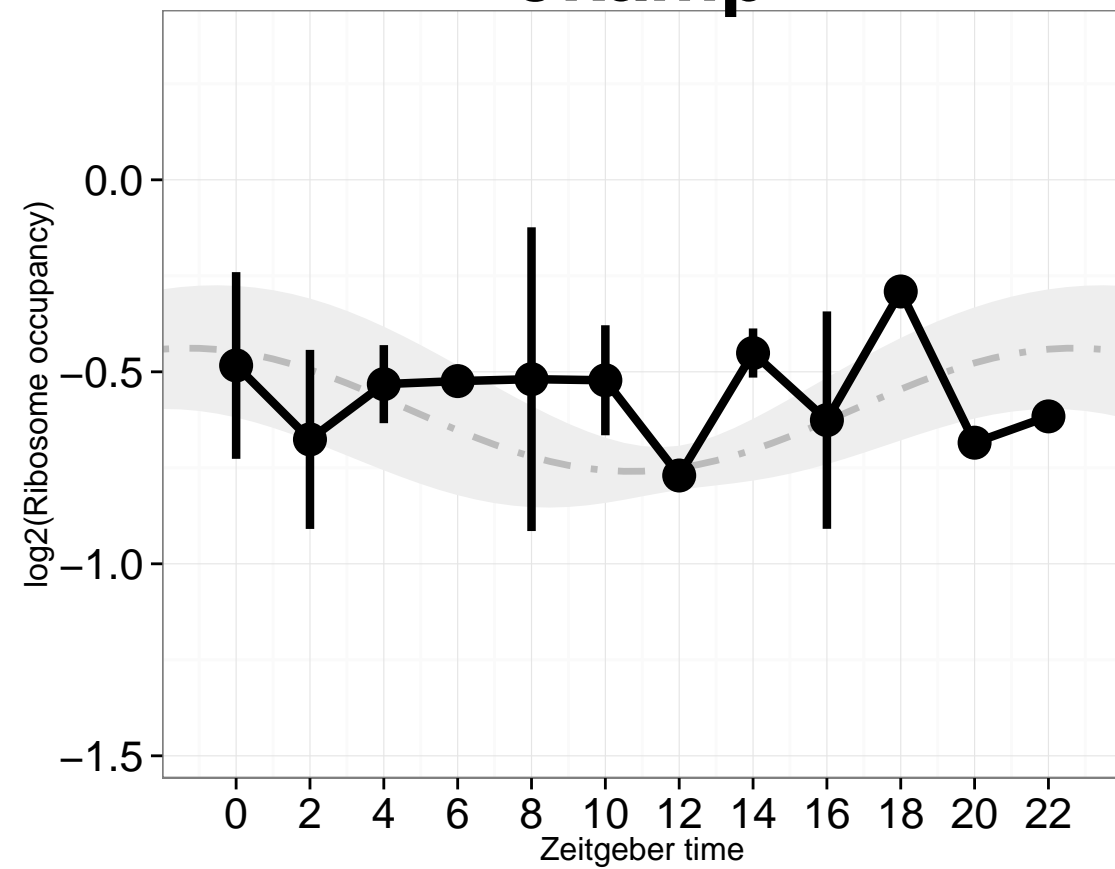

Supplement: SuppDataset_1.zip [file Jkamp_set_A.pdf › Supplemental Dataset 1/A-mRNA_nonrhyth_translation_nonrhyth/Jkamp_set_A.pdf]

## Jmjd1c

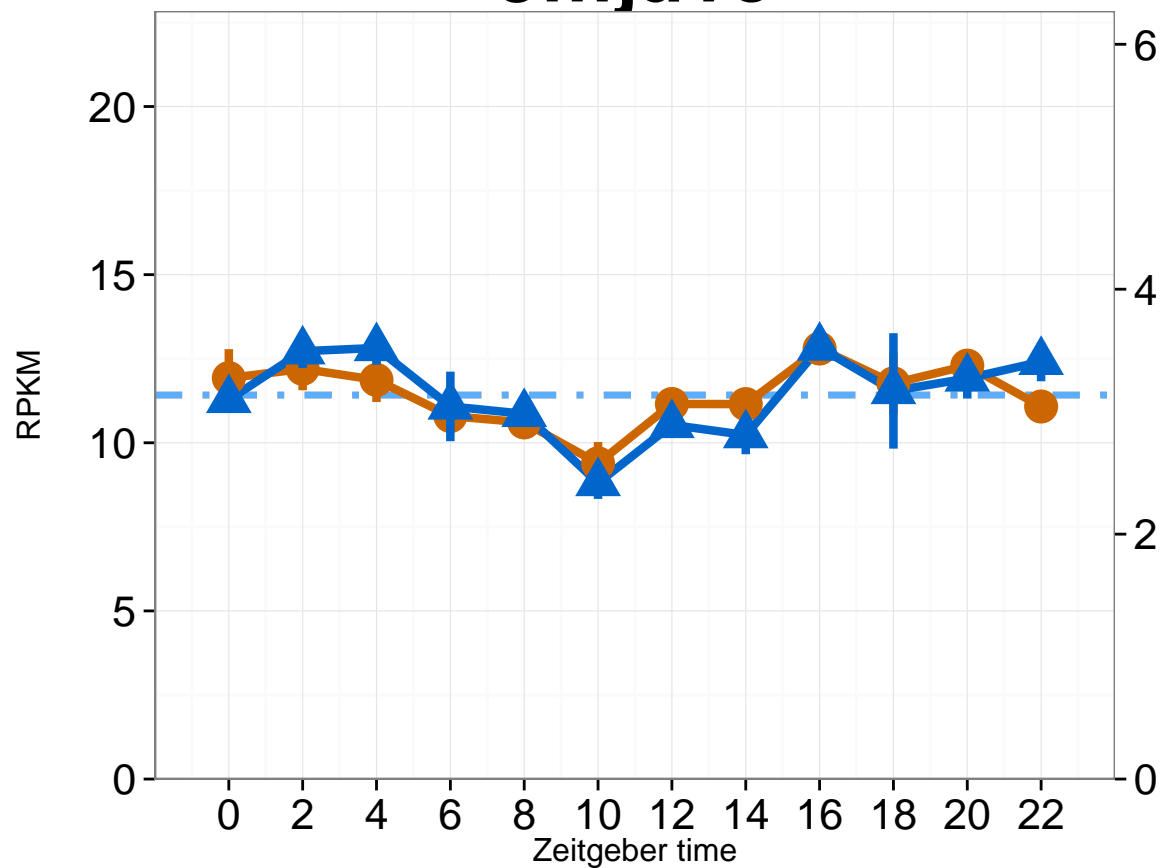

## Jmjd1c

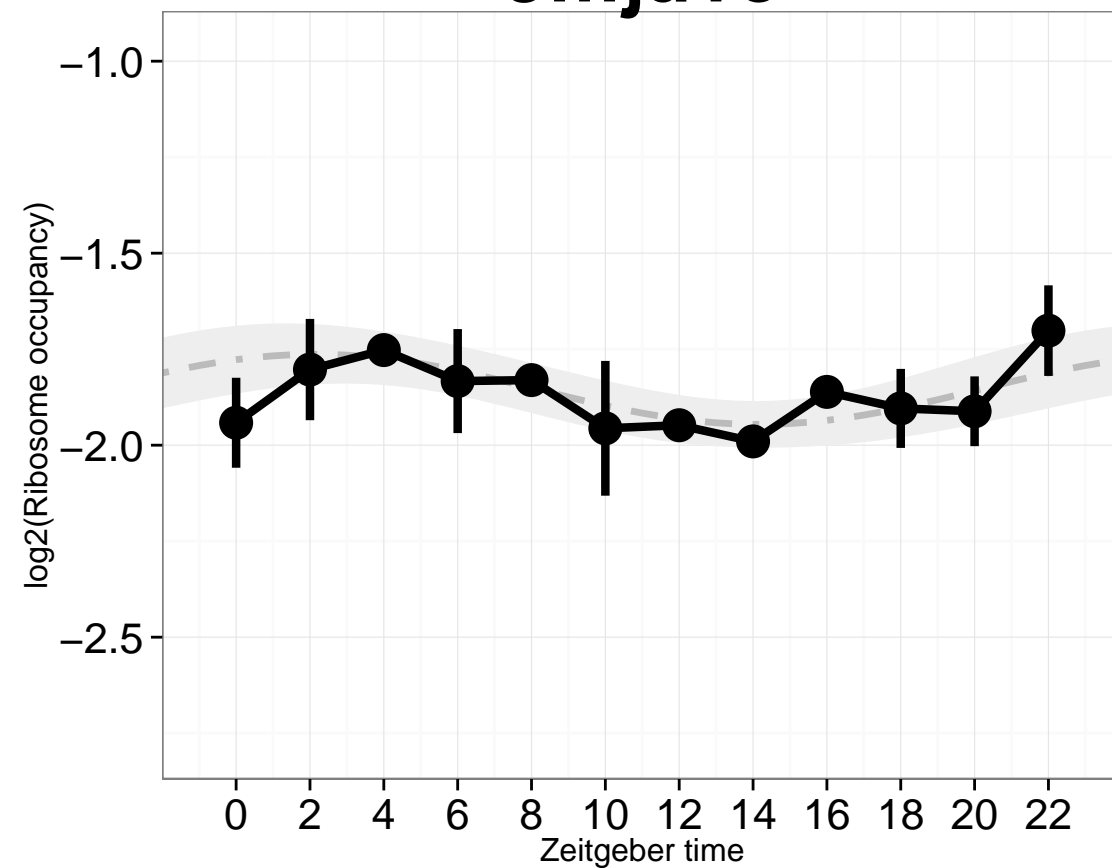

Supplement: SuppDataset_1.zip [file Jmjd1c_set_A.pdf › Supplemental Dataset 1/A-mRNA_nonrhyth_translation_nonrhyth/Jmjd1c_set_A.pdf]

## Jmjd4

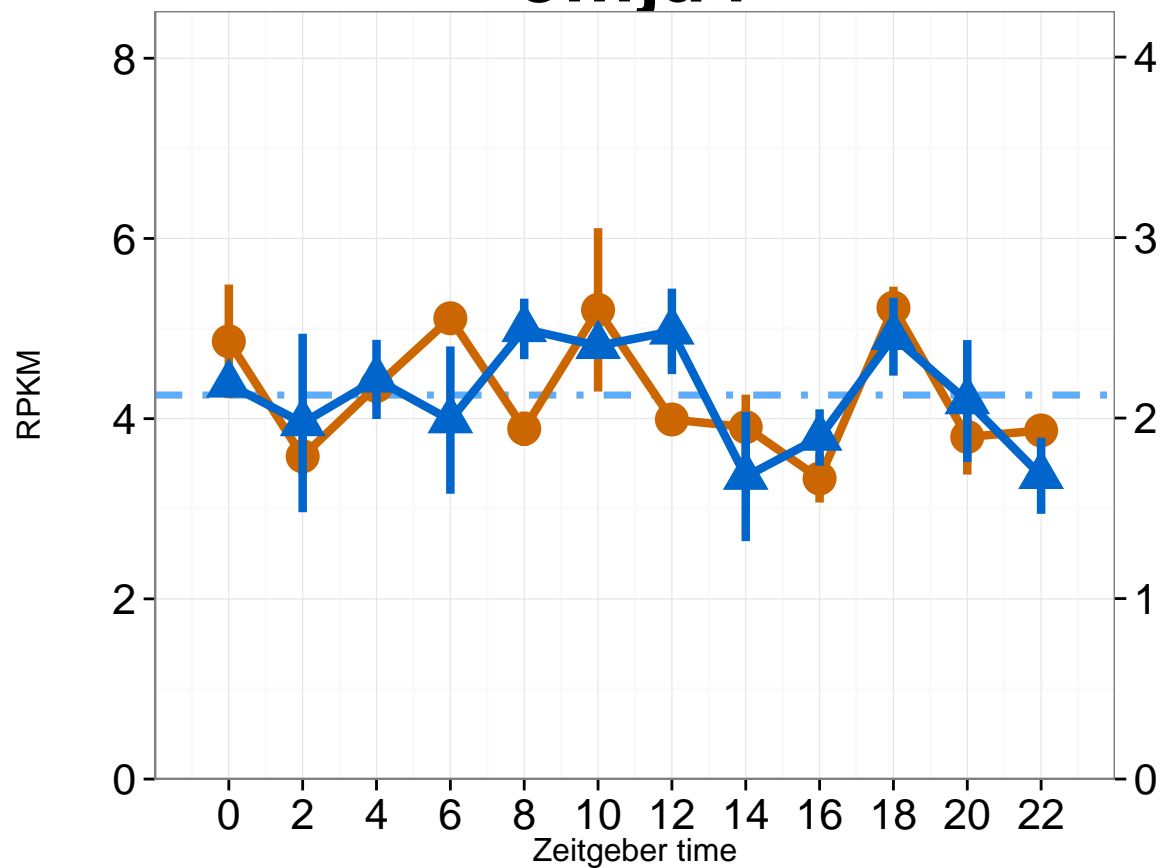

## Jmjd4

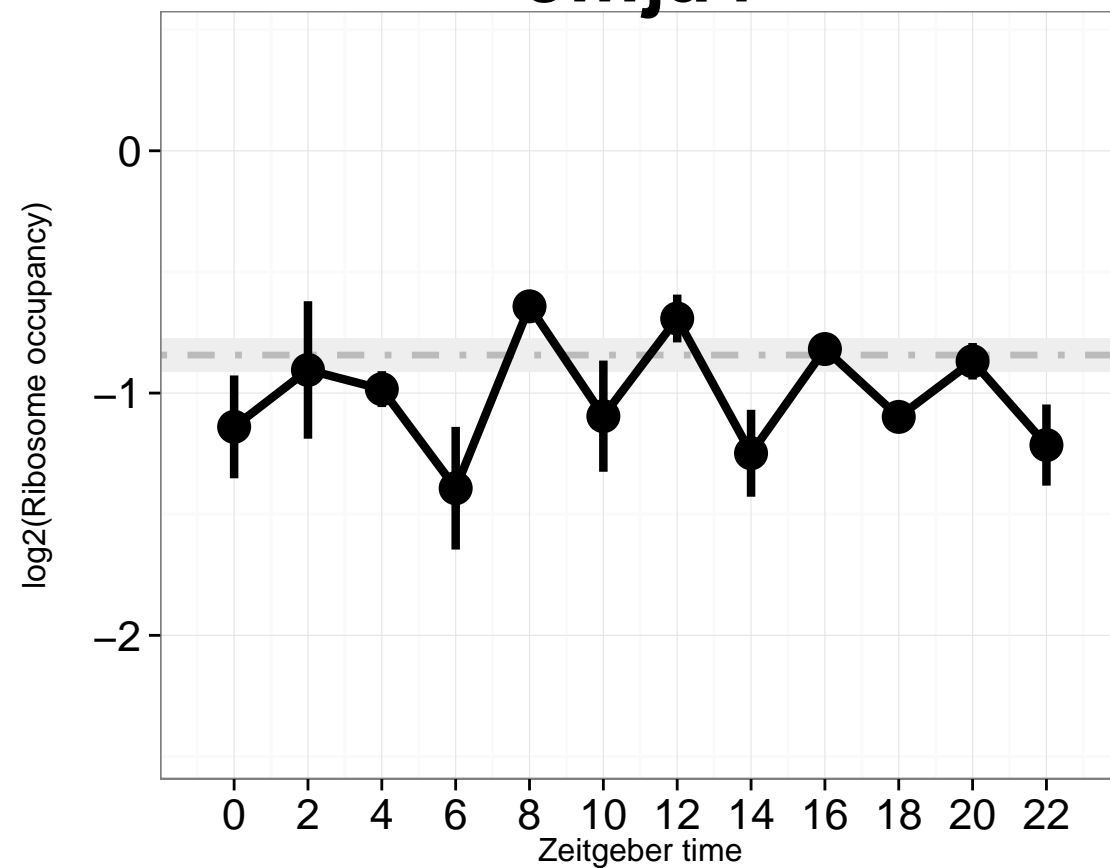

Supplement: SuppDataset_1.zip [file Jmjd4_set_A.pdf › Supplemental Dataset 1/A-mRNA_nonrhyth_translation_nonrhyth/Jmjd4_set_A.pdf]

## Jmjd6

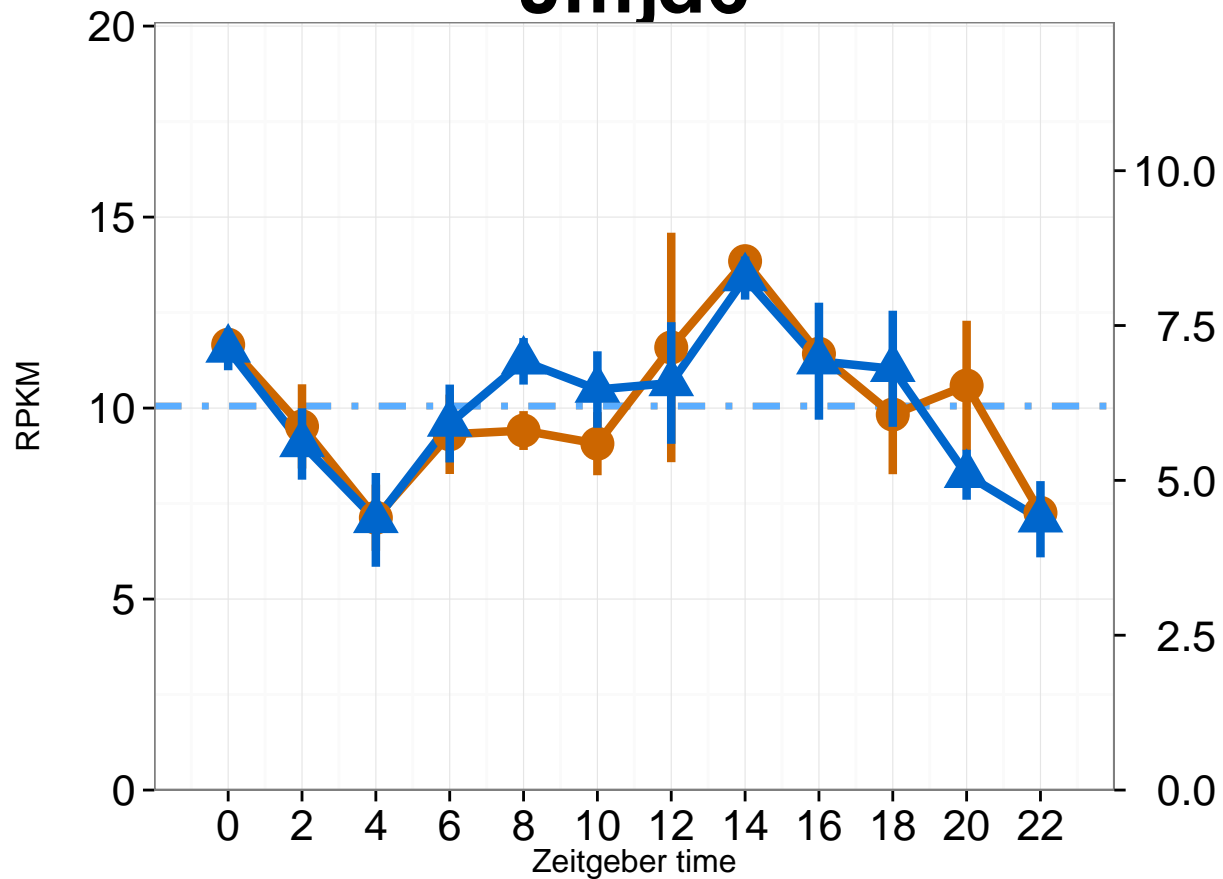

## Jmjd6

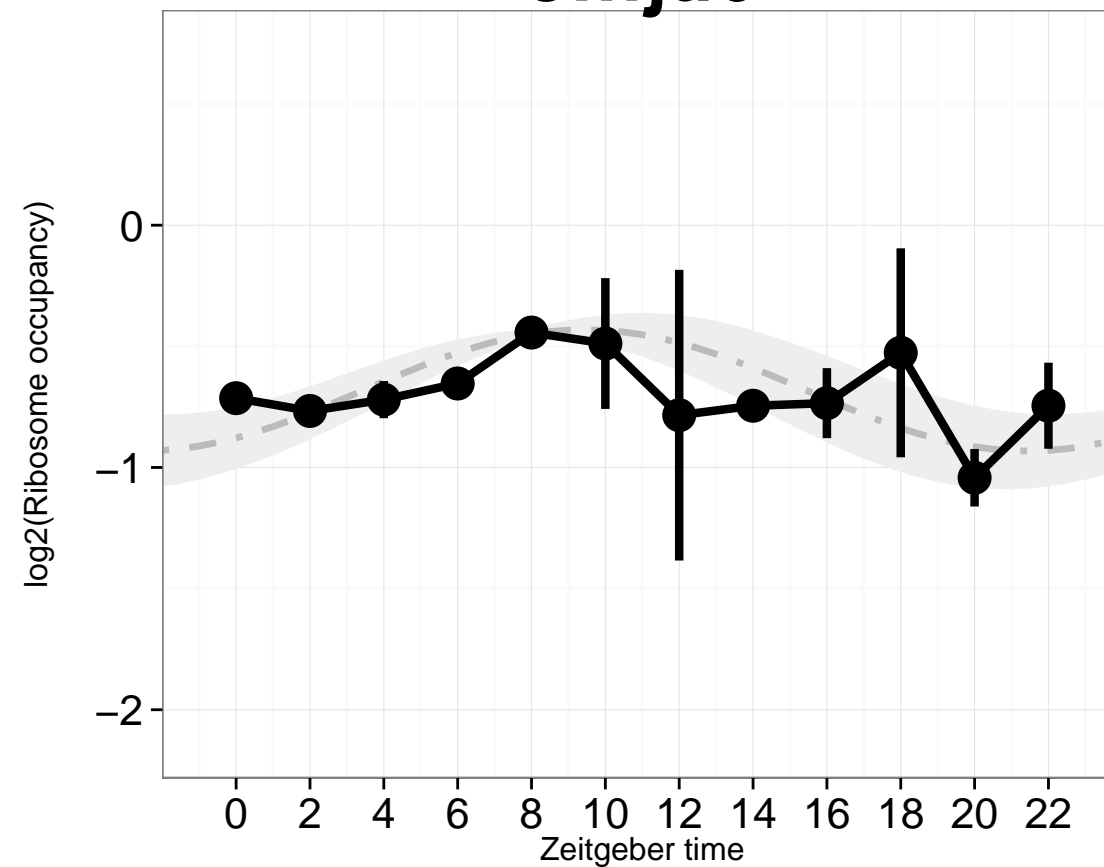

Supplement: SuppDataset_1.zip [file Jmjd6_set_A.pdf › Supplemental Dataset 1/A-mRNA_nonrhyth_translation_nonrhyth/Jmjd6_set_A.pdf]

# Jmjd7

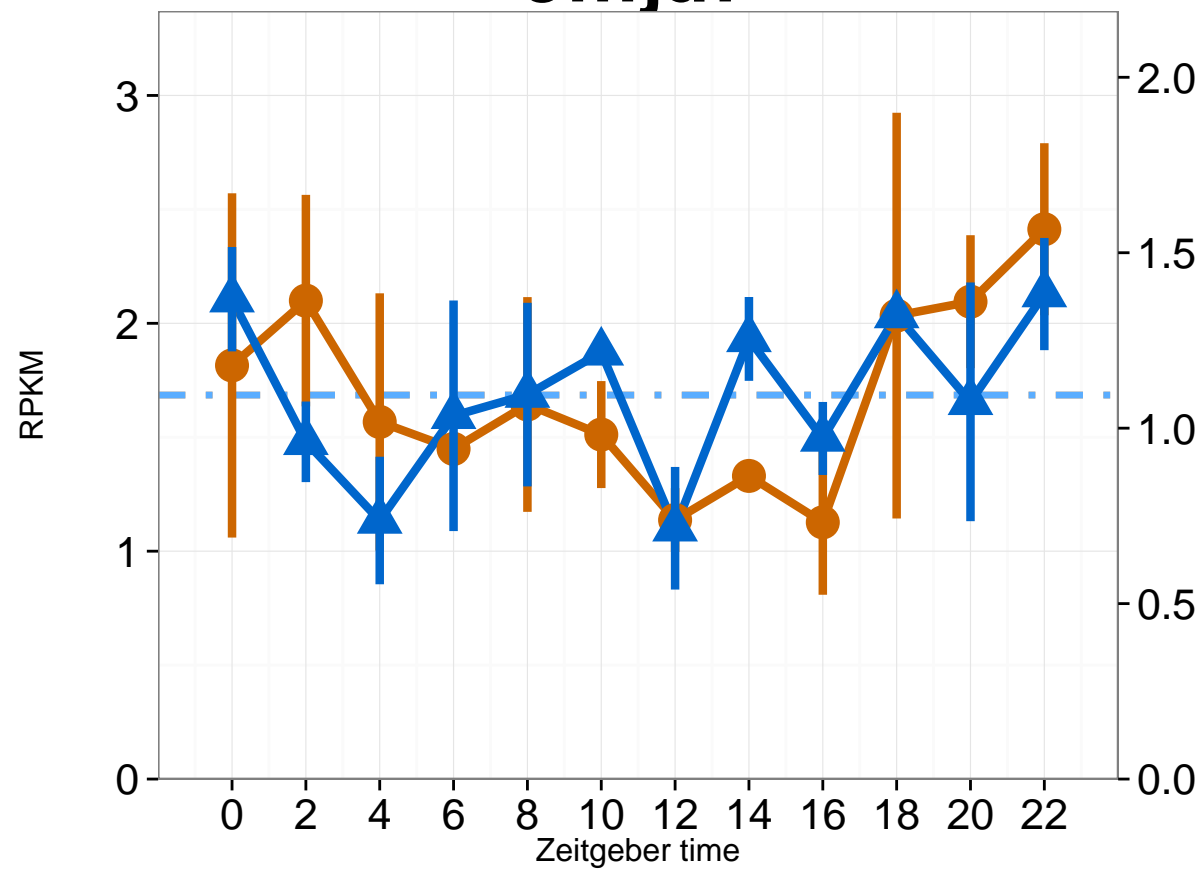

# Jmjd7

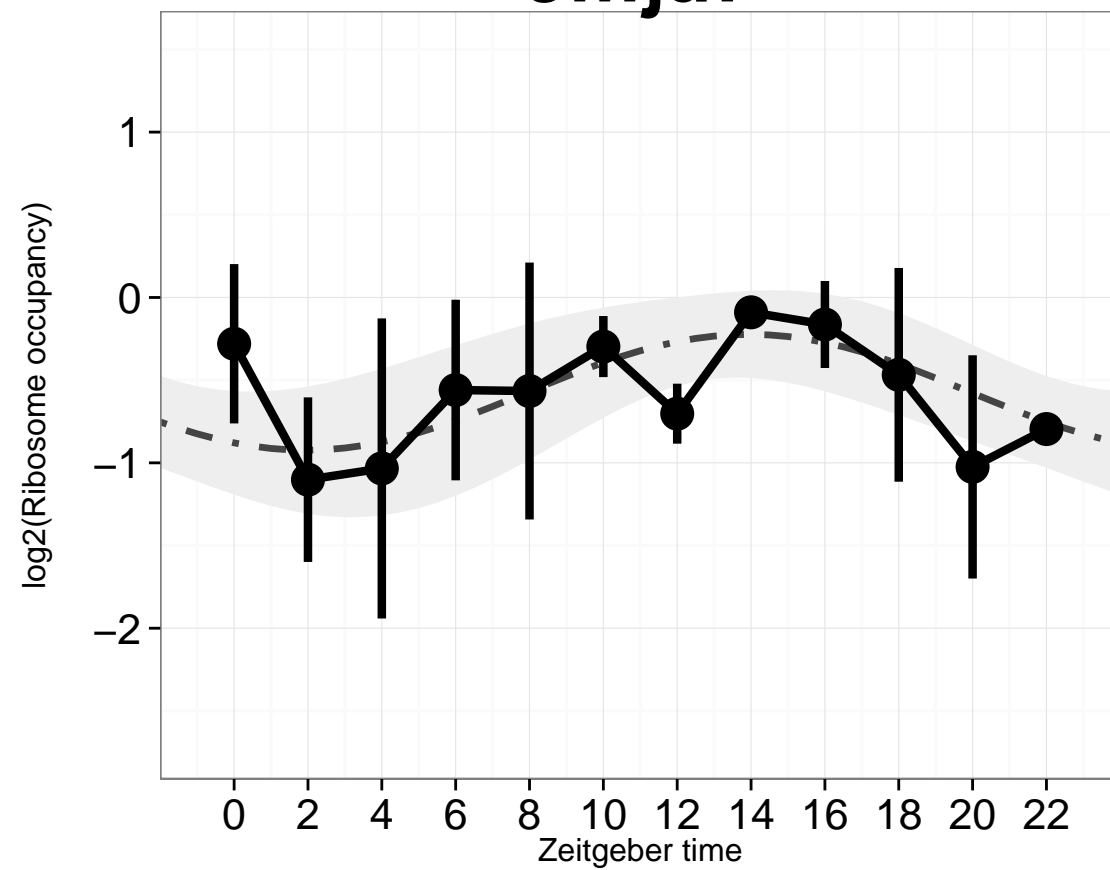

Supplement: SuppDataset_1.zip [file Jmjd7_set_A.pdf › Supplemental Dataset 1/A-mRNA_nonrhyth_translation_nonrhyth/Jmjd7_set_A.pdf]

## Jmjd8

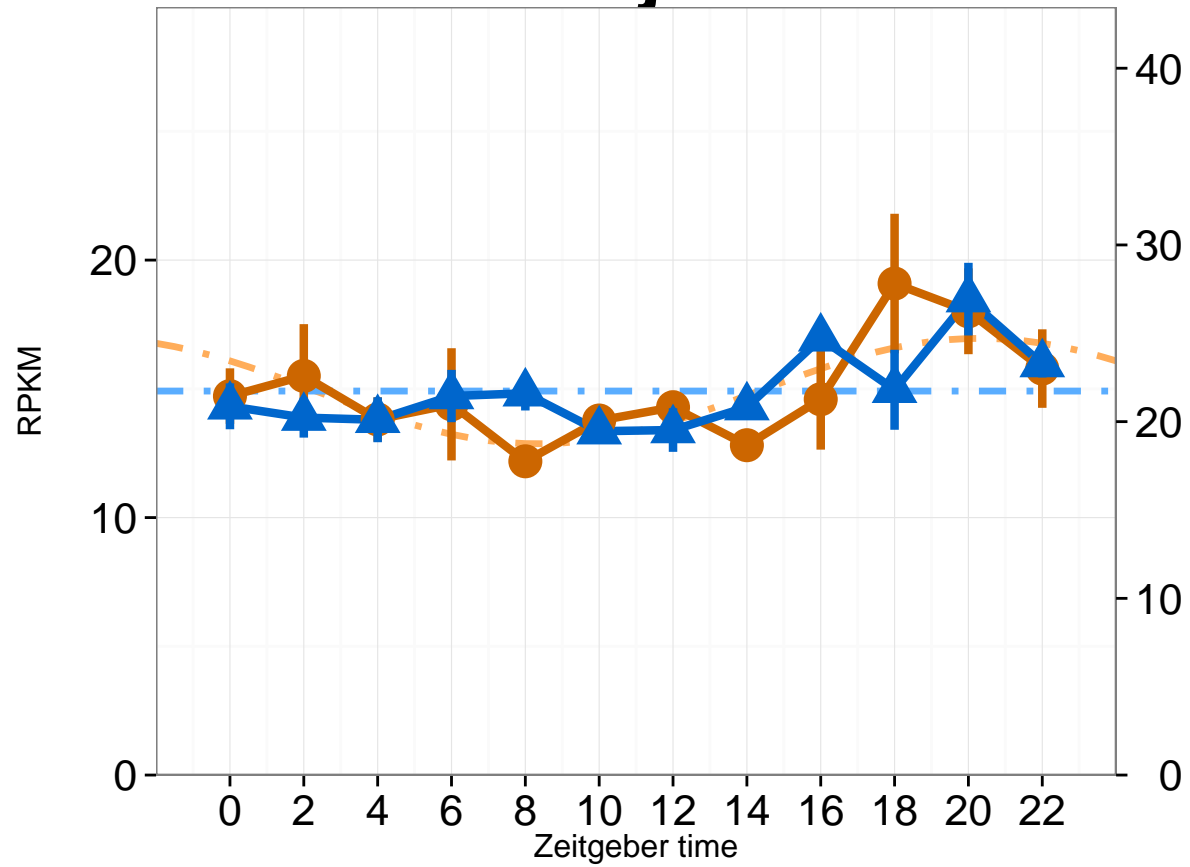

## Jmjd8

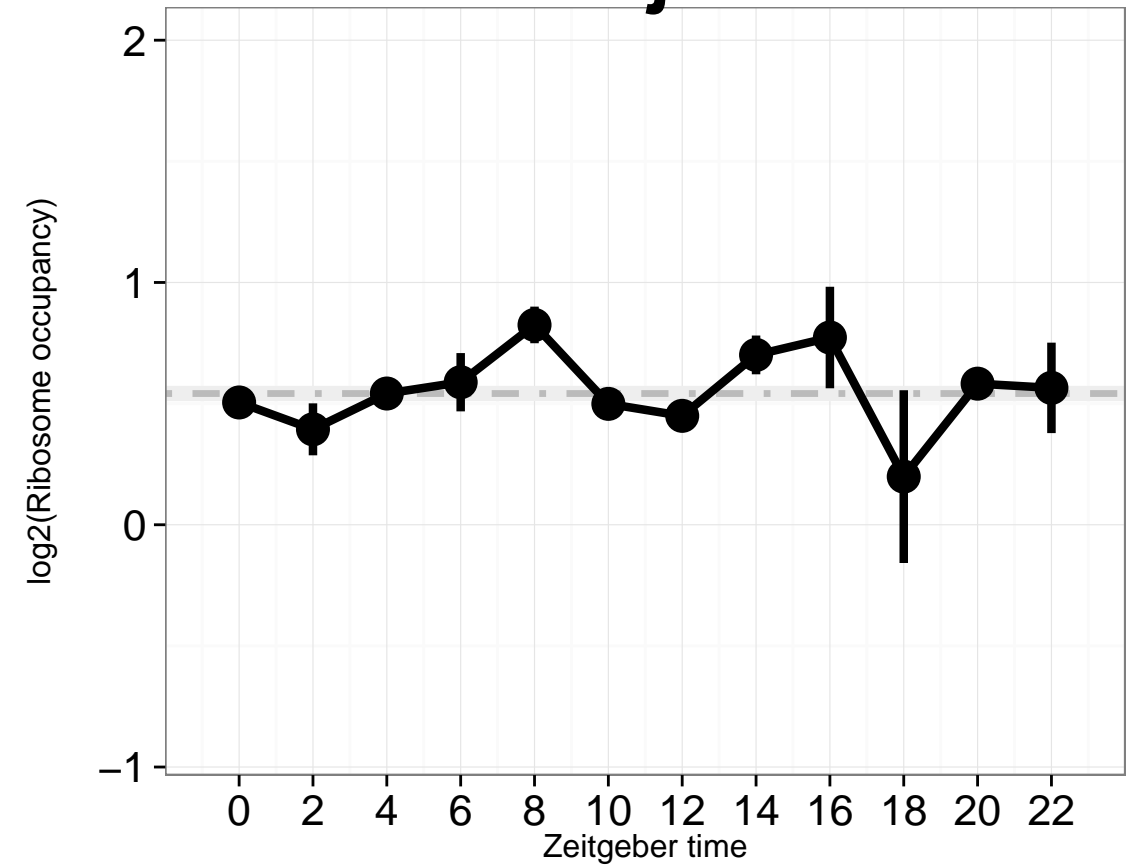

Supplement: SuppDataset_1.zip [file Jmjd8_set_A.pdf › Supplemental Dataset 1/A-mRNA_nonrhyth_translation_nonrhyth/Jmjd8_set_A.pdf]

# Jmy

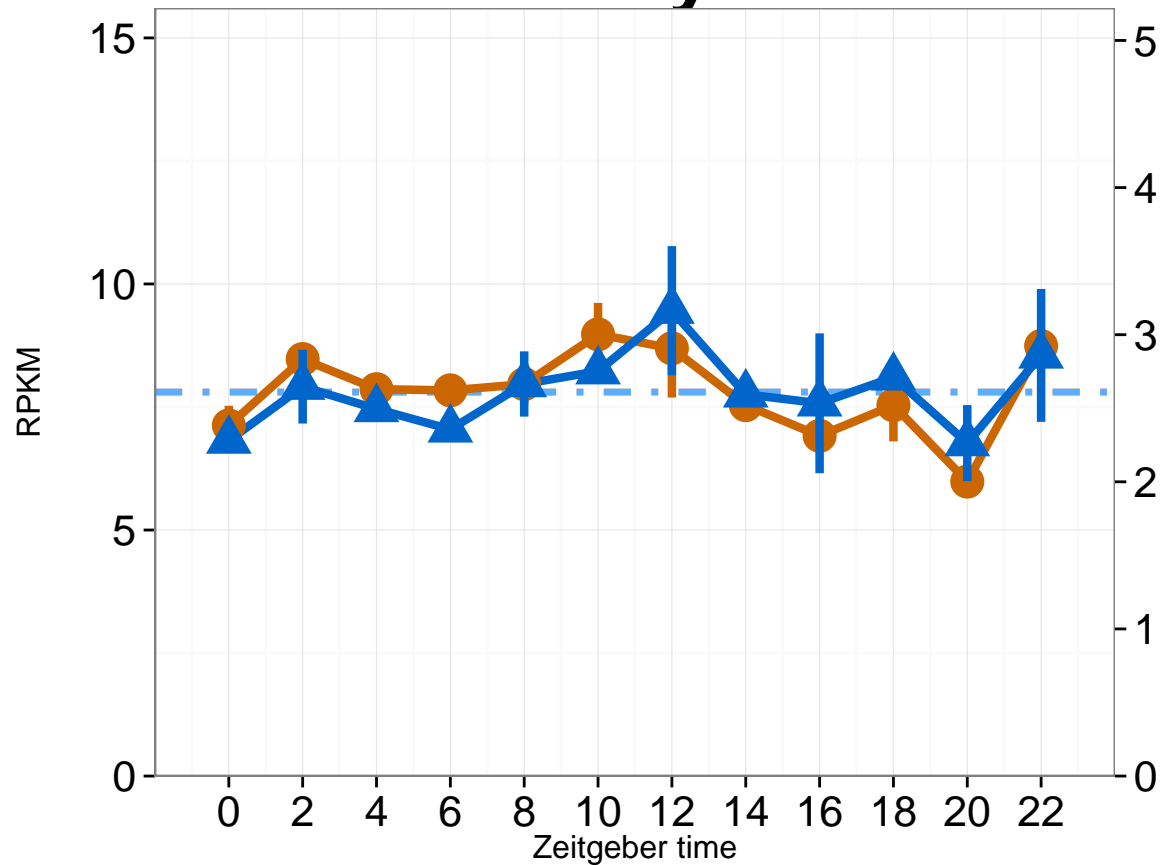

# Jmy

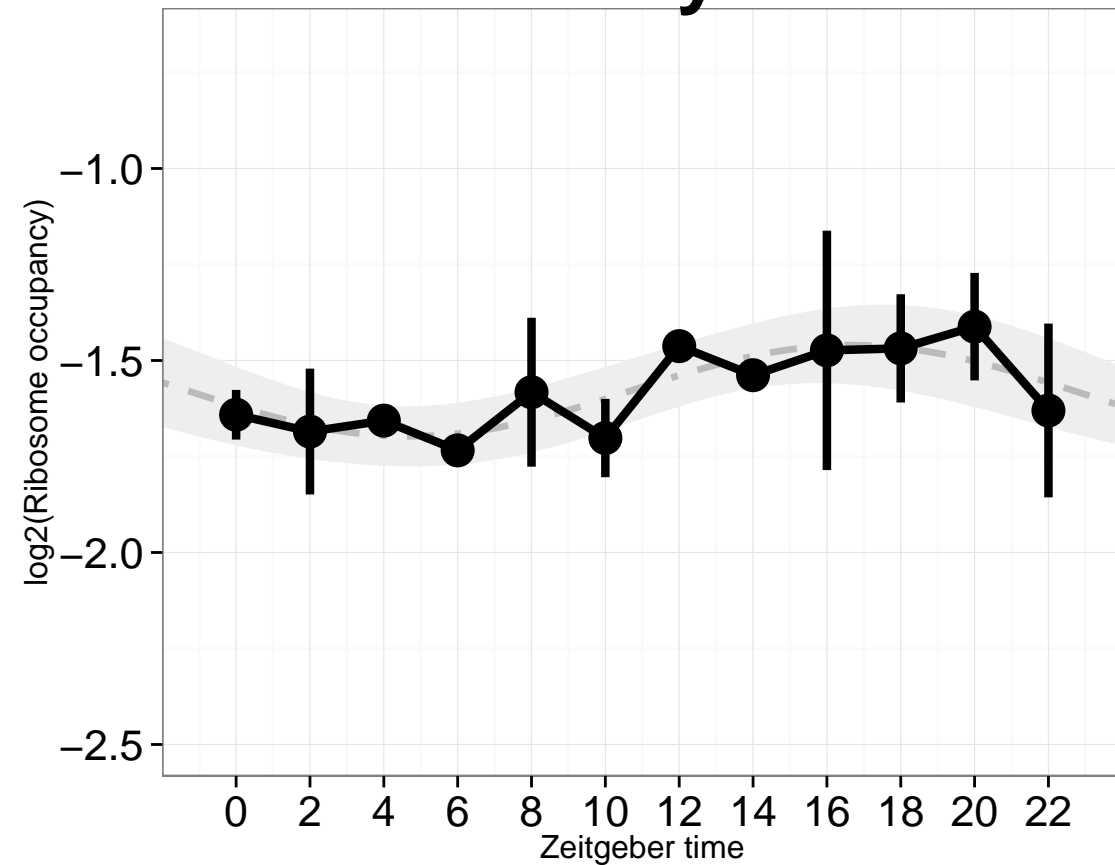

Supplement: SuppDataset_1.zip [file Jmy_set_A.pdf › Supplemental Dataset 1/A-mRNA_nonrhyth_translation_nonrhyth/Jmy_set_A.pdf]

# Josd1

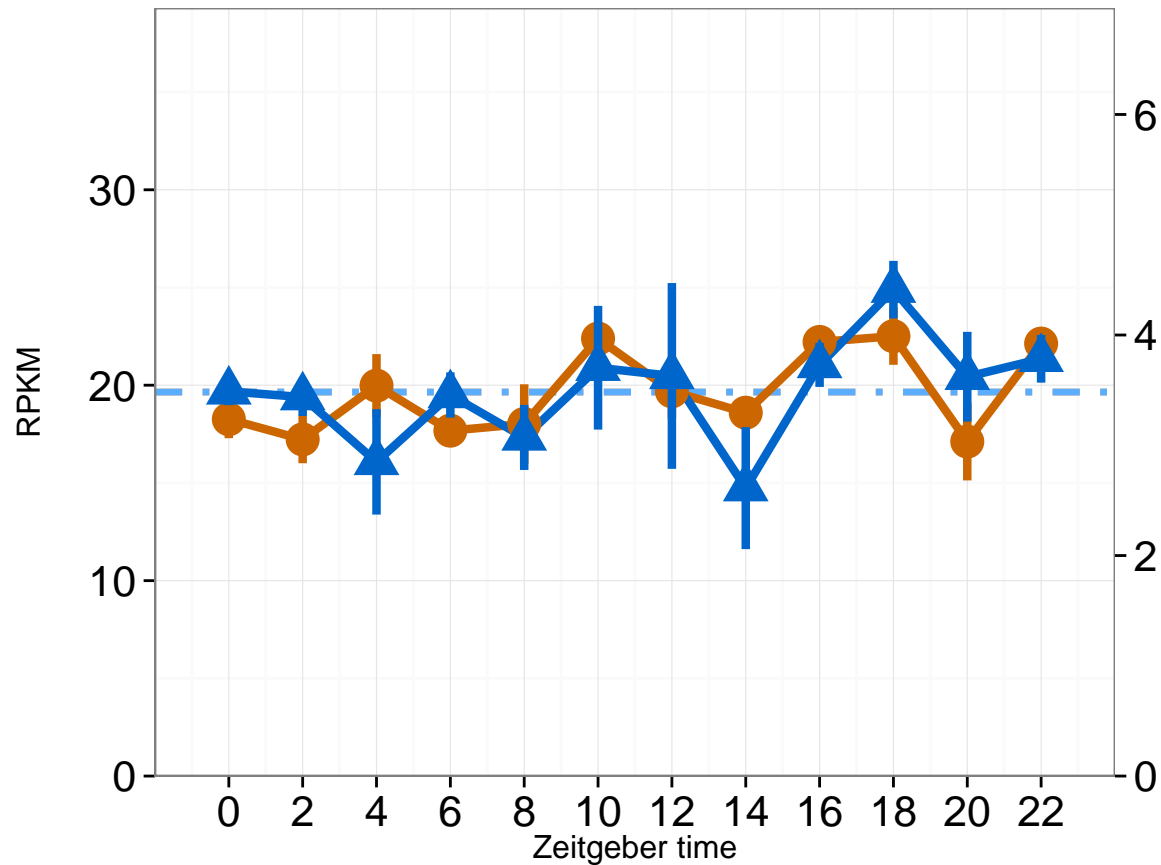

# Josd1

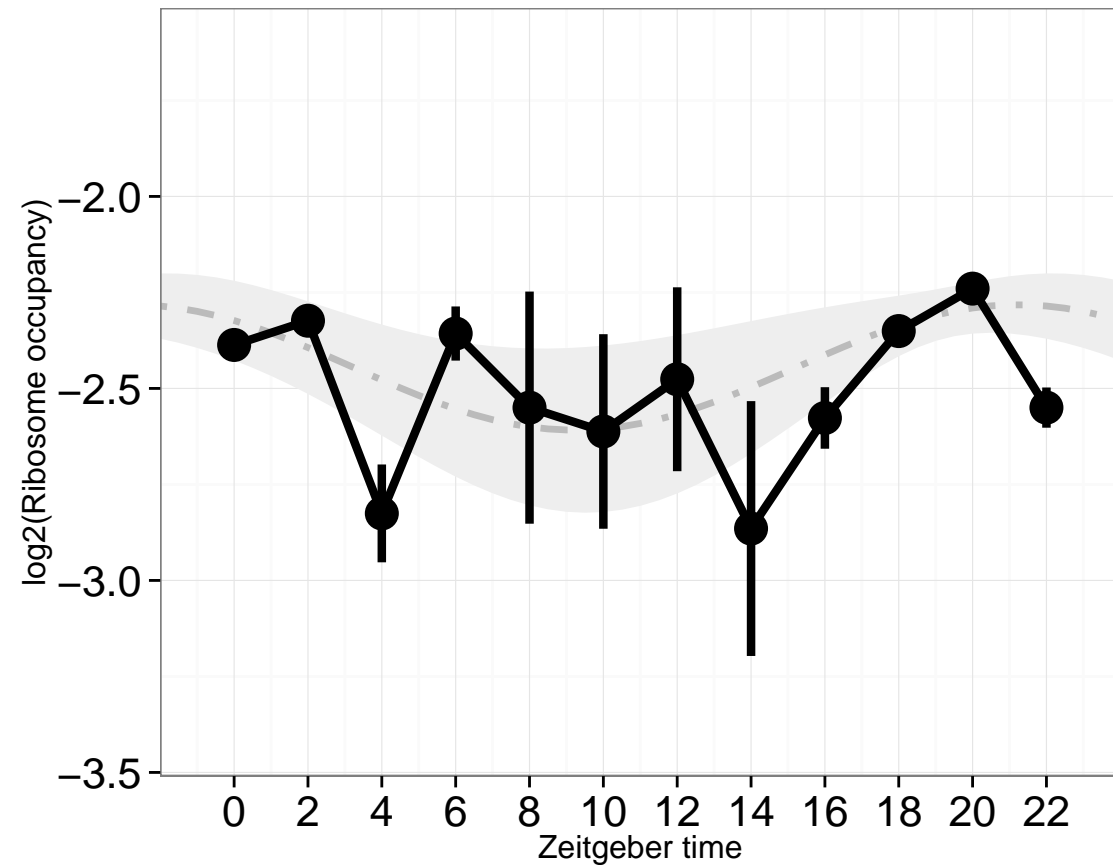

Supplement: SuppDataset_1.zip [file Josd1_set_A.pdf › Supplemental Dataset 1/A-mRNA_nonrhyth_translation_nonrhyth/Josd1_set_A.pdf]

# Jph1

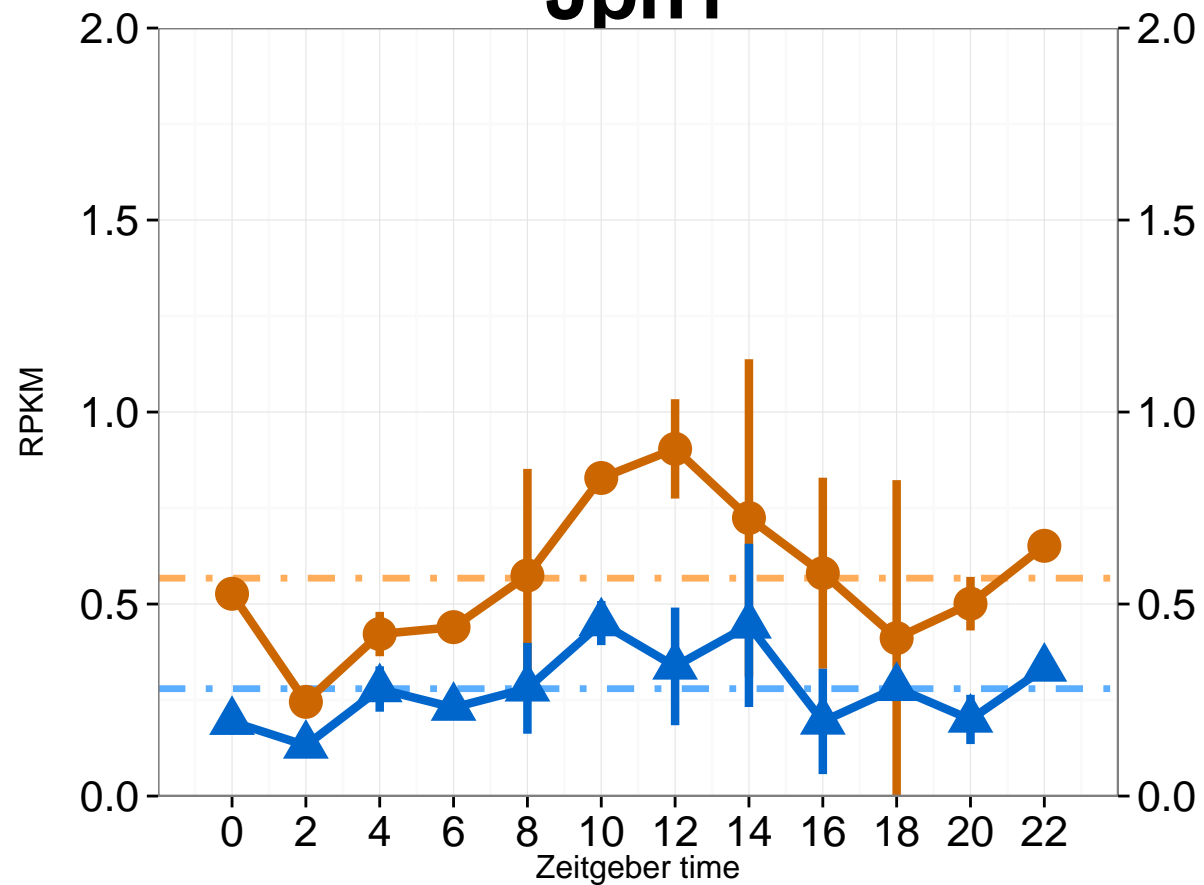

# Jph1

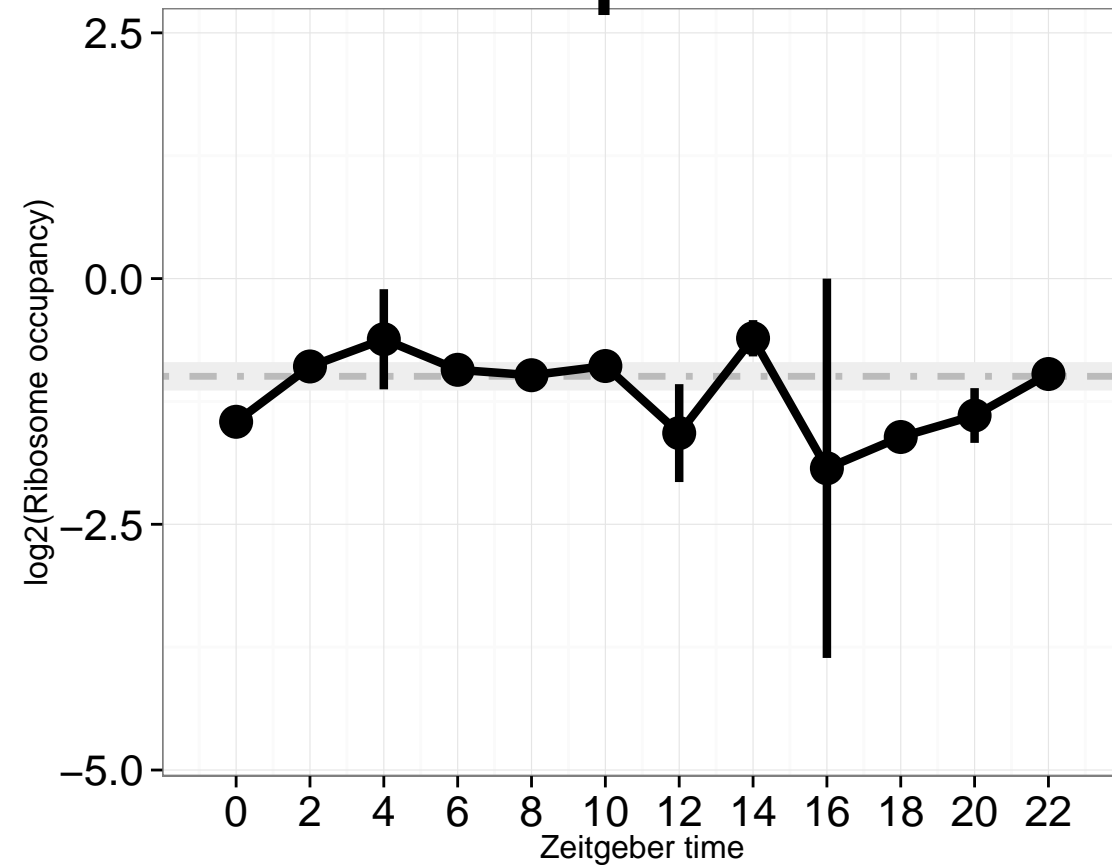

Supplement: SuppDataset_1.zip [file Jph1_set_A.pdf › Supplemental Dataset 1/A-mRNA_nonrhyth_translation_nonrhyth/Jph1_set_A.pdf]

## Jrk

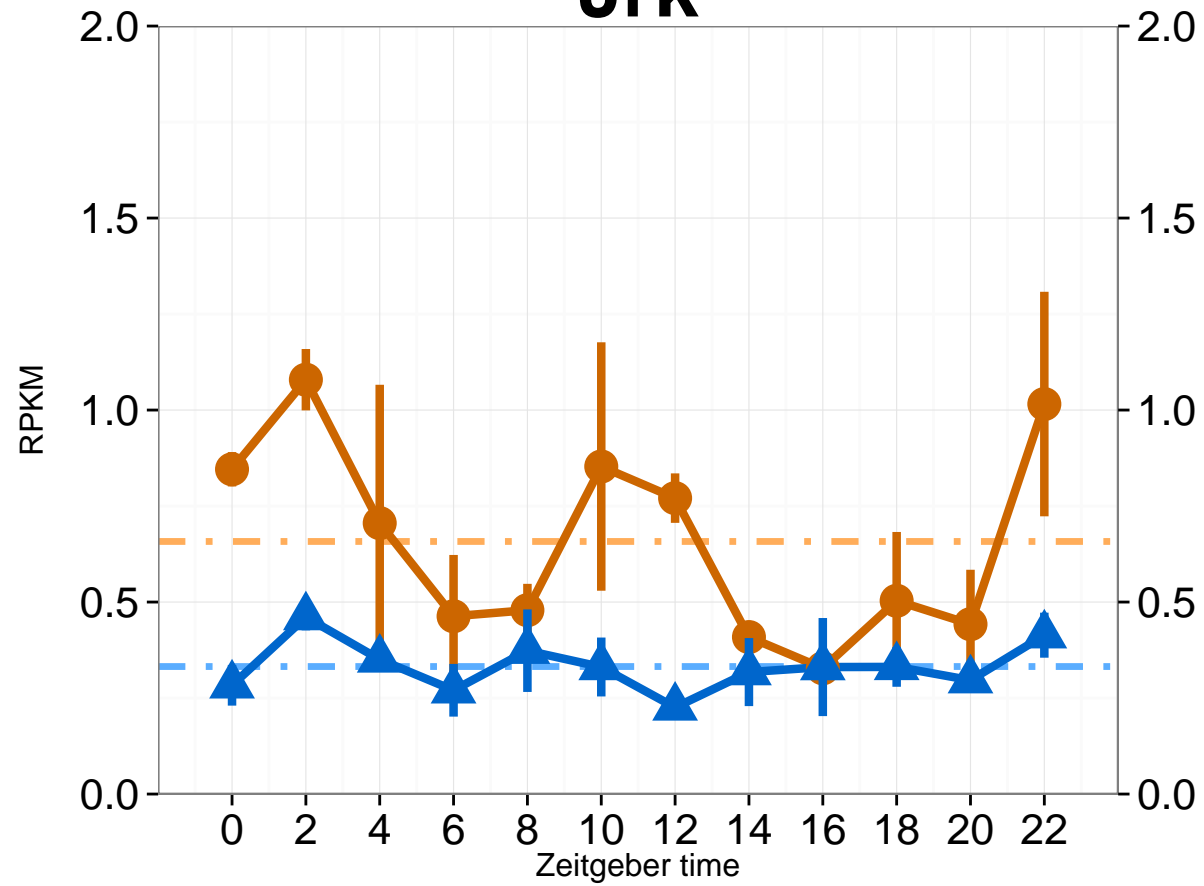

## Jrk

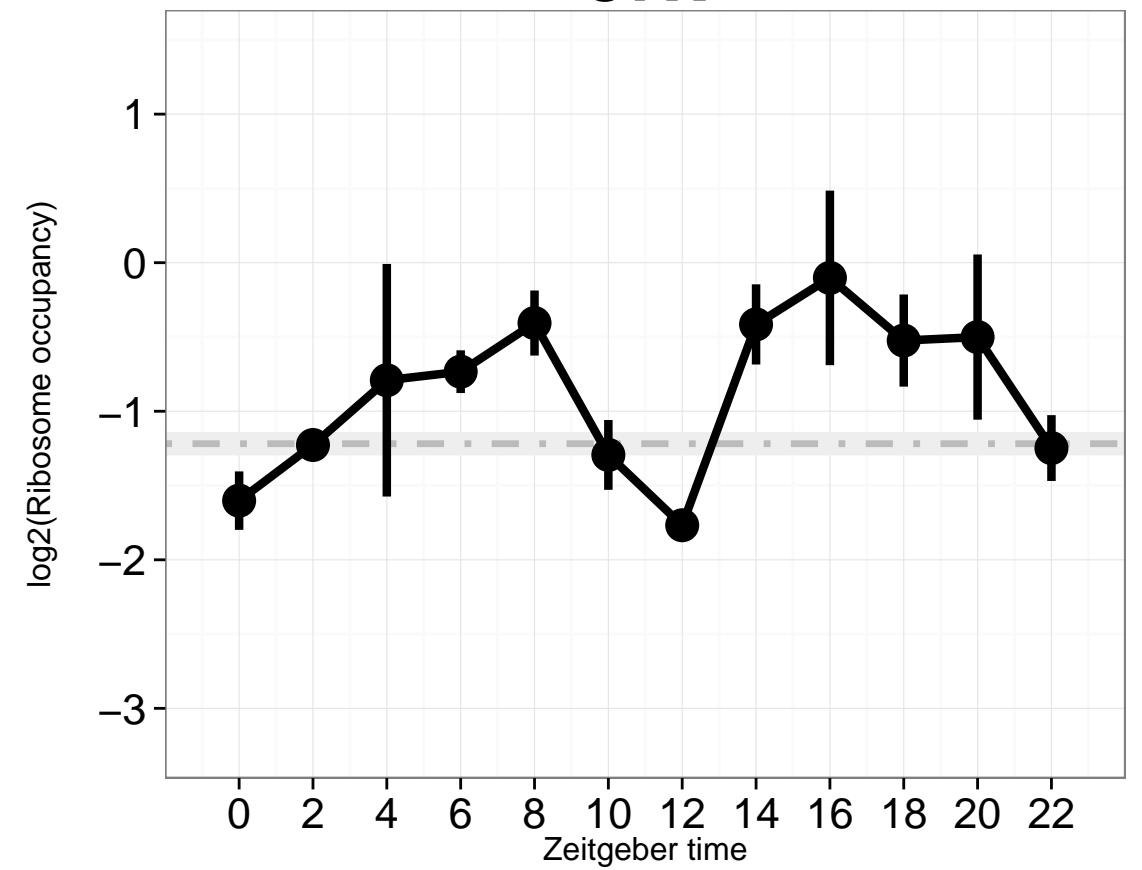

Supplement: SuppDataset_1.zip [file Jrk_set_A.pdf › Supplemental Dataset 1/A-mRNA_nonrhyth_translation_nonrhyth/Jrk_set_A.pdf]

## Jrkl

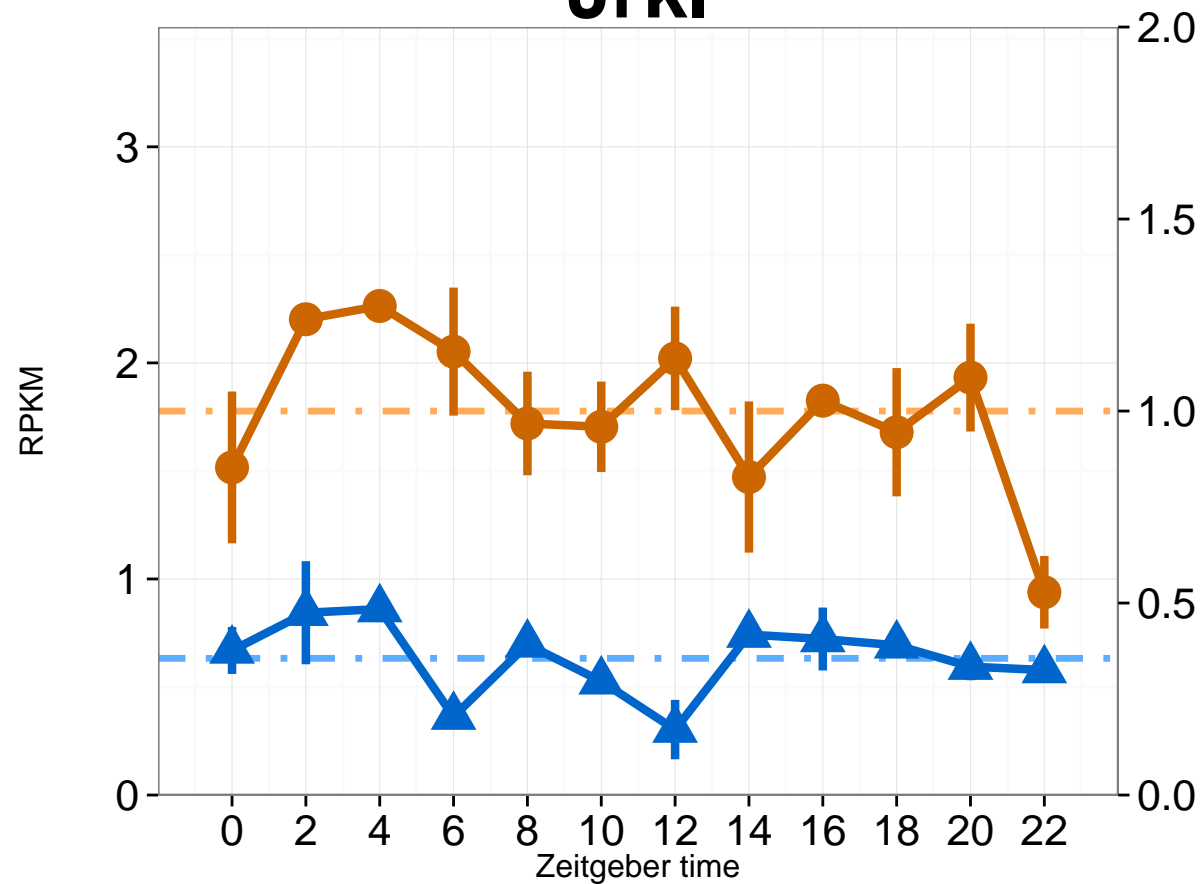

## Jrkl

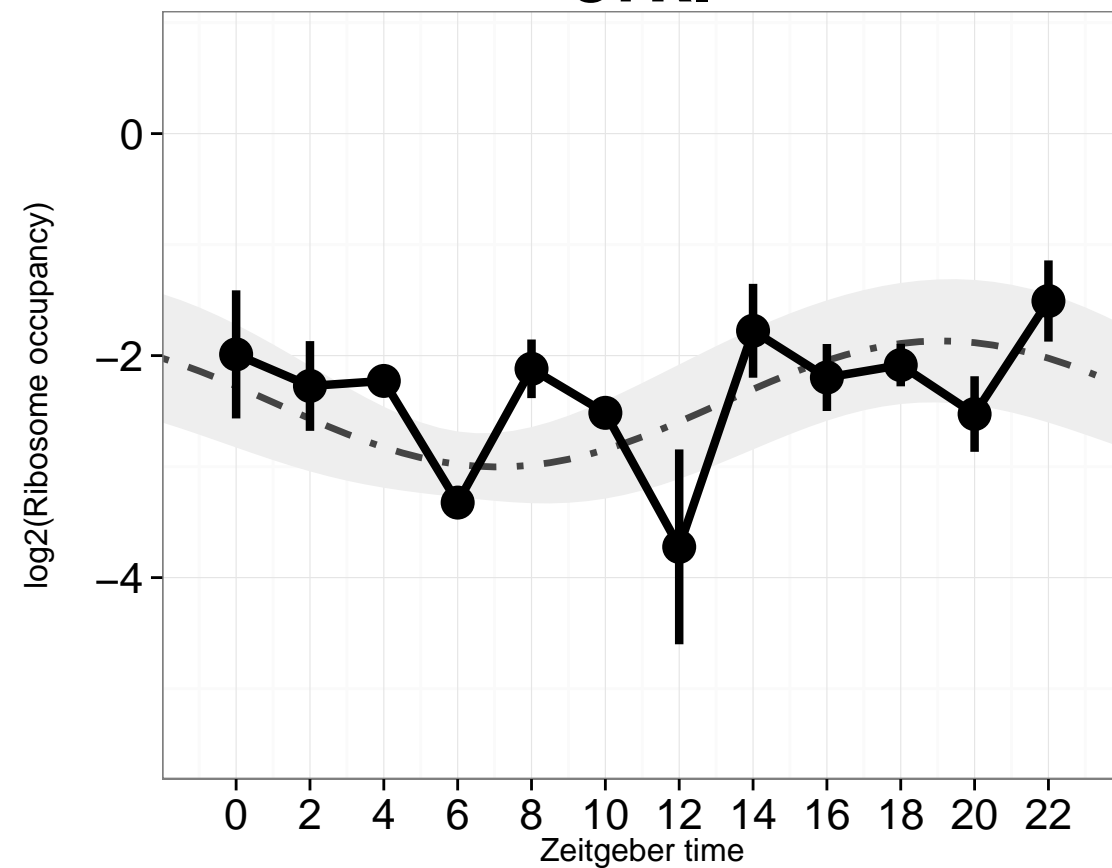

Supplement: SuppDataset_1.zip [file Jrkl_set_A.pdf › Supplemental Dataset 1/A-mRNA_nonrhyth_translation_nonrhyth/Jrkl_set_A.pdf]

## Jtb

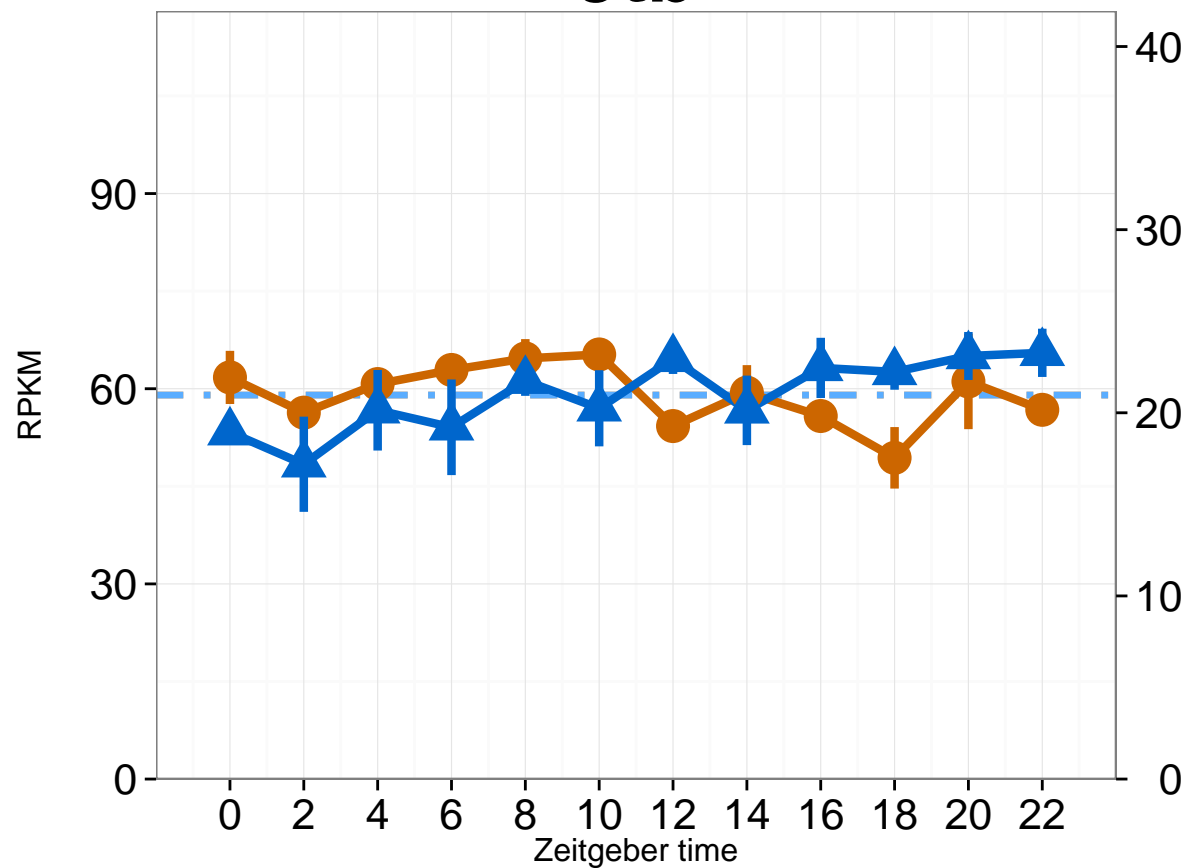

## Jtb

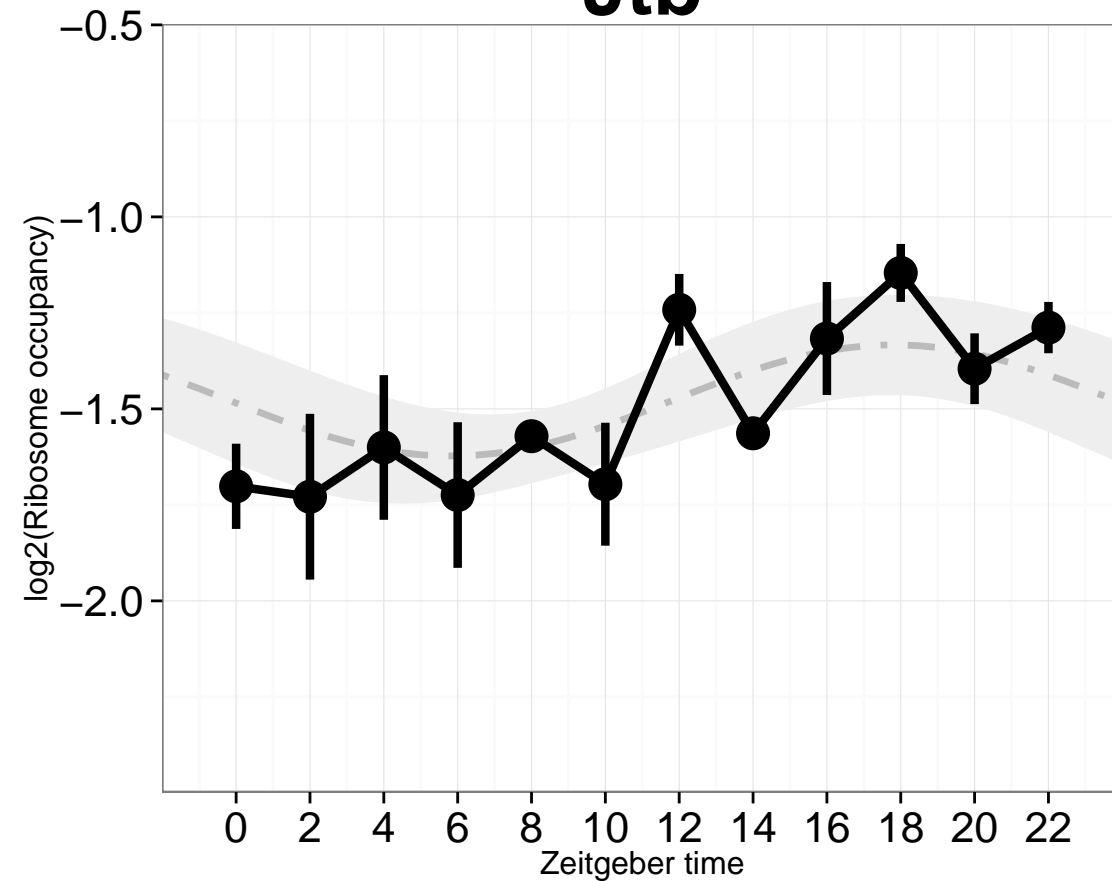

Supplement: SuppDataset_1.zip [file Jtb_set_A.pdf › Supplemental Dataset 1/A-mRNA_nonrhyth_translation_nonrhyth/Jtb_set_A.pdf]

# Jun

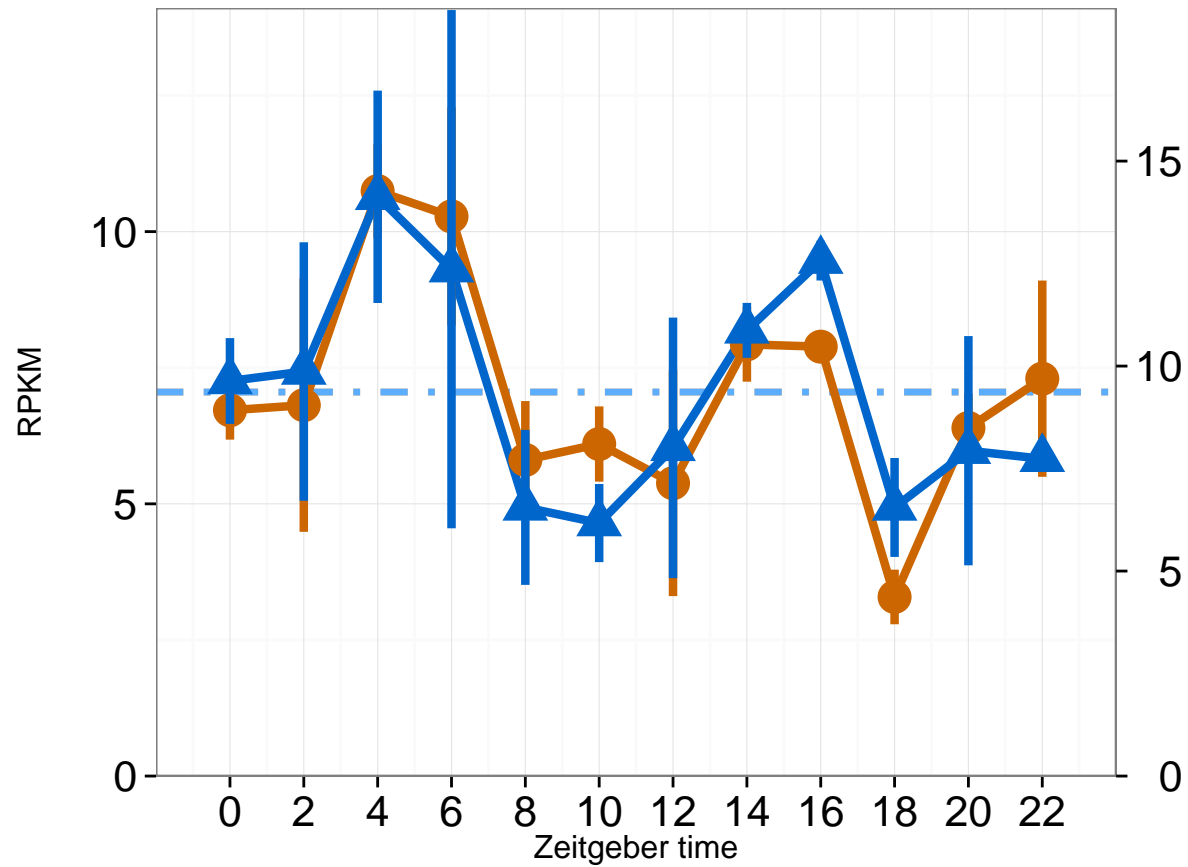

# Jun

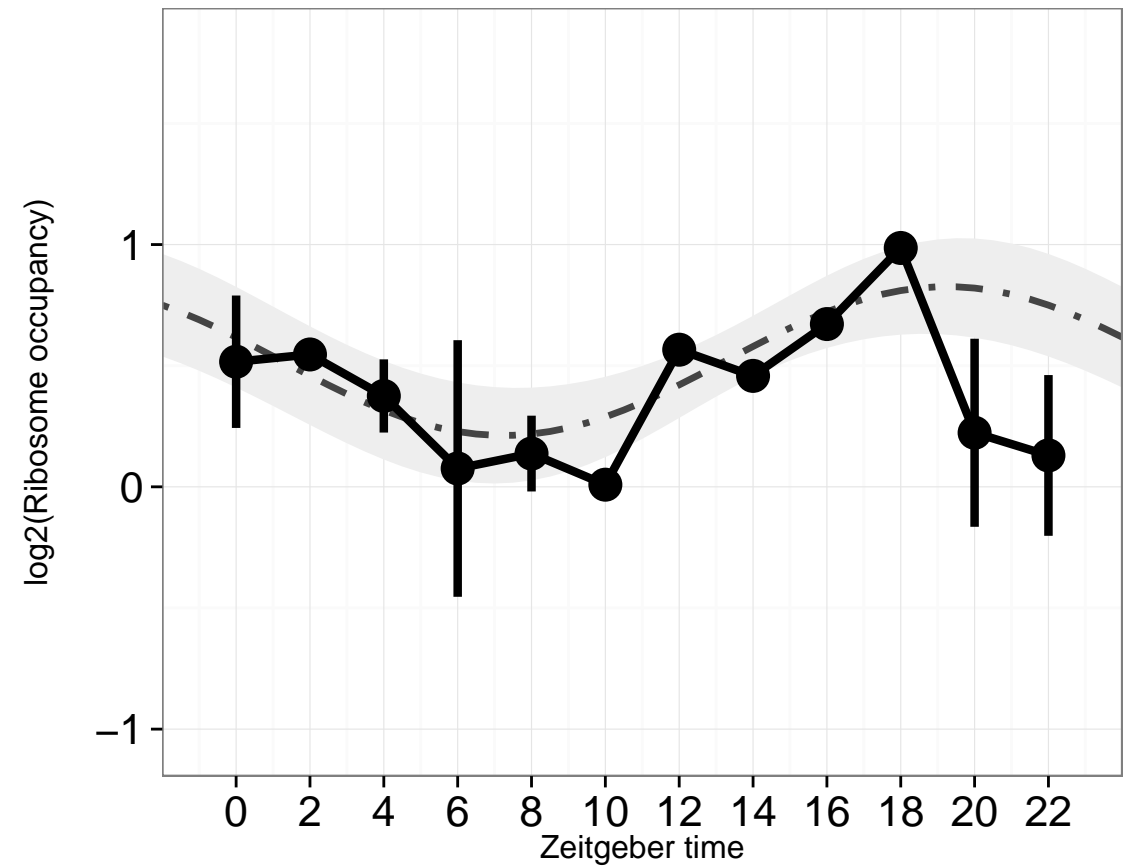

Supplement: SuppDataset_1.zip [file Jun_set_A.pdf › Supplemental Dataset 1/A-mRNA_nonrhyth_translation_nonrhyth/Jun_set_A.pdf]

## Jup

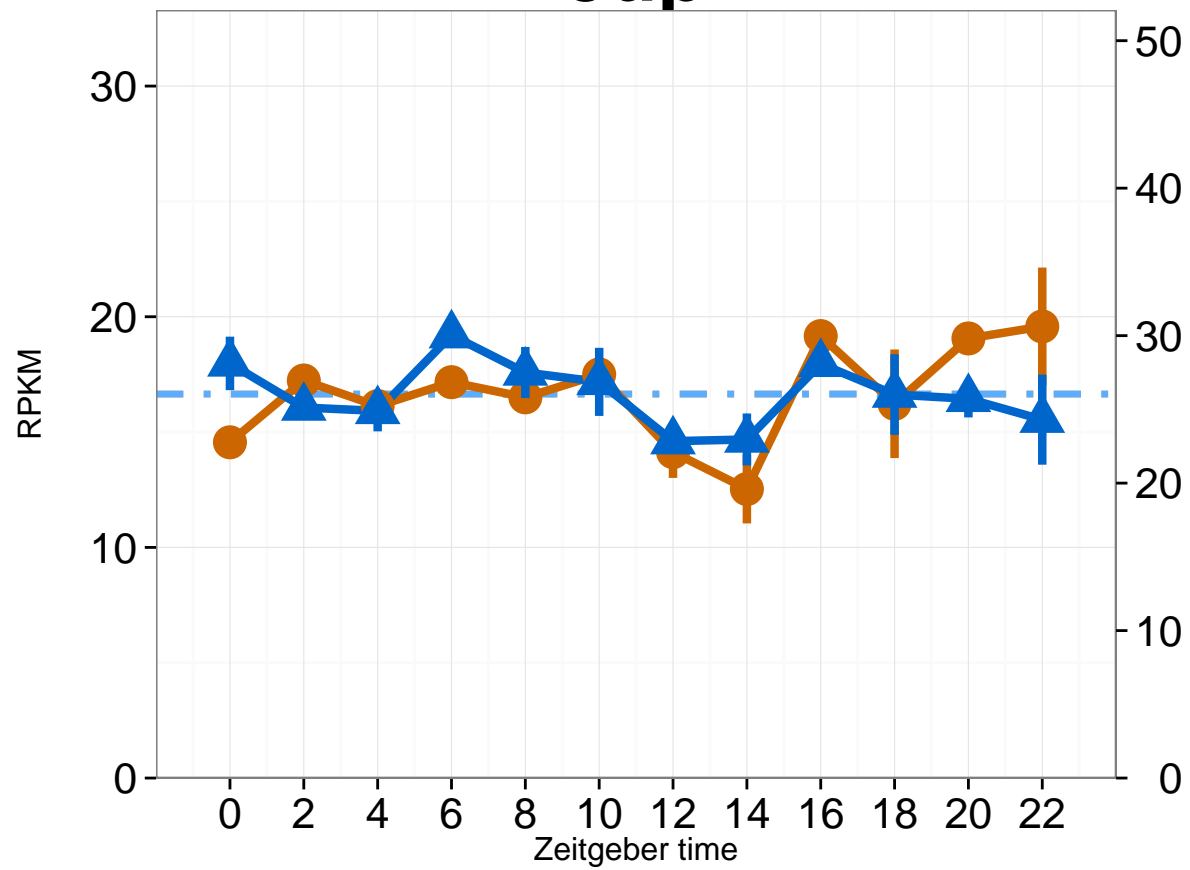

## Jup

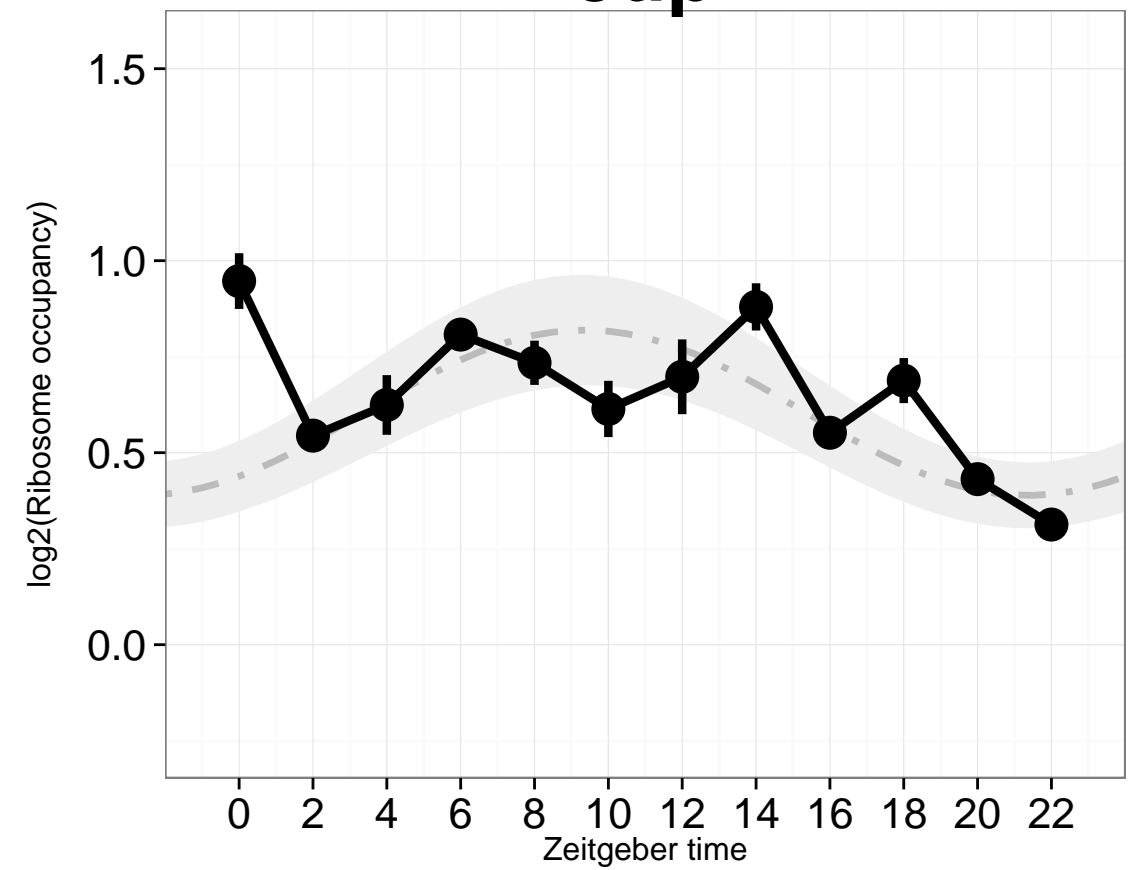

Supplement: SuppDataset_1.zip [file Jup_set_A.pdf › Supplemental Dataset 1/A-mRNA_nonrhyth_translation_nonrhyth/Jup_set_A.pdf]

# Kank1

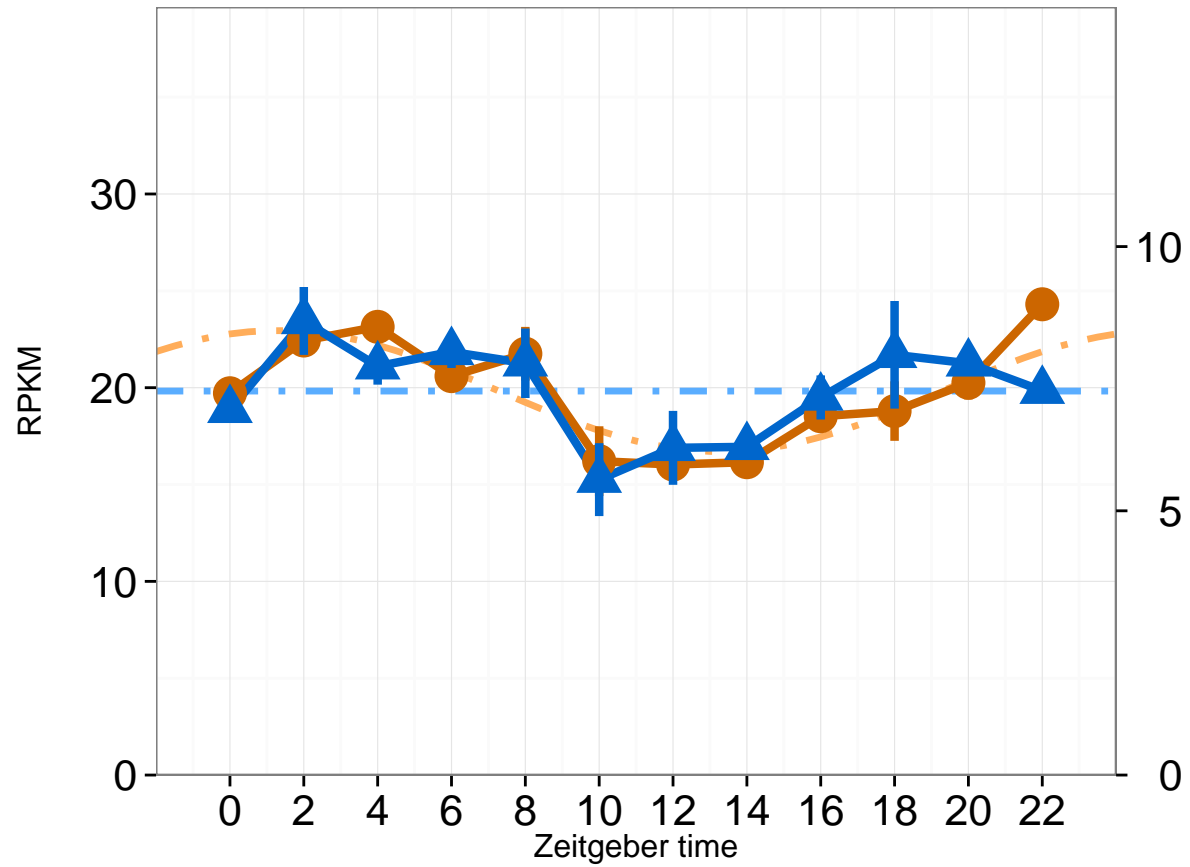

# Kank1

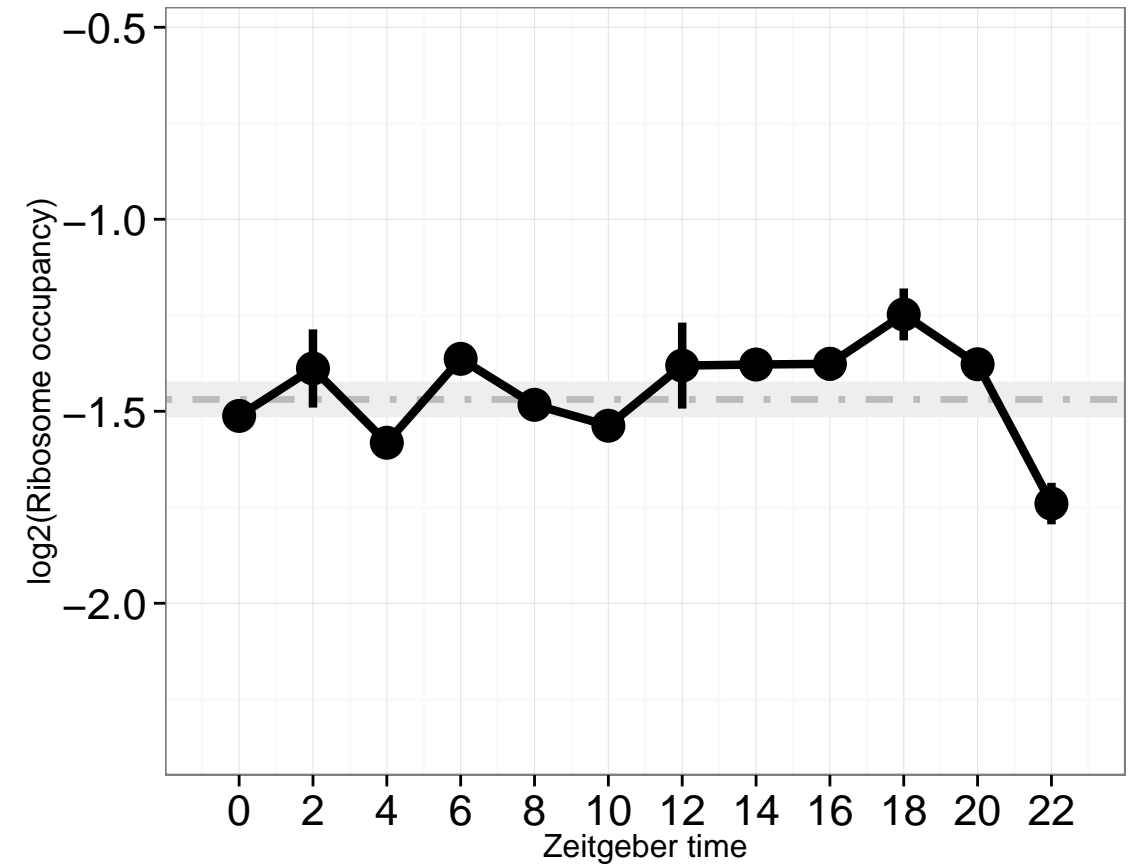

Supplement: SuppDataset_1.zip [file Kank1_set_A.pdf › Supplemental Dataset 1/A-mRNA_nonrhyth_translation_nonrhyth/Kank1_set_A.pdf]

## Kank2

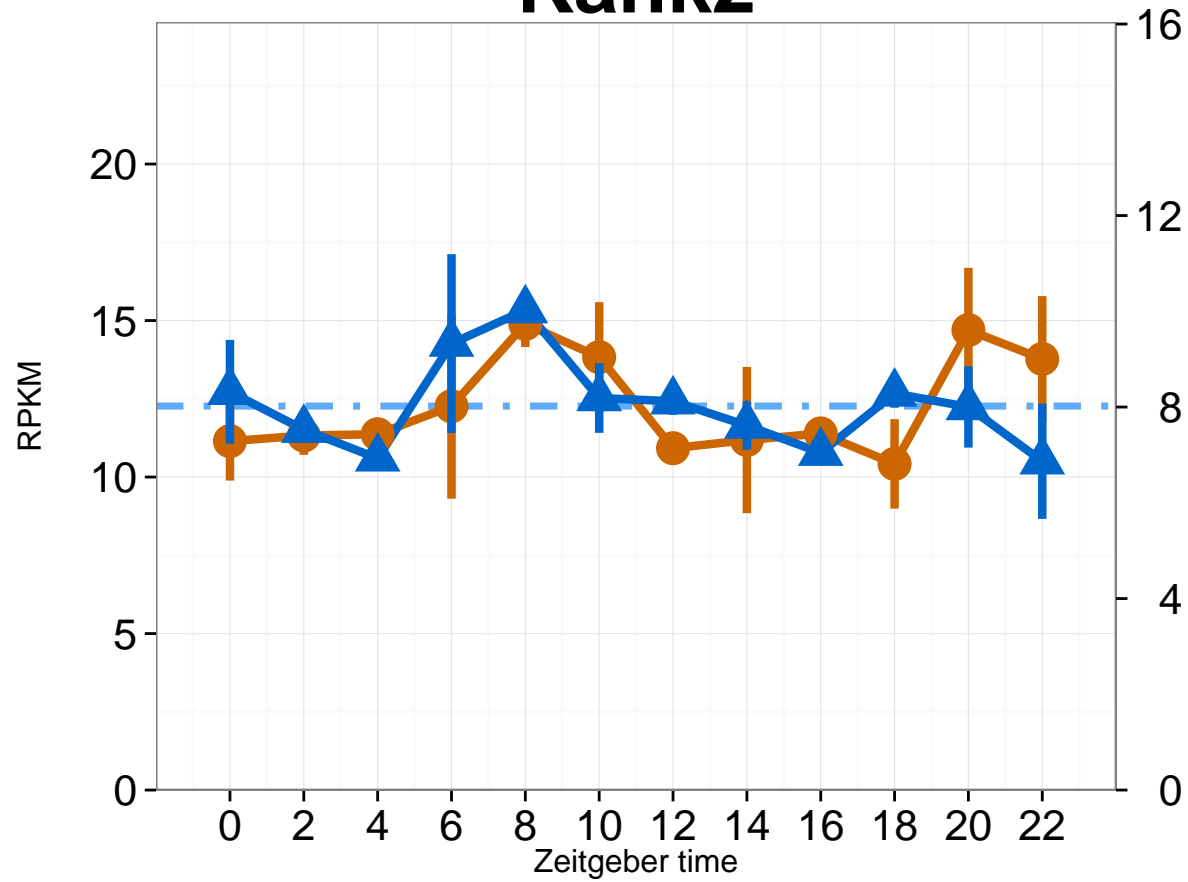

## Kank2

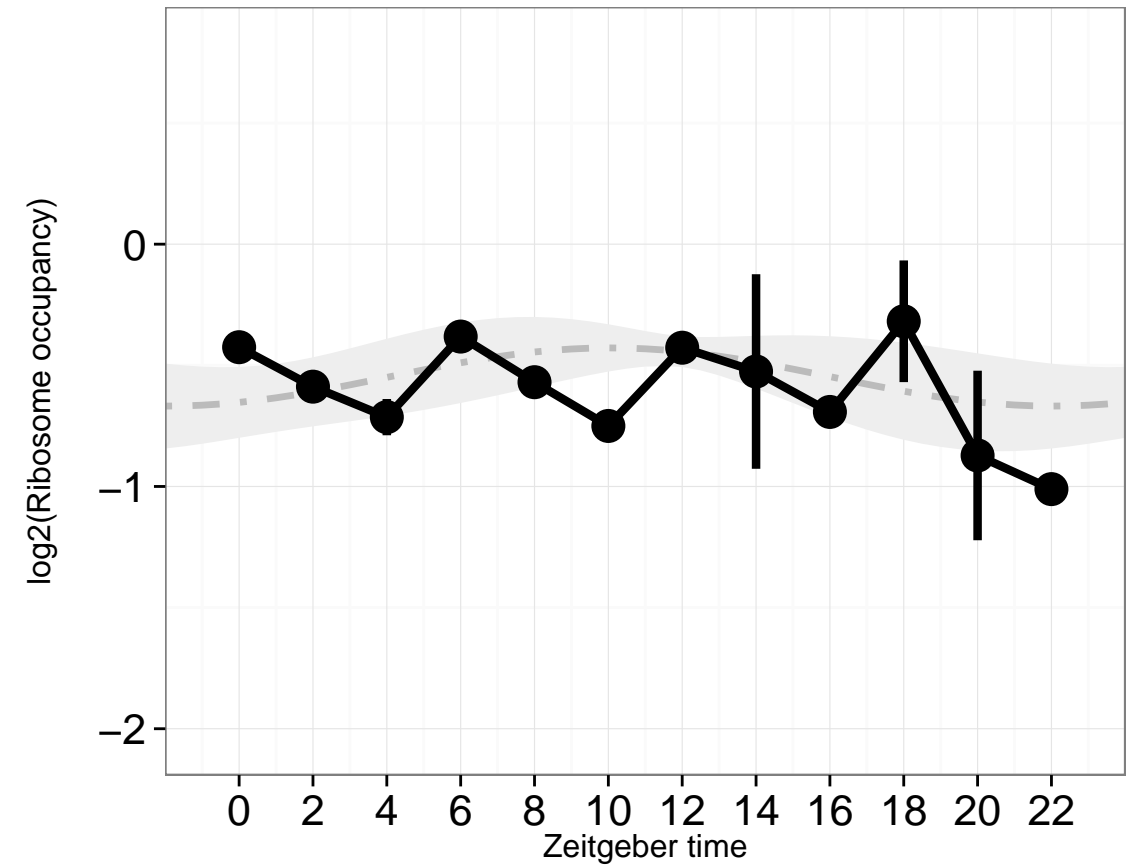

Supplement: SuppDataset_1.zip [file Kank2_set_A.pdf › Supplemental Dataset 1/A-mRNA_nonrhyth_translation_nonrhyth/Kank2_set_A.pdf]

## Kank3

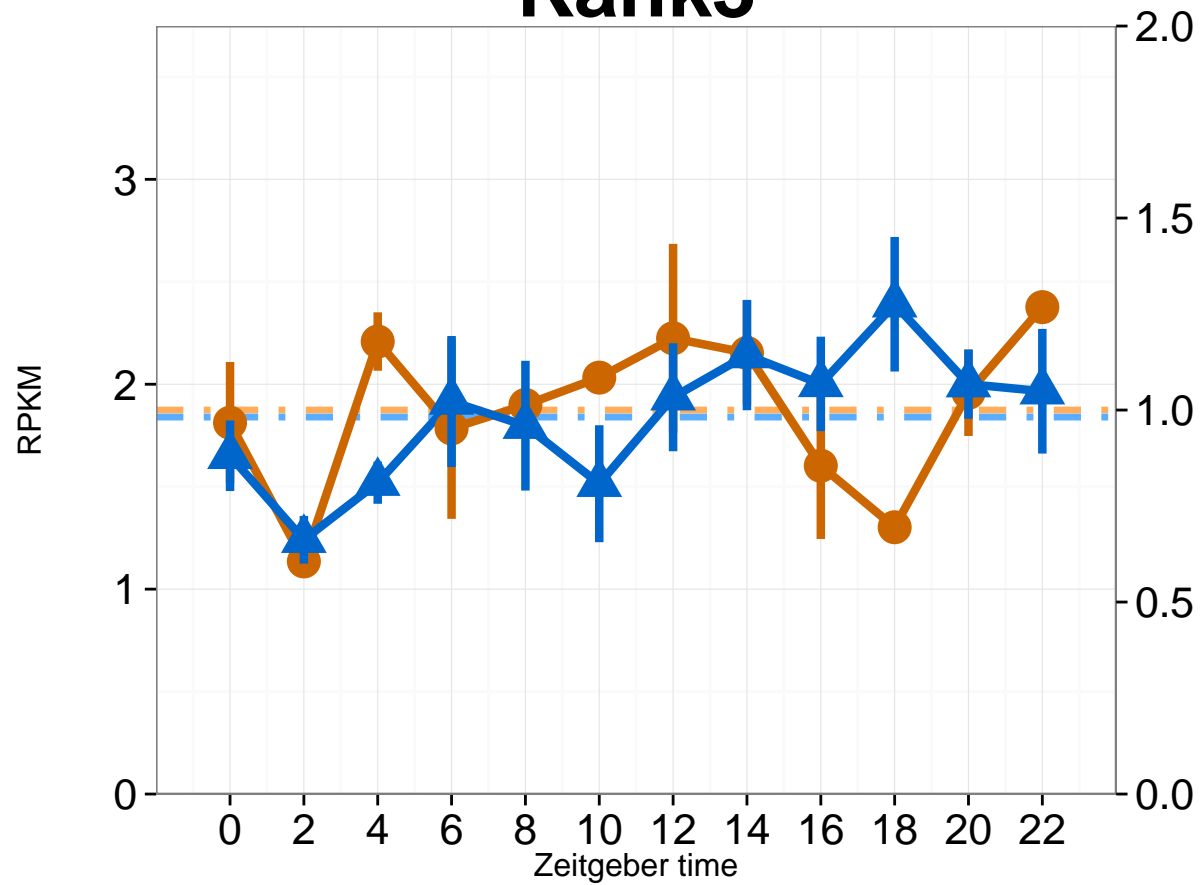

## Kank3

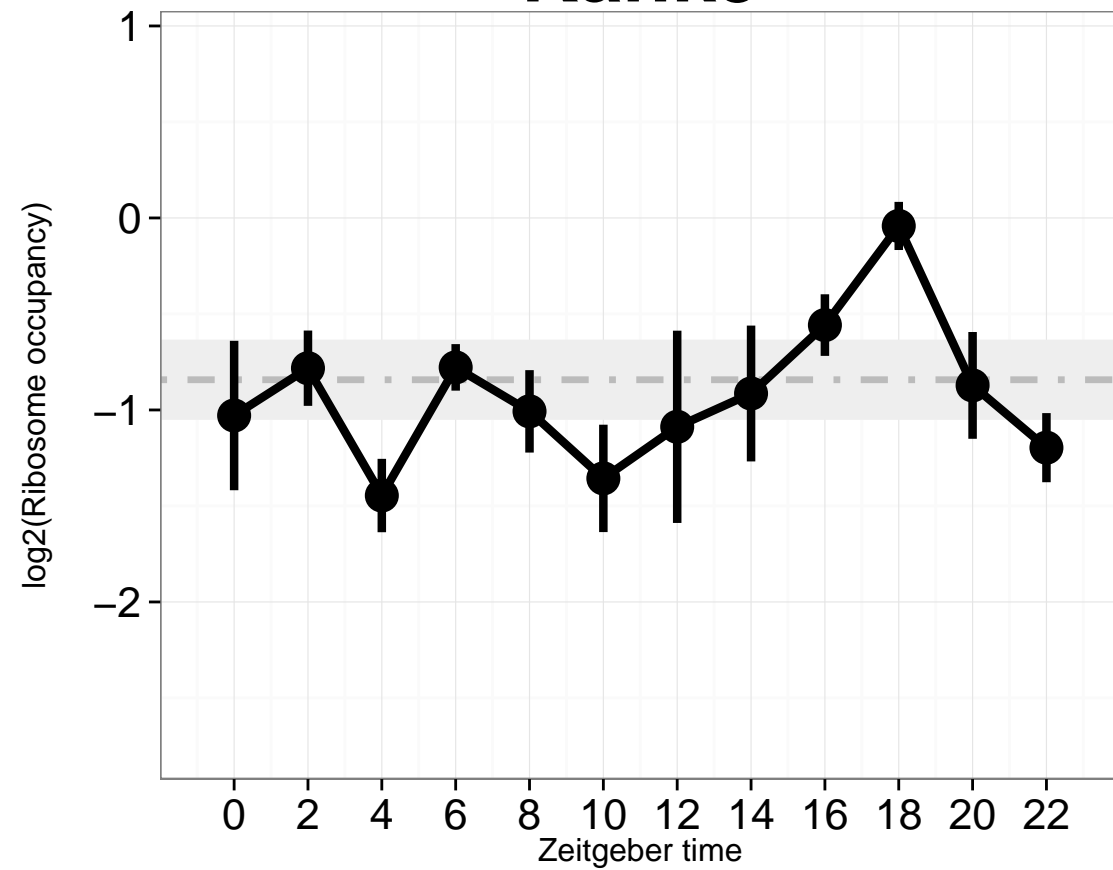

Supplement: SuppDataset_1.zip [file Kank3_set_A.pdf › Supplemental Dataset 1/A-mRNA_nonrhyth_translation_nonrhyth/Kank3_set_A.pdf]

# Kansl1

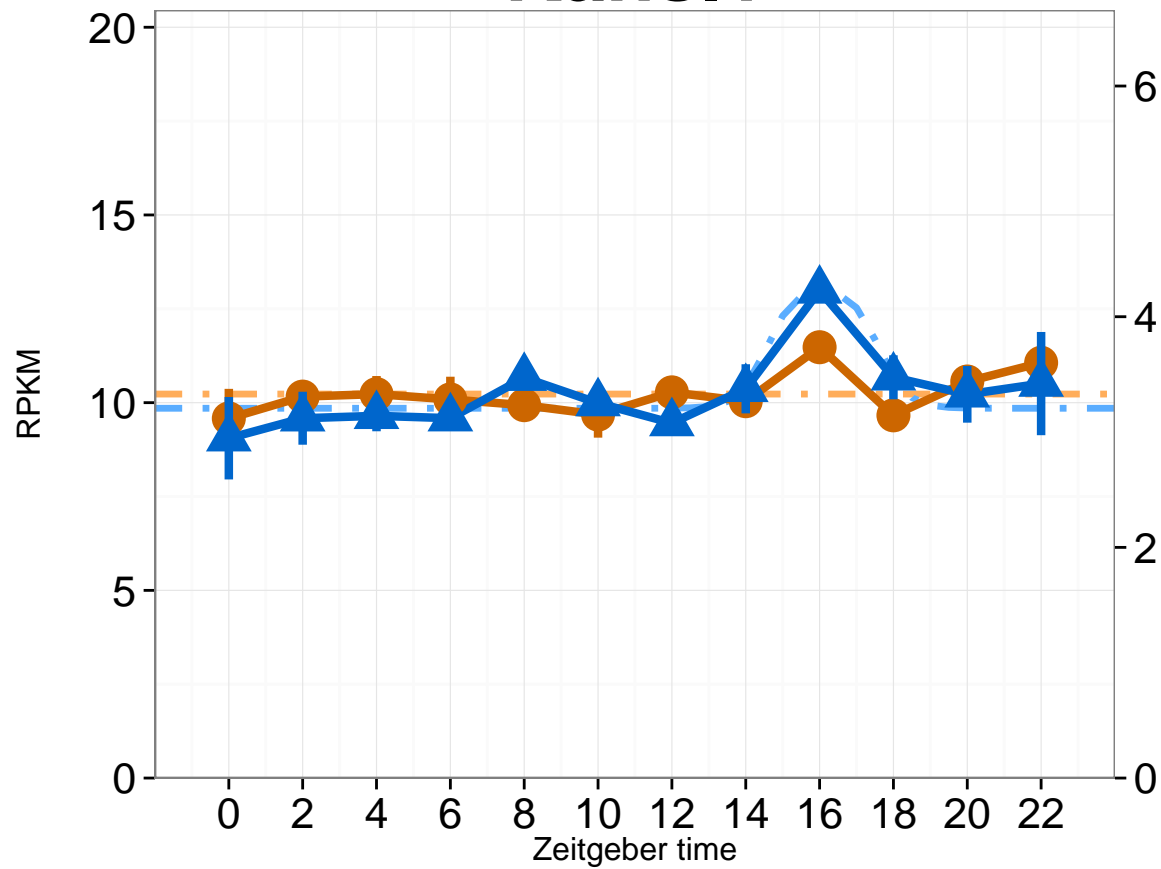

# Kansl1

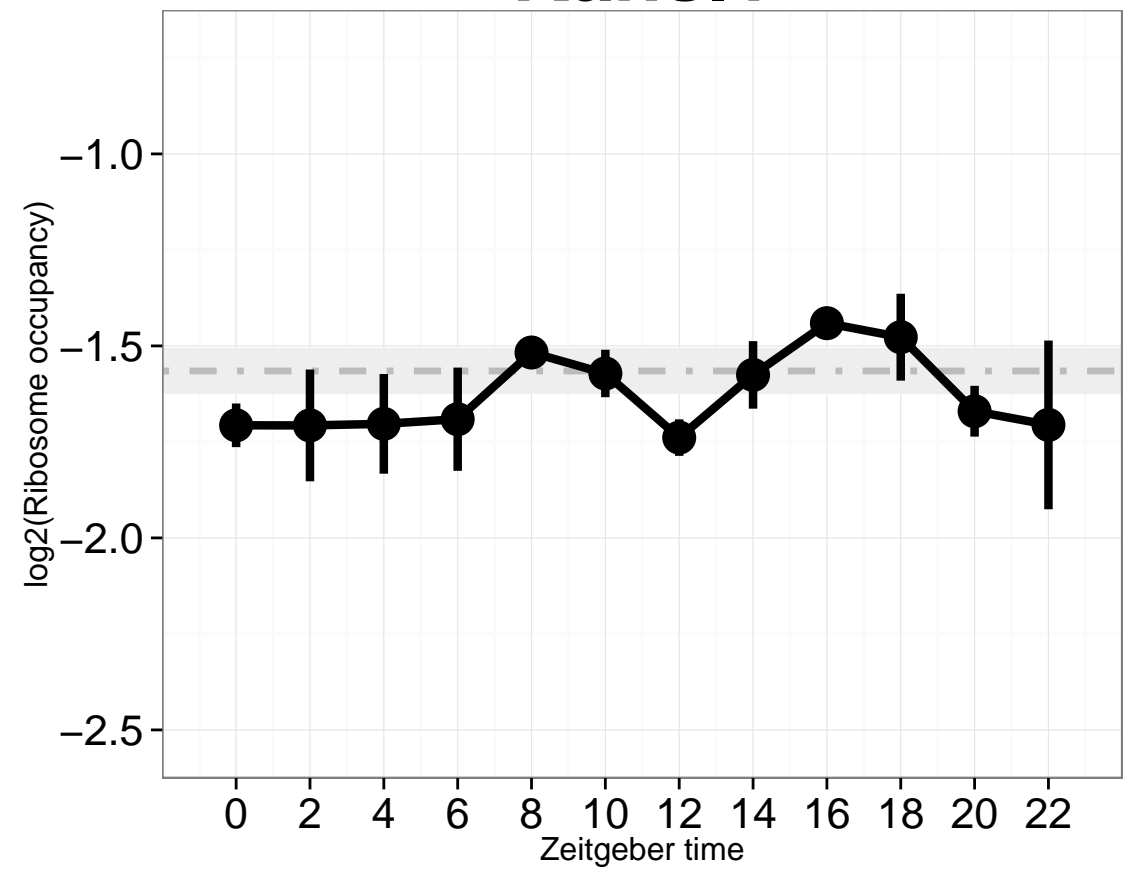

Supplement: SuppDataset_1.zip [file Kansl1_set_A.pdf › Supplemental Dataset 1/A-mRNA_nonrhyth_translation_nonrhyth/Kansl1_set_A.pdf]

## Kansl2

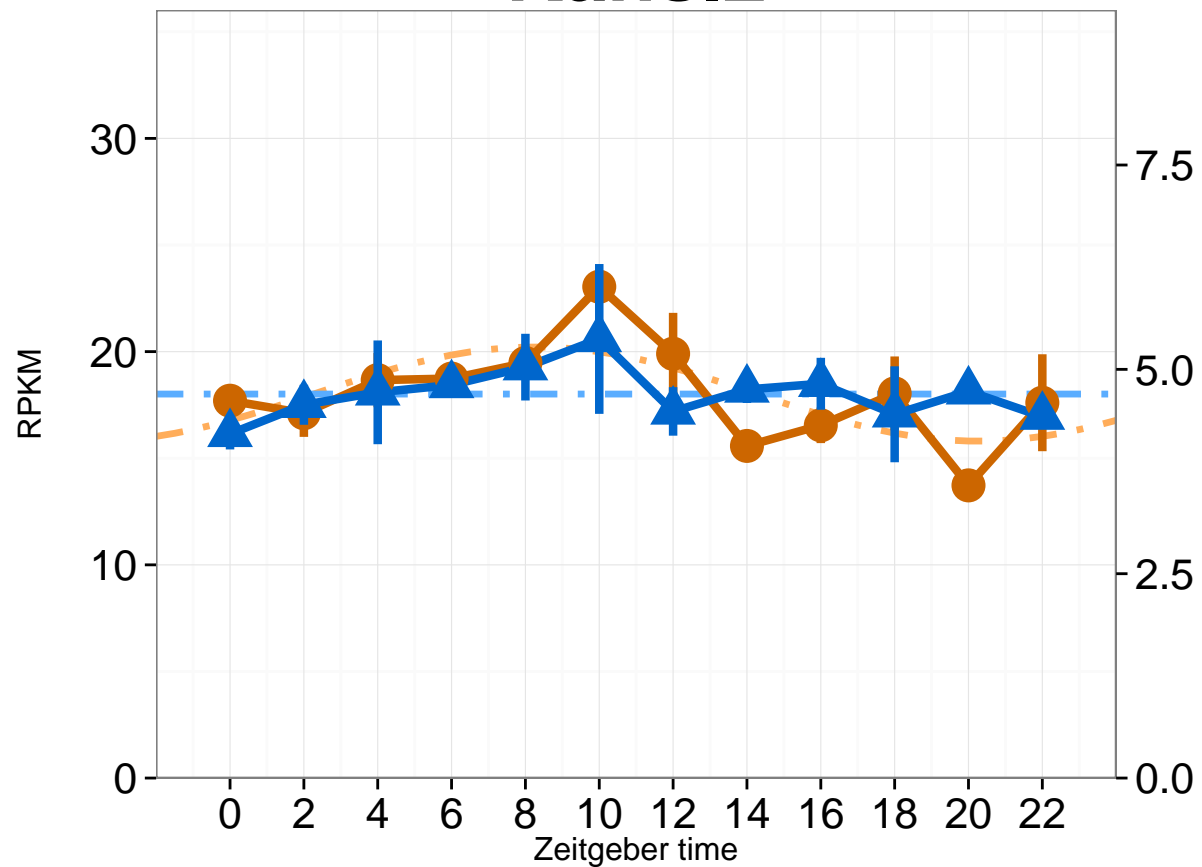

## Kansl2

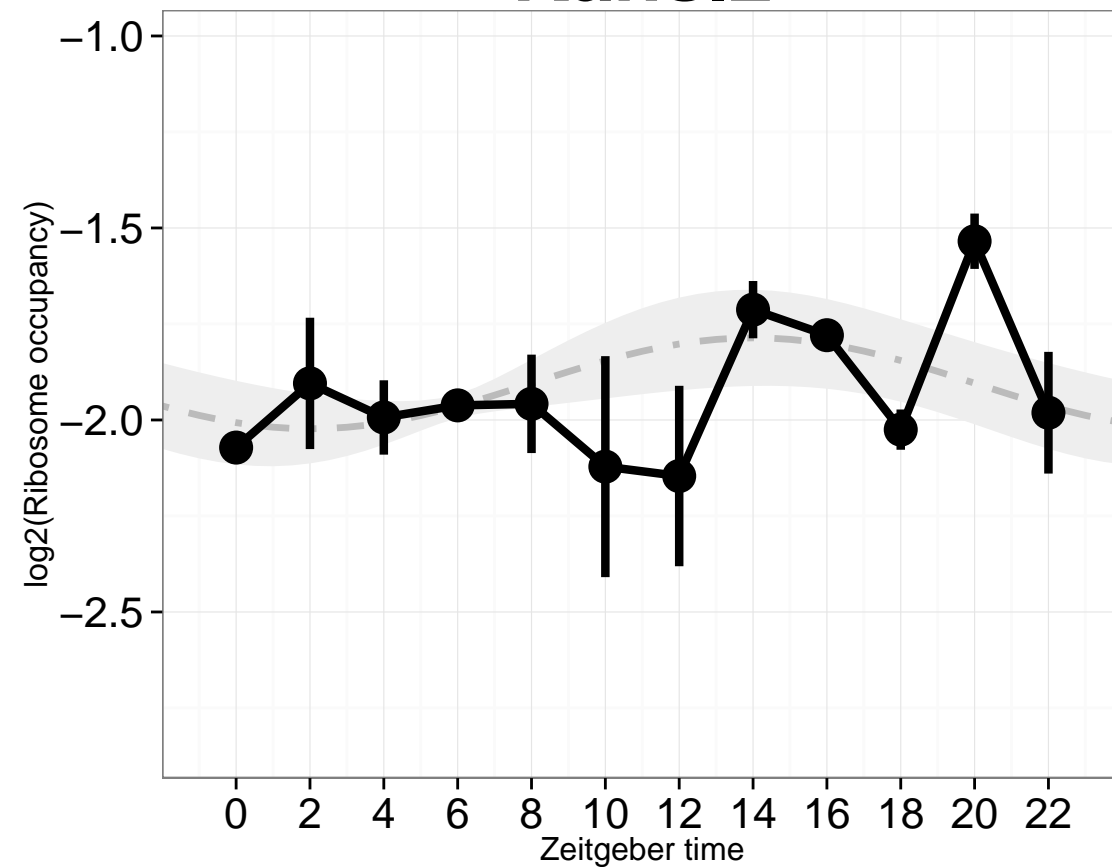

Supplement: SuppDataset_1.zip [file Kansl2_set_A.pdf › Supplemental Dataset 1/A-mRNA_nonrhyth_translation_nonrhyth/Kansl2_set_A.pdf]
