# Supplementary figures and images for: Ribosome profiling reveals the rhythmic liver translatome and circadian clock regulation by upstream open reading frames (part 38 of 113)
Source: HighWire-hosted journal article supplement (doi:10.1101/gr.195404.115), 2015-10-20

# Kansl3

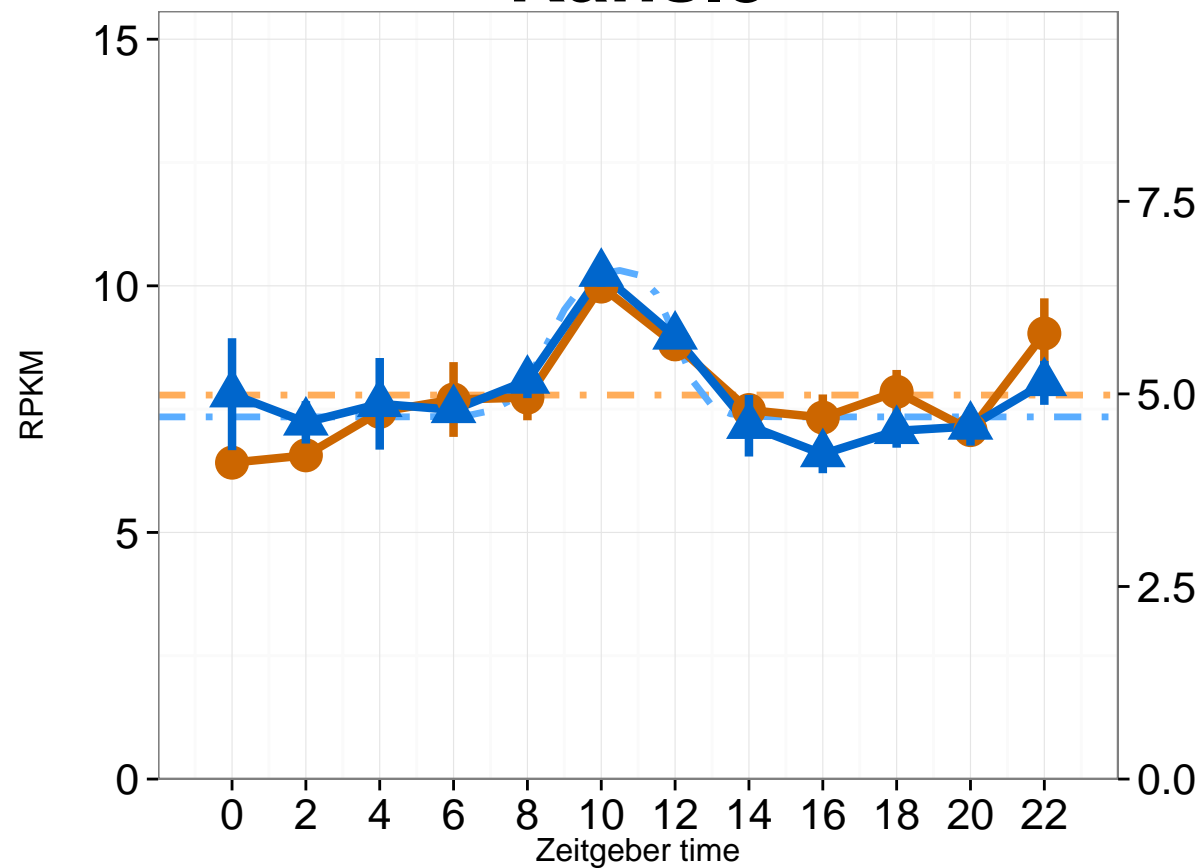

# Kansl3

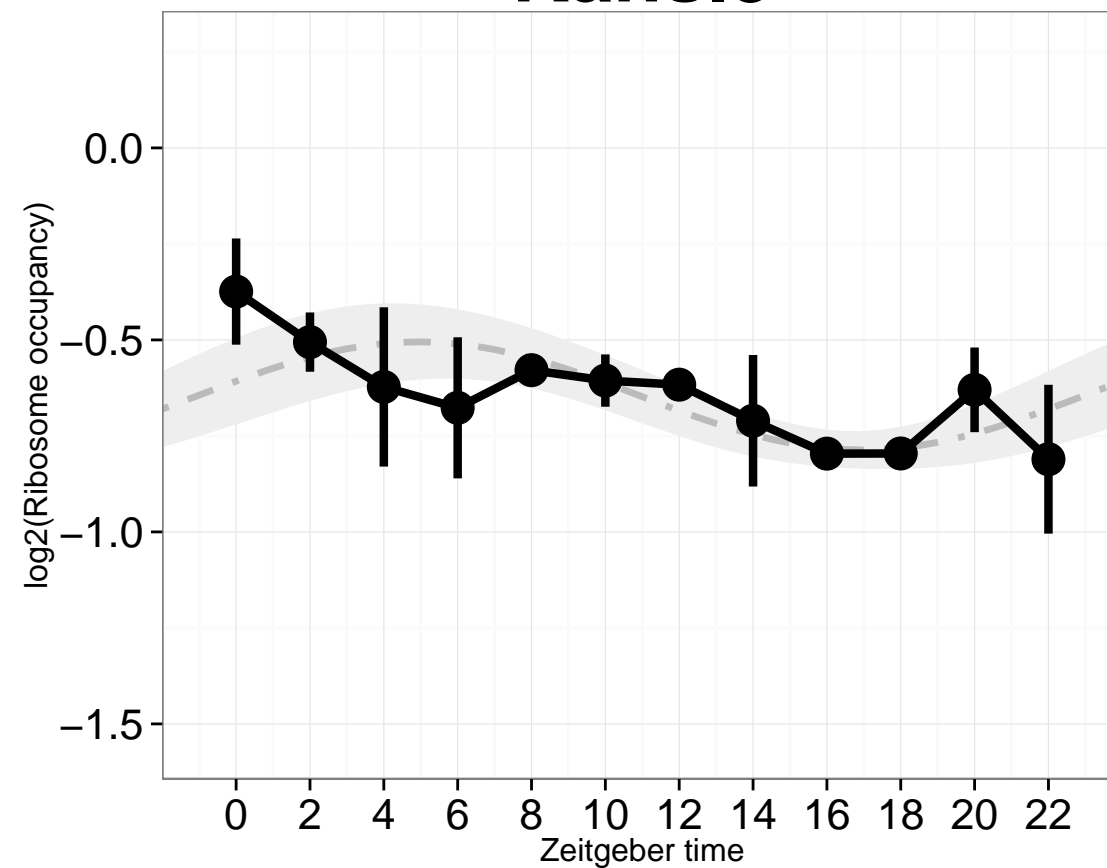

Supplement: SuppDataset_1.zip [file Kansl3_set_A.pdf › Supplemental Dataset 1/A-mRNA_nonrhyth_translation_nonrhyth/Kansl3_set_A.pdf]

## Kars

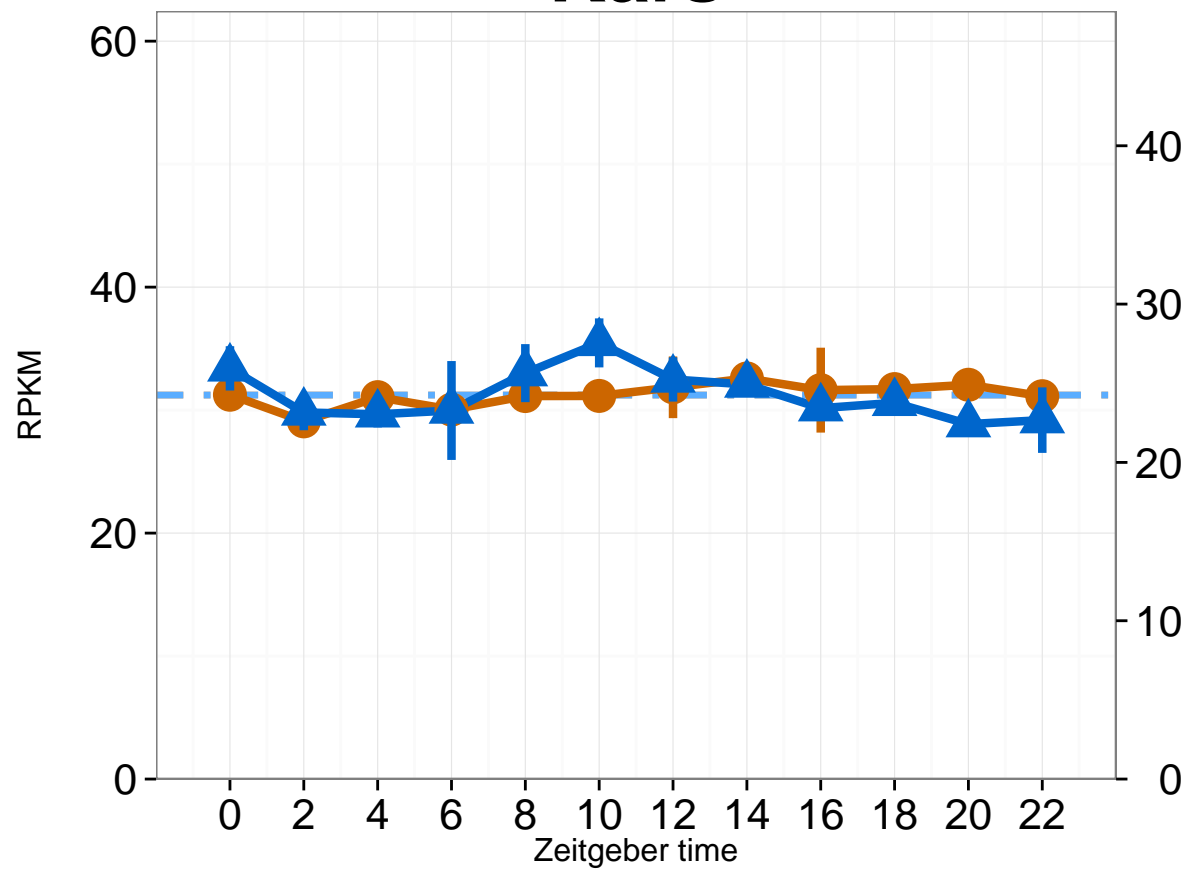

## Kars

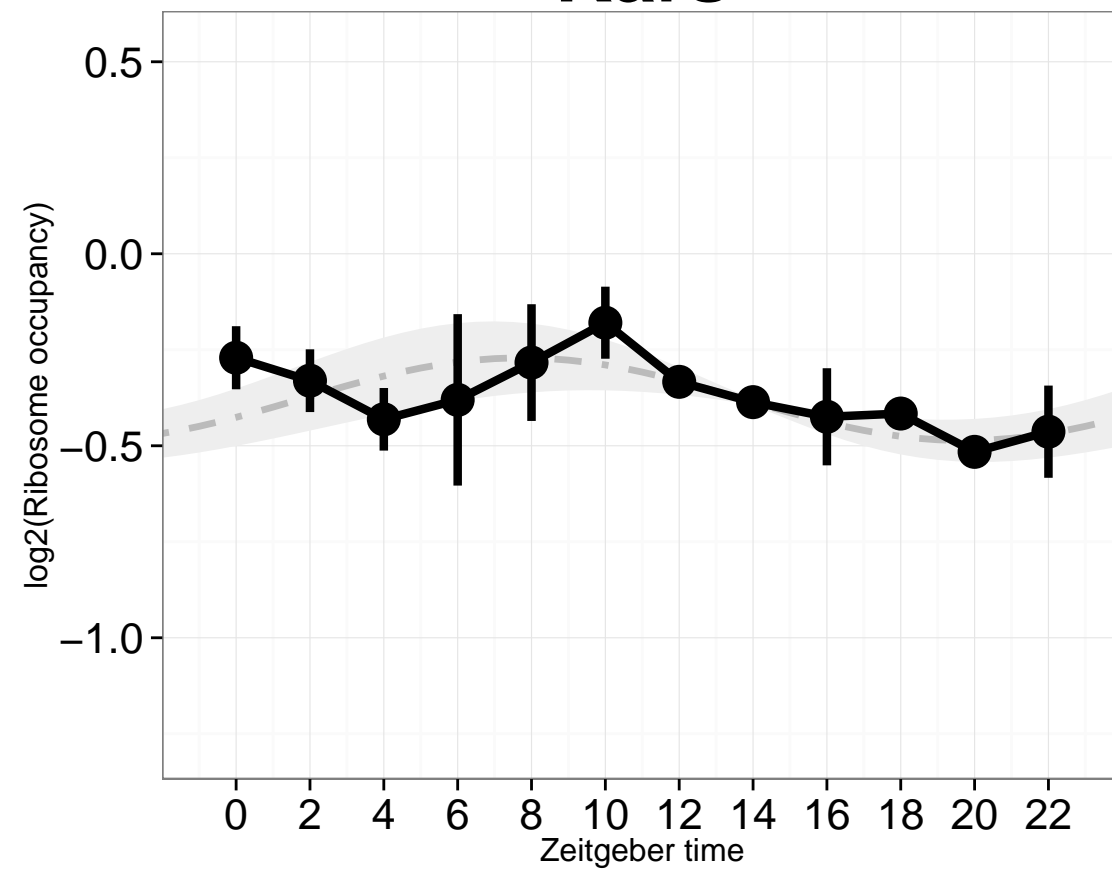

Supplement: SuppDataset_1.zip [file Kars_set_A.pdf › Supplemental Dataset 1/A-mRNA_nonrhyth_translation_nonrhyth/Kars_set_A.pdf]

# Kat2a

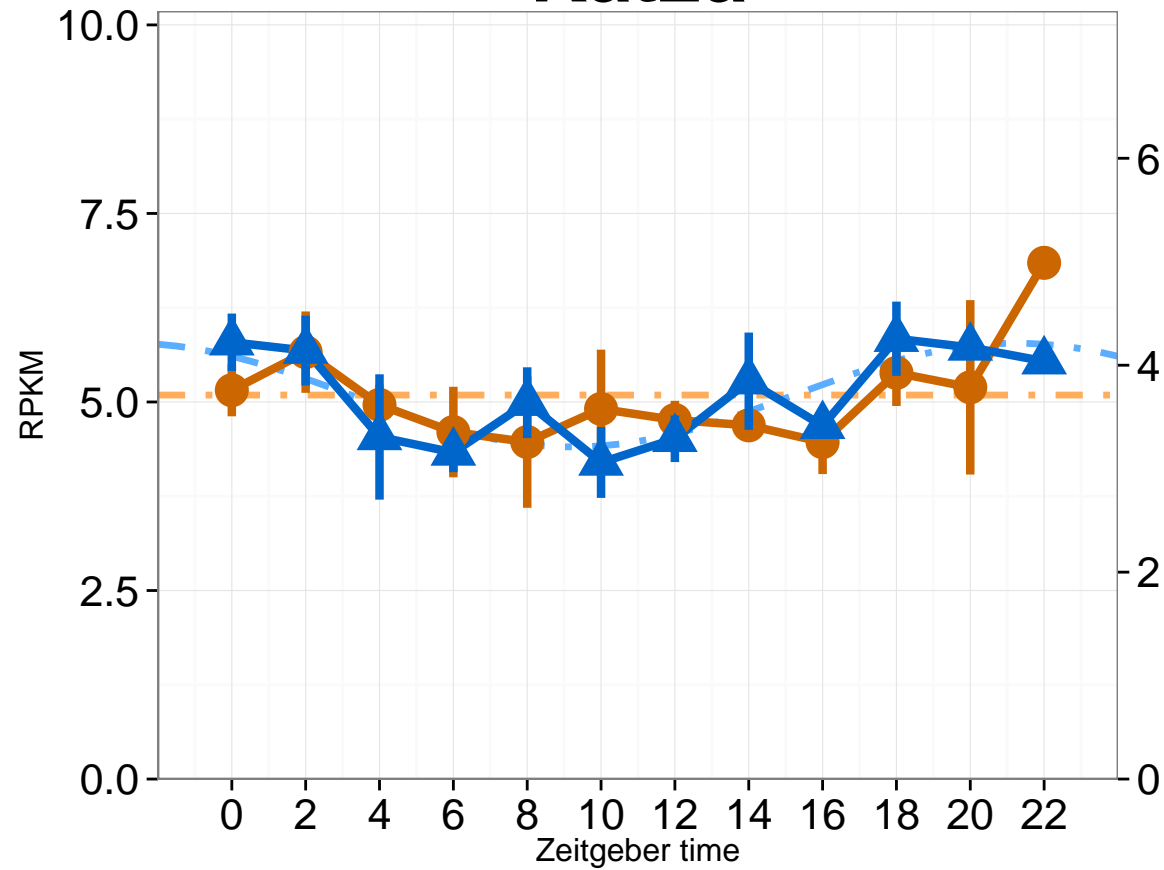

# Kat2a

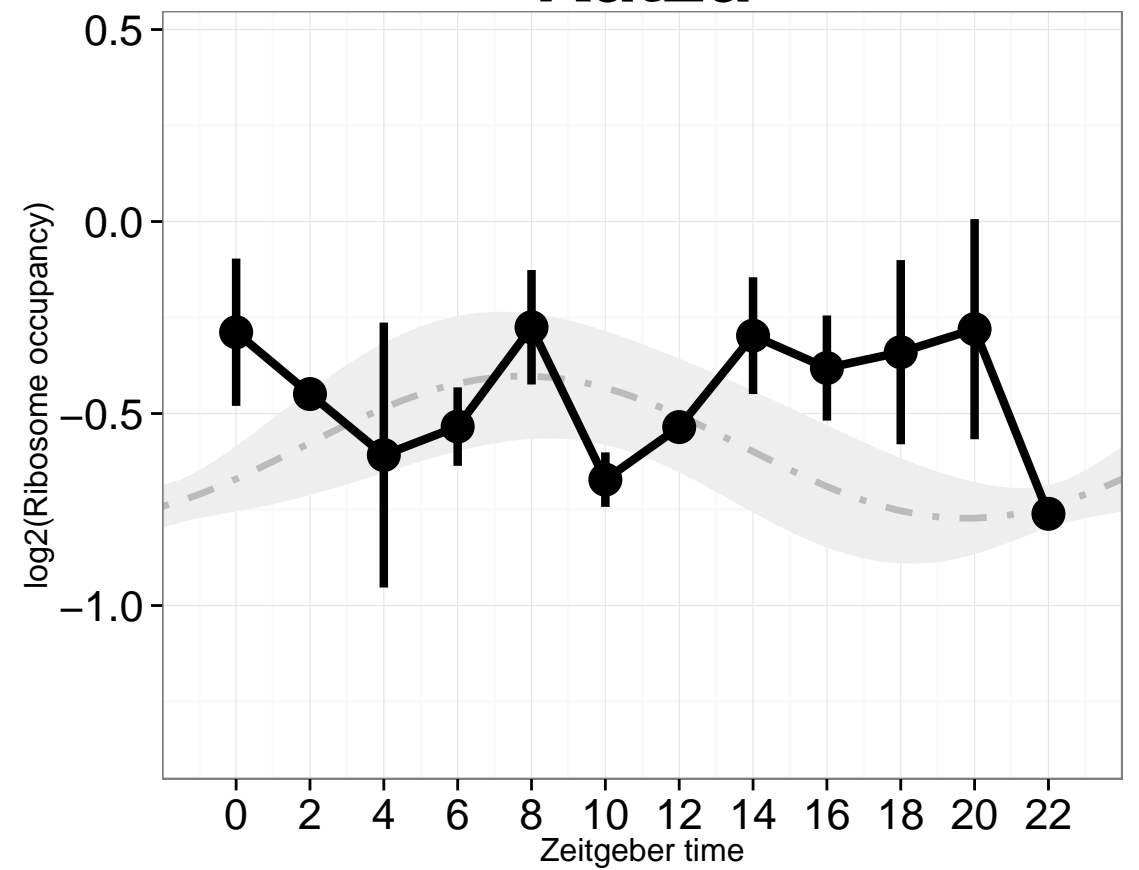

Supplement: SuppDataset_1.zip [file Kat2a_set_A.pdf › Supplemental Dataset 1/A-mRNA_nonrhyth_translation_nonrhyth/Kat2a_set_A.pdf]

# Kat2b

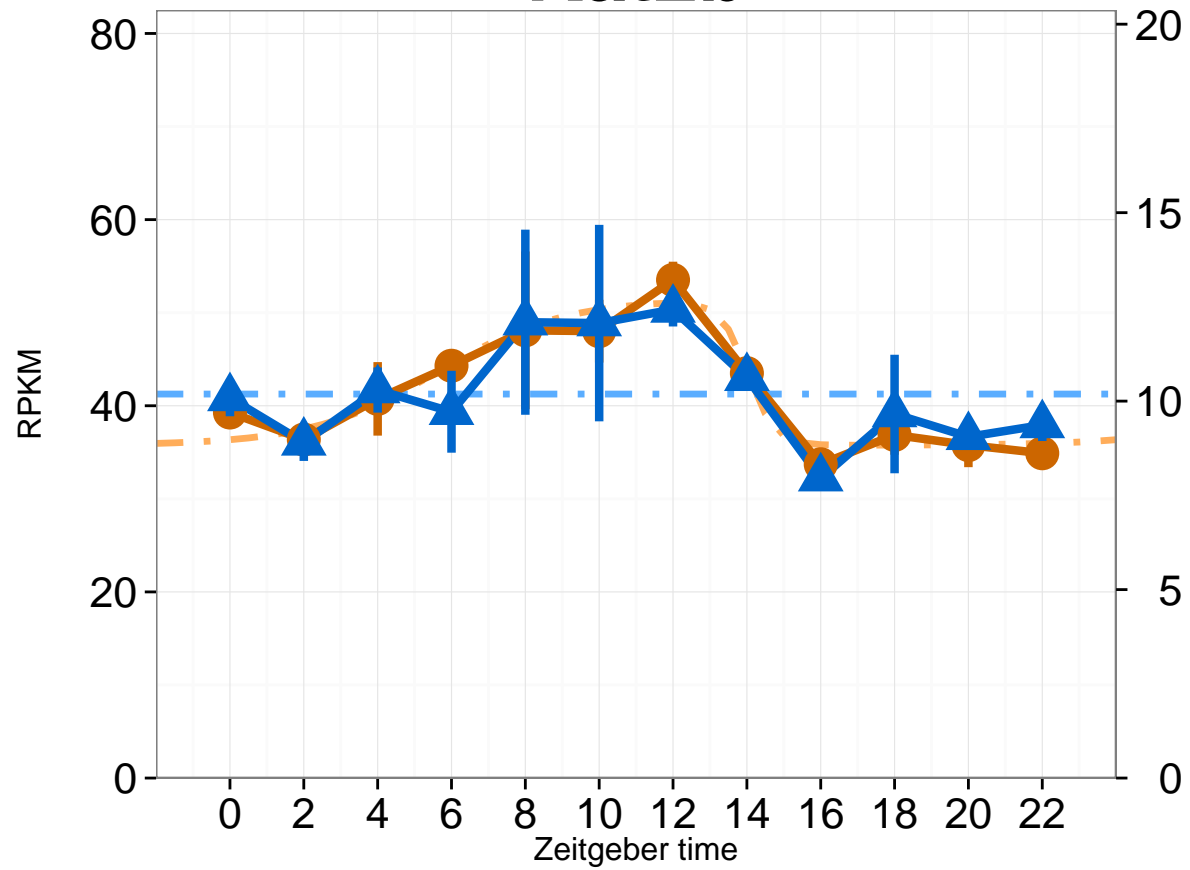

# Kat2b

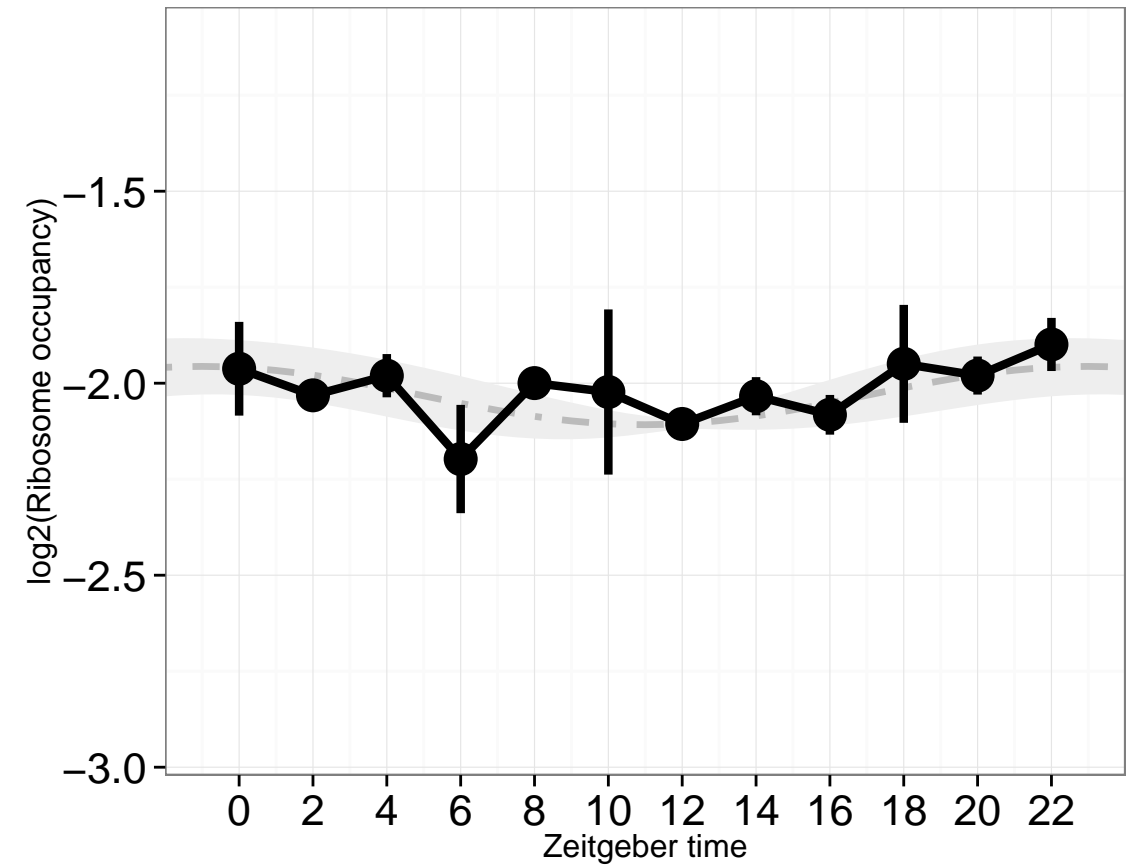

Supplement: SuppDataset_1.zip [file Kat2b_set_A.pdf › Supplemental Dataset 1/A-mRNA_nonrhyth_translation_nonrhyth/Kat2b_set_A.pdf]

# Kat5

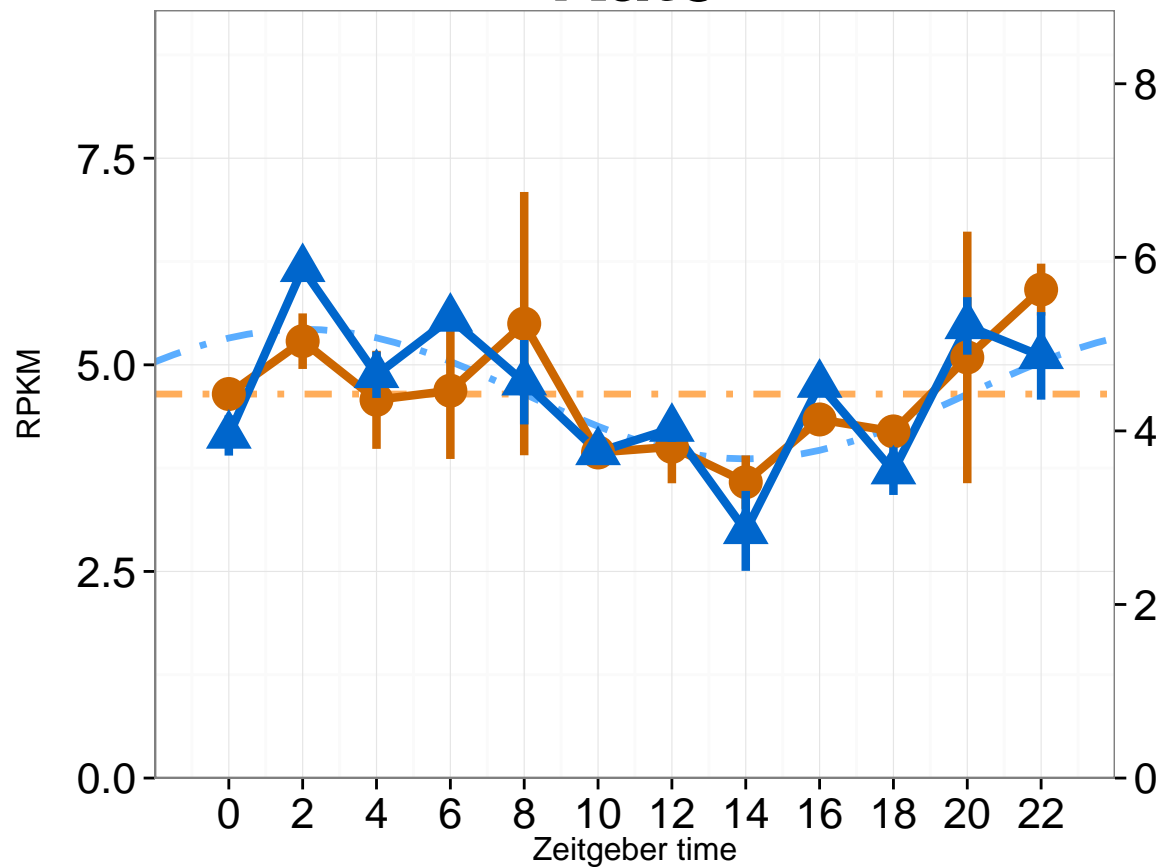

# Kat5

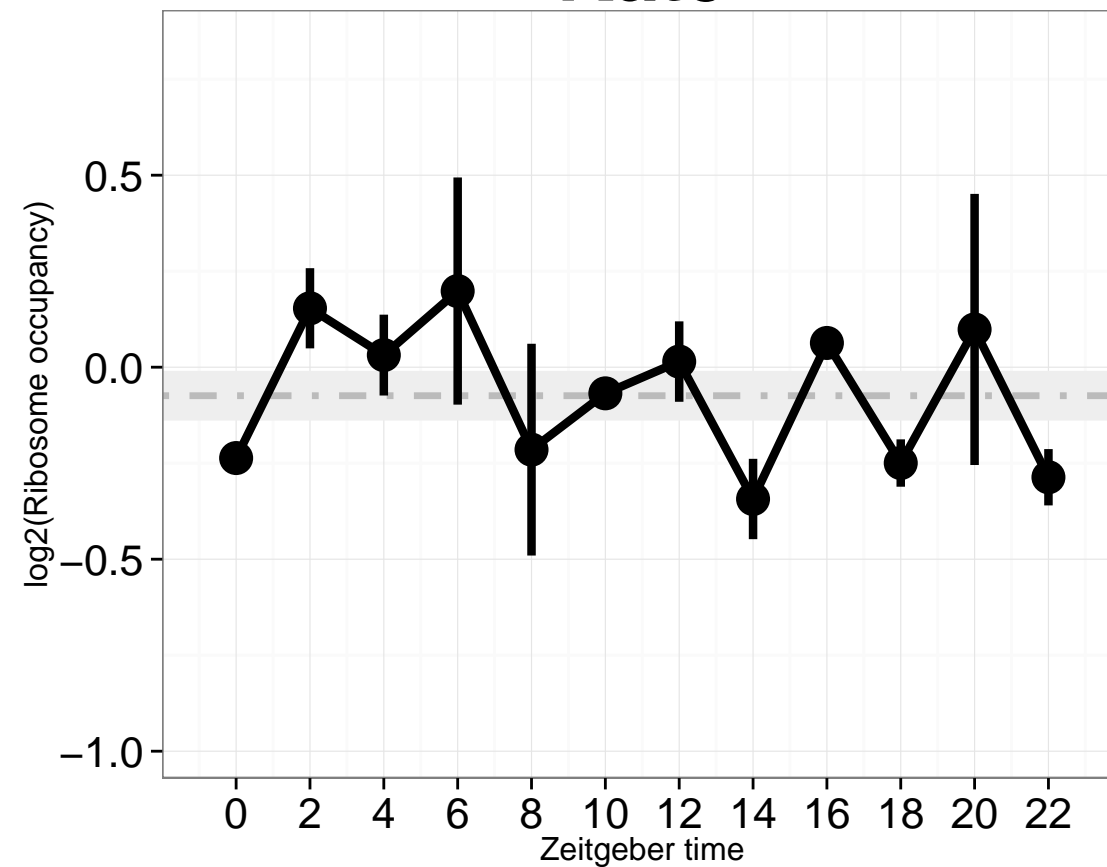

Supplement: SuppDataset_1.zip [file Kat5_set_A.pdf › Supplemental Dataset 1/A-mRNA_nonrhyth_translation_nonrhyth/Kat5_set_A.pdf]

# Kat6a

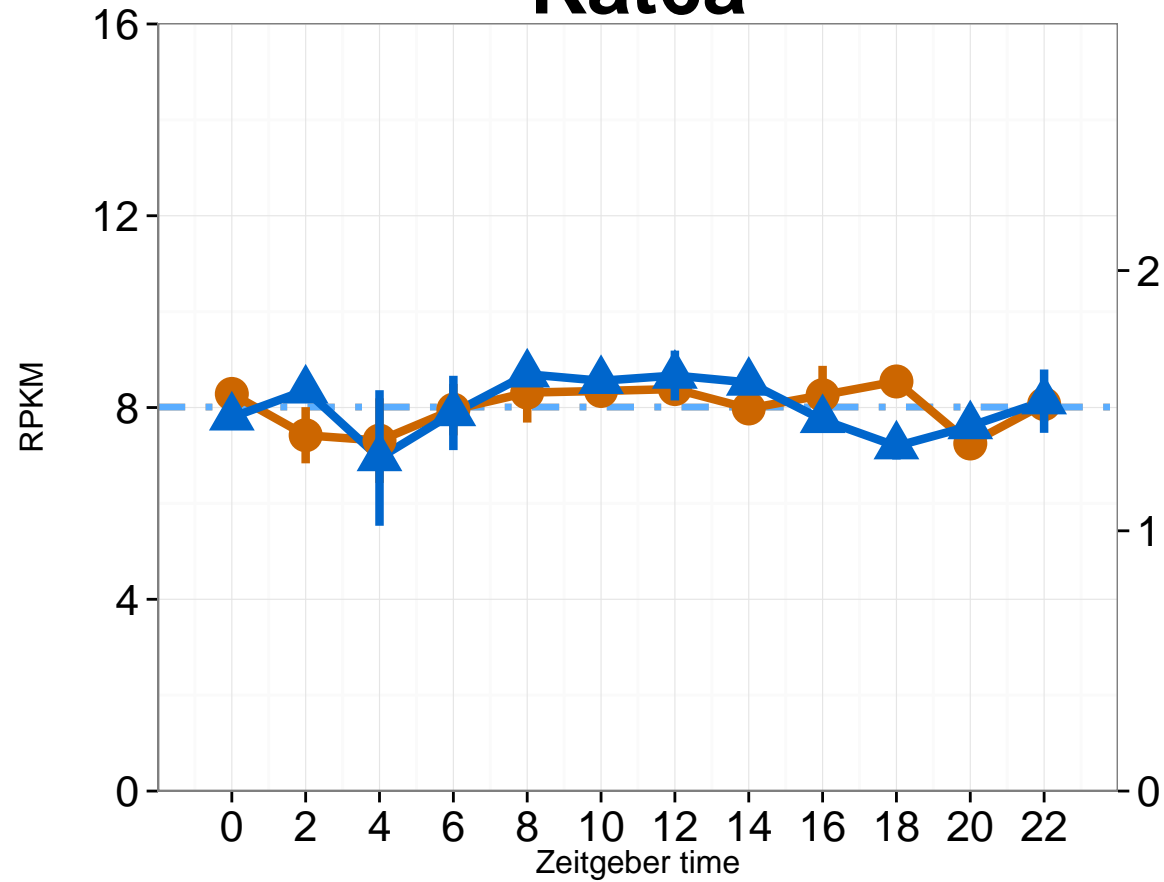

# Kat6a

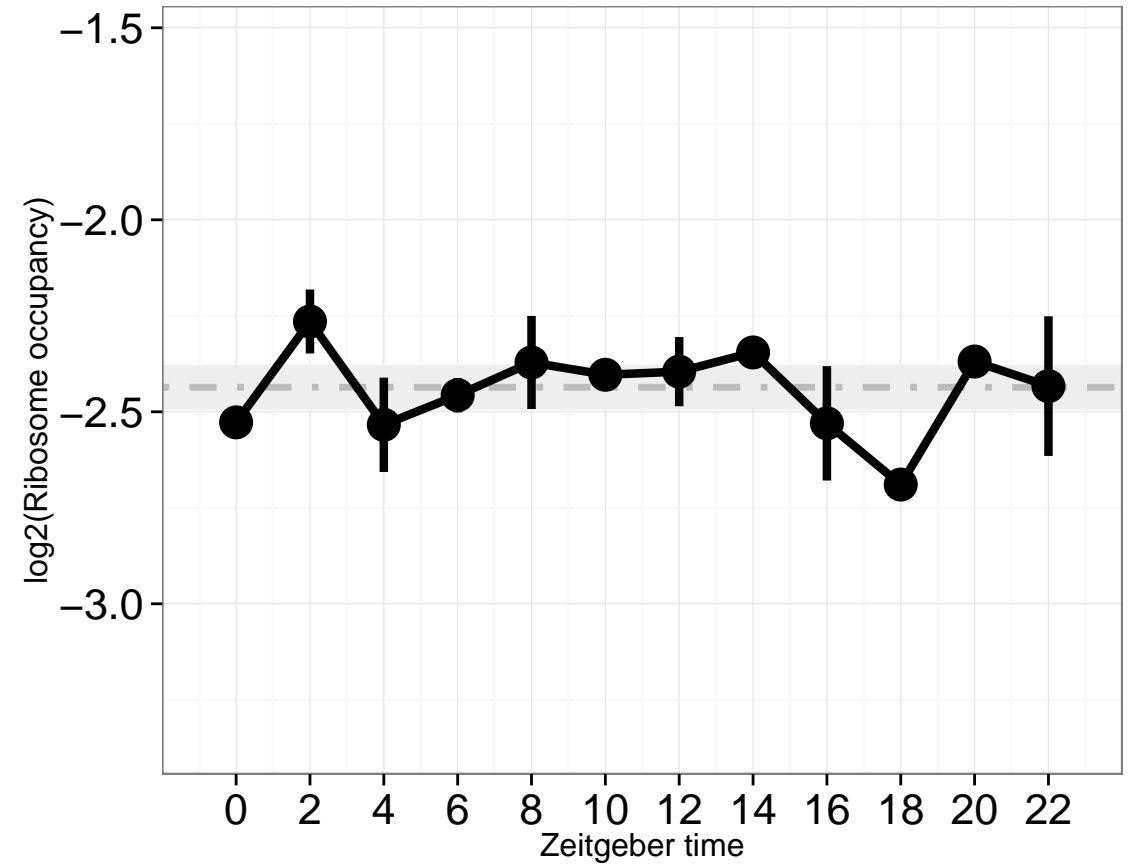

Supplement: SuppDataset_1.zip [file Kat6a_set_A.pdf › Supplemental Dataset 1/A-mRNA_nonrhyth_translation_nonrhyth/Kat6a_set_A.pdf]

# Kat6b

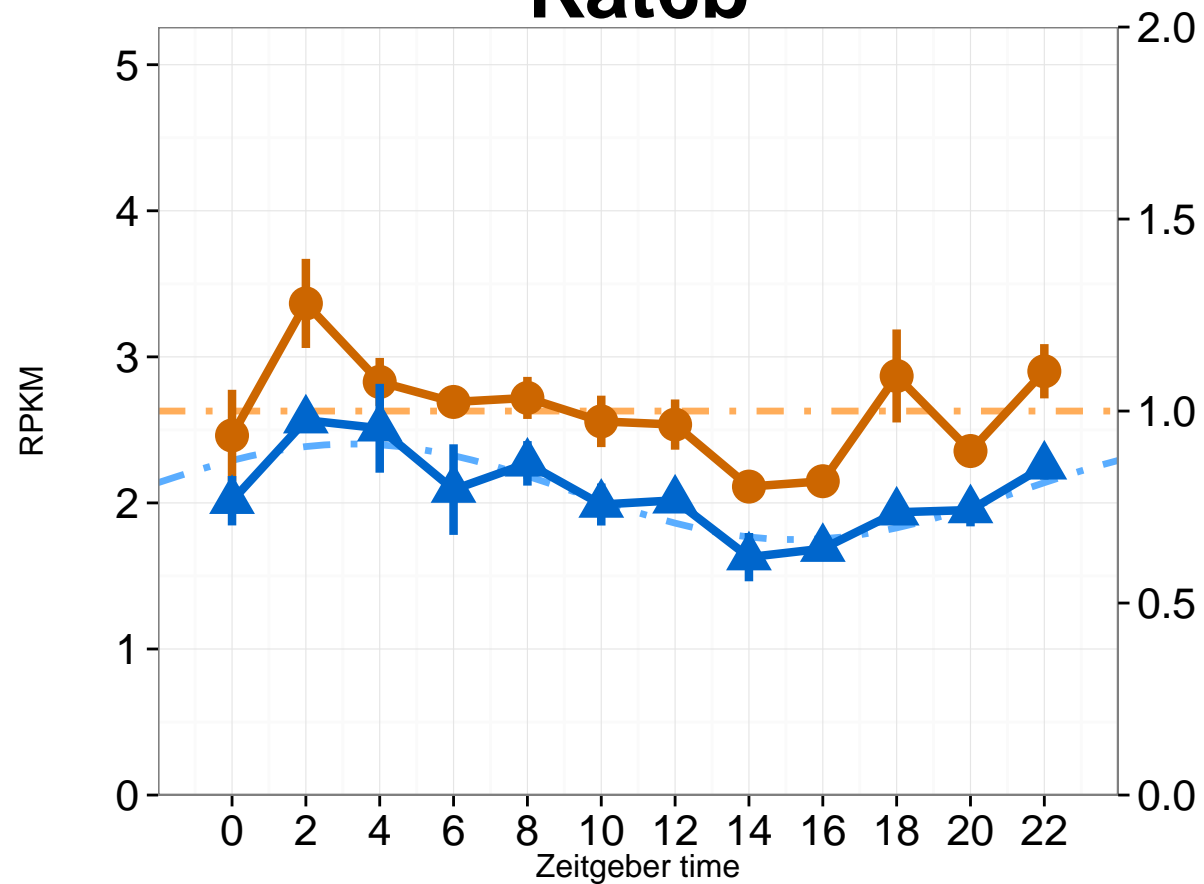

# Kat6b

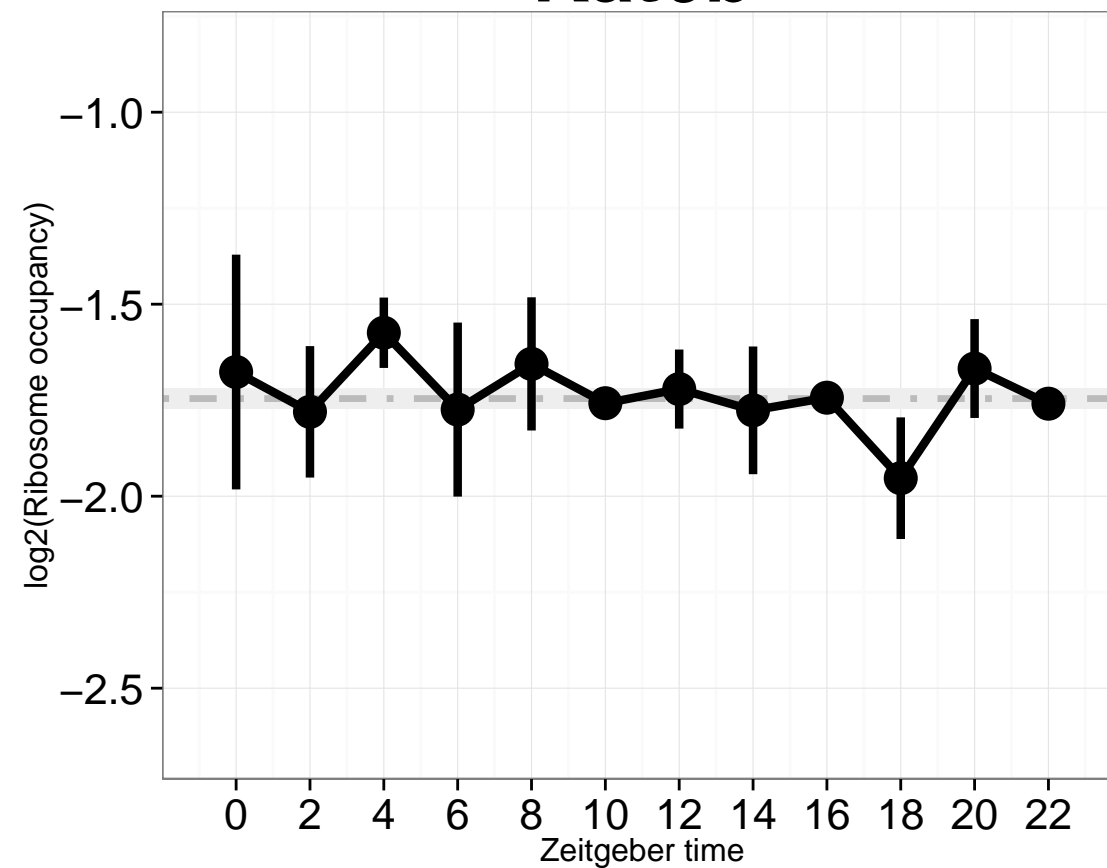

Supplement: SuppDataset_1.zip [file Kat6b_set_A.pdf › Supplemental Dataset 1/A-mRNA_nonrhyth_translation_nonrhyth/Kat6b_set_A.pdf]

## Kat7

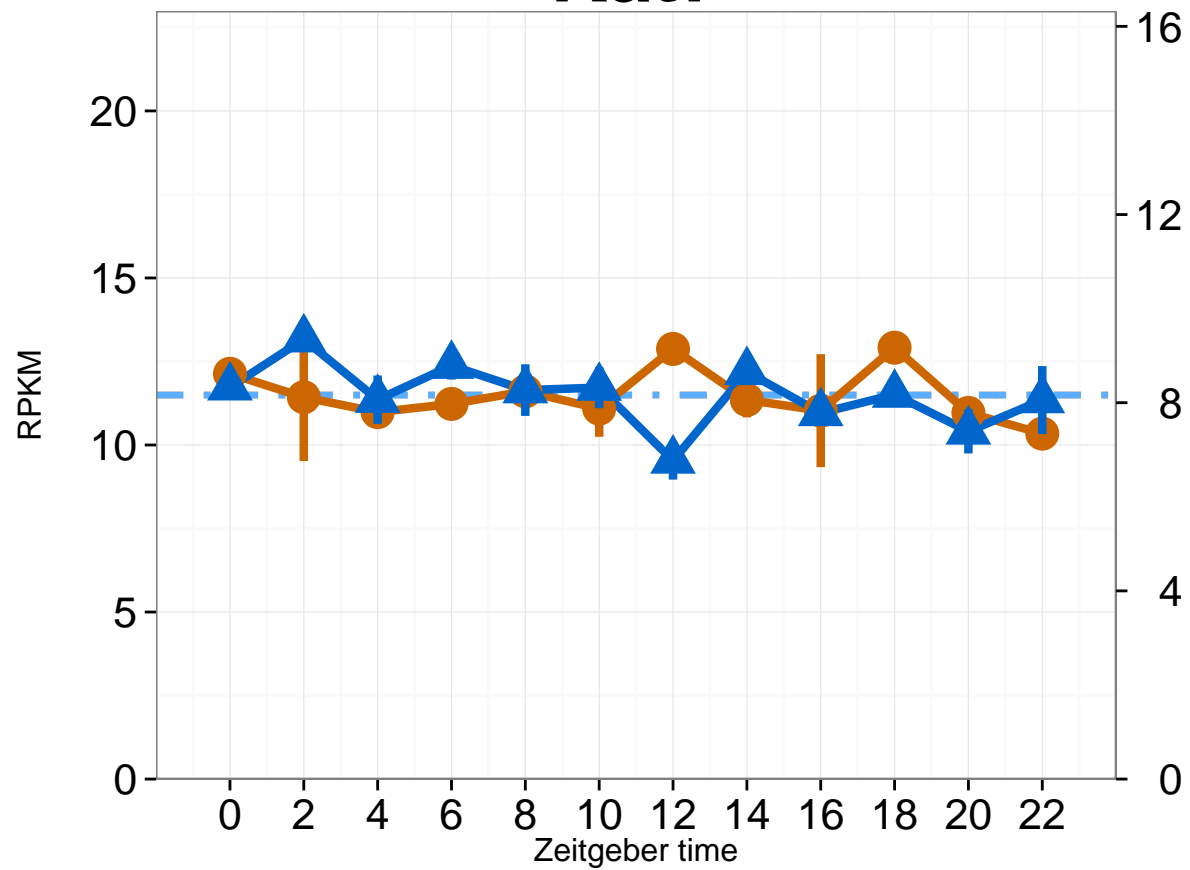

## Kat7

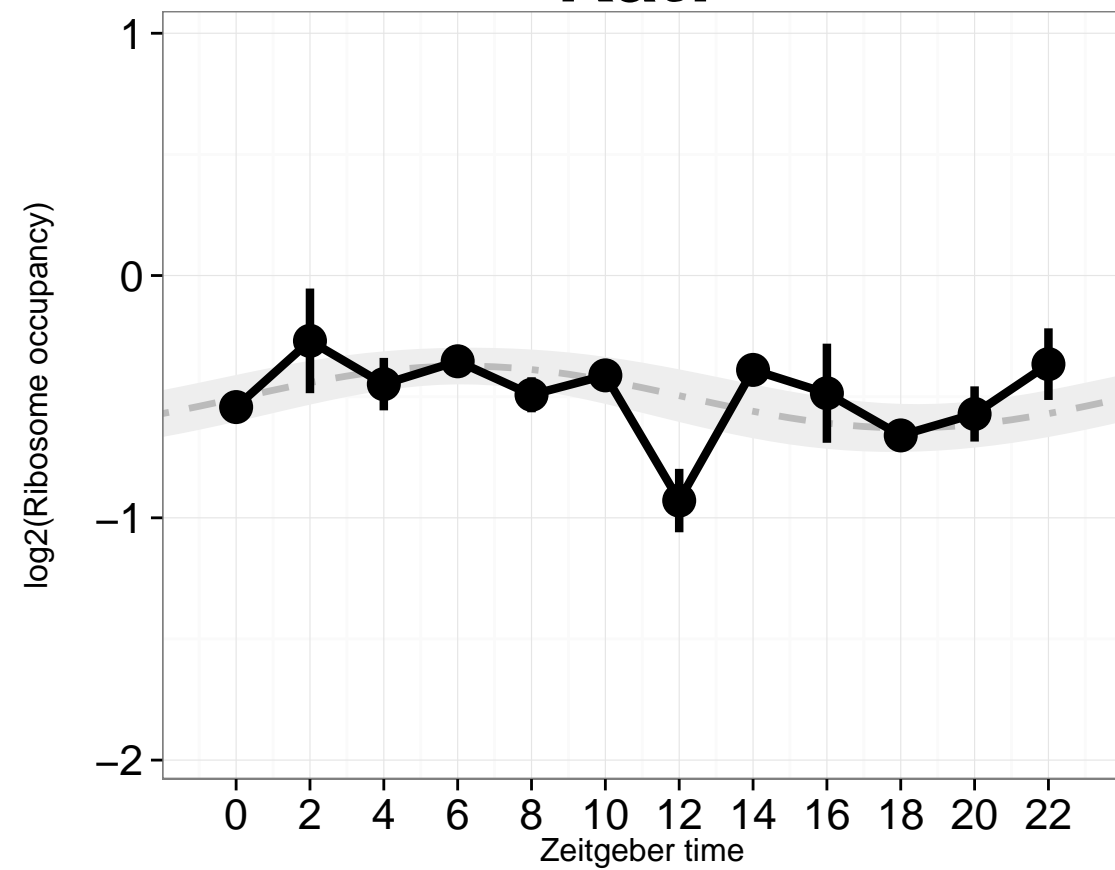

Supplement: SuppDataset_1.zip [file Kat7_set_A.pdf › Supplemental Dataset 1/A-mRNA_nonrhyth_translation_nonrhyth/Kat7_set_A.pdf]

## Kat8

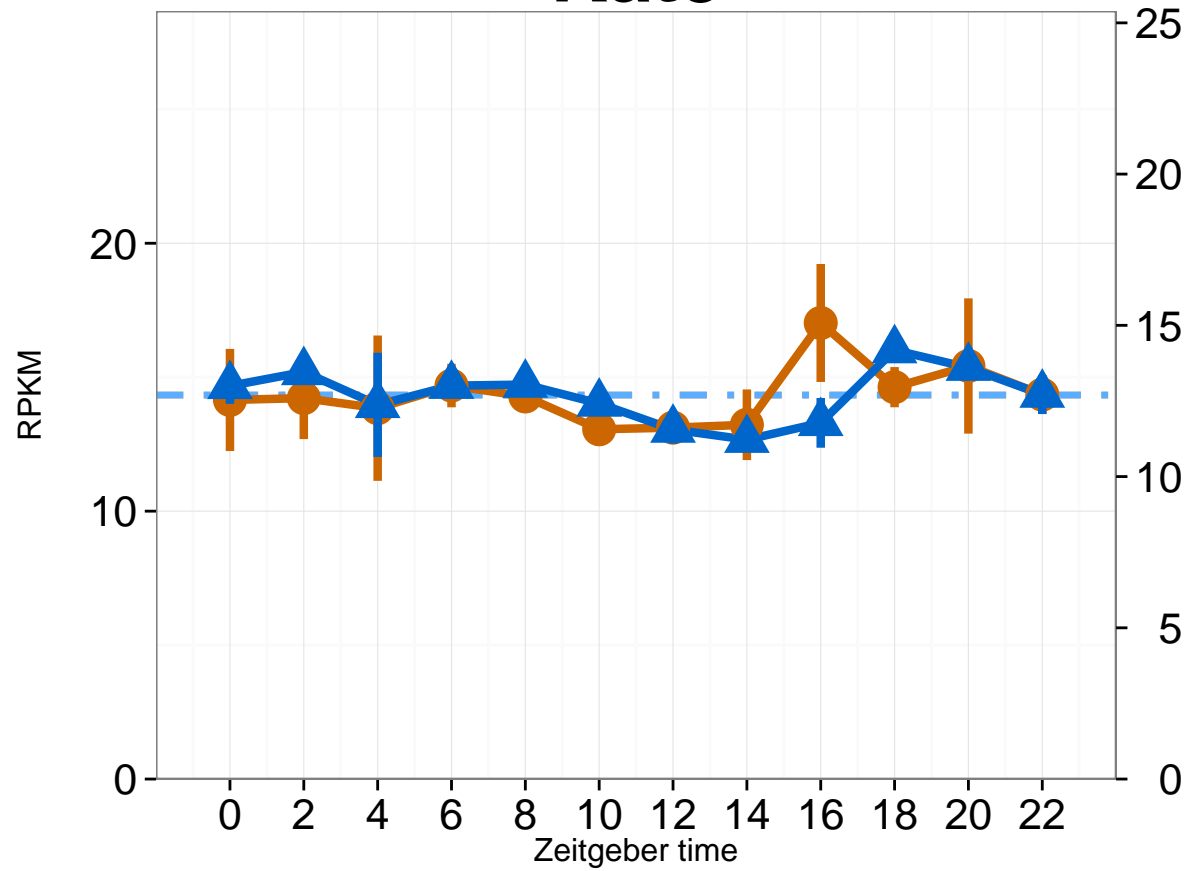

## Kat8

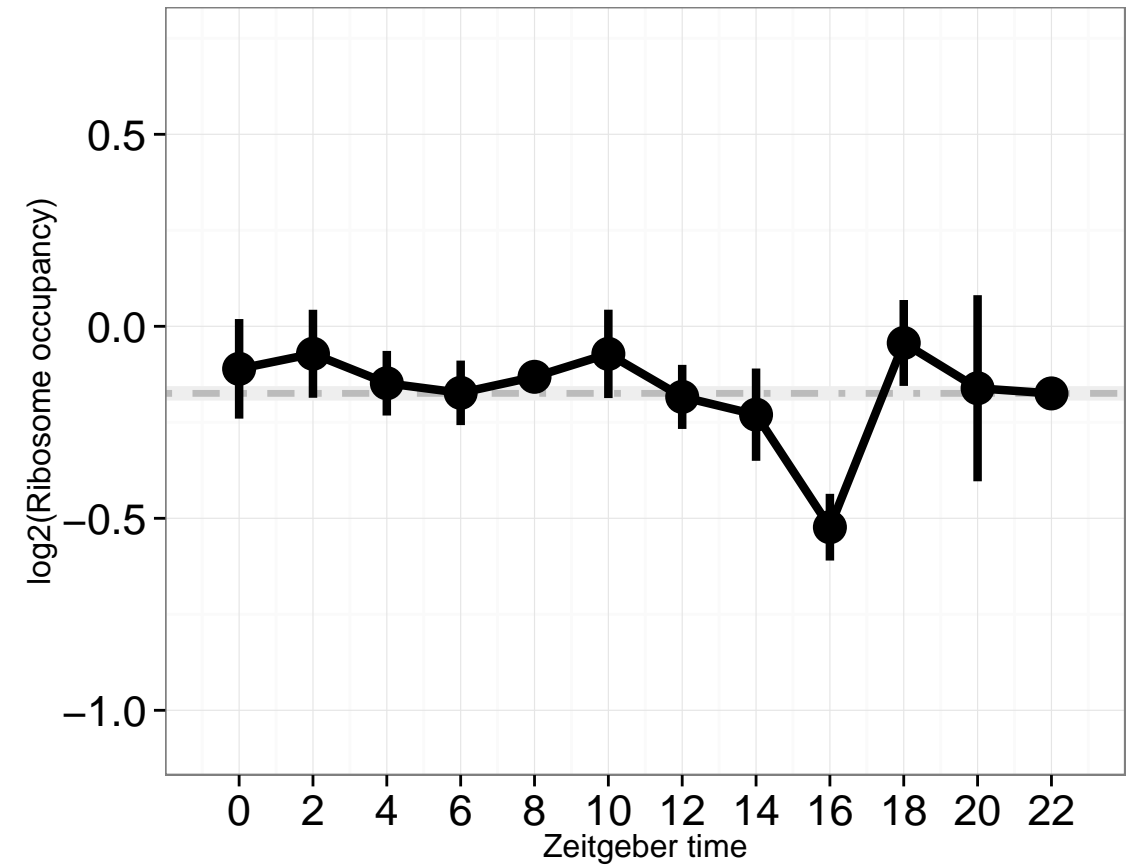

Supplement: SuppDataset_1.zip [file Kat8_set_A.pdf › Supplemental Dataset 1/A-mRNA_nonrhyth_translation_nonrhyth/Kat8_set_A.pdf]

## Katna1

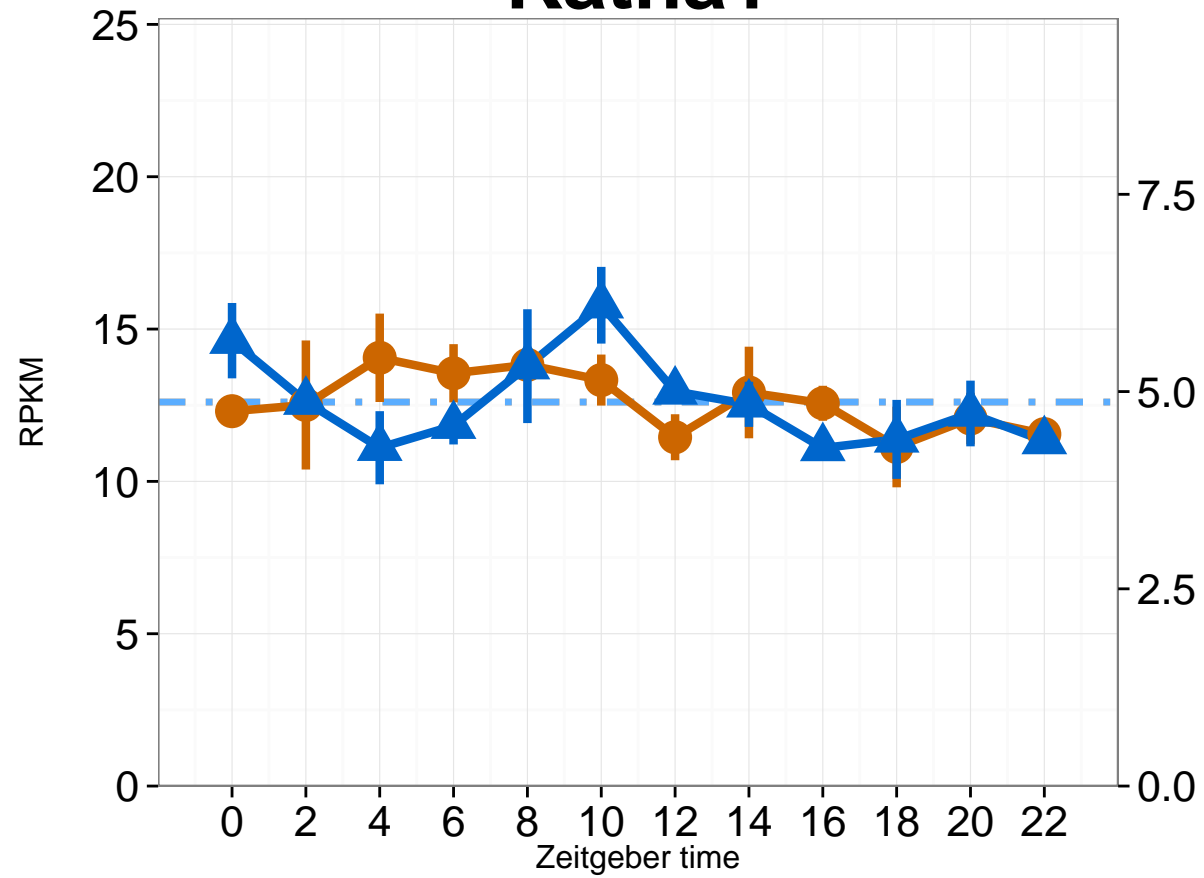

## Katna1

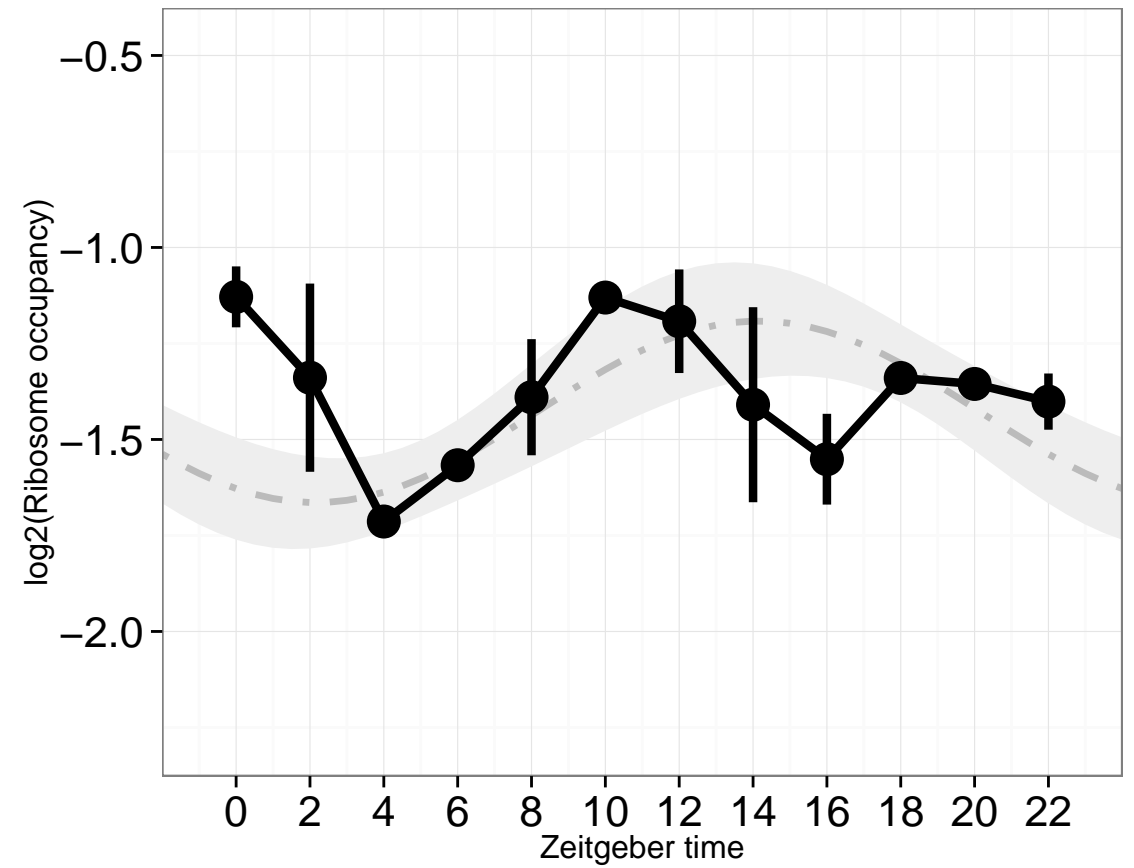

Supplement: SuppDataset_1.zip [file Katna1_set_A.pdf › Supplemental Dataset 1/A-mRNA_nonrhyth_translation_nonrhyth/Katna1_set_A.pdf]

# Katnal1

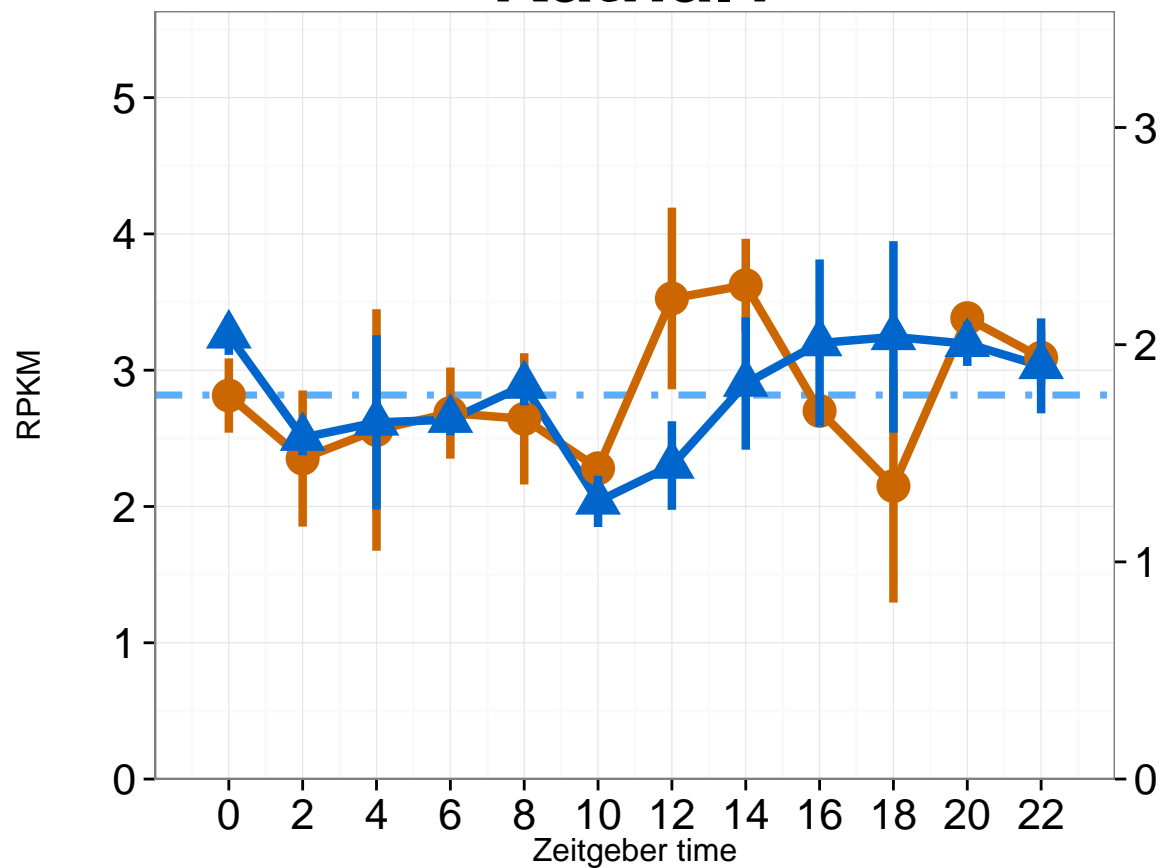

# Katnal1

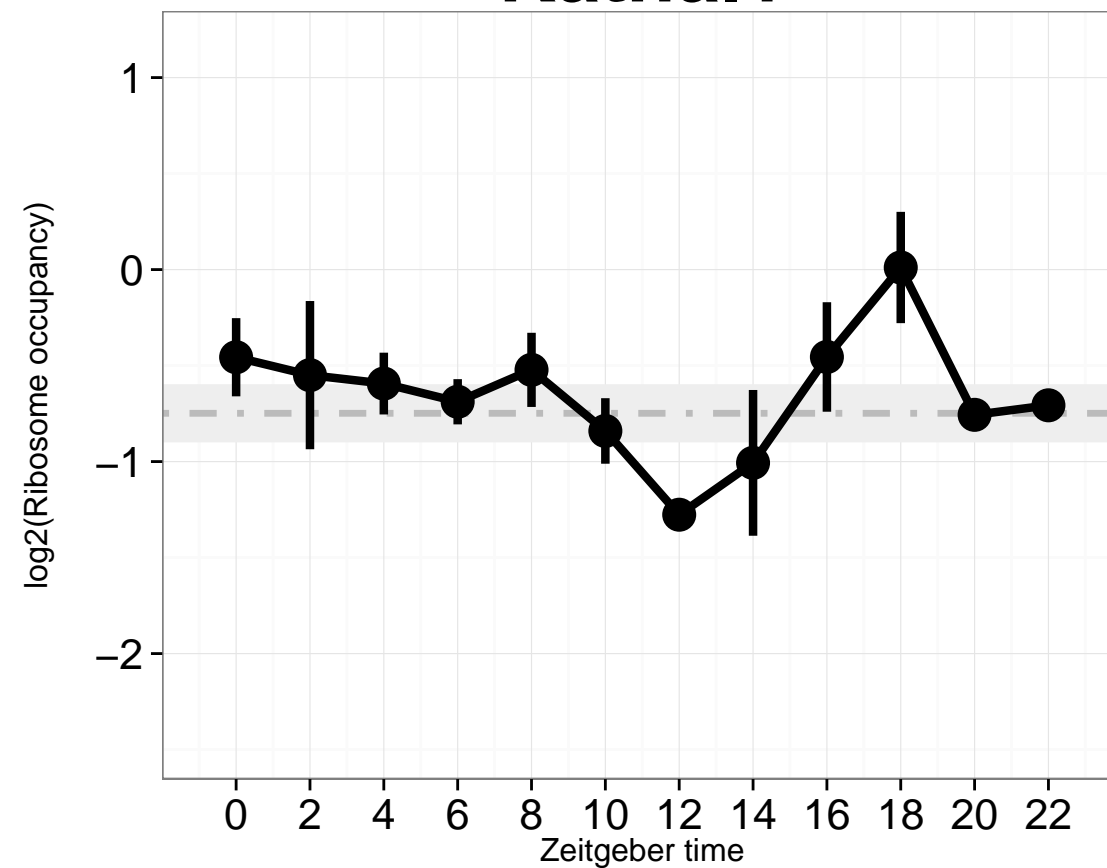

Supplement: SuppDataset_1.zip [file Katnal1_set_A.pdf › Supplemental Dataset 1/A-mRNA_nonrhyth_translation_nonrhyth/Katnal1_set_A.pdf]

## Katnb1l

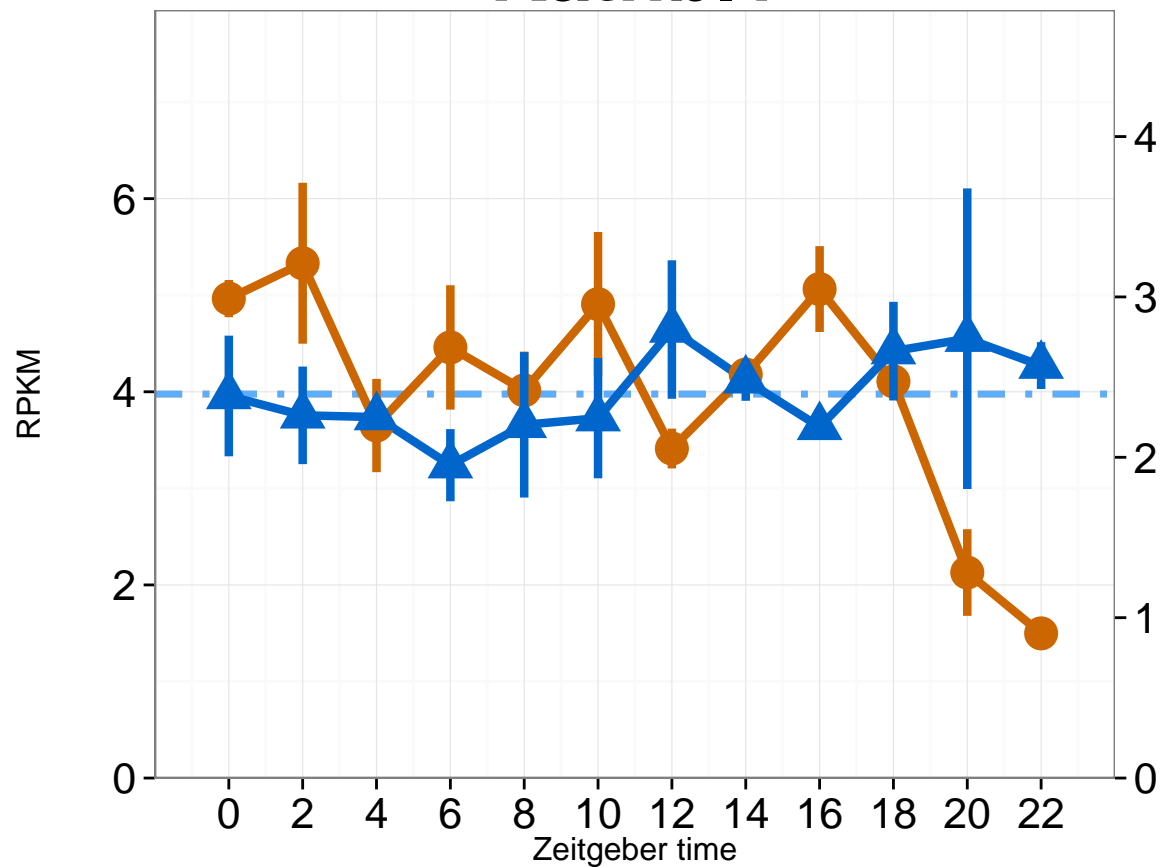

## Katnb1l

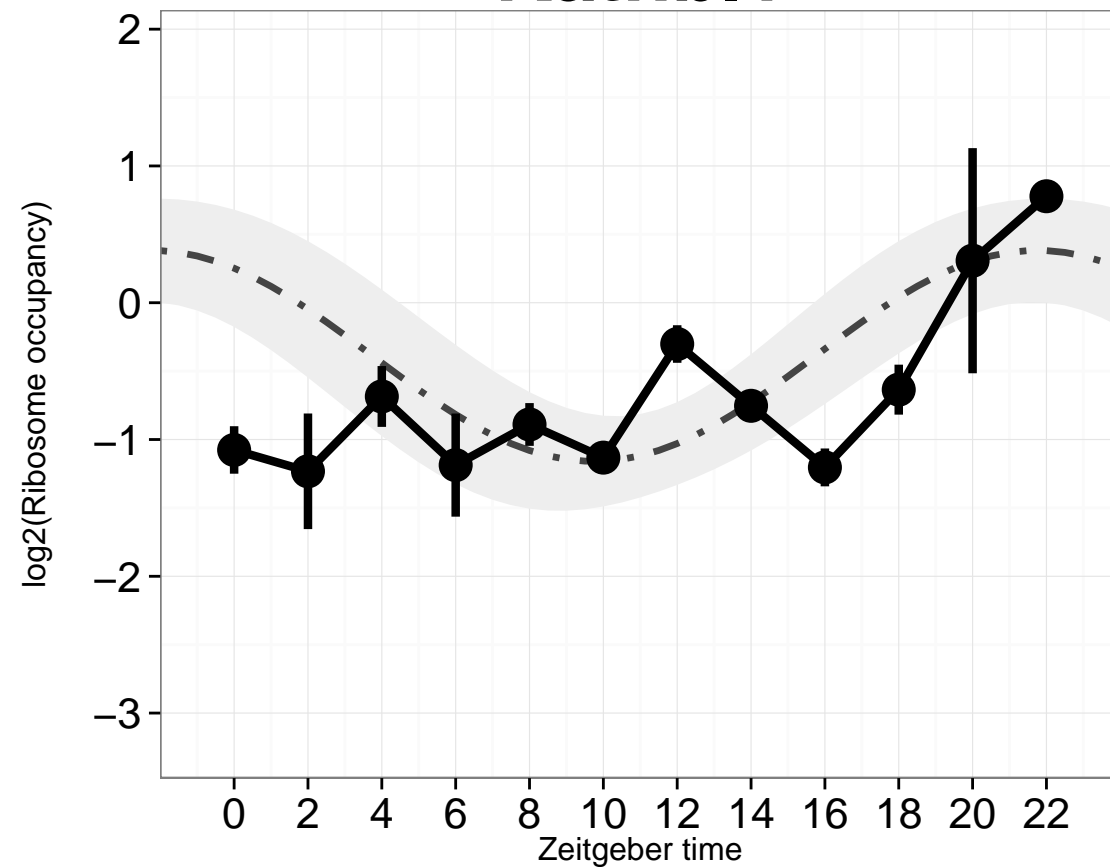

Supplement: SuppDataset_1.zip [file Katnbl1_set_A.pdf › Supplemental Dataset 1/A-mRNA_nonrhyth_translation_nonrhyth/Katnbl1_set_A.pdf]

## Kbtbd2

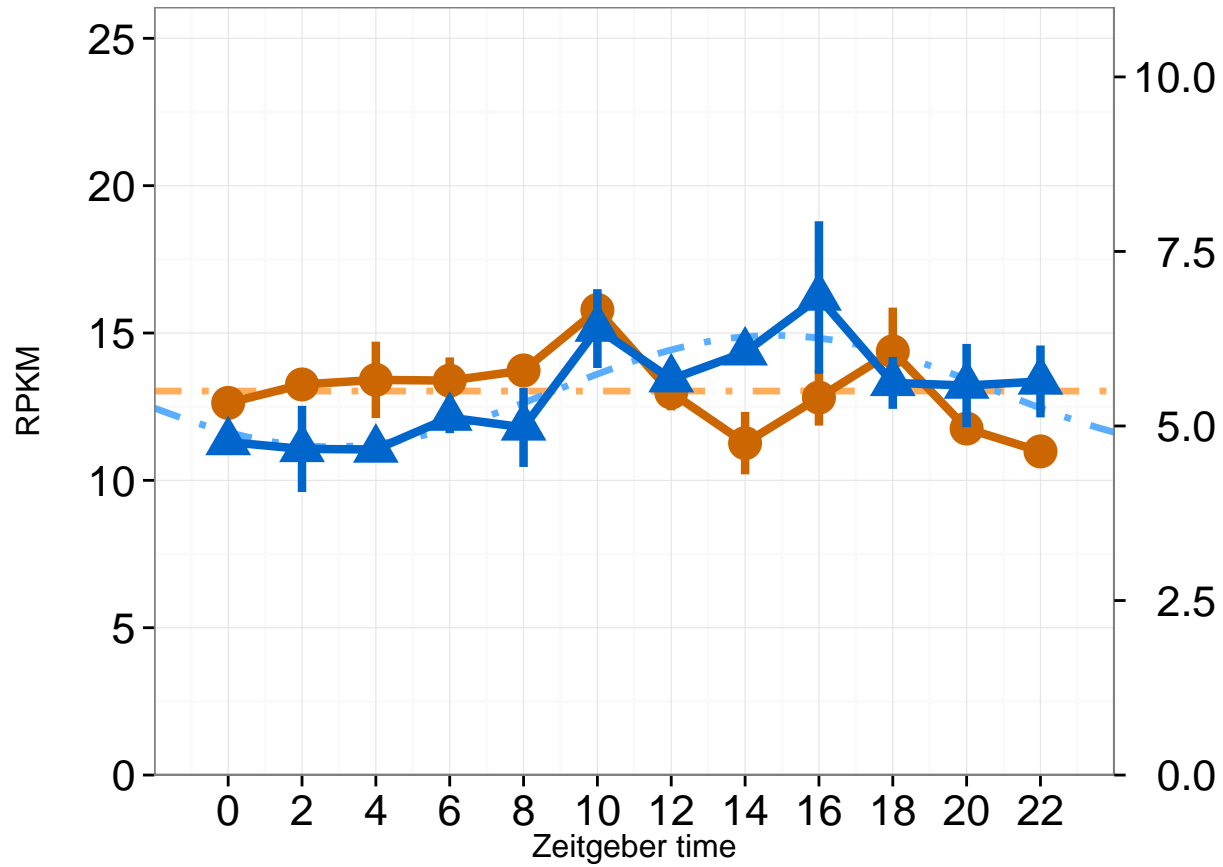

## Kbtbd2

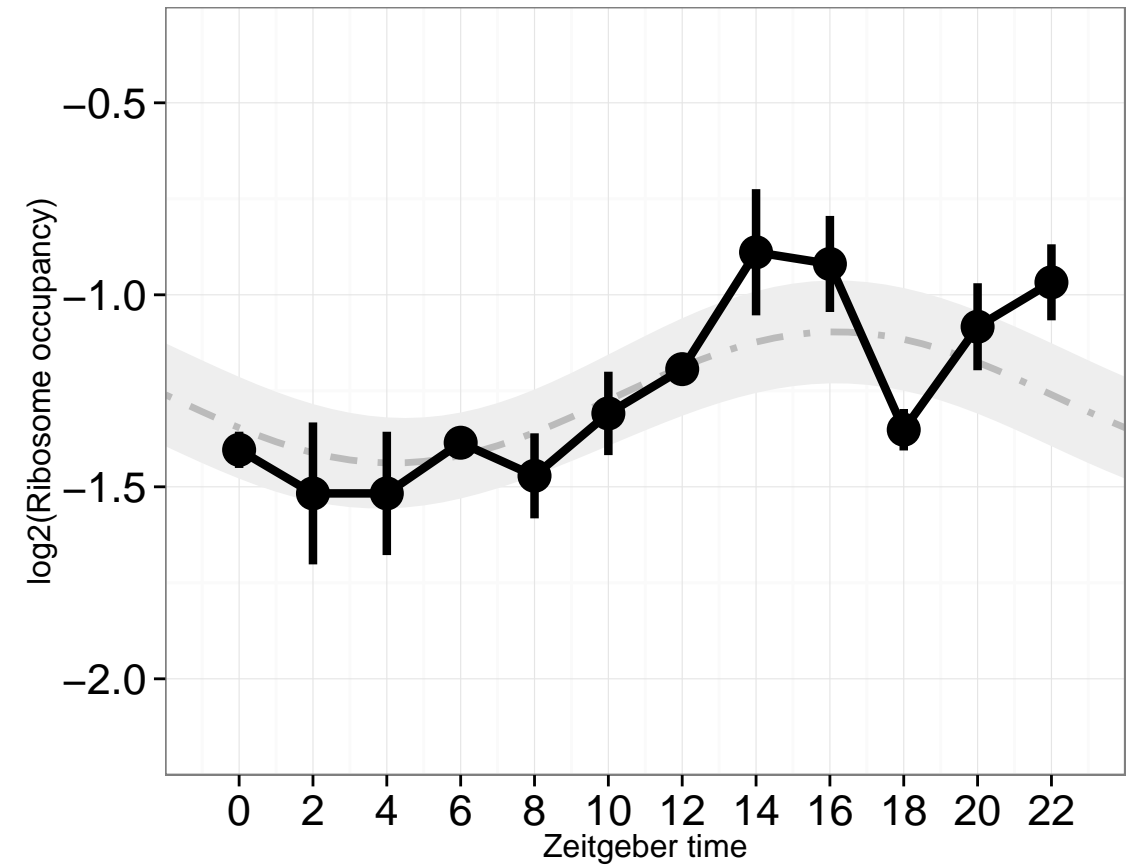

Supplement: SuppDataset_1.zip [file Kbtbd2_set_A.pdf › Supplemental Dataset 1/A-mRNA_nonrhyth_translation_nonrhyth/Kbtbd2_set_A.pdf]

# Kbtbd3

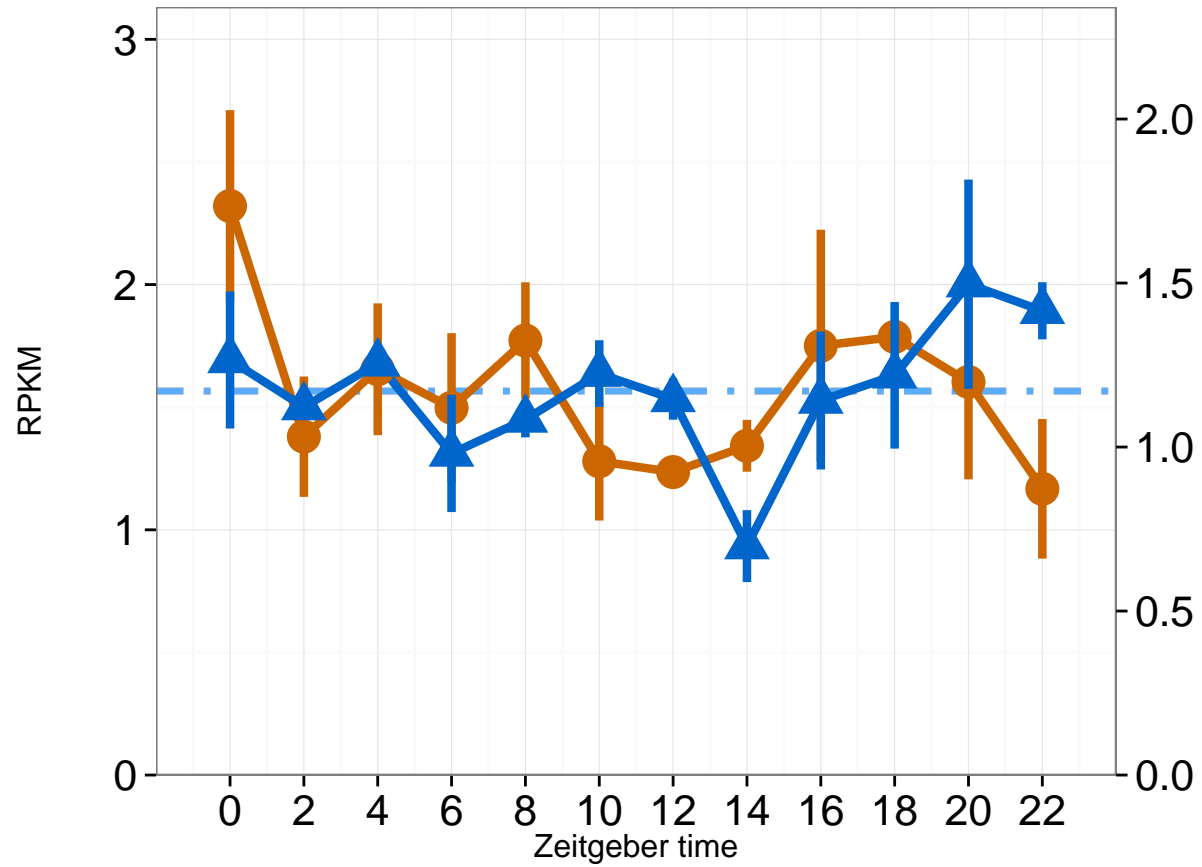

# Kbtbd3

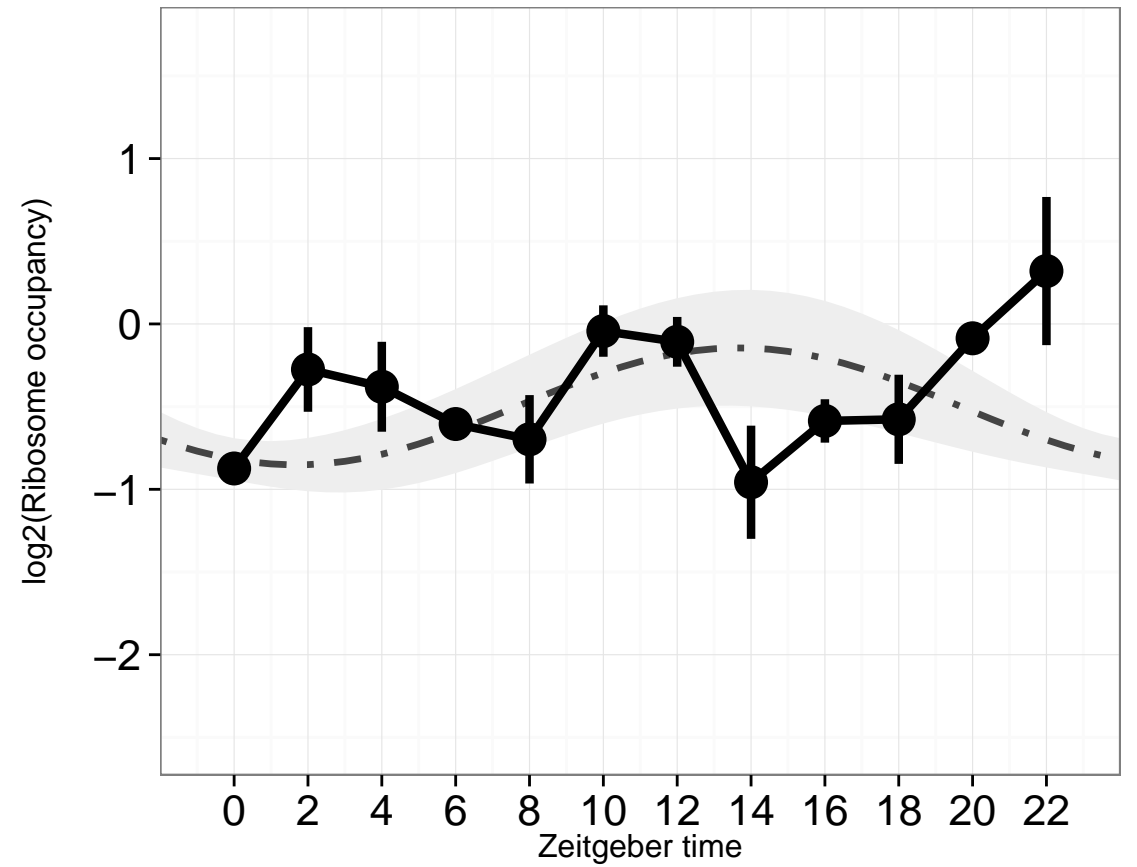

Supplement: SuppDataset_1.zip [file Kbtbd3_set_A.pdf › Supplemental Dataset 1/A-mRNA_nonrhyth_translation_nonrhyth/Kbtbd3_set_A.pdf]

## Kbtbd4

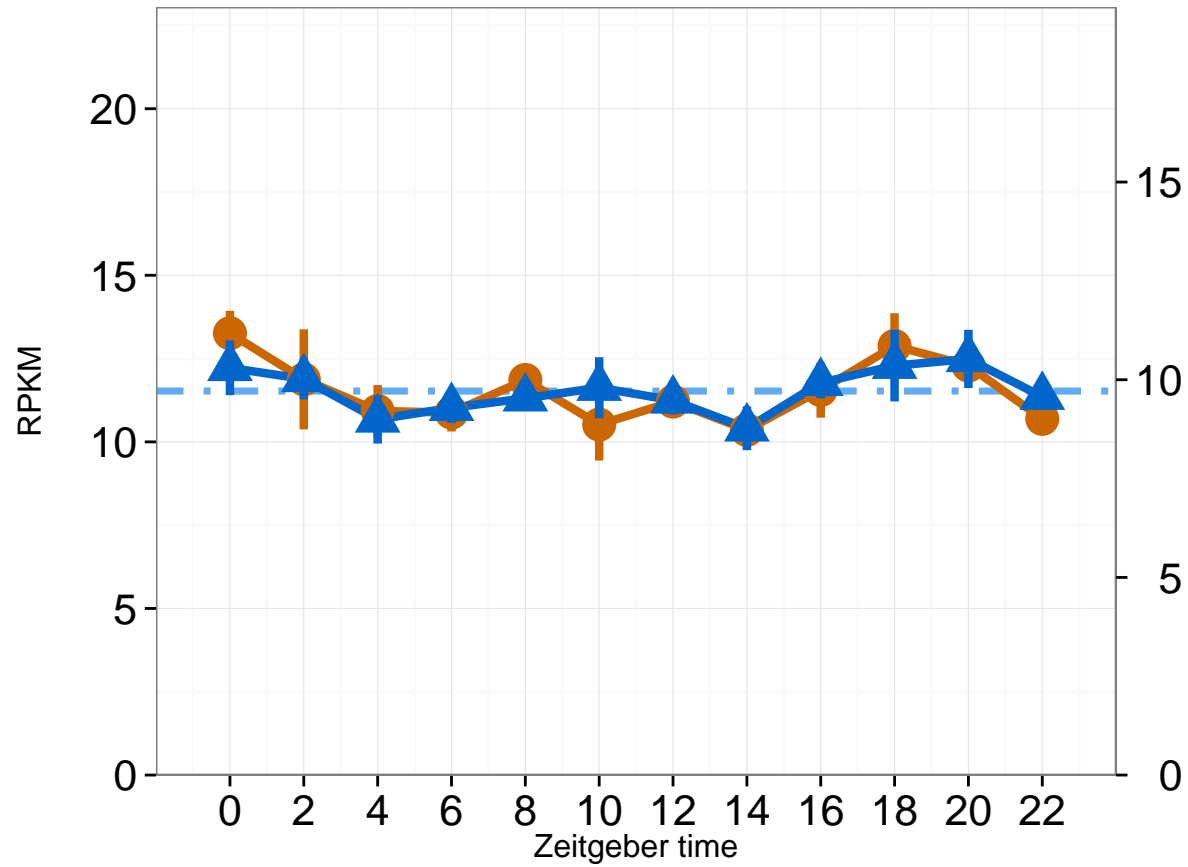

## Kbtbd4

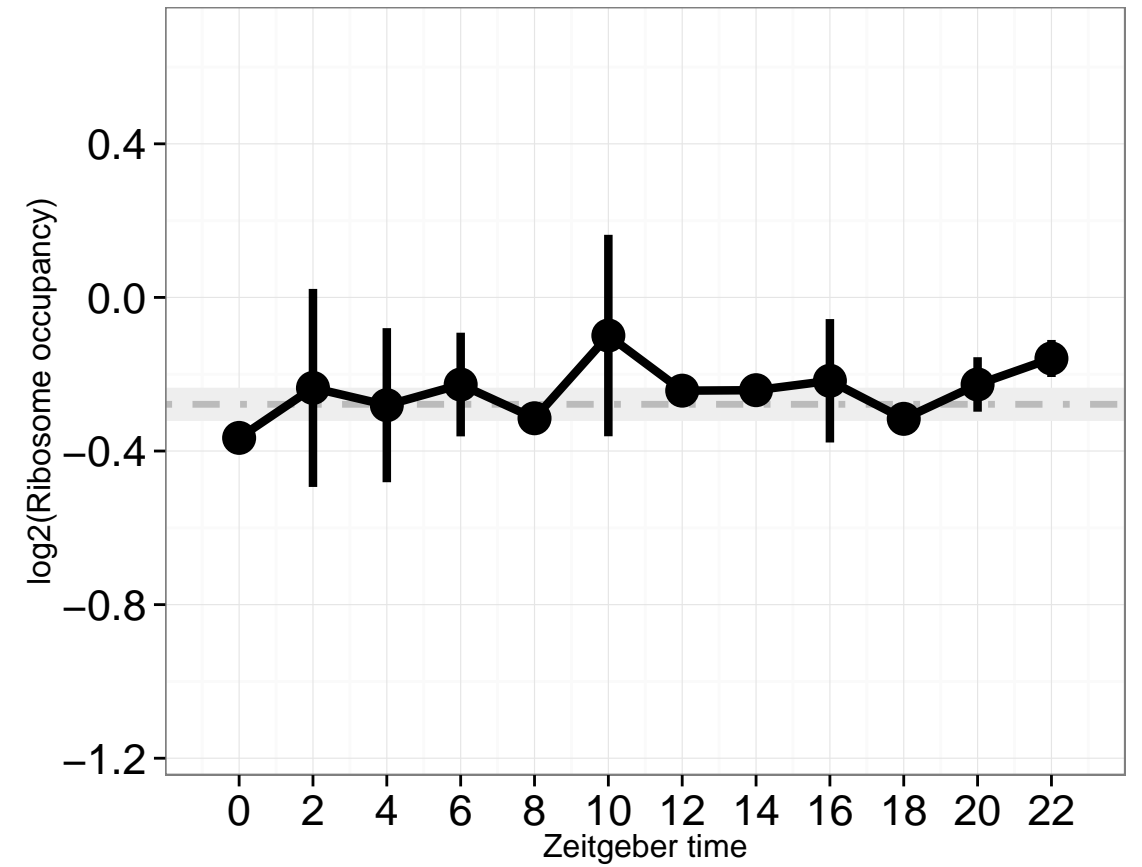

Supplement: SuppDataset_1.zip [file Kbtbd4_set_A.pdf › Supplemental Dataset 1/A-mRNA_nonrhyth_translation_nonrhyth/Kbtbd4_set_A.pdf]

## Kbtbd7

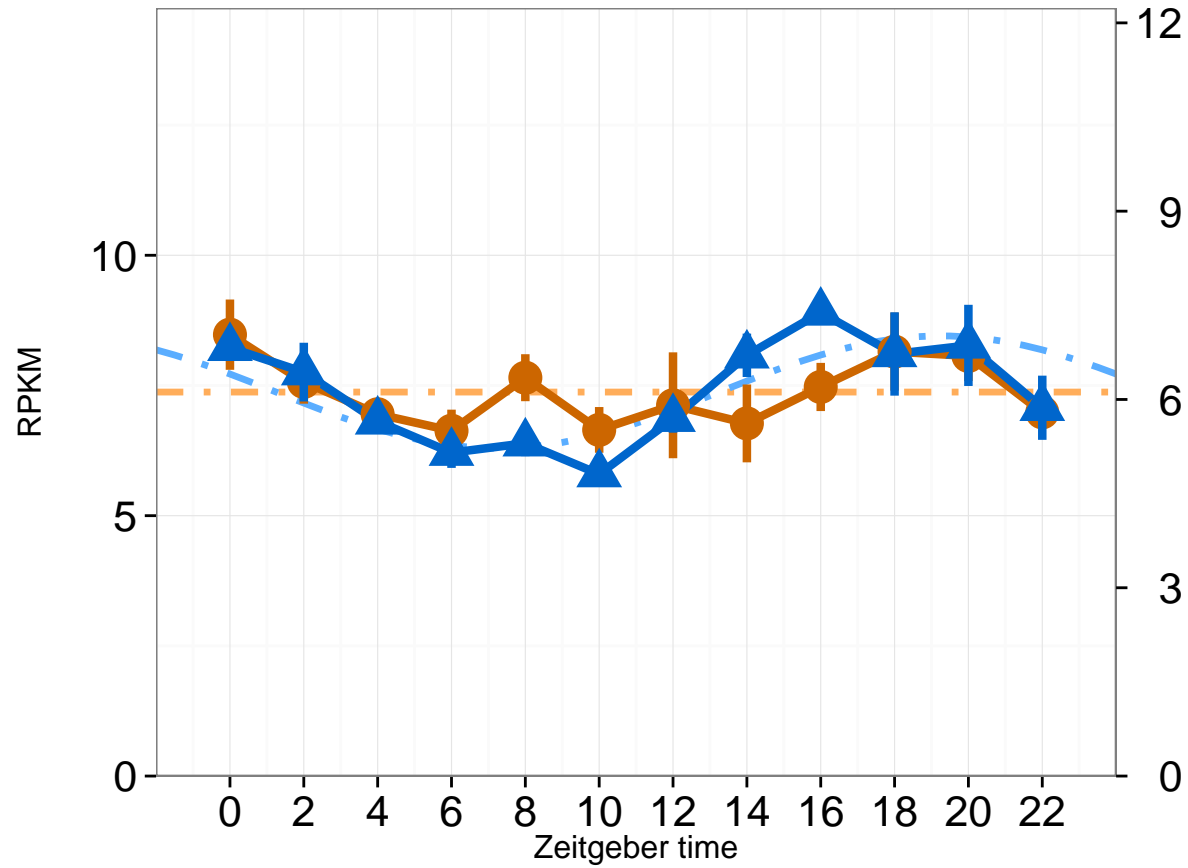

## Kbtbd7

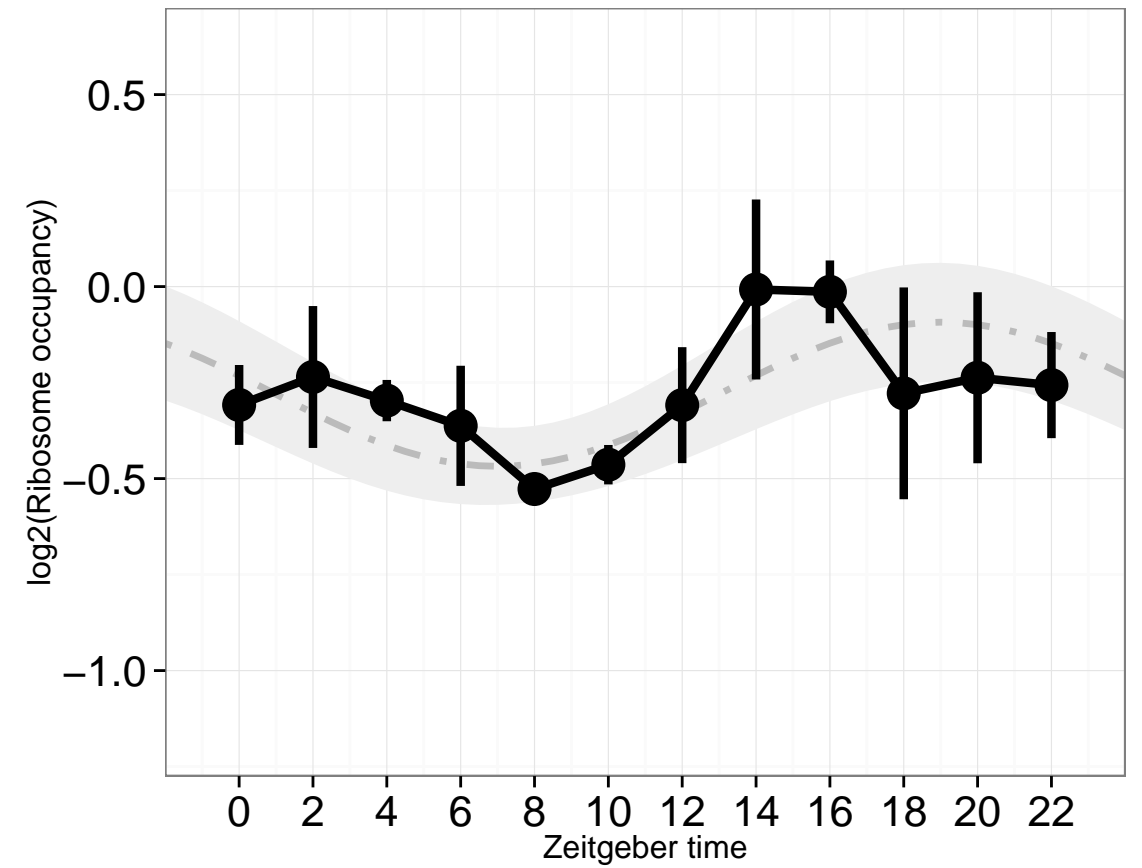

Supplement: SuppDataset_1.zip [file Kbtbd7_set_A.pdf › Supplemental Dataset 1/A-mRNA_nonrhyth_translation_nonrhyth/Kbtbd7_set_A.pdf]

# Kcmf1

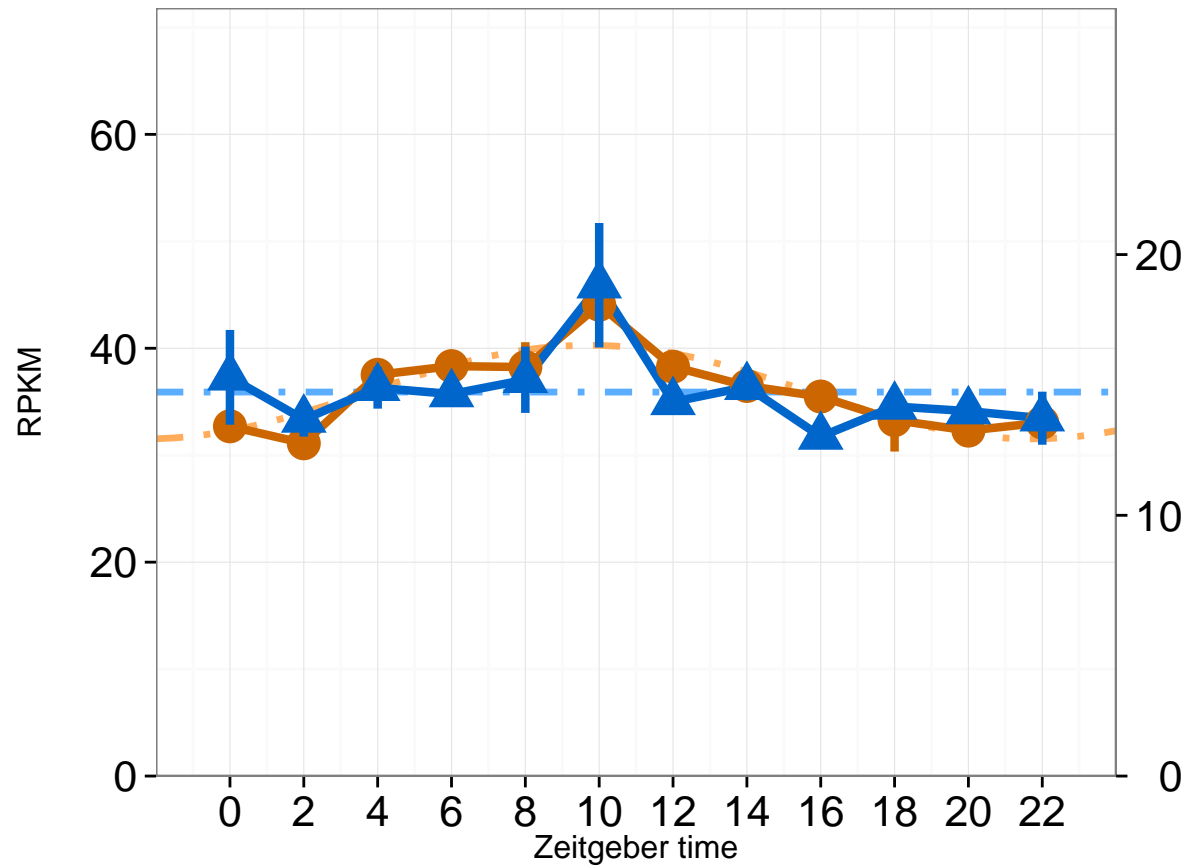

# Kcmf1

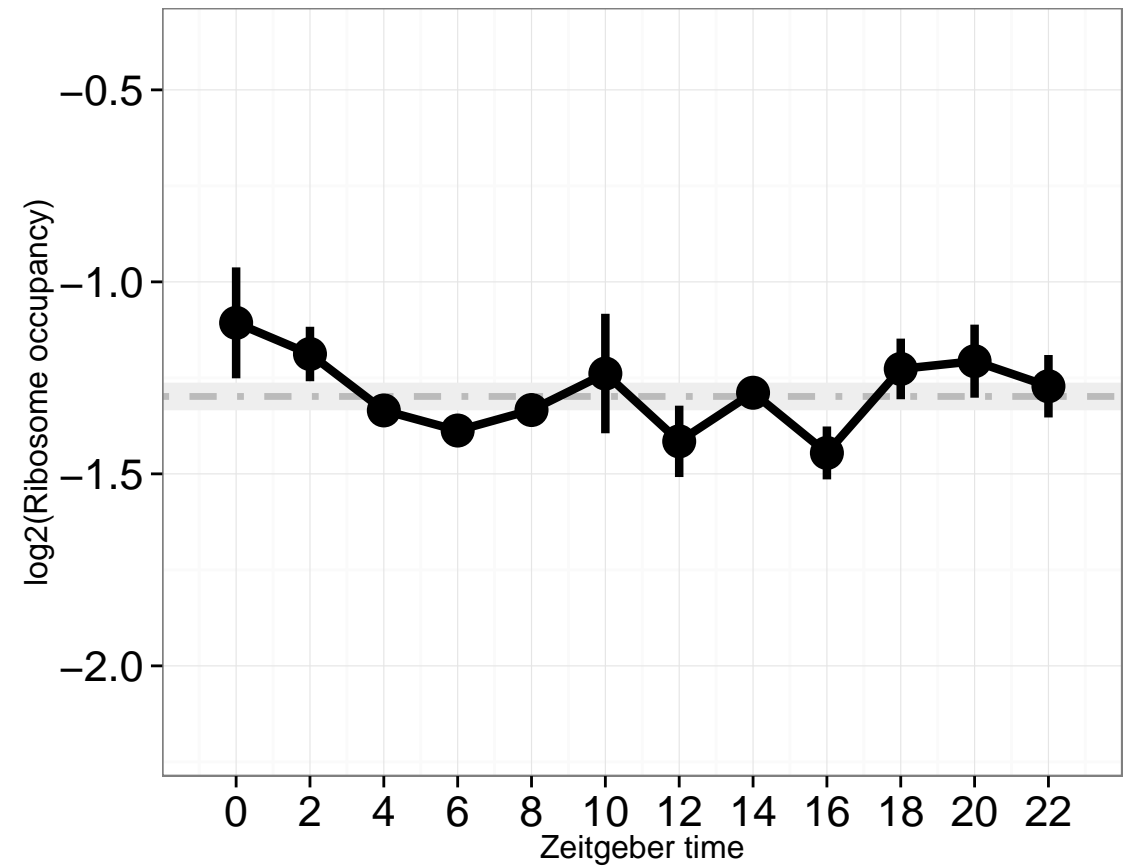

Supplement: SuppDataset_1.zip [file Kcmf1_set_A.pdf › Supplemental Dataset 1/A-mRNA_nonrhyth_translation_nonrhyth/Kcmf1_set_A.pdf]

# Kcna2

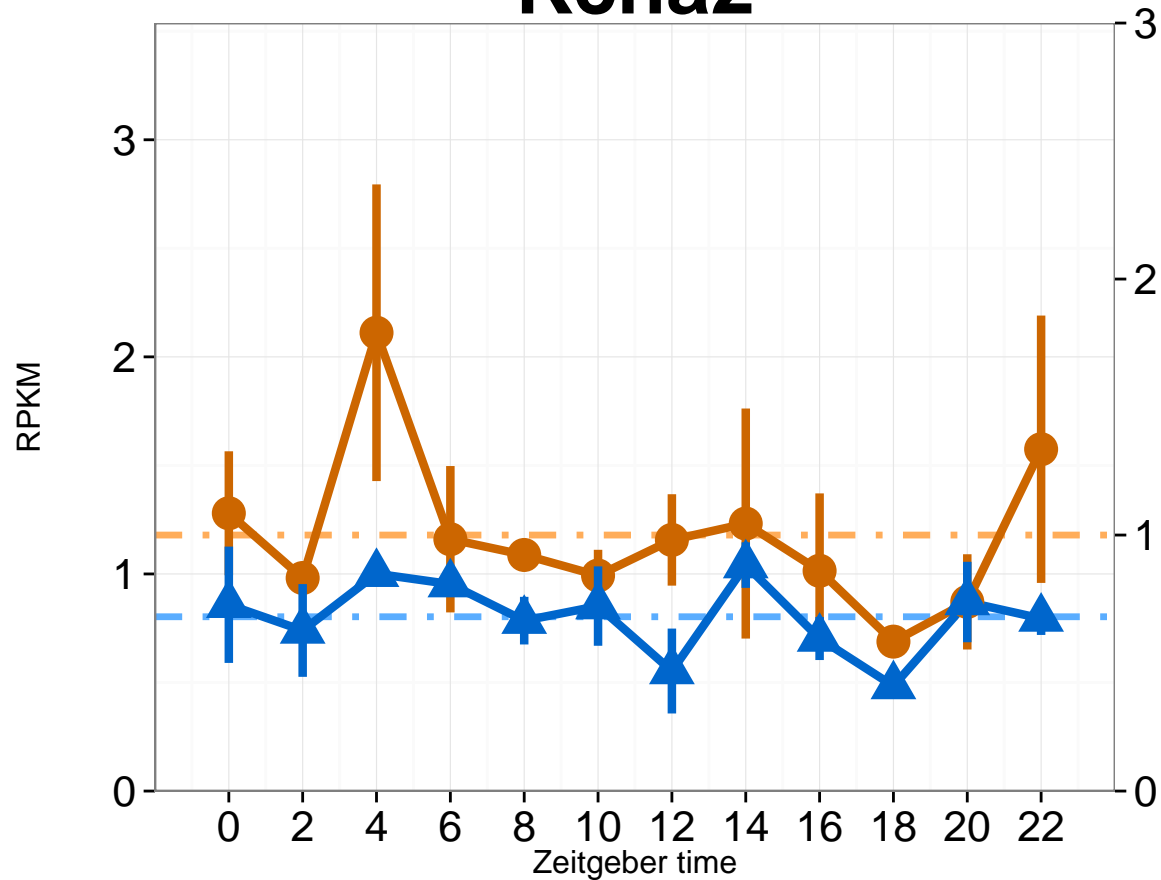

# Kcna2

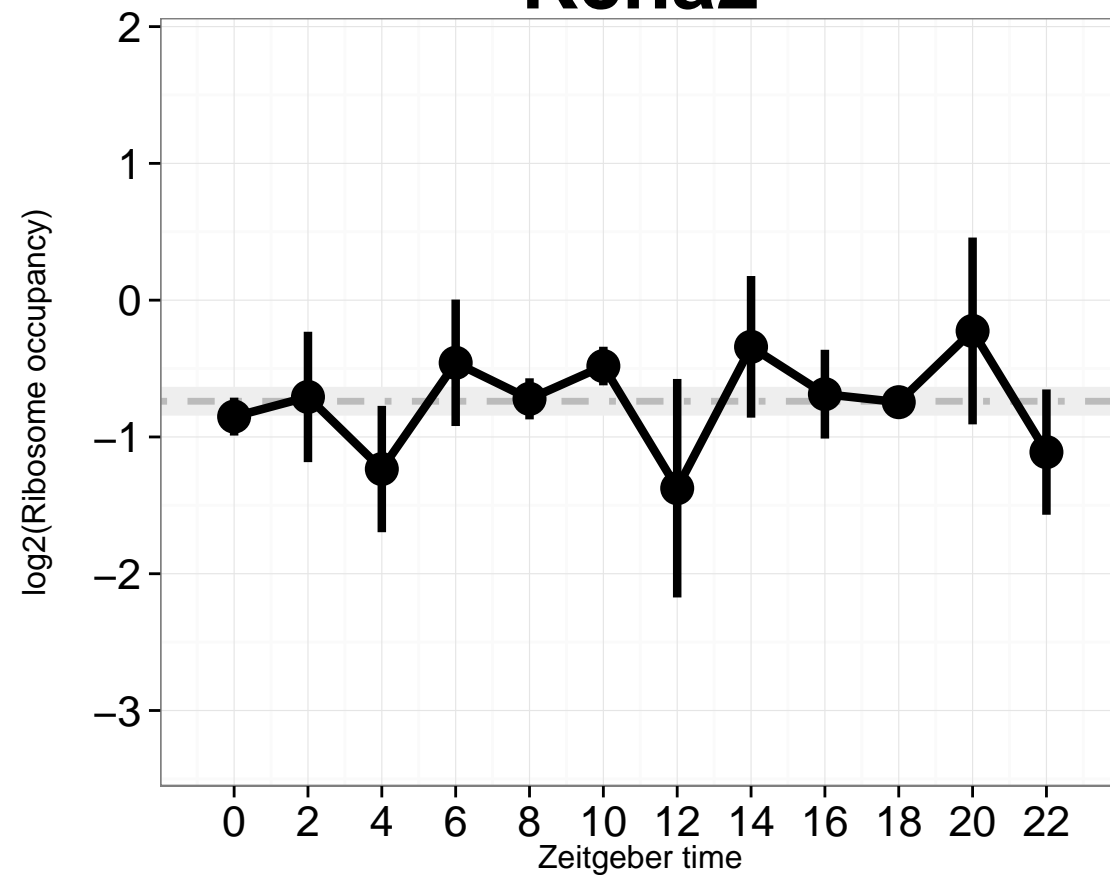

Supplement: SuppDataset_1.zip [file Kcna2_set_A.pdf › Supplemental Dataset 1/A-mRNA_nonrhyth_translation_nonrhyth/Kcna2_set_A.pdf]

## Kcnb1

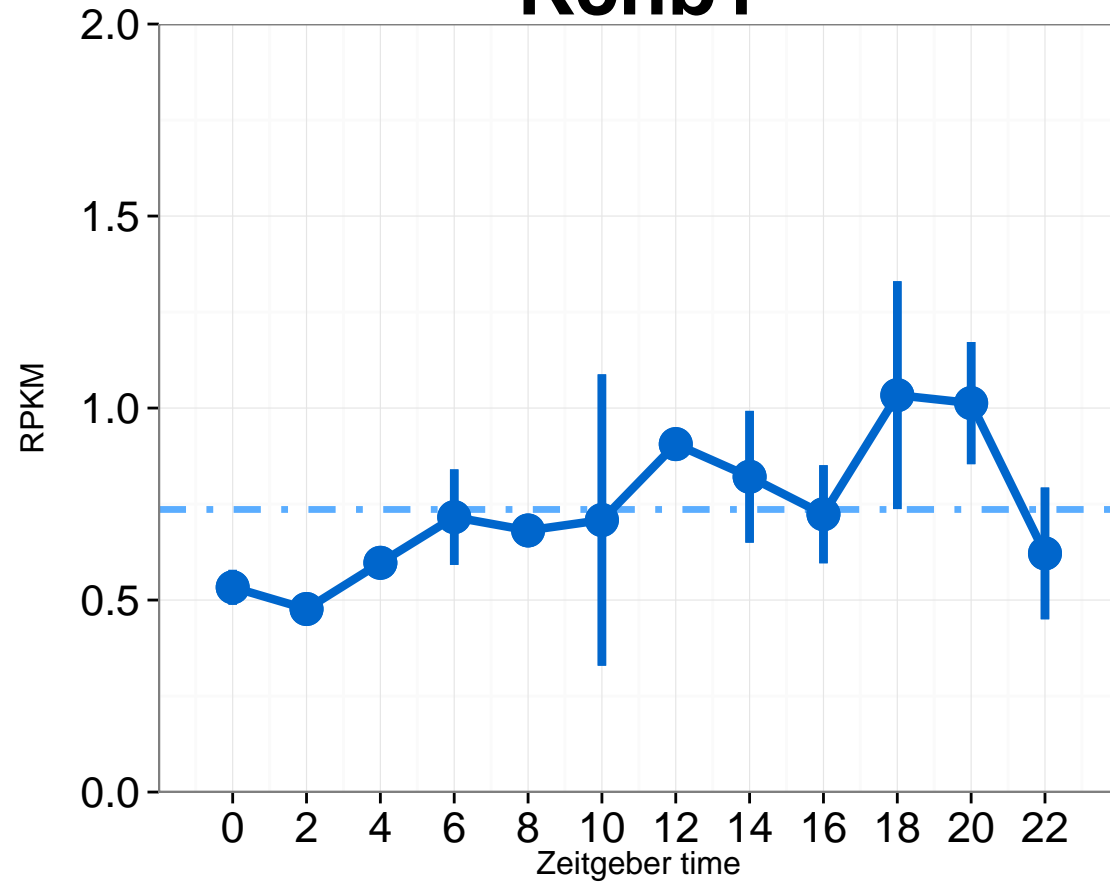

## Kcnb1 log2(Ribosome occupancy

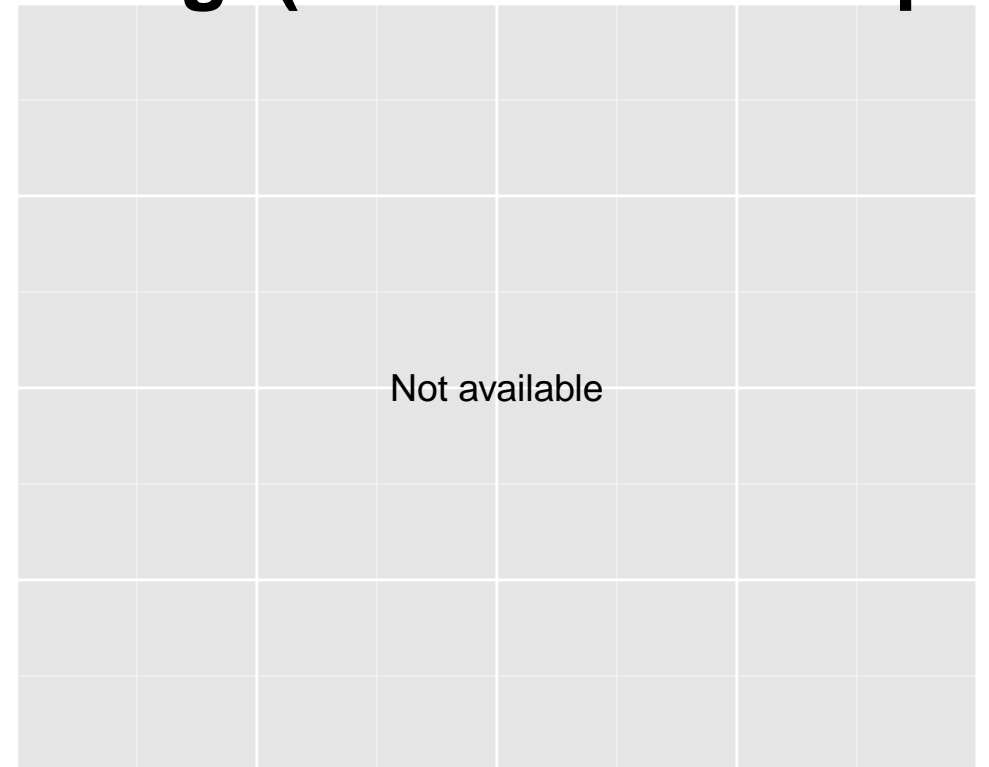

Supplement: SuppDataset_1.zip [file Kcnb1_set_A.pdf › Supplemental Dataset 1/A-mRNA_nonrhyth_translation_nonrhyth/Kcnb1_set_A.pdf]

**Kcnj10 TR**

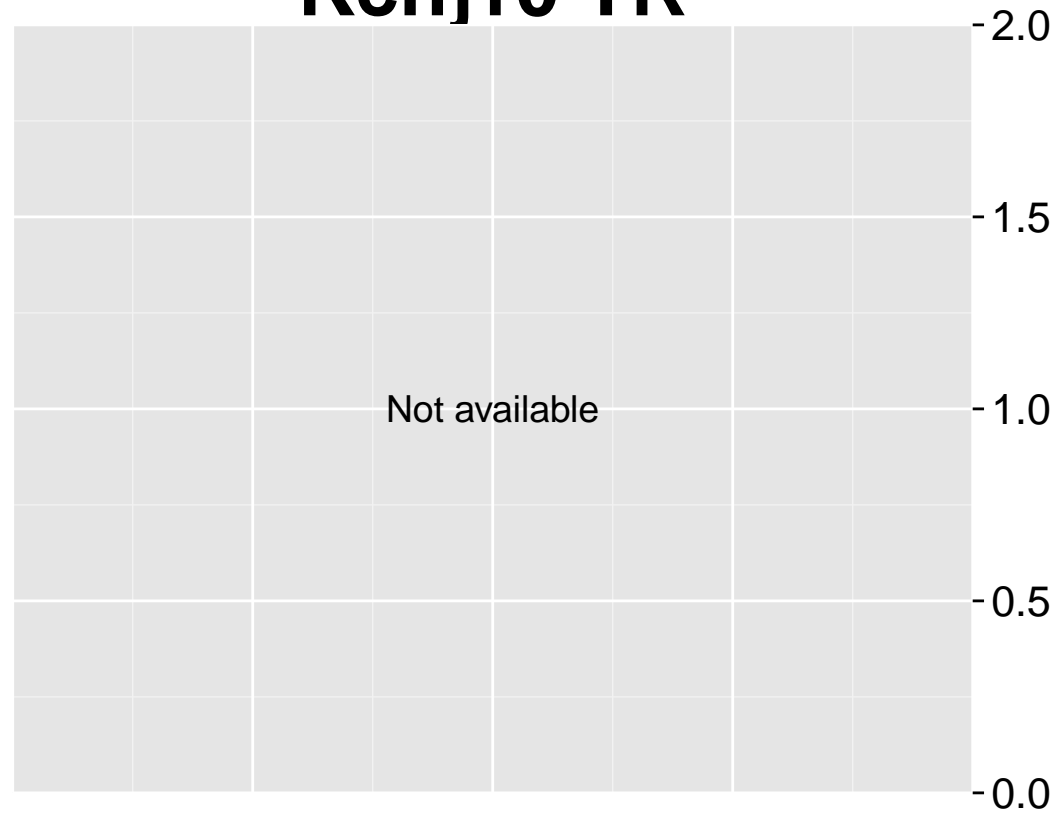

**Kcnj10 log2(Ribosome occupancy**

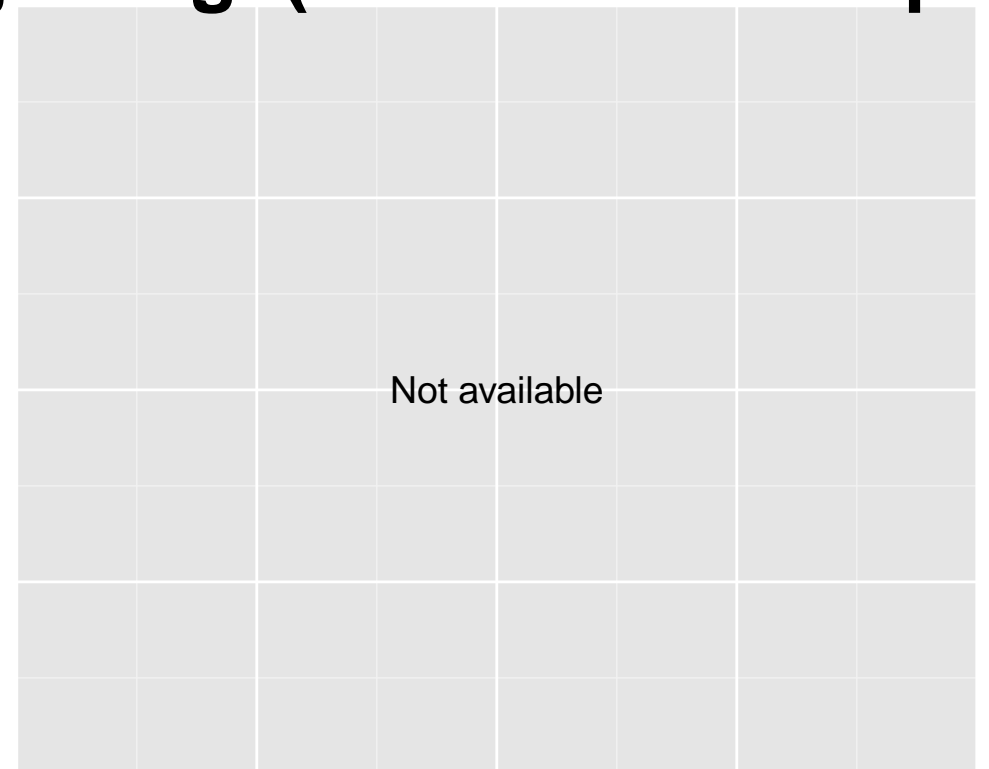

Supplement: SuppDataset_1.zip [file Kcnj10_set_A.pdf › Supplemental Dataset 1/A-mRNA_nonrhyth_translation_nonrhyth/Kcnj10_set_A.pdf]

# Kcnj2

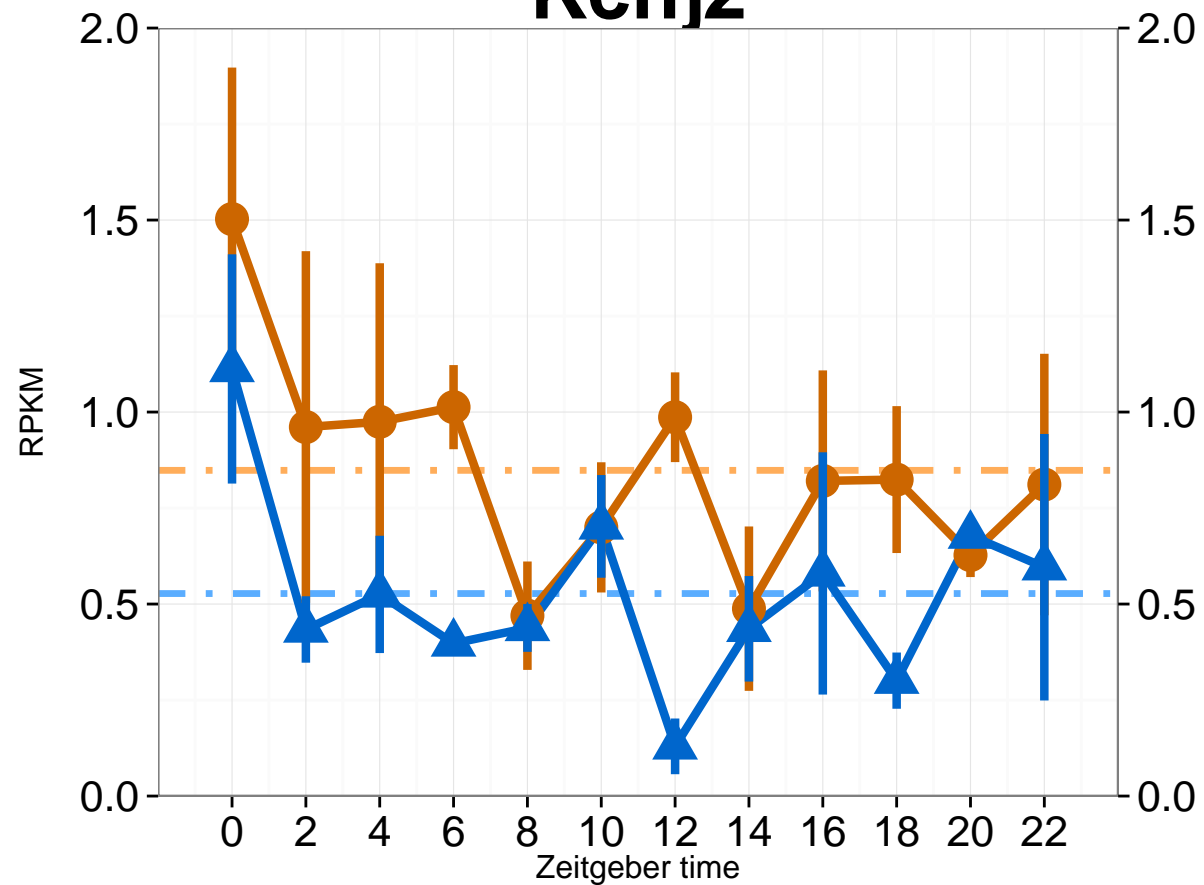

# Kcnj2

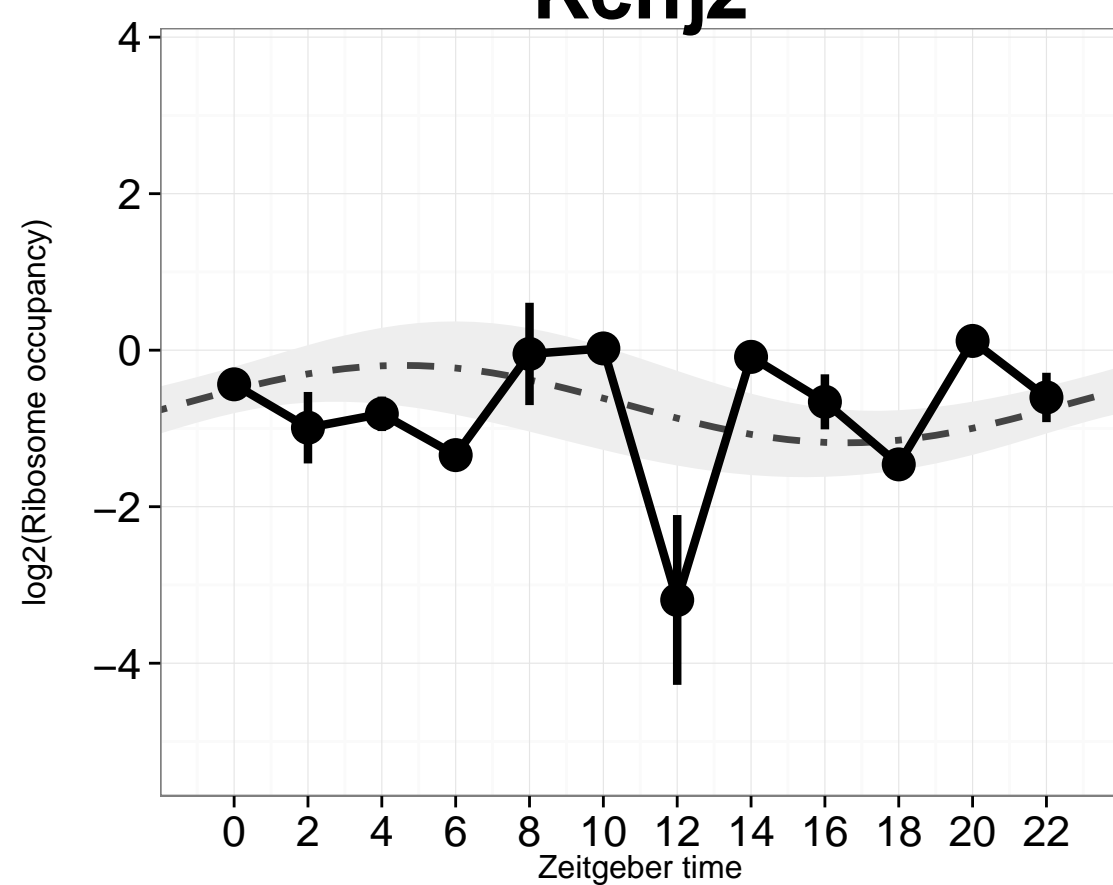

Supplement: SuppDataset_1.zip [file Kcnj2_set_A.pdf › Supplemental Dataset 1/A-mRNA_nonrhyth_translation_nonrhyth/Kcnj2_set_A.pdf]

# Kcnj8

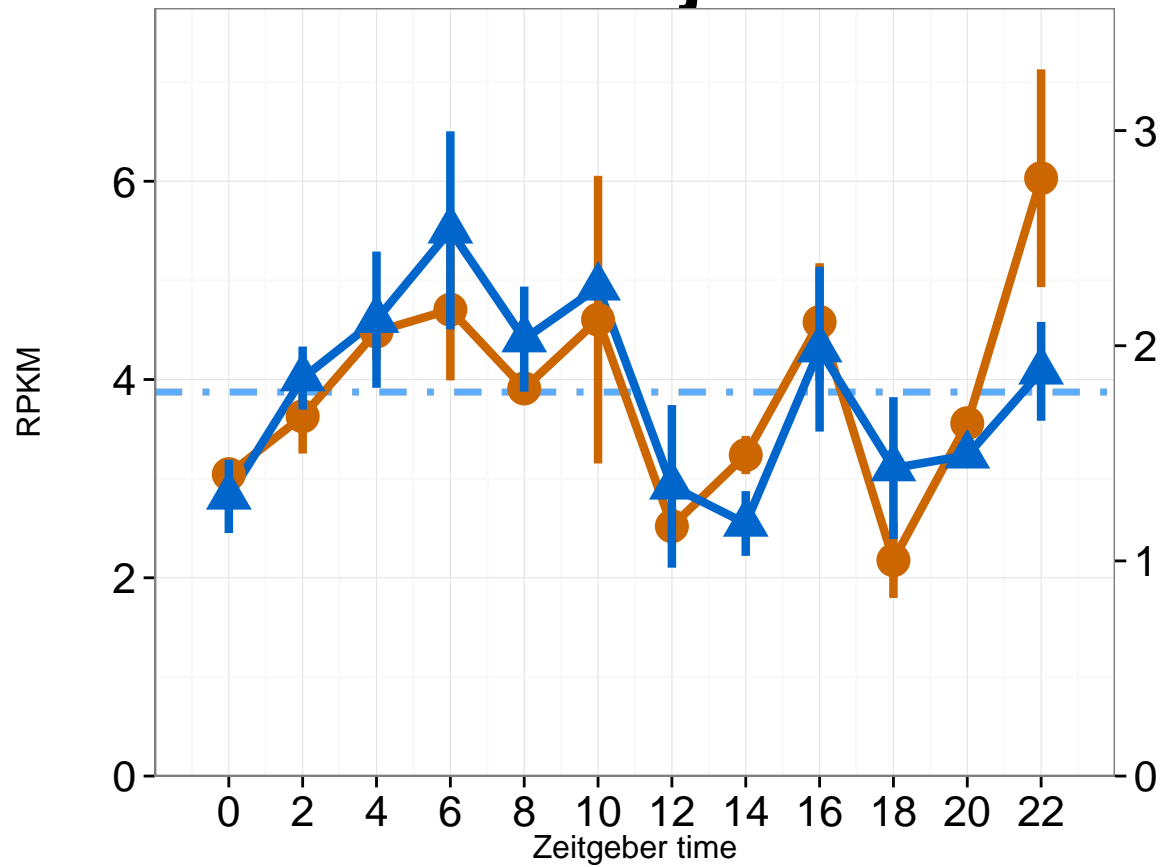

# Kcnj8

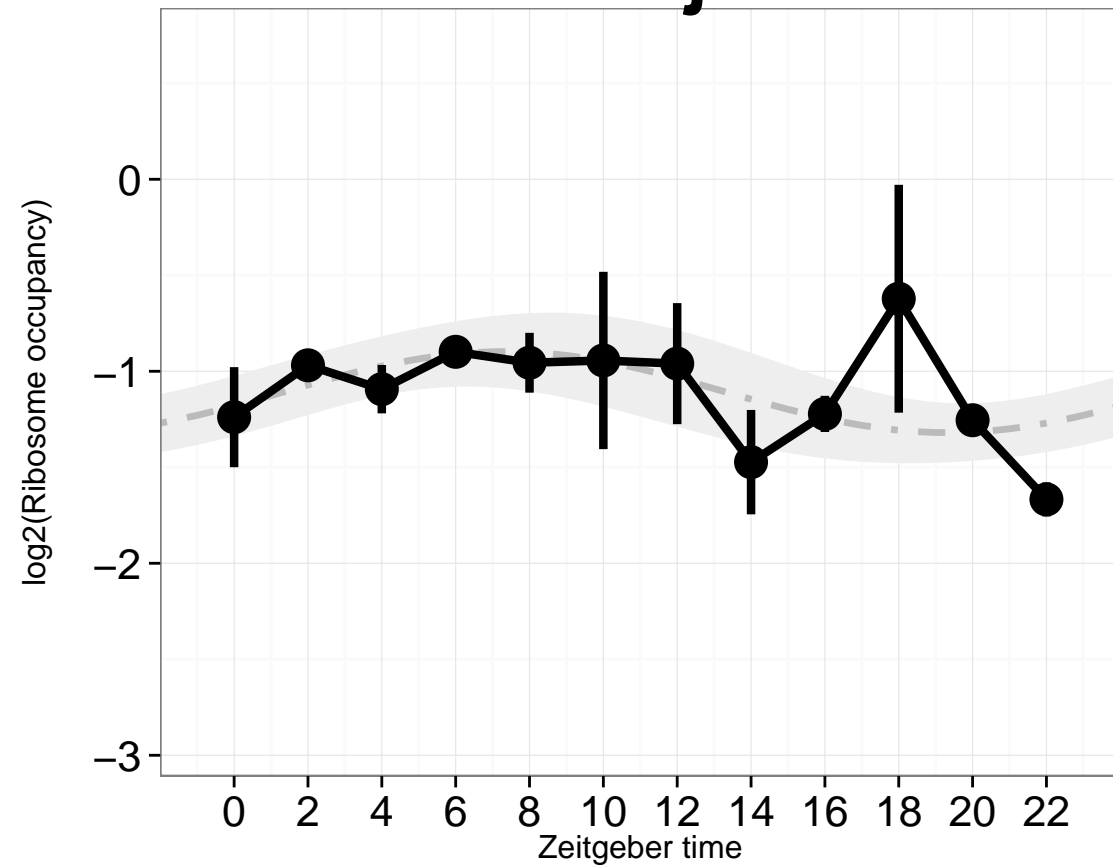

Supplement: SuppDataset_1.zip [file Kcnj8_set_A.pdf › Supplemental Dataset 1/A-mRNA_nonrhyth_translation_nonrhyth/Kcnj8_set_A.pdf]

## Kcnk13

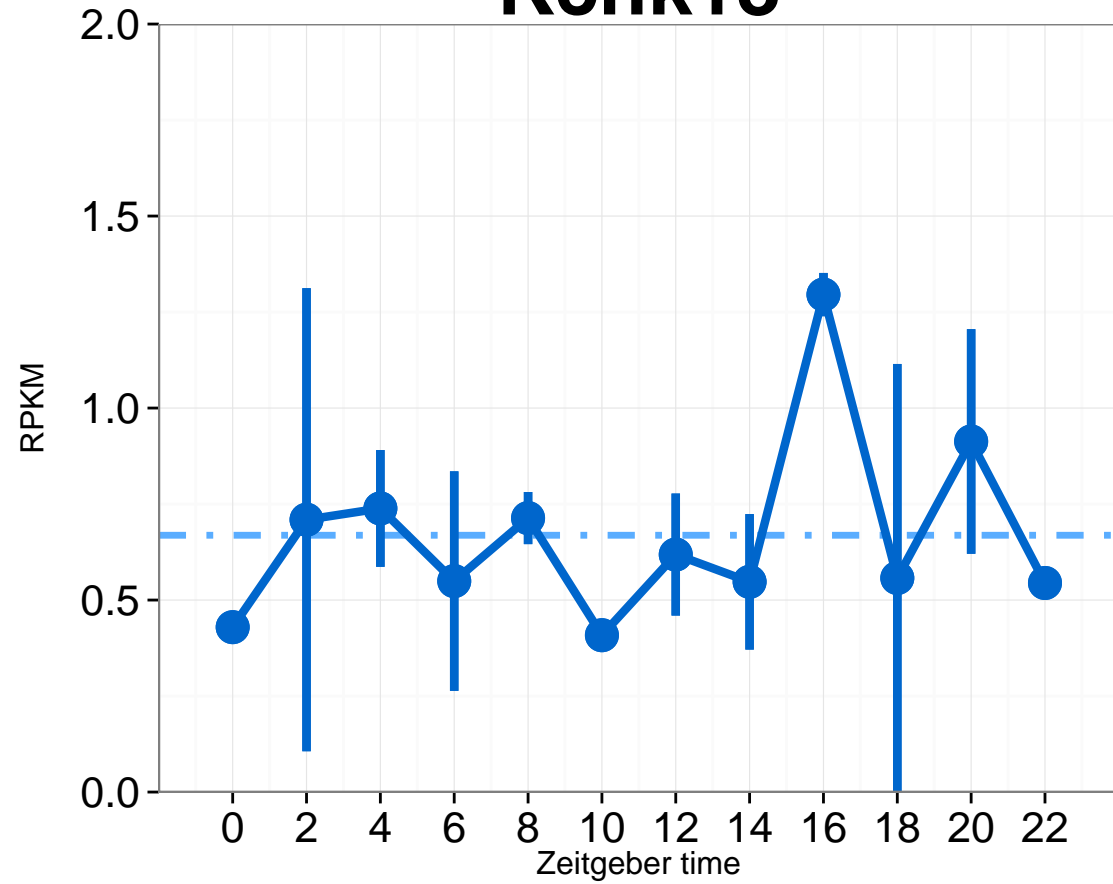

## Kcnk13 log2(Ribosome occupancy)

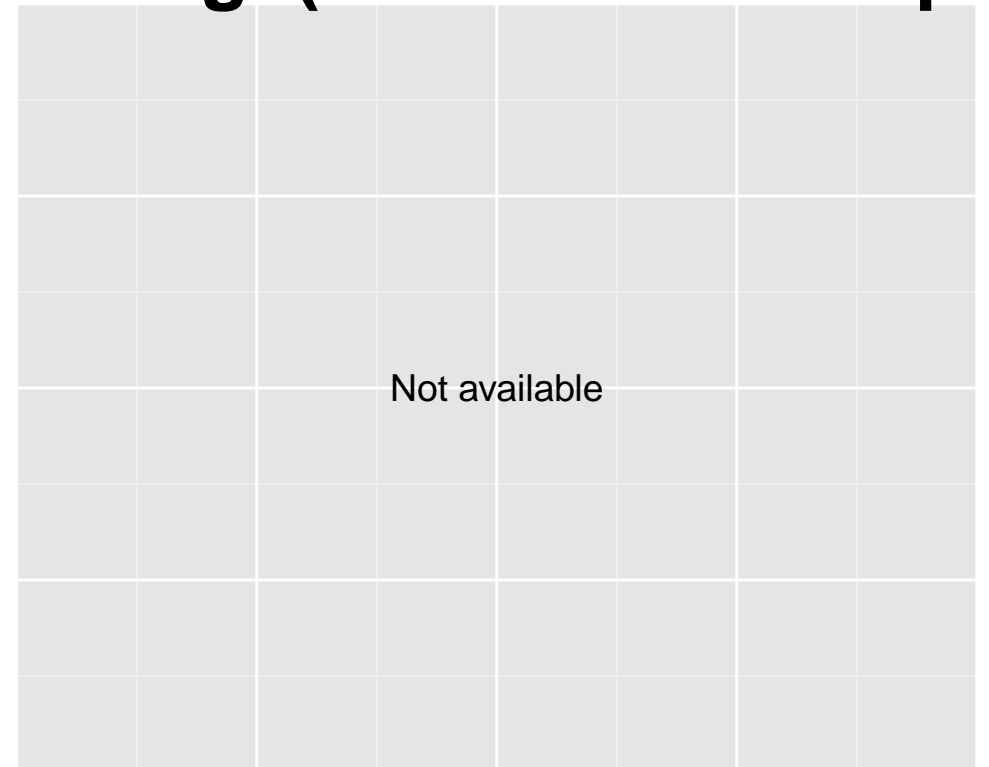

Supplement: SuppDataset_1.zip [file Kcnk13_set_A.pdf › Supplemental Dataset 1/A-mRNA_nonrhyth_translation_nonrhyth/Kcnk13_set_A.pdf]

# Kcnk6

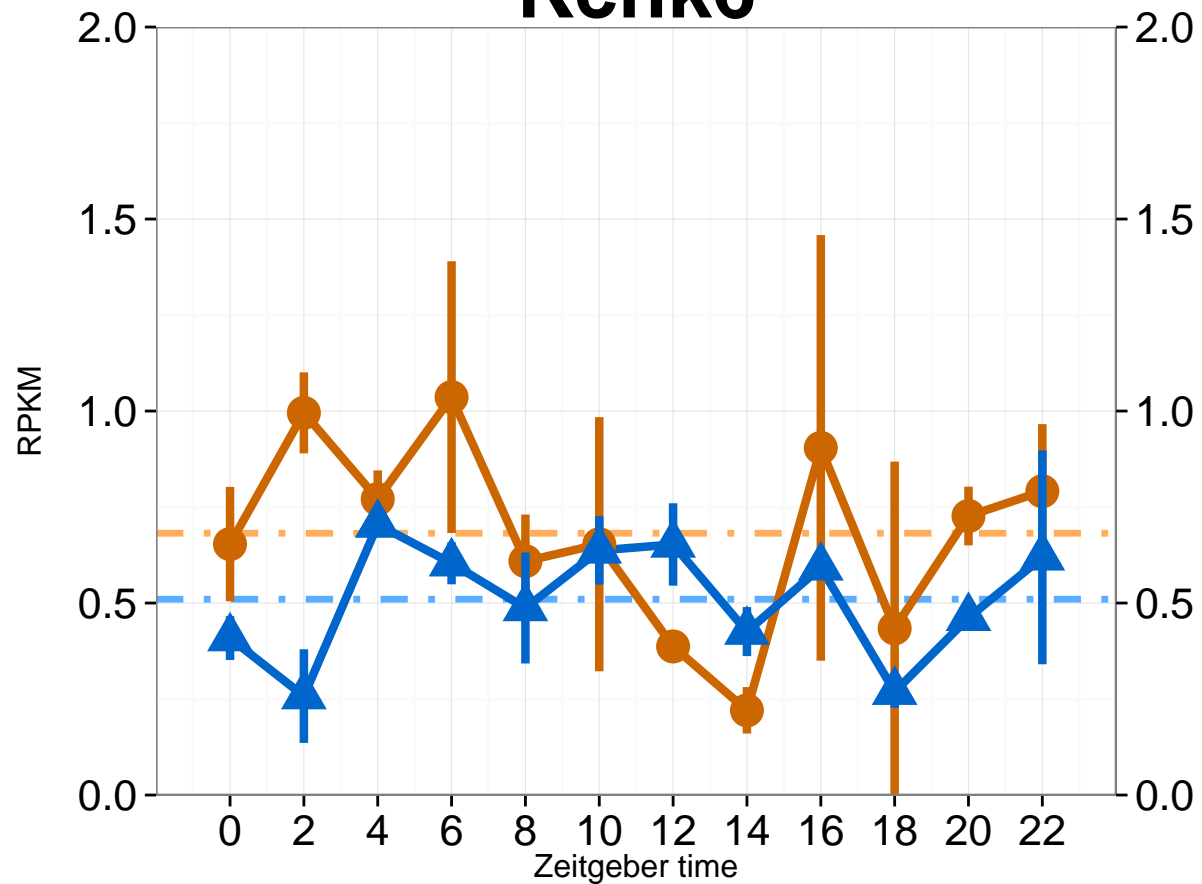

# Kcnk6

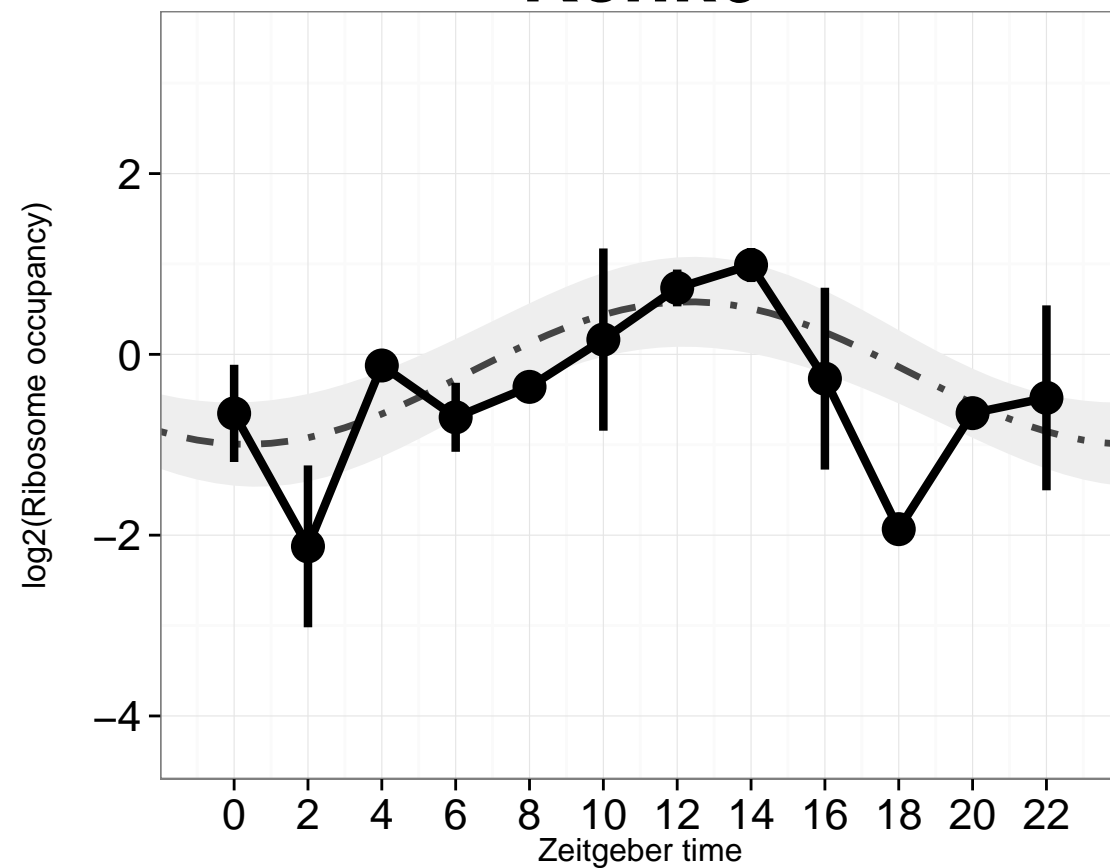

Supplement: SuppDataset_1.zip [file Kcnk6_set_A.pdf › Supplemental Dataset 1/A-mRNA_nonrhyth_translation_nonrhyth/Kcnk6_set_A.pdf]

# Kcnn2

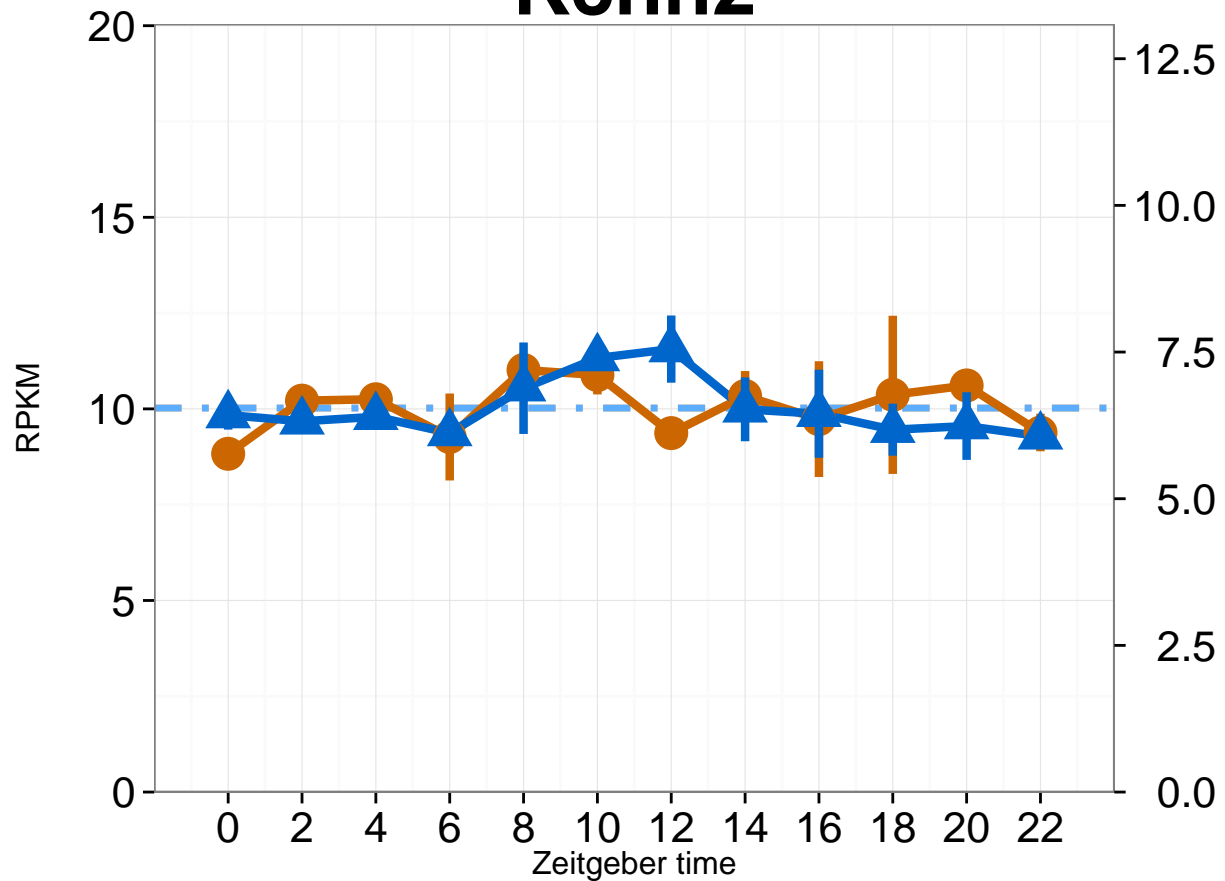

# Kcnn2

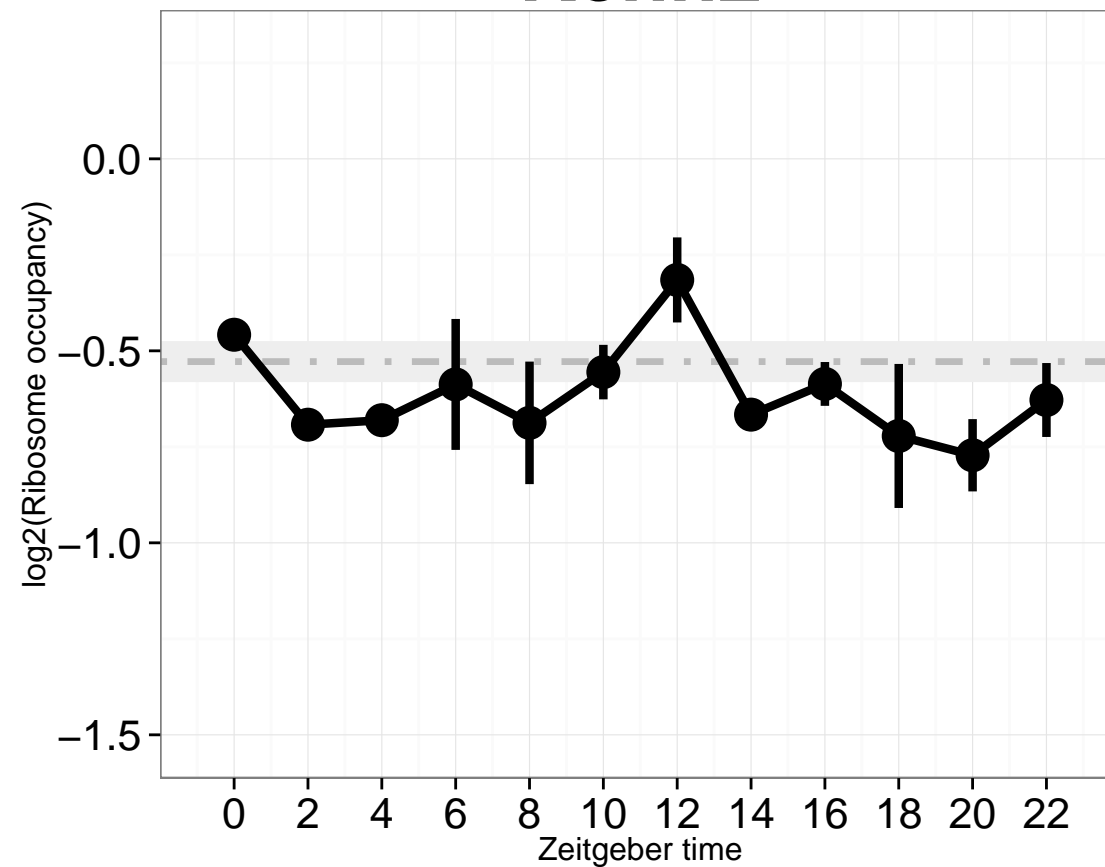

Supplement: SuppDataset_1.zip [file Kcnn2_set_A.pdf › Supplemental Dataset 1/A-mRNA_nonrhyth_translation_nonrhyth/Kcnn2_set_A.pdf]

# Kcnq1

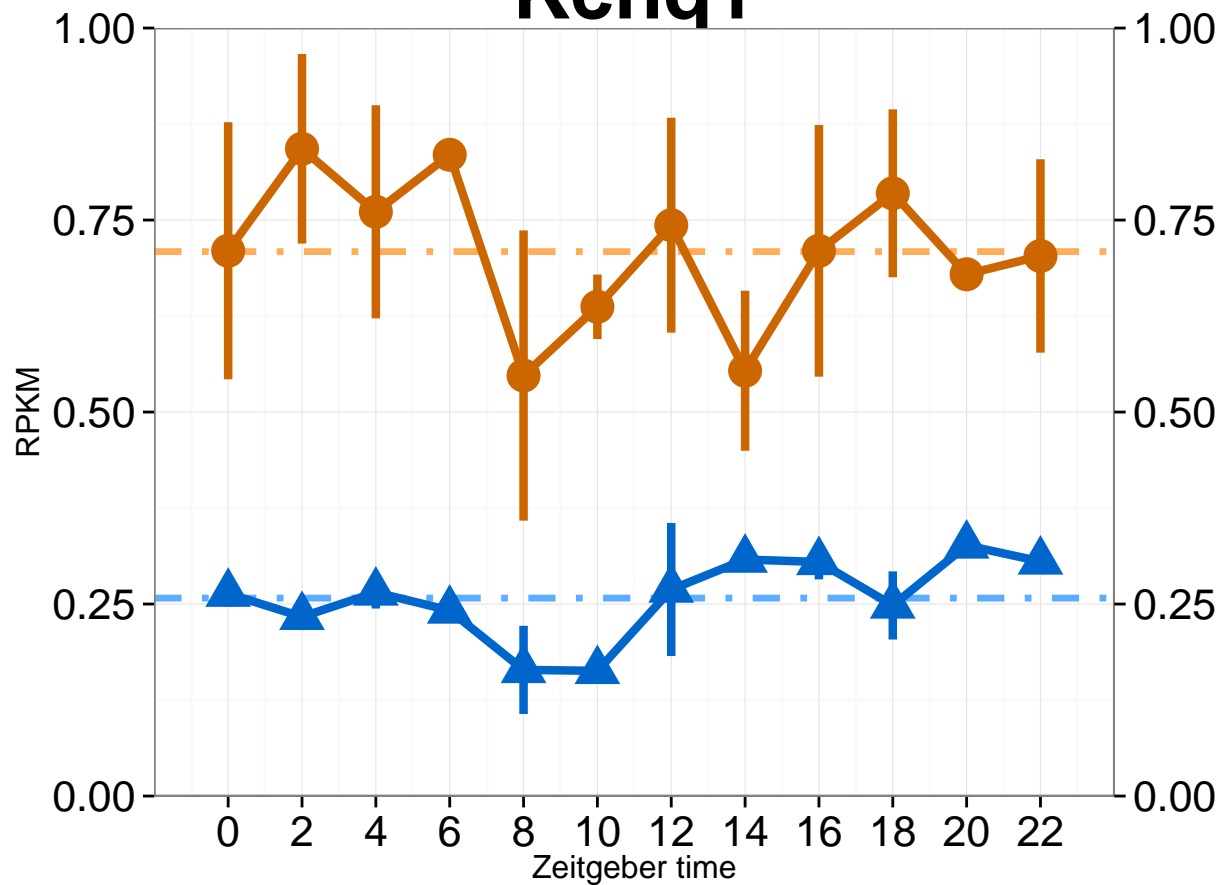

# Kcnq1

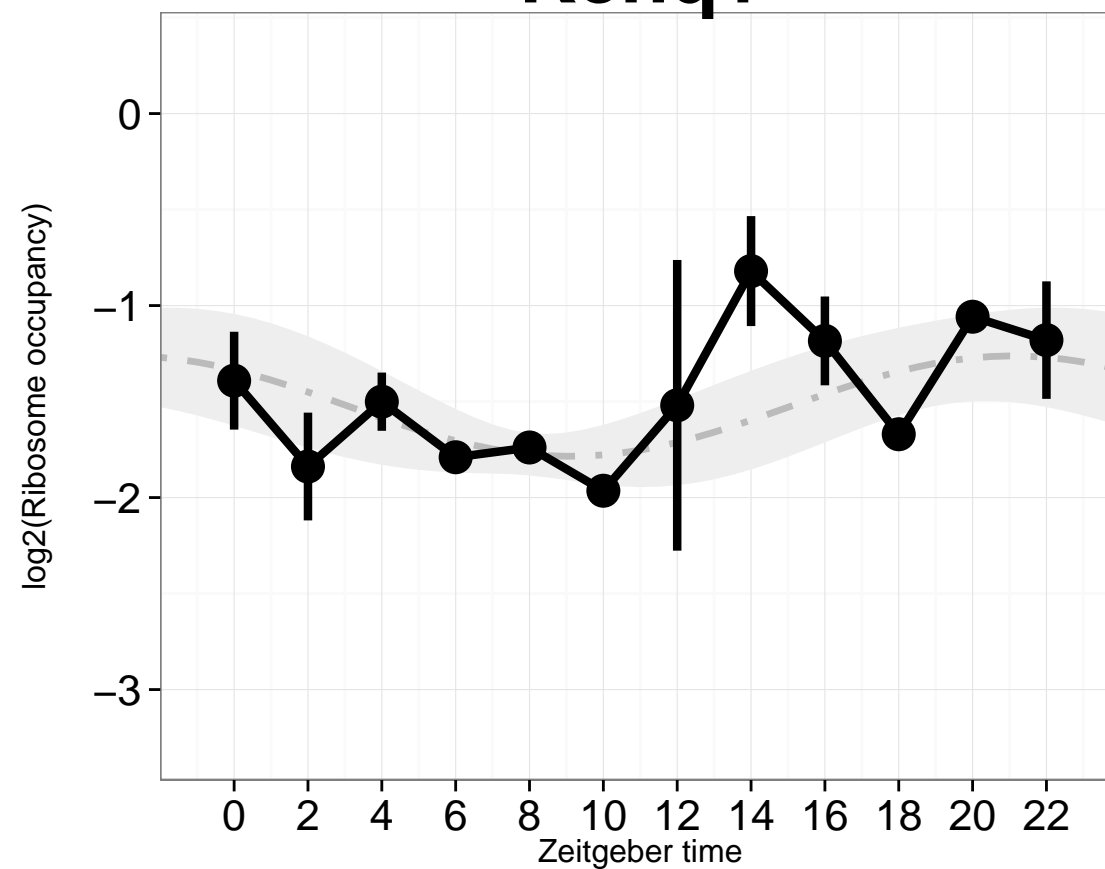

Supplement: SuppDataset_1.zip [file Kcnq1_set_A.pdf › Supplemental Dataset 1/A-mRNA_nonrhyth_translation_nonrhyth/Kcnq1_set_A.pdf]

## Kcp

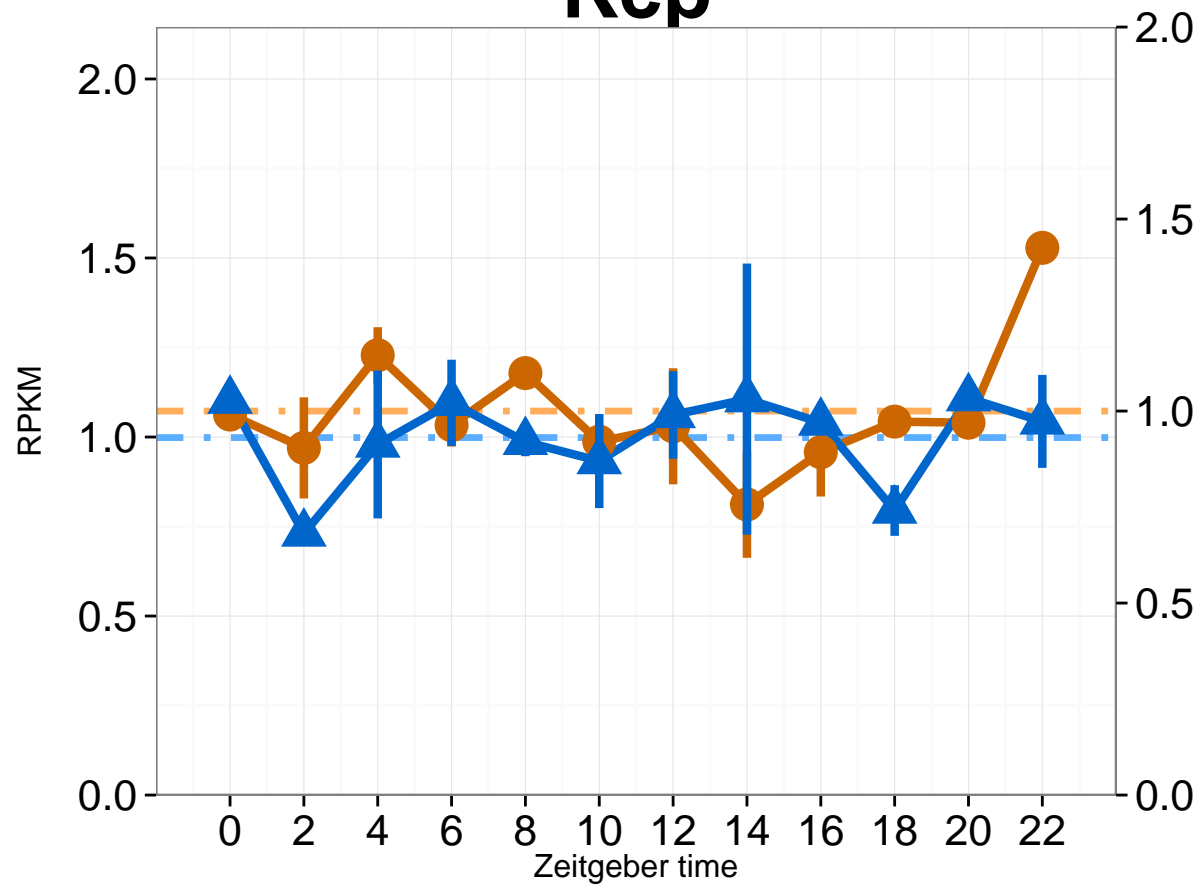

## Kcp

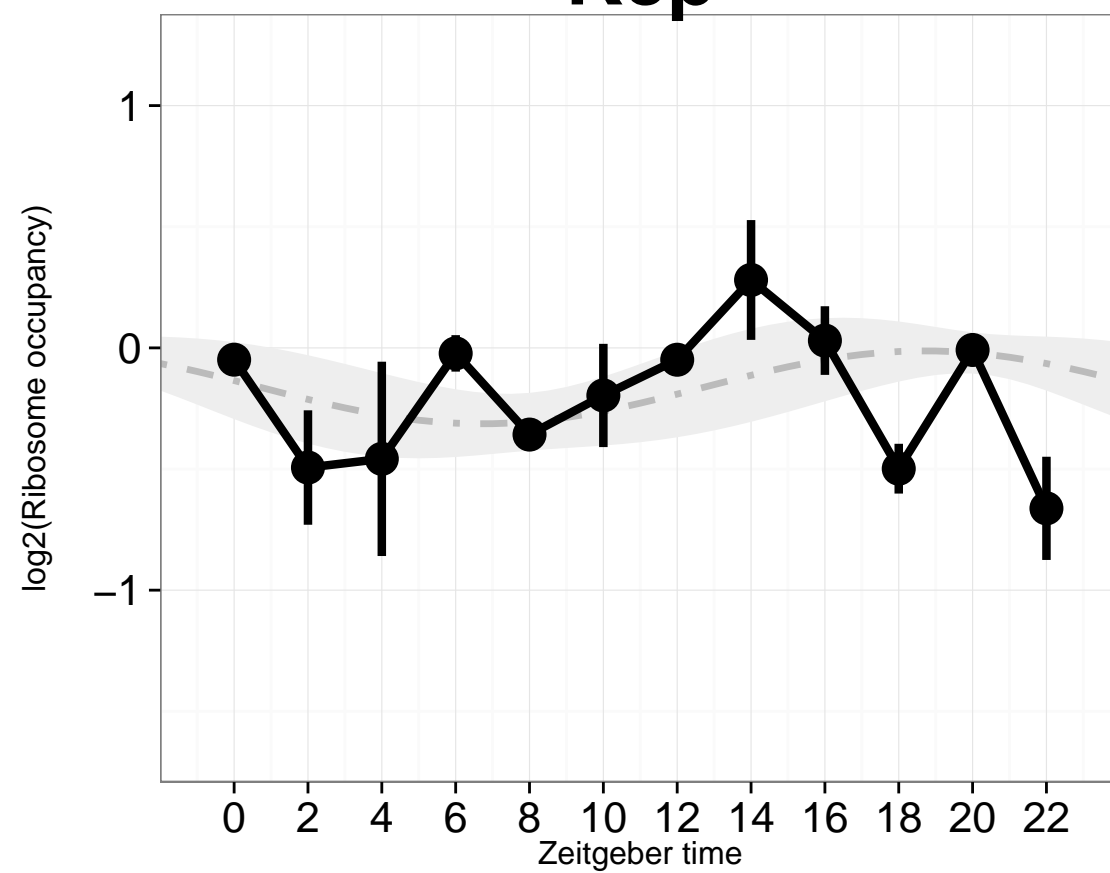

Supplement: SuppDataset_1.zip [file Kcp_set_A.pdf › Supplemental Dataset 1/A-mRNA_nonrhyth_translation_nonrhyth/Kcp_set_A.pdf]

## Kctd10

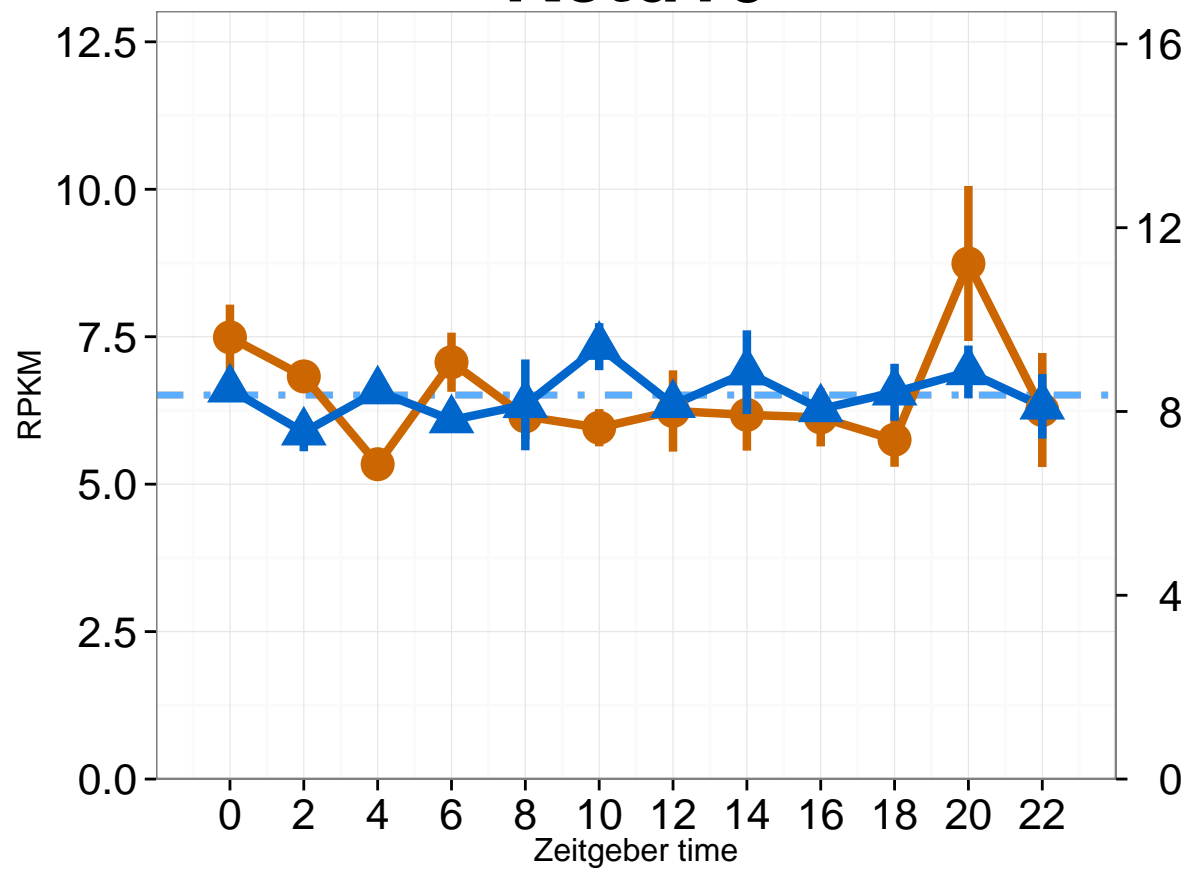

## Kctd10

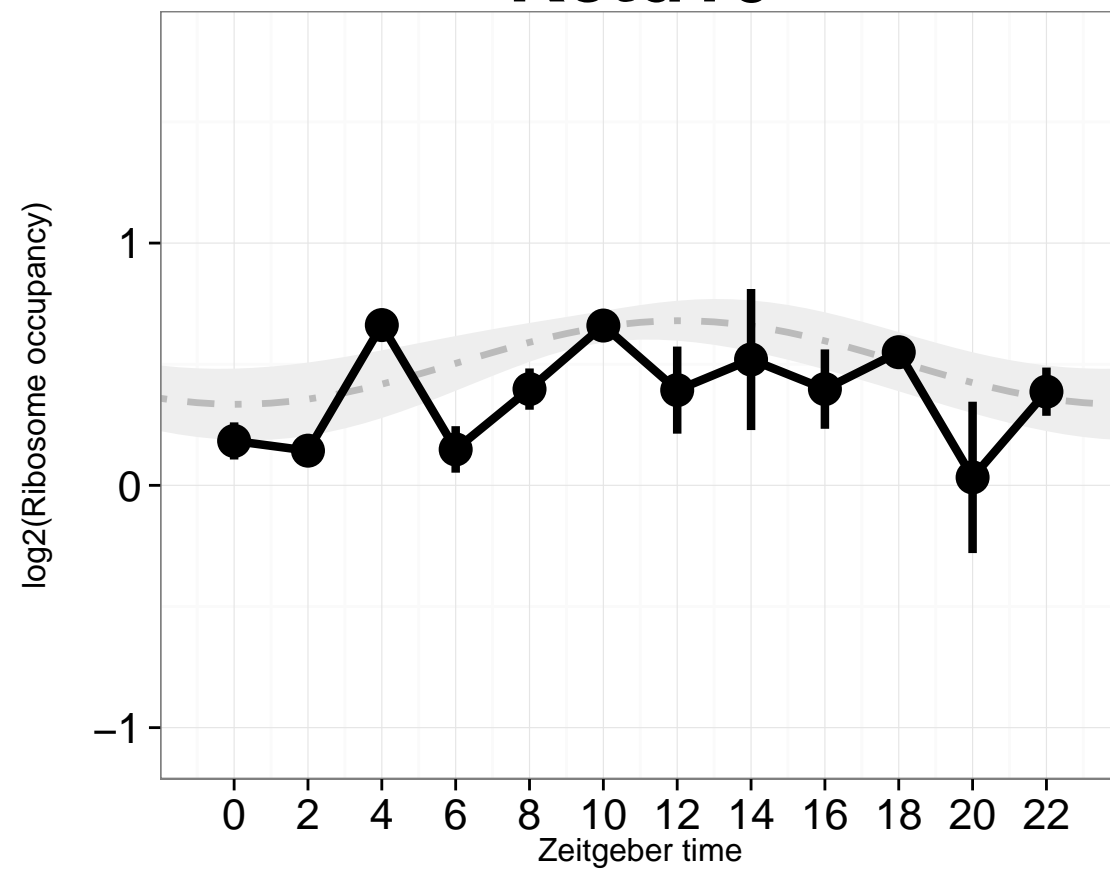

Supplement: SuppDataset_1.zip [file Kctd10_set_A.pdf › Supplemental Dataset 1/A-mRNA_nonrhyth_translation_nonrhyth/Kctd10_set_A.pdf]

## Kctd11

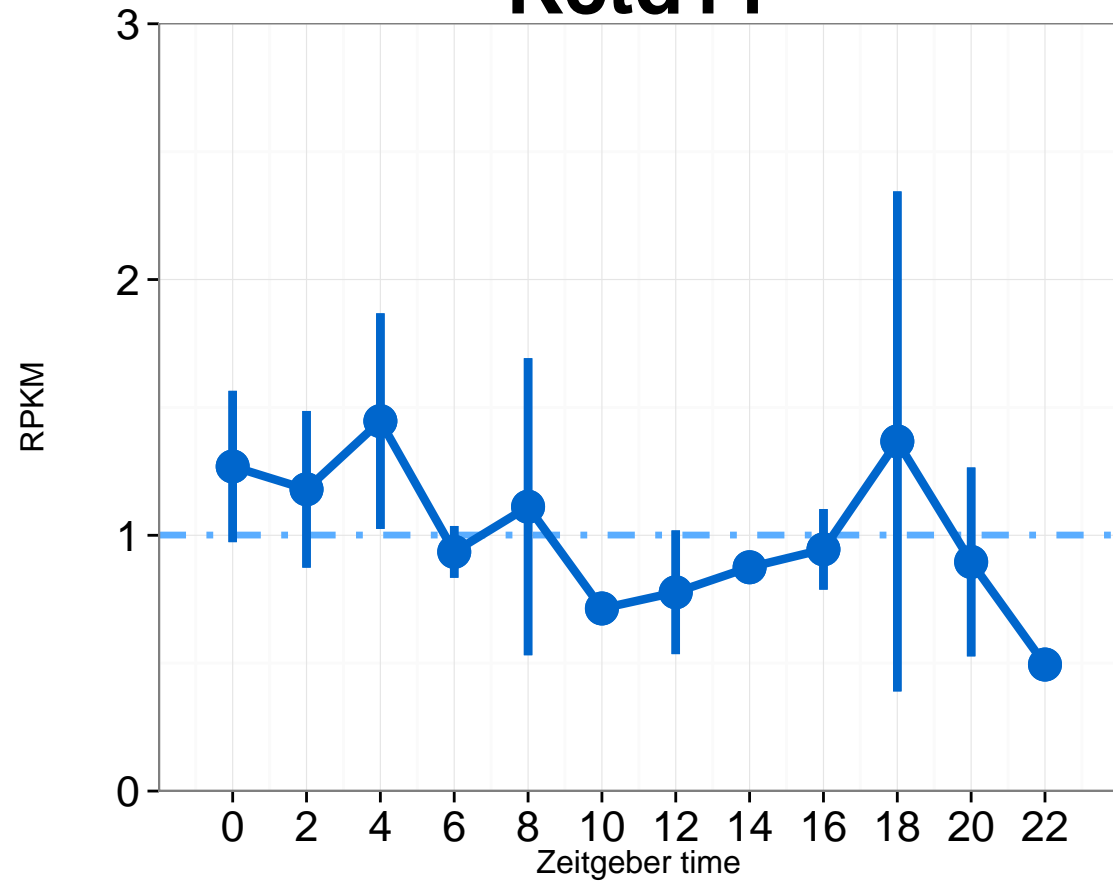

## Kctd11 log2(Ribosome occupancy

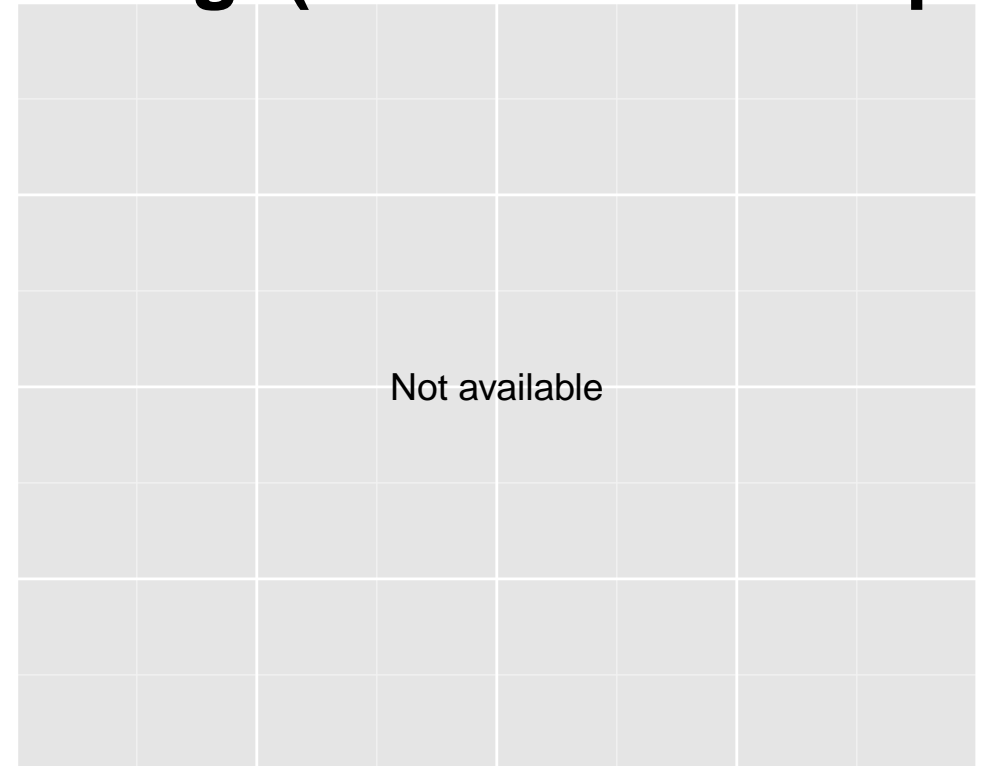

Supplement: SuppDataset_1.zip [file Kctd11_set_A.pdf › Supplemental Dataset 1/A-mRNA_nonrhyth_translation_nonrhyth/Kctd11_set_A.pdf]

# Kctd12b

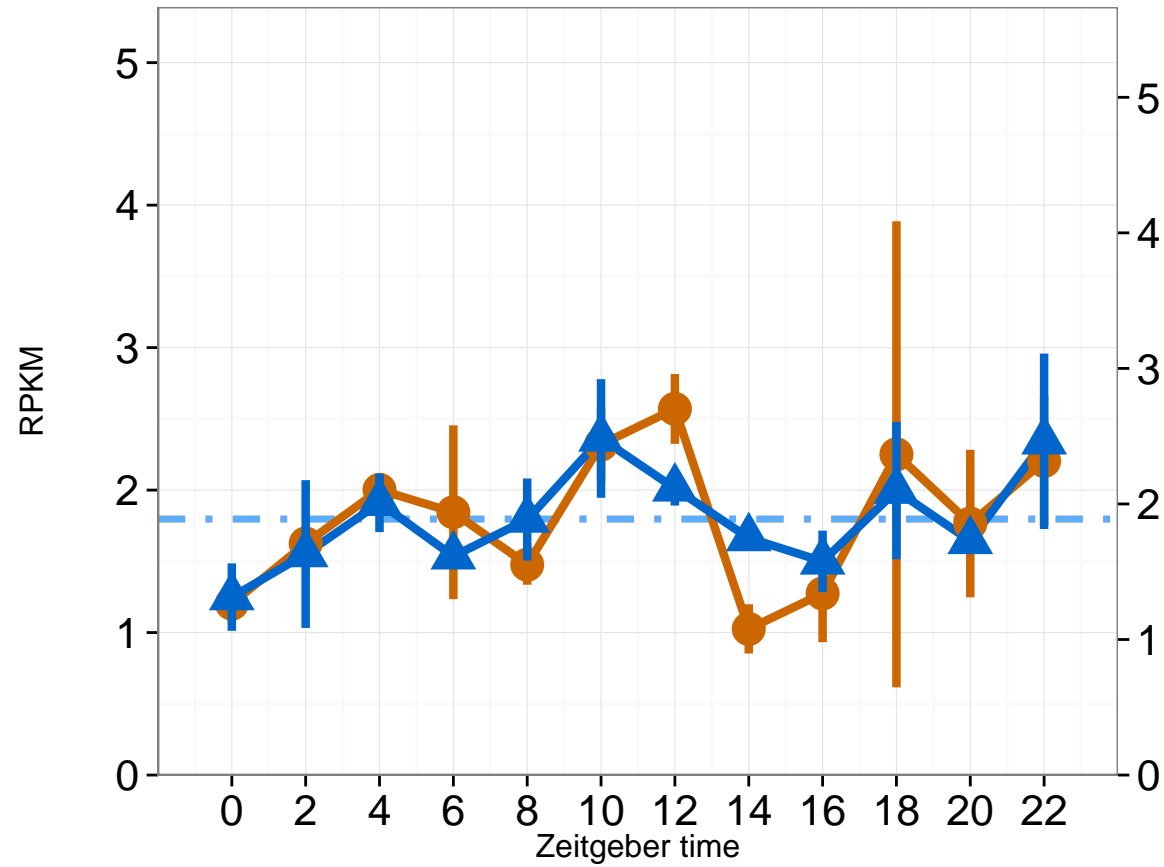

# Kctd12b

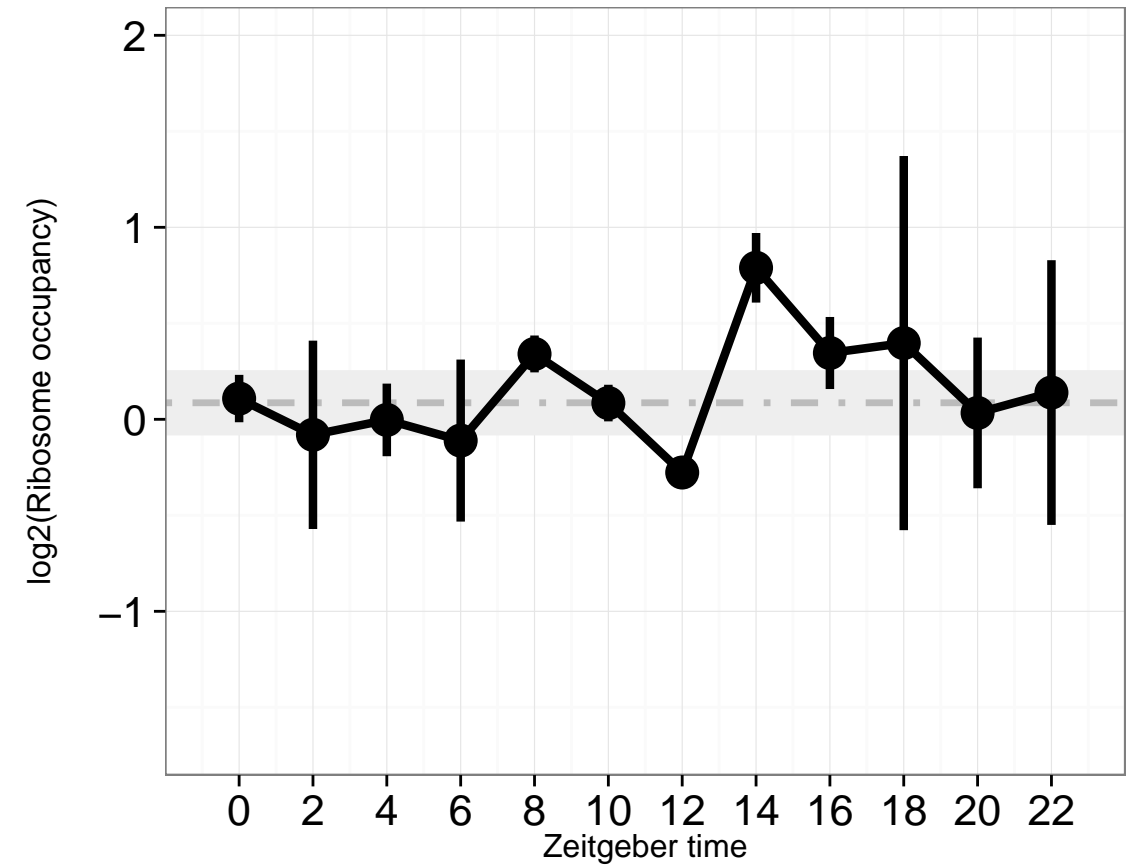

Supplement: SuppDataset_1.zip [file Kctd12b_set_A.pdf › Supplemental Dataset 1/A-mRNA_nonrhyth_translation_nonrhyth/Kctd12b_set_A.pdf]

## Kctd13

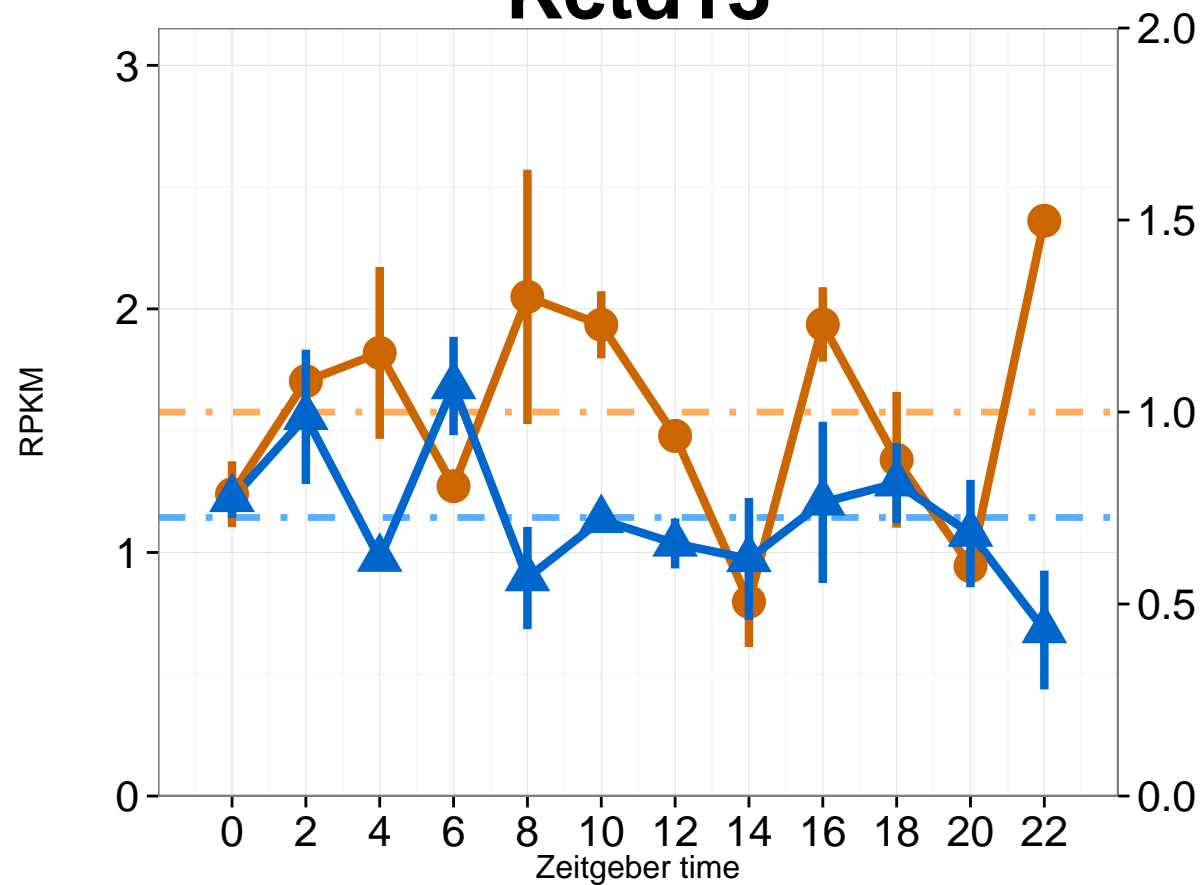

## Kctd13

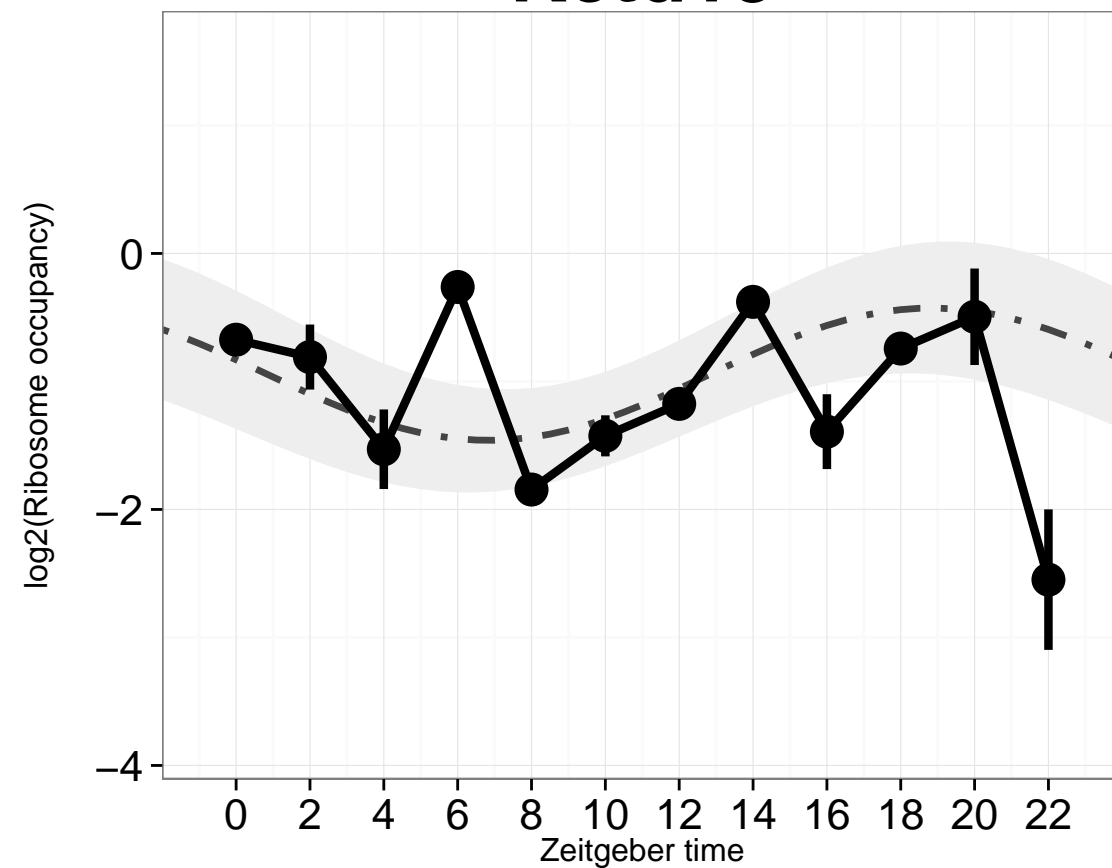

Supplement: SuppDataset_1.zip [file Kctd13_set_A.pdf › Supplemental Dataset 1/A-mRNA_nonrhyth_translation_nonrhyth/Kctd13_set_A.pdf]

## Kctd15

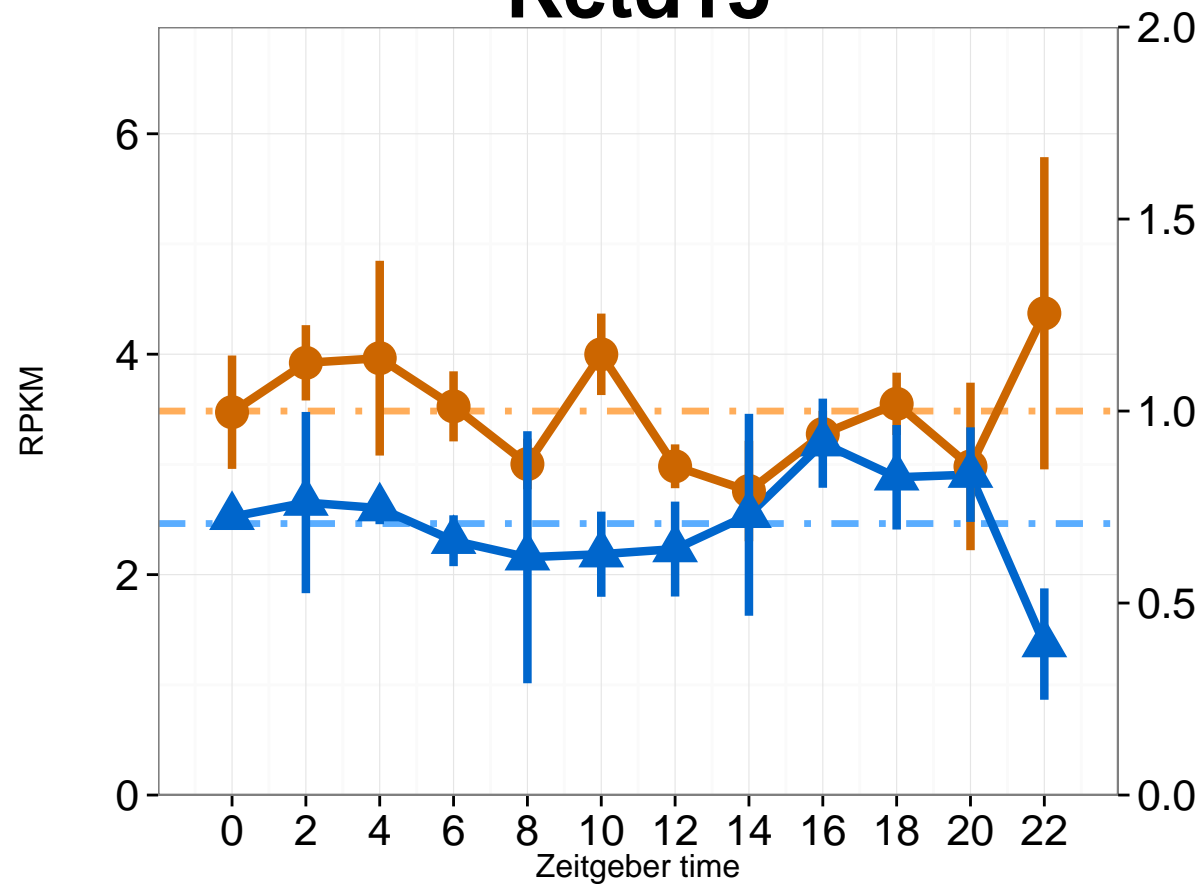

## Kctd15

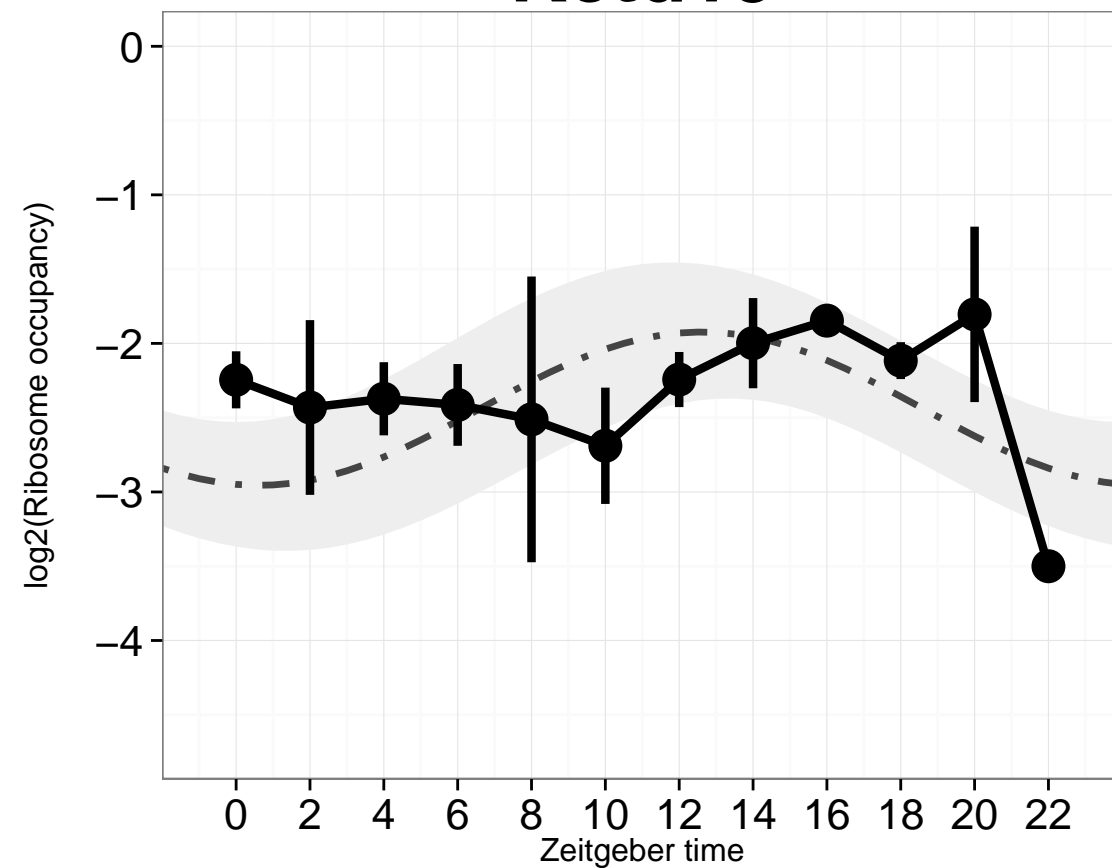

Supplement: SuppDataset_1.zip [file Kctd15_set_A.pdf › Supplemental Dataset 1/A-mRNA_nonrhyth_translation_nonrhyth/Kctd15_set_A.pdf]

## Kctd17

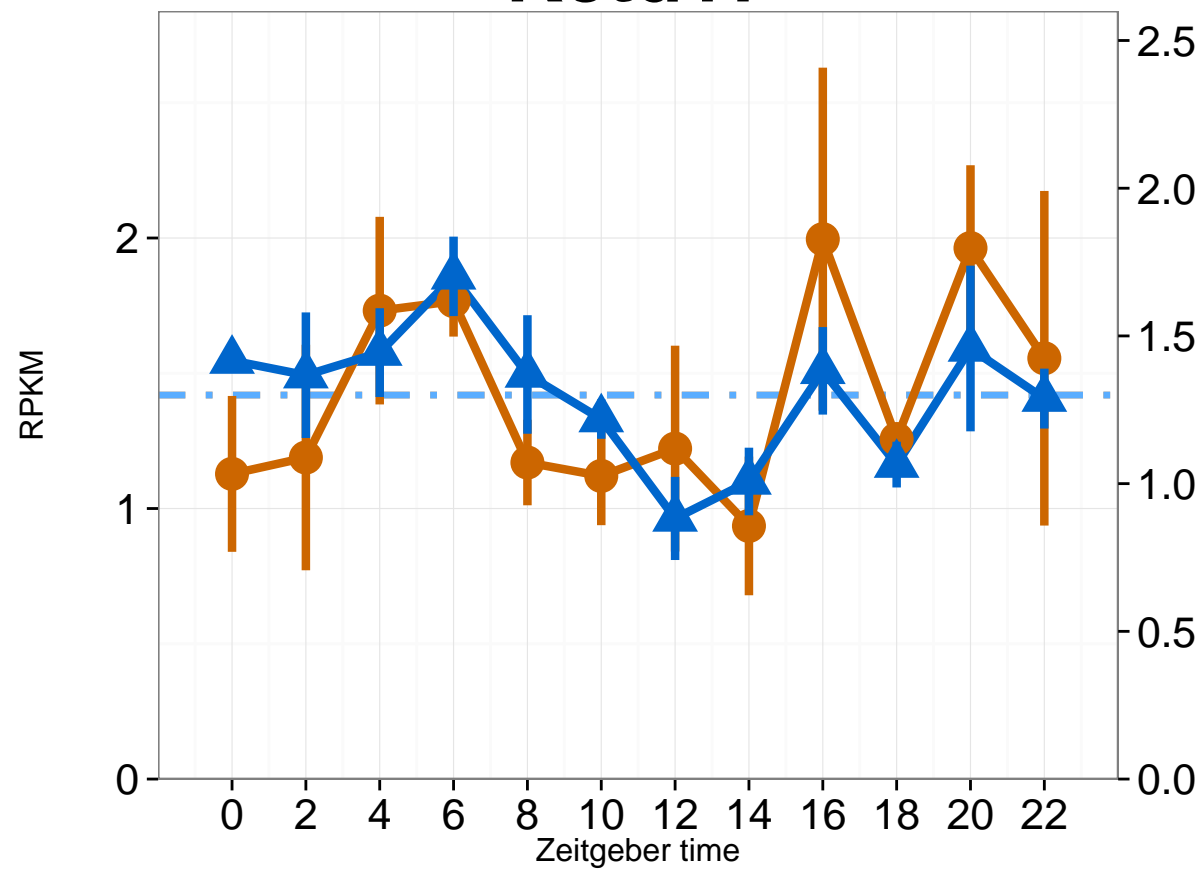

## Kctd17

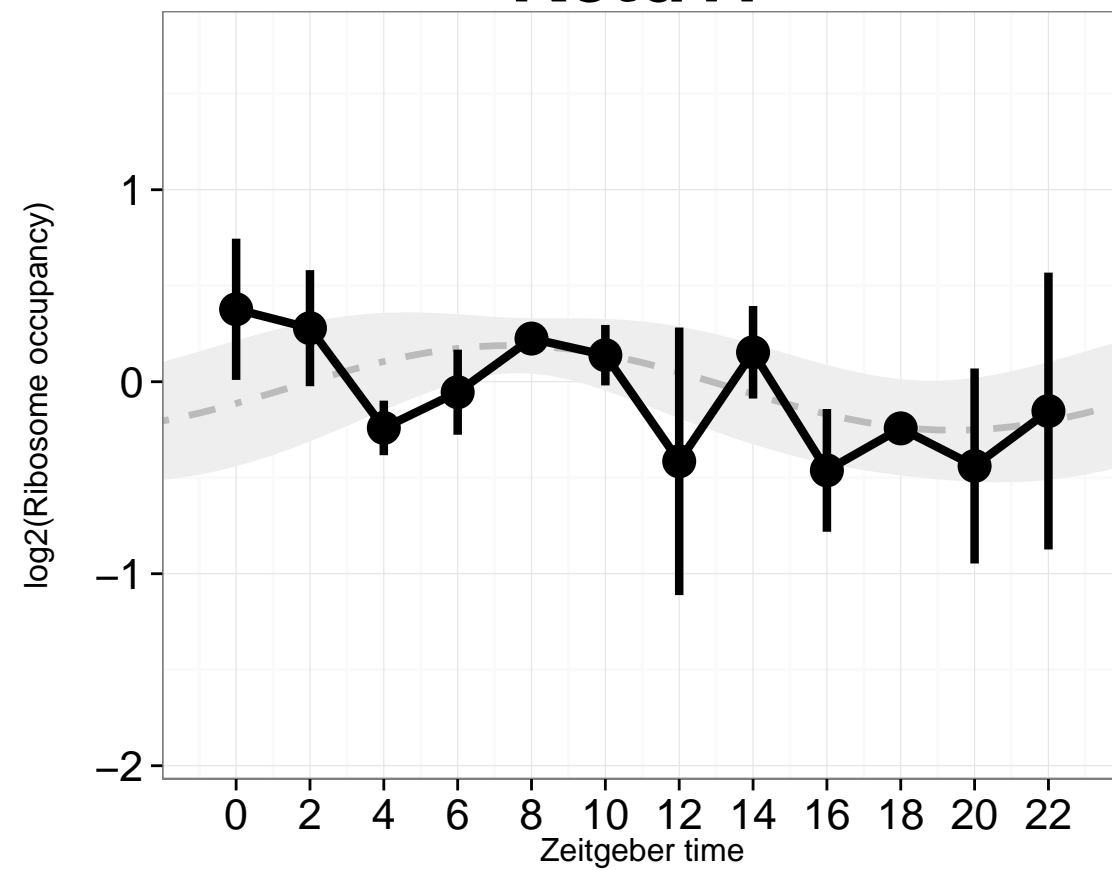

Supplement: SuppDataset_1.zip [file Kctd17_set_A.pdf › Supplemental Dataset 1/A-mRNA_nonrhyth_translation_nonrhyth/Kctd17_set_A.pdf]

## Kctd18

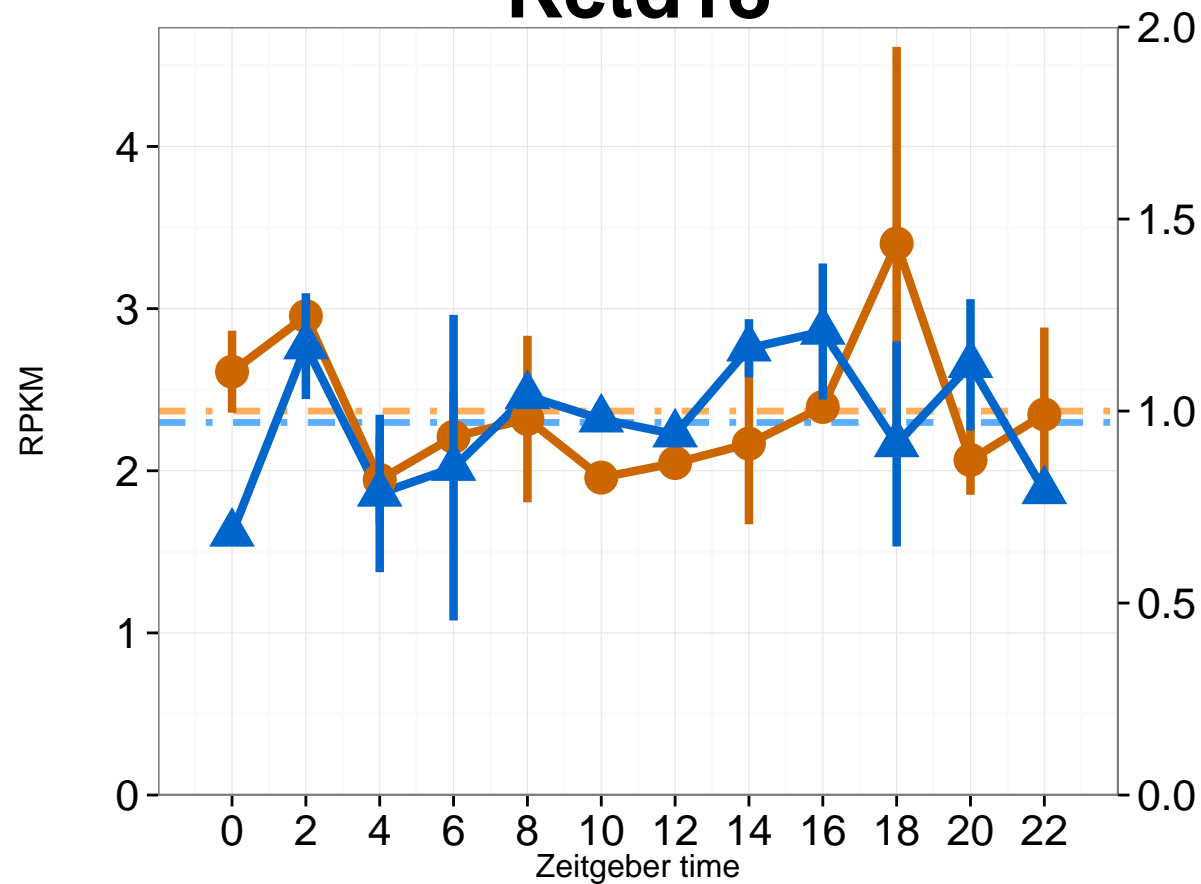

## Kctd18

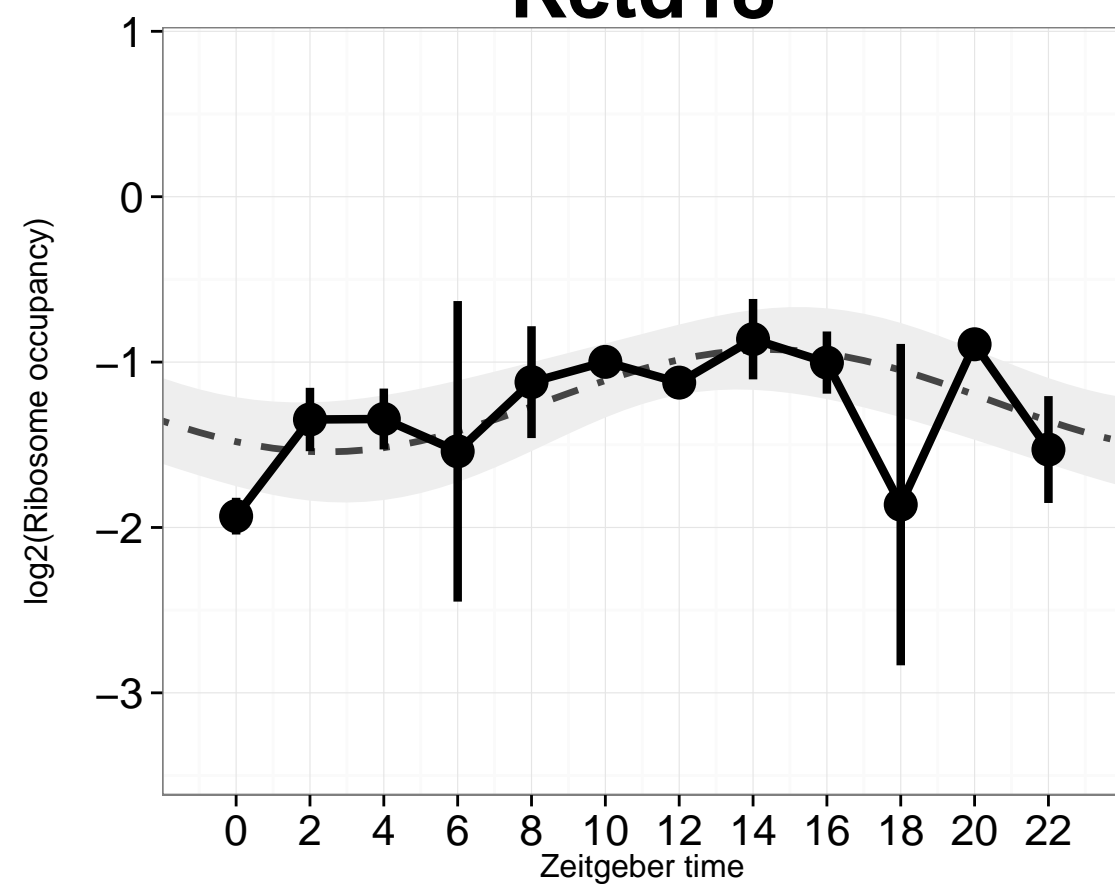

Supplement: SuppDataset_1.zip [file Kctd18_set_A.pdf › Supplemental Dataset 1/A-mRNA_nonrhyth_translation_nonrhyth/Kctd18_set_A.pdf]

## Kctd20

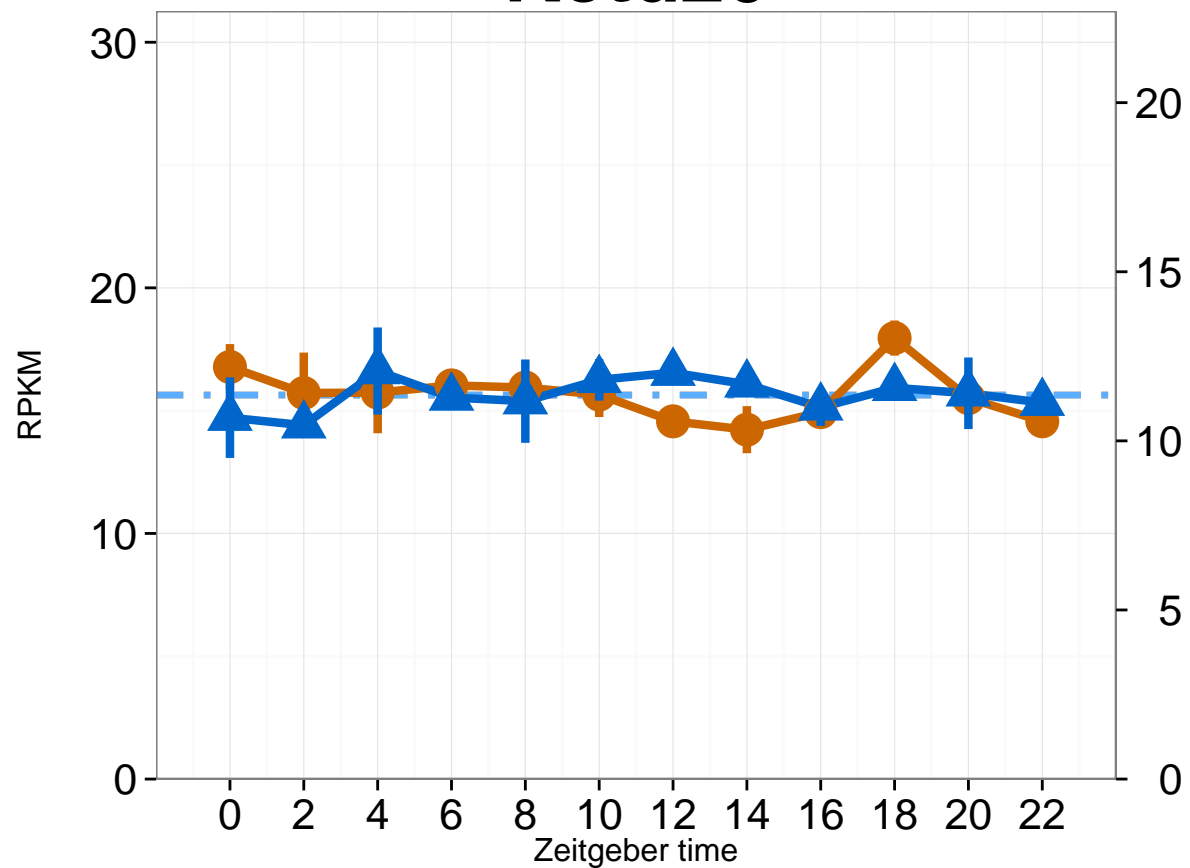

## Kctd20

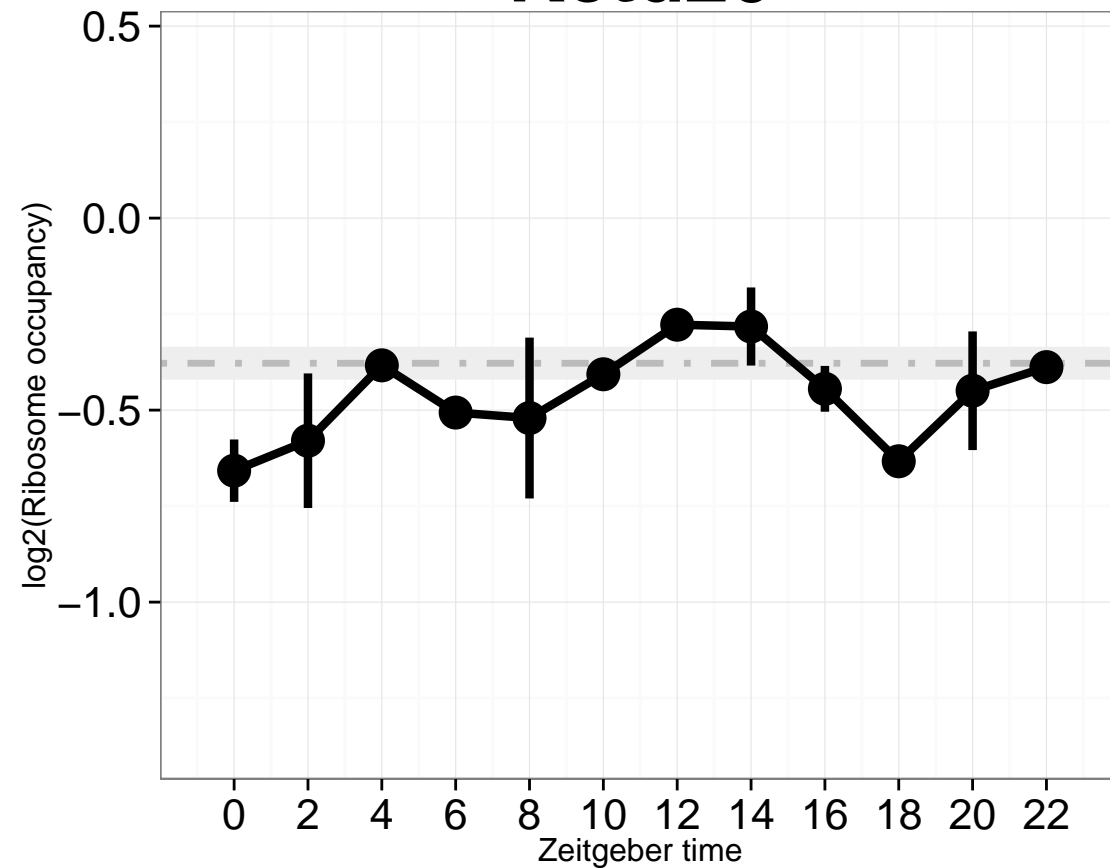

Supplement: SuppDataset_1.zip [file Kctd20_set_A.pdf › Supplemental Dataset 1/A-mRNA_nonrhyth_translation_nonrhyth/Kctd20_set_A.pdf]

## Kctd21

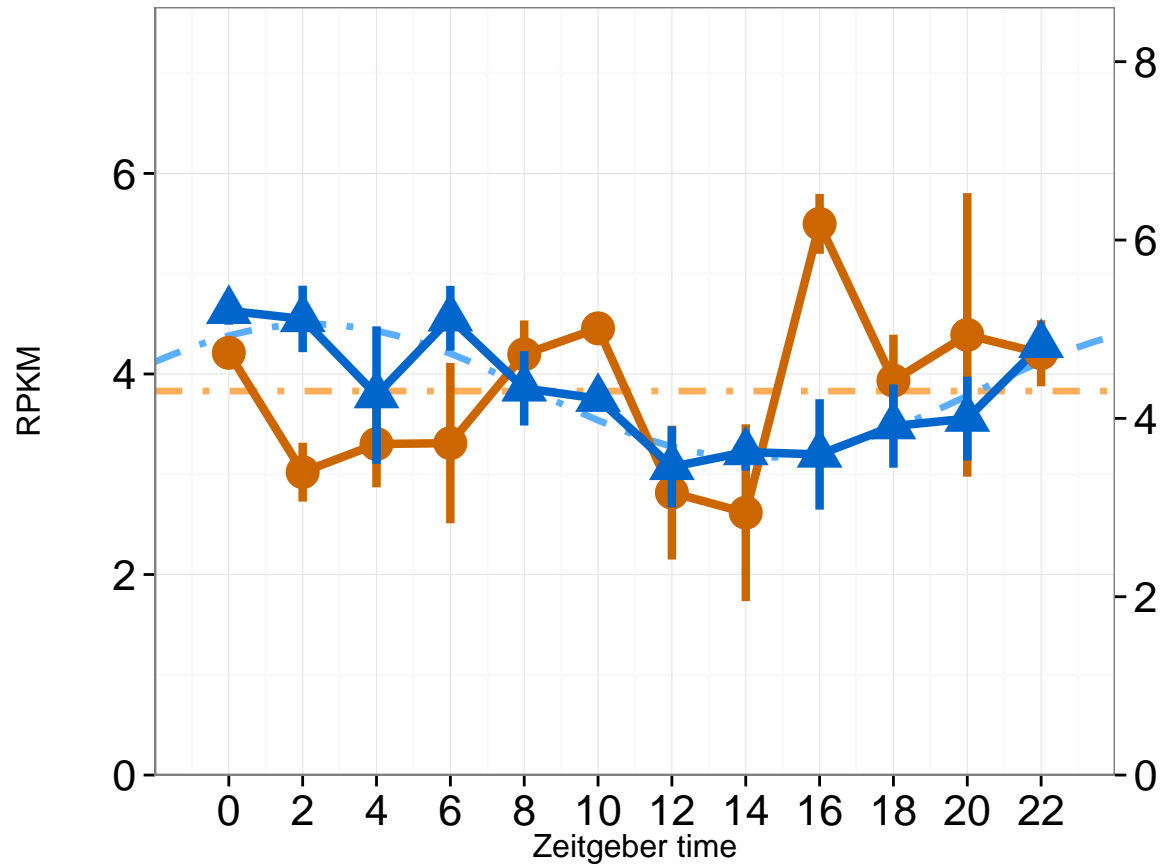

## Kctd21

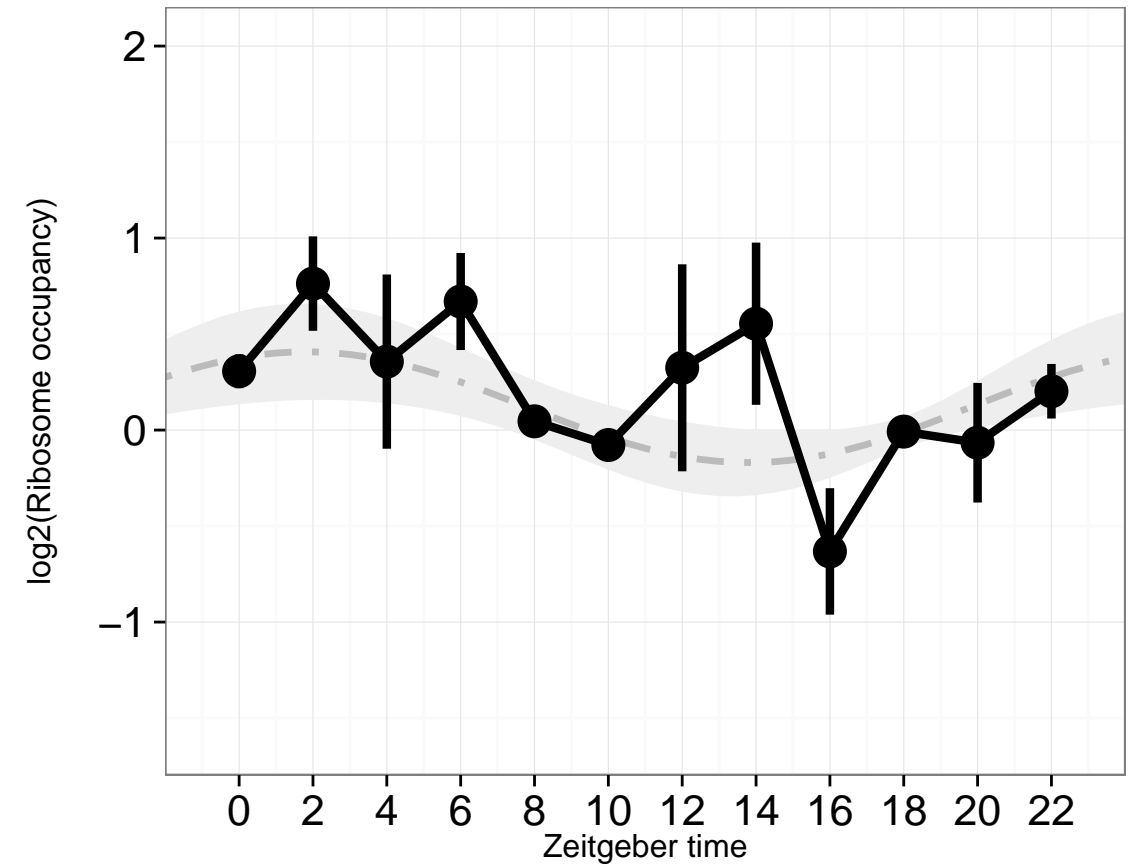

Supplement: SuppDataset_1.zip [file Kctd21_set_A.pdf › Supplemental Dataset 1/A-mRNA_nonrhyth_translation_nonrhyth/Kctd21_set_A.pdf]

## Kctd2

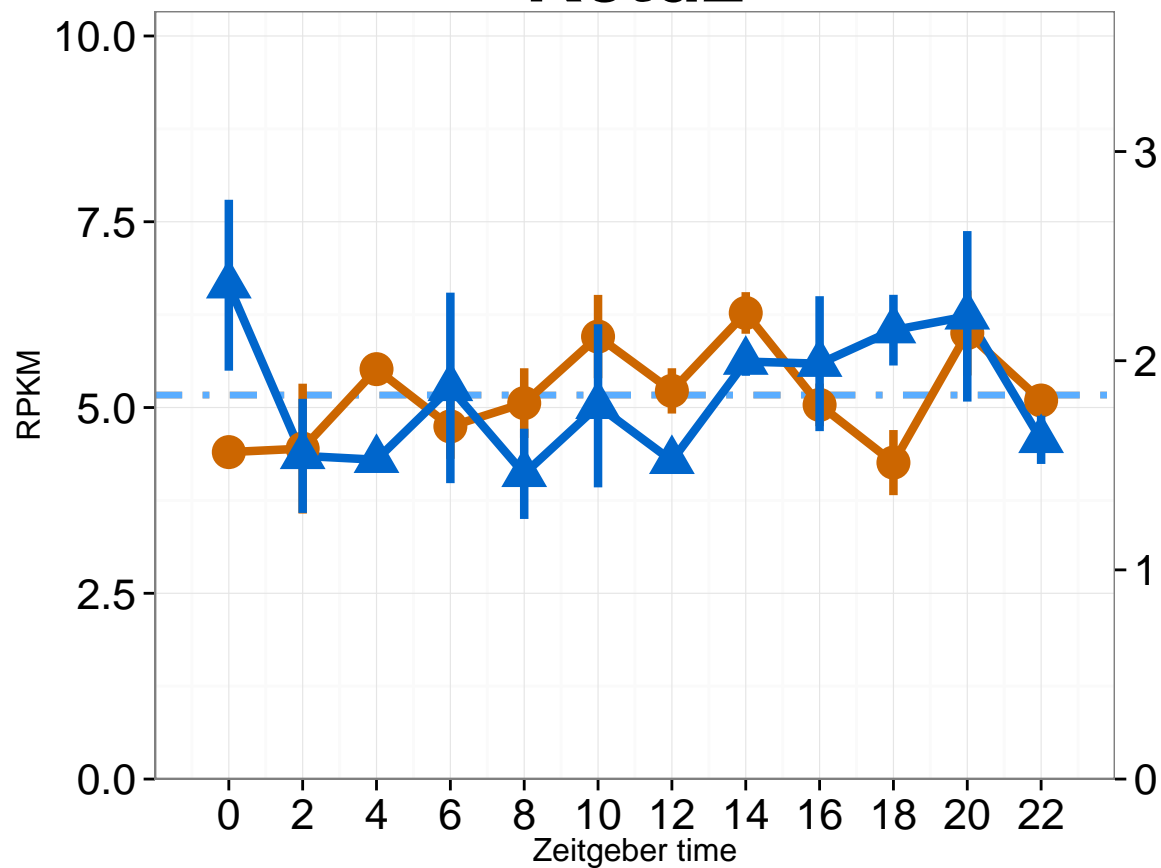

## Kctd2

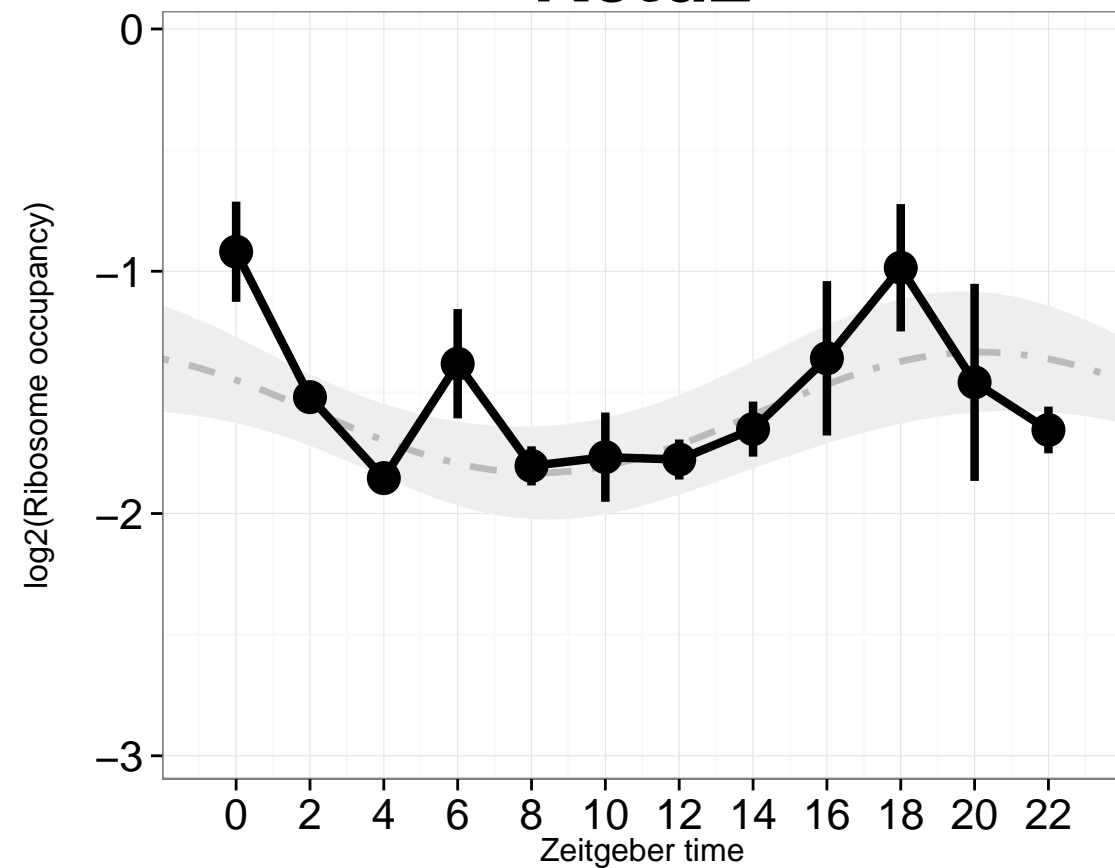

Supplement: SuppDataset_1.zip [file Kctd2_set_A.pdf › Supplemental Dataset 1/A-mRNA_nonrhyth_translation_nonrhyth/Kctd2_set_A.pdf]

# Kctd3

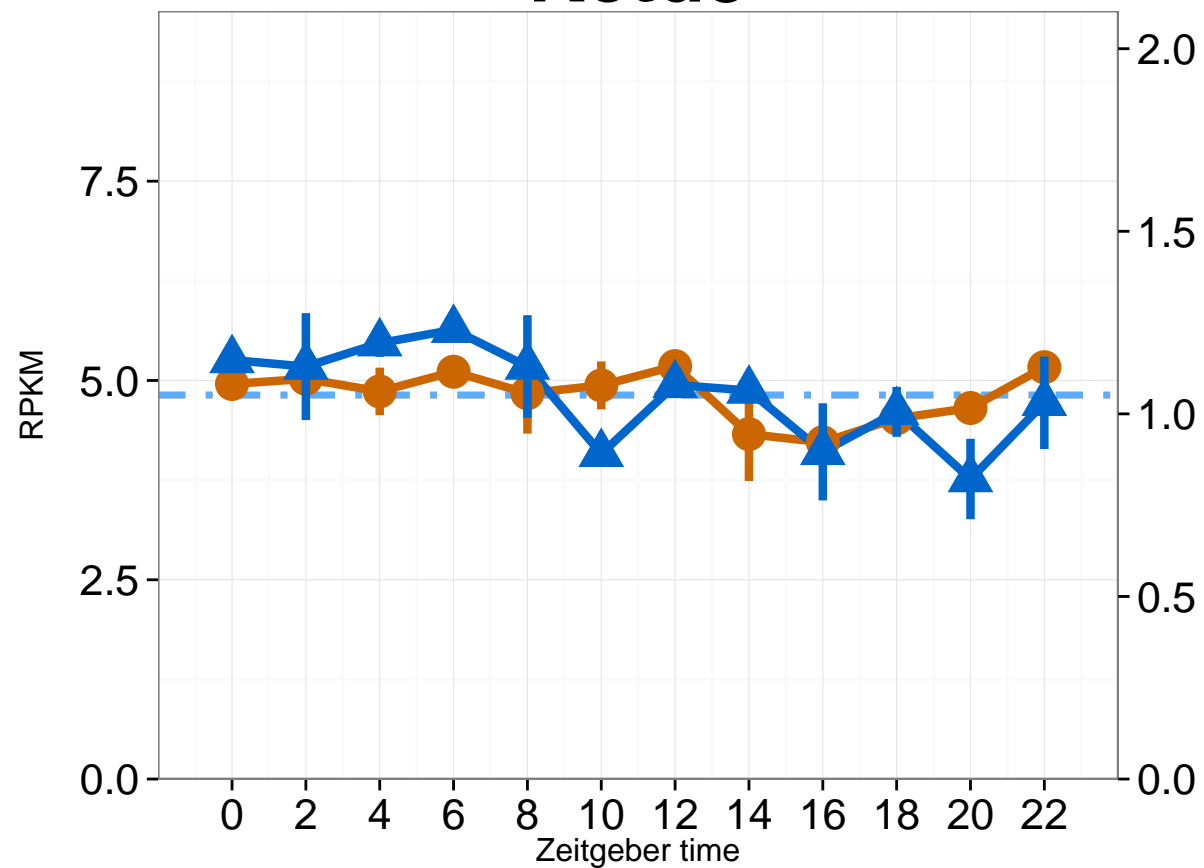

# Kctd3

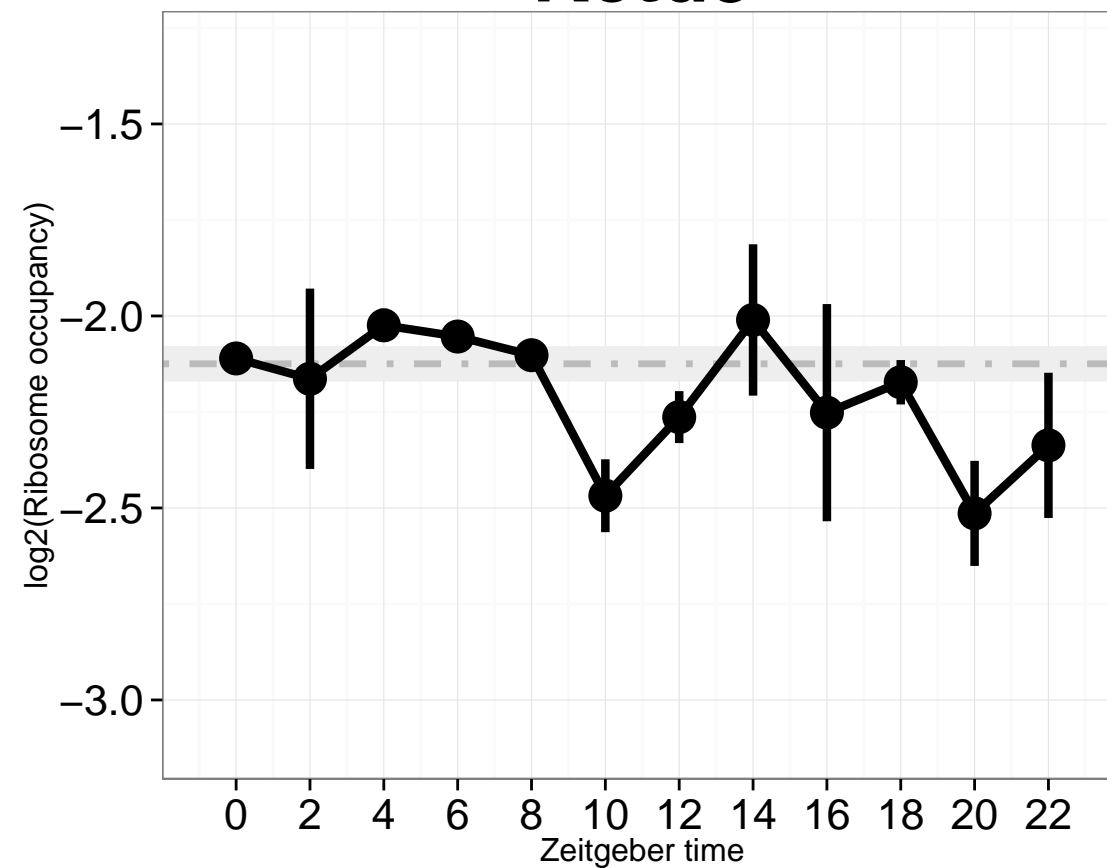

Supplement: SuppDataset_1.zip [file Kctd3_set_A.pdf › Supplemental Dataset 1/A-mRNA_nonrhyth_translation_nonrhyth/Kctd3_set_A.pdf]

## Kctd5

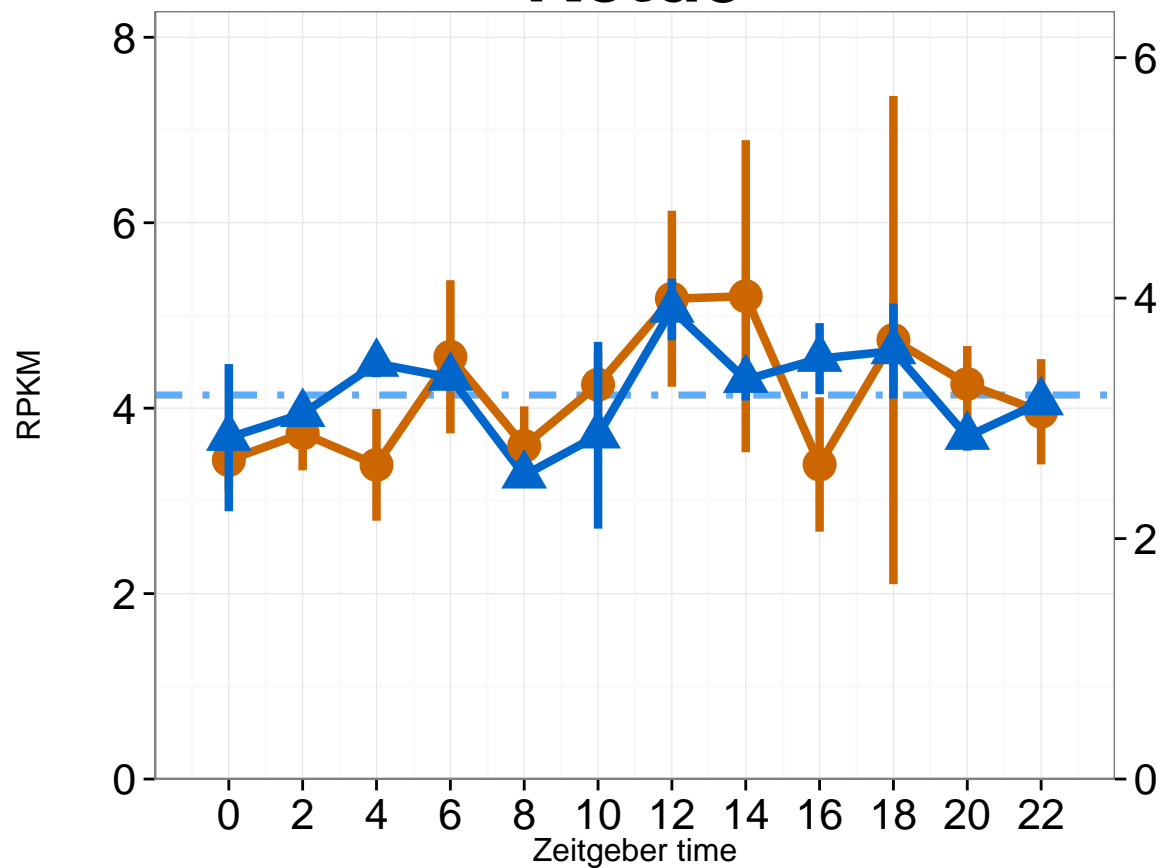

## Kctd5

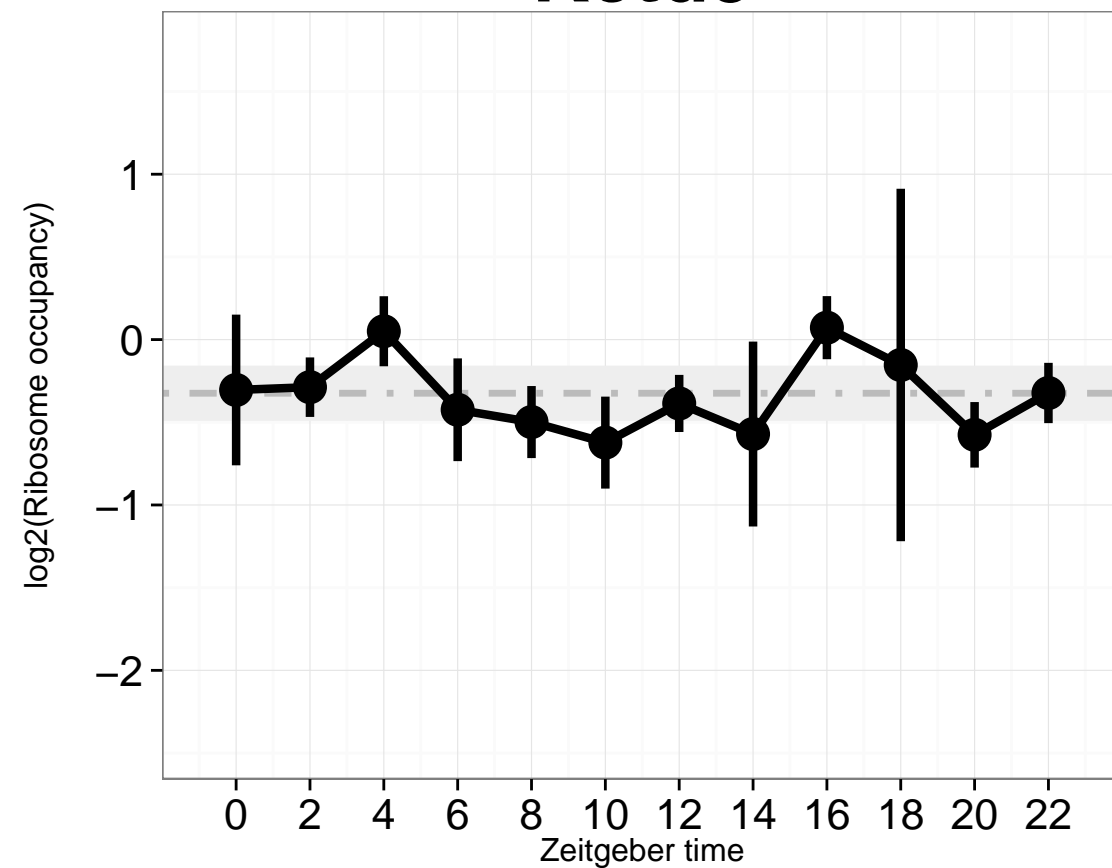

Supplement: SuppDataset_1.zip [file Kctd5_set_A.pdf › Supplemental Dataset 1/A-mRNA_nonrhyth_translation_nonrhyth/Kctd5_set_A.pdf]

# Kctd7

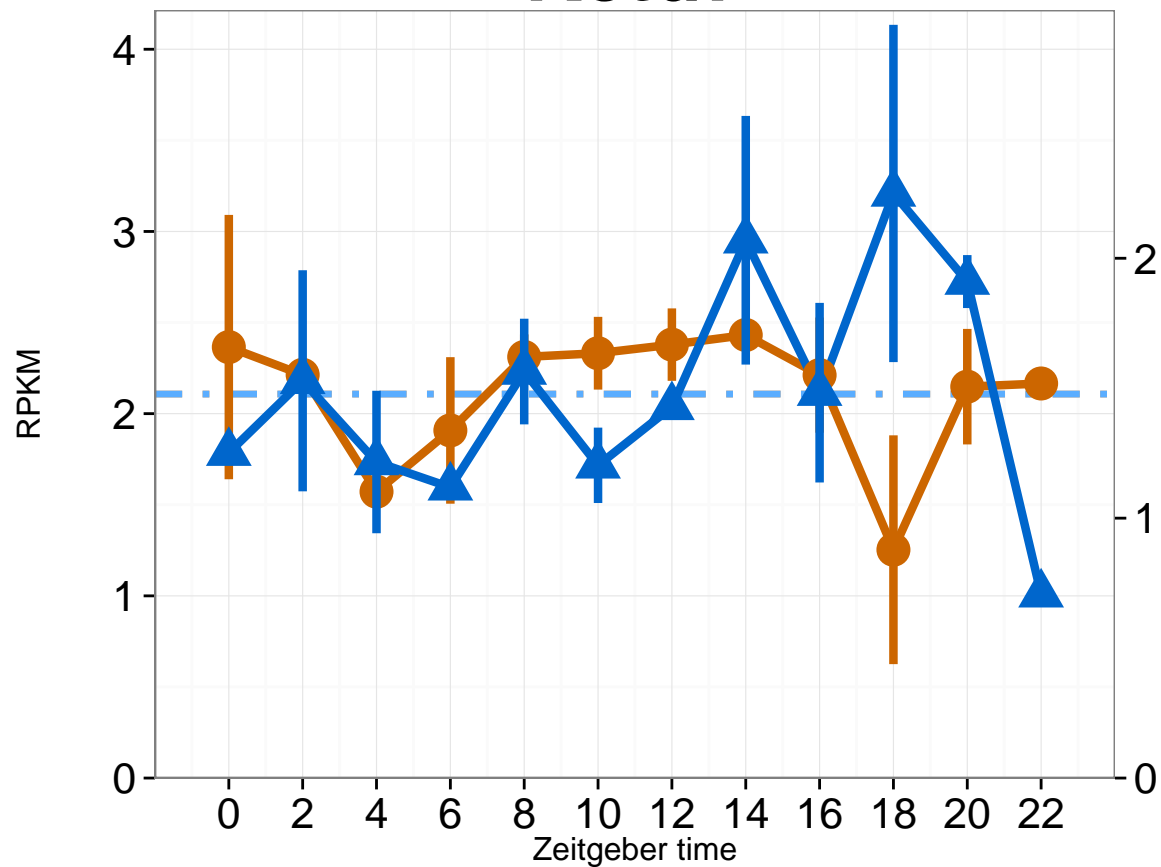

# Kctd7

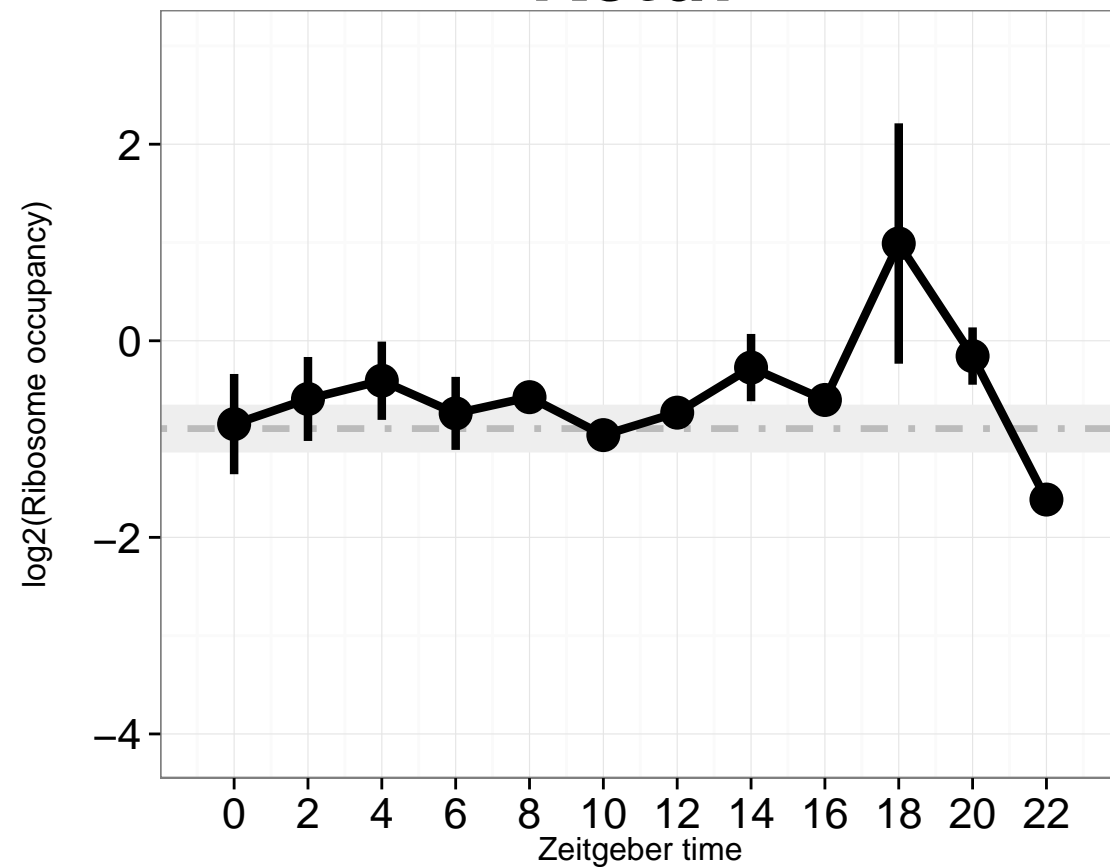

Supplement: SuppDataset_1.zip [file Kctd7_set_A.pdf › Supplemental Dataset 1/A-mRNA_nonrhyth_translation_nonrhyth/Kctd7_set_A.pdf]

# Kctd9

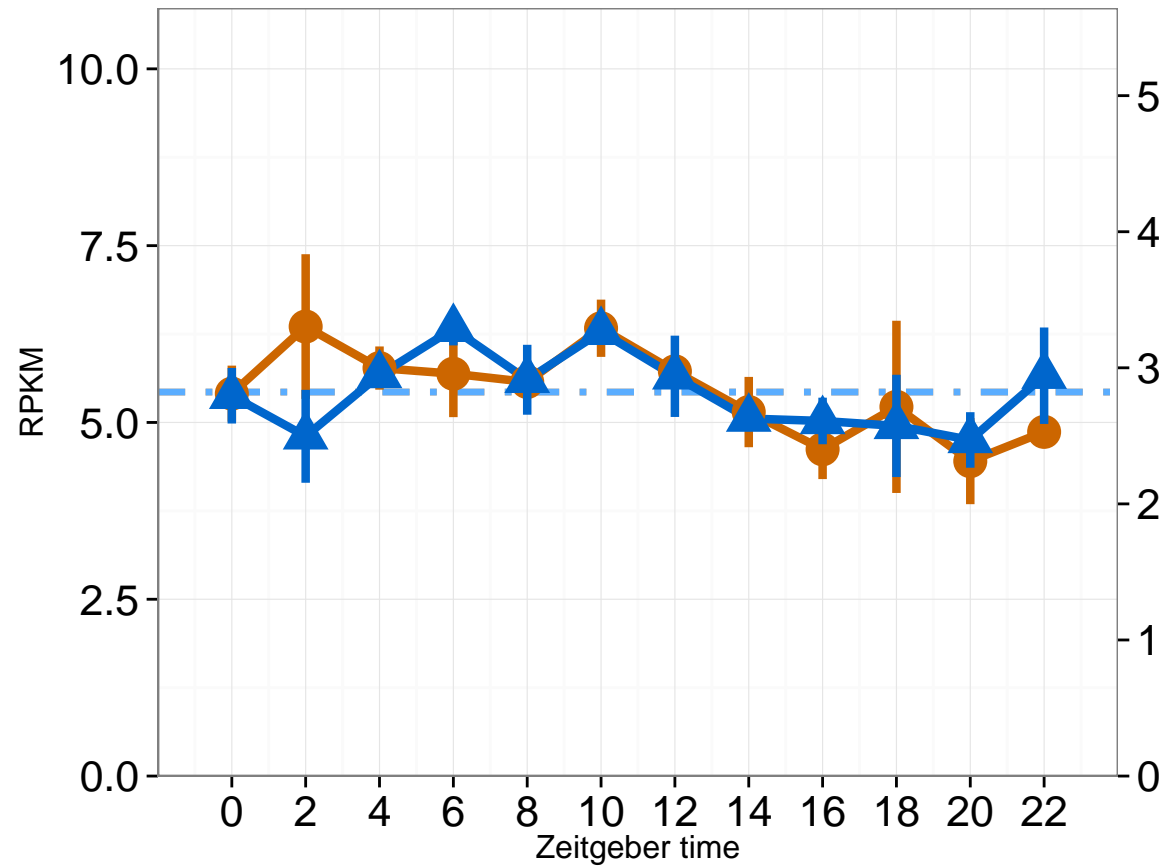

# Kctd9

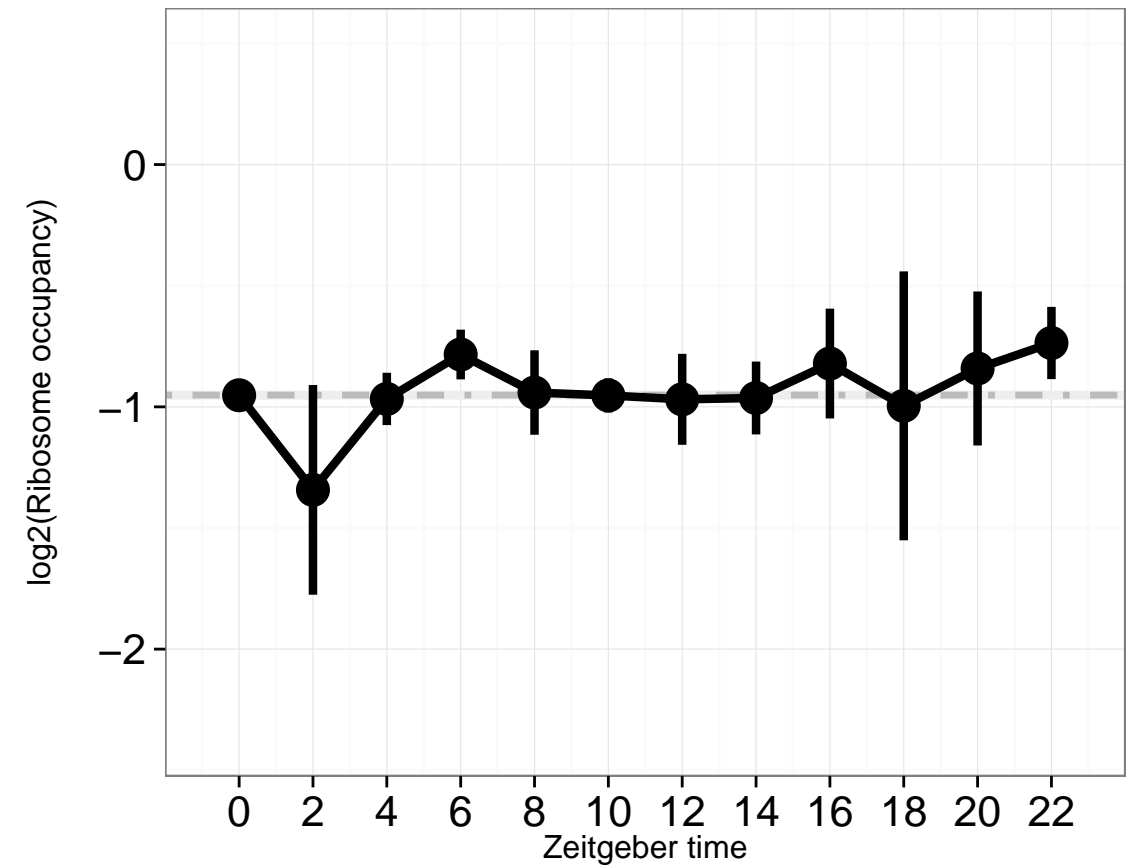

Supplement: SuppDataset_1.zip [file Kctd9_set_A.pdf › Supplemental Dataset 1/A-mRNA_nonrhyth_translation_nonrhyth/Kctd9_set_A.pdf]

## Kdelc1

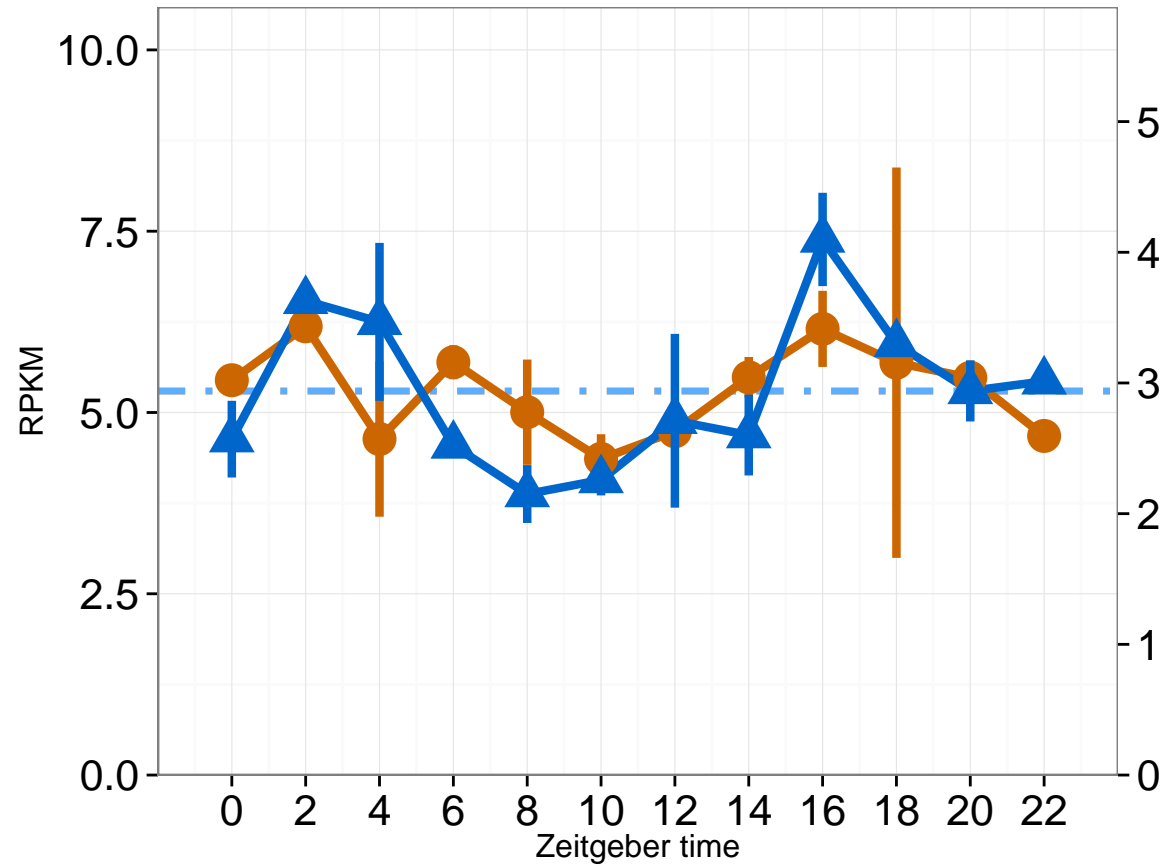

## Kdelc1

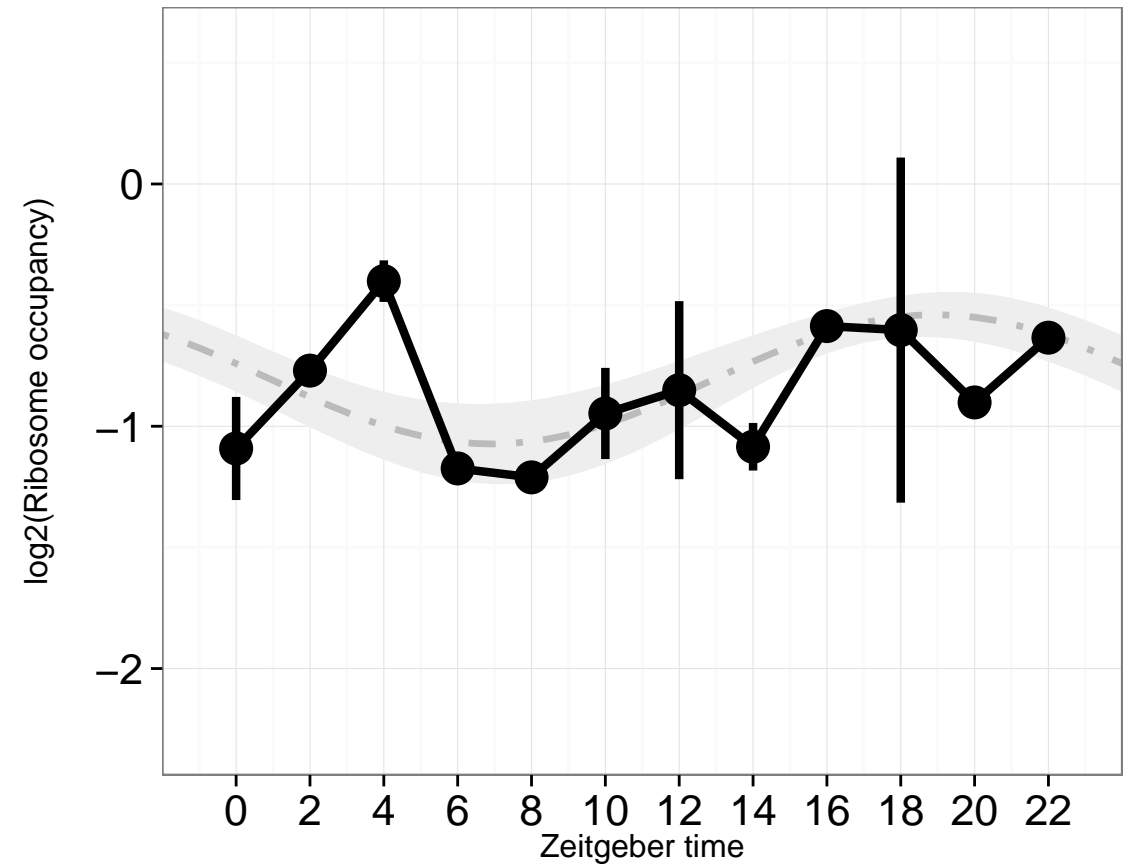

Supplement: SuppDataset_1.zip [file Kdelc1_set_A.pdf › Supplemental Dataset 1/A-mRNA_nonrhyth_translation_nonrhyth/Kdelc1_set_A.pdf]

## Kdelr1

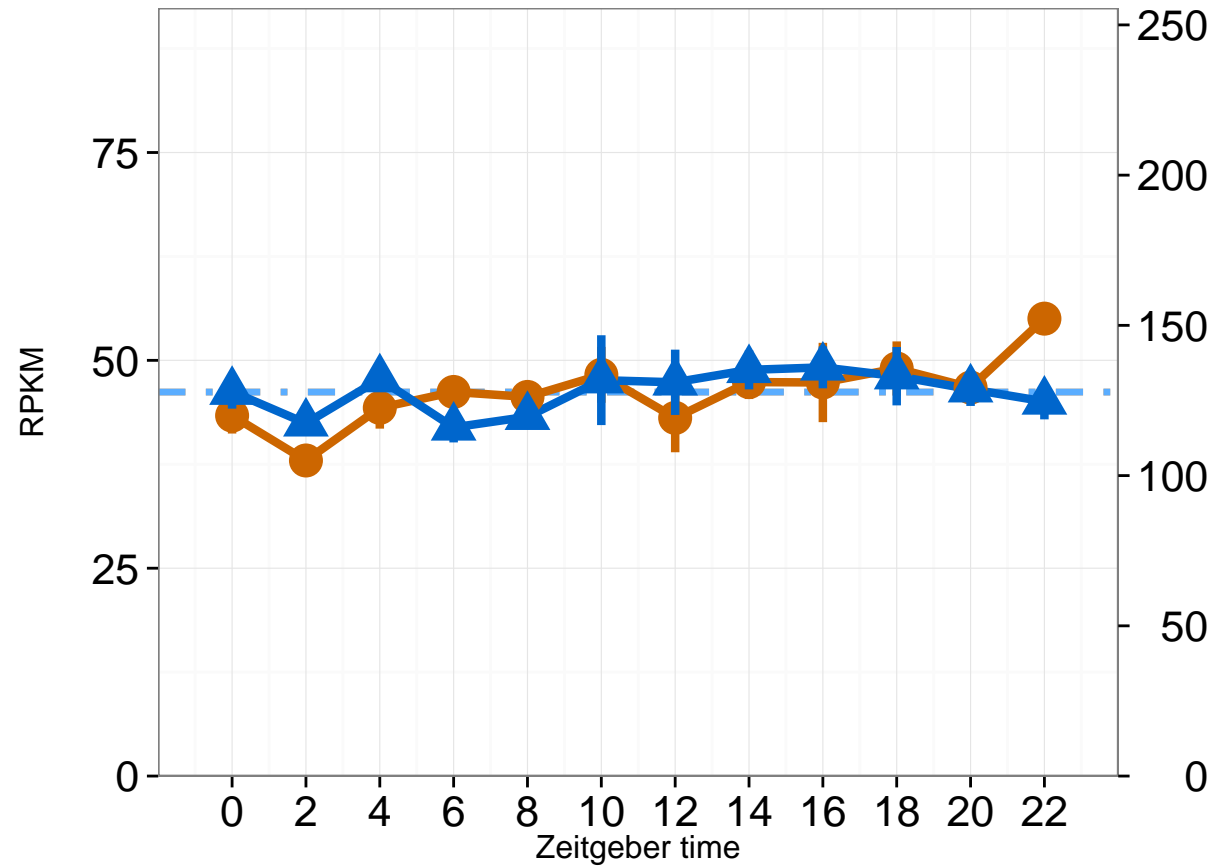

## Kdelr1

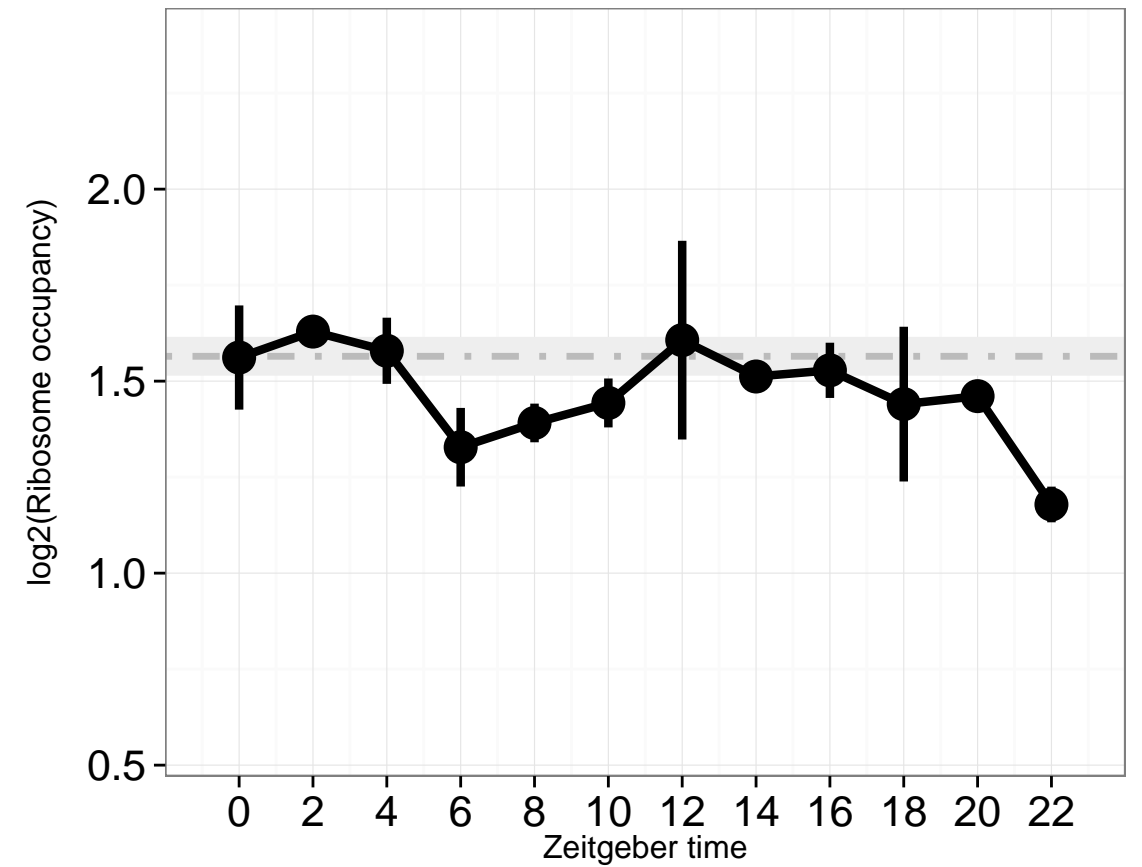

Supplement: SuppDataset_1.zip [file Kdelr1_set_A.pdf › Supplemental Dataset 1/A-mRNA_nonrhyth_translation_nonrhyth/Kdelr1_set_A.pdf]

## Kdelr2

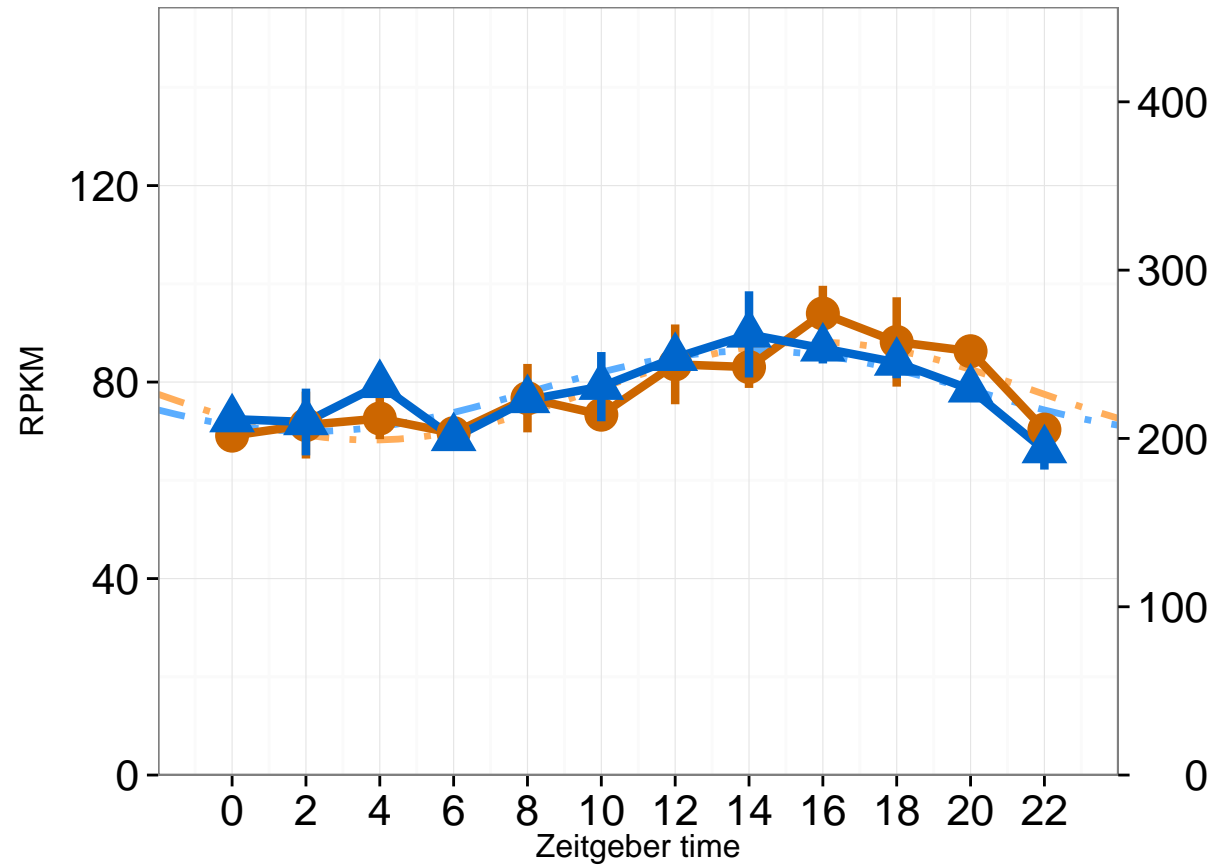

## Kdelr2

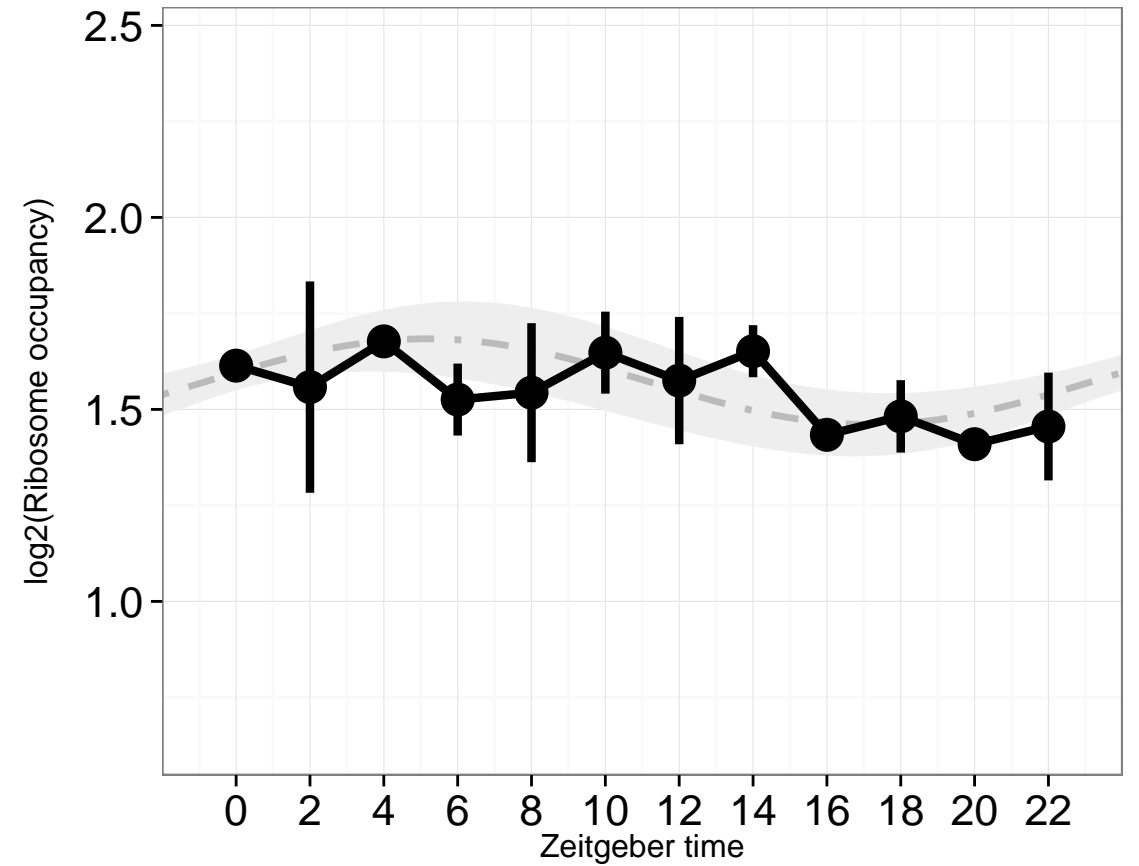

Supplement: SuppDataset_1.zip [file Kdelr2_set_A.pdf › Supplemental Dataset 1/A-mRNA_nonrhyth_translation_nonrhyth/Kdelr2_set_A.pdf]

## Kdm1a

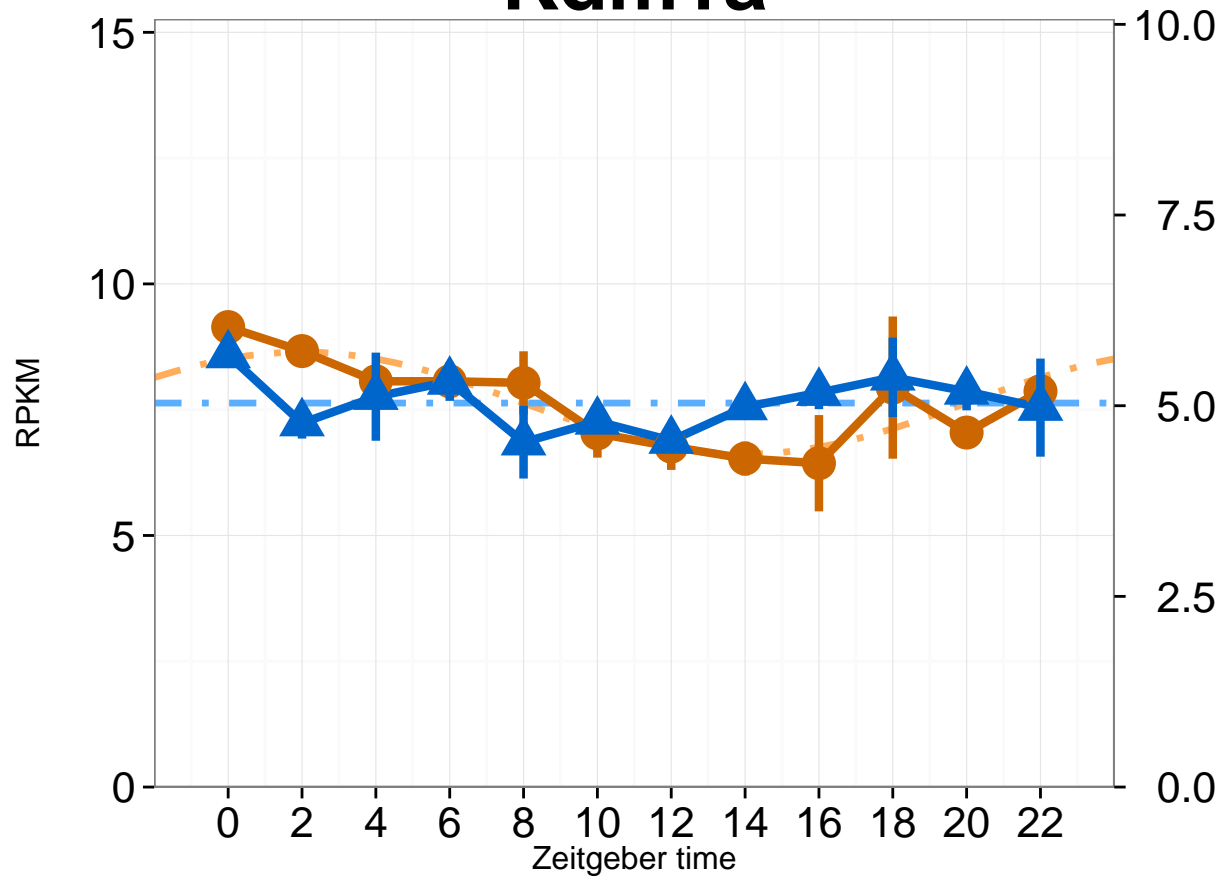

## Kdm1a

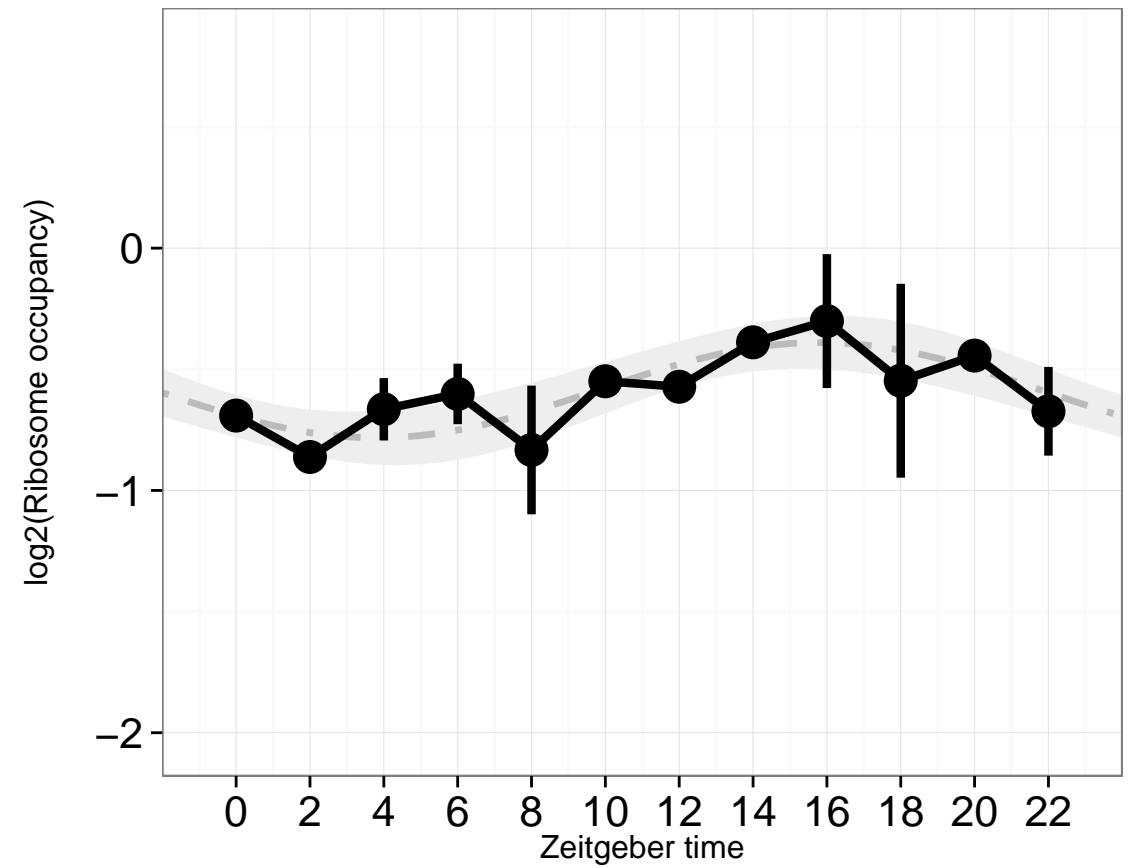

Supplement: SuppDataset_1.zip [file Kdm1a_set_A.pdf › Supplemental Dataset 1/A-mRNA_nonrhyth_translation_nonrhyth/Kdm1a_set_A.pdf]

## Kdm1b

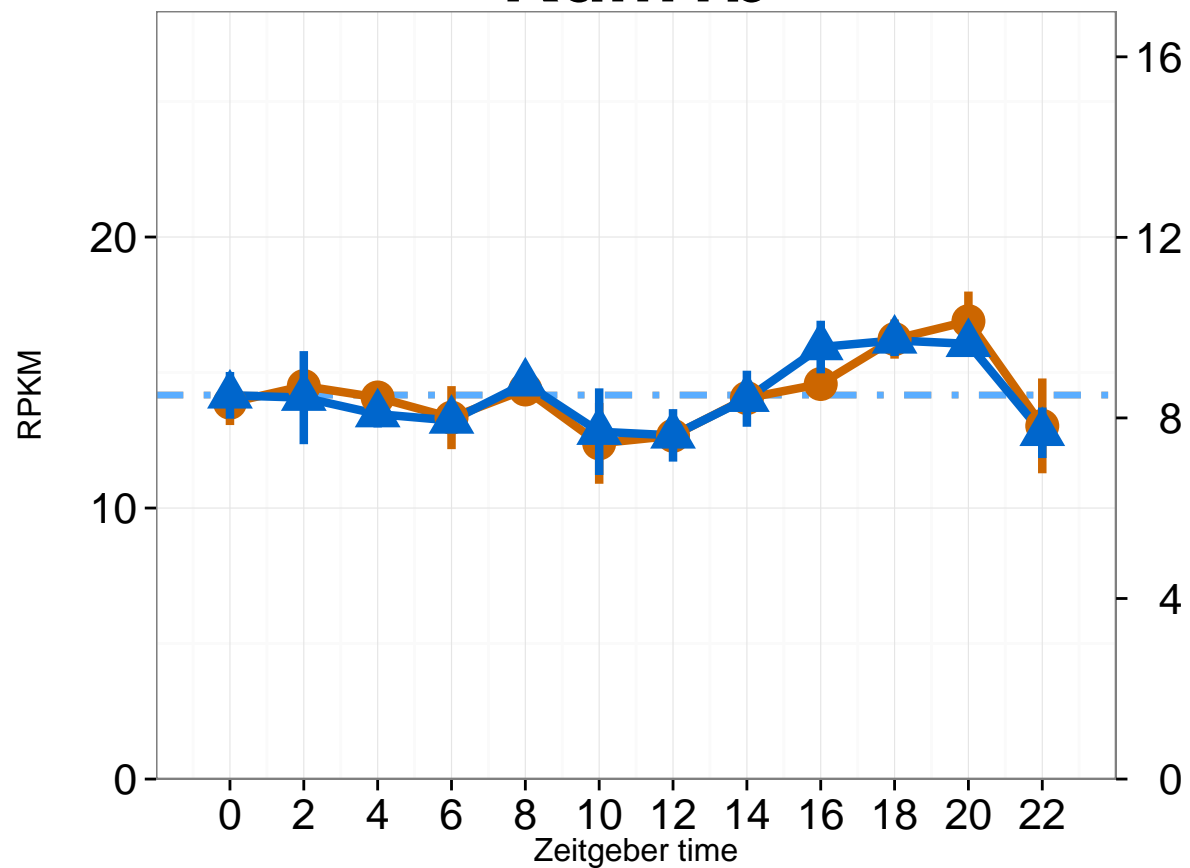

## Kdm1b

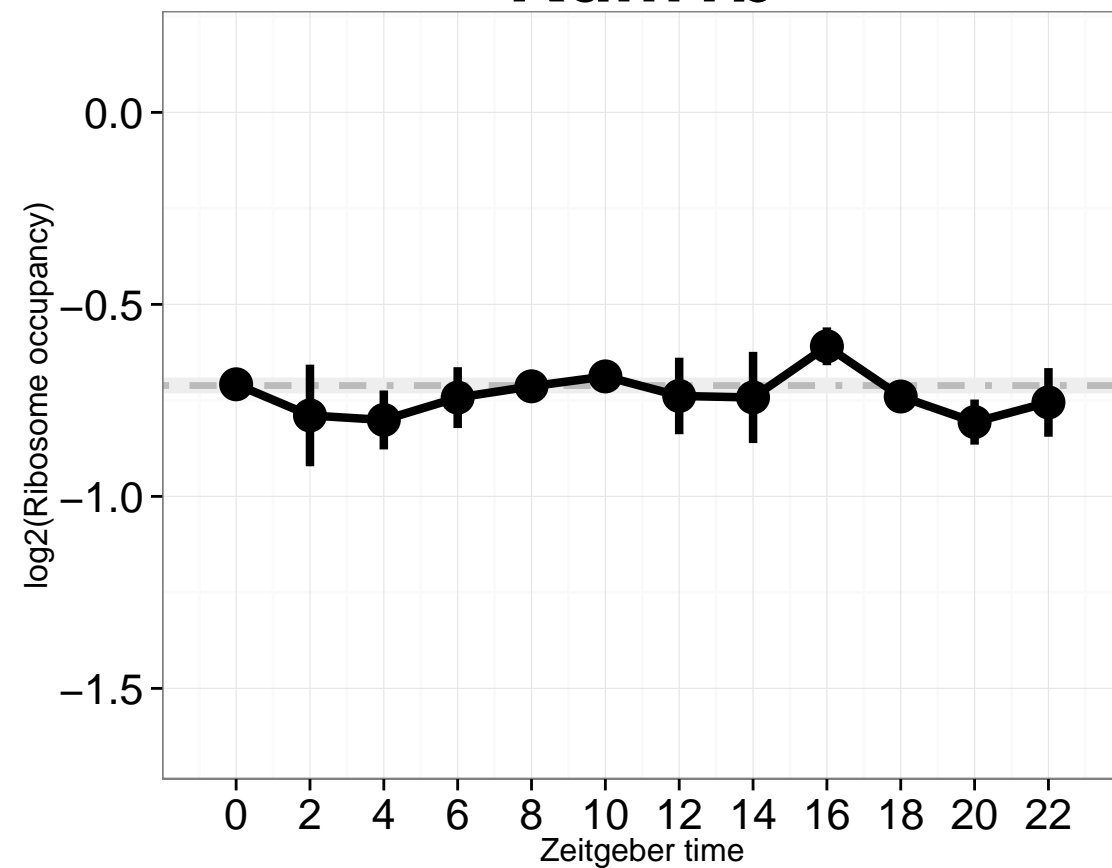

Supplement: SuppDataset_1.zip [file Kdm1b_set_A.pdf › Supplemental Dataset 1/A-mRNA_nonrhyth_translation_nonrhyth/Kdm1b_set_A.pdf]

## Kdm2a

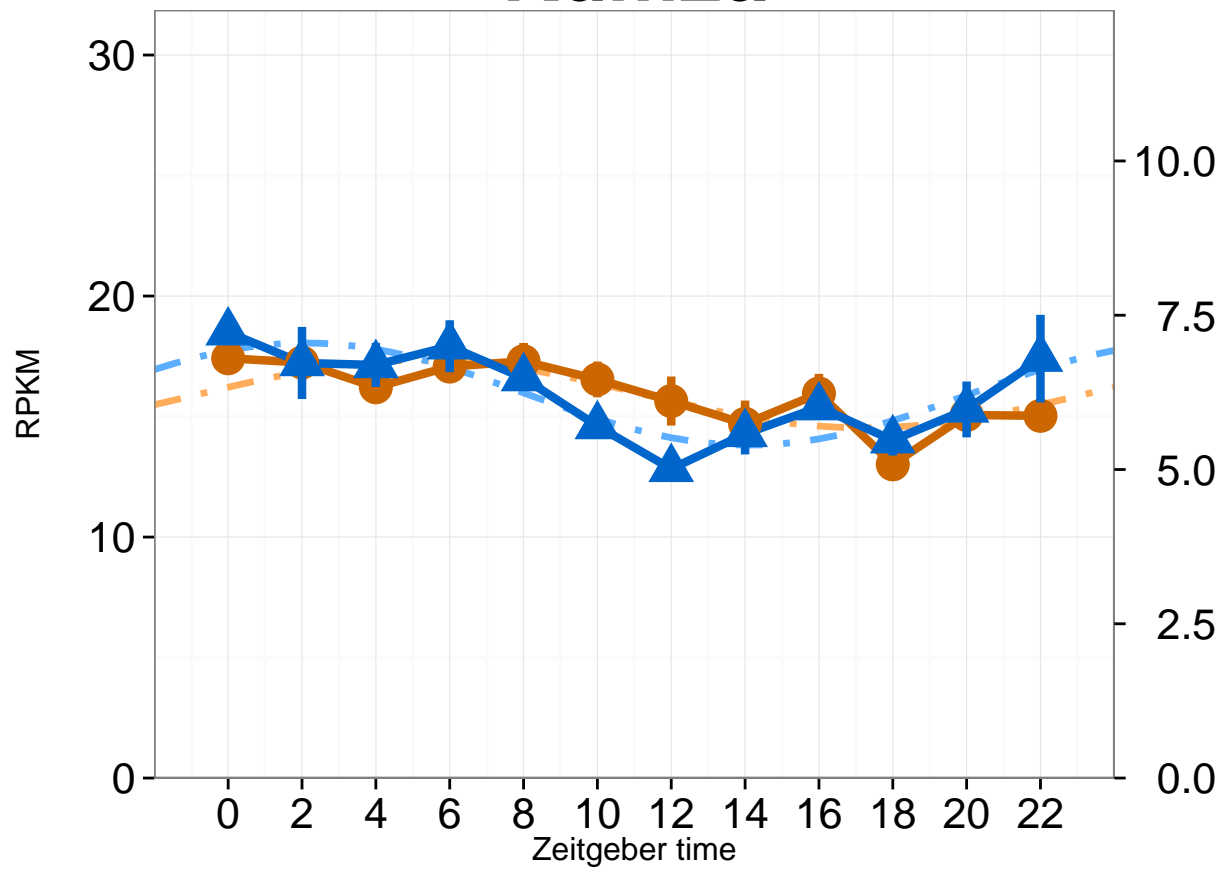

## Kdm2a

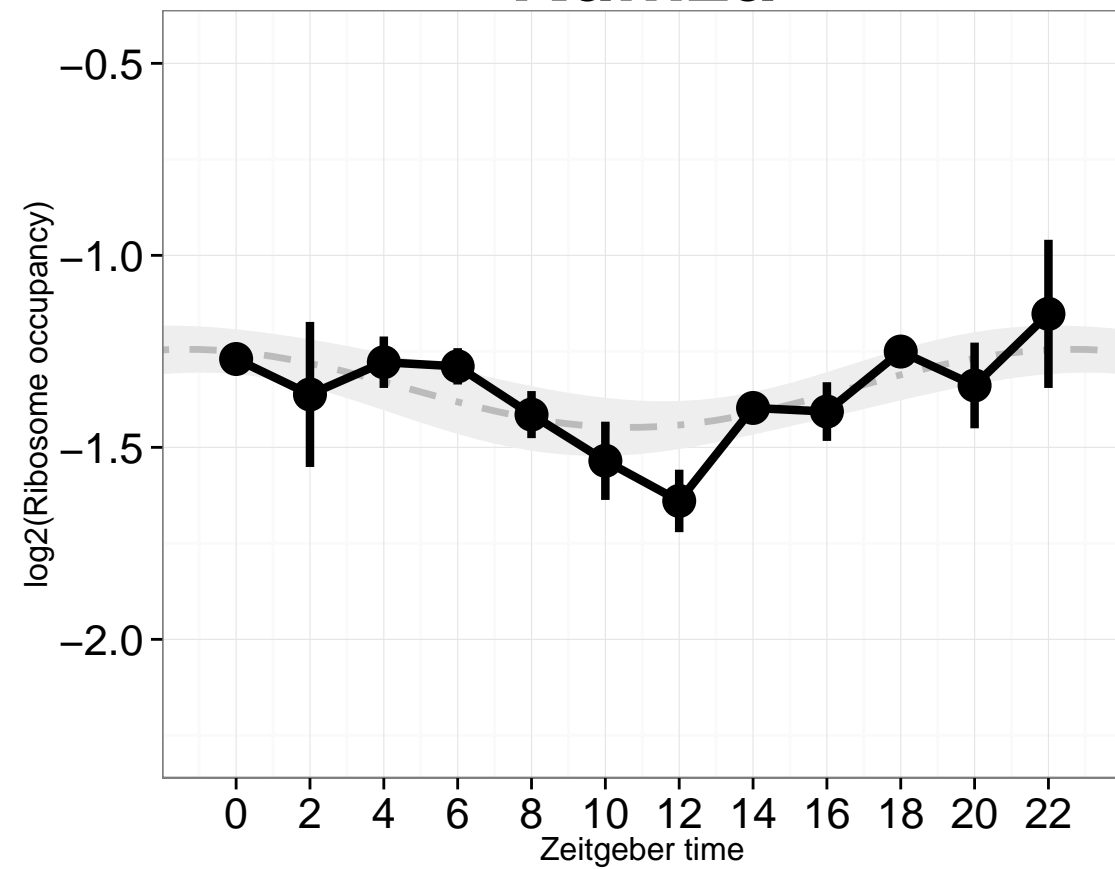

Supplement: SuppDataset_1.zip [file Kdm2a_set_A.pdf › Supplemental Dataset 1/A-mRNA_nonrhyth_translation_nonrhyth/Kdm2a_set_A.pdf]

## Kdm2b

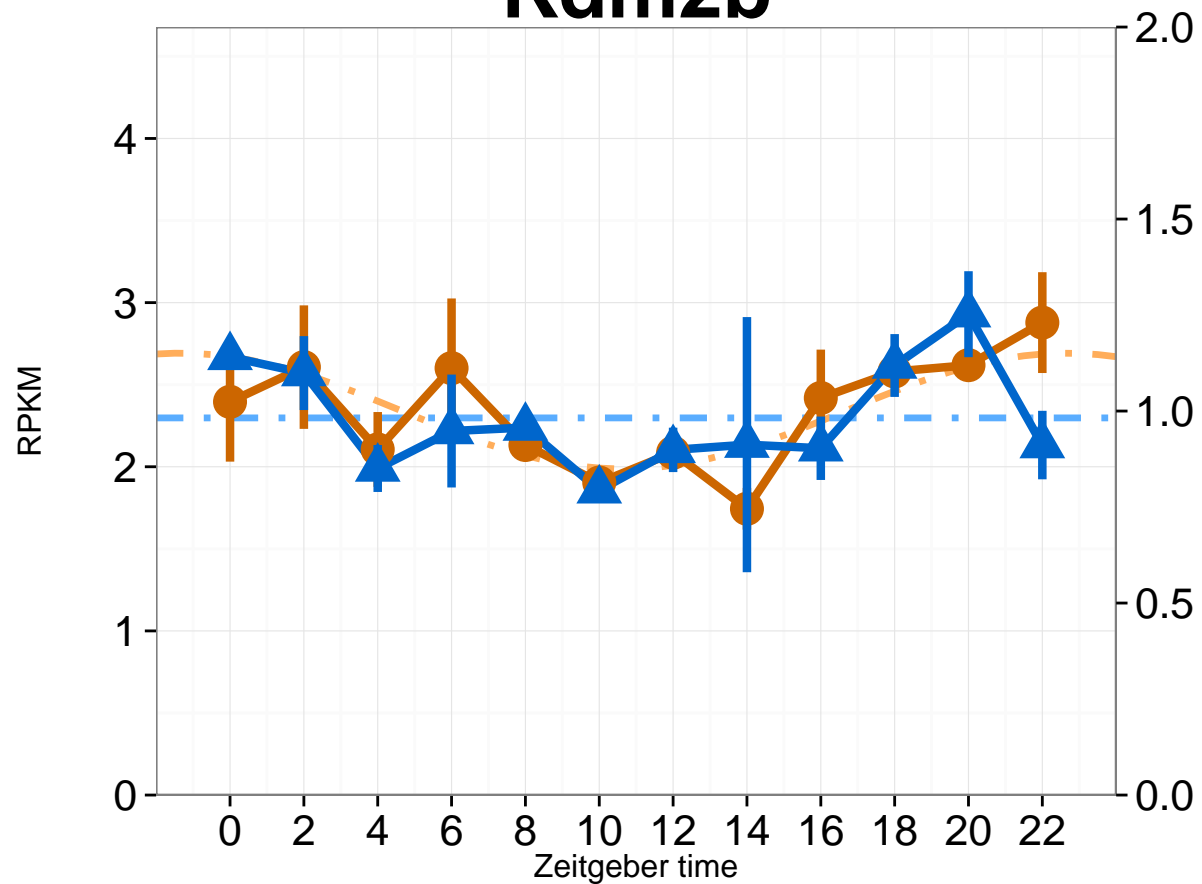

## Kdm2b

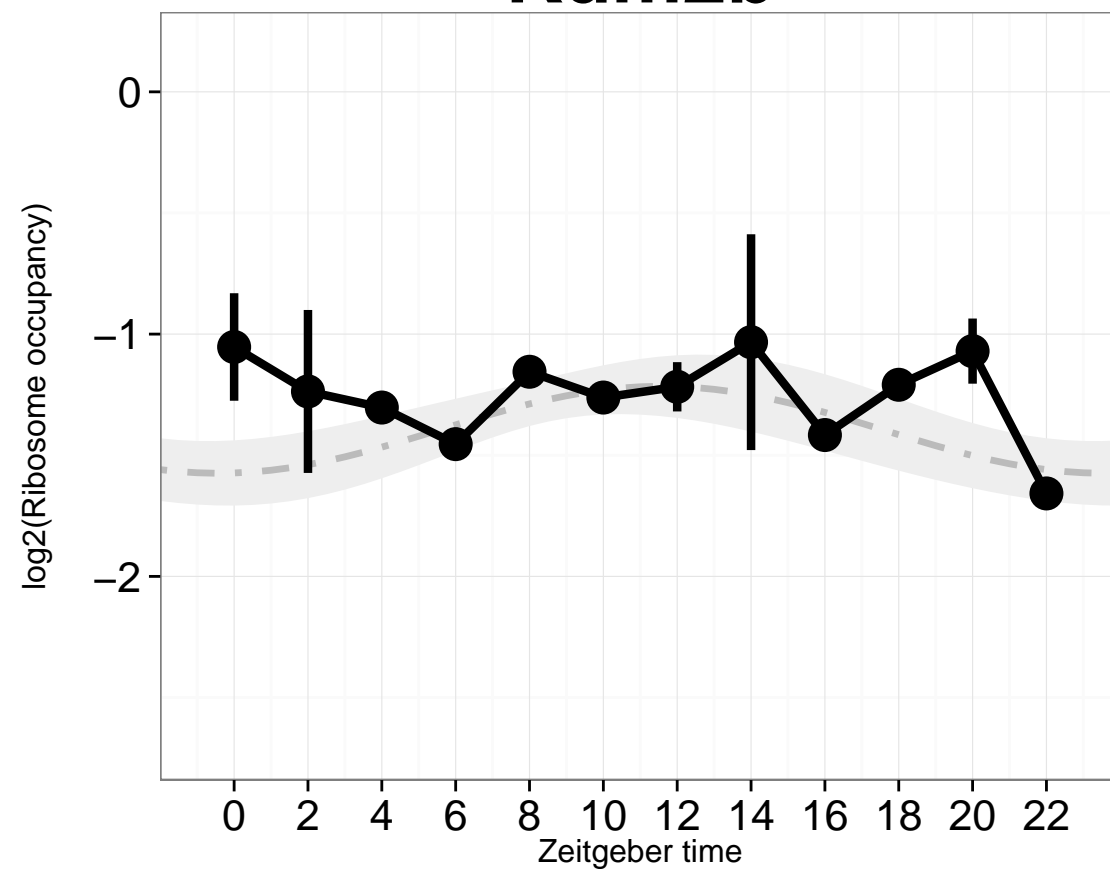

Supplement: SuppDataset_1.zip [file Kdm2b_set_A.pdf › Supplemental Dataset 1/A-mRNA_nonrhyth_translation_nonrhyth/Kdm2b_set_A.pdf]

# Kdm3b

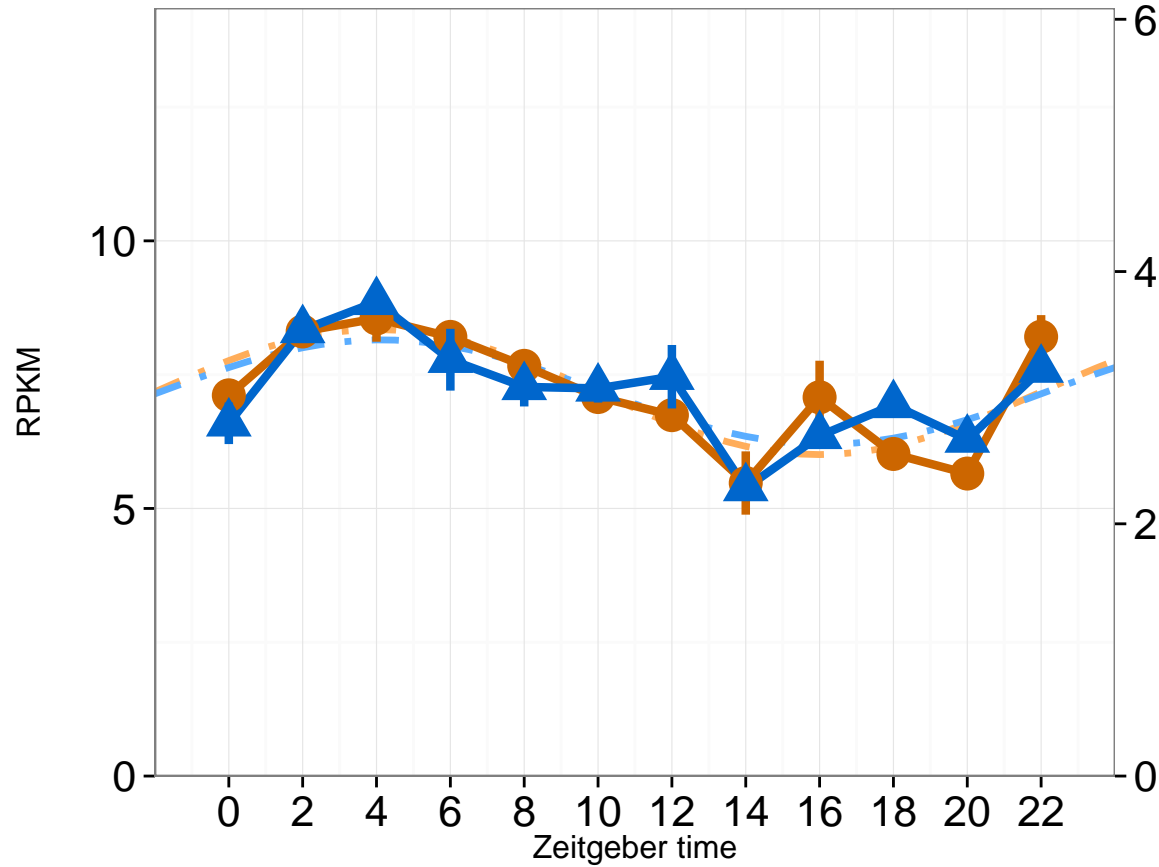

# Kdm3b

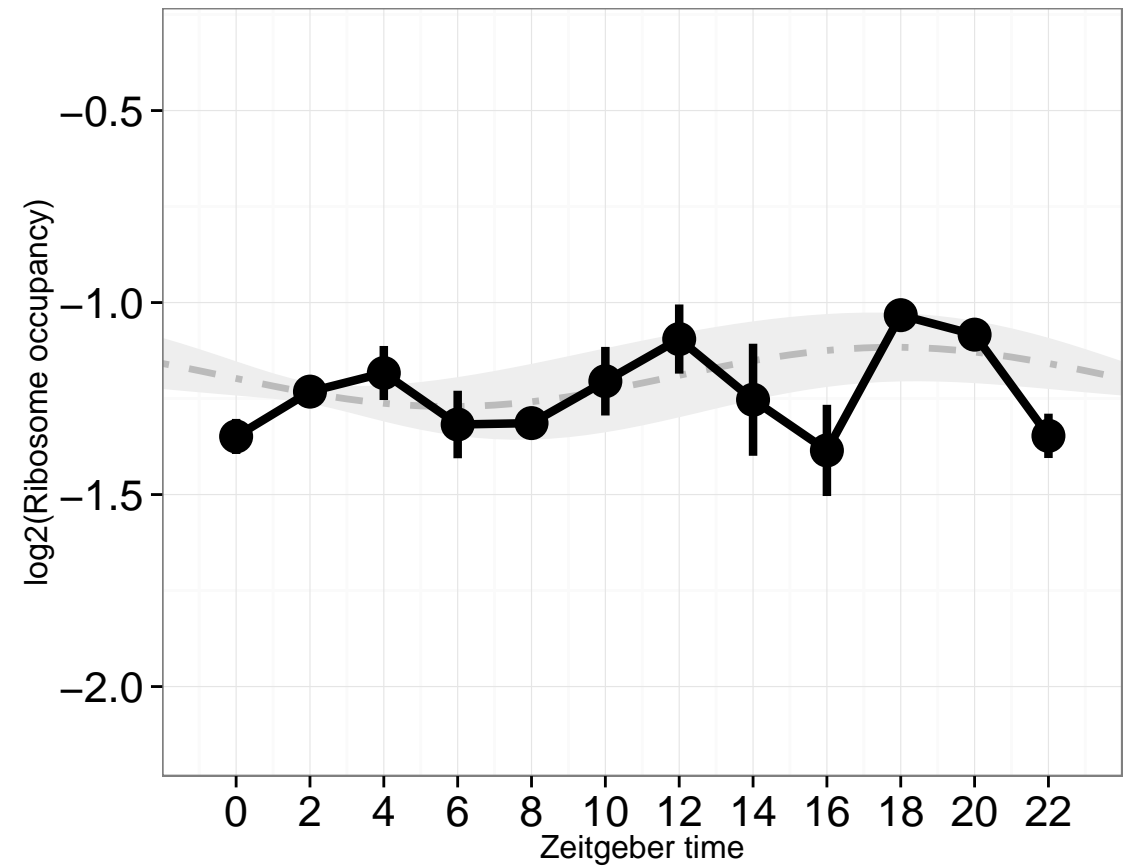

Supplement: SuppDataset_1.zip [file Kdm3b_set_A.pdf › Supplemental Dataset 1/A-mRNA_nonrhyth_translation_nonrhyth/Kdm3b_set_A.pdf]

## Kdm4b

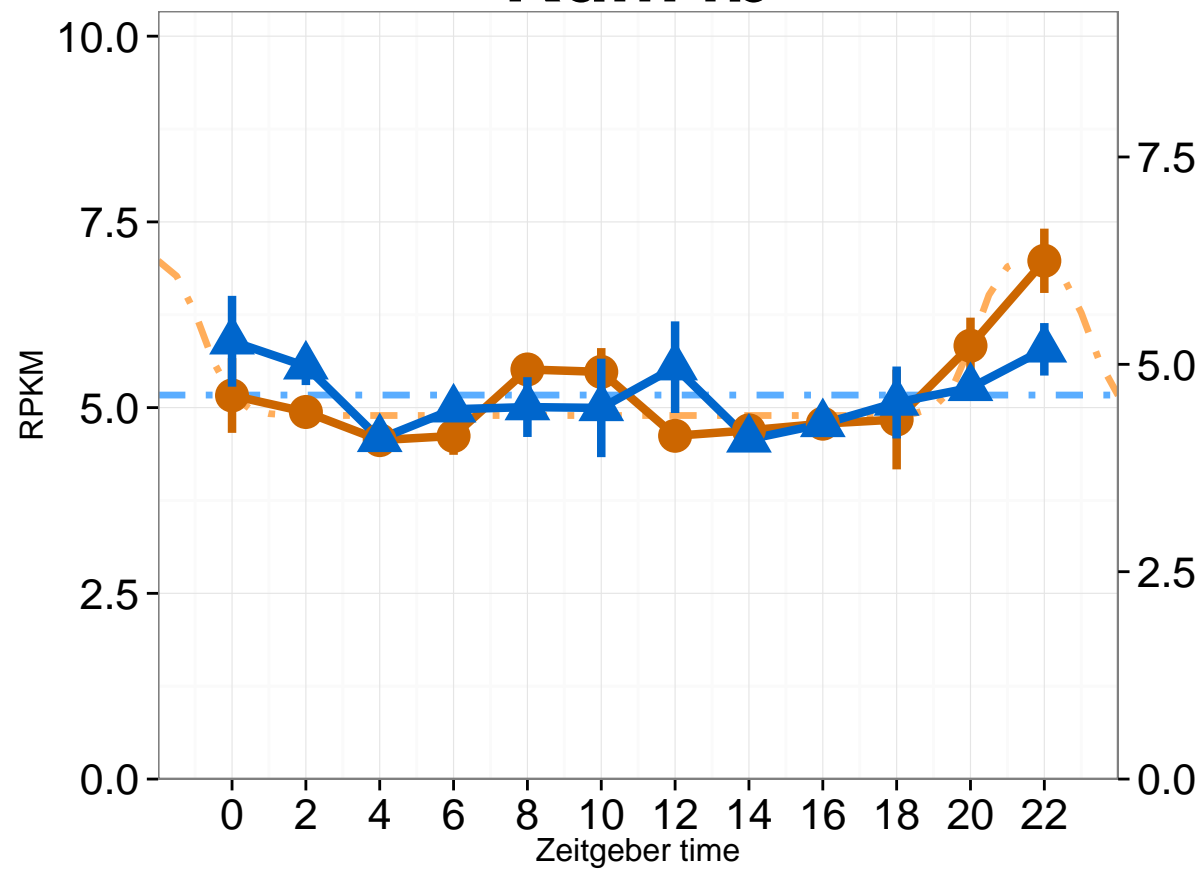

## Kdm4b

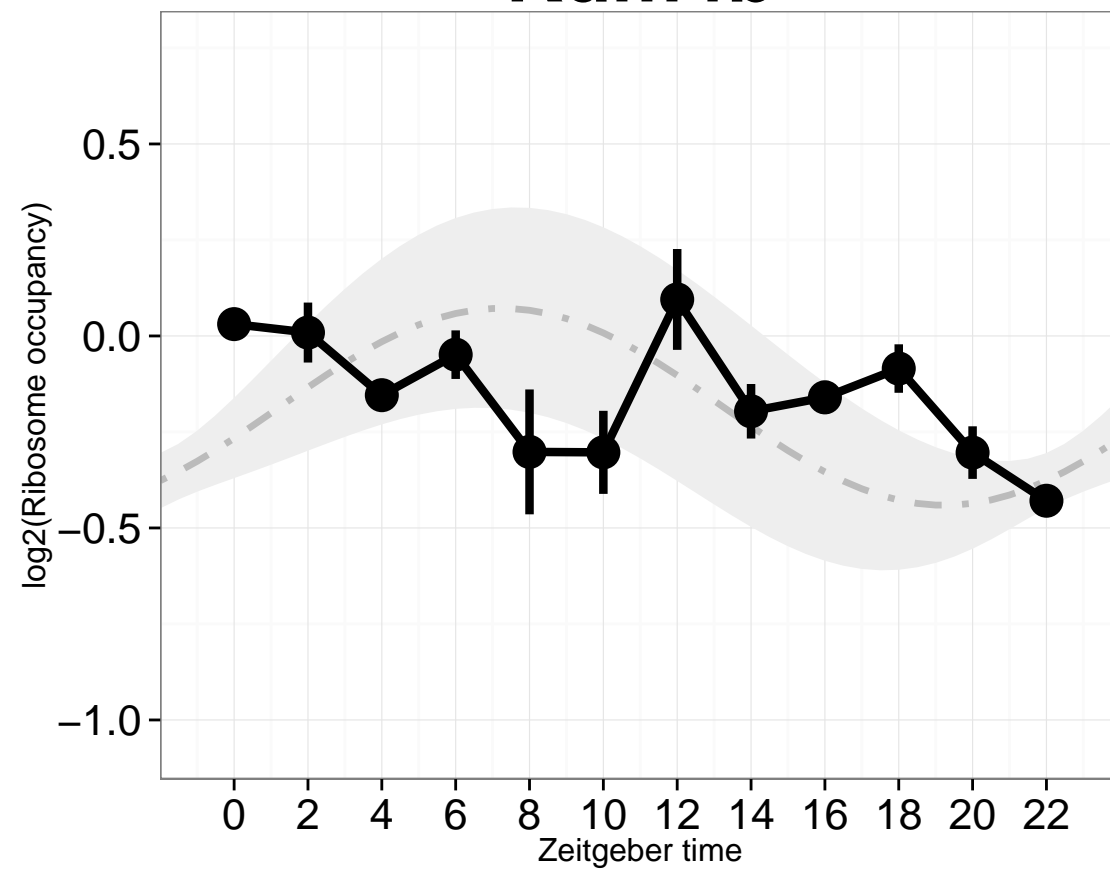

Supplement: SuppDataset_1.zip [file Kdm4b_set_A.pdf › Supplemental Dataset 1/A-mRNA_nonrhyth_translation_nonrhyth/Kdm4b_set_A.pdf]

## Kdm4c

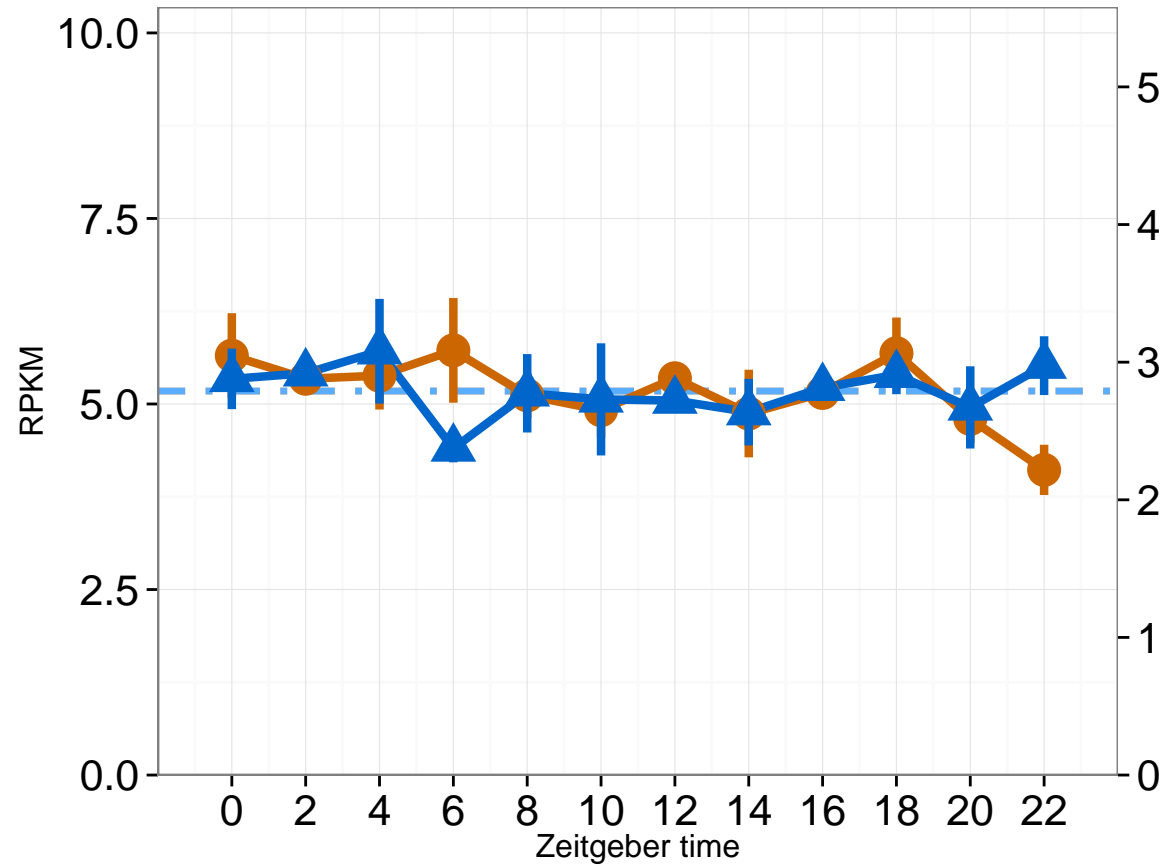

## Kdm4c

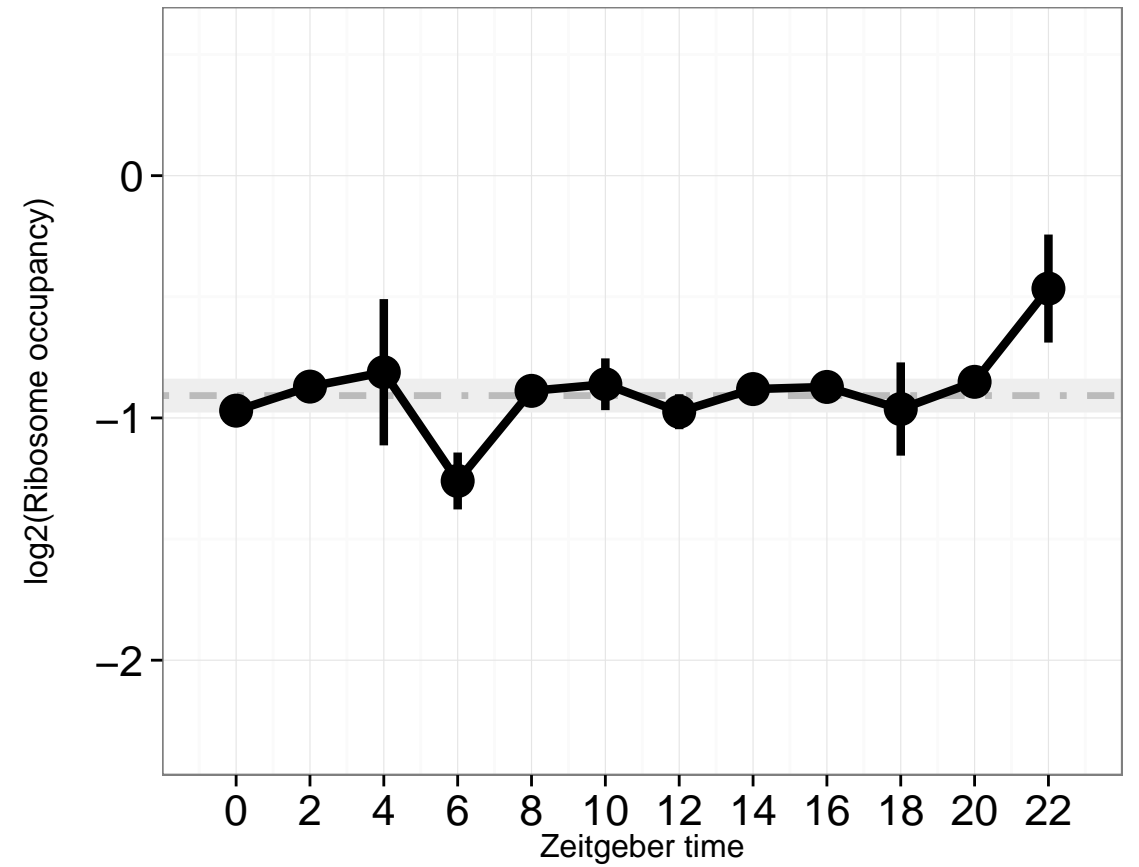

Supplement: SuppDataset_1.zip [file Kdm4c_set_A.pdf › Supplemental Dataset 1/A-mRNA_nonrhyth_translation_nonrhyth/Kdm4c_set_A.pdf]

# Kdm5a

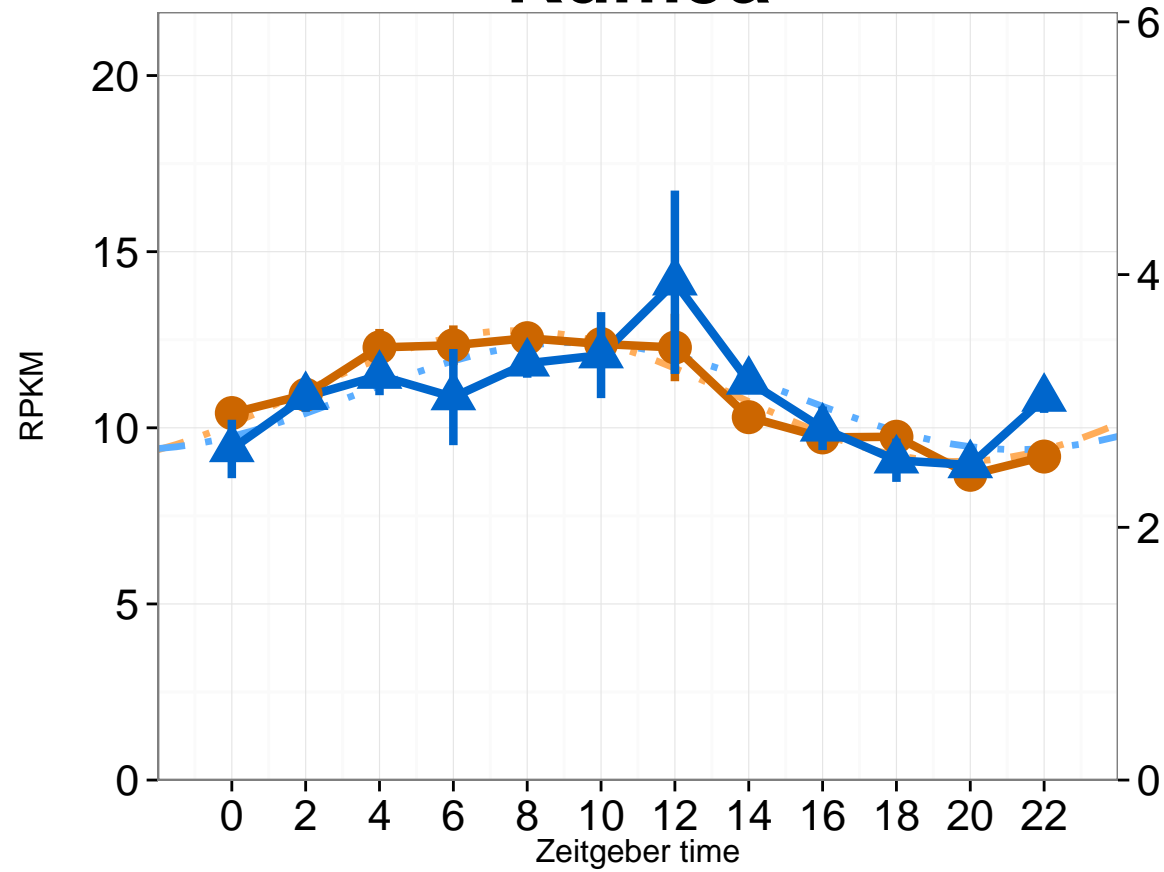

# Kdm5a

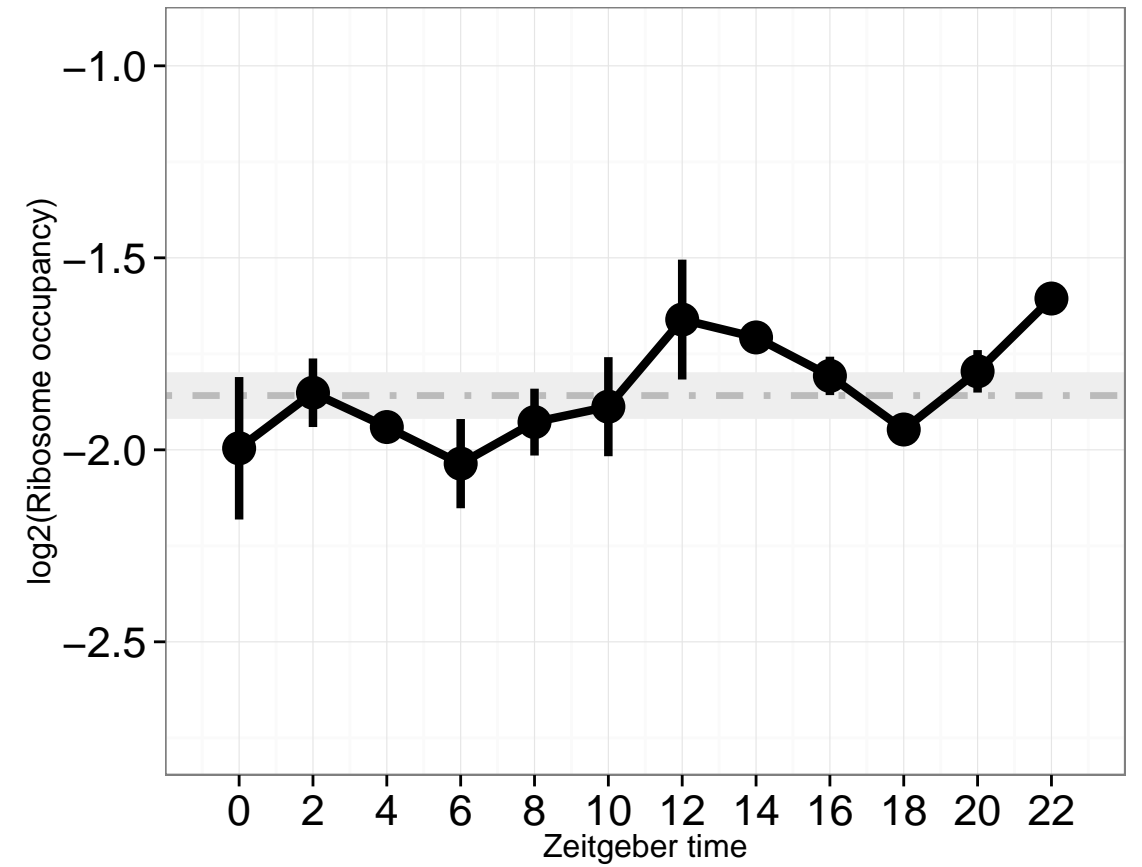

Supplement: SuppDataset_1.zip [file Kdm5a_set_A.pdf › Supplemental Dataset 1/A-mRNA_nonrhyth_translation_nonrhyth/Kdm5a_set_A.pdf]

# Kdm5b

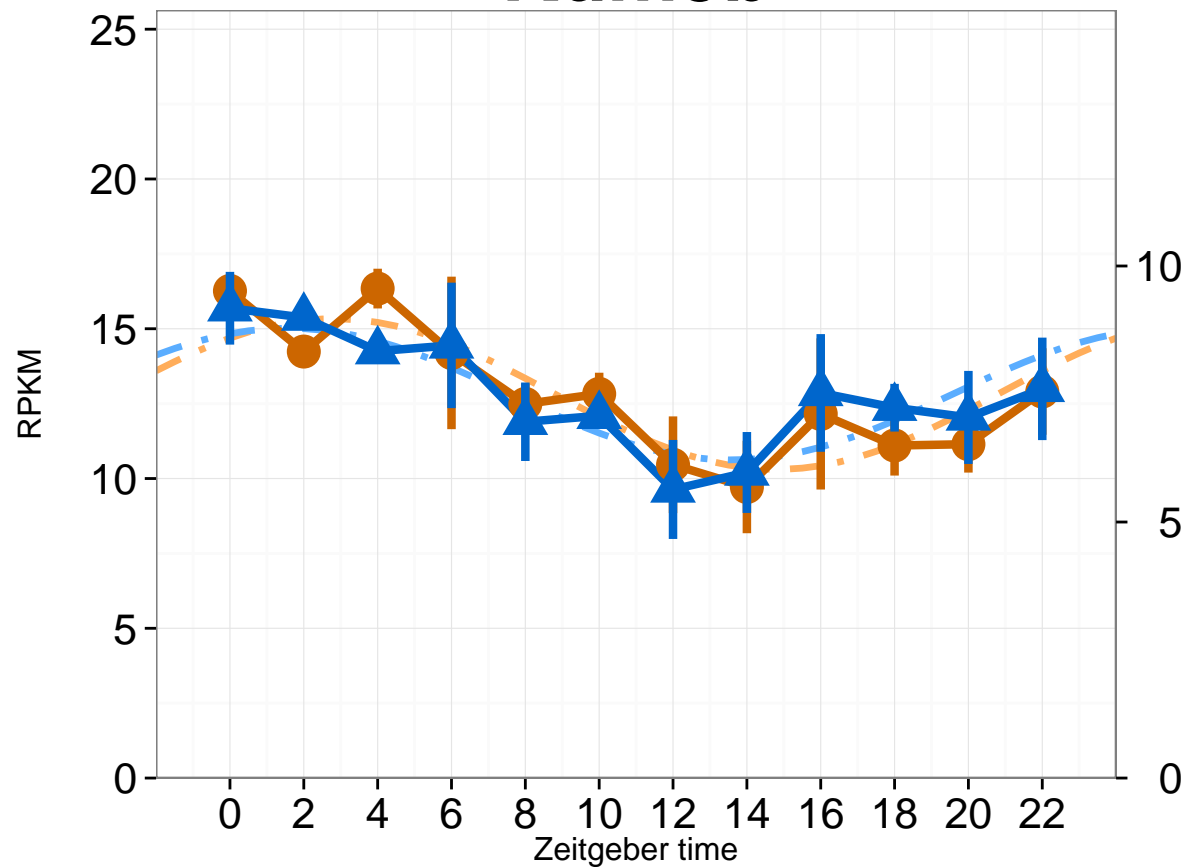

# Kdm5b

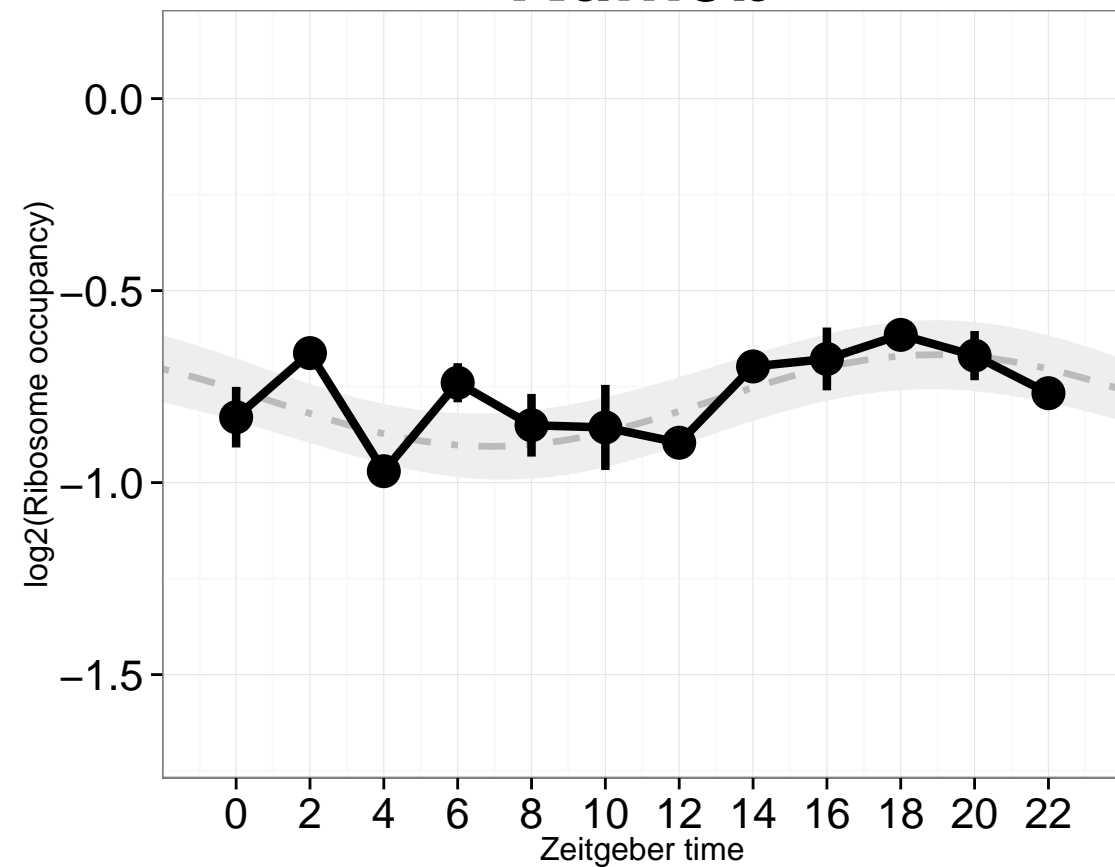

Supplement: SuppDataset_1.zip [file Kdm5b_set_A.pdf › Supplemental Dataset 1/A-mRNA_nonrhyth_translation_nonrhyth/Kdm5b_set_A.pdf]

## Kdm5c

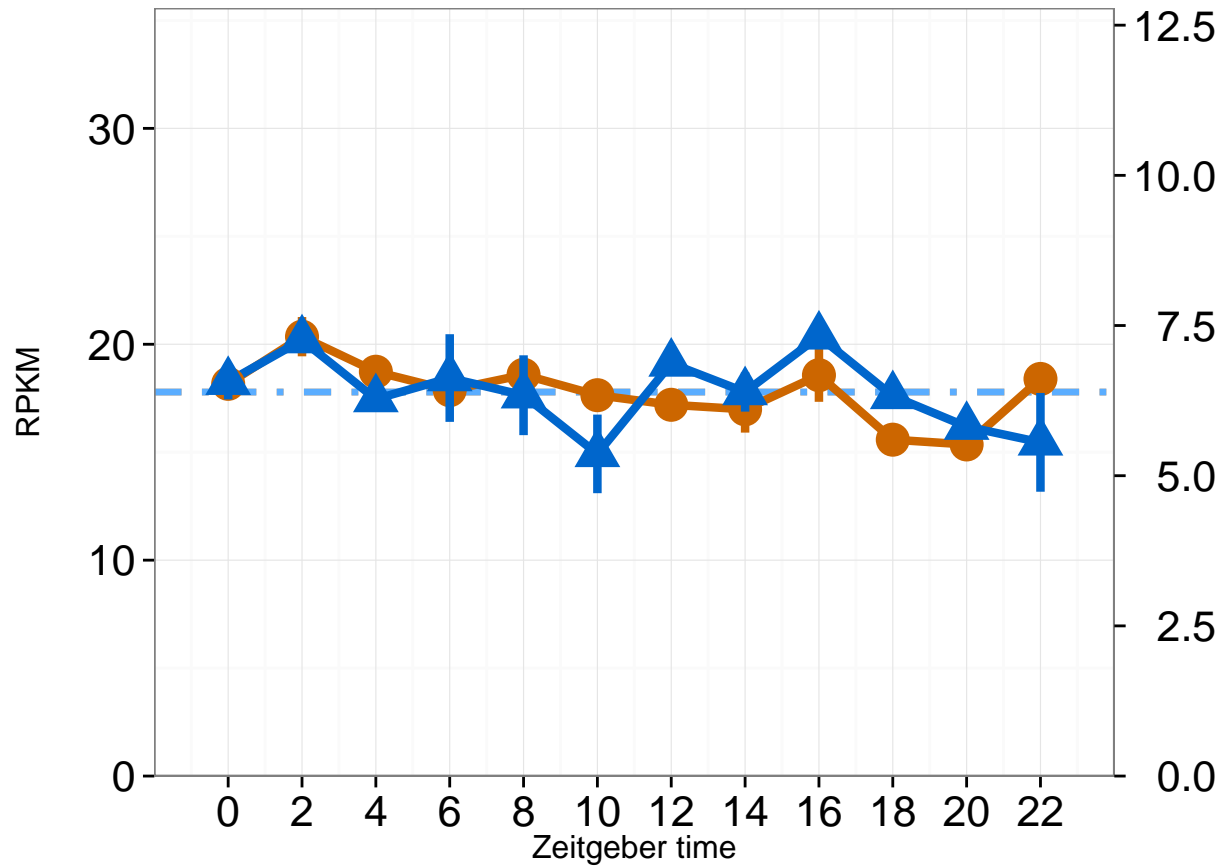

## Kdm5c

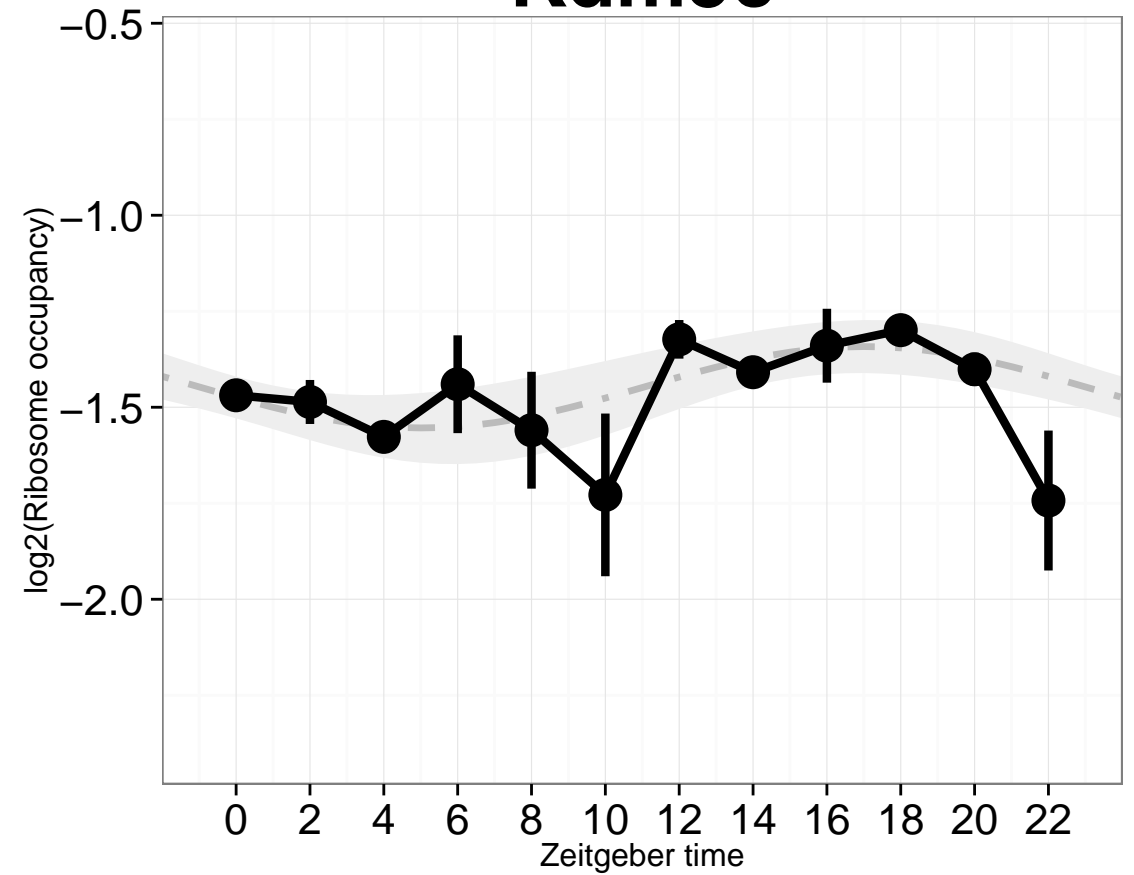

Supplement: SuppDataset_1.zip [file Kdm5c_set_A.pdf › Supplemental Dataset 1/A-mRNA_nonrhyth_translation_nonrhyth/Kdm5c_set_A.pdf]

## Kdm5d

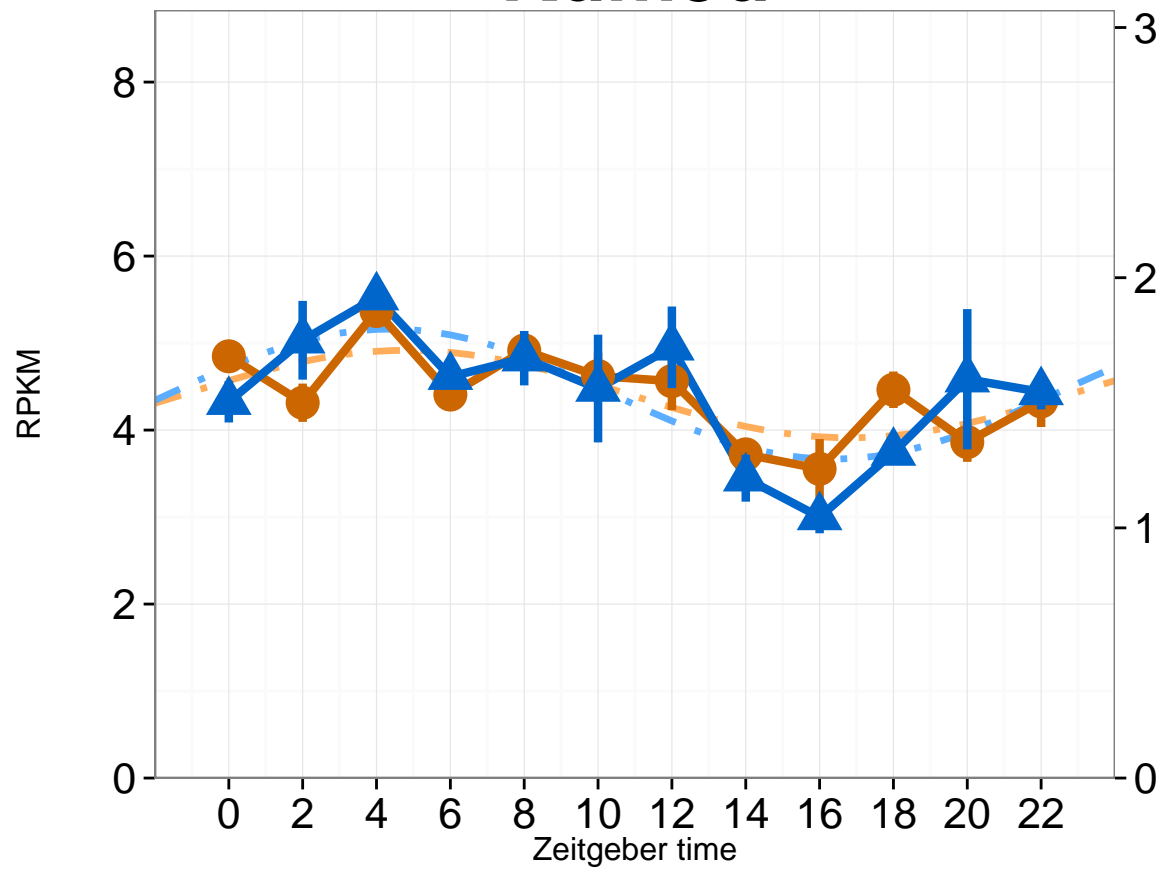

## Kdm5d

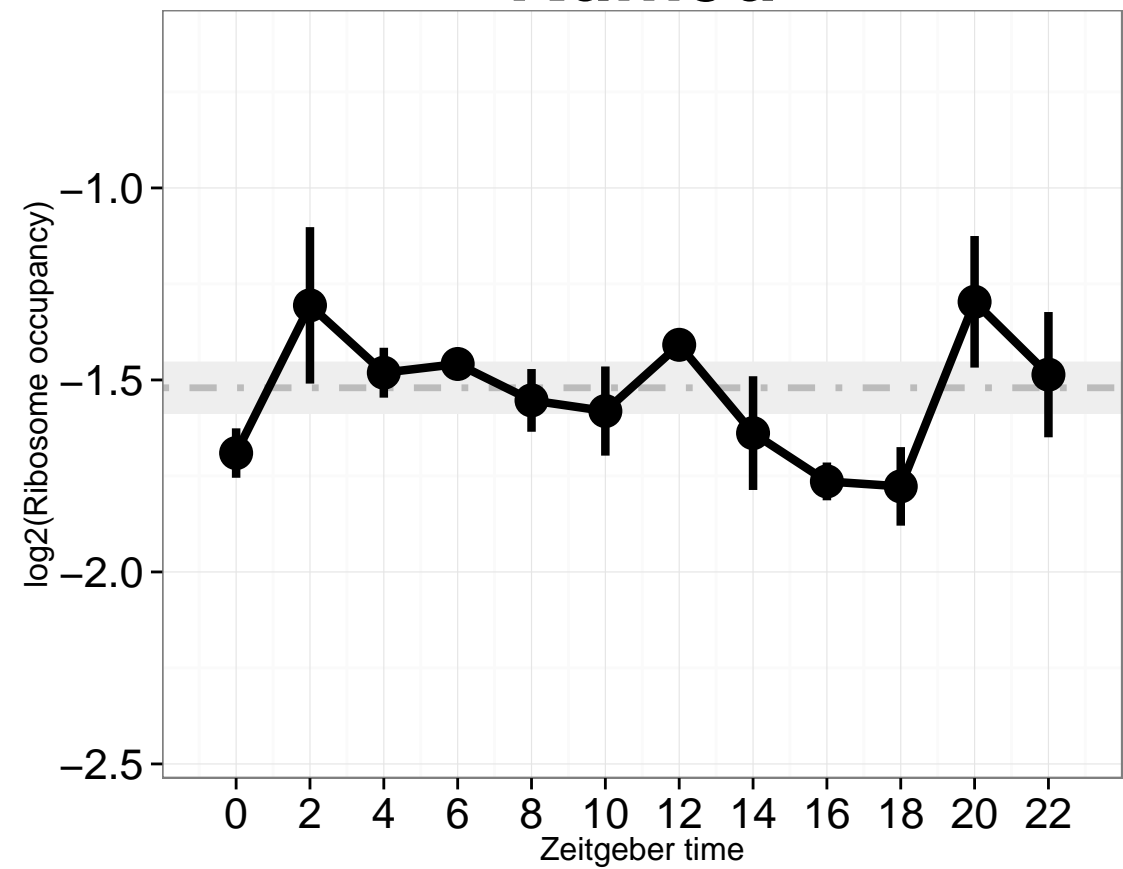

Supplement: SuppDataset_1.zip [file Kdm5d_set_A.pdf › Supplemental Dataset 1/A-mRNA_nonrhyth_translation_nonrhyth/Kdm5d_set_A.pdf]

# Kdm6a

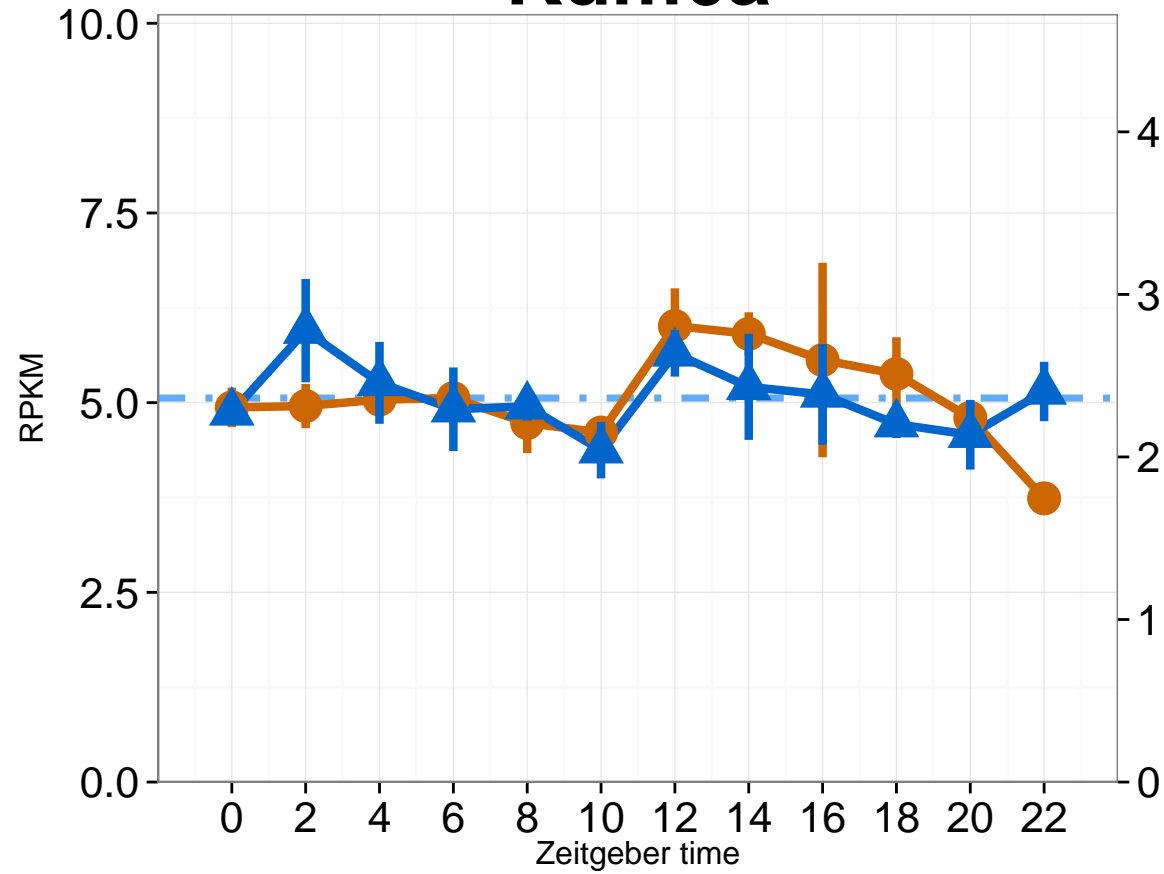

# Kdm6a

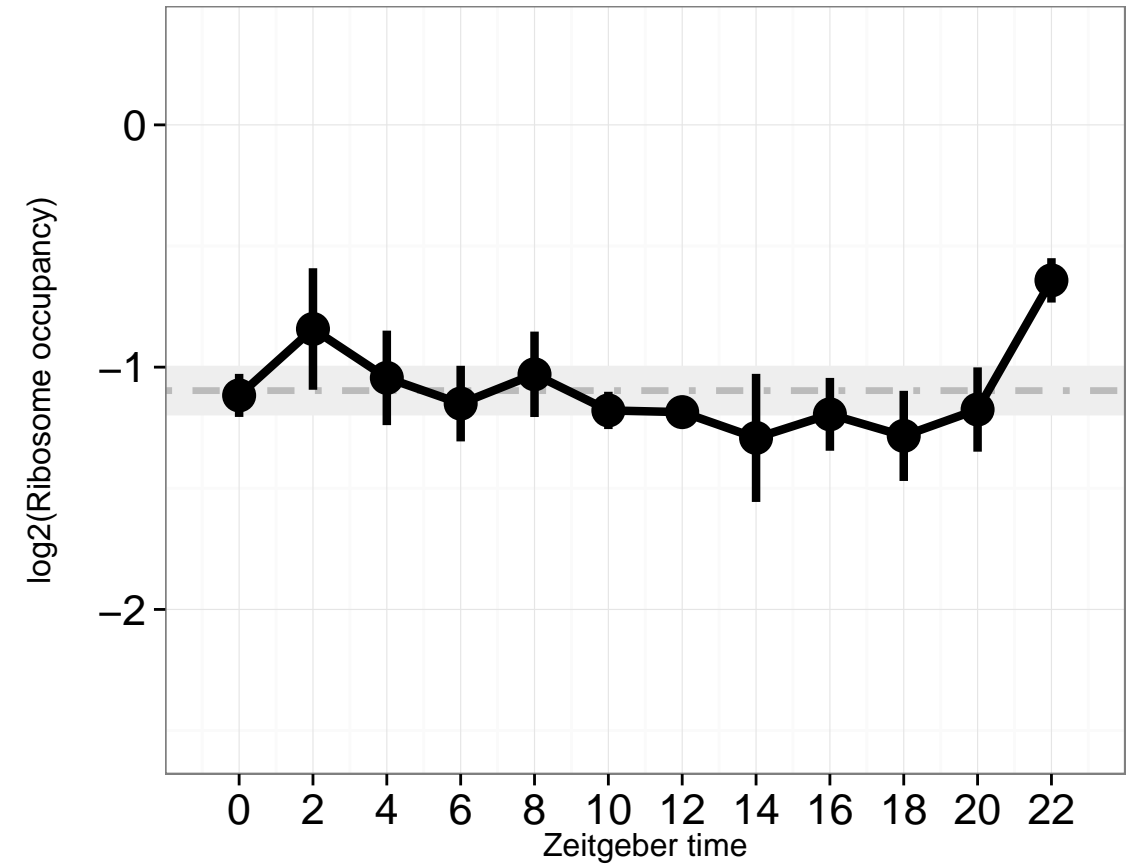

Supplement: SuppDataset_1.zip [file Kdm6a_set_A.pdf › Supplemental Dataset 1/A-mRNA_nonrhyth_translation_nonrhyth/Kdm6a_set_A.pdf]

## Kdm6b

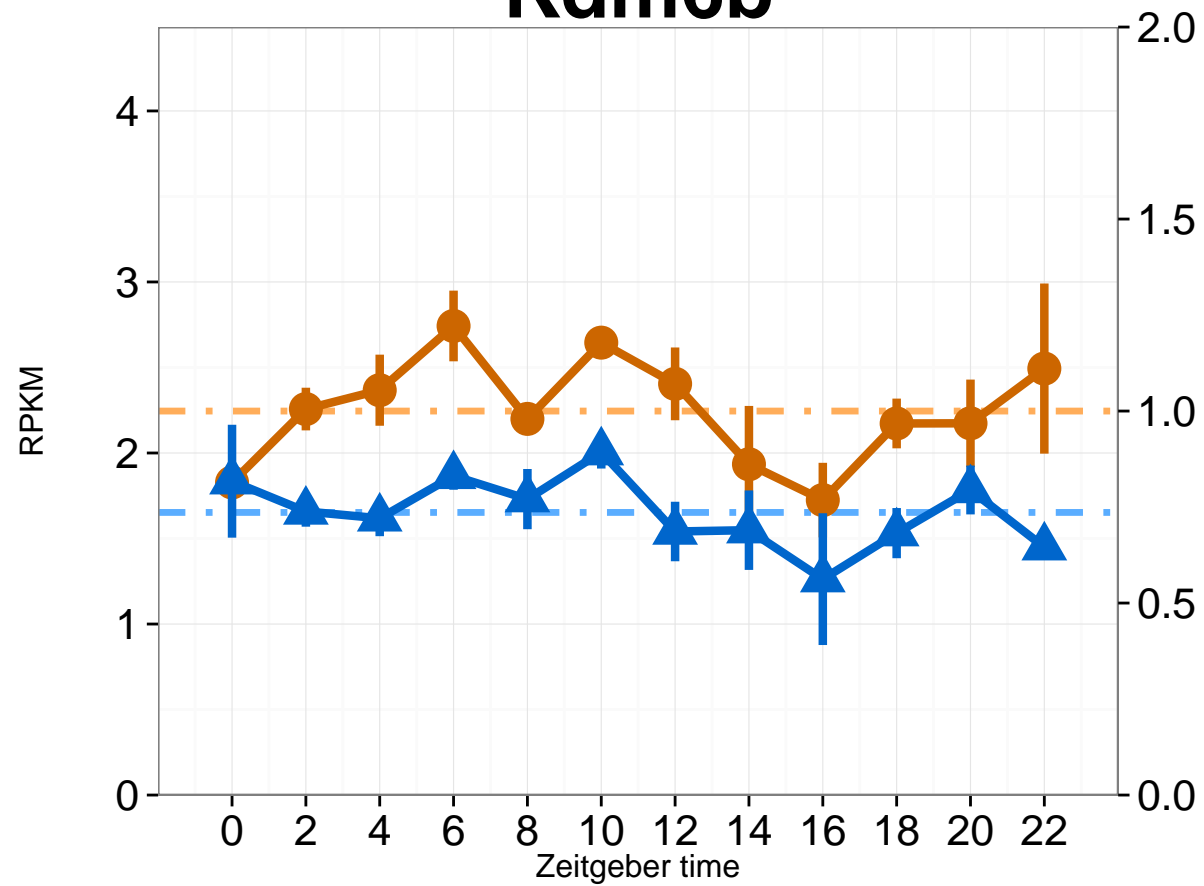

## Kdm6b

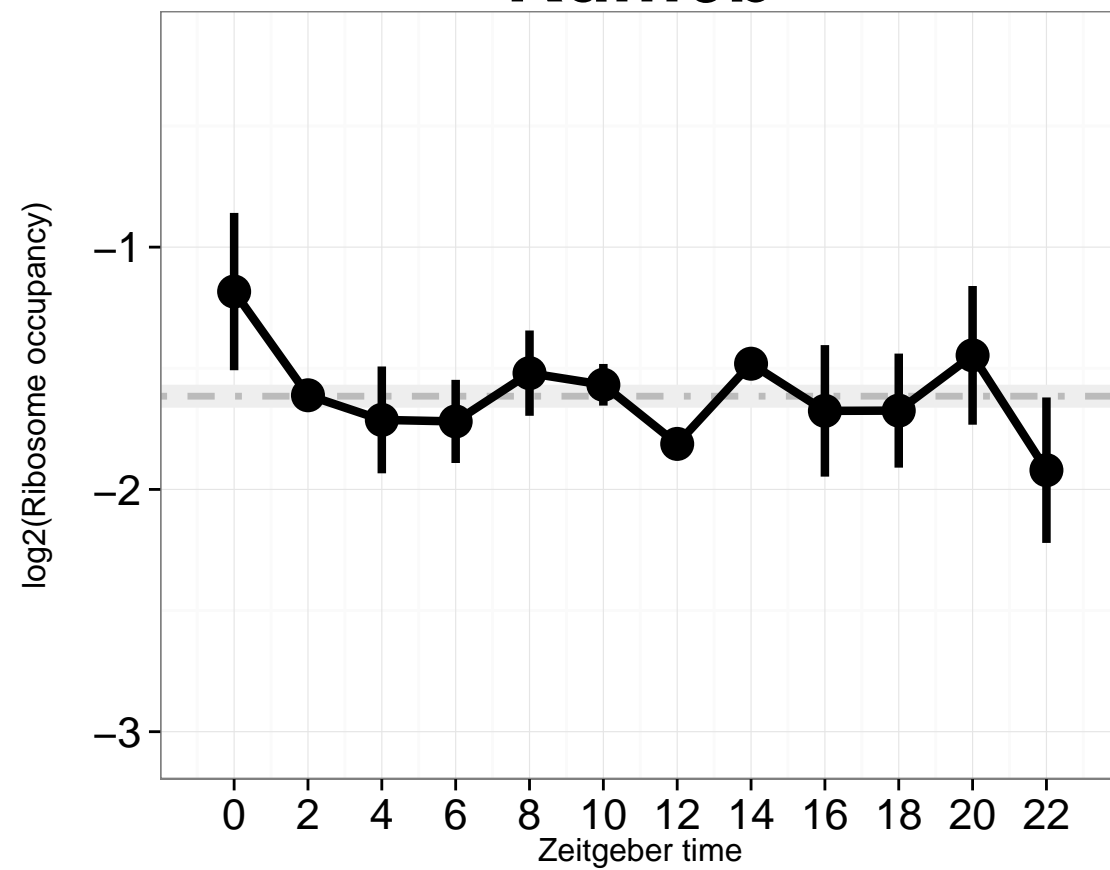

Supplement: SuppDataset_1.zip [file Kdm6b_set_A.pdf › Supplemental Dataset 1/A-mRNA_nonrhyth_translation_nonrhyth/Kdm6b_set_A.pdf]

# Kdm8

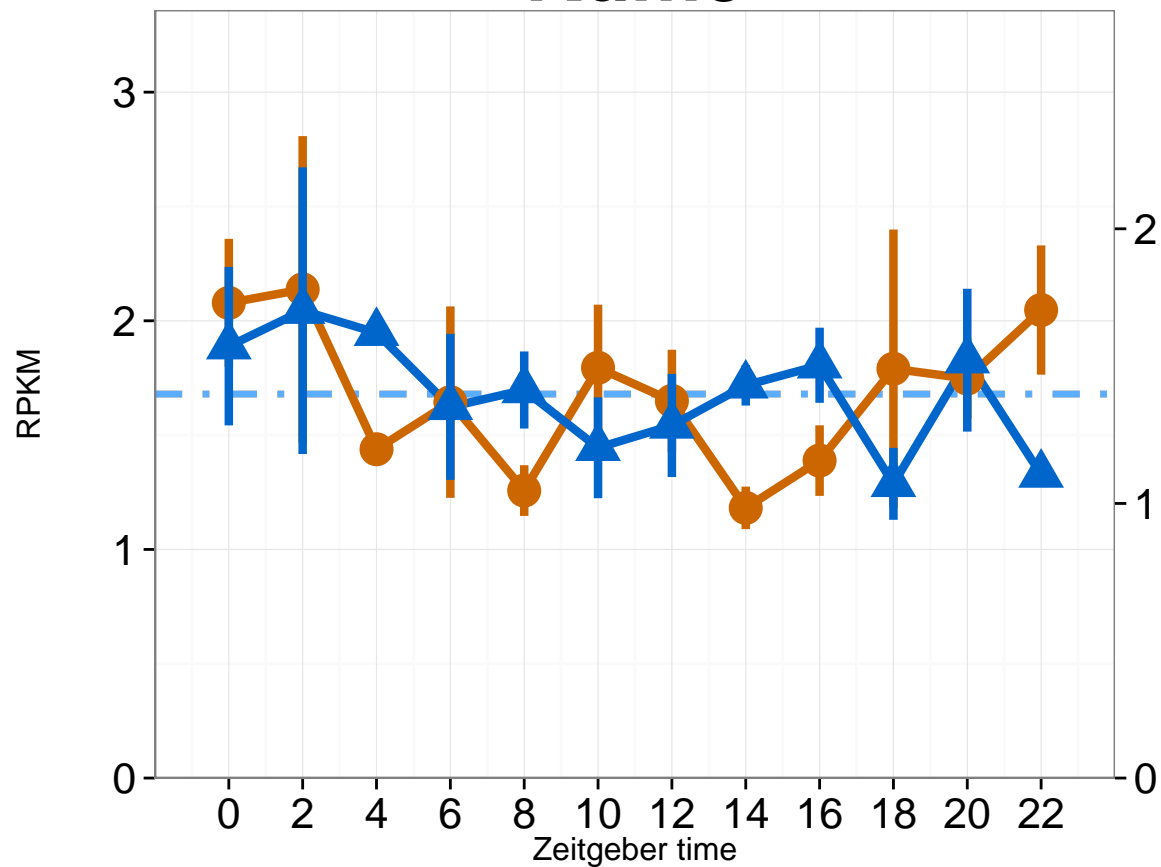

# Kdm8

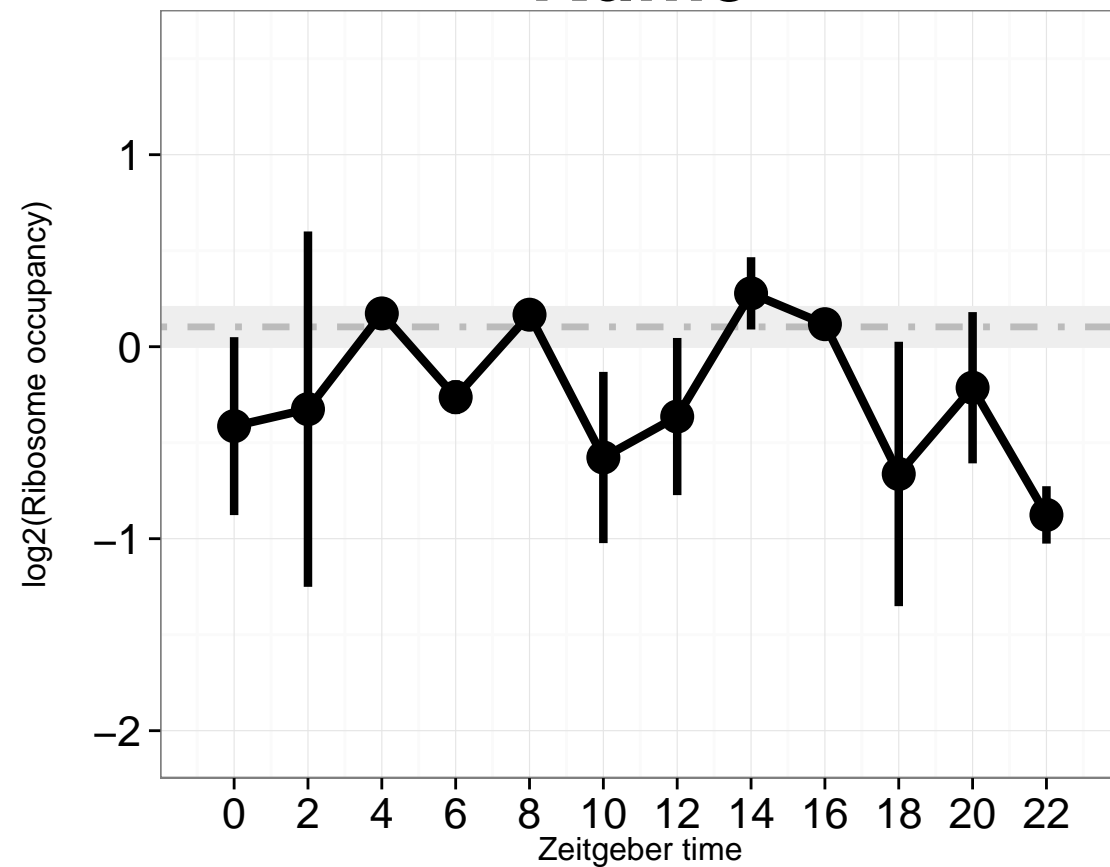

Supplement: SuppDataset_1.zip [file Kdm8_set_A.pdf › Supplemental Dataset 1/A-mRNA_nonrhyth_translation_nonrhyth/Kdm8_set_A.pdf]

## Kdr

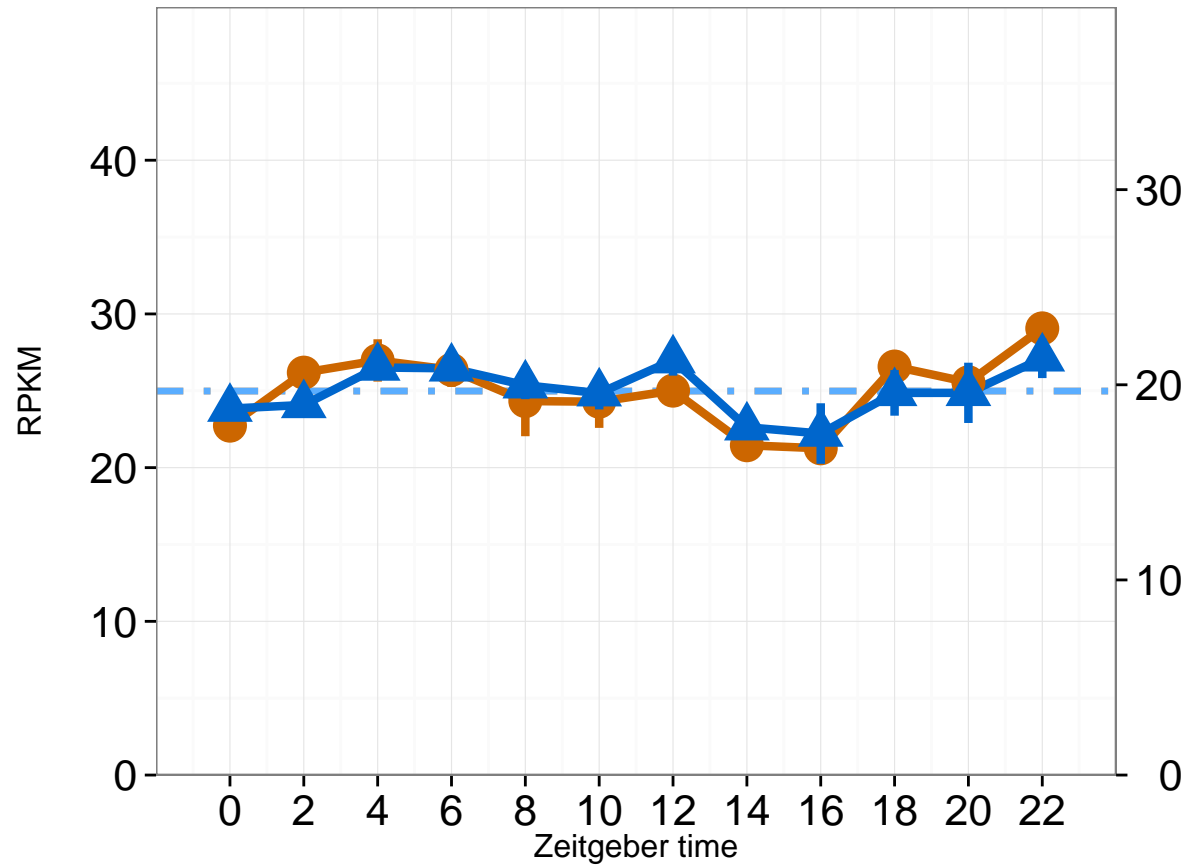

## Kdr

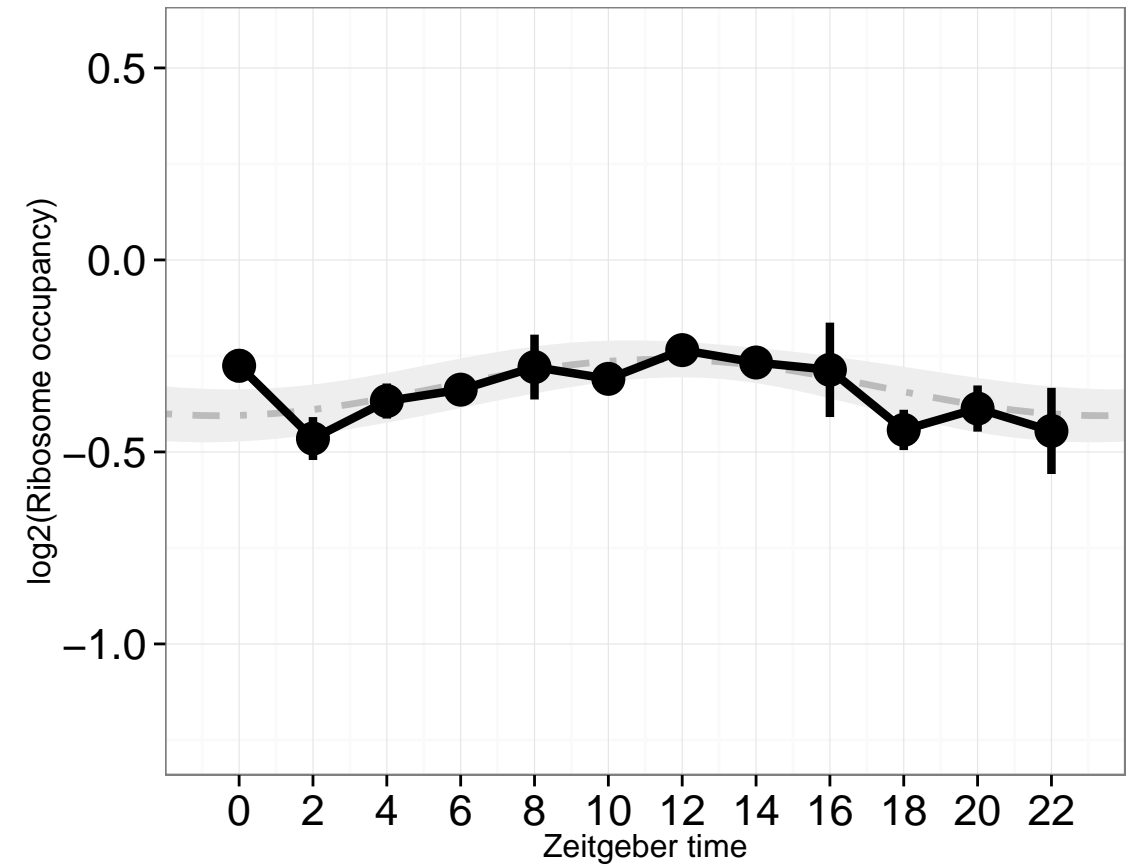

Supplement: SuppDataset_1.zip [file Kdr_set_A.pdf › Supplemental Dataset 1/A-mRNA_nonrhyth_translation_nonrhyth/Kdr_set_A.pdf]

## Kdsr

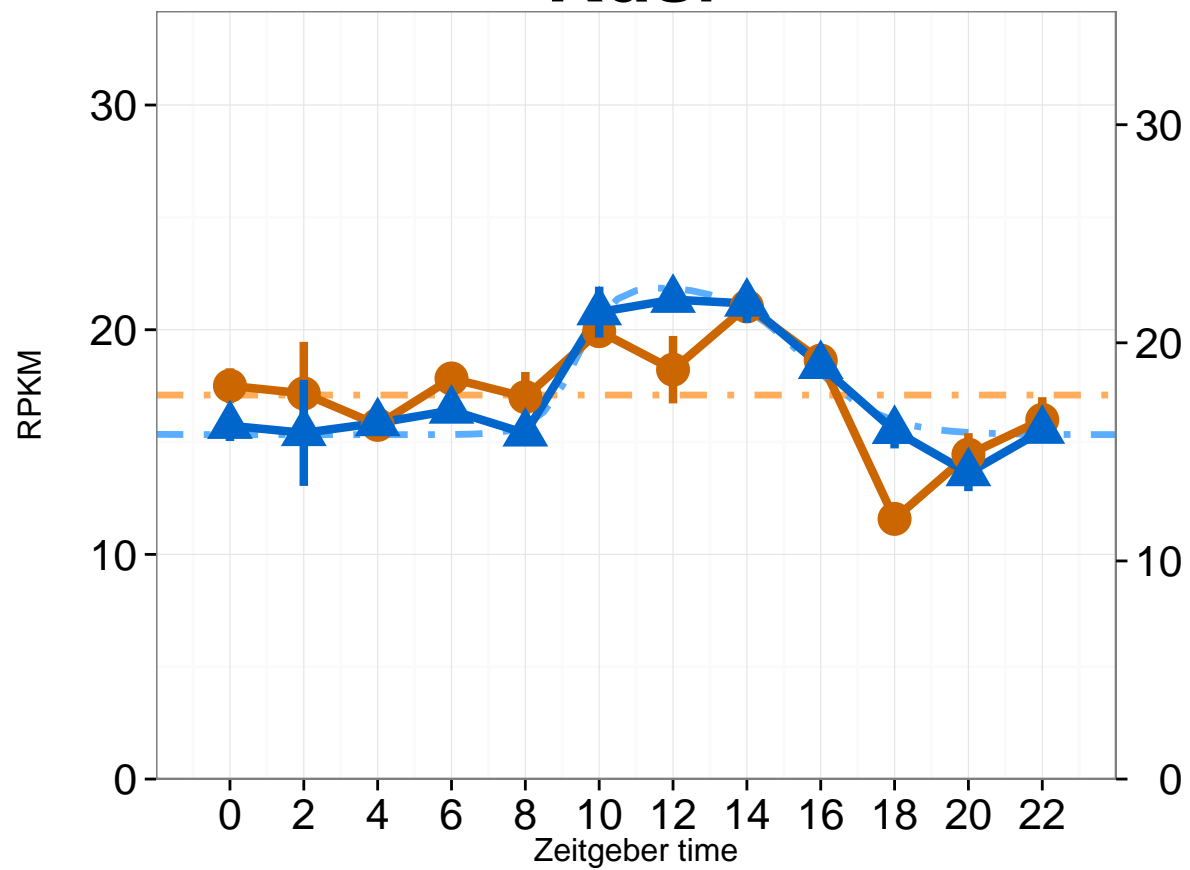

## Kdsr

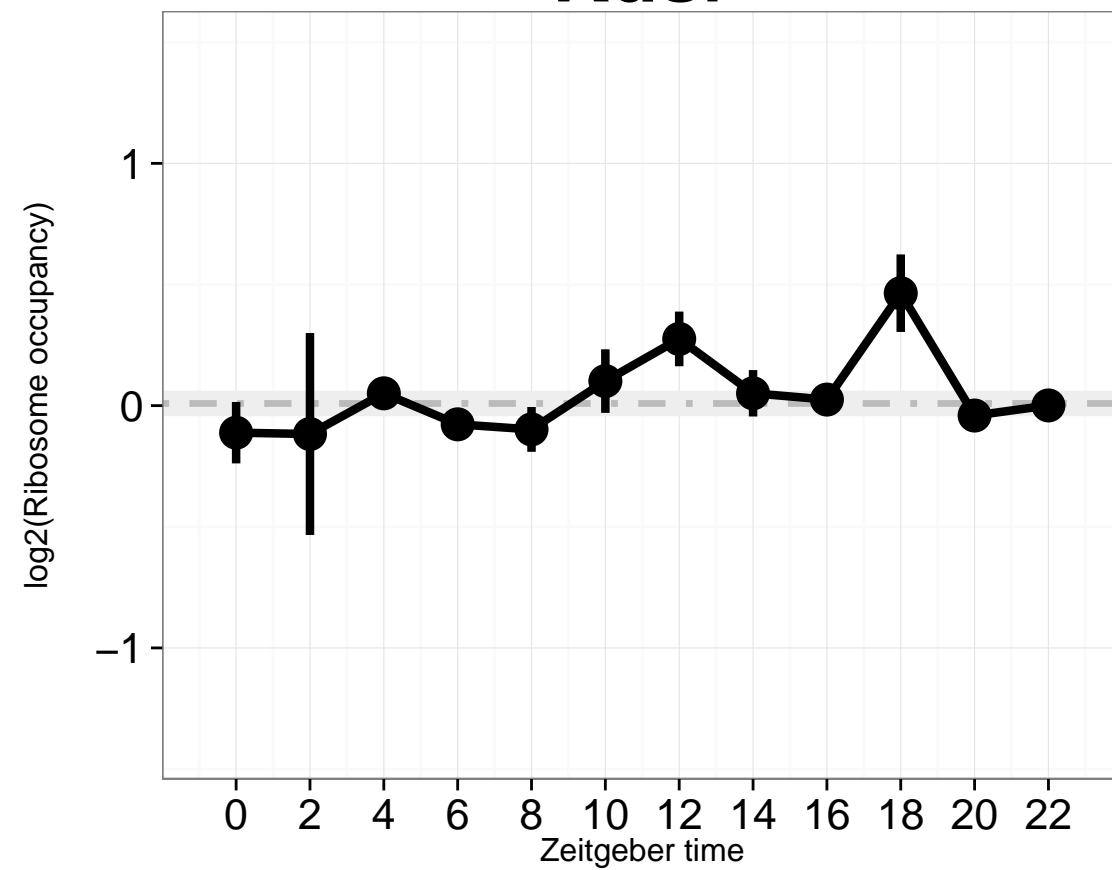

Supplement: SuppDataset_1.zip [file Kdsr_set_A.pdf › Supplemental Dataset 1/A-mRNA_nonrhyth_translation_nonrhyth/Kdsr_set_A.pdf]

# Keap1

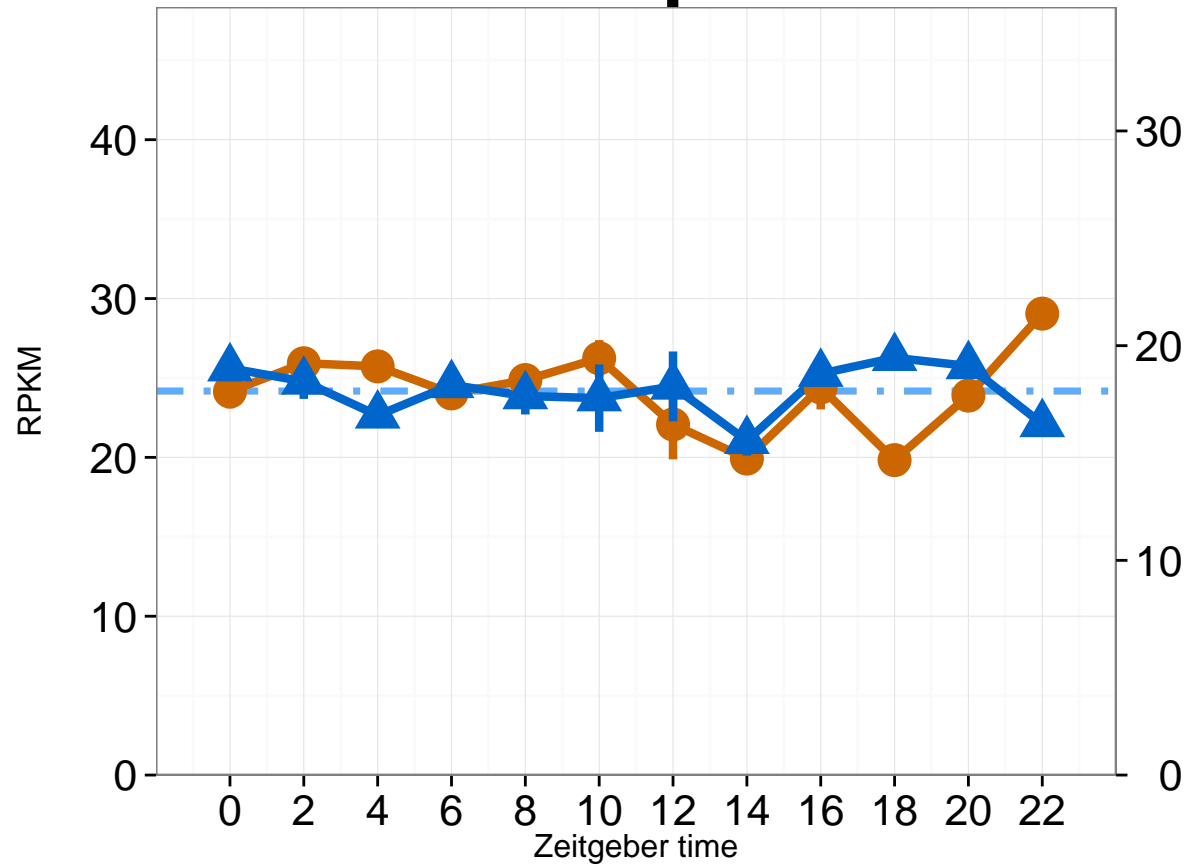

# Keap1

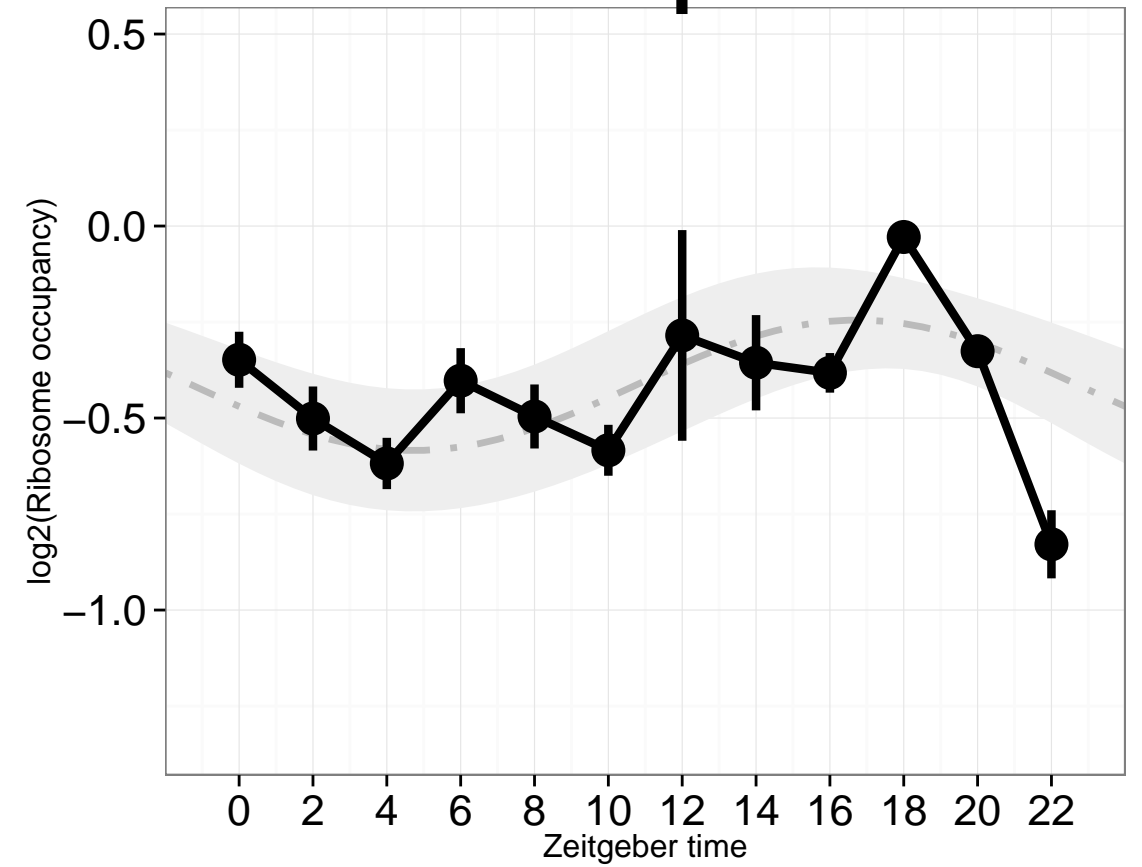

Supplement: SuppDataset_1.zip [file Keap1_set_A.pdf › Supplemental Dataset 1/A-mRNA_nonrhyth_translation_nonrhyth/Keap1_set_A.pdf]

# Keg1

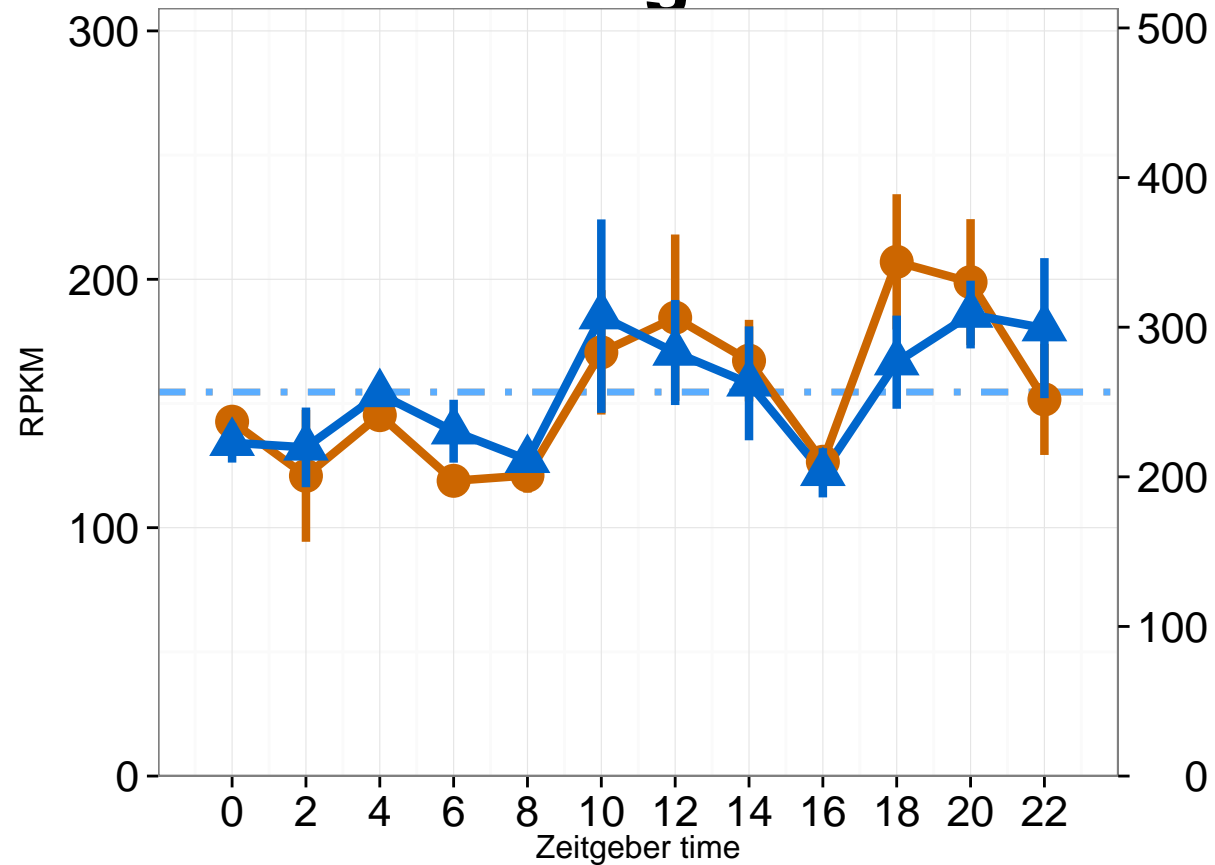

# Keg1

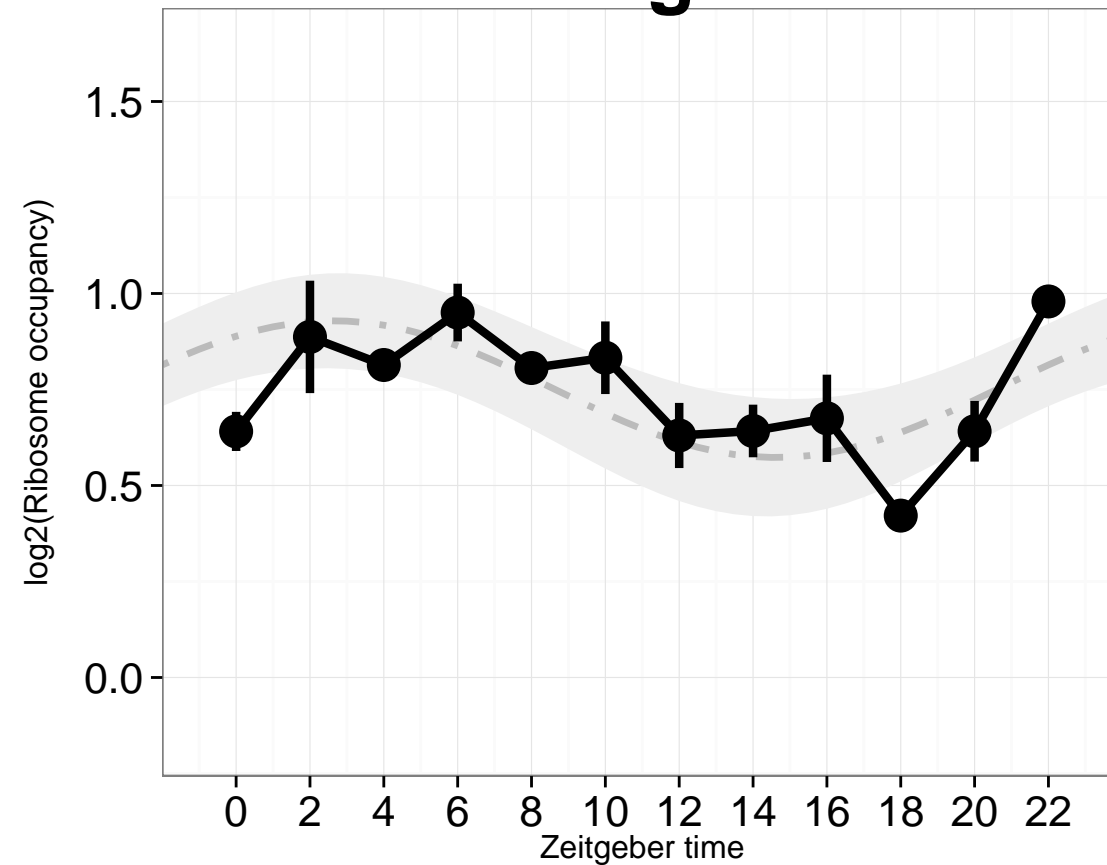

Supplement: SuppDataset_1.zip [file Keg1_set_A.pdf › Supplemental Dataset 1/A-mRNA_nonrhyth_translation_nonrhyth/Keg1_set_A.pdf]

## Khdrbs1

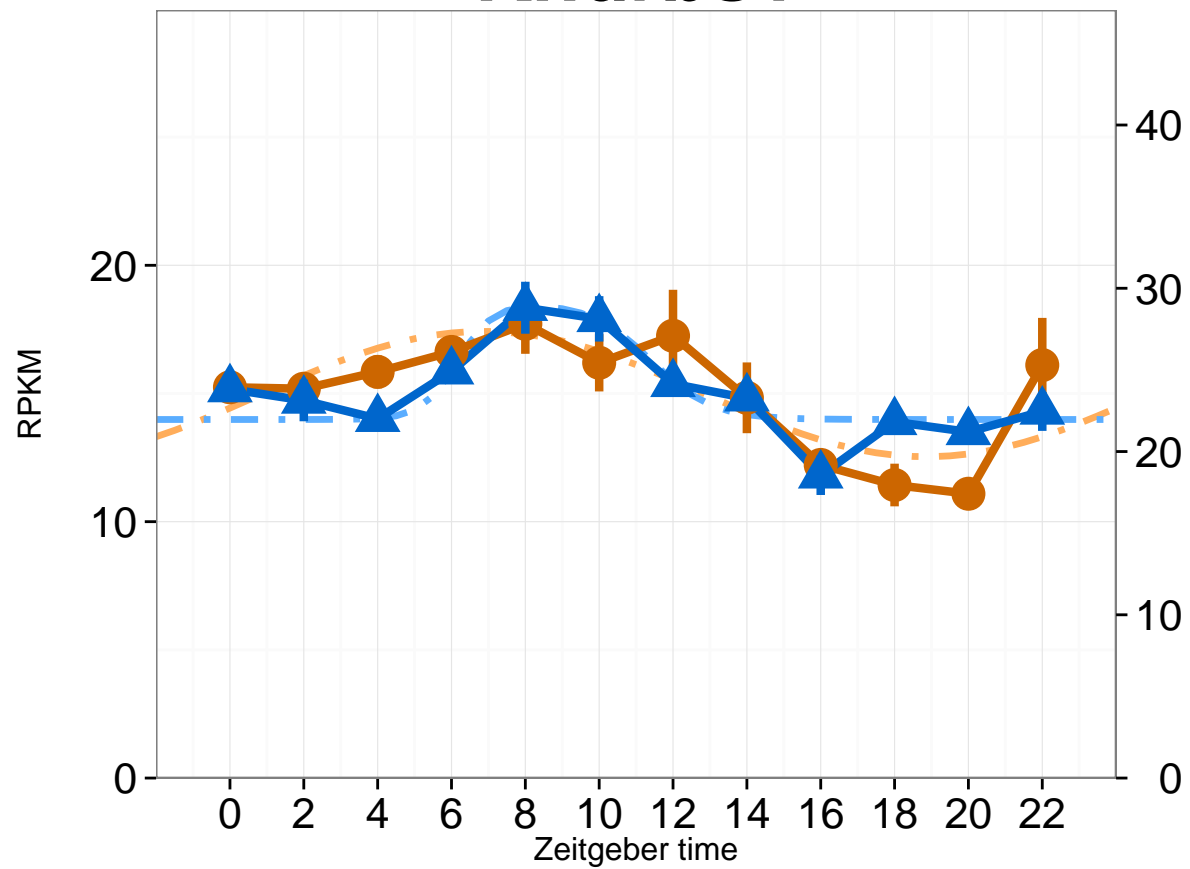

## Khdrbs1

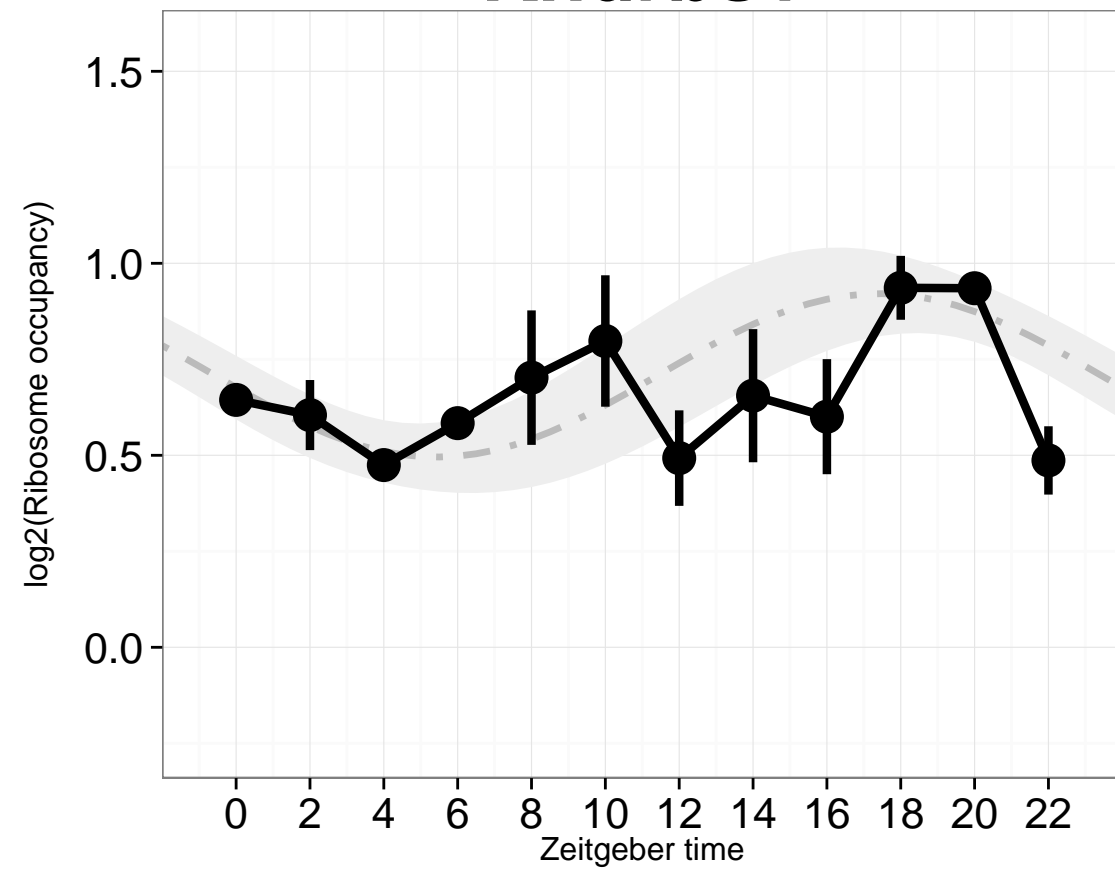

Supplement: SuppDataset_1.zip [file Khdrbs1_set_A.pdf › Supplemental Dataset 1/A-mRNA_nonrhyth_translation_nonrhyth/Khdrbs1_set_A.pdf]

## Khdrbs3

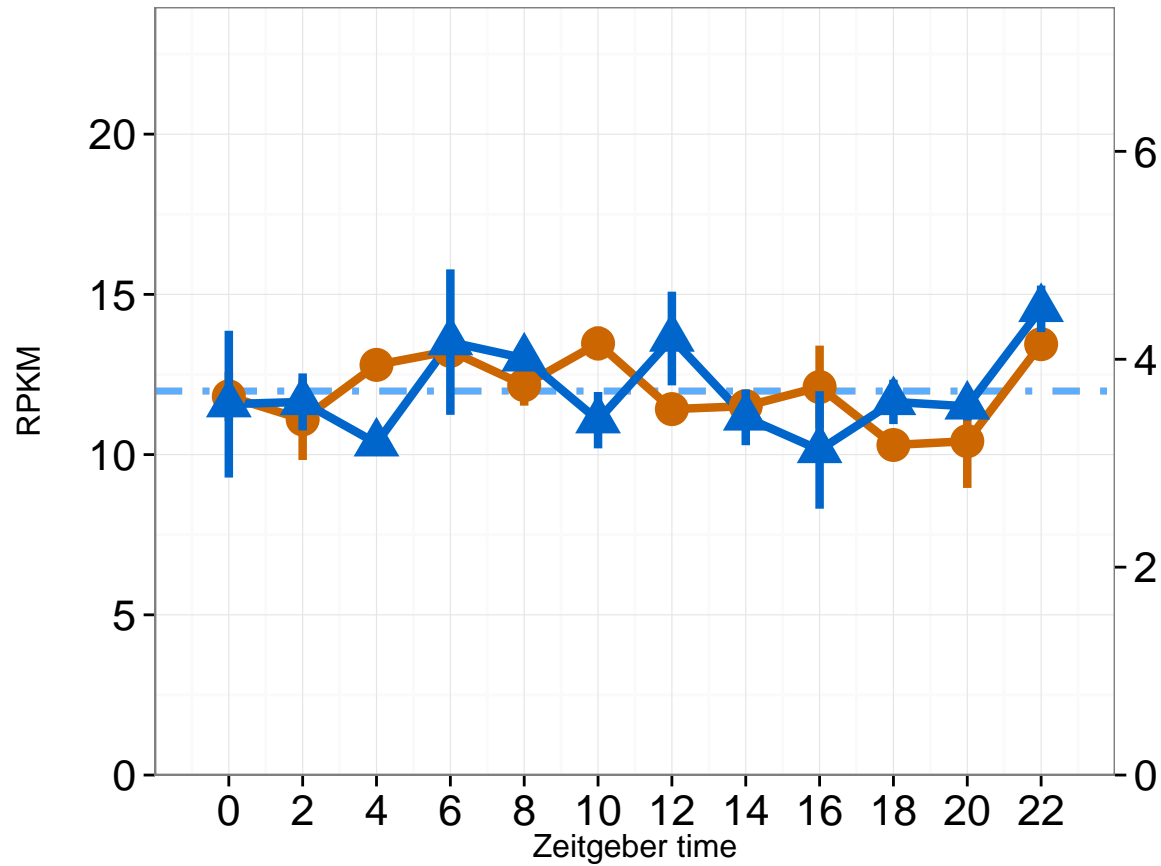

## Khdrbs3

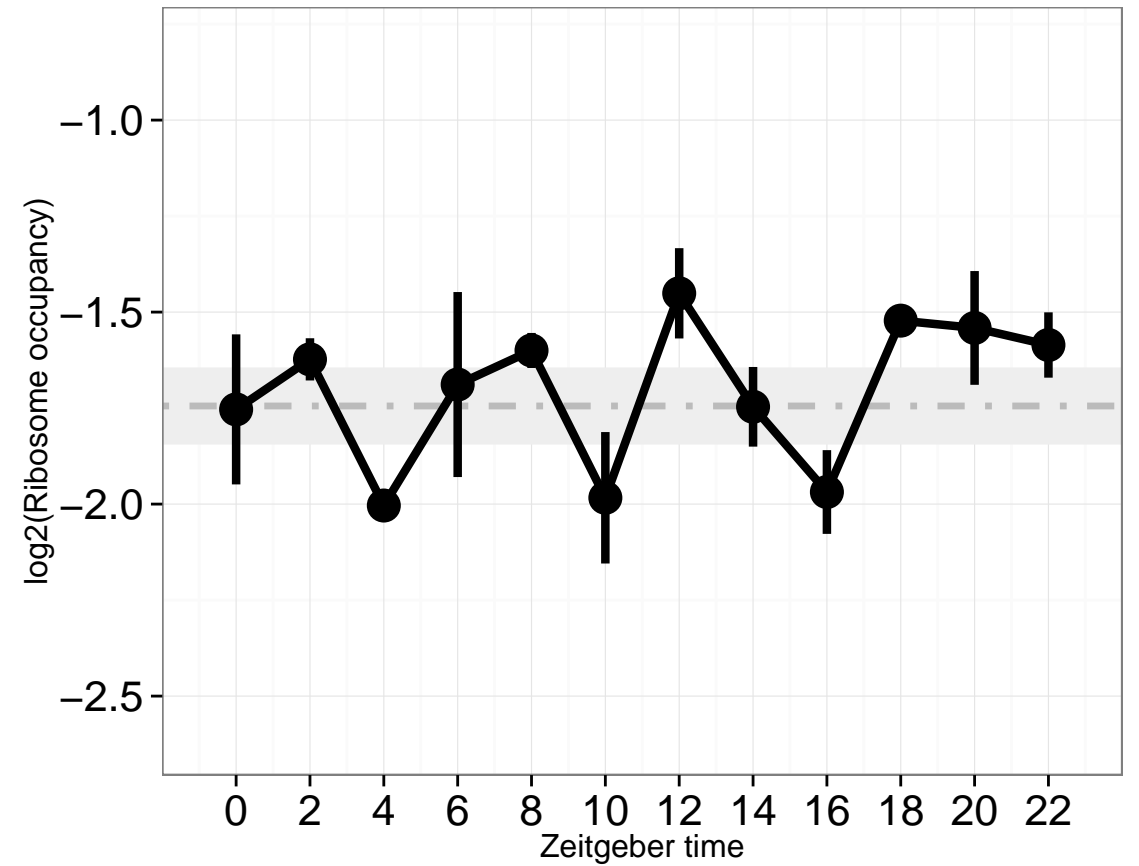

Supplement: SuppDataset_1.zip [file Khdrbs3_set_A.pdf › Supplemental Dataset 1/A-mRNA_nonrhyth_translation_nonrhyth/Khdrbs3_set_A.pdf]

## Khsrp

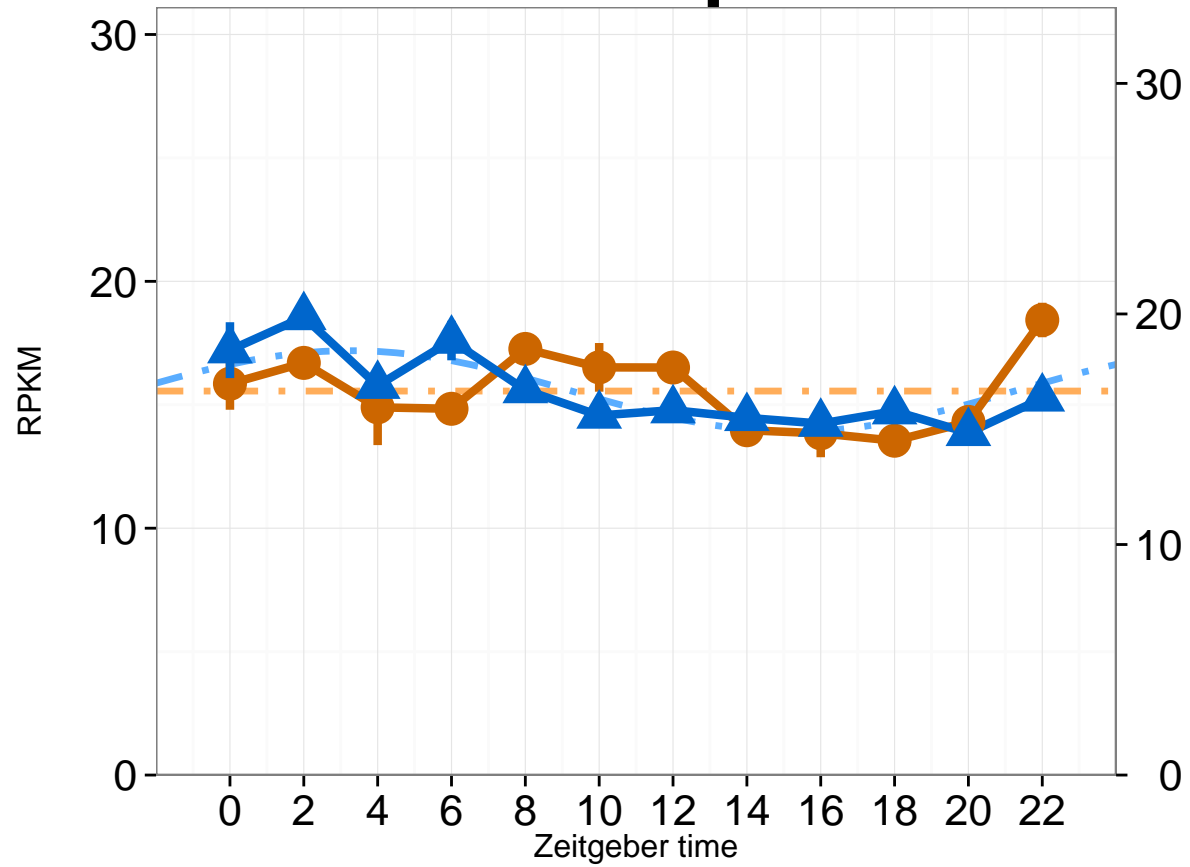

## Khsrp

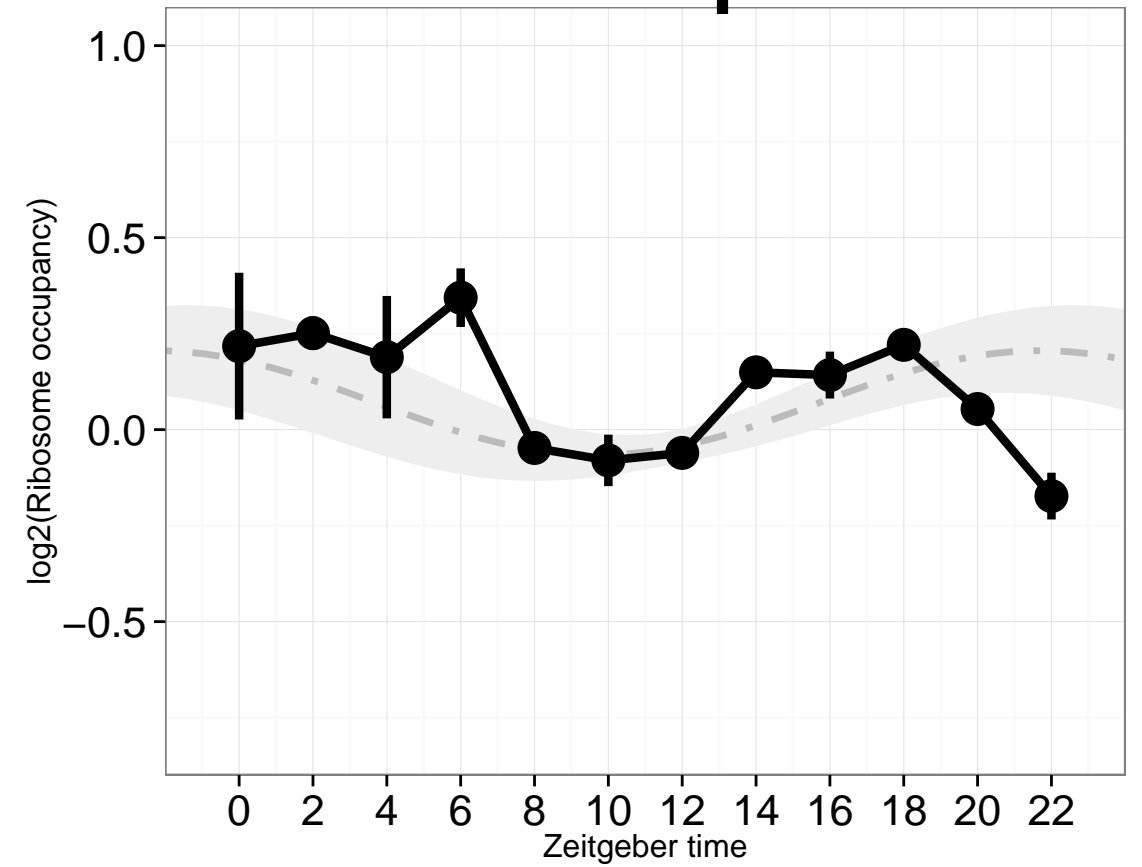

Supplement: SuppDataset_1.zip [file Khsrp_set_A.pdf › Supplemental Dataset 1/A-mRNA_nonrhyth_translation_nonrhyth/Khsrp_set_A.pdf]

## Kidins220

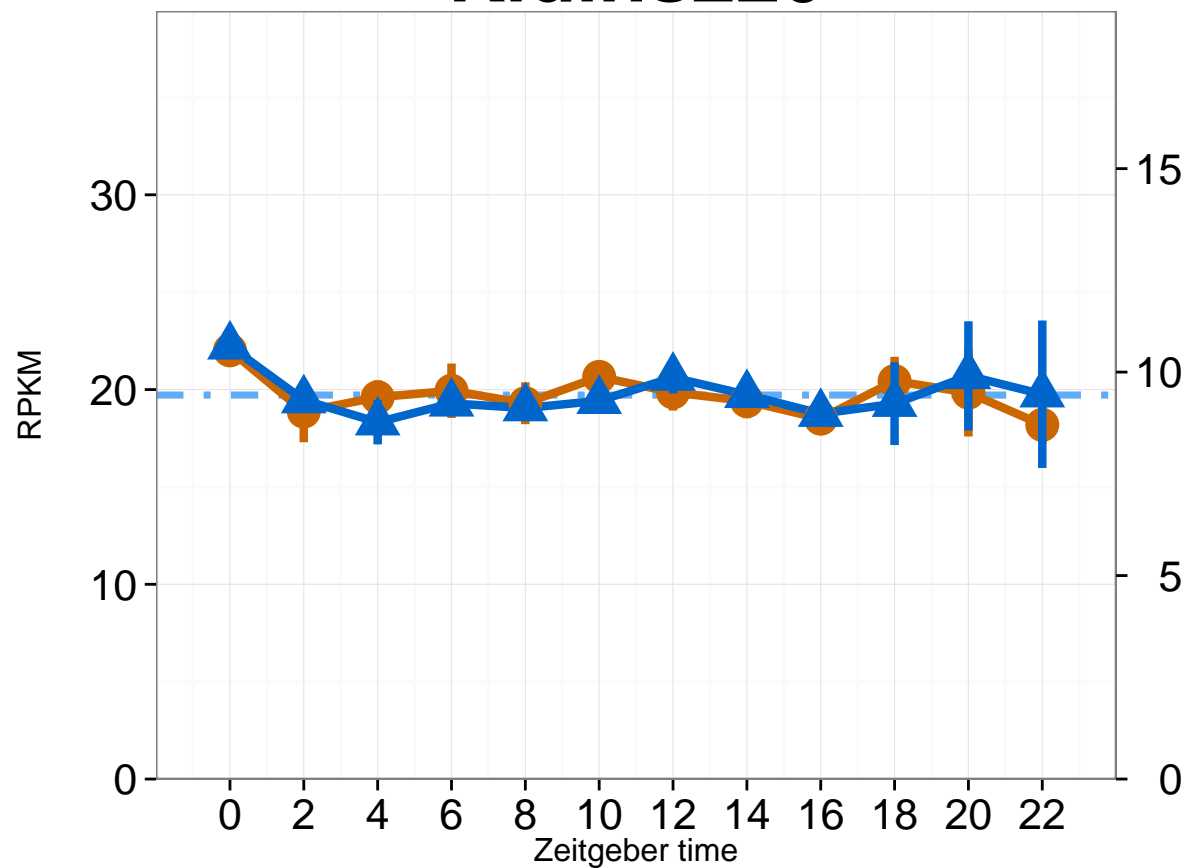

## Kidins220

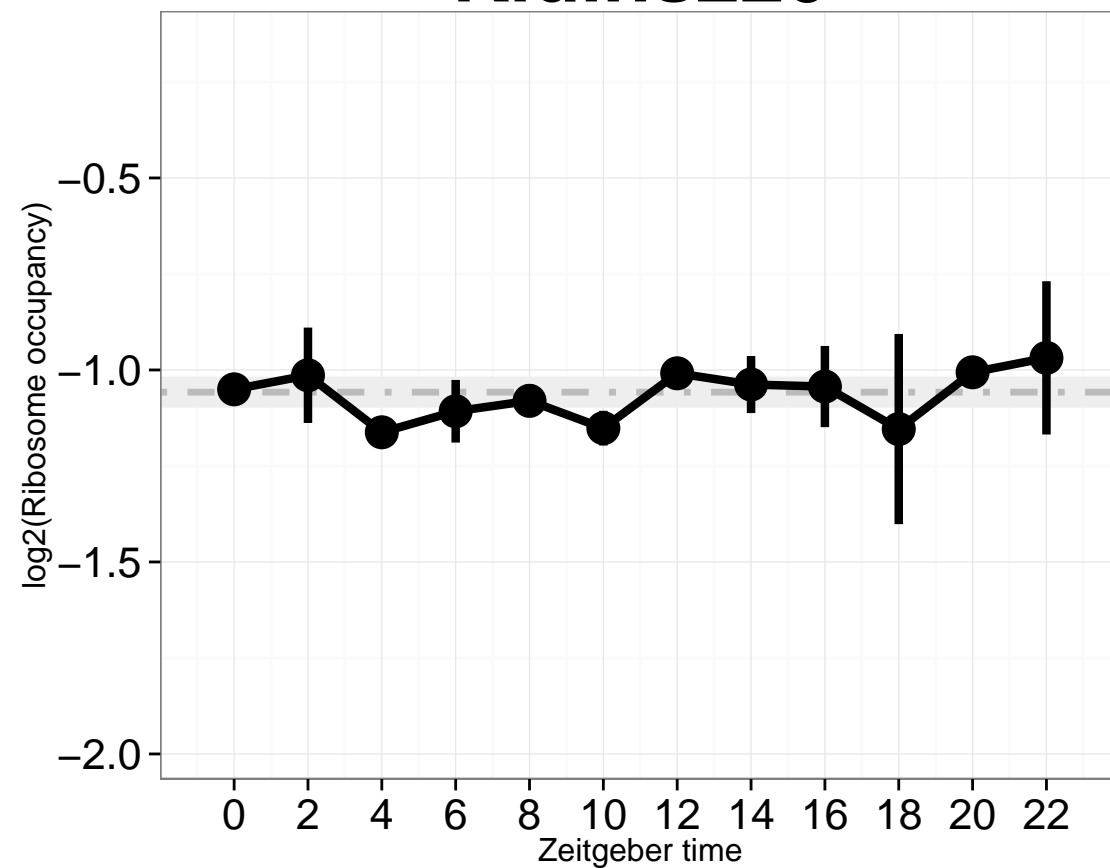

Supplement: SuppDataset_1.zip [file Kidins220_set_A.pdf › Supplemental Dataset 1/A-mRNA_nonrhyth_translation_nonrhyth/Kidins220_set_A.pdf]

## Kif11

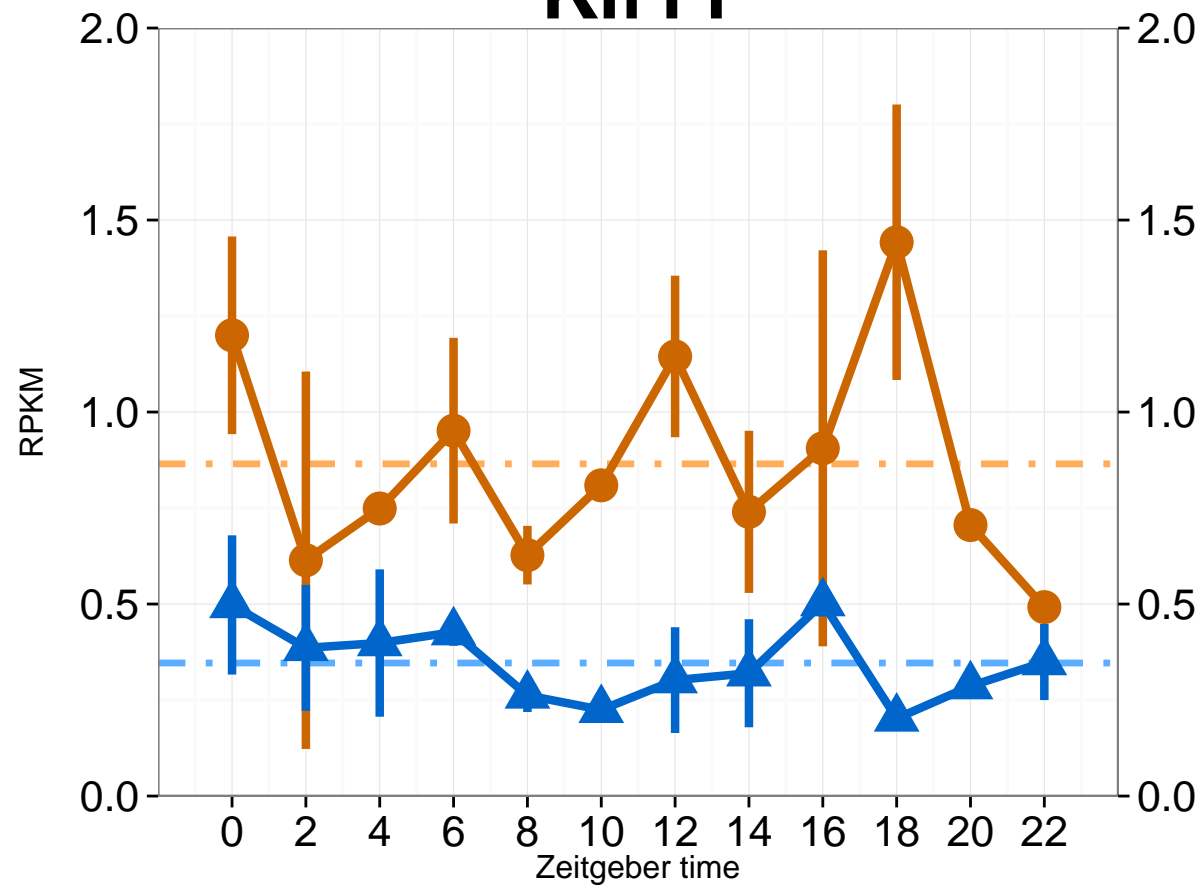

## Kif11

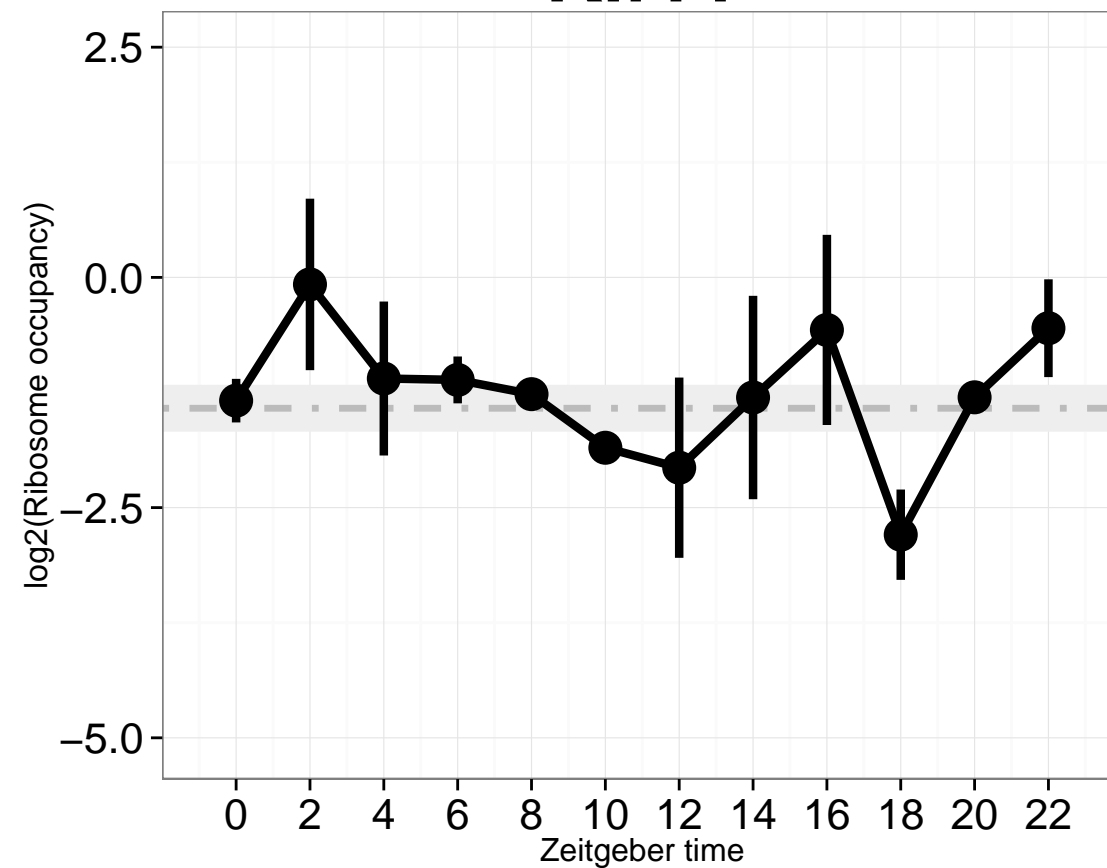

Supplement: SuppDataset_1.zip [file Kif11_set_A.pdf › Supplemental Dataset 1/A-mRNA_nonrhyth_translation_nonrhyth/Kif11_set_A.pdf]

# Kif13a

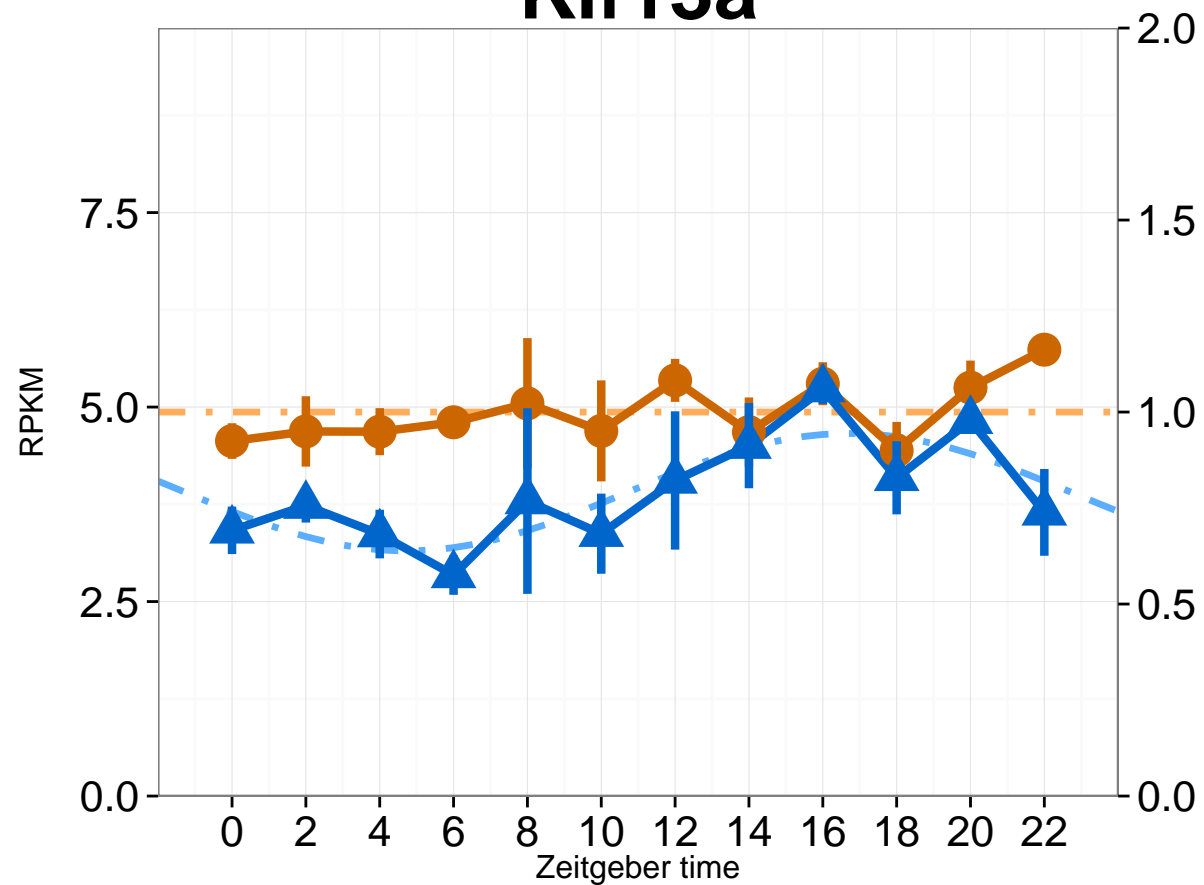

# Kif13a

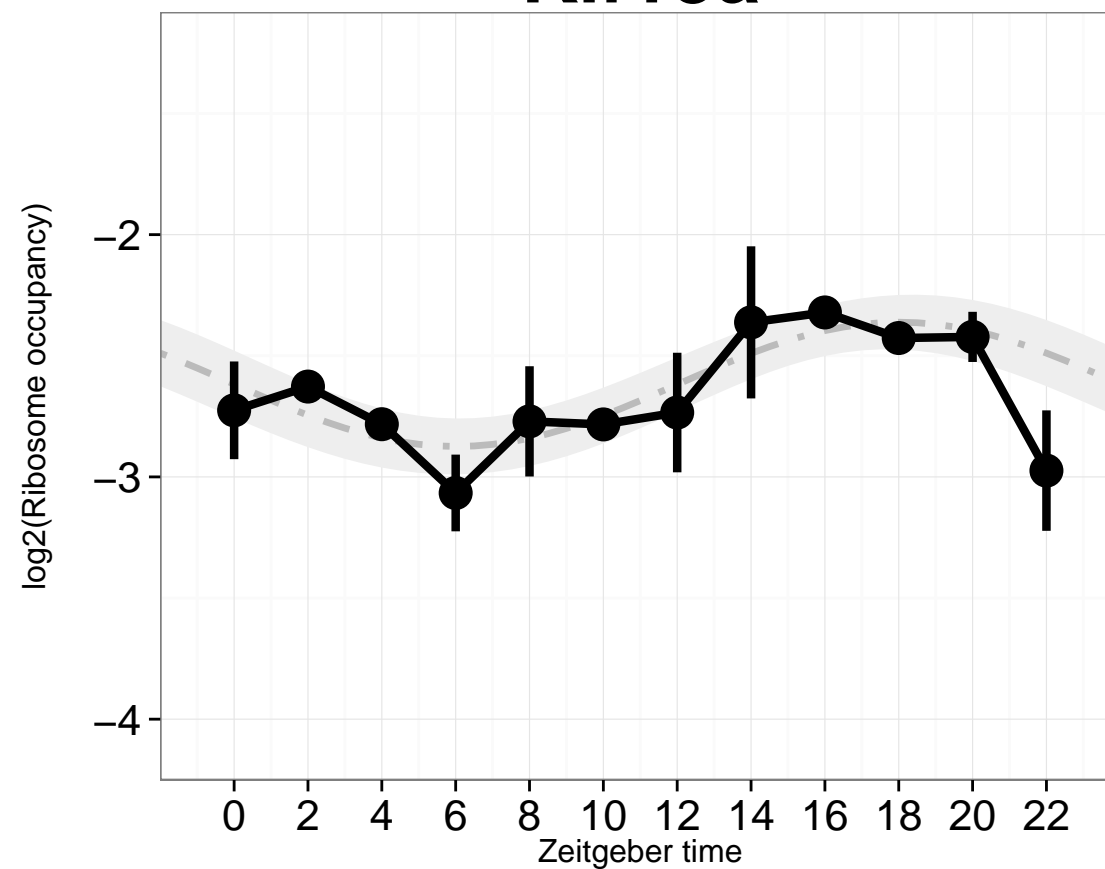

Supplement: SuppDataset_1.zip [file Kif13a_set_A.pdf › Supplemental Dataset 1/A-mRNA_nonrhyth_translation_nonrhyth/Kif13a_set_A.pdf]

## Kif13b

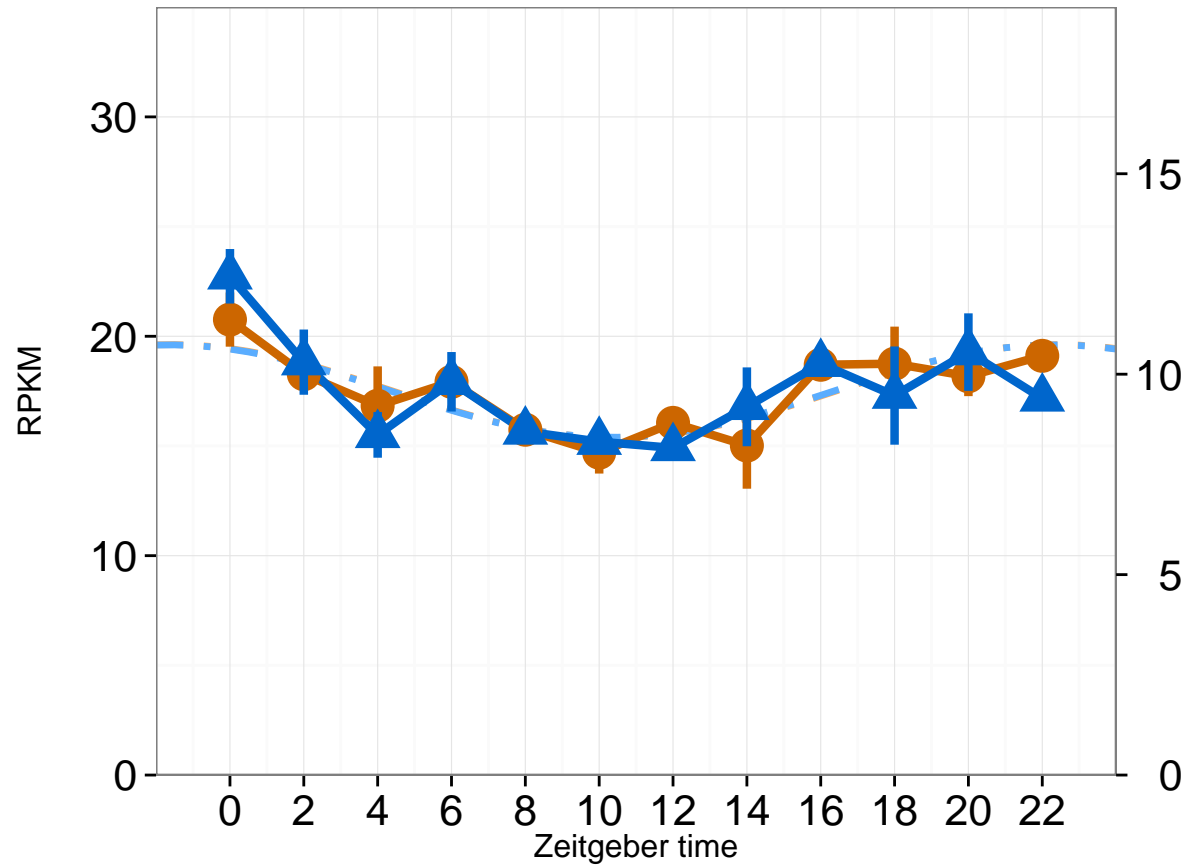

## Kif13b

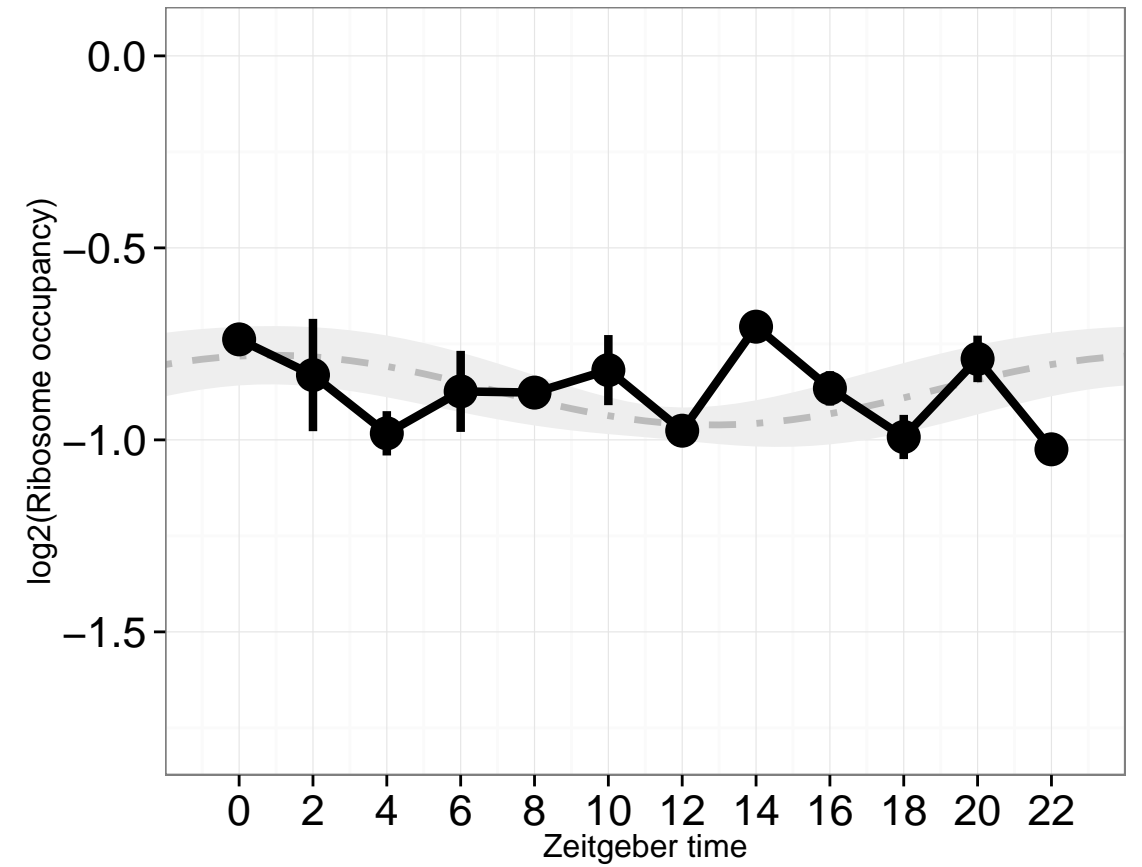

Supplement: SuppDataset_1.zip [file Kif13b_set_A.pdf › Supplemental Dataset 1/A-mRNA_nonrhyth_translation_nonrhyth/Kif13b_set_A.pdf]

## Kif15

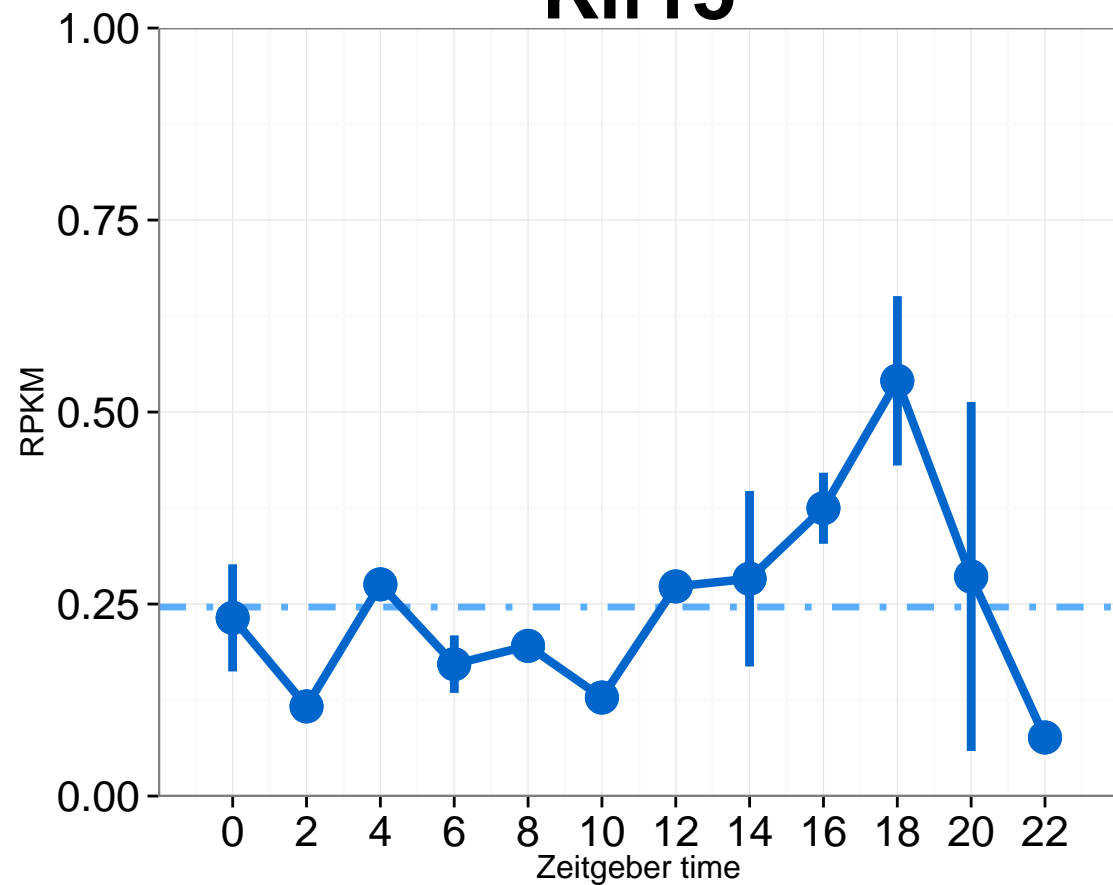

## Kif15 log<sub>2</sub>(Ribosome occupancy)

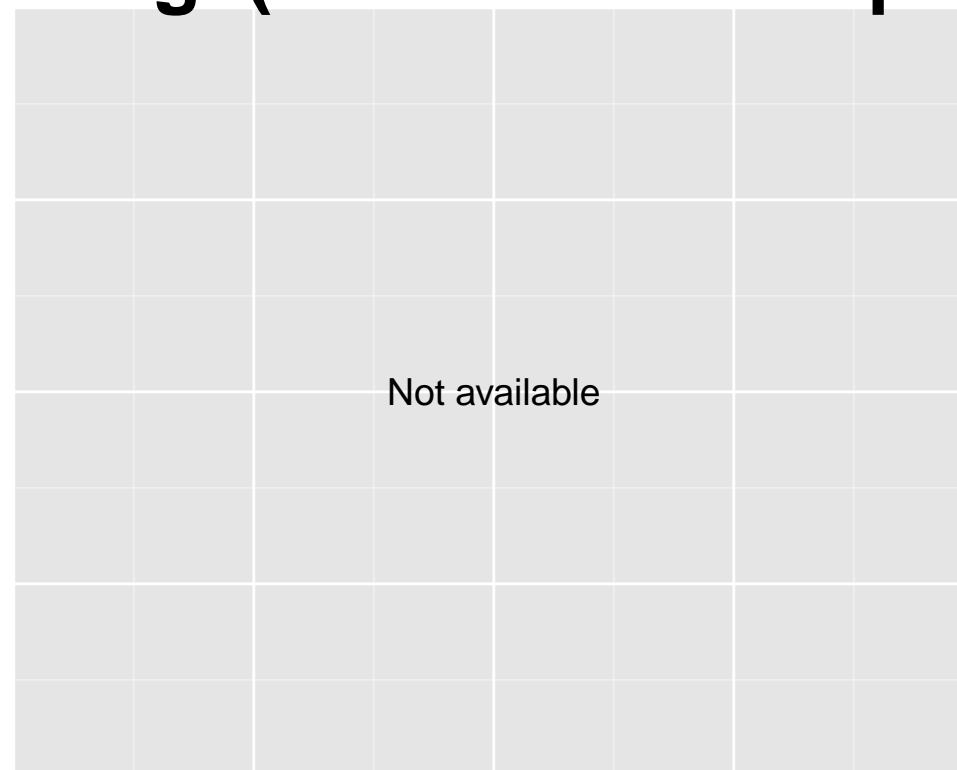

Supplement: SuppDataset_1.zip [file Kif15_set_A.pdf › Supplemental Dataset 1/A-mRNA_nonrhyth_translation_nonrhyth/Kif15_set_A.pdf]

## Kif16b

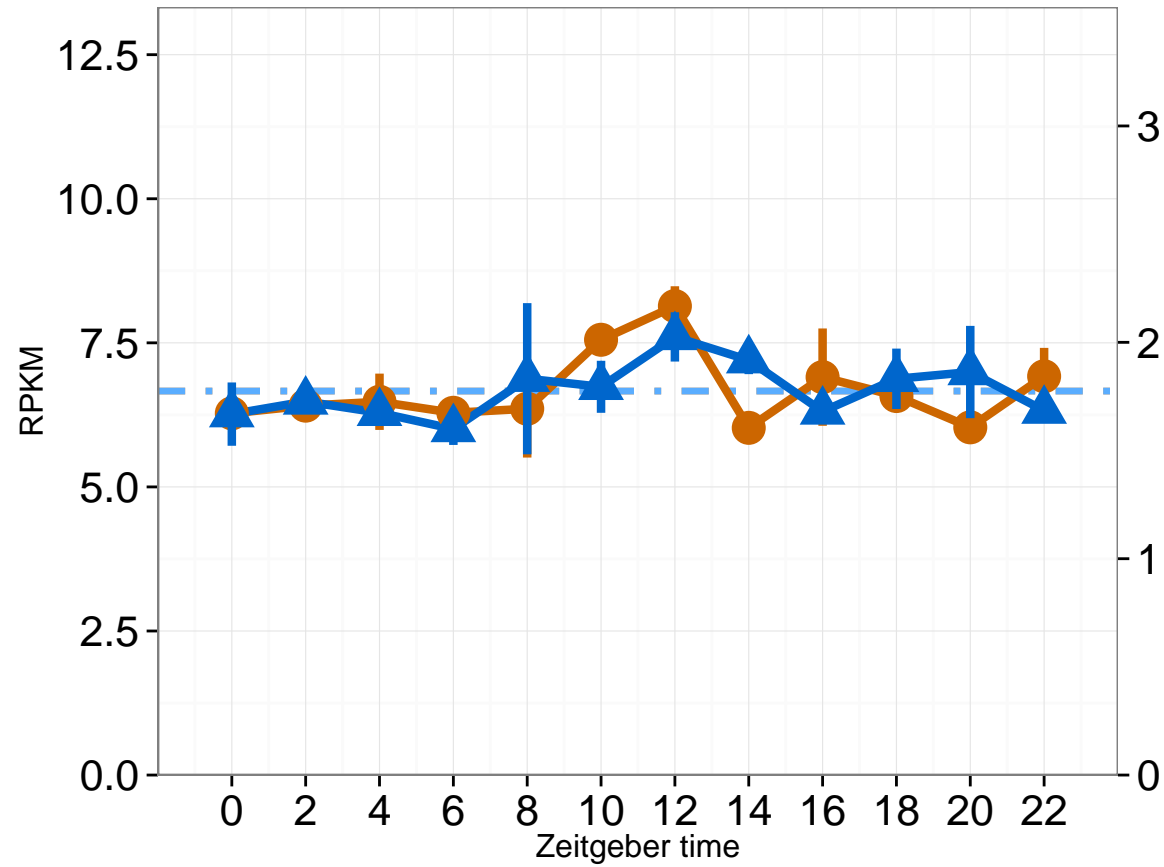

## Kif16b

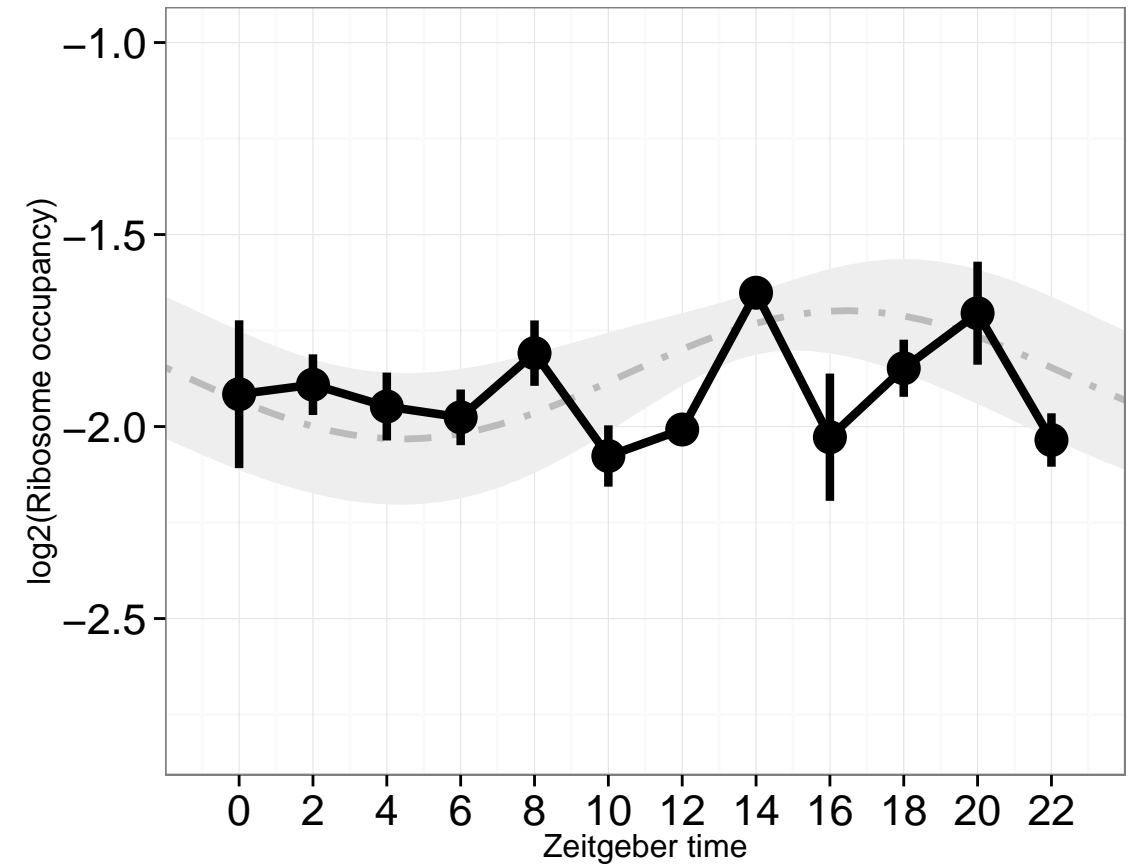

Supplement: SuppDataset_1.zip [file Kif16b_set_A.pdf › Supplemental Dataset 1/A-mRNA_nonrhyth_translation_nonrhyth/Kif16b_set_A.pdf]

# Kif18a

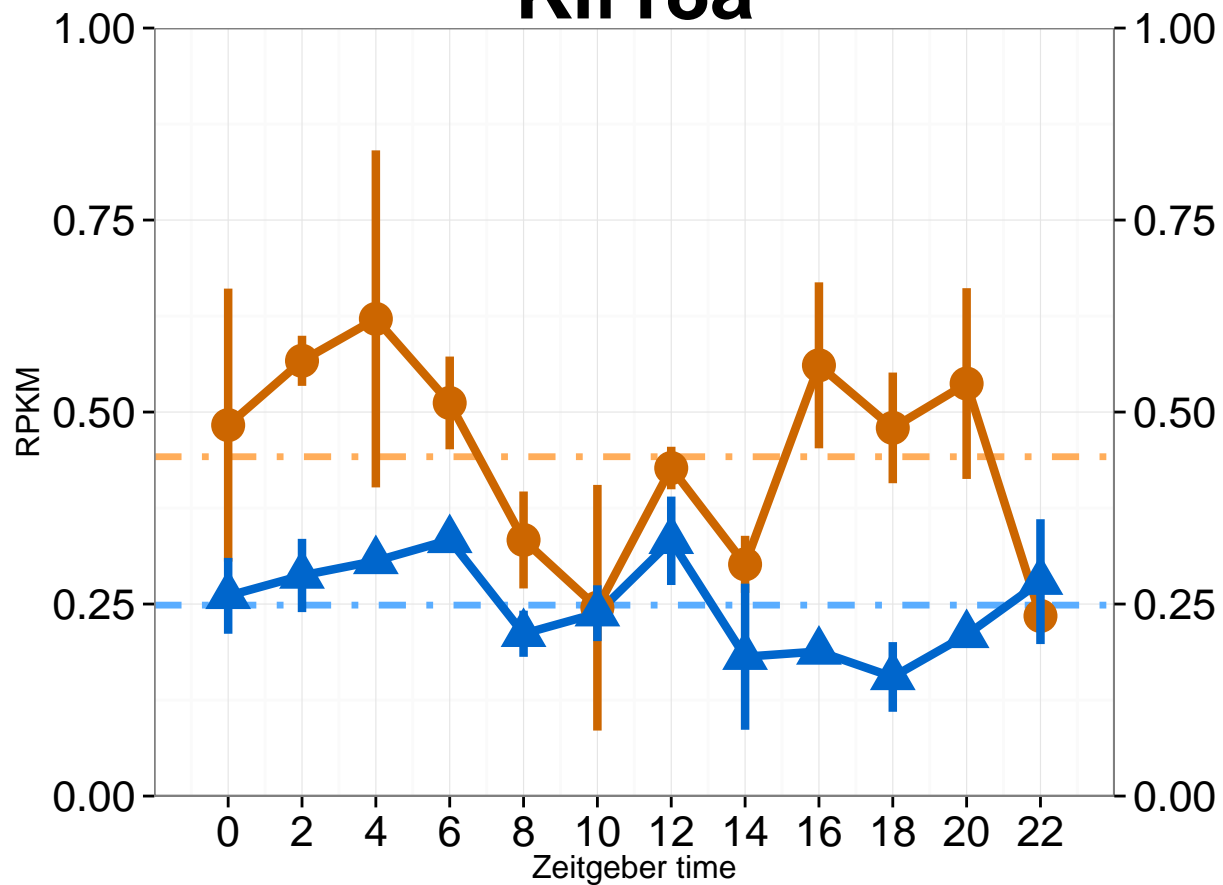

# Kif18a

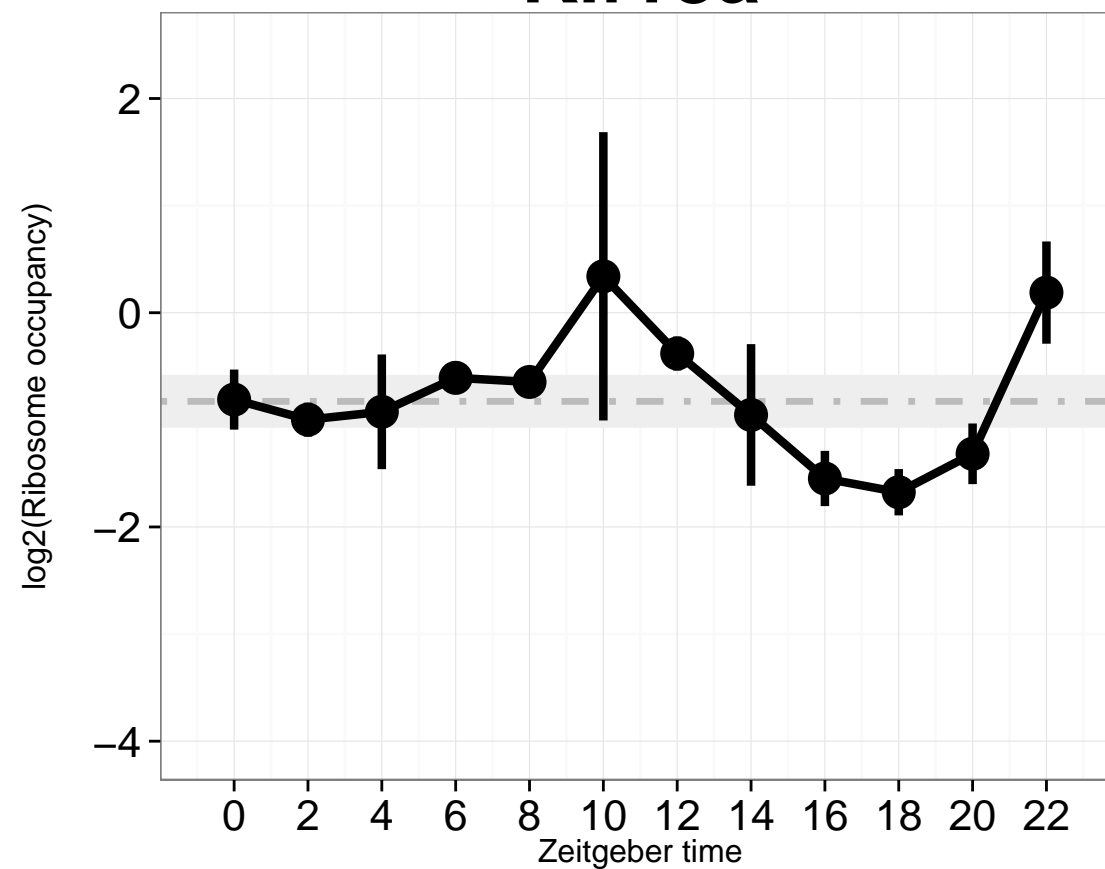

Supplement: SuppDataset_1.zip [file Kif18a_set_A.pdf › Supplemental Dataset 1/A-mRNA_nonrhyth_translation_nonrhyth/Kif18a_set_A.pdf]

## Kif1b

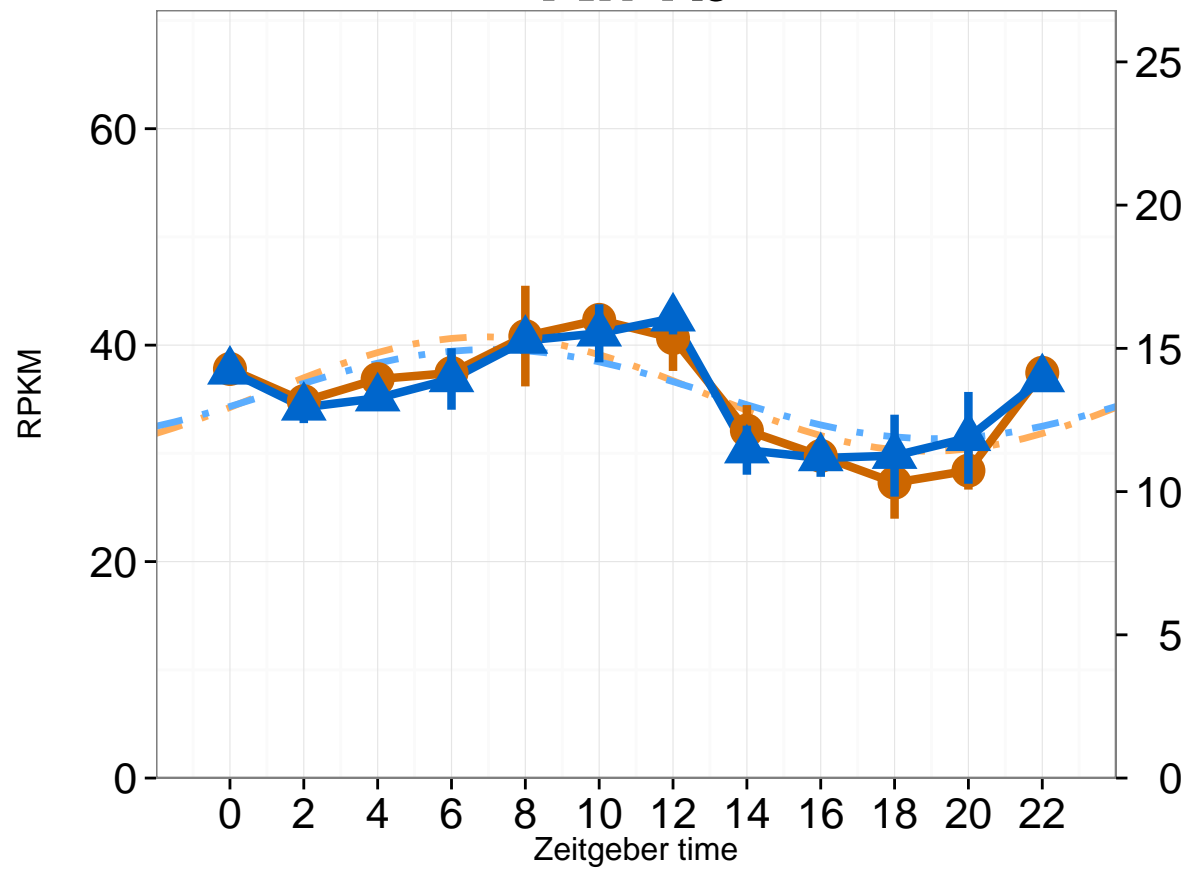

## Kif1b

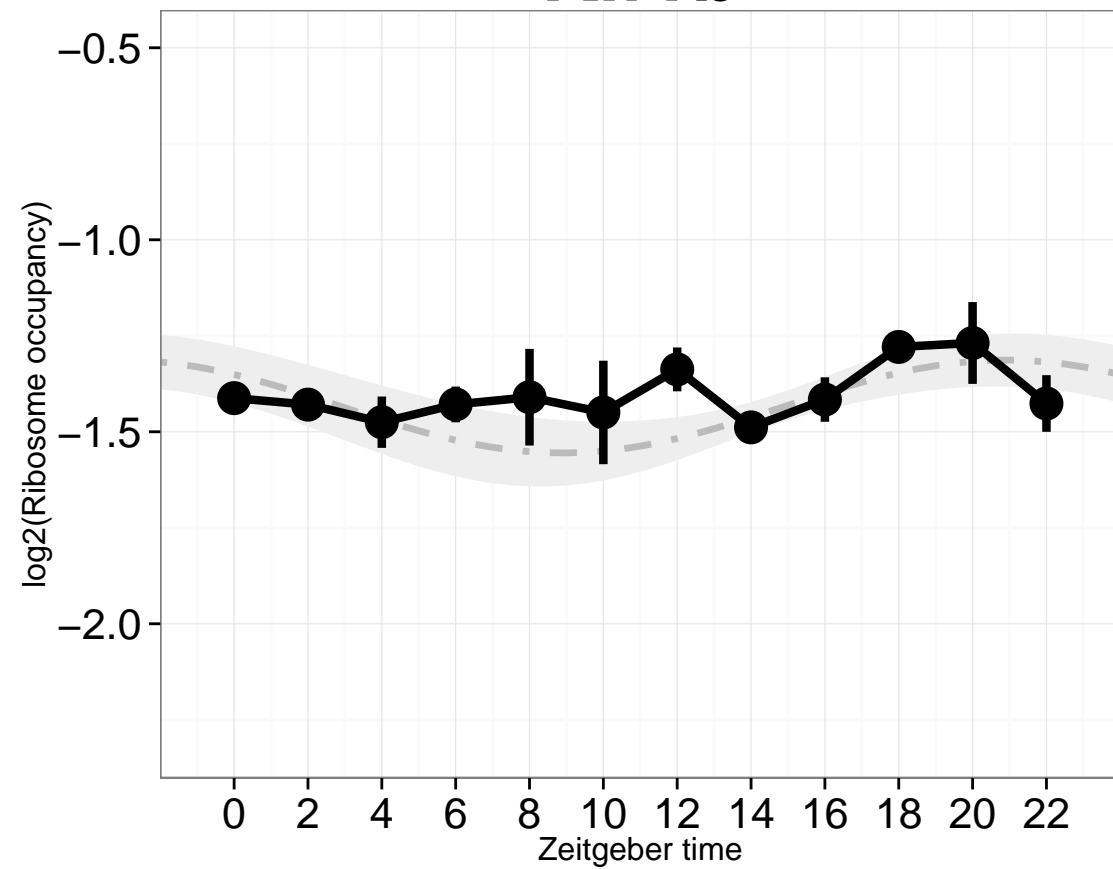

Supplement: SuppDataset_1.zip [file Kif1b_set_A.pdf › Supplemental Dataset 1/A-mRNA_nonrhyth_translation_nonrhyth/Kif1b_set_A.pdf]

# Kif20a

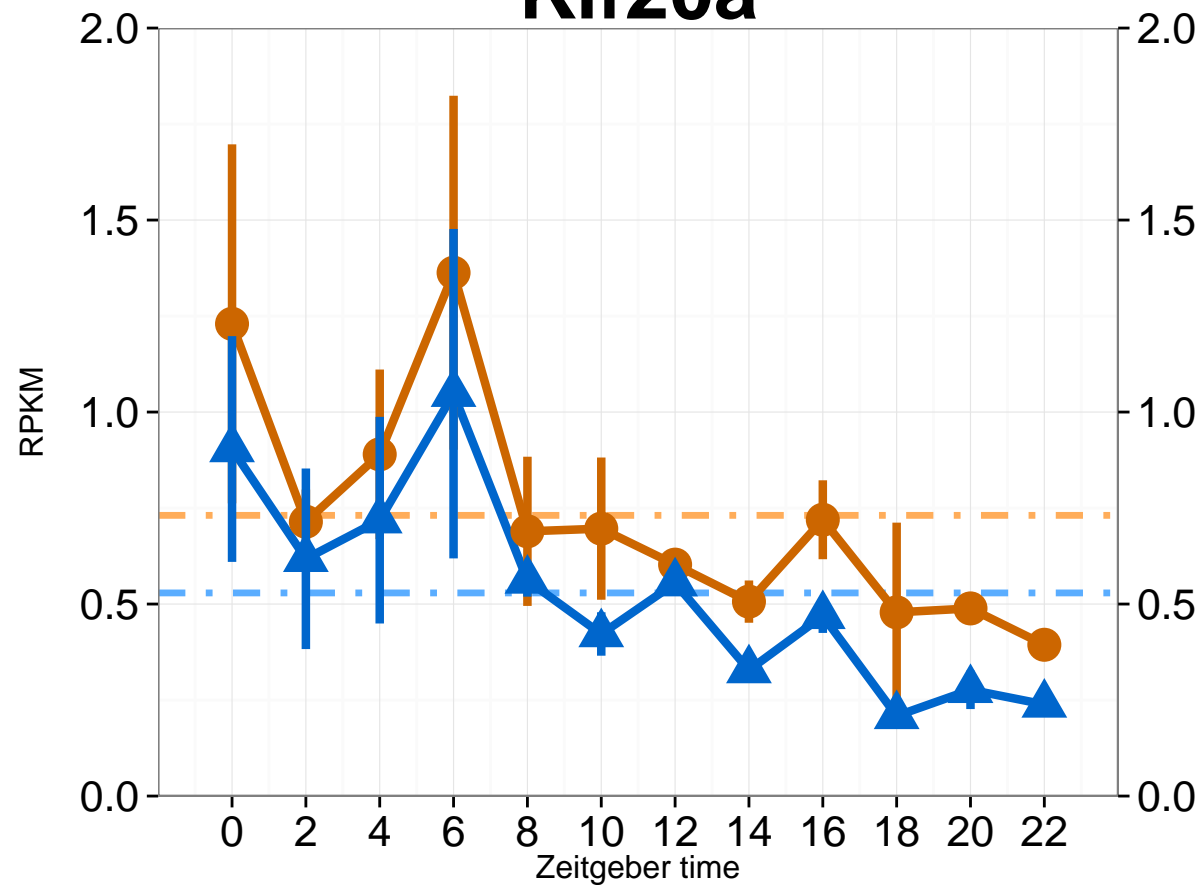

# Kif20a

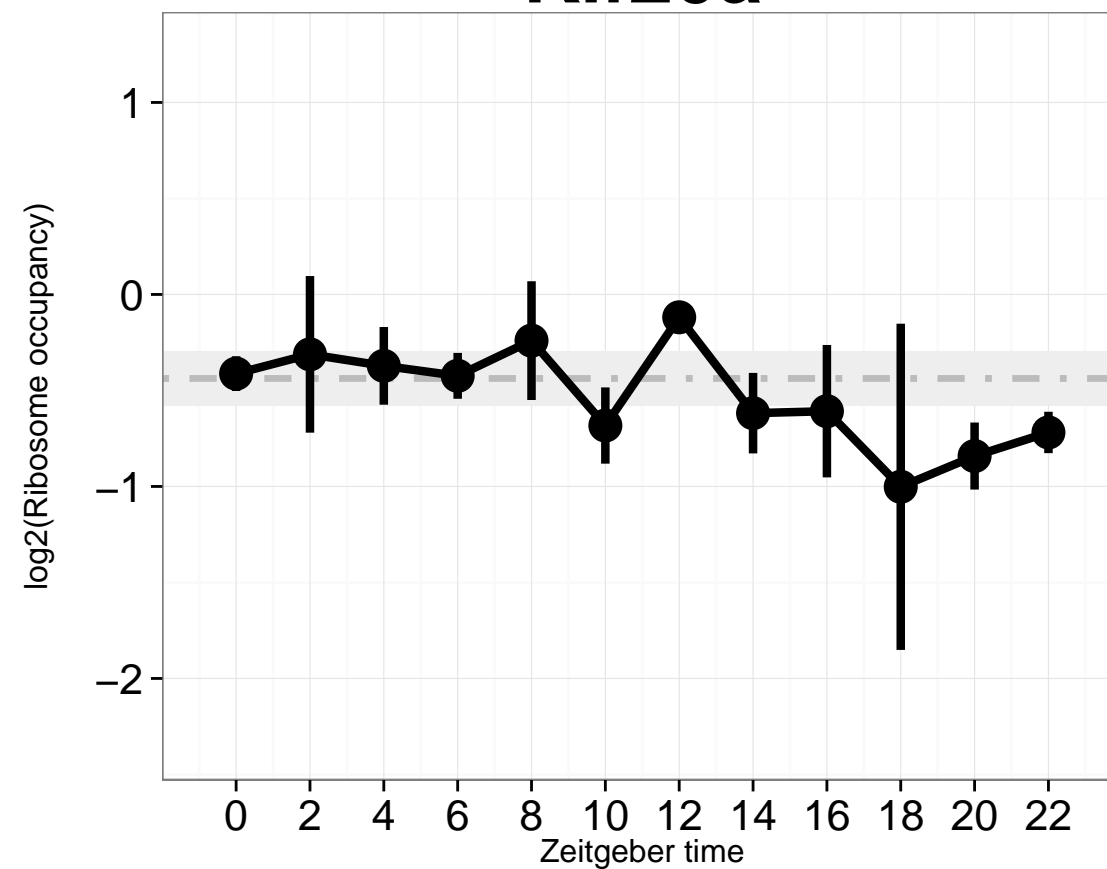

Supplement: SuppDataset_1.zip [file Kif20a_set_A.pdf › Supplemental Dataset 1/A-mRNA_nonrhyth_translation_nonrhyth/Kif20a_set_A.pdf]

# Kif20b

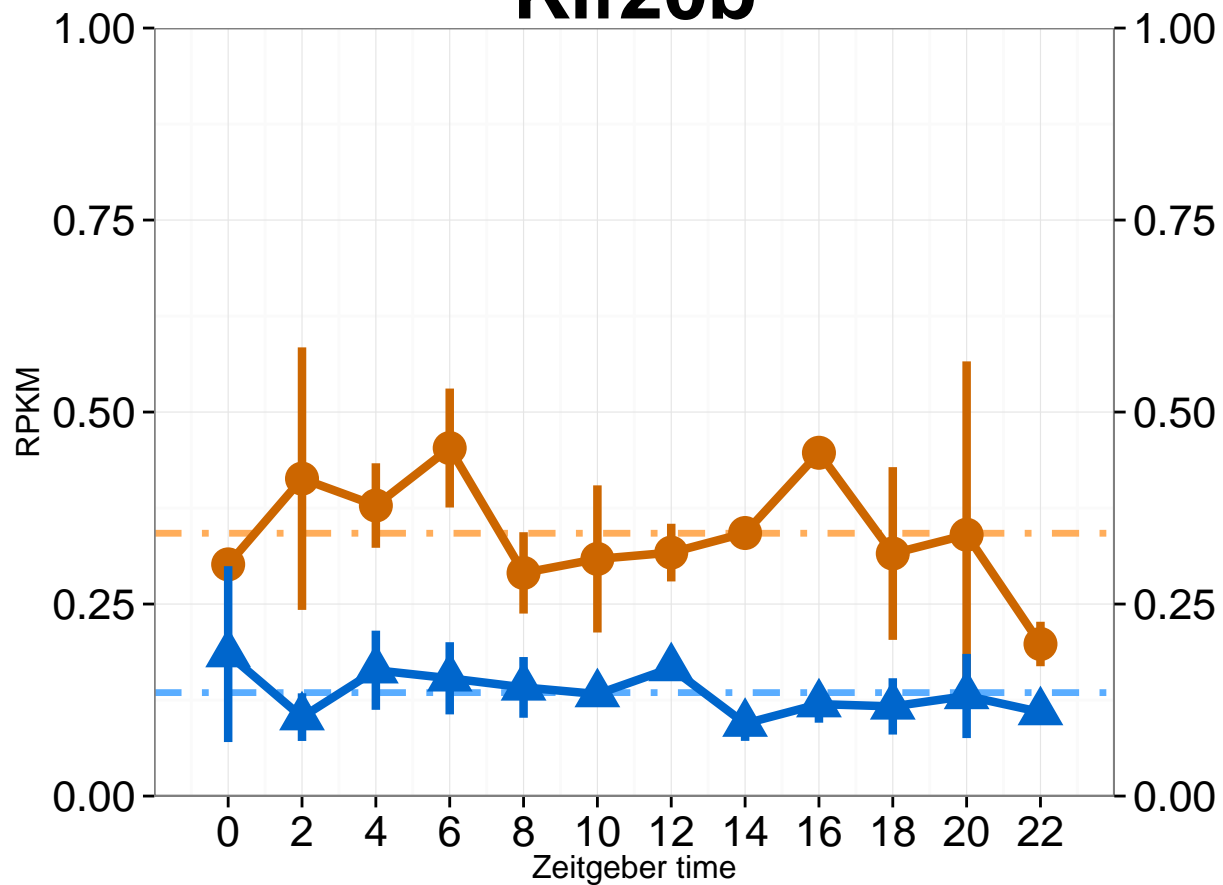

# Kif20b

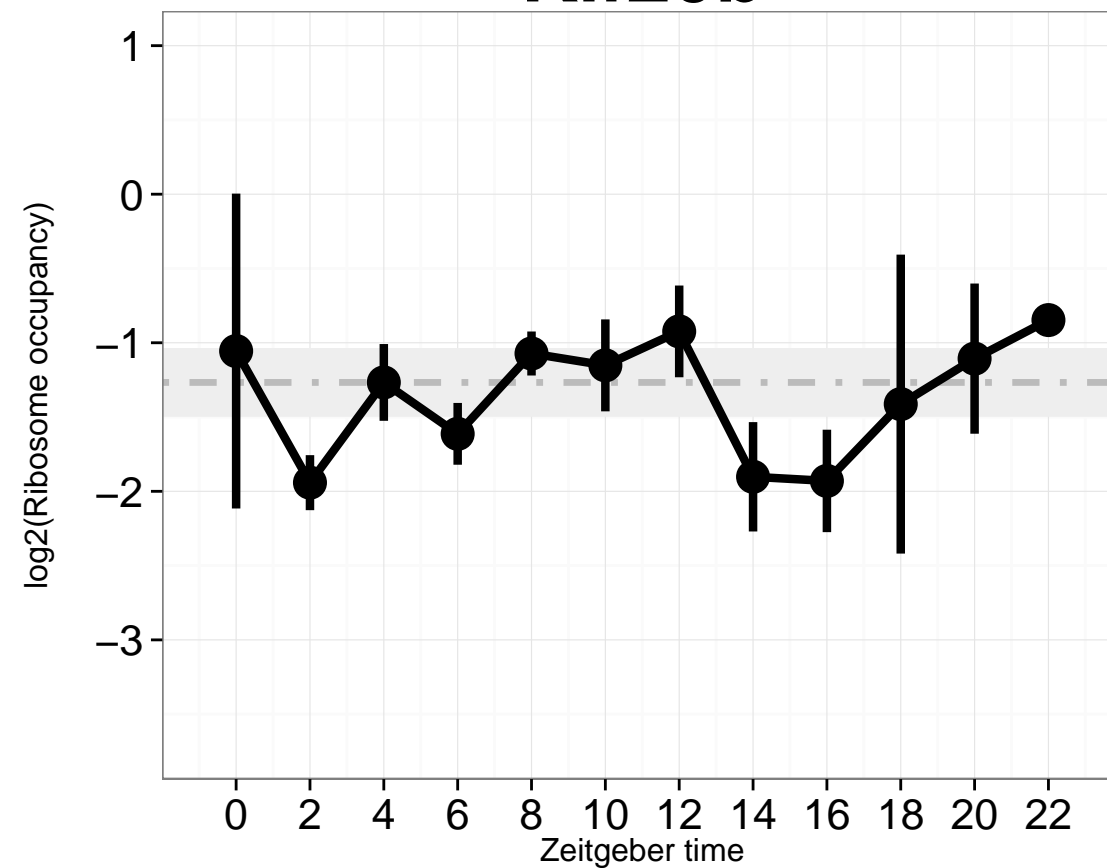

Supplement: SuppDataset_1.zip [file Kif20b_set_A.pdf › Supplemental Dataset 1/A-mRNA_nonrhyth_translation_nonrhyth/Kif20b_set_A.pdf]

## Kif21a

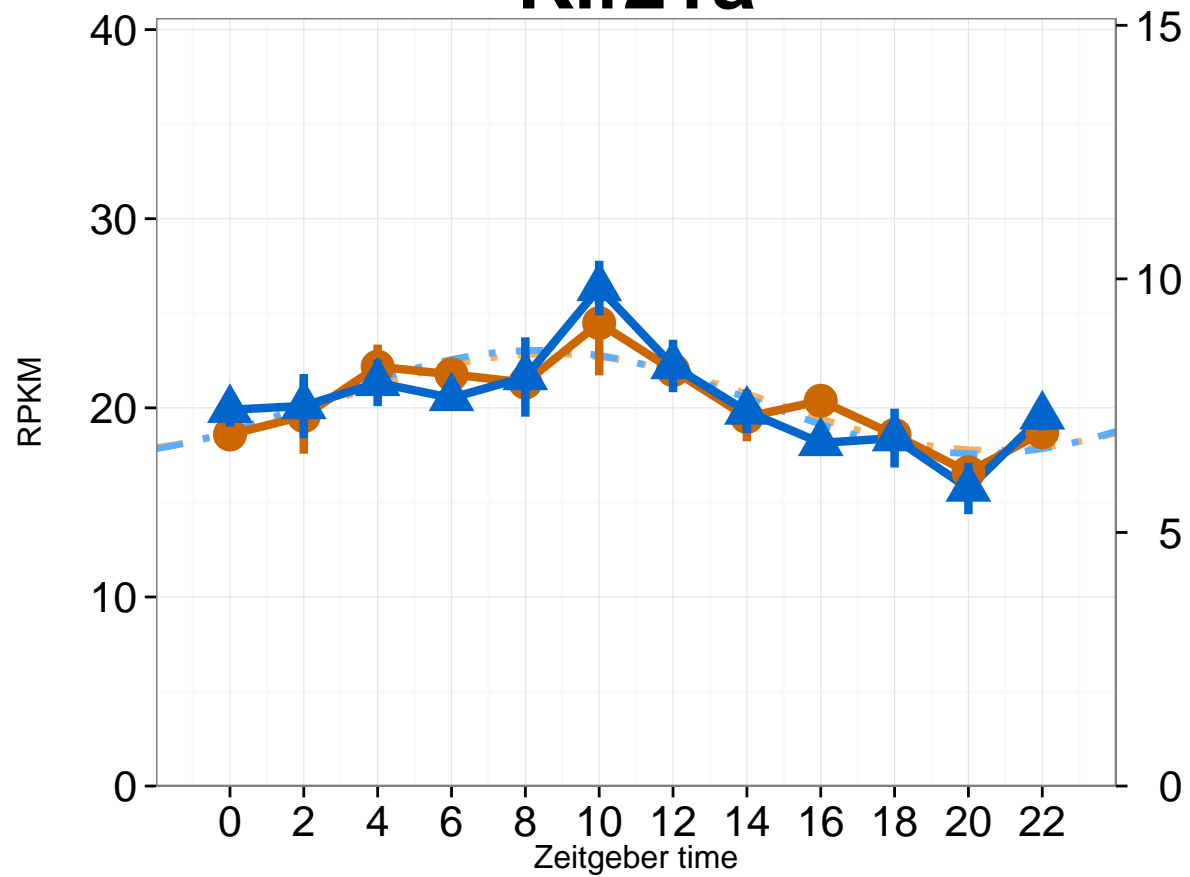

## Kif21a

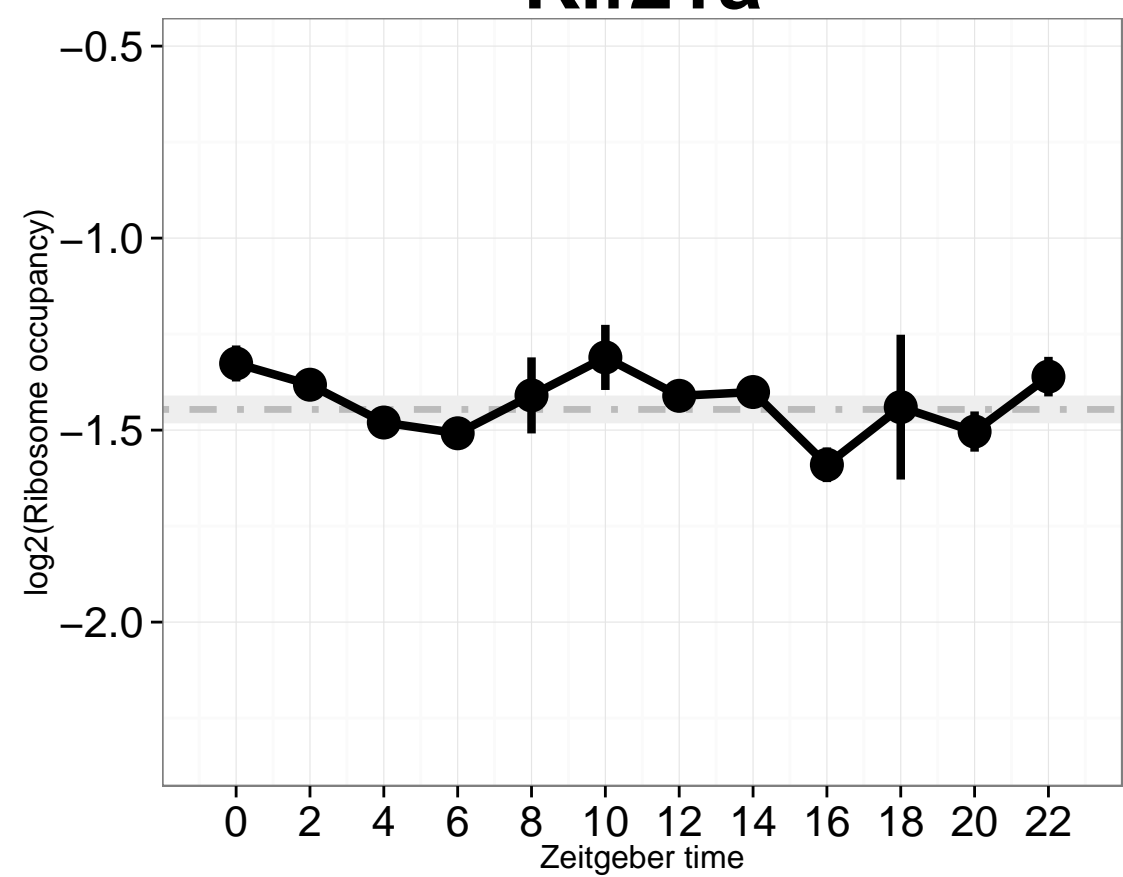

Supplement: SuppDataset_1.zip [file Kif21a_set_A.pdf › Supplemental Dataset 1/A-mRNA_nonrhyth_translation_nonrhyth/Kif21a_set_A.pdf]

## Kif22

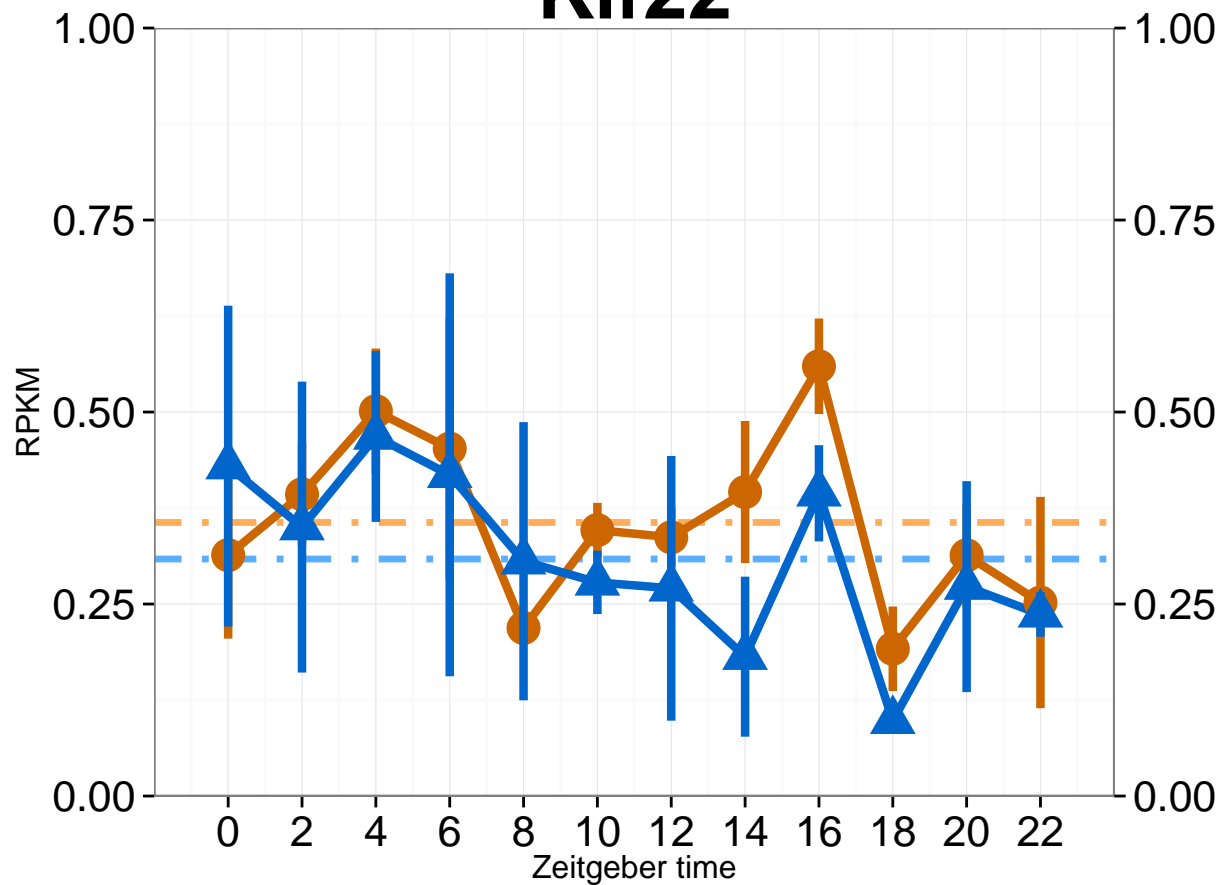

## Kif22

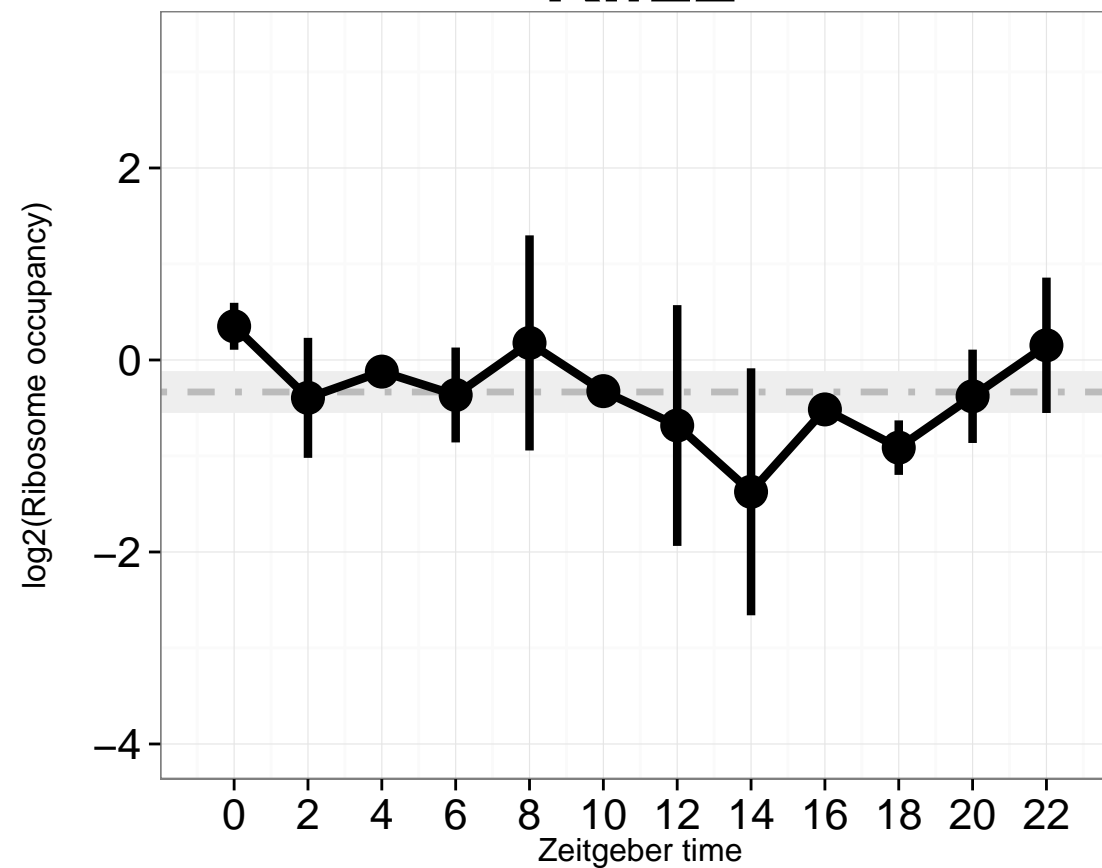

Supplement: SuppDataset_1.zip [file Kif22_set_A.pdf › Supplemental Dataset 1/A-mRNA_nonrhyth_translation_nonrhyth/Kif22_set_A.pdf]

# Kif23

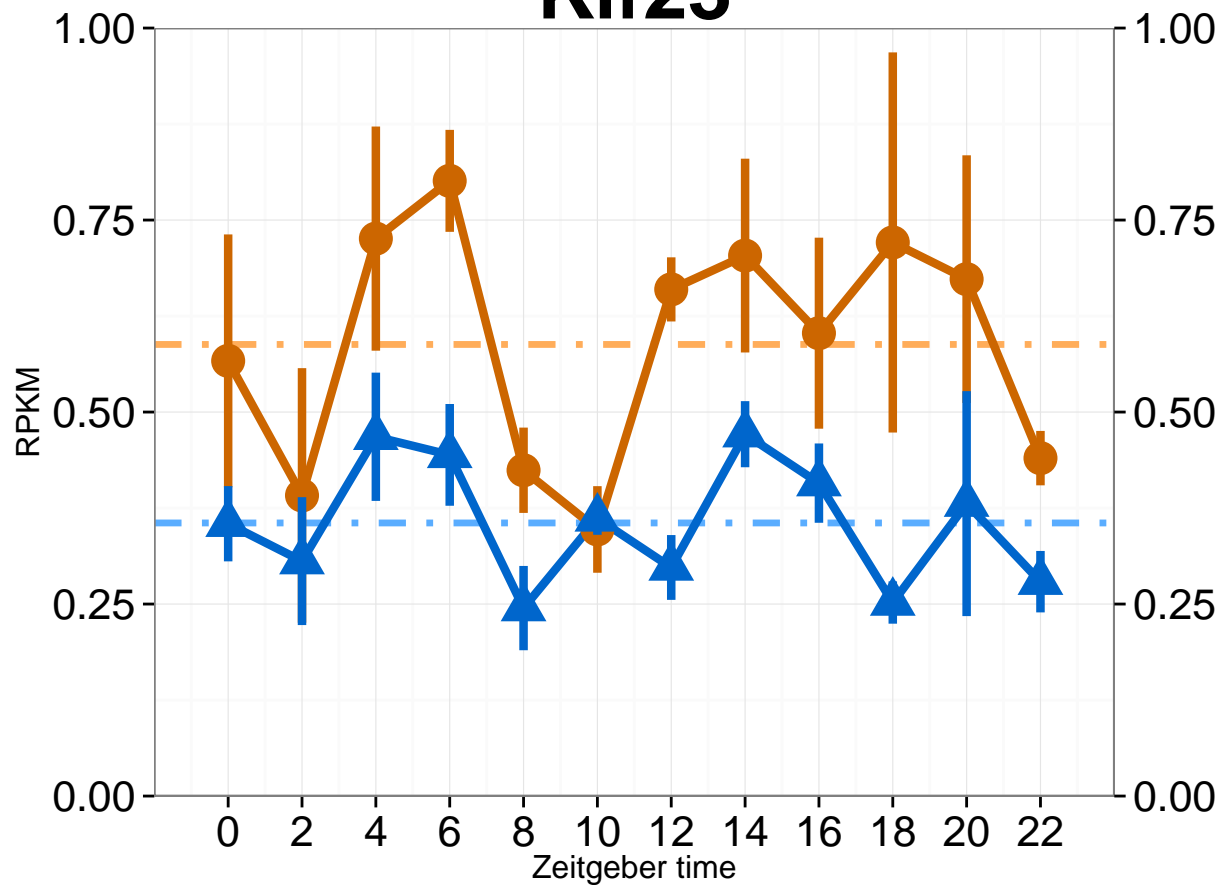

# Kif23

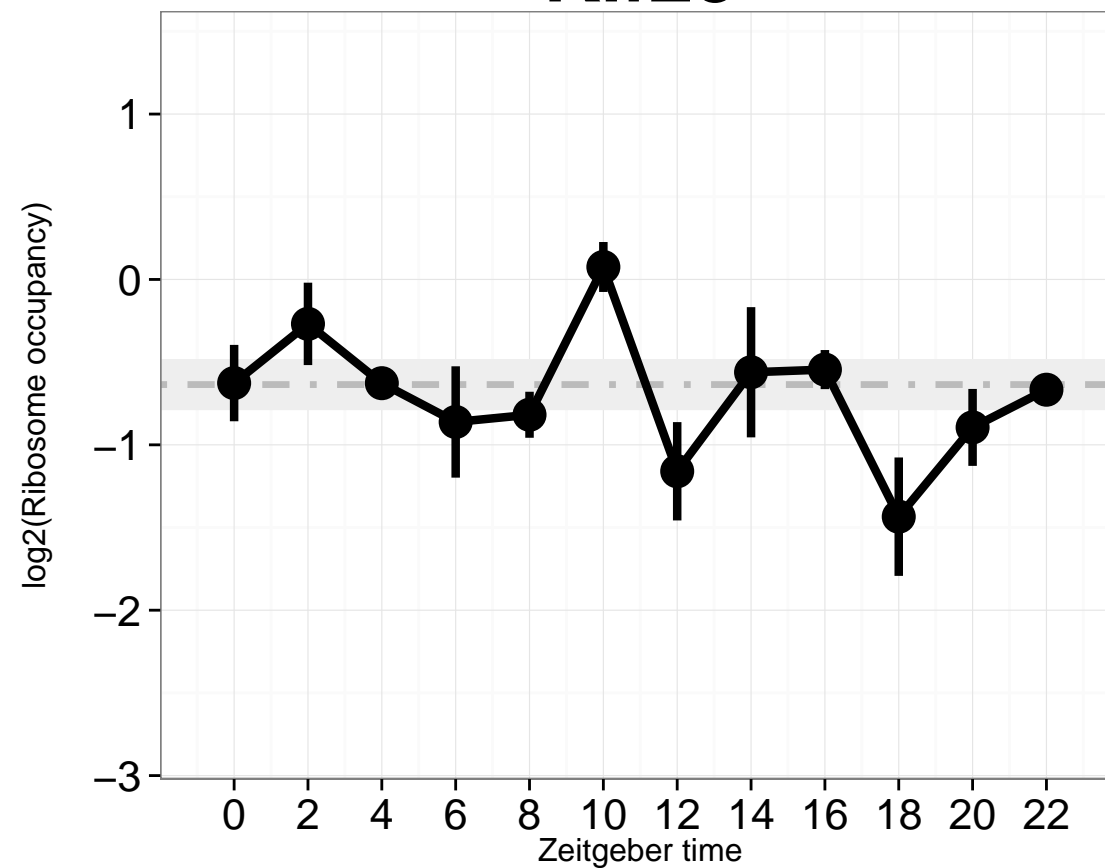

Supplement: SuppDataset_1.zip [file Kif23_set_A.pdf › Supplemental Dataset 1/A-mRNA_nonrhyth_translation_nonrhyth/Kif23_set_A.pdf]

## Kif24

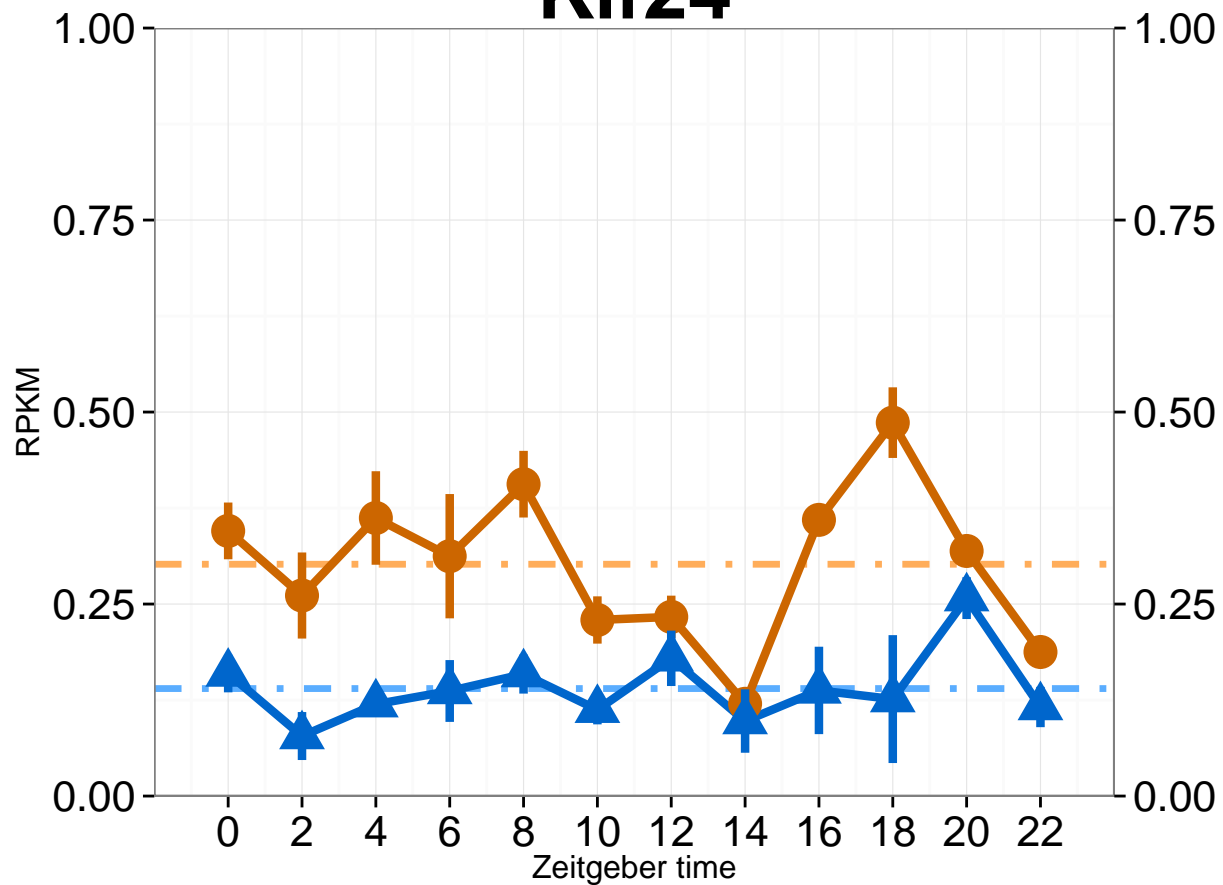

## Kif24

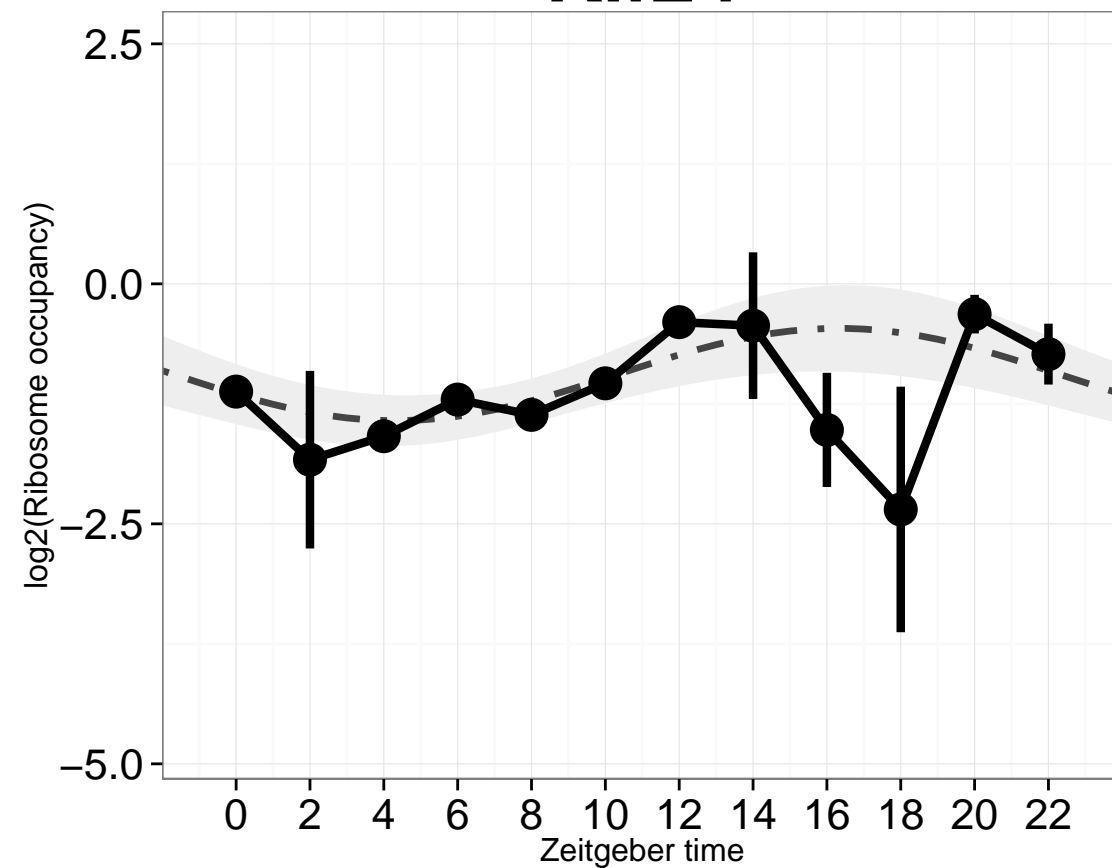

Supplement: SuppDataset_1.zip [file Kif24_set_A.pdf › Supplemental Dataset 1/A-mRNA_nonrhyth_translation_nonrhyth/Kif24_set_A.pdf]

# Kif26a

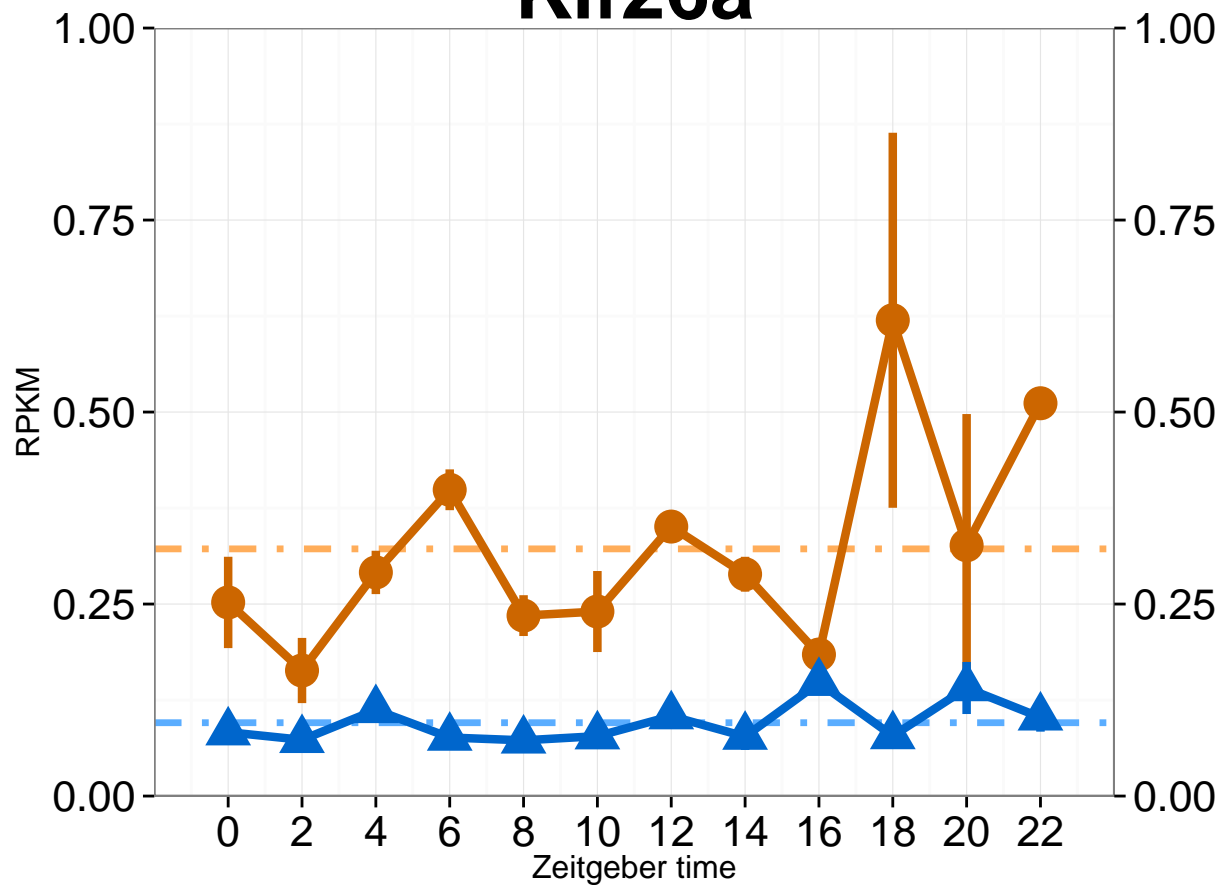

# Kif26a

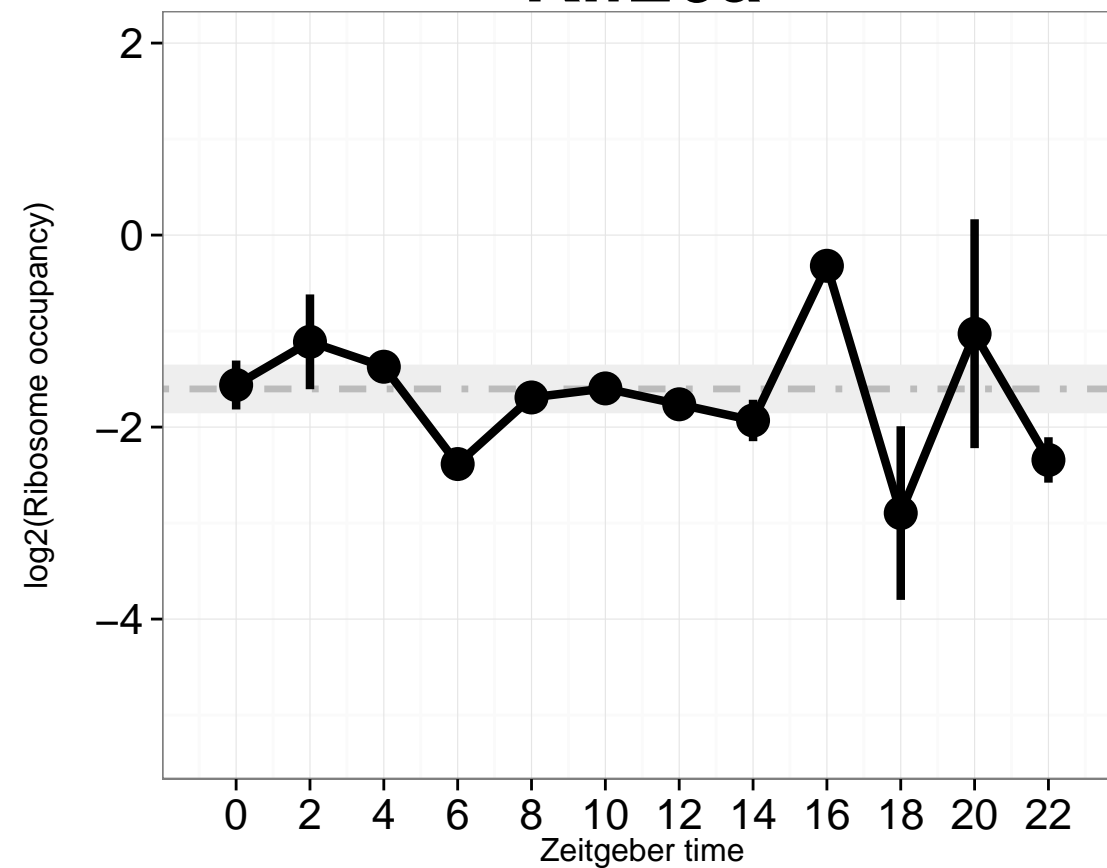

Supplement: SuppDataset_1.zip [file Kif26a_set_A.pdf › Supplemental Dataset 1/A-mRNA_nonrhyth_translation_nonrhyth/Kif26a_set_A.pdf]

## Kif2a

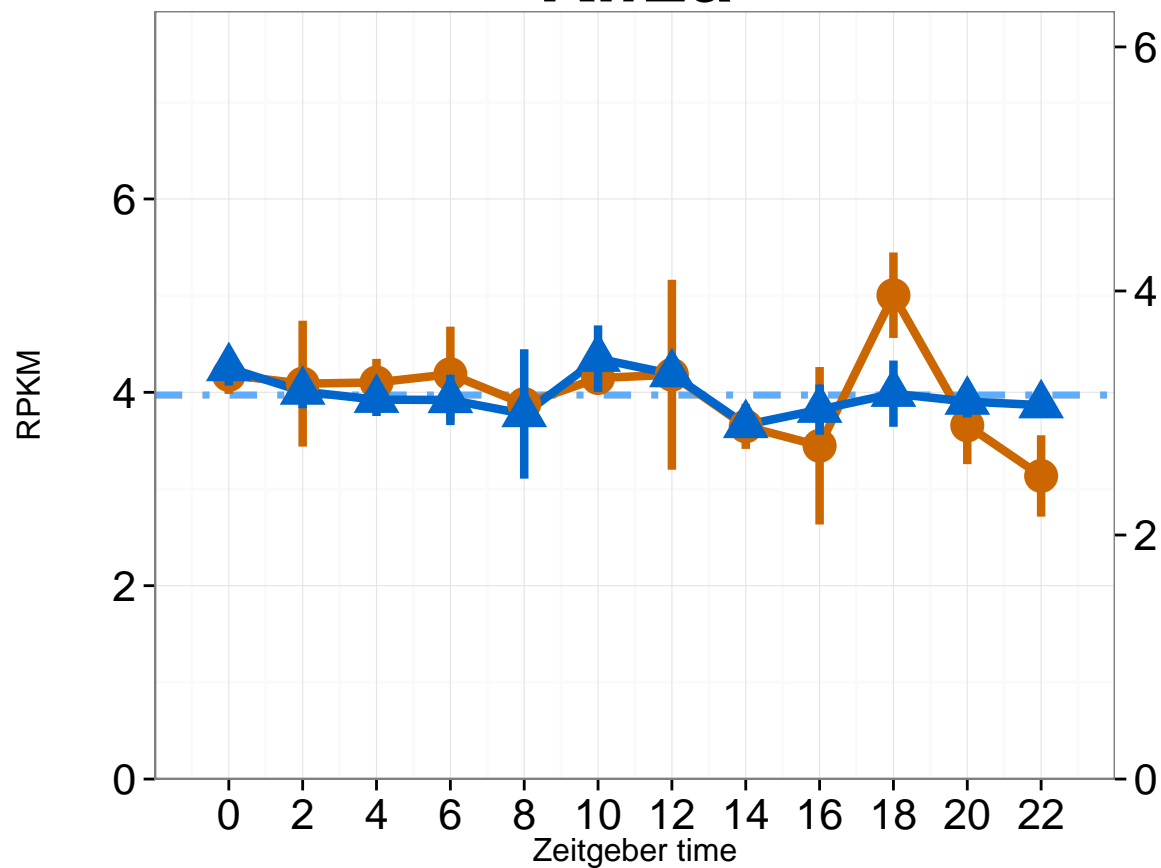

## Kif2a

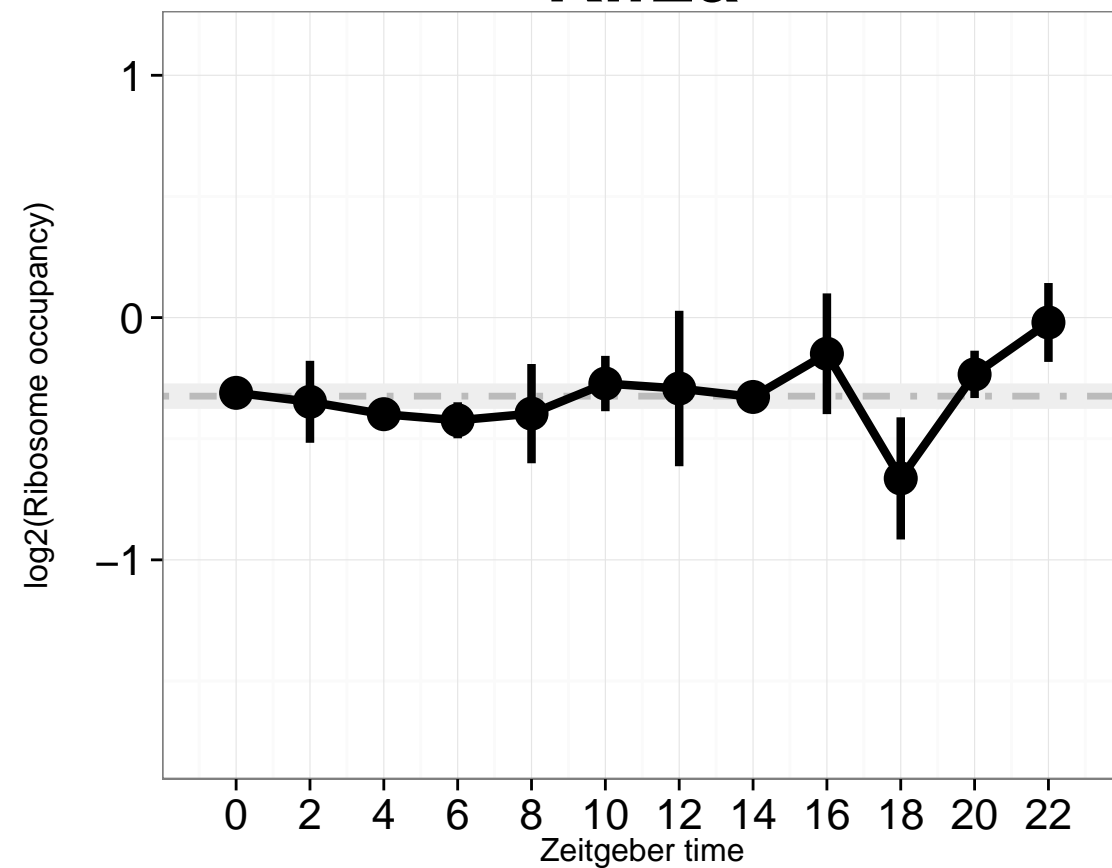

Supplement: SuppDataset_1.zip [file Kif2a_set_A.pdf › Supplemental Dataset 1/A-mRNA_nonrhyth_translation_nonrhyth/Kif2a_set_A.pdf]

## Kif2c

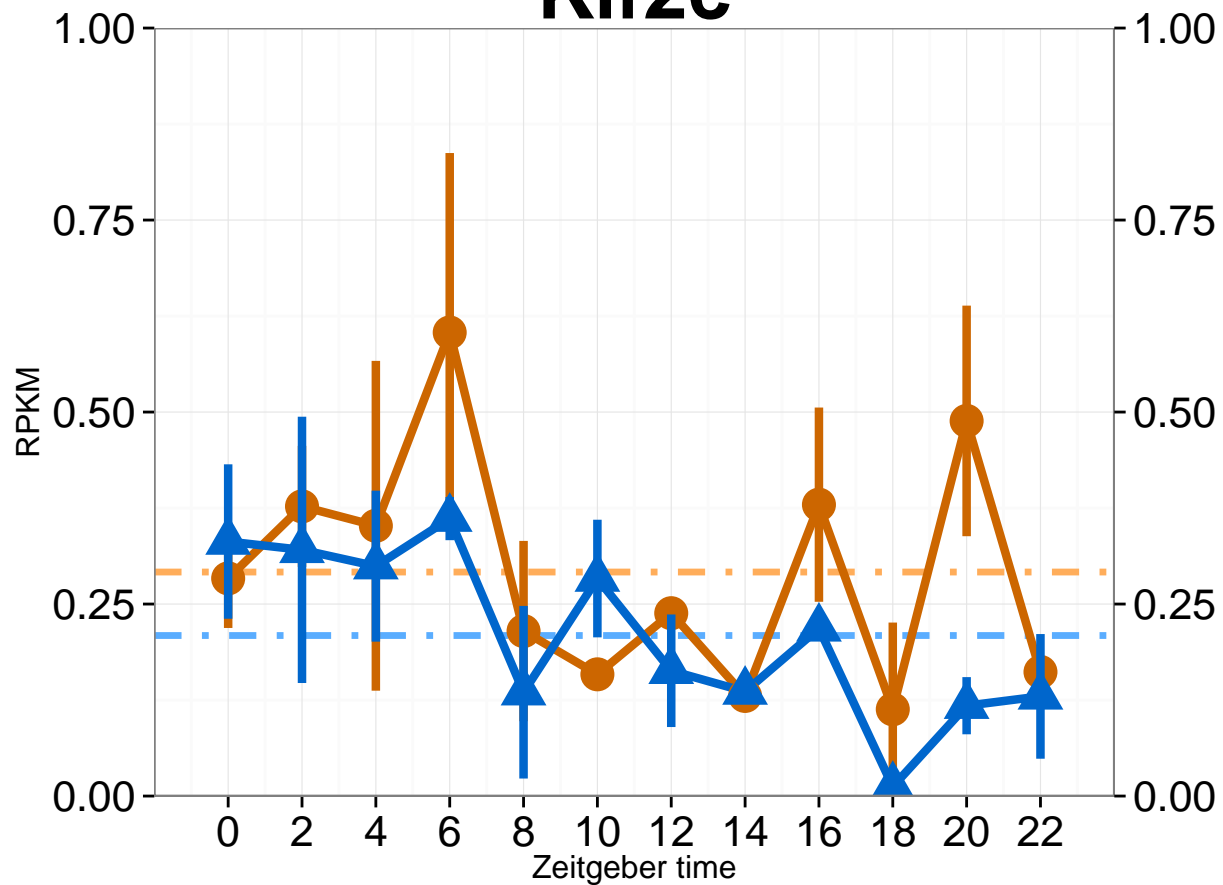

## Kif2c

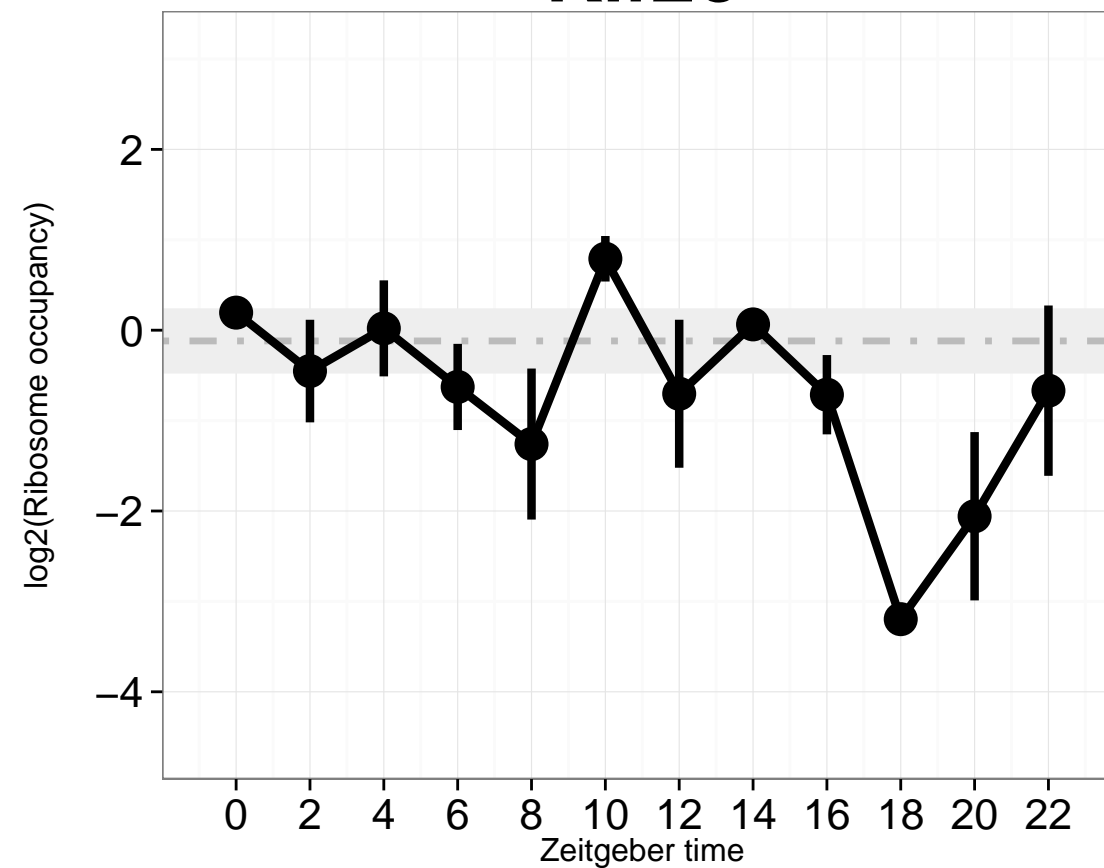

Supplement: SuppDataset_1.zip [file Kif2c_set_A.pdf › Supplemental Dataset 1/A-mRNA_nonrhyth_translation_nonrhyth/Kif2c_set_A.pdf]

## Kif3b

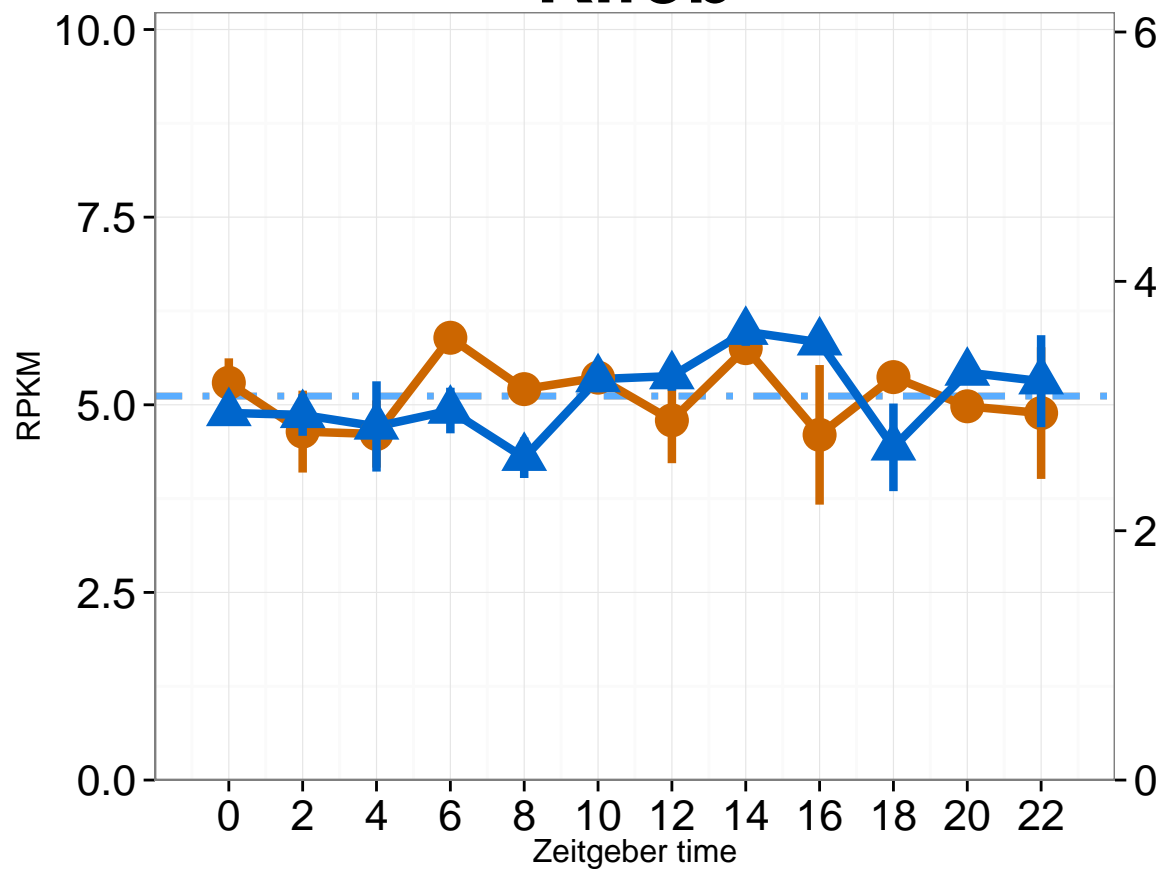

## Kif3b

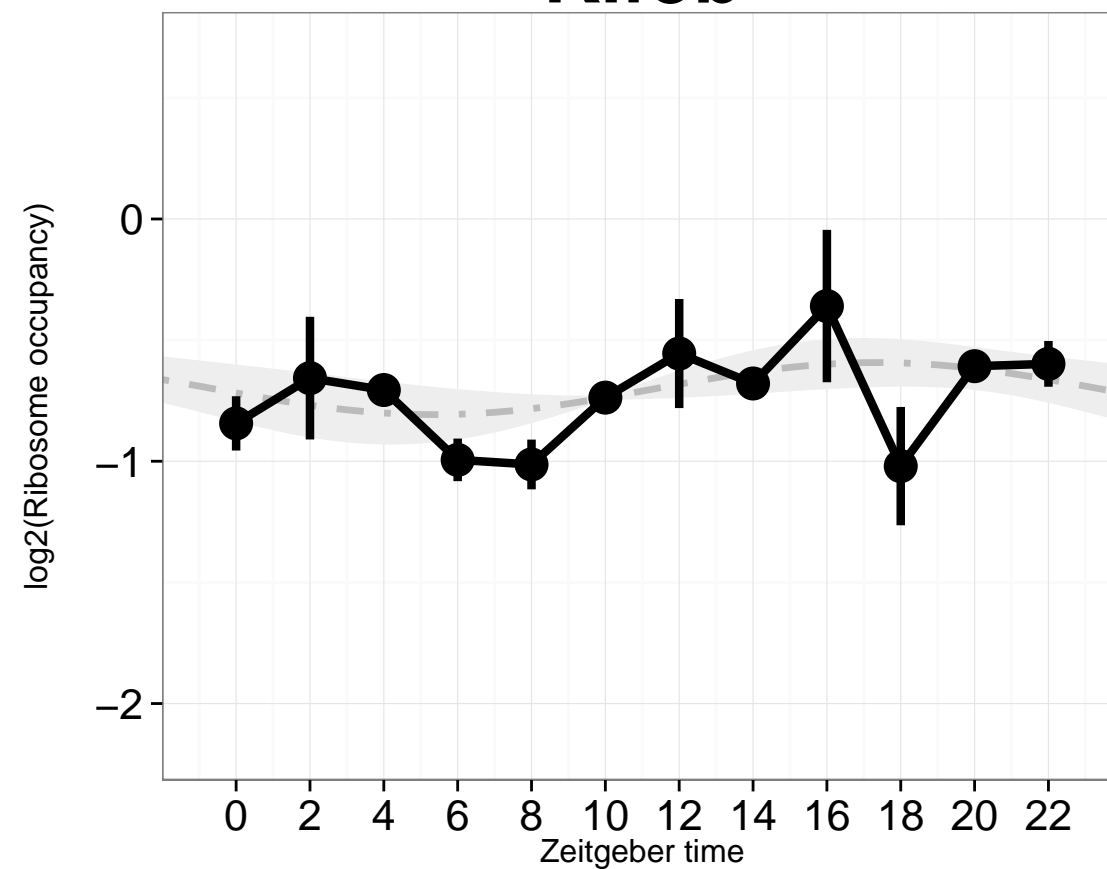

Supplement: SuppDataset_1.zip [file Kif3b_set_A.pdf › Supplemental Dataset 1/A-mRNA_nonrhyth_translation_nonrhyth/Kif3b_set_A.pdf]

## Kif5b

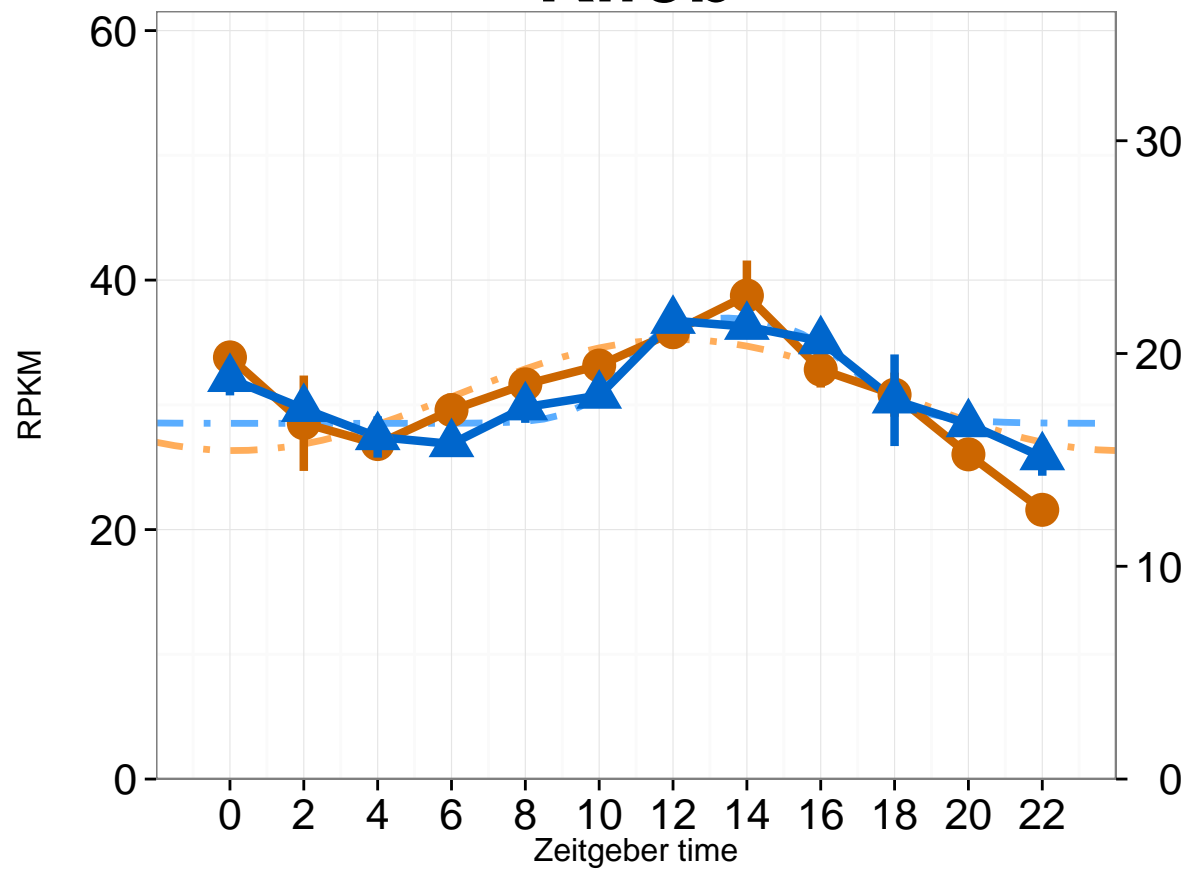

## Kif5b

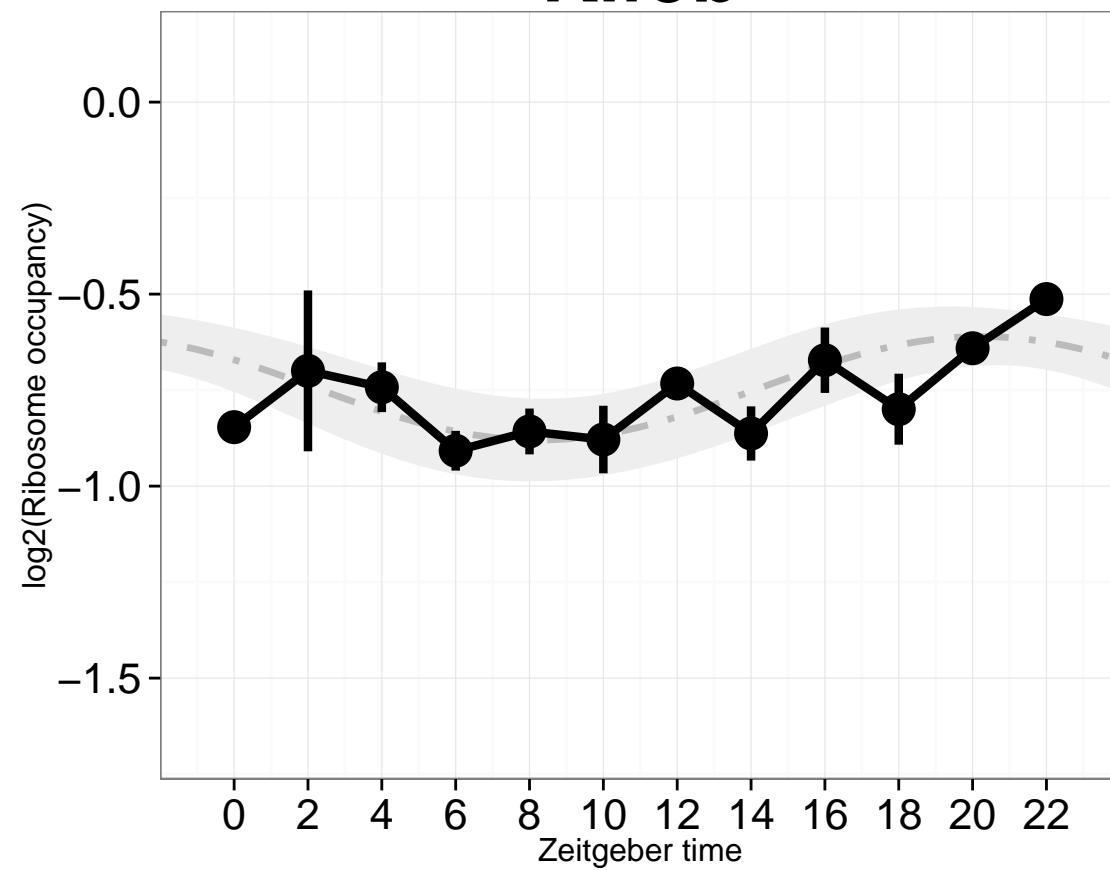

Supplement: SuppDataset_1.zip [file Kif5b_set_A.pdf › Supplemental Dataset 1/A-mRNA_nonrhyth_translation_nonrhyth/Kif5b_set_A.pdf]

## Kifc2

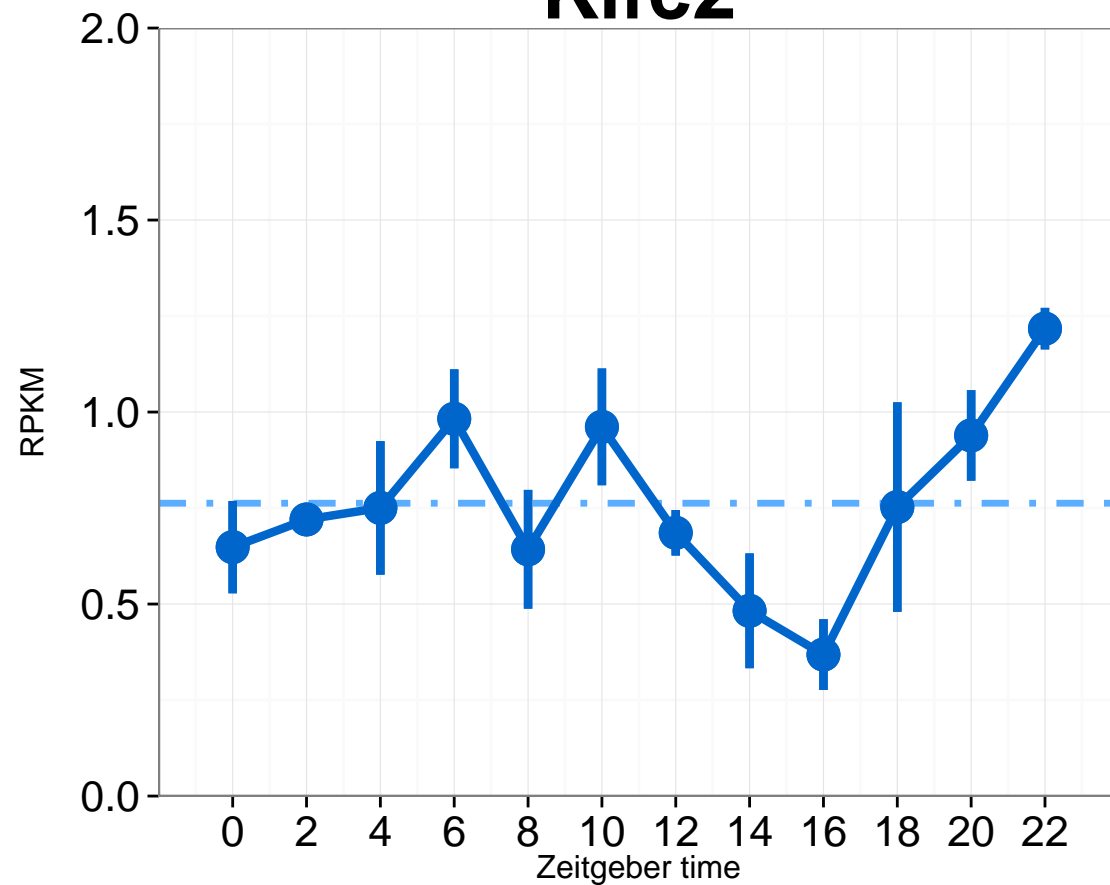

## Kifc2 log2(Ribosome occupancy)

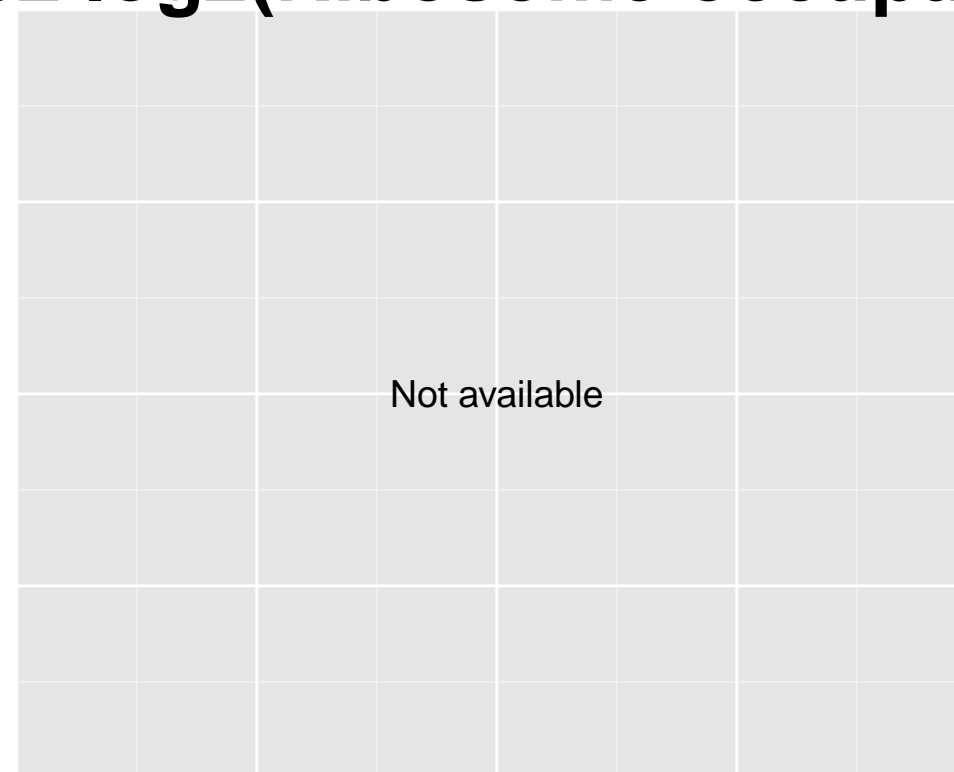

Supplement: SuppDataset_1.zip [file Kifc2_set_A.pdf › Supplemental Dataset 1/A-mRNA_nonrhyth_translation_nonrhyth/Kifc2_set_A.pdf]

## Klc1

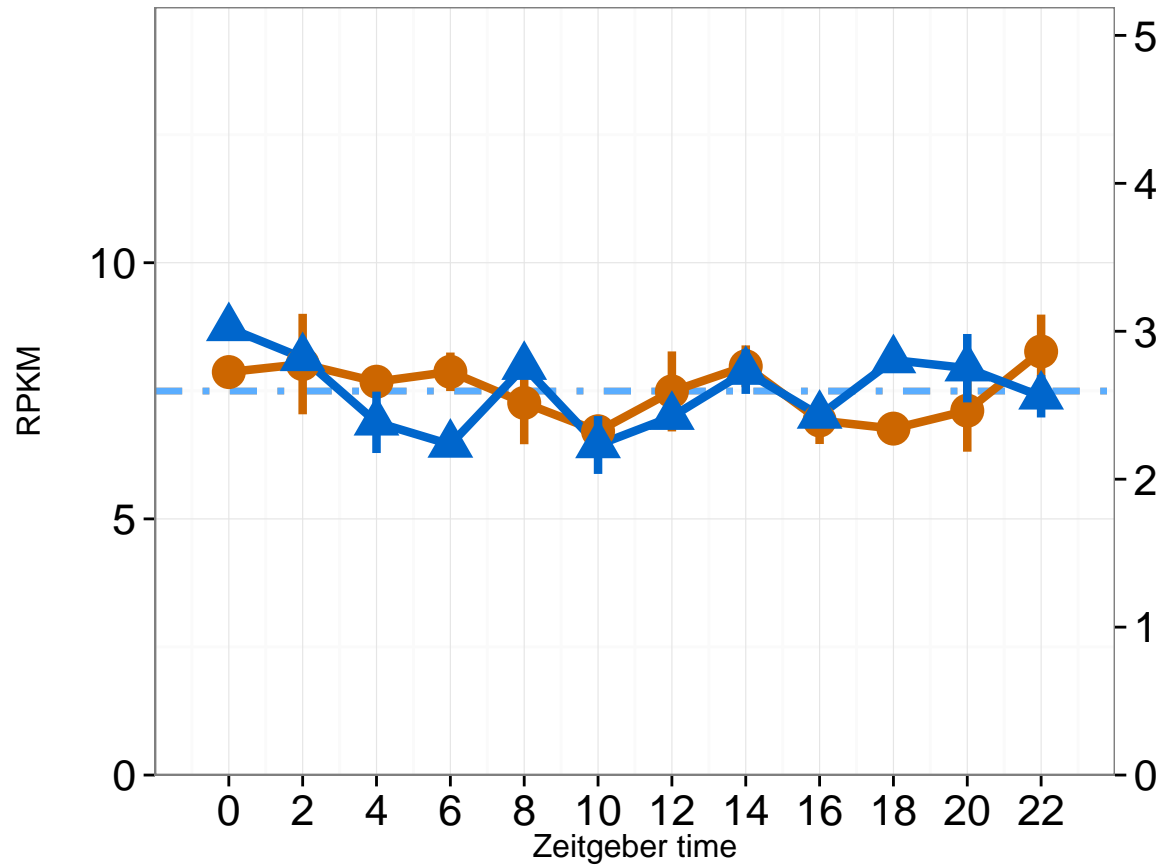

## Klc1

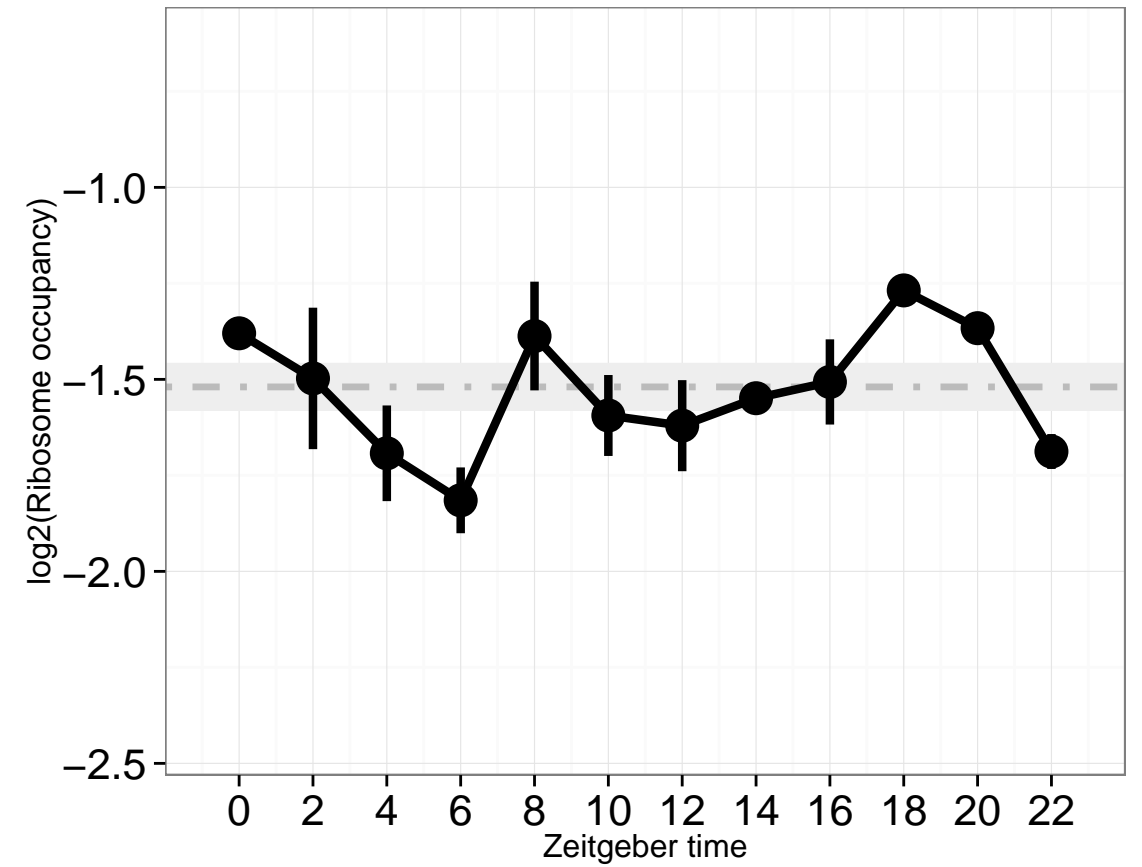

Supplement: SuppDataset_1.zip [file Klc1_set_A.pdf › Supplemental Dataset 1/A-mRNA_nonrhyth_translation_nonrhyth/Klc1_set_A.pdf]

## Klc2

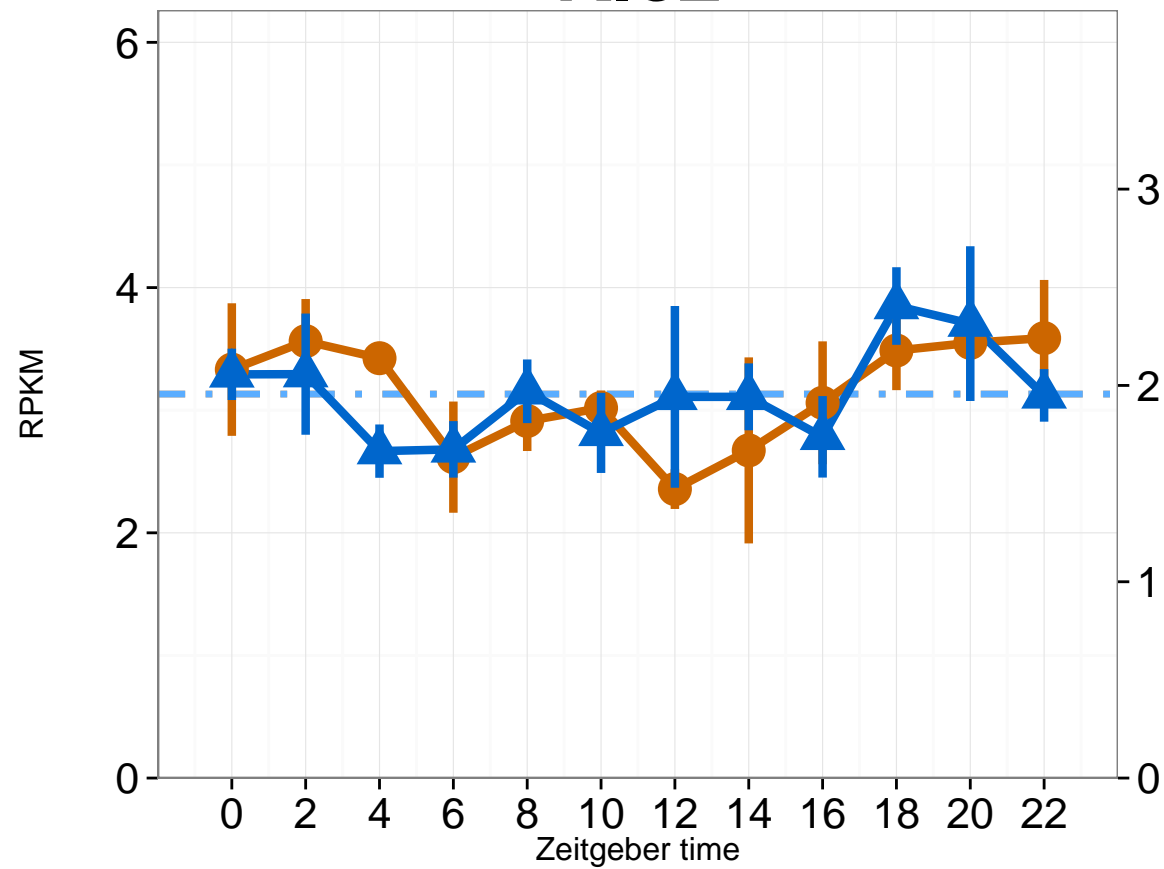

## Klc2

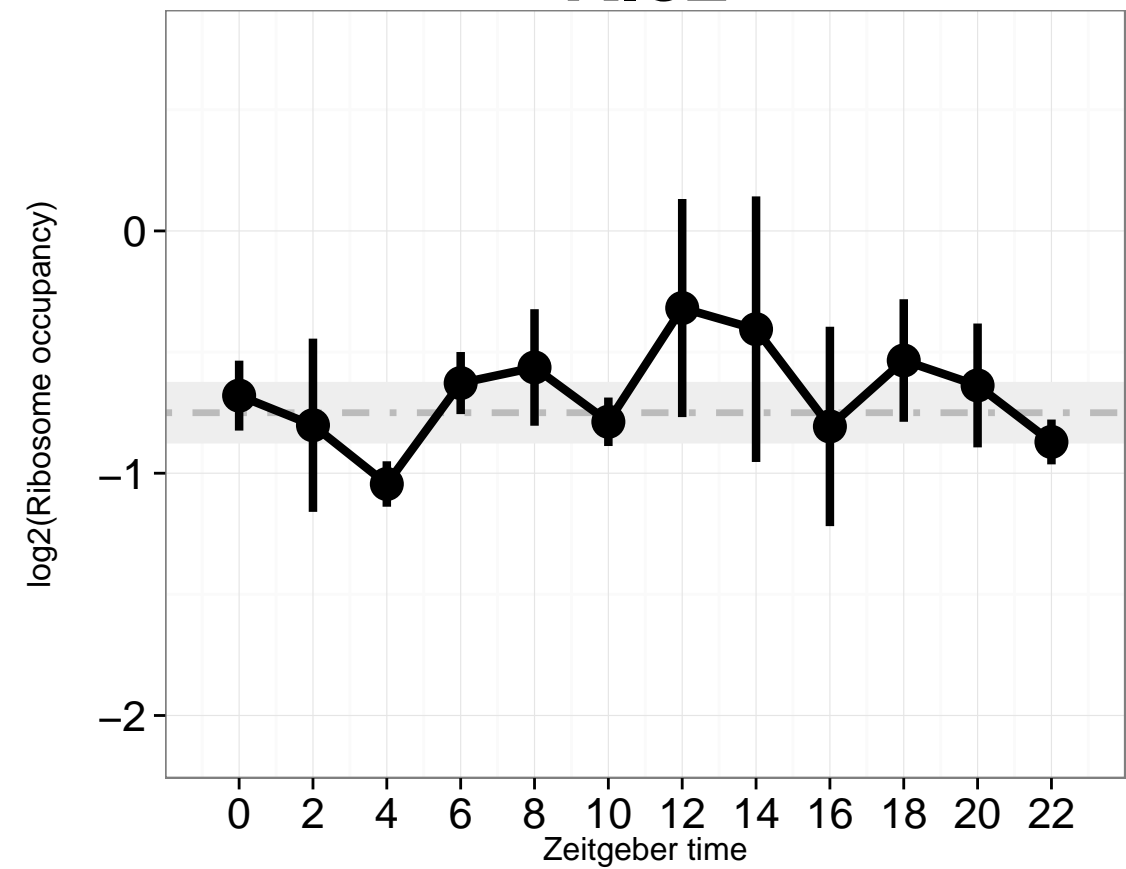

Supplement: SuppDataset_1.zip [file Klc2_set_A.pdf › Supplemental Dataset 1/A-mRNA_nonrhyth_translation_nonrhyth/Klc2_set_A.pdf]

## Klc4

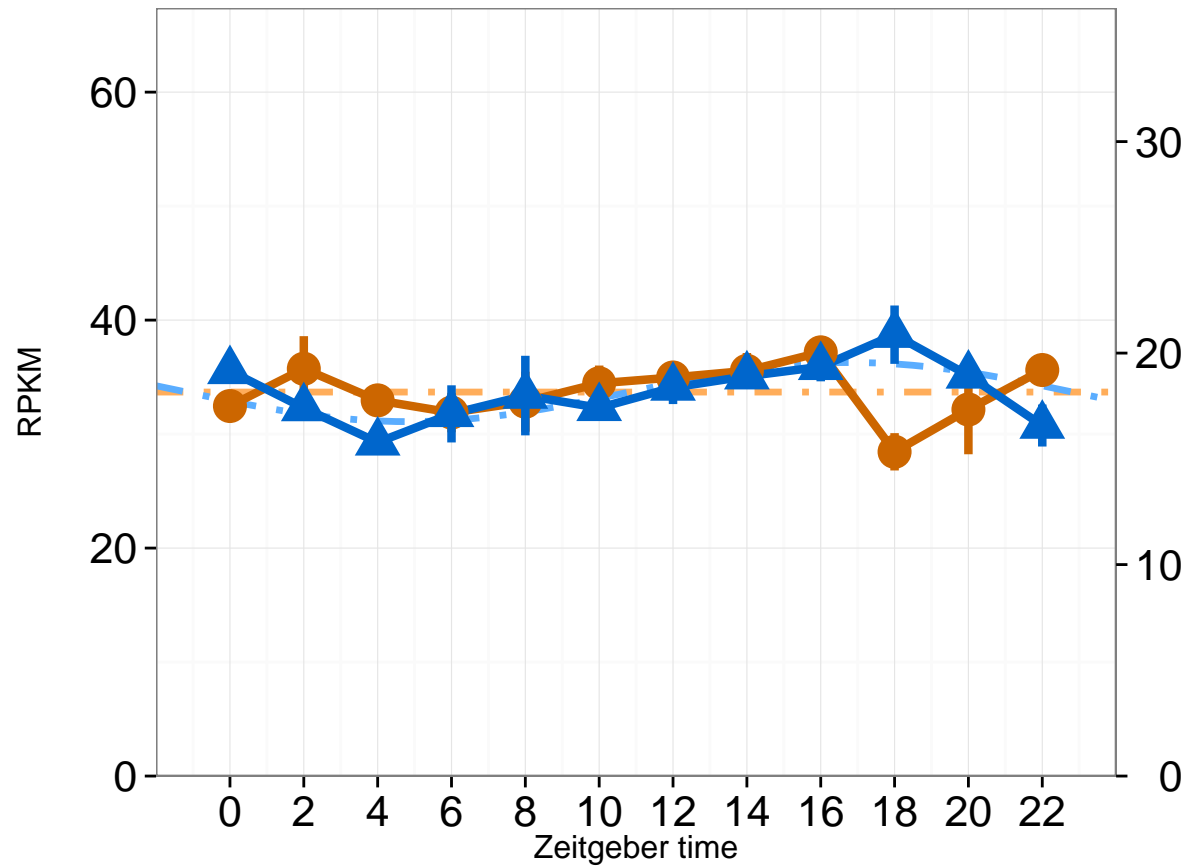

## Klc4

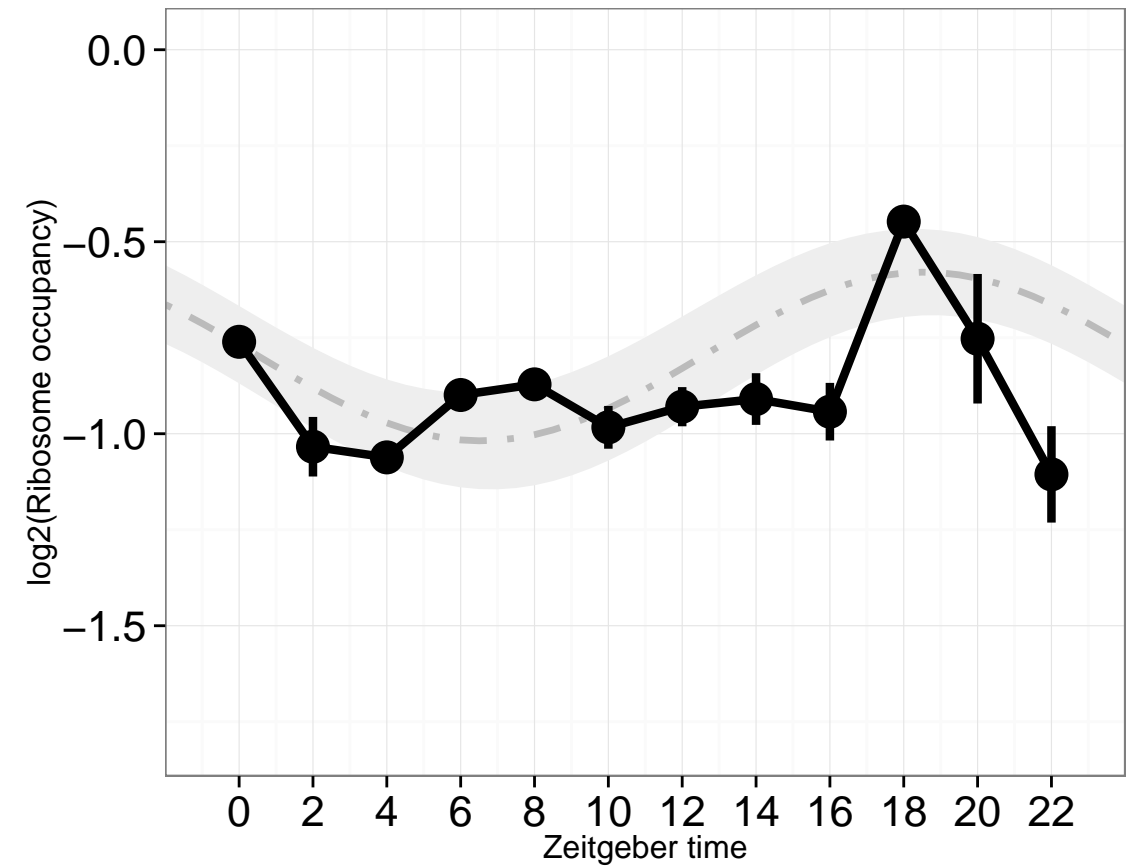

Supplement: SuppDataset_1.zip [file Klc4_set_A.pdf › Supplemental Dataset 1/A-mRNA_nonrhyth_translation_nonrhyth/Klc4_set_A.pdf]

## Klf11

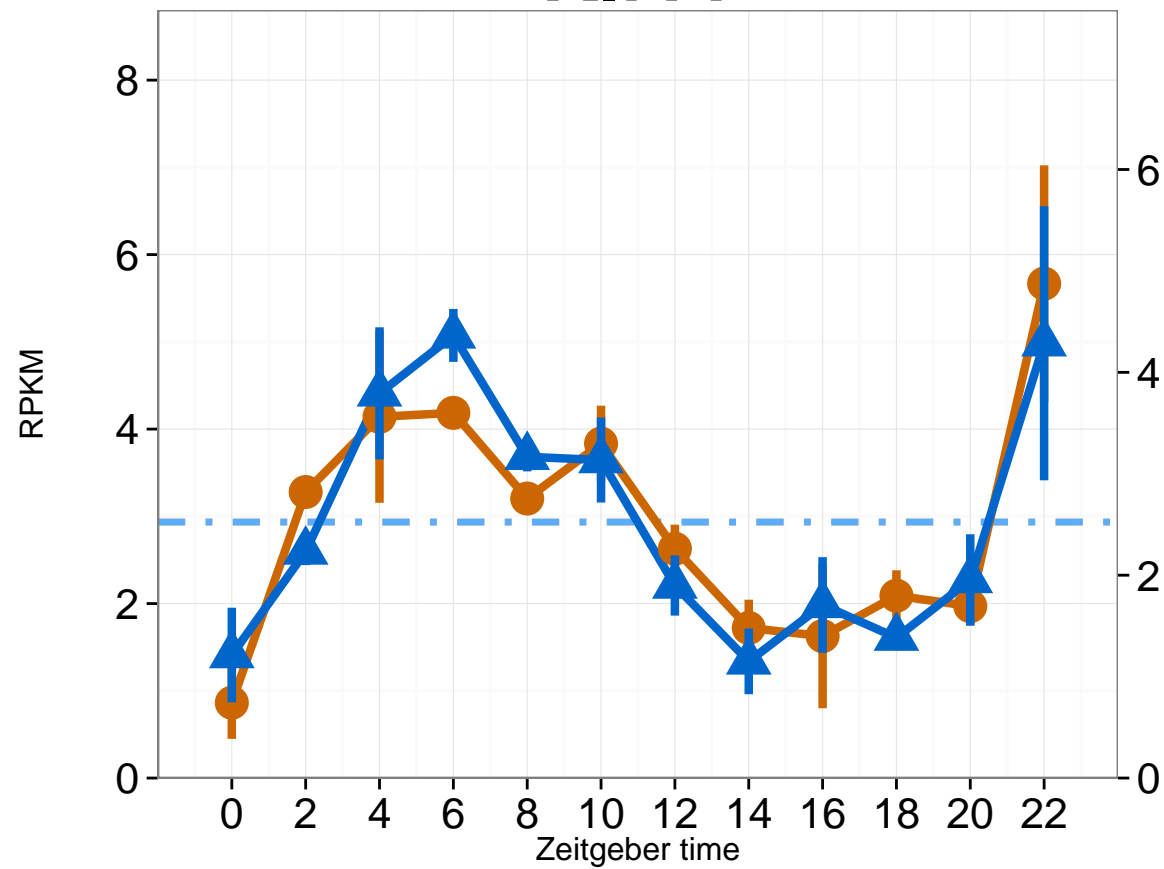

## Klf11

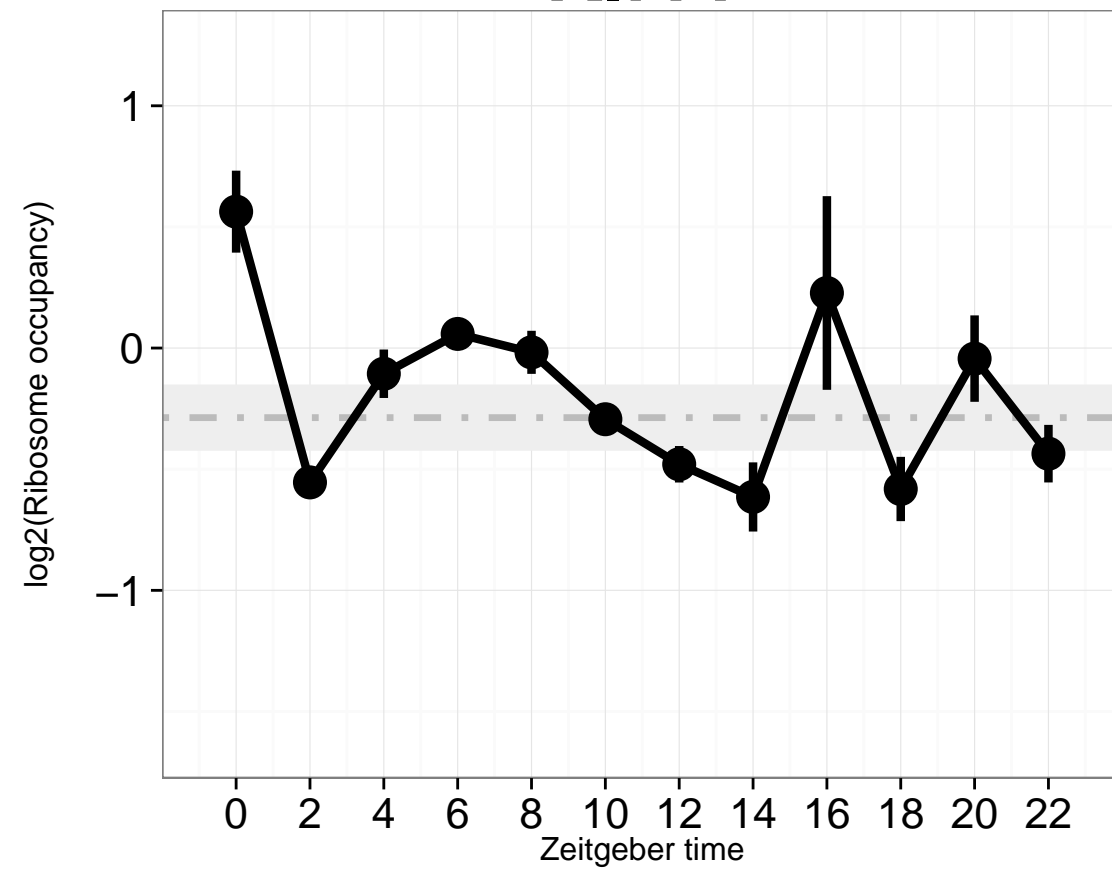

Supplement: SuppDataset_1.zip [file Klf11_set_A.pdf › Supplemental Dataset 1/A-mRNA_nonrhyth_translation_nonrhyth/Klf11_set_A.pdf]

## Klf15

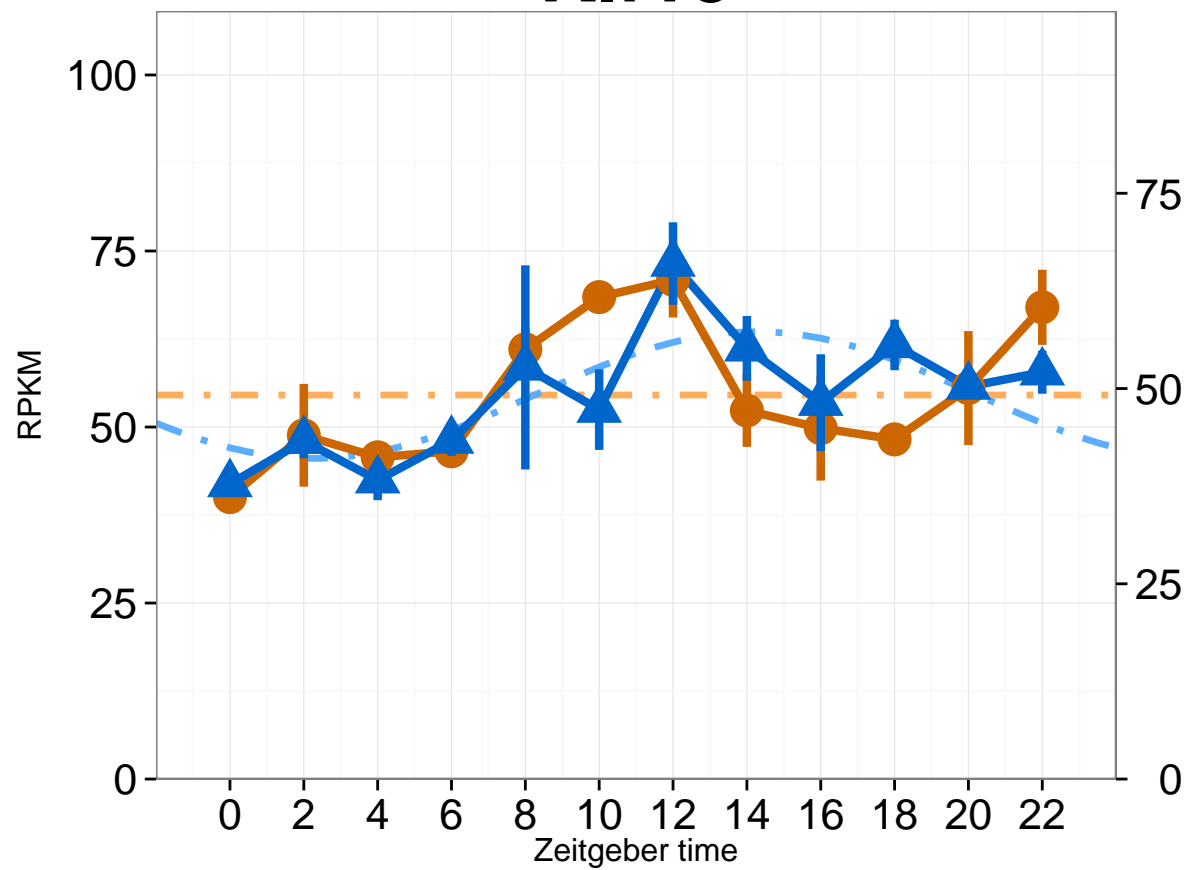

## Klf15

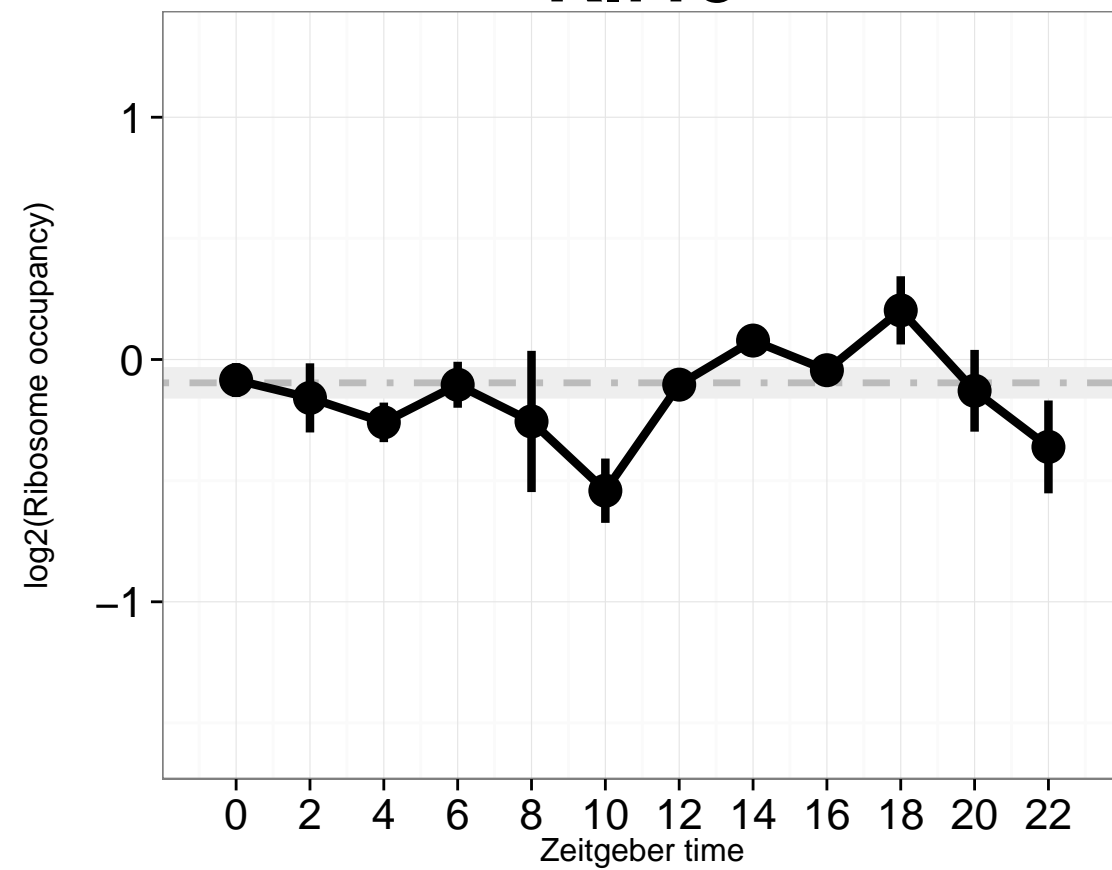

Supplement: SuppDataset_1.zip [file Klf15_set_A.pdf › Supplemental Dataset 1/A-mRNA_nonrhyth_translation_nonrhyth/Klf15_set_A.pdf]

# Klf1

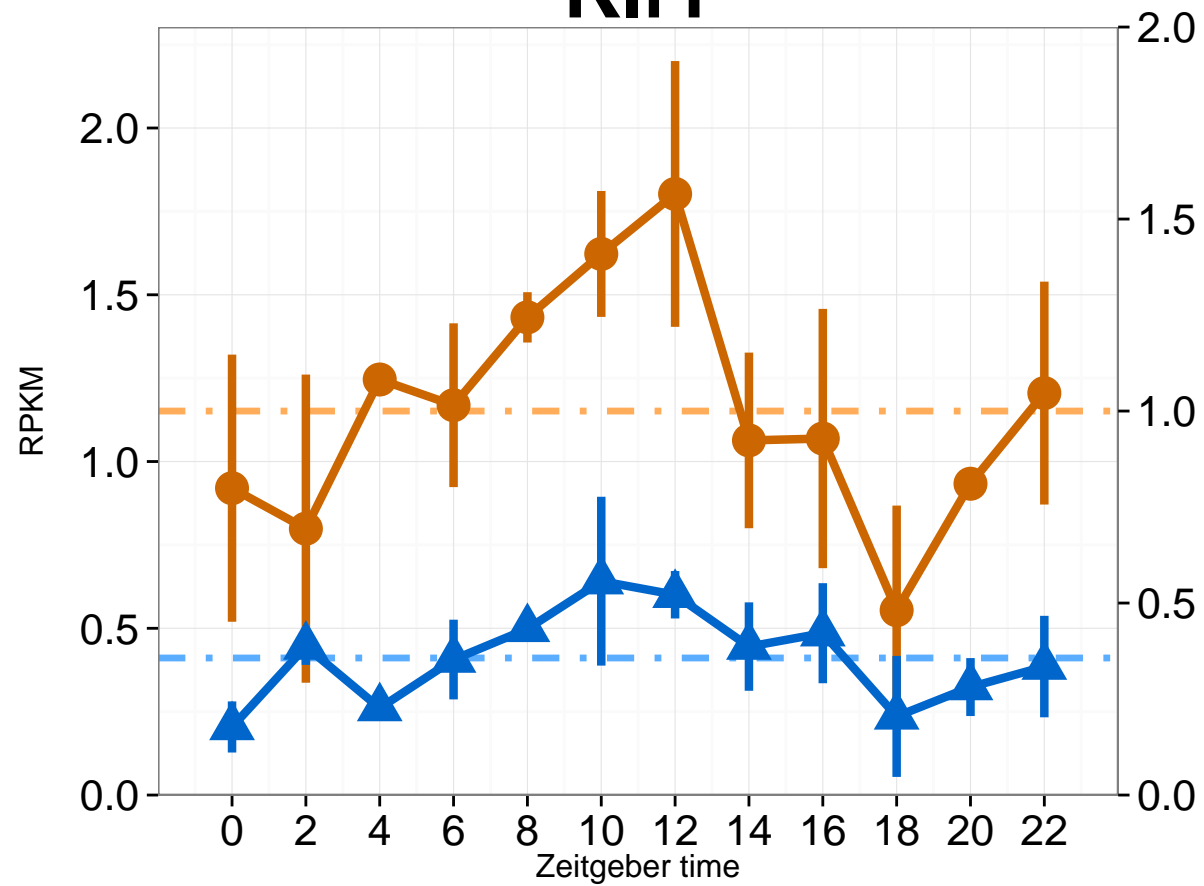

# Klf1

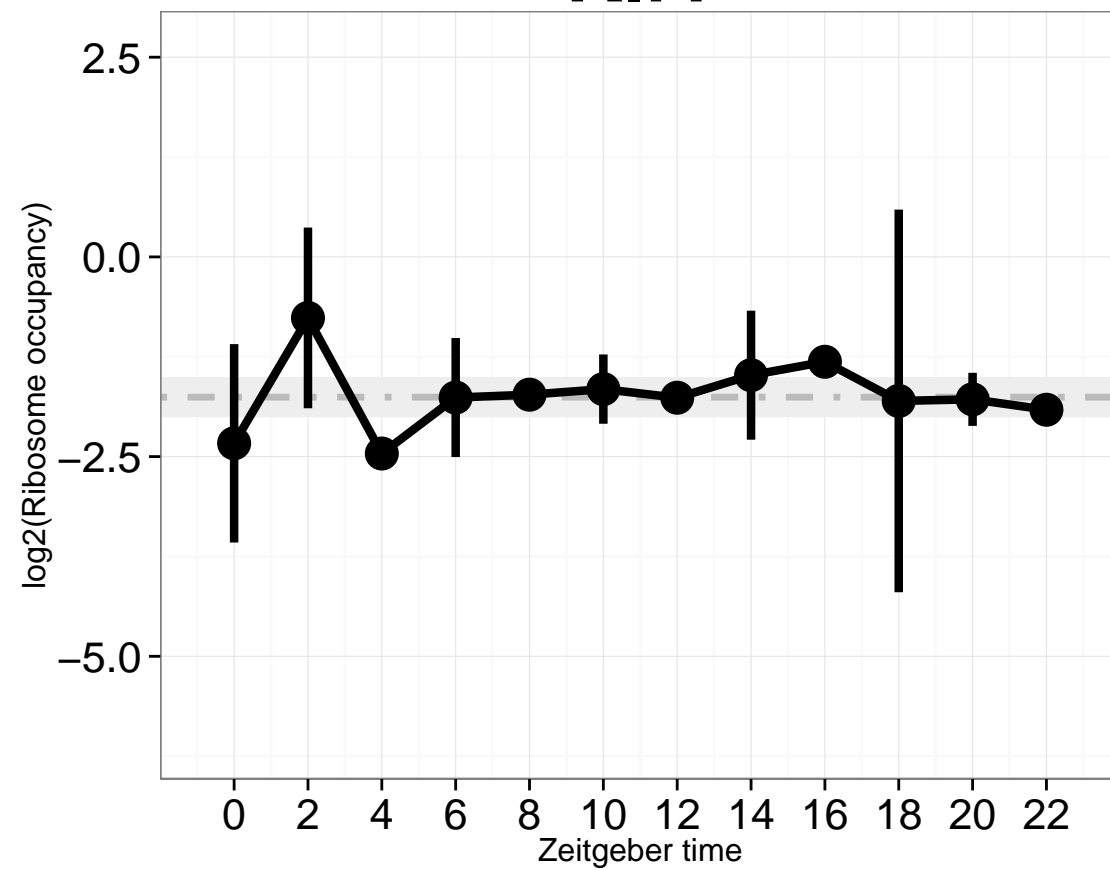

Supplement: SuppDataset_1.zip [file Klf1_set_A.pdf › Supplemental Dataset 1/A-mRNA_nonrhyth_translation_nonrhyth/Klf1_set_A.pdf]

## Klf2

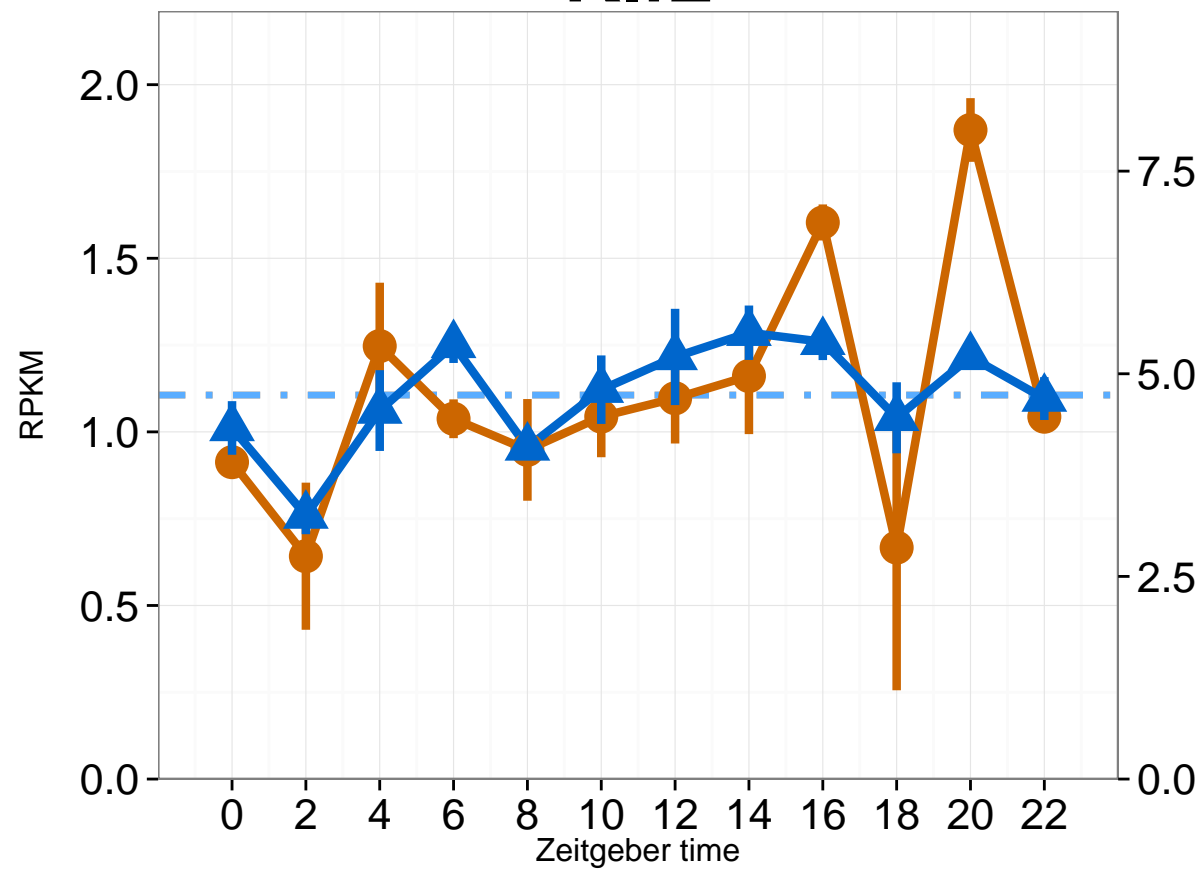

## Klf2

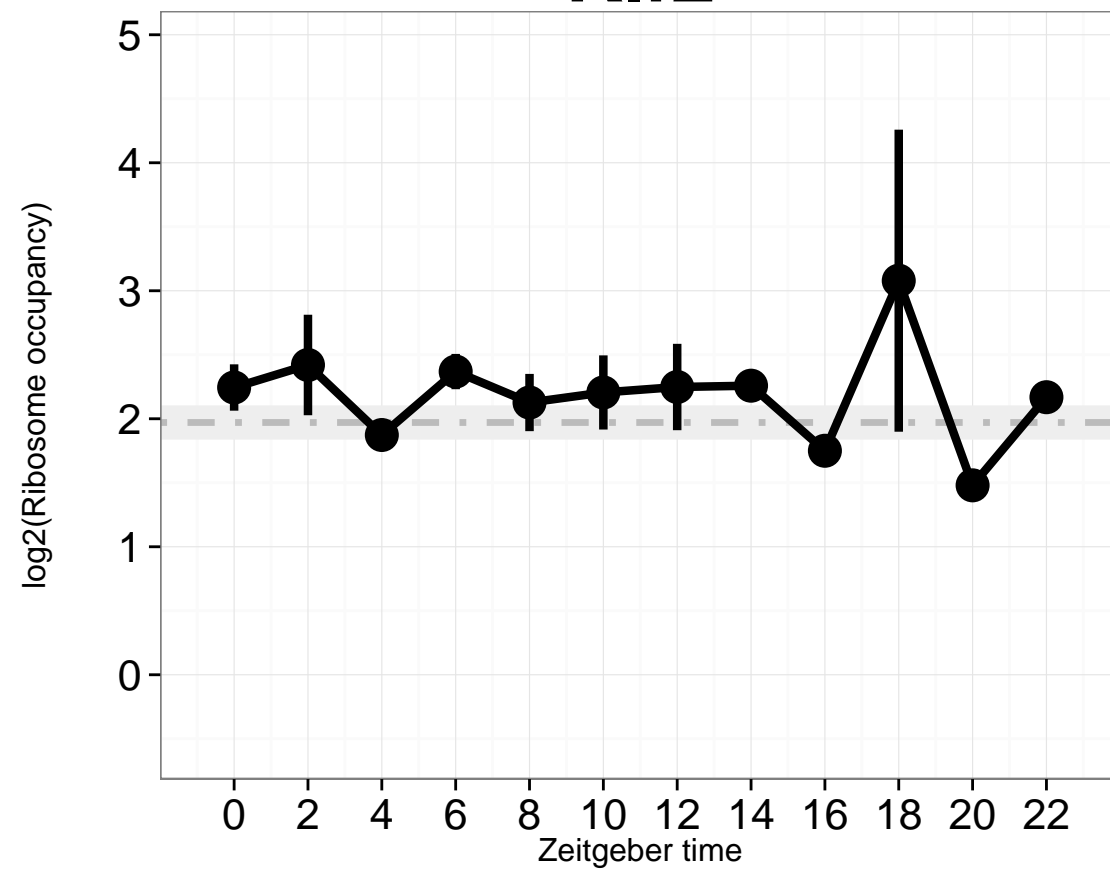

Supplement: SuppDataset_1.zip [file Klf2_set_A.pdf › Supplemental Dataset 1/A-mRNA_nonrhyth_translation_nonrhyth/Klf2_set_A.pdf]

## Klf3

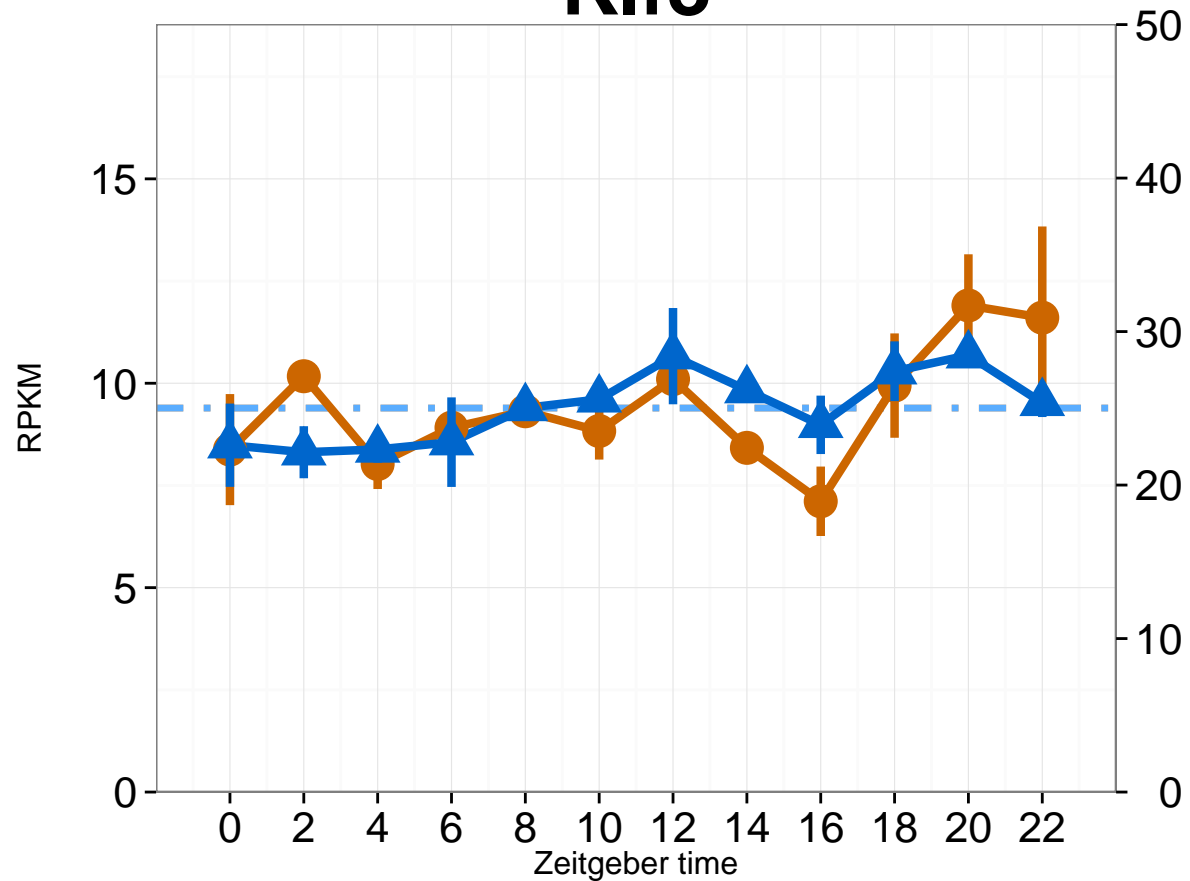

## Klf3

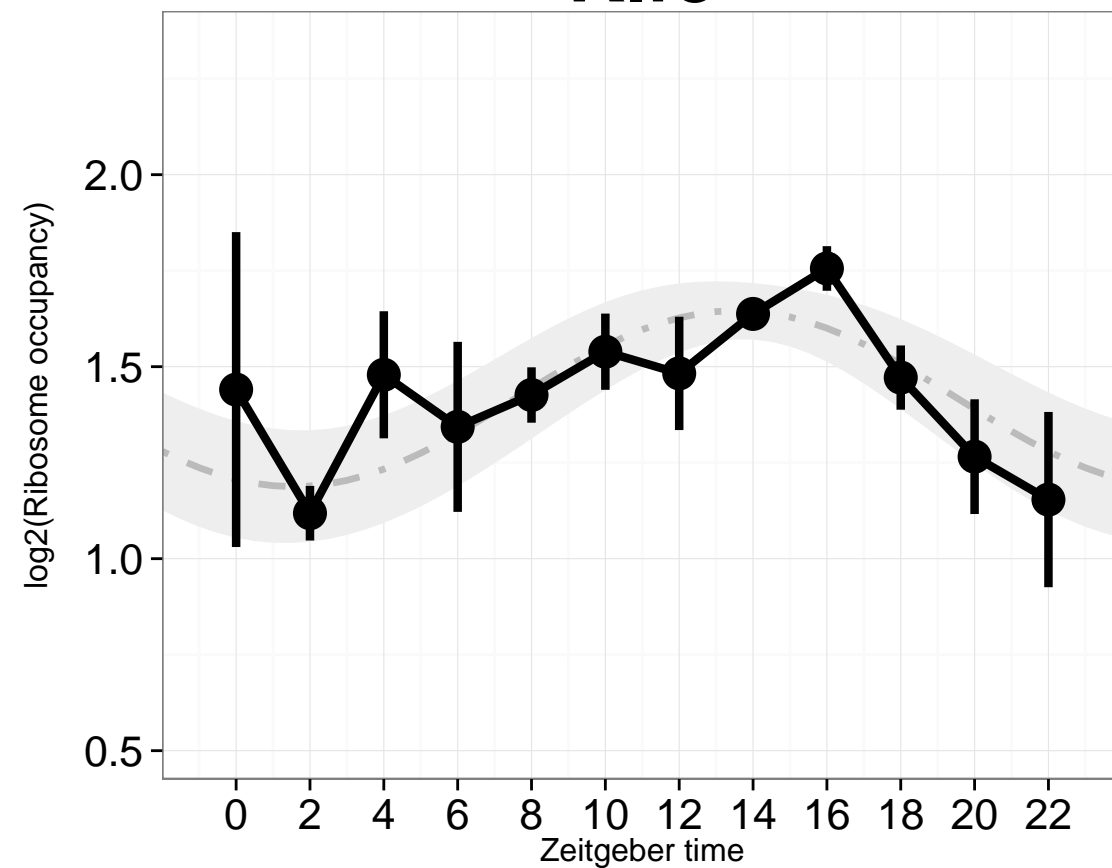

Supplement: SuppDataset_1.zip [file Klf3_set_A.pdf › Supplemental Dataset 1/A-mRNA_nonrhyth_translation_nonrhyth/Klf3_set_A.pdf]

## Klf6

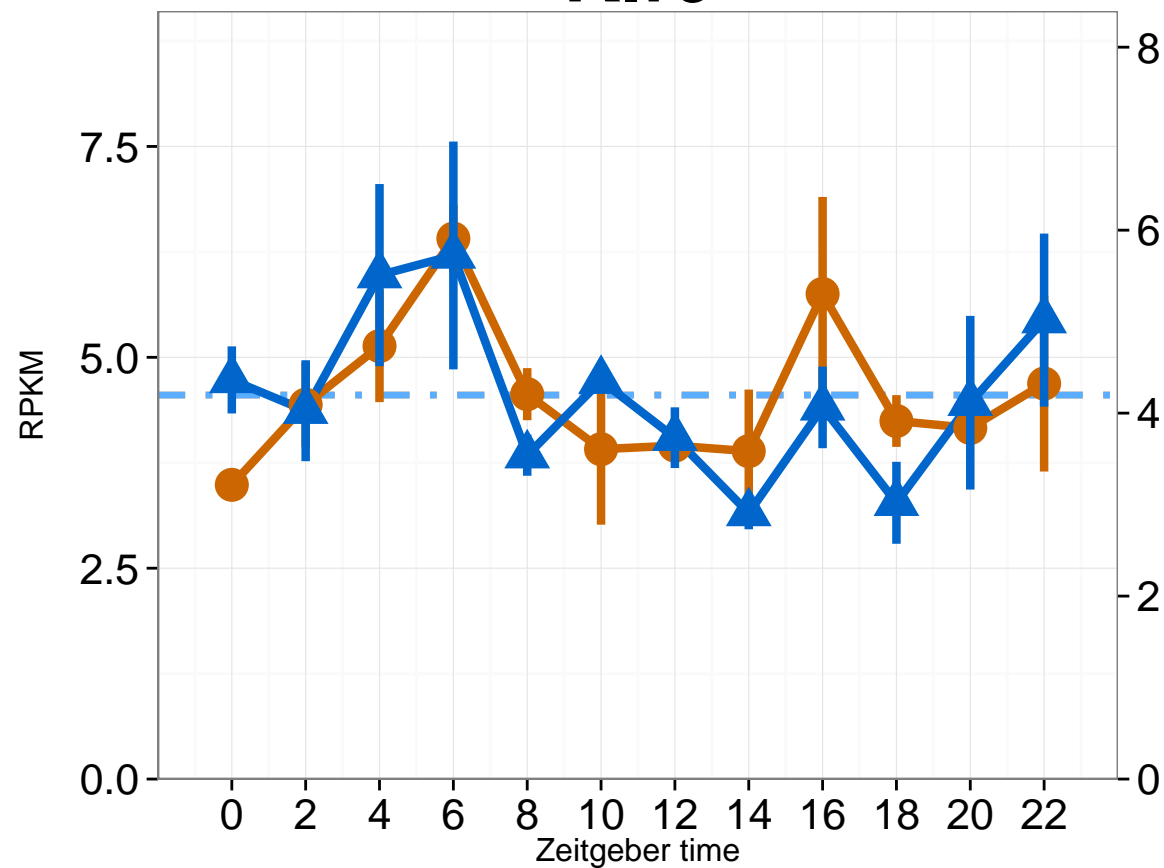

## Klf6

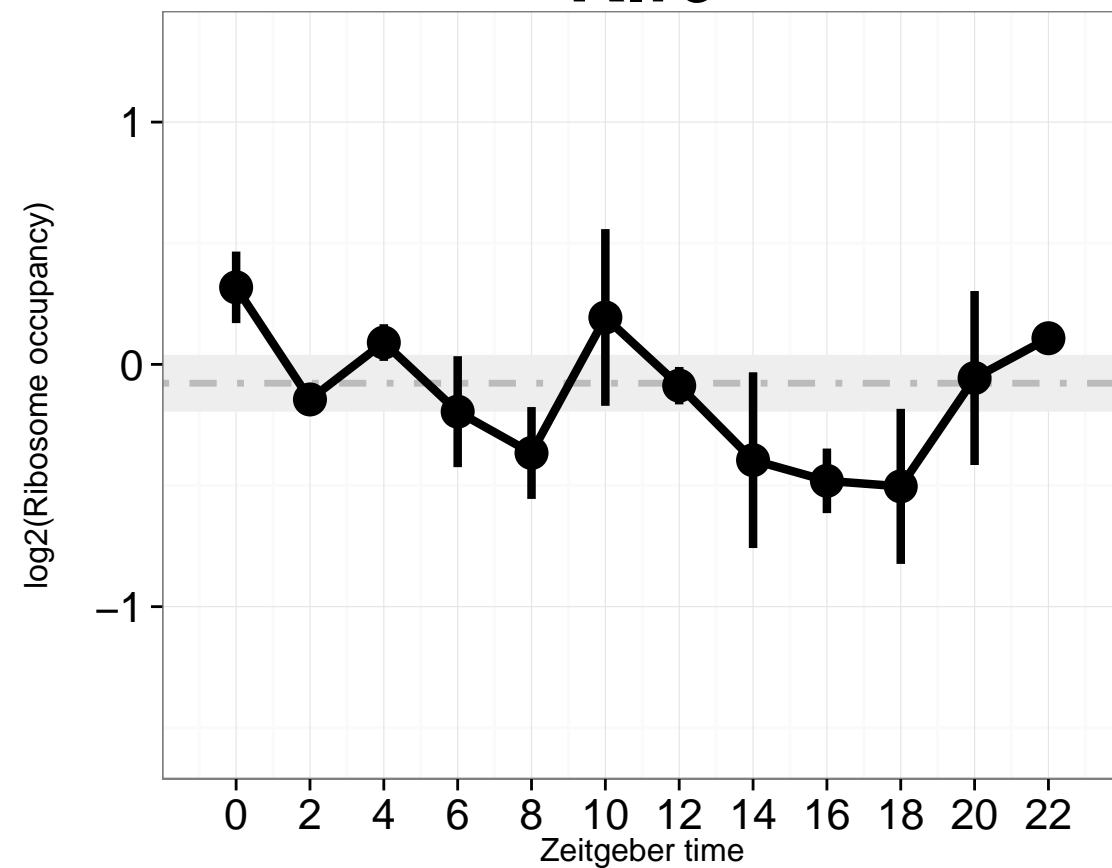

Supplement: SuppDataset_1.zip [file Klf6_set_A.pdf › Supplemental Dataset 1/A-mRNA_nonrhyth_translation_nonrhyth/Klf6_set_A.pdf]

## Klf7

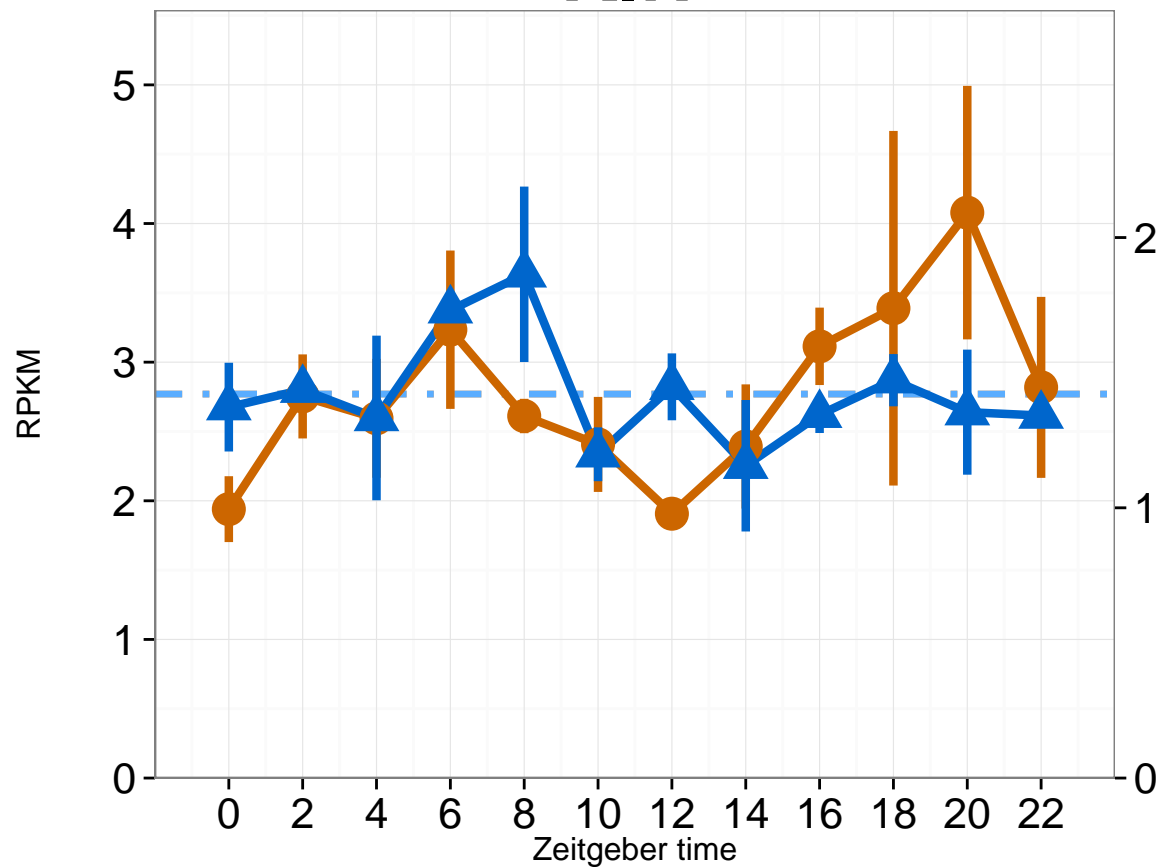

## Klf7

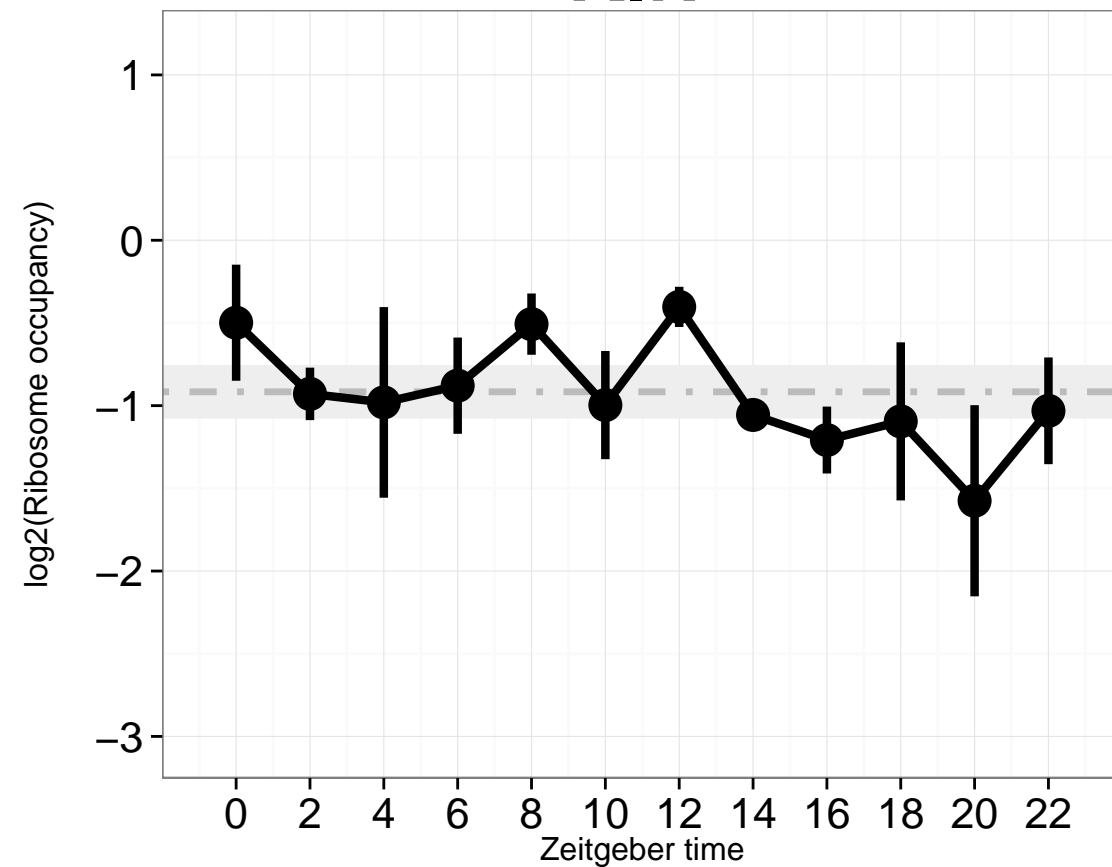

Supplement: SuppDataset_1.zip [file Klf7_set_A.pdf › Supplemental Dataset 1/A-mRNA_nonrhyth_translation_nonrhyth/Klf7_set_A.pdf]

**Klhdc10**

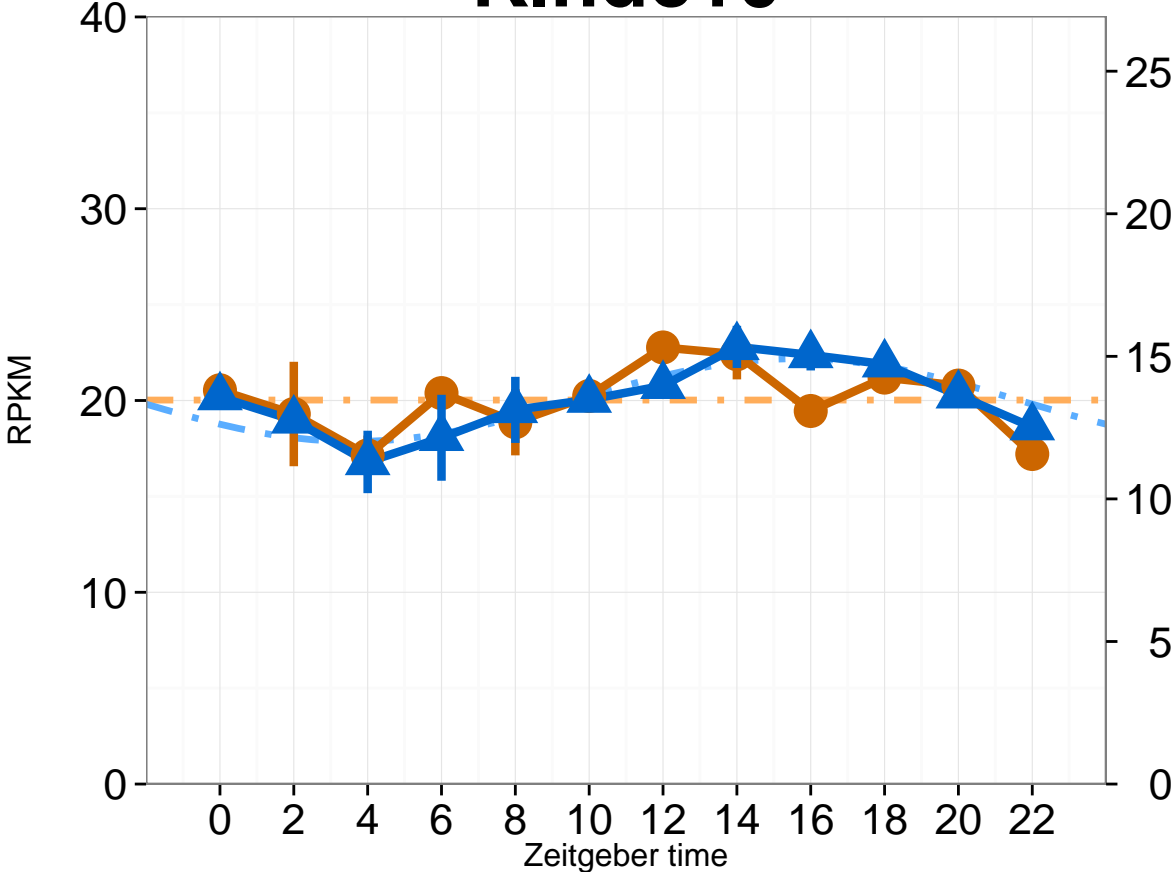

**Klhdc10**

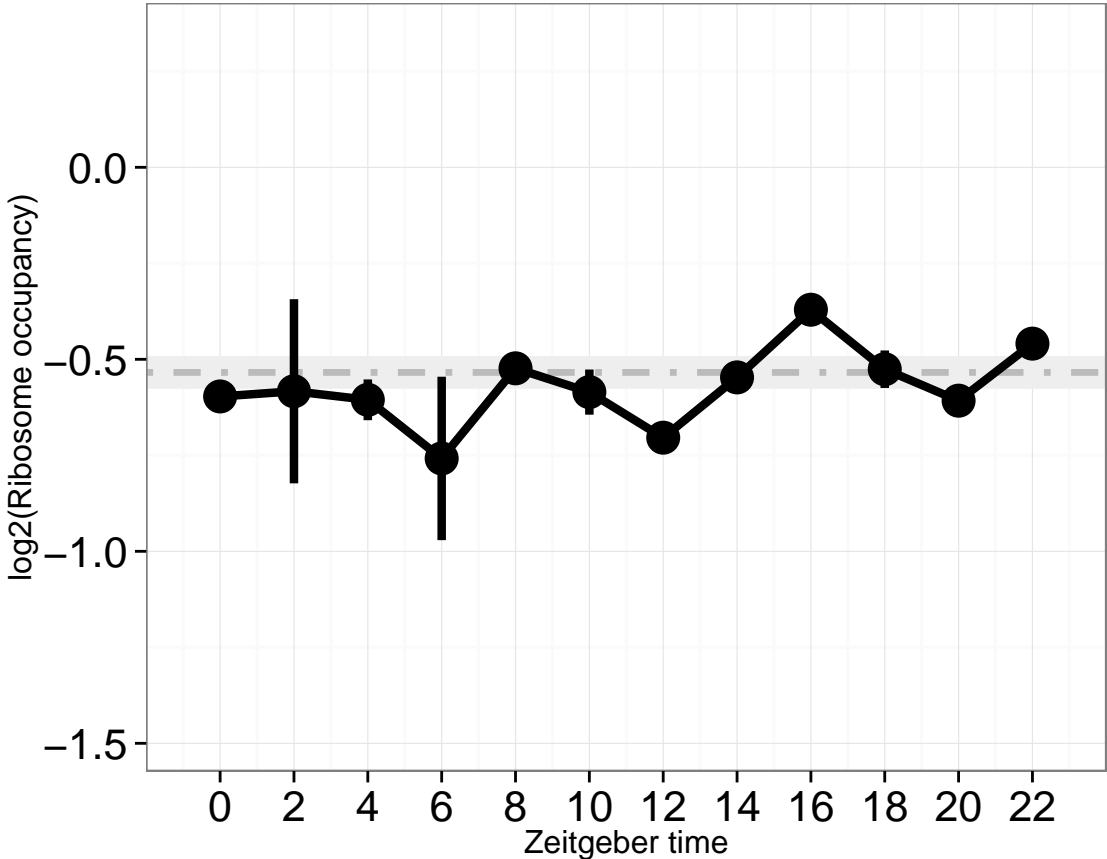

Supplement: SuppDataset_1.zip [file Klhdc10_set_A.pdf › Supplemental Dataset 1/A-mRNA_nonrhyth_translation_nonrhyth/Klhdc10_set_A.pdf]

## Klhdc2

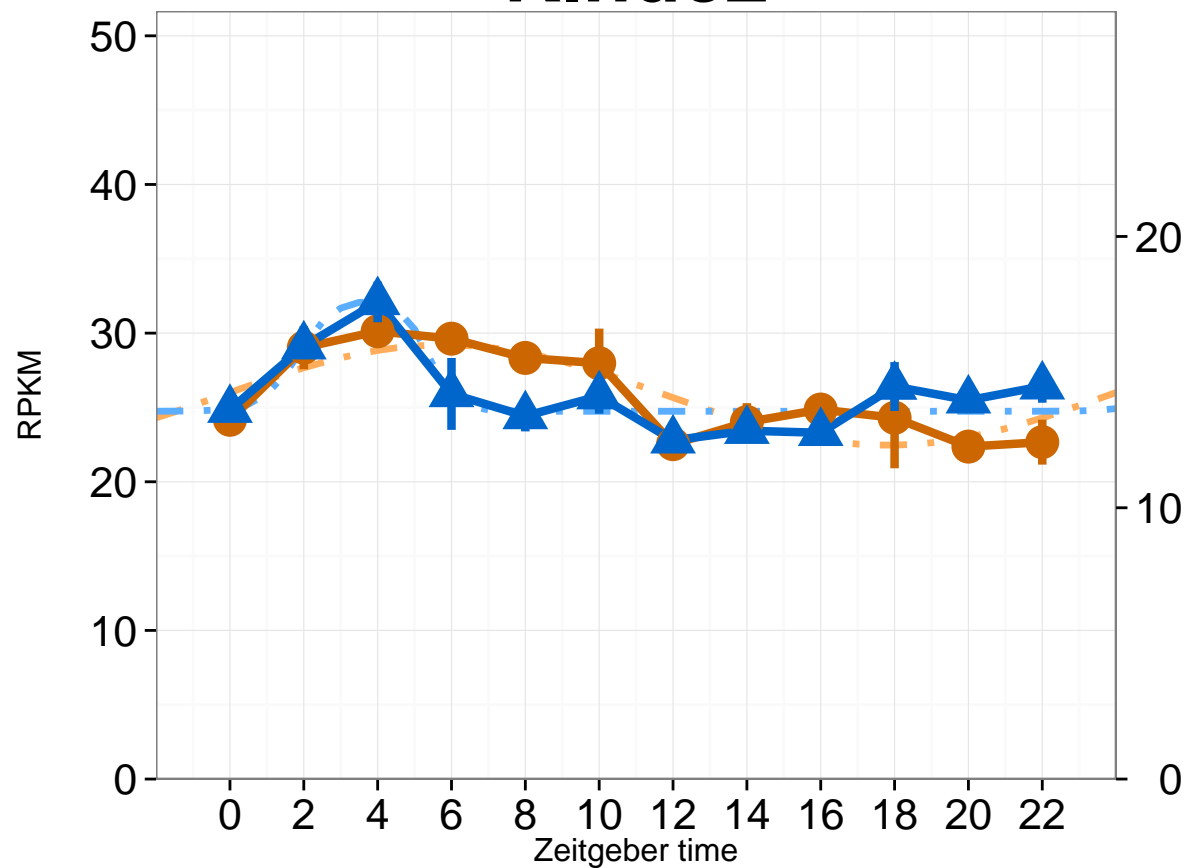

## Klhdc2

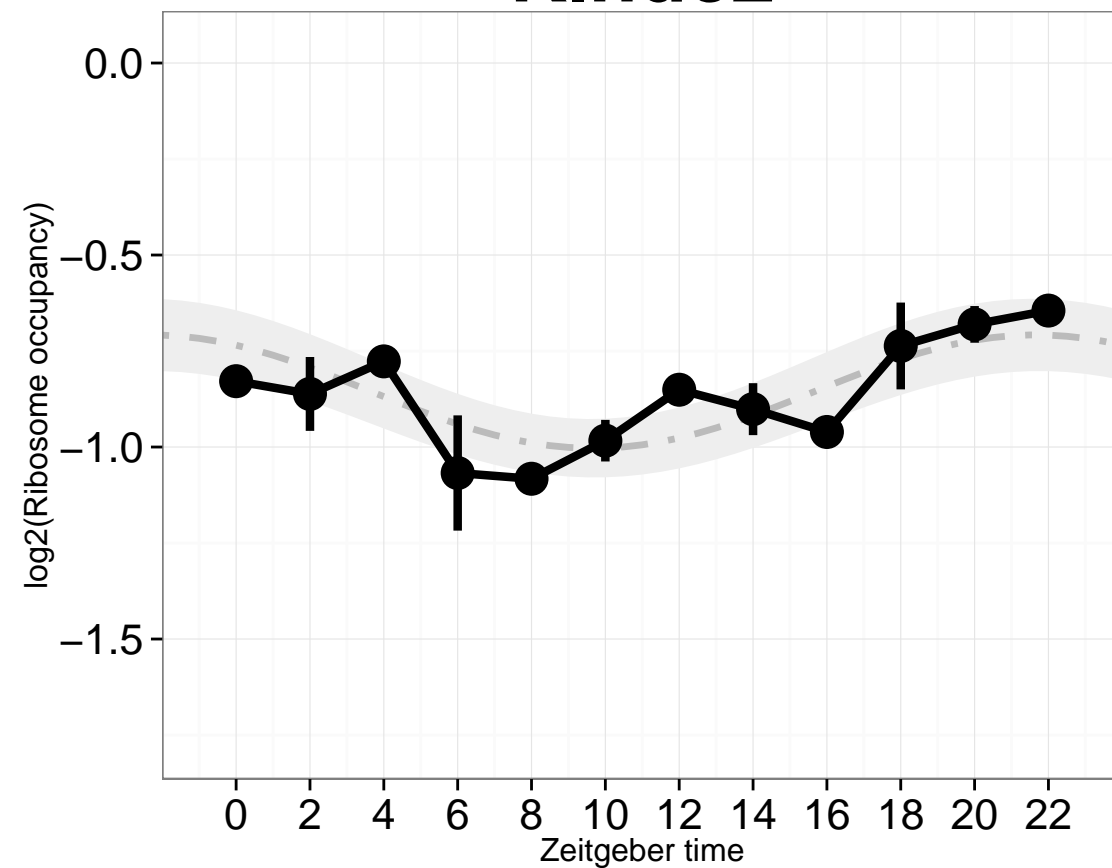

Supplement: SuppDataset_1.zip [file Klhdc2_set_A.pdf › Supplemental Dataset 1/A-mRNA_nonrhyth_translation_nonrhyth/Klhdc2_set_A.pdf]

## Klhdc3

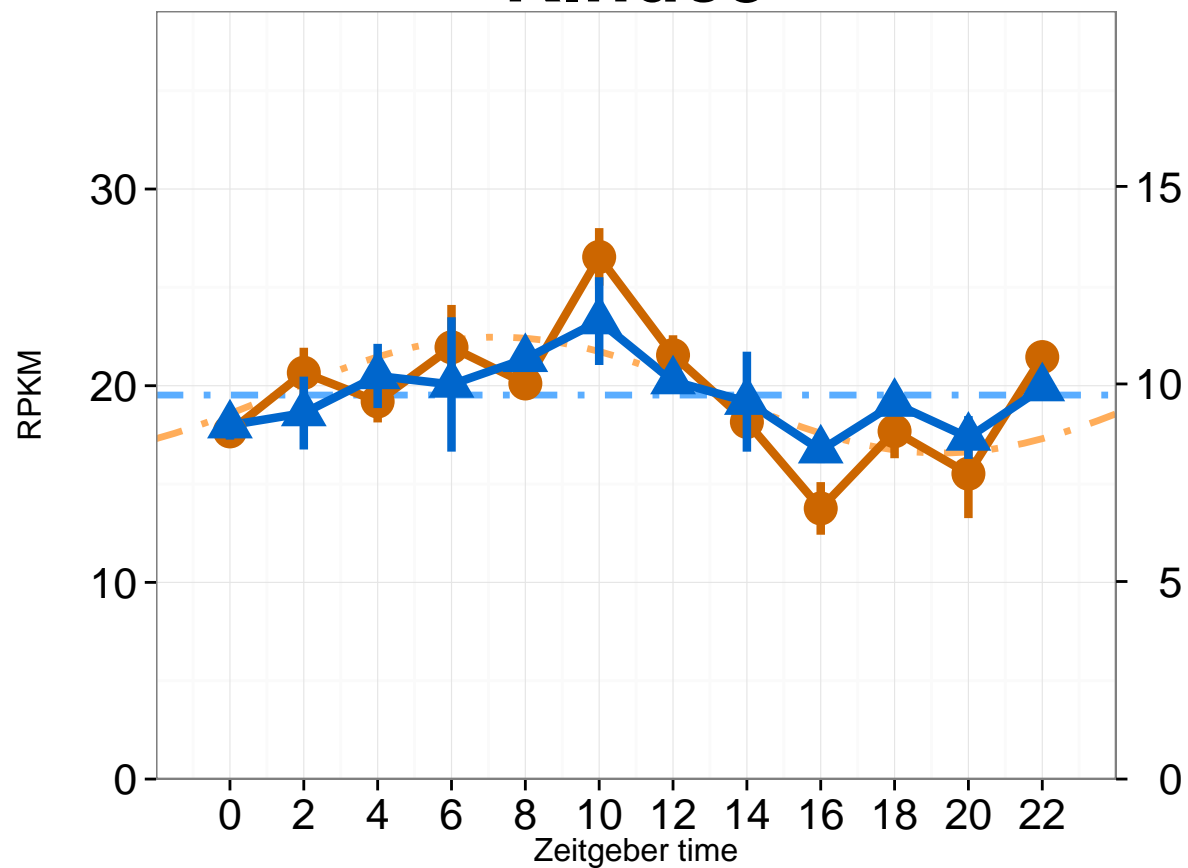

## Klhdc3

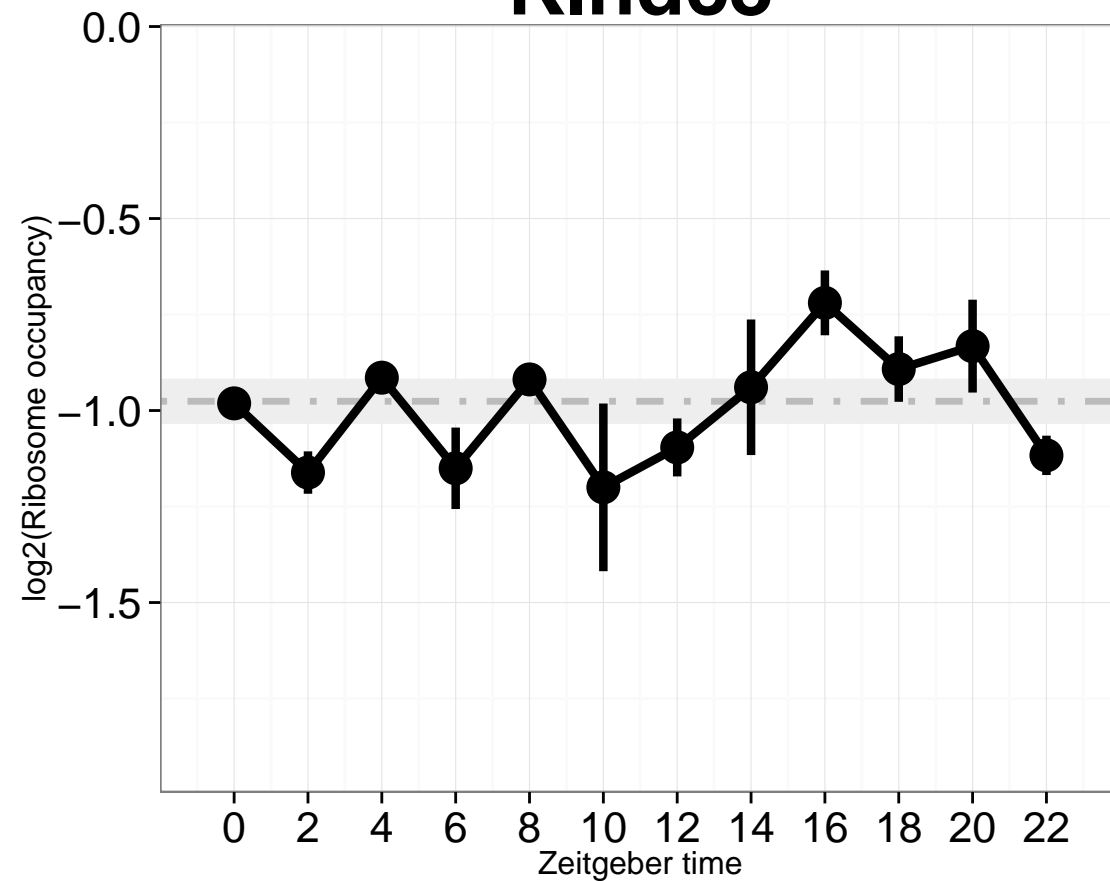

Supplement: SuppDataset_1.zip [file Klhdc3_set_A.pdf › Supplemental Dataset 1/A-mRNA_nonrhyth_translation_nonrhyth/Klhdc3_set_A.pdf]

## Klhdc8b

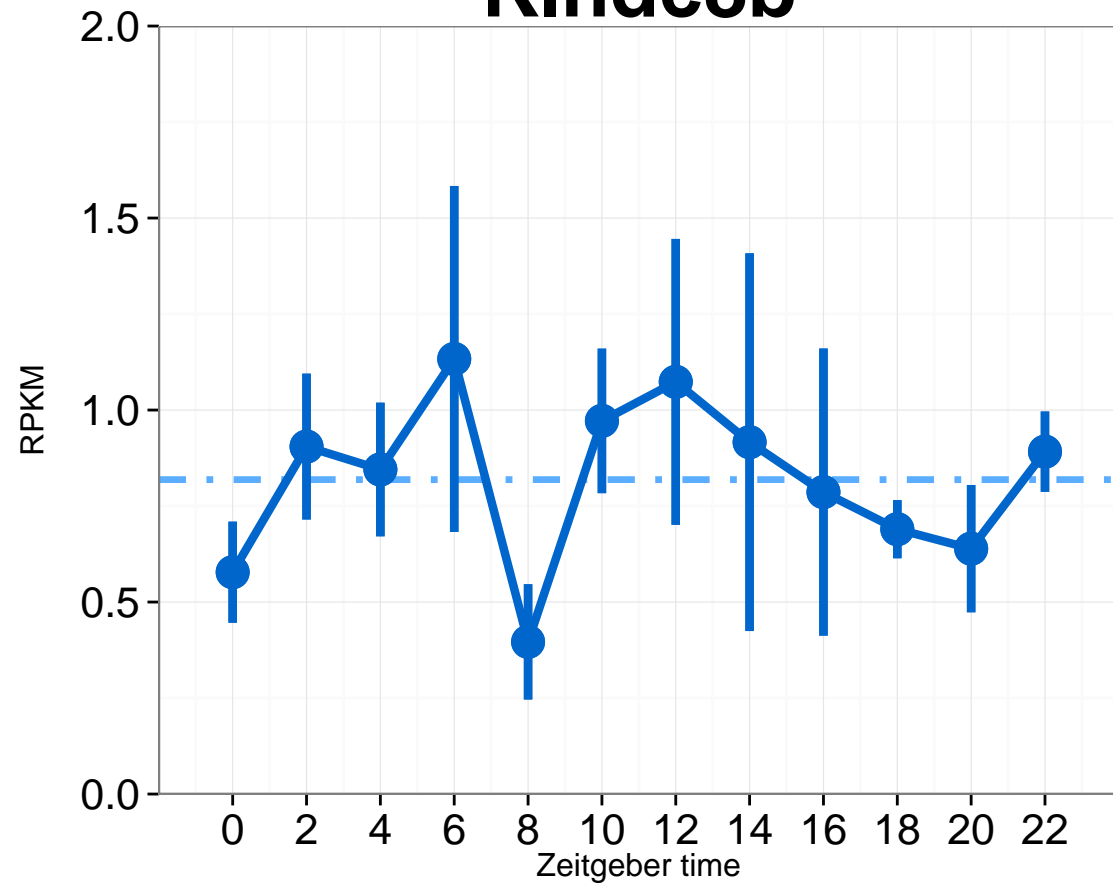

## Klhdc8b log2(Ribosome occupanc

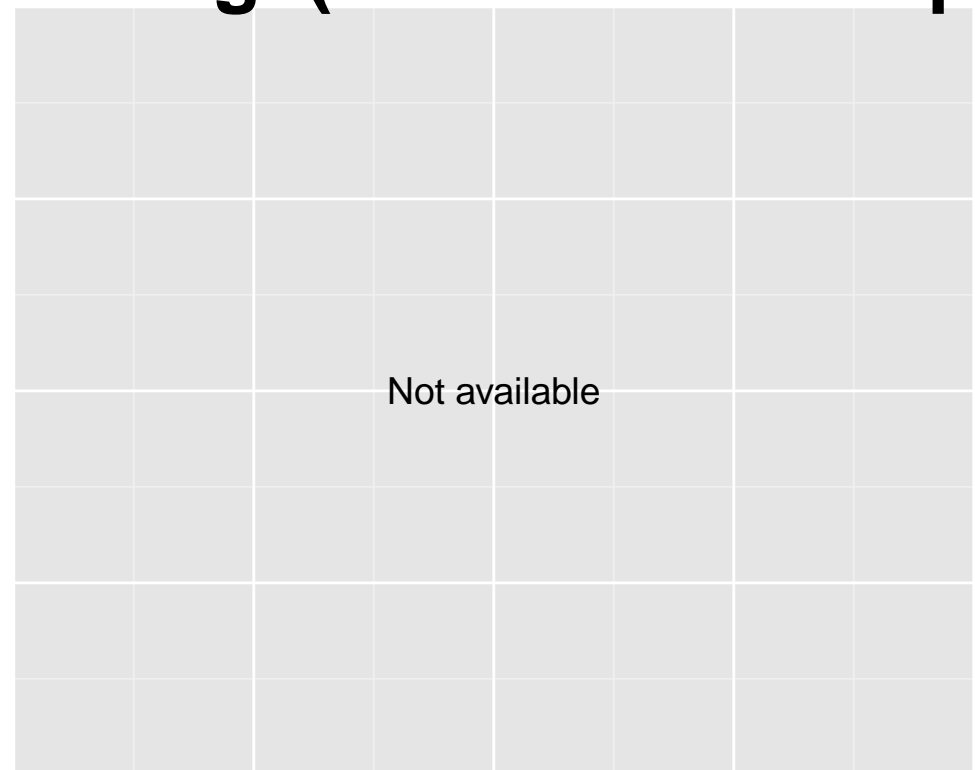

Supplement: SuppDataset_1.zip [file Klhdc8b_set_A.pdf › Supplemental Dataset 1/A-mRNA_nonrhyth_translation_nonrhyth/Klhdc8b_set_A.pdf]

# Klh12

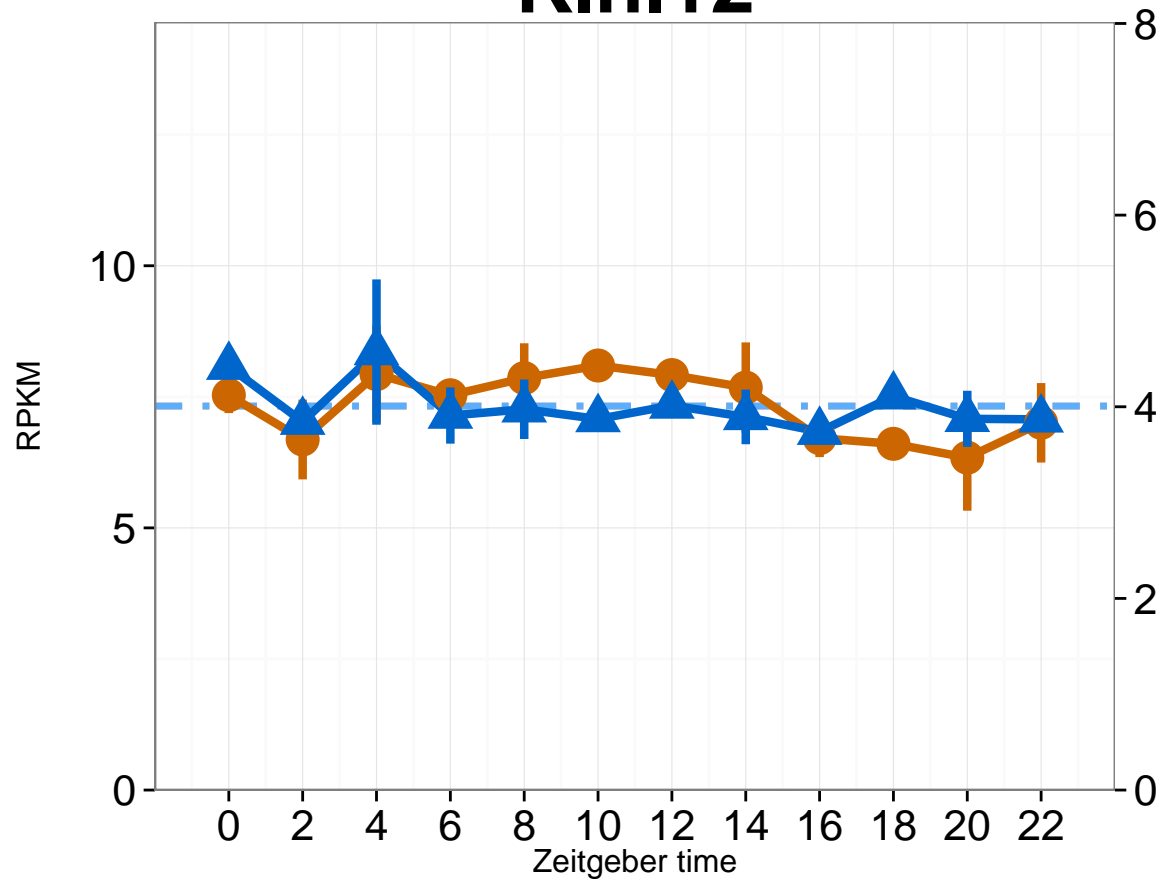

# Klh12

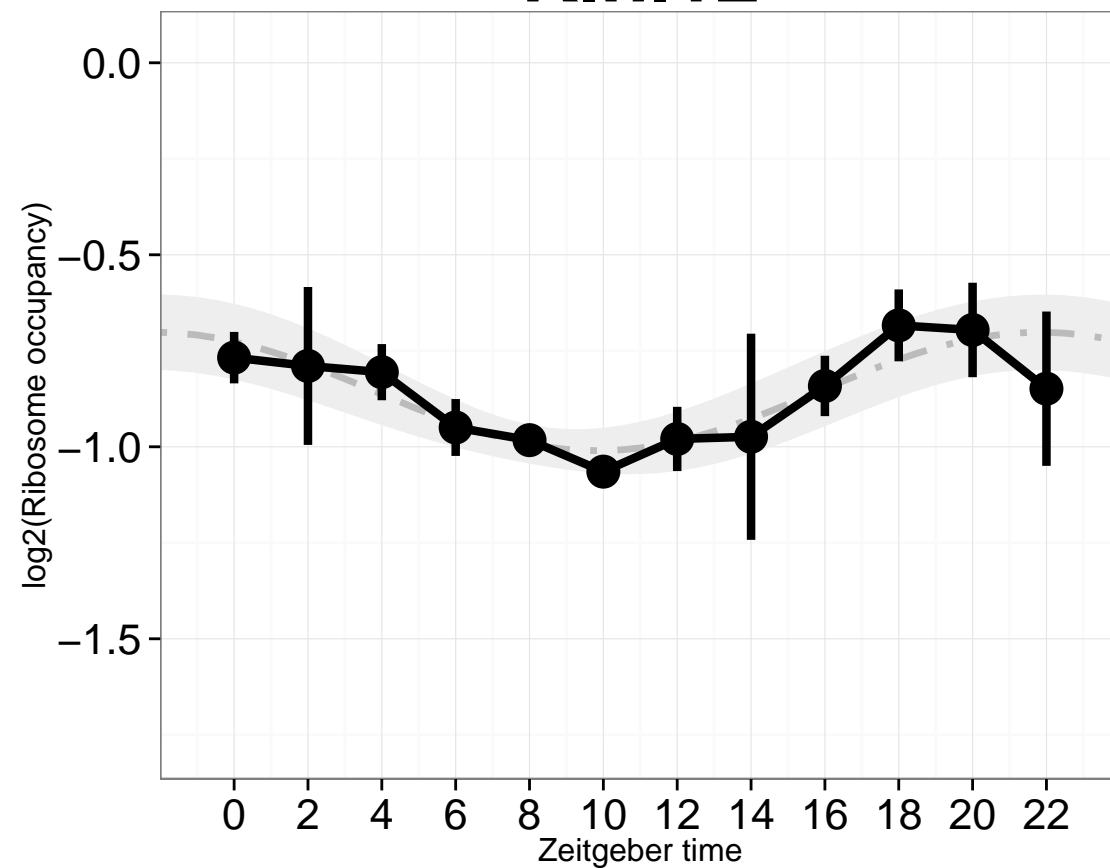

Supplement: SuppDataset_1.zip [file Klhl12_set_A.pdf › Supplemental Dataset 1/A-mRNA_nonrhyth_translation_nonrhyth/Klhl12_set_A.pdf]
