# Supplementary figures and images for: Ribosome profiling reveals the rhythmic liver translatome and circadian clock regulation by upstream open reading frames (part 39 of 113)
Source: HighWire-hosted journal article supplement (doi:10.1101/gr.195404.115), 2015-10-20

# KIhI13

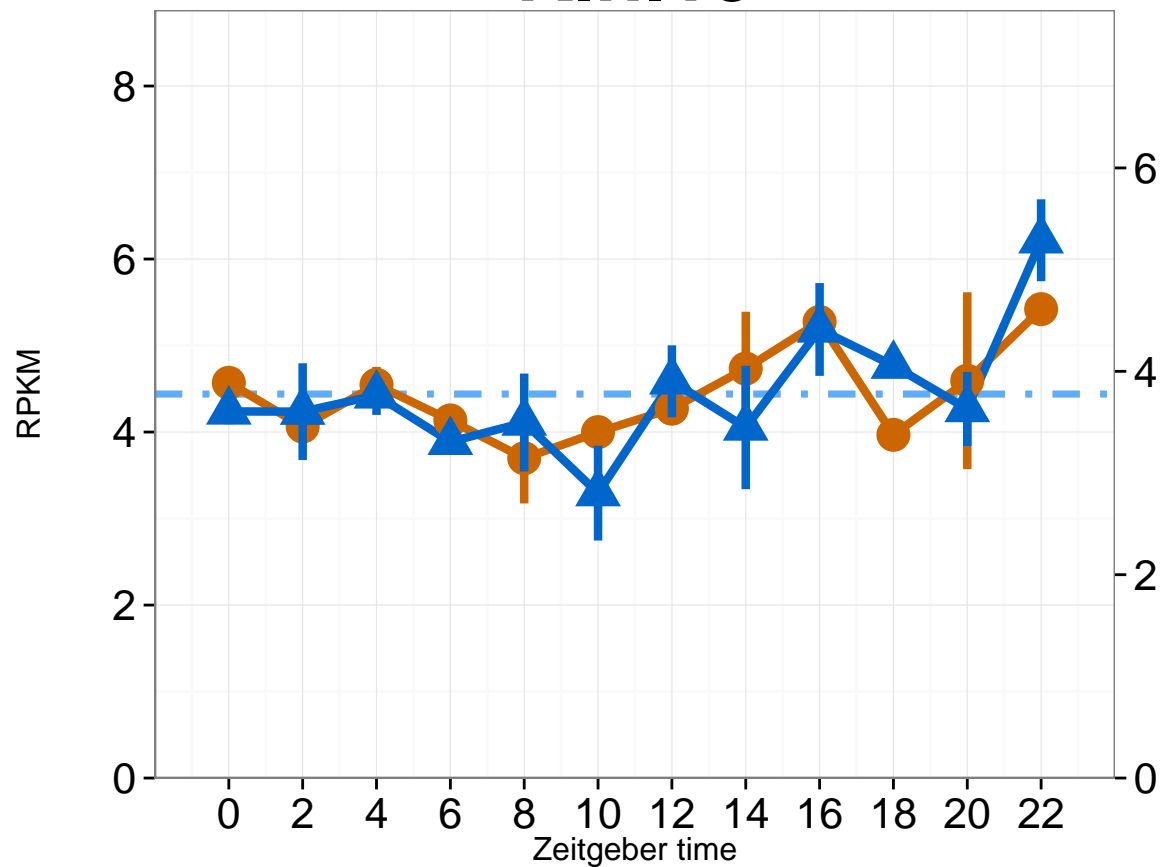

# KIhI13

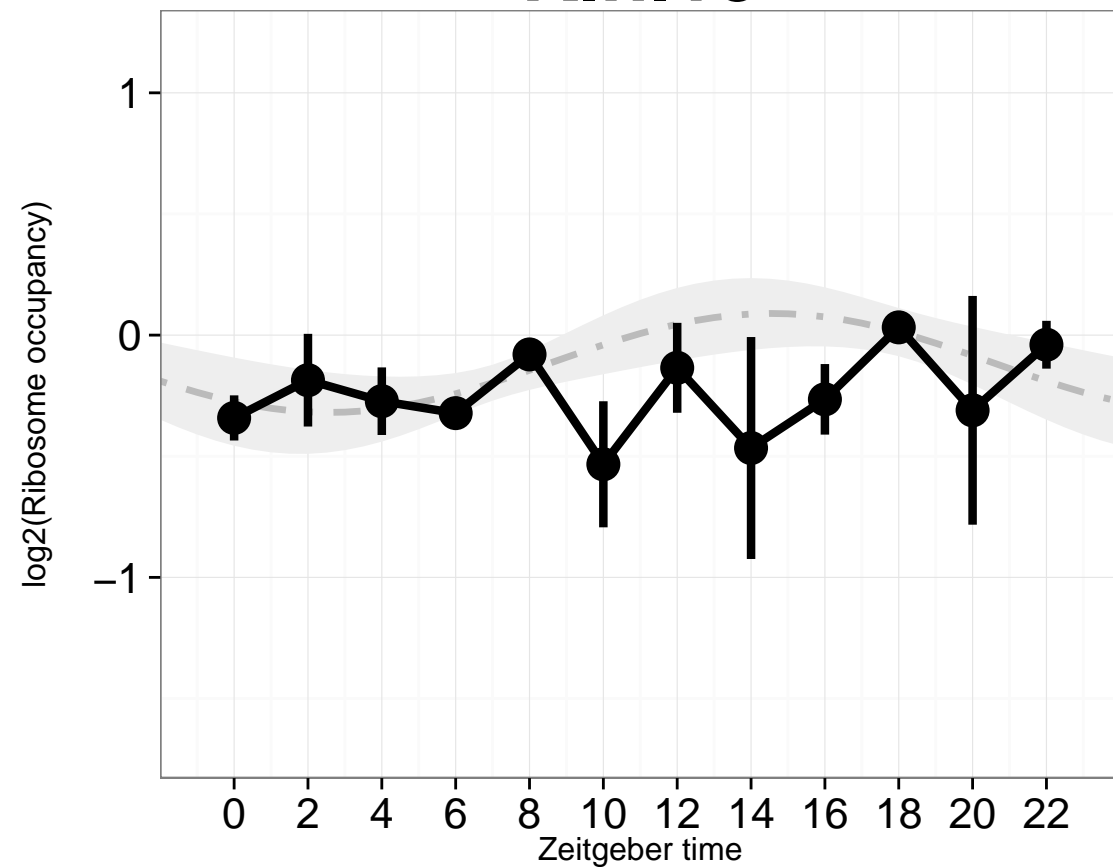

Supplement: SuppDataset_1.zip [file Klhl13_set_A.pdf › Supplemental Dataset 1/A-mRNA_nonrhyth_translation_nonrhyth/Klhl13_set_A.pdf]

# Klh15

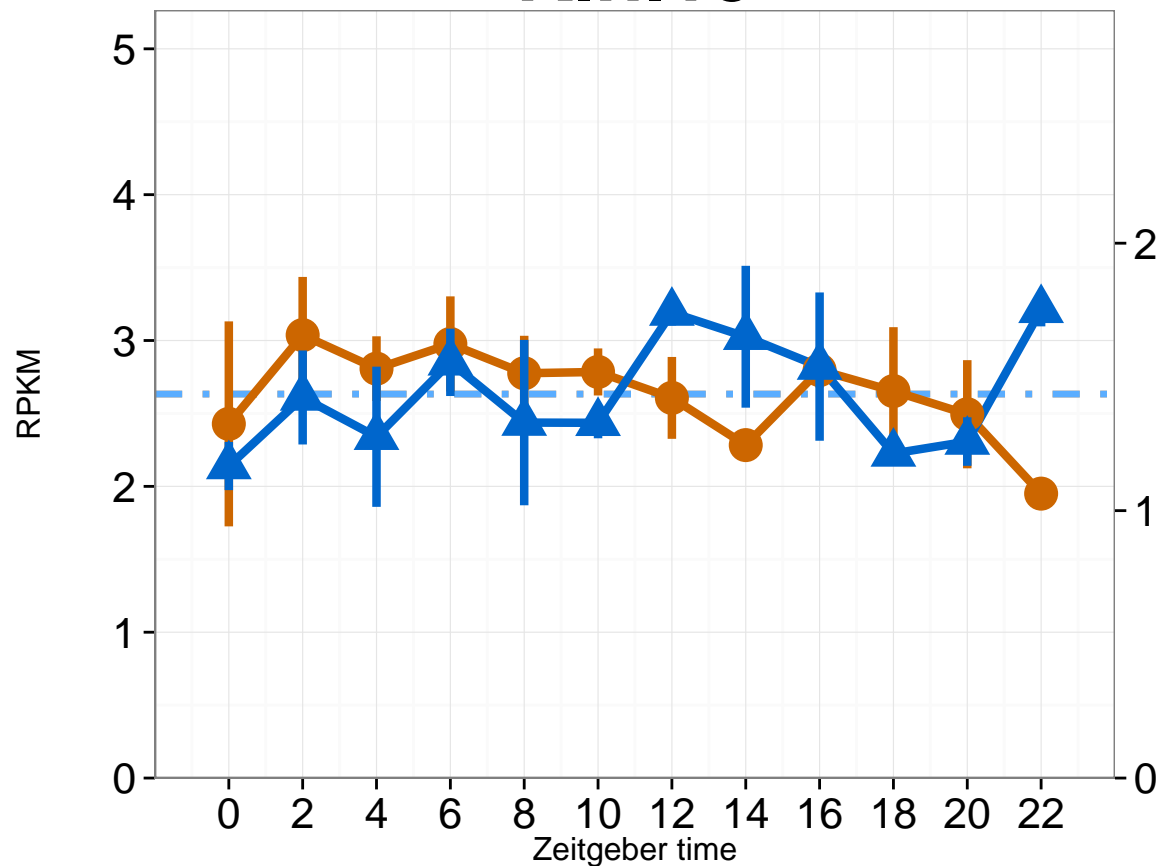

# Klh15

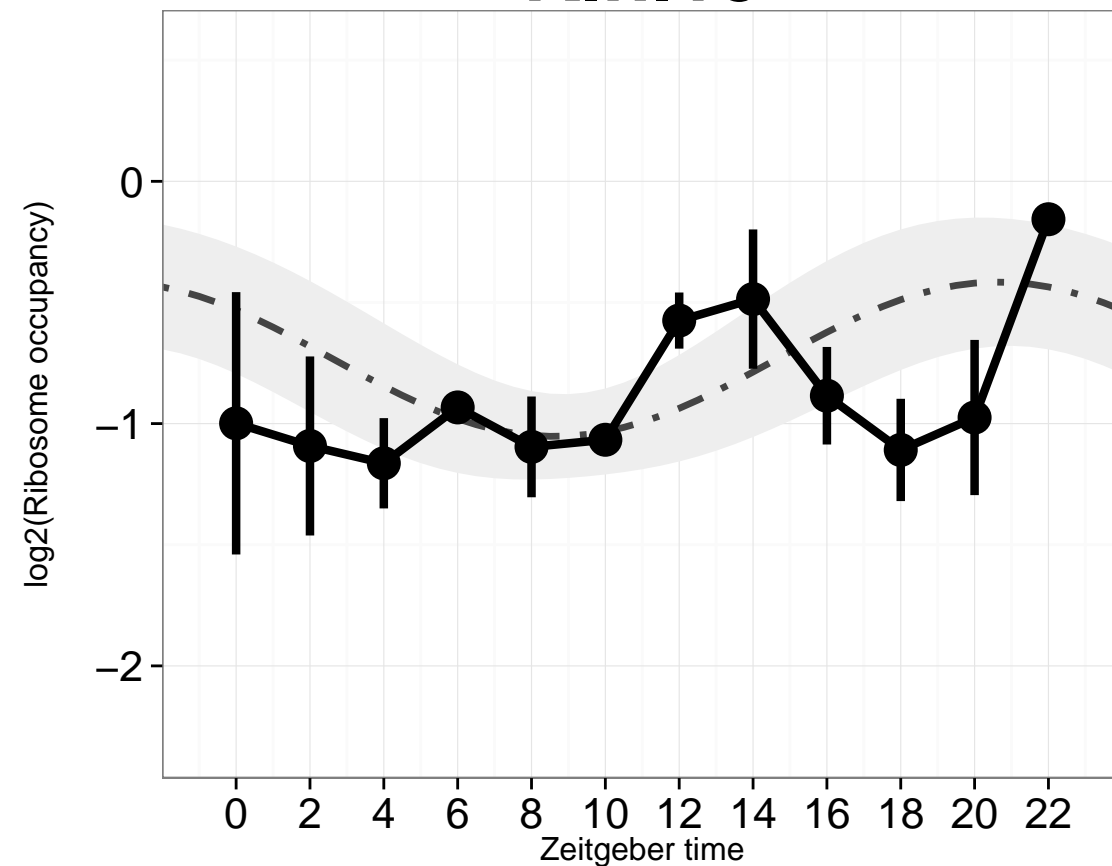

Supplement: SuppDataset_1.zip [file Klhl15_set_A.pdf › Supplemental Dataset 1/A-mRNA_nonrhyth_translation_nonrhyth/Klhl15_set_A.pdf]

# Klh17

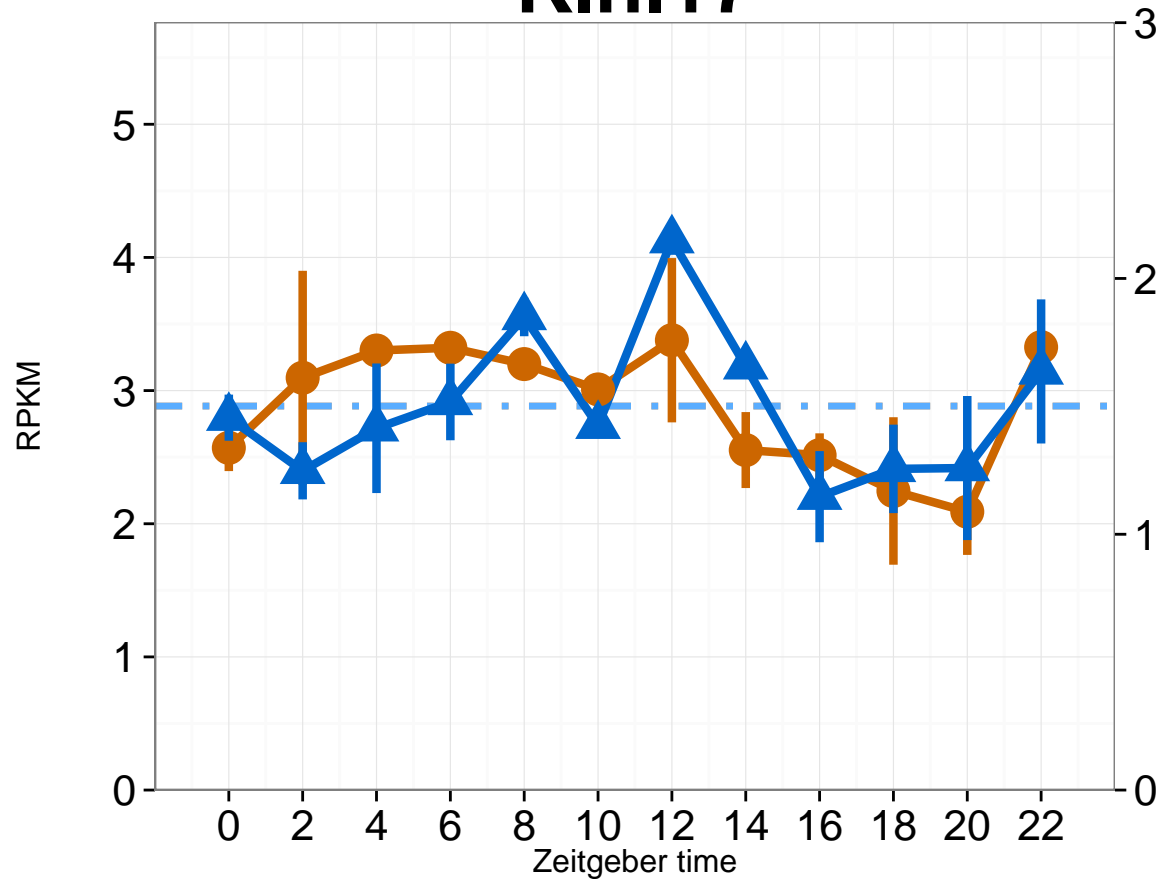

# Klh17

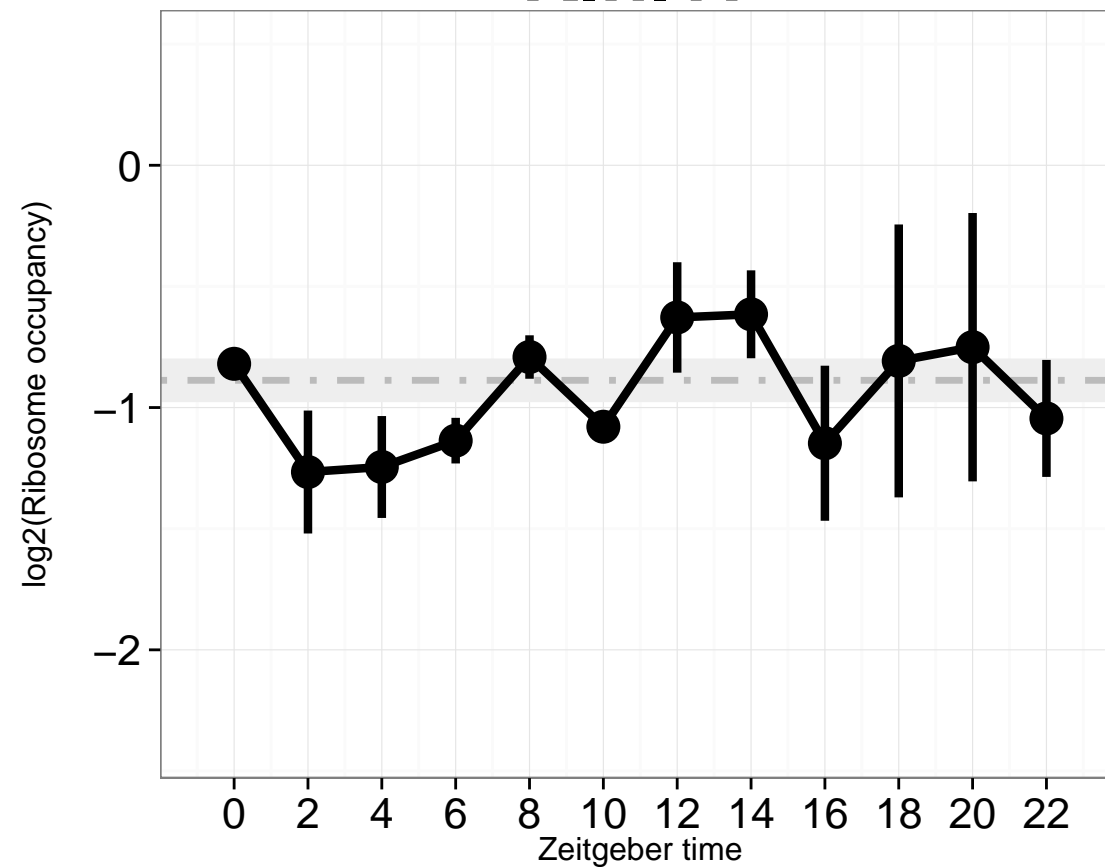

Supplement: SuppDataset_1.zip [file Klhl17_set_A.pdf › Supplemental Dataset 1/A-mRNA_nonrhyth_translation_nonrhyth/Klhl17_set_A.pdf]

# Klh18

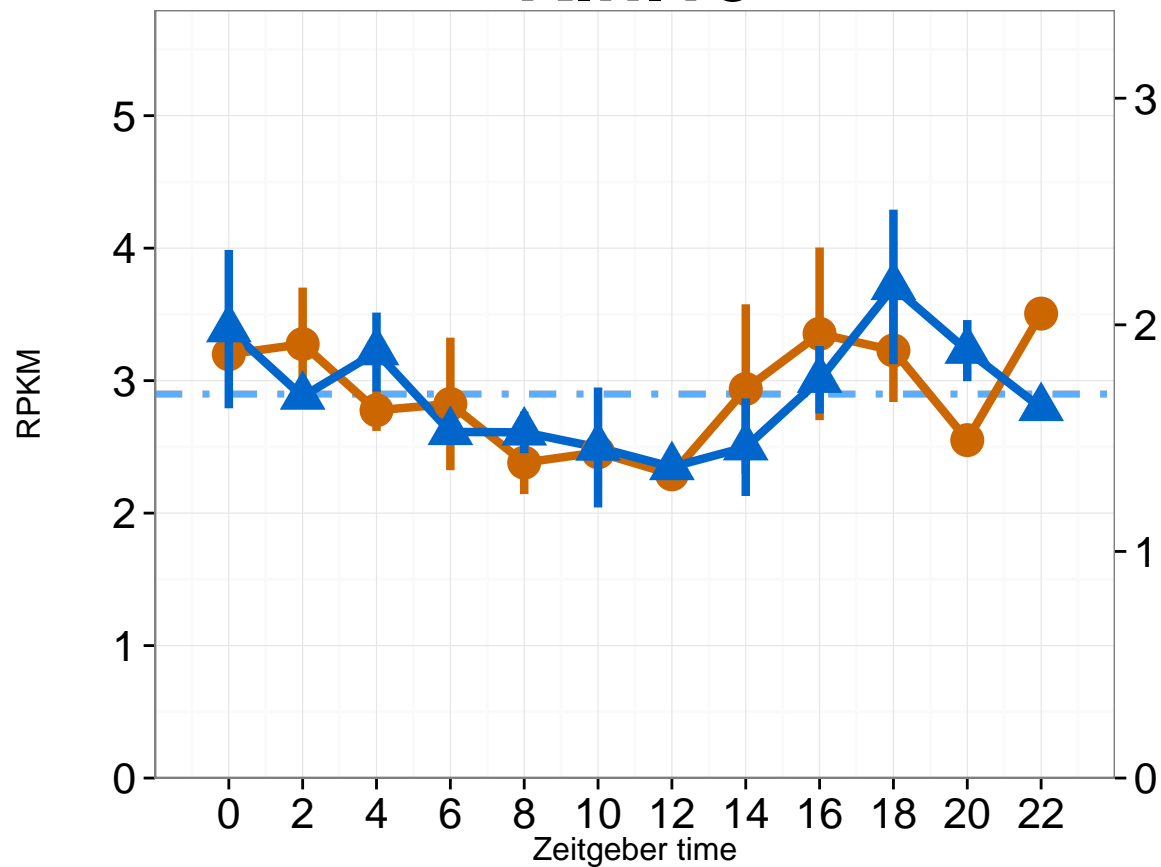

# Klh18

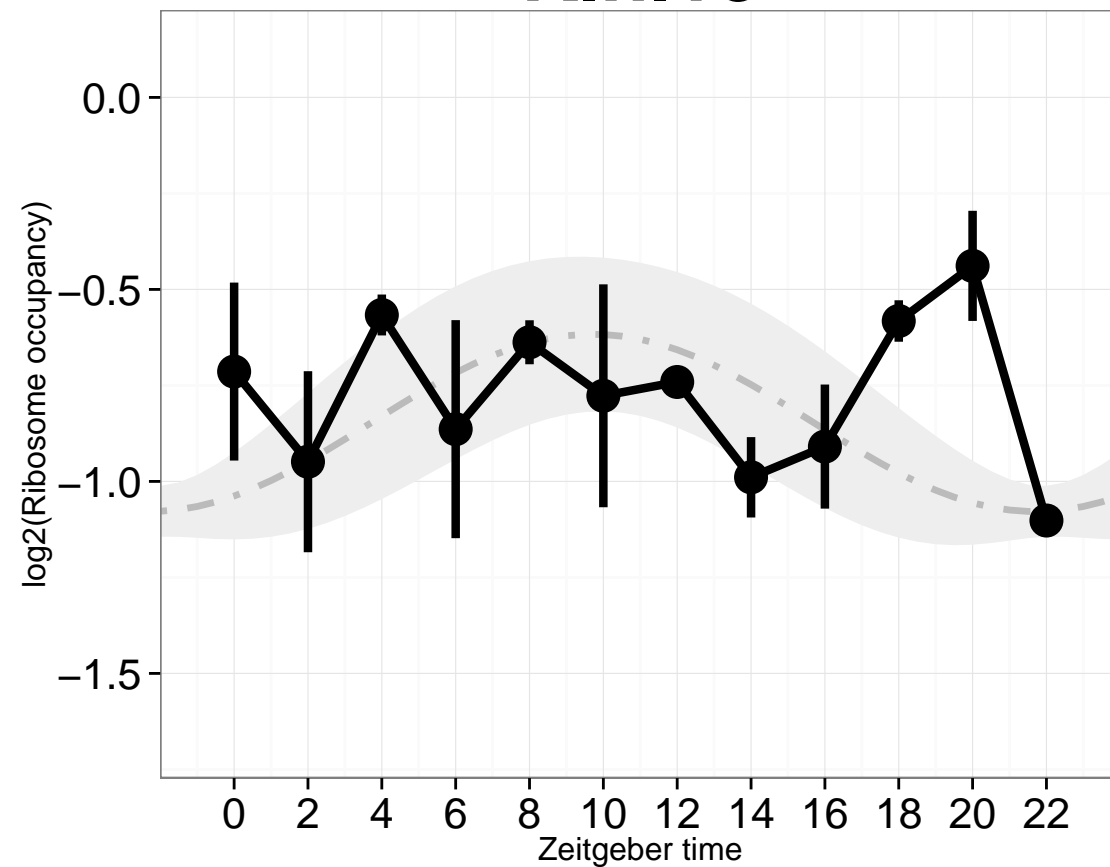

Supplement: SuppDataset_1.zip [file Klhl18_set_A.pdf › Supplemental Dataset 1/A-mRNA_nonrhyth_translation_nonrhyth/Klhl18_set_A.pdf]

## KIhI20

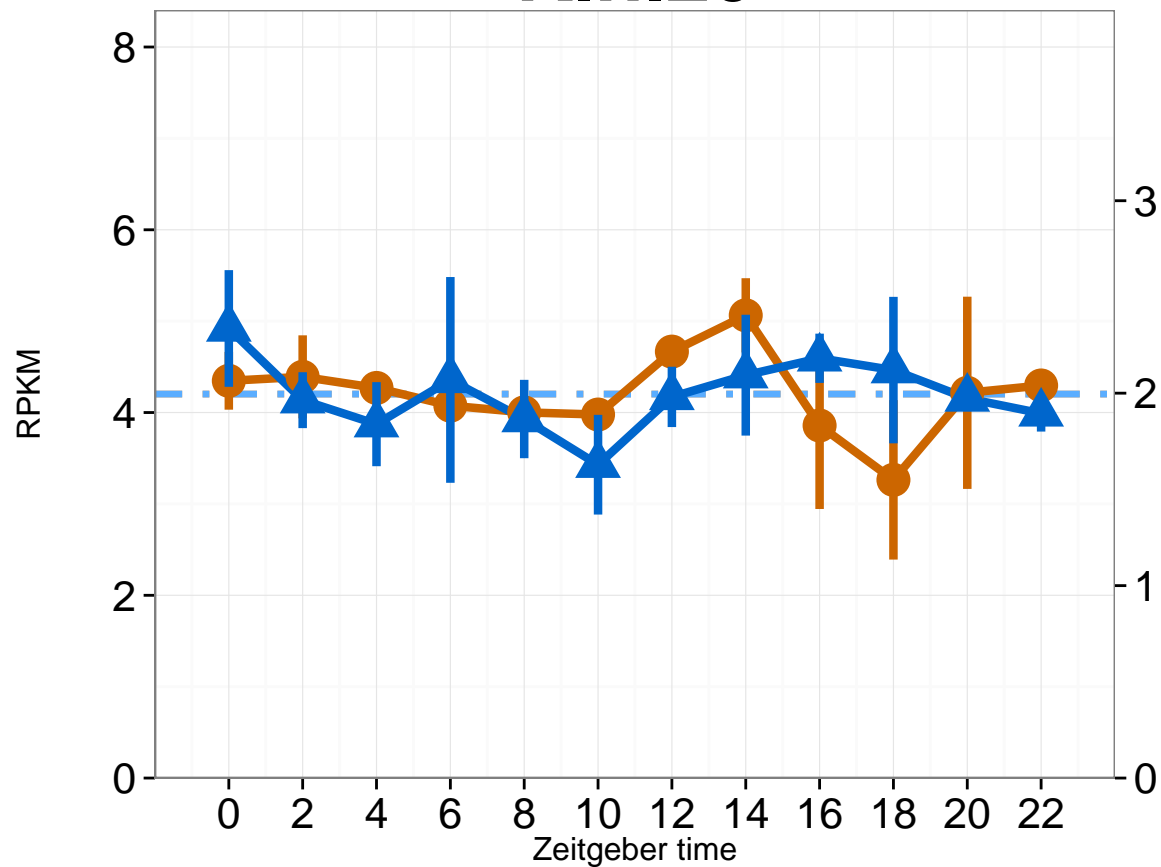

## KIhI20

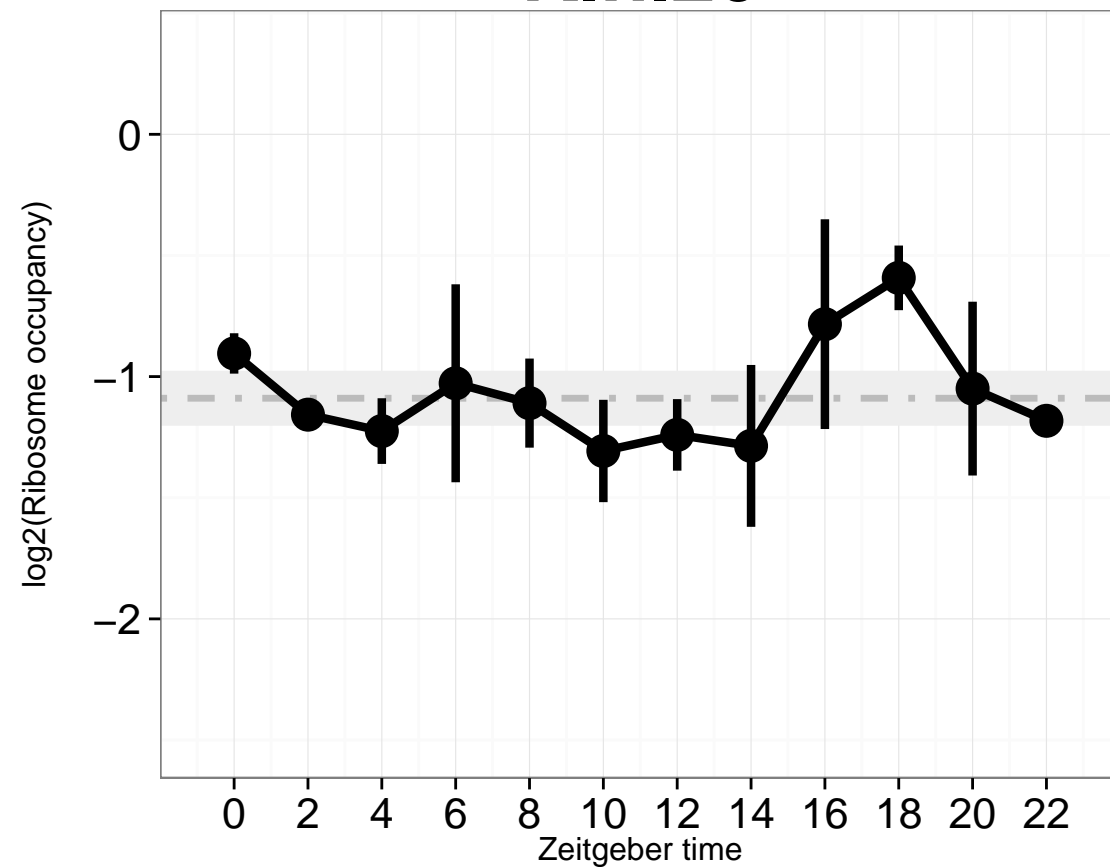

Supplement: SuppDataset_1.zip [file Klhl20_set_A.pdf › Supplemental Dataset 1/A-mRNA_nonrhyth_translation_nonrhyth/Klhl20_set_A.pdf]

# KIhI22

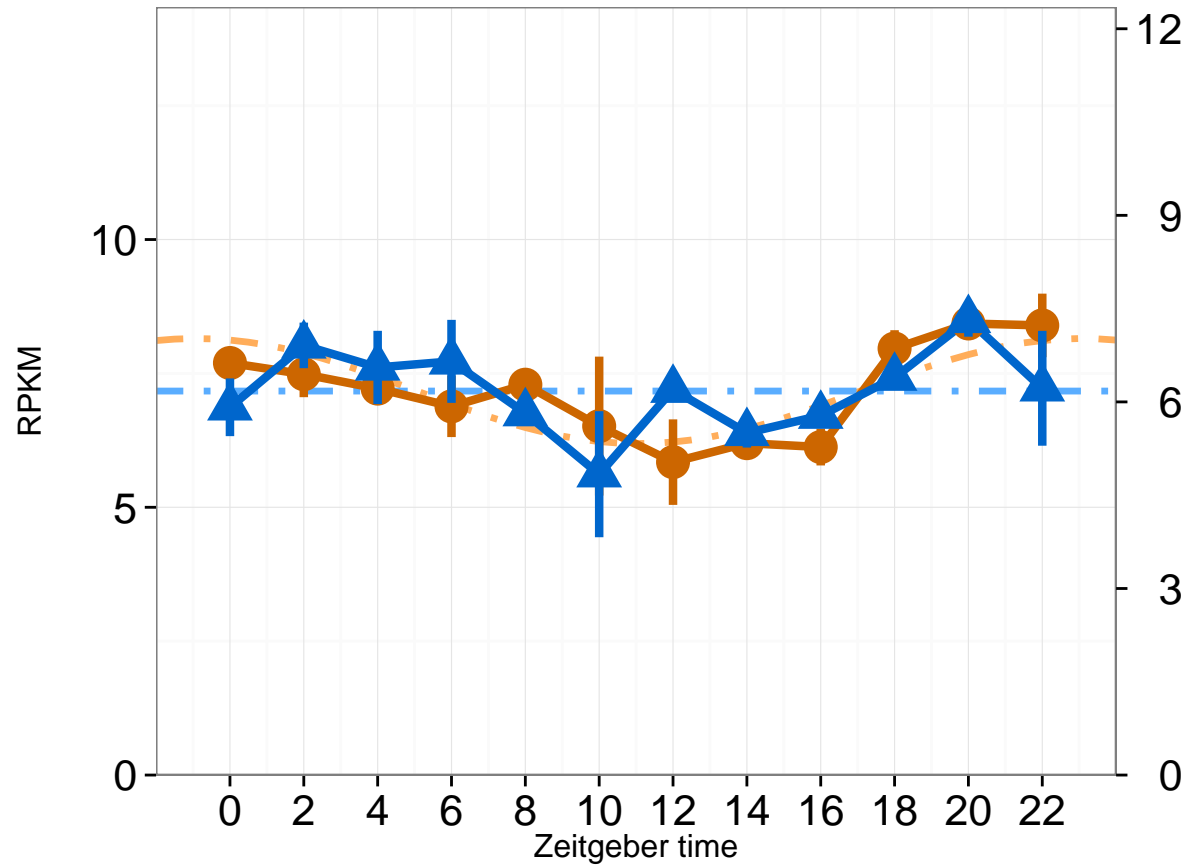

# KIhI22

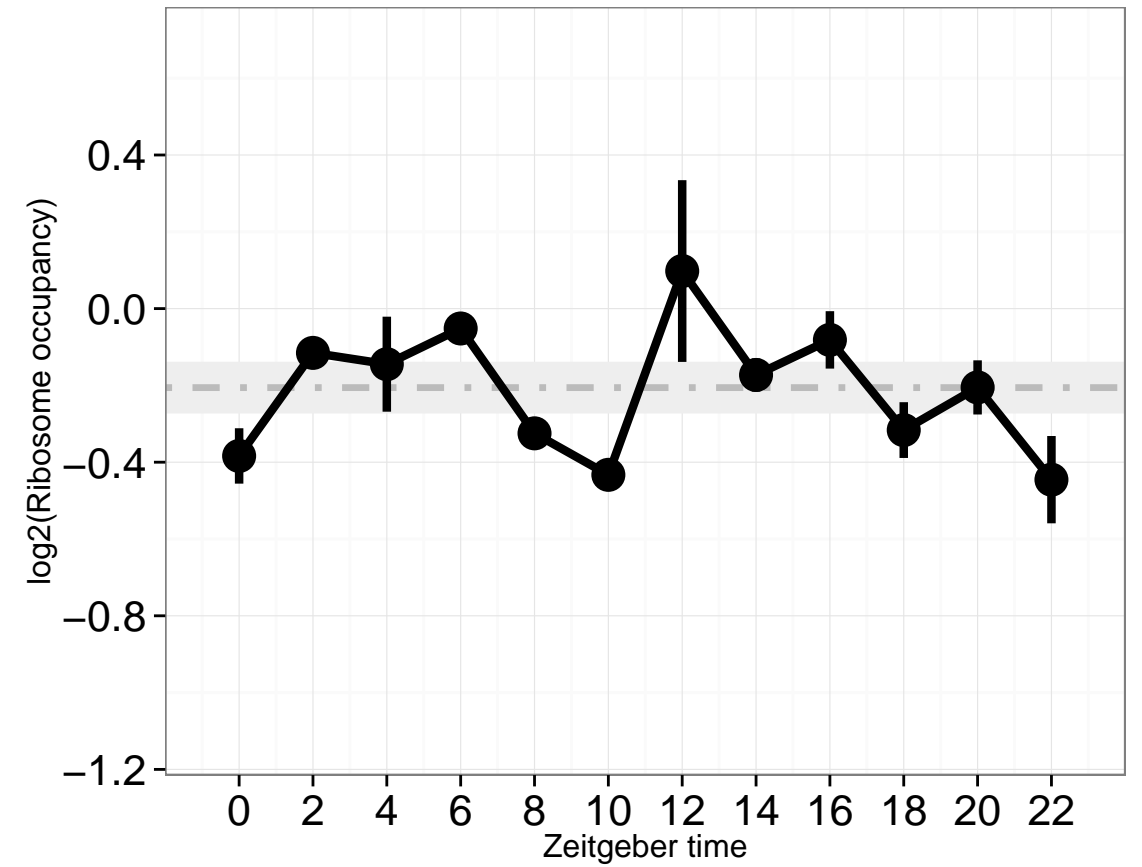

Supplement: SuppDataset_1.zip [file Klhl22_set_A.pdf › Supplemental Dataset 1/A-mRNA_nonrhyth_translation_nonrhyth/Klhl22_set_A.pdf]

# KIhl23

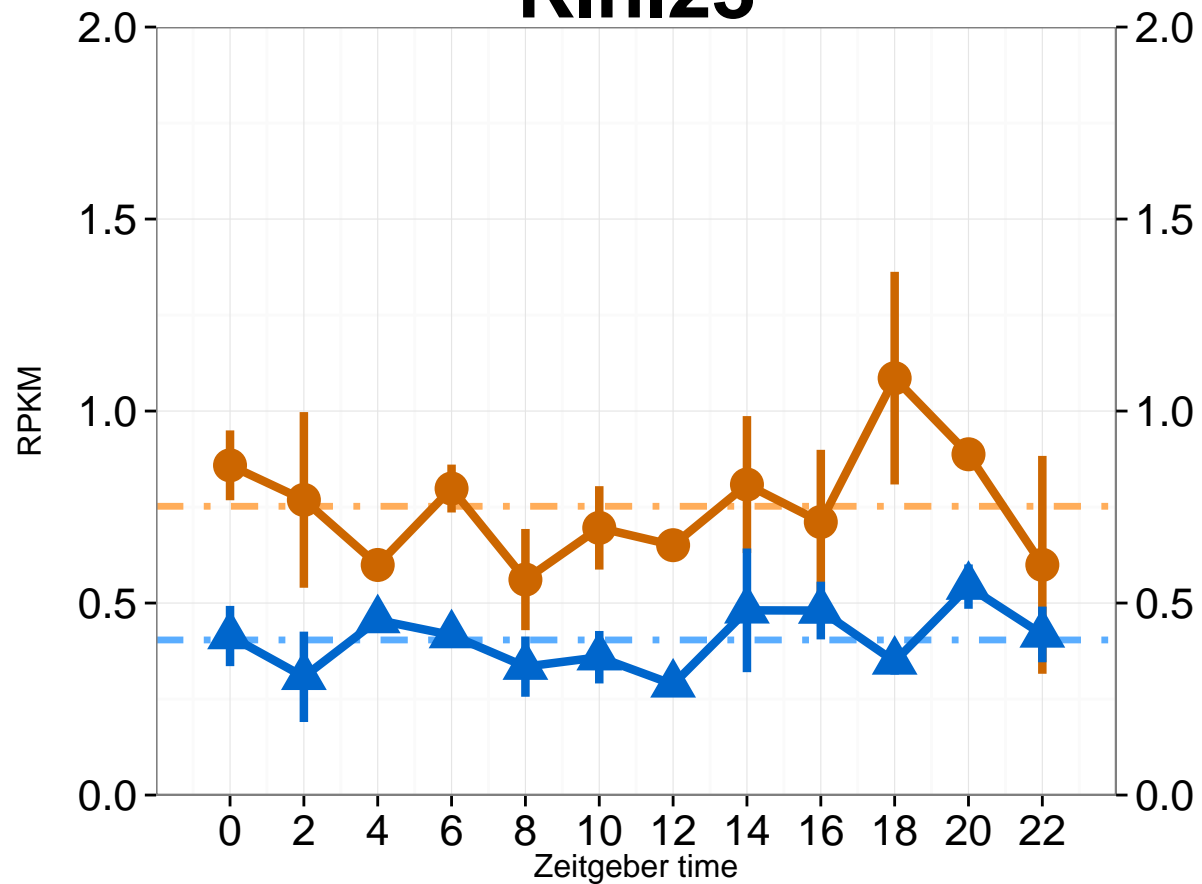

# KIhl23

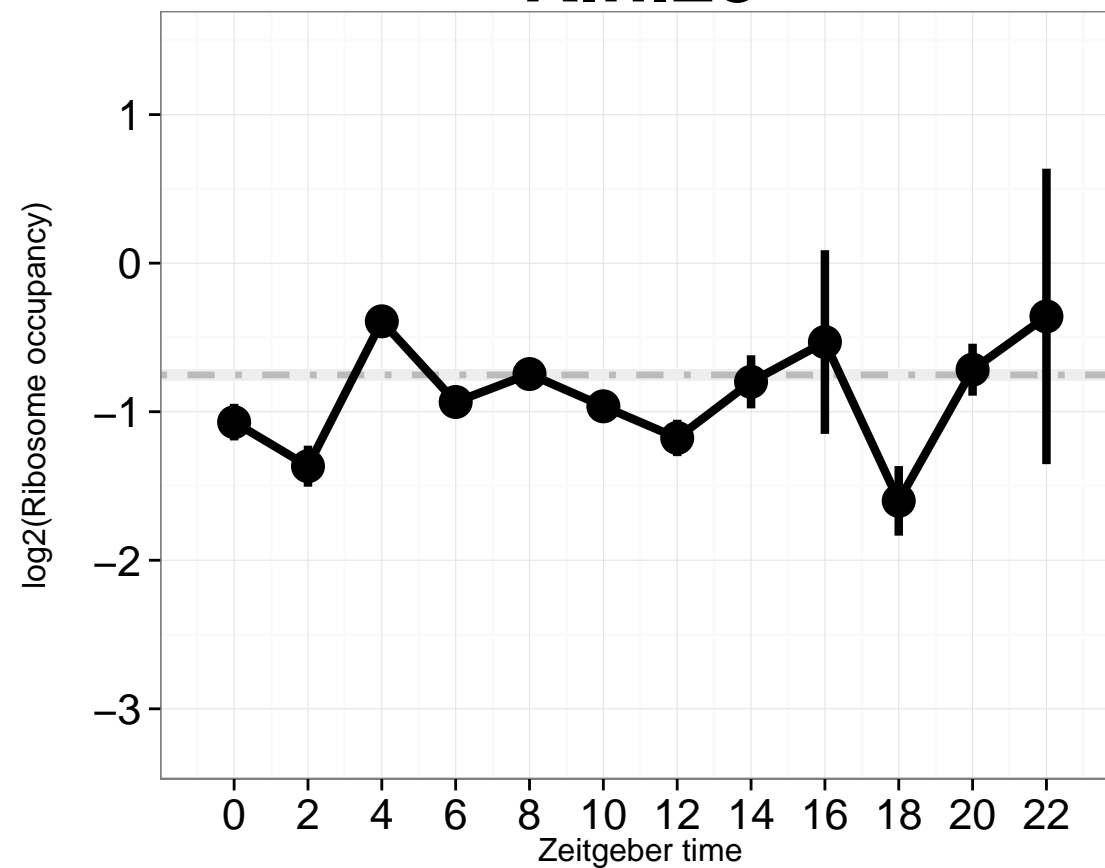

Supplement: SuppDataset_1.zip [file Klhl23_set_A.pdf › Supplemental Dataset 1/A-mRNA_nonrhyth_translation_nonrhyth/Klhl23_set_A.pdf]

# KIhI28

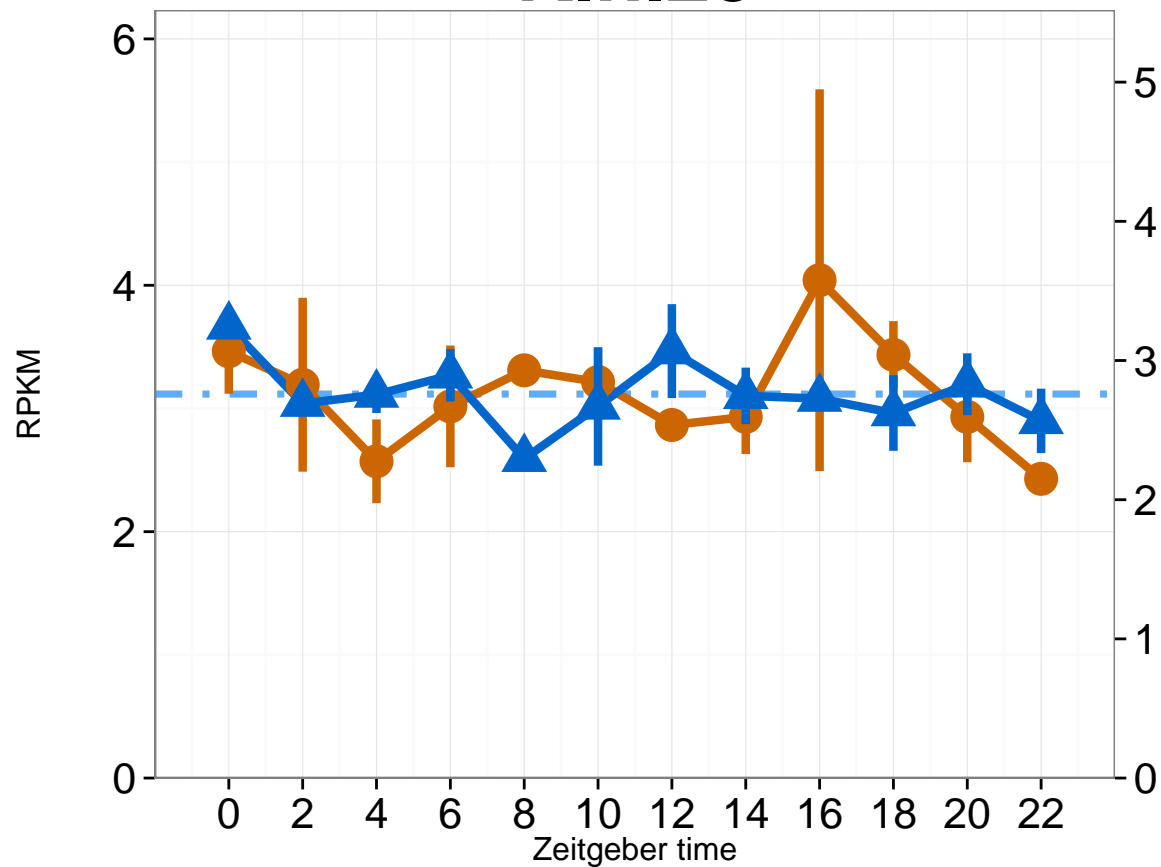

# KIhI28

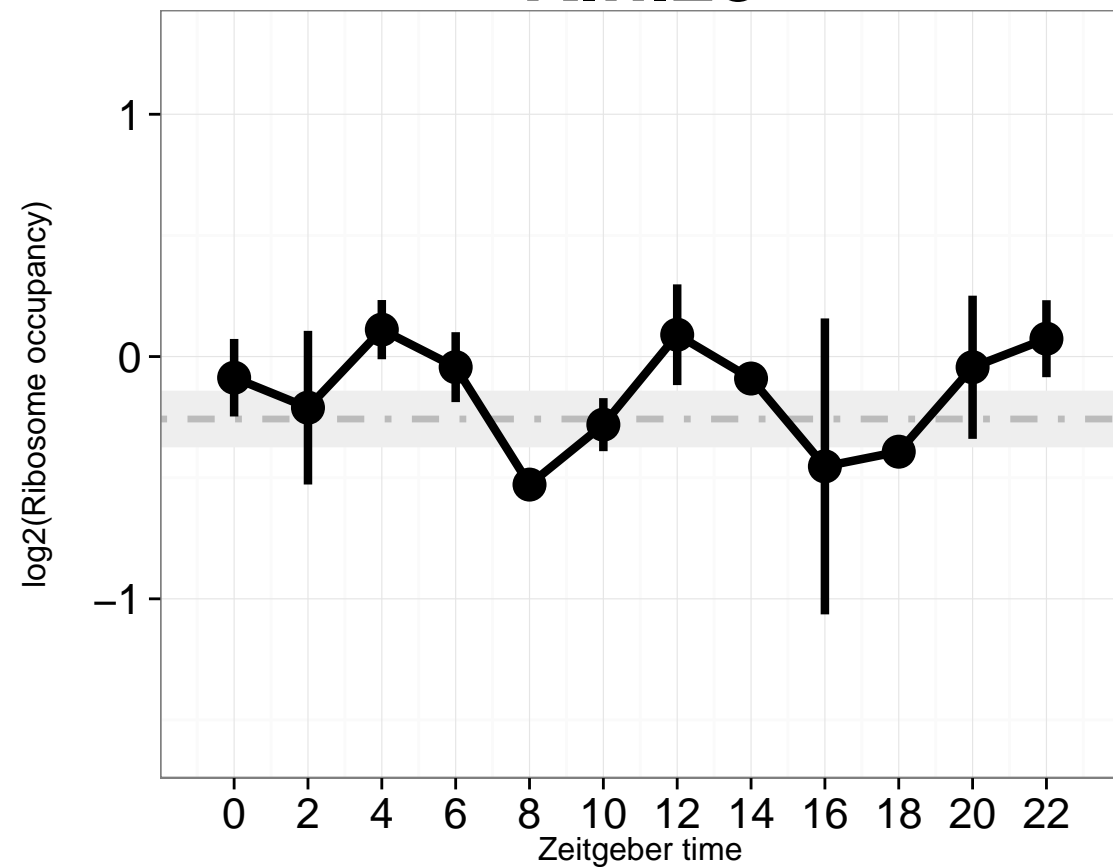

Supplement: SuppDataset_1.zip [file Klhl28_set_A.pdf › Supplemental Dataset 1/A-mRNA_nonrhyth_translation_nonrhyth/Klhl28_set_A.pdf]

## KlhI2

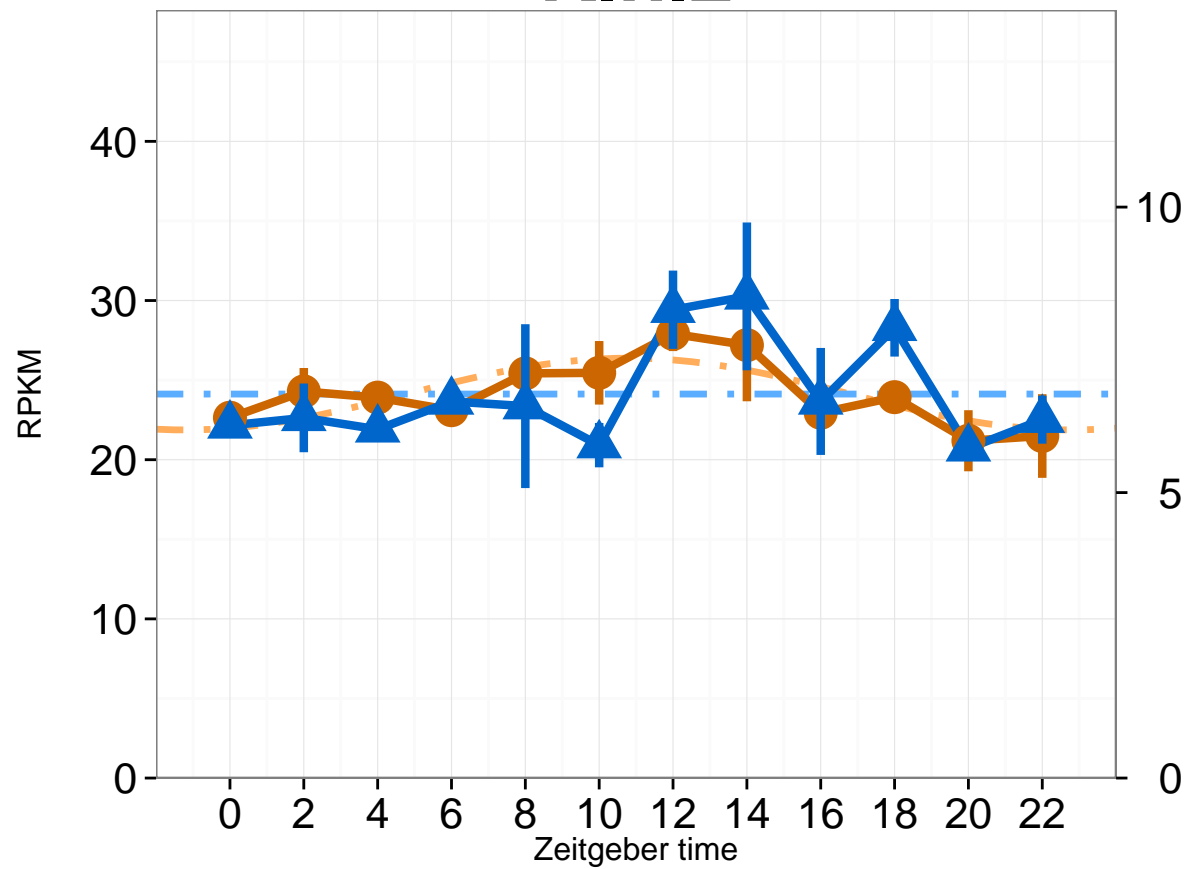

## KlhI2

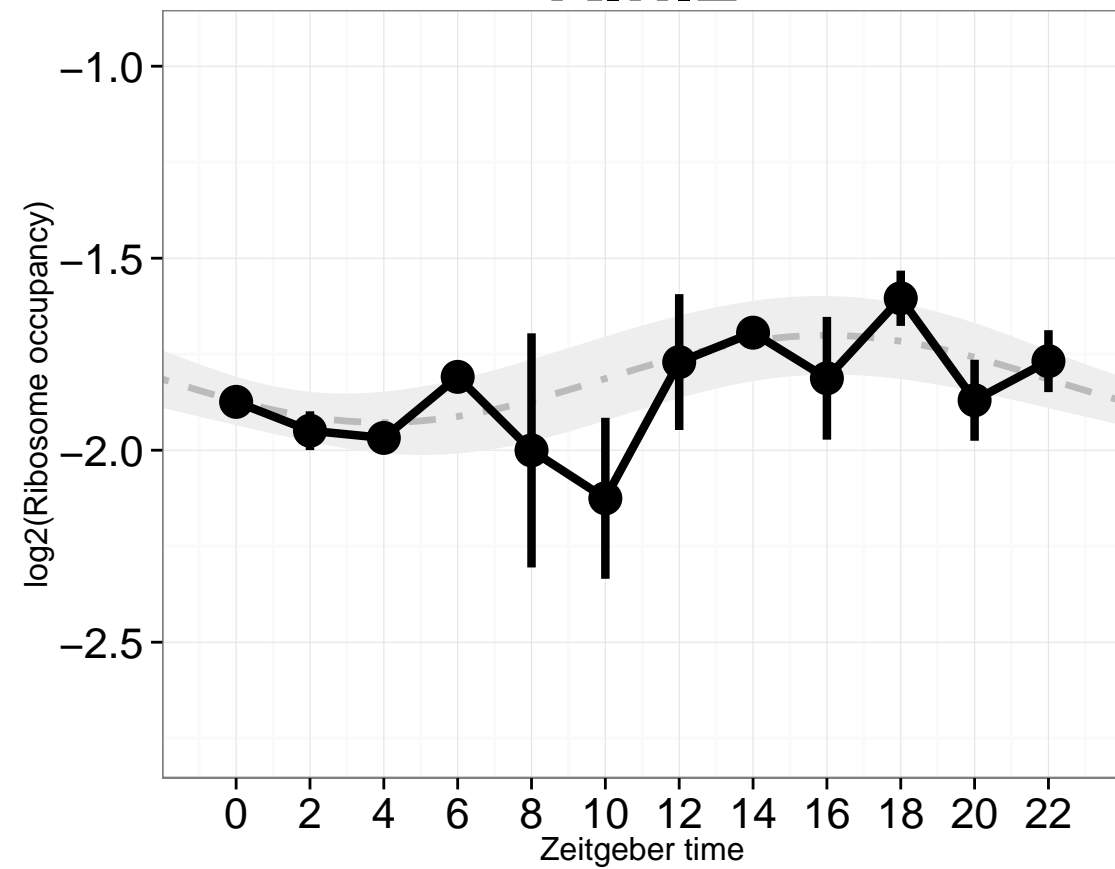

Supplement: SuppDataset_1.zip [file Klhl2_set_A.pdf › Supplemental Dataset 1/A-mRNA_nonrhyth_translation_nonrhyth/Klhl2_set_A.pdf]

## KIhl36

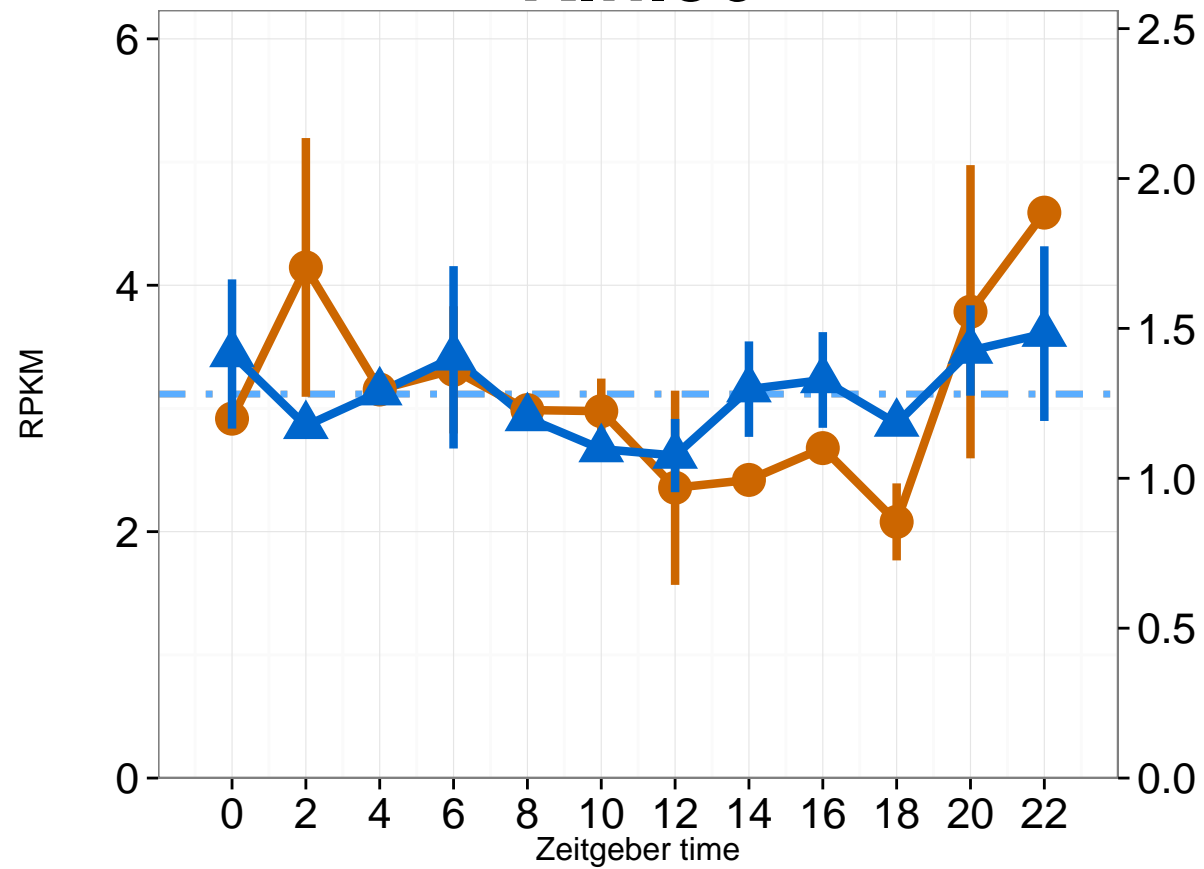

## KIhl36

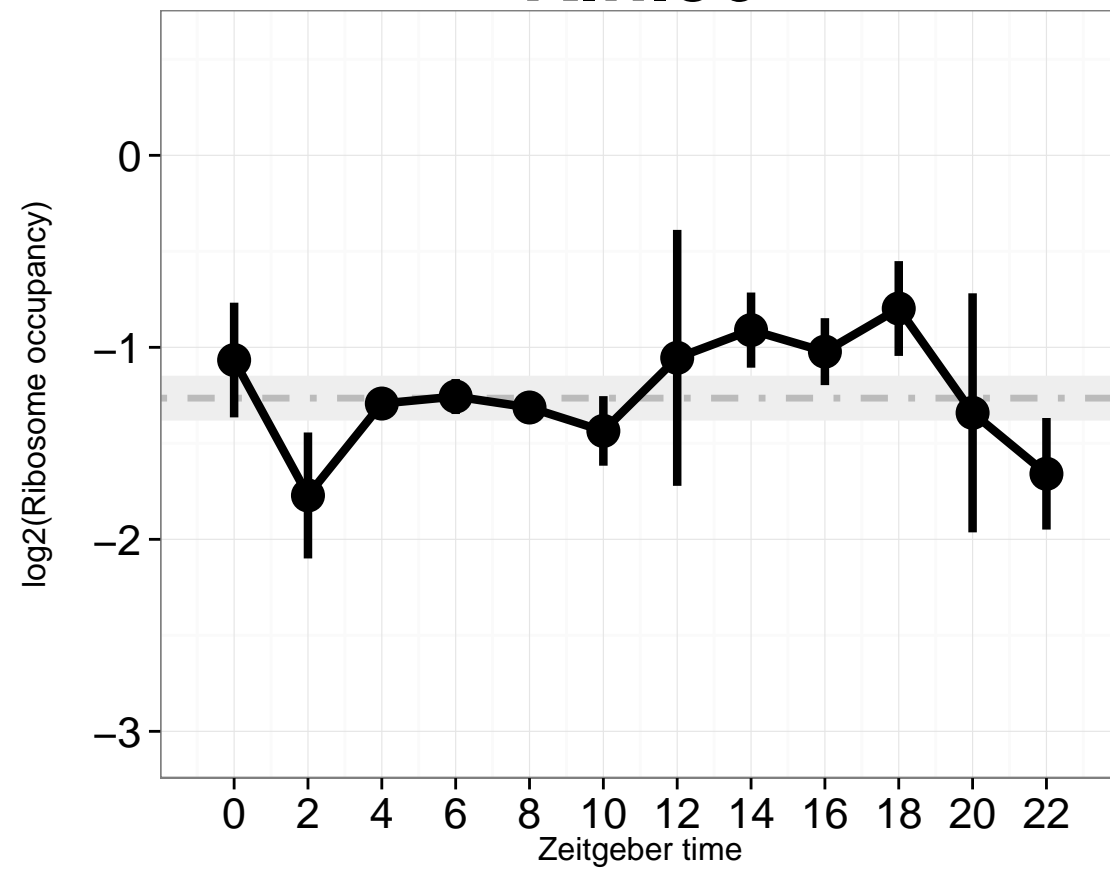

Supplement: SuppDataset_1.zip [file Klhl36_set_A.pdf › Supplemental Dataset 1/A-mRNA_nonrhyth_translation_nonrhyth/Klhl36_set_A.pdf]

## KIhl42

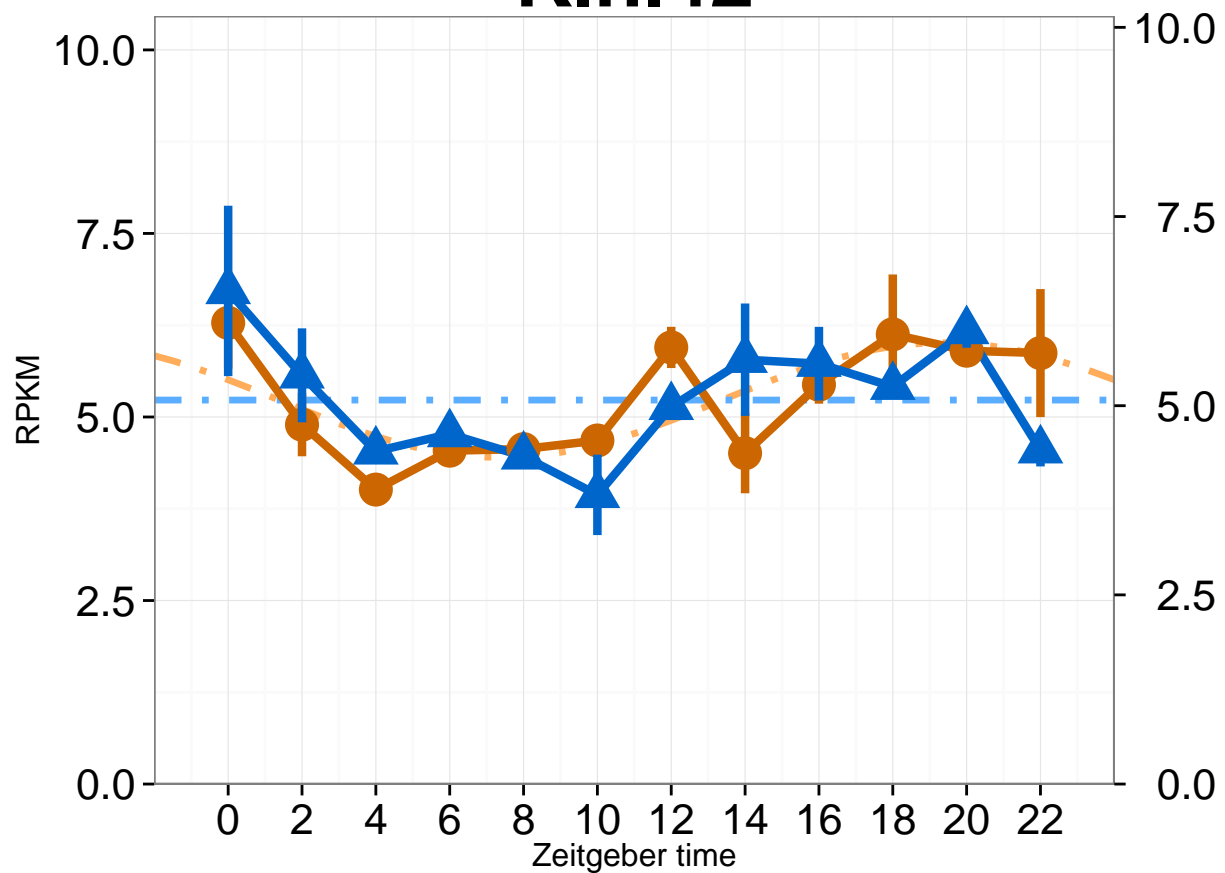

## KIhl42

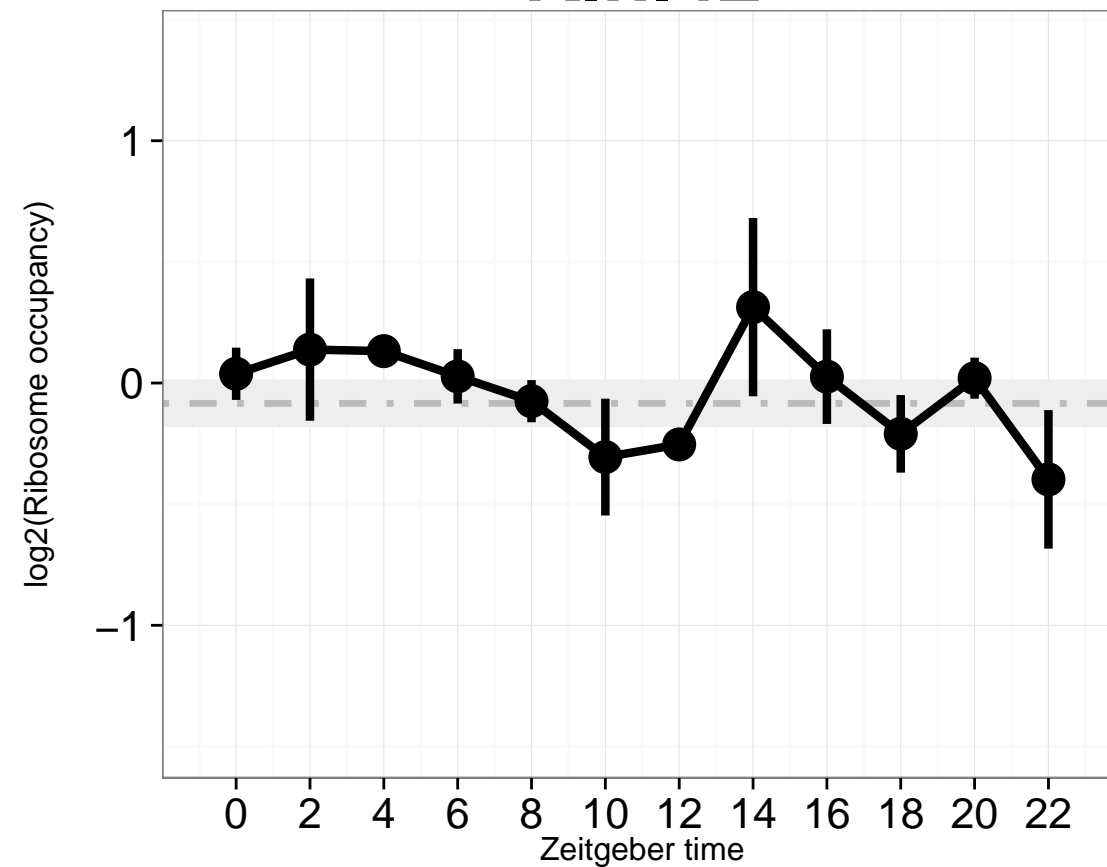

Supplement: SuppDataset_1.zip [file Klhl42_set_A.pdf › Supplemental Dataset 1/A-mRNA_nonrhyth_translation_nonrhyth/Klhl42_set_A.pdf]

## Klhl4

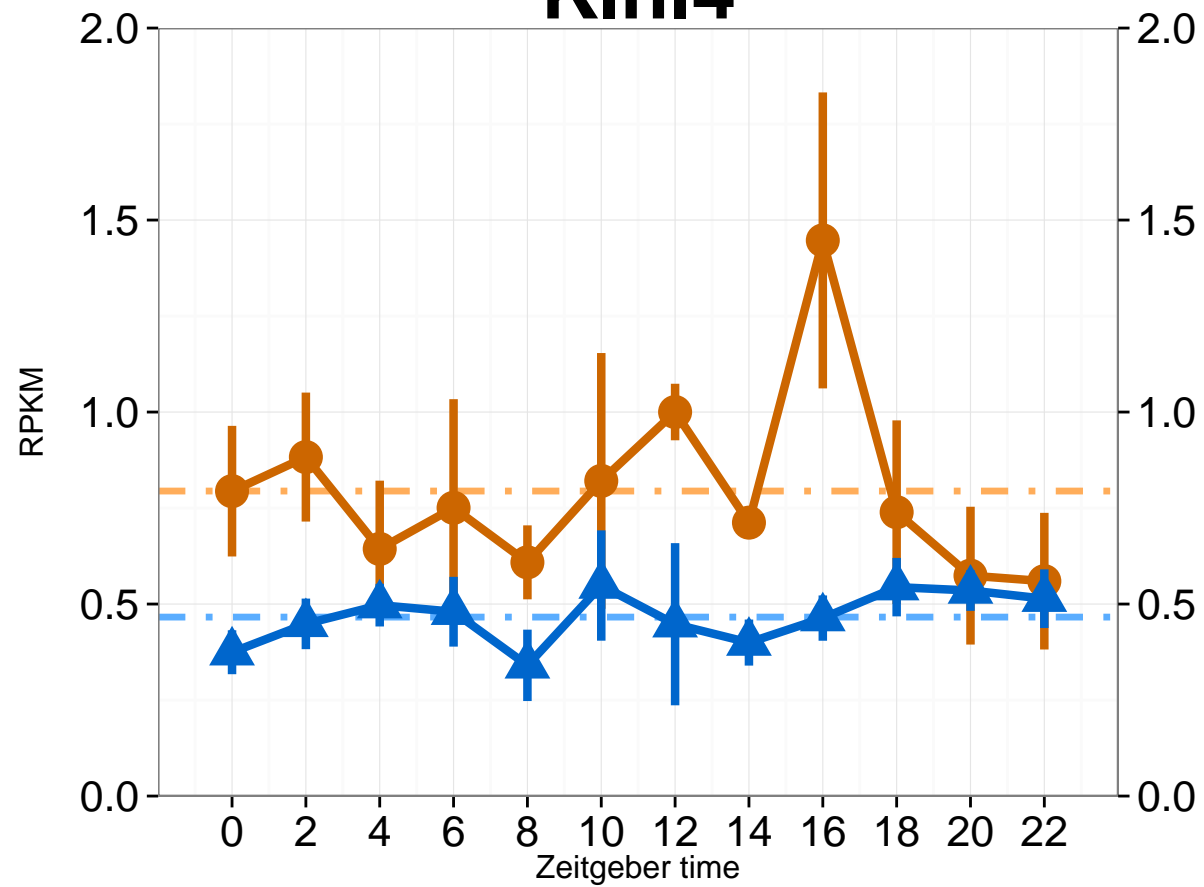

## Klhl4

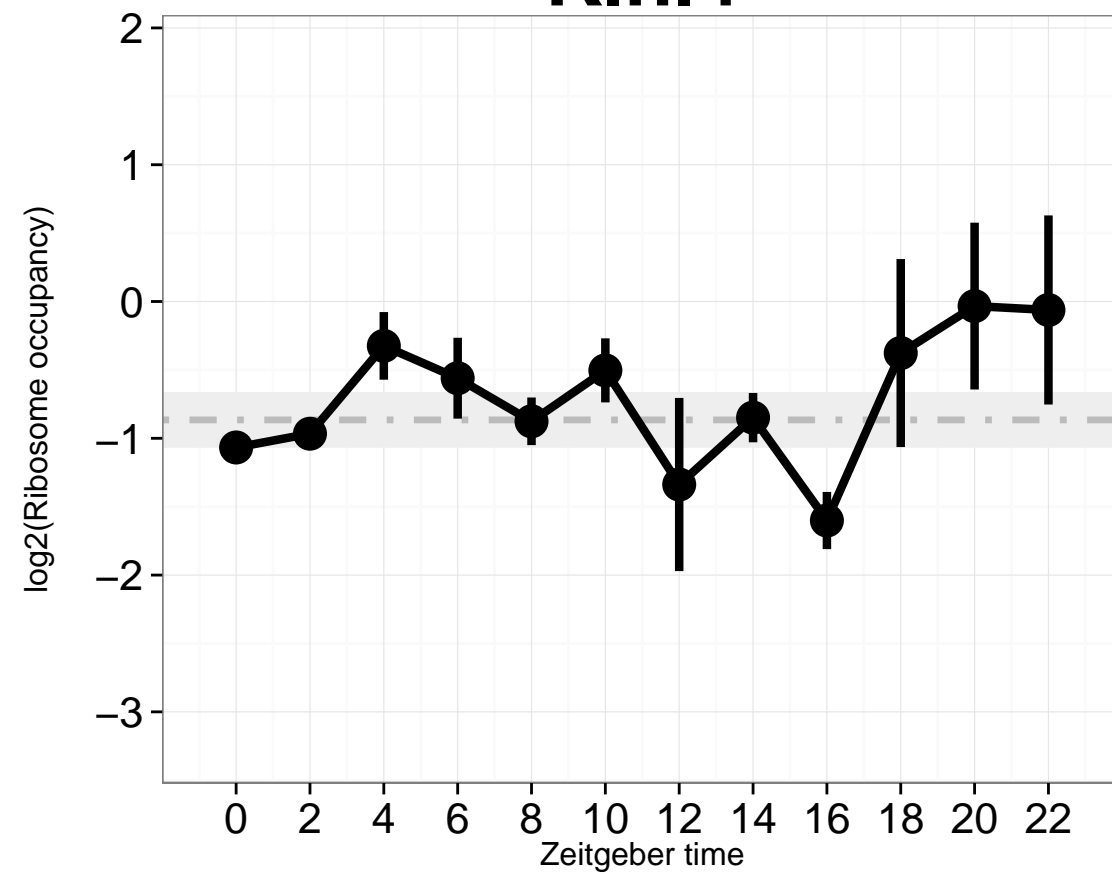

Supplement: SuppDataset_1.zip [file Klhl4_set_A.pdf › Supplemental Dataset 1/A-mRNA_nonrhyth_translation_nonrhyth/Klhl4_set_A.pdf]

## KlhI5

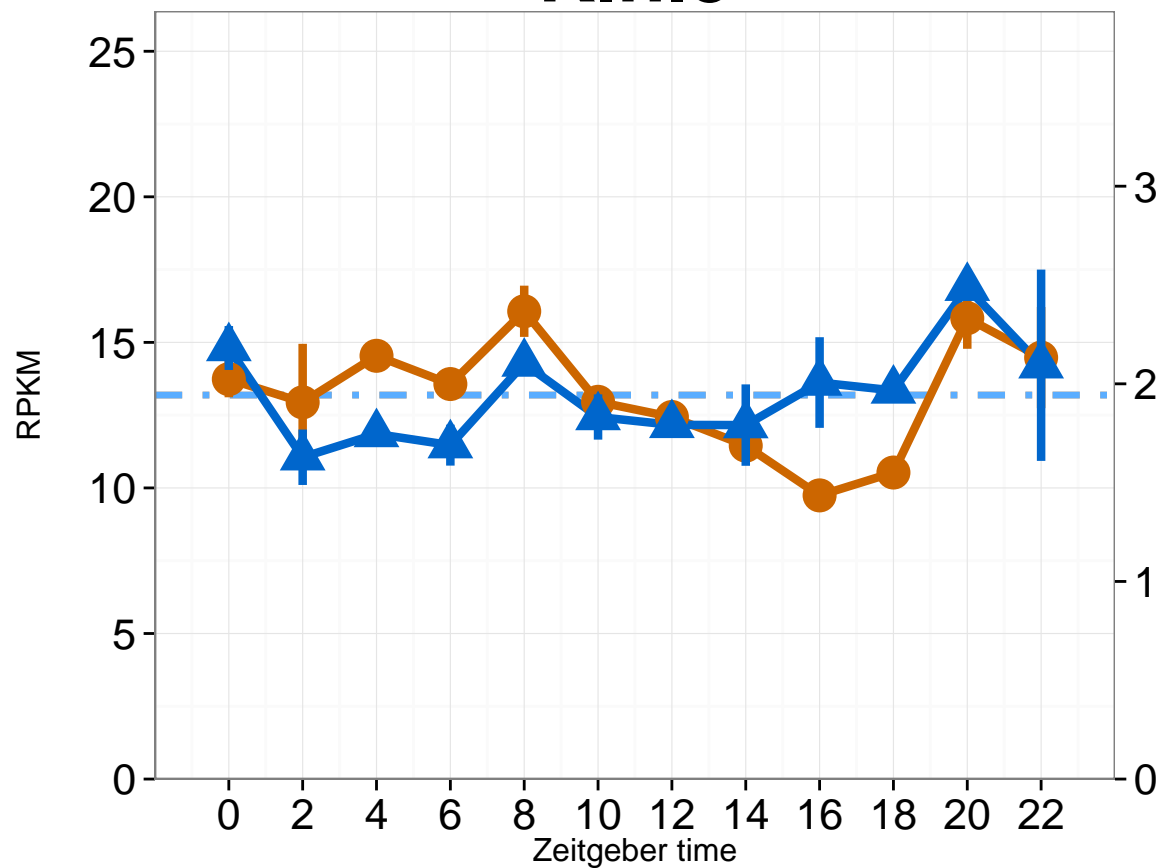

## KlhI5

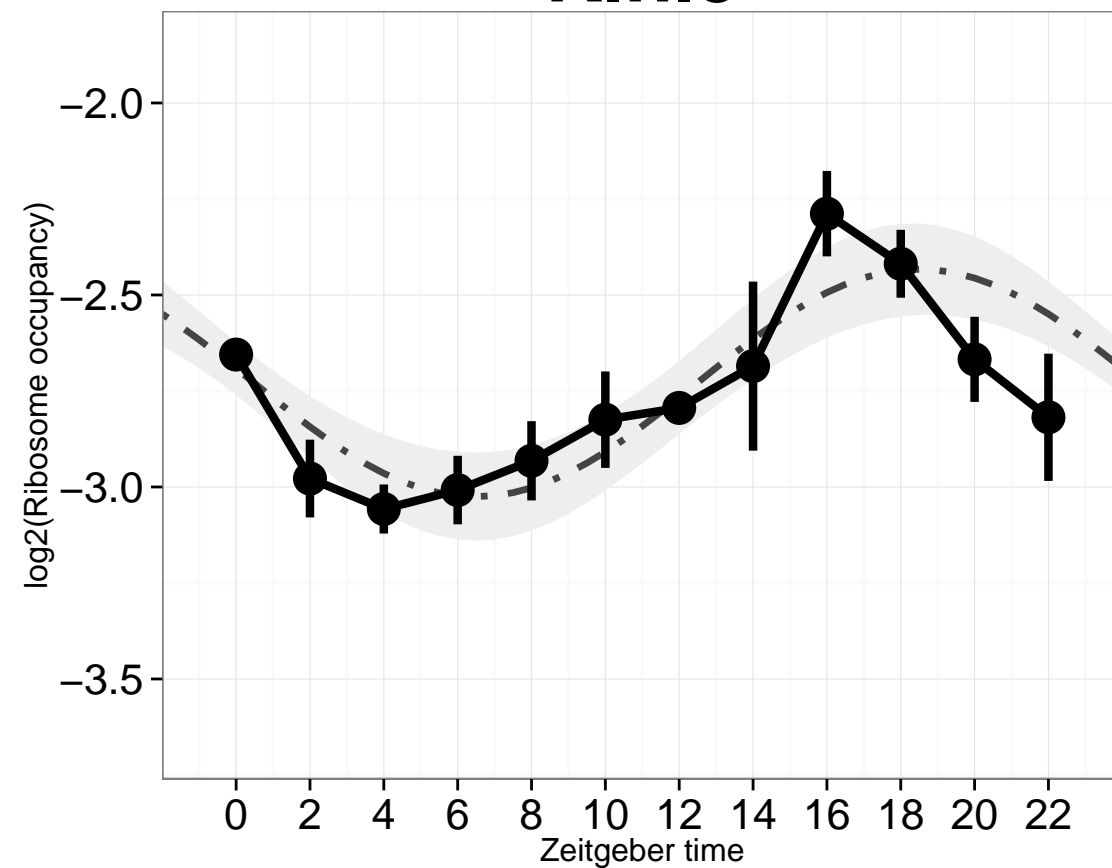

Supplement: SuppDataset_1.zip [file Klhl5_set_A.pdf › Supplemental Dataset 1/A-mRNA_nonrhyth_translation_nonrhyth/Klhl5_set_A.pdf]

## KlhI6

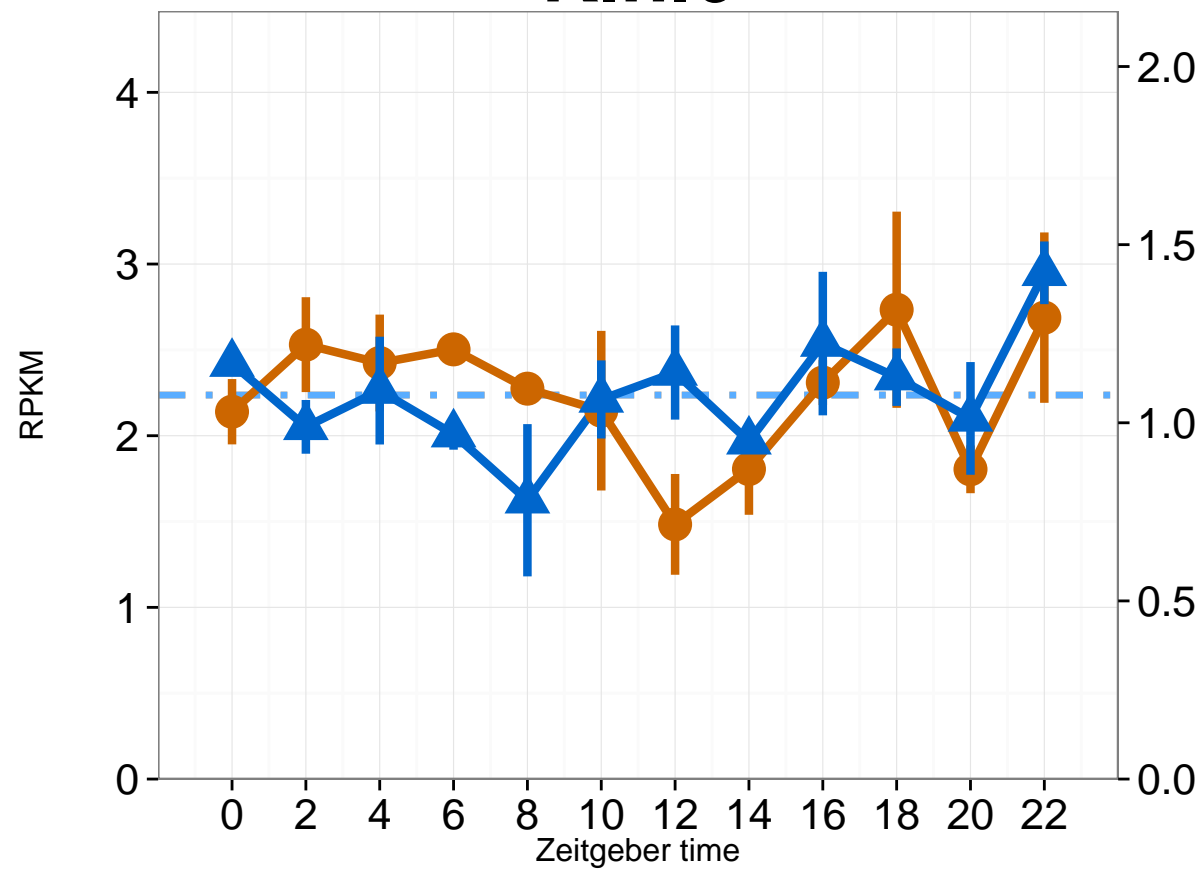

## KlhI6

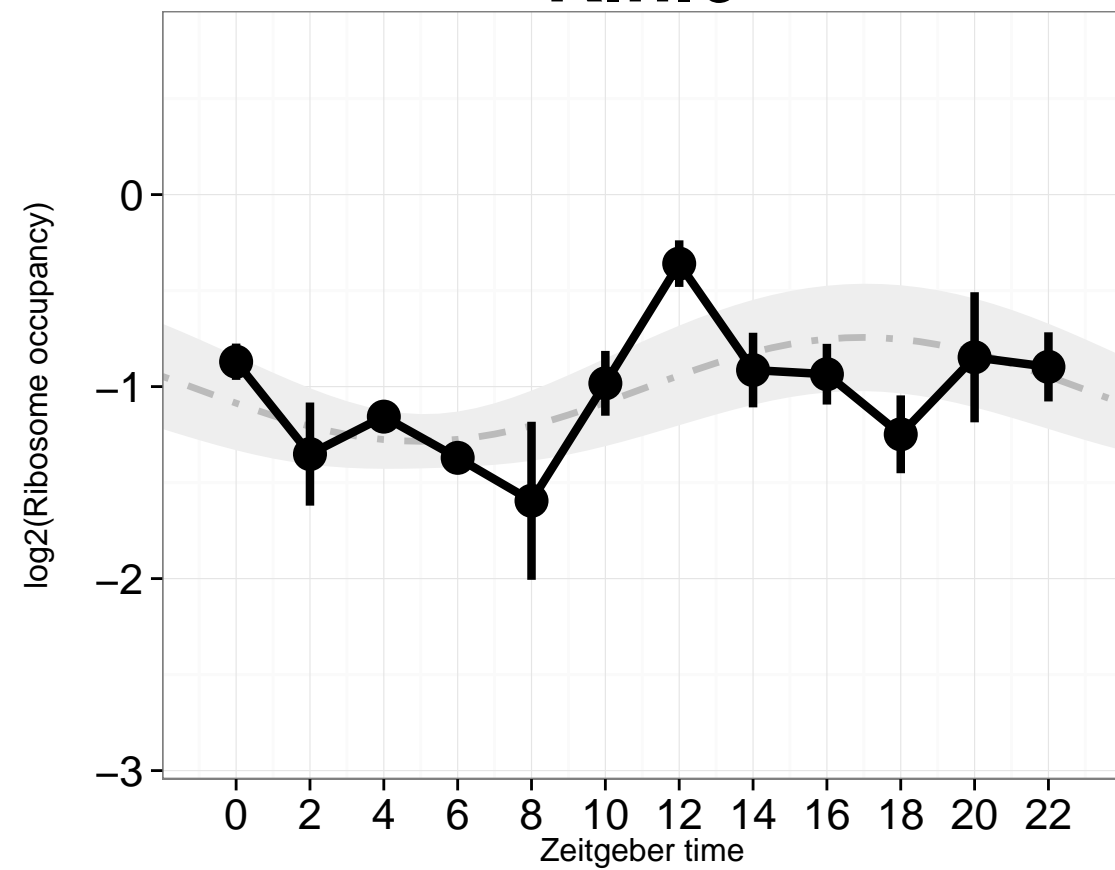

Supplement: SuppDataset_1.zip [file Klhl6_set_A.pdf › Supplemental Dataset 1/A-mRNA_nonrhyth_translation_nonrhyth/Klhl6_set_A.pdf]

## Klh17

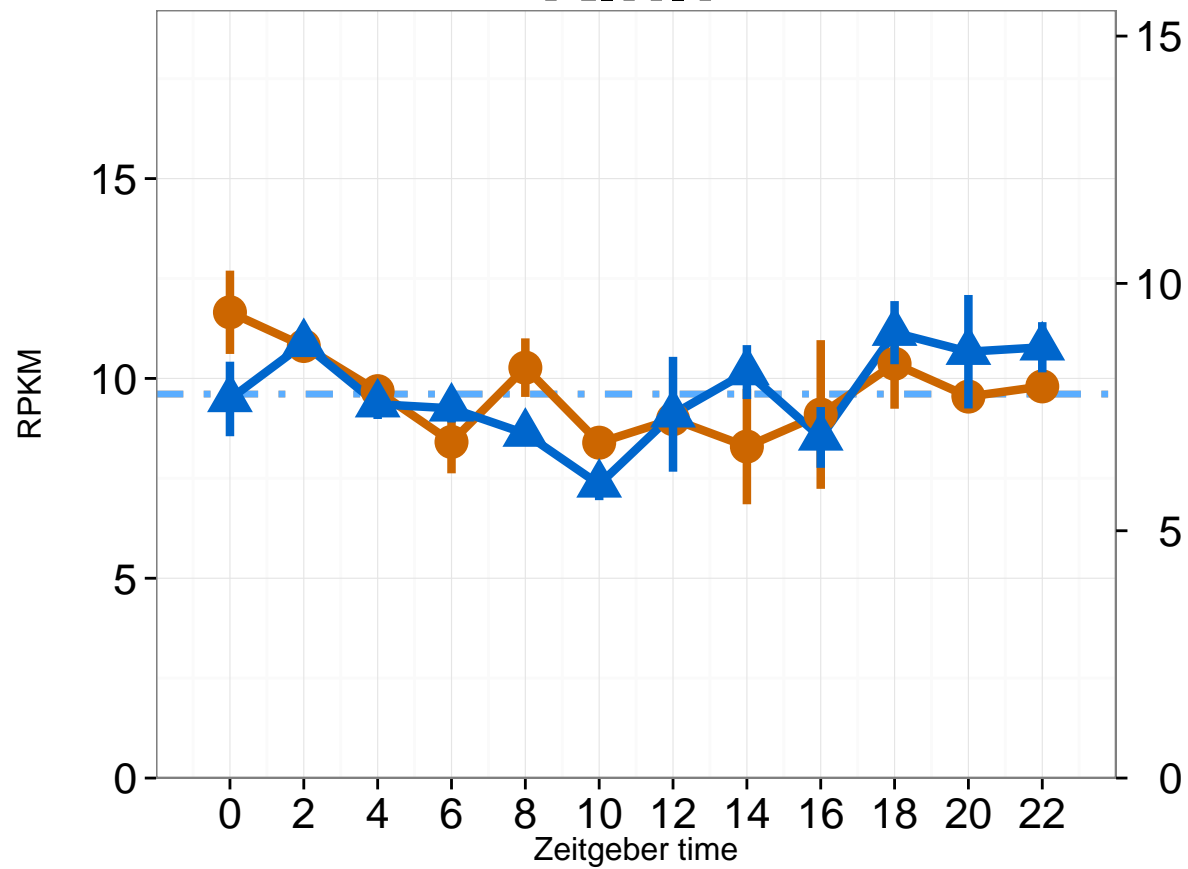

## Klh17

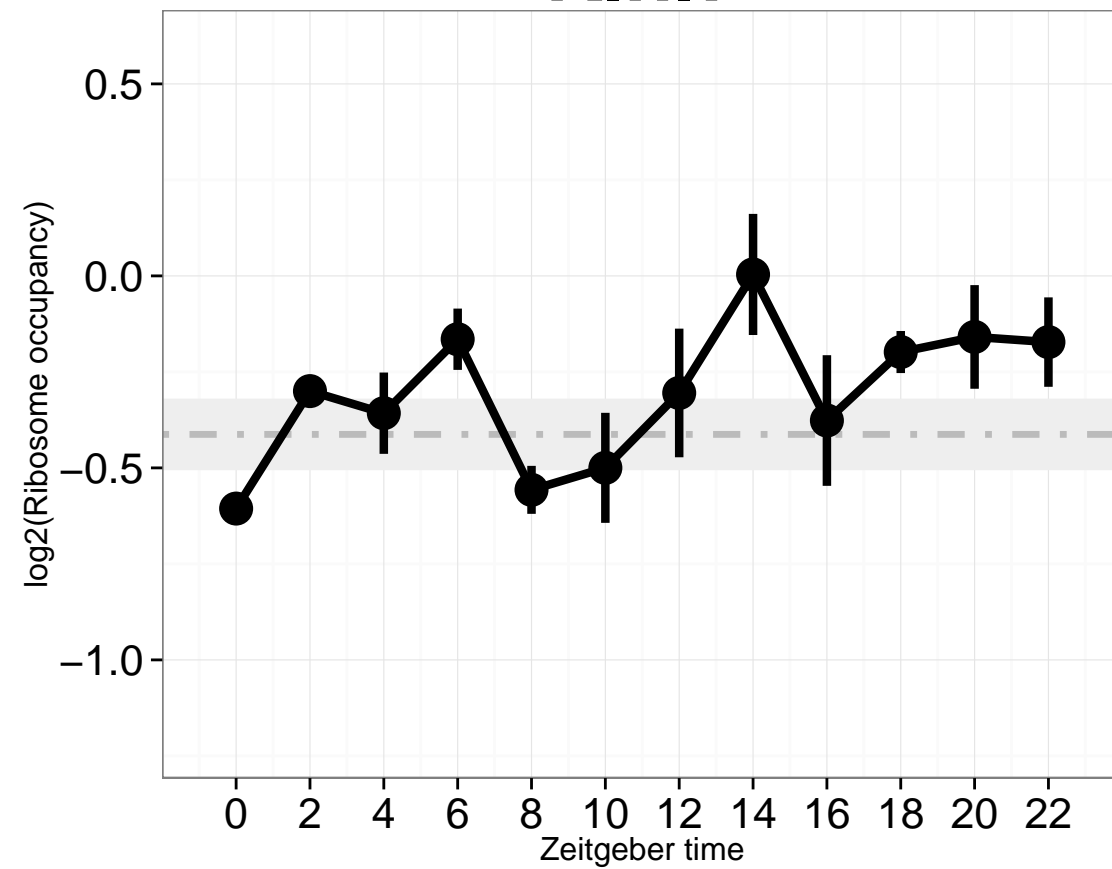

Supplement: SuppDataset_1.zip [file Klhl7_set_A.pdf › Supplemental Dataset 1/A-mRNA_nonrhyth_translation_nonrhyth/Klhl7_set_A.pdf]

## KlhI9

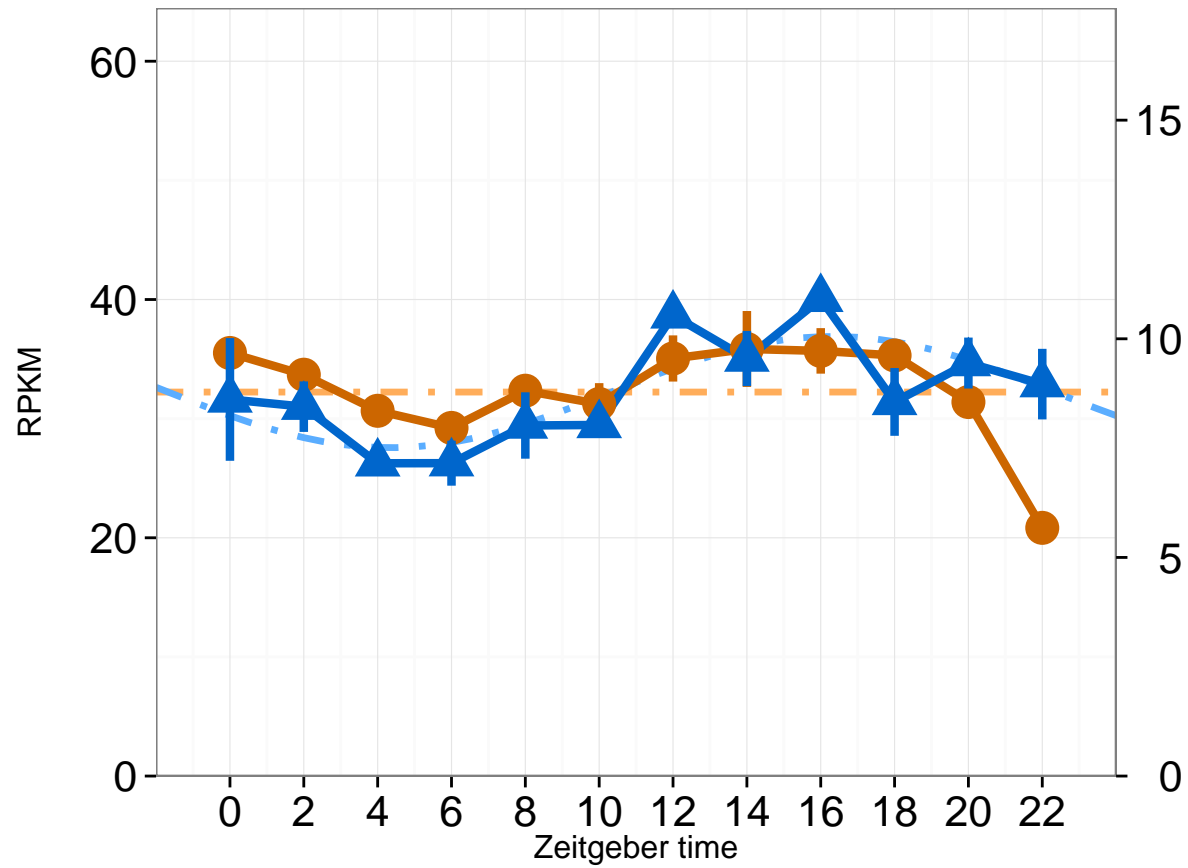

## KlhI9

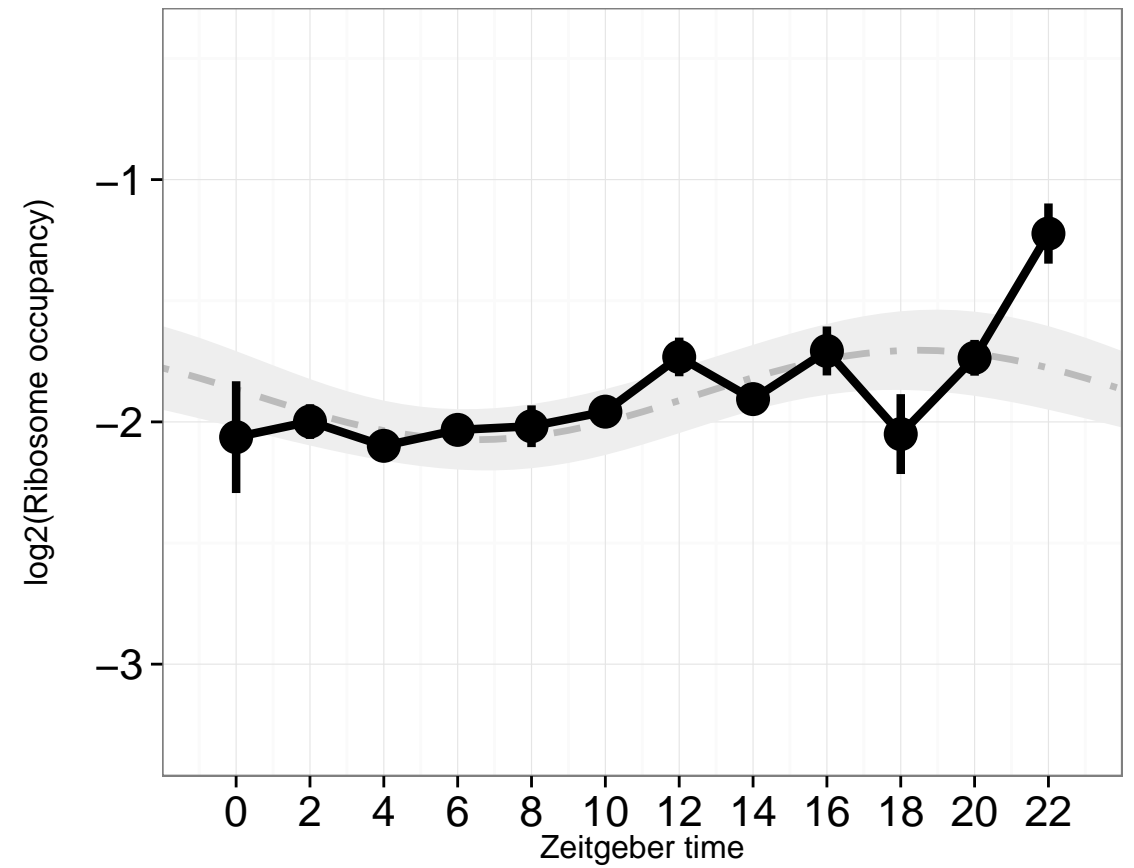

Supplement: SuppDataset_1.zip [file Klhl9_set_A.pdf › Supplemental Dataset 1/A-mRNA_nonrhyth_translation_nonrhyth/Klhl9_set_A.pdf]

# Klk1b4

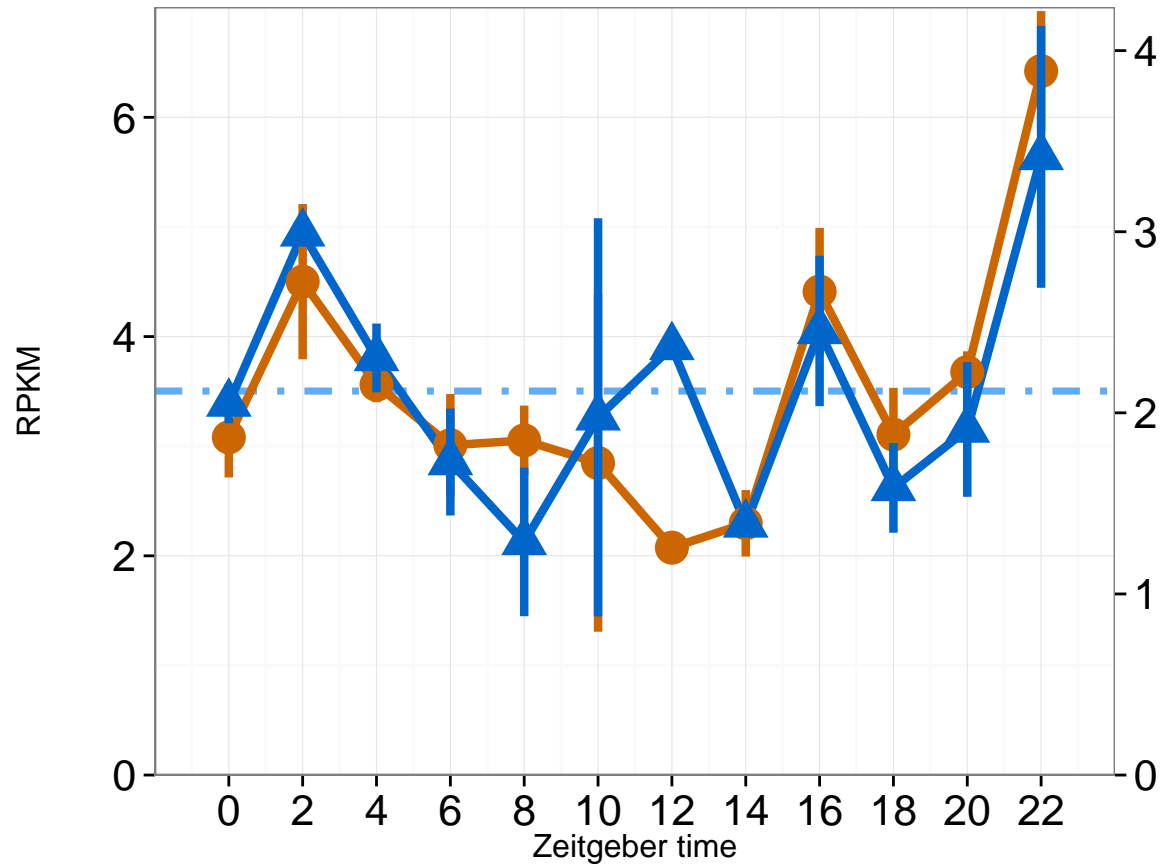

# Klk1b4

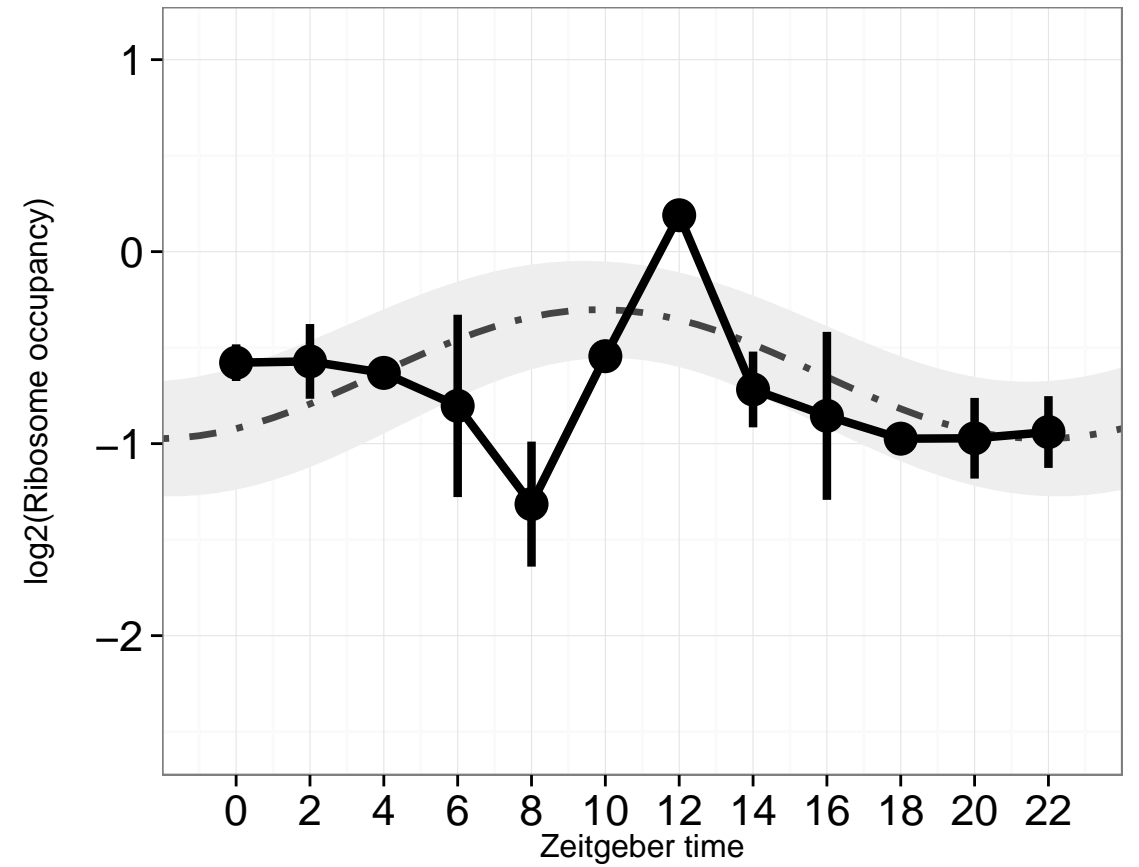

Supplement: SuppDataset_1.zip [file Klk1b4_set_A.pdf › Supplemental Dataset 1/A-mRNA_nonrhyth_translation_nonrhyth/Klk1b4_set_A.pdf]

## Klra2

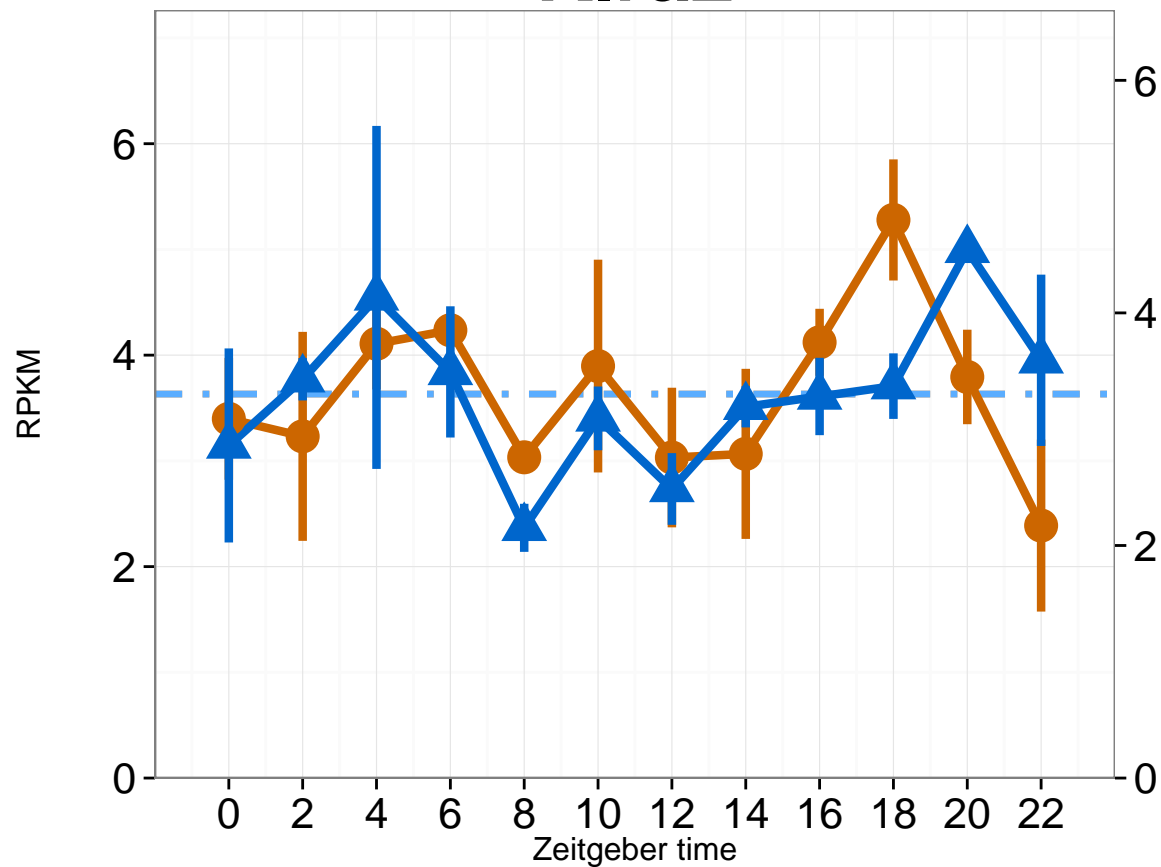

## Klra2

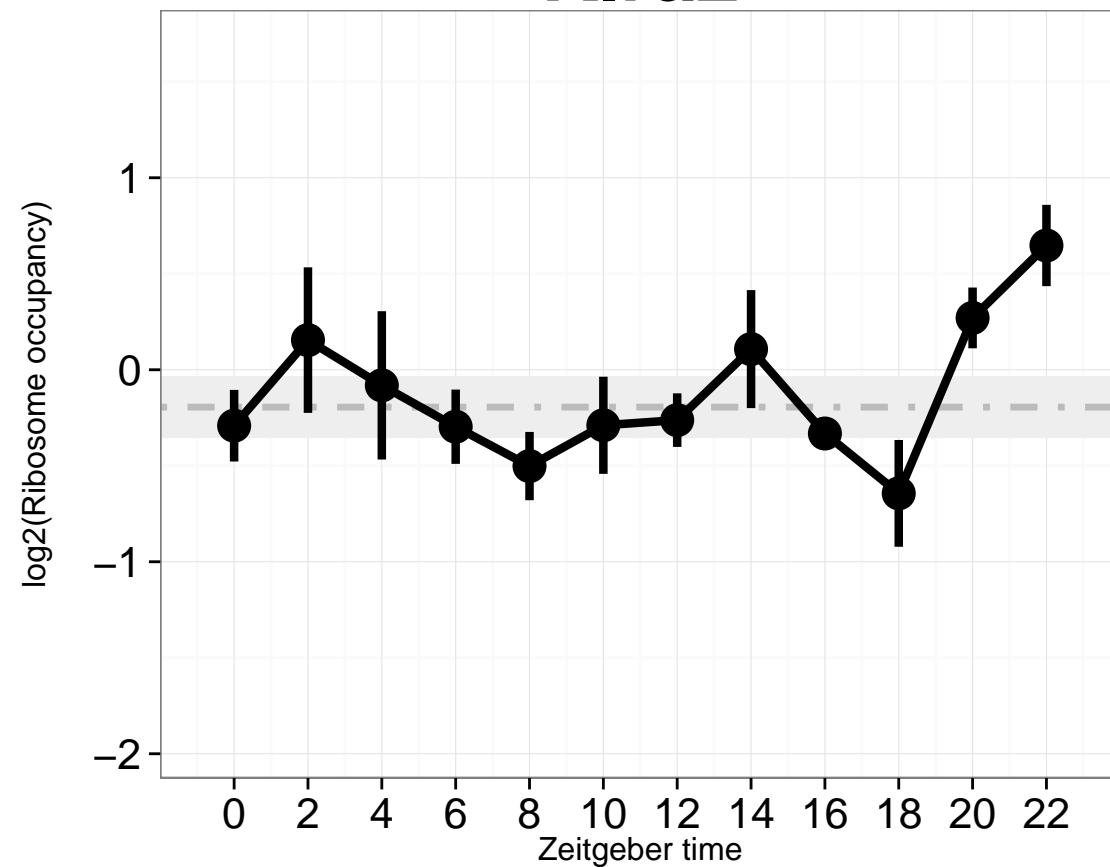

Supplement: SuppDataset_1.zip [file Klra2_set_A.pdf › Supplemental Dataset 1/A-mRNA_nonrhyth_translation_nonrhyth/Klra2_set_A.pdf]

## Klrk1

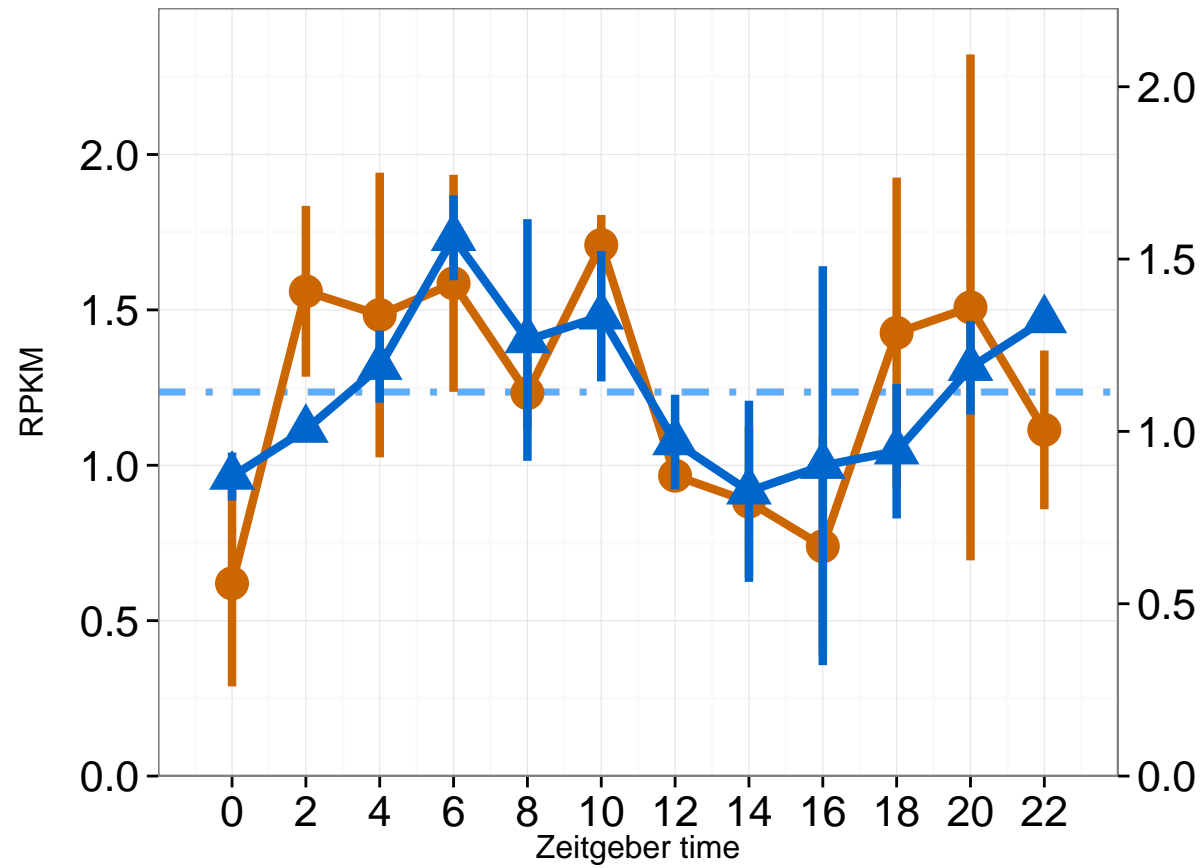

## Klrk1

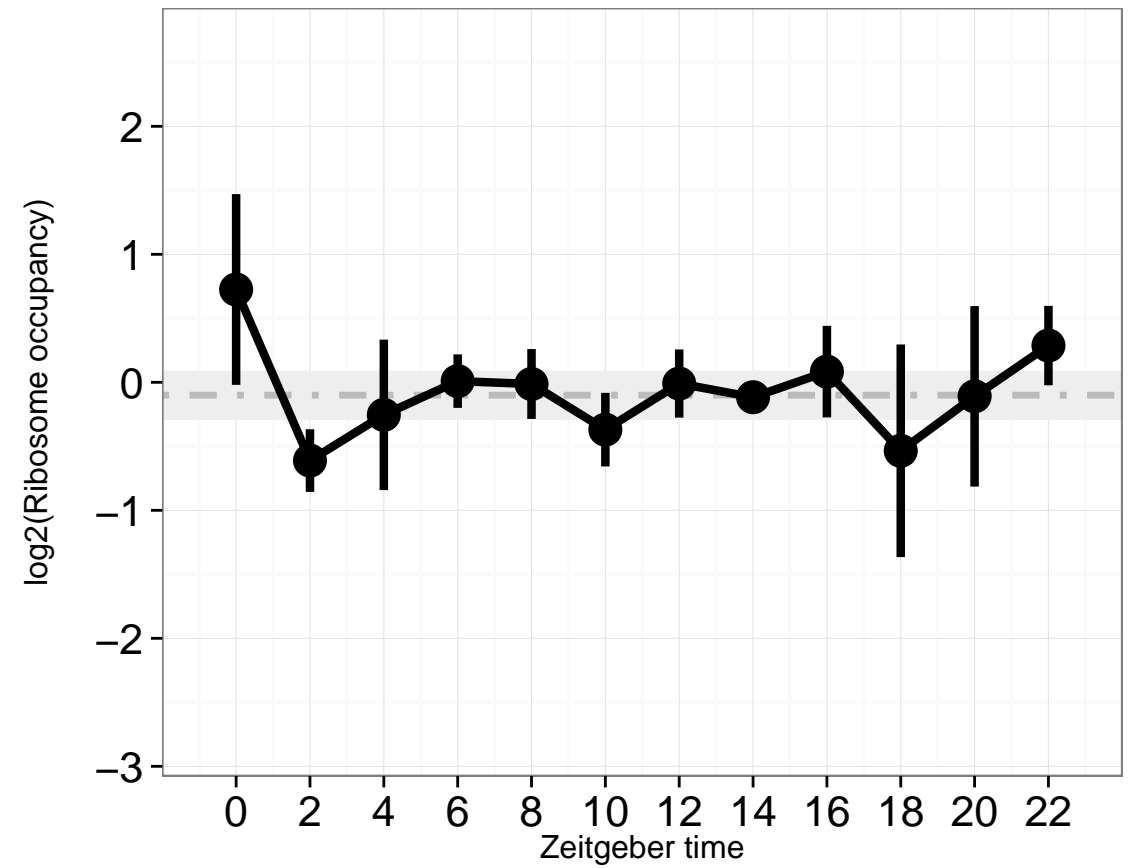

Supplement: SuppDataset_1.zip [file Klrk1_set_A.pdf › Supplemental Dataset 1/A-mRNA_nonrhyth_translation_nonrhyth/Klrk1_set_A.pdf]

## Kmo

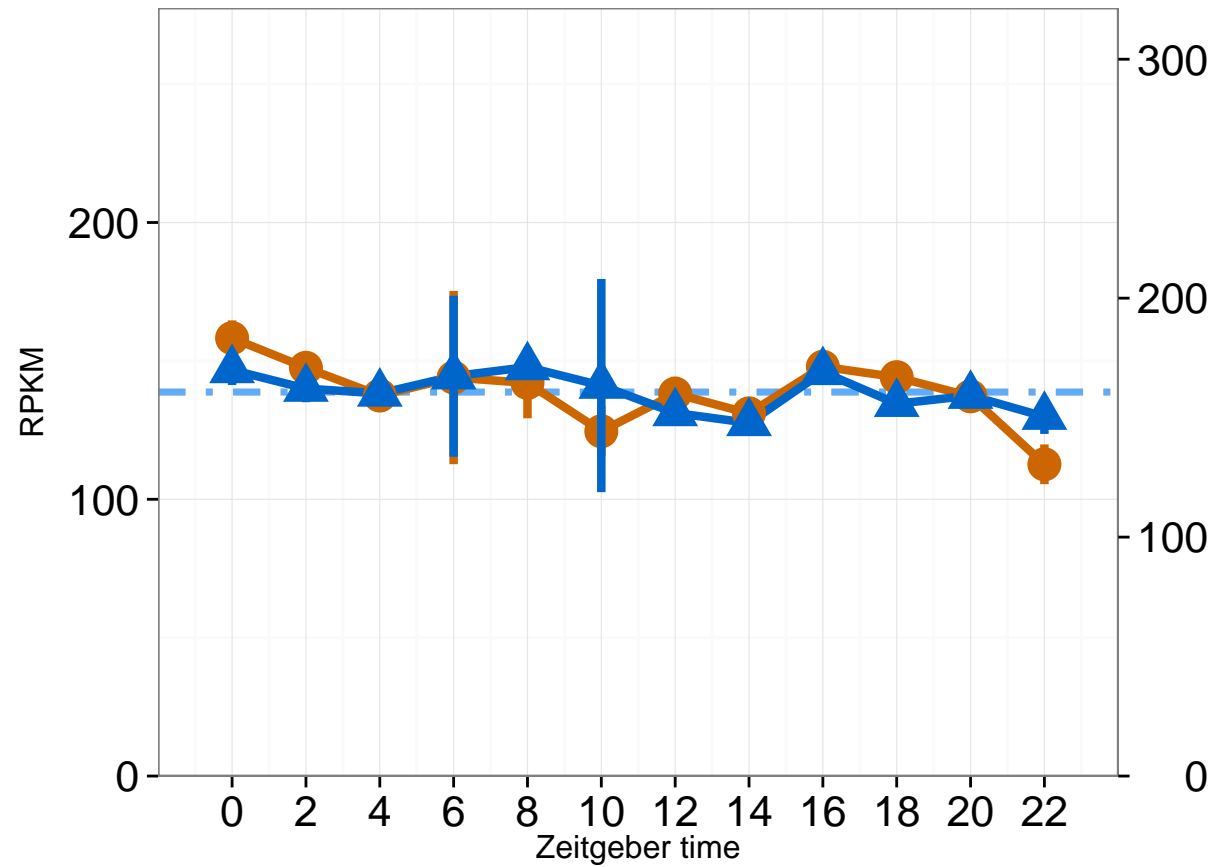

## Kmo

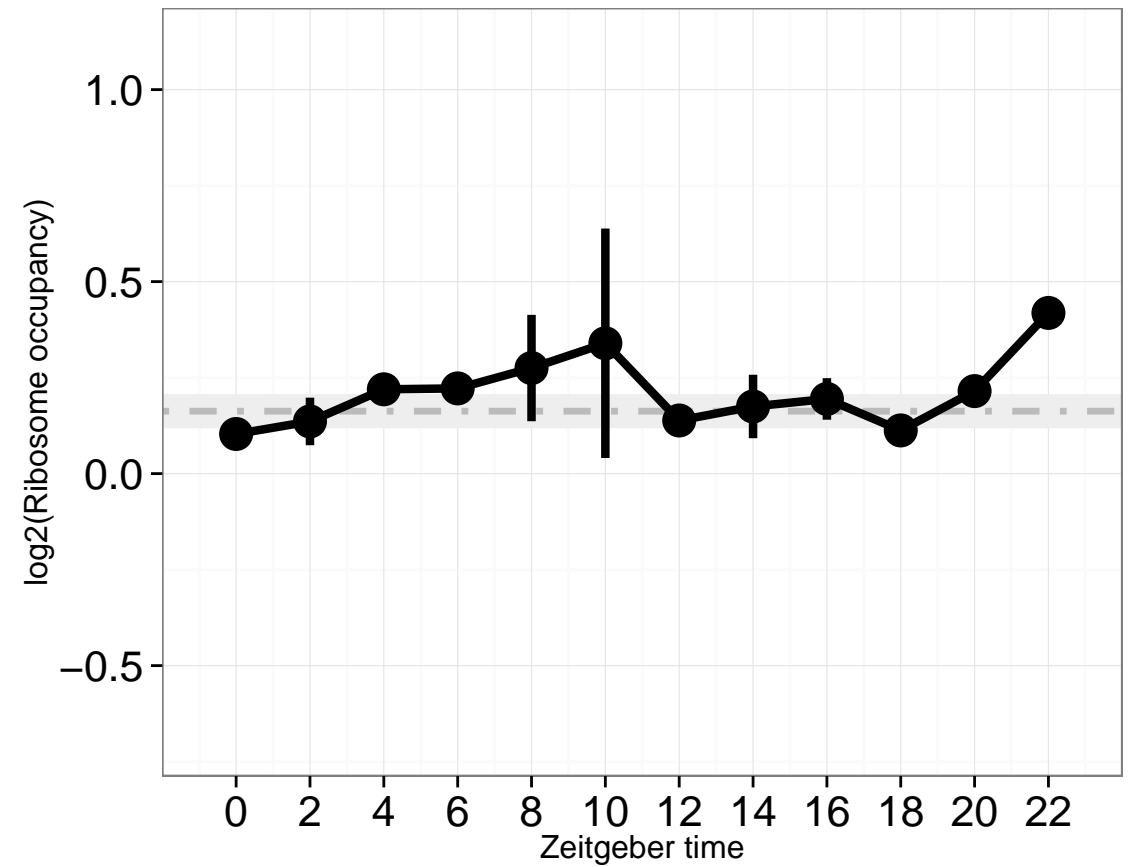

Supplement: SuppDataset_1.zip [file Kmo_set_A.pdf › Supplemental Dataset 1/A-mRNA_nonrhyth_translation_nonrhyth/Kmo_set_A.pdf]

# Kmt2a

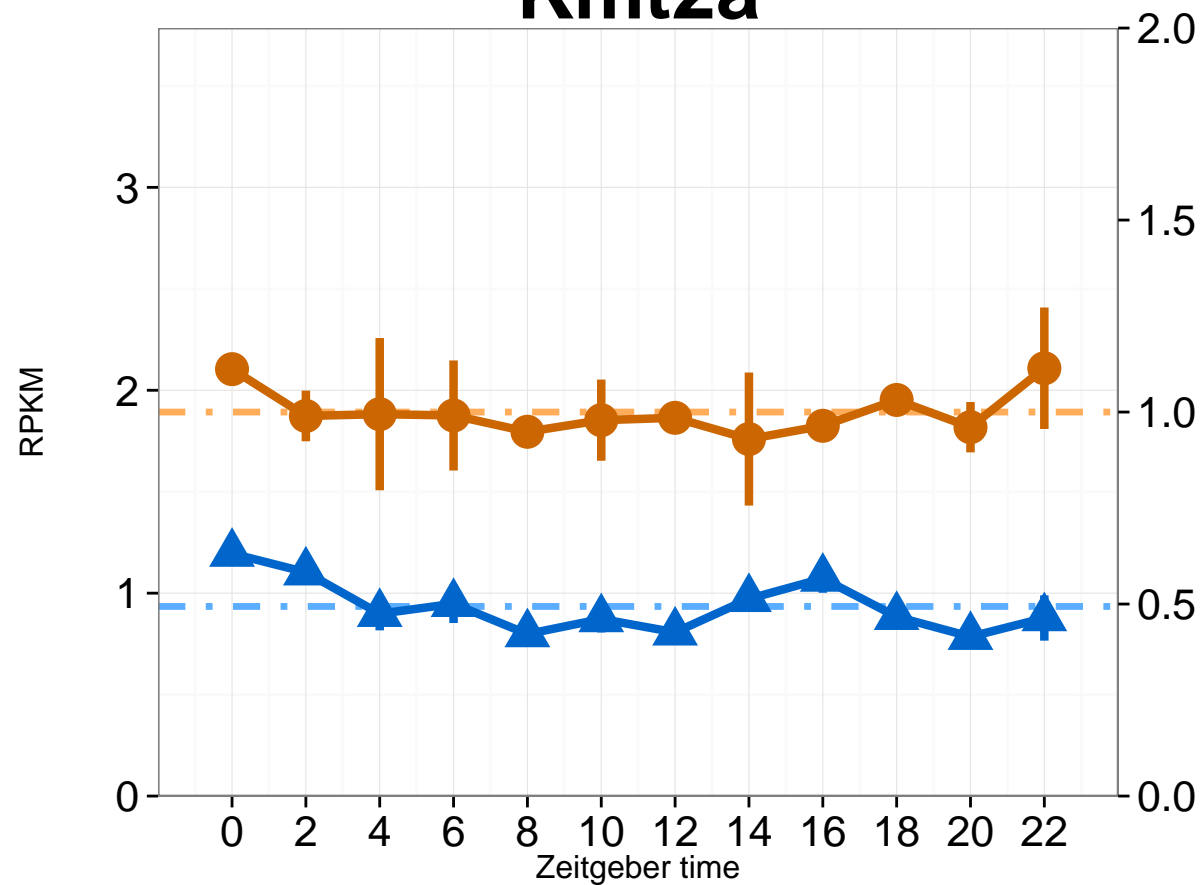

# Kmt2a

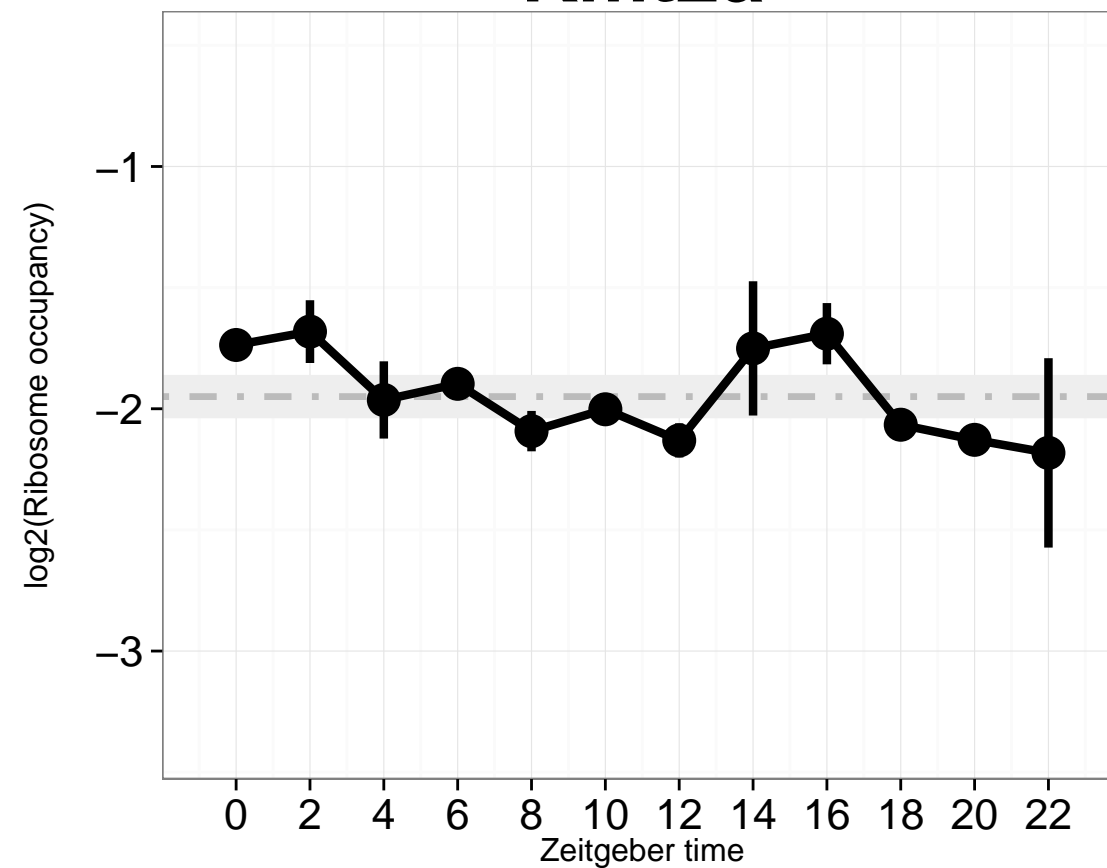

Supplement: SuppDataset_1.zip [file Kmt2a_set_A.pdf › Supplemental Dataset 1/A-mRNA_nonrhyth_translation_nonrhyth/Kmt2a_set_A.pdf]

# Kmt2b

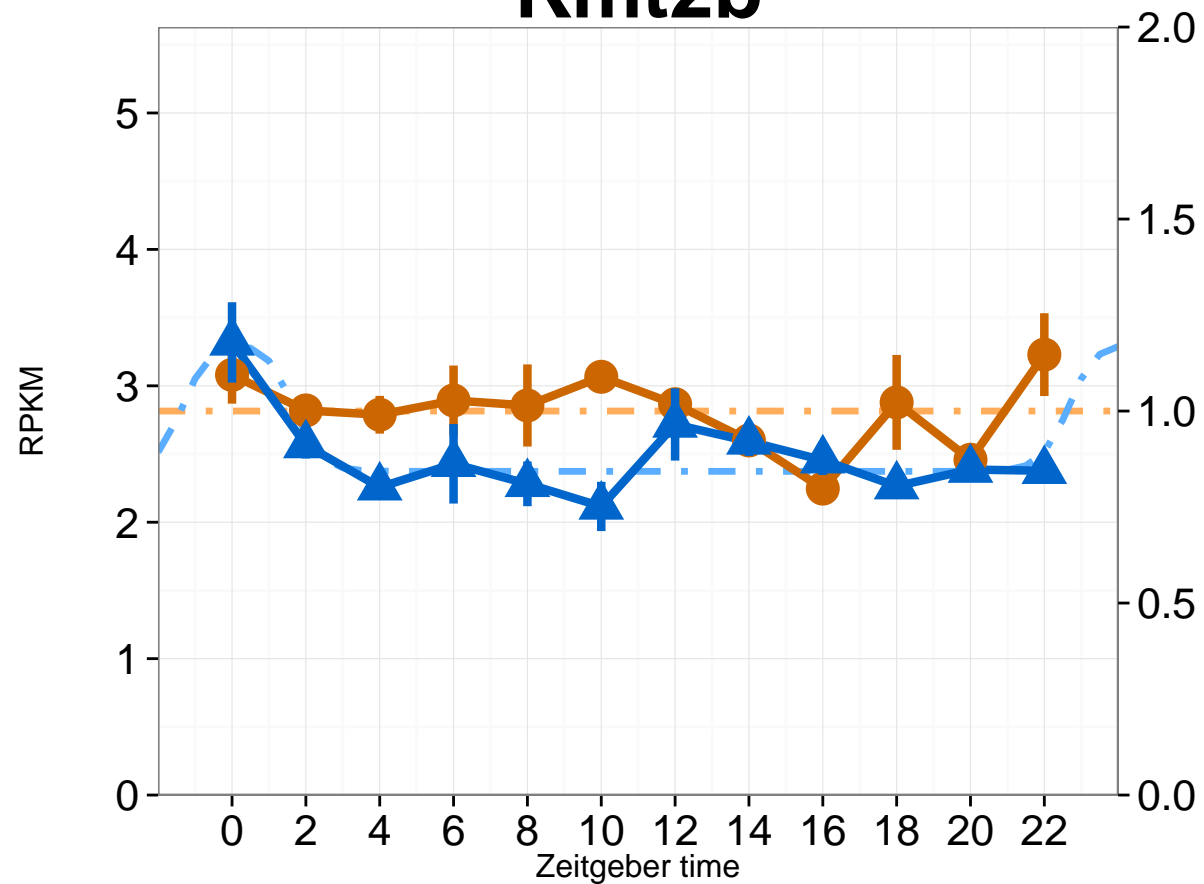

# Kmt2b

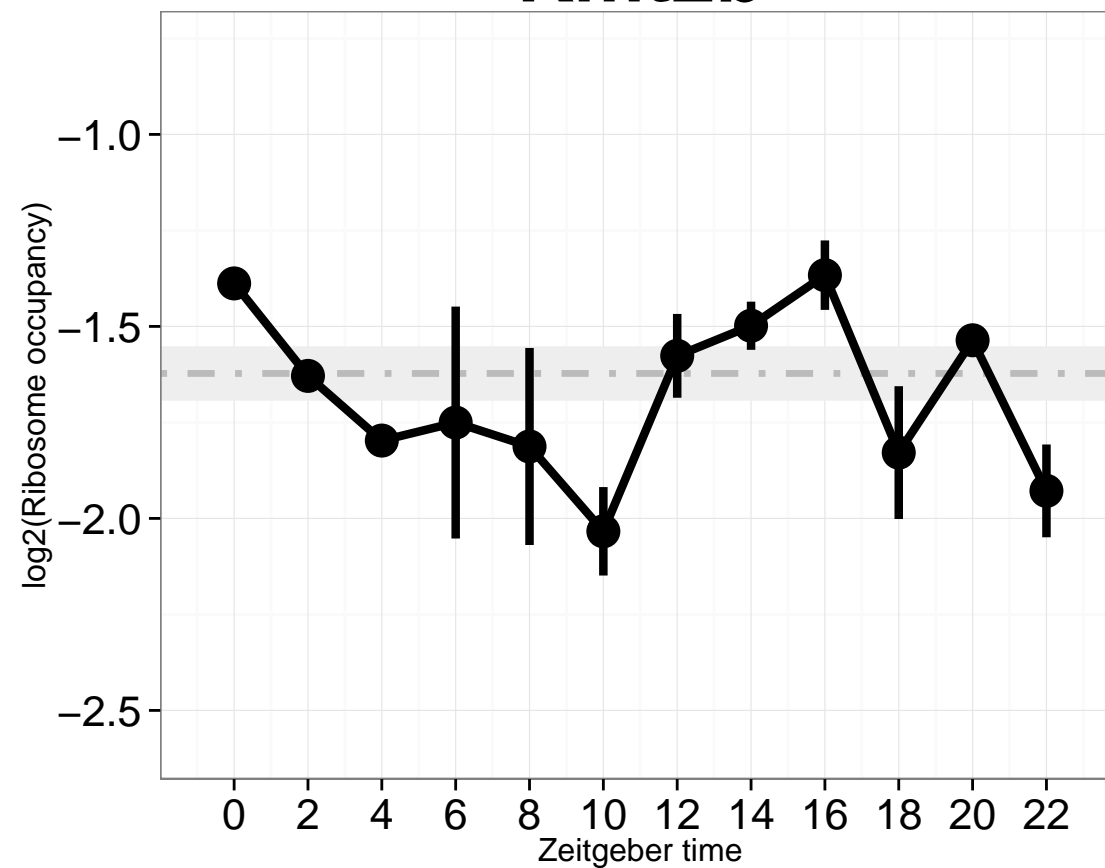

Supplement: SuppDataset_1.zip [file Kmt2b_set_A.pdf › Supplemental Dataset 1/A-mRNA_nonrhyth_translation_nonrhyth/Kmt2b_set_A.pdf]

# Kmt2d

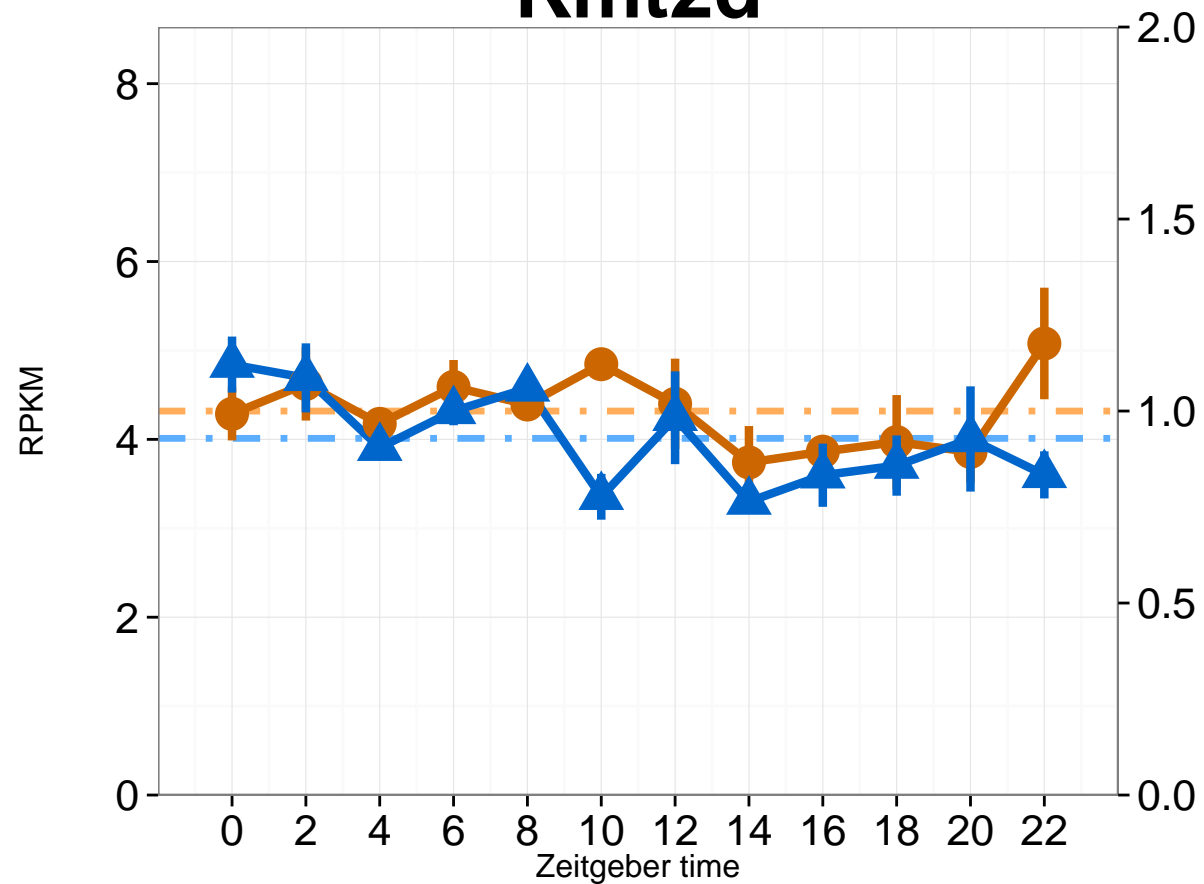

# Kmt2d

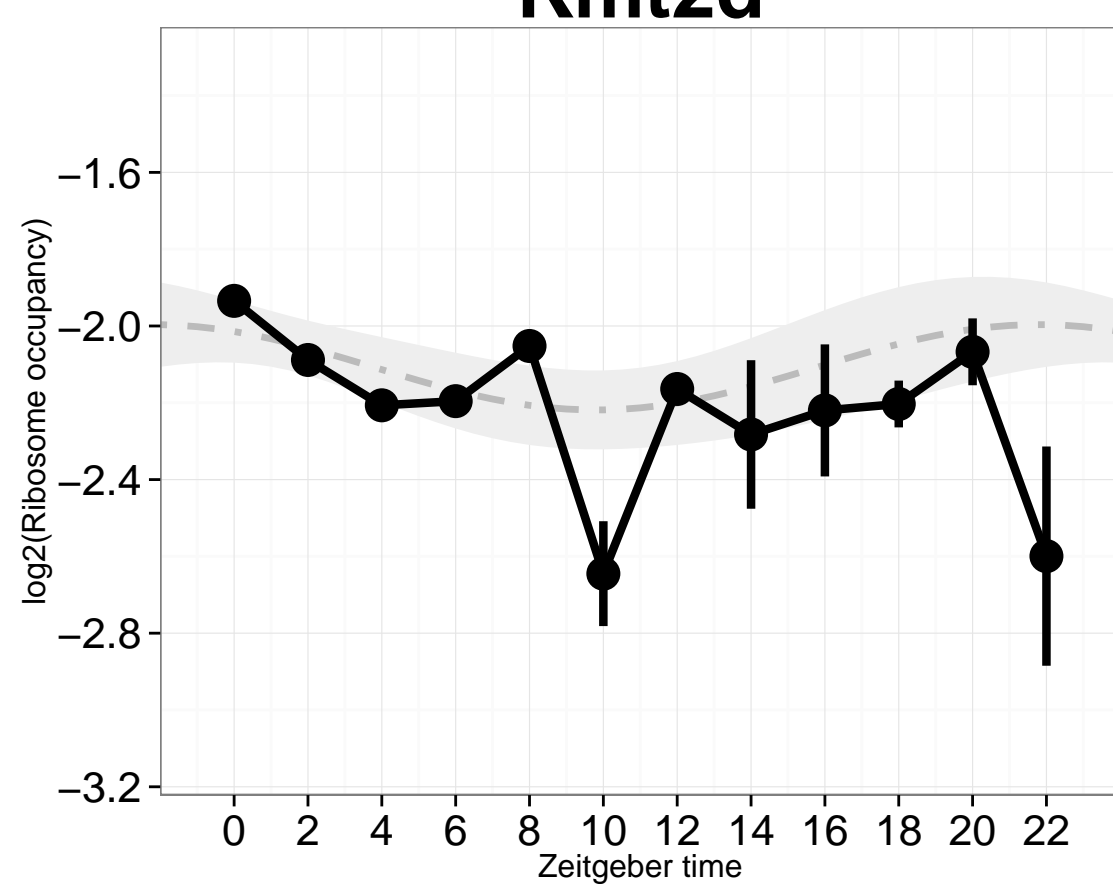

Supplement: SuppDataset_1.zip [file Kmt2d_set_A.pdf › Supplemental Dataset 1/A-mRNA_nonrhyth_translation_nonrhyth/Kmt2d_set_A.pdf]

## Knop1

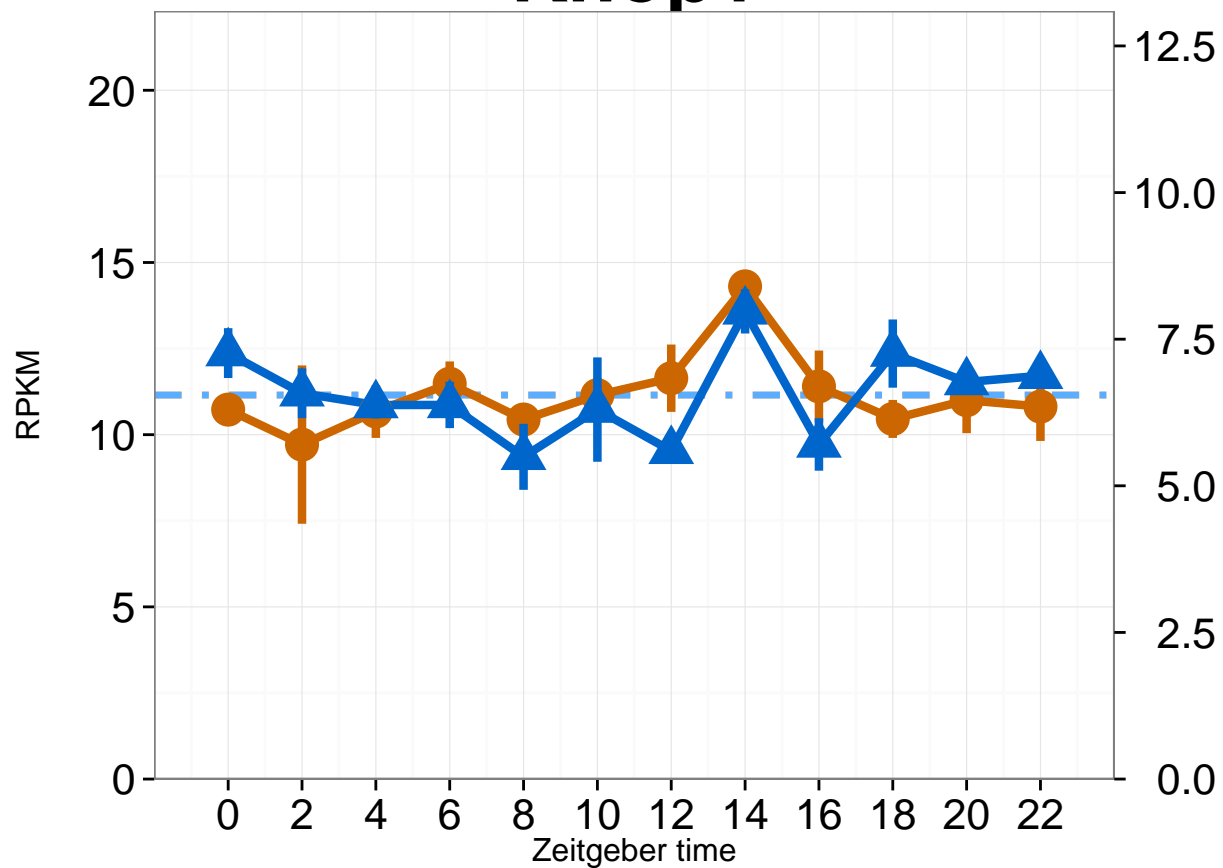

## Knop1

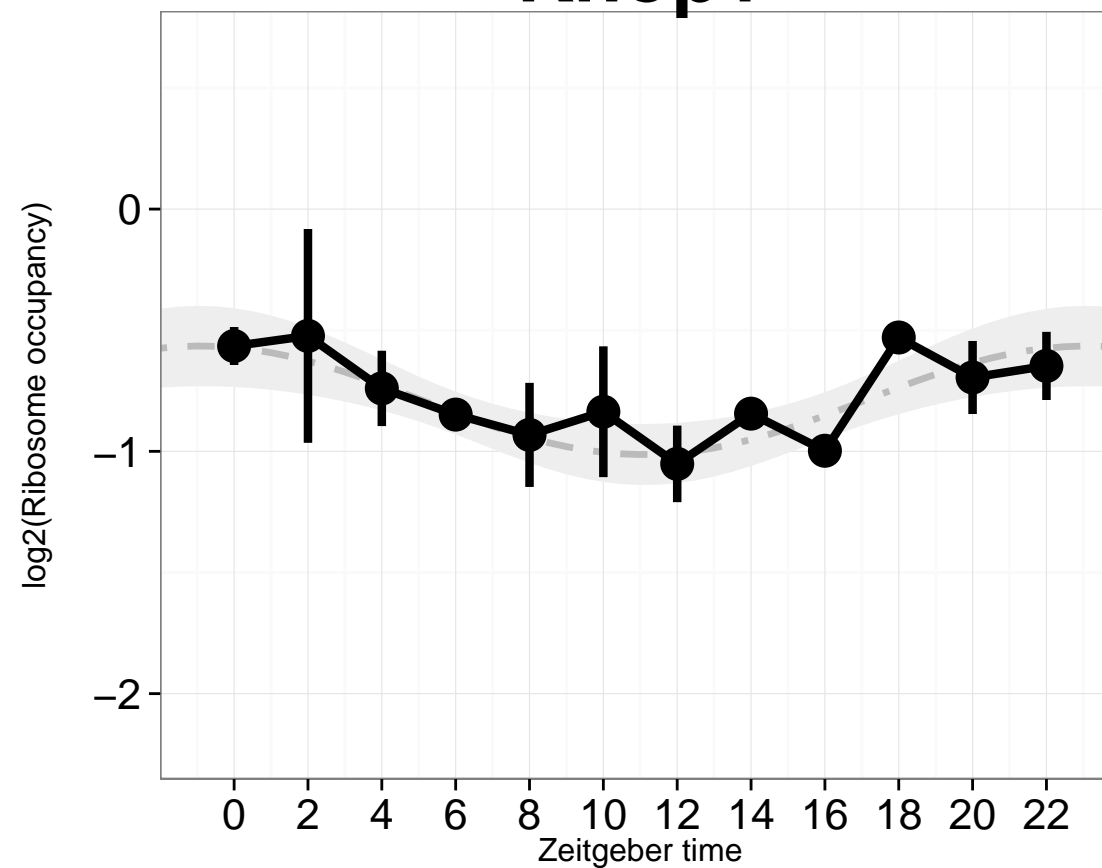

Supplement: SuppDataset_1.zip [file Knop1_set_A.pdf › Supplemental Dataset 1/A-mRNA_nonrhyth_translation_nonrhyth/Knop1_set_A.pdf]

## Knstrn

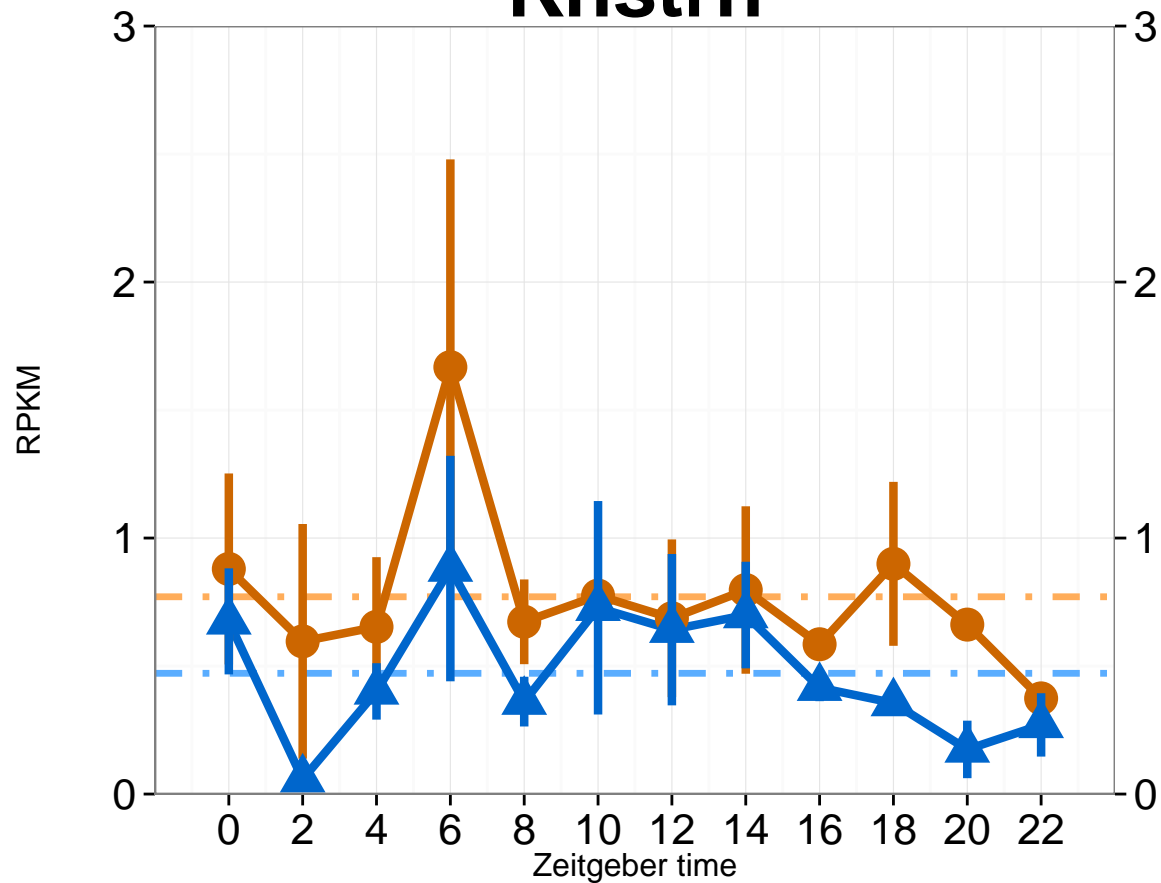

## Knstrn

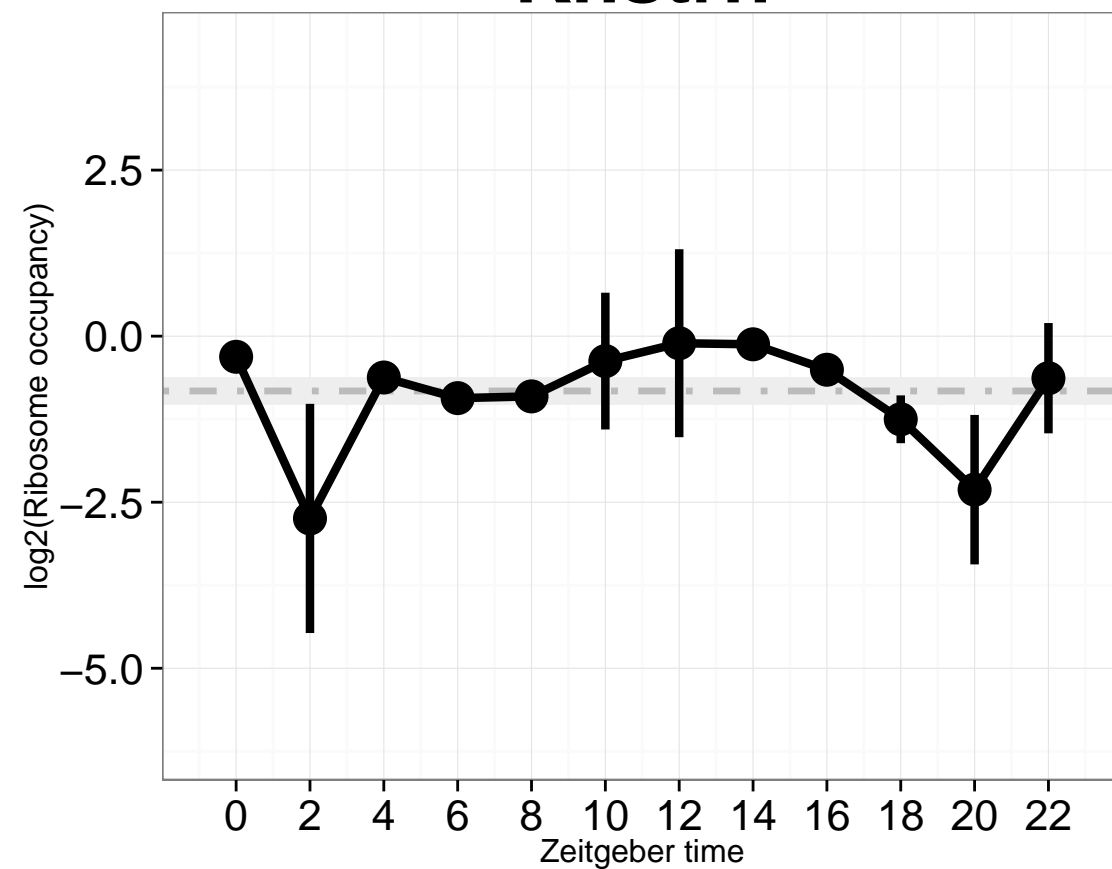

Supplement: SuppDataset_1.zip [file Knstrn_set_A.pdf › Supplemental Dataset 1/A-mRNA_nonrhyth_translation_nonrhyth/Knstrn_set_A.pdf]

# Kntc1

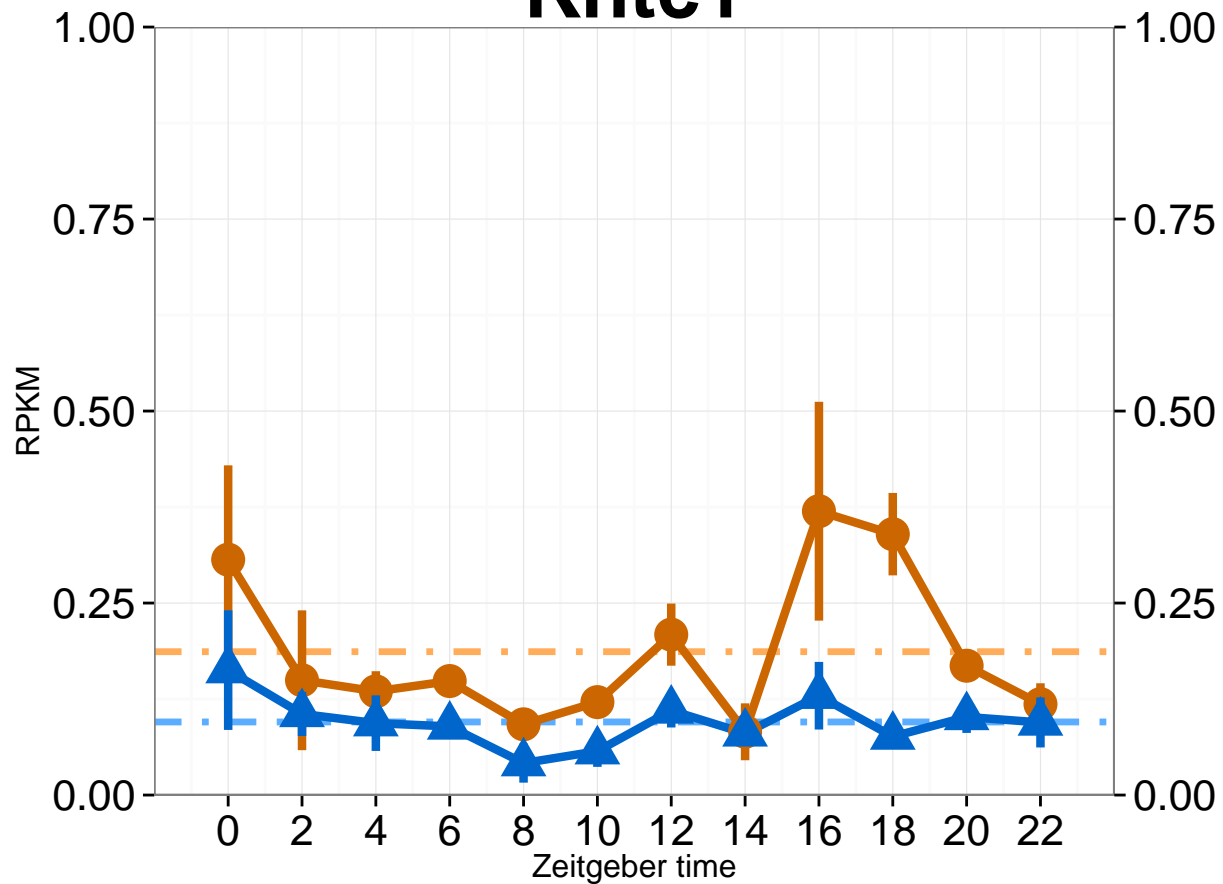

# Kntc1

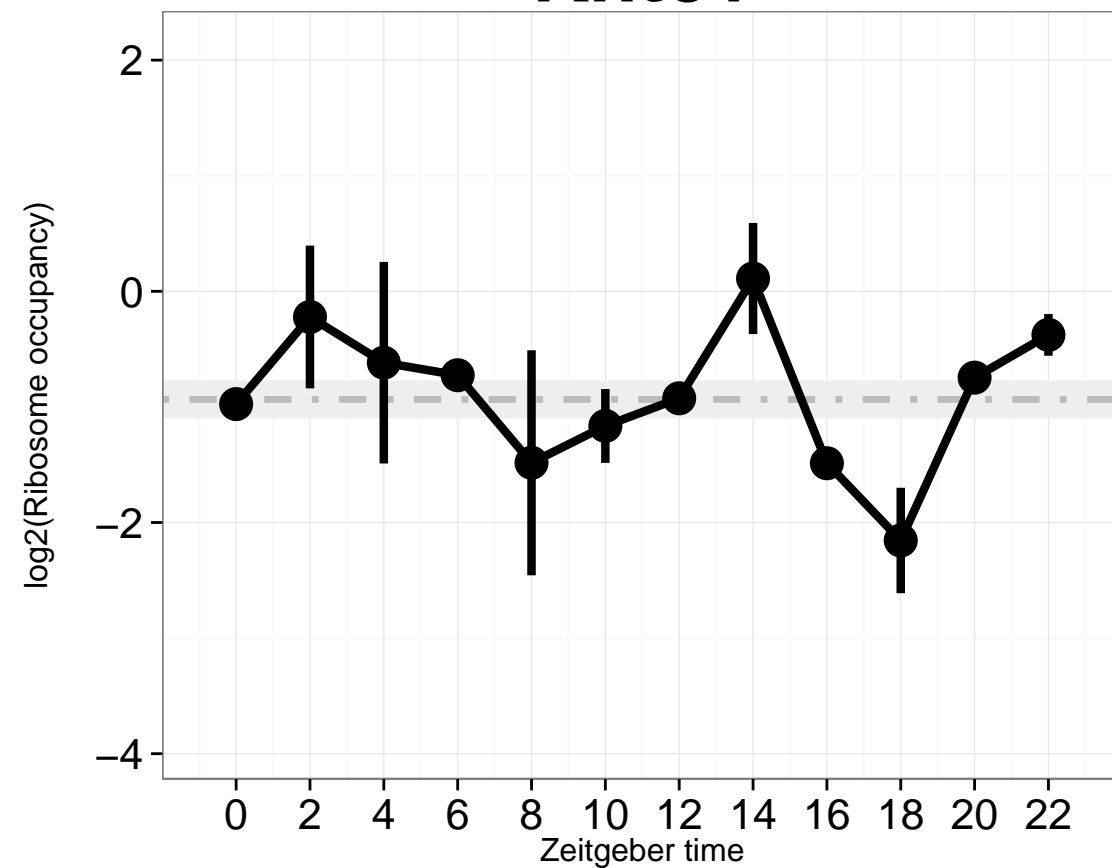

Supplement: SuppDataset_1.zip [file Kntc1_set_A.pdf › Supplemental Dataset 1/A-mRNA_nonrhyth_translation_nonrhyth/Kntc1_set_A.pdf]

# Kpna1

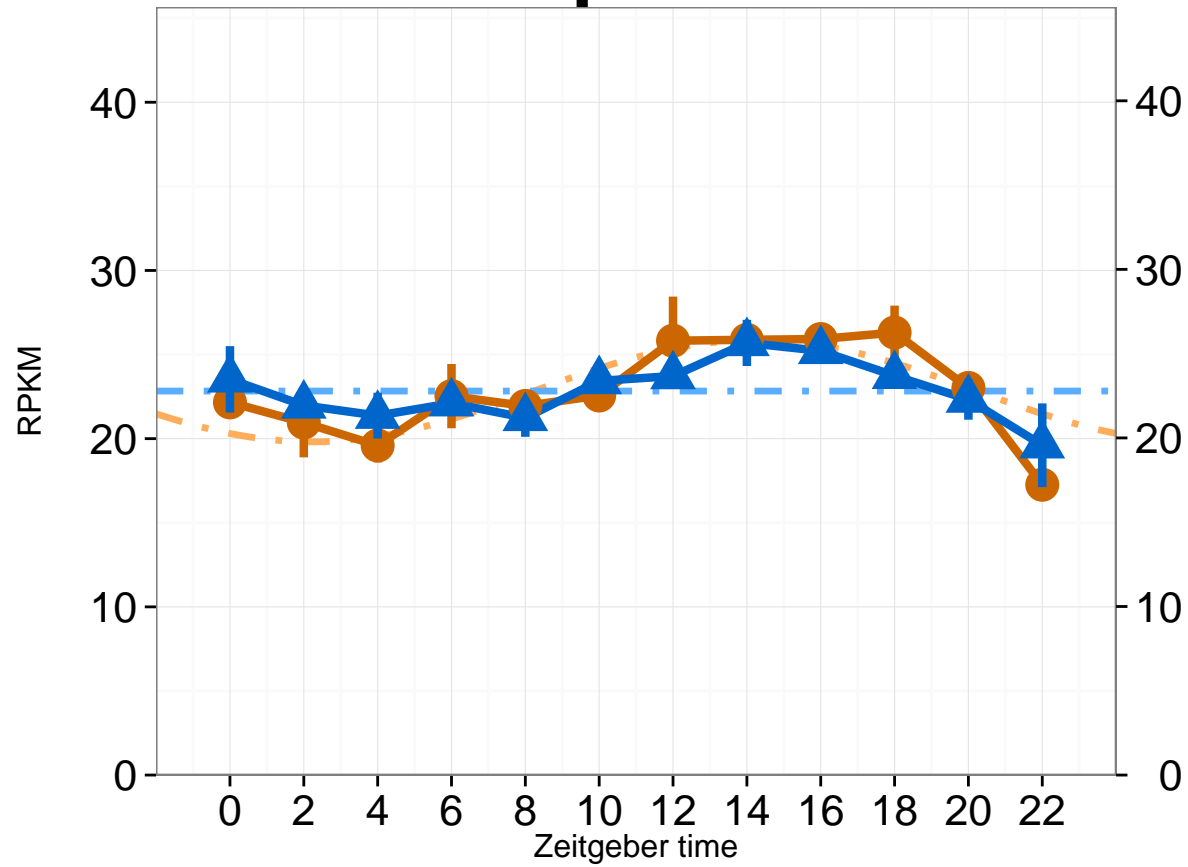

# Kpna1

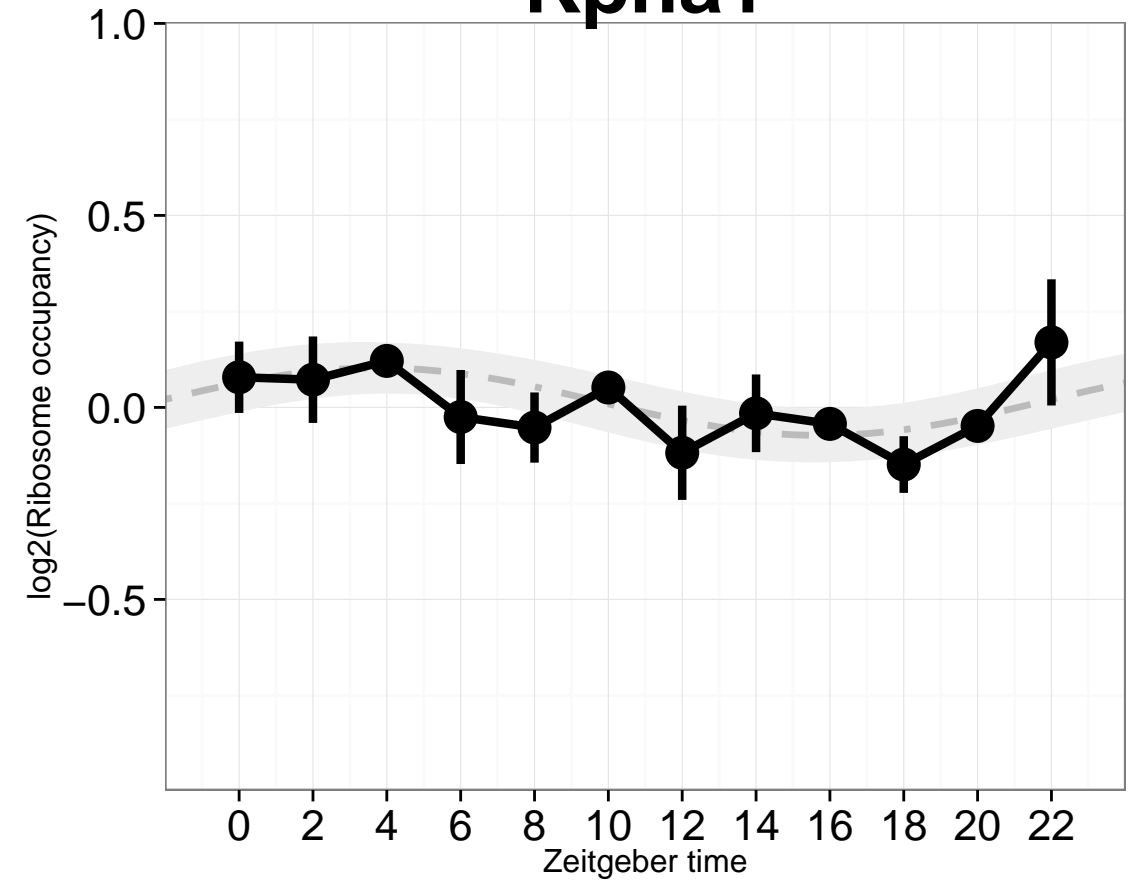

Supplement: SuppDataset_1.zip [file Kpna1_set_A.pdf › Supplemental Dataset 1/A-mRNA_nonrhyth_translation_nonrhyth/Kpna1_set_A.pdf]

# Kpna2

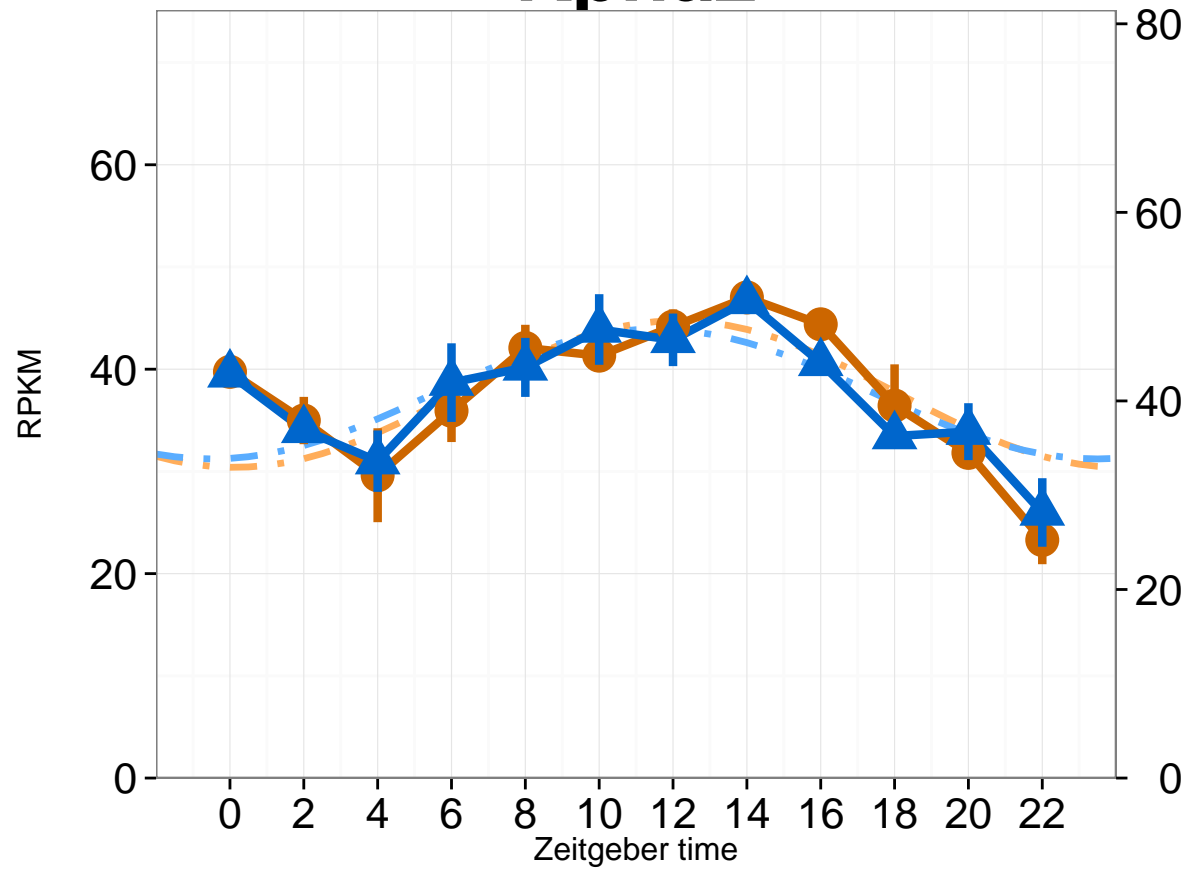

# Kpna2

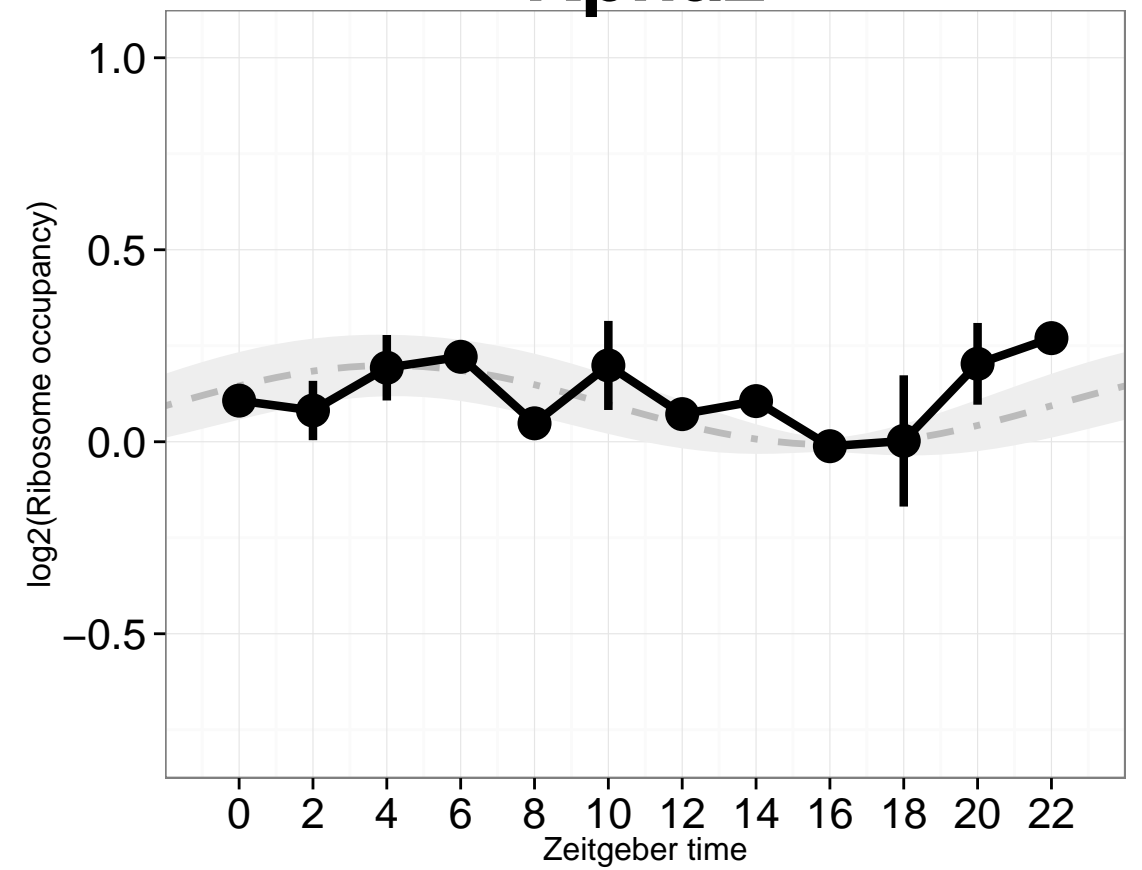

Supplement: SuppDataset_1.zip [file Kpna2_set_A.pdf › Supplemental Dataset 1/A-mRNA_nonrhyth_translation_nonrhyth/Kpna2_set_A.pdf]

# Kpna3

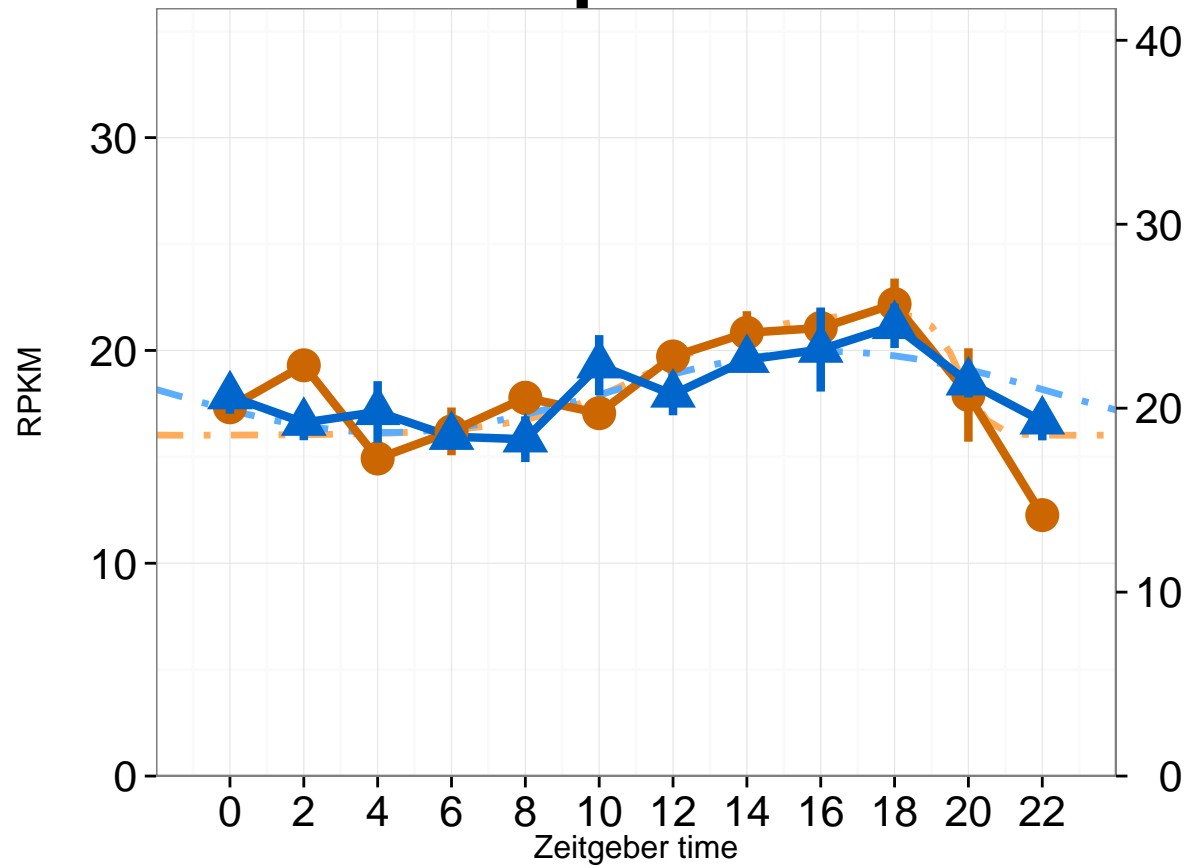

# Kpna3

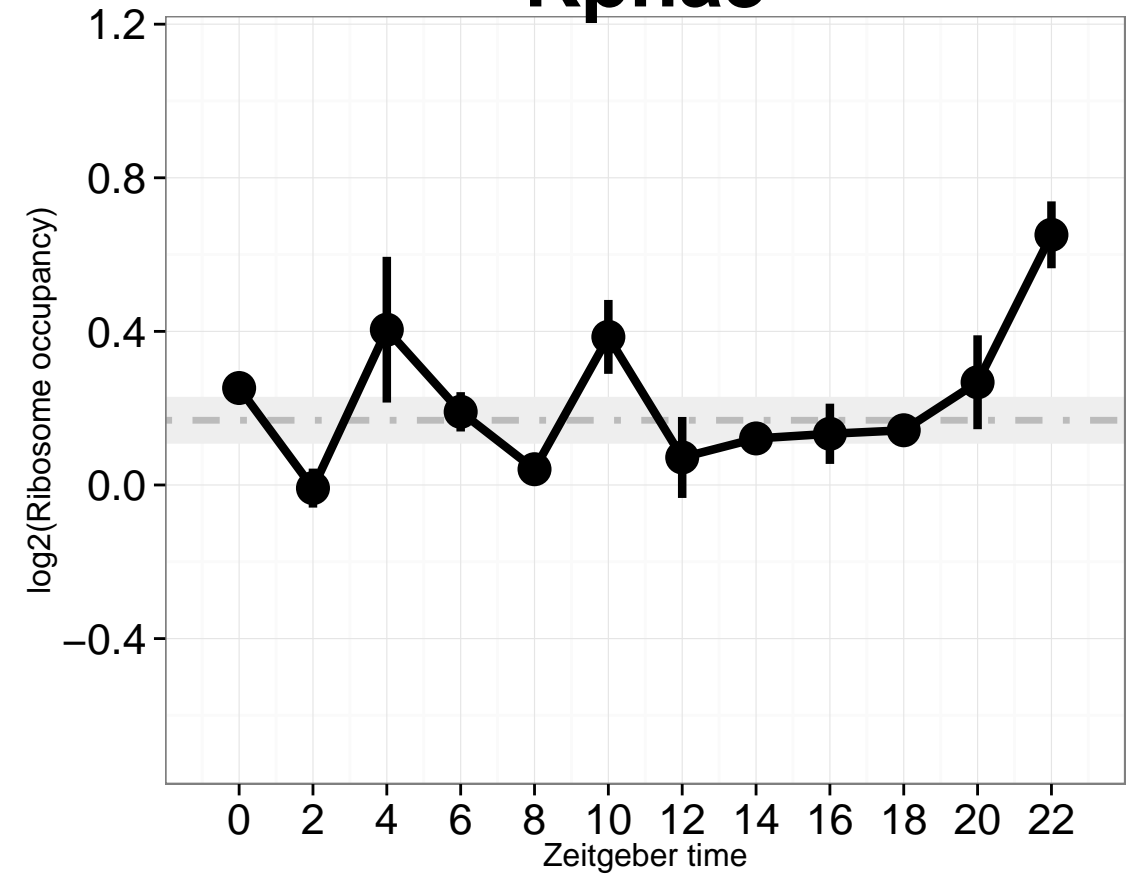

Supplement: SuppDataset_1.zip [file Kpna3_set_A.pdf › Supplemental Dataset 1/A-mRNA_nonrhyth_translation_nonrhyth/Kpna3_set_A.pdf]

# Kpna4

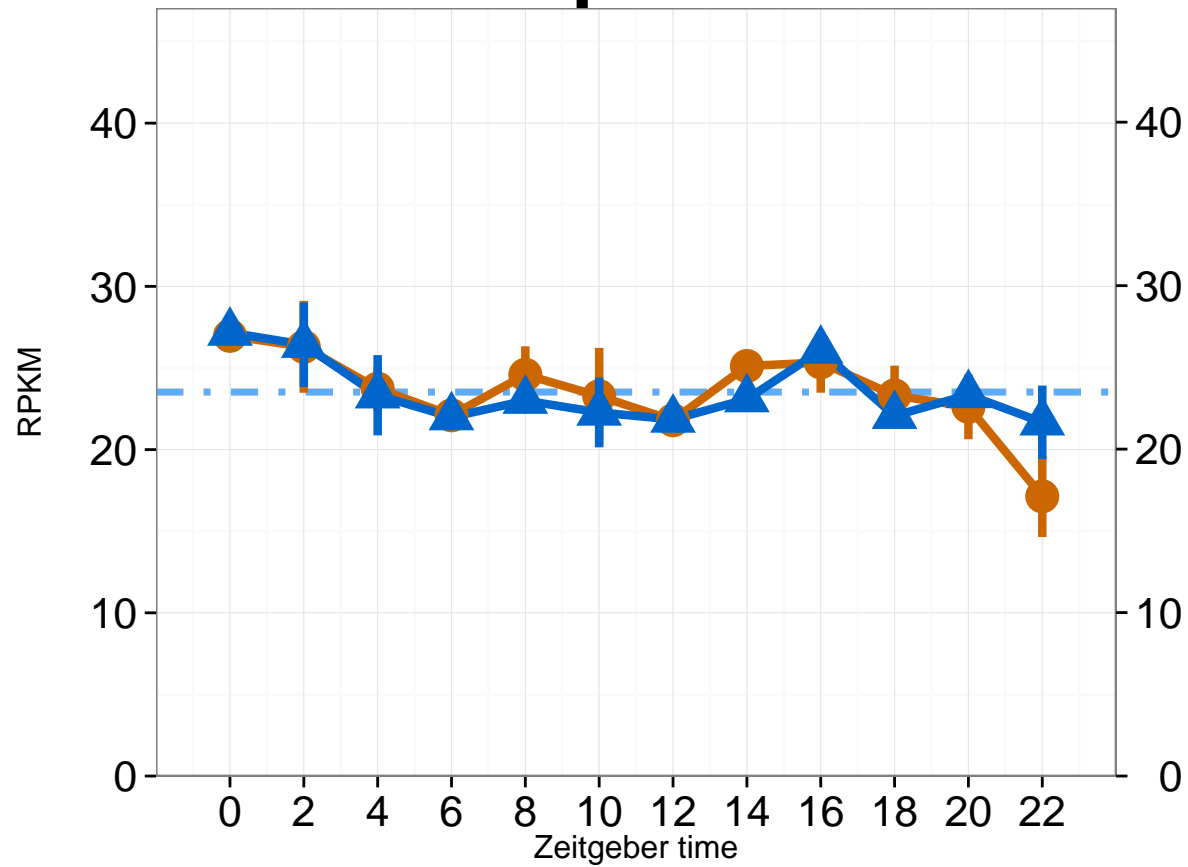

# Kpna4

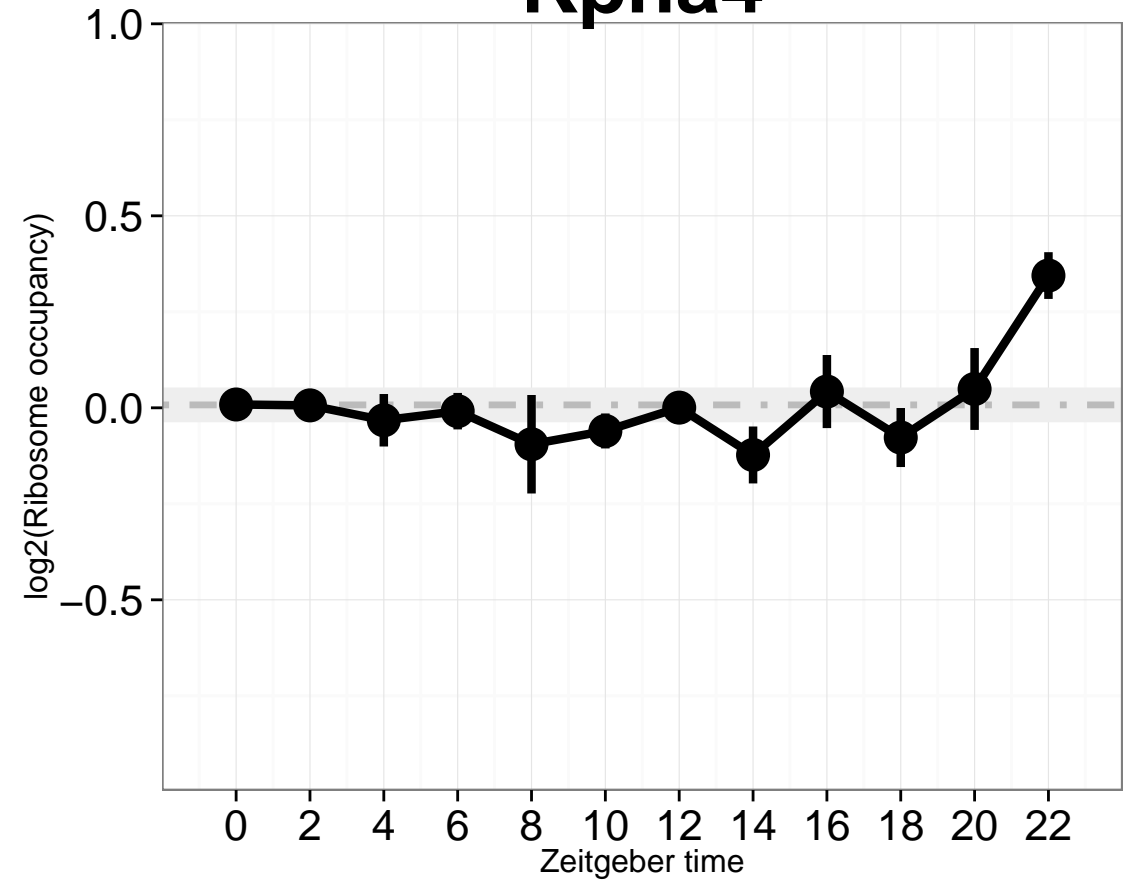

Supplement: SuppDataset_1.zip [file Kpna4_set_A.pdf › Supplemental Dataset 1/A-mRNA_nonrhyth_translation_nonrhyth/Kpna4_set_A.pdf]

# Kpna6

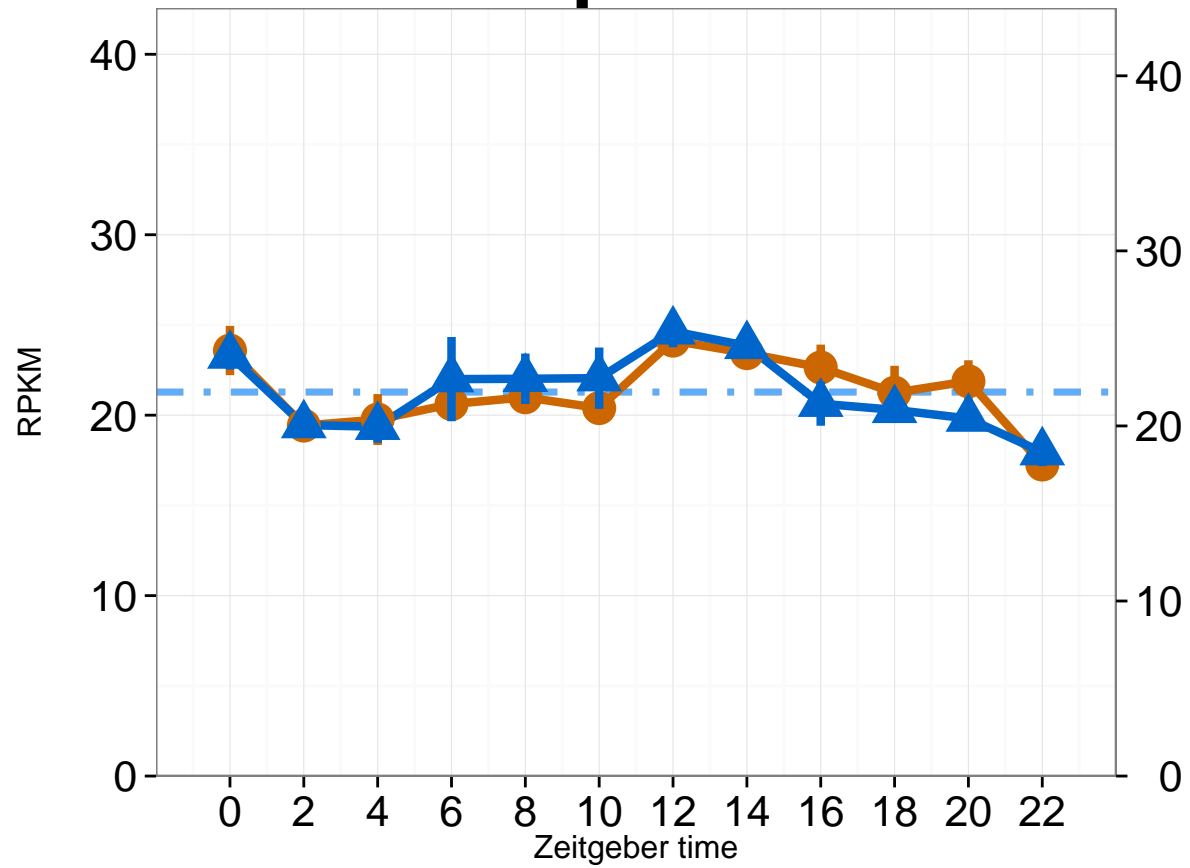

# Kpna6

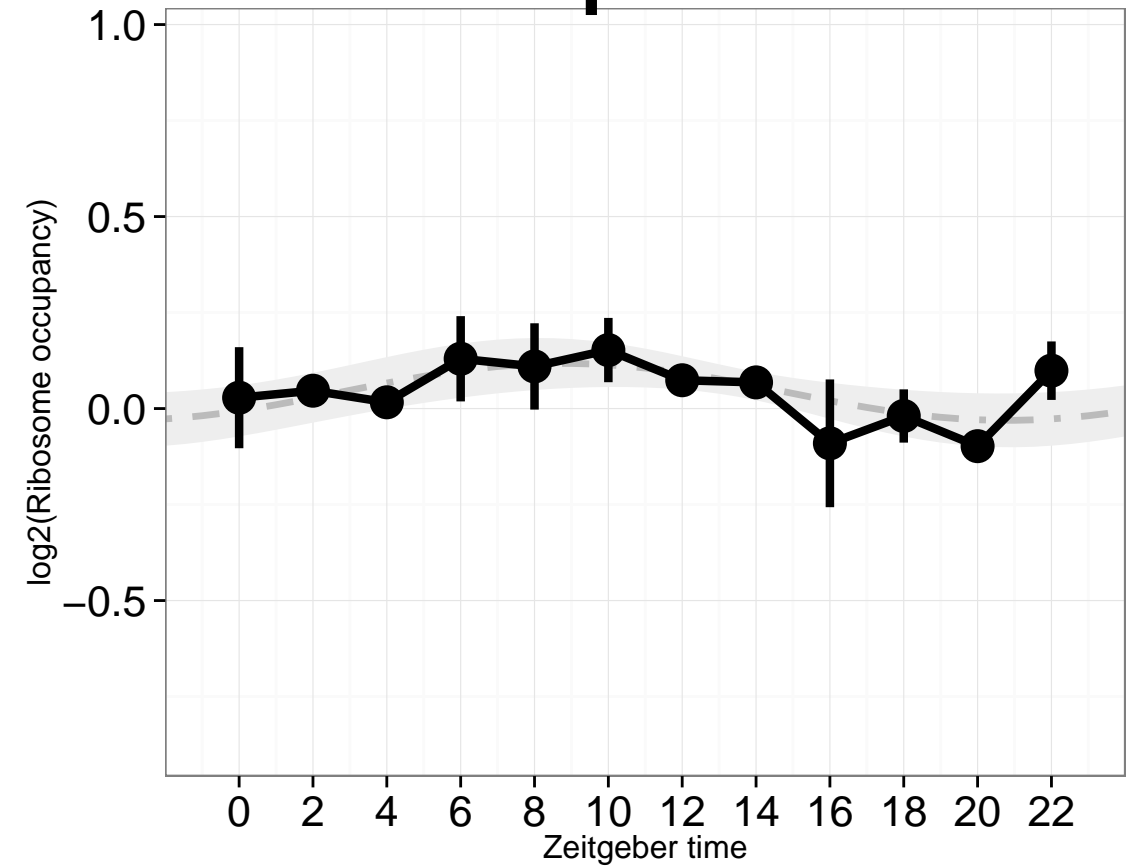

Supplement: SuppDataset_1.zip [file Kpna6_set_A.pdf › Supplemental Dataset 1/A-mRNA_nonrhyth_translation_nonrhyth/Kpna6_set_A.pdf]

# Kpnb1

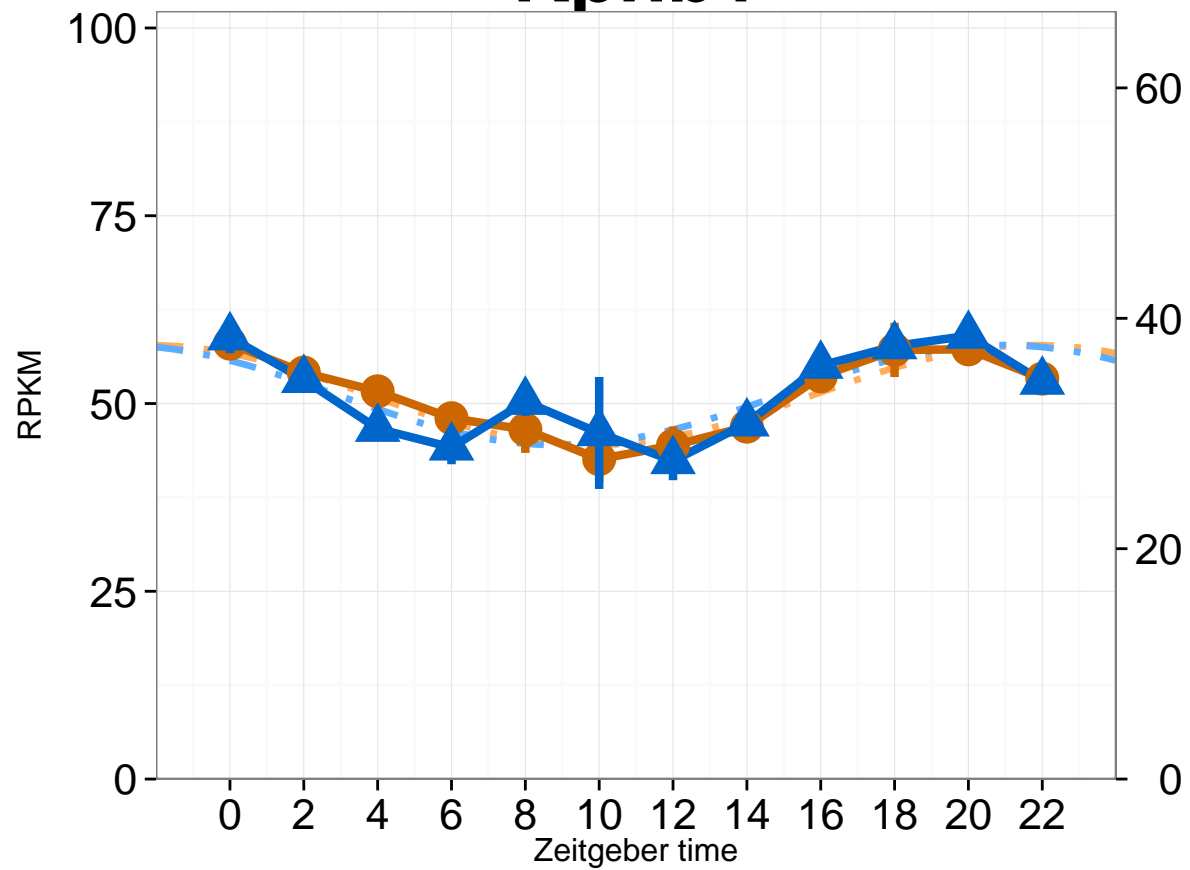

# Kpnb1

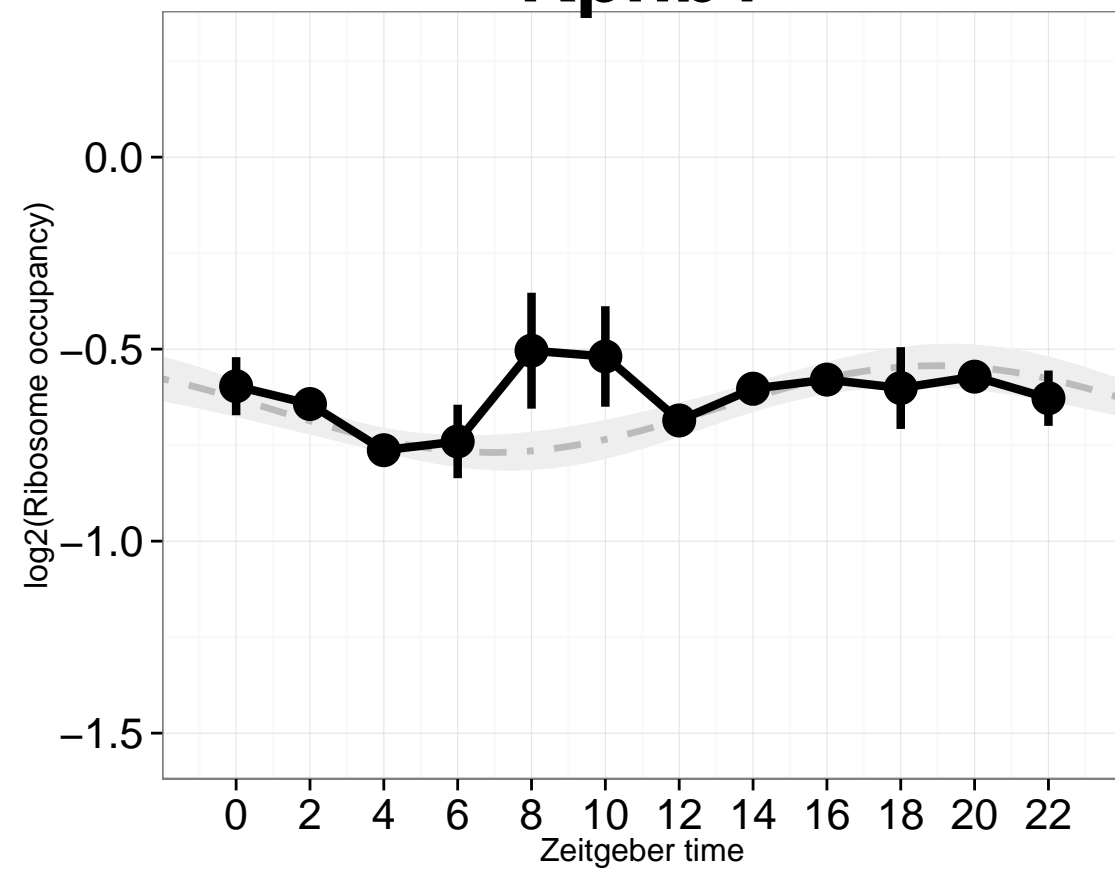

Supplement: SuppDataset_1.zip [file Kpnb1_set_A.pdf › Supplemental Dataset 1/A-mRNA_nonrhyth_translation_nonrhyth/Kpnb1_set_A.pdf]

## Kptn

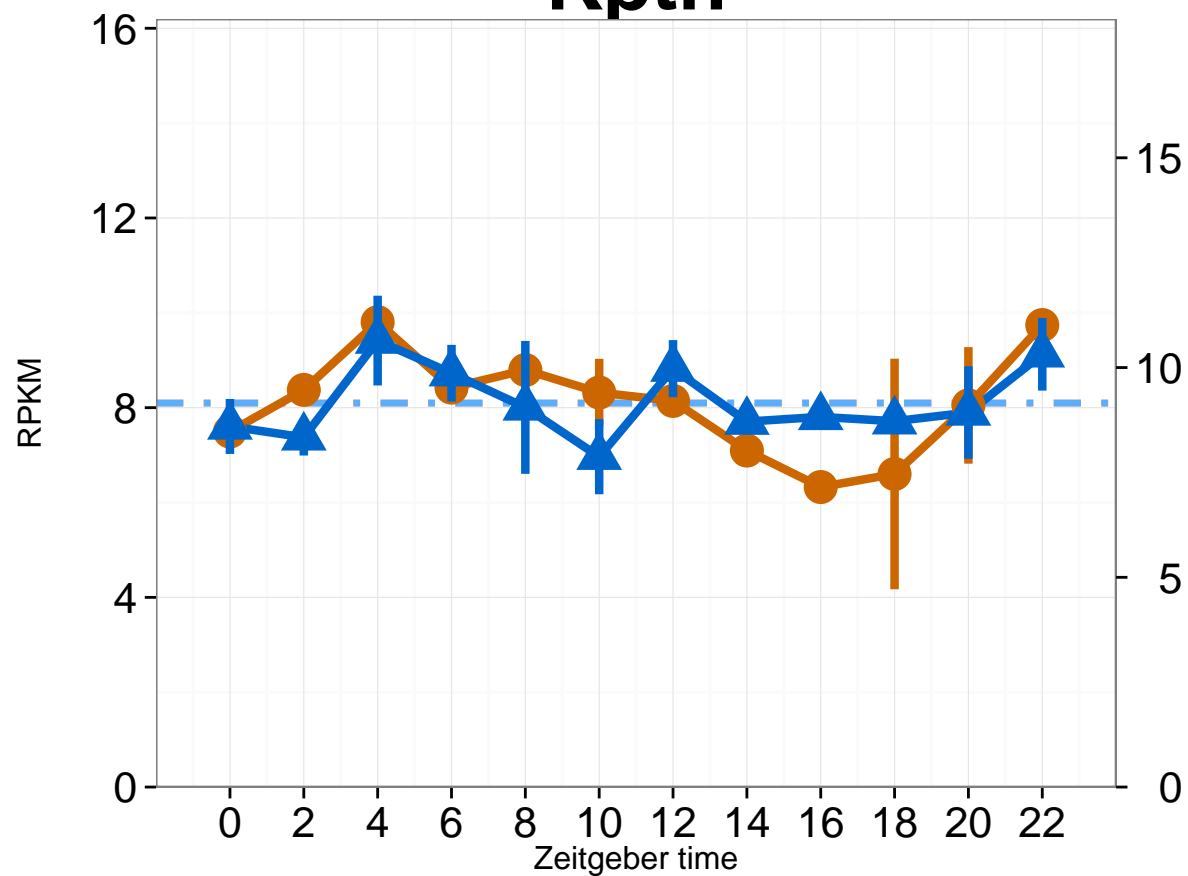

## Kptn

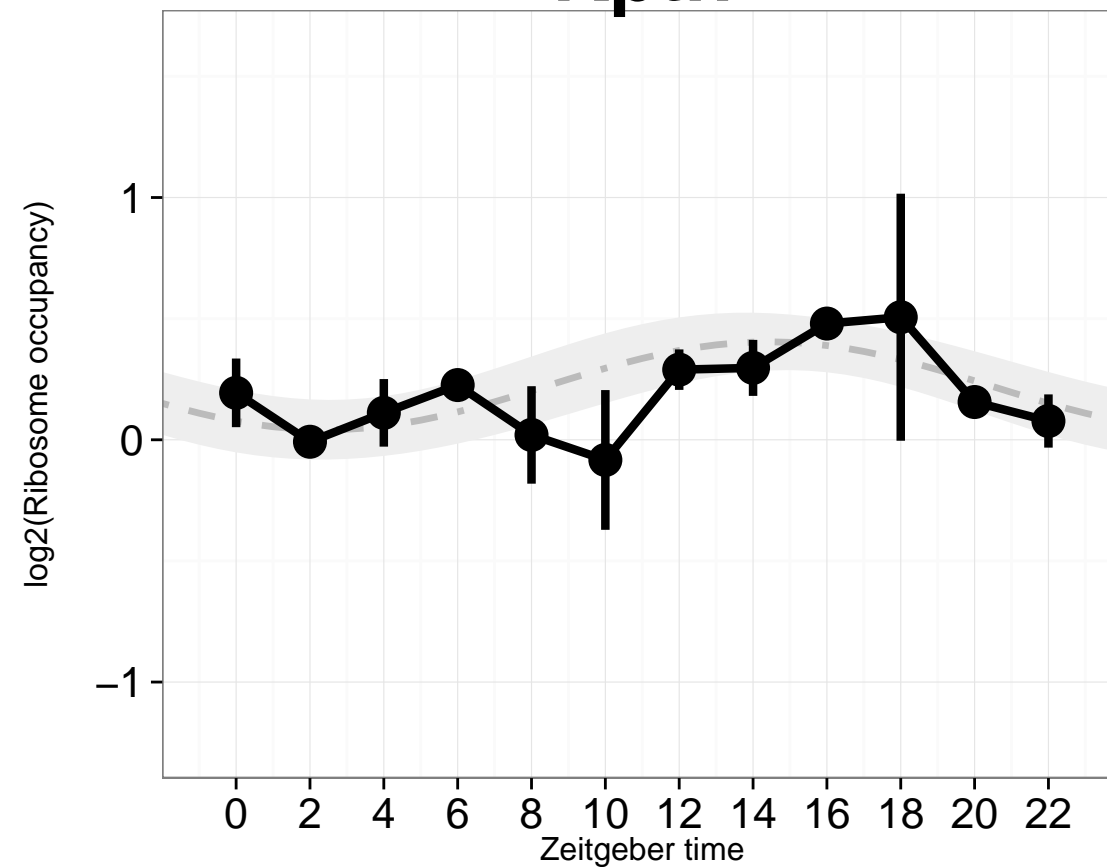

Supplement: SuppDataset_1.zip [file Kptn_set_A.pdf › Supplemental Dataset 1/A-mRNA_nonrhyth_translation_nonrhyth/Kptn_set_A.pdf]

# Kras

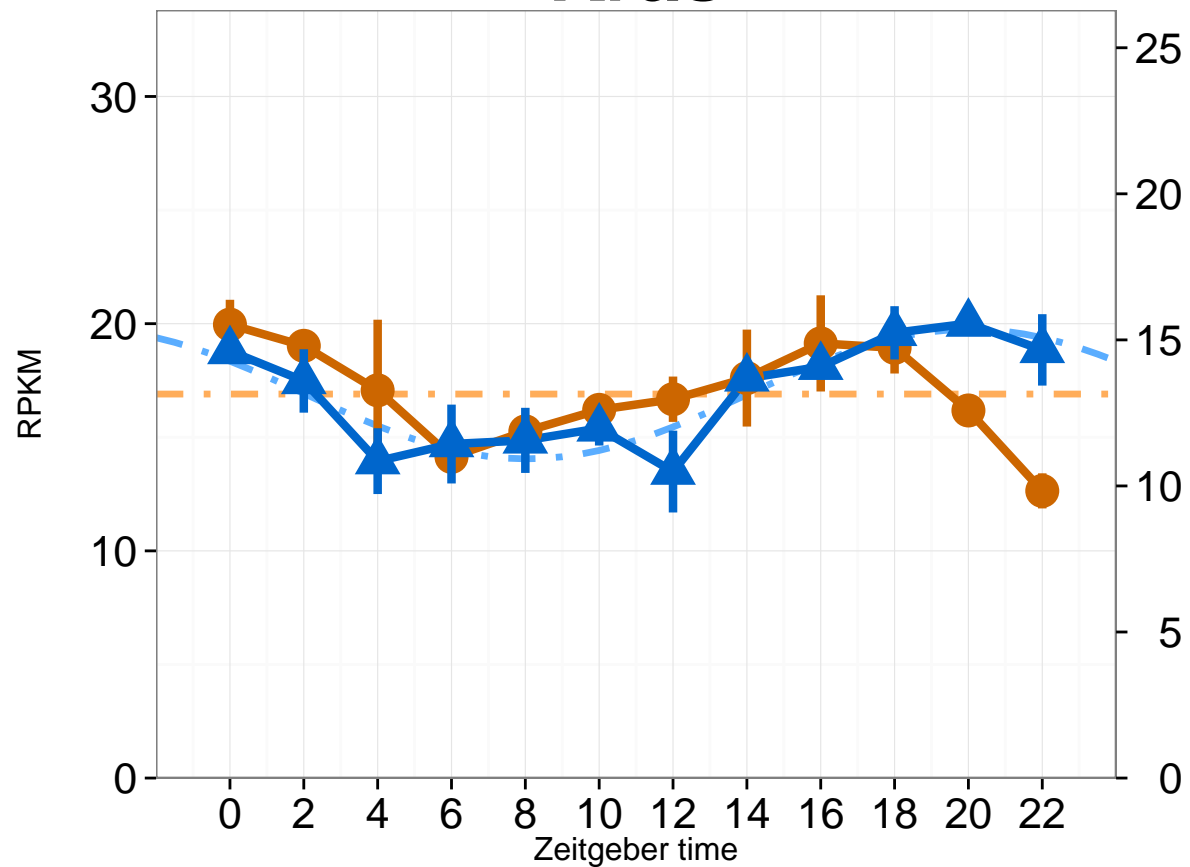

# Kras

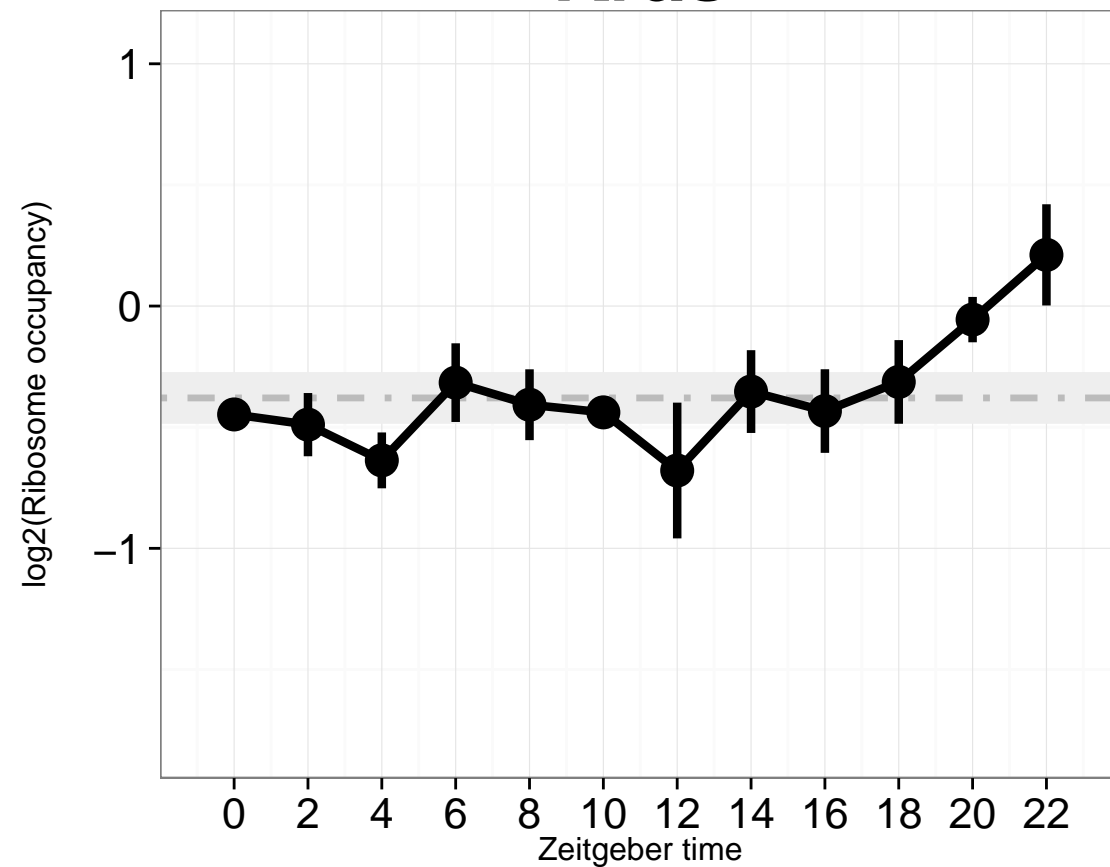

Supplement: SuppDataset_1.zip [file Kras_set_A.pdf › Supplemental Dataset 1/A-mRNA_nonrhyth_translation_nonrhyth/Kras_set_A.pdf]

# Krba1

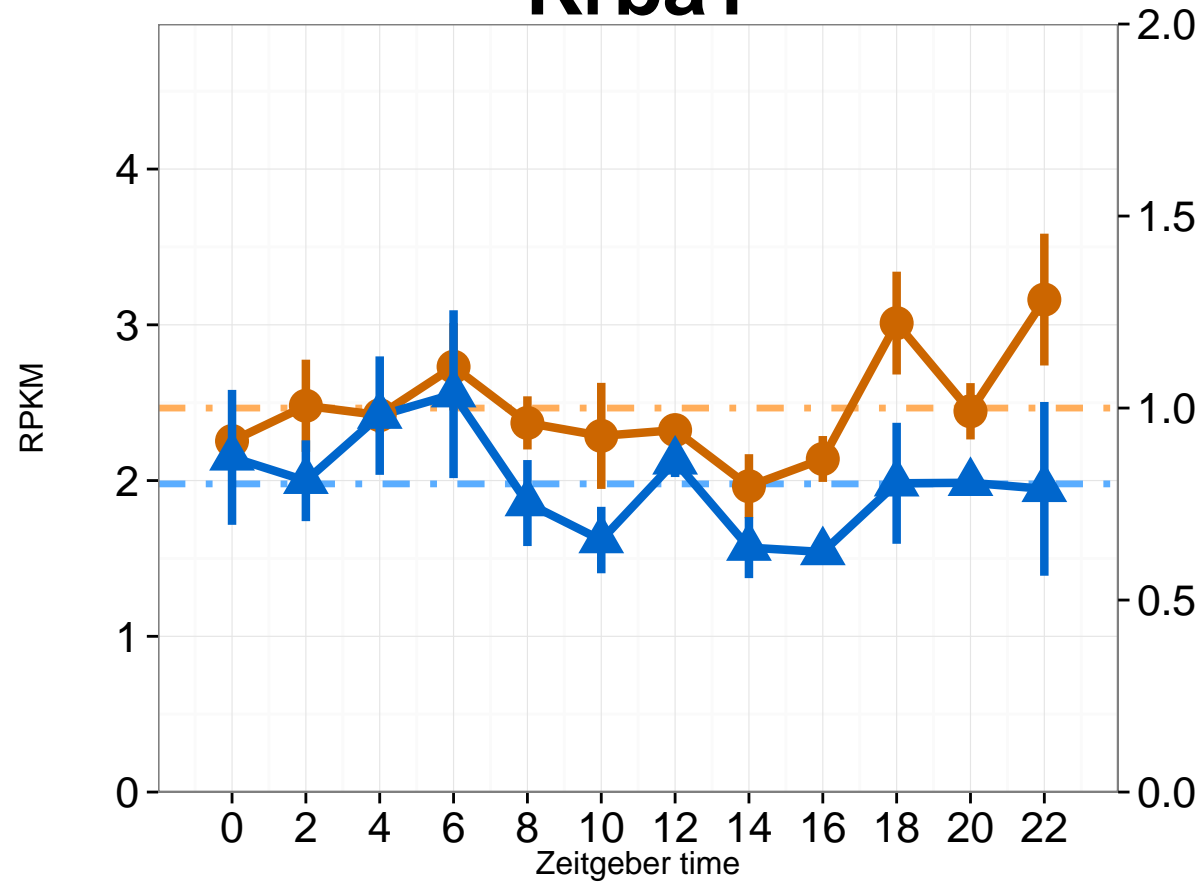

# Krba1

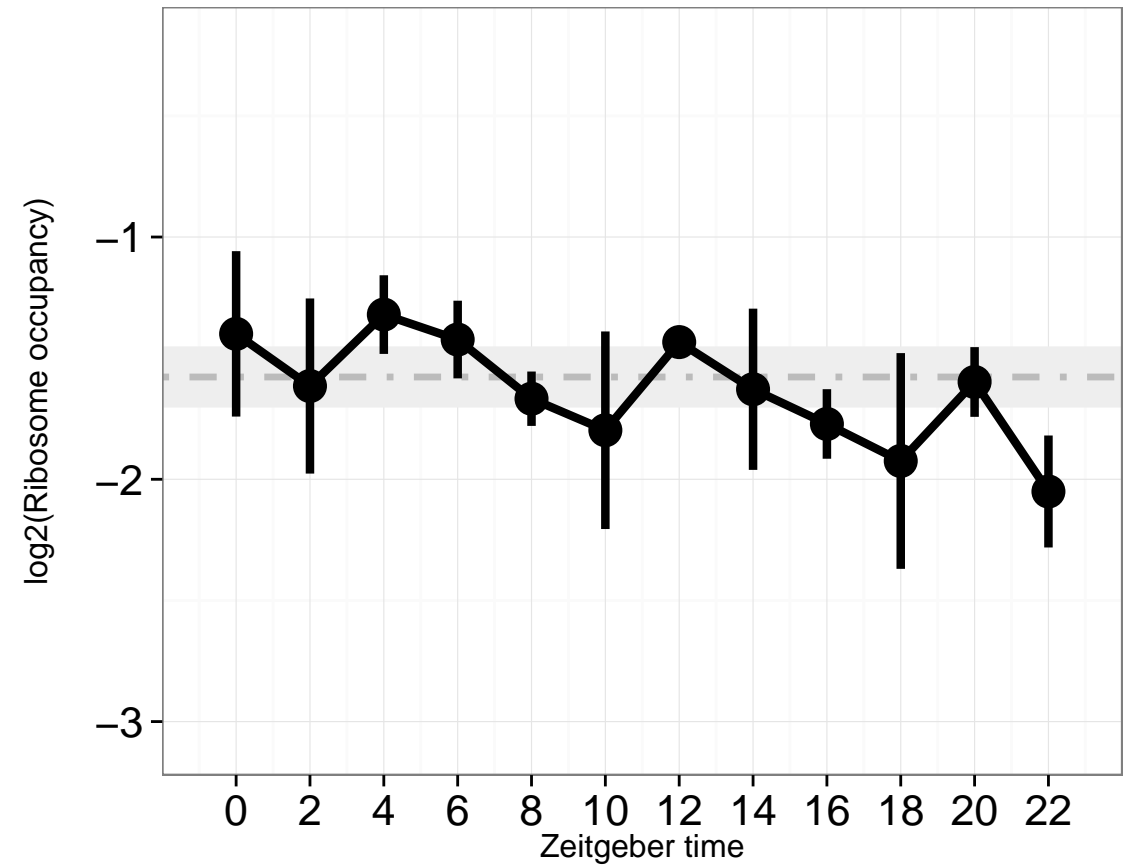

Supplement: SuppDataset_1.zip [file Krba1_set_A.pdf › Supplemental Dataset 1/A-mRNA_nonrhyth_translation_nonrhyth/Krba1_set_A.pdf]

## Krcc1

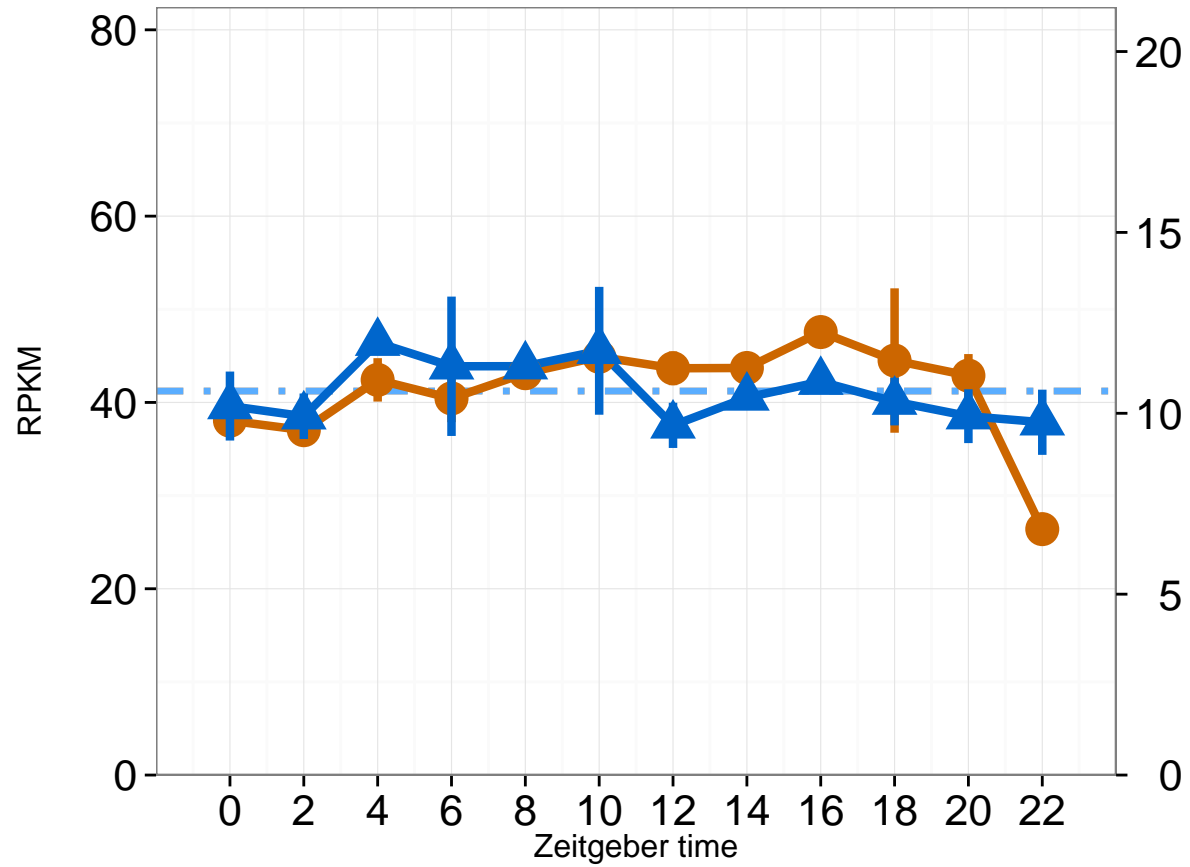

## Krcc1

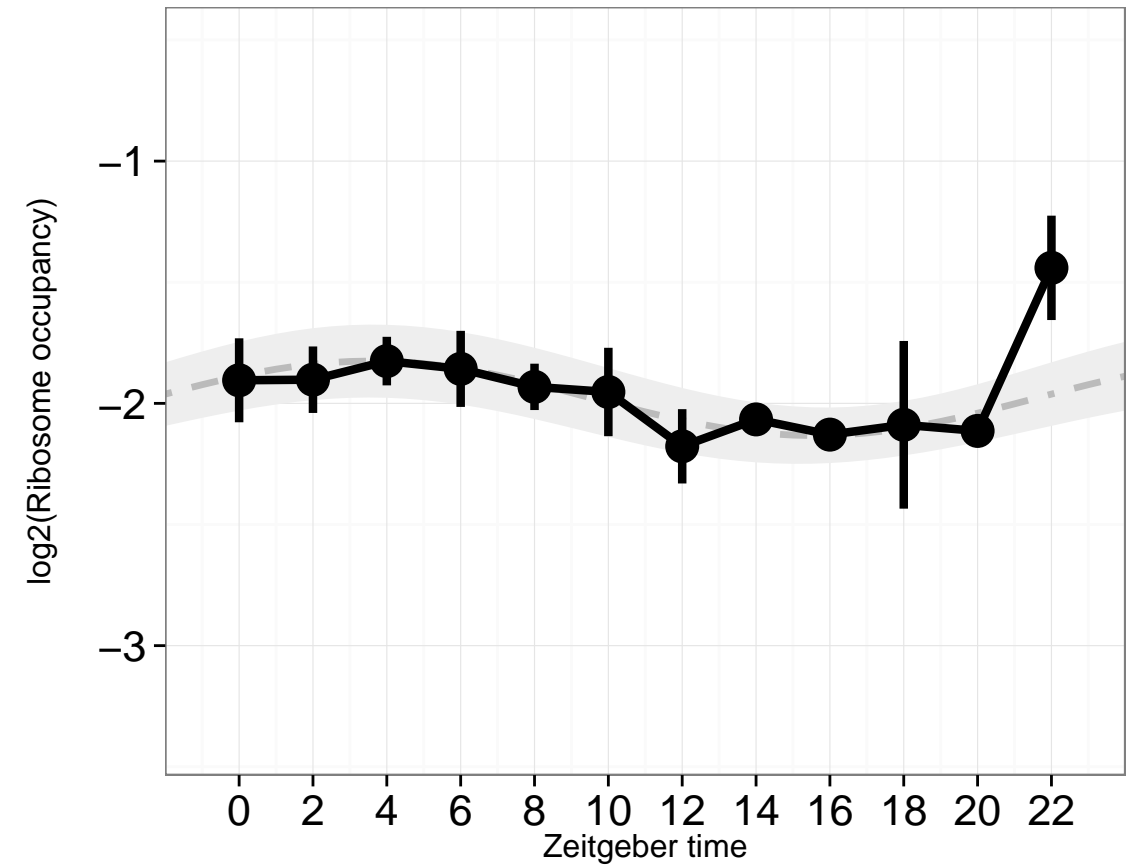

Supplement: SuppDataset_1.zip [file Krcc1_set_A.pdf › Supplemental Dataset 1/A-mRNA_nonrhyth_translation_nonrhyth/Krcc1_set_A.pdf]

# Kremen1

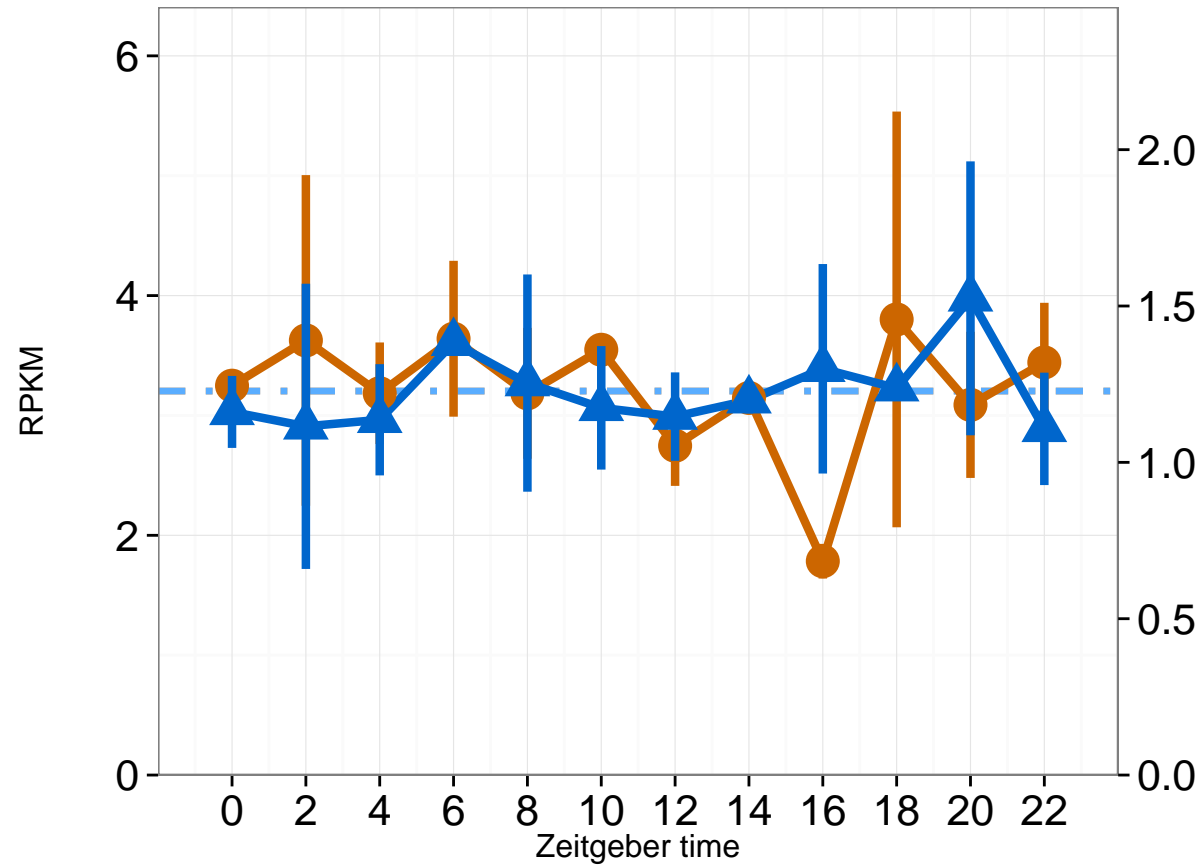

# Kremen1

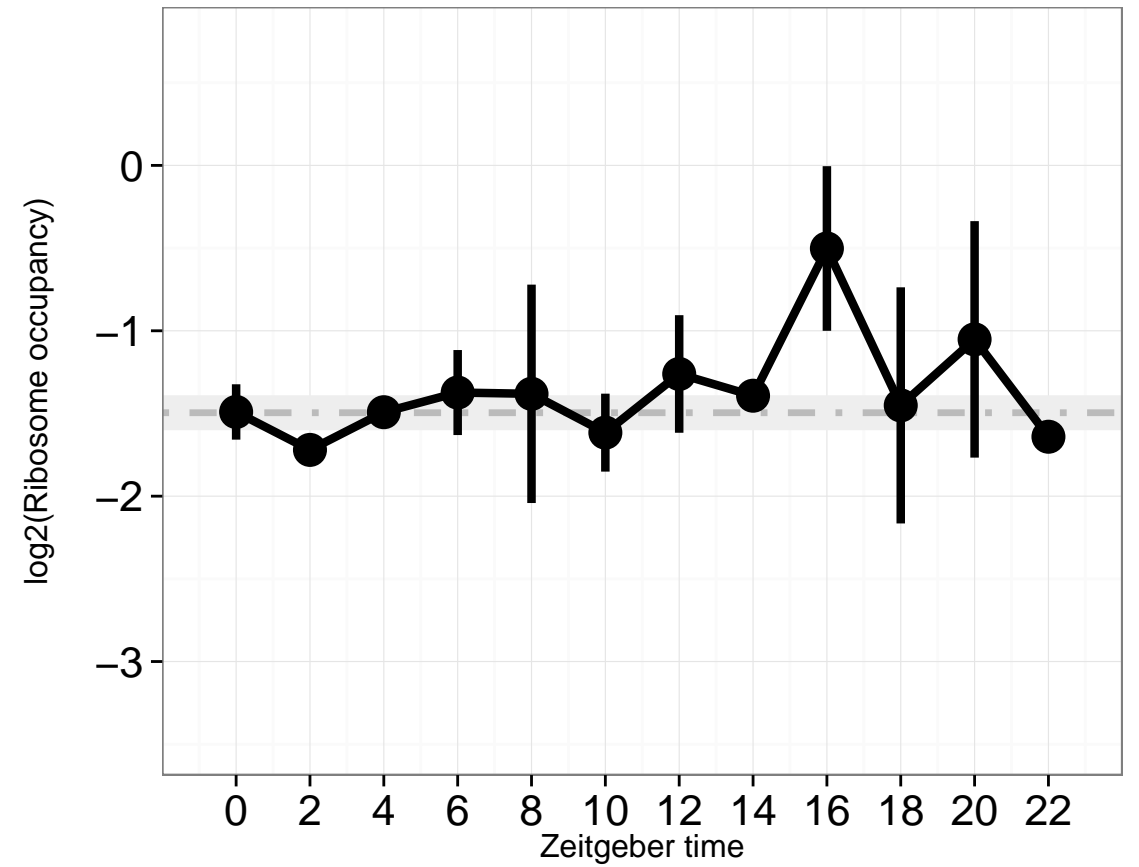

Supplement: SuppDataset_1.zip [file Kremen1_set_A.pdf › Supplemental Dataset 1/A-mRNA_nonrhyth_translation_nonrhyth/Kremen1_set_A.pdf]

## Kri1

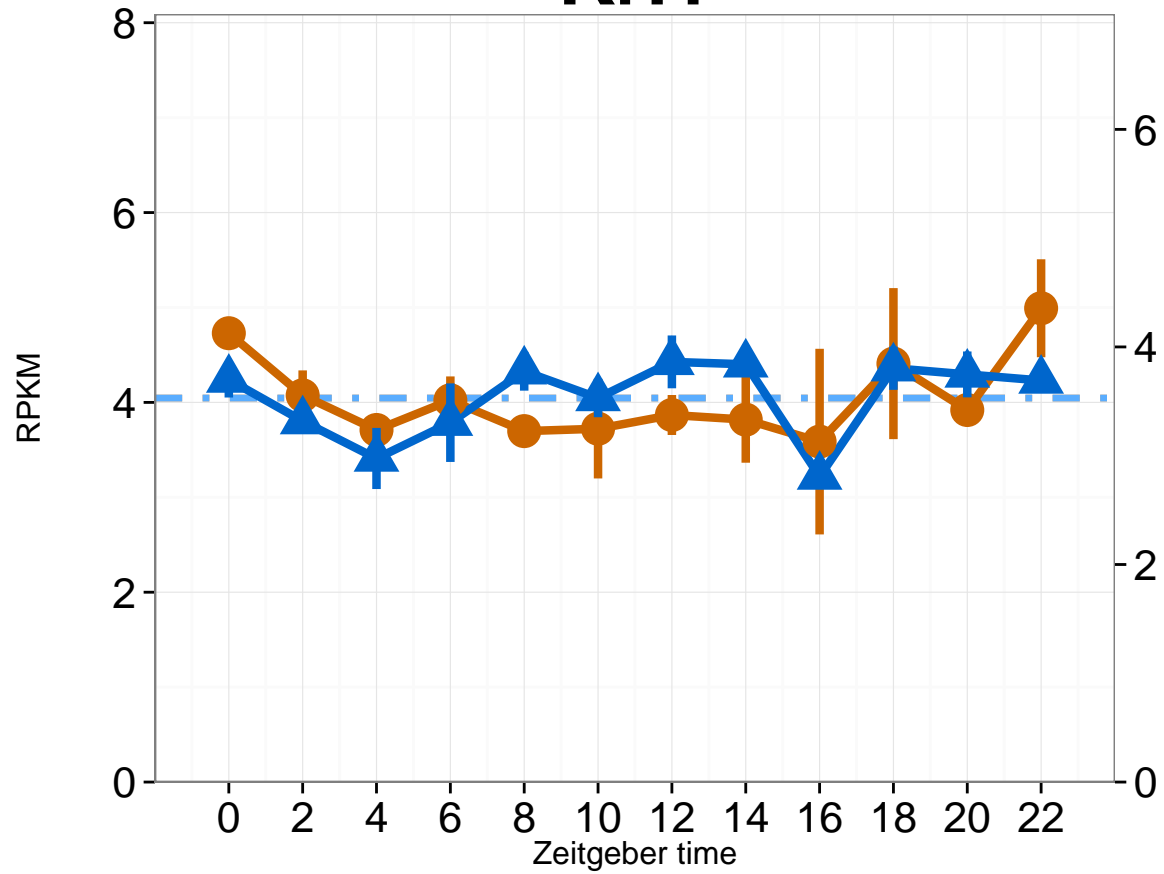

## Kri1

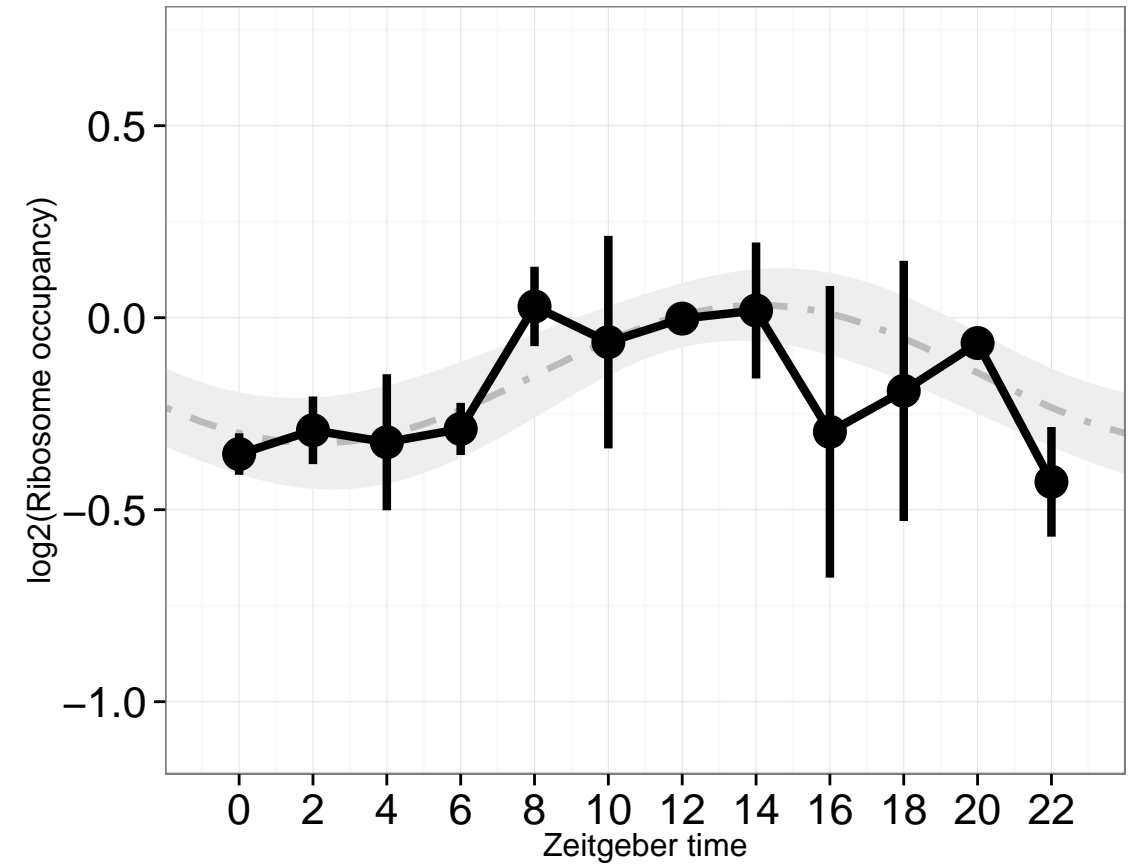

Supplement: SuppDataset_1.zip [file Kri1_set_A.pdf › Supplemental Dataset 1/A-mRNA_nonrhyth_translation_nonrhyth/Kri1_set_A.pdf]

## Krit1

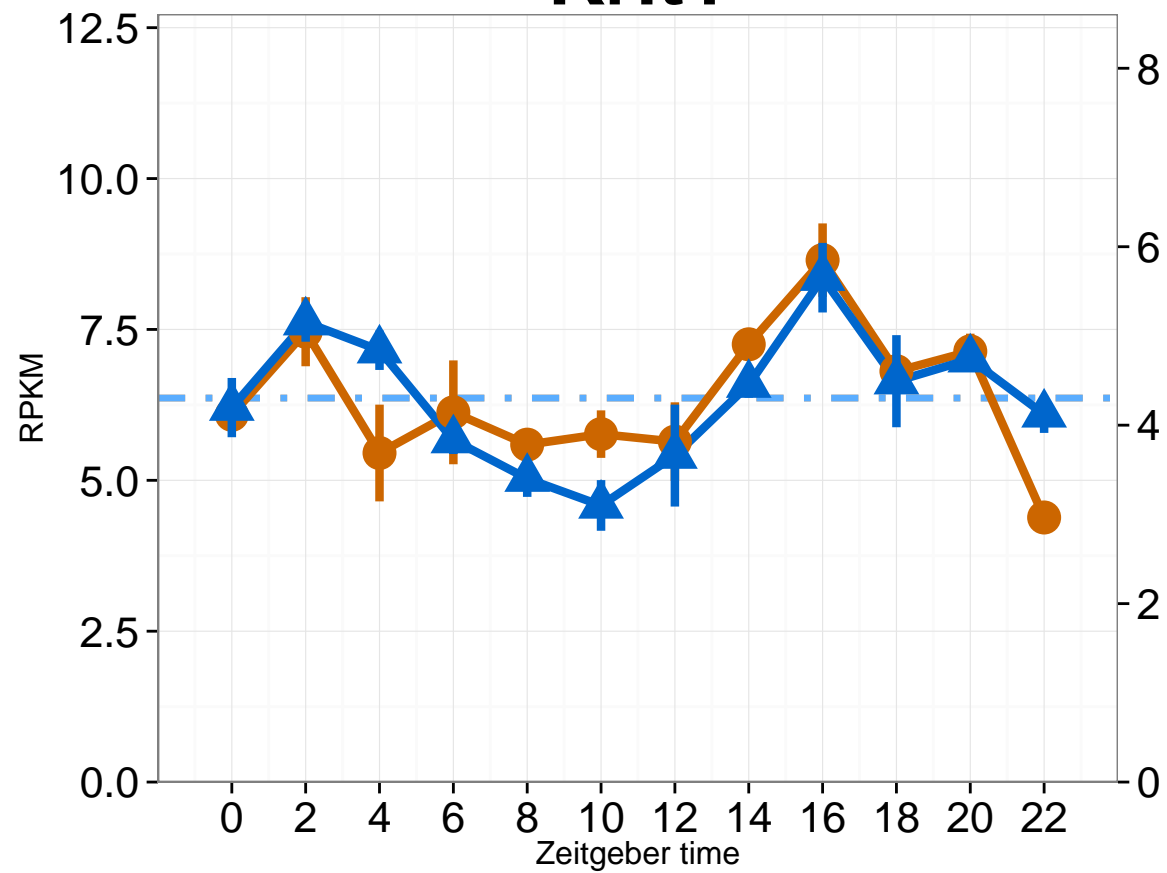

## Krit1

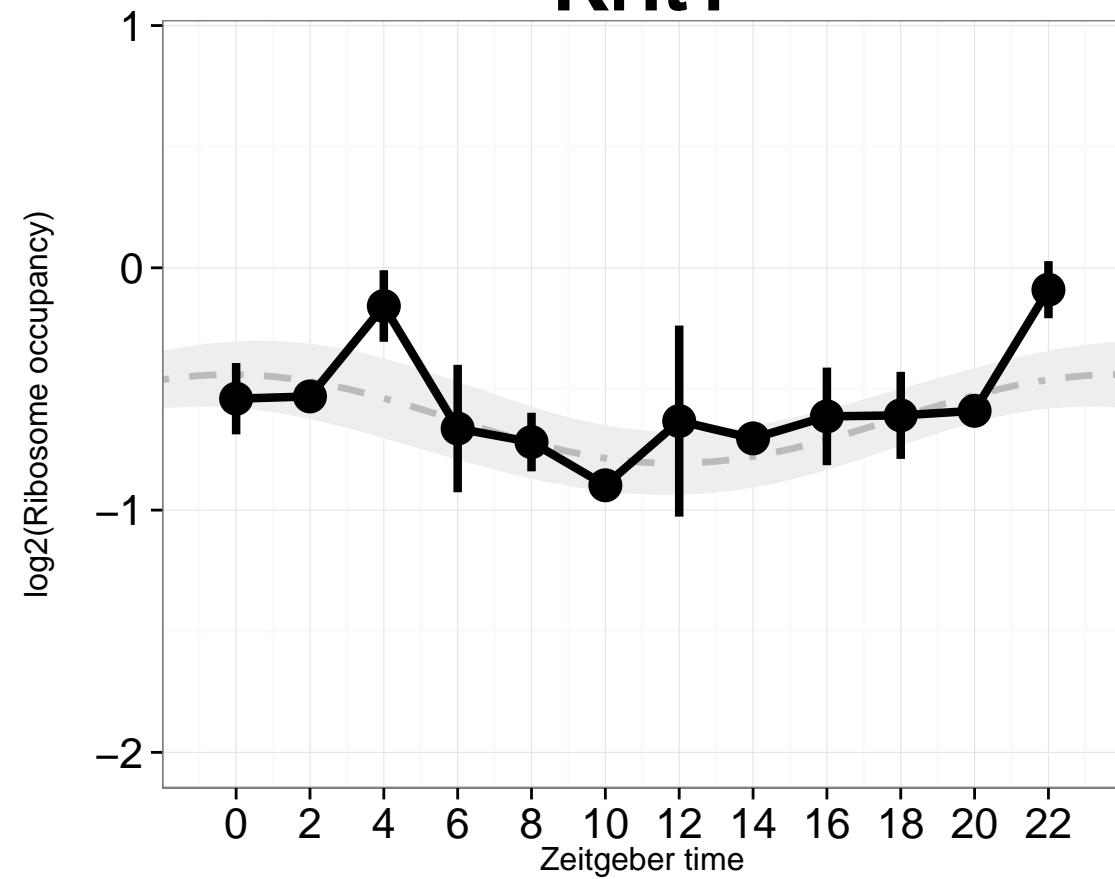

Supplement: SuppDataset_1.zip [file Krit1_set_A.pdf › Supplemental Dataset 1/A-mRNA_nonrhyth_translation_nonrhyth/Krit1_set_A.pdf]

## Krr1

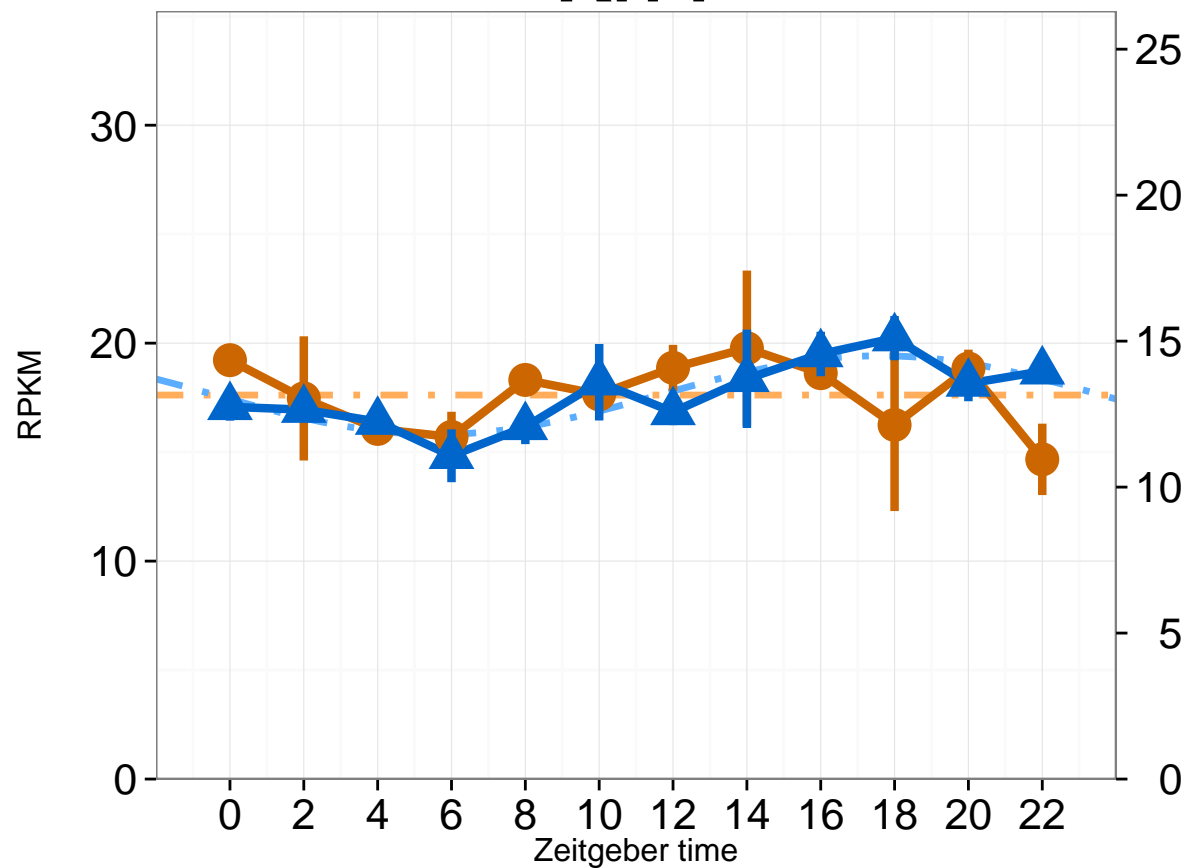

## Krr1

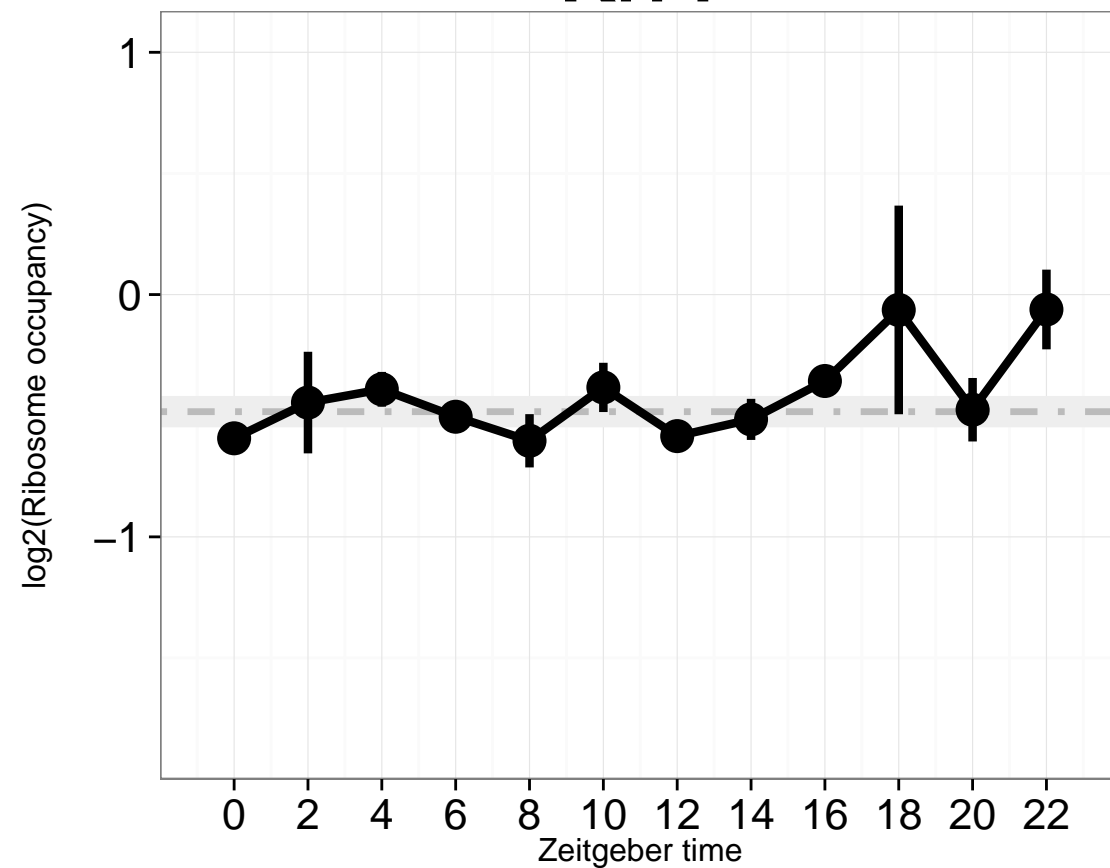

Supplement: SuppDataset_1.zip [file Krr1_set_A.pdf › Supplemental Dataset 1/A-mRNA_nonrhyth_translation_nonrhyth/Krr1_set_A.pdf]

# Krt23

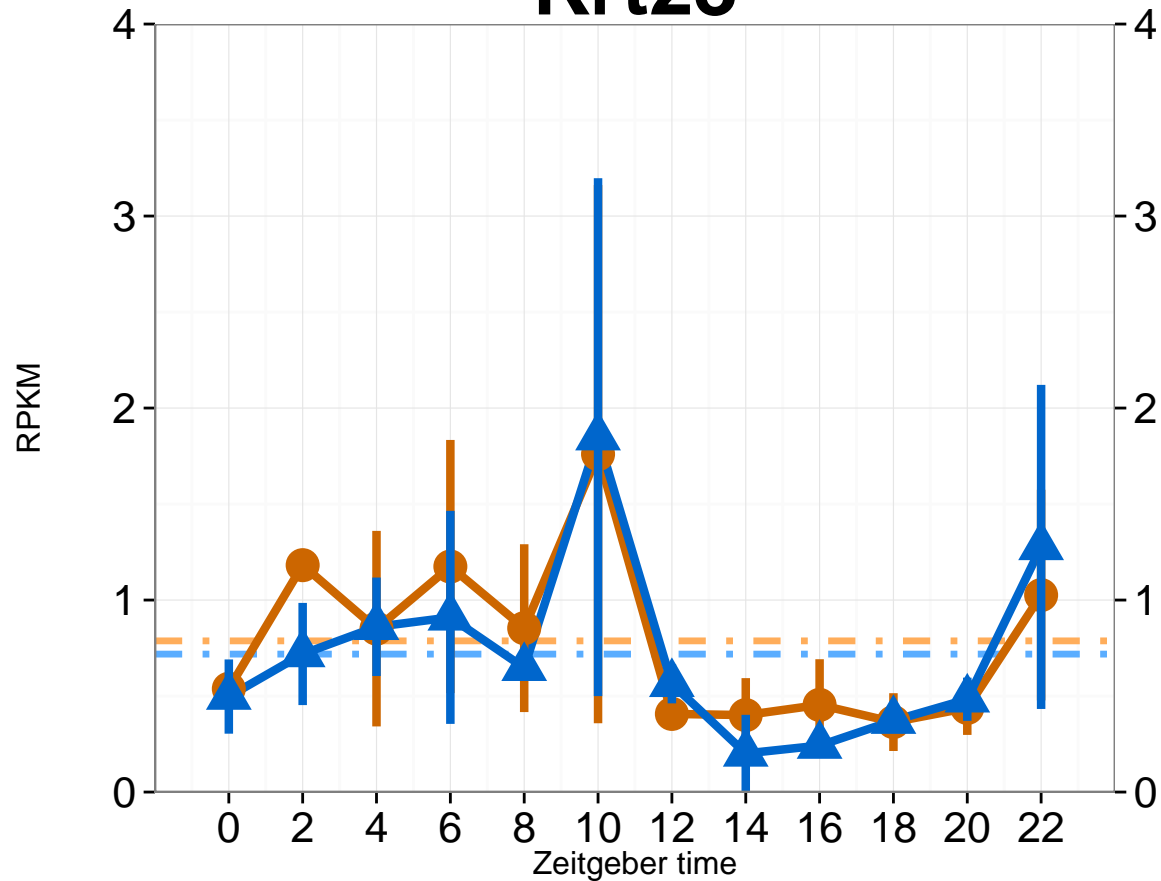

# Krt23

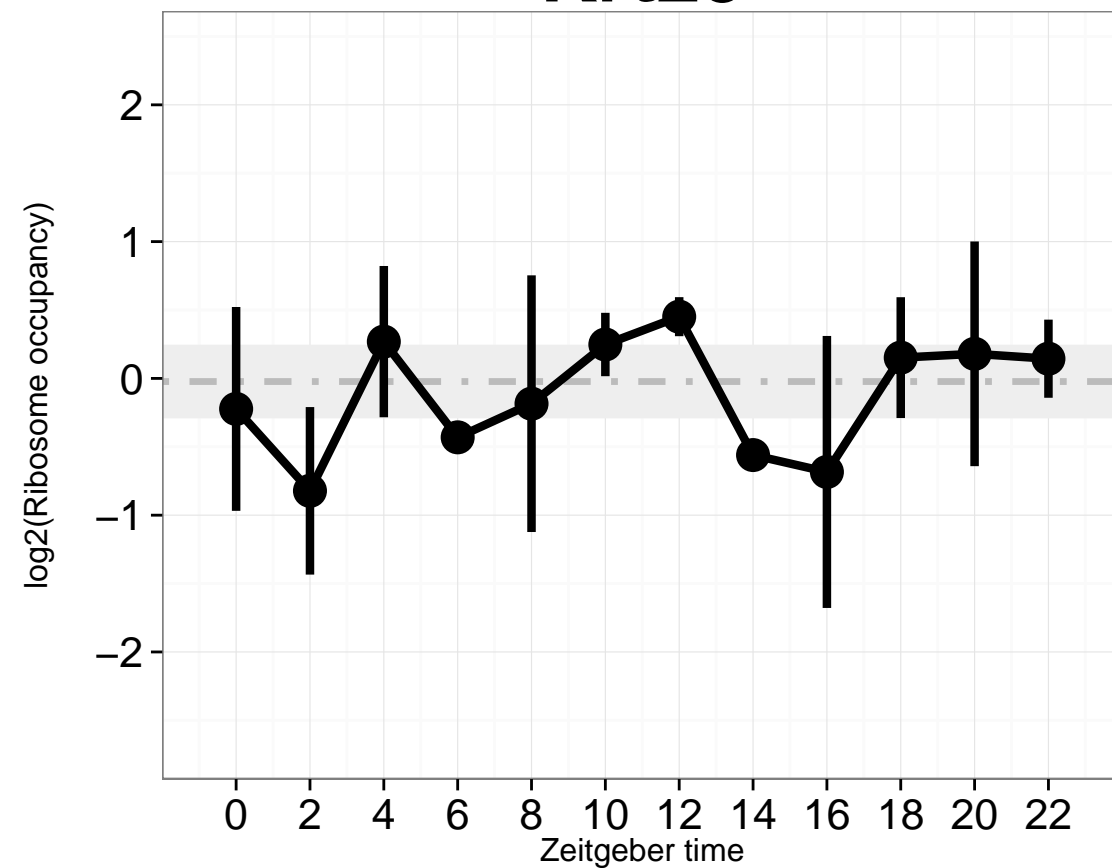

Supplement: SuppDataset_1.zip [file Krt23_set_A.pdf › Supplemental Dataset 1/A-mRNA_nonrhyth_translation_nonrhyth/Krt23_set_A.pdf]

# Krt8

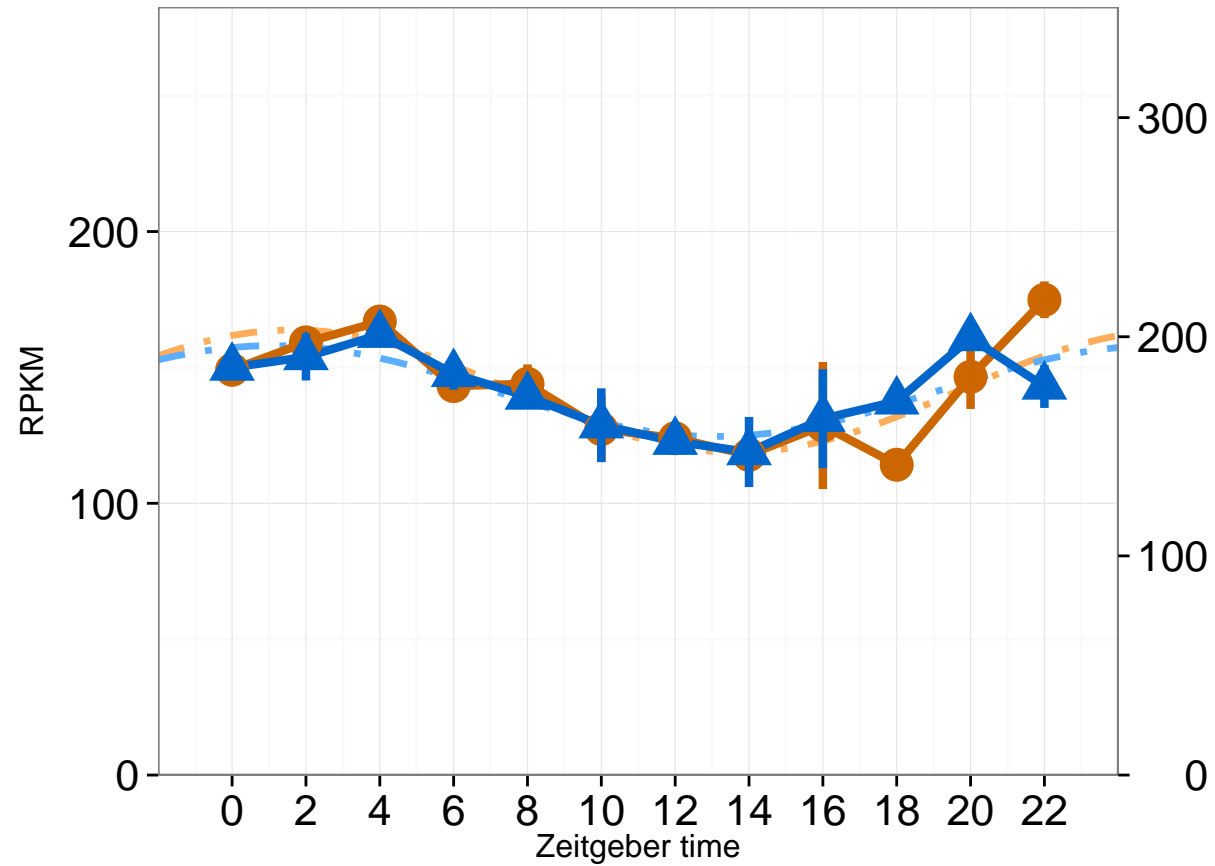

# Krt8

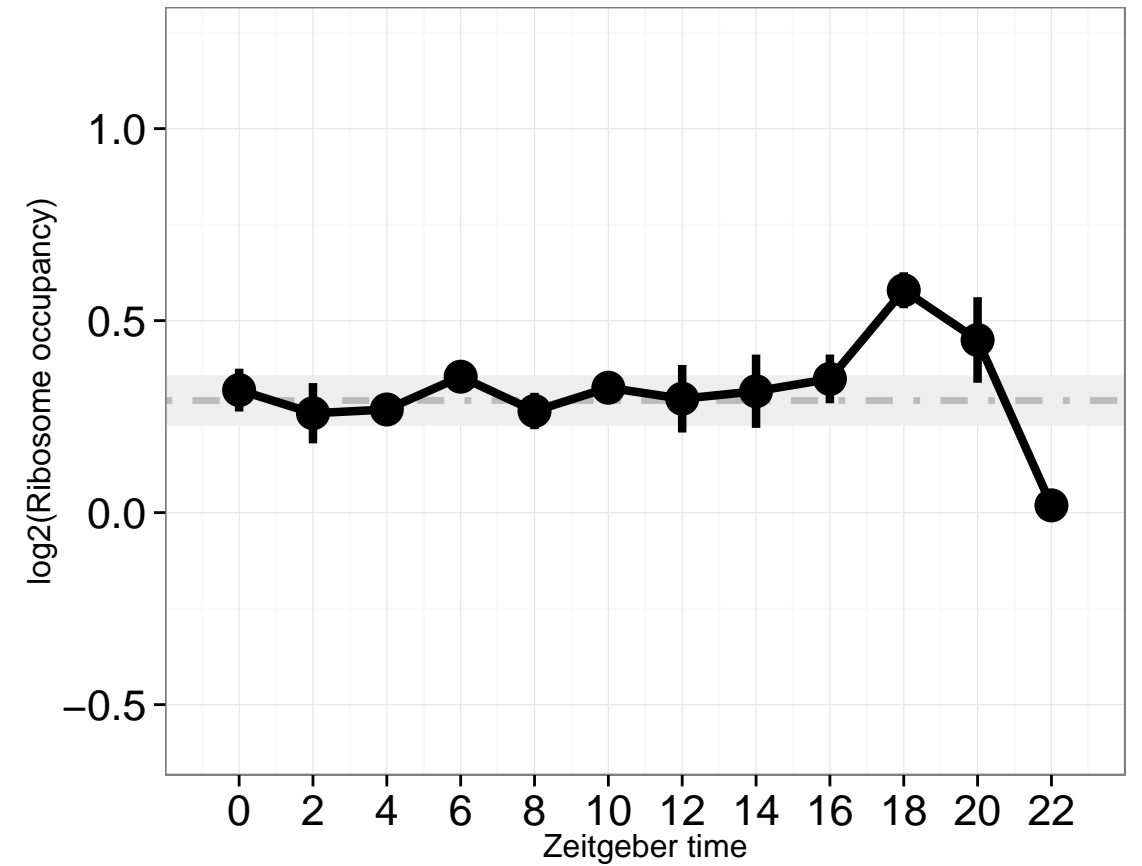

Supplement: SuppDataset_1.zip [file Krt8_set_A.pdf › Supplemental Dataset 1/A-mRNA_nonrhyth_translation_nonrhyth/Krt8_set_A.pdf]

# Krtcap2

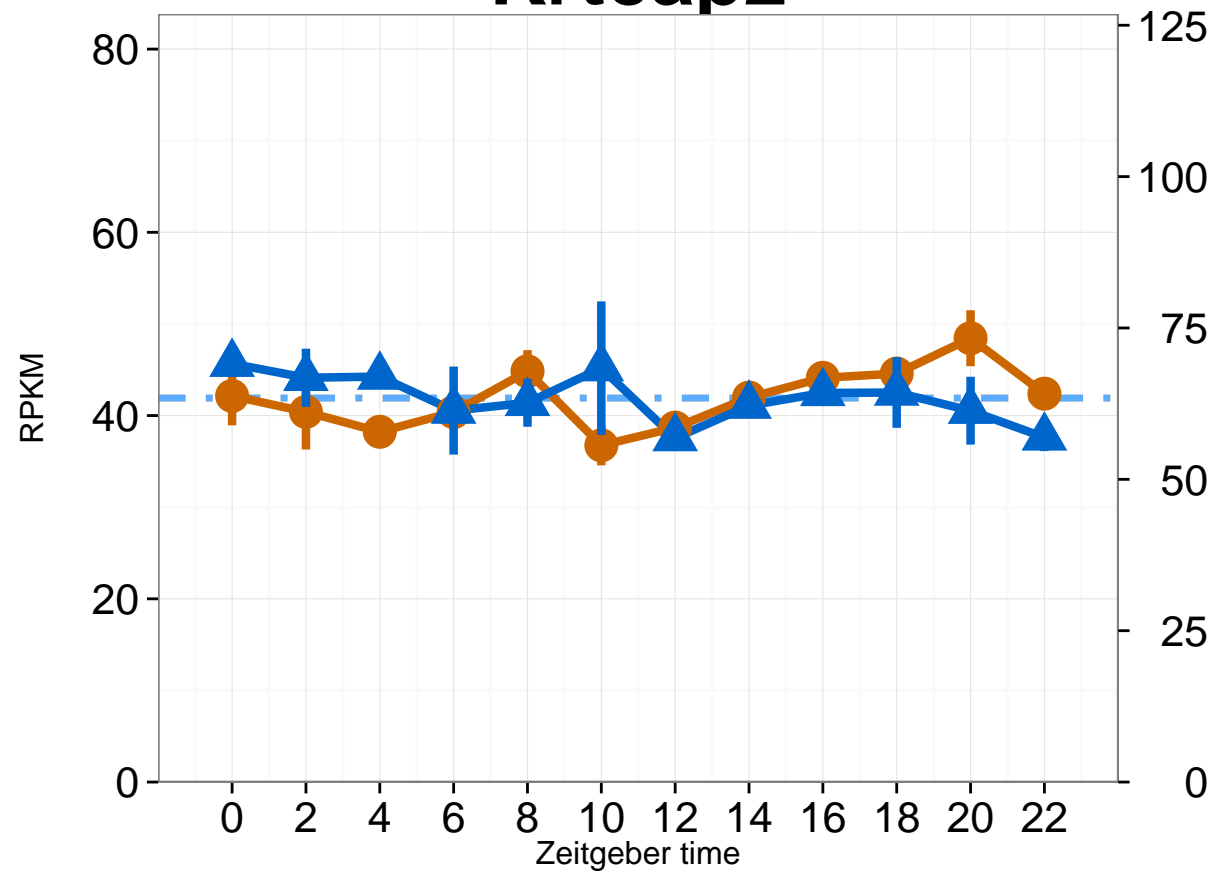

# Krtcap2

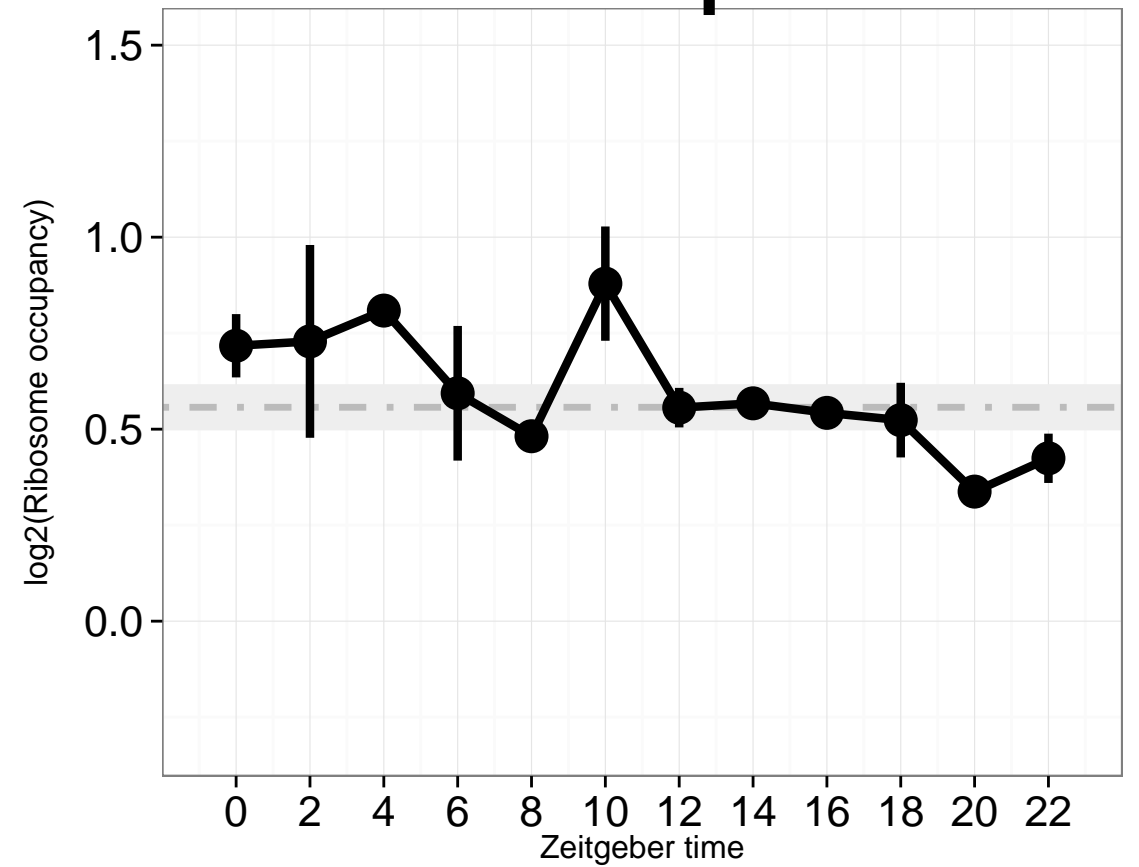

Supplement: SuppDataset_1.zip [file Krtcap2_set_A.pdf › Supplemental Dataset 1/A-mRNA_nonrhyth_translation_nonrhyth/Krtcap2_set_A.pdf]

# Ksr1

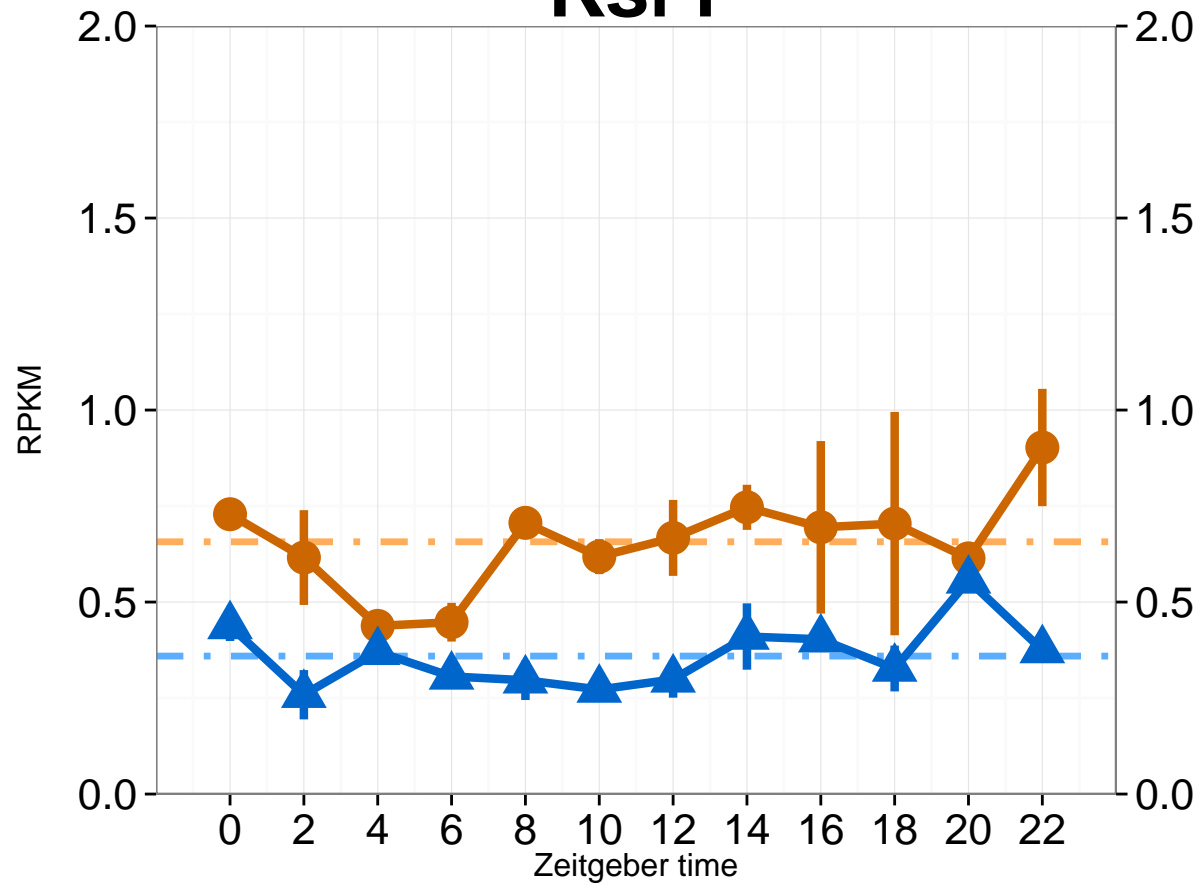

# Ksr1

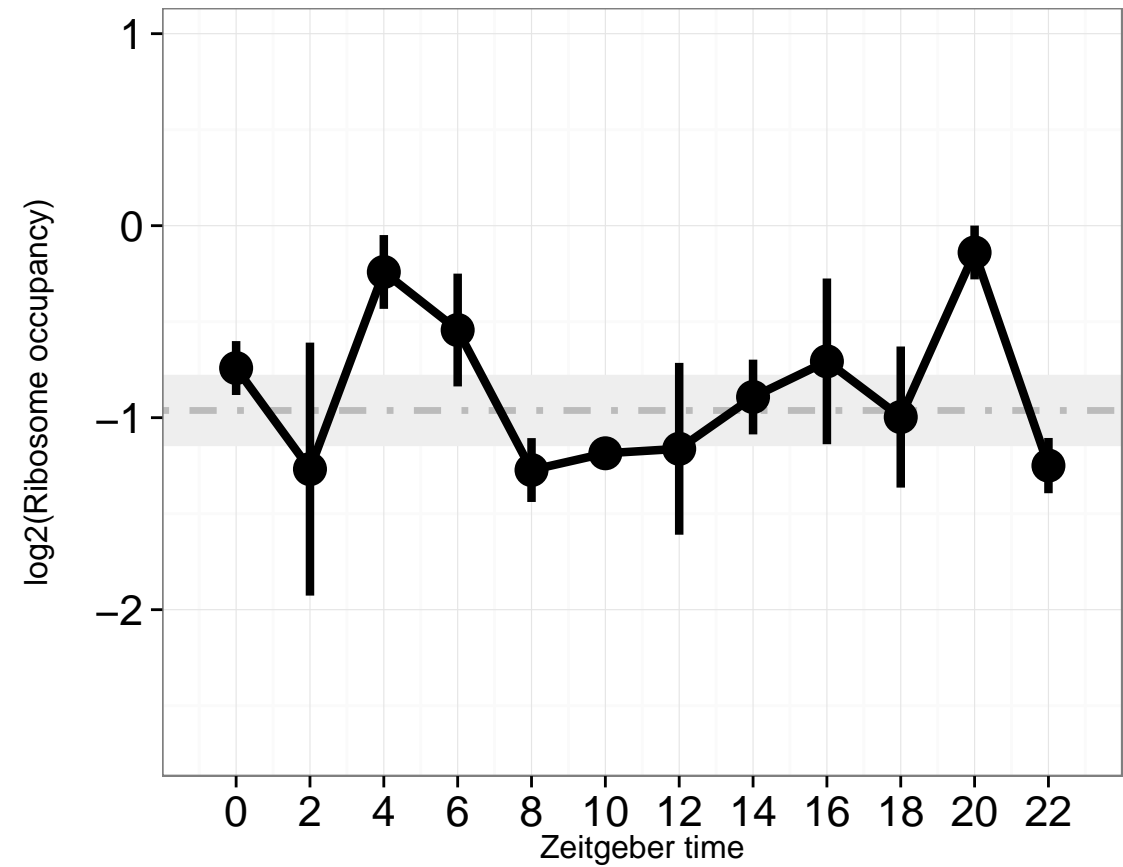

Supplement: SuppDataset_1.zip [file Ksr1_set_A.pdf › Supplemental Dataset 1/A-mRNA_nonrhyth_translation_nonrhyth/Ksr1_set_A.pdf]

## Kti12

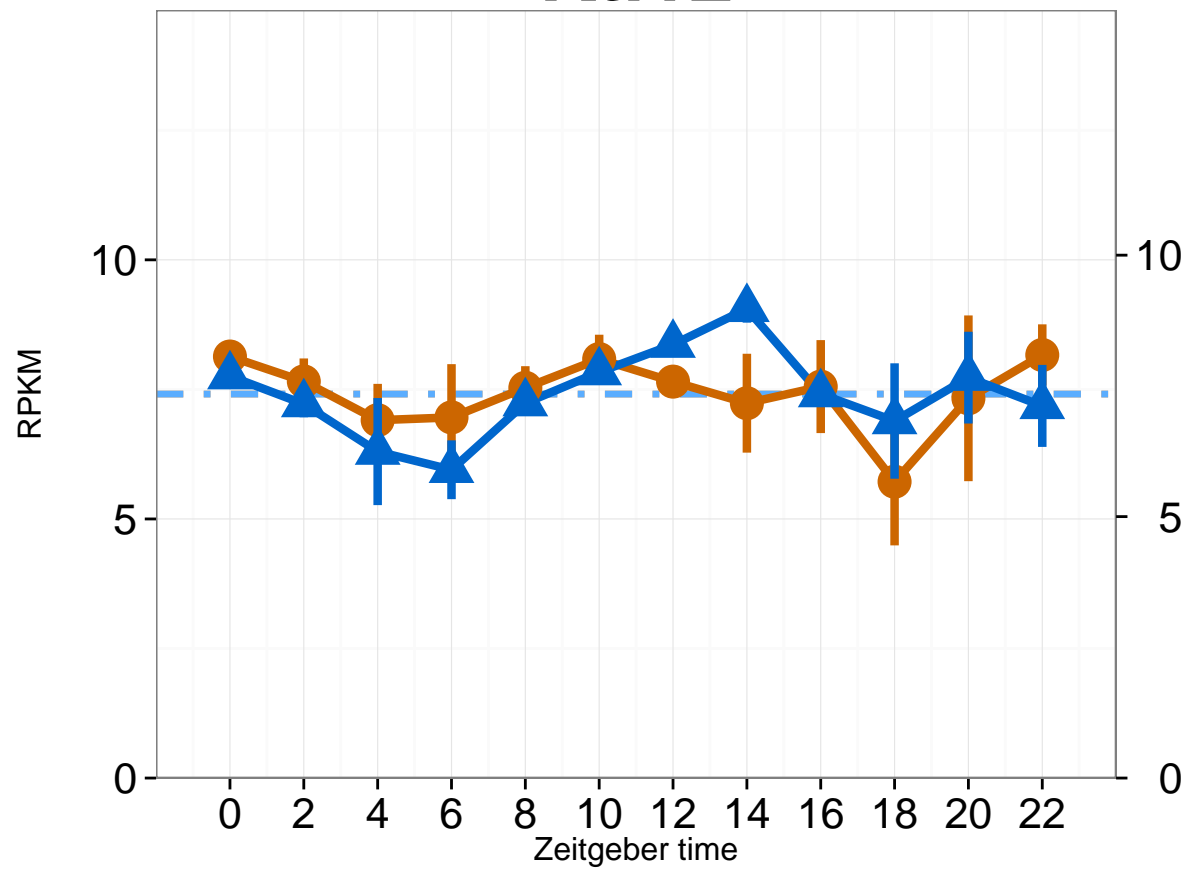

## Kti12

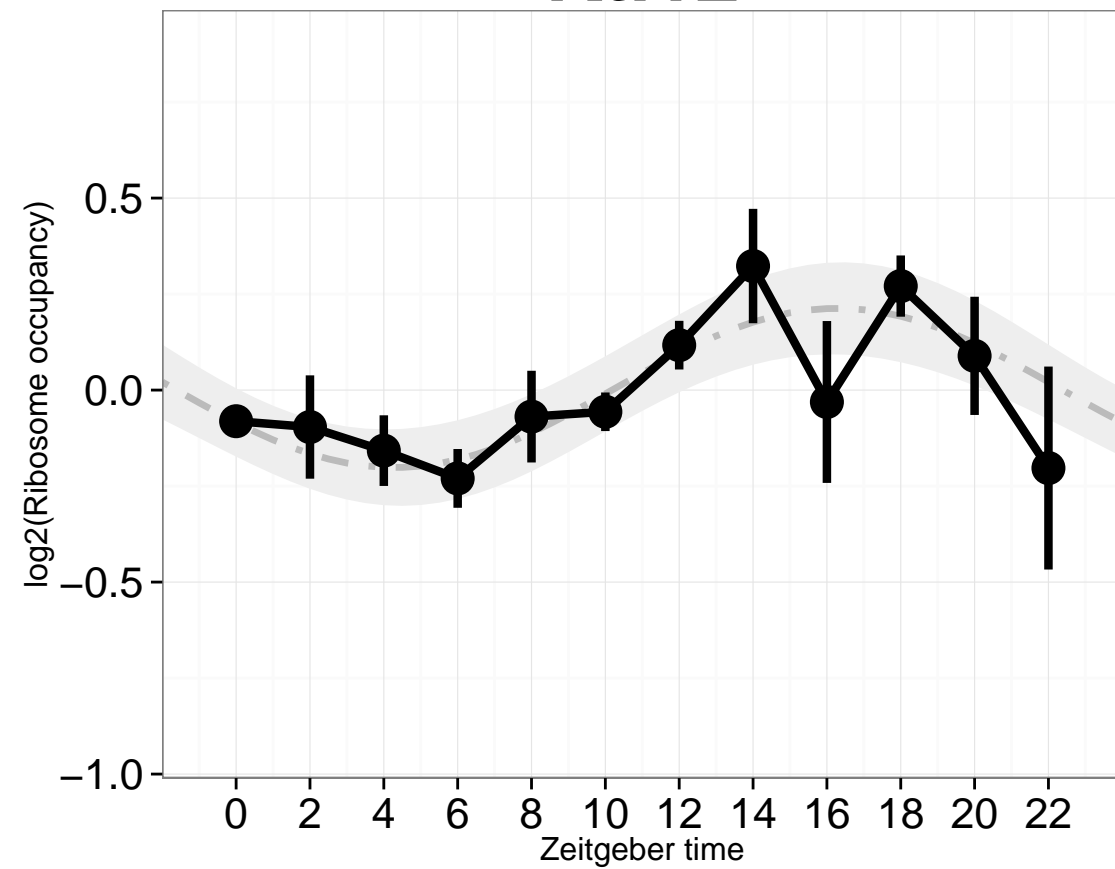

Supplement: SuppDataset_1.zip [file Kti12_set_A.pdf › Supplemental Dataset 1/A-mRNA_nonrhyth_translation_nonrhyth/Kti12_set_A.pdf]

## Kxd1

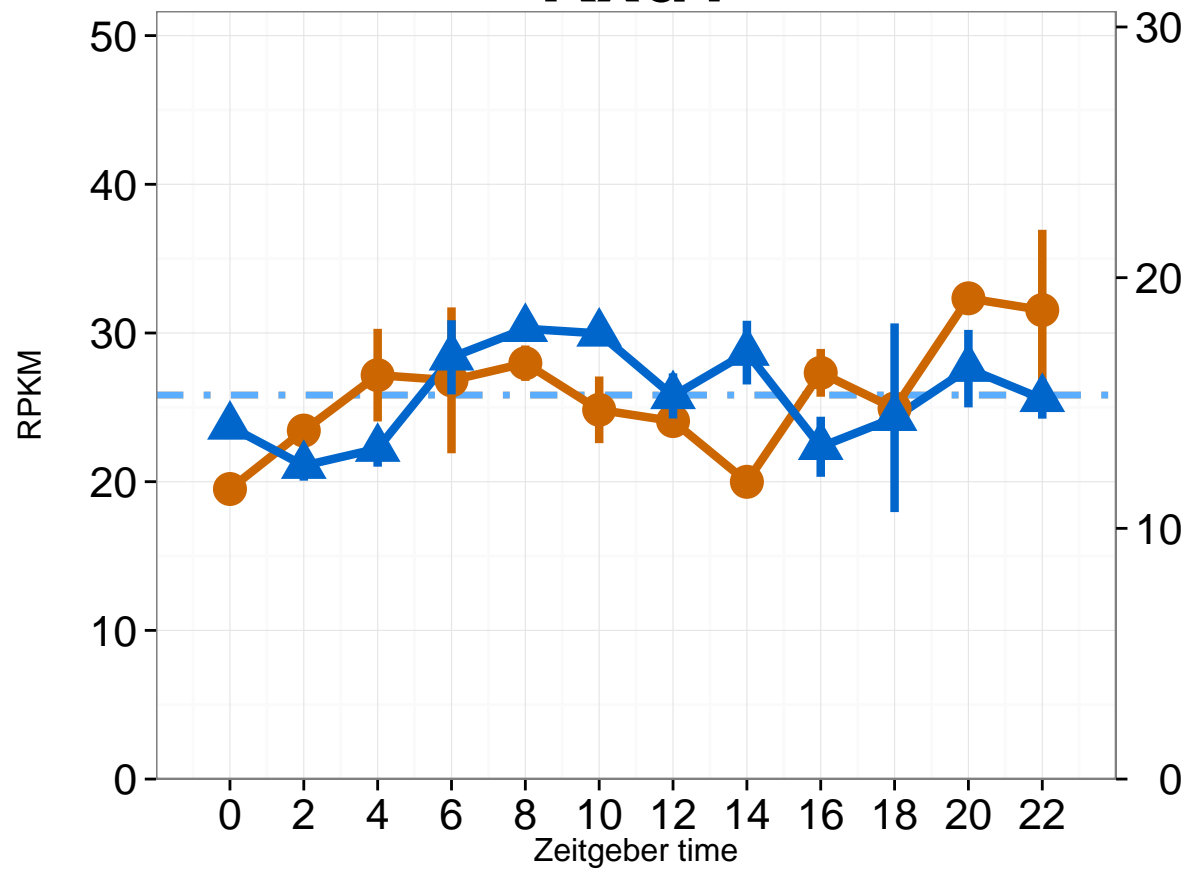

## Kxd1

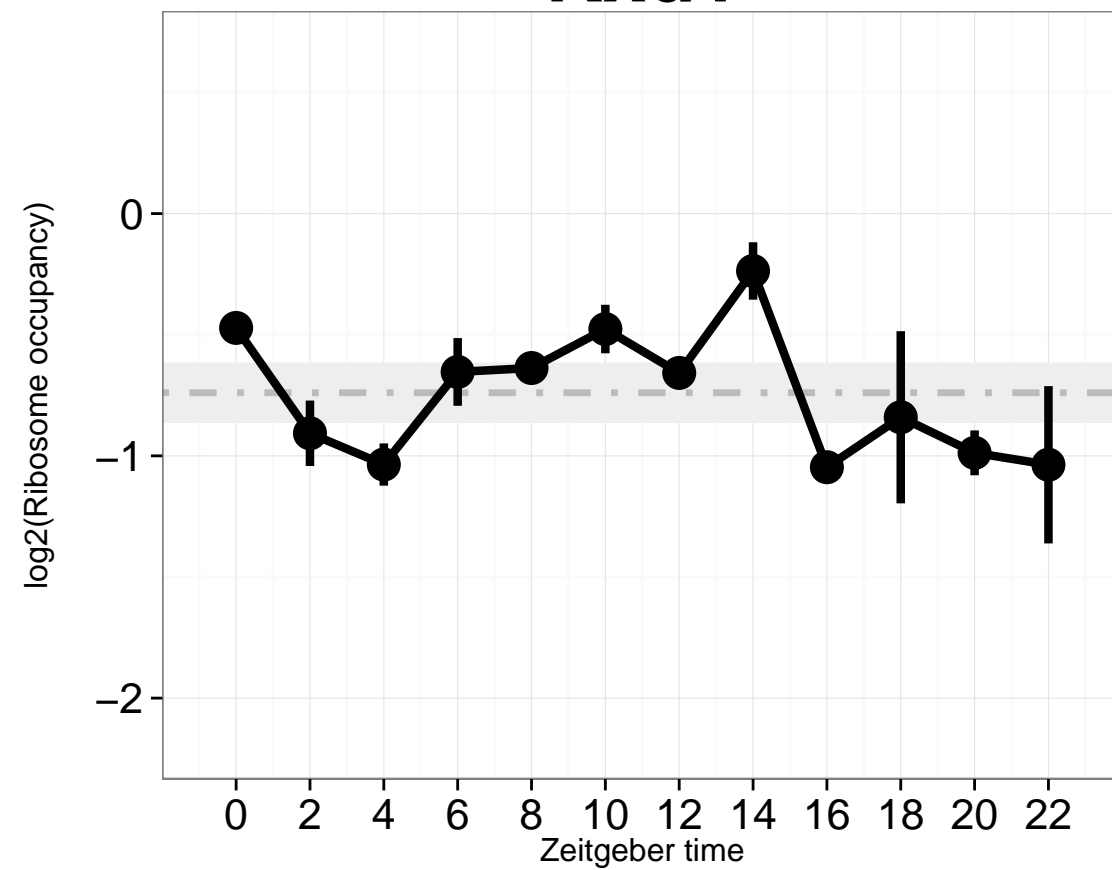

Supplement: SuppDataset_1.zip [file Kxd1_set_A.pdf › Supplemental Dataset 1/A-mRNA_nonrhyth_translation_nonrhyth/Kxd1_set_A.pdf]

# L2hgdh

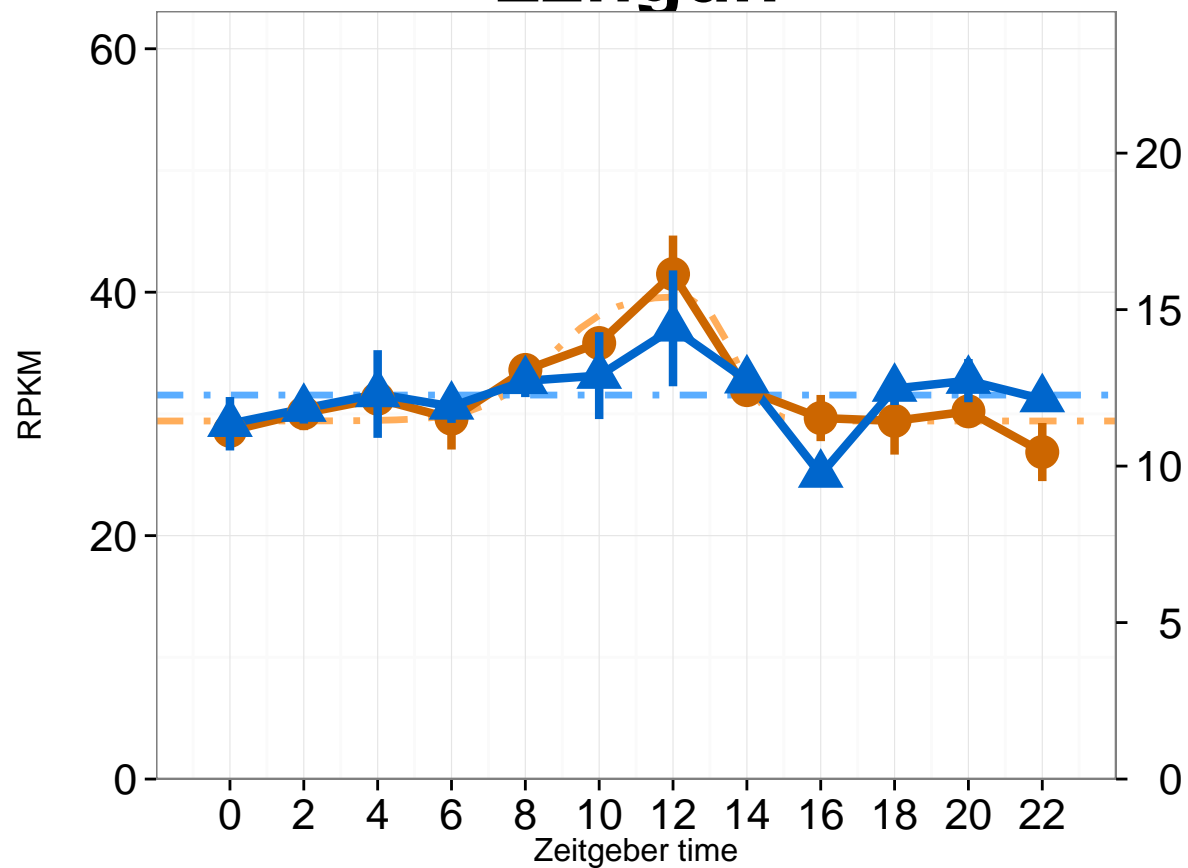

# L2hgdh

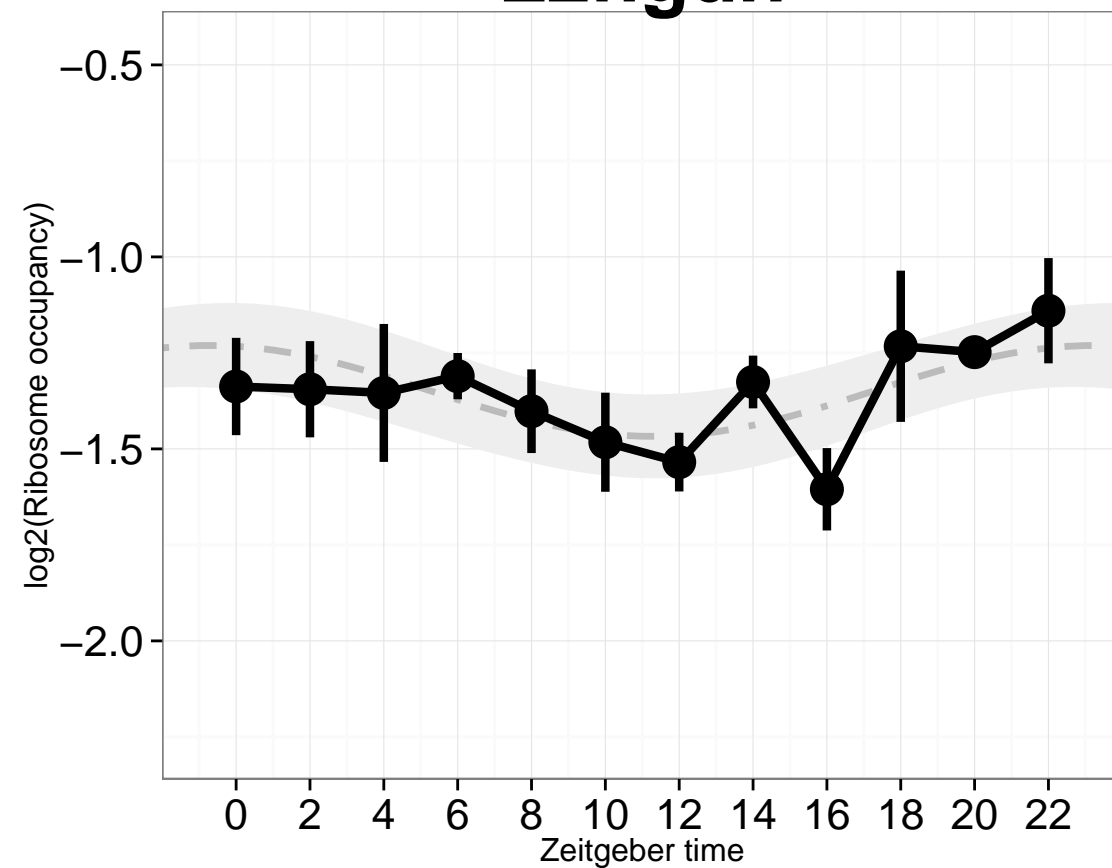

Supplement: SuppDataset_1.zip [file L2hgdh_set_A.pdf › Supplemental Dataset 1/A-mRNA_nonrhyth_translation_nonrhyth/L2hgdh_set_A.pdf]

## L3hypdh

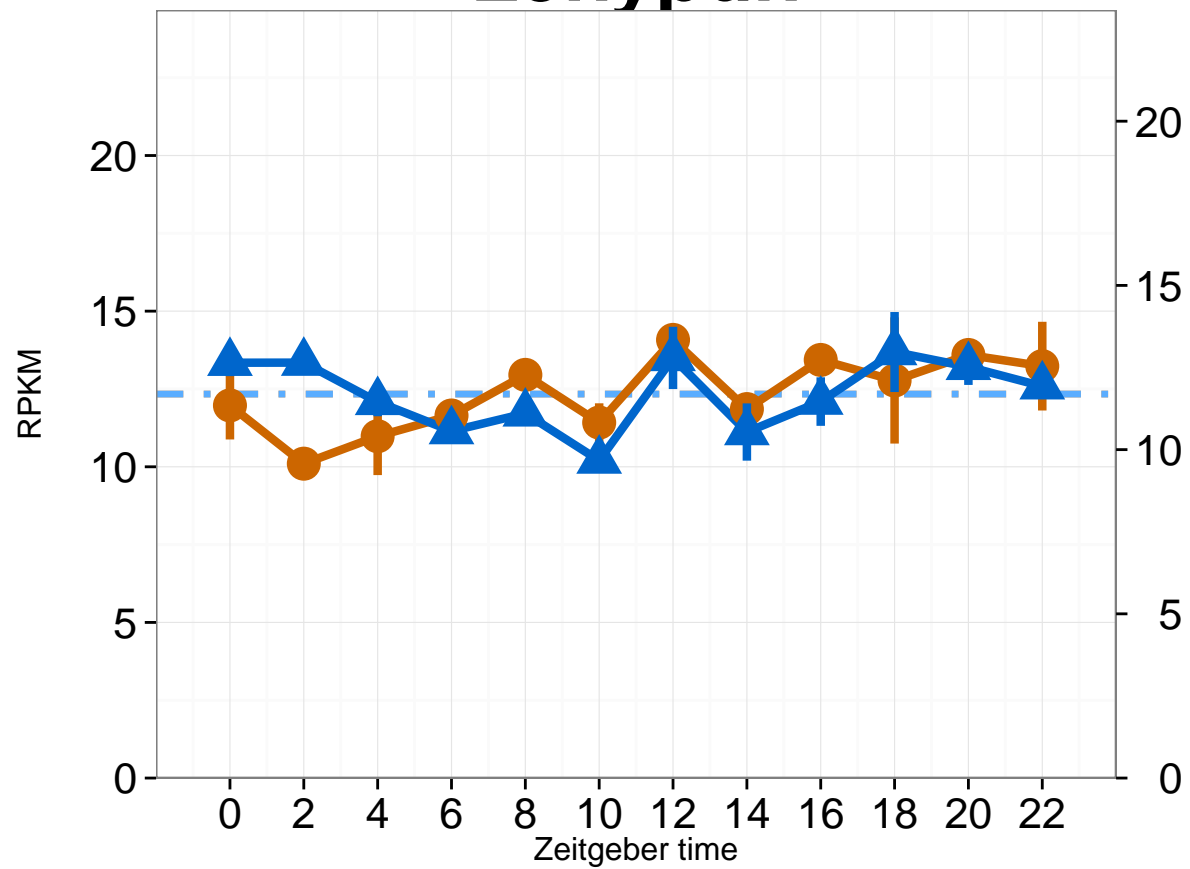

## L3hypdh

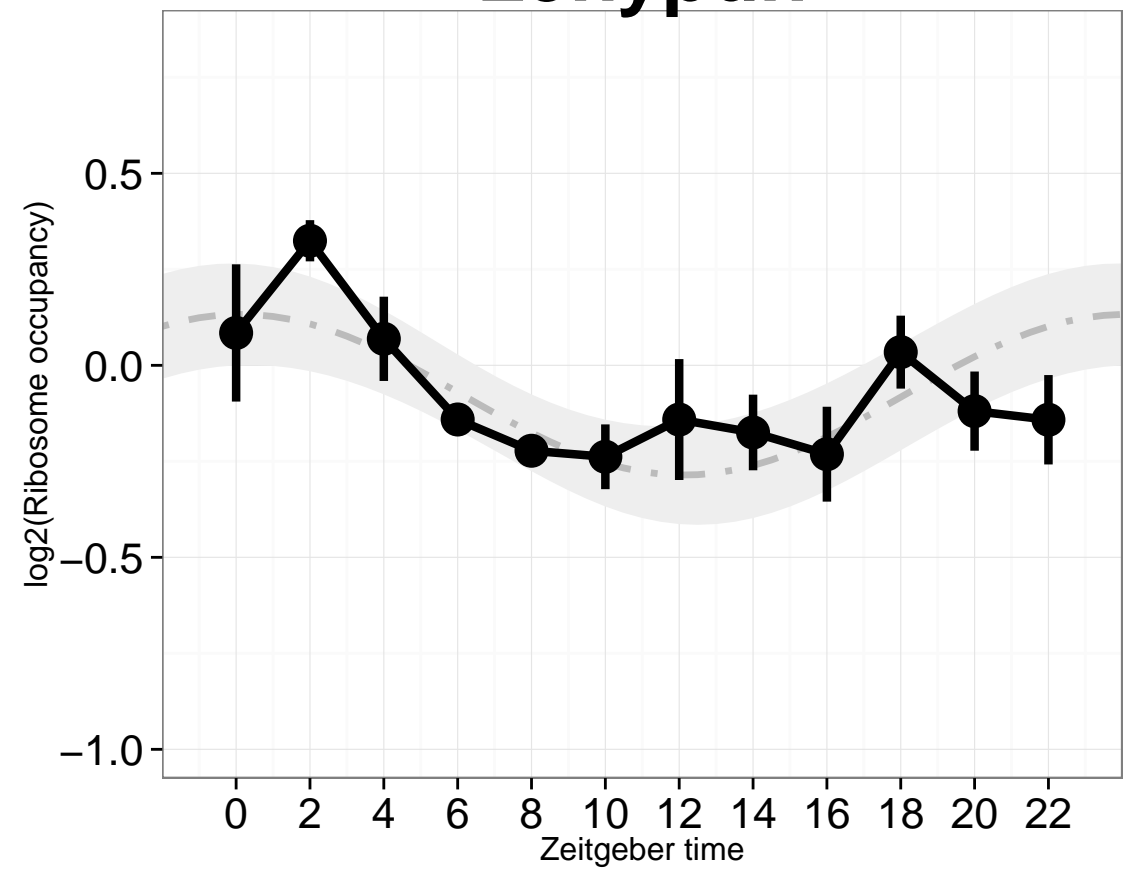

Supplement: SuppDataset_1.zip [file L3hypdh_set_A.pdf › Supplemental Dataset 1/A-mRNA_nonrhyth_translation_nonrhyth/L3hypdh_set_A.pdf]

# L3mbtl2

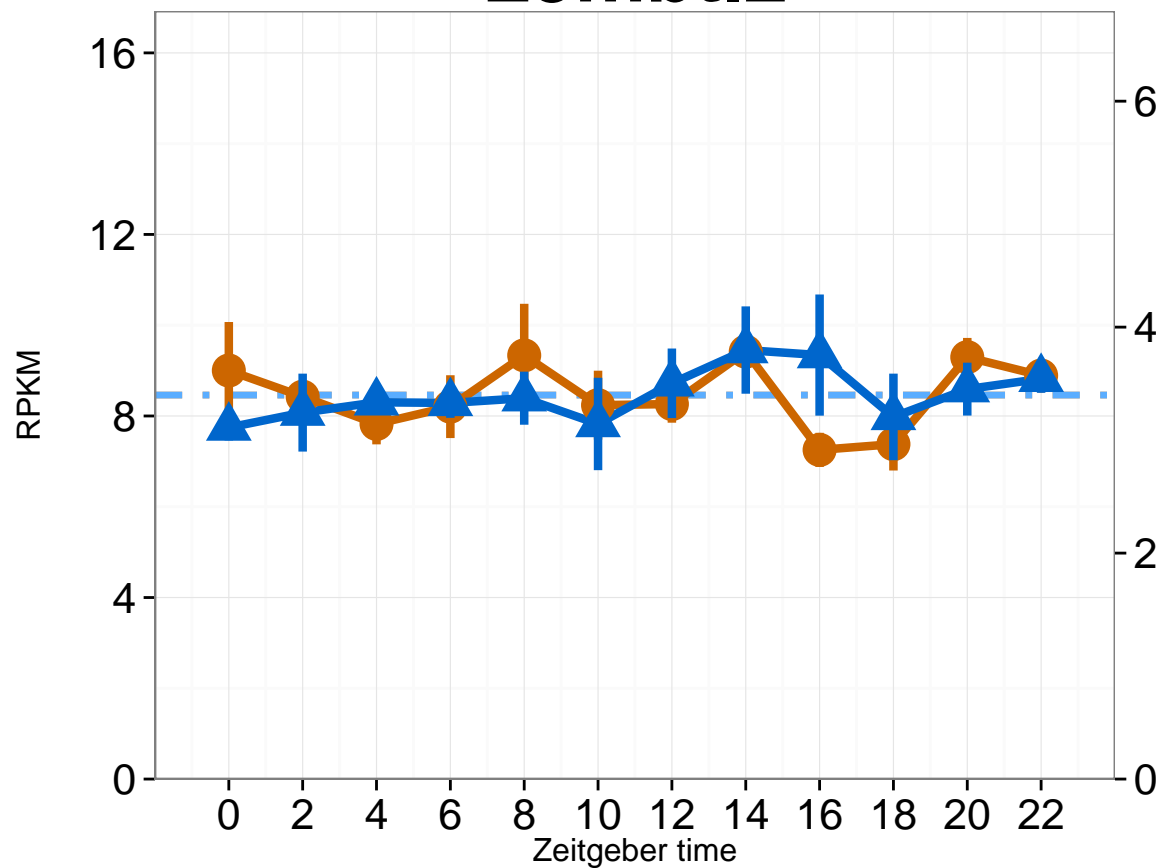

# L3mbtl2

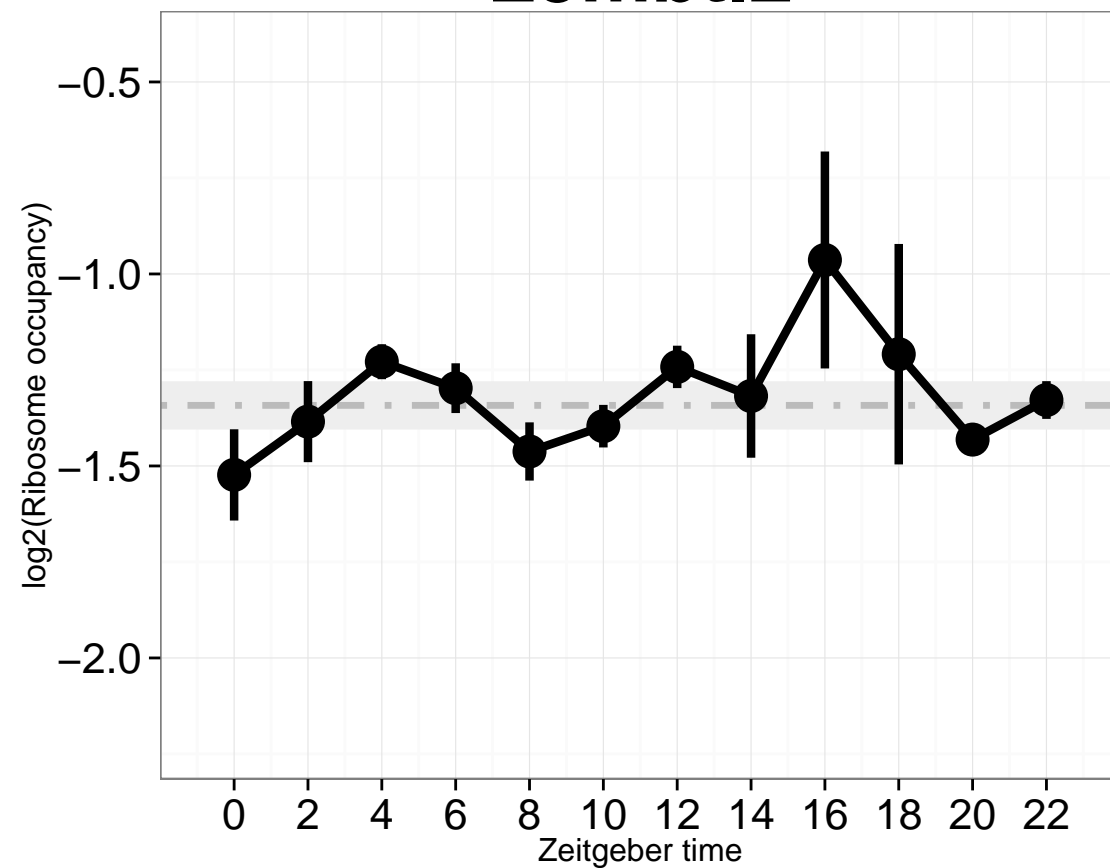

Supplement: SuppDataset_1.zip [file L3mbtl2_set_A.pdf › Supplemental Dataset 1/A-mRNA_nonrhyth_translation_nonrhyth/L3mbtl2_set_A.pdf]

# Lace1

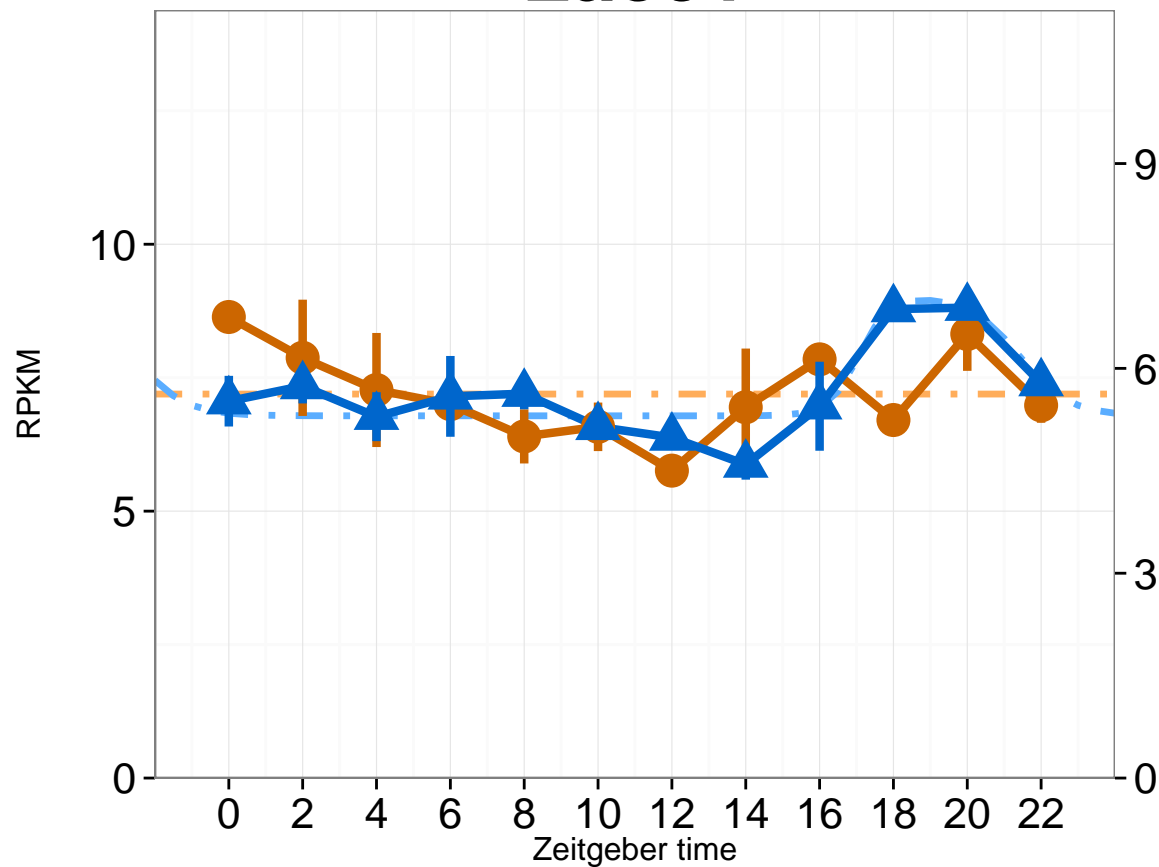

# Lace1

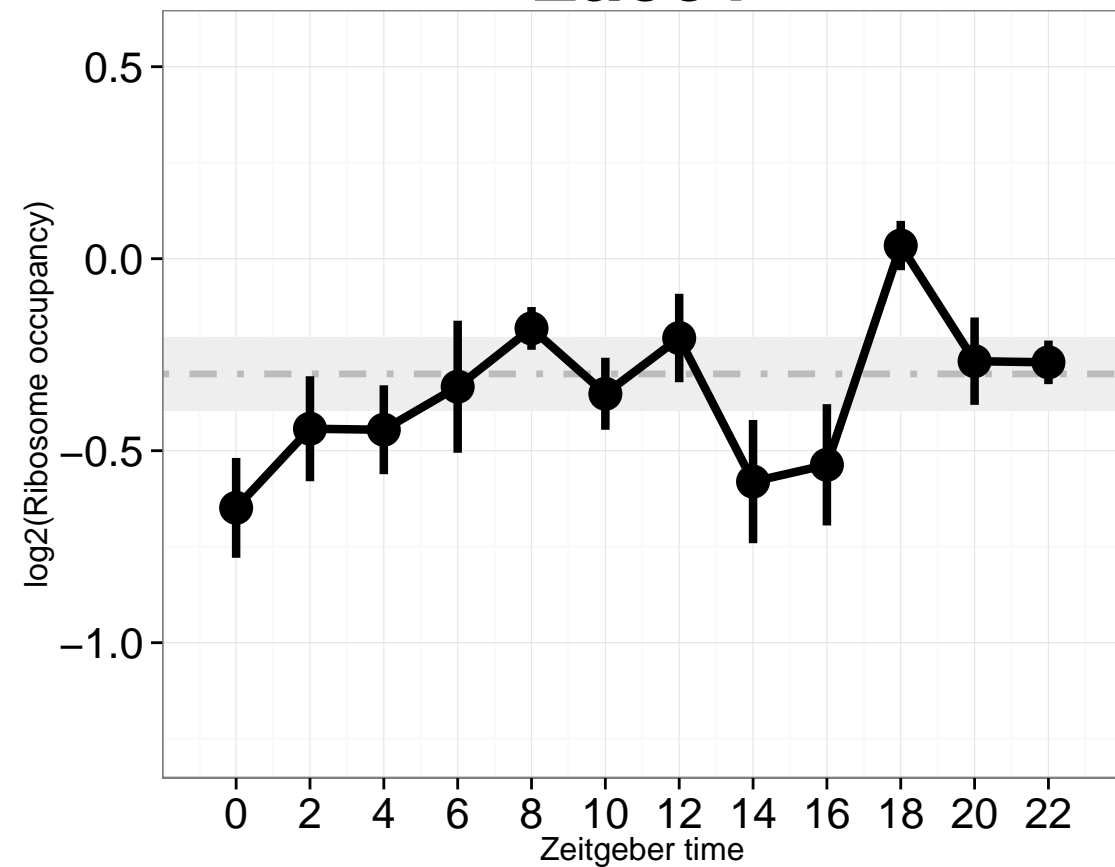

Supplement: SuppDataset_1.zip [file Lace1_set_A.pdf › Supplemental Dataset 1/A-mRNA_nonrhyth_translation_nonrhyth/Lace1_set_A.pdf]

# Lactb2

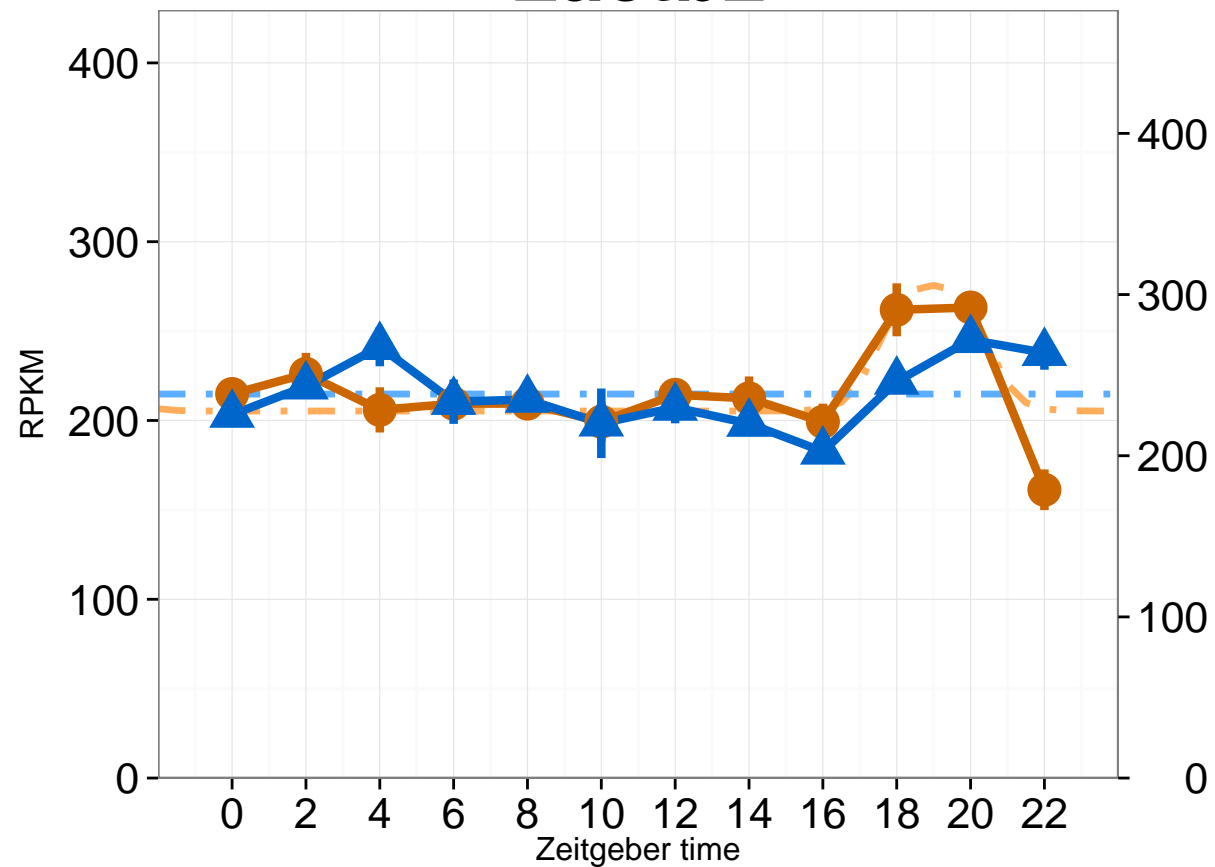

# Lactb2

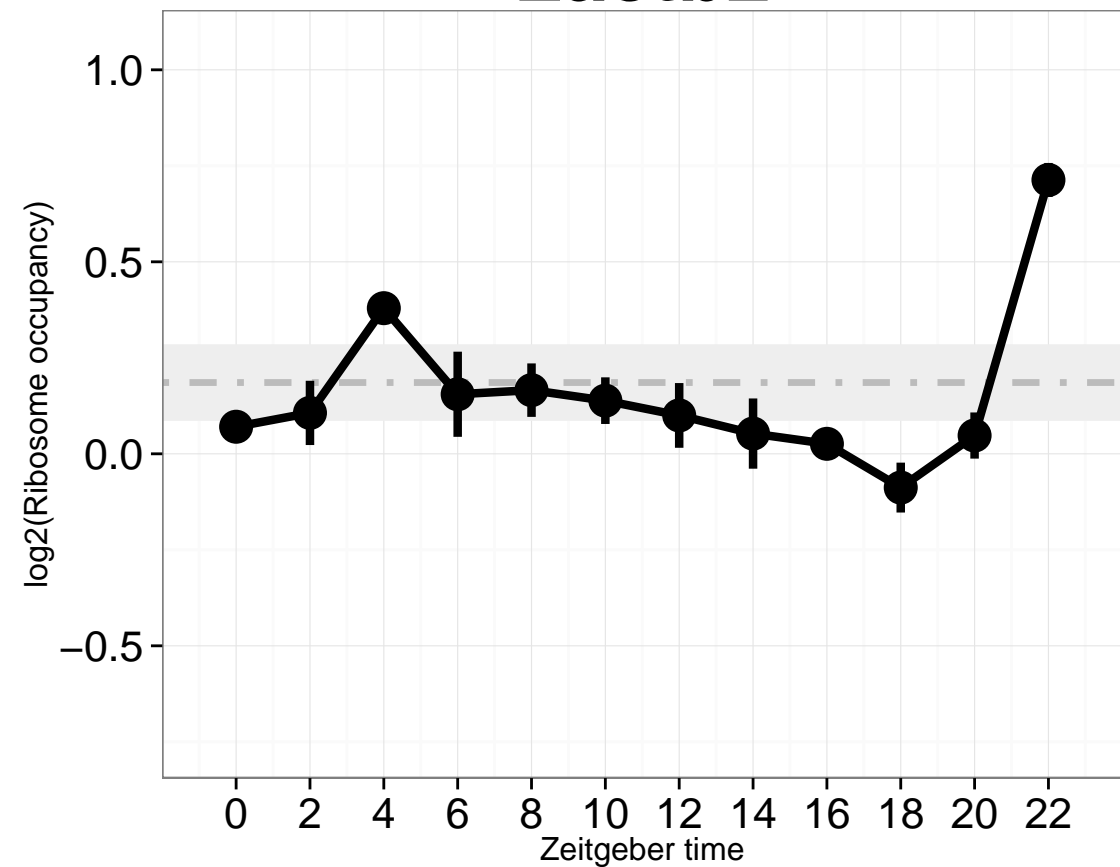

Supplement: SuppDataset_1.zip [file Lactb2_set_A.pdf › Supplemental Dataset 1/A-mRNA_nonrhyth_translation_nonrhyth/Lactb2_set_A.pdf]

## Lactb

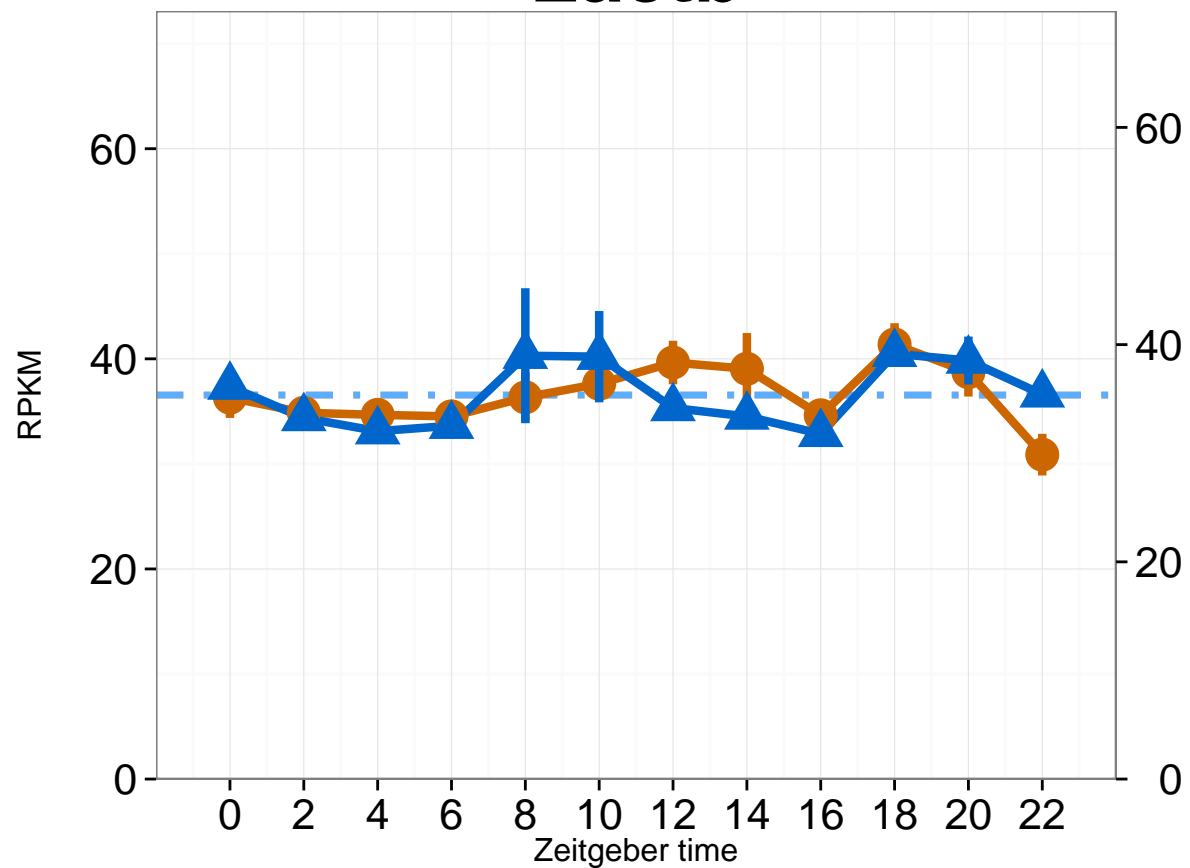

## Lactb

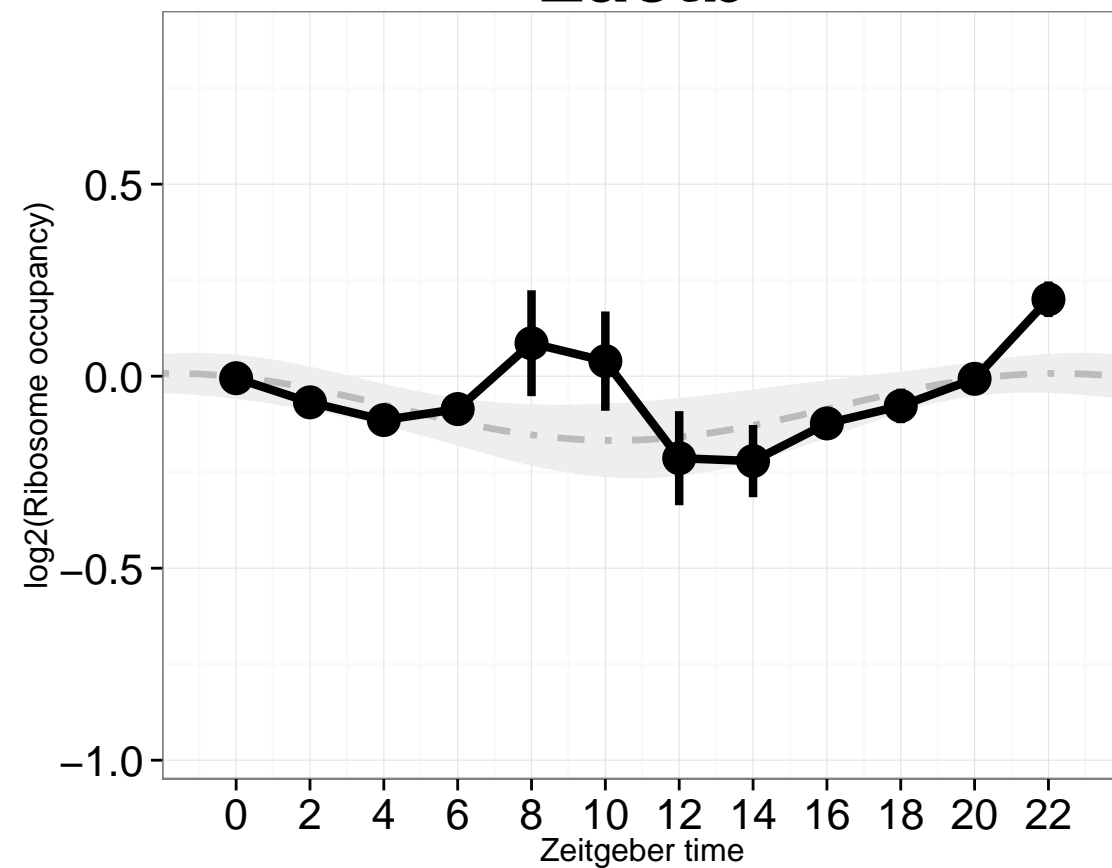

Supplement: SuppDataset_1.zip [file Lactb_set_A.pdf › Supplemental Dataset 1/A-mRNA_nonrhyth_translation_nonrhyth/Lactb_set_A.pdf]

# Lage3

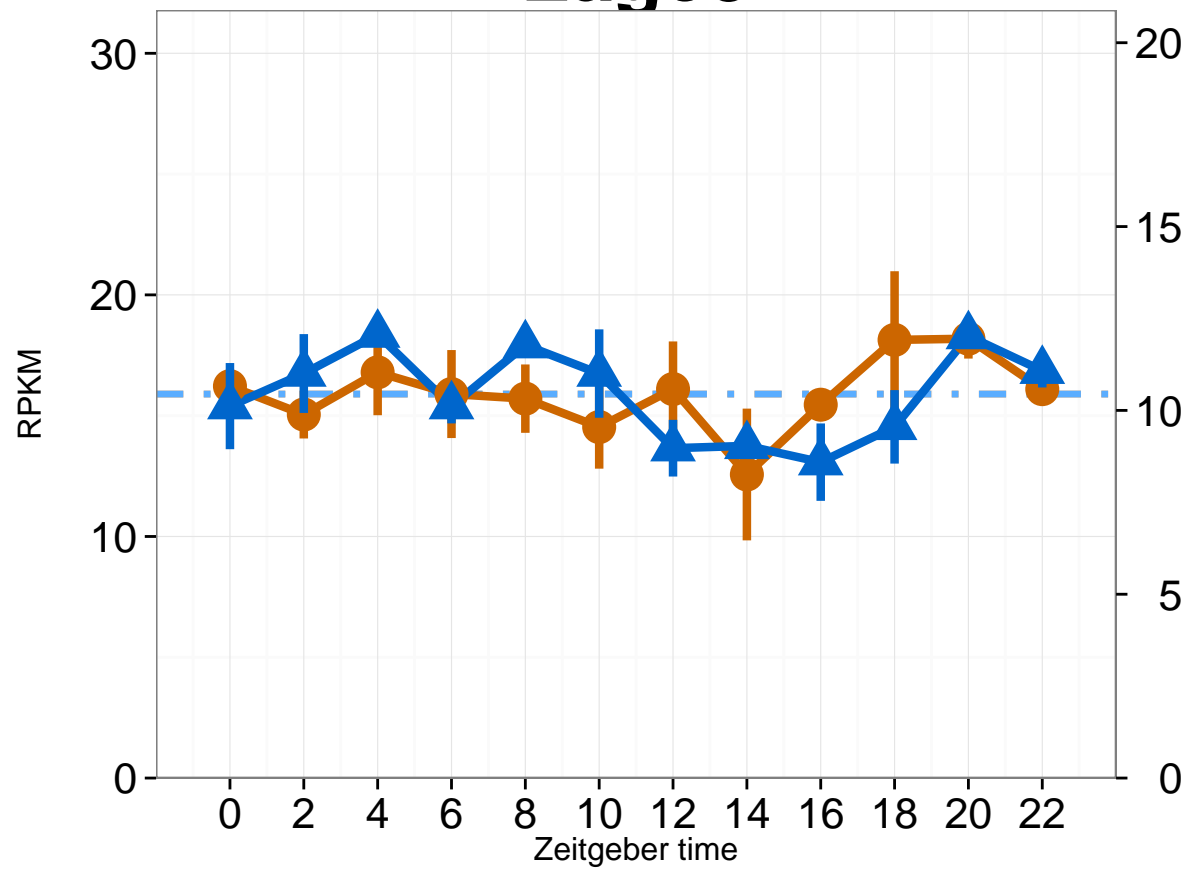

# Lage3

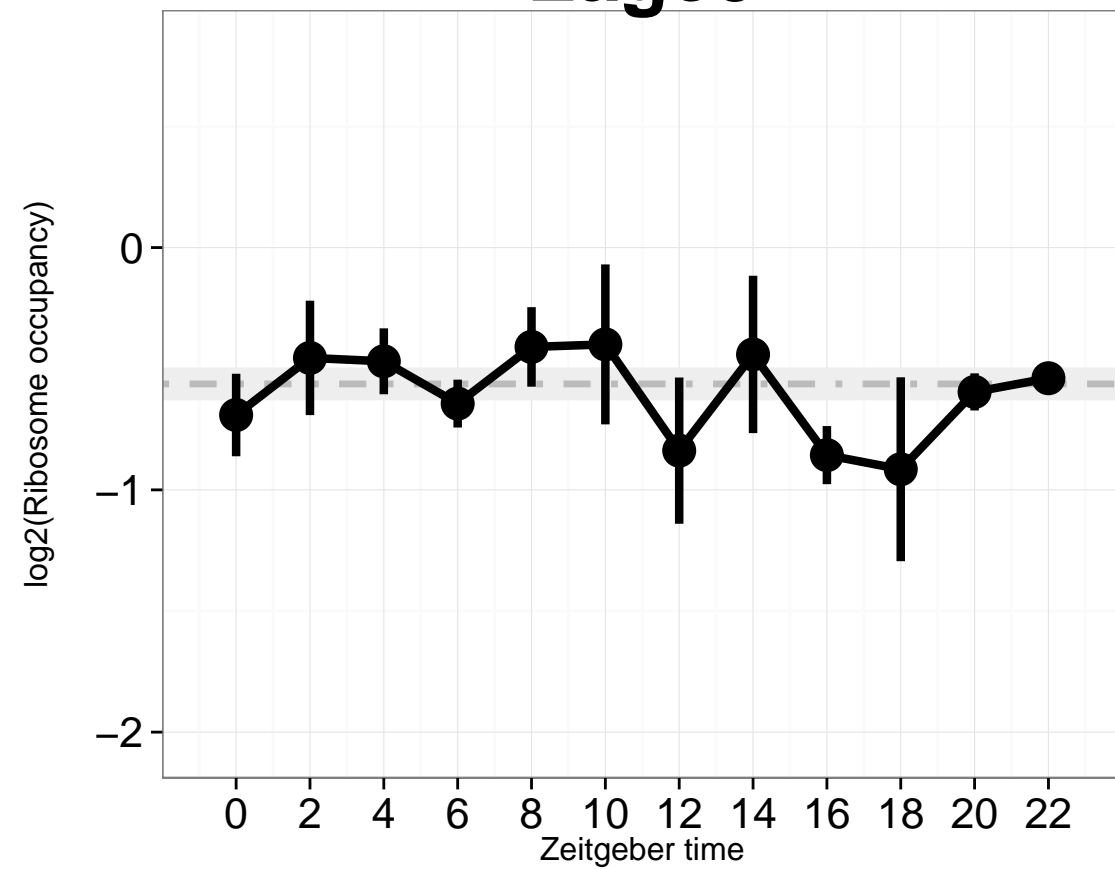

Supplement: SuppDataset_1.zip [file Lage3_set_A.pdf › Supplemental Dataset 1/A-mRNA_nonrhyth_translation_nonrhyth/Lage3_set_A.pdf]

# Lair1

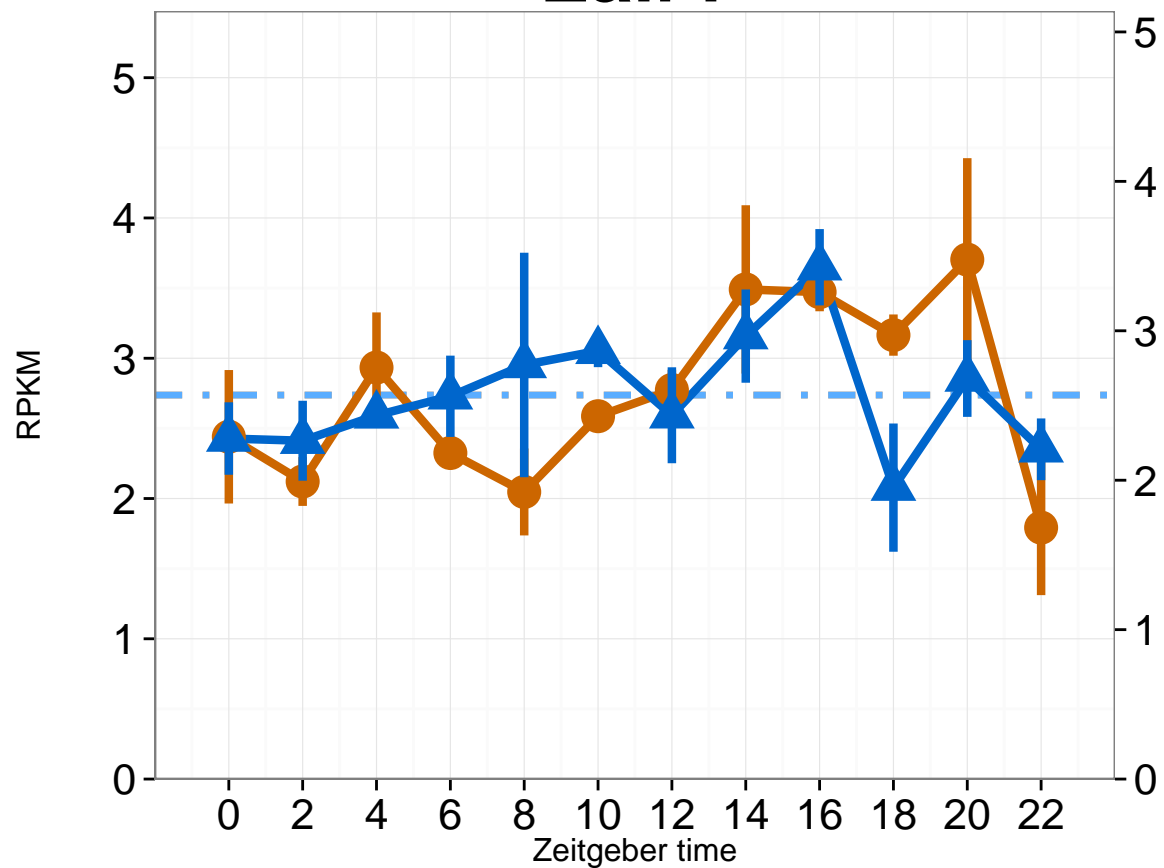

# Lair1

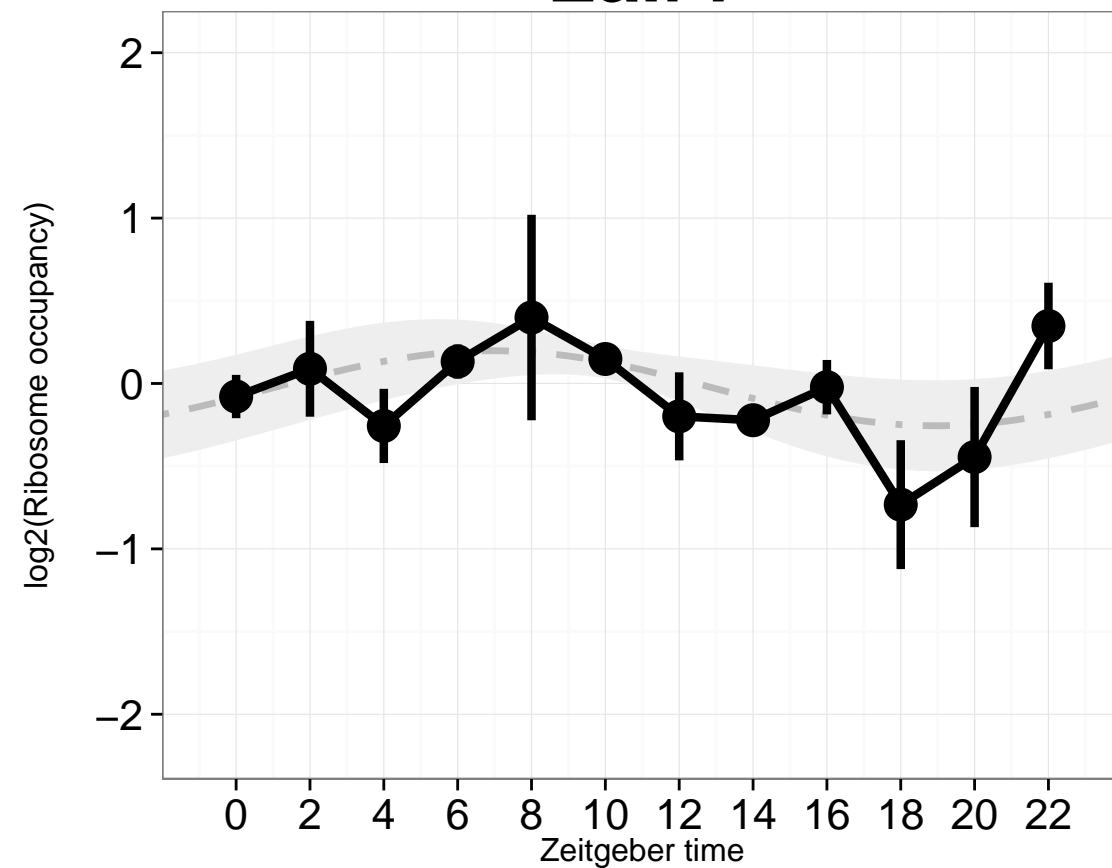

Supplement: SuppDataset_1.zip [file Lair1_set_A.pdf › Supplemental Dataset 1/A-mRNA_nonrhyth_translation_nonrhyth/Lair1_set_A.pdf]

# Lama1

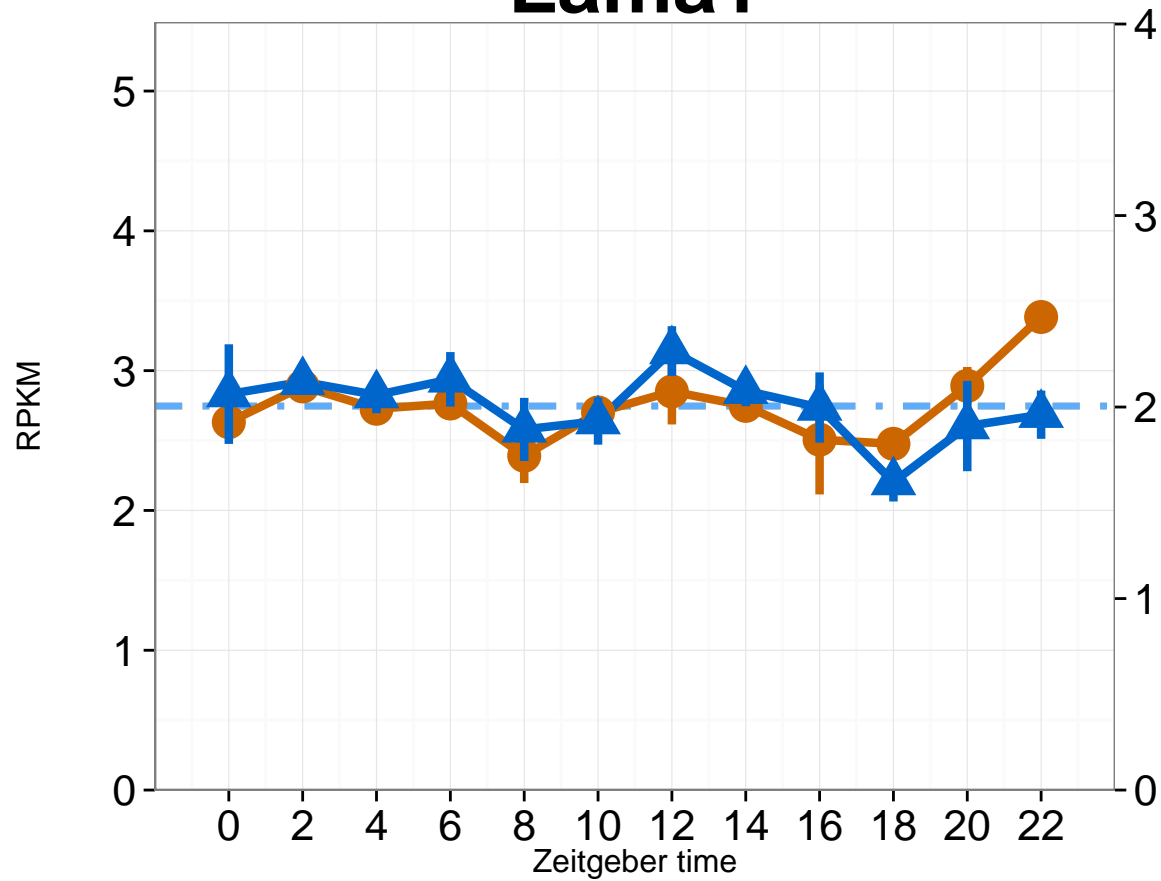

# Lama1

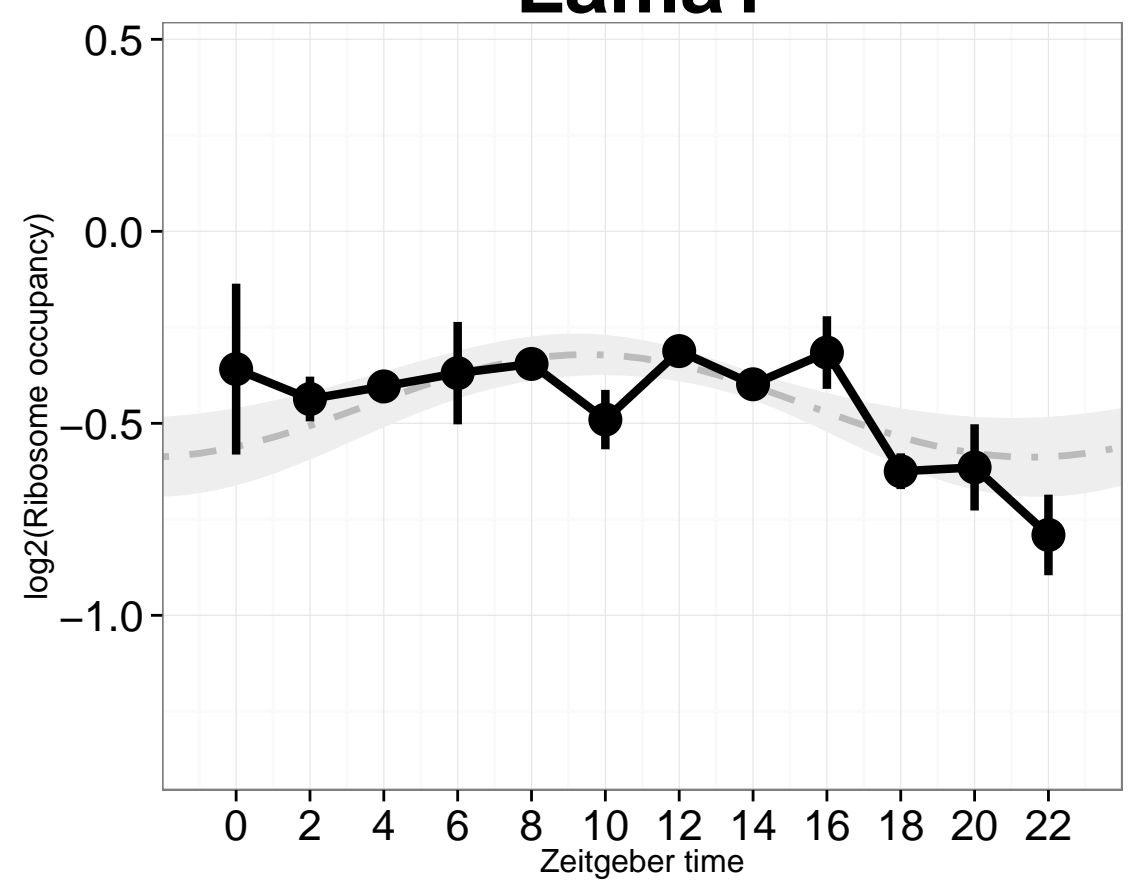

Supplement: SuppDataset_1.zip [file Lama1_set_A.pdf › Supplemental Dataset 1/A-mRNA_nonrhyth_translation_nonrhyth/Lama1_set_A.pdf]

# Lama2

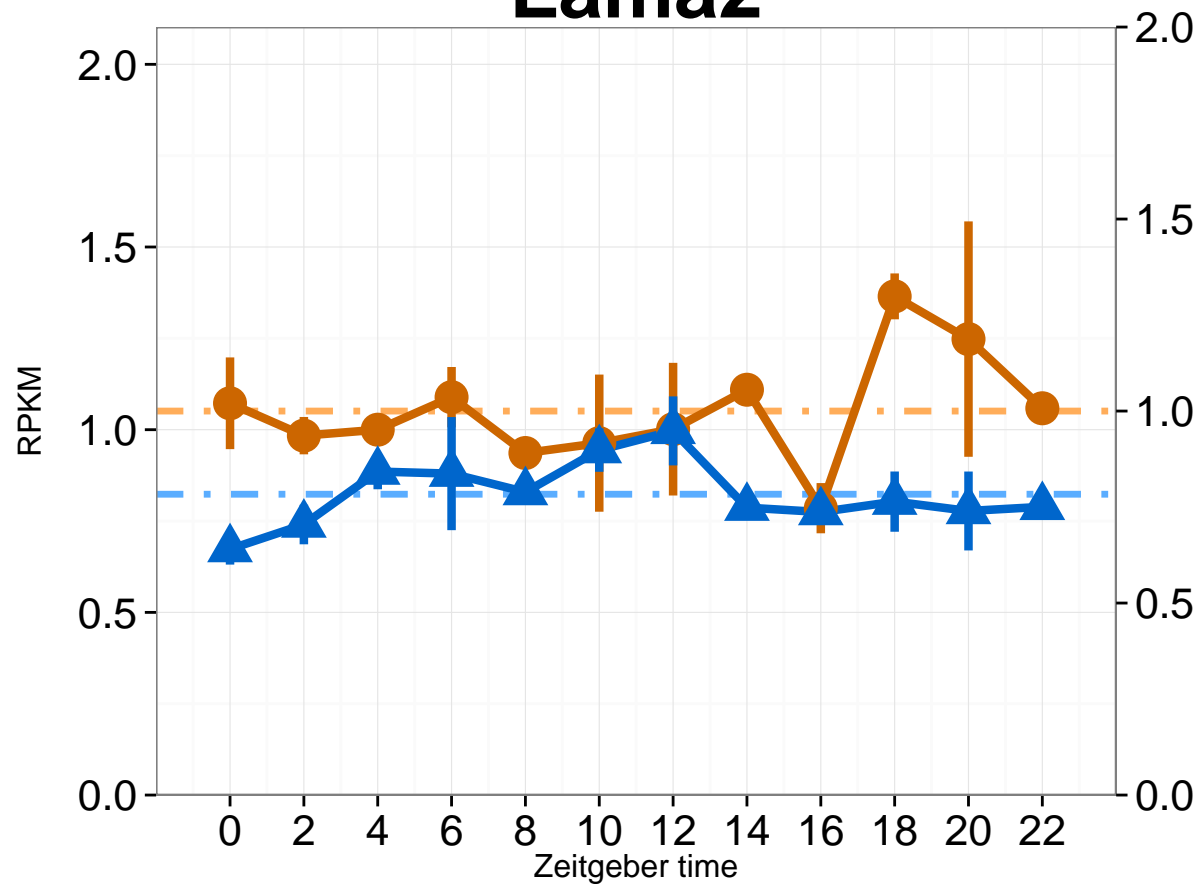

# Lama2

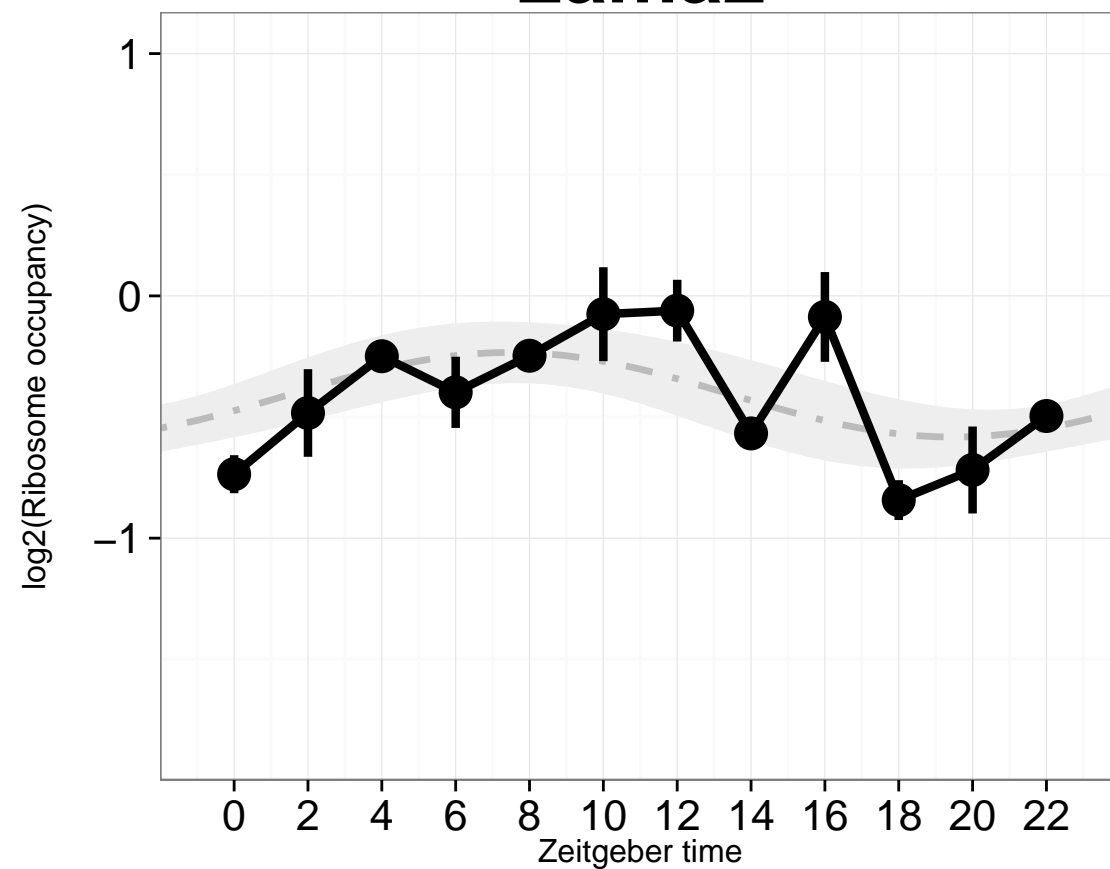

Supplement: SuppDataset_1.zip [file Lama2_set_A.pdf › Supplemental Dataset 1/A-mRNA_nonrhyth_translation_nonrhyth/Lama2_set_A.pdf]

# Lama4

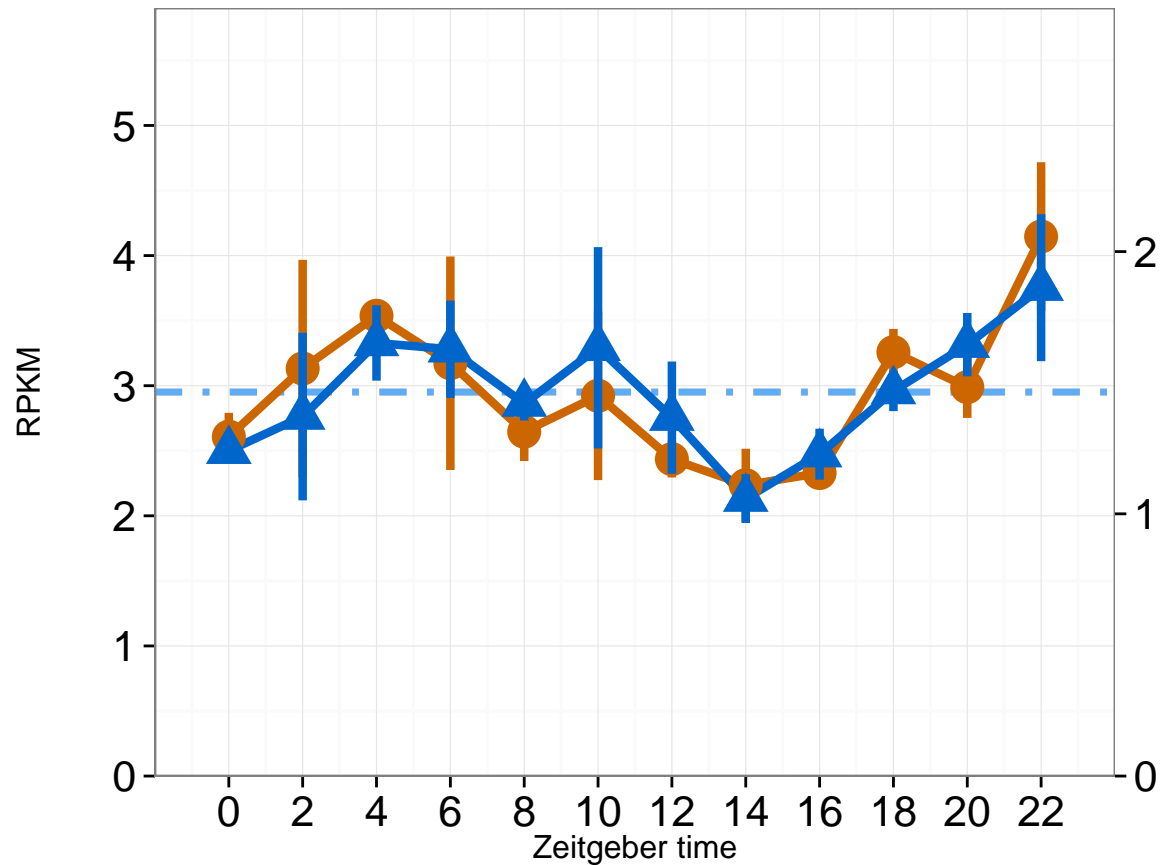

# Lama4

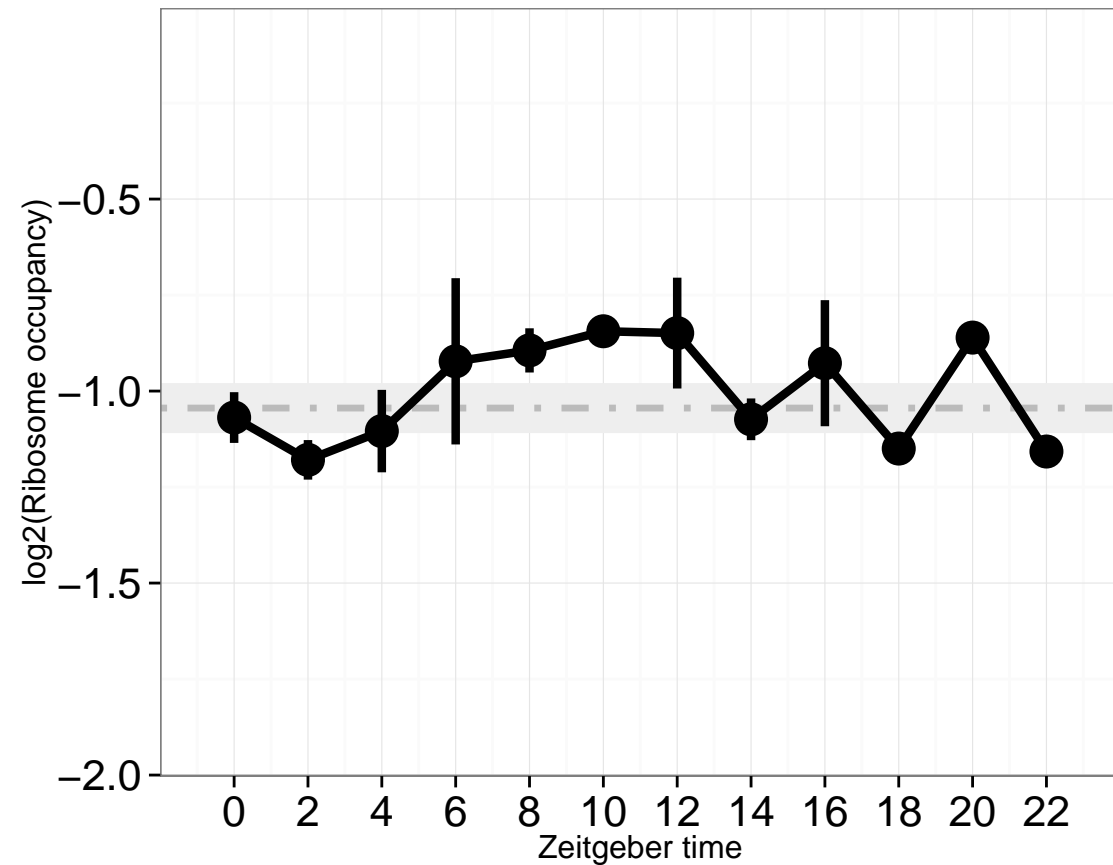

Supplement: SuppDataset_1.zip [file Lama4_set_A.pdf › Supplemental Dataset 1/A-mRNA_nonrhyth_translation_nonrhyth/Lama4_set_A.pdf]

# Lama5

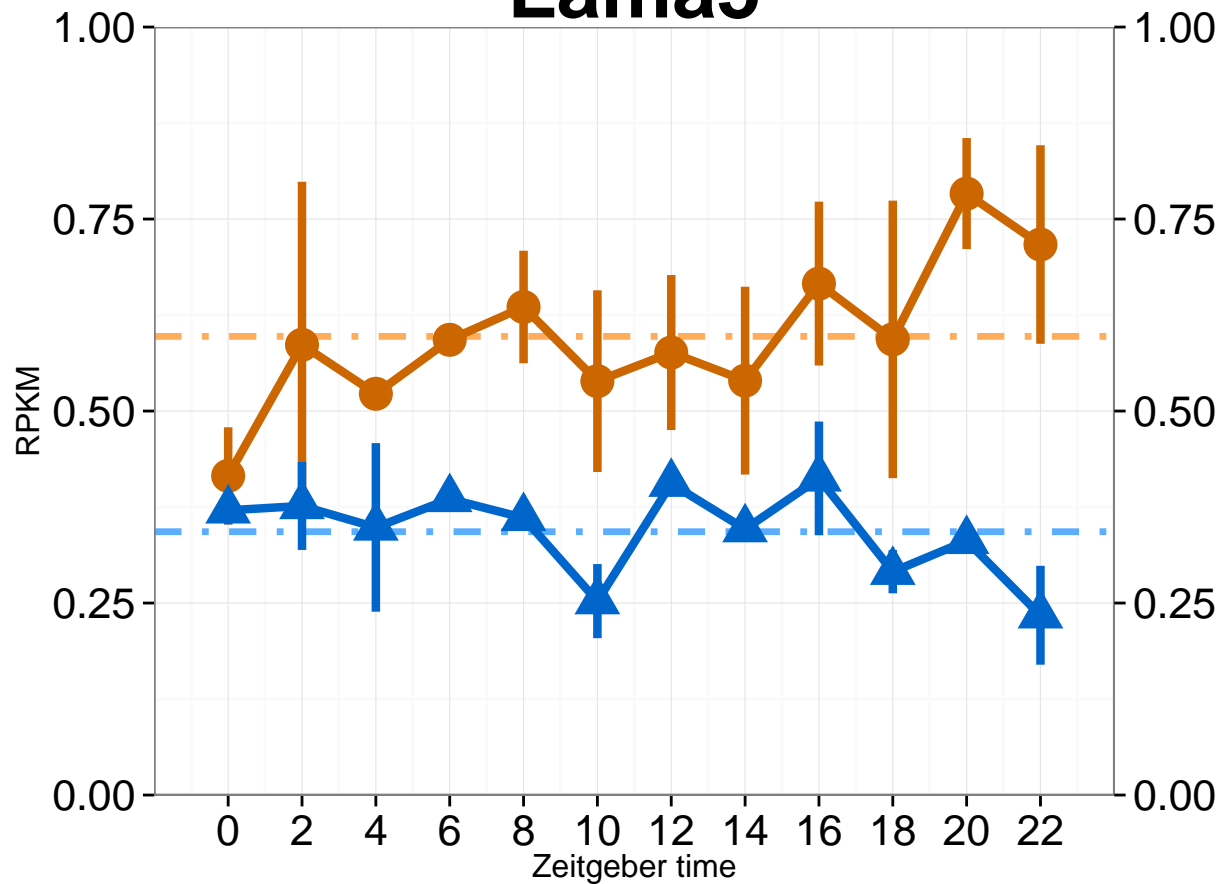

# Lama5

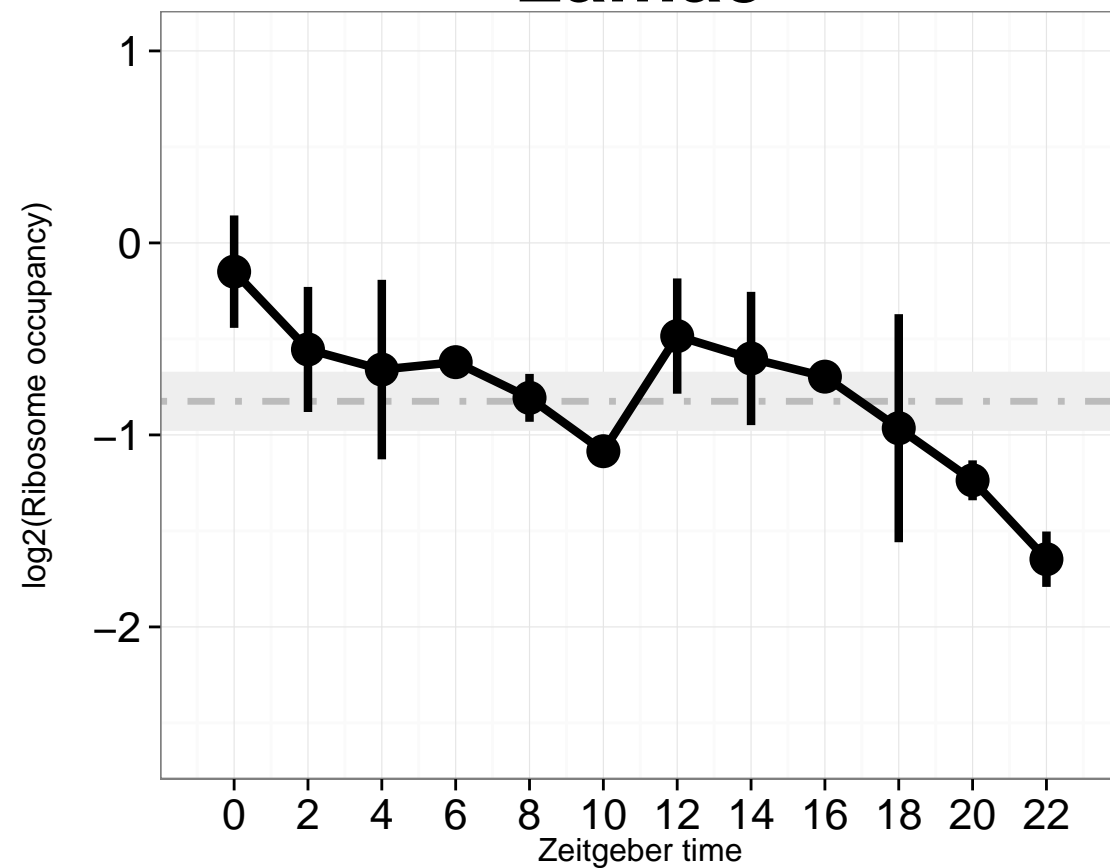

Supplement: SuppDataset_1.zip [file Lama5_set_A.pdf › Supplemental Dataset 1/A-mRNA_nonrhyth_translation_nonrhyth/Lama5_set_A.pdf]

# Lamb1

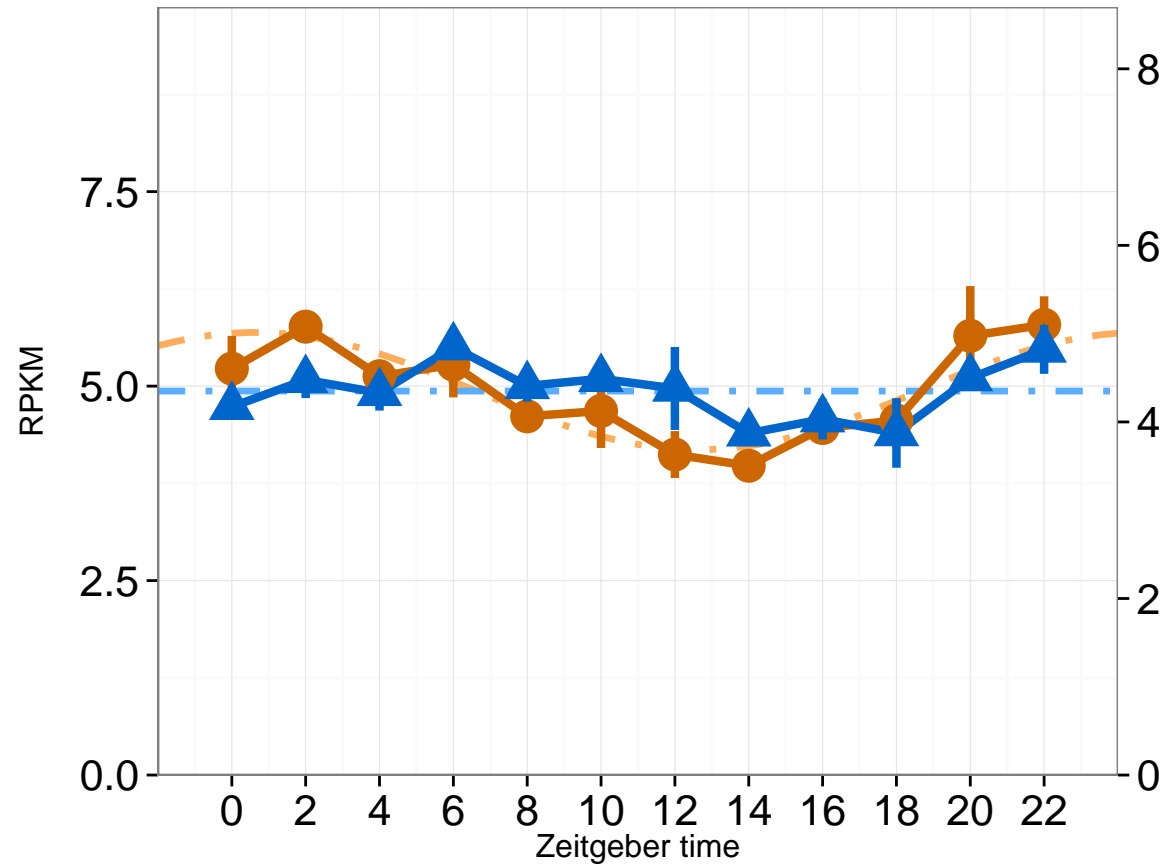

# Lamb1

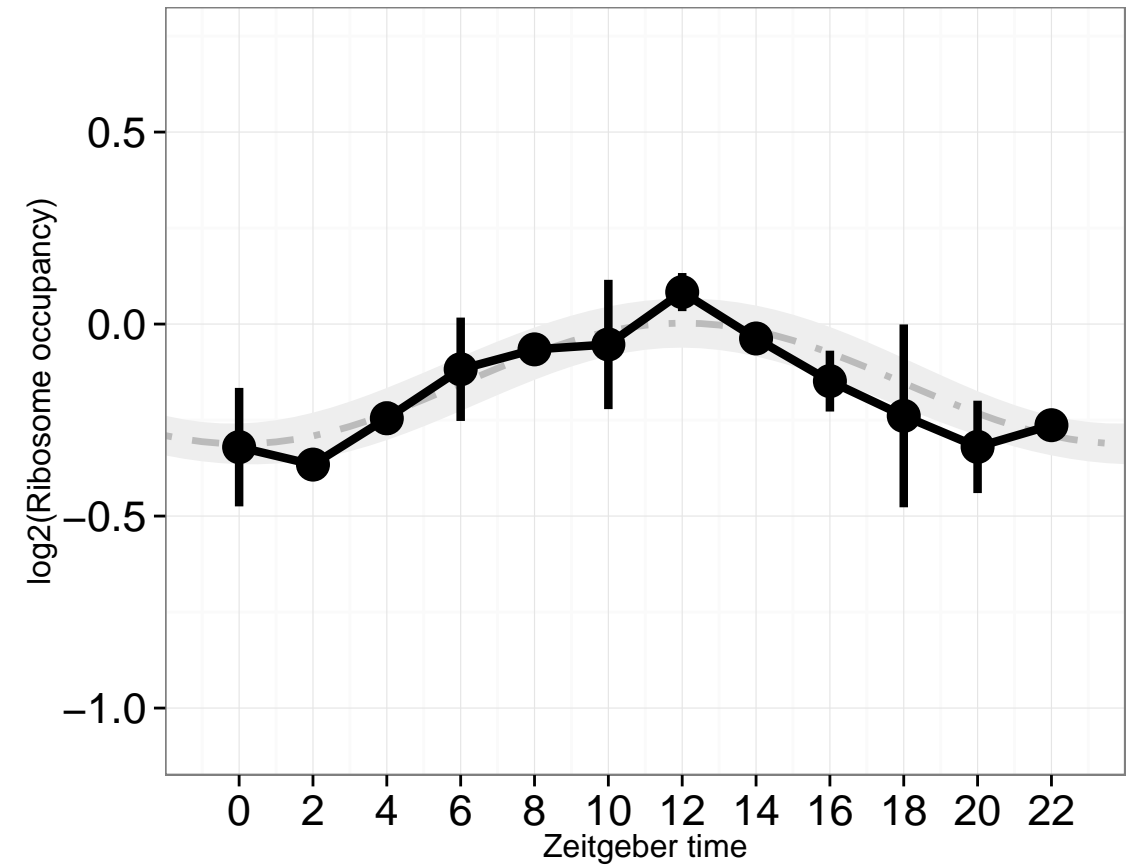

Supplement: SuppDataset_1.zip [file Lamb1_set_A.pdf › Supplemental Dataset 1/A-mRNA_nonrhyth_translation_nonrhyth/Lamb1_set_A.pdf]

## Lamb2

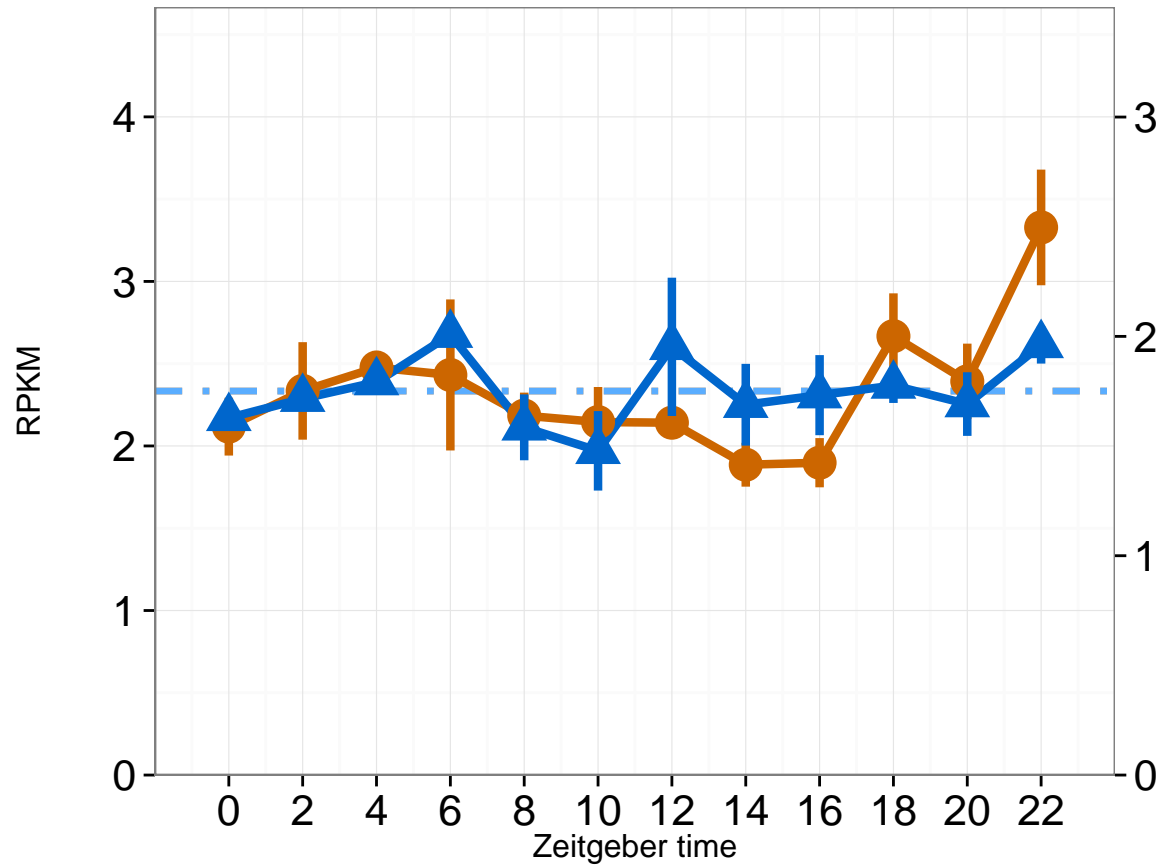

## Lamb2

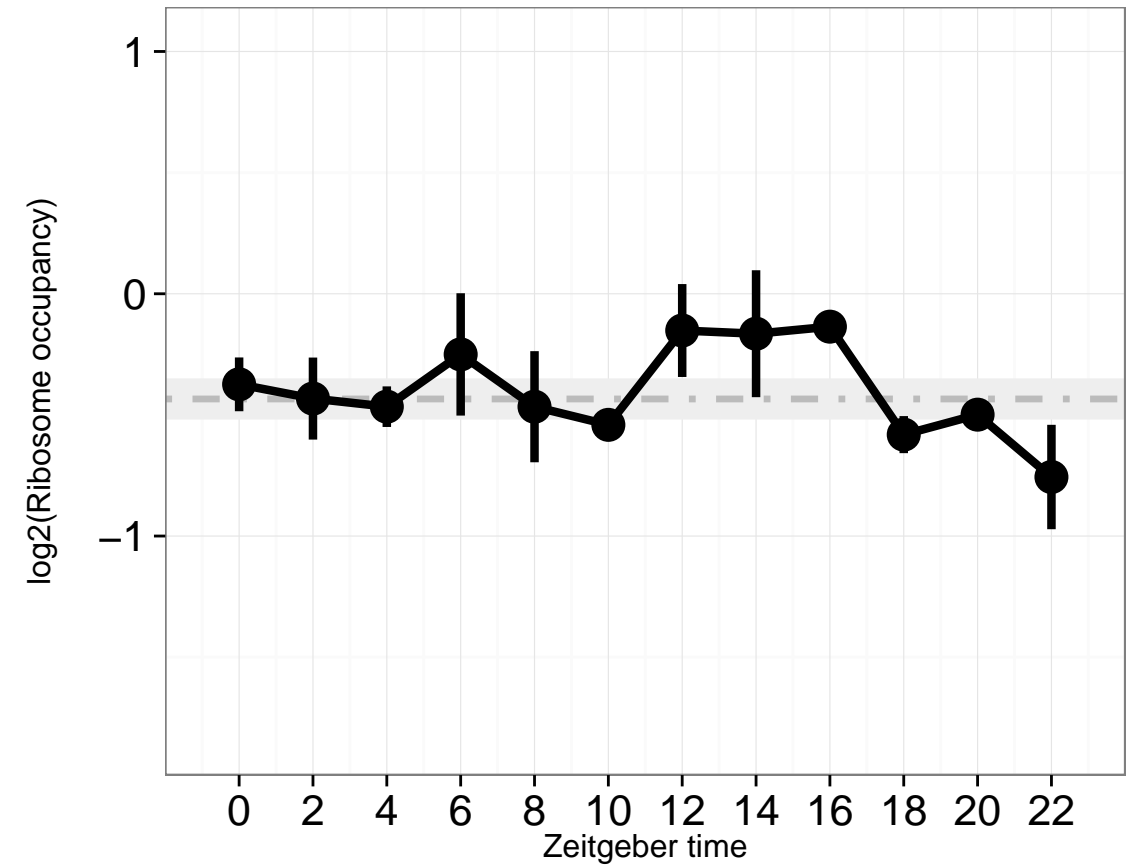

Supplement: SuppDataset_1.zip [file Lamb2_set_A.pdf › Supplemental Dataset 1/A-mRNA_nonrhyth_translation_nonrhyth/Lamb2_set_A.pdf]

# Lamb3

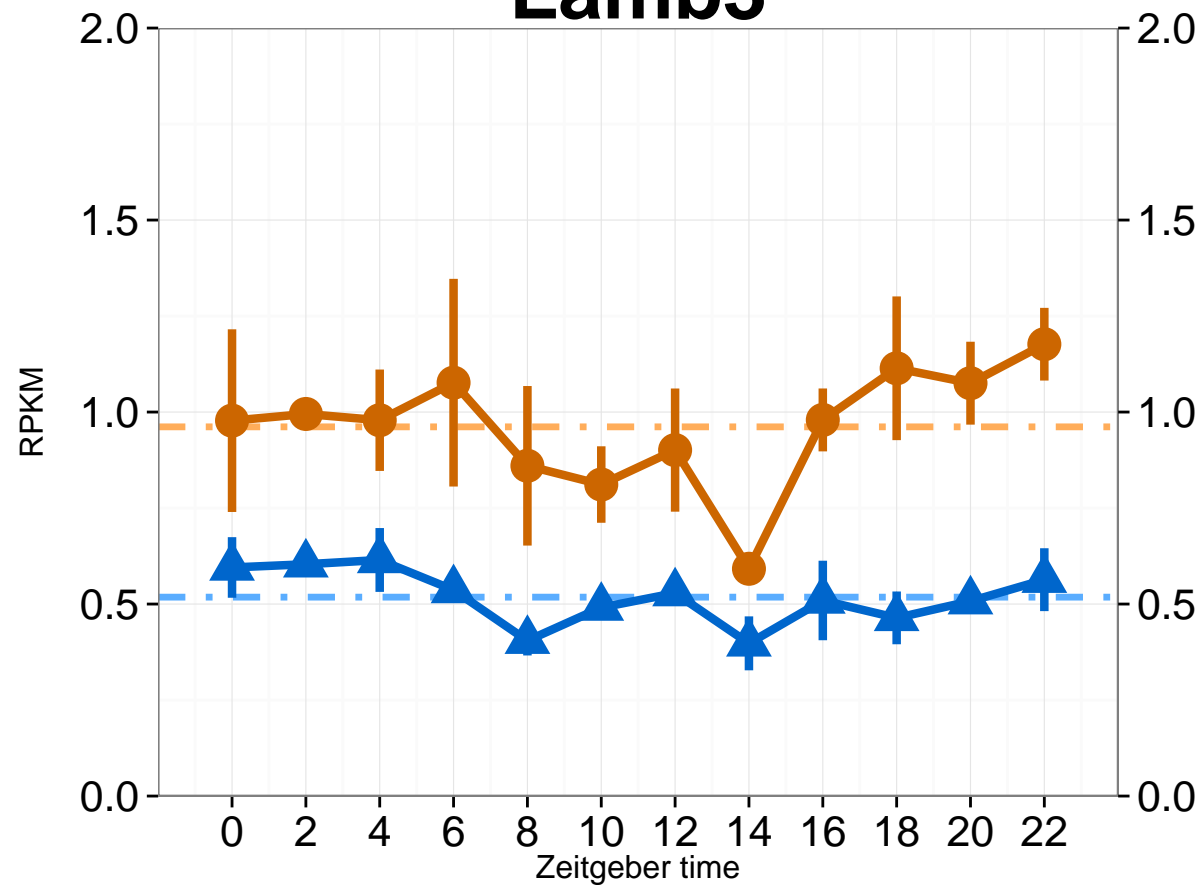

# Lamb3

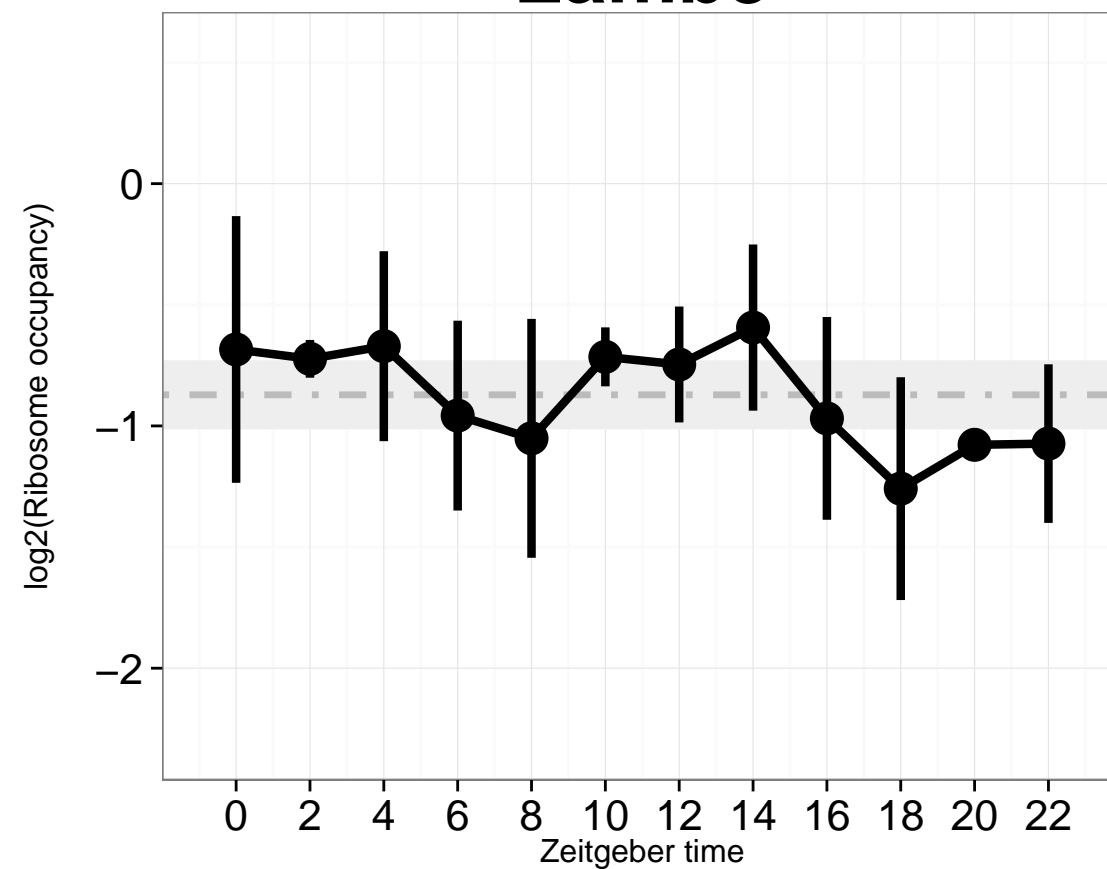

Supplement: SuppDataset_1.zip [file Lamb3_set_A.pdf › Supplemental Dataset 1/A-mRNA_nonrhyth_translation_nonrhyth/Lamb3_set_A.pdf]

# Lamc1

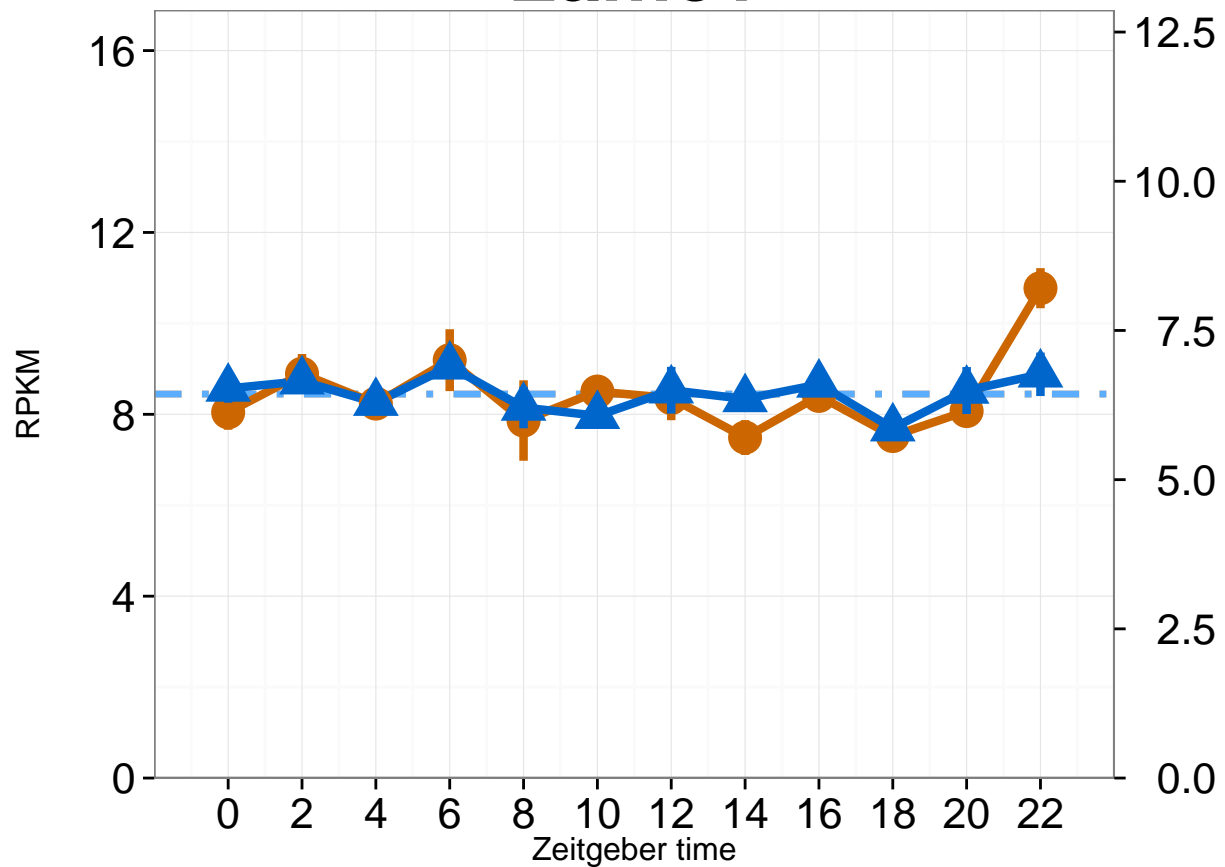

# Lamc1

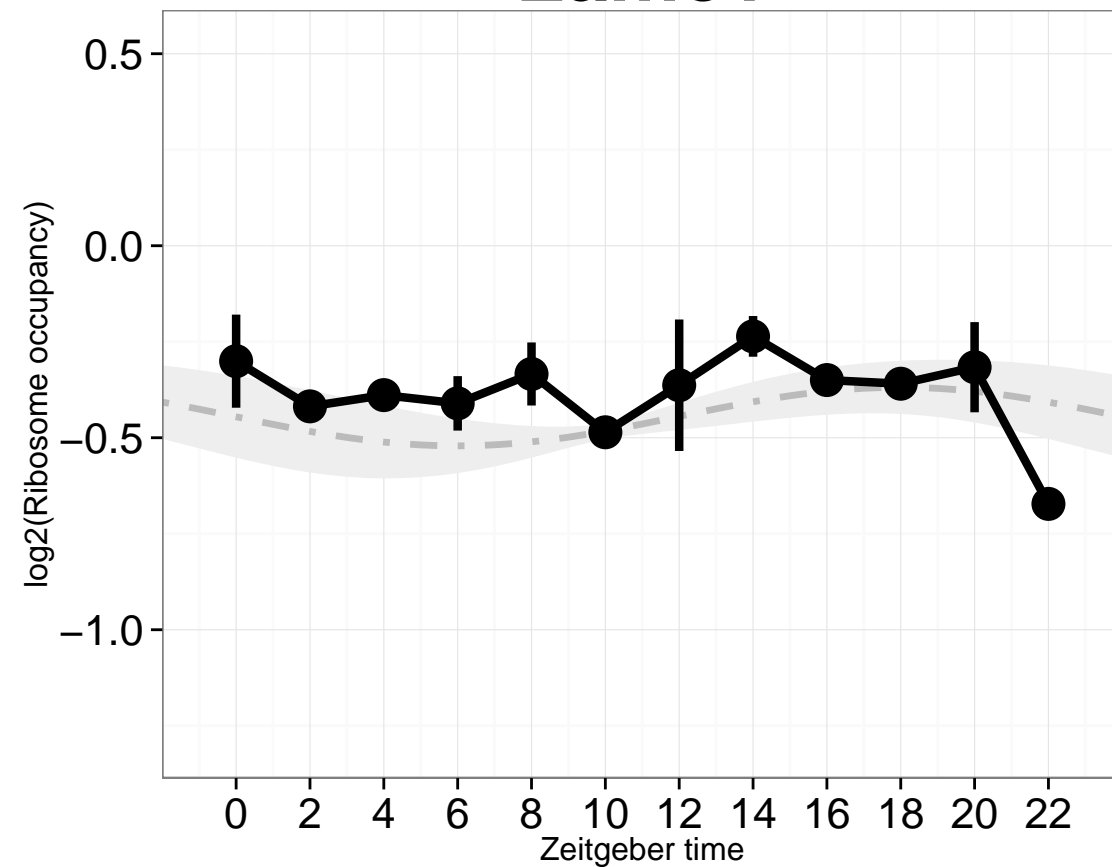

Supplement: SuppDataset_1.zip [file Lamc1_set_A.pdf › Supplemental Dataset 1/A-mRNA_nonrhyth_translation_nonrhyth/Lamc1_set_A.pdf]

# Lamc3

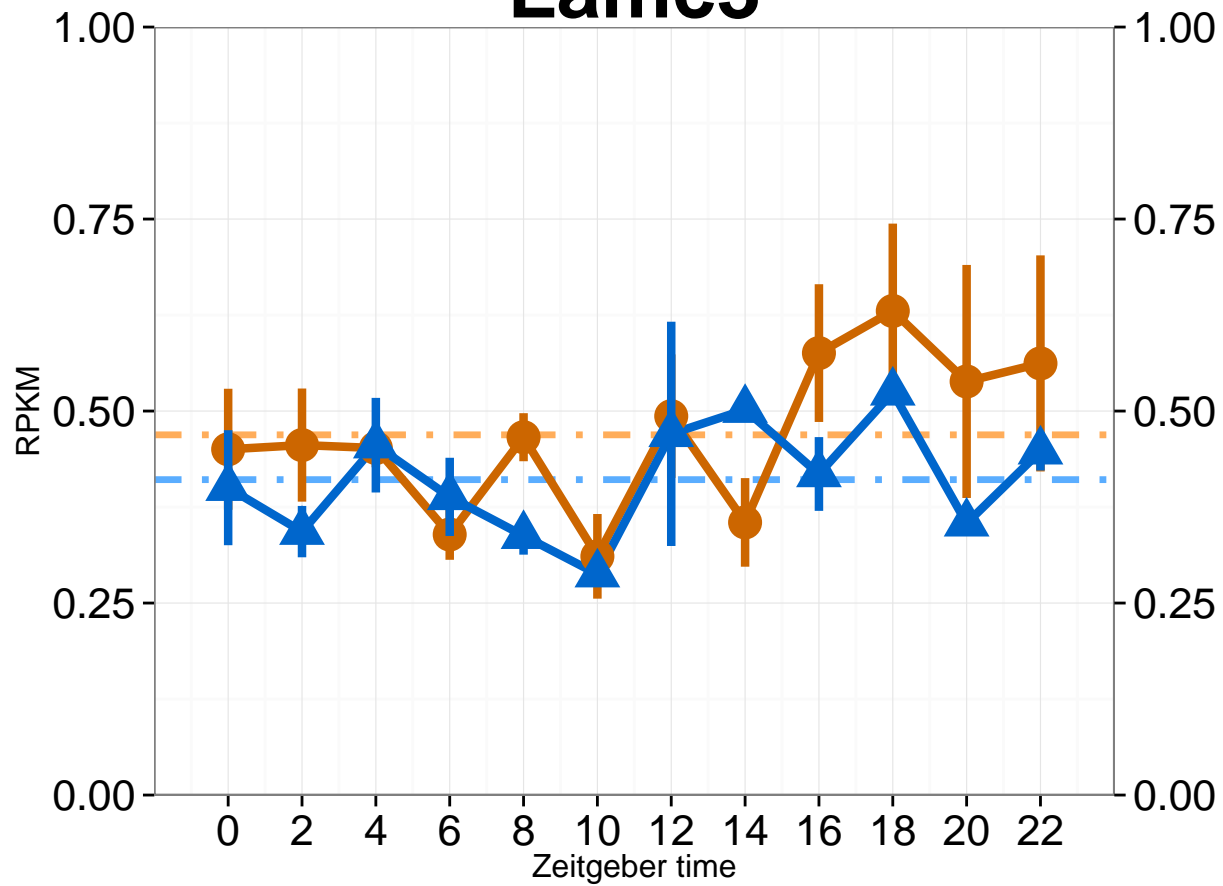

# Lamc3

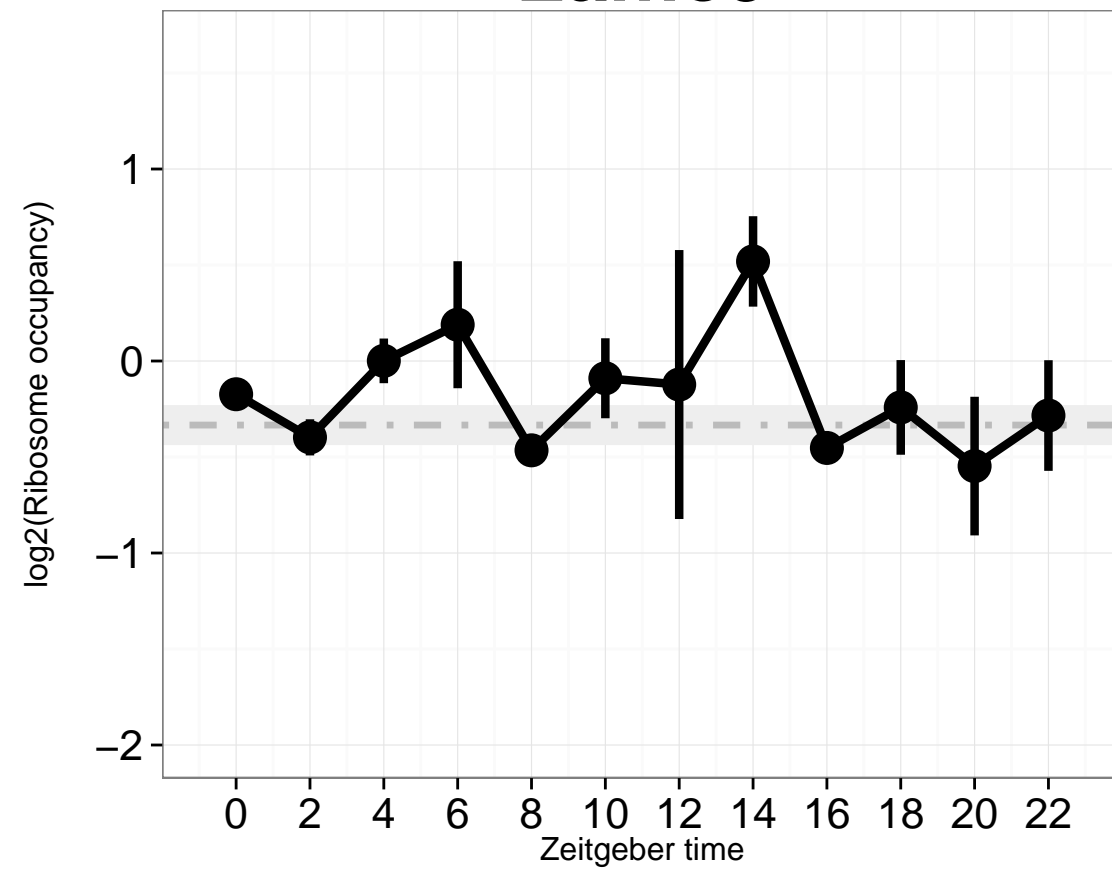

Supplement: SuppDataset_1.zip [file Lamc3_set_A.pdf › Supplemental Dataset 1/A-mRNA_nonrhyth_translation_nonrhyth/Lamc3_set_A.pdf]

# Lamp1

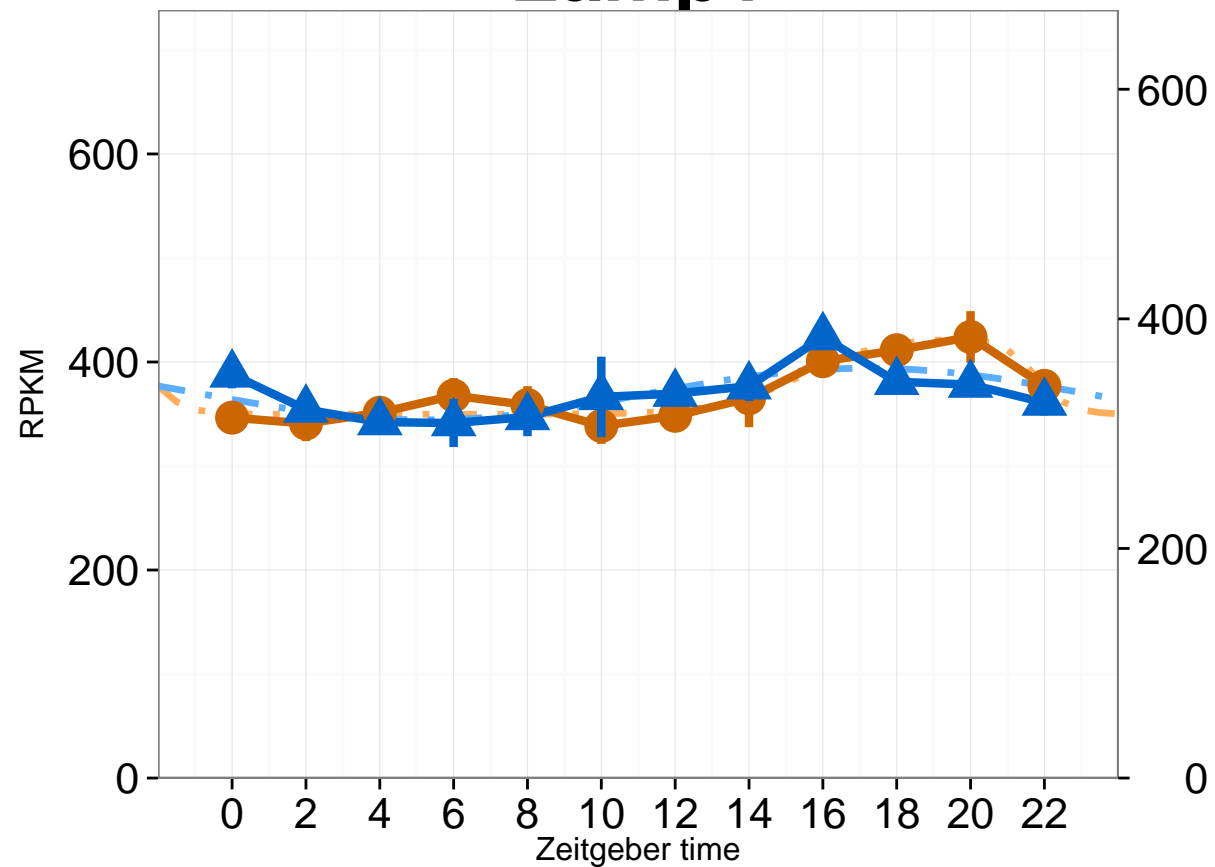

# Lamp1

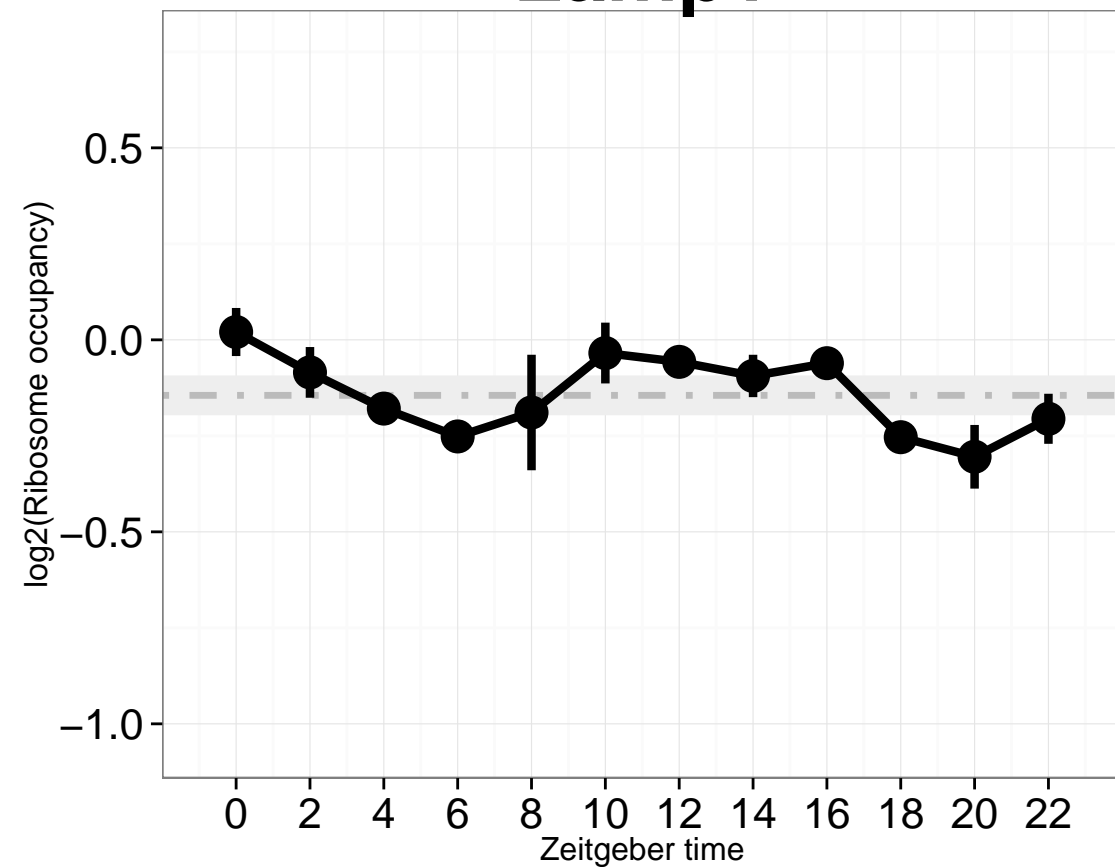

Supplement: SuppDataset_1.zip [file Lamp1_set_A.pdf › Supplemental Dataset 1/A-mRNA_nonrhyth_translation_nonrhyth/Lamp1_set_A.pdf]

## Lamp2

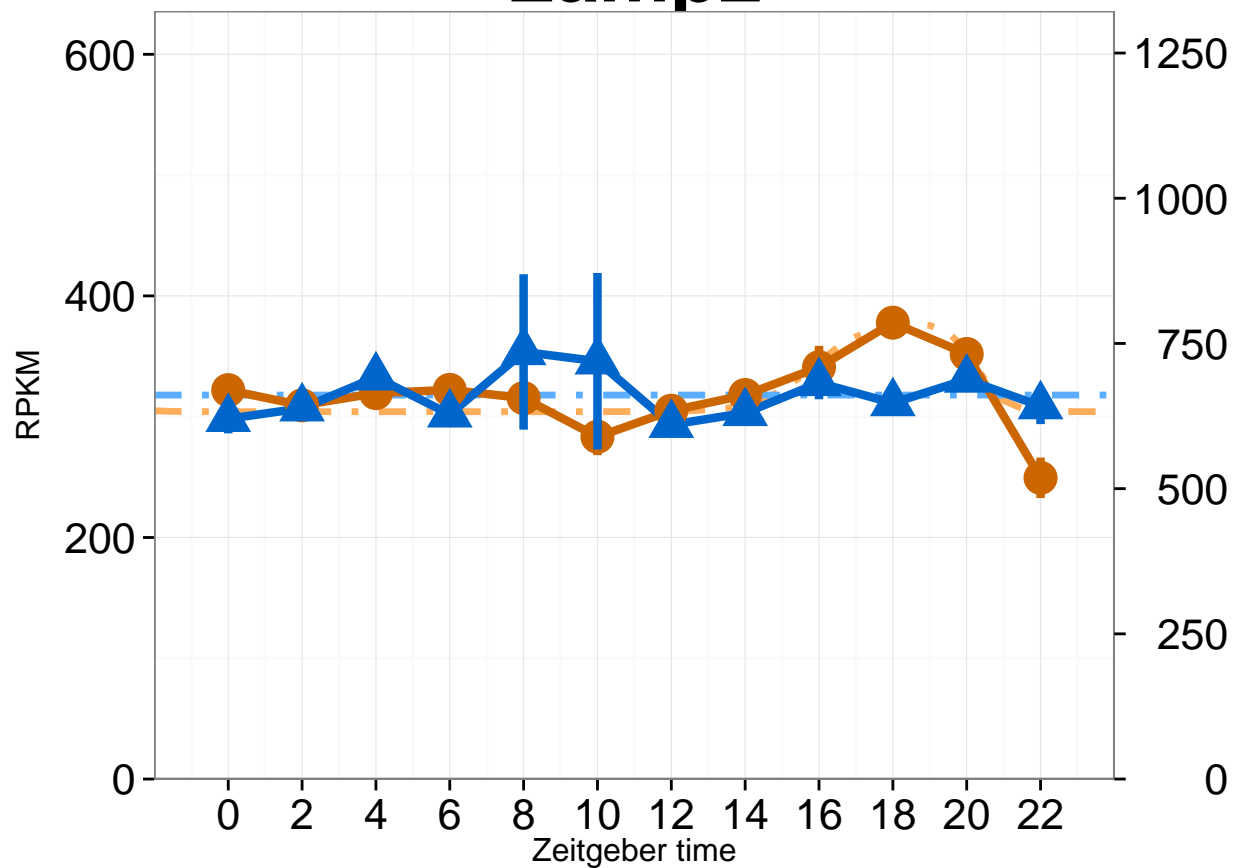

## Lamp2

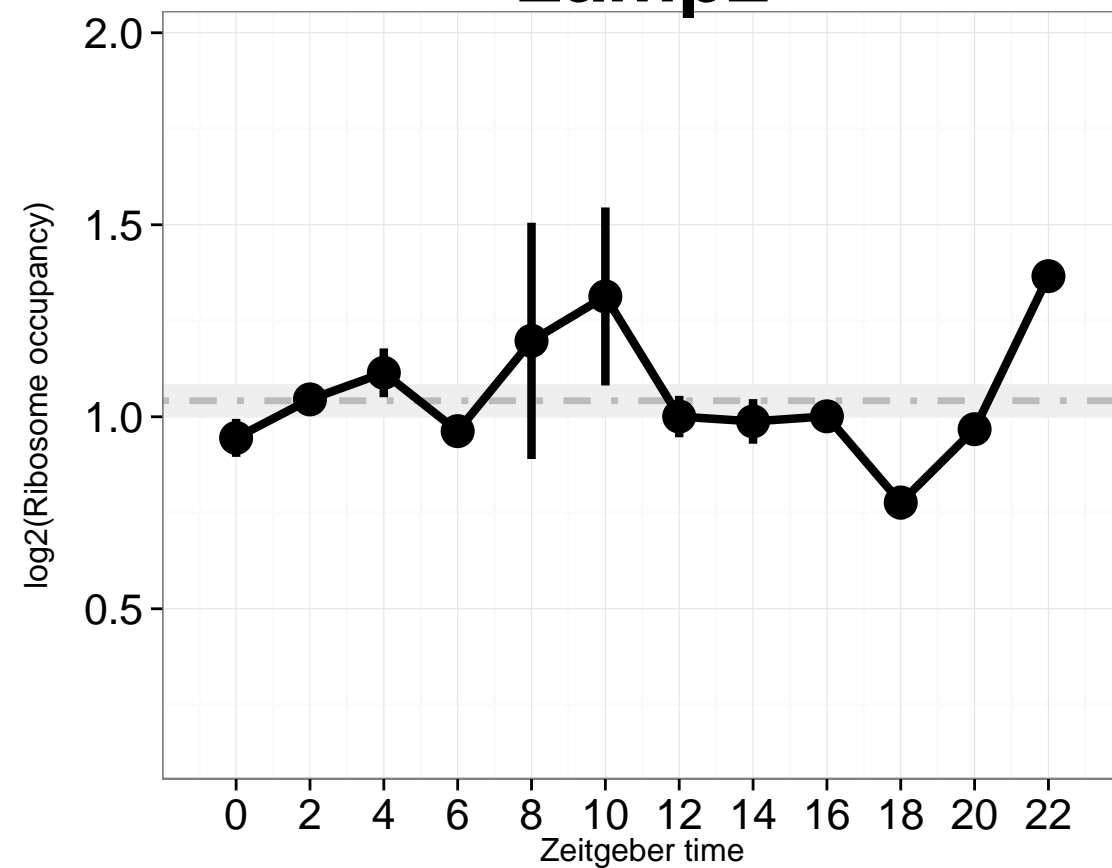

Supplement: SuppDataset_1.zip [file Lamp2_set_A.pdf › Supplemental Dataset 1/A-mRNA_nonrhyth_translation_nonrhyth/Lamp2_set_A.pdf]

## Lamtor2

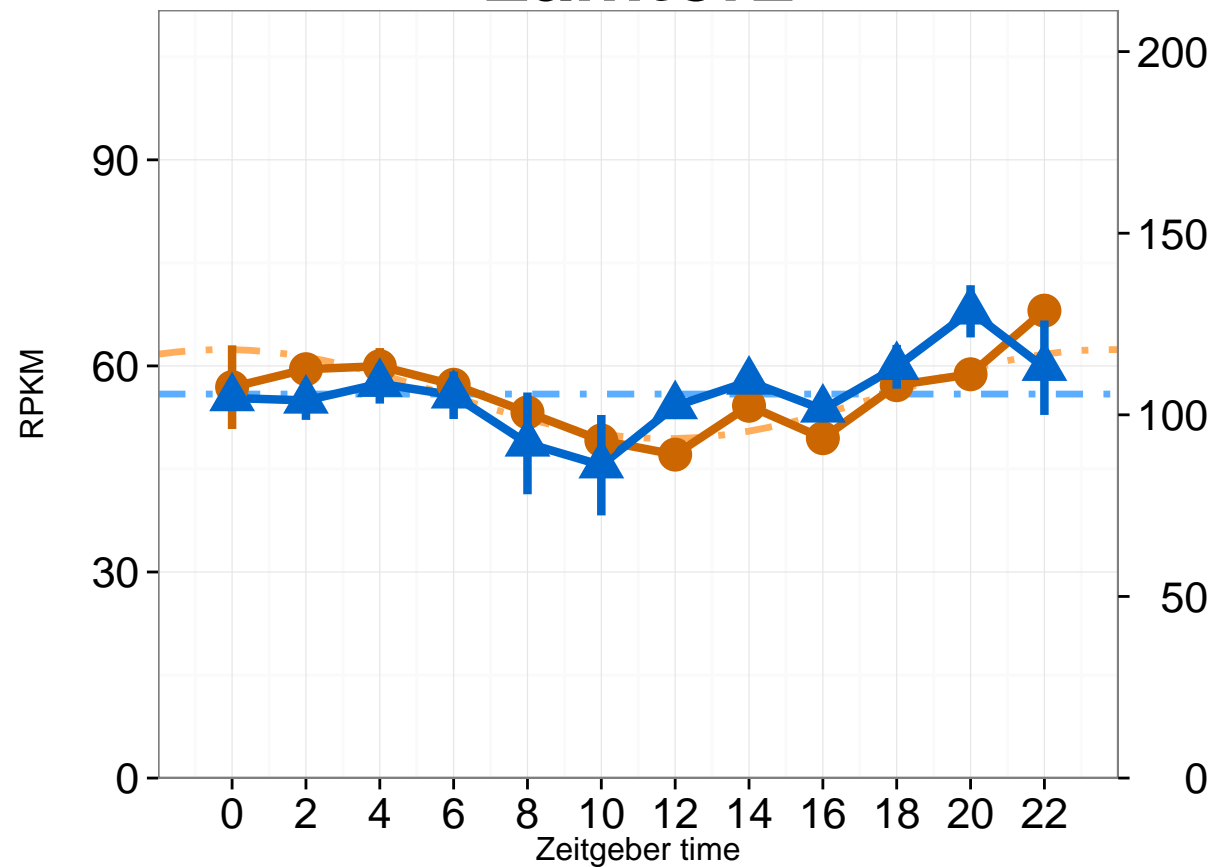

## Lamtor2

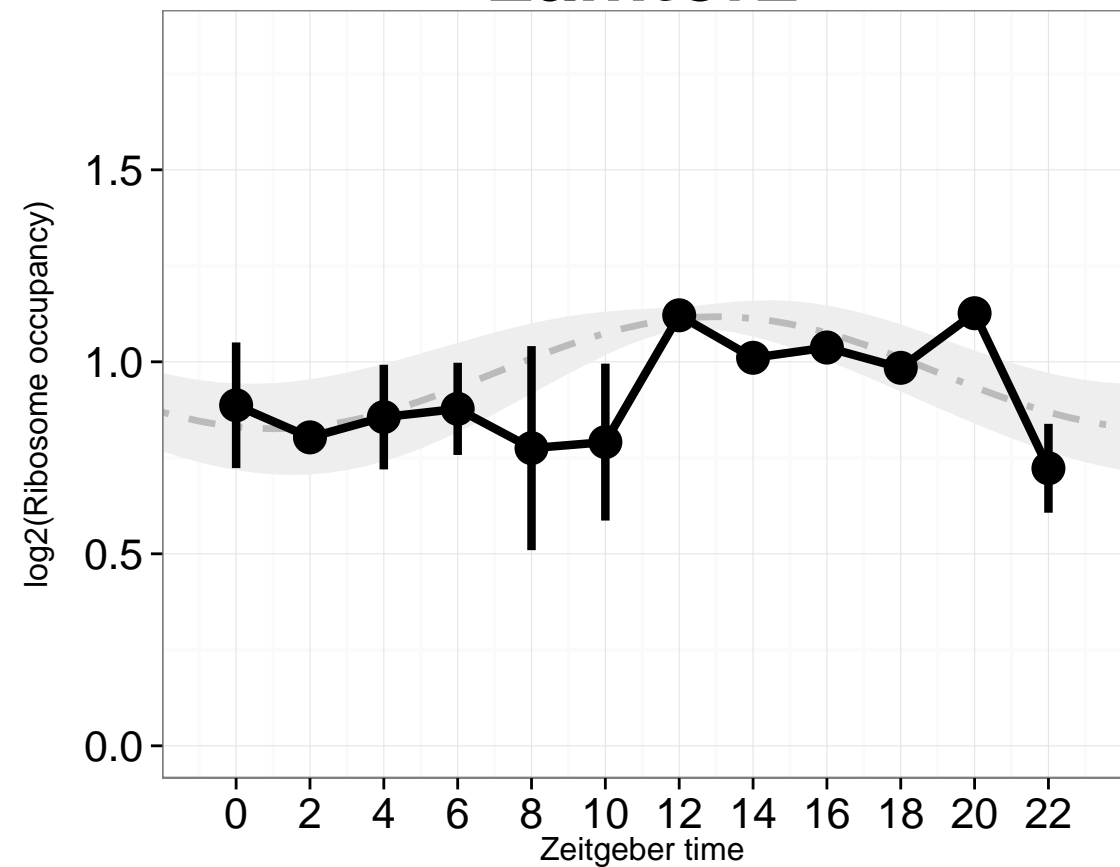

Supplement: SuppDataset_1.zip [file Lamtor2_set_A.pdf › Supplemental Dataset 1/A-mRNA_nonrhyth_translation_nonrhyth/Lamtor2_set_A.pdf]

## Lamtor3

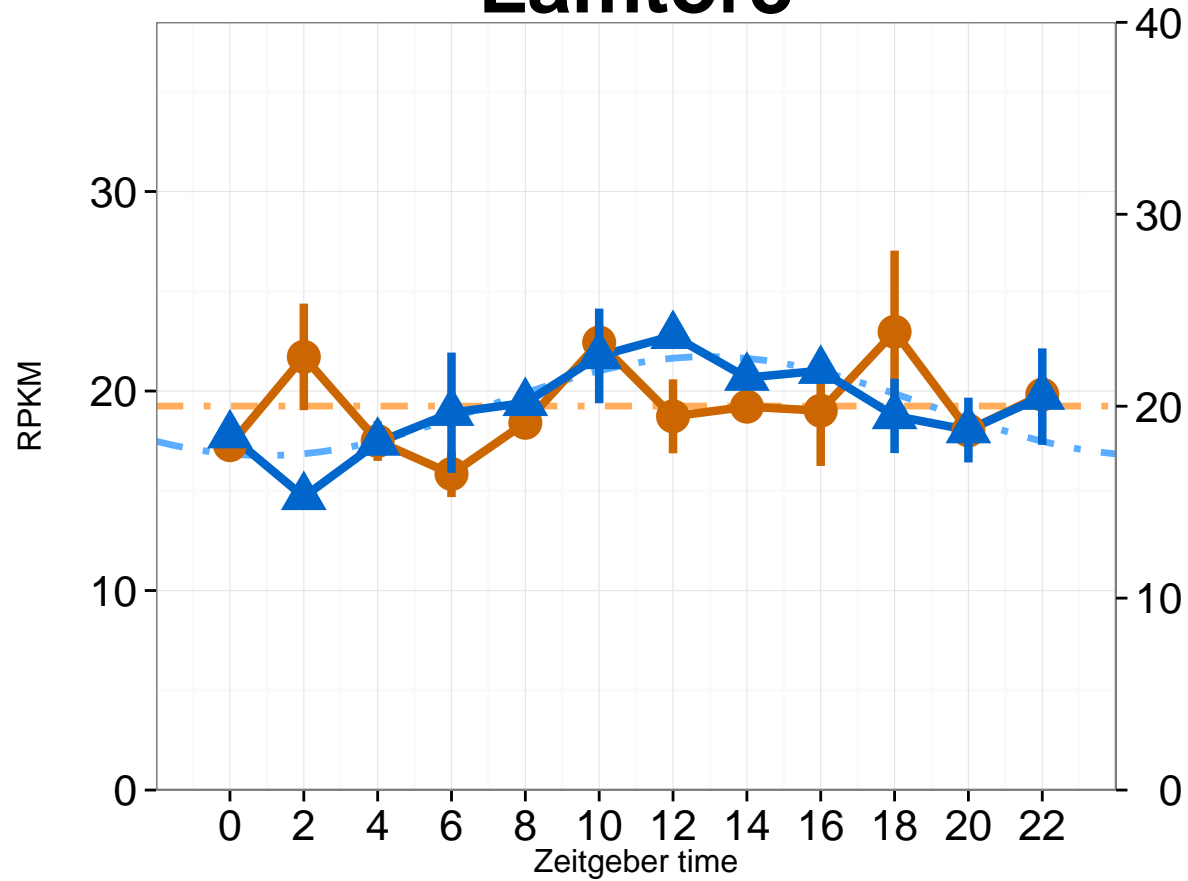

## Lamtor3

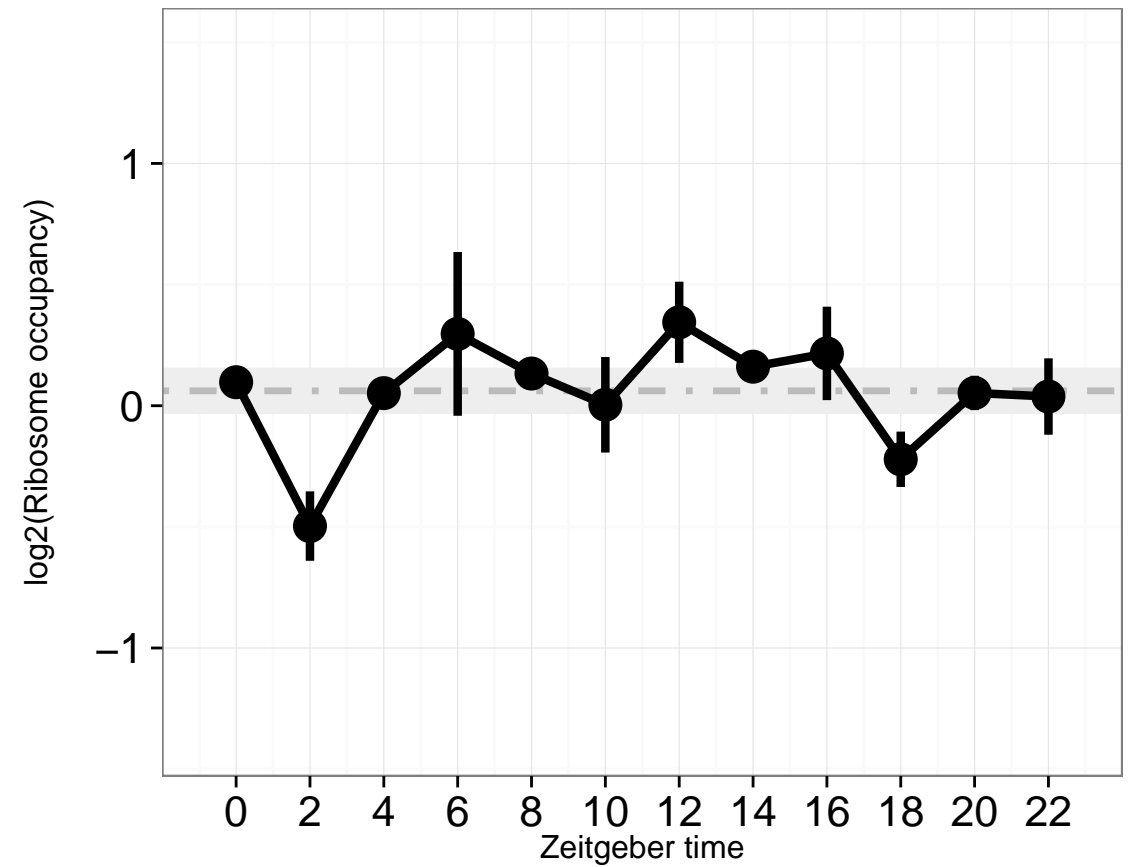

Supplement: SuppDataset_1.zip [file Lamtor3_set_A.pdf › Supplemental Dataset 1/A-mRNA_nonrhyth_translation_nonrhyth/Lamtor3_set_A.pdf]

## Lamtor5

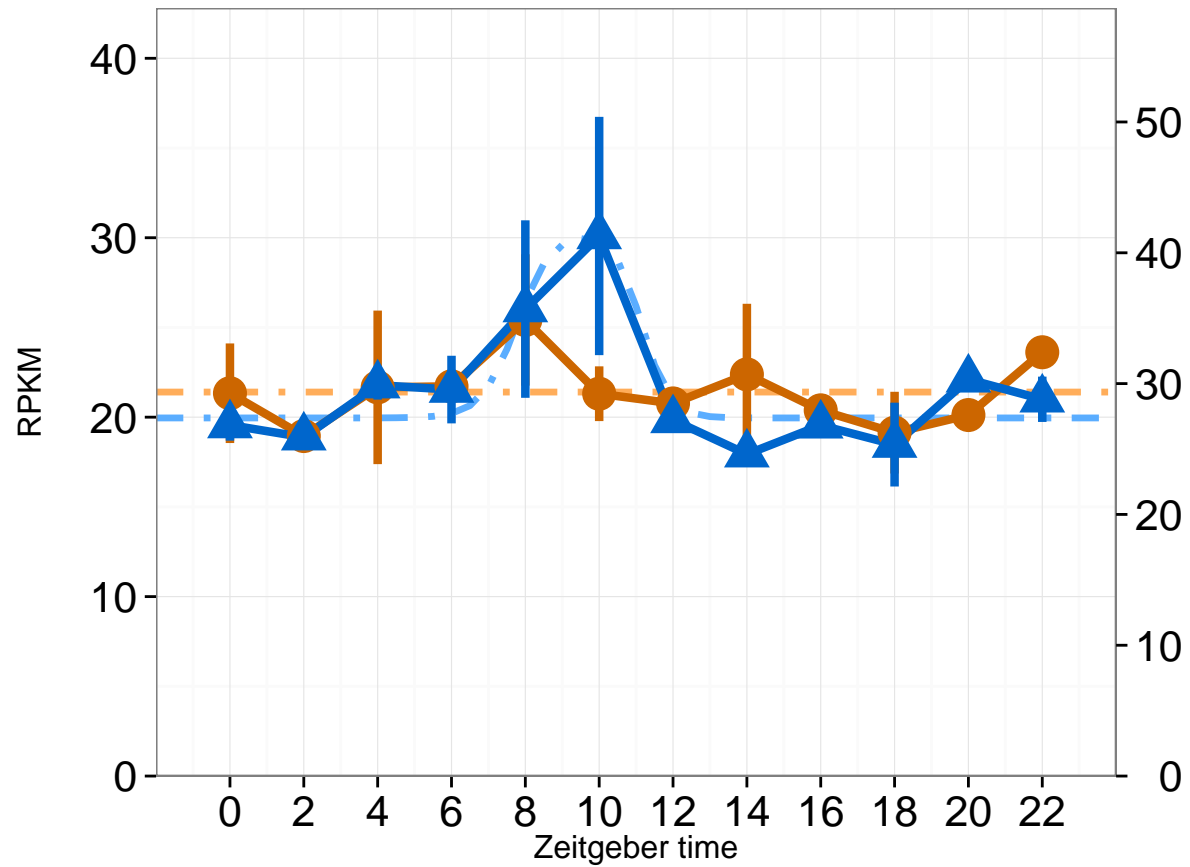

## Lamtor5

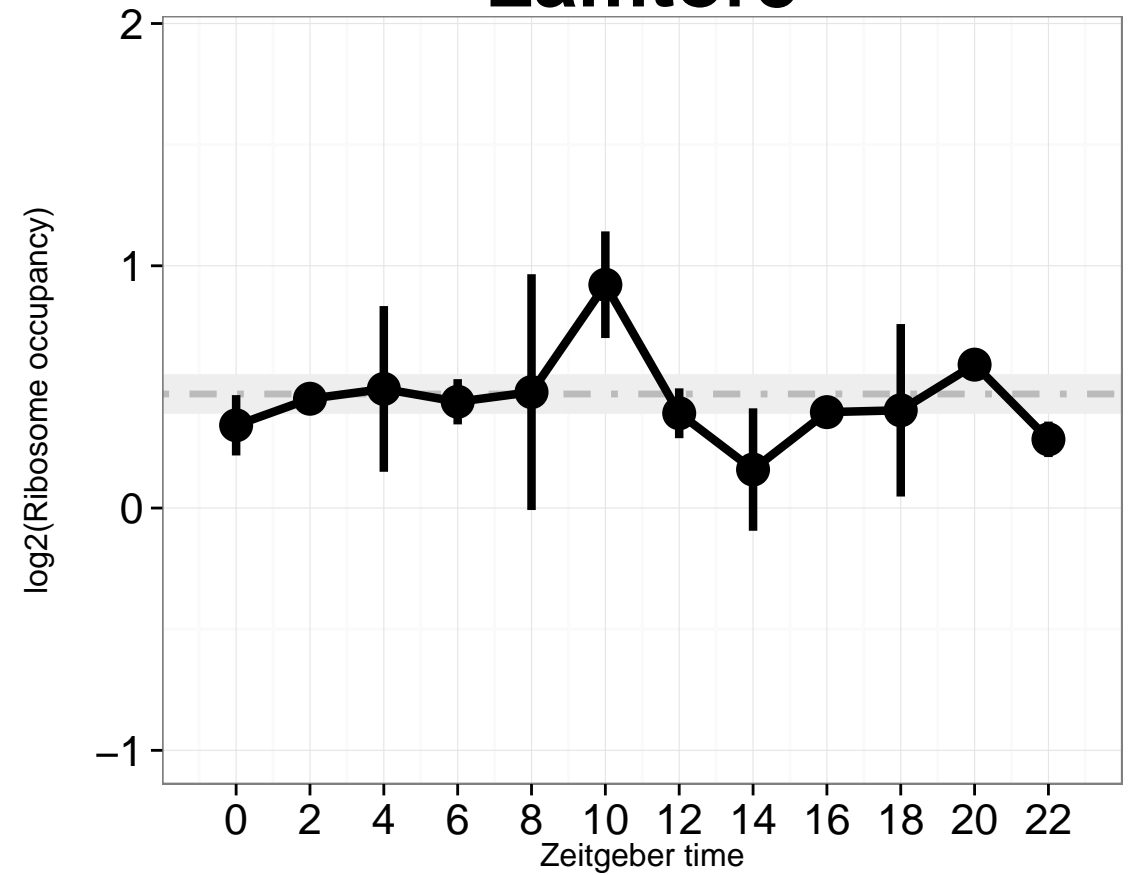

Supplement: SuppDataset_1.zip [file Lamtor5_set_A.pdf › Supplemental Dataset 1/A-mRNA_nonrhyth_translation_nonrhyth/Lamtor5_set_A.pdf]

# Lanc1

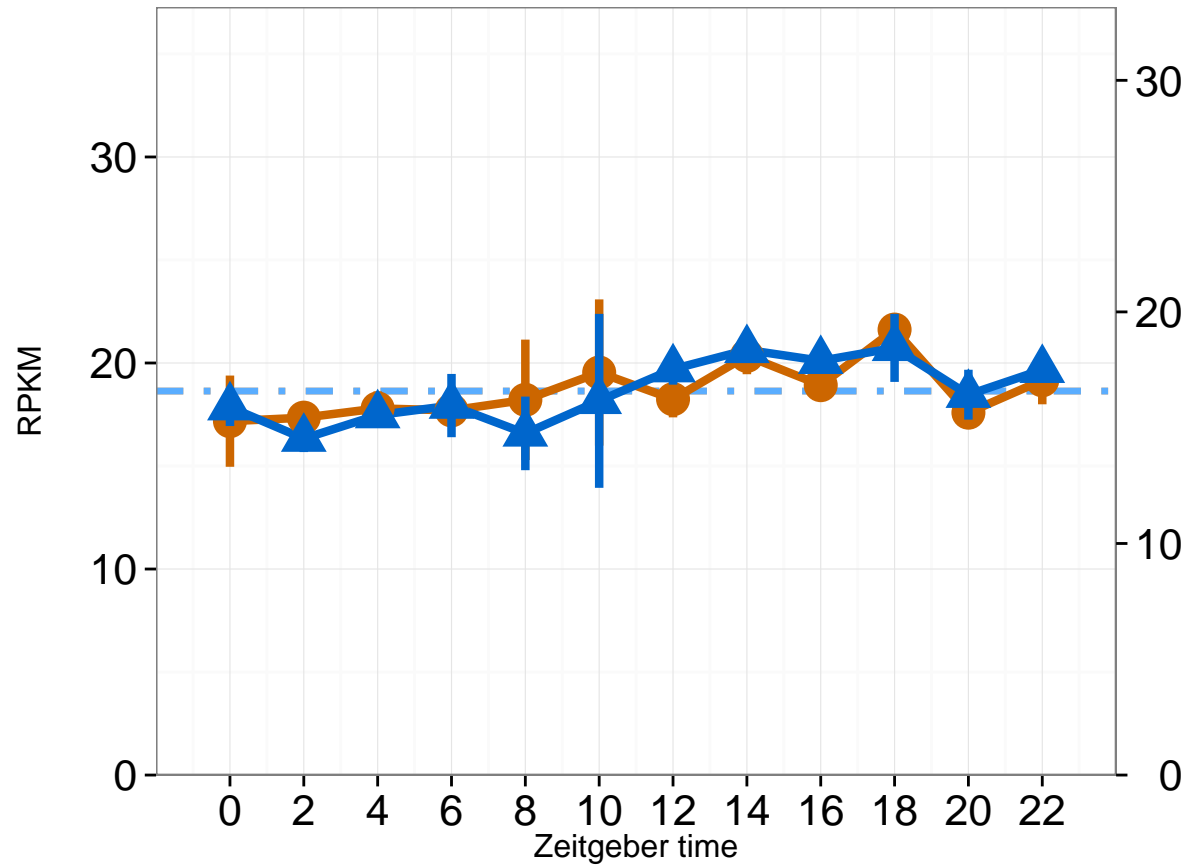

# Lanc1

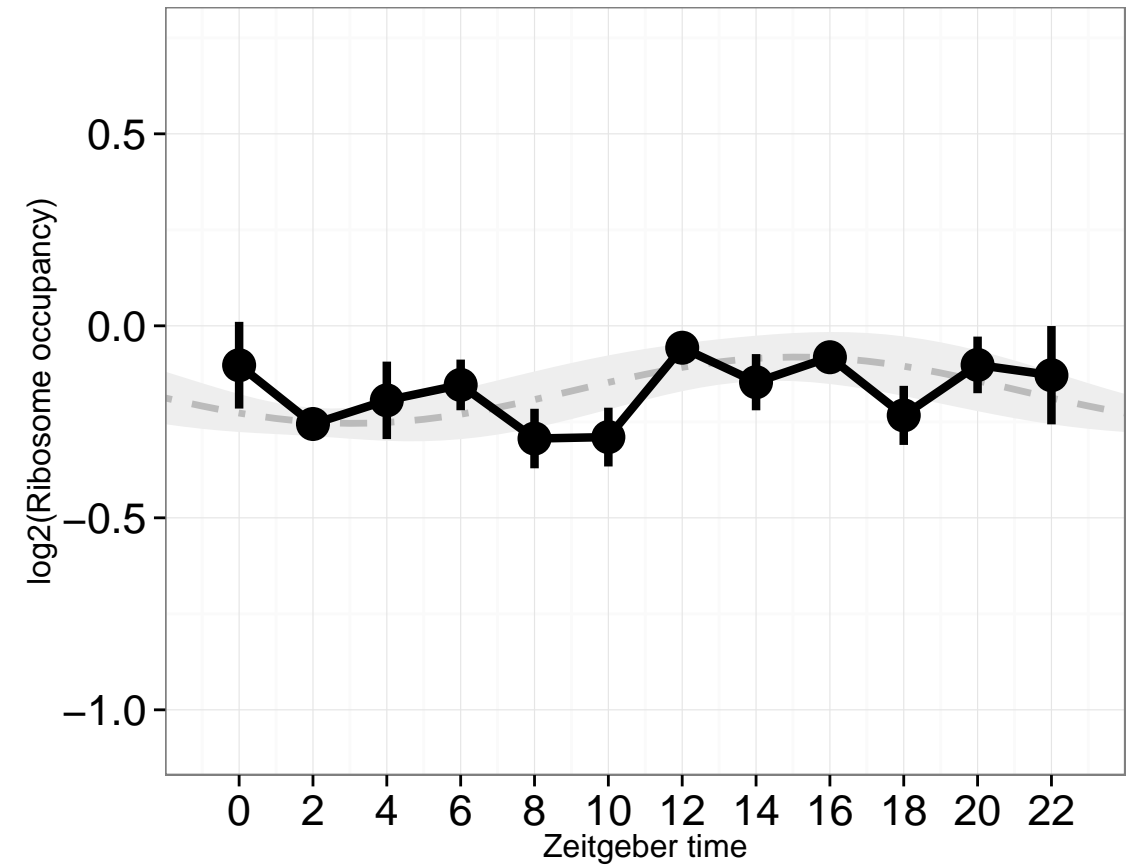

Supplement: SuppDataset_1.zip [file Lancl1_set_A.pdf › Supplemental Dataset 1/A-mRNA_nonrhyth_translation_nonrhyth/Lancl1_set_A.pdf]

## Lanc12

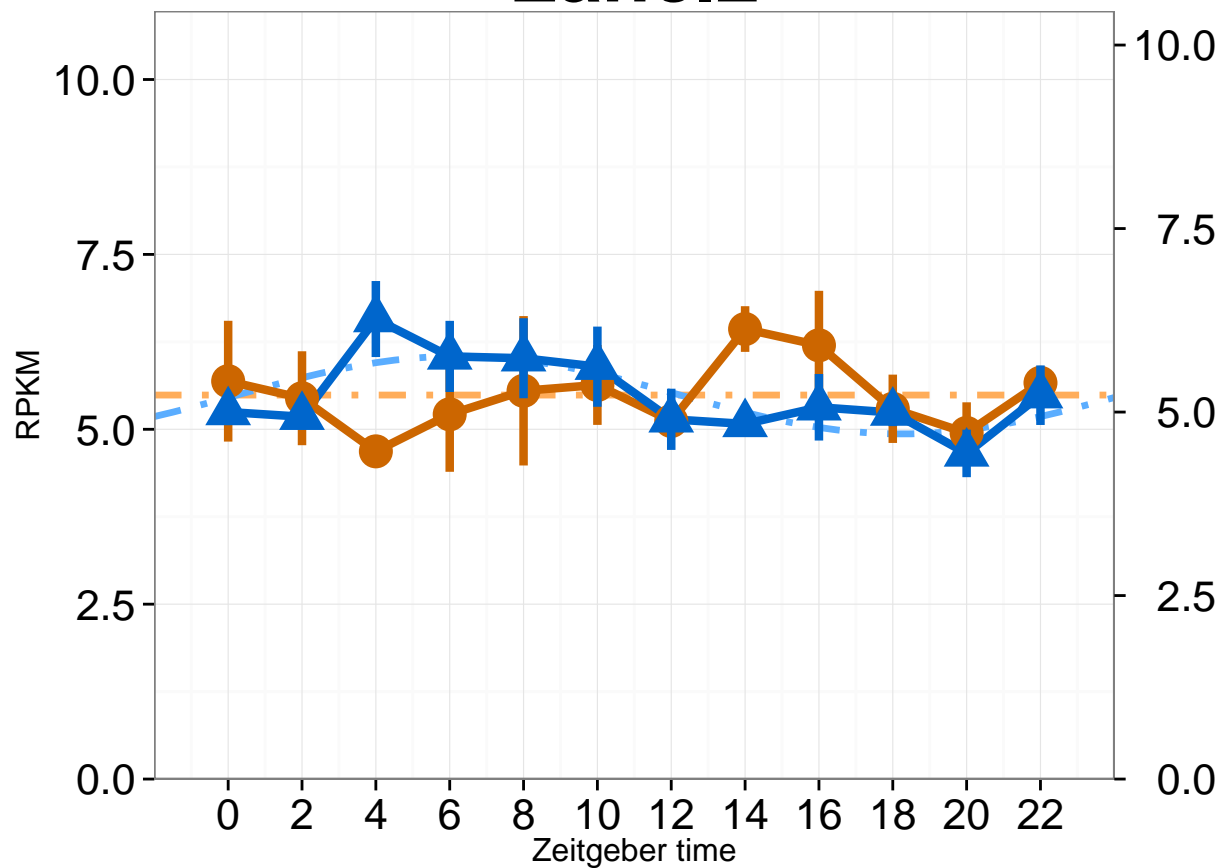

## Lanc12

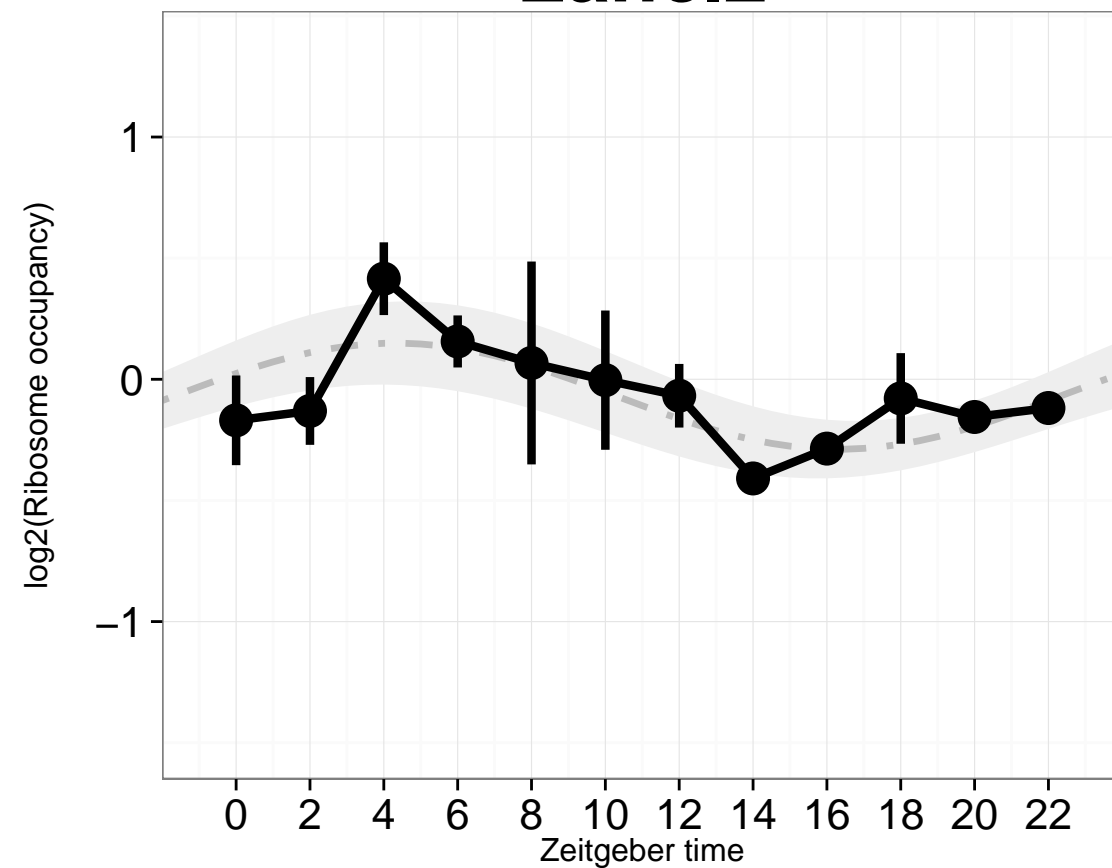

Supplement: SuppDataset_1.zip [file Lancl2_set_A.pdf › Supplemental Dataset 1/A-mRNA_nonrhyth_translation_nonrhyth/Lancl2_set_A.pdf]

# Lap3

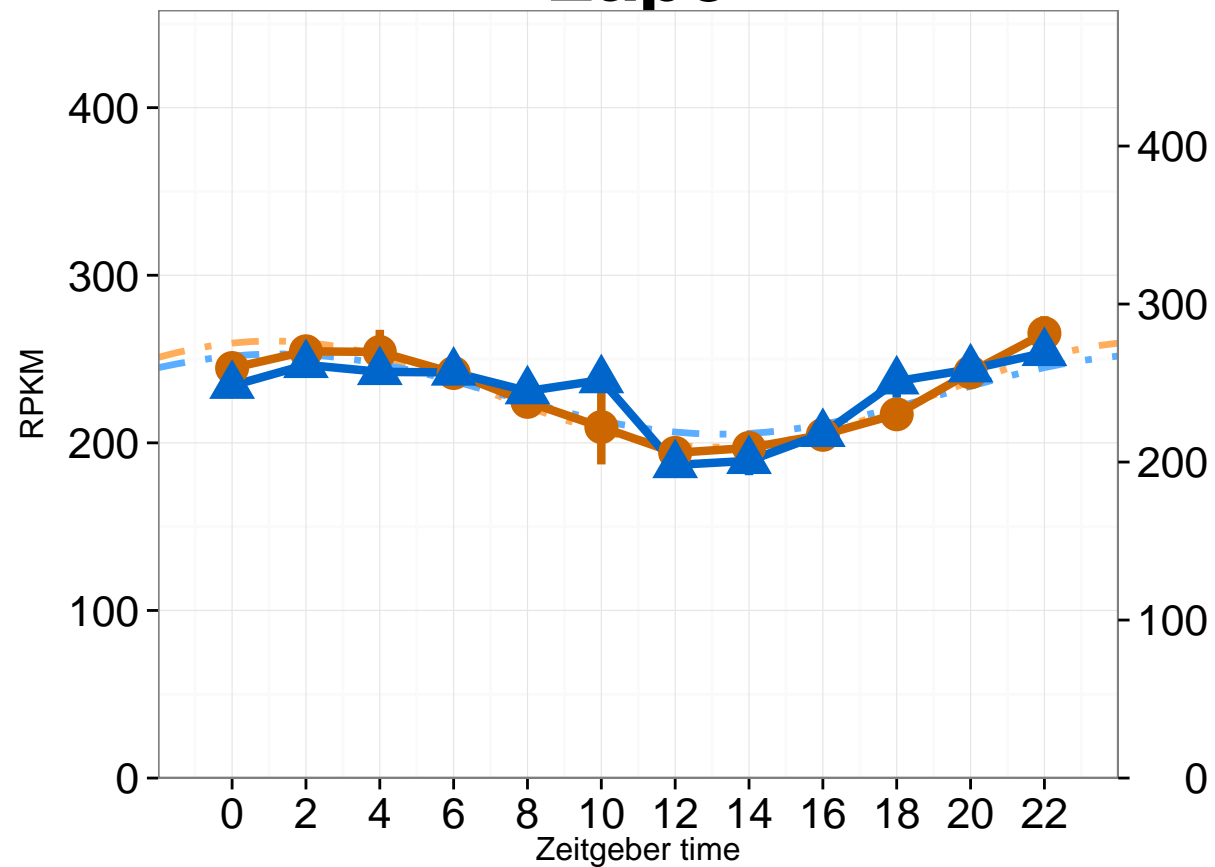

# Lap3

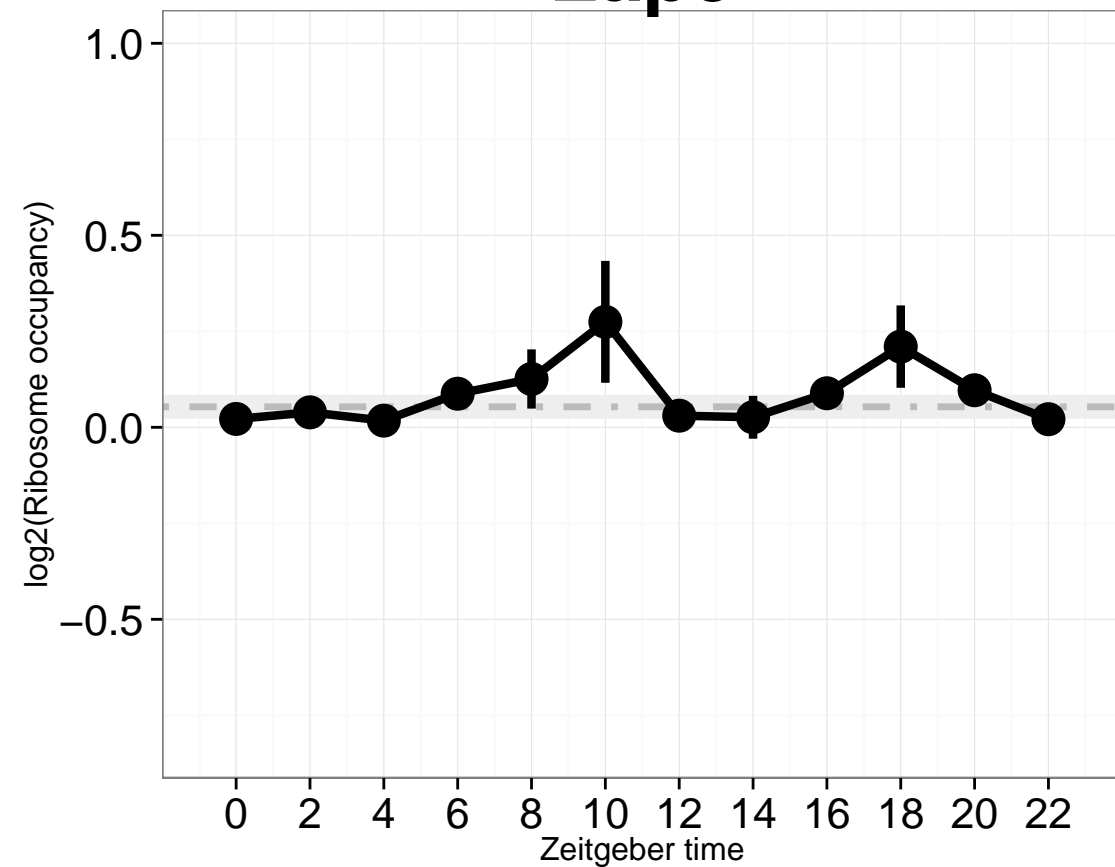

Supplement: SuppDataset_1.zip [file Lap3_set_A.pdf › Supplemental Dataset 1/A-mRNA_nonrhyth_translation_nonrhyth/Lap3_set_A.pdf]

# Laptm4a

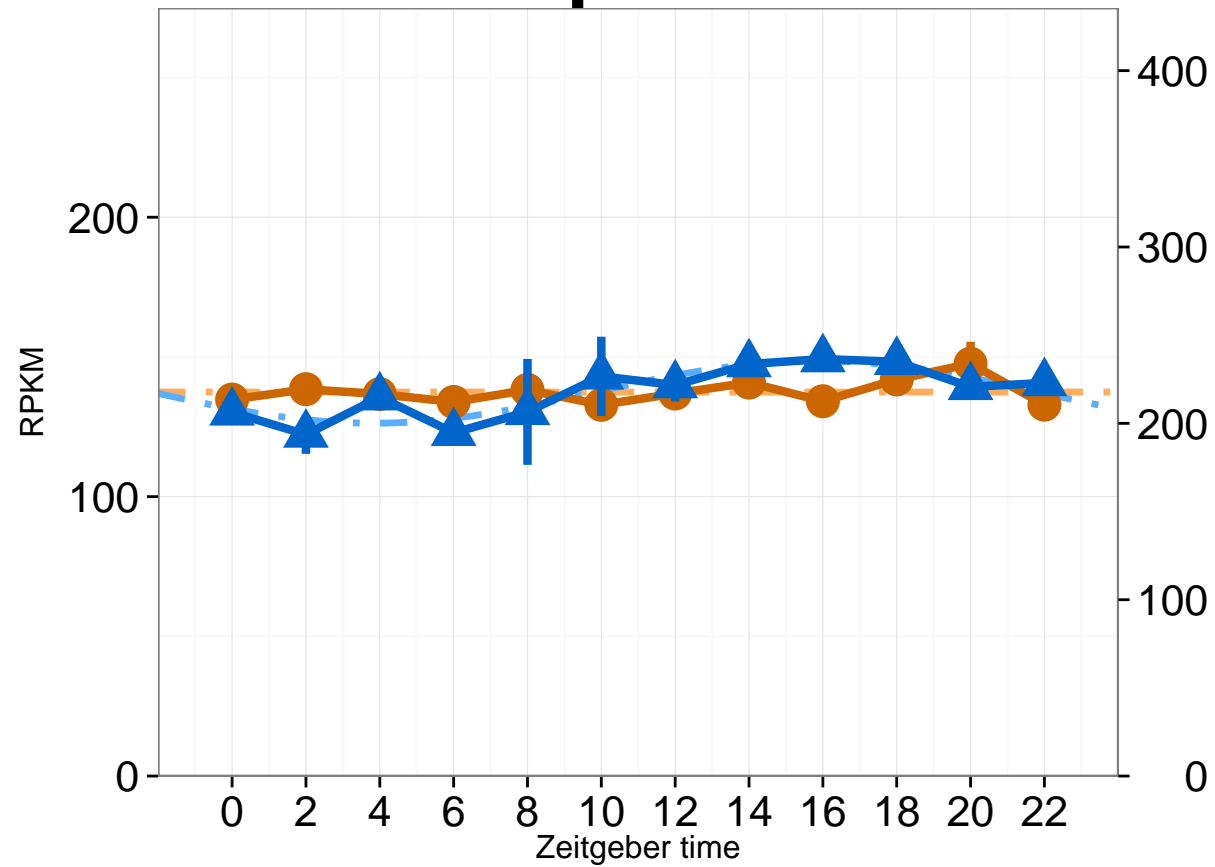

# Laptm4a

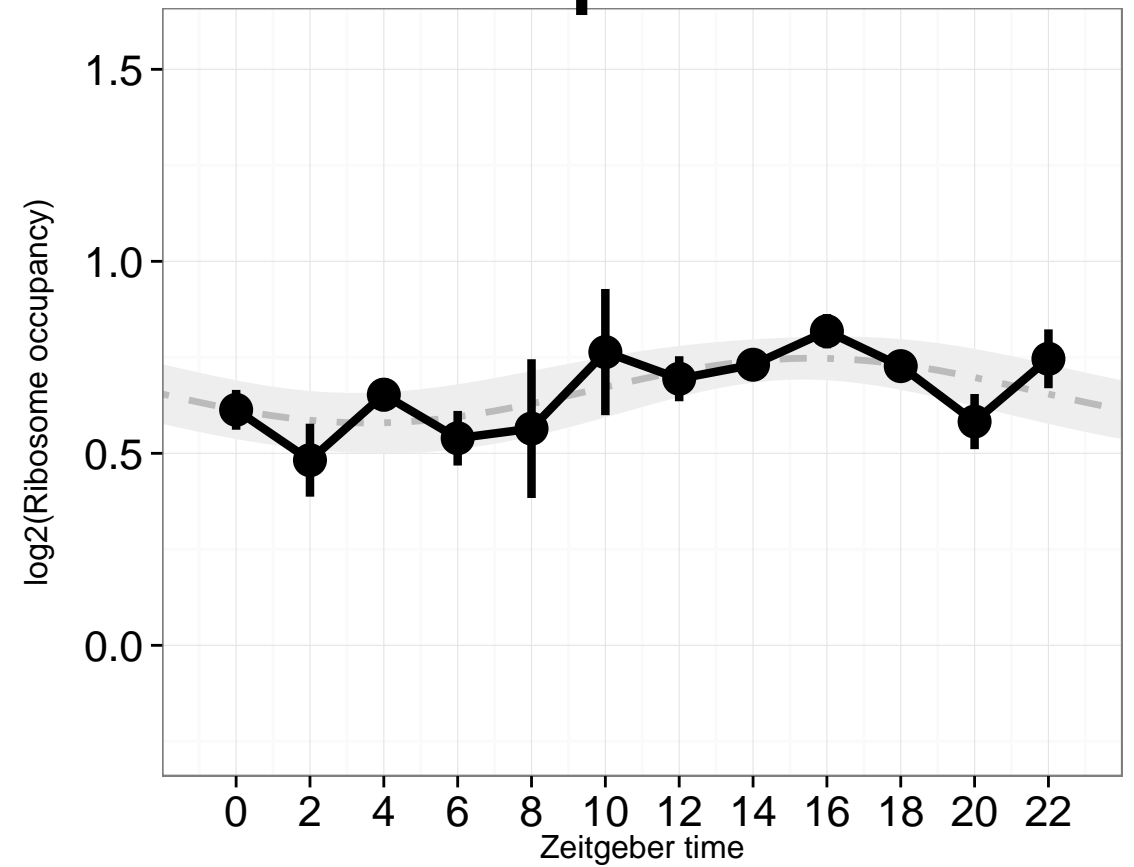

Supplement: SuppDataset_1.zip [file Laptm4a_set_A.pdf › Supplemental Dataset 1/A-mRNA_nonrhyth_translation_nonrhyth/Laptm4a_set_A.pdf]

# Laptm4b

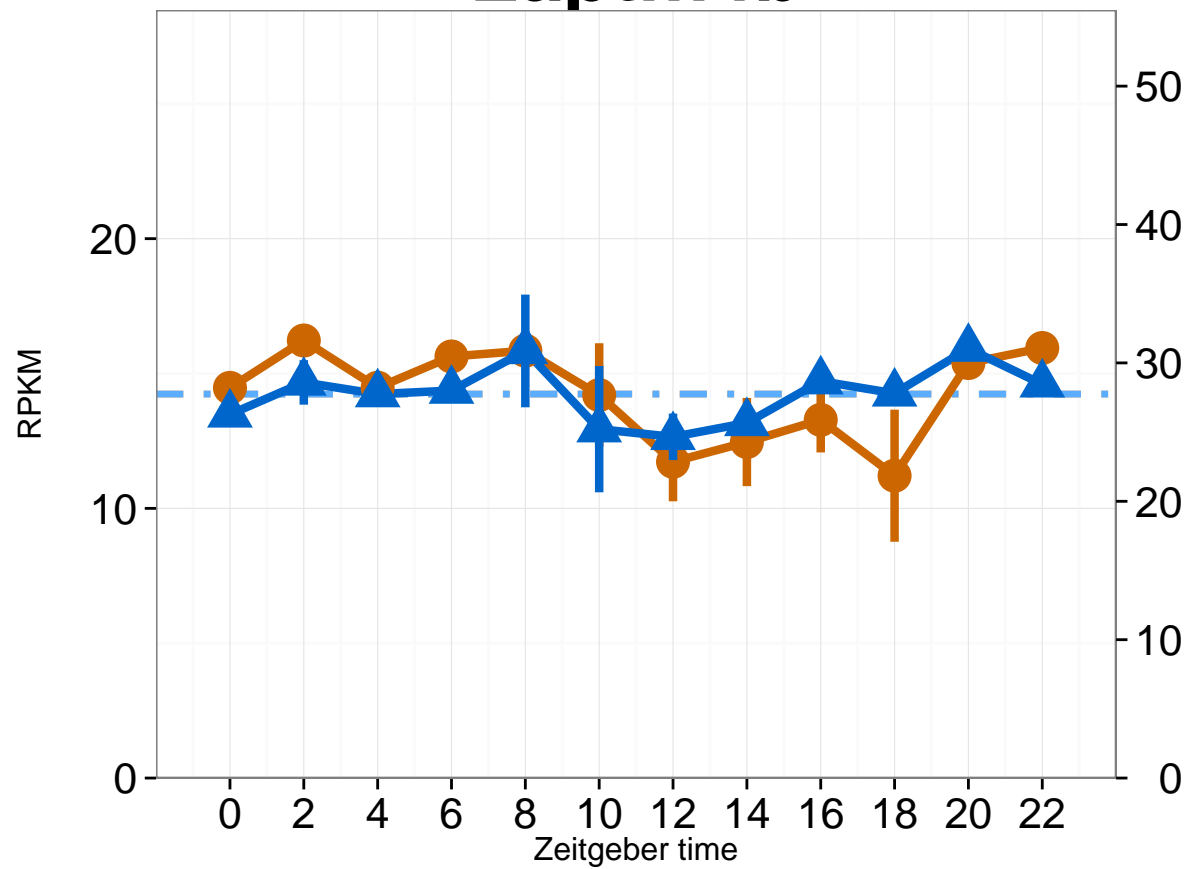

# Laptm4b

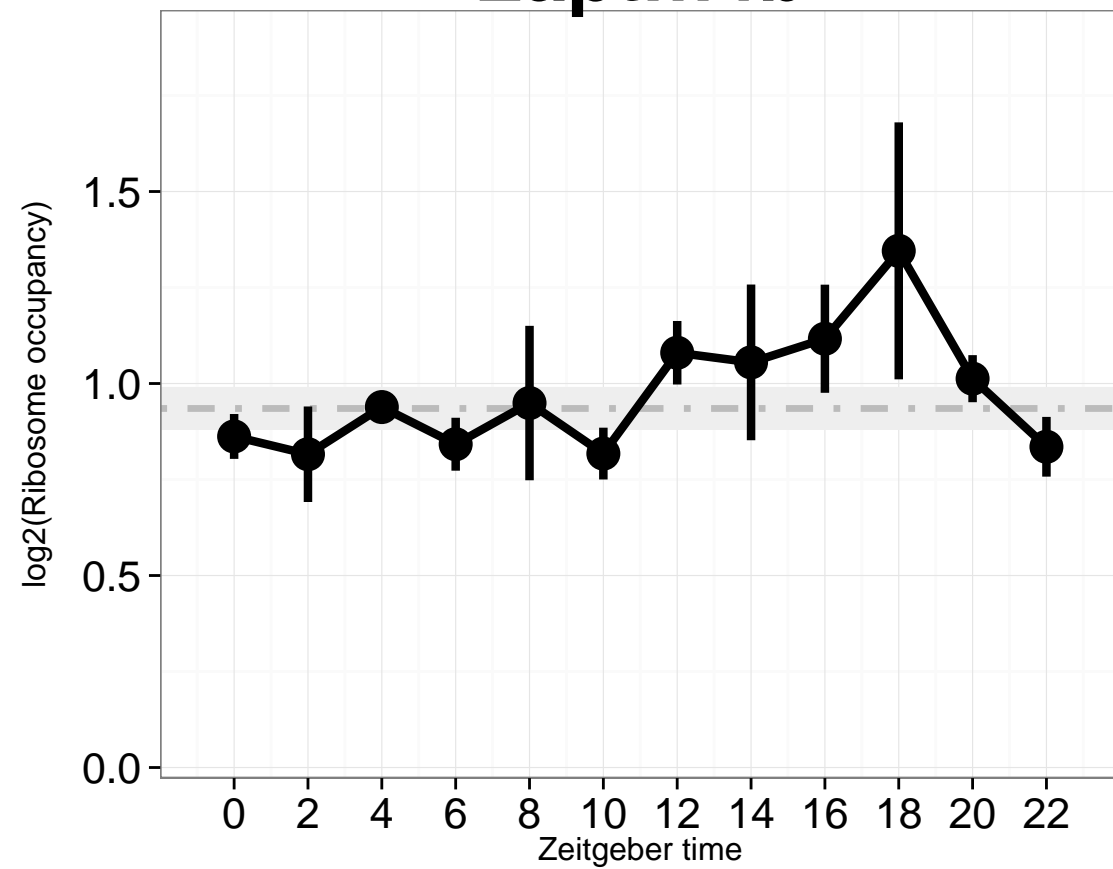

Supplement: SuppDataset_1.zip [file Laptm4b_set_A.pdf › Supplemental Dataset 1/A-mRNA_nonrhyth_translation_nonrhyth/Laptm4b_set_A.pdf]

# Laptm5

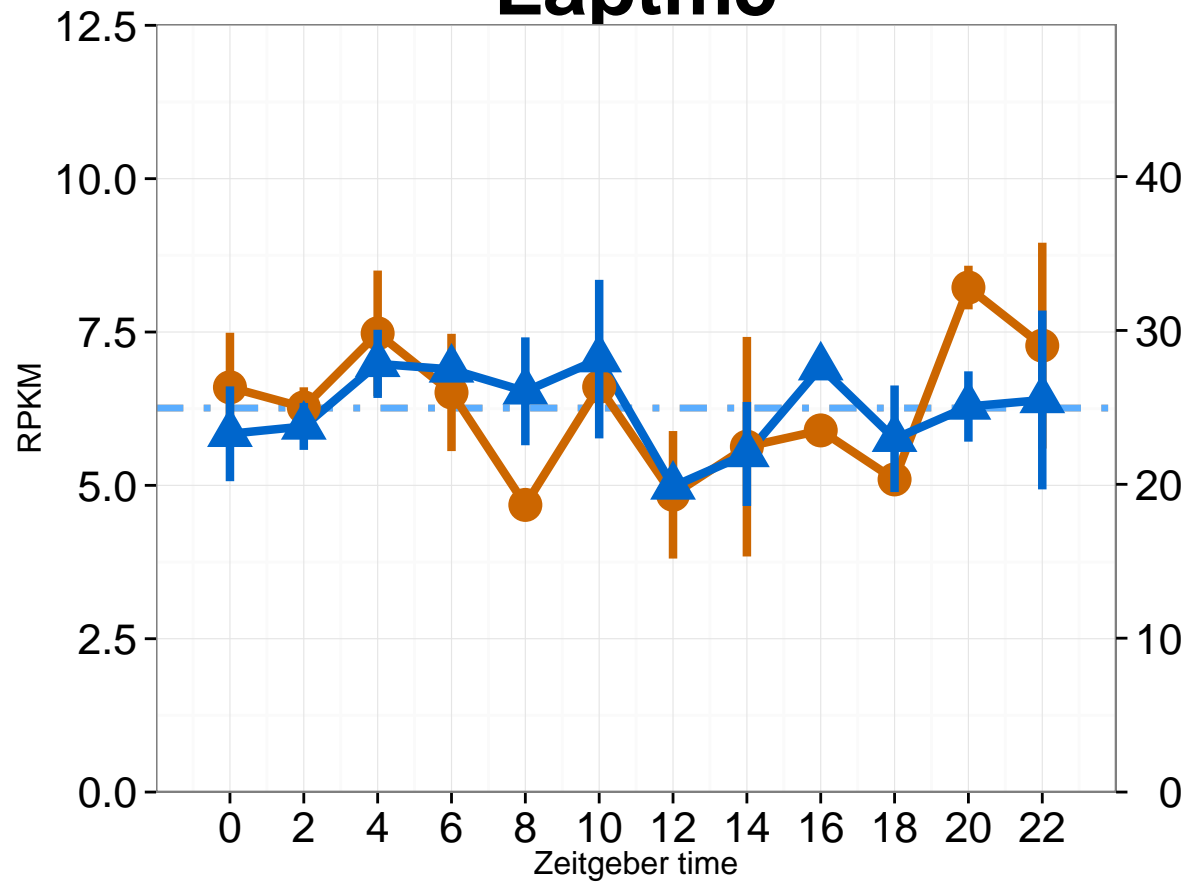

# Laptm5

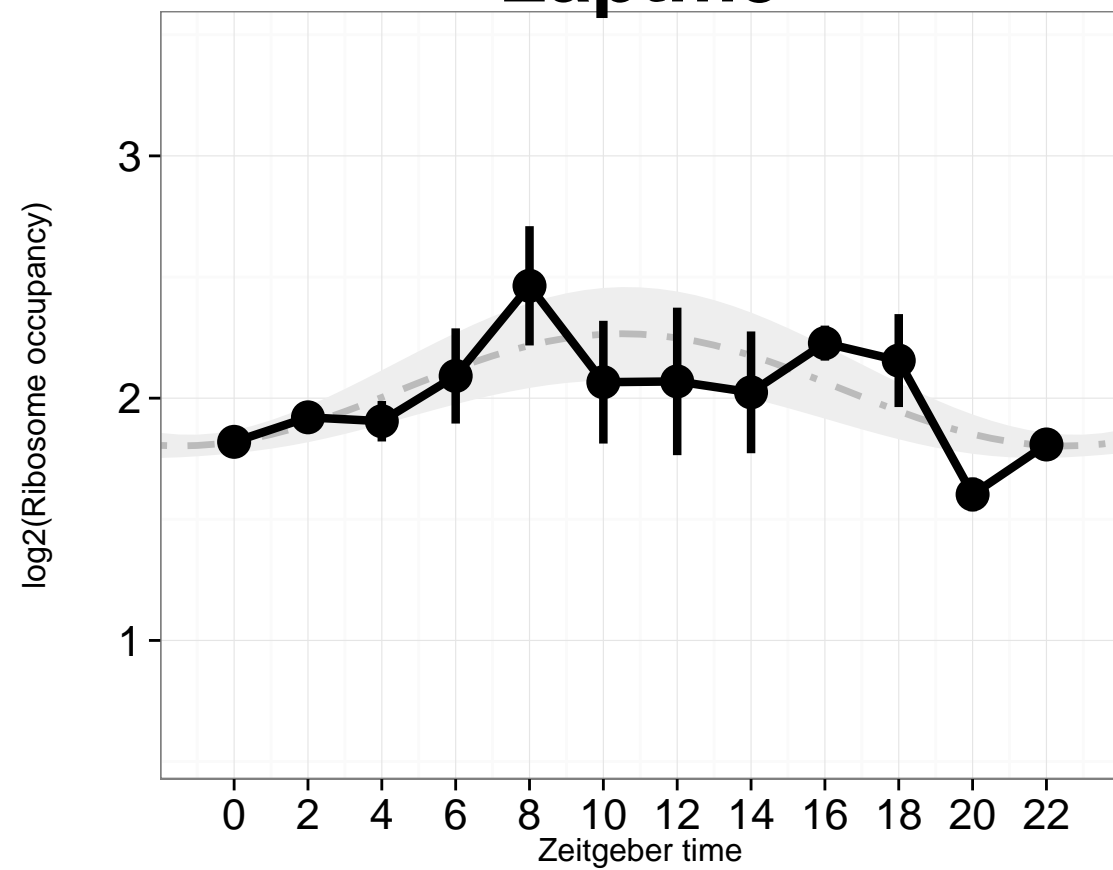

Supplement: SuppDataset_1.zip [file Laptm5_set_A.pdf › Supplemental Dataset 1/A-mRNA_nonrhyth_translation_nonrhyth/Laptm5_set_A.pdf]

## Large

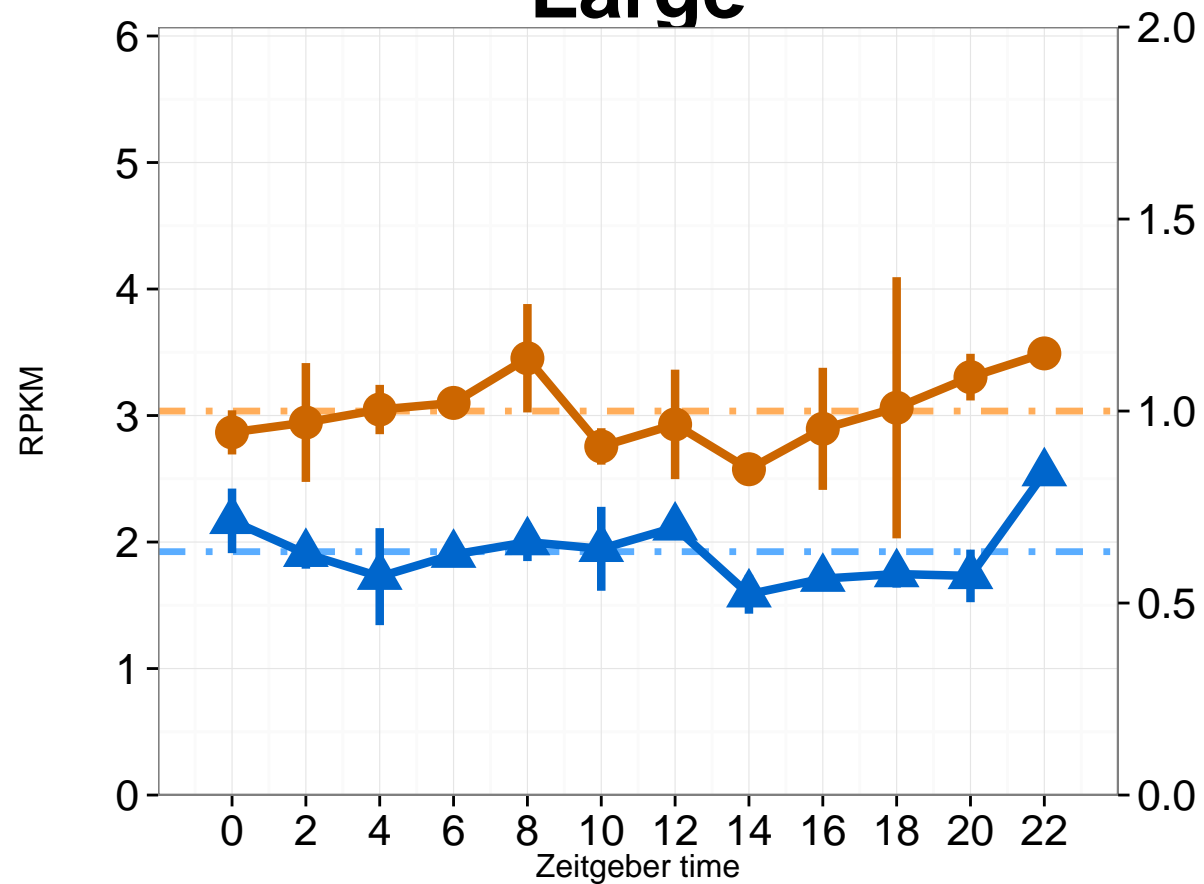

## Large

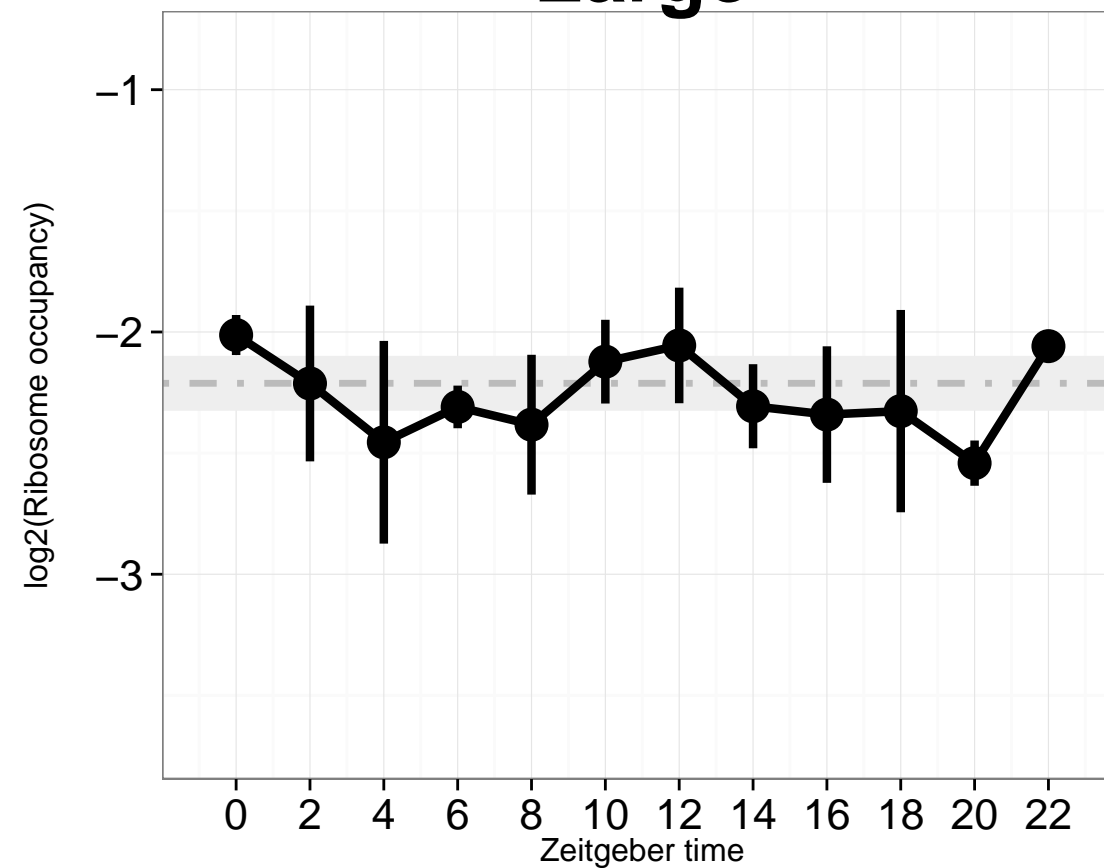

Supplement: SuppDataset_1.zip [file Large_set_A.pdf › Supplemental Dataset 1/A-mRNA_nonrhyth_translation_nonrhyth/Large_set_A.pdf]

# Larp1b

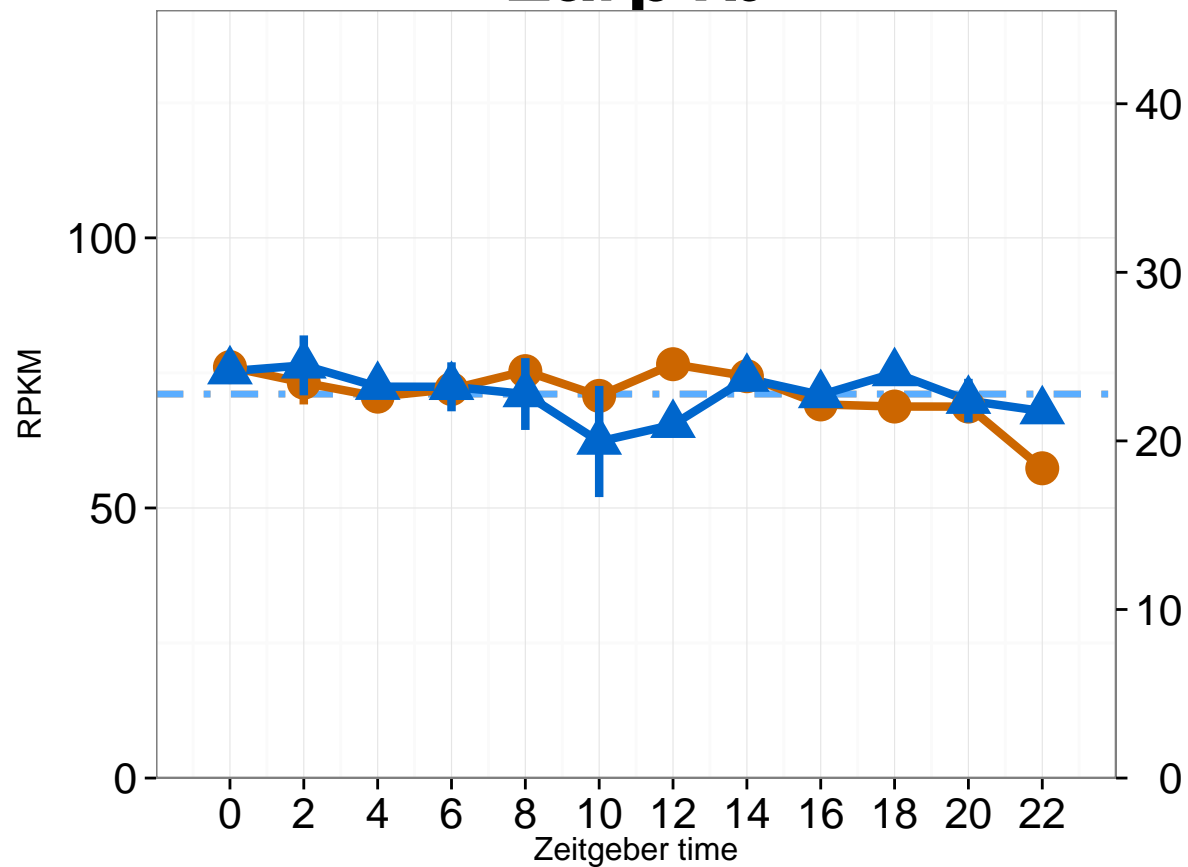

# Larp1b

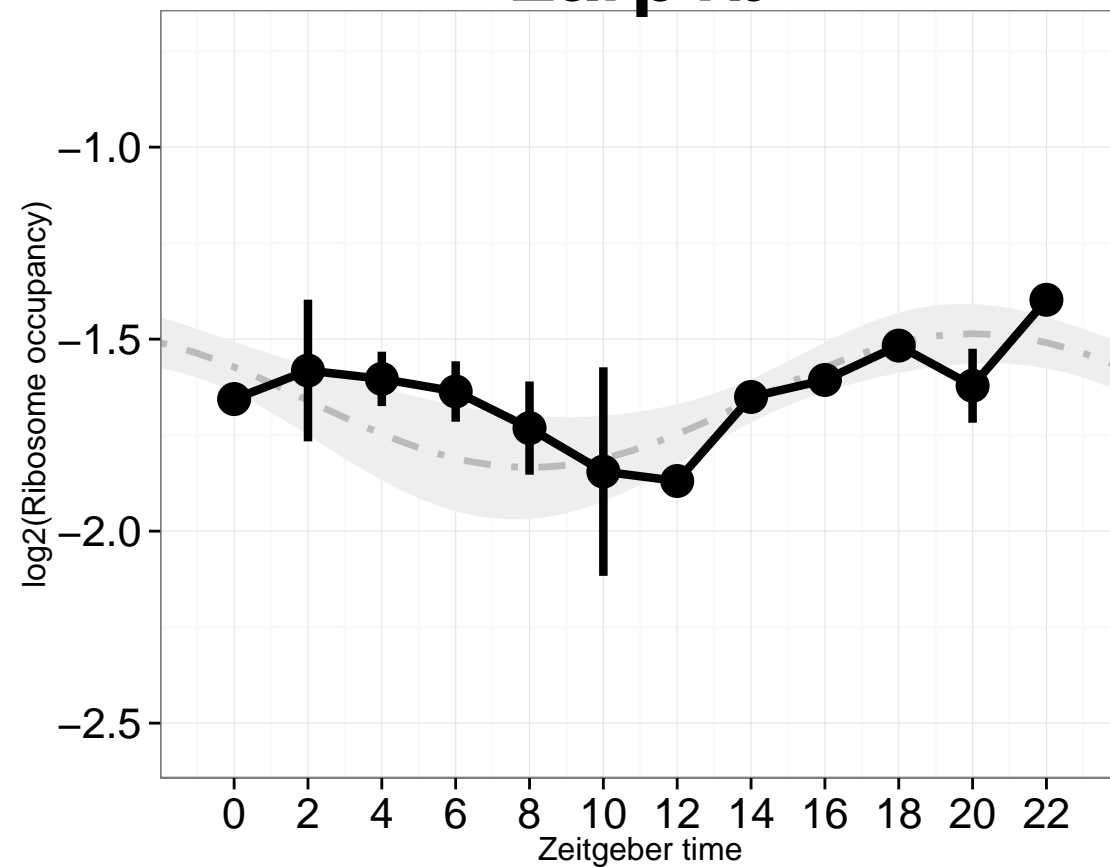

Supplement: SuppDataset_1.zip [file Larp1b_set_A.pdf › Supplemental Dataset 1/A-mRNA_nonrhyth_translation_nonrhyth/Larp1b_set_A.pdf]

## Larp4

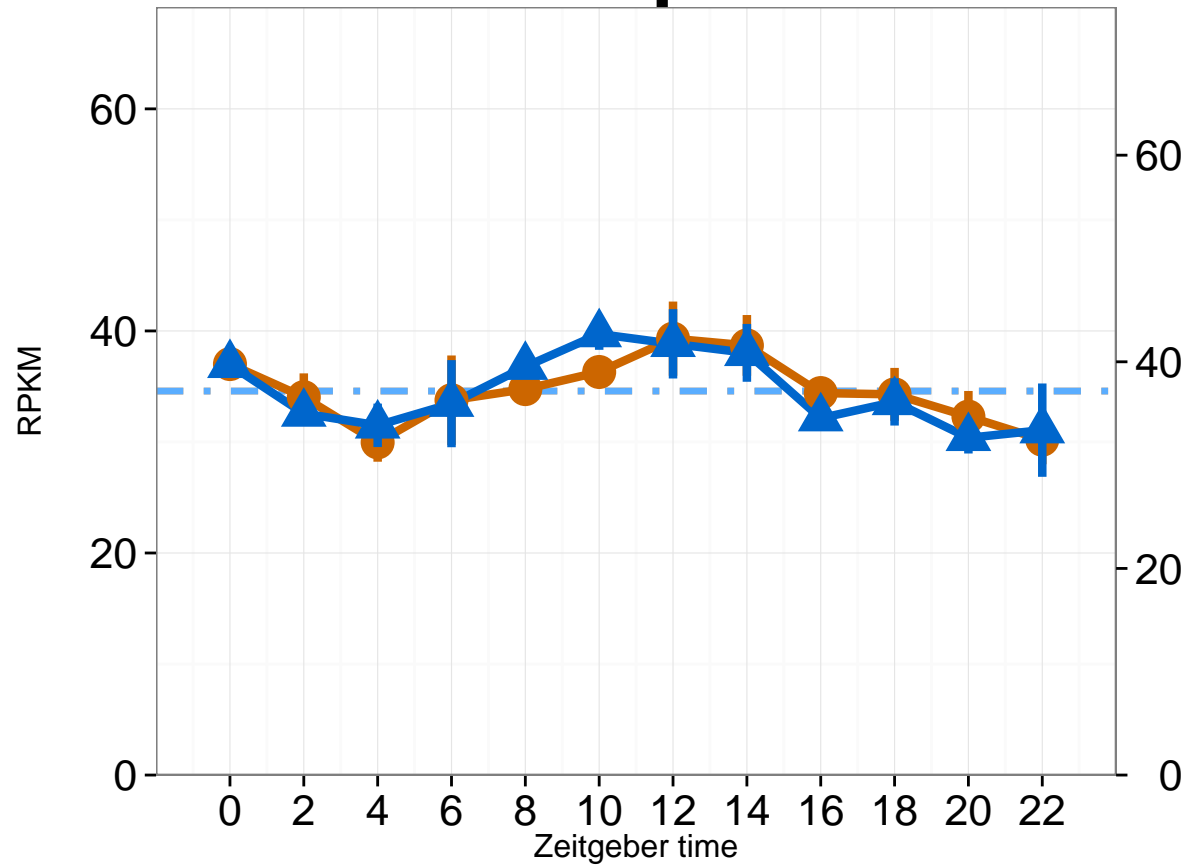

## Larp4

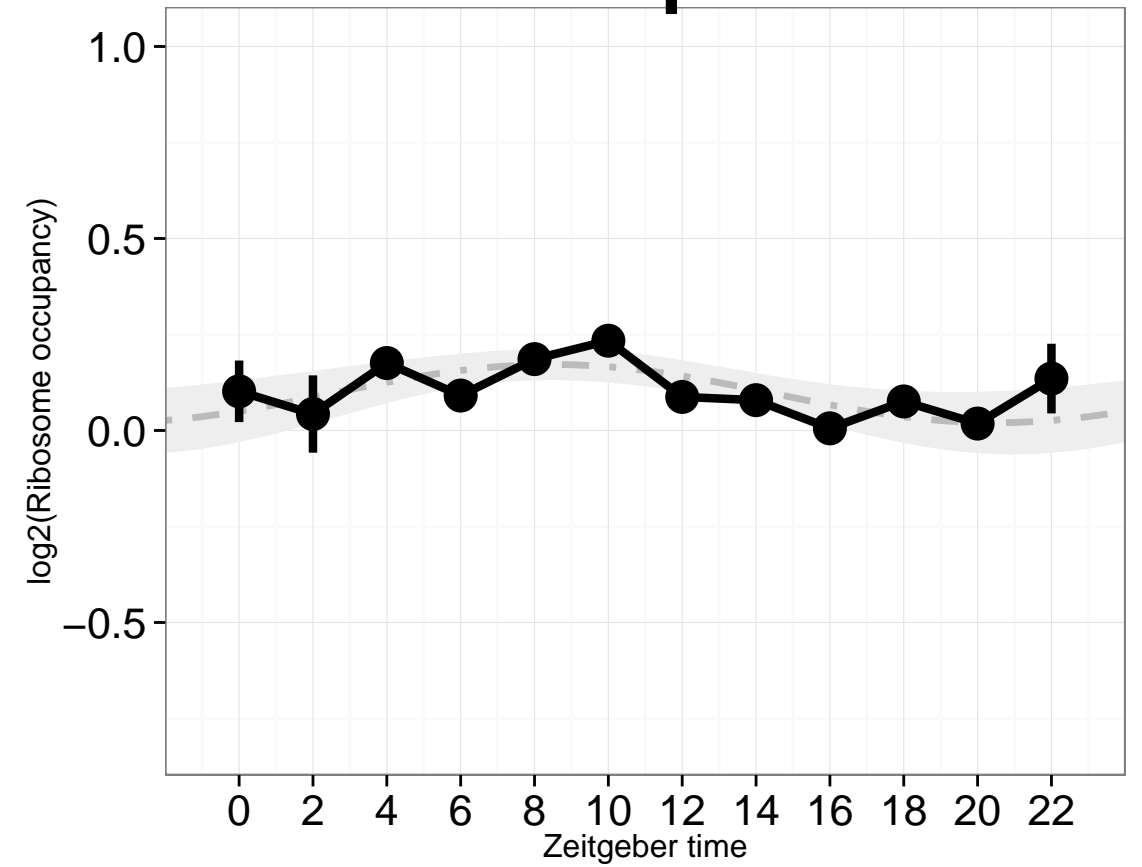

Supplement: SuppDataset_1.zip [file Larp4_set_A.pdf › Supplemental Dataset 1/A-mRNA_nonrhyth_translation_nonrhyth/Larp4_set_A.pdf]

# Larp4b

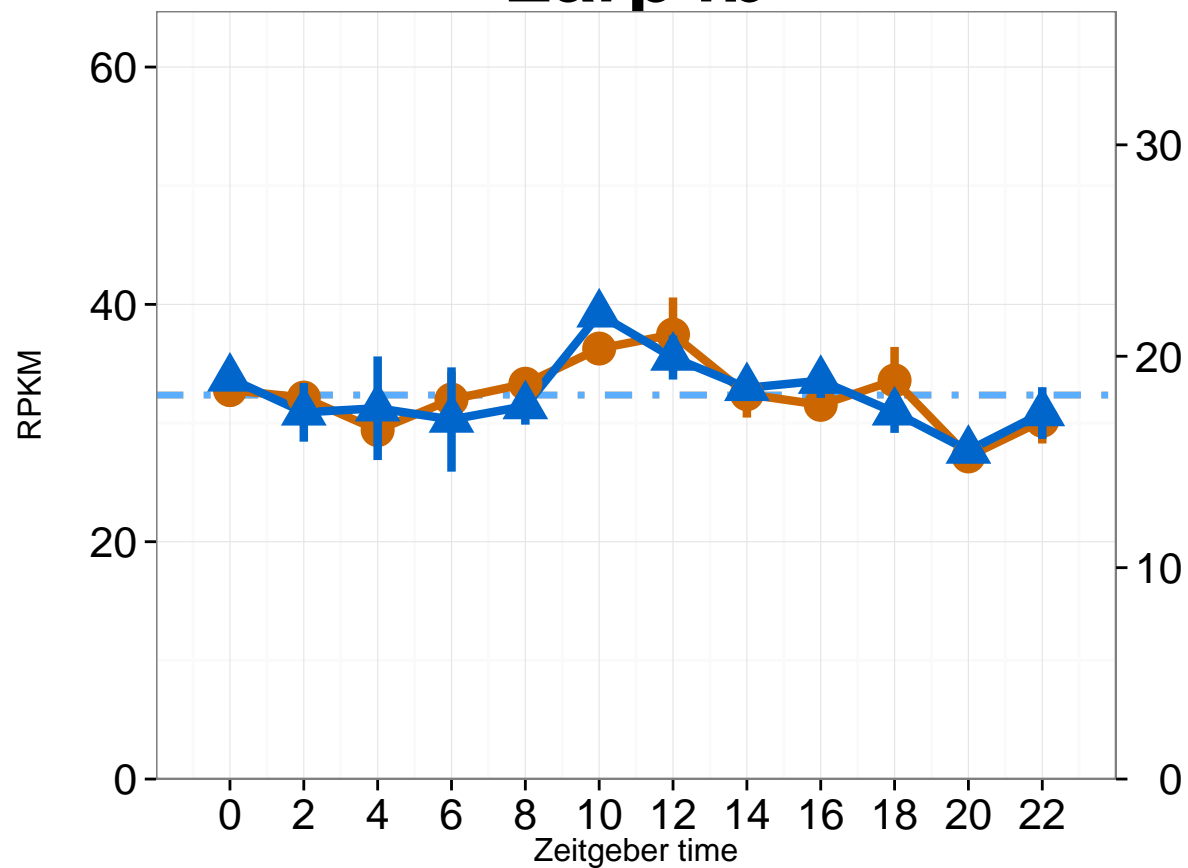

# Larp4b

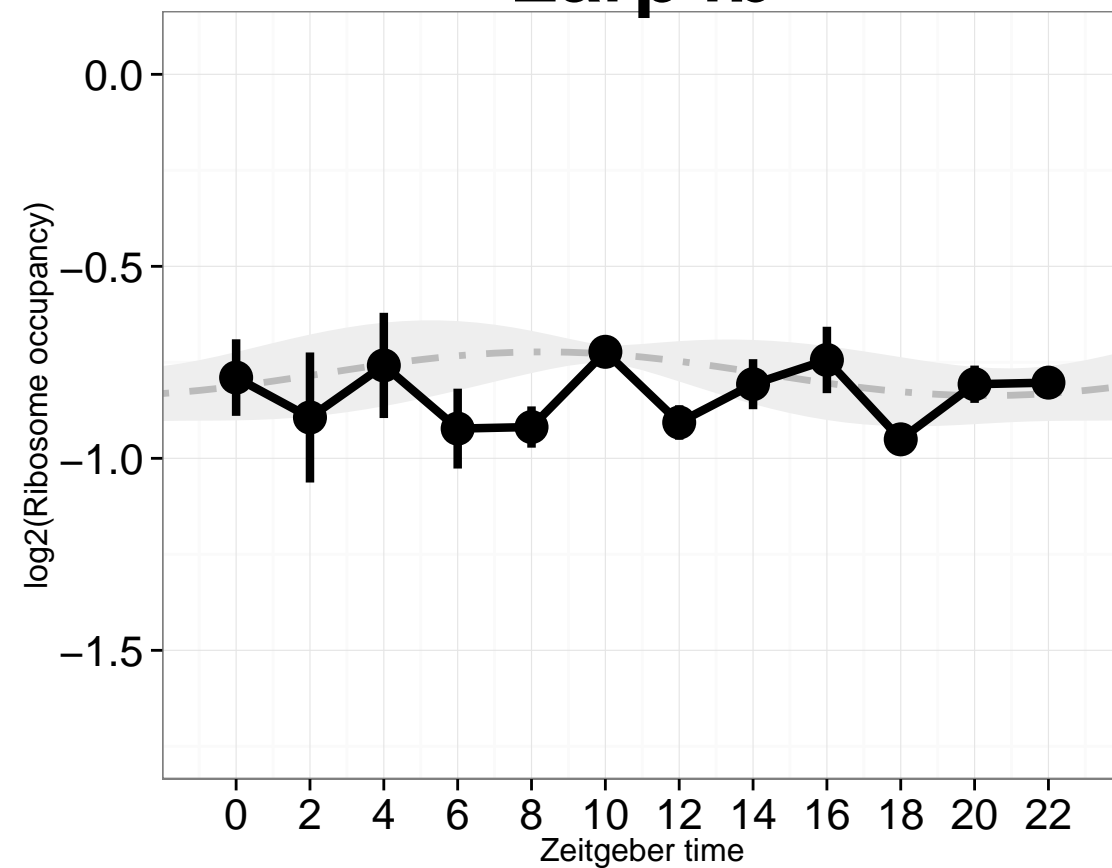

Supplement: SuppDataset_1.zip [file Larp4b_set_A.pdf › Supplemental Dataset 1/A-mRNA_nonrhyth_translation_nonrhyth/Larp4b_set_A.pdf]

## Larp7

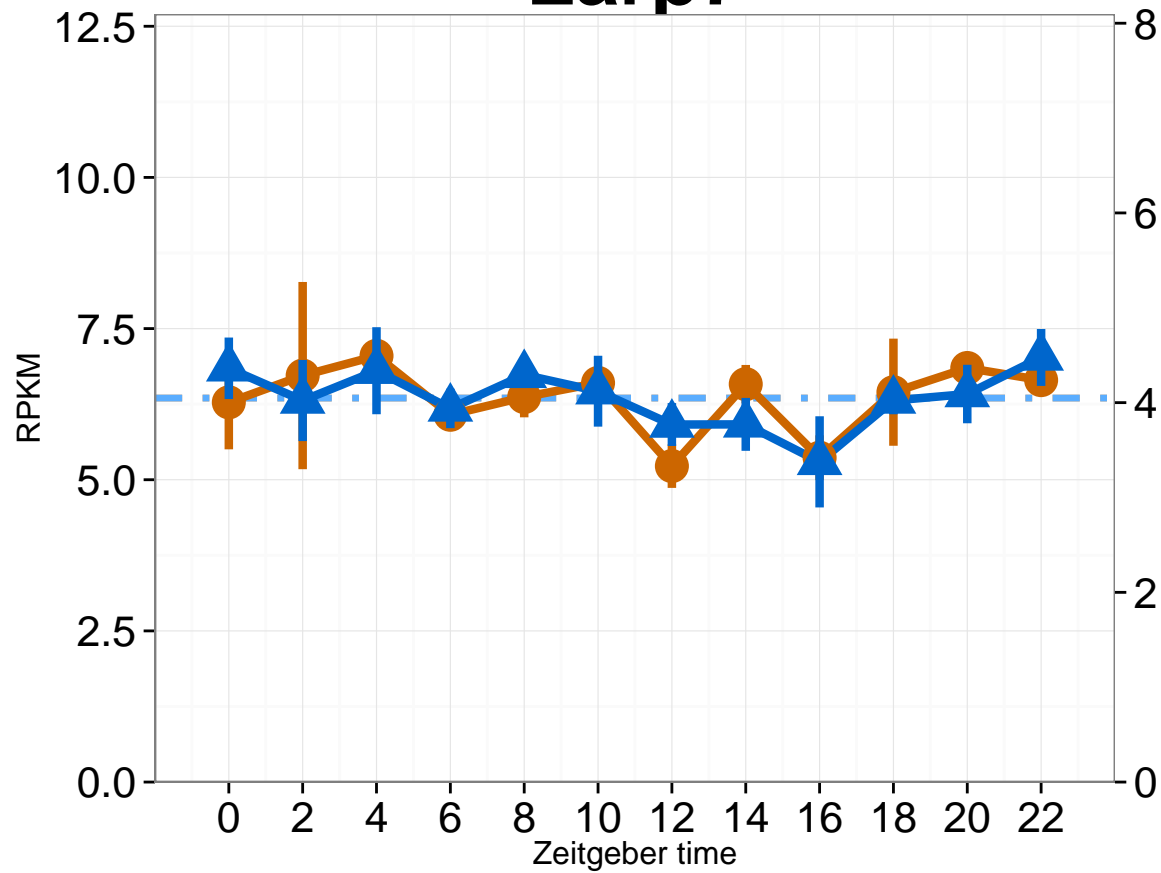

## Larp7

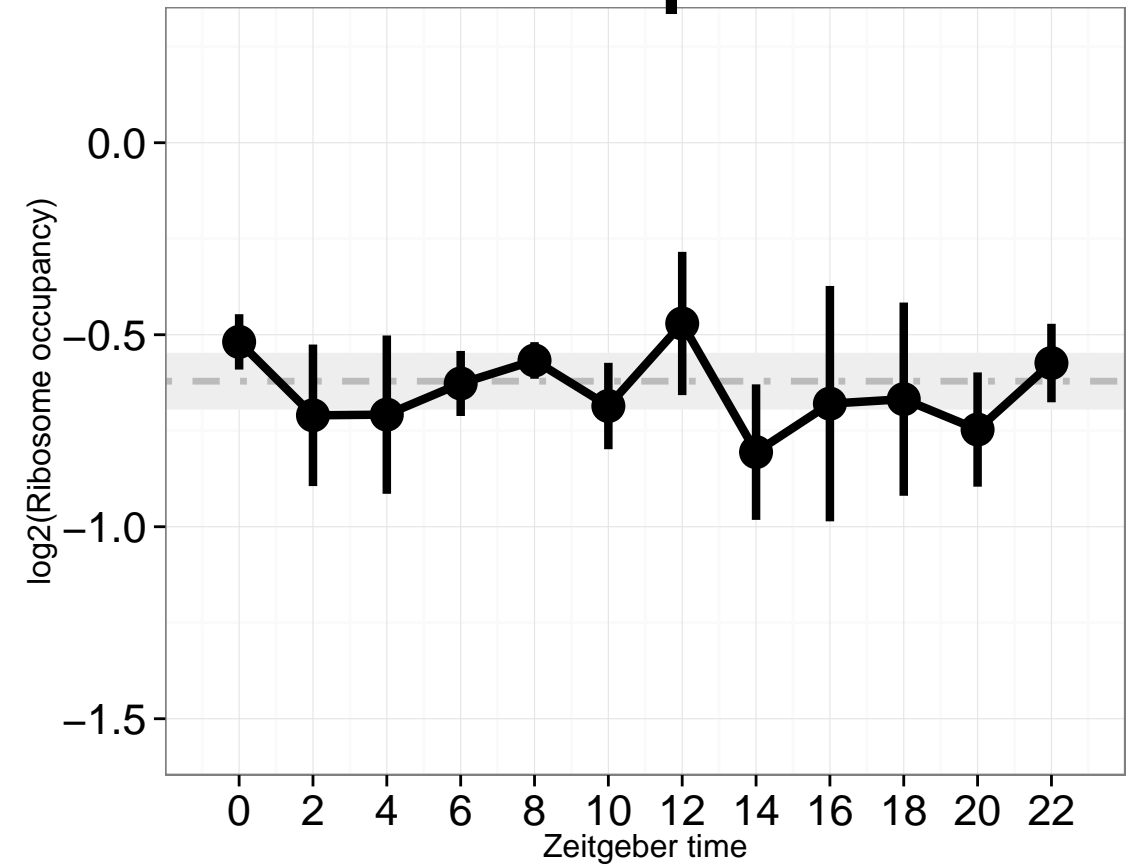

Supplement: SuppDataset_1.zip [file Larp7_set_A.pdf › Supplemental Dataset 1/A-mRNA_nonrhyth_translation_nonrhyth/Larp7_set_A.pdf]

# Lars2

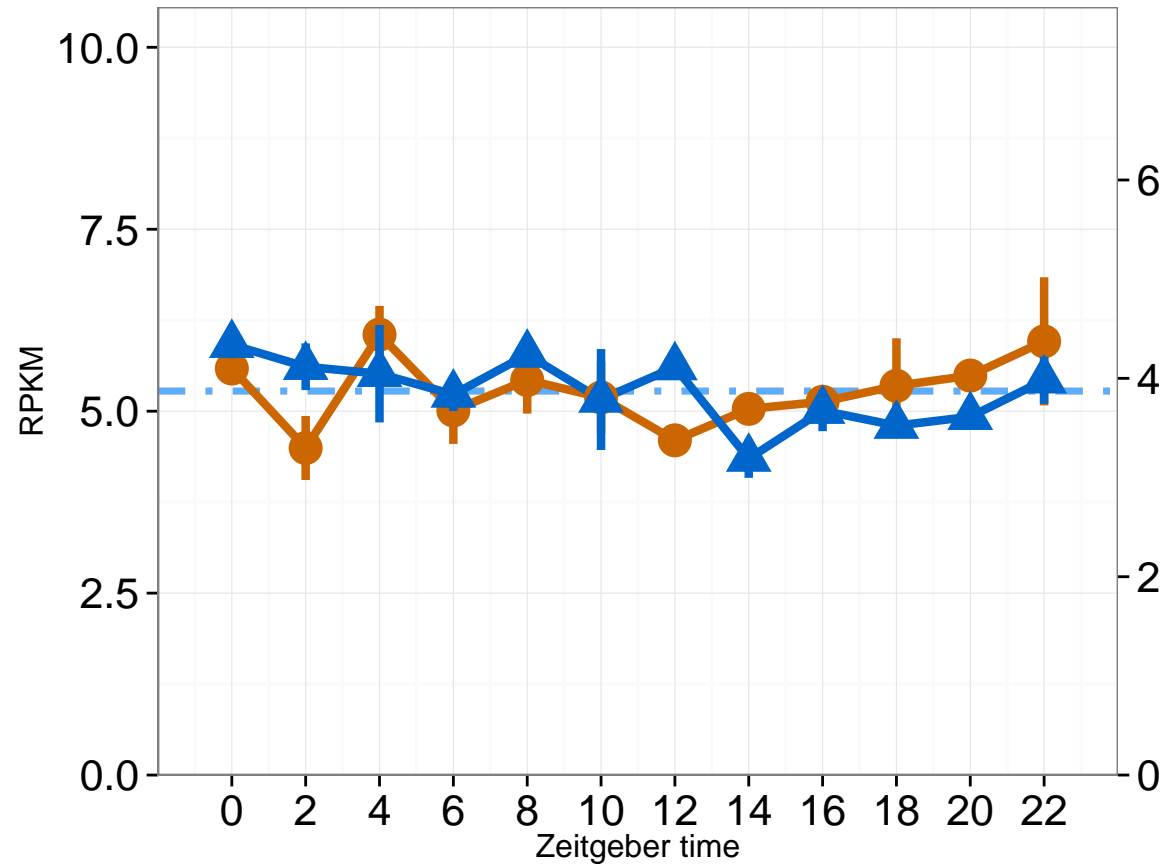

# Lars2

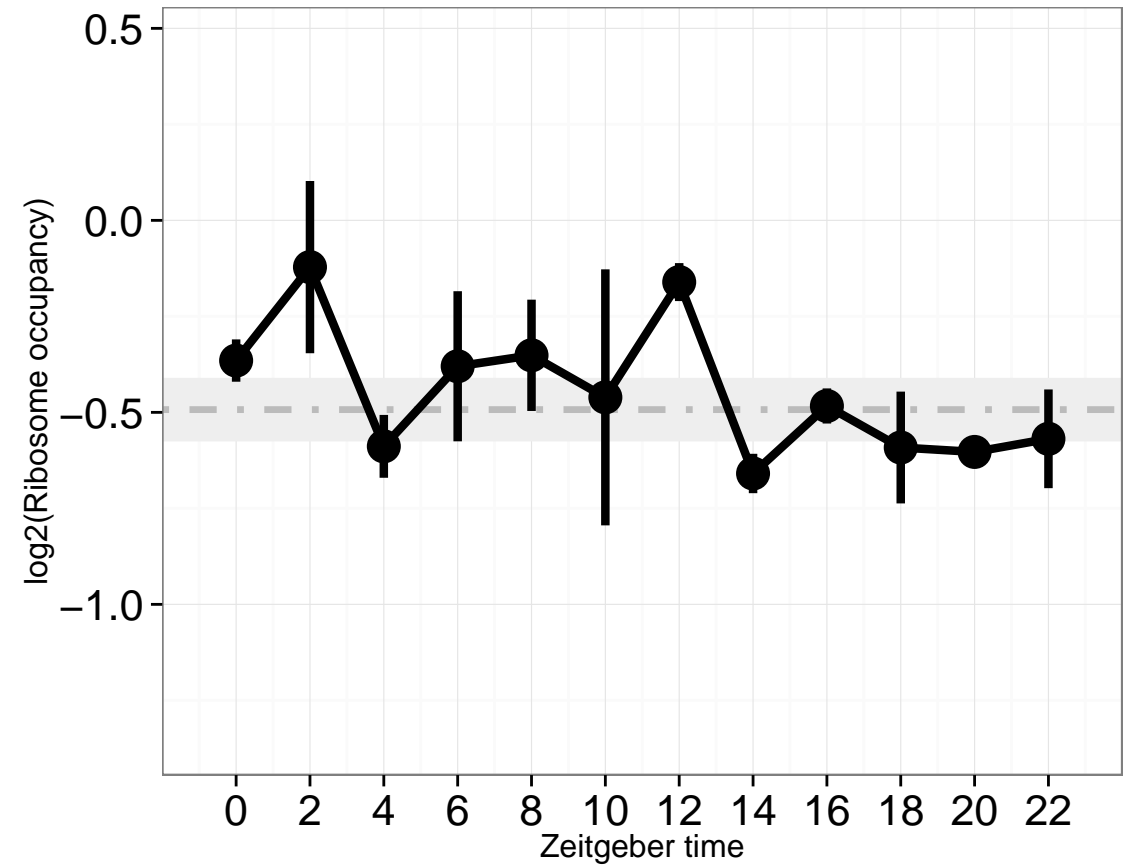

Supplement: SuppDataset_1.zip [file Lars2_set_A.pdf › Supplemental Dataset 1/A-mRNA_nonrhyth_translation_nonrhyth/Lars2_set_A.pdf]

## Lars

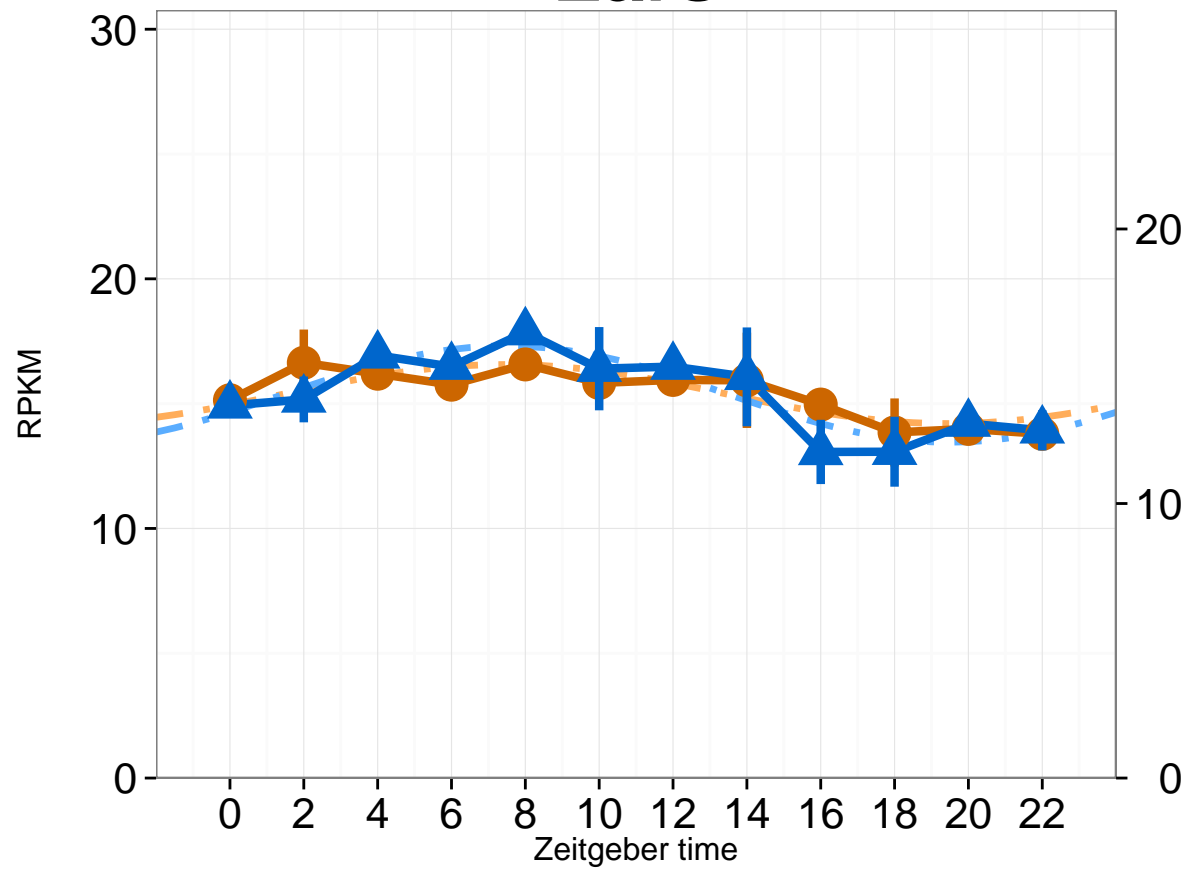

## Lars

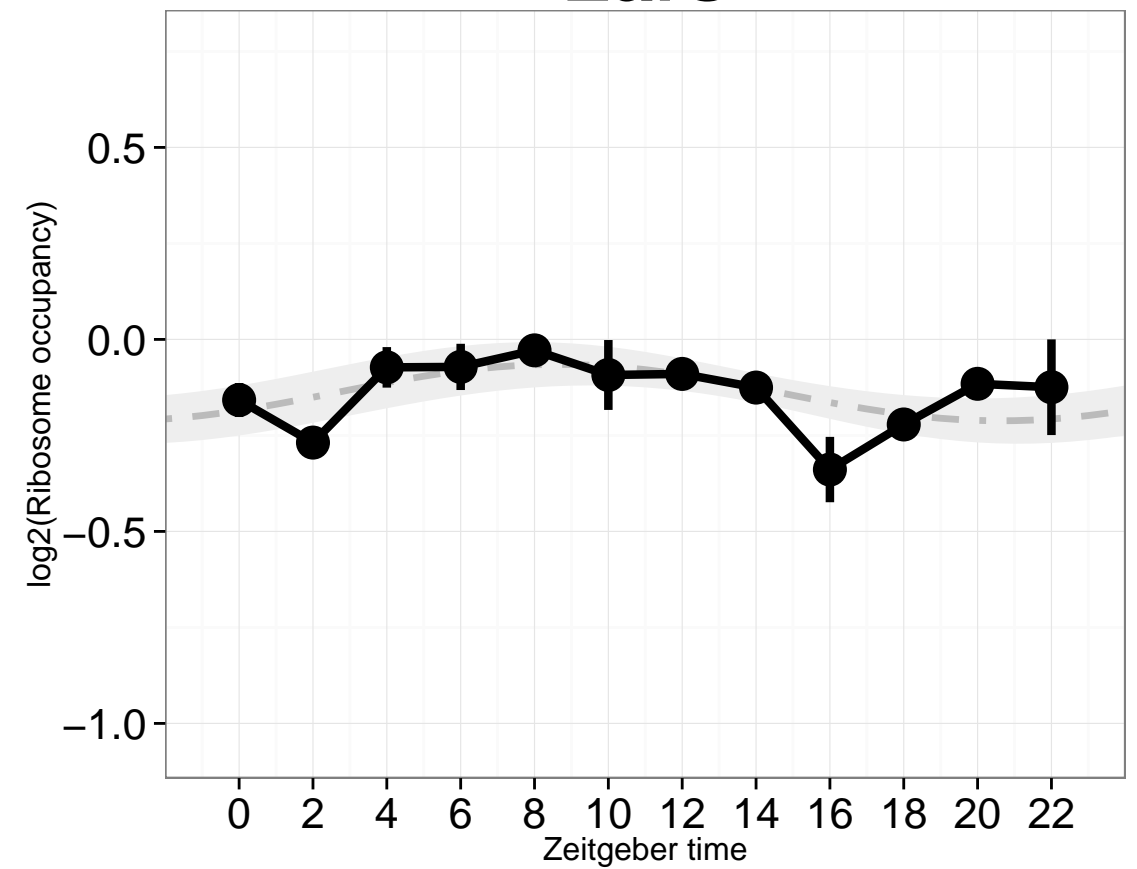

Supplement: SuppDataset_1.zip [file Lars_set_A.pdf › Supplemental Dataset 1/A-mRNA_nonrhyth_translation_nonrhyth/Lars_set_A.pdf]

## Las1l

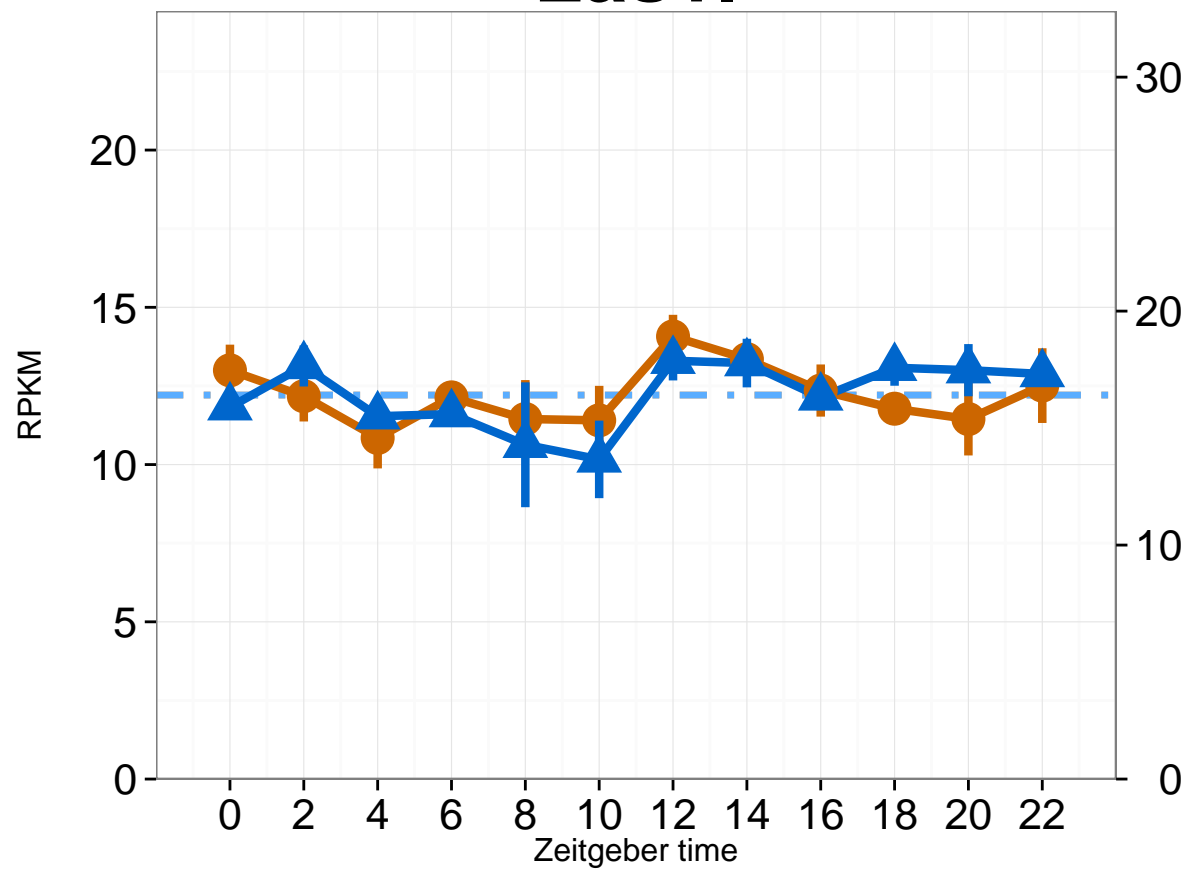

## Las1l

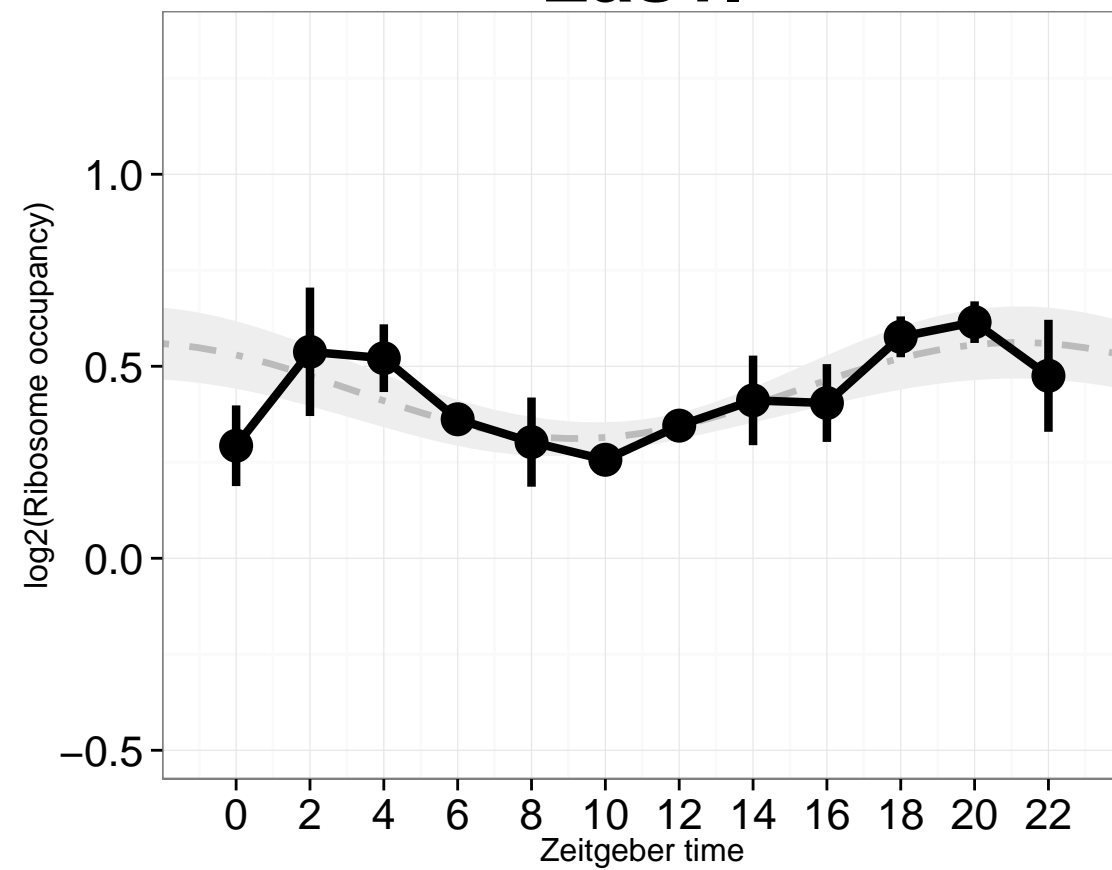

Supplement: SuppDataset_1.zip [file Las1l_set_A.pdf › Supplemental Dataset 1/A-mRNA_nonrhyth_translation_nonrhyth/Las1l_set_A.pdf]

# Lats1

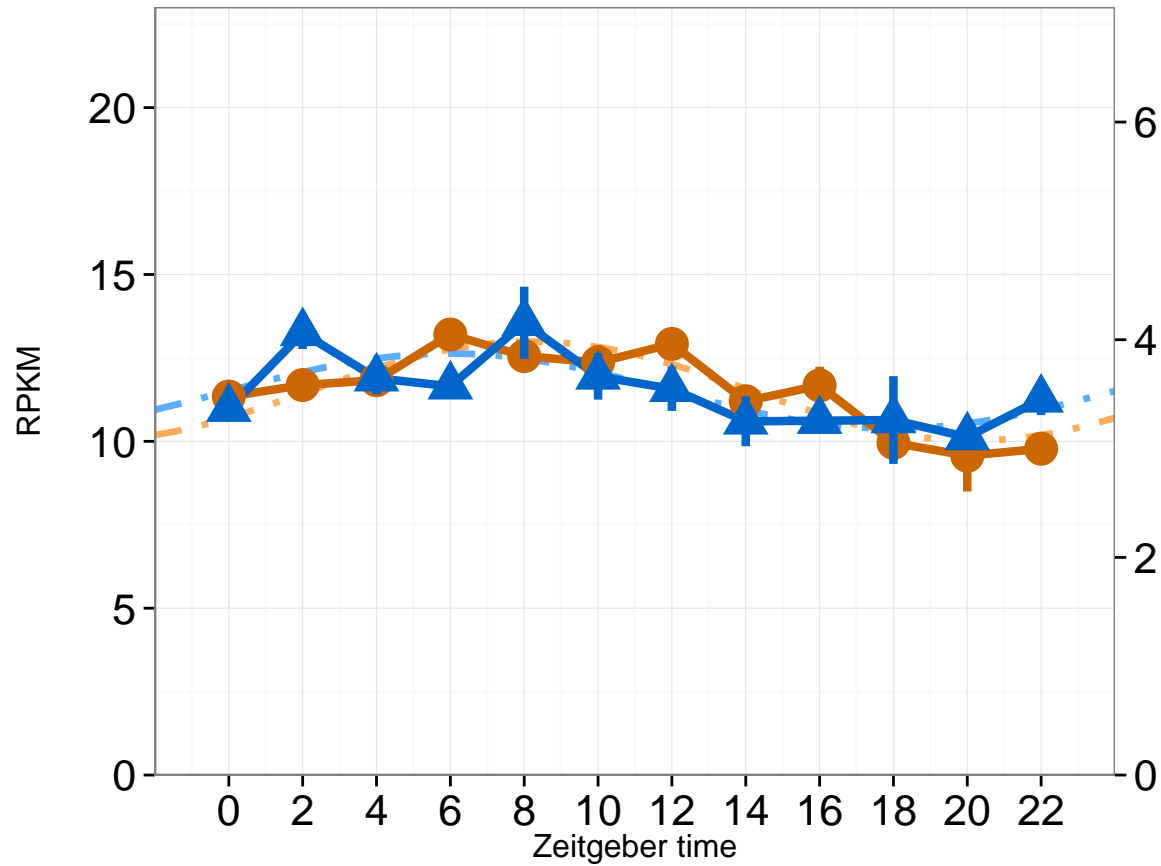

# Lats1

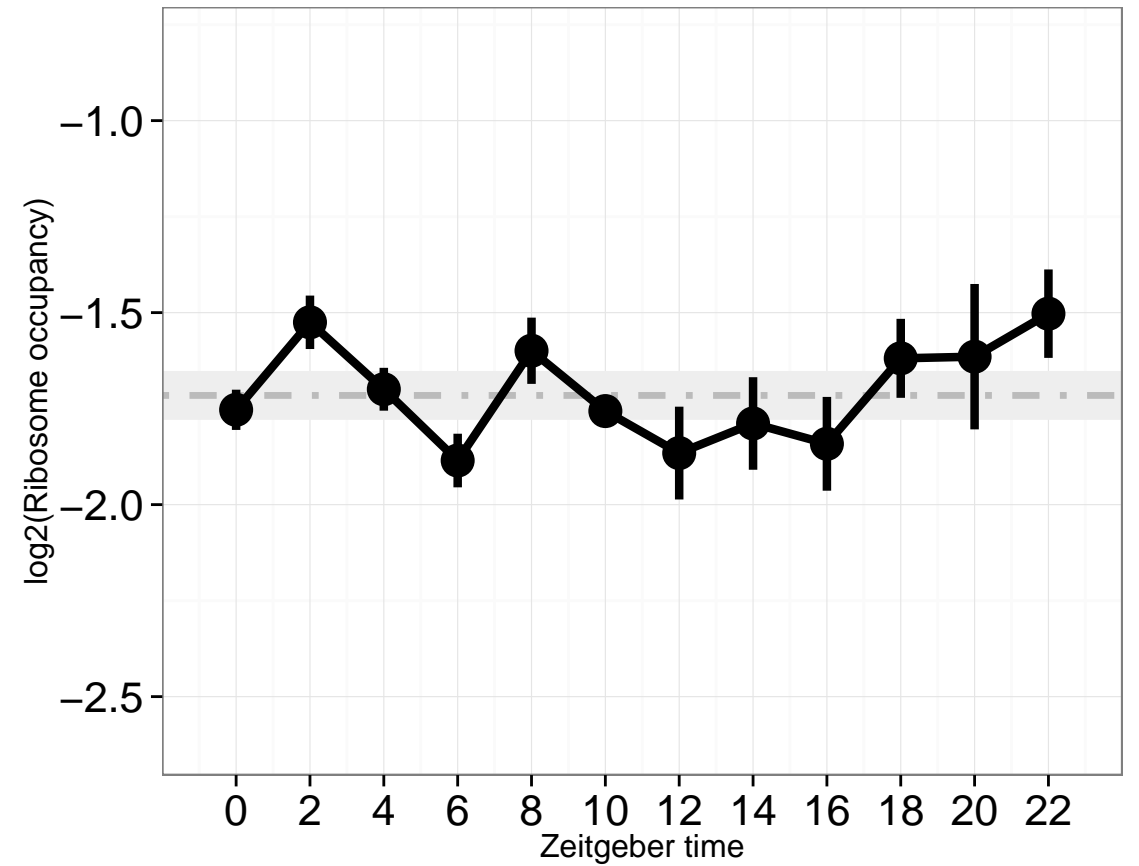

Supplement: SuppDataset_1.zip [file Lats1_set_A.pdf › Supplemental Dataset 1/A-mRNA_nonrhyth_translation_nonrhyth/Lats1_set_A.pdf]

## Lats2

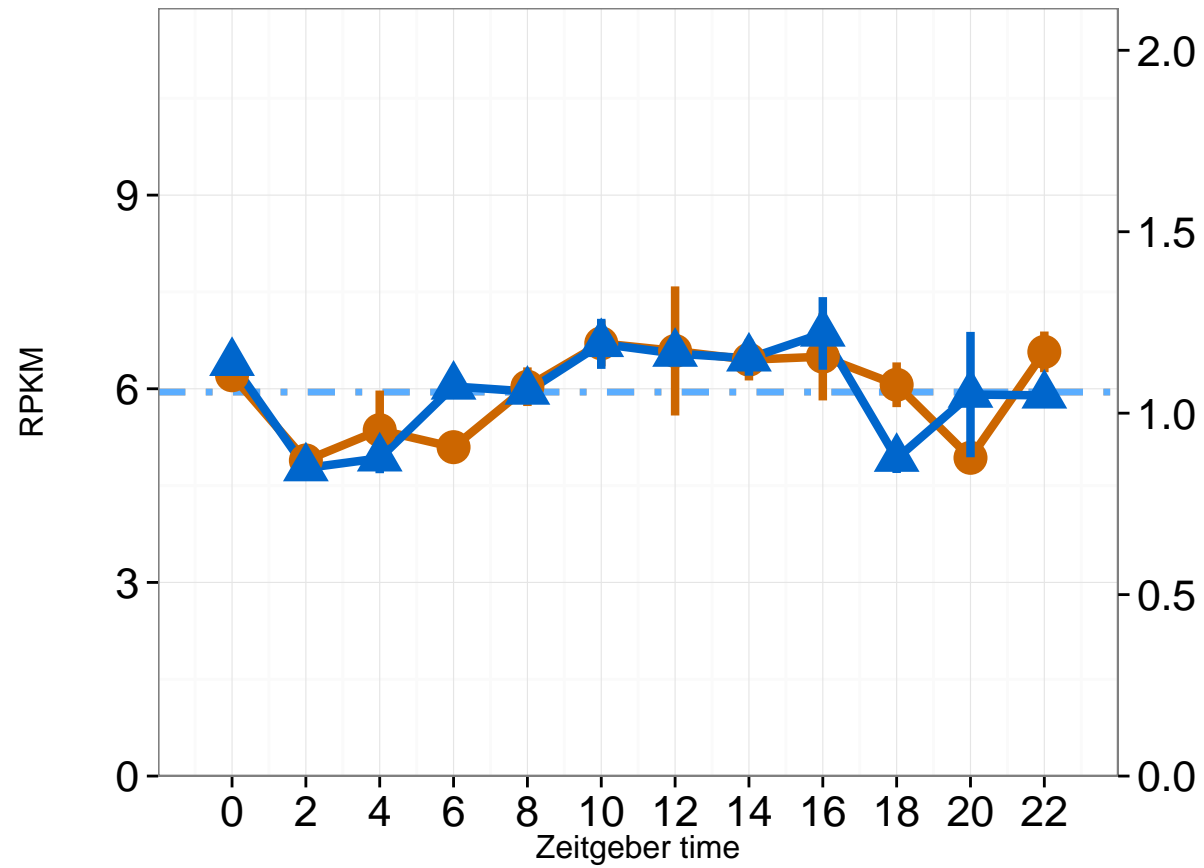

## Lats2

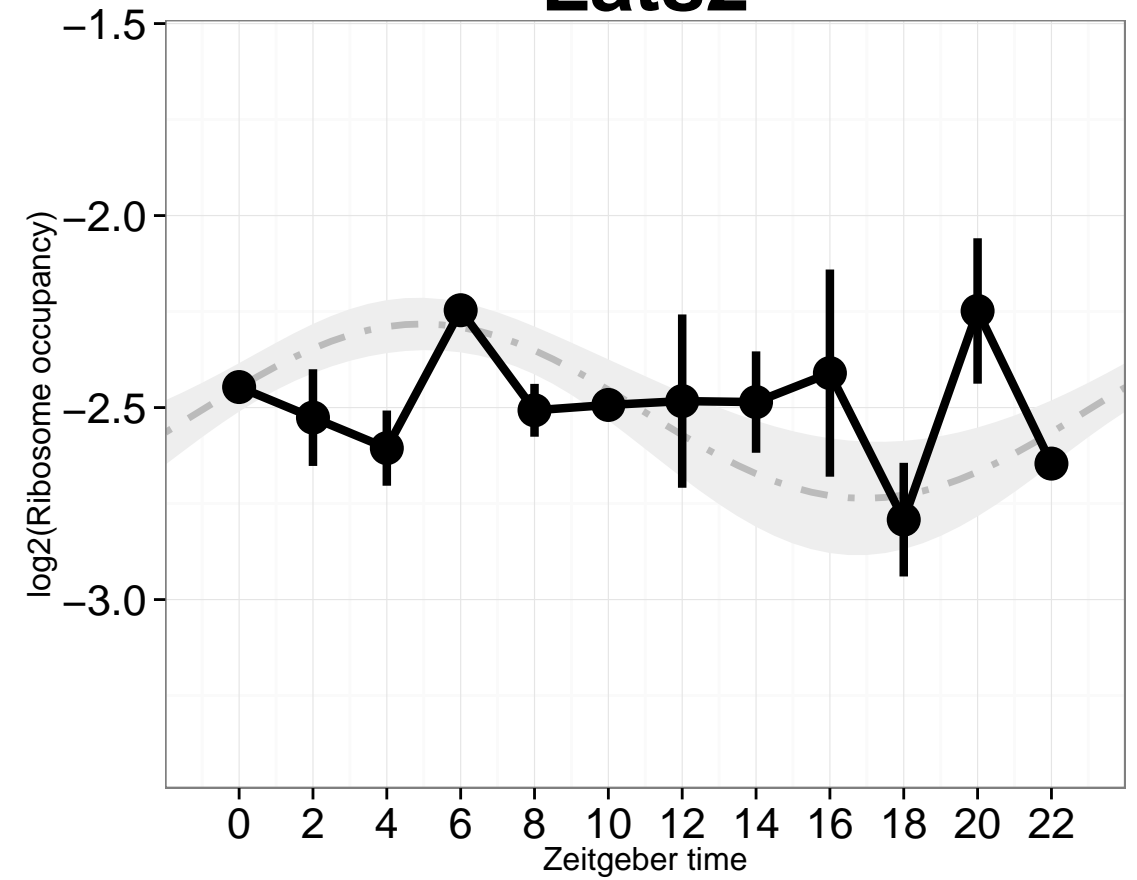

Supplement: SuppDataset_1.zip [file Lats2_set_A.pdf › Supplemental Dataset 1/A-mRNA_nonrhyth_translation_nonrhyth/Lats2_set_A.pdf]

## Layn

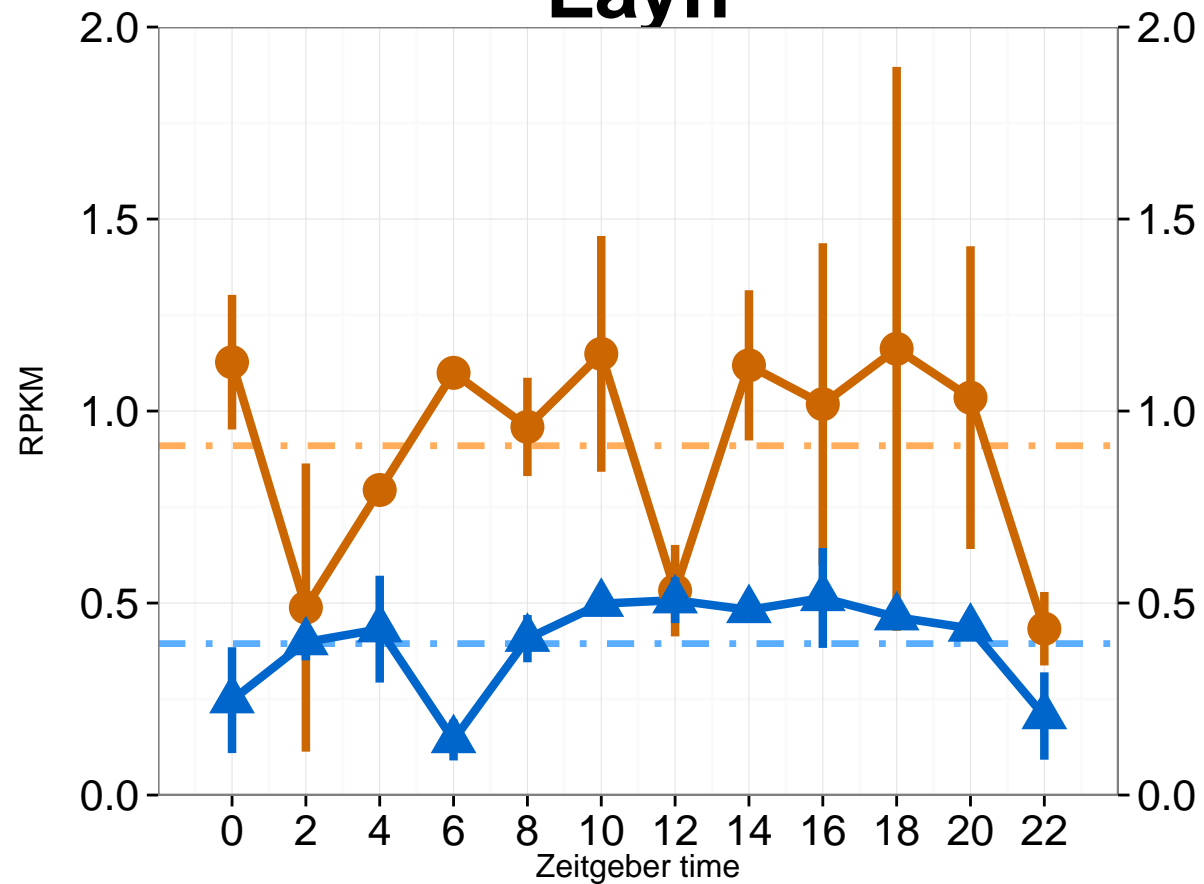

## Layn

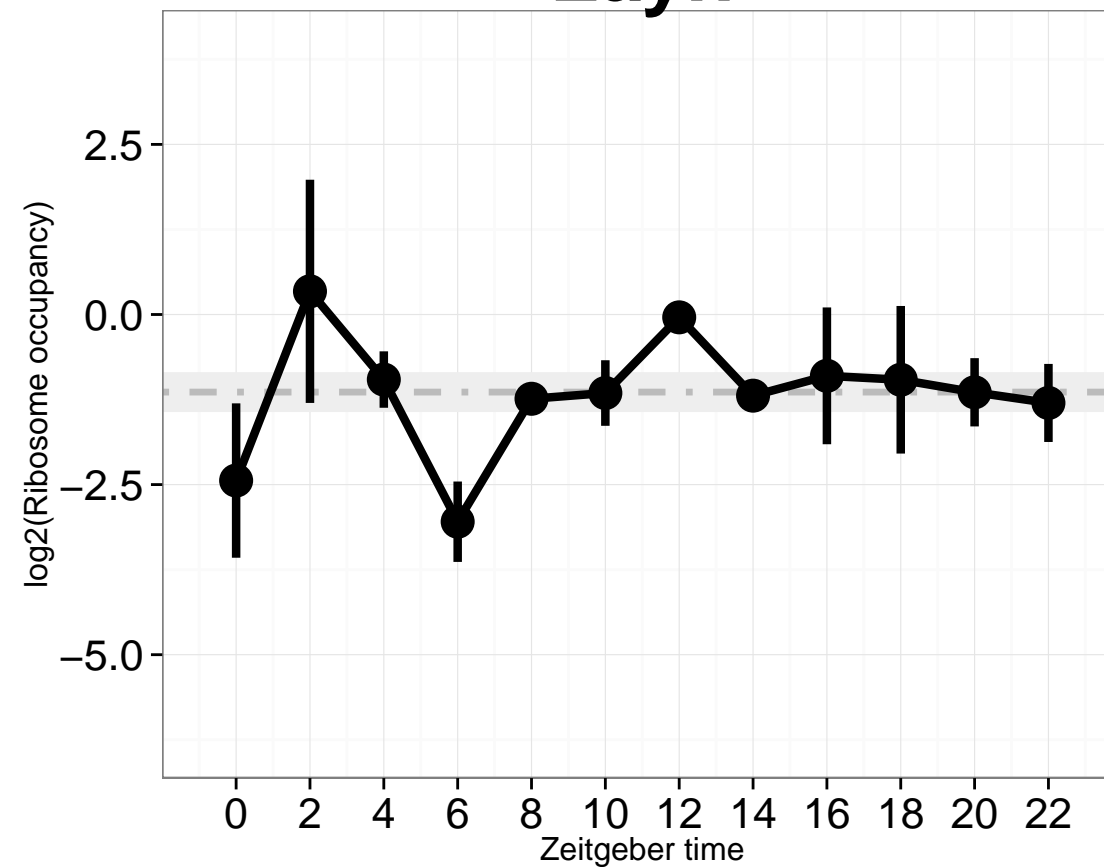

Supplement: SuppDataset_1.zip [file Layn_set_A.pdf › Supplemental Dataset 1/A-mRNA_nonrhyth_translation_nonrhyth/Layn_set_A.pdf]

## Lbh

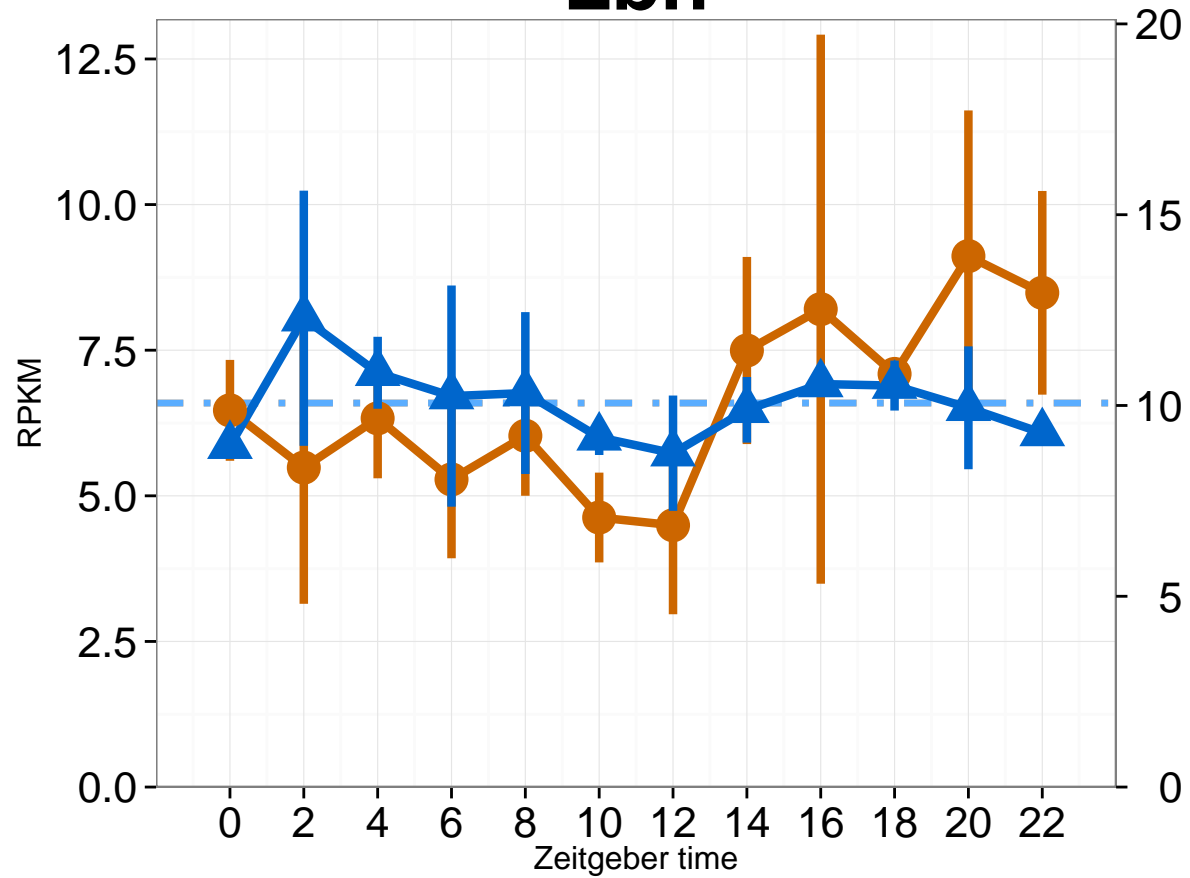

## Lbh

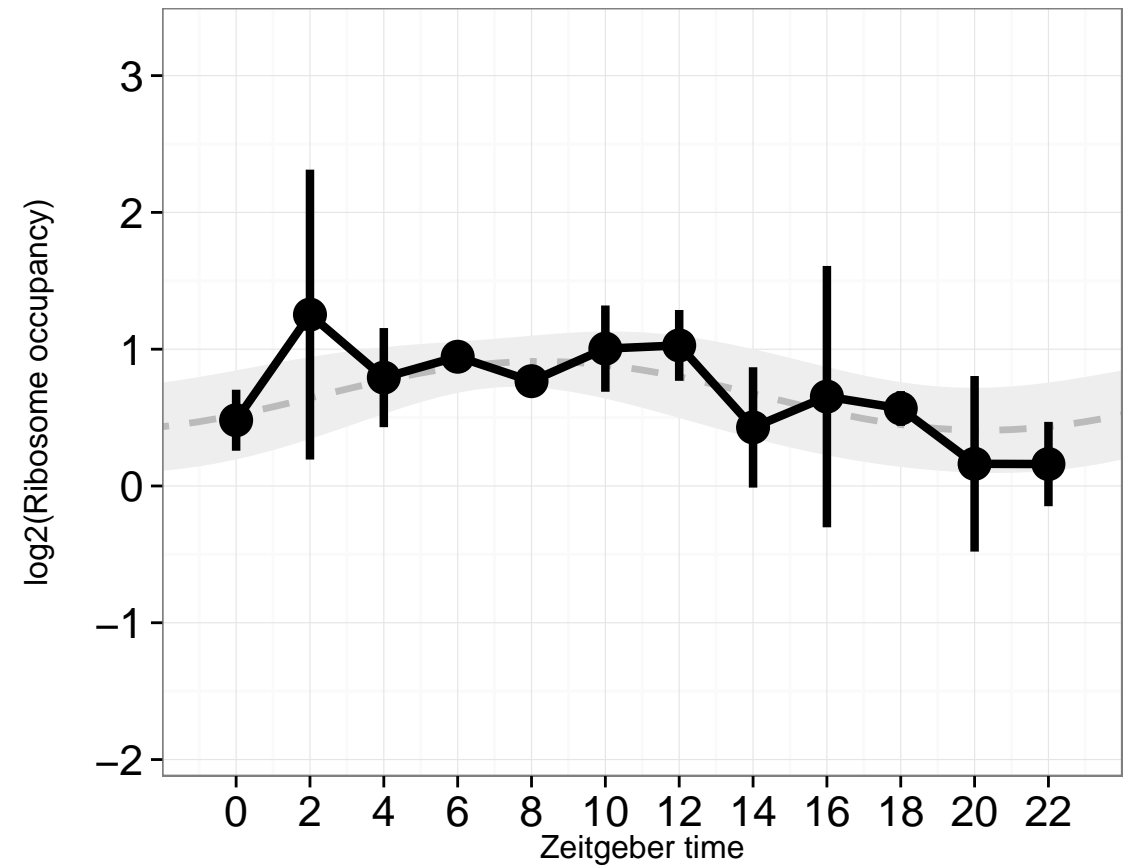

Supplement: SuppDataset_1.zip [file Lbh_set_A.pdf › Supplemental Dataset 1/A-mRNA_nonrhyth_translation_nonrhyth/Lbh_set_A.pdf]

## Lbp

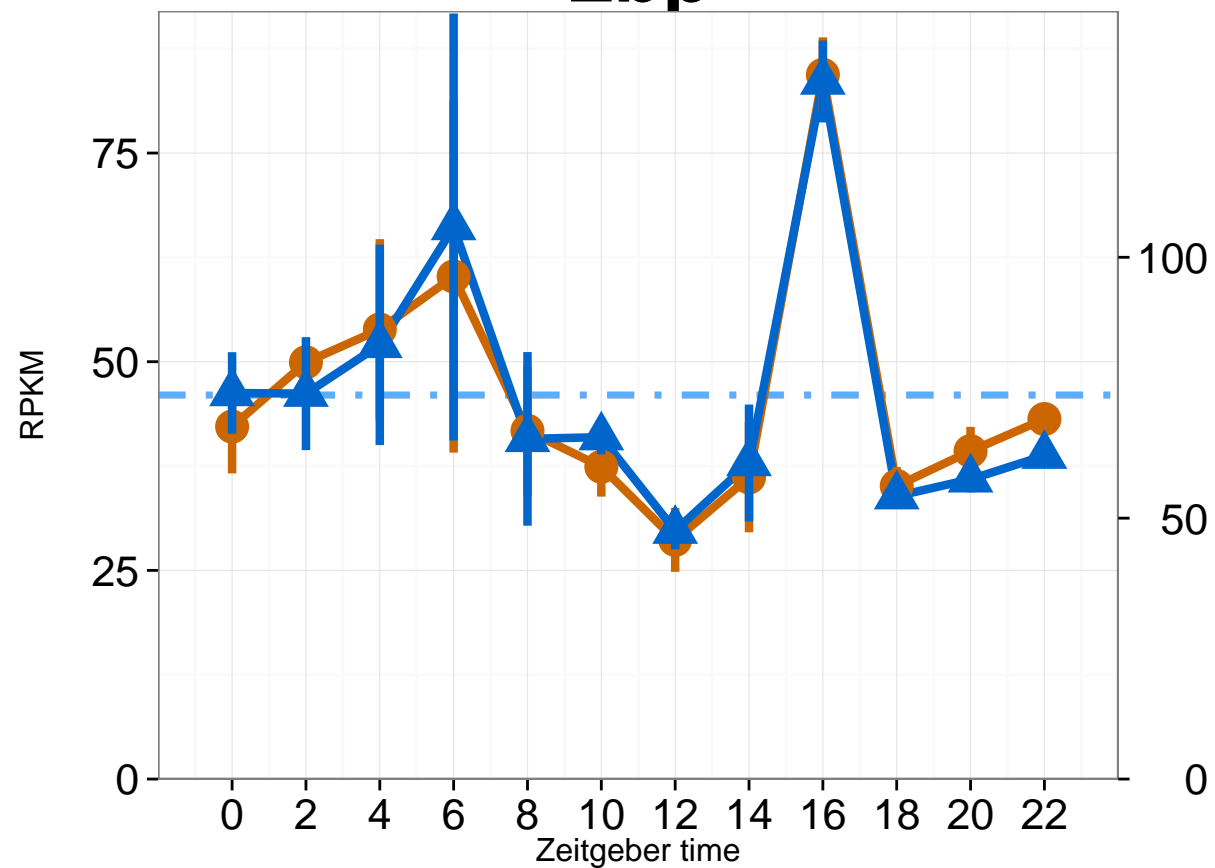

## Lbp

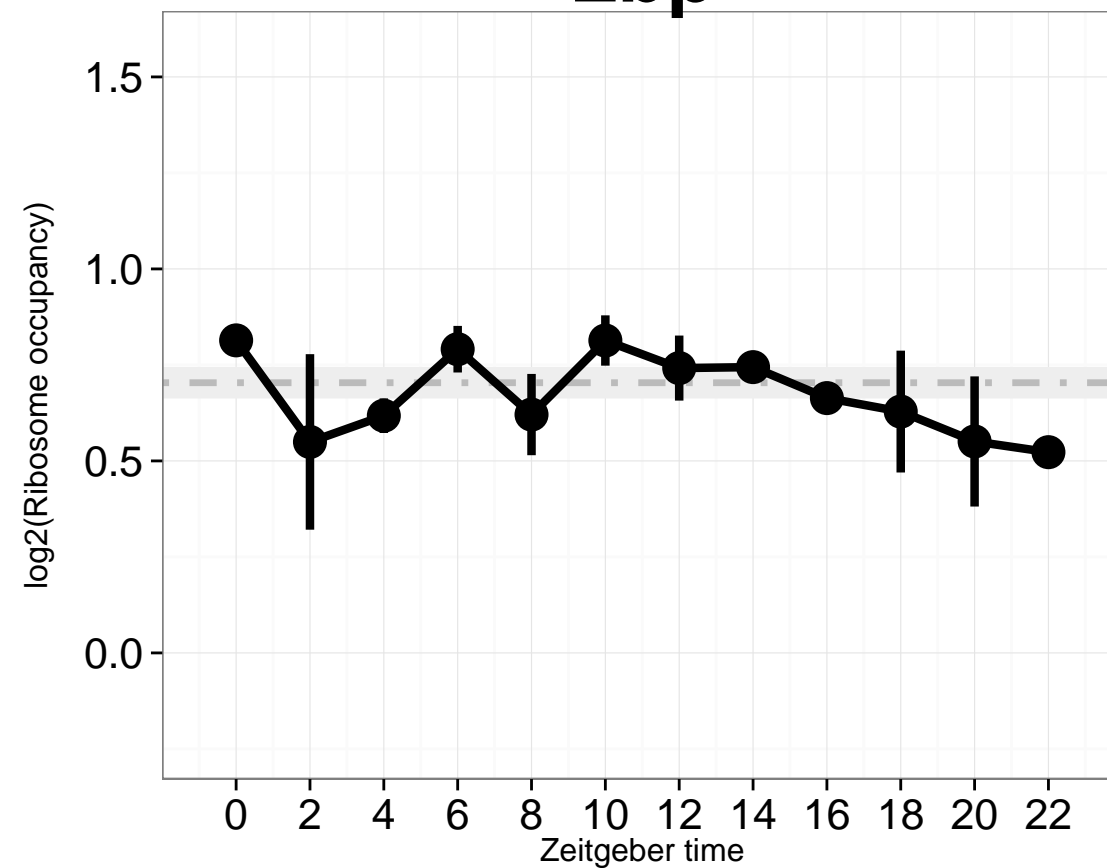

Supplement: SuppDataset_1.zip [file Lbp_set_A.pdf › Supplemental Dataset 1/A-mRNA_nonrhyth_translation_nonrhyth/Lbp_set_A.pdf]

## Lbr

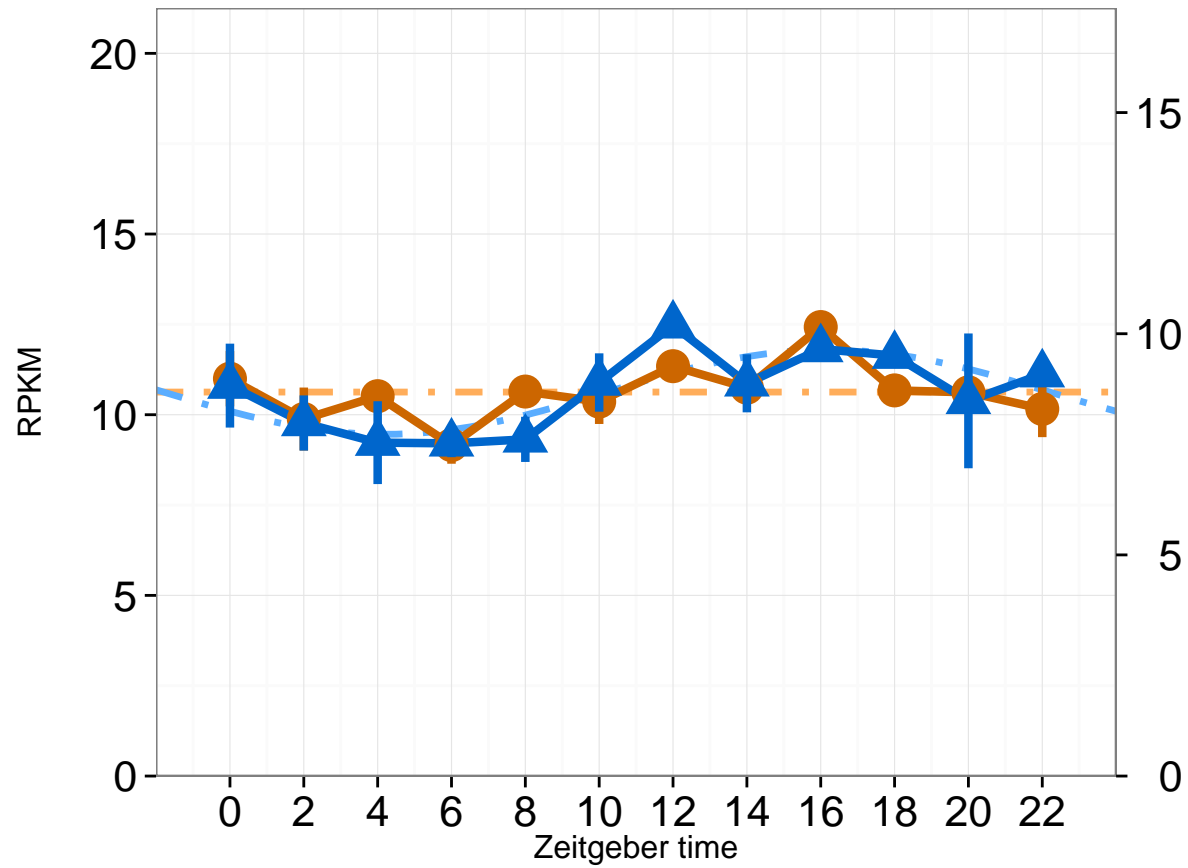

## Lbr

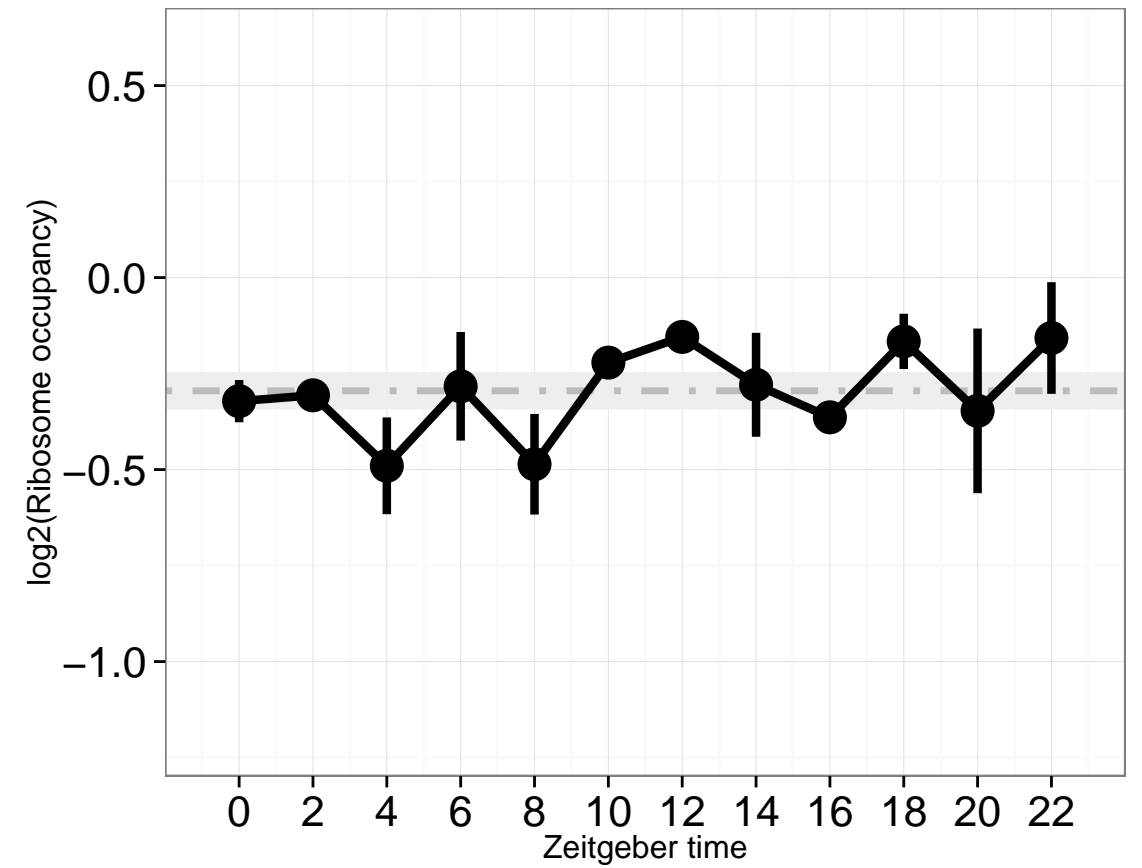

Supplement: SuppDataset_1.zip [file Lbr_set_A.pdf › Supplemental Dataset 1/A-mRNA_nonrhyth_translation_nonrhyth/Lbr_set_A.pdf]

## Lcat

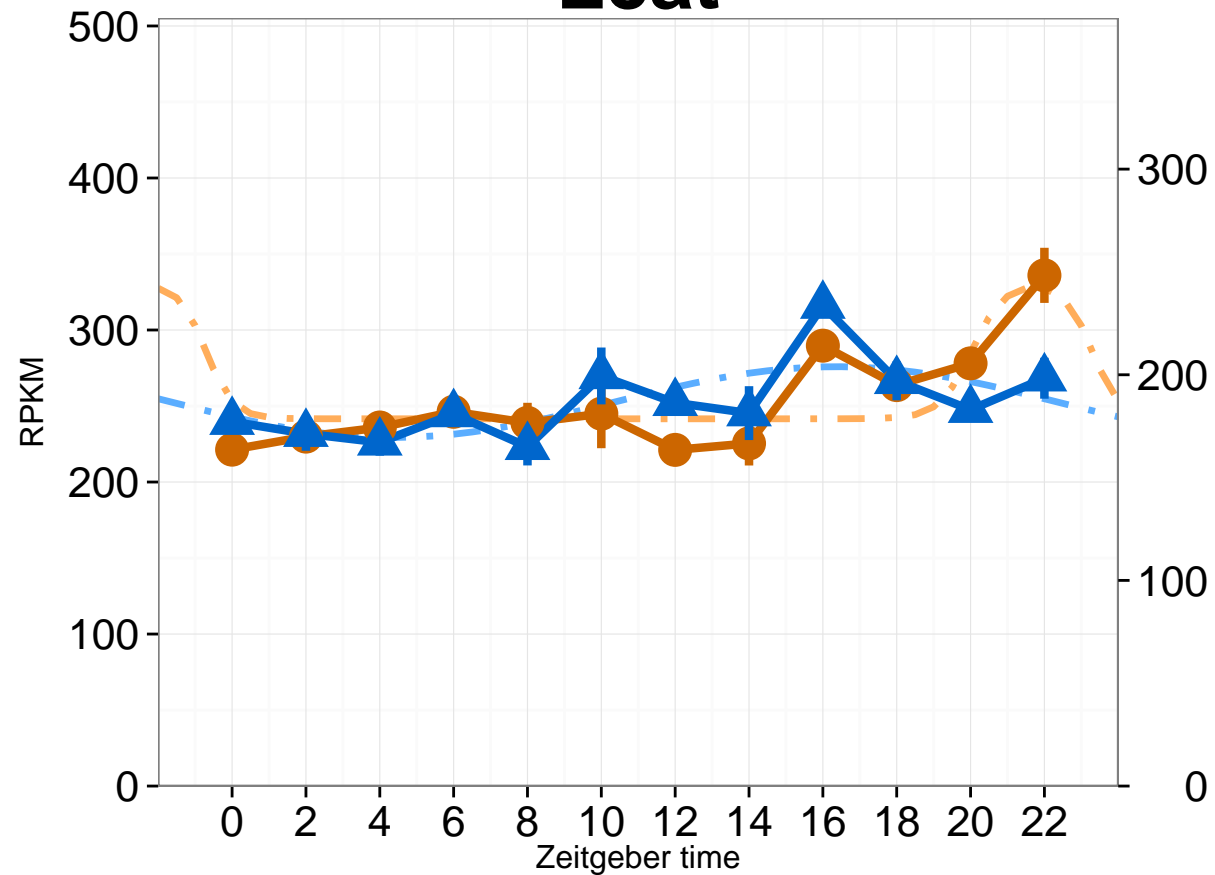

## Lcat

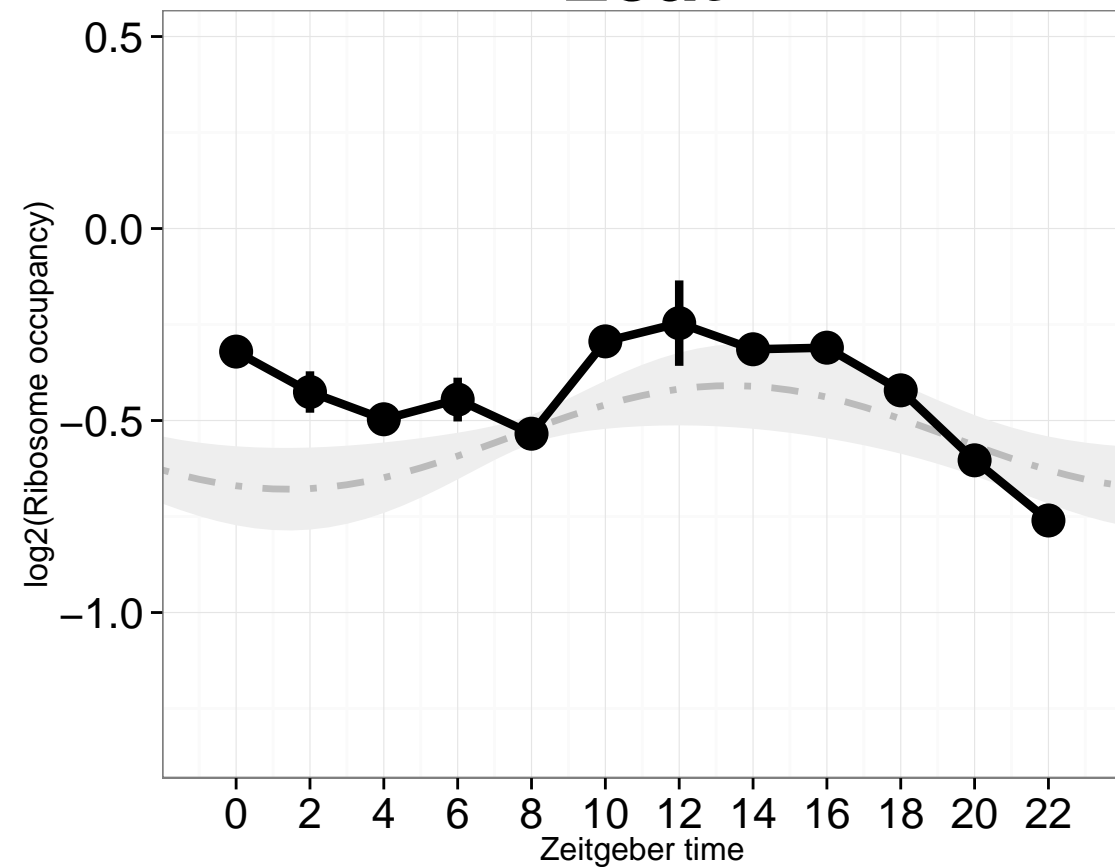

Supplement: SuppDataset_1.zip [file Lcat_set_A.pdf › Supplemental Dataset 1/A-mRNA_nonrhyth_translation_nonrhyth/Lcat_set_A.pdf]

# Lclat1

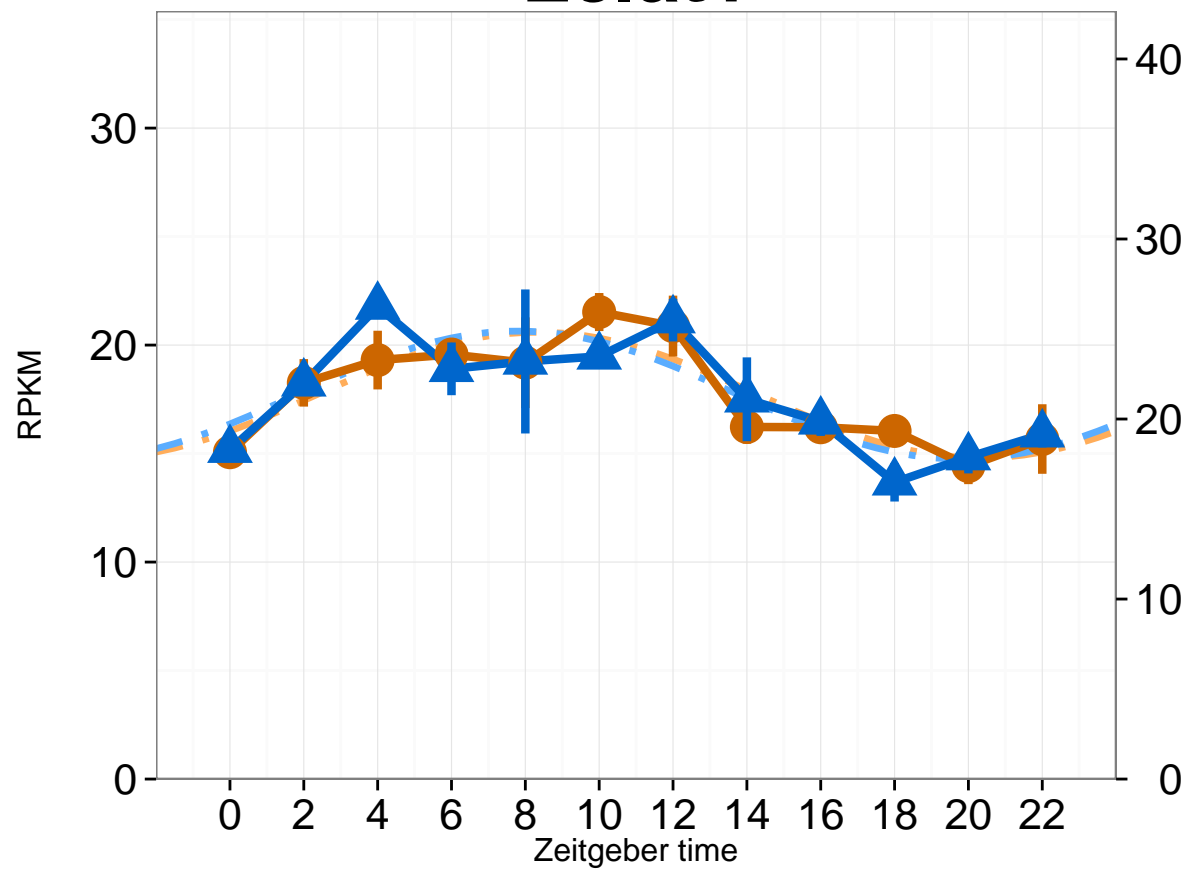

# Lclat1

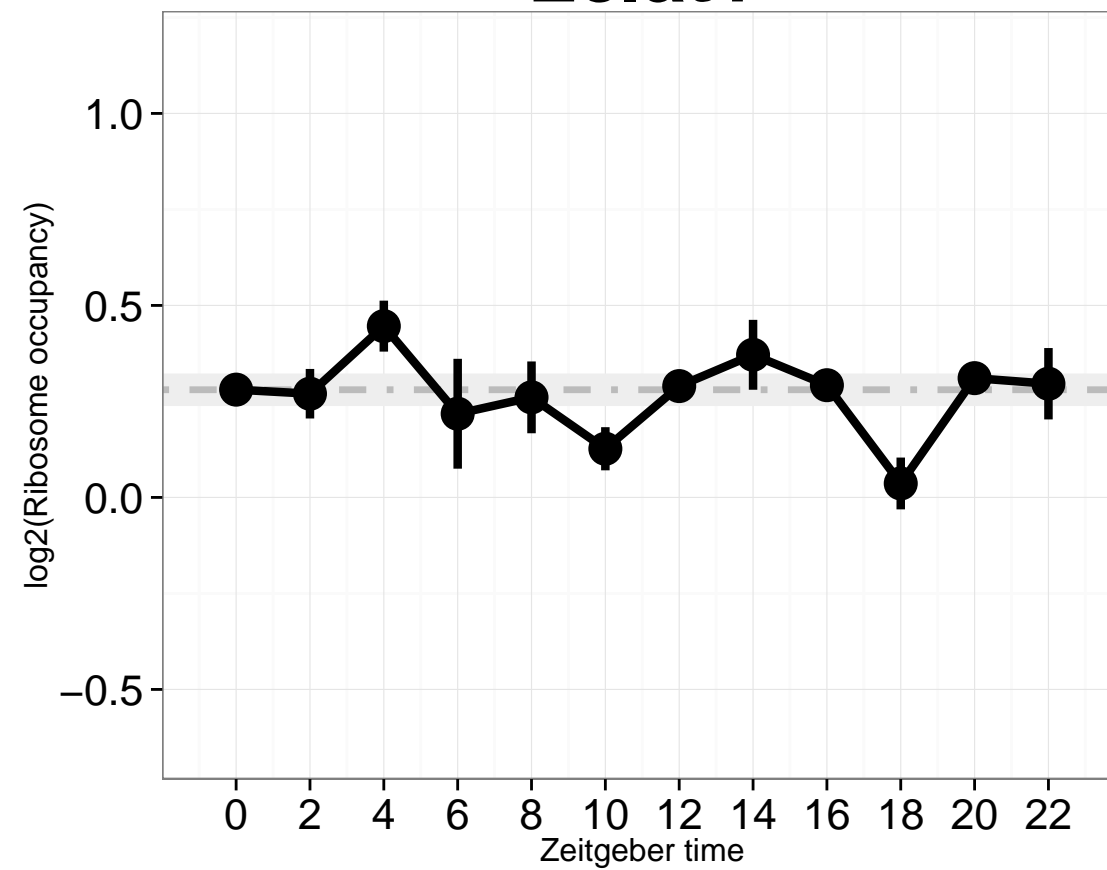

Supplement: SuppDataset_1.zip [file Lclat1_set_A.pdf › Supplemental Dataset 1/A-mRNA_nonrhyth_translation_nonrhyth/Lclat1_set_A.pdf]

# Lcmt1

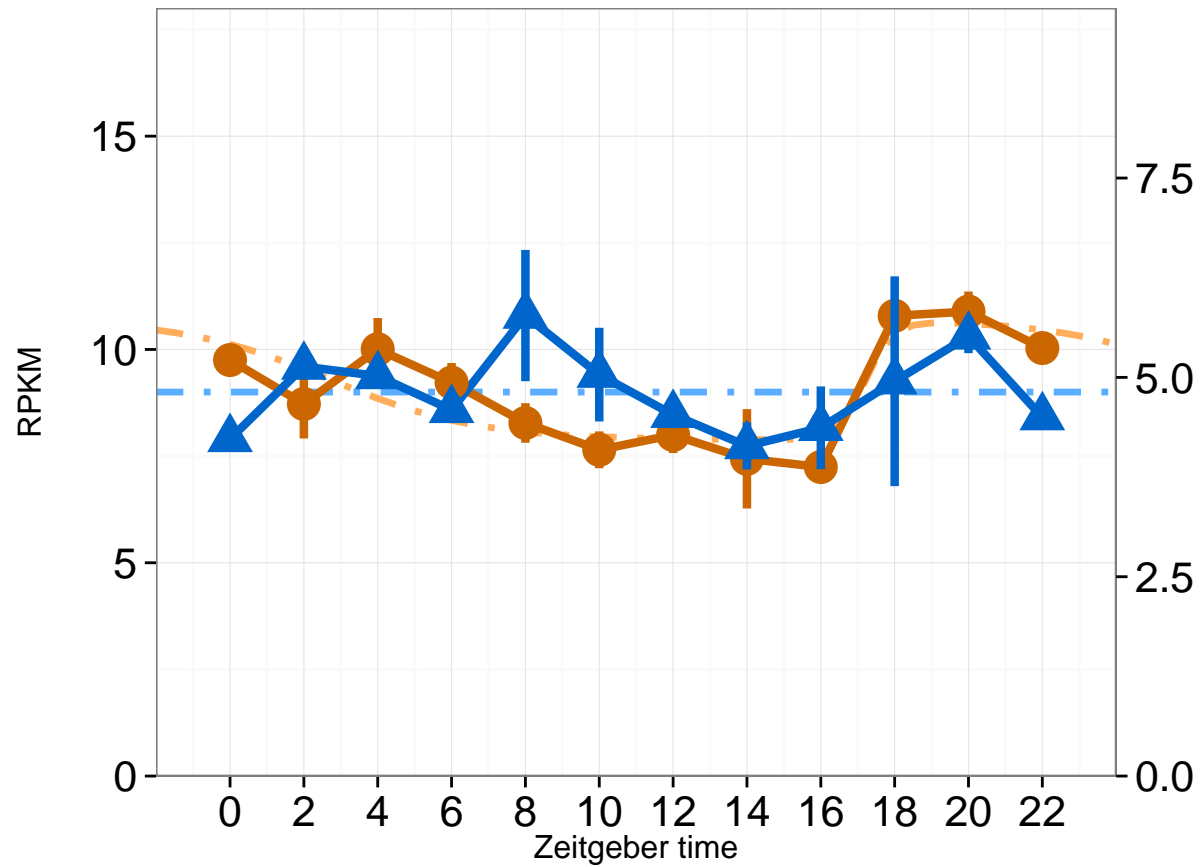

# Lcmt1

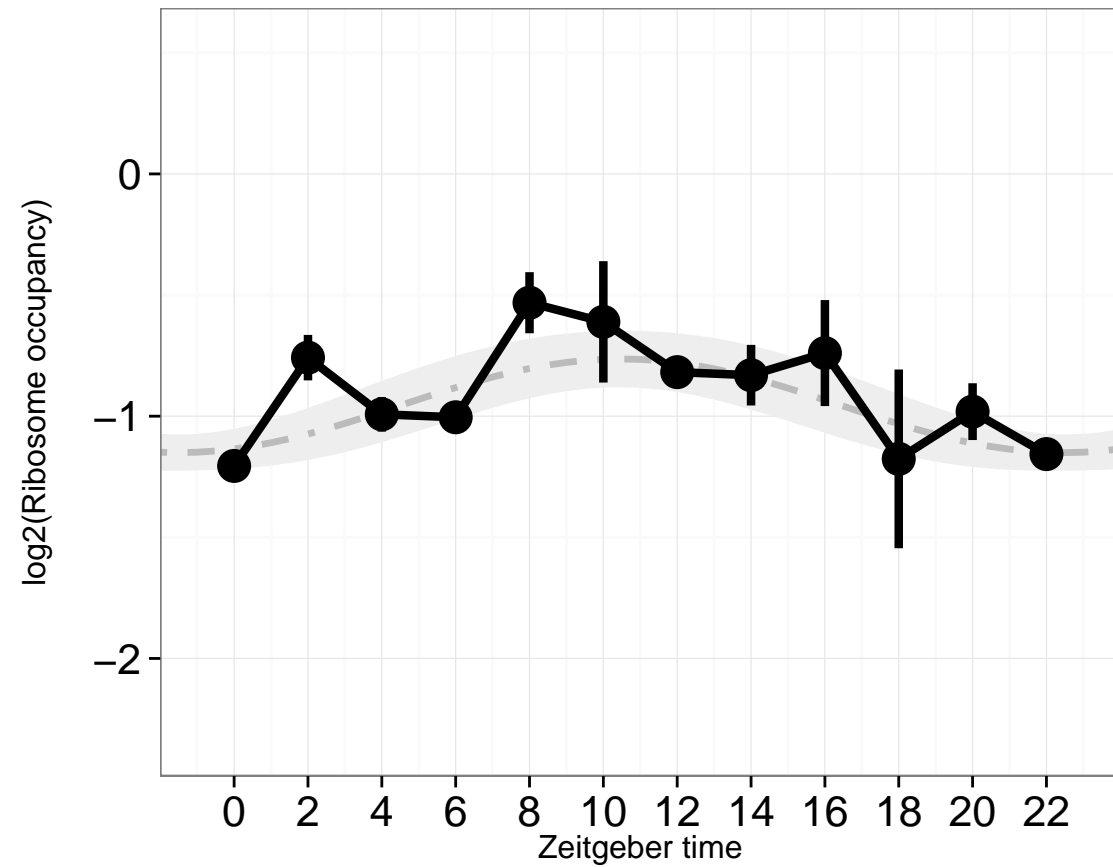

Supplement: SuppDataset_1.zip [file Lcmt1_set_A.pdf › Supplemental Dataset 1/A-mRNA_nonrhyth_translation_nonrhyth/Lcmt1_set_A.pdf]

## Lcmt2

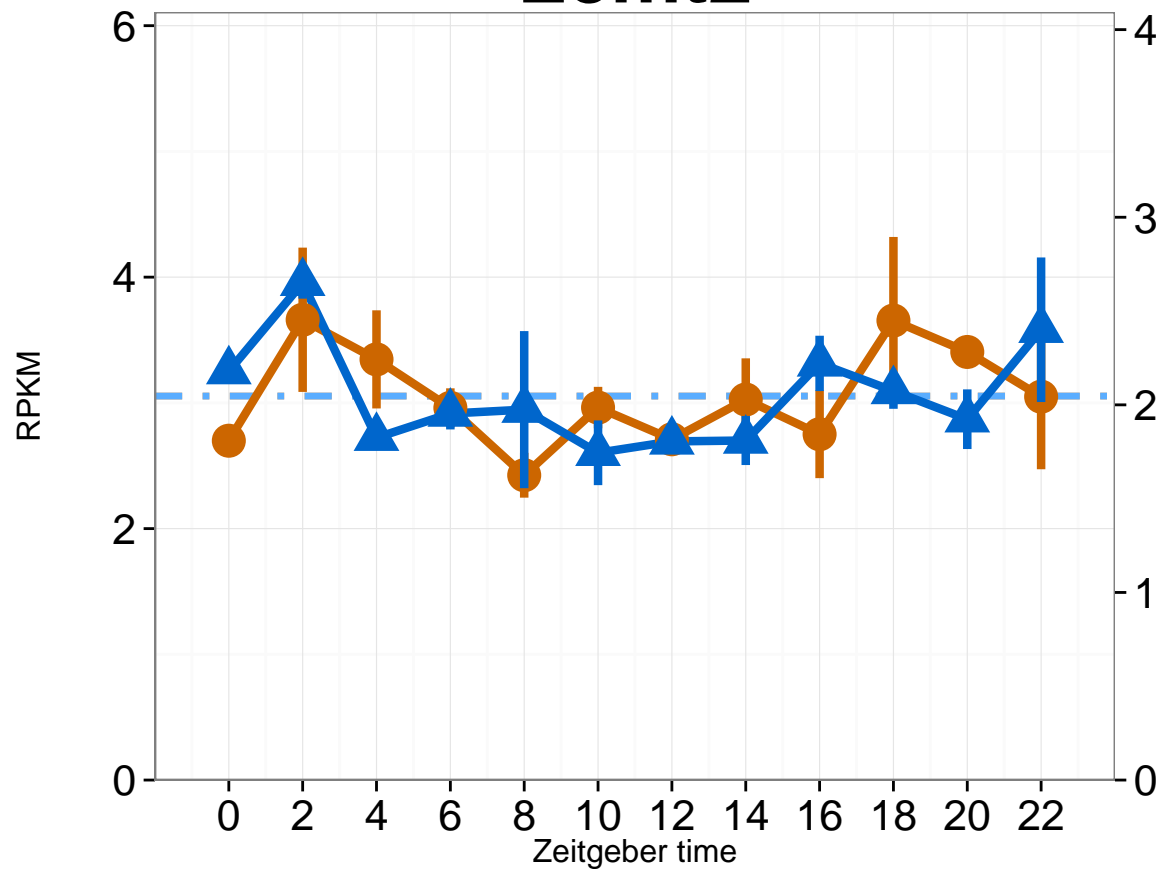

## Lcmt2

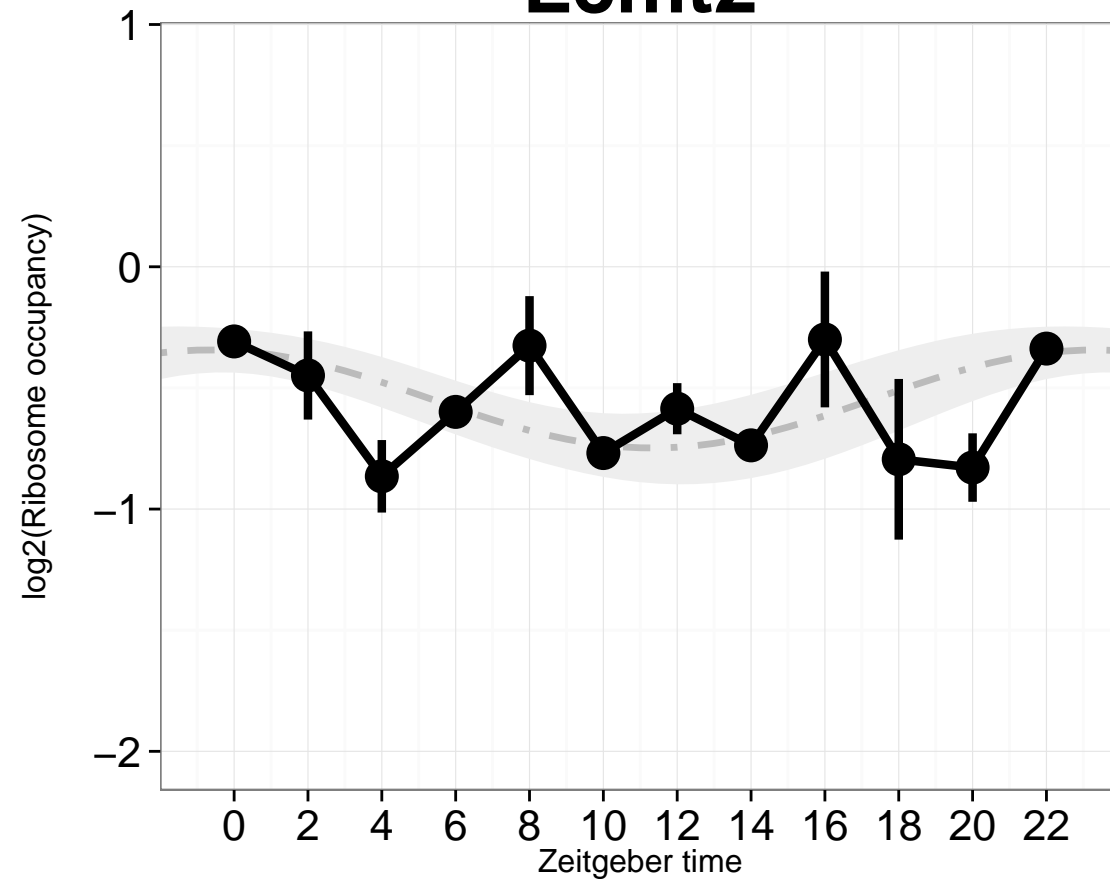

Supplement: SuppDataset_1.zip [file Lcmt2_set_A.pdf › Supplemental Dataset 1/A-mRNA_nonrhyth_translation_nonrhyth/Lcmt2_set_A.pdf]

## Lcor

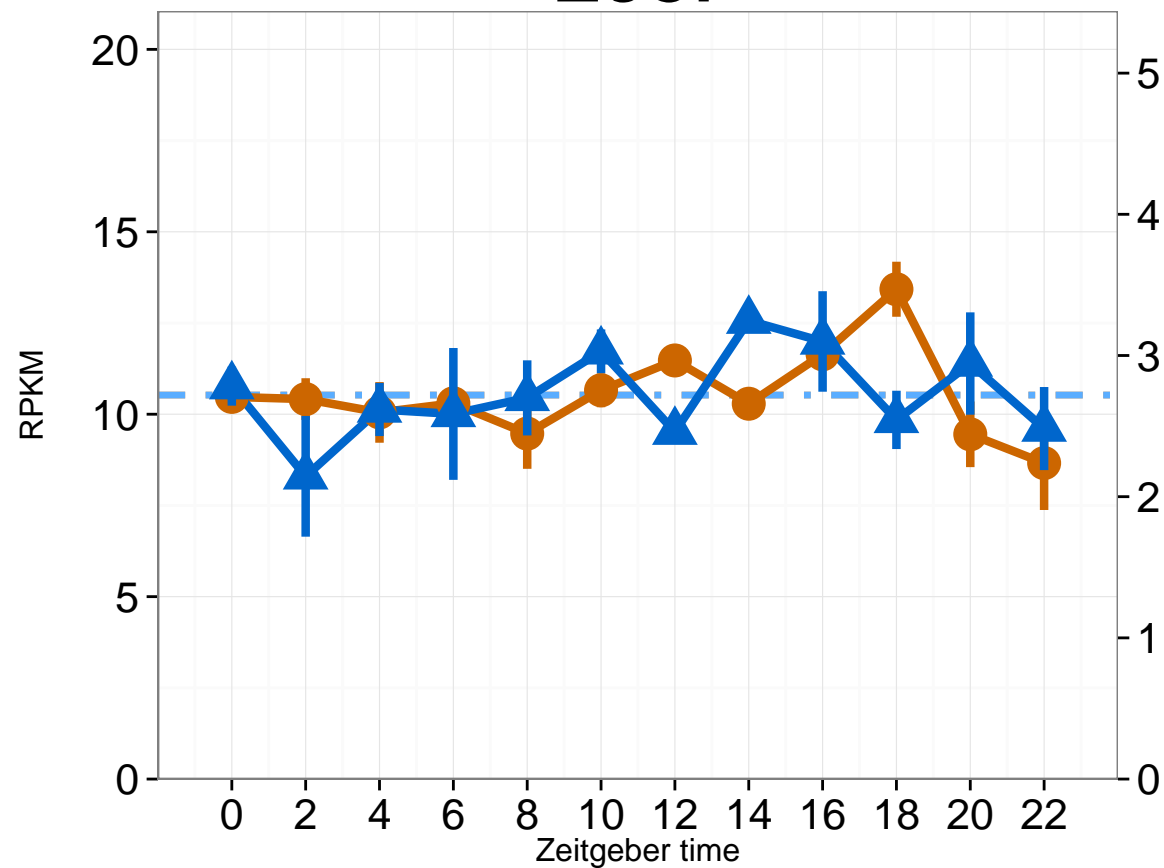

## Lcor

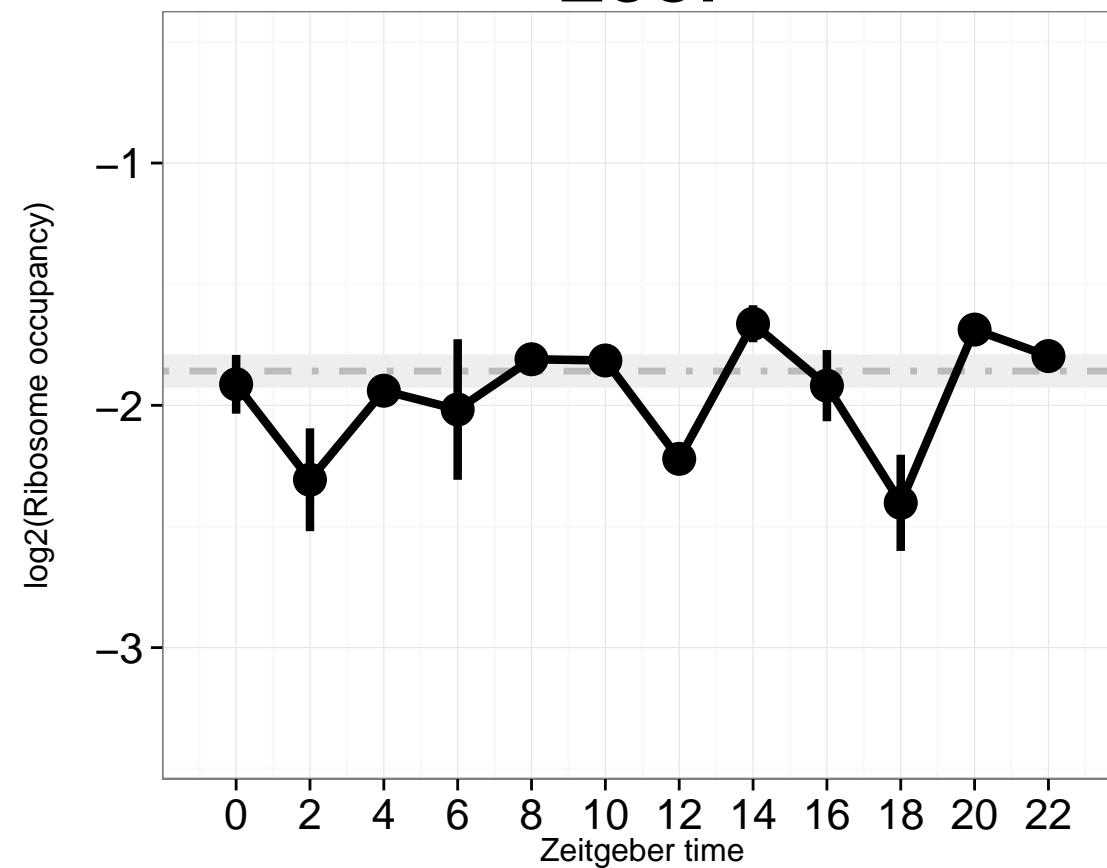

Supplement: SuppDataset_1.zip [file Lcor_set_A.pdf › Supplemental Dataset 1/A-mRNA_nonrhyth_translation_nonrhyth/Lcor_set_A.pdf]

## Lcp1

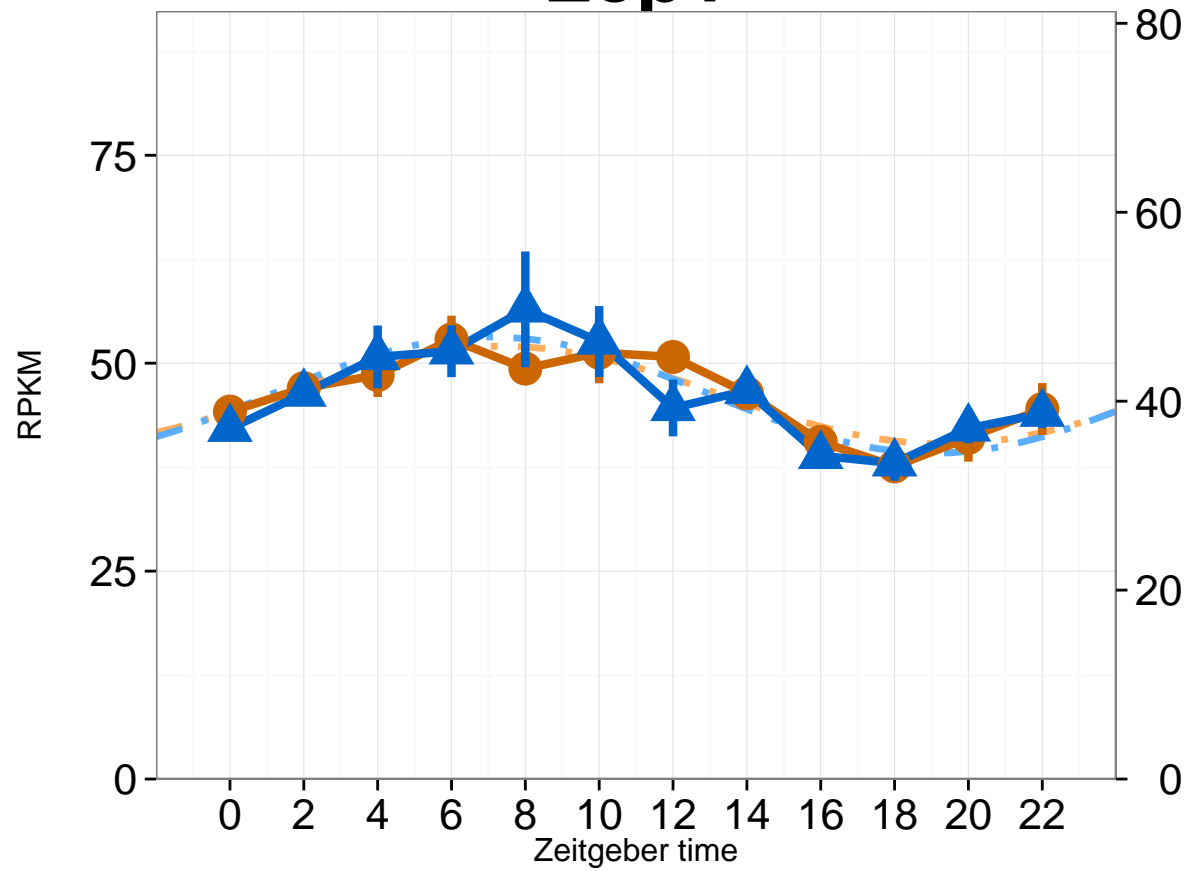

## Lcp1

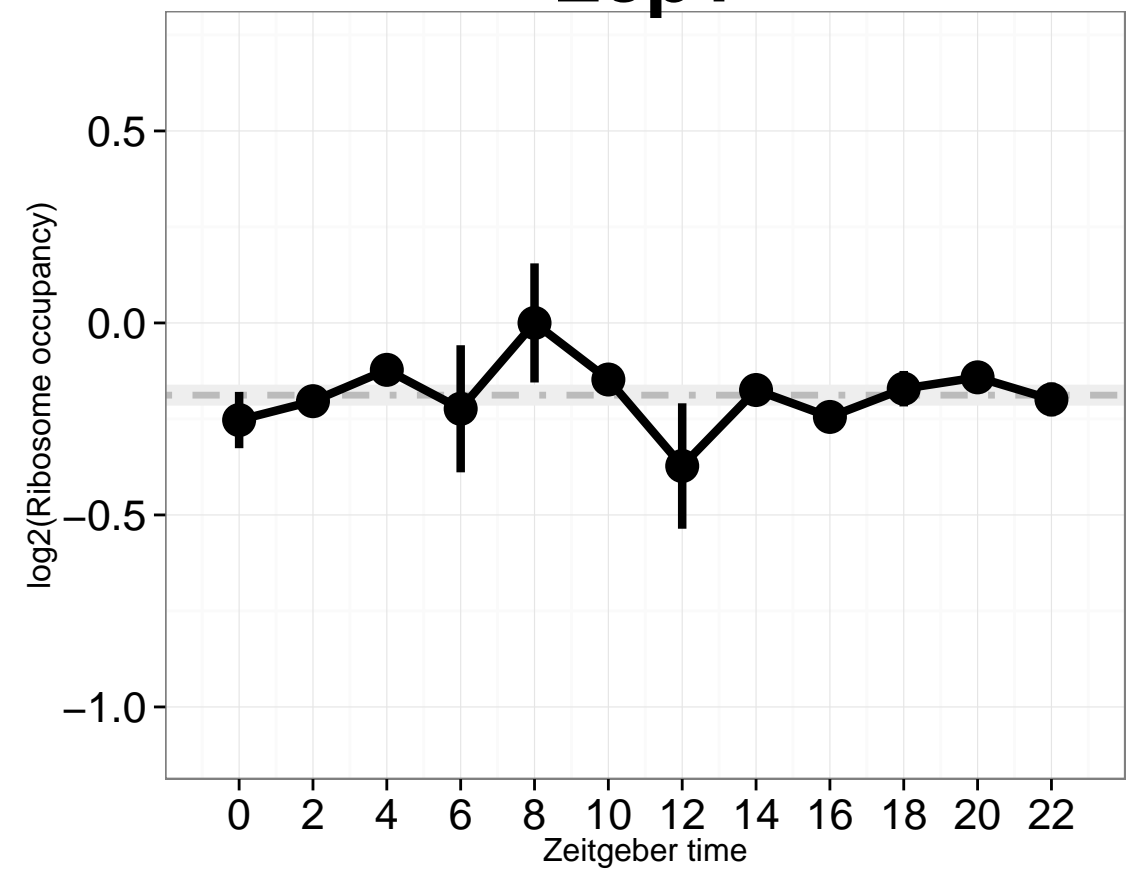

Supplement: SuppDataset_1.zip [file Lcp1_set_A.pdf › Supplemental Dataset 1/A-mRNA_nonrhyth_translation_nonrhyth/Lcp1_set_A.pdf]

# Ldb2

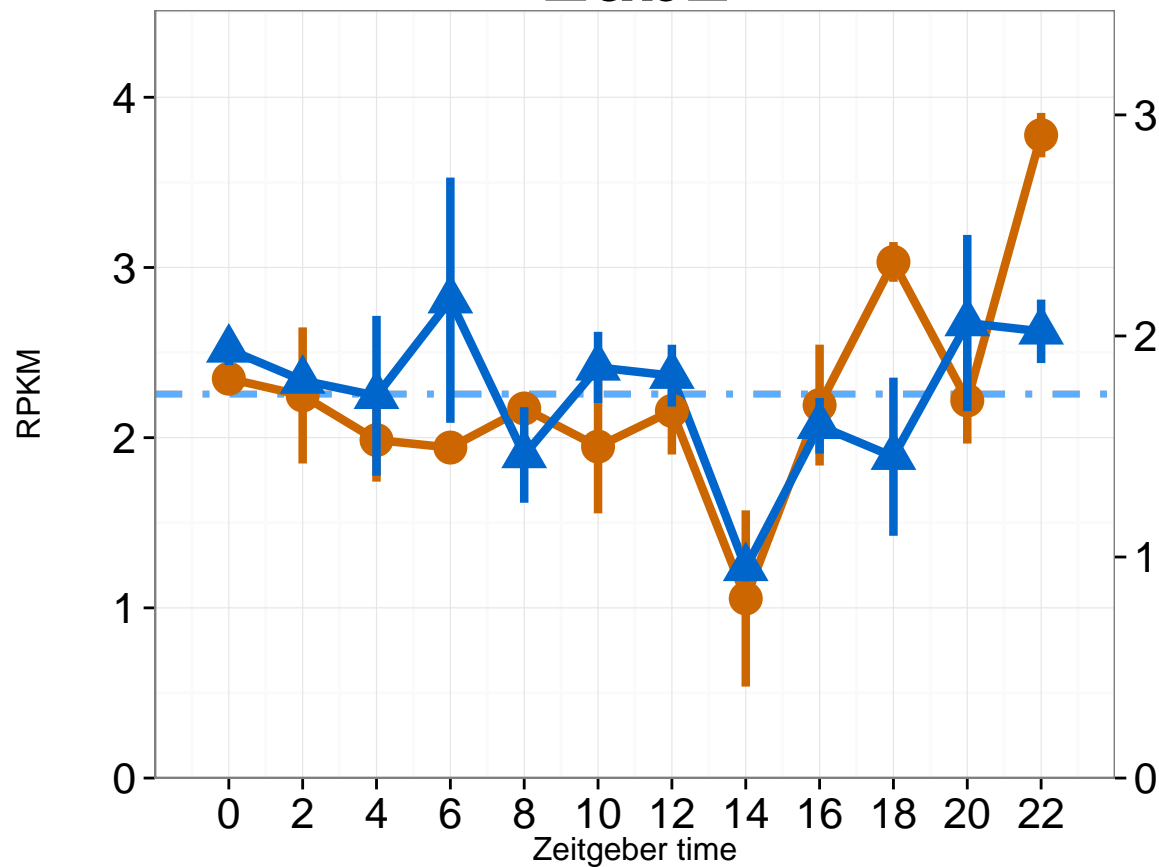

# Ldb2

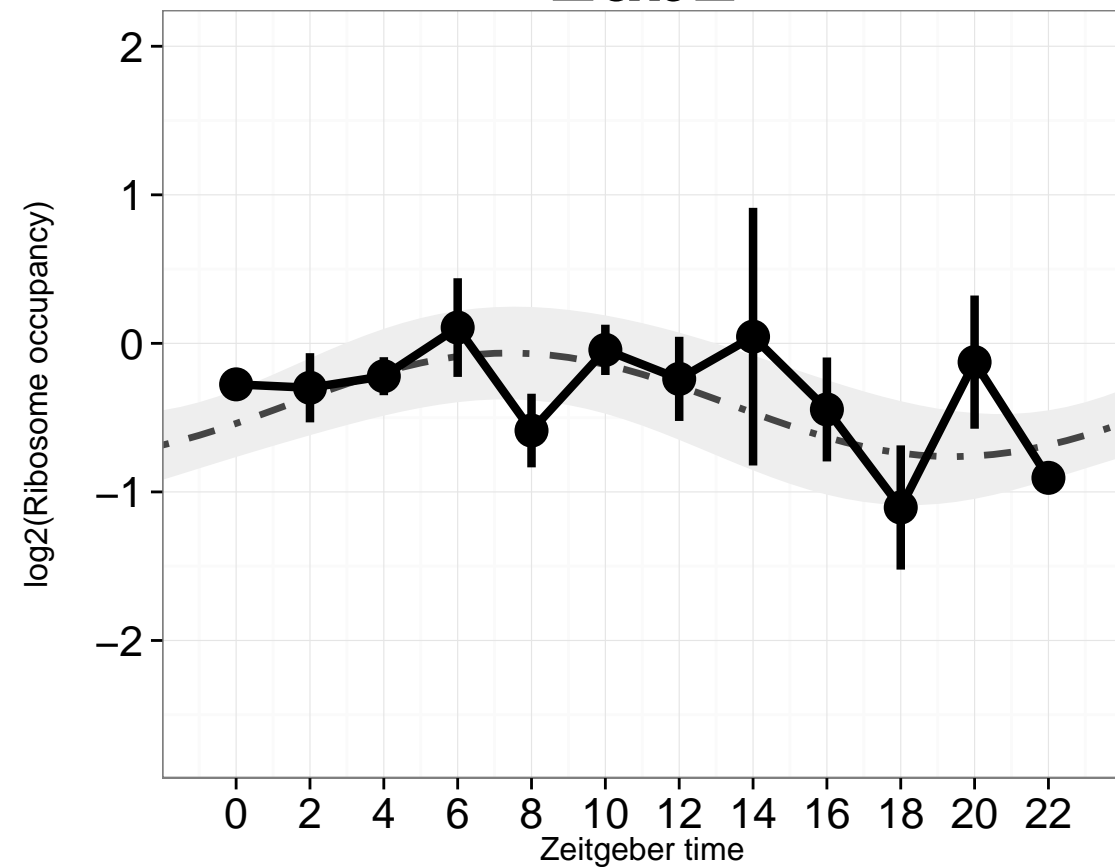

Supplement: SuppDataset_1.zip [file Ldb2_set_A.pdf › Supplemental Dataset 1/A-mRNA_nonrhyth_translation_nonrhyth/Ldb2_set_A.pdf]

## Ldha

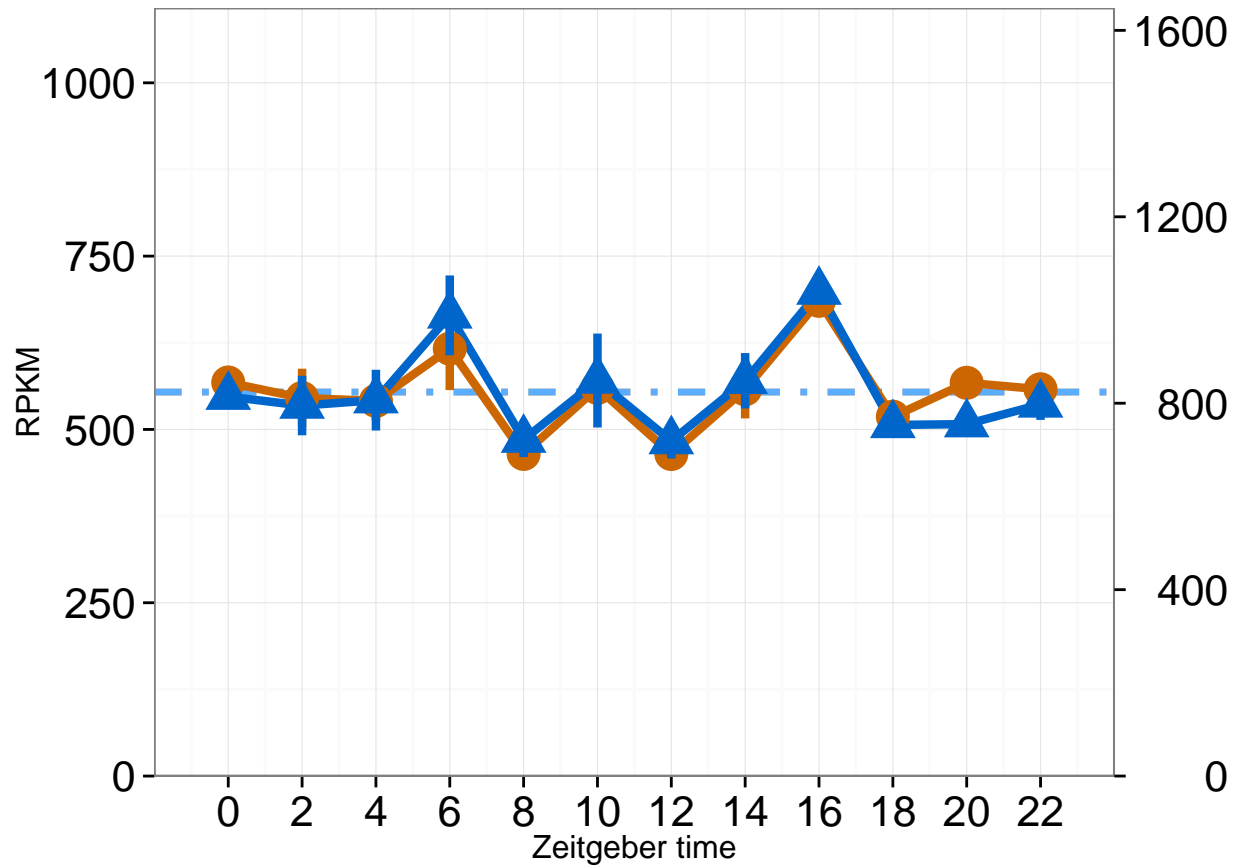

## Ldha

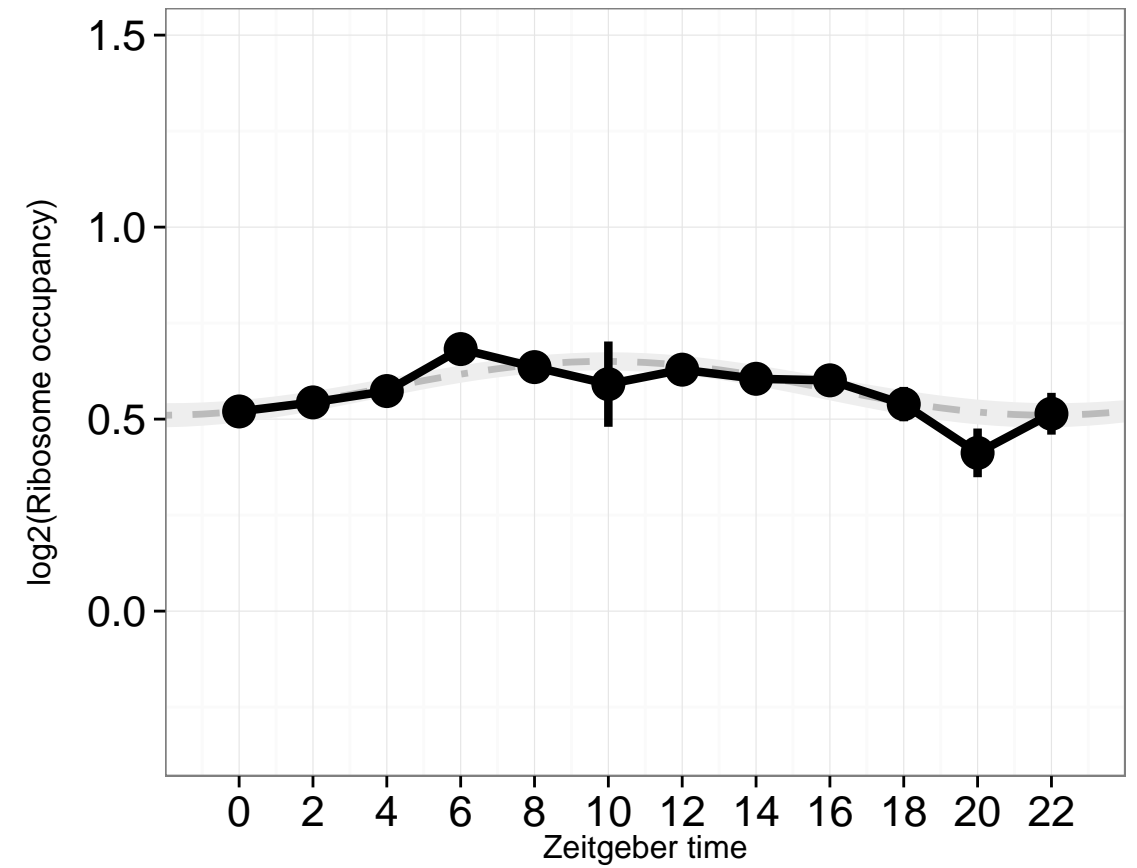

Supplement: SuppDataset_1.zip [file Ldha_set_A.pdf › Supplemental Dataset 1/A-mRNA_nonrhyth_translation_nonrhyth/Ldha_set_A.pdf]

## Ldhb

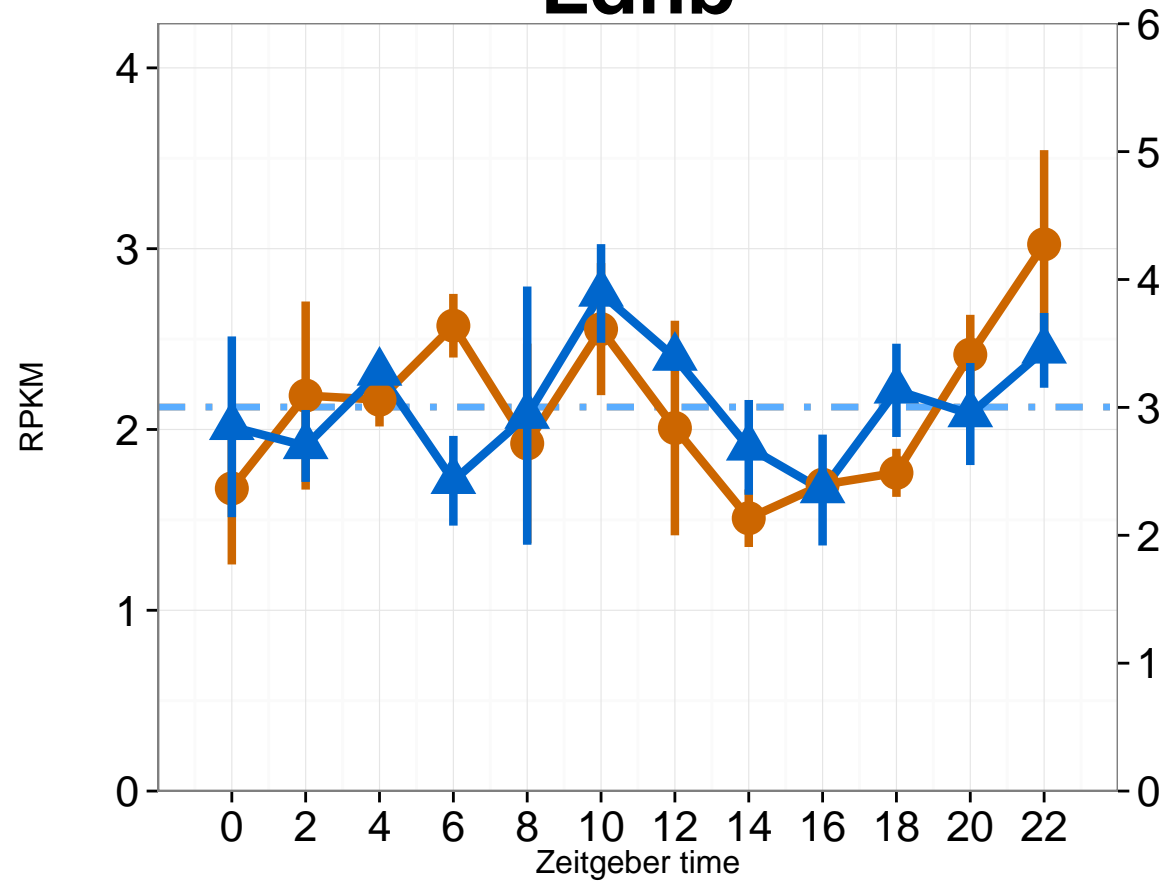

## Ldhb

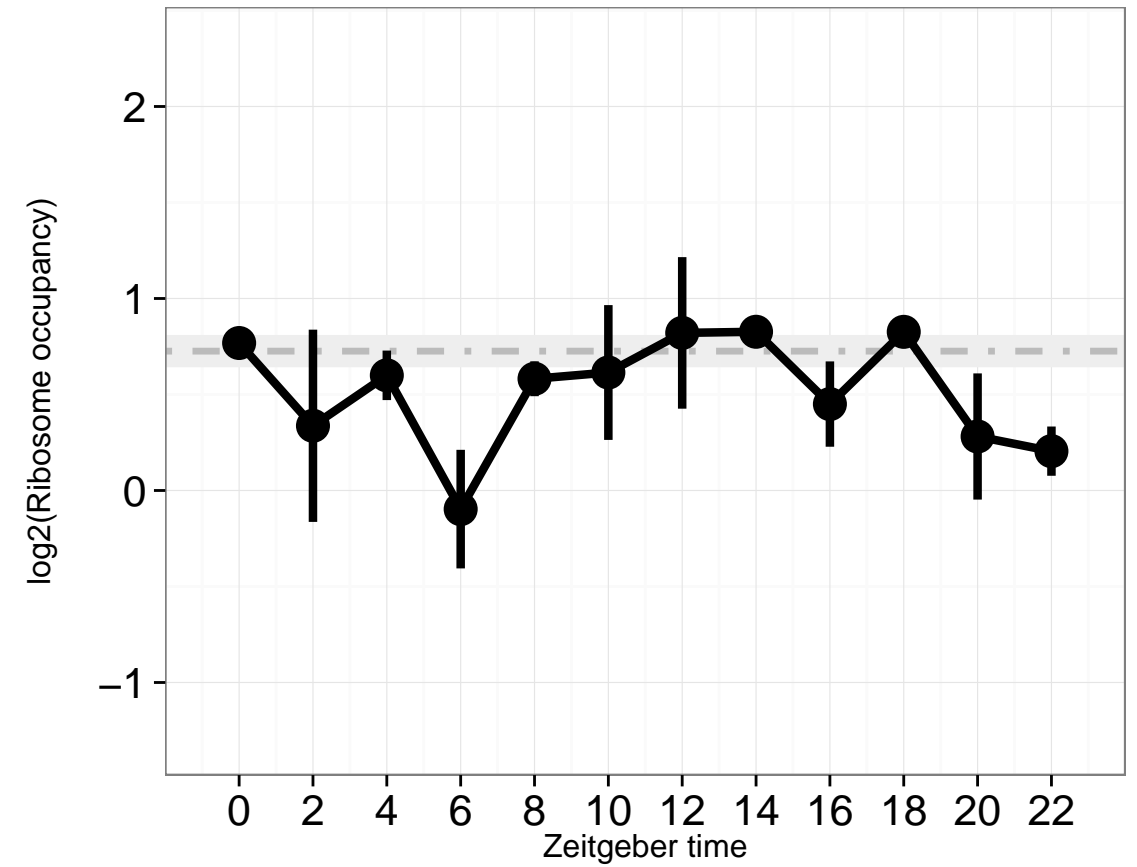

Supplement: SuppDataset_1.zip [file Ldhb_set_A.pdf › Supplemental Dataset 1/A-mRNA_nonrhyth_translation_nonrhyth/Ldhb_set_A.pdf]

## Ldhd

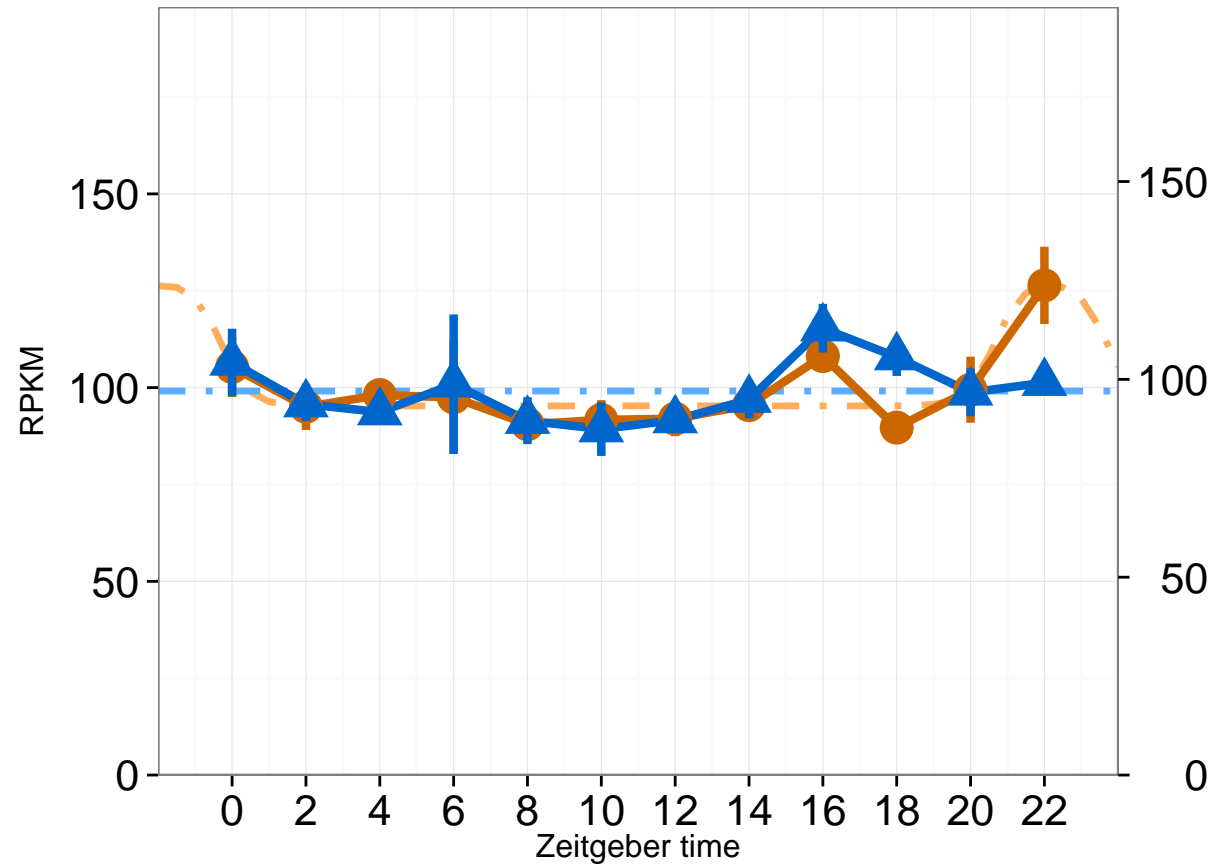

## Ldhd

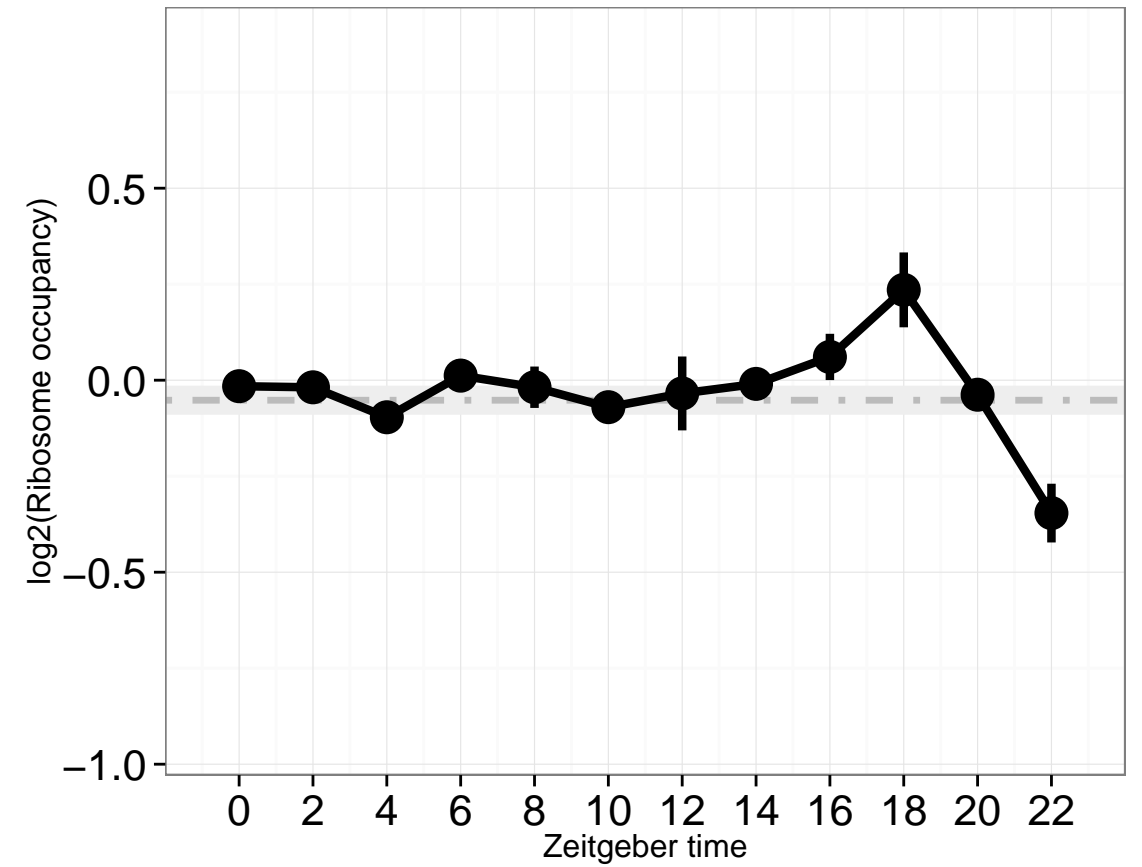

Supplement: SuppDataset_1.zip [file Ldhd_set_A.pdf › Supplemental Dataset 1/A-mRNA_nonrhyth_translation_nonrhyth/Ldhd_set_A.pdf]

## Ldlr

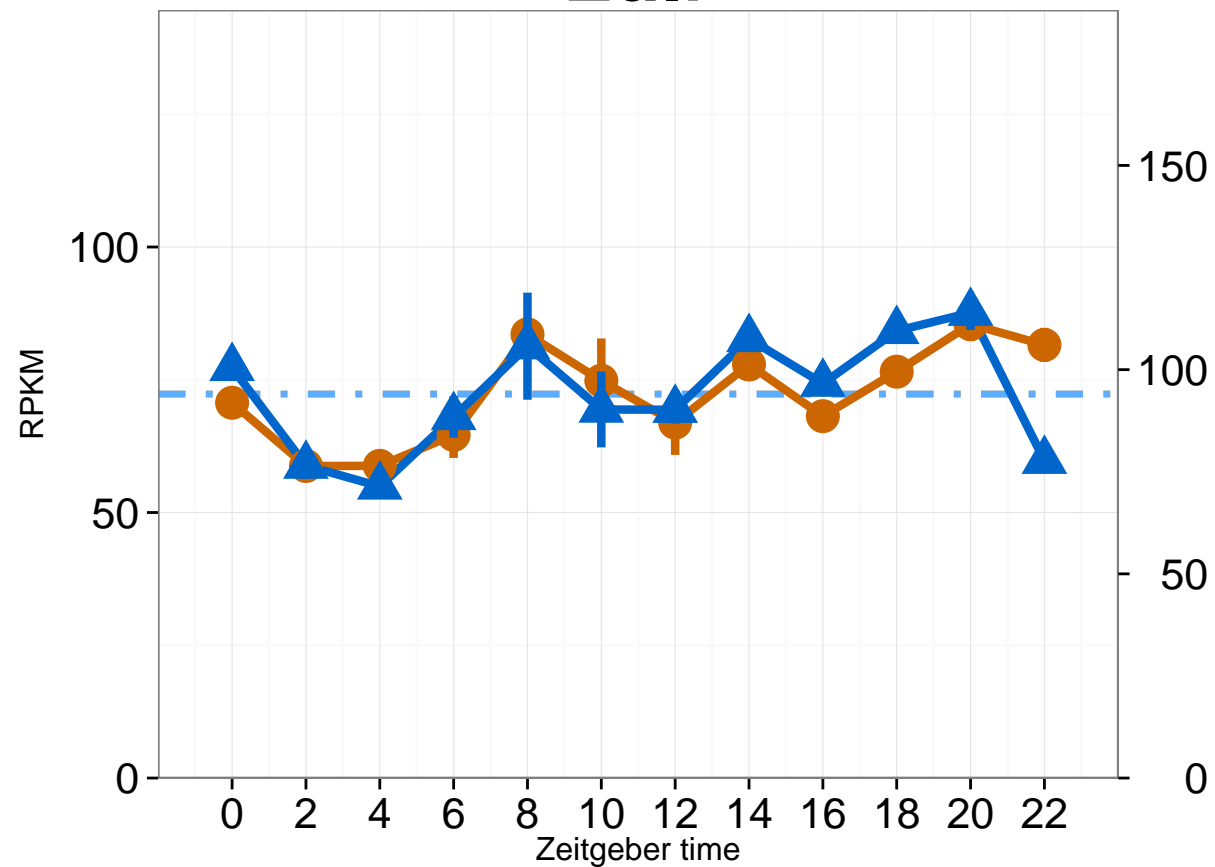

## Ldlr

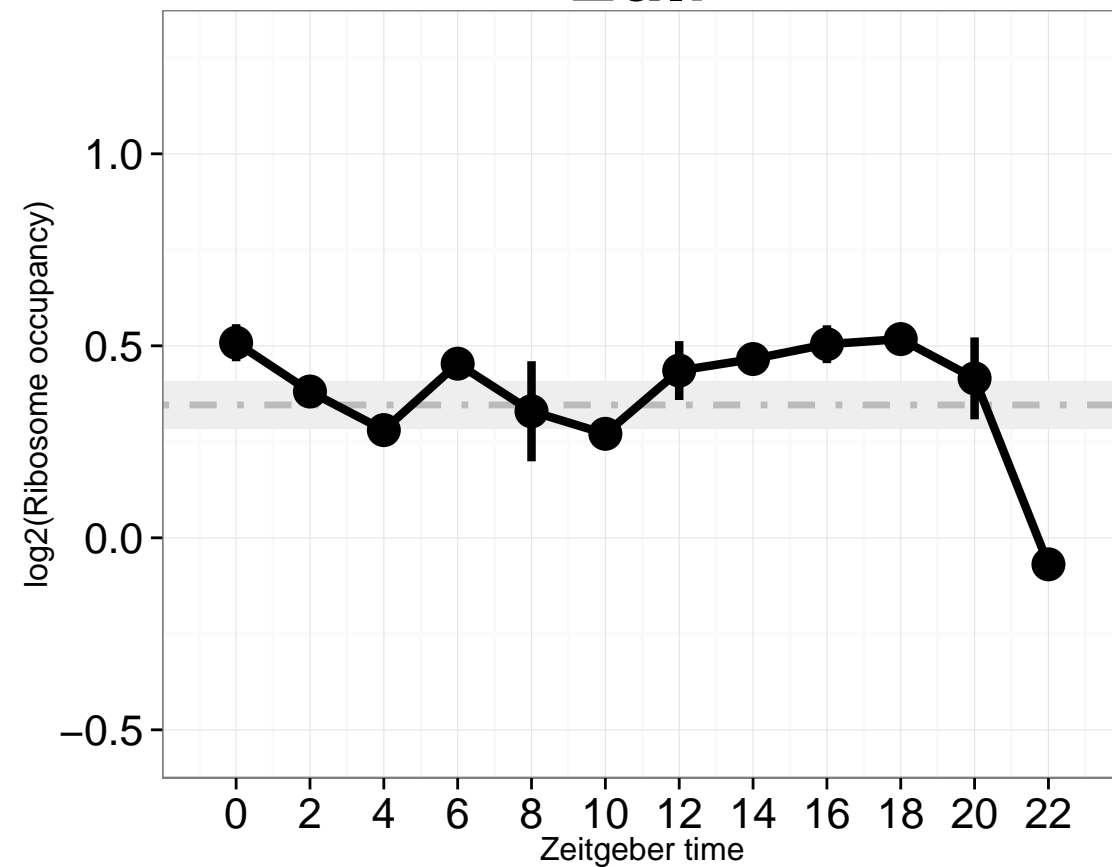

Supplement: SuppDataset_1.zip [file Ldlr_set_A.pdf › Supplemental Dataset 1/A-mRNA_nonrhyth_translation_nonrhyth/Ldlr_set_A.pdf]

## Ldlrad3

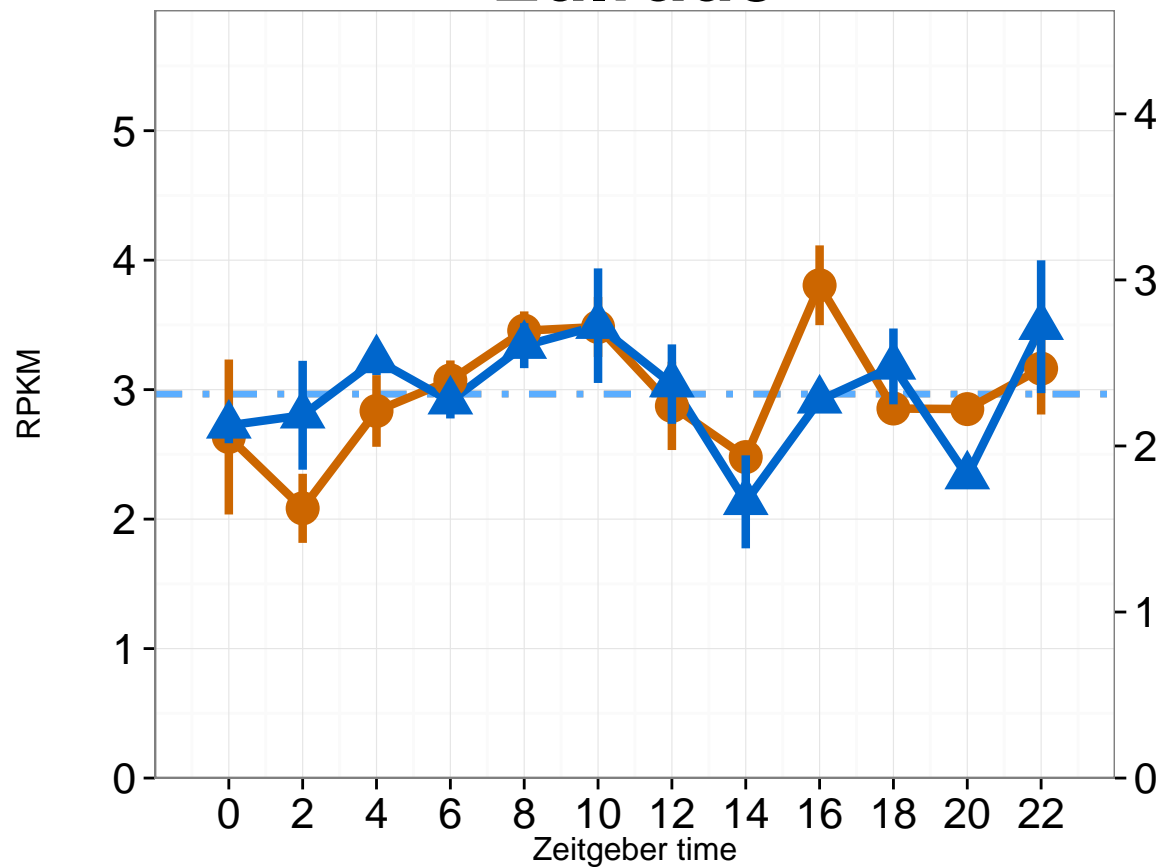

## Ldlrad3

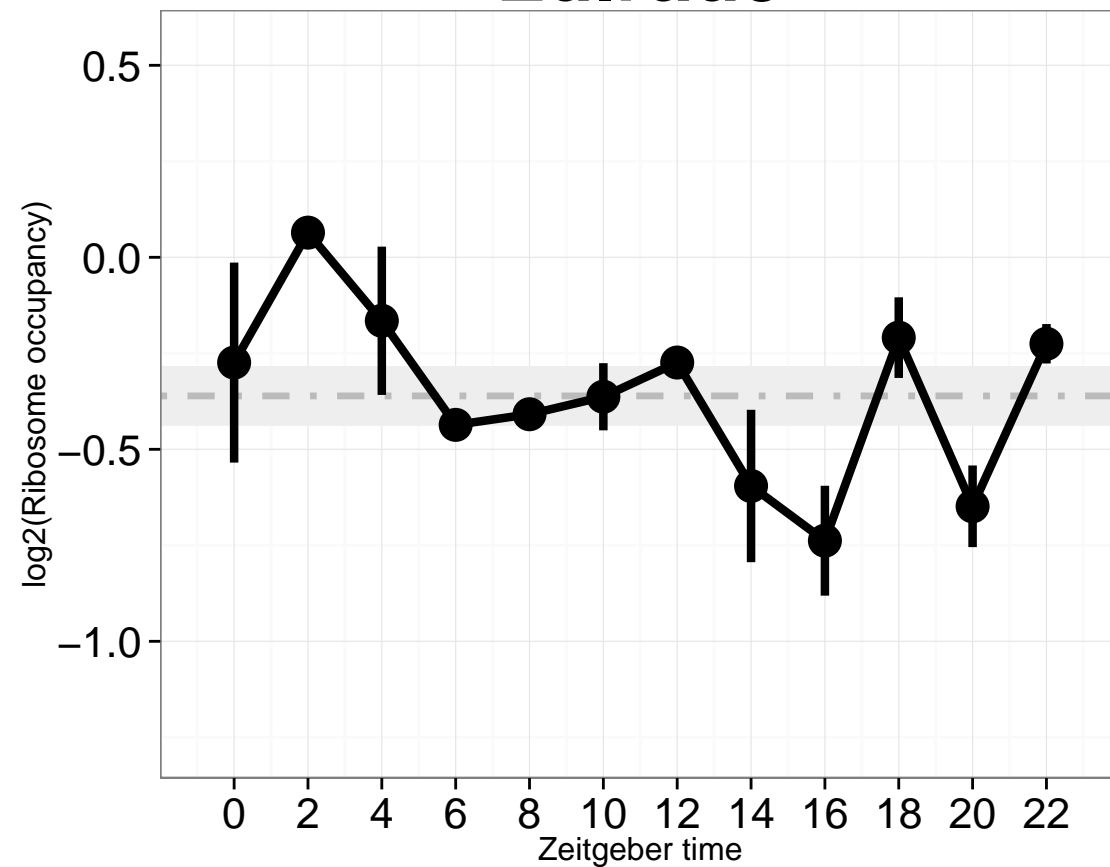

Supplement: SuppDataset_1.zip [file Ldlrad3_set_A.pdf › Supplemental Dataset 1/A-mRNA_nonrhyth_translation_nonrhyth/Ldlrad3_set_A.pdf]
