# Supplementary figures and images for: Ribosome profiling reveals the rhythmic liver translatome and circadian clock regulation by upstream open reading frames (part 40 of 113)
Source: HighWire-hosted journal article supplement (doi:10.1101/gr.195404.115), 2015-10-20

# Ldtrap1

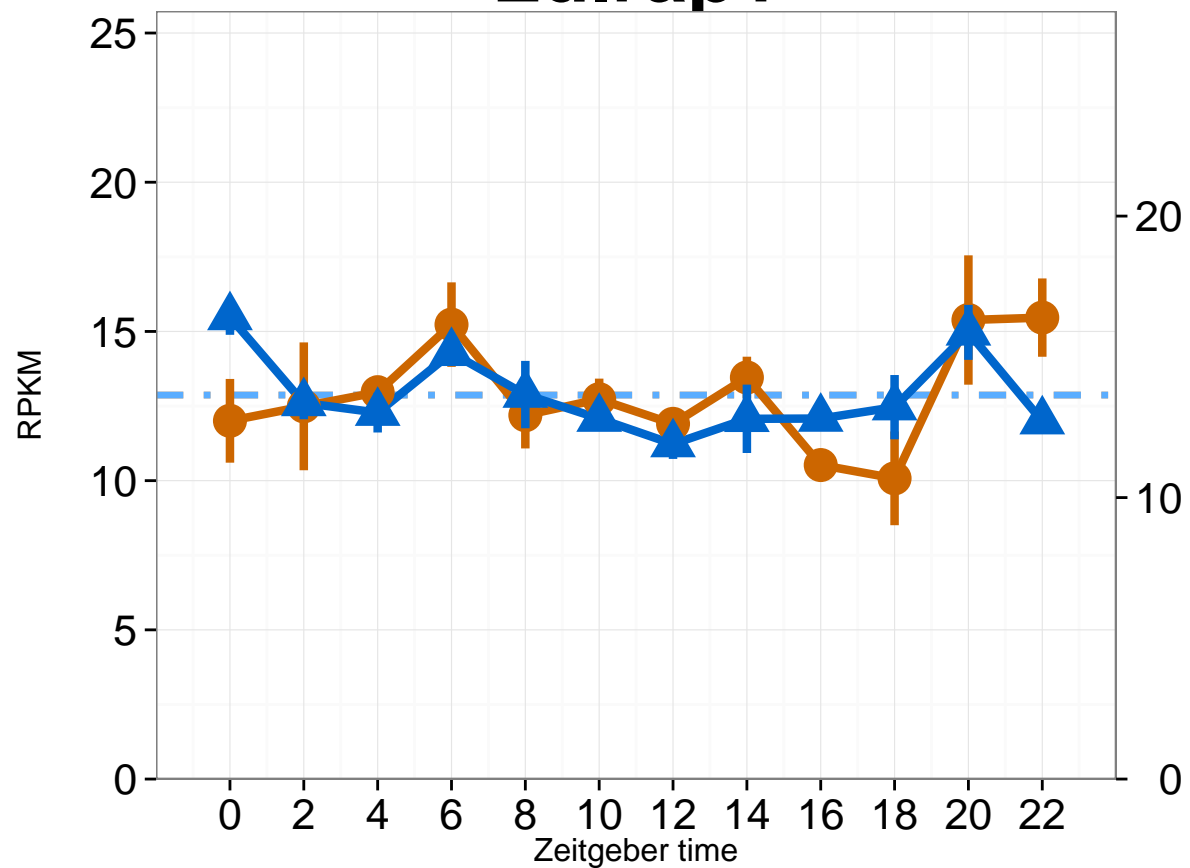

# Ldtrap1

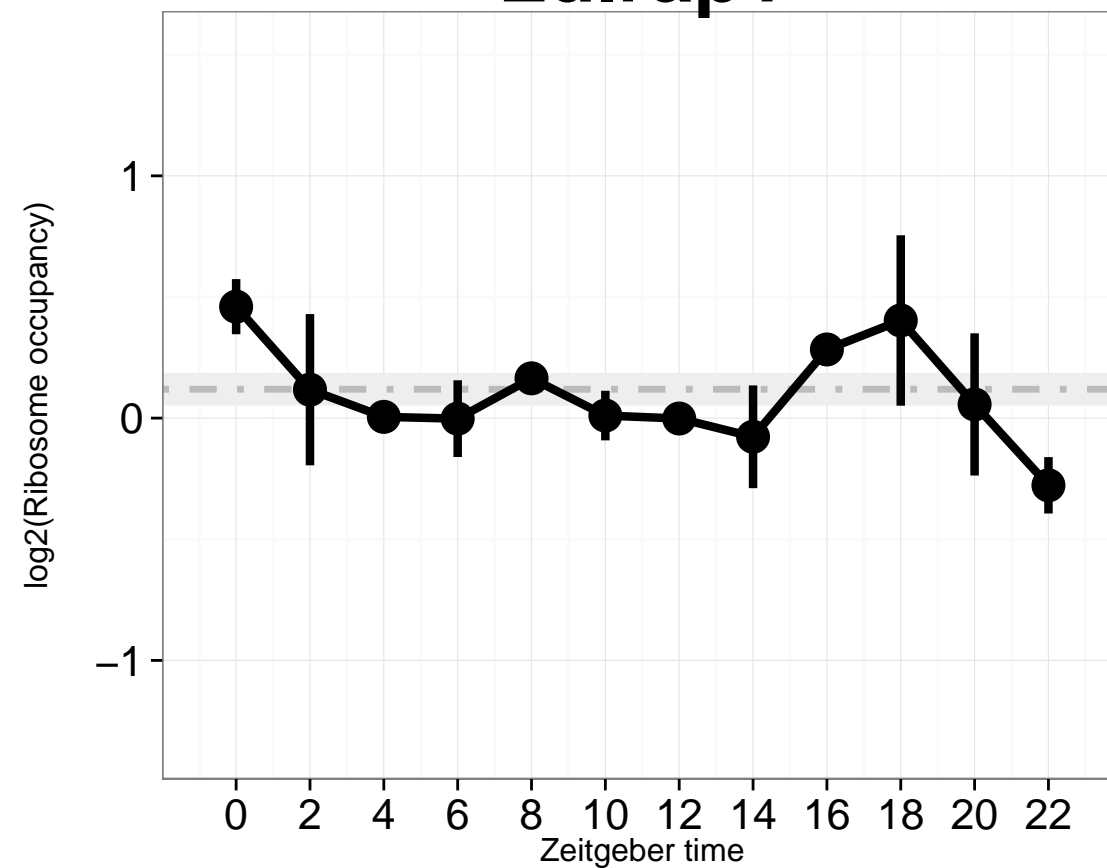

Supplement: SuppDataset_1.zip [file Ldlrap1_set_A.pdf › Supplemental Dataset 1/A-mRNA_nonrhyth_translation_nonrhyth/Ldlrap1_set_A.pdf]

# Lect2

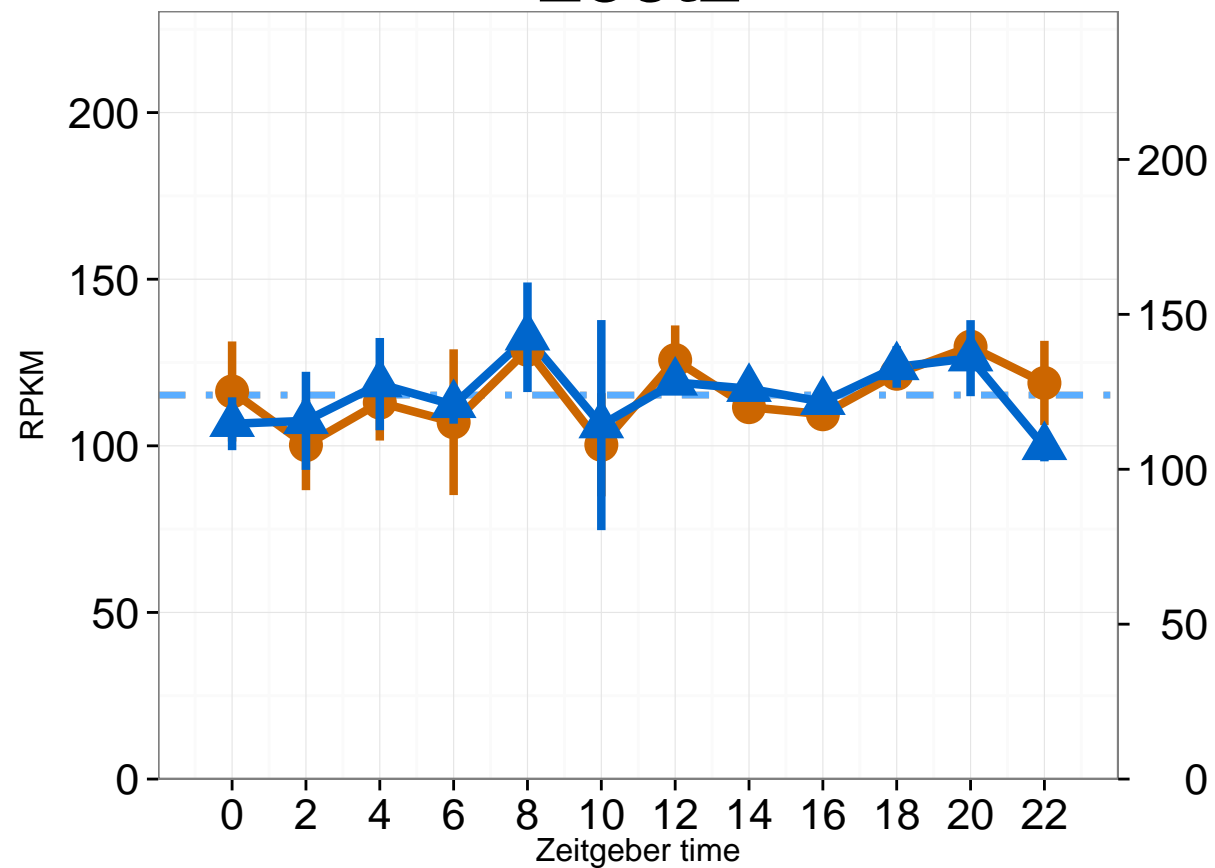

# Lect2

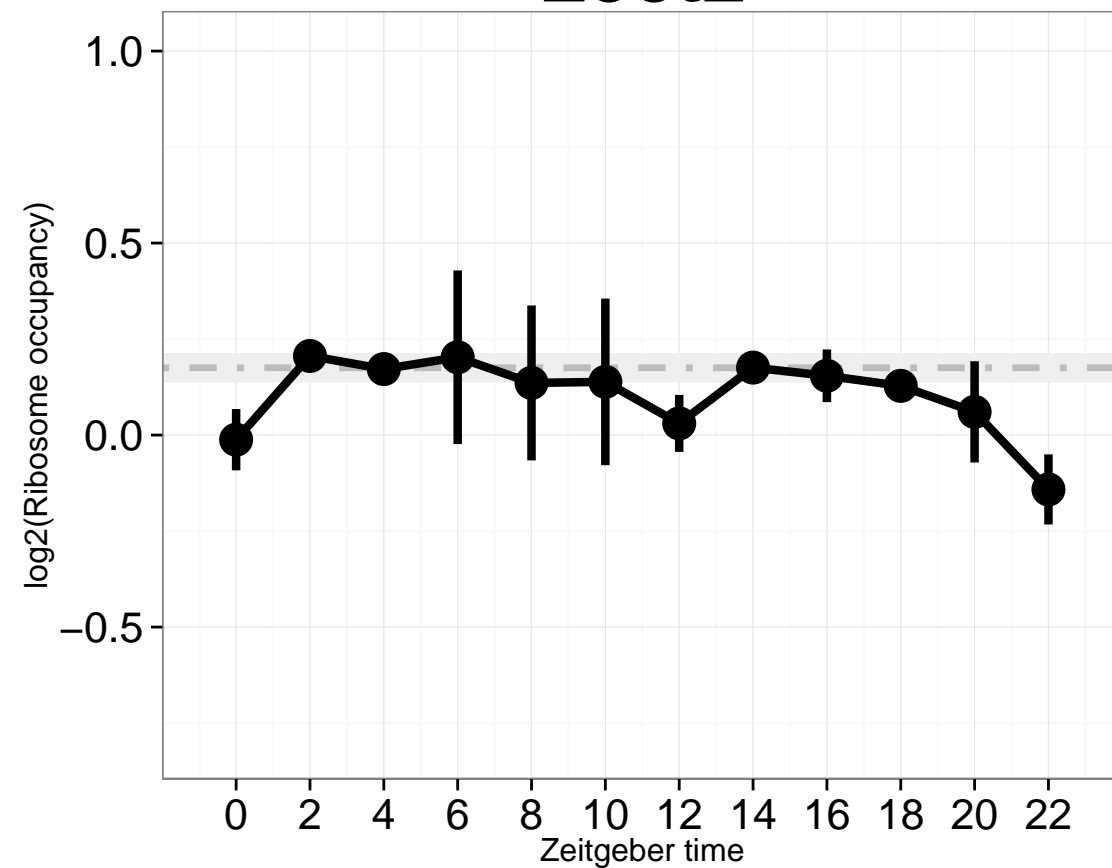

Supplement: SuppDataset_1.zip [file Lect2_set_A.pdf › Supplemental Dataset 1/A-mRNA_nonrhyth_translation_nonrhyth/Lect2_set_A.pdf]

# Lemd2

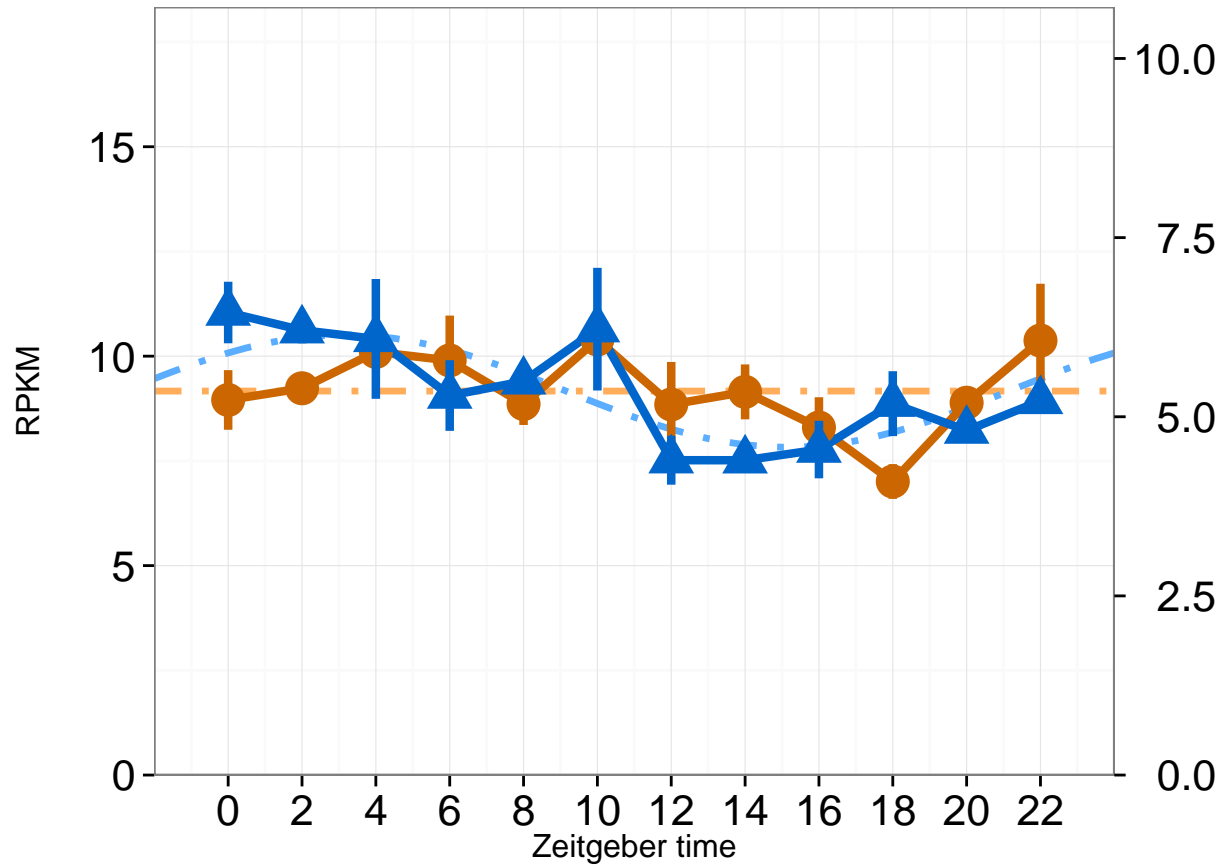

# Lemd2

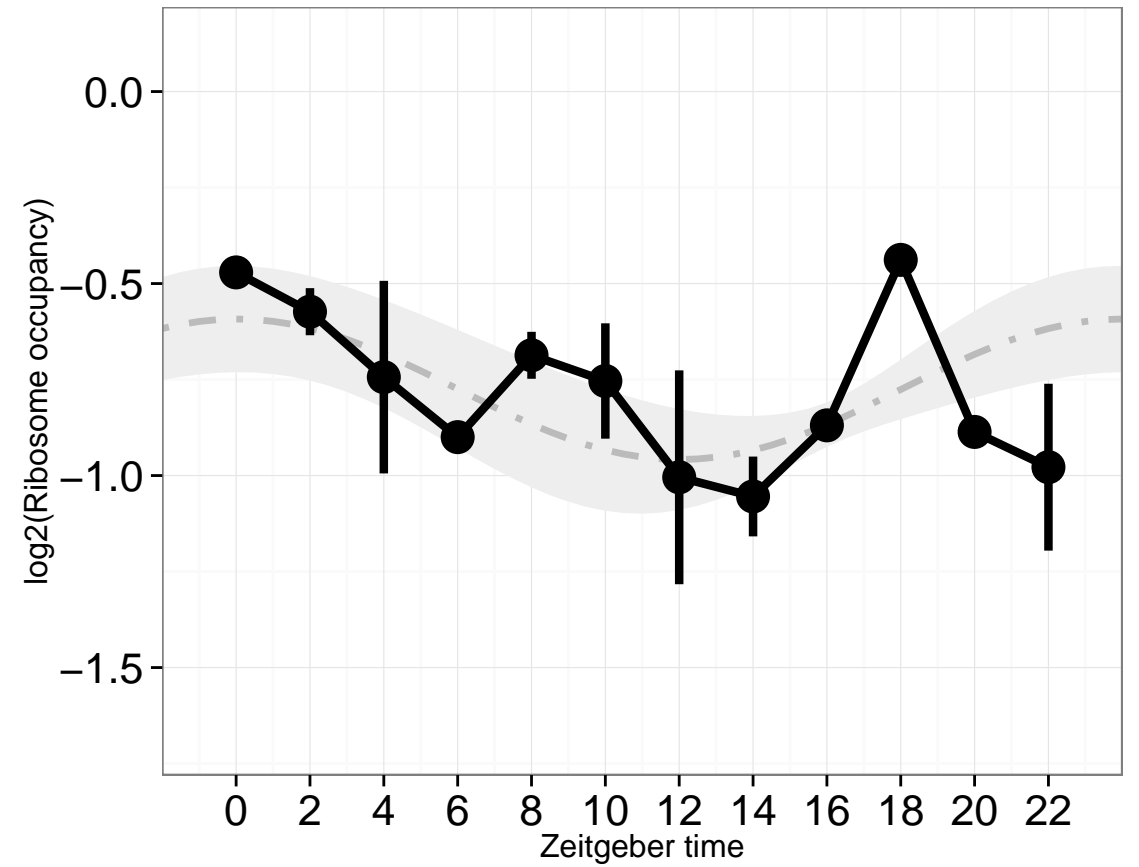

Supplement: SuppDataset_1.zip [file Lemd2_set_A.pdf › Supplemental Dataset 1/A-mRNA_nonrhyth_translation_nonrhyth/Lemd2_set_A.pdf]

## Lemd3

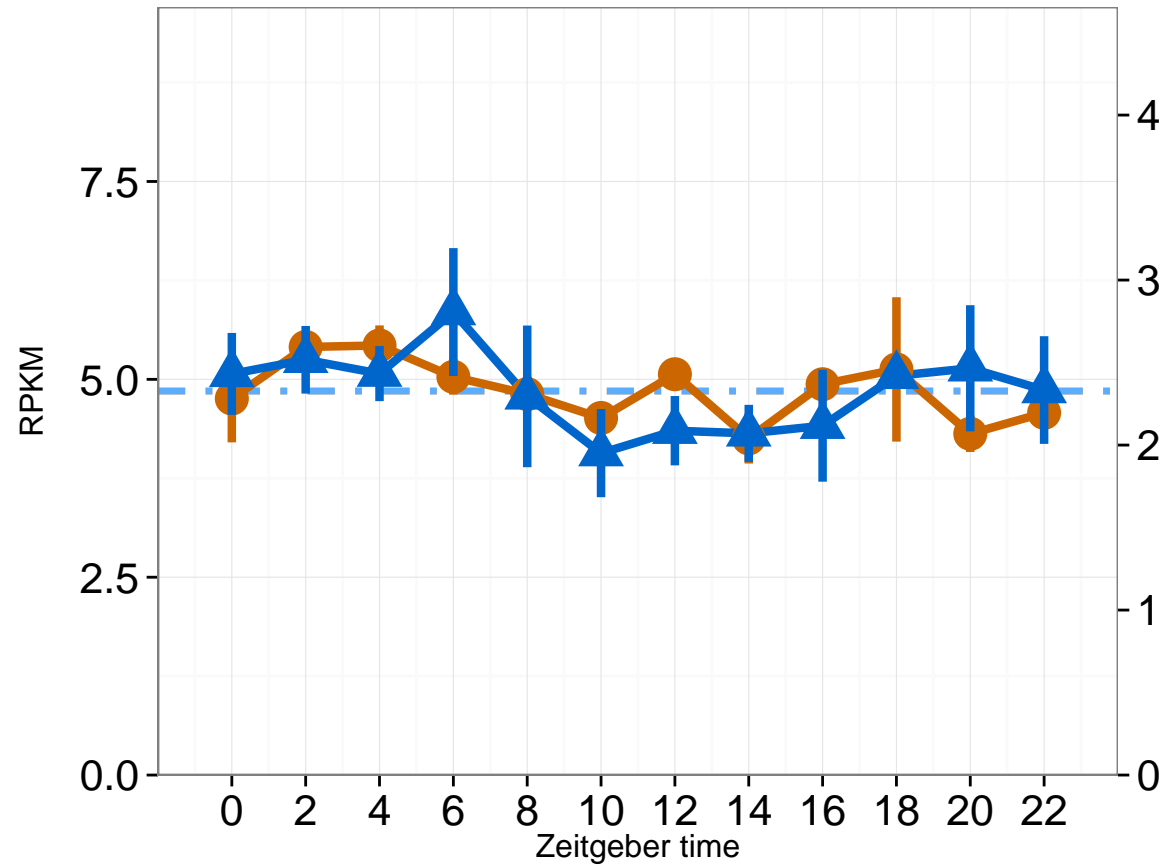

## Lemd3

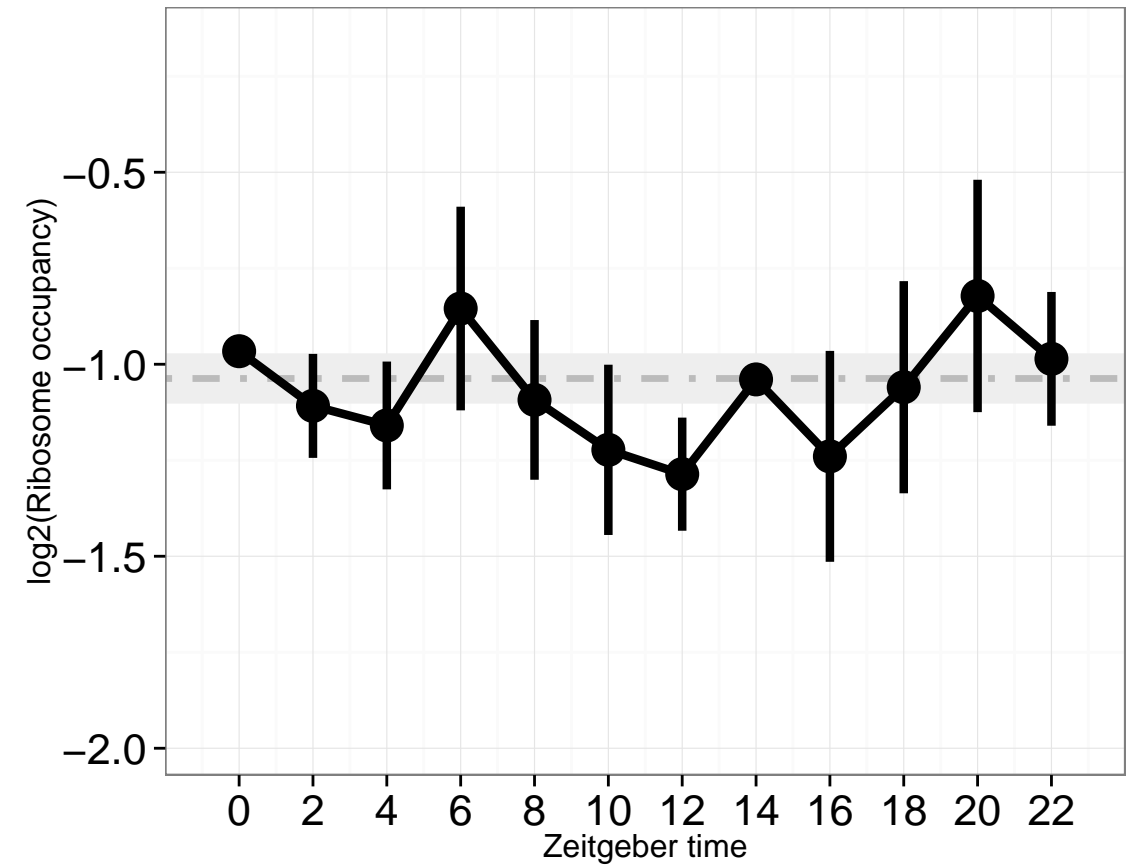

Supplement: SuppDataset_1.zip [file Lemd3_set_A.pdf › Supplemental Dataset 1/A-mRNA_nonrhyth_translation_nonrhyth/Lemd3_set_A.pdf]

# Leng1

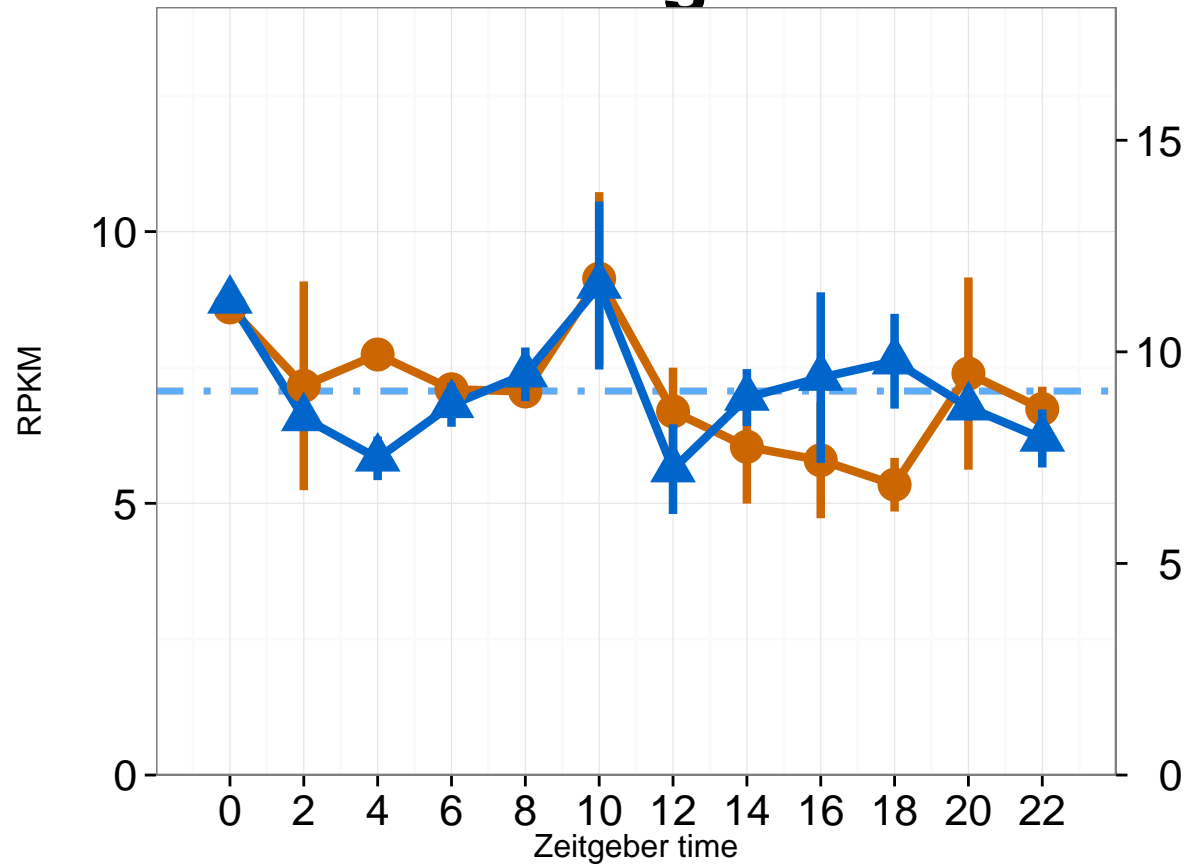

# Leng1

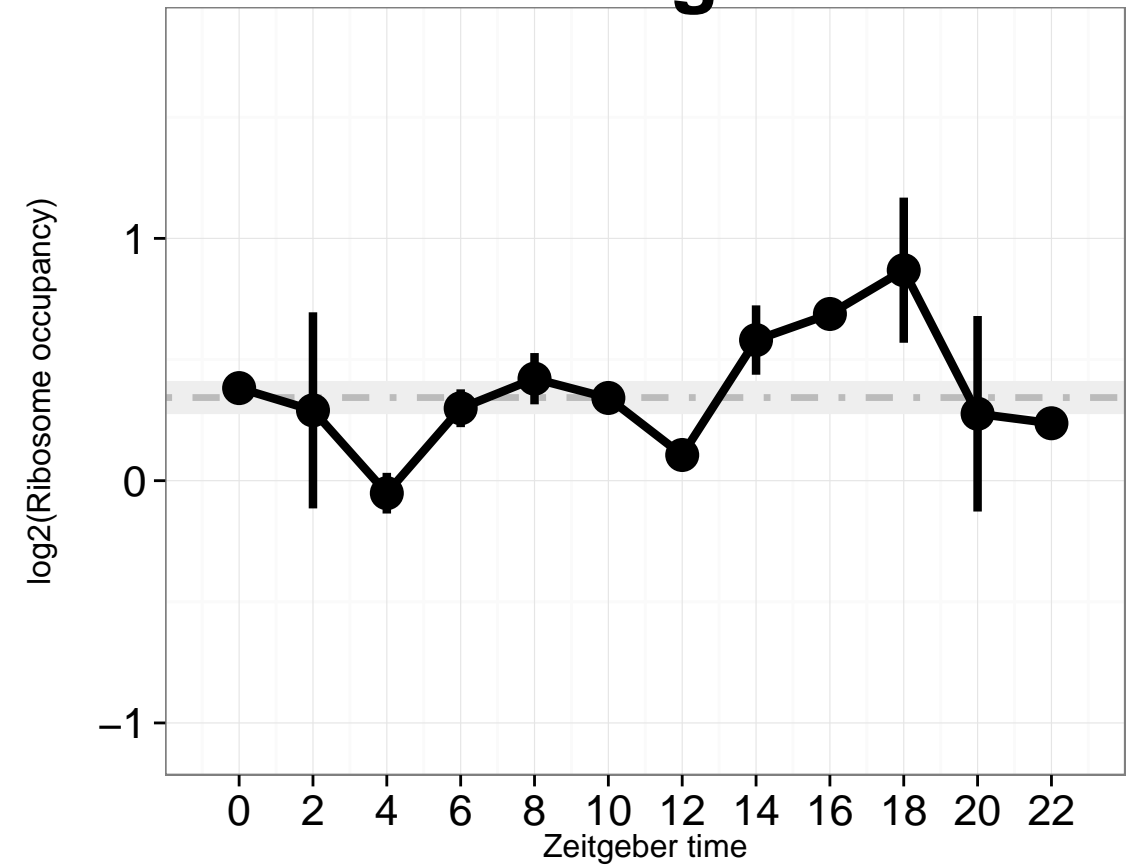

Supplement: SuppDataset_1.zip [file Leng1_set_A.pdf › Supplemental Dataset 1/A-mRNA_nonrhyth_translation_nonrhyth/Leng1_set_A.pdf]

# Lepr

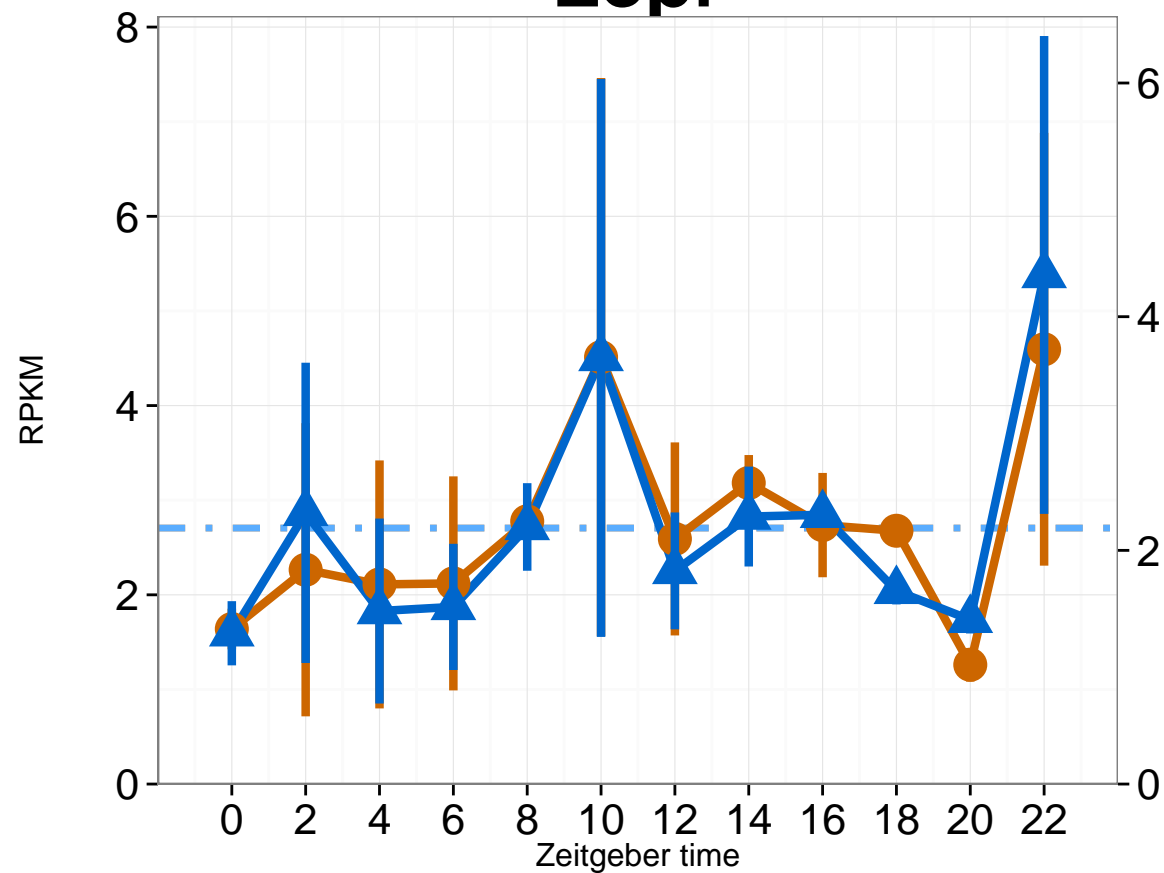

# Lepr

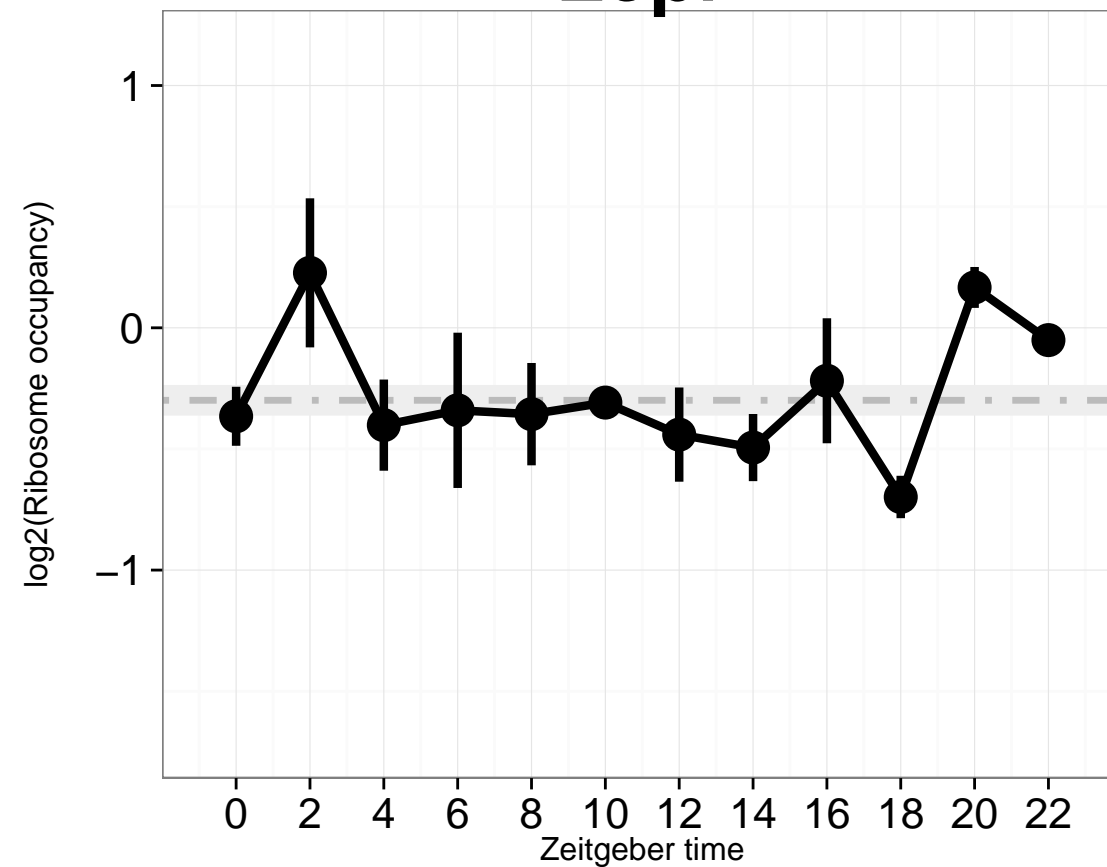

Supplement: SuppDataset_1.zip [file Lepr_set_A.pdf › Supplemental Dataset 1/A-mRNA_nonrhyth_translation_nonrhyth/Lepr_set_A.pdf]

## Lepre1

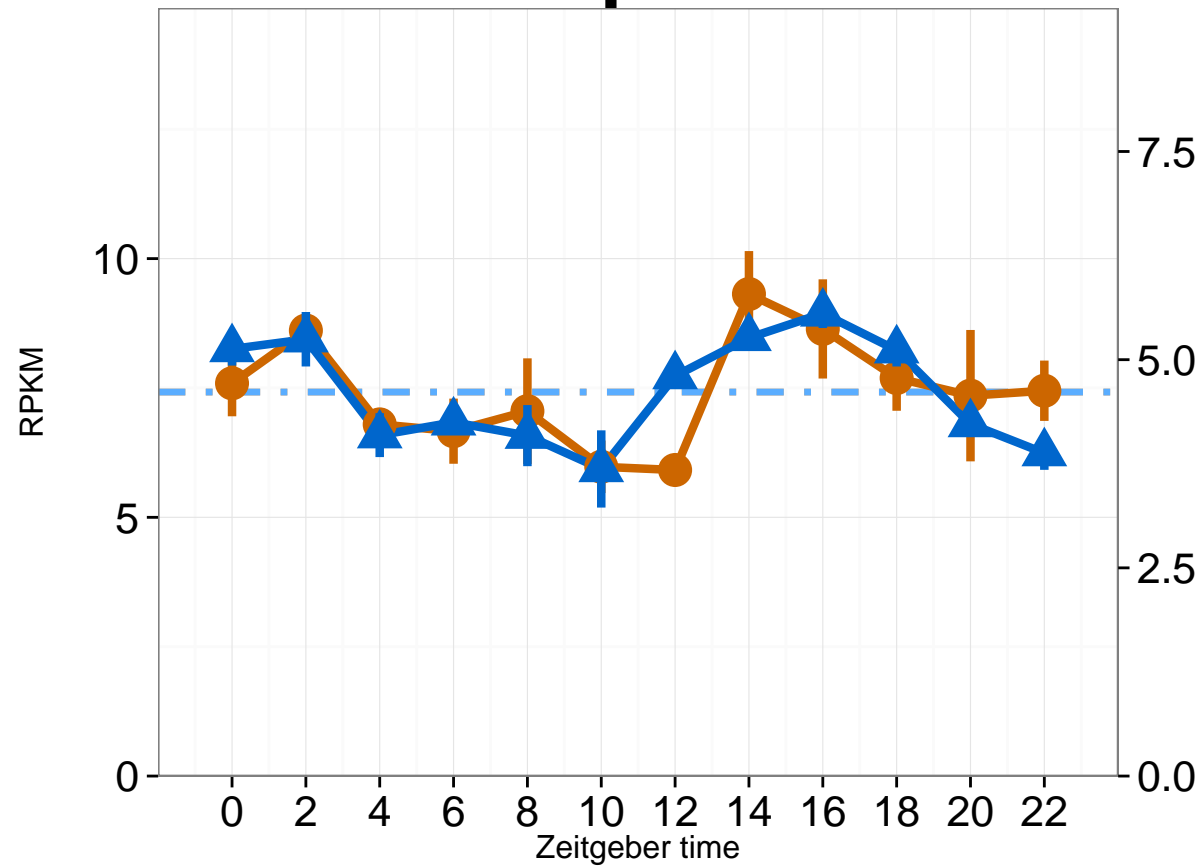

## Lepre1

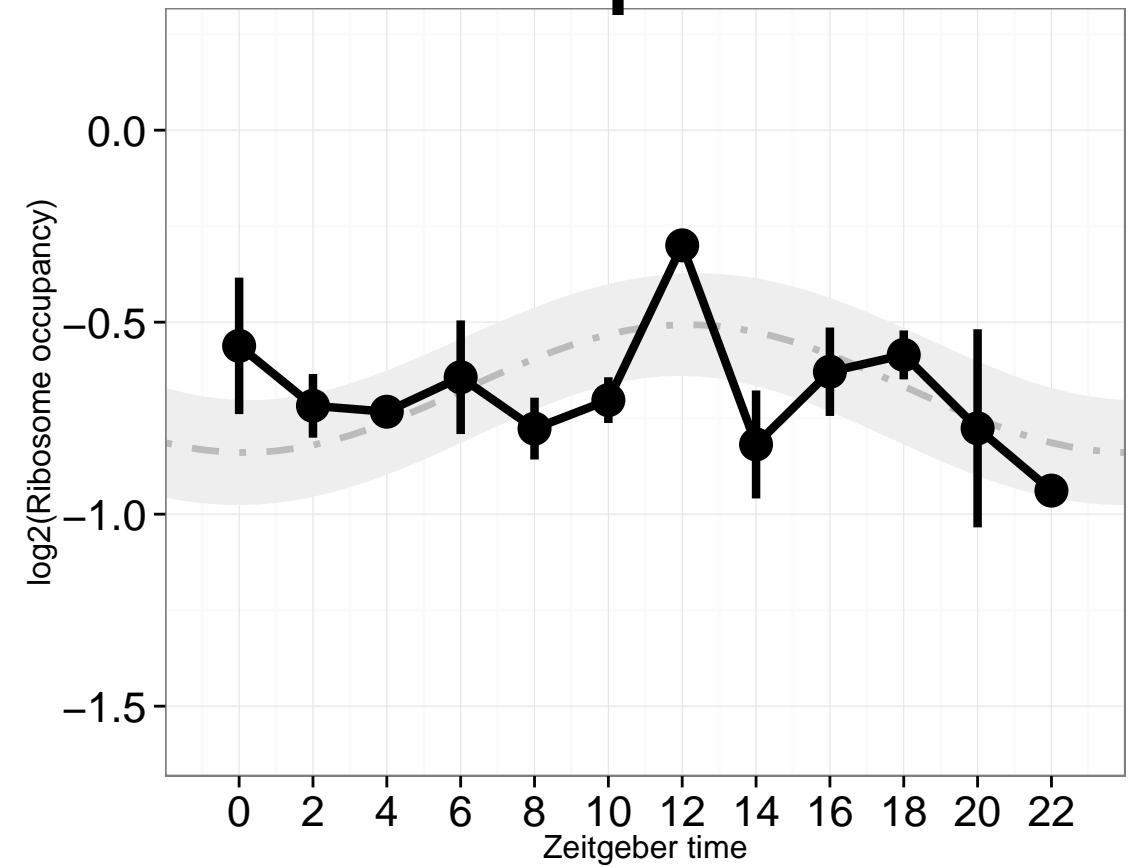

Supplement: SuppDataset_1.zip [file Lepre1_set_A.pdf › Supplemental Dataset 1/A-mRNA_nonrhyth_translation_nonrhyth/Lepre1_set_A.pdf]

# Leprel1

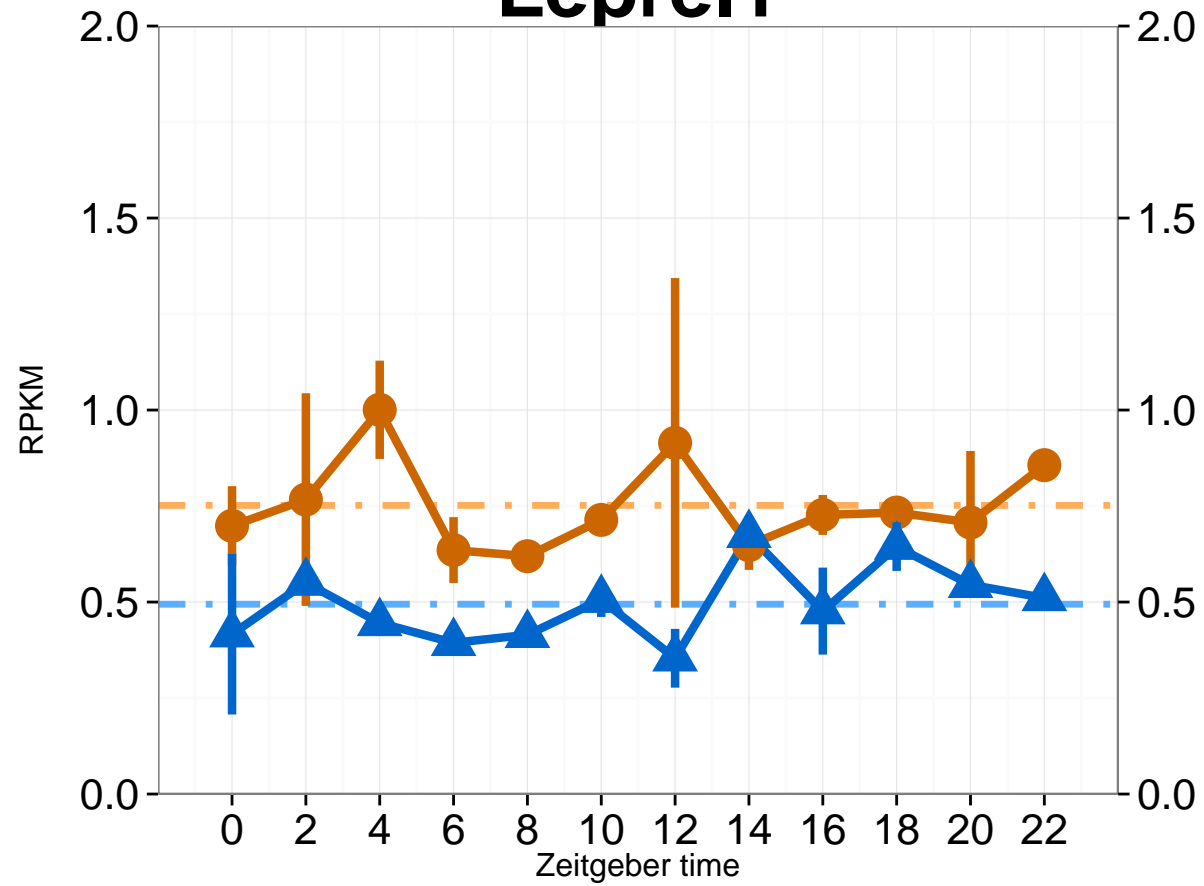

# Leprel1

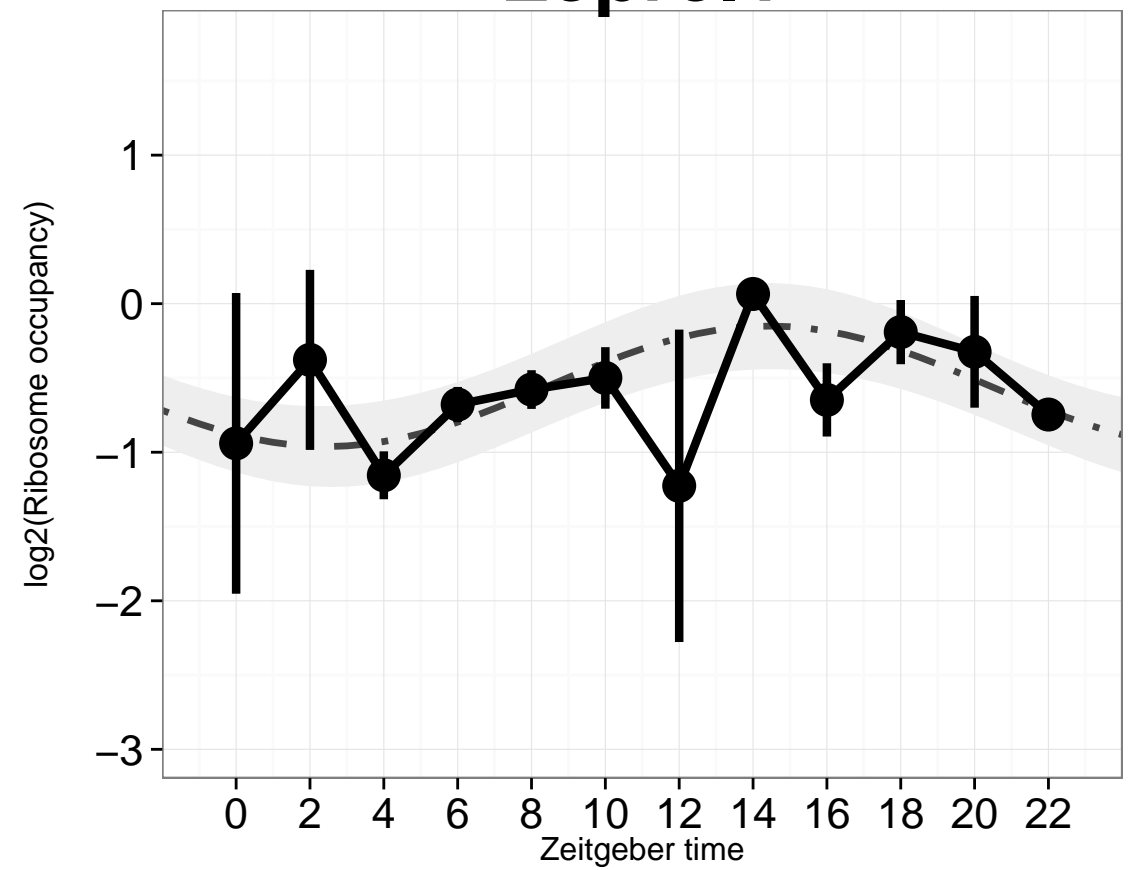

Supplement: SuppDataset_1.zip [file Leprel1_set_A.pdf › Supplemental Dataset 1/A-mRNA_nonrhyth_translation_nonrhyth/Leprel1_set_A.pdf]

## Leprel2

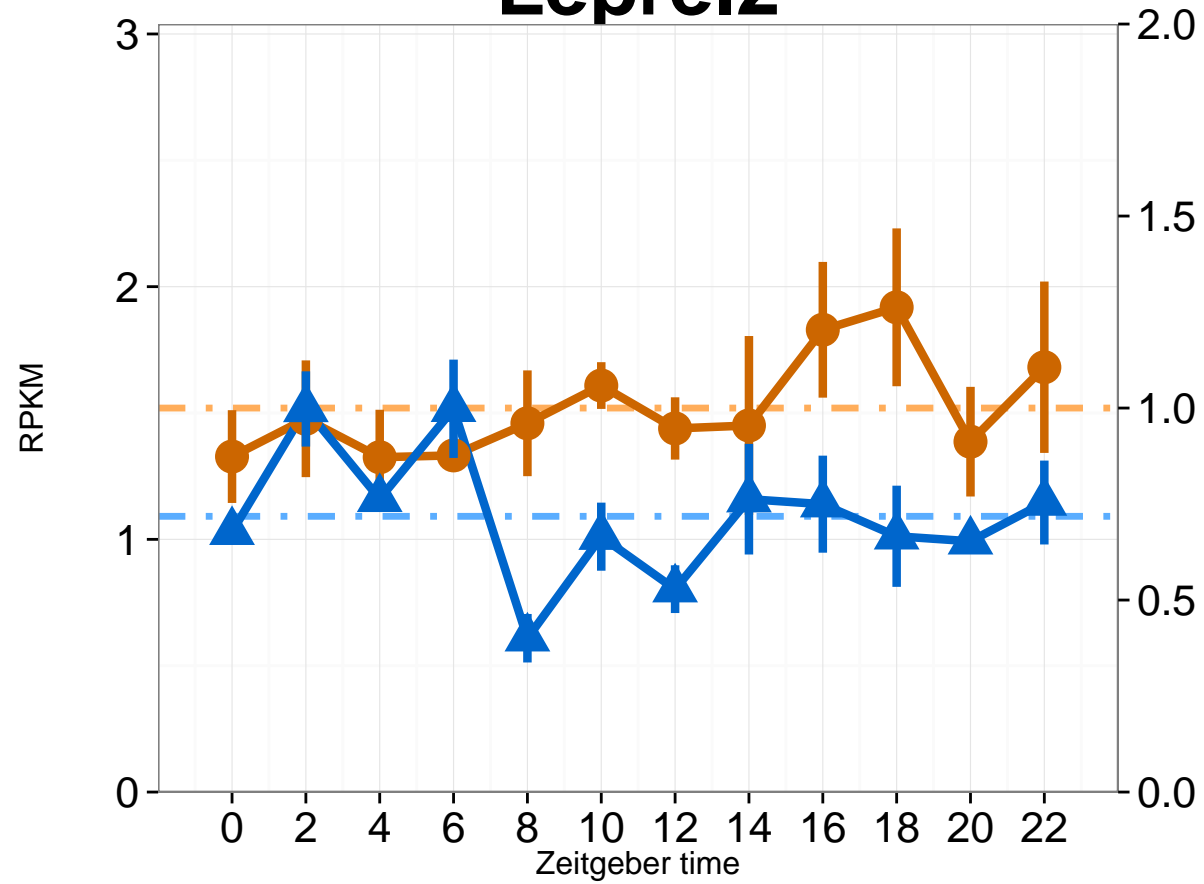

## Leprel2

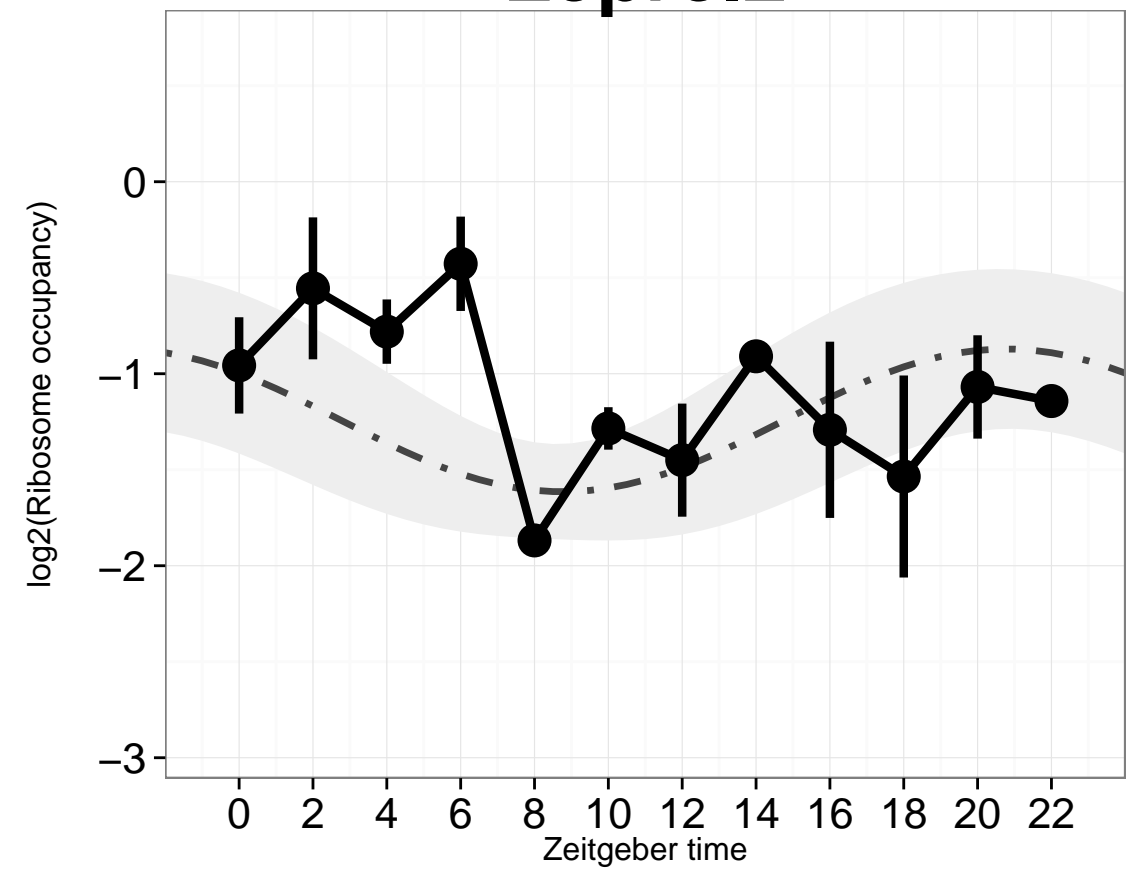

Supplement: SuppDataset_1.zip [file Leprel2_set_A.pdf › Supplemental Dataset 1/A-mRNA_nonrhyth_translation_nonrhyth/Leprel2_set_A.pdf]

## Leprot

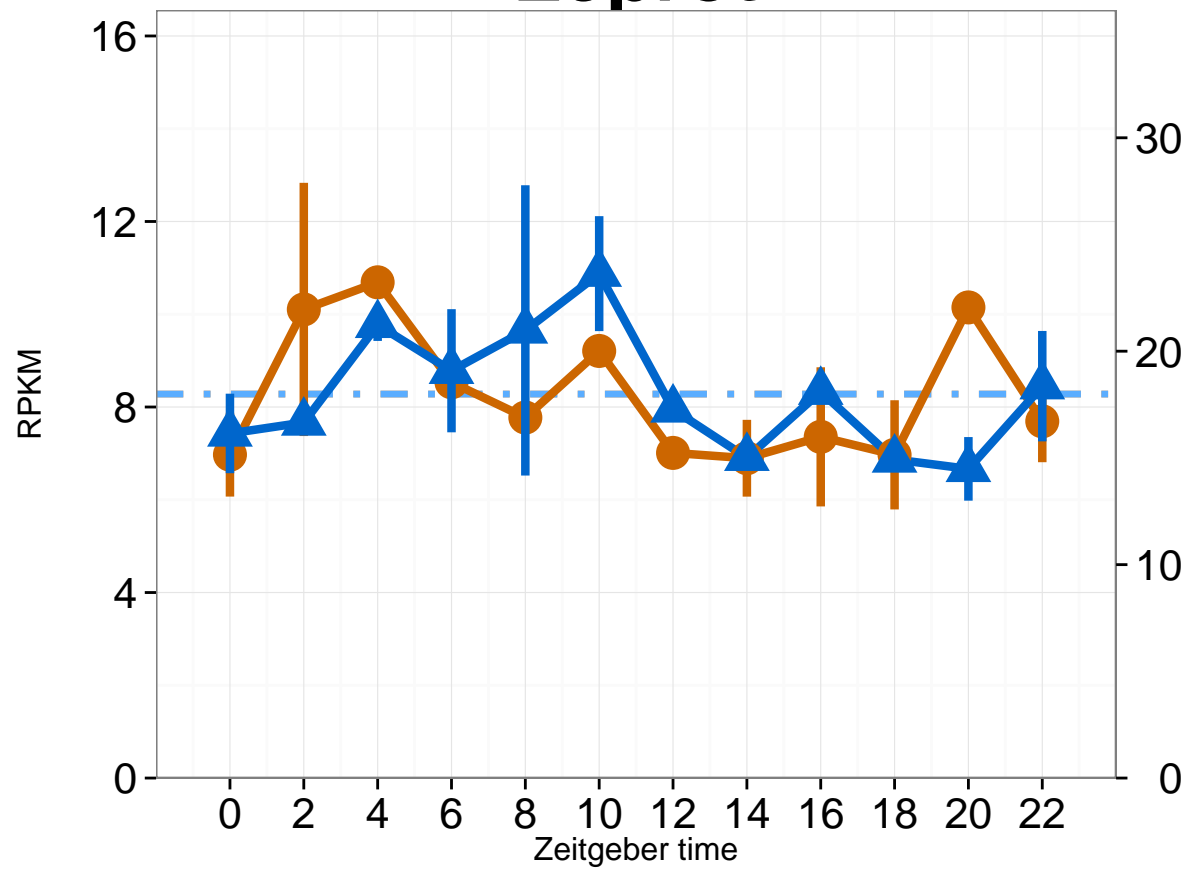

## Leprot

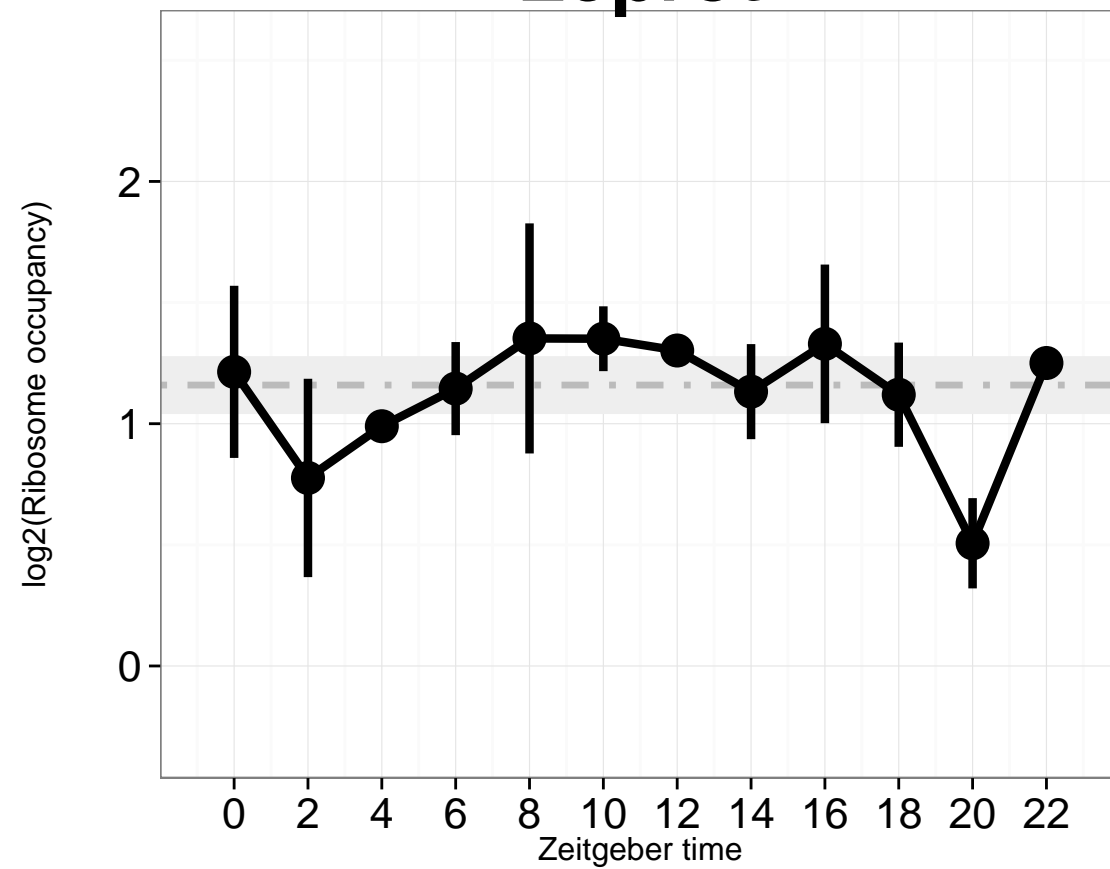

Supplement: SuppDataset_1.zip [file Leprot_set_A.pdf › Supplemental Dataset 1/A-mRNA_nonrhyth_translation_nonrhyth/Leprot_set_A.pdf]

# Letm1

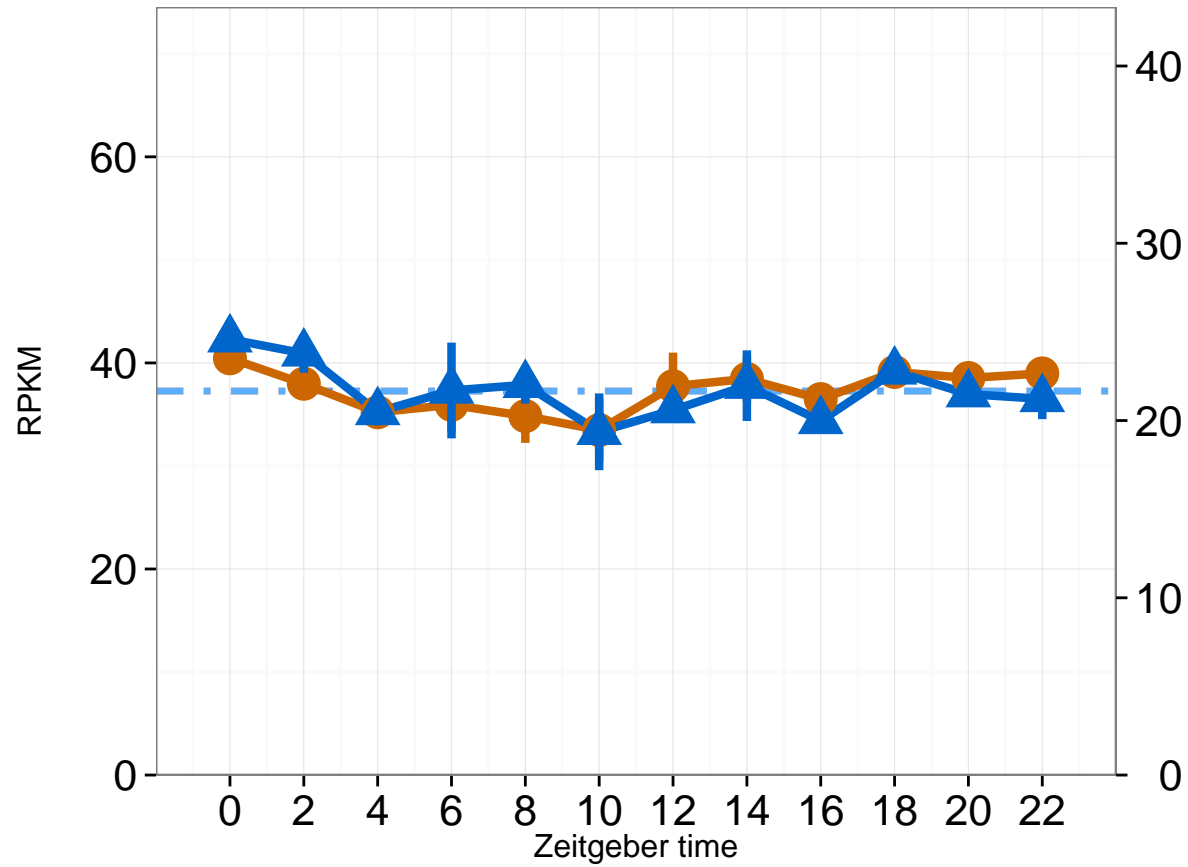

# Letm1

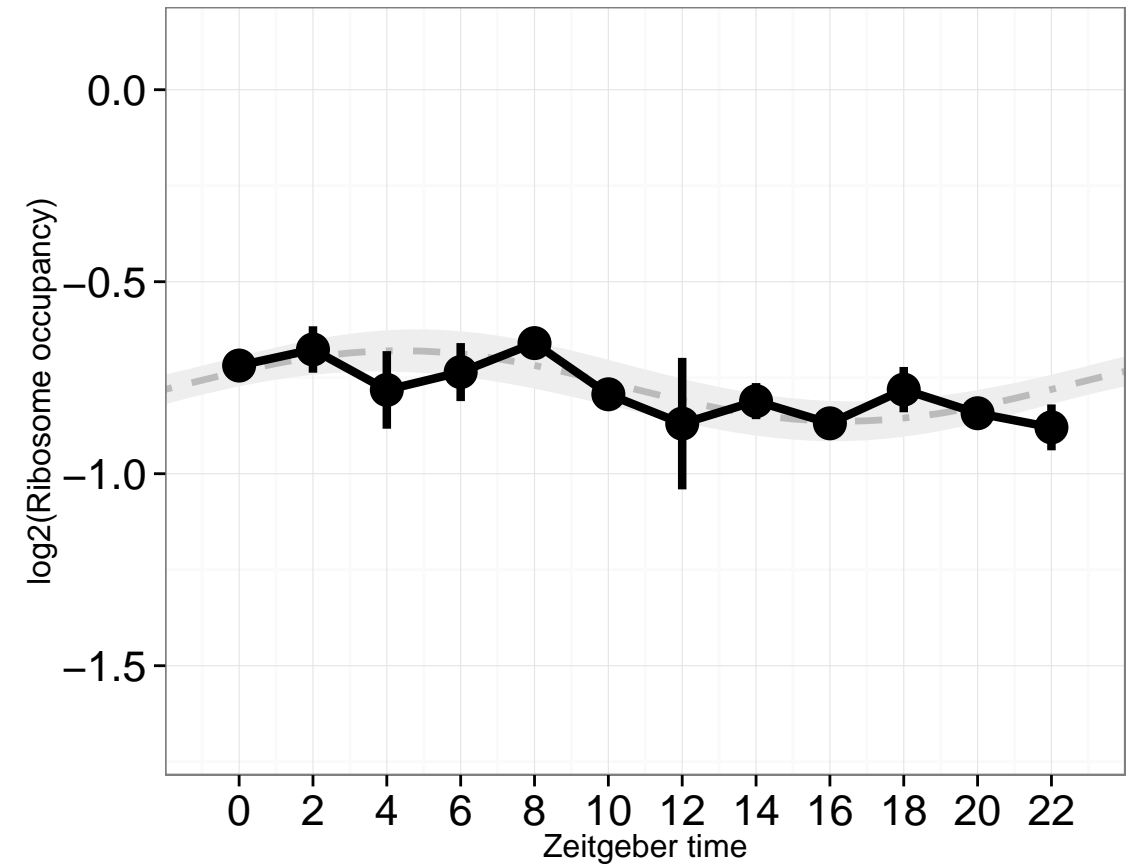

Supplement: SuppDataset_1.zip [file Letm1_set_A.pdf › Supplemental Dataset 1/A-mRNA_nonrhyth_translation_nonrhyth/Letm1_set_A.pdf]

# Letm2

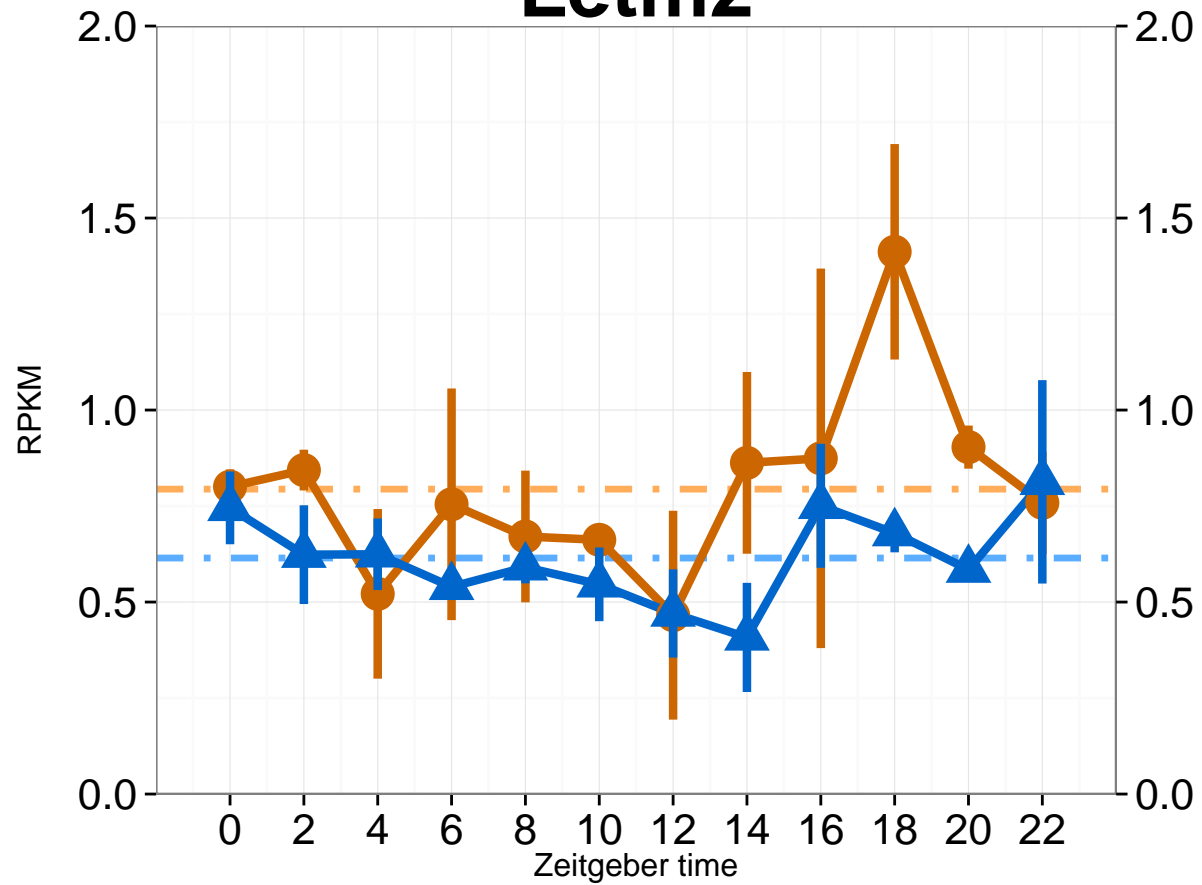

# Letm2

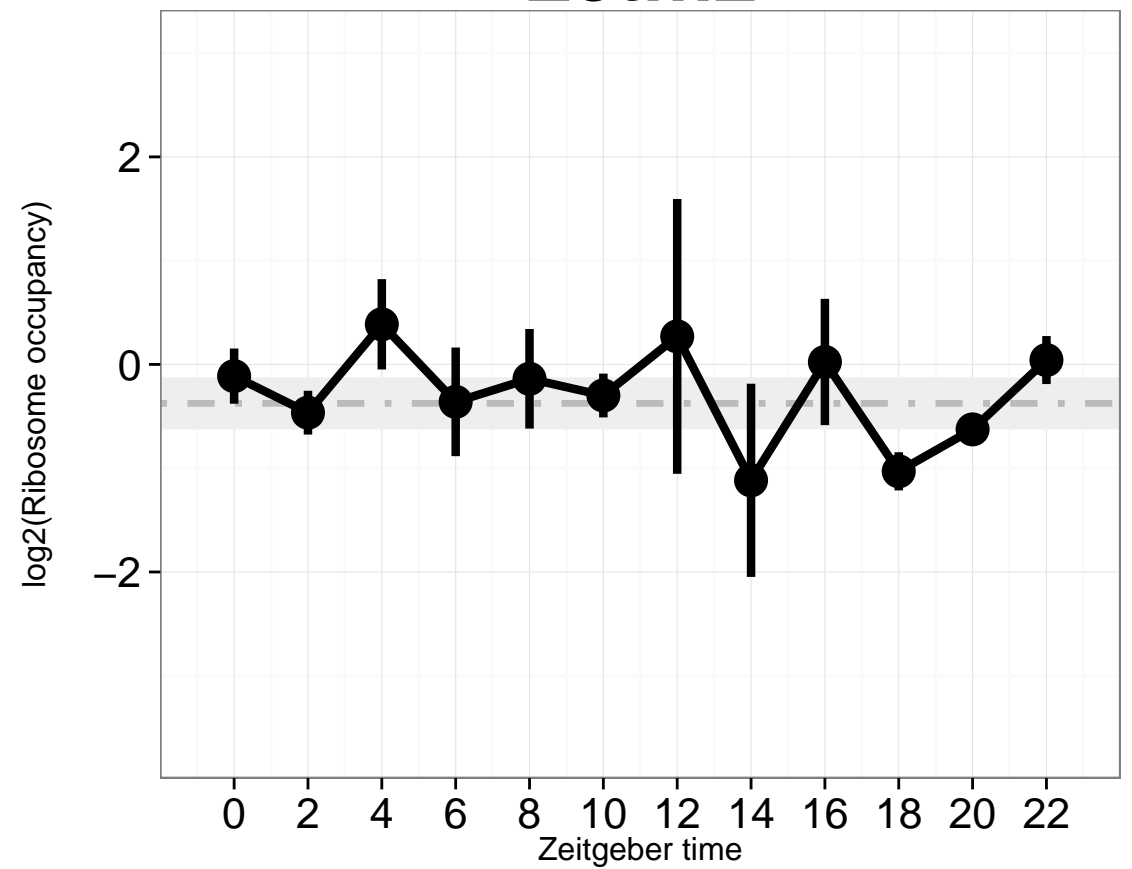

Supplement: SuppDataset_1.zip [file Letm2_set_A.pdf › Supplemental Dataset 1/A-mRNA_nonrhyth_translation_nonrhyth/Letm2_set_A.pdf]

## Letmd1

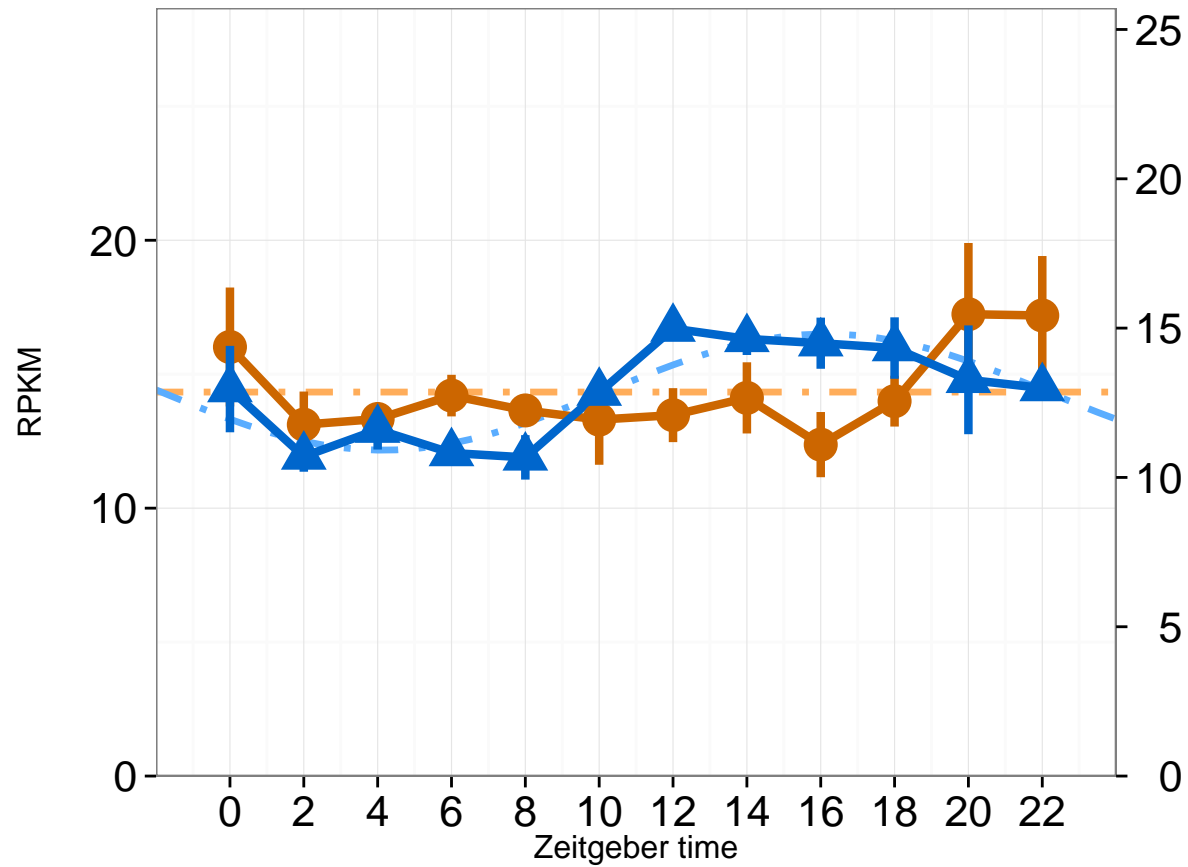

## Letmd1

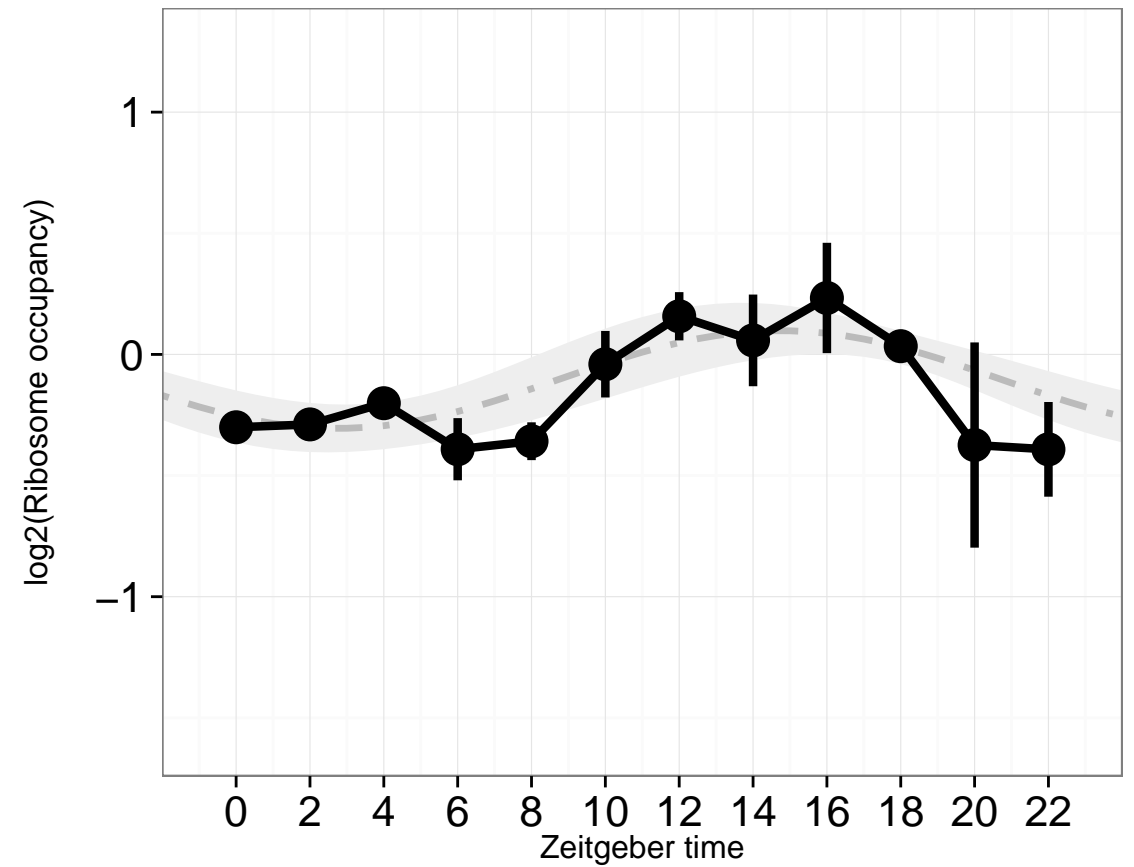

Supplement: SuppDataset_1.zip [file Letmd1_set_A.pdf › Supplemental Dataset 1/A-mRNA_nonrhyth_translation_nonrhyth/Letmd1_set_A.pdf]

## Lfng

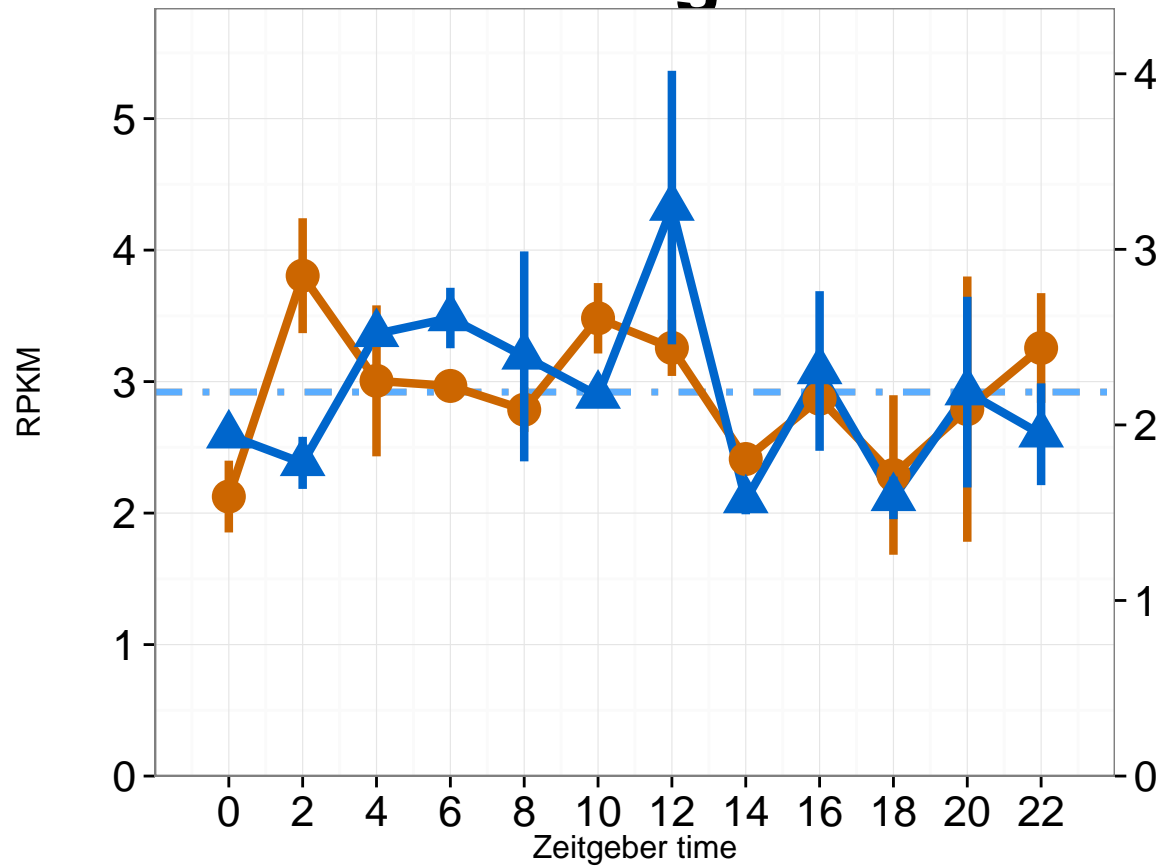

## Lfng

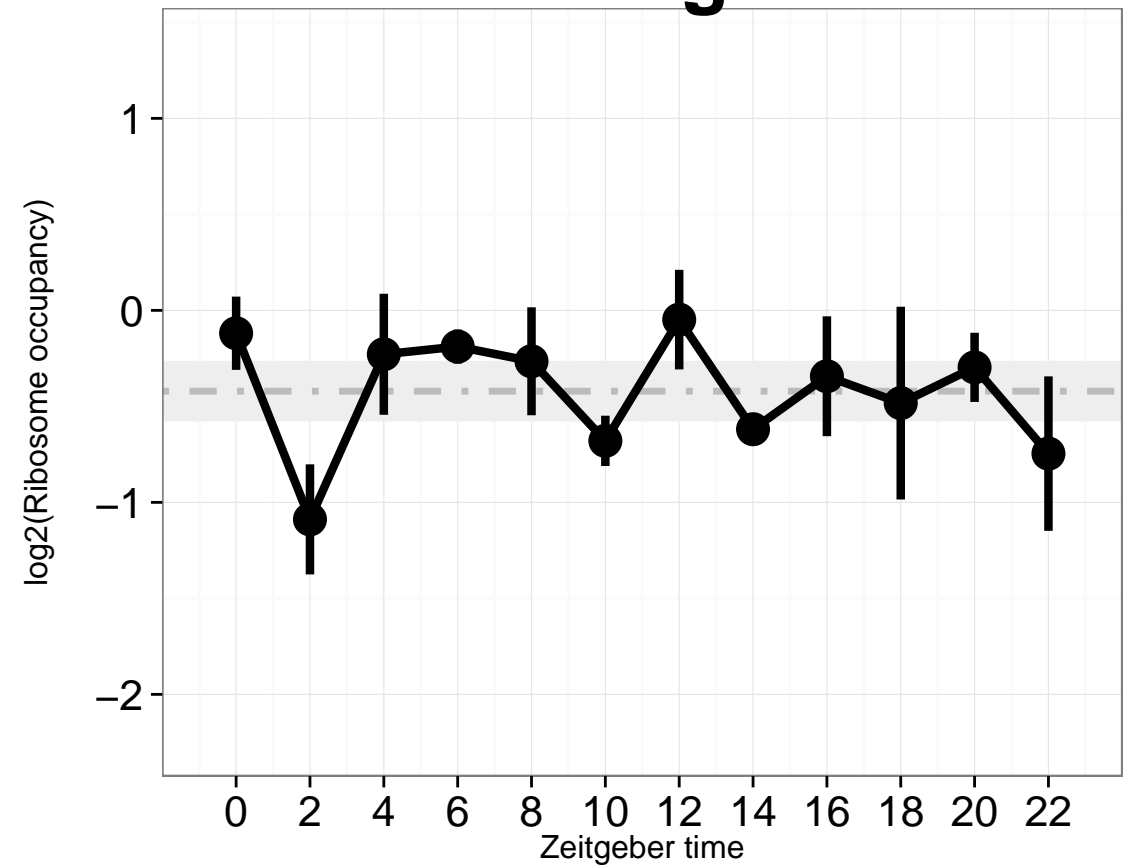

Supplement: SuppDataset_1.zip [file Lfng_set_A.pdf › Supplemental Dataset 1/A-mRNA_nonrhyth_translation_nonrhyth/Lfng_set_A.pdf]

## Lgals1

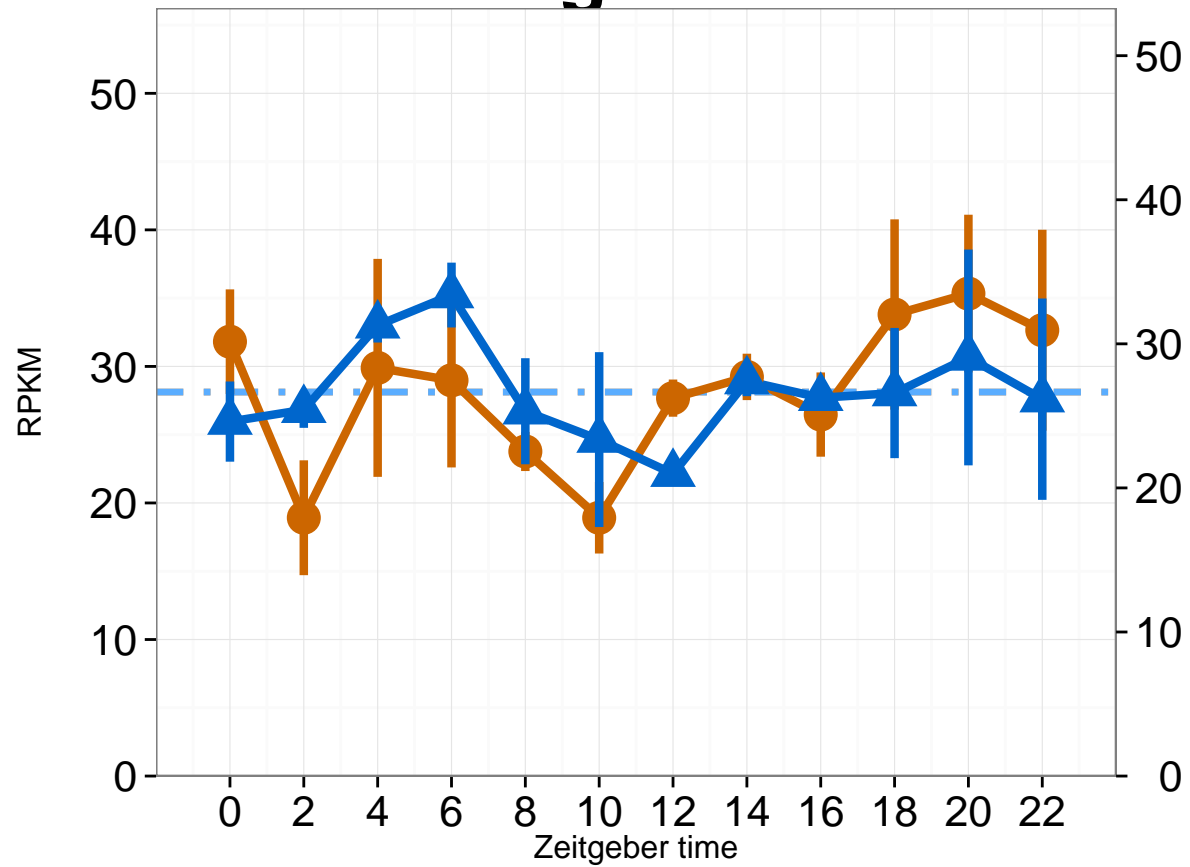

## Lgals1

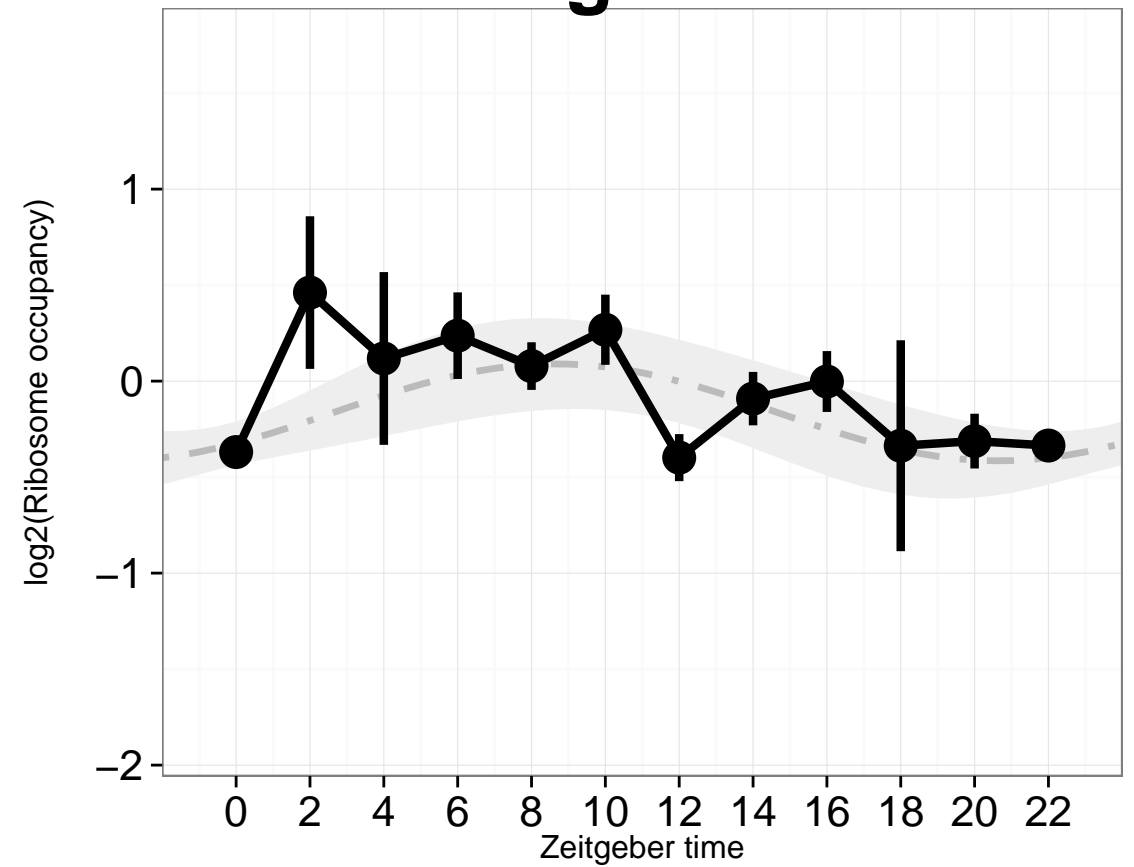

Supplement: SuppDataset_1.zip [file Lgals1_set_A.pdf › Supplemental Dataset 1/A-mRNA_nonrhyth_translation_nonrhyth/Lgals1_set_A.pdf]

## Lgals3

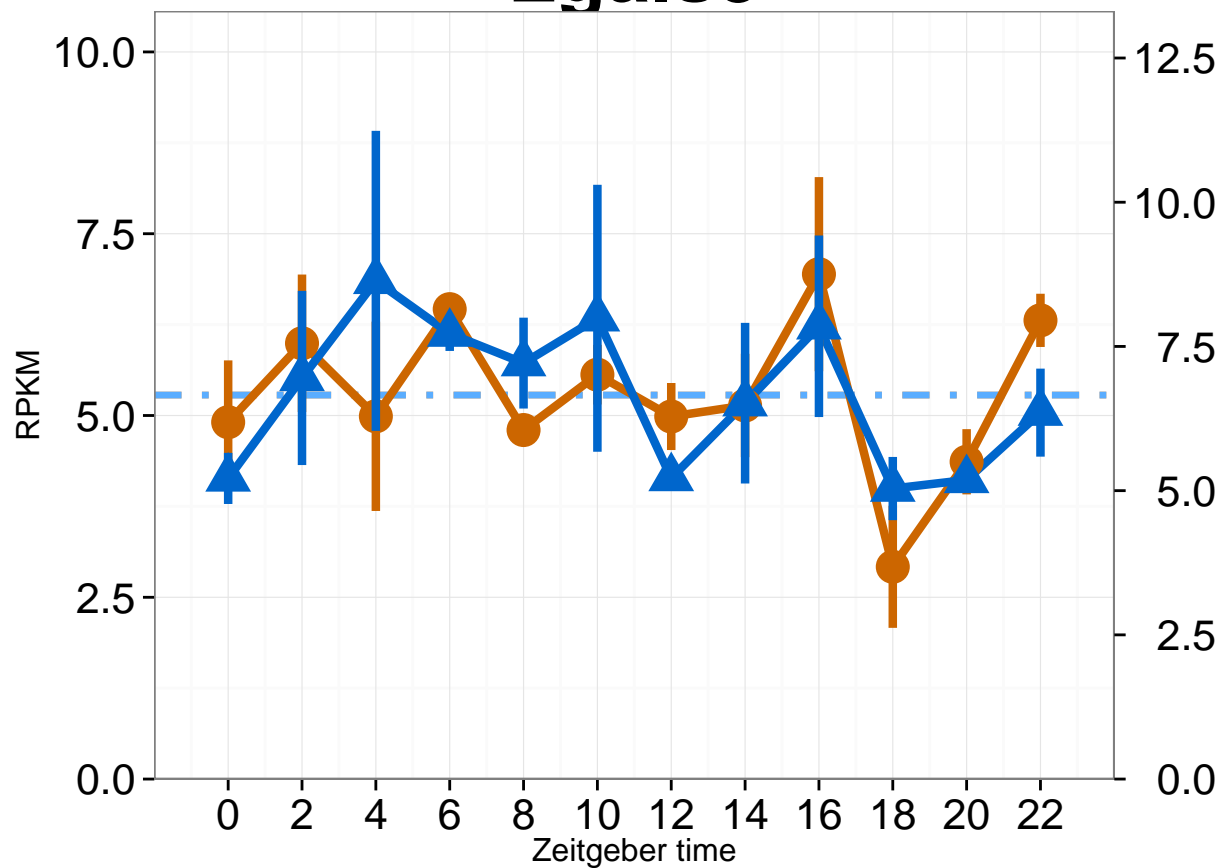

## Lgals3

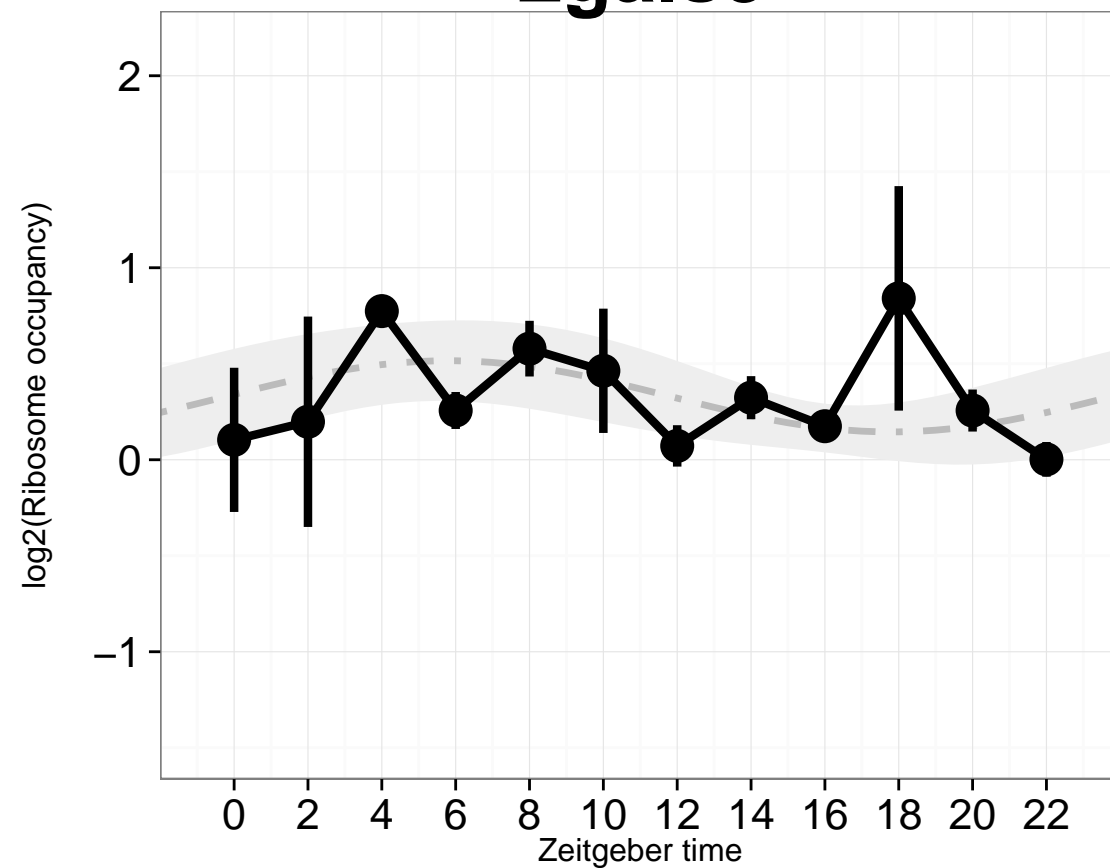

Supplement: SuppDataset_1.zip [file Lgals3_set_A.pdf › Supplemental Dataset 1/A-mRNA_nonrhyth_translation_nonrhyth/Lgals3_set_A.pdf]

# Lgals3bp

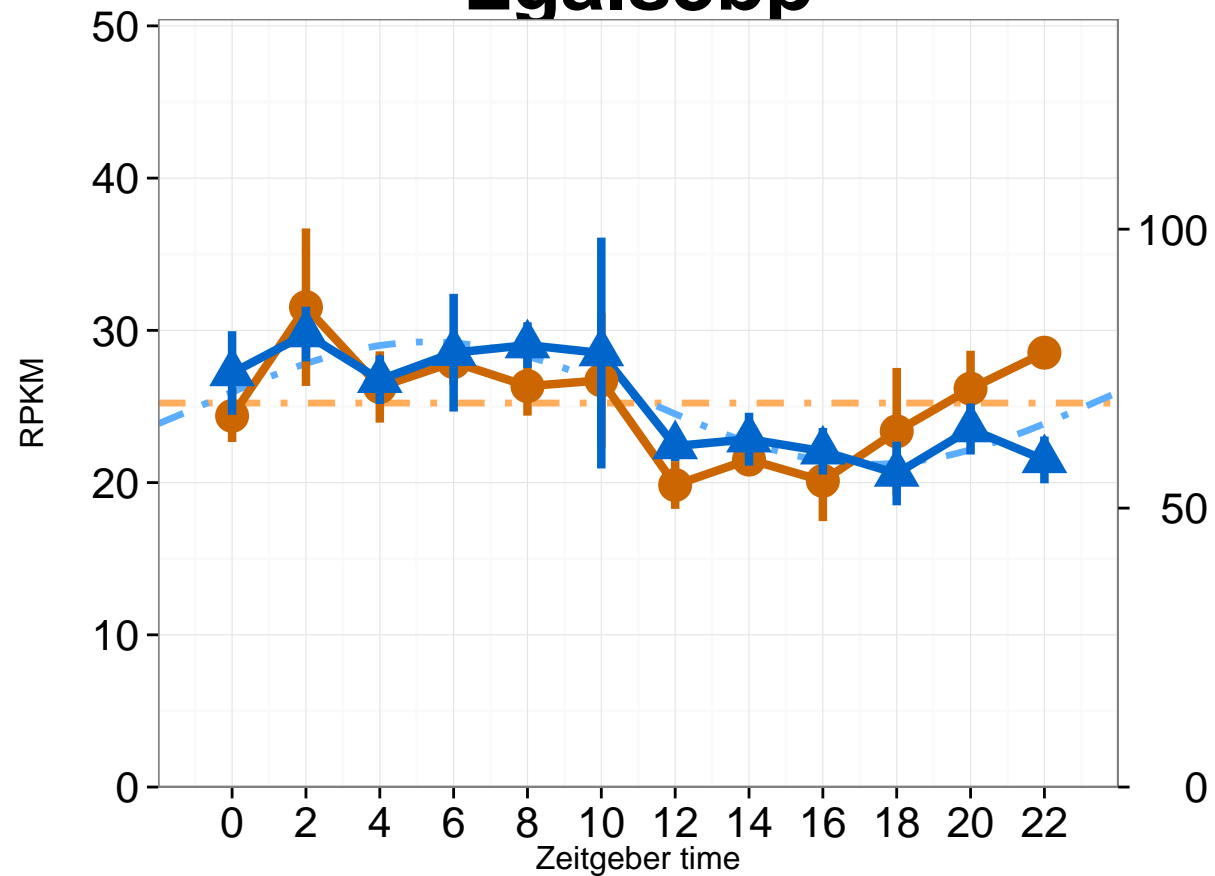

# Lgals3bp

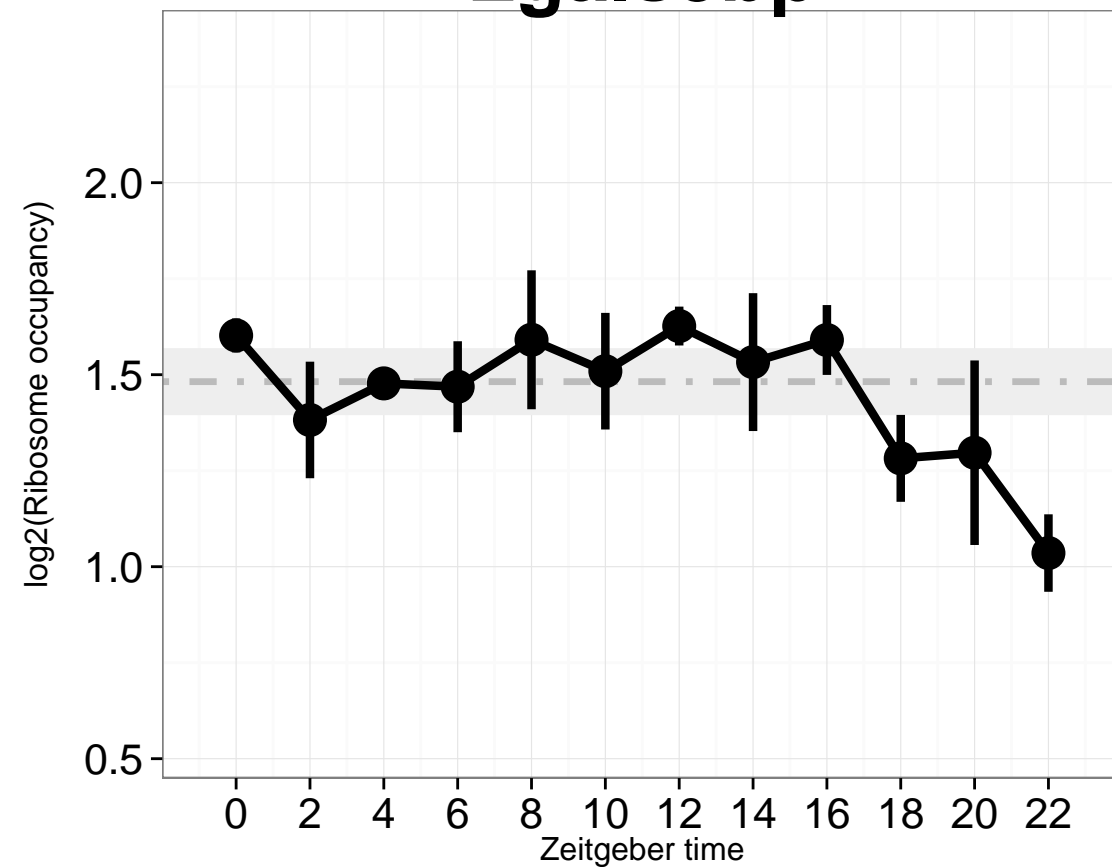

Supplement: SuppDataset_1.zip [file Lgals3bp_set_A.pdf › Supplemental Dataset 1/A-mRNA_nonrhyth_translation_nonrhyth/Lgals3bp_set_A.pdf]

## Lgals4

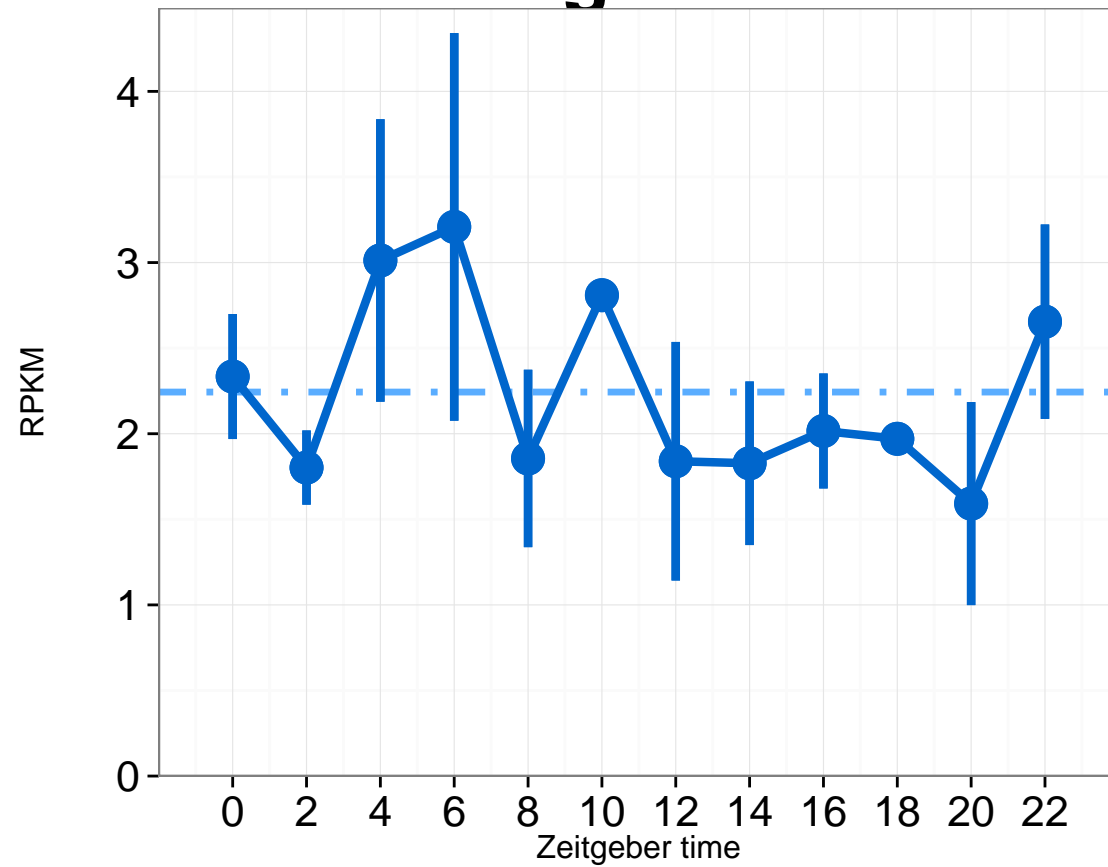

## Lgals4 log2(Ribosome occupancy

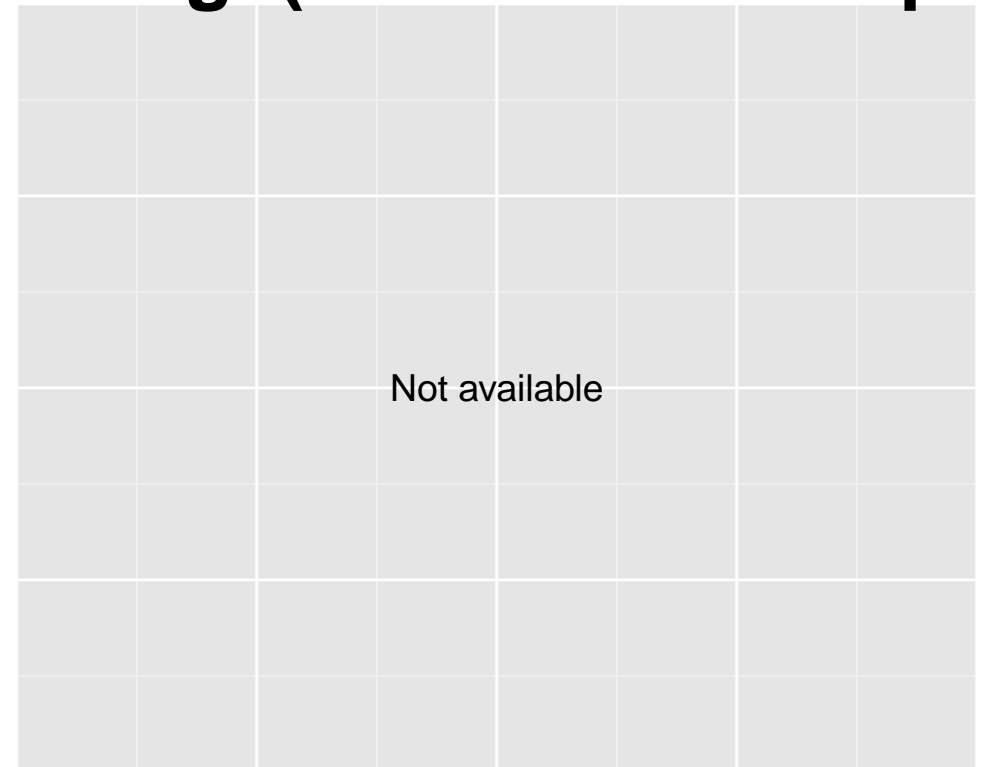

Supplement: SuppDataset_1.zip [file Lgals4_set_A.pdf › Supplemental Dataset 1/A-mRNA_nonrhyth_translation_nonrhyth/Lgals4_set_A.pdf]

## Lgals8

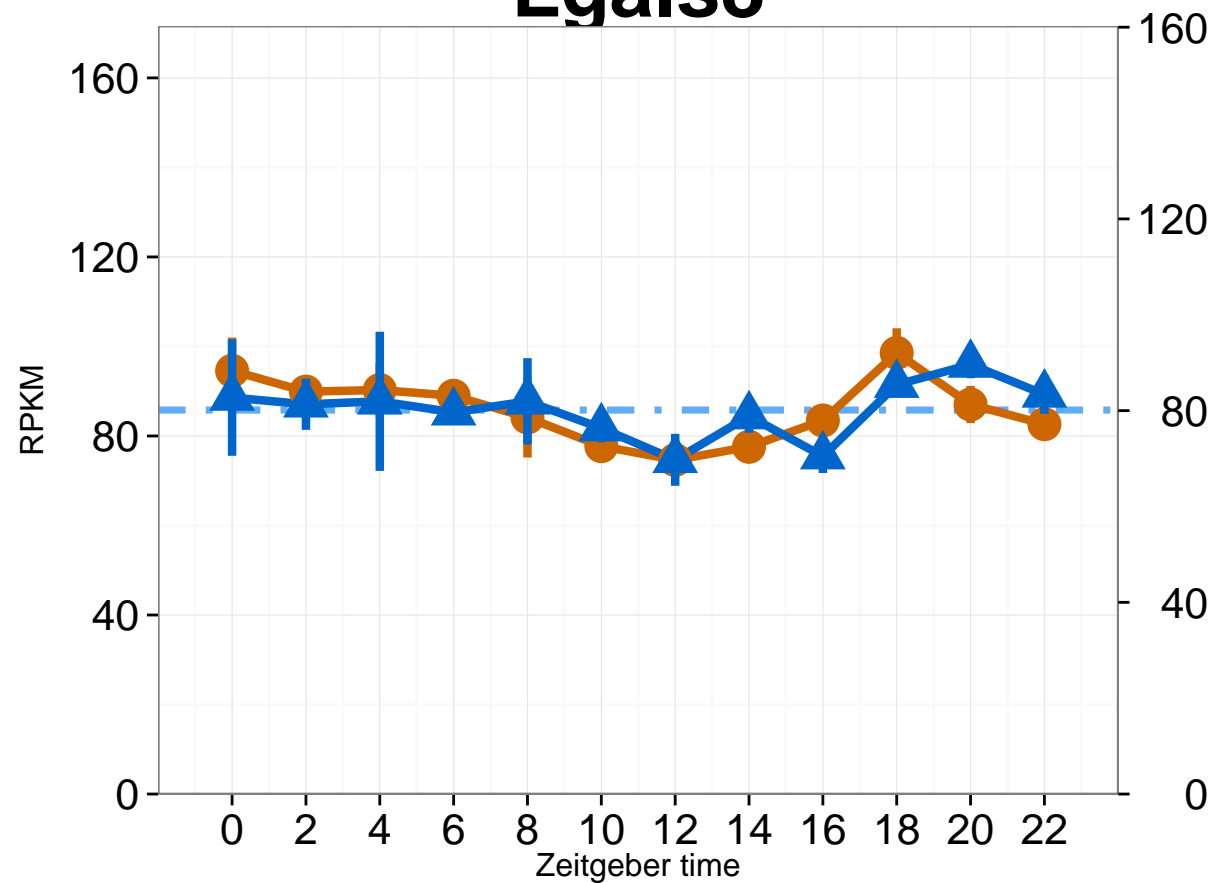

## Lgals8

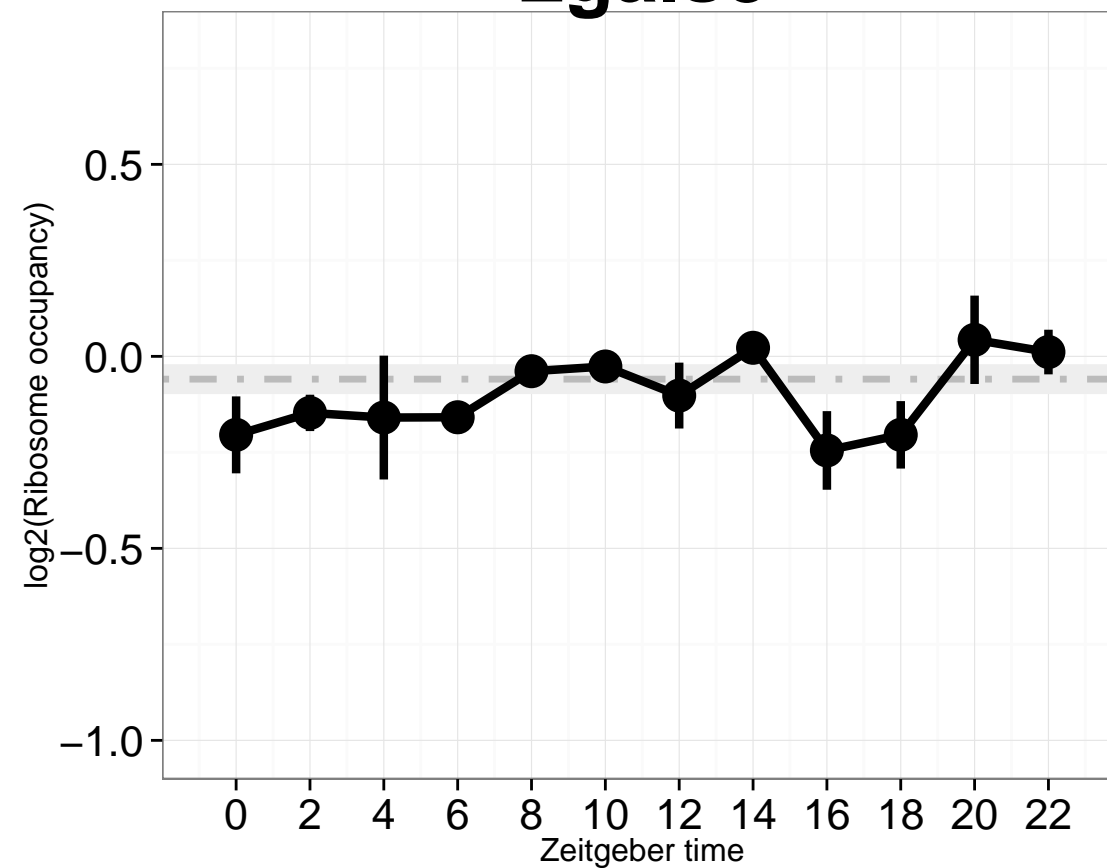

Supplement: SuppDataset_1.zip [file Lgals8_set_A.pdf › Supplemental Dataset 1/A-mRNA_nonrhyth_translation_nonrhyth/Lgals8_set_A.pdf]

# Lgmn

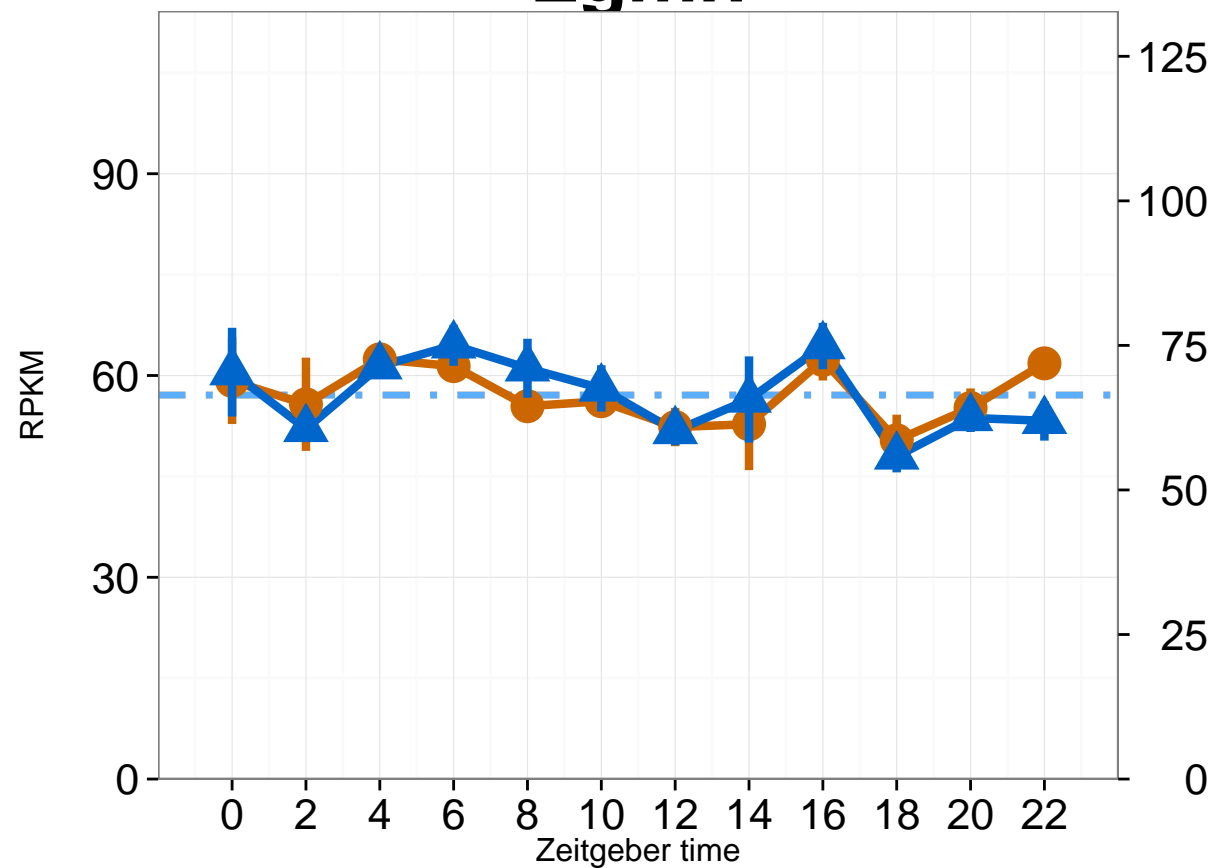

# Lgmn

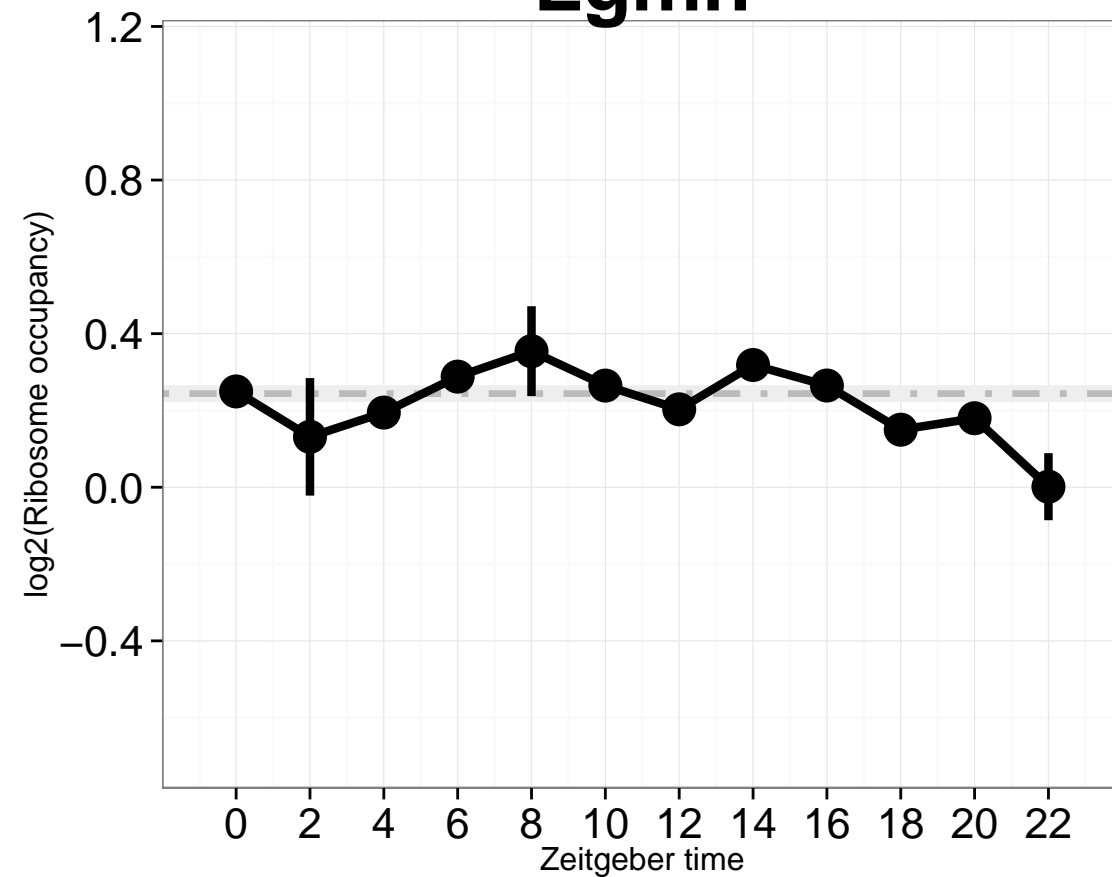

Supplement: SuppDataset_1.zip [file Lgmn_set_A.pdf › Supplemental Dataset 1/A-mRNA_nonrhyth_translation_nonrhyth/Lgmn_set_A.pdf]

# Lgr4

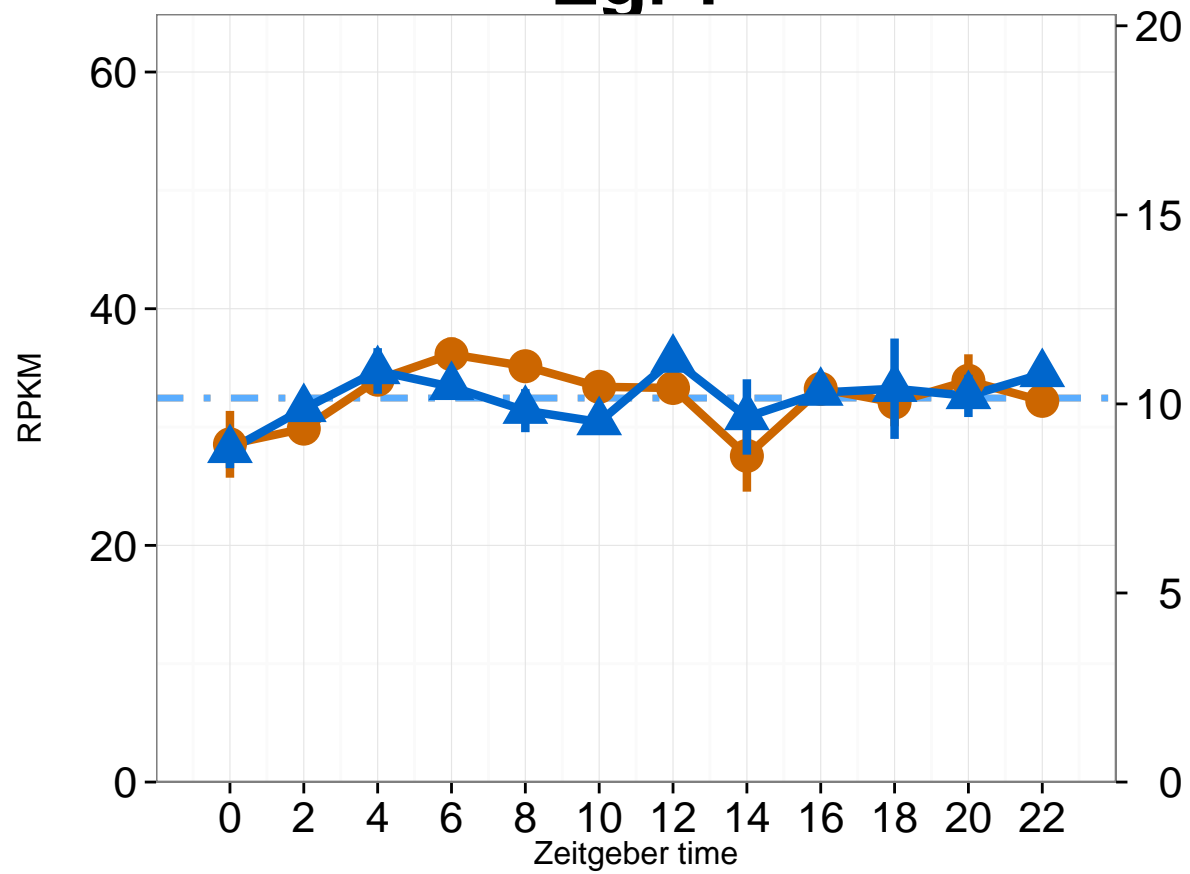

# Lgr4

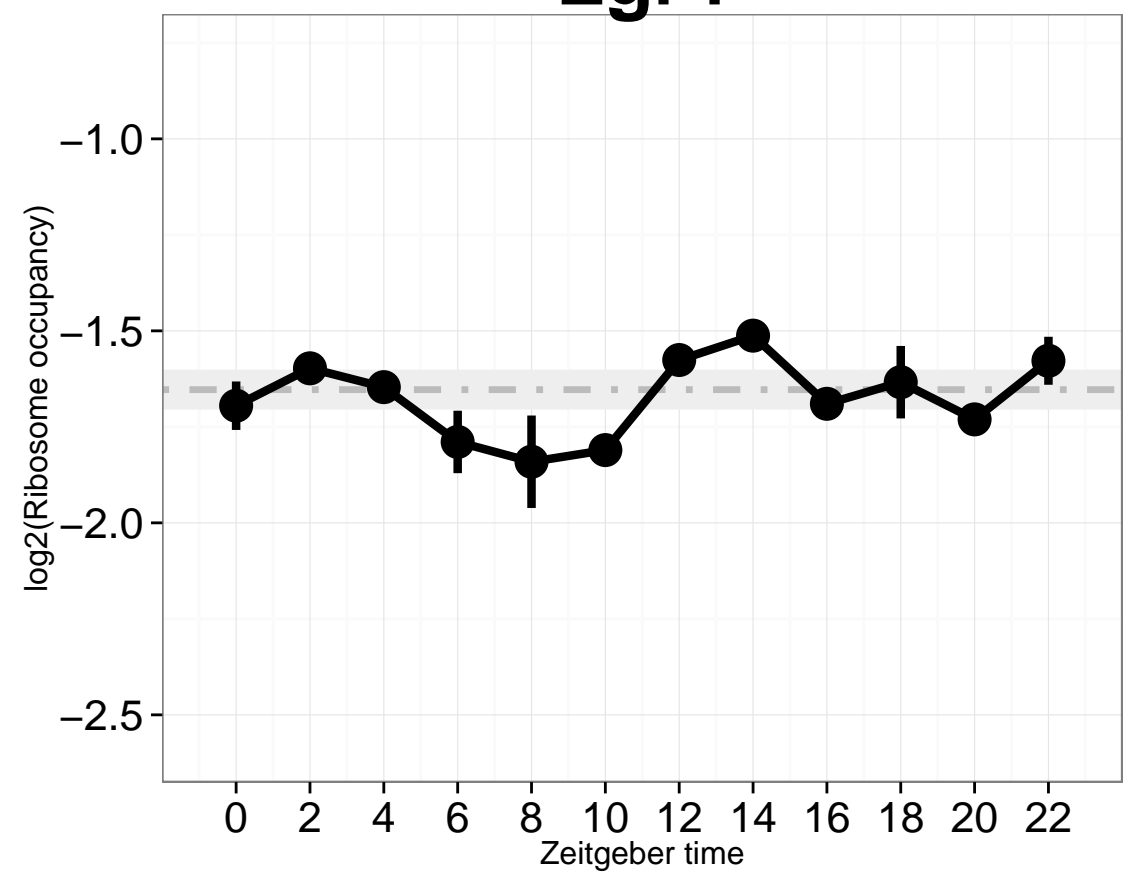

Supplement: SuppDataset_1.zip [file Lgr4_set_A.pdf › Supplemental Dataset 1/A-mRNA_nonrhyth_translation_nonrhyth/Lgr4_set_A.pdf]

# Lhfp

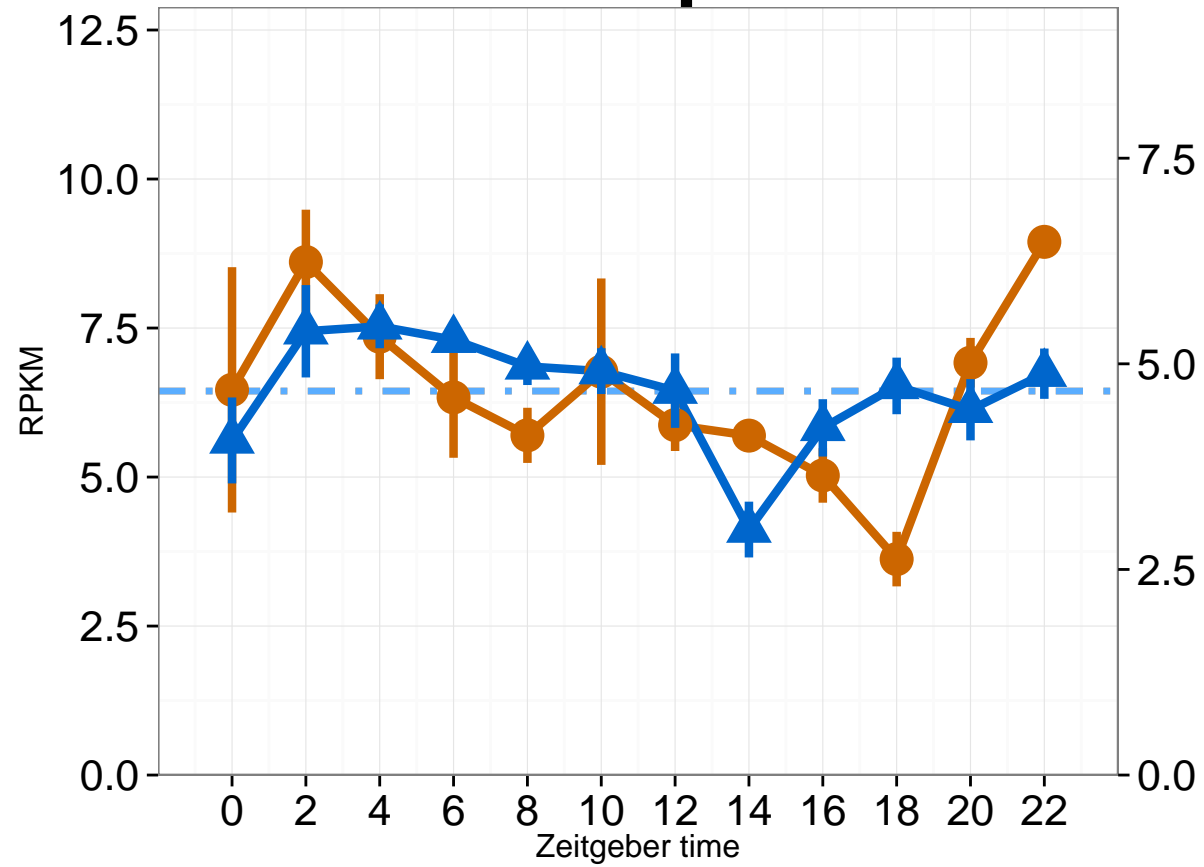

# Lhfp

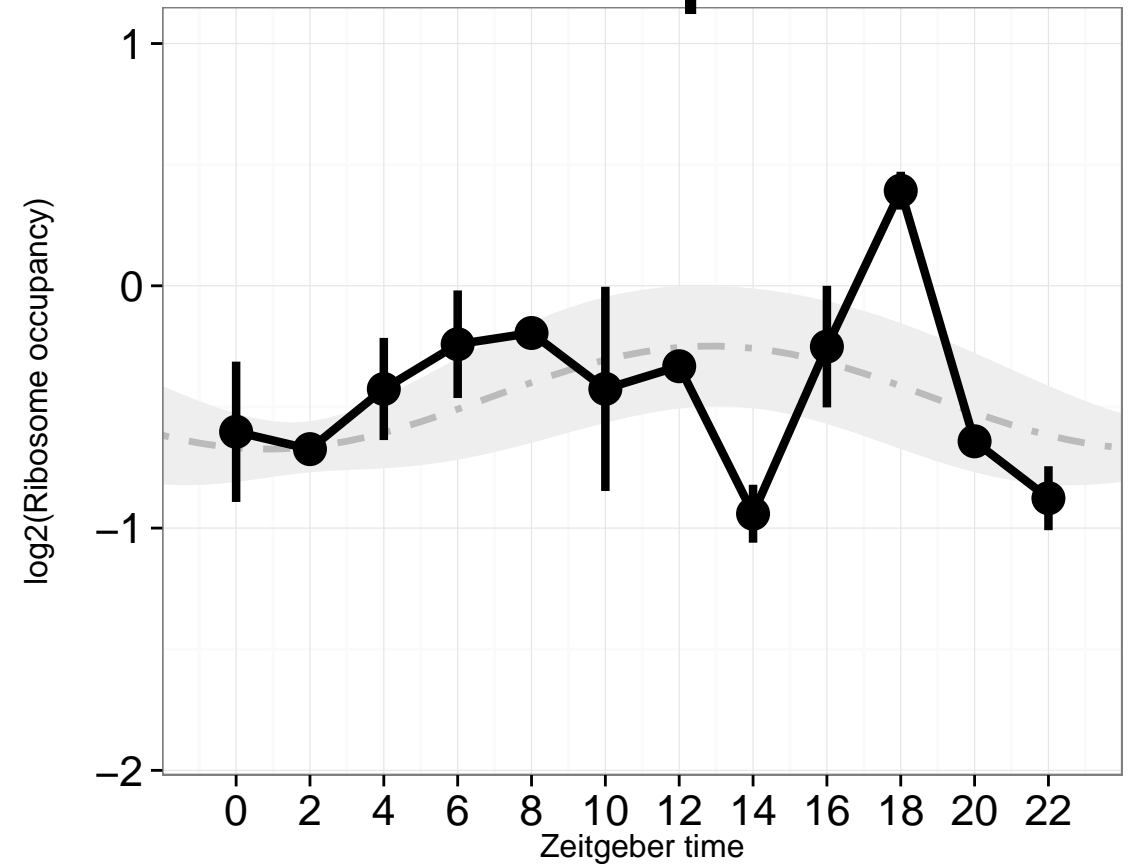

Supplement: SuppDataset_1.zip [file Lhfp_set_A.pdf › Supplemental Dataset 1/A-mRNA_nonrhyth_translation_nonrhyth/Lhfp_set_A.pdf]

# Lhfpl2

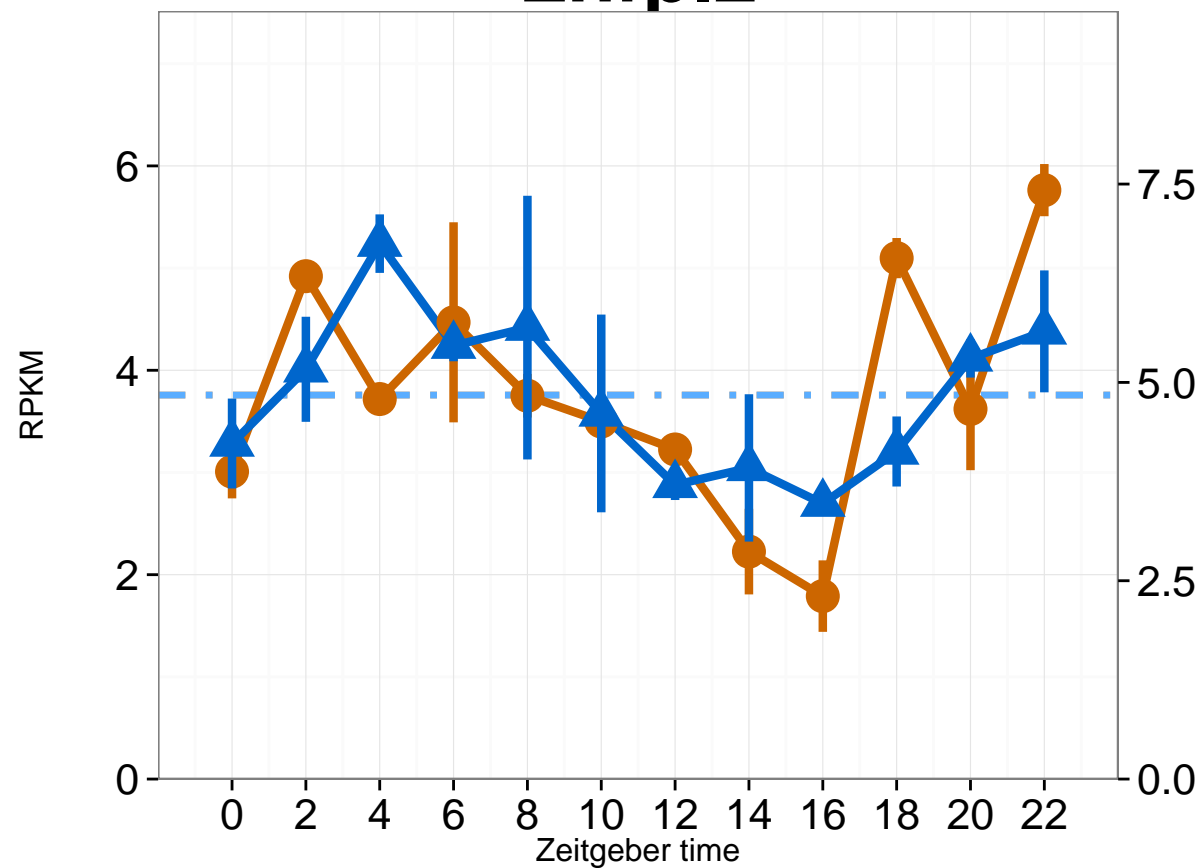

# Lhfpl2

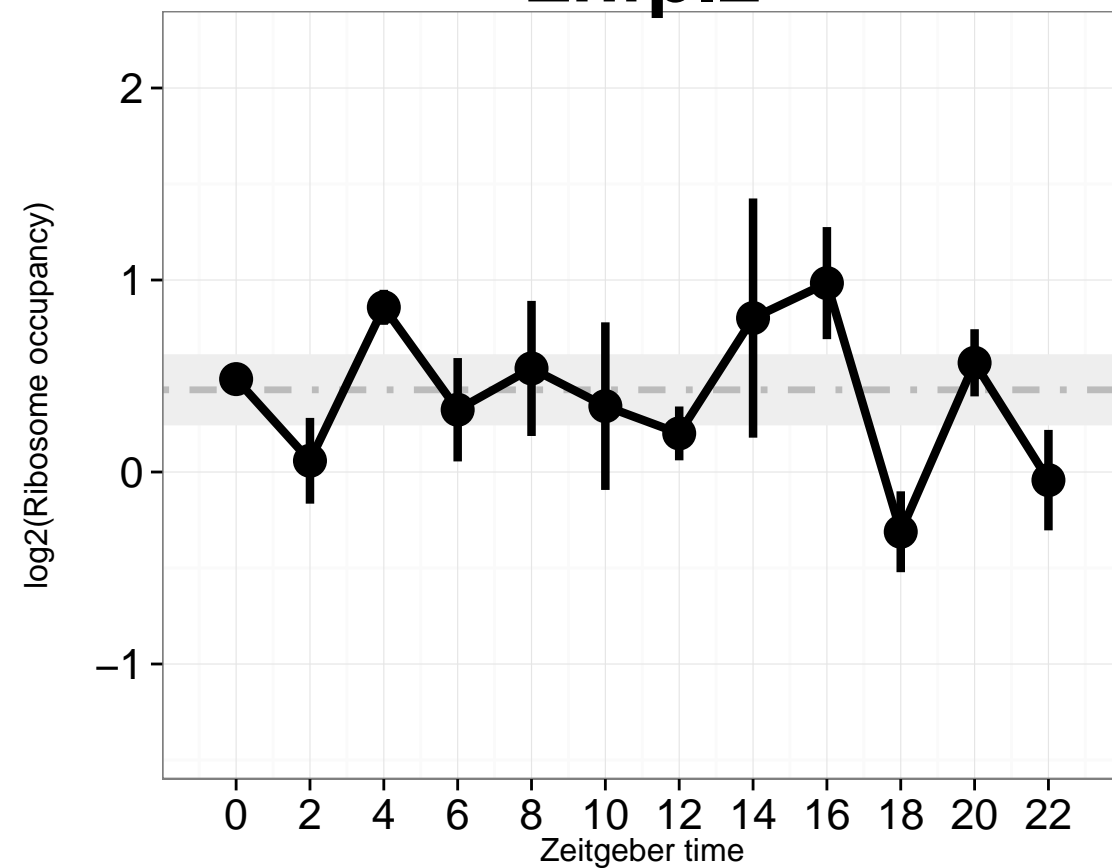

Supplement: SuppDataset_1.zip [file Lhfpl2_set_A.pdf › Supplemental Dataset 1/A-mRNA_nonrhyth_translation_nonrhyth/Lhfpl2_set_A.pdf]

## Lhx2

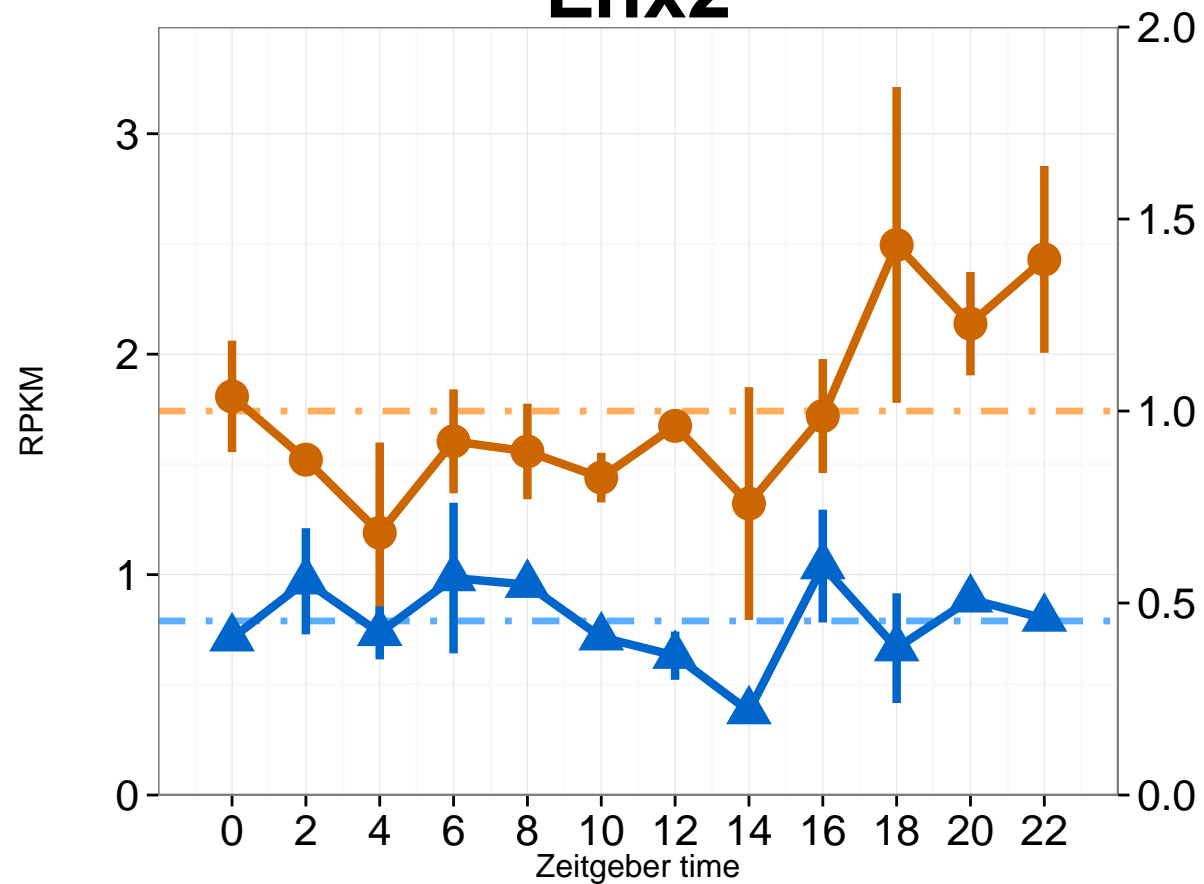

## Lhx2

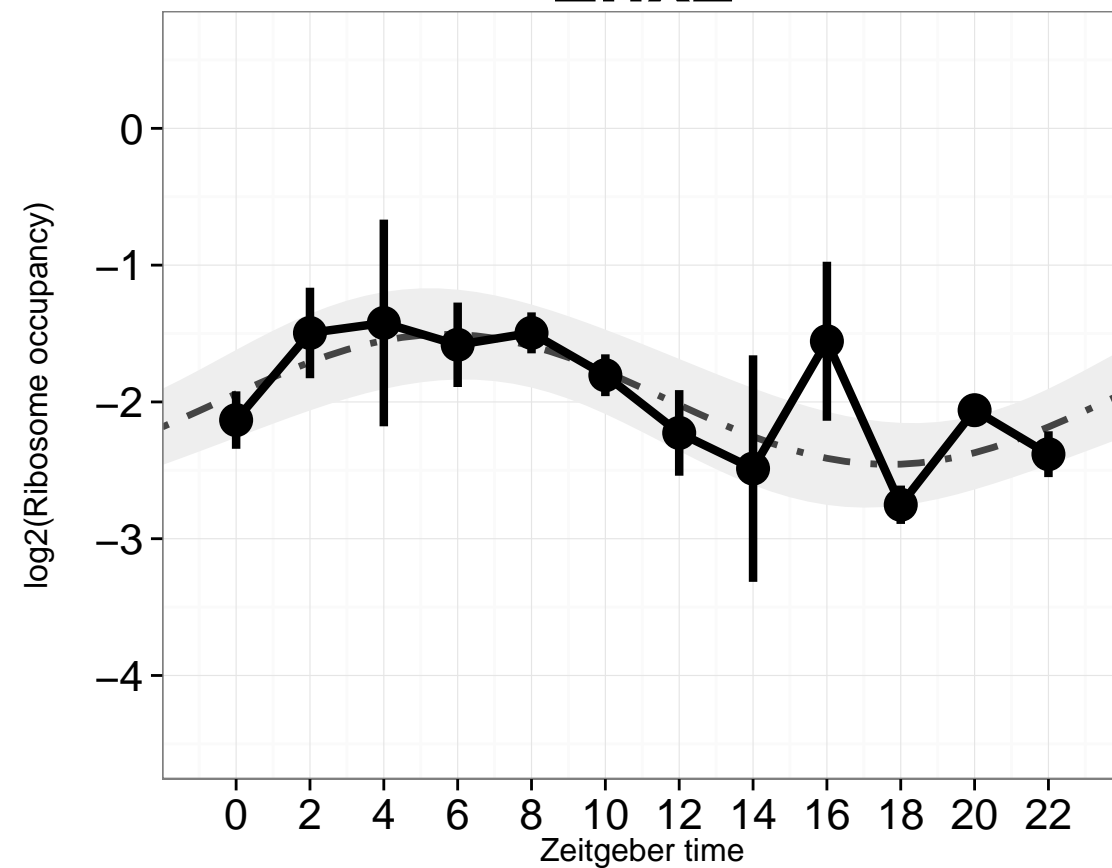

Supplement: SuppDataset_1.zip [file Lhx2_set_A.pdf › Supplemental Dataset 1/A-mRNA_nonrhyth_translation_nonrhyth/Lhx2_set_A.pdf]

# Lhx6

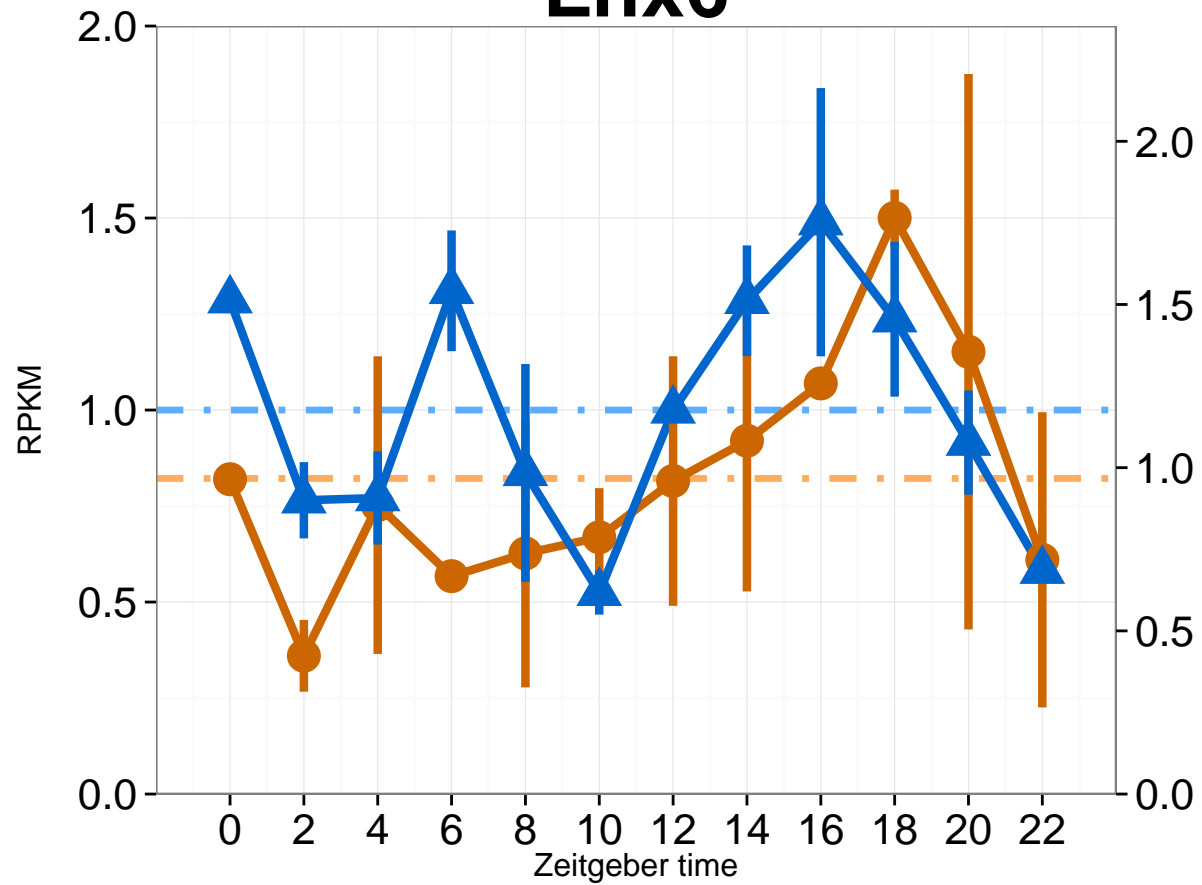

# Lhx6

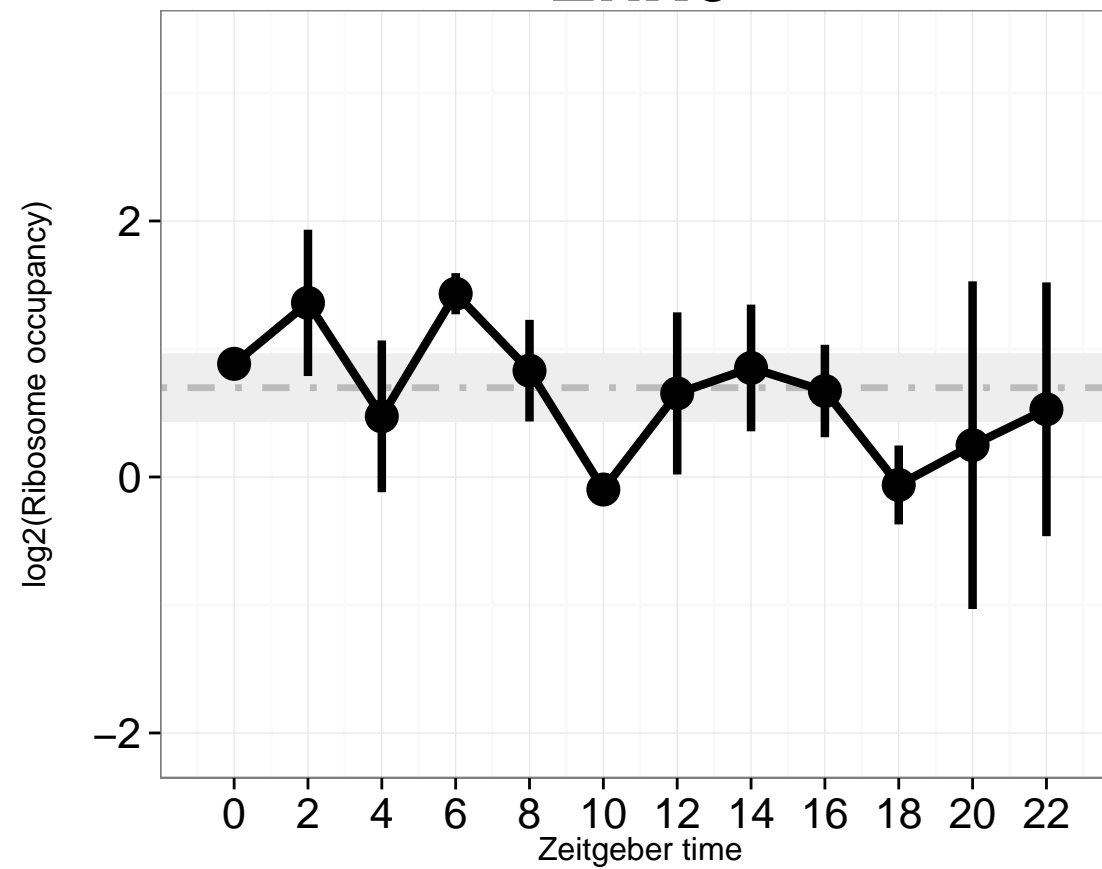

Supplement: SuppDataset_1.zip [file Lhx6_set_A.pdf › Supplemental Dataset 1/A-mRNA_nonrhyth_translation_nonrhyth/Lhx6_set_A.pdf]

## Lias

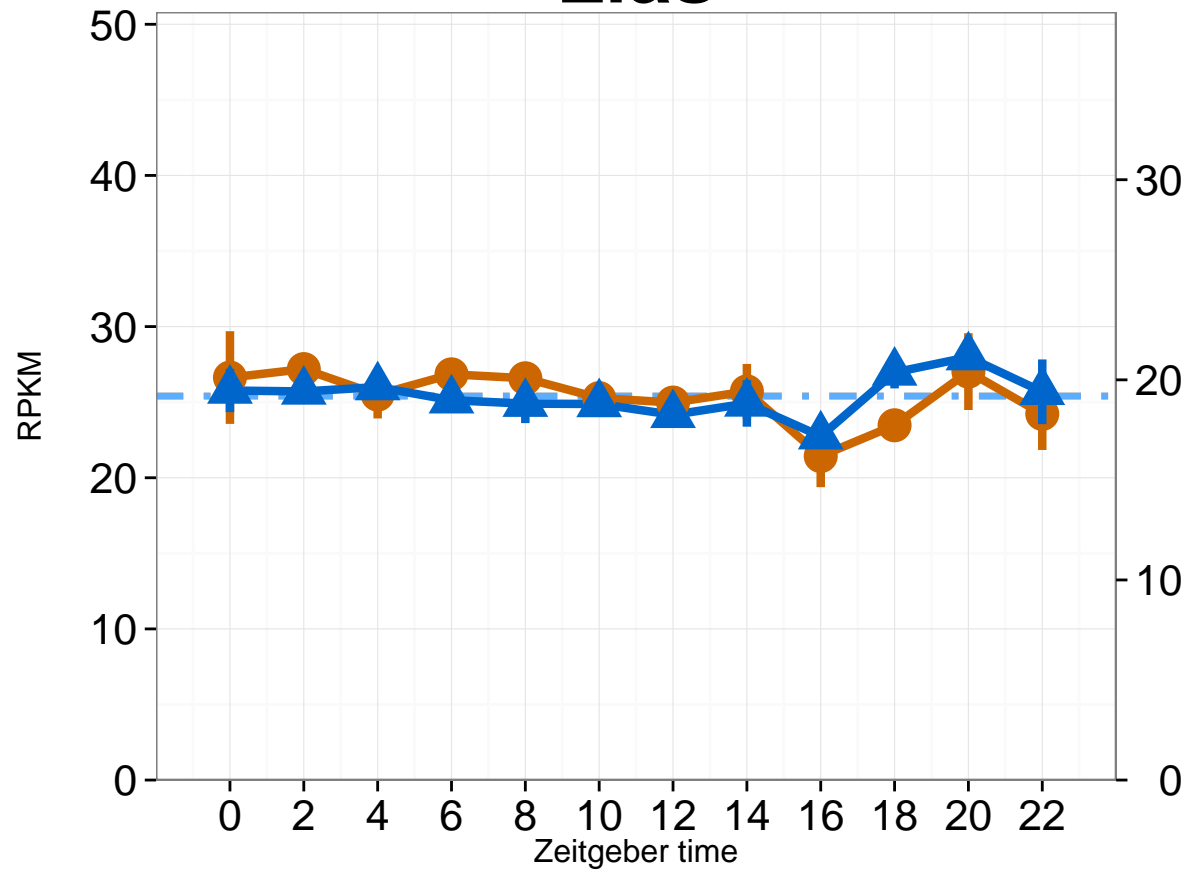

## Lias

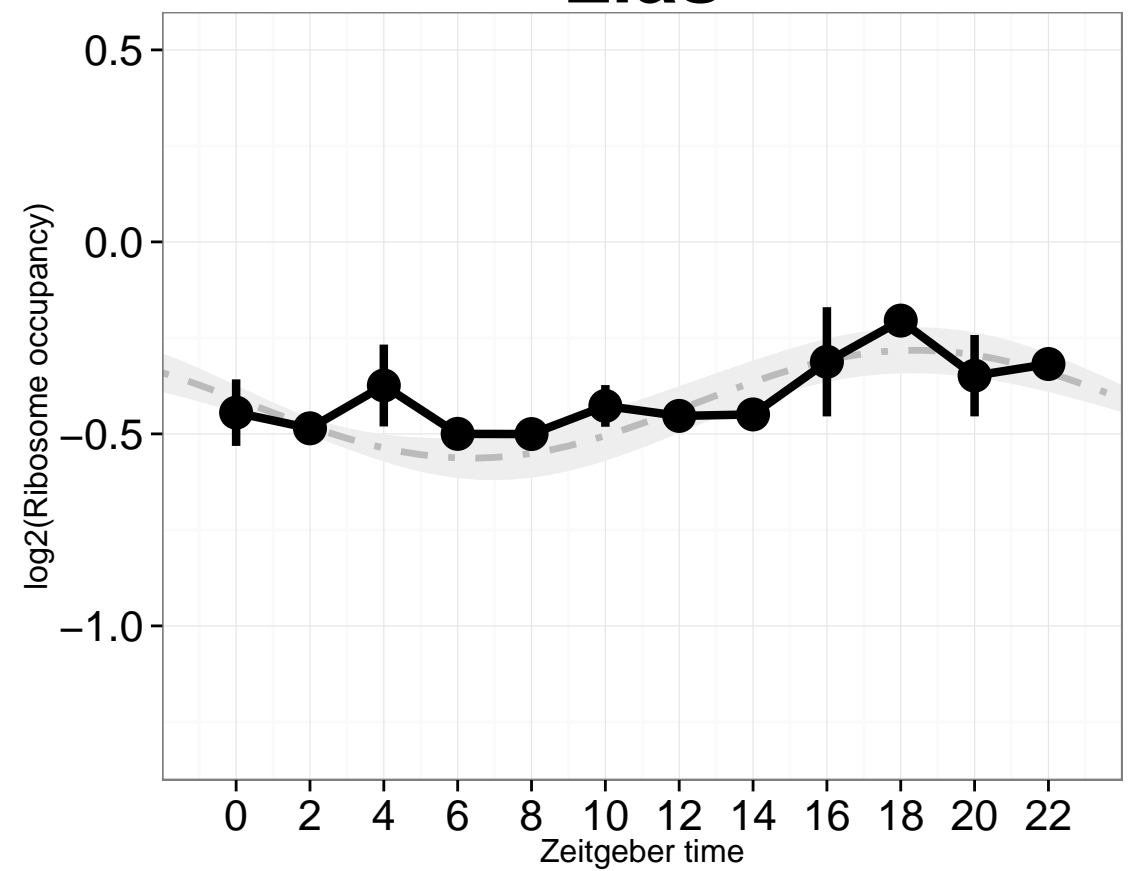

Supplement: SuppDataset_1.zip [file Lias_set_A.pdf › Supplemental Dataset 1/A-mRNA_nonrhyth_translation_nonrhyth/Lias_set_A.pdf]

## Lifr

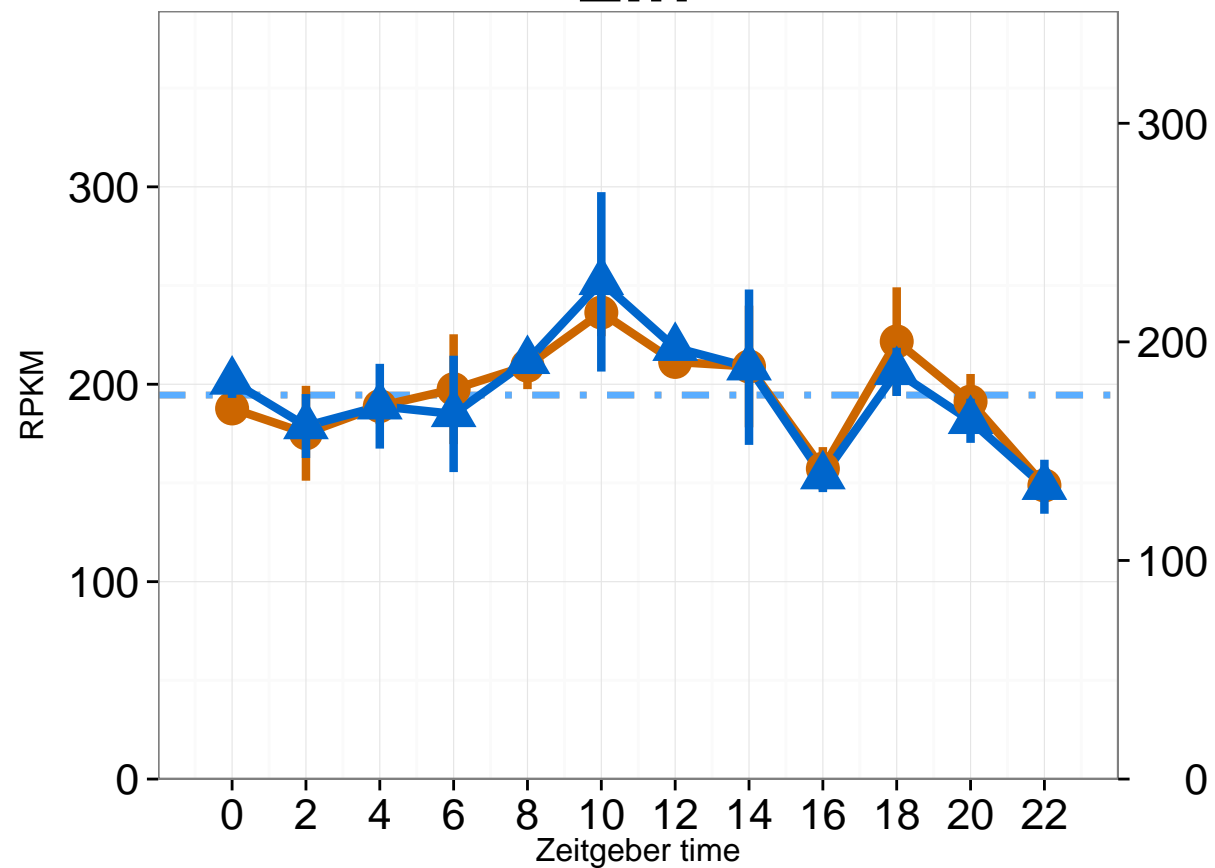

## Lifr

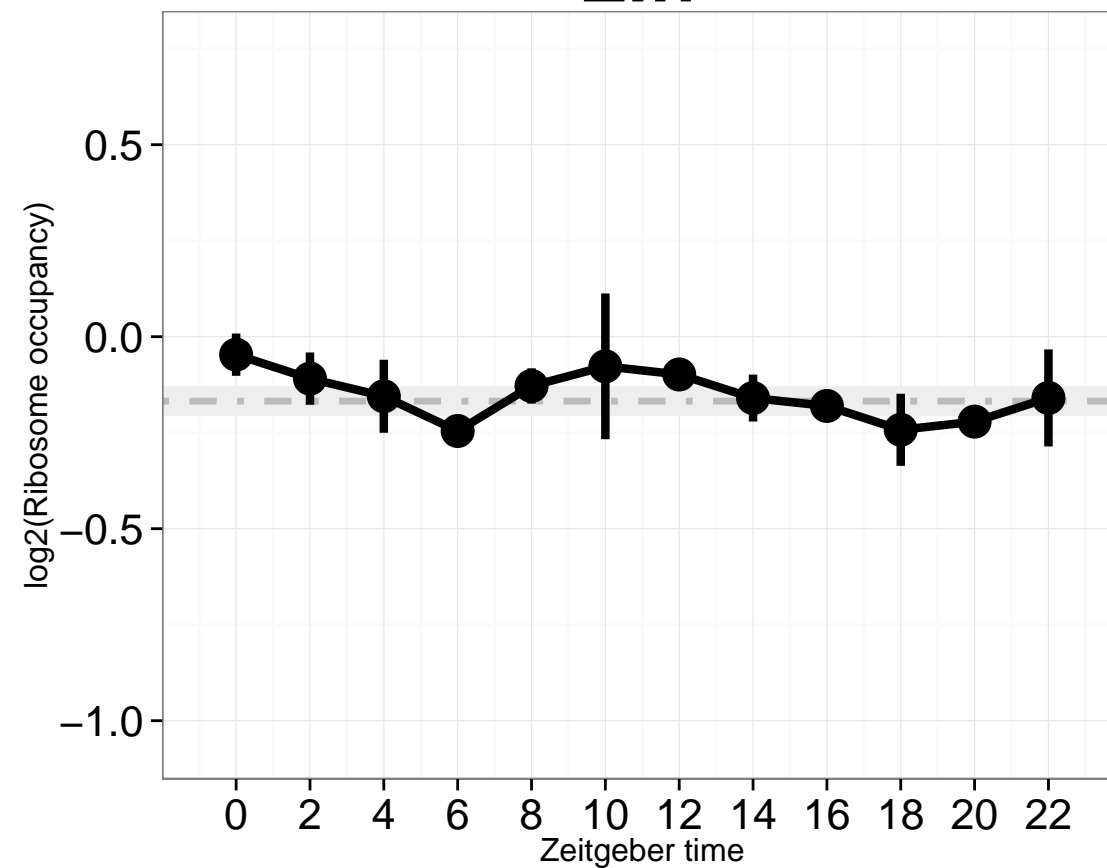

Supplement: SuppDataset_1.zip [file Lifr_set_A.pdf › Supplemental Dataset 1/A-mRNA_nonrhyth_translation_nonrhyth/Lifr_set_A.pdf]

## Lig3

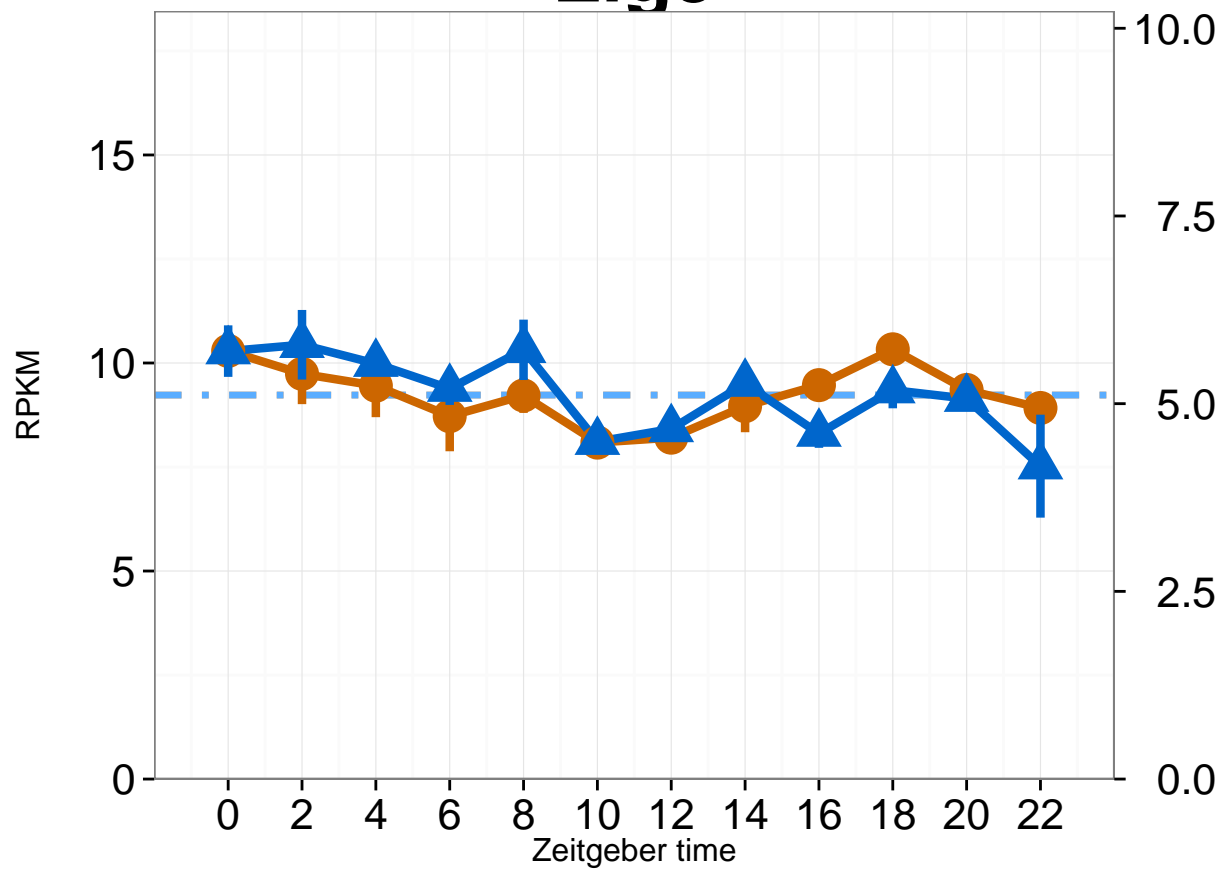

## Lig3

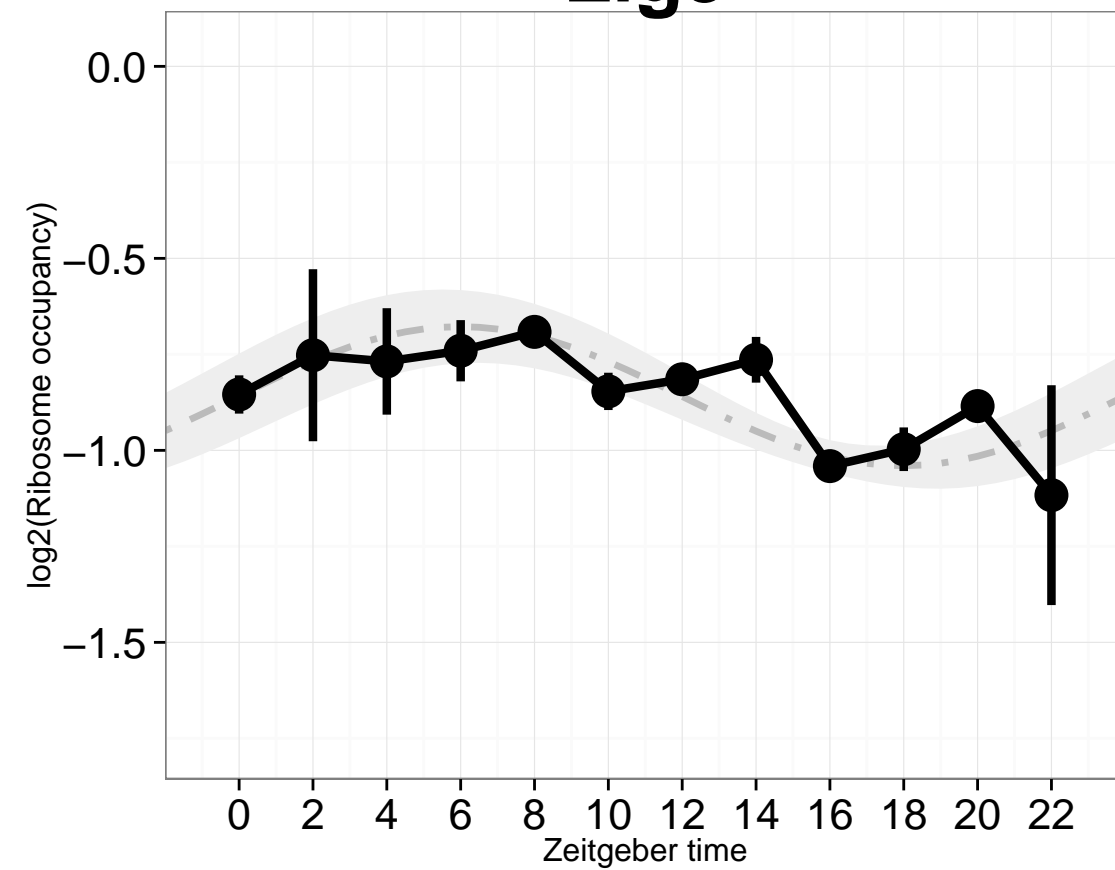

Supplement: SuppDataset_1.zip [file Lig3_set_A.pdf › Supplemental Dataset 1/A-mRNA_nonrhyth_translation_nonrhyth/Lig3_set_A.pdf]

## Lilra5

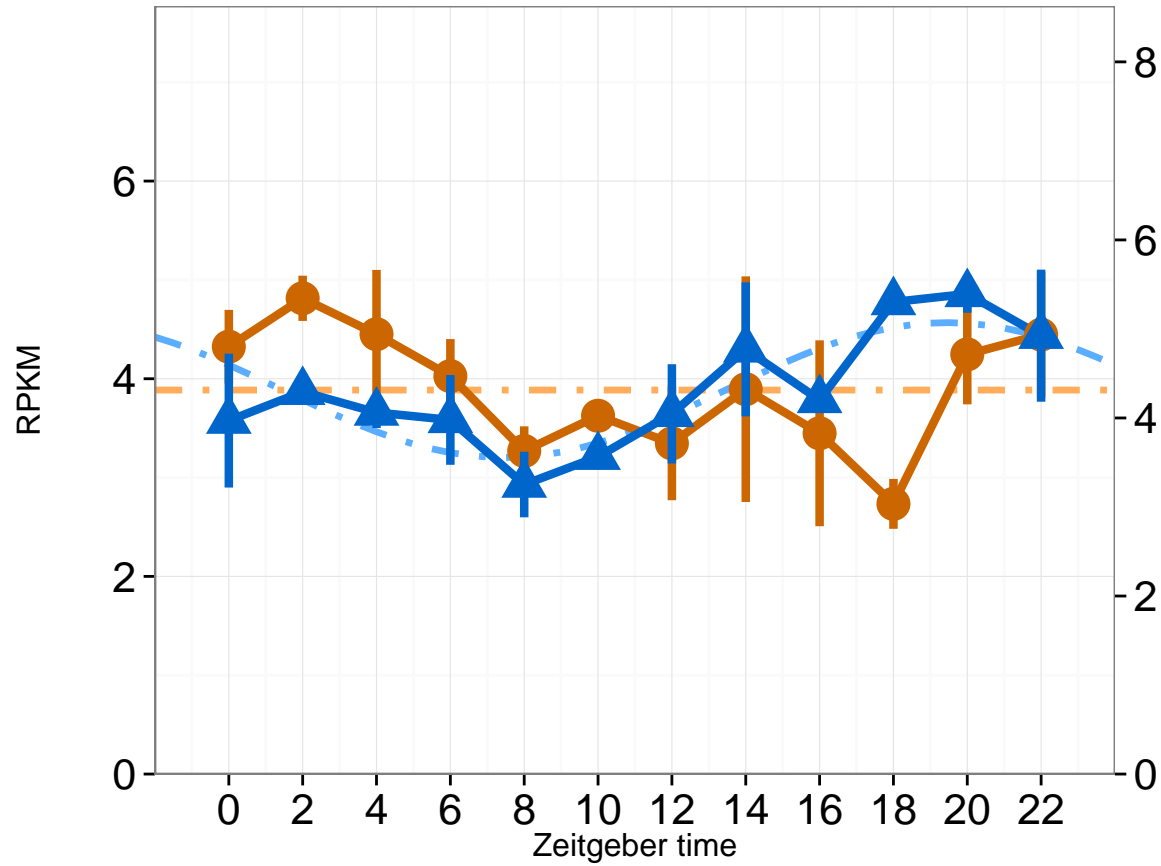

## Lilra5

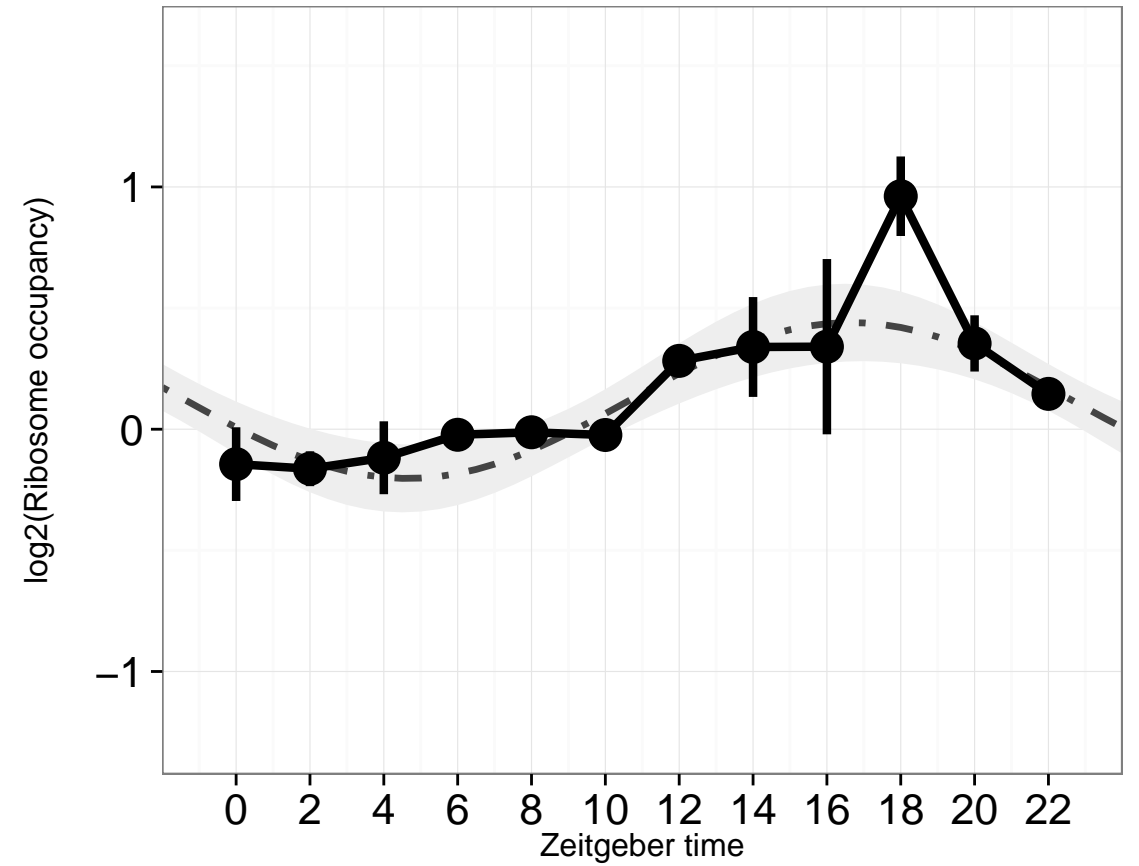

Supplement: SuppDataset_1.zip [file Lilra5_set_A.pdf › Supplemental Dataset 1/A-mRNA_nonrhyth_translation_nonrhyth/Lilra5_set_A.pdf]

# Lilrb4

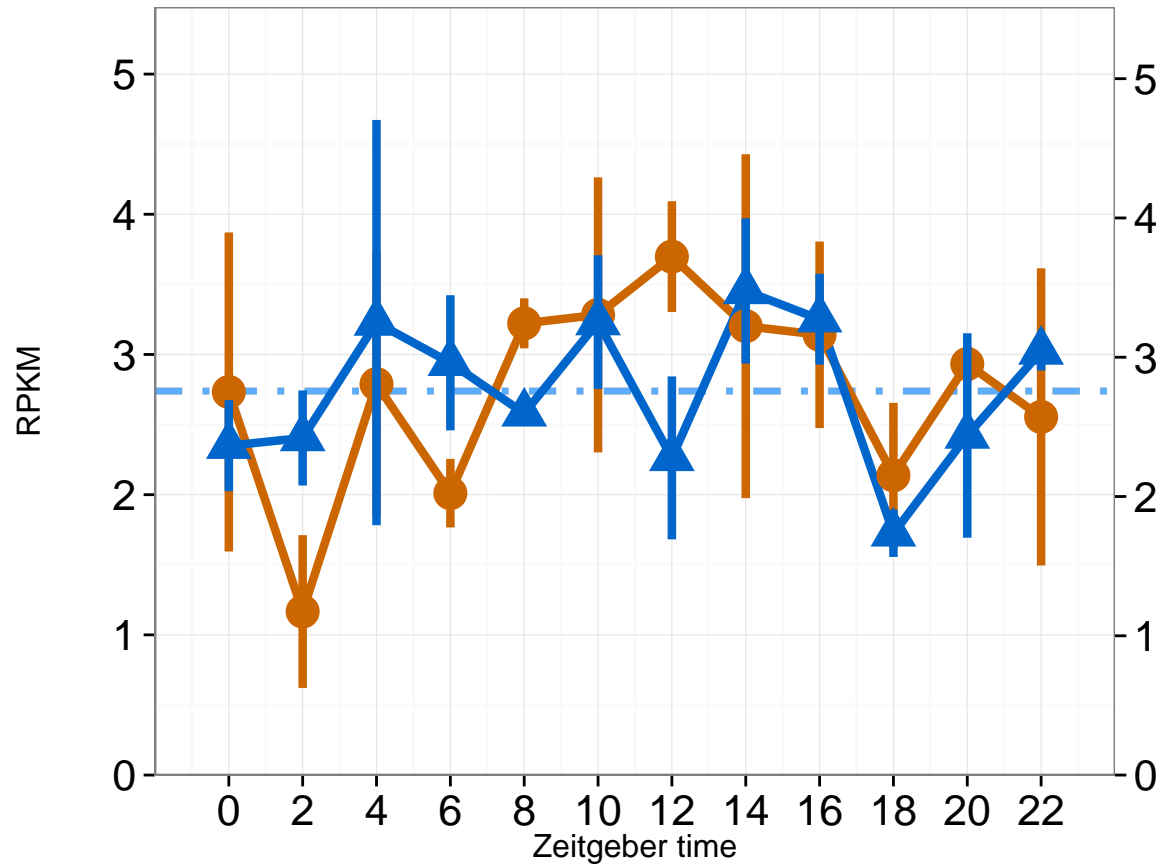

# Lilrb4

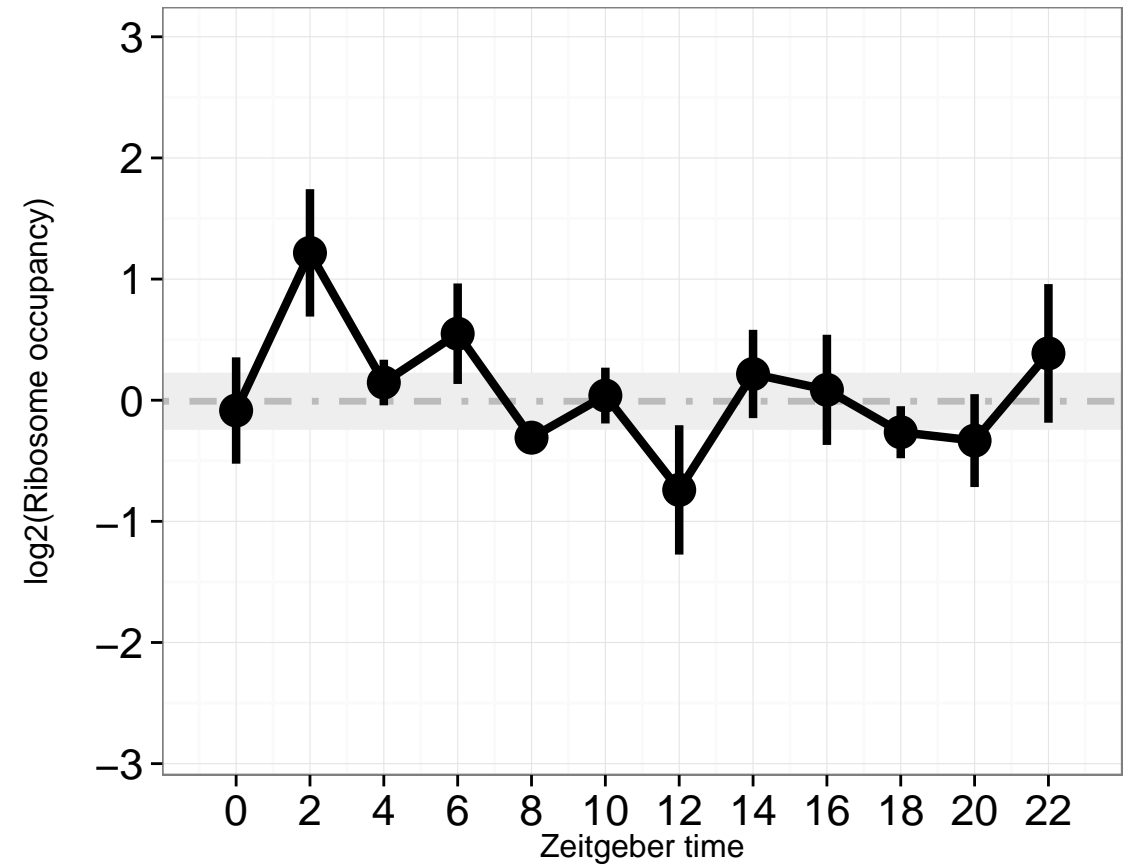

Supplement: SuppDataset_1.zip [file Lilrb4_set_A.pdf › Supplemental Dataset 1/A-mRNA_nonrhyth_translation_nonrhyth/Lilrb4_set_A.pdf]

# Lima1

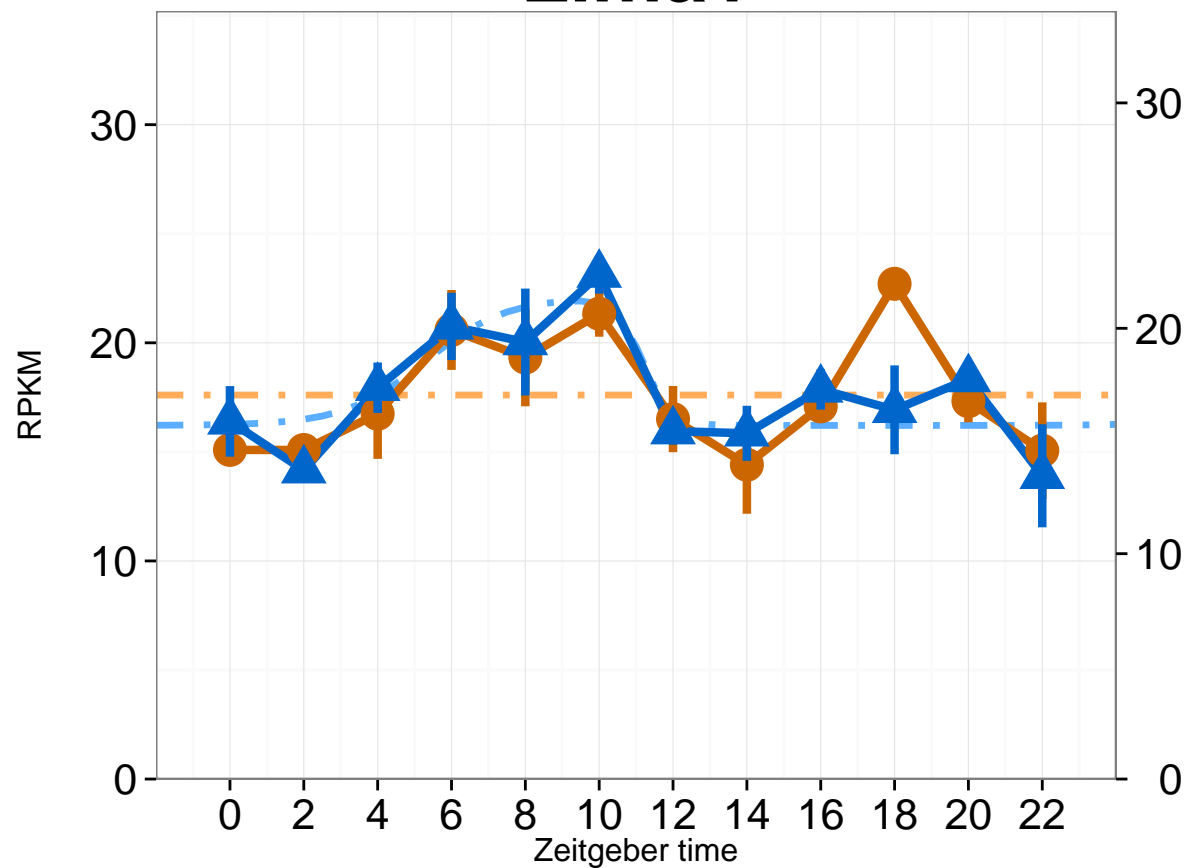

# Lima1

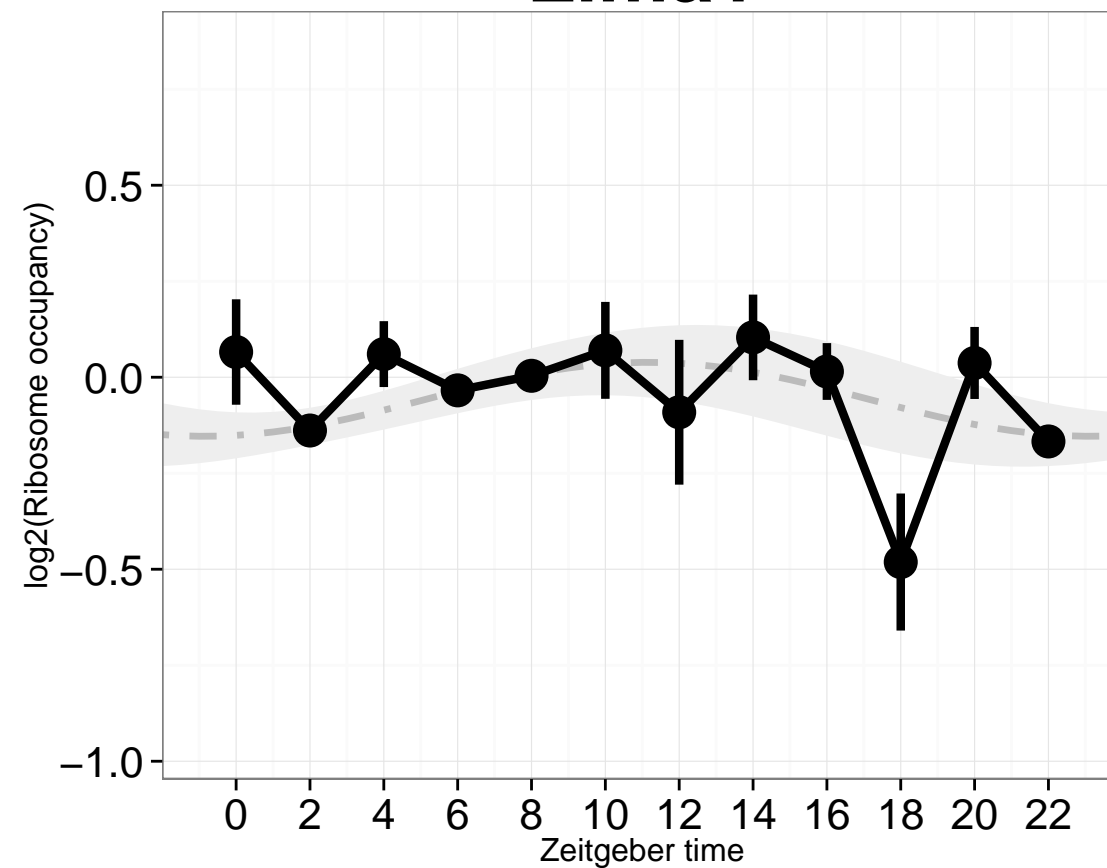

Supplement: SuppDataset_1.zip [file Lima1_set_A.pdf › Supplemental Dataset 1/A-mRNA_nonrhyth_translation_nonrhyth/Lima1_set_A.pdf]

# Limd1

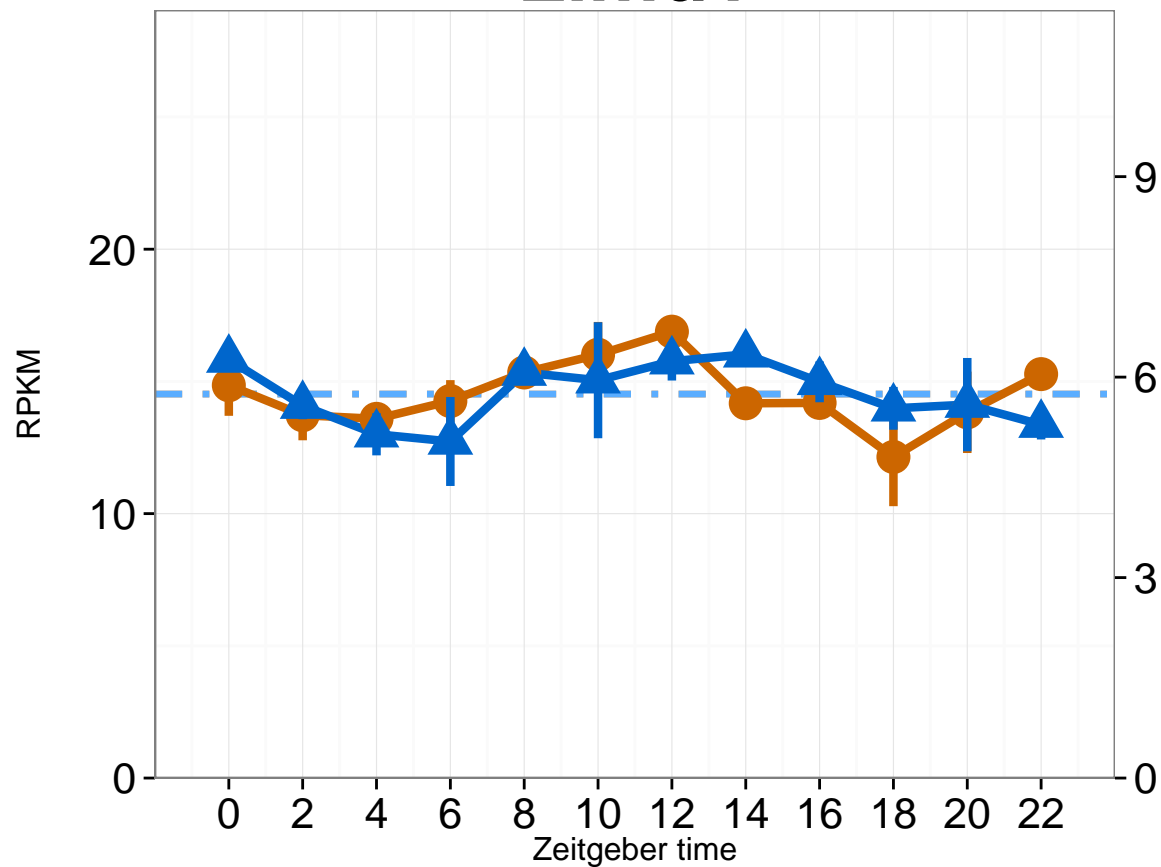

# Limd1

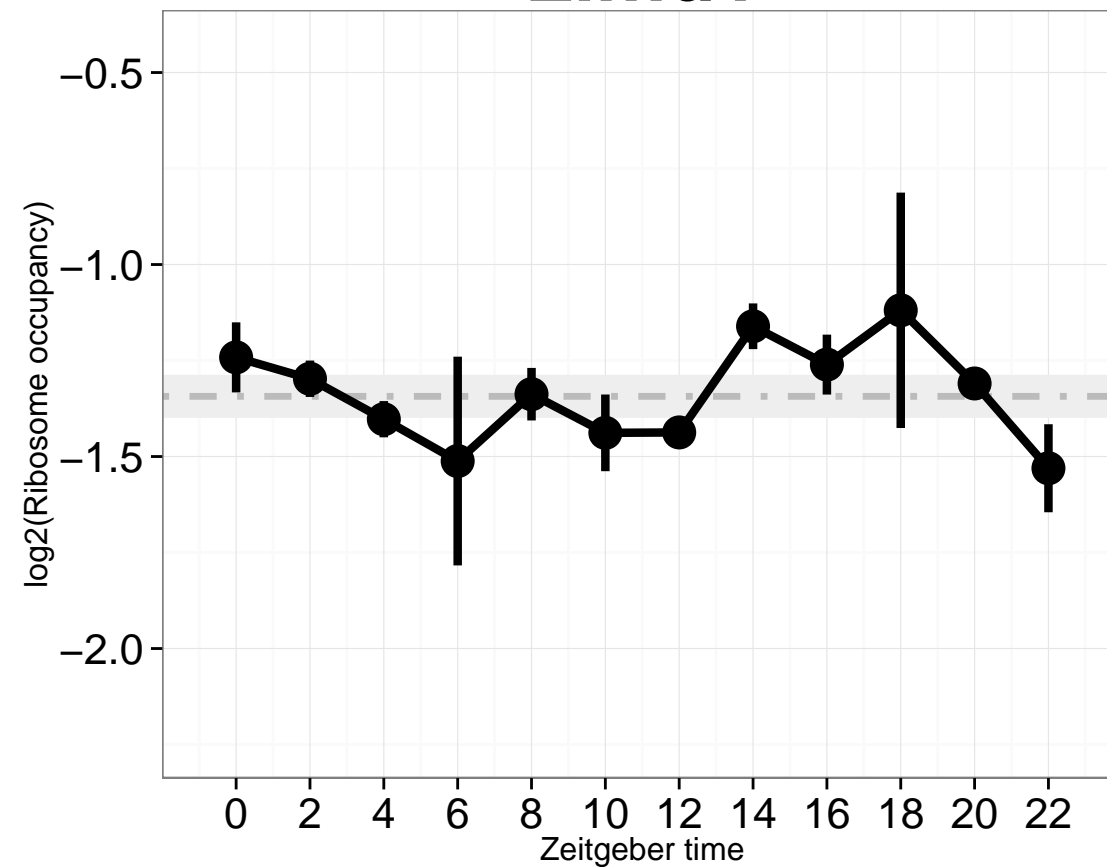

Supplement: SuppDataset_1.zip [file Limd1_set_A.pdf › Supplemental Dataset 1/A-mRNA_nonrhyth_translation_nonrhyth/Limd1_set_A.pdf]

## Limd2

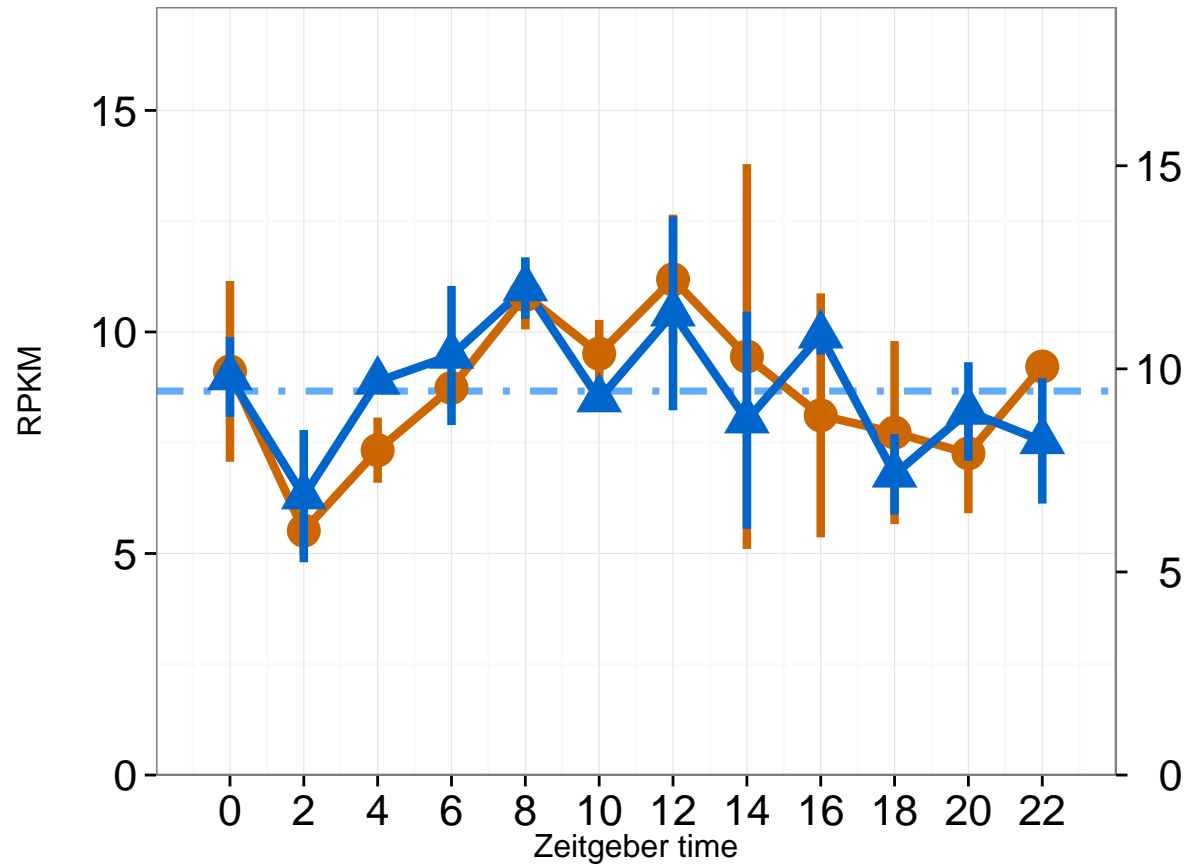

## Limd2

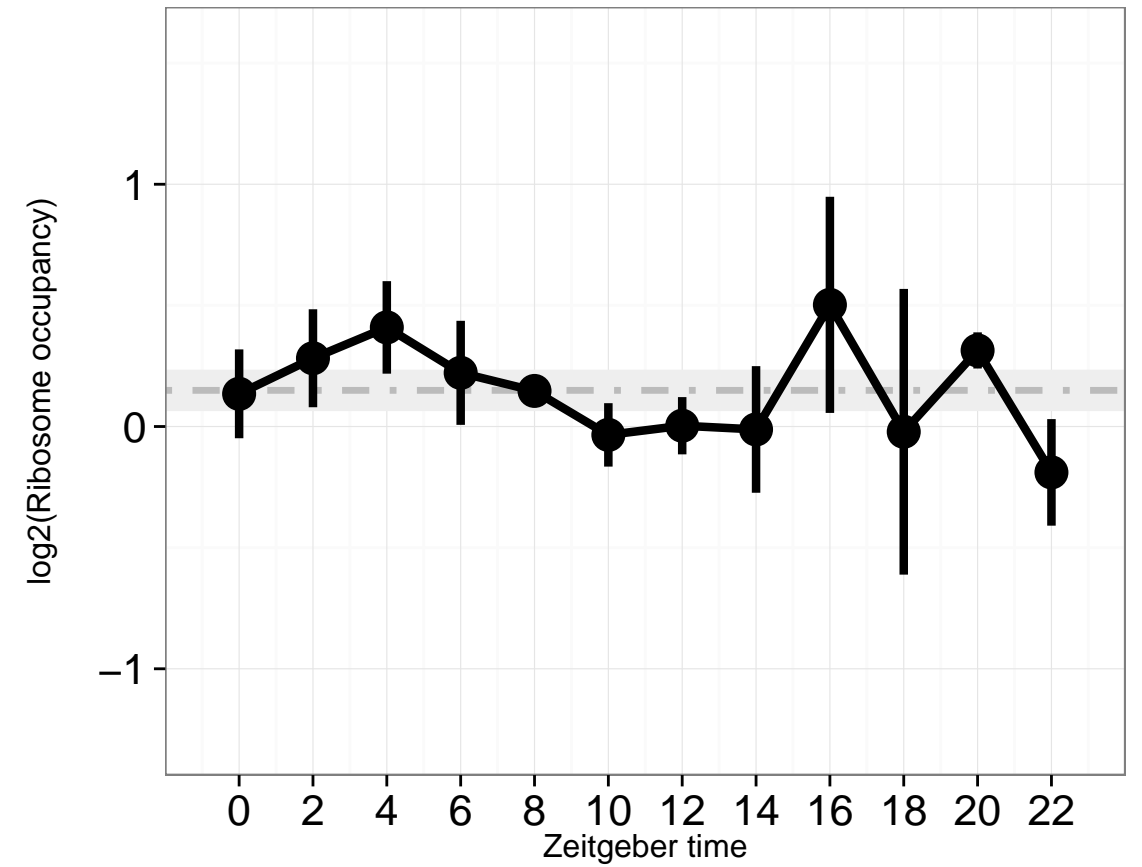

Supplement: SuppDataset_1.zip [file Limd2_set_A.pdf › Supplemental Dataset 1/A-mRNA_nonrhyth_translation_nonrhyth/Limd2_set_A.pdf]

# Limk1

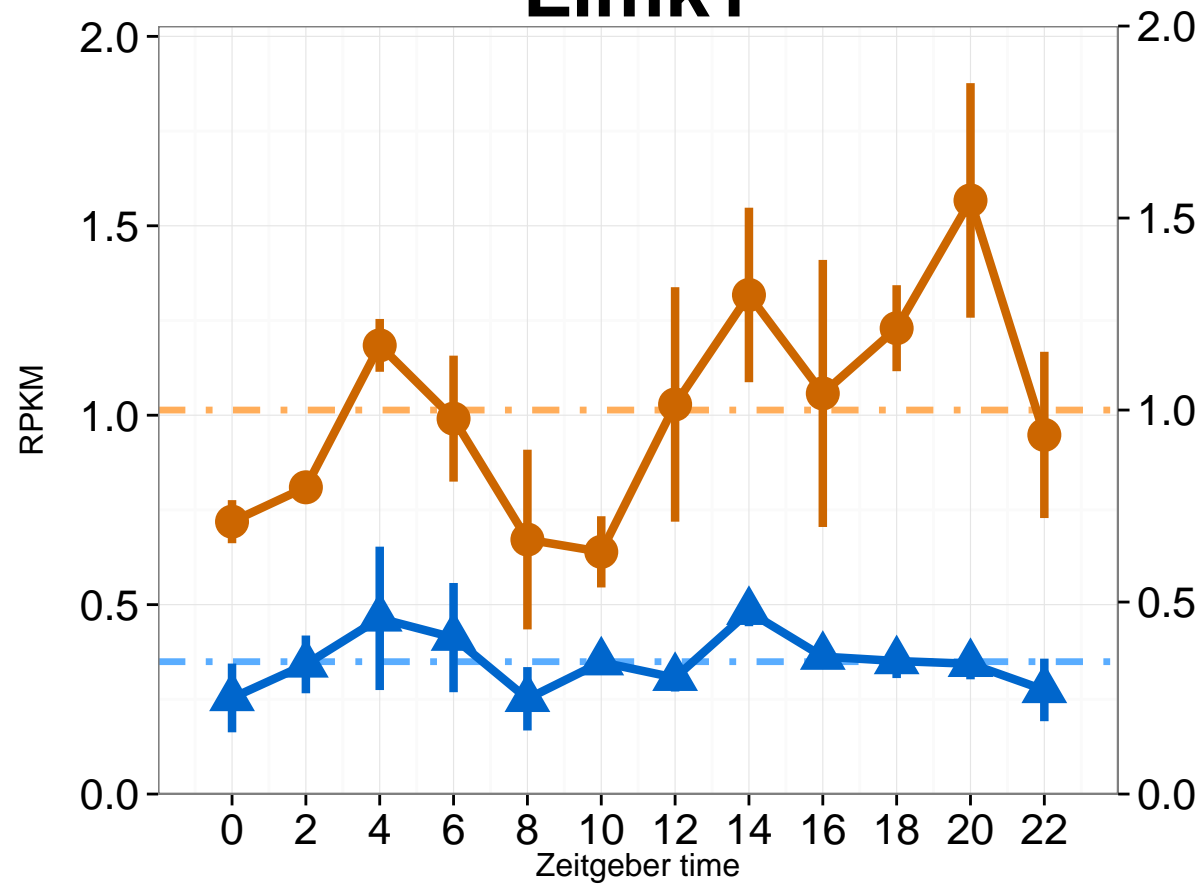

# Limk1

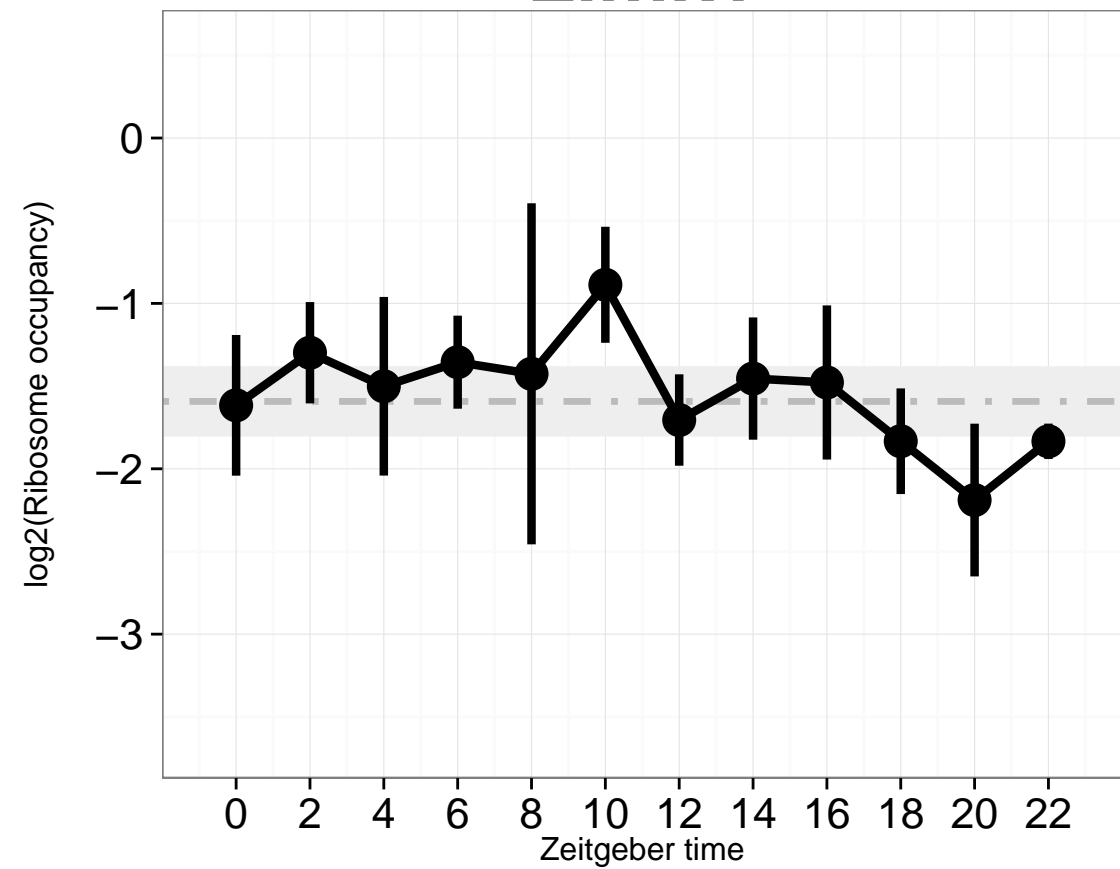

Supplement: SuppDataset_1.zip [file Limk1_set_A.pdf › Supplemental Dataset 1/A-mRNA_nonrhyth_translation_nonrhyth/Limk1_set_A.pdf]

## Limk2

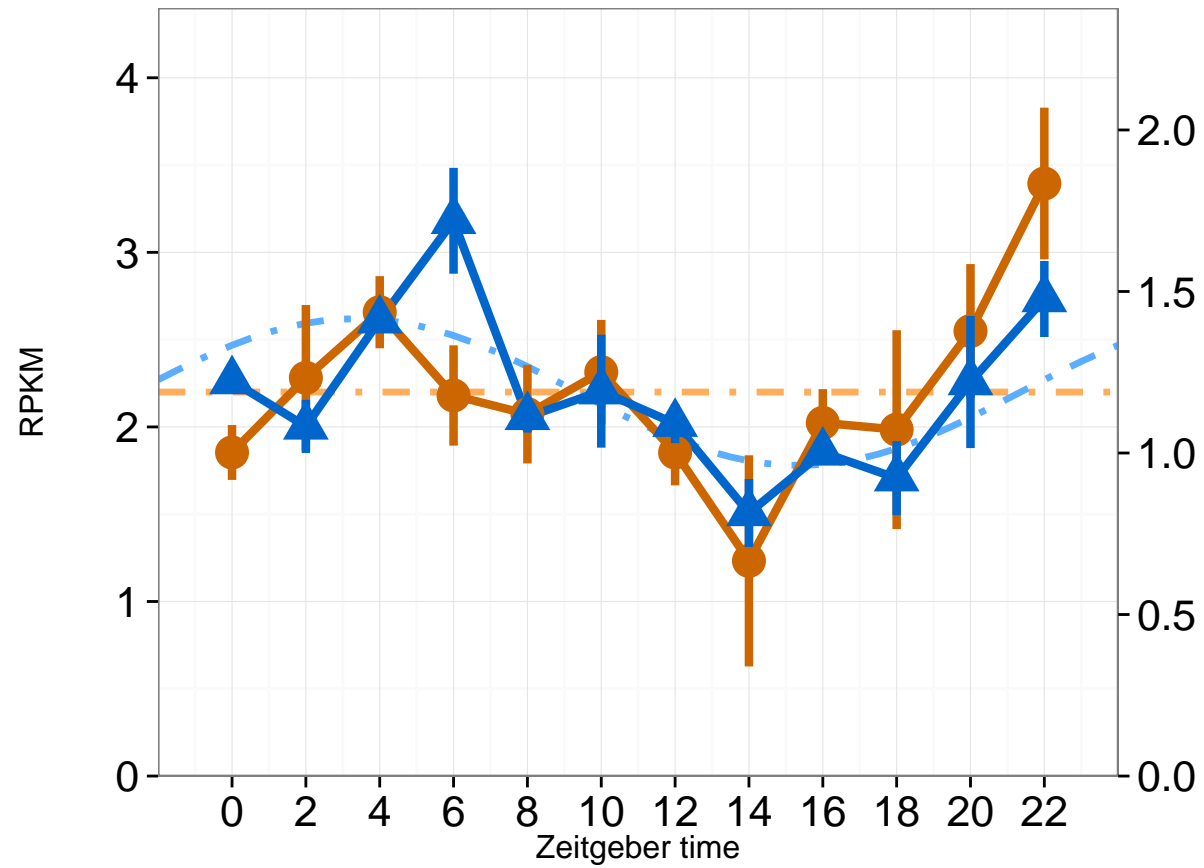

## Limk2

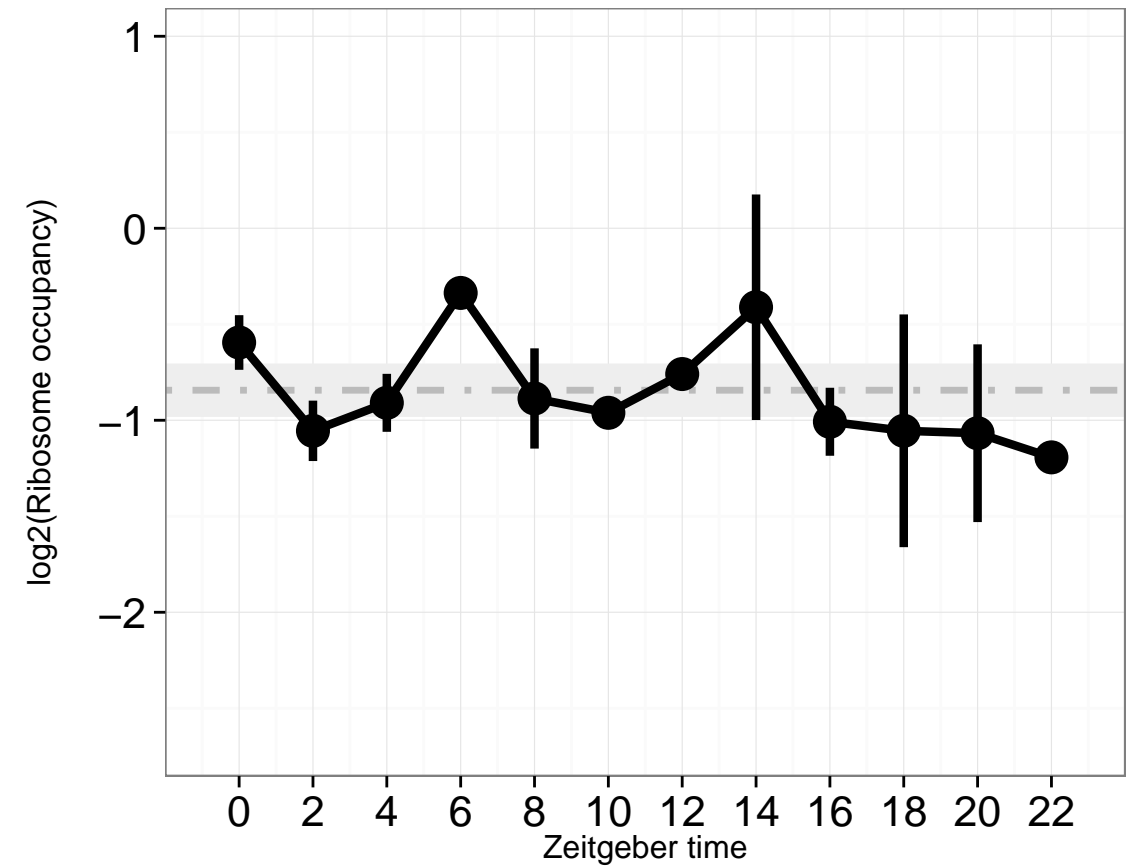

Supplement: SuppDataset_1.zip [file Limk2_set_A.pdf › Supplemental Dataset 1/A-mRNA_nonrhyth_translation_nonrhyth/Limk2_set_A.pdf]

## Lims1

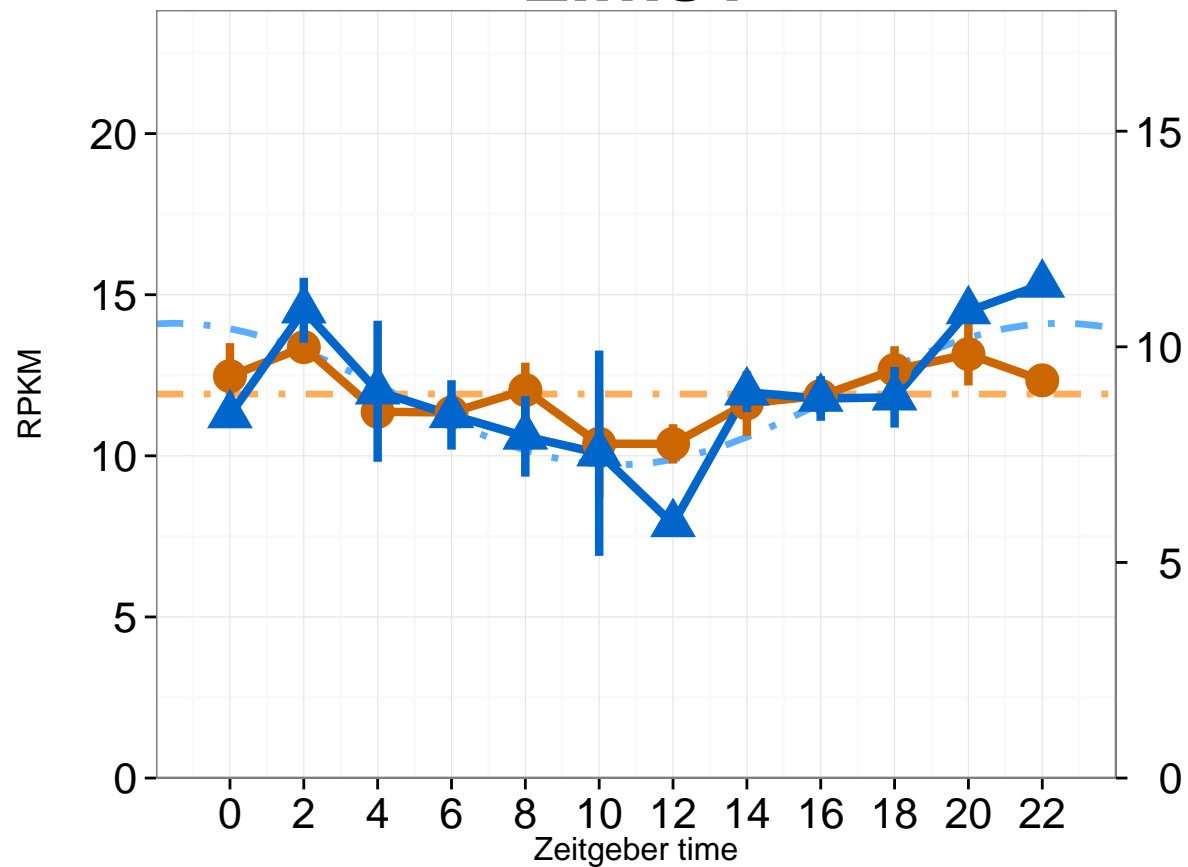

## Lims1

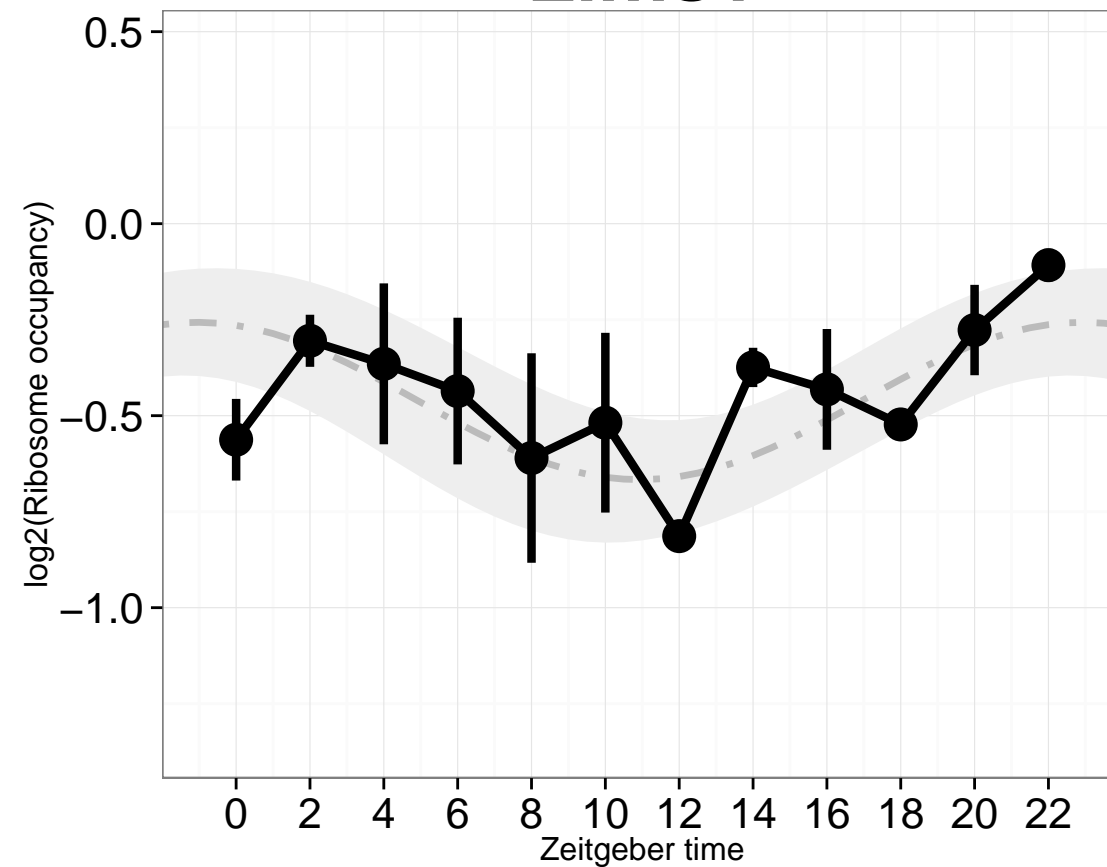

Supplement: SuppDataset_1.zip [file Lims1_set_A.pdf › Supplemental Dataset 1/A-mRNA_nonrhyth_translation_nonrhyth/Lims1_set_A.pdf]

## Lims2

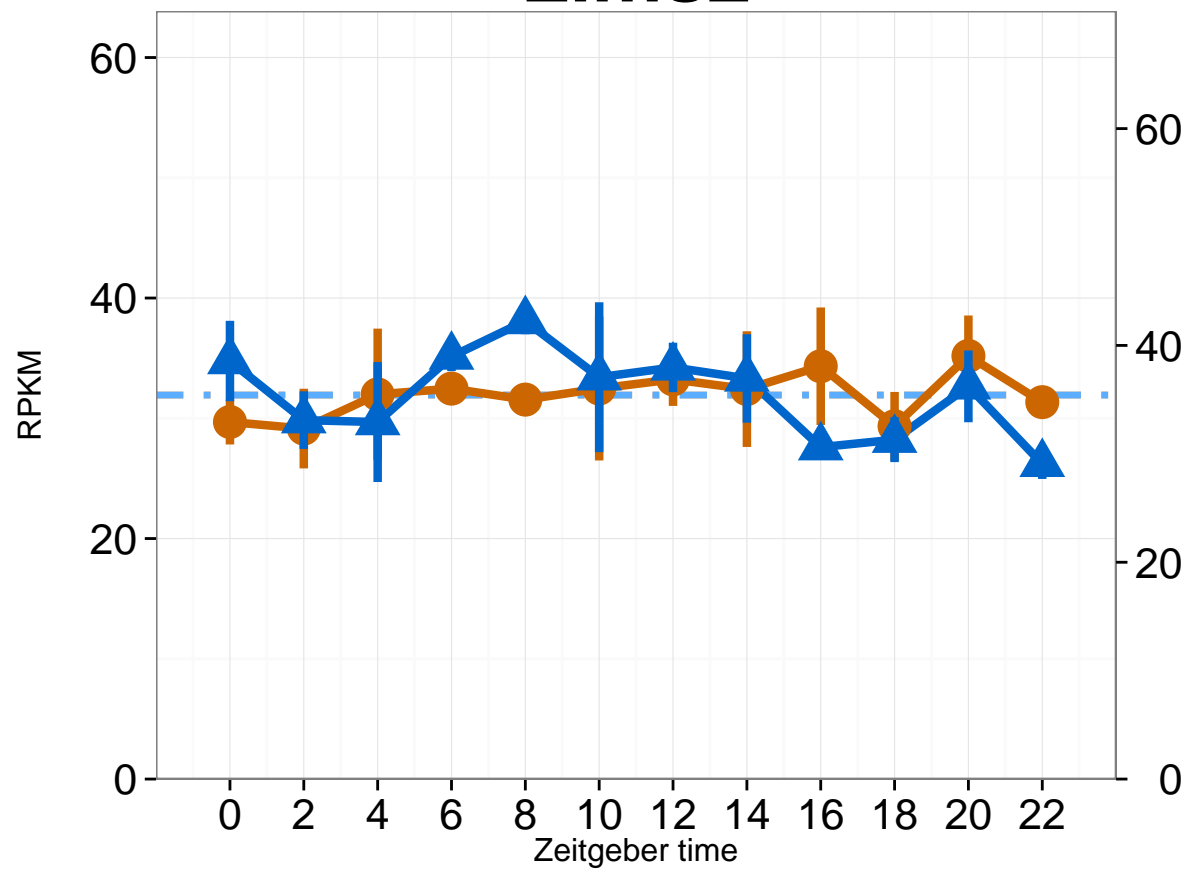

## Lims2

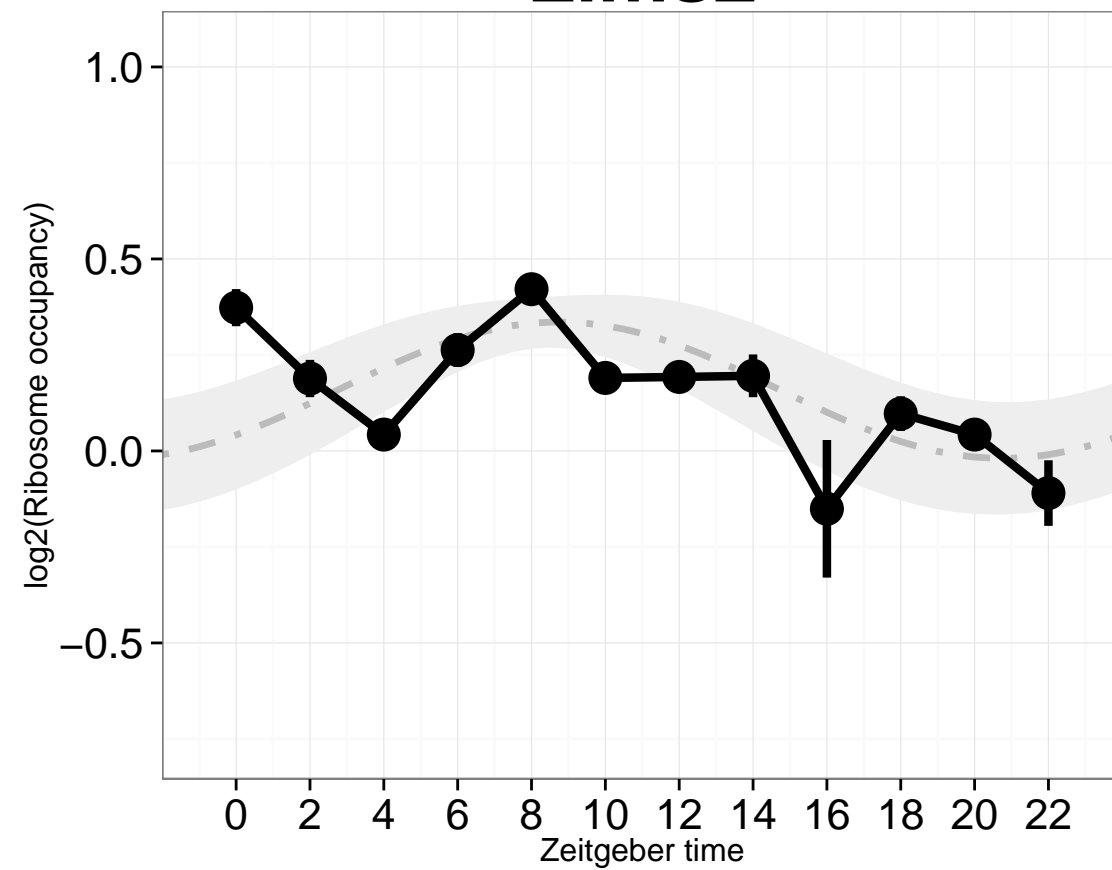

Supplement: SuppDataset_1.zip [file Lims2_set_A.pdf › Supplemental Dataset 1/A-mRNA_nonrhyth_translation_nonrhyth/Lims2_set_A.pdf]

## Lin37

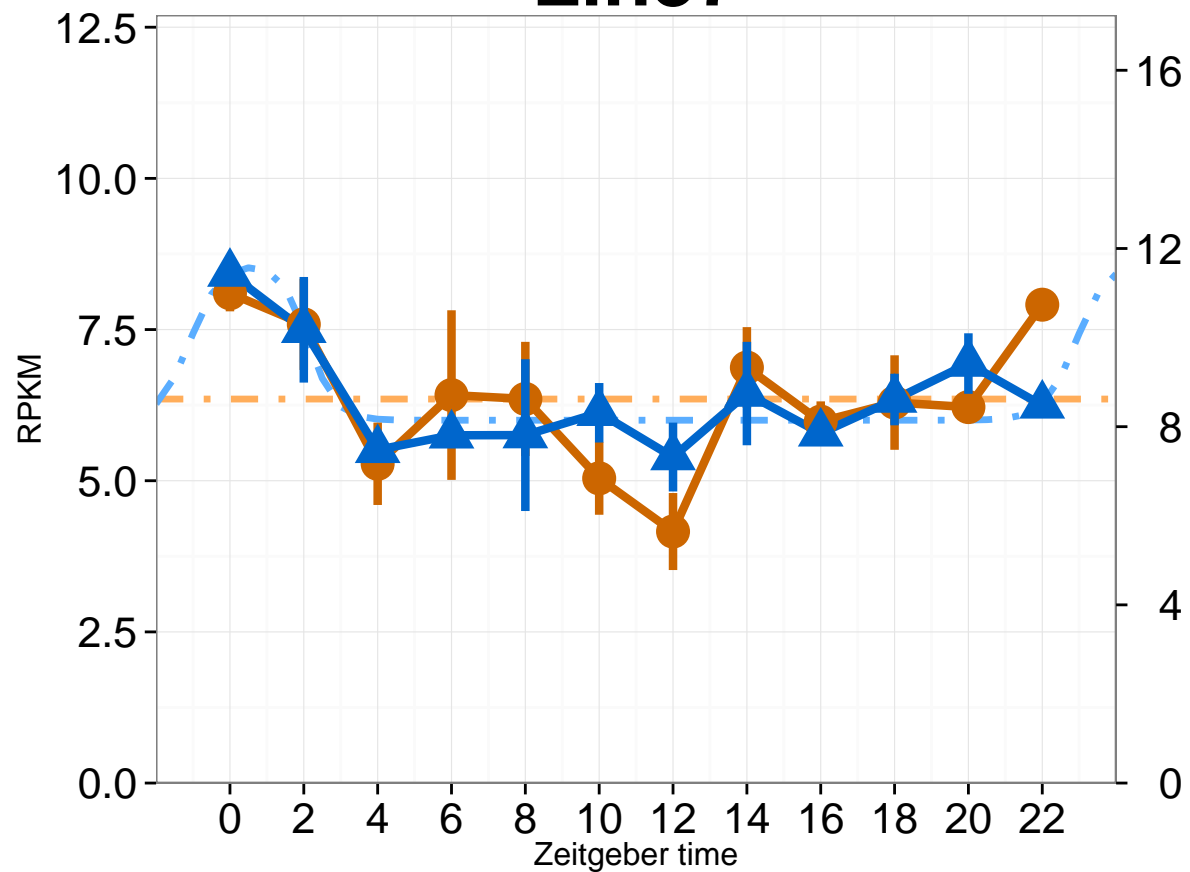

## Lin37

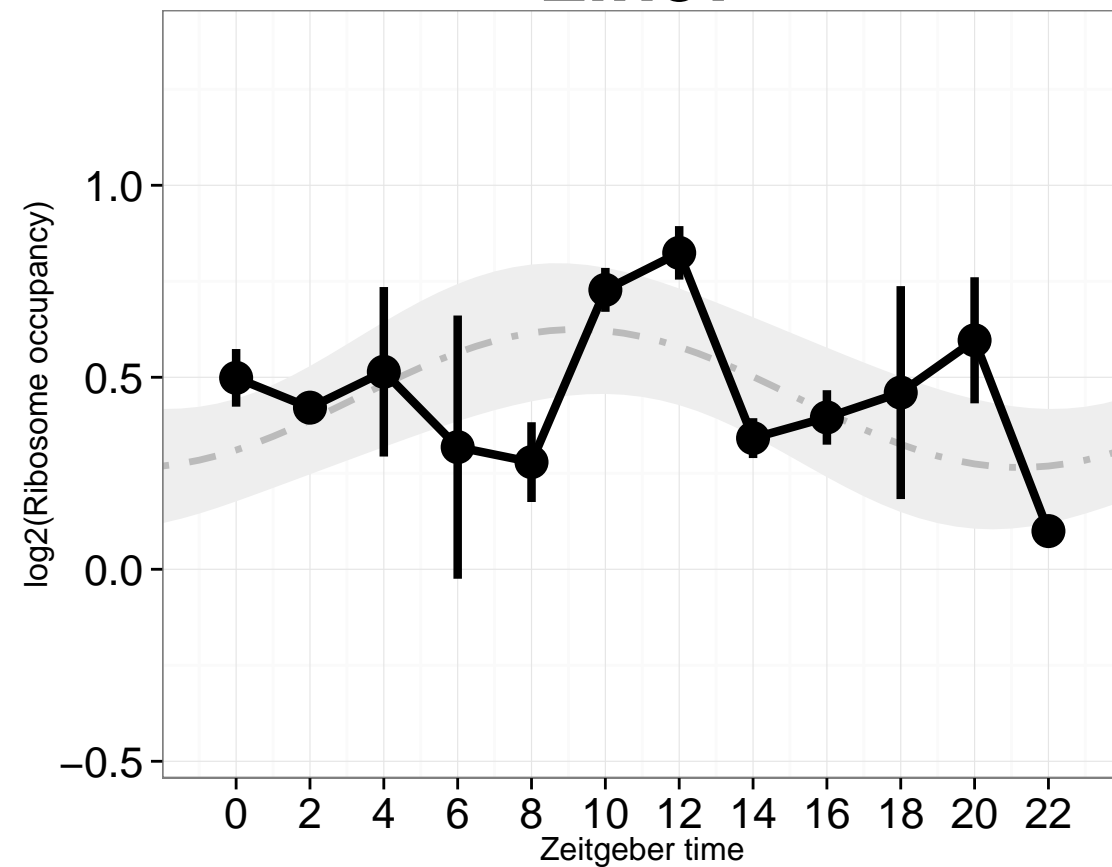

Supplement: SuppDataset_1.zip [file Lin37_set_A.pdf › Supplemental Dataset 1/A-mRNA_nonrhyth_translation_nonrhyth/Lin37_set_A.pdf]

# Lin54

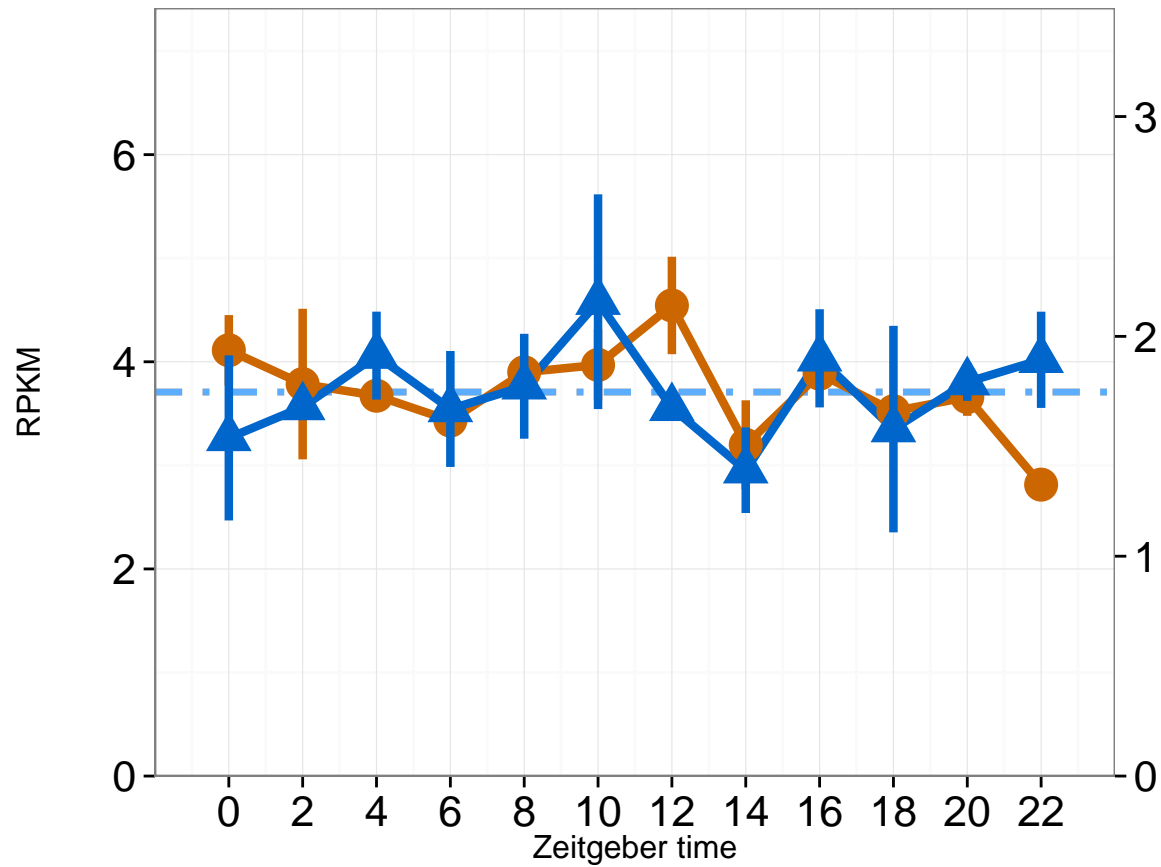

# Lin54

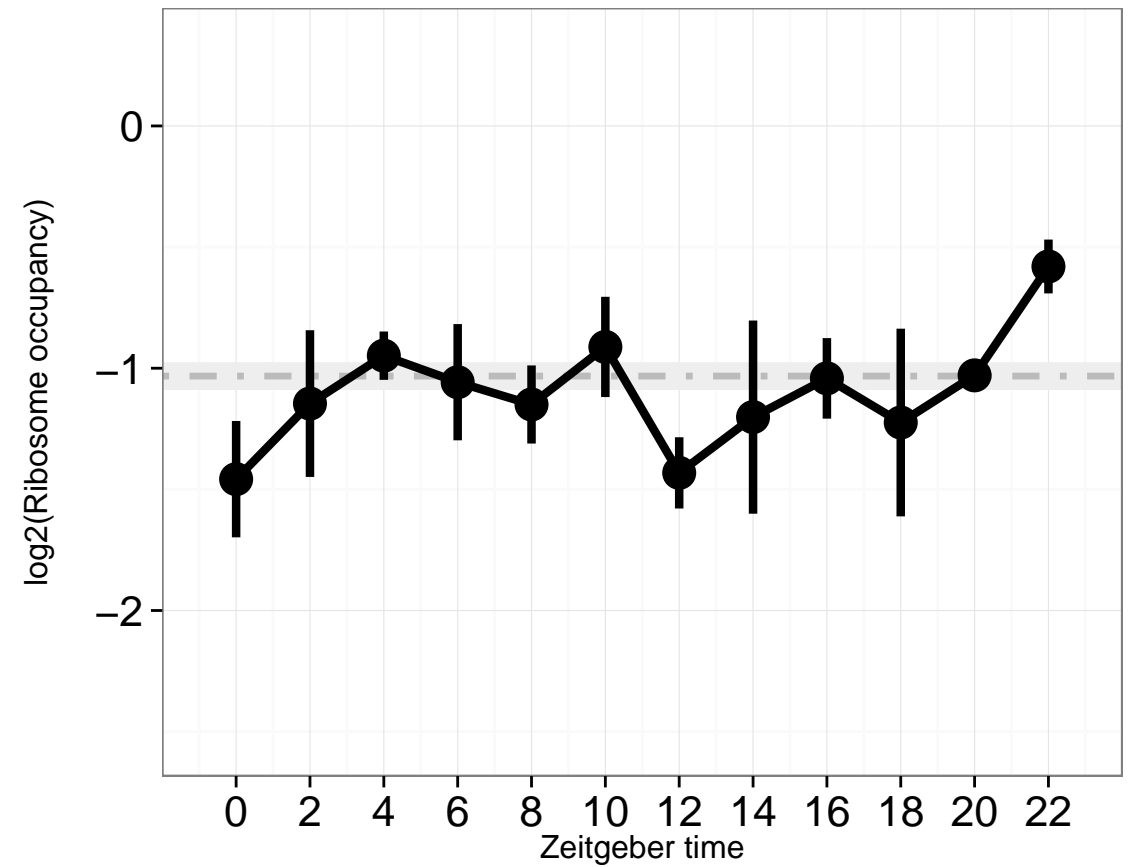

Supplement: SuppDataset_1.zip [file Lin54_set_A.pdf › Supplemental Dataset 1/A-mRNA_nonrhyth_translation_nonrhyth/Lin54_set_A.pdf]

# Lin7a

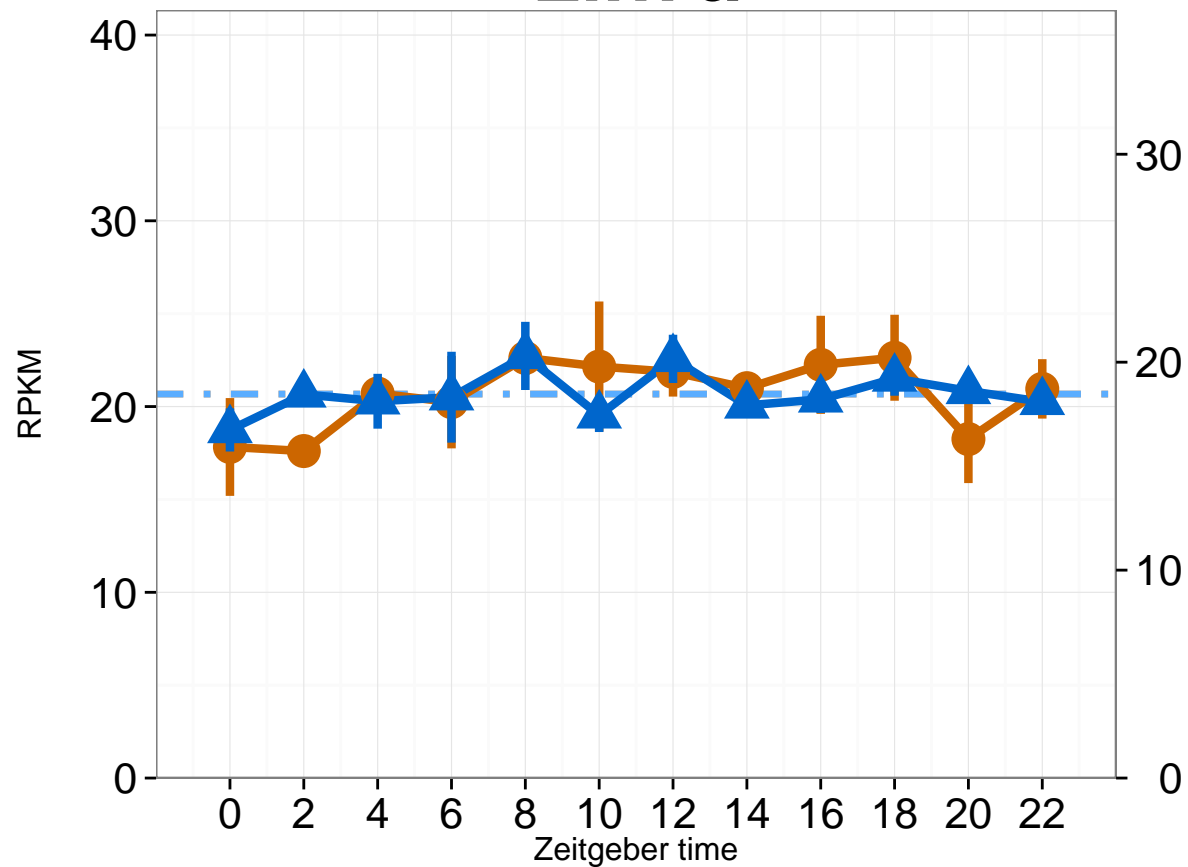

# Lin7a

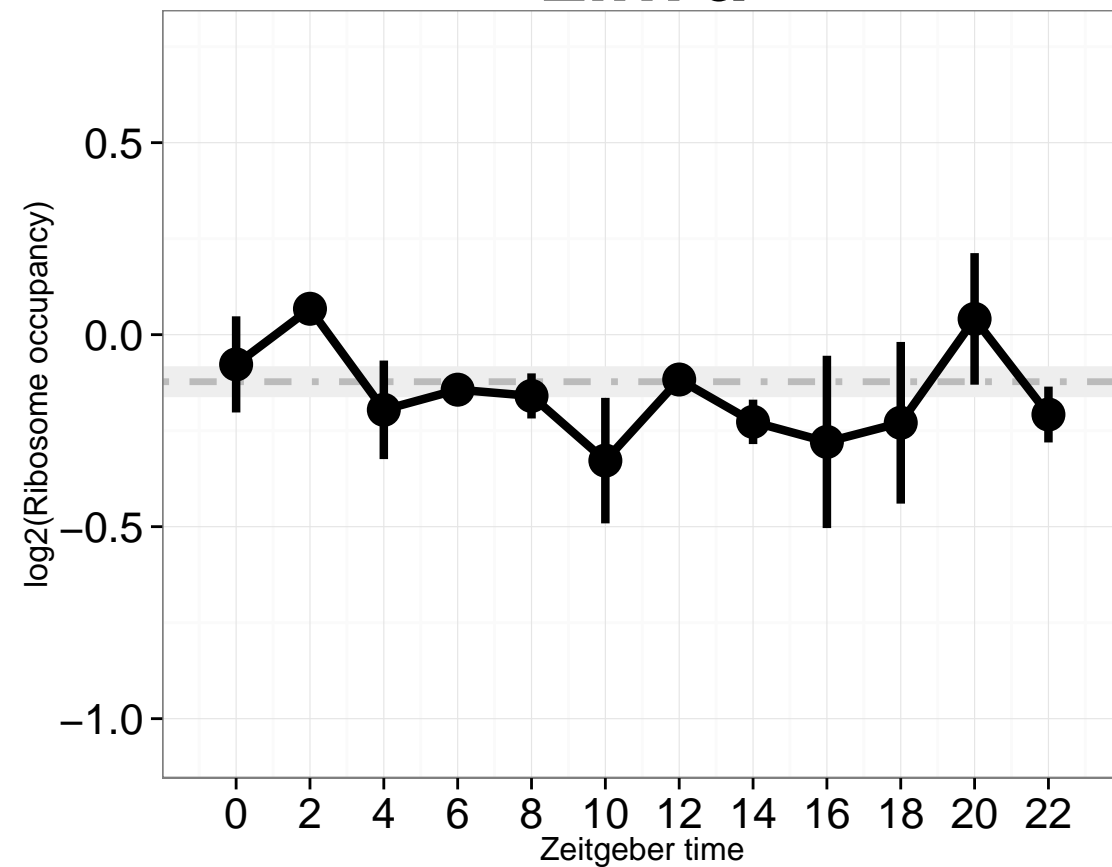

Supplement: SuppDataset_1.zip [file Lin7a_set_A.pdf › Supplemental Dataset 1/A-mRNA_nonrhyth_translation_nonrhyth/Lin7a_set_A.pdf]

## Lin7c

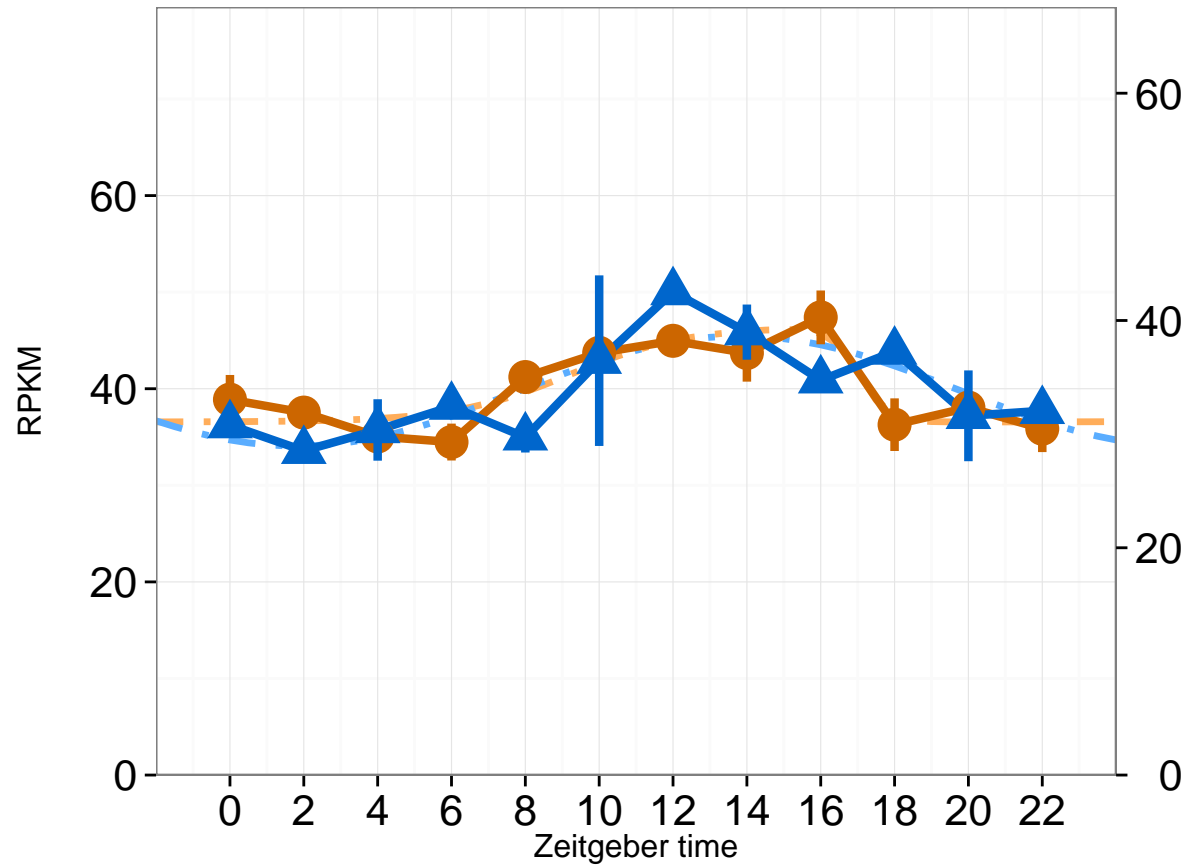

## Lin7c

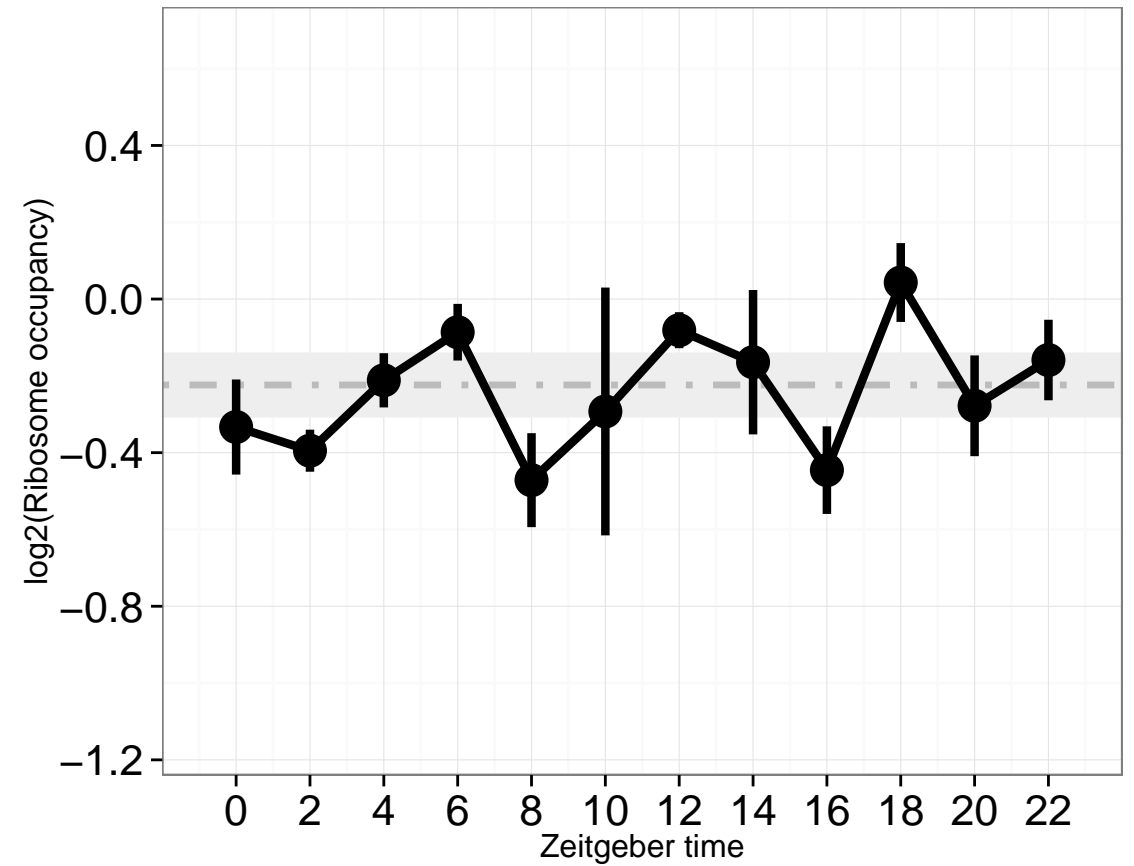

Supplement: SuppDataset_1.zip [file Lin7c_set_A.pdf › Supplemental Dataset 1/A-mRNA_nonrhyth_translation_nonrhyth/Lin7c_set_A.pdf]

## Lins

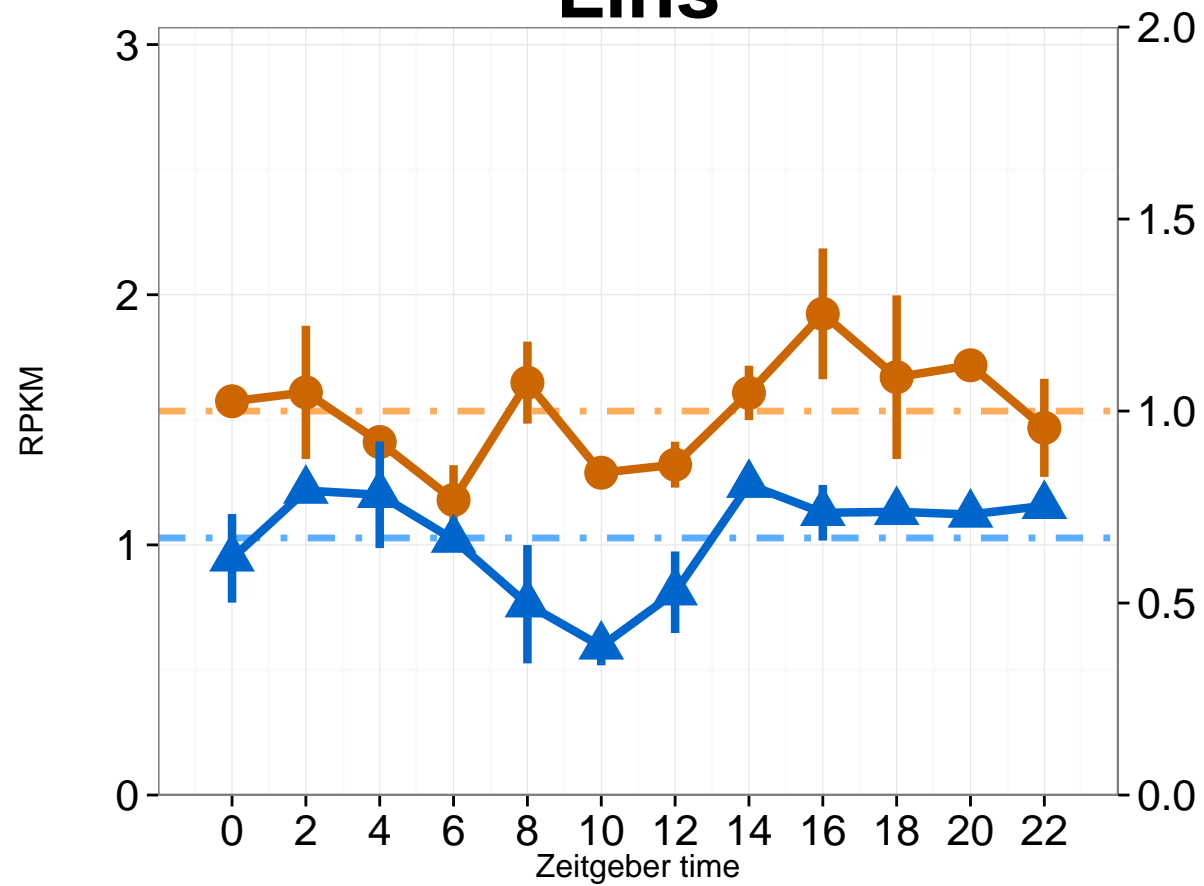

## Lins

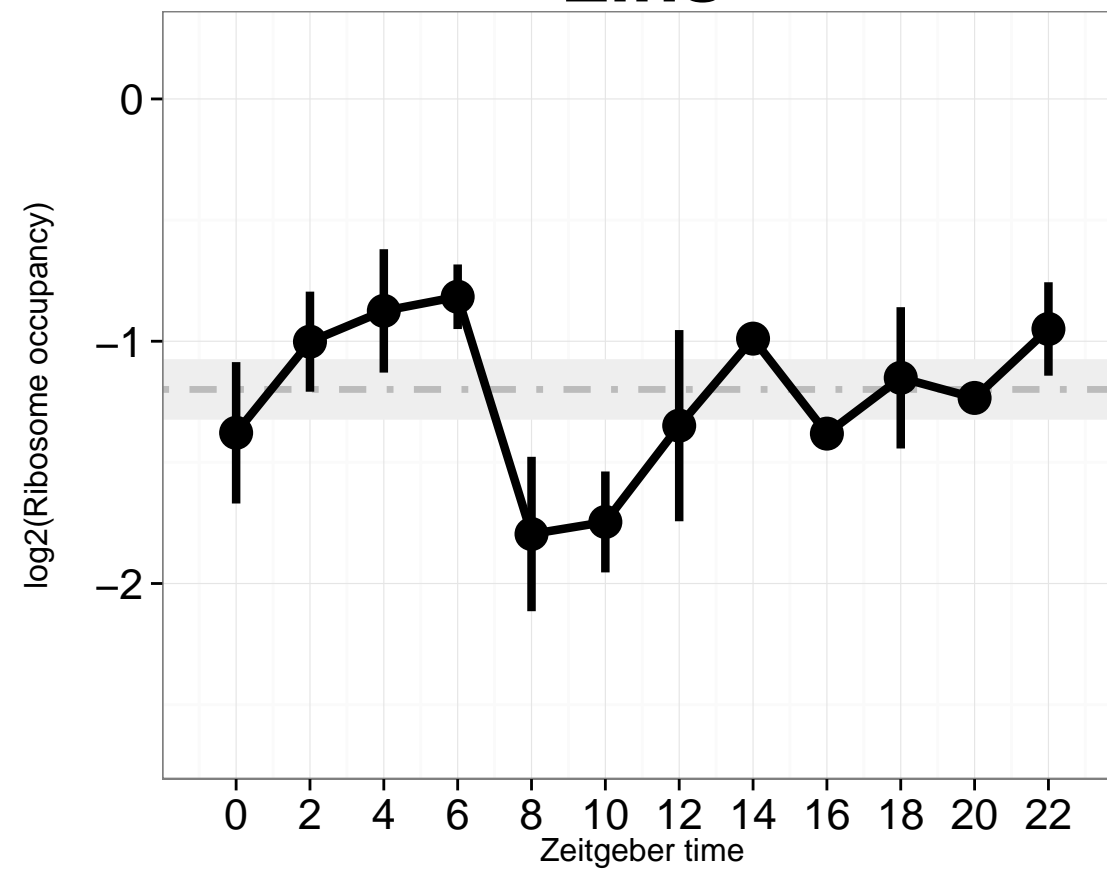

Supplement: SuppDataset_1.zip [file Lins_set_A.pdf › Supplemental Dataset 1/A-mRNA_nonrhyth_translation_nonrhyth/Lins_set_A.pdf]

## Lipc

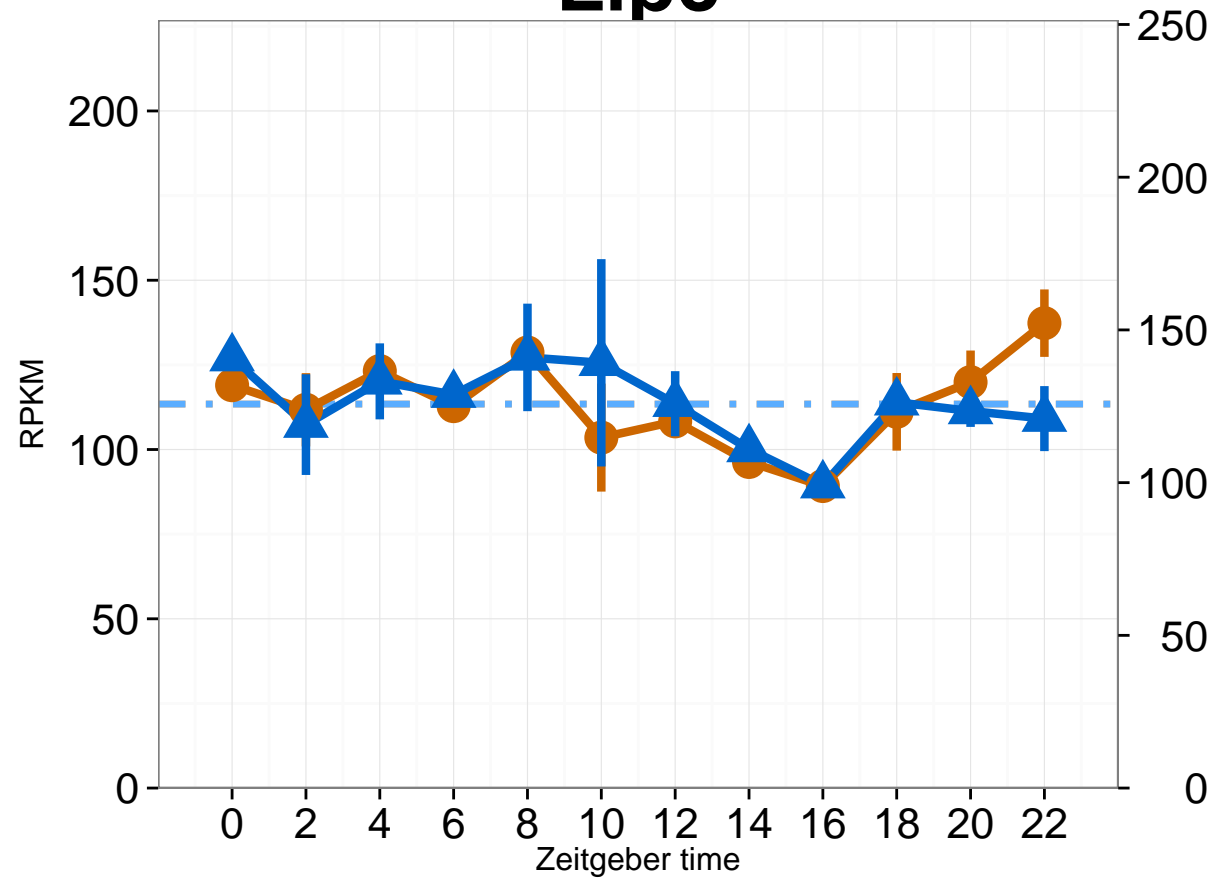

## Lipc

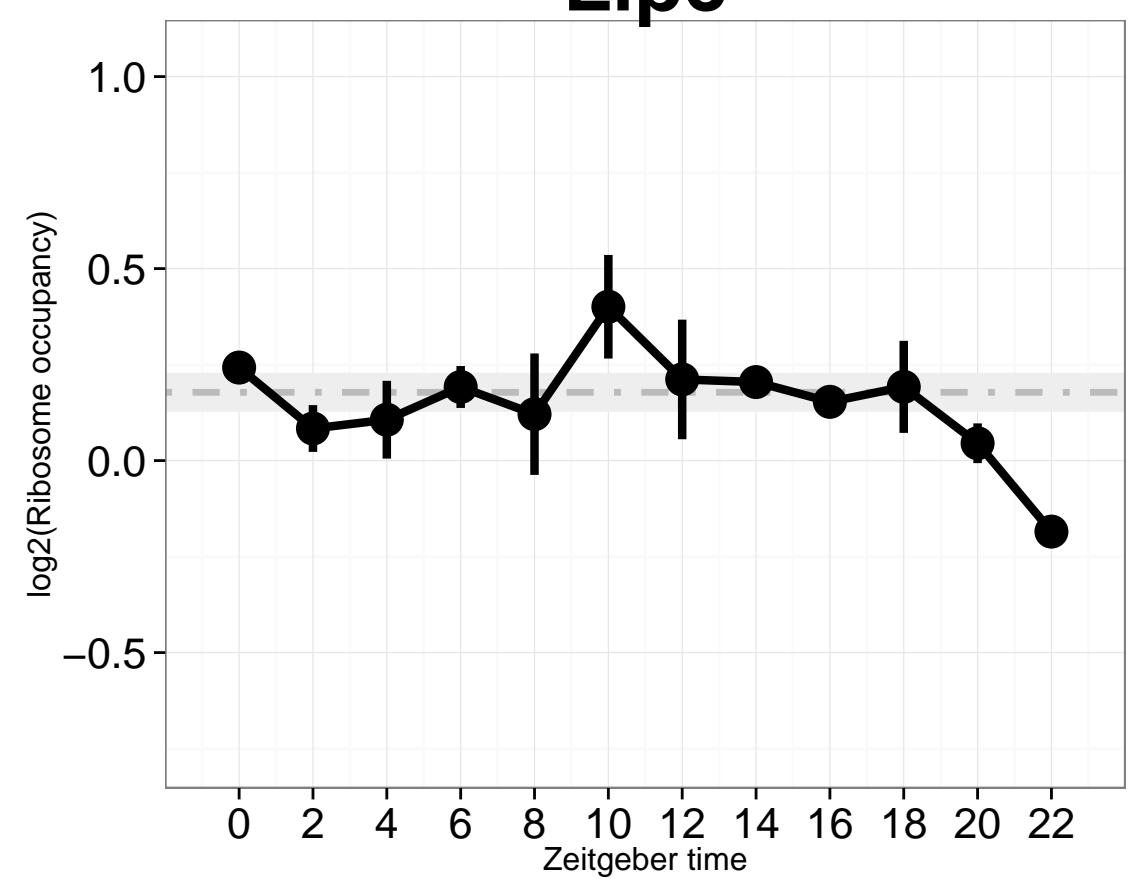

Supplement: SuppDataset_1.zip [file Lipc_set_A.pdf › Supplemental Dataset 1/A-mRNA_nonrhyth_translation_nonrhyth/Lipc_set_A.pdf]

## LiPe

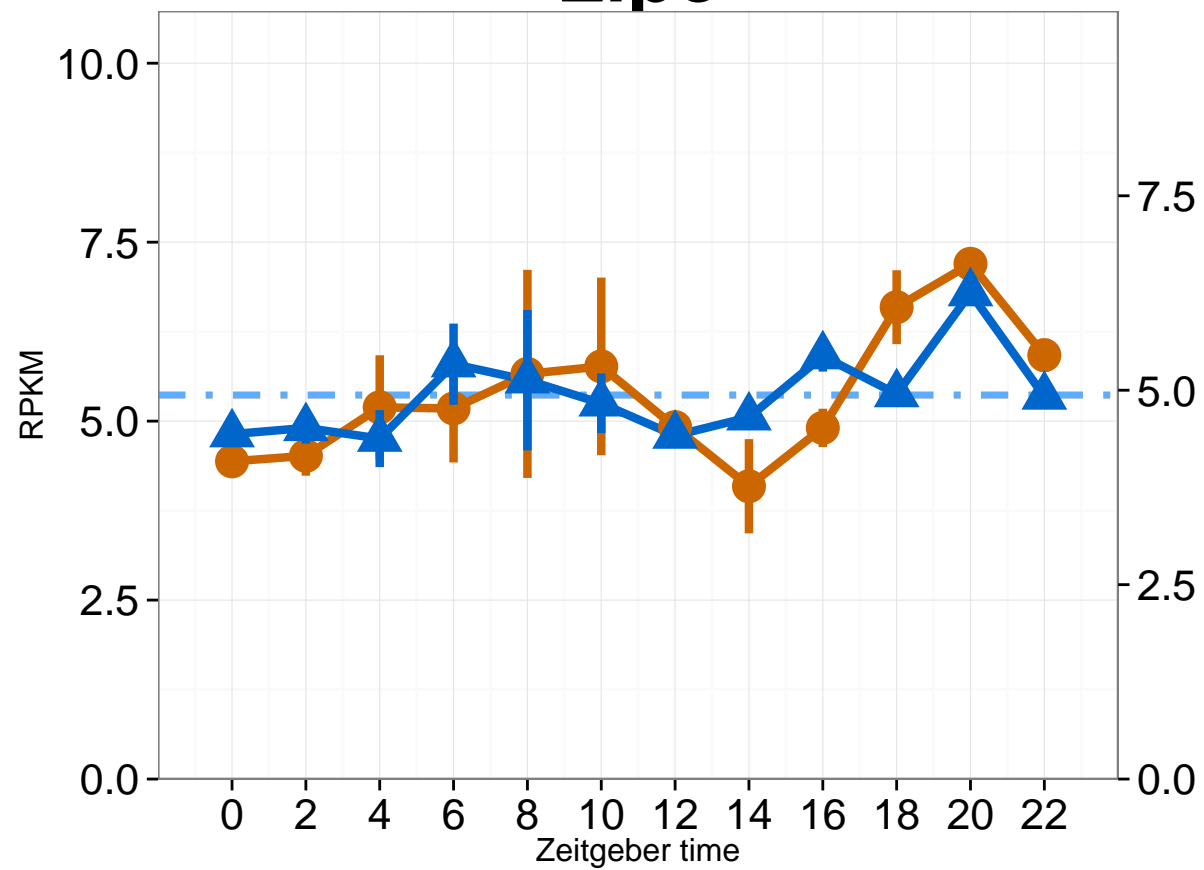

## LiPe

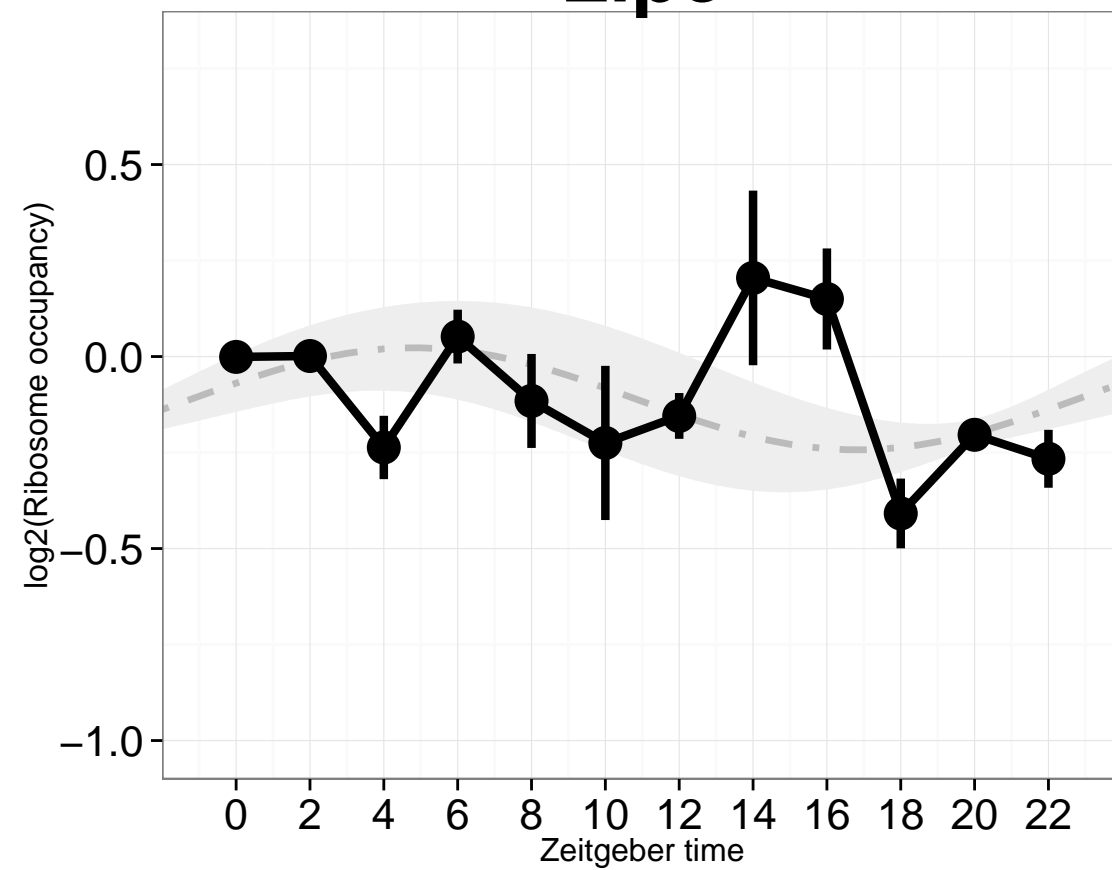

Supplement: SuppDataset_1.zip [file Lipe_set_A.pdf › Supplemental Dataset 1/A-mRNA_nonrhyth_translation_nonrhyth/Lipe_set_A.pdf]

## Lipo1

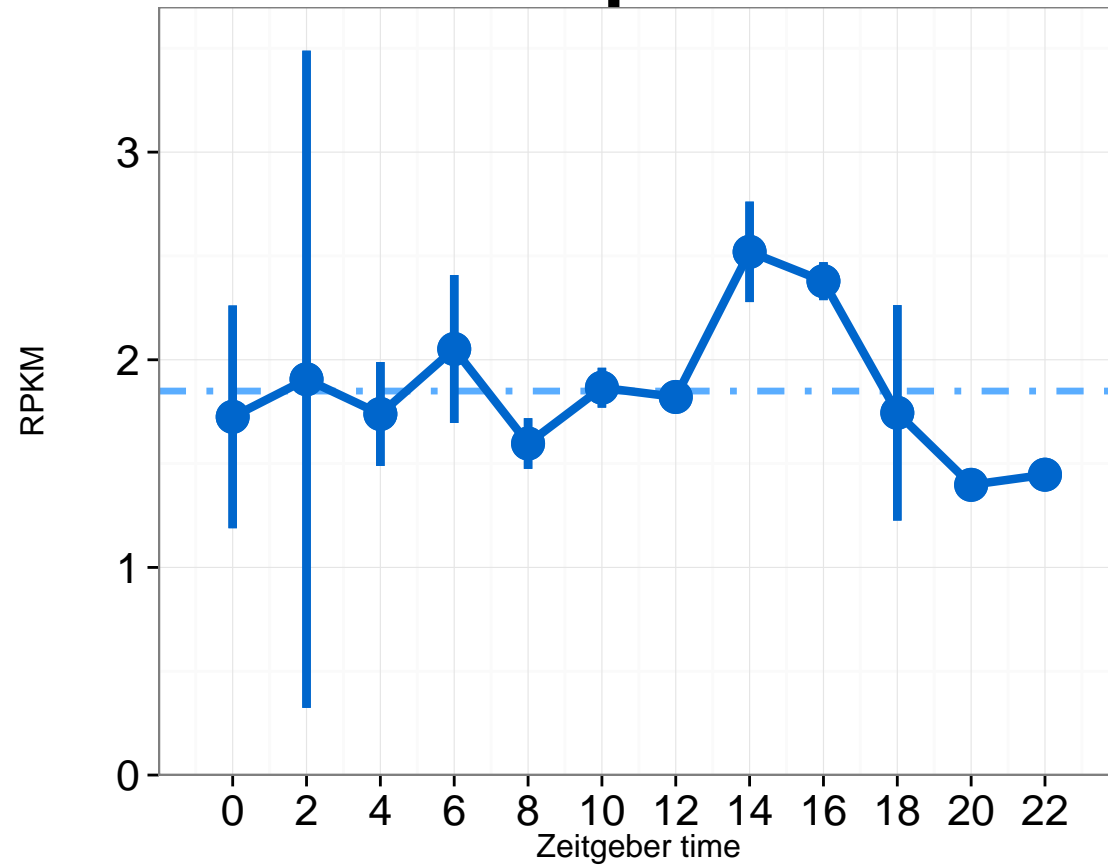

## Lipo1 log2(Ribosome occupancy)

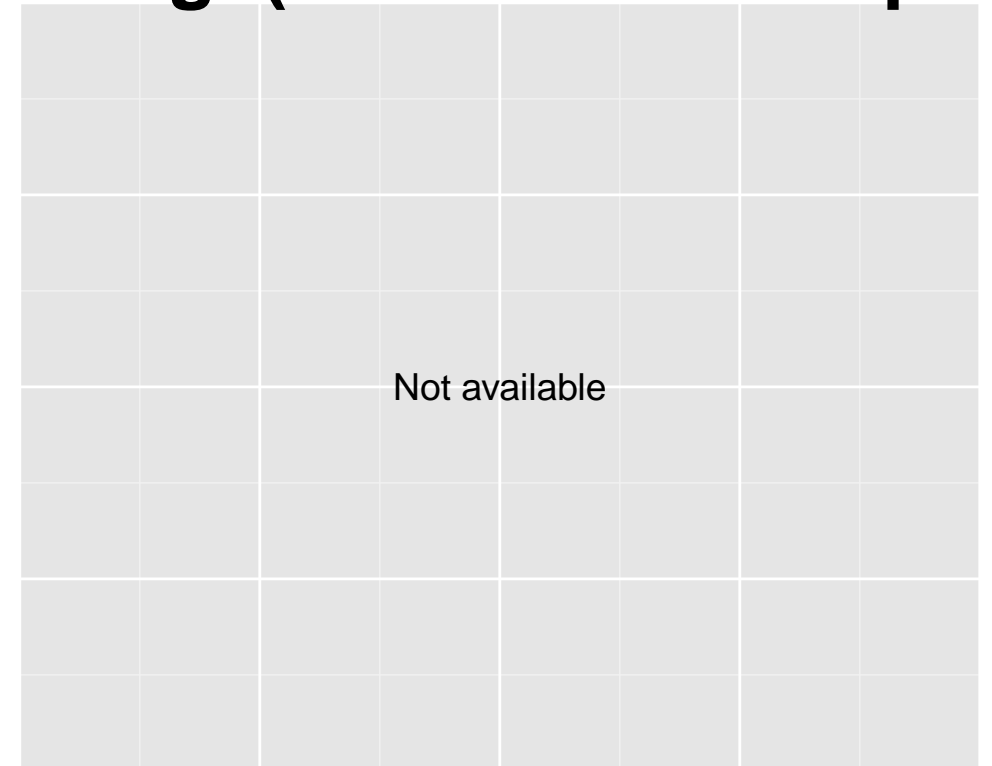

Supplement: SuppDataset_1.zip [file Lipo1_set_A.pdf › Supplemental Dataset 1/A-mRNA_nonrhyth_translation_nonrhyth/Lipo1_set_A.pdf]

# Lipt1

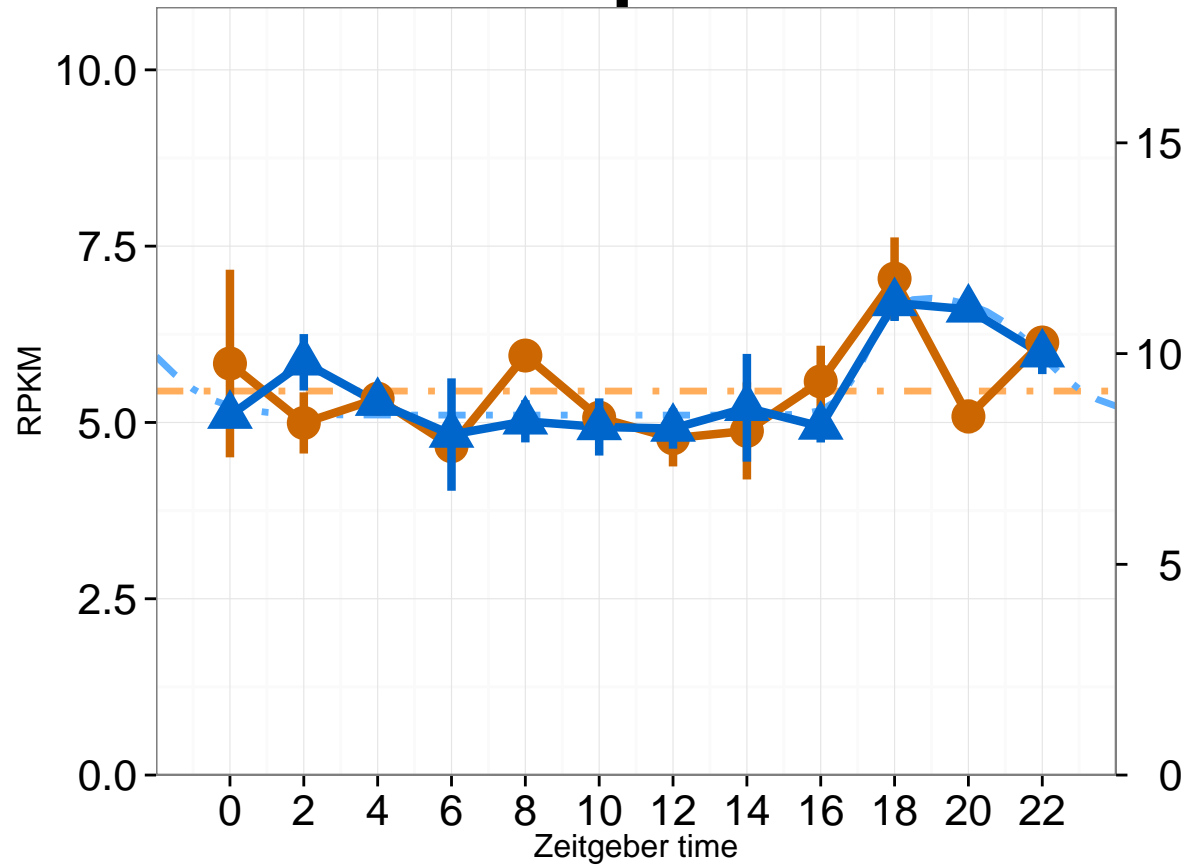

# Lipt1

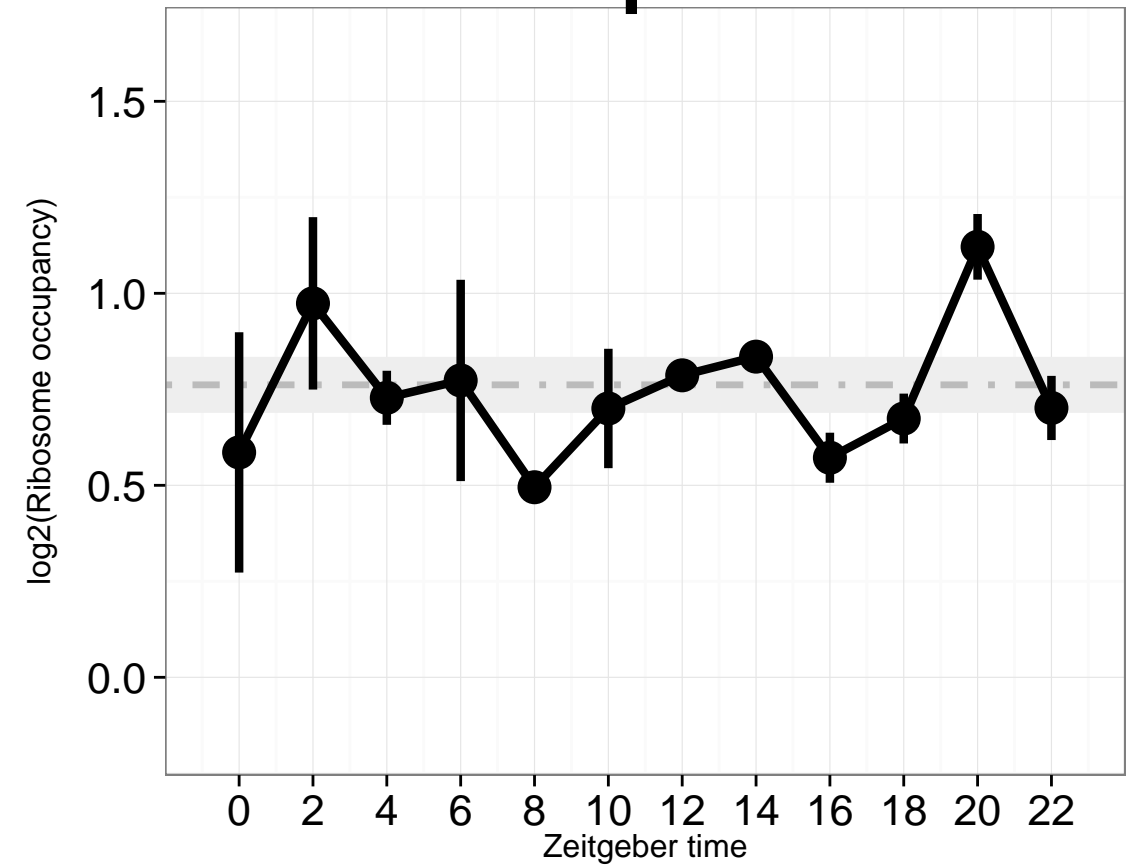

Supplement: SuppDataset_1.zip [file Lipt1_set_A.pdf › Supplemental Dataset 1/A-mRNA_nonrhyth_translation_nonrhyth/Lipt1_set_A.pdf]

# Lipt2

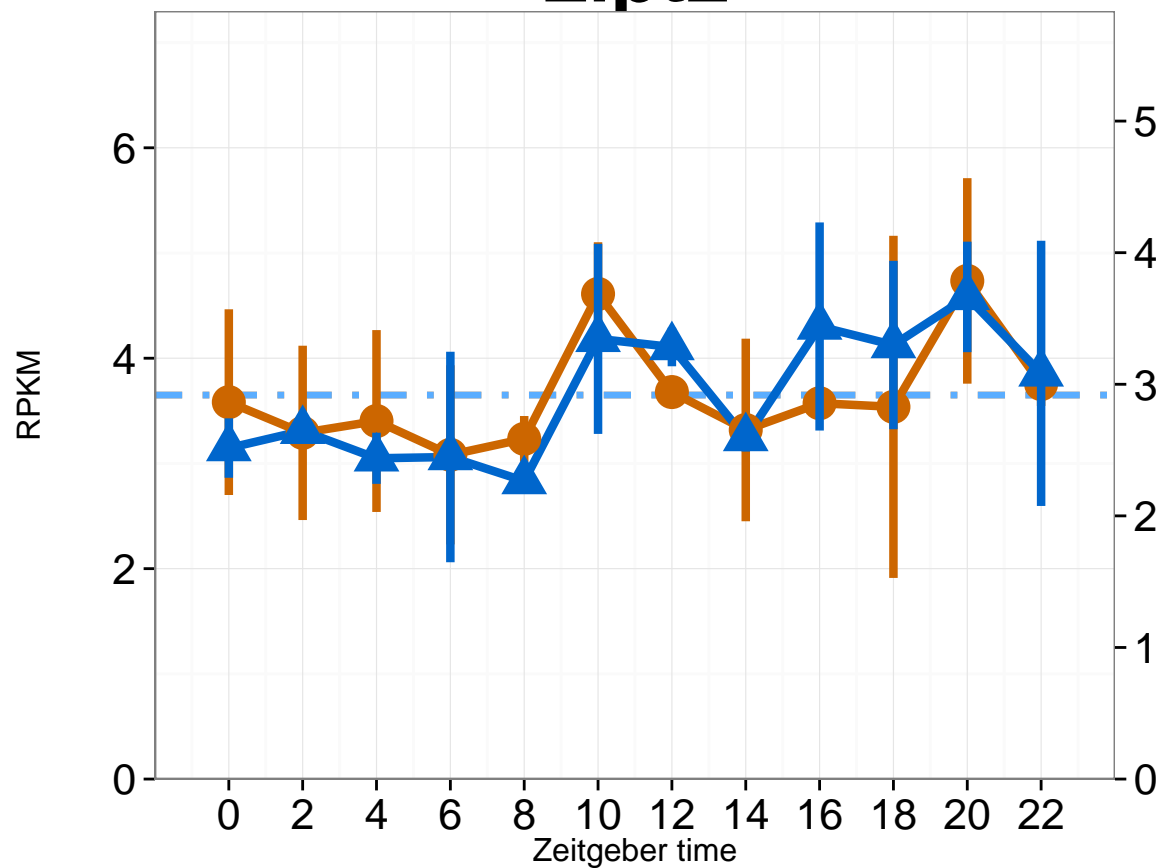

# Lipt2

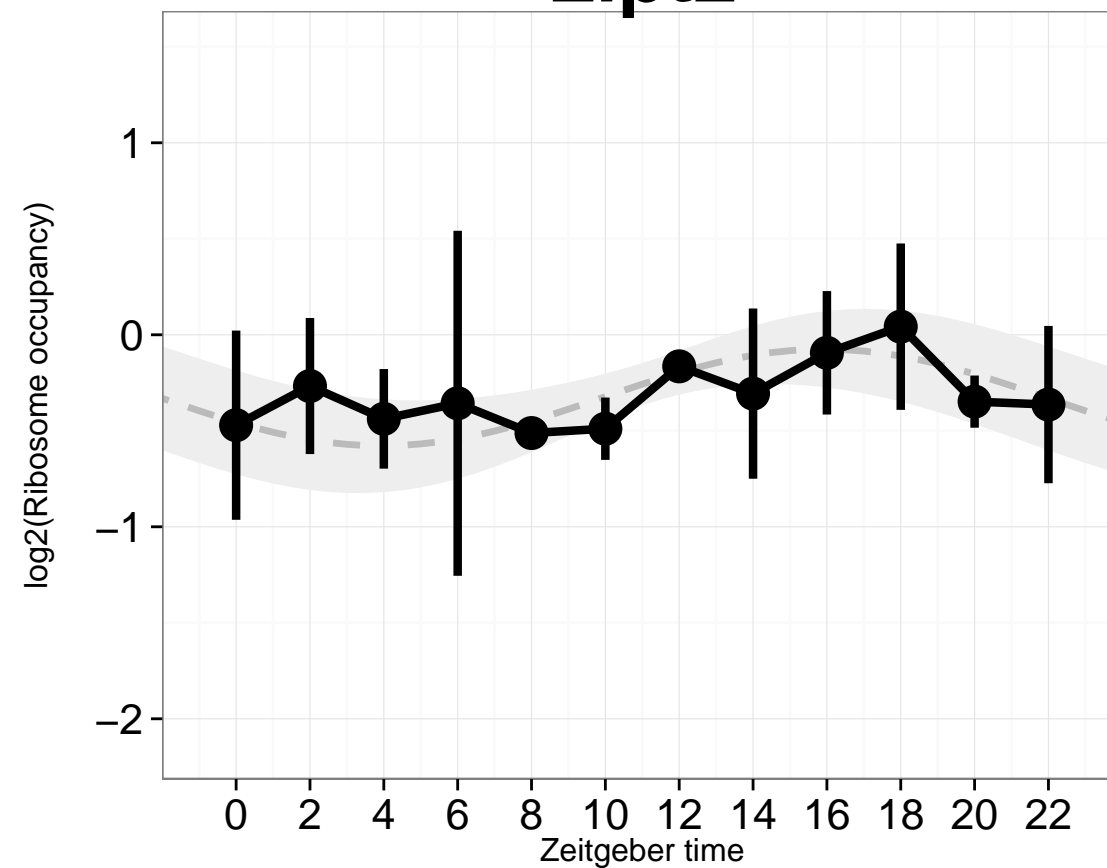

Supplement: SuppDataset_1.zip [file Lipt2_set_A.pdf › Supplemental Dataset 1/A-mRNA_nonrhyth_translation_nonrhyth/Lipt2_set_A.pdf]

## Lix1l

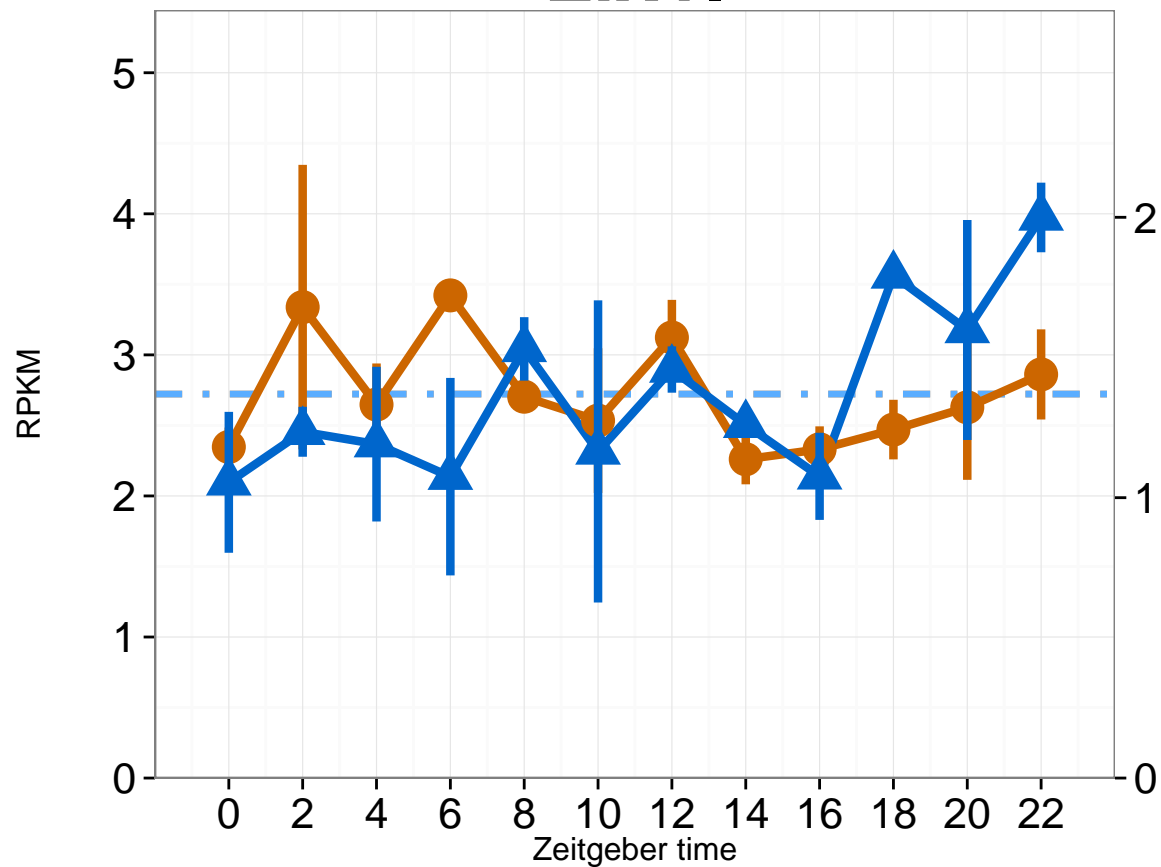

## Lix1l

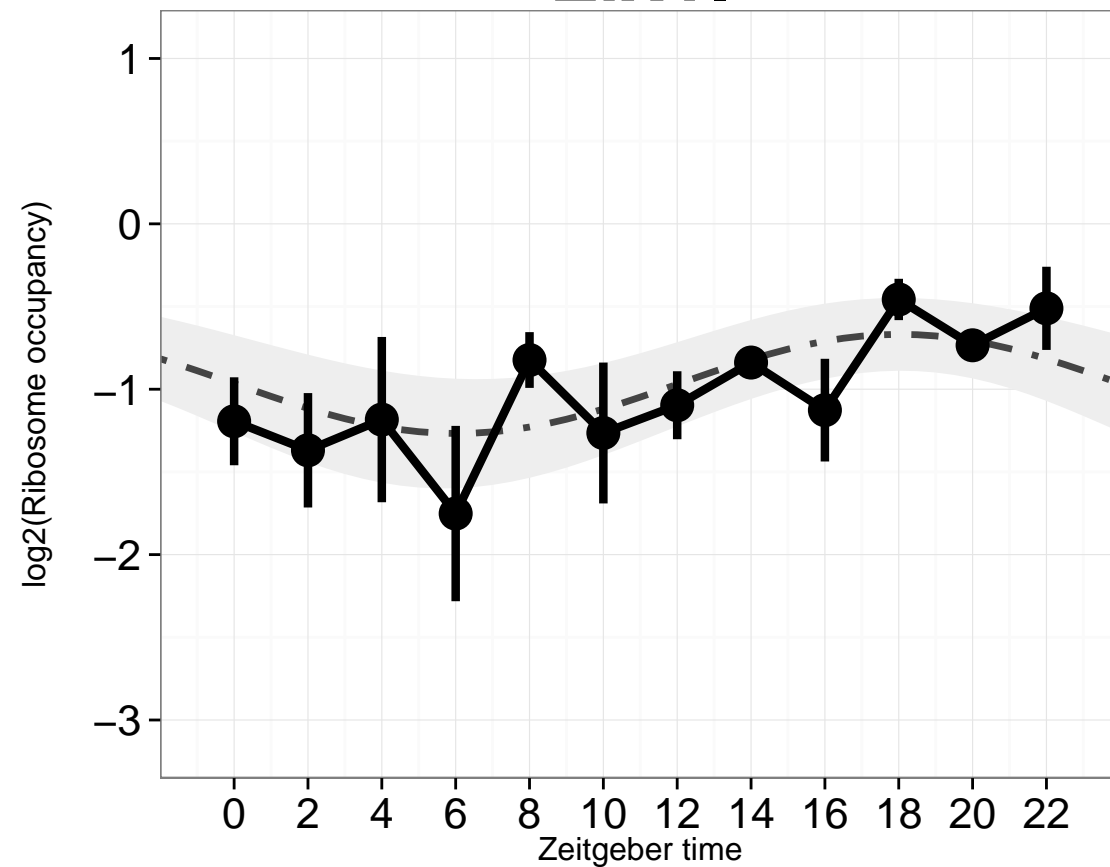

Supplement: SuppDataset_1.zip [file Lix1l_set_A.pdf › Supplemental Dataset 1/A-mRNA_nonrhyth_translation_nonrhyth/Lix1l_set_A.pdf]

## Llg1

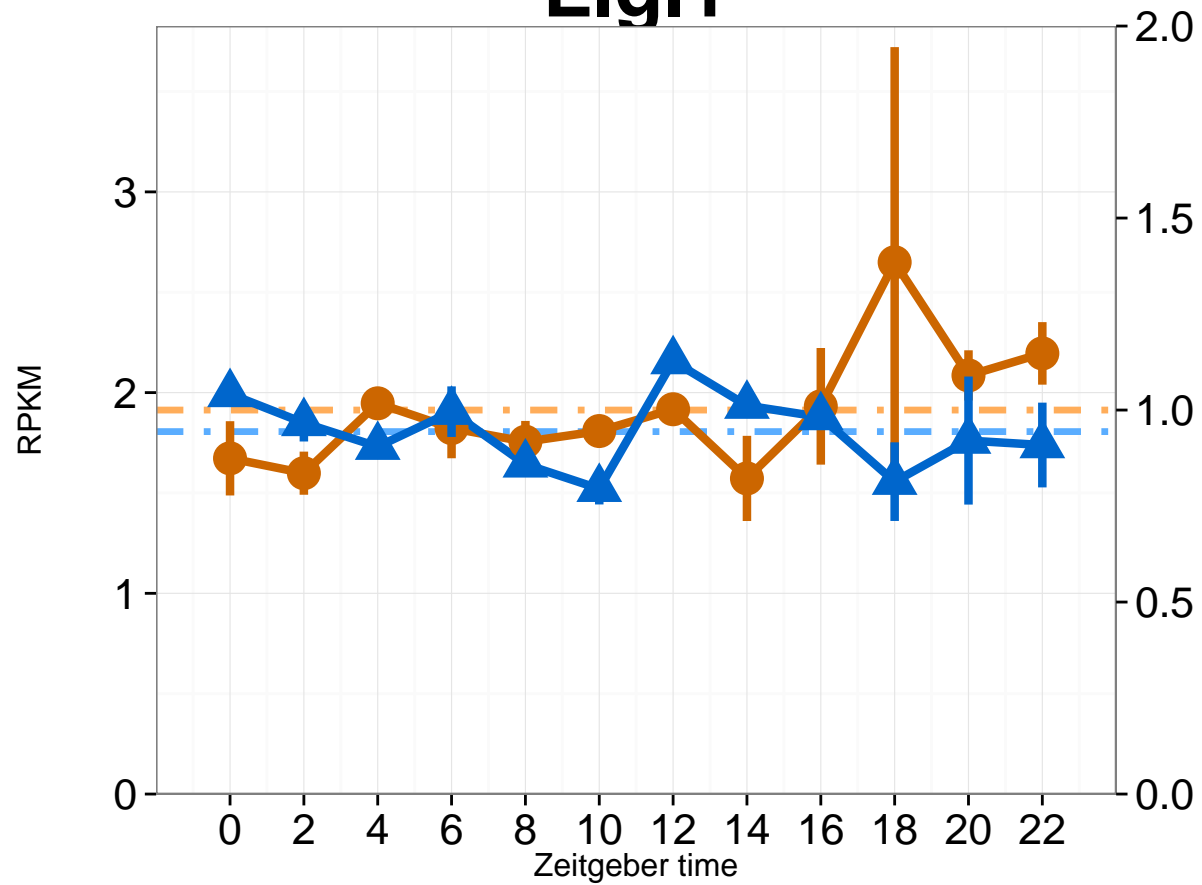

## Llg1

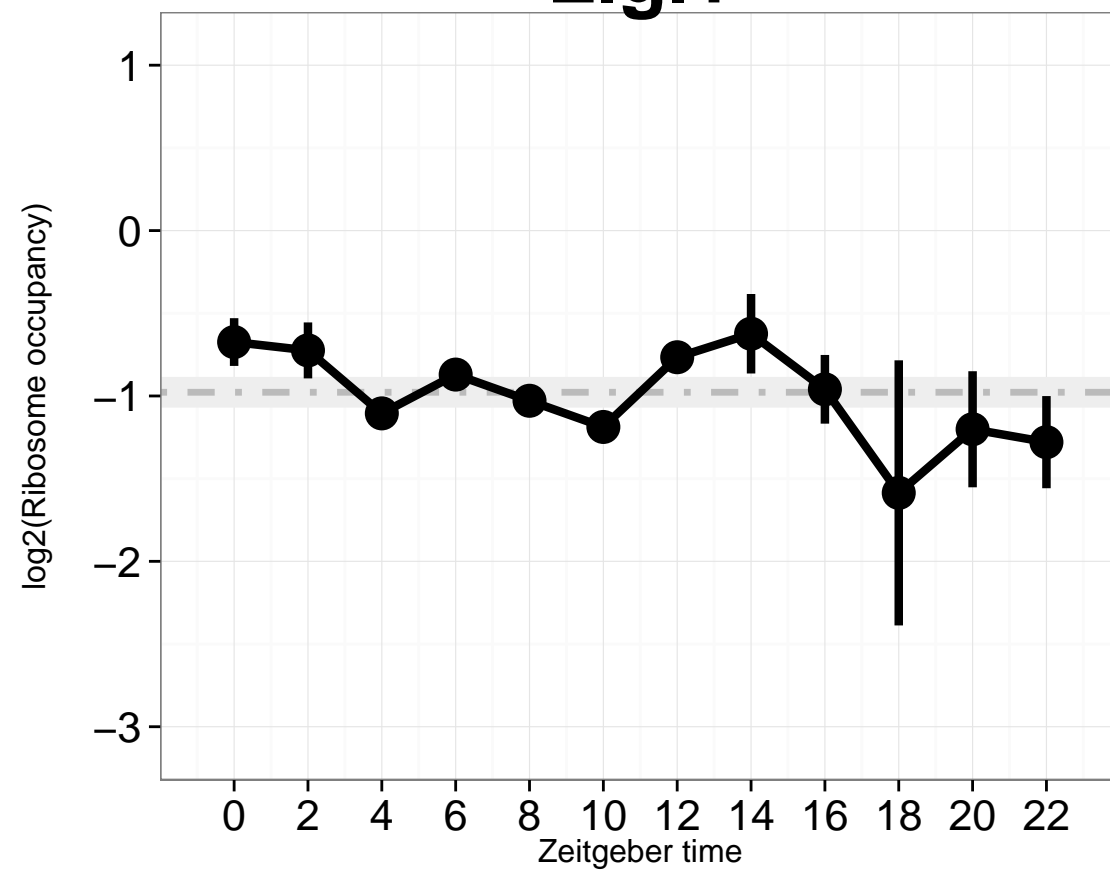

Supplement: SuppDataset_1.zip [file Llgl1_set_A.pdf › Supplemental Dataset 1/A-mRNA_nonrhyth_translation_nonrhyth/Llgl1_set_A.pdf]

## Lph

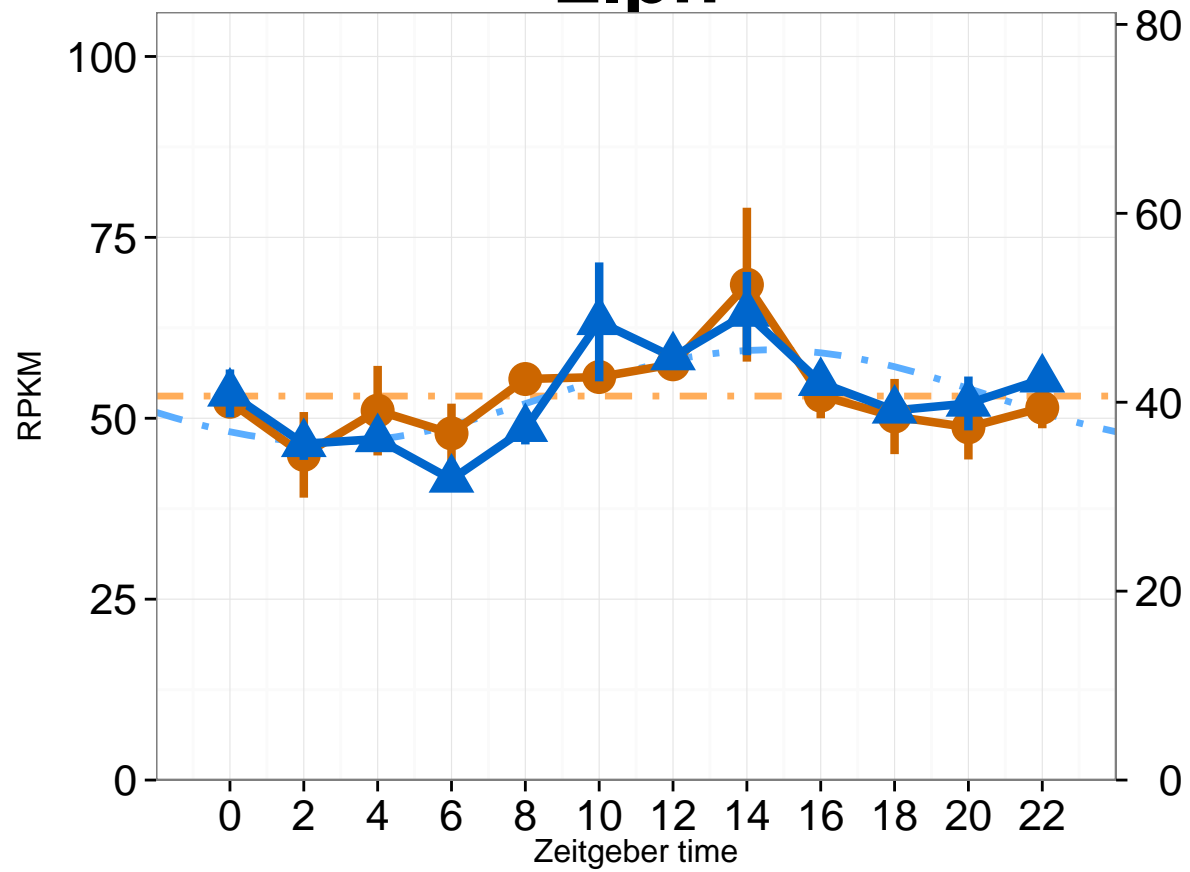

## Lph

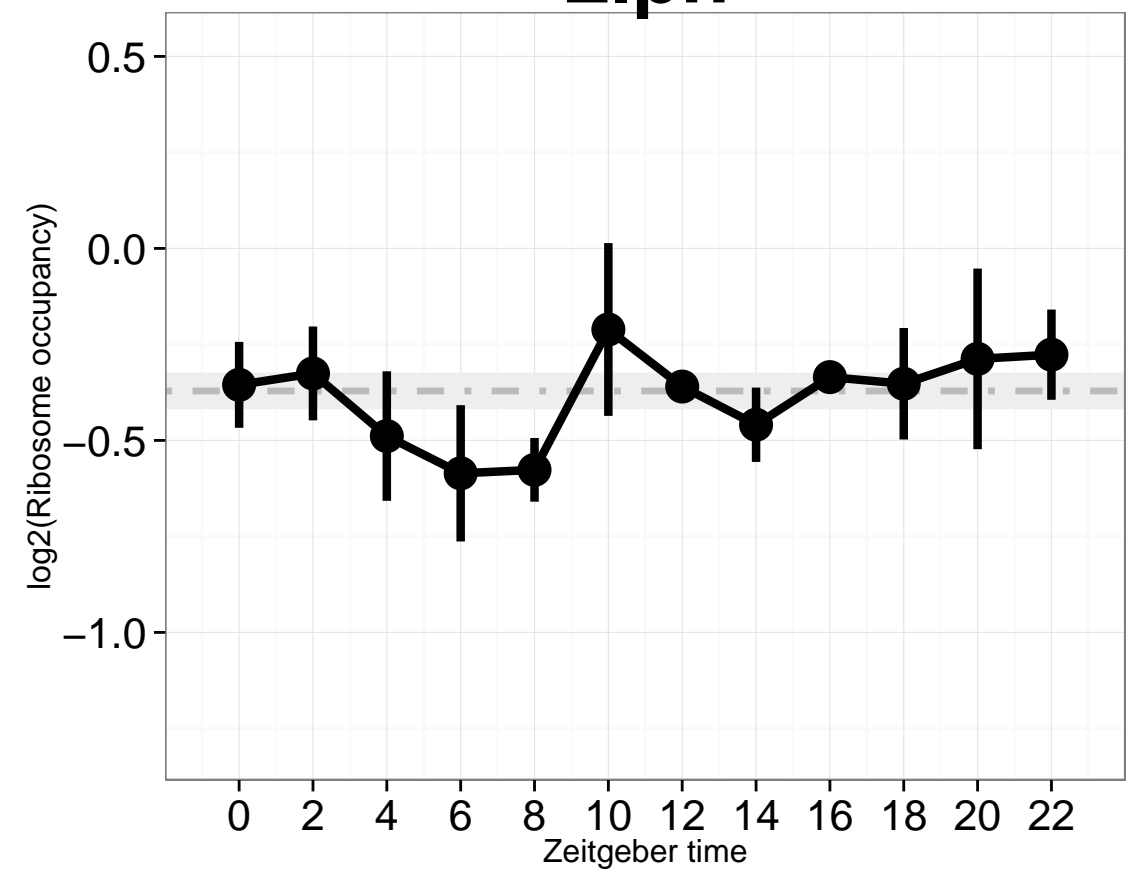

Supplement: SuppDataset_1.zip [file Llph_set_A.pdf › Supplemental Dataset 1/A-mRNA_nonrhyth_translation_nonrhyth/Llph_set_A.pdf]

## Lman1

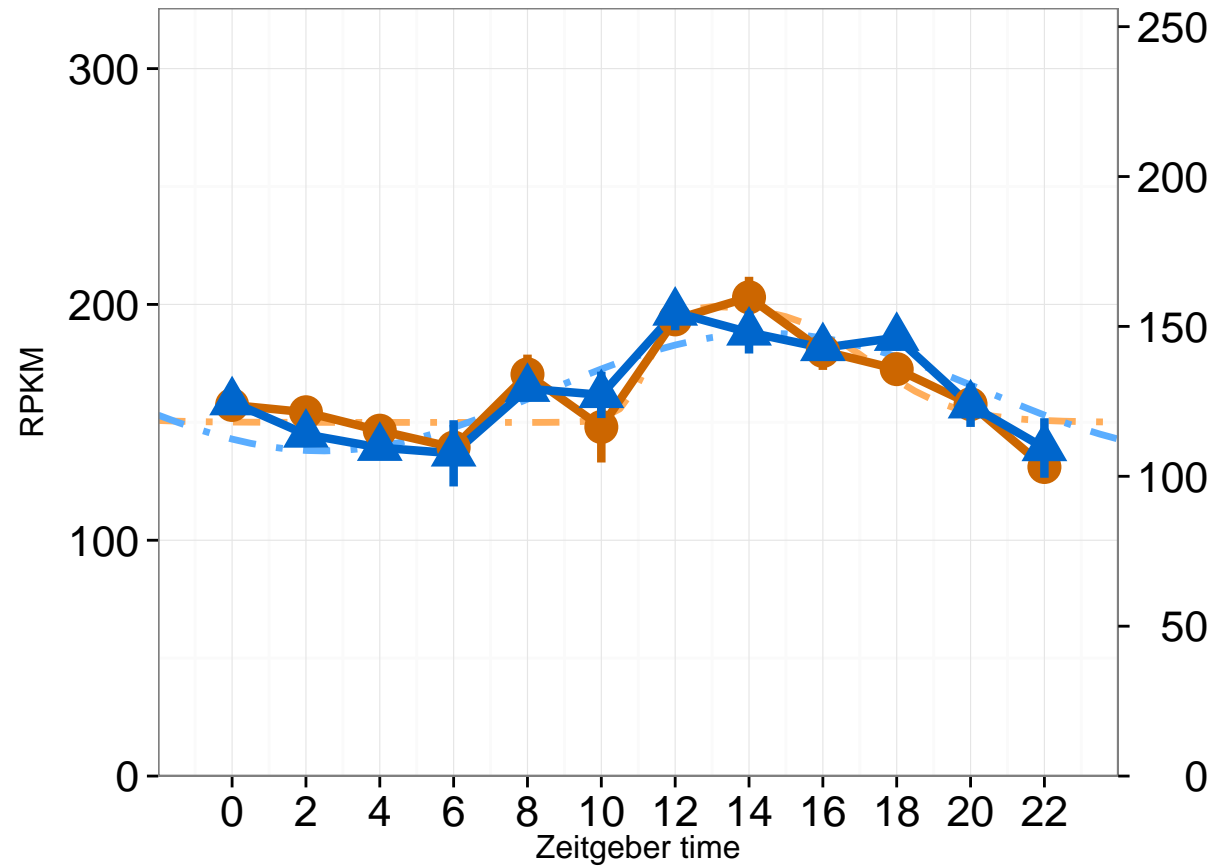

## Lman1

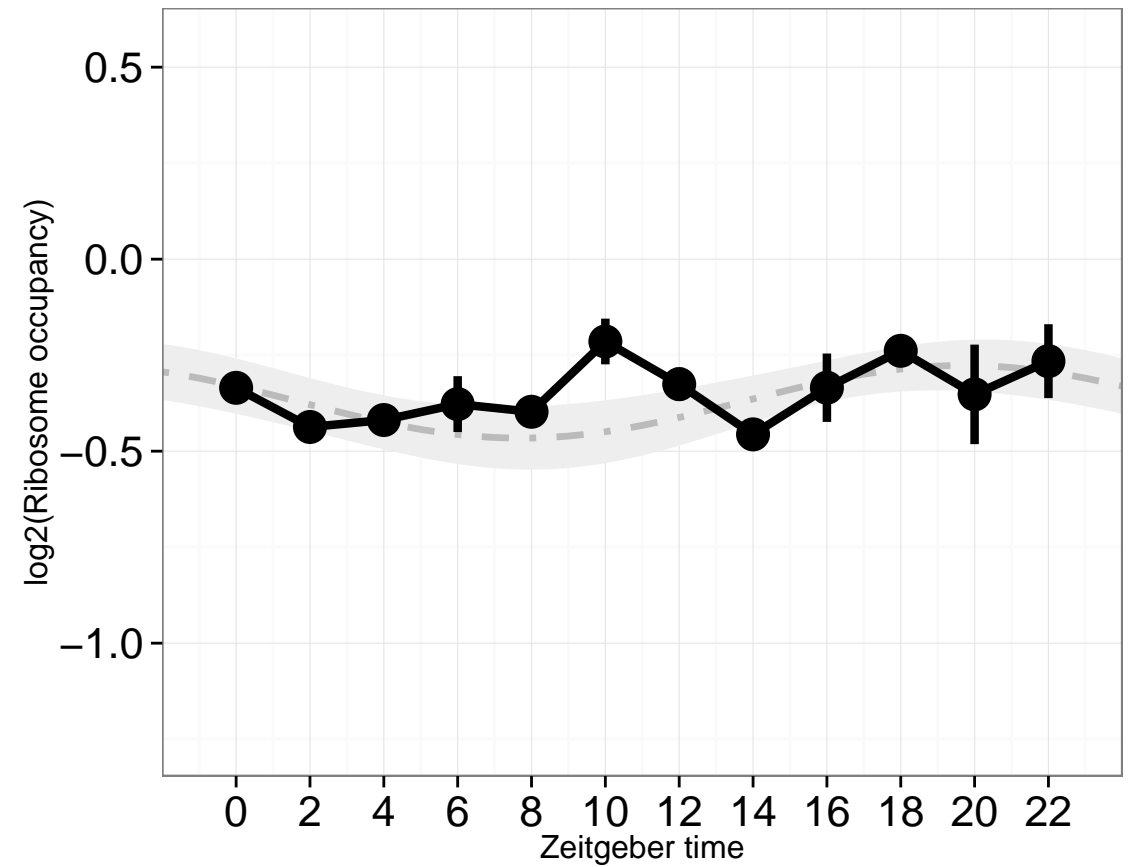

Supplement: SuppDataset_1.zip [file Lman1_set_A.pdf › Supplemental Dataset 1/A-mRNA_nonrhyth_translation_nonrhyth/Lman1_set_A.pdf]

## Lman2

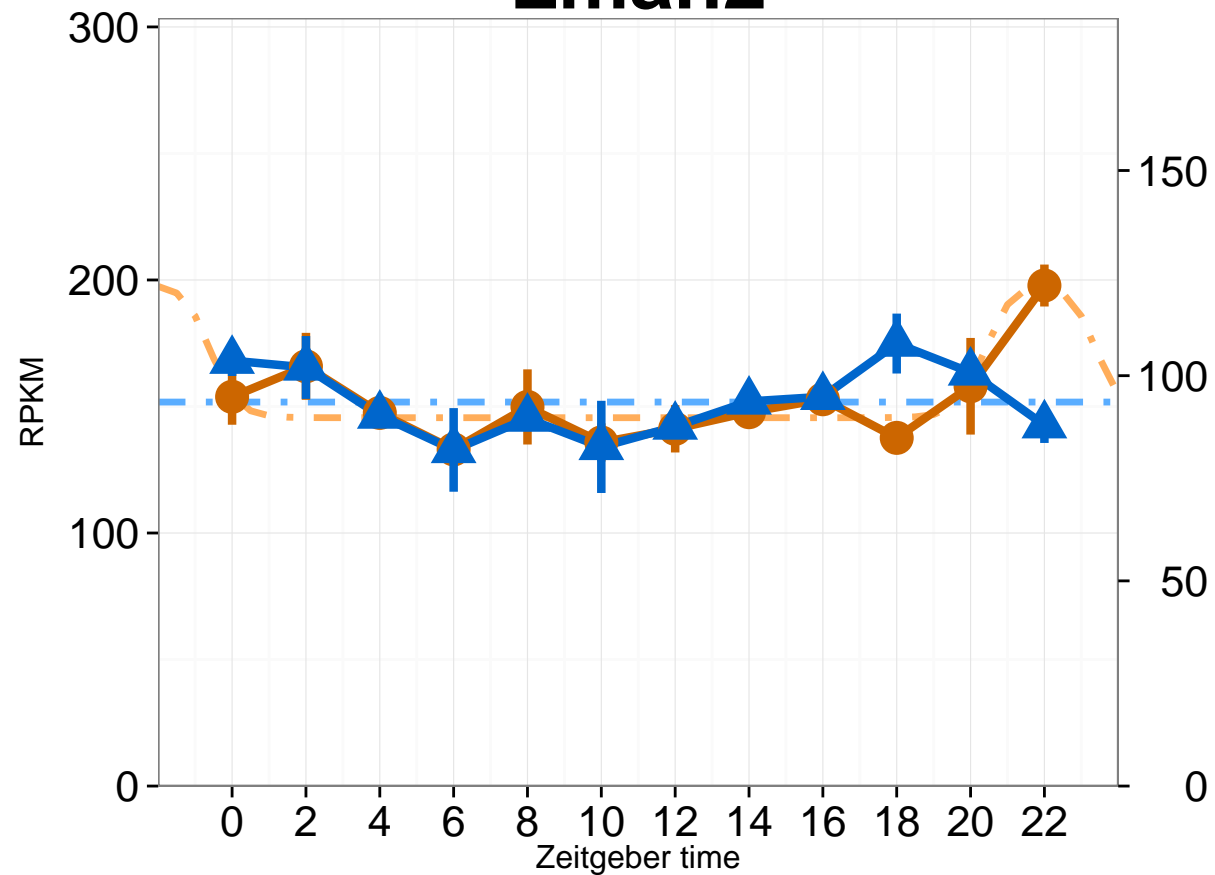

## Lman2

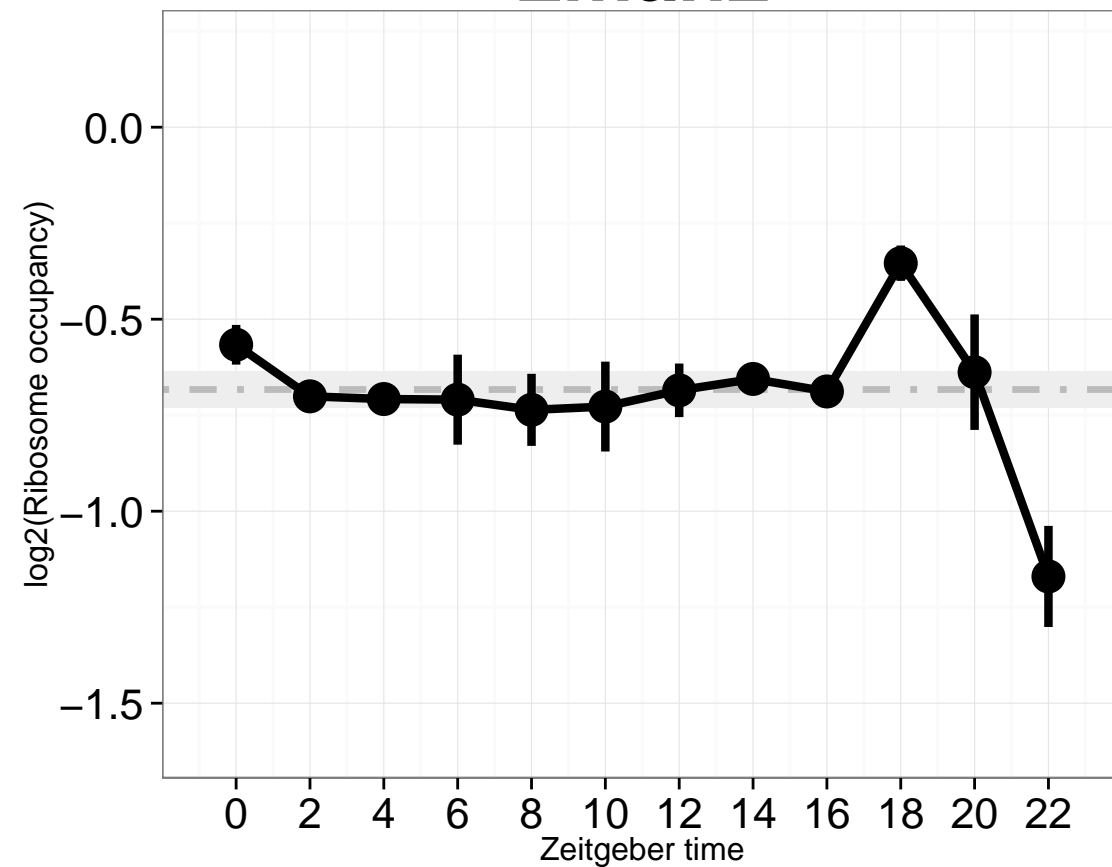

Supplement: SuppDataset_1.zip [file Lman2_set_A.pdf › Supplemental Dataset 1/A-mRNA_nonrhyth_translation_nonrhyth/Lman2_set_A.pdf]

## Lman2l

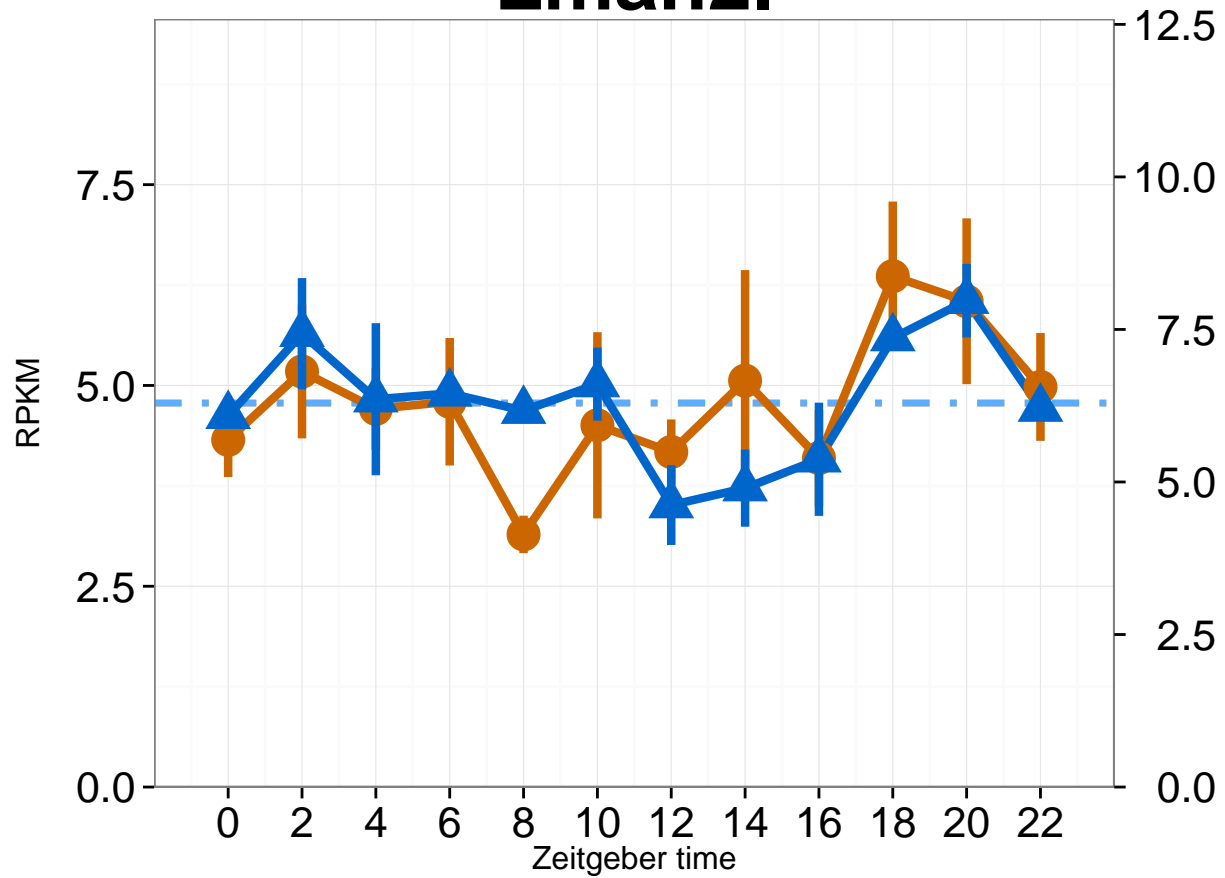

## Lman2l

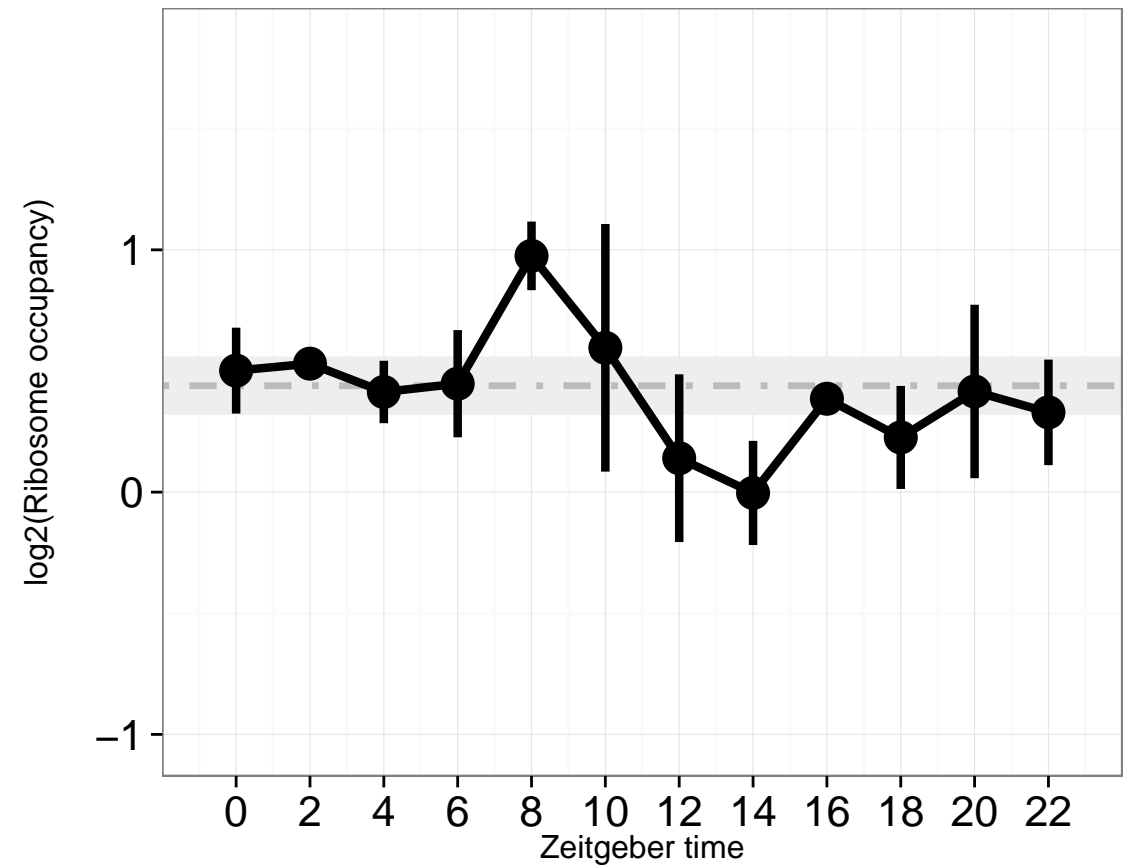

Supplement: SuppDataset_1.zip [file Lman2l_set_A.pdf › Supplemental Dataset 1/A-mRNA_nonrhyth_translation_nonrhyth/Lman2l_set_A.pdf]

# Lmbr1

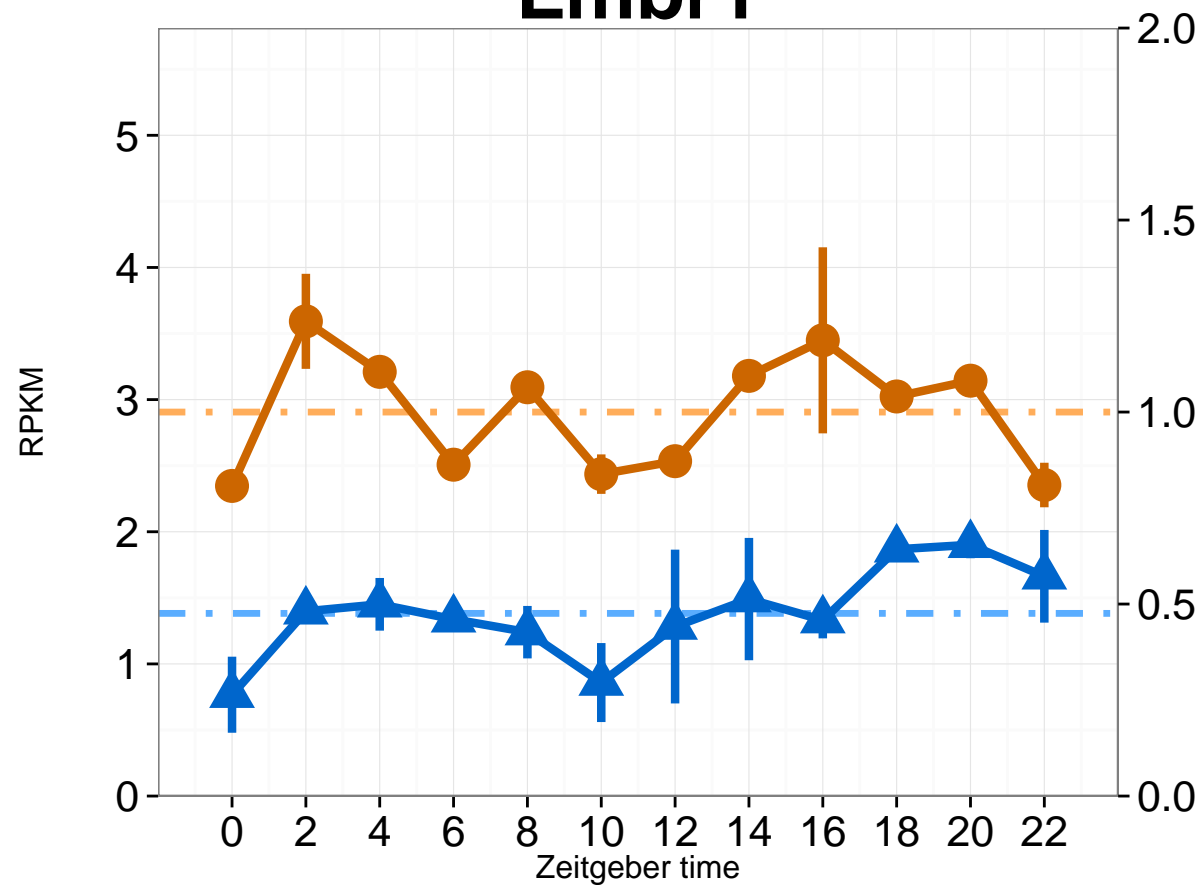

# Lmbr1

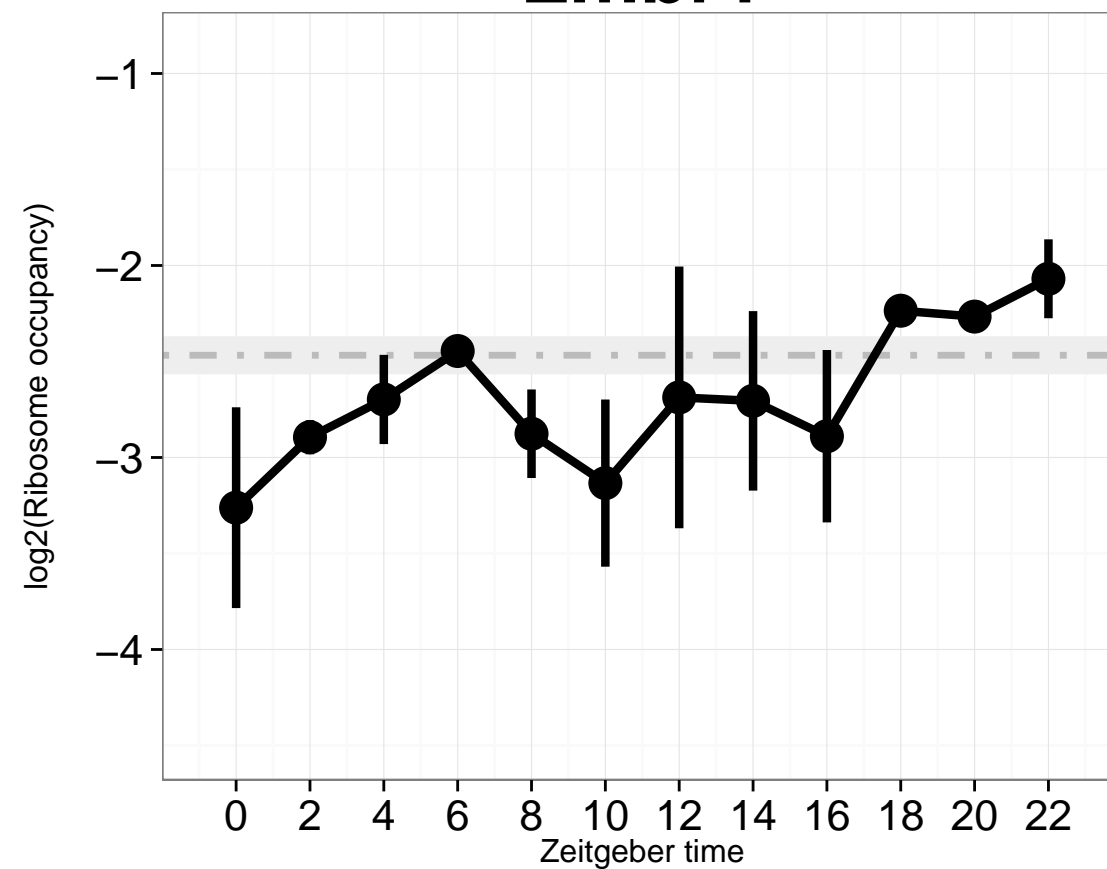

Supplement: SuppDataset_1.zip [file Lmbr1_set_A.pdf › Supplemental Dataset 1/A-mRNA_nonrhyth_translation_nonrhyth/Lmbr1_set_A.pdf]

## Lmbr1l

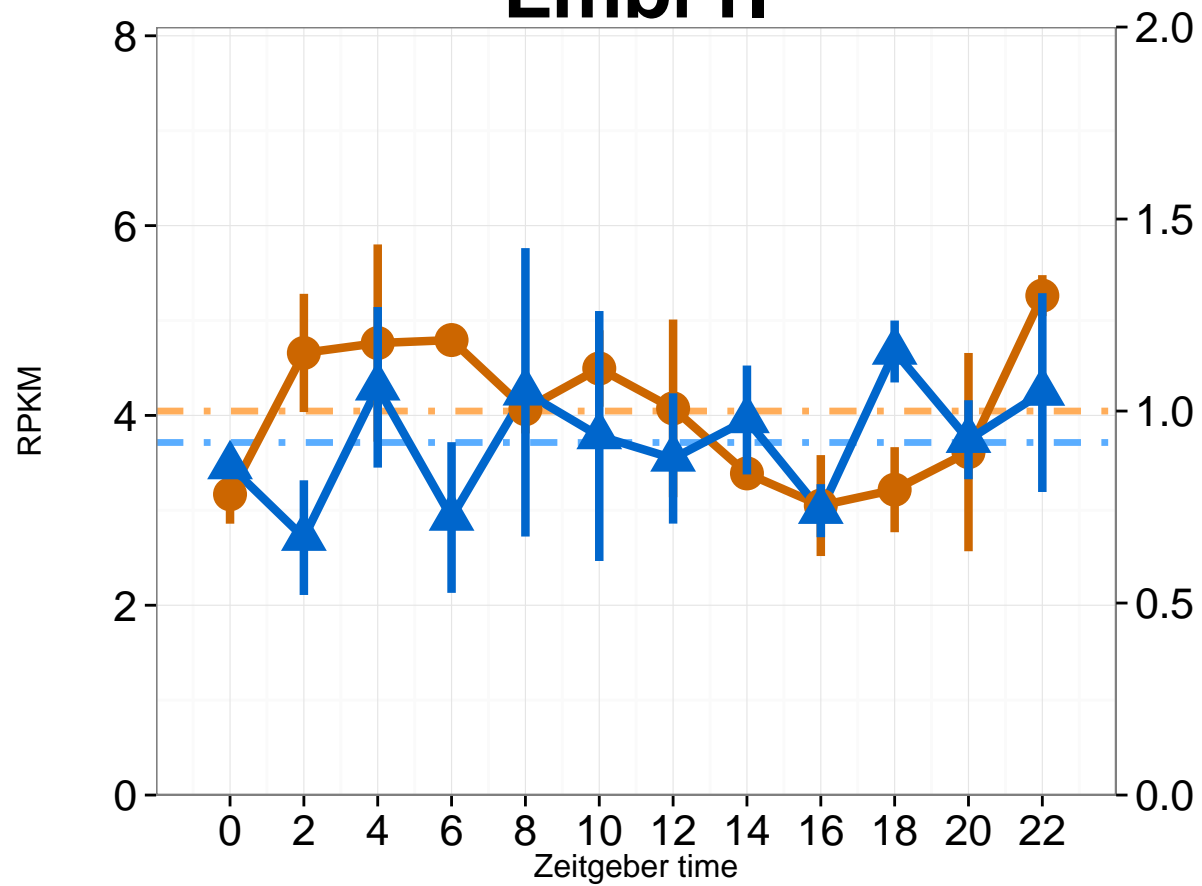

## Lmbr1l

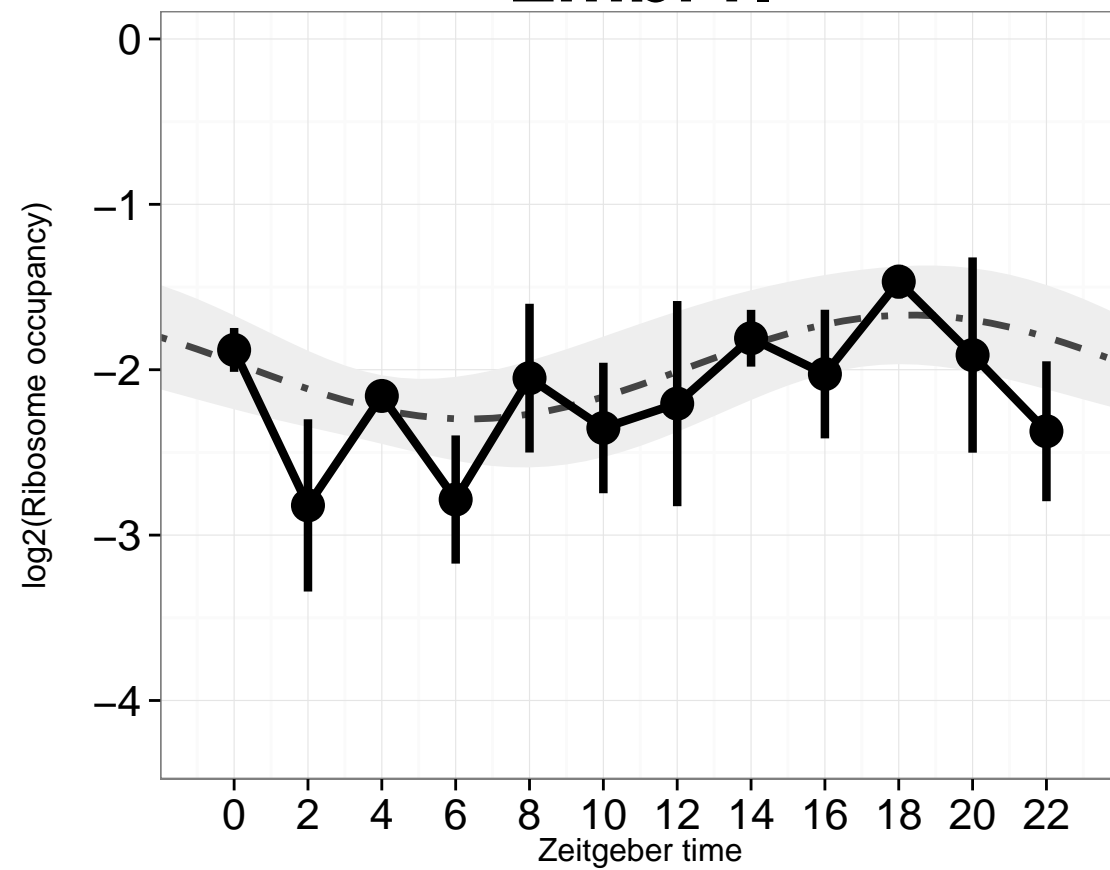

Supplement: SuppDataset_1.zip [file Lmbr1l_set_A.pdf › Supplemental Dataset 1/A-mRNA_nonrhyth_translation_nonrhyth/Lmbr1l_set_A.pdf]

# Lmbrd1

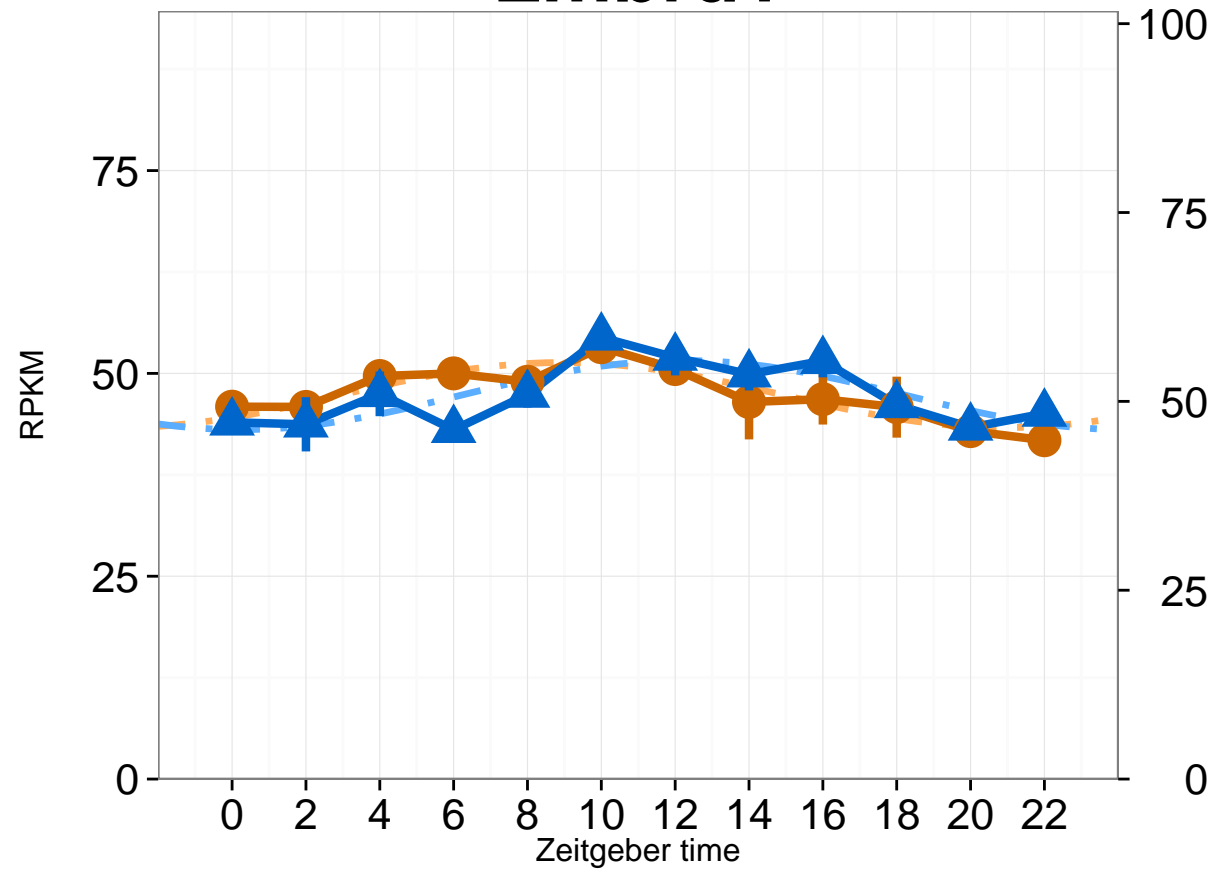

# Lmbrd1

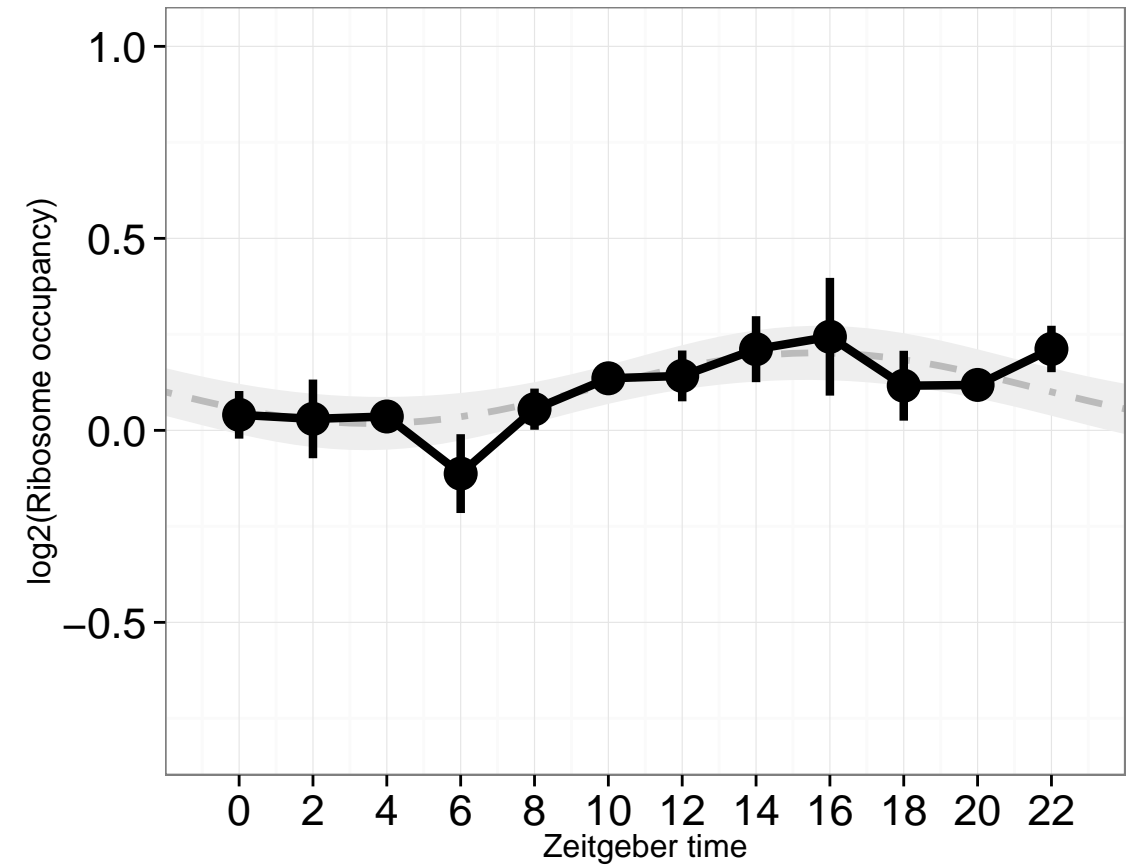

Supplement: SuppDataset_1.zip [file Lmbrd1_set_A.pdf › Supplemental Dataset 1/A-mRNA_nonrhyth_translation_nonrhyth/Lmbrd1_set_A.pdf]

## Lmbrd2

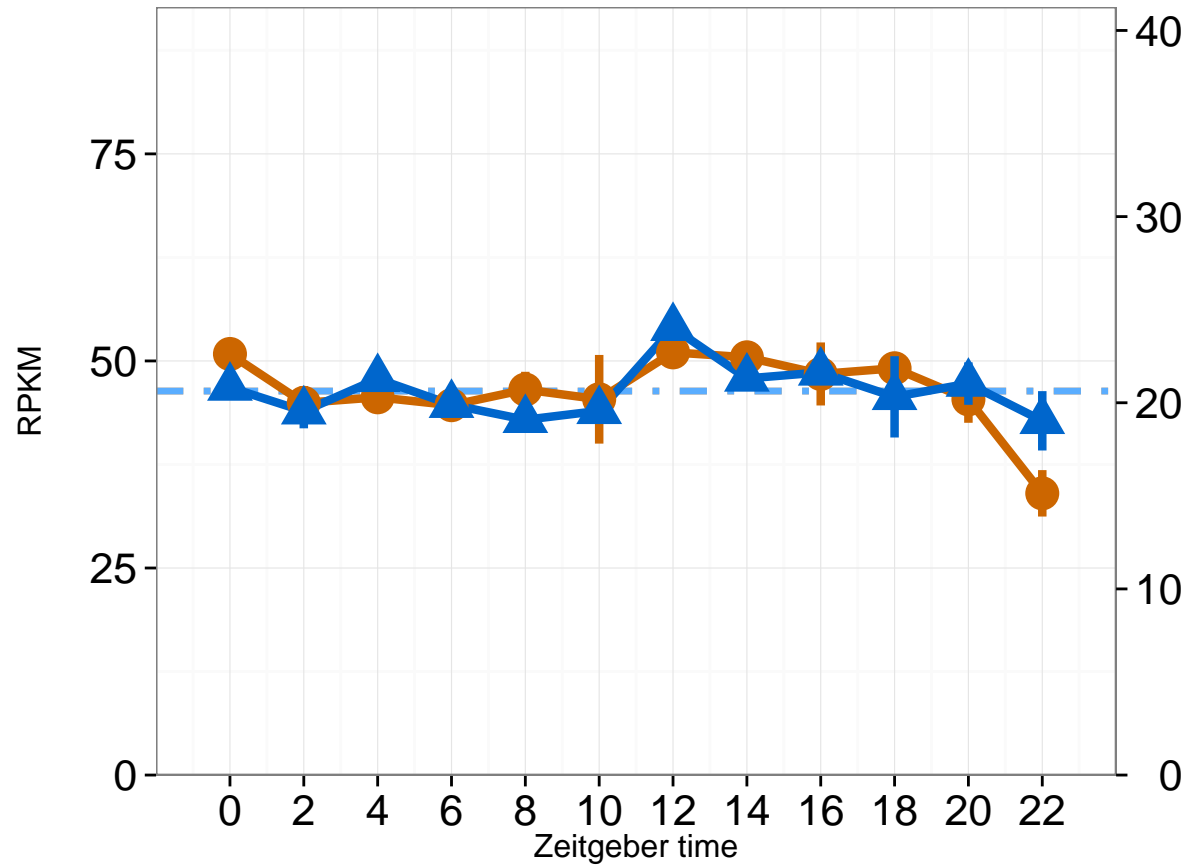

## Lmbrd2

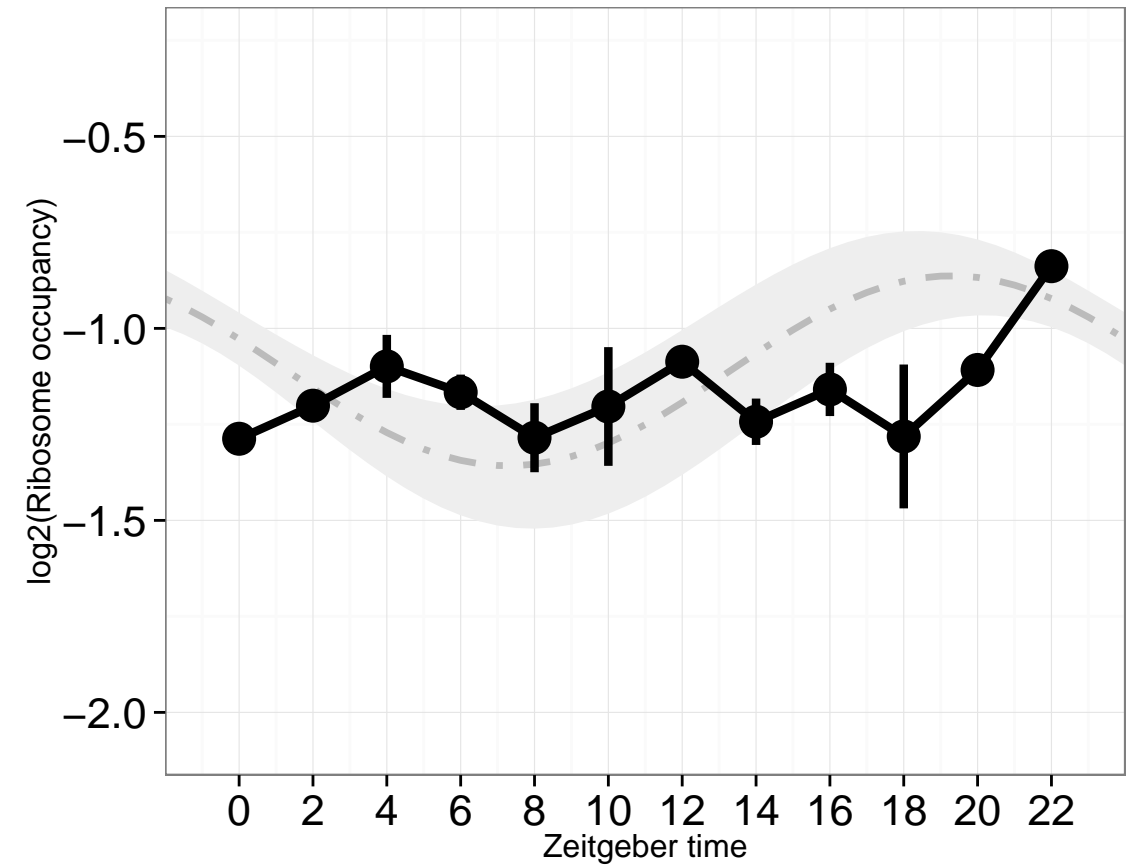

Supplement: SuppDataset_1.zip [file Lmbrd2_set_A.pdf › Supplemental Dataset 1/A-mRNA_nonrhyth_translation_nonrhyth/Lmbrd2_set_A.pdf]

**Lmcd1 TR**

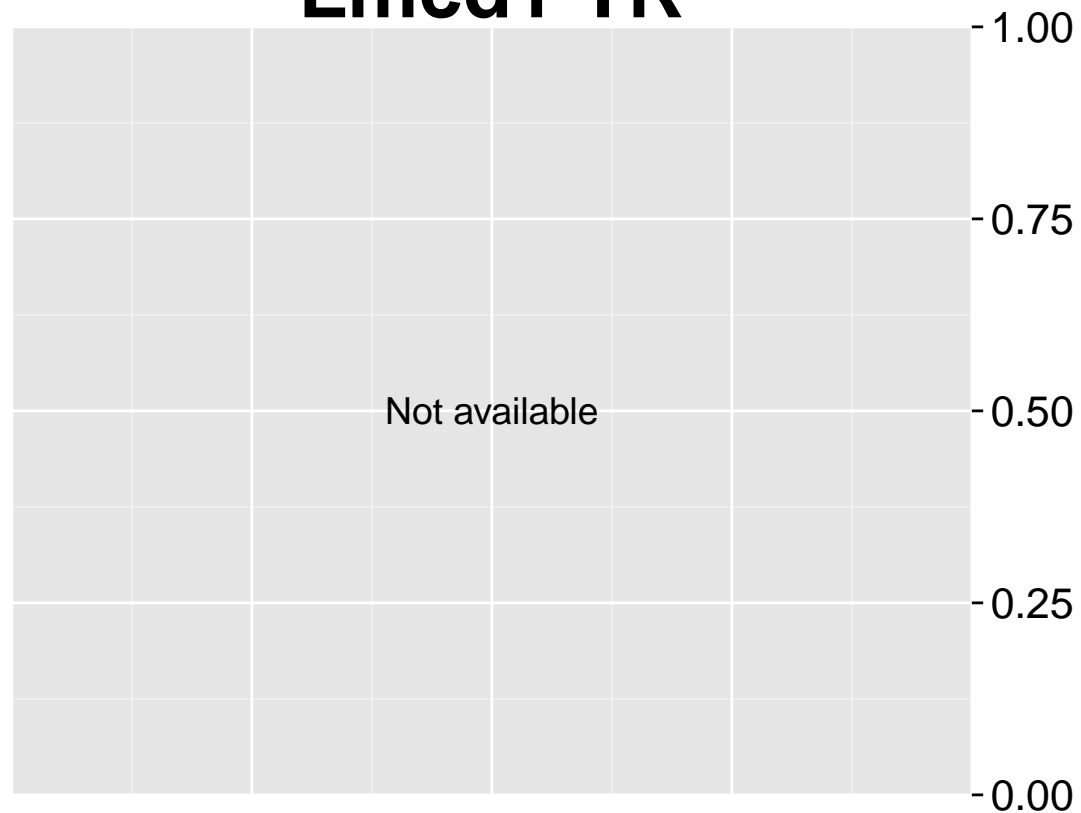

**Lmcd1 log2(Ribosome occupancy**

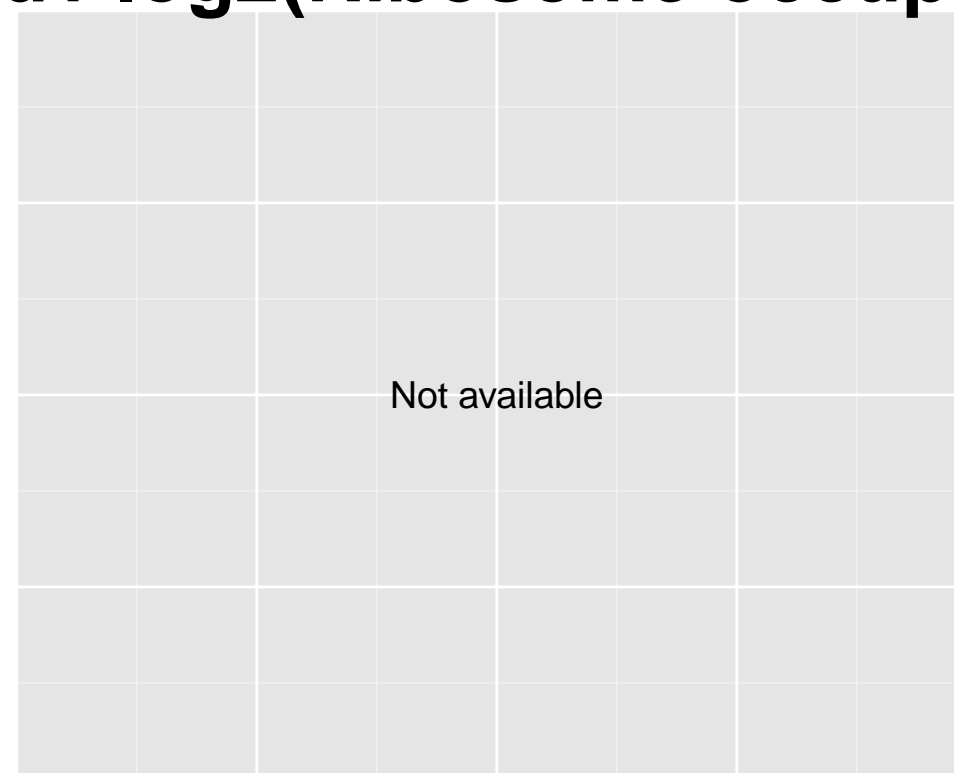

Supplement: SuppDataset_1.zip [file Lmcd1_set_A.pdf › Supplemental Dataset 1/A-mRNA_nonrhyth_translation_nonrhyth/Lmcd1_set_A.pdf]

# Lmf1

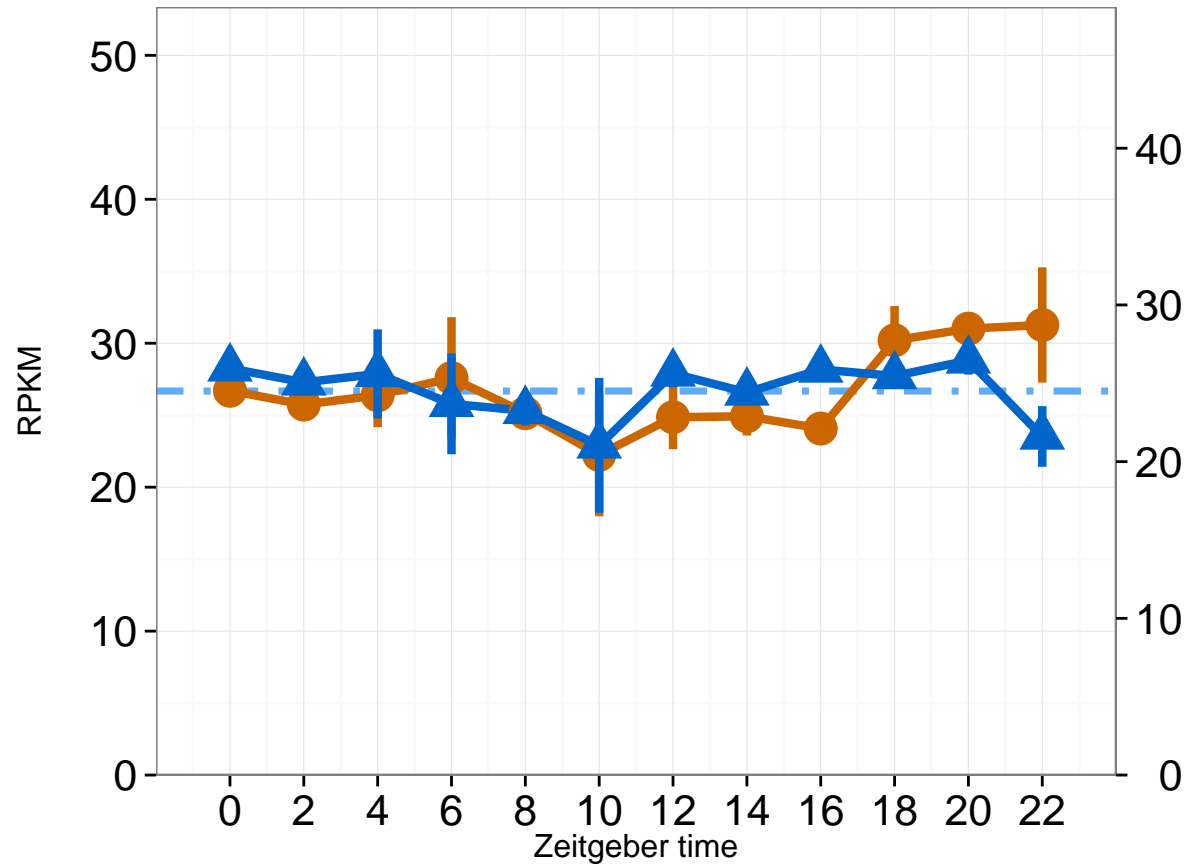

# Lmf1

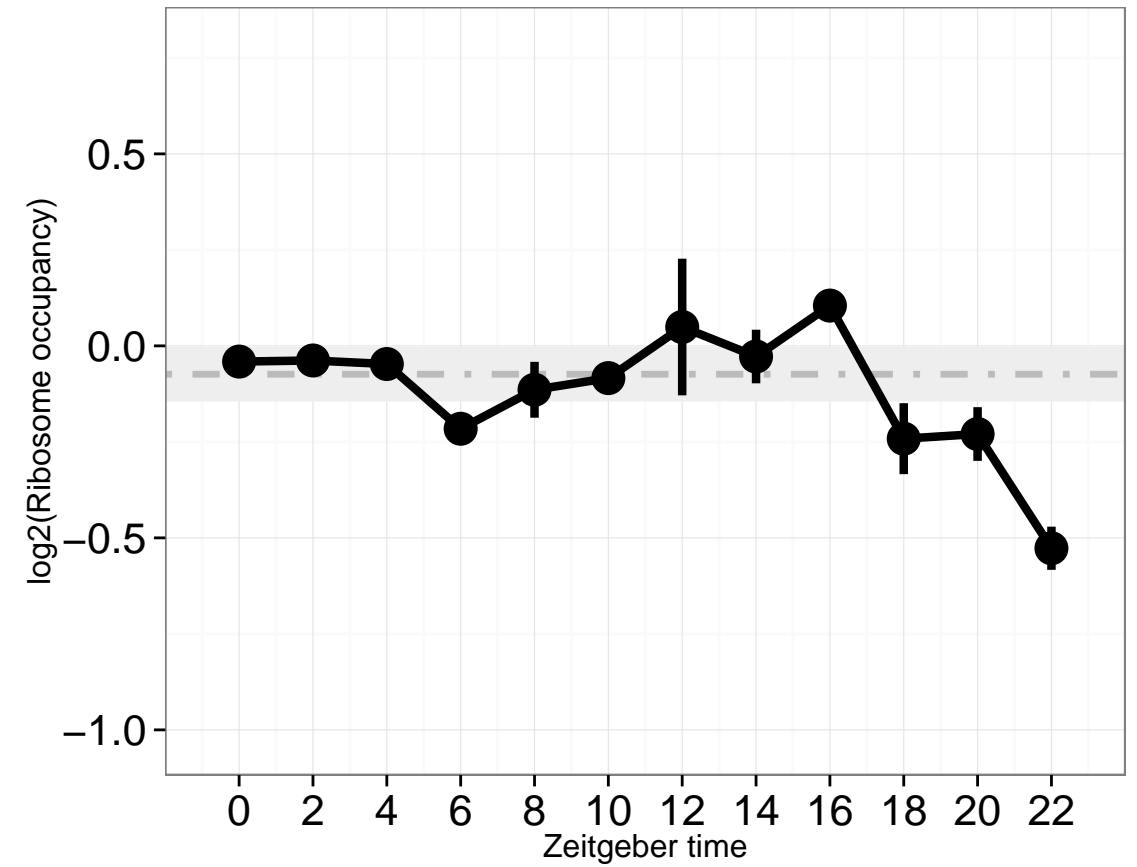

Supplement: SuppDataset_1.zip [file Lmf1_set_A.pdf › Supplemental Dataset 1/A-mRNA_nonrhyth_translation_nonrhyth/Lmf1_set_A.pdf]

# Lmna

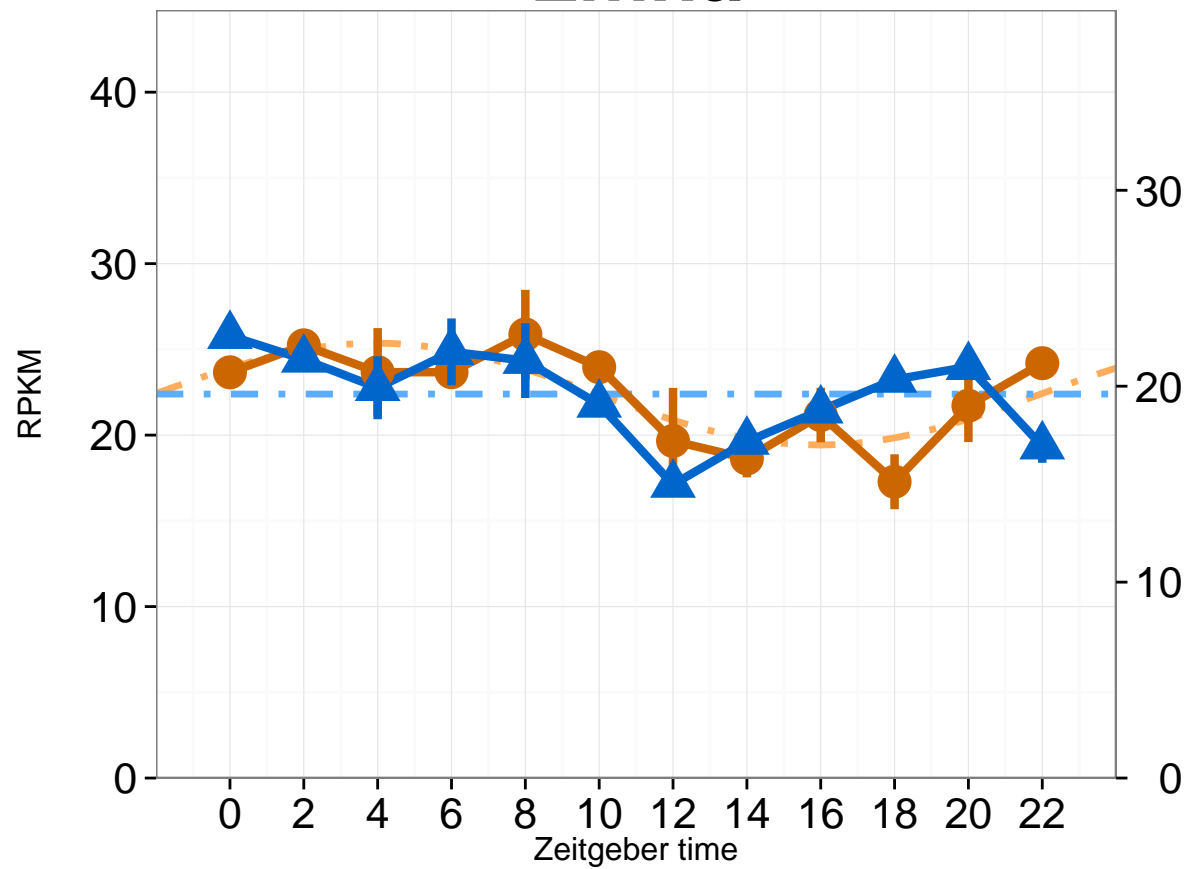

# Lmna

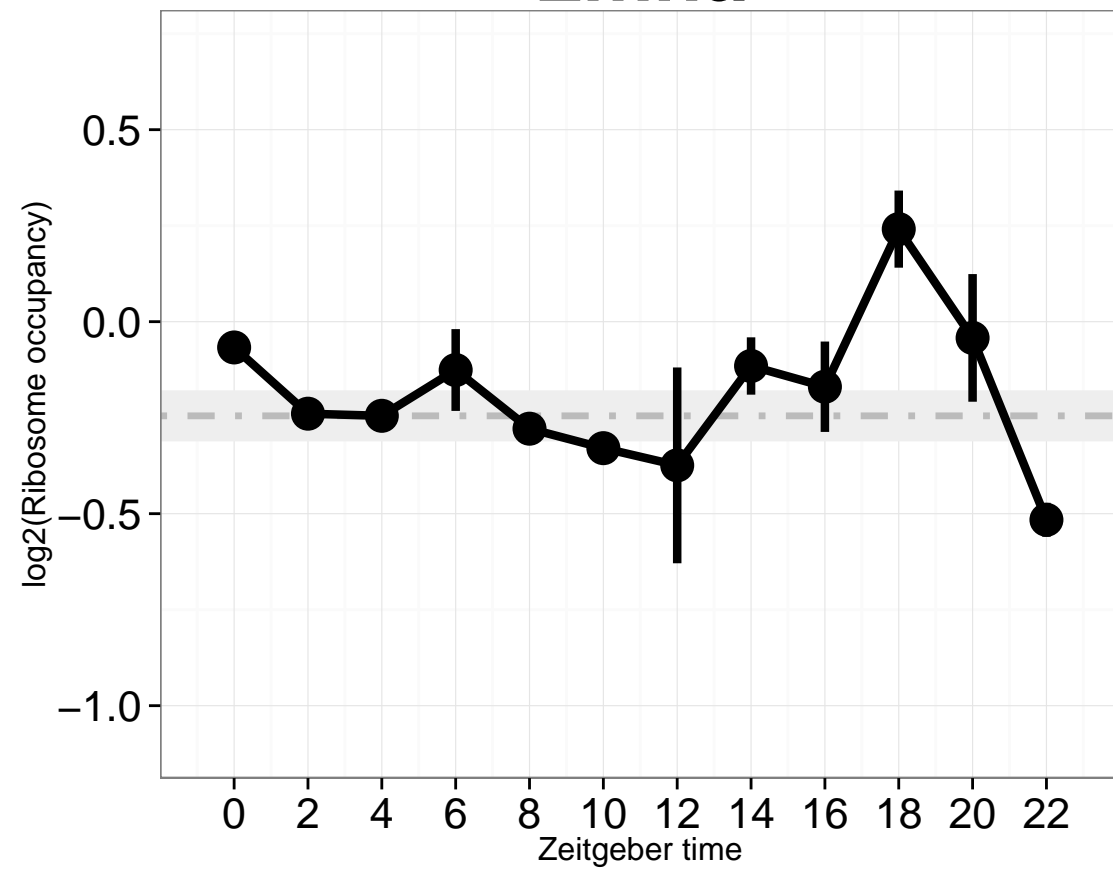

Supplement: SuppDataset_1.zip [file Lmna_set_A.pdf › Supplemental Dataset 1/A-mRNA_nonrhyth_translation_nonrhyth/Lmna_set_A.pdf]

## Lmnb1

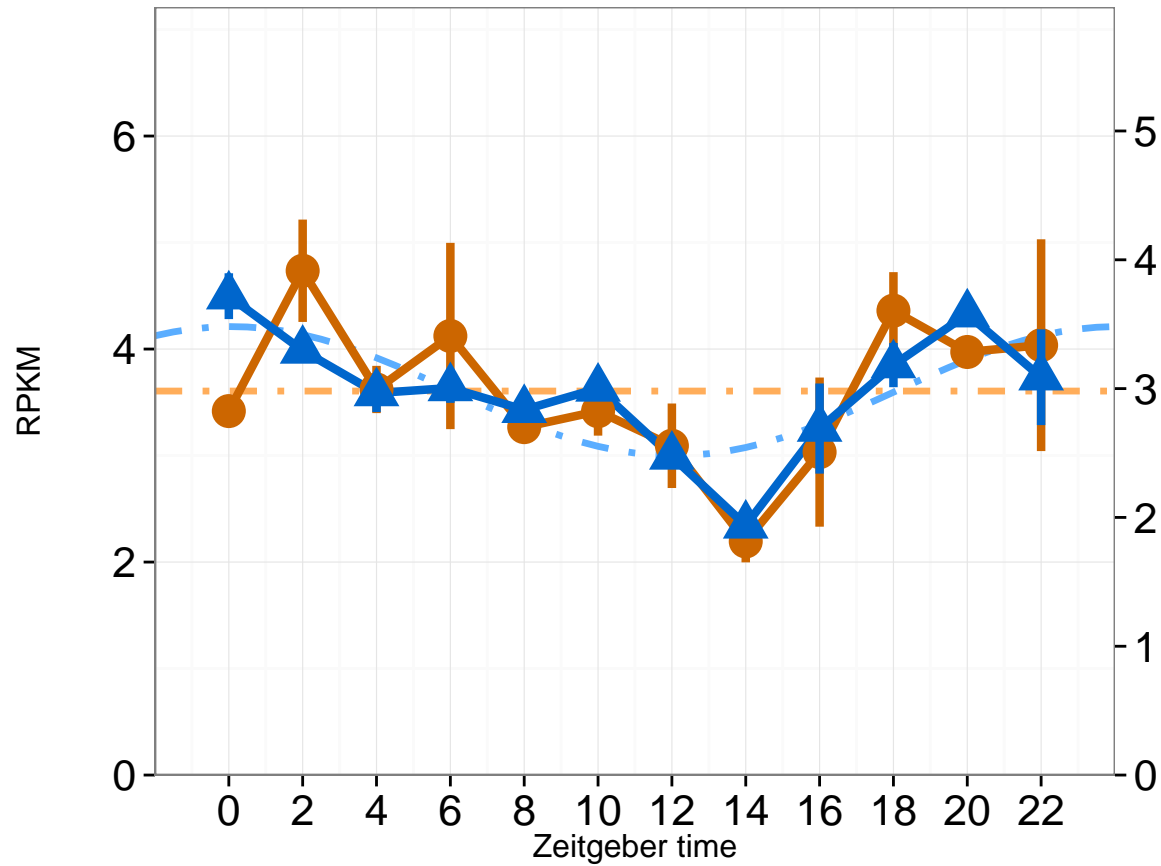

## Lmnb1

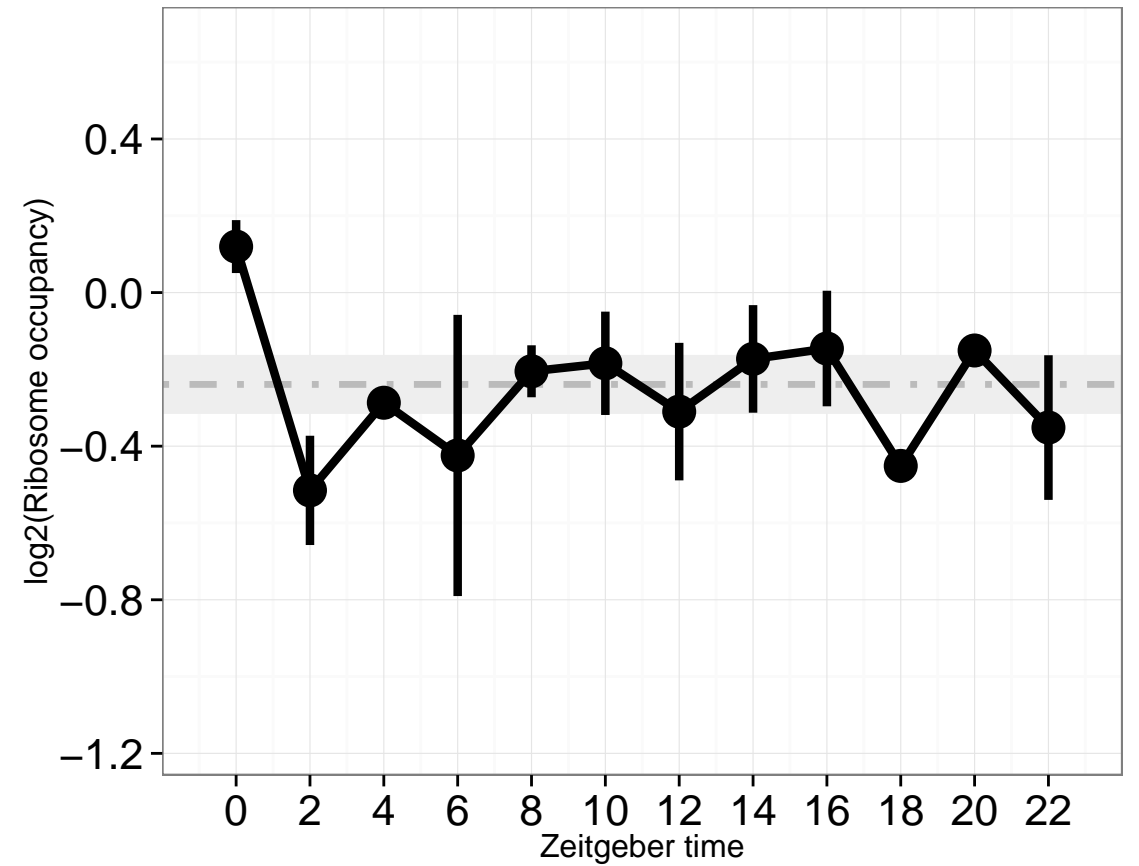

Supplement: SuppDataset_1.zip [file Lmnb1_set_A.pdf › Supplemental Dataset 1/A-mRNA_nonrhyth_translation_nonrhyth/Lmnb1_set_A.pdf]

## Lmo2

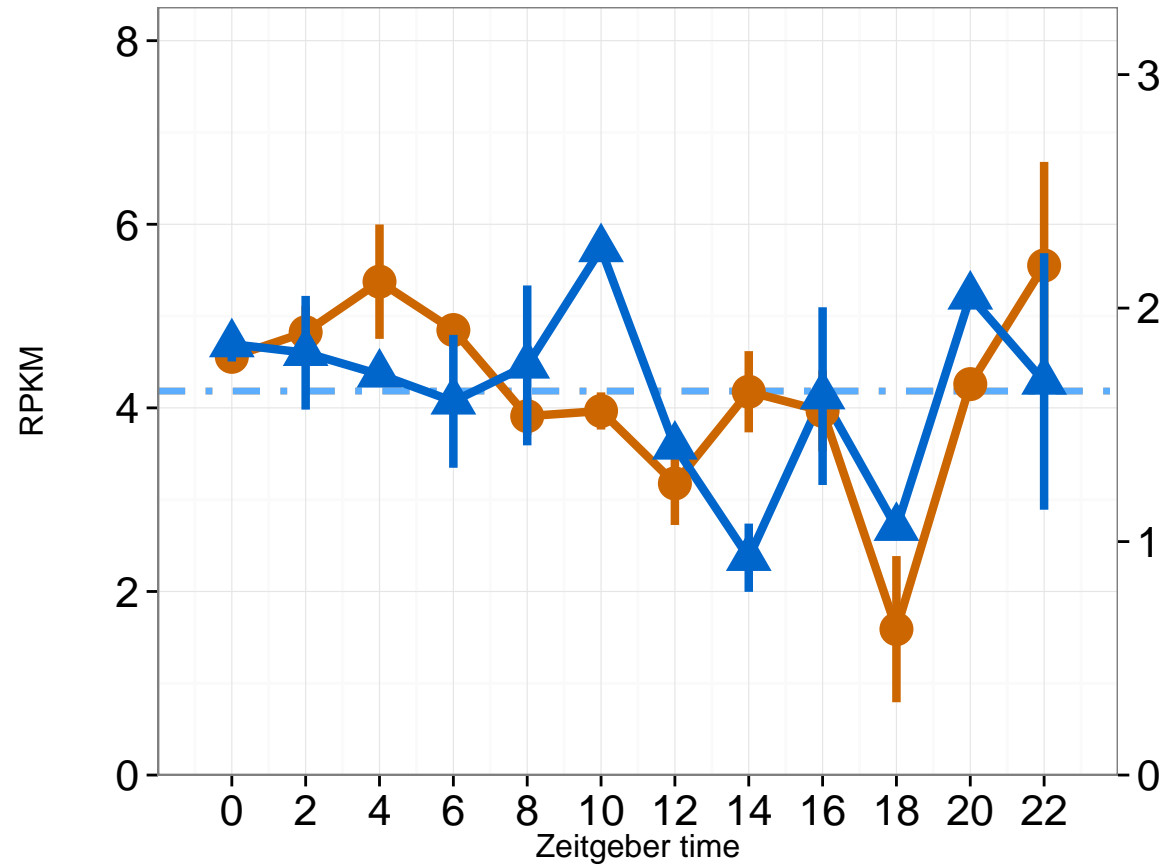

## Lmo2

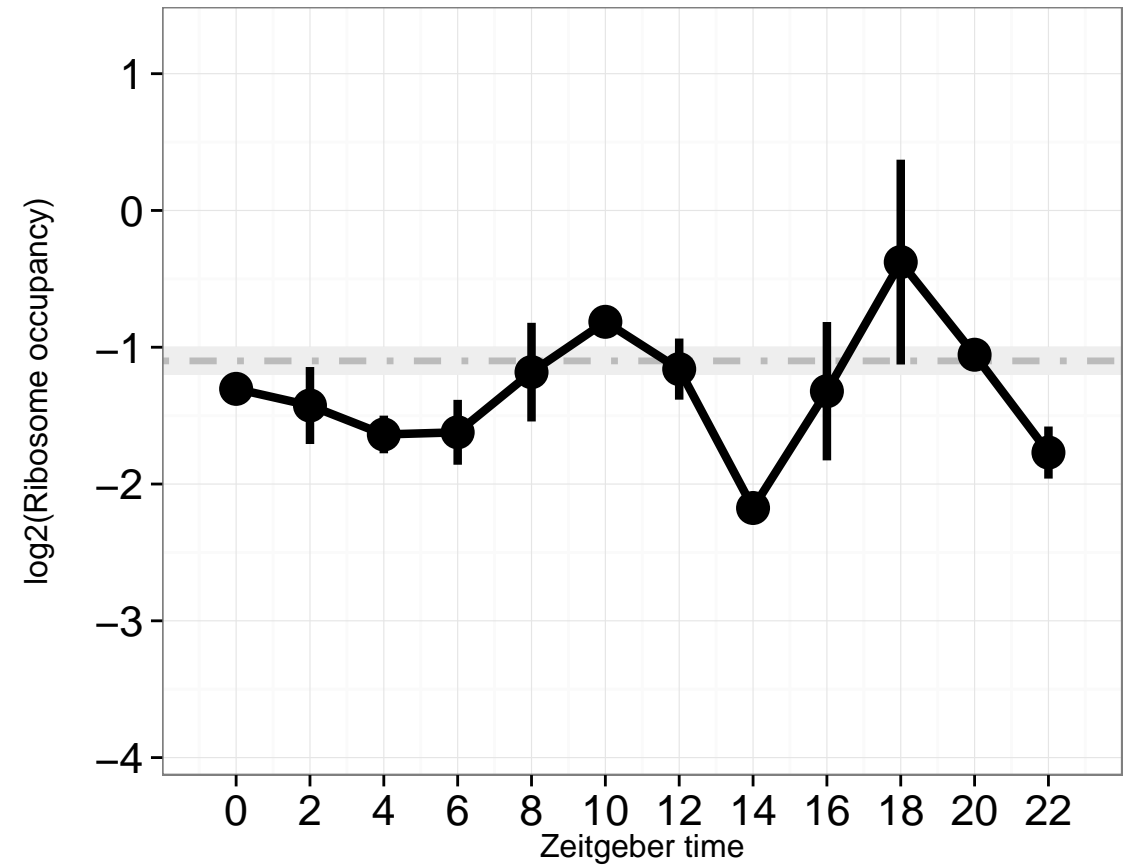

Supplement: SuppDataset_1.zip [file Lmo2_set_A.pdf › Supplemental Dataset 1/A-mRNA_nonrhyth_translation_nonrhyth/Lmo2_set_A.pdf]

# Lmo4

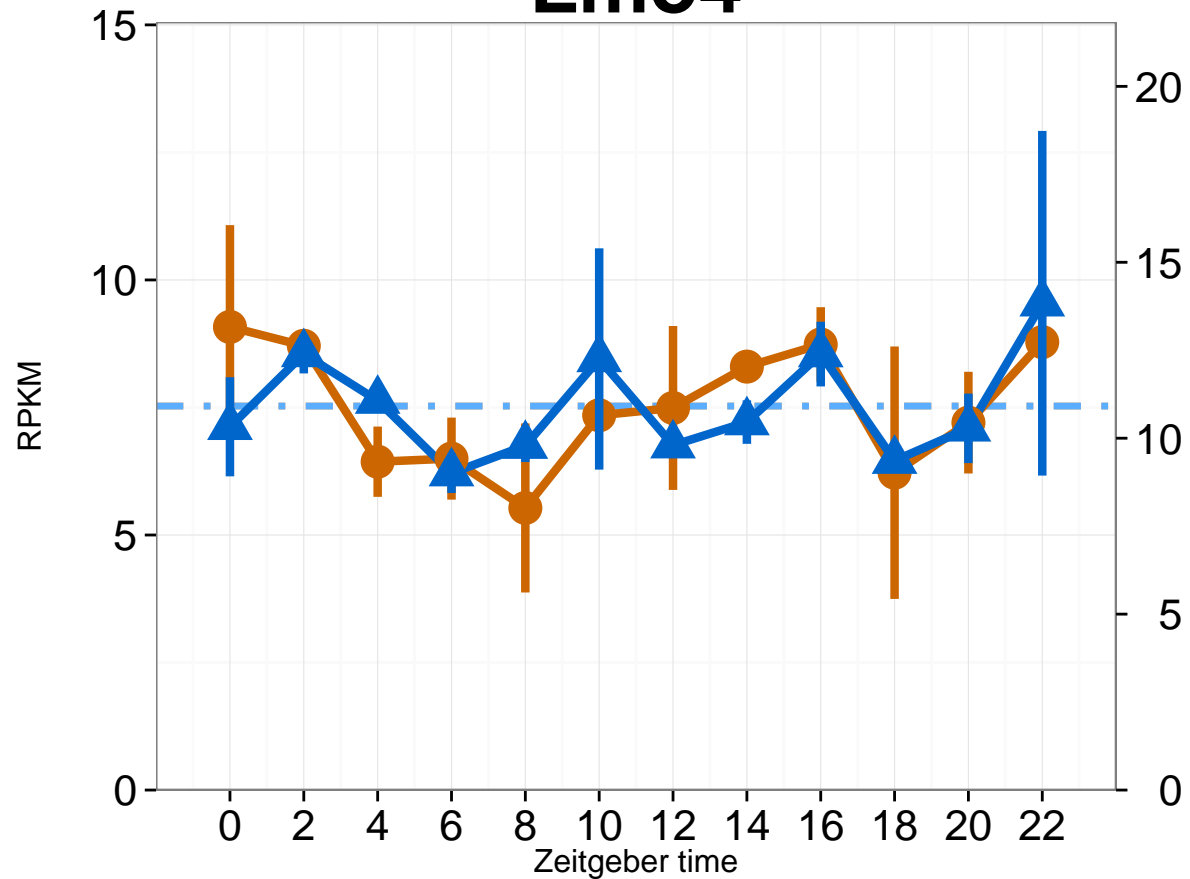

# Lmo4

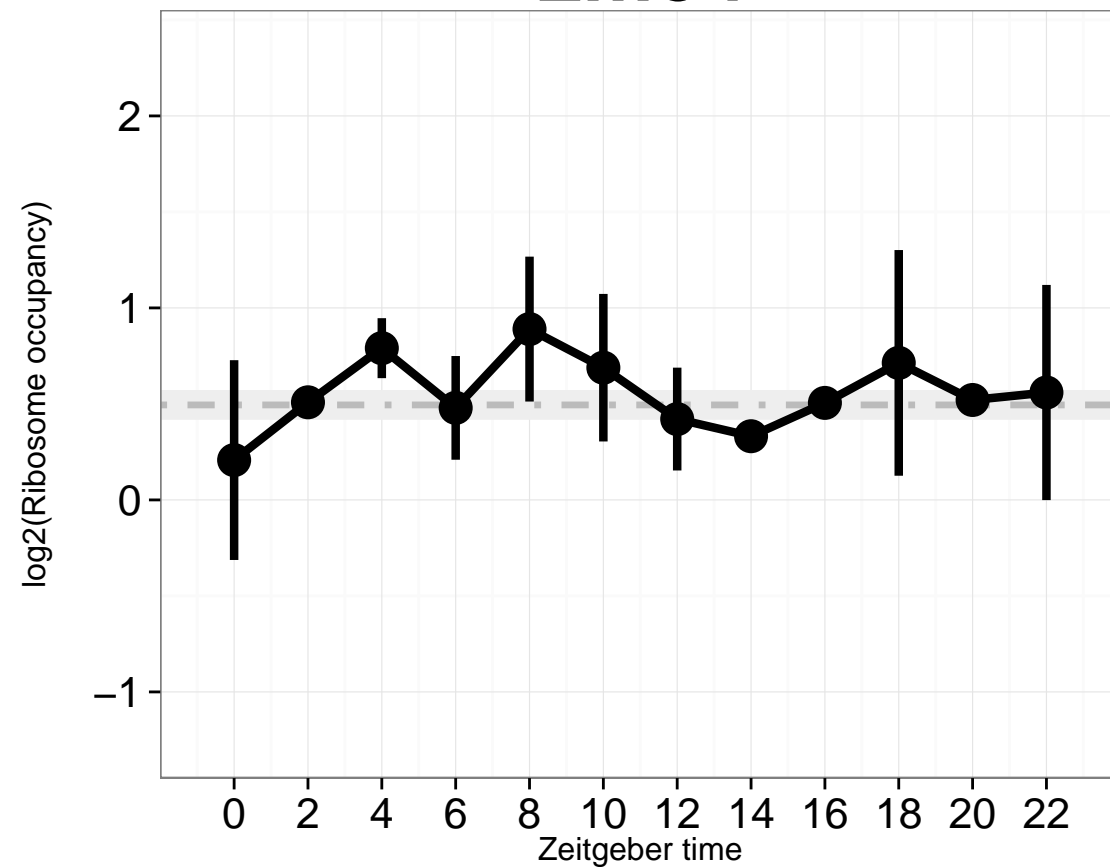

Supplement: SuppDataset_1.zip [file Lmo4_set_A.pdf › Supplemental Dataset 1/A-mRNA_nonrhyth_translation_nonrhyth/Lmo4_set_A.pdf]

# Lmtk2

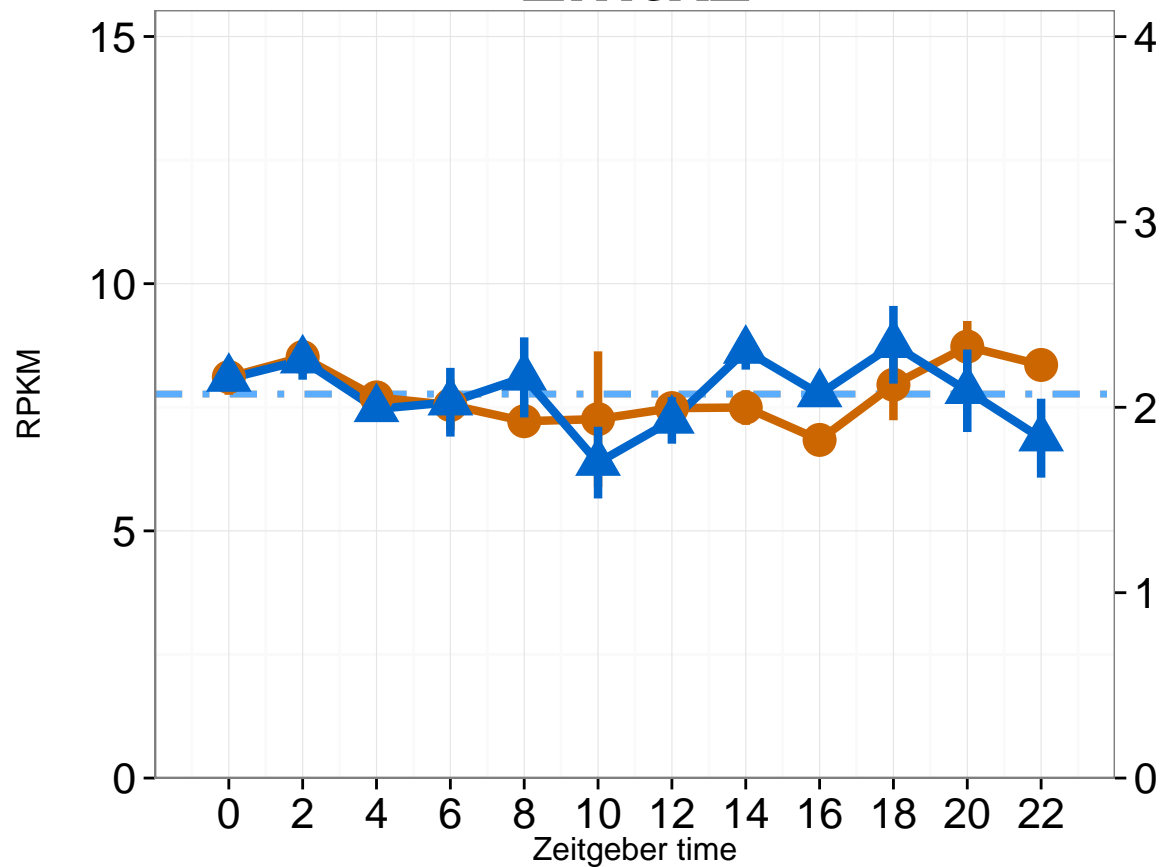

# Lmtk2

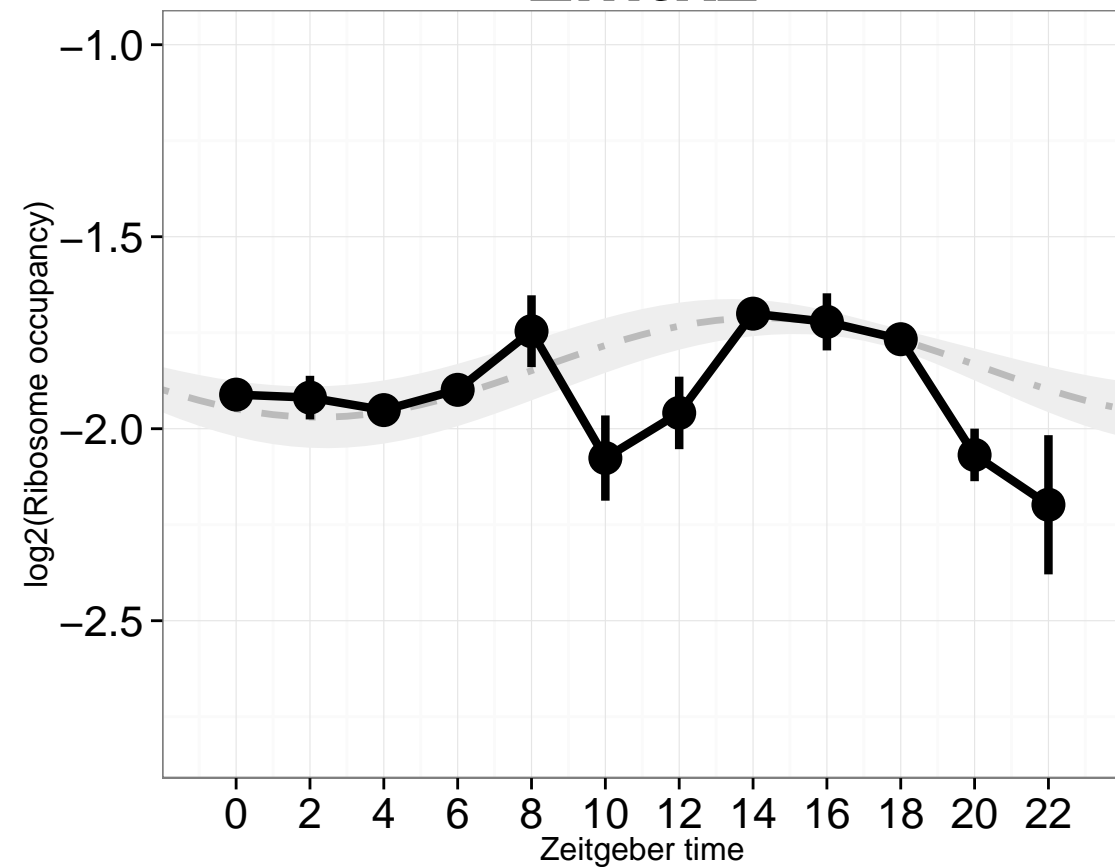

Supplement: SuppDataset_1.zip [file Lmtk2_set_A.pdf › Supplemental Dataset 1/A-mRNA_nonrhyth_translation_nonrhyth/Lmtk2_set_A.pdf]

## Lnp

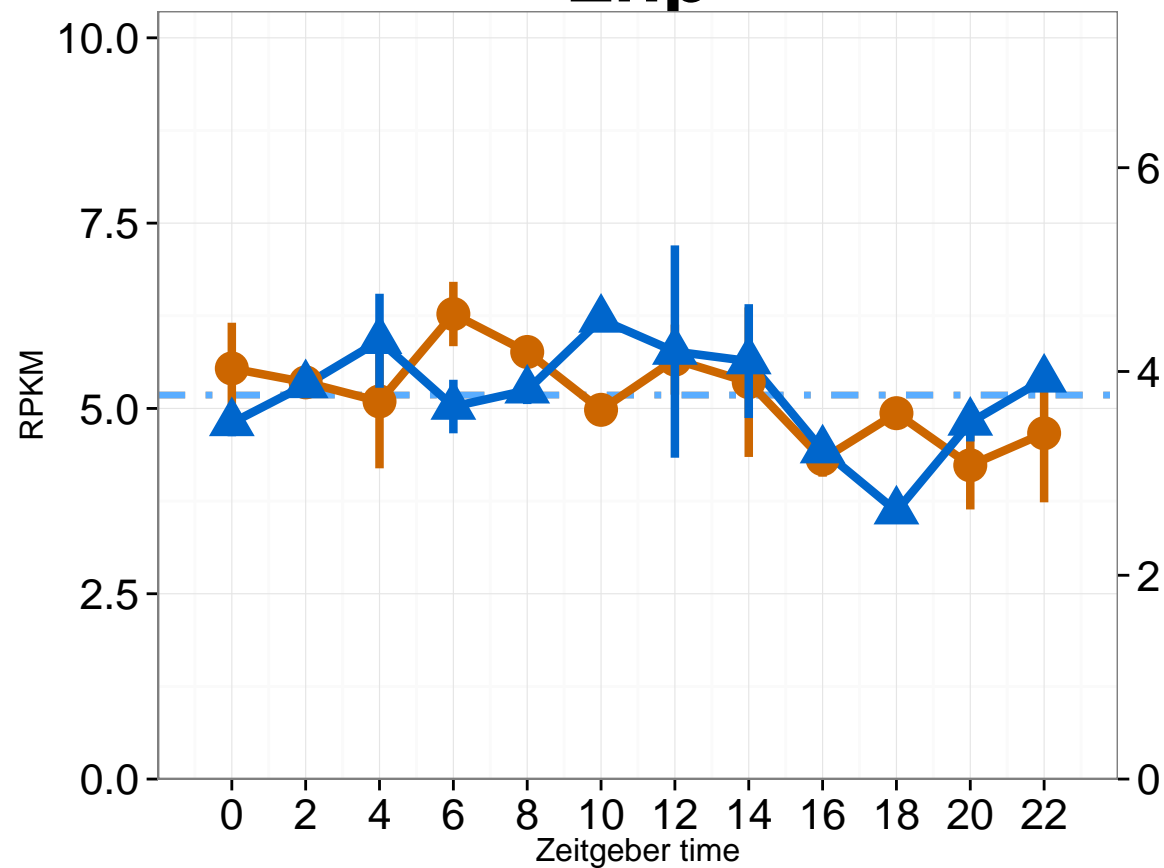

## Lnp

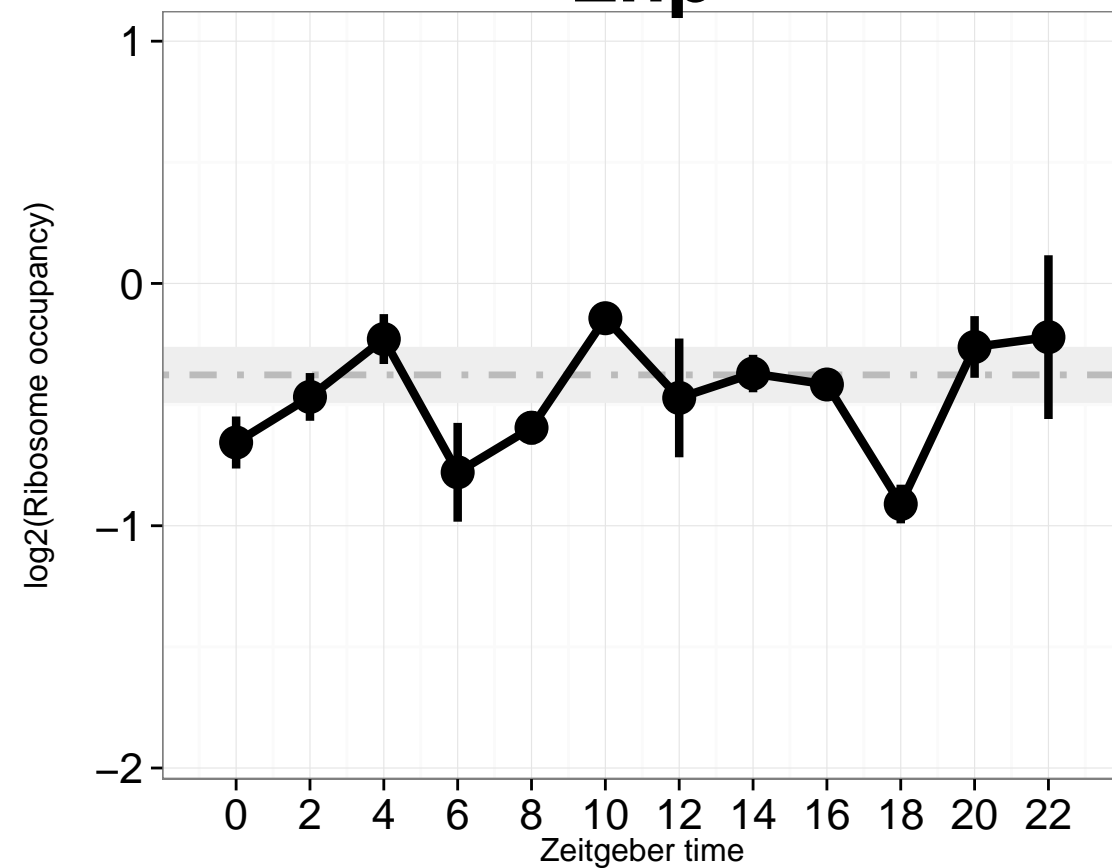

Supplement: SuppDataset_1.zip [file Lnp_set_A.pdf › Supplemental Dataset 1/A-mRNA_nonrhyth_translation_nonrhyth/Lnp_set_A.pdf]

## Lnpep

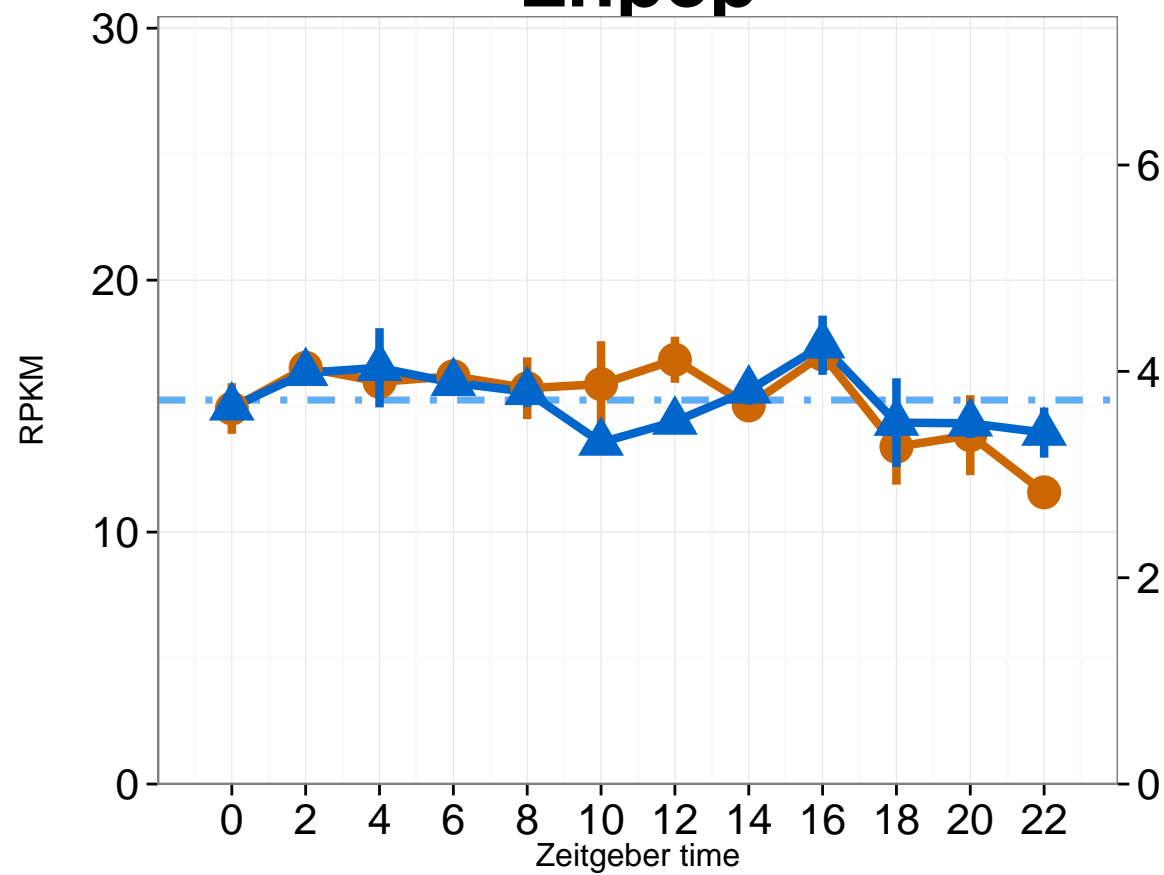

## Lnpep

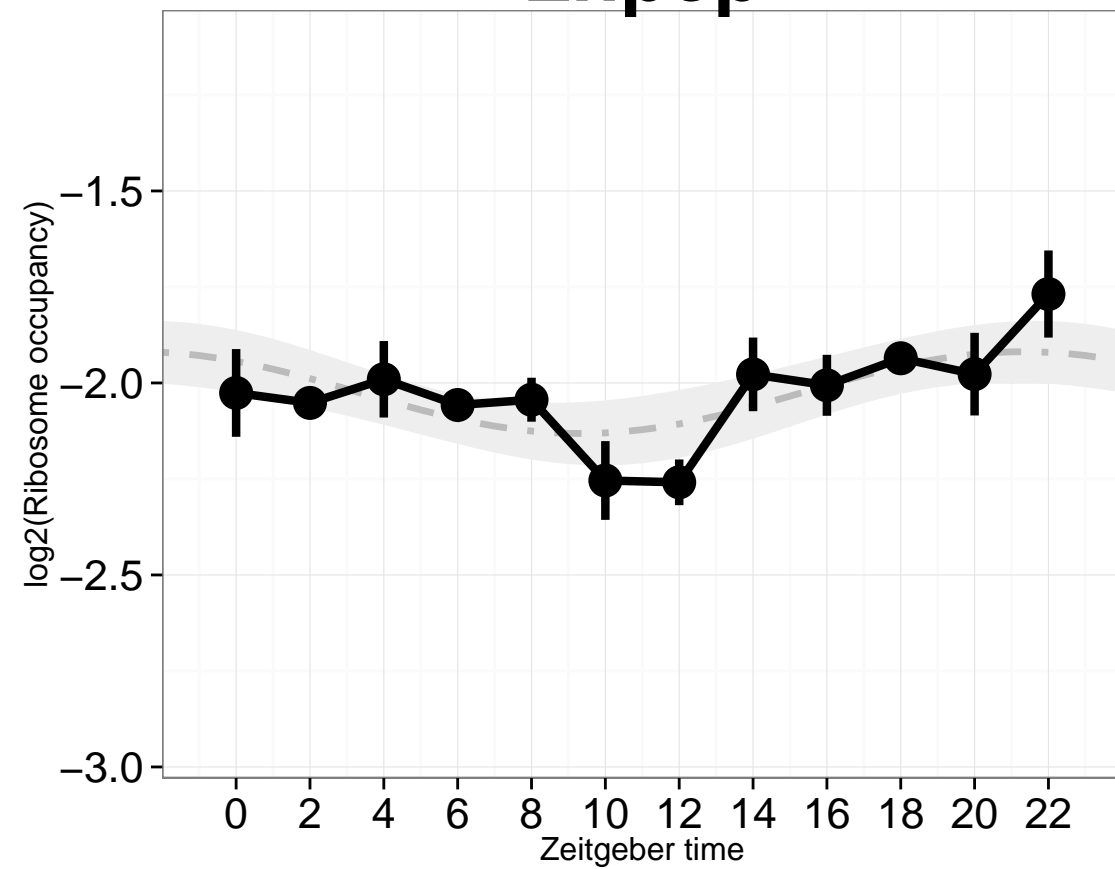

Supplement: SuppDataset_1.zip [file Lnpep_set_A.pdf › Supplemental Dataset 1/A-mRNA_nonrhyth_translation_nonrhyth/Lnpep_set_A.pdf]

# Loh12cr1

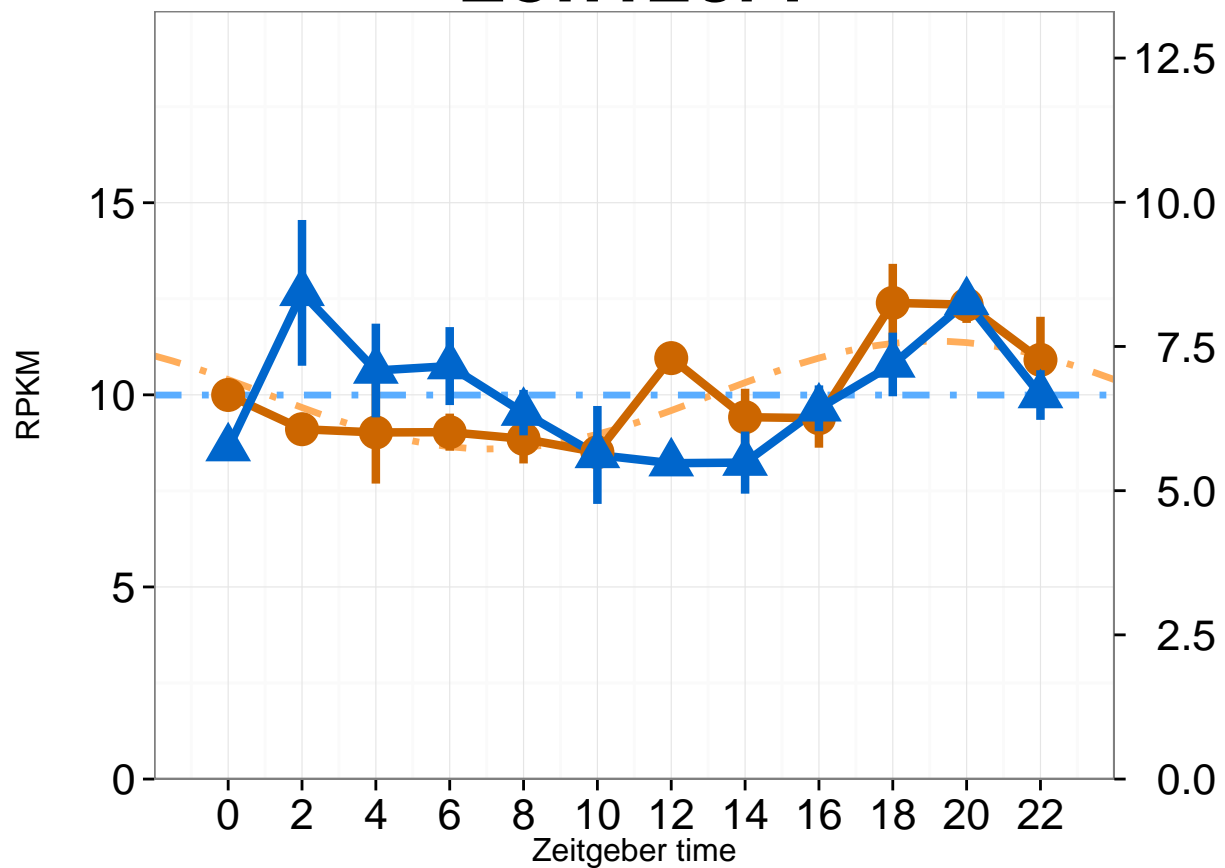

# Loh12cr1

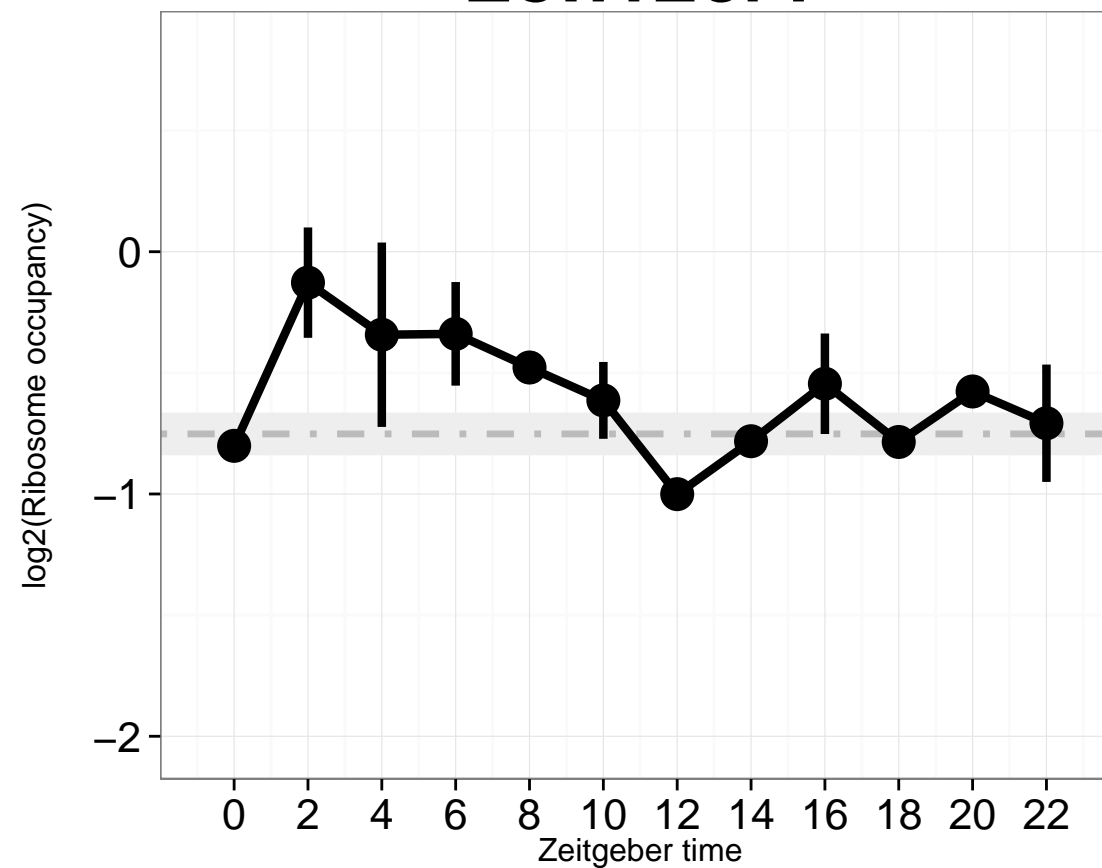

Supplement: SuppDataset_1.zip [file Loh12cr1_set_A.pdf › Supplemental Dataset 1/A-mRNA_nonrhyth_translation_nonrhyth/Loh12cr1_set_A.pdf]

# Lonp1

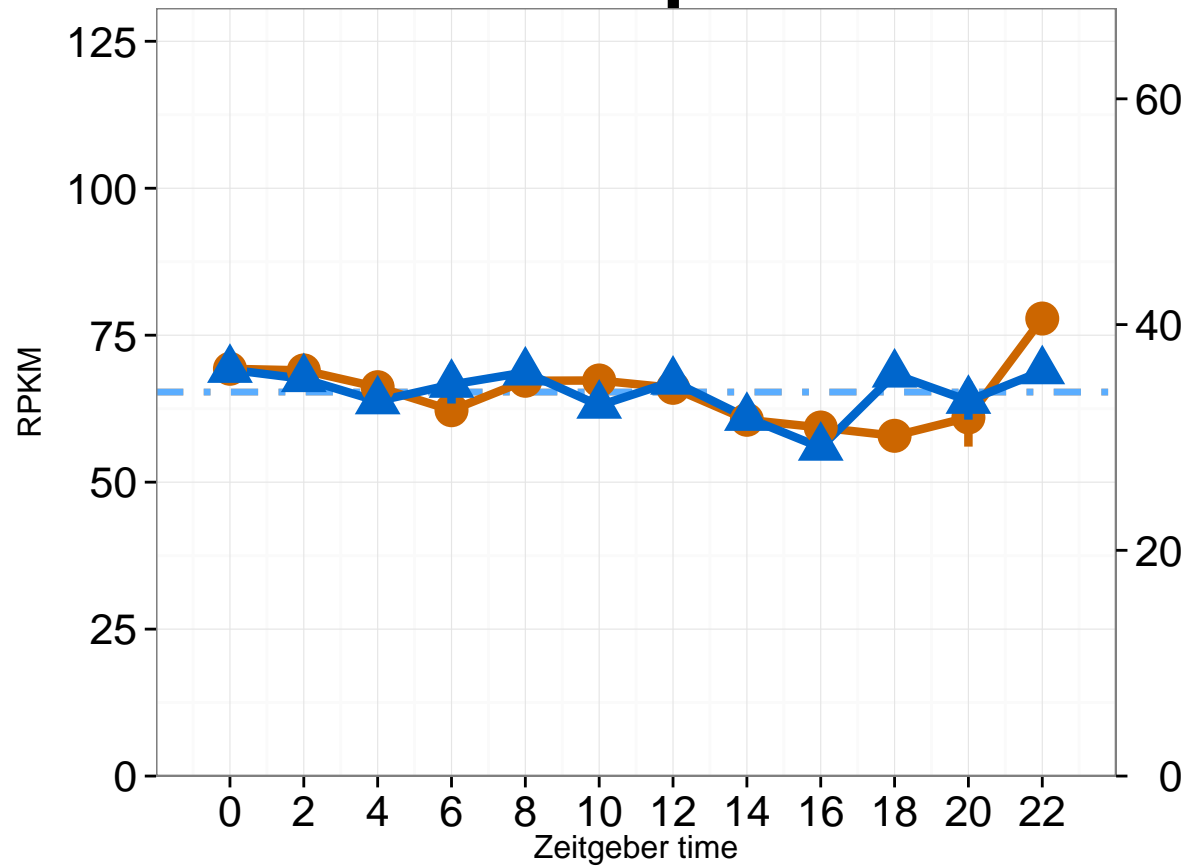

# Lonp1

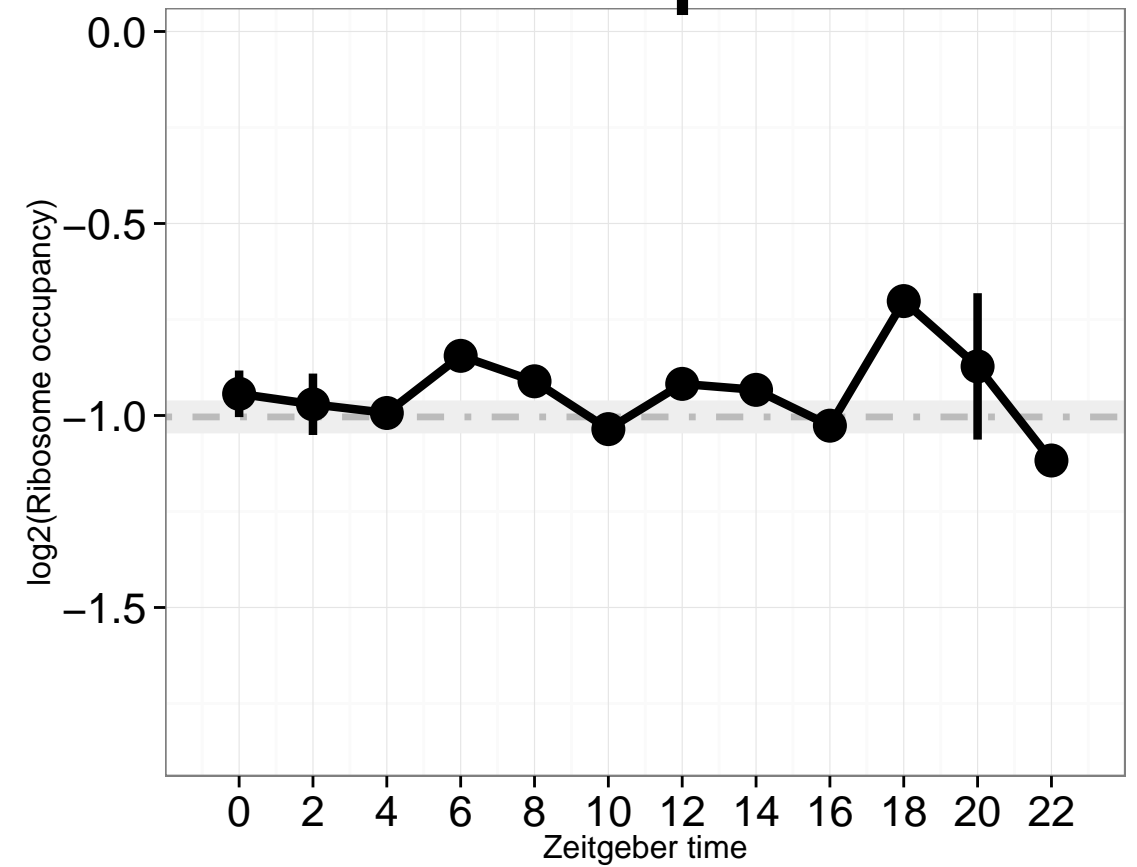

Supplement: SuppDataset_1.zip [file Lonp1_set_A.pdf › Supplemental Dataset 1/A-mRNA_nonrhyth_translation_nonrhyth/Lonp1_set_A.pdf]

## Loxl3

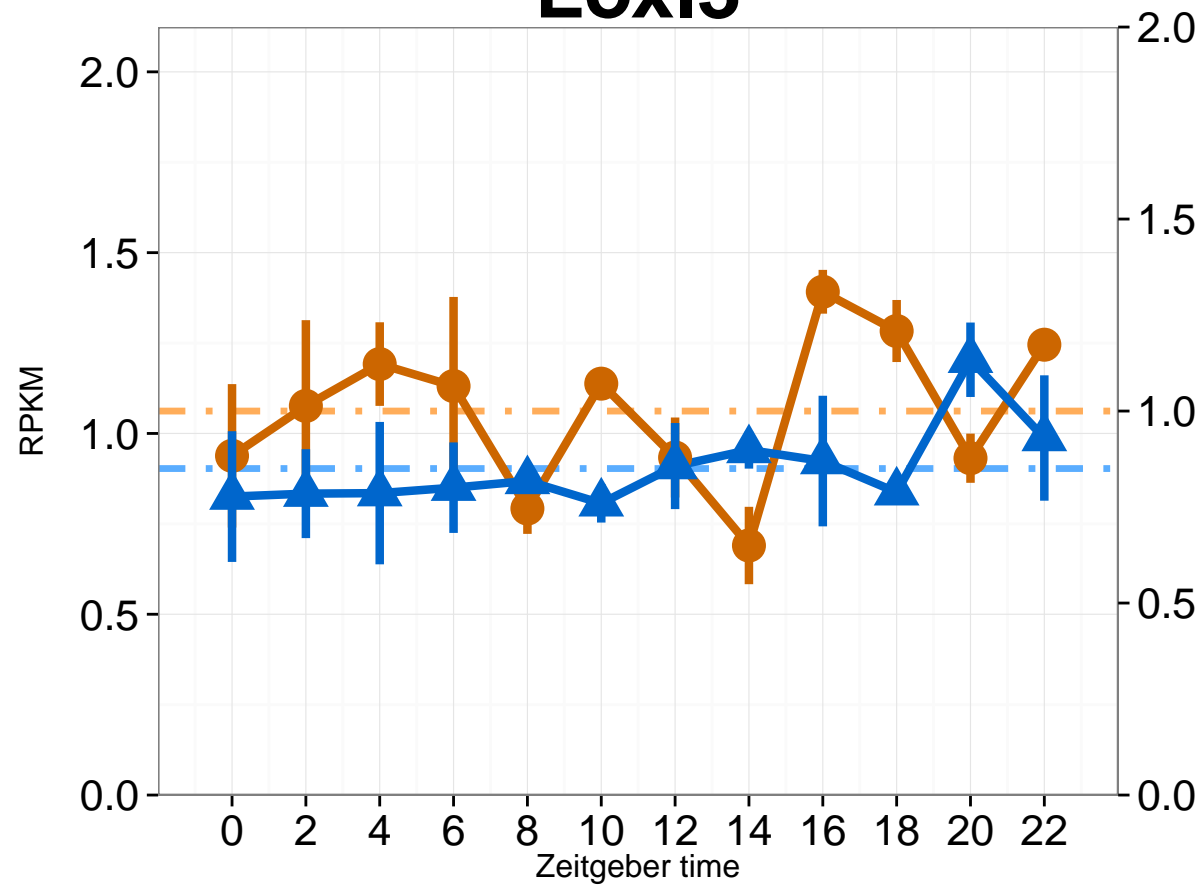

## Loxl3

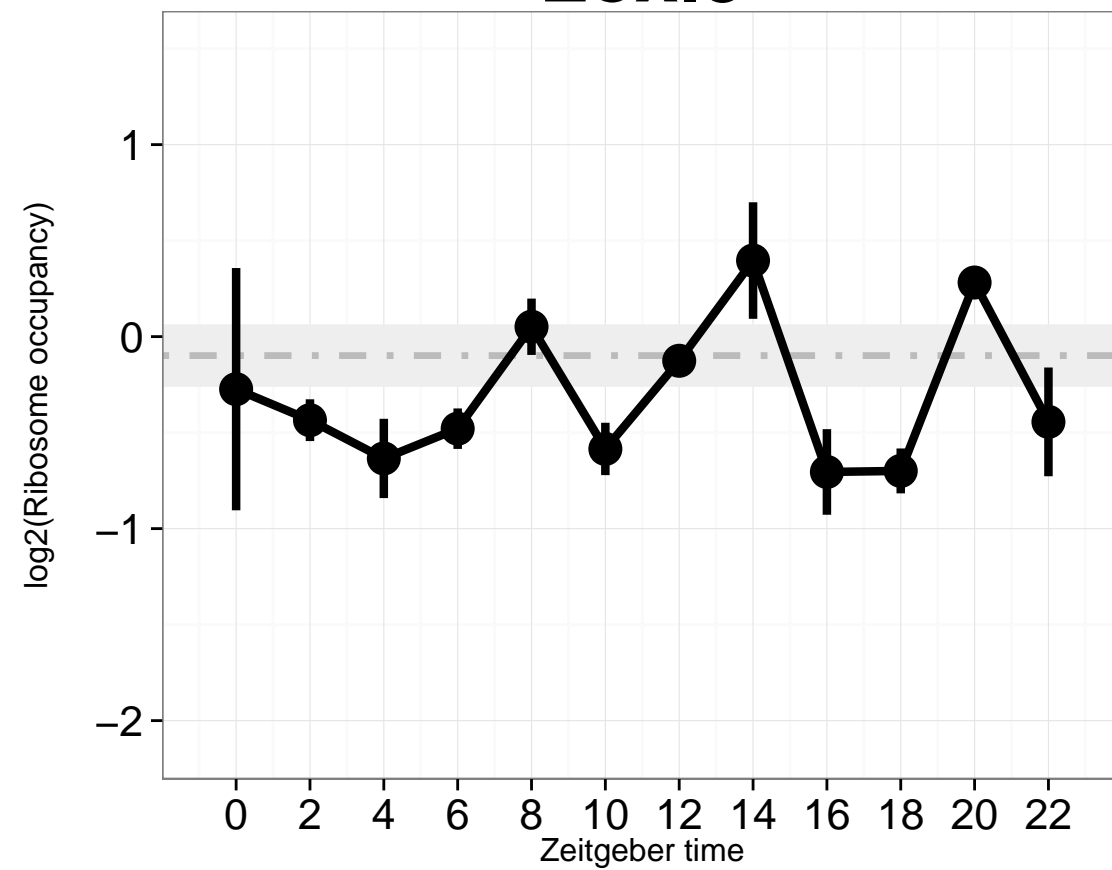

Supplement: SuppDataset_1.zip [file Loxl3_set_A.pdf › Supplemental Dataset 1/A-mRNA_nonrhyth_translation_nonrhyth/Loxl3_set_A.pdf]

**Lpar1 TR**

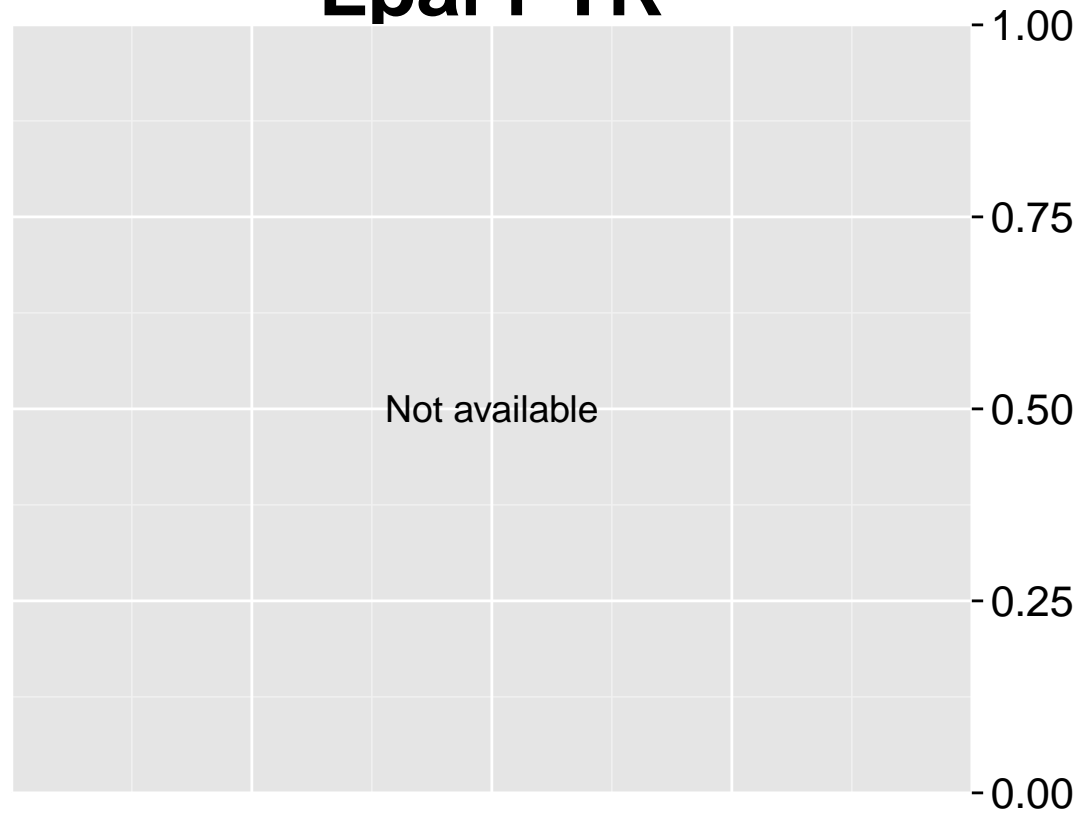

**Lpar1 log2(Ribosome occupancy)**

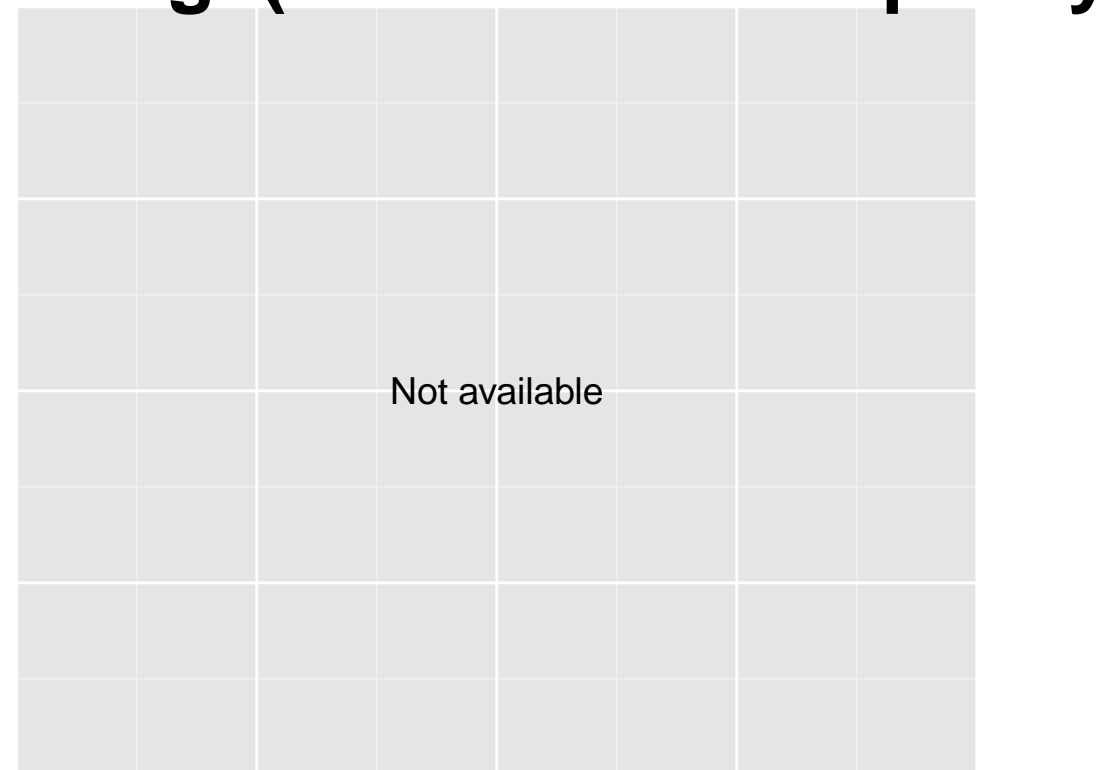

Supplement: SuppDataset_1.zip [file Lpar1_set_A.pdf › Supplemental Dataset 1/A-mRNA_nonrhyth_translation_nonrhyth/Lpar1_set_A.pdf]

## Lpar6

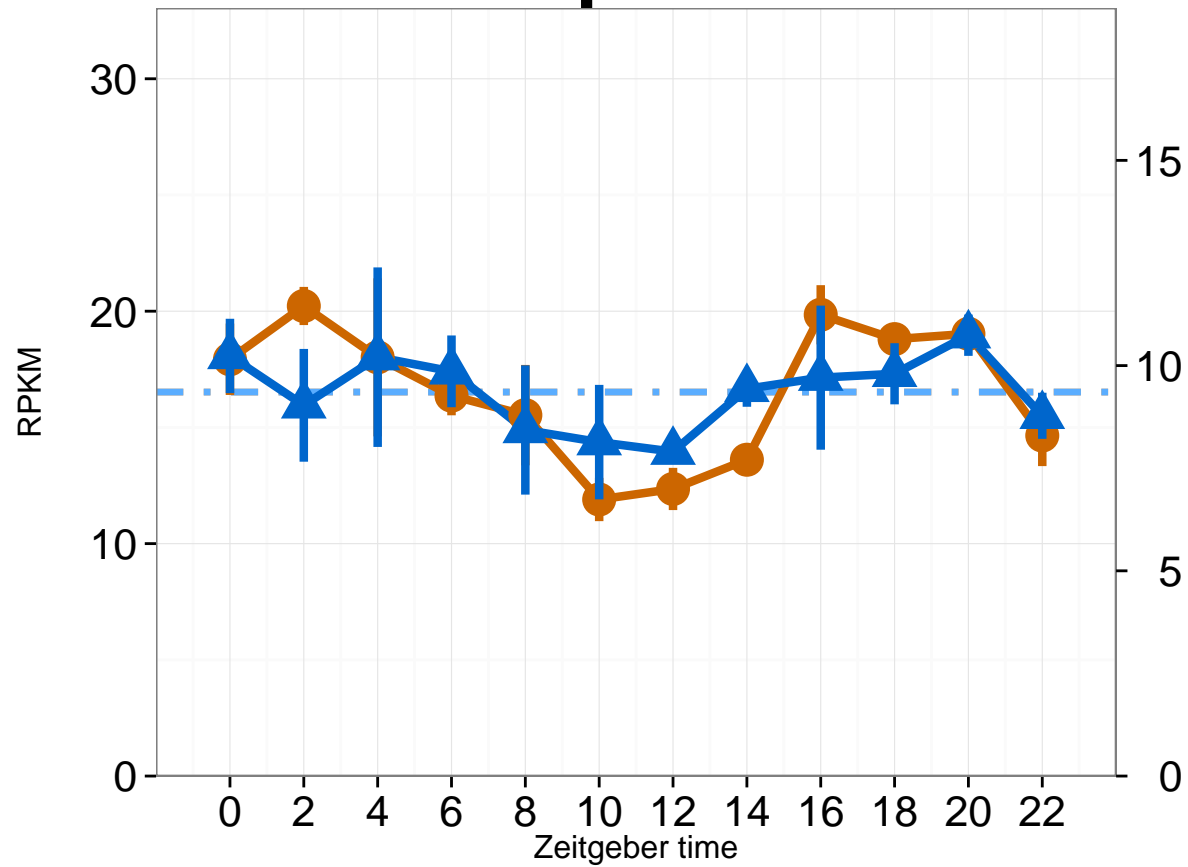

## Lpar6

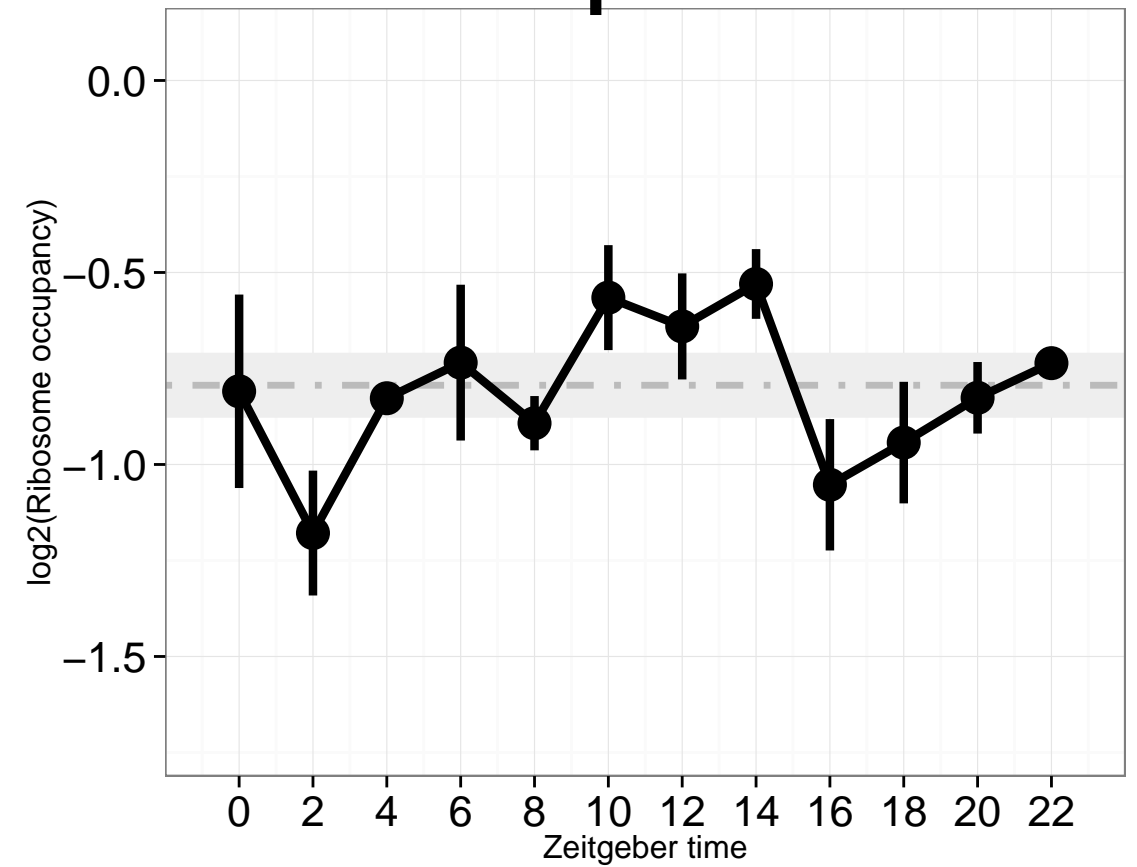

Supplement: SuppDataset_1.zip [file Lpar6_set_A.pdf › Supplemental Dataset 1/A-mRNA_nonrhyth_translation_nonrhyth/Lpar6_set_A.pdf]

# Lpcat2

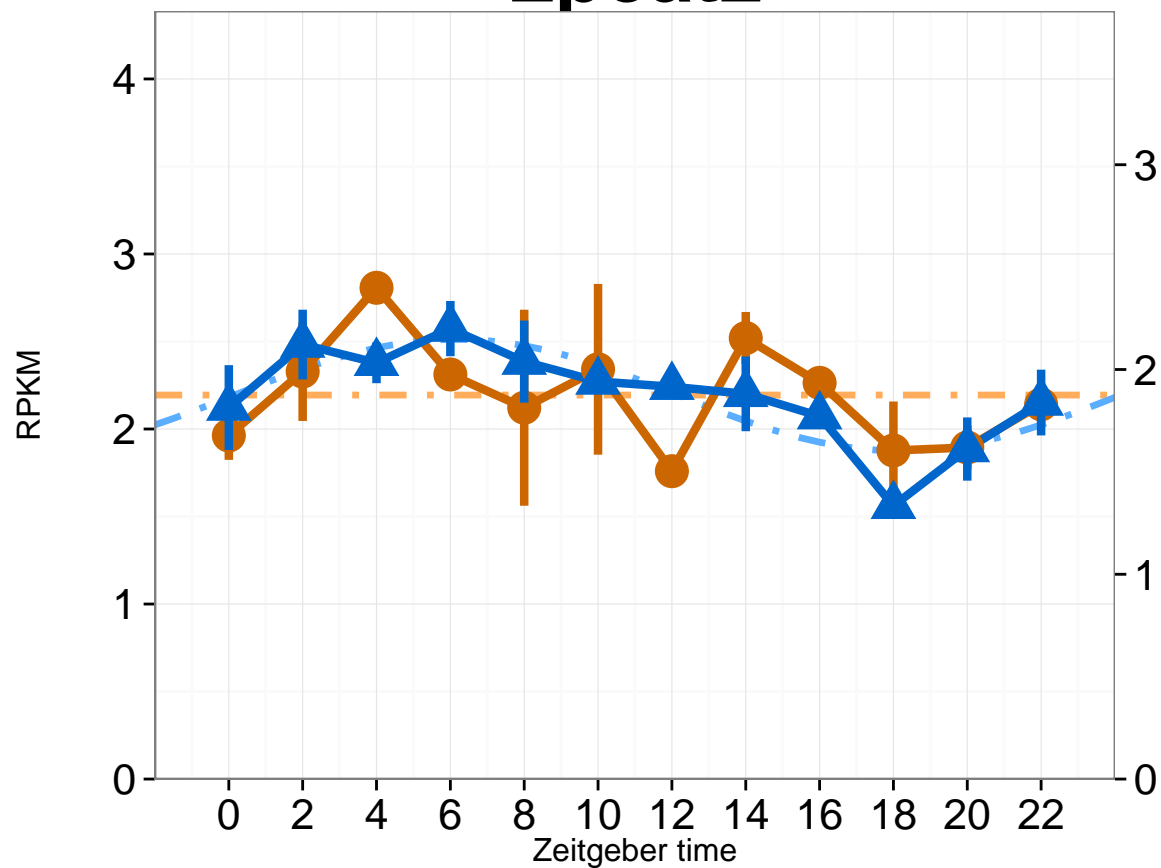

# Lpcat2

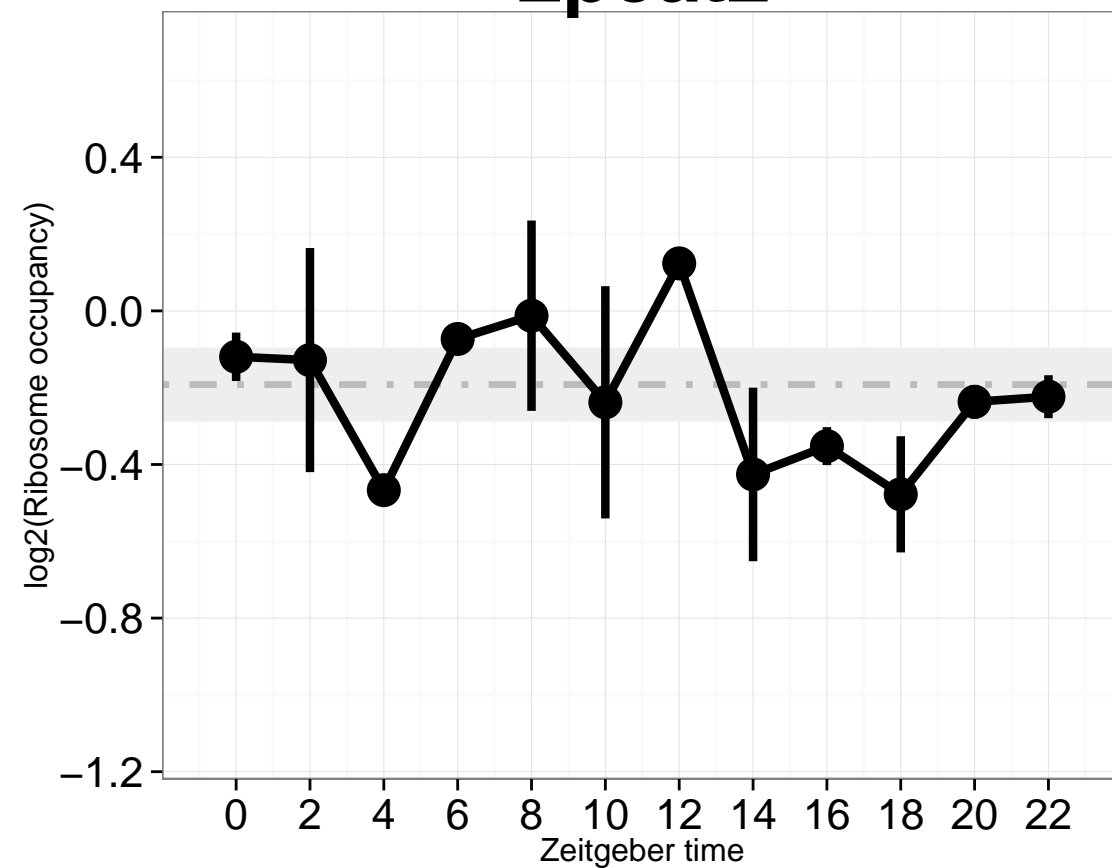

Supplement: SuppDataset_1.zip [file Lpcat2_set_A.pdf › Supplemental Dataset 1/A-mRNA_nonrhyth_translation_nonrhyth/Lpcat2_set_A.pdf]

# Lpcat3

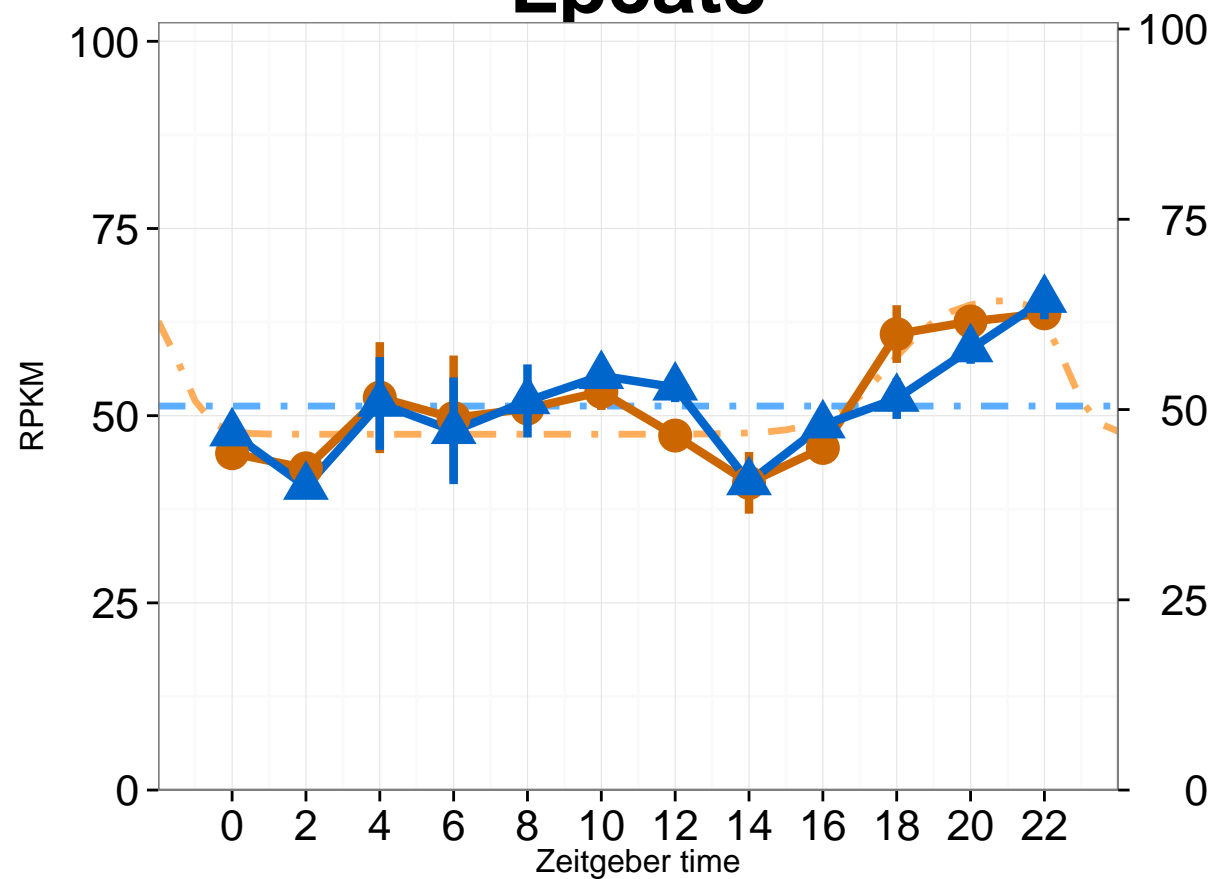

# Lpcat3

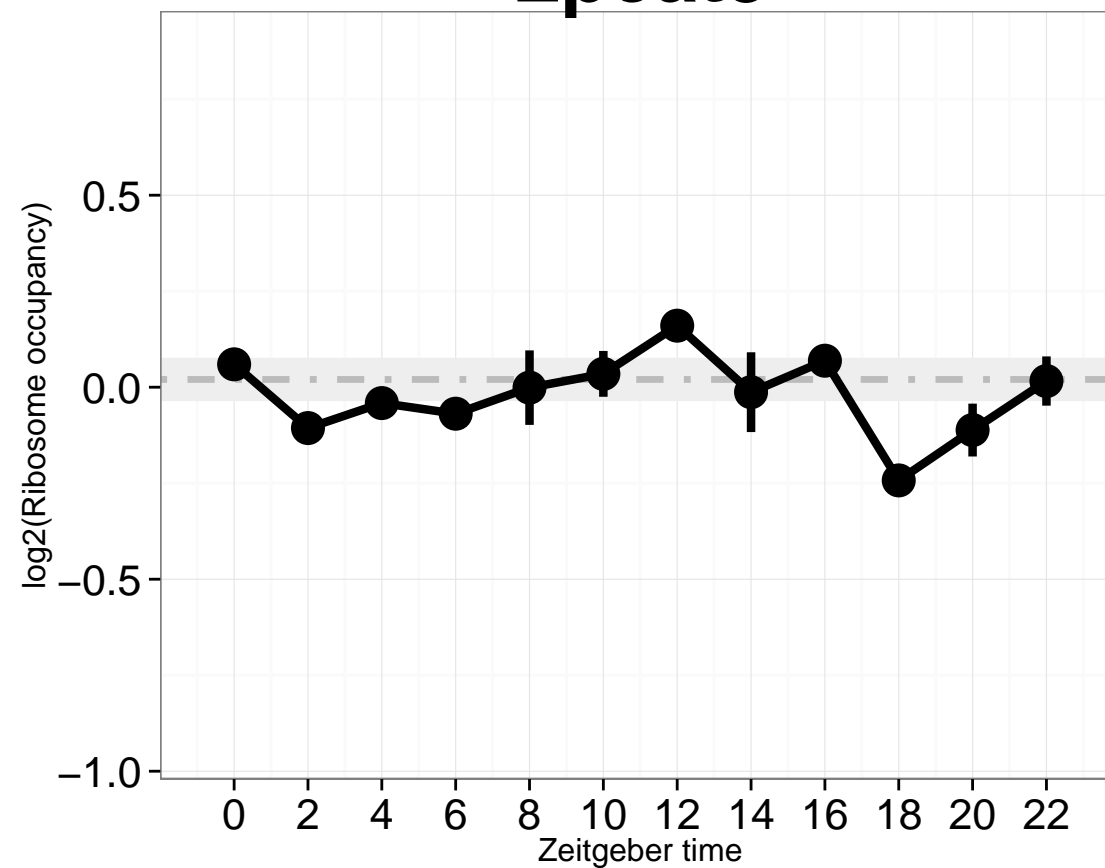

Supplement: SuppDataset_1.zip [file Lpcat3_set_A.pdf › Supplemental Dataset 1/A-mRNA_nonrhyth_translation_nonrhyth/Lpcat3_set_A.pdf]

## Lphn1

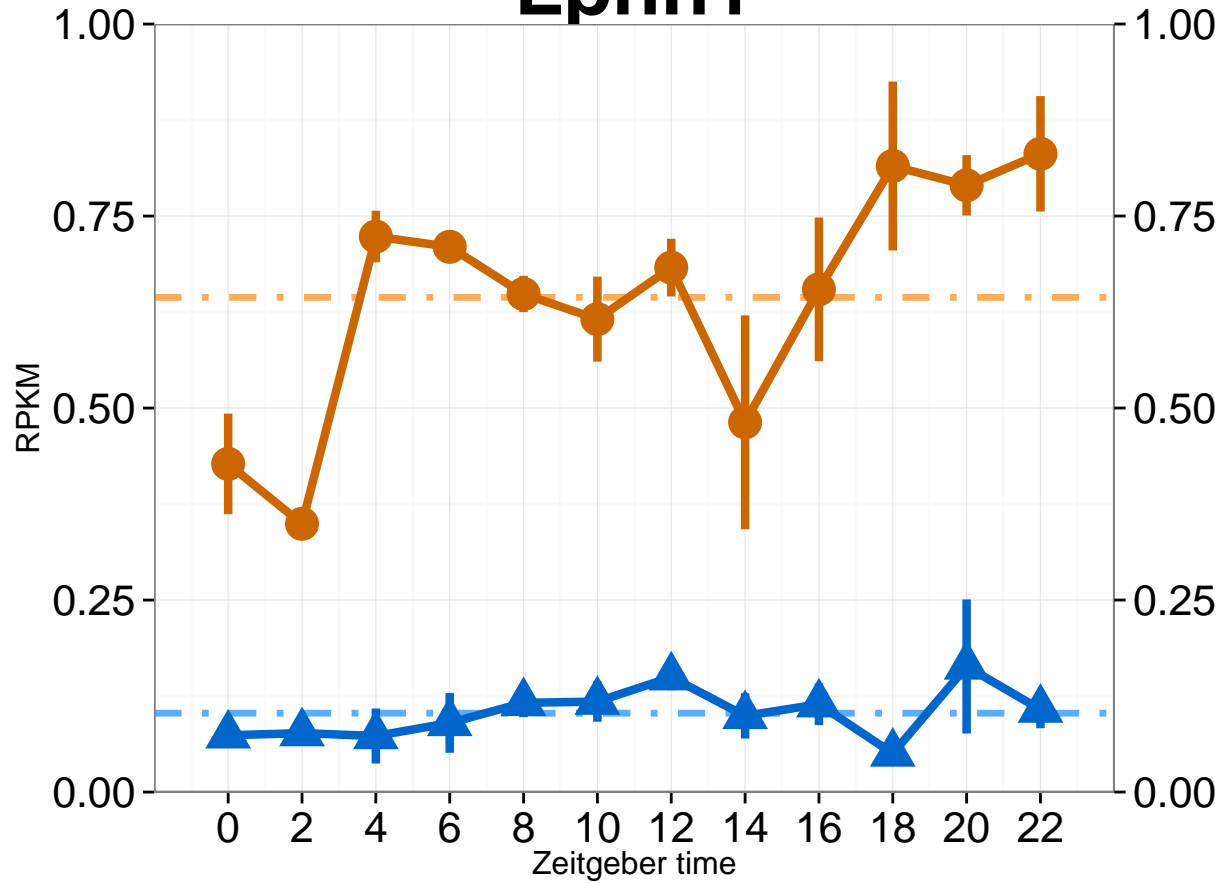

## Lphn1

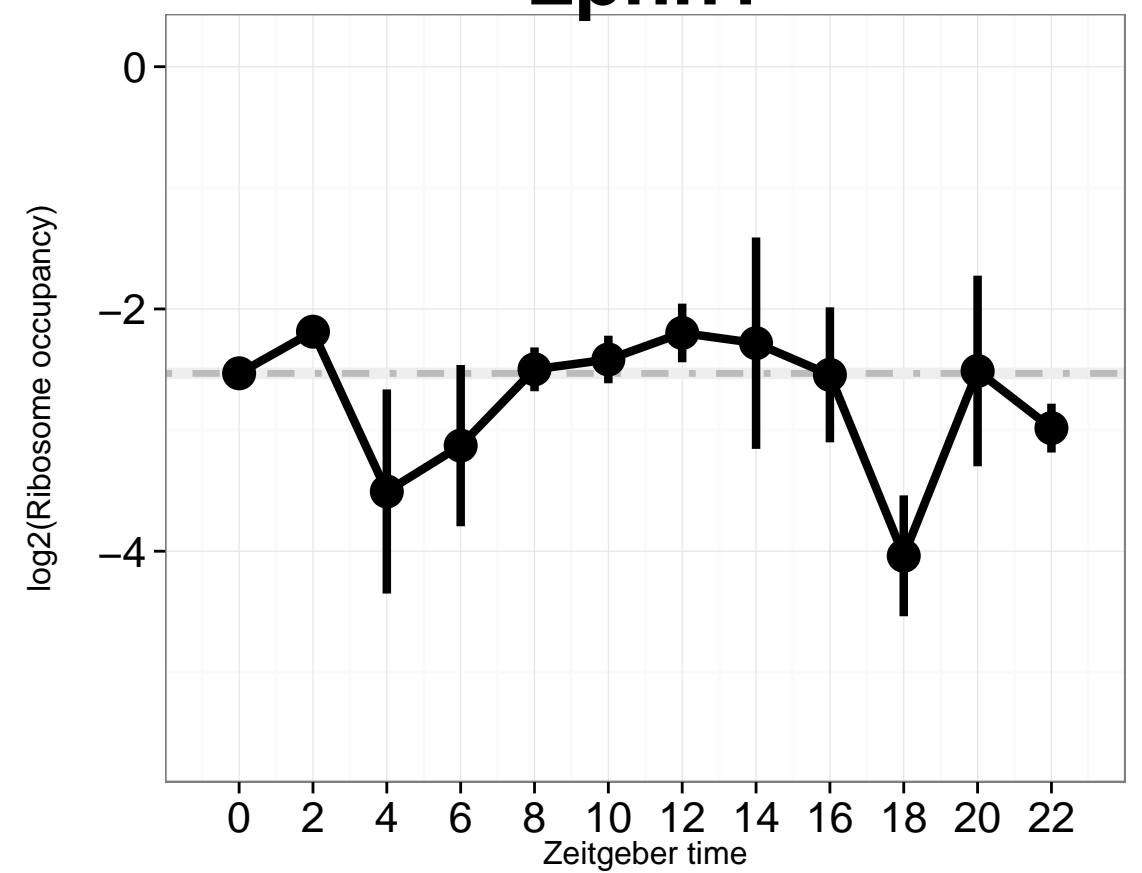

Supplement: SuppDataset_1.zip [file Lphn1_set_A.pdf › Supplemental Dataset 1/A-mRNA_nonrhyth_translation_nonrhyth/Lphn1_set_A.pdf]

# Lphn2

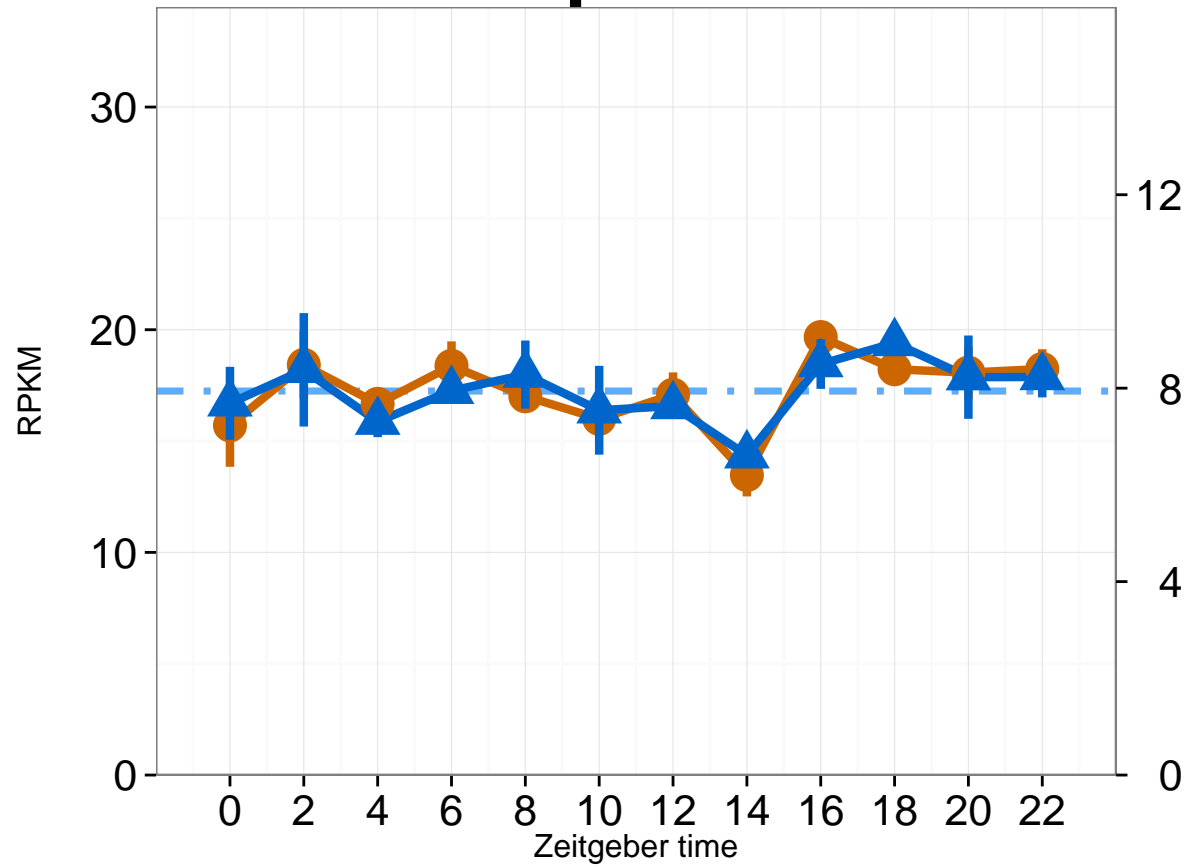

# Lphn2

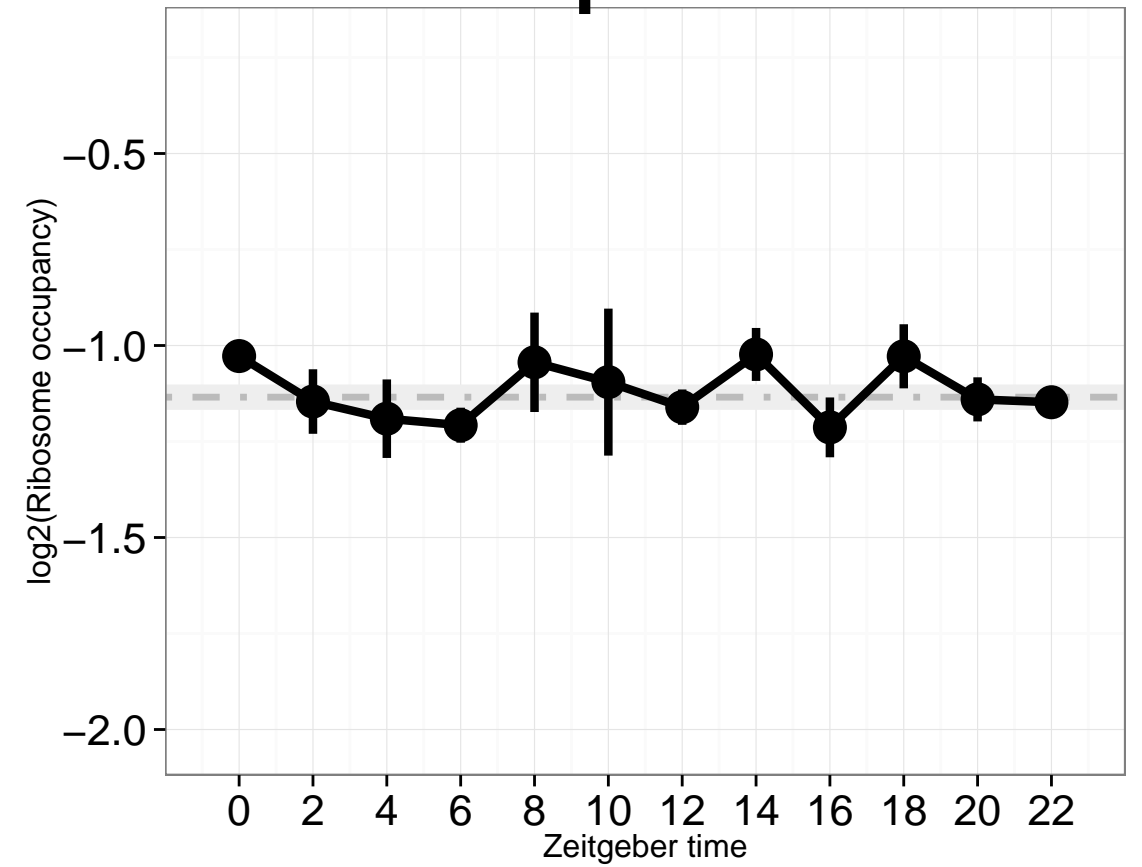

Supplement: SuppDataset_1.zip [file Lphn2_set_A.pdf › Supplemental Dataset 1/A-mRNA_nonrhyth_translation_nonrhyth/Lphn2_set_A.pdf]

## Lpp

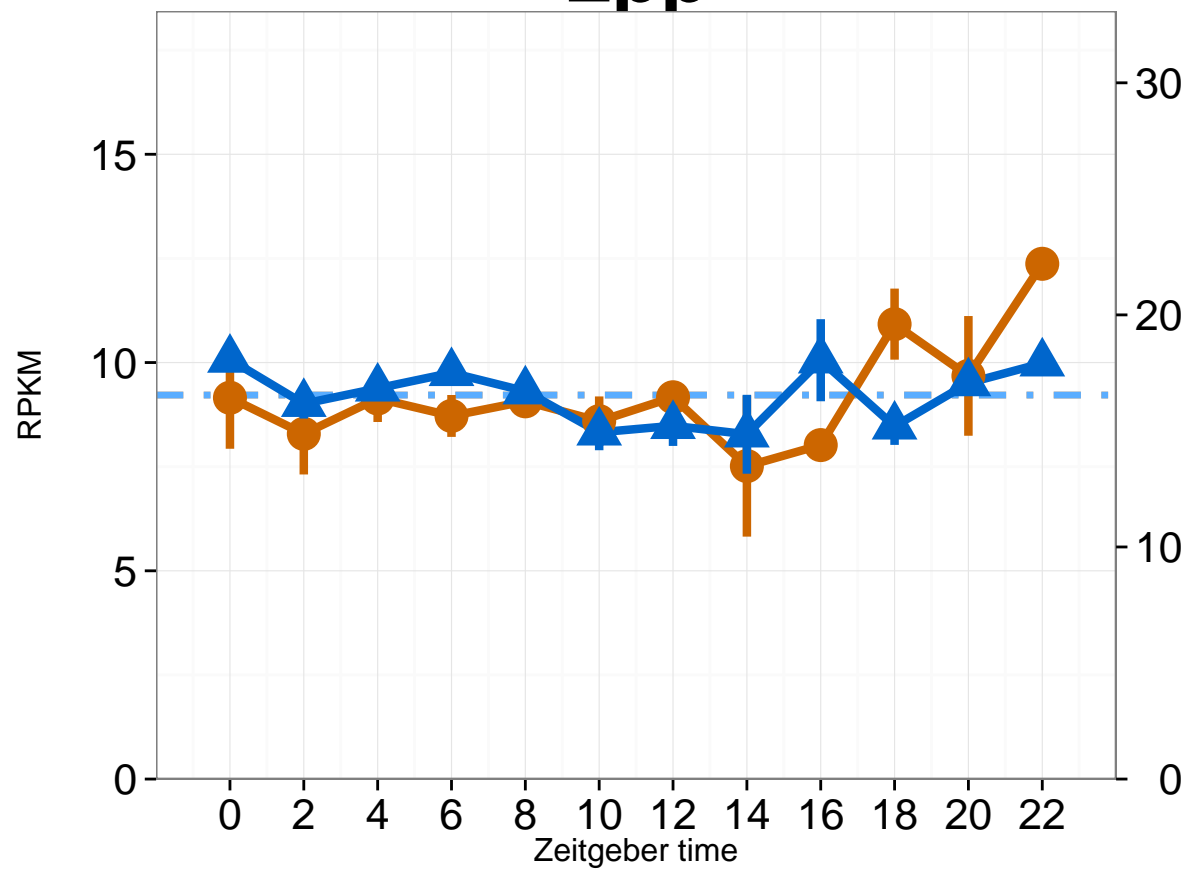

## Lpp

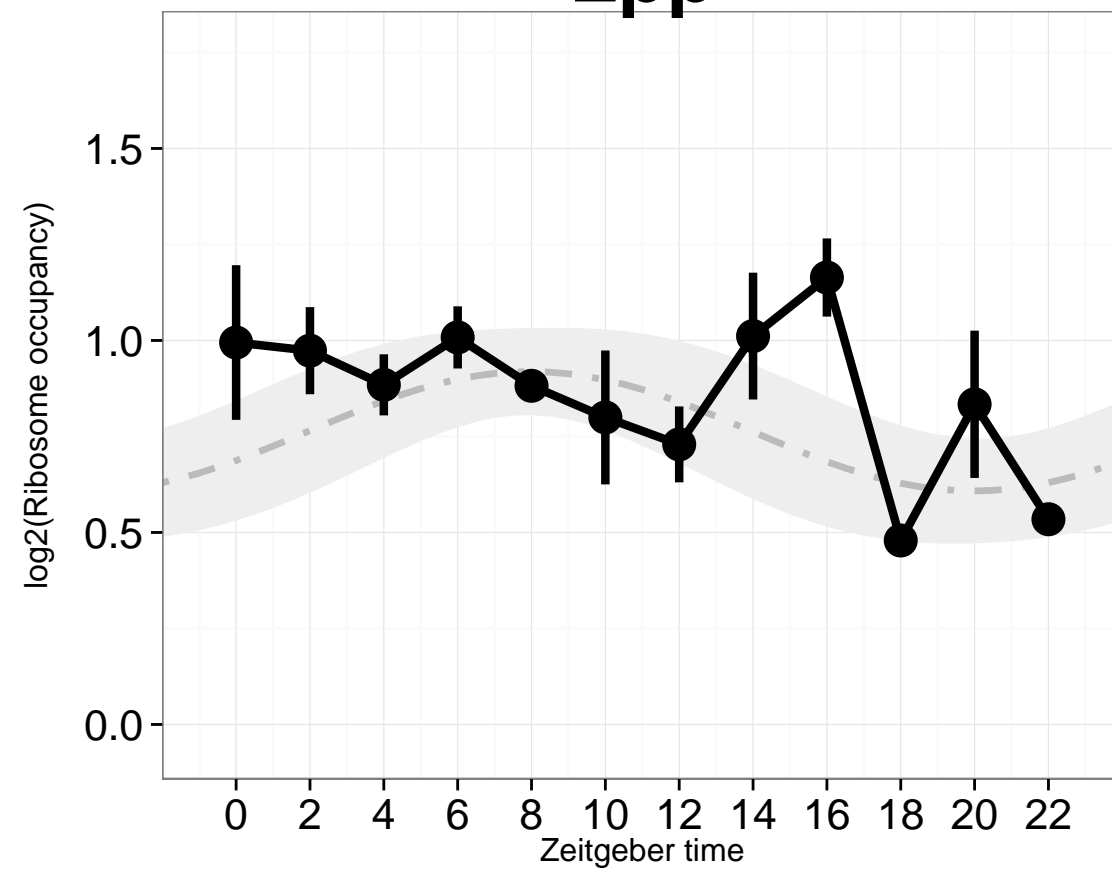

Supplement: SuppDataset_1.zip [file Lpp_set_A.pdf › Supplemental Dataset 1/A-mRNA_nonrhyth_translation_nonrhyth/Lpp_set_A.pdf]

## Lpxn

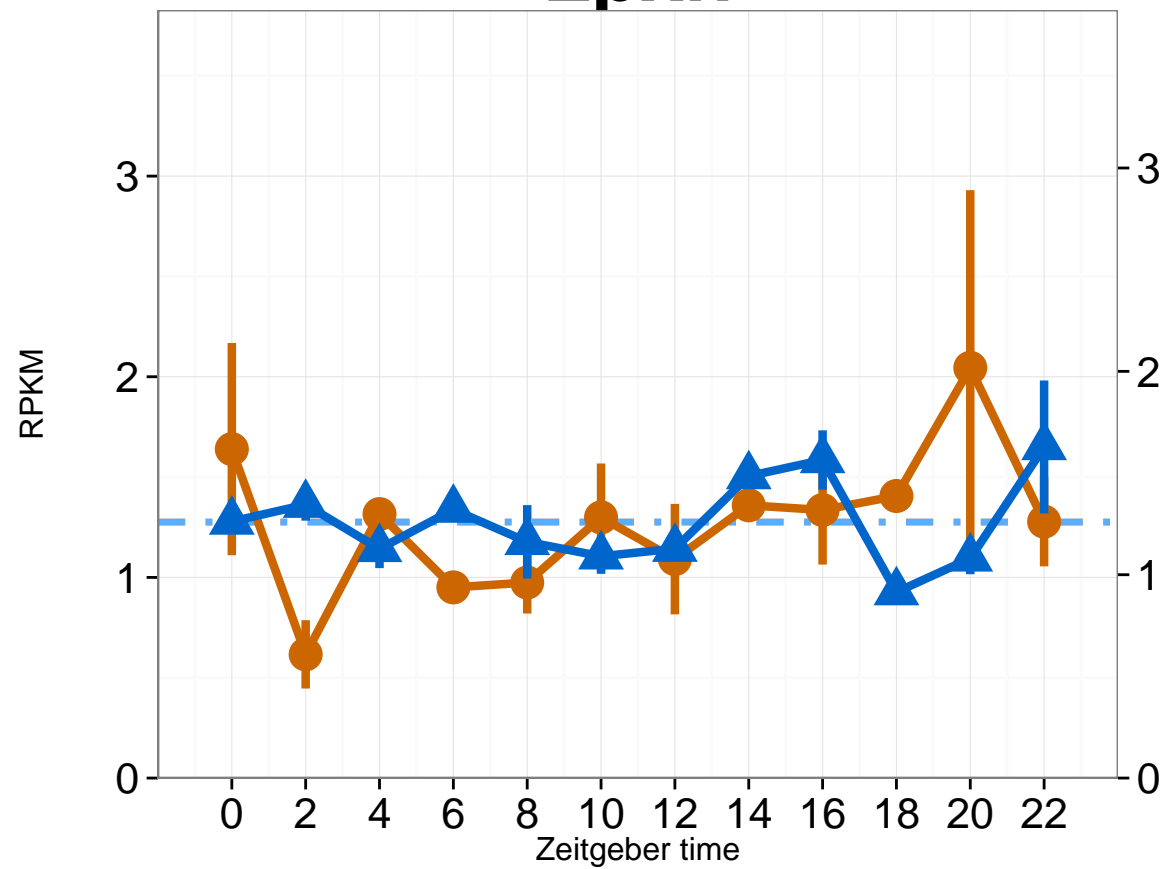

## Lpxn

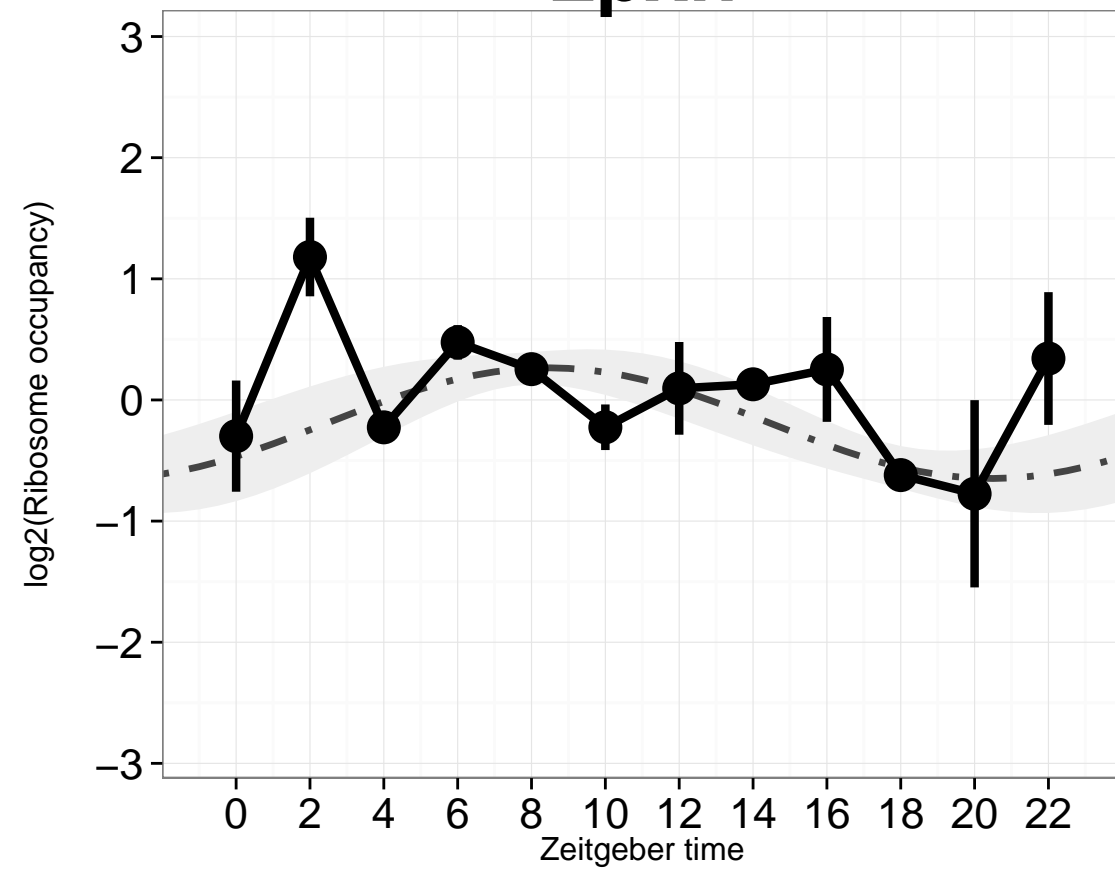

Supplement: SuppDataset_1.zip [file Lpxn_set_A.pdf › Supplemental Dataset 1/A-mRNA_nonrhyth_translation_nonrhyth/Lpxn_set_A.pdf]

## Lrat

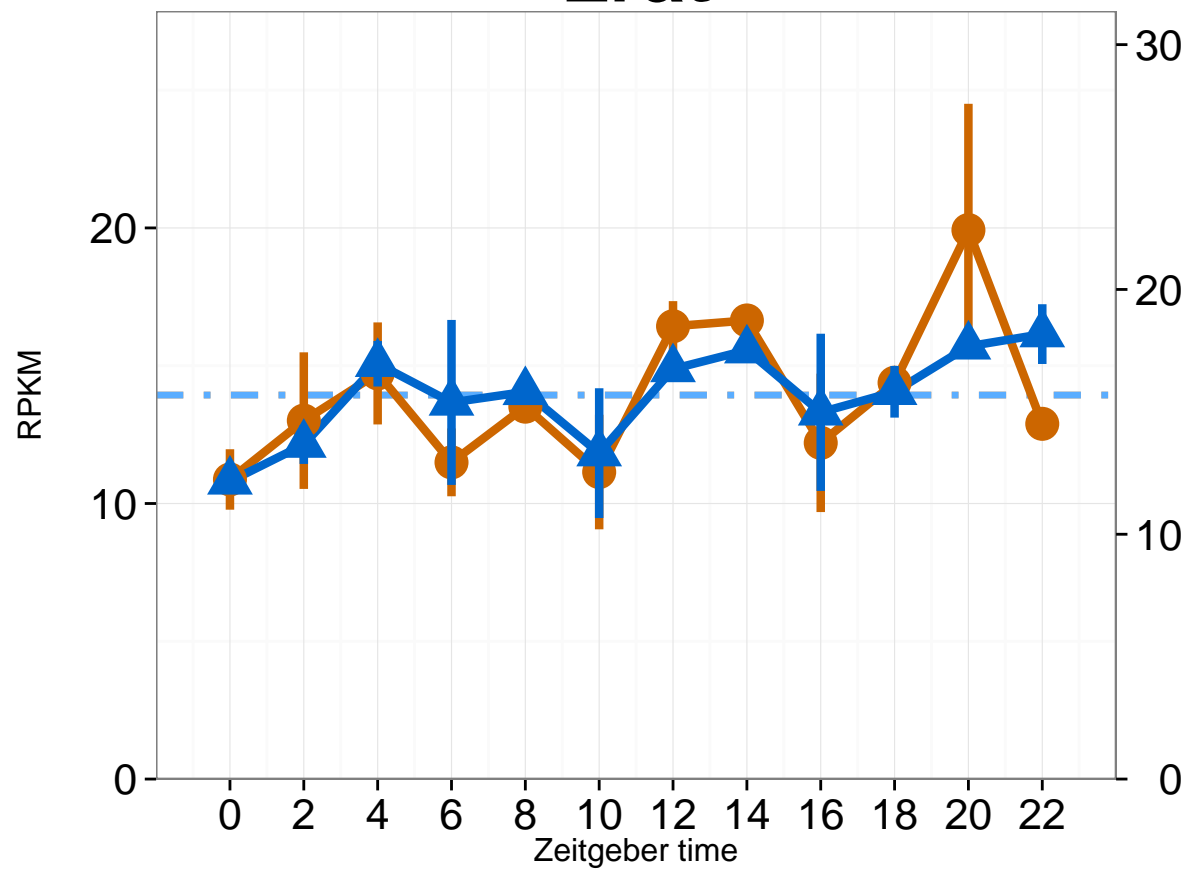

## Lrat

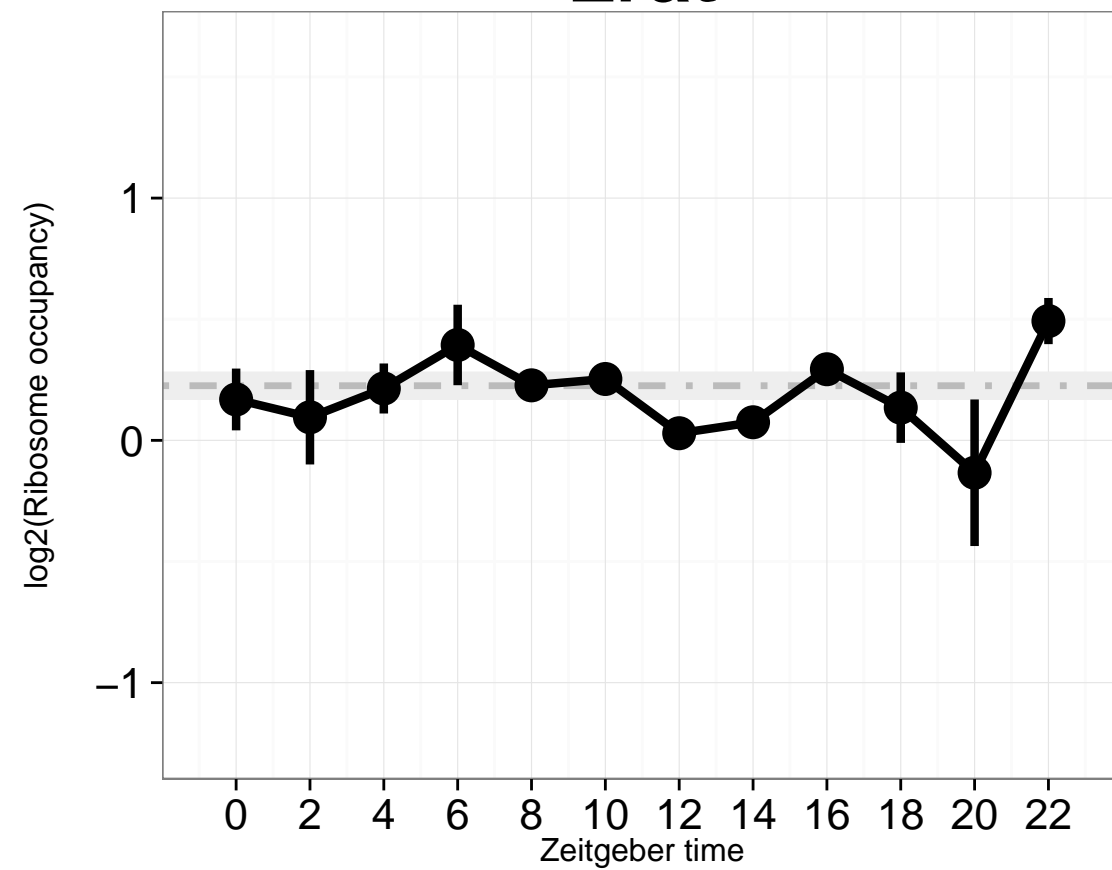

Supplement: SuppDataset_1.zip [file Lrat_set_A.pdf › Supplemental Dataset 1/A-mRNA_nonrhyth_translation_nonrhyth/Lrat_set_A.pdf]

## Lrba

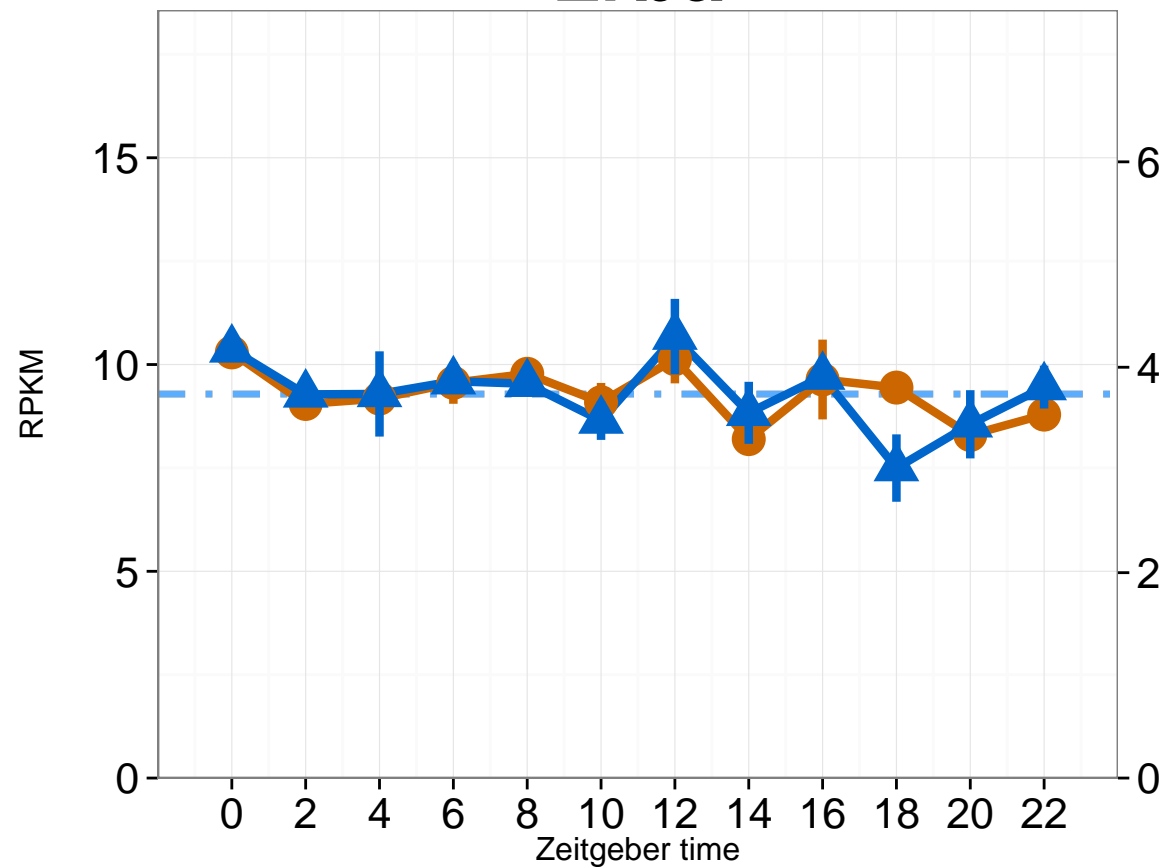

## Lrba

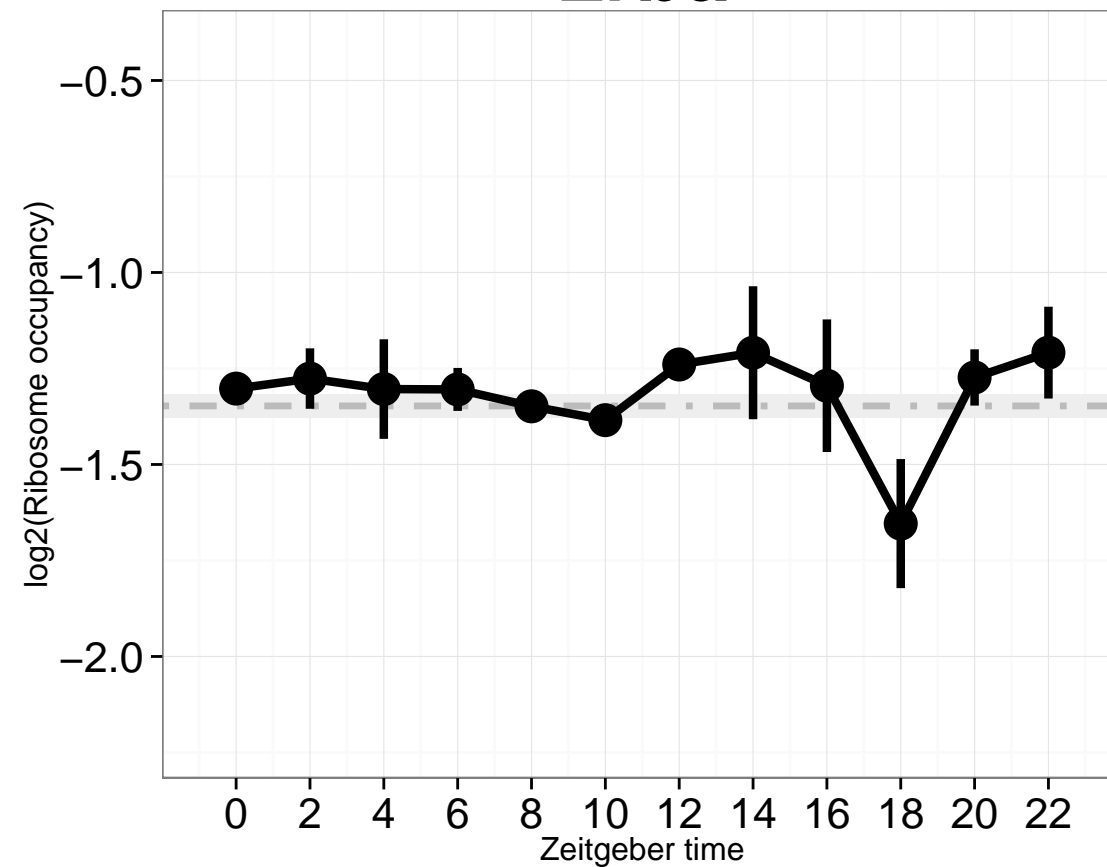

Supplement: SuppDataset_1.zip [file Lrba_set_A.pdf › Supplemental Dataset 1/A-mRNA_nonrhyth_translation_nonrhyth/Lrba_set_A.pdf]

# Lrch1

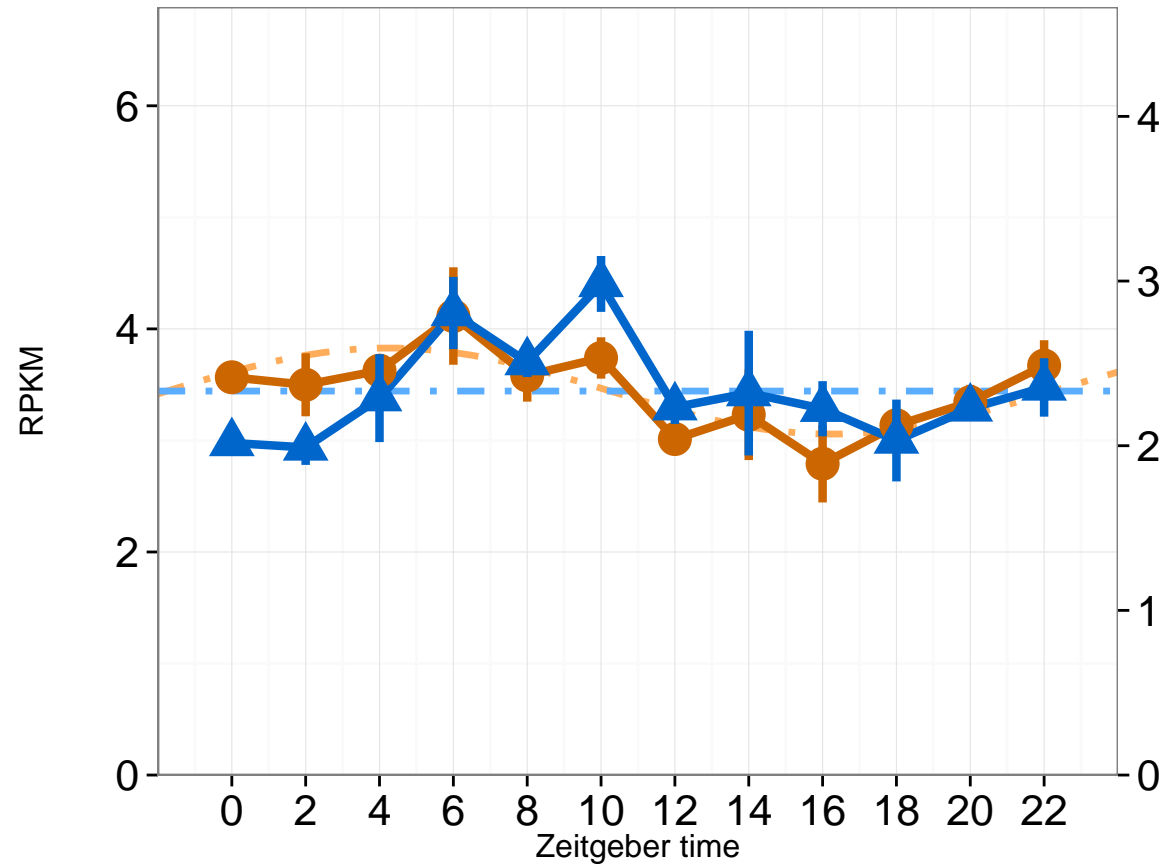

# Lrch1

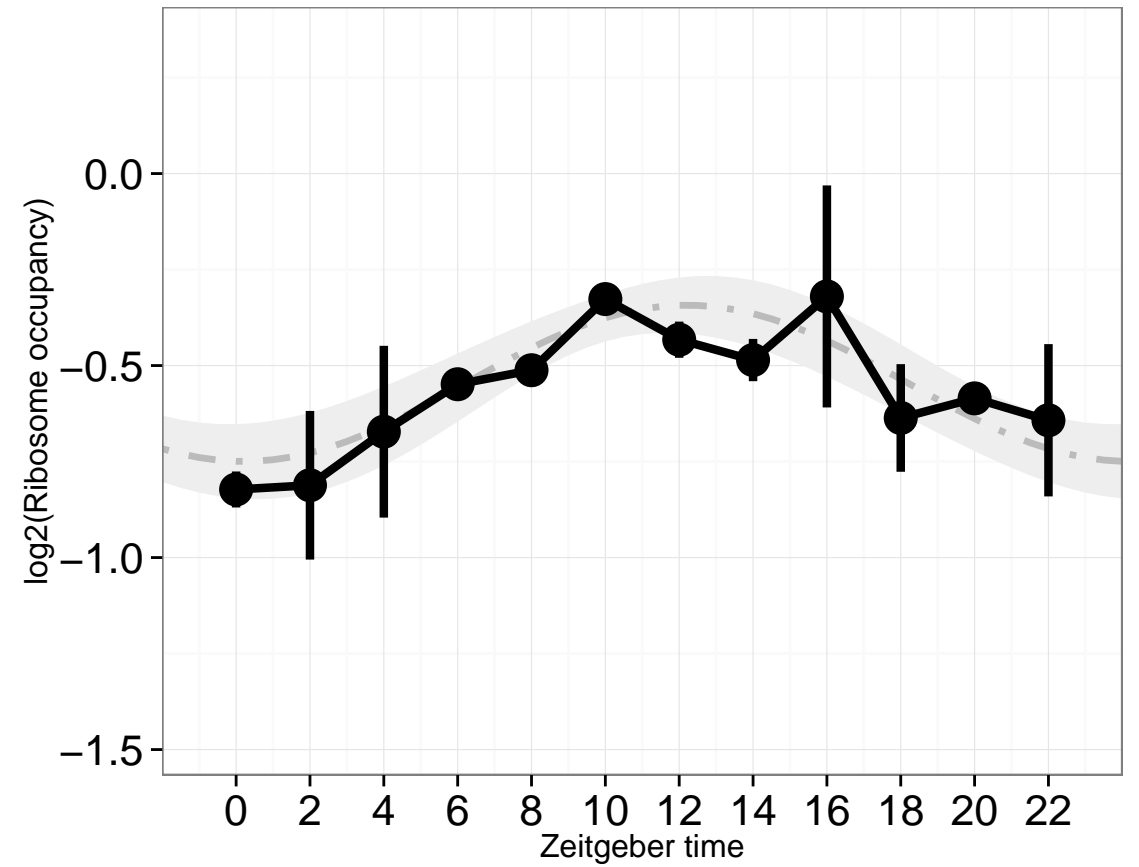

Supplement: SuppDataset_1.zip [file Lrch1_set_A.pdf › Supplemental Dataset 1/A-mRNA_nonrhyth_translation_nonrhyth/Lrch1_set_A.pdf]

# Lrch3

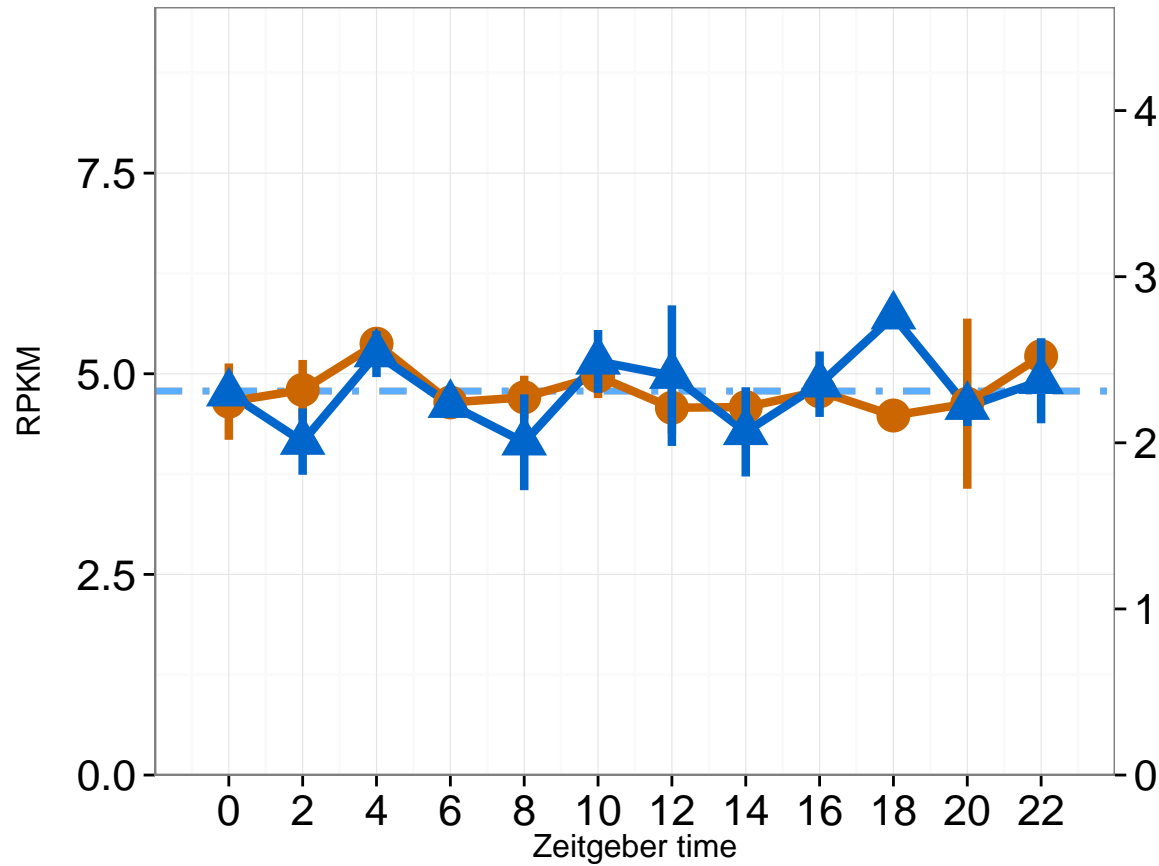

# Lrch3

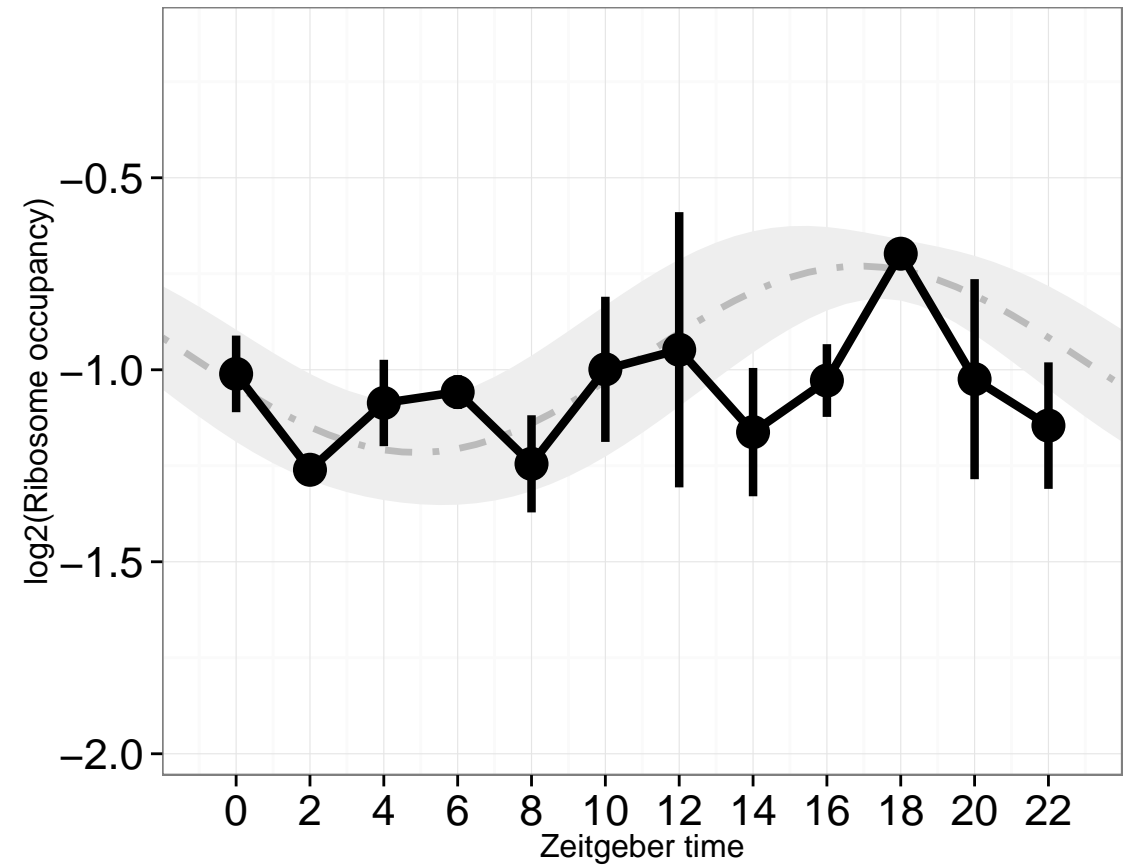

Supplement: SuppDataset_1.zip [file Lrch3_set_A.pdf › Supplemental Dataset 1/A-mRNA_nonrhyth_translation_nonrhyth/Lrch3_set_A.pdf]

## Lrif1

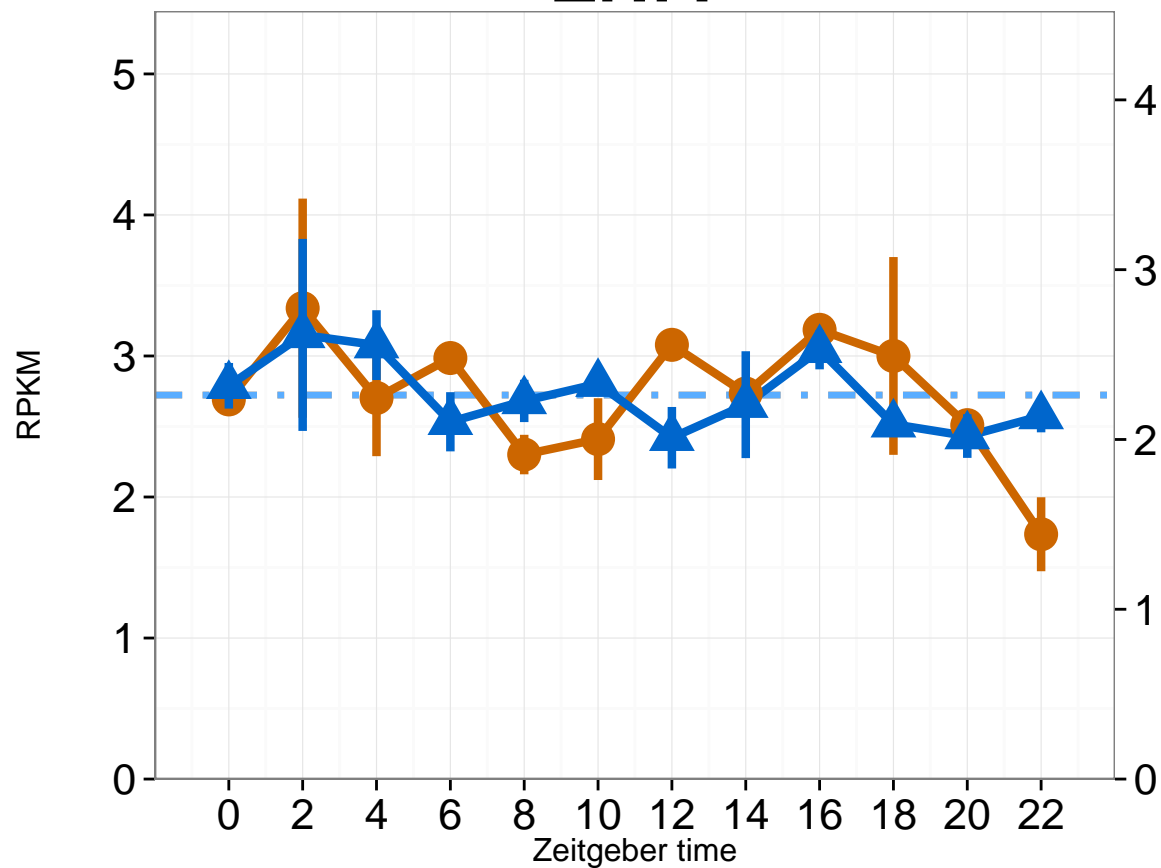

## Lrif1

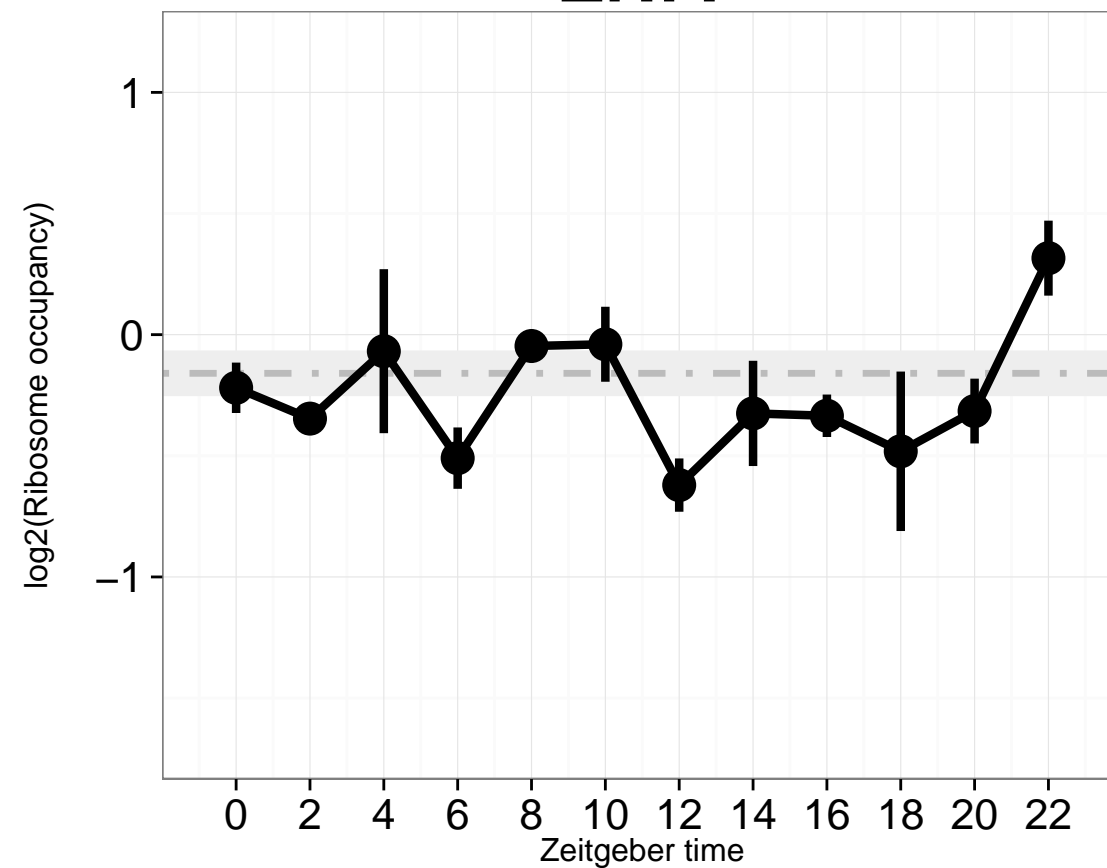

Supplement: SuppDataset_1.zip [file Lrif1_set_A.pdf › Supplemental Dataset 1/A-mRNA_nonrhyth_translation_nonrhyth/Lrif1_set_A.pdf]

# Lrig1

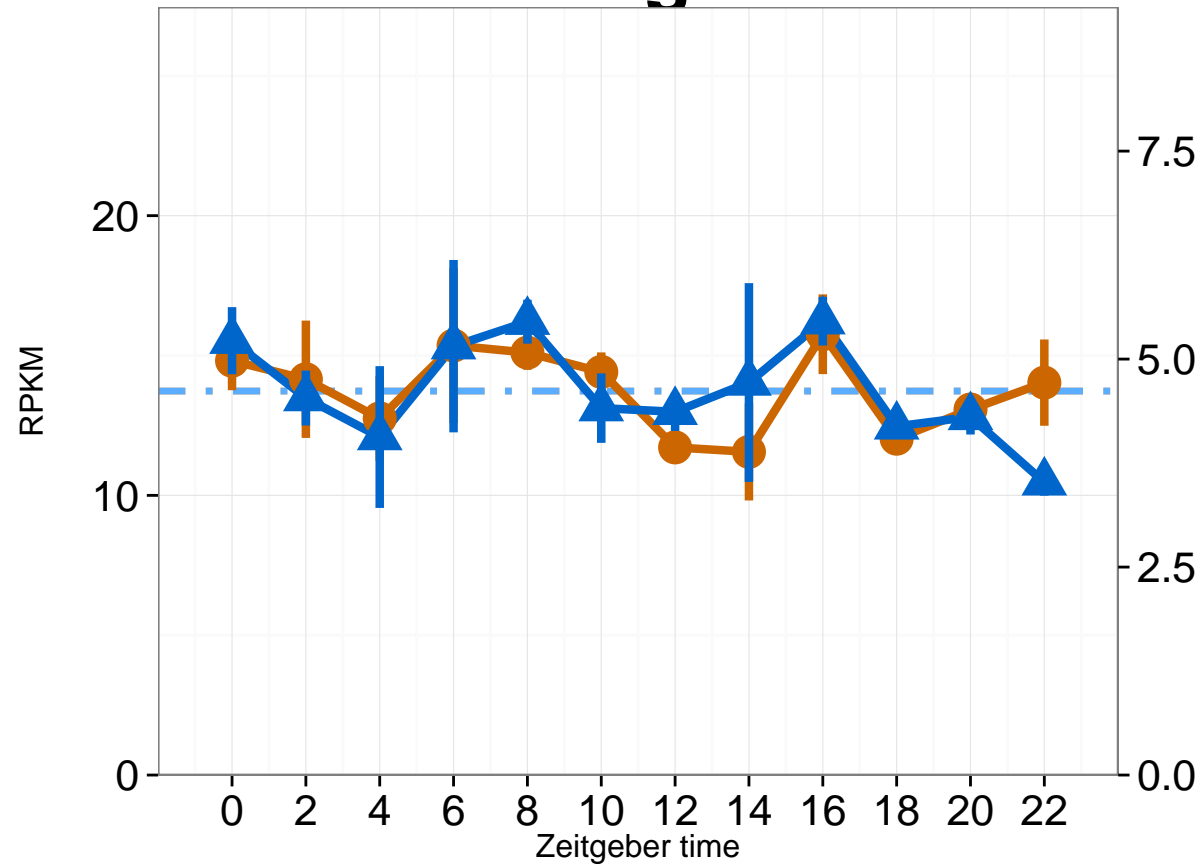

# Lrig1

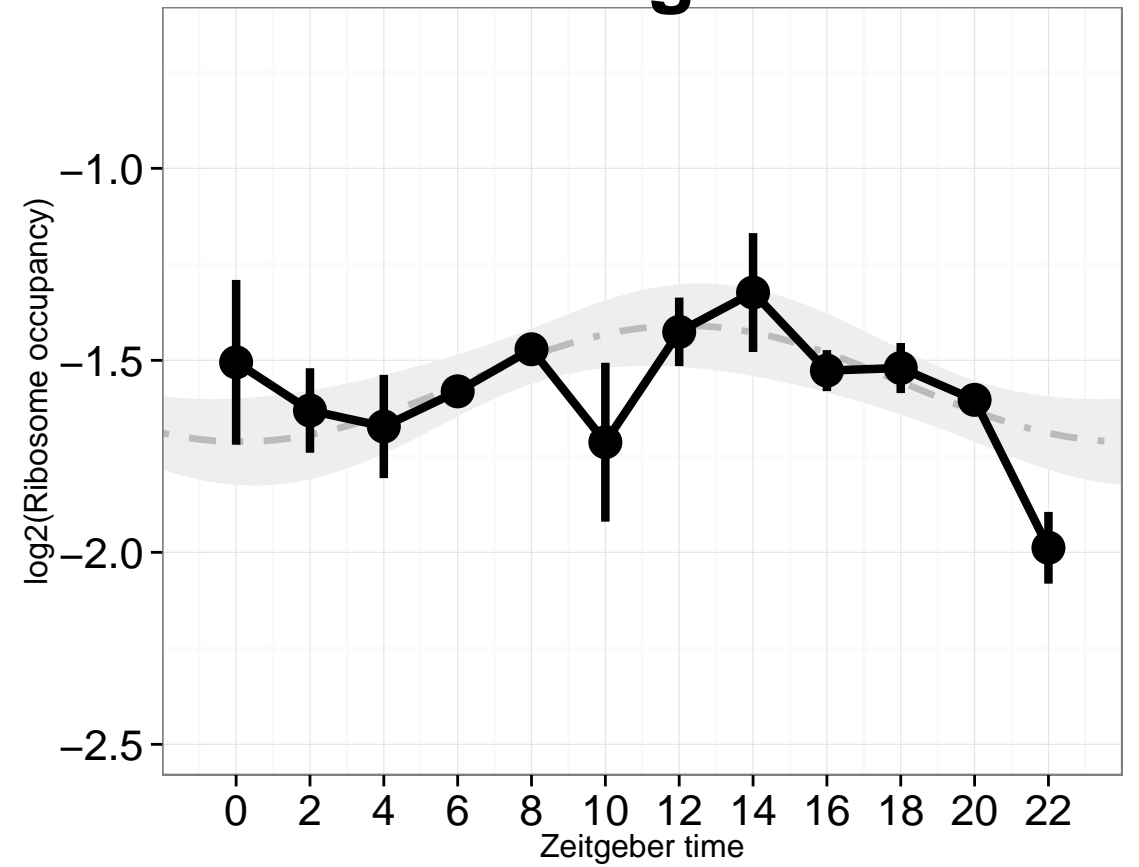

Supplement: SuppDataset_1.zip [file Lrig1_set_A.pdf › Supplemental Dataset 1/A-mRNA_nonrhyth_translation_nonrhyth/Lrig1_set_A.pdf]

# Lrig2

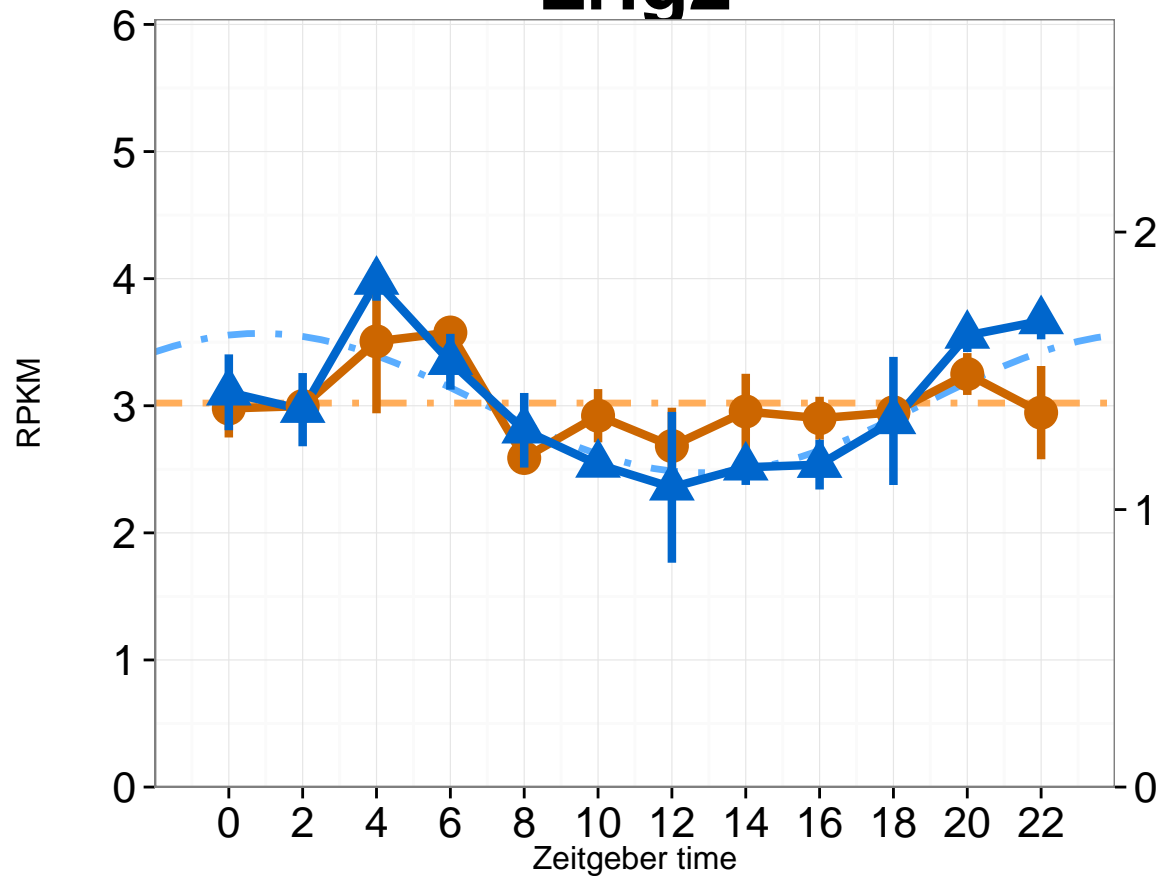

# Lrig2

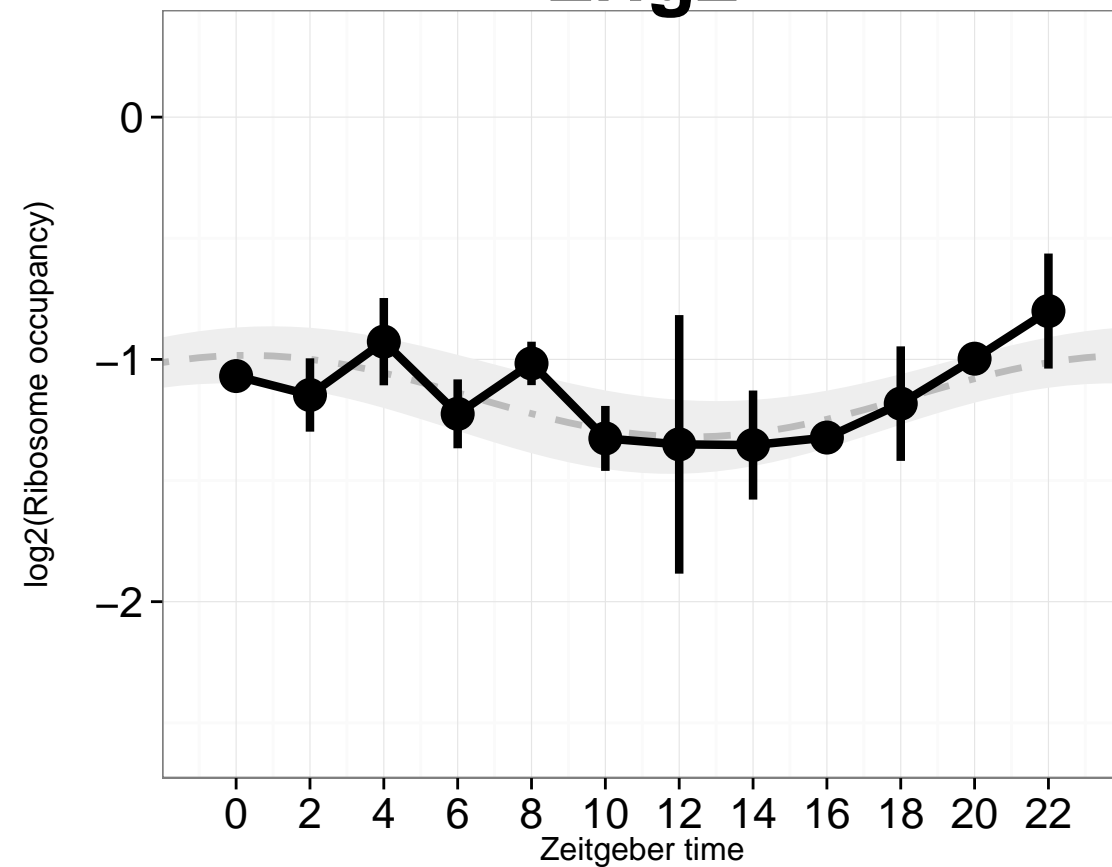

Supplement: SuppDataset_1.zip [file Lrig2_set_A.pdf › Supplemental Dataset 1/A-mRNA_nonrhyth_translation_nonrhyth/Lrig2_set_A.pdf]

# Lrig3

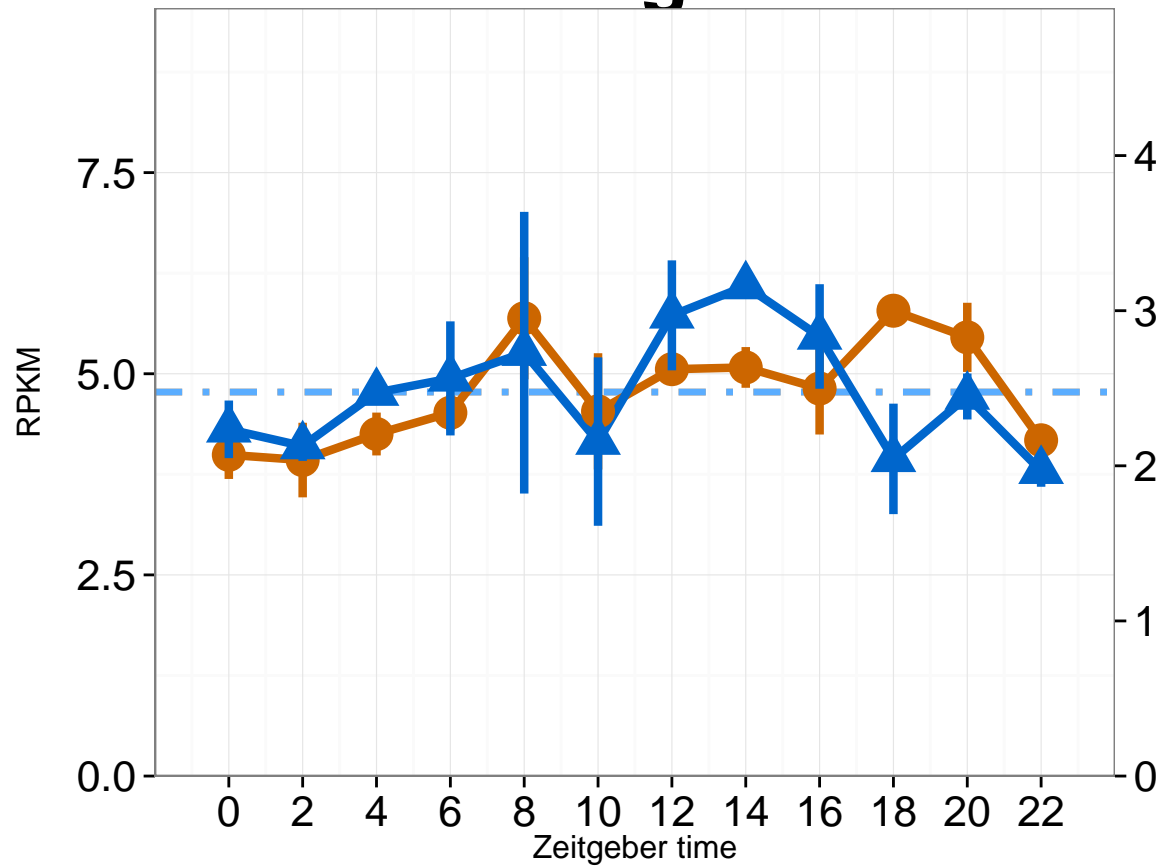

# Lrig3

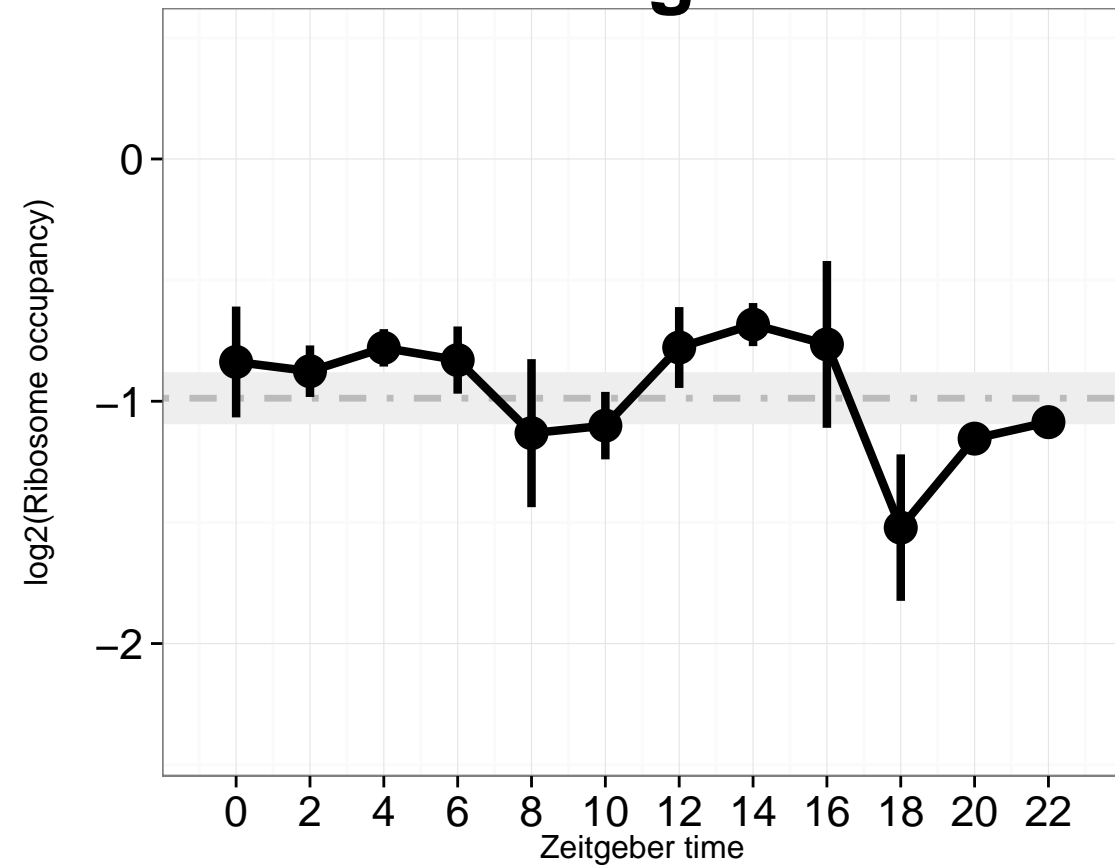

Supplement: SuppDataset_1.zip [file Lrig3_set_A.pdf › Supplemental Dataset 1/A-mRNA_nonrhyth_translation_nonrhyth/Lrig3_set_A.pdf]

# Lrmp

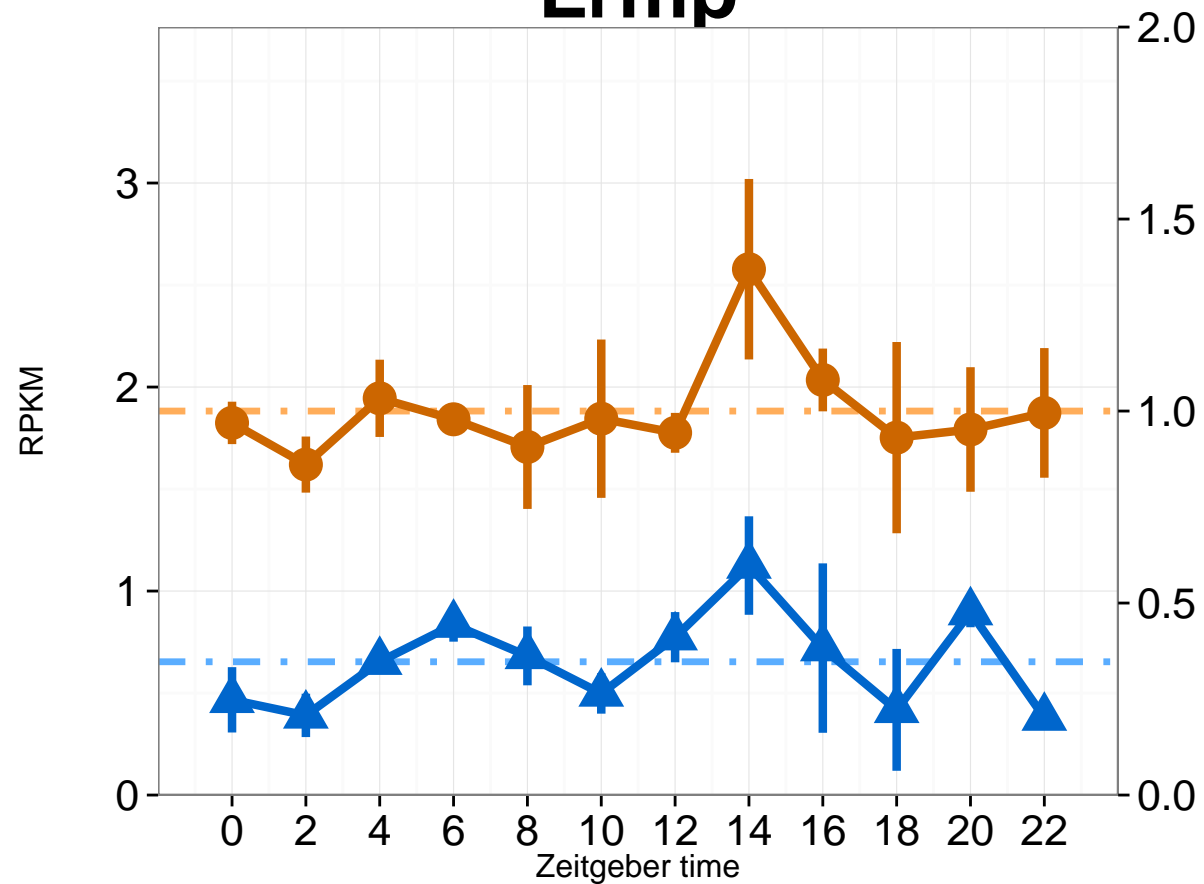

# Lrmp

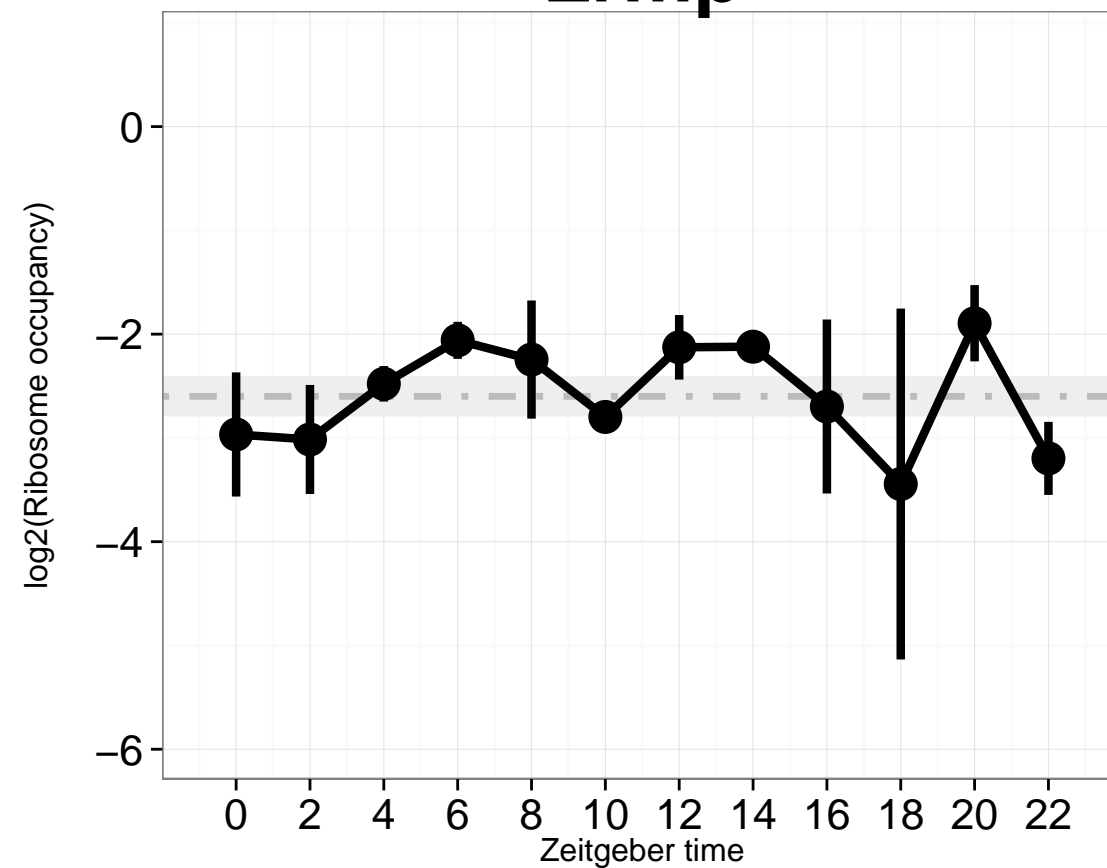

Supplement: SuppDataset_1.zip [file Lrmp_set_A.pdf › Supplemental Dataset 1/A-mRNA_nonrhyth_translation_nonrhyth/Lrmp_set_A.pdf]

# Lrp1

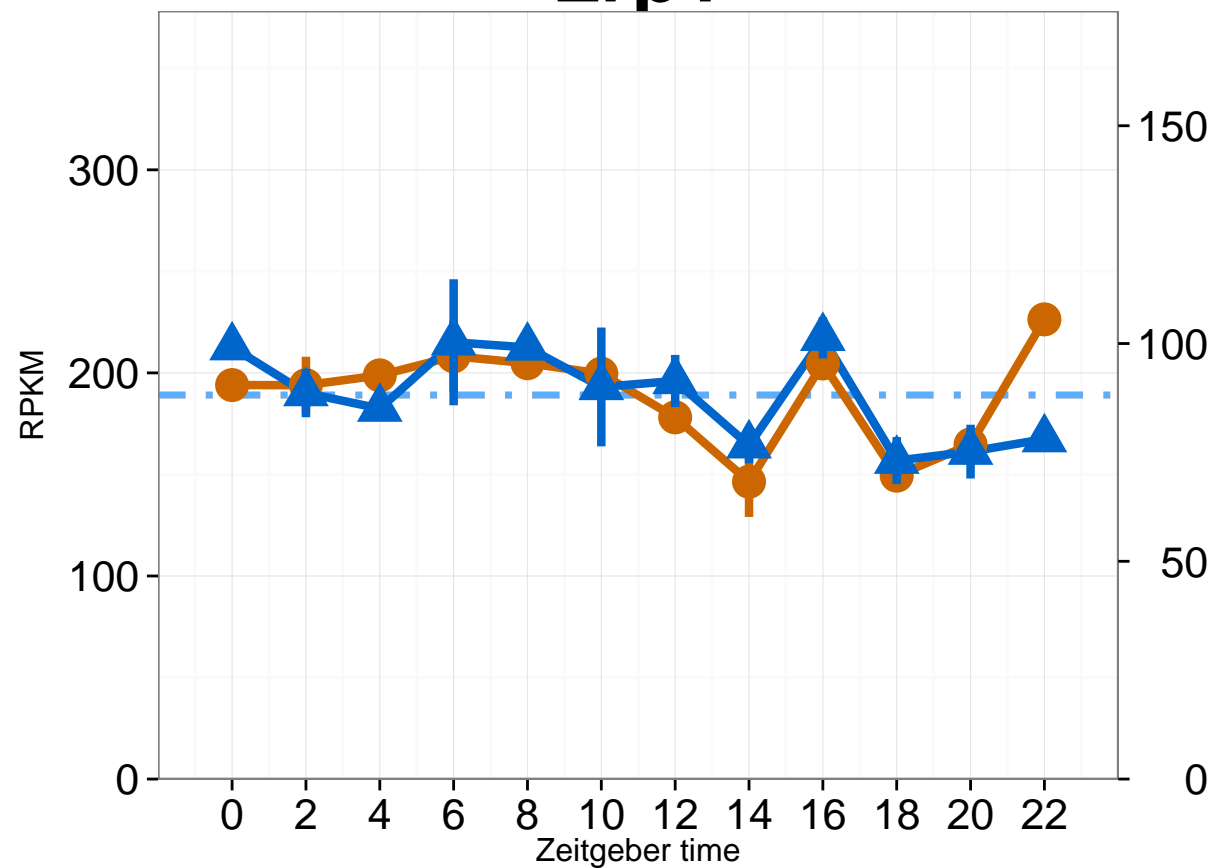

# Lrp1

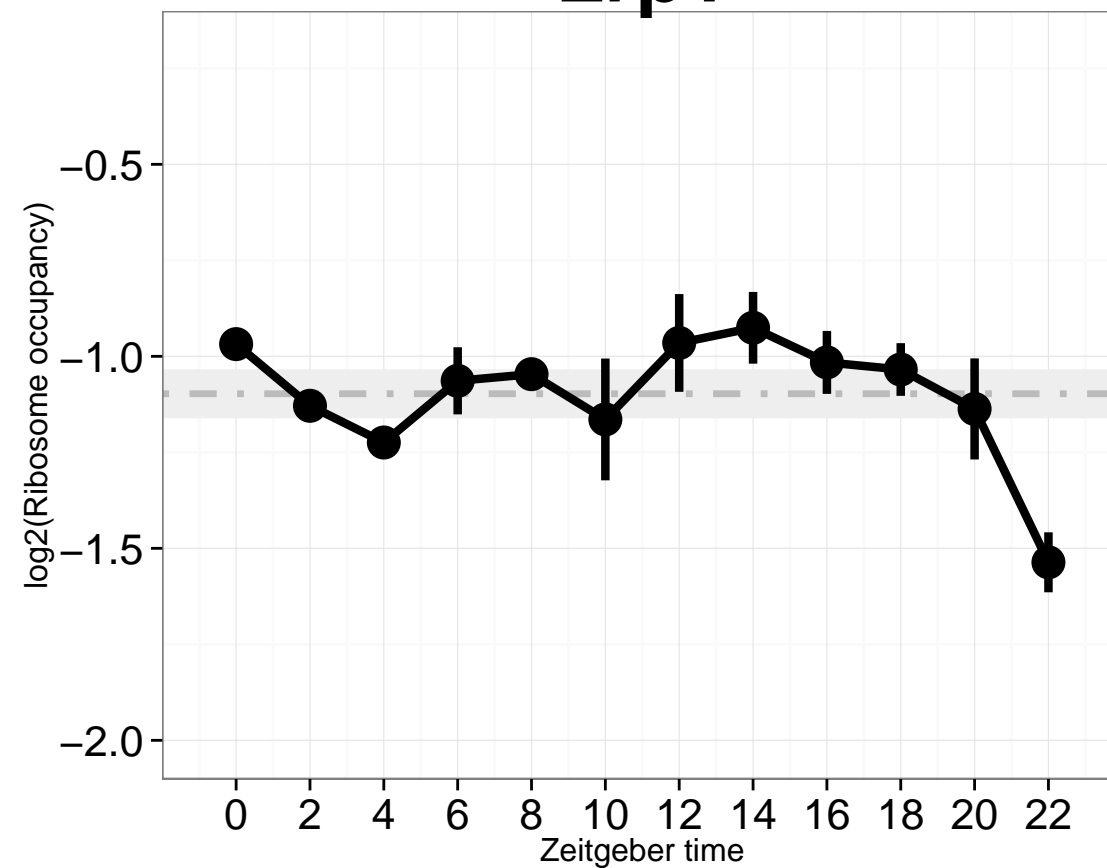

Supplement: SuppDataset_1.zip [file Lrp1_set_A.pdf › Supplemental Dataset 1/A-mRNA_nonrhyth_translation_nonrhyth/Lrp1_set_A.pdf]

## Lrp2bp

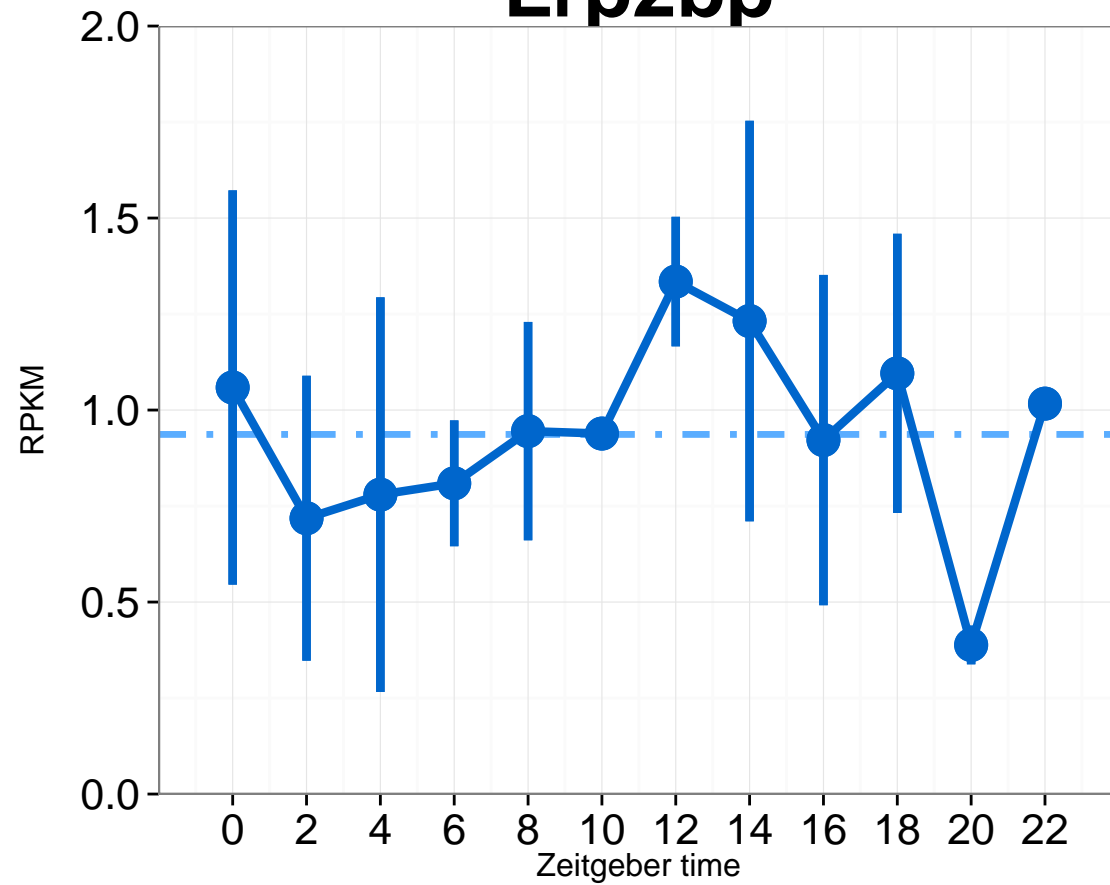

## Lrp2bp log2(Ribosome occupancy

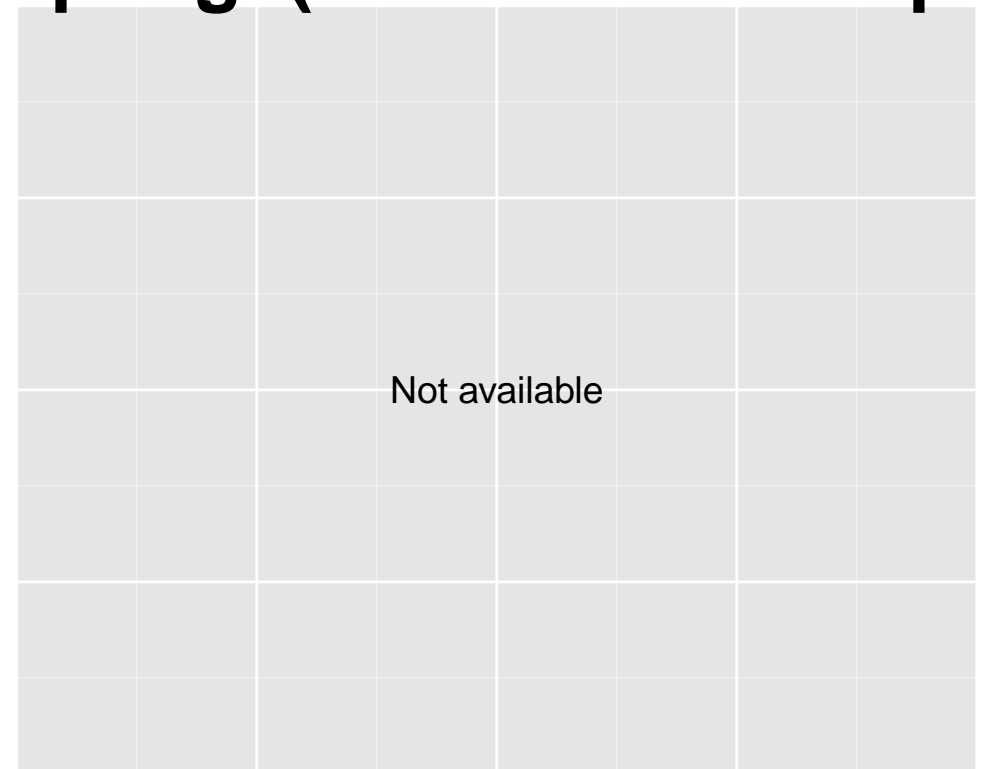

Supplement: SuppDataset_1.zip [file Lrp2bp_set_A.pdf › Supplemental Dataset 1/A-mRNA_nonrhyth_translation_nonrhyth/Lrp2bp_set_A.pdf]

# Lrp3

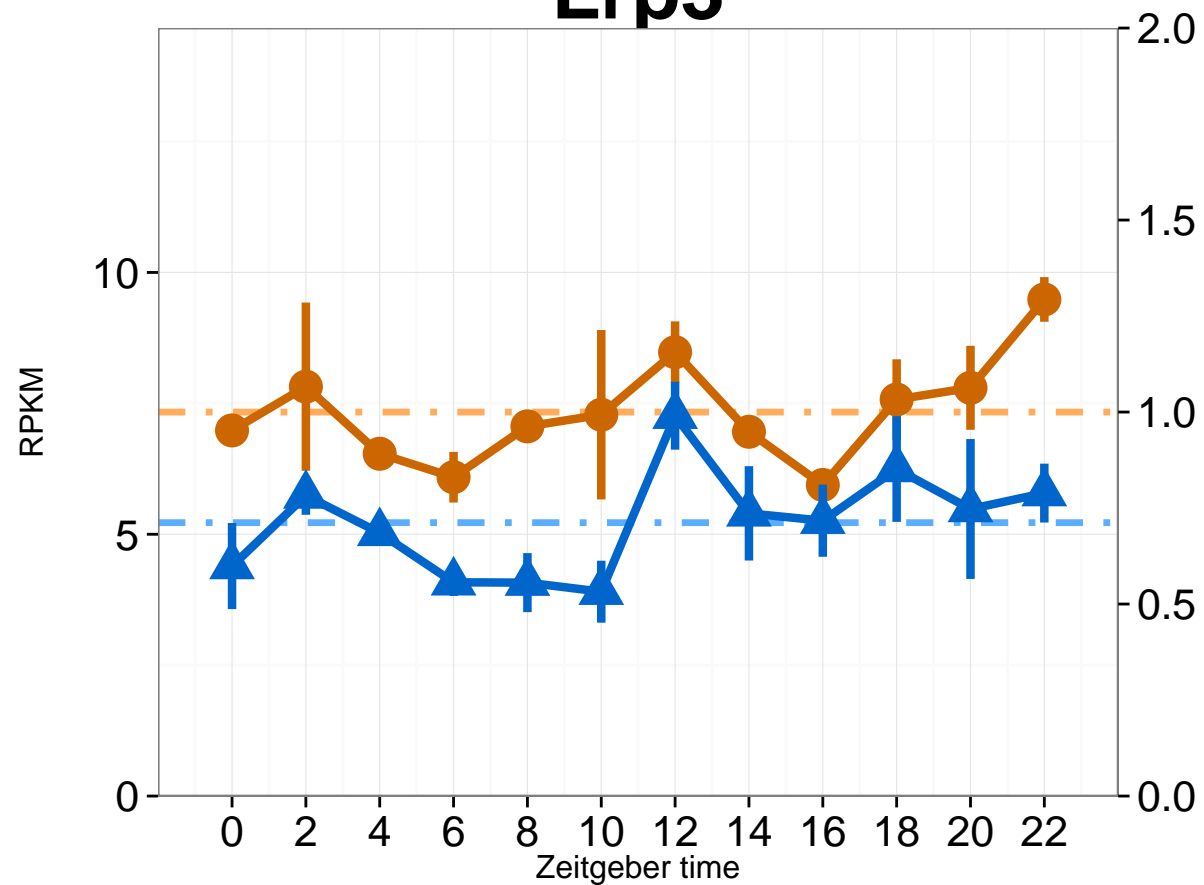

# Lrp3

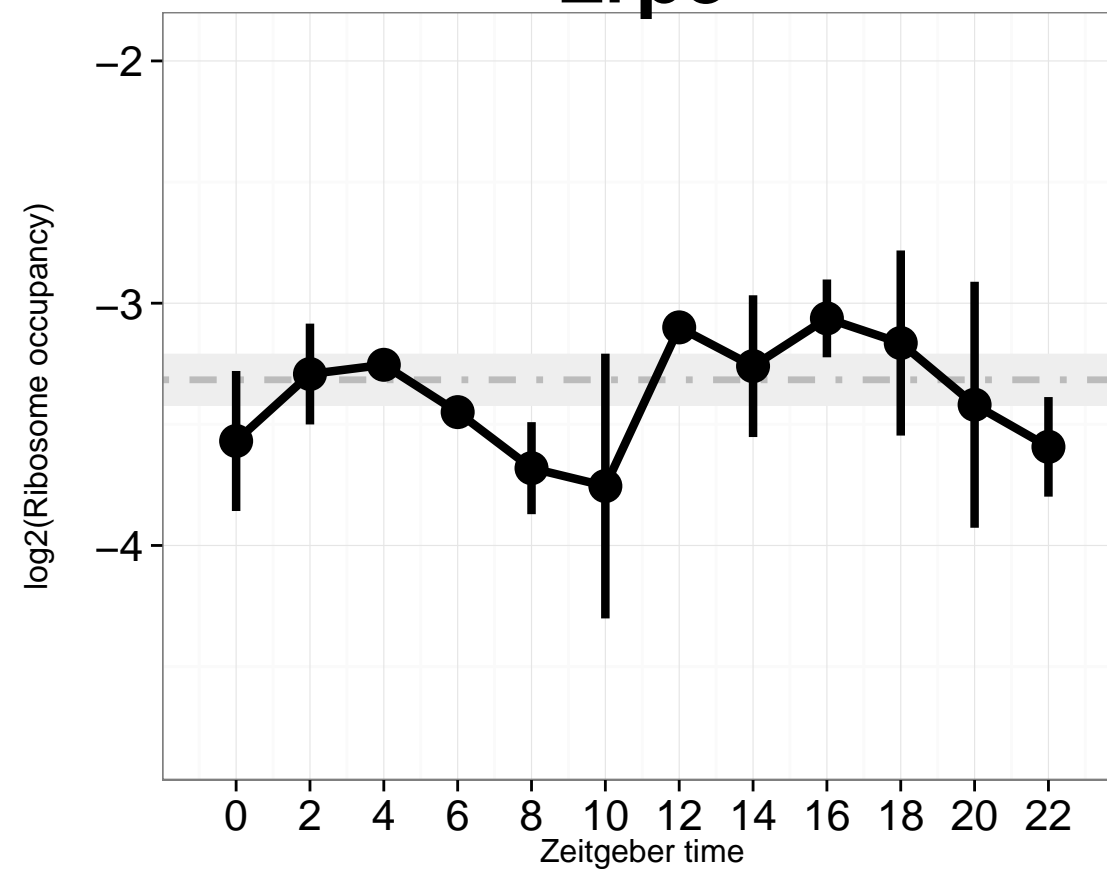

Supplement: SuppDataset_1.zip [file Lrp3_set_A.pdf › Supplemental Dataset 1/A-mRNA_nonrhyth_translation_nonrhyth/Lrp3_set_A.pdf]

# Lrp6

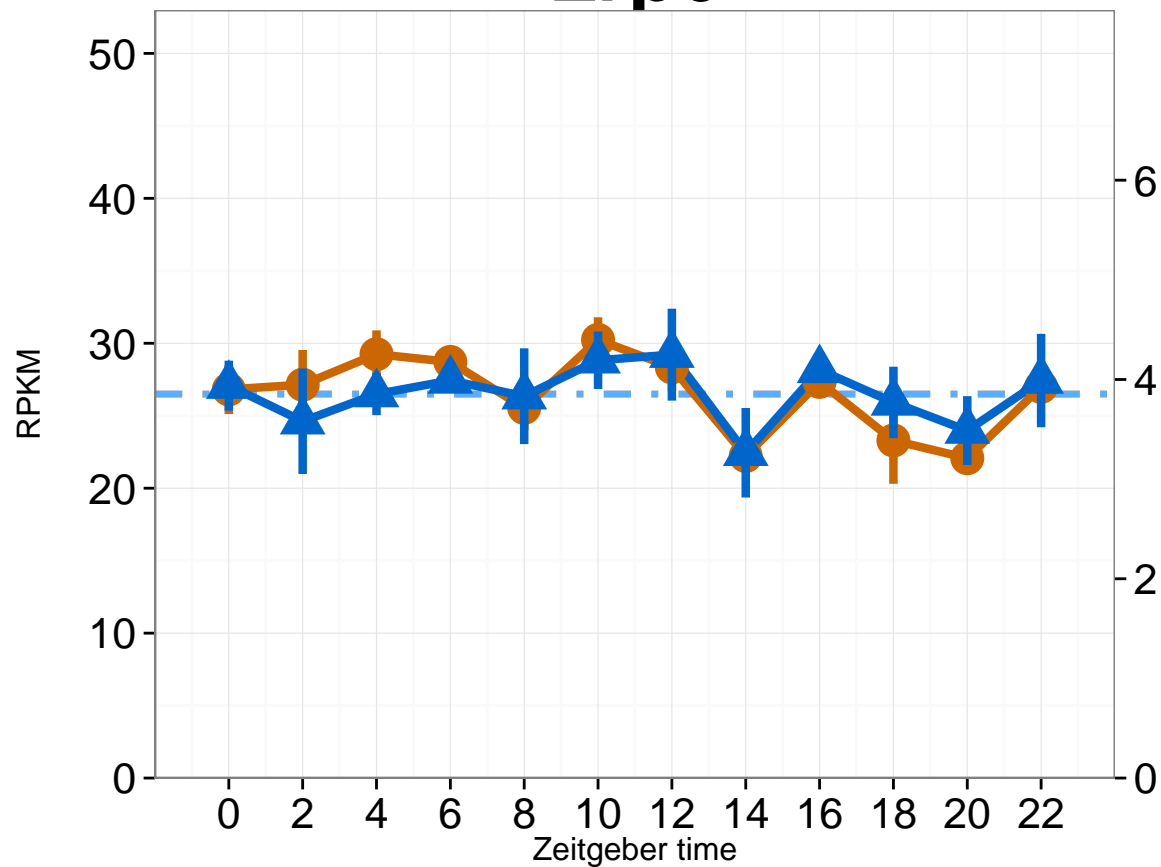

# Lrp6

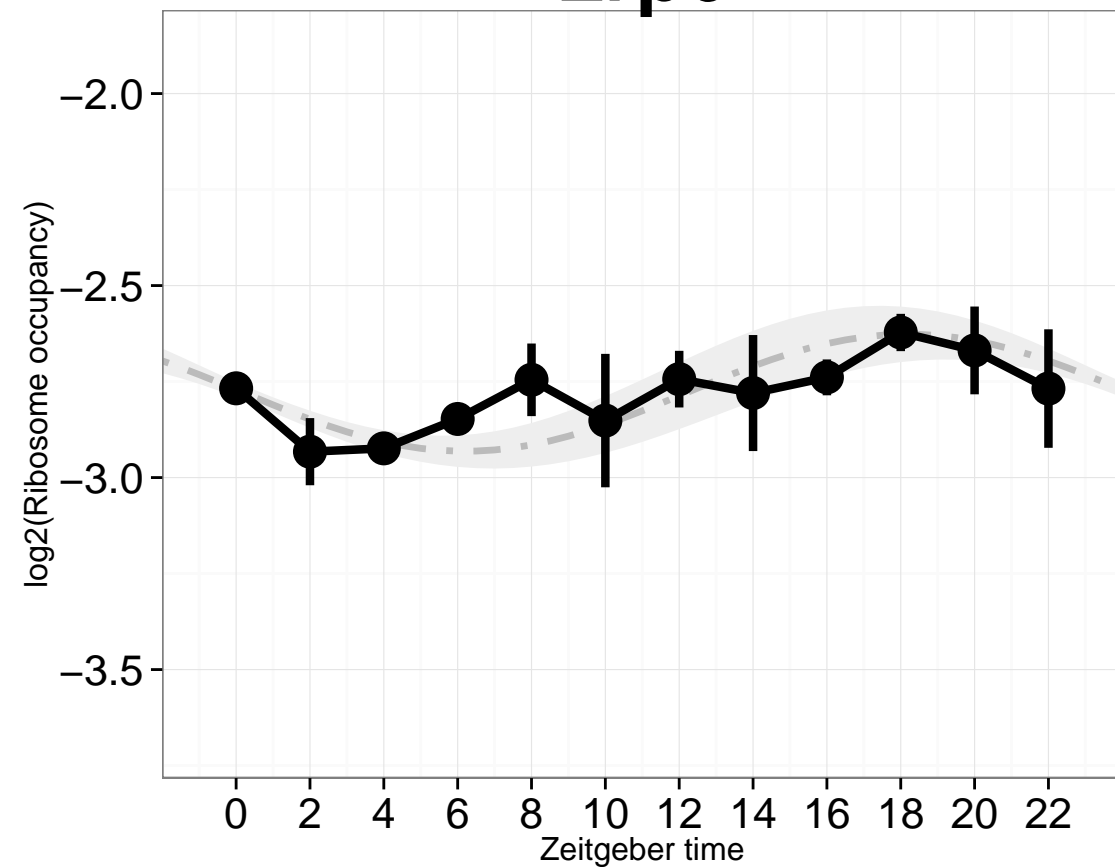

Supplement: SuppDataset_1.zip [file Lrp6_set_A.pdf › Supplemental Dataset 1/A-mRNA_nonrhyth_translation_nonrhyth/Lrp6_set_A.pdf]

# Lrpap1

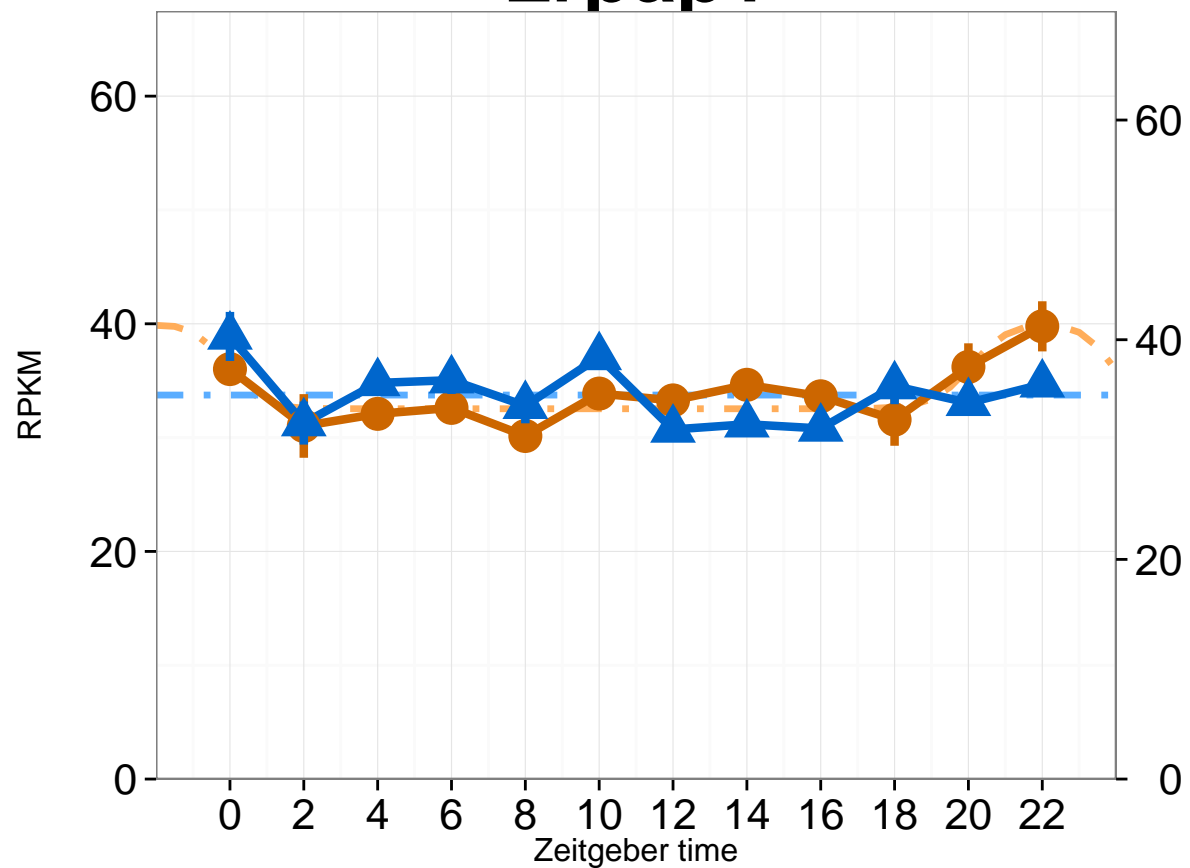

# Lrpap1

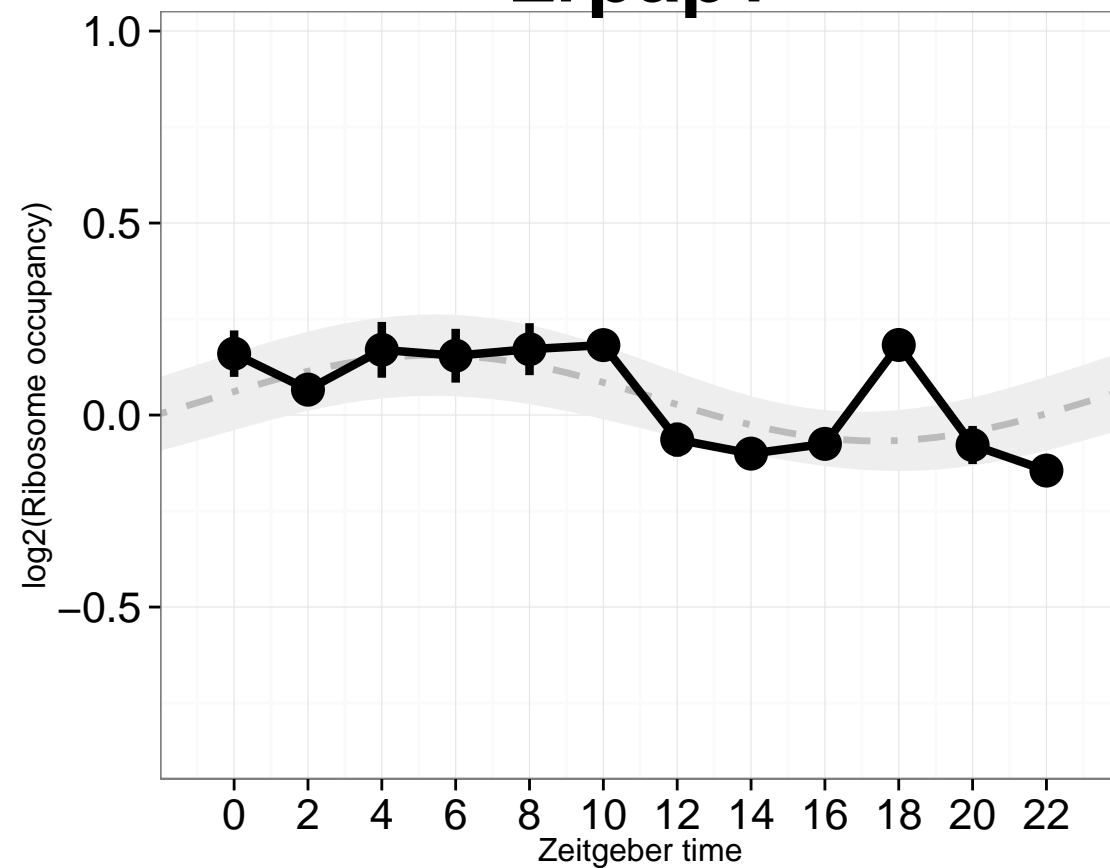

Supplement: SuppDataset_1.zip [file Lrpap1_set_A.pdf › Supplemental Dataset 1/A-mRNA_nonrhyth_translation_nonrhyth/Lrpap1_set_A.pdf]

# Lrpprc

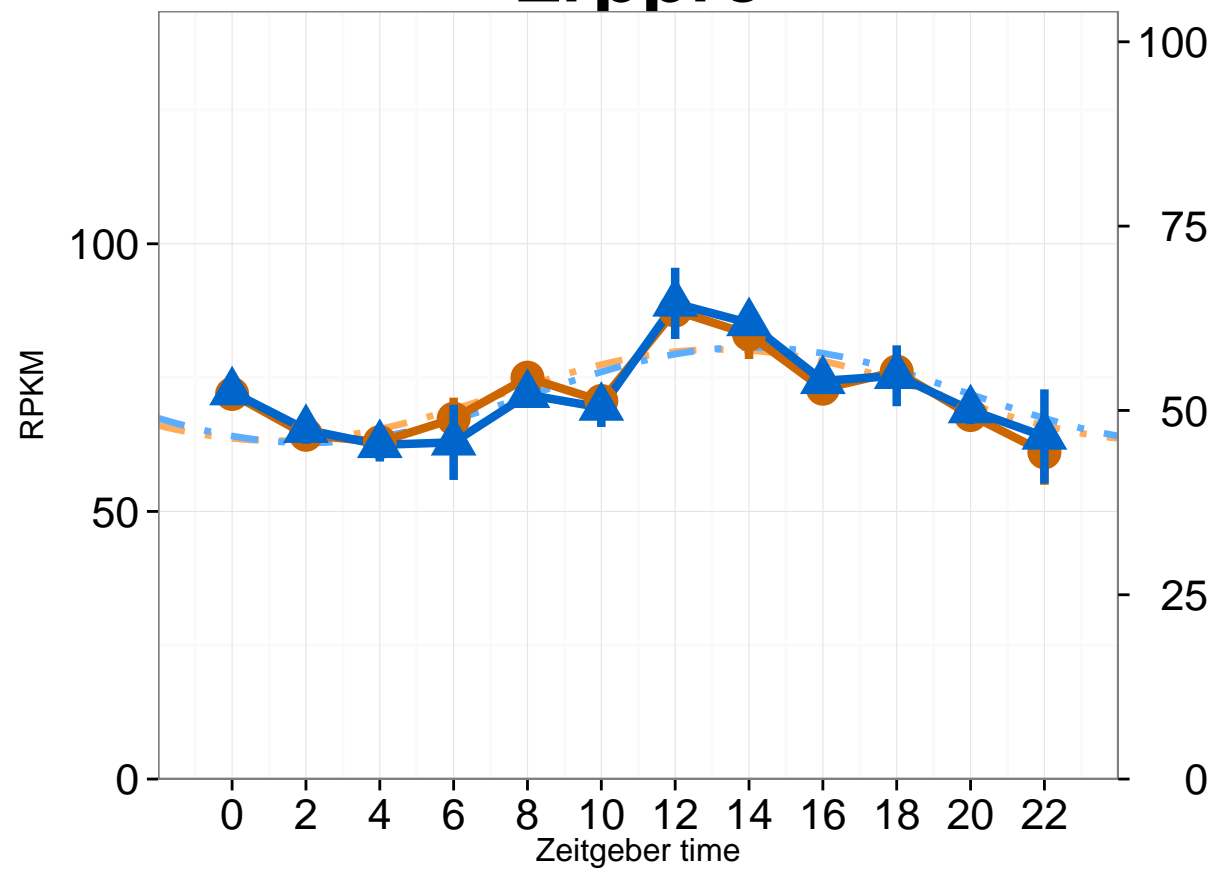

# Lrpprc

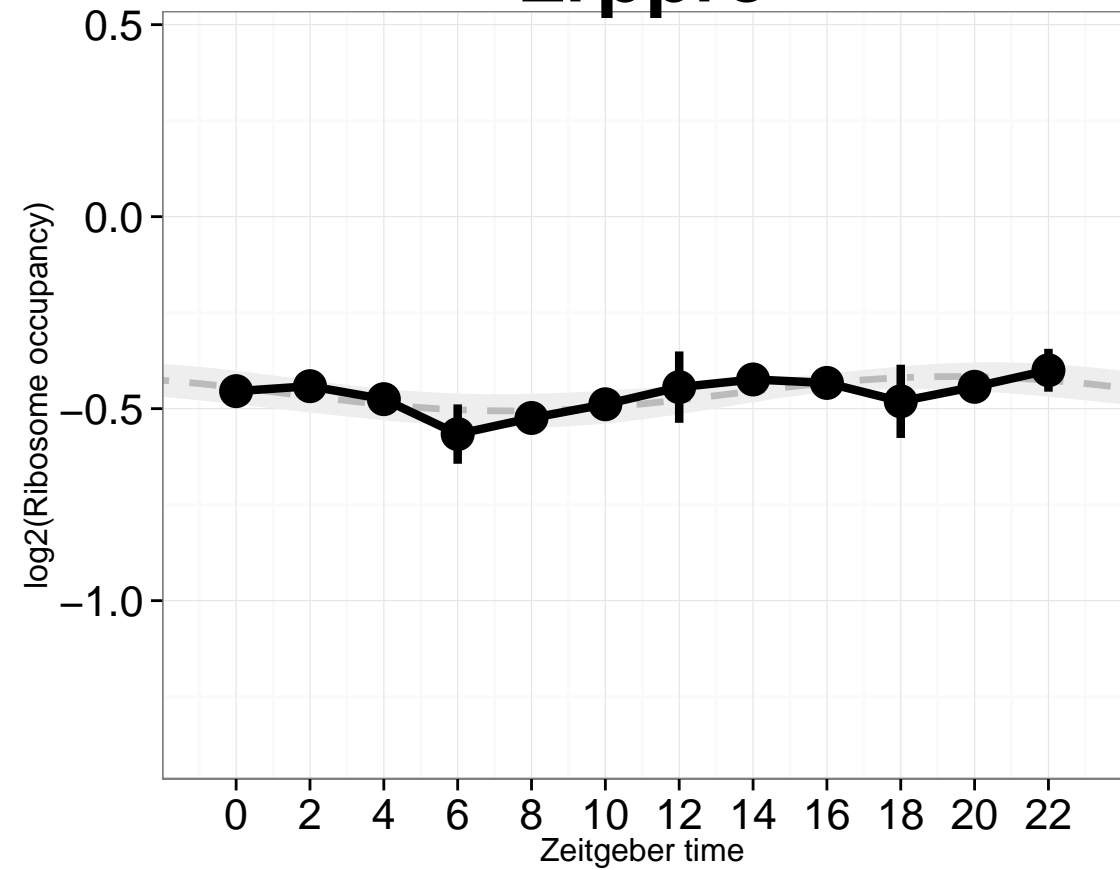

Supplement: SuppDataset_1.zip [file Lrpprc_set_A.pdf › Supplemental Dataset 1/A-mRNA_nonrhyth_translation_nonrhyth/Lrpprc_set_A.pdf]

# Lrrc14

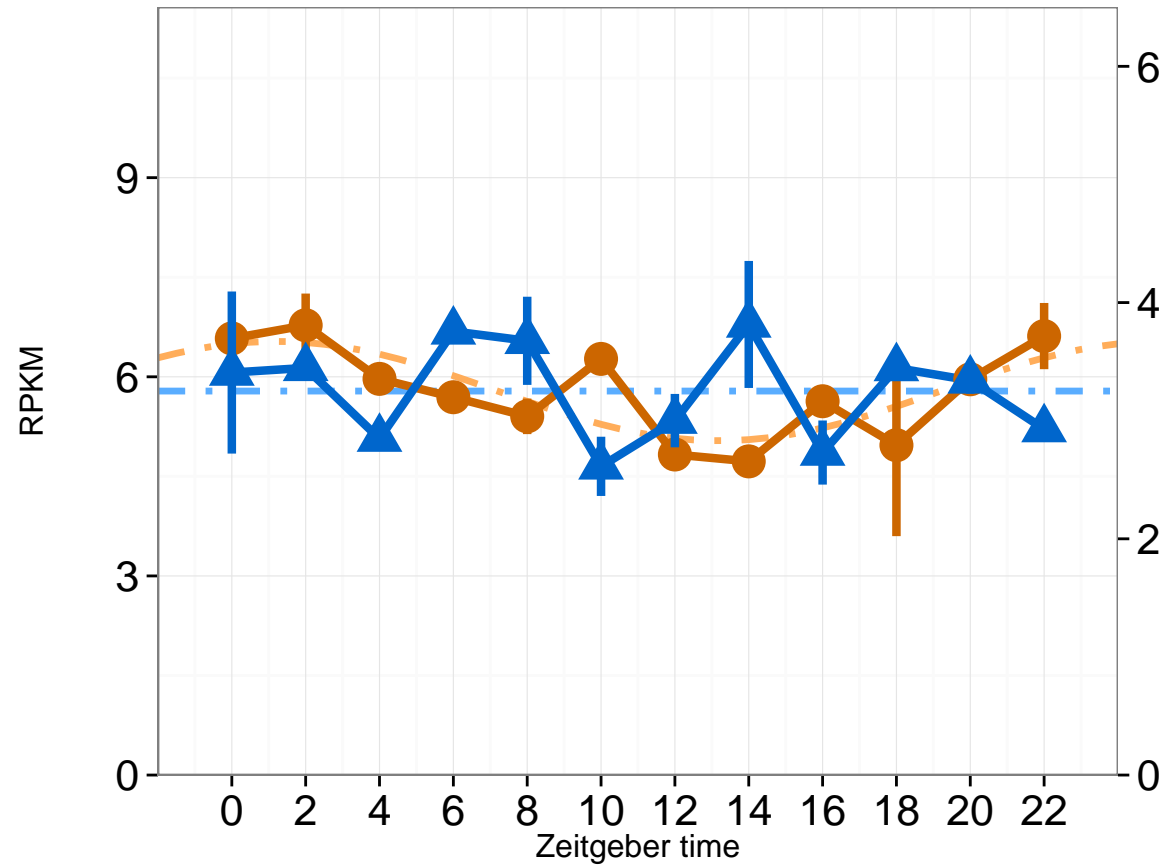

# Lrrc14

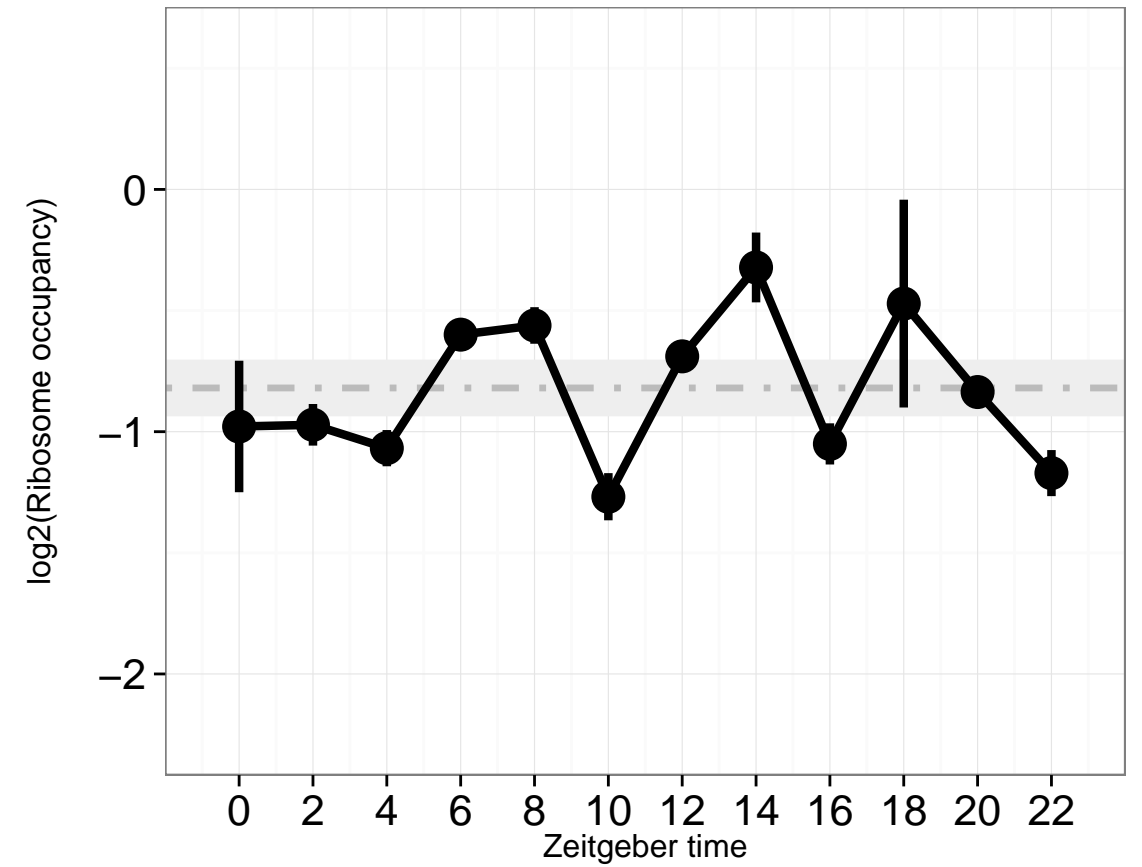

Supplement: SuppDataset_1.zip [file Lrrc14_set_A.pdf › Supplemental Dataset 1/A-mRNA_nonrhyth_translation_nonrhyth/Lrrc14_set_A.pdf]

**Lrrc14b TR**

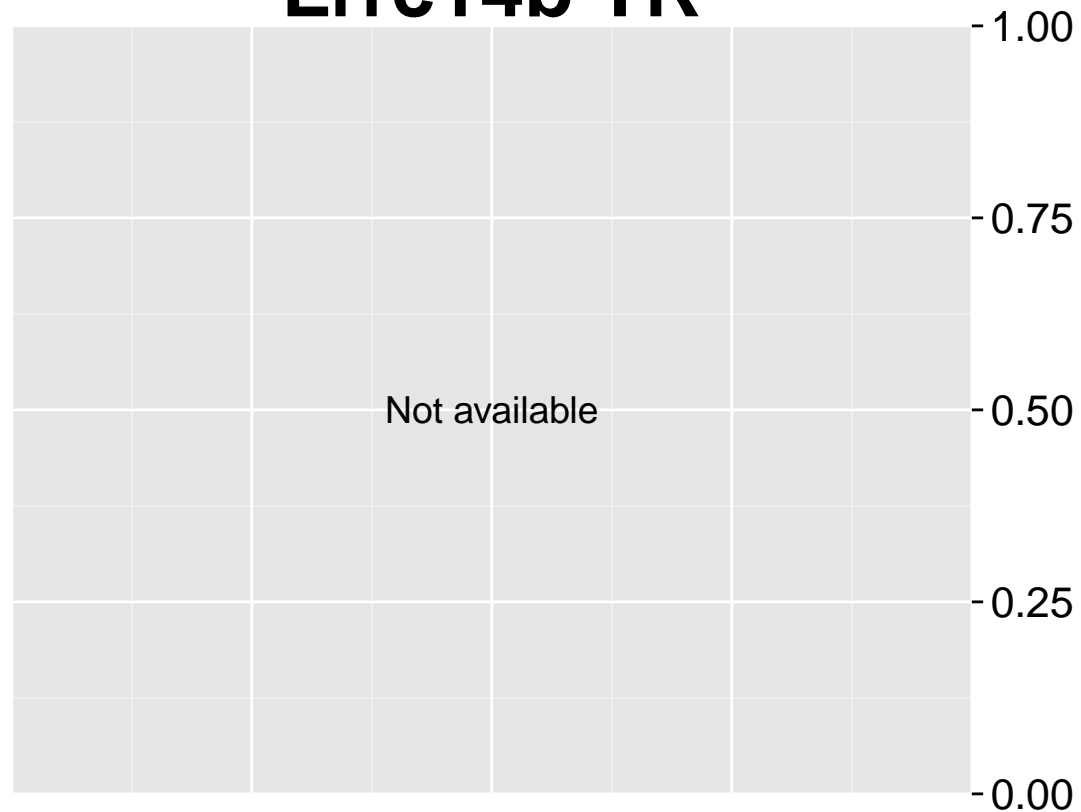

**Lrrc14b log2(Ribosome occupancy**

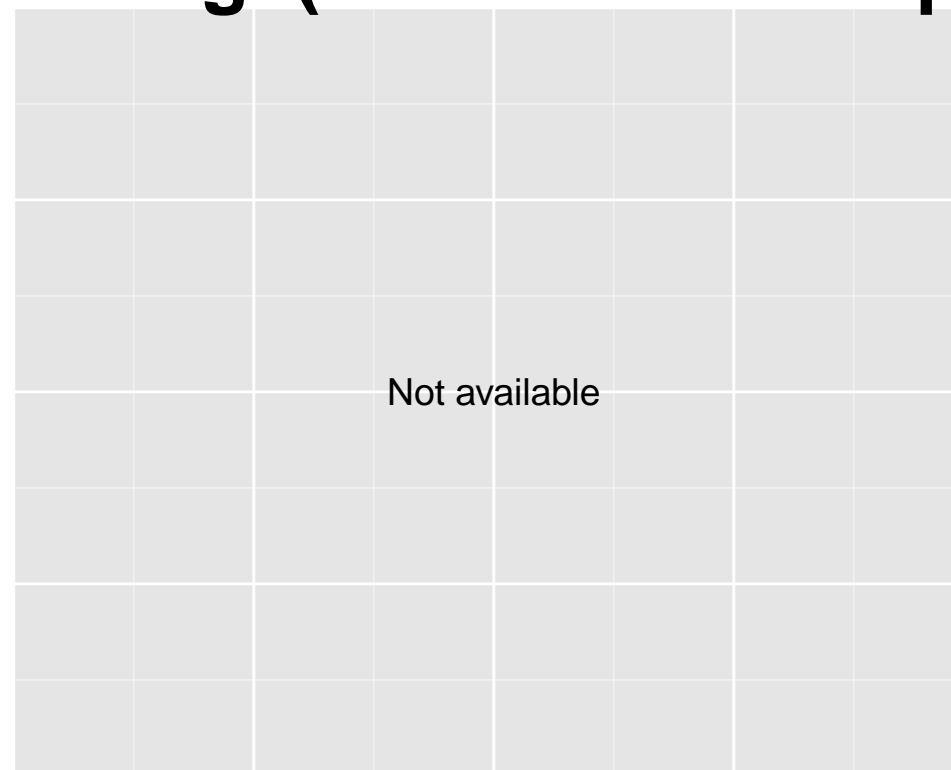

Supplement: SuppDataset_1.zip [file Lrrc14b_set_A.pdf › Supplemental Dataset 1/A-mRNA_nonrhyth_translation_nonrhyth/Lrrc14b_set_A.pdf]

# Lrrc16a

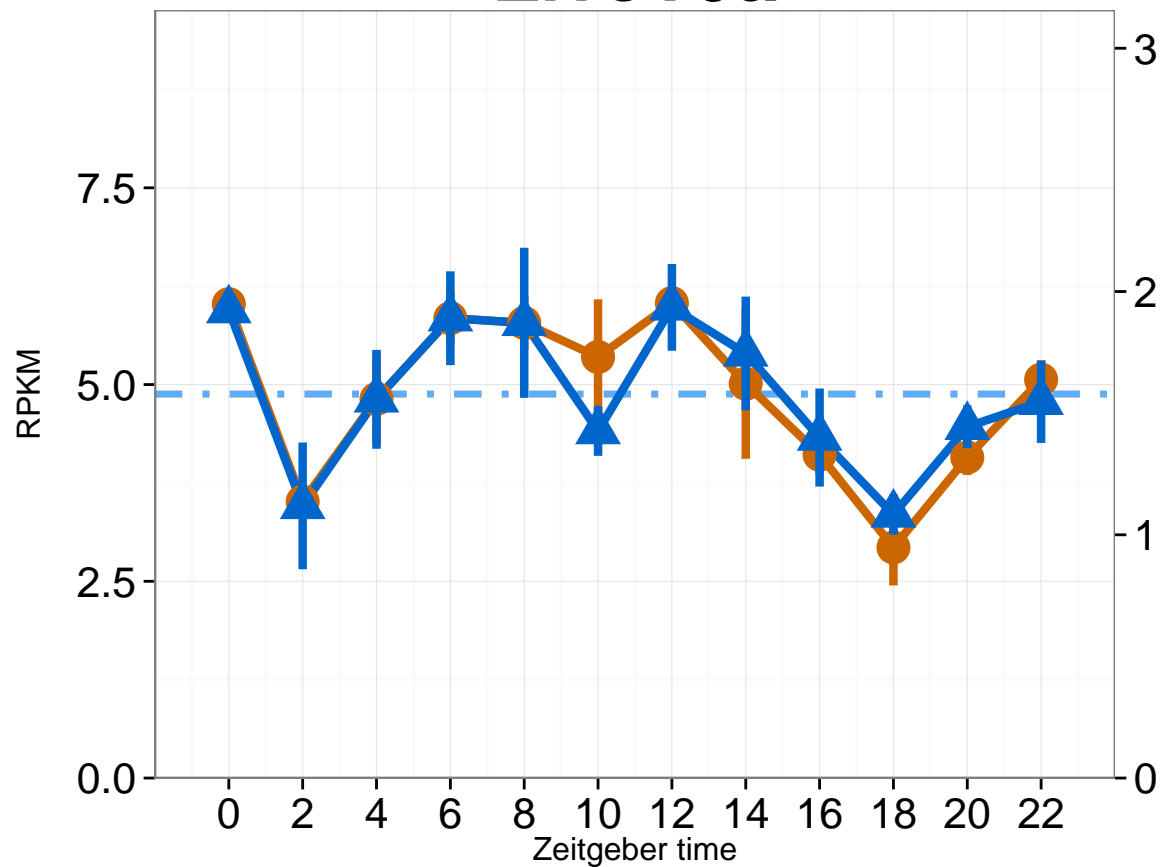

# Lrrc16a

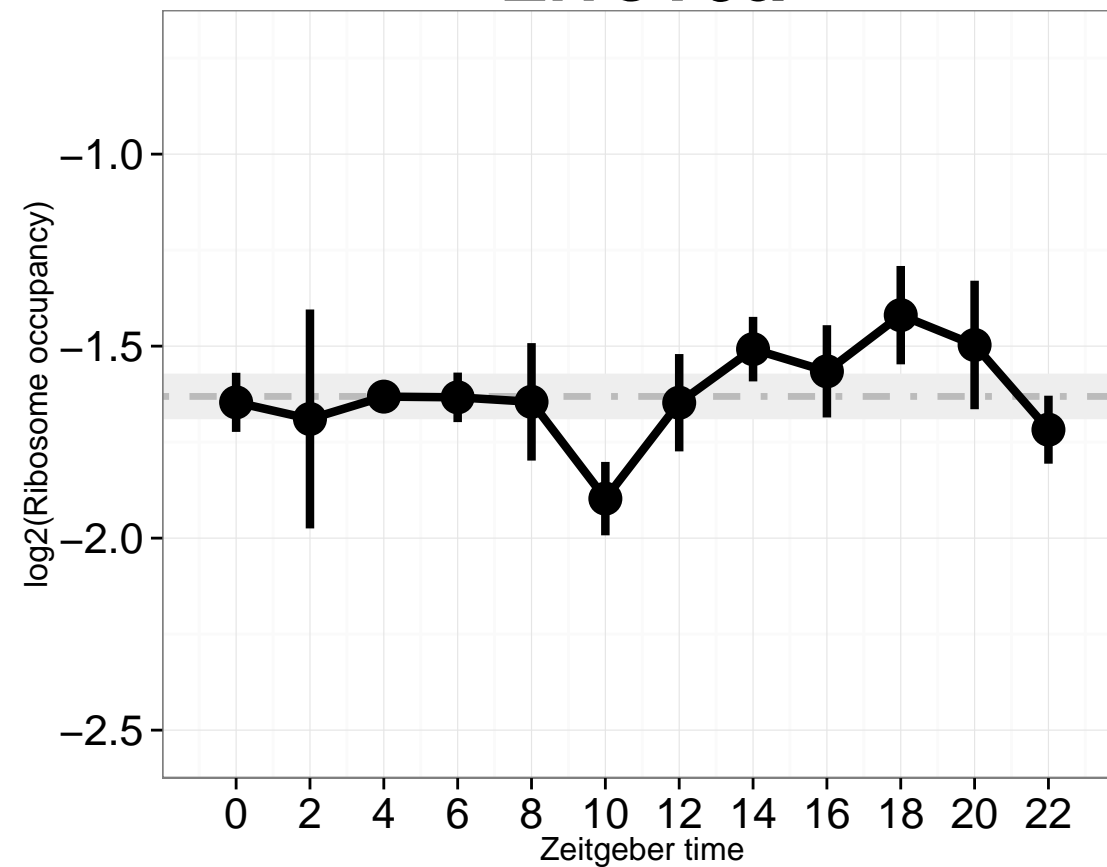

Supplement: SuppDataset_1.zip [file Lrrc16a_set_A.pdf › Supplemental Dataset 1/A-mRNA_nonrhyth_translation_nonrhyth/Lrrc16a_set_A.pdf]

# Lrrc20

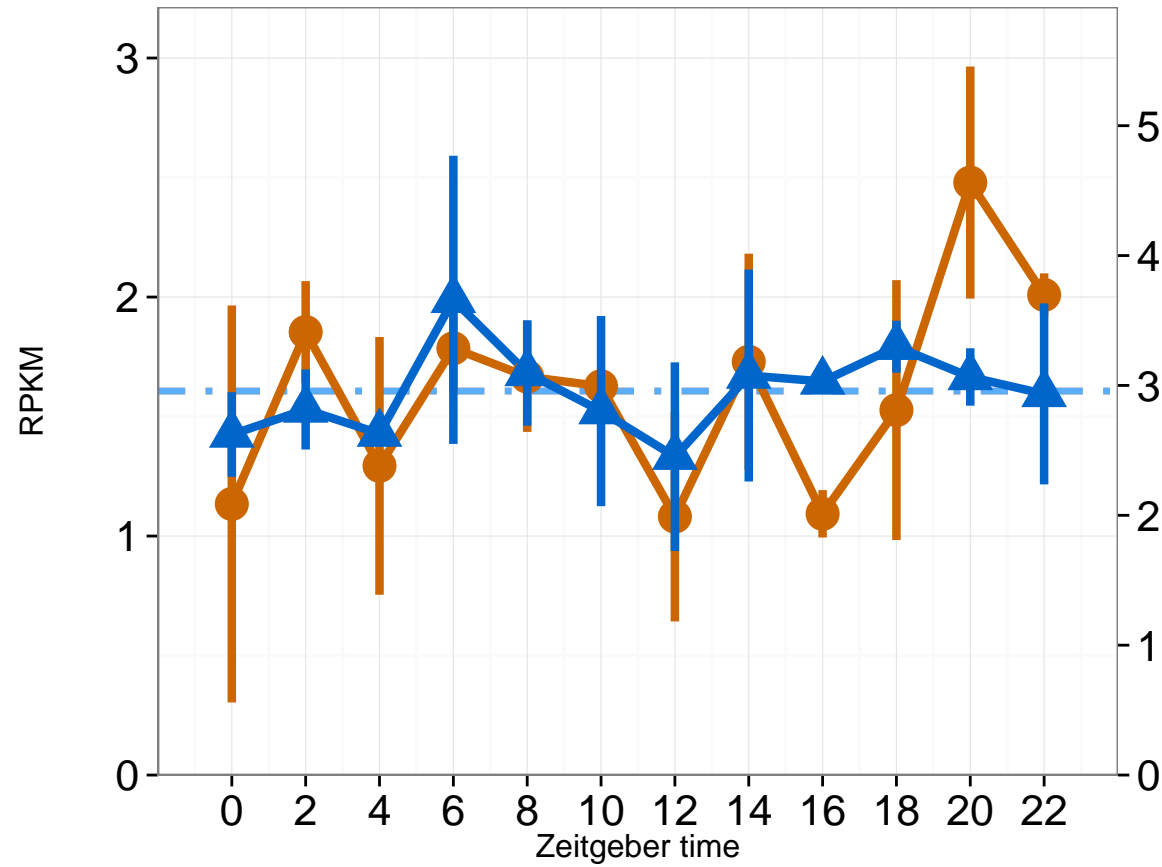

# Lrrc20

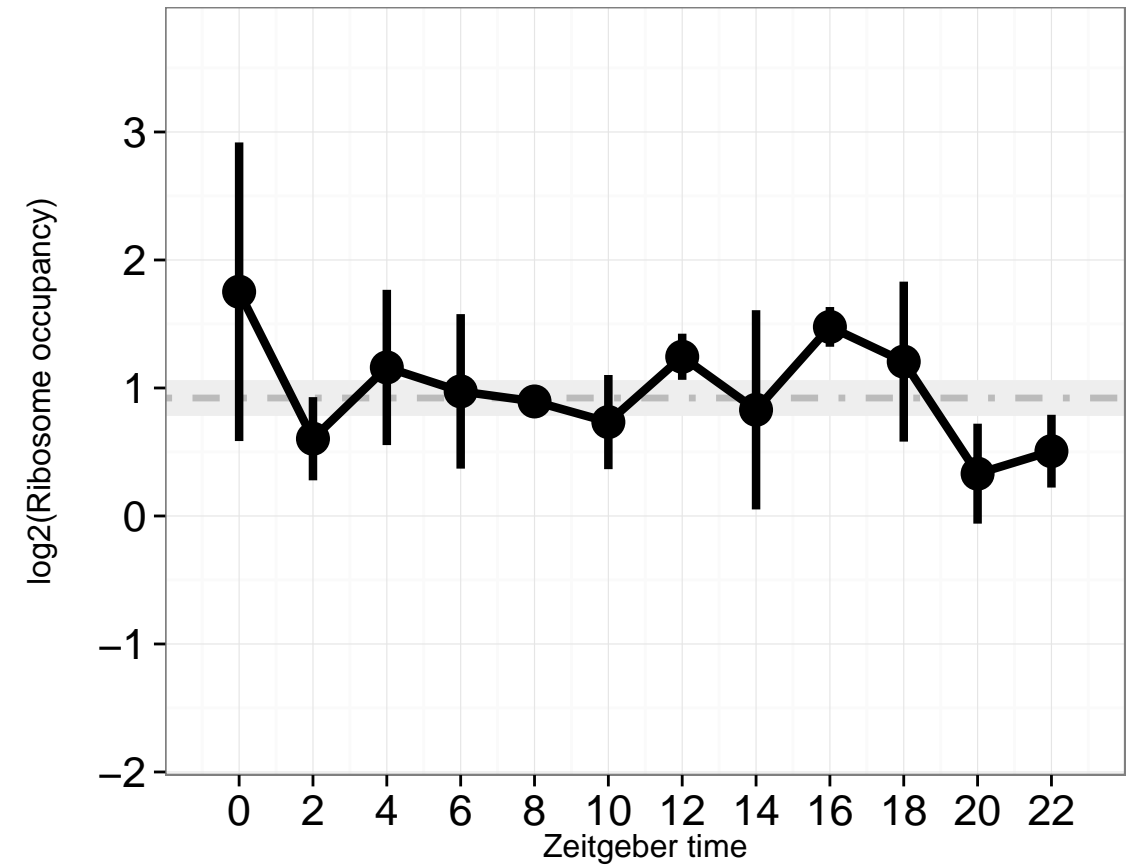

Supplement: SuppDataset_1.zip [file Lrrc20_set_A.pdf › Supplemental Dataset 1/A-mRNA_nonrhyth_translation_nonrhyth/Lrrc20_set_A.pdf]

## Lrrc25

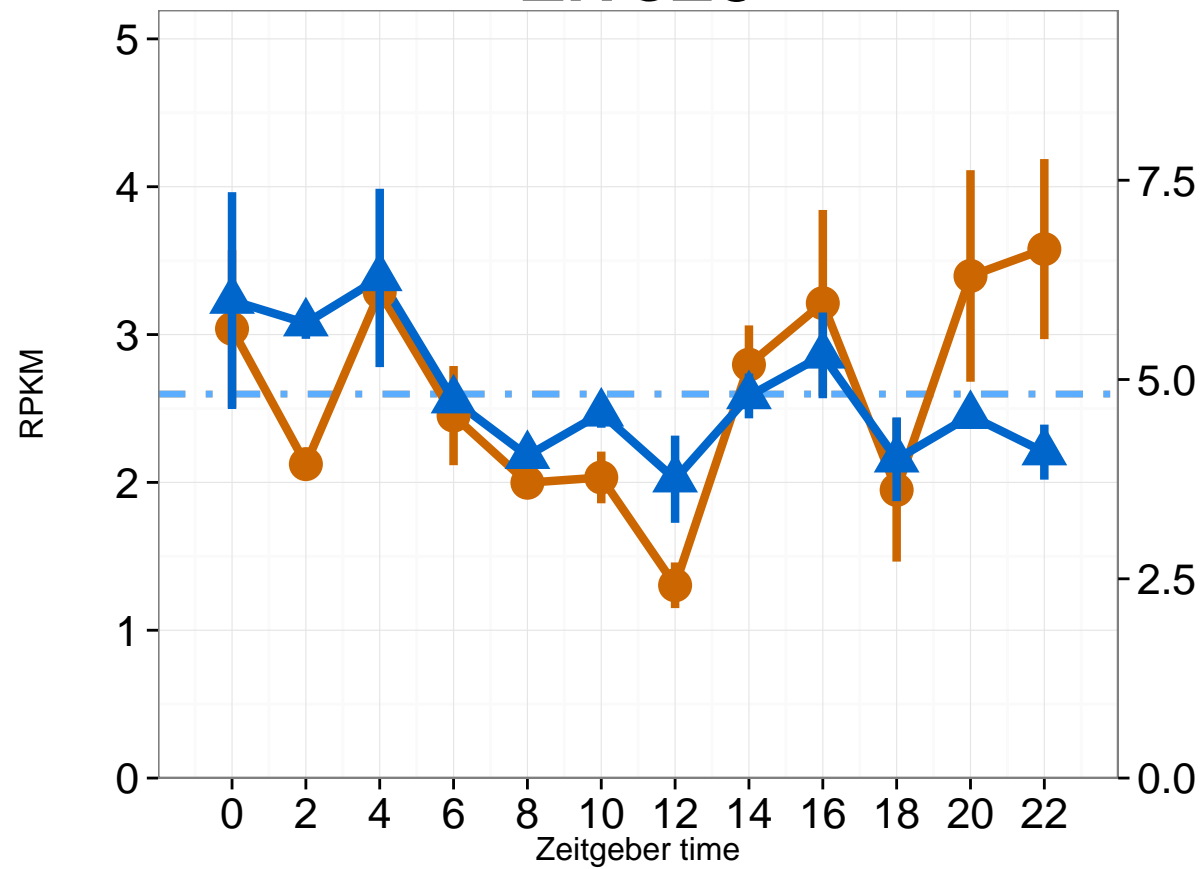

## Lrrc25

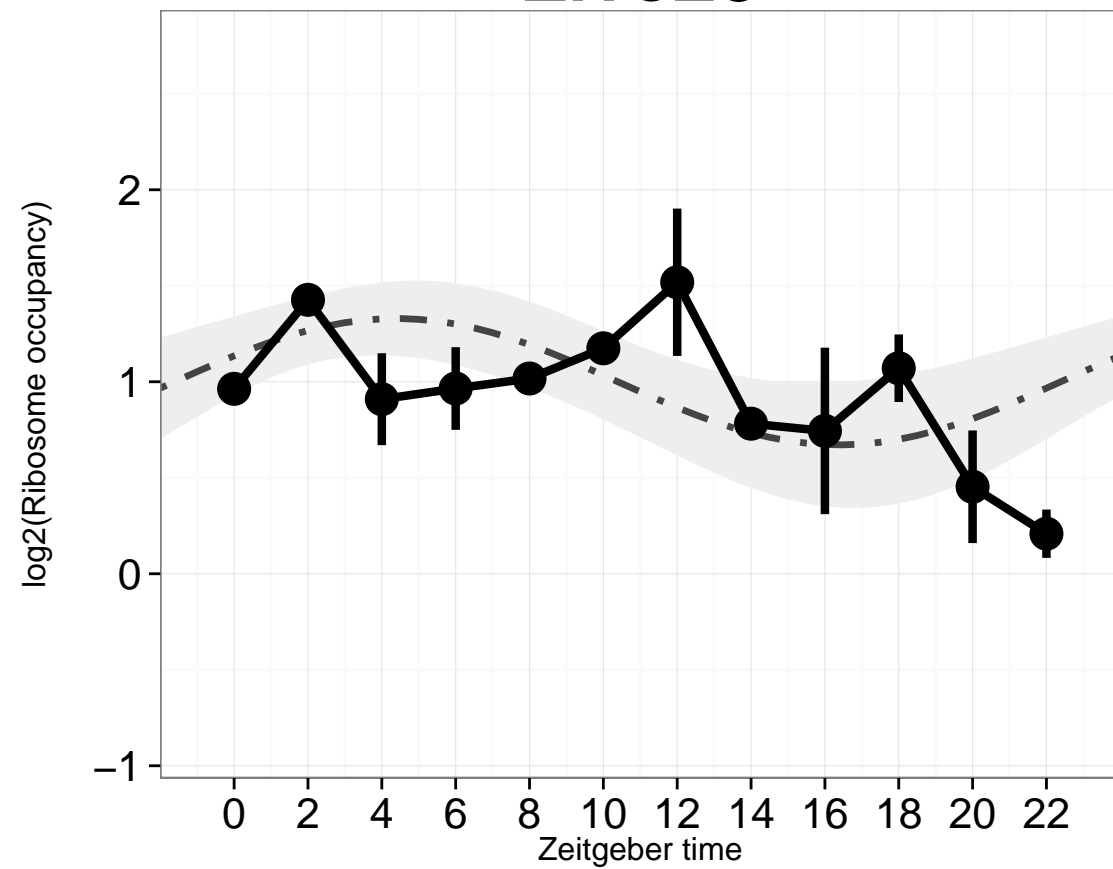

Supplement: SuppDataset_1.zip [file Lrrc25_set_A.pdf › Supplemental Dataset 1/A-mRNA_nonrhyth_translation_nonrhyth/Lrrc25_set_A.pdf]

## Lrrc29

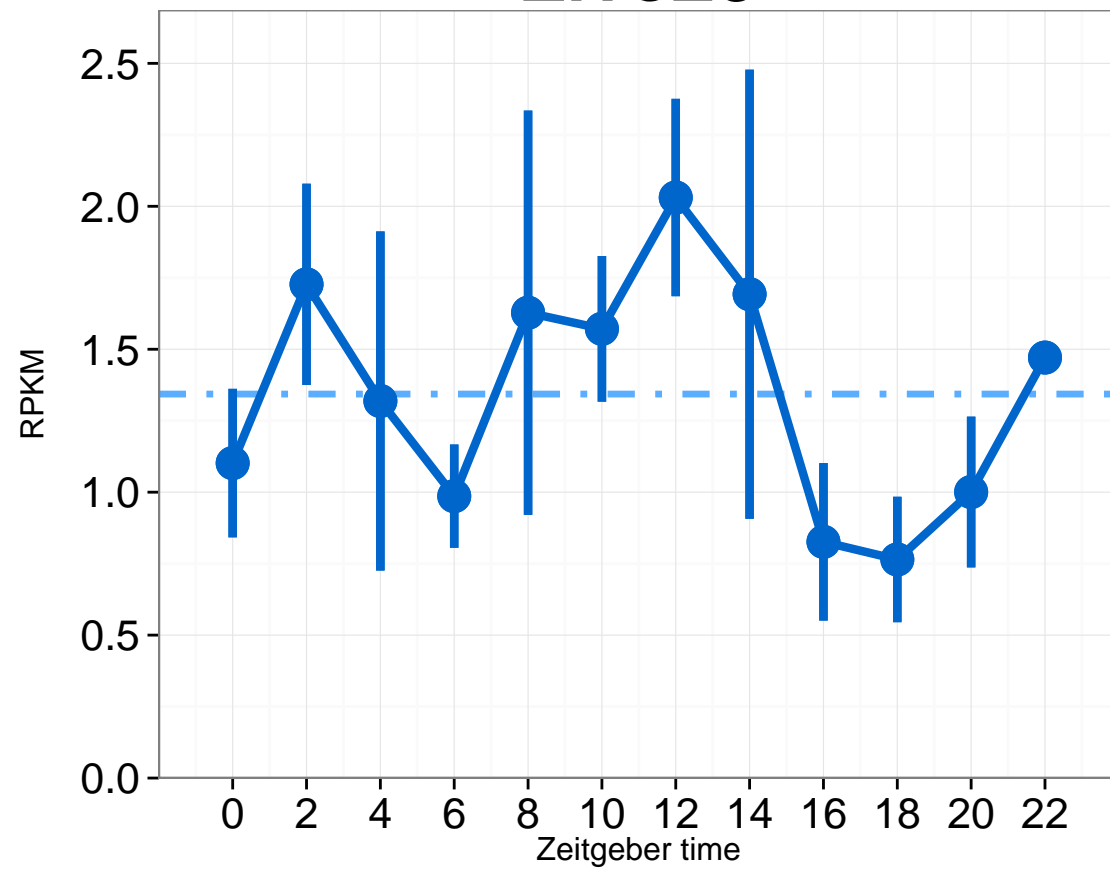

## Lrrc29 log2(Ribosome occupancy

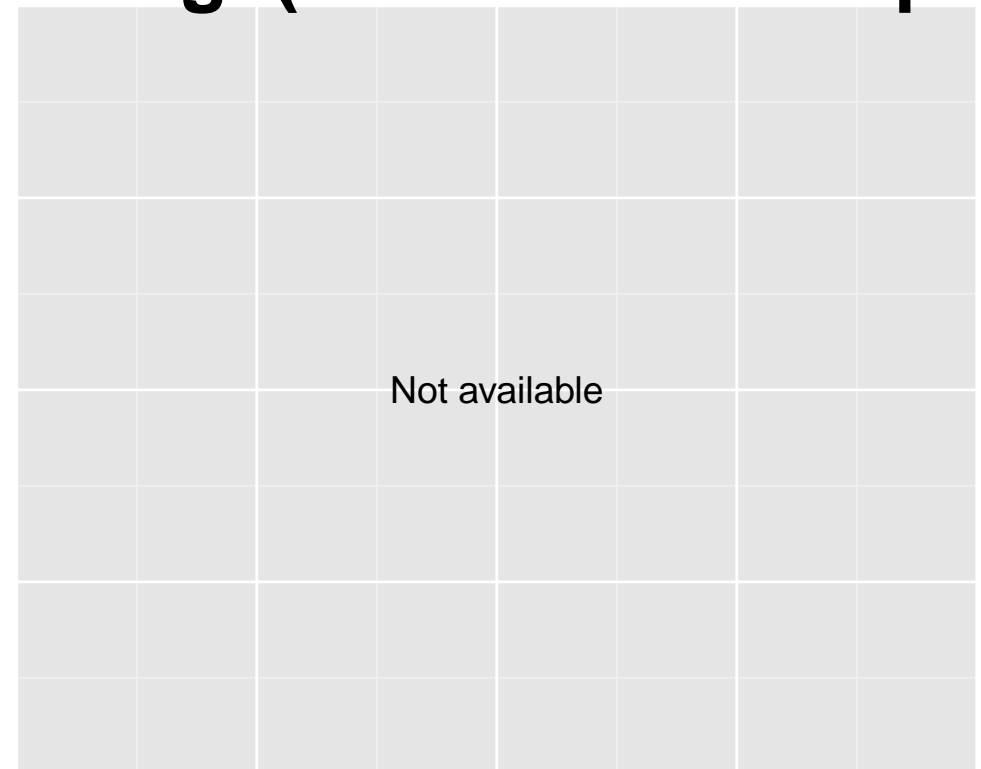

Supplement: SuppDataset_1.zip [file Lrrc29_set_A.pdf › Supplemental Dataset 1/A-mRNA_nonrhyth_translation_nonrhyth/Lrrc29_set_A.pdf]

## Lrrc32

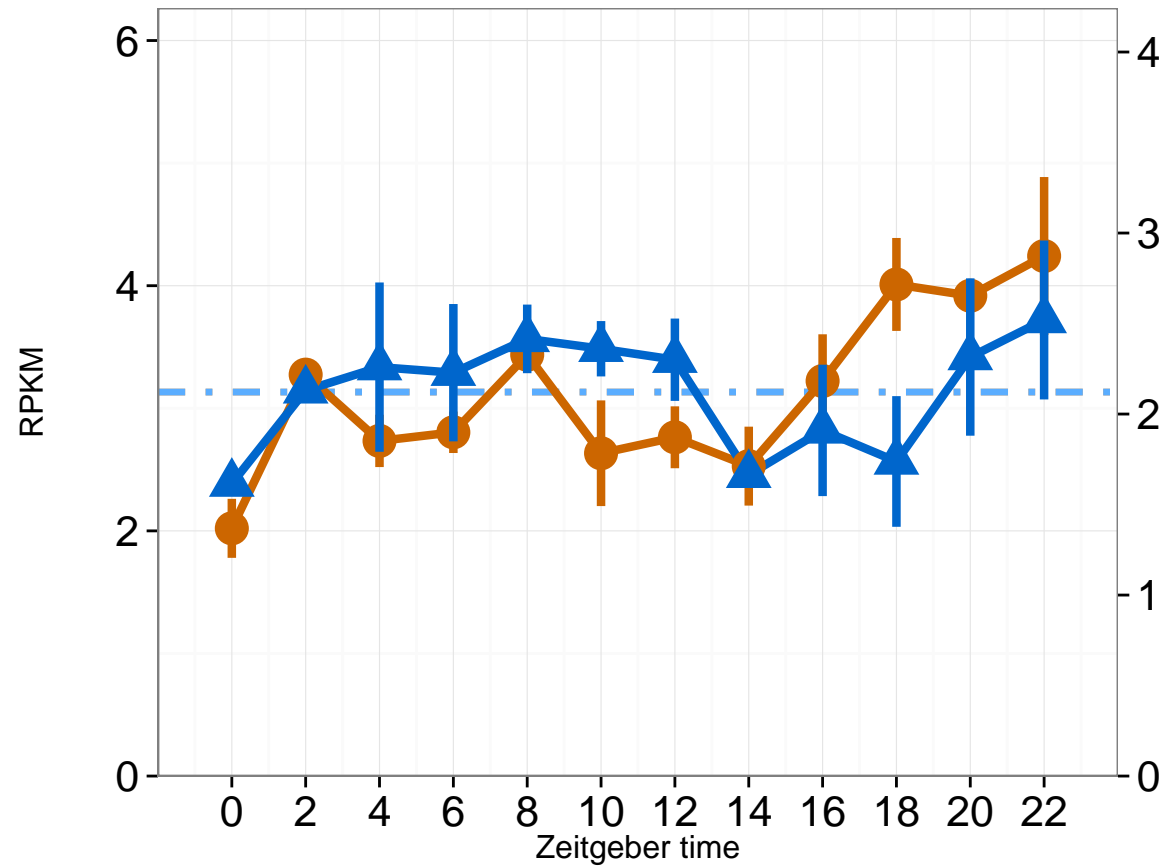

## Lrrc32

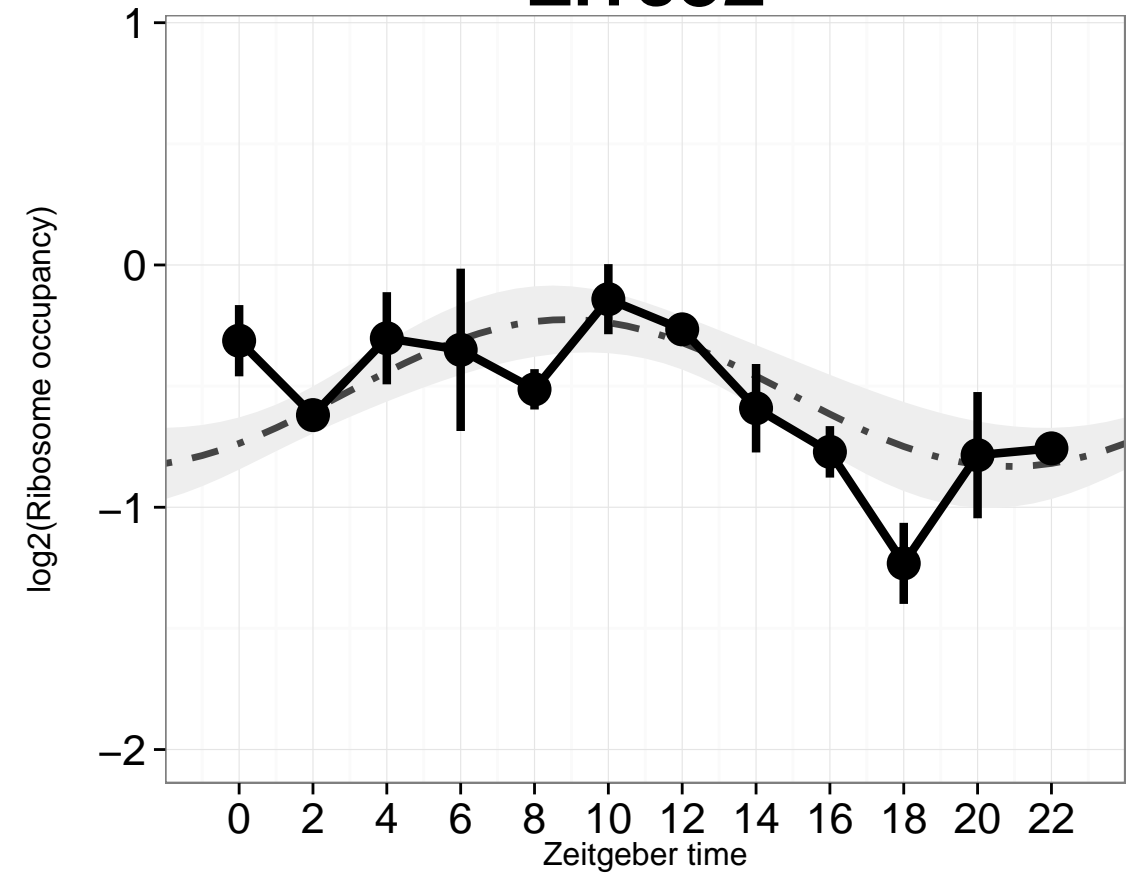

Supplement: SuppDataset_1.zip [file Lrrc32_set_A.pdf › Supplemental Dataset 1/A-mRNA_nonrhyth_translation_nonrhyth/Lrrc32_set_A.pdf]

# Lrrc40

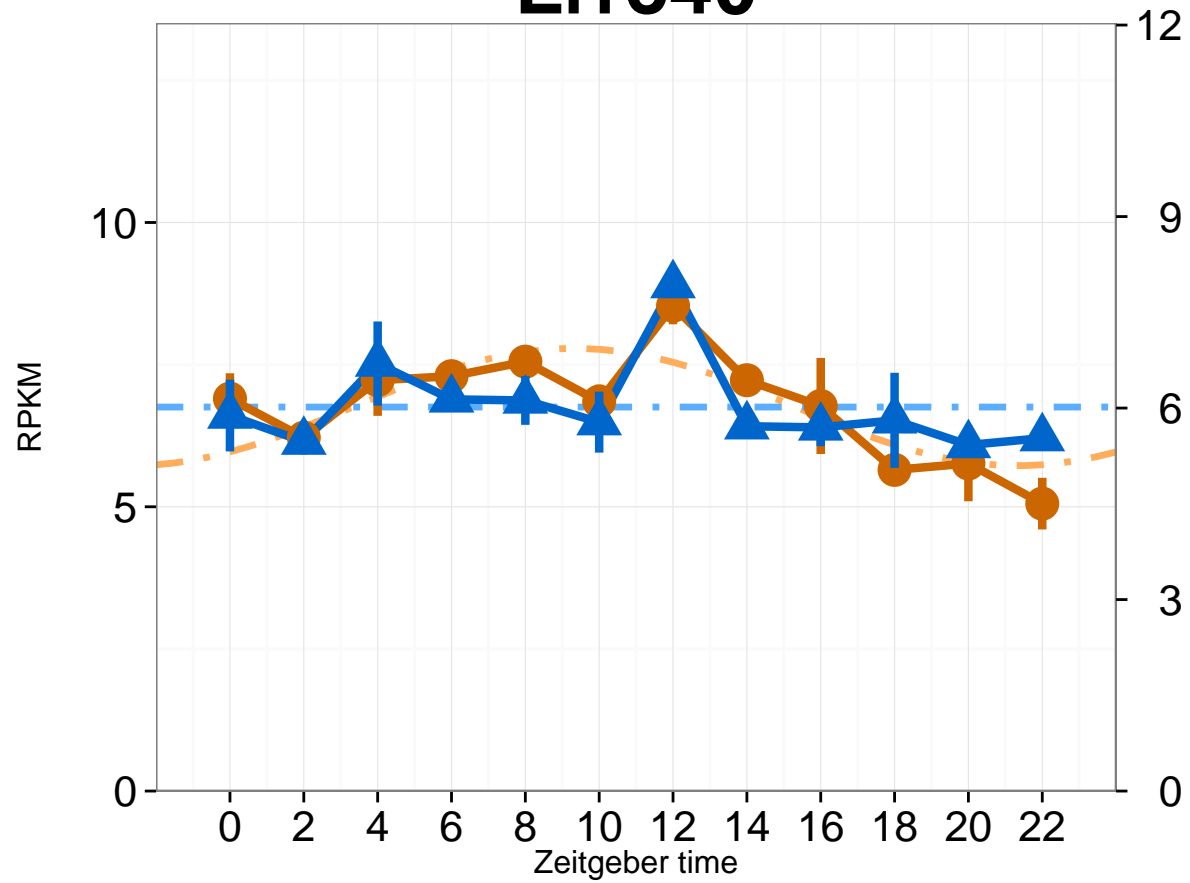

# Lrrc40

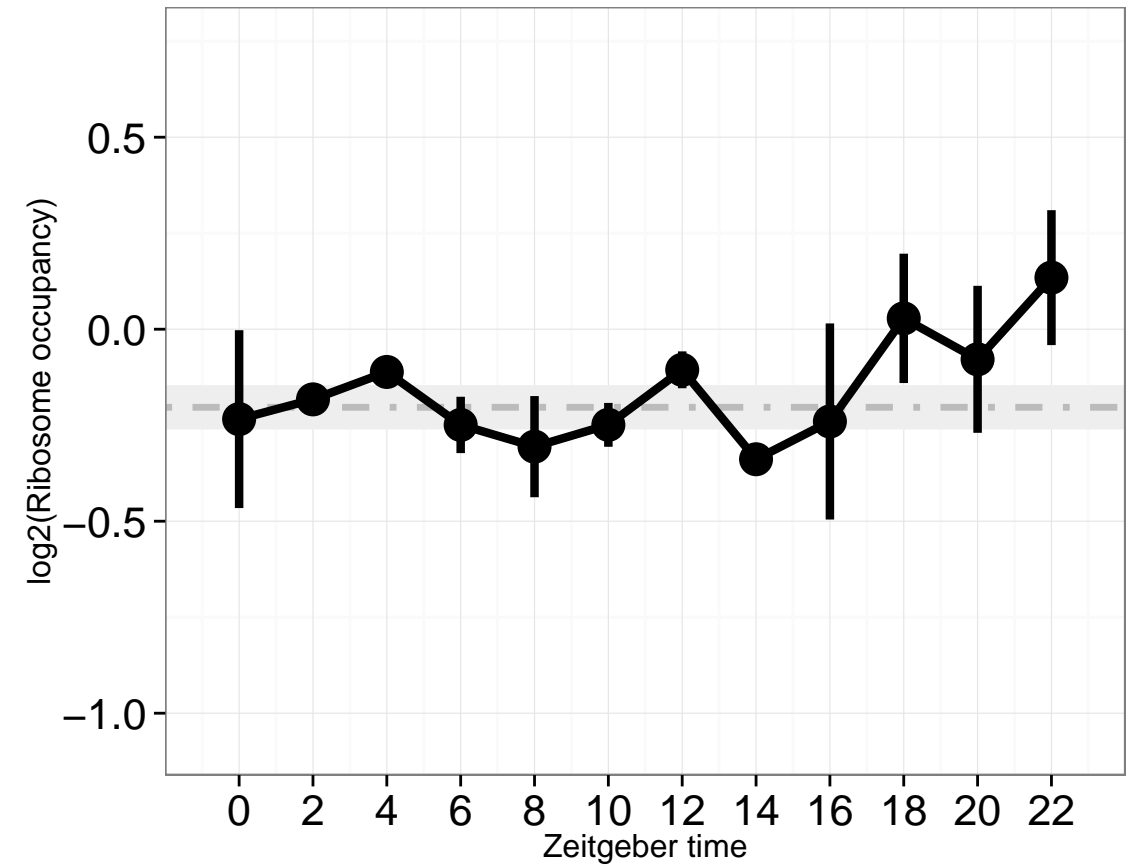

Supplement: SuppDataset_1.zip [file Lrrc40_set_A.pdf › Supplemental Dataset 1/A-mRNA_nonrhyth_translation_nonrhyth/Lrrc40_set_A.pdf]
