# Supplementary figures and images for: Ribosome profiling reveals the rhythmic liver translatome and circadian clock regulation by upstream open reading frames (part 98 of 113)
Source: HighWire-hosted journal article supplement (doi:10.1101/gr.195404.115), 2015-10-20

## Lpin3

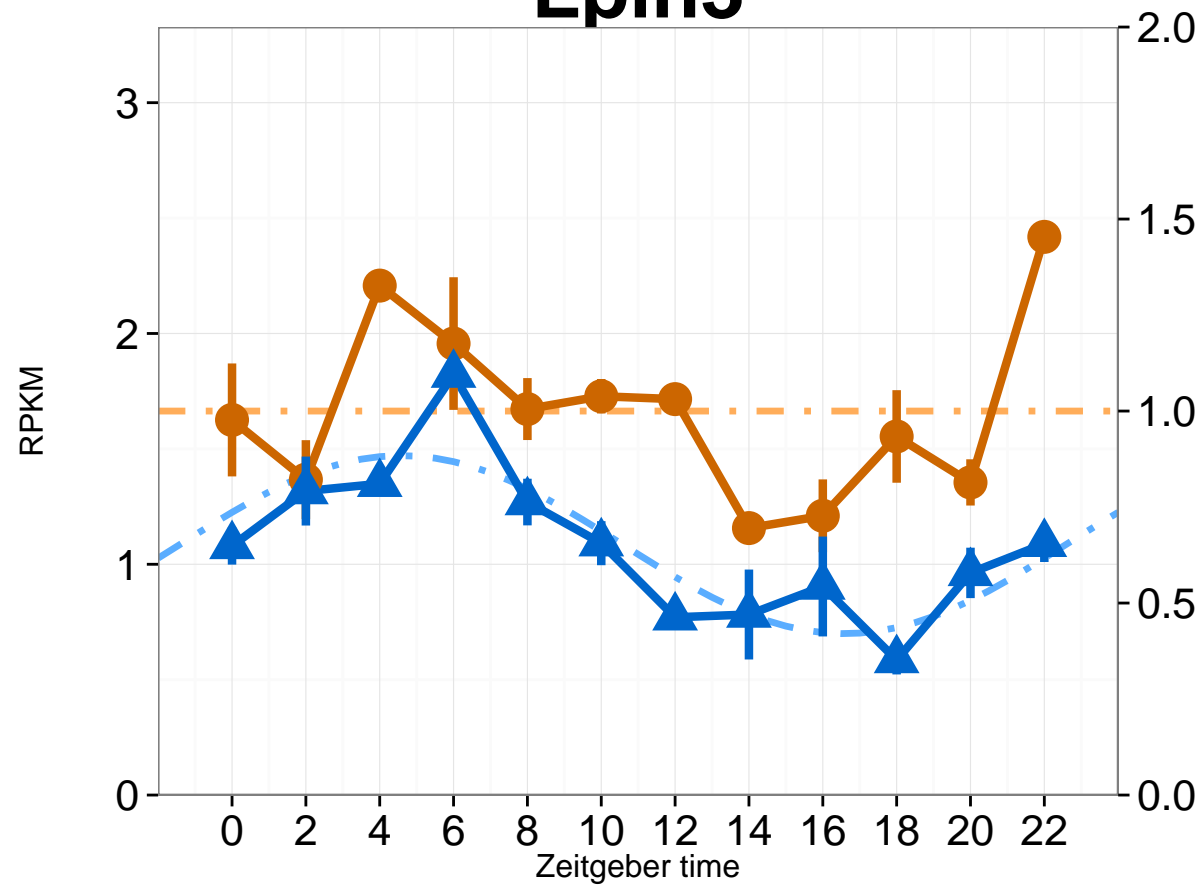

## Lpin3

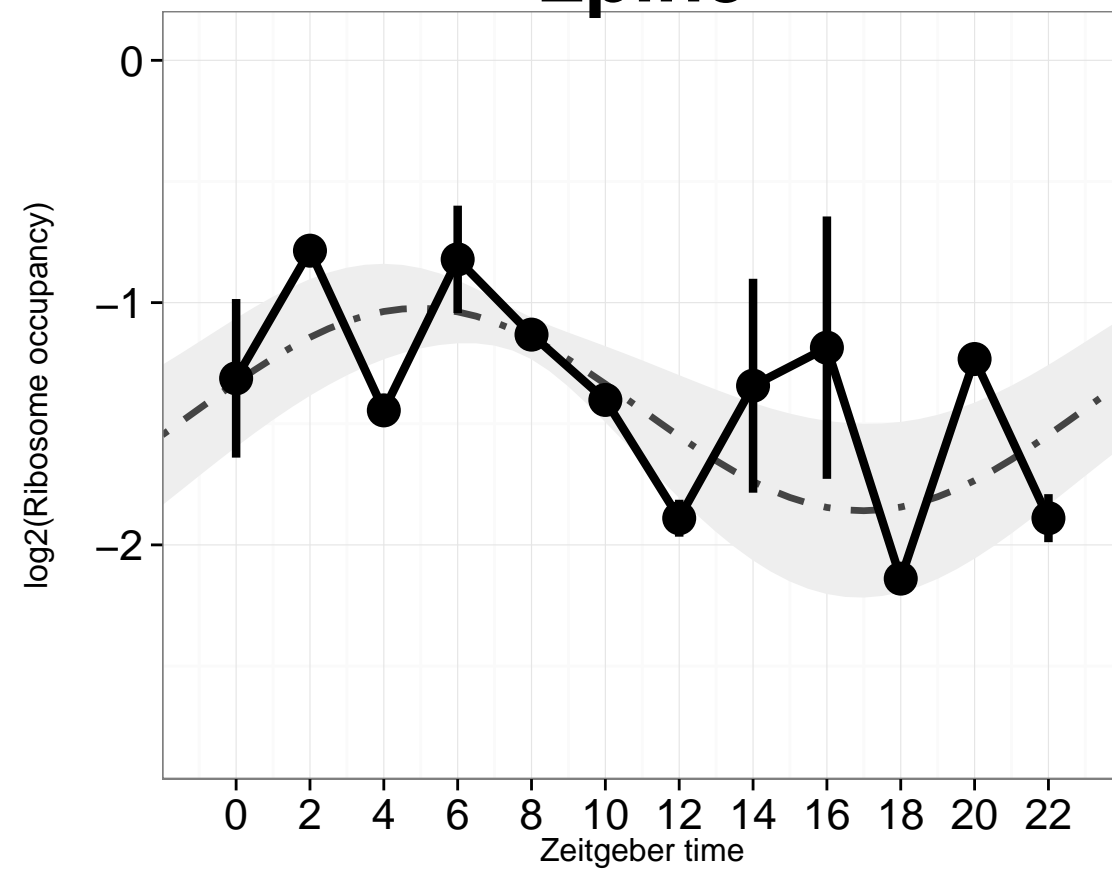

Supplement: SuppDataset_1.zip [file Lpin3_set_C.pdf › Supplemental Dataset 1/C-mRNA_nonrhythm_translation_rhyth/Lpin3_set_C.pdf]

## Lrp12

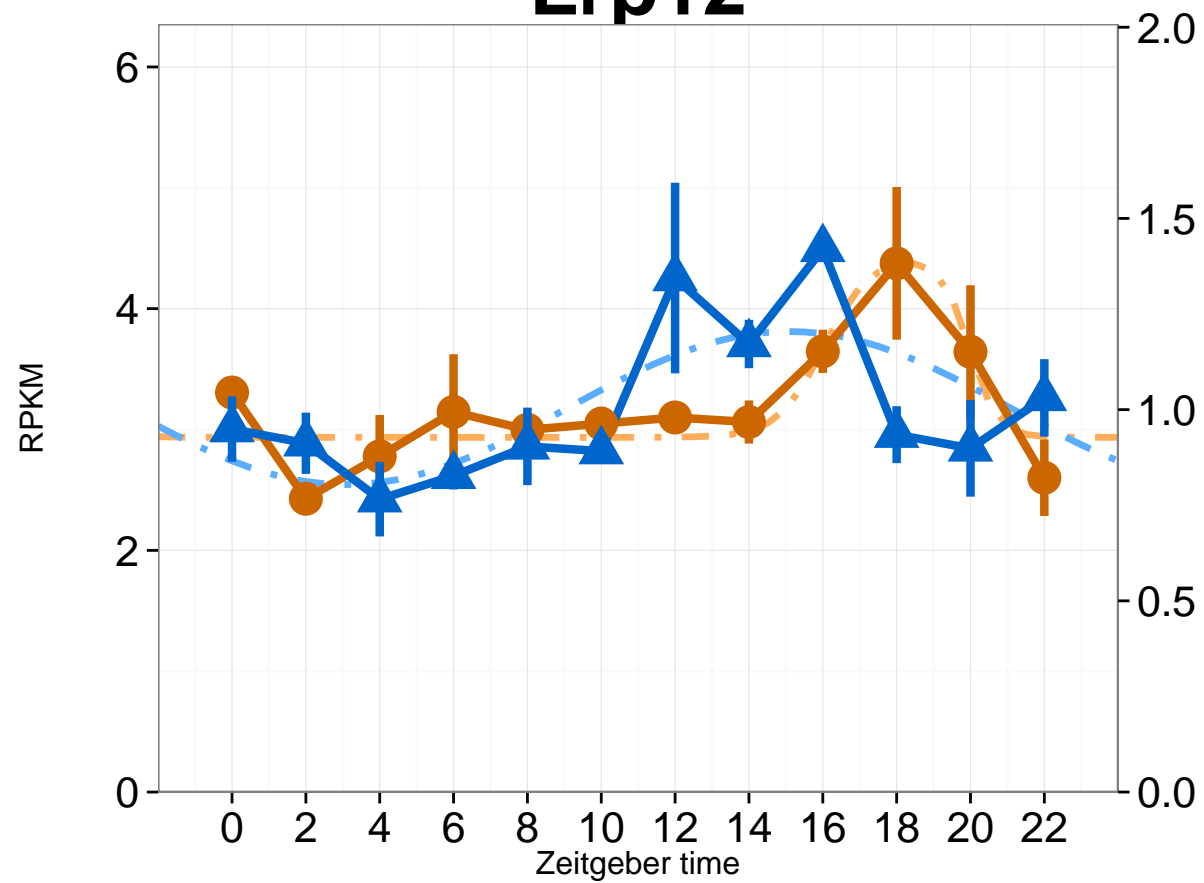

## Lrp12

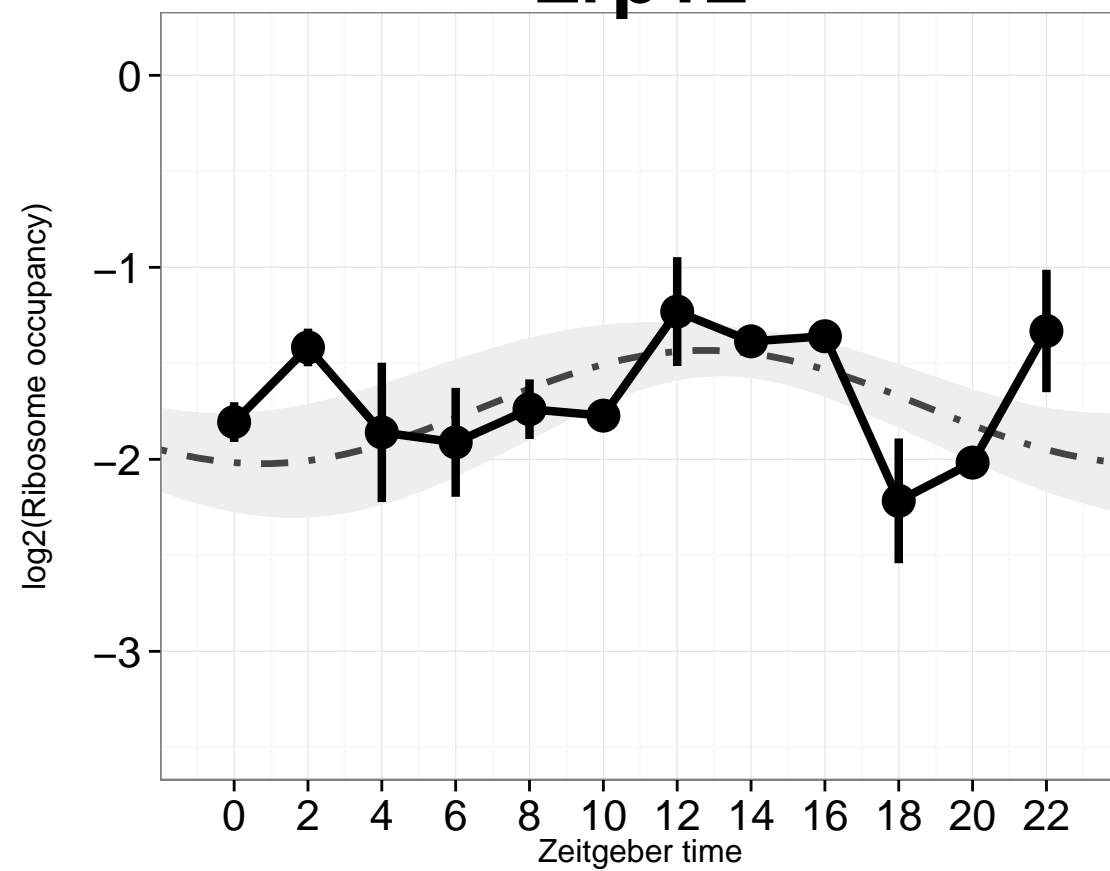

Supplement: SuppDataset_1.zip [file Lrp12_set_C.pdf › Supplemental Dataset 1/C-mRNA_nonrhythm_translation_rhyth/Lrp12_set_C.pdf]

# Lrp2

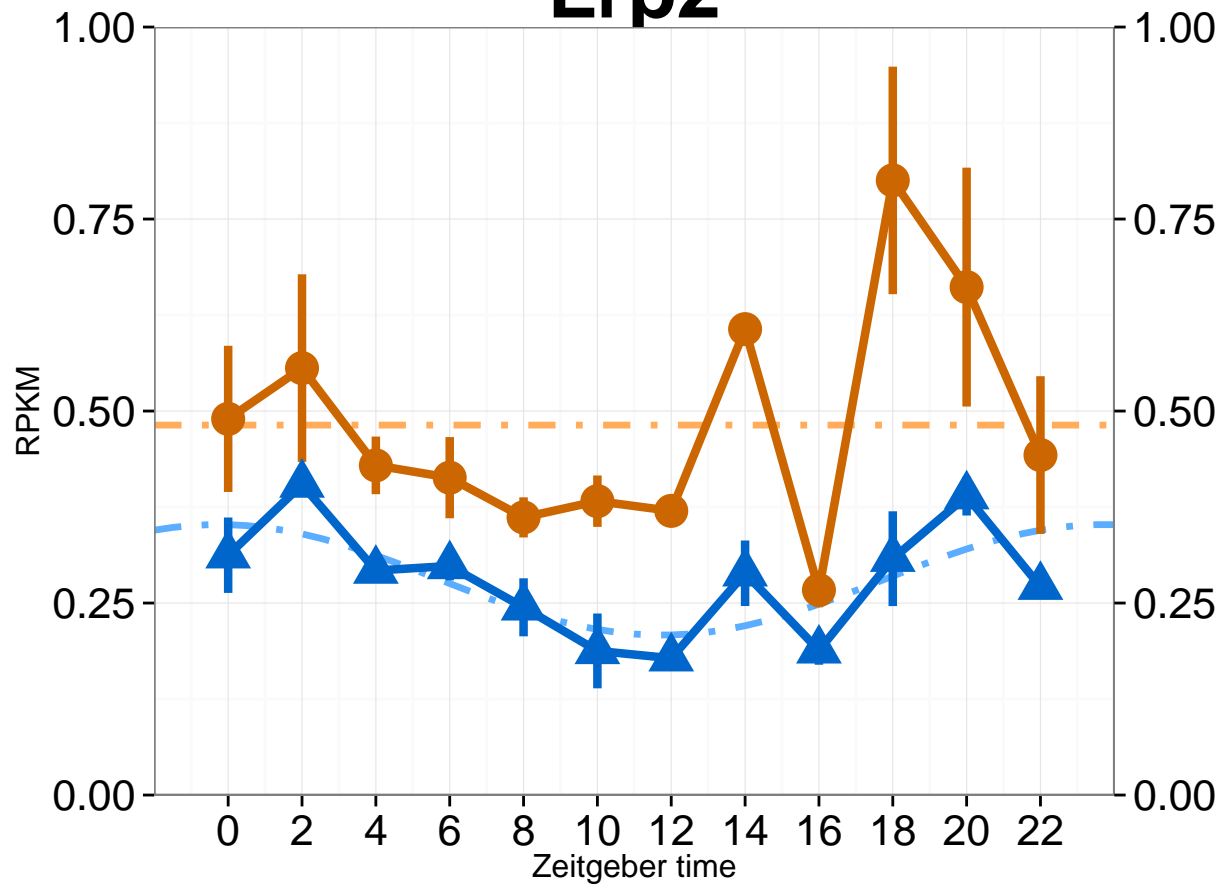

# Lrp2

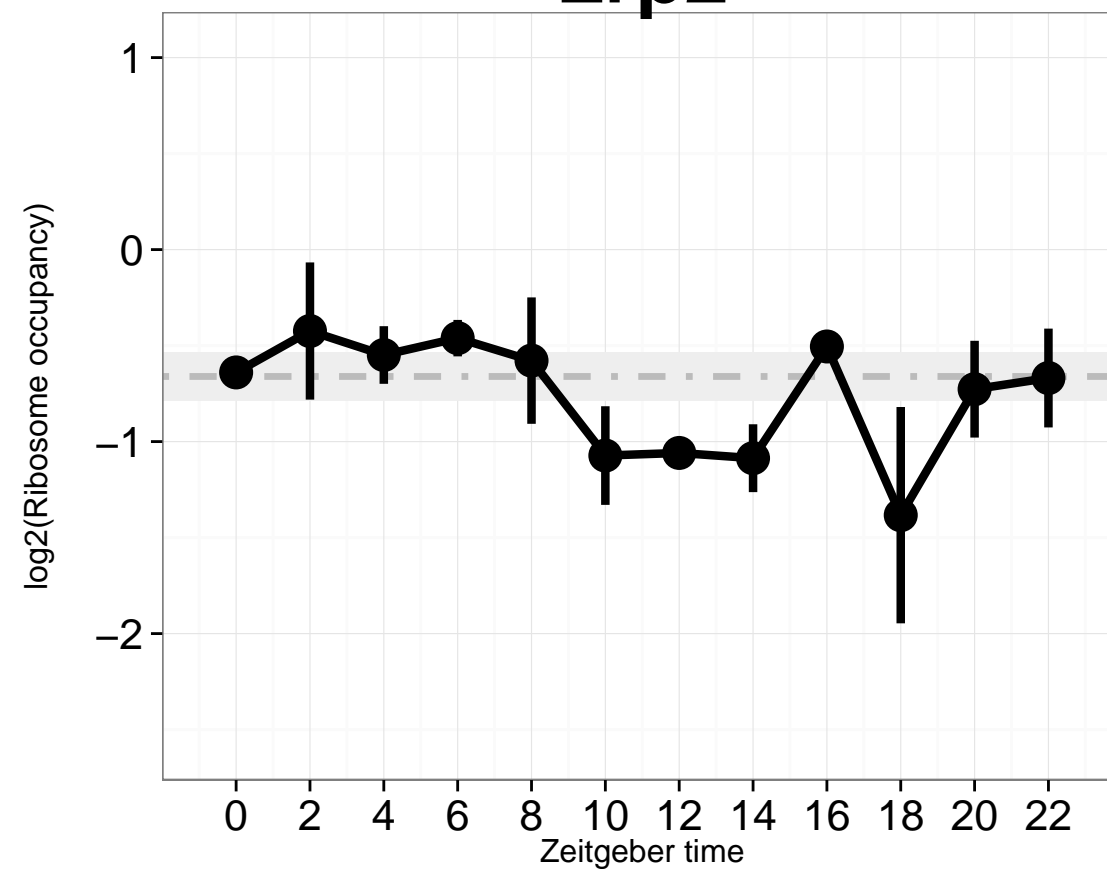

Supplement: SuppDataset_1.zip [file Lrp2_set_C.pdf › Supplemental Dataset 1/C-mRNA_nonrhythm_translation_rhyth/Lrp2_set_C.pdf]

## Lrrc58

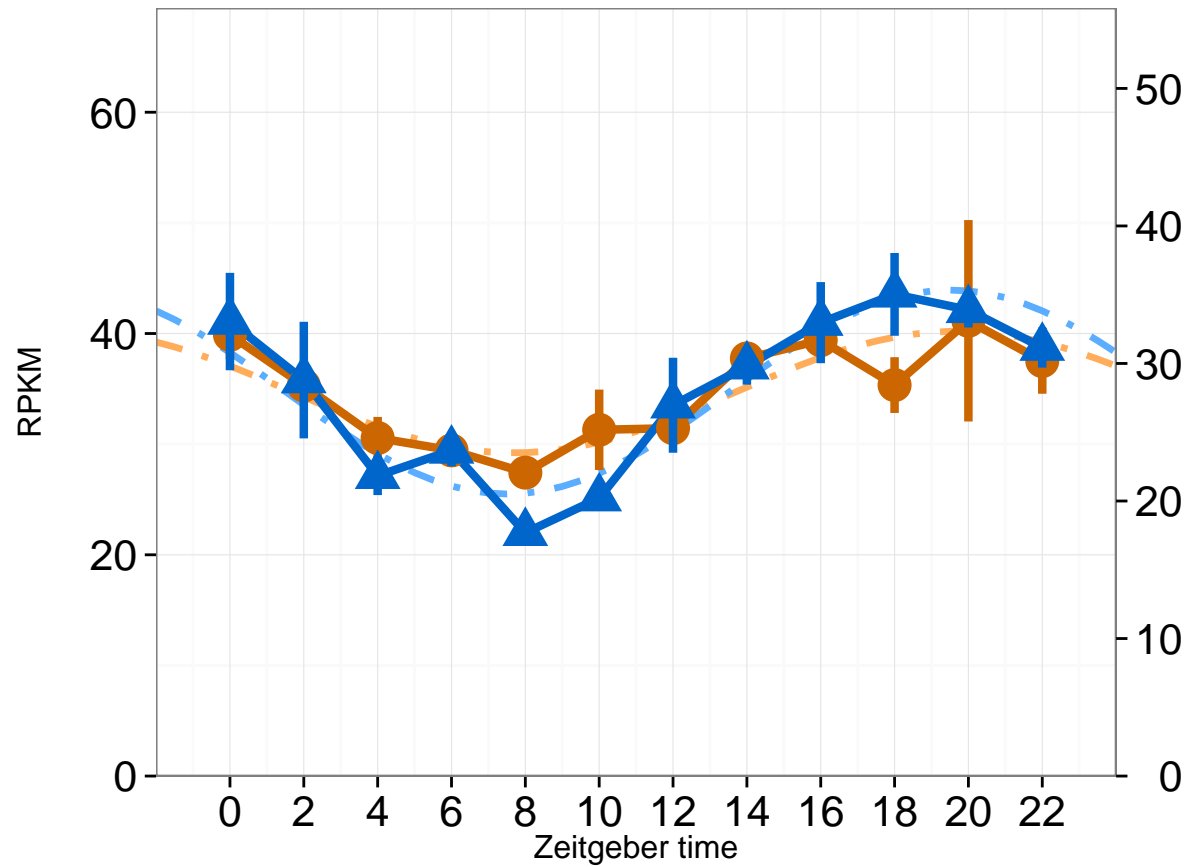

## Lrrc58

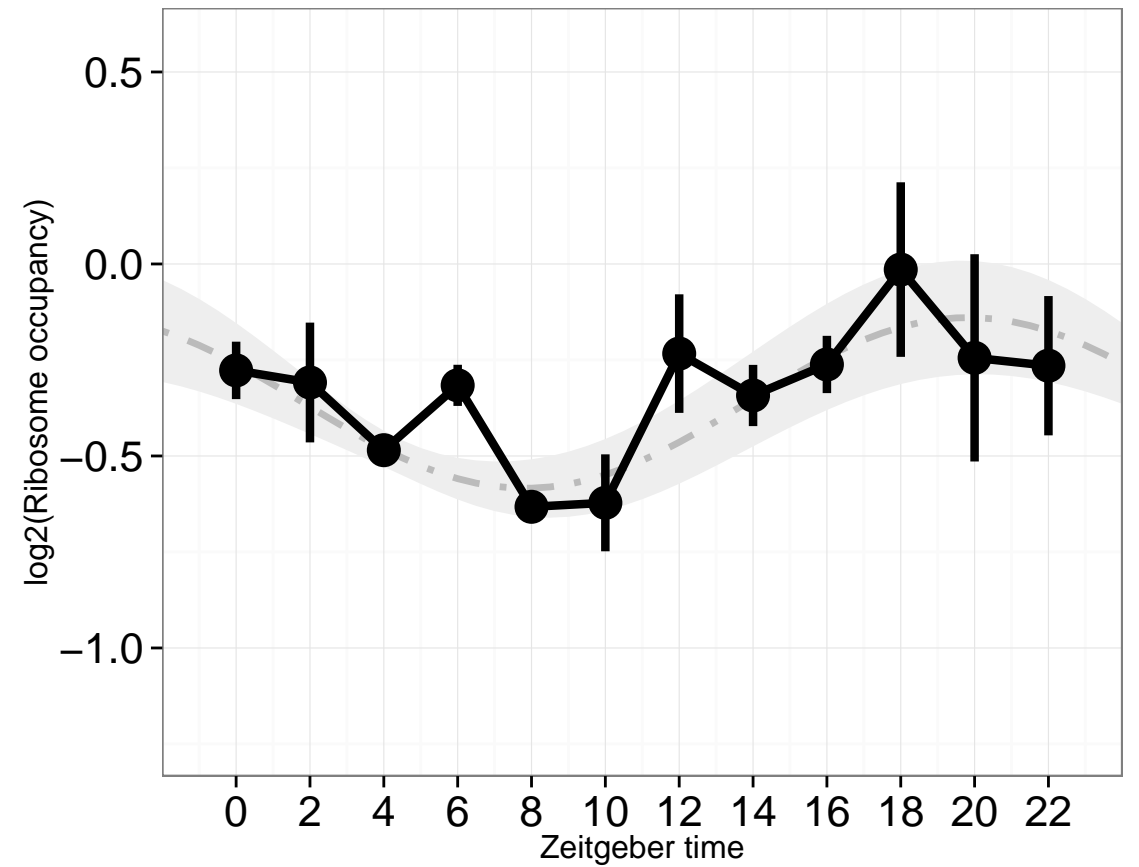

Supplement: SuppDataset_1.zip [file Lrrc58_set_C.pdf › Supplemental Dataset 1/C-mRNA_nonrhythm_translation_rhyth/Lrrc58_set_C.pdf]

# Lrrc61

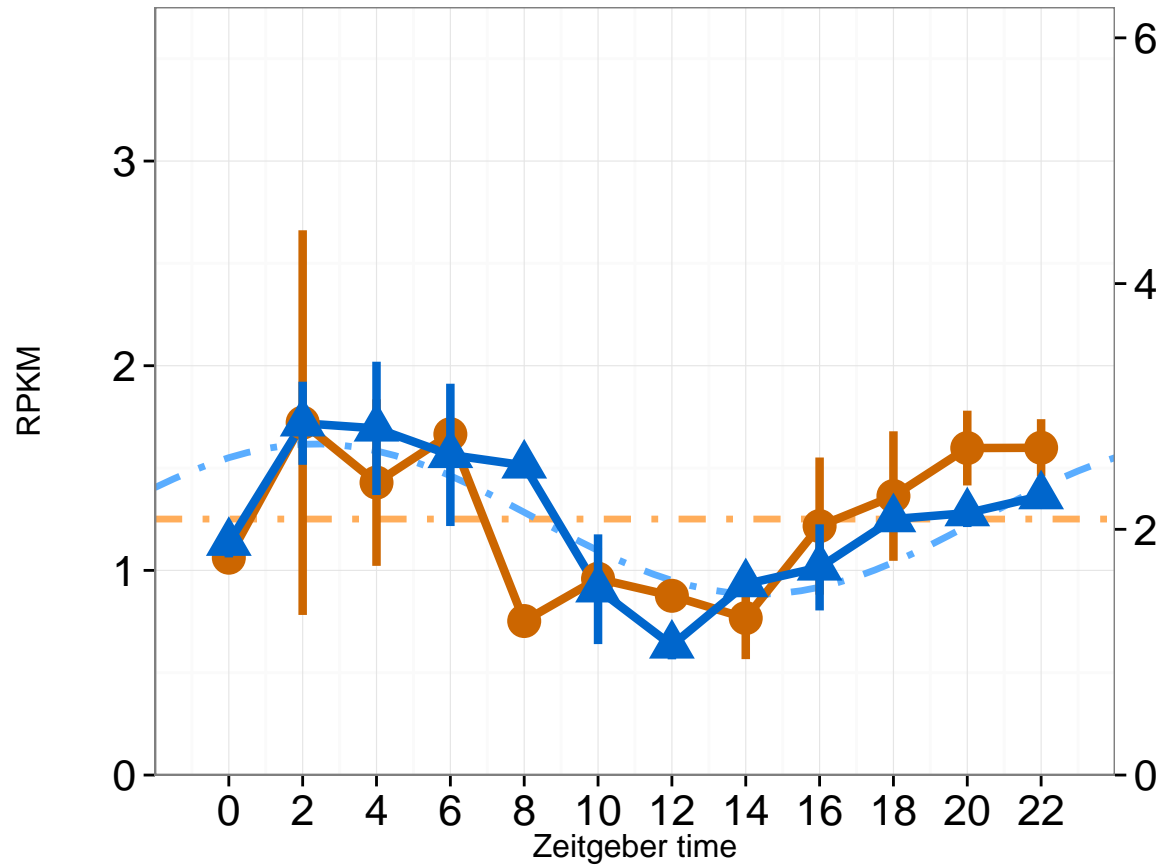

# Lrrc61

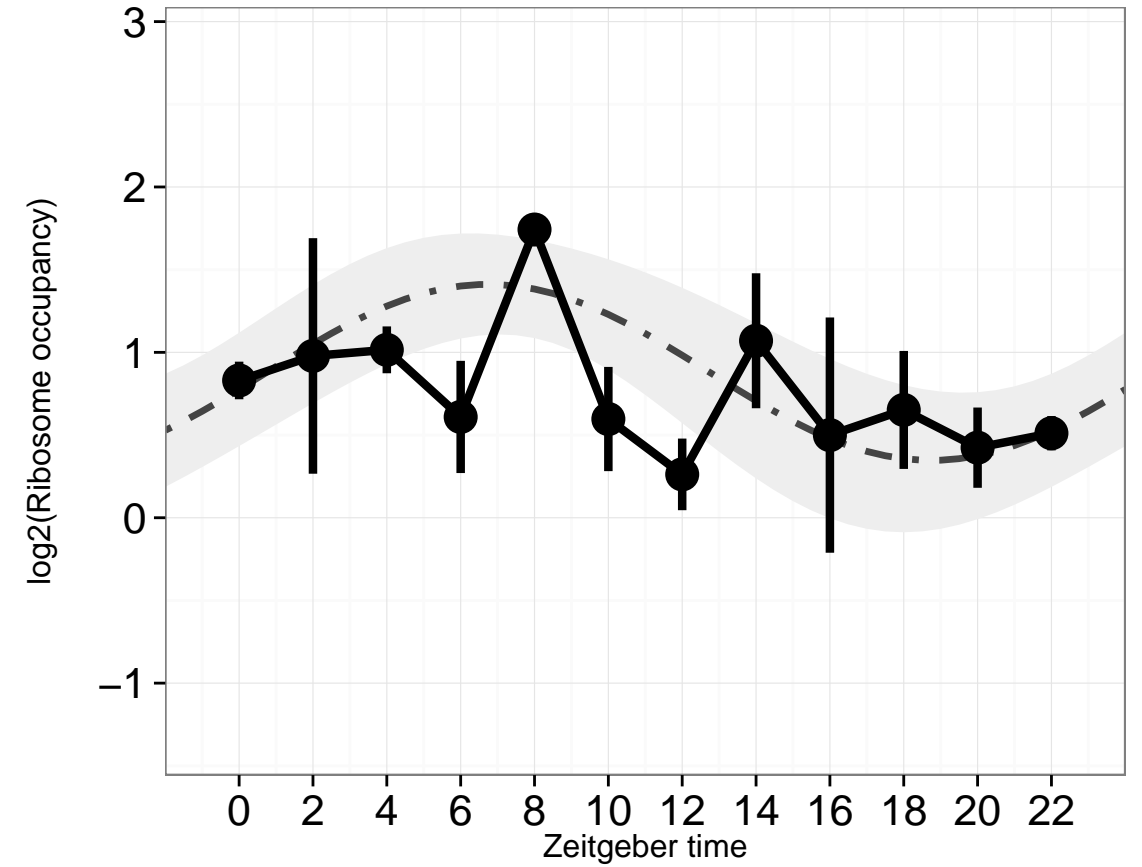

Supplement: SuppDataset_1.zip [file Lrrc61_set_C.pdf › Supplemental Dataset 1/C-mRNA_nonrhythm_translation_rhyth/Lrrc61_set_C.pdf]

# Lrrcc1

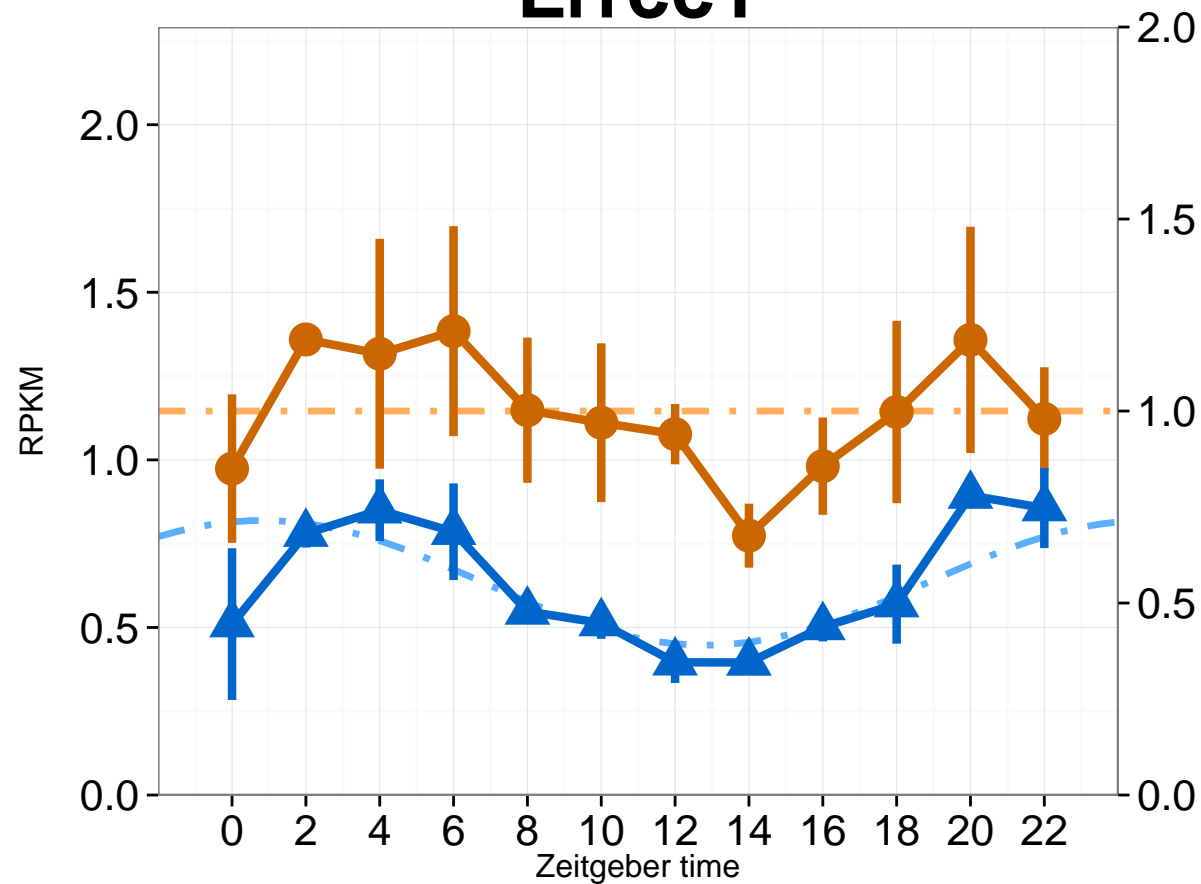

# Lrrcc1

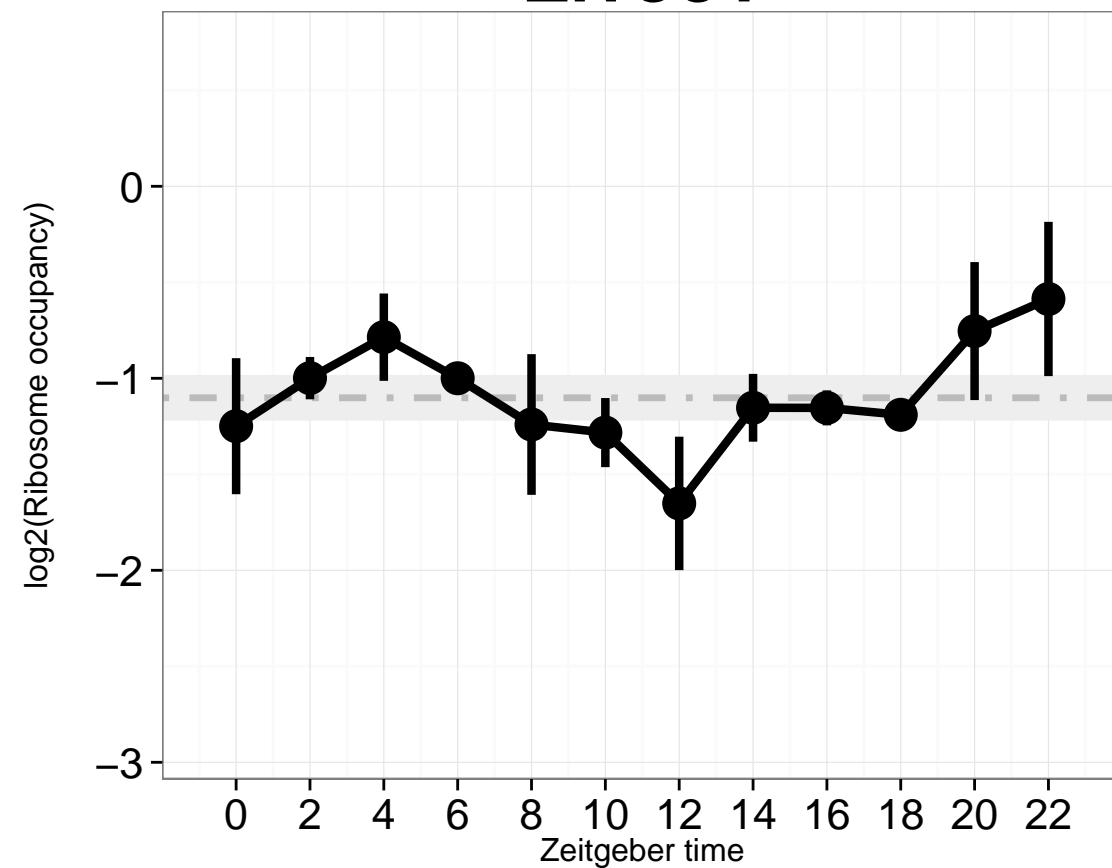

Supplement: SuppDataset_1.zip [file Lrrcc1_set_C.pdf › Supplemental Dataset 1/C-mRNA_nonrhythm_translation_rhyth/Lrrcc1_set_C.pdf]

## Ltb4r1 TR

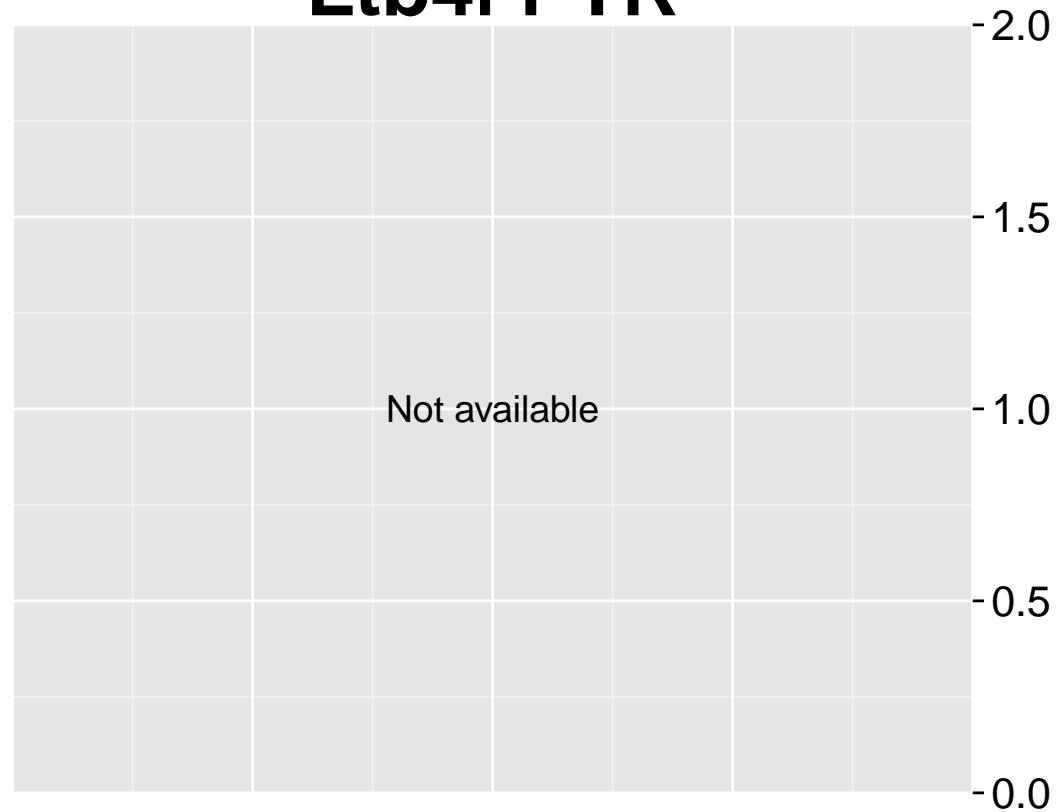

## Ltb4r1 log2(Ribosome occupancy

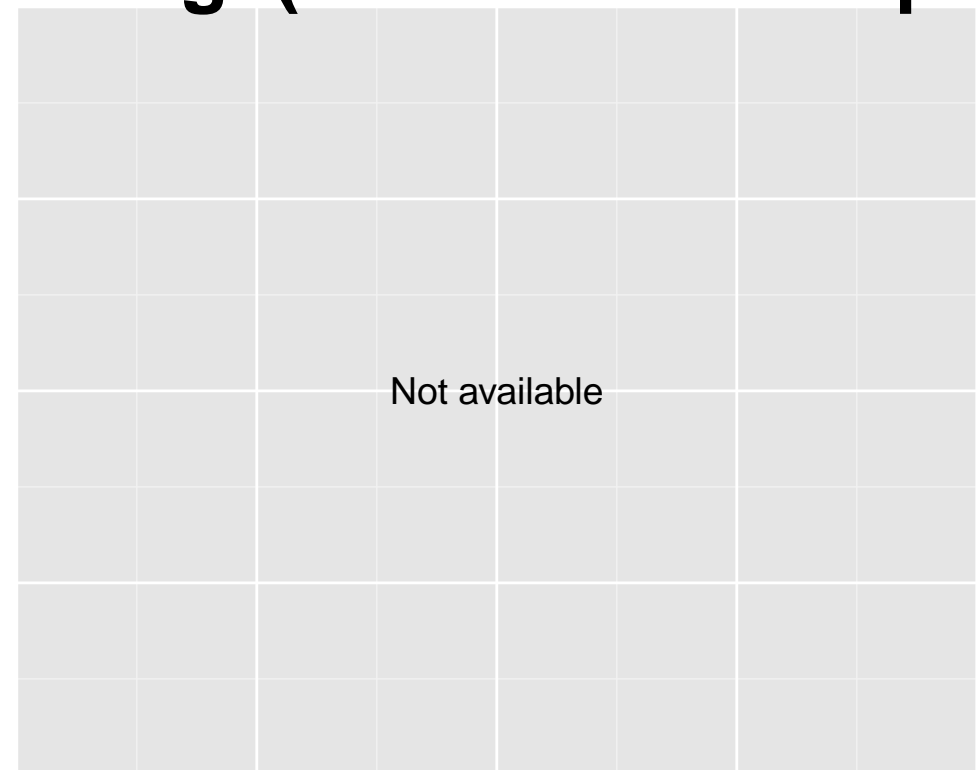

Supplement: SuppDataset_1.zip [file Ltb4r1_set_C.pdf › Supplemental Dataset 1/C-mRNA_nonrhythm_translation_rhyth/Ltb4r1_set_C.pdf]

## Luc7l

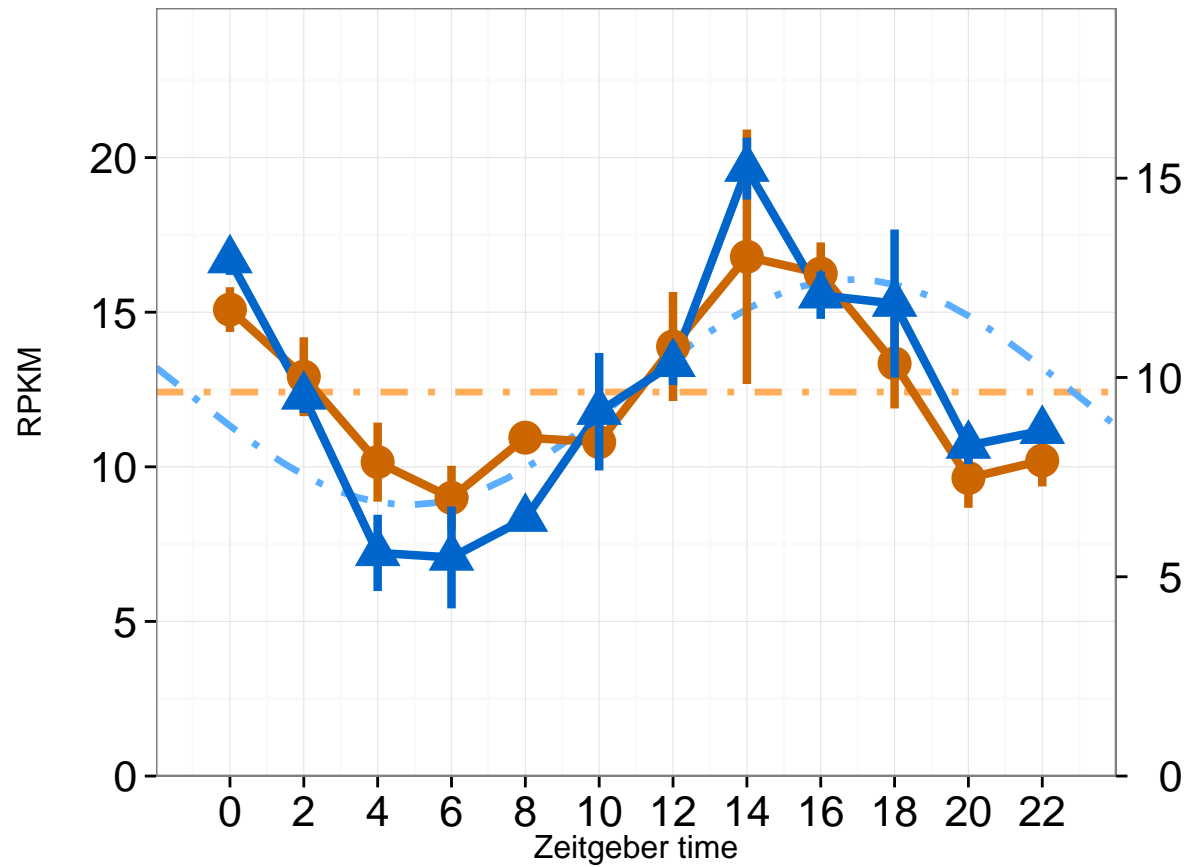

## Luc7l

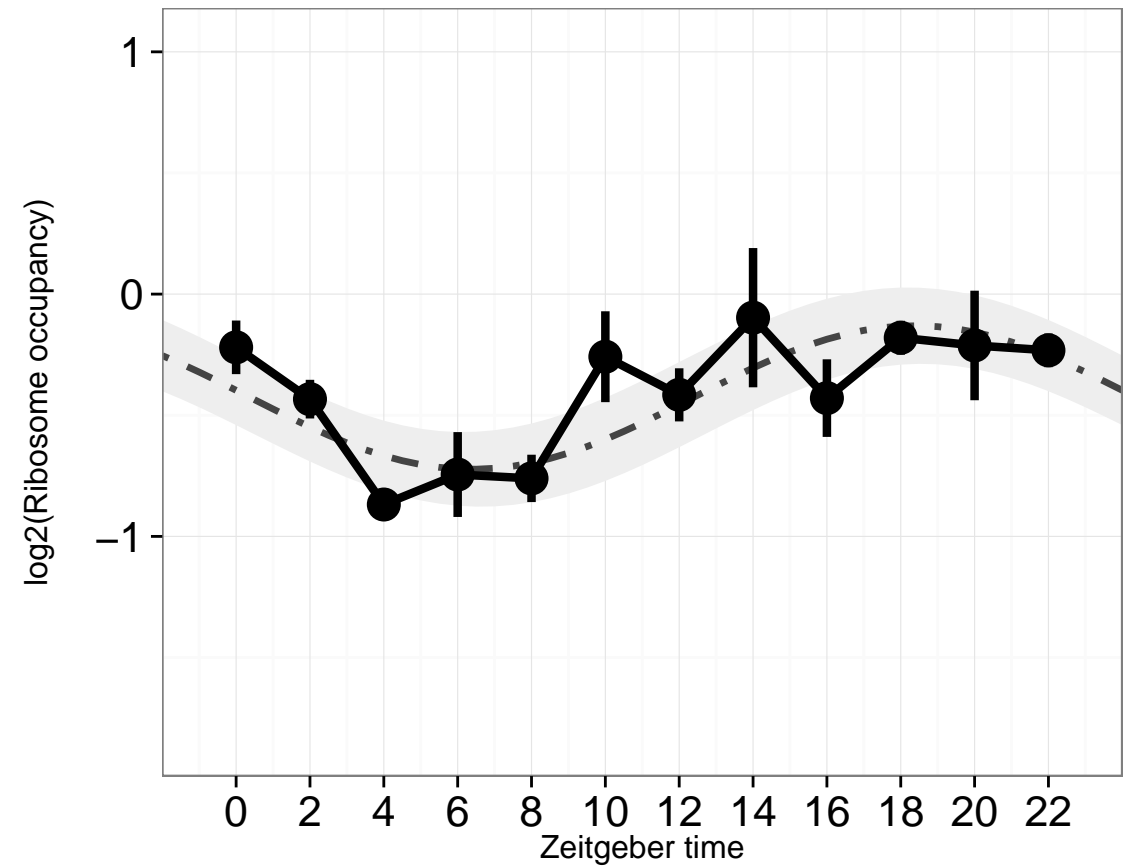

Supplement: SuppDataset_1.zip [file Luc7l_set_C.pdf › Supplemental Dataset 1/C-mRNA_nonrhythm_translation_rhyth/Luc7l_set_C.pdf]

## Lyar

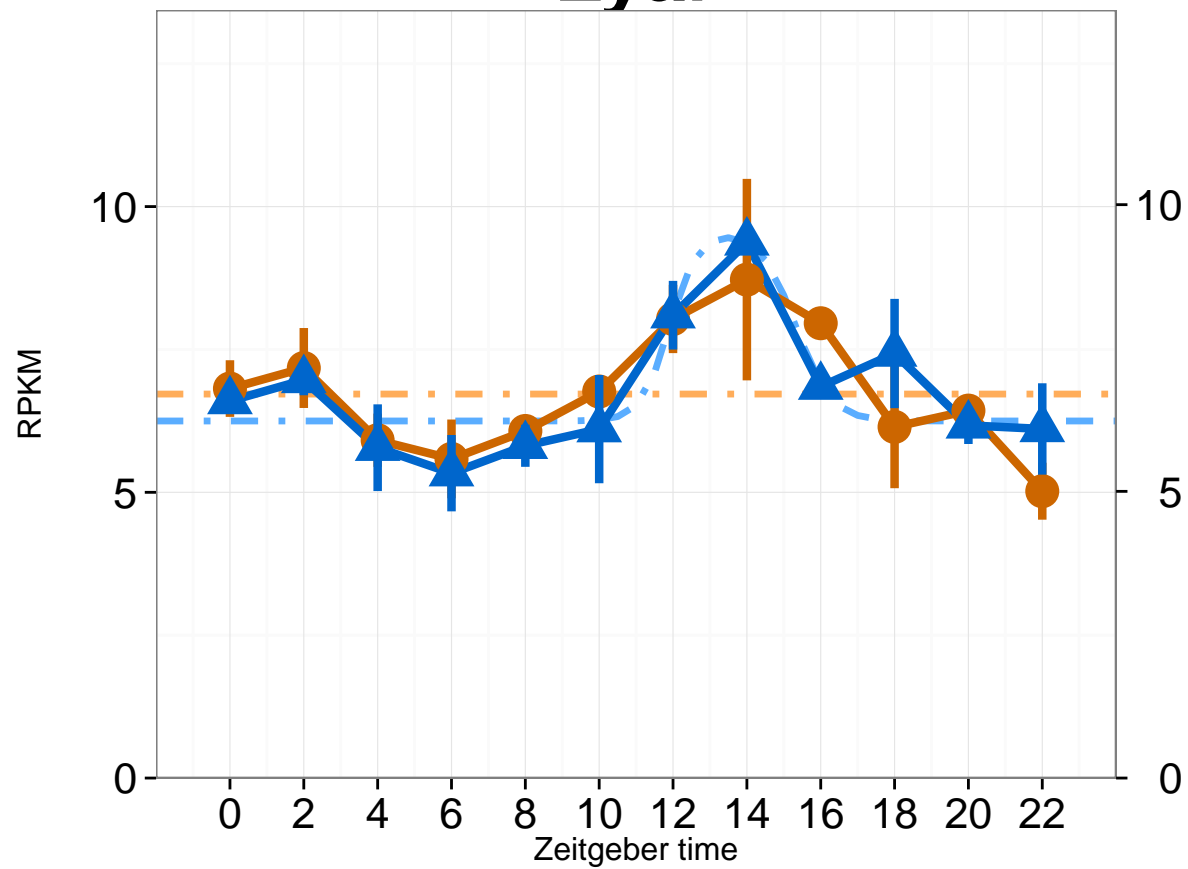

## Lyar

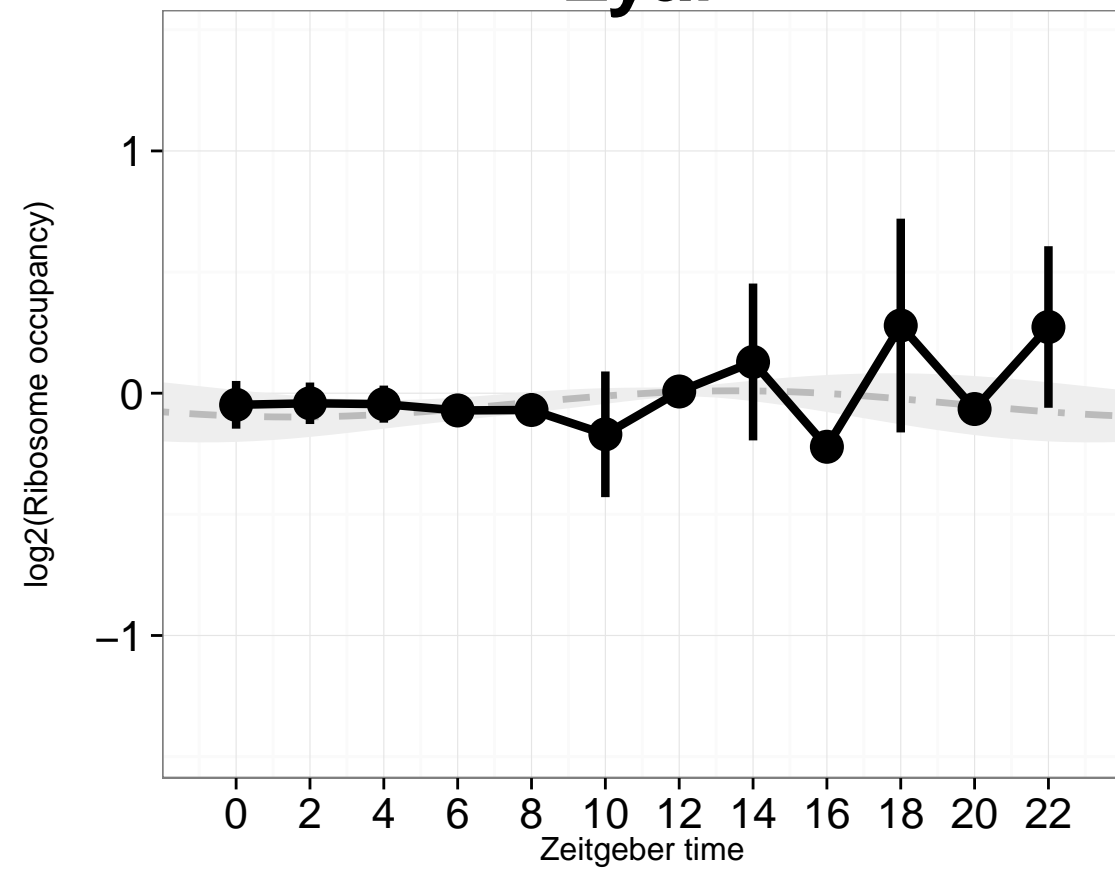

Supplement: SuppDataset_1.zip [file Lyar_set_C.pdf › Supplemental Dataset 1/C-mRNA_nonrhythm_translation_rhyth/Lyar_set_C.pdf]

## Lypla2

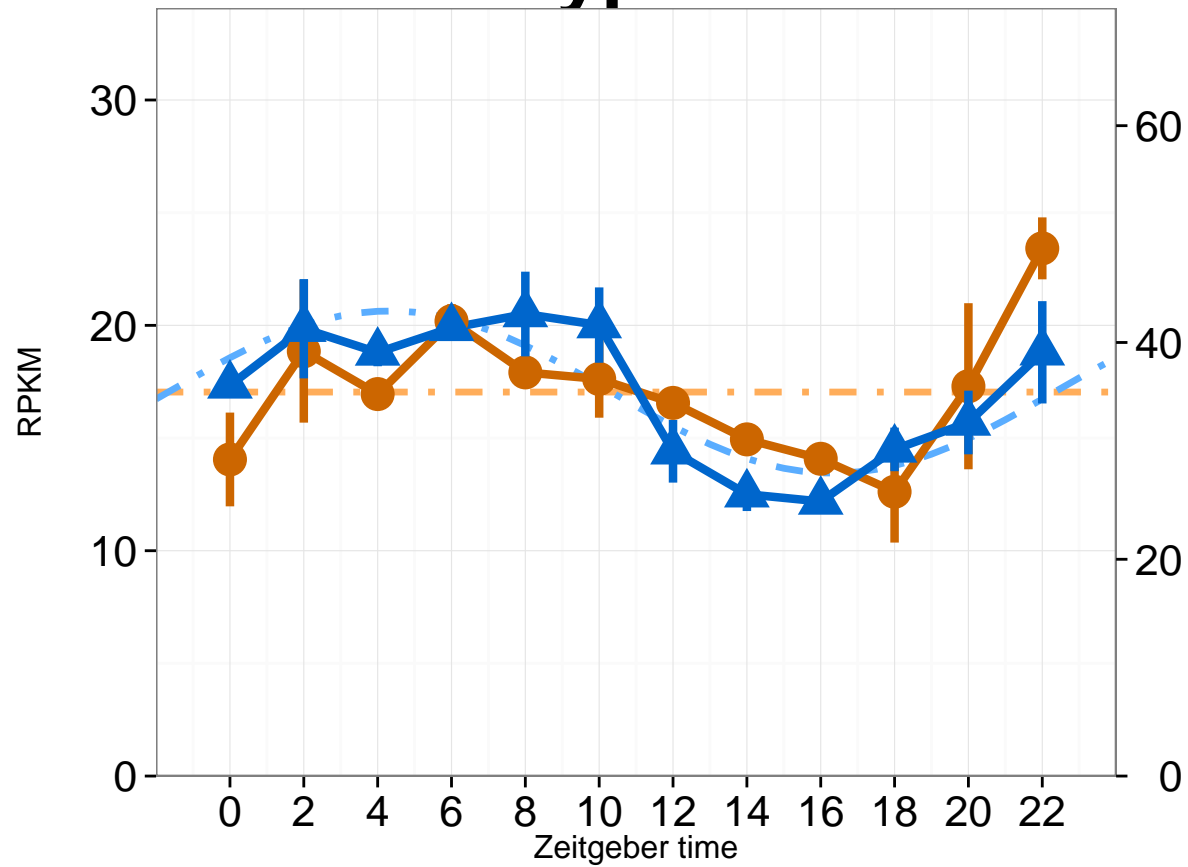

## Lypla2

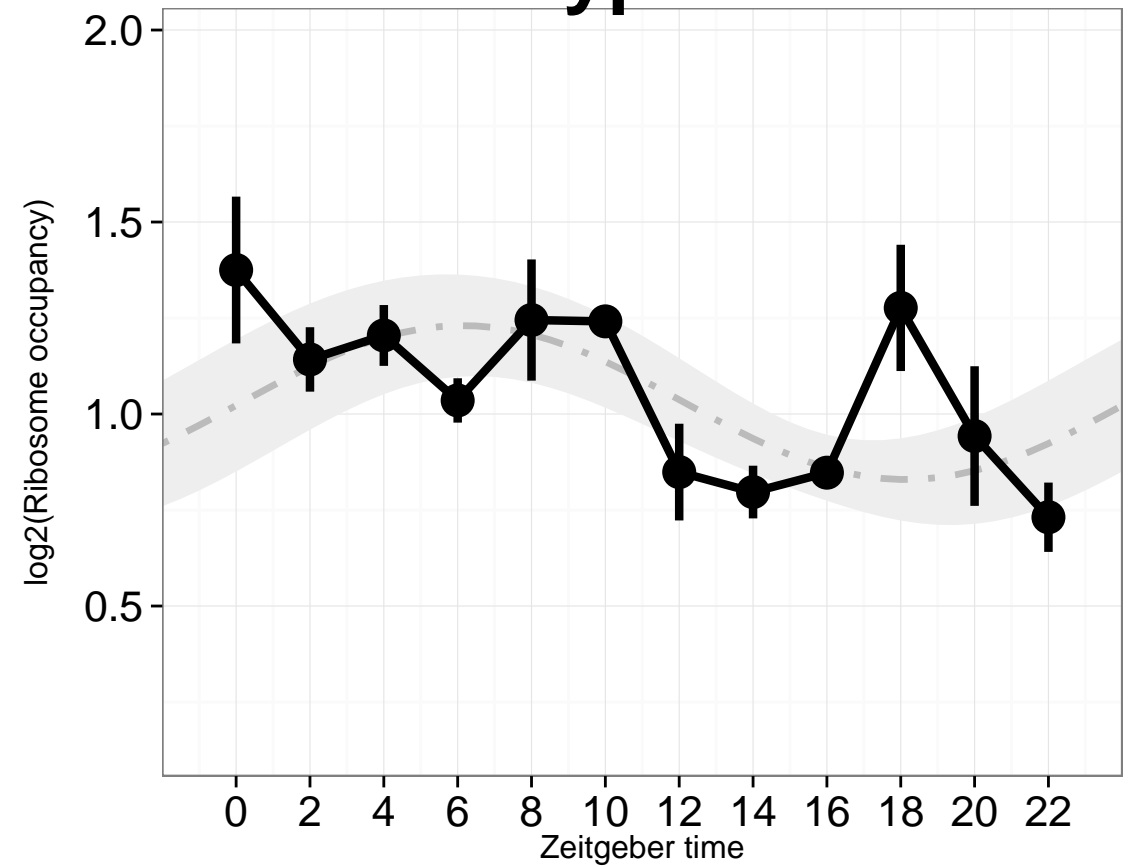

Supplement: SuppDataset_1.zip [file Lypla2_set_C.pdf › Supplemental Dataset 1/C-mRNA_nonrhythm_translation_rhyth/Lypla2_set_C.pdf]

**Mab21l2 TR**

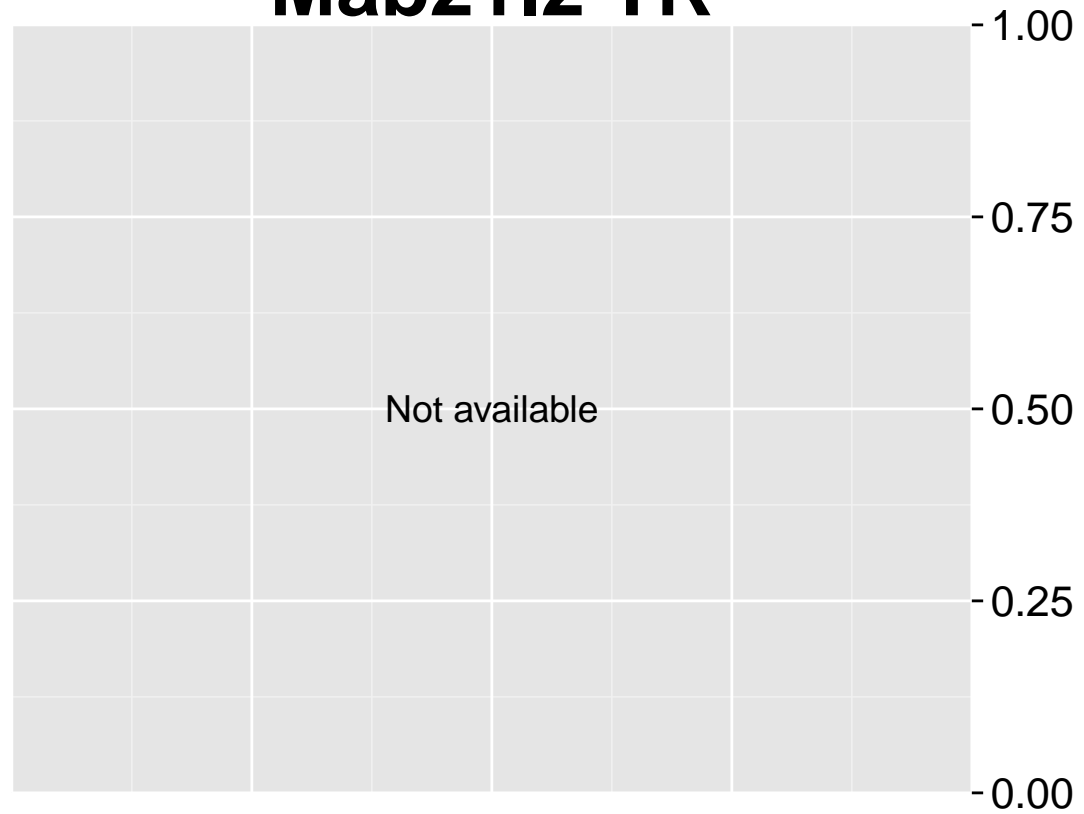

**Mab21l2 log2(Ribosome occupanc**

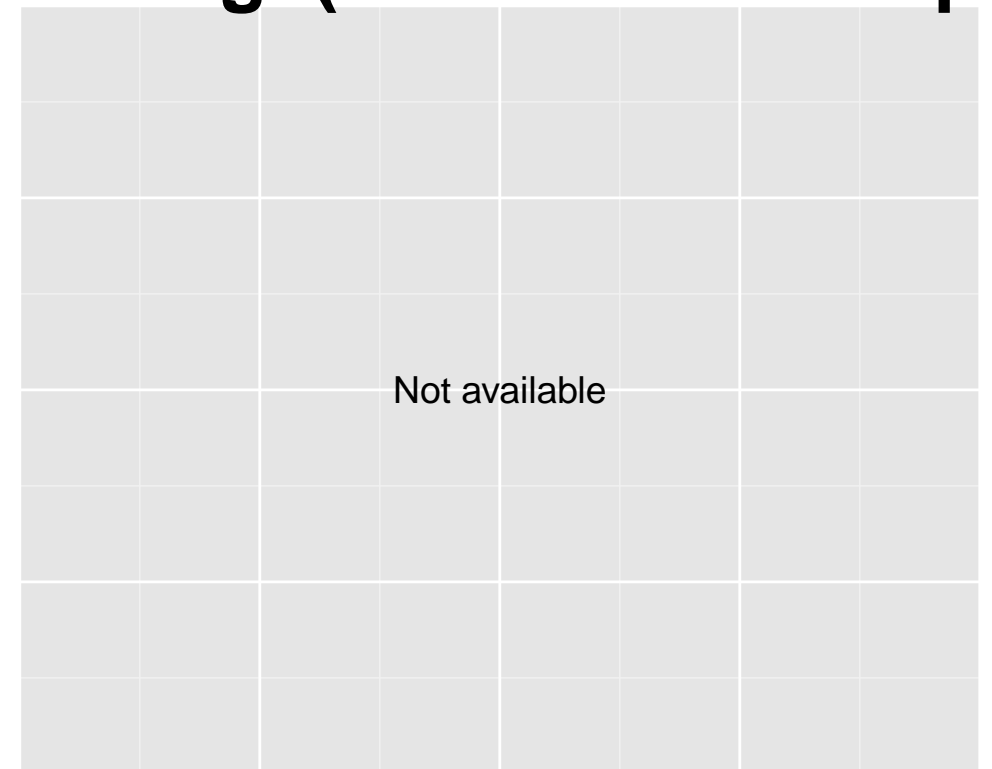

Supplement: SuppDataset_1.zip [file Mab21l2_set_C.pdf › Supplemental Dataset 1/C-mRNA_nonrhythm_translation_rhyth/Mab21l2_set_C.pdf]

## Mafk

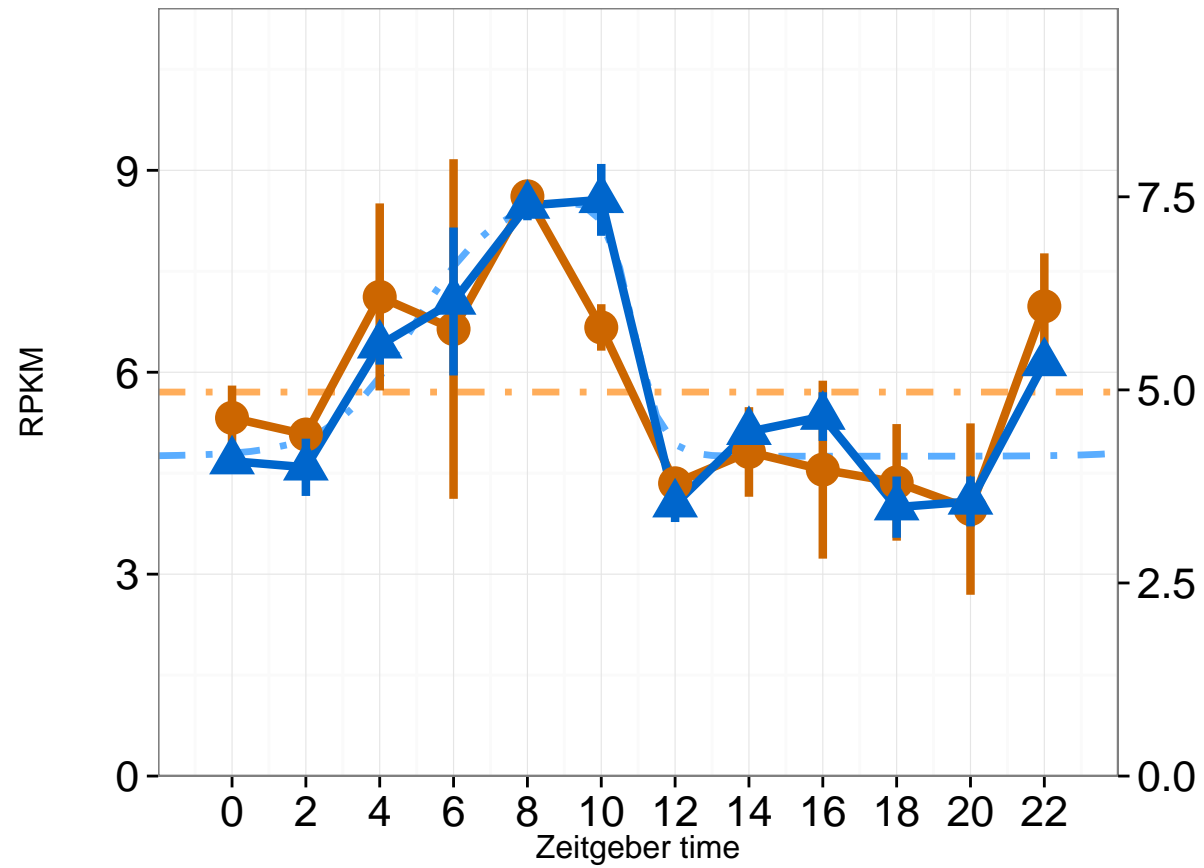

## Mafk

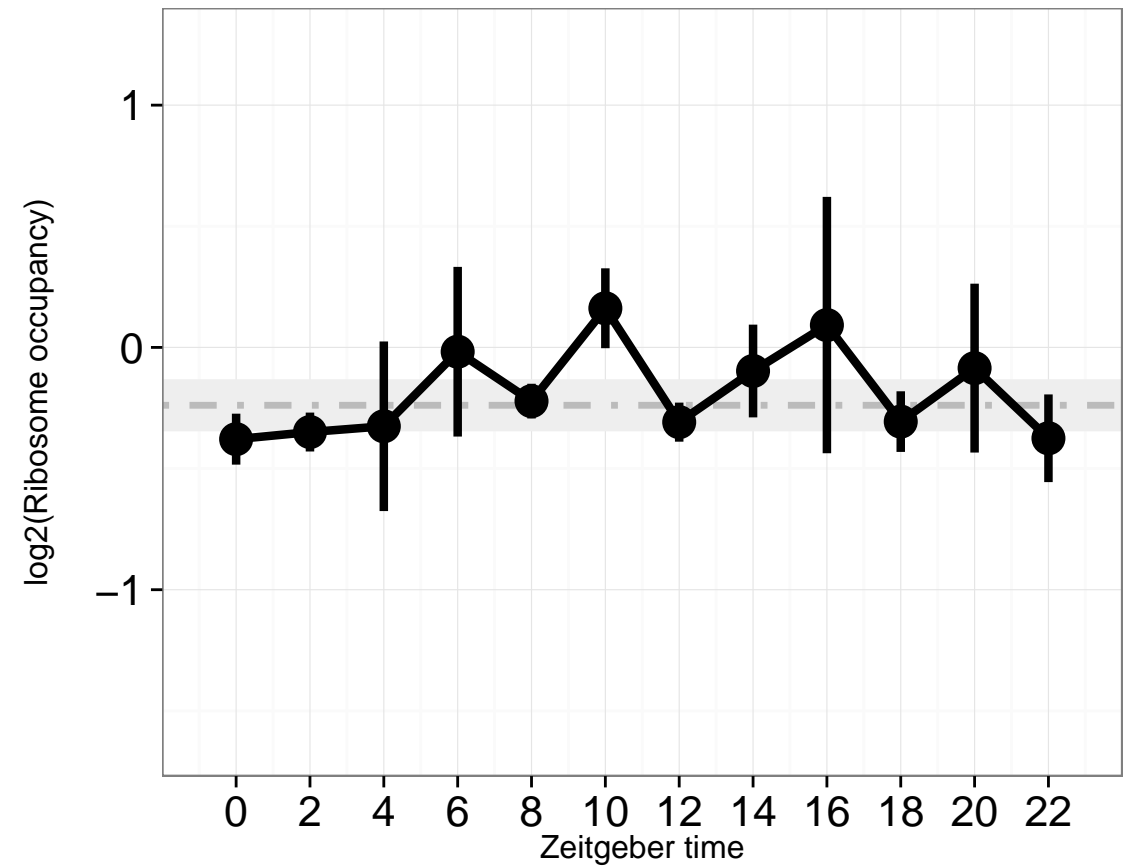

Supplement: SuppDataset_1.zip [file Mafk_set_C.pdf › Supplemental Dataset 1/C-mRNA_nonrhythm_translation_rhyth/Mafk_set_C.pdf]

## Maged2

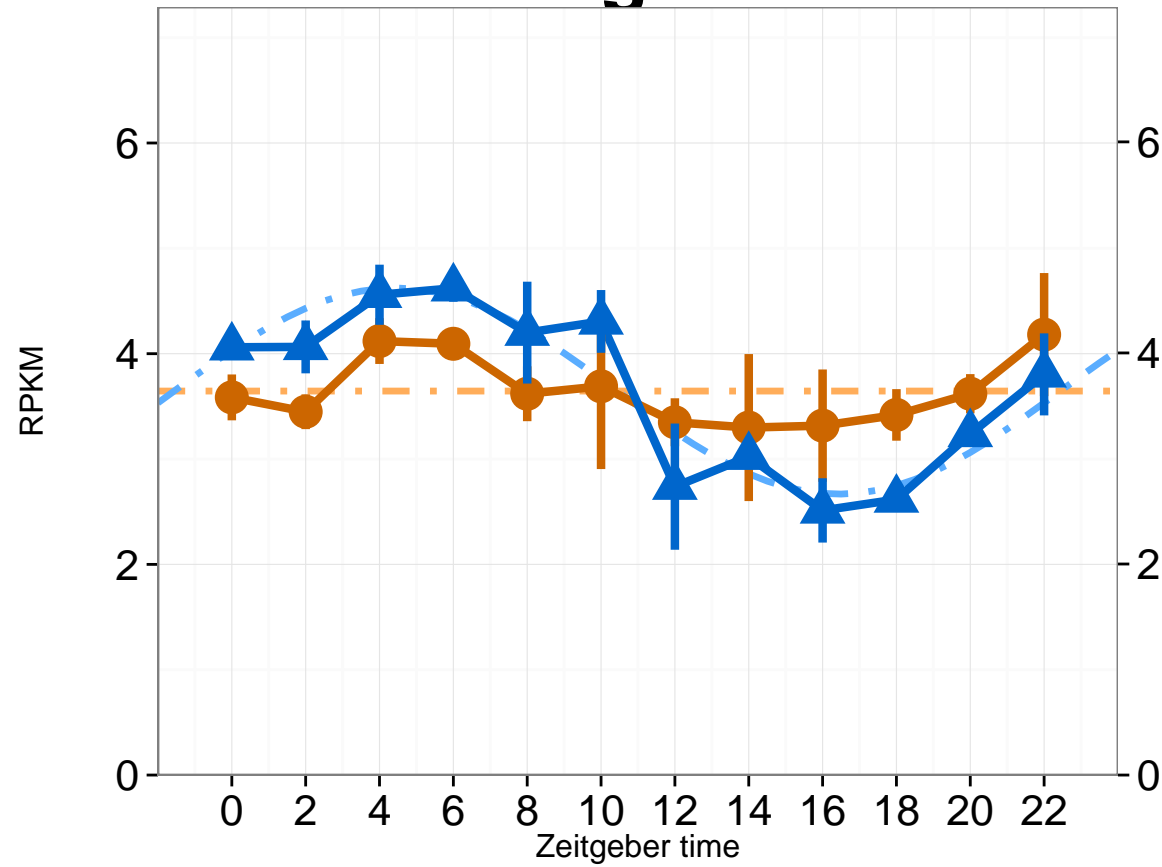

## Maged2

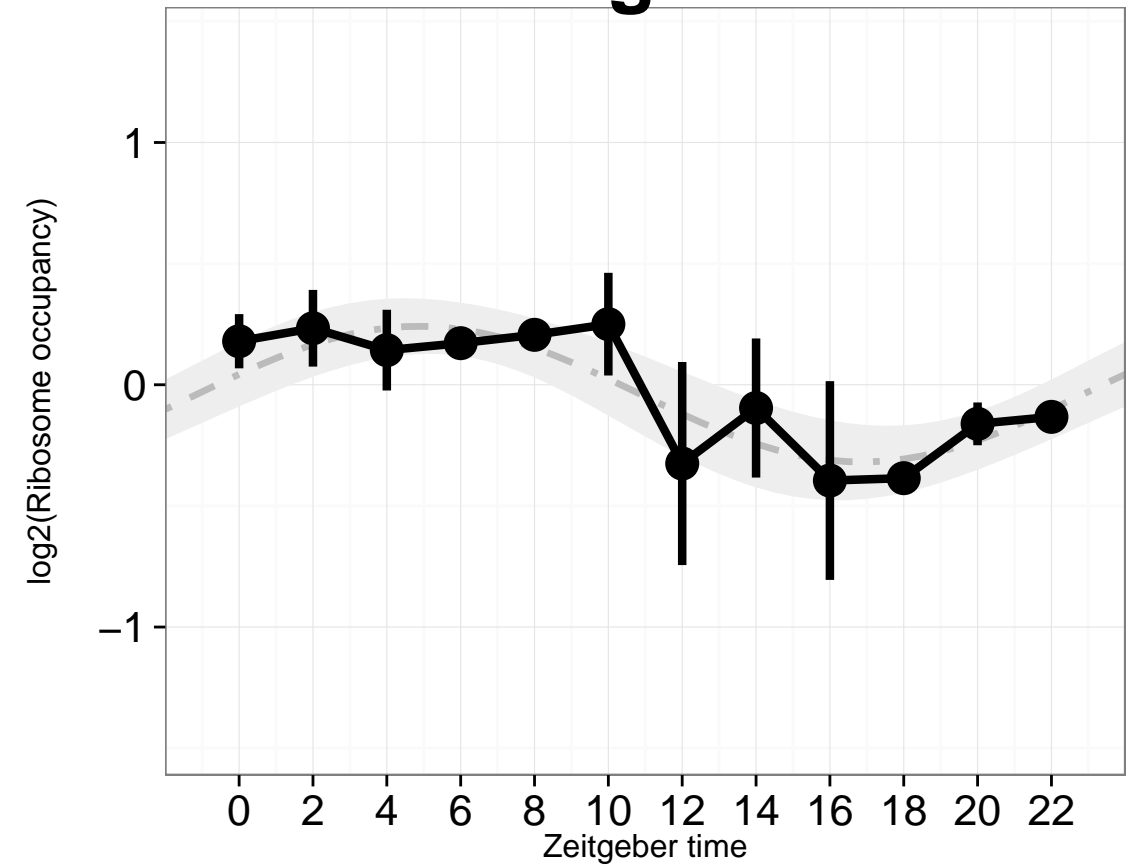

Supplement: SuppDataset_1.zip [file Maged2_set_C.pdf › Supplemental Dataset 1/C-mRNA_nonrhythm_translation_rhyth/Maged2_set_C.pdf]

## Mamdc2

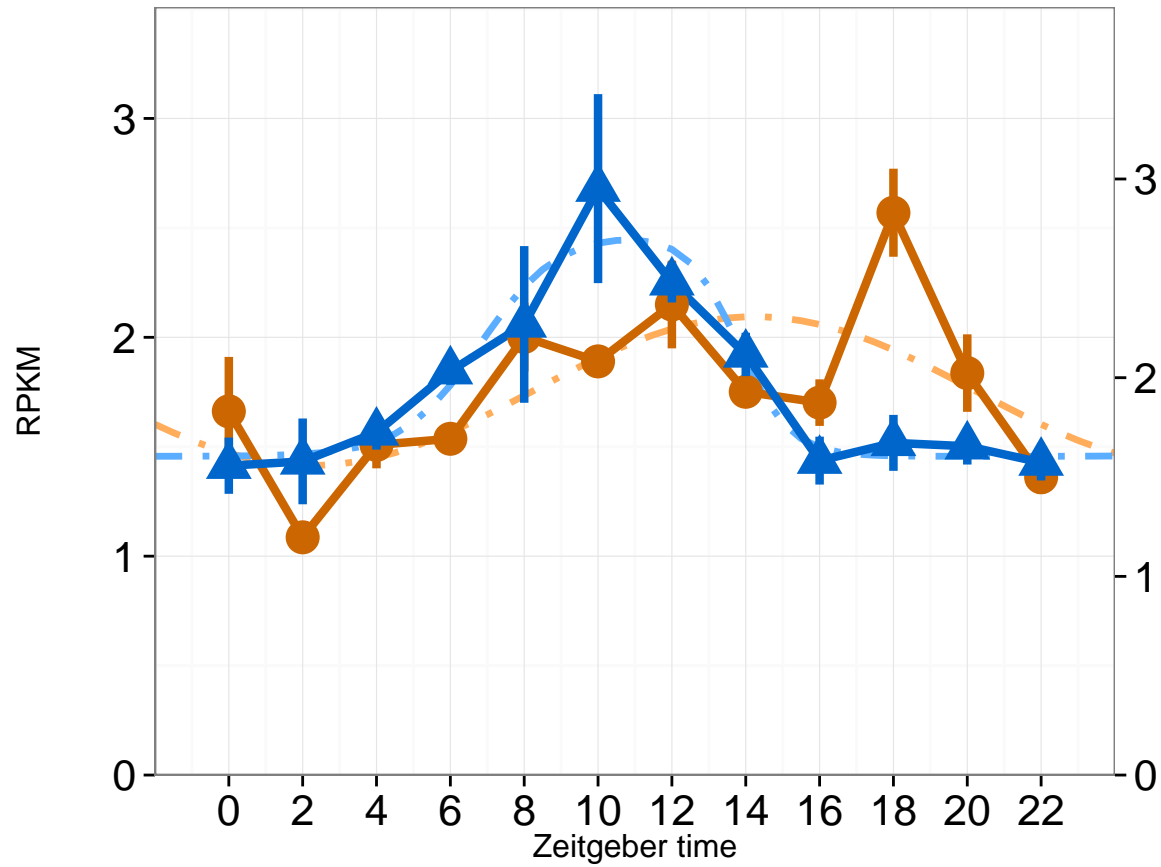

## Mamdc2

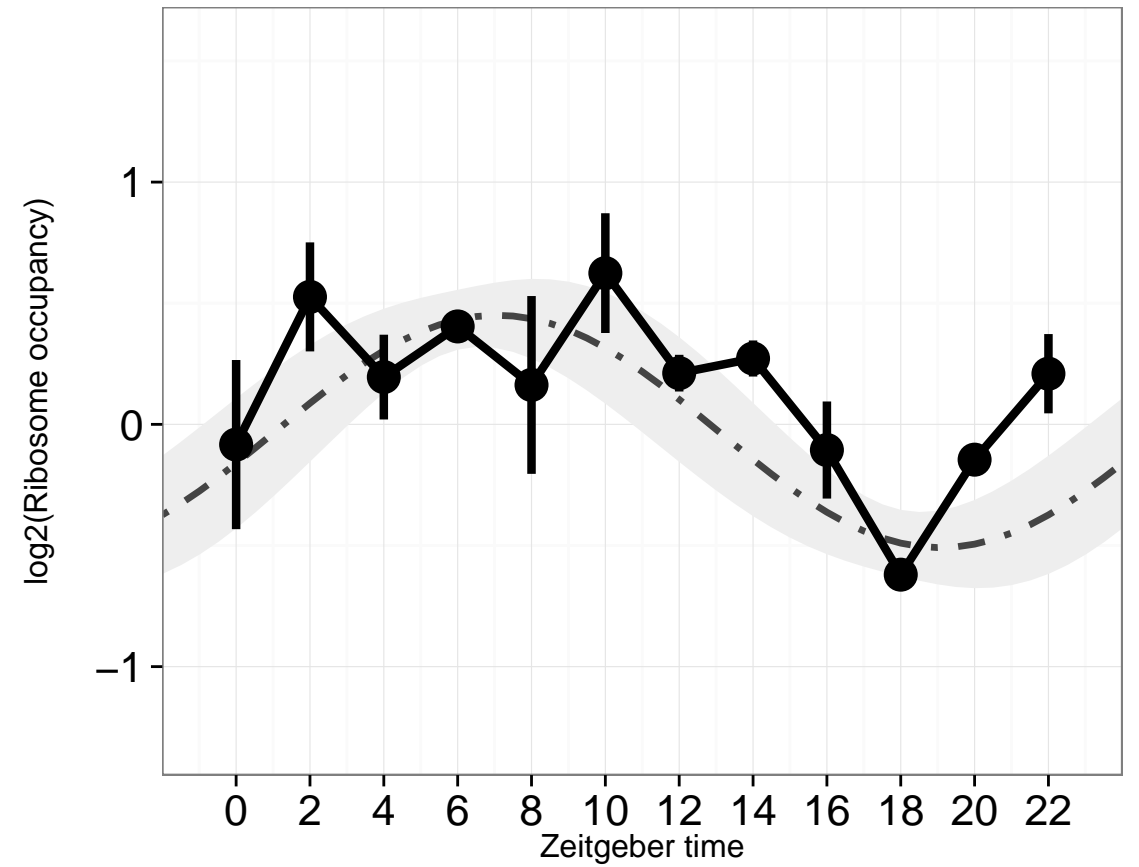

Supplement: SuppDataset_1.zip [file Mamdc2_set_C.pdf › Supplemental Dataset 1/C-mRNA_nonrhythm_translation_rhyth/Mamdc2_set_C.pdf]

## Manbal

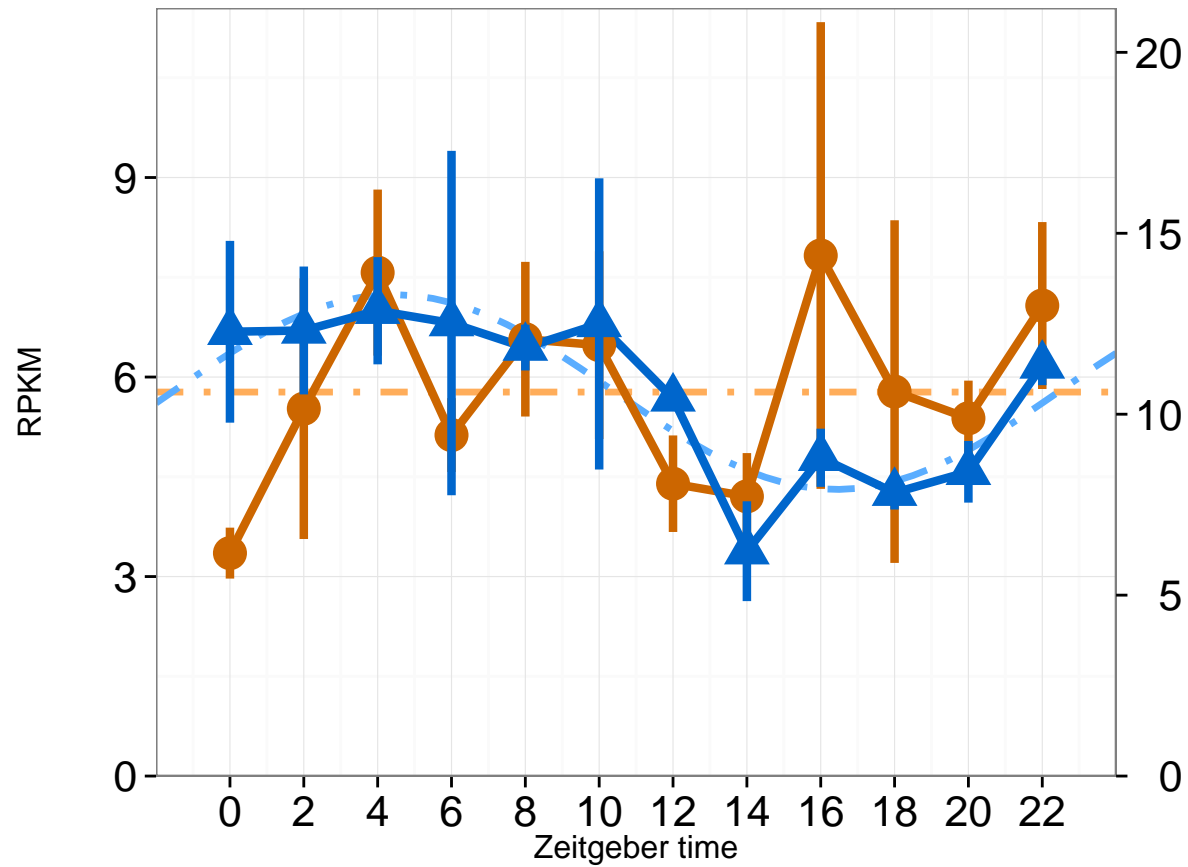

## Manbal

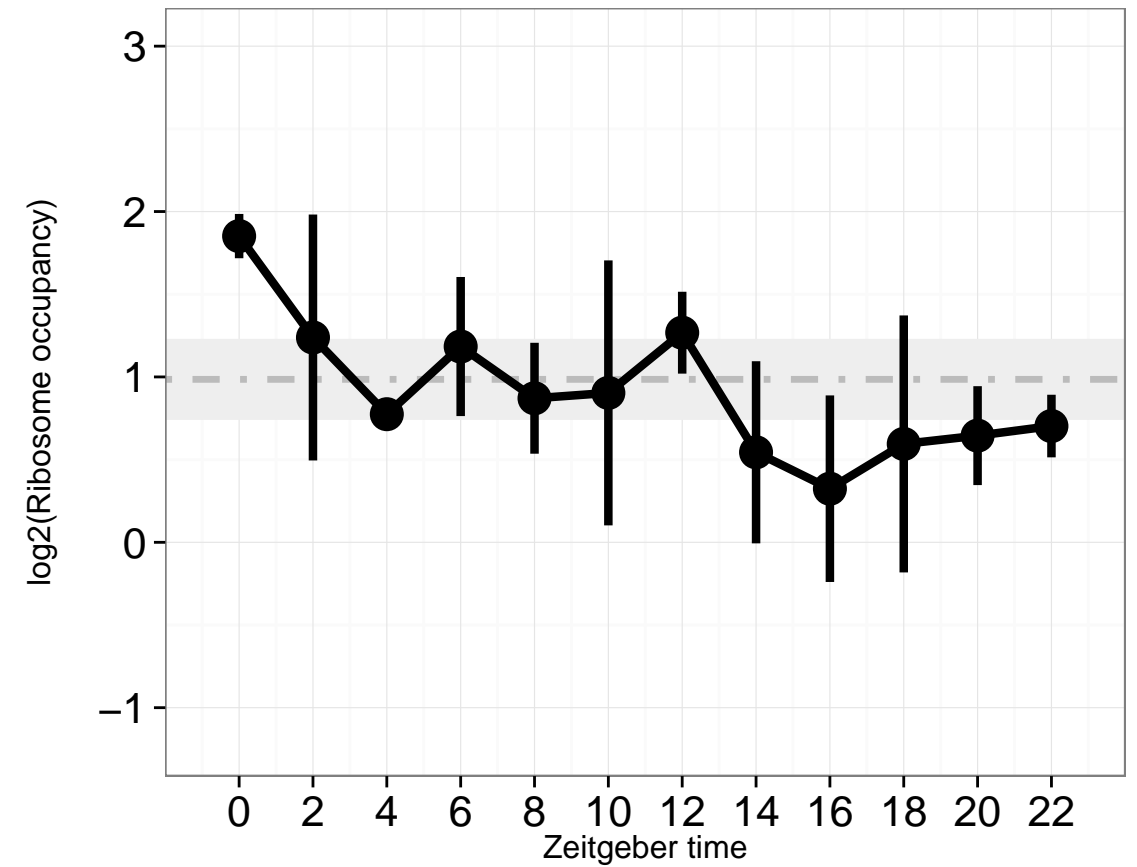

Supplement: SuppDataset_1.zip [file Manbal_set_C.pdf › Supplemental Dataset 1/C-mRNA_nonrhythm_translation_rhyth/Manbal_set_C.pdf]

# Map3k14

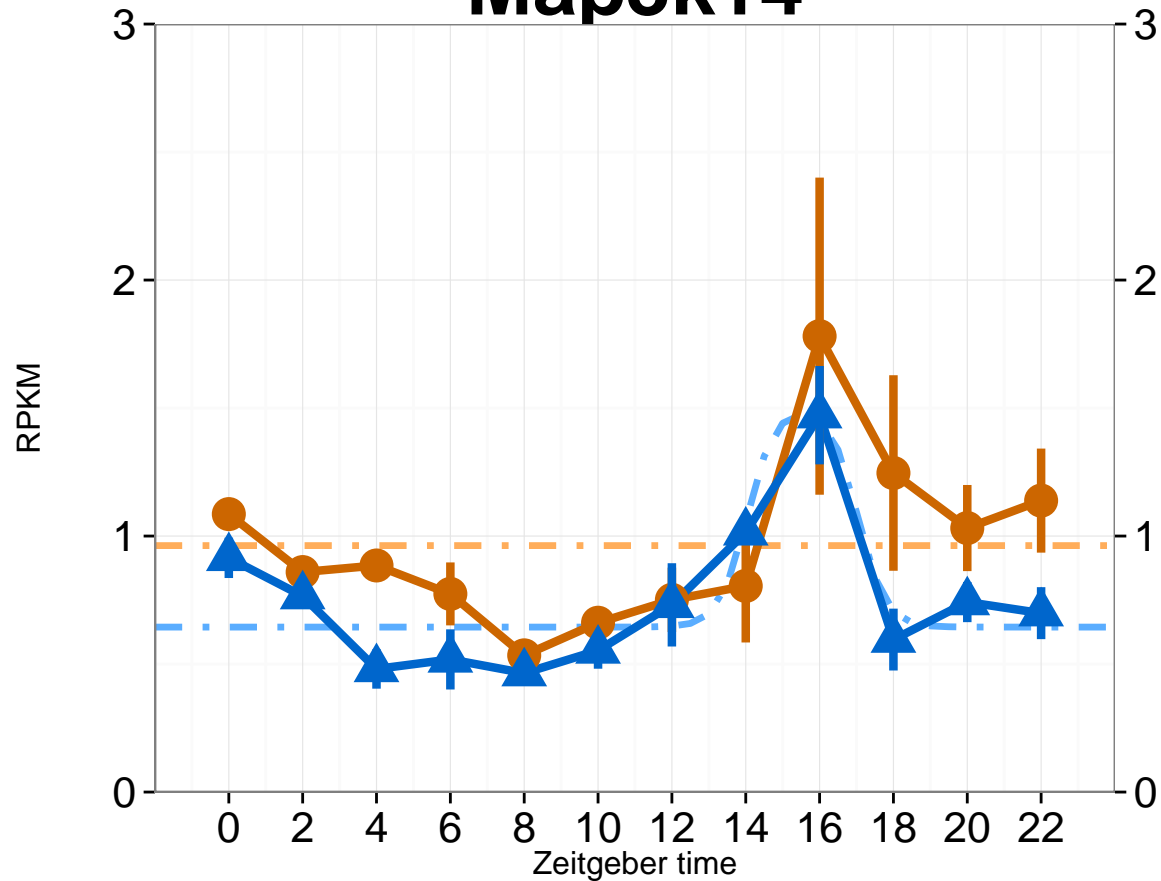

# Map3k14

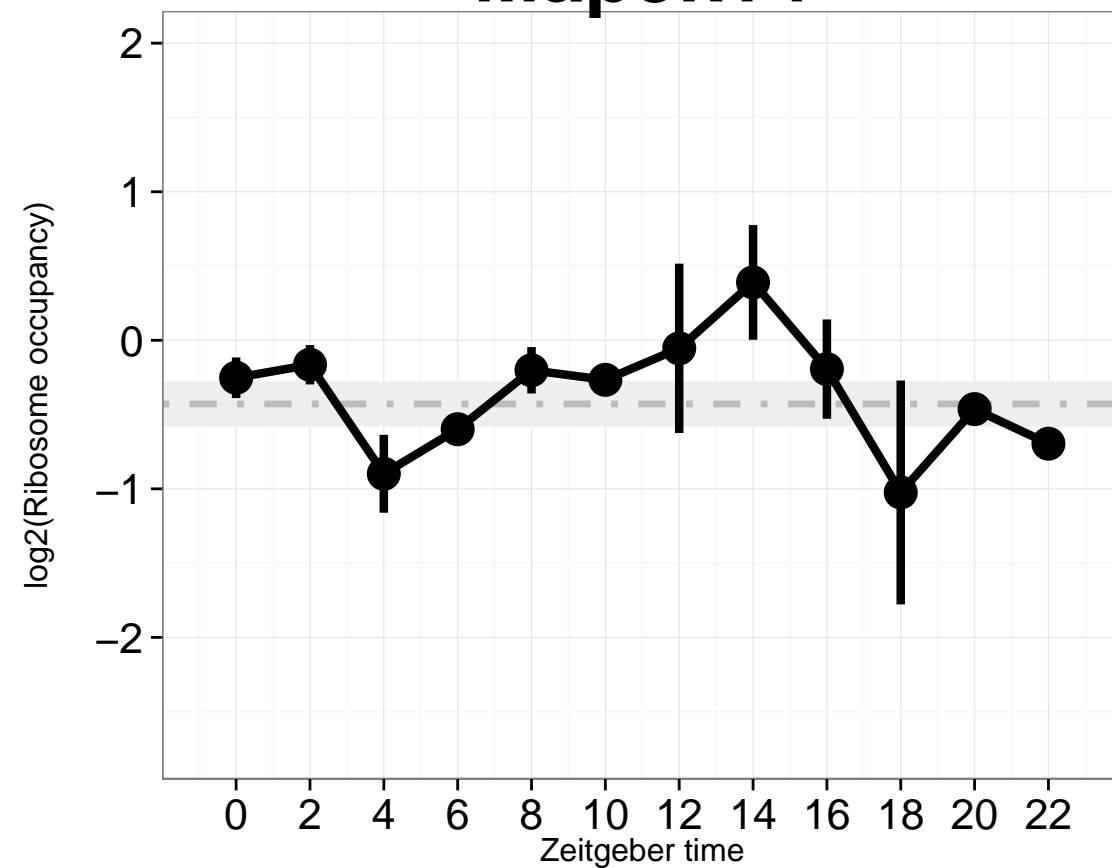

Supplement: SuppDataset_1.zip [file Map3k14_set_C.pdf › Supplemental Dataset 1/C-mRNA_nonrhythm_translation_rhyth/Map3k14_set_C.pdf]

## Mapk14

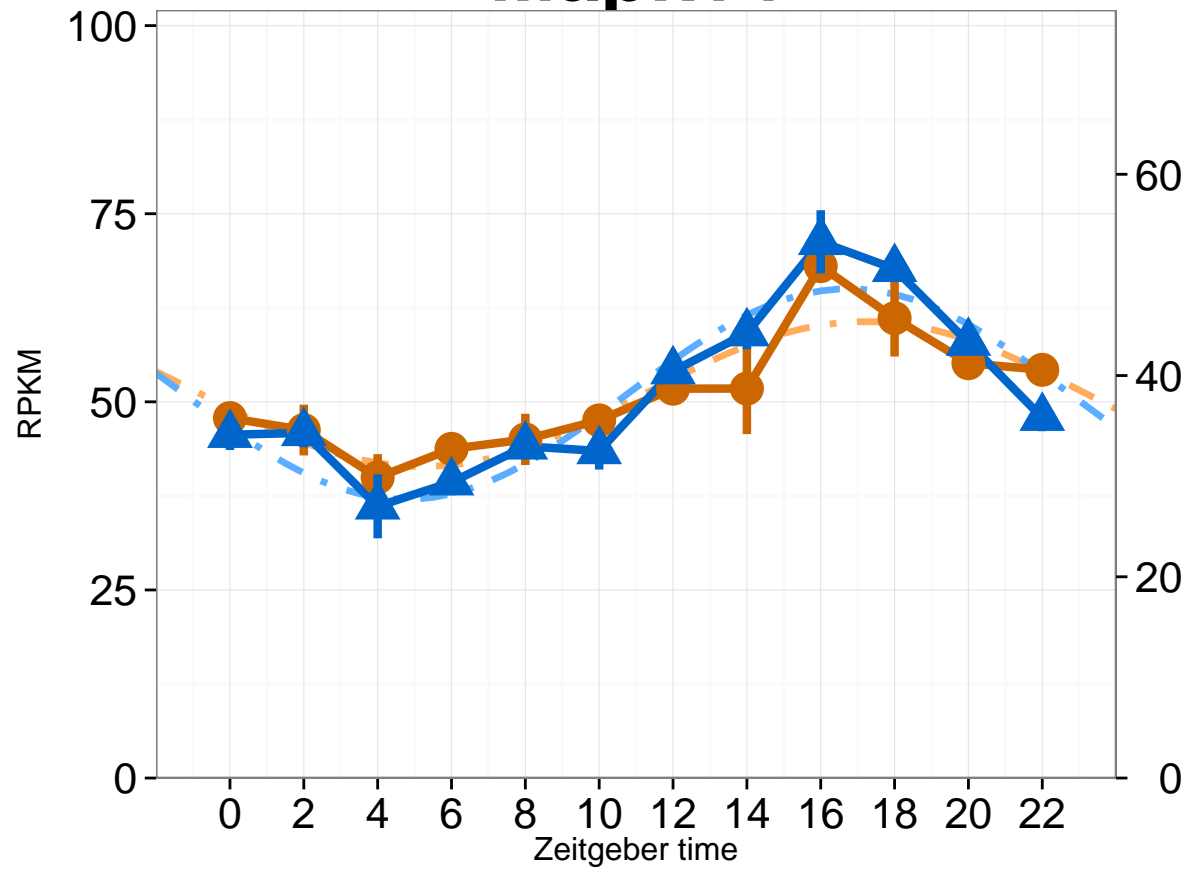

## Mapk14

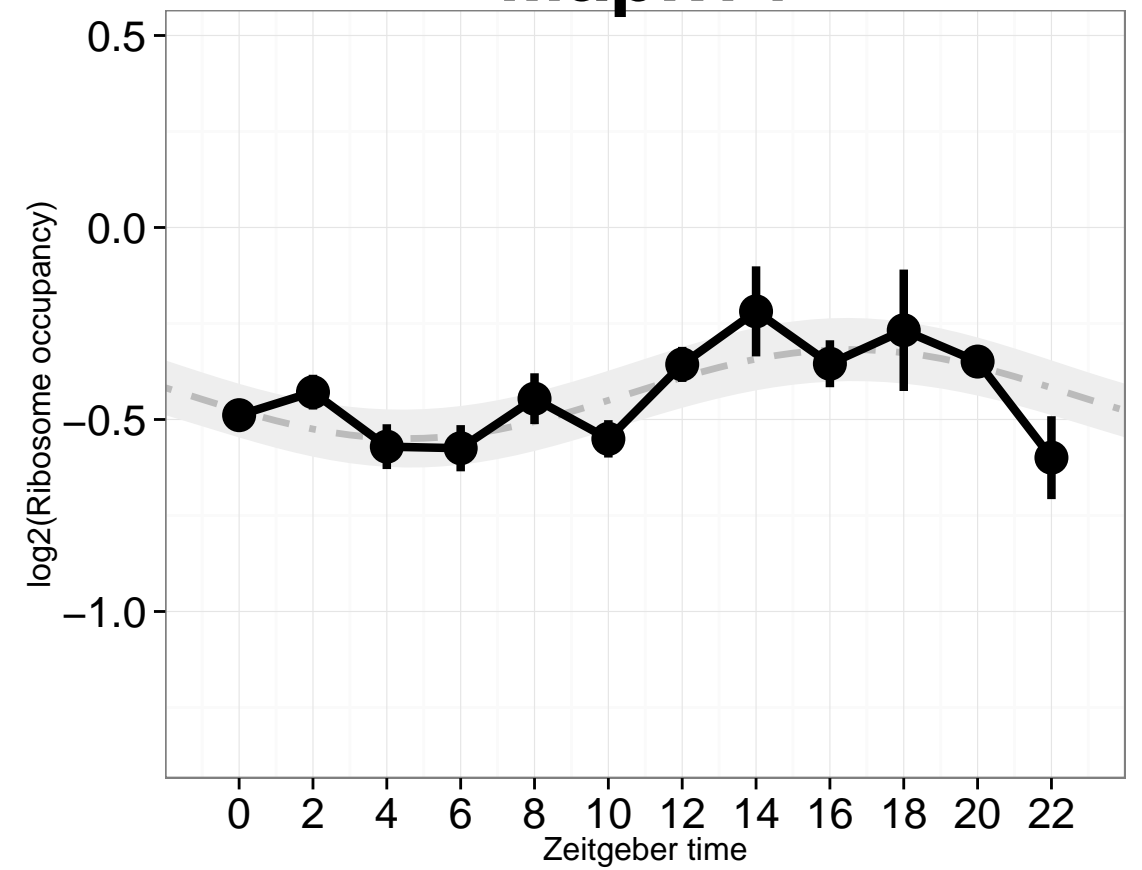

Supplement: SuppDataset_1.zip [file Mapk14_set_C.pdf › Supplemental Dataset 1/C-mRNA_nonrhythm_translation_rhyth/Mapk14_set_C.pdf]

# Mapk1ip1

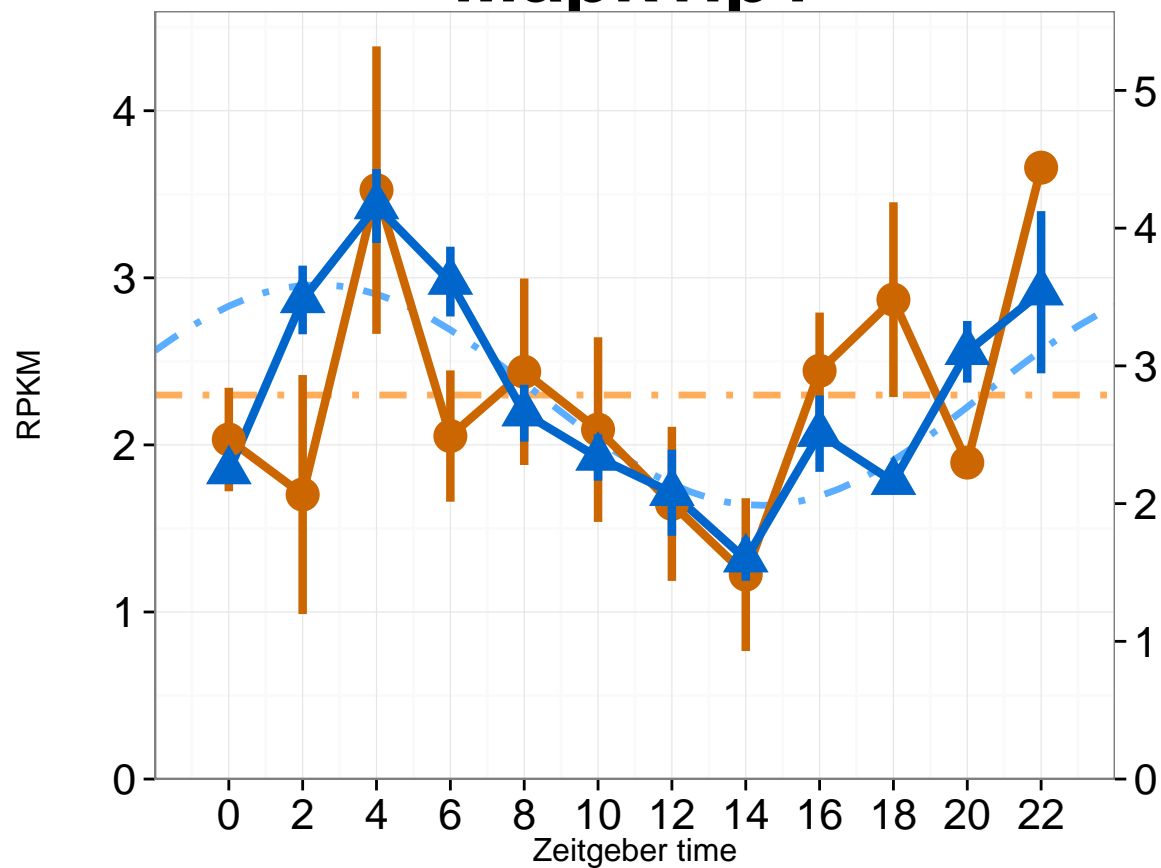

# Mapk1ip1

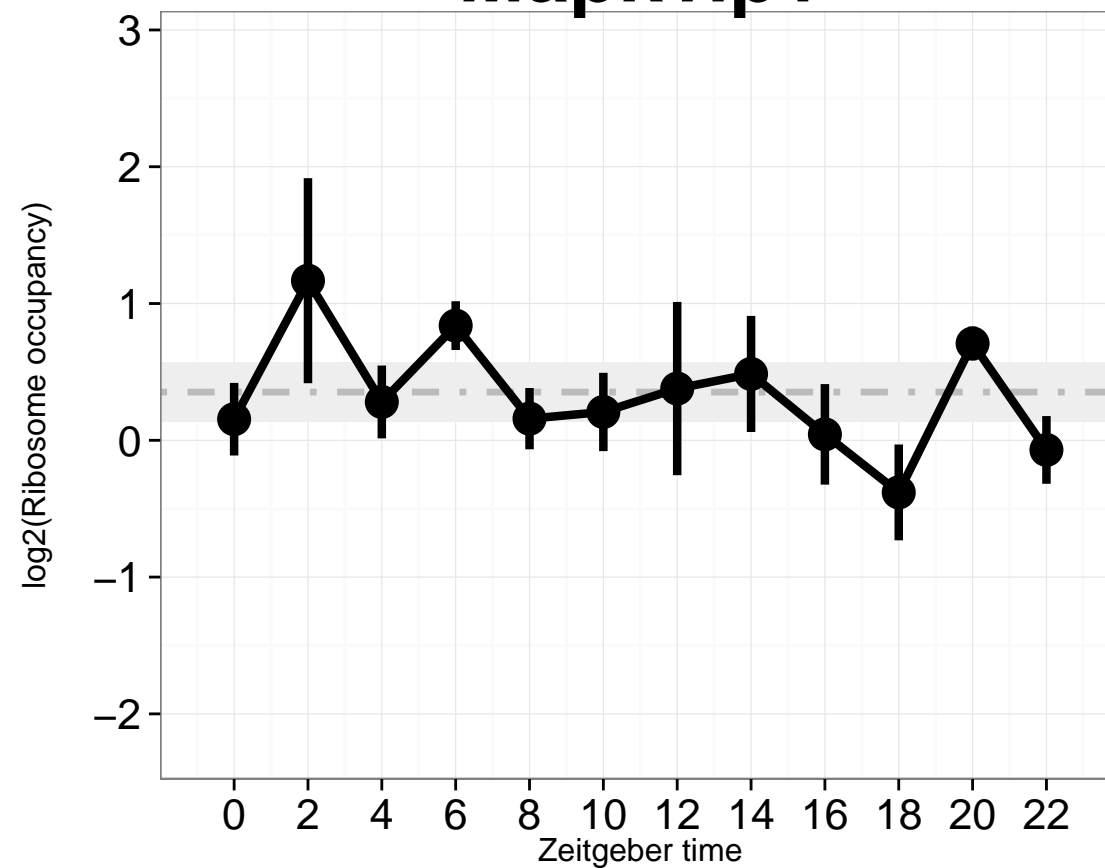

Supplement: SuppDataset_1.zip [file Mapk1ip1_set_C.pdf › Supplemental Dataset 1/C-mRNA_nonrhythm_translation_rhyth/Mapk1ip1_set_C.pdf]

# Marveld1

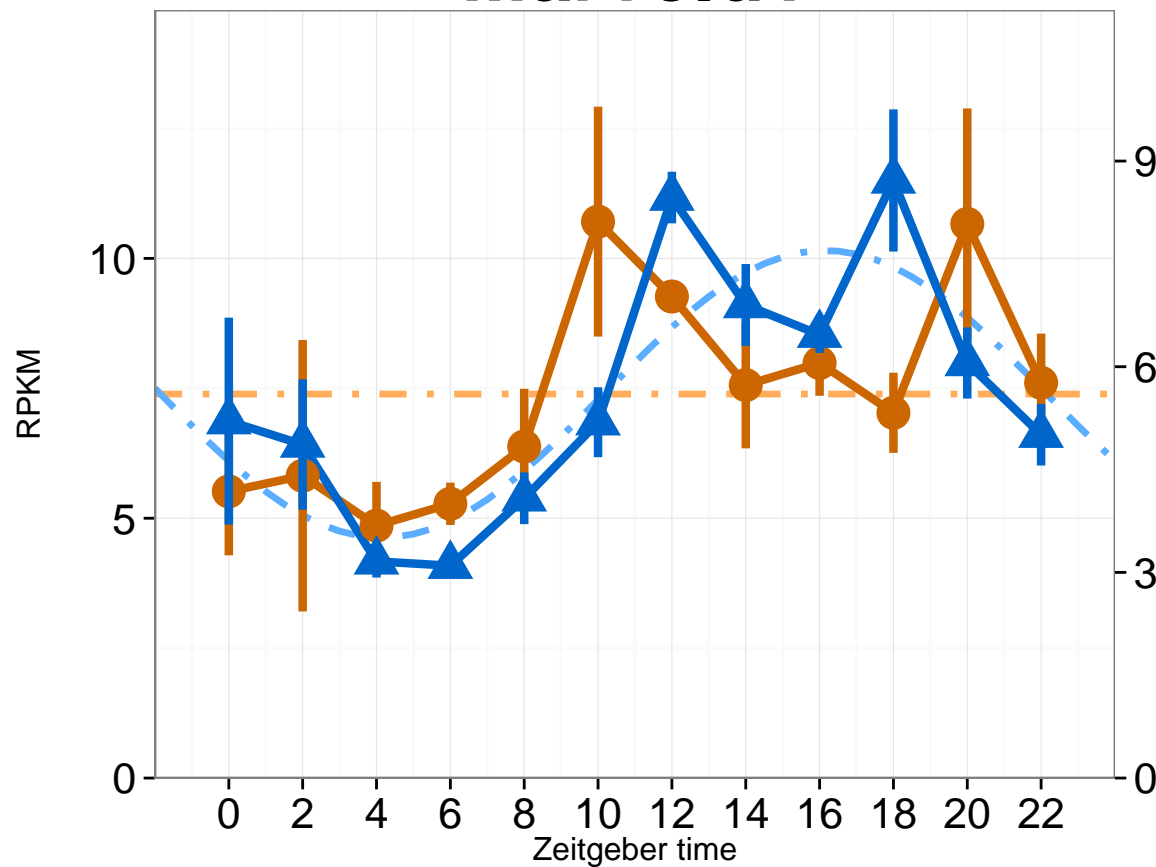

# Marveld1

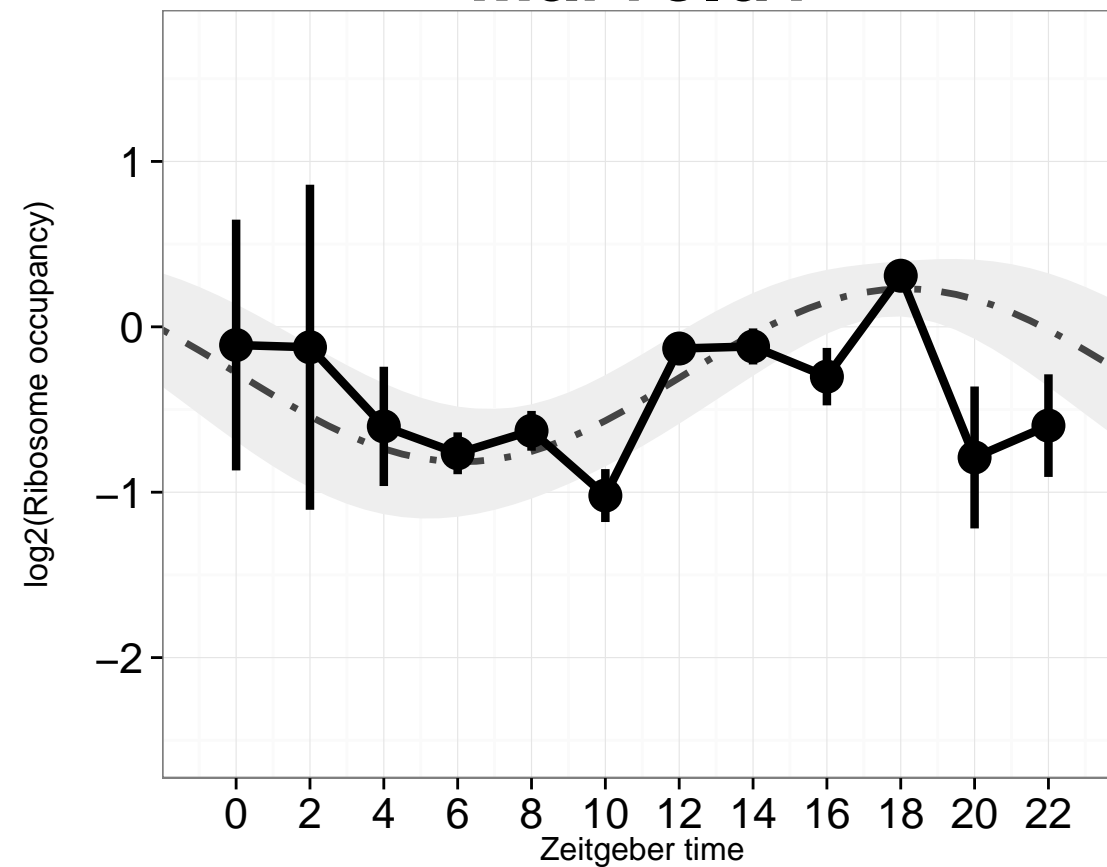

Supplement: SuppDataset_1.zip [file Marveld1_set_C.pdf › Supplemental Dataset 1/C-mRNA_nonrhythm_translation_rhyth/Marveld1_set_C.pdf]

# Mblac1

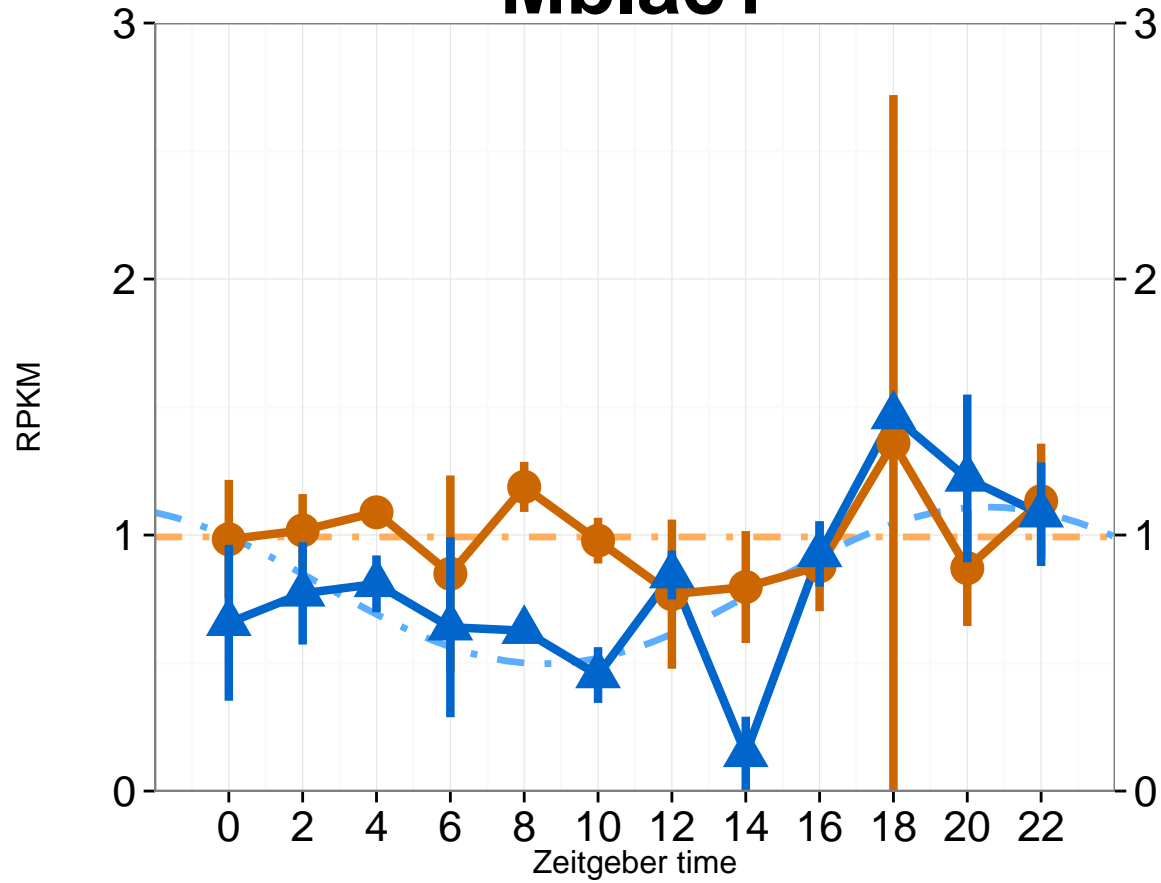

# Mblac1

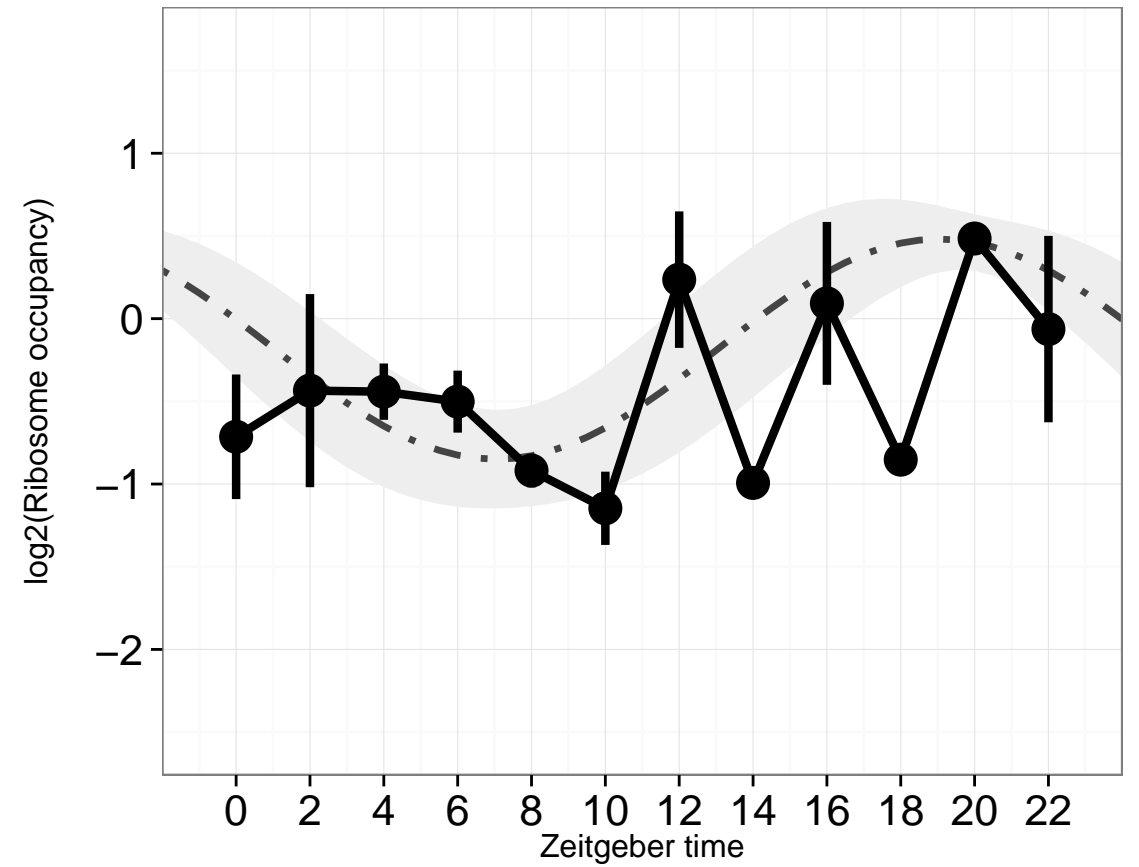

Supplement: SuppDataset_1.zip [file Mblac1_set_C.pdf › Supplemental Dataset 1/C-mRNA_nonrhythm_translation_rhyth/Mblac1_set_C.pdf]

## Med9

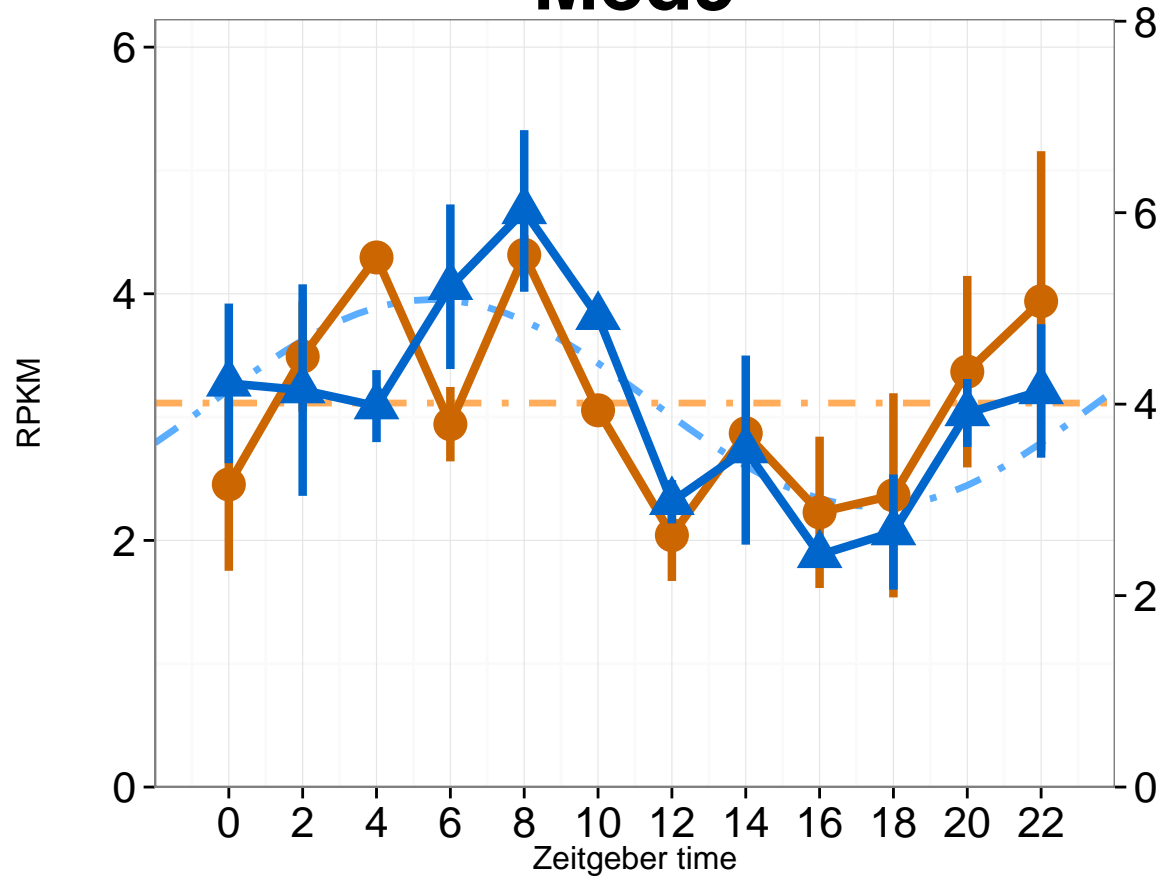

## Med9

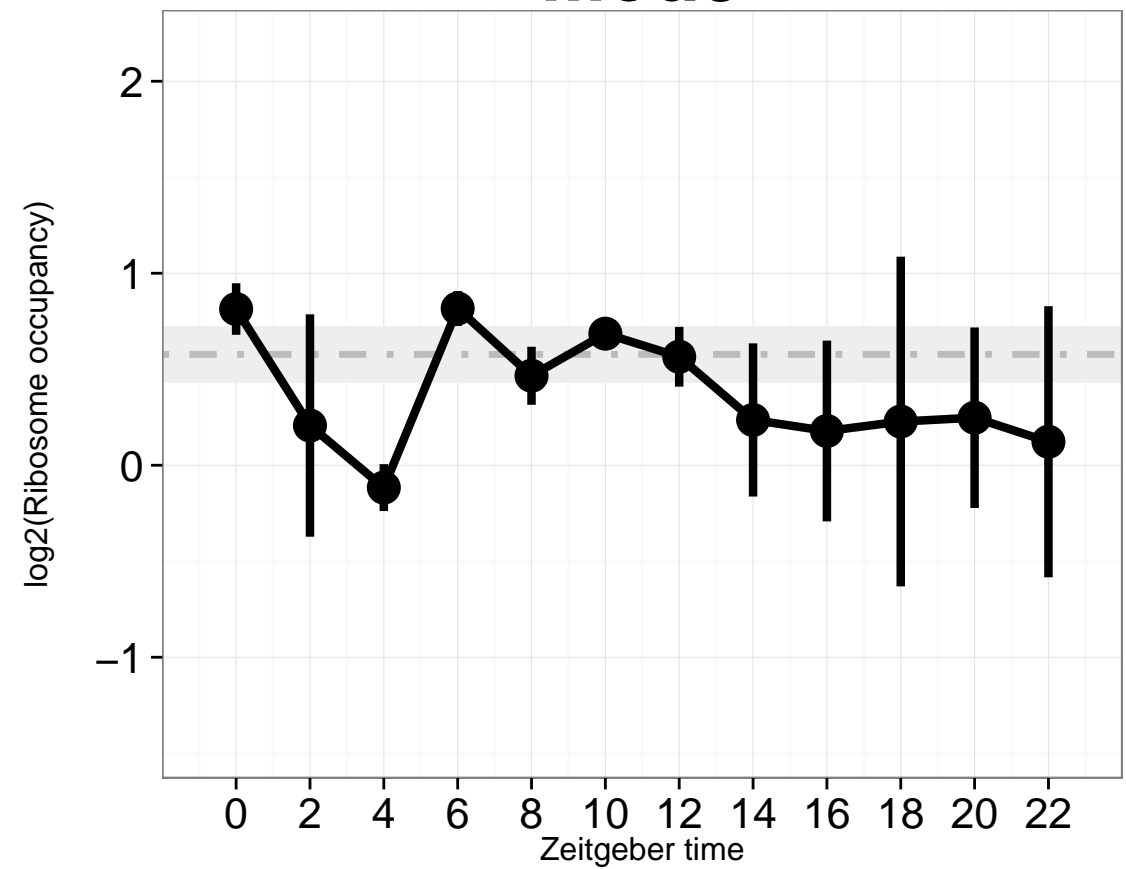

Supplement: SuppDataset_1.zip [file Med9_set_C.pdf › Supplemental Dataset 1/C-mRNA_nonrhythm_translation_rhyth/Med9_set_C.pdf]

# Megf9

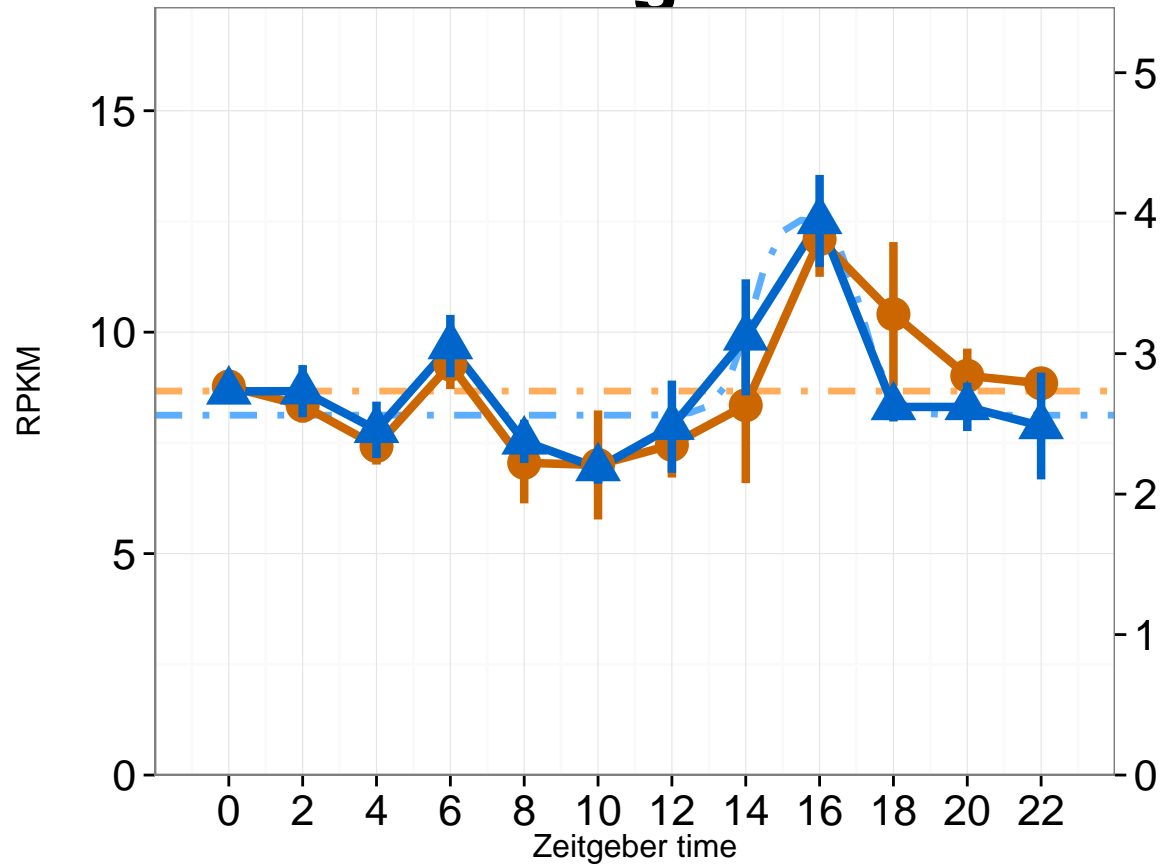

# Megf9

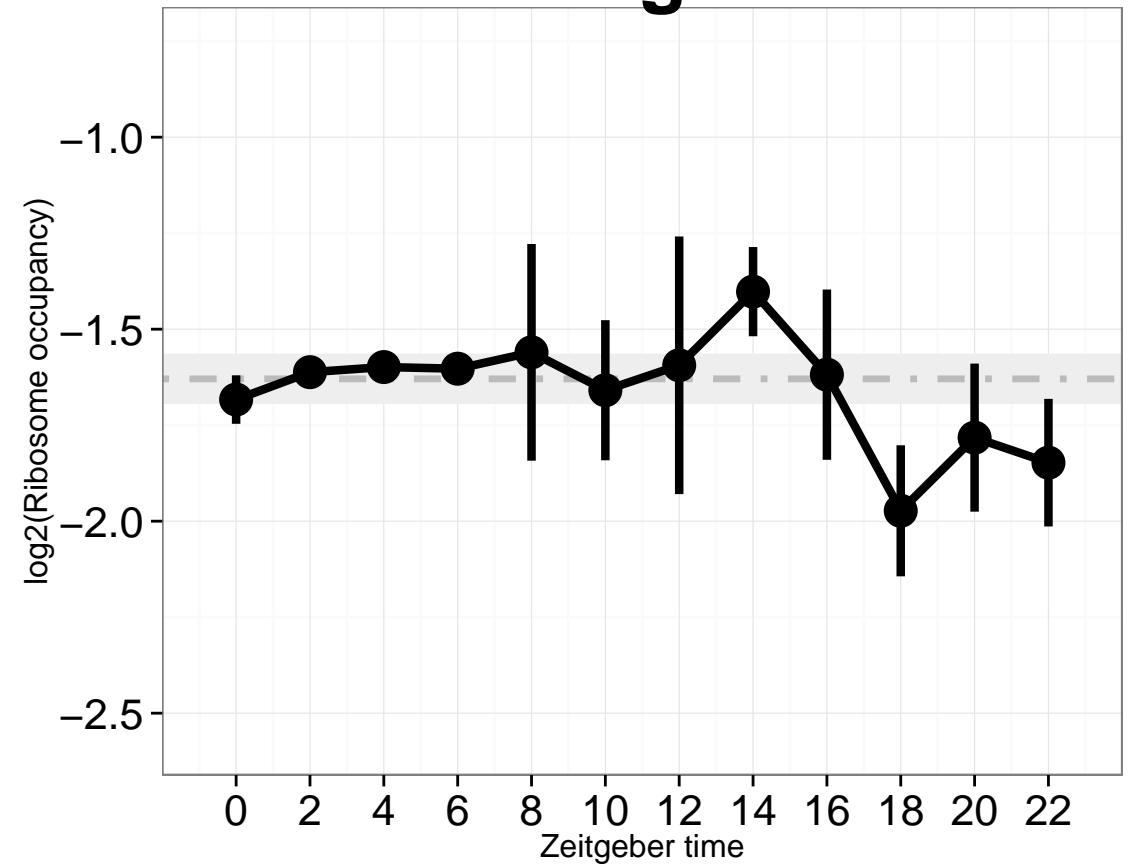

Supplement: SuppDataset_1.zip [file Megf9_set_C.pdf › Supplemental Dataset 1/C-mRNA_nonrhythm_translation_rhyth/Megf9_set_C.pdf]

## Mertk

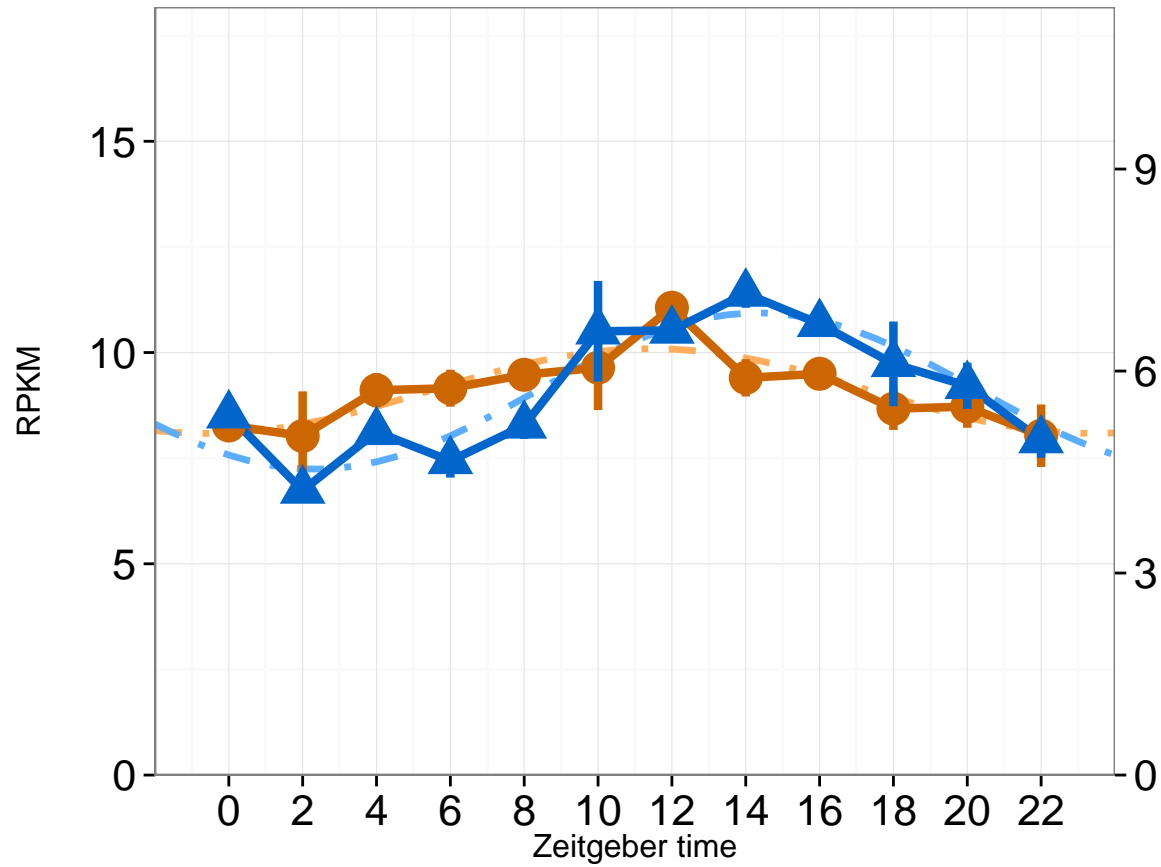

## Mertk

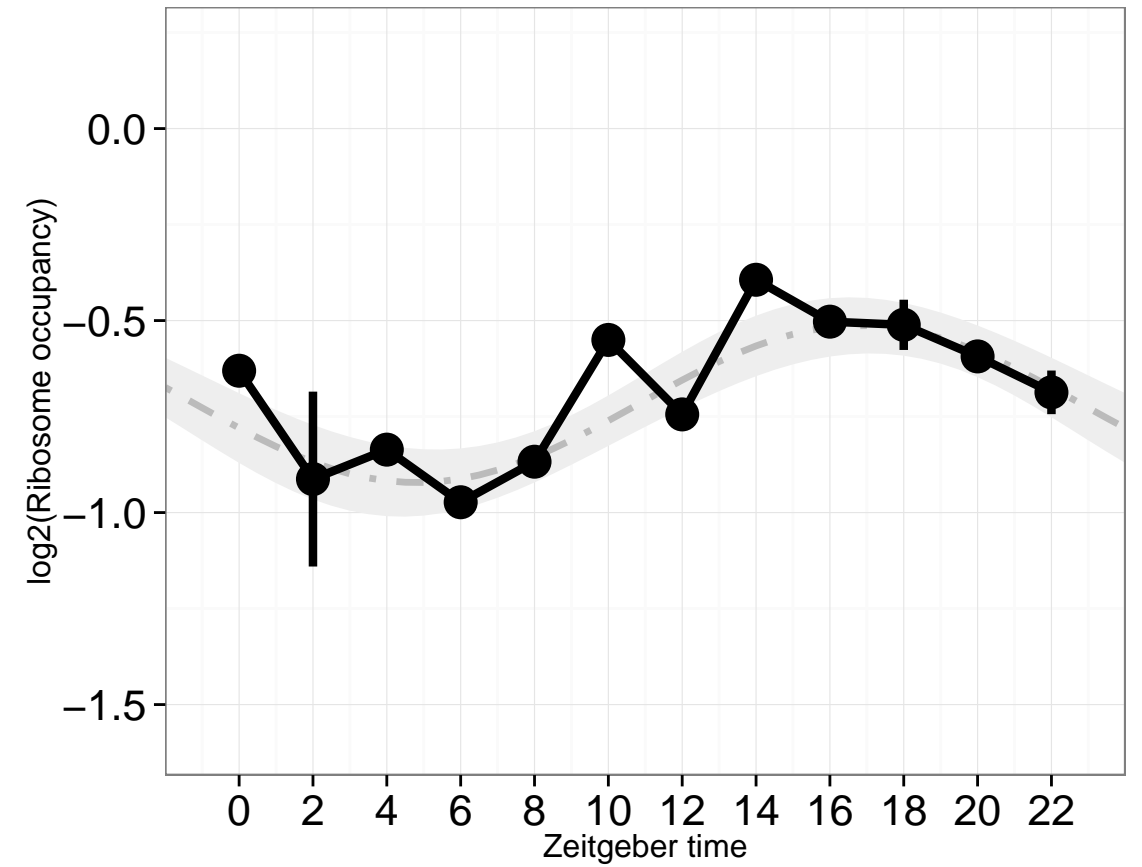

Supplement: SuppDataset_1.zip [file Mertk_set_C.pdf › Supplemental Dataset 1/C-mRNA_nonrhythm_translation_rhyth/Mertk_set_C.pdf]

## Mest

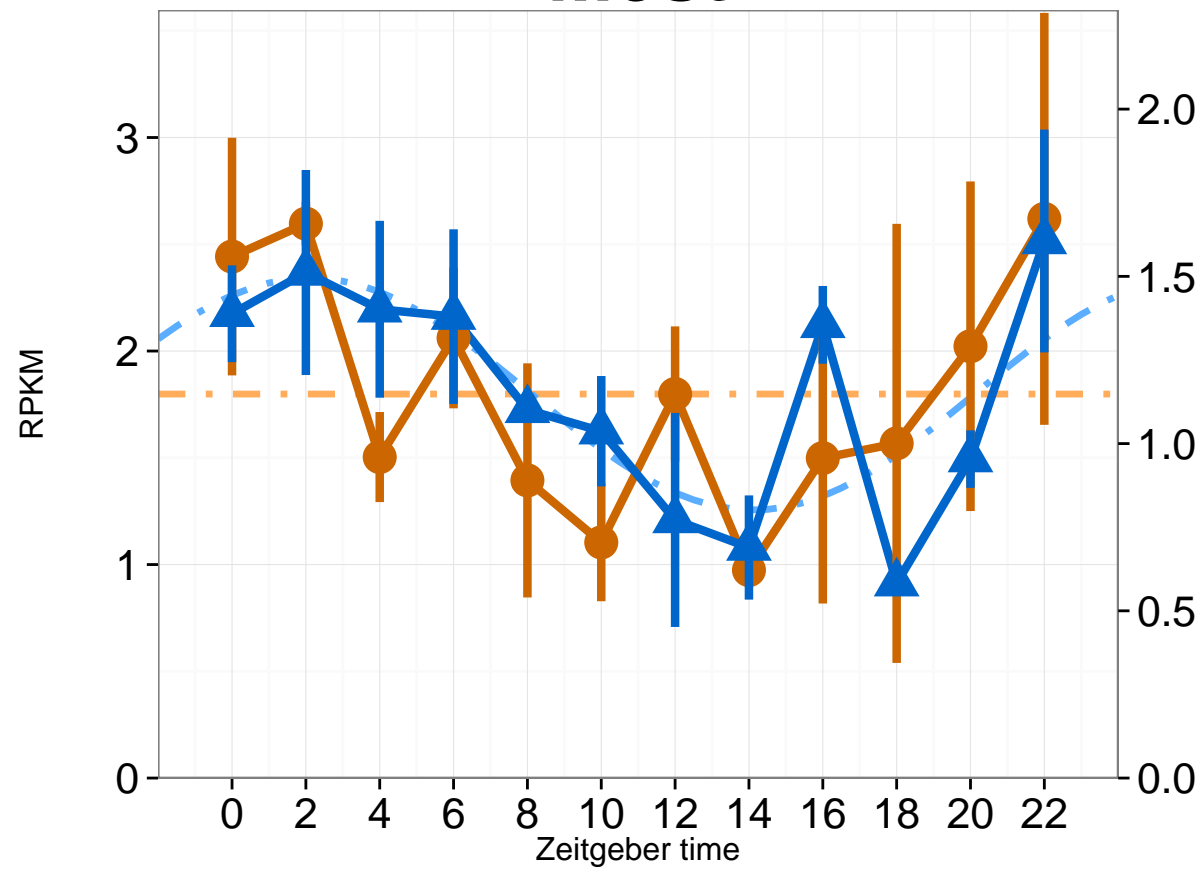

## Mest

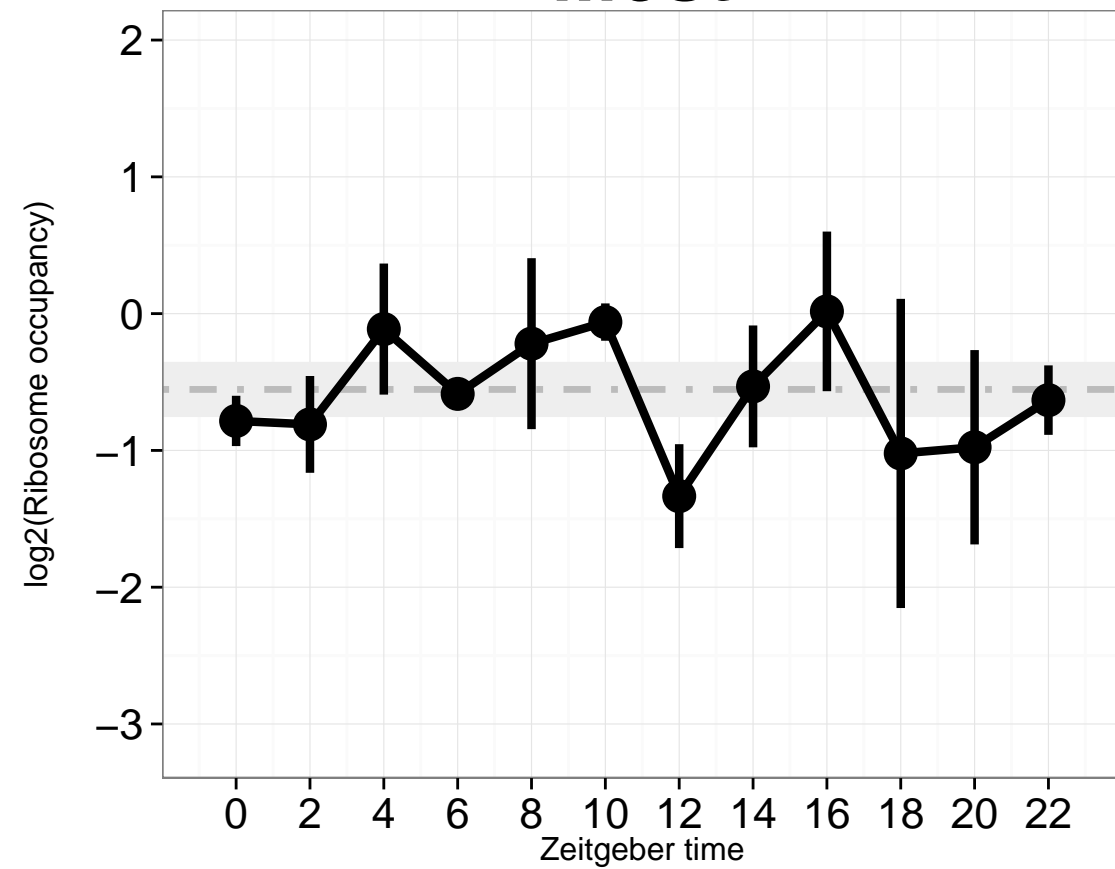

Supplement: SuppDataset_1.zip [file Mest_set_C.pdf › Supplemental Dataset 1/C-mRNA_nonrhythm_translation_rhyth/Mest_set_C.pdf]

# Mettl13

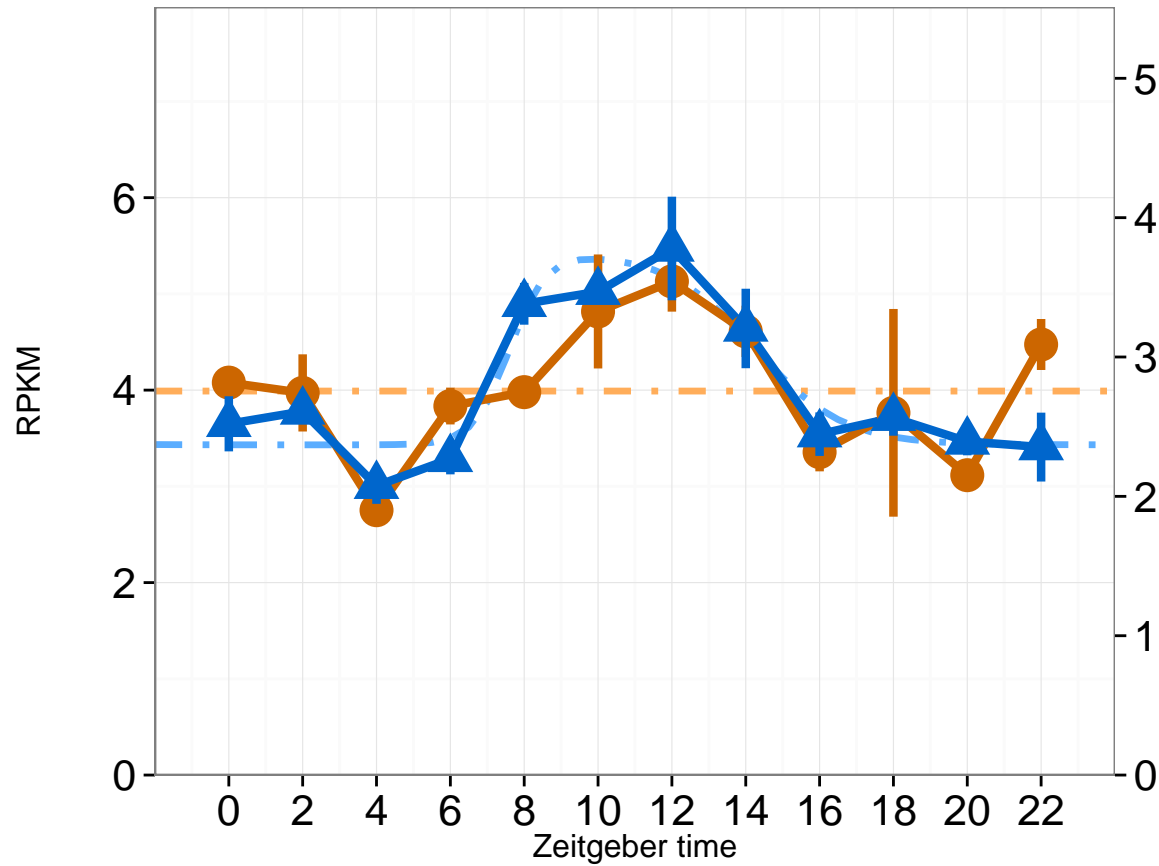

# Mettl13

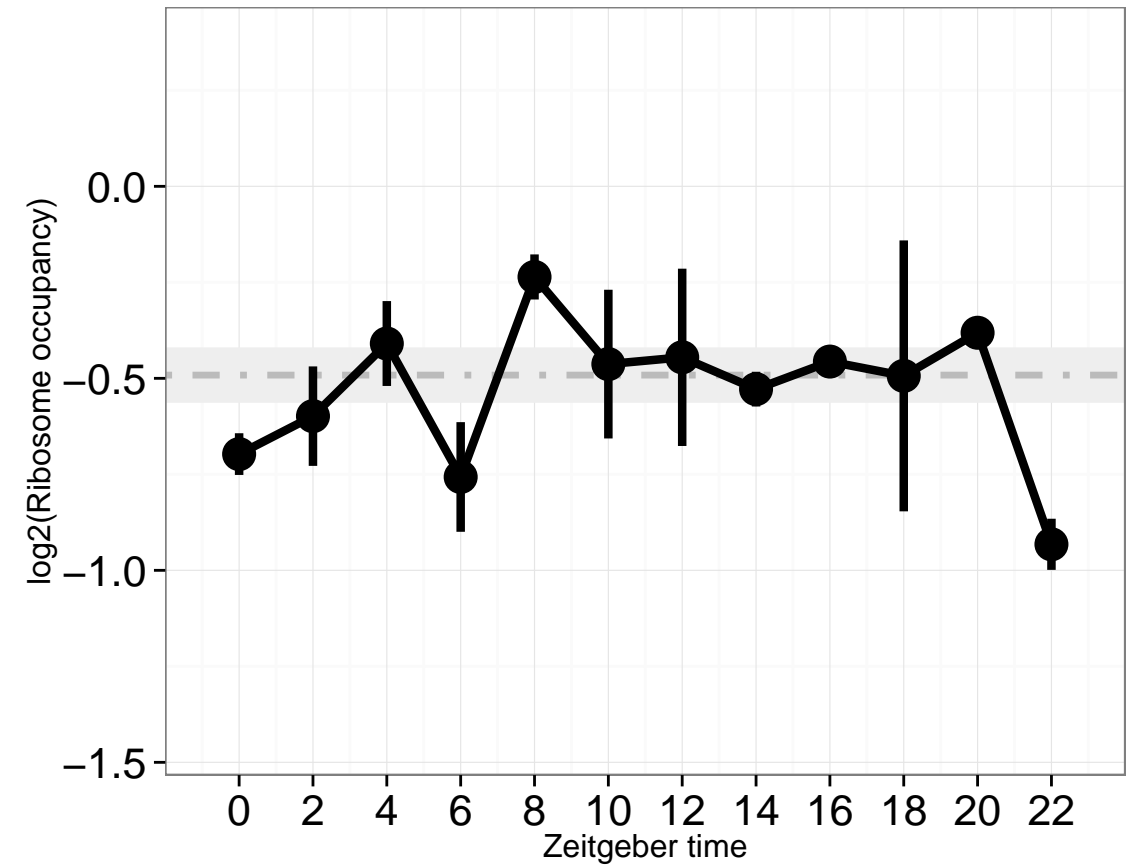

Supplement: SuppDataset_1.zip [file Mettl13_set_C.pdf › Supplemental Dataset 1/C-mRNA_nonrhythm_translation_rhyth/Mettl13_set_C.pdf]

# Mfsd7b

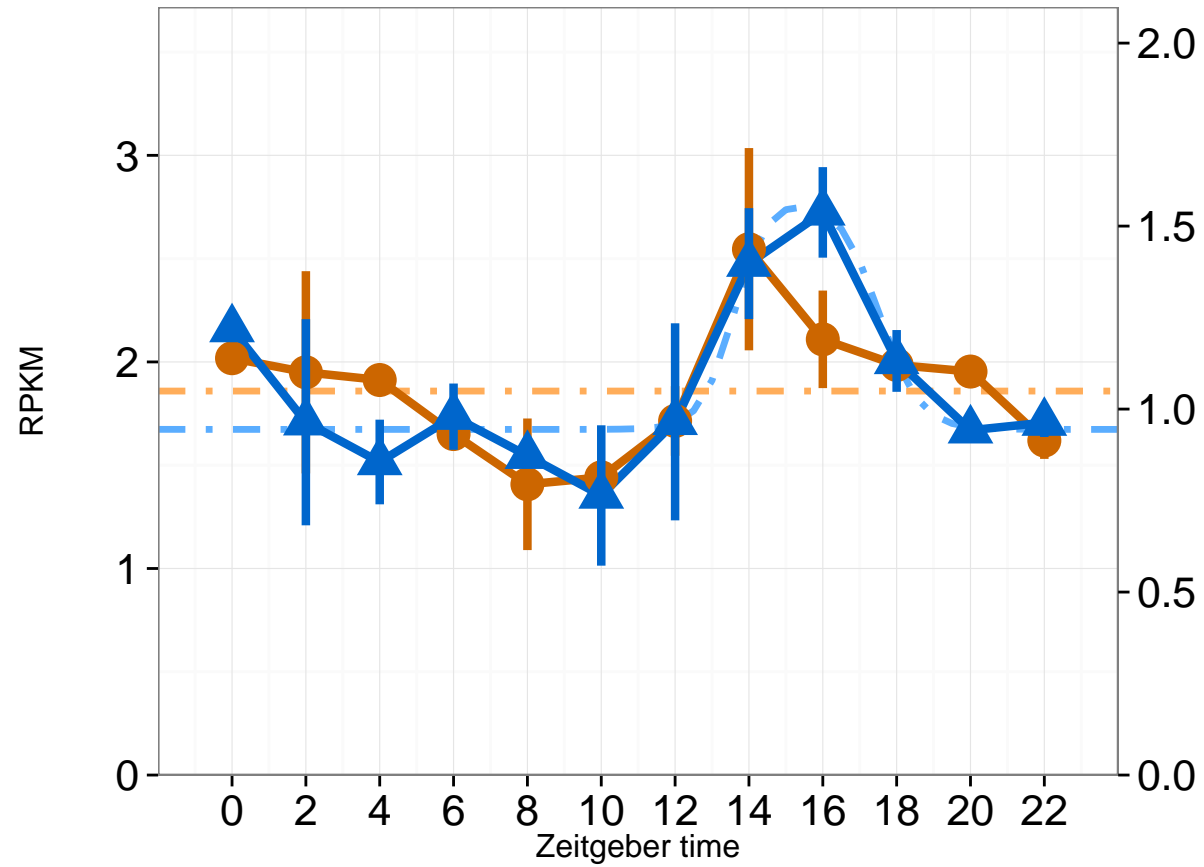

# Mfsd7b

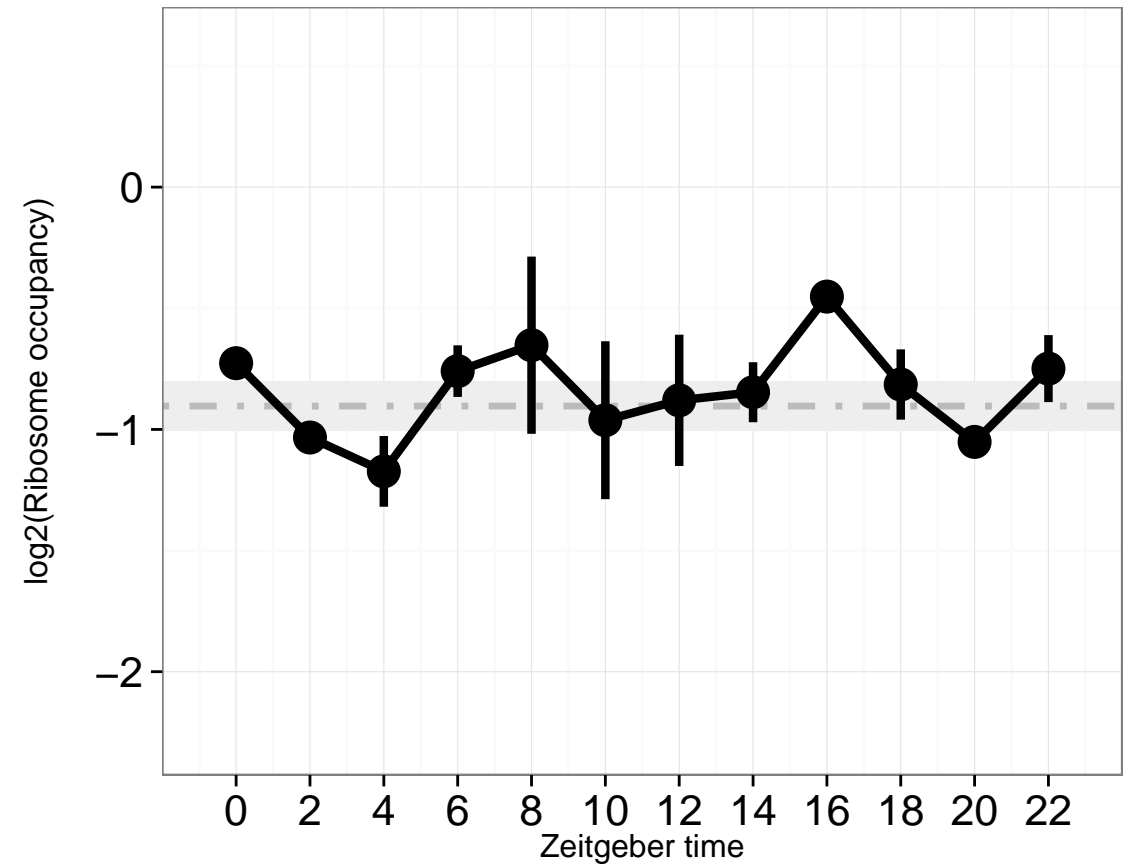

Supplement: SuppDataset_1.zip [file Mfsd7b_set_C.pdf › Supplemental Dataset 1/C-mRNA_nonrhythm_translation_rhyth/Mfsd7b_set_C.pdf]

# Mfsd8

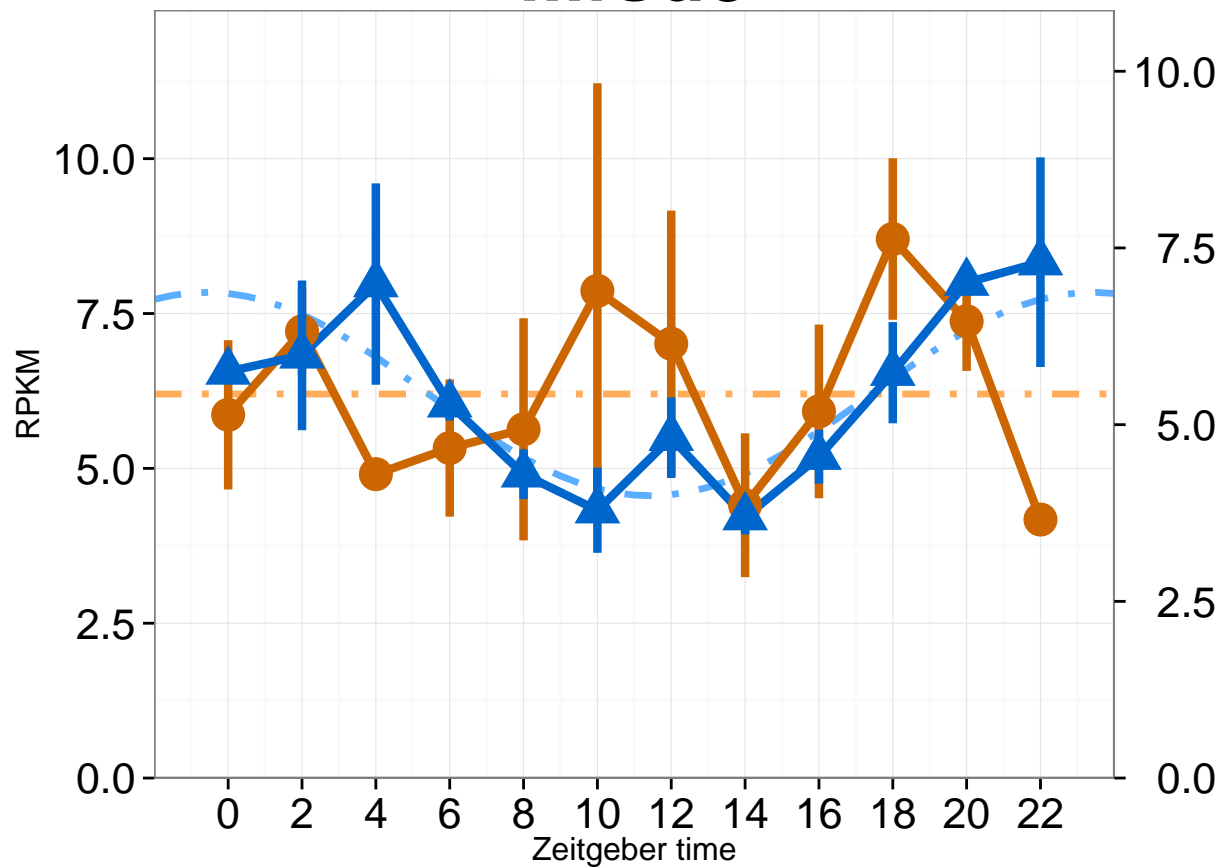

# Mfsd8

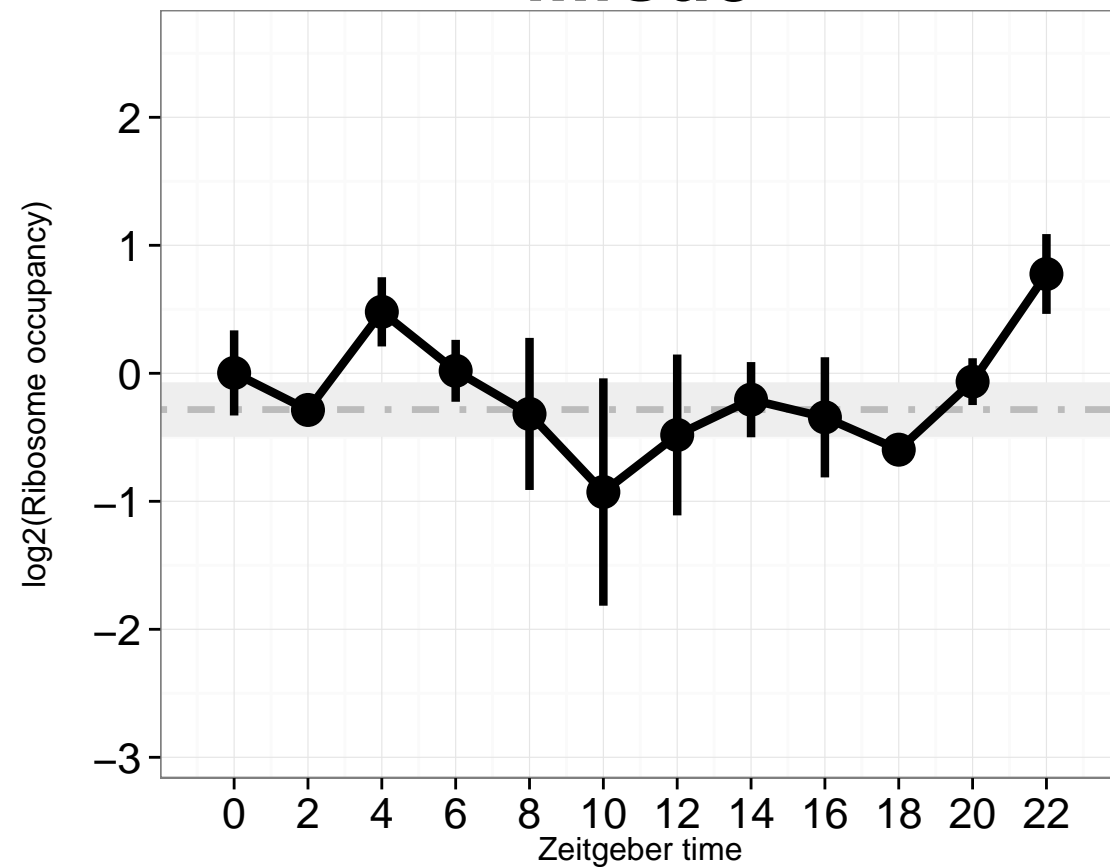

Supplement: SuppDataset_1.zip [file Mfsd8_set_C.pdf › Supplemental Dataset 1/C-mRNA_nonrhythm_translation_rhyth/Mfsd8_set_C.pdf]

## Miip

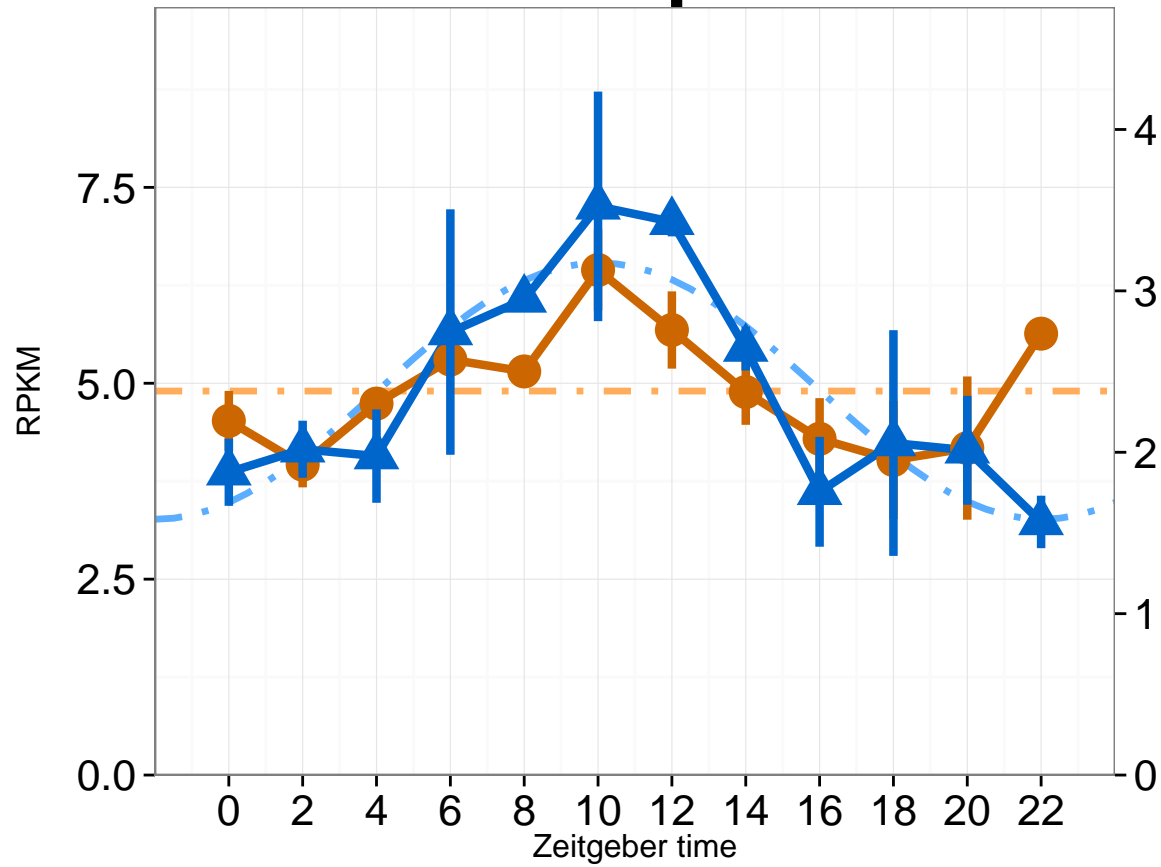

## Miip

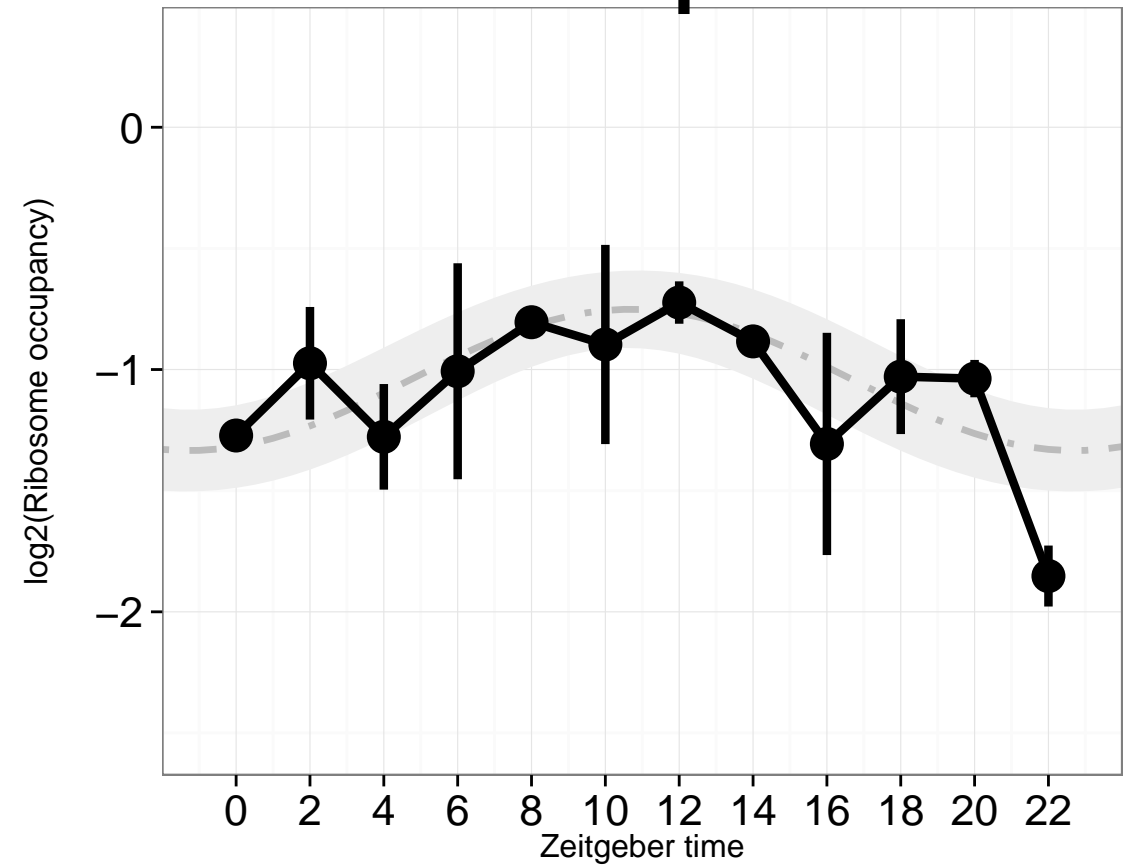

Supplement: SuppDataset_1.zip [file Miip_set_C.pdf › Supplemental Dataset 1/C-mRNA_nonrhythm_translation_rhyth/Miip_set_C.pdf]

## Mks1

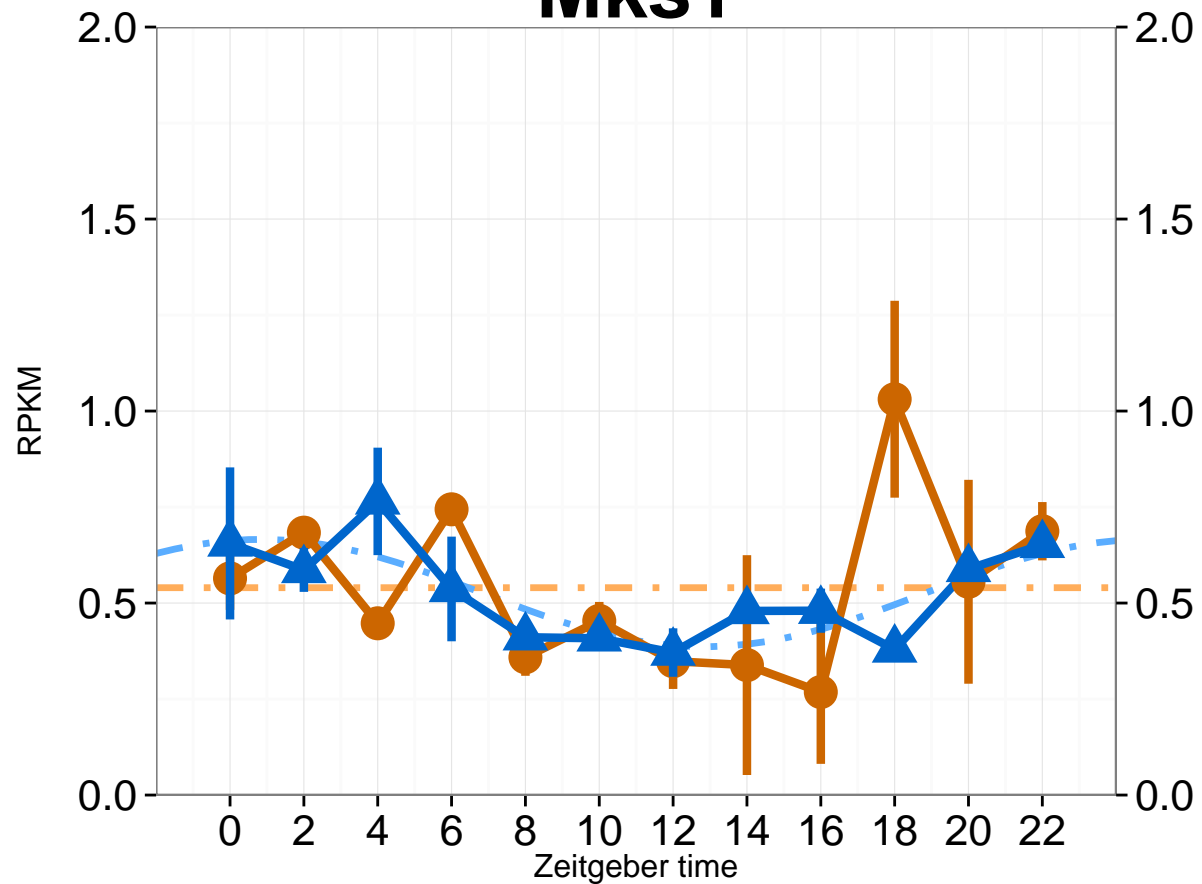

## Mks1

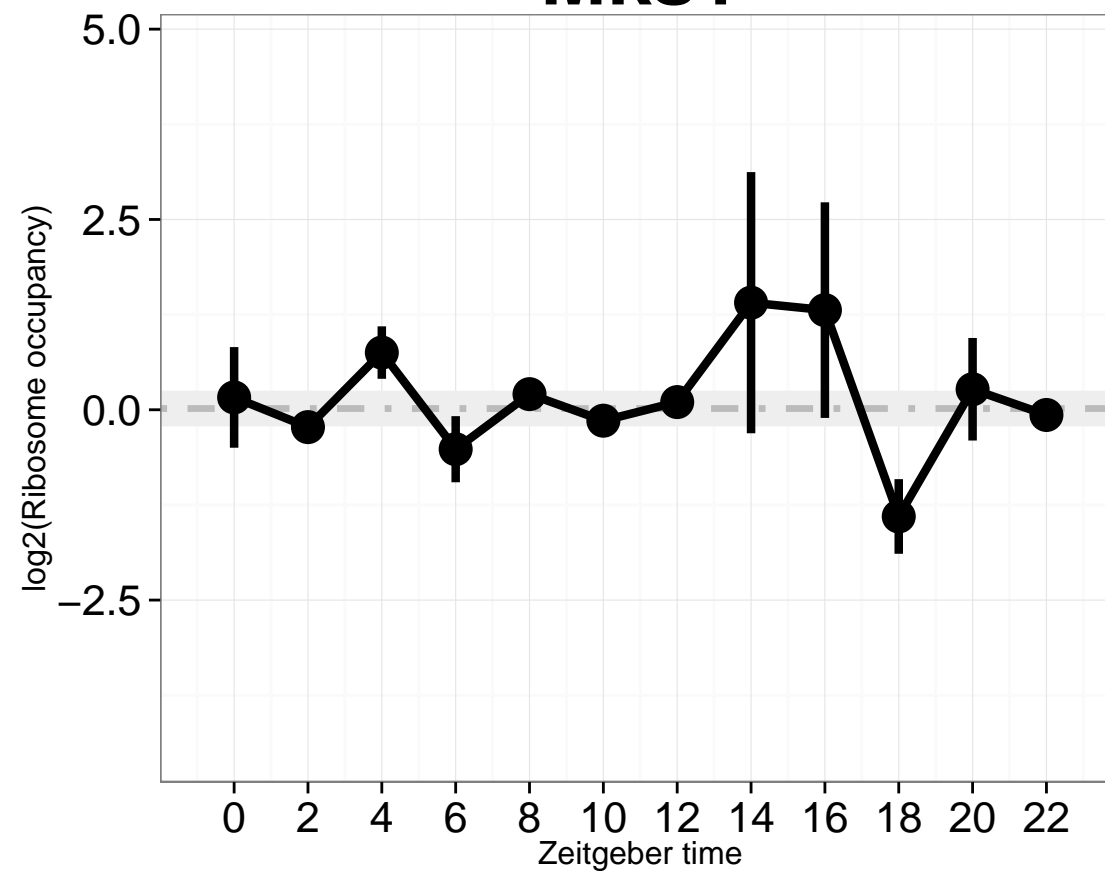

Supplement: SuppDataset_1.zip [file Mks1_set_C.pdf › Supplemental Dataset 1/C-mRNA_nonrhythm_translation_rhyth/Mks1_set_C.pdf]

# Mlxip1

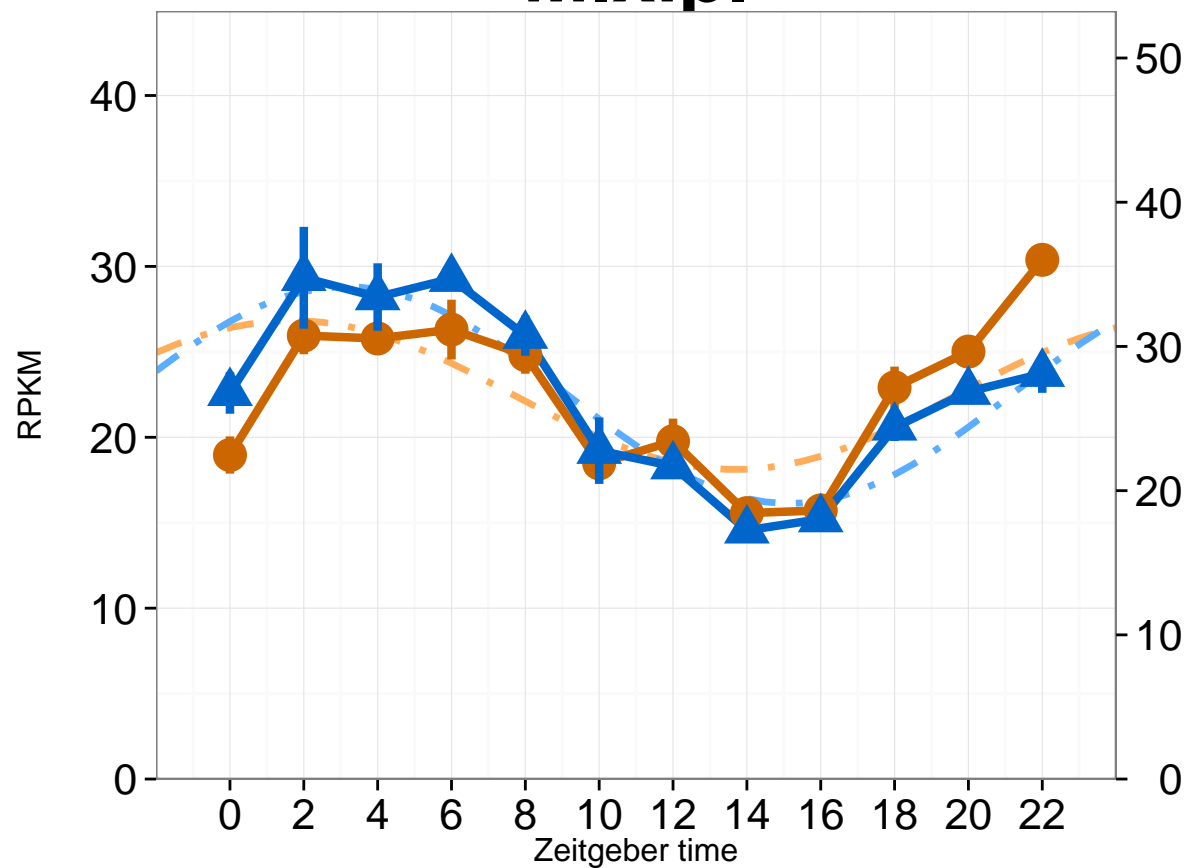

# Mlxip1

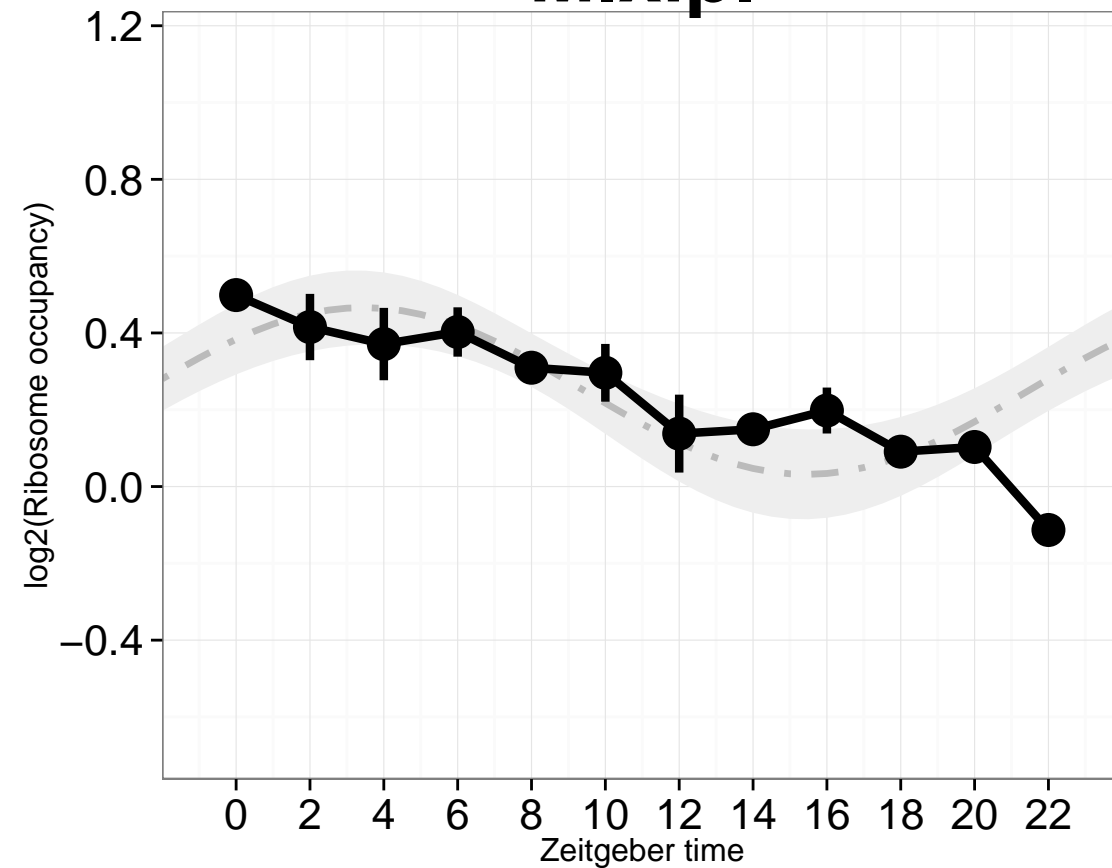

Supplement: SuppDataset_1.zip [file Mlxipl_set_C.pdf › Supplemental Dataset 1/C-mRNA_nonrhythm_translation_rhyth/Mlxipl_set_C.pdf]

# Mn1

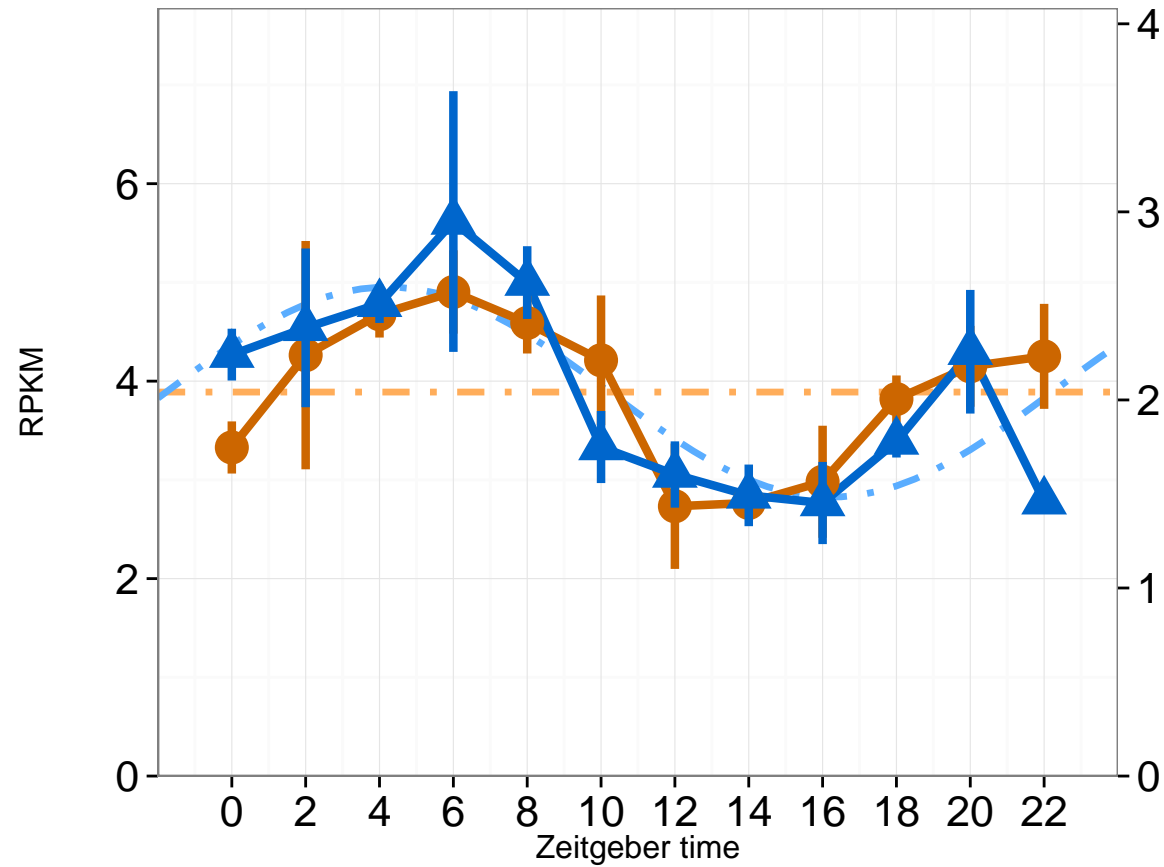

# Mn1

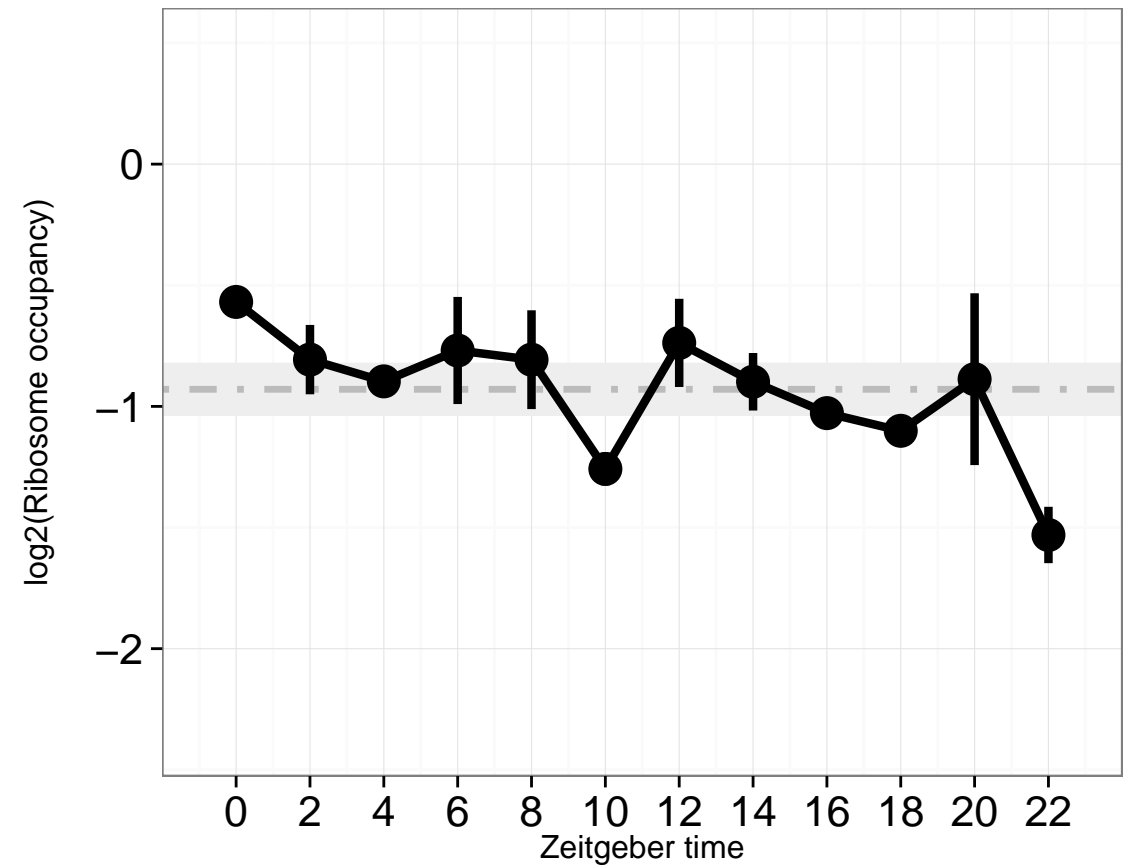

Supplement: SuppDataset_1.zip [file Mn1_set_C.pdf › Supplemental Dataset 1/C-mRNA_nonrhythm_translation_rhyth/Mn1_set_C.pdf]

# Mov10

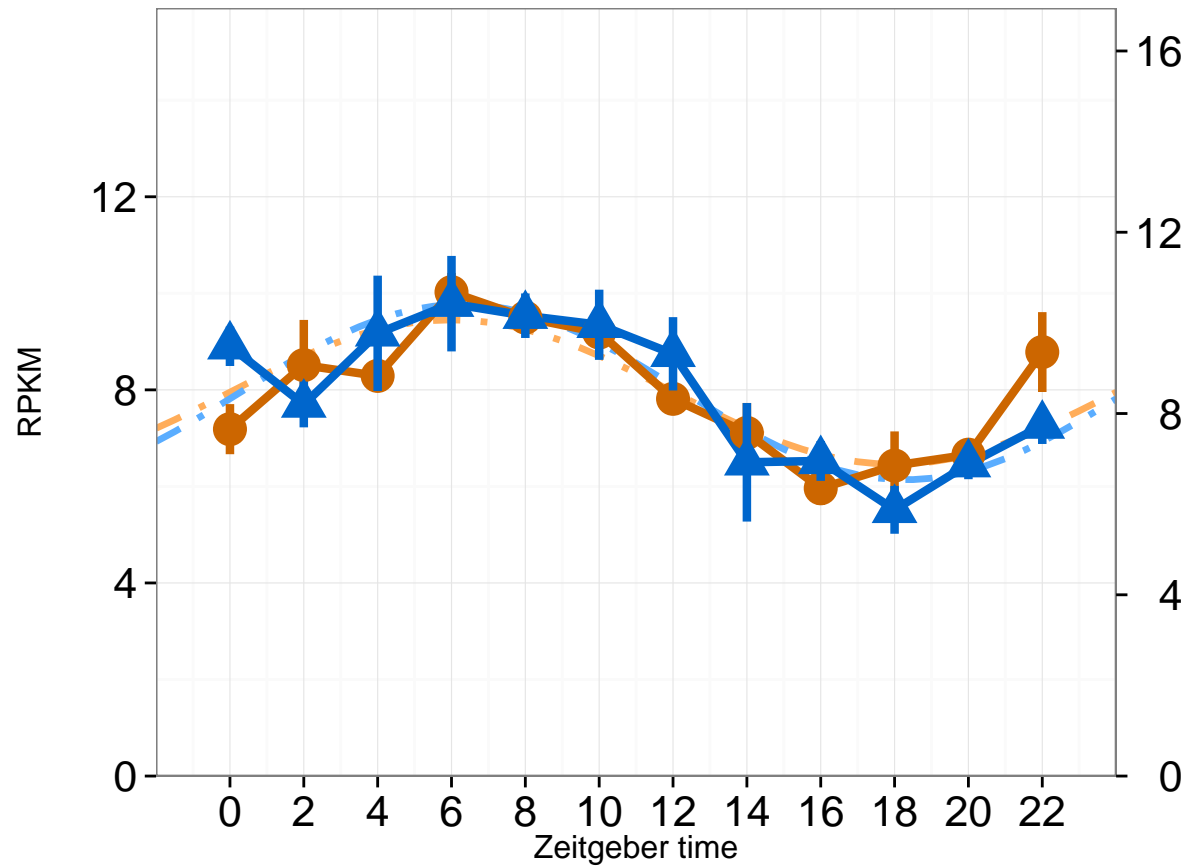

# Mov10

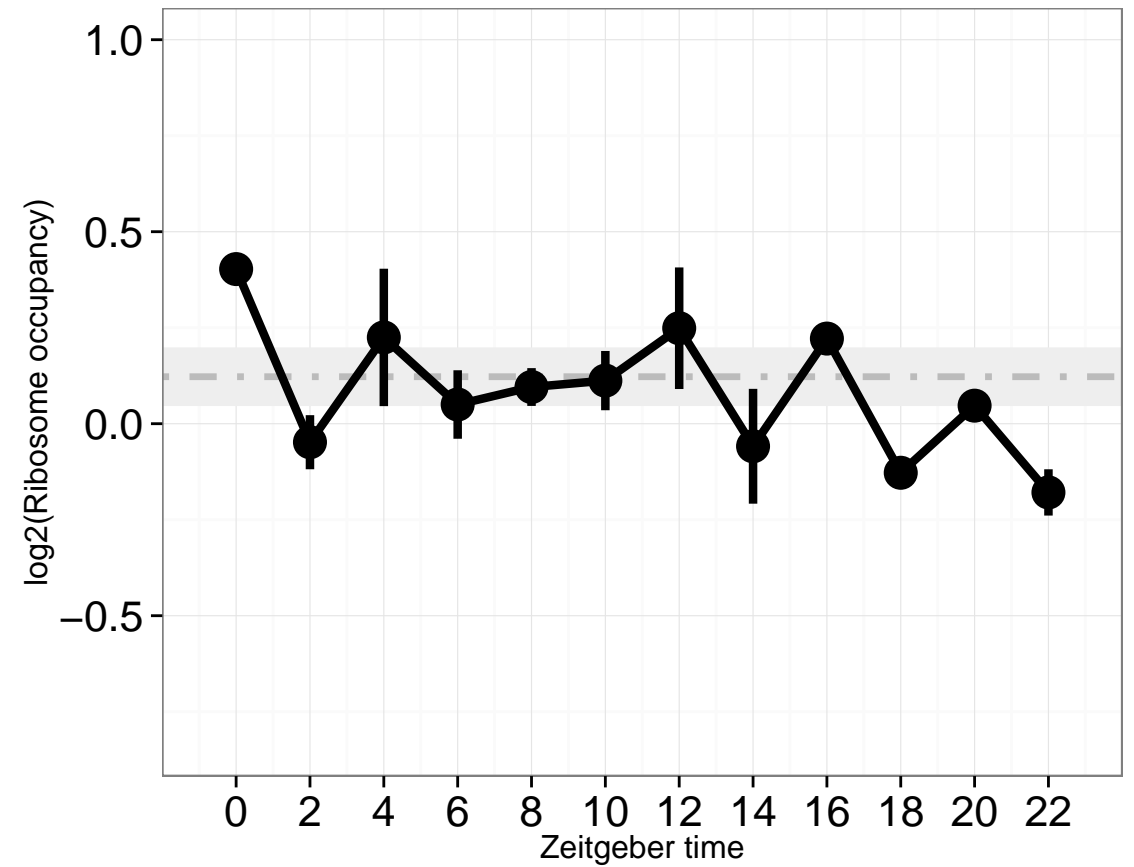

Supplement: SuppDataset_1.zip [file Mov10_set_C.pdf › Supplemental Dataset 1/C-mRNA_nonrhythm_translation_rhyth/Mov10_set_C.pdf]

# Mpg

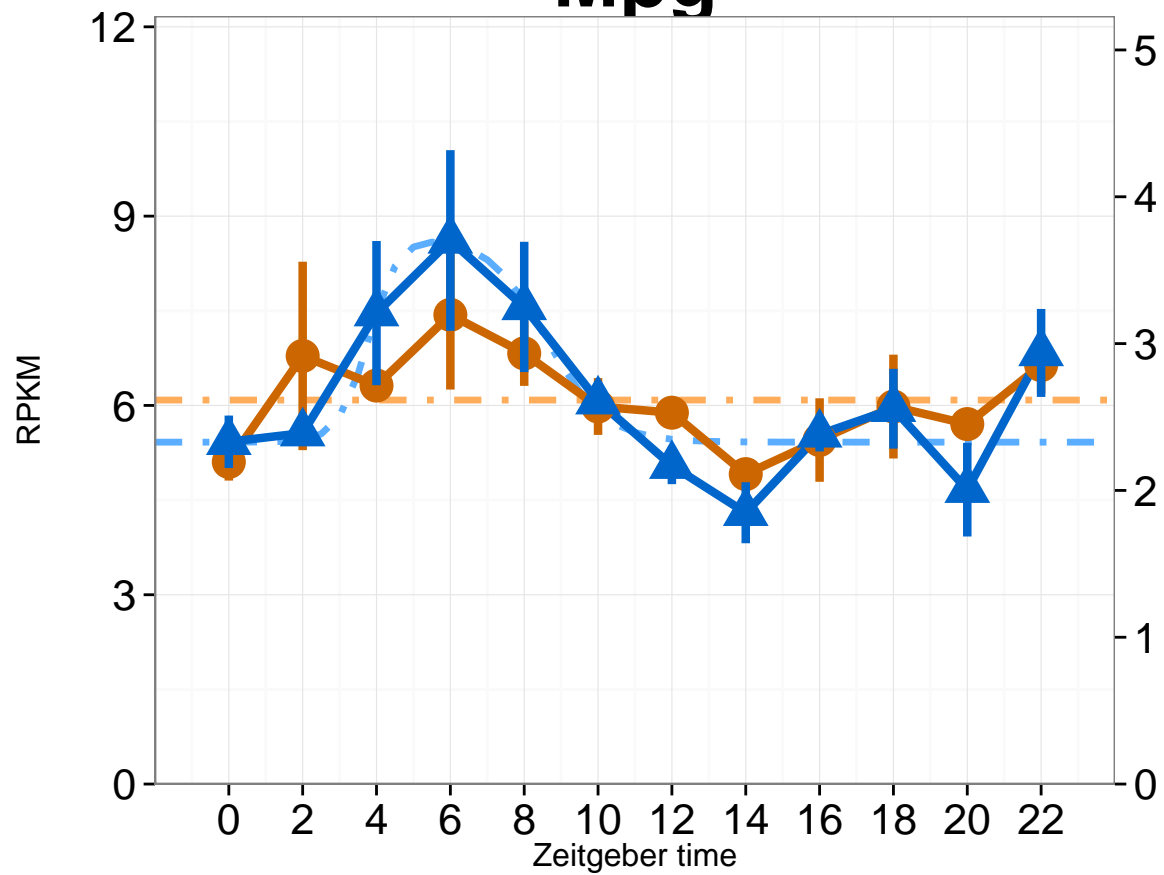

# Mpg

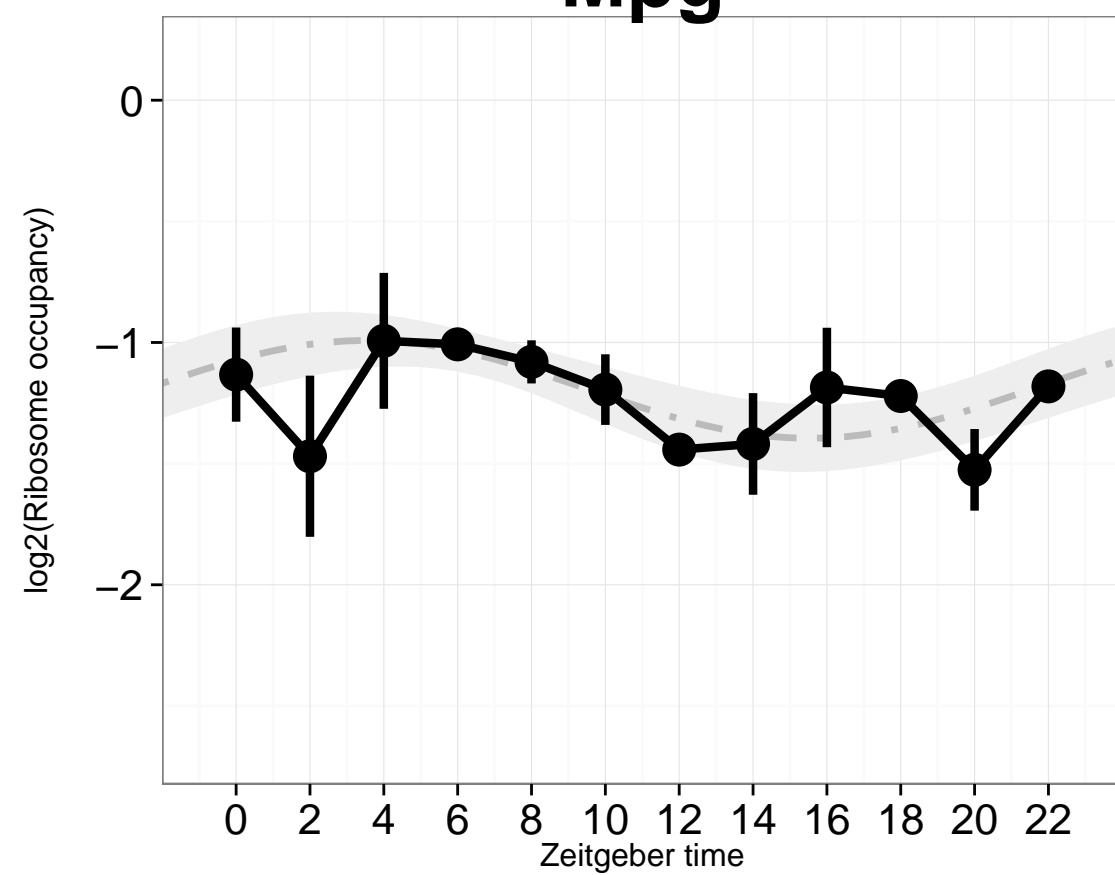

Supplement: SuppDataset_1.zip [file Mpg_set_C.pdf › Supplemental Dataset 1/C-mRNA_nonrhythm_translation_rhyth/Mpg_set_C.pdf]

## Mpp1

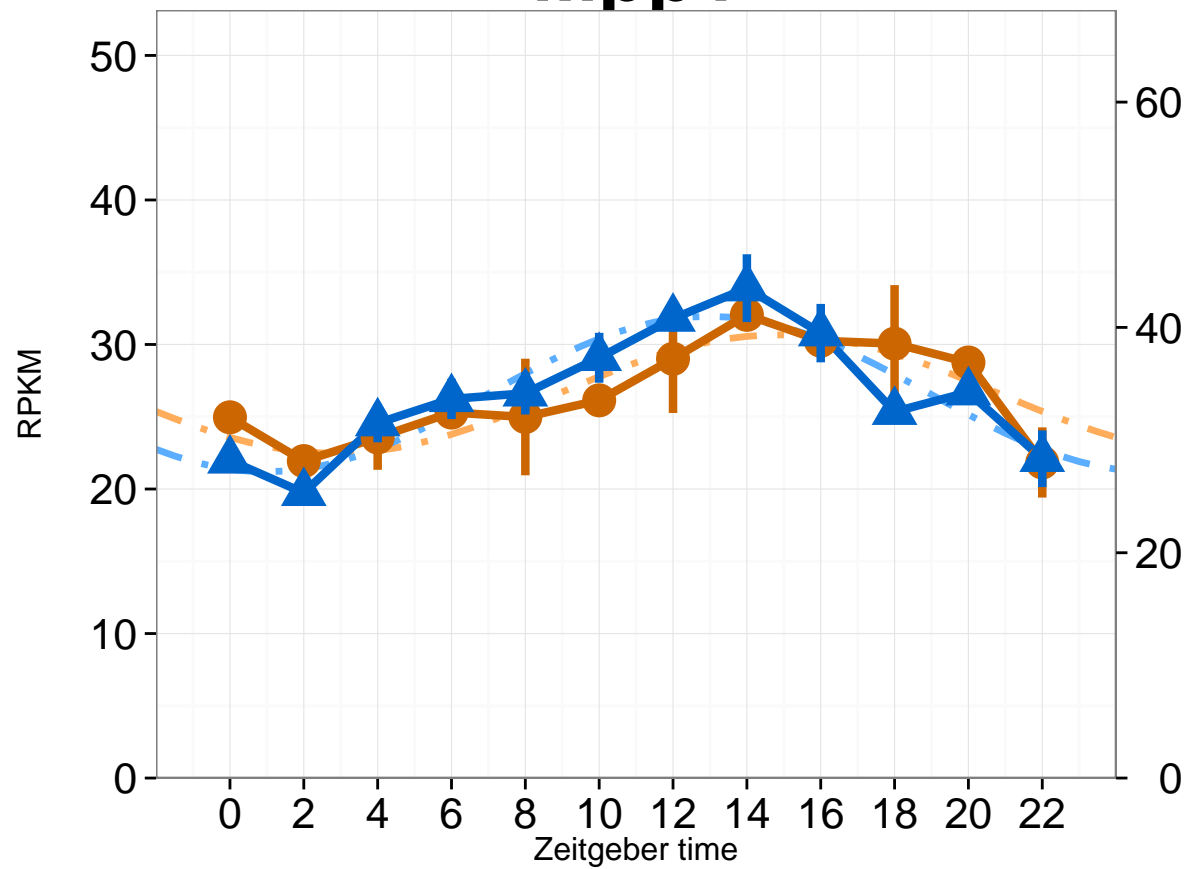

## Mpp1

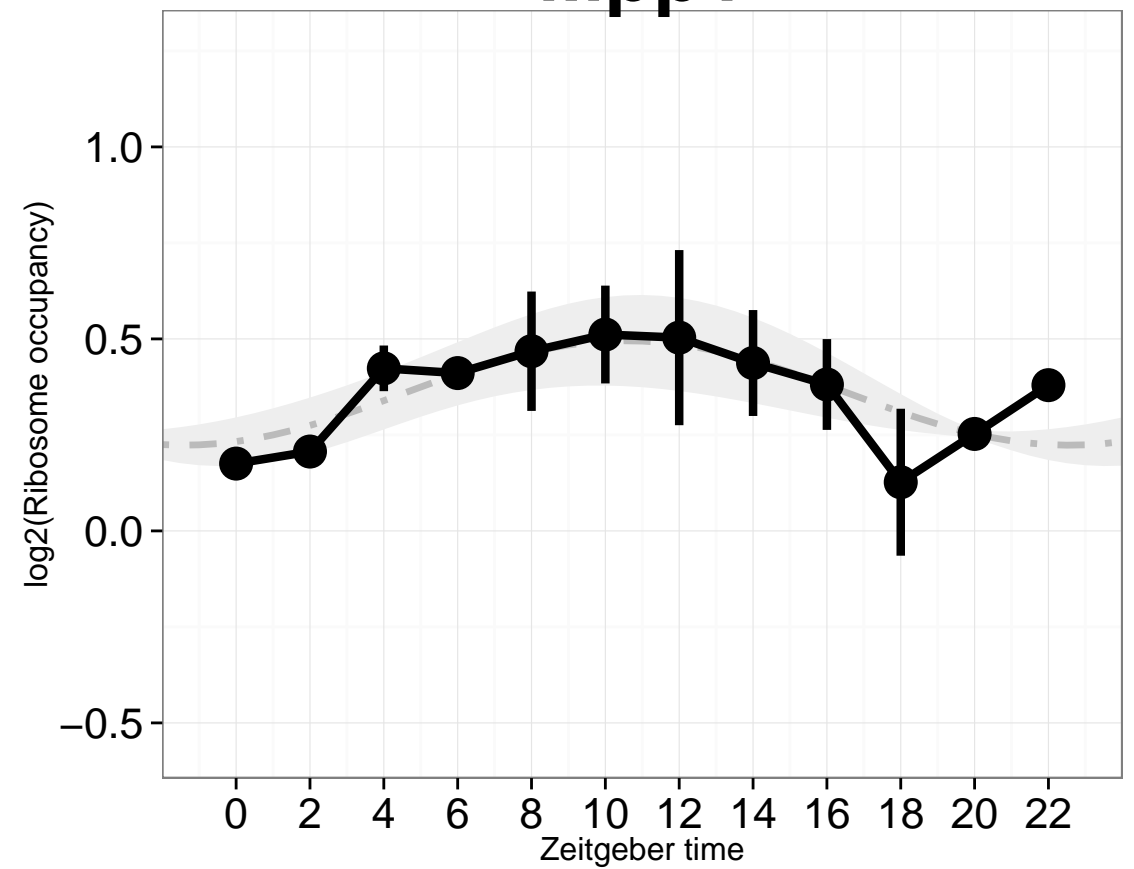

Supplement: SuppDataset_1.zip [file Mpp1_set_C.pdf › Supplemental Dataset 1/C-mRNA_nonrhythm_translation_rhyth/Mpp1_set_C.pdf]

# Mpzi2

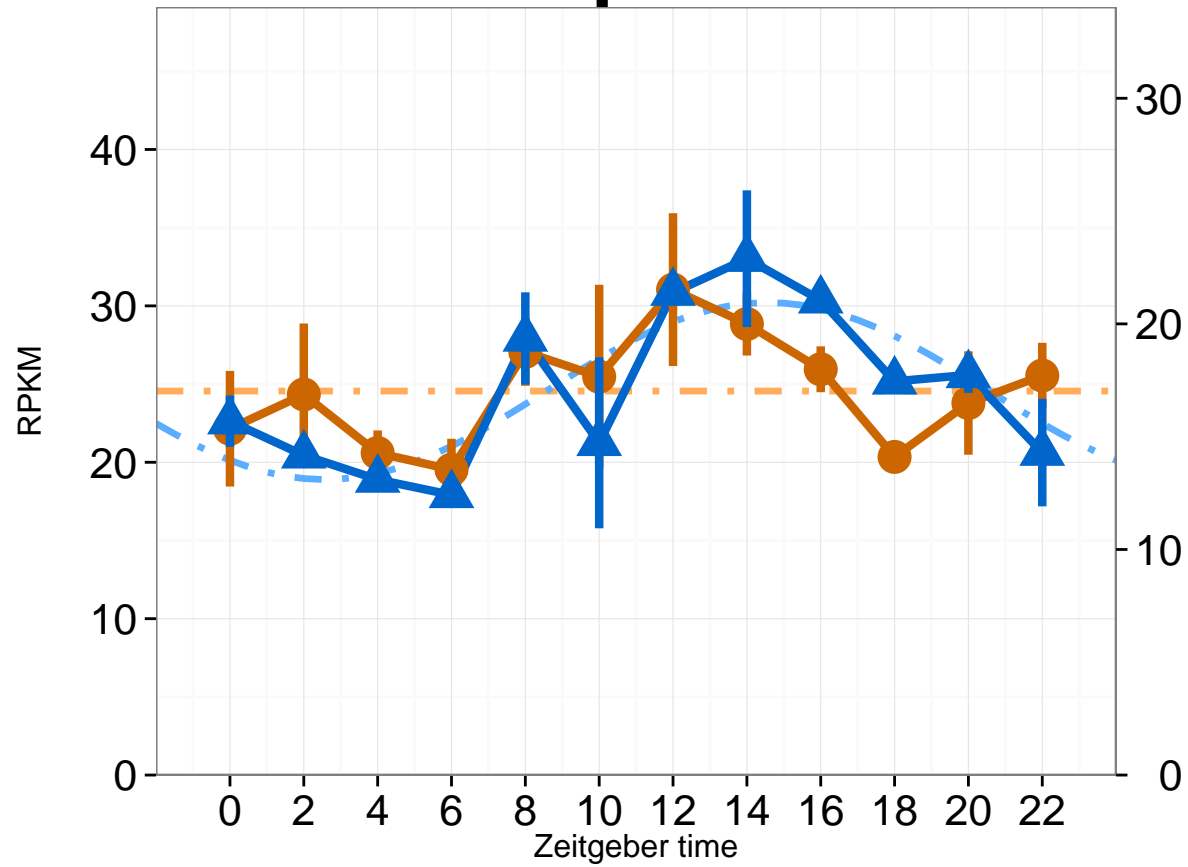

# Mpzi2

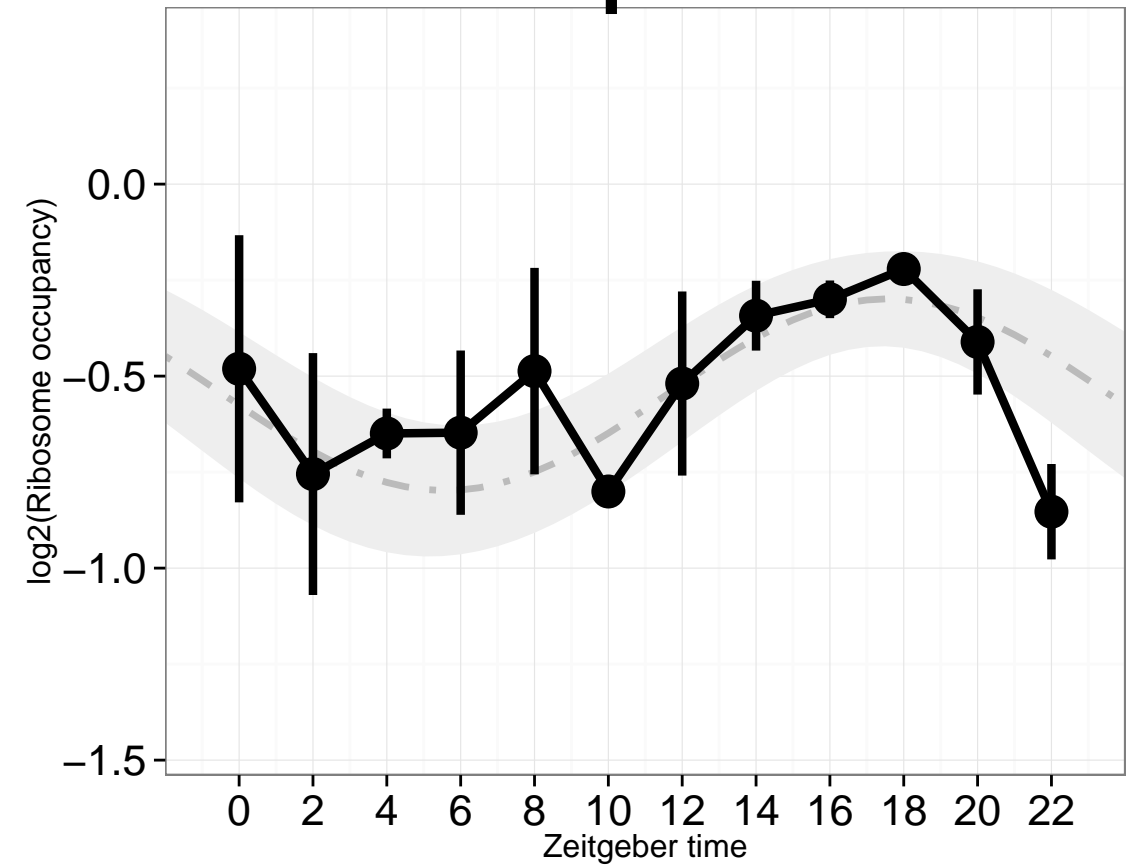

Supplement: SuppDataset_1.zip [file Mpzl2_set_C.pdf › Supplemental Dataset 1/C-mRNA_nonrhythm_translation_rhyth/Mpzl2_set_C.pdf]

# Ms4a8a

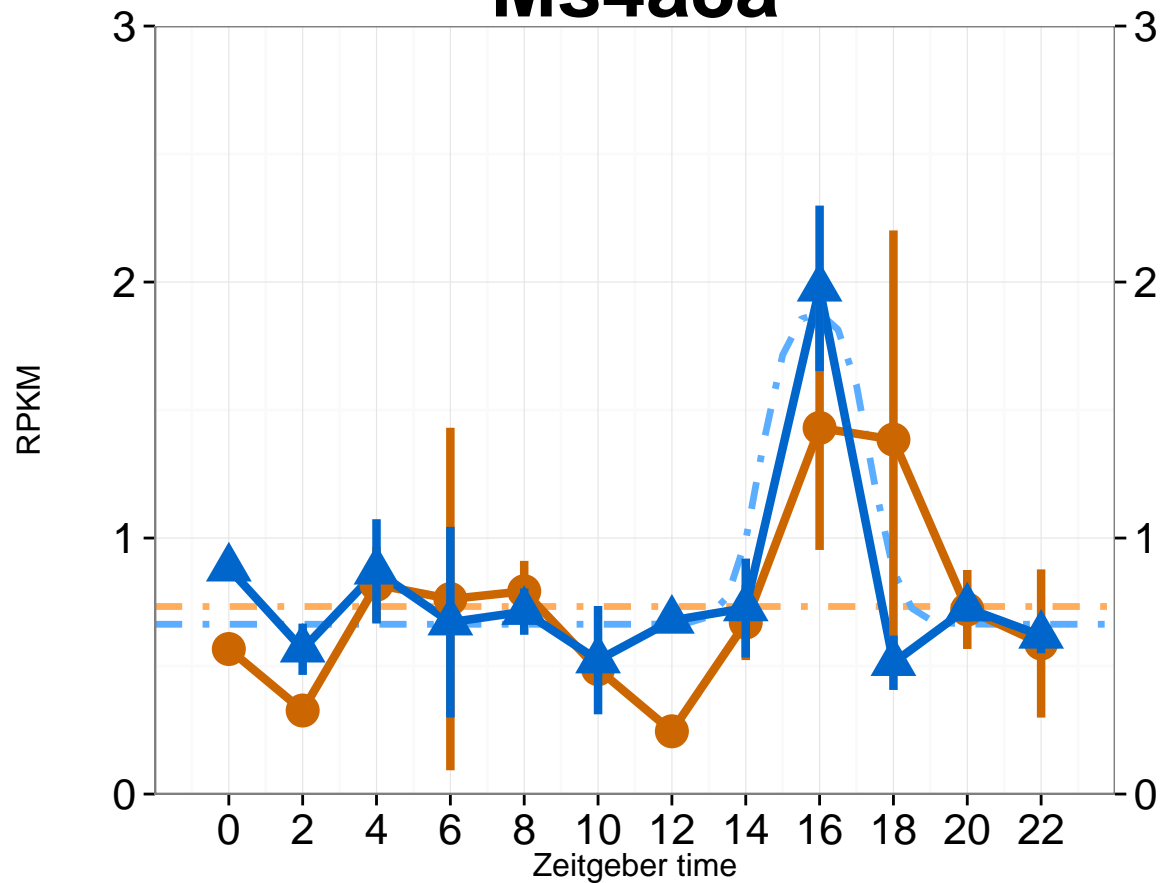

# Ms4a8a

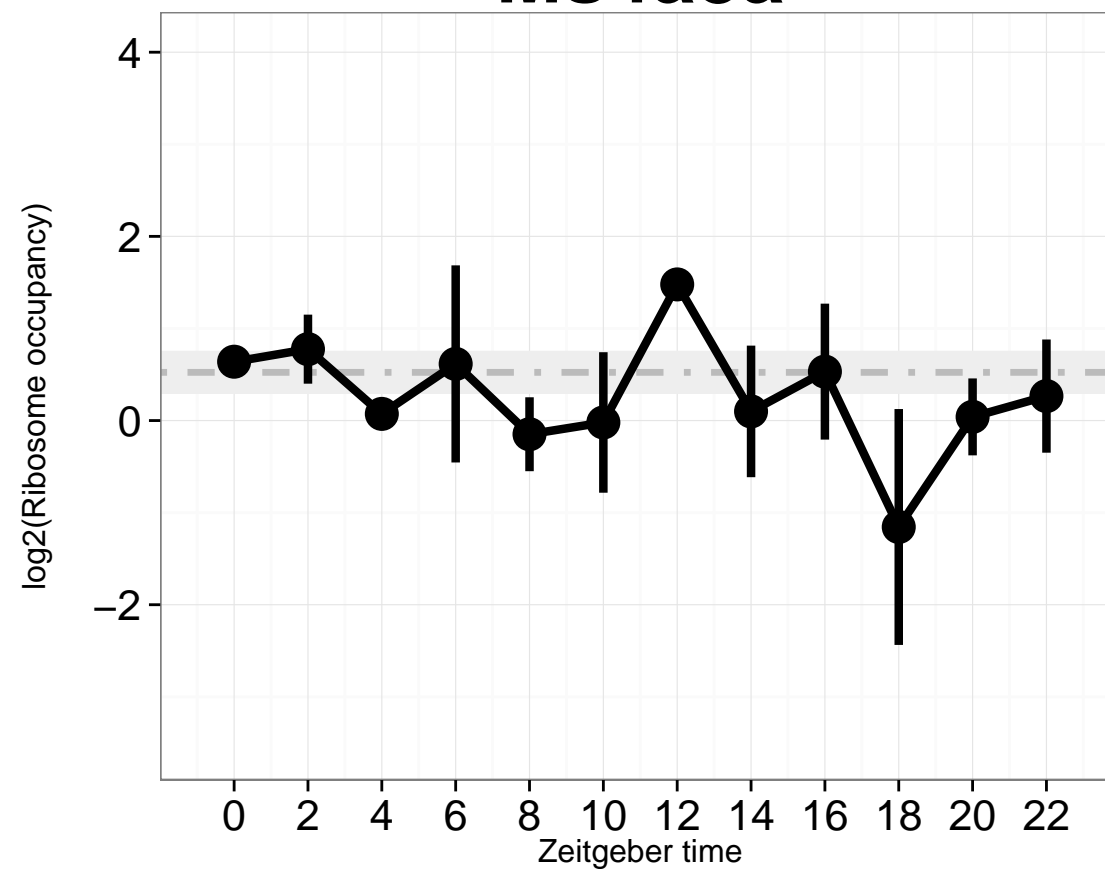

Supplement: SuppDataset_1.zip [file Ms4a8a_set_C.pdf › Supplemental Dataset 1/C-mRNA_nonrhythm_translation_rhyth/Ms4a8a_set_C.pdf]

## Mxi1

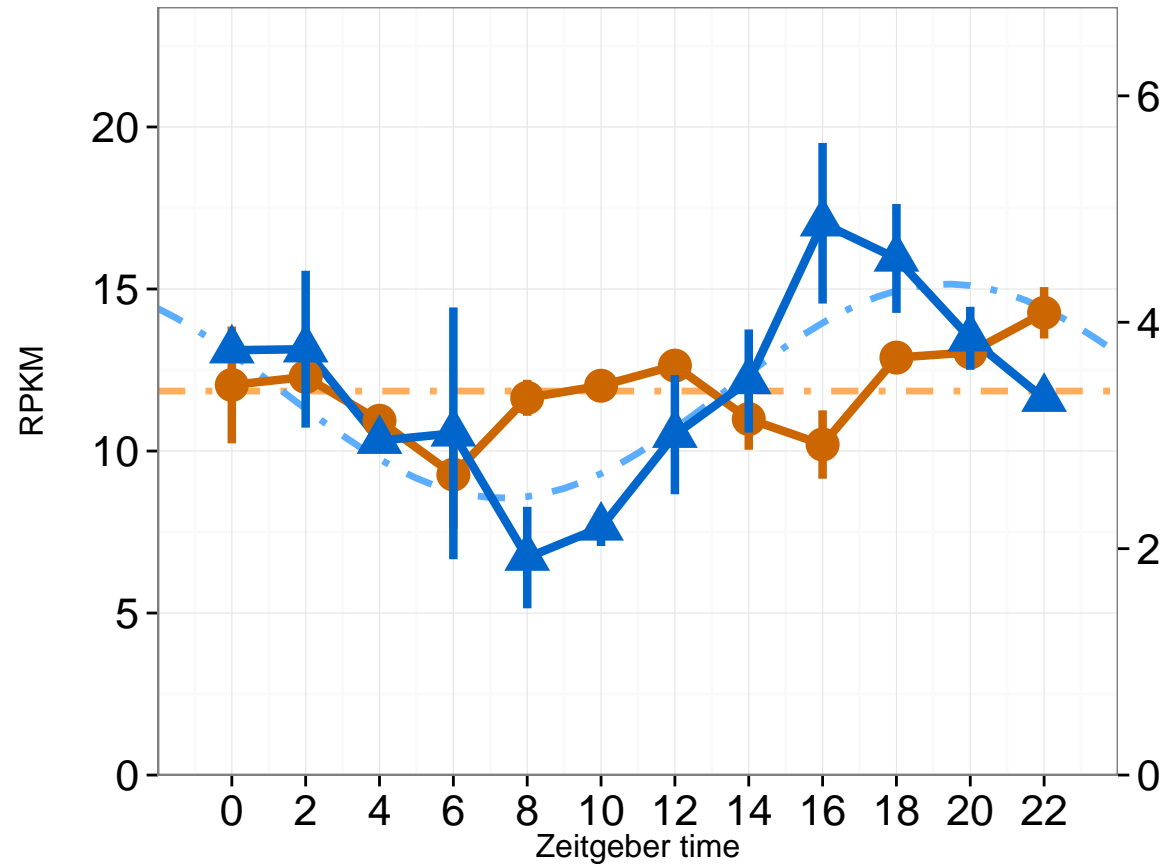

## Mxi1

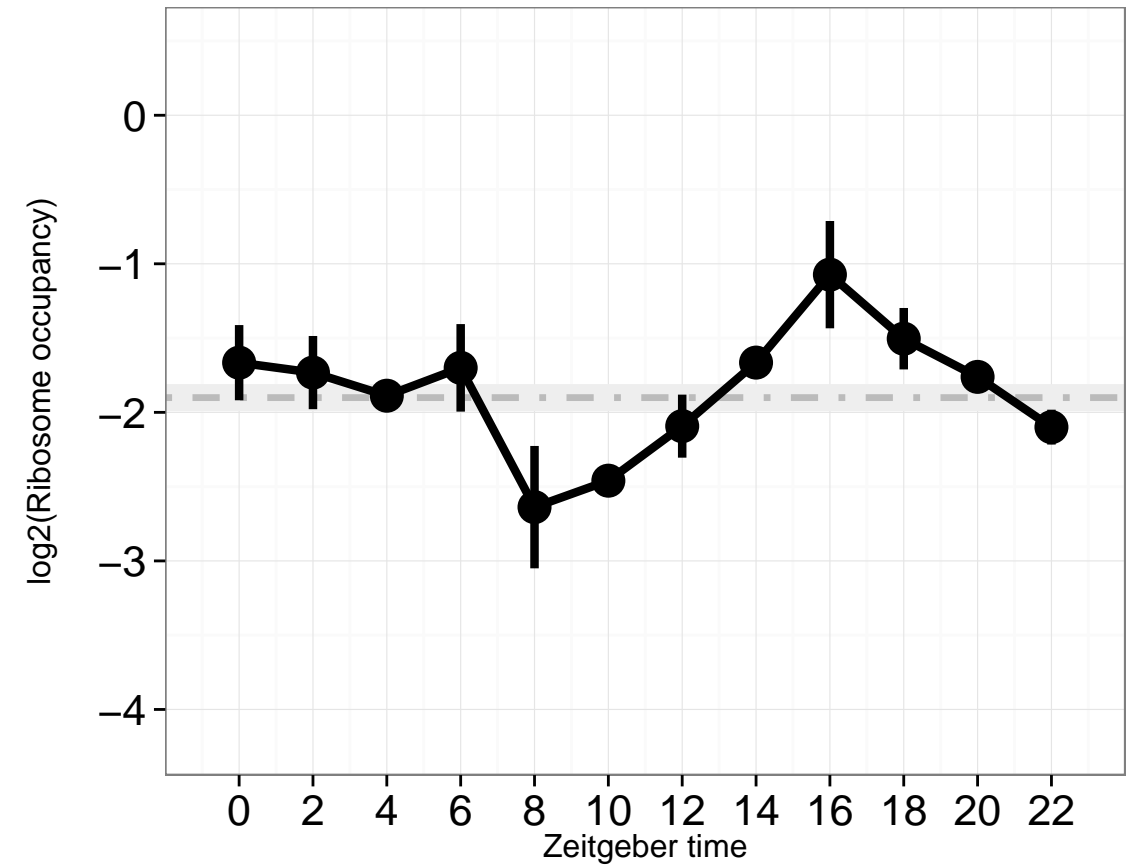

Supplement: SuppDataset_1.zip [file Mxi1_set_C.pdf › Supplemental Dataset 1/C-mRNA_nonrhythm_translation_rhyth/Mxi1_set_C.pdf]

## Myh14

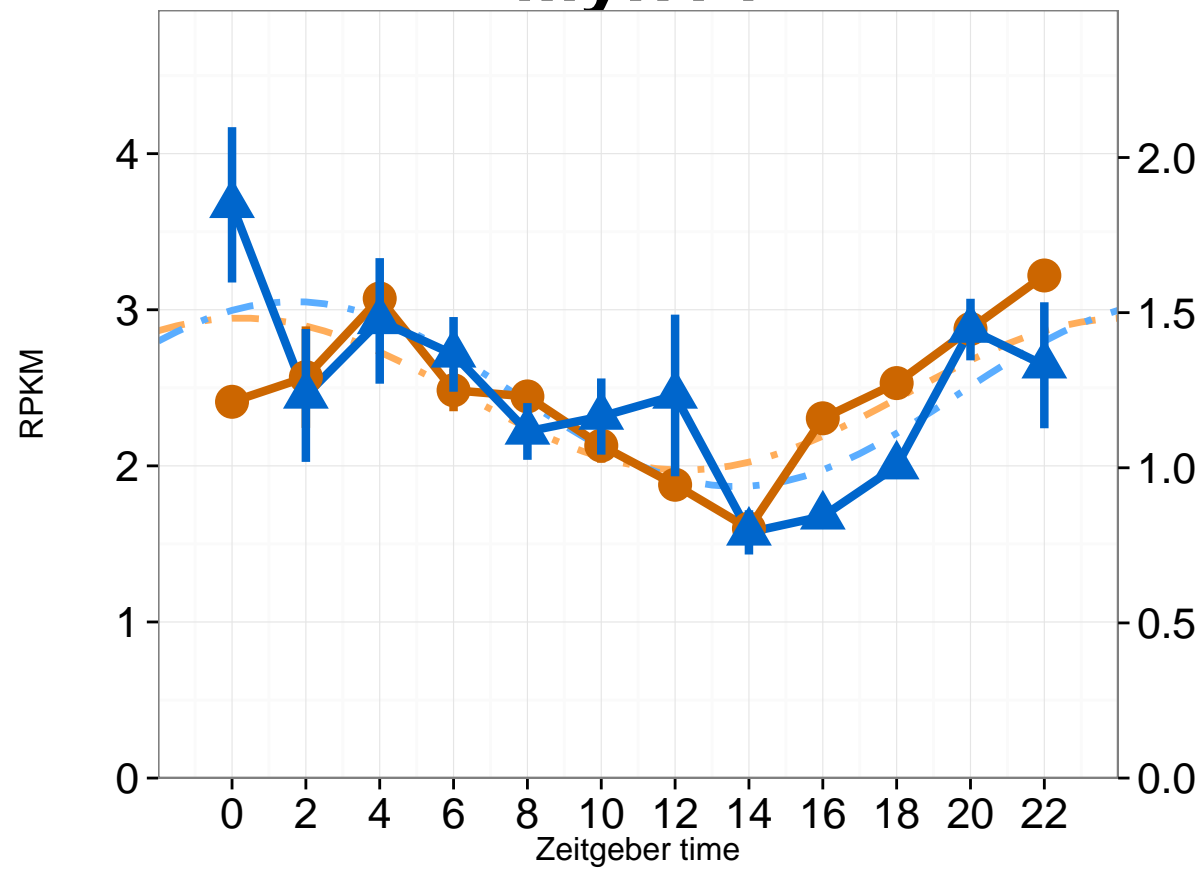

## Myh14

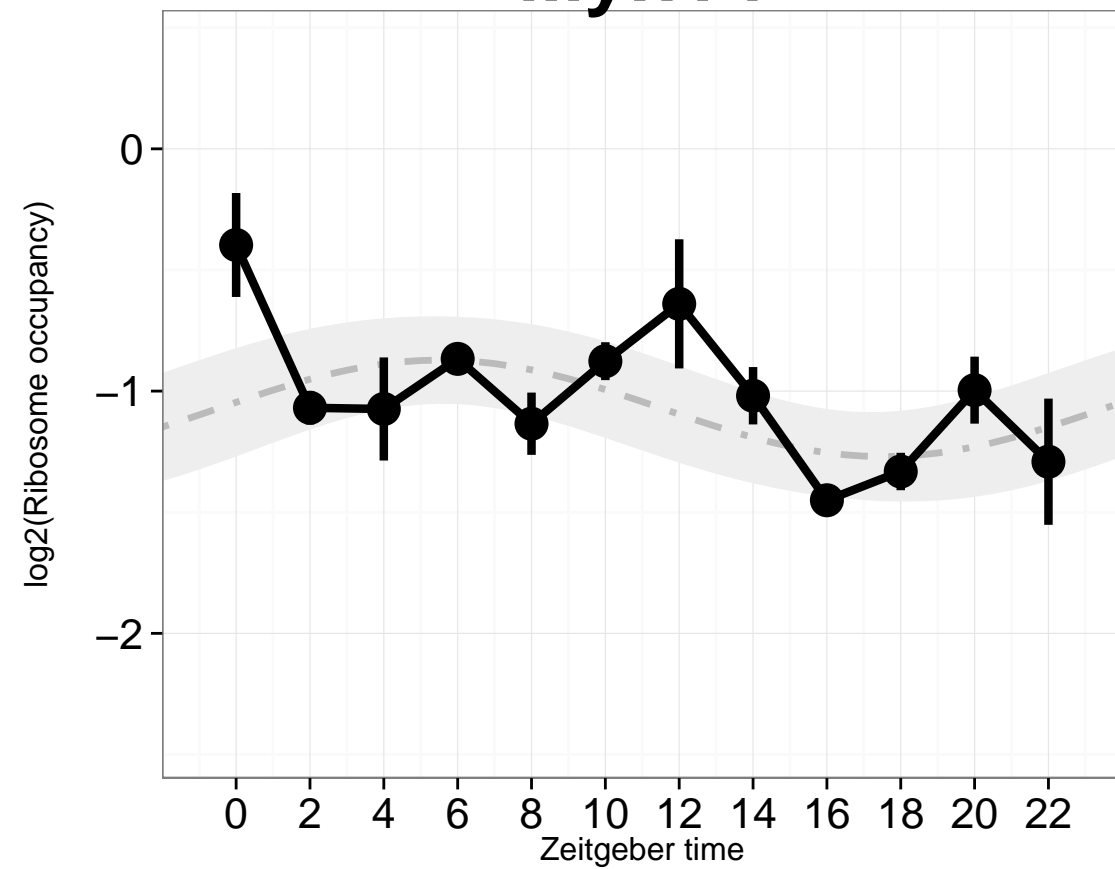

Supplement: SuppDataset_1.zip [file Myh14_set_C.pdf › Supplemental Dataset 1/C-mRNA_nonrhythm_translation_rhyth/Myh14_set_C.pdf]

# MyI9

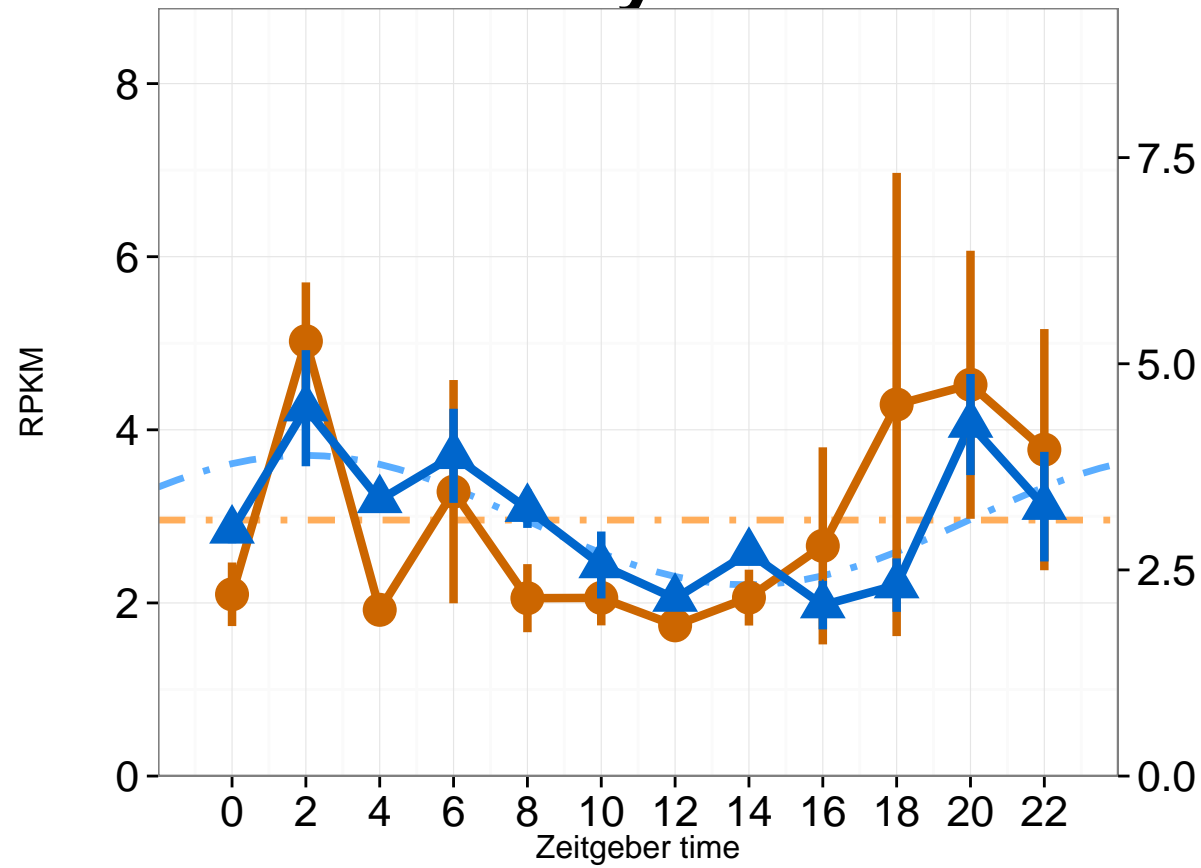

# MyI9

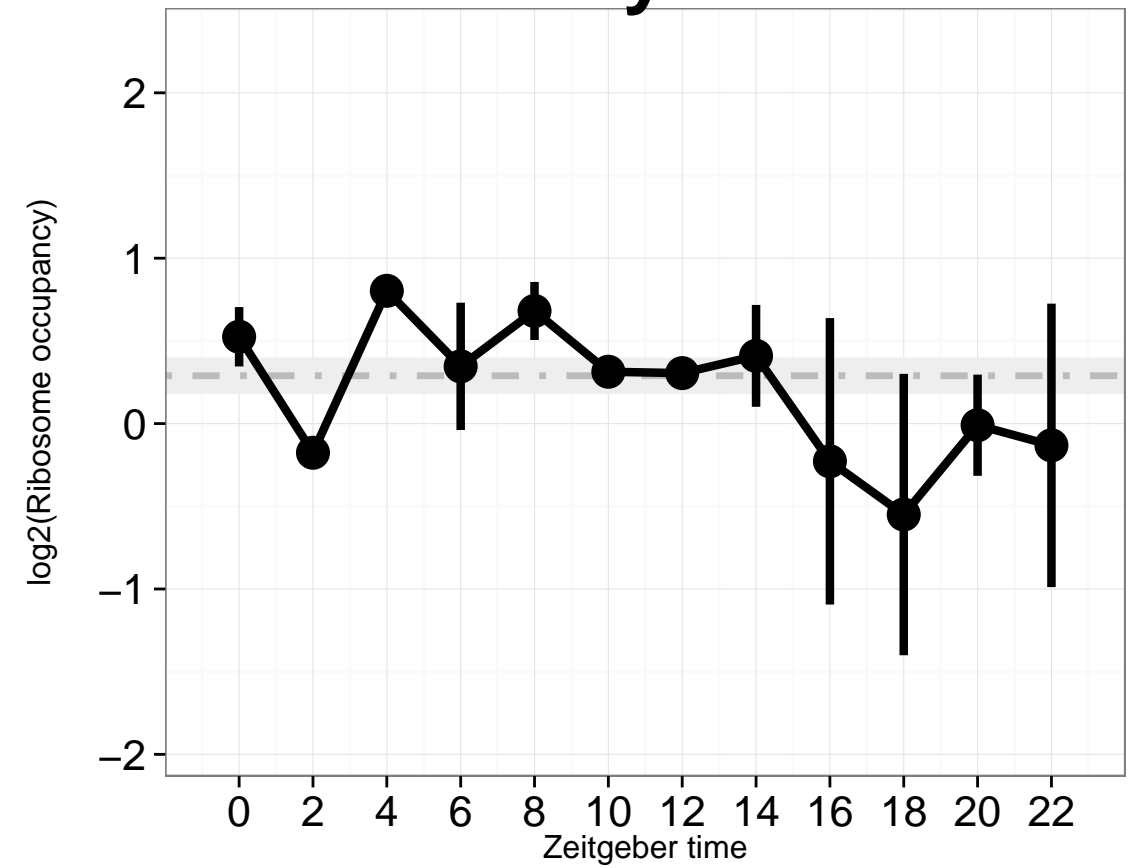

Supplement: SuppDataset_1.zip [file Myl9_set_C.pdf › Supplemental Dataset 1/C-mRNA_nonrhythm_translation_rhyth/Myl9_set_C.pdf]

# Myo19

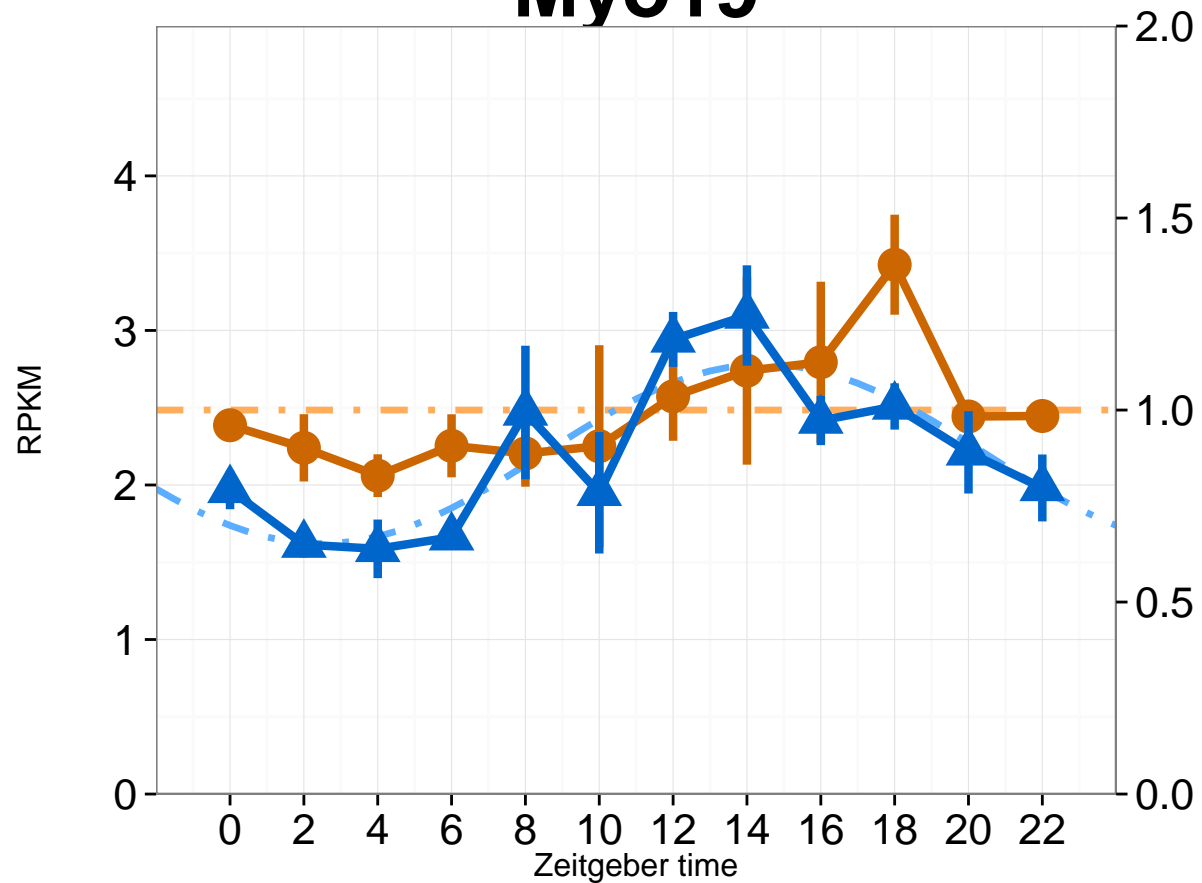

# Myo19

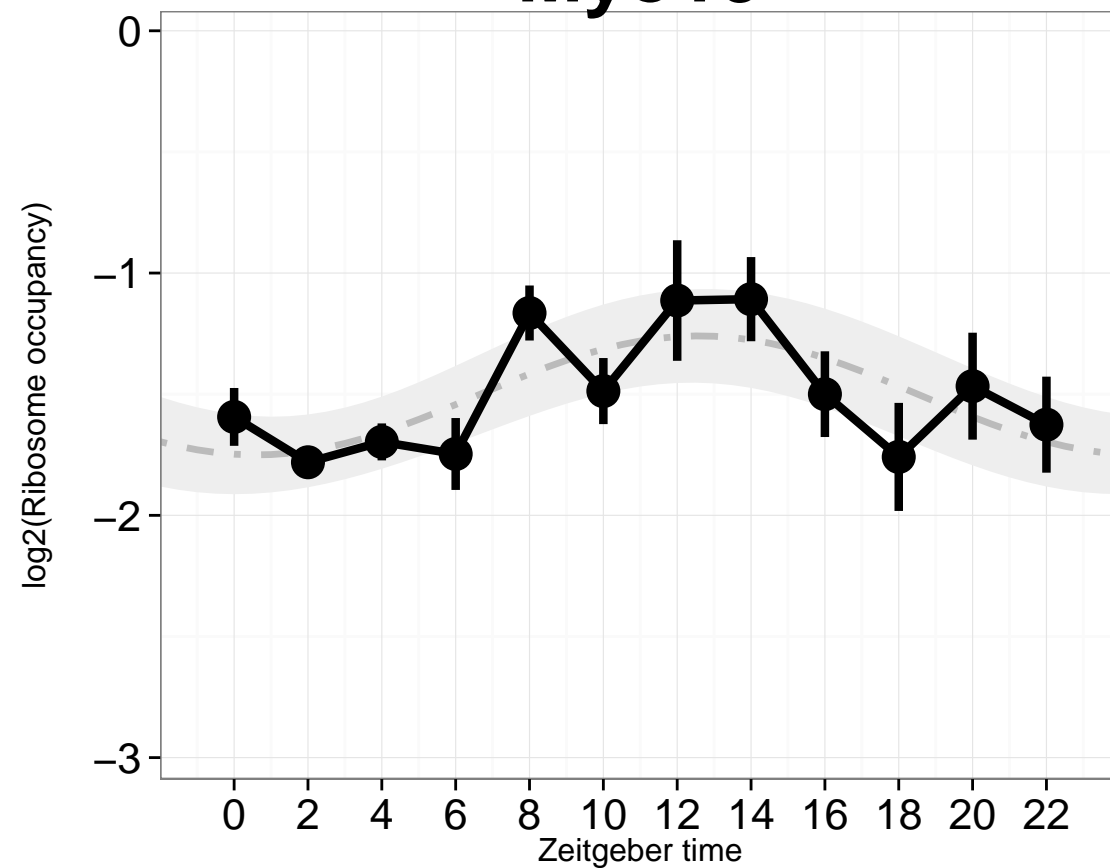

Supplement: SuppDataset_1.zip [file Myo19_set_C.pdf › Supplemental Dataset 1/C-mRNA_nonrhythm_translation_rhyth/Myo19_set_C.pdf]

# N6amt1

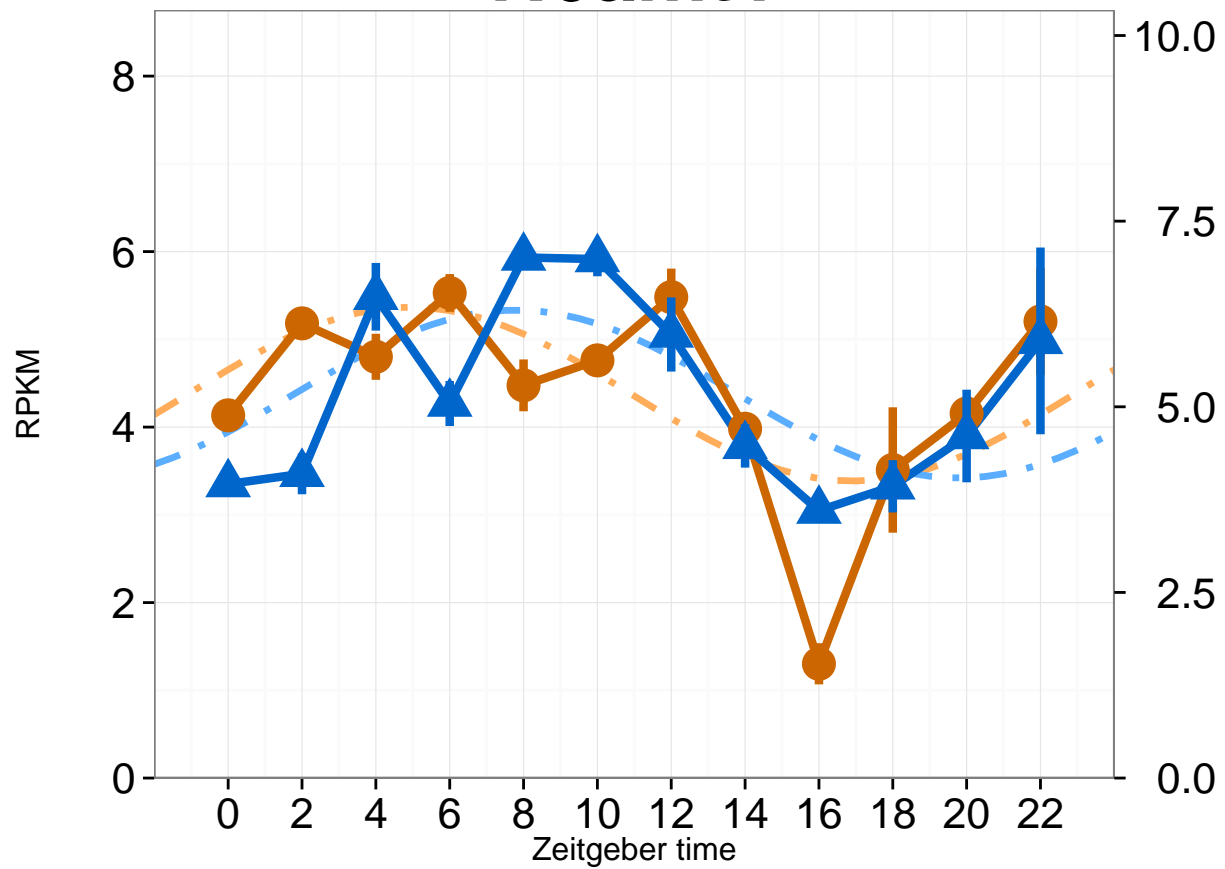

# N6amt1

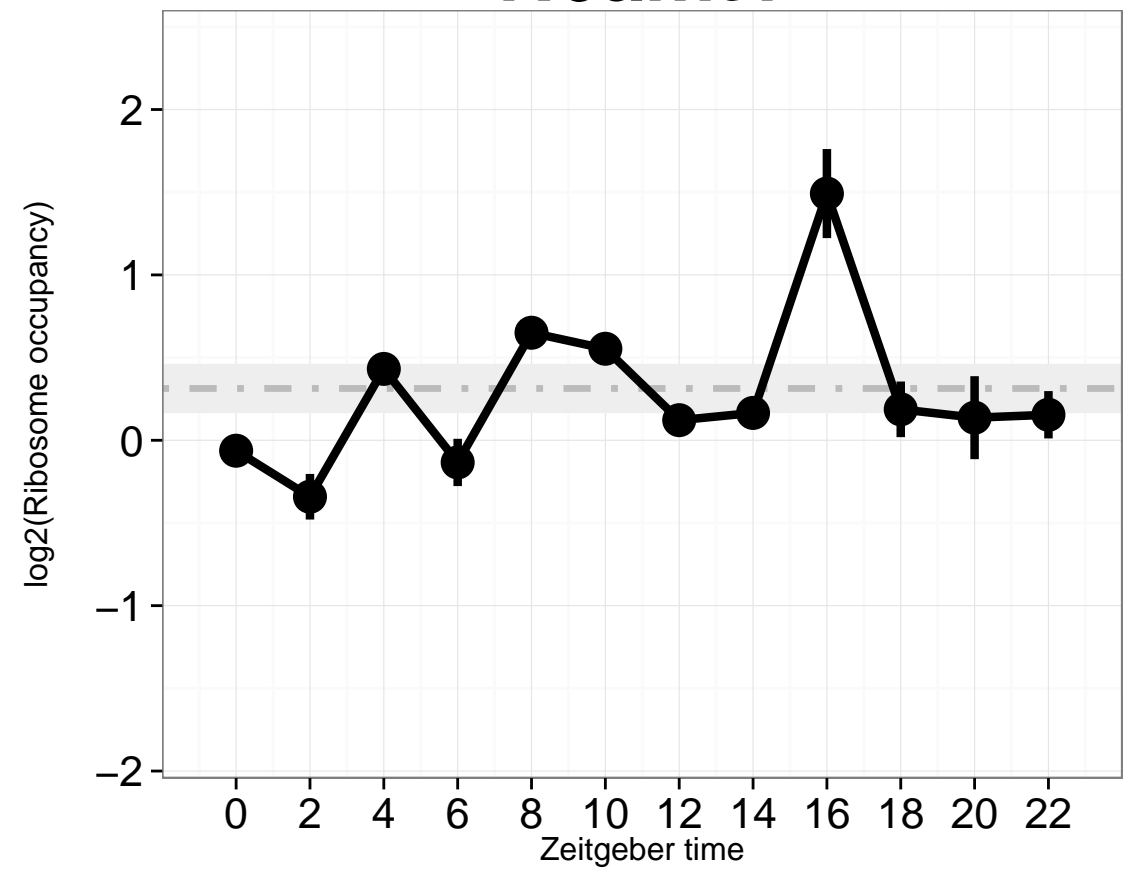

Supplement: SuppDataset_1.zip [file N6amt1_set_C.pdf › Supplemental Dataset 1/C-mRNA_nonrhythm_translation_rhyth/N6amt1_set_C.pdf]

## Naa38

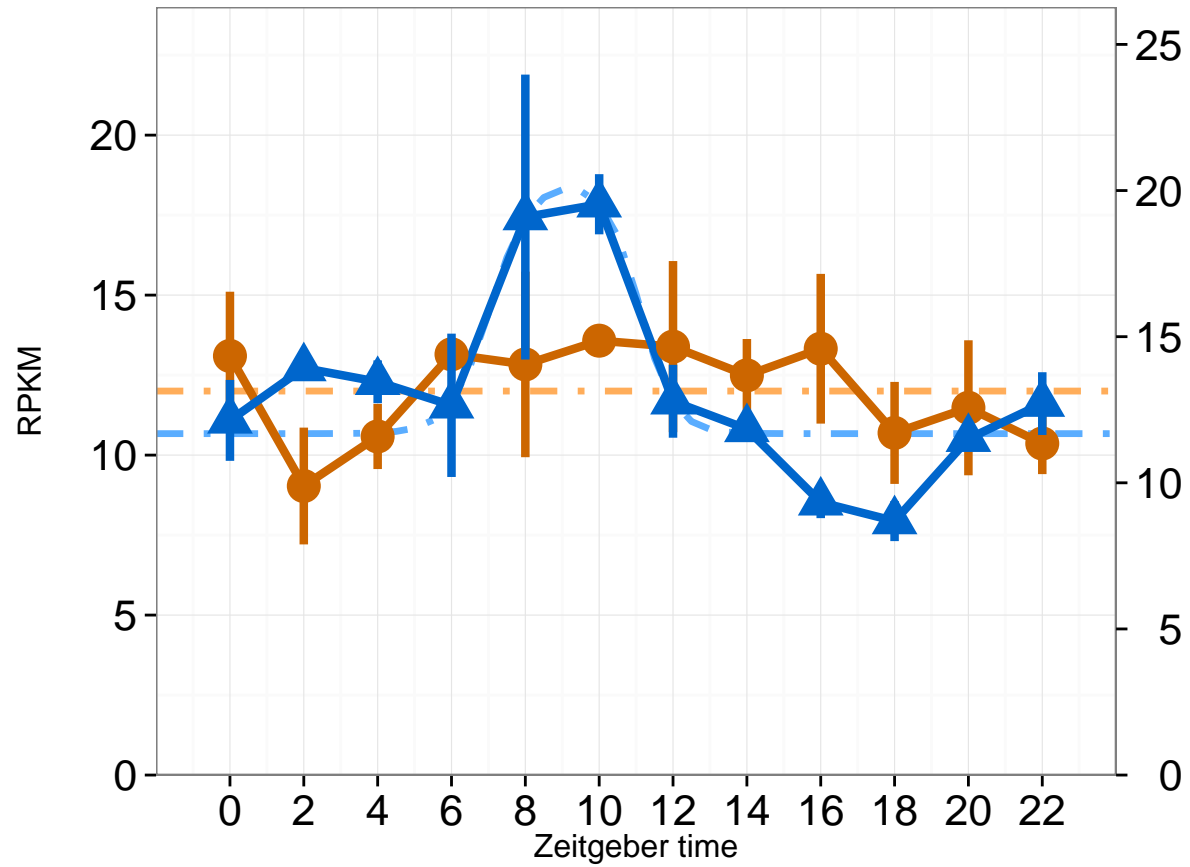

## Naa38

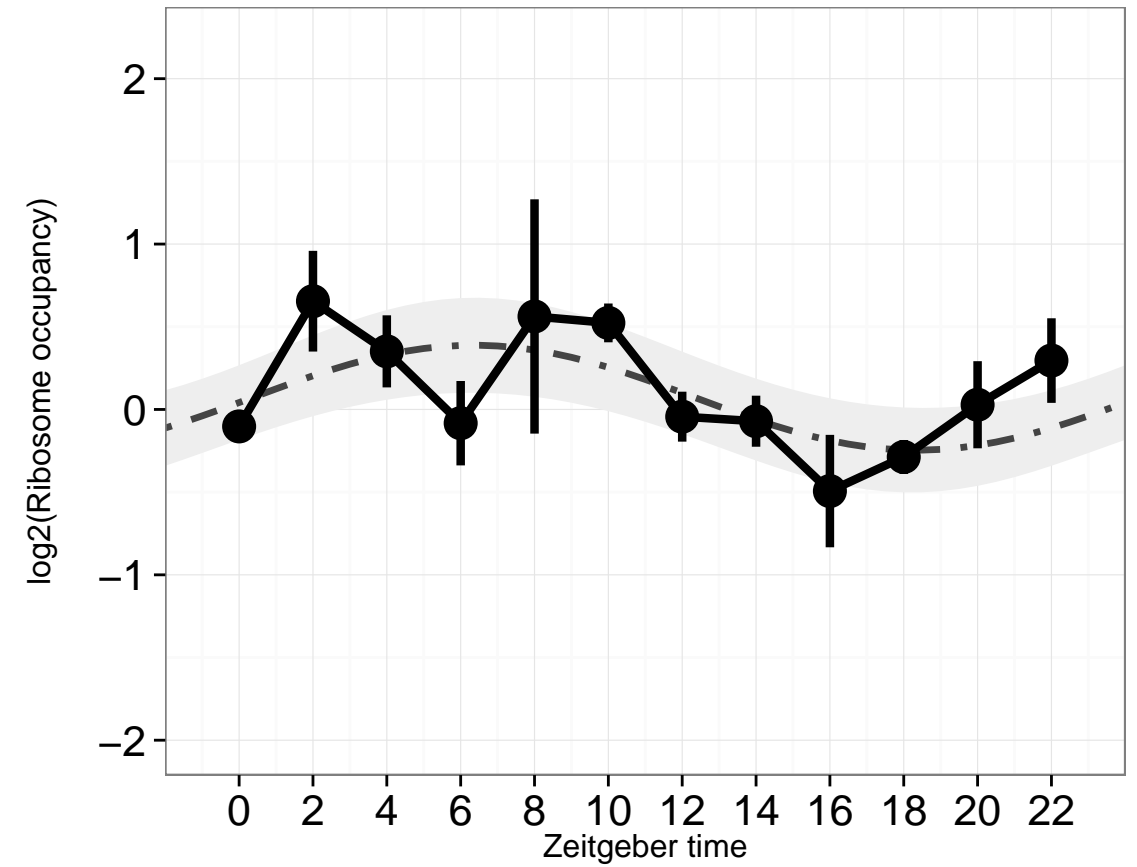

Supplement: SuppDataset_1.zip [file Naa38_set_C.pdf › Supplemental Dataset 1/C-mRNA_nonrhythm_translation_rhyth/Naa38_set_C.pdf]

## Naca

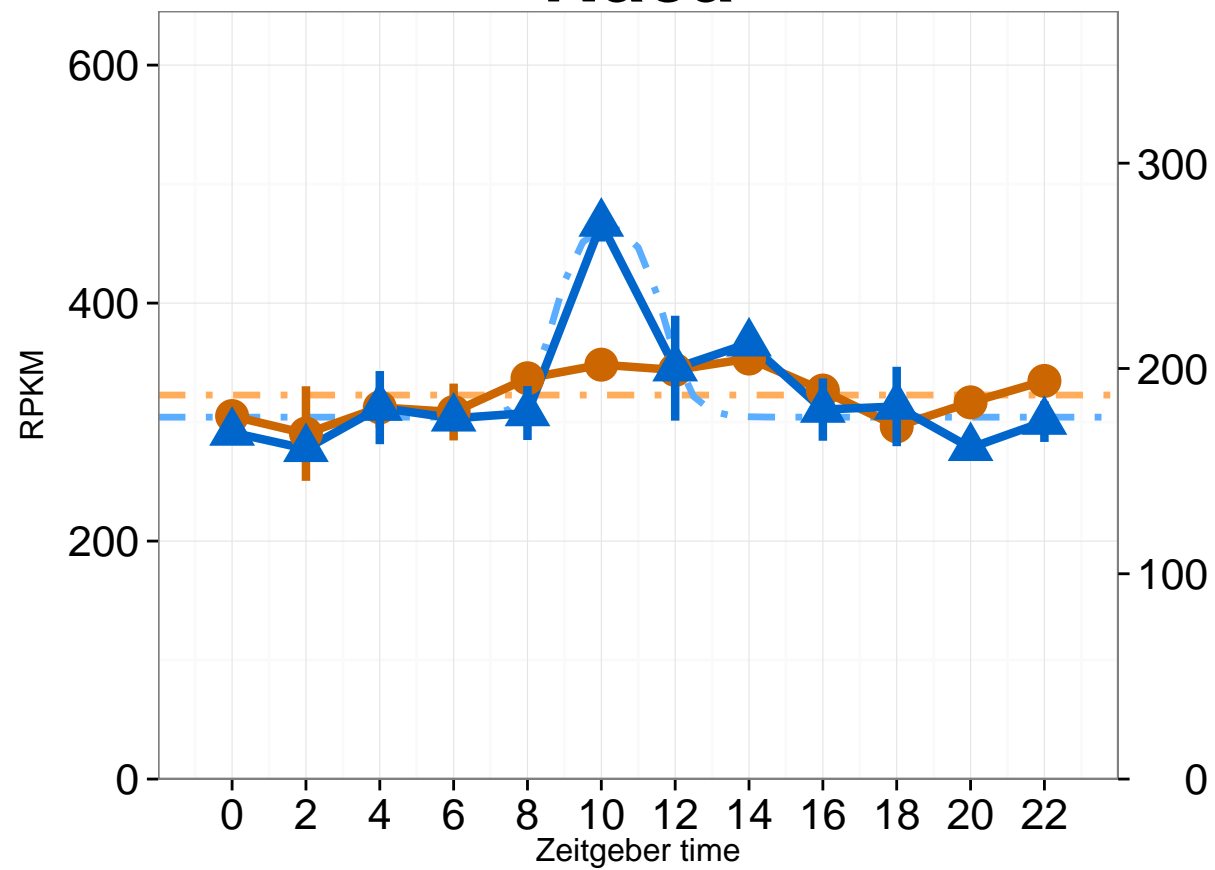

## Naca

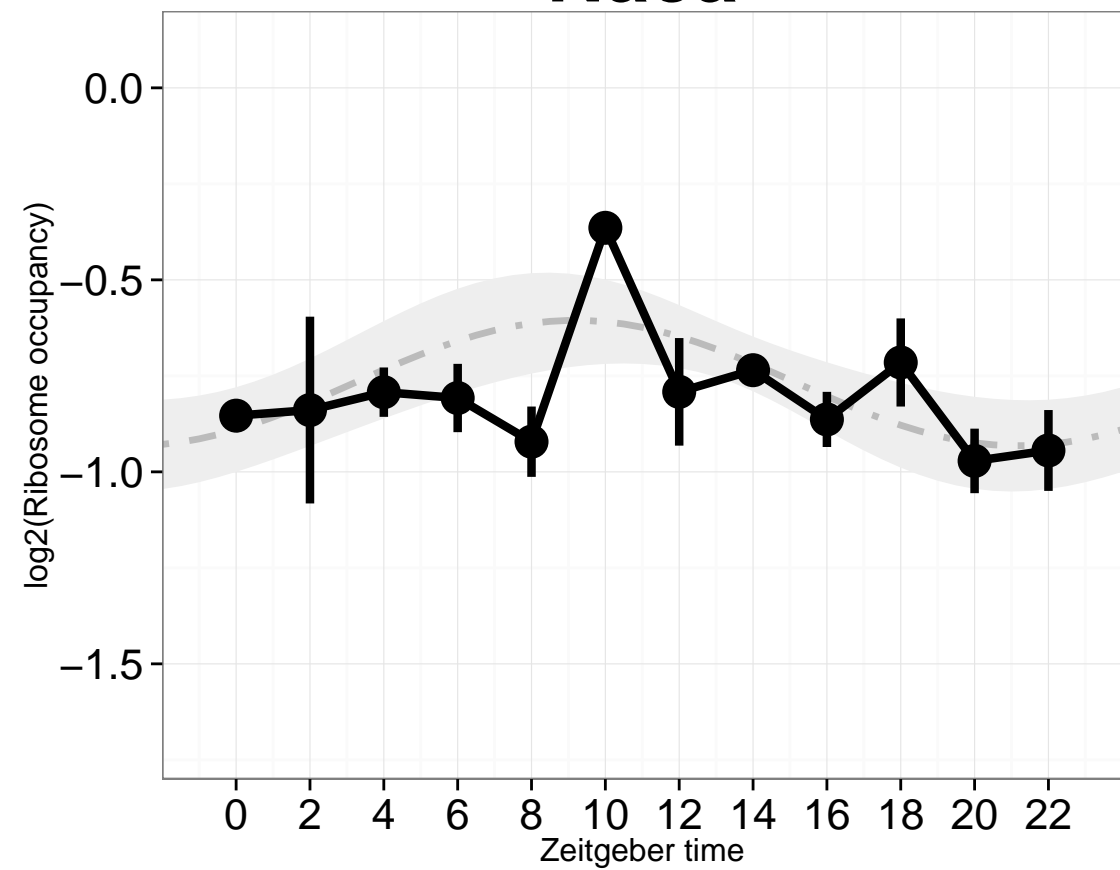

Supplement: SuppDataset_1.zip [file Naca_set_C.pdf › Supplemental Dataset 1/C-mRNA_nonrhythm_translation_rhyth/Naca_set_C.pdf]

## Napepld

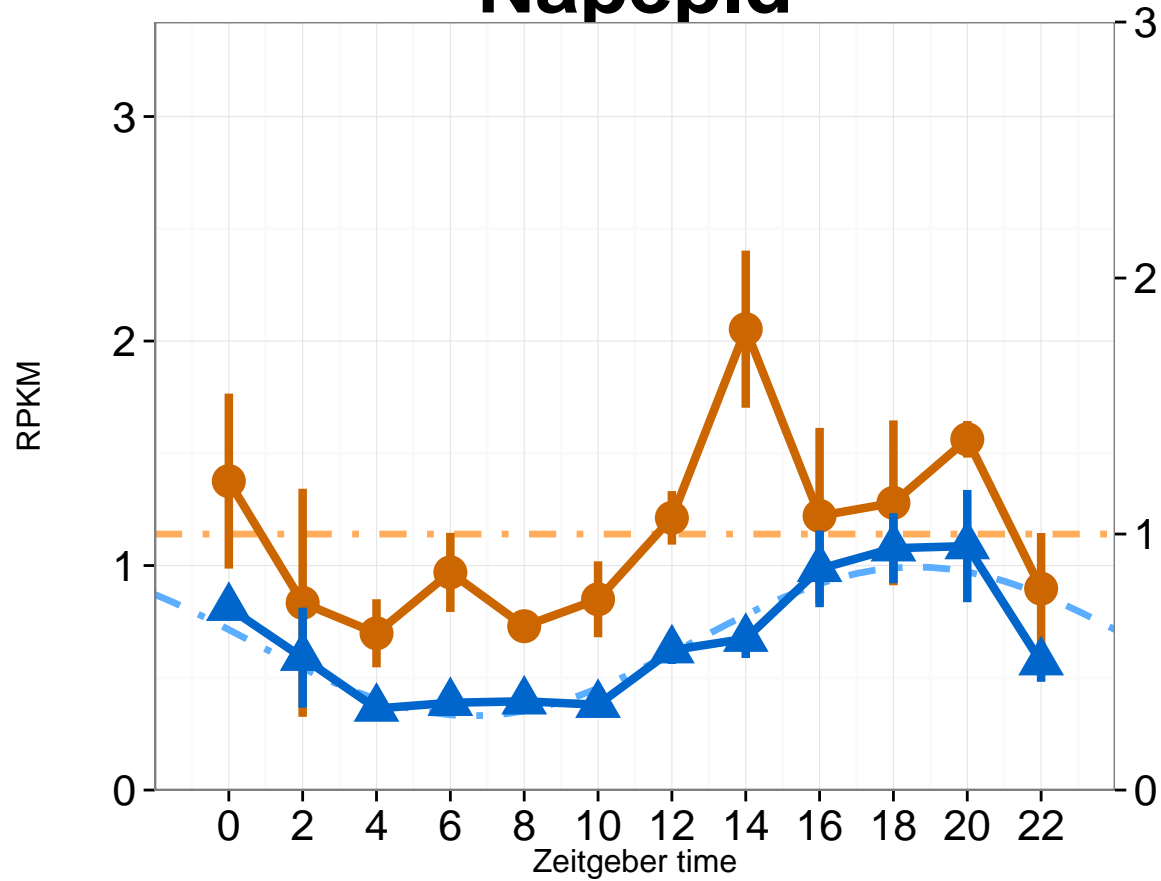

## Napepld

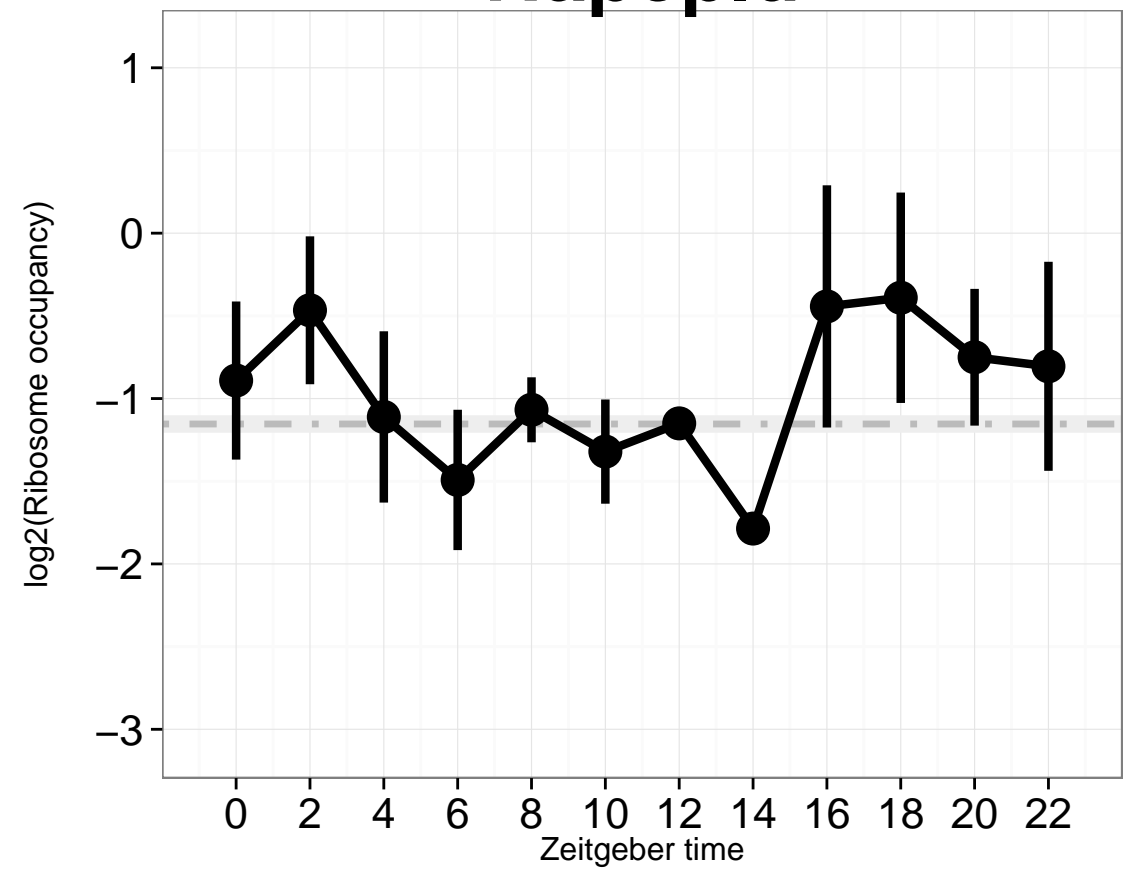

Supplement: SuppDataset_1.zip [file Napepld_set_C.pdf › Supplemental Dataset 1/C-mRNA_nonrhythm_translation_rhyth/Napepld_set_C.pdf]

## Neil1

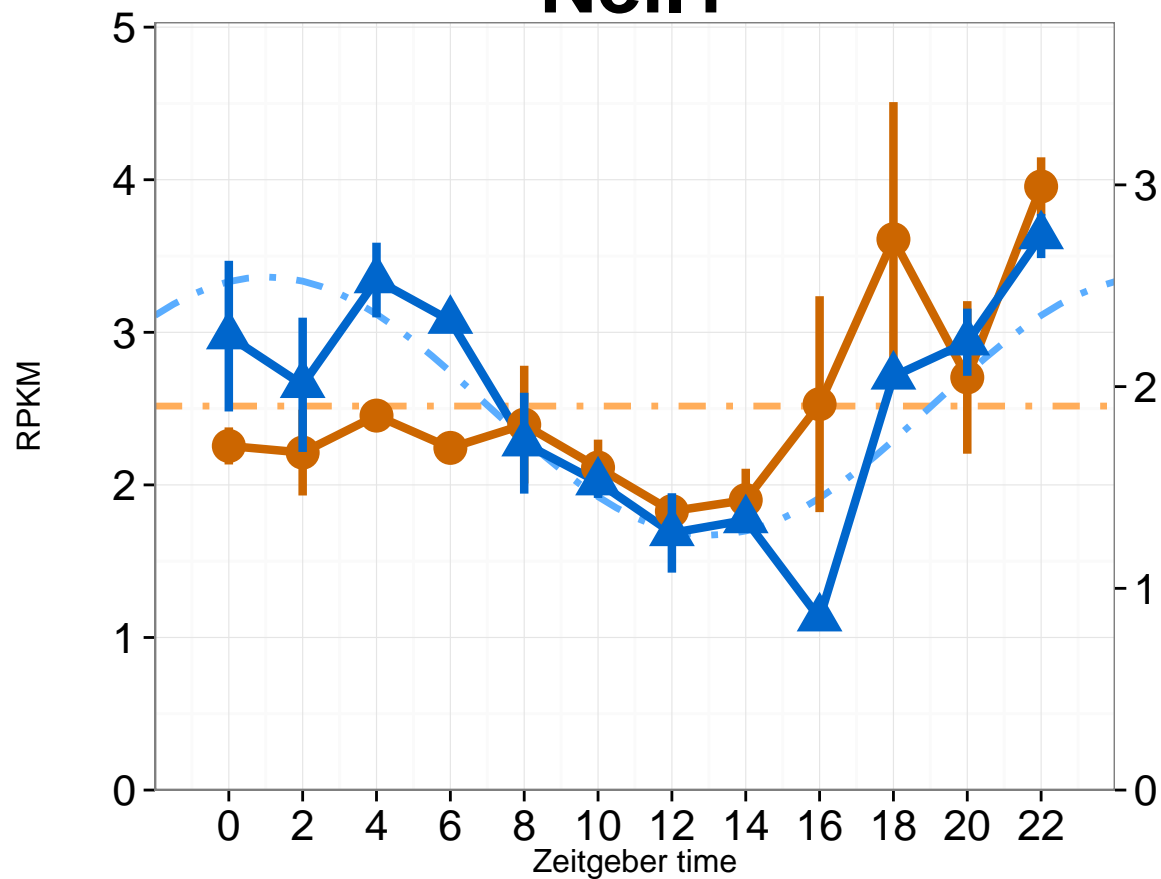

## Neil1

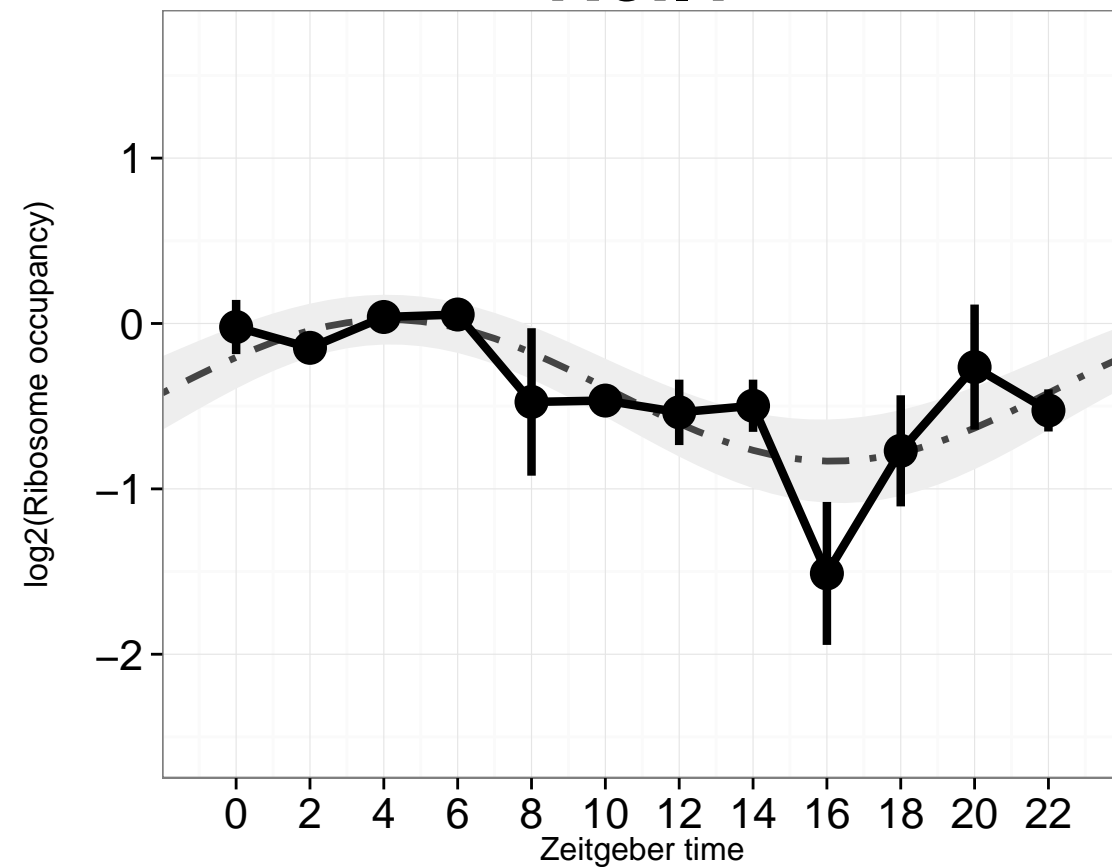

Supplement: SuppDataset_1.zip [file Neil1_set_C.pdf › Supplemental Dataset 1/C-mRNA_nonrhythm_translation_rhyth/Neil1_set_C.pdf]

## Nek4

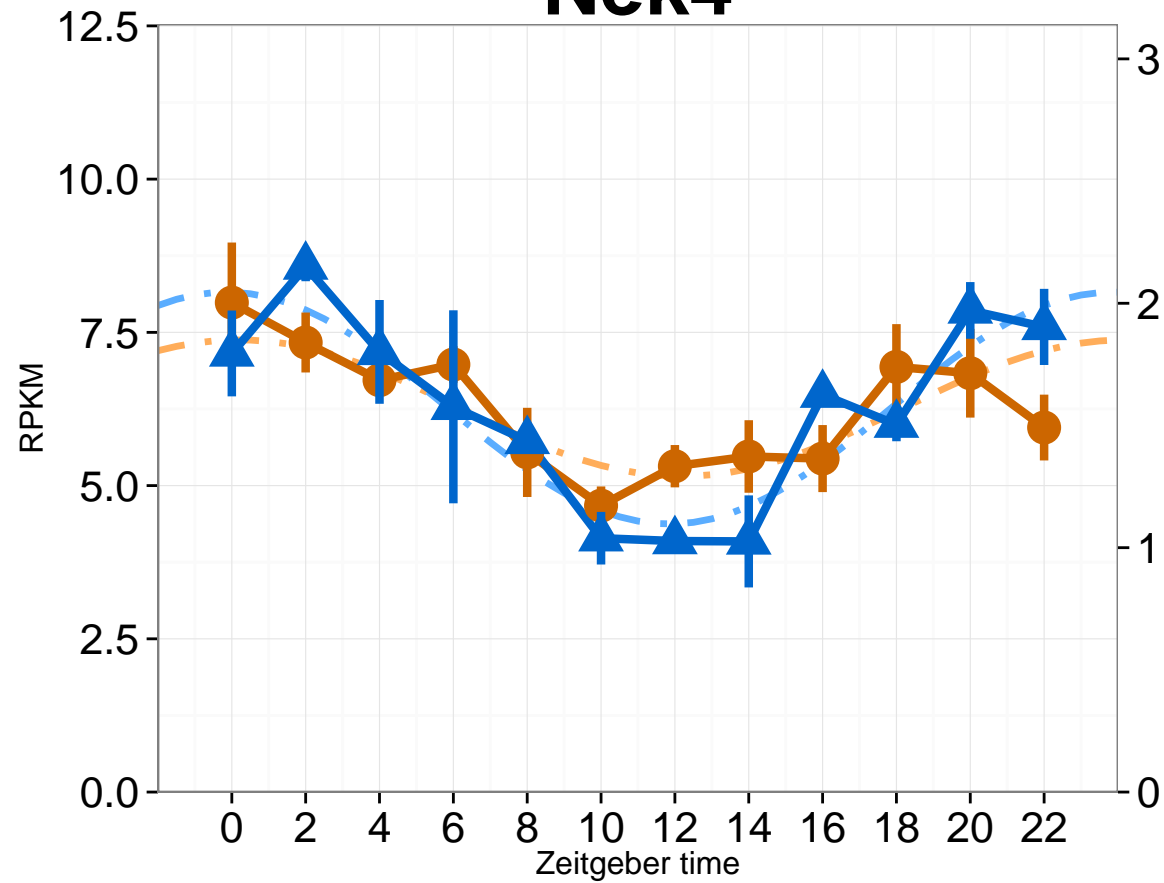

## Nek4

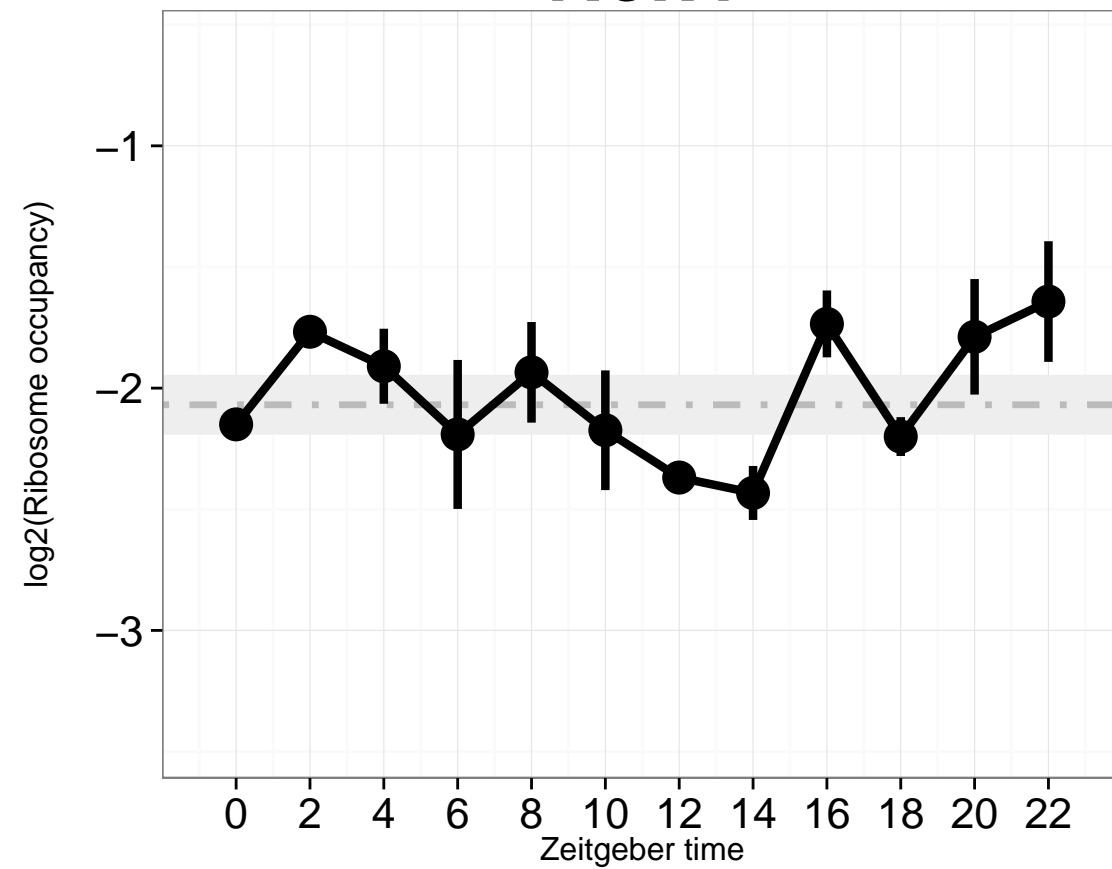

Supplement: SuppDataset_1.zip [file Nek4_set_C.pdf › Supplemental Dataset 1/C-mRNA_nonrhythm_translation_rhyth/Nek4_set_C.pdf]

## Neu3

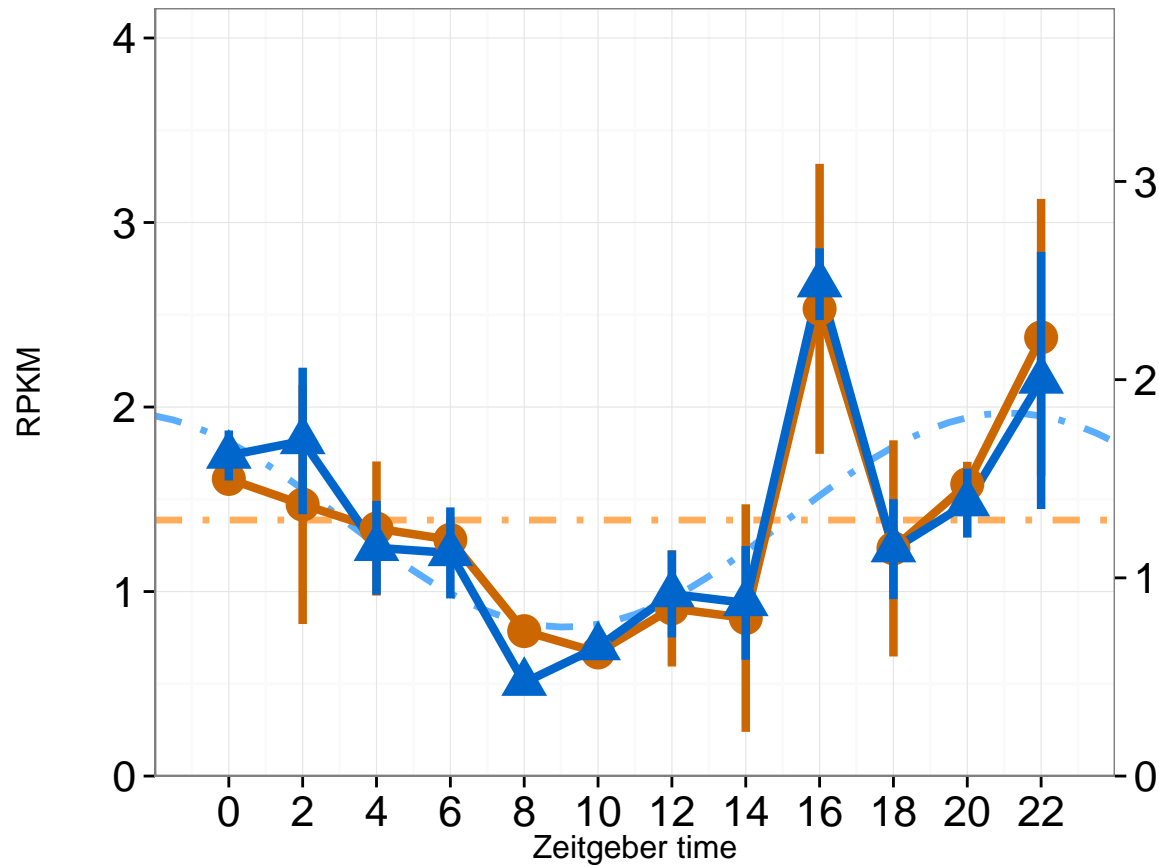

## Neu3

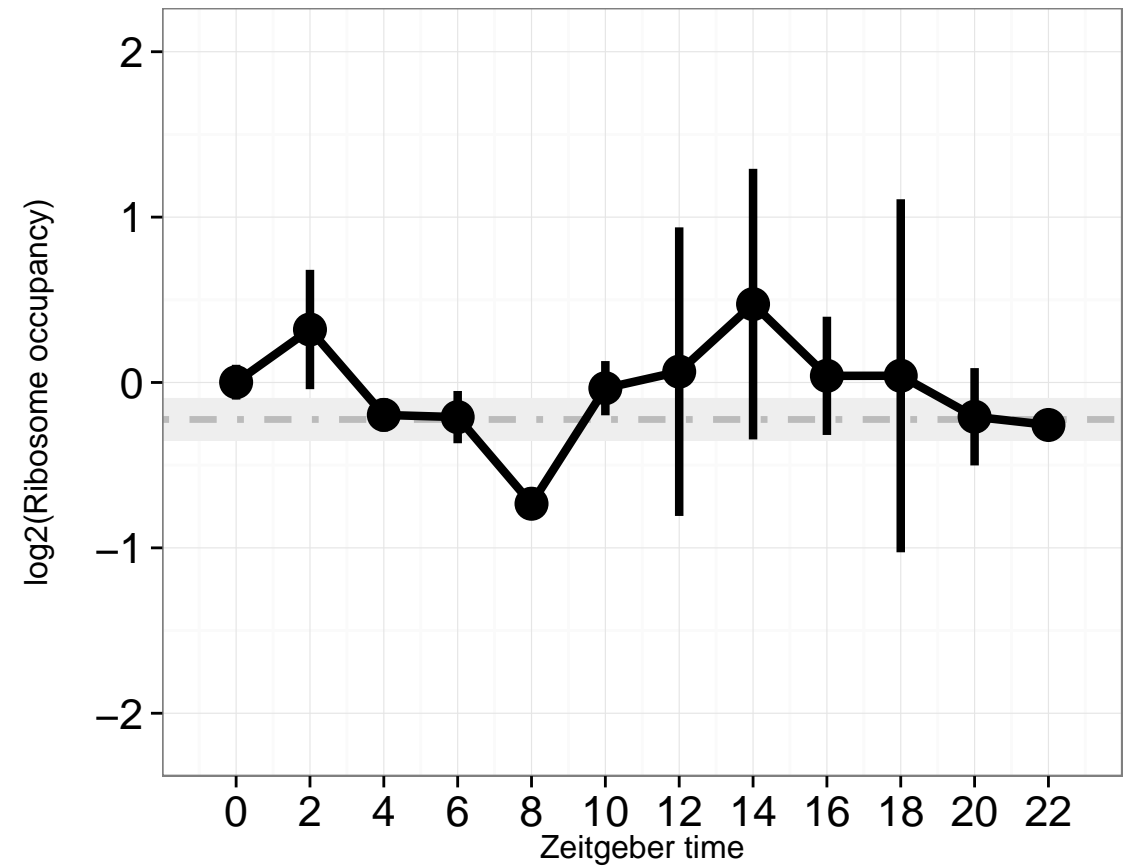

Supplement: SuppDataset_1.zip [file Neu3_set_C.pdf › Supplemental Dataset 1/C-mRNA_nonrhythm_translation_rhyth/Neu3_set_C.pdf]

## Nfic

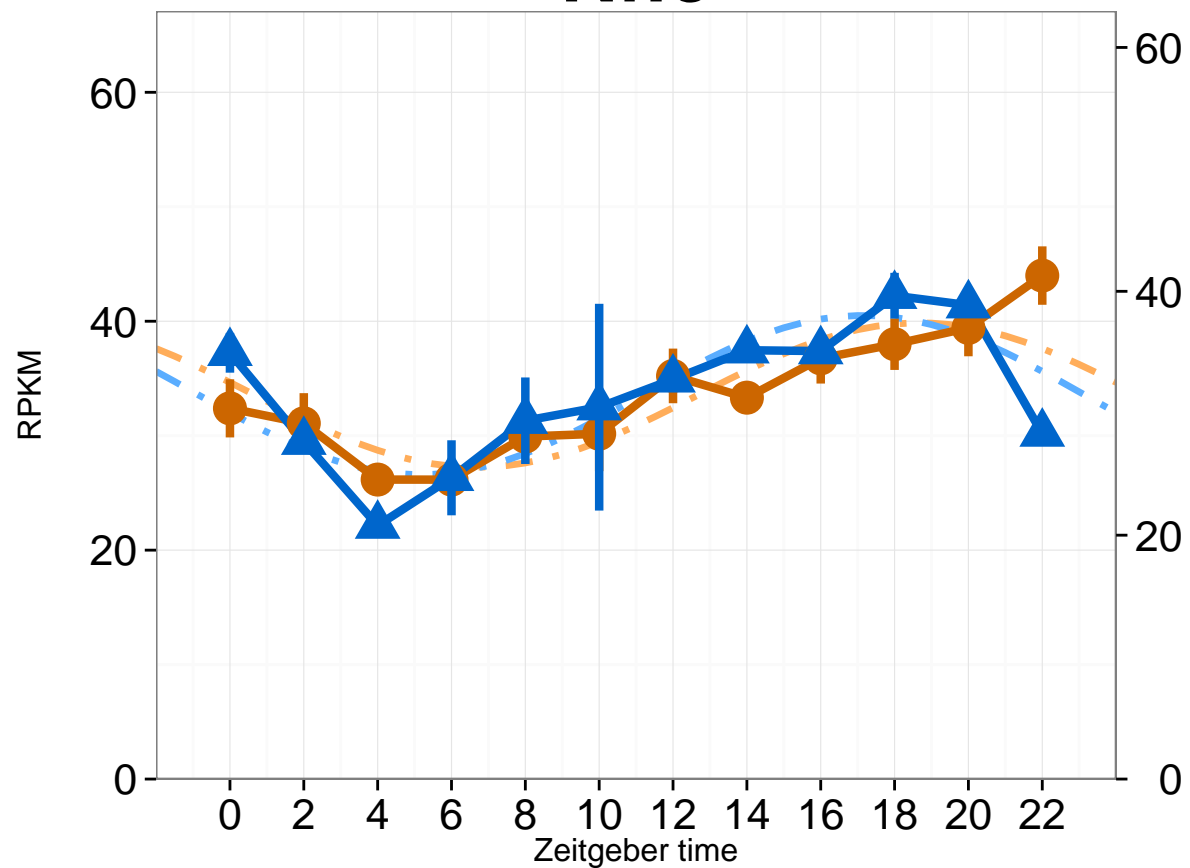

## Nfic

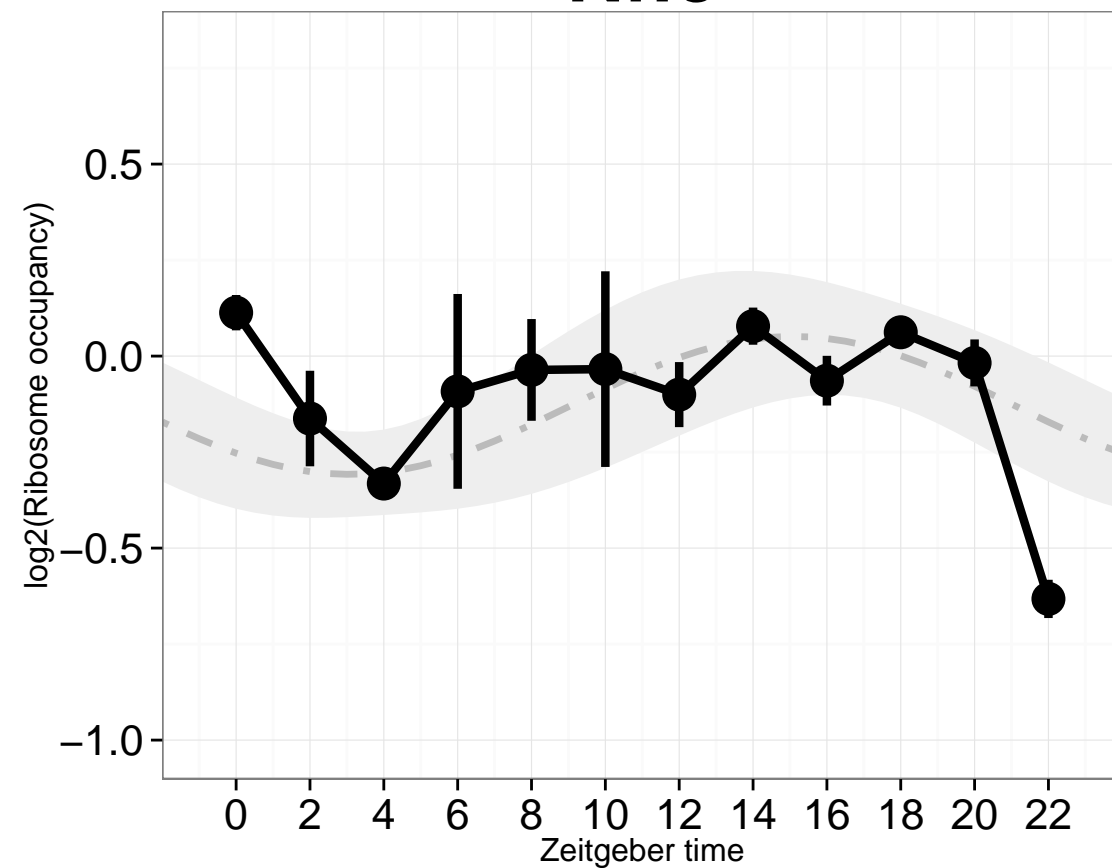

Supplement: SuppDataset_1.zip [file Nfic_set_C.pdf › Supplemental Dataset 1/C-mRNA_nonrhythm_translation_rhyth/Nfic_set_C.pdf]

## Nfkbiz

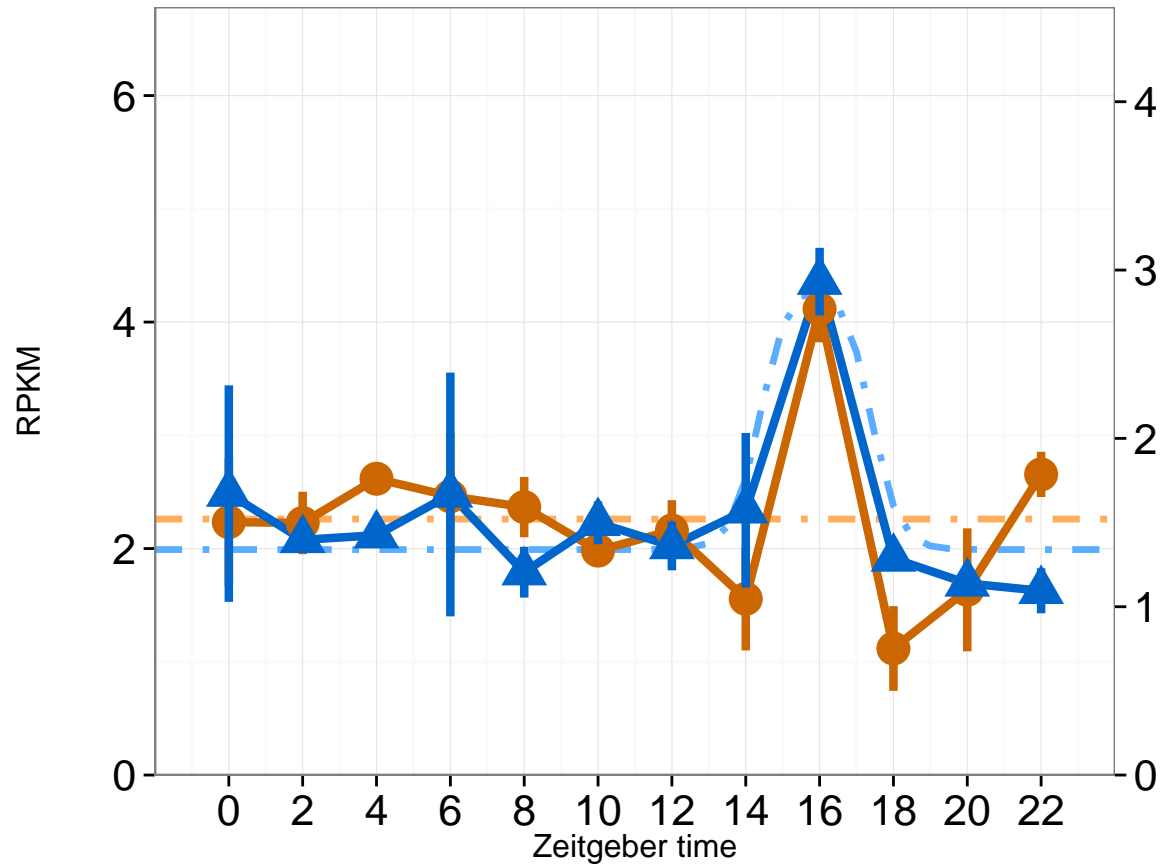

## Nfkbiz

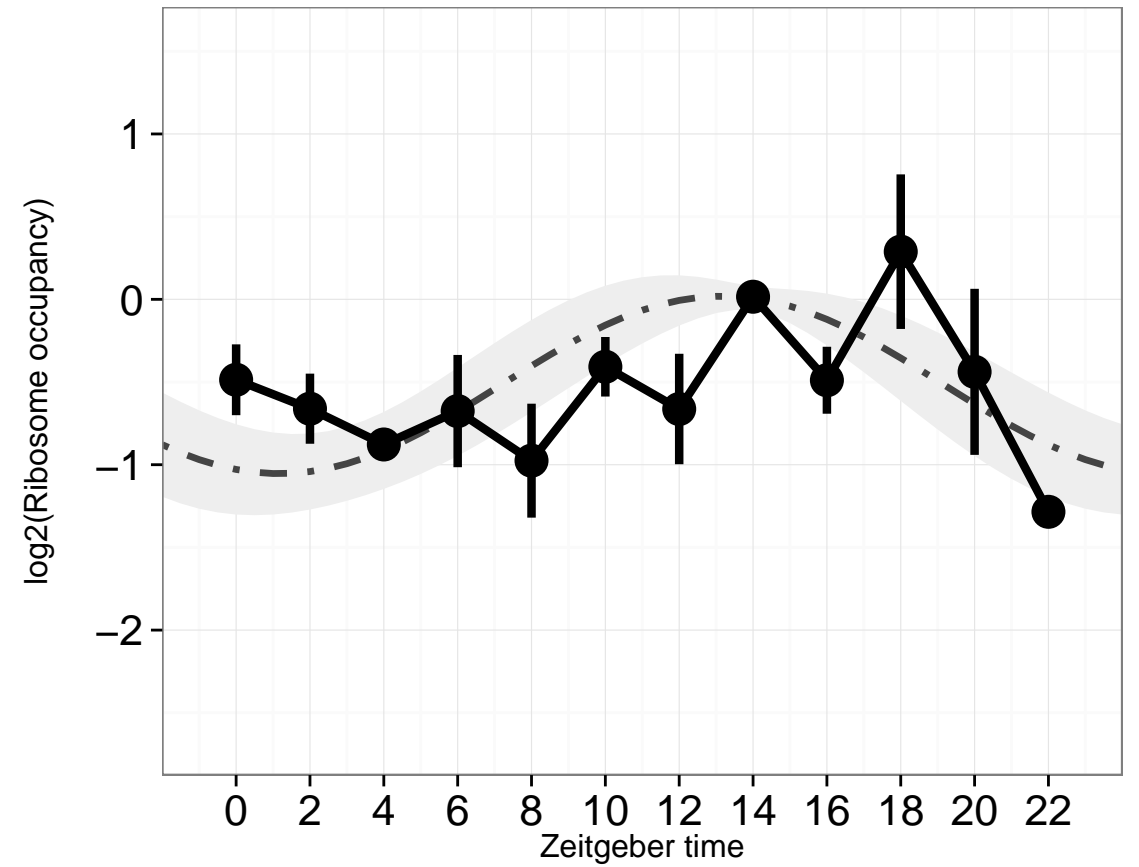

Supplement: SuppDataset_1.zip [file Nfkbiz_set_C.pdf › Supplemental Dataset 1/C-mRNA_nonrhythm_translation_rhyth/Nfkbiz_set_C.pdf]

## Nhej1

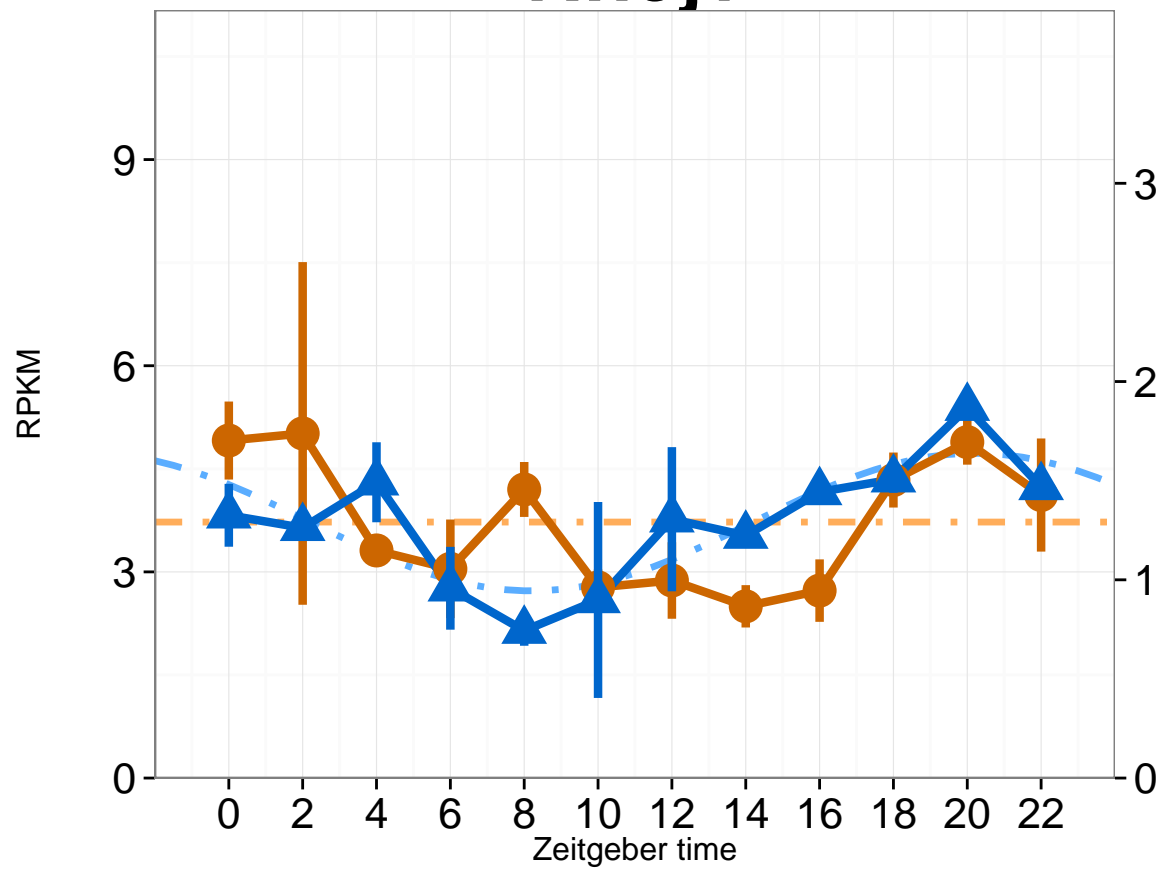

## Nhej1

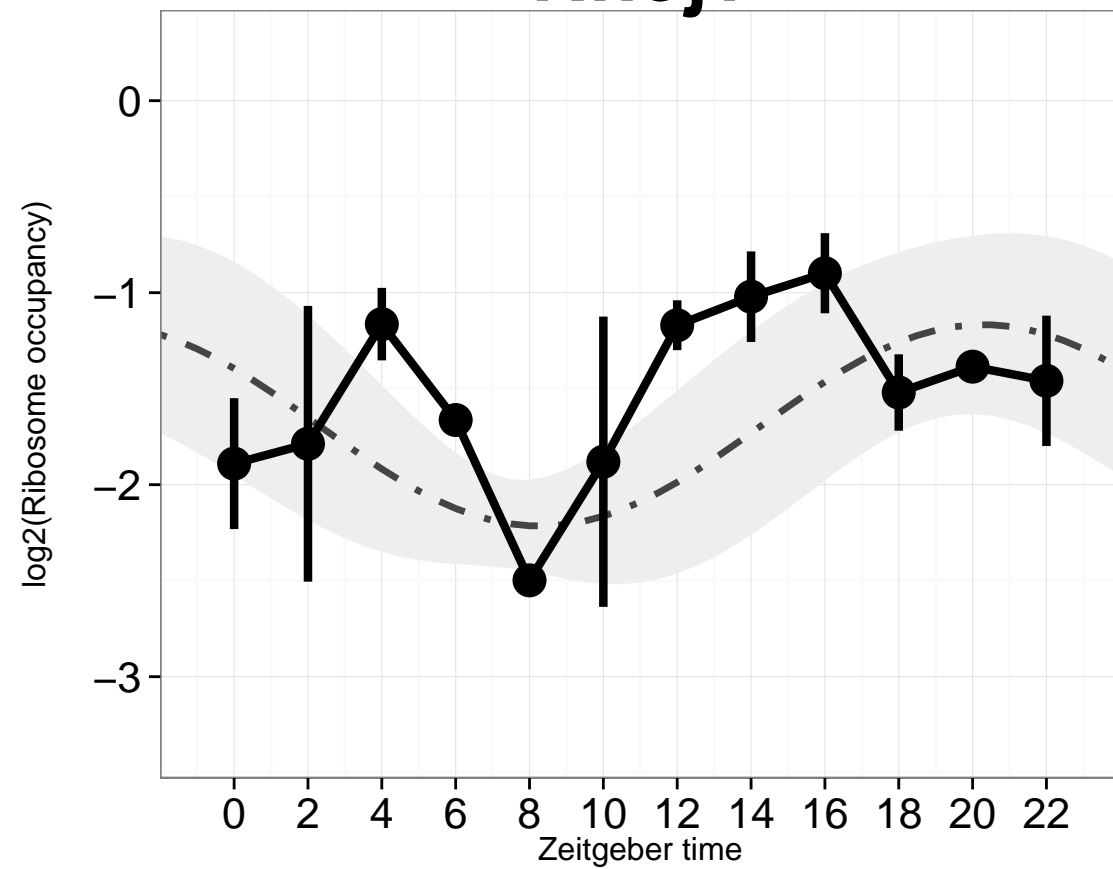

Supplement: SuppDataset_1.zip [file Nhej1_set_C.pdf › Supplemental Dataset 1/C-mRNA_nonrhythm_translation_rhyth/Nhej1_set_C.pdf]

## Nicn1

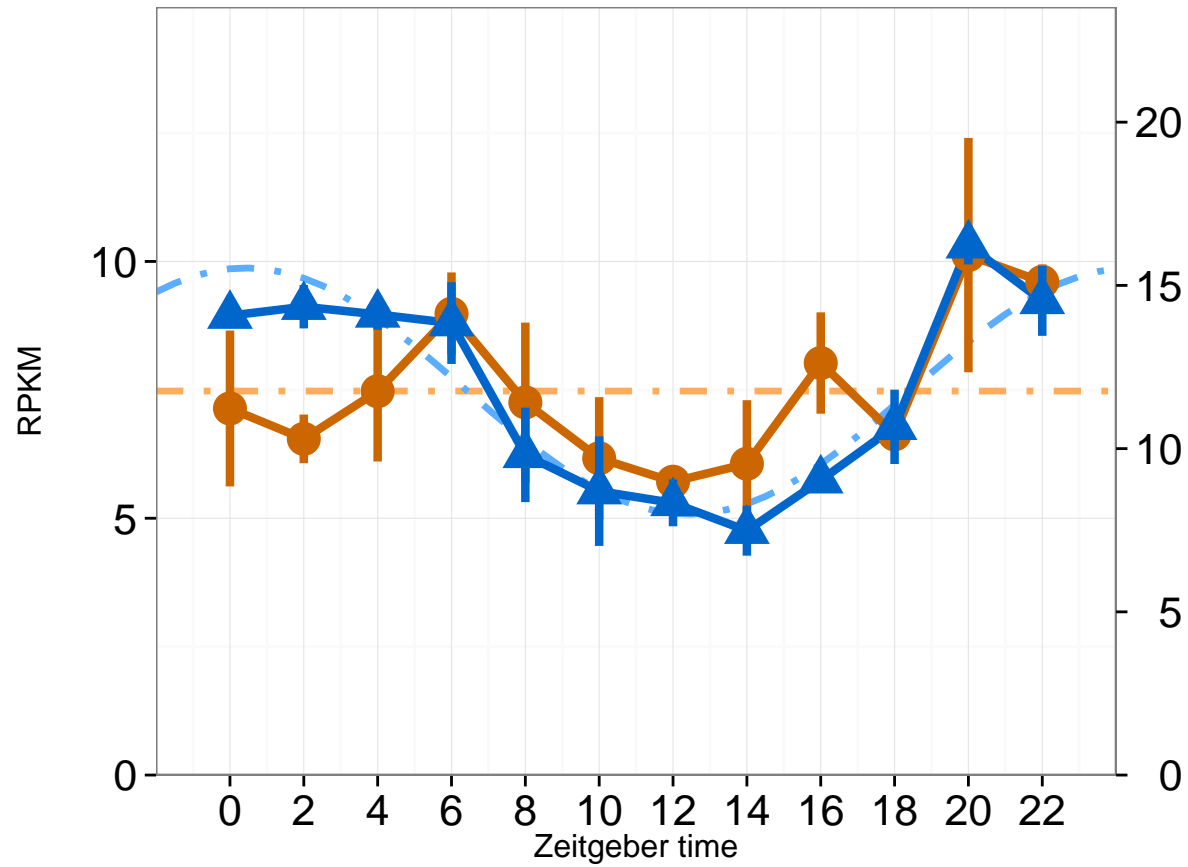

## Nicn1

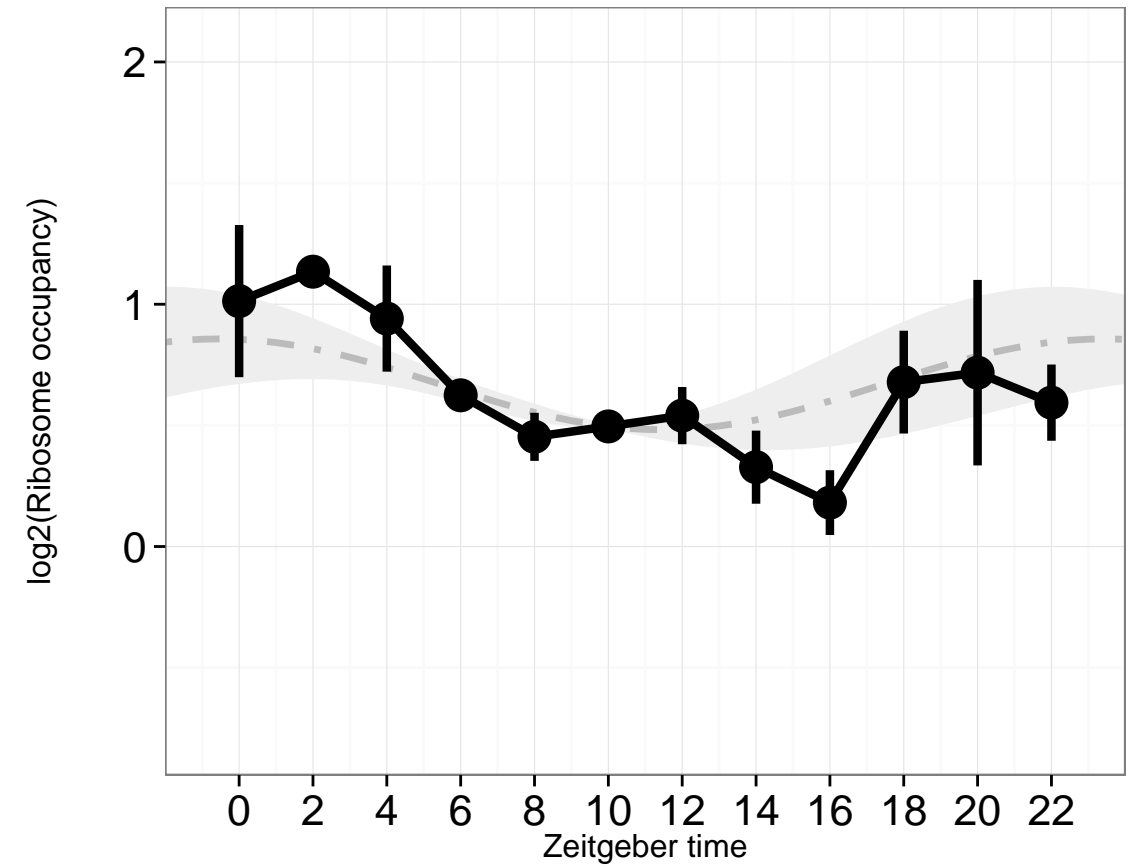

Supplement: SuppDataset_1.zip [file Nicn1_set_C.pdf › Supplemental Dataset 1/C-mRNA_nonrhythm_translation_rhyth/Nicn1_set_C.pdf]

## Nipal3

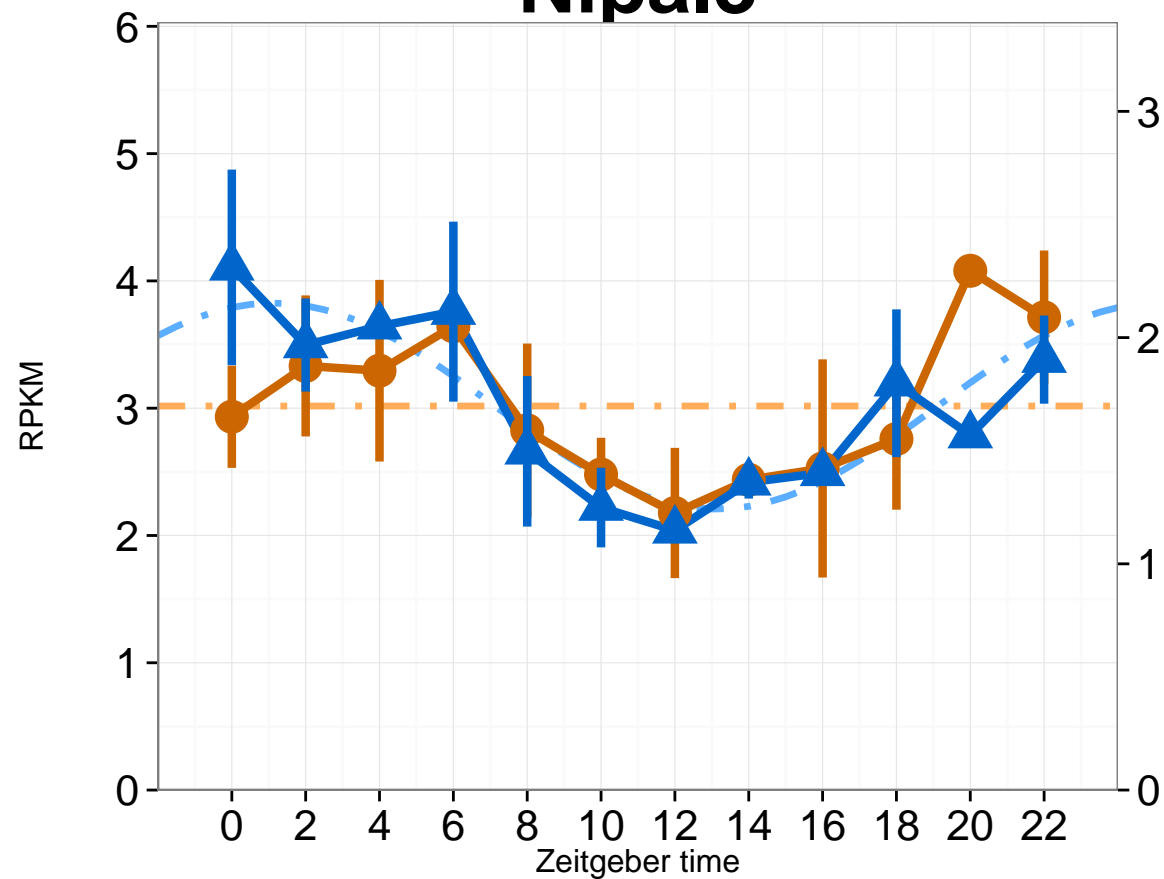

## Nipal3

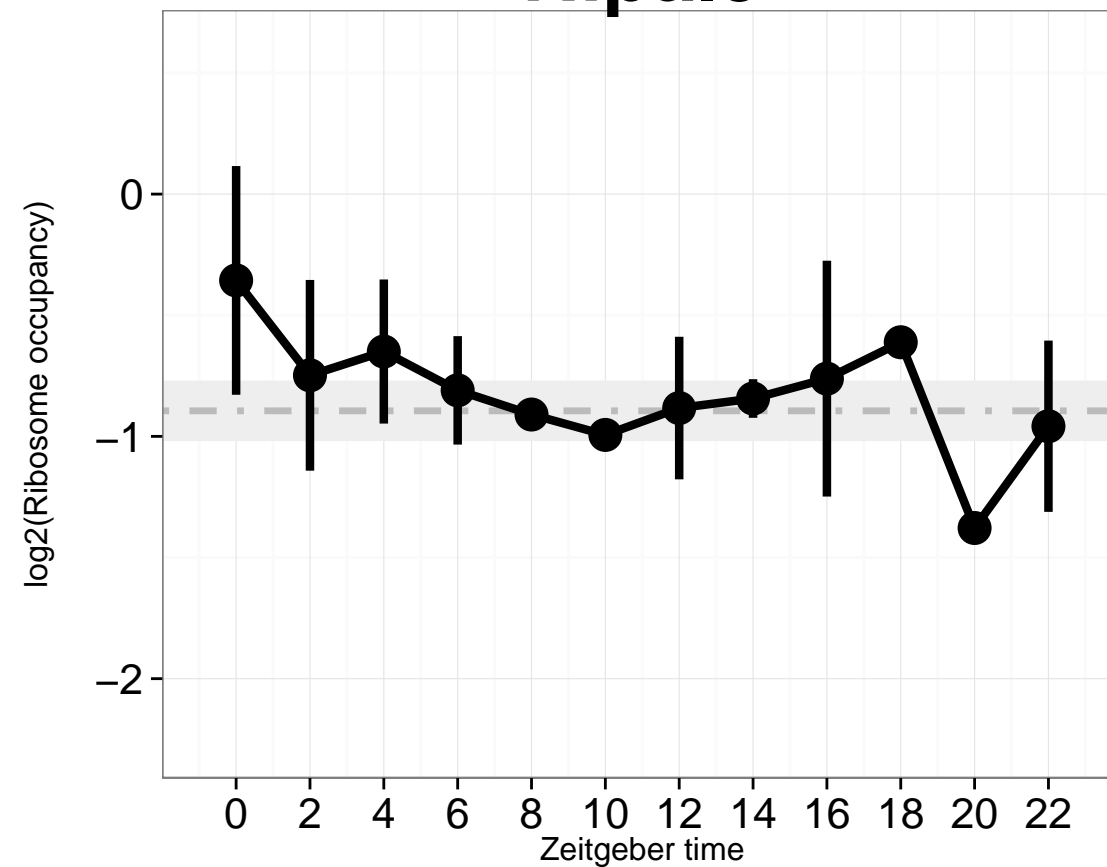

Supplement: SuppDataset_1.zip [file Nipal3_set_C.pdf › Supplemental Dataset 1/C-mRNA_nonrhythm_translation_rhyth/Nipal3_set_C.pdf]

# Nme4

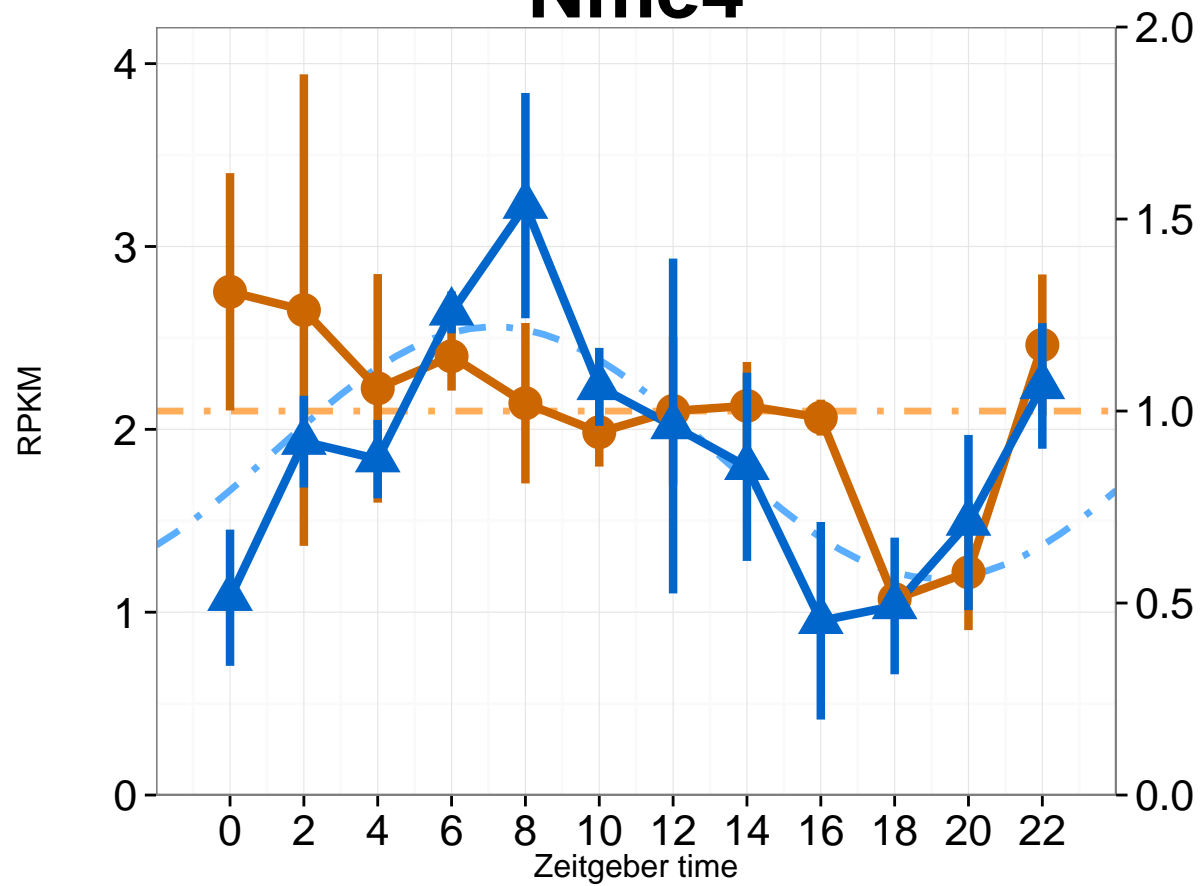

# Nme4

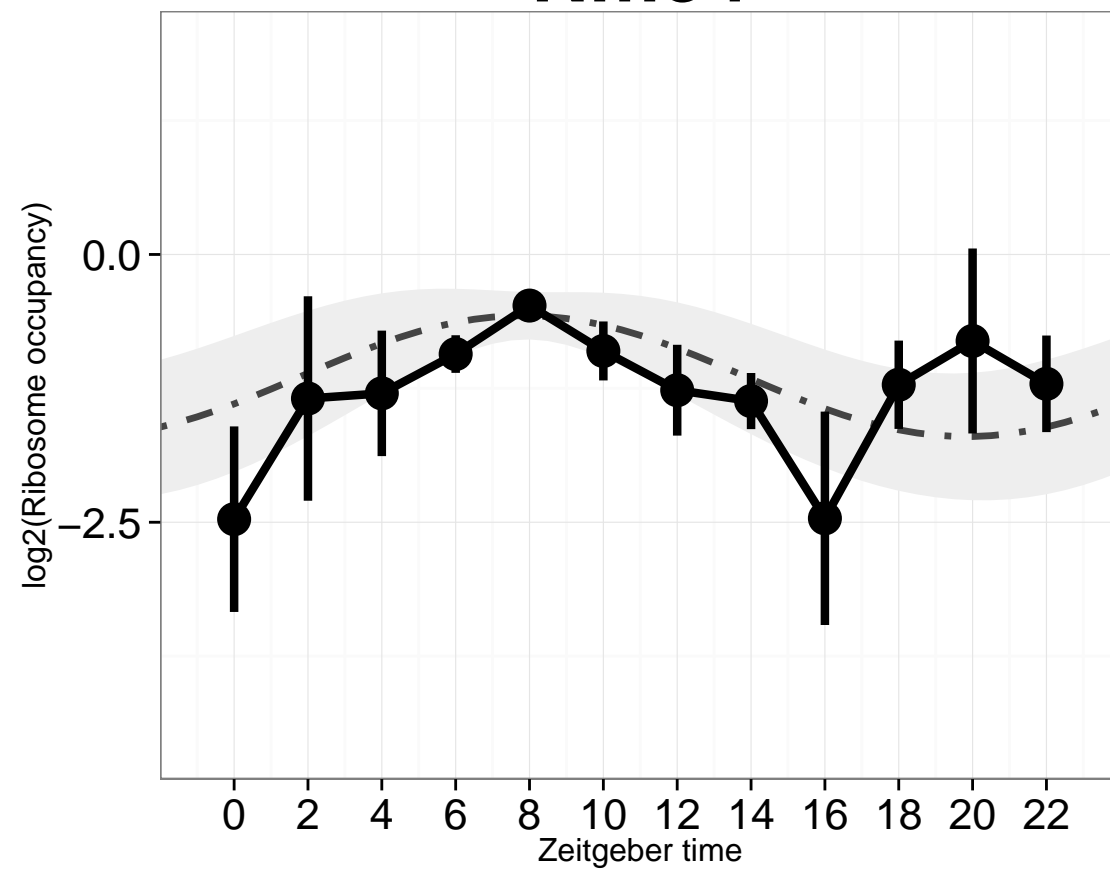

Supplement: SuppDataset_1.zip [file Nme4_set_C.pdf › Supplemental Dataset 1/C-mRNA_nonrhythm_translation_rhyth/Nme4_set_C.pdf]

## Nosip

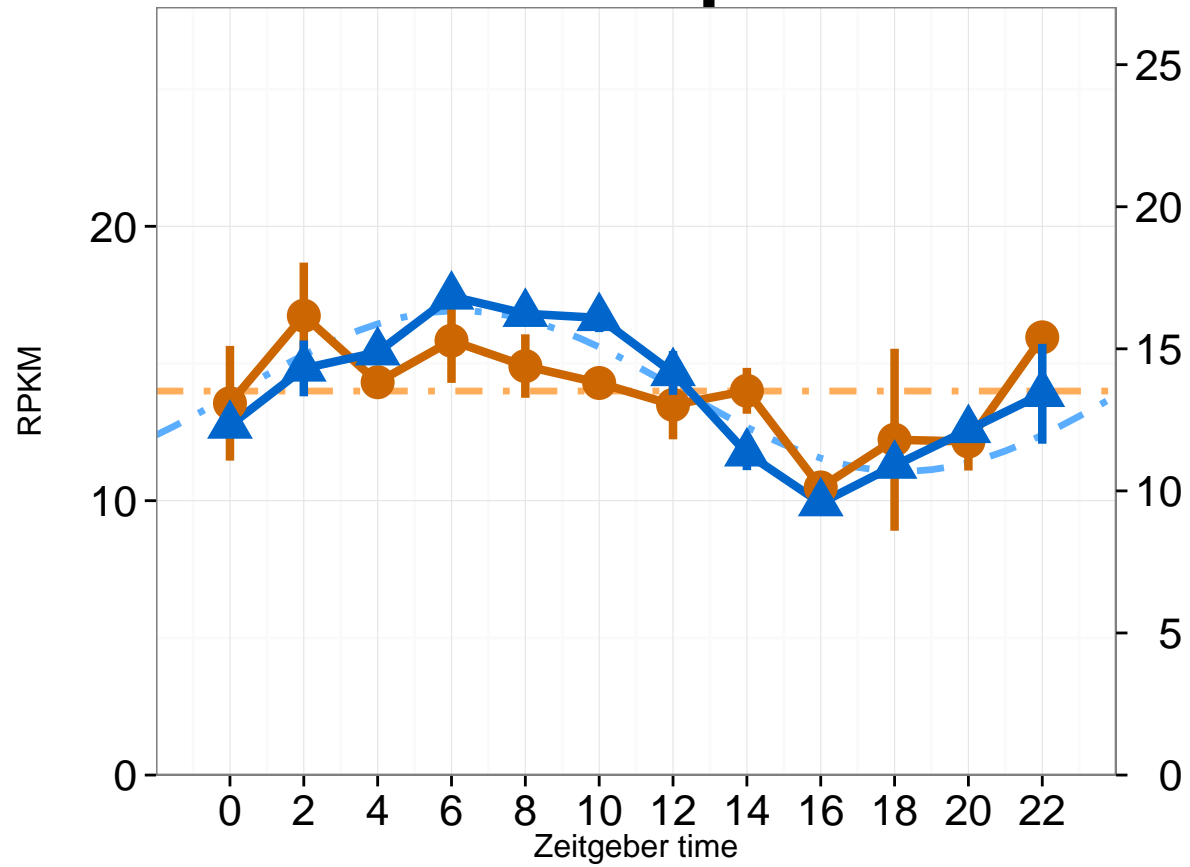

## Nosip

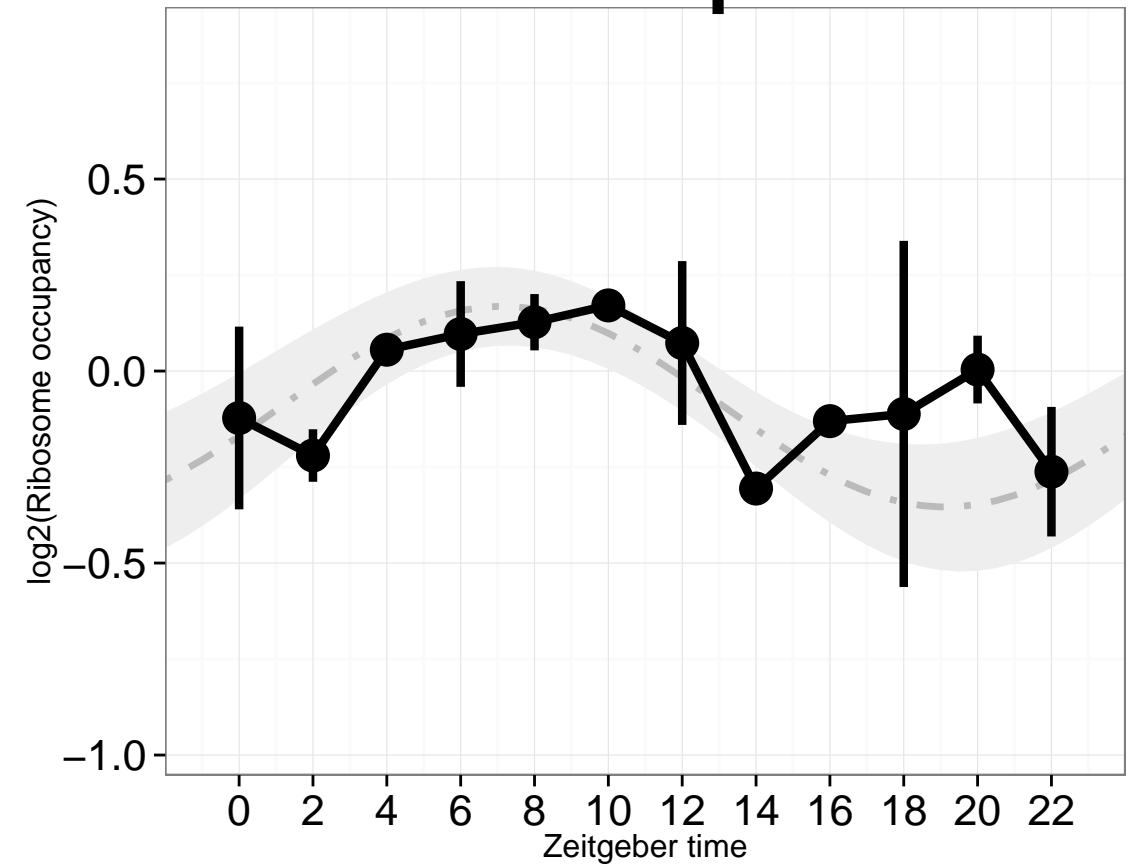

Supplement: SuppDataset_1.zip [file Nosip_set_C.pdf › Supplemental Dataset 1/C-mRNA_nonrhythm_translation_rhyth/Nosip_set_C.pdf]

# Npm1

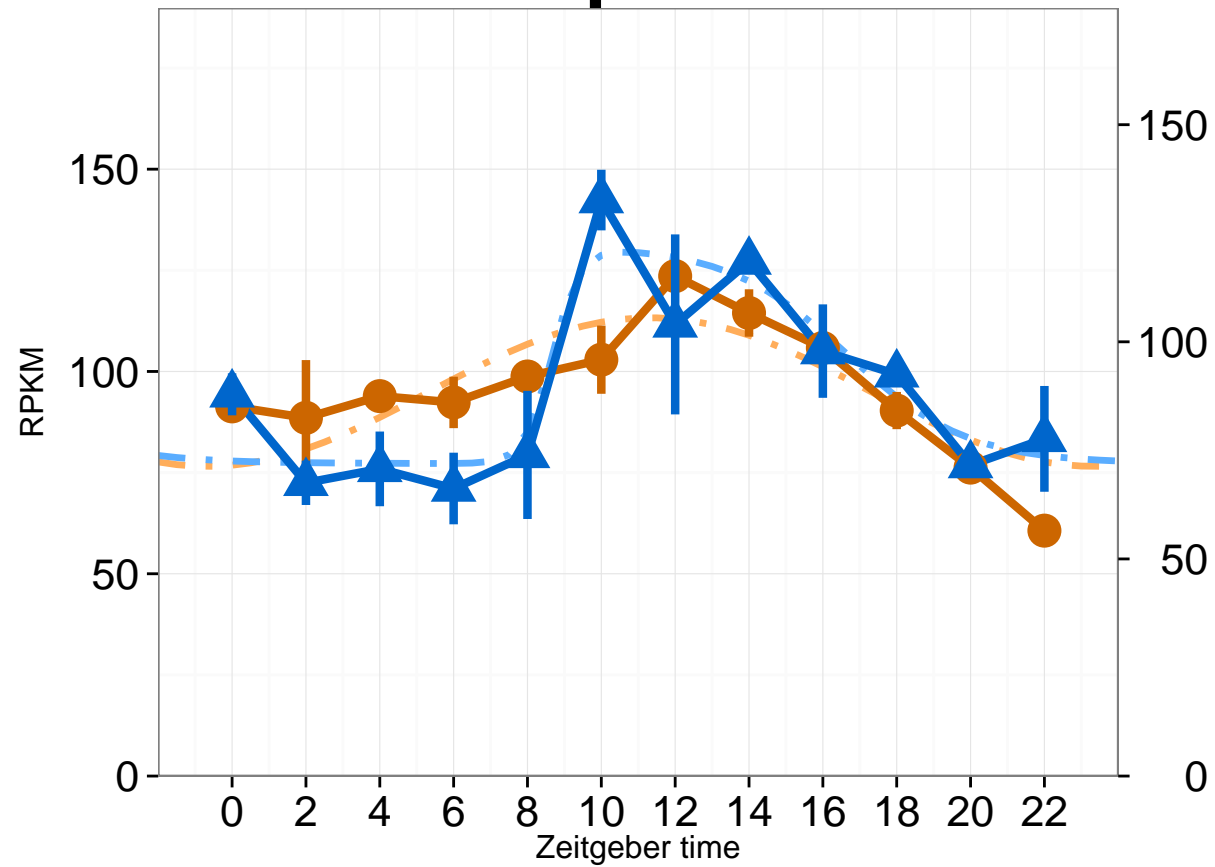

# Npm1

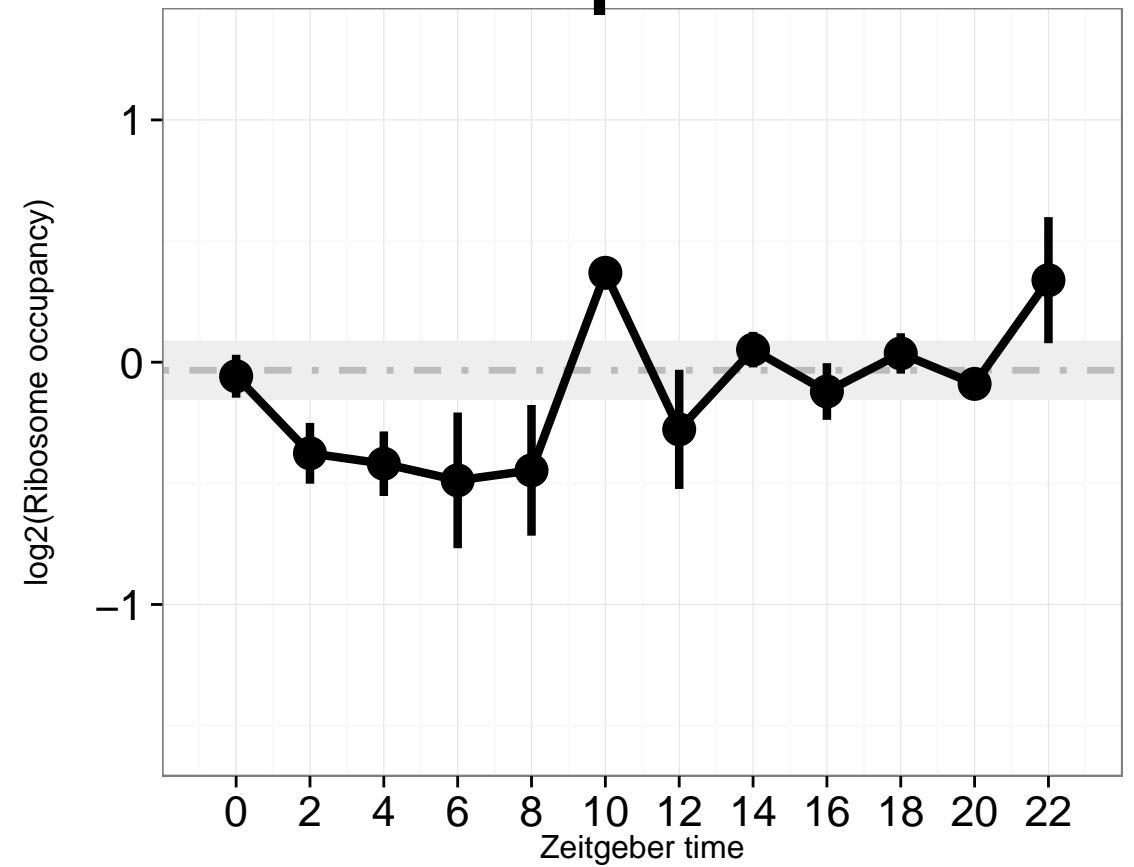

Supplement: SuppDataset_1.zip [file Npm1_set_C.pdf › Supplemental Dataset 1/C-mRNA_nonrhythm_translation_rhyth/Npm1_set_C.pdf]

# Nr1h5

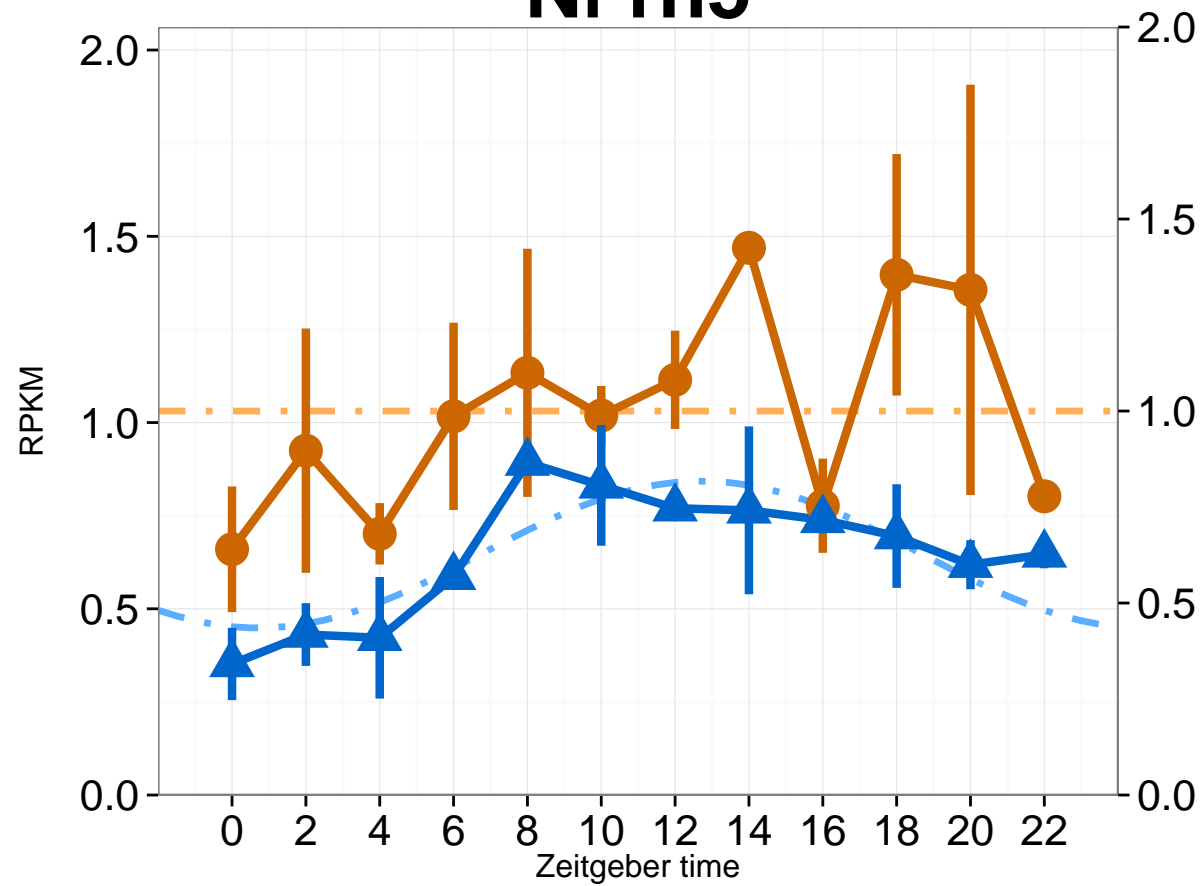

# Nr1h5

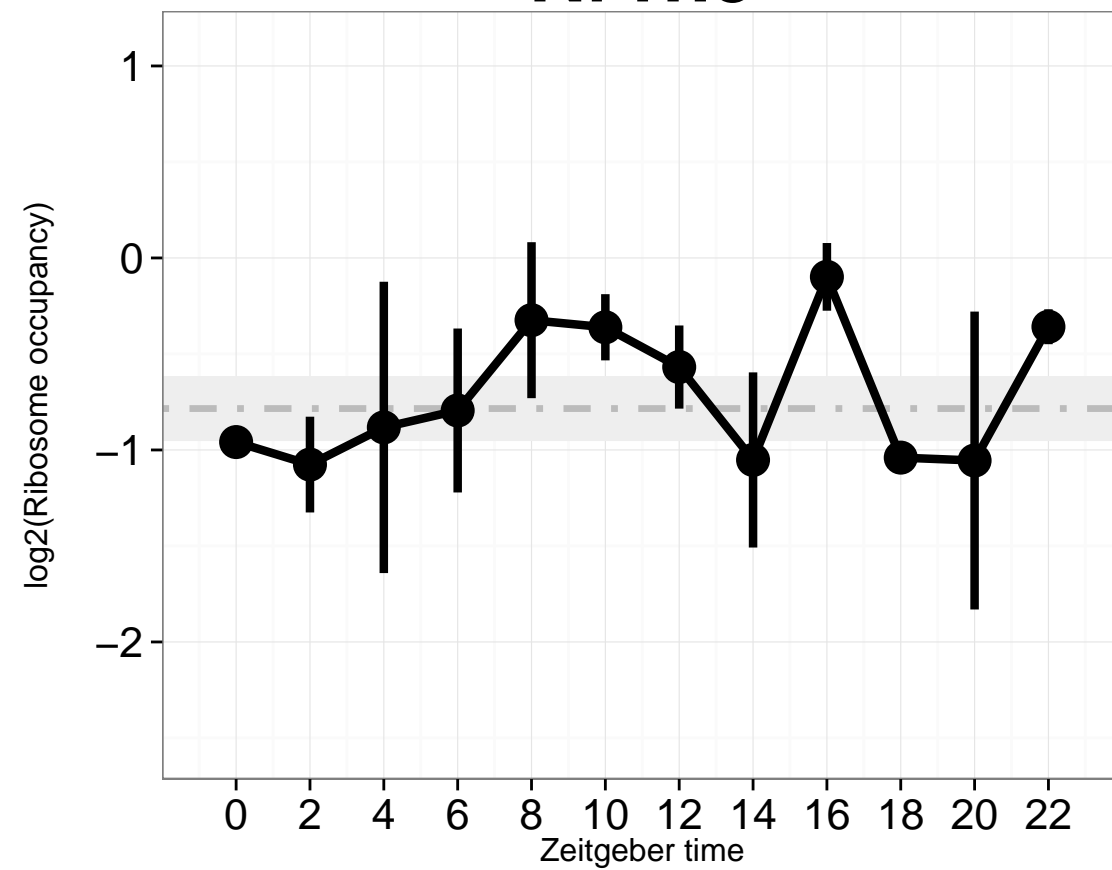

Supplement: SuppDataset_1.zip [file Nr1h5_set_C.pdf › Supplemental Dataset 1/C-mRNA_nonrhythm_translation_rhyth/Nr1h5_set_C.pdf]

# Nr2f2

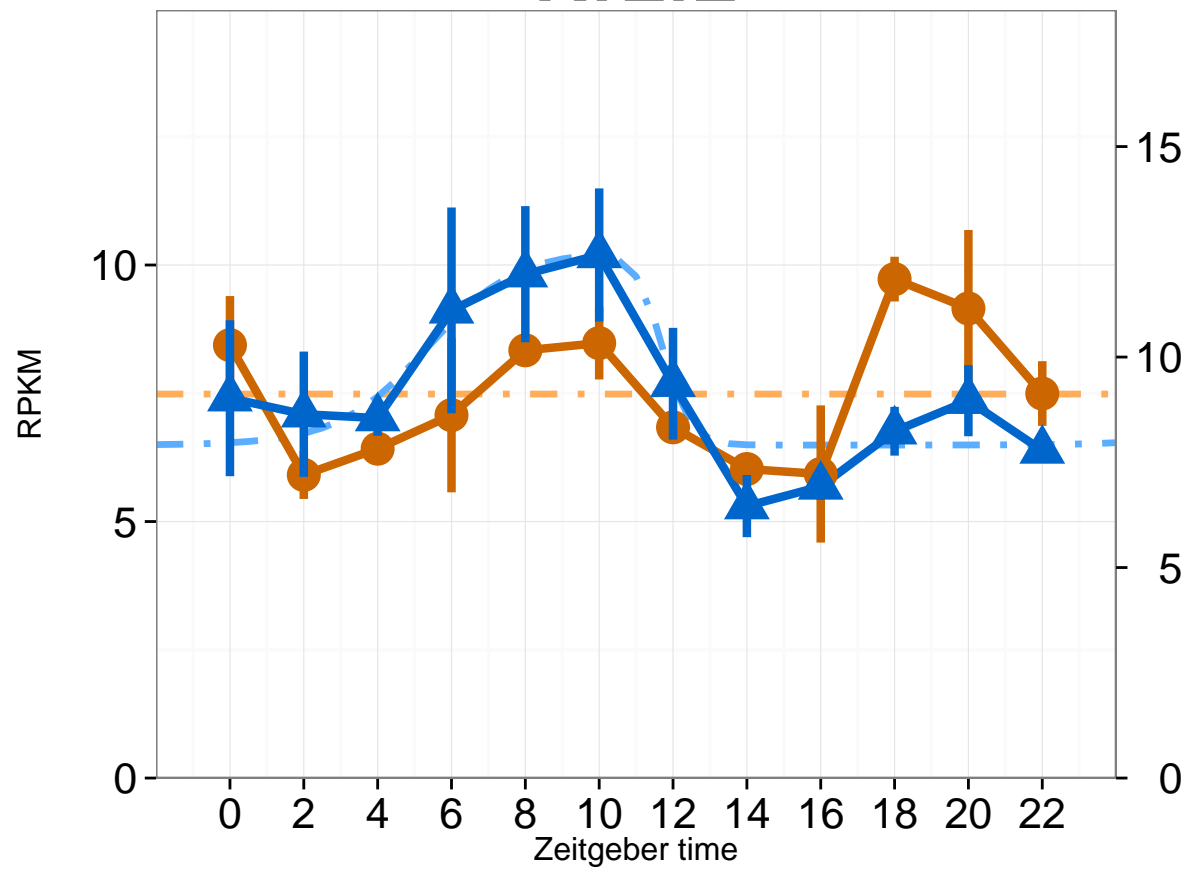

# Nr2f2

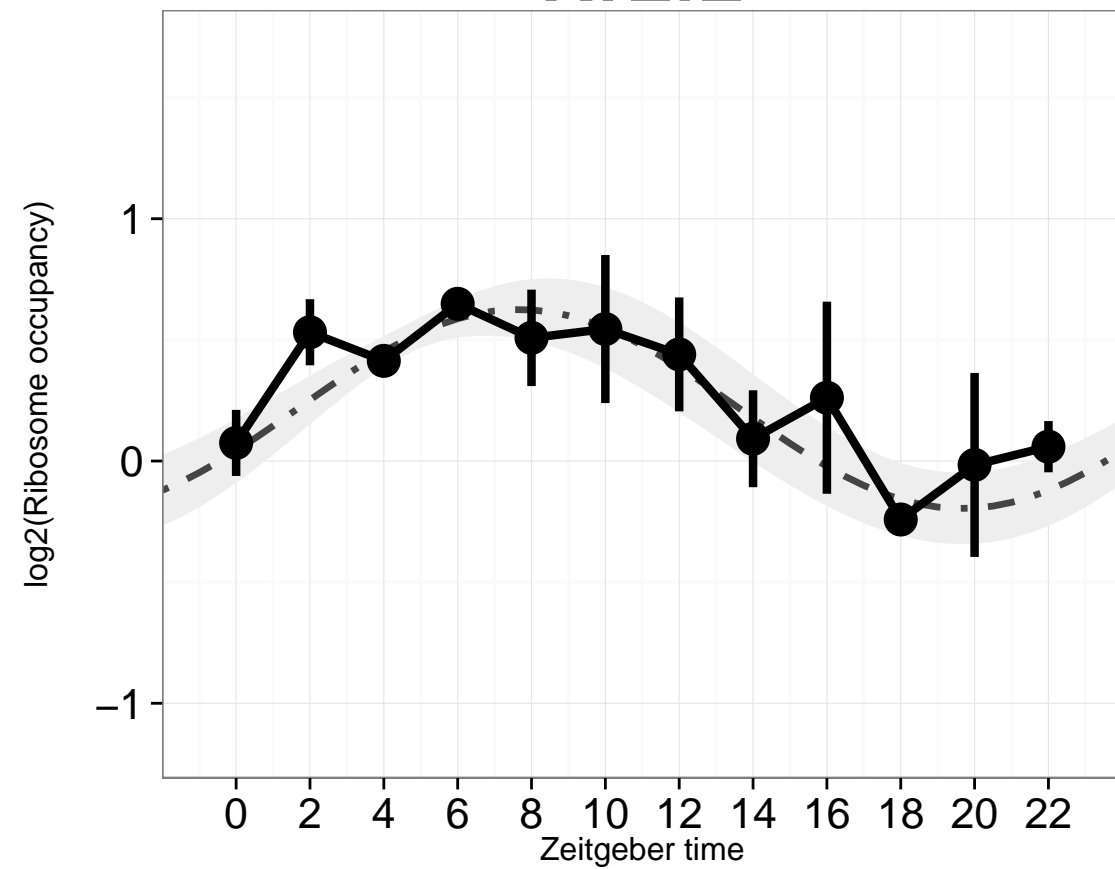

Supplement: SuppDataset_1.zip [file Nr2f2_set_C.pdf › Supplemental Dataset 1/C-mRNA_nonrhythm_translation_rhyth/Nr2f2_set_C.pdf]

# Nsmce2

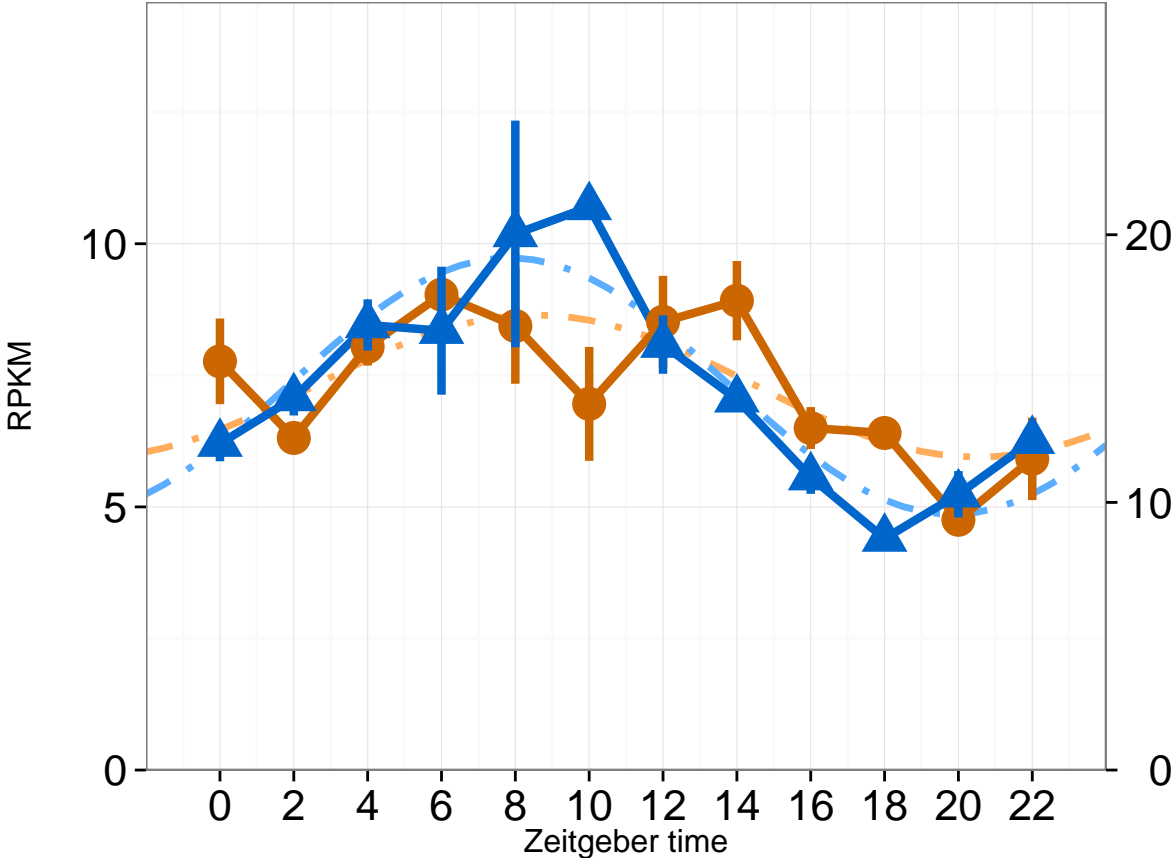

# Nsmce2

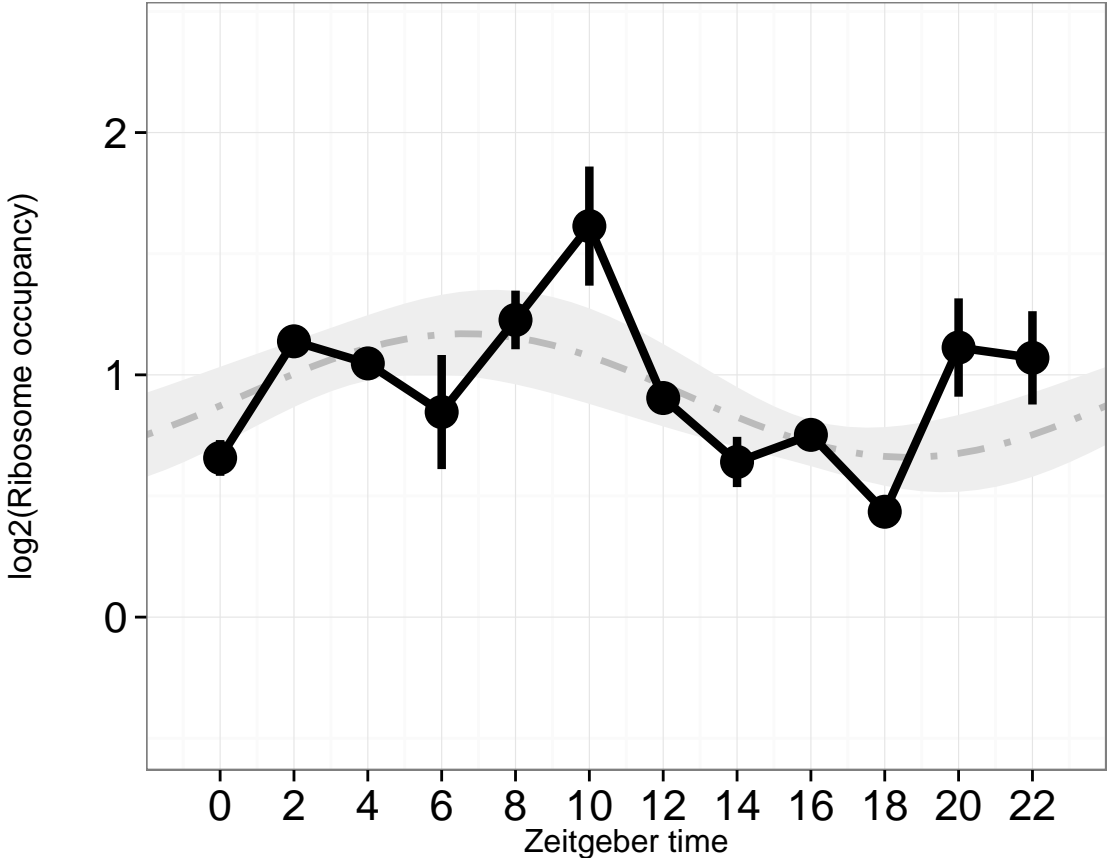

Supplement: SuppDataset_1.zip [file Nsmce2_set_C.pdf › Supplemental Dataset 1/C-mRNA_nonrhythm_translation_rhyth/Nsmce2_set_C.pdf]

## Ntn4

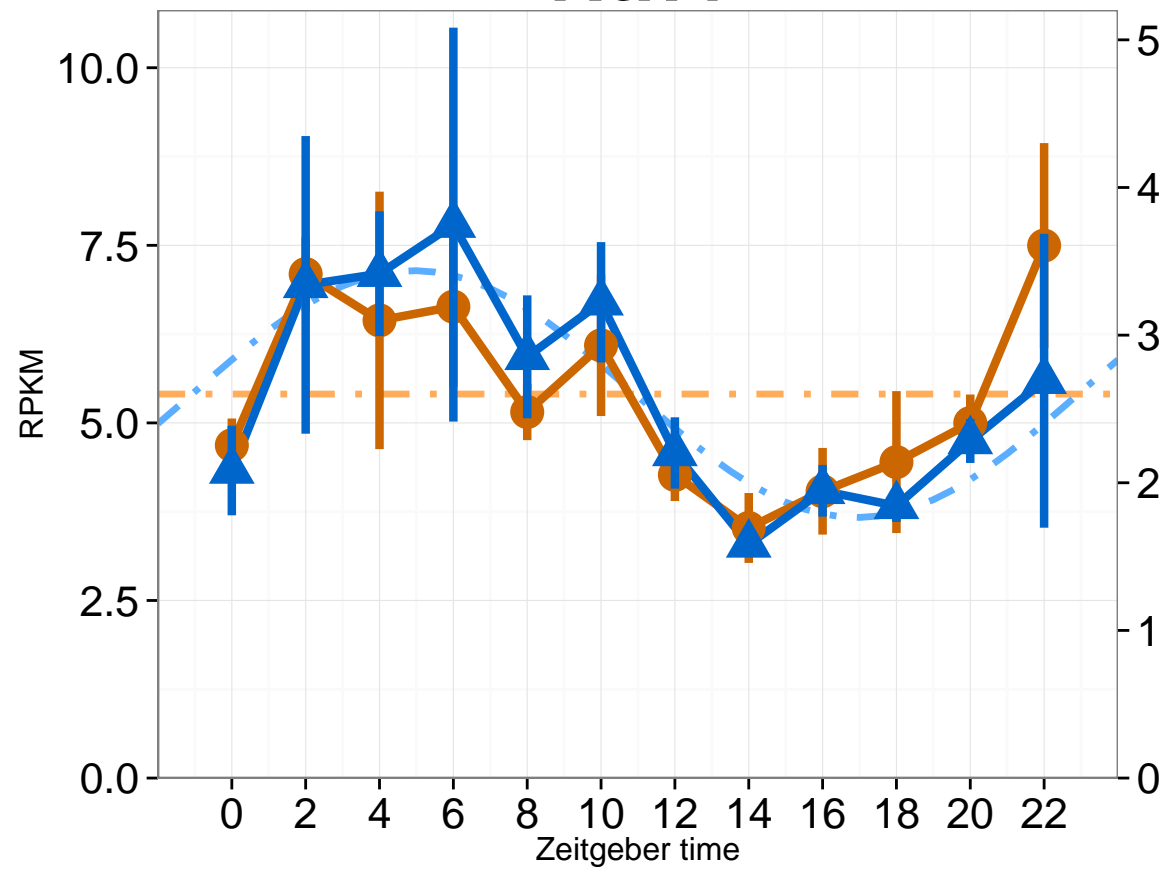

## Ntn4

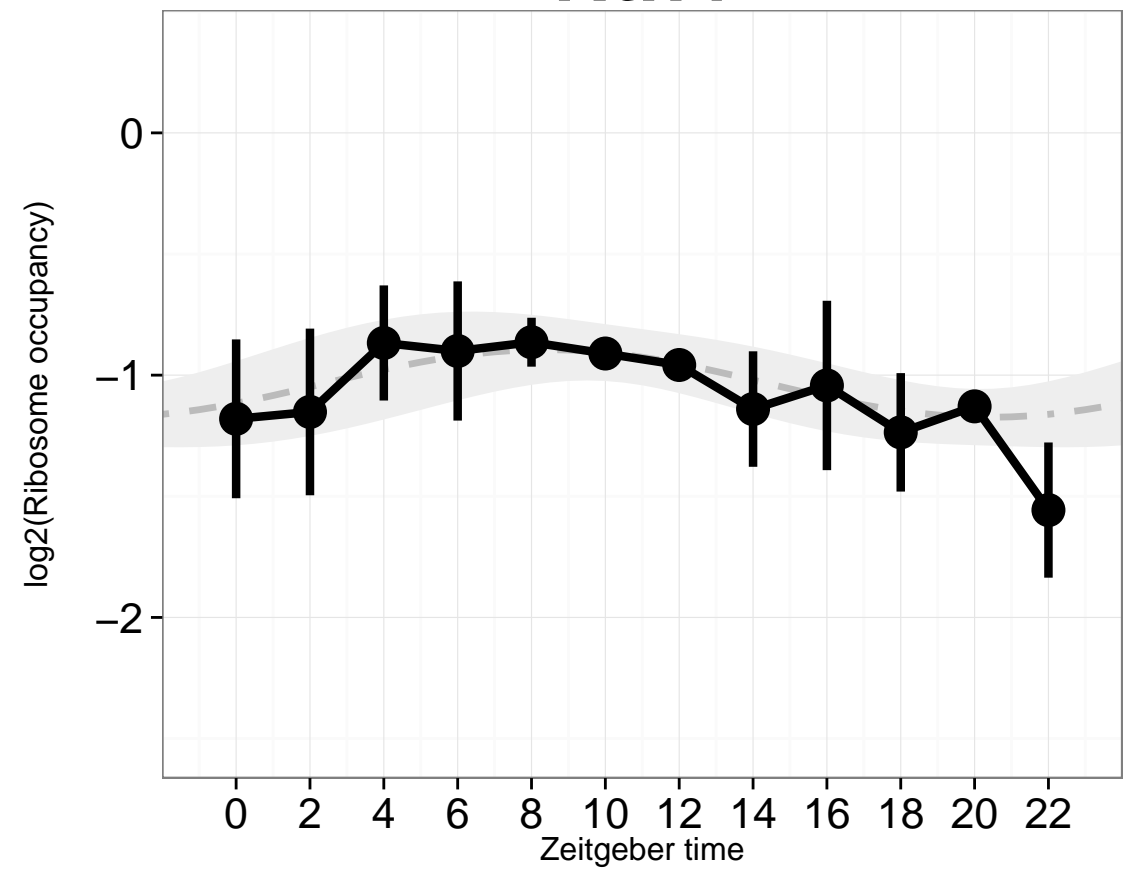

Supplement: SuppDataset_1.zip [file Ntn4_set_C.pdf › Supplemental Dataset 1/C-mRNA_nonrhythm_translation_rhyth/Ntn4_set_C.pdf]

# Nudt16

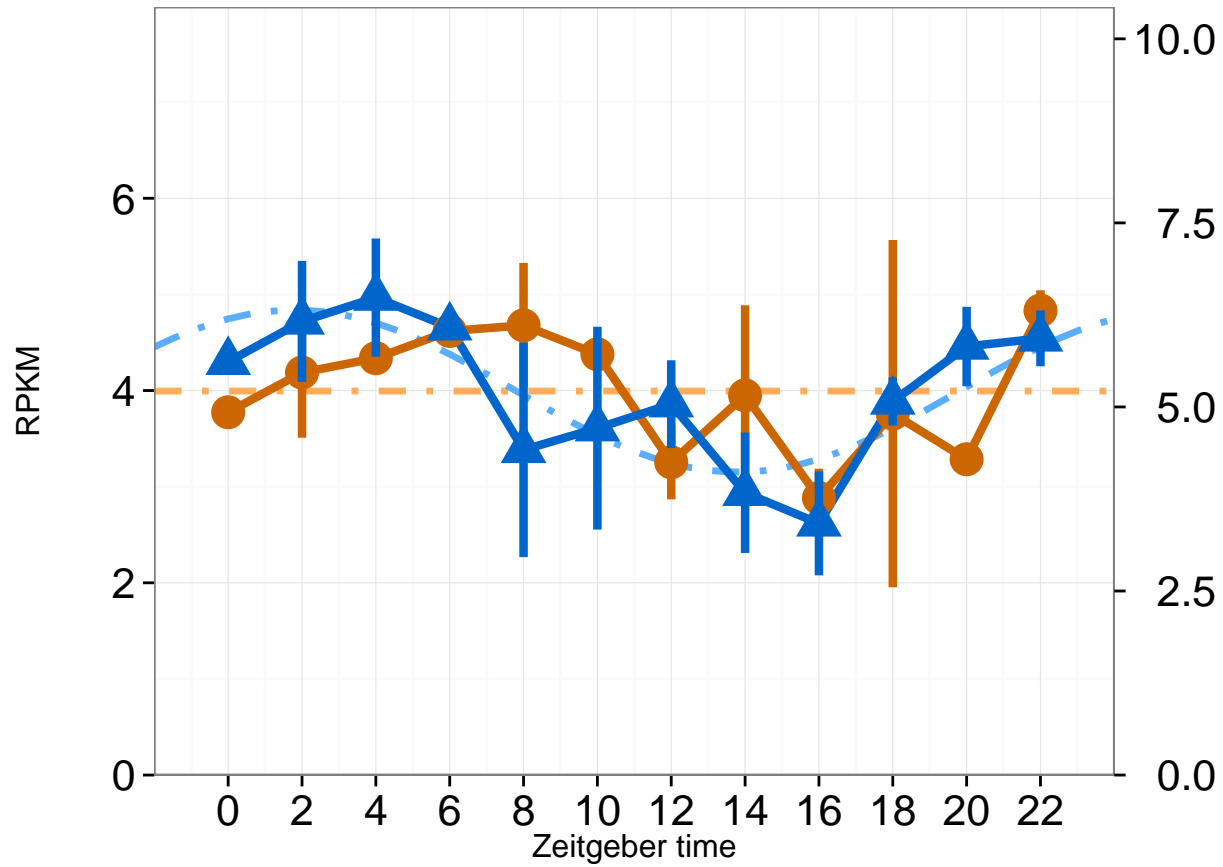

# Nudt16

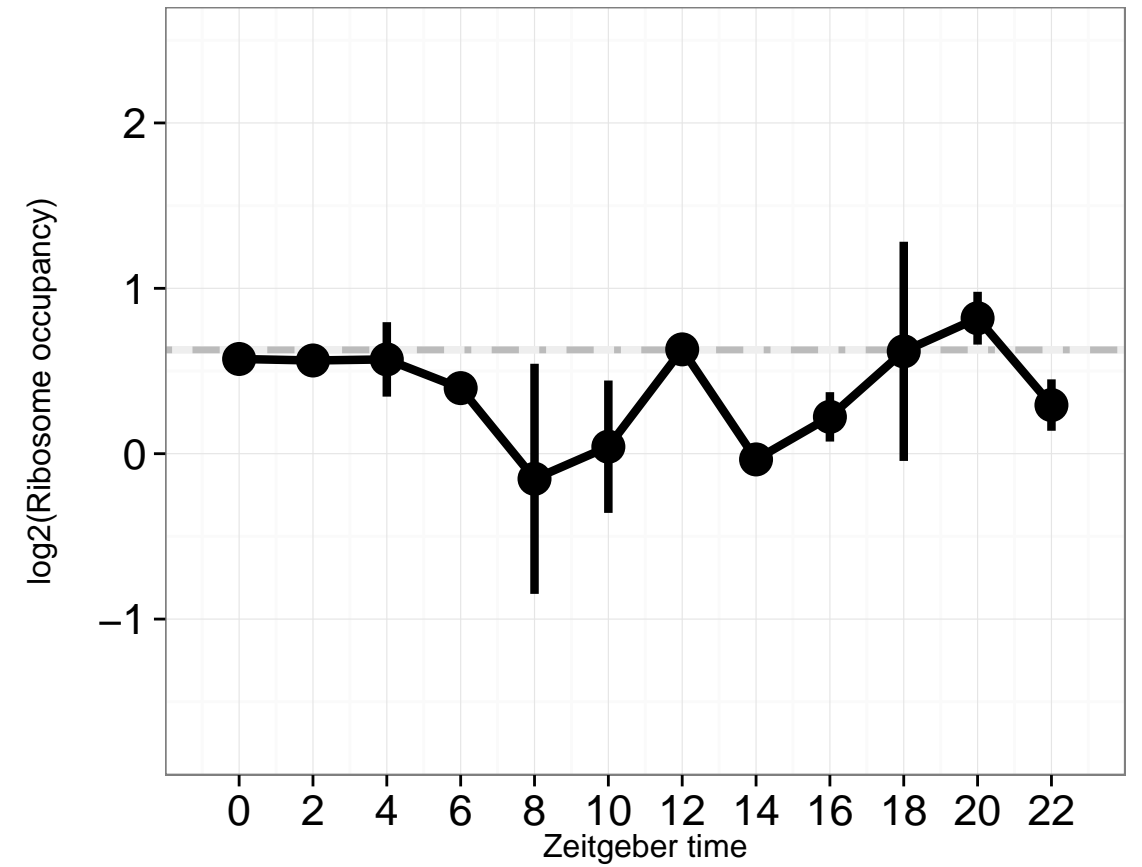

Supplement: SuppDataset_1.zip [file Nudt16_set_C.pdf › Supplemental Dataset 1/C-mRNA_nonrhythm_translation_rhyth/Nudt16_set_C.pdf]

# Nudt18

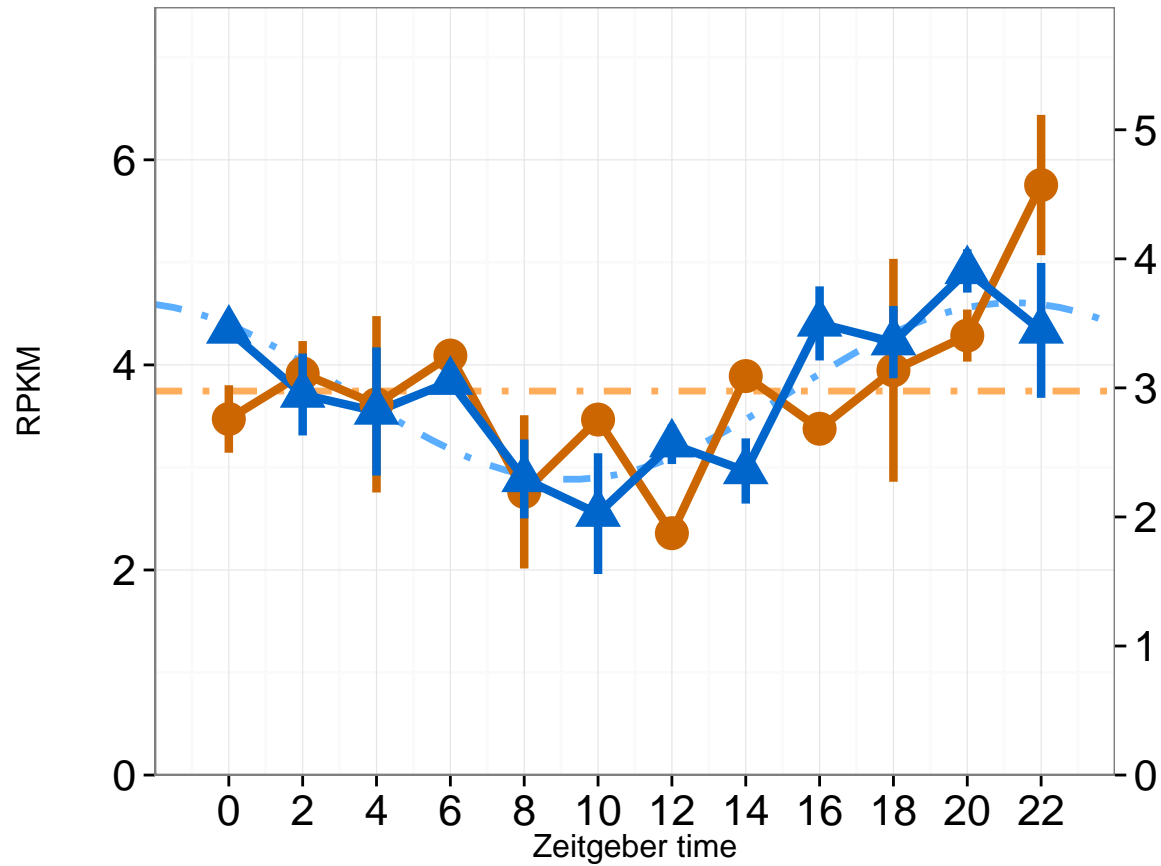

# Nudt18

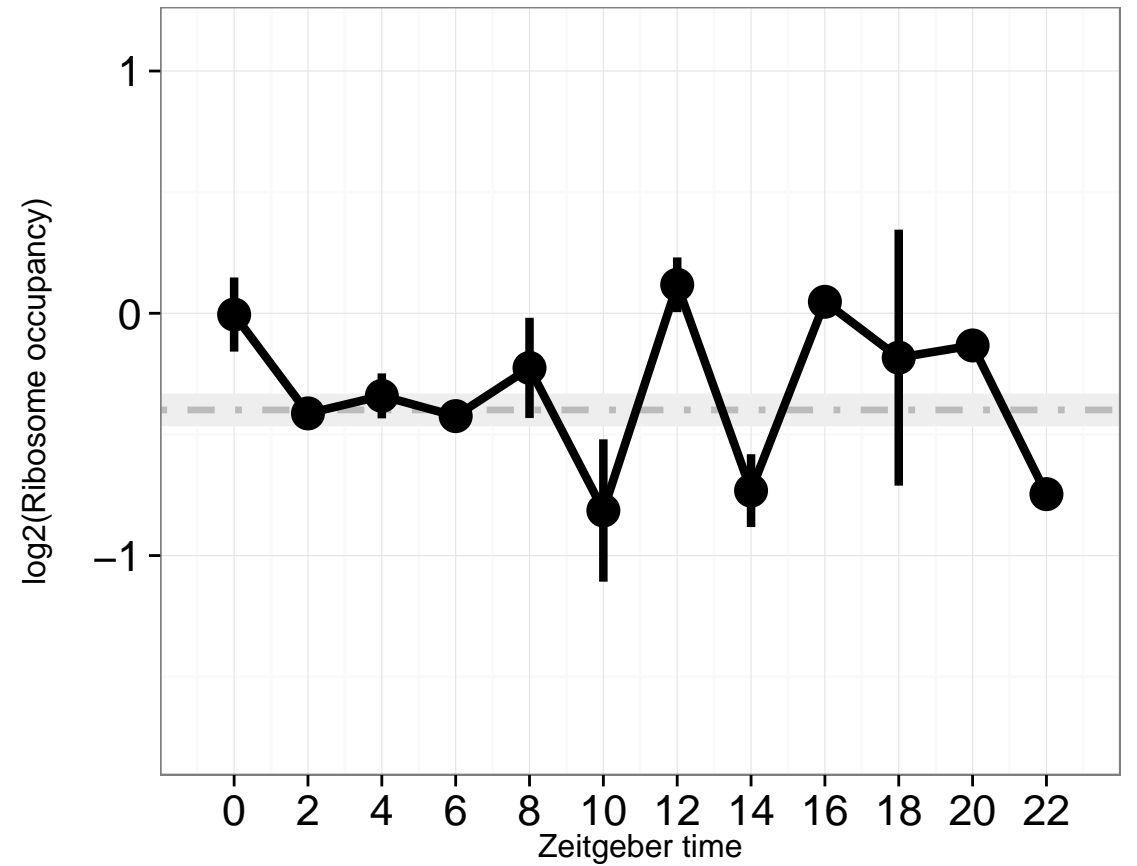

Supplement: SuppDataset_1.zip [file Nudt18_set_C.pdf › Supplemental Dataset 1/C-mRNA_nonrhythm_translation_rhyth/Nudt18_set_C.pdf]

# Nusap1

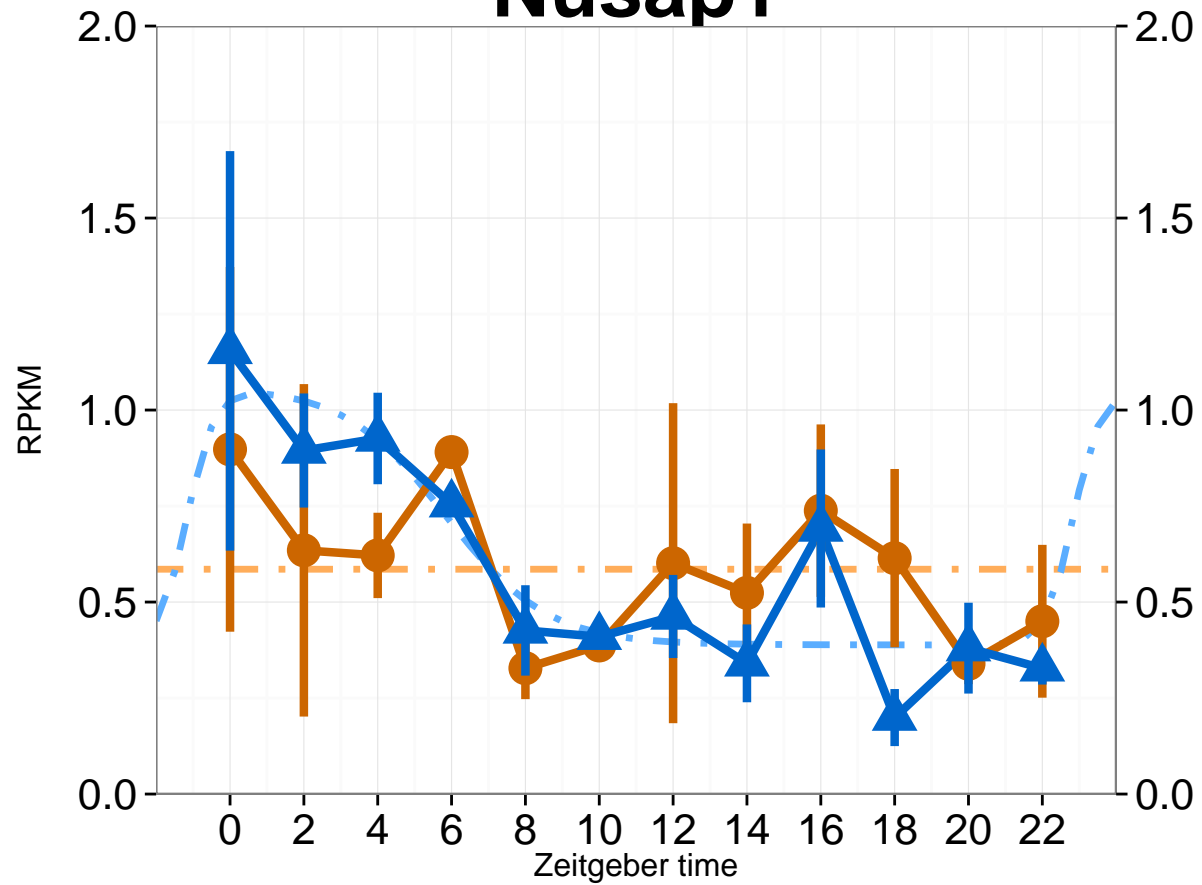

# Nusap1

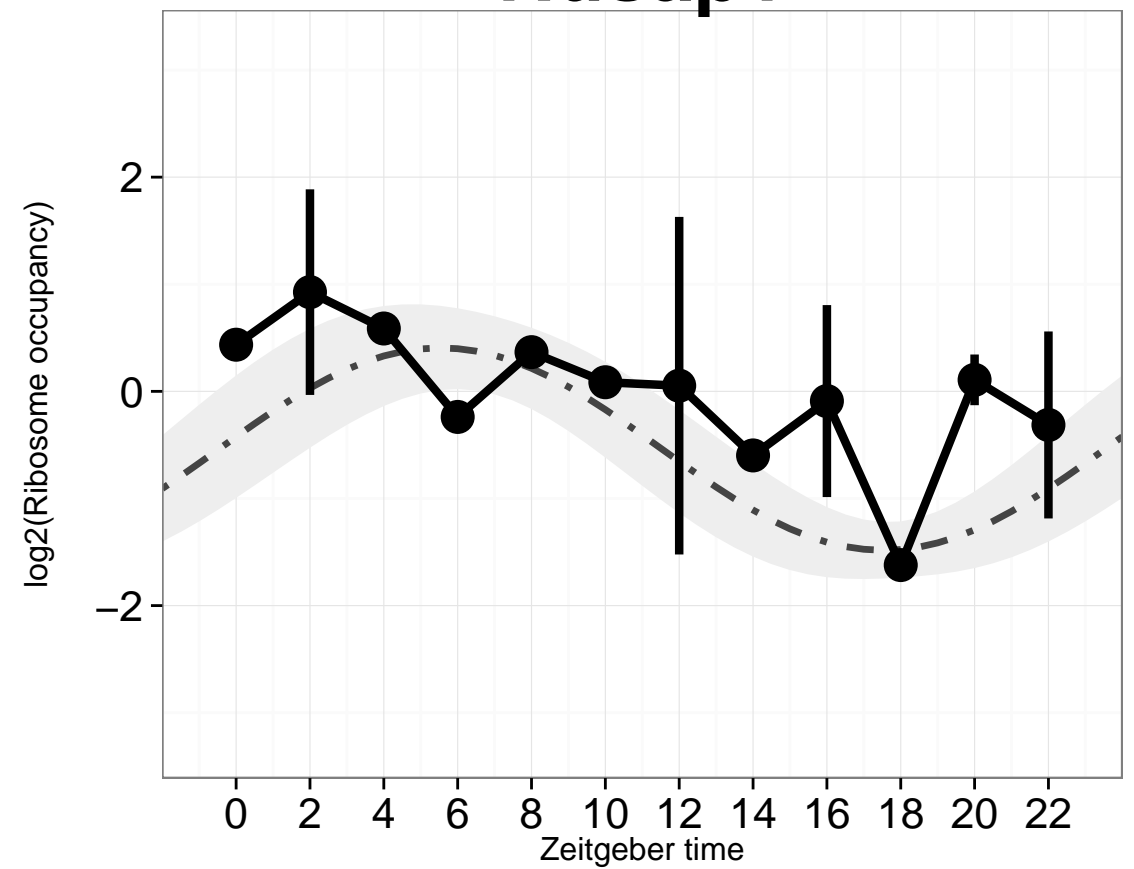

Supplement: SuppDataset_1.zip [file Nusap1_set_C.pdf › Supplemental Dataset 1/C-mRNA_nonrhythm_translation_rhyth/Nusap1_set_C.pdf]

## Nxn

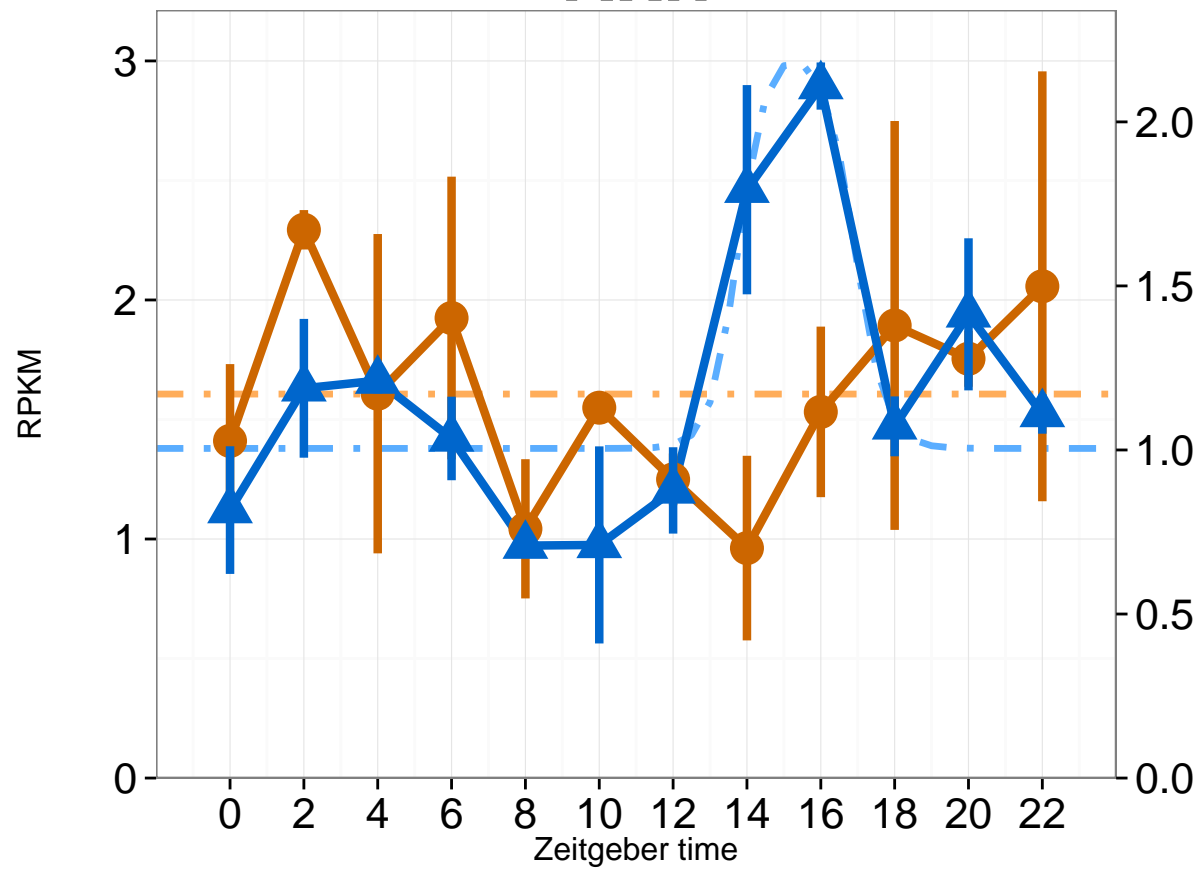

## Nxn

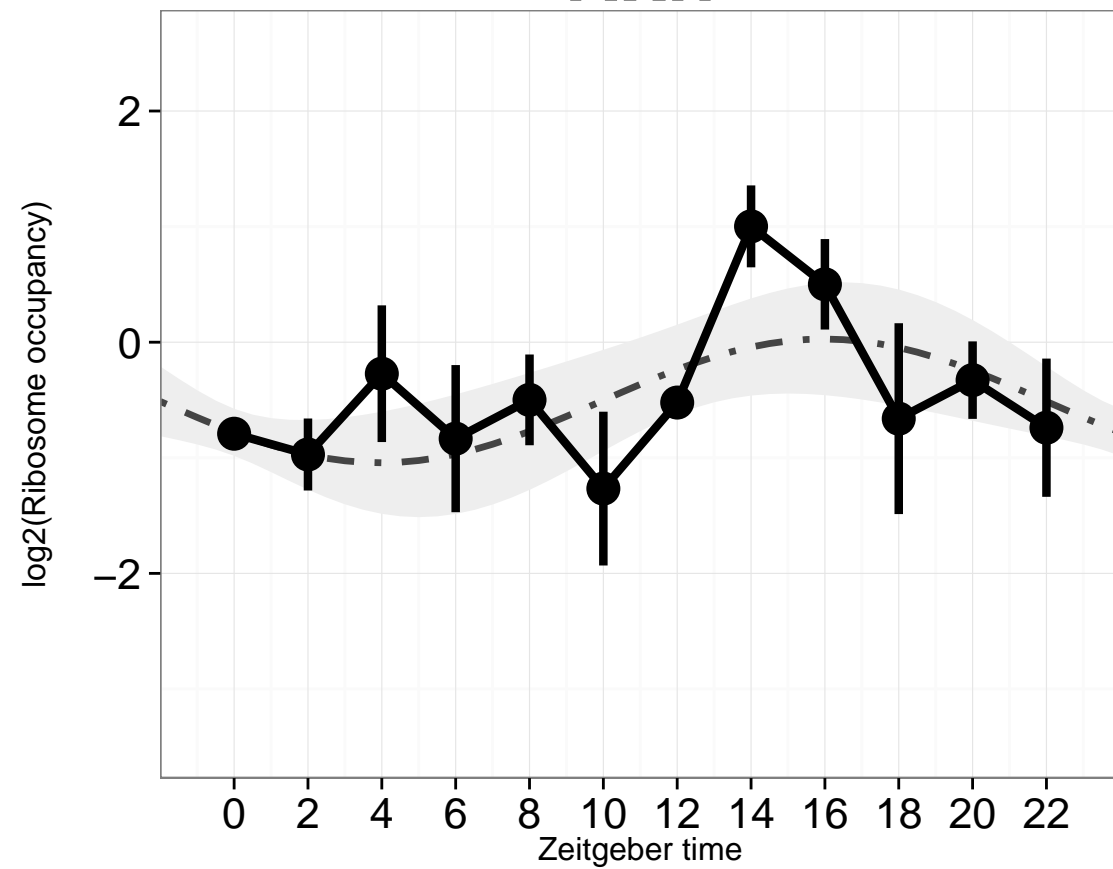

Supplement: SuppDataset_1.zip [file Nxn_set_C.pdf › Supplemental Dataset 1/C-mRNA_nonrhythm_translation_rhyth/Nxn_set_C.pdf]

# Ogg1

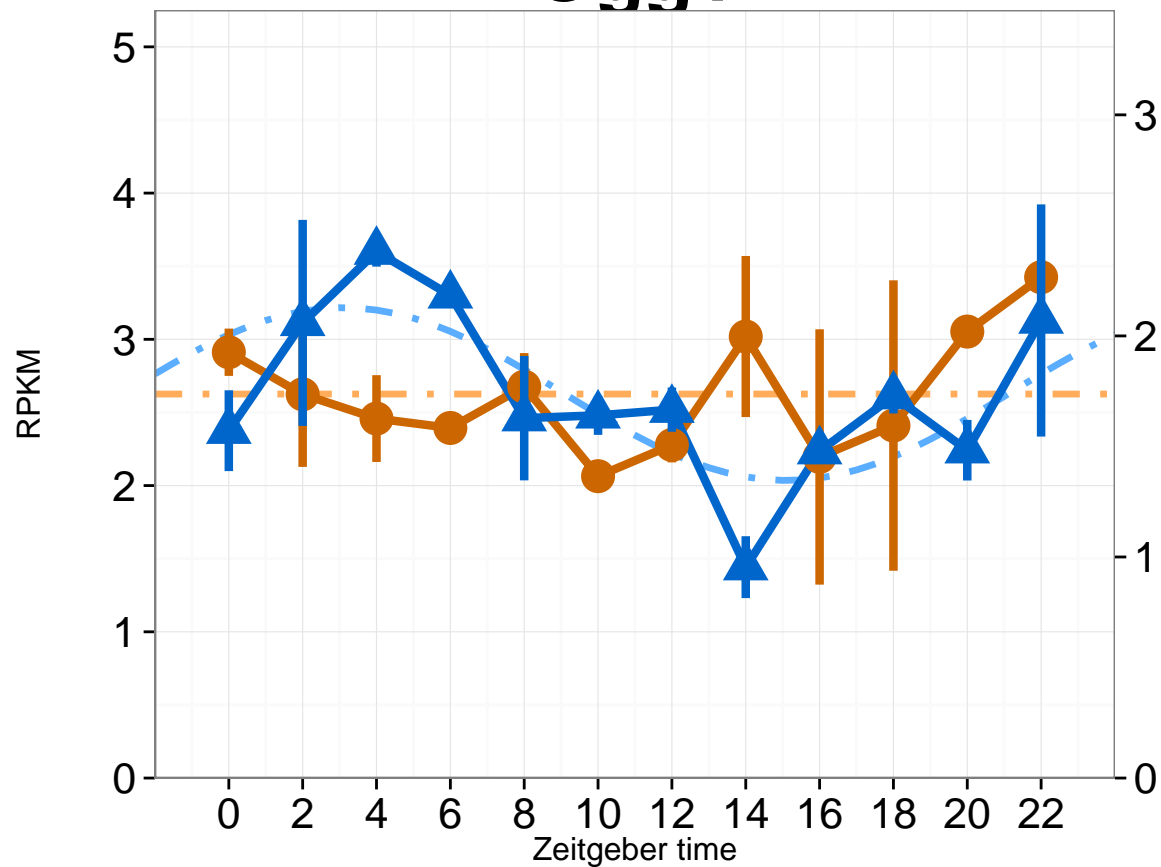

# Ogg1

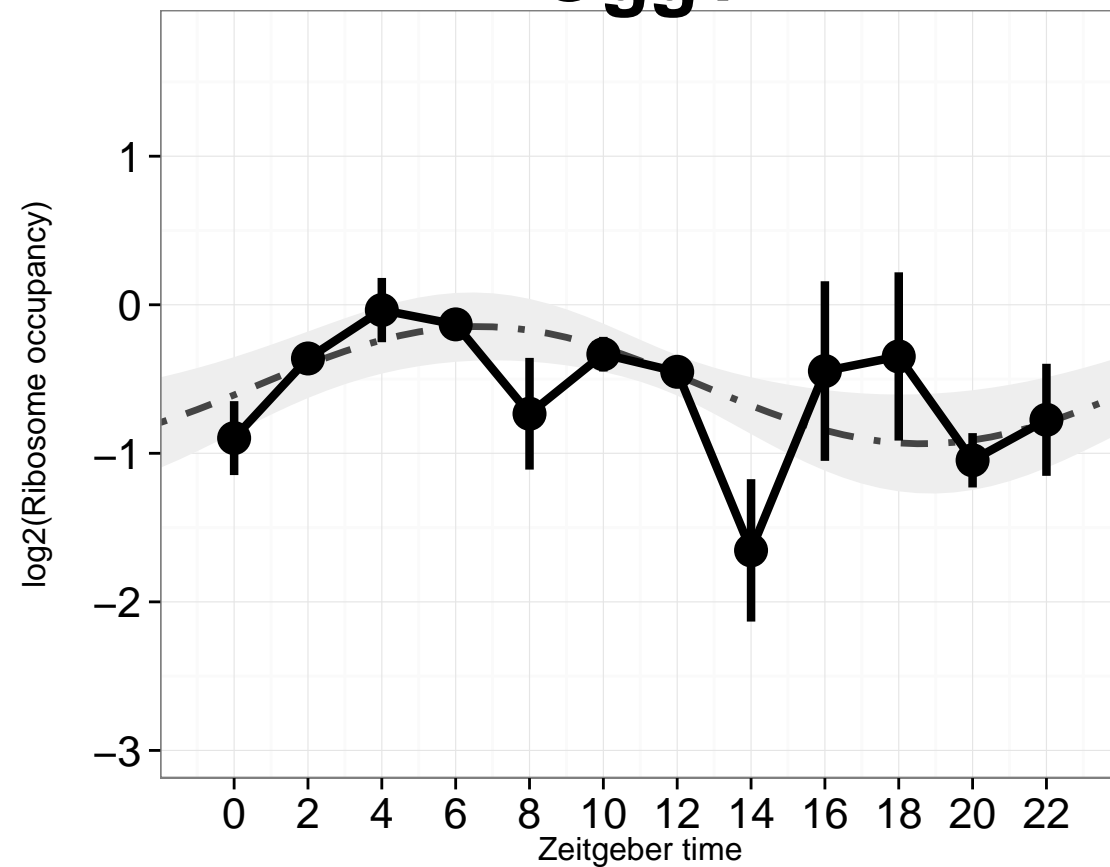

Supplement: SuppDataset_1.zip [file Ogg1_set_C.pdf › Supplemental Dataset 1/C-mRNA_nonrhythm_translation_rhyth/Ogg1_set_C.pdf]

## Ogt

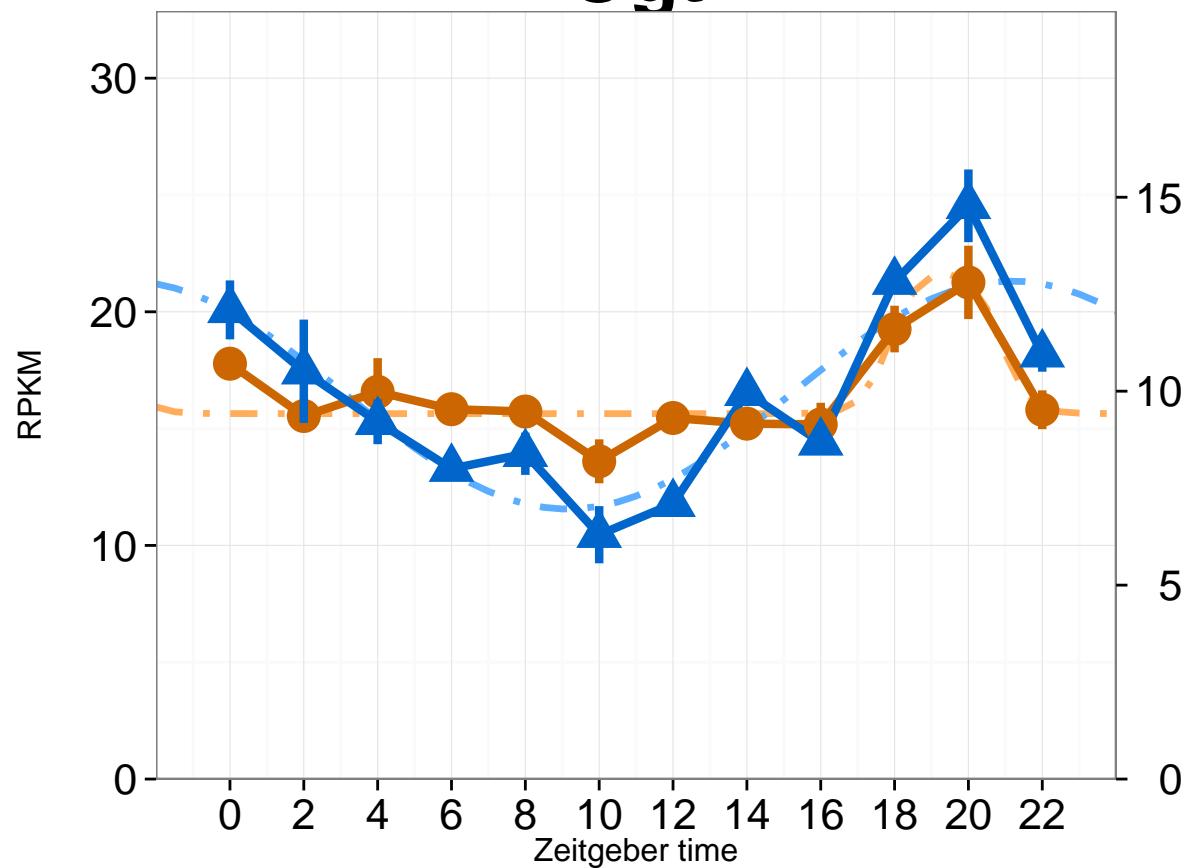

## Ogt

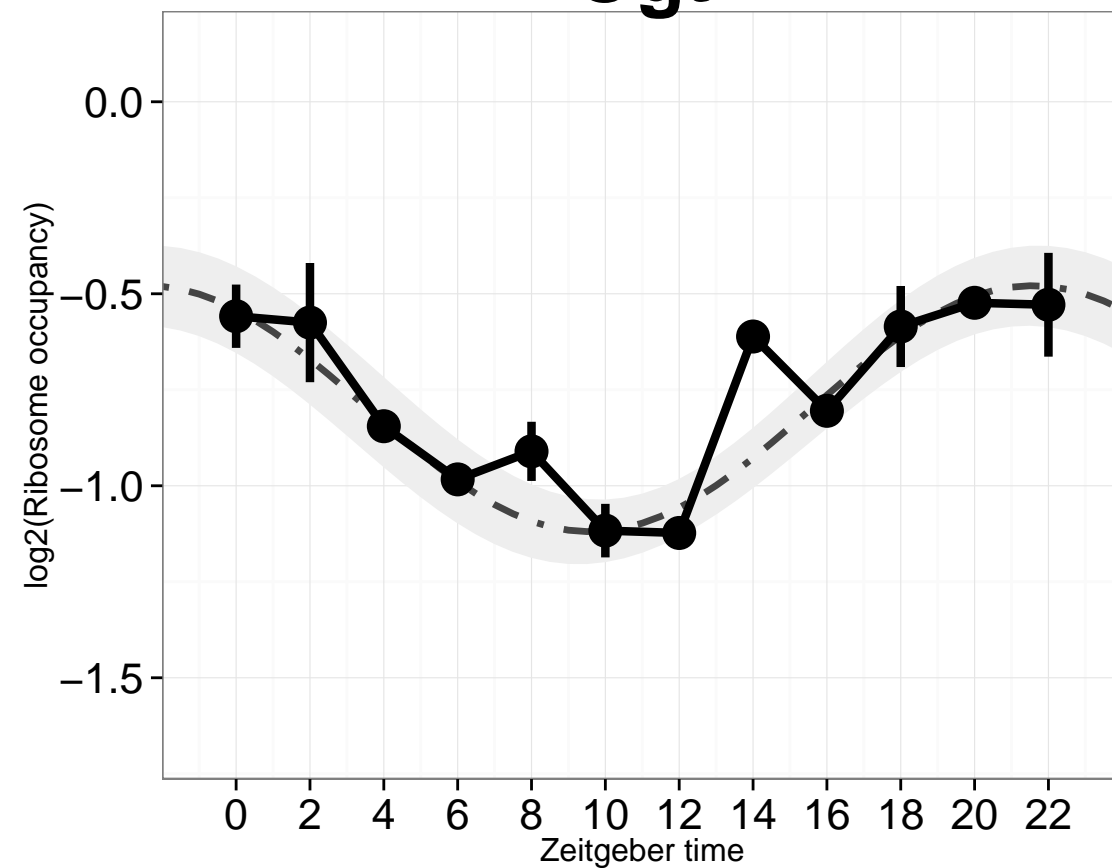

Supplement: SuppDataset_1.zip [file Ogt_set_C.pdf › Supplemental Dataset 1/C-mRNA_nonrhythm_translation_rhyth/Ogt_set_C.pdf]

# Osbp2

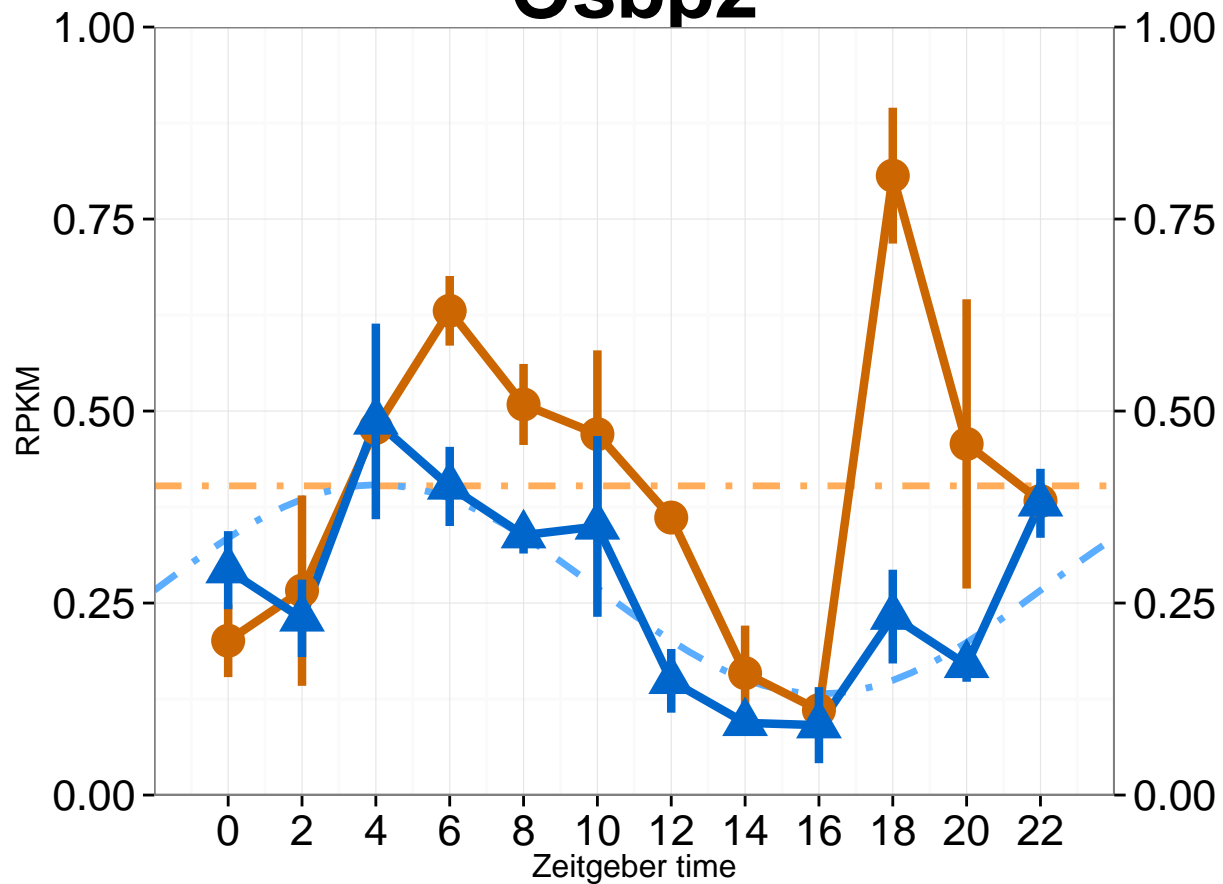

# Osbp2

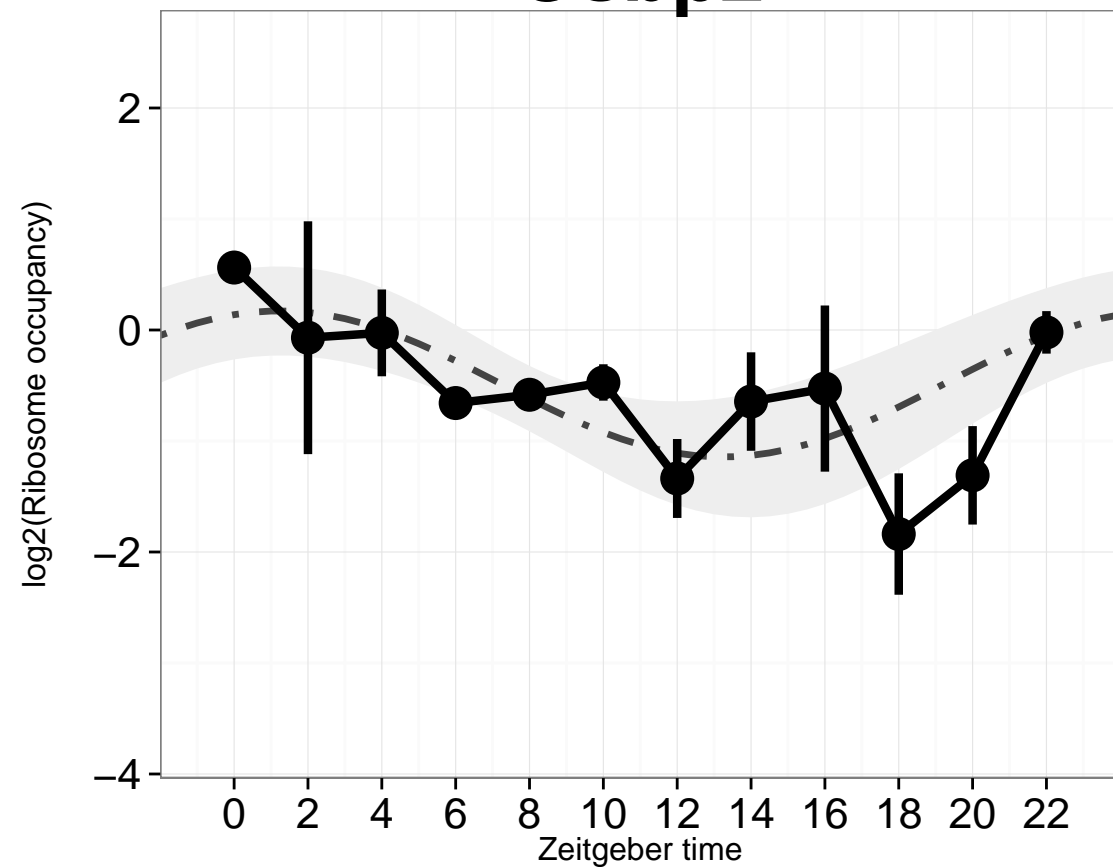

Supplement: SuppDataset_1.zip [file Osbp2_set_C.pdf › Supplemental Dataset 1/C-mRNA_nonrhythm_translation_rhyth/Osbp2_set_C.pdf]

## Otub2

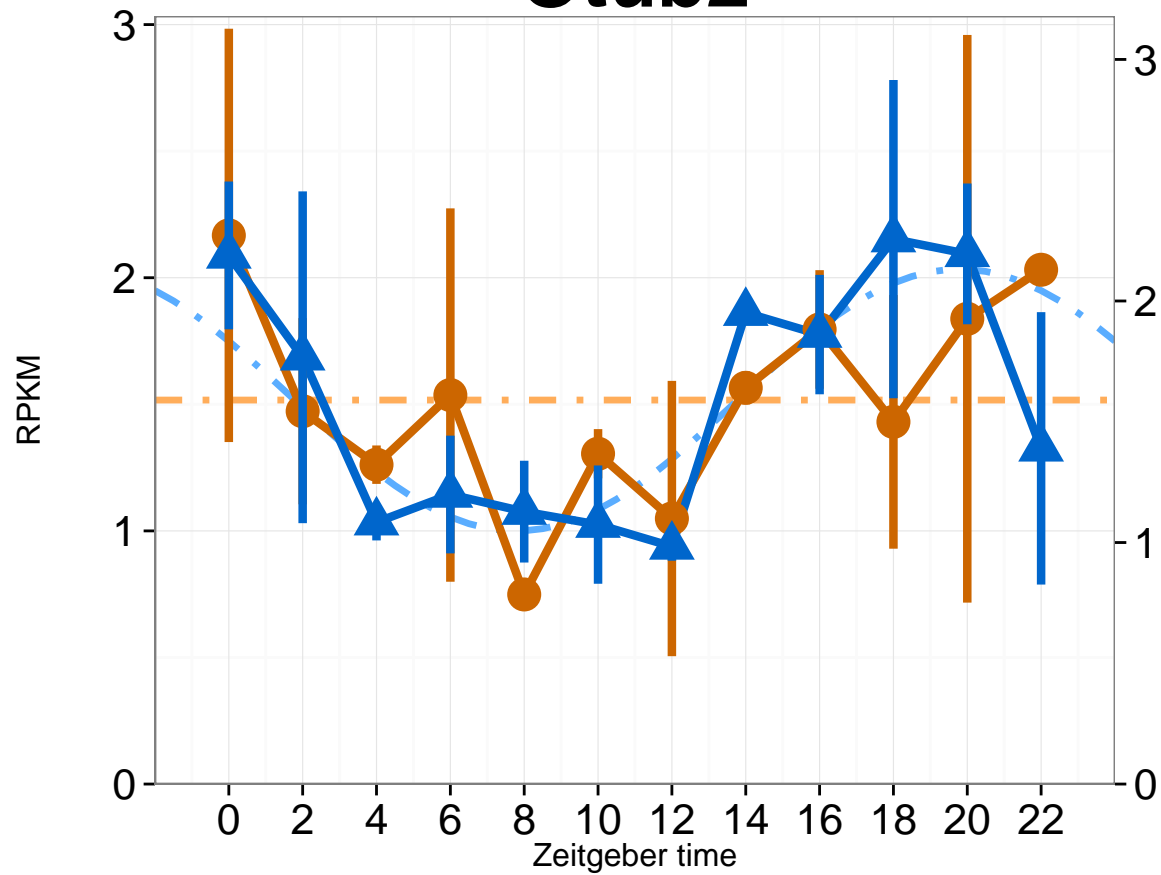

## Otub2

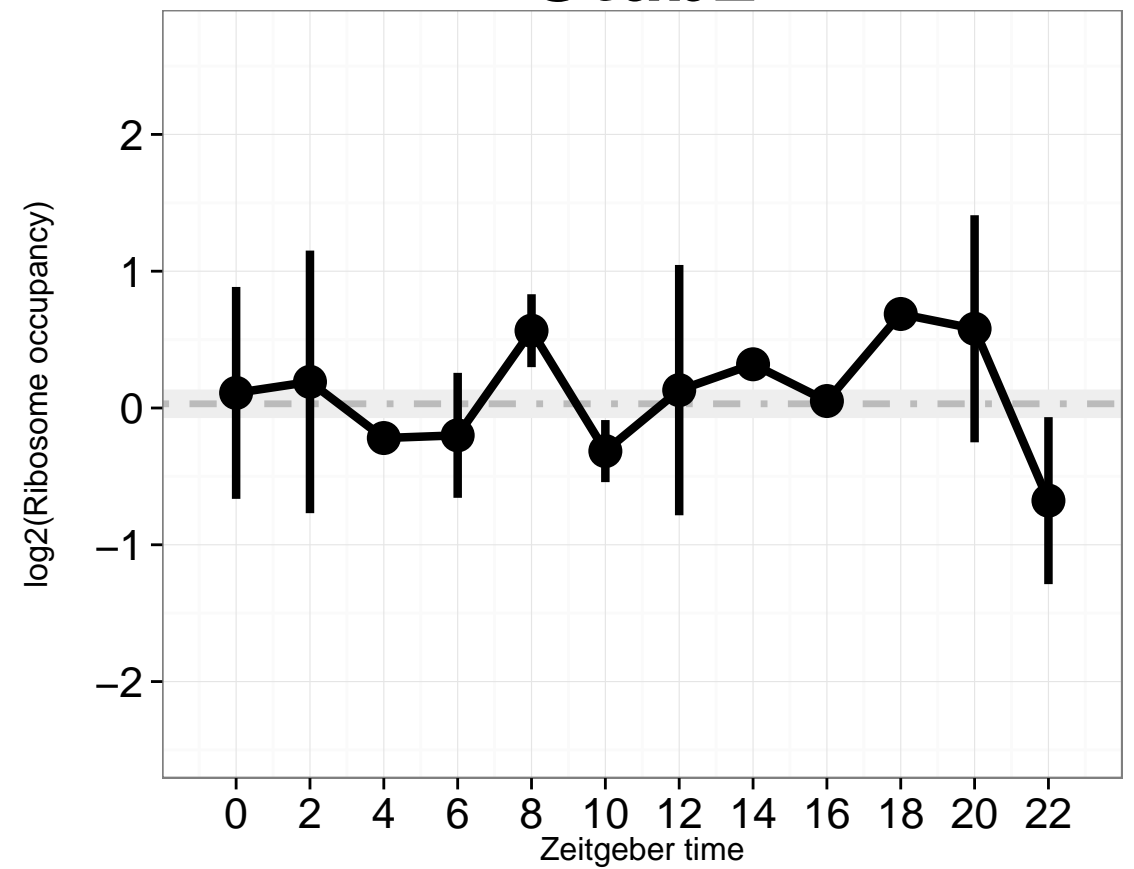

Supplement: SuppDataset_1.zip [file Otub2_set_C.pdf › Supplemental Dataset 1/C-mRNA_nonrhythm_translation_rhyth/Otub2_set_C.pdf]

# Pabpc1

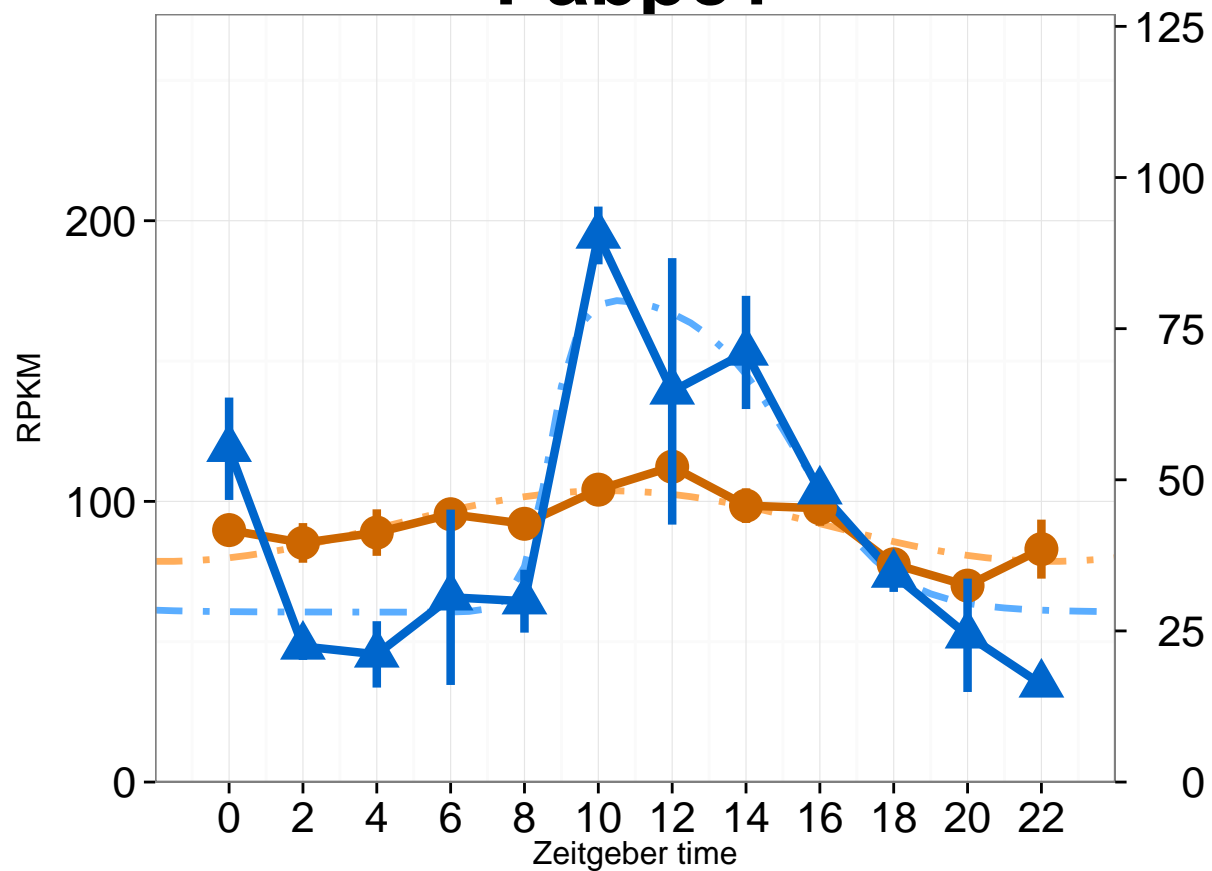

# Pabpc1

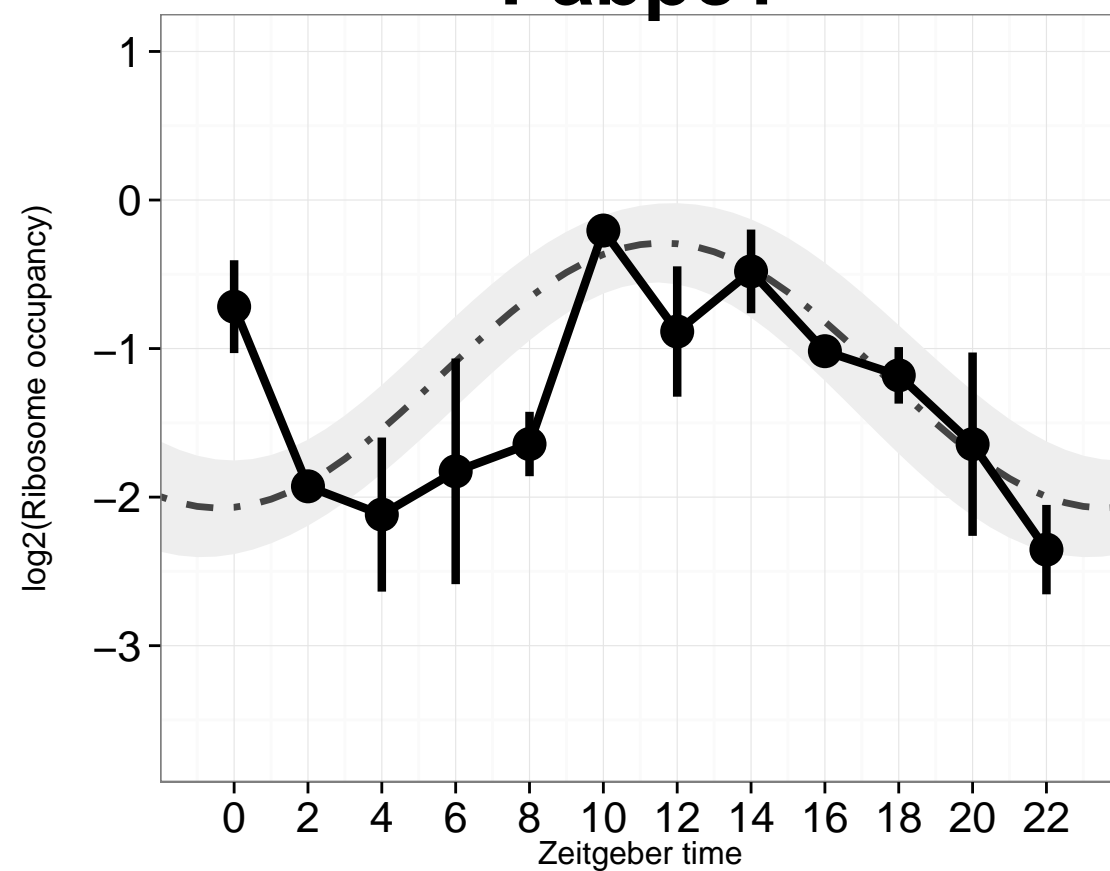

Supplement: SuppDataset_1.zip [file Pabpc1_set_C.pdf › Supplemental Dataset 1/C-mRNA_nonrhythm_translation_rhyth/Pabpc1_set_C.pdf]

# Pabpc4

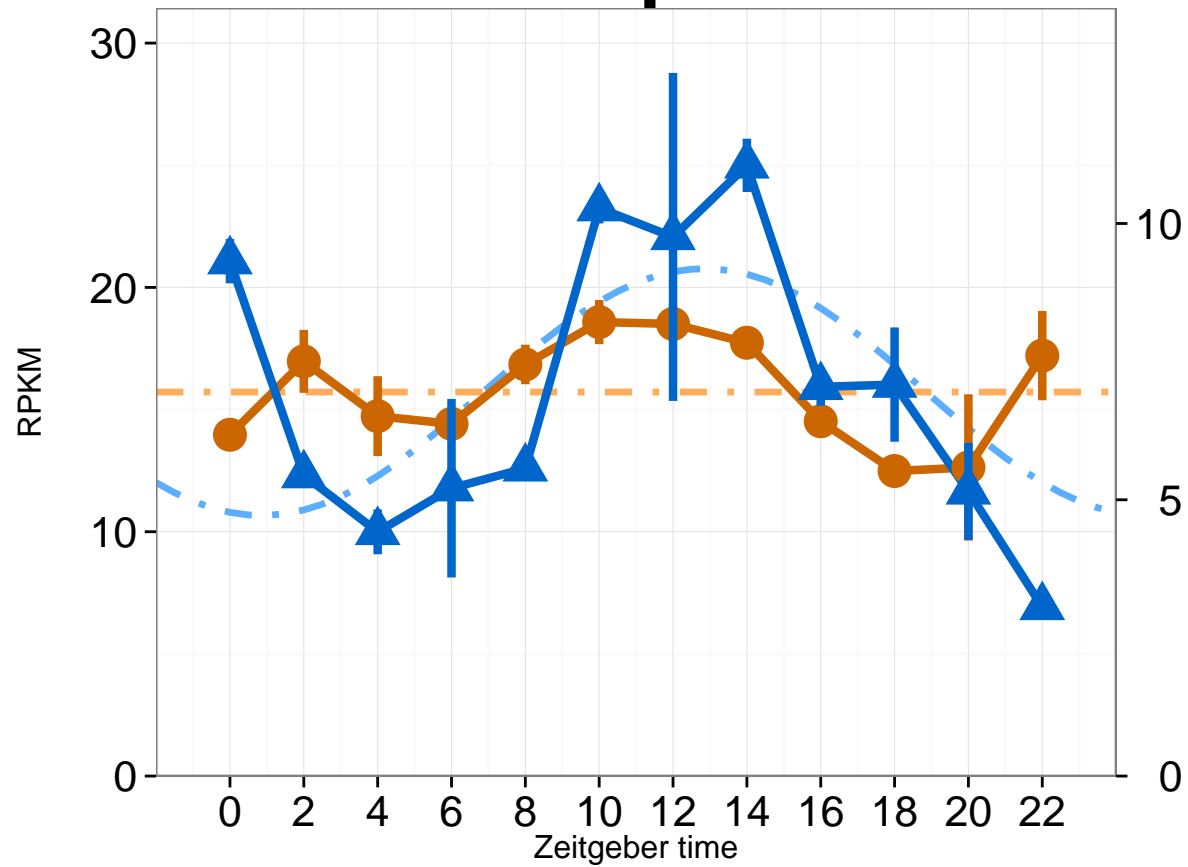

# Pabpc4

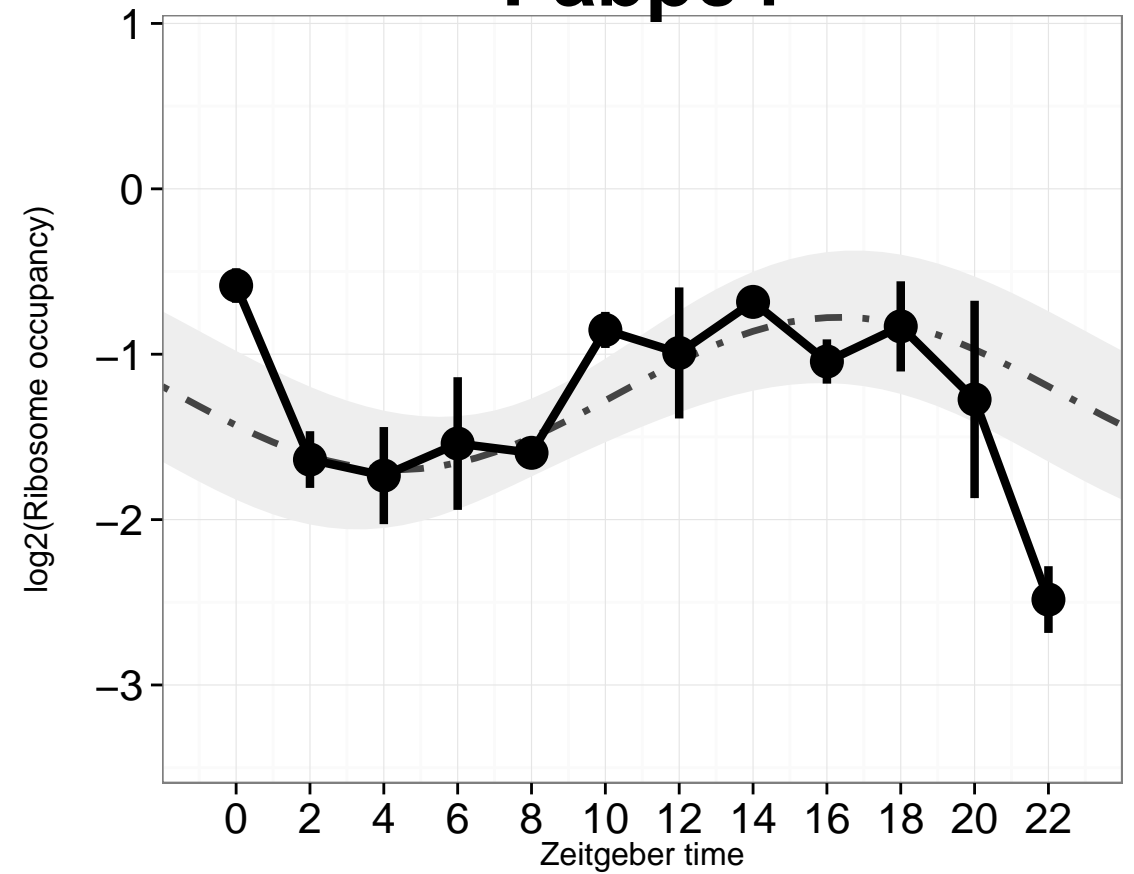

Supplement: SuppDataset_1.zip [file Pabpc4_set_C.pdf › Supplemental Dataset 1/C-mRNA_nonrhythm_translation_rhyth/Pabpc4_set_C.pdf]

## Pacrgl

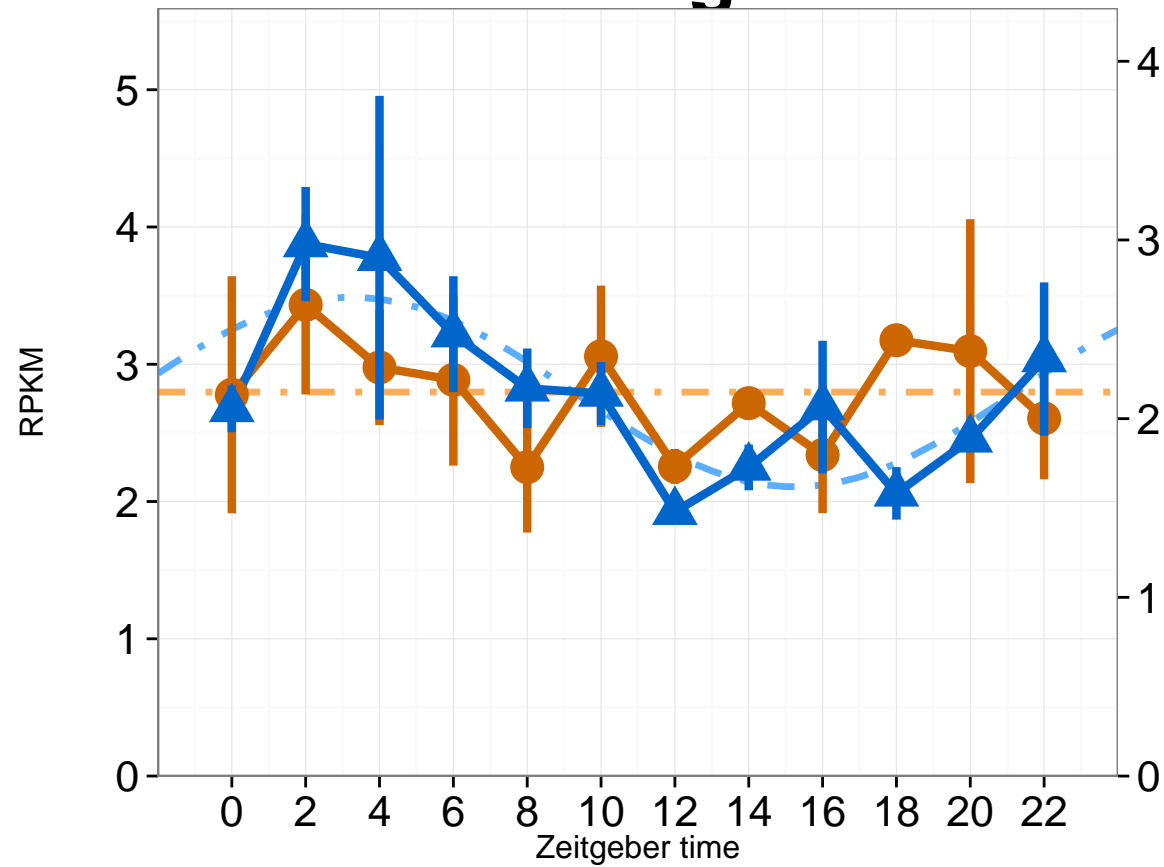

## Pacrgl

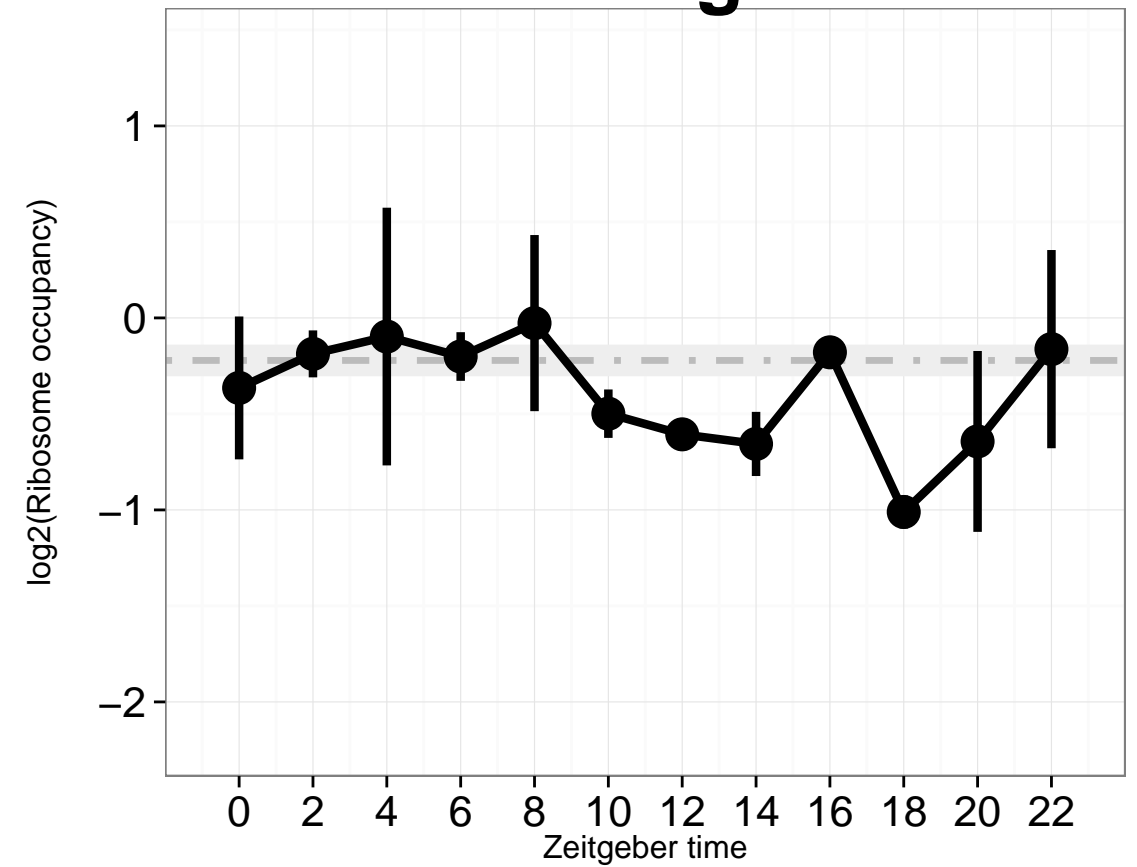

Supplement: SuppDataset_1.zip [file Pacrgl_set_C.pdf › Supplemental Dataset 1/C-mRNA_nonrhythm_translation_rhyth/Pacrgl_set_C.pdf]

# Park2

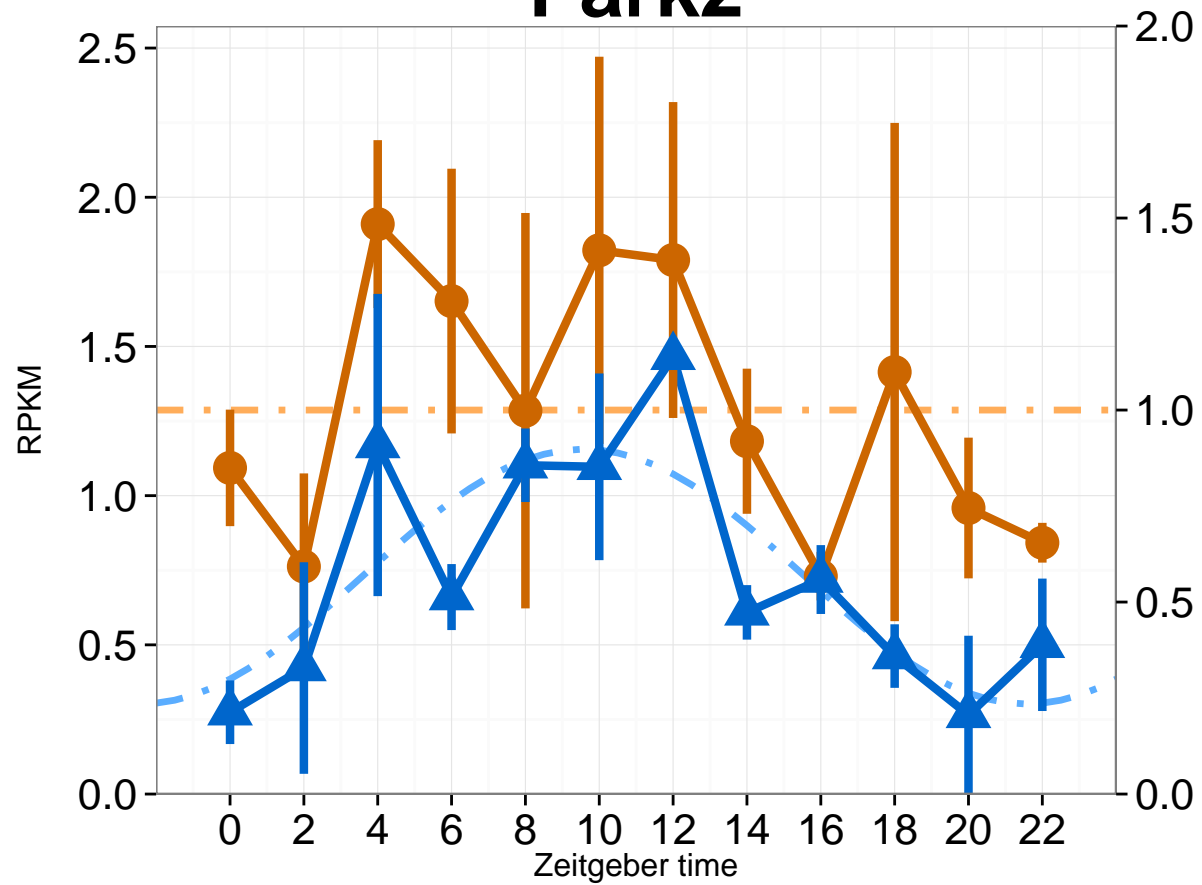

# Park2

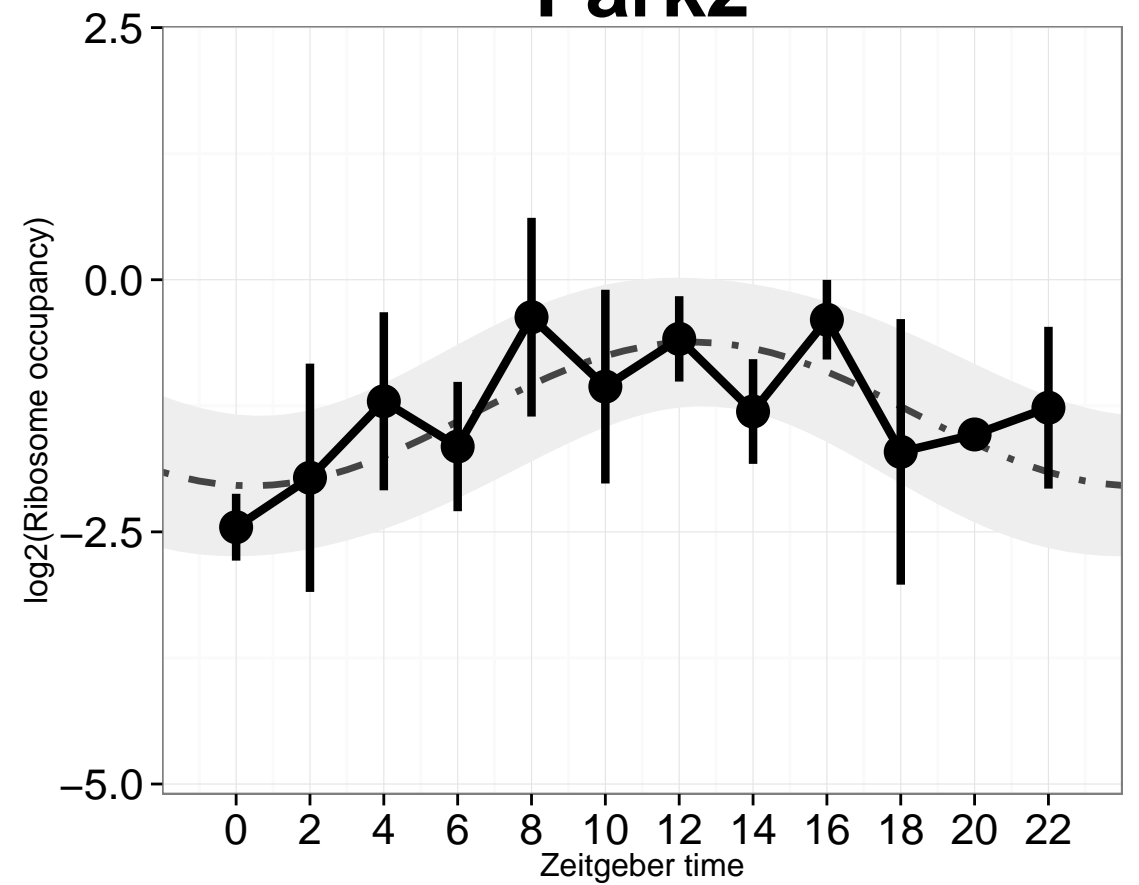

Supplement: SuppDataset_1.zip [file Park2_set_C.pdf › Supplemental Dataset 1/C-mRNA_nonrhythm_translation_rhyth/Park2_set_C.pdf]

## Parp16

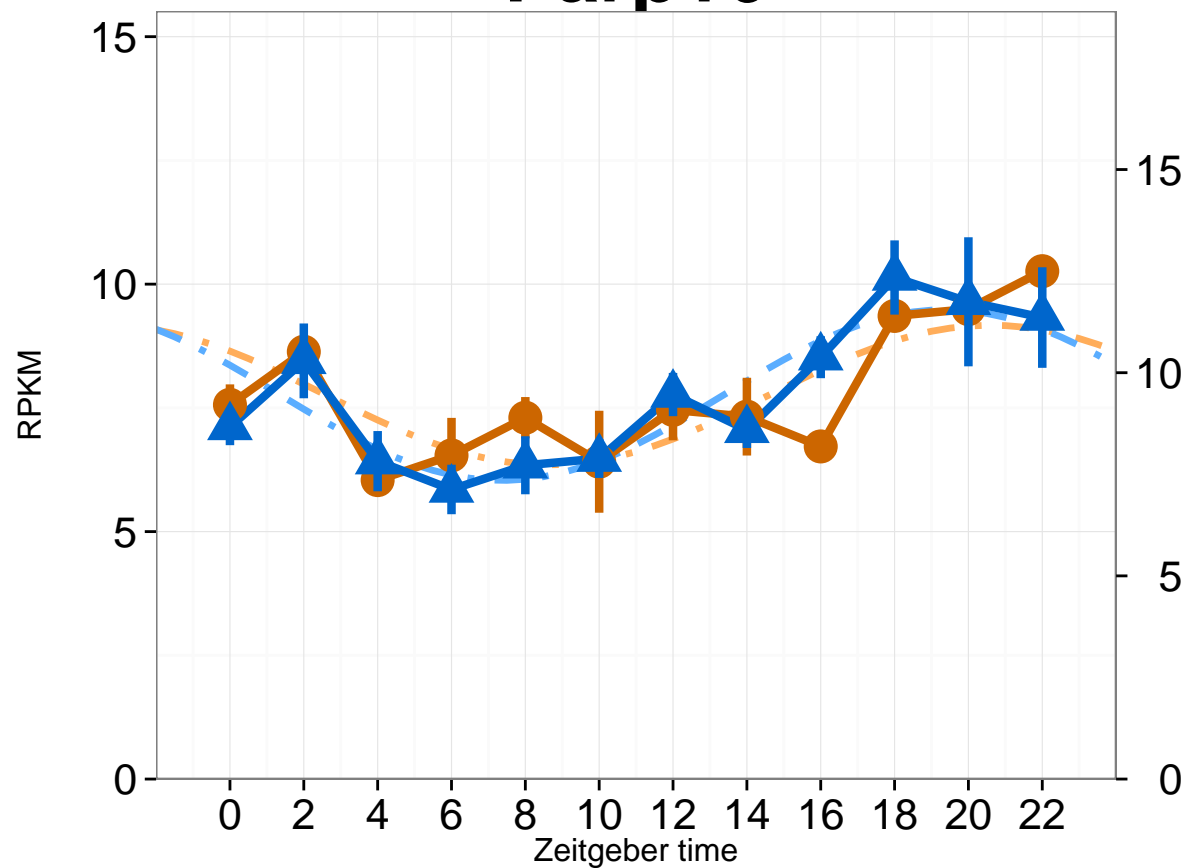

## Parp16

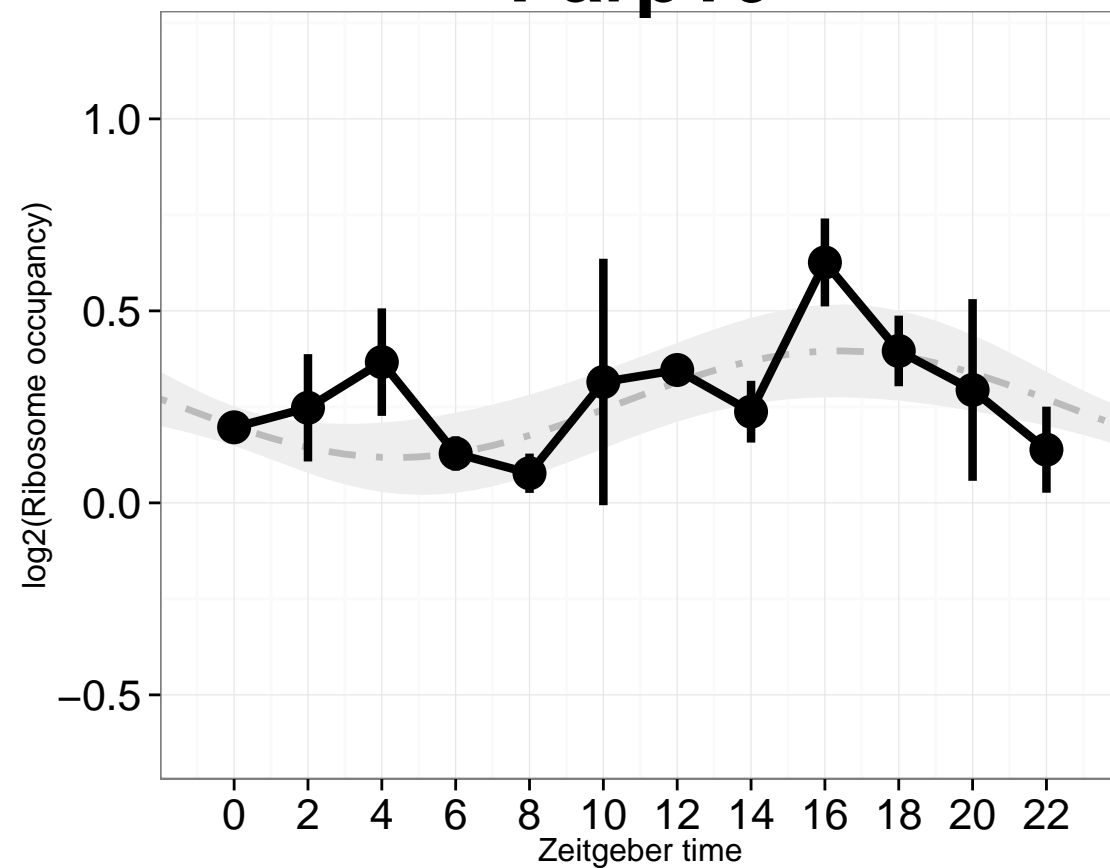

Supplement: SuppDataset_1.zip [file Parp16_set_C.pdf › Supplemental Dataset 1/C-mRNA_nonrhythm_translation_rhyth/Parp16_set_C.pdf]

# Parp2

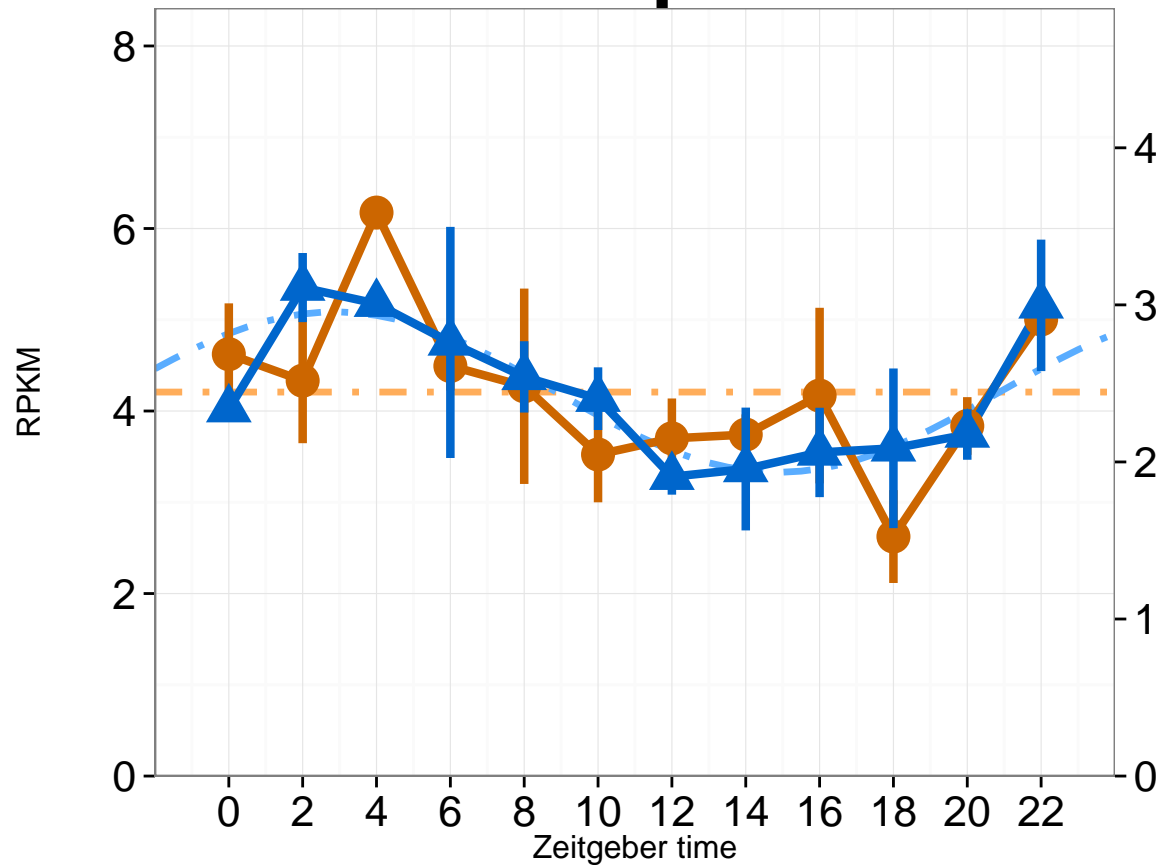

# Parp2

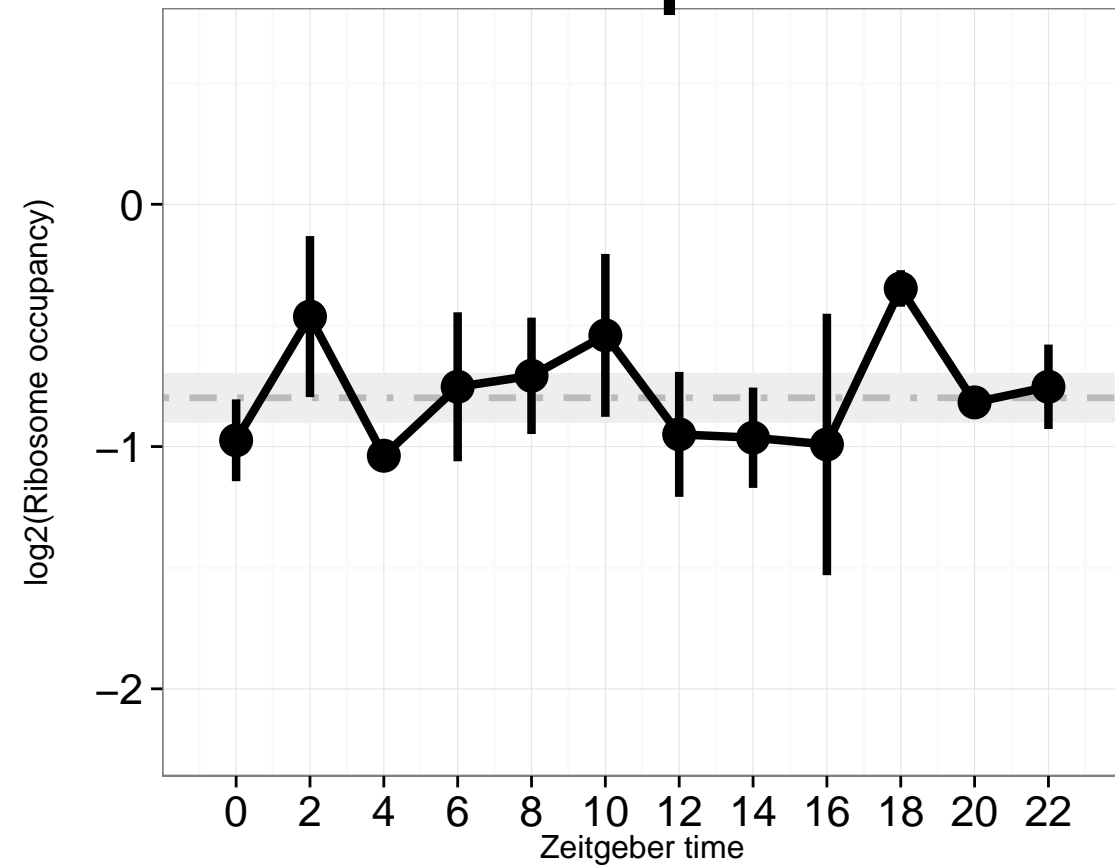

Supplement: SuppDataset_1.zip [file Parp2_set_C.pdf › Supplemental Dataset 1/C-mRNA_nonrhythm_translation_rhyth/Parp2_set_C.pdf]

## Parp3

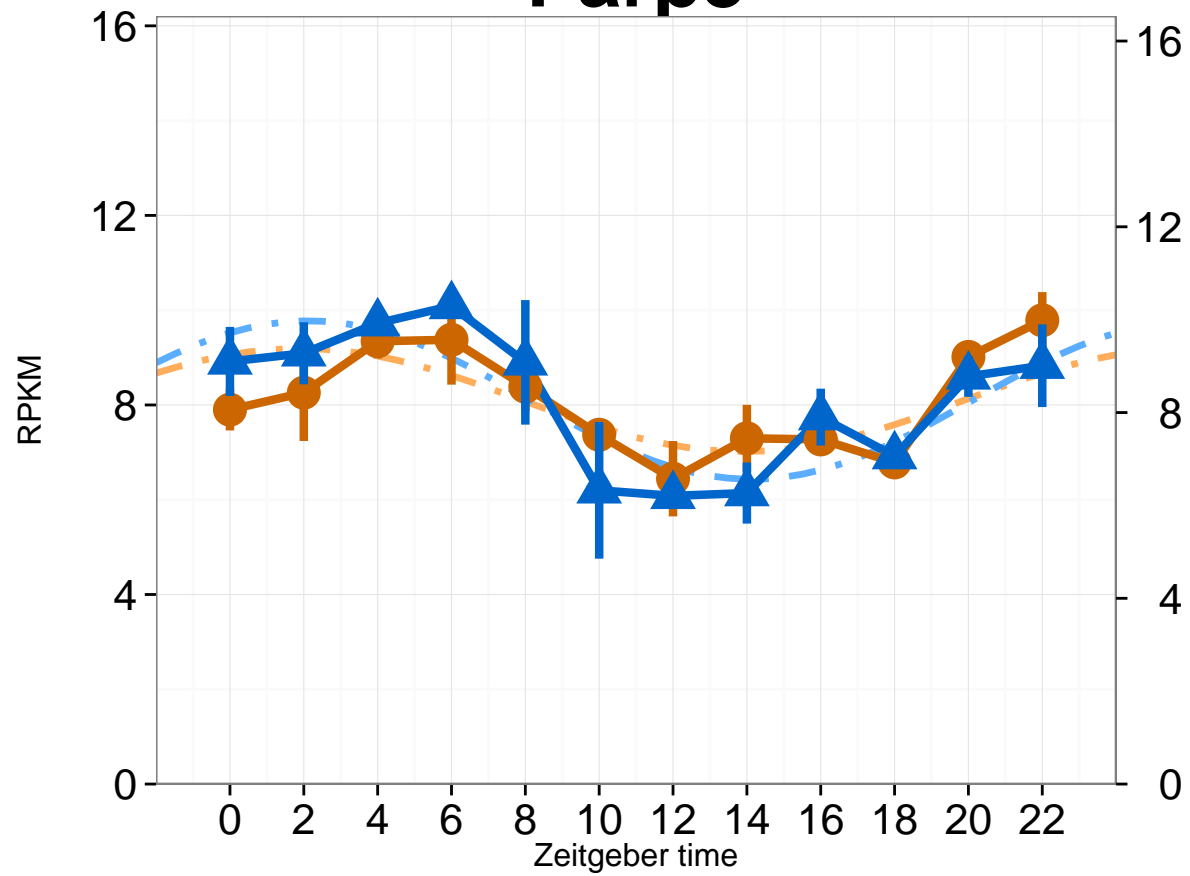

## Parp3

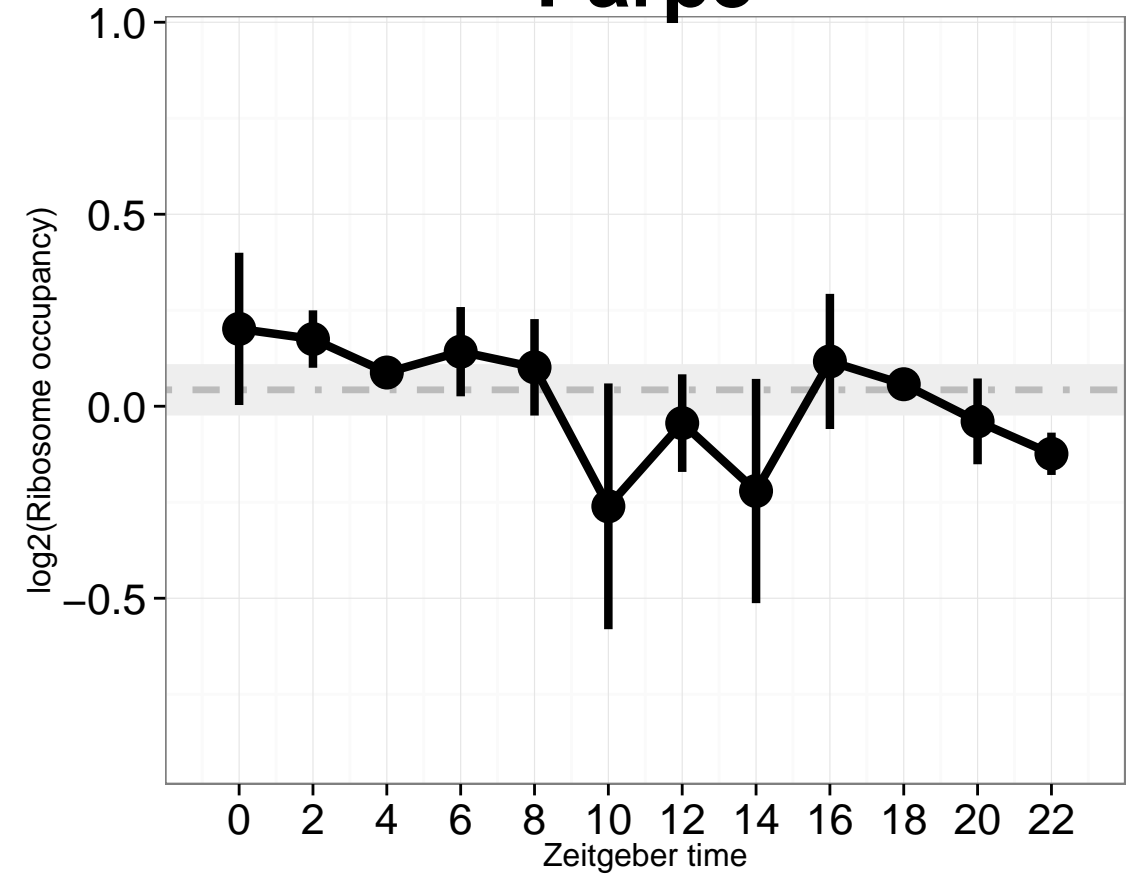

Supplement: SuppDataset_1.zip [file Parp3_set_C.pdf › Supplemental Dataset 1/C-mRNA_nonrhythm_translation_rhyth/Parp3_set_C.pdf]

# Patz1

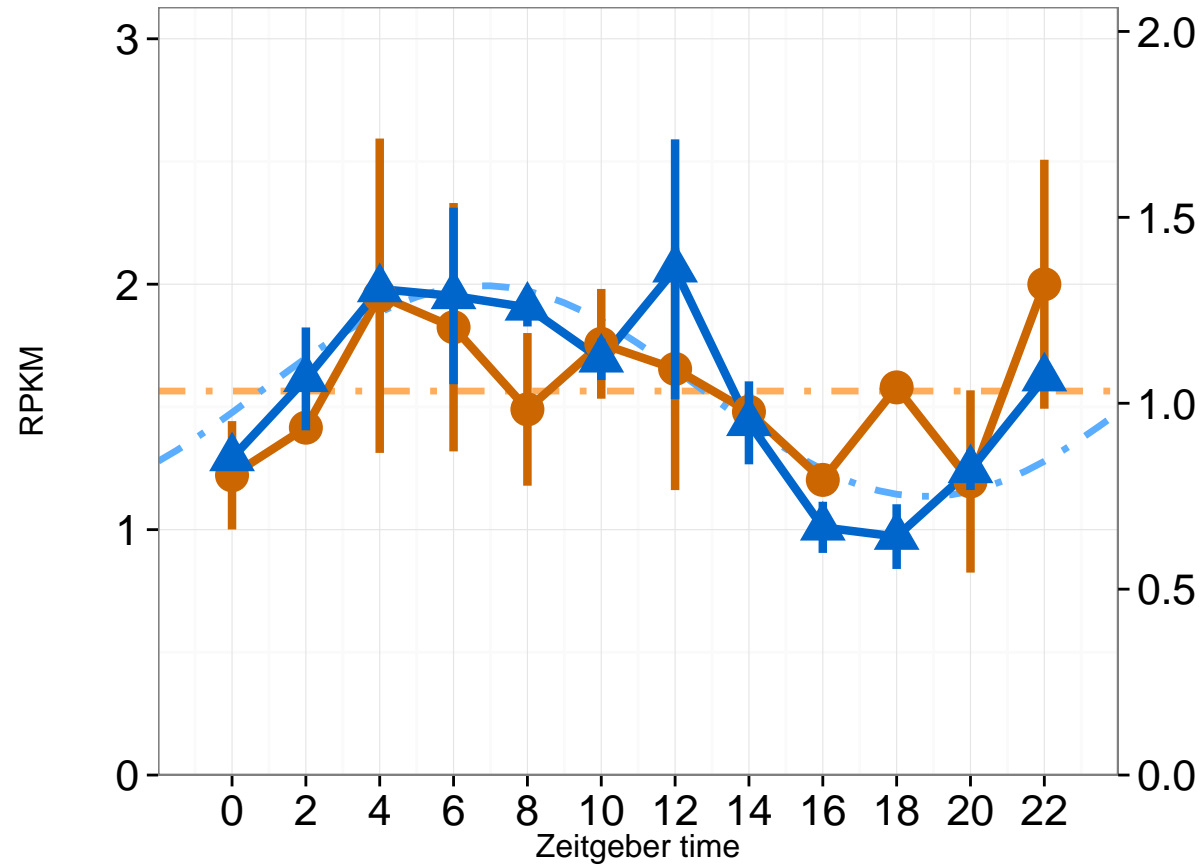

# Patz1

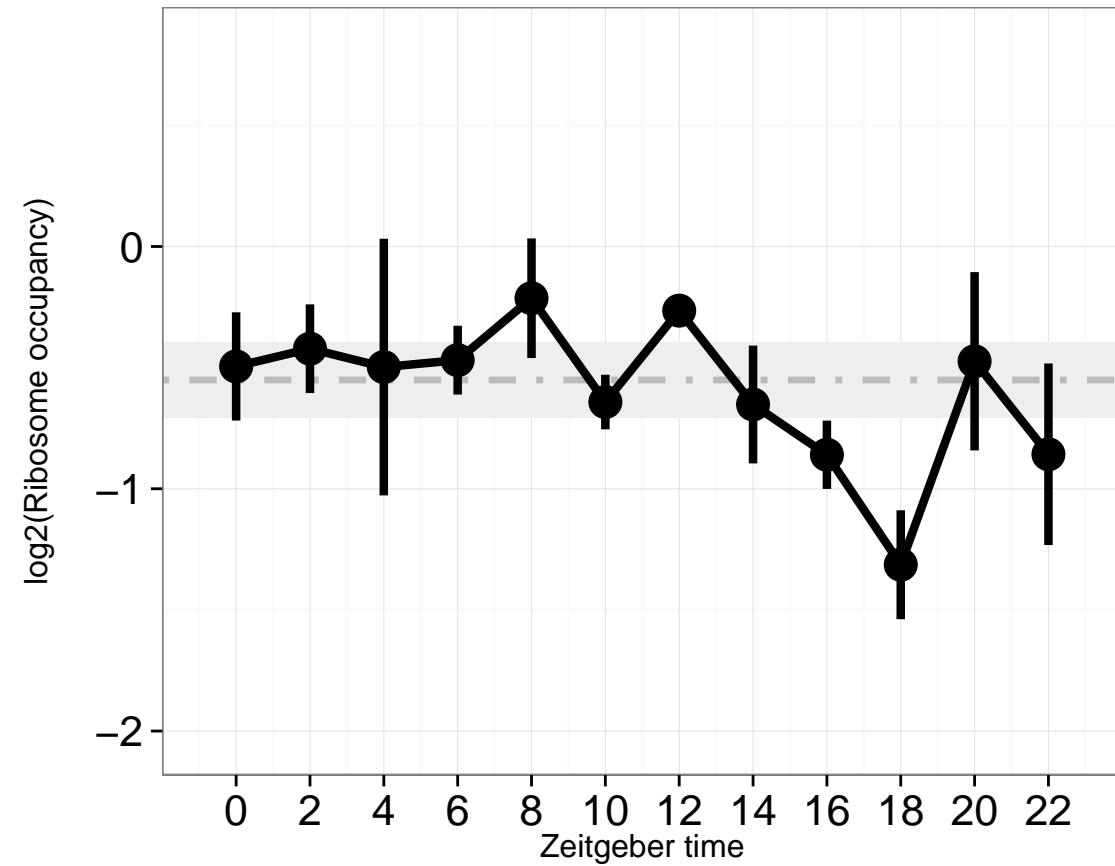

Supplement: SuppDataset_1.zip [file Patz1_set_C.pdf › Supplemental Dataset 1/C-mRNA_nonrhythm_translation_rhyth/Patz1_set_C.pdf]

## Pclo

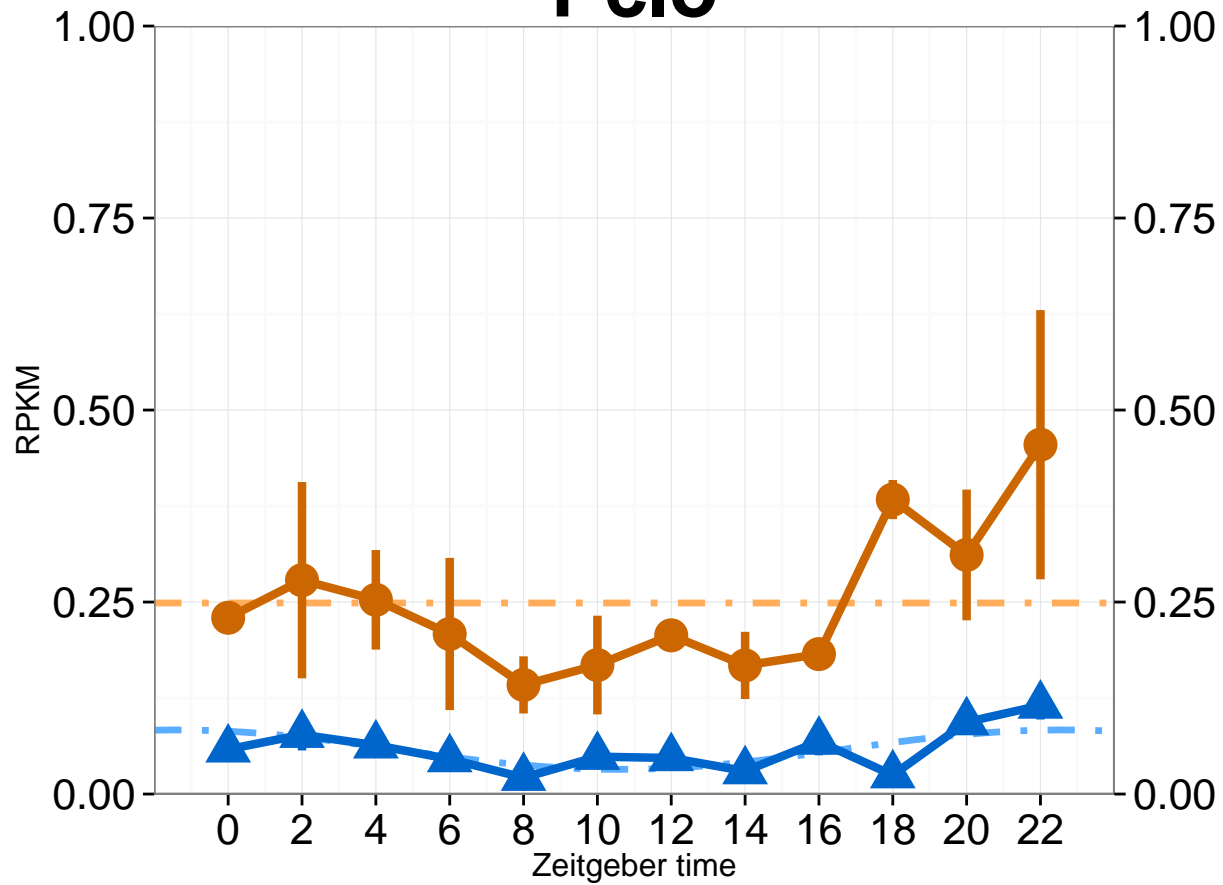

## Pclo

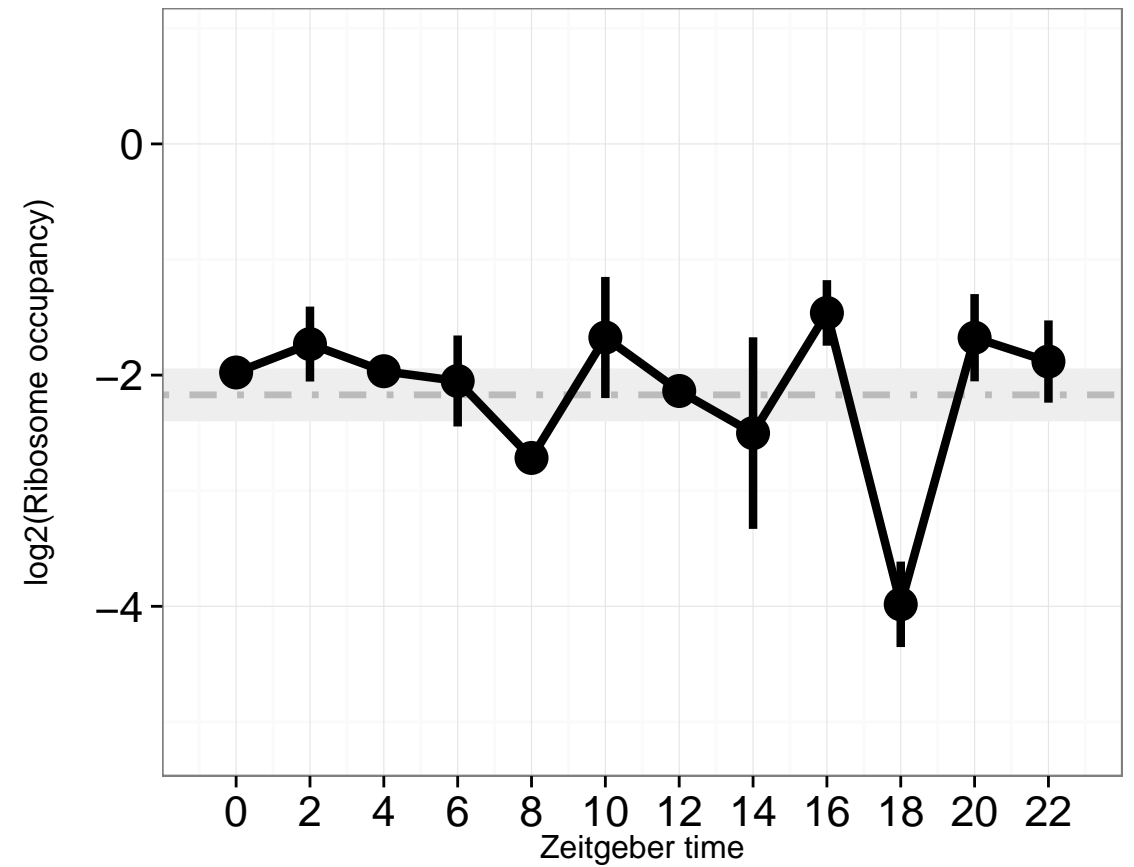

Supplement: SuppDataset_1.zip [file Pclo_set_C.pdf › Supplemental Dataset 1/C-mRNA_nonrhythm_translation_rhyth/Pclo_set_C.pdf]

# Pcyox1l

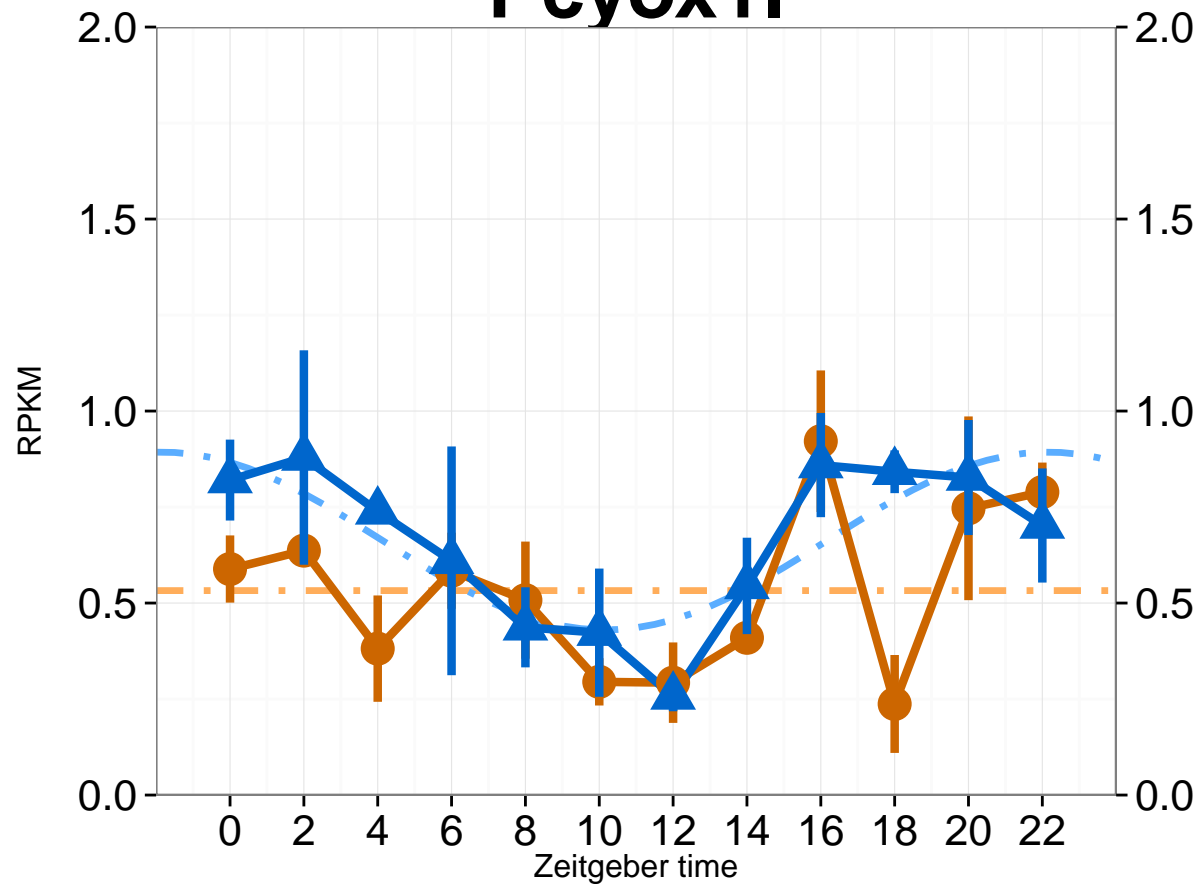

# Pcyox1l

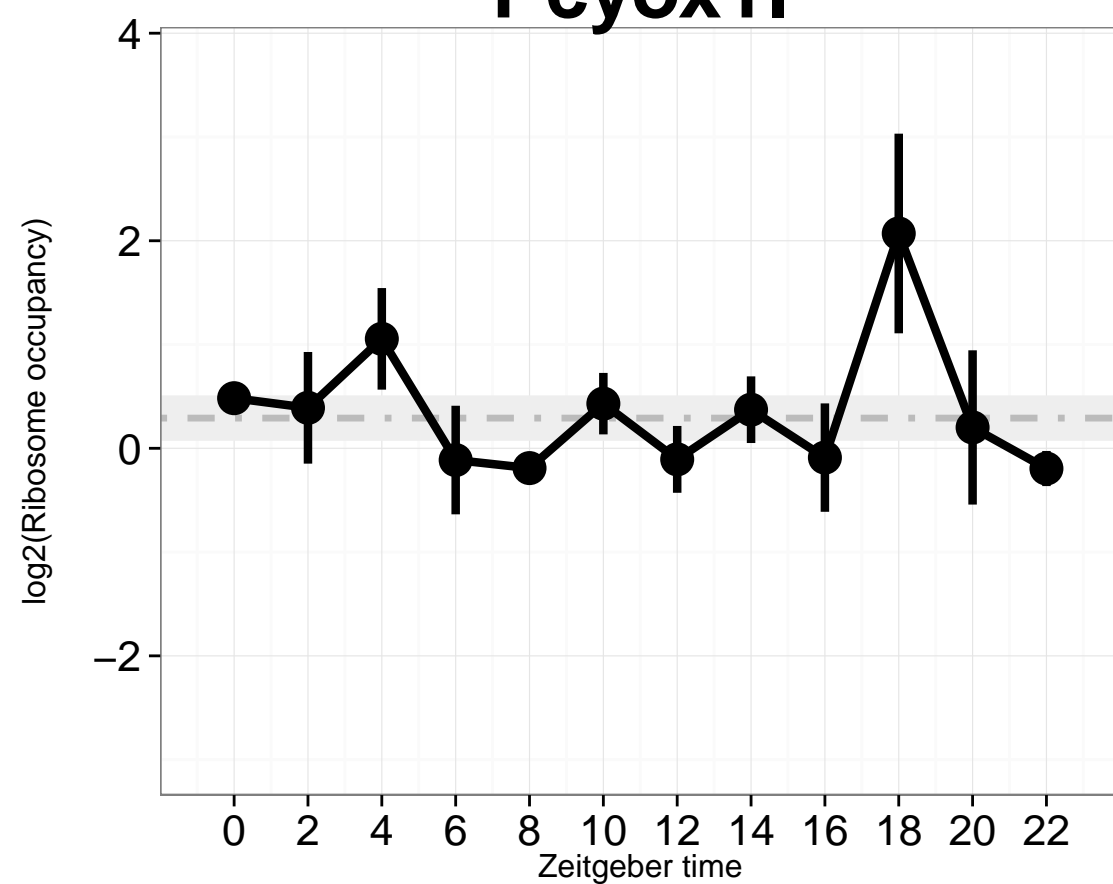

Supplement: SuppDataset_1.zip [file Pcyox1l_set_C.pdf › Supplemental Dataset 1/C-mRNA_nonrhythm_translation_rhyth/Pcyox1l_set_C.pdf]

## Pde5a

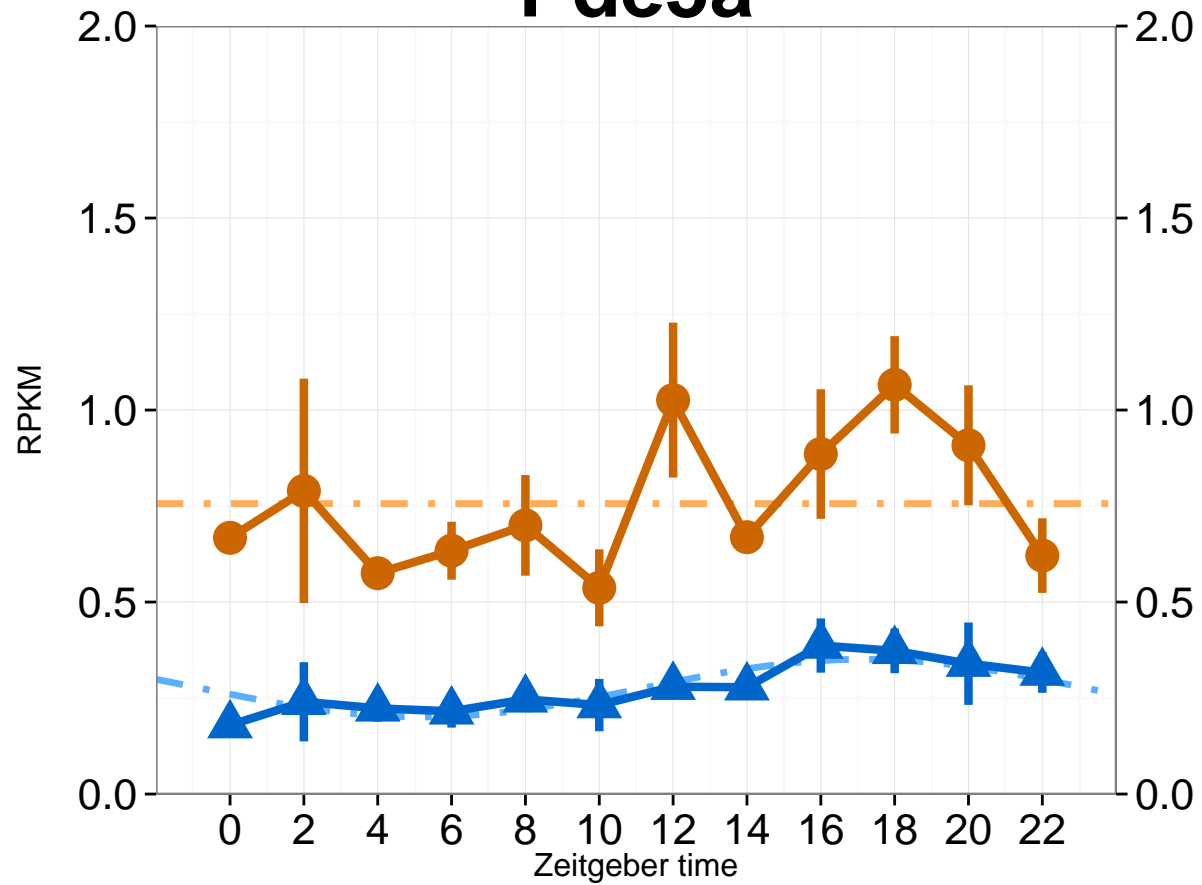

## Pde5a

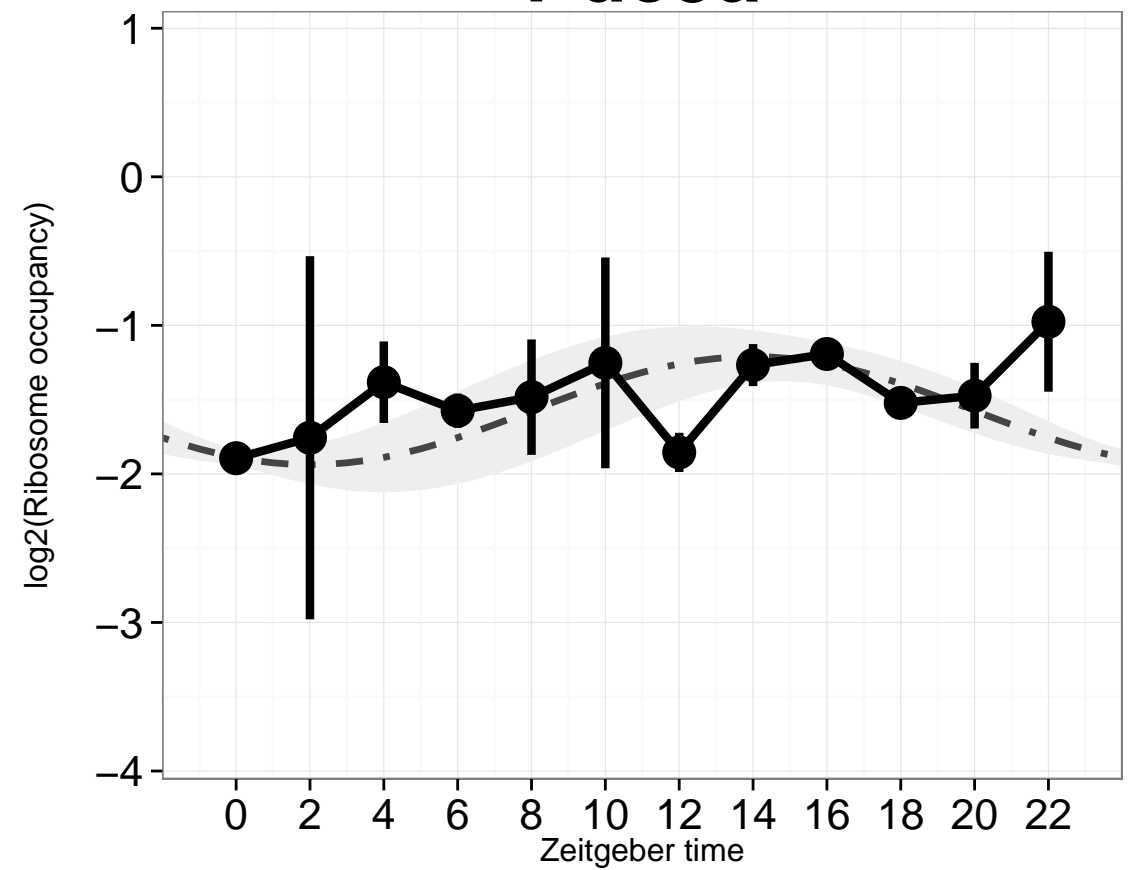

Supplement: SuppDataset_1.zip [file Pde5a_set_C.pdf › Supplemental Dataset 1/C-mRNA_nonrhythm_translation_rhyth/Pde5a_set_C.pdf]

## Pdia4

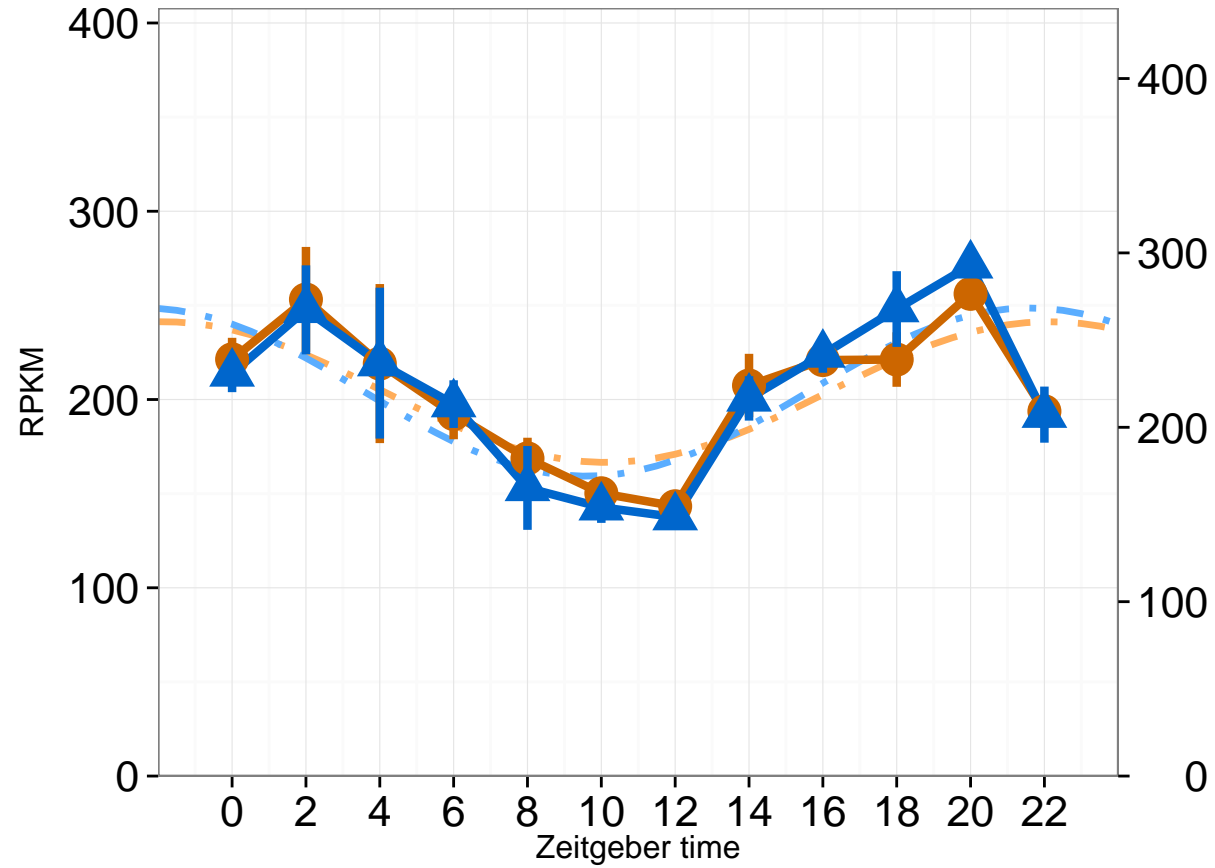

## Pdia4

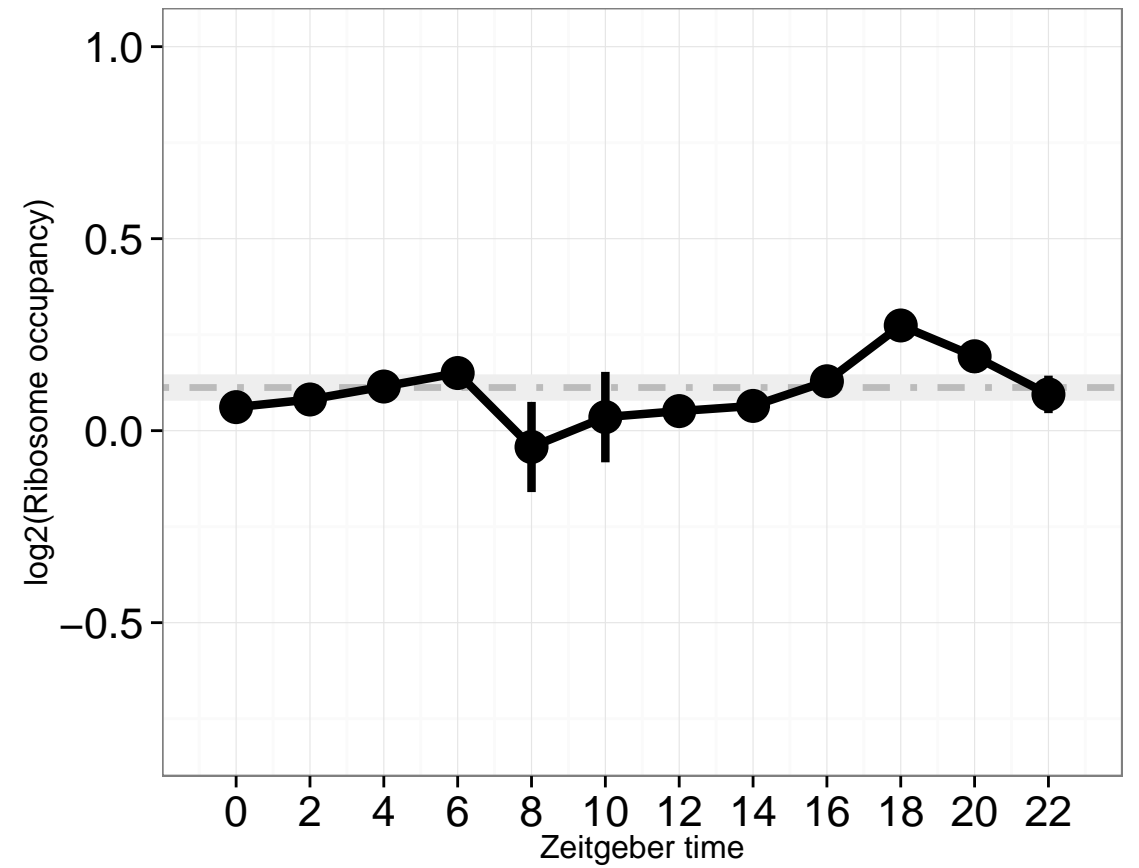

Supplement: SuppDataset_1.zip [file Pdia4_set_C.pdf › Supplemental Dataset 1/C-mRNA_nonrhythm_translation_rhyth/Pdia4_set_C.pdf]

# Pdlim4

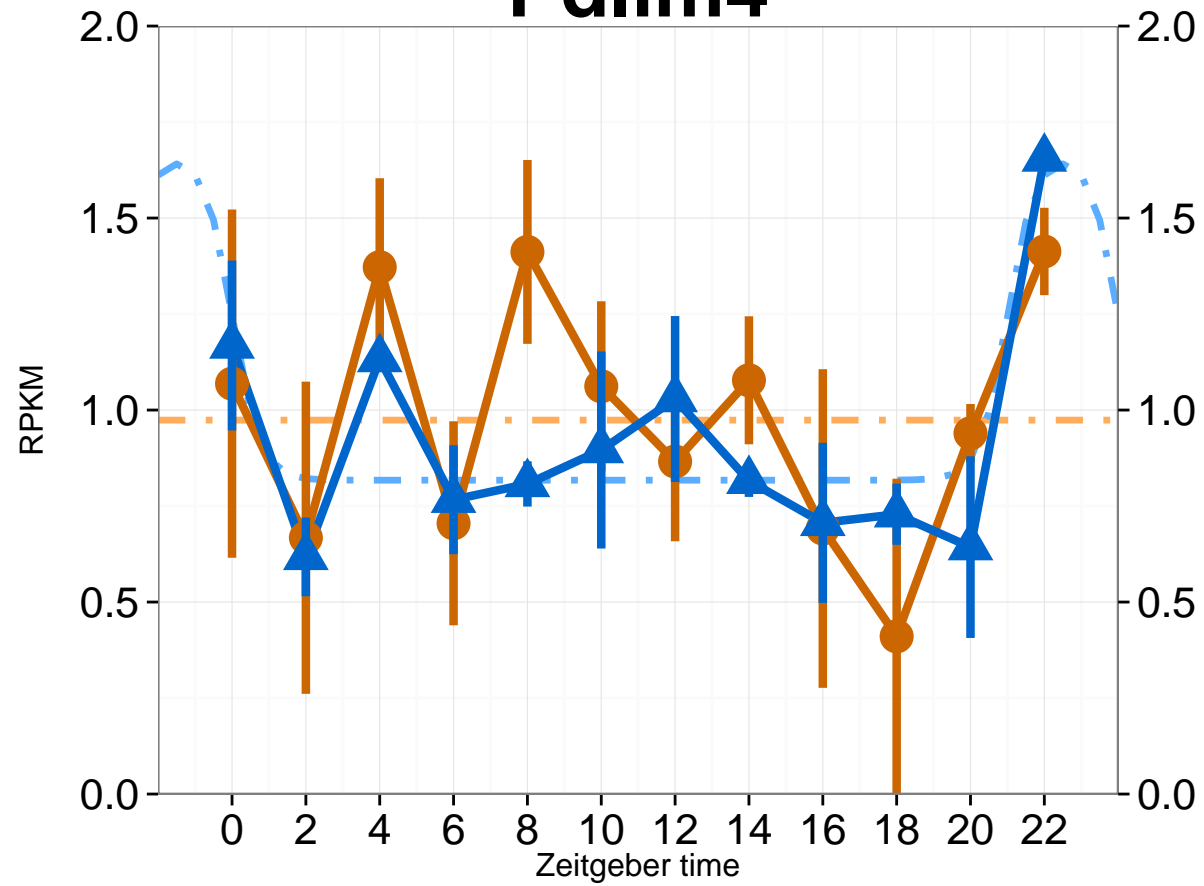

# Pdlim4

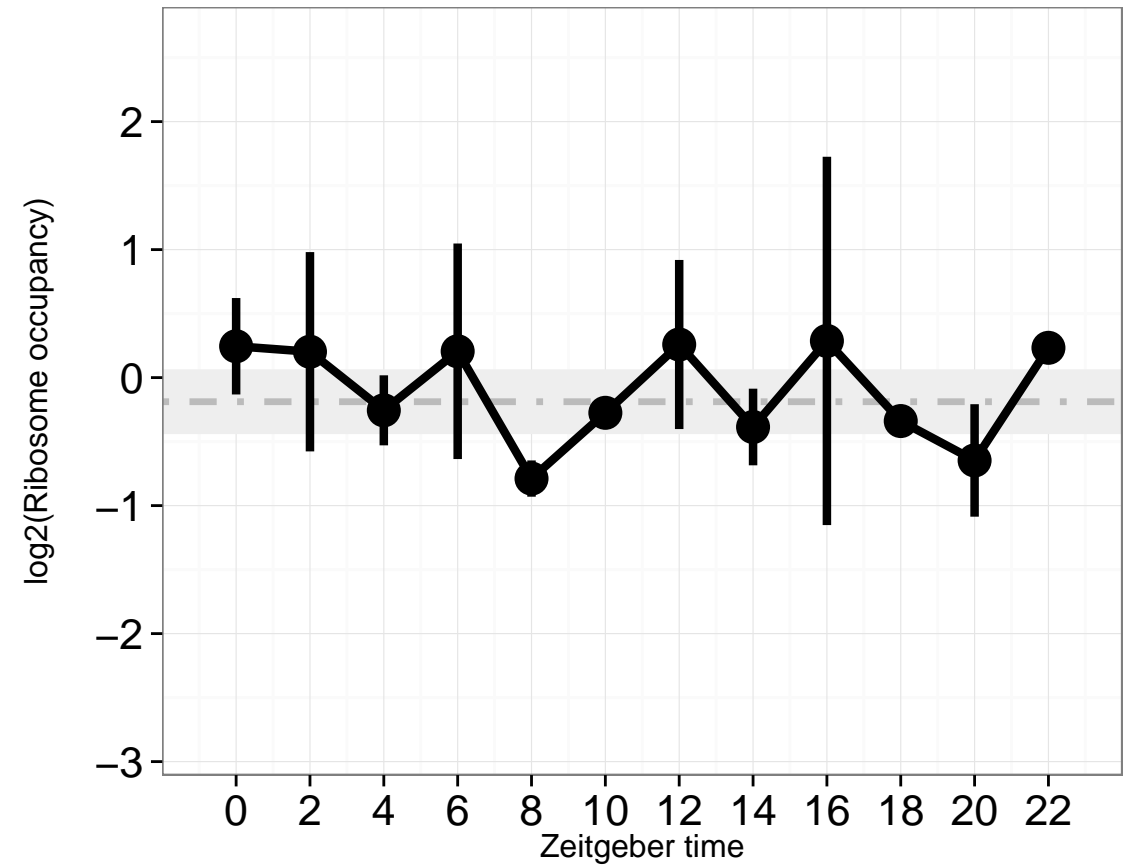

Supplement: SuppDataset_1.zip [file Pdlim4_set_C.pdf › Supplemental Dataset 1/C-mRNA_nonrhythm_translation_rhyth/Pdlim4_set_C.pdf]

# Pdss1

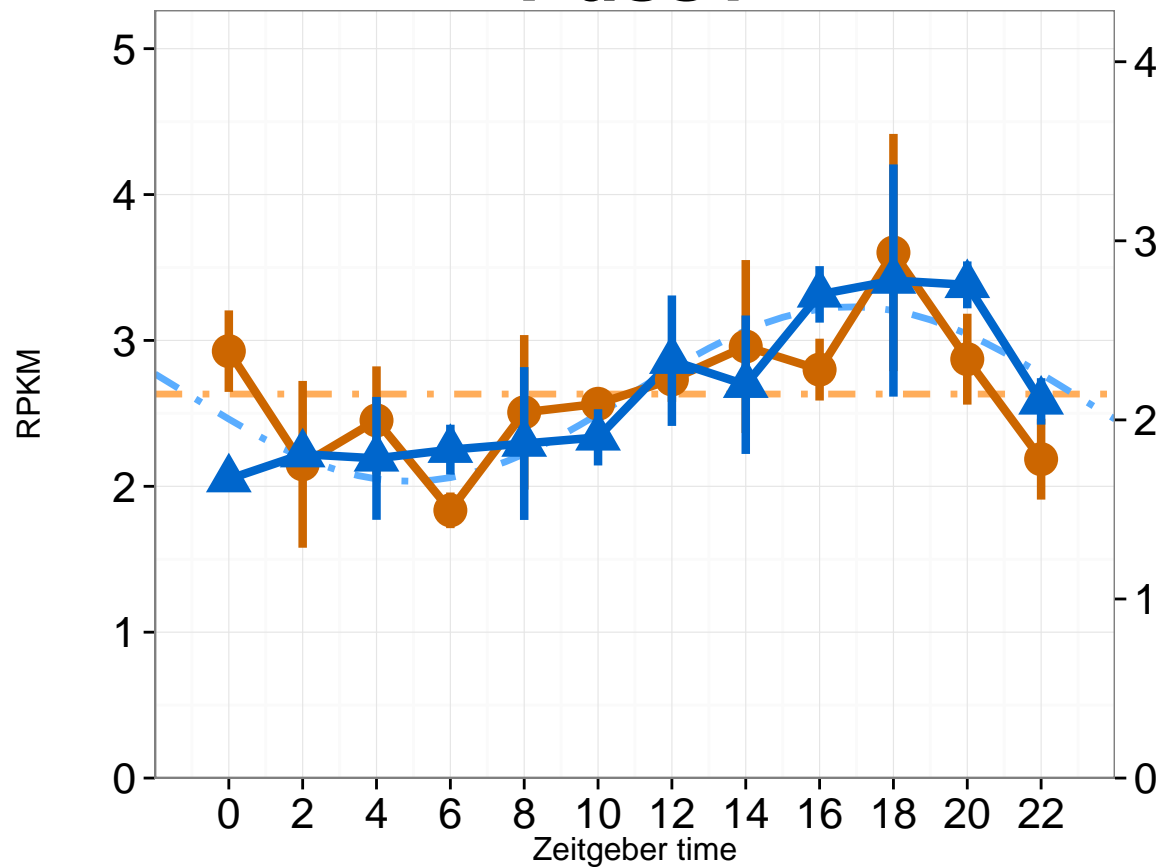

# Pdss1

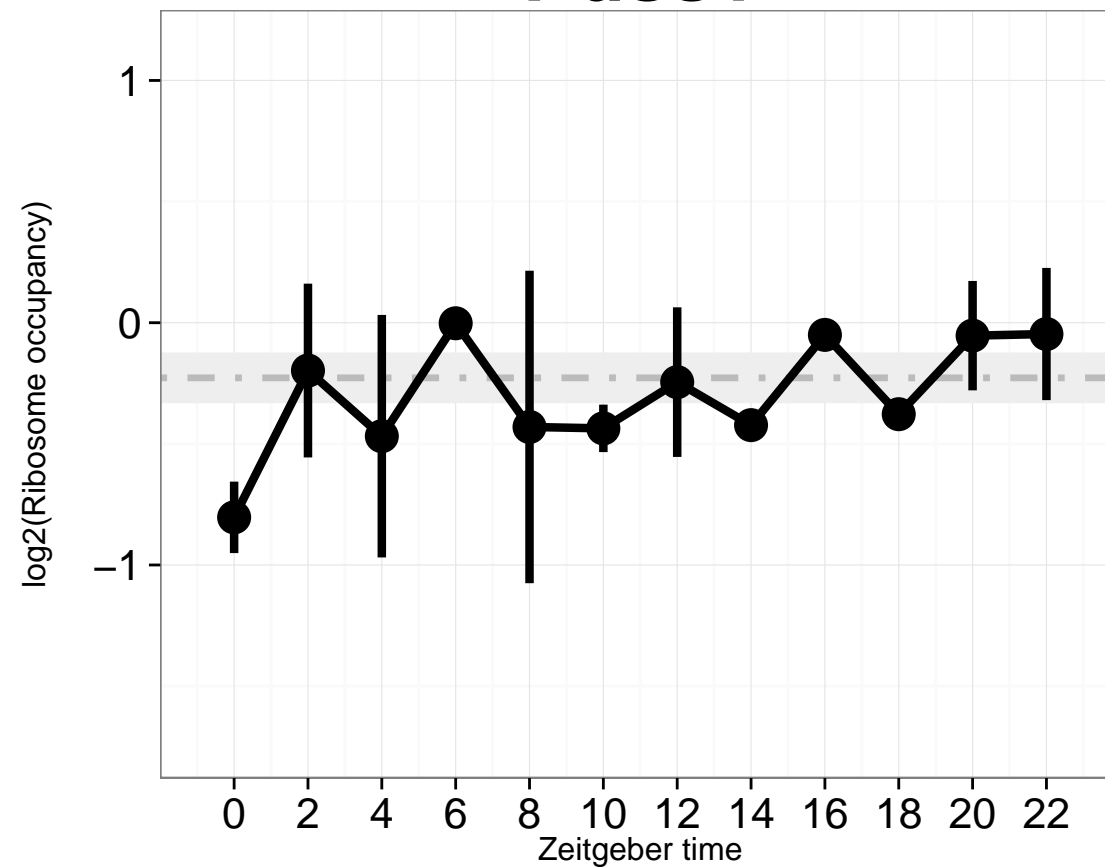

Supplement: SuppDataset_1.zip [file Pdss1_set_C.pdf › Supplemental Dataset 1/C-mRNA_nonrhythm_translation_rhyth/Pdss1_set_C.pdf]

# Pdzrn3

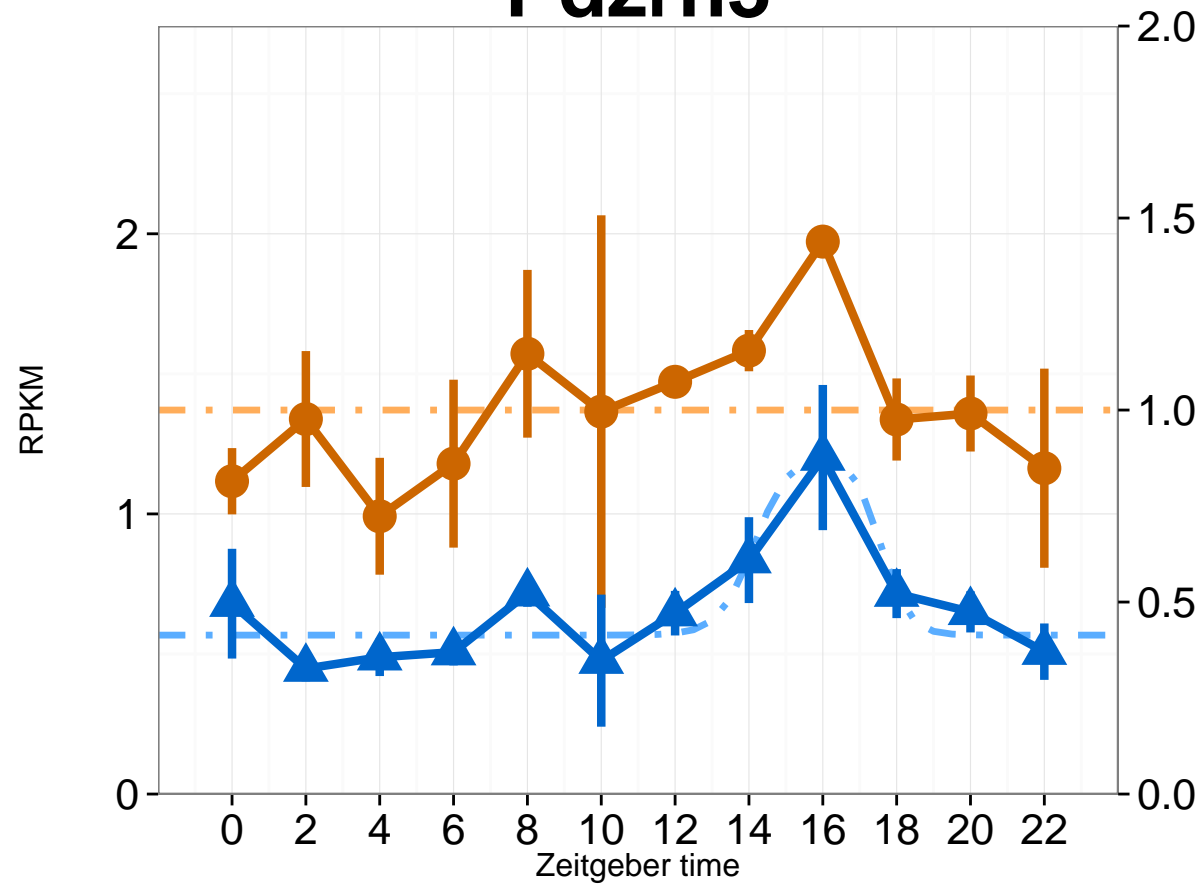

# Pdzrn3

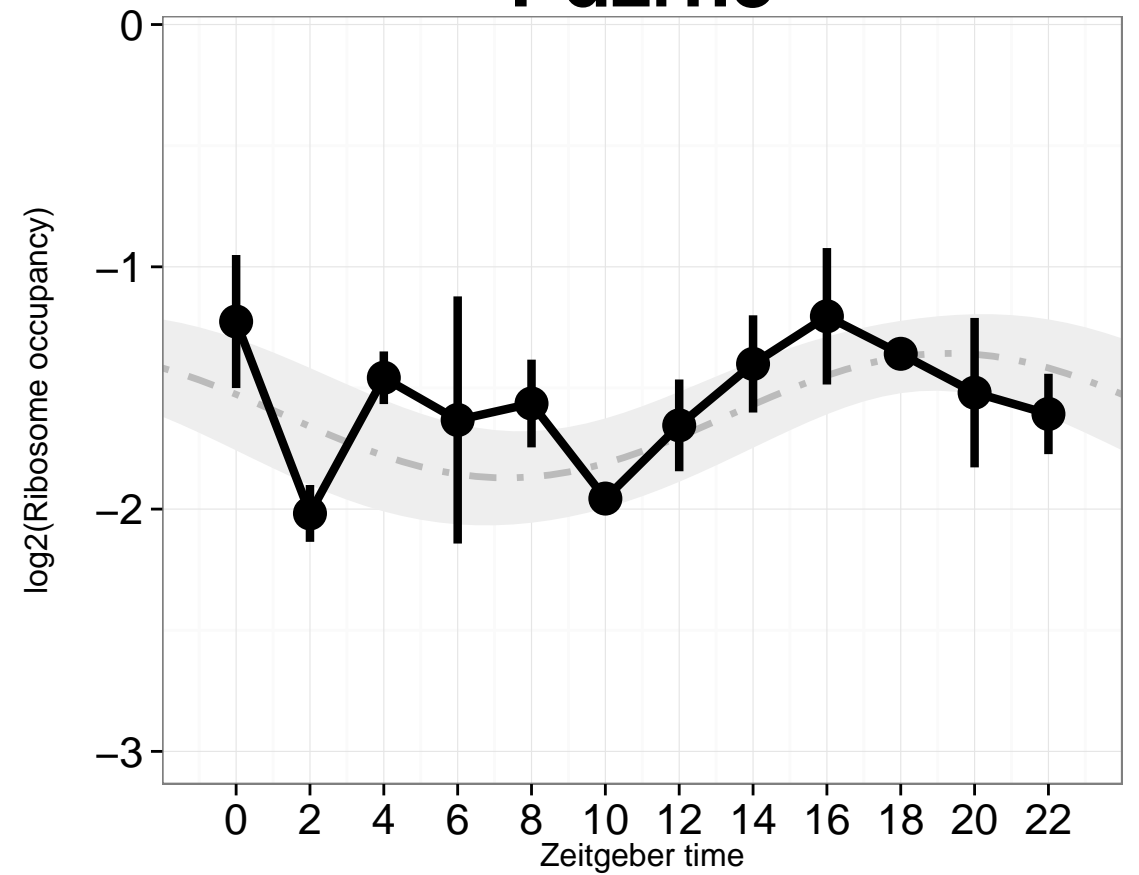

Supplement: SuppDataset_1.zip [file Pdzrn3_set_C.pdf › Supplemental Dataset 1/C-mRNA_nonrhythm_translation_rhyth/Pdzrn3_set_C.pdf]

## Pex26

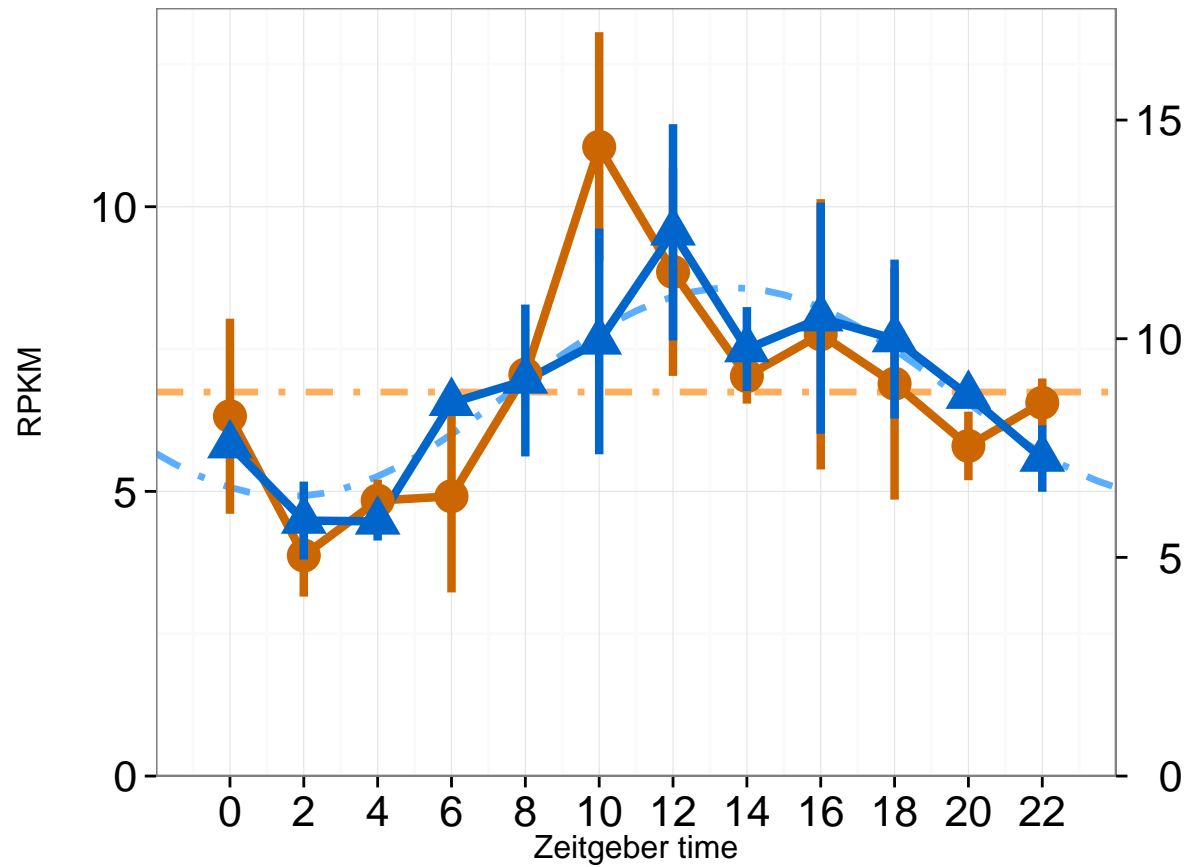

## Pex26

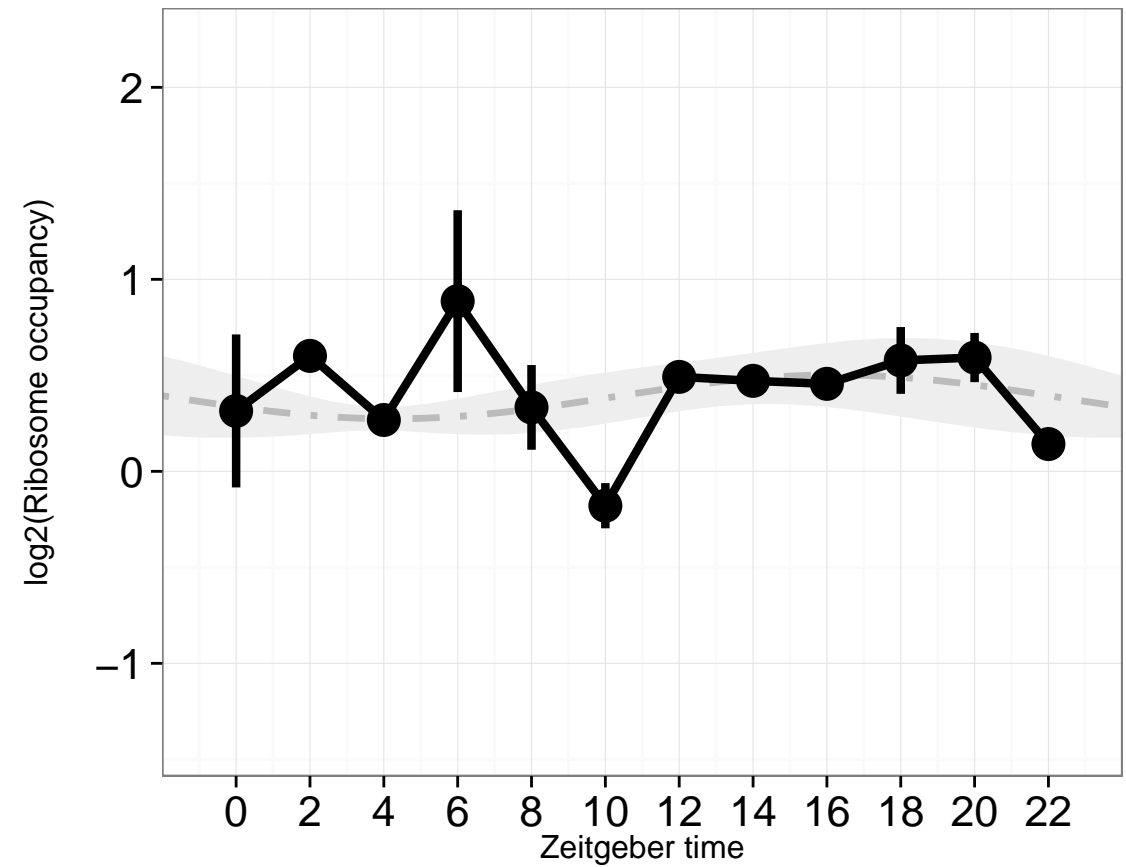

Supplement: SuppDataset_1.zip [file Pex26_set_C.pdf › Supplemental Dataset 1/C-mRNA_nonrhythm_translation_rhyth/Pex26_set_C.pdf]

# Pfkfb4

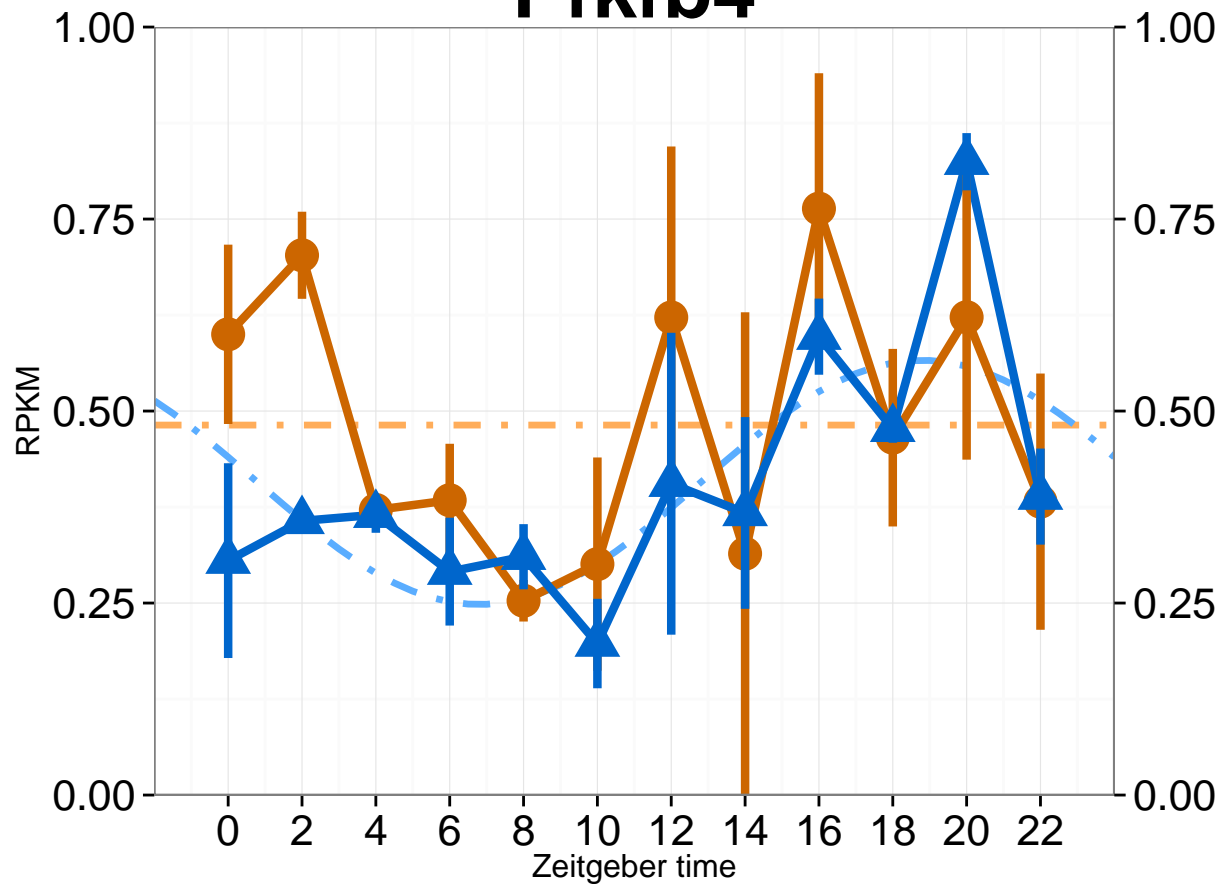

# Pfkfb4

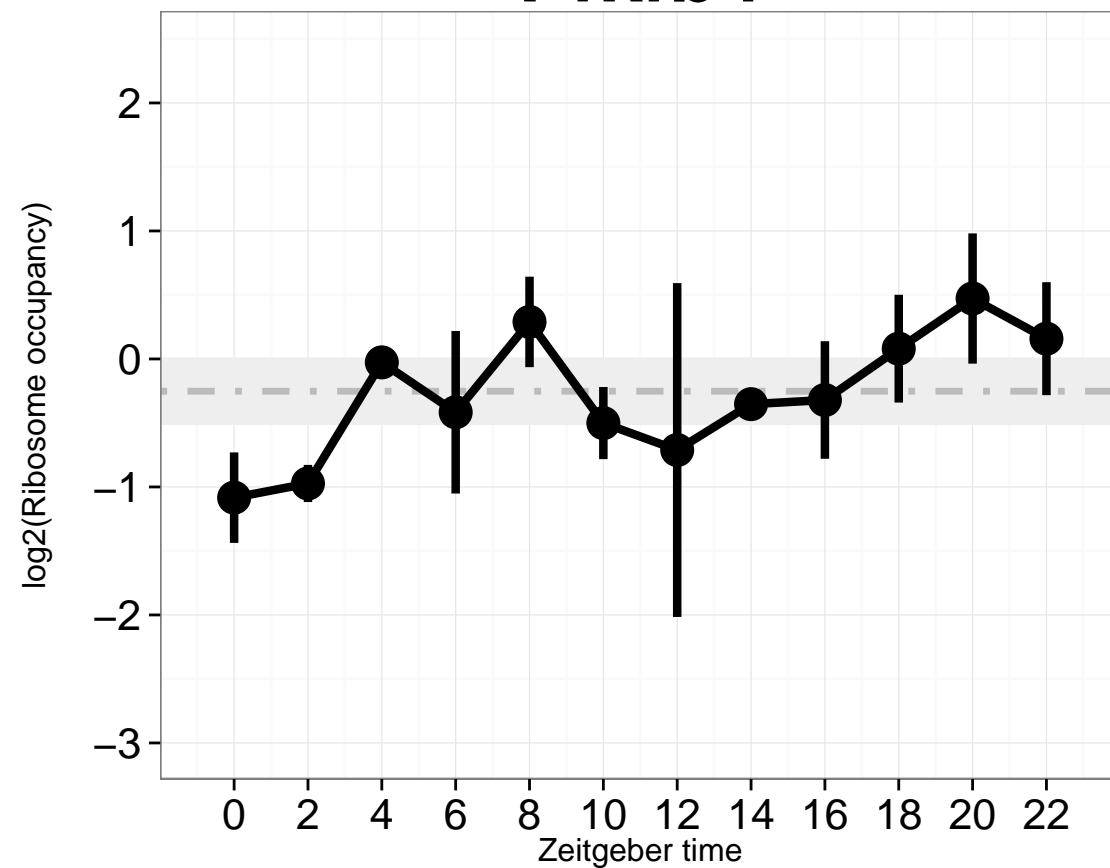

Supplement: SuppDataset_1.zip [file Pfkfb4_set_C.pdf › Supplemental Dataset 1/C-mRNA_nonrhythm_translation_rhyth/Pfkfb4_set_C.pdf]

# Phf11d

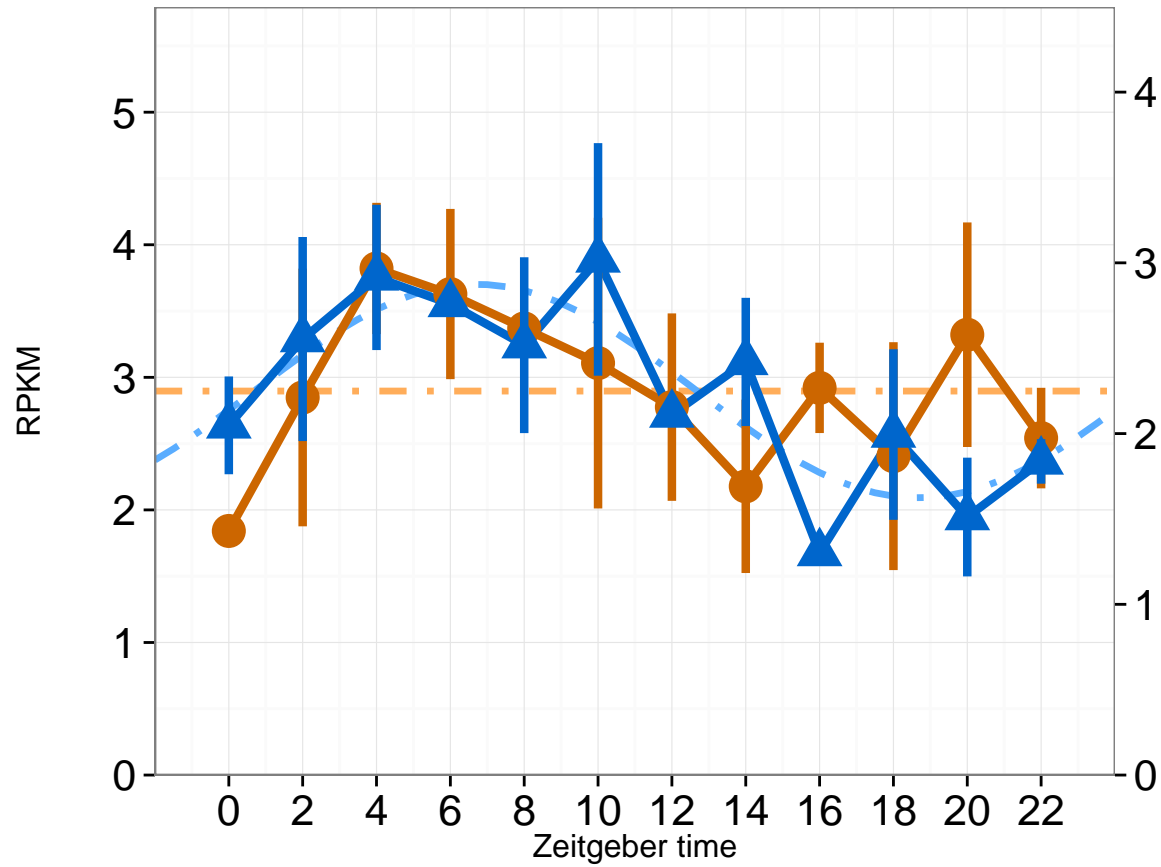

# Phf11d

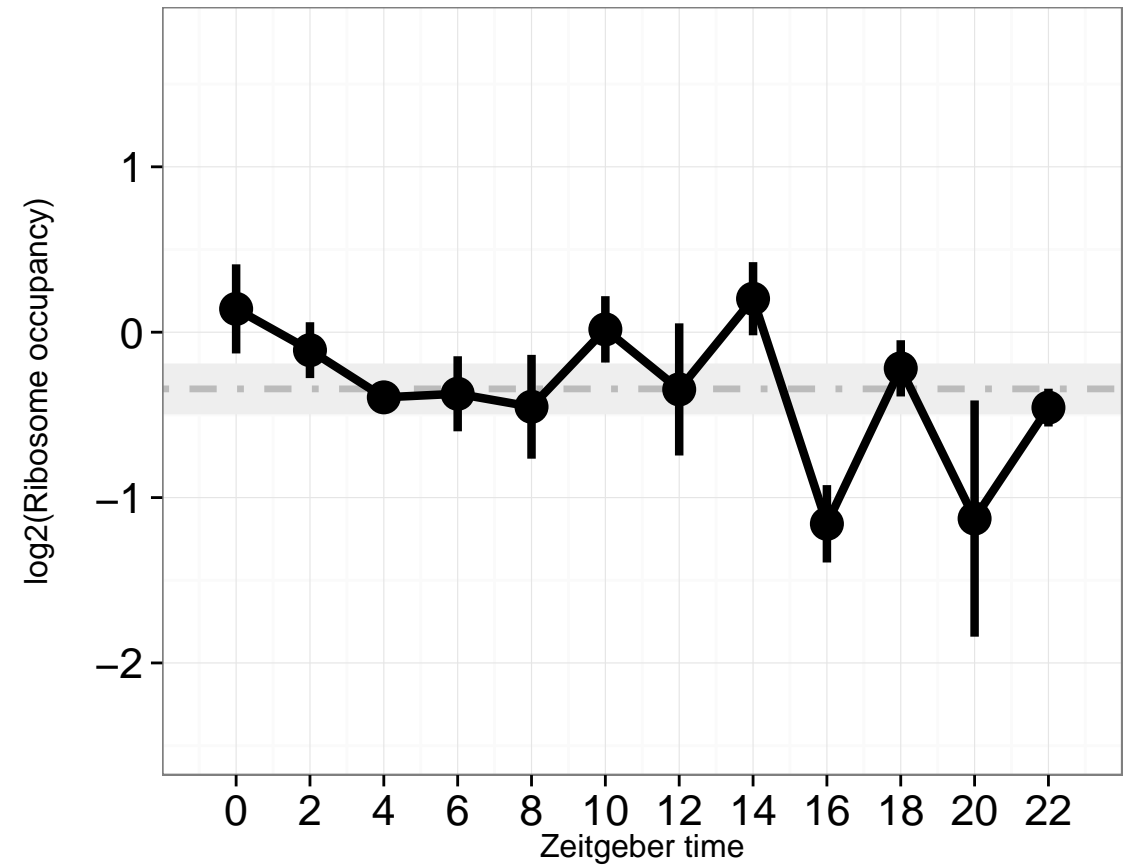

Supplement: SuppDataset_1.zip [file Phf11d_set_C.pdf › Supplemental Dataset 1/C-mRNA_nonrhythm_translation_rhyth/Phf11d_set_C.pdf]

## Phkg2

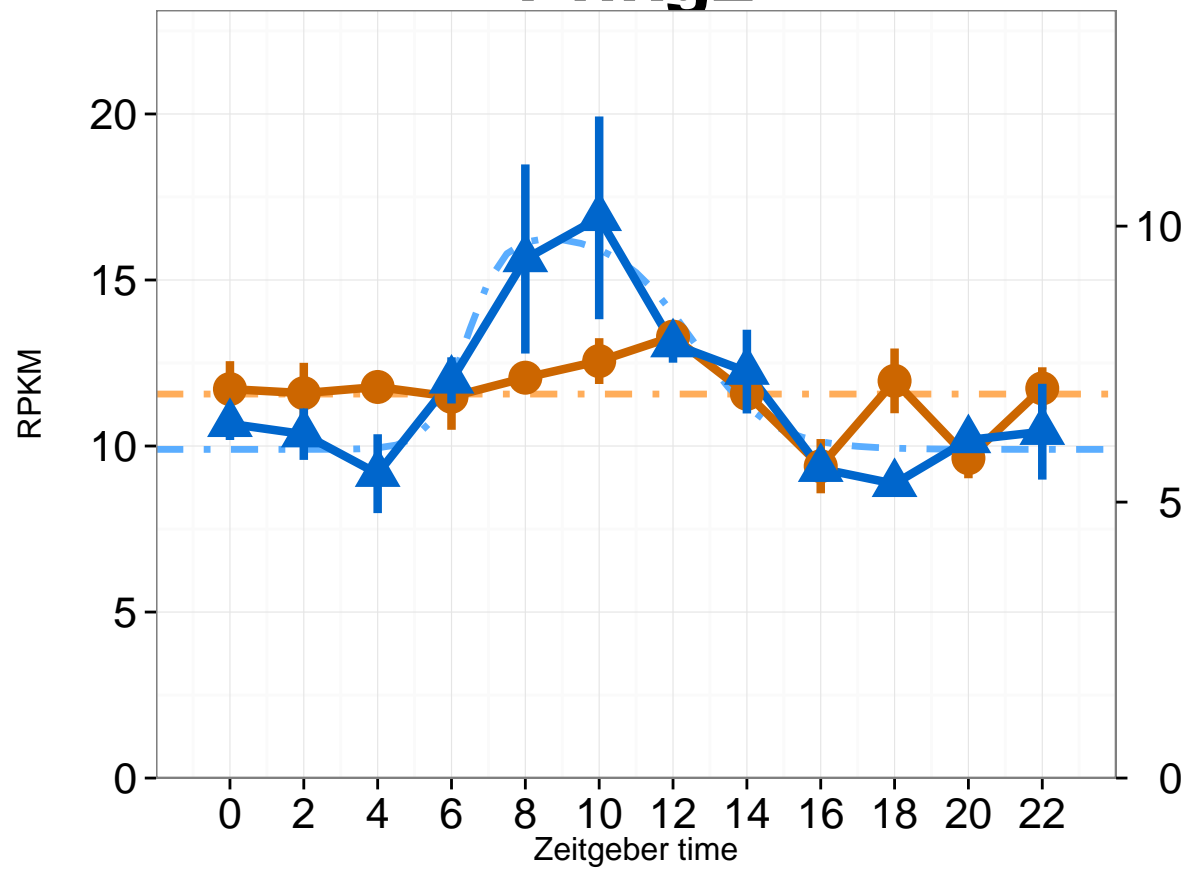

## Phkg2

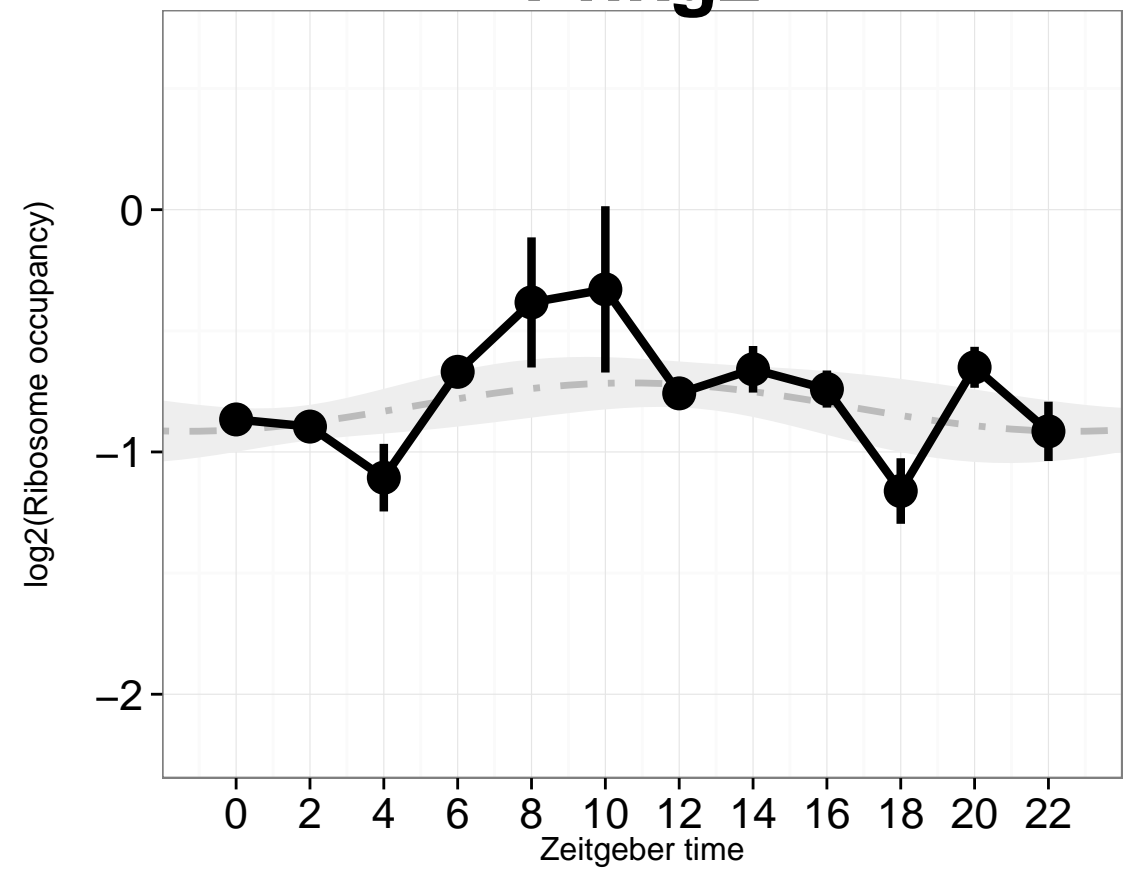

Supplement: SuppDataset_1.zip [file Phkg2_set_C.pdf › Supplemental Dataset 1/C-mRNA_nonrhythm_translation_rhyth/Phkg2_set_C.pdf]

**Phlda2 TR**

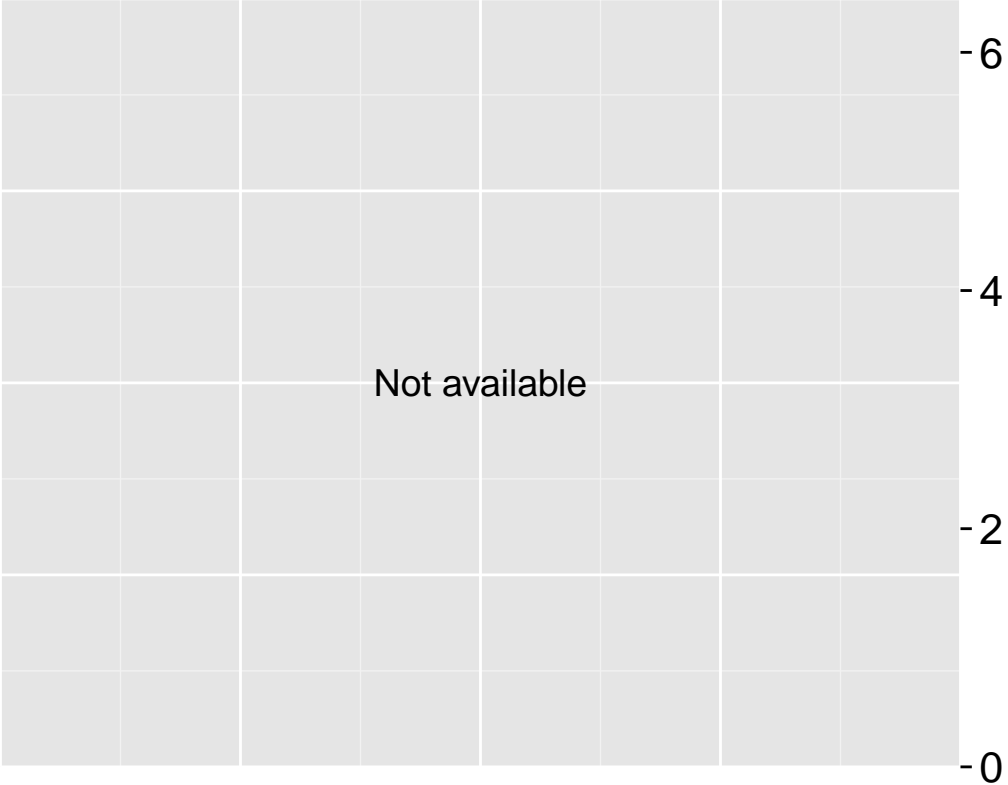

**Phlda2 log2(Ribosome occupancy**

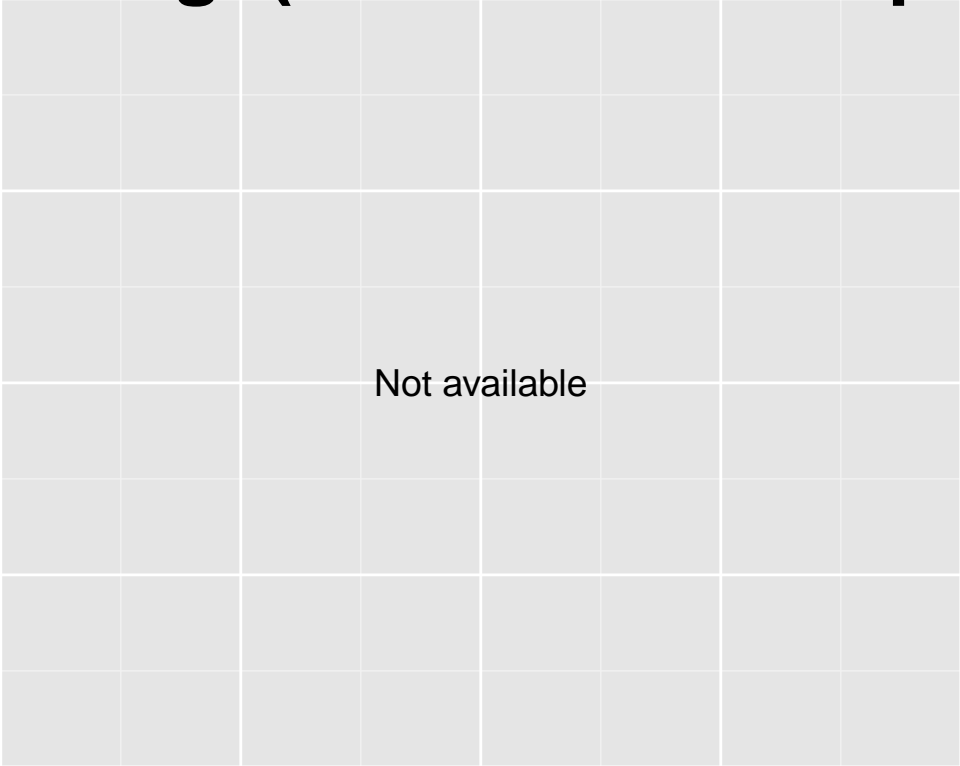

Supplement: SuppDataset_1.zip [file Phlda2_set_C.pdf › Supplemental Dataset 1/C-mRNA_nonrhythm_translation_rhyth/Phlda2_set_C.pdf]

## Phlpp2

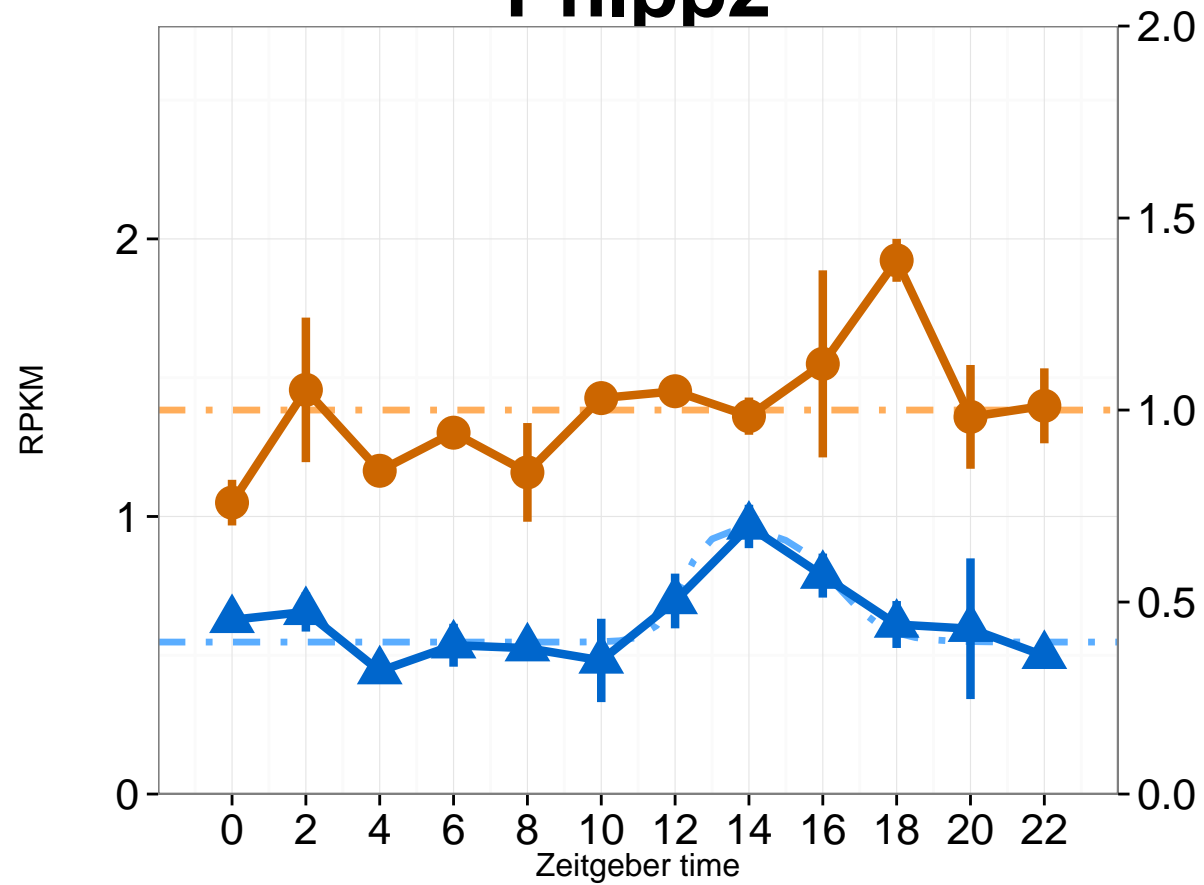

## Phlpp2

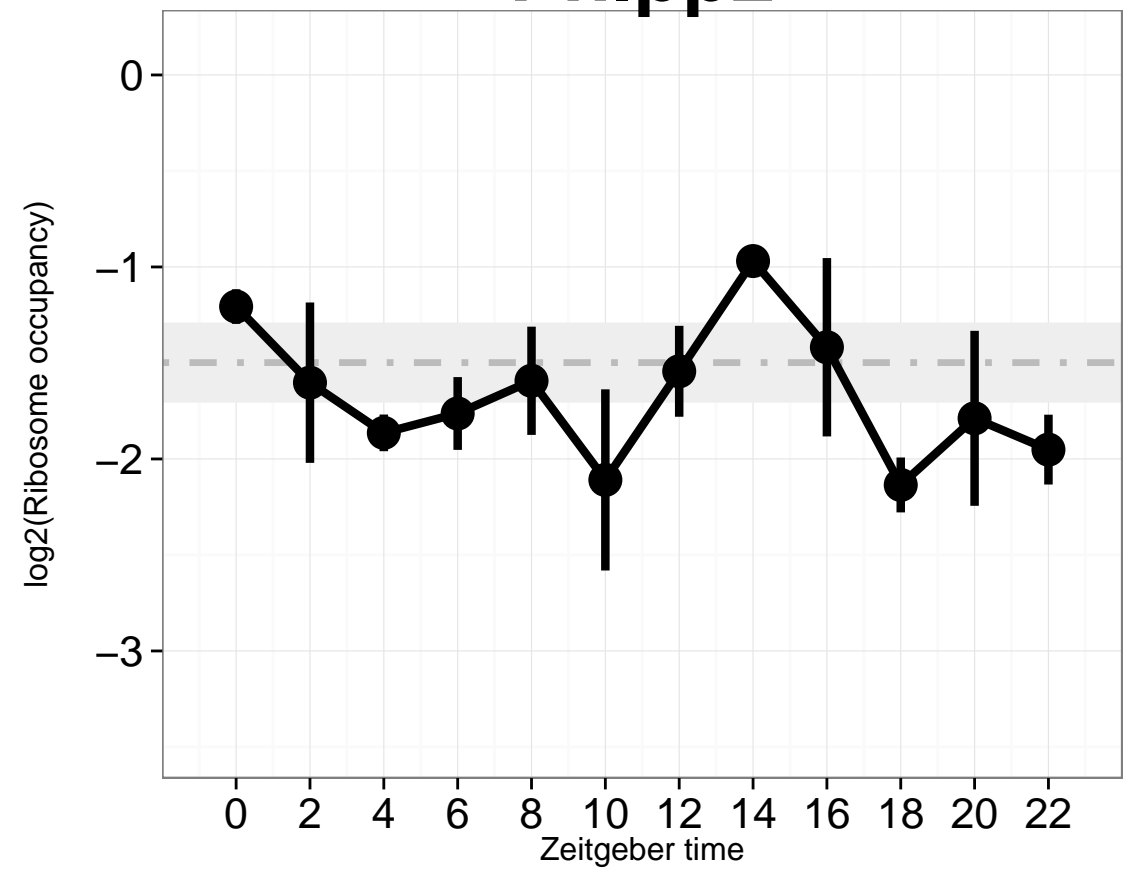

Supplement: SuppDataset_1.zip [file Phlpp2_set_C.pdf › Supplemental Dataset 1/C-mRNA_nonrhythm_translation_rhyth/Phlpp2_set_C.pdf]

# Phtf2

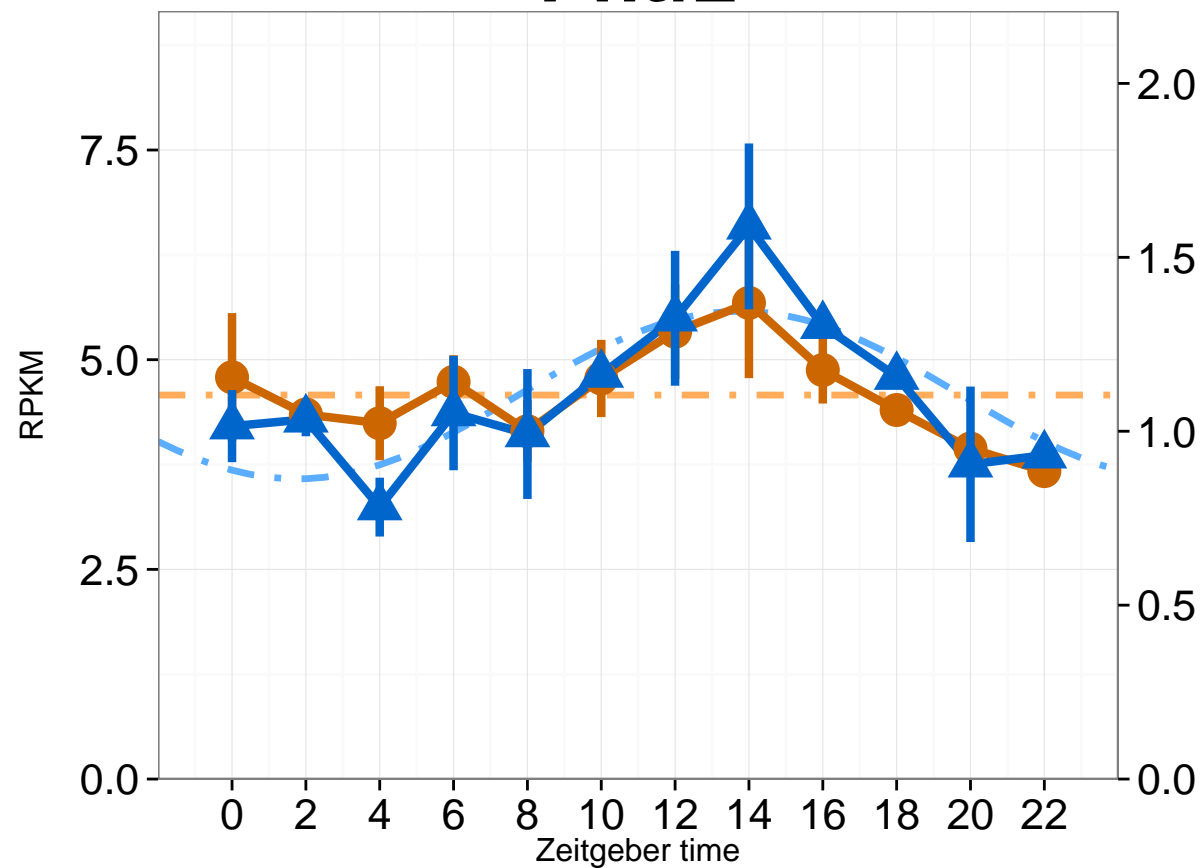

# Phtf2

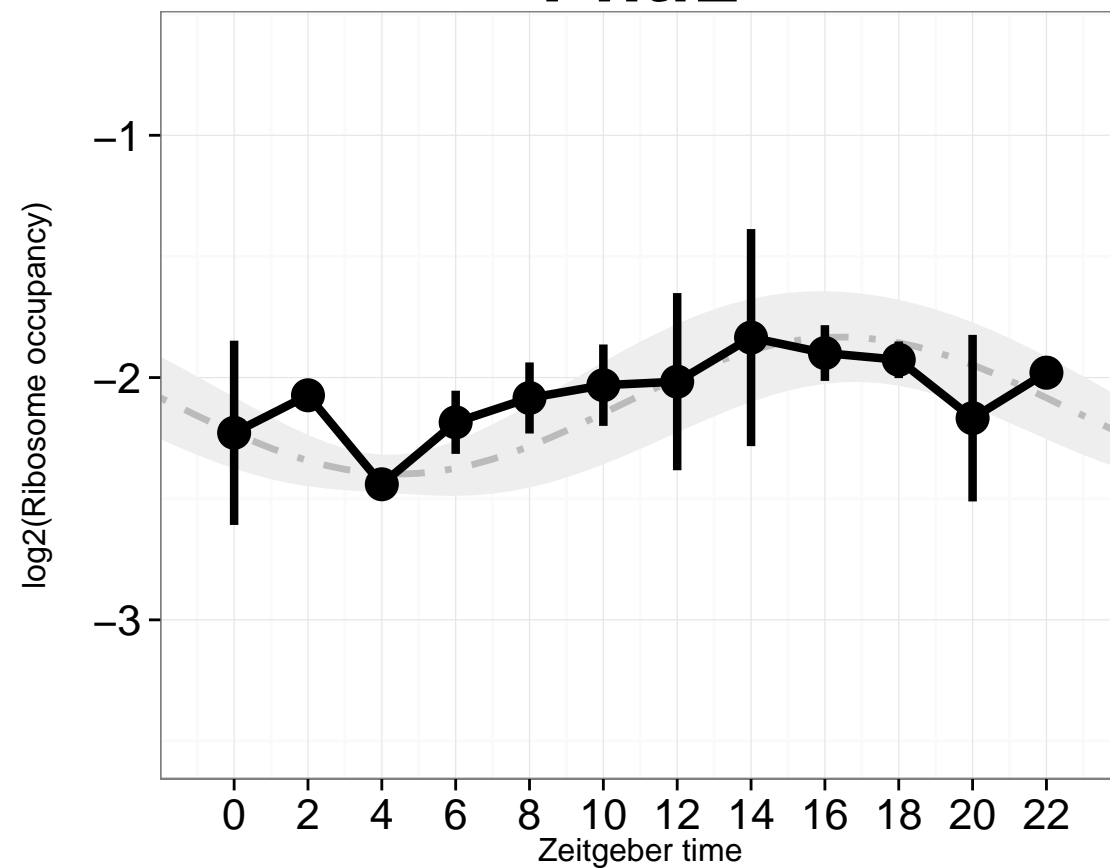

Supplement: SuppDataset_1.zip [file Phtf2_set_C.pdf › Supplemental Dataset 1/C-mRNA_nonrhythm_translation_rhyth/Phtf2_set_C.pdf]

# Pi4k2a

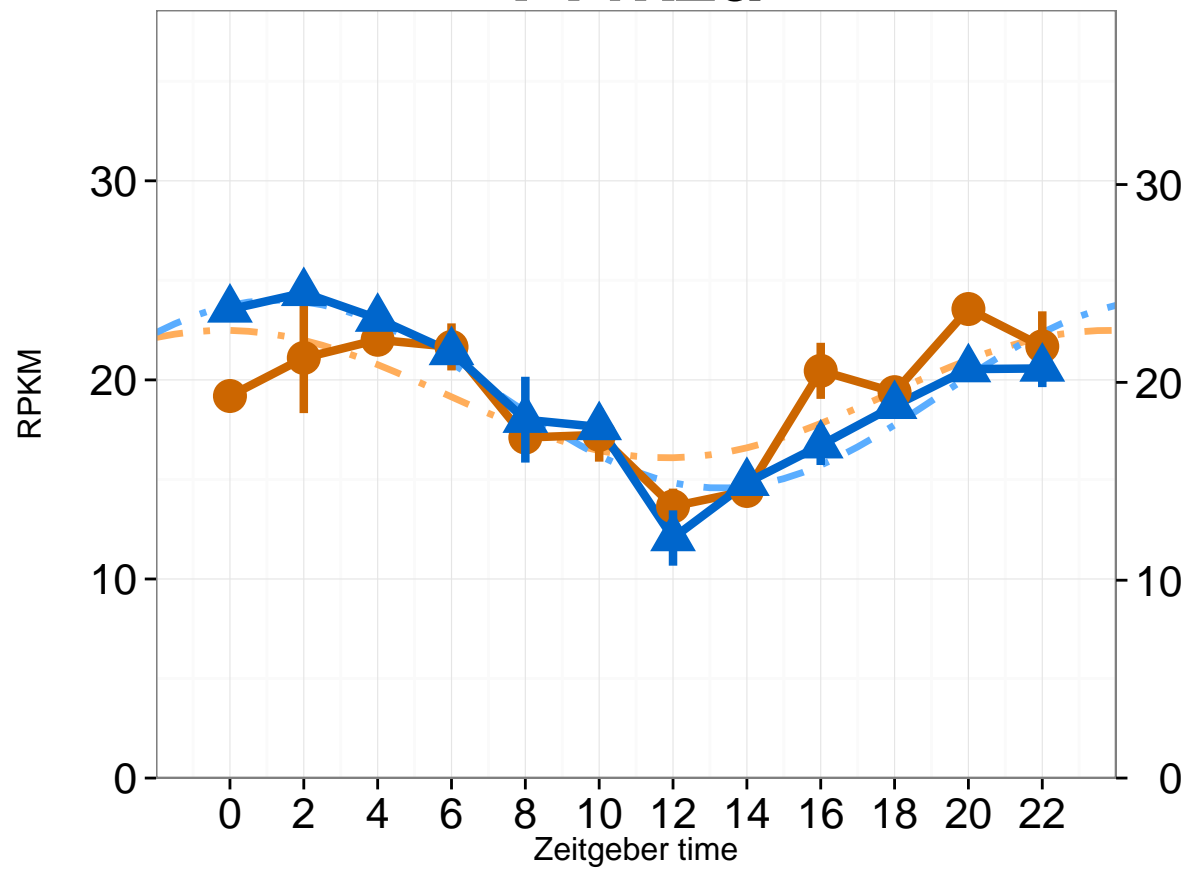

# Pi4k2a

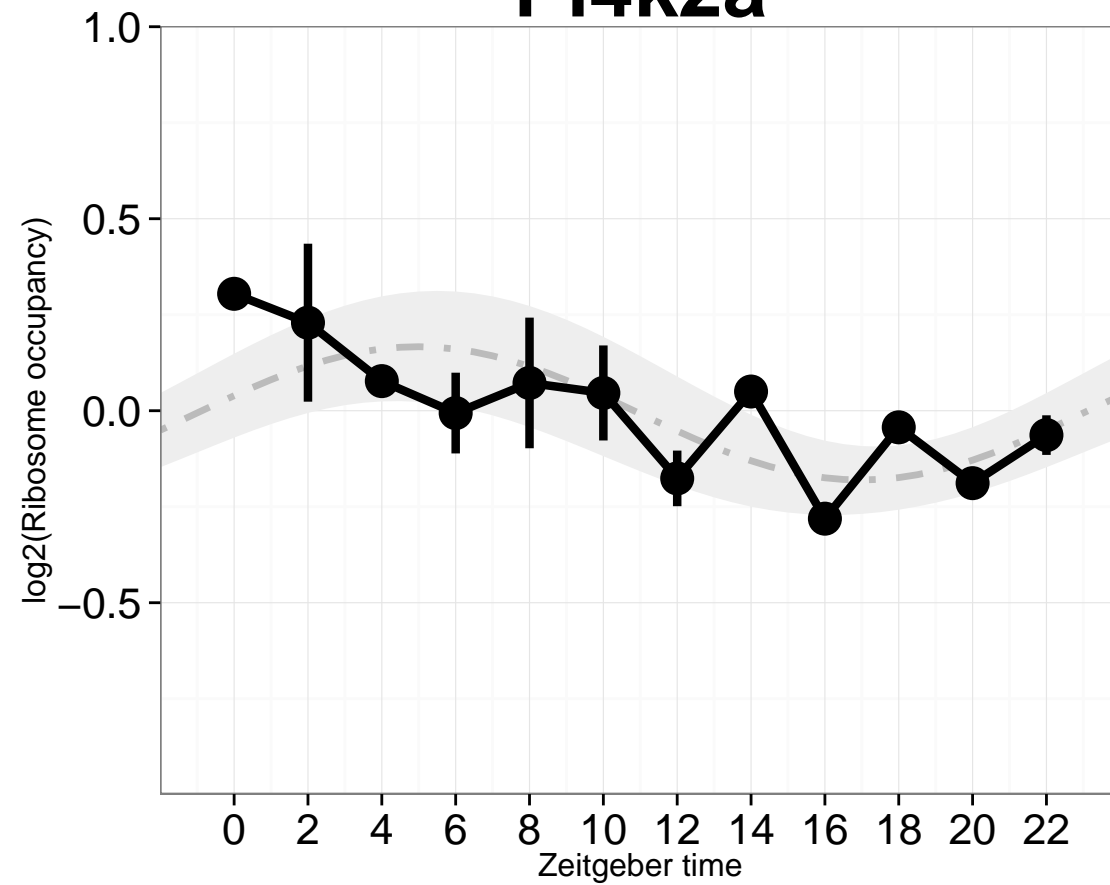

Supplement: SuppDataset_1.zip [file Pi4k2a_set_C.pdf › Supplemental Dataset 1/C-mRNA_nonrhythm_translation_rhyth/Pi4k2a_set_C.pdf]

# Pi4k2b

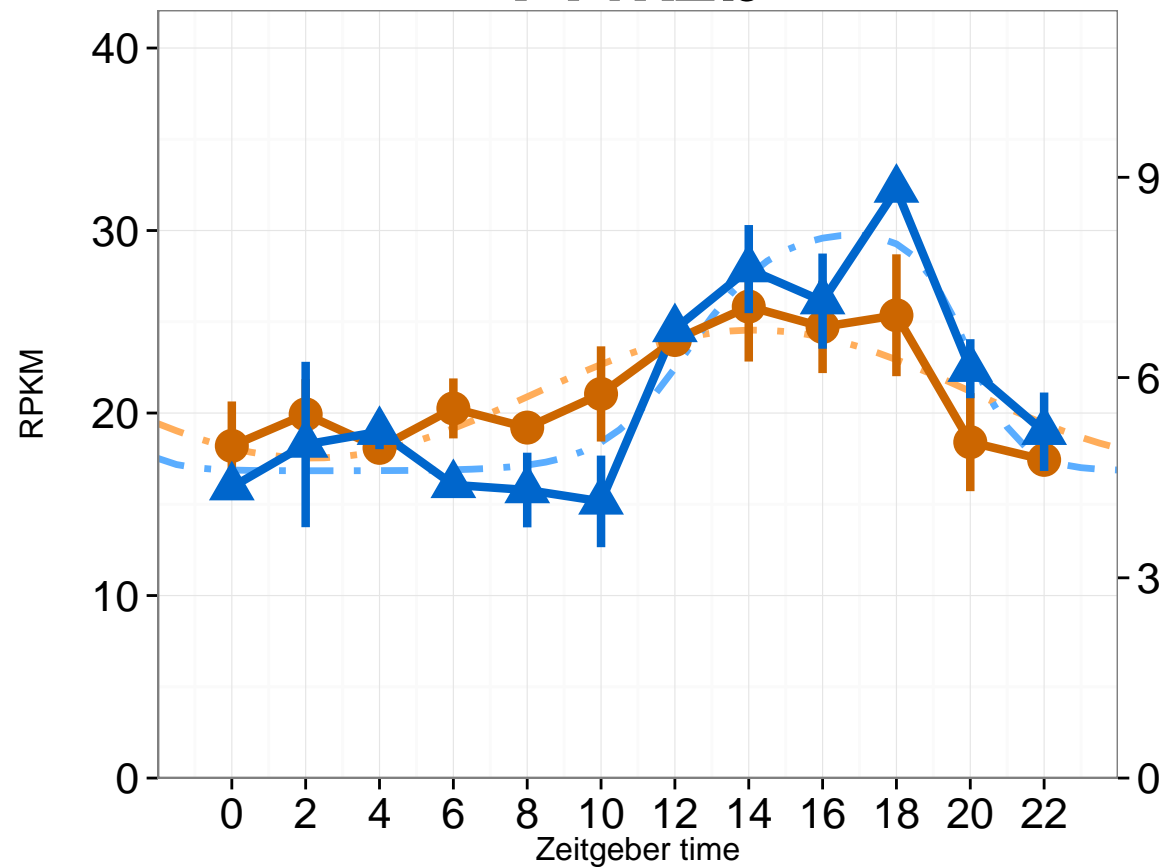

# Pi4k2b

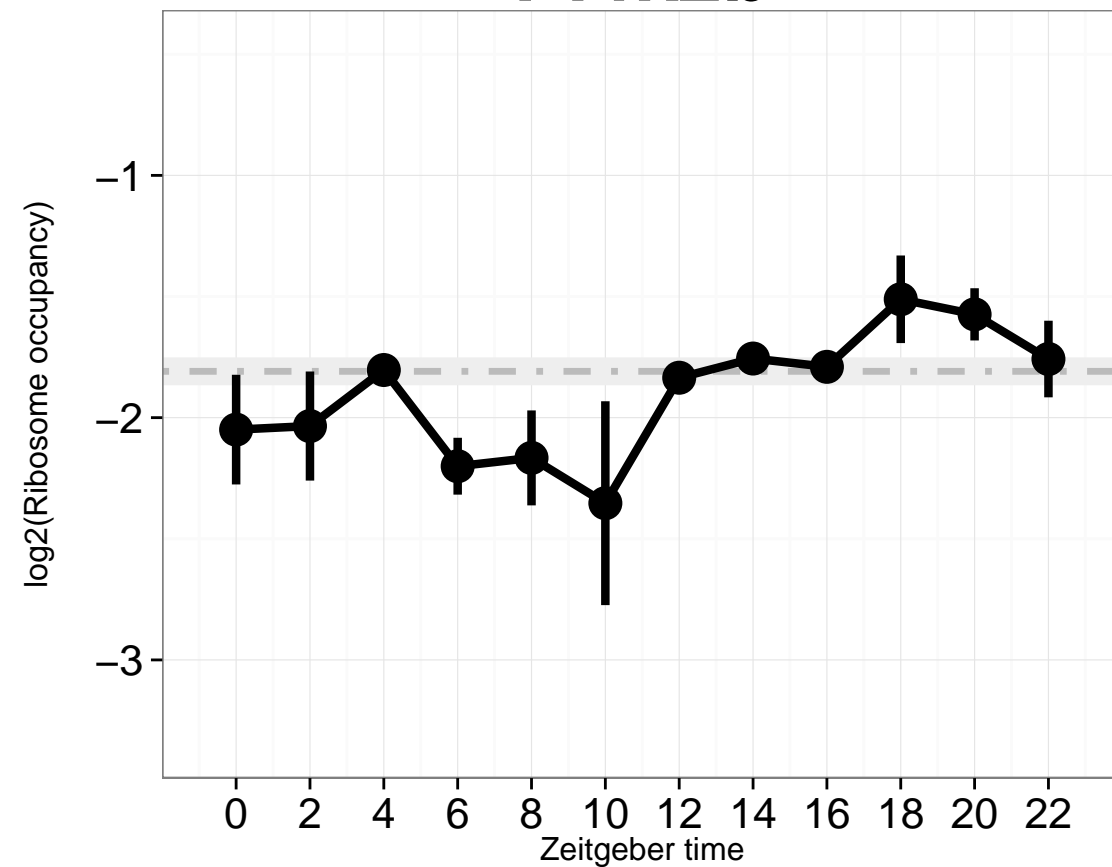

Supplement: SuppDataset_1.zip [file Pi4k2b_set_C.pdf › Supplemental Dataset 1/C-mRNA_nonrhythm_translation_rhyth/Pi4k2b_set_C.pdf]

## Pibf1

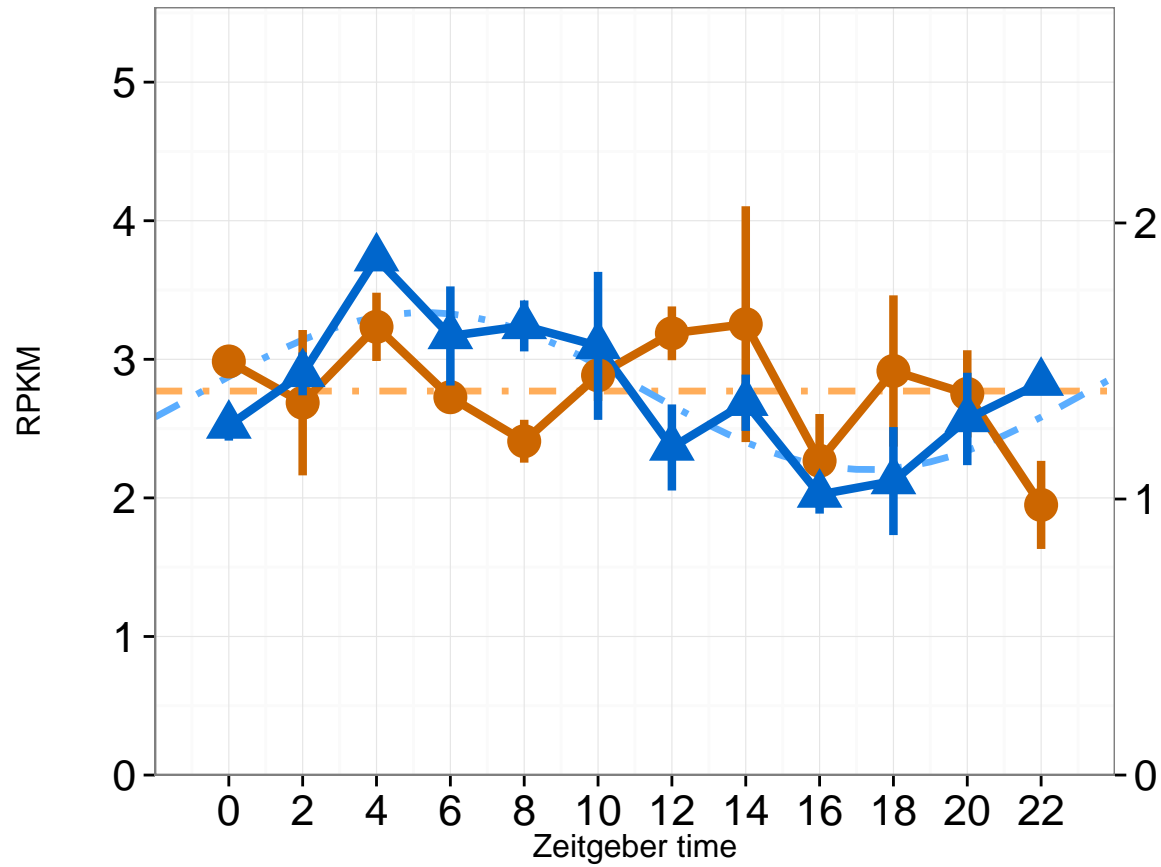

## Pibf1

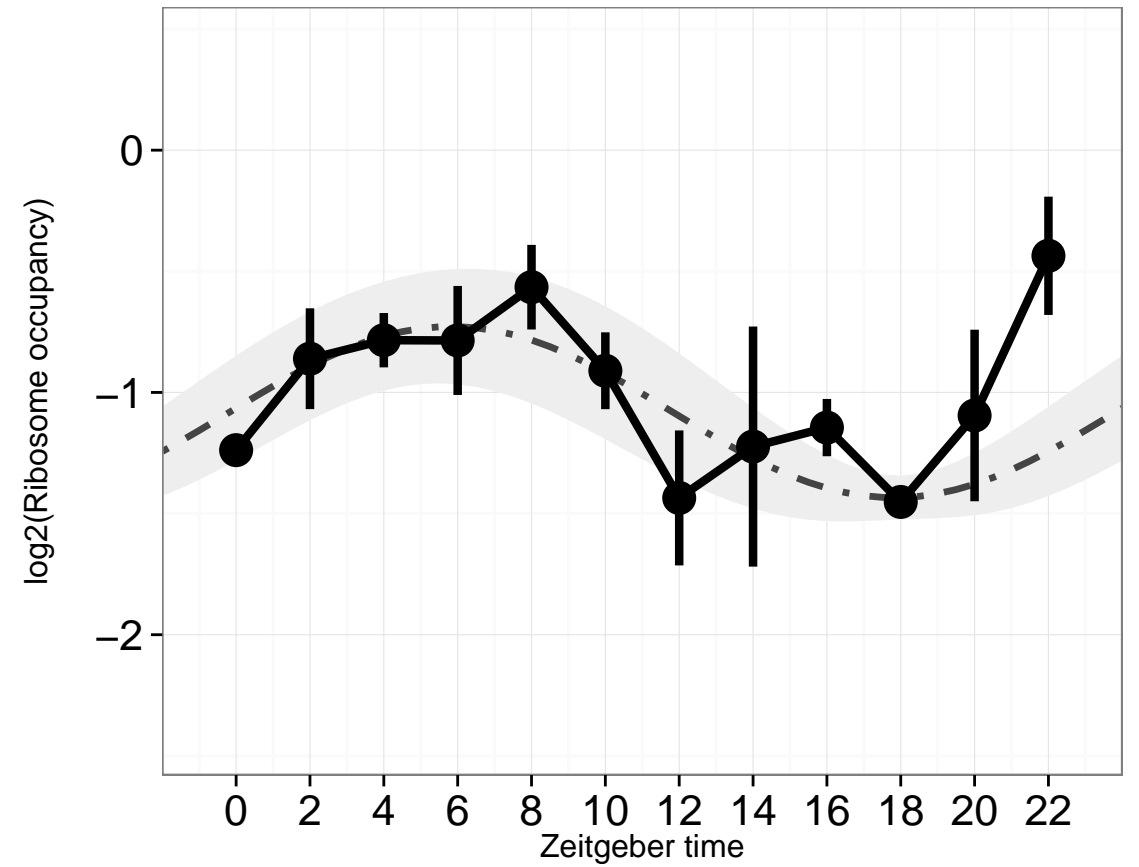

Supplement: SuppDataset_1.zip [file Pibf1_set_C.pdf › Supplemental Dataset 1/C-mRNA_nonrhythm_translation_rhyth/Pibf1_set_C.pdf]

## Pigf

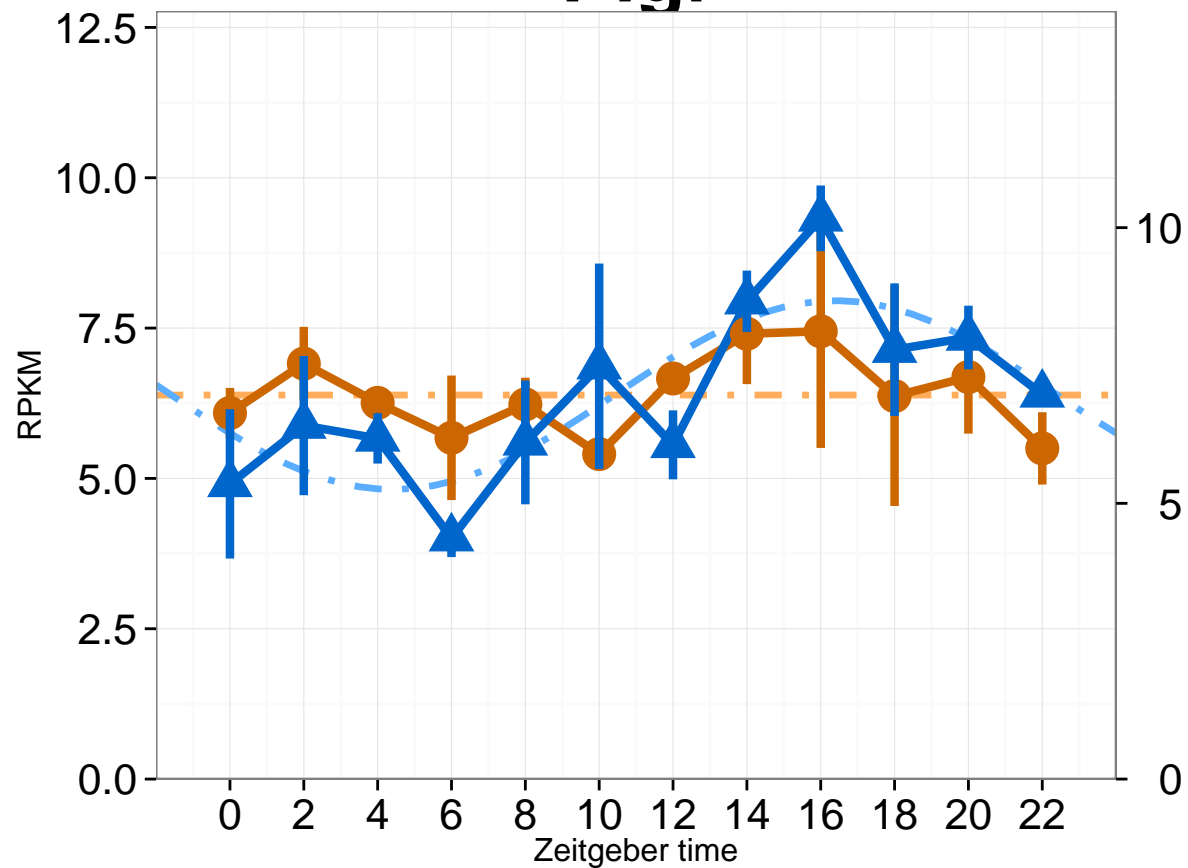

## Pigf

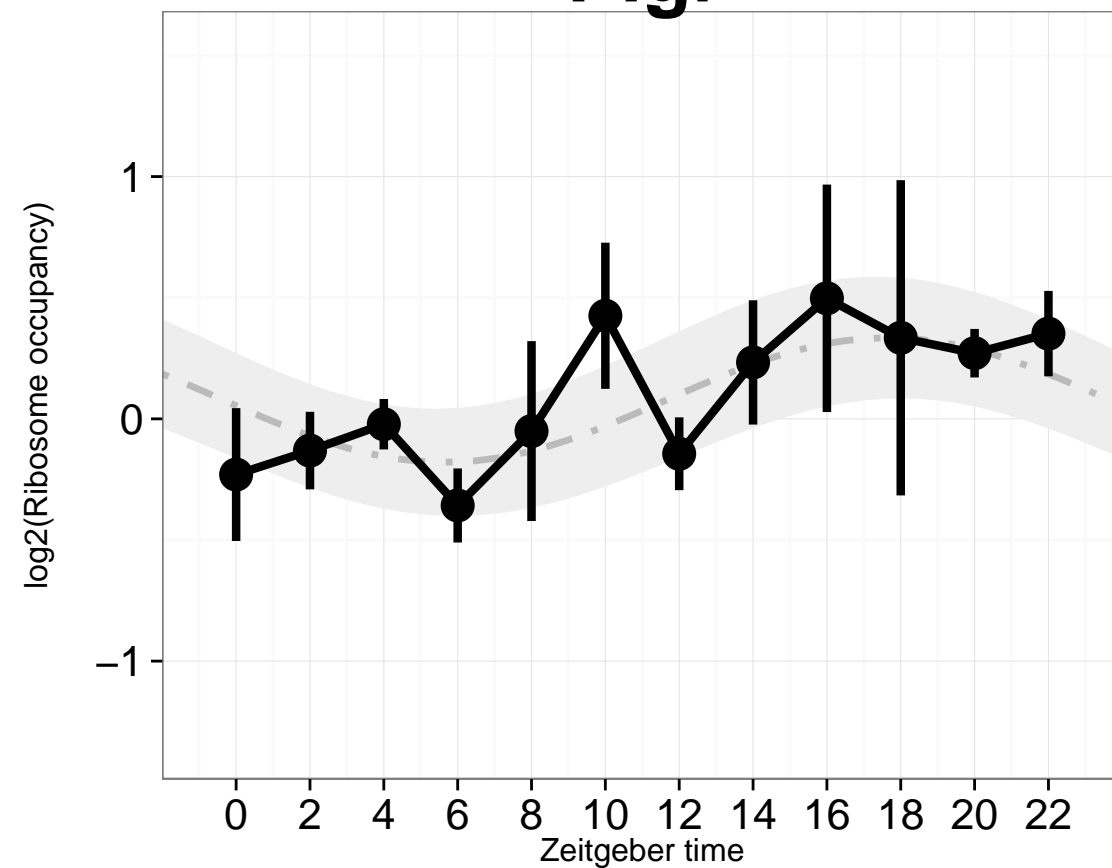

Supplement: SuppDataset_1.zip [file Pigf_set_C.pdf › Supplemental Dataset 1/C-mRNA_nonrhythm_translation_rhyth/Pigf_set_C.pdf]

# Pik3c2g

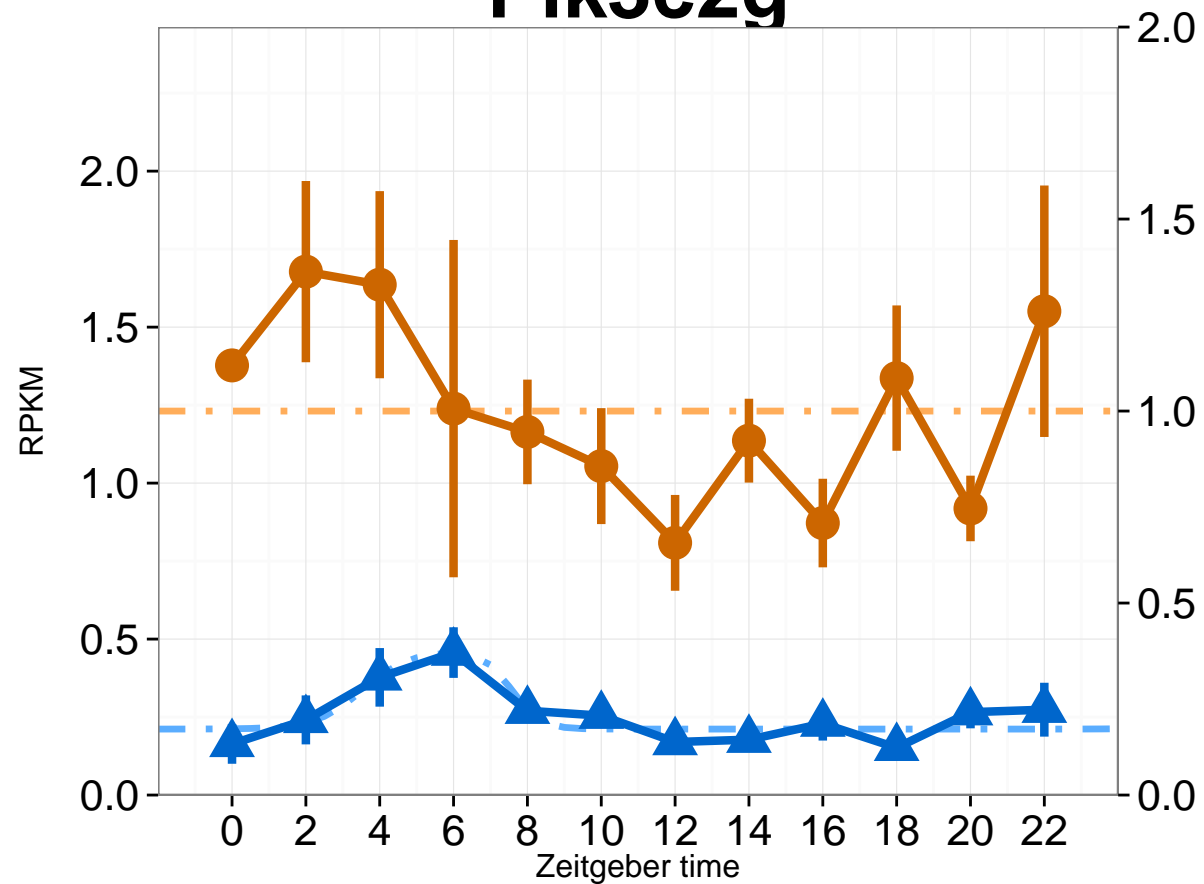

# Pik3c2g

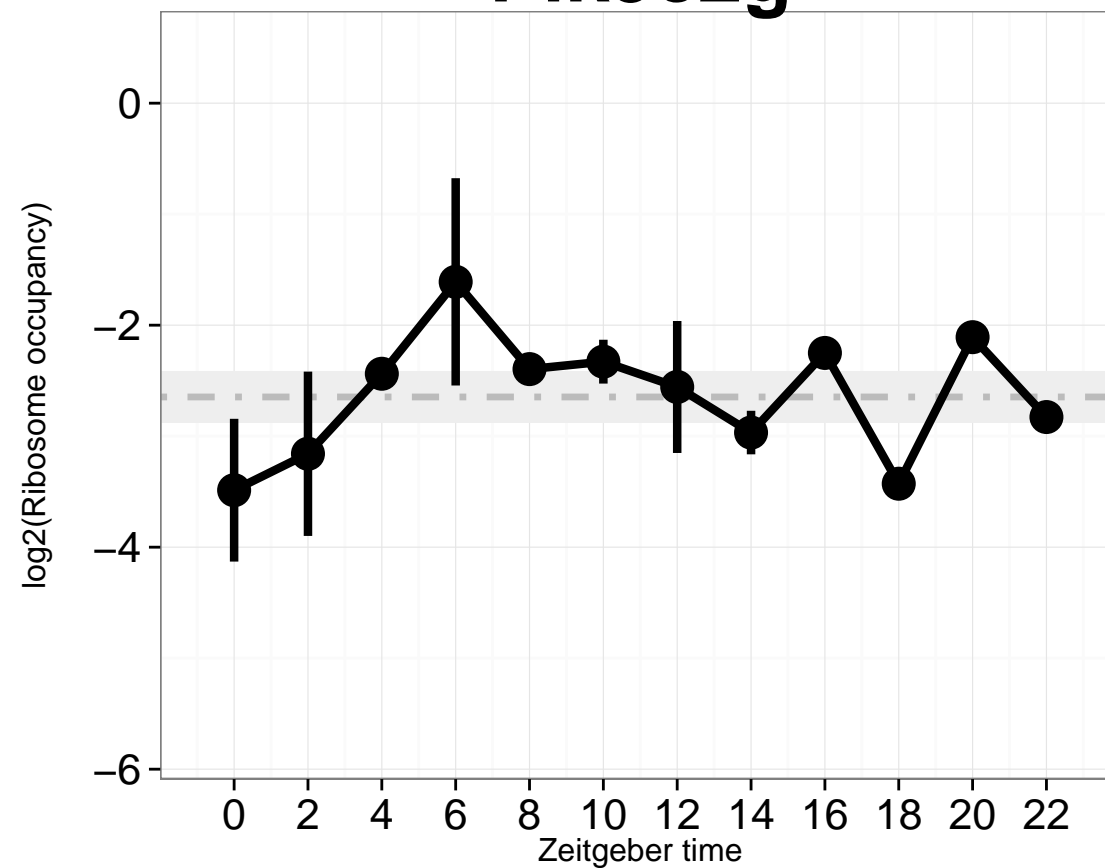

Supplement: SuppDataset_1.zip [file Pik3c2g_set_C.pdf › Supplemental Dataset 1/C-mRNA_nonrhythm_translation_rhyth/Pik3c2g_set_C.pdf]

## Pilrb2

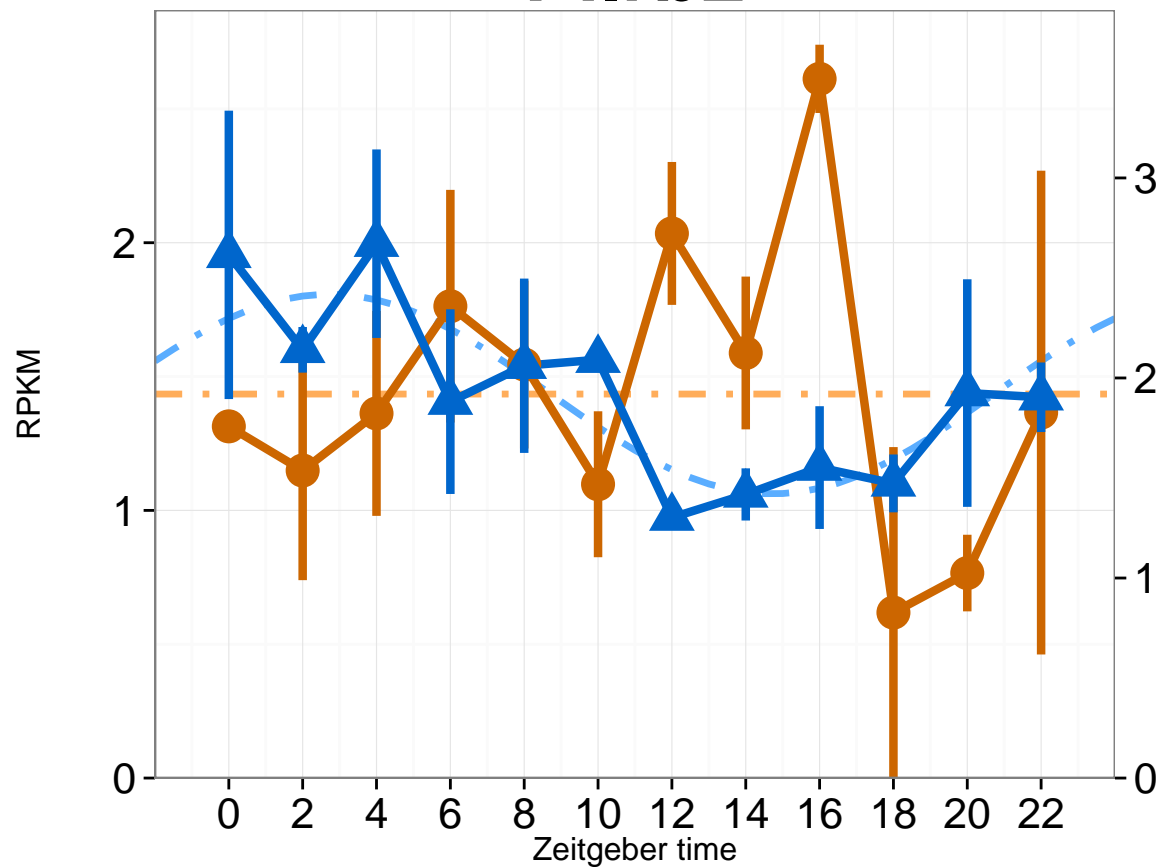

## Pilrb2

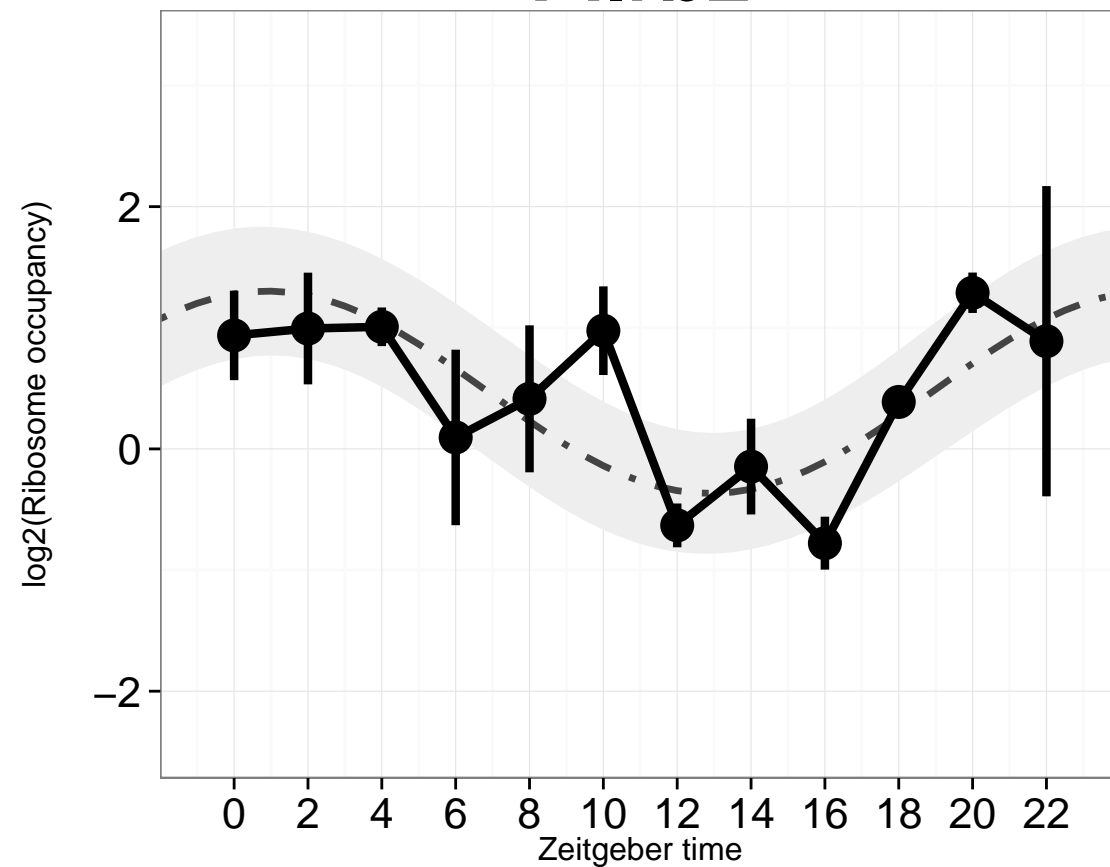

Supplement: SuppDataset_1.zip [file Pilrb2_set_C.pdf › Supplemental Dataset 1/C-mRNA_nonrhythm_translation_rhyth/Pilrb2_set_C.pdf]

## Plau

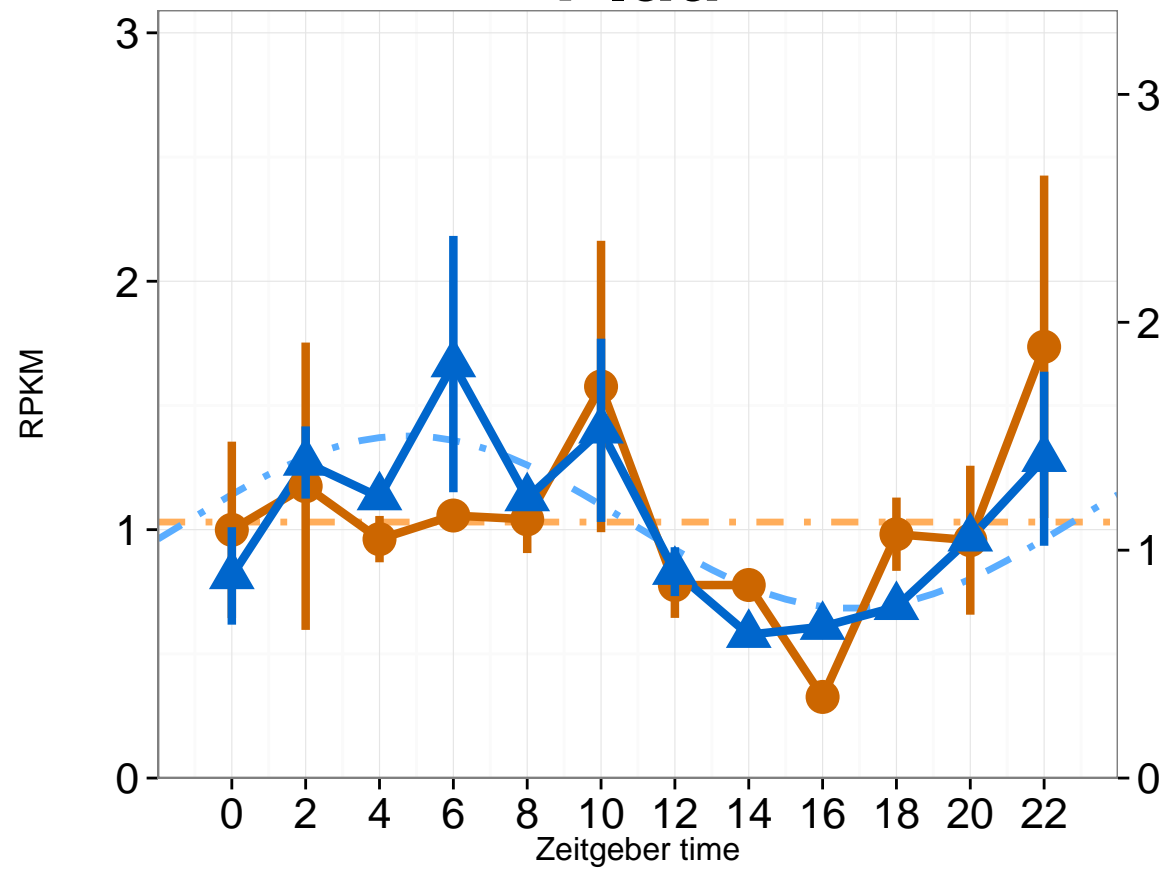

## Plau

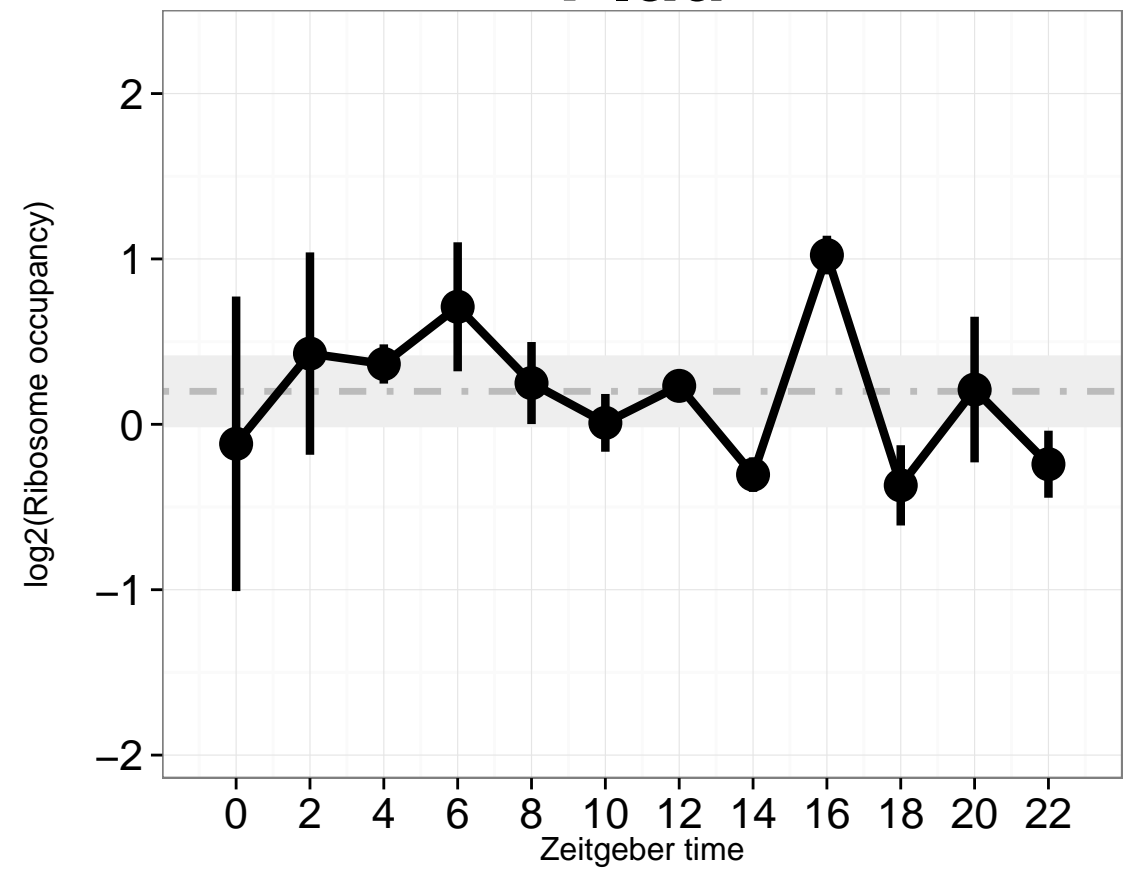

Supplement: SuppDataset_1.zip [file Plau_set_C.pdf › Supplemental Dataset 1/C-mRNA_nonrhythm_translation_rhyth/Plau_set_C.pdf]

## Plcg1

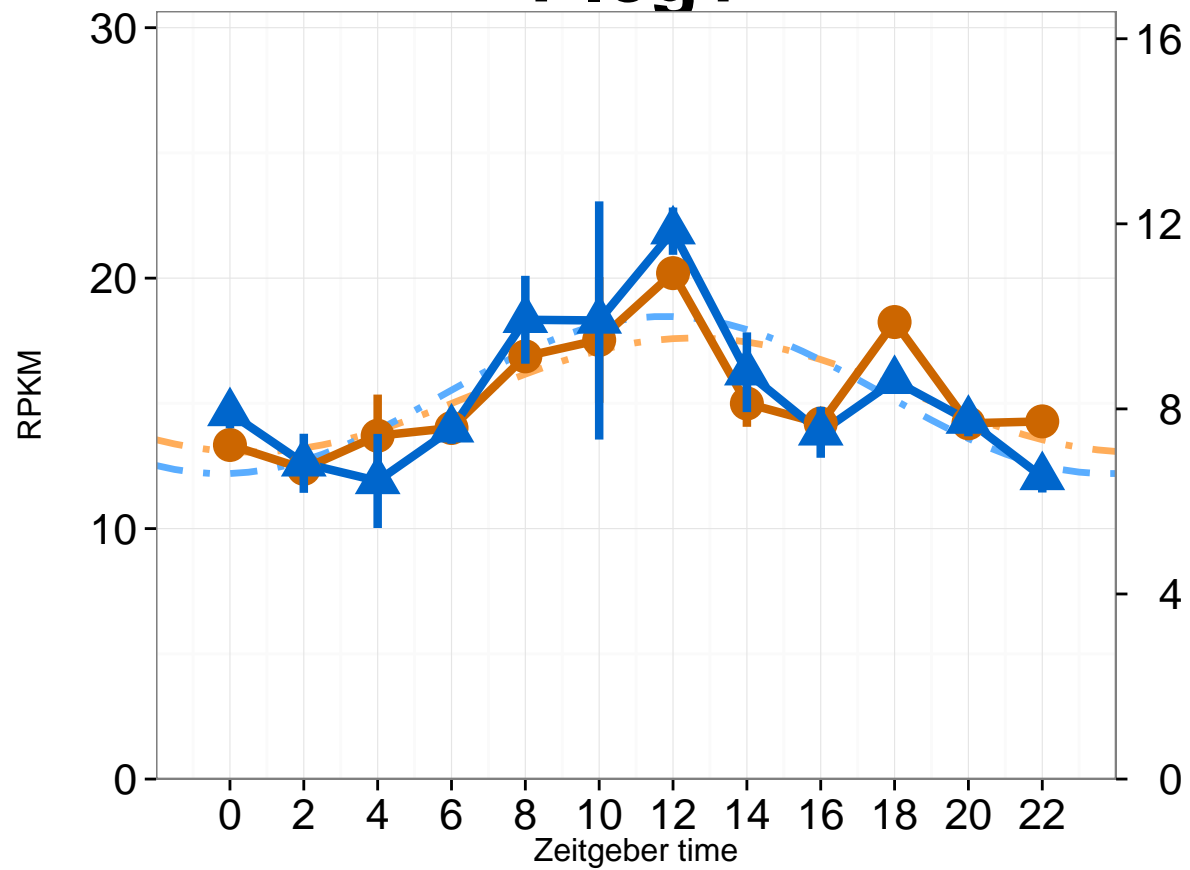

## Plcg1

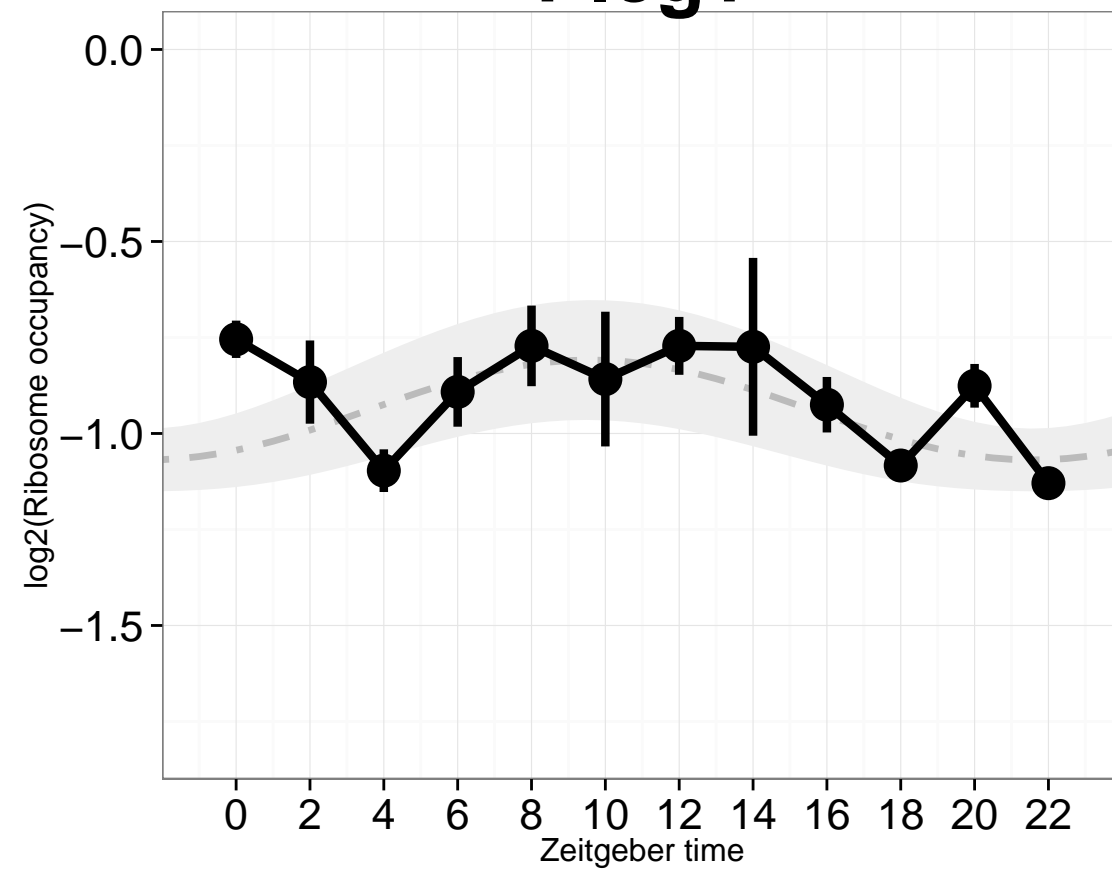

Supplement: SuppDataset_1.zip [file Plcg1_set_C.pdf › Supplemental Dataset 1/C-mRNA_nonrhythm_translation_rhyth/Plcg1_set_C.pdf]

## Plekhf1

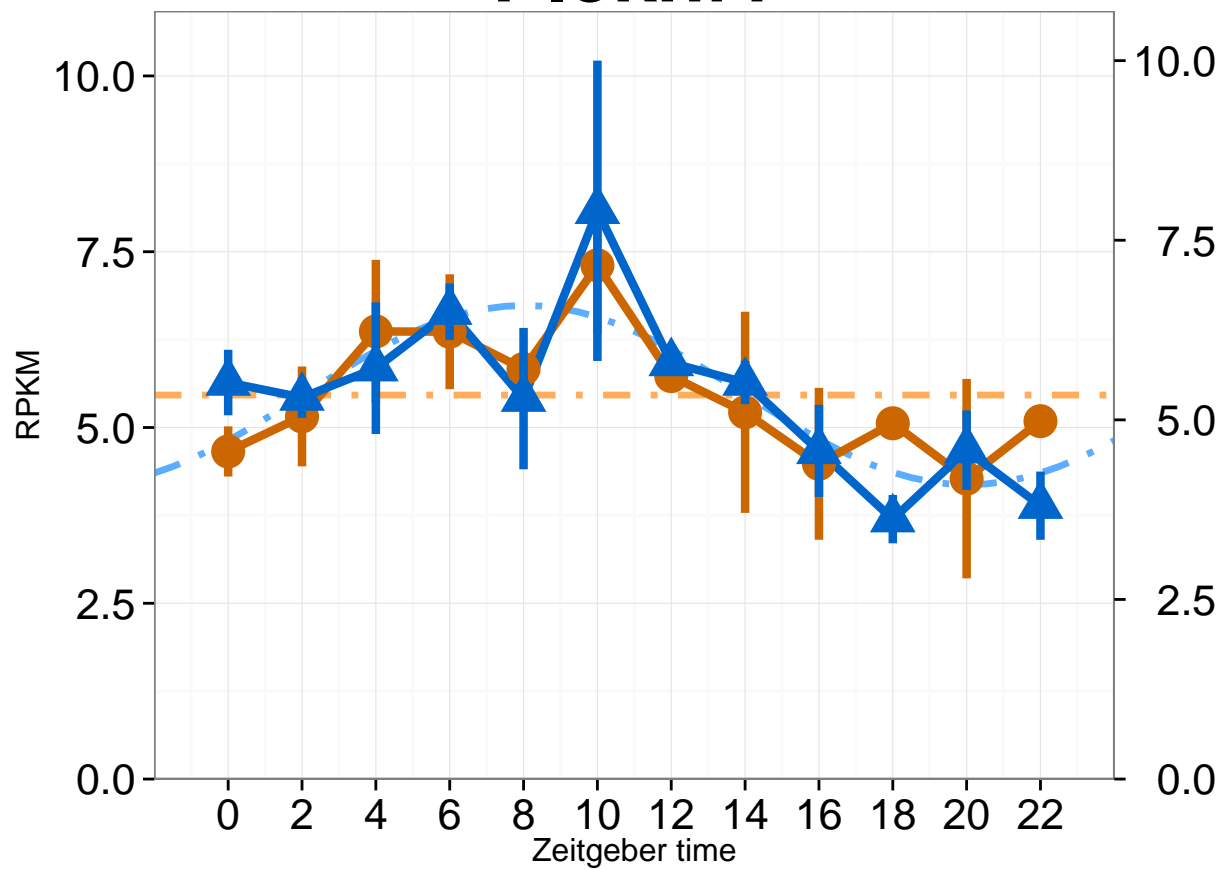

## Plekhf1

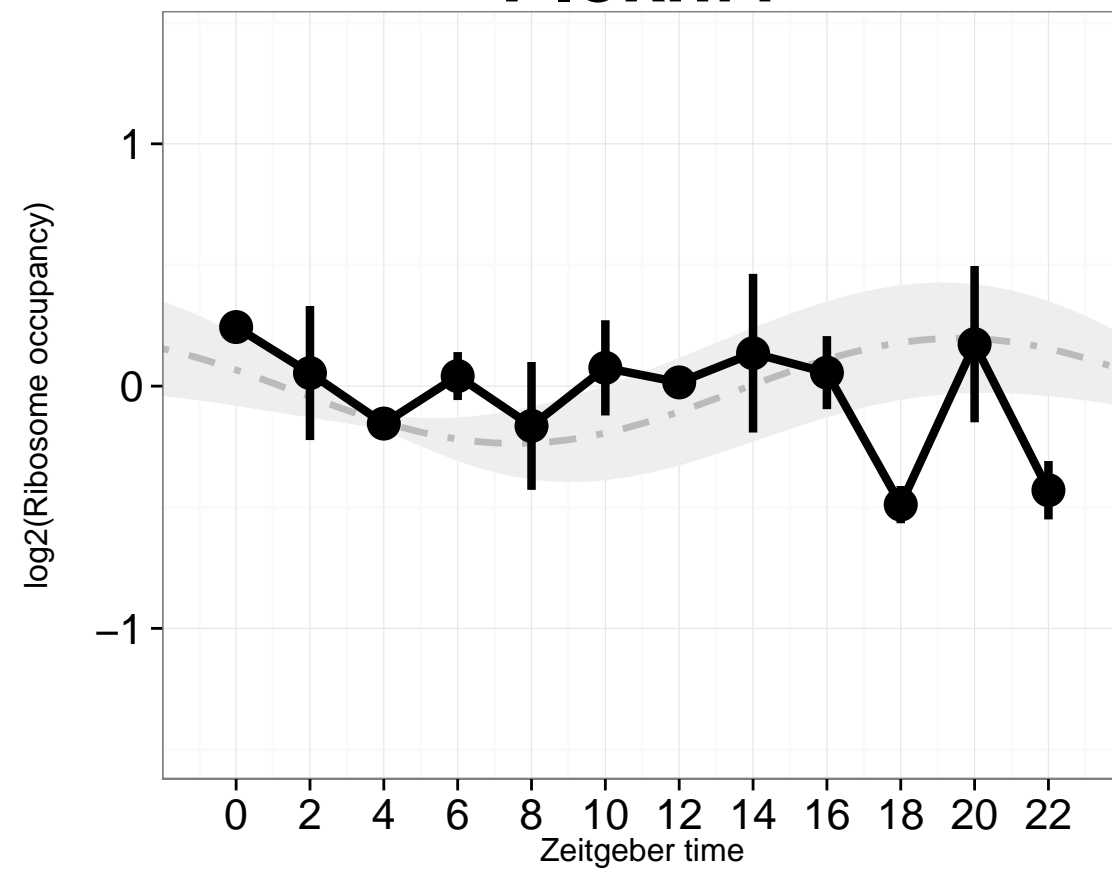

Supplement: SuppDataset_1.zip [file Plekhf1_set_C.pdf › Supplemental Dataset 1/C-mRNA_nonrhythm_translation_rhyth/Plekhf1_set_C.pdf]

# Plekhhg1

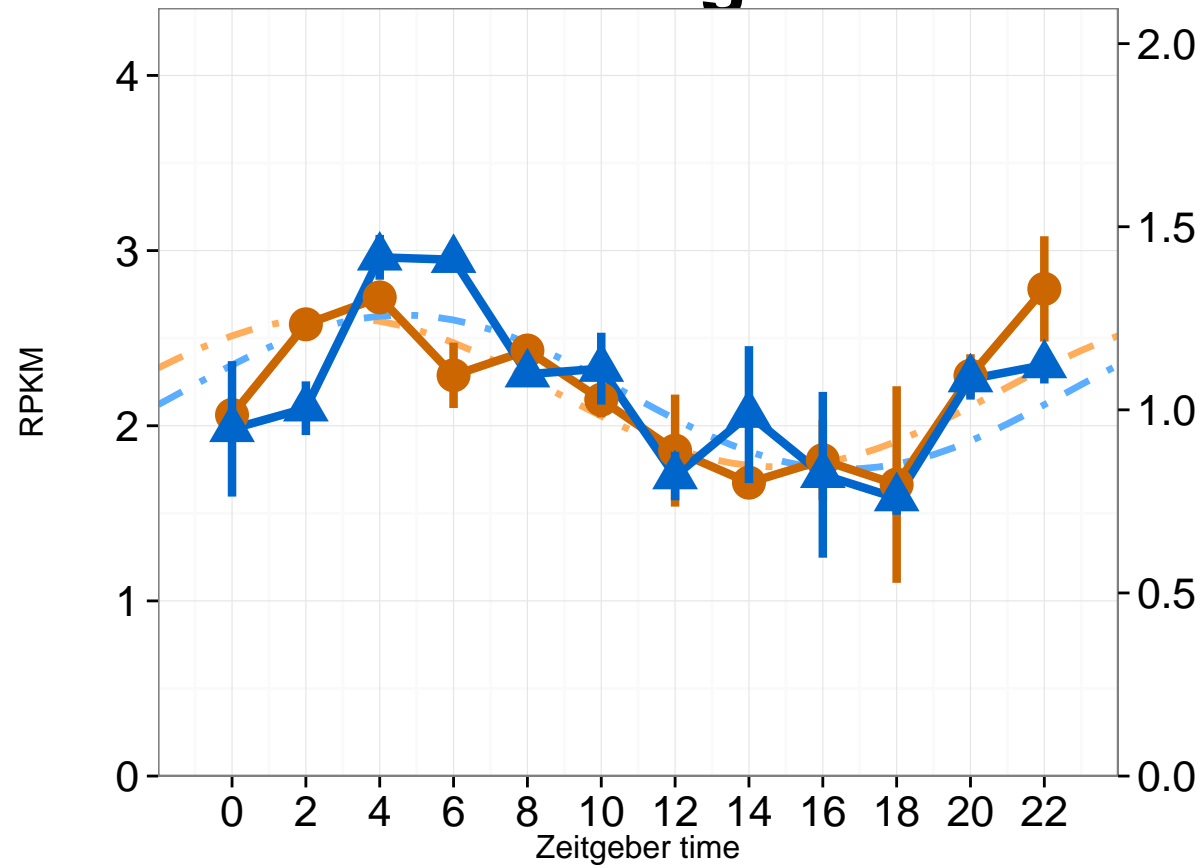

# Plekhhg1

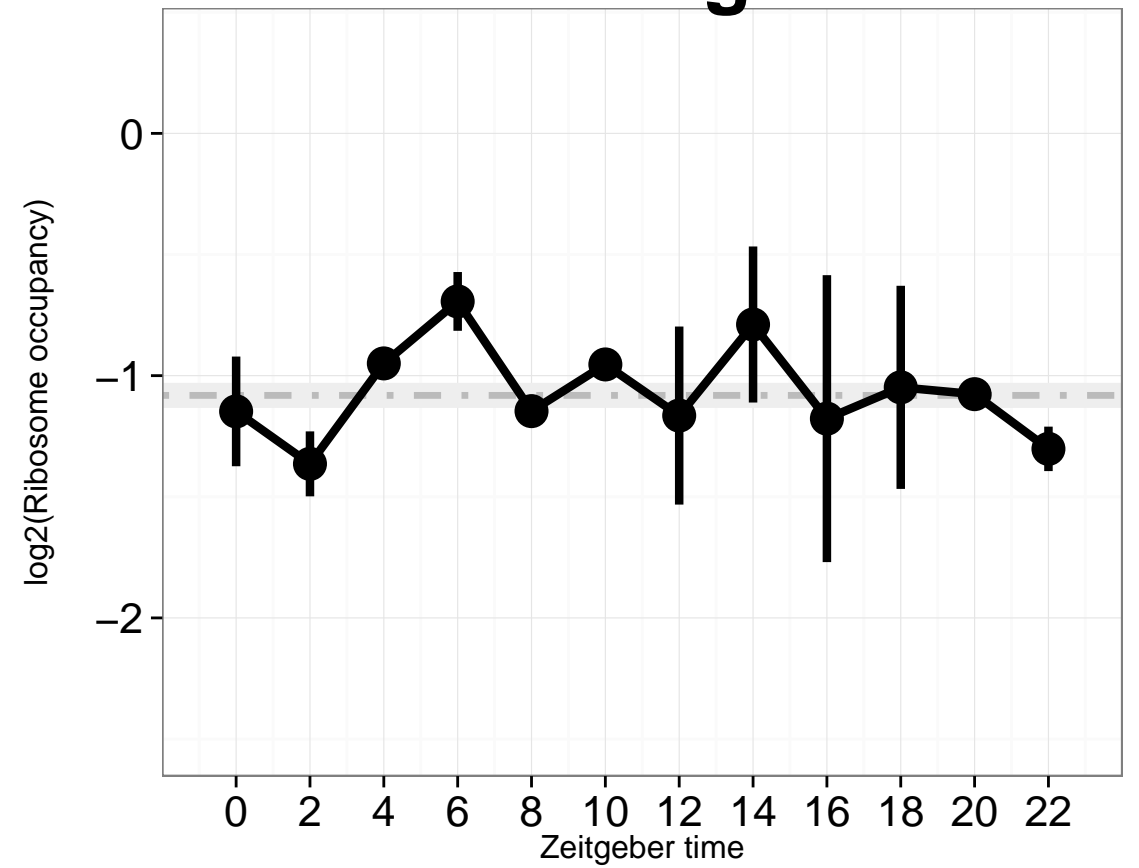

Supplement: SuppDataset_1.zip [file Plekhg1_set_C.pdf › Supplemental Dataset 1/C-mRNA_nonrhythm_translation_rhyth/Plekhg1_set_C.pdf]

# Plscr4

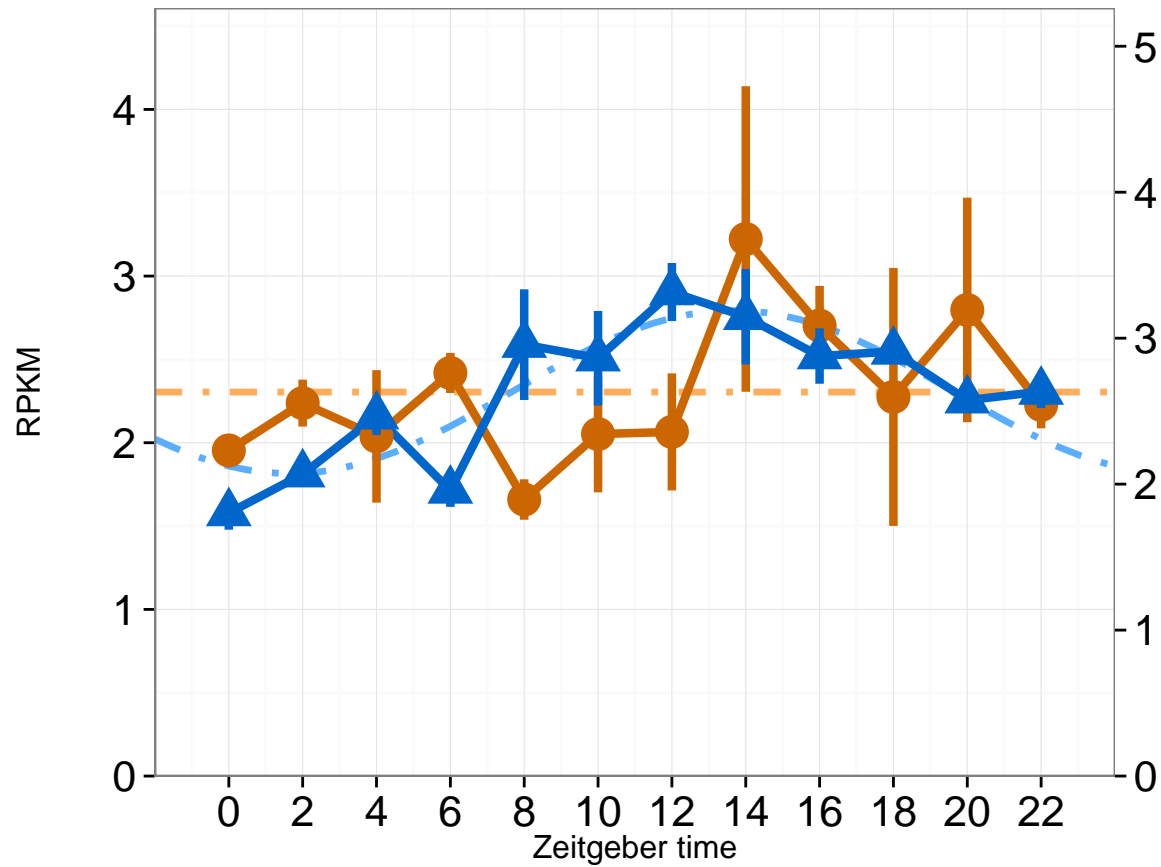

# Plscr4

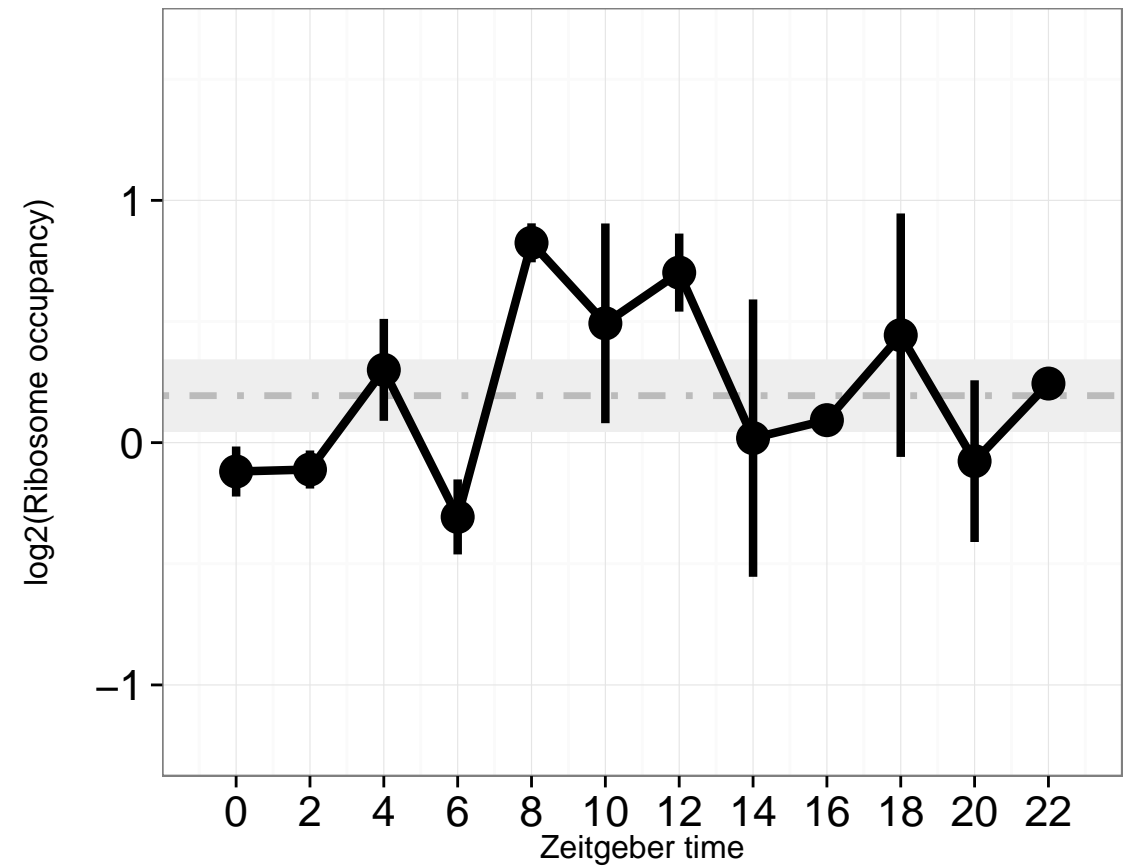

Supplement: SuppDataset_1.zip [file Plscr4_set_C.pdf › Supplemental Dataset 1/C-mRNA_nonrhythm_translation_rhyth/Plscr4_set_C.pdf]
