# Supplementary figures and images for: Ribosome profiling reveals the rhythmic liver translatome and circadian clock regulation by upstream open reading frames (part 41 of 113)
Source: HighWire-hosted journal article supplement (doi:10.1101/gr.195404.115), 2015-10-20

# Lrrc41

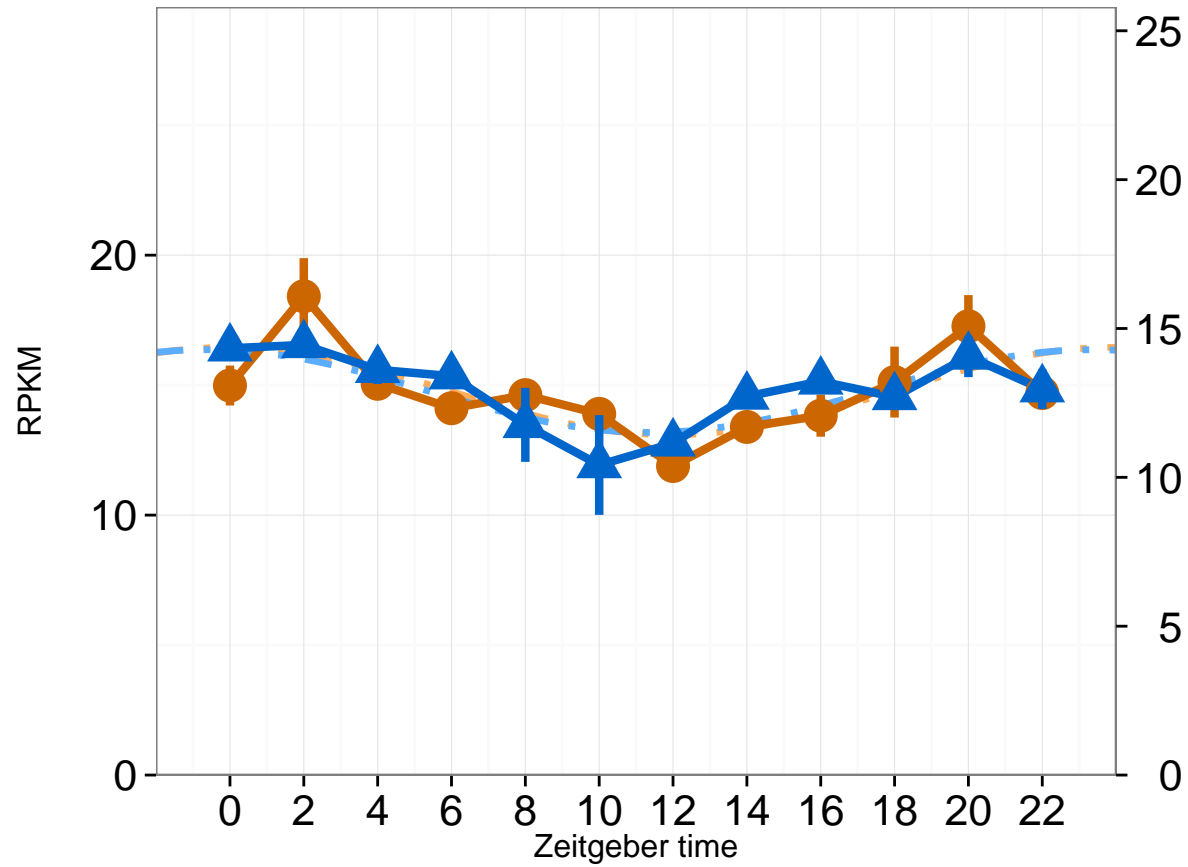

# Lrrc41

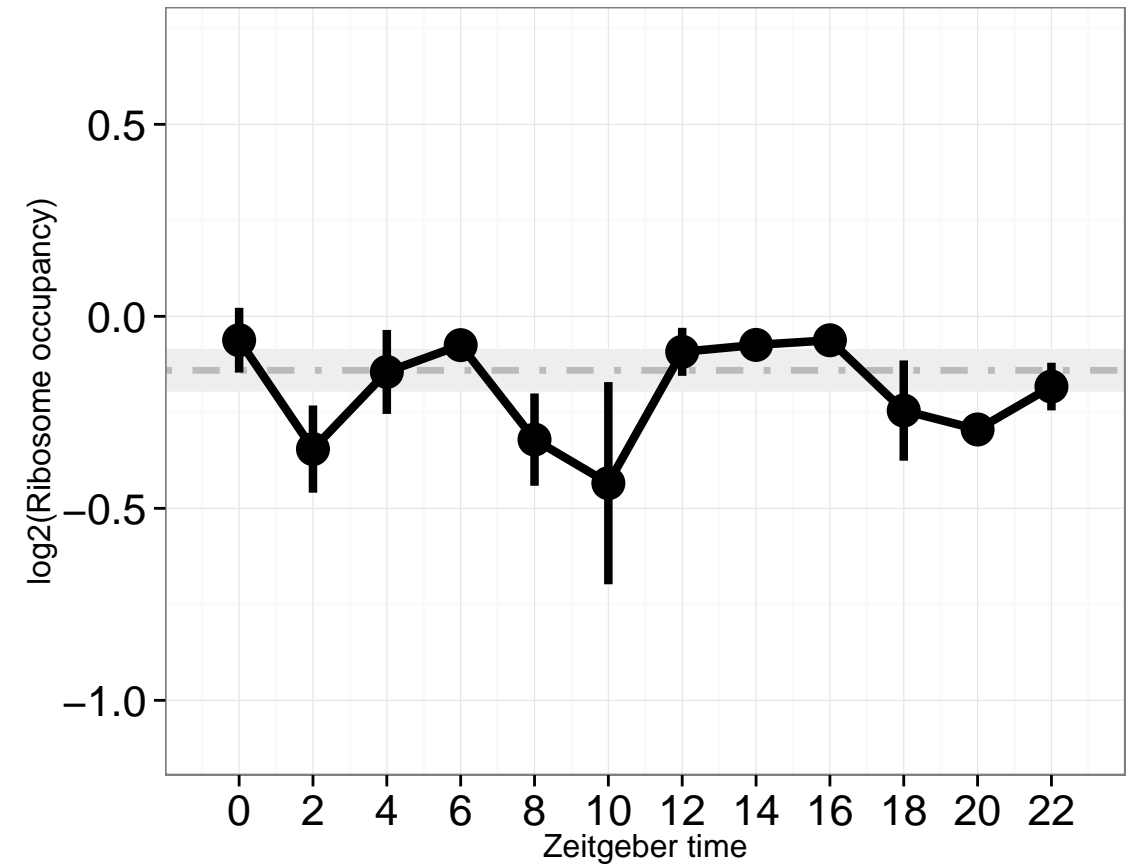

Supplement: SuppDataset_1.zip [file Lrrc41_set_A.pdf › Supplemental Dataset 1/A-mRNA_nonrhyth_translation_nonrhyth/Lrrc41_set_A.pdf]

# Lrrc45

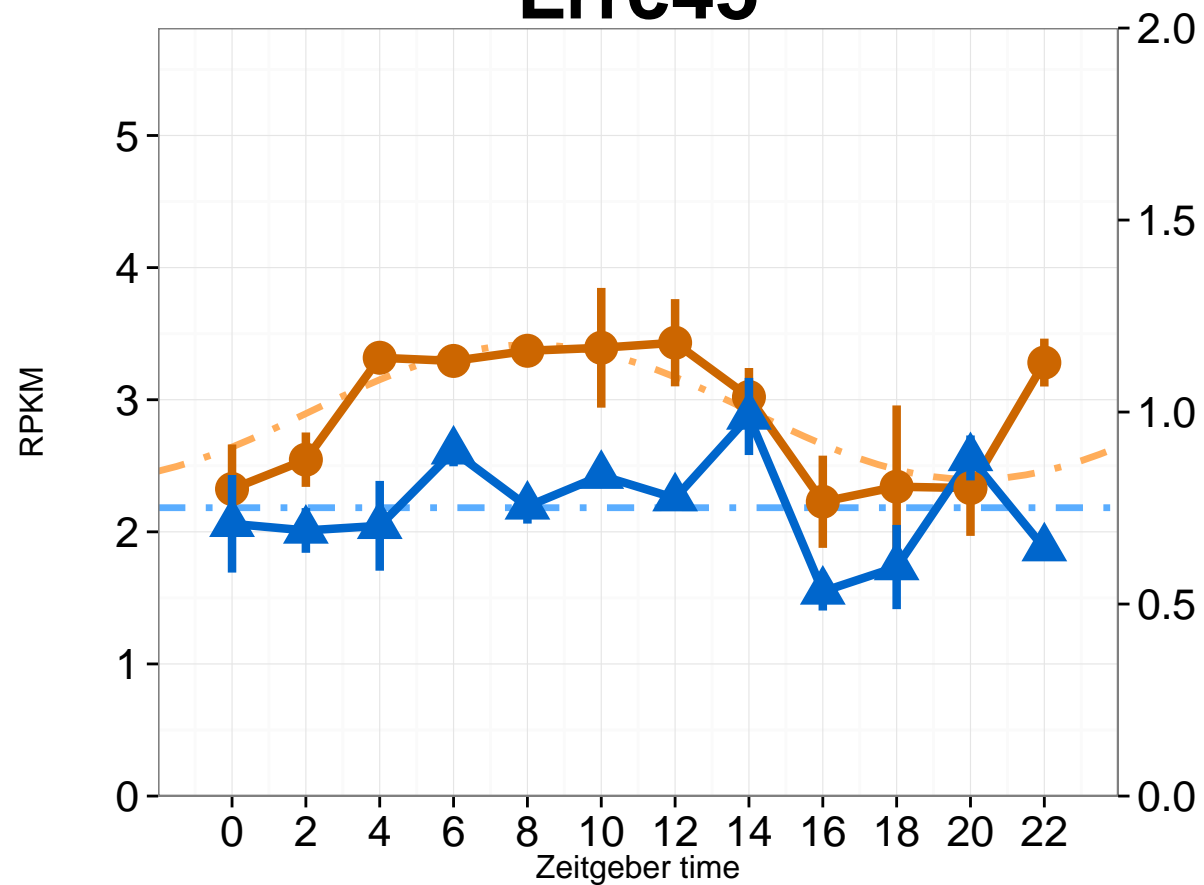

# Lrrc45

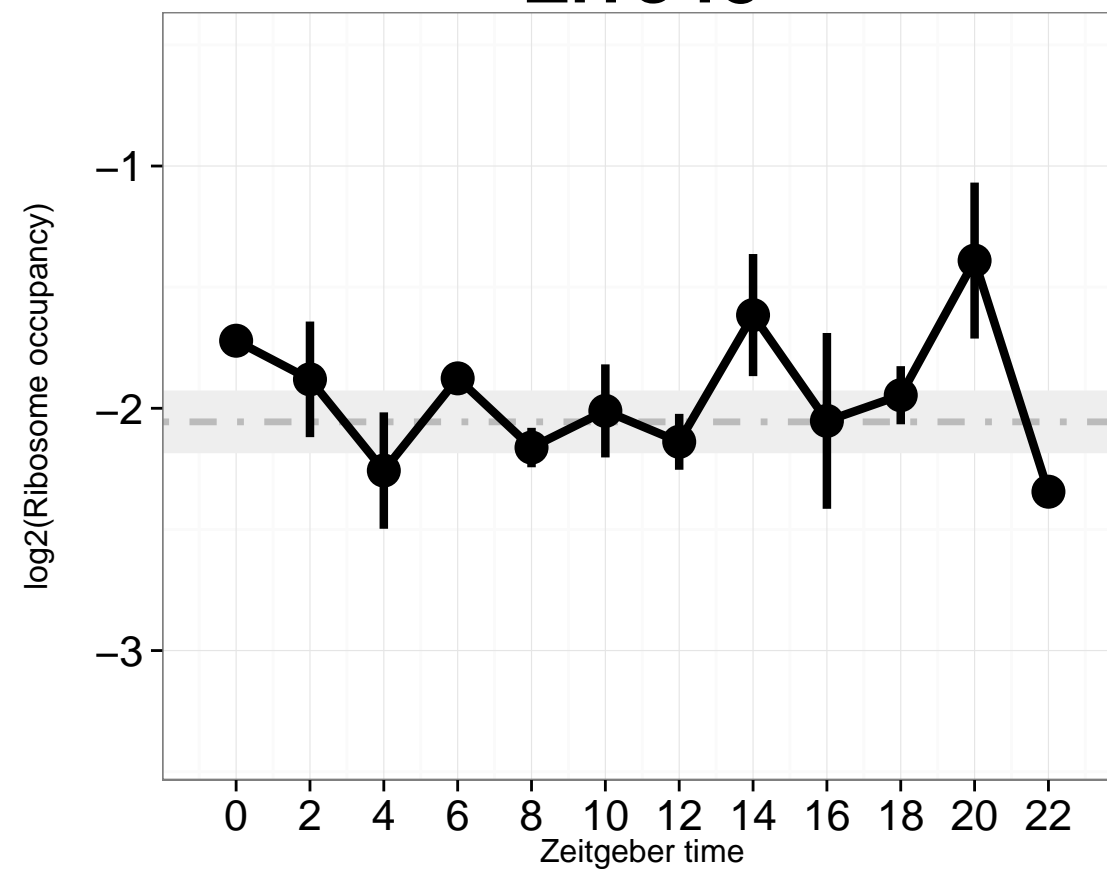

Supplement: SuppDataset_1.zip [file Lrrc45_set_A.pdf › Supplemental Dataset 1/A-mRNA_nonrhyth_translation_nonrhyth/Lrrc45_set_A.pdf]

## Lrrc47

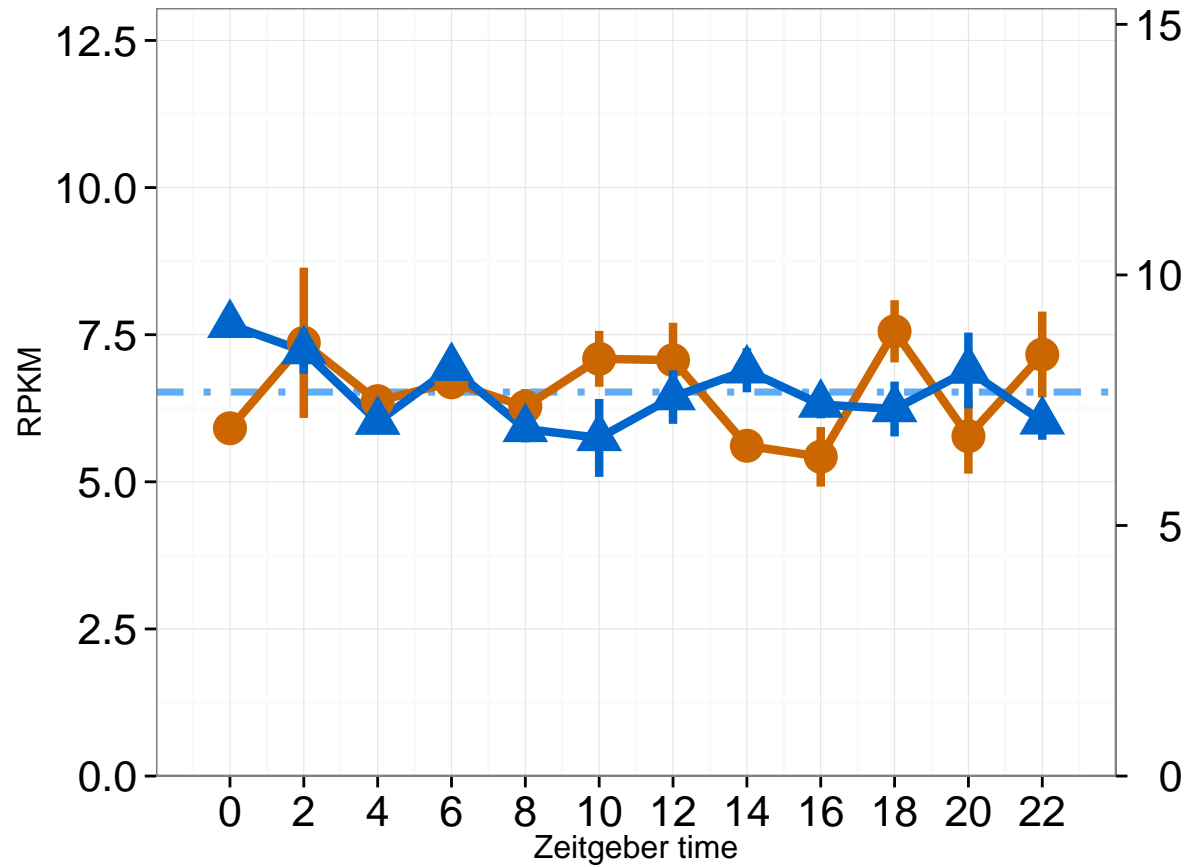

## Lrrc47

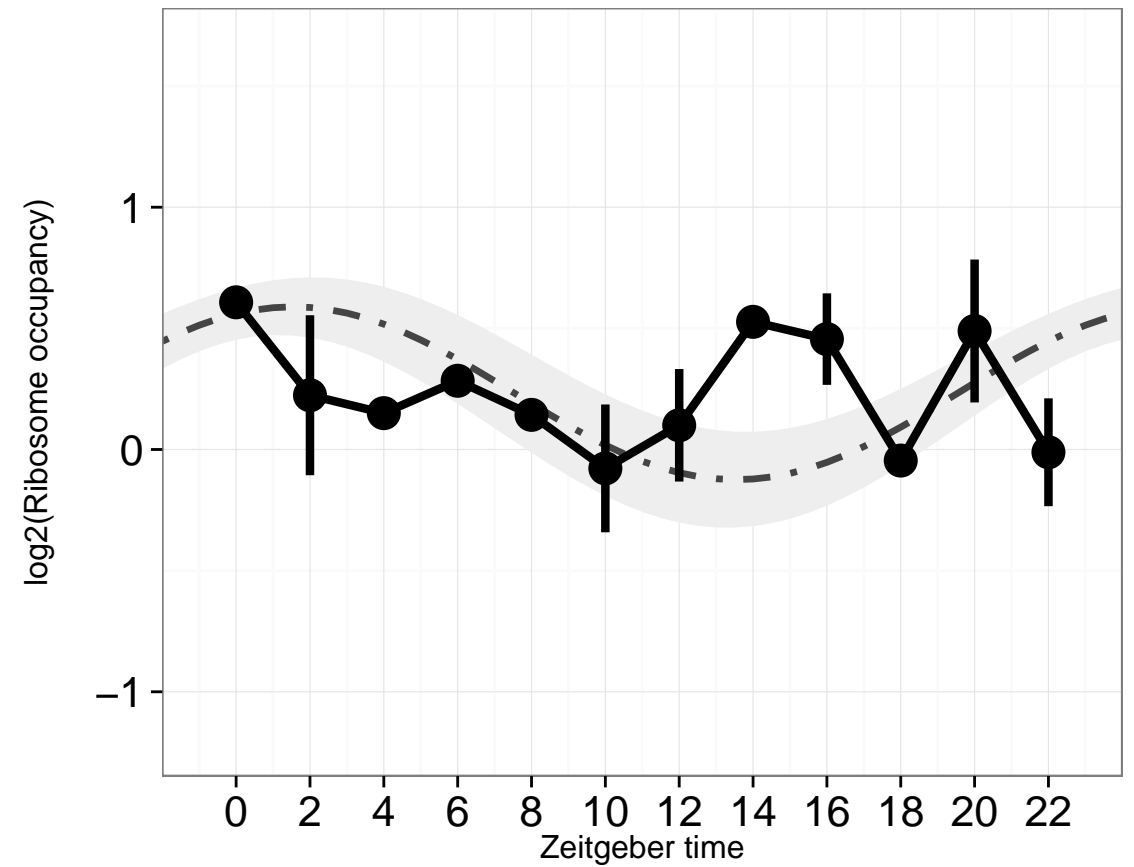

Supplement: SuppDataset_1.zip [file Lrrc47_set_A.pdf › Supplemental Dataset 1/A-mRNA_nonrhyth_translation_nonrhyth/Lrrc47_set_A.pdf]

## Lrrc4c

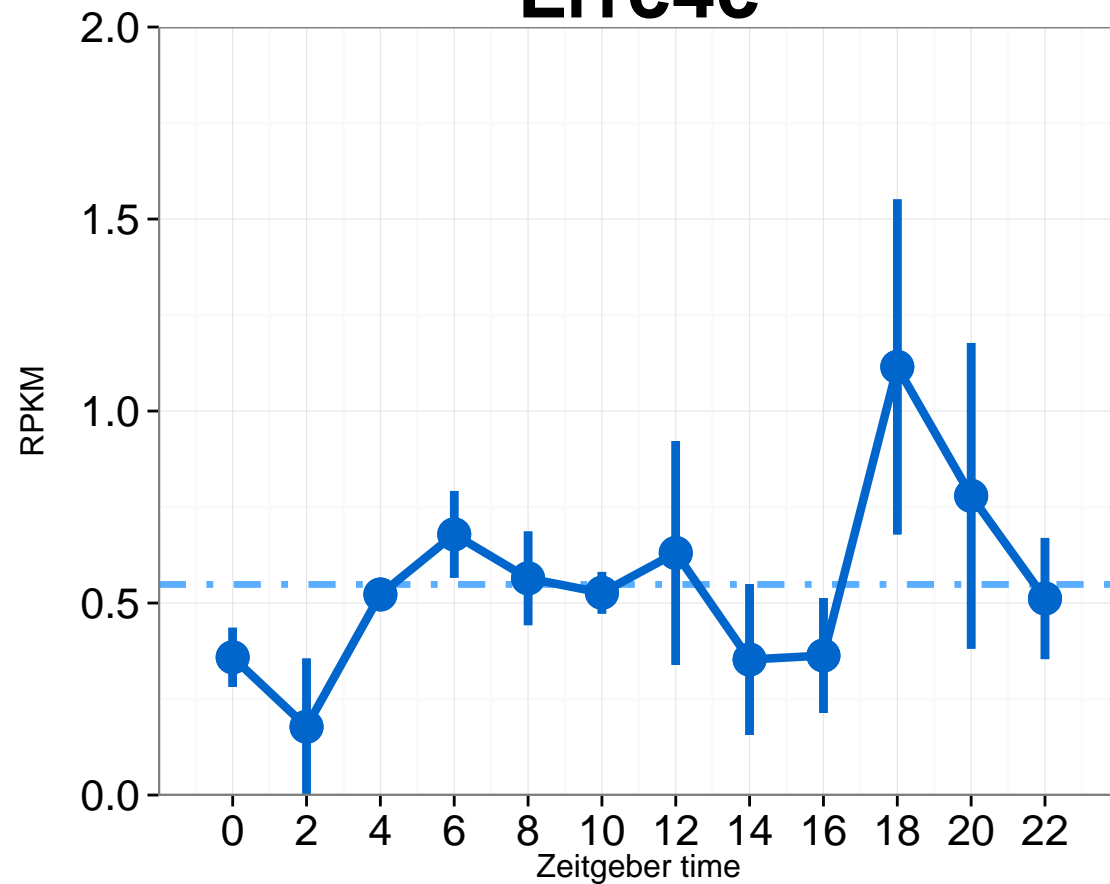

## Lrrc4c log2(Ribosome occupancy

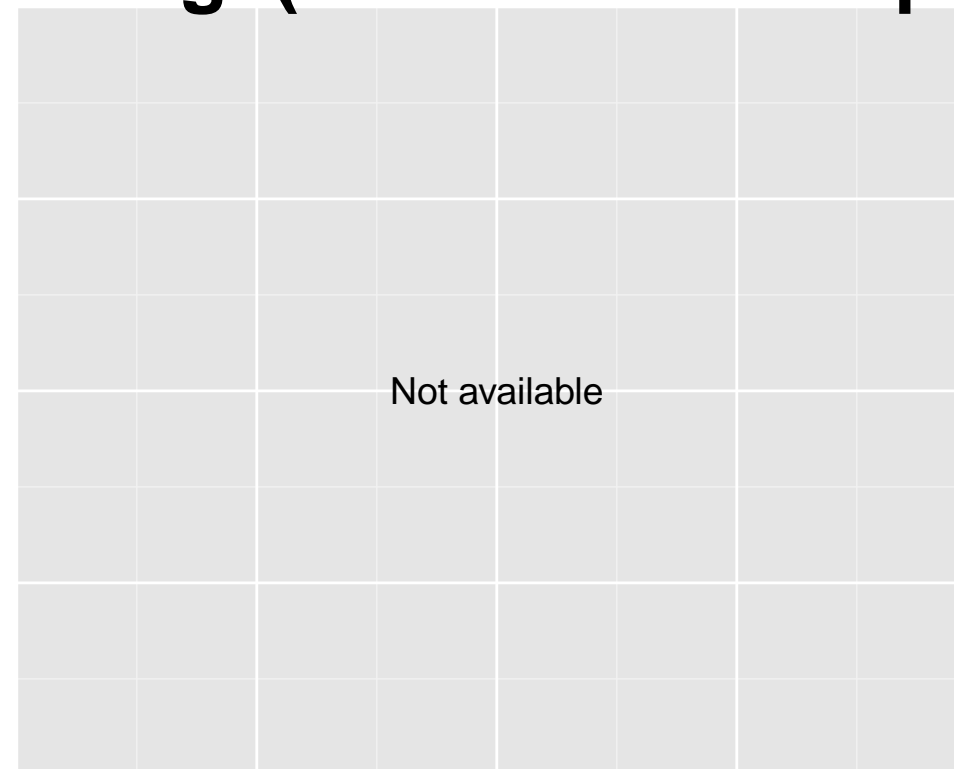

Supplement: SuppDataset_1.zip [file Lrrc4c_set_A.pdf › Supplemental Dataset 1/A-mRNA_nonrhyth_translation_nonrhyth/Lrrc4c_set_A.pdf]

## Lrrc51

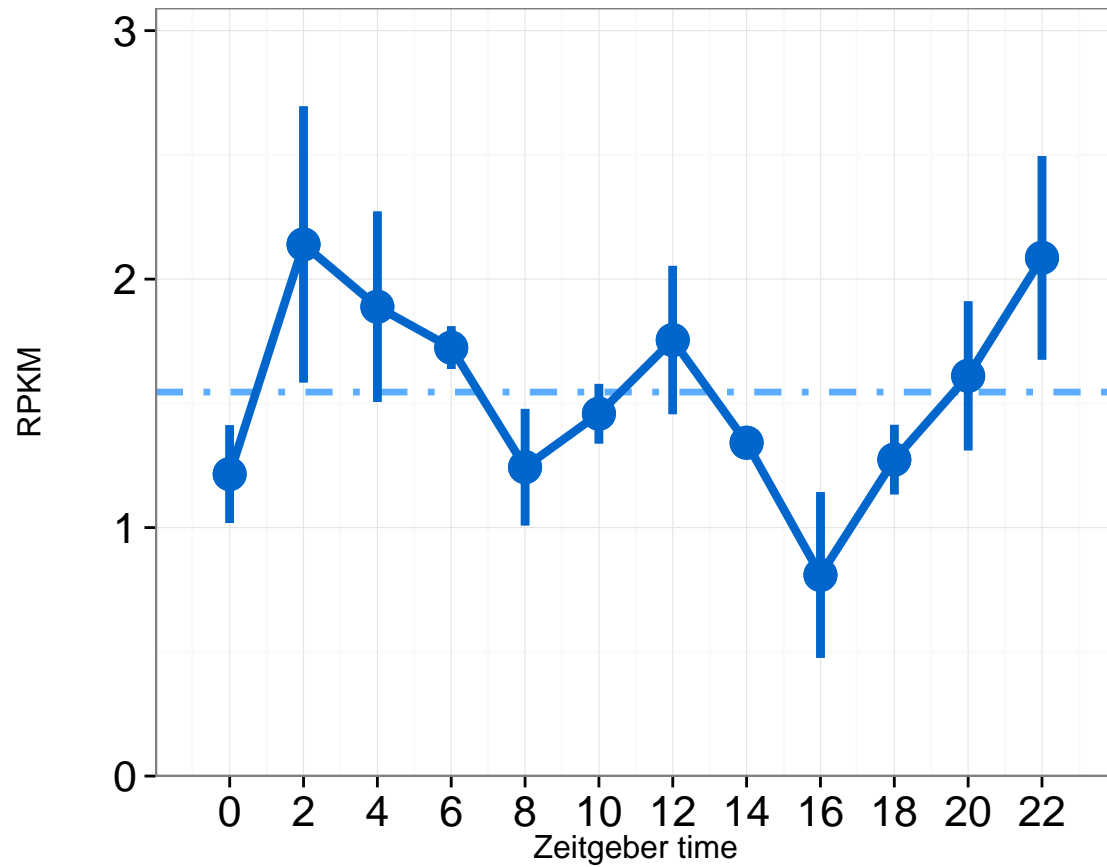

## Lrrc51 log2(Ribosome occupancy

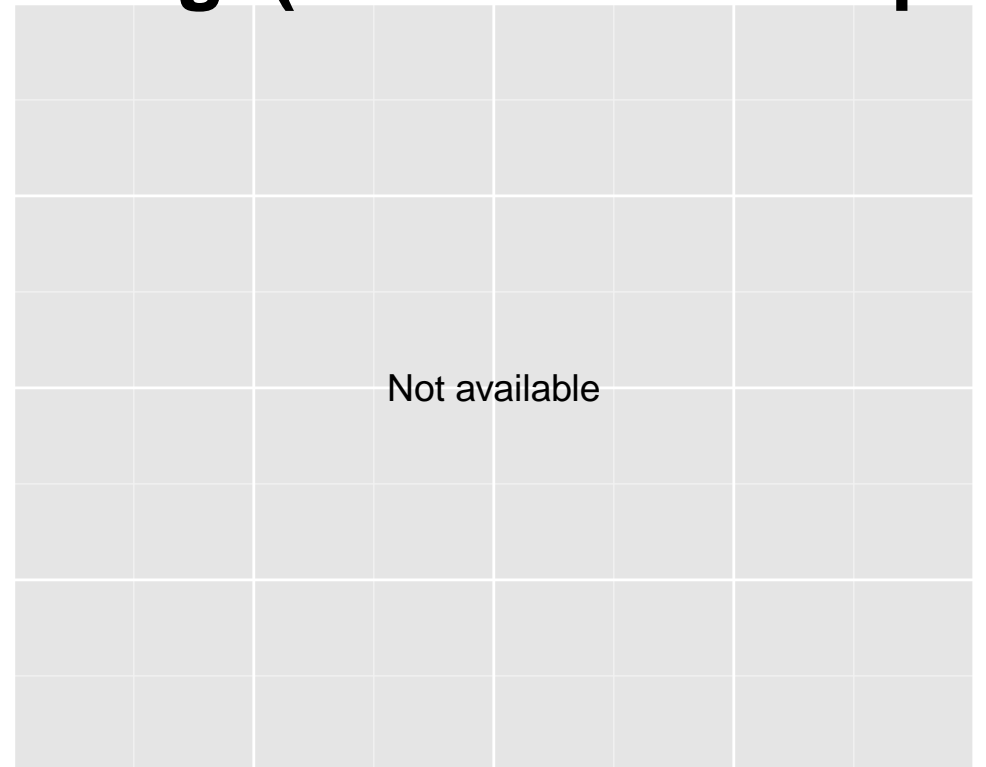

Supplement: SuppDataset_1.zip [file Lrrc51_set_A.pdf › Supplemental Dataset 1/A-mRNA_nonrhyth_translation_nonrhyth/Lrrc51_set_A.pdf]

## Lrrc56

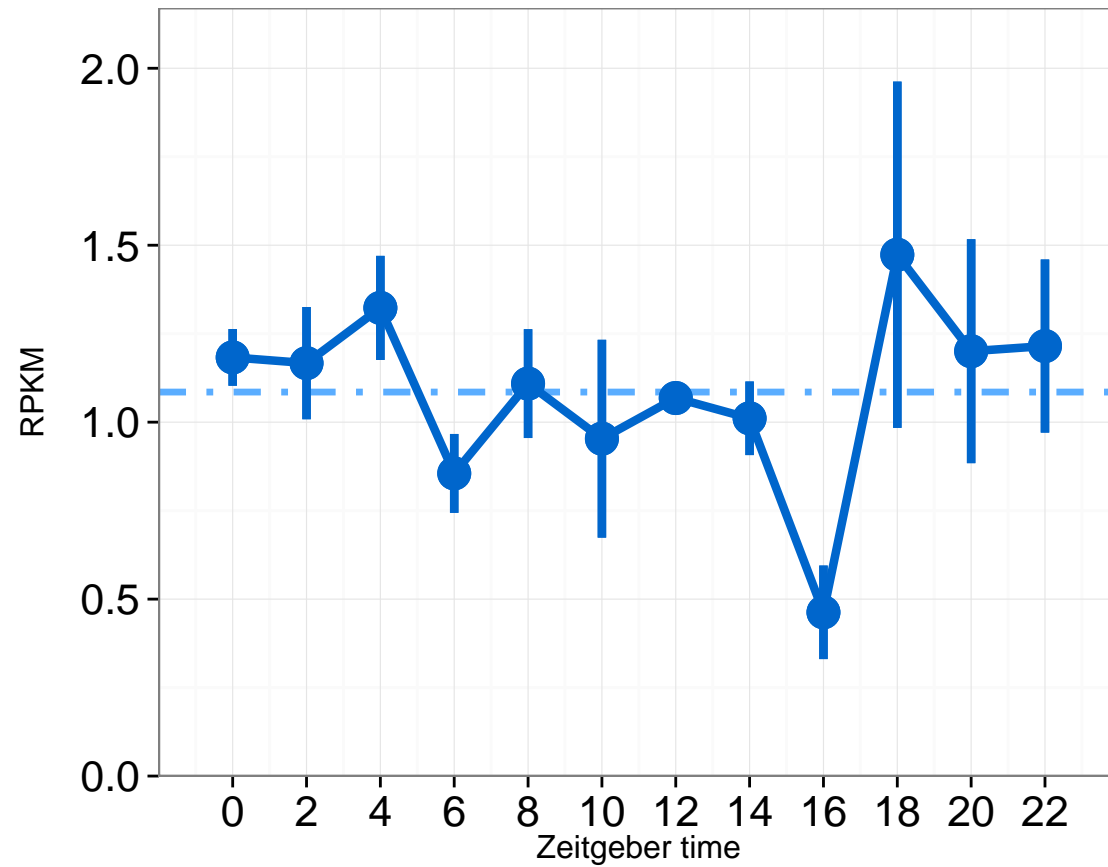

## Lrrc56 log2(Ribosome occupancy

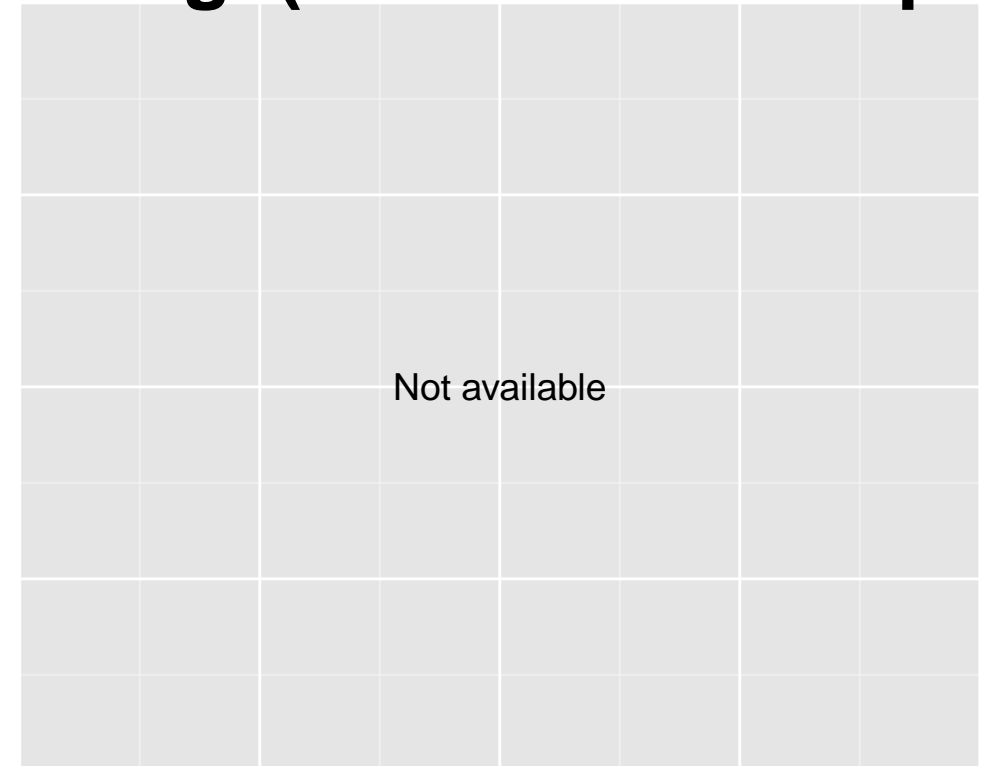

Supplement: SuppDataset_1.zip [file Lrrc56_set_A.pdf › Supplemental Dataset 1/A-mRNA_nonrhyth_translation_nonrhyth/Lrrc56_set_A.pdf]

## Lrrc57

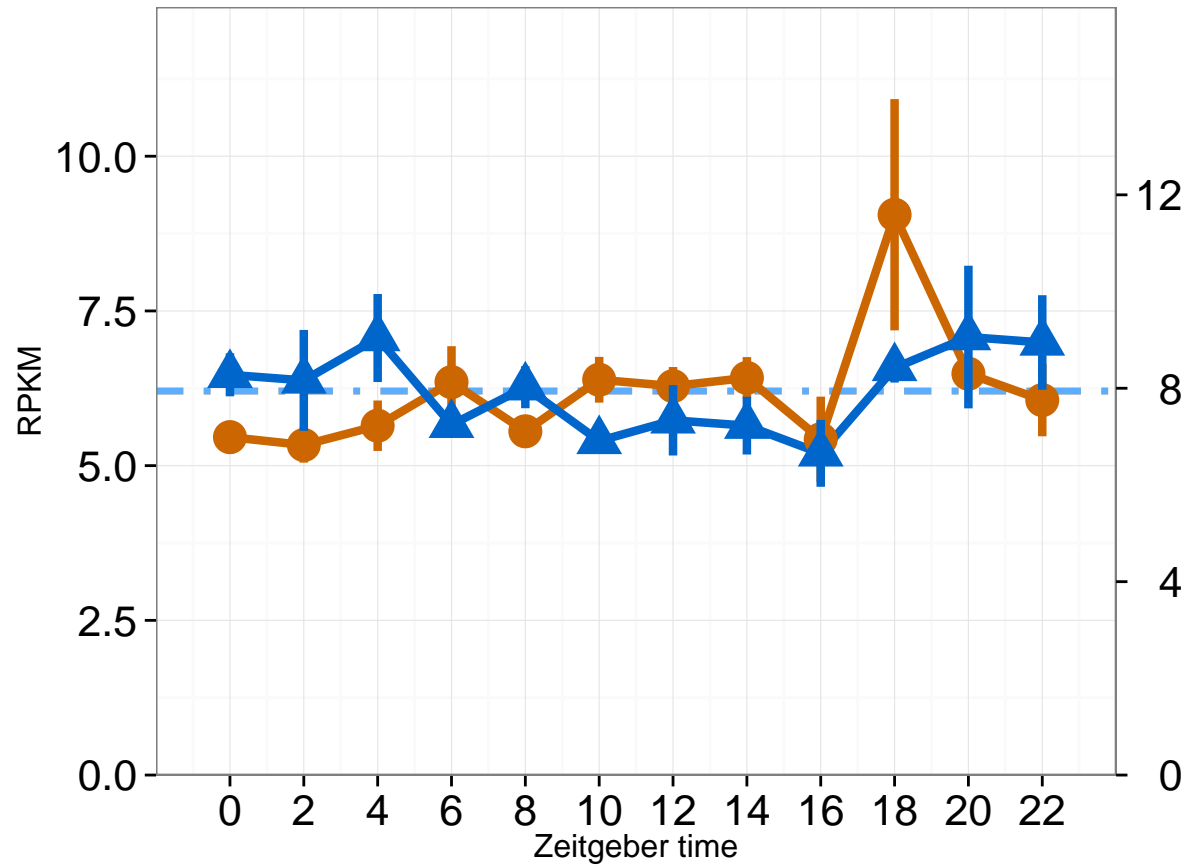

## Lrrc57

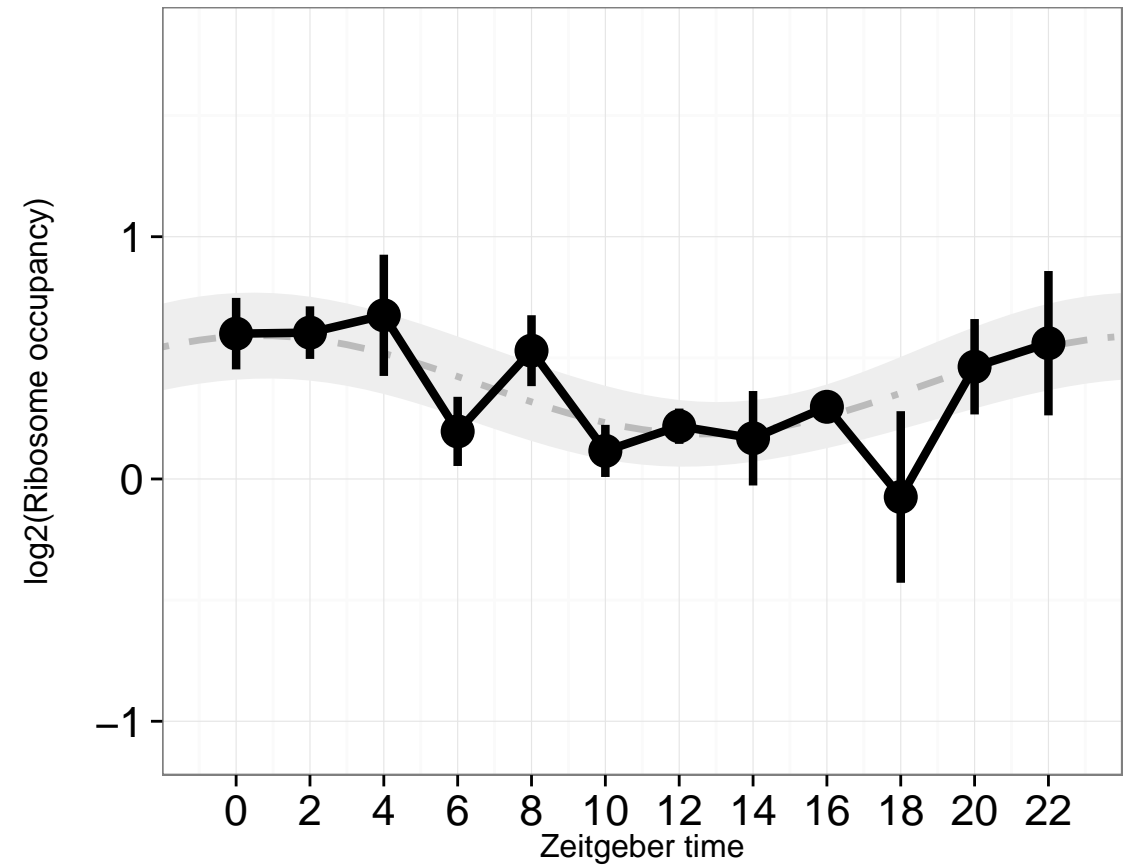

Supplement: SuppDataset_1.zip [file Lrrc57_set_A.pdf › Supplemental Dataset 1/A-mRNA_nonrhyth_translation_nonrhyth/Lrrc57_set_A.pdf]

# Lrrc59

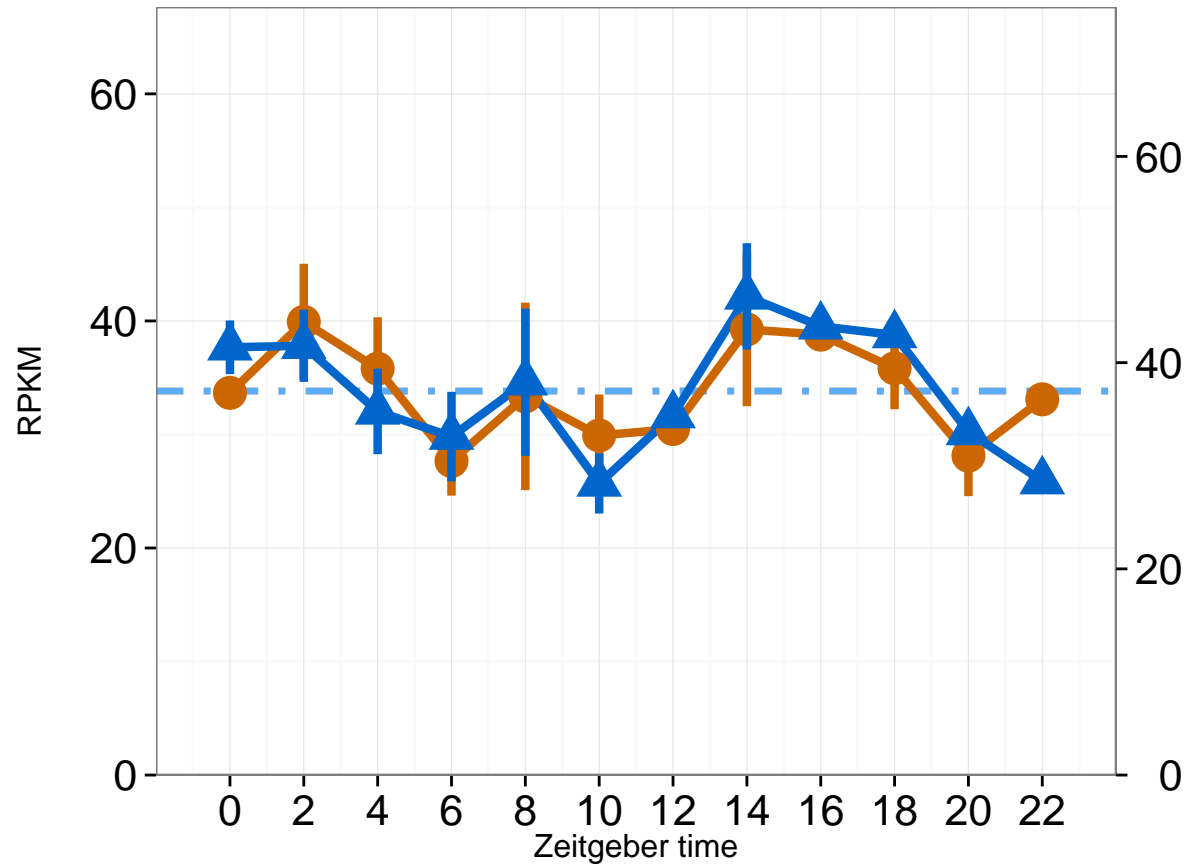

# Lrrc59

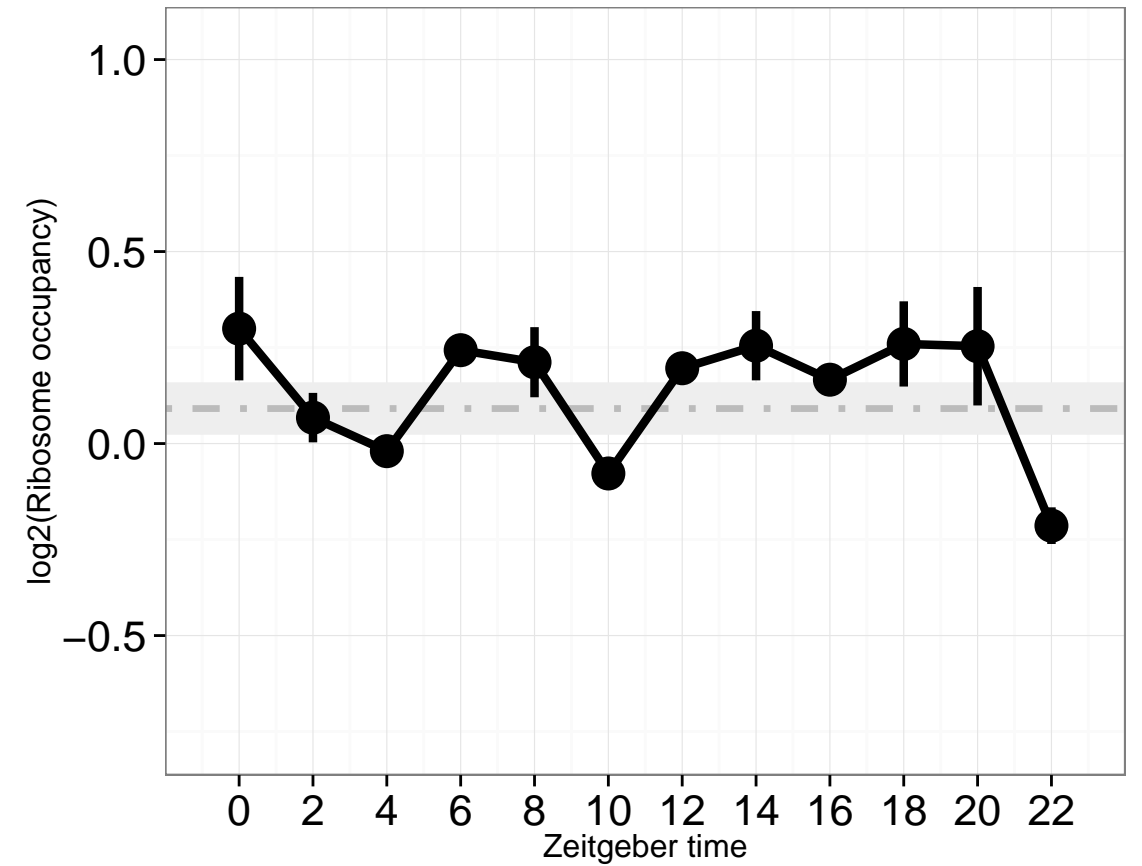

Supplement: SuppDataset_1.zip [file Lrrc59_set_A.pdf › Supplemental Dataset 1/A-mRNA_nonrhyth_translation_nonrhyth/Lrrc59_set_A.pdf]

**Lrrc8a TR**

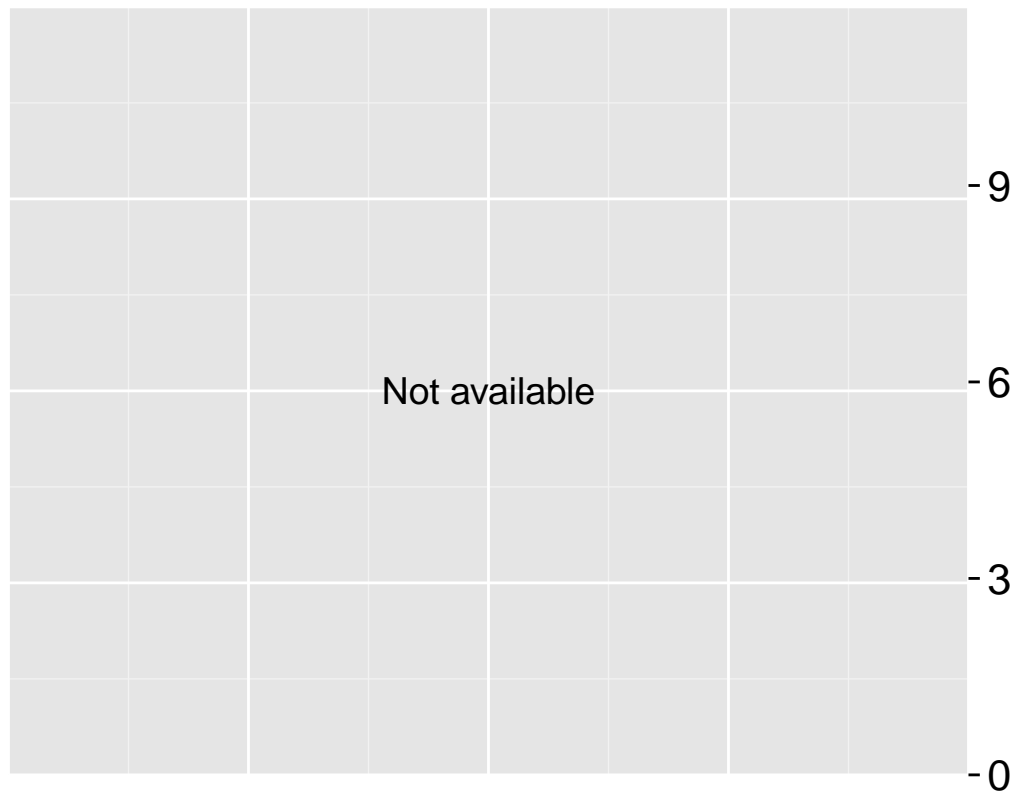

**Lrrc8a log2(Ribosome occupancy**

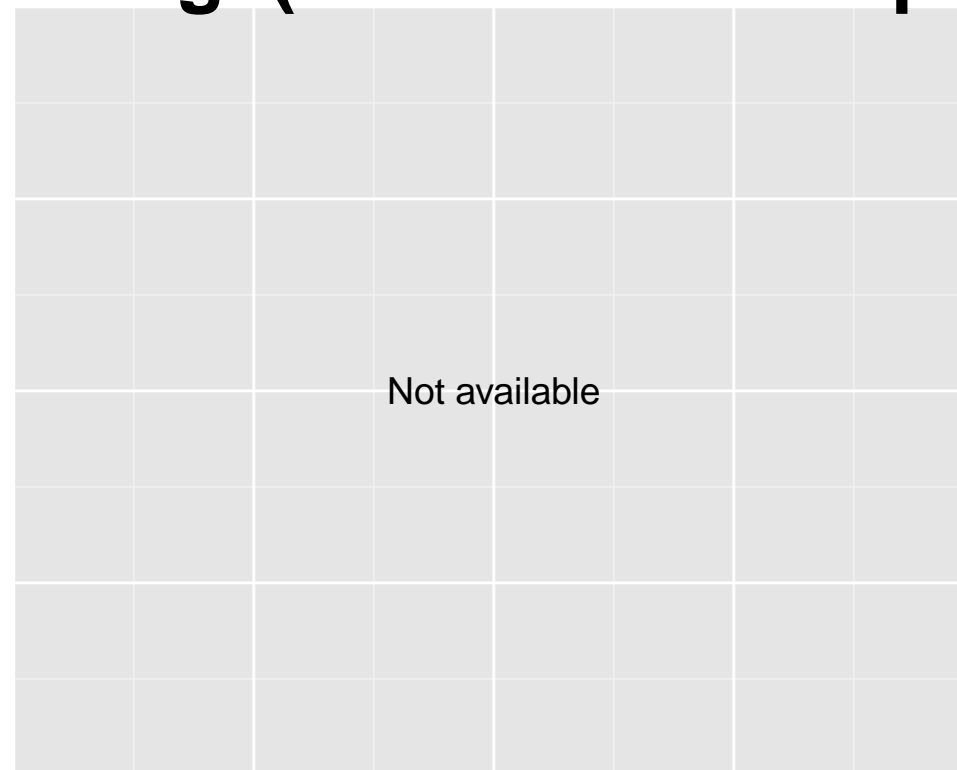

Supplement: SuppDataset_1.zip [file Lrrc8a_set_A.pdf › Supplemental Dataset 1/A-mRNA_nonrhyth_translation_nonrhyth/Lrrc8a_set_A.pdf]

## Lrrc8b

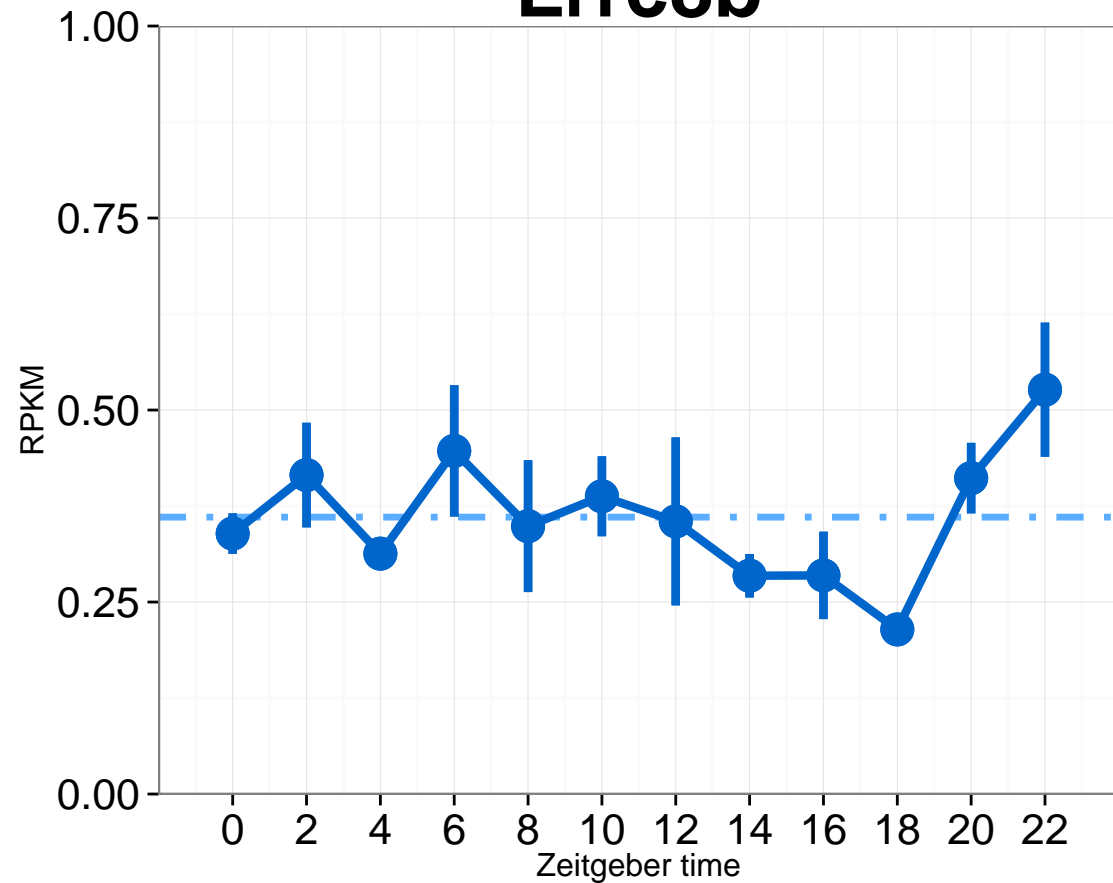

## Lrrc8b log2(Ribosome occupancy

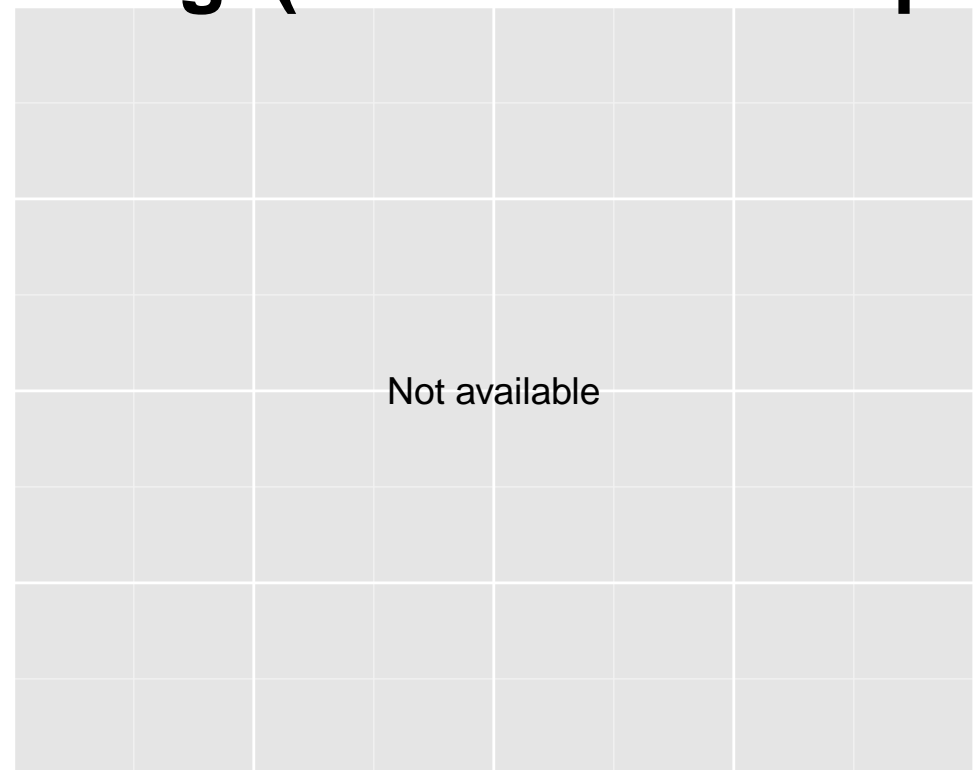

Supplement: SuppDataset_1.zip [file Lrrc8b_set_A.pdf › Supplemental Dataset 1/A-mRNA_nonrhyth_translation_nonrhyth/Lrrc8b_set_A.pdf]

## Lrrc8c

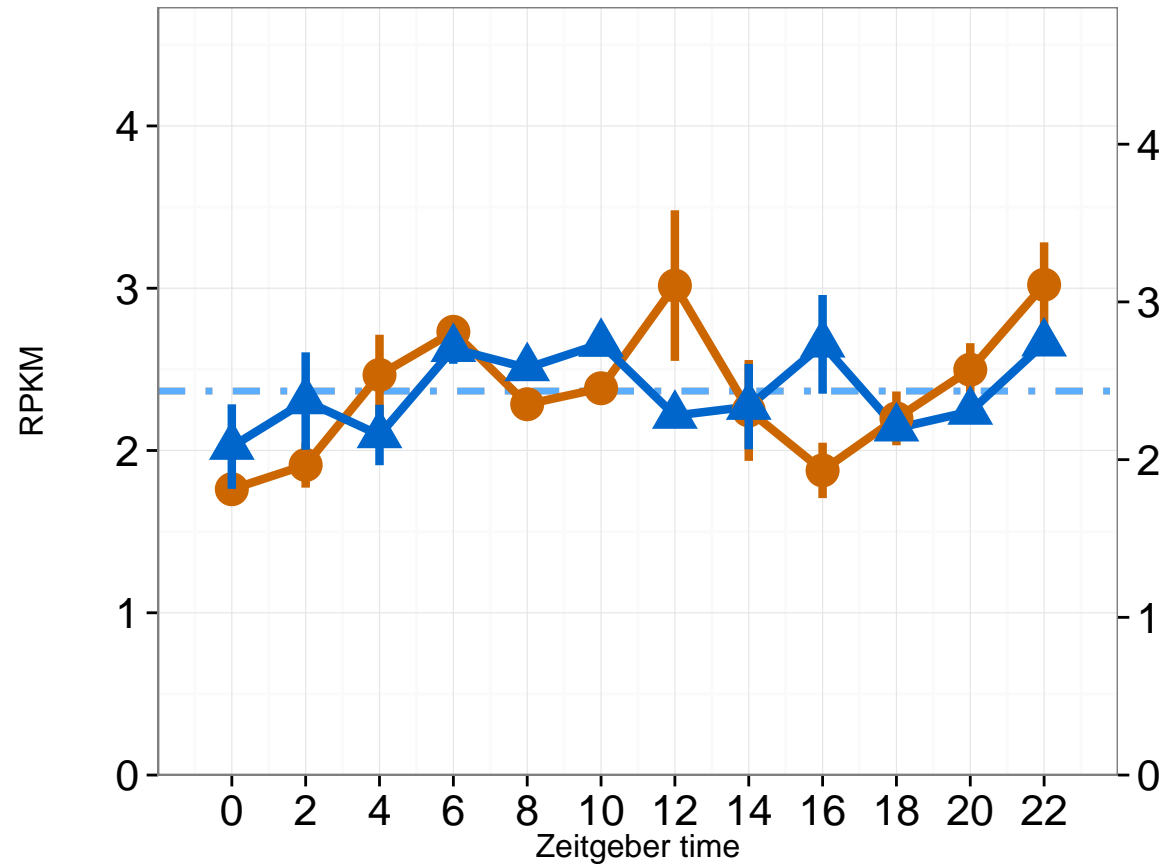

## Lrrc8c

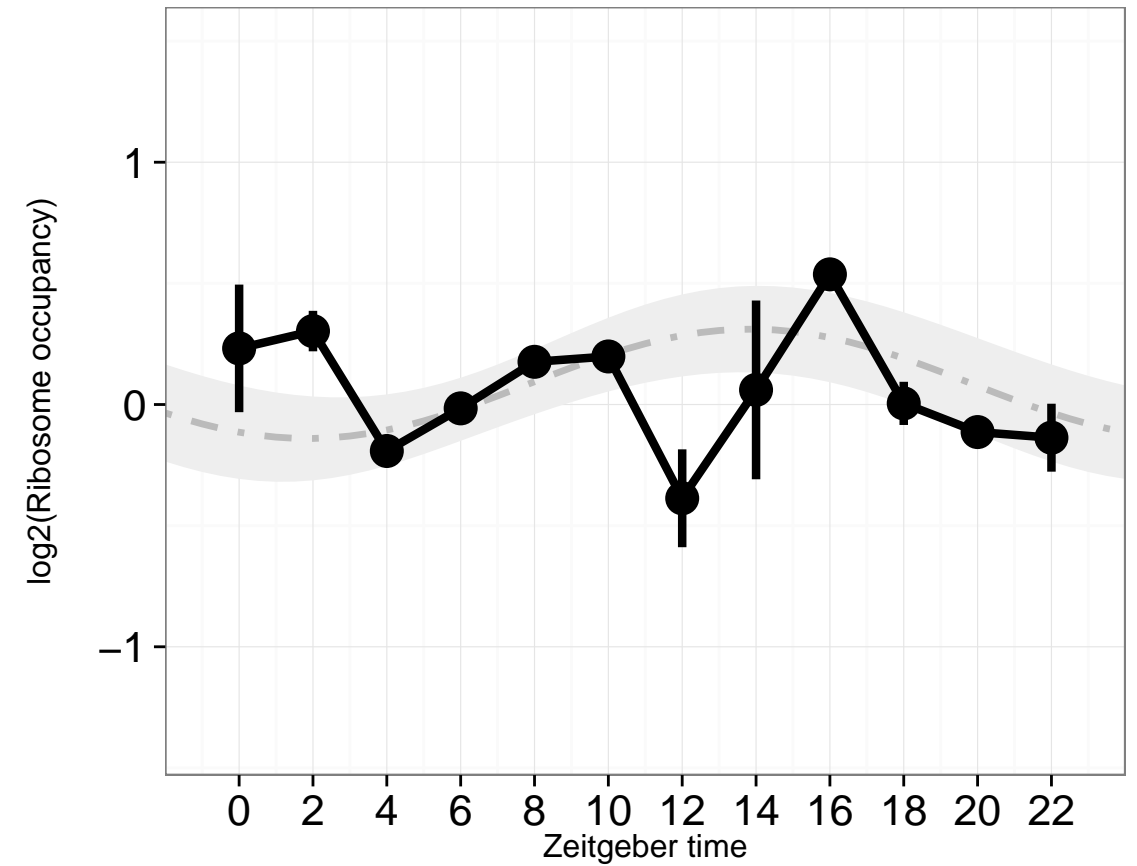

Supplement: SuppDataset_1.zip [file Lrrc8c_set_A.pdf › Supplemental Dataset 1/A-mRNA_nonrhyth_translation_nonrhyth/Lrrc8c_set_A.pdf]

# Lrrfip1

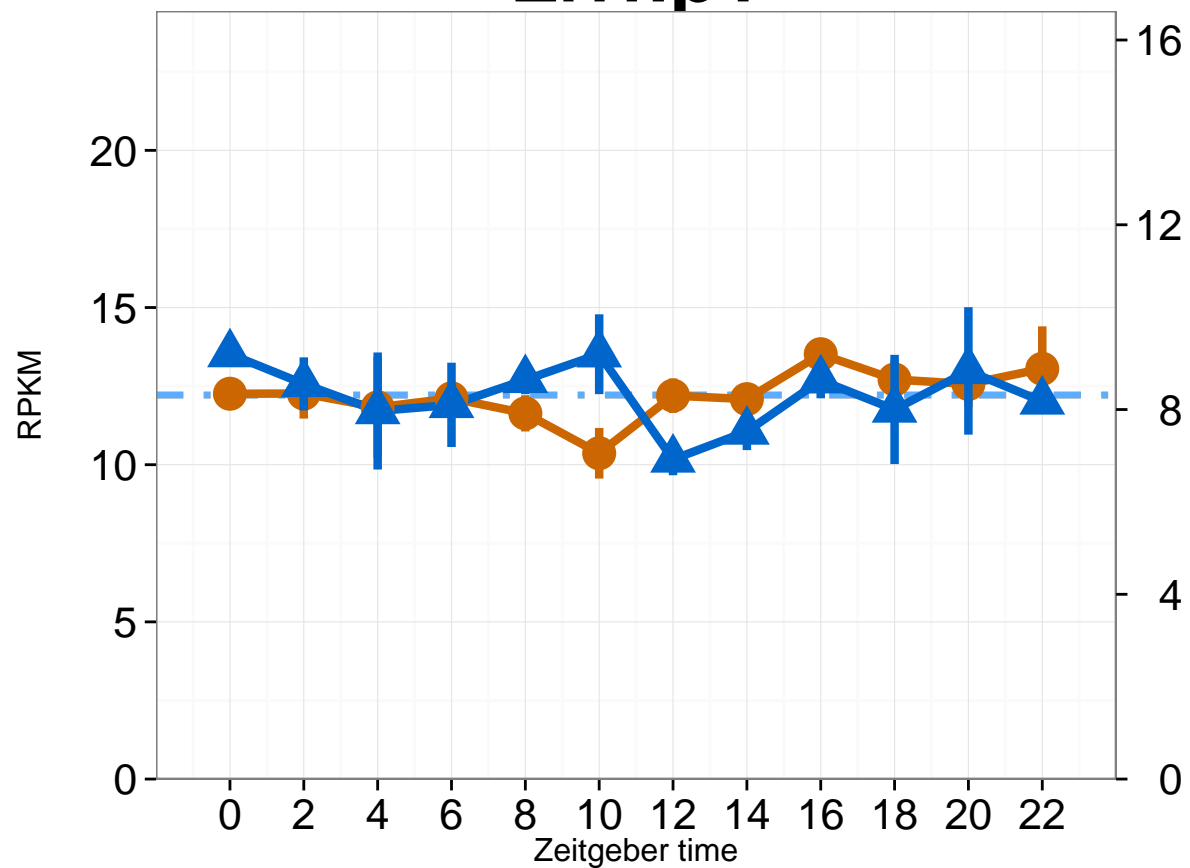

# Lrrfip1

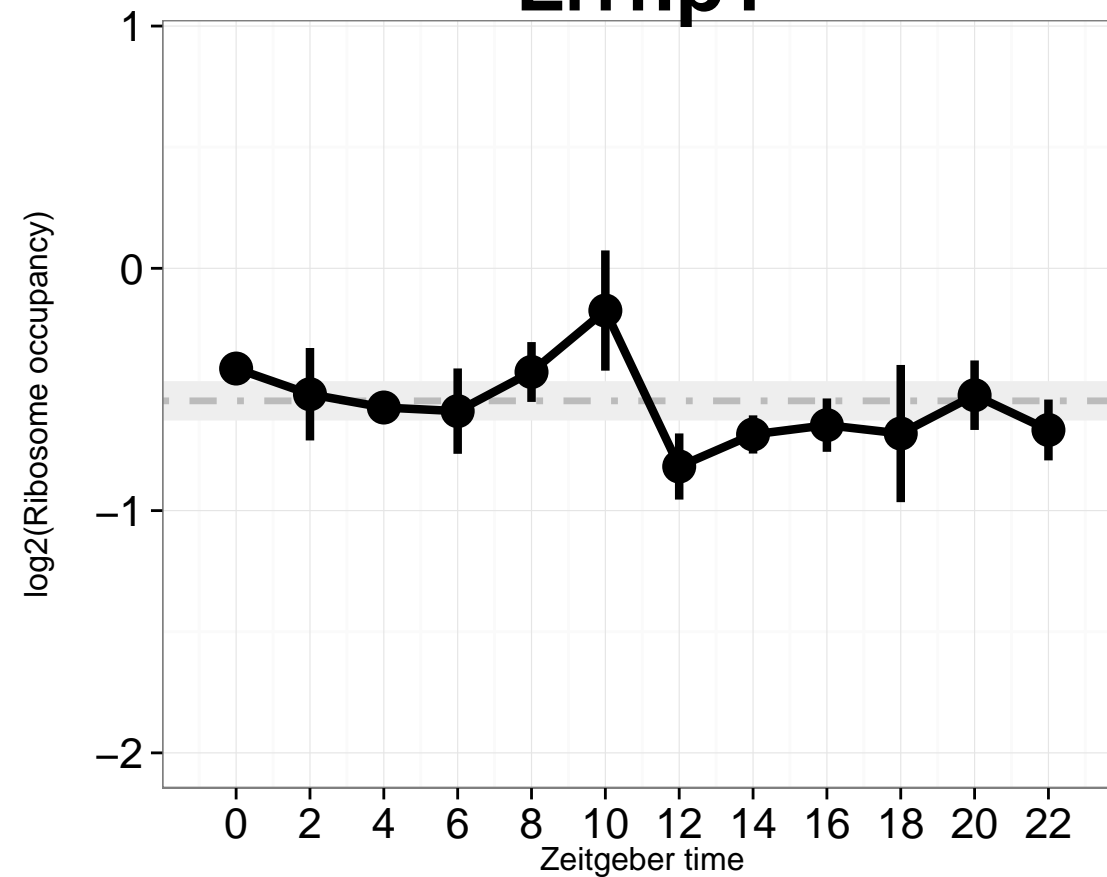

Supplement: SuppDataset_1.zip [file Lrrfip1_set_A.pdf › Supplemental Dataset 1/A-mRNA_nonrhyth_translation_nonrhyth/Lrrfip1_set_A.pdf]

# Lrrfip2

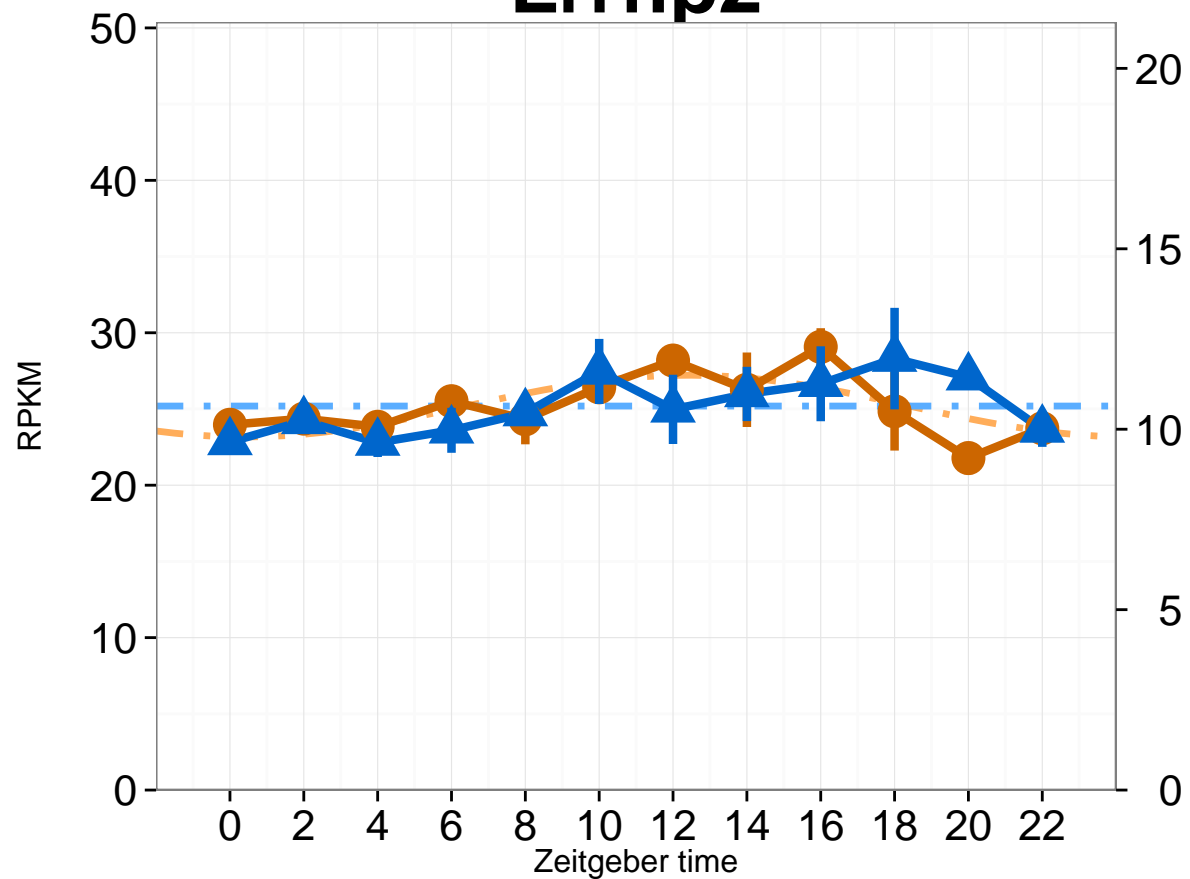

# Lrrfip2

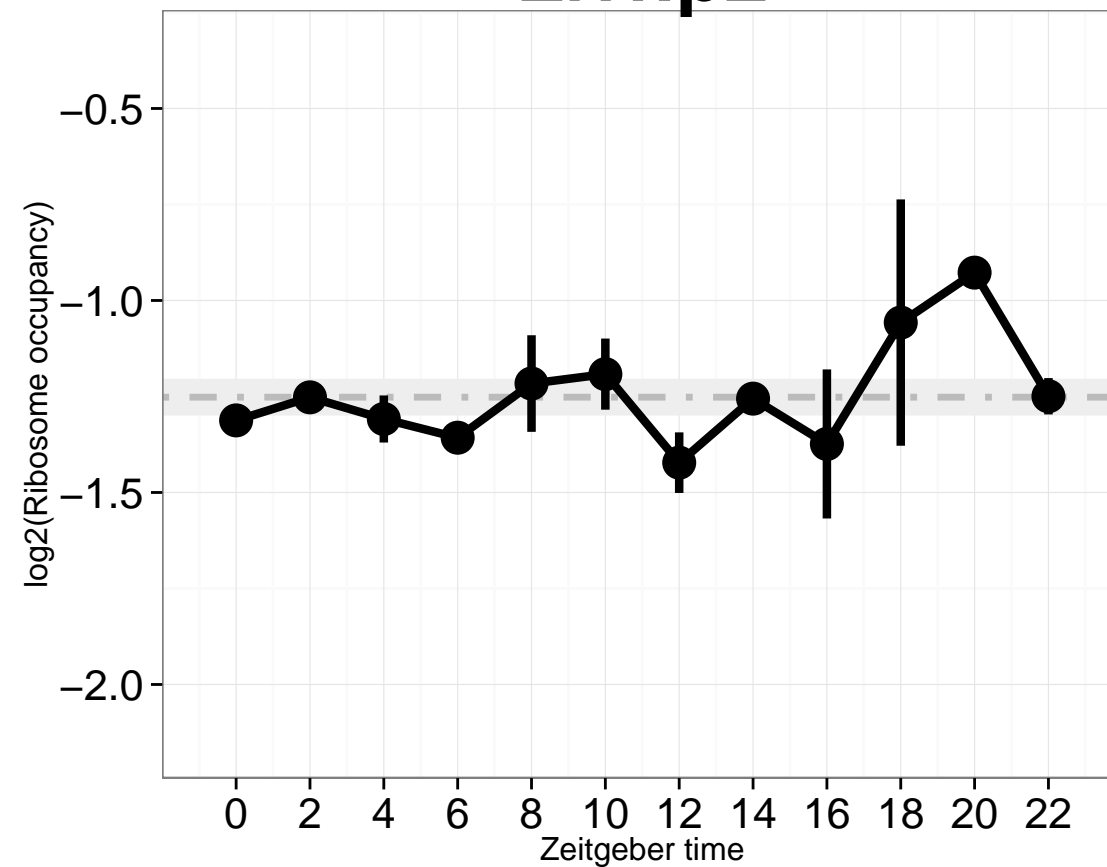

Supplement: SuppDataset_1.zip [file Lrrfip2_set_A.pdf › Supplemental Dataset 1/A-mRNA_nonrhyth_translation_nonrhyth/Lrrfip2_set_A.pdf]

## Lrriq3

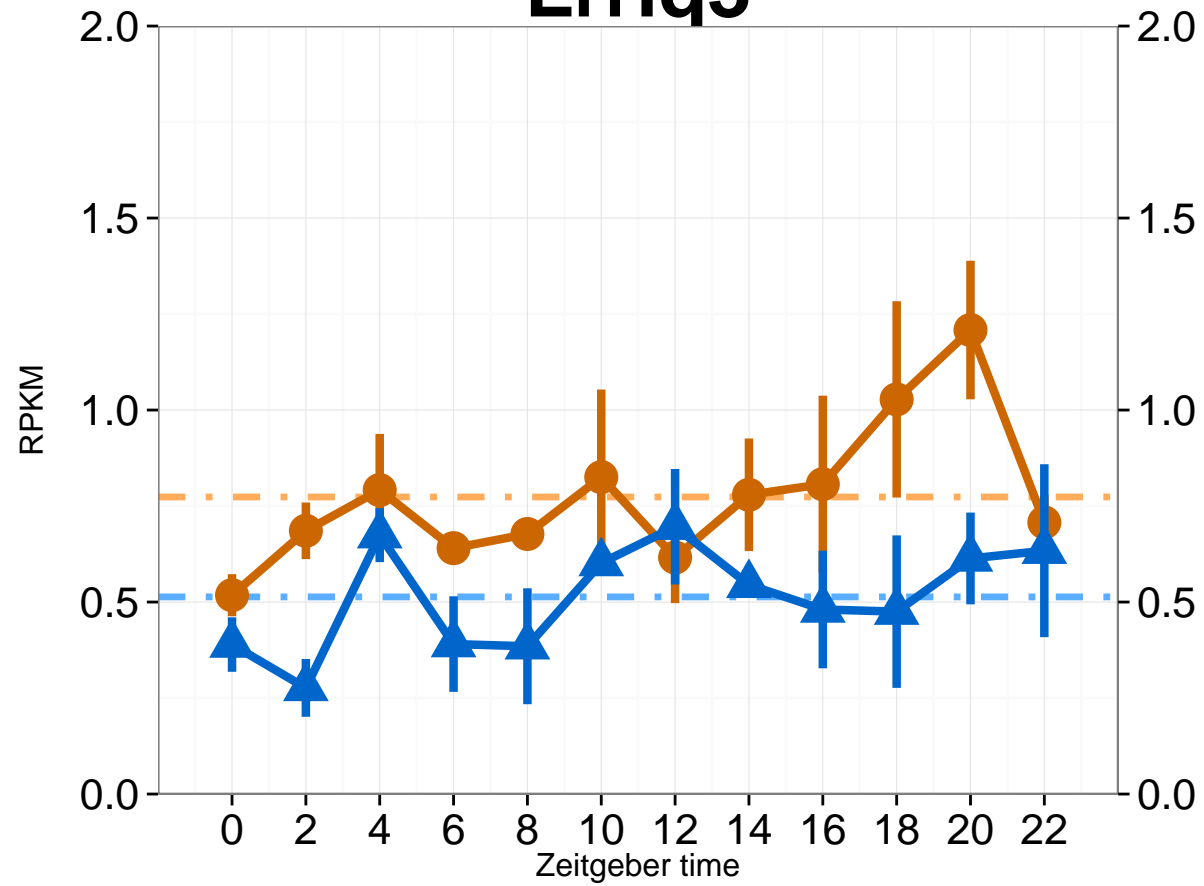

## Lrriq3

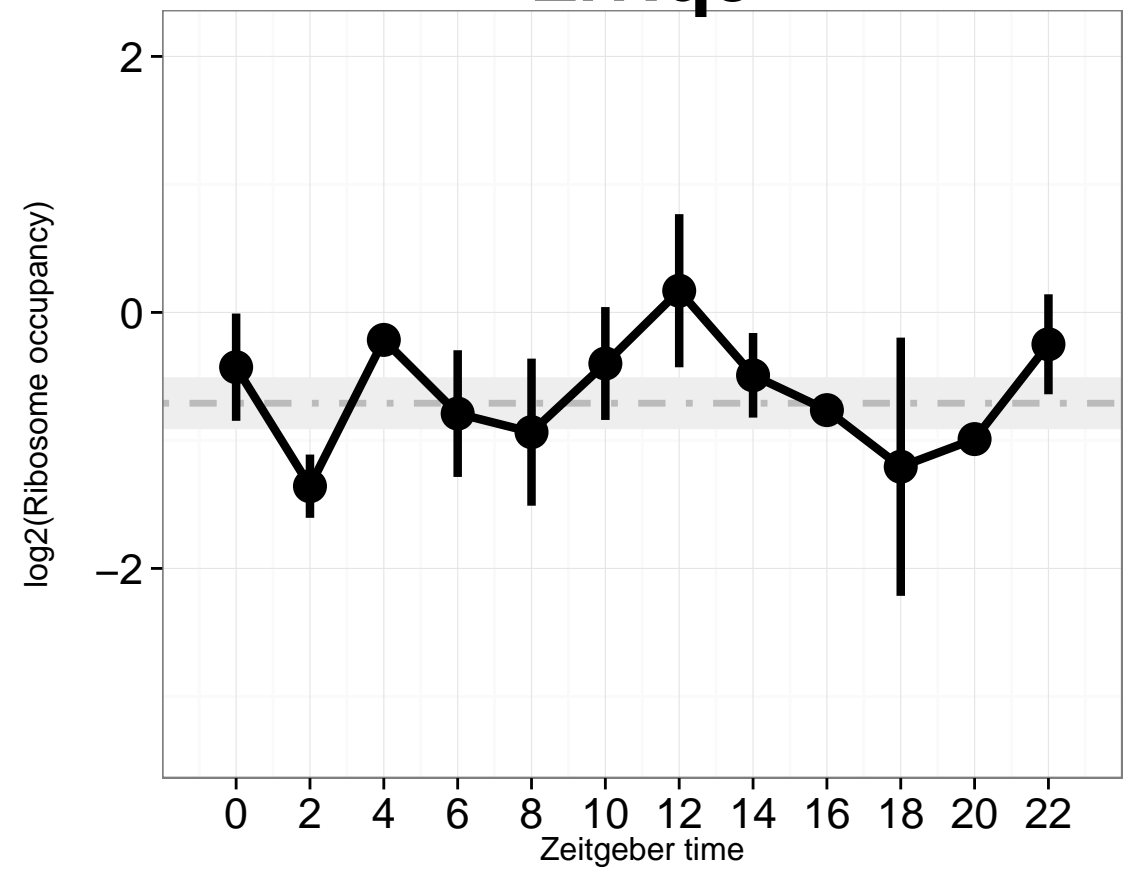

Supplement: SuppDataset_1.zip [file Lrriq3_set_A.pdf › Supplemental Dataset 1/A-mRNA_nonrhyth_translation_nonrhyth/Lrriq3_set_A.pdf]

# Lrrk1

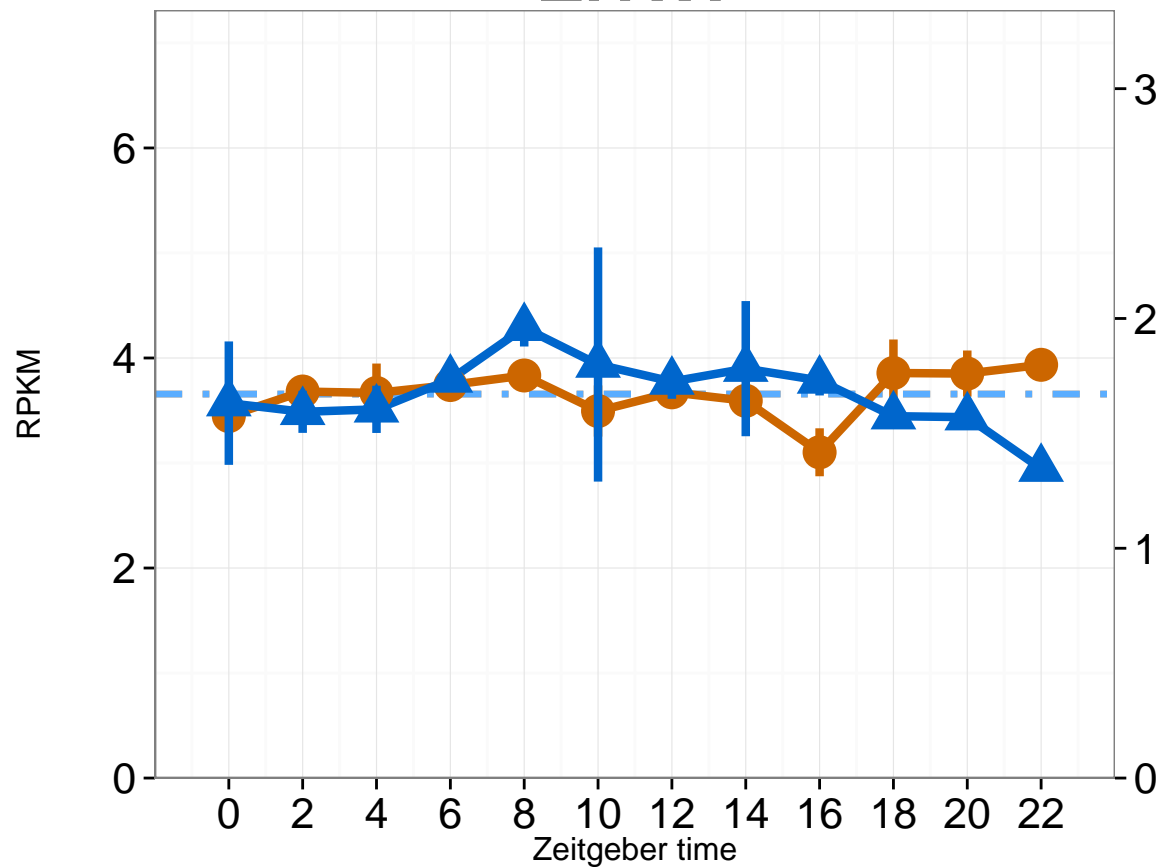

# Lrrk1

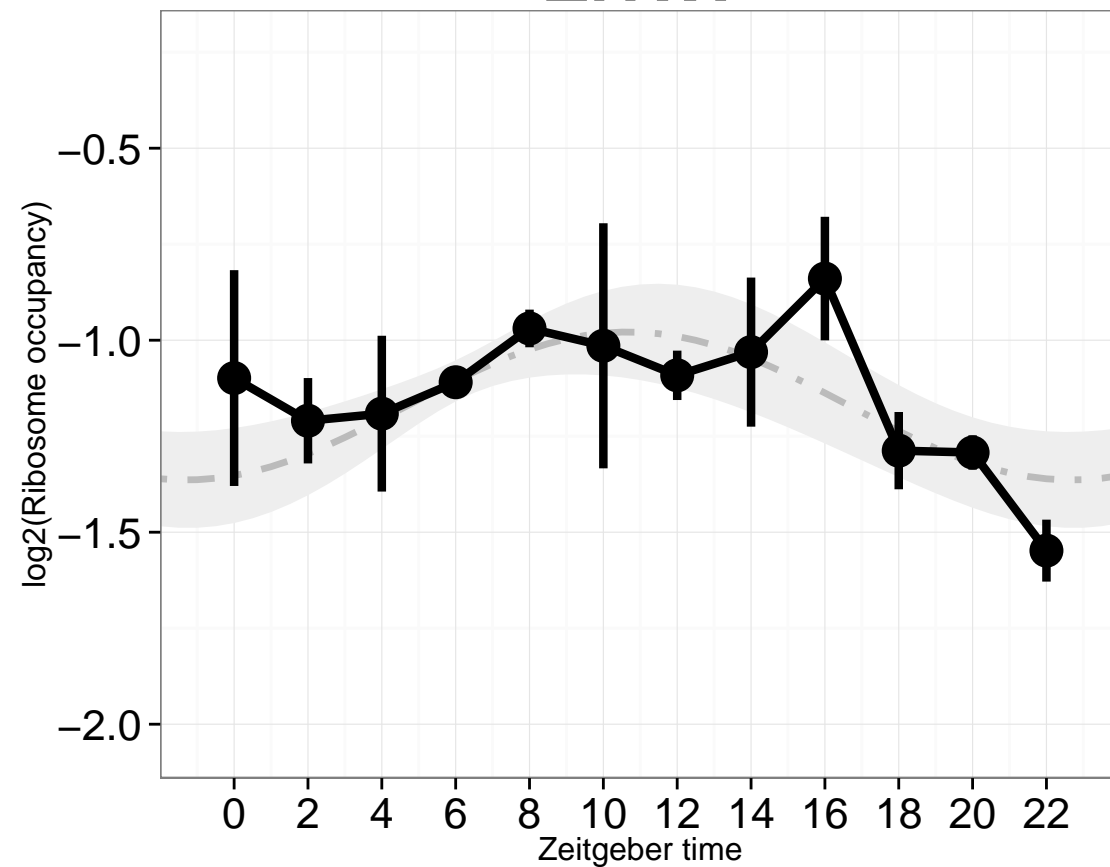

Supplement: SuppDataset_1.zip [file Lrrk1_set_A.pdf › Supplemental Dataset 1/A-mRNA_nonrhyth_translation_nonrhyth/Lrrk1_set_A.pdf]

# Lrrk2

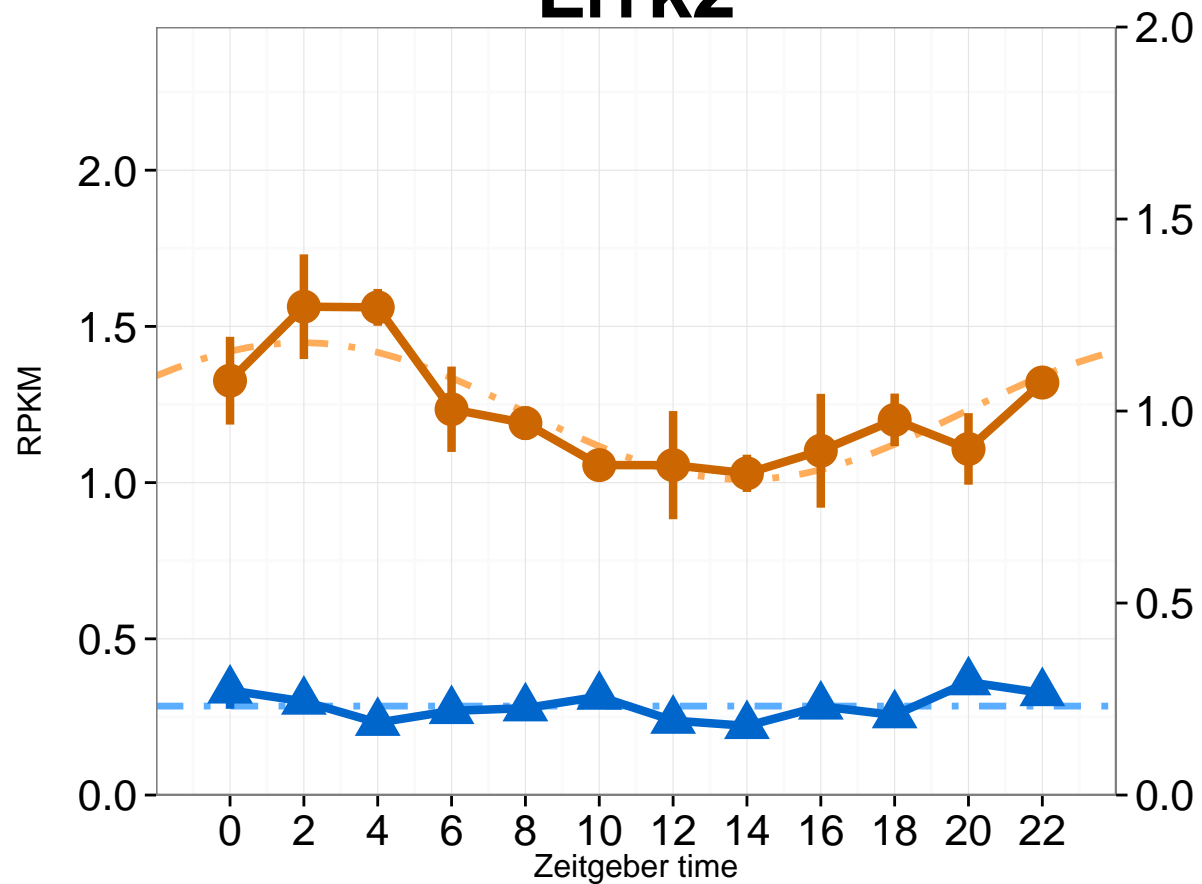

# Lrrk2

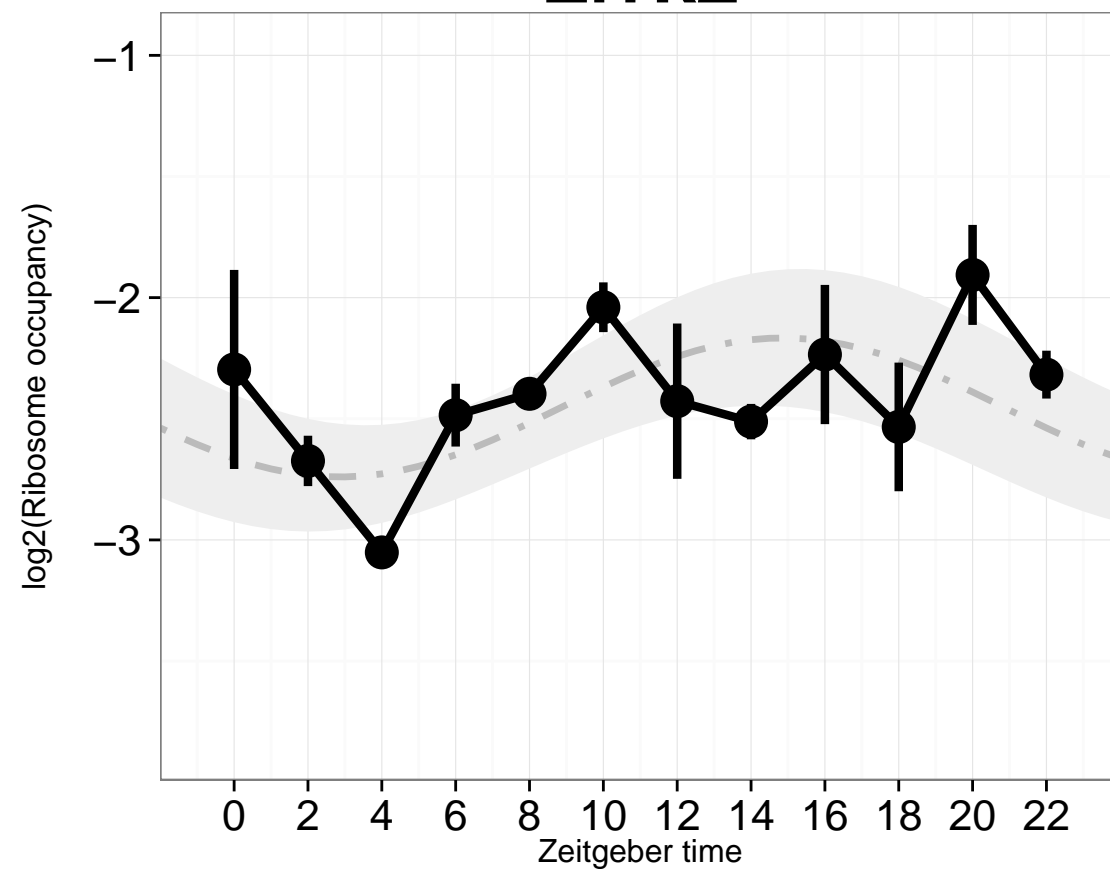

Supplement: SuppDataset_1.zip [file Lrrk2_set_A.pdf › Supplemental Dataset 1/A-mRNA_nonrhyth_translation_nonrhyth/Lrrk2_set_A.pdf]

# Lrrn3

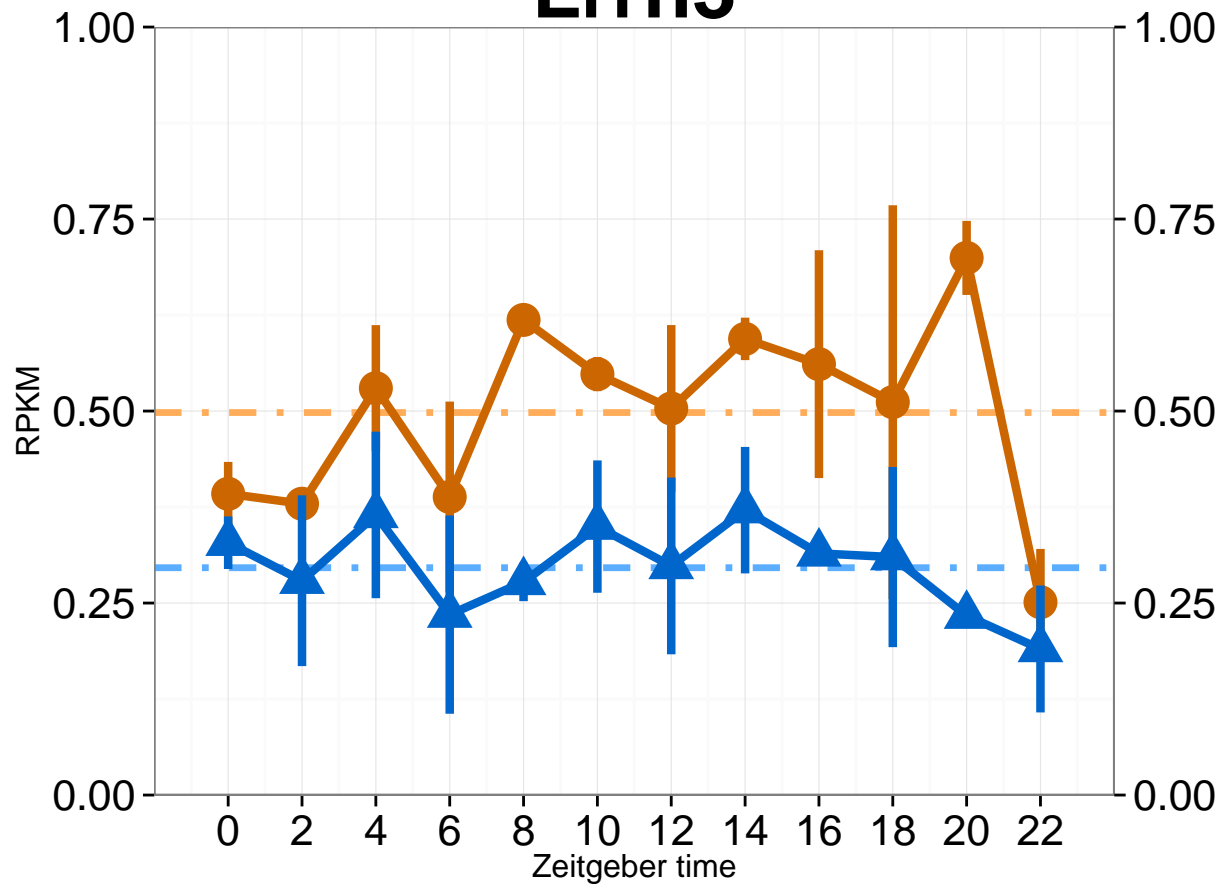

# Lrrn3

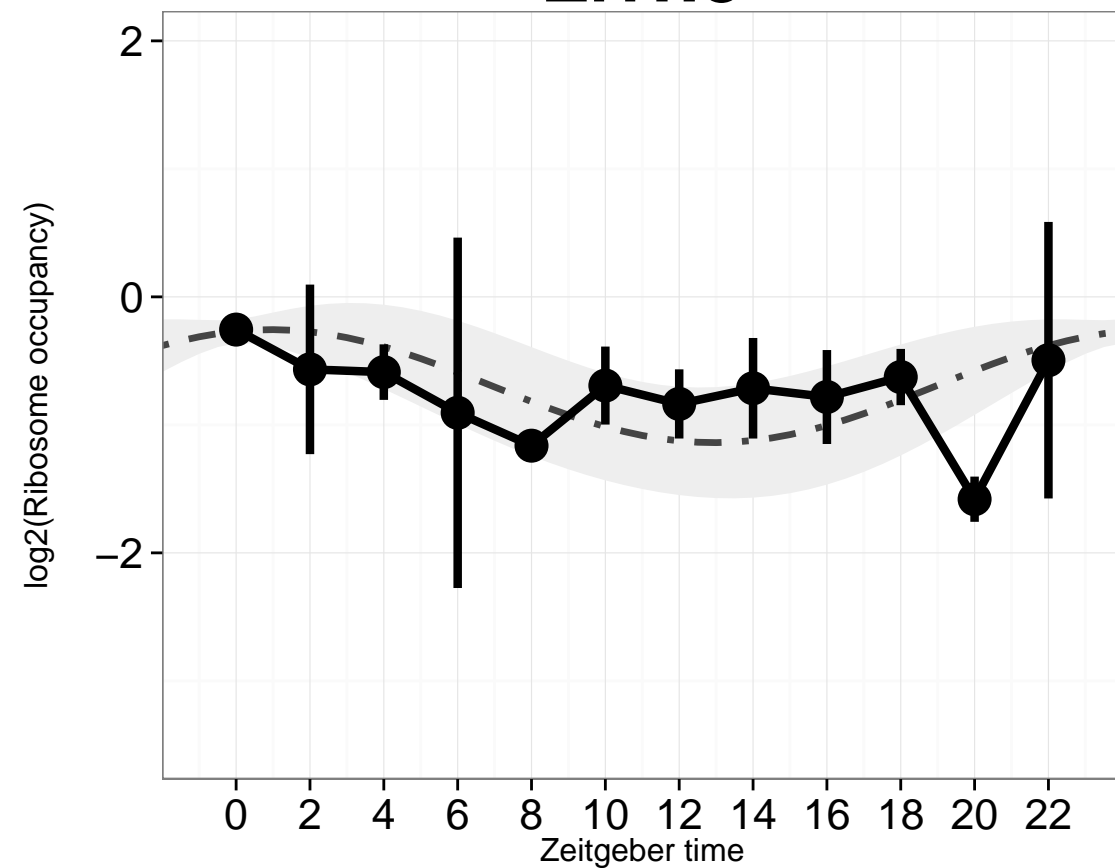

Supplement: SuppDataset_1.zip [file Lrrn3_set_A.pdf › Supplemental Dataset 1/A-mRNA_nonrhyth_translation_nonrhyth/Lrrn3_set_A.pdf]

**Lrrn4 TR**

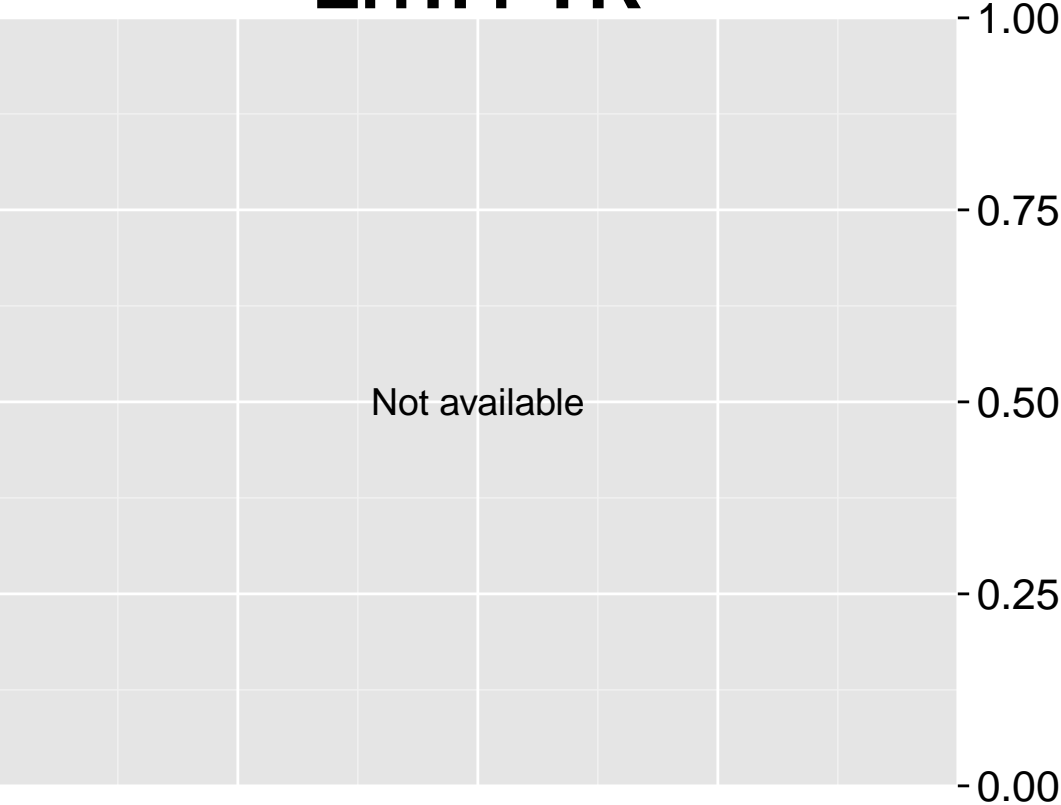

**Lrrn4 log2(Ribosome occupancy)**

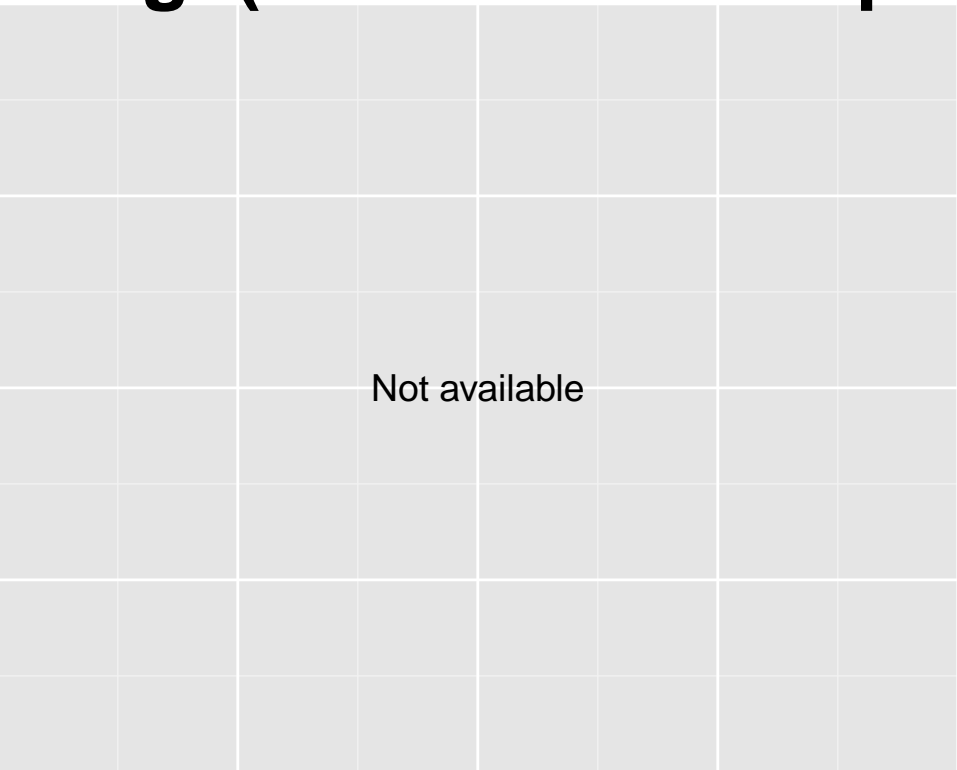

Supplement: SuppDataset_1.zip [file Lrrn4_set_A.pdf › Supplemental Dataset 1/A-mRNA_nonrhyth_translation_nonrhyth/Lrrn4_set_A.pdf]

## Lrsam1

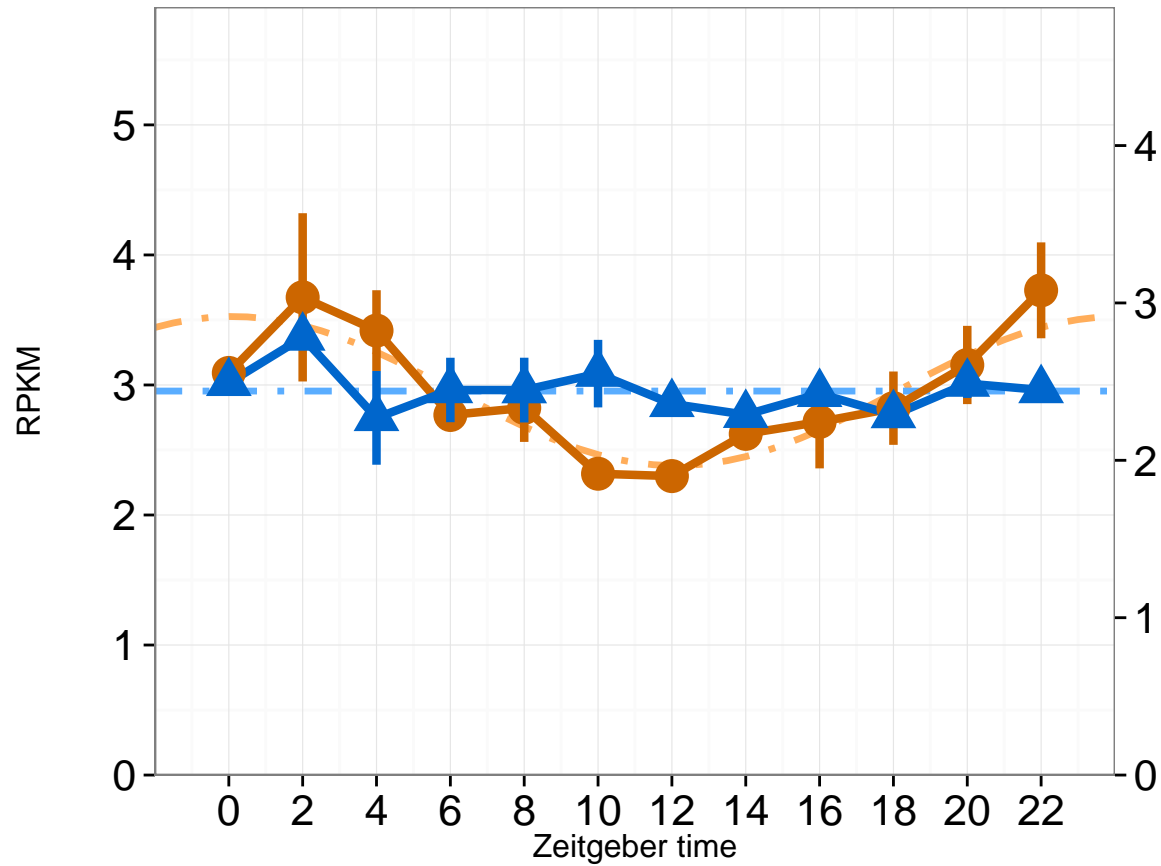

## Lrsam1

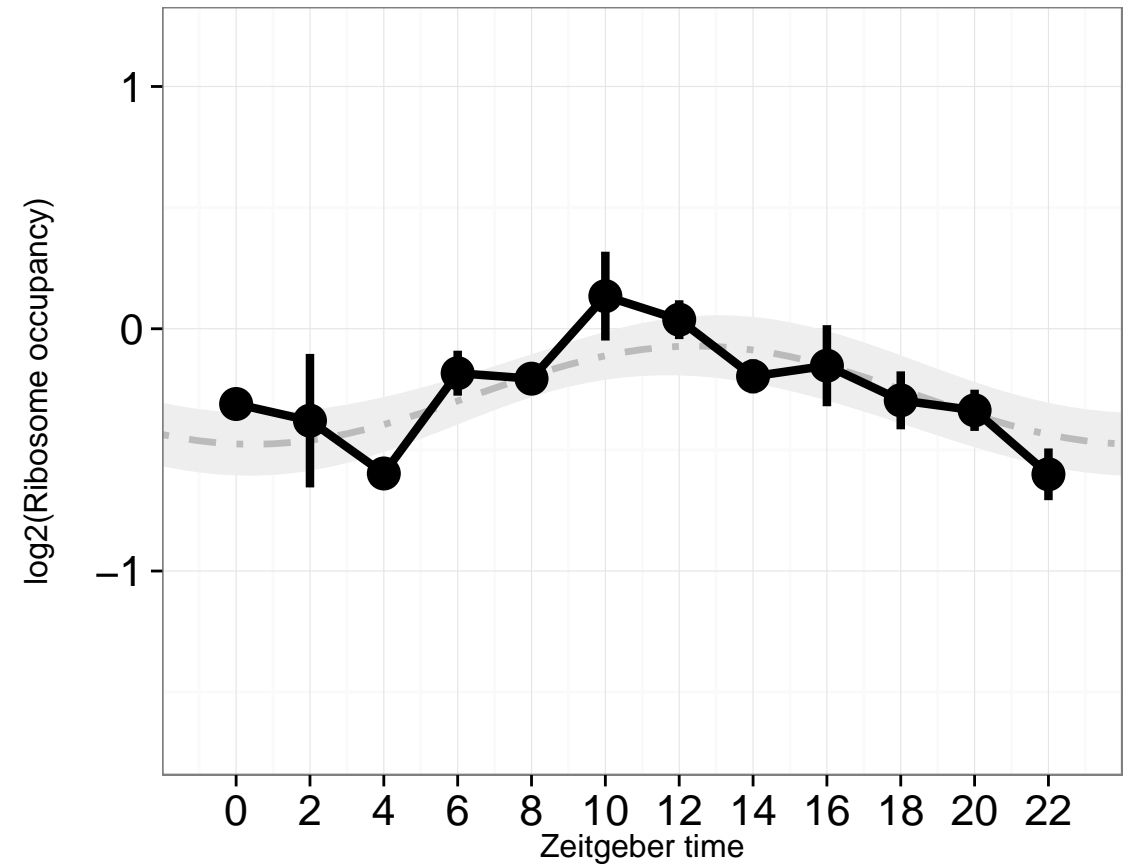

Supplement: SuppDataset_1.zip [file Lrsam1_set_A.pdf › Supplemental Dataset 1/A-mRNA_nonrhyth_translation_nonrhyth/Lrsam1_set_A.pdf]

# Lrtm1

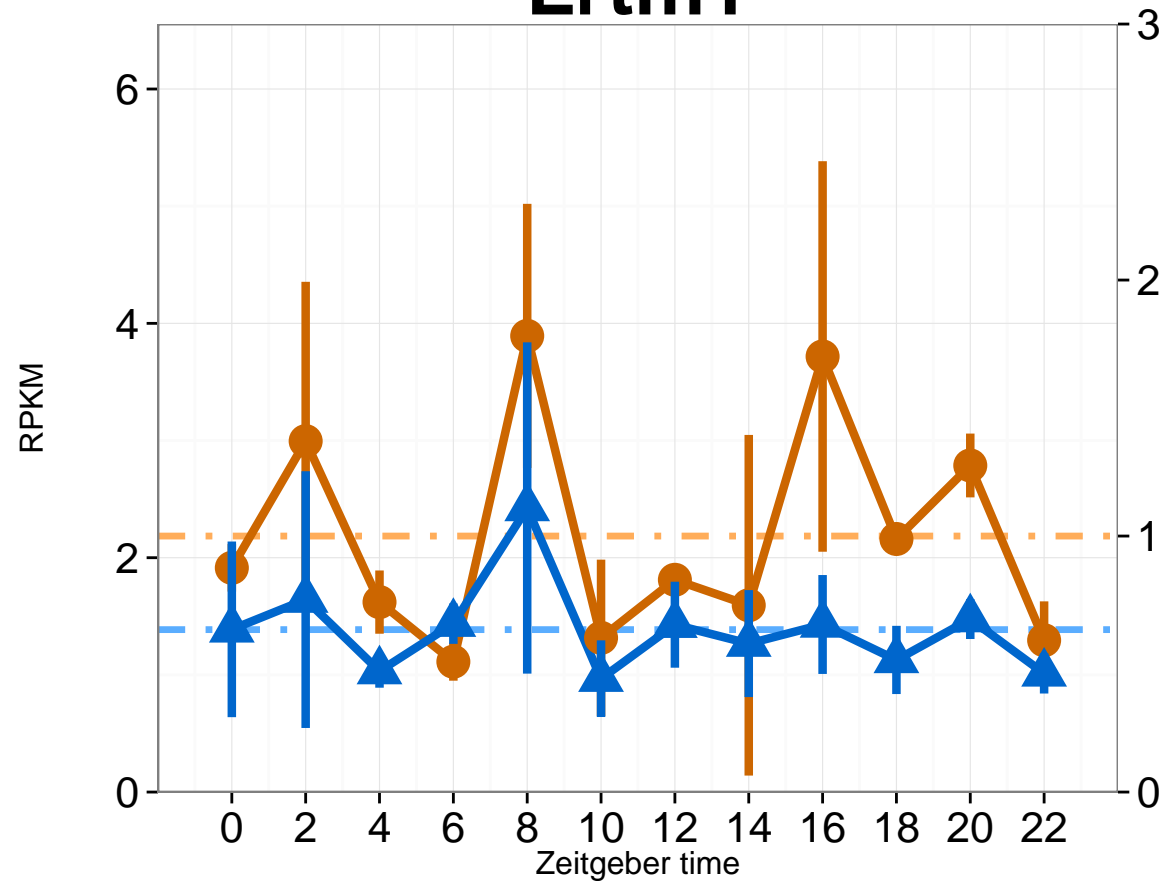

# Lrtm1

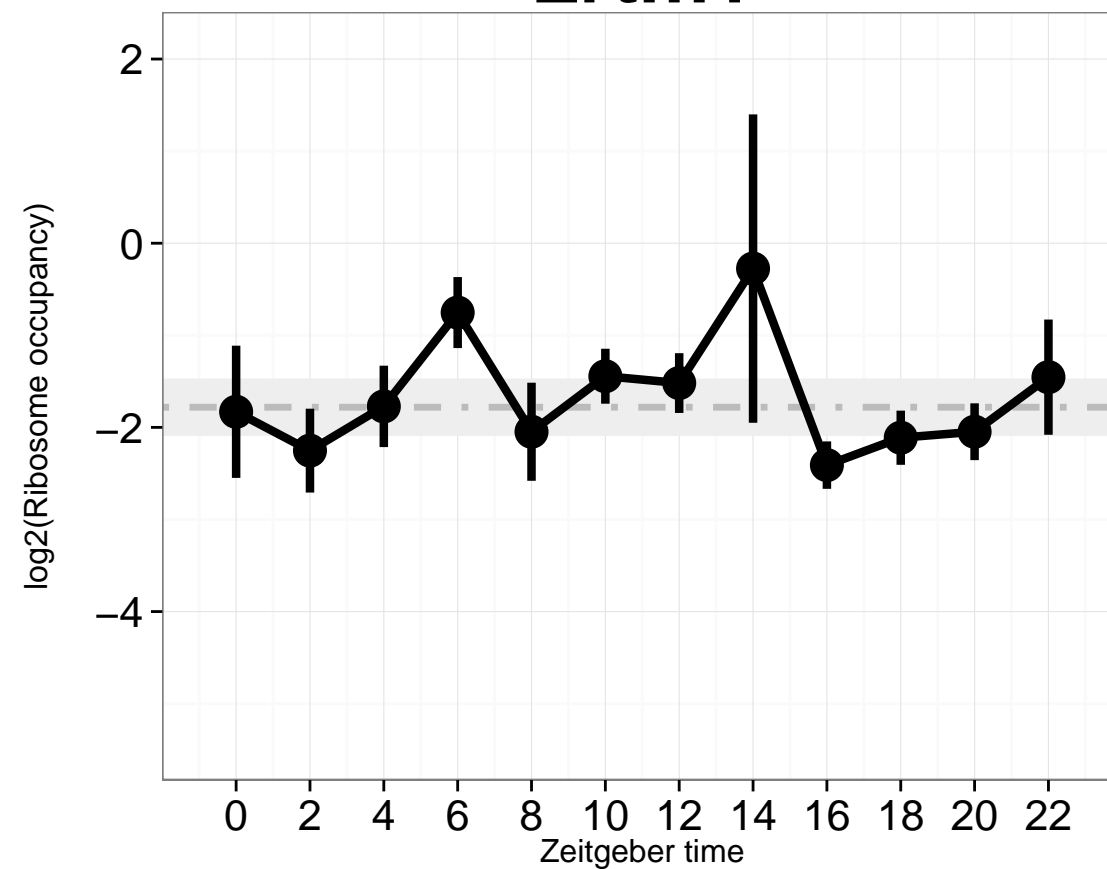

Supplement: SuppDataset_1.zip [file Lrtm1_set_A.pdf › Supplemental Dataset 1/A-mRNA_nonrhyth_translation_nonrhyth/Lrtm1_set_A.pdf]

# Lrwd1

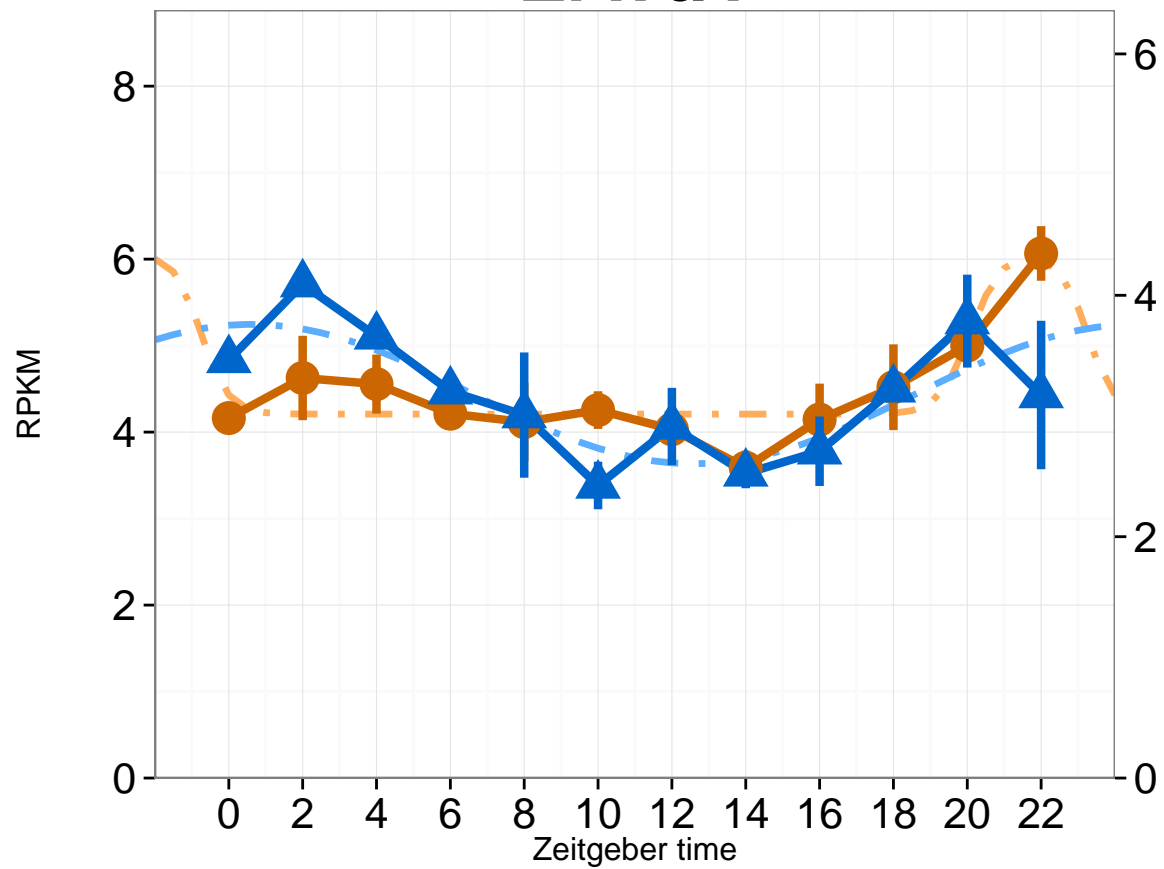

# Lrwd1

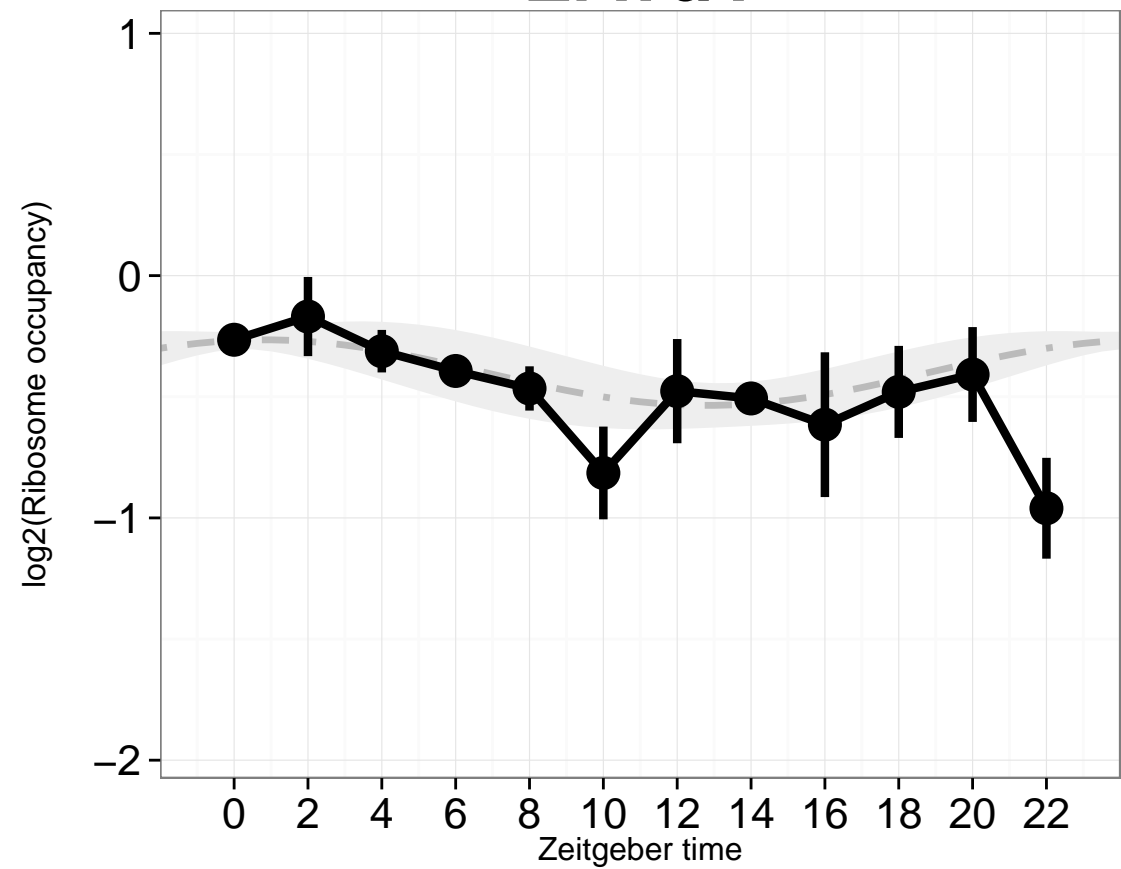

Supplement: SuppDataset_1.zip [file Lrwd1_set_A.pdf › Supplemental Dataset 1/A-mRNA_nonrhyth_translation_nonrhyth/Lrwd1_set_A.pdf]

# Lsg1

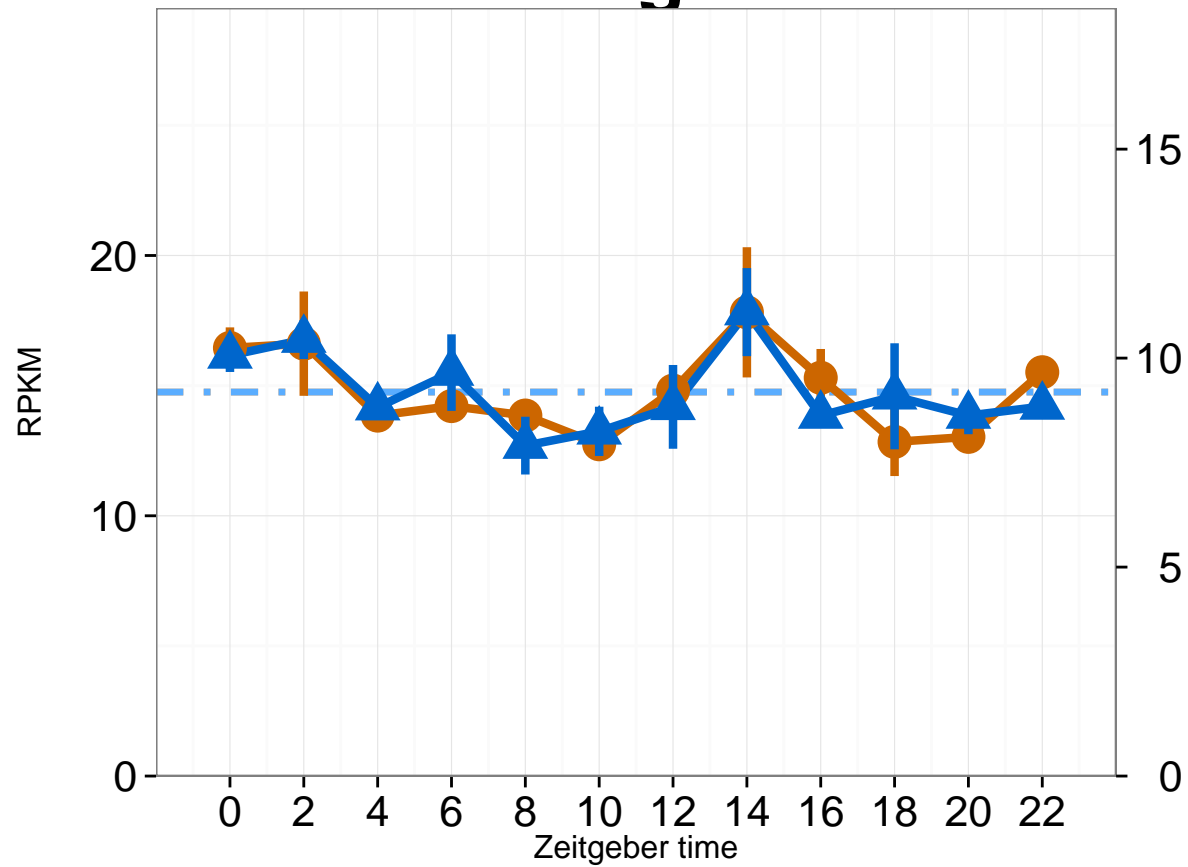

# Lsg1

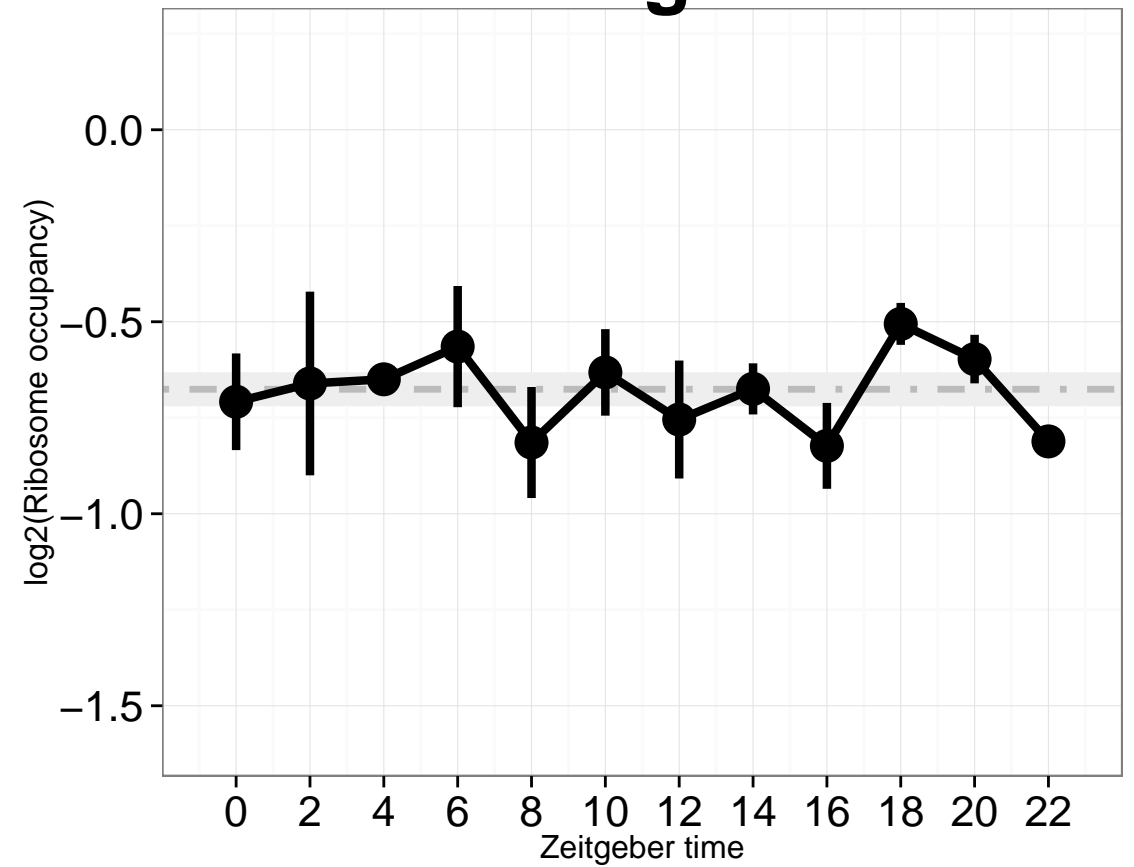

Supplement: SuppDataset_1.zip [file Lsg1_set_A.pdf › Supplemental Dataset 1/A-mRNA_nonrhyth_translation_nonrhyth/Lsg1_set_A.pdf]

# Lsm11

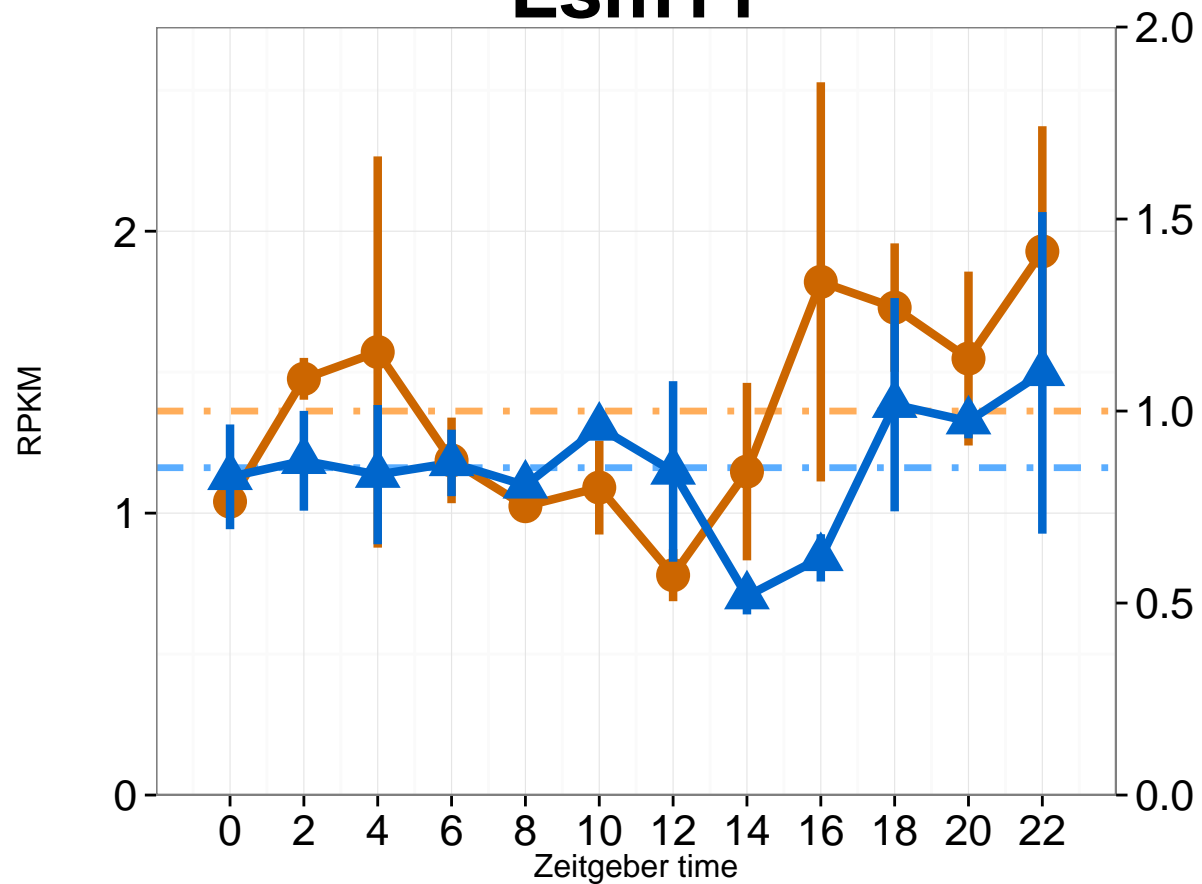

# Lsm11

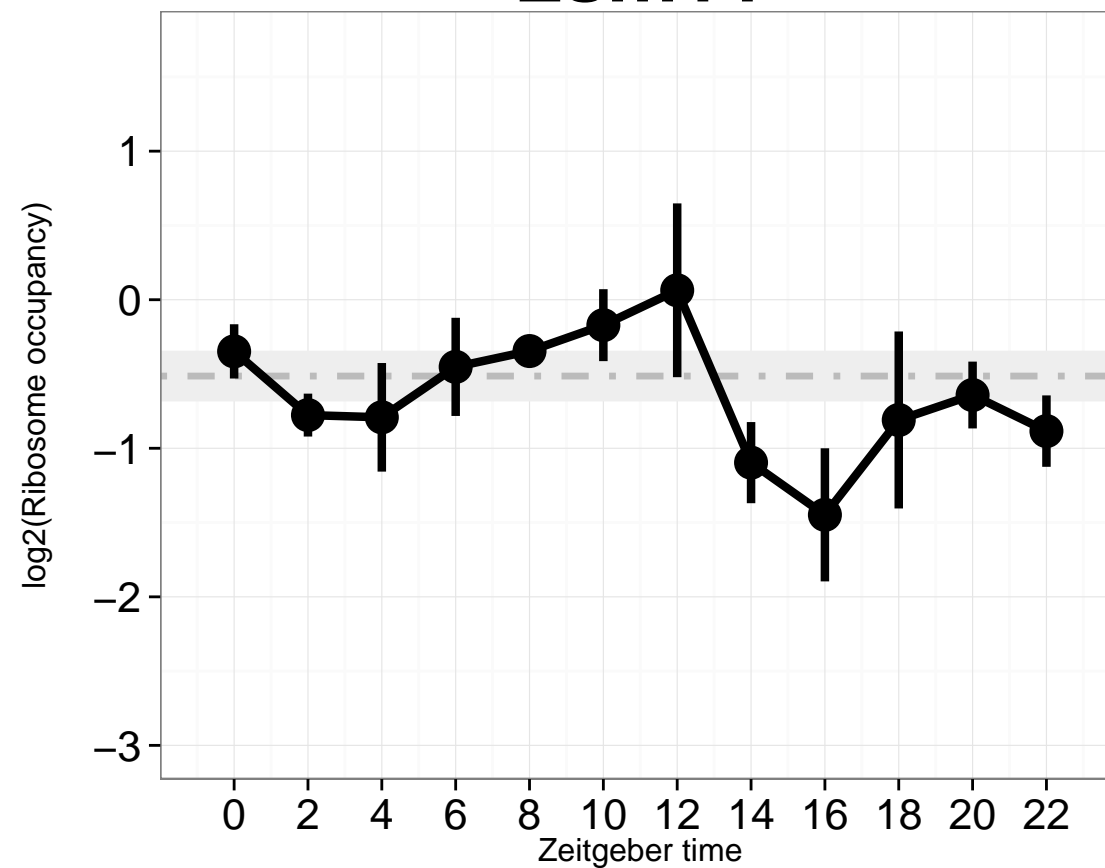

Supplement: SuppDataset_1.zip [file Lsm11_set_A.pdf › Supplemental Dataset 1/A-mRNA_nonrhyth_translation_nonrhyth/Lsm11_set_A.pdf]

## Lsm12

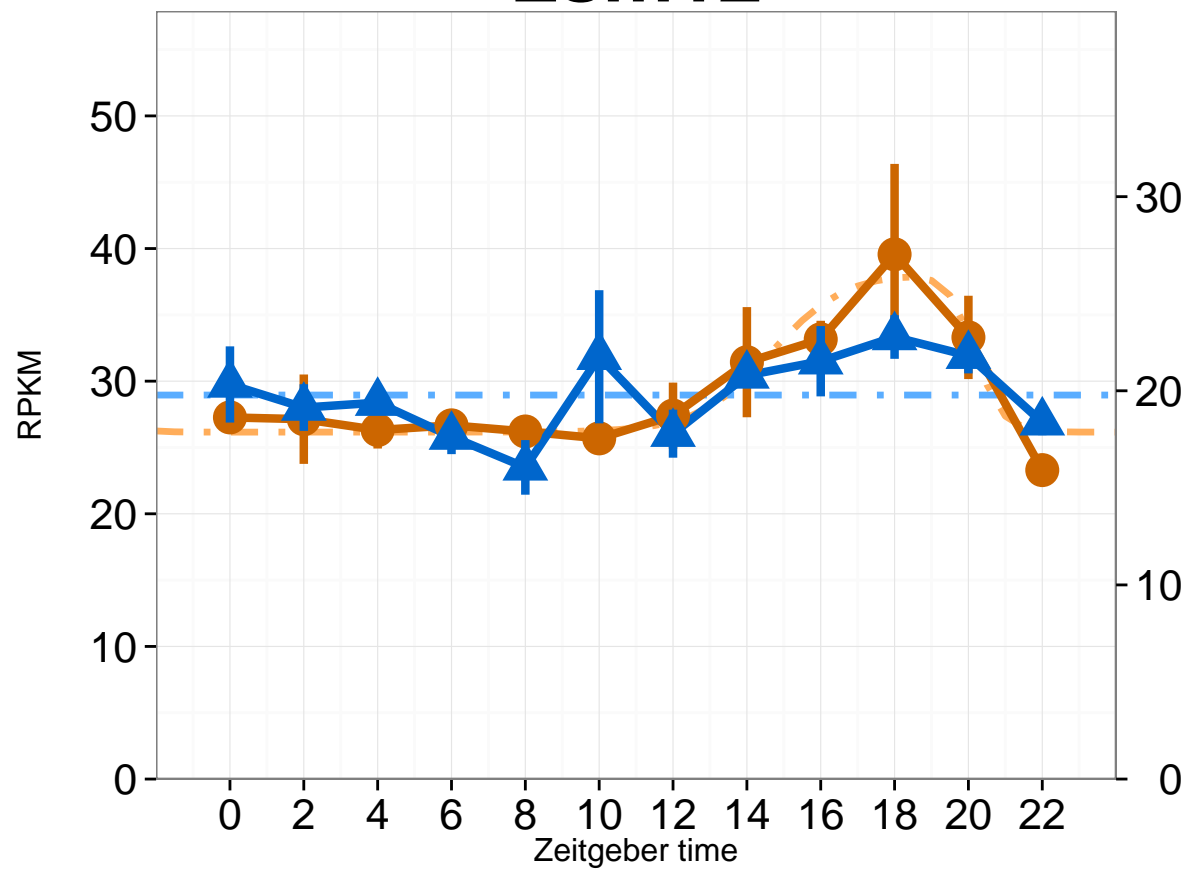

## Lsm12

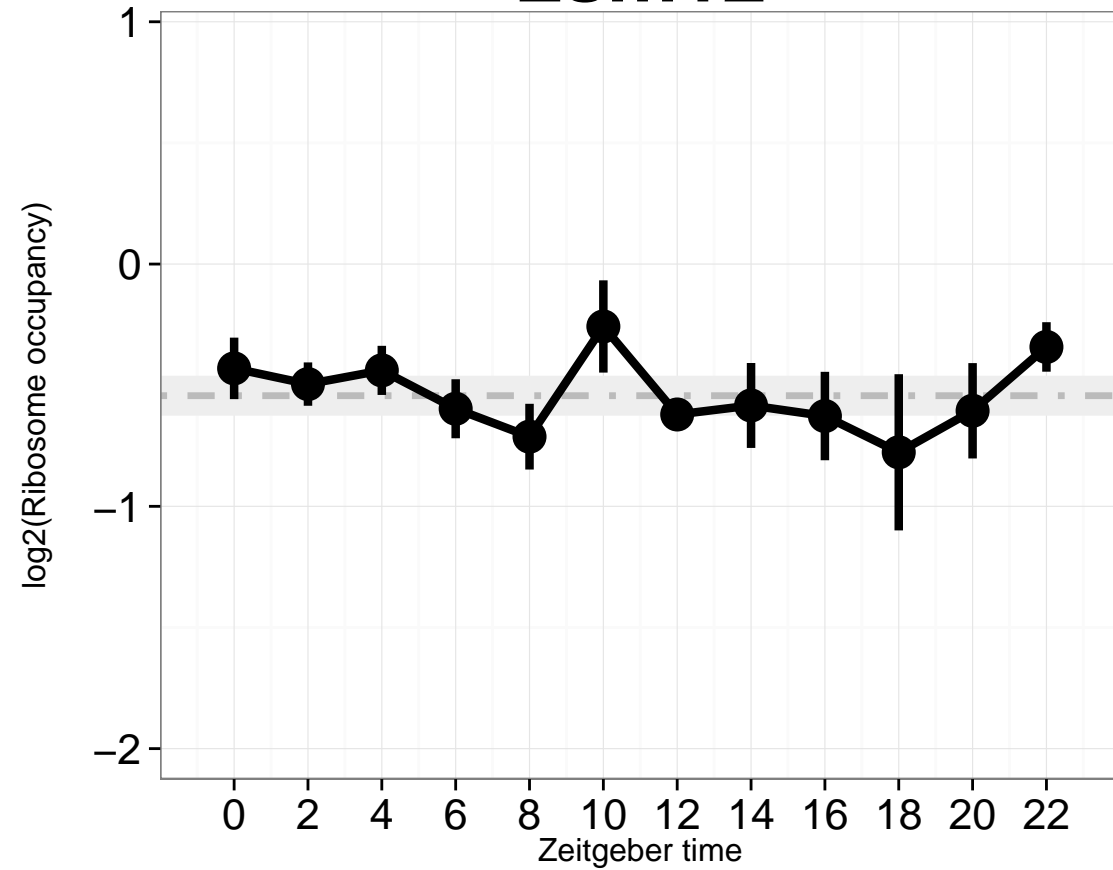

Supplement: SuppDataset_1.zip [file Lsm12_set_A.pdf › Supplemental Dataset 1/A-mRNA_nonrhyth_translation_nonrhyth/Lsm12_set_A.pdf]

# Lsm14a

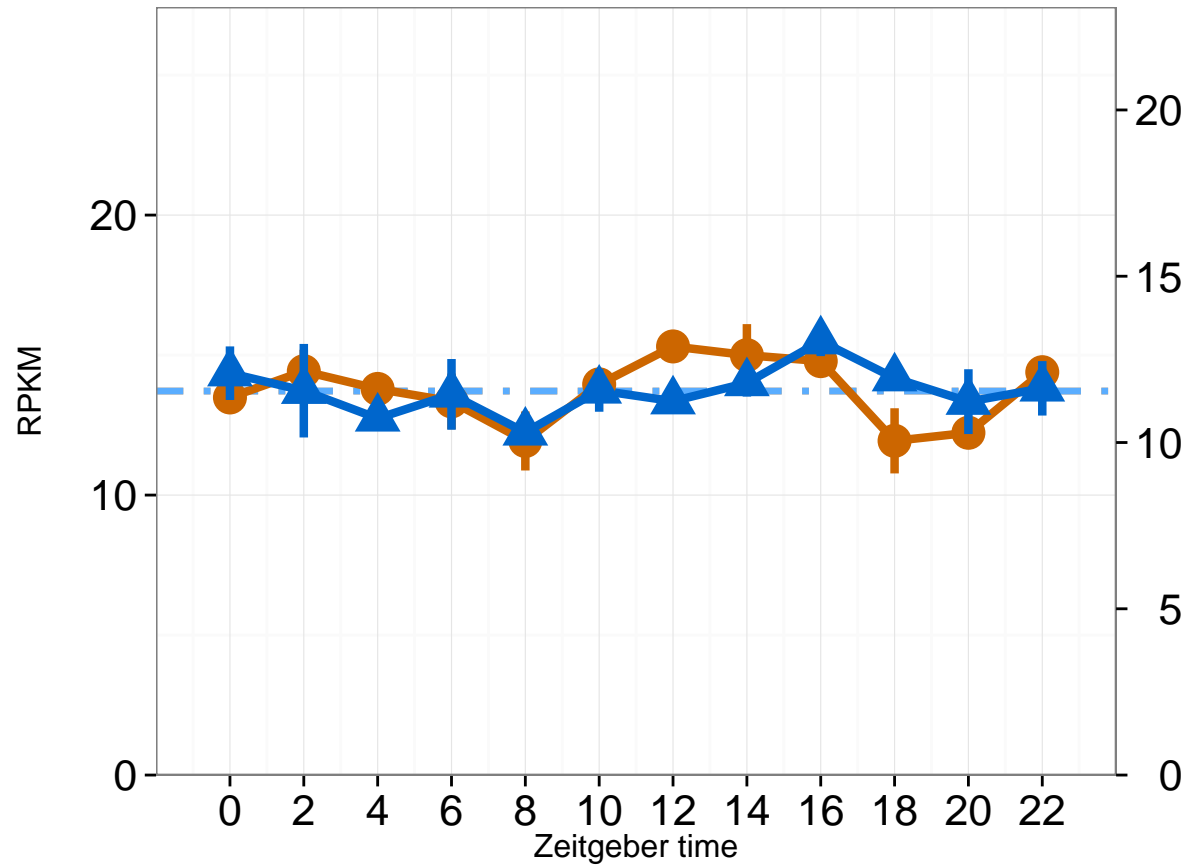

# Lsm14a

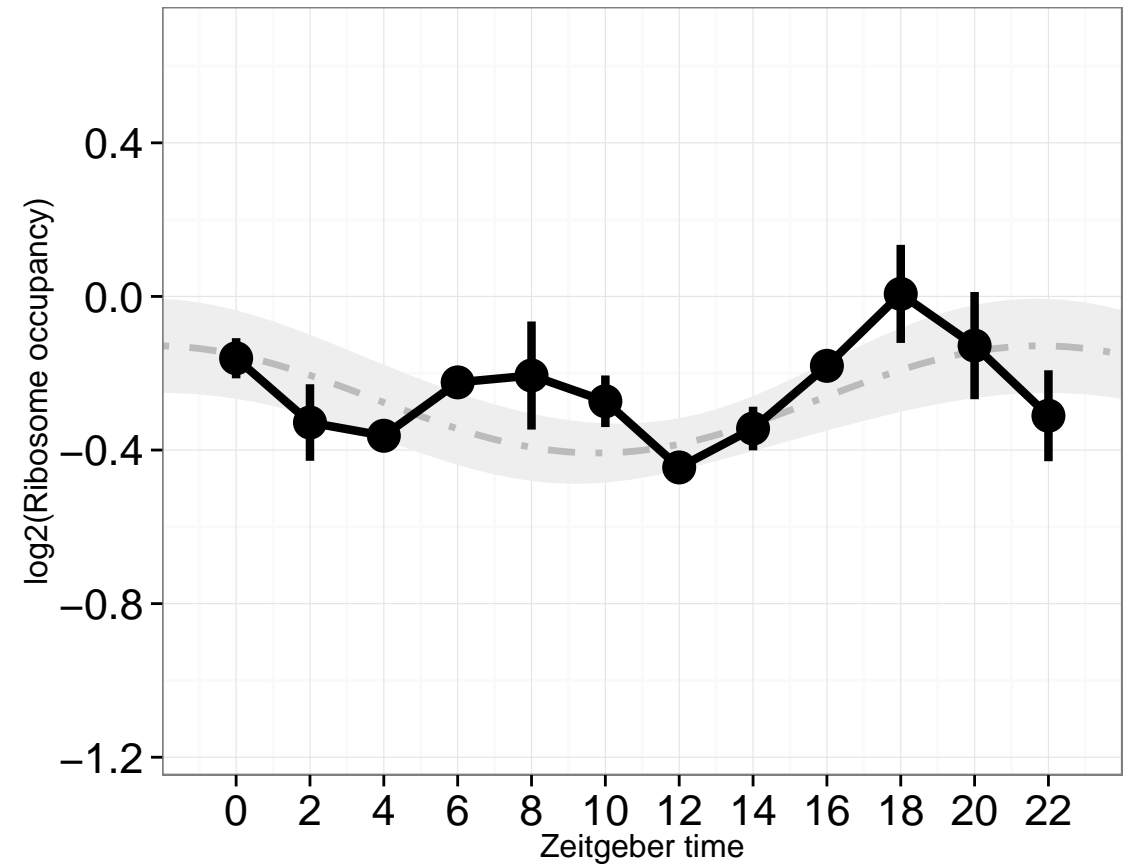

Supplement: SuppDataset_1.zip [file Lsm14a_set_A.pdf › Supplemental Dataset 1/A-mRNA_nonrhyth_translation_nonrhyth/Lsm14a_set_A.pdf]

# Lsm14b

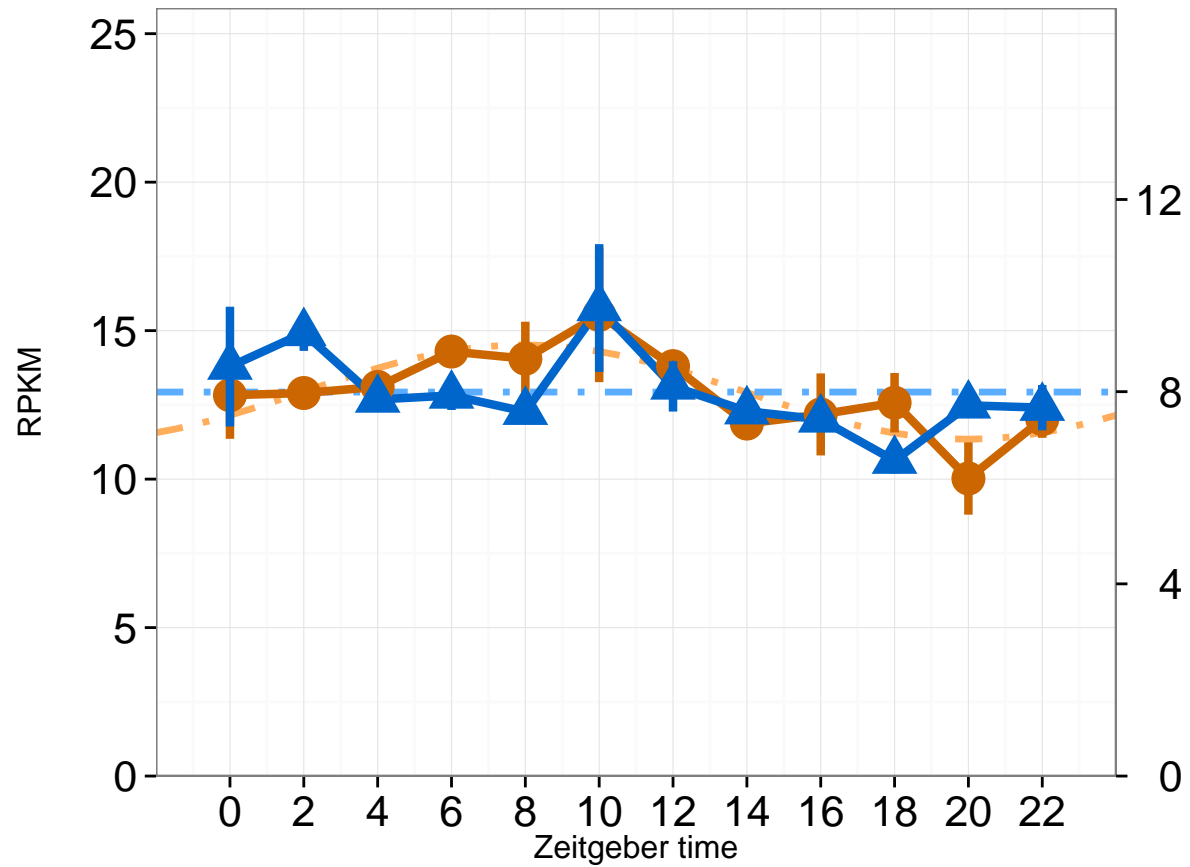

# Lsm14b

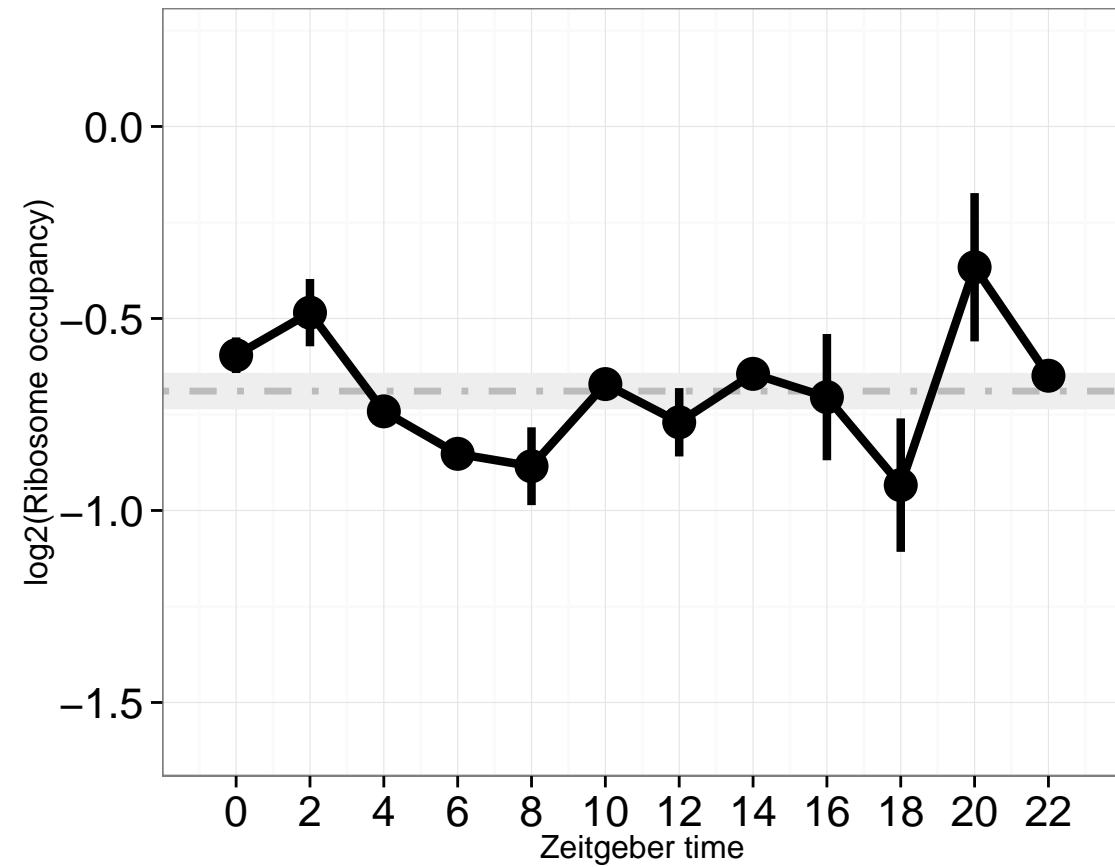

Supplement: SuppDataset_1.zip [file Lsm14b_set_A.pdf › Supplemental Dataset 1/A-mRNA_nonrhyth_translation_nonrhyth/Lsm14b_set_A.pdf]

## Lsm1

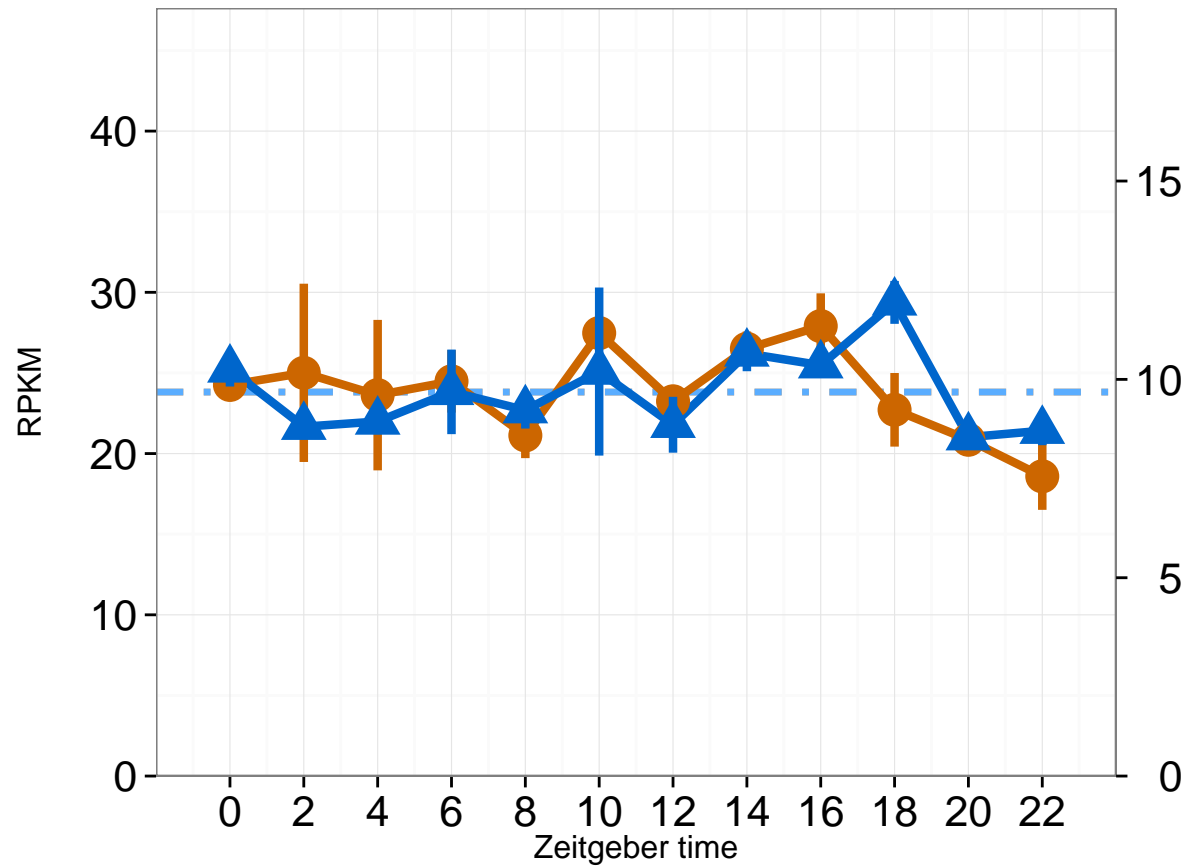

## Lsm1

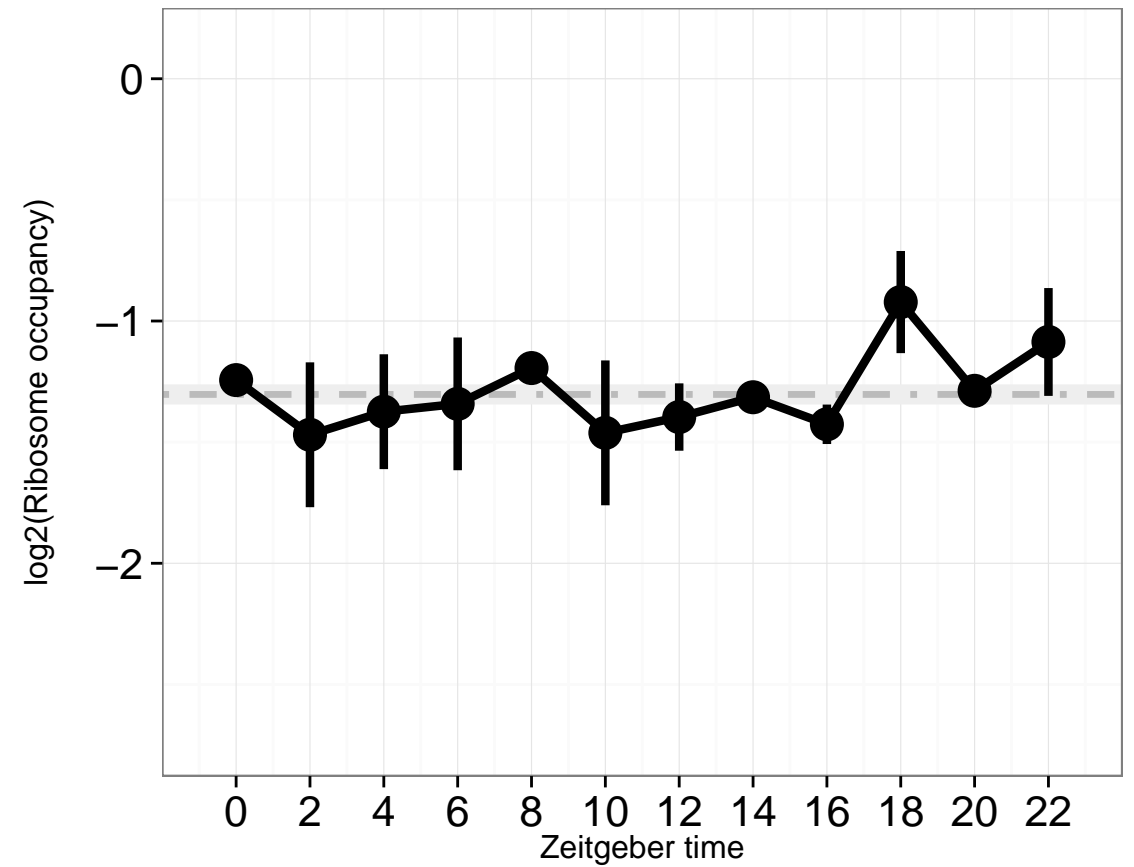

Supplement: SuppDataset_1.zip [file Lsm1_set_A.pdf › Supplemental Dataset 1/A-mRNA_nonrhyth_translation_nonrhyth/Lsm1_set_A.pdf]

## Lsm2

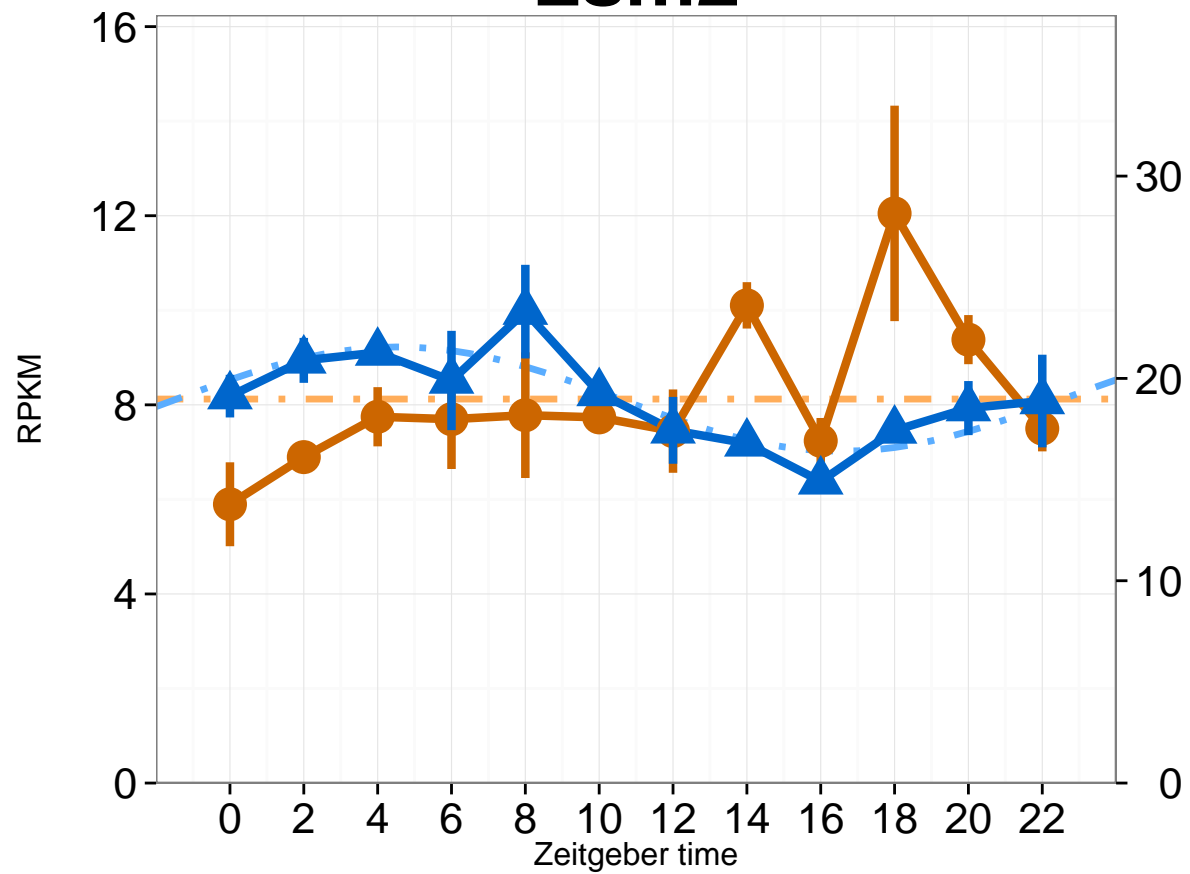

## Lsm2

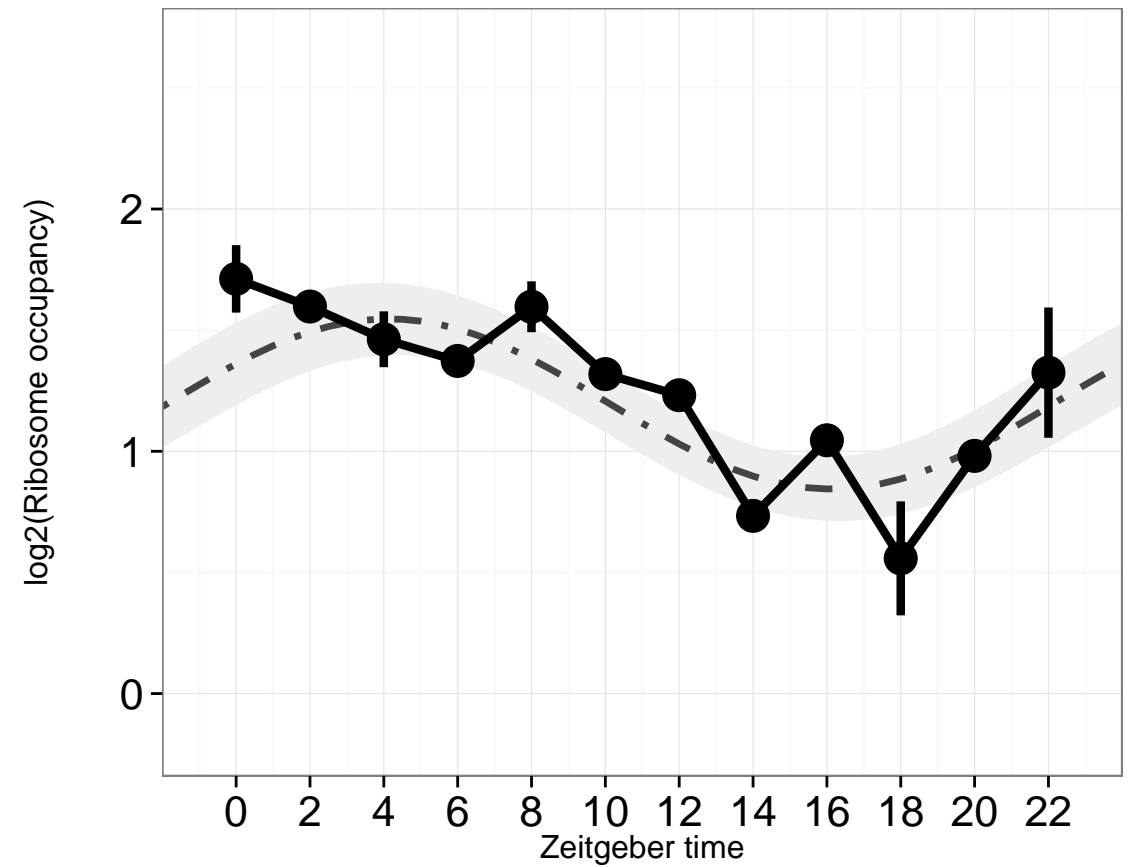

Supplement: SuppDataset_1.zip [file Lsm2_set_A.pdf › Supplemental Dataset 1/A-mRNA_nonrhyth_translation_nonrhyth/Lsm2_set_A.pdf]

# Lsm4

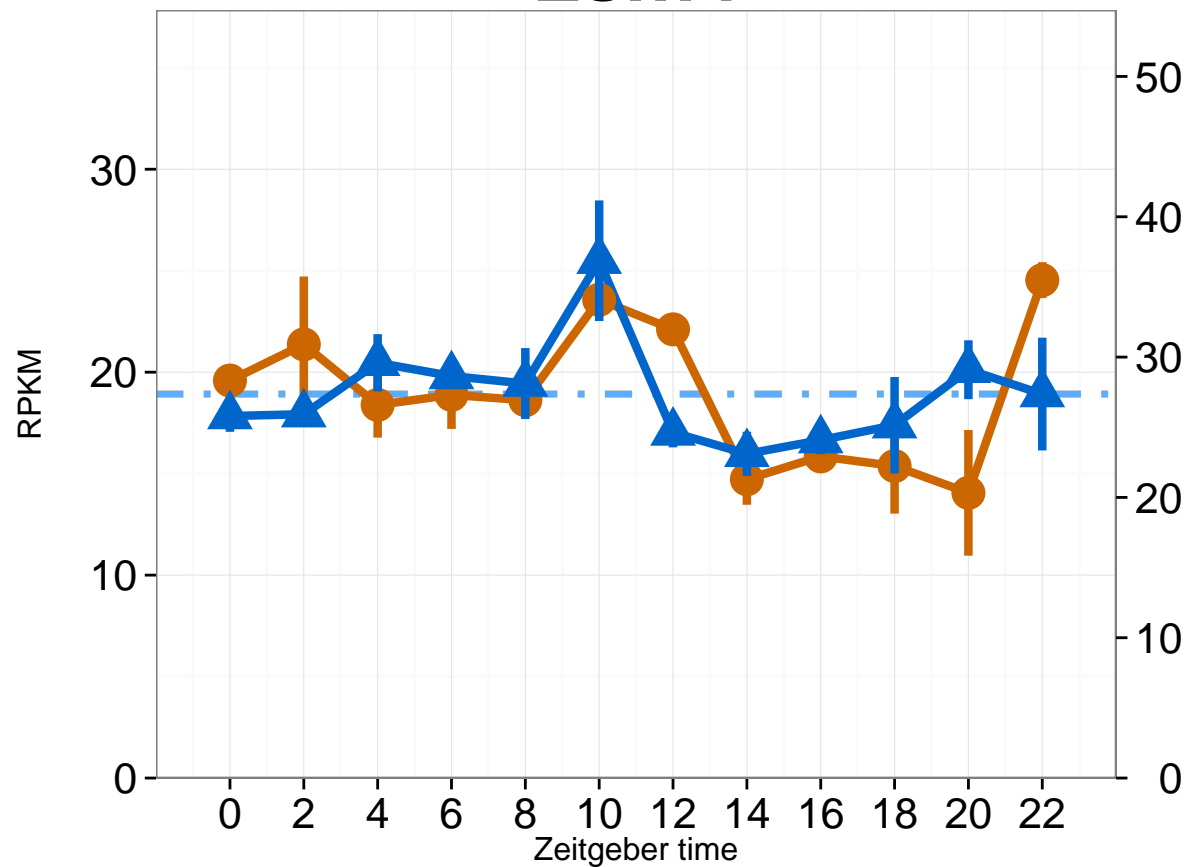

# Lsm4

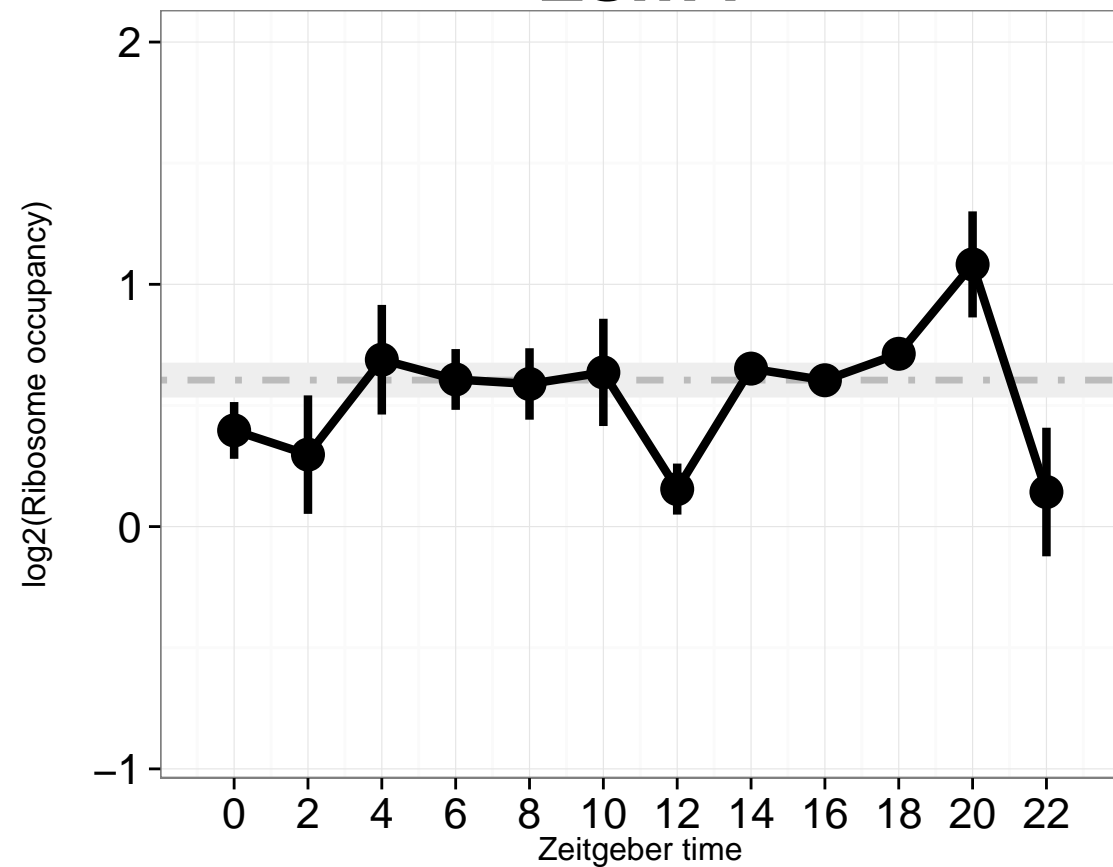

Supplement: SuppDataset_1.zip [file Lsm4_set_A.pdf › Supplemental Dataset 1/A-mRNA_nonrhyth_translation_nonrhyth/Lsm4_set_A.pdf]

# Lsm5

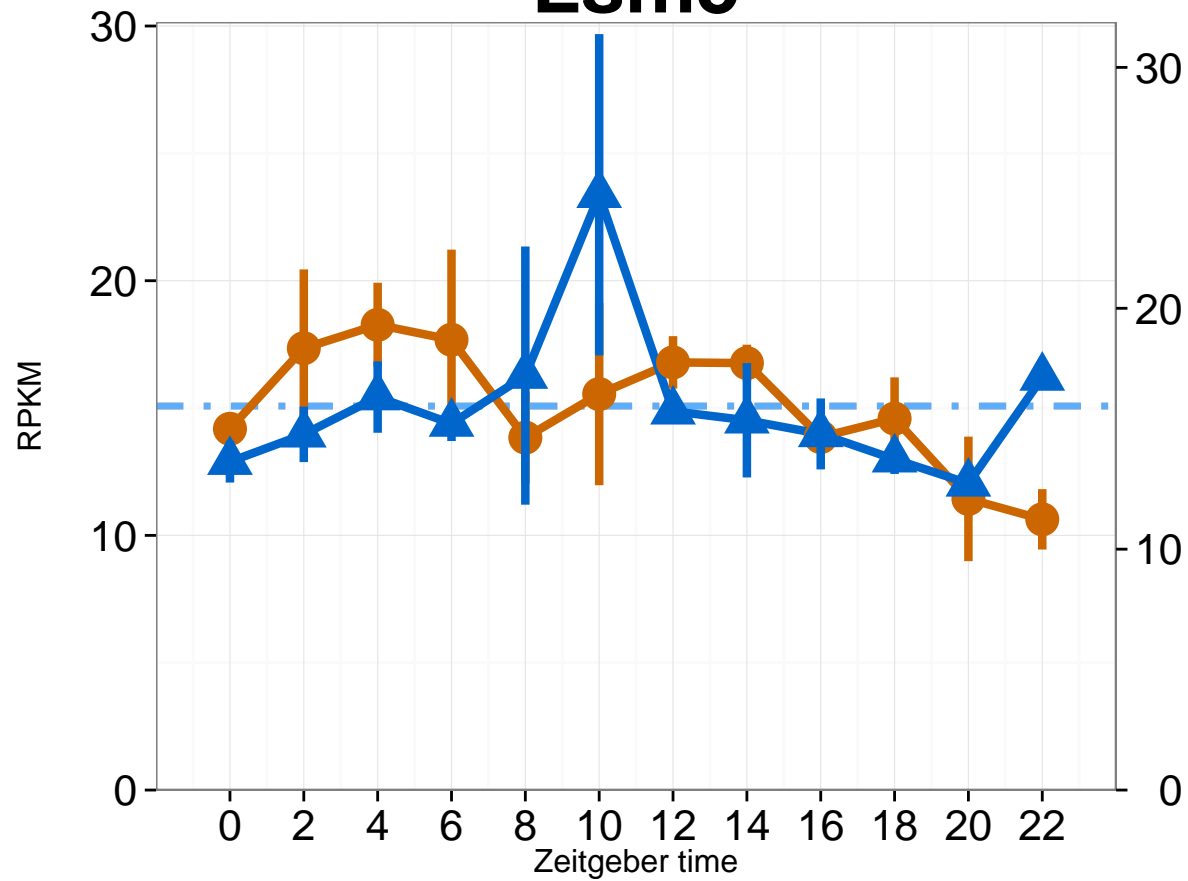

# Lsm5

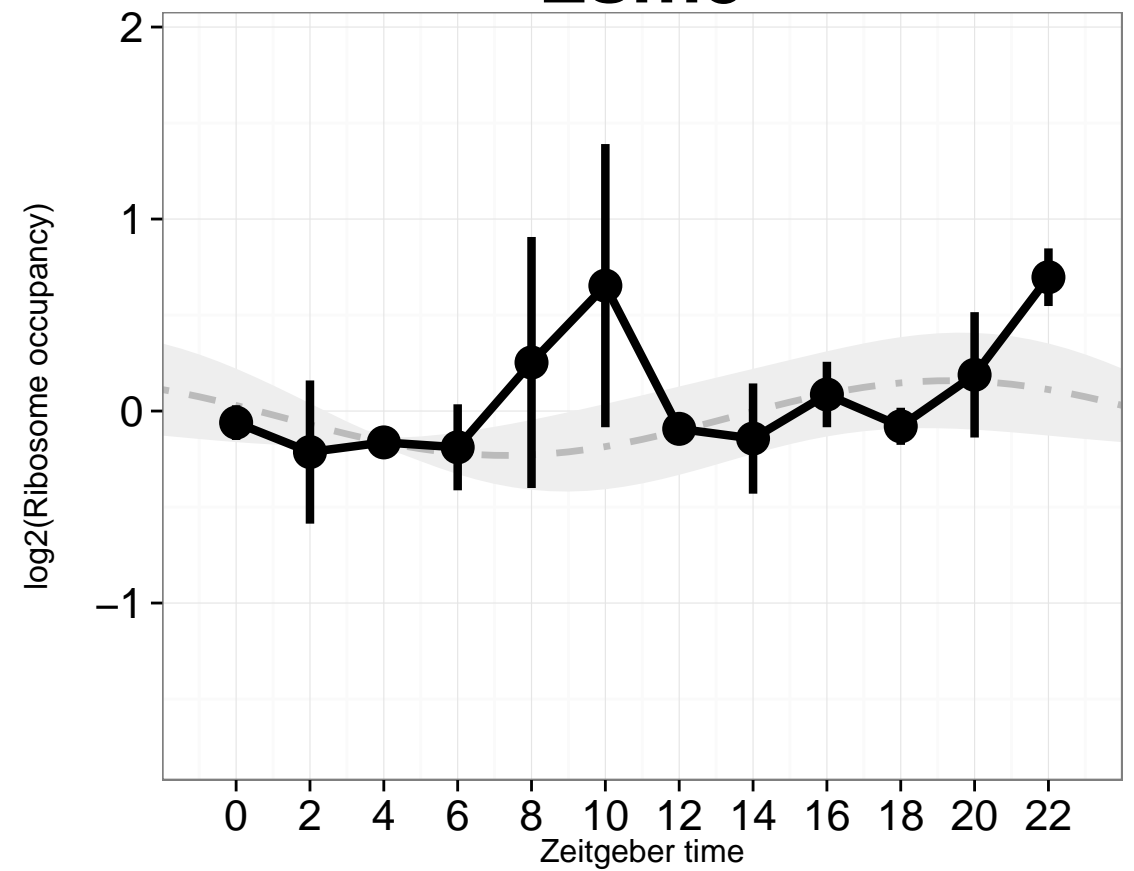

Supplement: SuppDataset_1.zip [file Lsm5_set_A.pdf › Supplemental Dataset 1/A-mRNA_nonrhyth_translation_nonrhyth/Lsm5_set_A.pdf]

# Lsm6

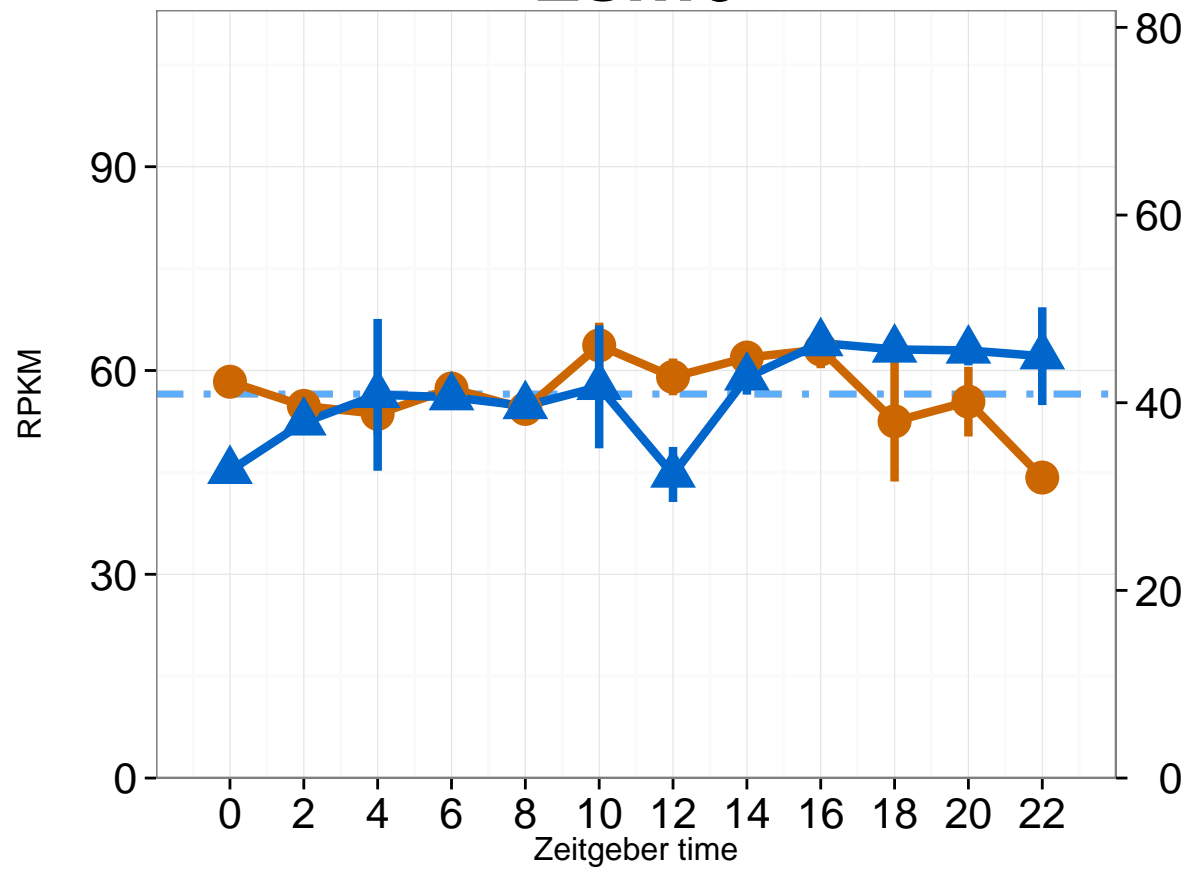

# Lsm6

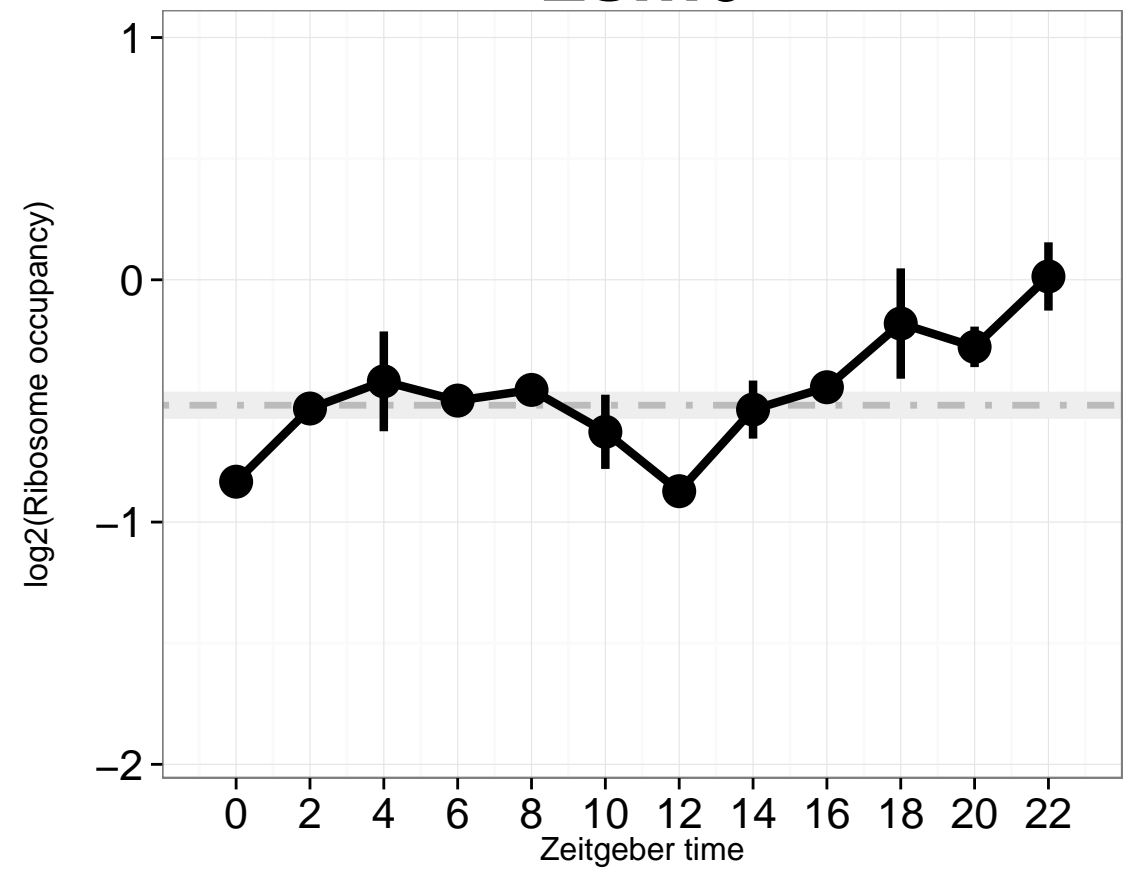

Supplement: SuppDataset_1.zip [file Lsm6_set_A.pdf › Supplemental Dataset 1/A-mRNA_nonrhyth_translation_nonrhyth/Lsm6_set_A.pdf]

## Lsm7

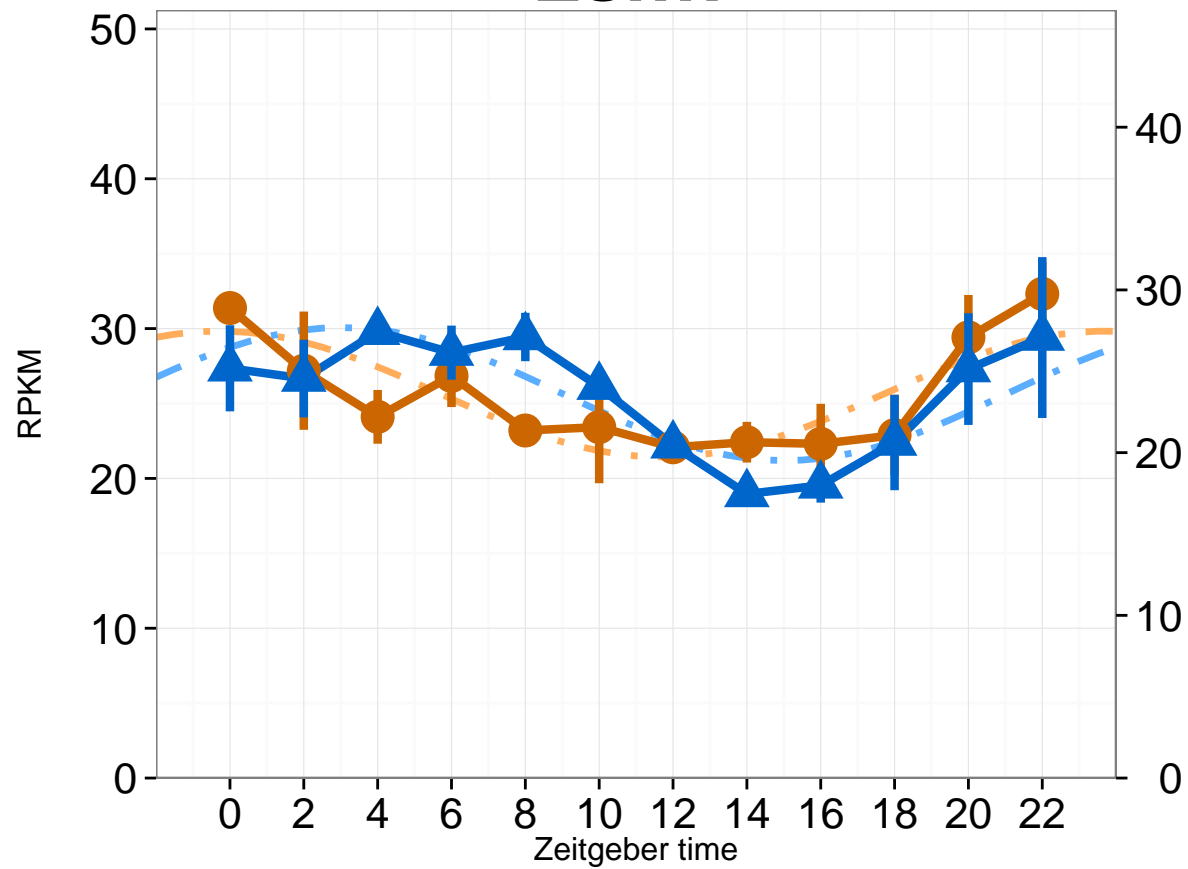

## Lsm7

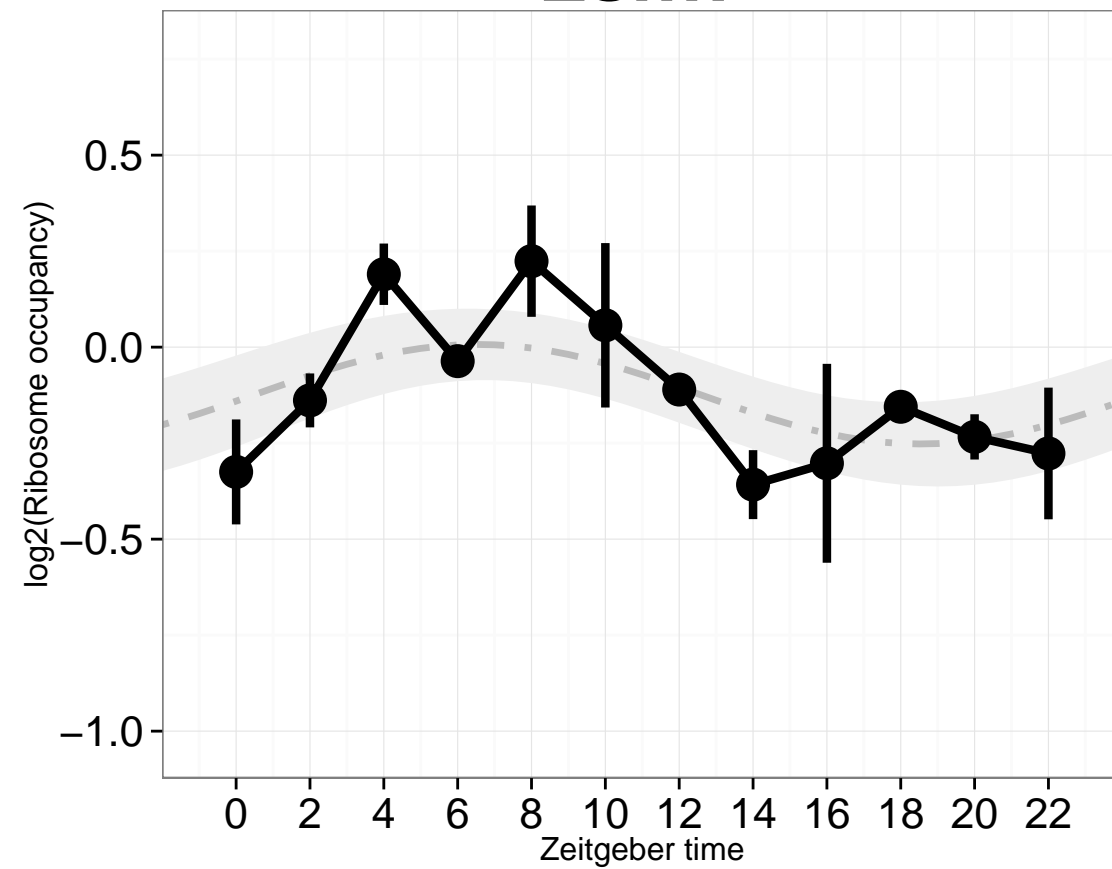

Supplement: SuppDataset_1.zip [file Lsm7_set_A.pdf › Supplemental Dataset 1/A-mRNA_nonrhyth_translation_nonrhyth/Lsm7_set_A.pdf]

# Lst1

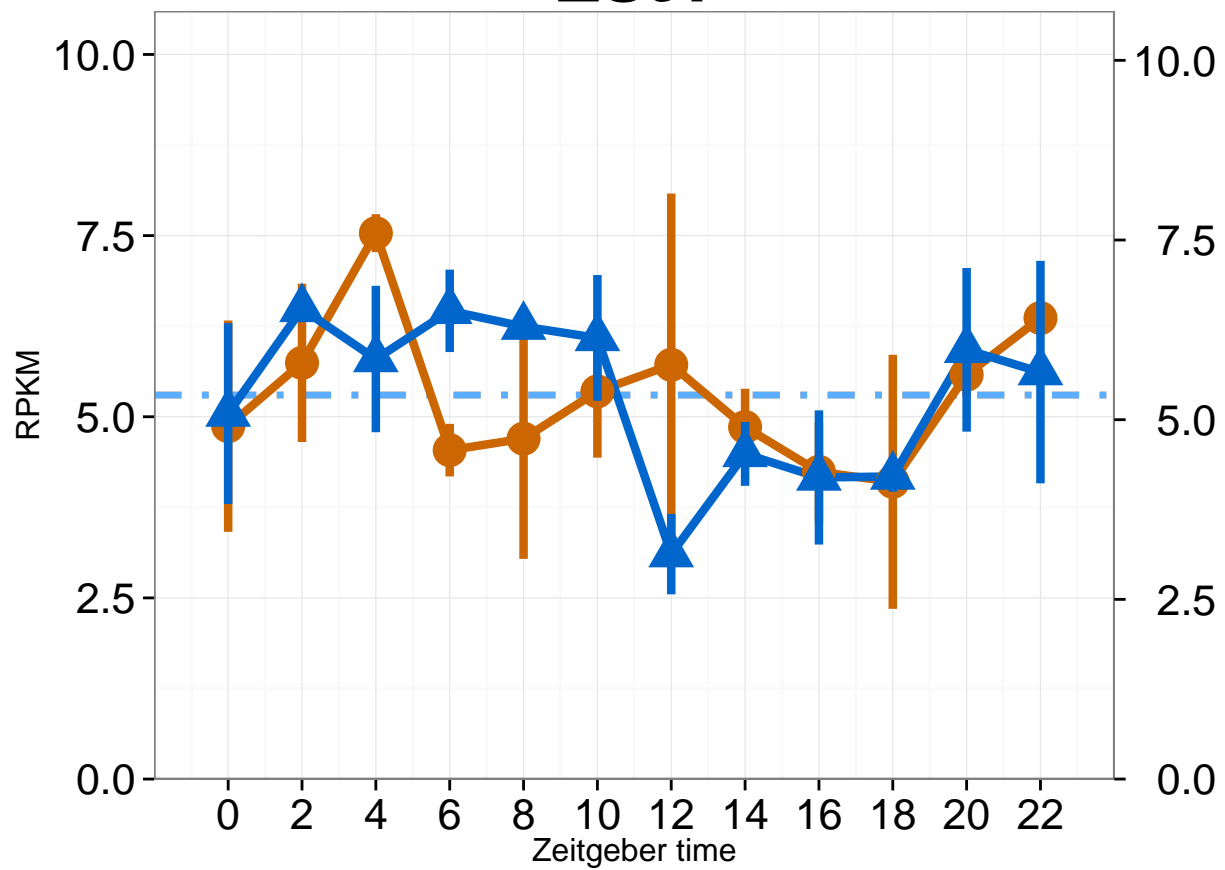

# Lst1

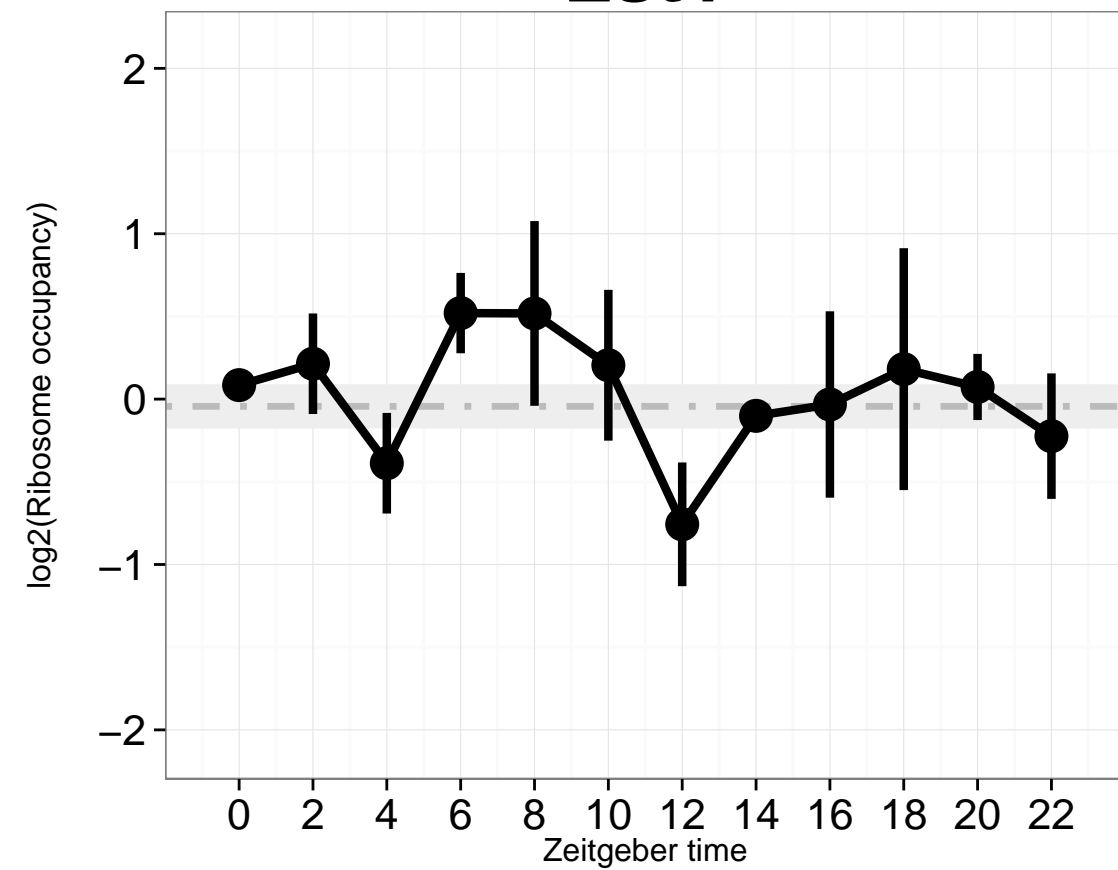

Supplement: SuppDataset_1.zip [file Lst1_set_A.pdf › Supplemental Dataset 1/A-mRNA_nonrhyth_translation_nonrhyth/Lst1_set_A.pdf]

# Lta4h

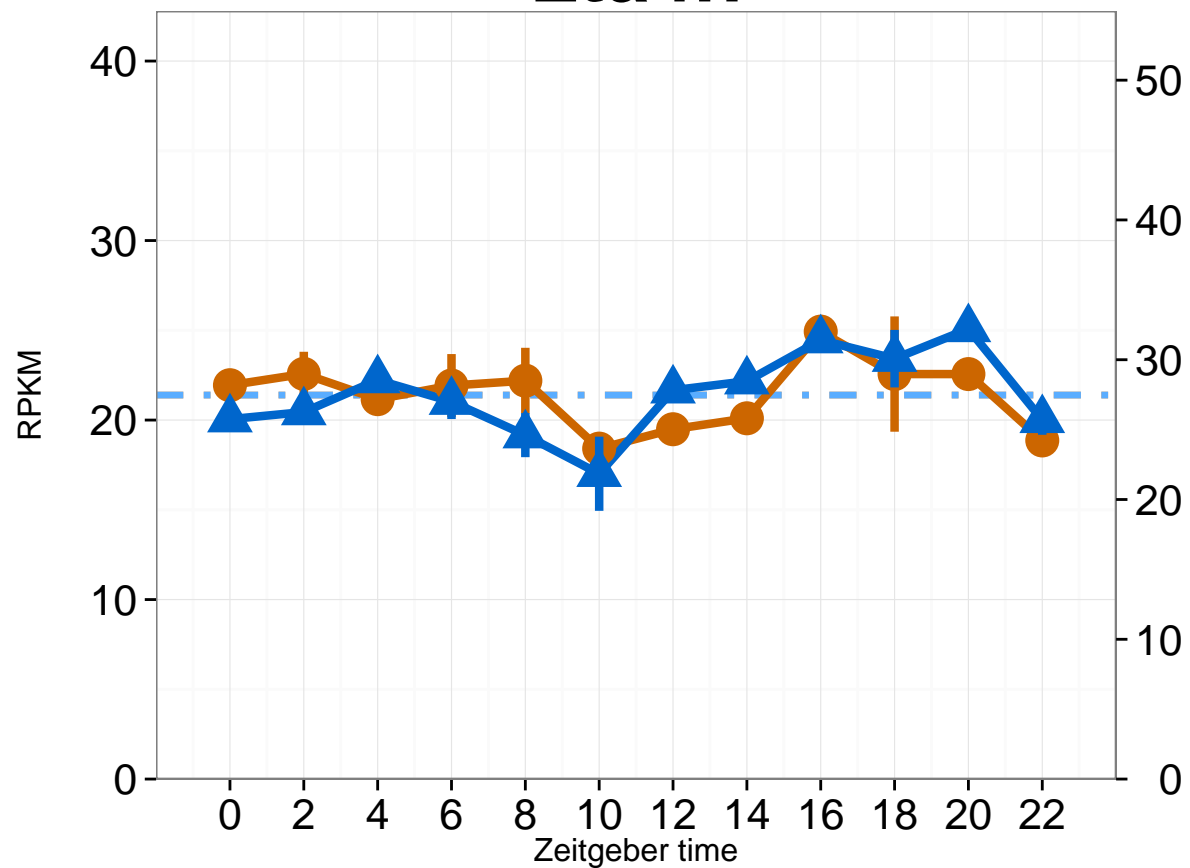

# Lta4h

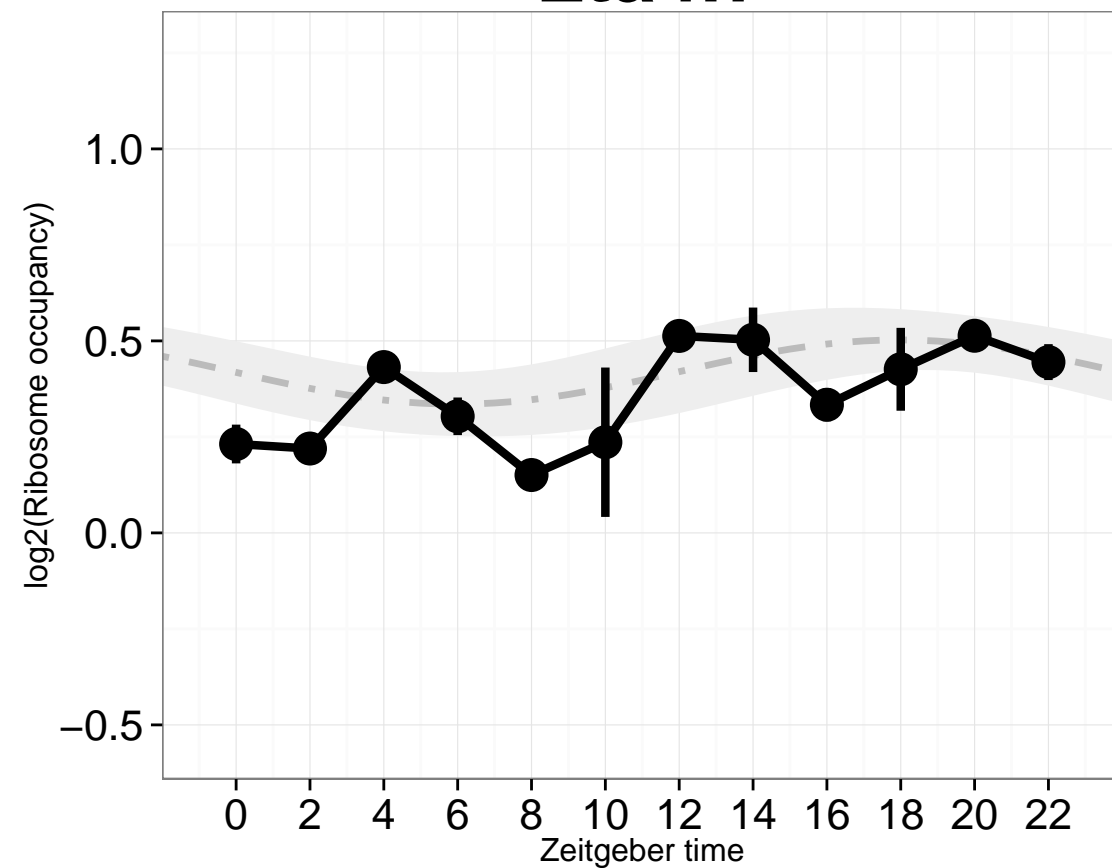

Supplement: SuppDataset_1.zip [file Lta4h_set_A.pdf › Supplemental Dataset 1/A-mRNA_nonrhyth_translation_nonrhyth/Lta4h_set_A.pdf]

# Ltb4r2

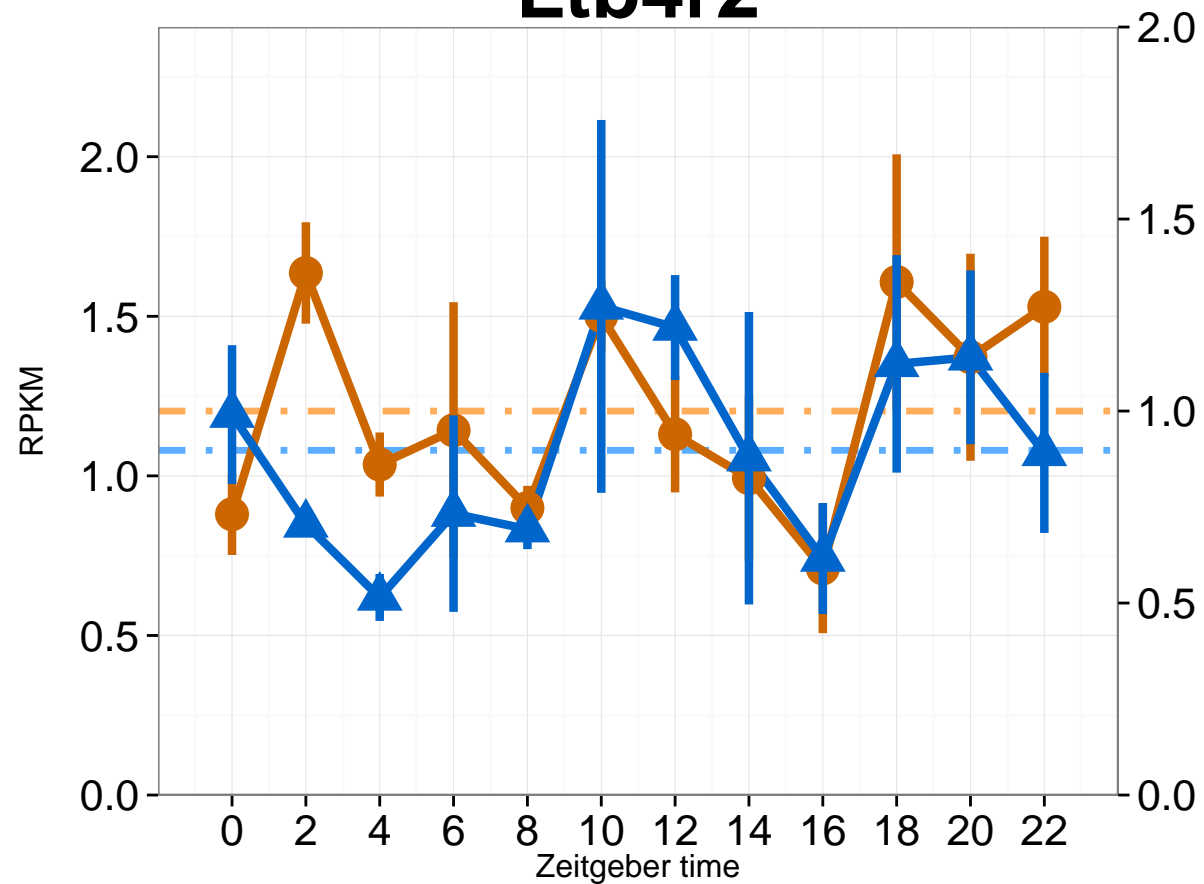

# Ltb4r2

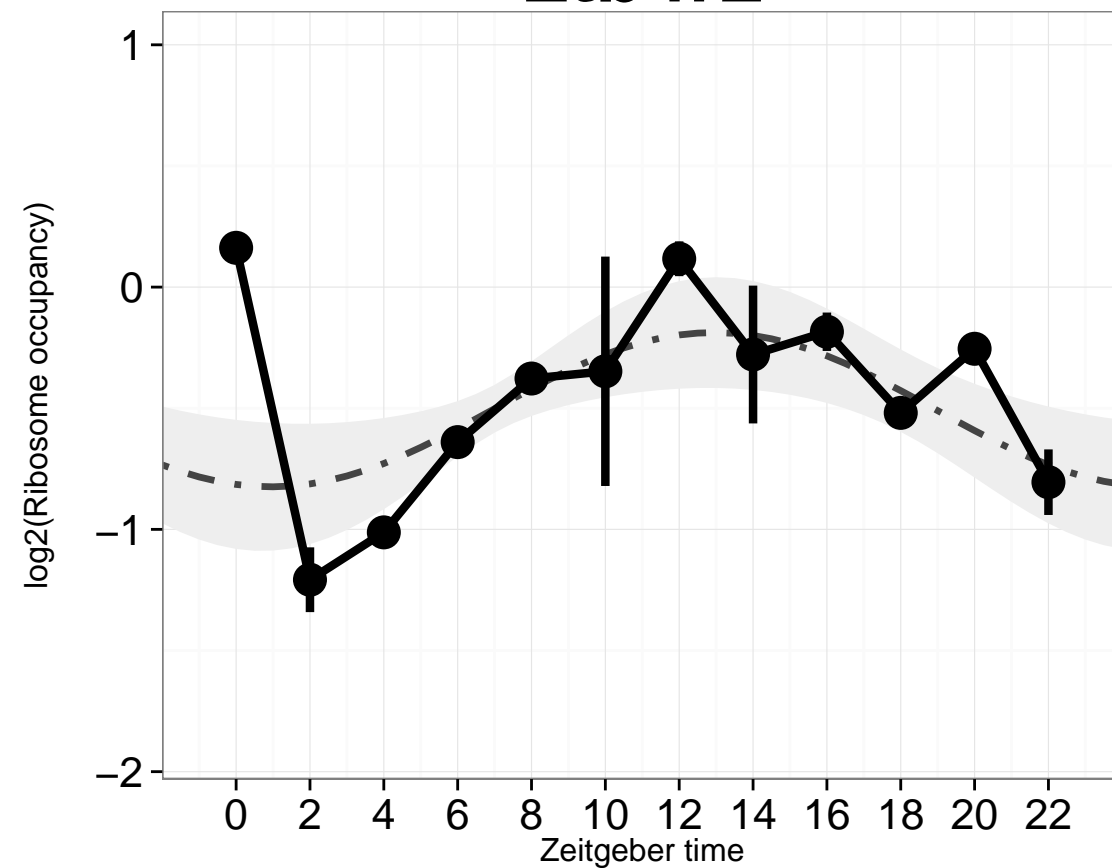

Supplement: SuppDataset_1.zip [file Ltb4r2_set_A.pdf › Supplemental Dataset 1/A-mRNA_nonrhyth_translation_nonrhyth/Ltb4r2_set_A.pdf]

## Ltb

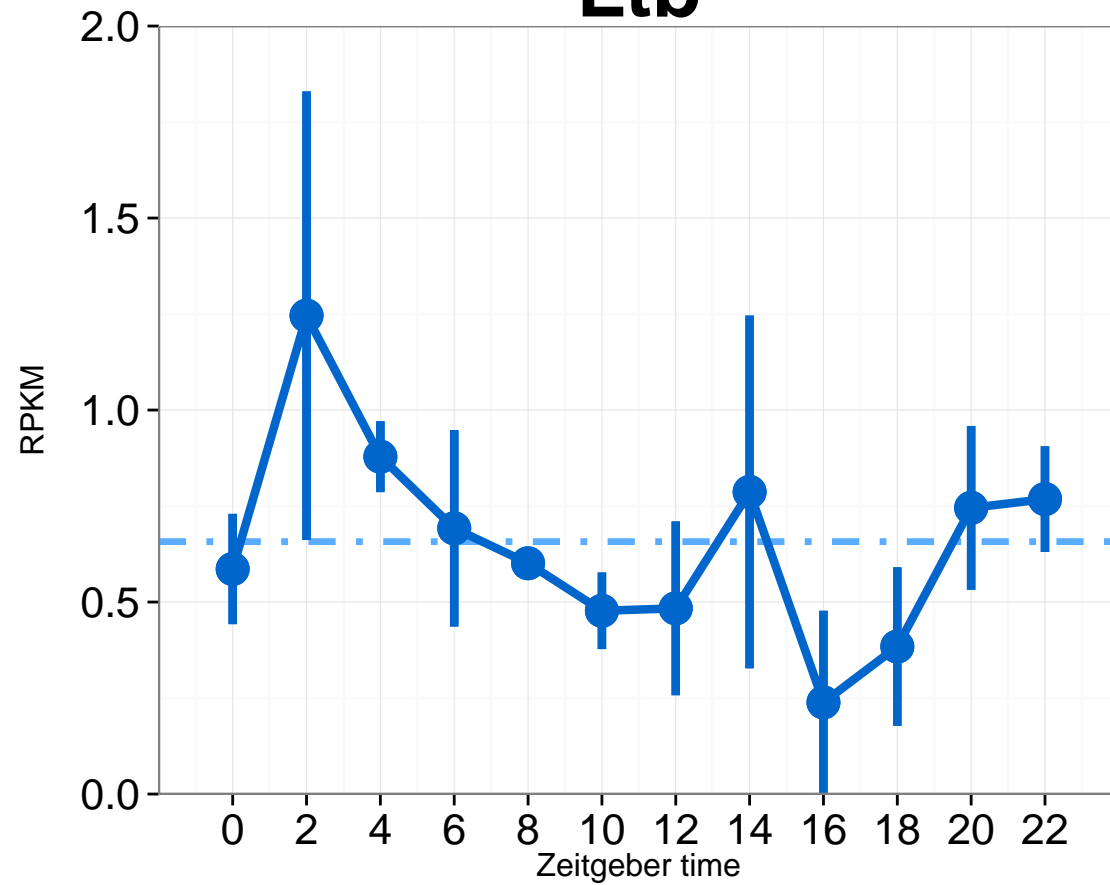

## Ltb log2(Ribosome occupancy)

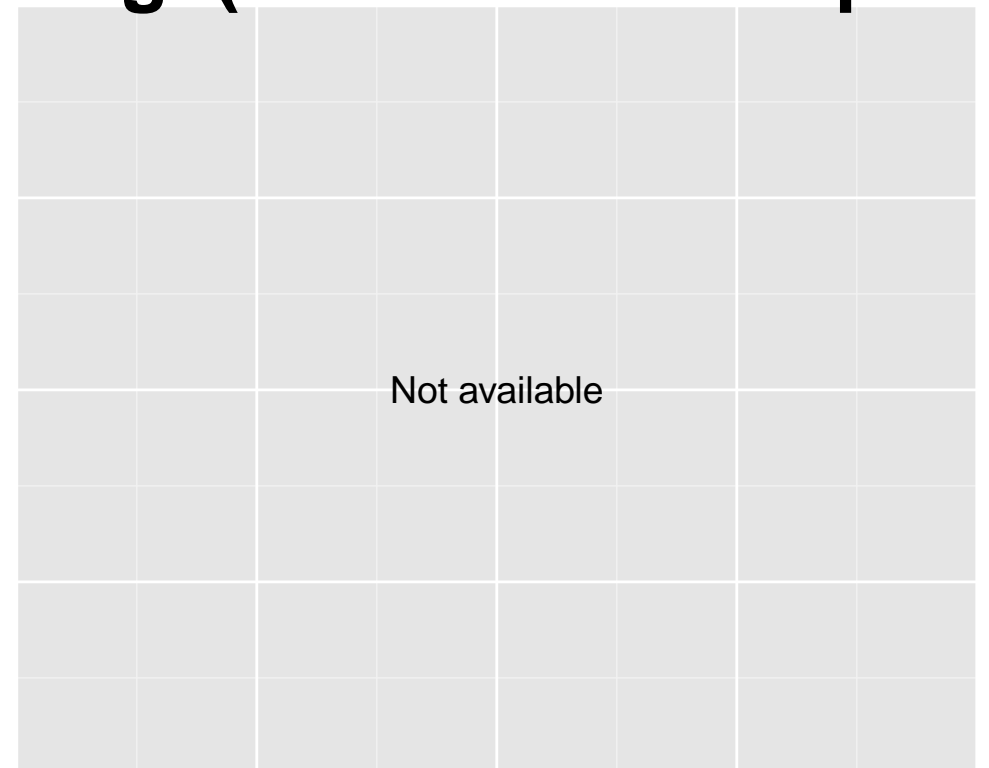

Supplement: SuppDataset_1.zip [file Ltb_set_A.pdf › Supplemental Dataset 1/A-mRNA_nonrhyth_translation_nonrhyth/Ltb_set_A.pdf]

# Ltbp2

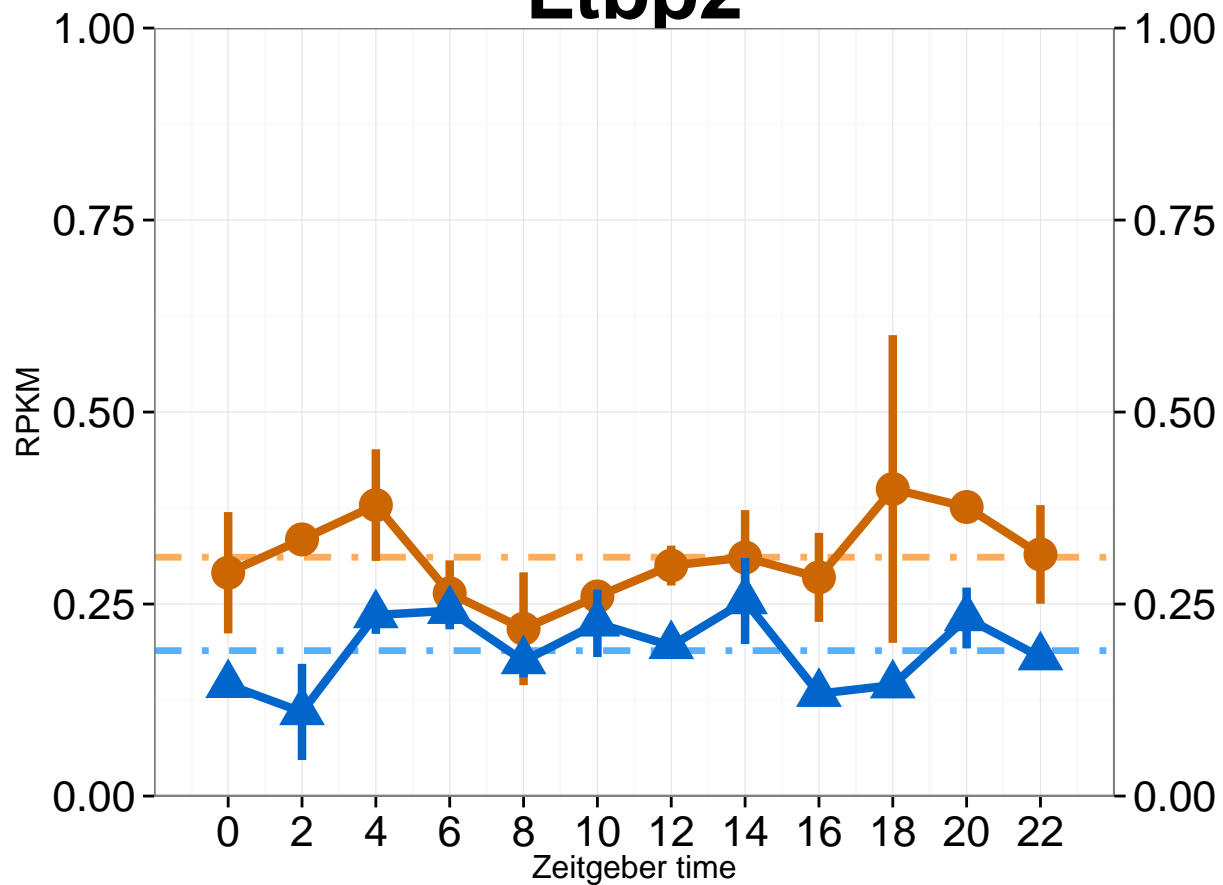

# Ltbp2

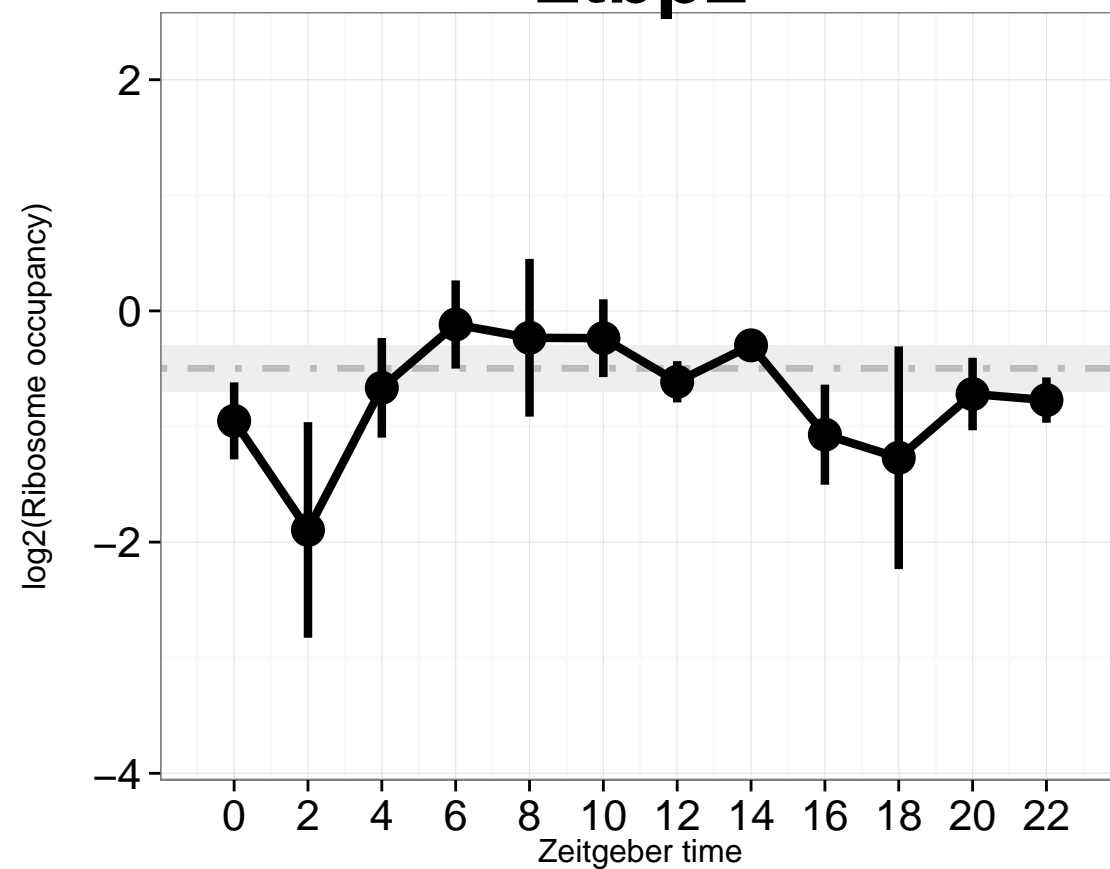

Supplement: SuppDataset_1.zip [file Ltbp2_set_A.pdf › Supplemental Dataset 1/A-mRNA_nonrhyth_translation_nonrhyth/Ltbp2_set_A.pdf]

# Ltbr

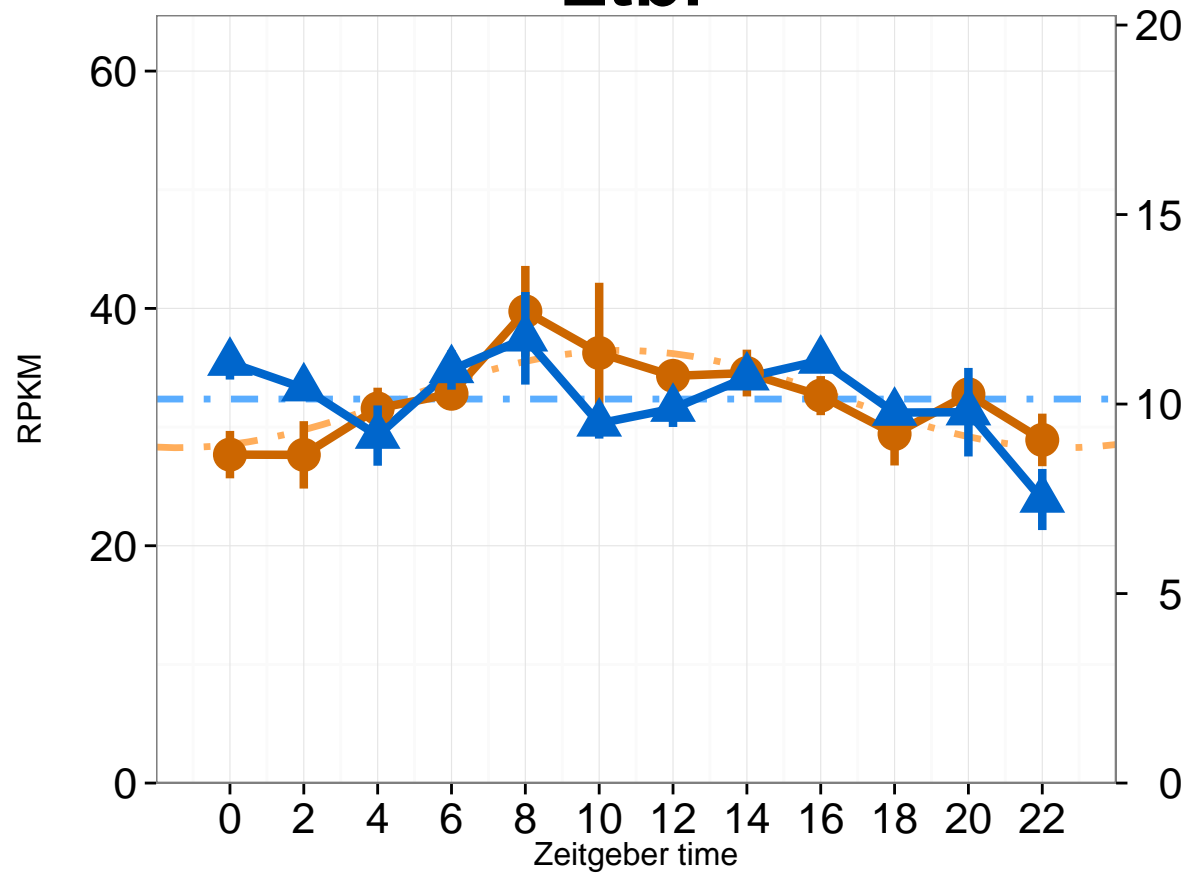

# Ltbr

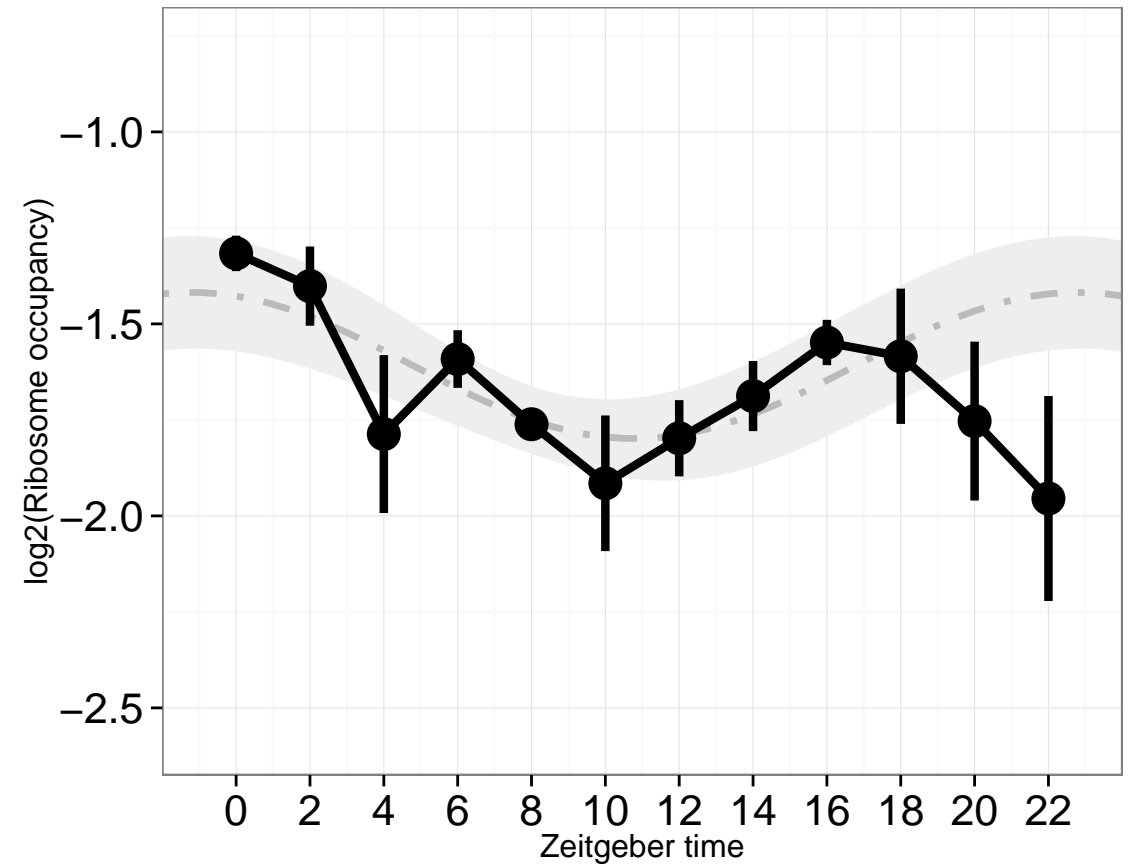

Supplement: SuppDataset_1.zip [file Ltbr_set_A.pdf › Supplemental Dataset 1/A-mRNA_nonrhyth_translation_nonrhyth/Ltbr_set_A.pdf]

# Ltn1

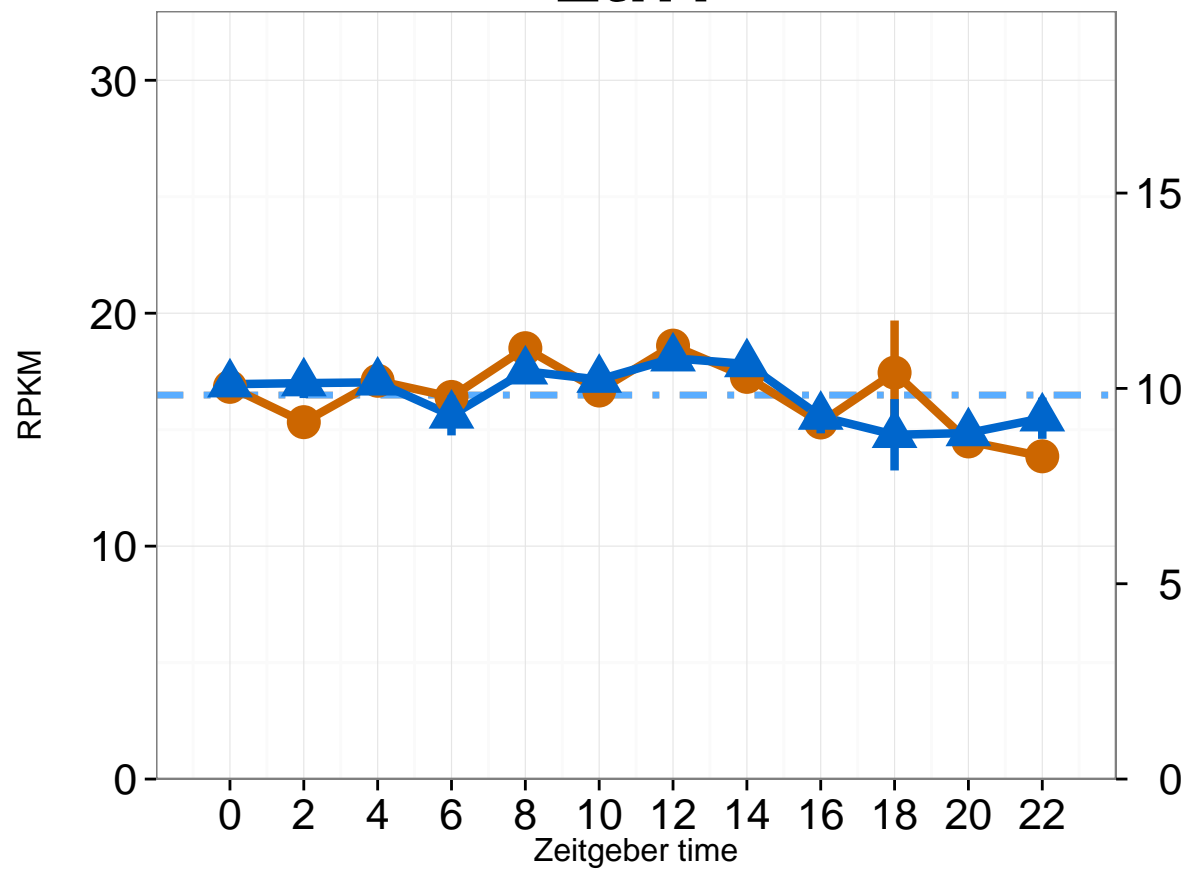

# Ltn1

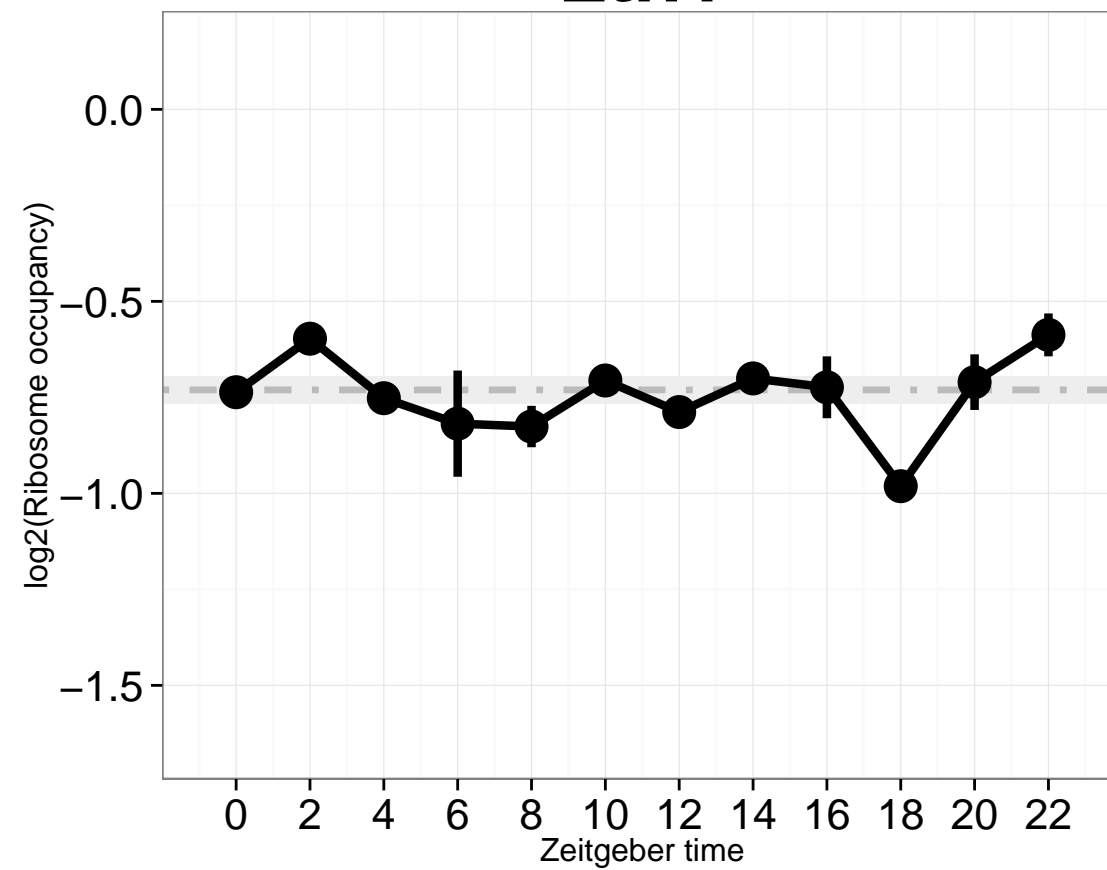

Supplement: SuppDataset_1.zip [file Ltn1_set_A.pdf › Supplemental Dataset 1/A-mRNA_nonrhyth_translation_nonrhyth/Ltn1_set_A.pdf]

# Ltv1

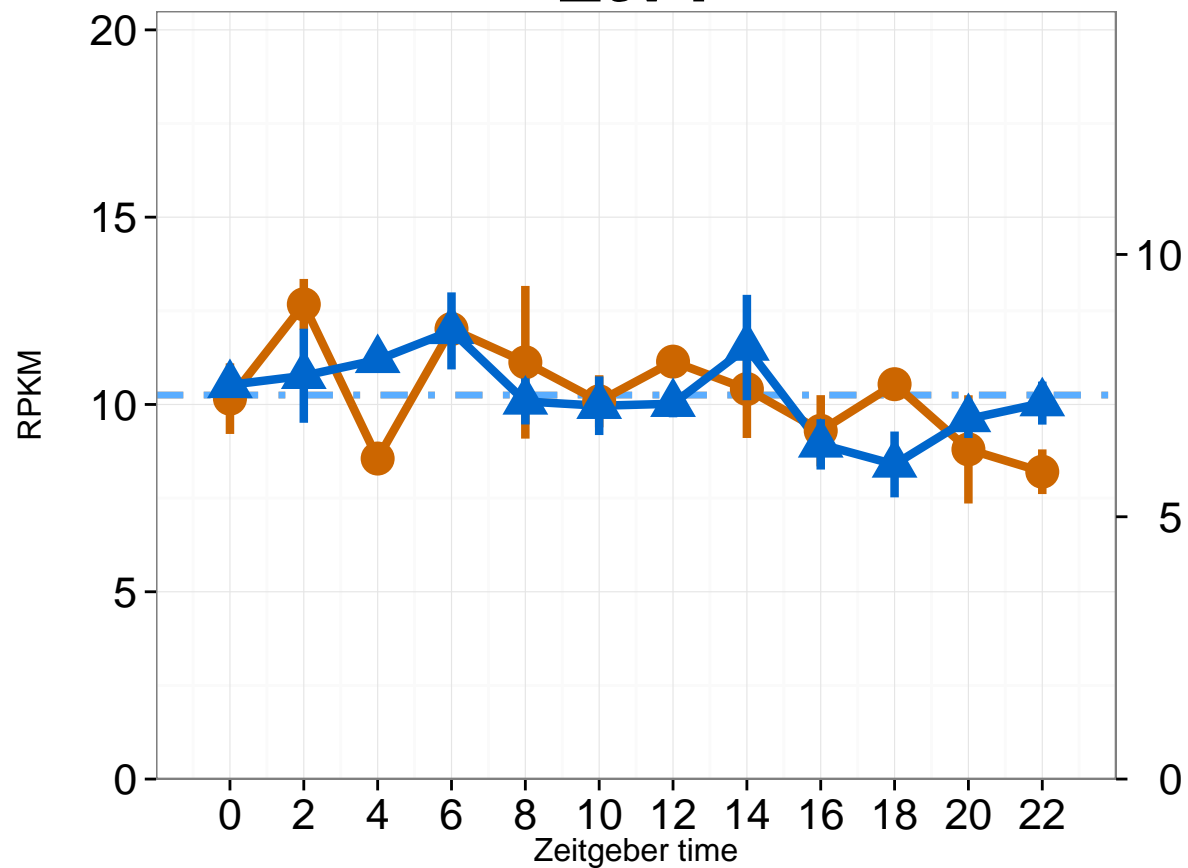

# Ltv1

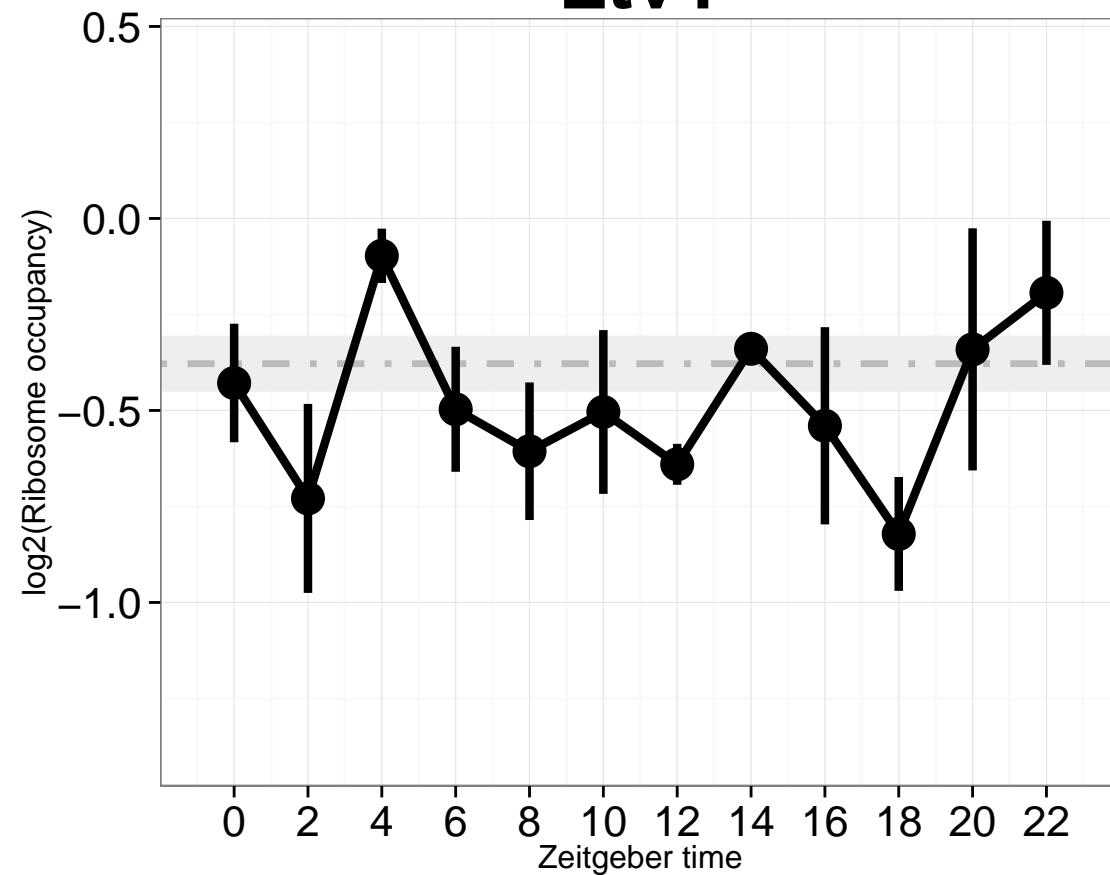

Supplement: SuppDataset_1.zip [file Ltv1_set_A.pdf › Supplemental Dataset 1/A-mRNA_nonrhyth_translation_nonrhyth/Ltv1_set_A.pdf]

# Luc7l2

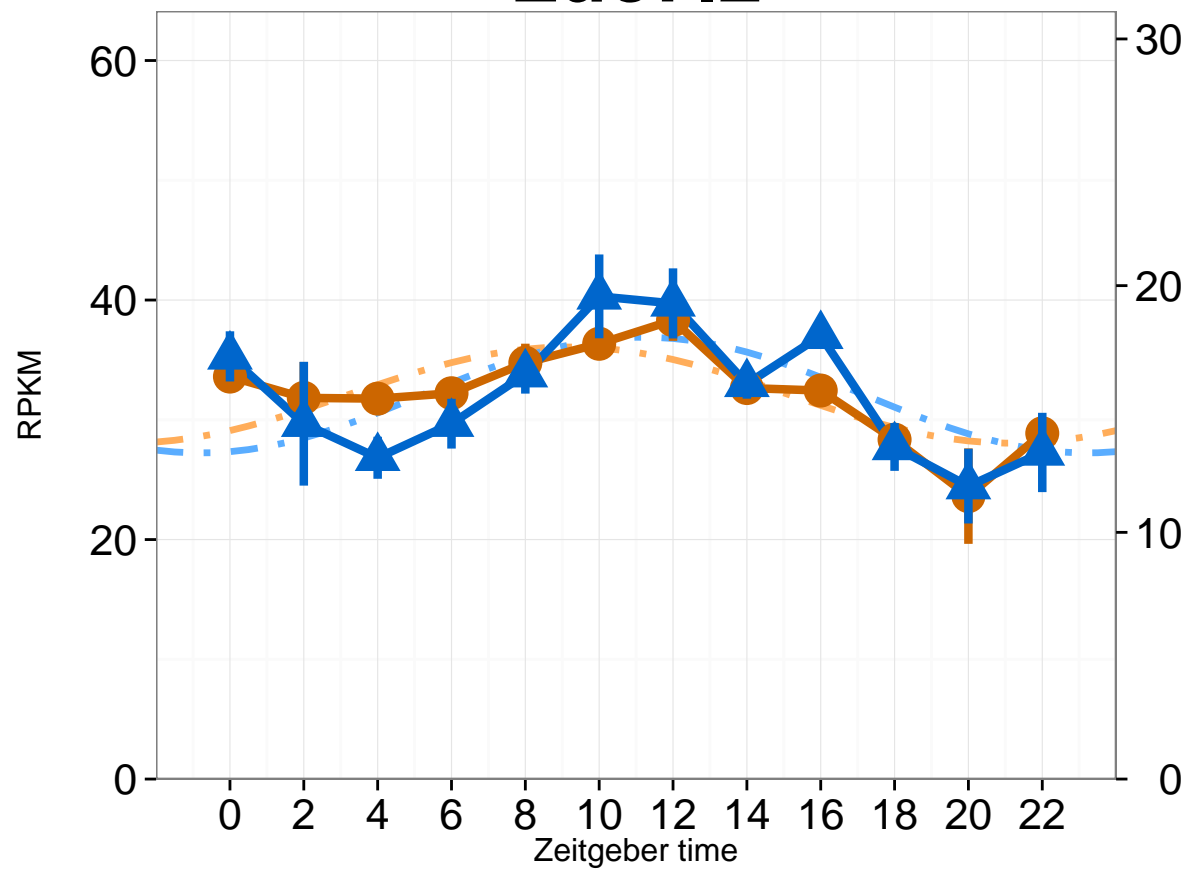

# Luc7l2

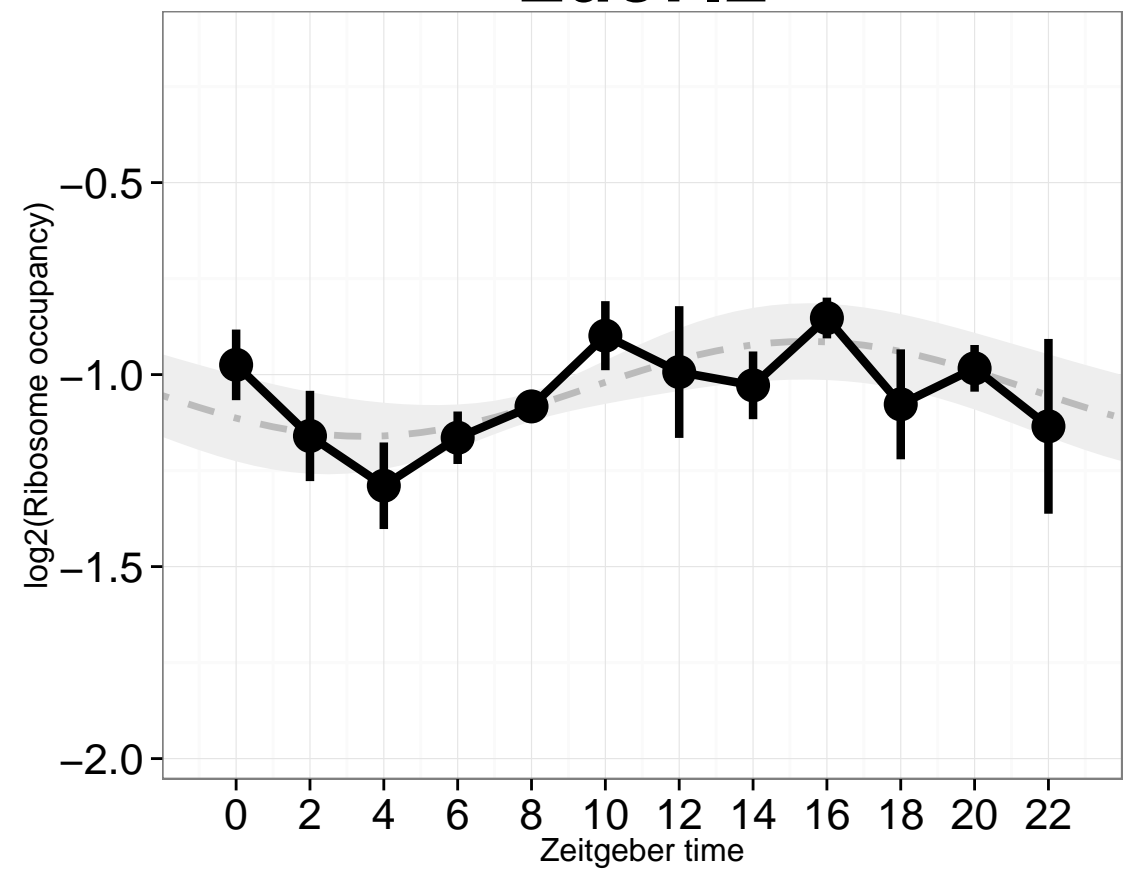

Supplement: SuppDataset_1.zip [file Luc7l2_set_A.pdf › Supplemental Dataset 1/A-mRNA_nonrhyth_translation_nonrhyth/Luc7l2_set_A.pdf]

# Luc7l3

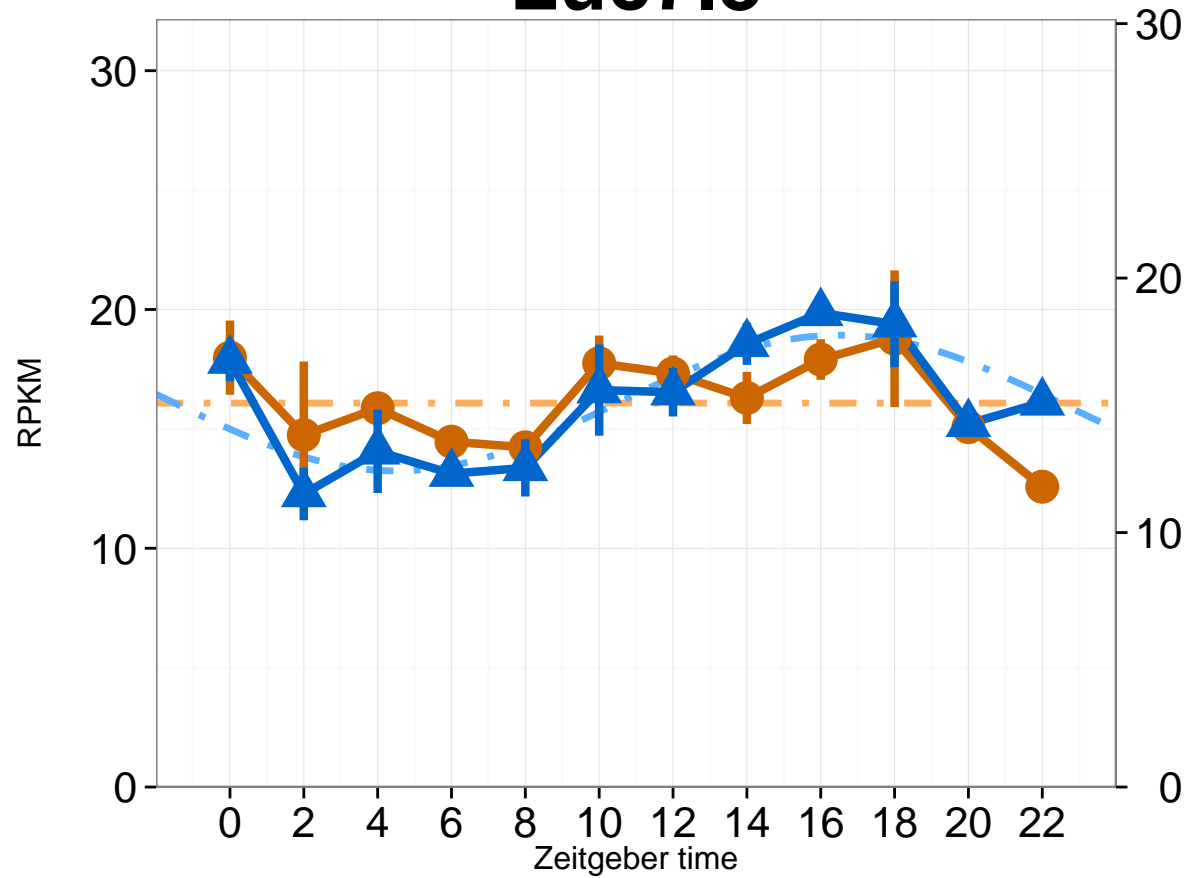

# Luc7l3

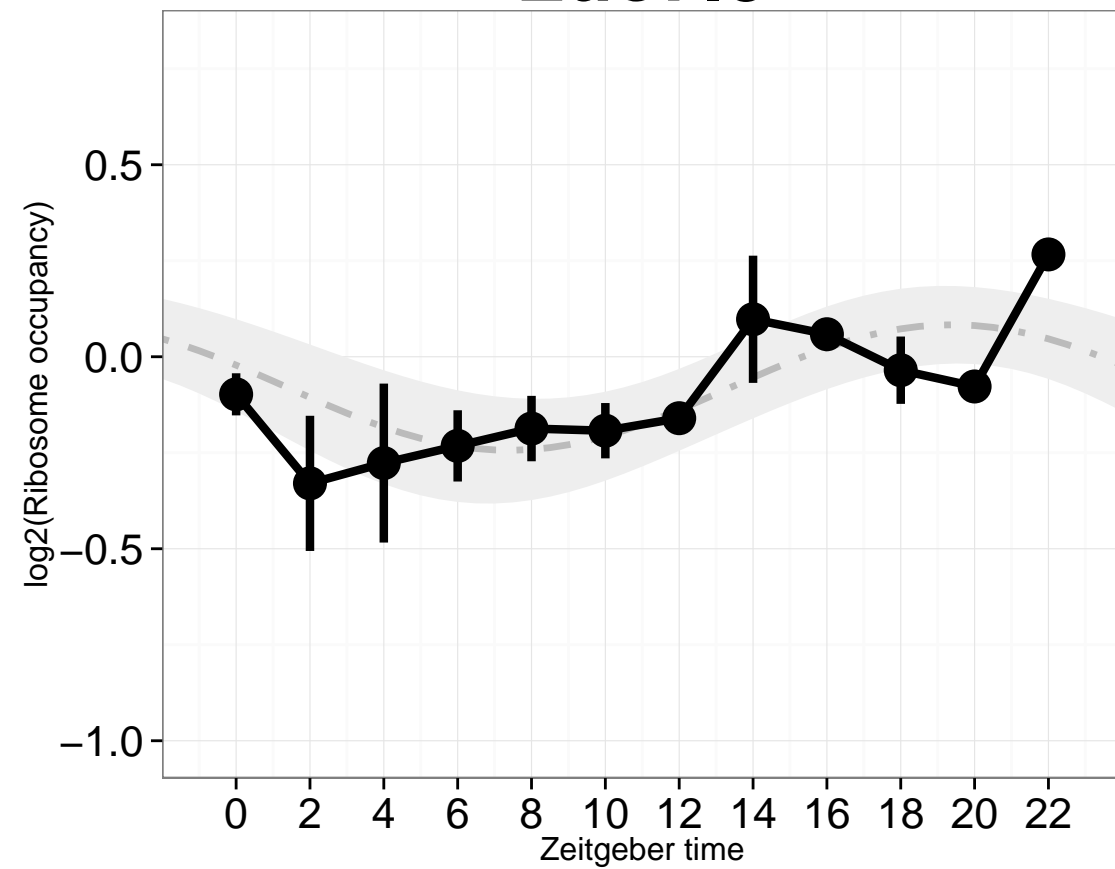

Supplement: SuppDataset_1.zip [file Luc7l3_set_A.pdf › Supplemental Dataset 1/A-mRNA_nonrhyth_translation_nonrhyth/Luc7l3_set_A.pdf]

# Lurap1l

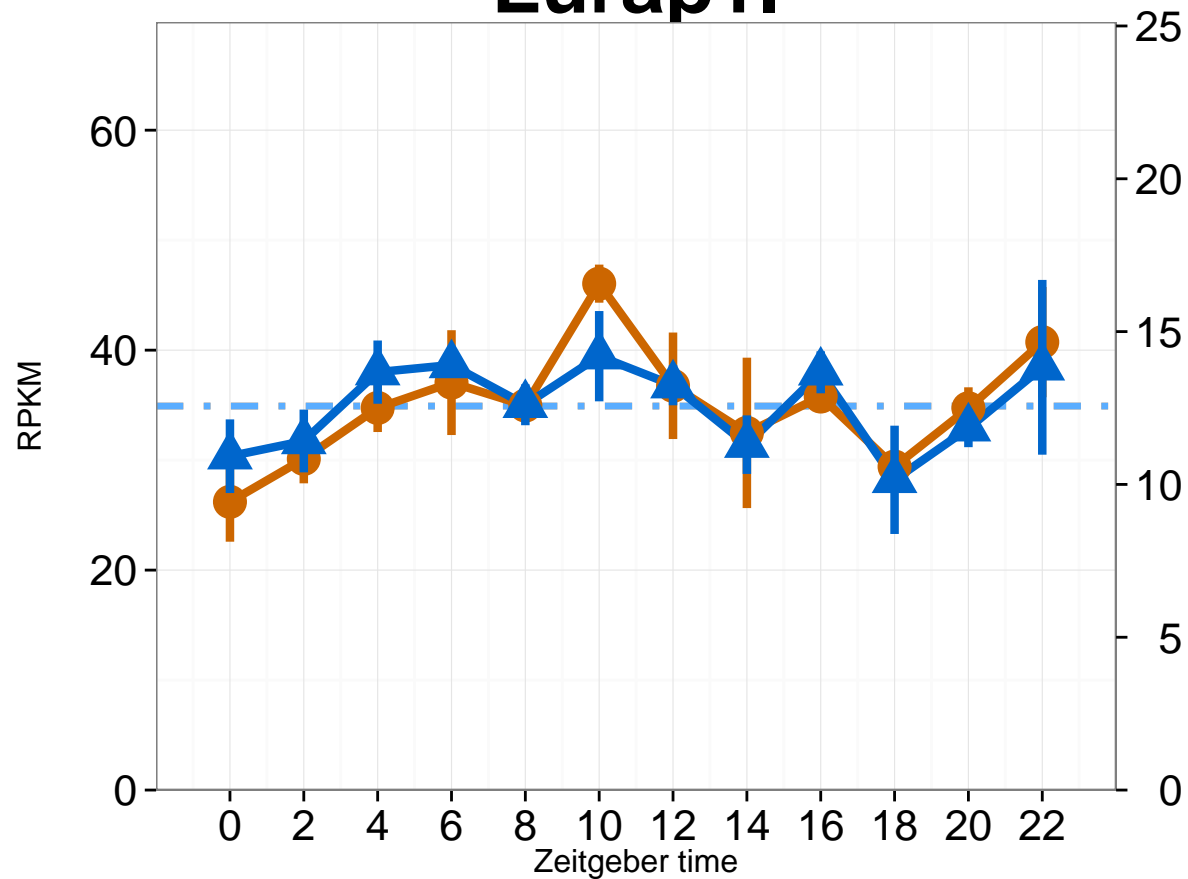

# Lurap1l

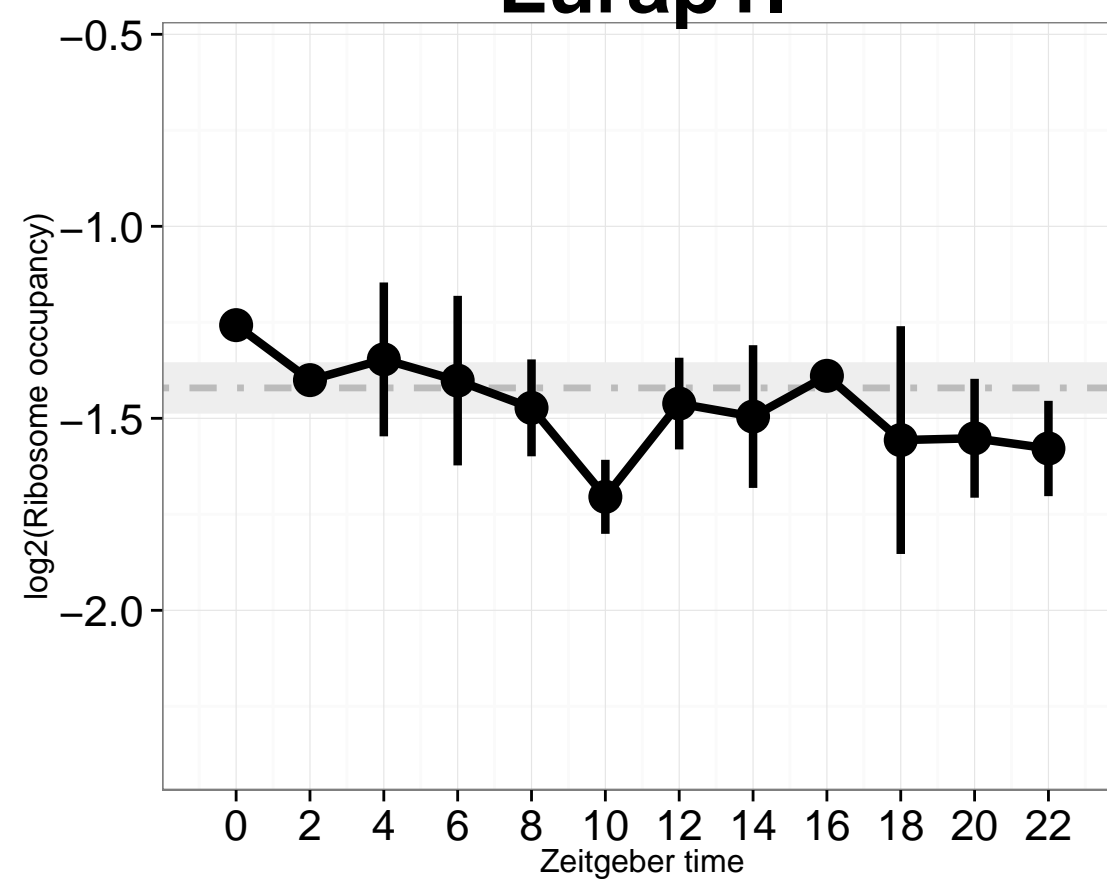

Supplement: SuppDataset_1.zip [file Lurap1l_set_A.pdf › Supplemental Dataset 1/A-mRNA_nonrhyth_translation_nonrhyth/Lurap1l_set_A.pdf]

# Luzp1

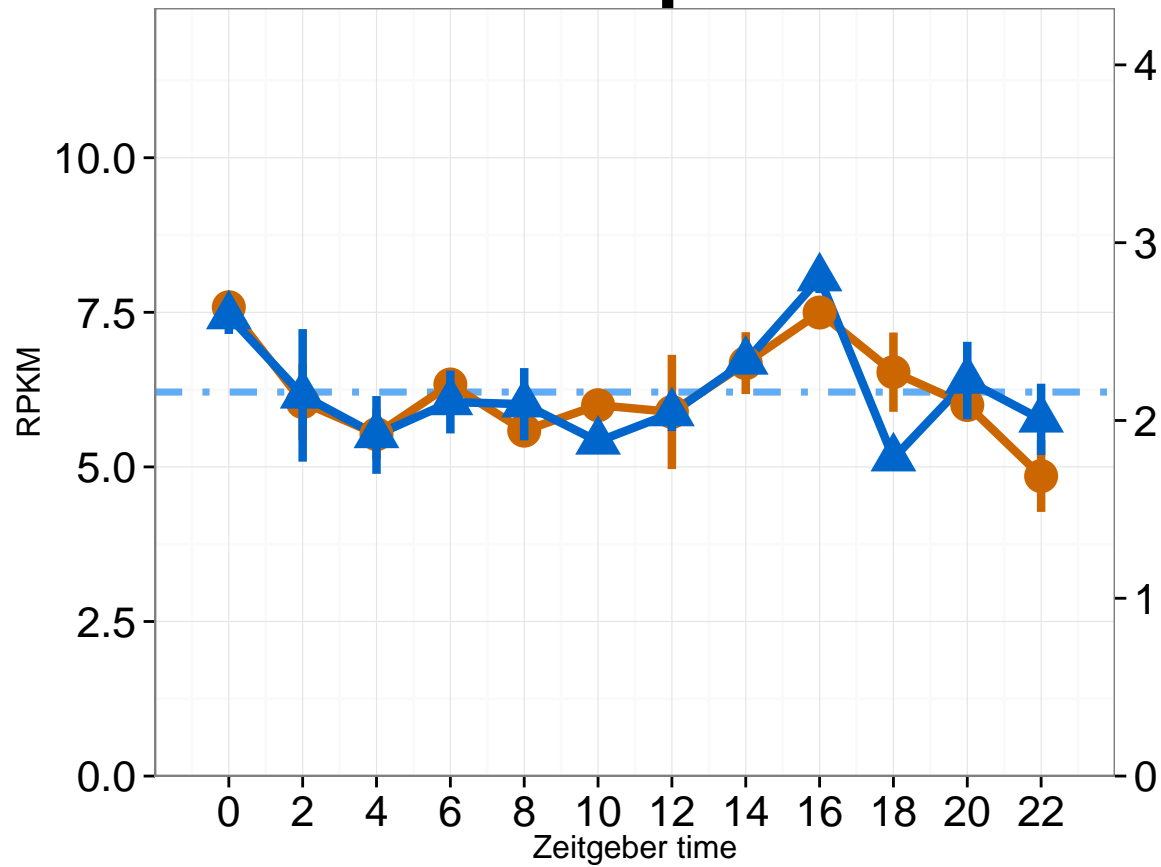

# Luzp1

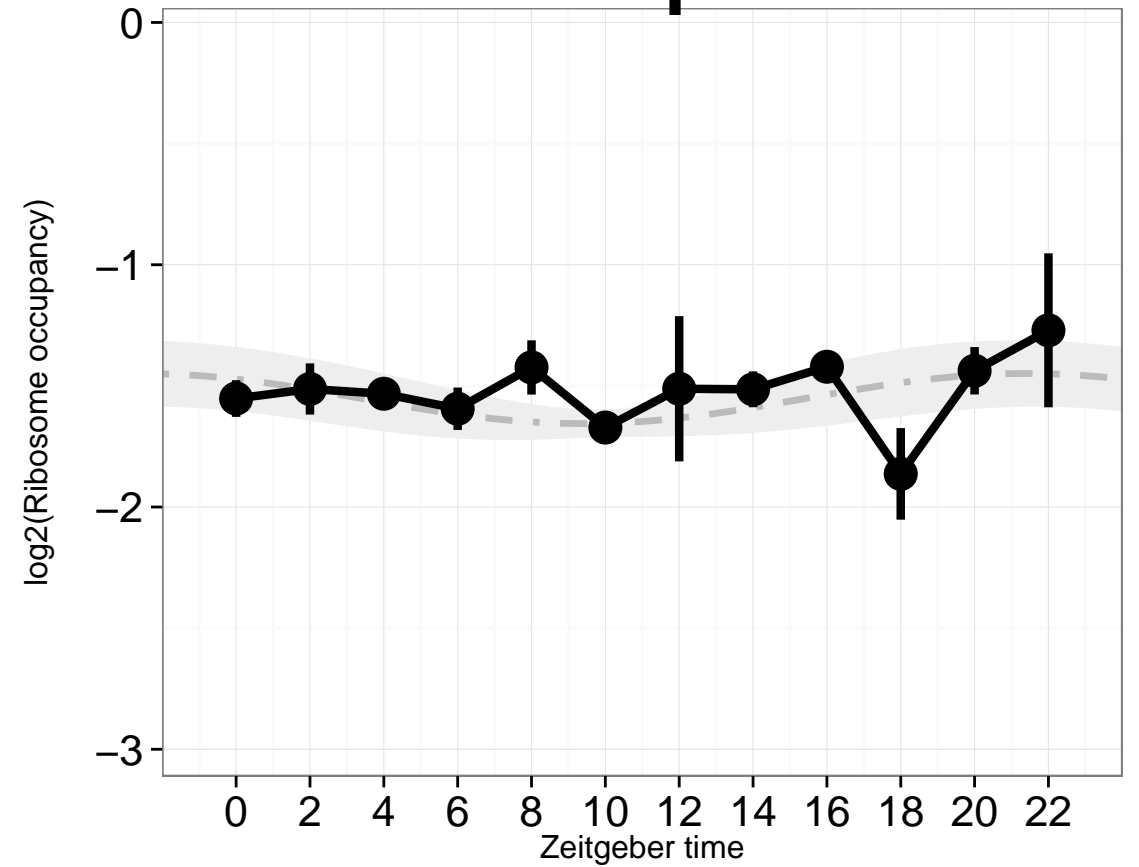

Supplement: SuppDataset_1.zip [file Luzp1_set_A.pdf › Supplemental Dataset 1/A-mRNA_nonrhyth_translation_nonrhyth/Luzp1_set_A.pdf]

**Lxn TR**

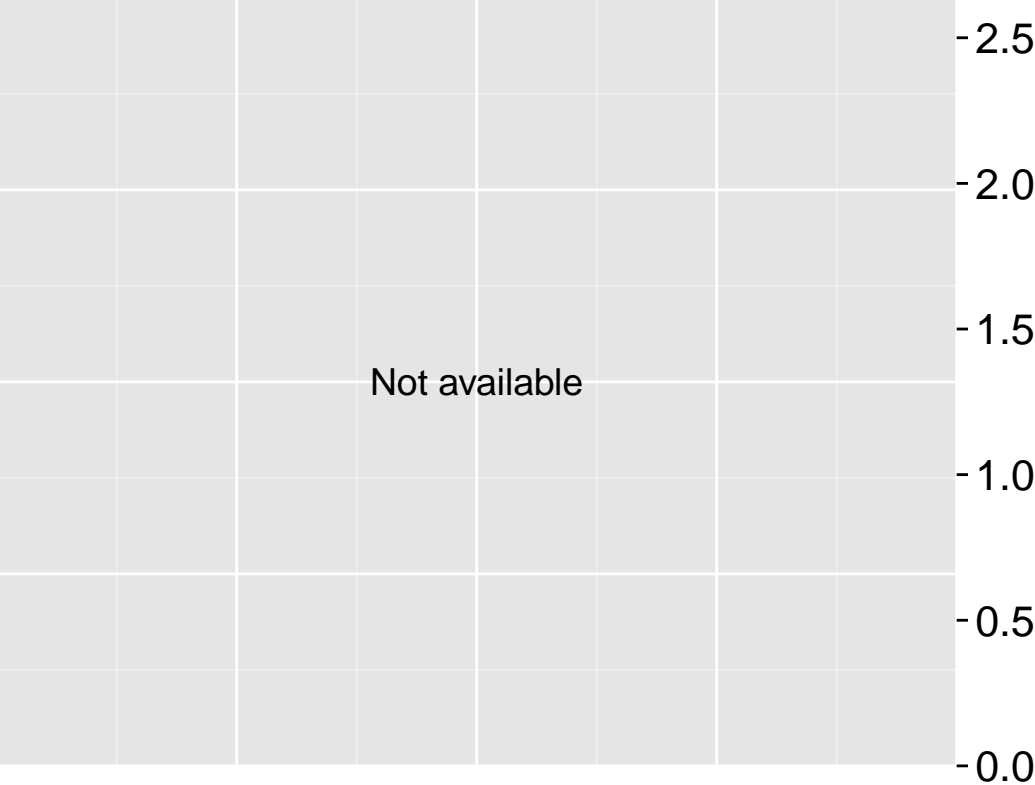

**Lxn log2(Ribosome occupancy)**

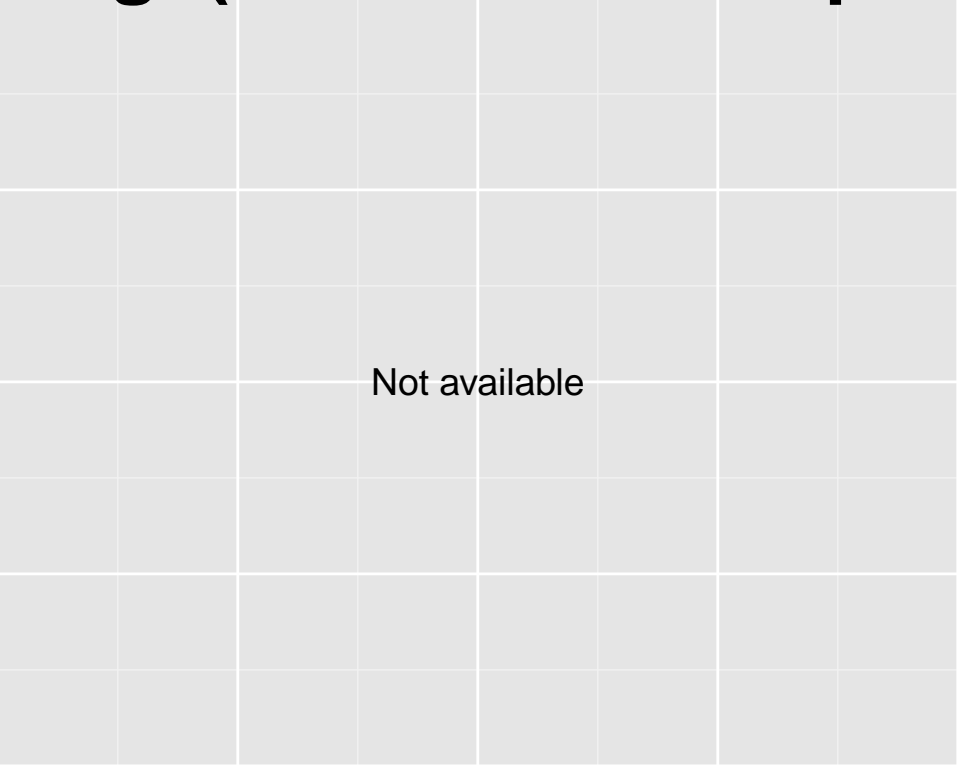

Supplement: SuppDataset_1.zip [file Lxn_set_A.pdf › Supplemental Dataset 1/A-mRNA_nonrhyth_translation_nonrhyth/Lxn_set_A.pdf]

# Ly6a

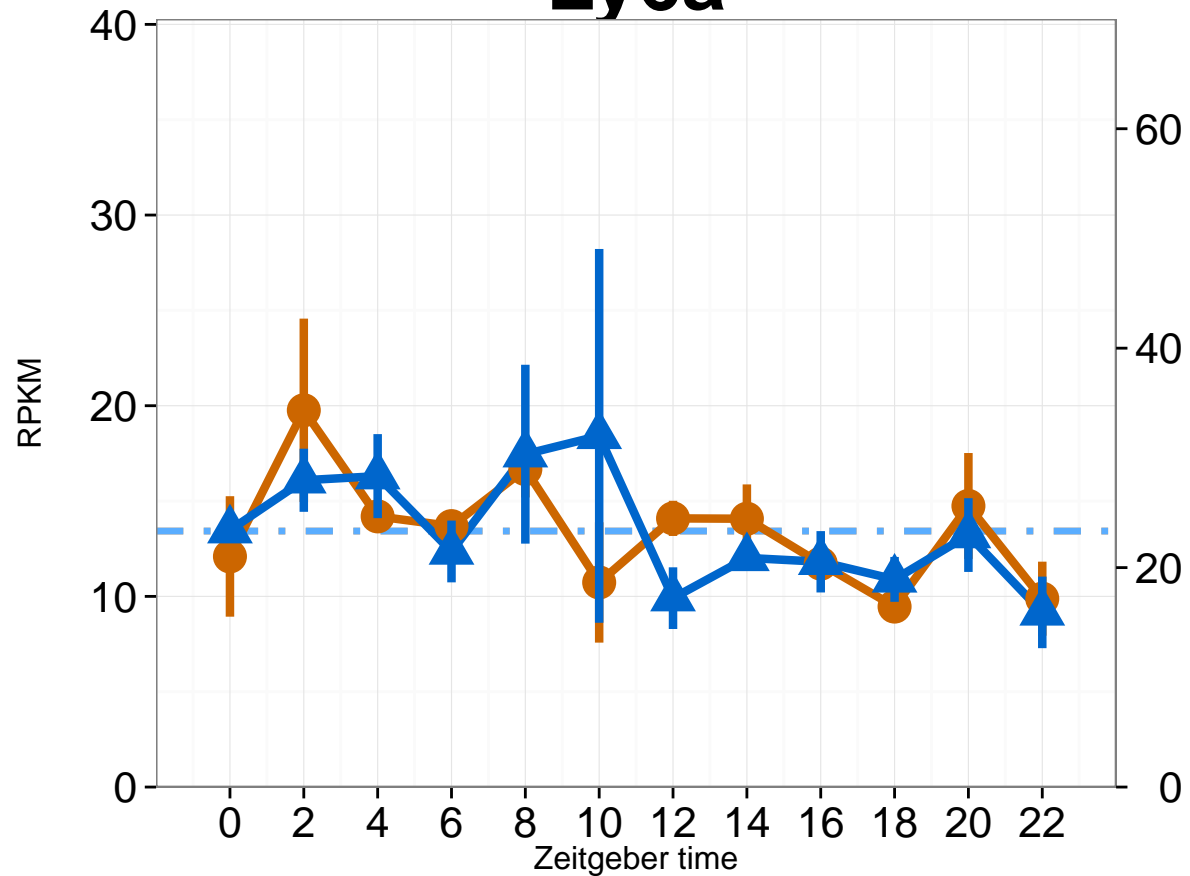

# Ly6a

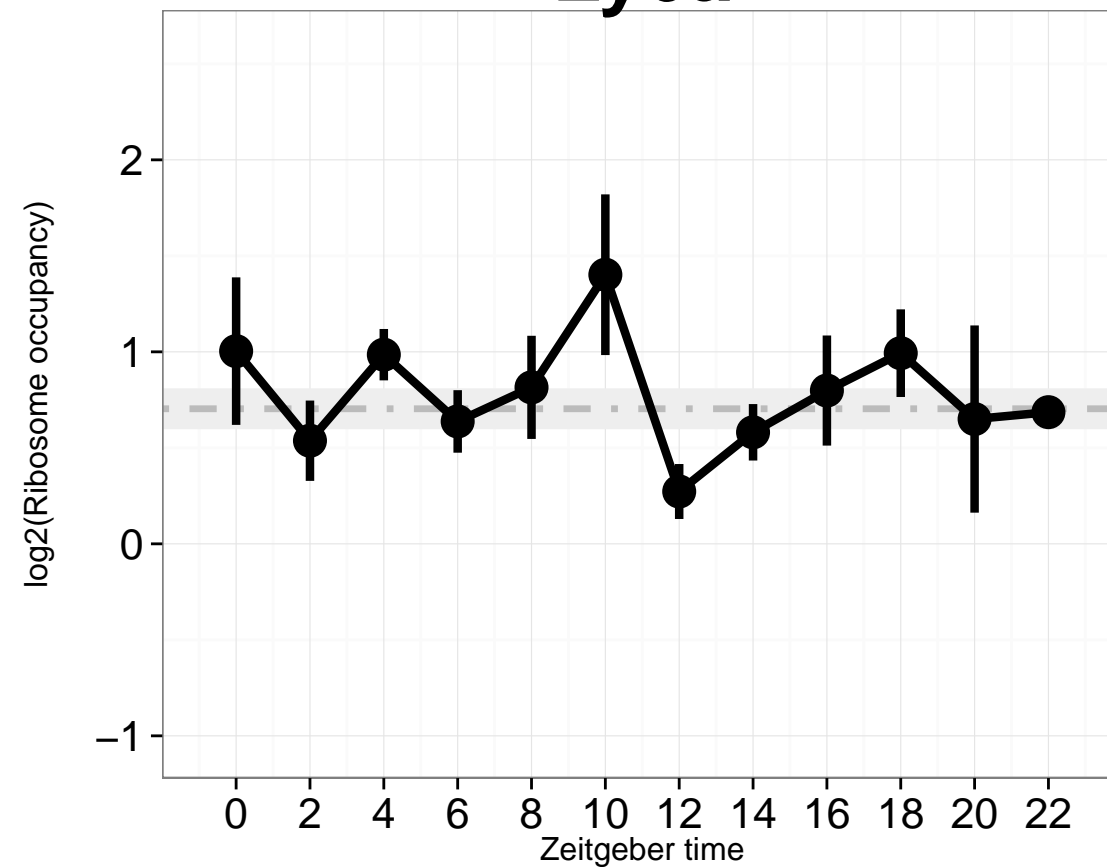

Supplement: SuppDataset_1.zip [file Ly6a_set_A.pdf › Supplemental Dataset 1/A-mRNA_nonrhyth_translation_nonrhyth/Ly6a_set_A.pdf]

# Ly6c2

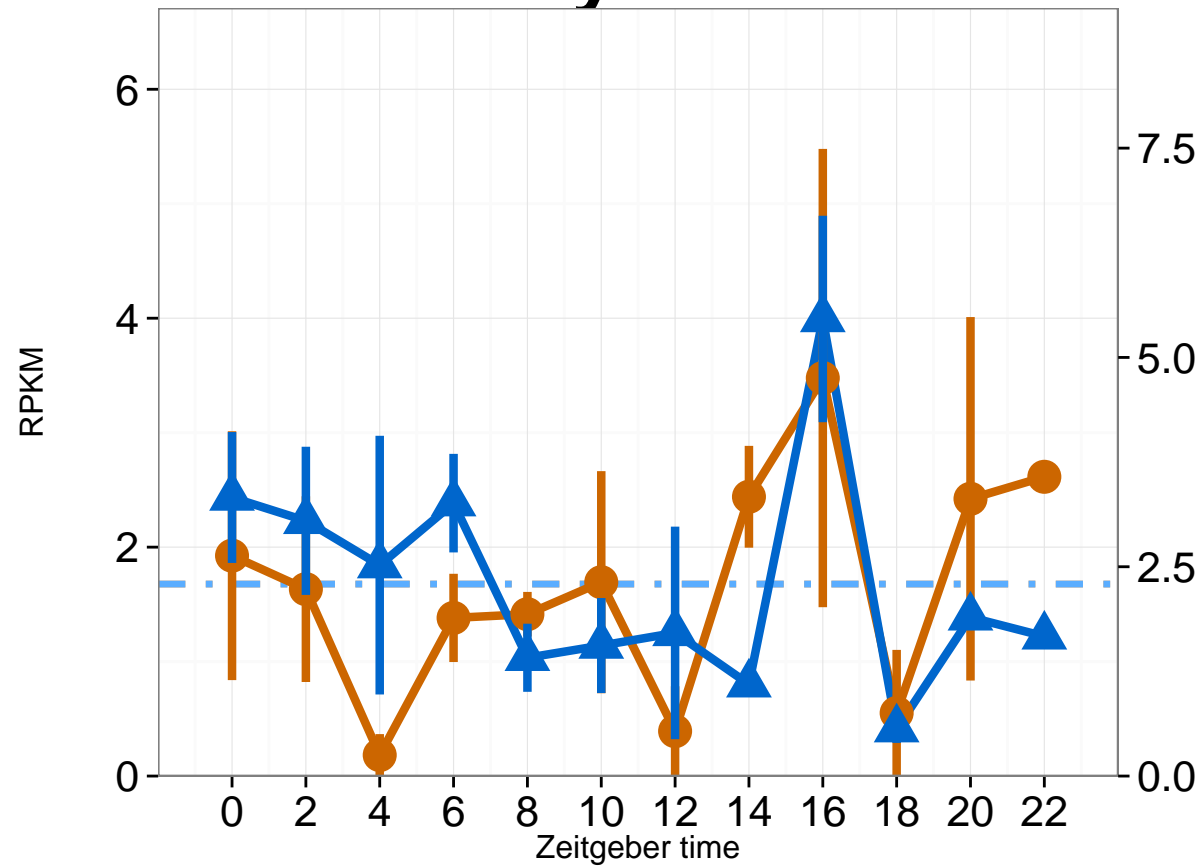

# Ly6c2

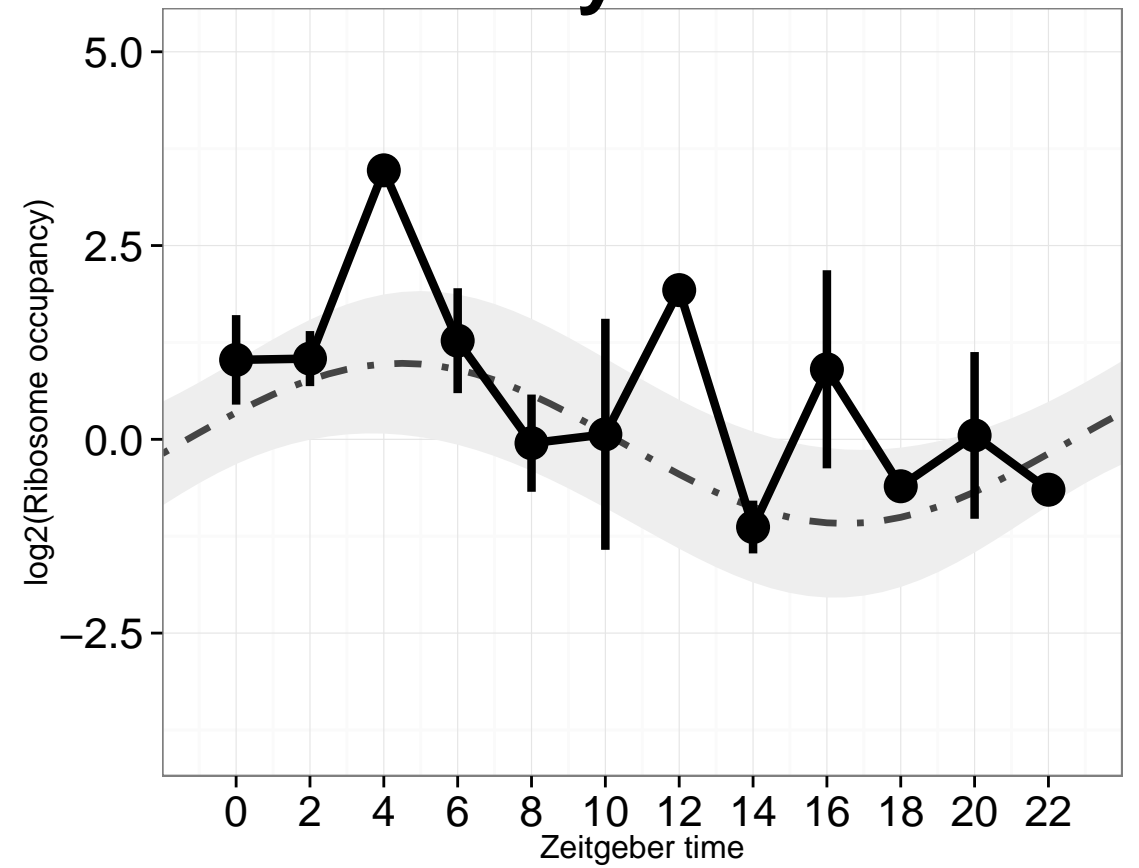

Supplement: SuppDataset_1.zip [file Ly6c2_set_A.pdf › Supplemental Dataset 1/A-mRNA_nonrhyth_translation_nonrhyth/Ly6c2_set_A.pdf]

**Ly6d TR**

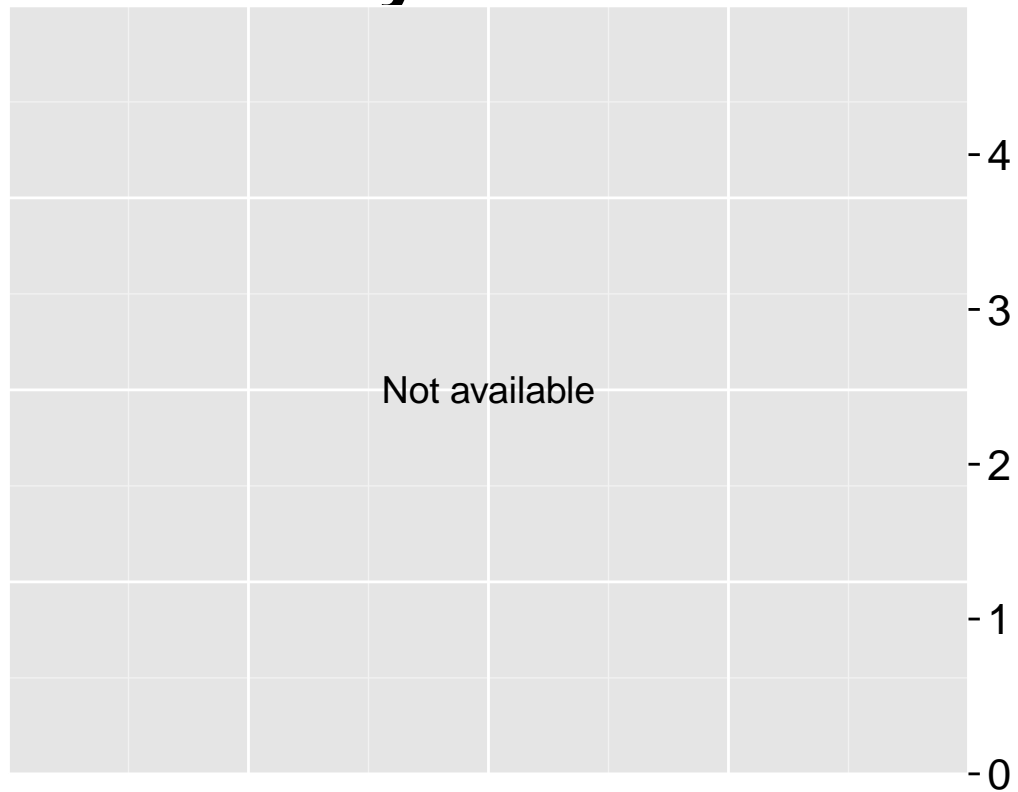

**Ly6d log2(Ribosome occupancy)**

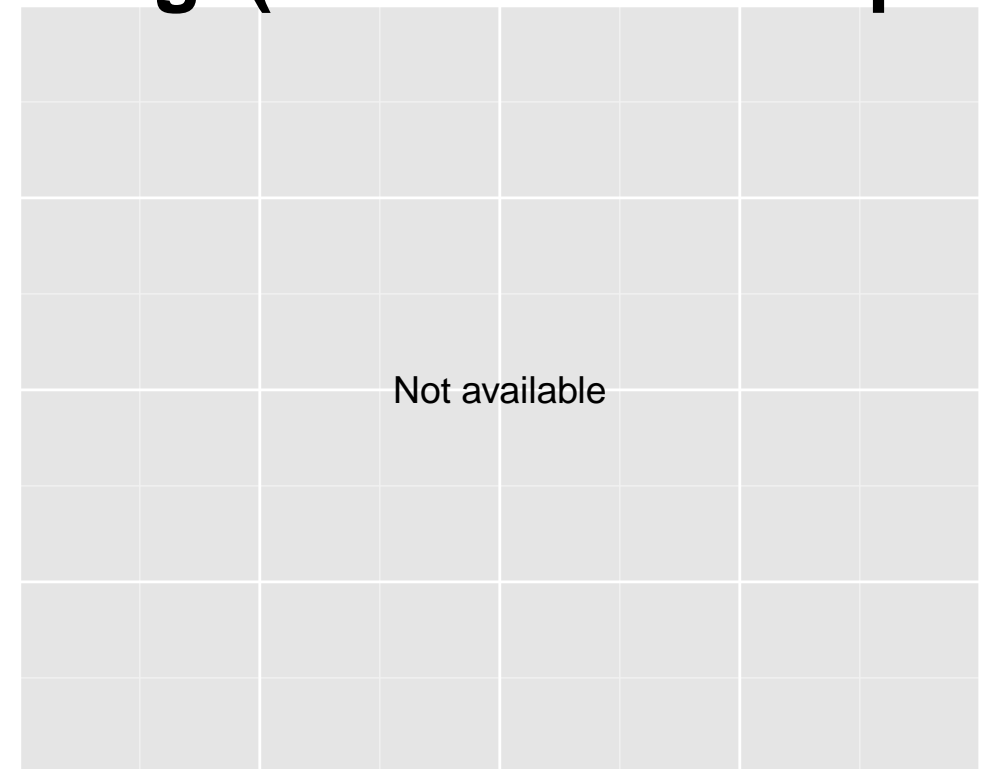

Supplement: SuppDataset_1.zip [file Ly6d_set_A.pdf › Supplemental Dataset 1/A-mRNA_nonrhyth_translation_nonrhyth/Ly6d_set_A.pdf]

# Ly6e

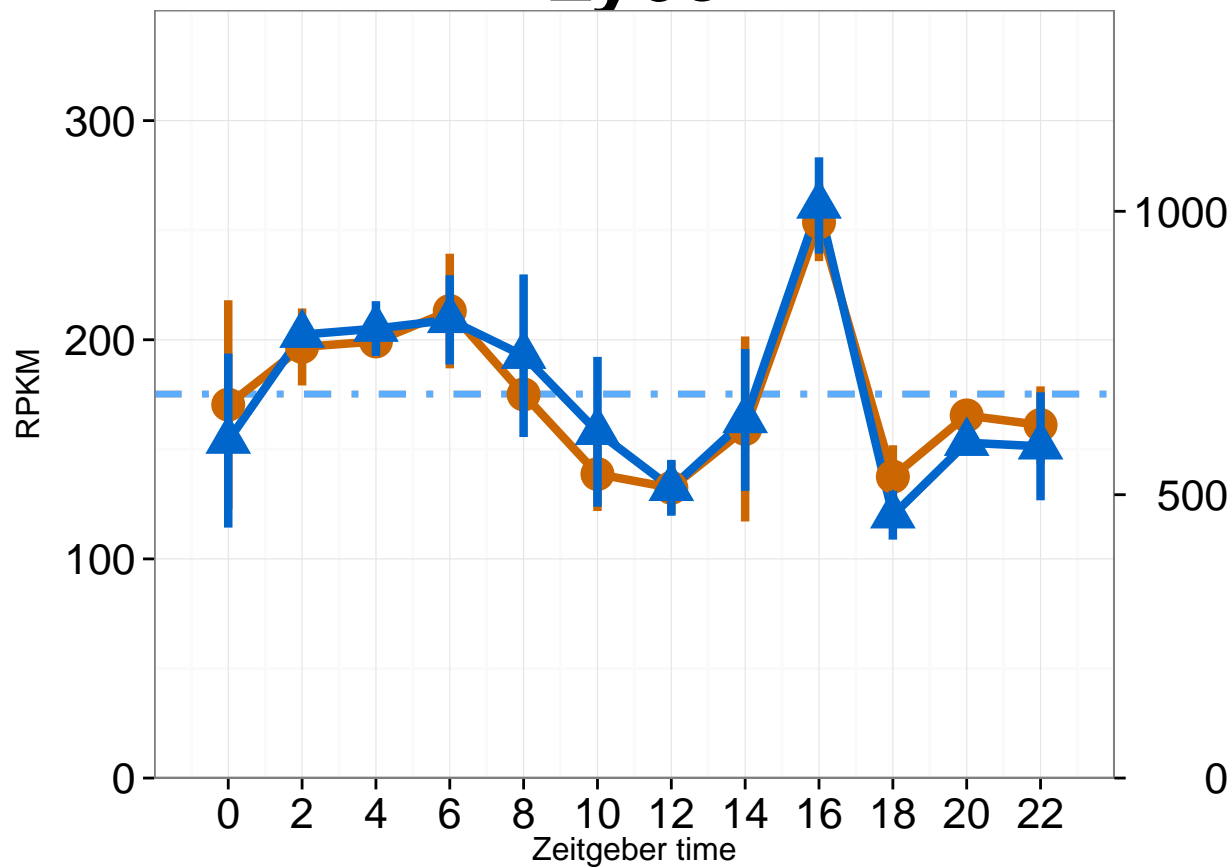

# Ly6e

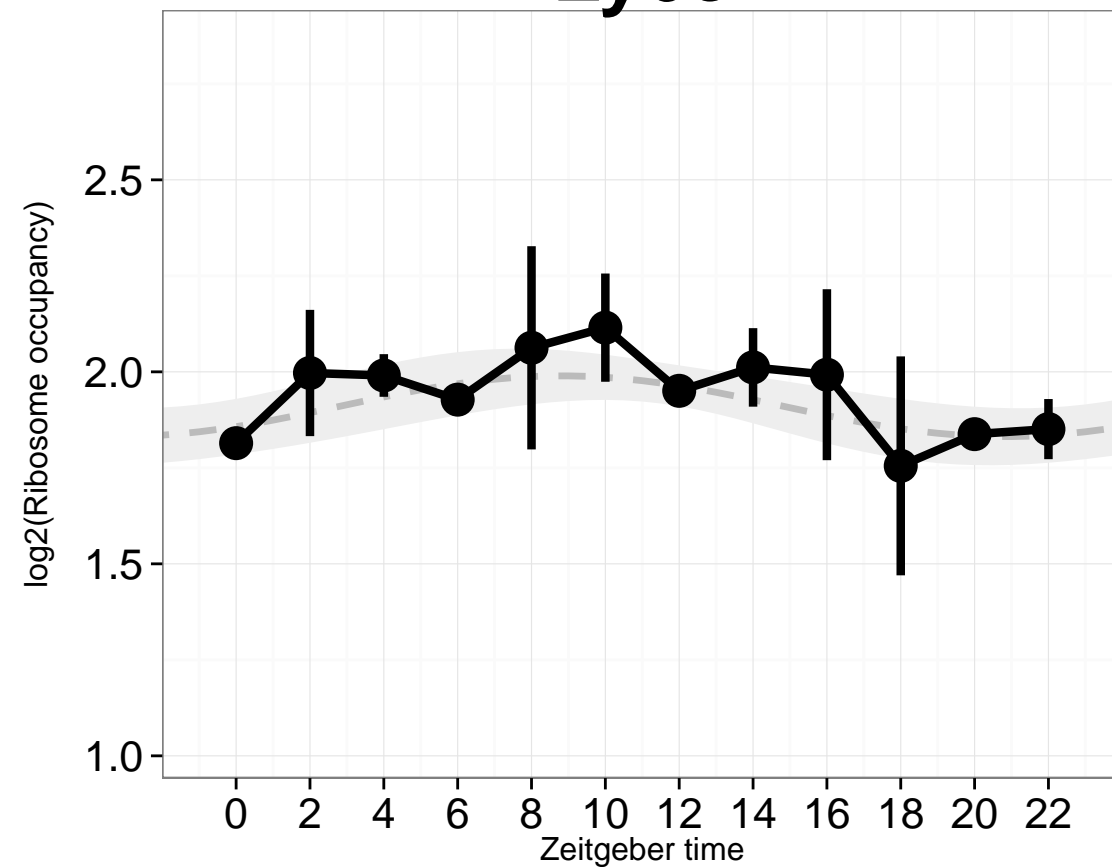

Supplement: SuppDataset_1.zip [file Ly6e_set_A.pdf › Supplemental Dataset 1/A-mRNA_nonrhyth_translation_nonrhyth/Ly6e_set_A.pdf]

## Ly86

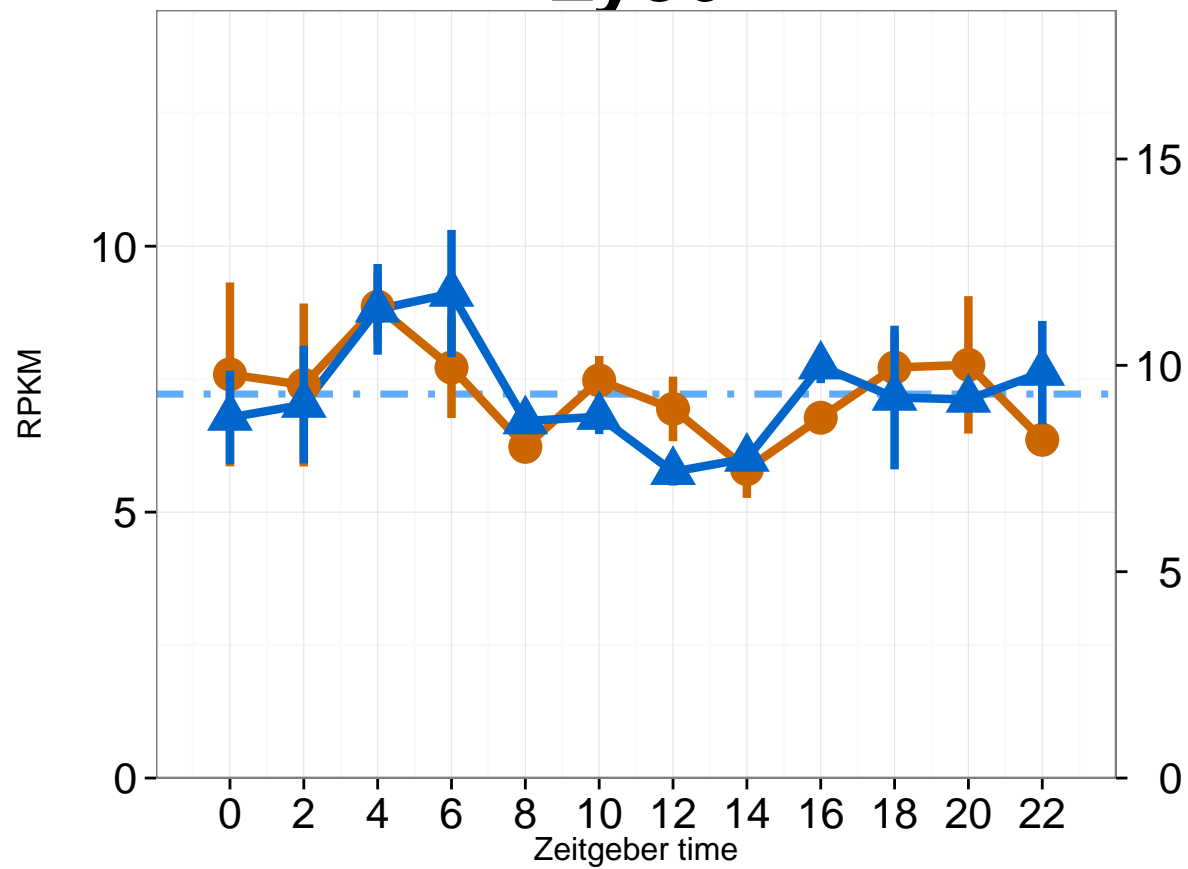

## Ly86

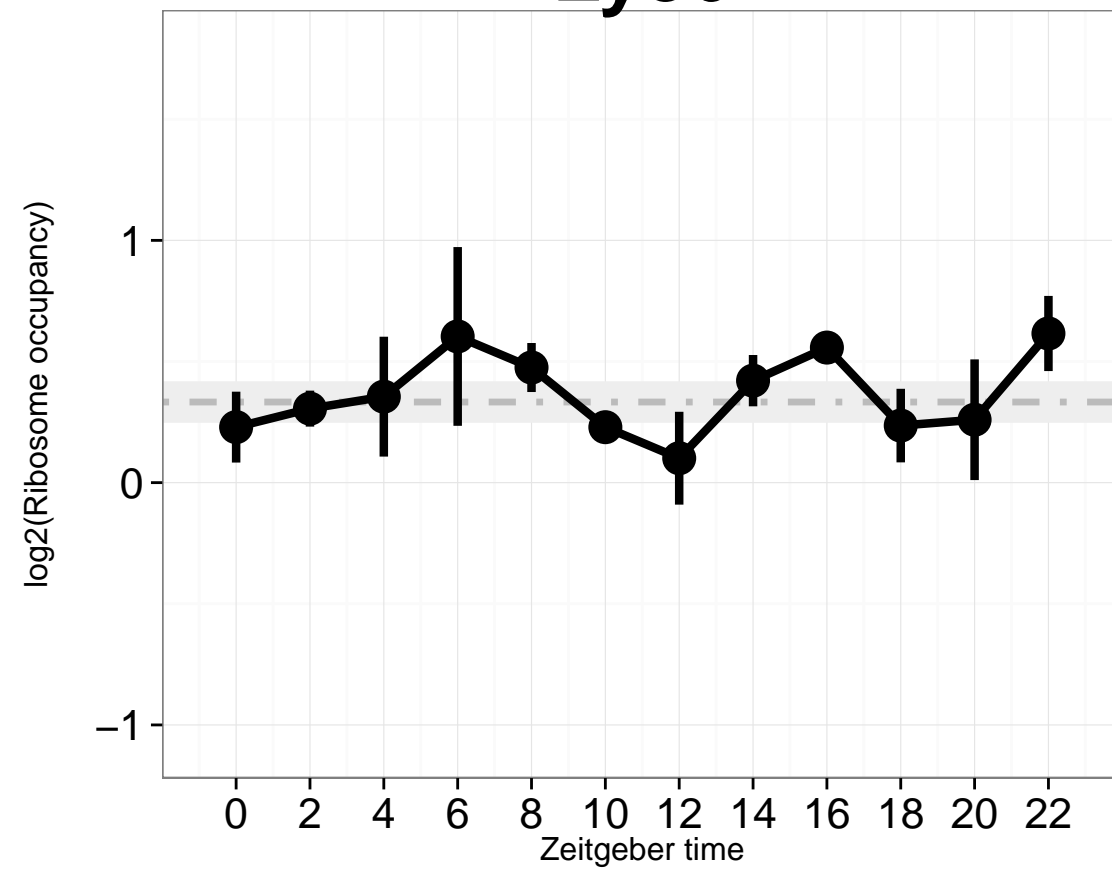

Supplement: SuppDataset_1.zip [file Ly86_set_A.pdf › Supplemental Dataset 1/A-mRNA_nonrhyth_translation_nonrhyth/Ly86_set_A.pdf]

## Ly96

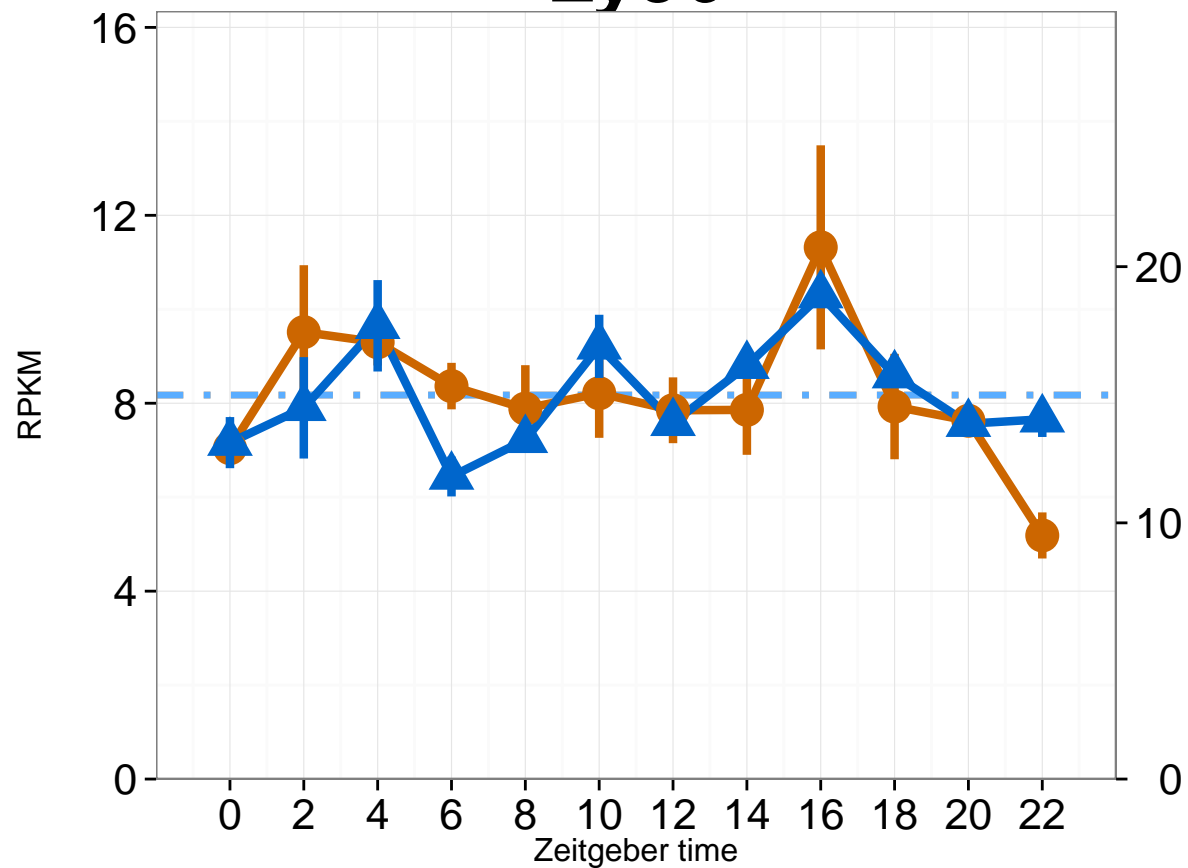

## Ly96

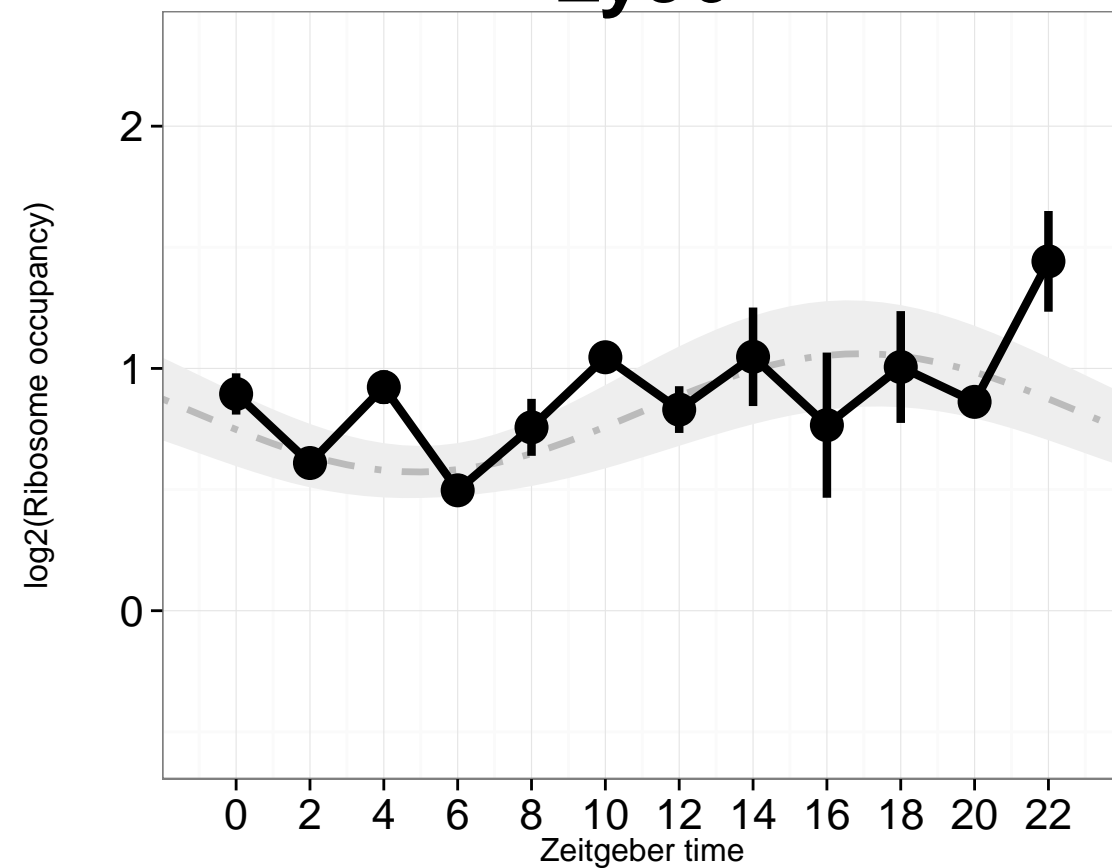

Supplement: SuppDataset_1.zip [file Ly96_set_A.pdf › Supplemental Dataset 1/A-mRNA_nonrhyth_translation_nonrhyth/Ly96_set_A.pdf]

# Ly9

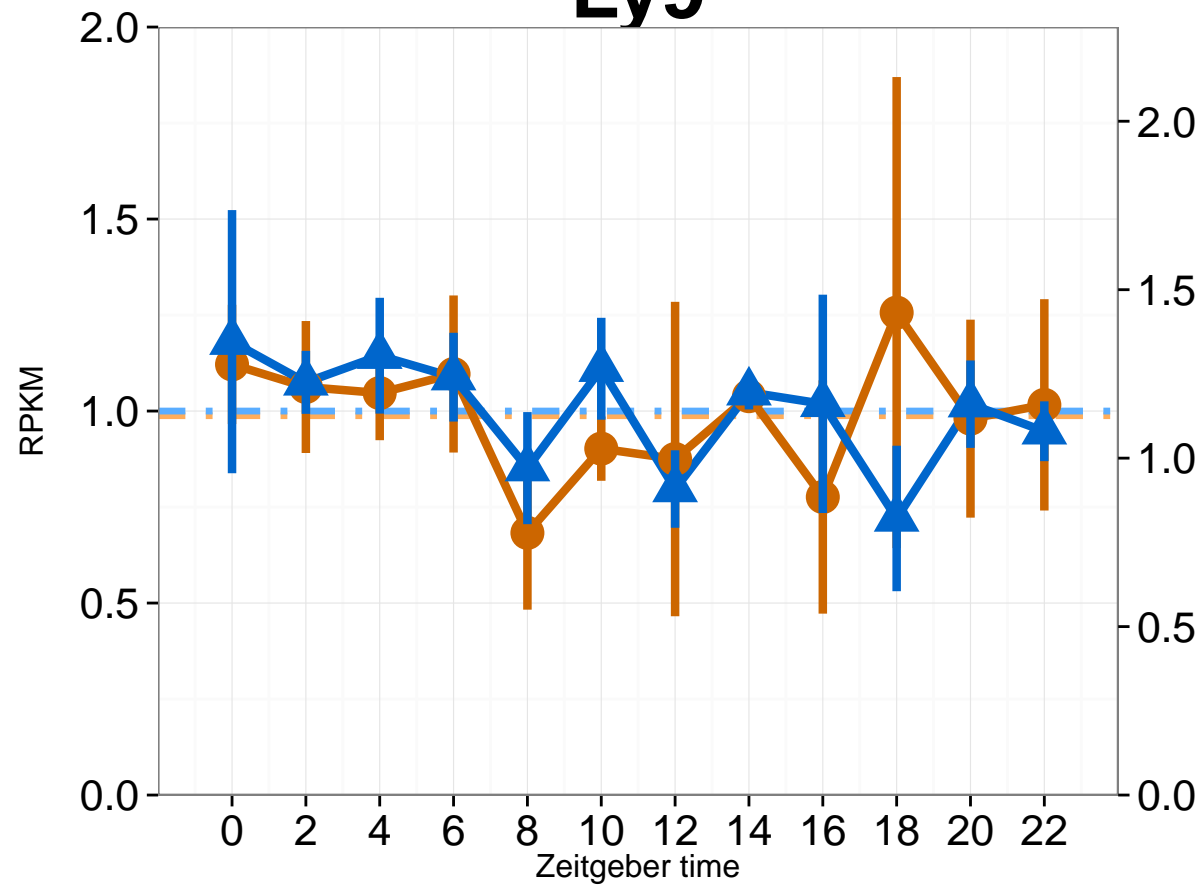

# Ly9

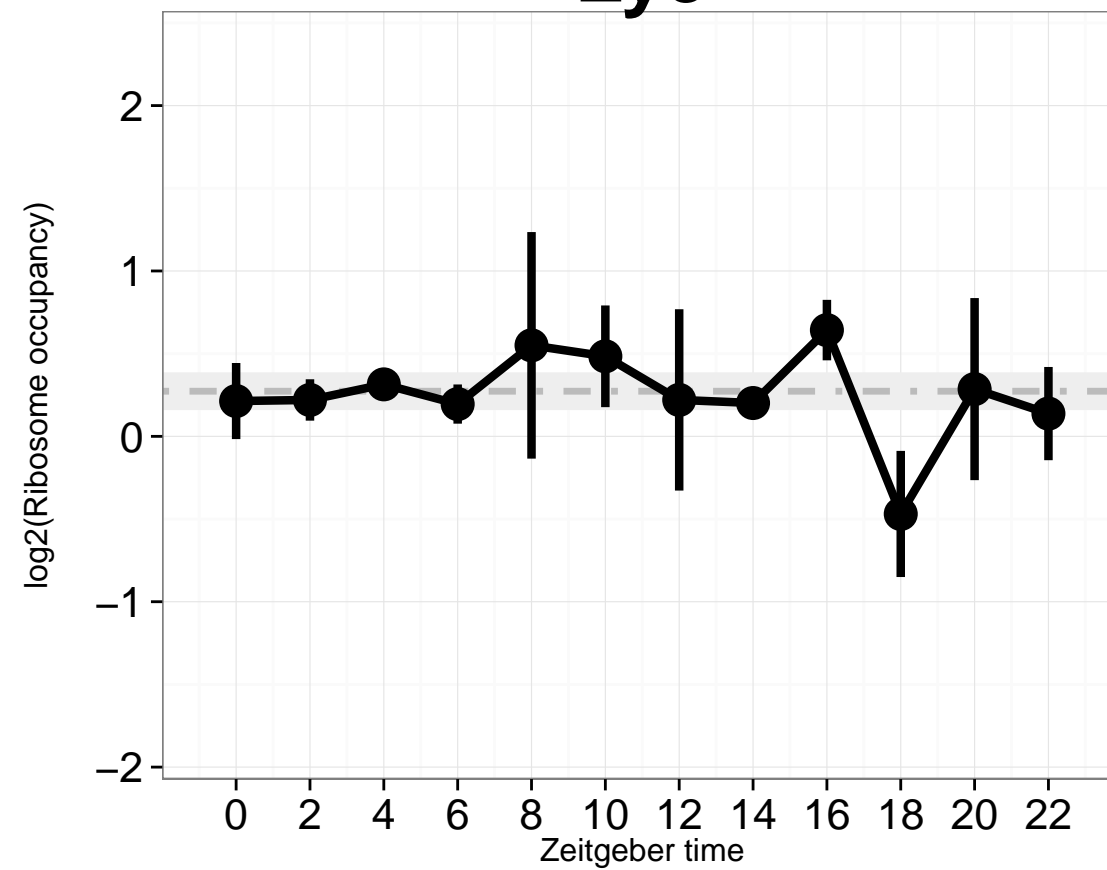

Supplement: SuppDataset_1.zip [file Ly9_set_A.pdf › Supplemental Dataset 1/A-mRNA_nonrhyth_translation_nonrhyth/Ly9_set_A.pdf]

# Lyn

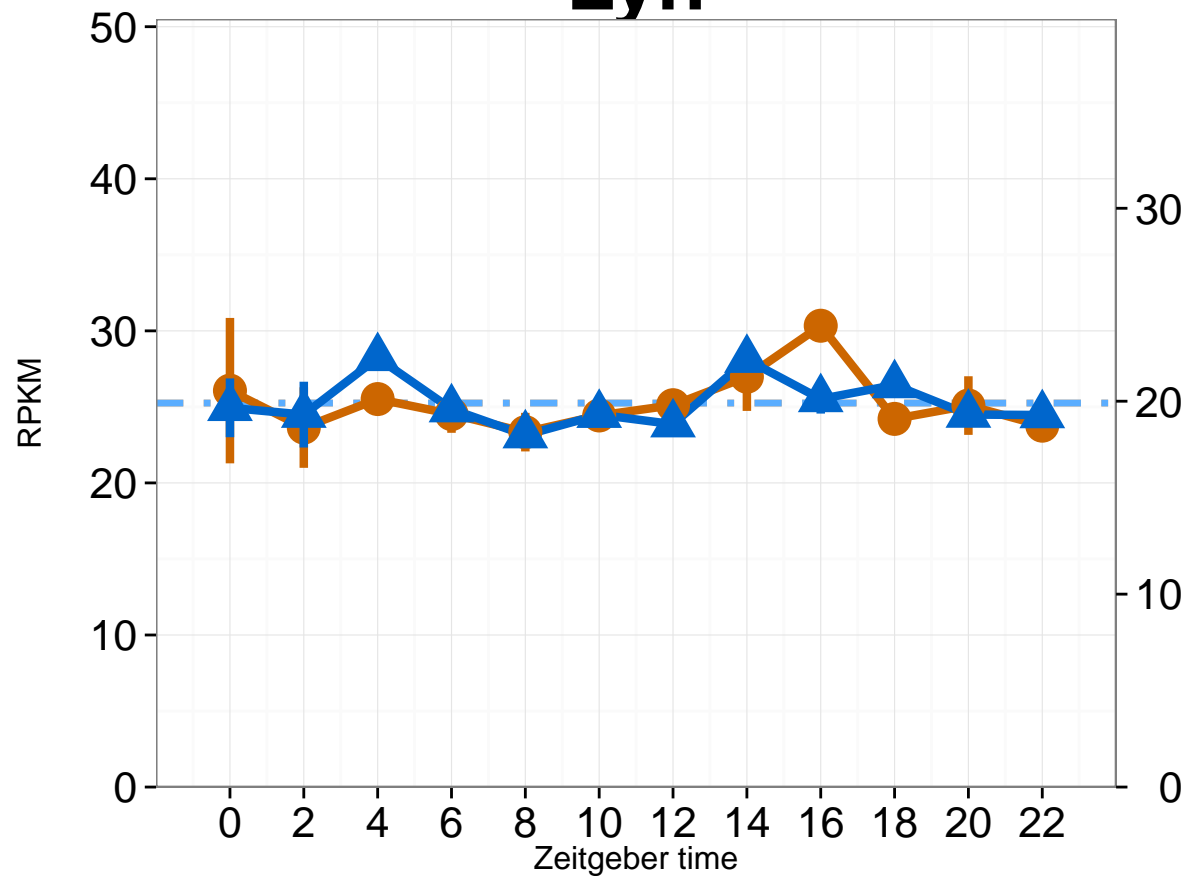

# Lyn

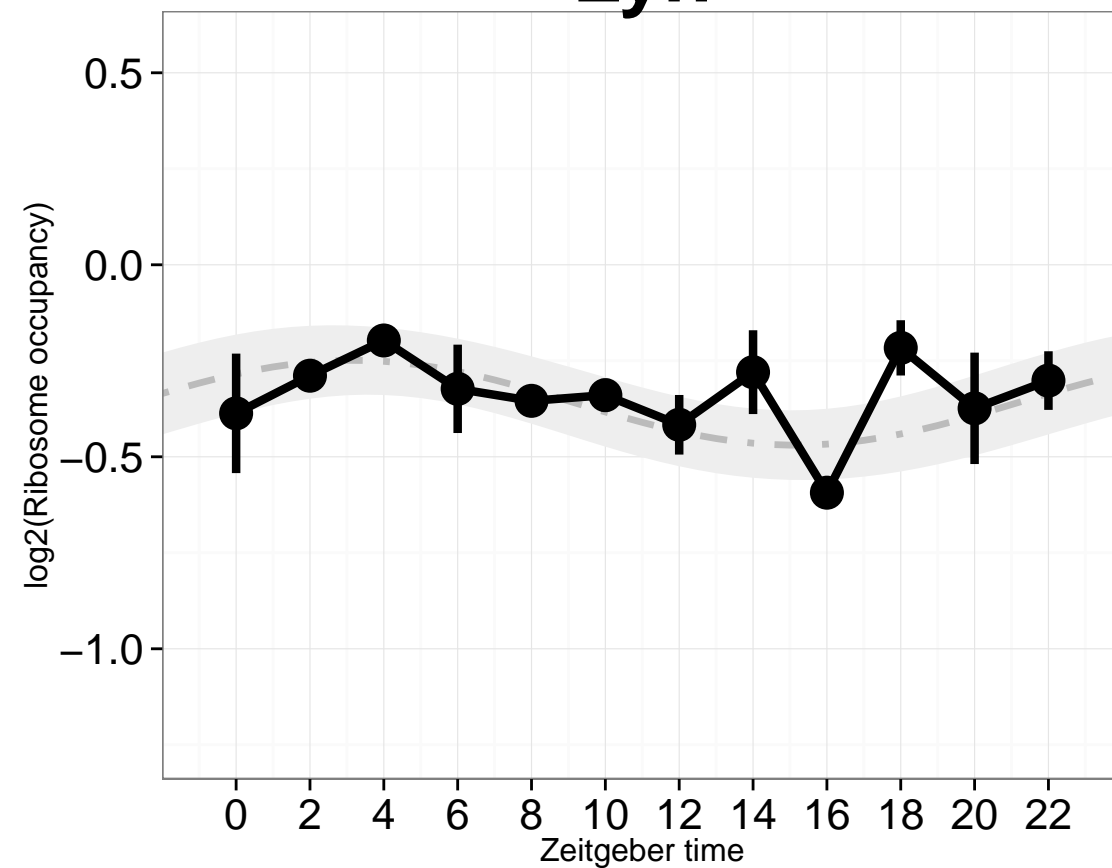

Supplement: SuppDataset_1.zip [file Lyn_set_A.pdf › Supplemental Dataset 1/A-mRNA_nonrhyth_translation_nonrhyth/Lyn_set_A.pdf]

# Lypla1

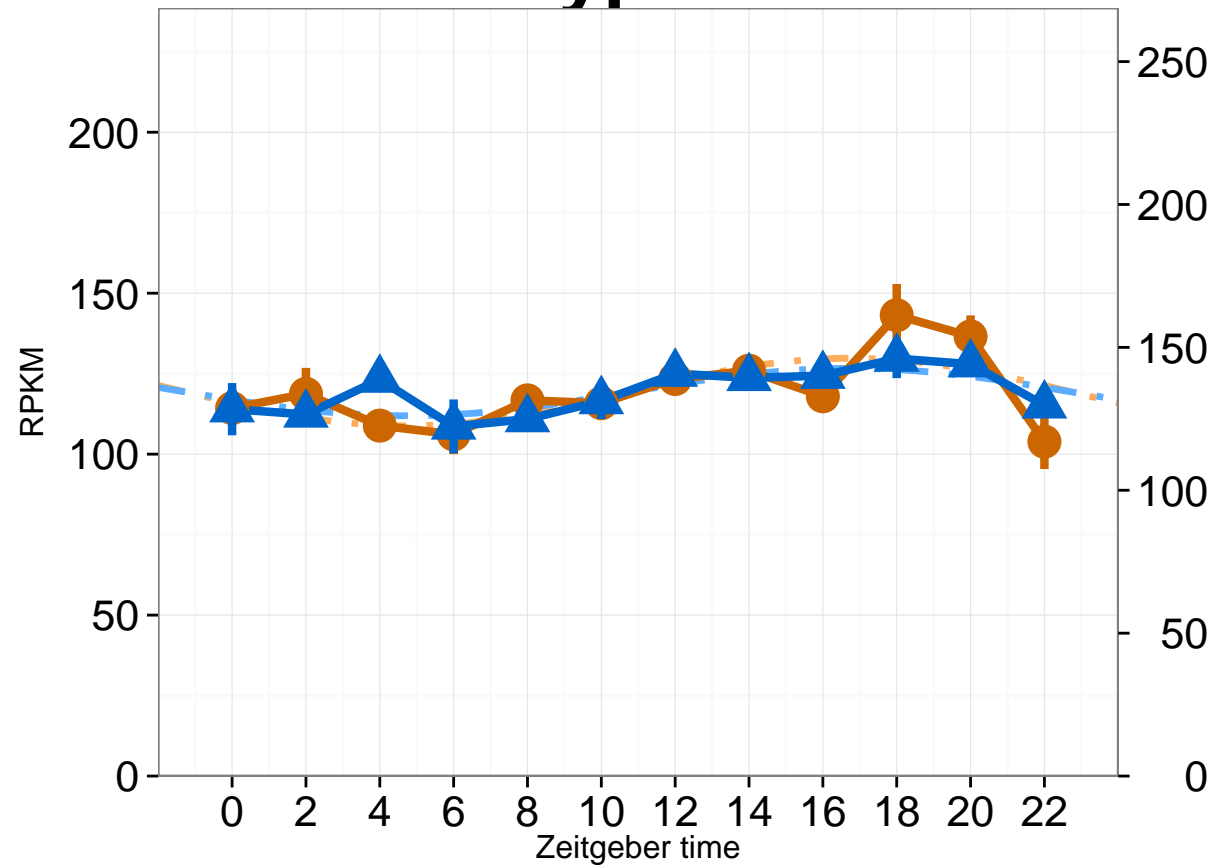

# Lypla1

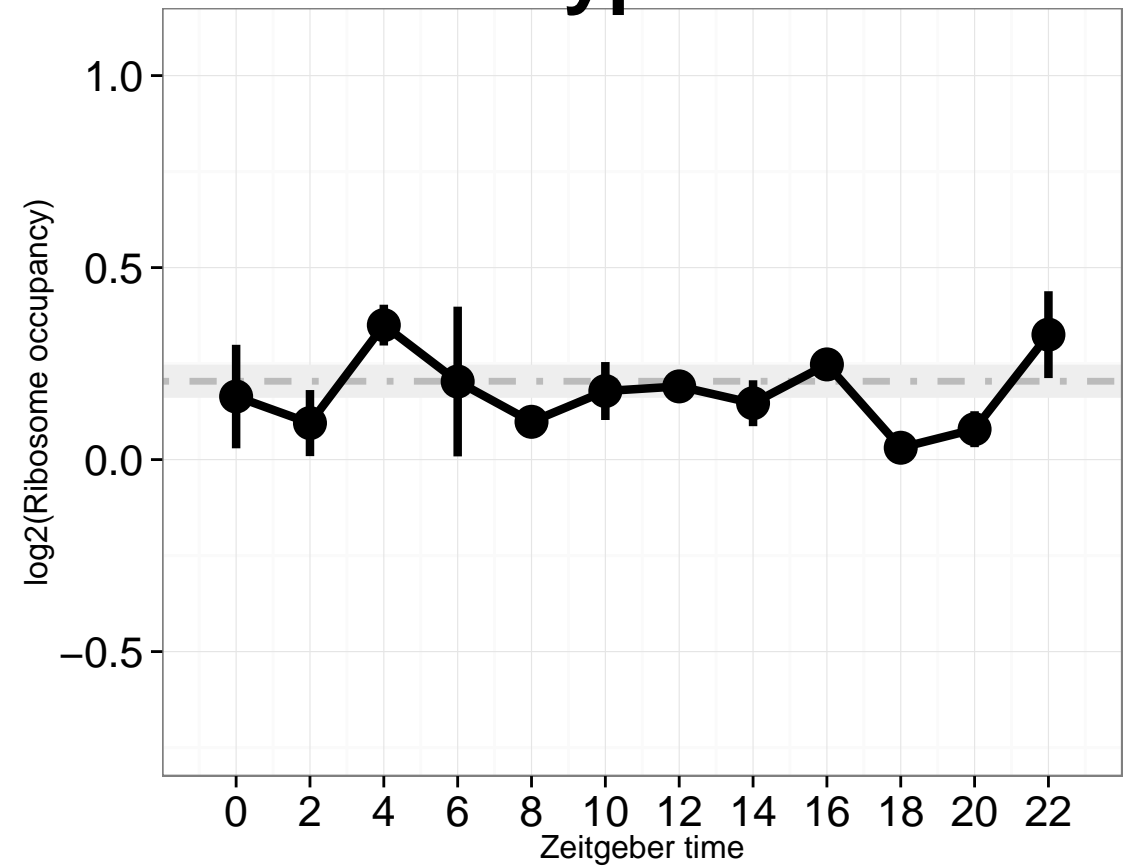

Supplement: SuppDataset_1.zip [file Lypla1_set_A.pdf › Supplemental Dataset 1/A-mRNA_nonrhyth_translation_nonrhyth/Lypla1_set_A.pdf]

## Lyplal1

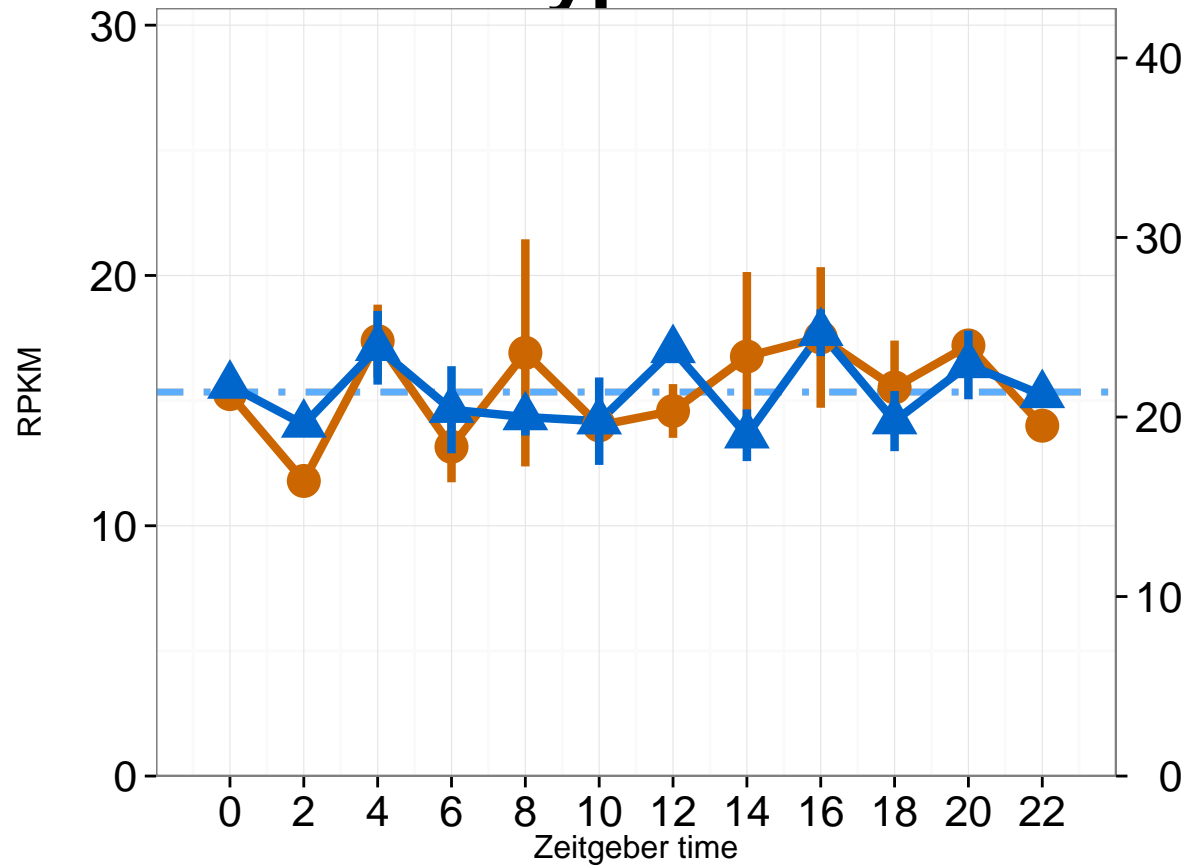

## Lyplal1

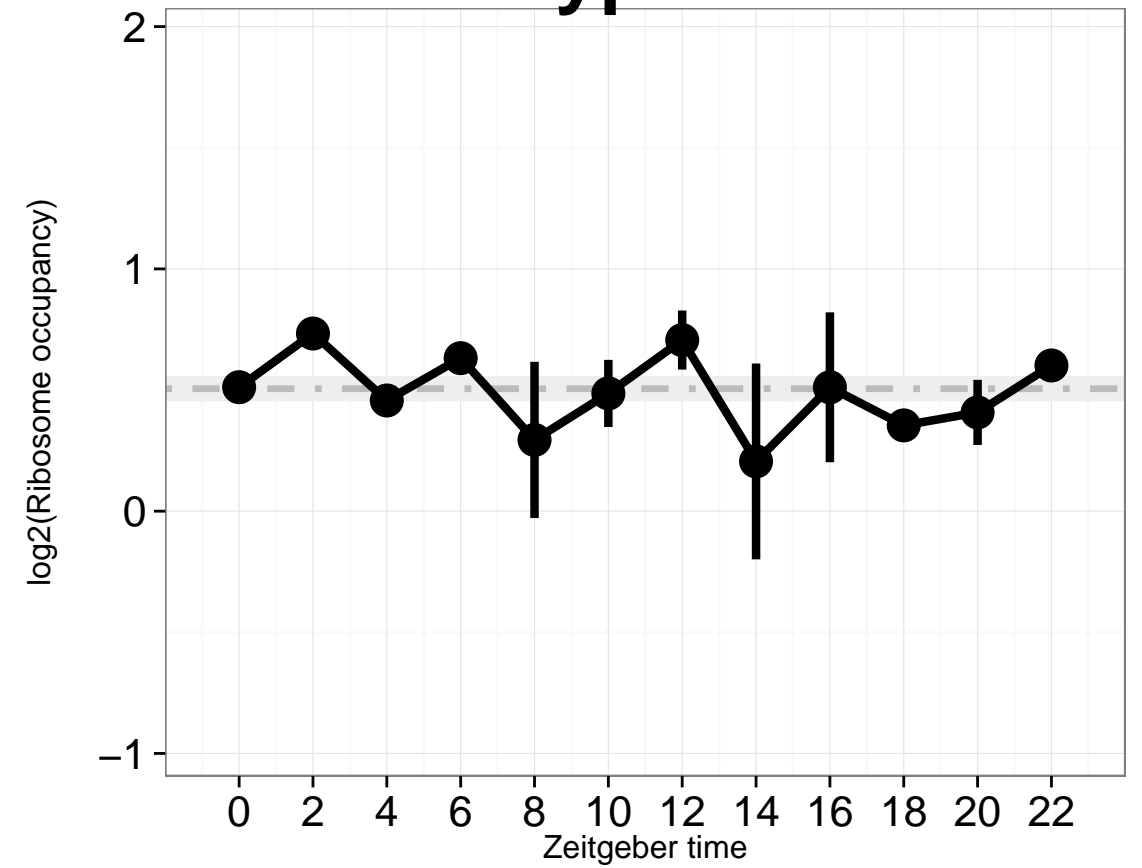

Supplement: SuppDataset_1.zip [file Lyplal1_set_A.pdf › Supplemental Dataset 1/A-mRNA_nonrhyth_translation_nonrhyth/Lyplal1_set_A.pdf]

# Lyrm1

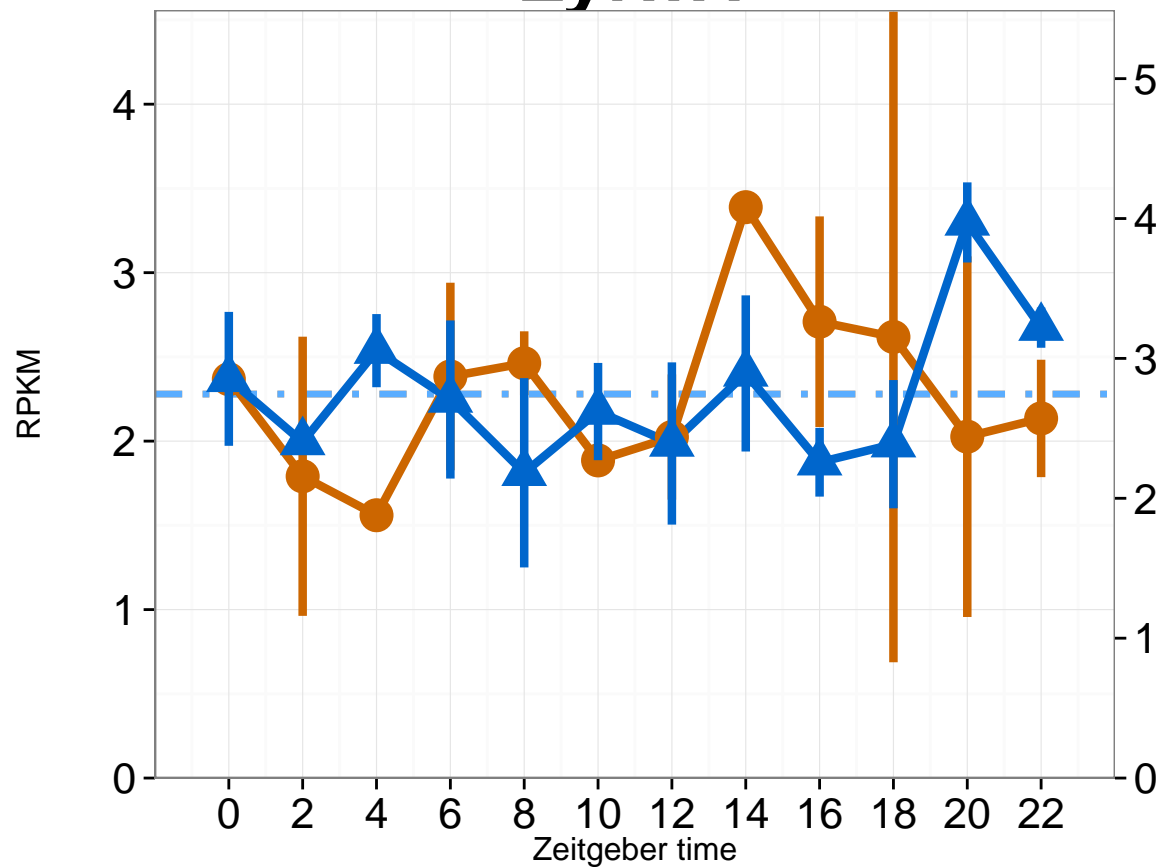

# Lyrm1

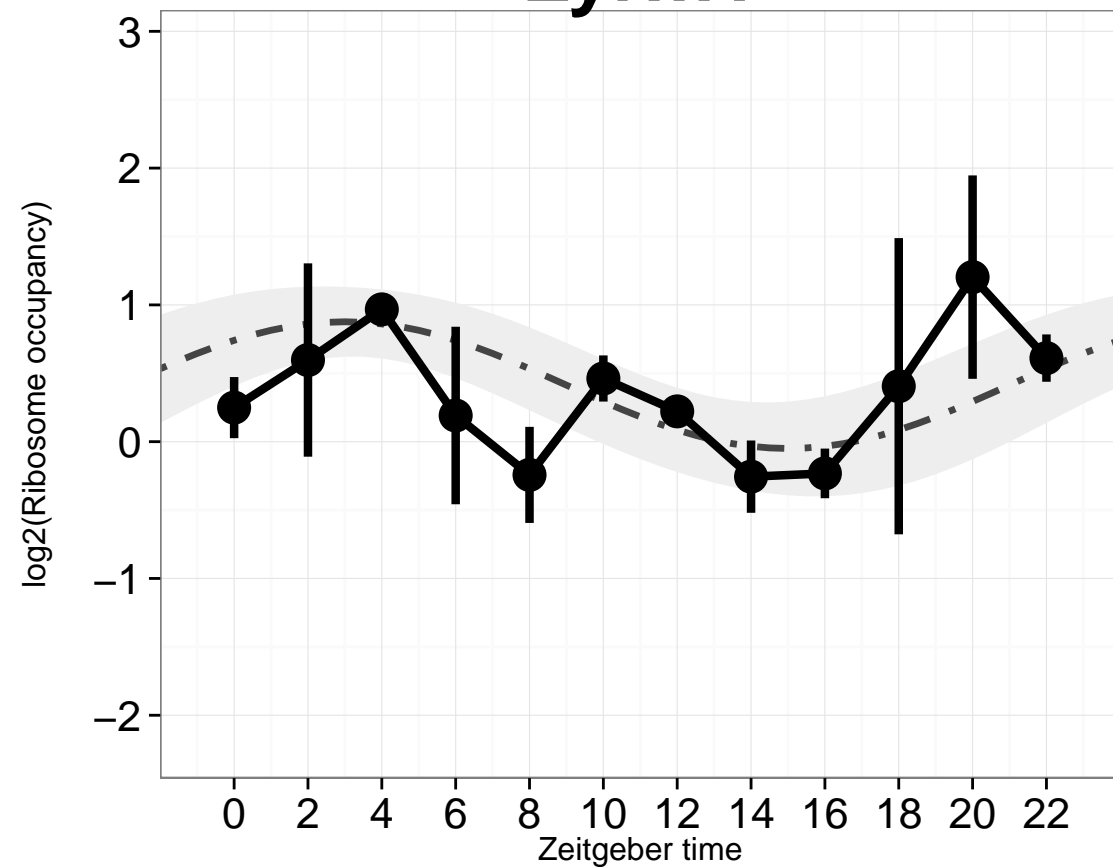

Supplement: SuppDataset_1.zip [file Lyrm1_set_A.pdf › Supplemental Dataset 1/A-mRNA_nonrhyth_translation_nonrhyth/Lyrm1_set_A.pdf]

# Lyrm4

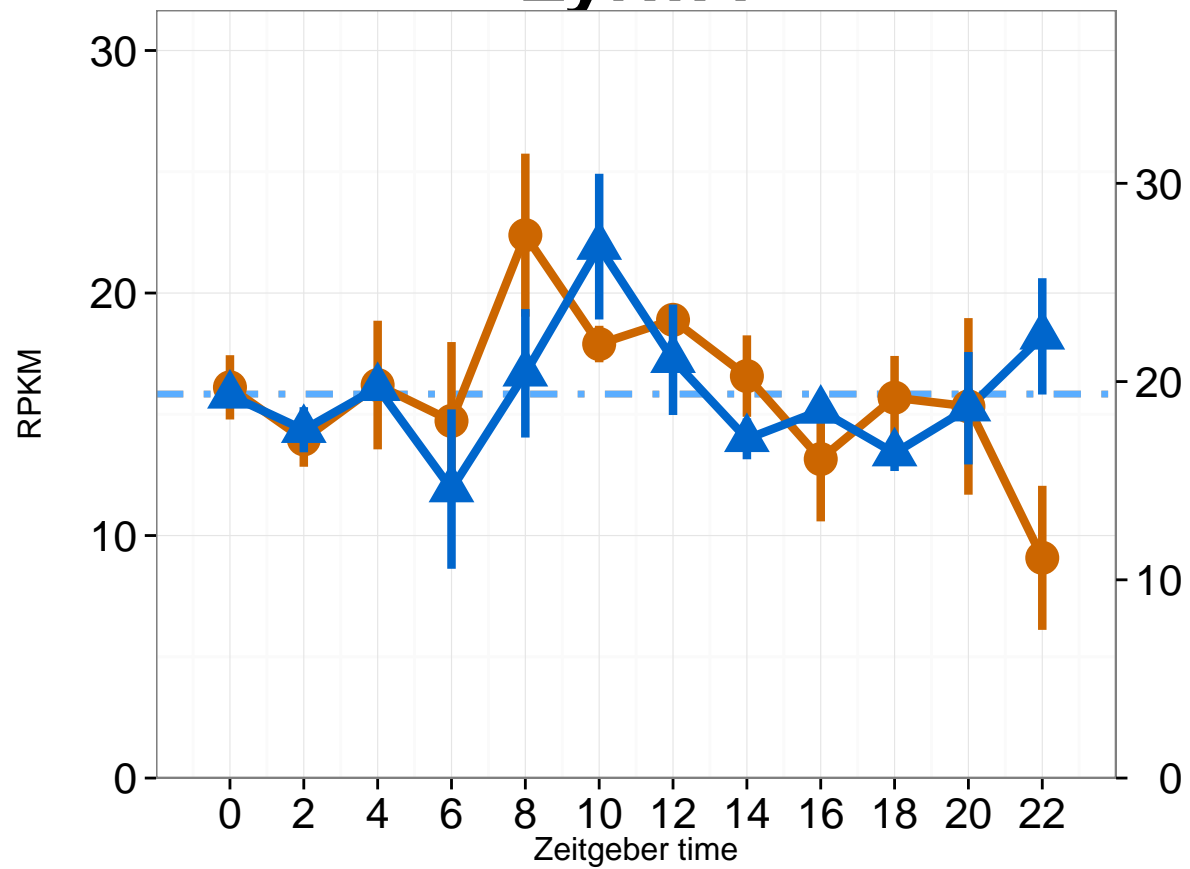

# Lyrm4

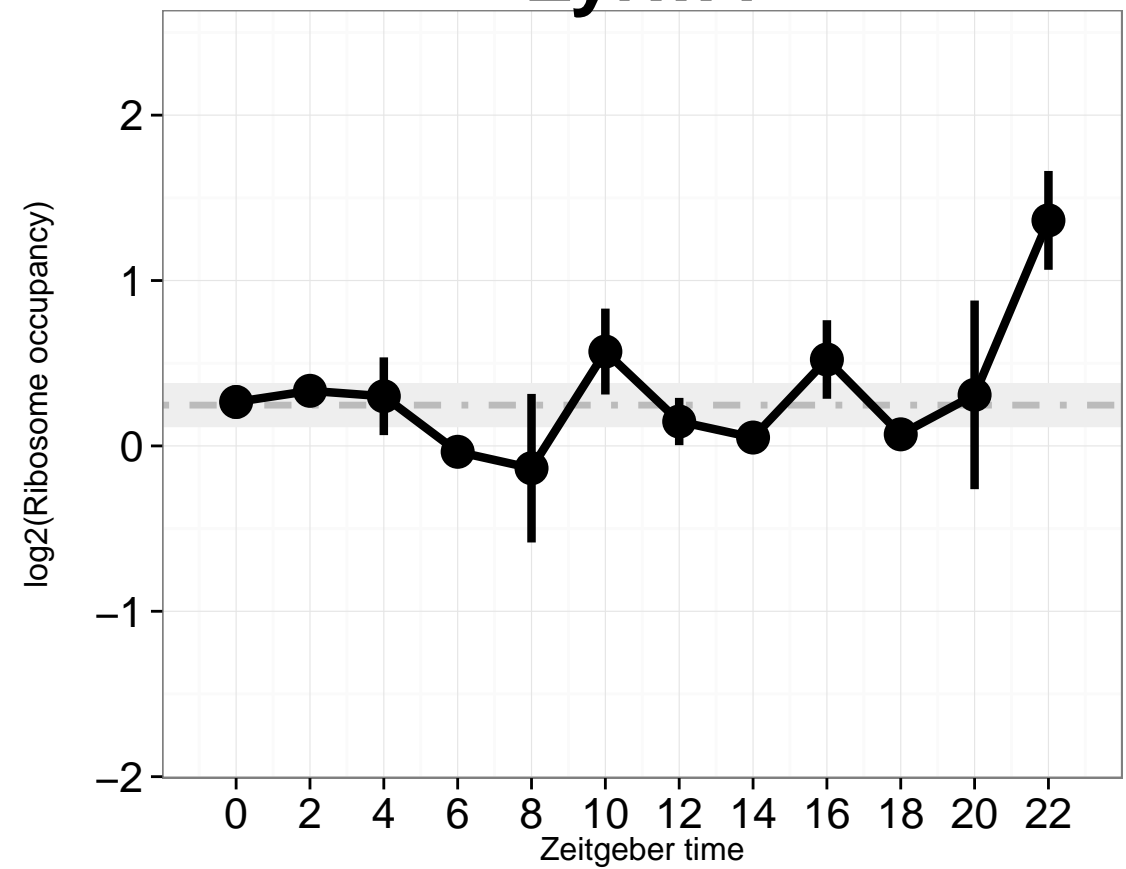

Supplement: SuppDataset_1.zip [file Lyrm4_set_A.pdf › Supplemental Dataset 1/A-mRNA_nonrhyth_translation_nonrhyth/Lyrm4_set_A.pdf]

# Lyrm5

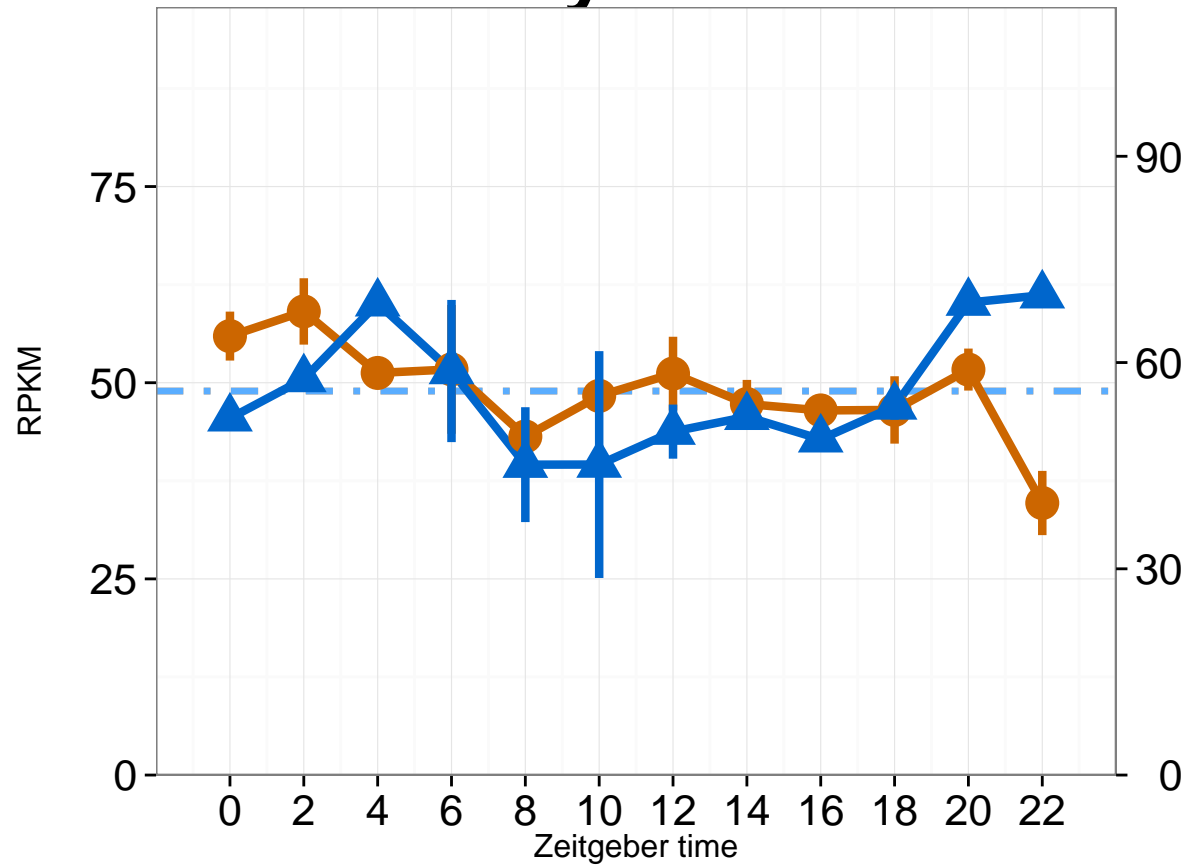

# Lyrm5

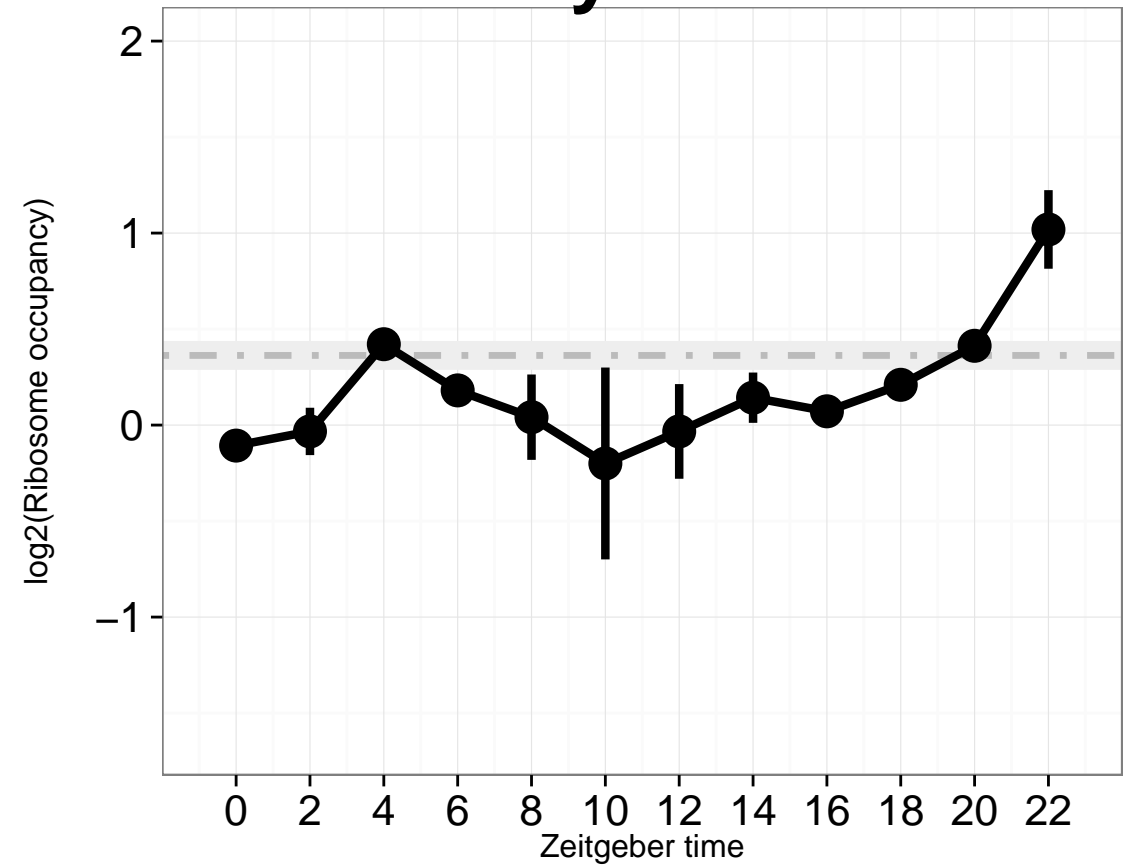

Supplement: SuppDataset_1.zip [file Lyrm5_set_A.pdf › Supplemental Dataset 1/A-mRNA_nonrhyth_translation_nonrhyth/Lyrm5_set_A.pdf]

# Lyrm9

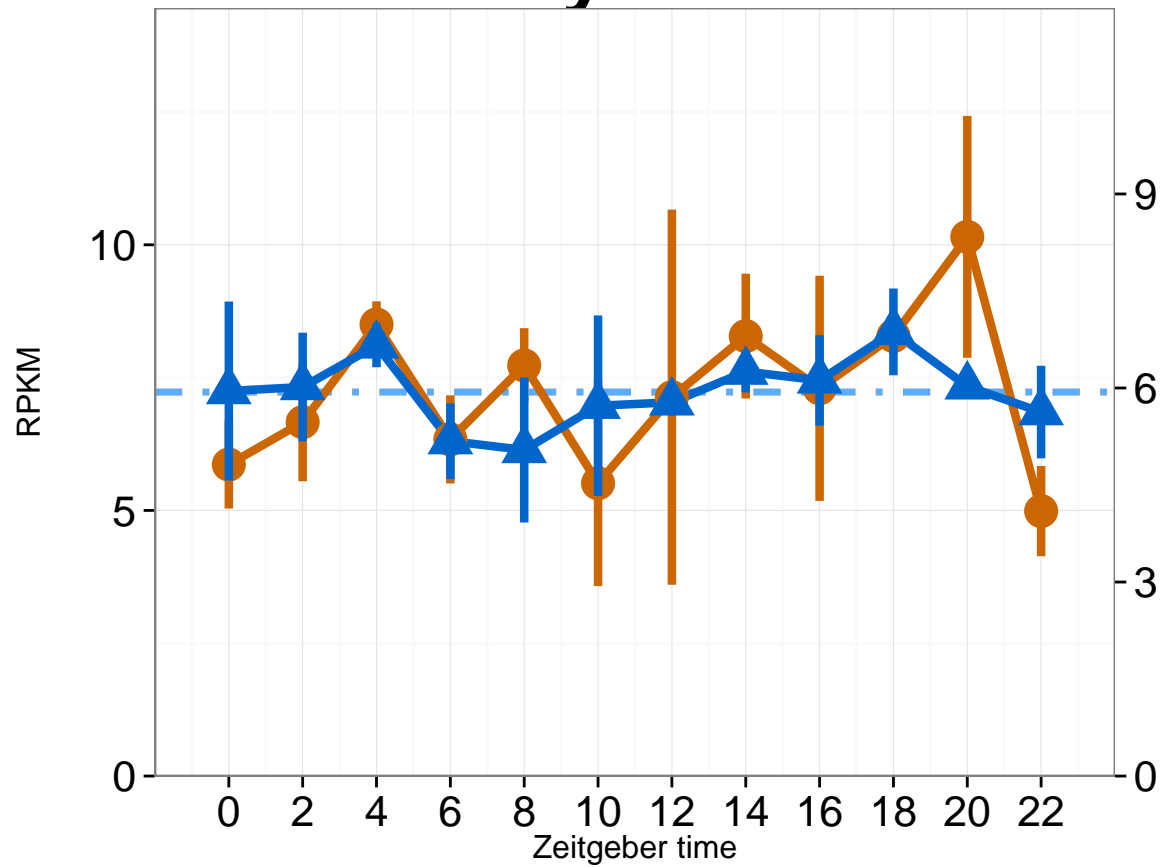

# Lyrm9

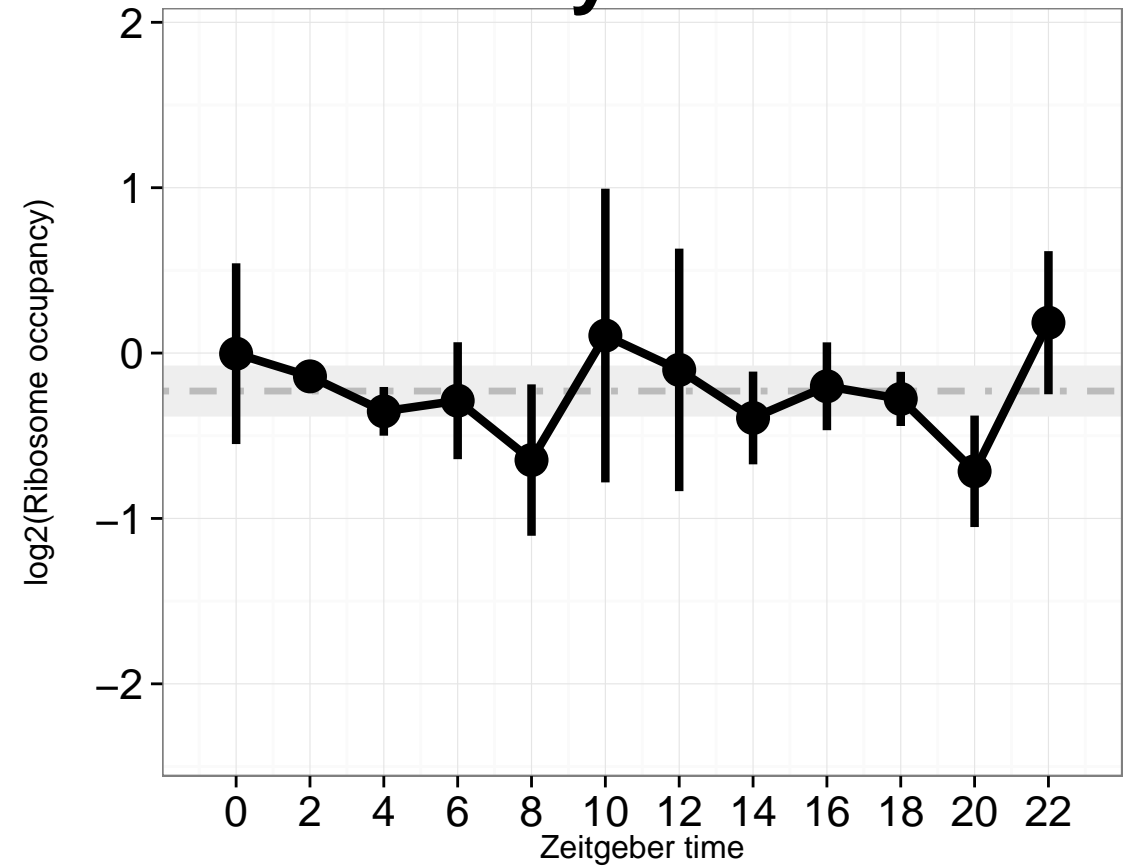

Supplement: SuppDataset_1.zip [file Lyrm9_set_A.pdf › Supplemental Dataset 1/A-mRNA_nonrhyth_translation_nonrhyth/Lyrm9_set_A.pdf]

# Lysmd1

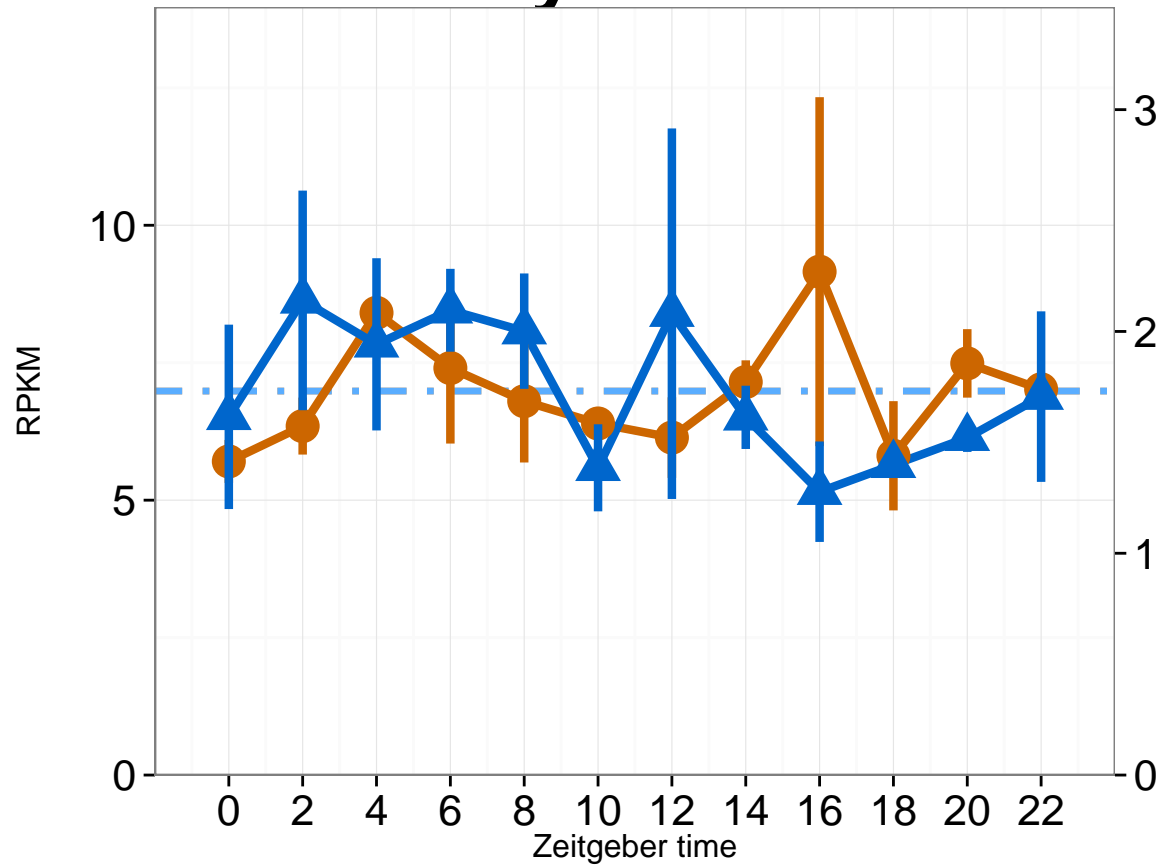

# Lysmd1

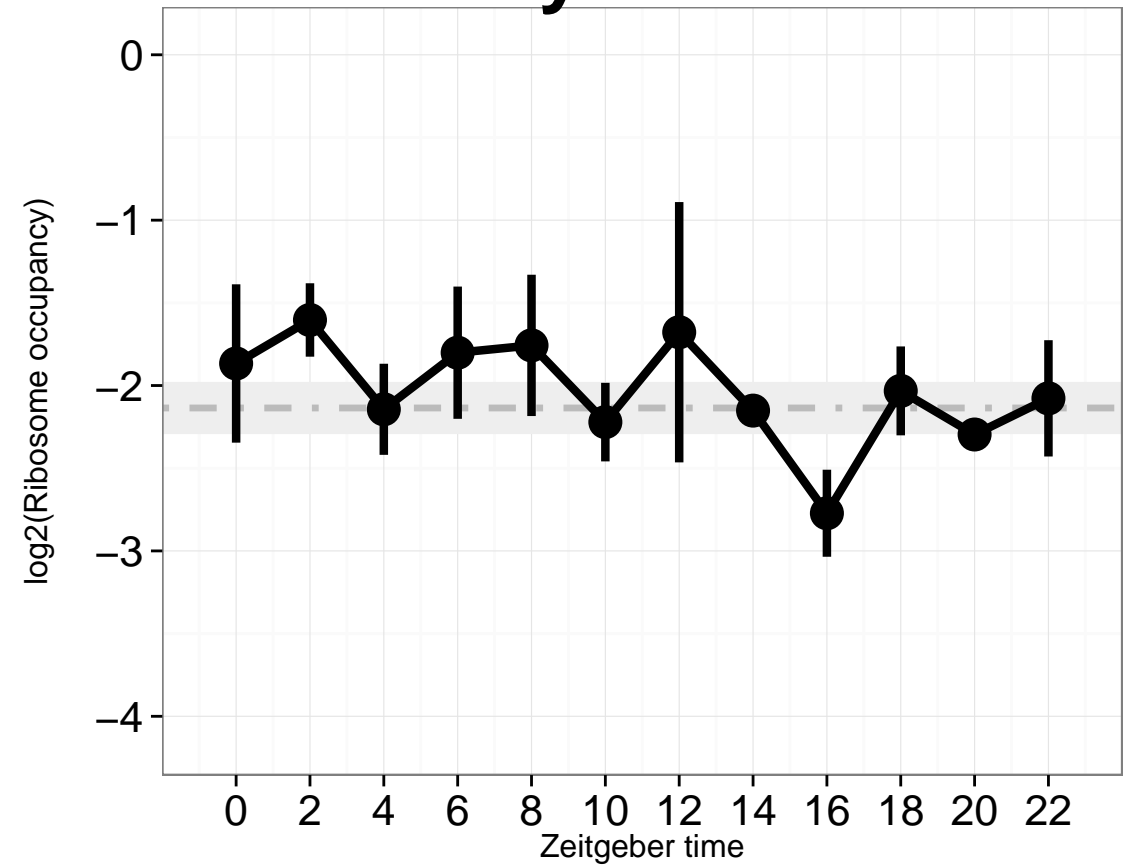

Supplement: SuppDataset_1.zip [file Lysmd1_set_A.pdf › Supplemental Dataset 1/A-mRNA_nonrhyth_translation_nonrhyth/Lysmd1_set_A.pdf]

## Lysmd4

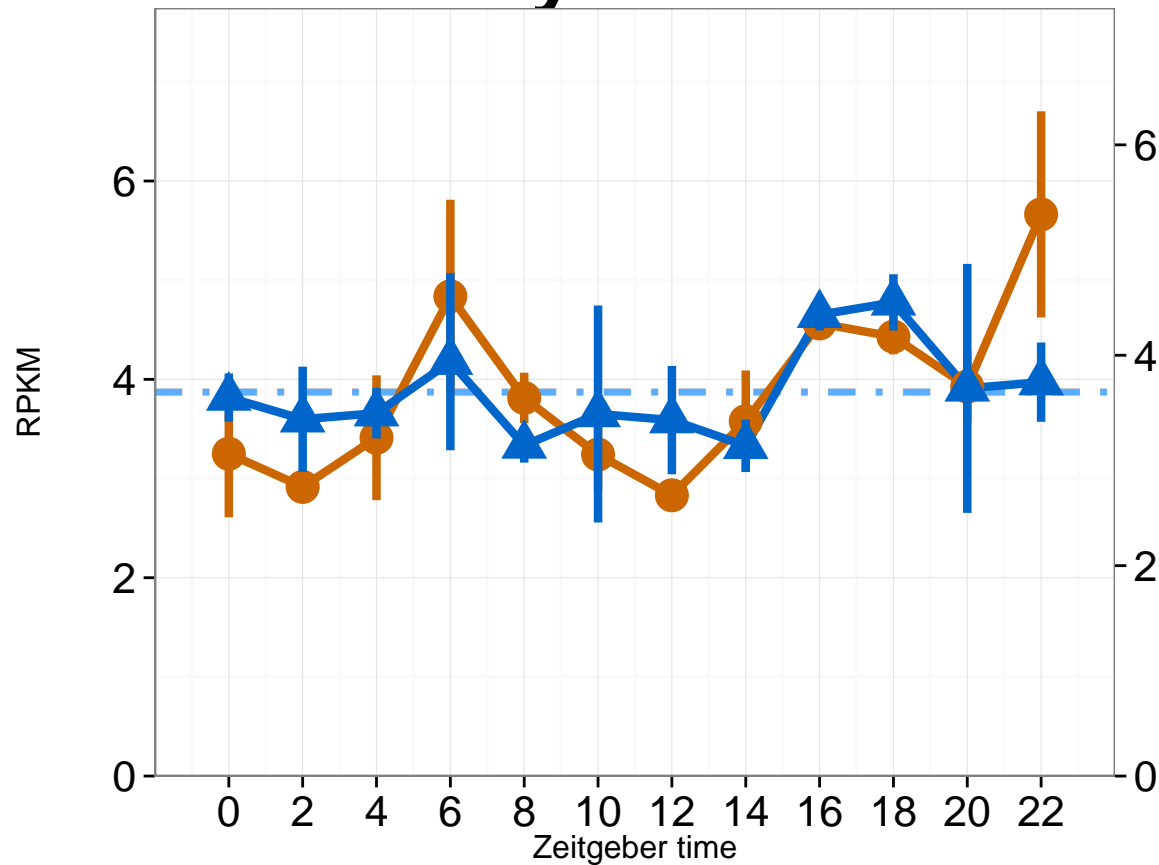

## Lysmd4

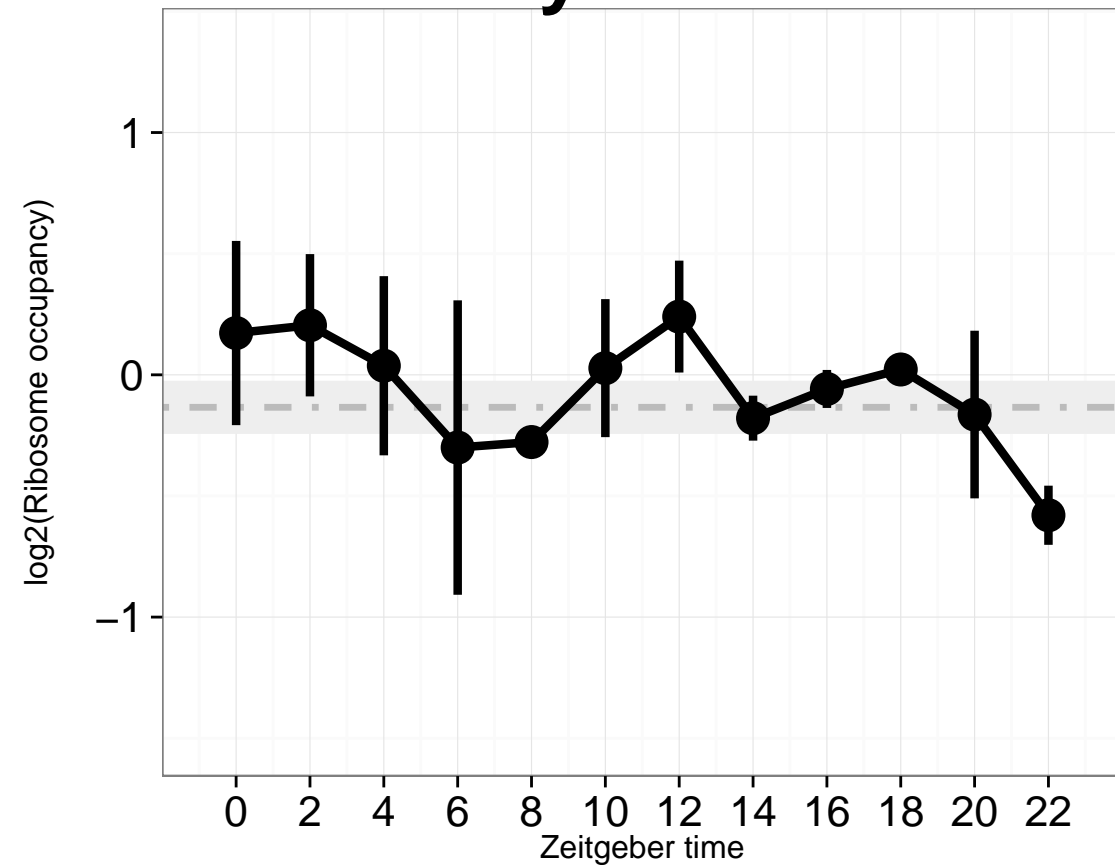

Supplement: SuppDataset_1.zip [file Lysmd4_set_A.pdf › Supplemental Dataset 1/A-mRNA_nonrhyth_translation_nonrhyth/Lysmd4_set_A.pdf]

## Lyst

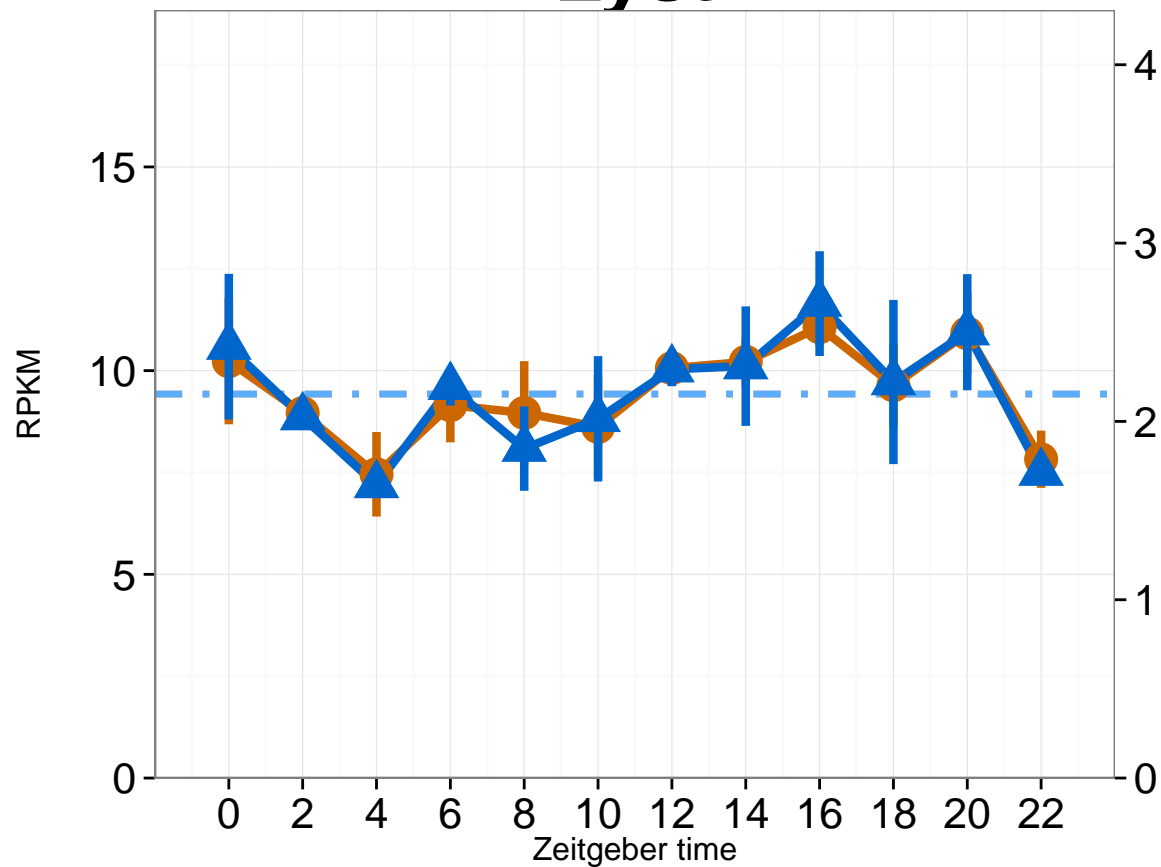

## Lyst

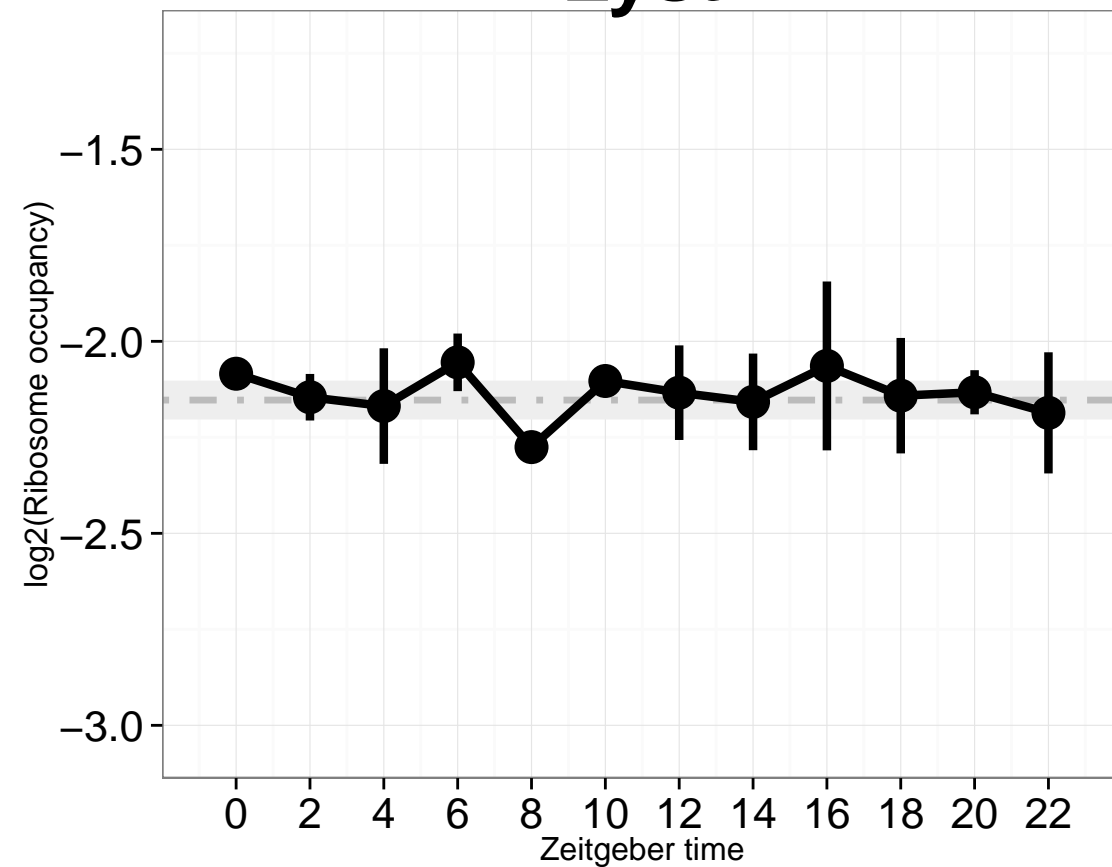

Supplement: SuppDataset_1.zip [file Lyst_set_A.pdf › Supplemental Dataset 1/A-mRNA_nonrhyth_translation_nonrhyth/Lyst_set_A.pdf]

## Lyve1

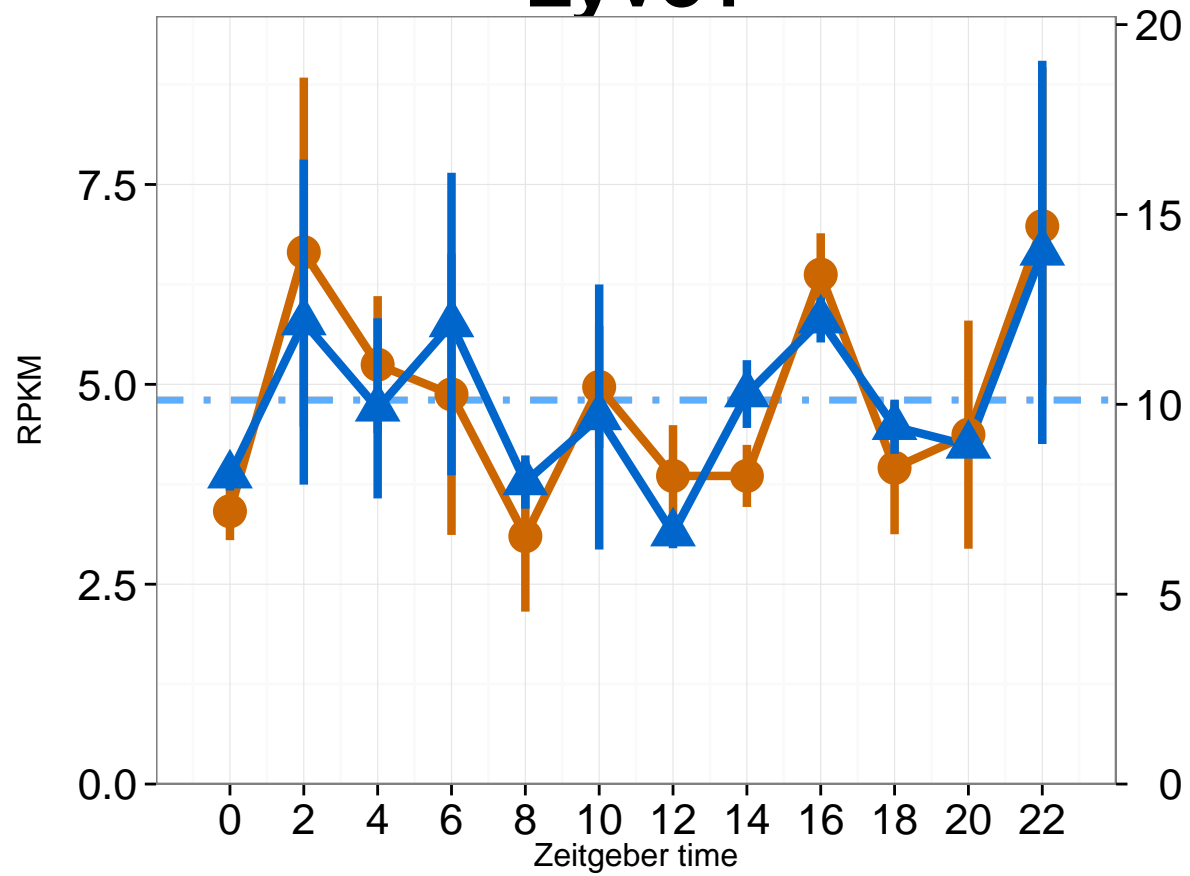

## Lyve1

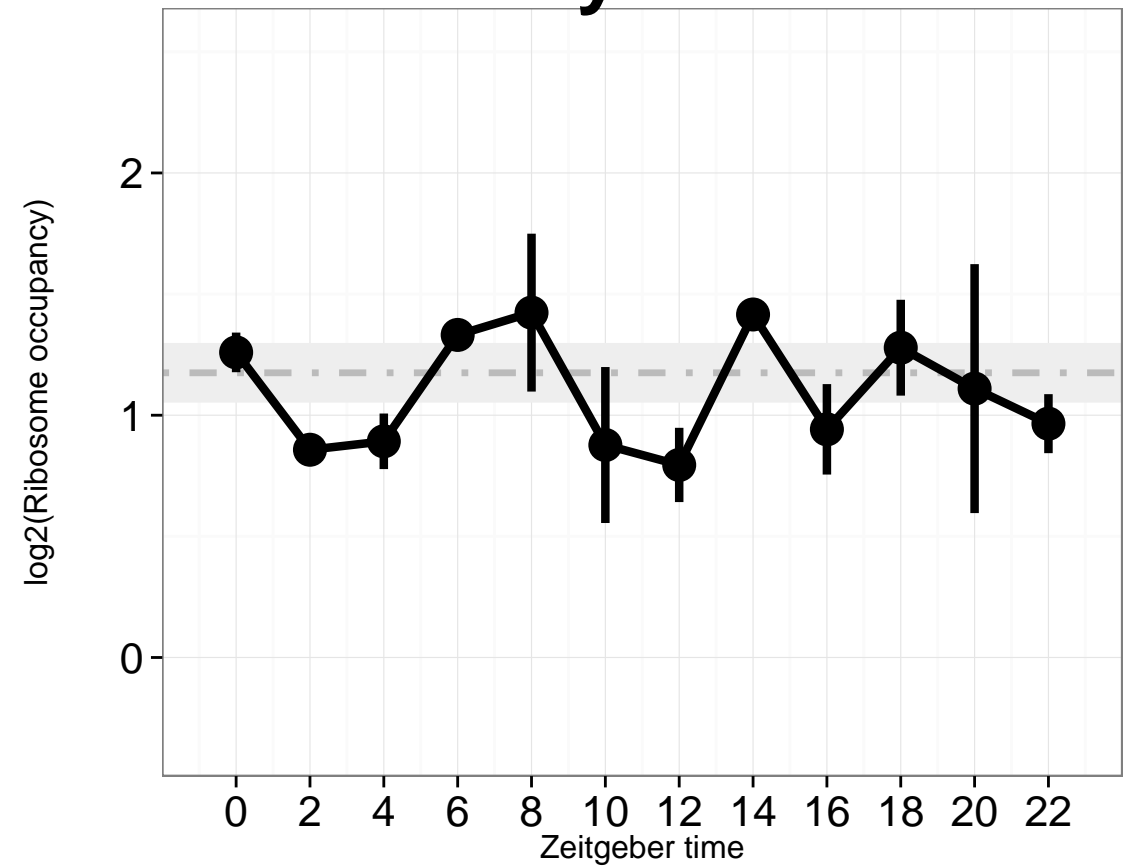

Supplement: SuppDataset_1.zip [file Lyve1_set_A.pdf › Supplemental Dataset 1/A-mRNA_nonrhyth_translation_nonrhyth/Lyve1_set_A.pdf]

## Lyz2

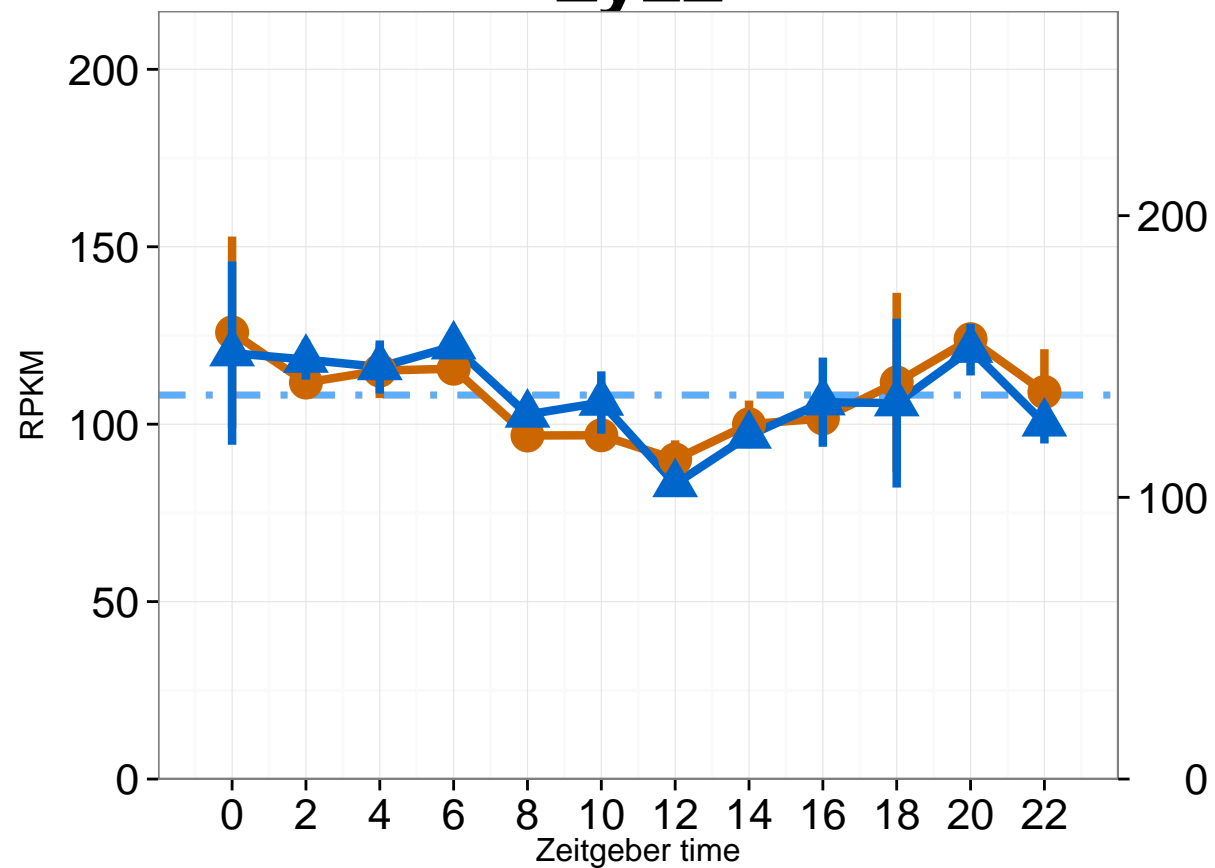

## Lyz2

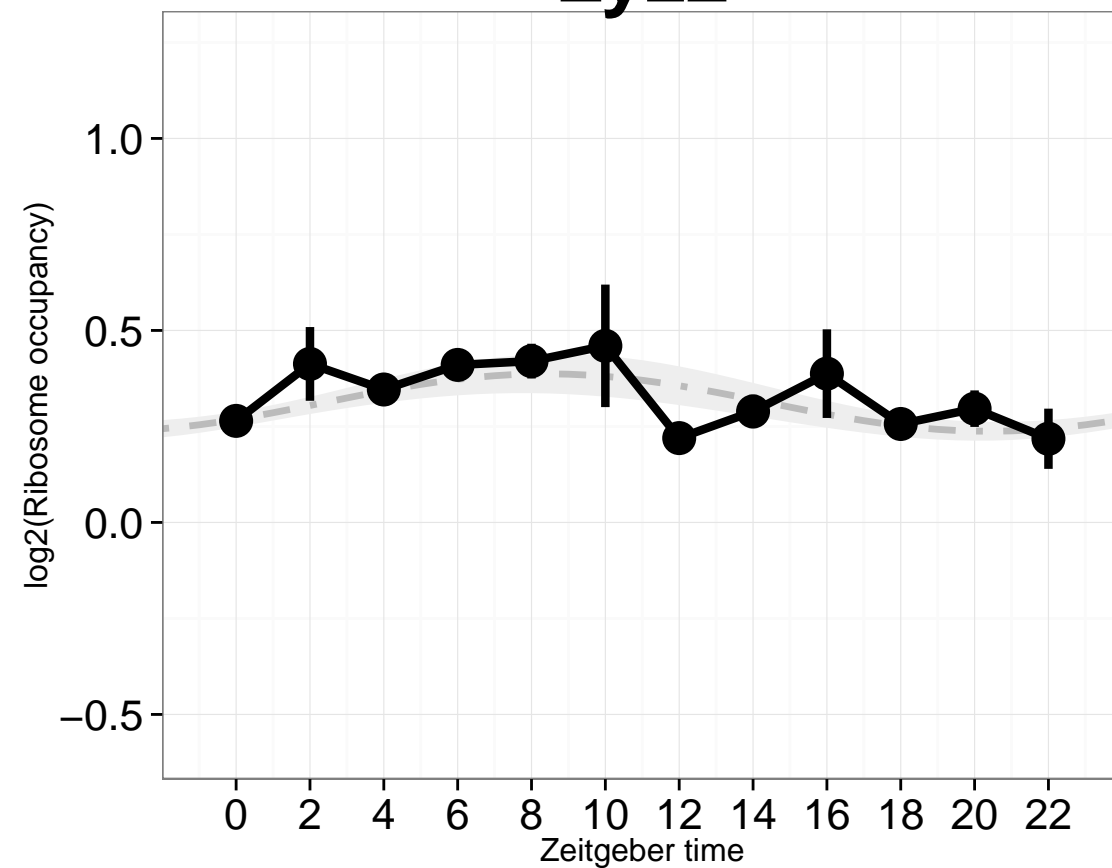

Supplement: SuppDataset_1.zip [file Lyz2_set_A.pdf › Supplemental Dataset 1/A-mRNA_nonrhyth_translation_nonrhyth/Lyz2_set_A.pdf]

## Lzic

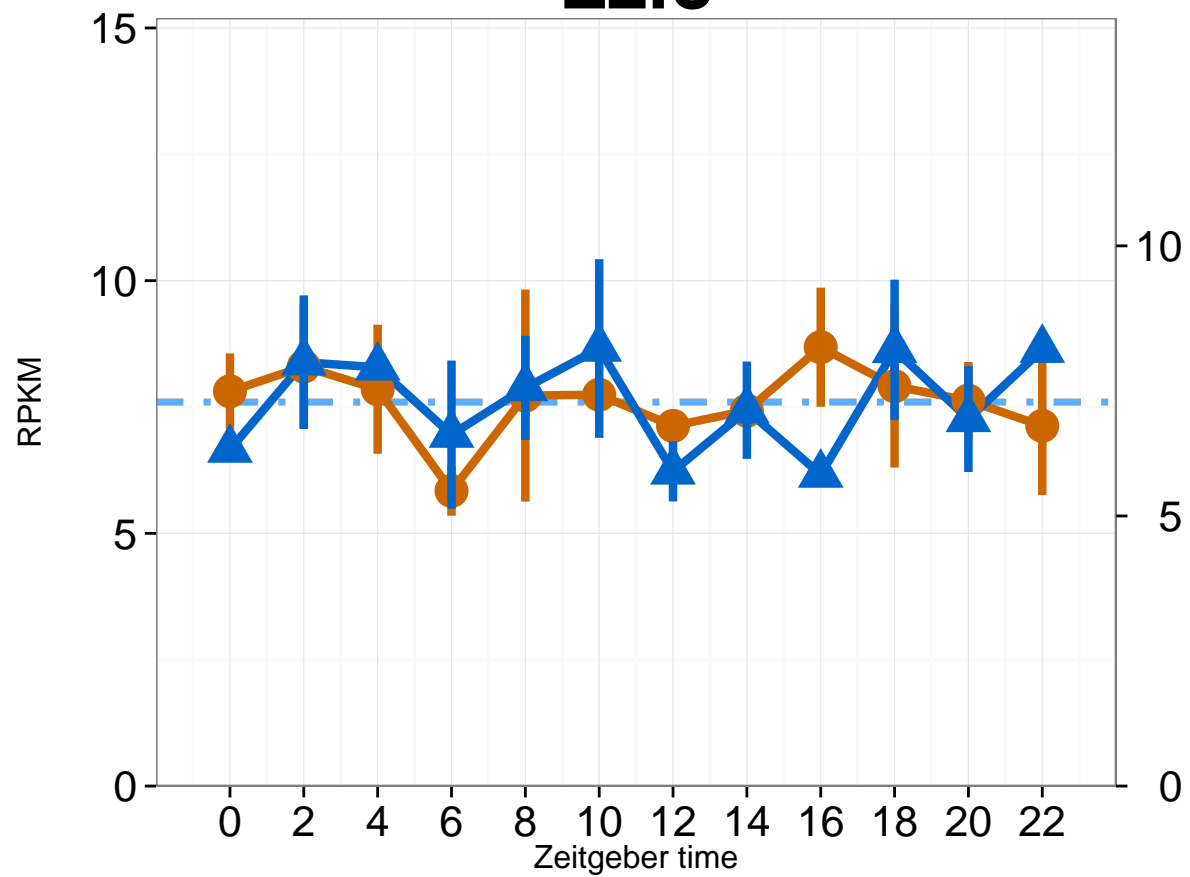

## Lzic

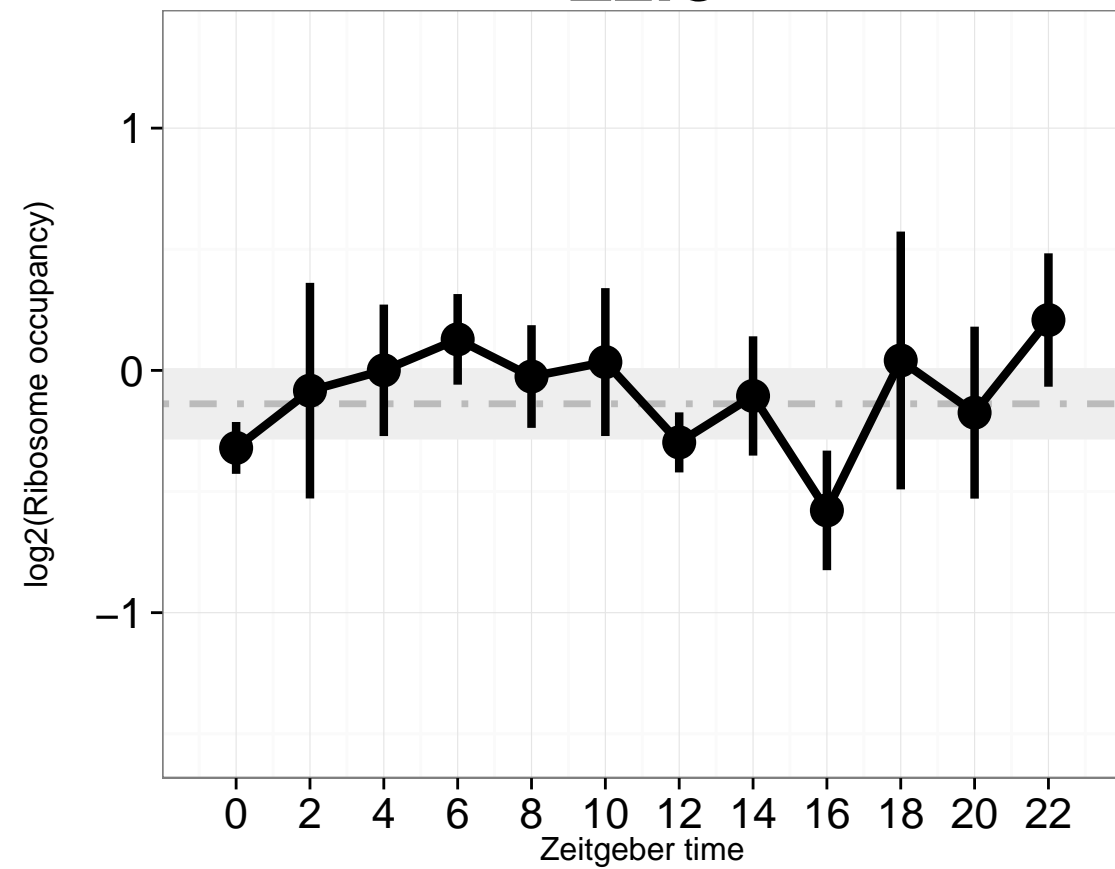

Supplement: SuppDataset_1.zip [file Lzic_set_A.pdf › Supplemental Dataset 1/A-mRNA_nonrhyth_translation_nonrhyth/Lzic_set_A.pdf]

# Lztf1

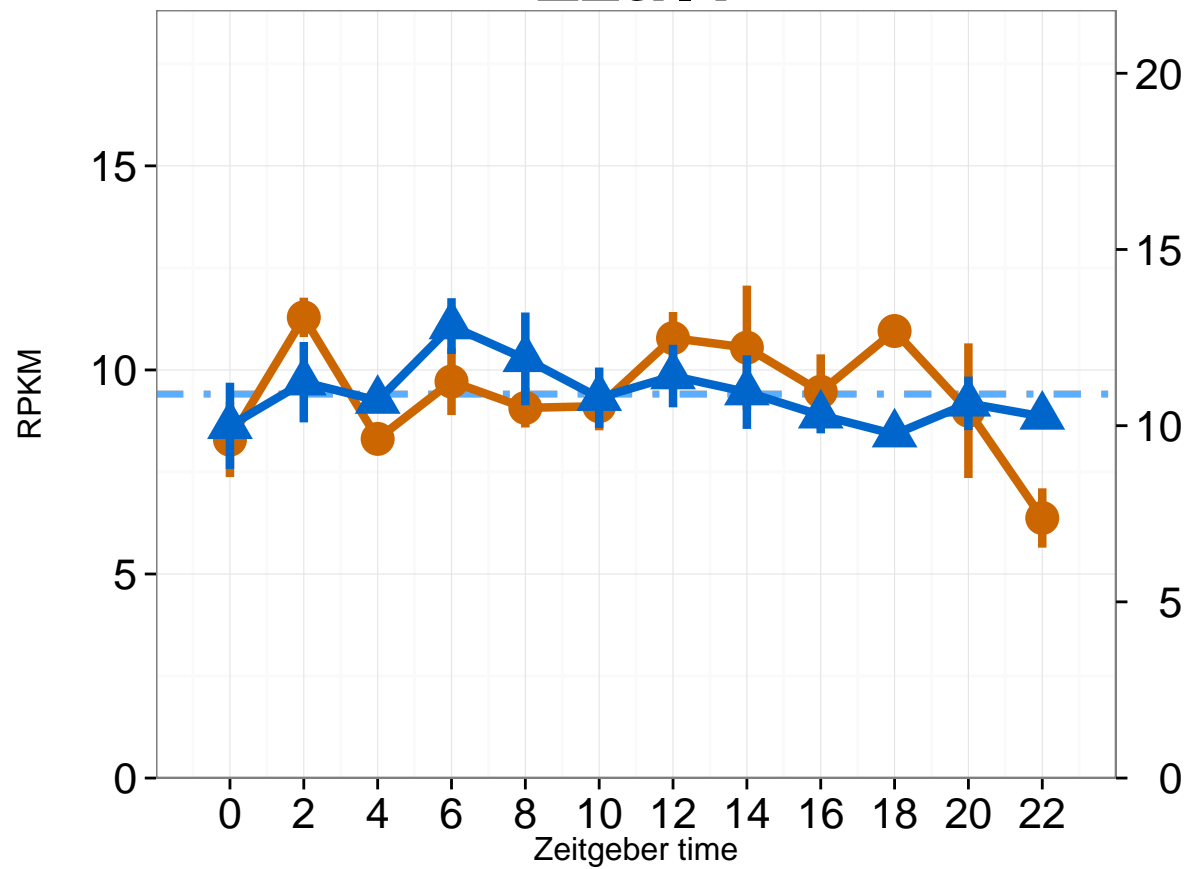

# Lztf1

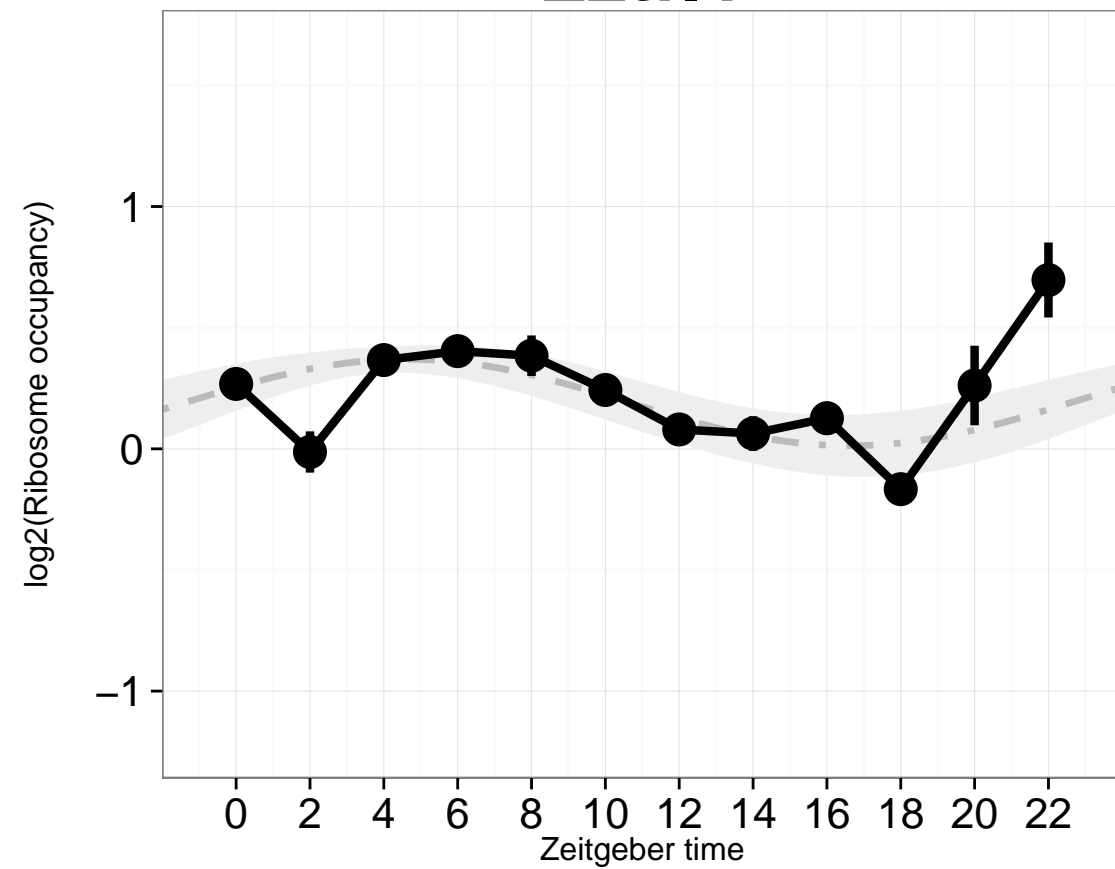

Supplement: SuppDataset_1.zip [file Lztfl1_set_A.pdf › Supplemental Dataset 1/A-mRNA_nonrhyth_translation_nonrhyth/Lztfl1_set_A.pdf]

# Lztr1

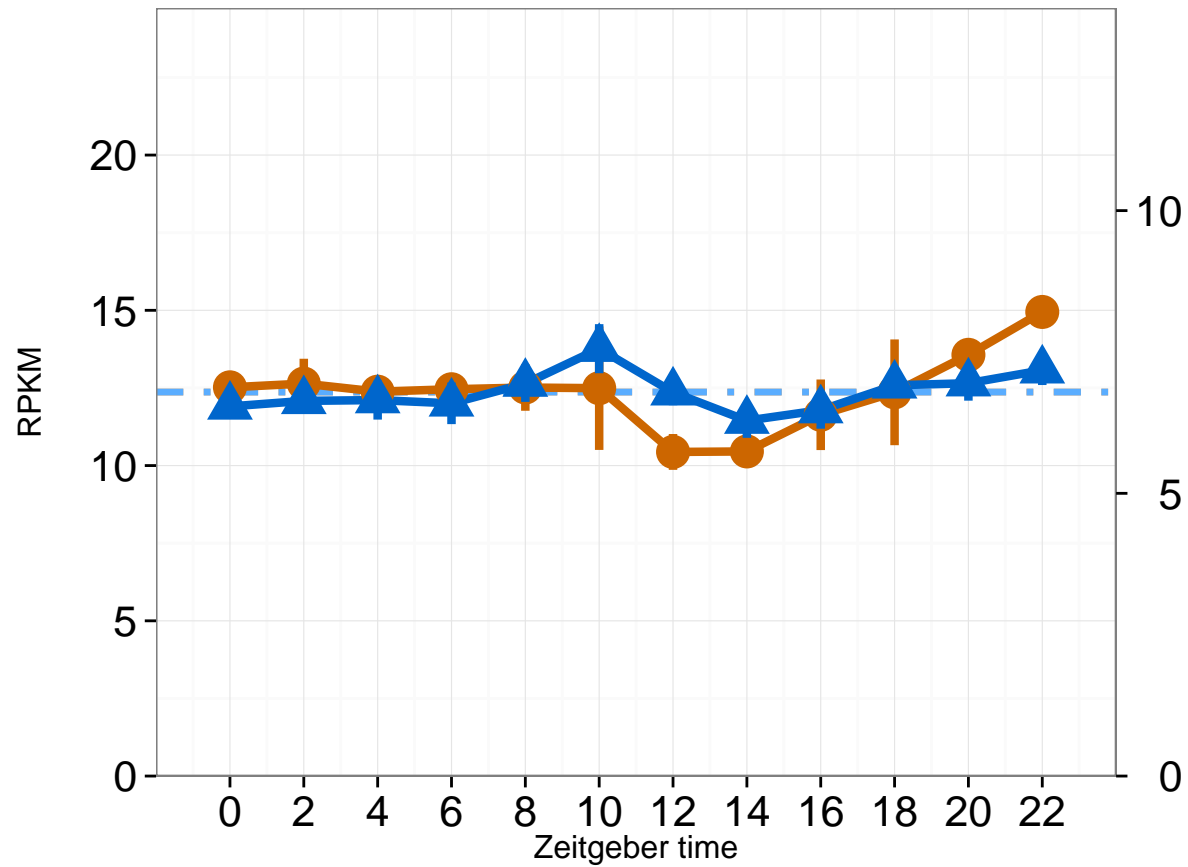

# Lztr1

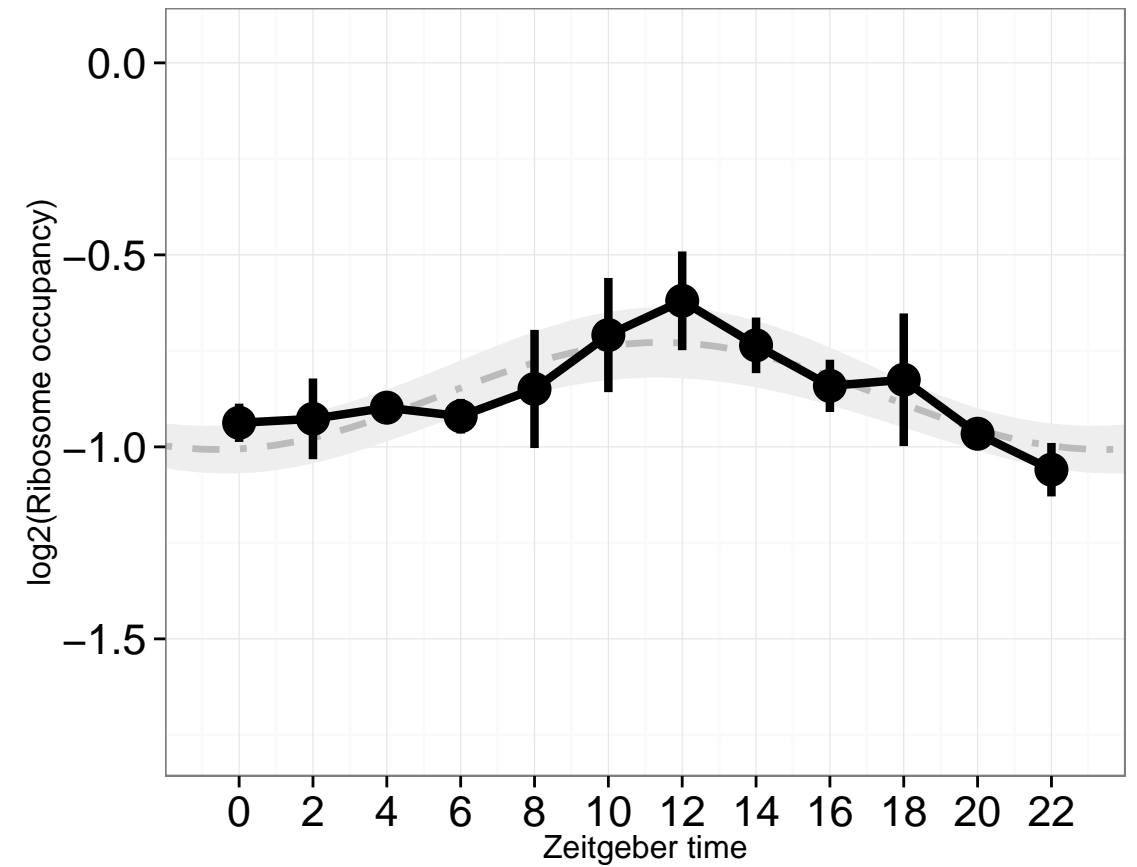

Supplement: SuppDataset_1.zip [file Lztr1_set_A.pdf › Supplemental Dataset 1/A-mRNA_nonrhyth_translation_nonrhyth/Lztr1_set_A.pdf]

## Lzts3

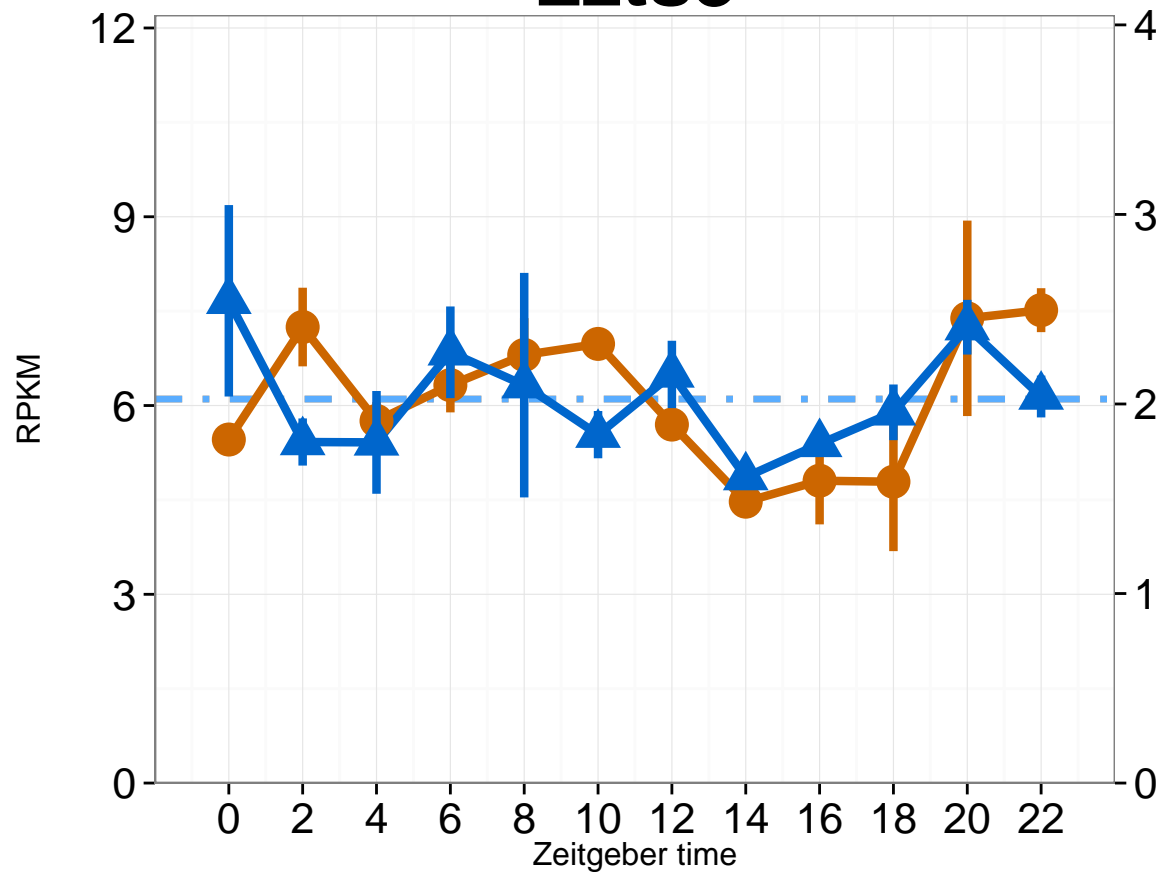

## Lzts3

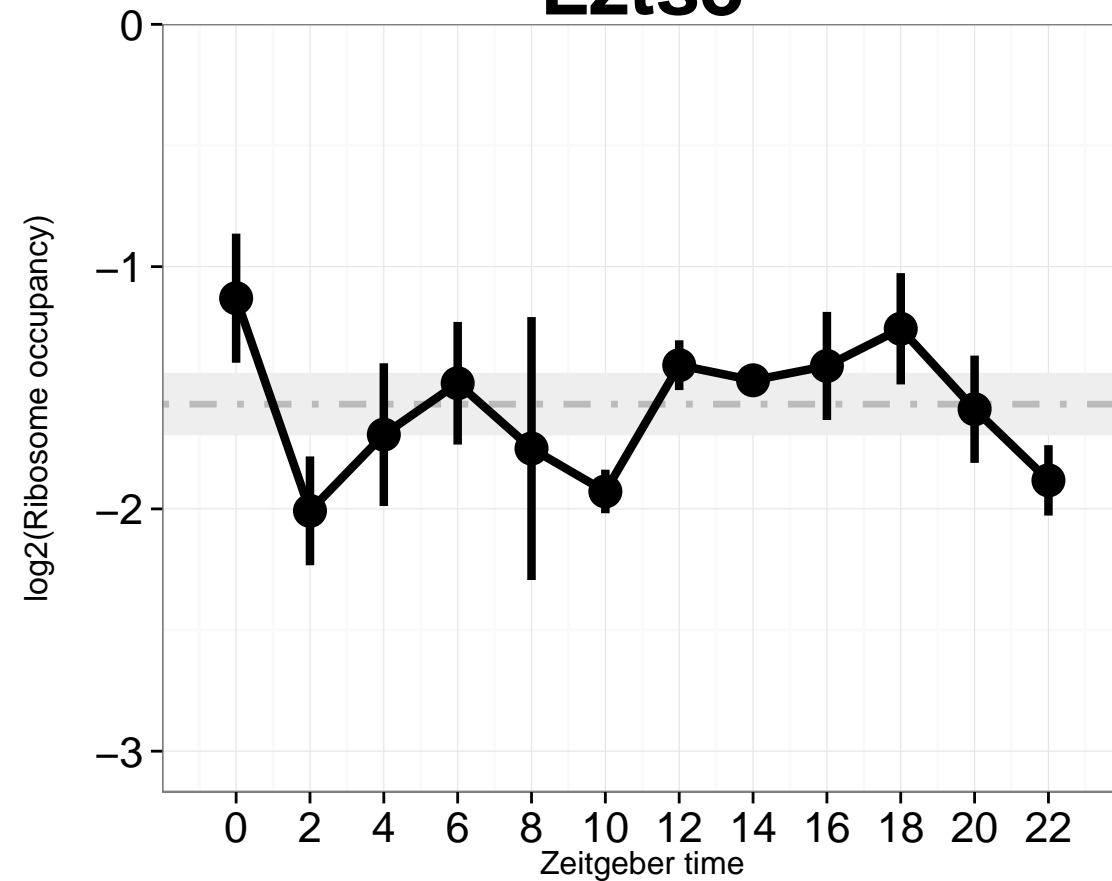

Supplement: SuppDataset_1.zip [file Lzts3_set_A.pdf › Supplemental Dataset 1/A-mRNA_nonrhyth_translation_nonrhyth/Lzts3_set_A.pdf]

# M6pr

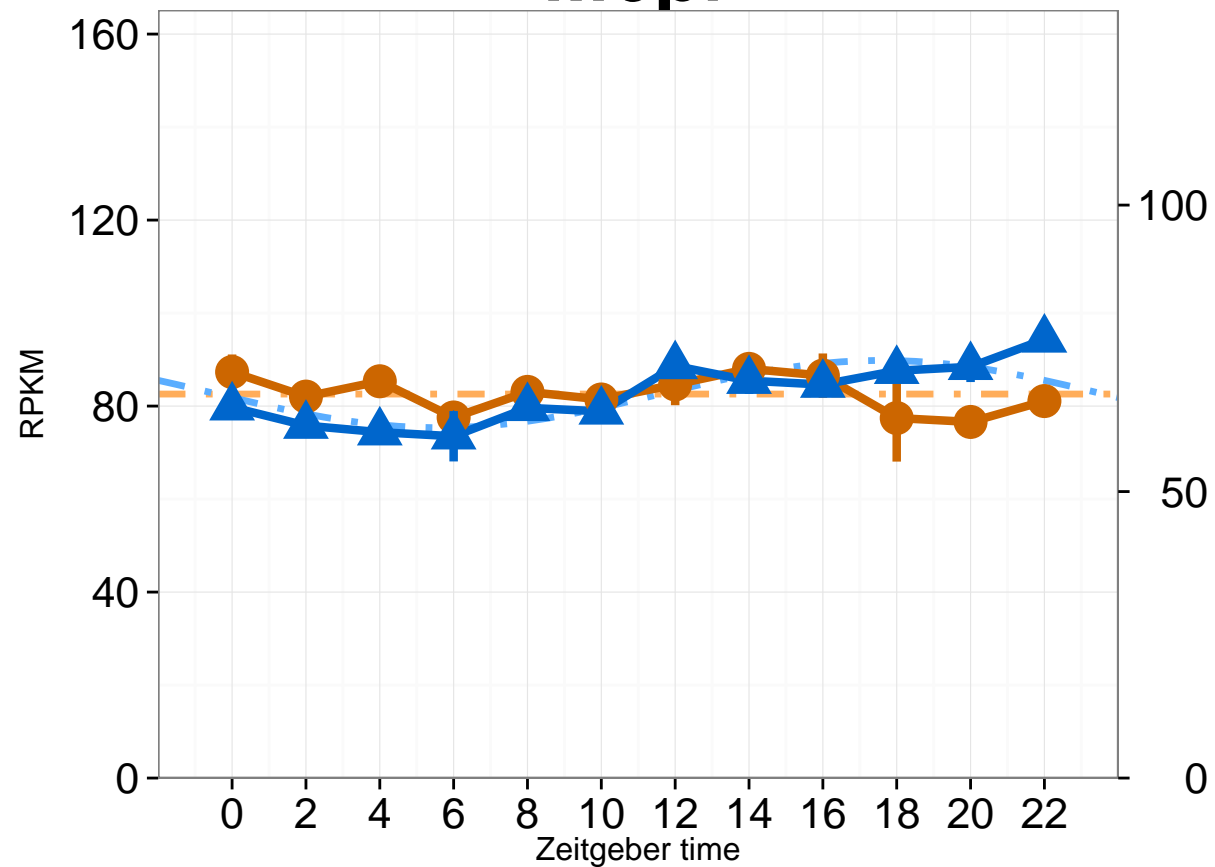

# M6pr

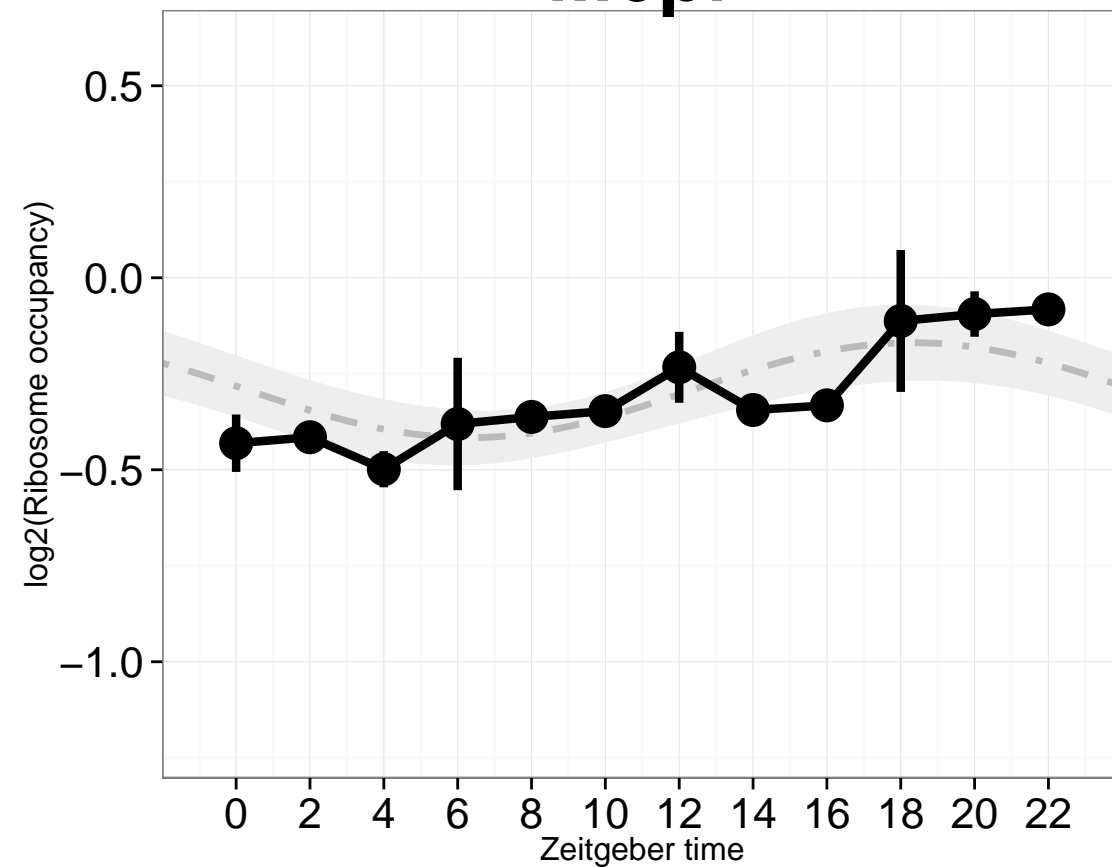

Supplement: SuppDataset_1.zip [file M6pr_set_A.pdf › Supplemental Dataset 1/A-mRNA_nonrhyth_translation_nonrhyth/M6pr_set_A.pdf]

## Macf1

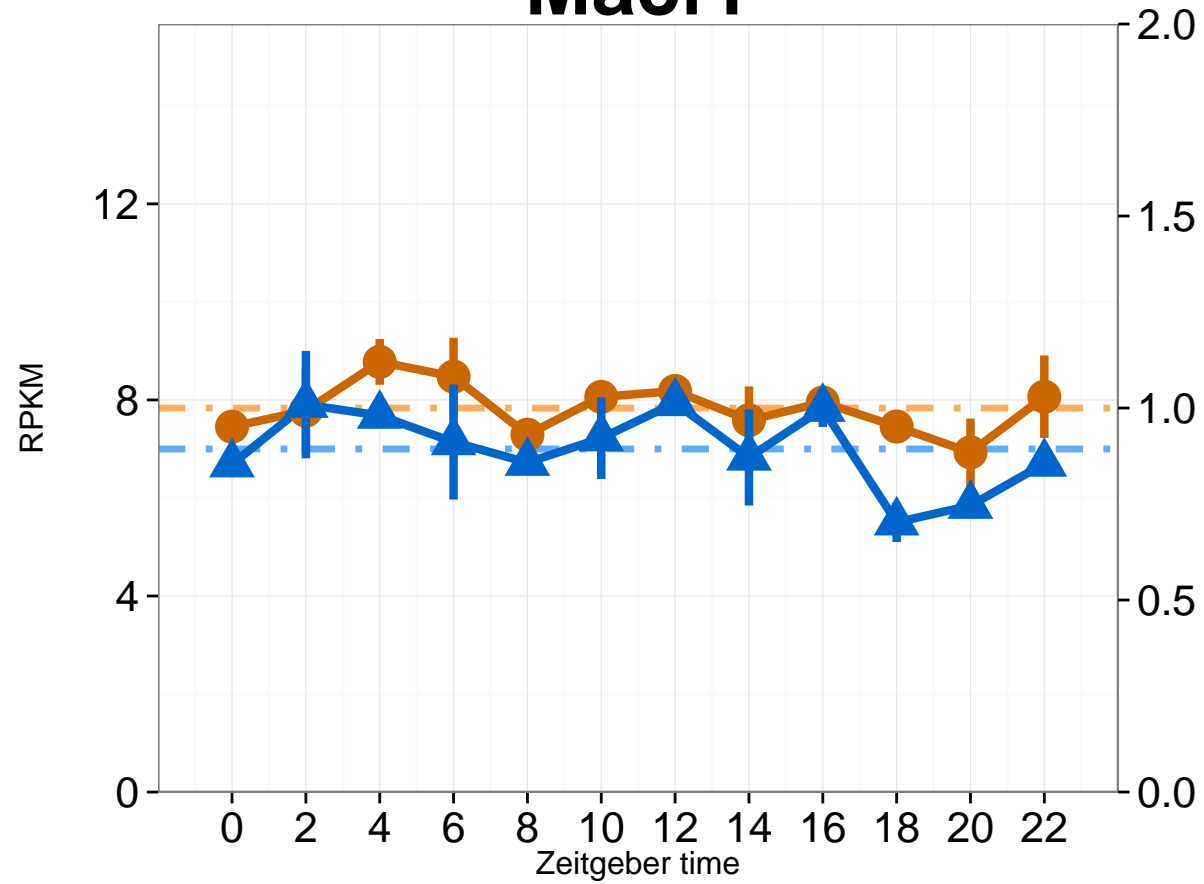

## Macf1

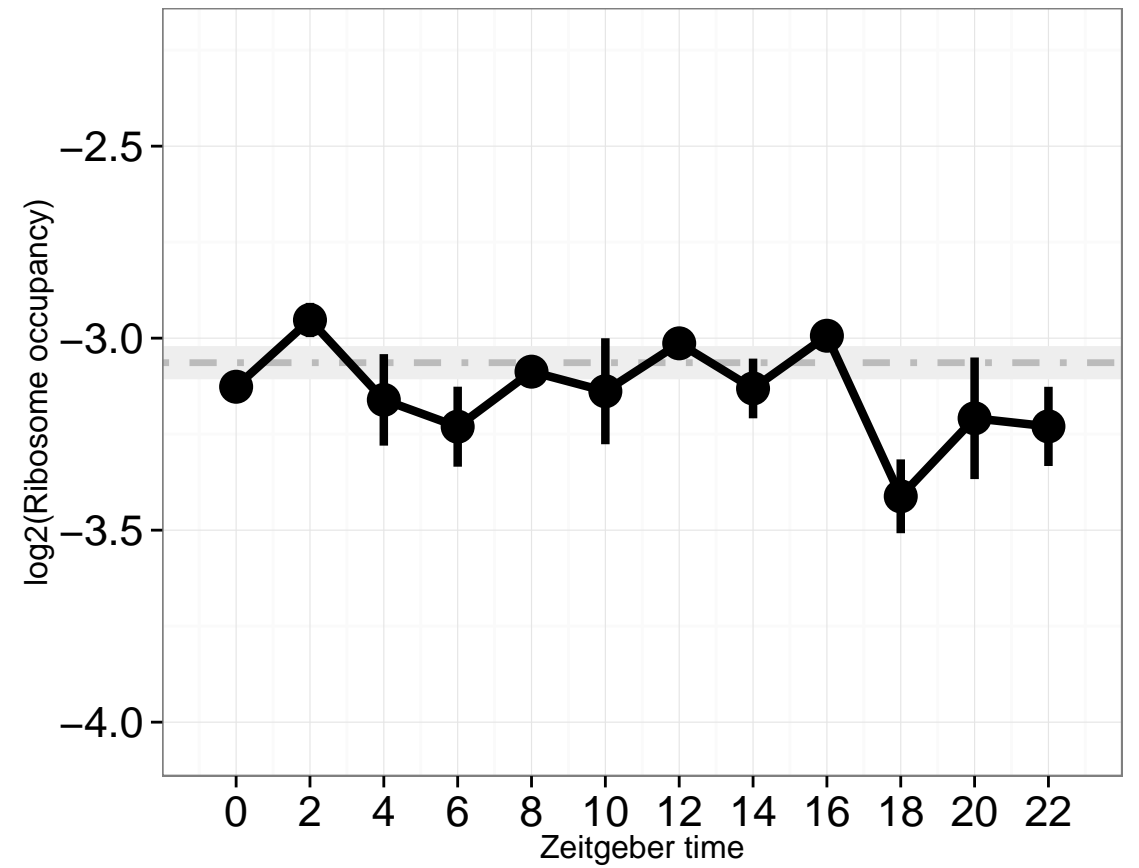

Supplement: SuppDataset_1.zip [file Macf1_set_A.pdf › Supplemental Dataset 1/A-mRNA_nonrhyth_translation_nonrhyth/Macf1_set_A.pdf]

# Macrocl1

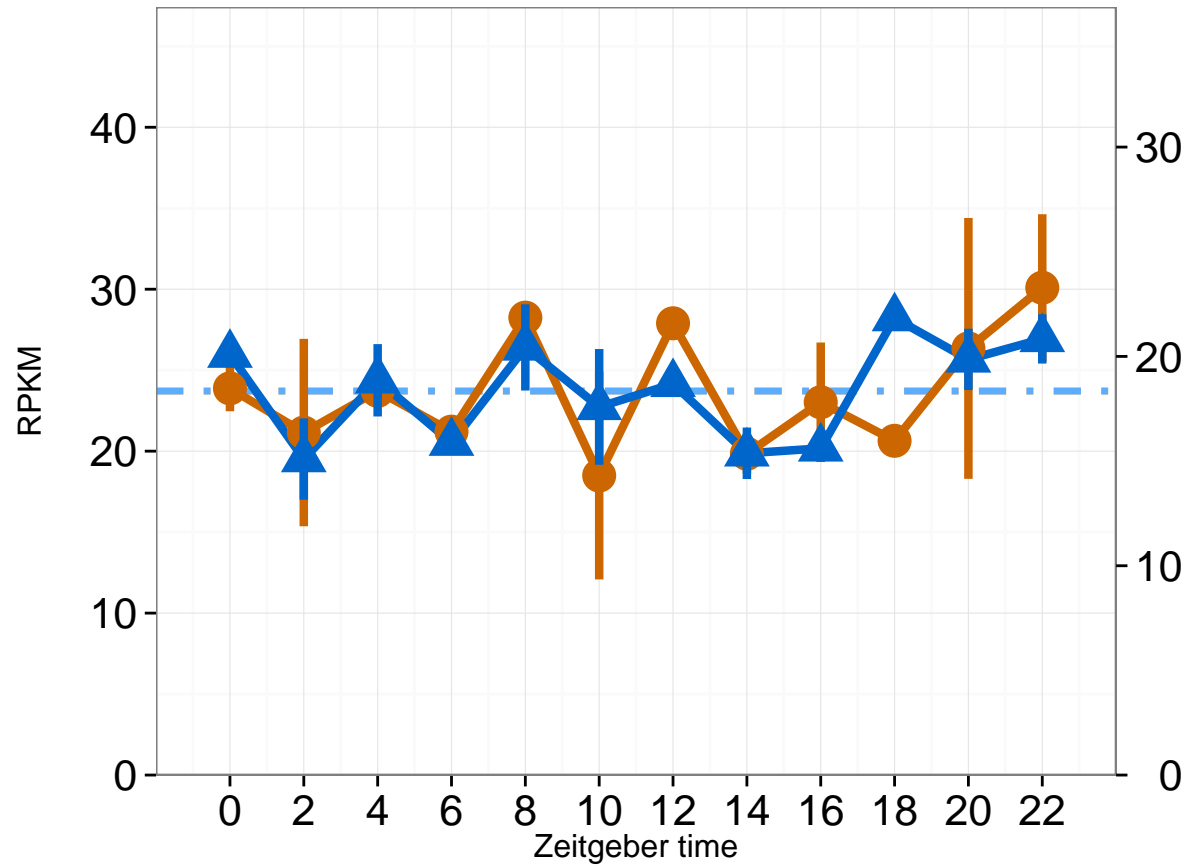

# Macrocl1

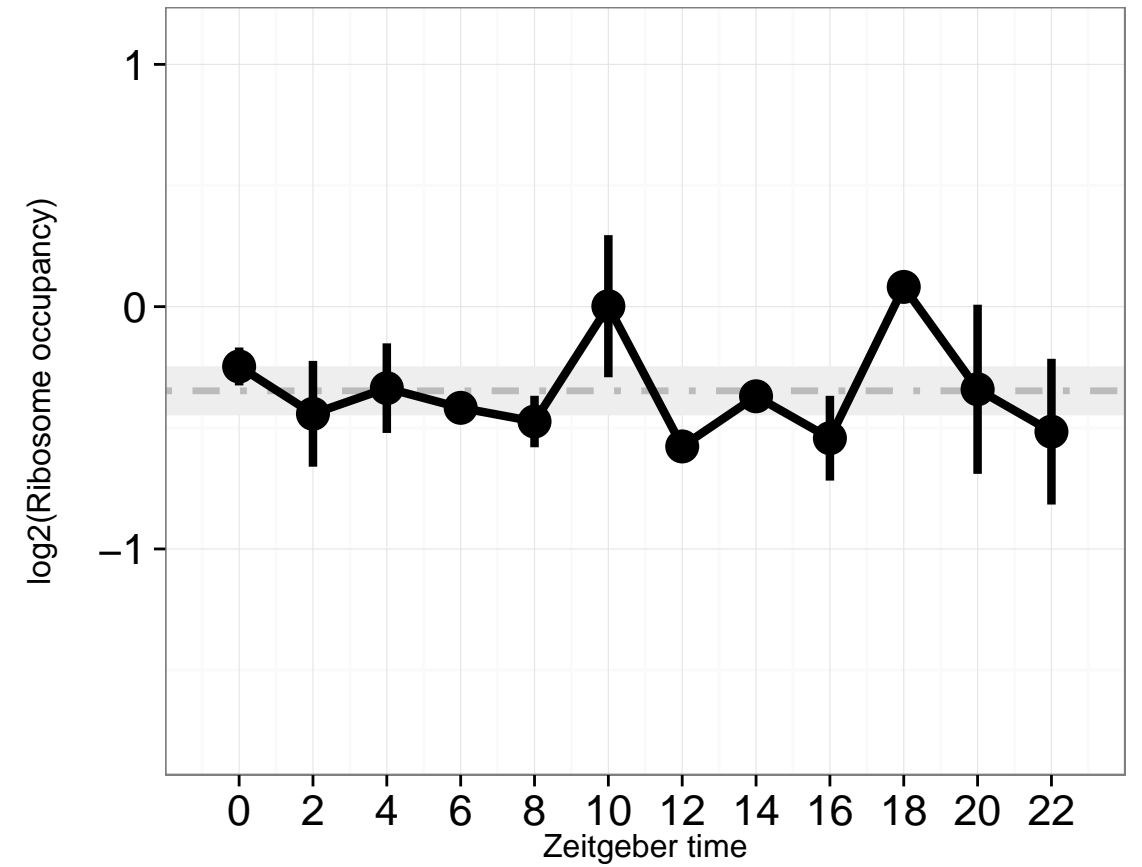

Supplement: SuppDataset_1.zip [file Macrod1_set_A.pdf › Supplemental Dataset 1/A-mRNA_nonrhyth_translation_nonrhyth/Macrod1_set_A.pdf]

## Mad1l1

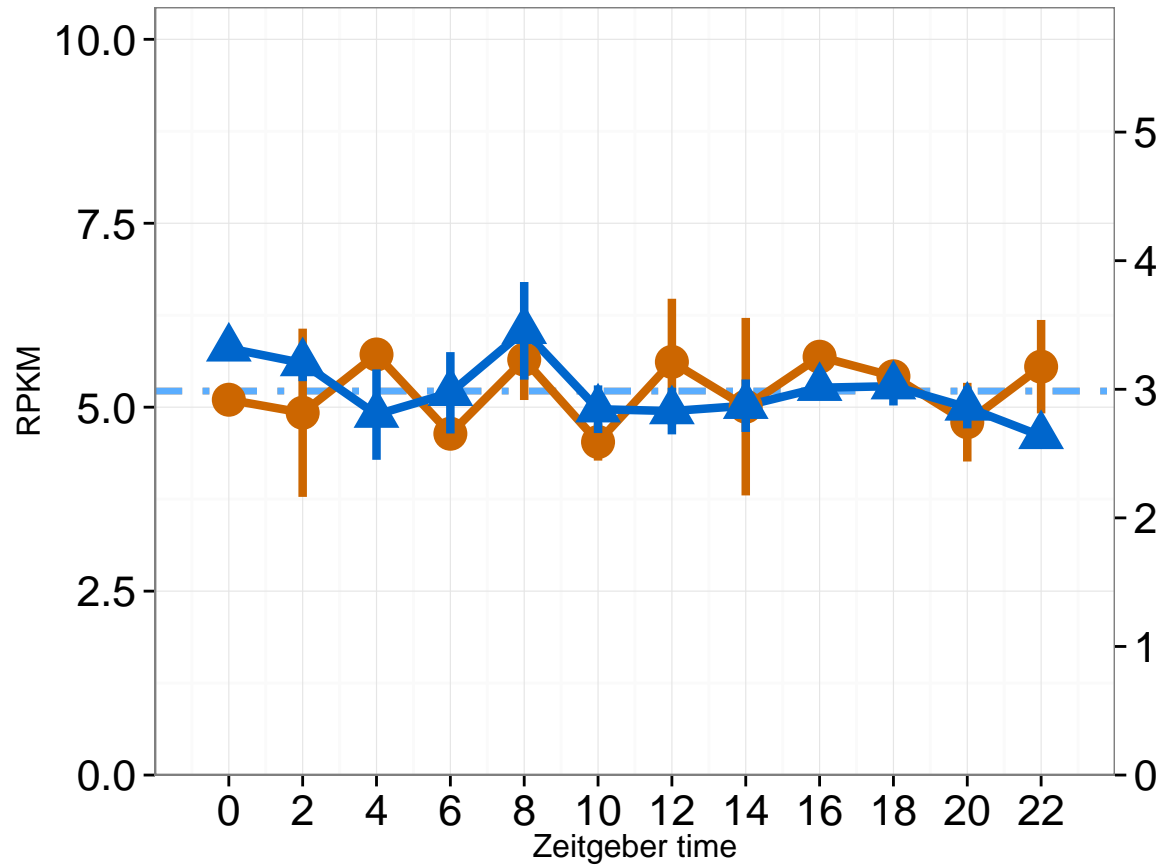

## Mad1l1

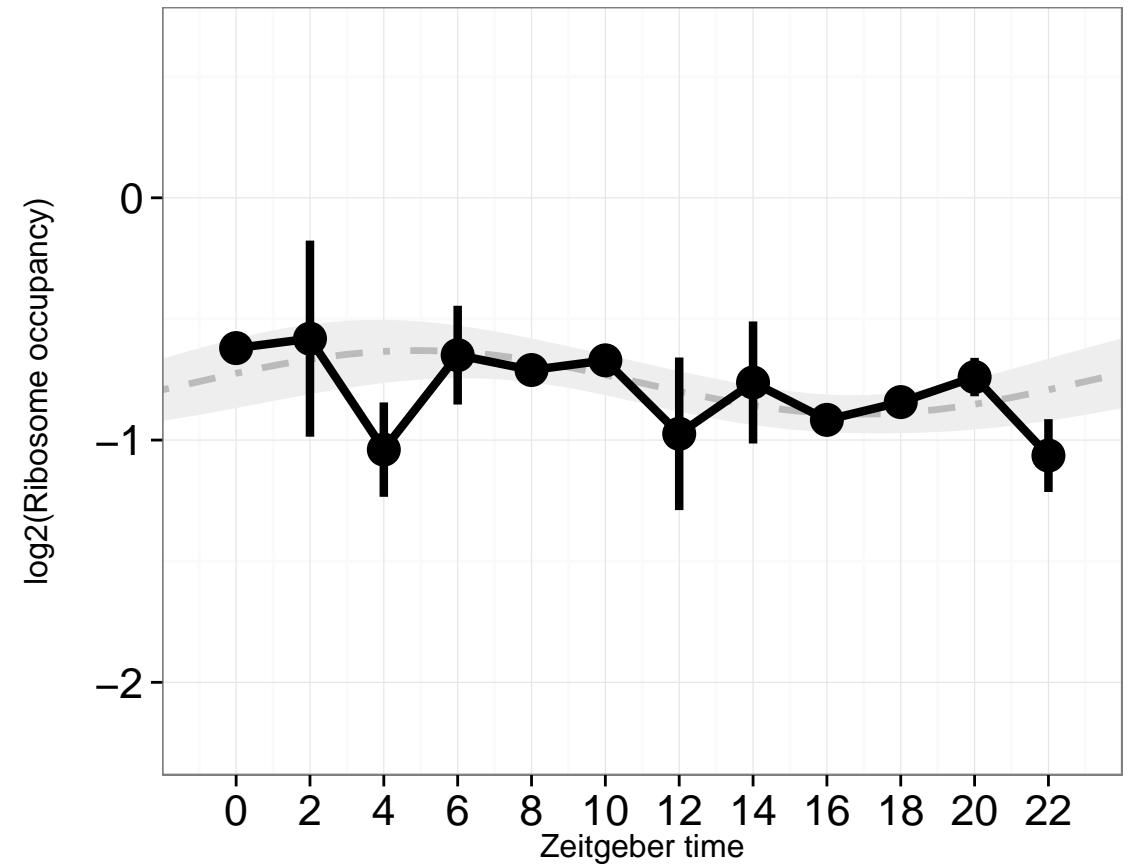

Supplement: SuppDataset_1.zip [file Mad1l1_set_A.pdf › Supplemental Dataset 1/A-mRNA_nonrhyth_translation_nonrhyth/Mad1l1_set_A.pdf]

## Mad2l1

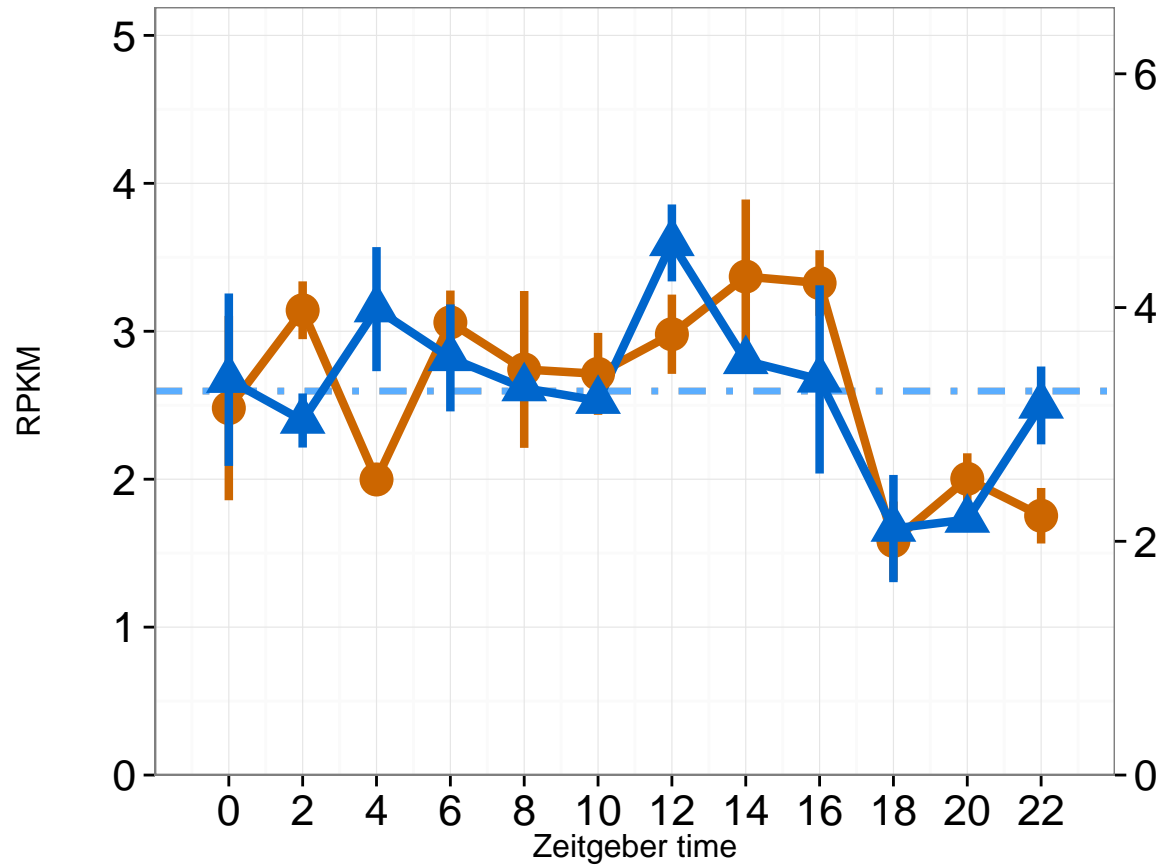

## Mad2l1

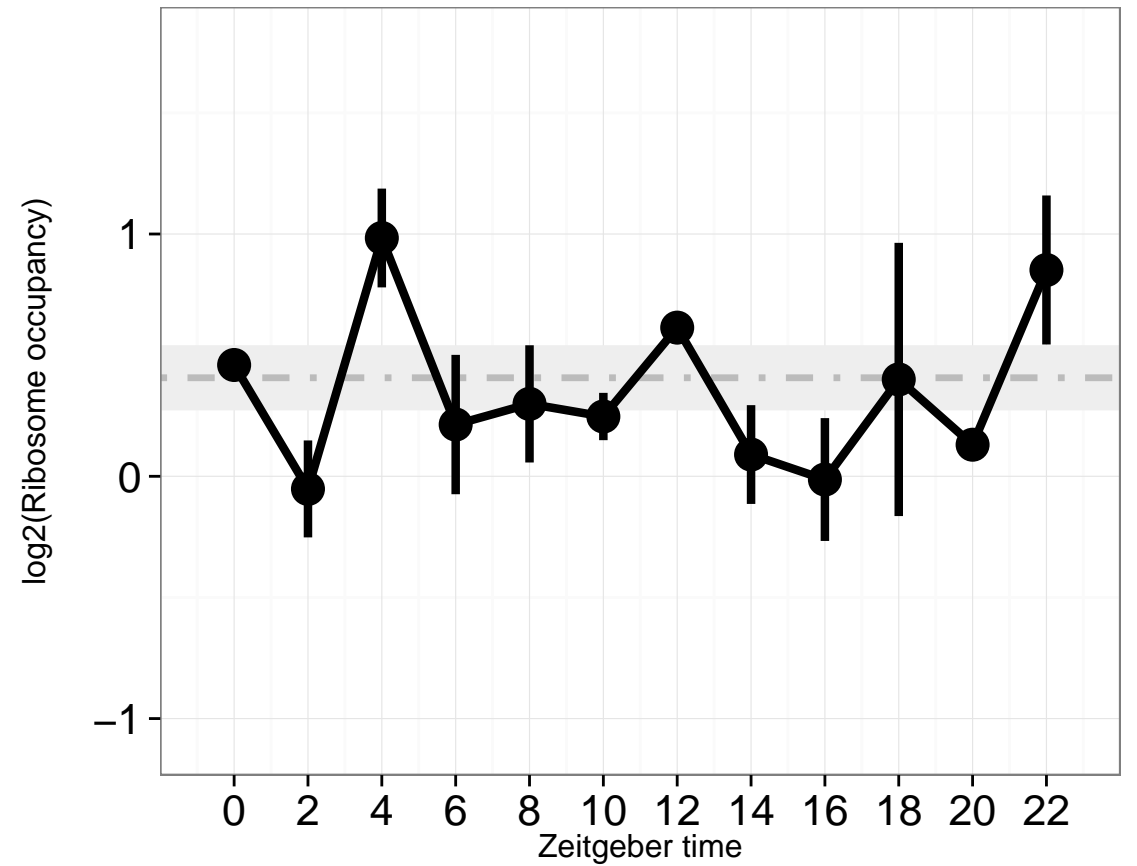

Supplement: SuppDataset_1.zip [file Mad2l1_set_A.pdf › Supplemental Dataset 1/A-mRNA_nonrhyth_translation_nonrhyth/Mad2l1_set_A.pdf]

# Mad2l1 bp

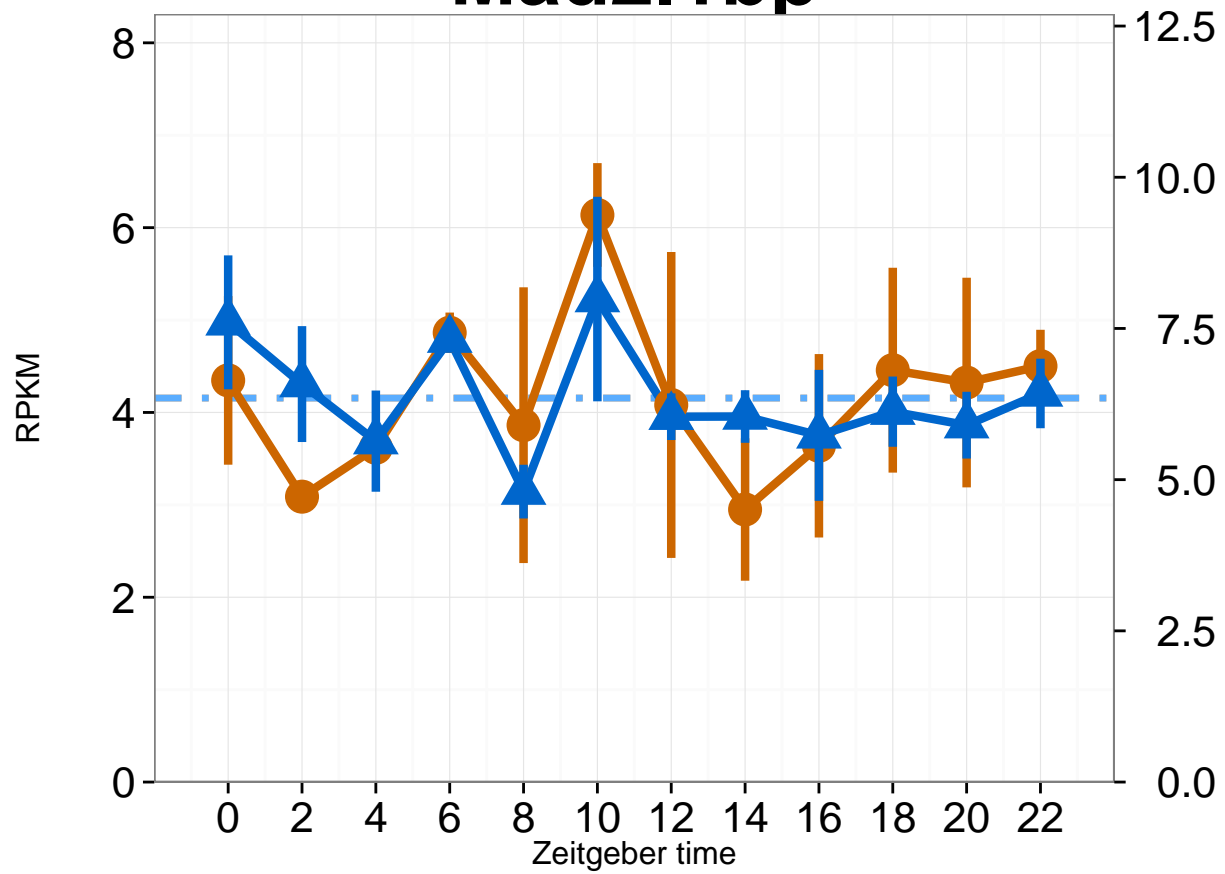

# Mad2l1 bp

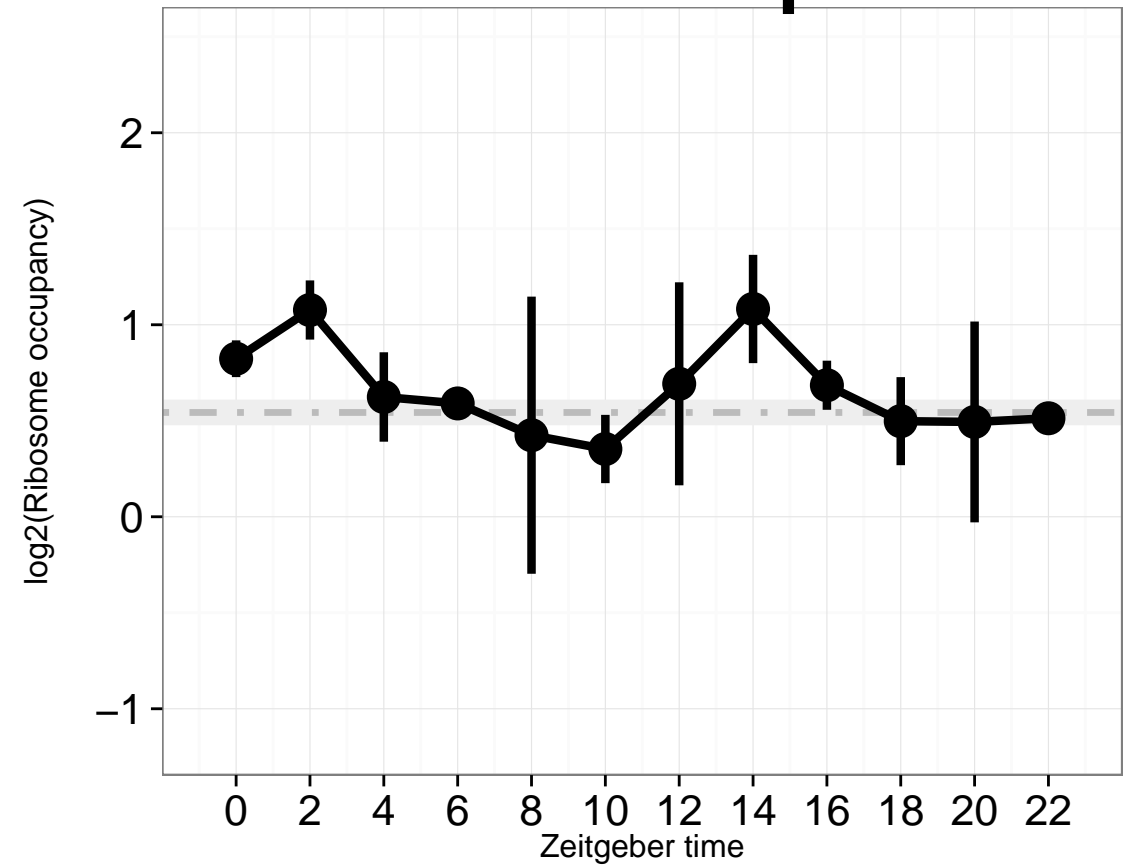

Supplement: SuppDataset_1.zip [file Mad2l1bp_set_A.pdf › Supplemental Dataset 1/A-mRNA_nonrhyth_translation_nonrhyth/Mad2l1bp_set_A.pdf]

## Madd

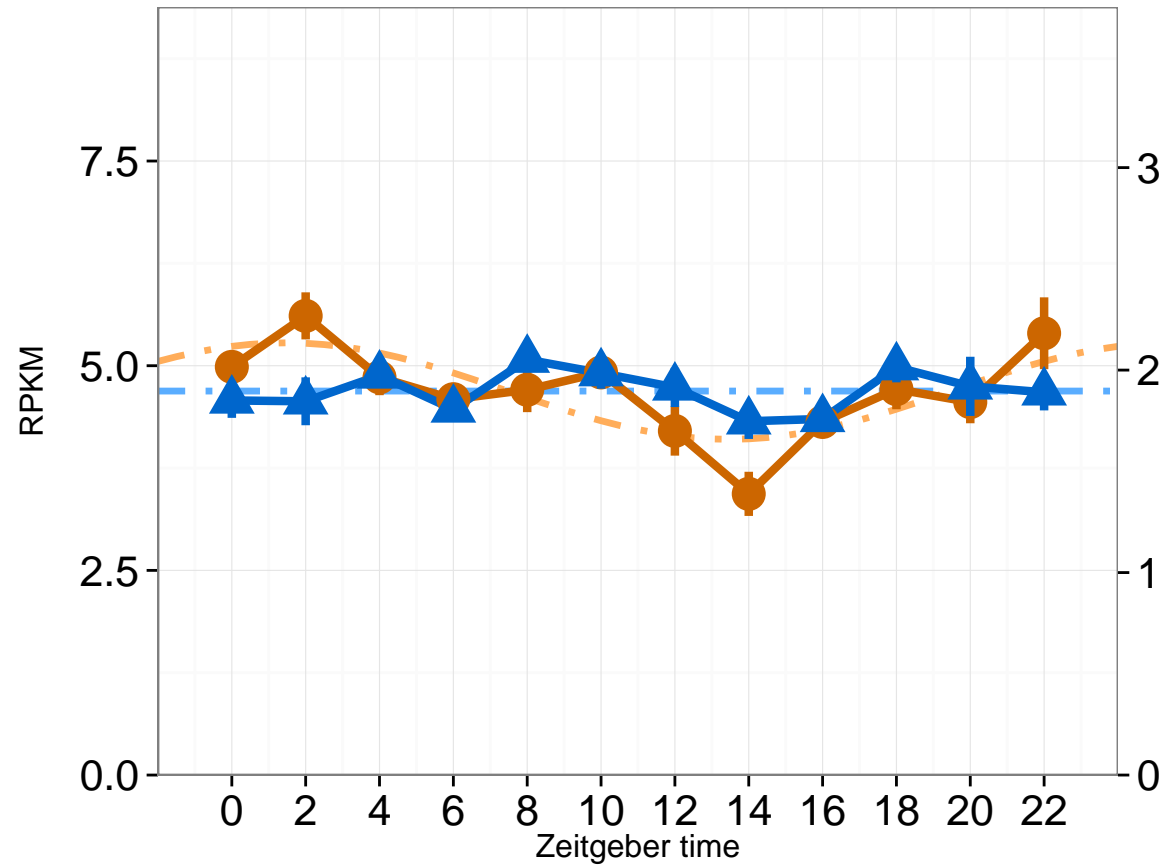

## Madd

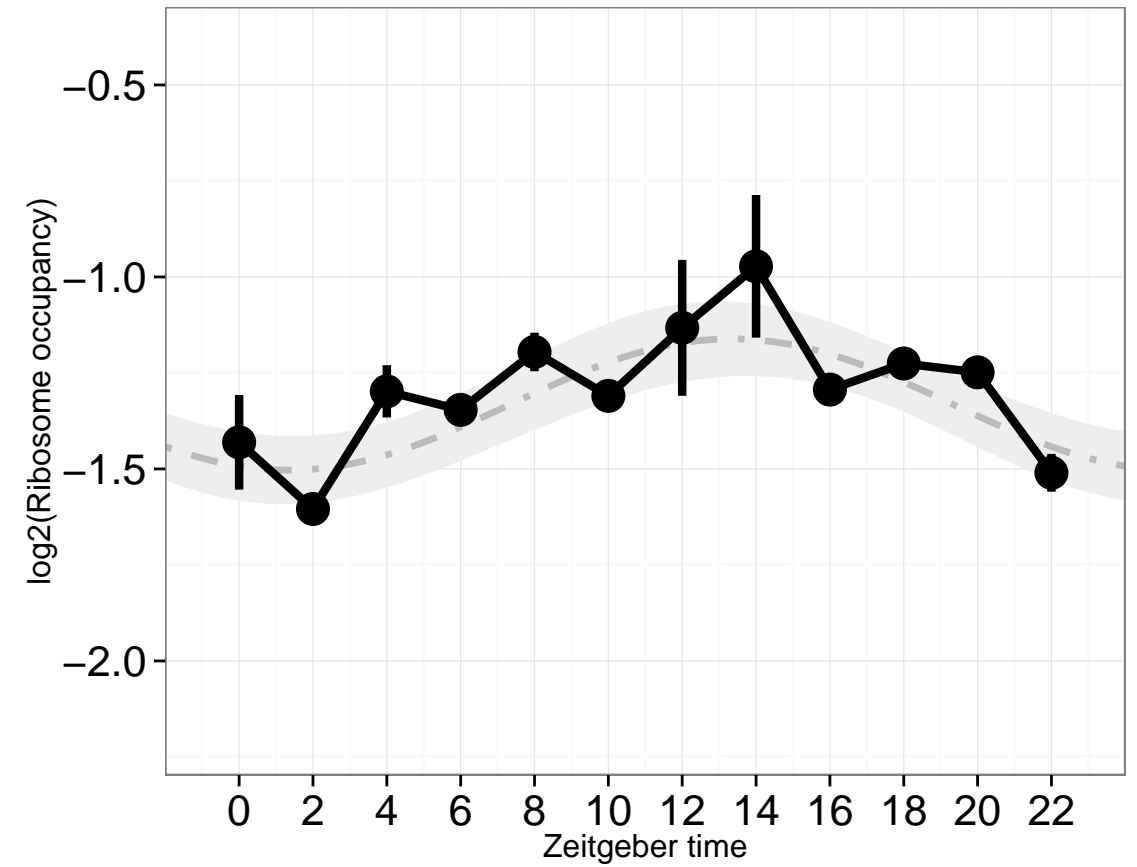

Supplement: SuppDataset_1.zip [file Madd_set_A.pdf › Supplemental Dataset 1/A-mRNA_nonrhyth_translation_nonrhyth/Madd_set_A.pdf]

## Maea

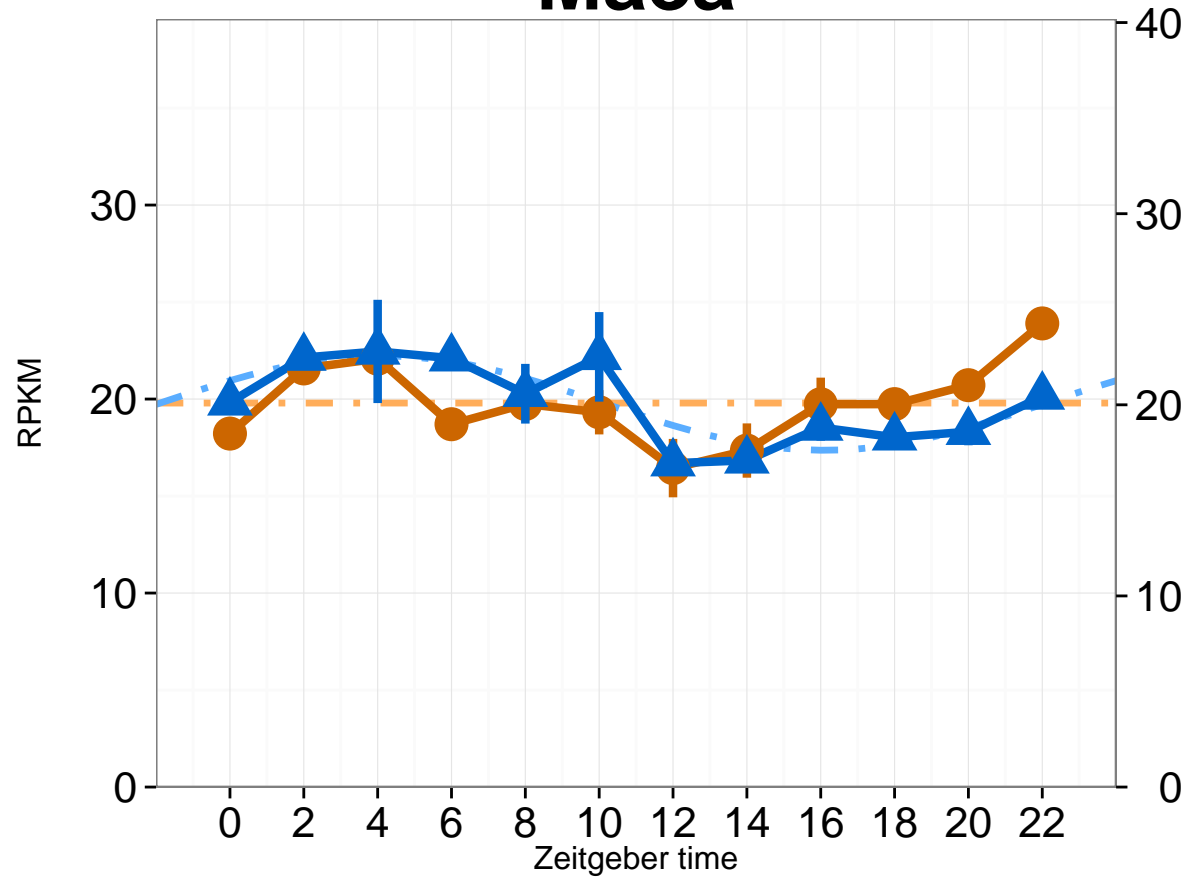

## Maea

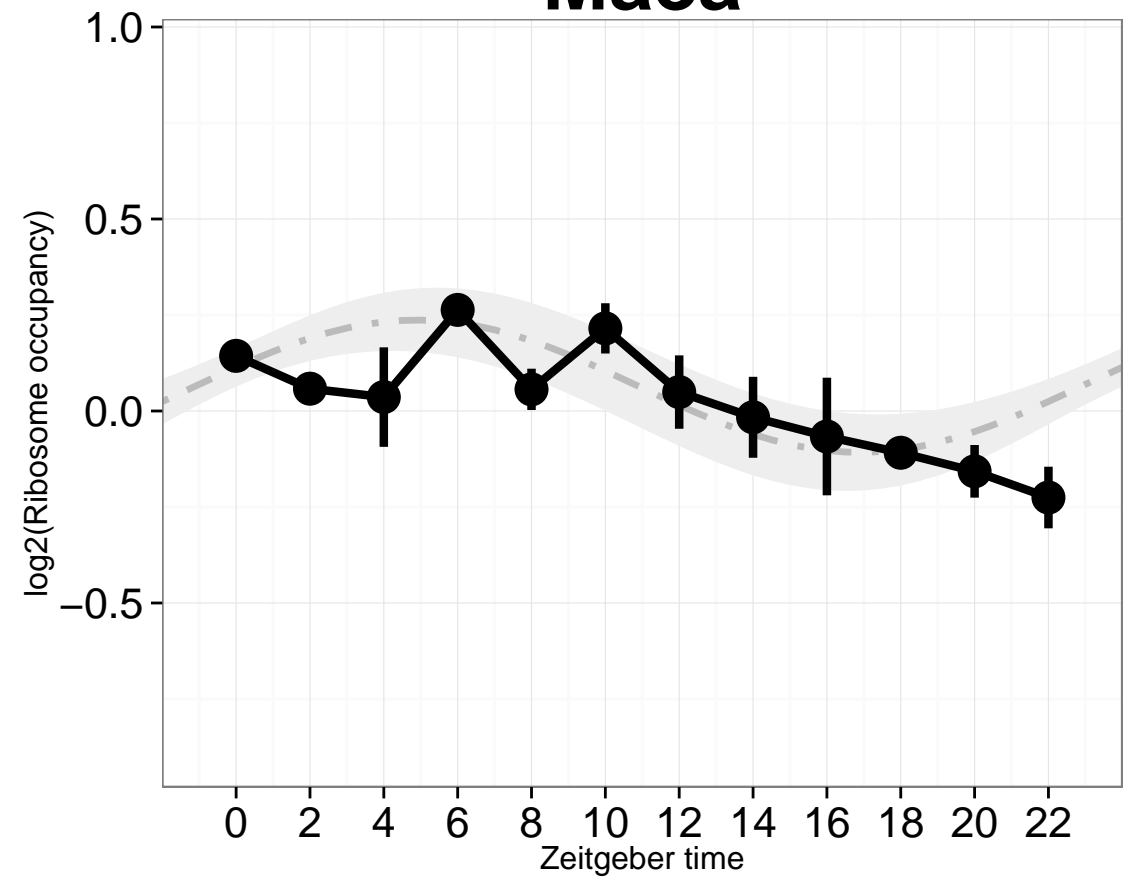

Supplement: SuppDataset_1.zip [file Maea_set_A.pdf › Supplemental Dataset 1/A-mRNA_nonrhyth_translation_nonrhyth/Maea_set_A.pdf]

# Maf1

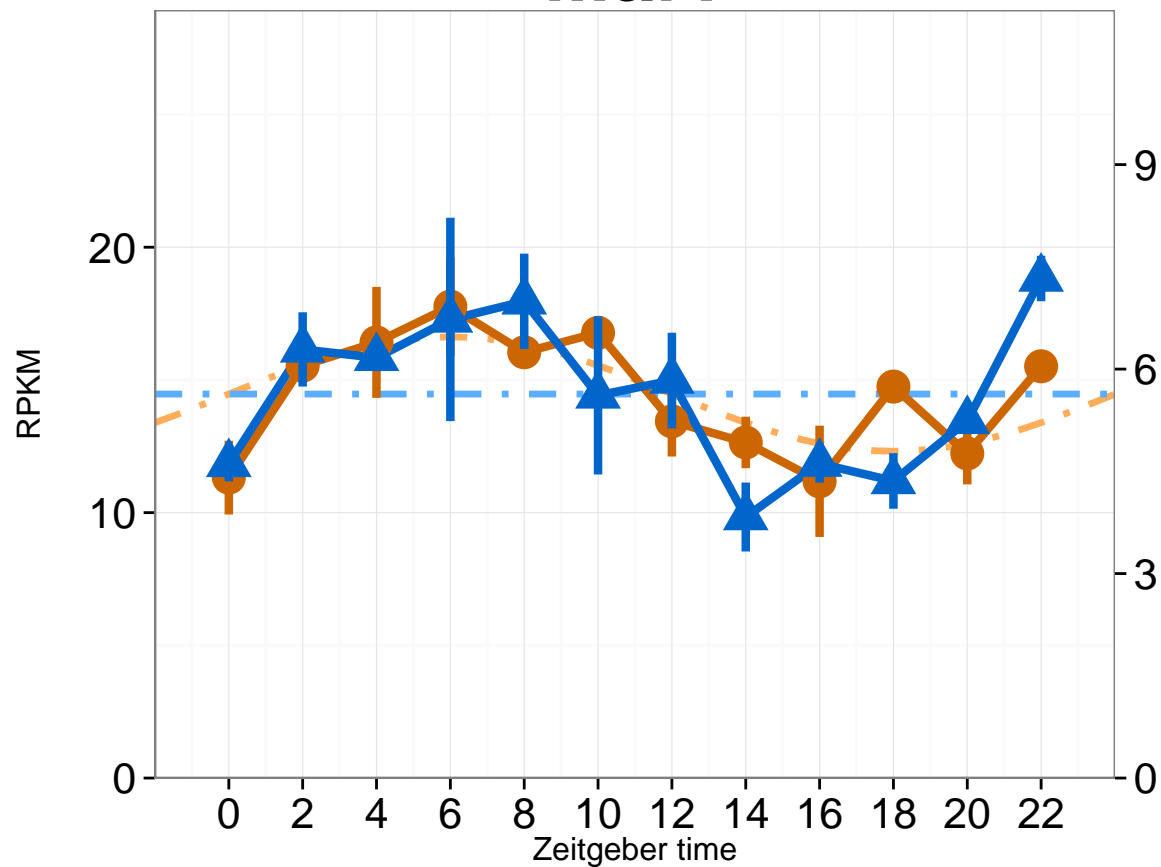

# Maf1

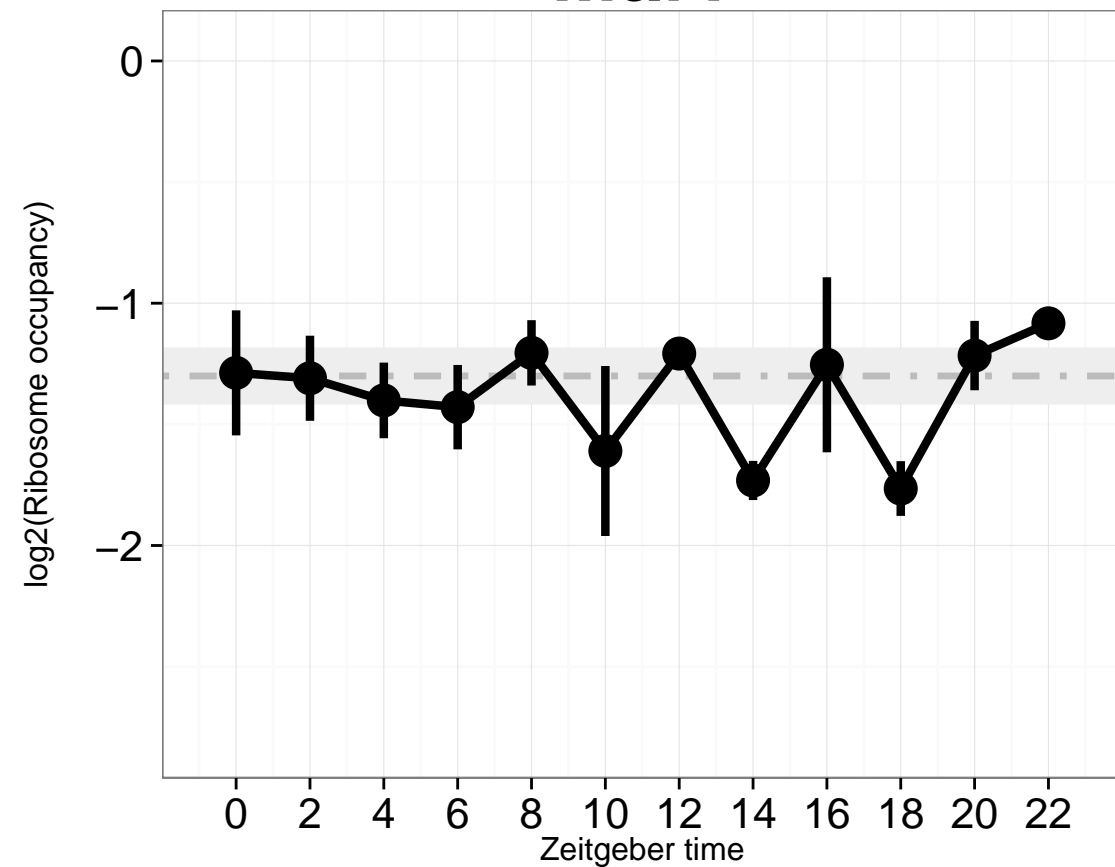

Supplement: SuppDataset_1.zip [file Maf1_set_A.pdf › Supplemental Dataset 1/A-mRNA_nonrhyth_translation_nonrhyth/Maf1_set_A.pdf]

## Maf

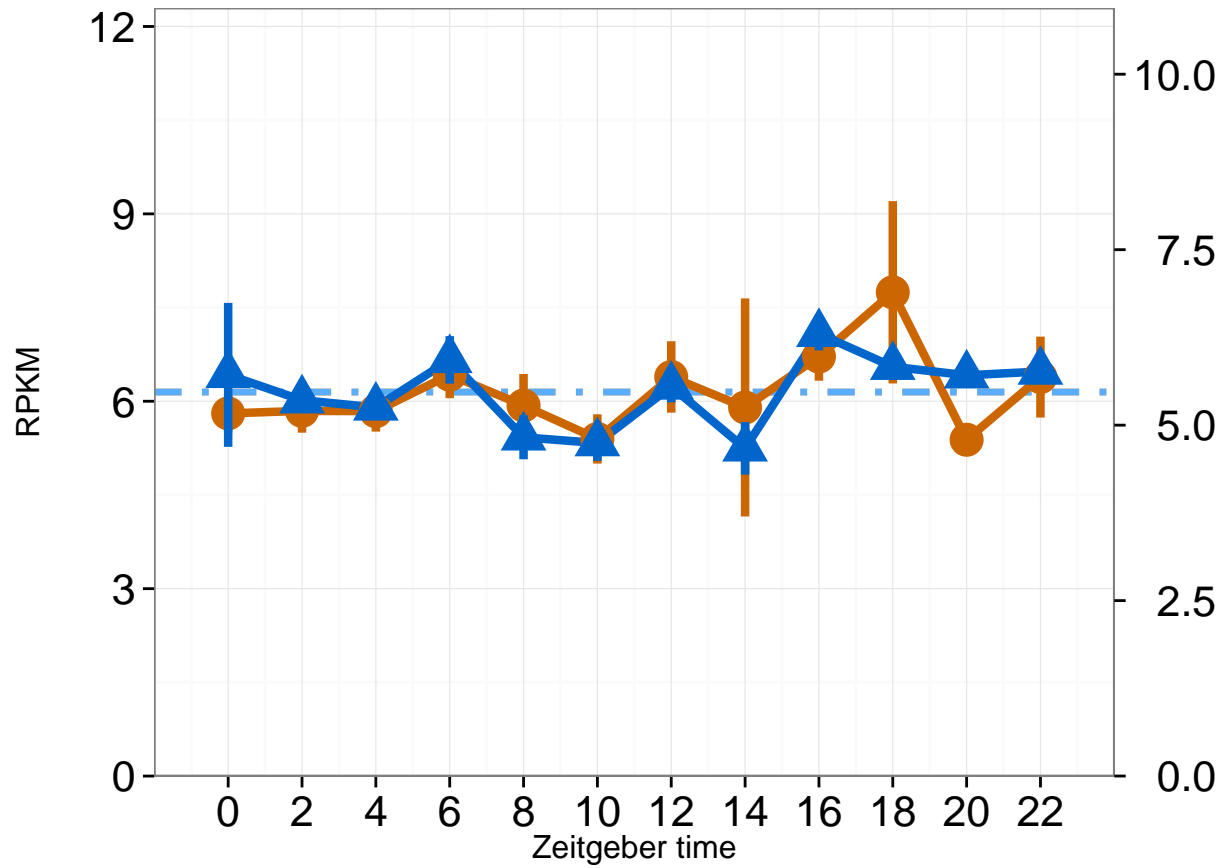

## Maf

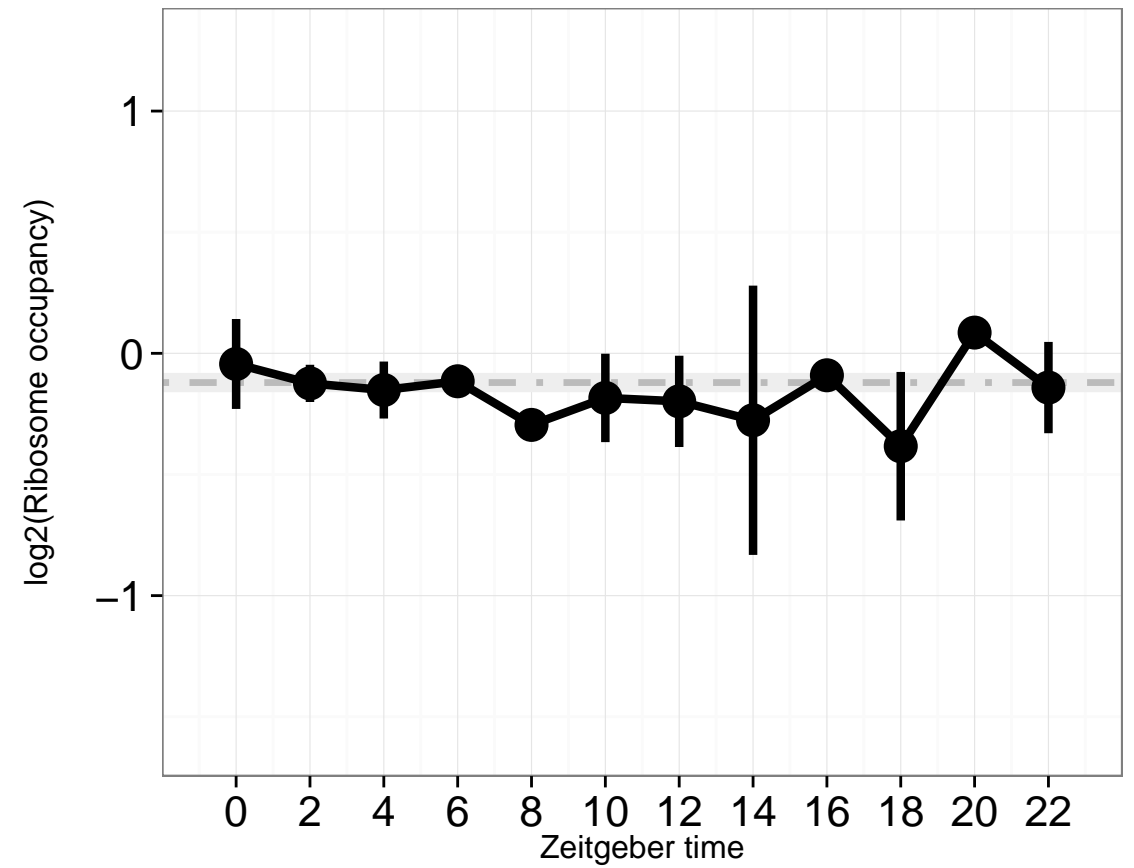

Supplement: SuppDataset_1.zip [file Maf_set_A.pdf › Supplemental Dataset 1/A-mRNA_nonrhyth_translation_nonrhyth/Maf_set_A.pdf]

## Mafg

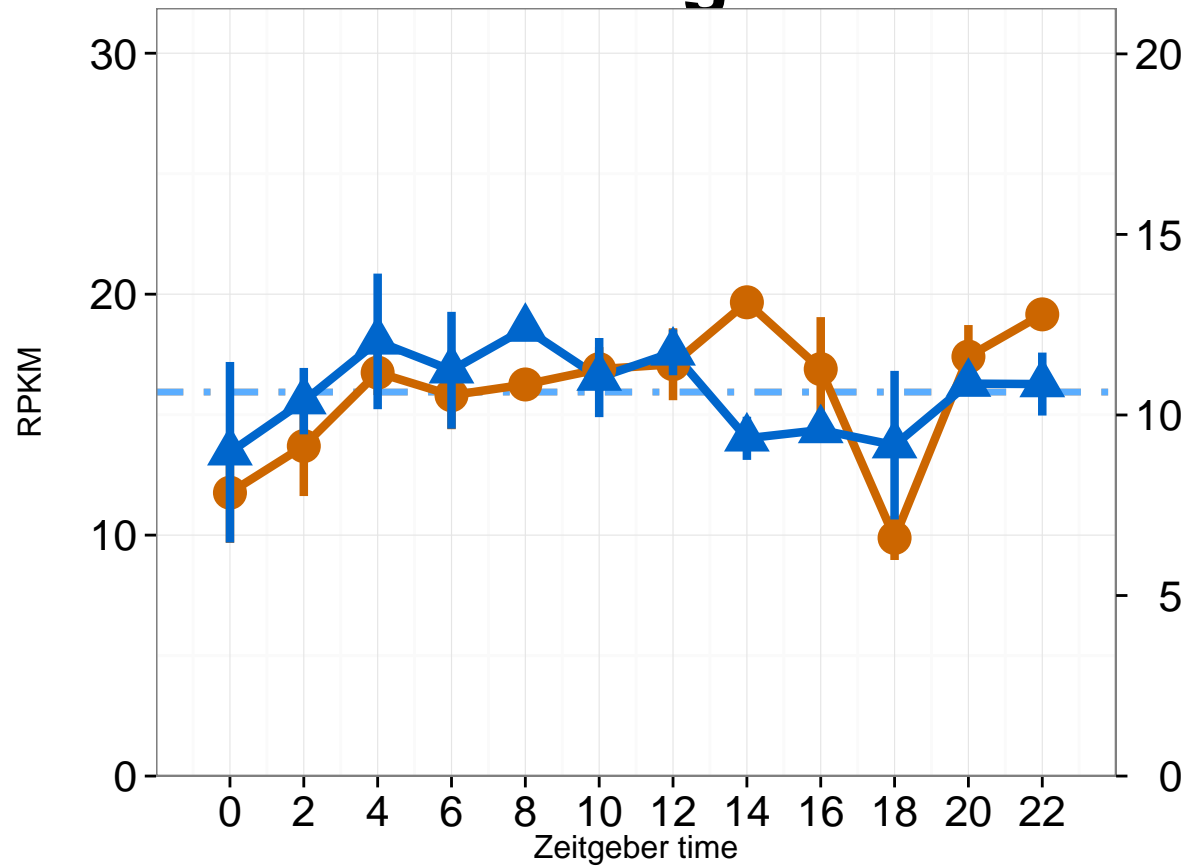

## Mafg

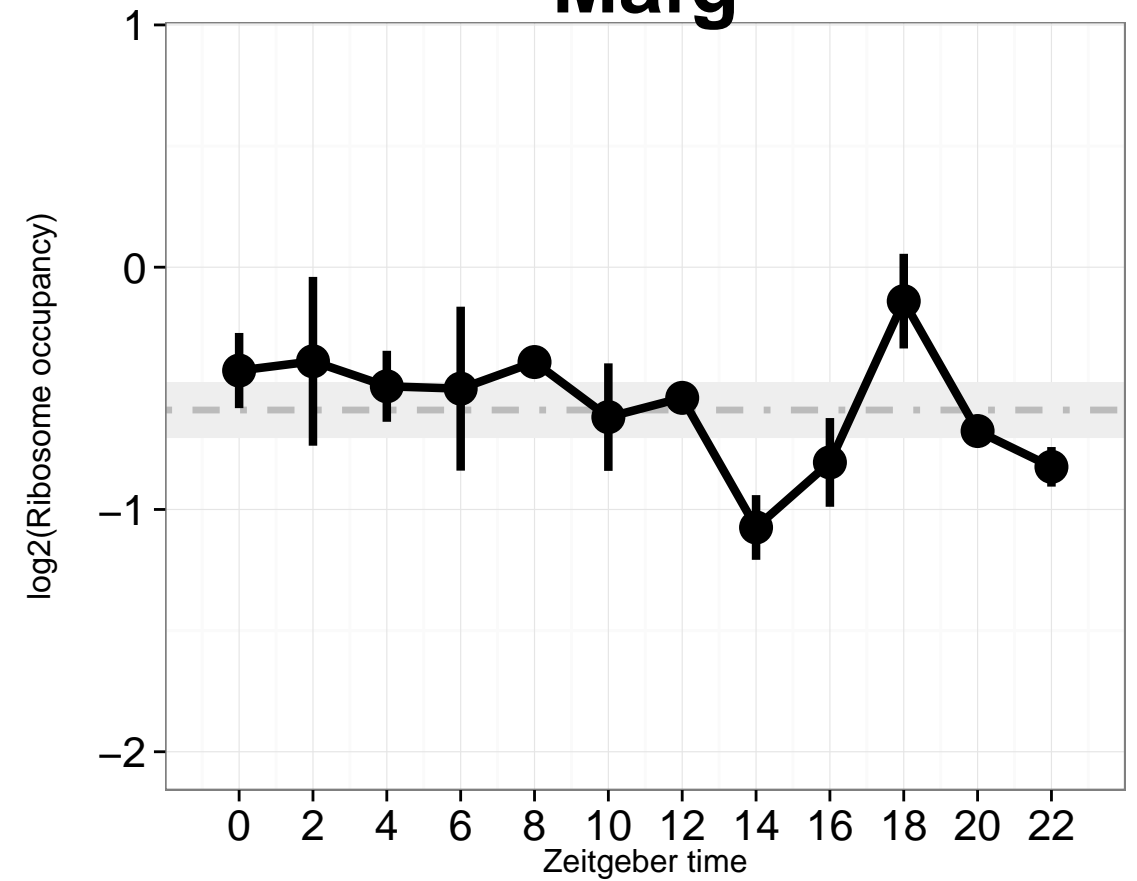

Supplement: SuppDataset_1.zip [file Mafg_set_A.pdf › Supplemental Dataset 1/A-mRNA_nonrhyth_translation_nonrhyth/Mafg_set_A.pdf]

# Maged1

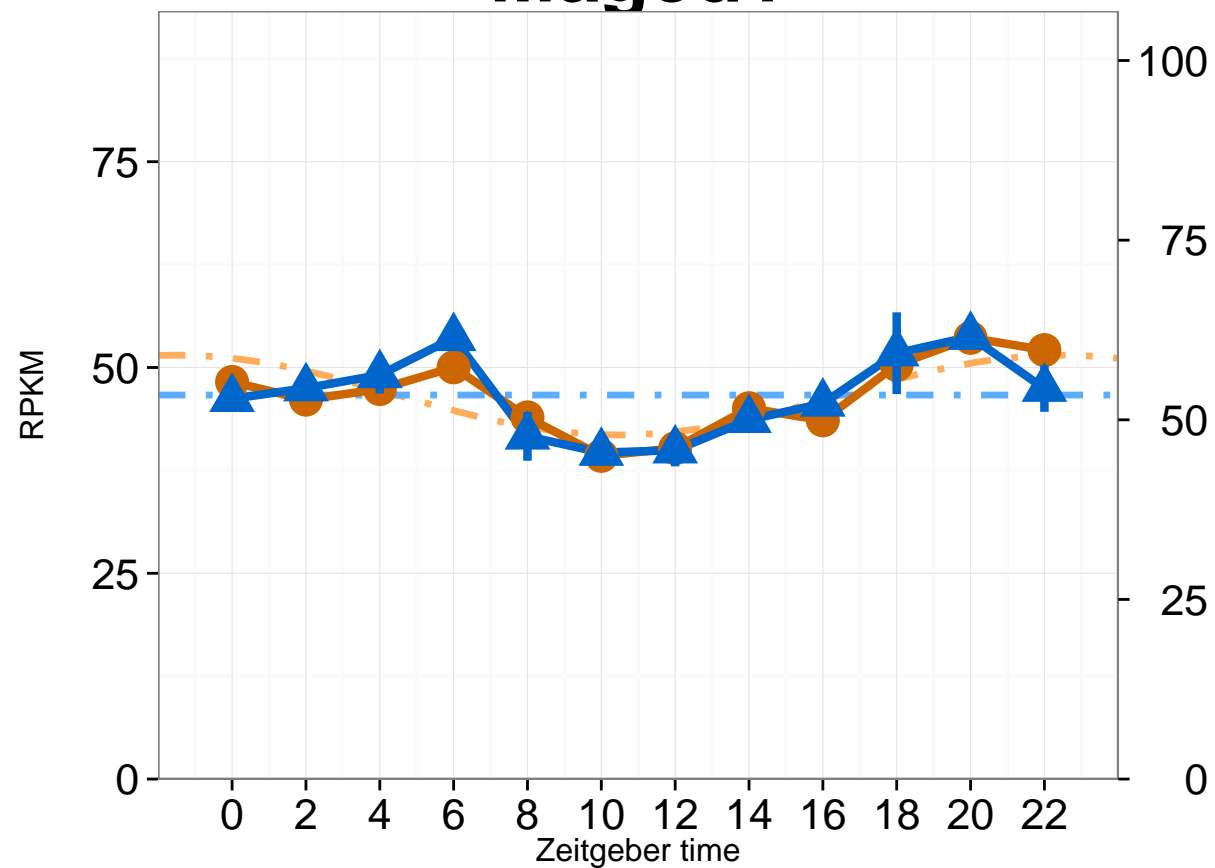

# Maged1

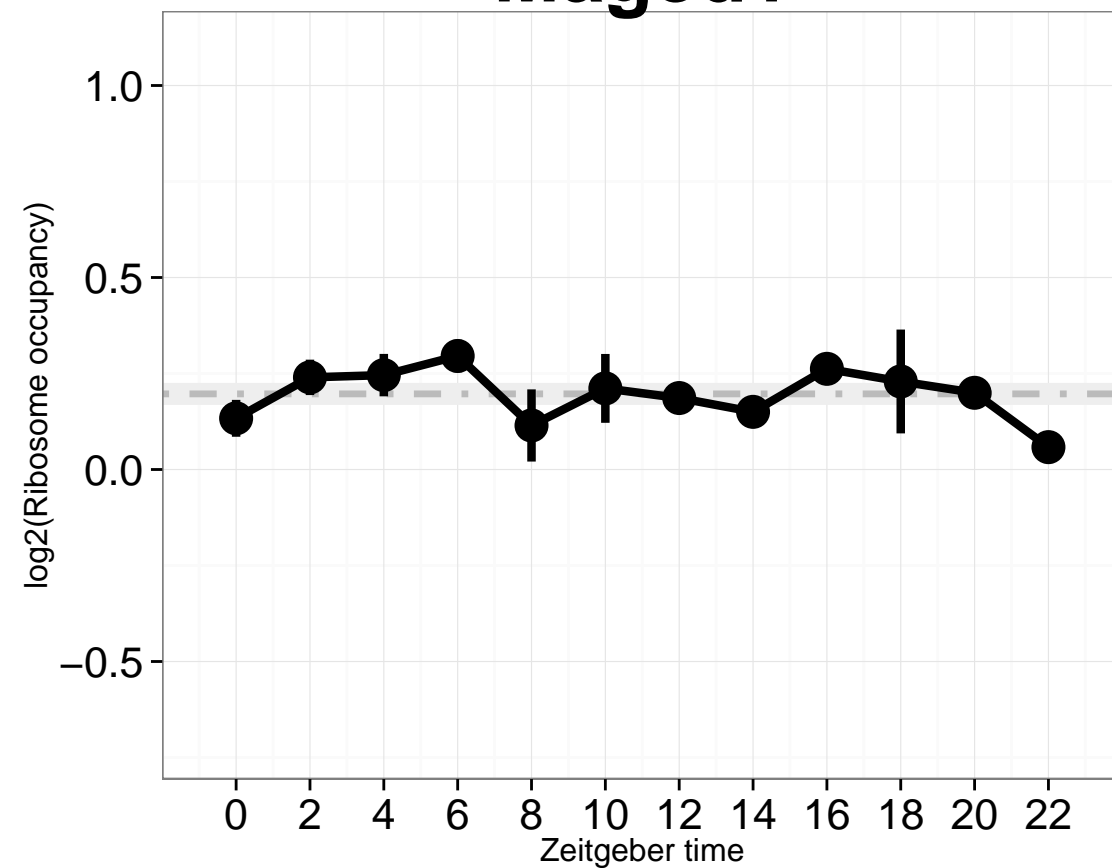

Supplement: SuppDataset_1.zip [file Maged1_set_A.pdf › Supplemental Dataset 1/A-mRNA_nonrhyth_translation_nonrhyth/Maged1_set_A.pdf]

## Magee1

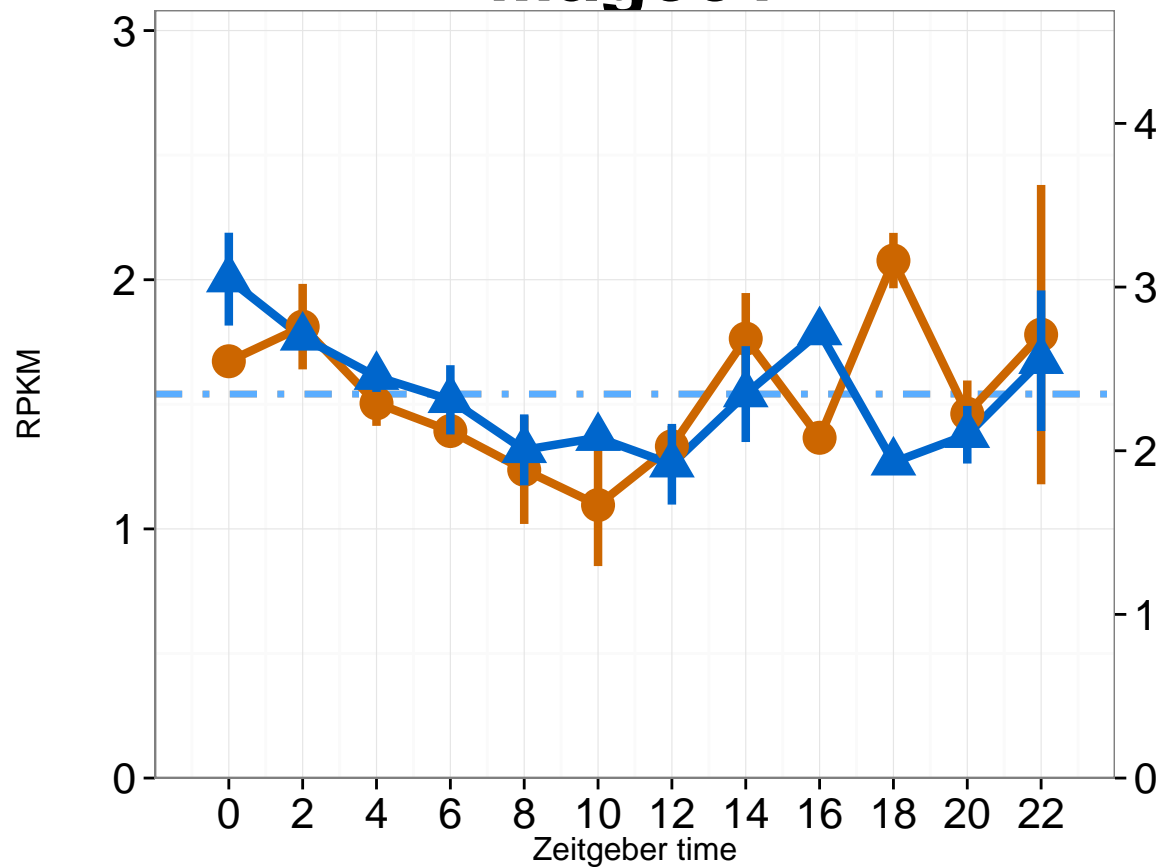

## Magee1

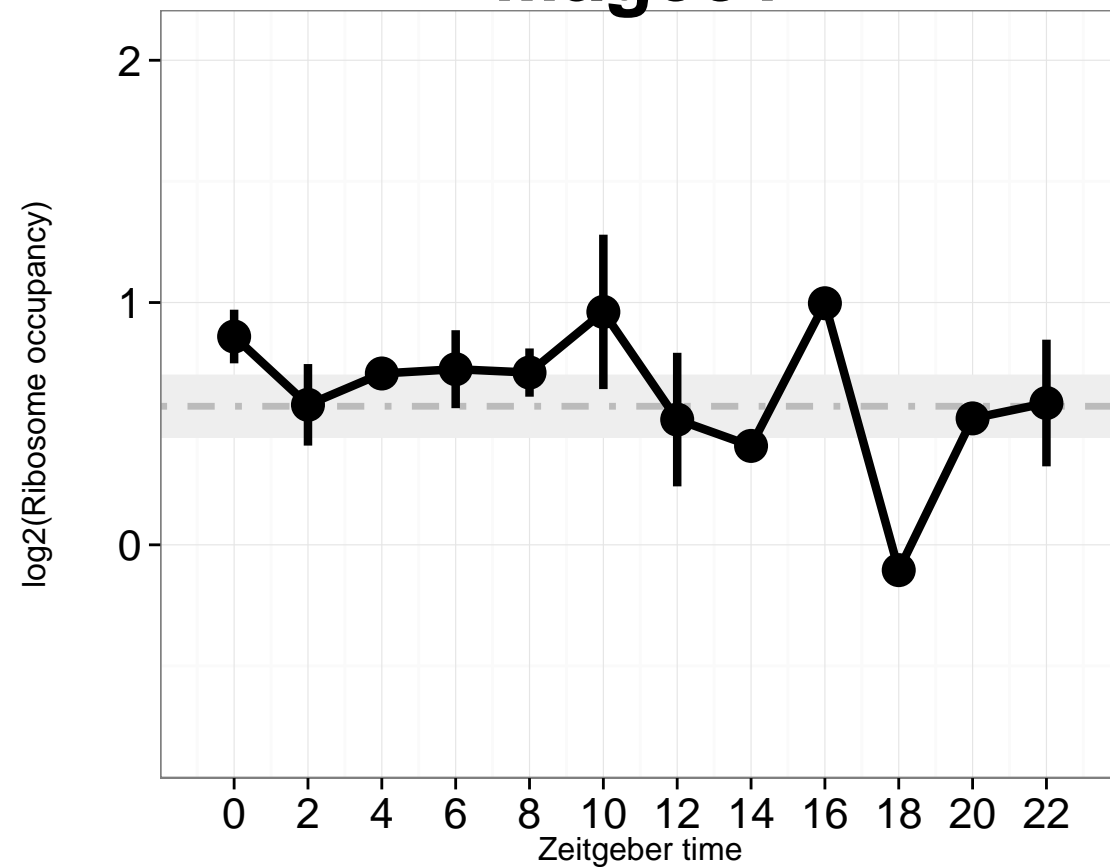

Supplement: SuppDataset_1.zip [file Magee1_set_A.pdf › Supplemental Dataset 1/A-mRNA_nonrhyth_translation_nonrhyth/Magee1_set_A.pdf]

# Mageh1

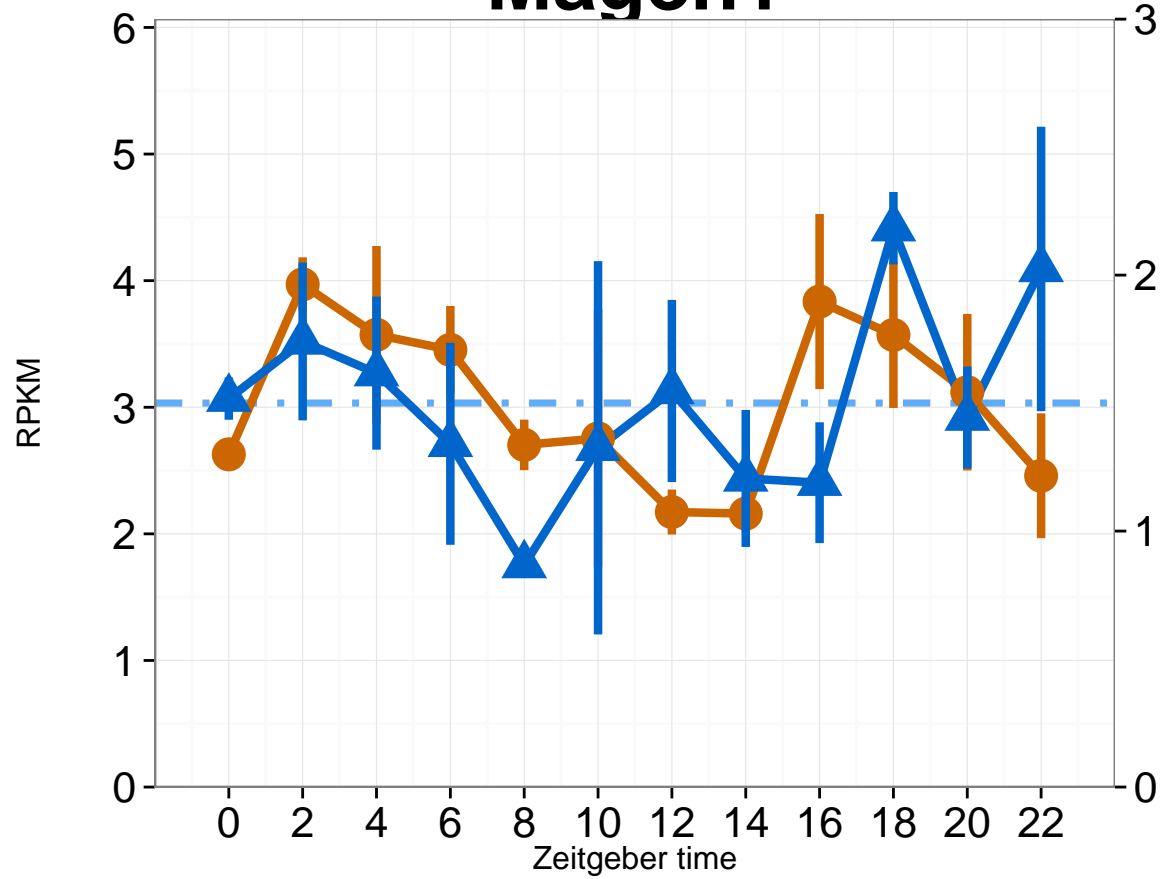

# Mageh1

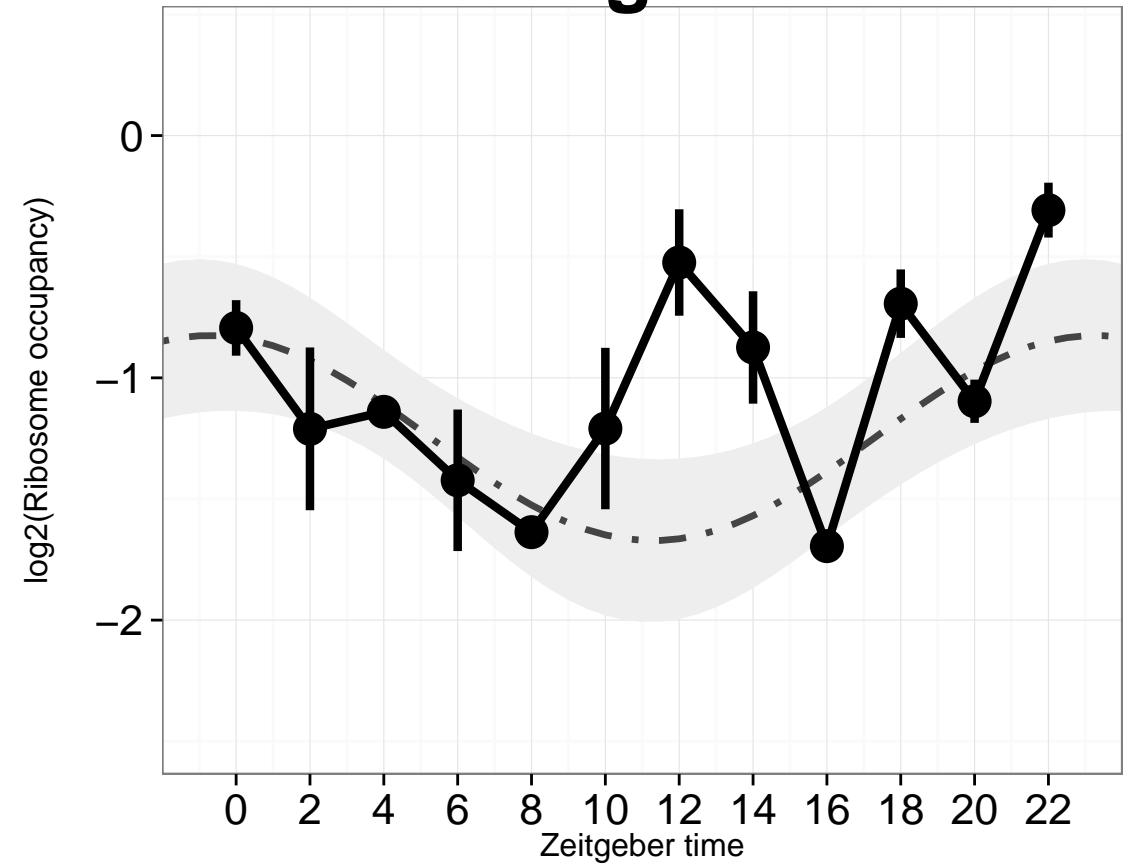

Supplement: SuppDataset_1.zip [file Mageh1_set_A.pdf › Supplemental Dataset 1/A-mRNA_nonrhyth_translation_nonrhyth/Mageh1_set_A.pdf]

# Magi1

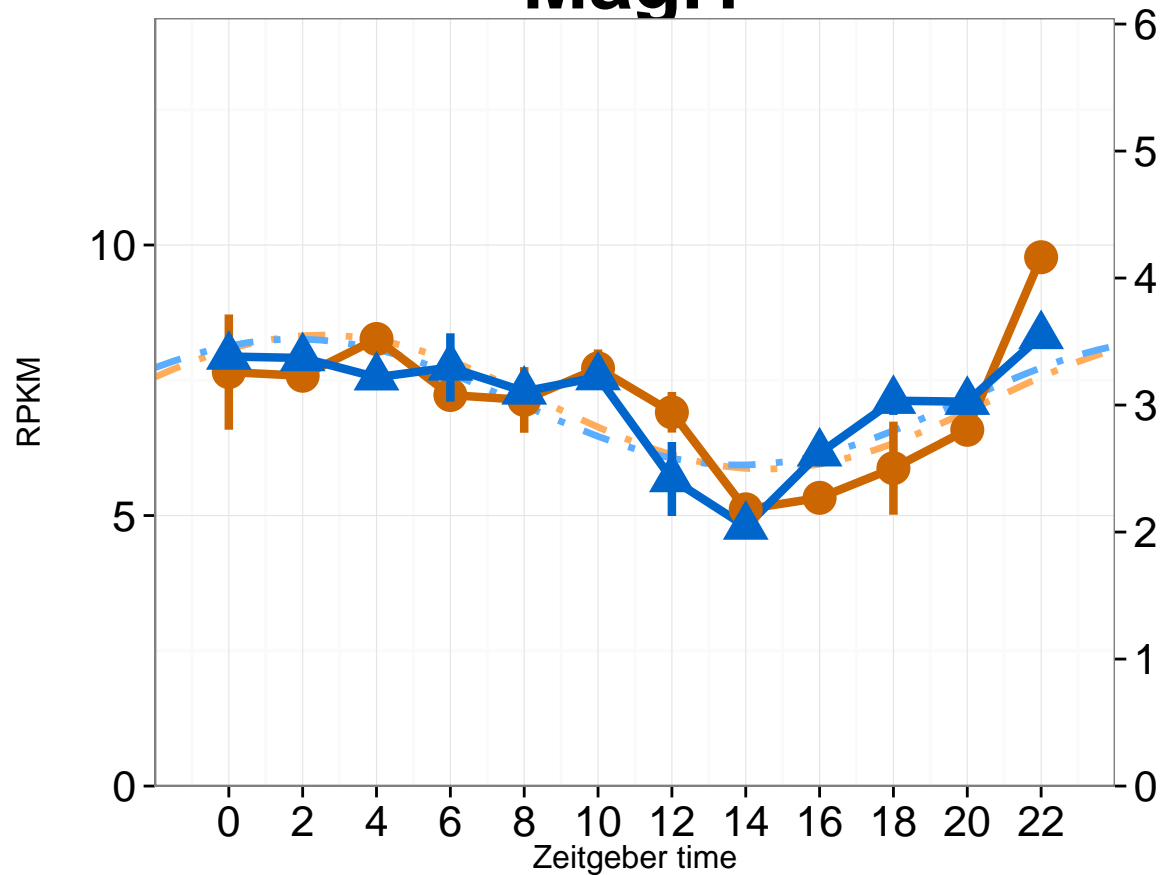

# Magi1

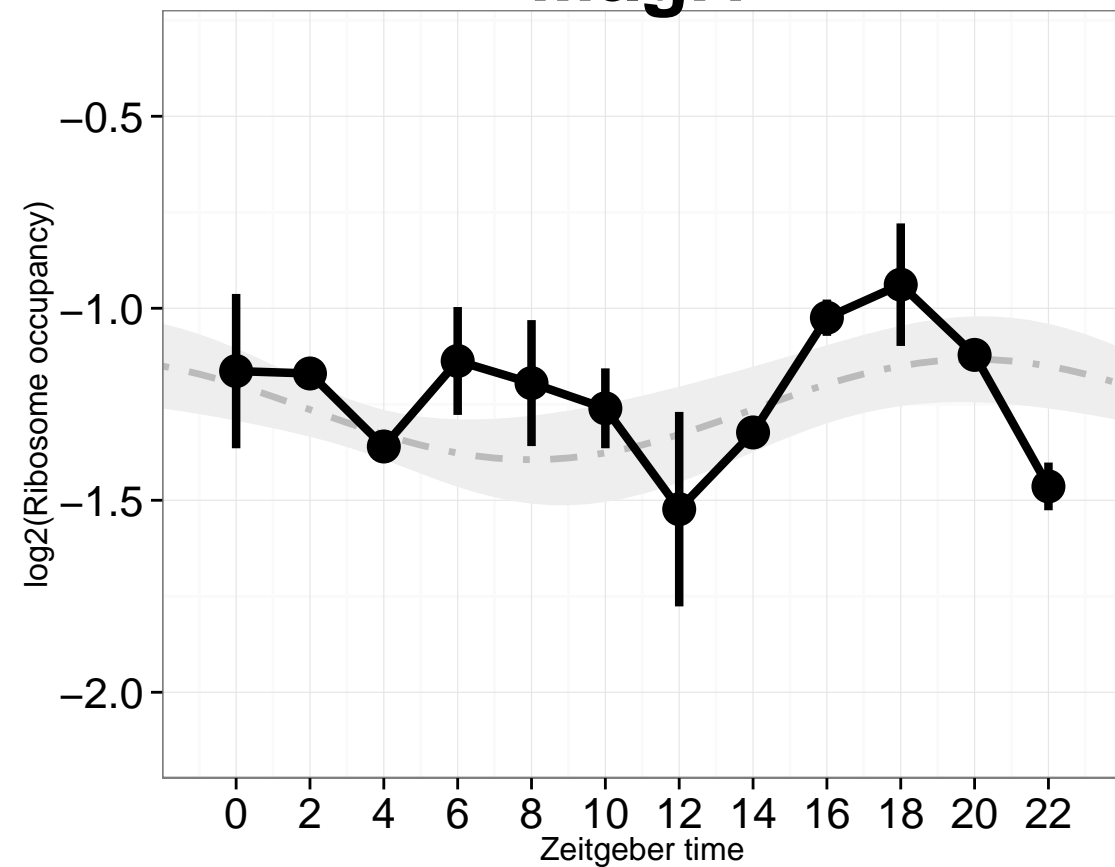

Supplement: SuppDataset_1.zip [file Magi1_set_A.pdf › Supplemental Dataset 1/A-mRNA_nonrhyth_translation_nonrhyth/Magi1_set_A.pdf]

# Magi3

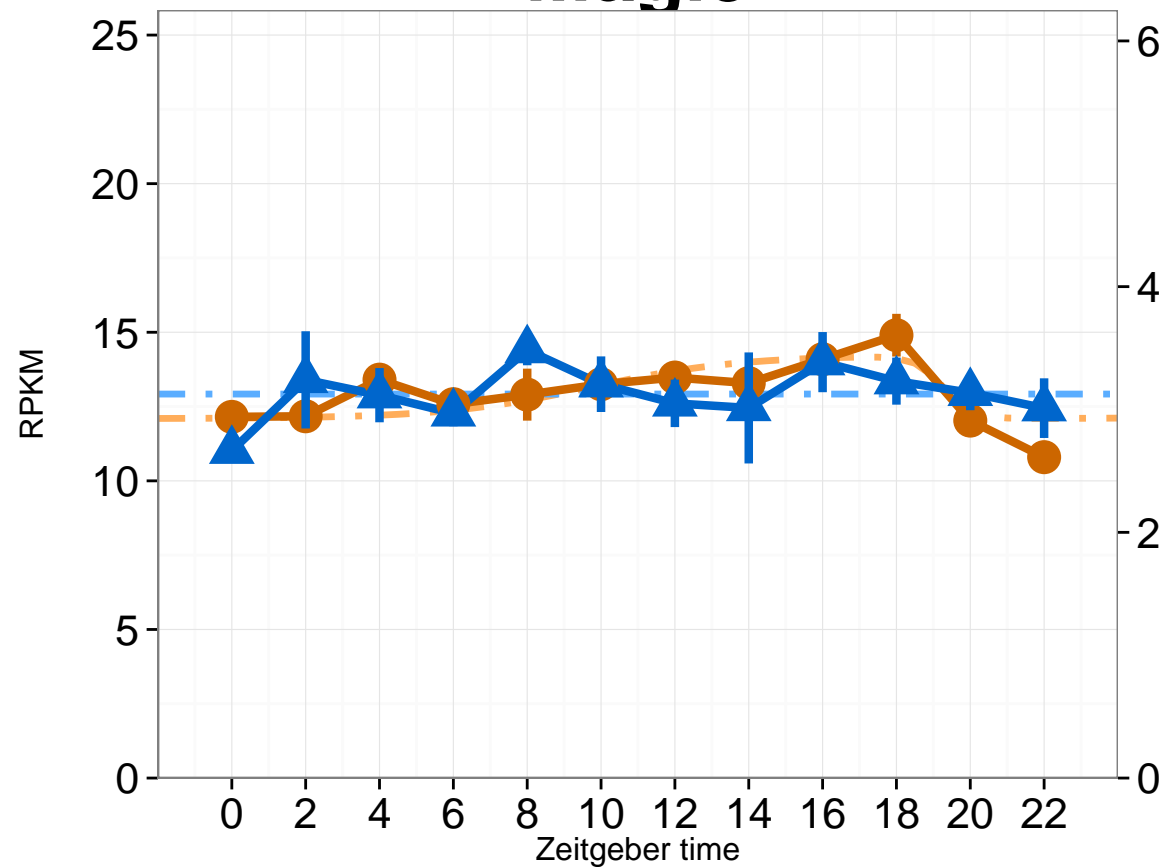

# Magi3

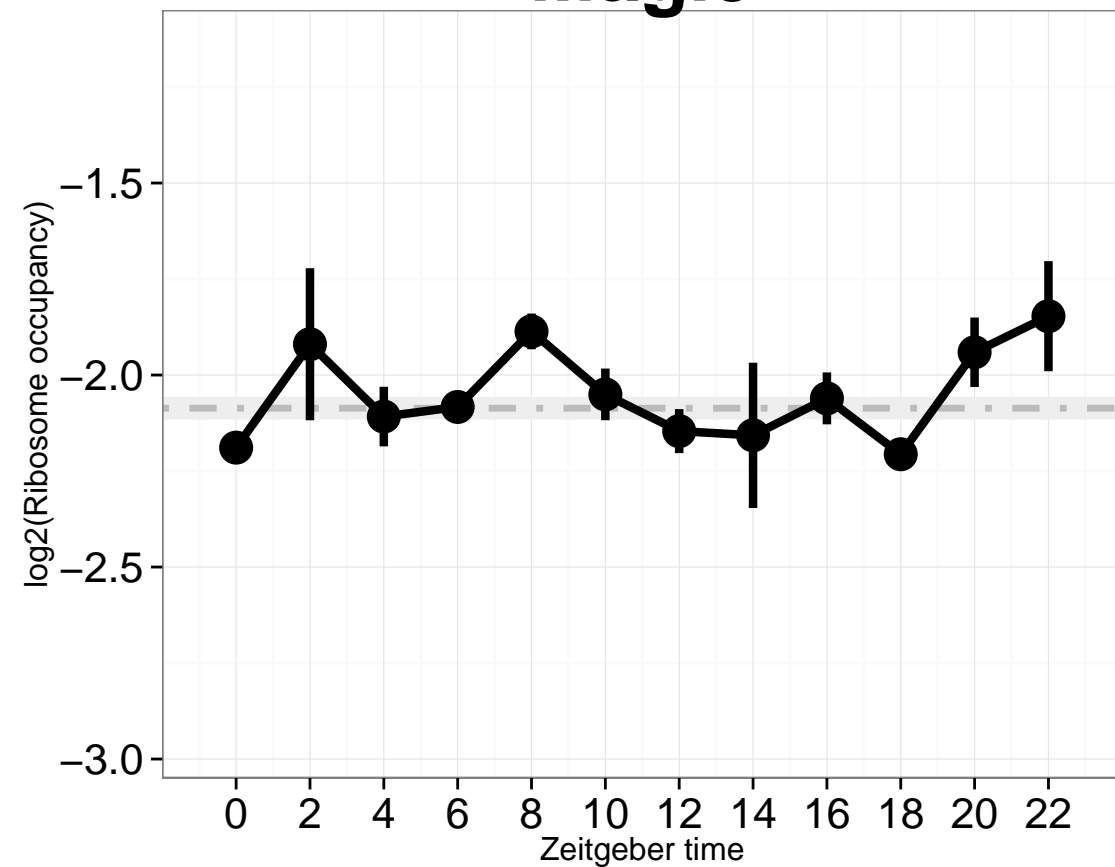

Supplement: SuppDataset_1.zip [file Magi3_set_A.pdf › Supplemental Dataset 1/A-mRNA_nonrhyth_translation_nonrhyth/Magi3_set_A.pdf]

## Magoh

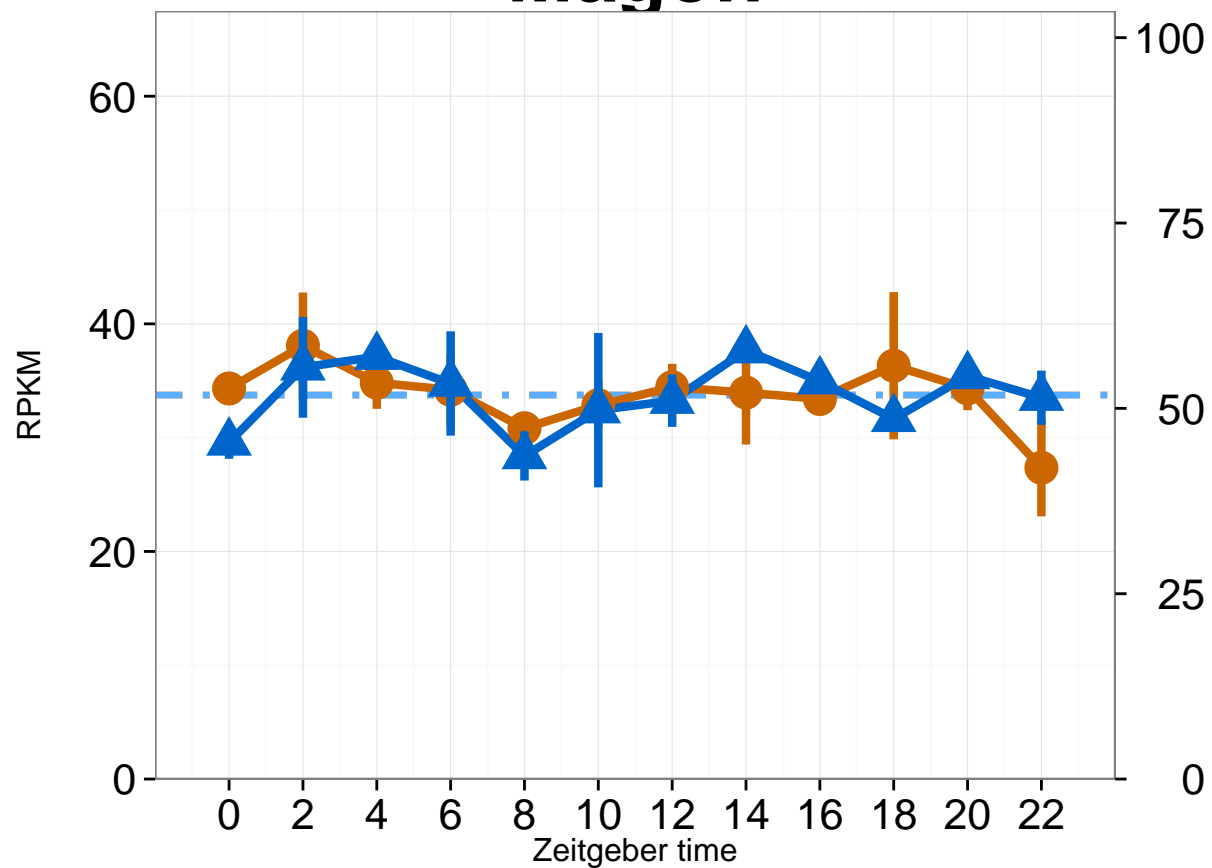

## Magoh

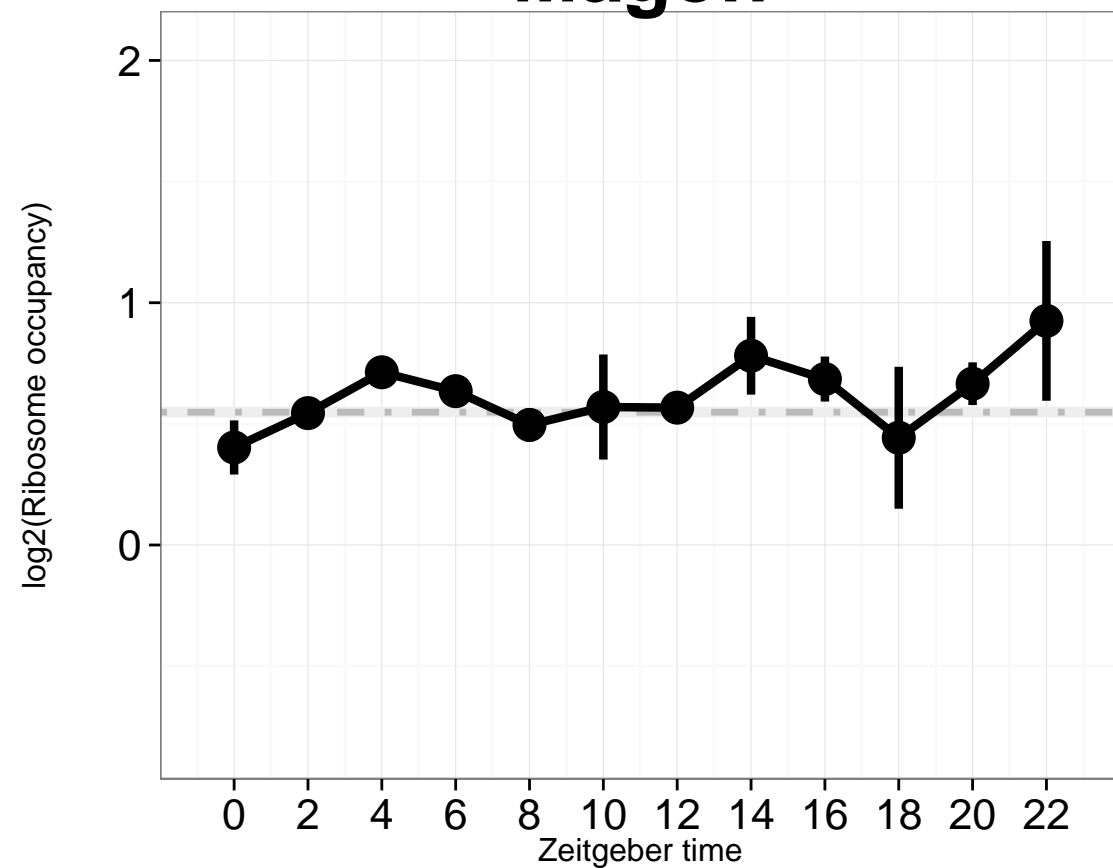

Supplement: SuppDataset_1.zip [file Magoh_set_A.pdf › Supplemental Dataset 1/A-mRNA_nonrhyth_translation_nonrhyth/Magoh_set_A.pdf]

## Magohb

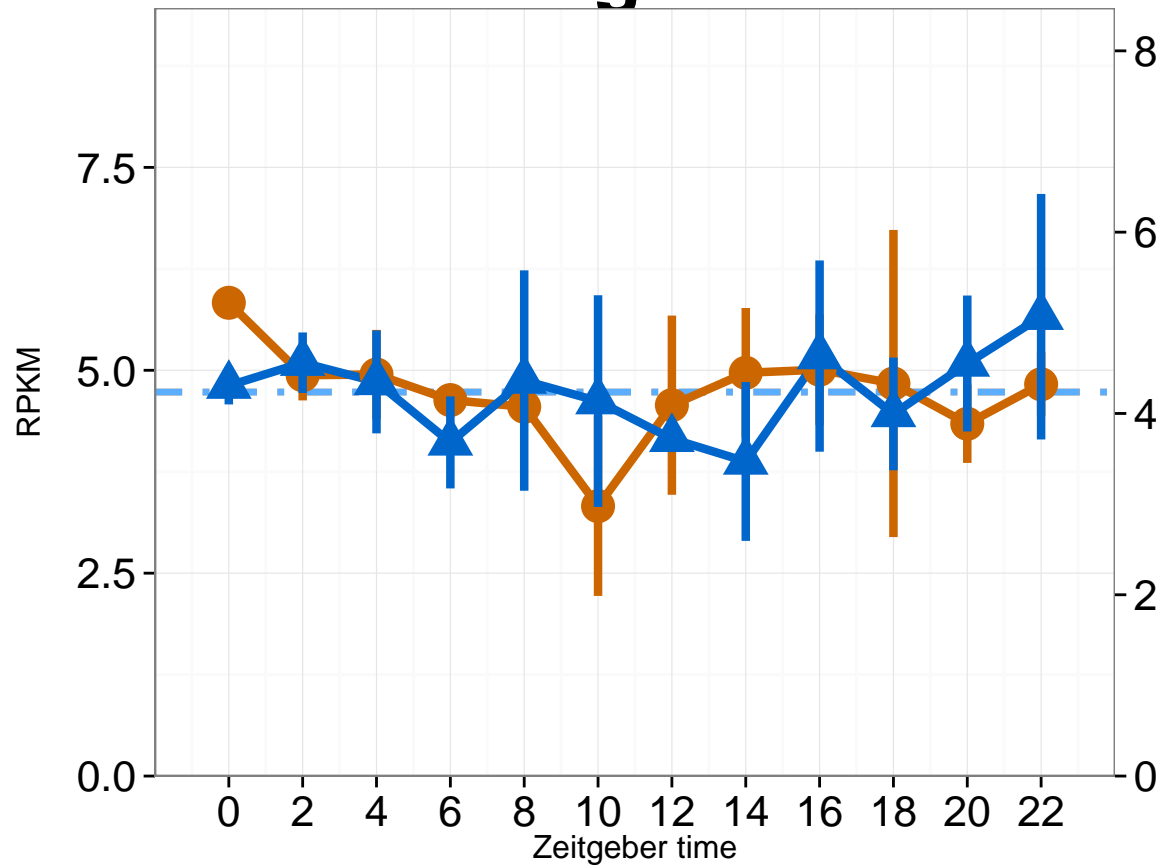

## Magohb

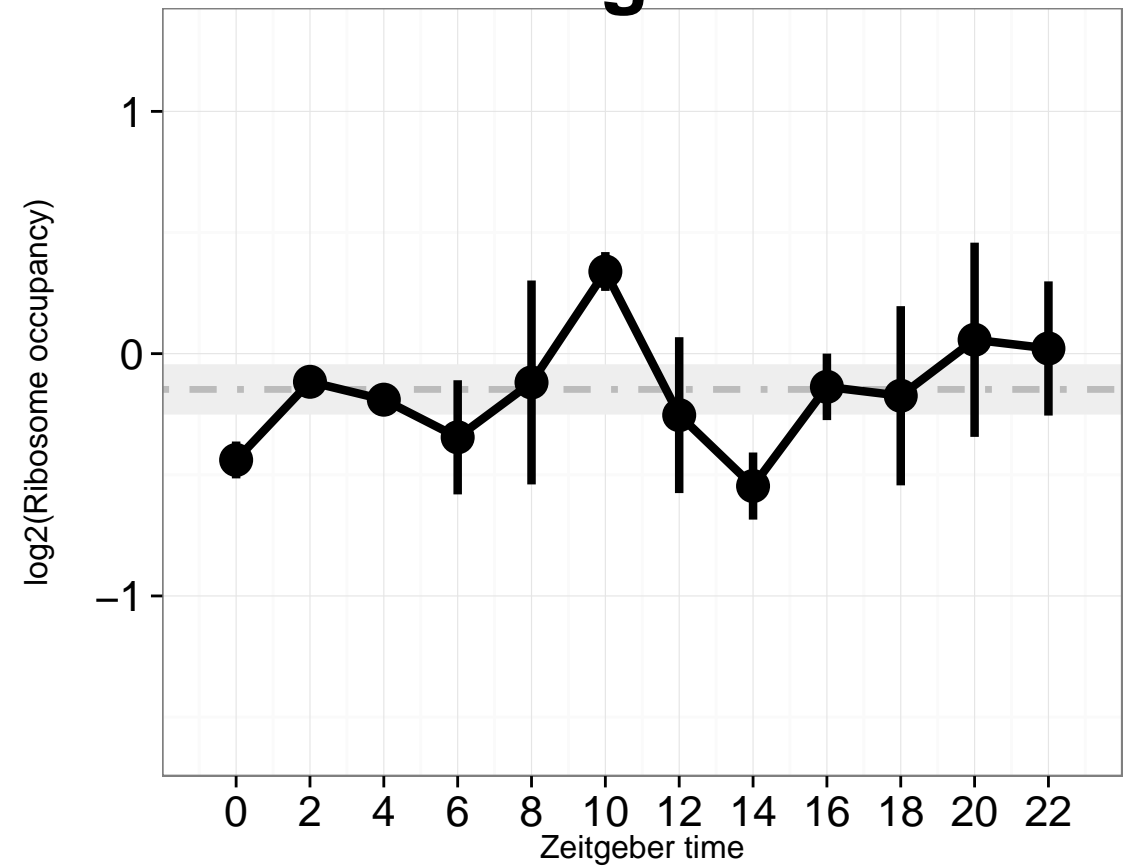

Supplement: SuppDataset_1.zip [file Magohb_set_A.pdf › Supplemental Dataset 1/A-mRNA_nonrhyth_translation_nonrhyth/Magohb_set_A.pdf]

# Magt1

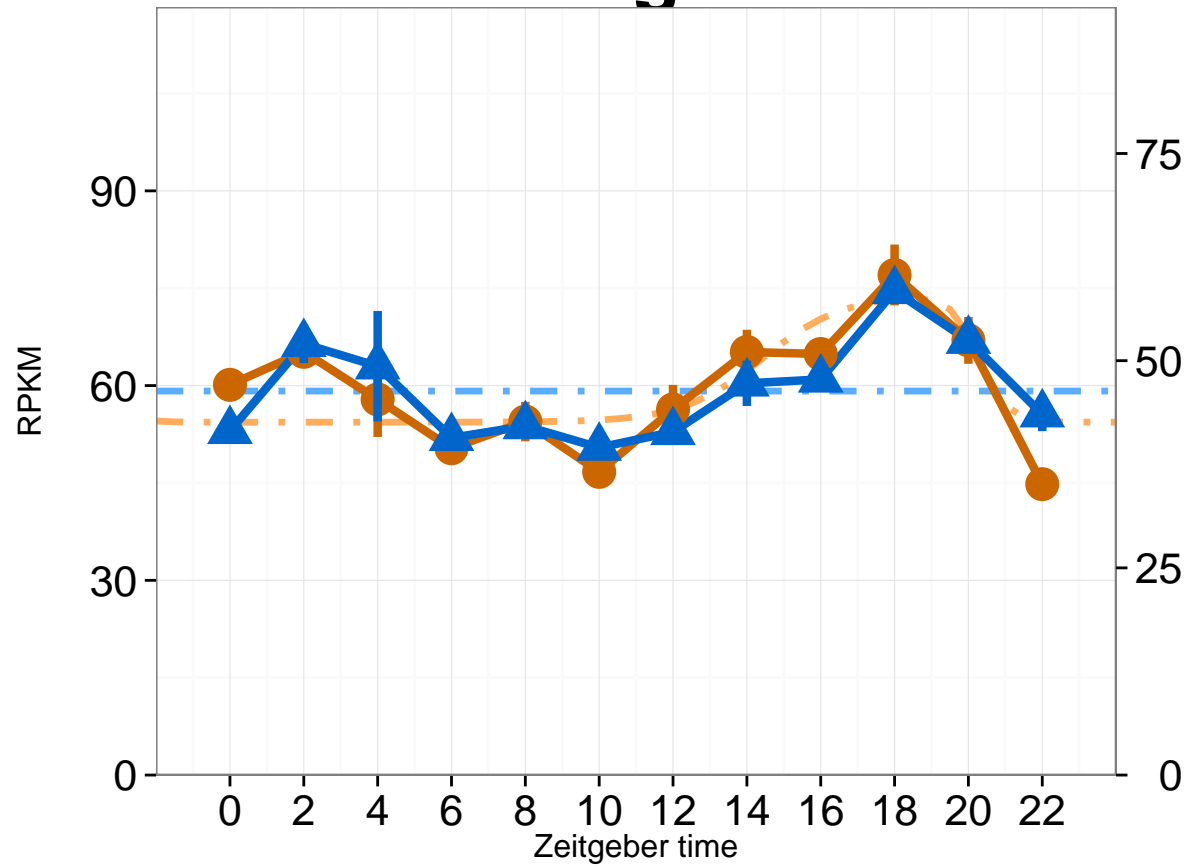

# Magt1

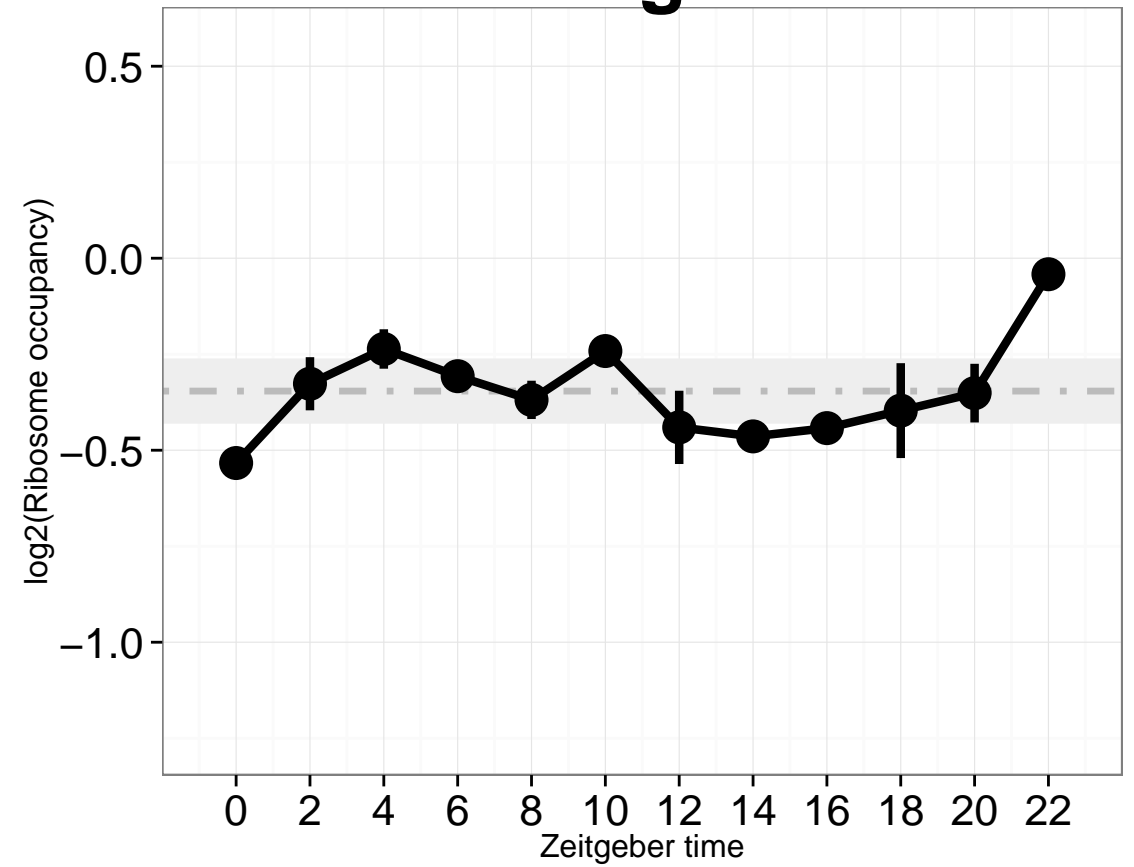

Supplement: SuppDataset_1.zip [file Magt1_set_A.pdf › Supplemental Dataset 1/A-mRNA_nonrhyth_translation_nonrhyth/Magt1_set_A.pdf]

# Mak16

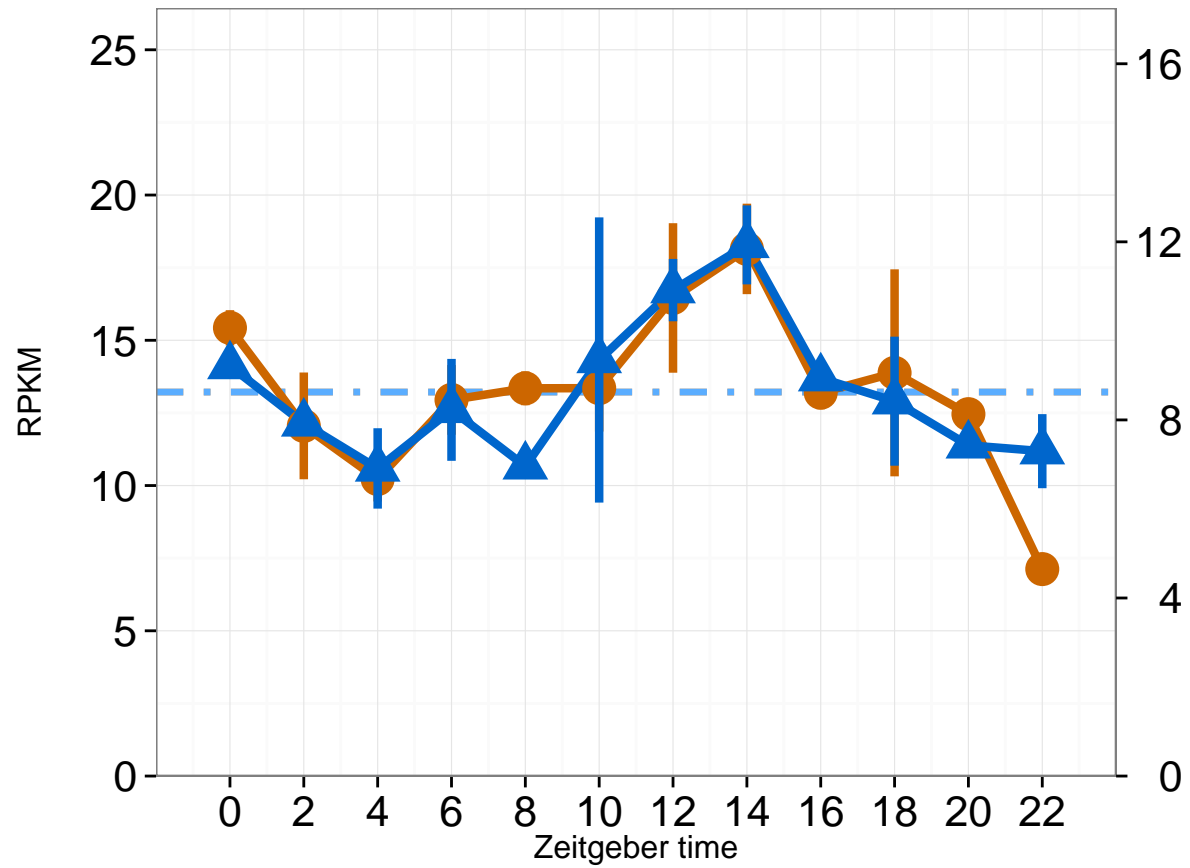

# Mak16

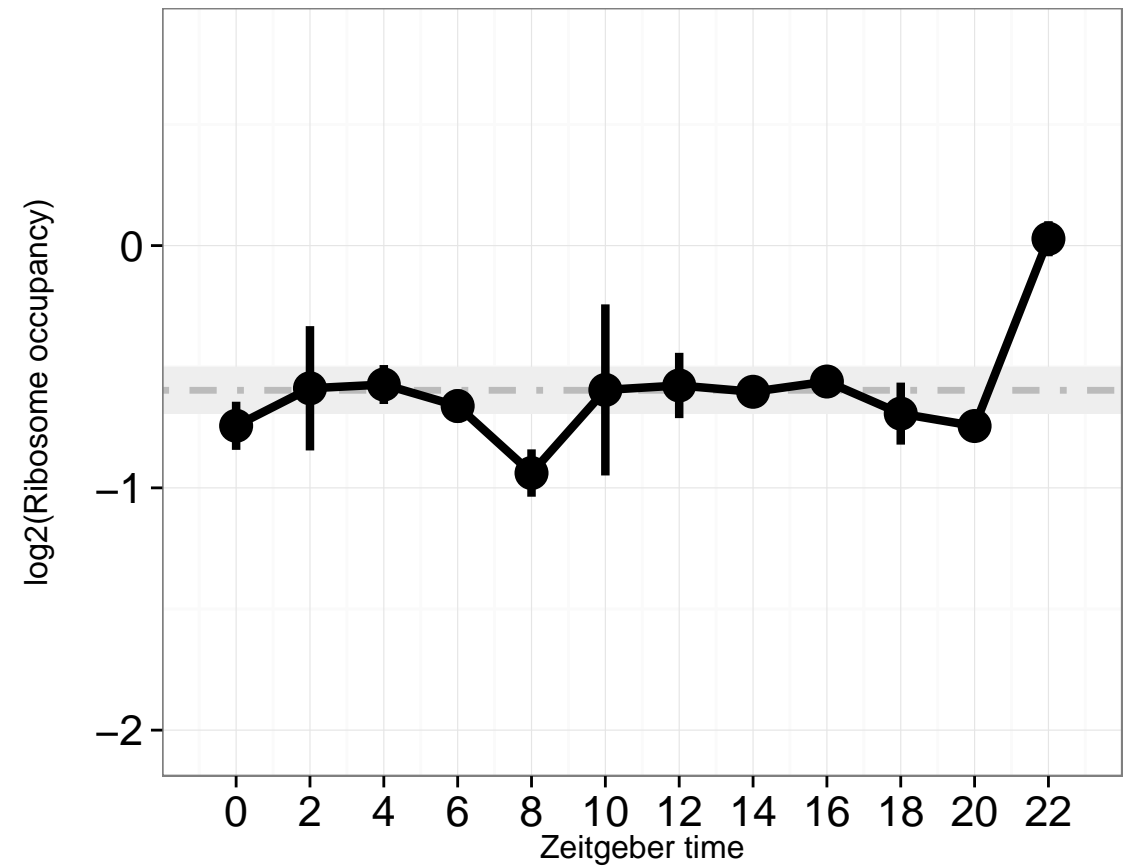

Supplement: SuppDataset_1.zip [file Mak16_set_A.pdf › Supplemental Dataset 1/A-mRNA_nonrhyth_translation_nonrhyth/Mak16_set_A.pdf]

## Malt1

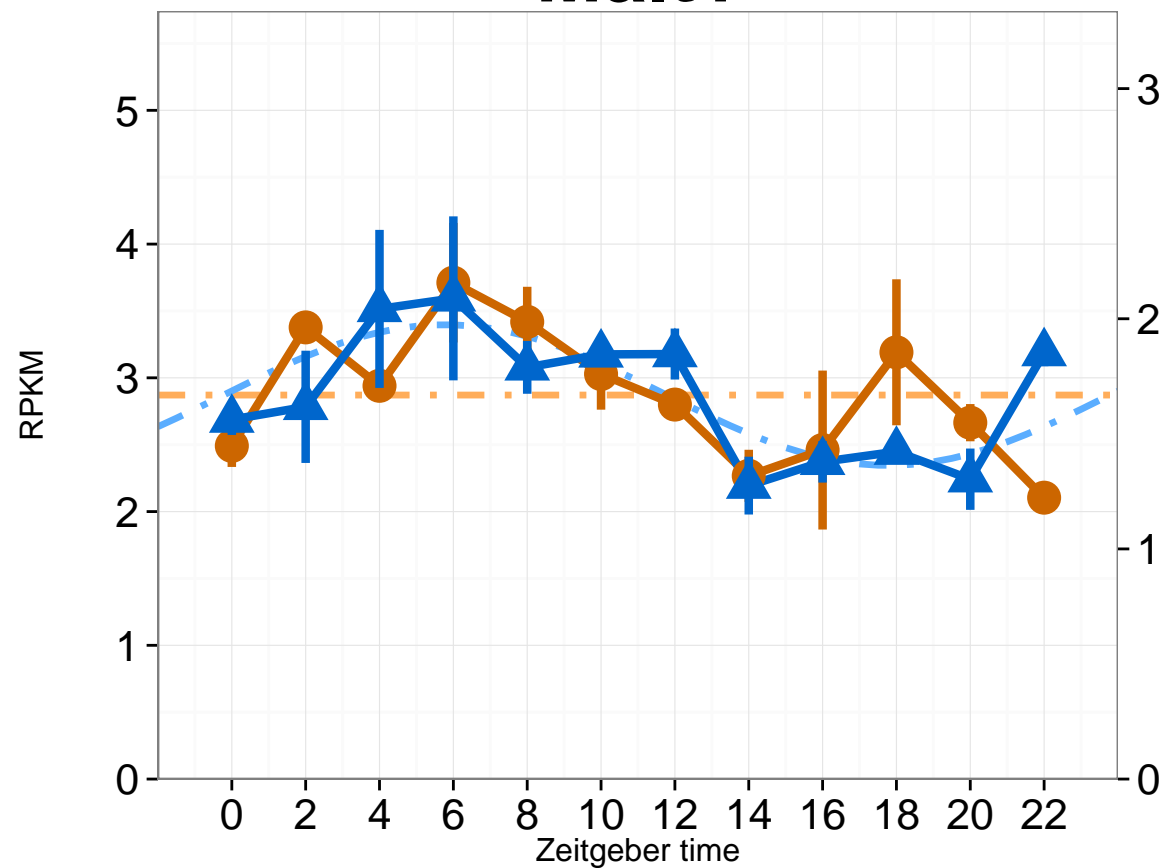

## Malt1

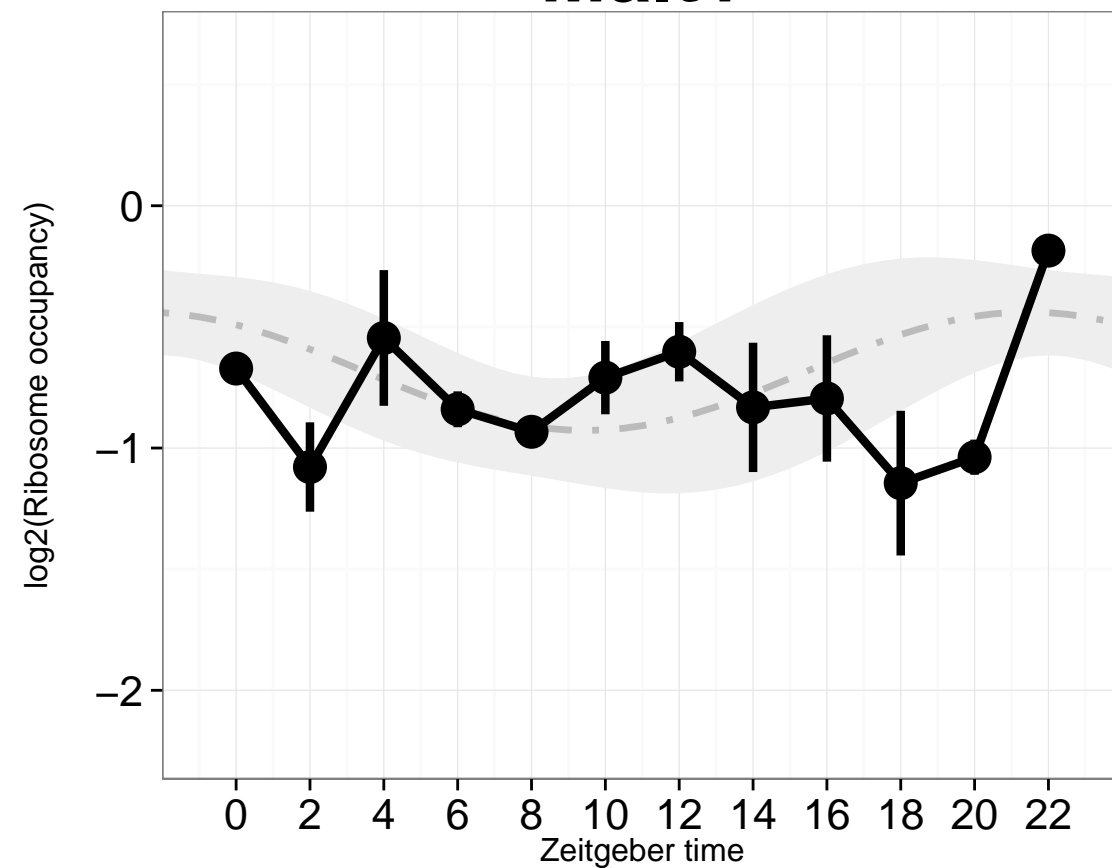

Supplement: SuppDataset_1.zip [file Malt1_set_A.pdf › Supplemental Dataset 1/A-mRNA_nonrhyth_translation_nonrhyth/Malt1_set_A.pdf]

# Maml1

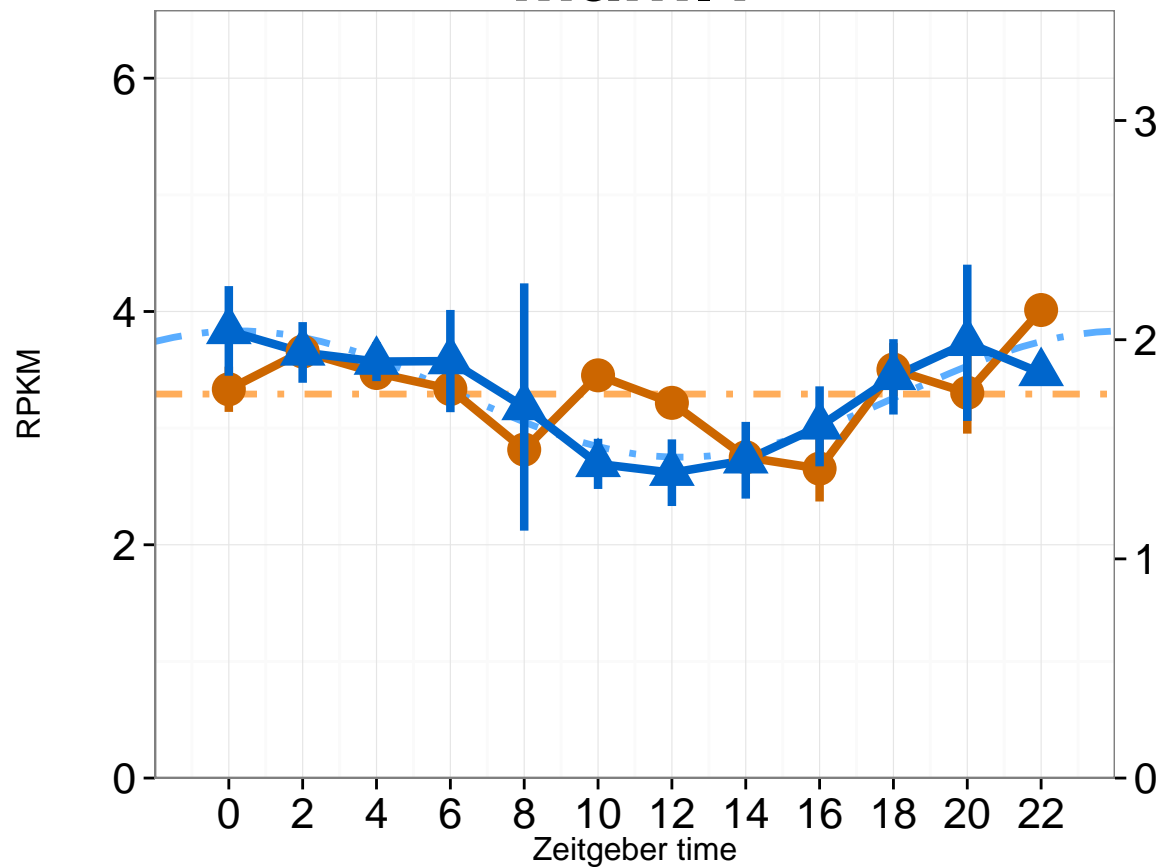

# Maml1

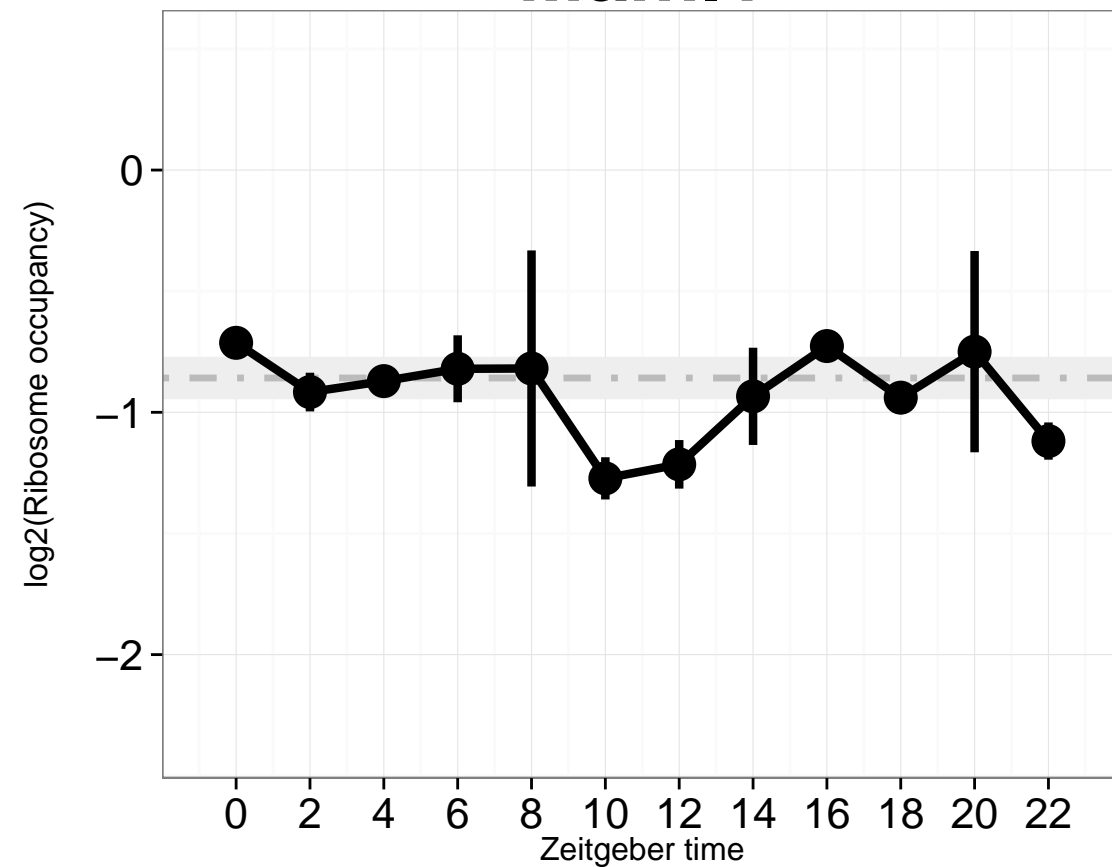

Supplement: SuppDataset_1.zip [file Maml1_set_A.pdf › Supplemental Dataset 1/A-mRNA_nonrhyth_translation_nonrhyth/Maml1_set_A.pdf]

## Maml2

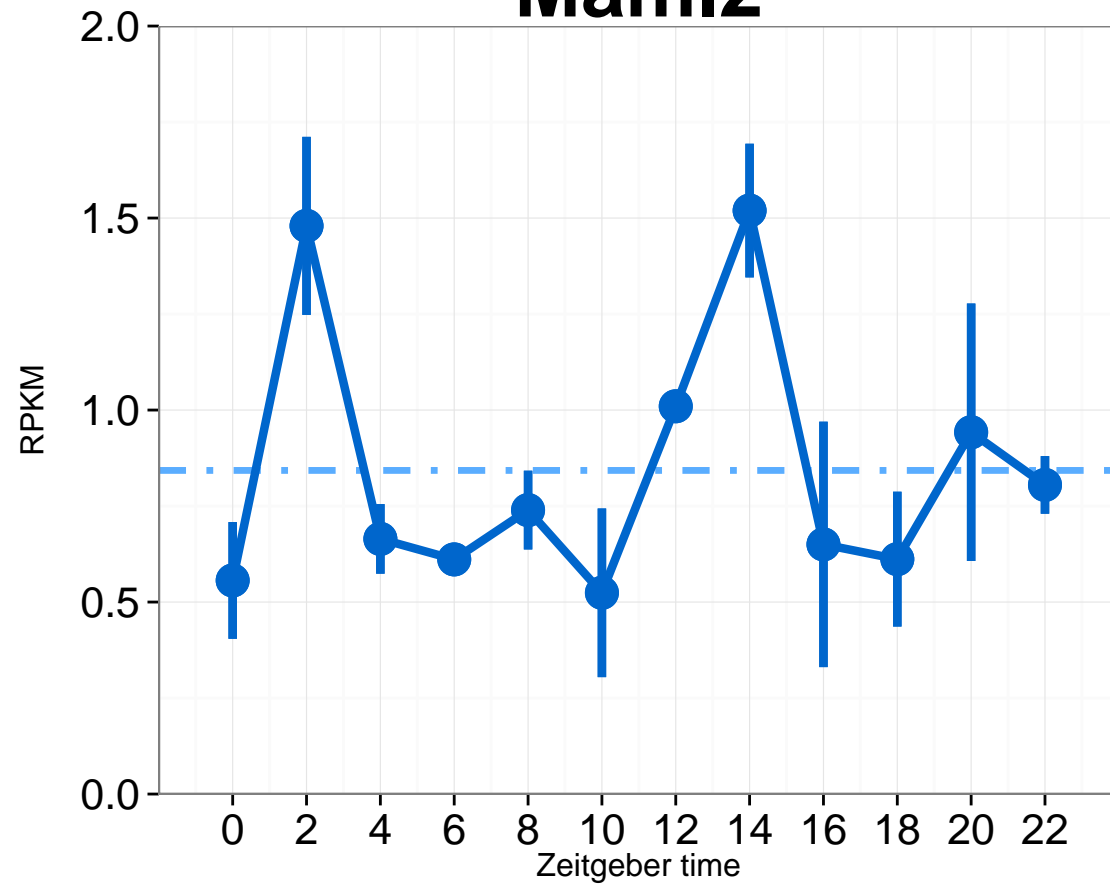

## Maml2 log2(Ribosome occupancy

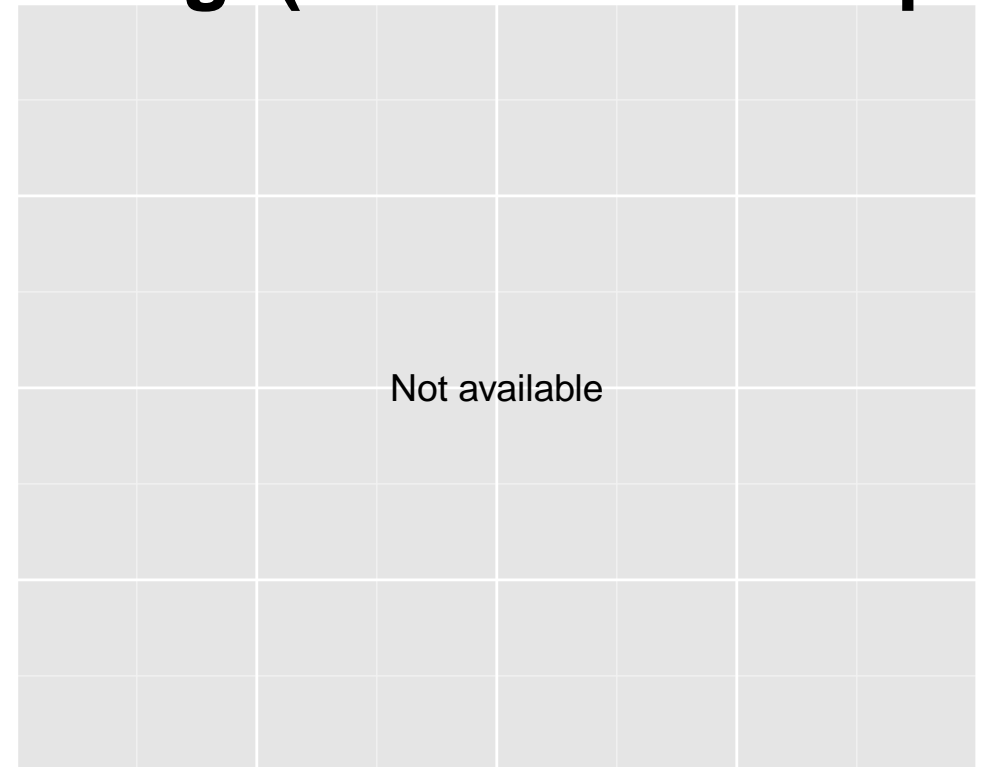

Supplement: SuppDataset_1.zip [file Maml2_set_A.pdf › Supplemental Dataset 1/A-mRNA_nonrhyth_translation_nonrhyth/Maml2_set_A.pdf]

## Maml3

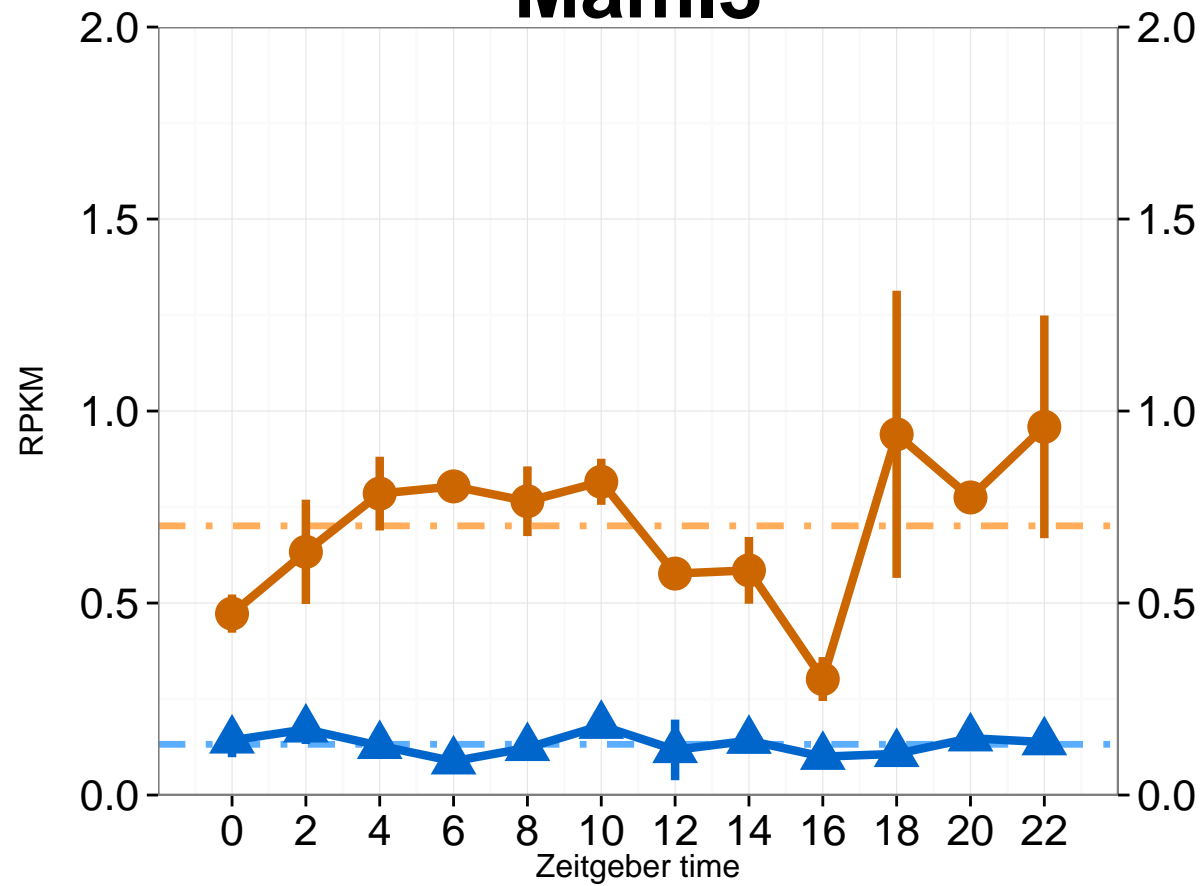

## Maml3

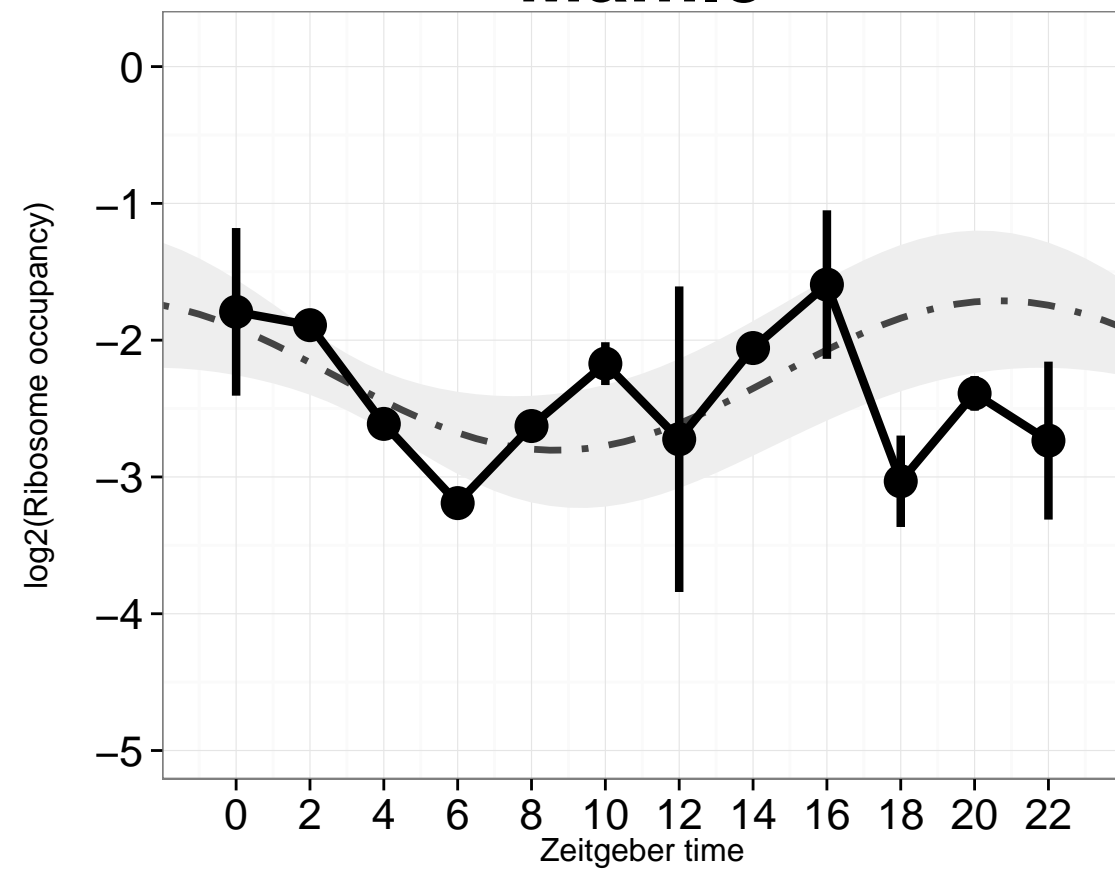

Supplement: SuppDataset_1.zip [file Maml3_set_A.pdf › Supplemental Dataset 1/A-mRNA_nonrhyth_translation_nonrhyth/Maml3_set_A.pdf]

# Man1a2

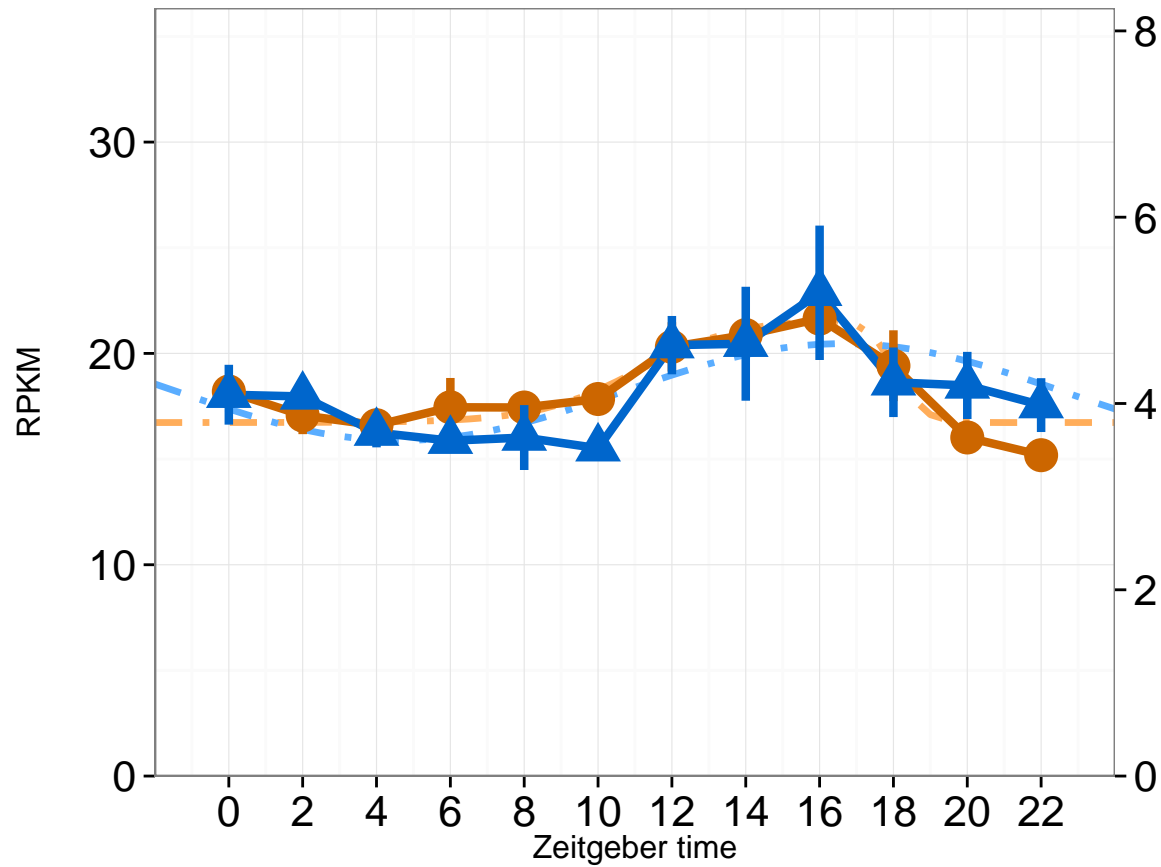

# Man1a2

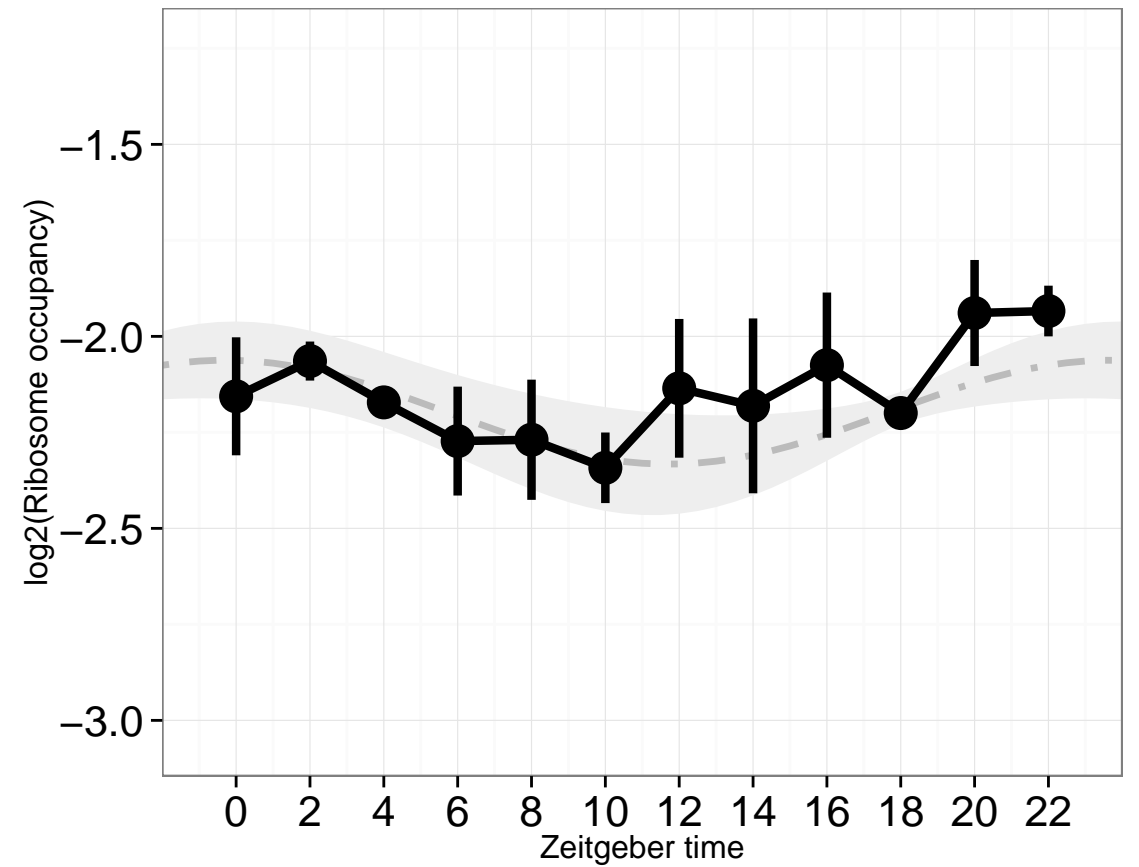

Supplement: SuppDataset_1.zip [file Man1a2_set_A.pdf › Supplemental Dataset 1/A-mRNA_nonrhyth_translation_nonrhyth/Man1a2_set_A.pdf]

# Man1a

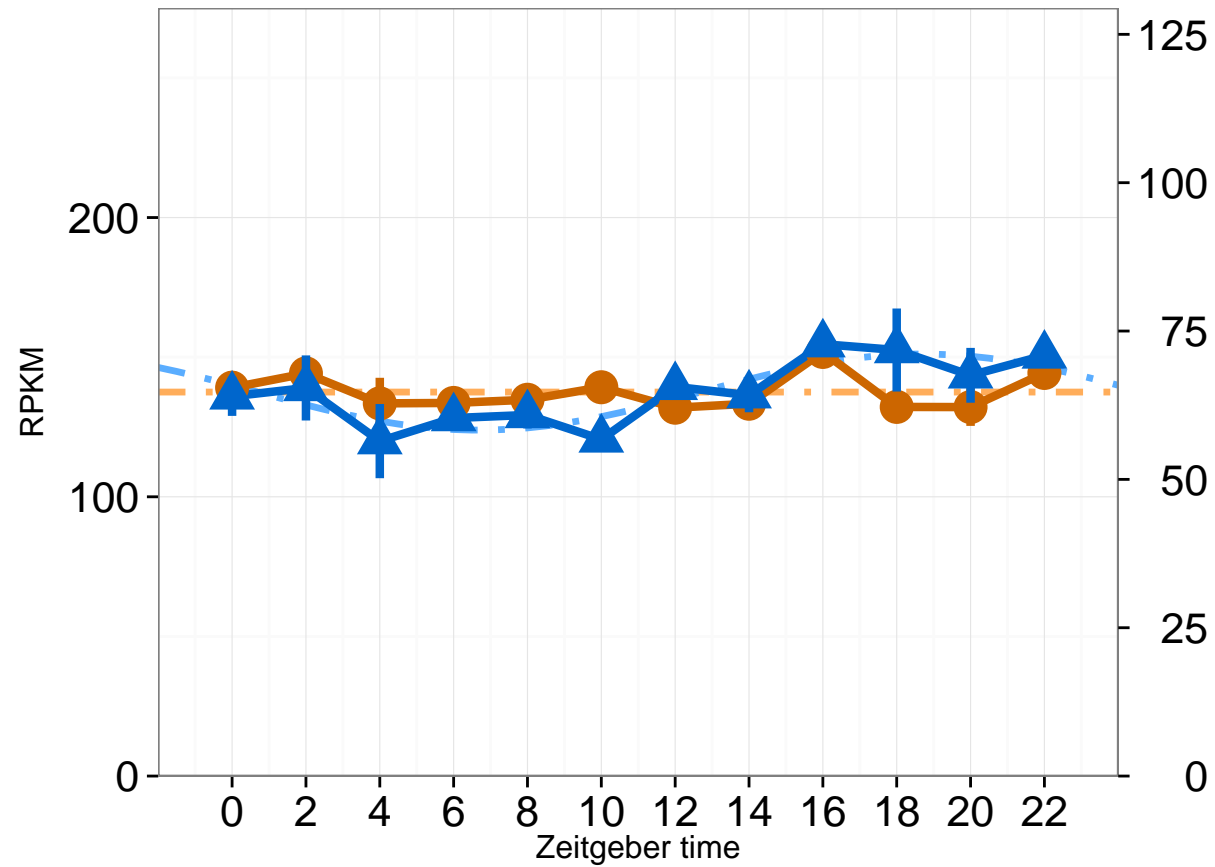

# Man1a

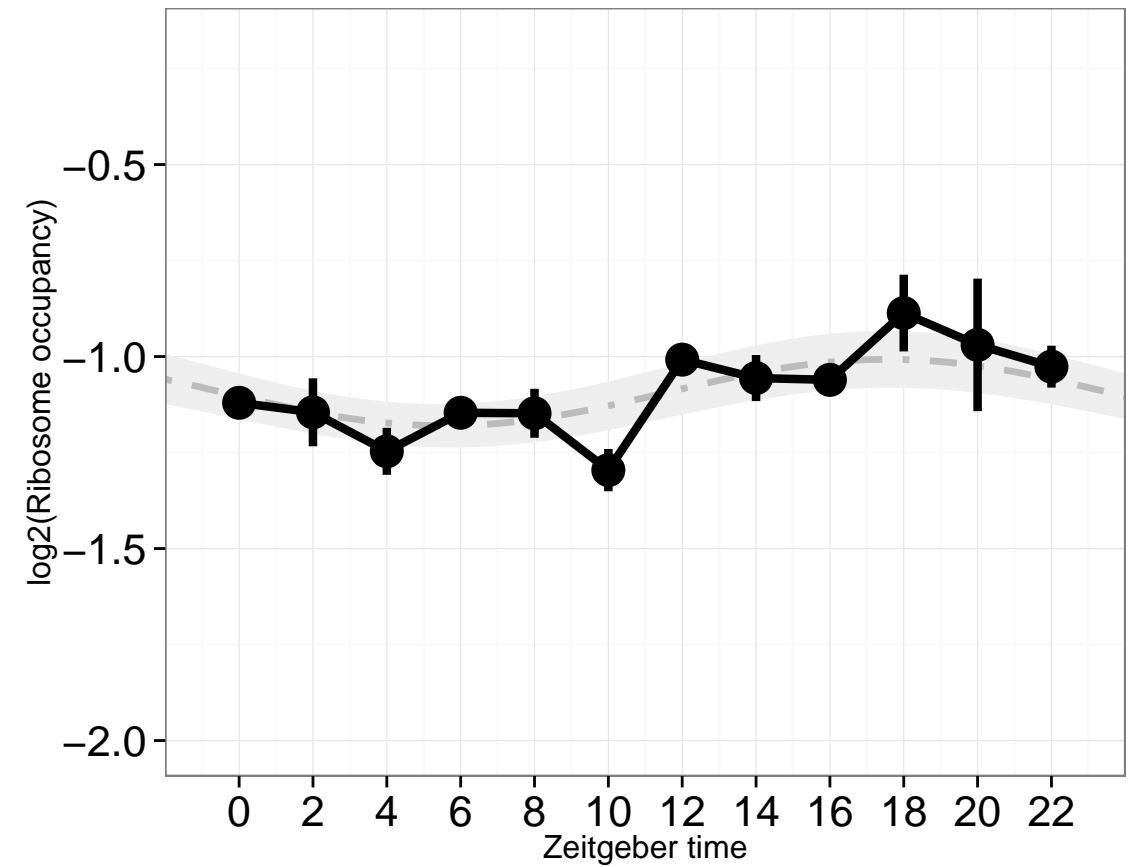

Supplement: SuppDataset_1.zip [file Man1a_set_A.pdf › Supplemental Dataset 1/A-mRNA_nonrhyth_translation_nonrhyth/Man1a_set_A.pdf]

# Man1b1

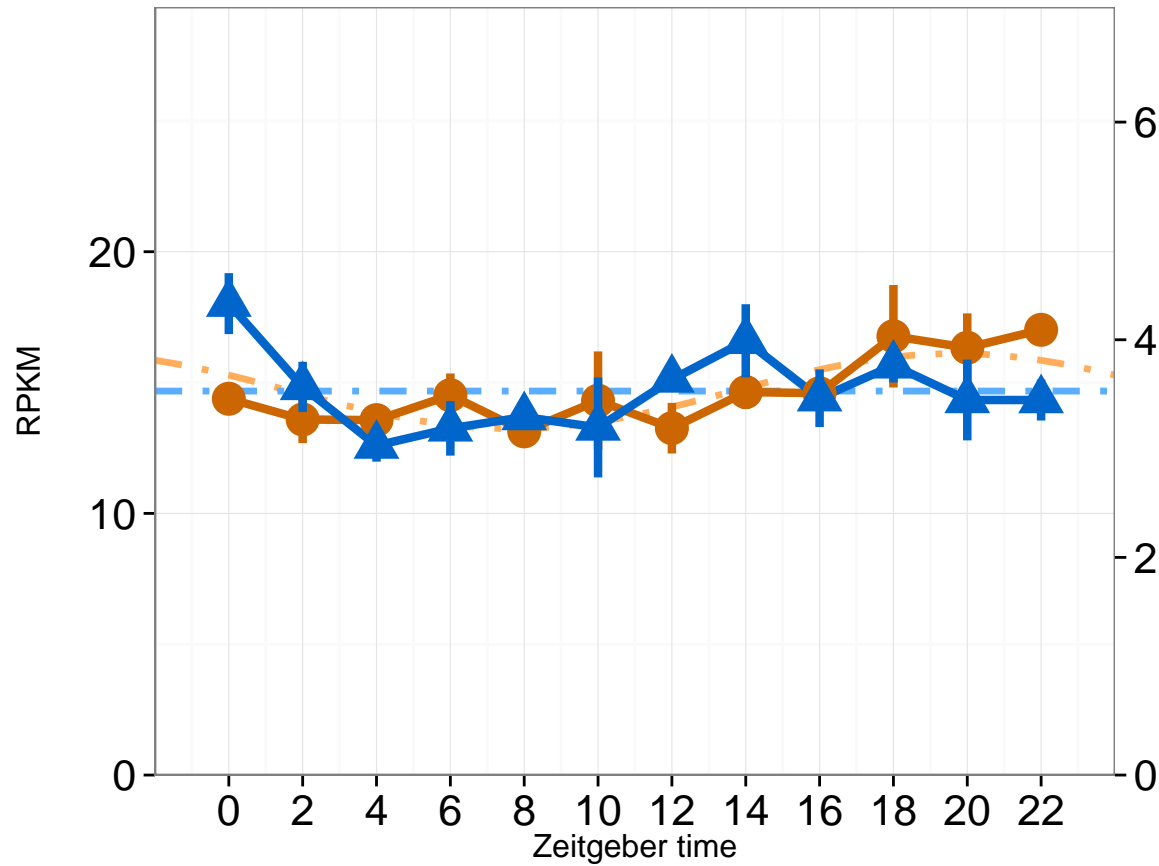

# Man1b1

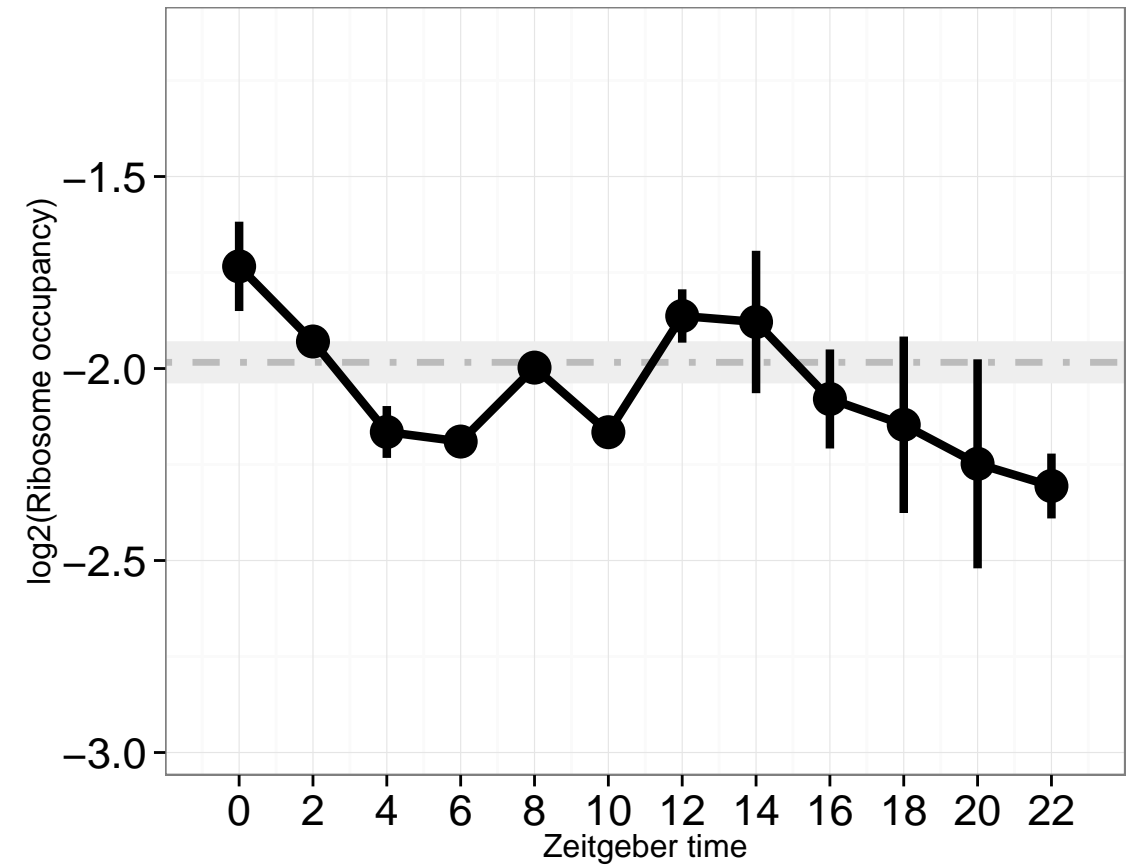

Supplement: SuppDataset_1.zip [file Man1b1_set_A.pdf › Supplemental Dataset 1/A-mRNA_nonrhyth_translation_nonrhyth/Man1b1_set_A.pdf]

# Man1c1

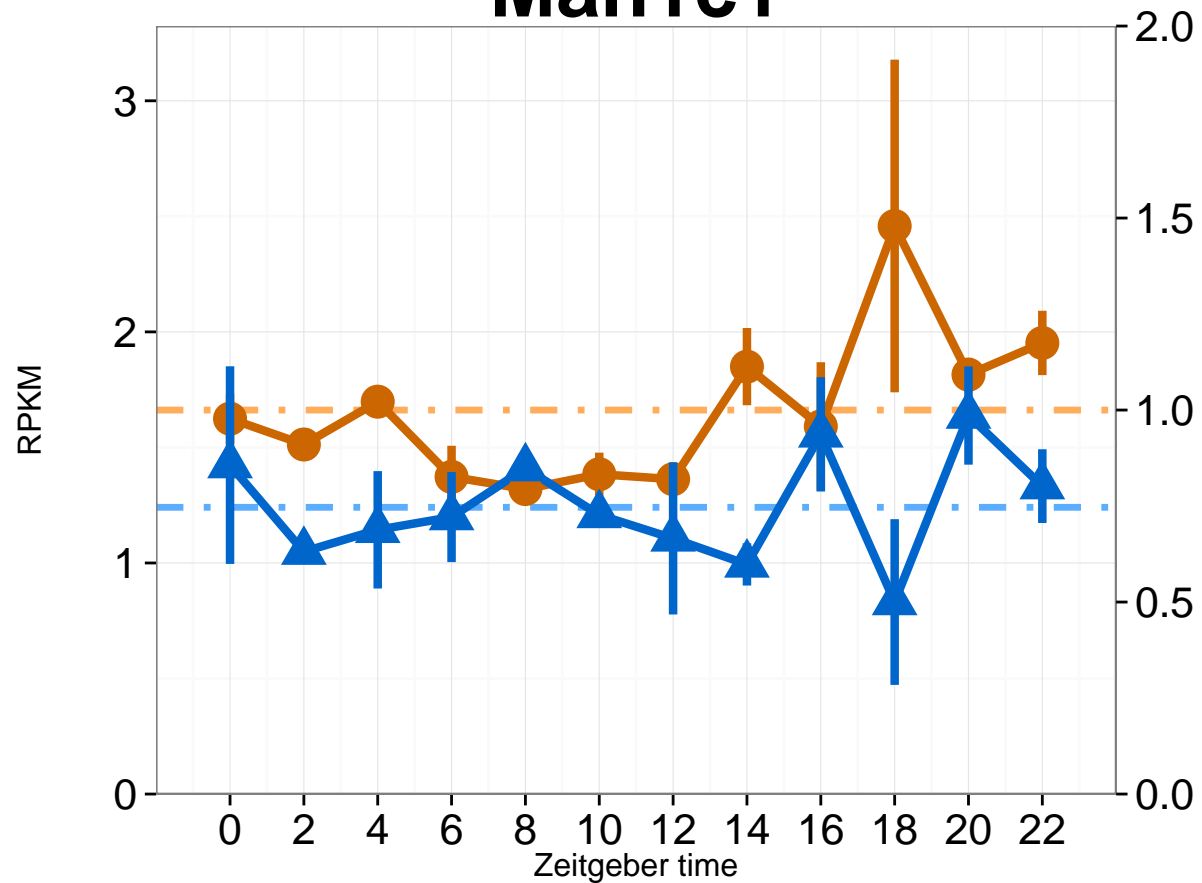

# Man1c1

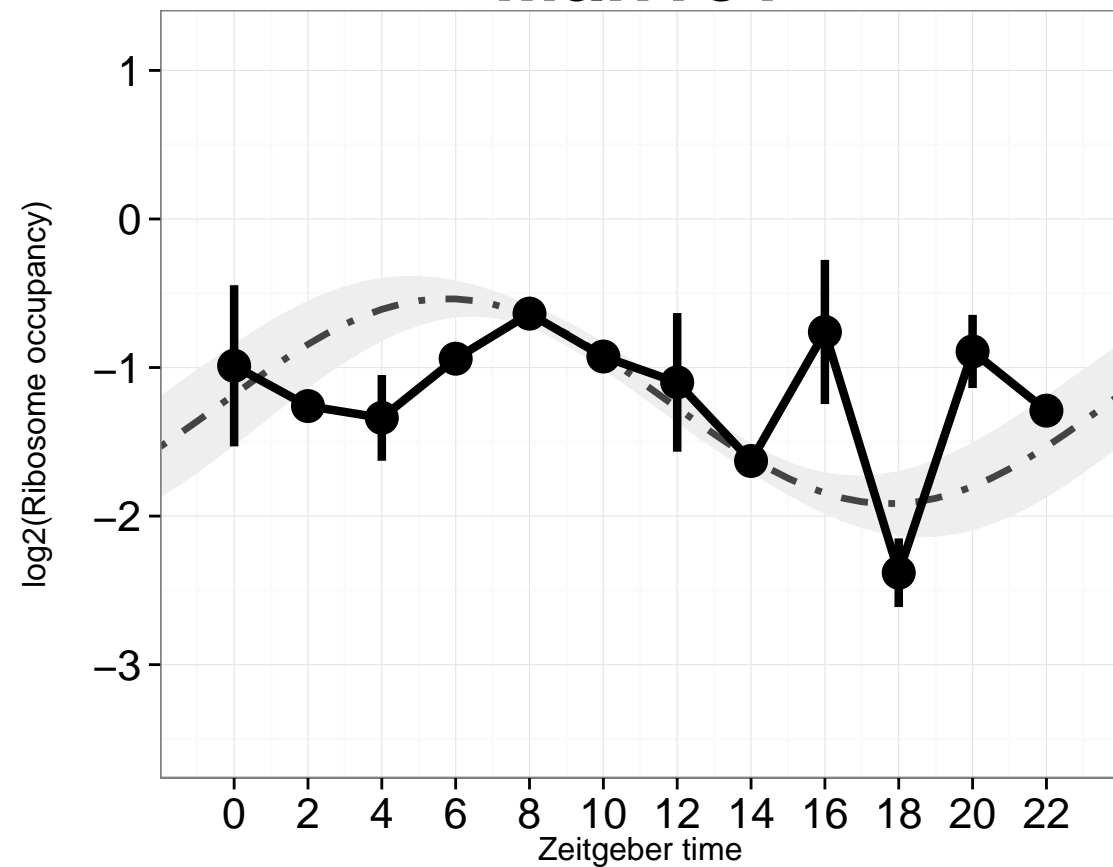

Supplement: SuppDataset_1.zip [file Man1c1_set_A.pdf › Supplemental Dataset 1/A-mRNA_nonrhyth_translation_nonrhyth/Man1c1_set_A.pdf]

# Man2a2

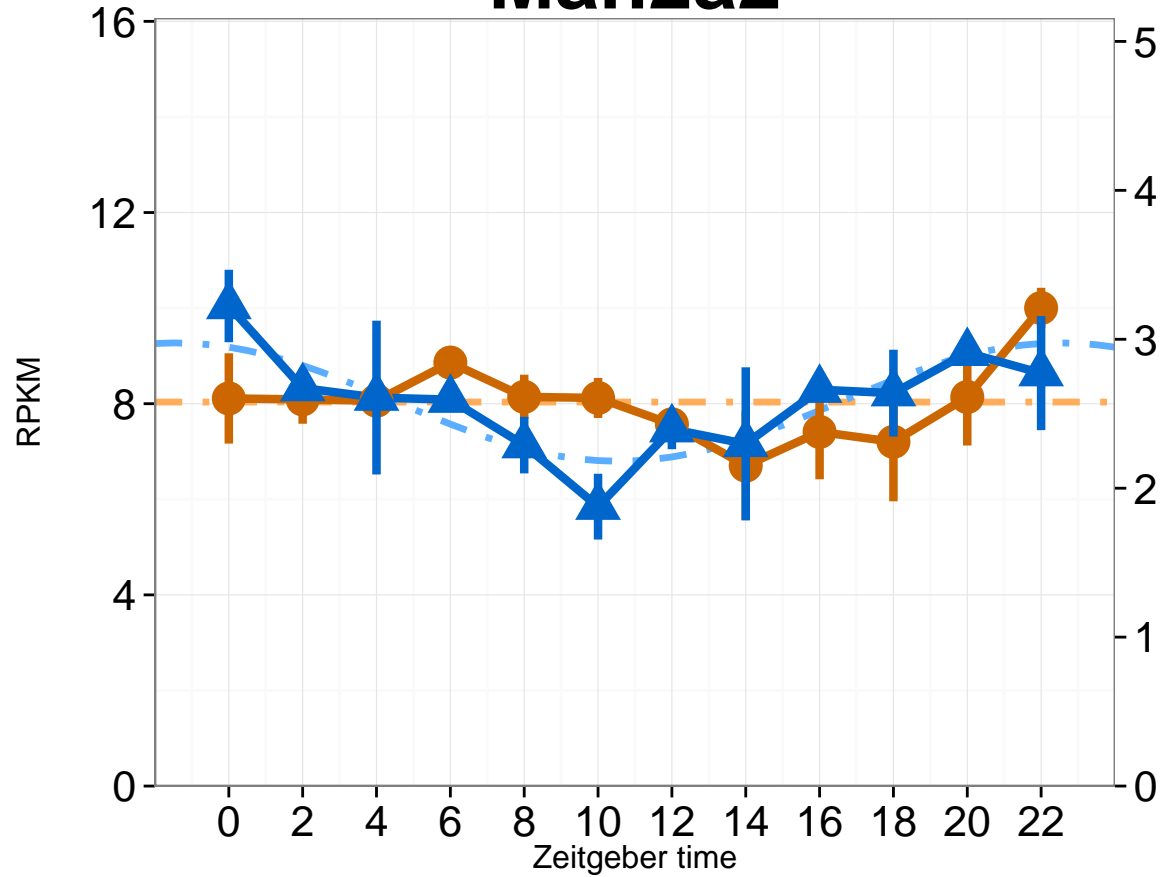

# Man2a2

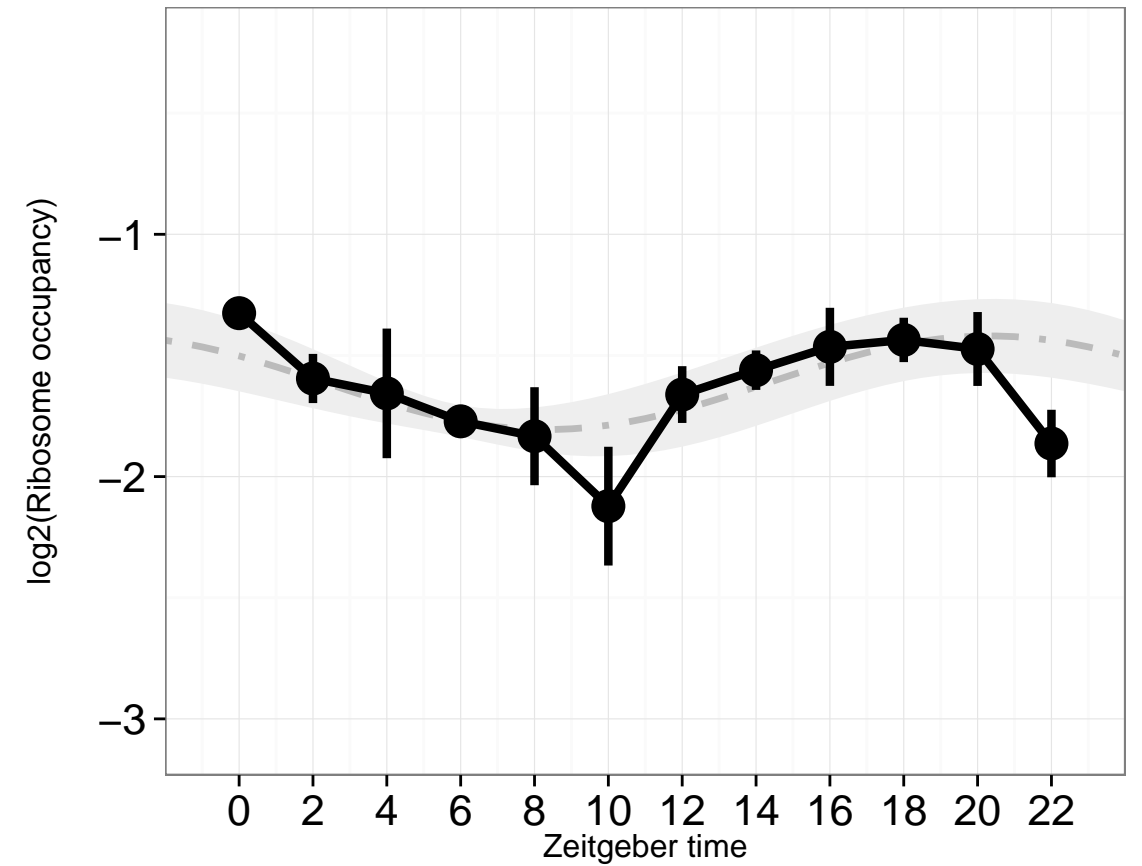

Supplement: SuppDataset_1.zip [file Man2a2_set_A.pdf › Supplemental Dataset 1/A-mRNA_nonrhyth_translation_nonrhyth/Man2a2_set_A.pdf]

# Man2b1

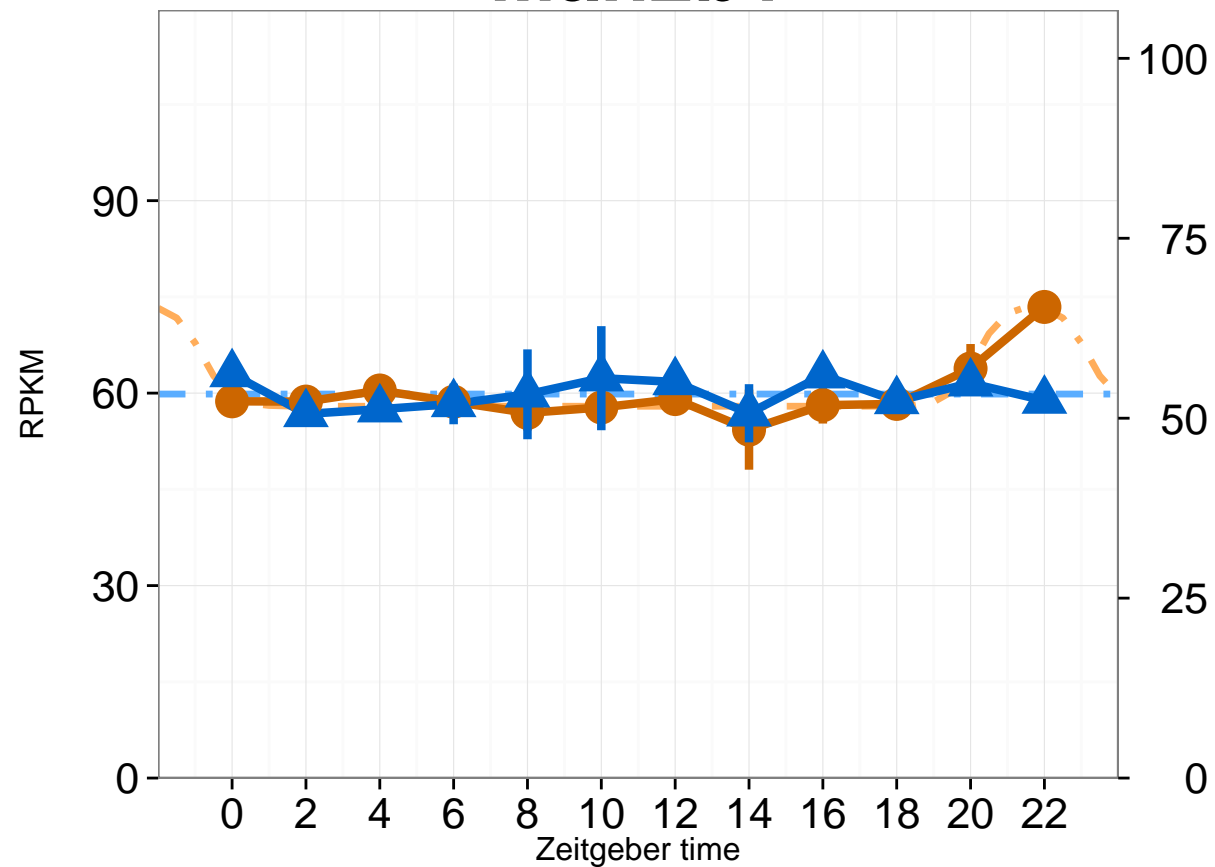

# Man2b1

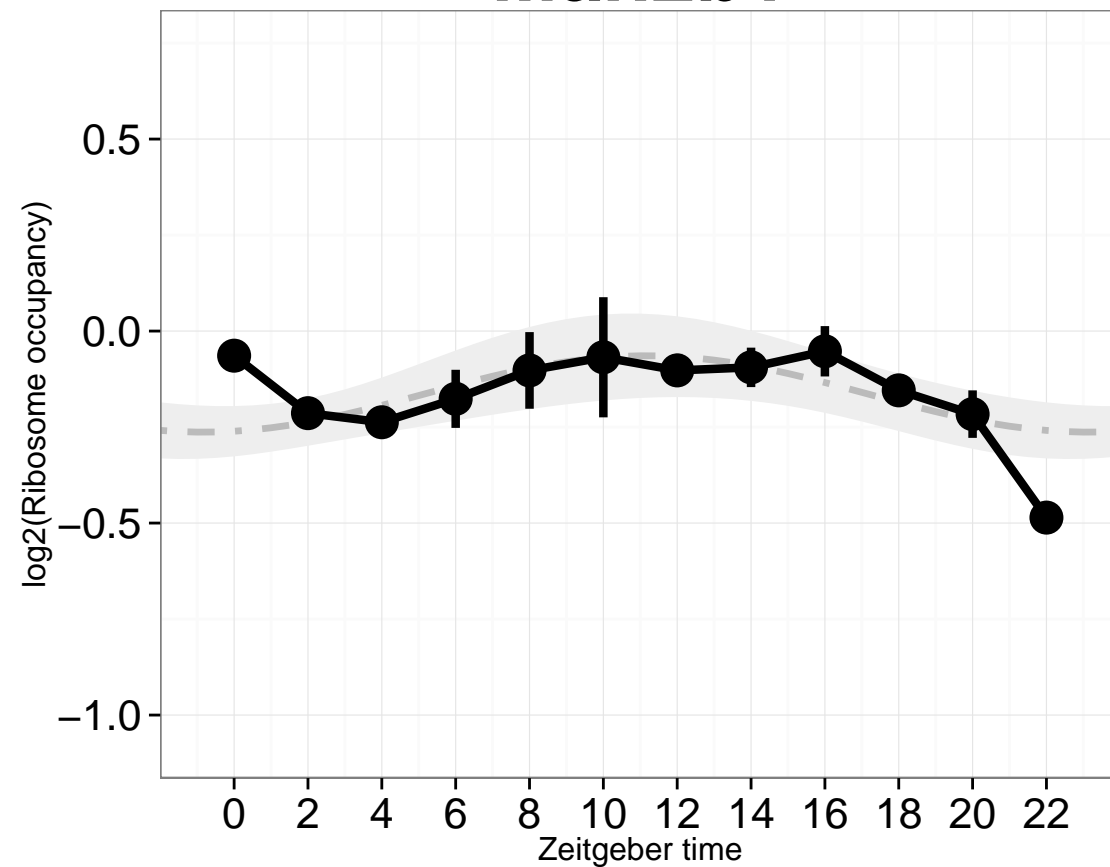

Supplement: SuppDataset_1.zip [file Man2b1_set_A.pdf › Supplemental Dataset 1/A-mRNA_nonrhyth_translation_nonrhyth/Man2b1_set_A.pdf]

# Man2b2

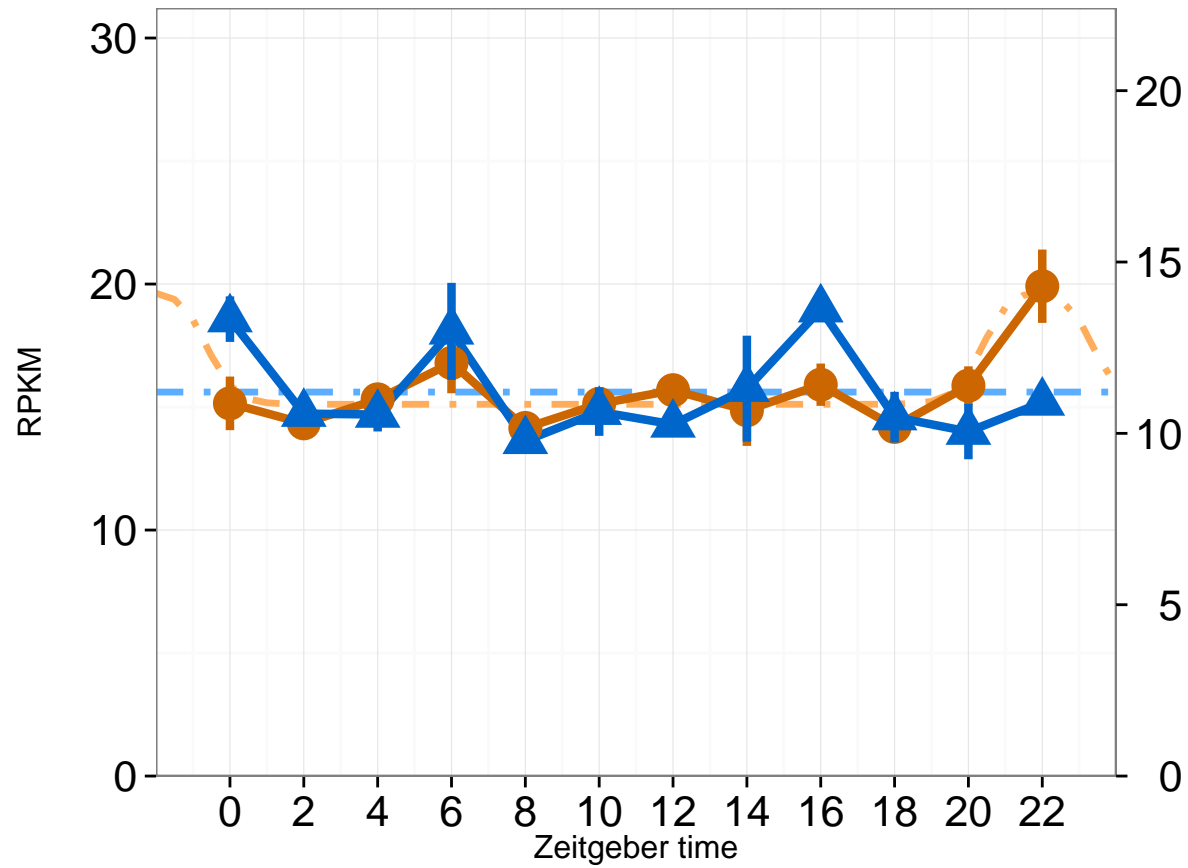

# Man2b2

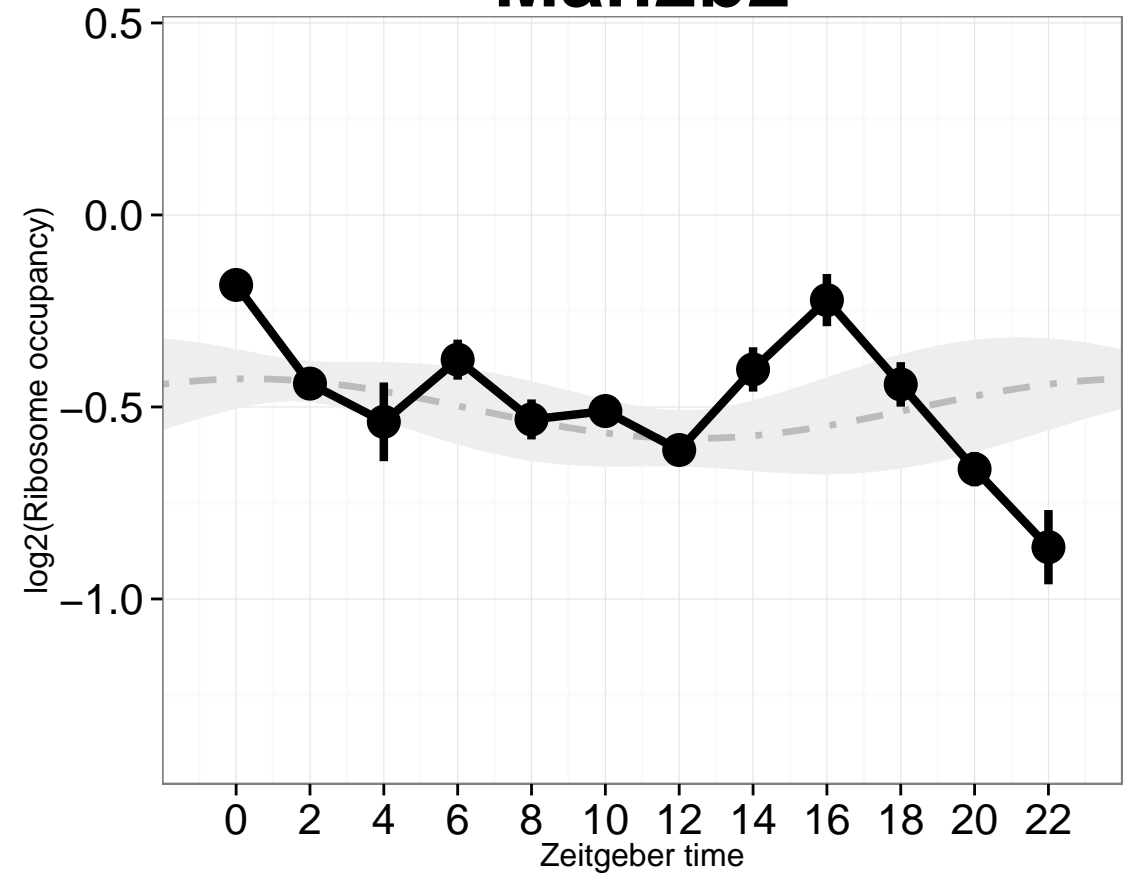

Supplement: SuppDataset_1.zip [file Man2b2_set_A.pdf › Supplemental Dataset 1/A-mRNA_nonrhyth_translation_nonrhyth/Man2b2_set_A.pdf]

# Man2c1

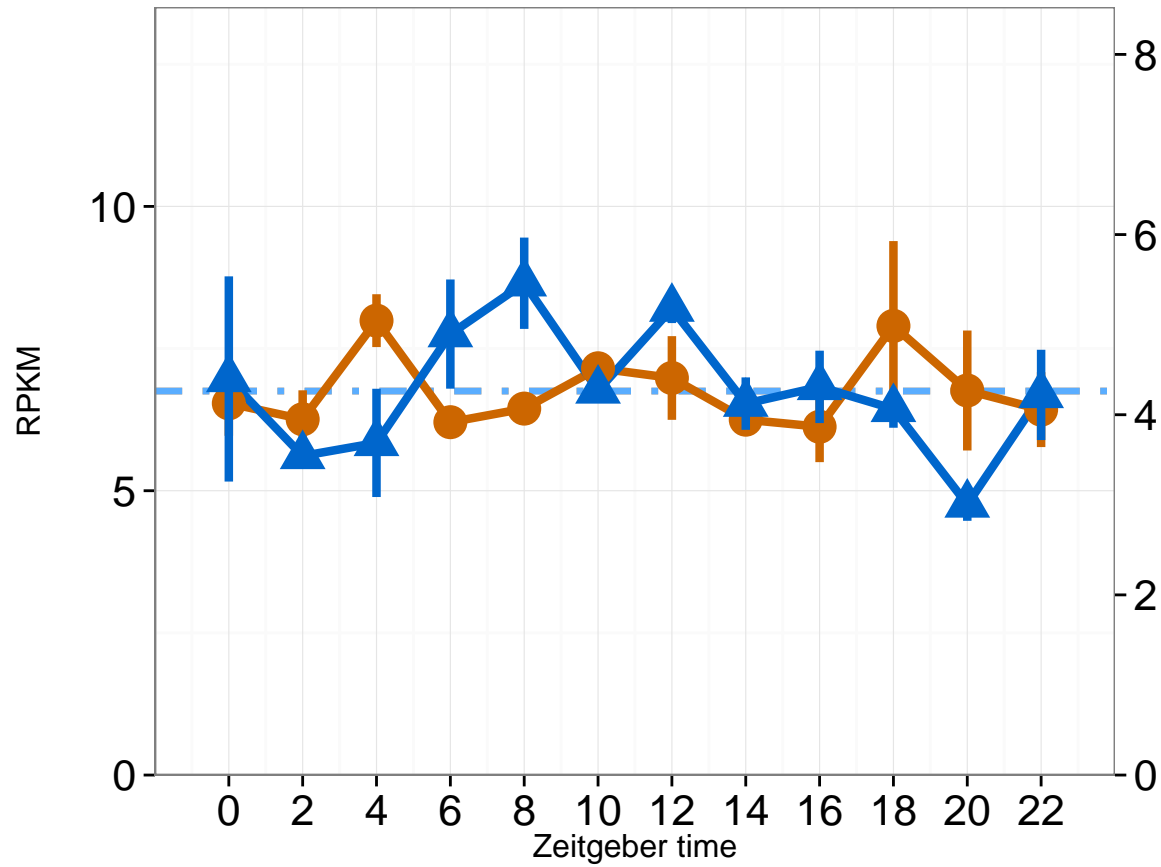

# Man2c1

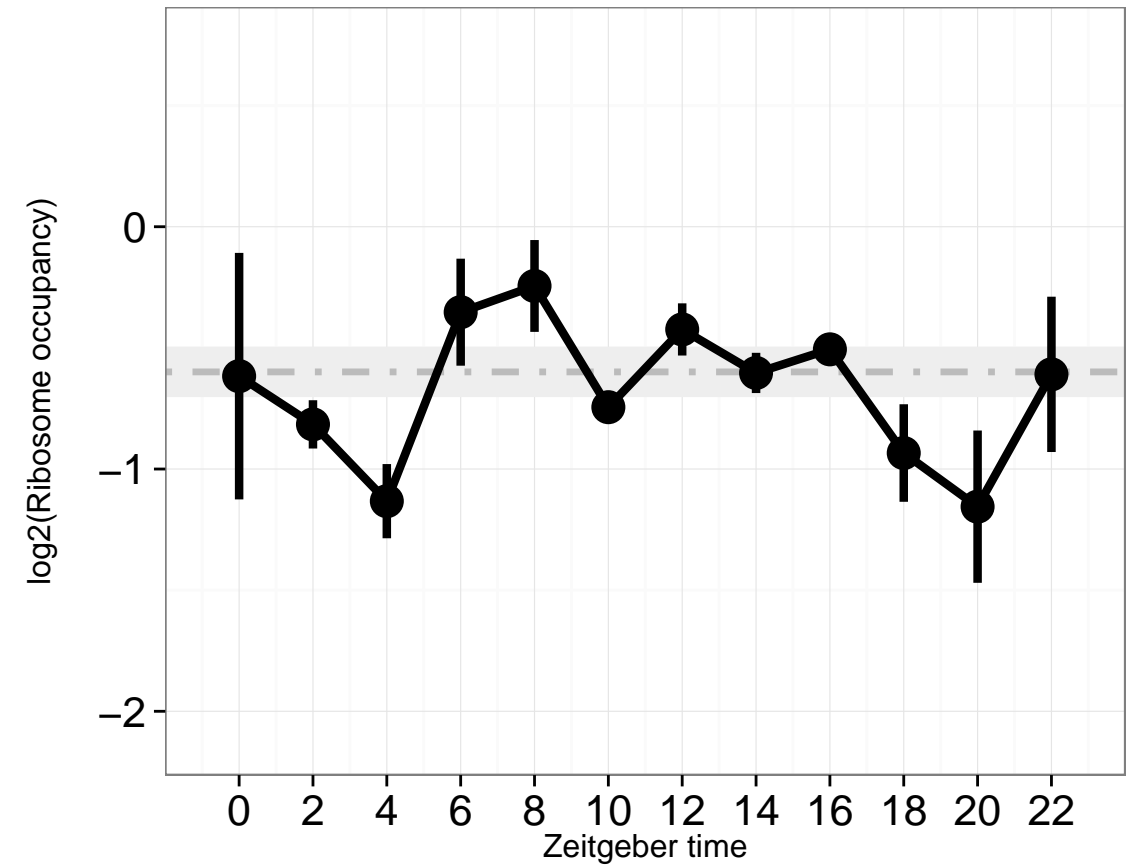

Supplement: SuppDataset_1.zip [file Man2c1_set_A.pdf › Supplemental Dataset 1/A-mRNA_nonrhyth_translation_nonrhyth/Man2c1_set_A.pdf]
