# Supplementary figures and images for: Ribosome profiling reveals the rhythmic liver translatome and circadian clock regulation by upstream open reading frames (part 91 of 113)
Source: HighWire-hosted journal article supplement (doi:10.1101/gr.195404.115), 2015-10-20

# Lsm10

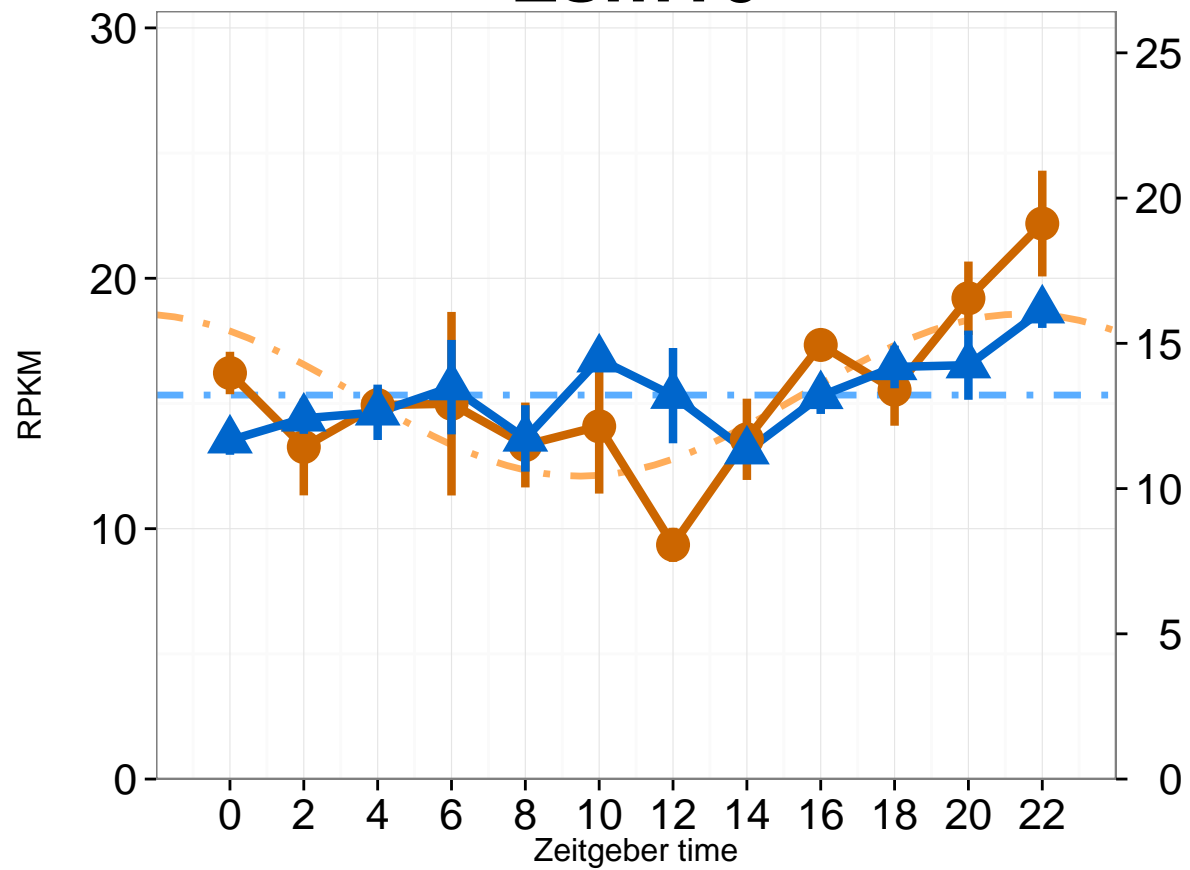

# Lsm10

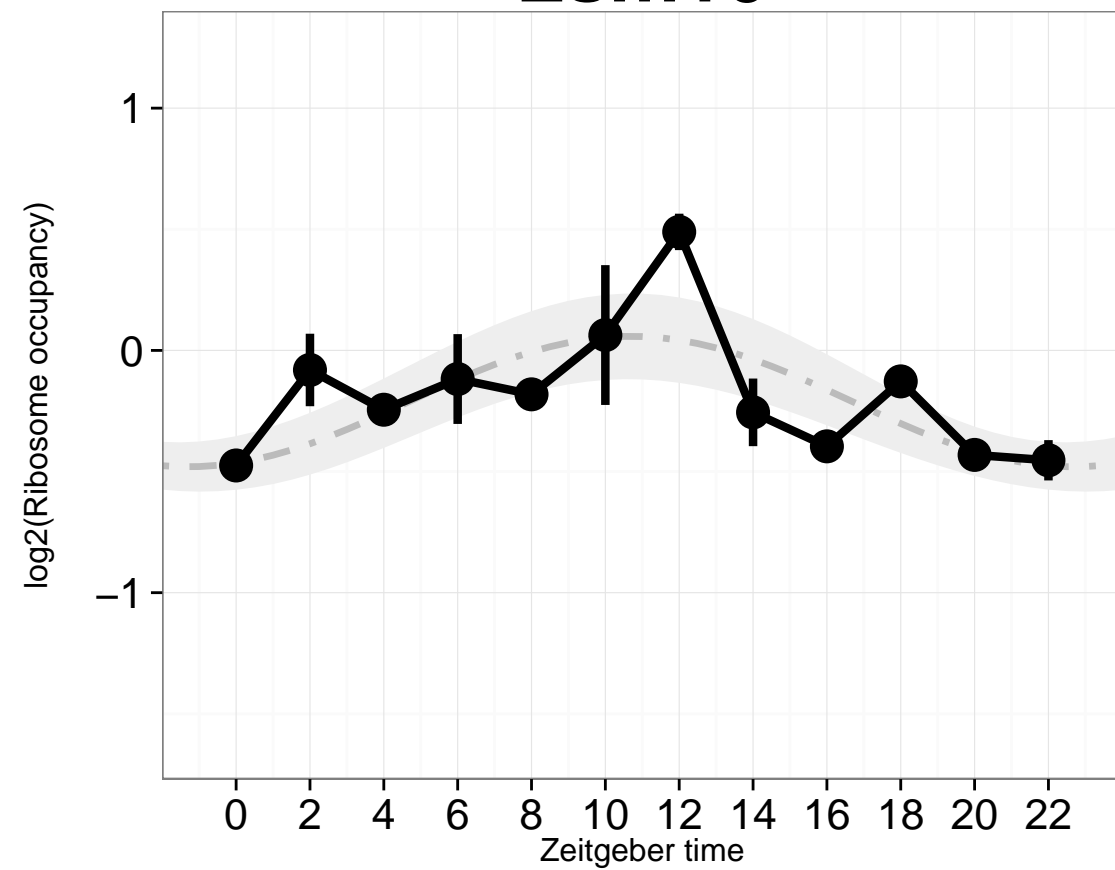

Supplement: SuppDataset_1.zip [file Lsm10_set_B.pdf › Supplemental Dataset 1/B-mRNA_rhythm_translation_nonrhyth/Lsm10_set_B.pdf]

# Lsm3

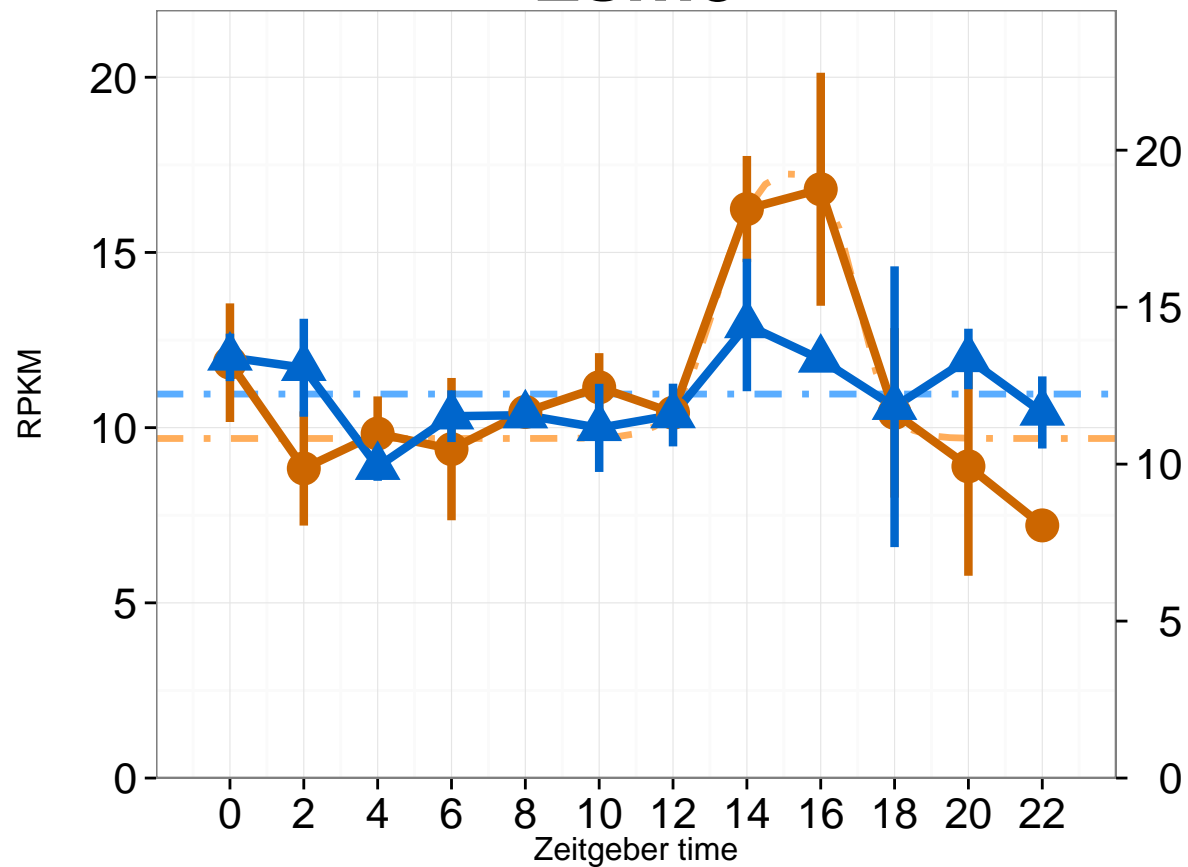

# Lsm3

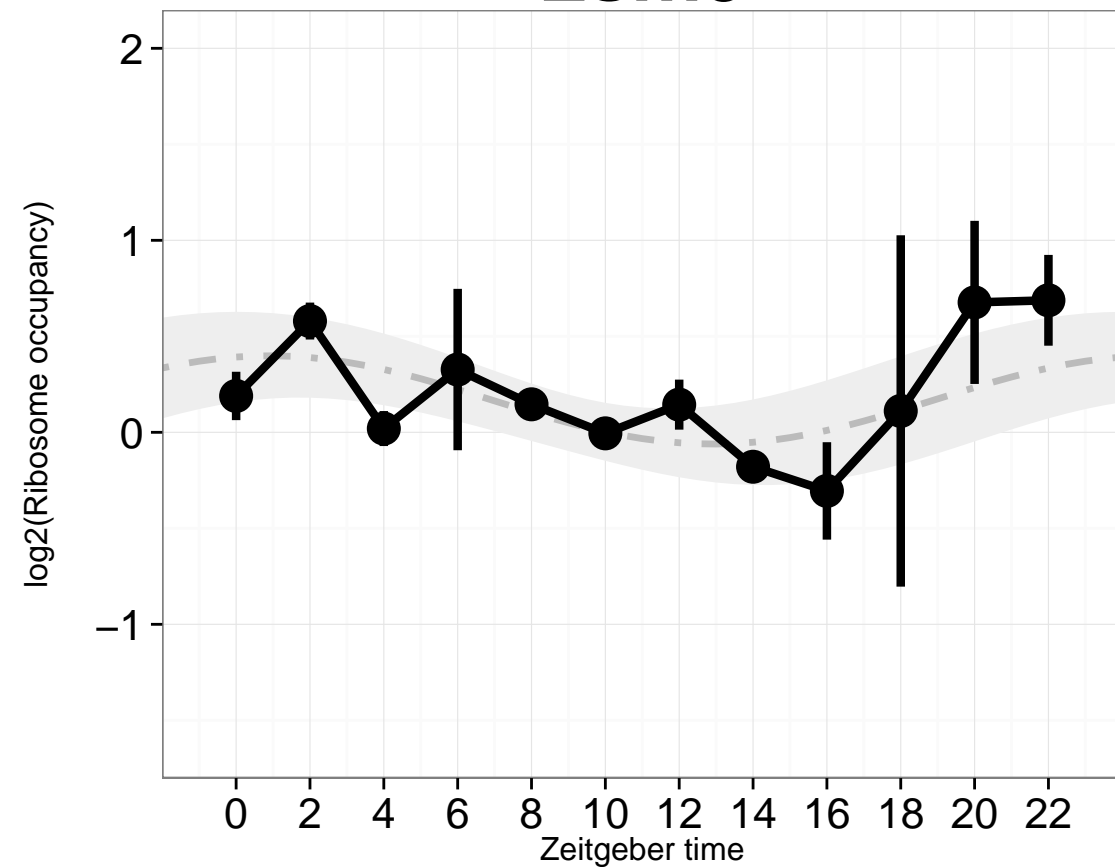

Supplement: SuppDataset_1.zip [file Lsm3_set_B.pdf › Supplemental Dataset 1/B-mRNA_rhythm_translation_nonrhyth/Lsm3_set_B.pdf]

# Lsmd1

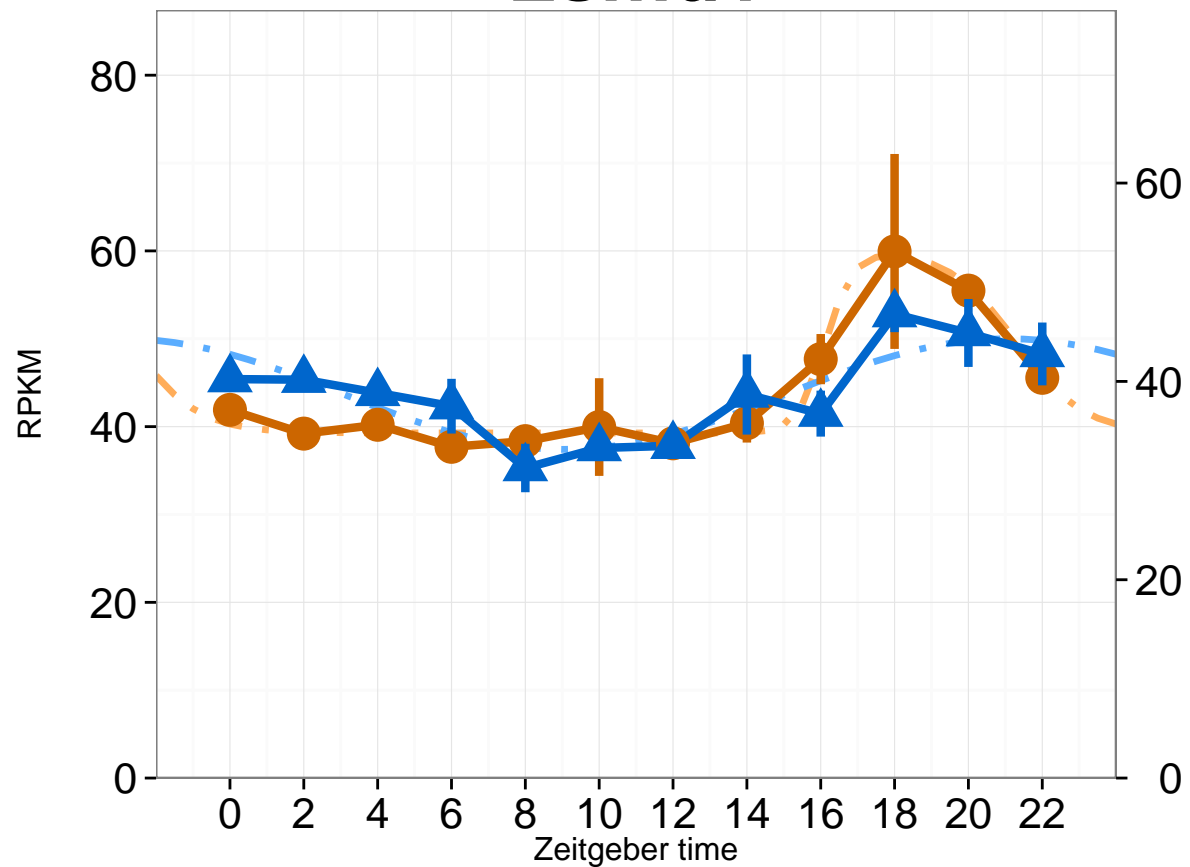

# Lsmd1

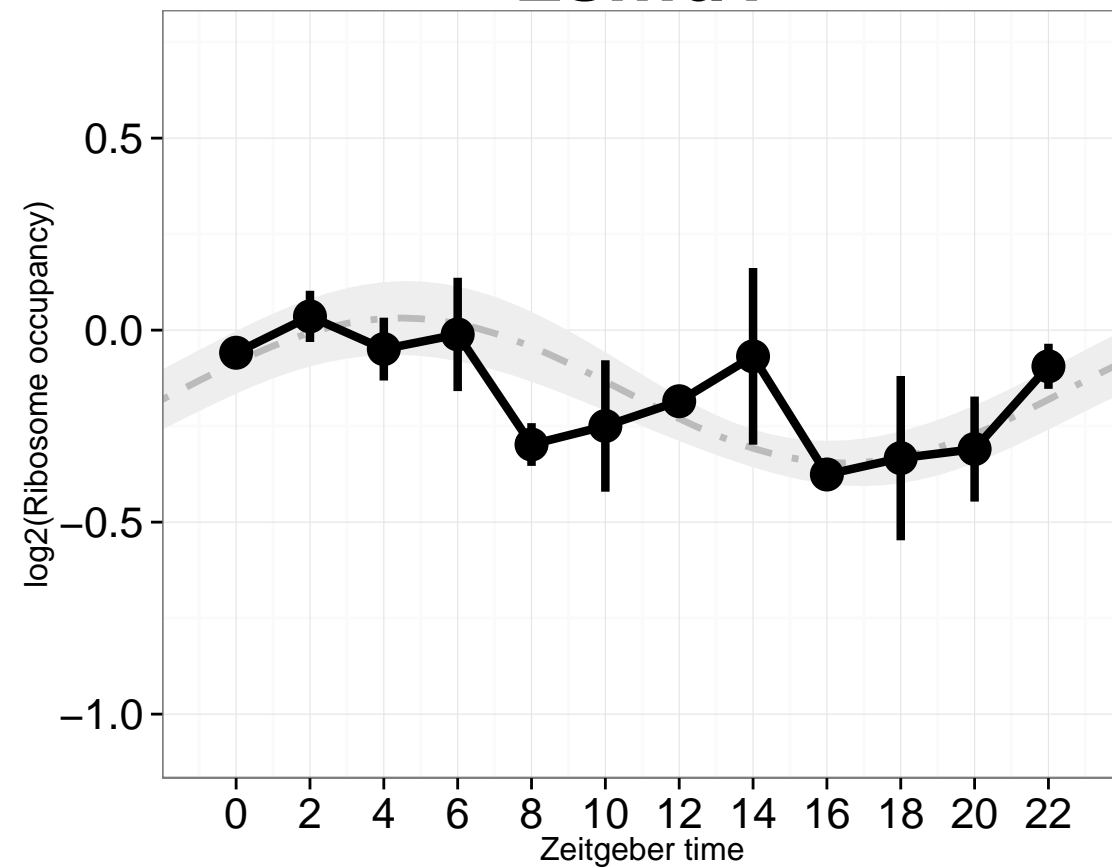

Supplement: SuppDataset_1.zip [file Lsmd1_set_B.pdf › Supplemental Dataset 1/B-mRNA_rhythm_translation_nonrhyth/Lsmd1_set_B.pdf]

# Ltbp1

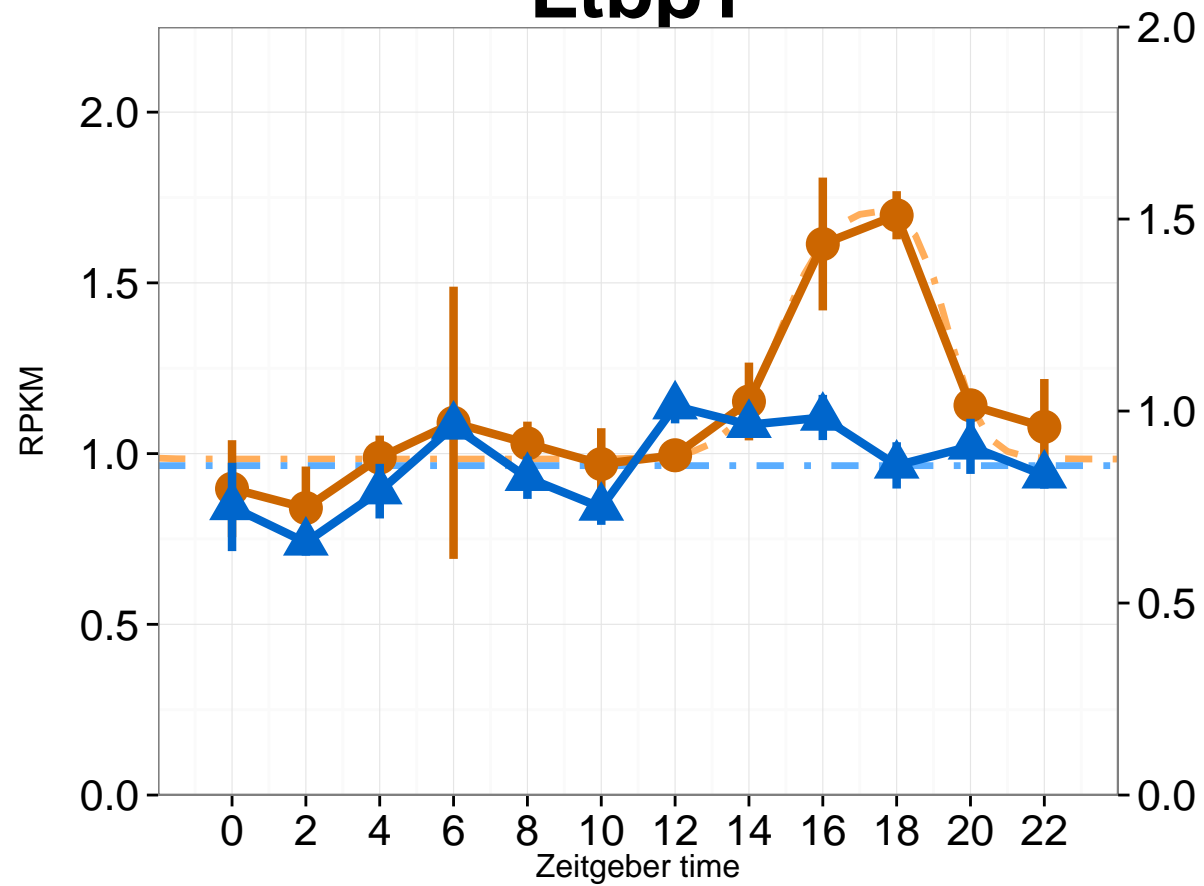

# Ltbp1

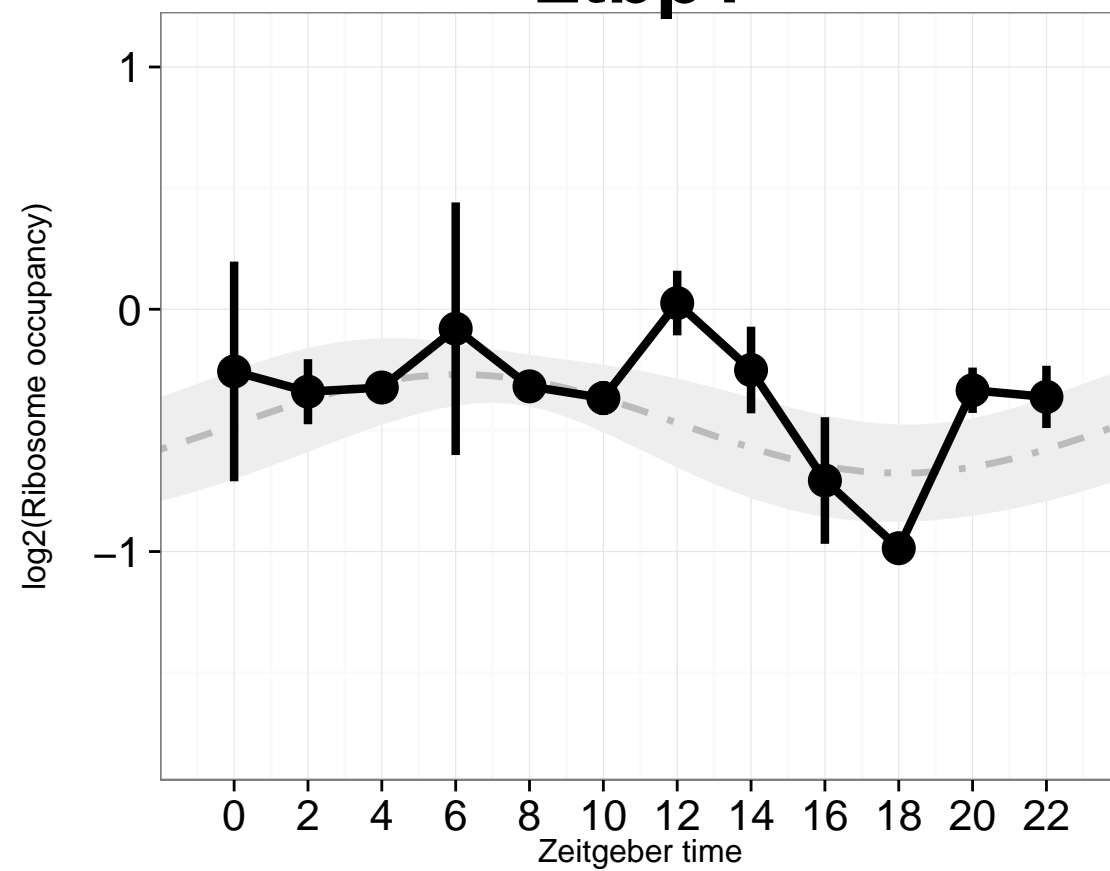

Supplement: SuppDataset_1.zip [file Ltbp1_set_B.pdf › Supplemental Dataset 1/B-mRNA_rhythm_translation_nonrhyth/Ltbp1_set_B.pdf]

# Ltbp3

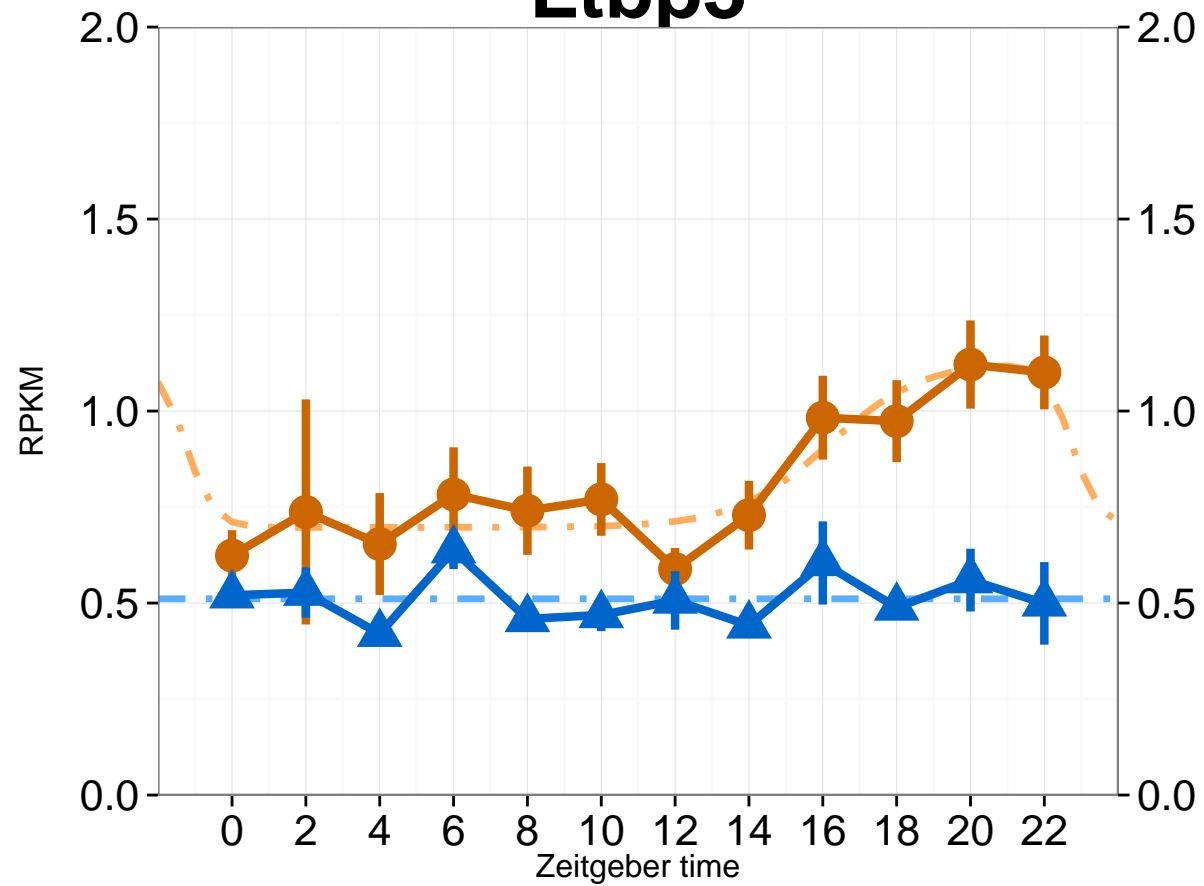

# Ltbp3

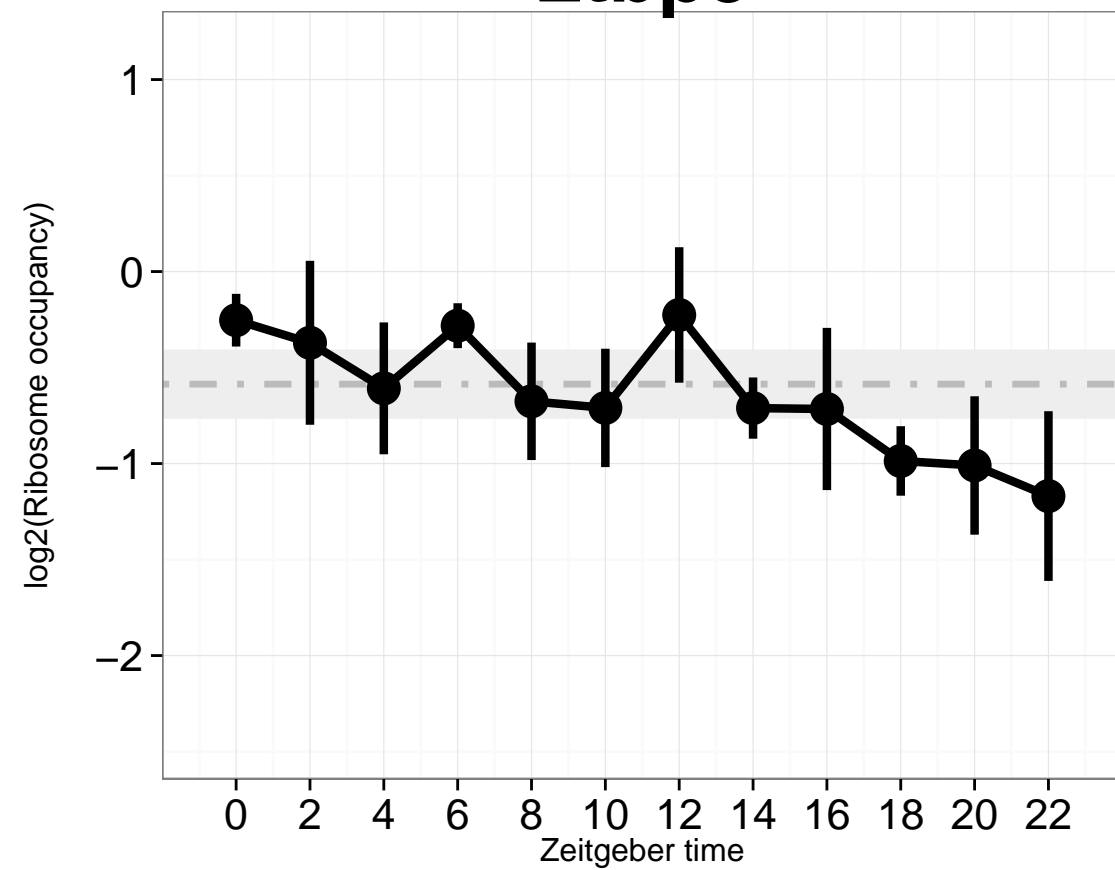

Supplement: SuppDataset_1.zip [file Ltbp3_set_B.pdf › Supplemental Dataset 1/B-mRNA_rhythm_translation_nonrhyth/Ltbp3_set_B.pdf]

# Ltbp4

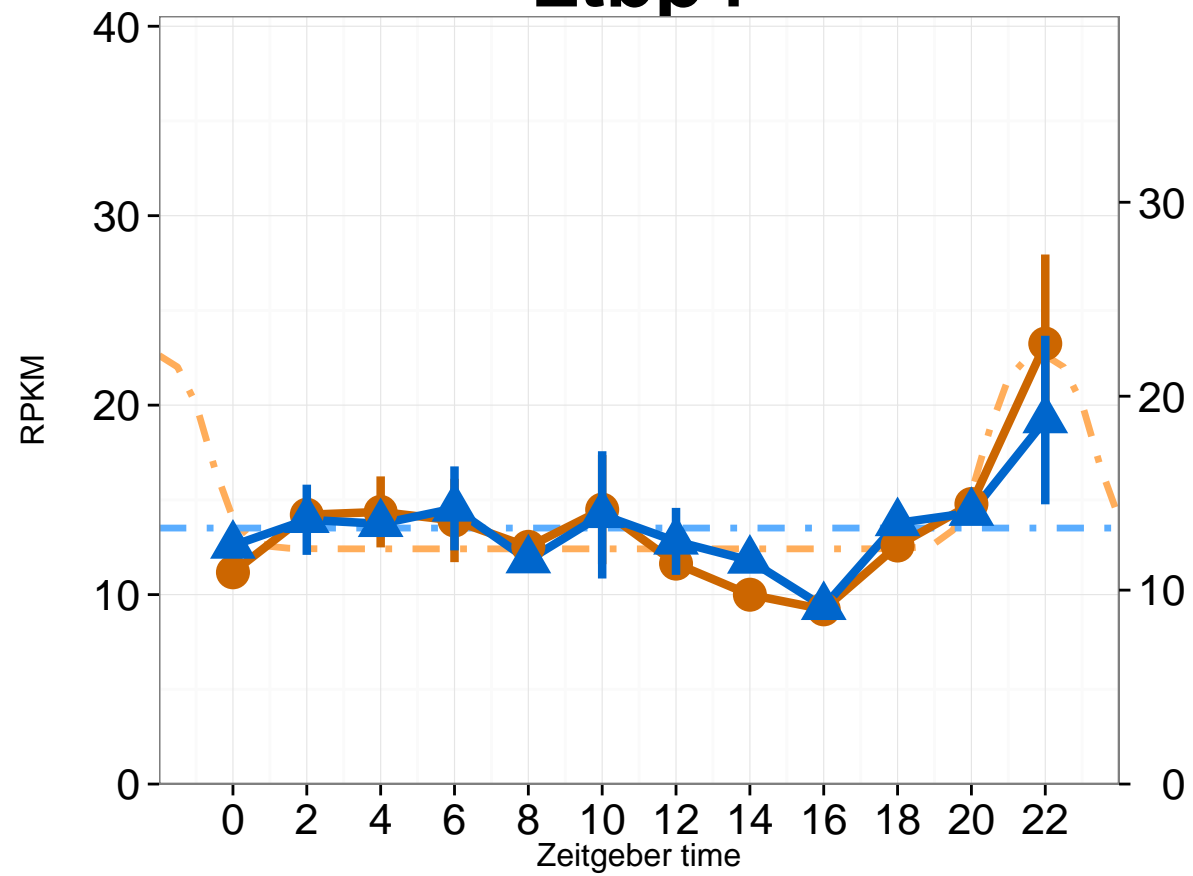

# Ltbp4

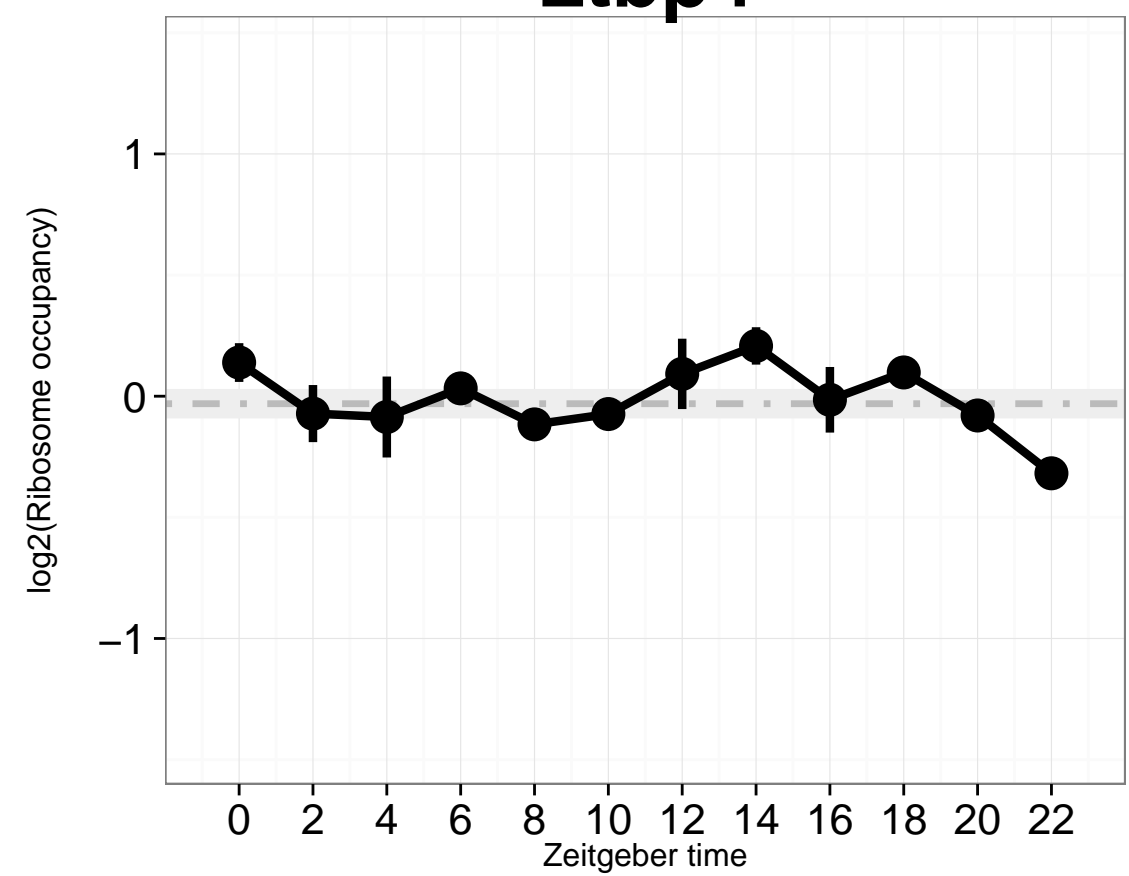

Supplement: SuppDataset_1.zip [file Ltbp4_set_B.pdf › Supplemental Dataset 1/B-mRNA_rhythm_translation_nonrhyth/Ltbp4_set_B.pdf]

## Lum

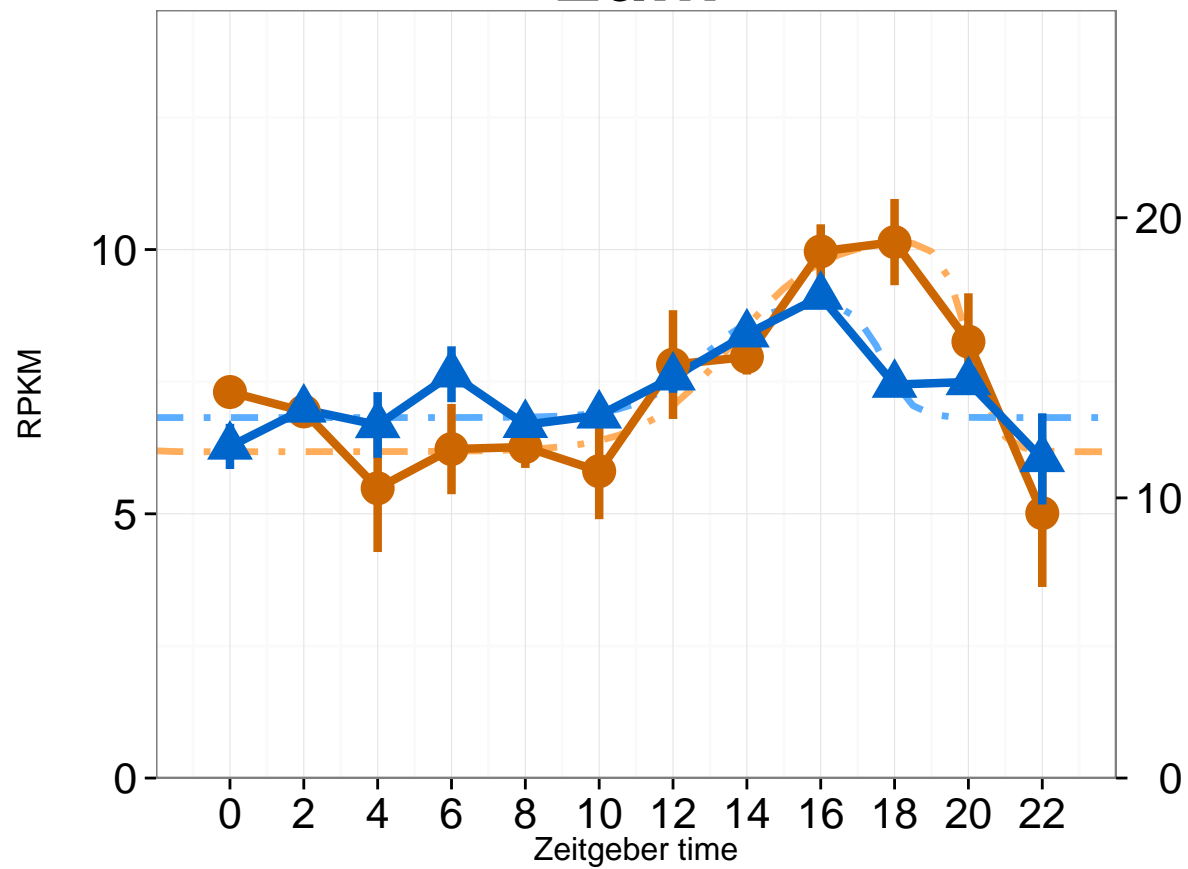

## Lum

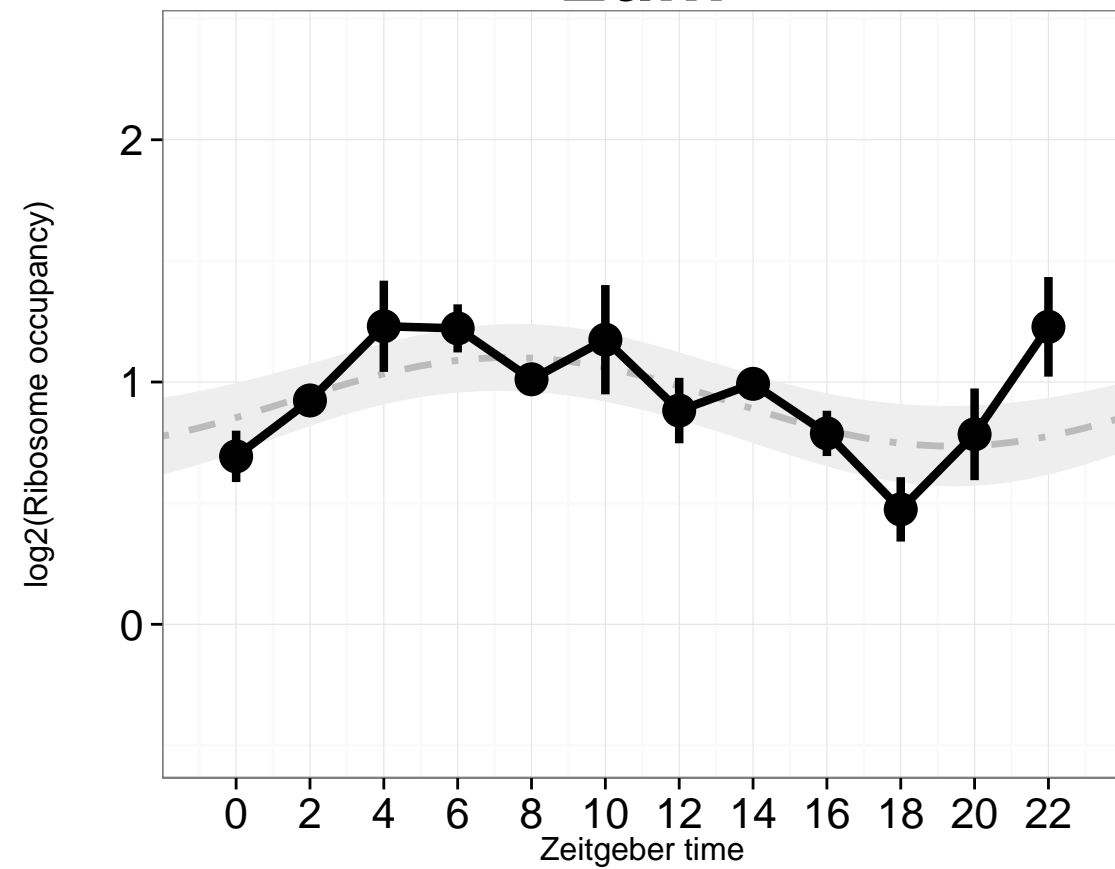

Supplement: SuppDataset_1.zip [file Lum_set_B.pdf › Supplemental Dataset 1/B-mRNA_rhythm_translation_nonrhyth/Lum_set_B.pdf]

## Lyrm2

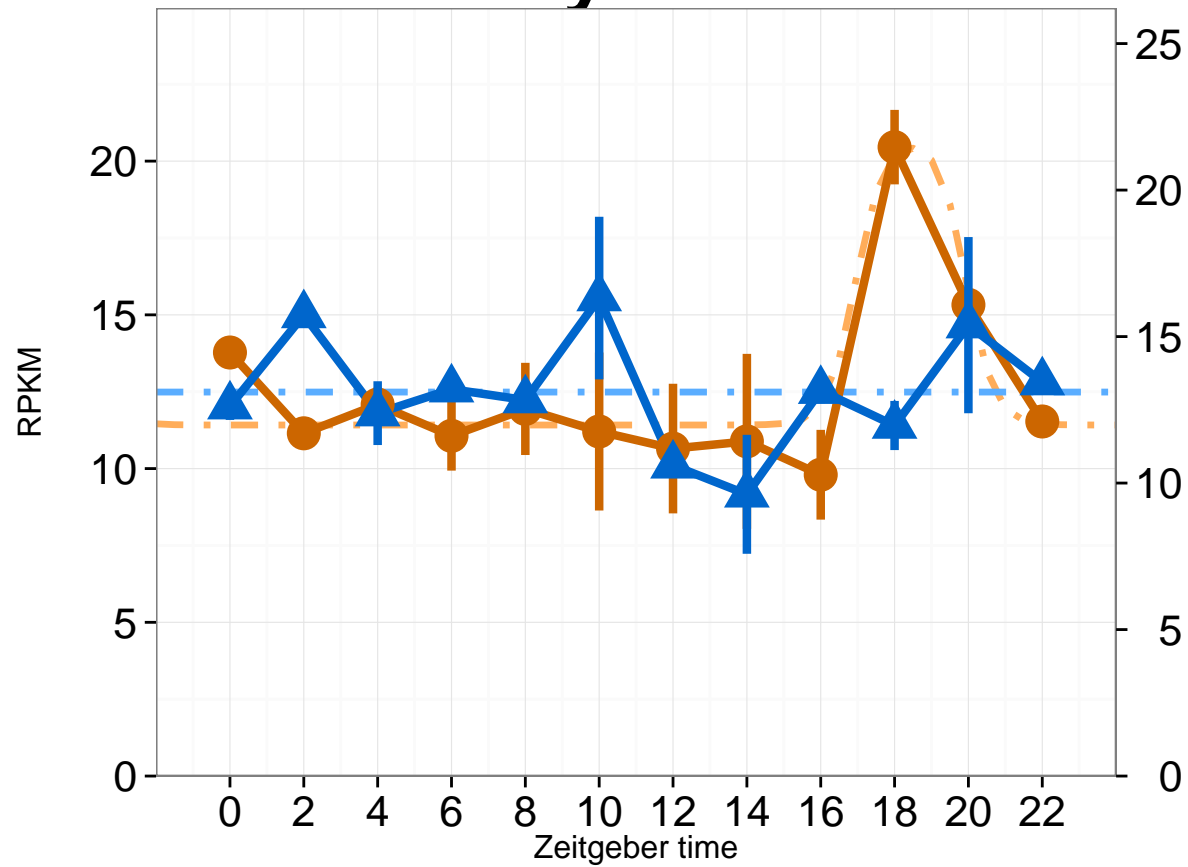

## Lyrm2

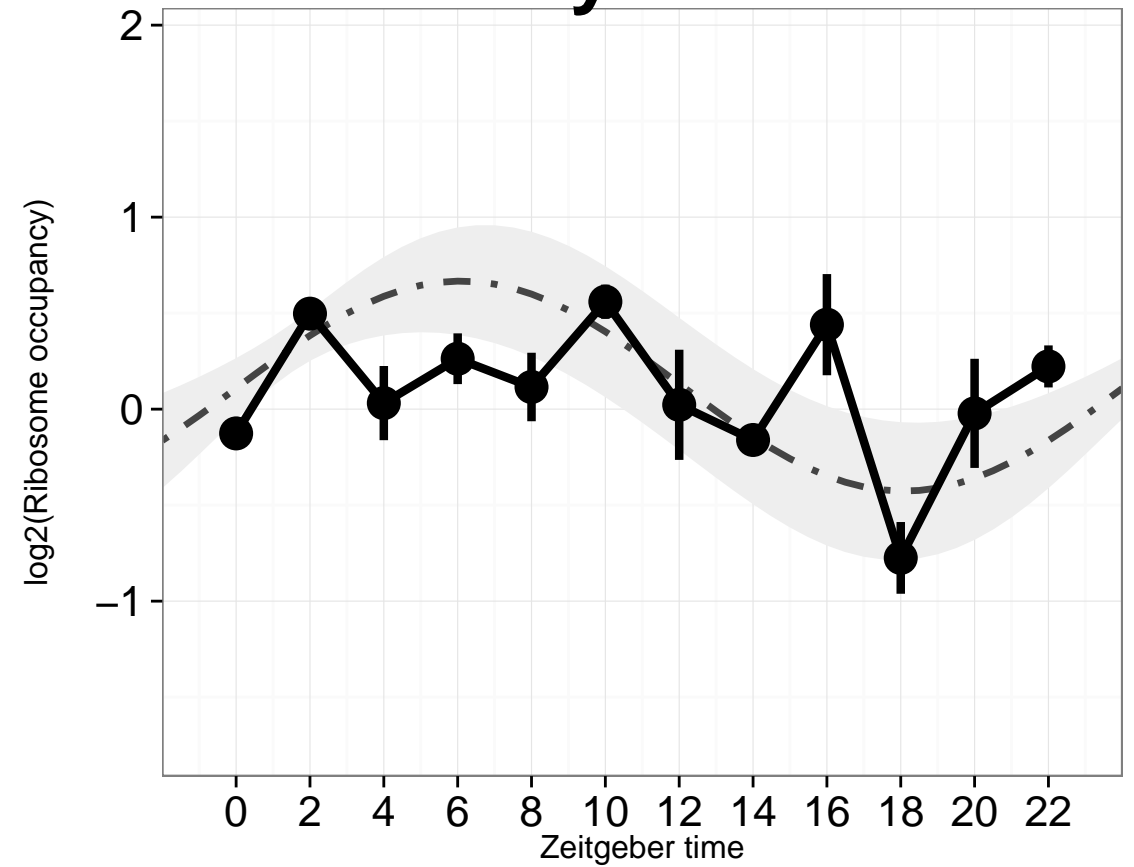

Supplement: SuppDataset_1.zip [file Lyrm2_set_B.pdf › Supplemental Dataset 1/B-mRNA_rhythm_translation_nonrhyth/Lyrm2_set_B.pdf]

# Lyrm7

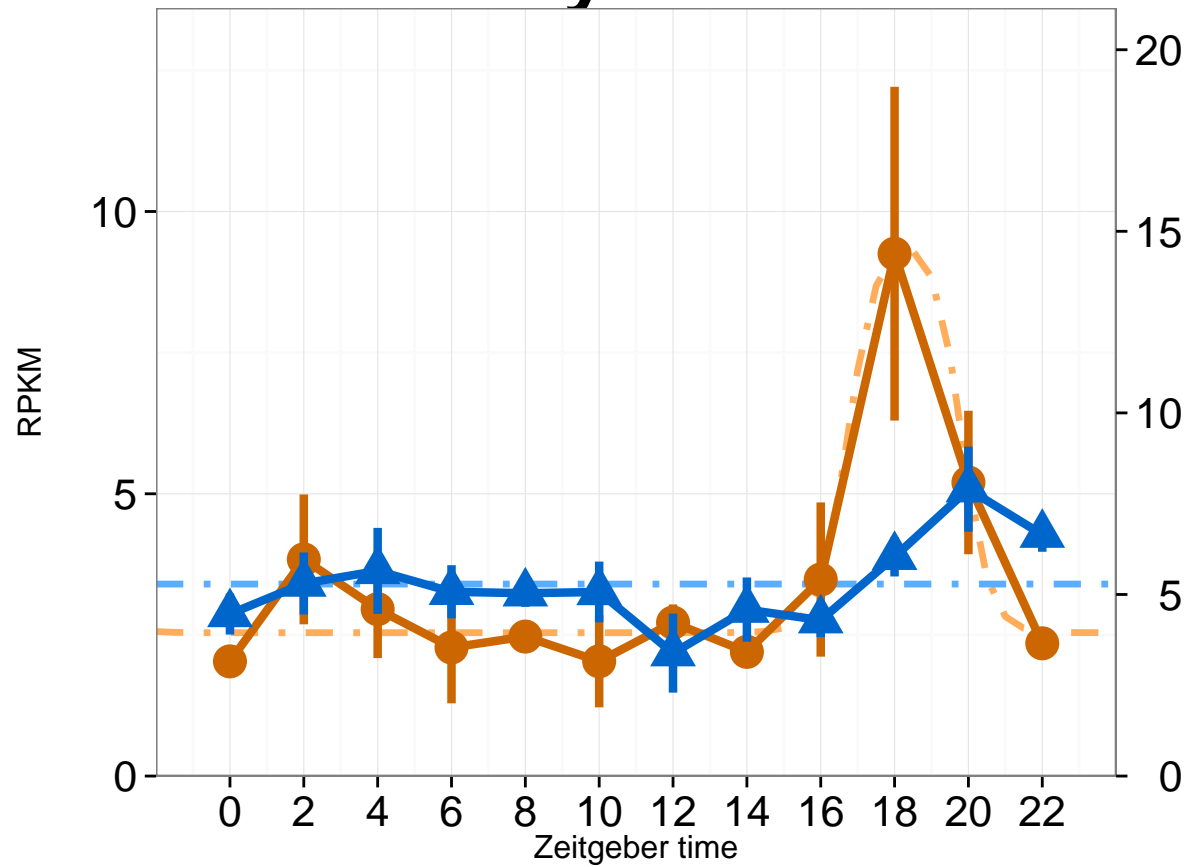

# Lyrm7

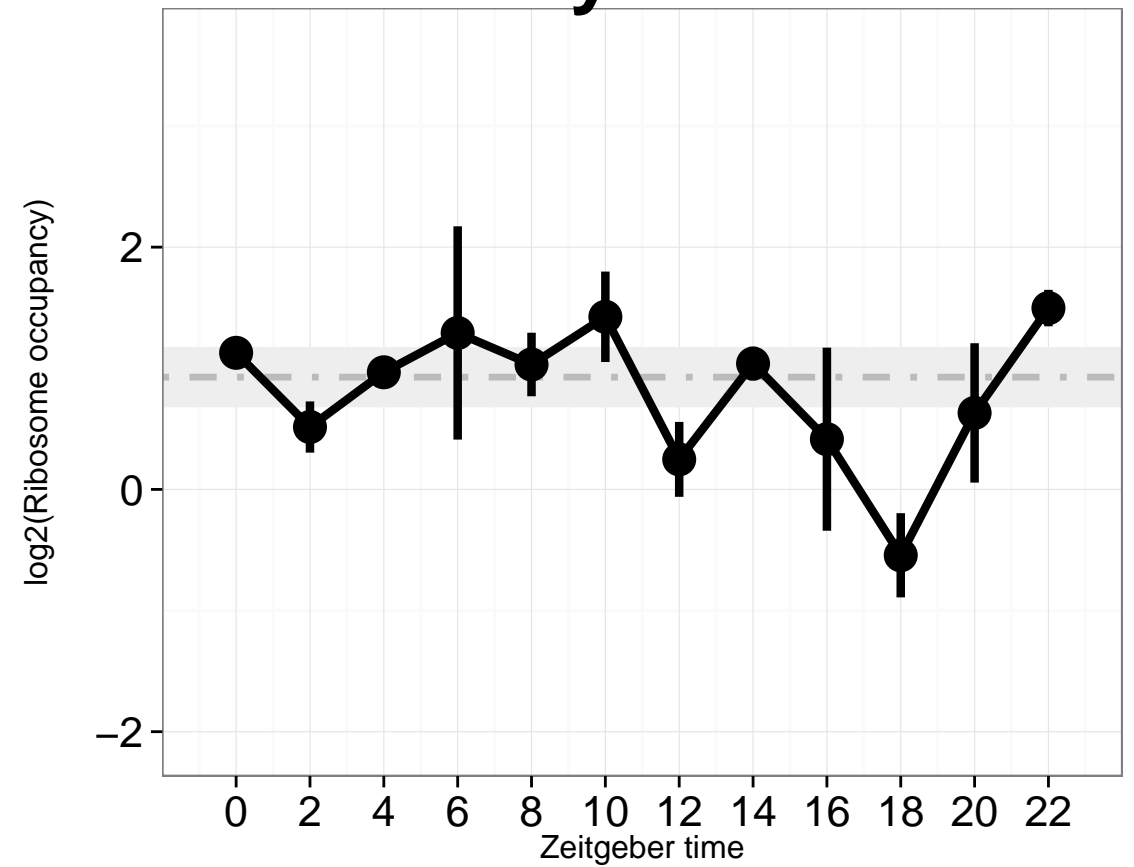

Supplement: SuppDataset_1.zip [file Lyrm7_set_B.pdf › Supplemental Dataset 1/B-mRNA_rhythm_translation_nonrhyth/Lyrm7_set_B.pdf]

# Lzts2

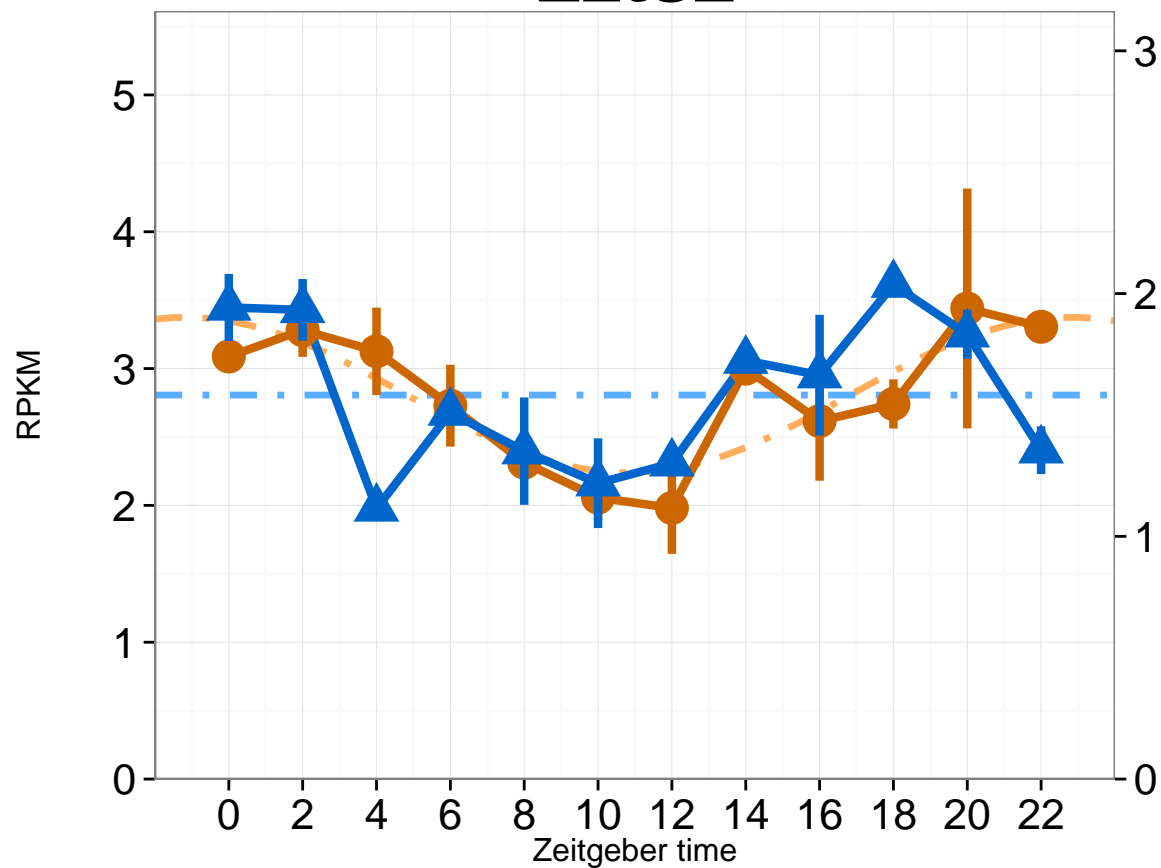

# Lzts2

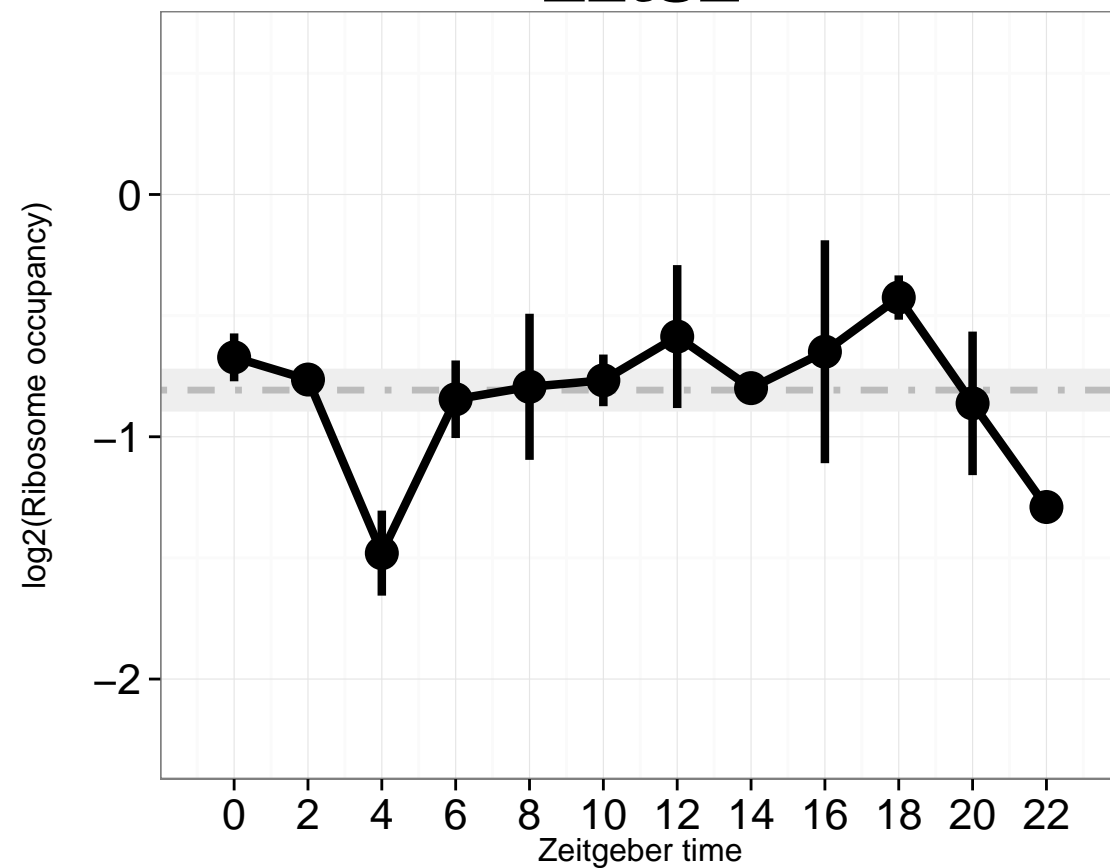

Supplement: SuppDataset_1.zip [file Lzts2_set_B.pdf › Supplemental Dataset 1/B-mRNA_rhythm_translation_nonrhyth/Lzts2_set_B.pdf]

## Mafb

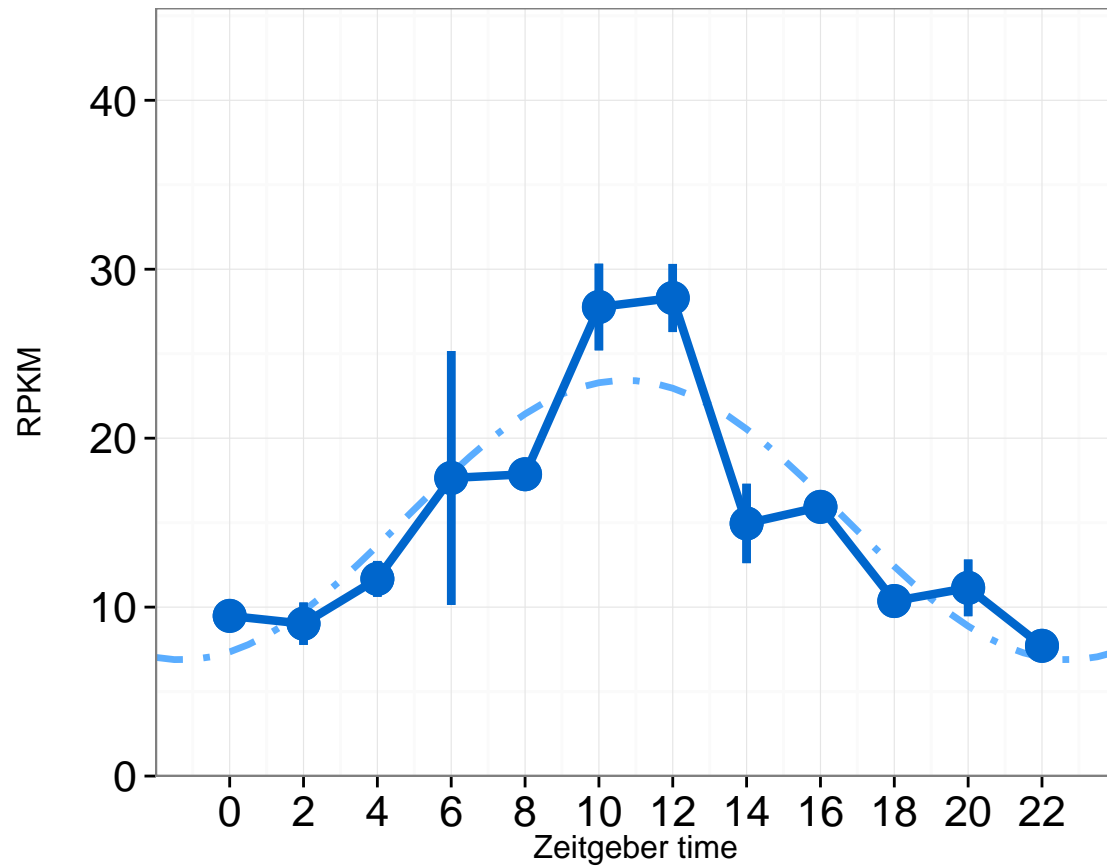

## Mafb log2(Ribosome occupancy)

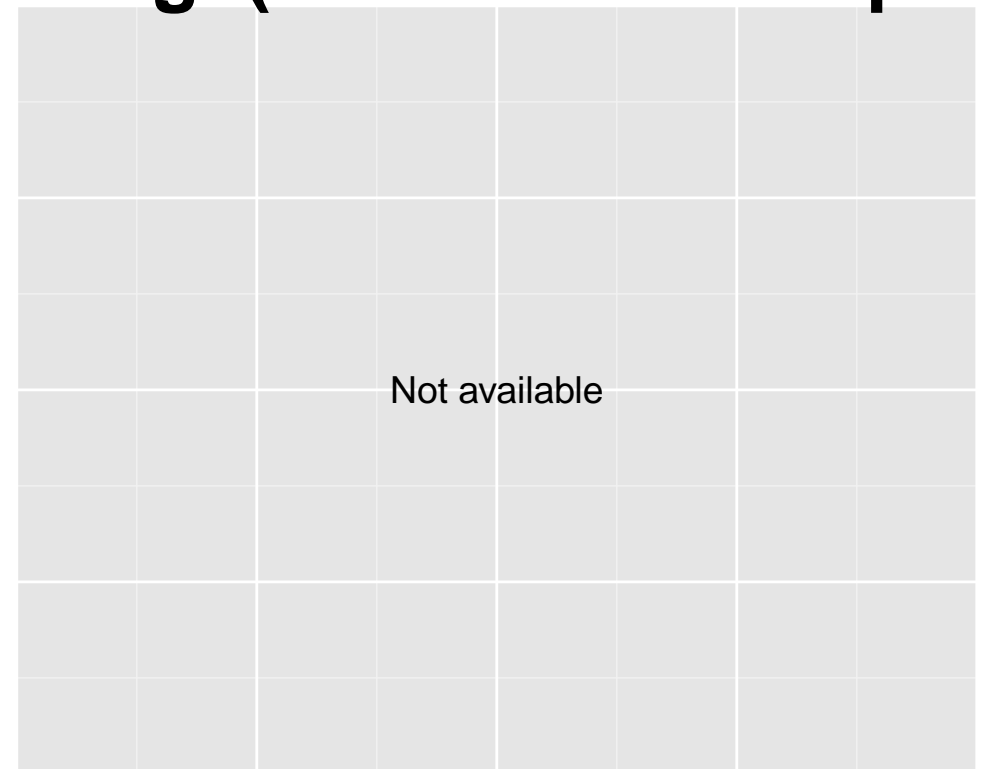

Supplement: SuppDataset_1.zip [file Mafb_set_B.pdf › Supplemental Dataset 1/B-mRNA_rhythm_translation_nonrhyth/Mafb_set_B.pdf]

# Map1b

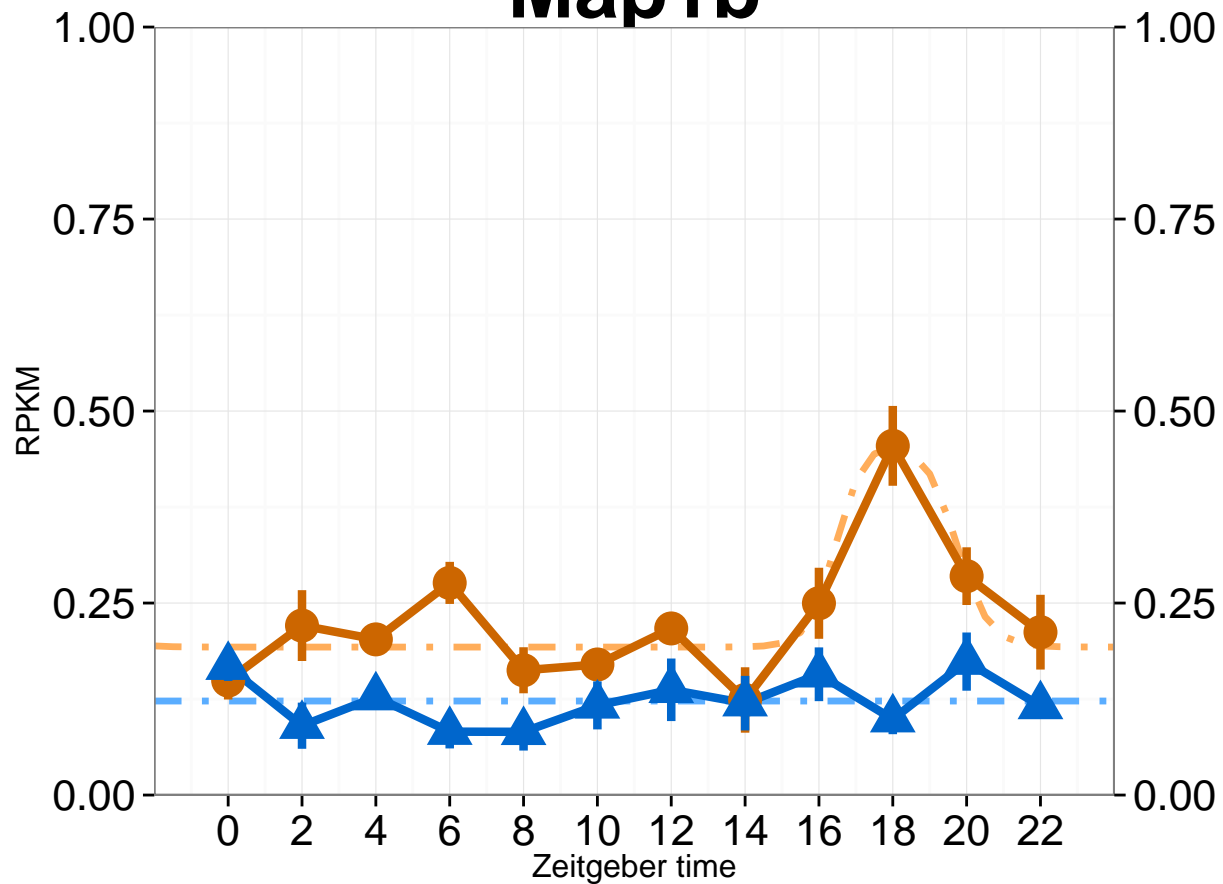

# Map1b

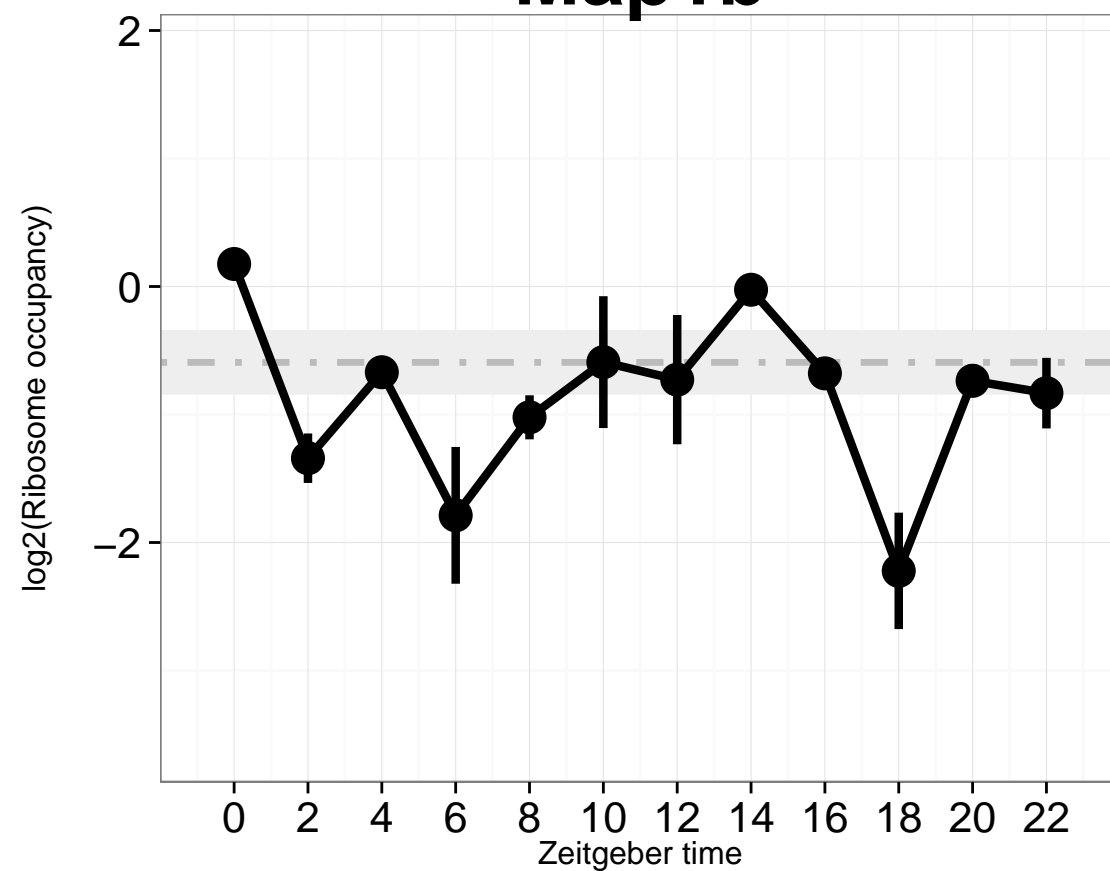

Supplement: SuppDataset_1.zip [file Map1b_set_B.pdf › Supplemental Dataset 1/B-mRNA_rhythm_translation_nonrhyth/Map1b_set_B.pdf]

# Map1lc3a

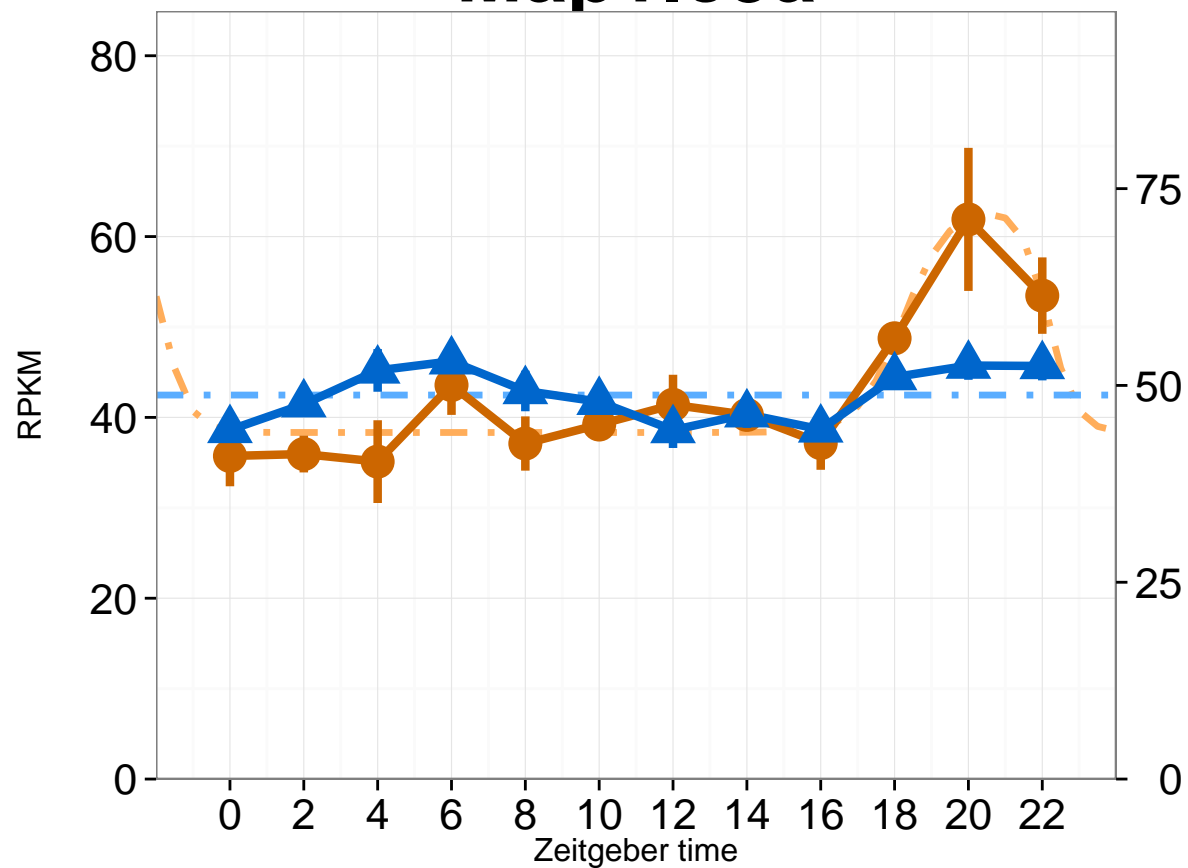

# Map1lc3a

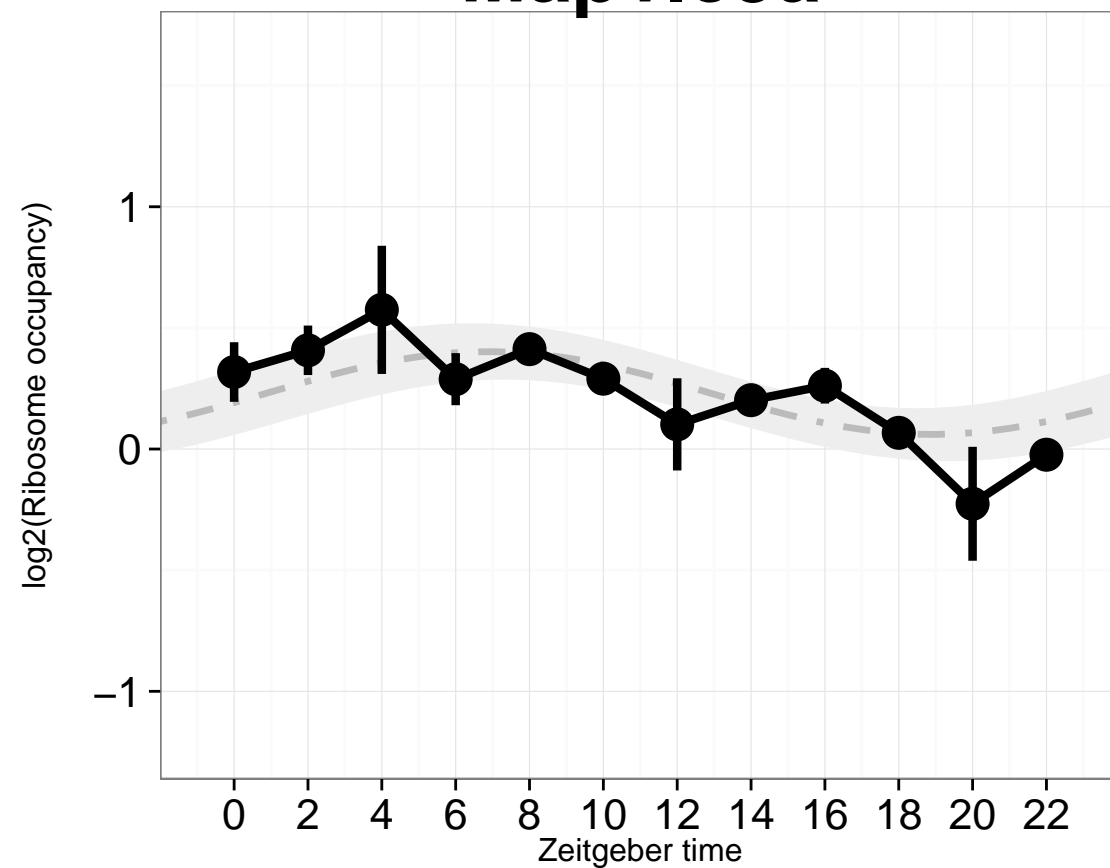

Supplement: SuppDataset_1.zip [file Map1lc3a_set_B.pdf › Supplemental Dataset 1/B-mRNA_rhythm_translation_nonrhyth/Map1lc3a_set_B.pdf]

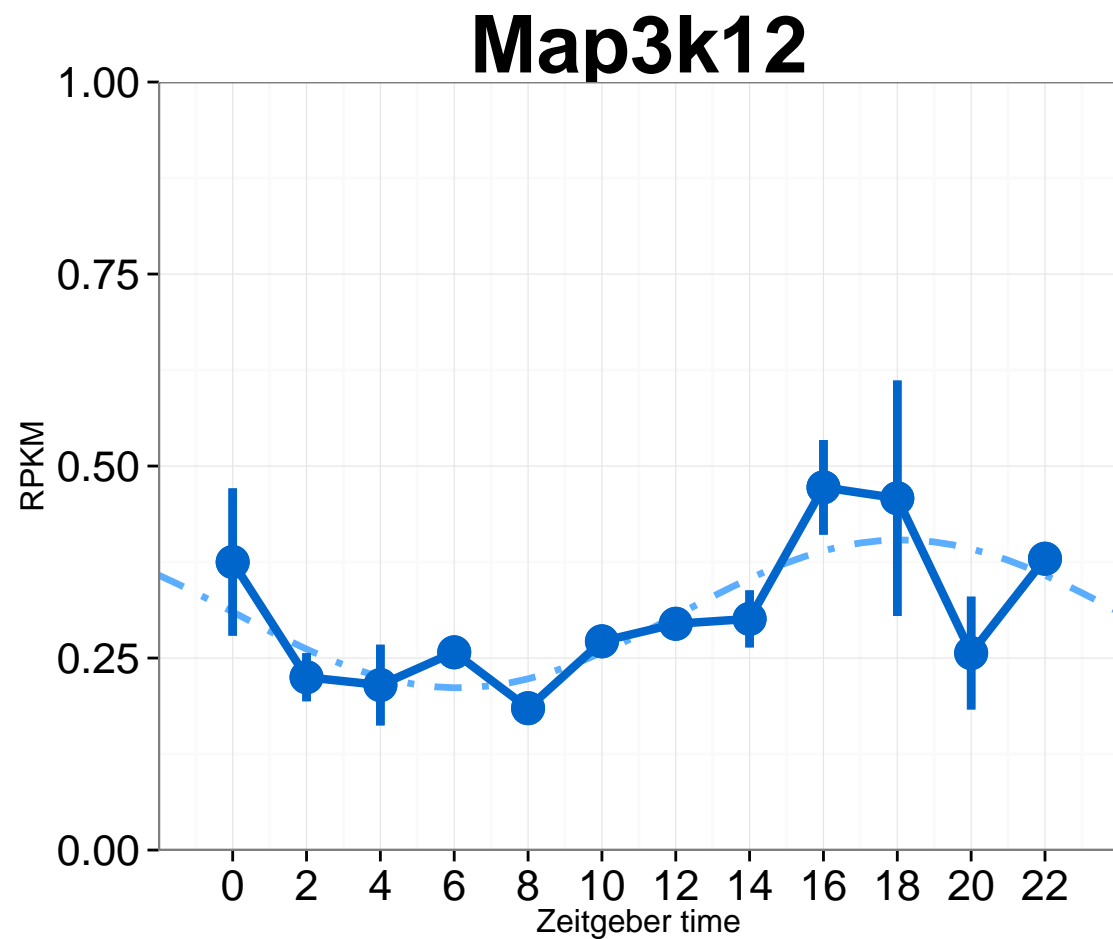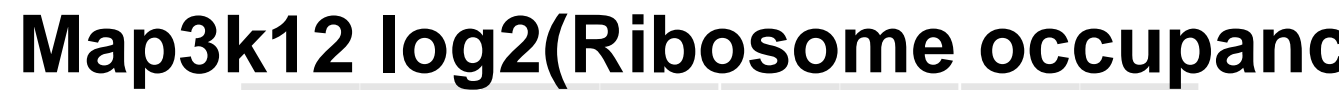

Supplement: SuppDataset_1.zip [file Map3k12_set_B.pdf › Supplemental Dataset 1/B-mRNA_rhythm_translation_nonrhyth/Map3k12_set_B.pdf]

# Map3k1

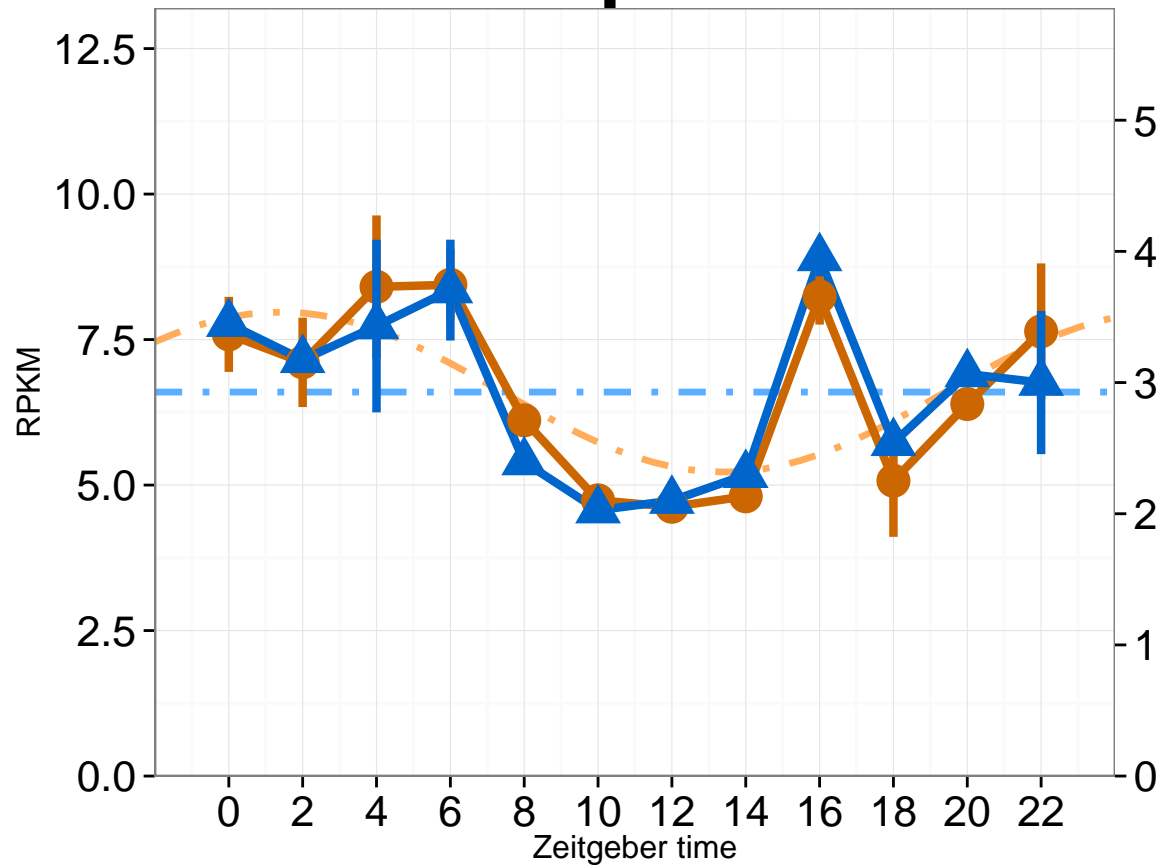

# Map3k1

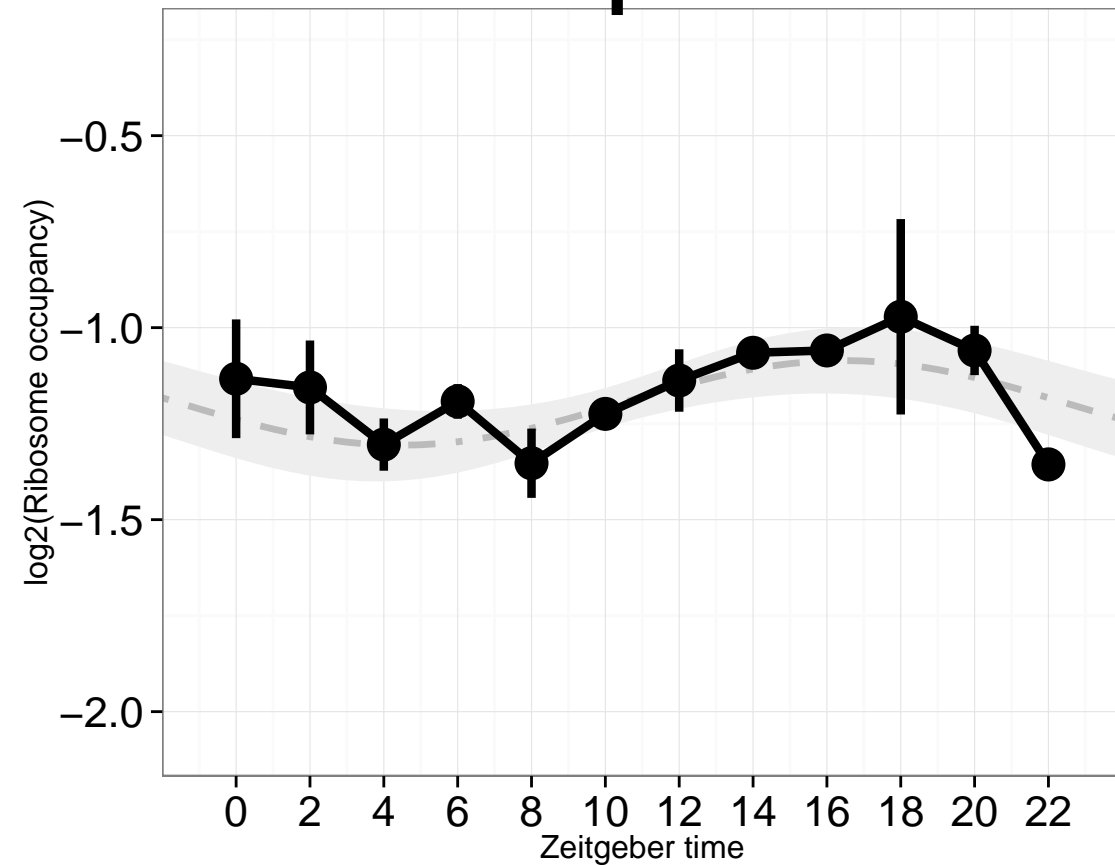

Supplement: SuppDataset_1.zip [file Map3k1_set_B.pdf › Supplemental Dataset 1/B-mRNA_rhythm_translation_nonrhyth/Map3k1_set_B.pdf]

# Map4k3

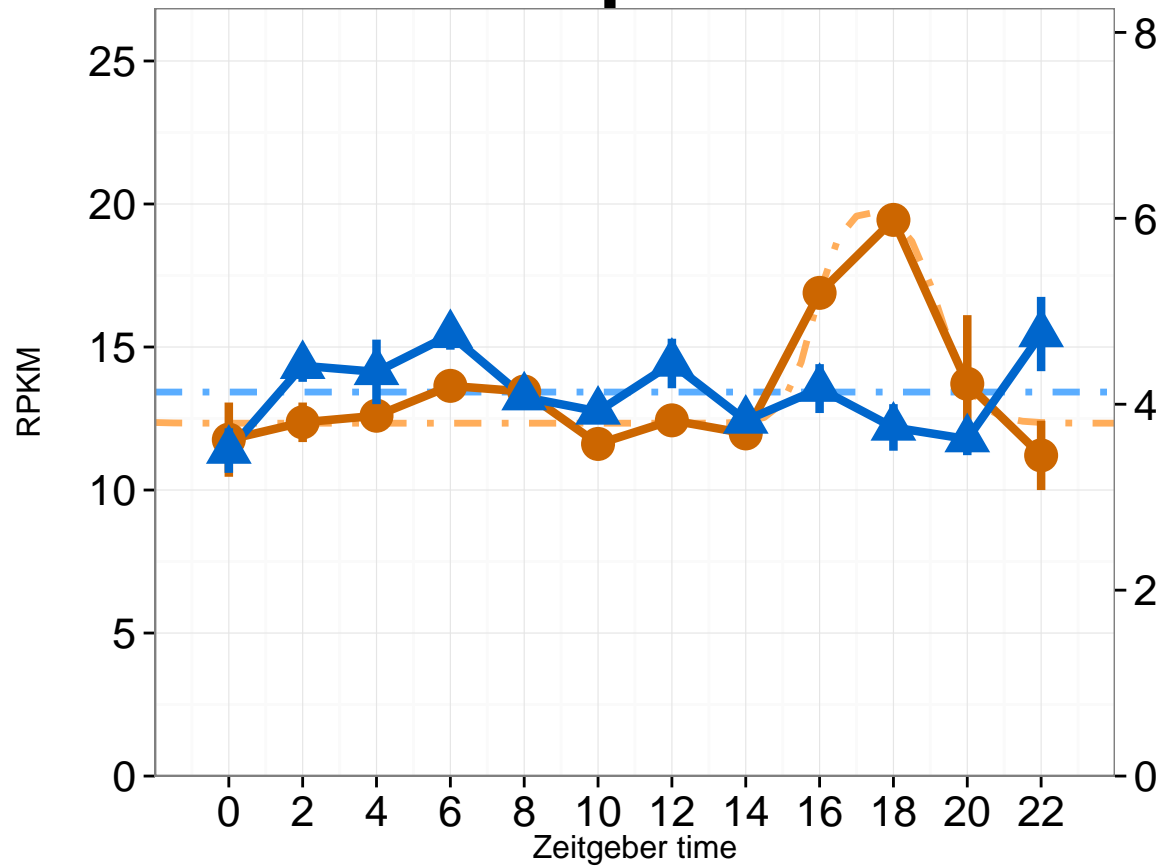

# Map4k3

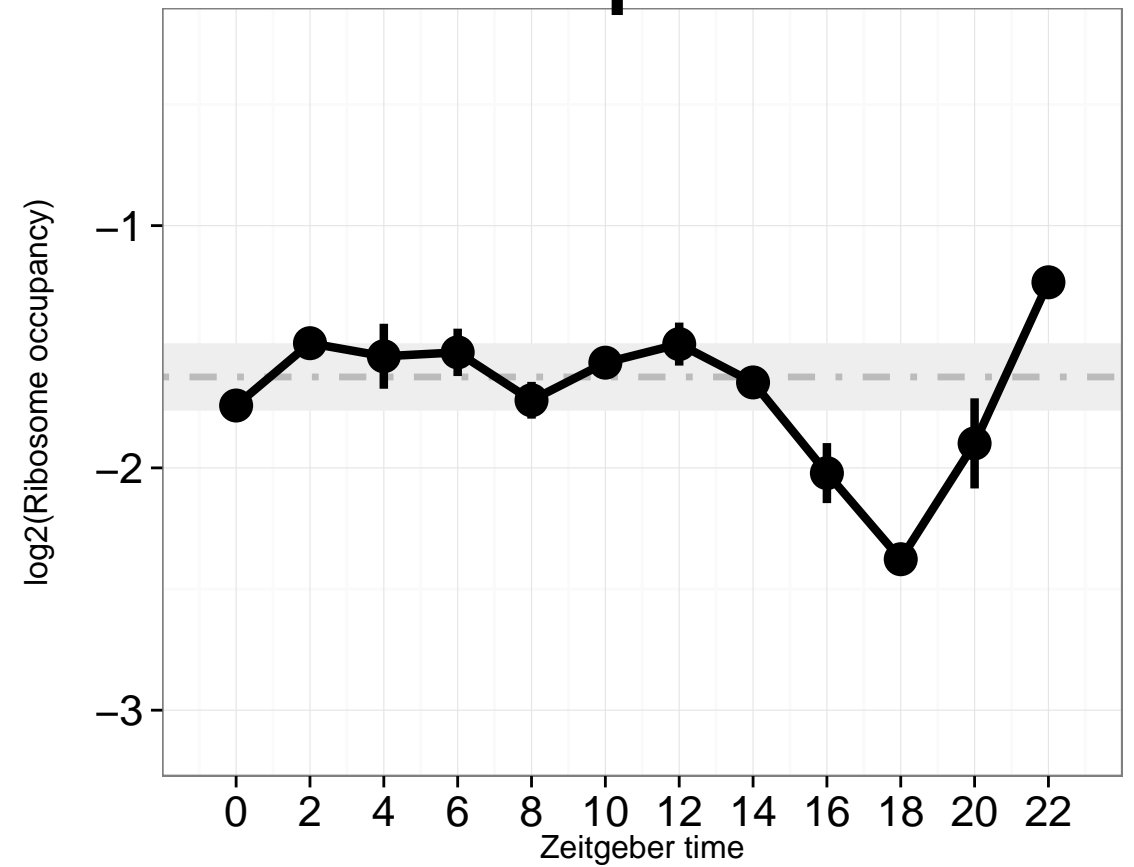

Supplement: SuppDataset_1.zip [file Map4k3_set_B.pdf › Supplemental Dataset 1/B-mRNA_rhythm_translation_nonrhyth/Map4k3_set_B.pdf]

## Marcks

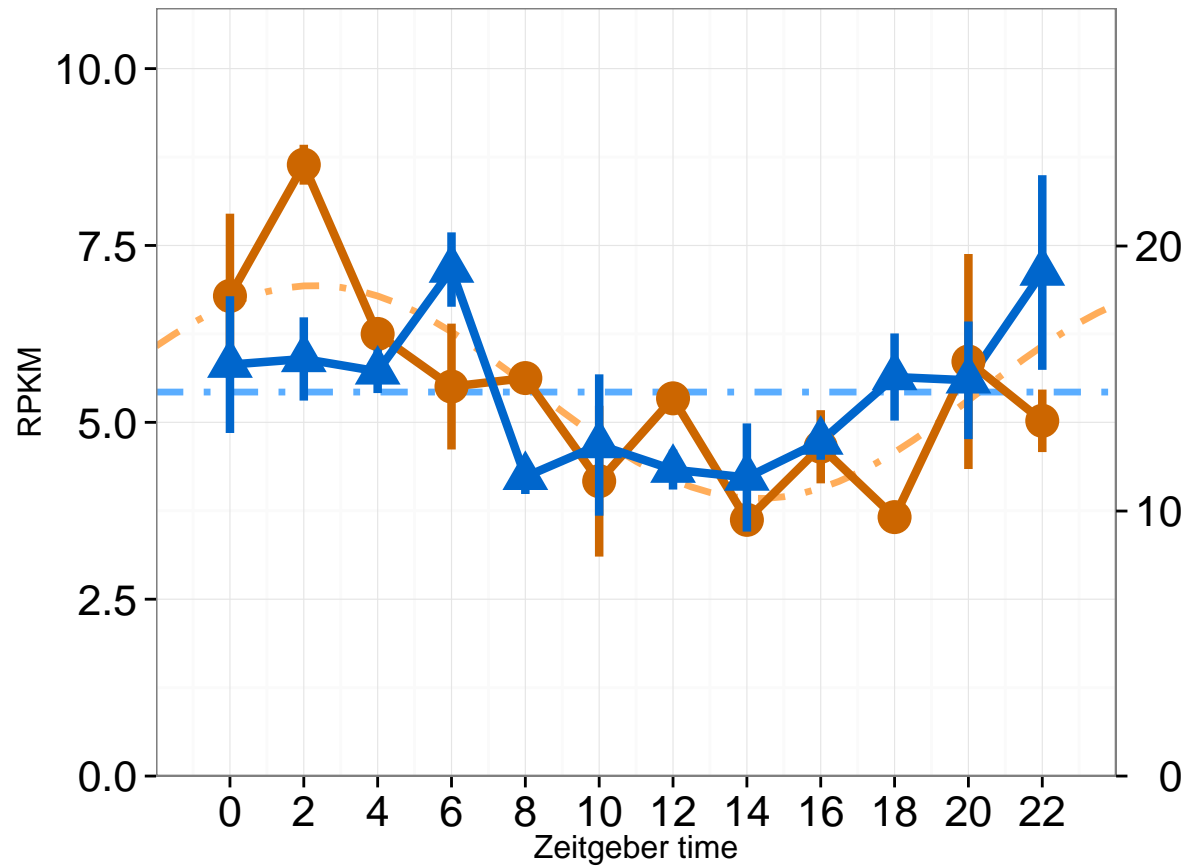

## Marcks

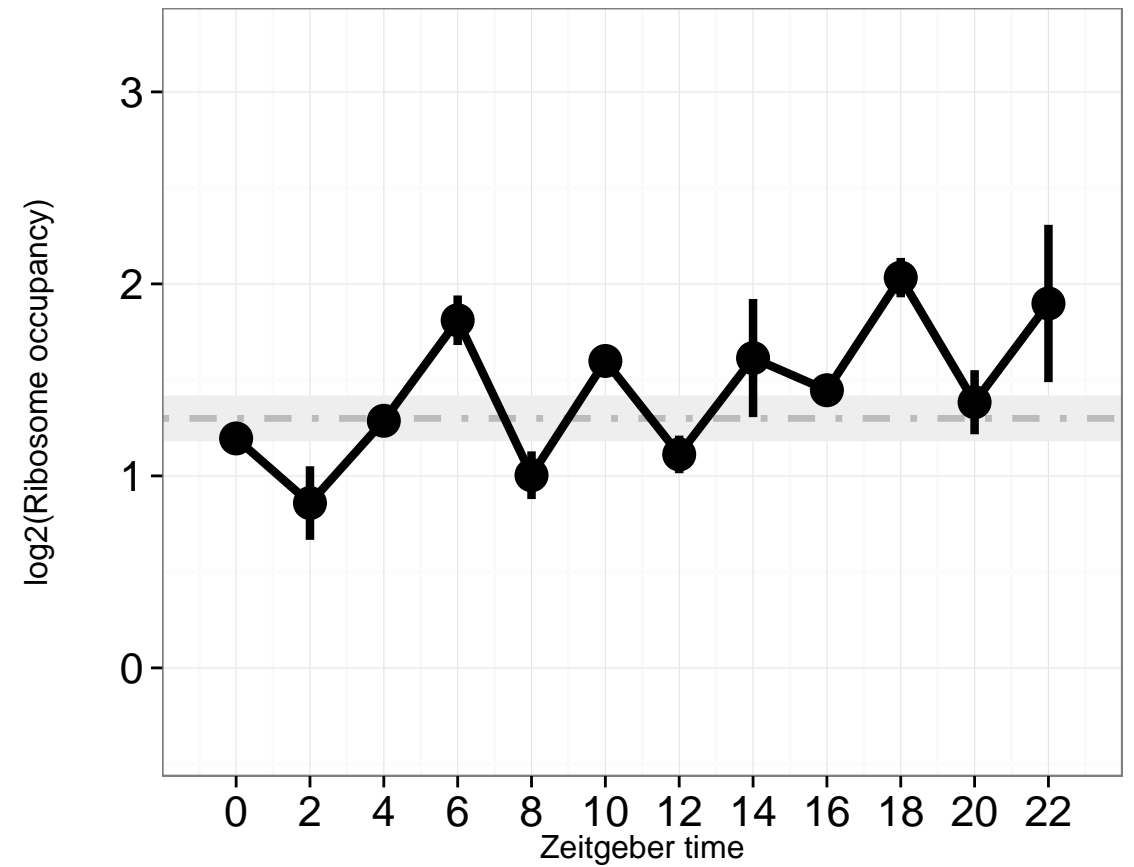

Supplement: SuppDataset_1.zip [file Marcks_set_B.pdf › Supplemental Dataset 1/B-mRNA_rhythm_translation_nonrhyth/Marcks_set_B.pdf]

# Mast4

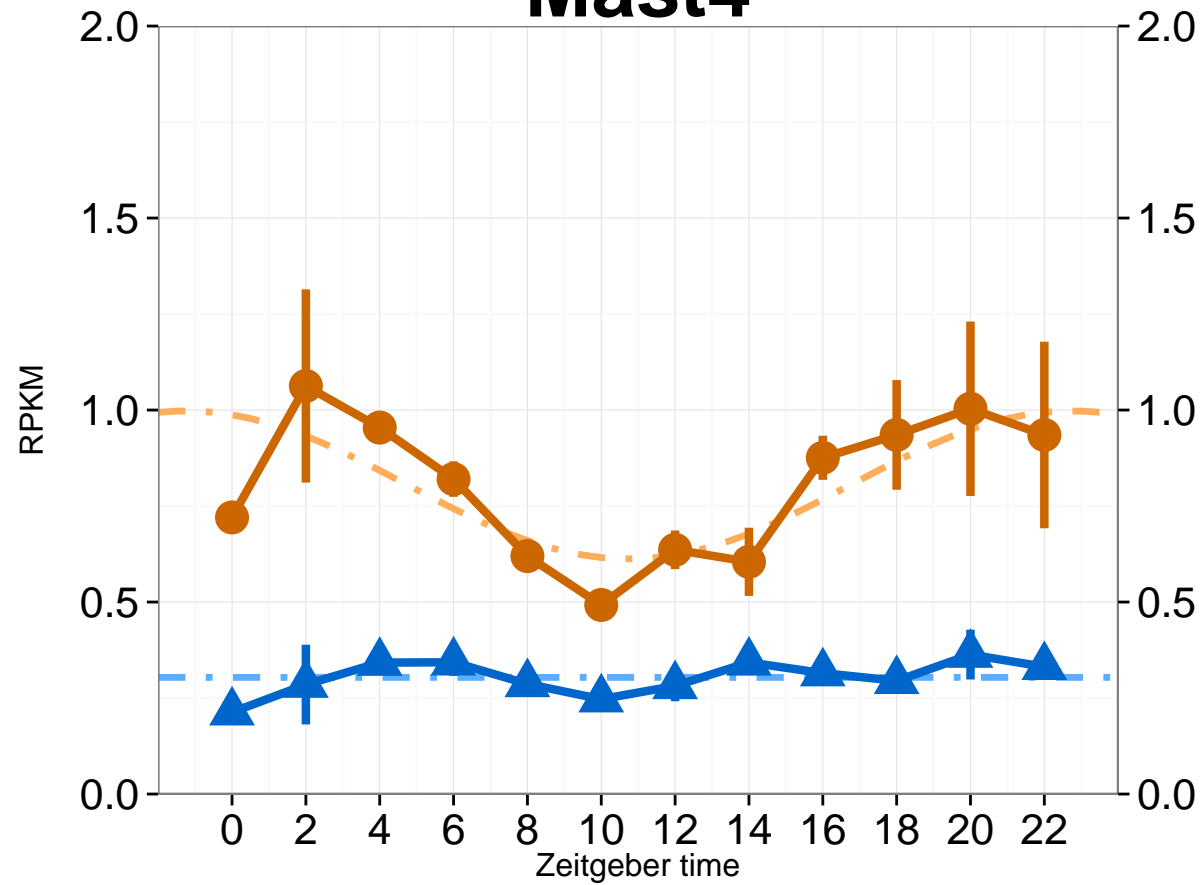

# Mast4

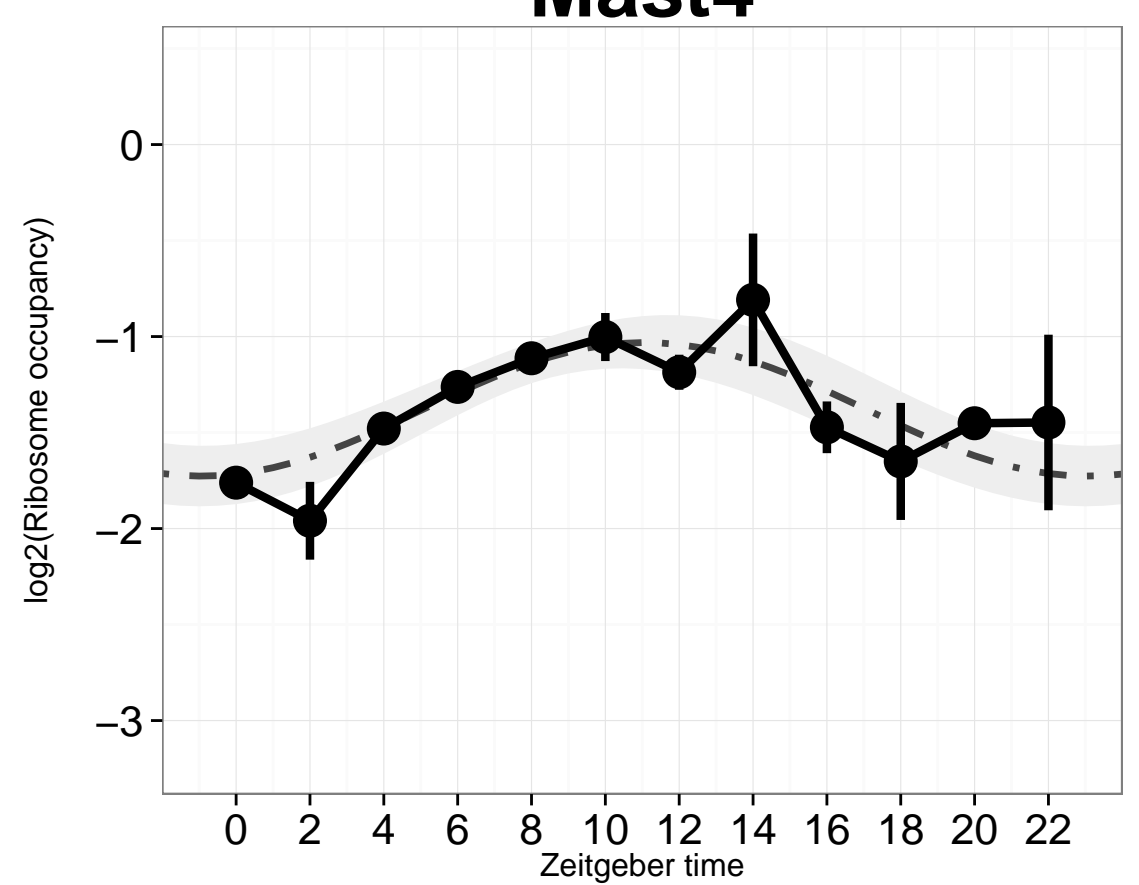

Supplement: SuppDataset_1.zip [file Mast4_set_B.pdf › Supplemental Dataset 1/B-mRNA_rhythm_translation_nonrhyth/Mast4_set_B.pdf]

## Mavs

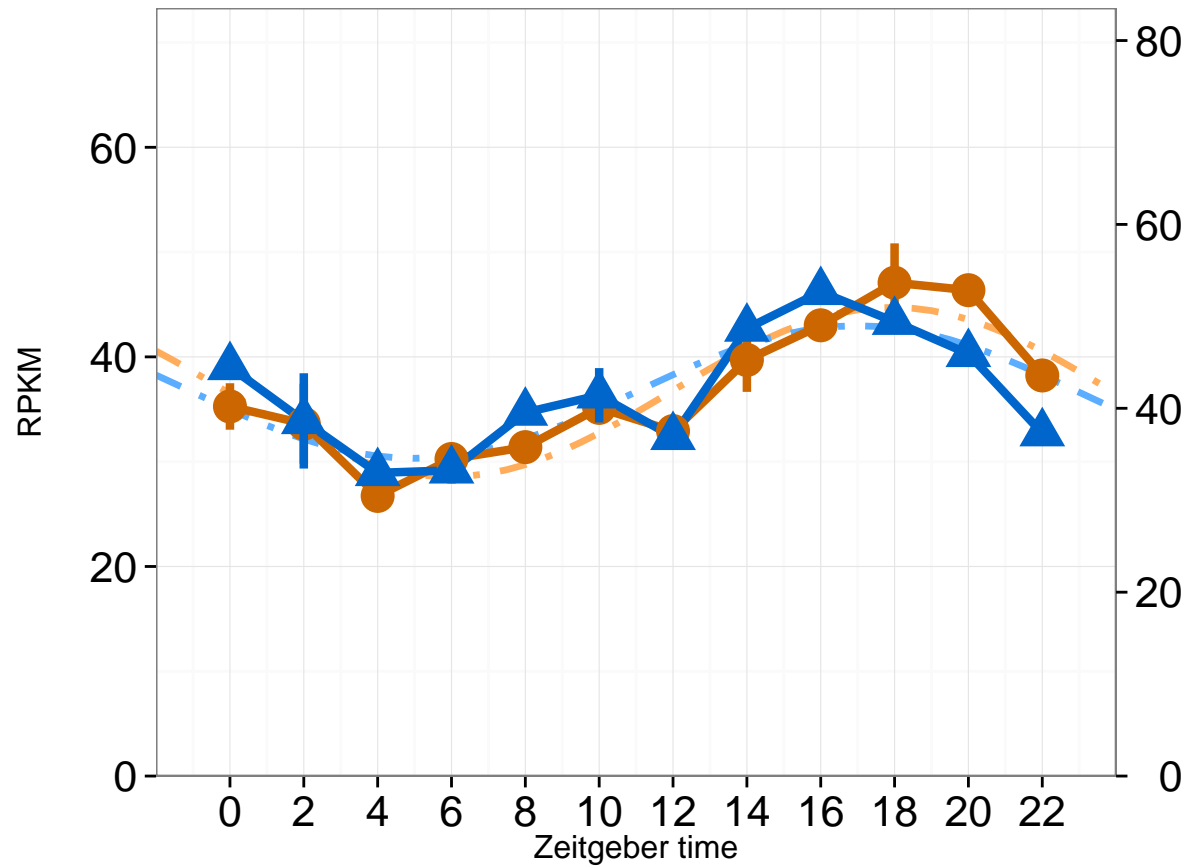

## Mavs

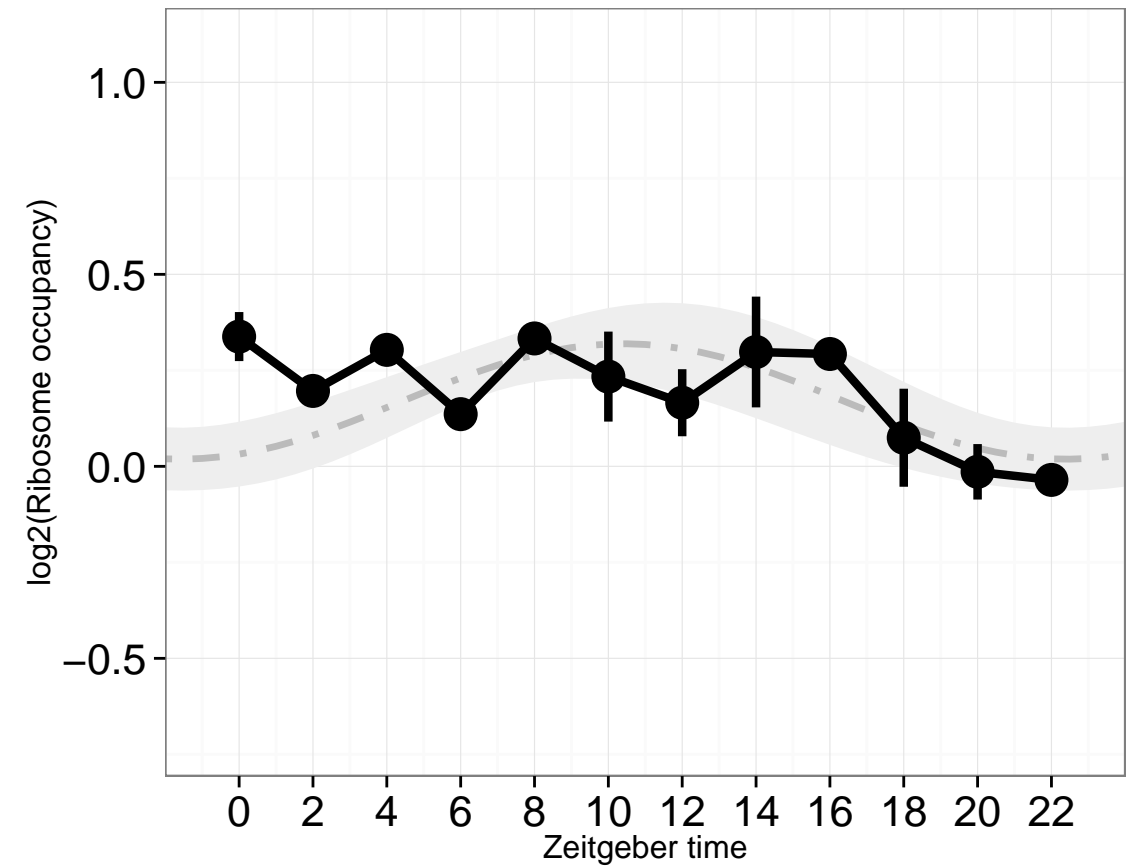

Supplement: SuppDataset_1.zip [file Mavs_set_B.pdf › Supplemental Dataset 1/B-mRNA_rhythm_translation_nonrhyth/Mavs_set_B.pdf]

# Max

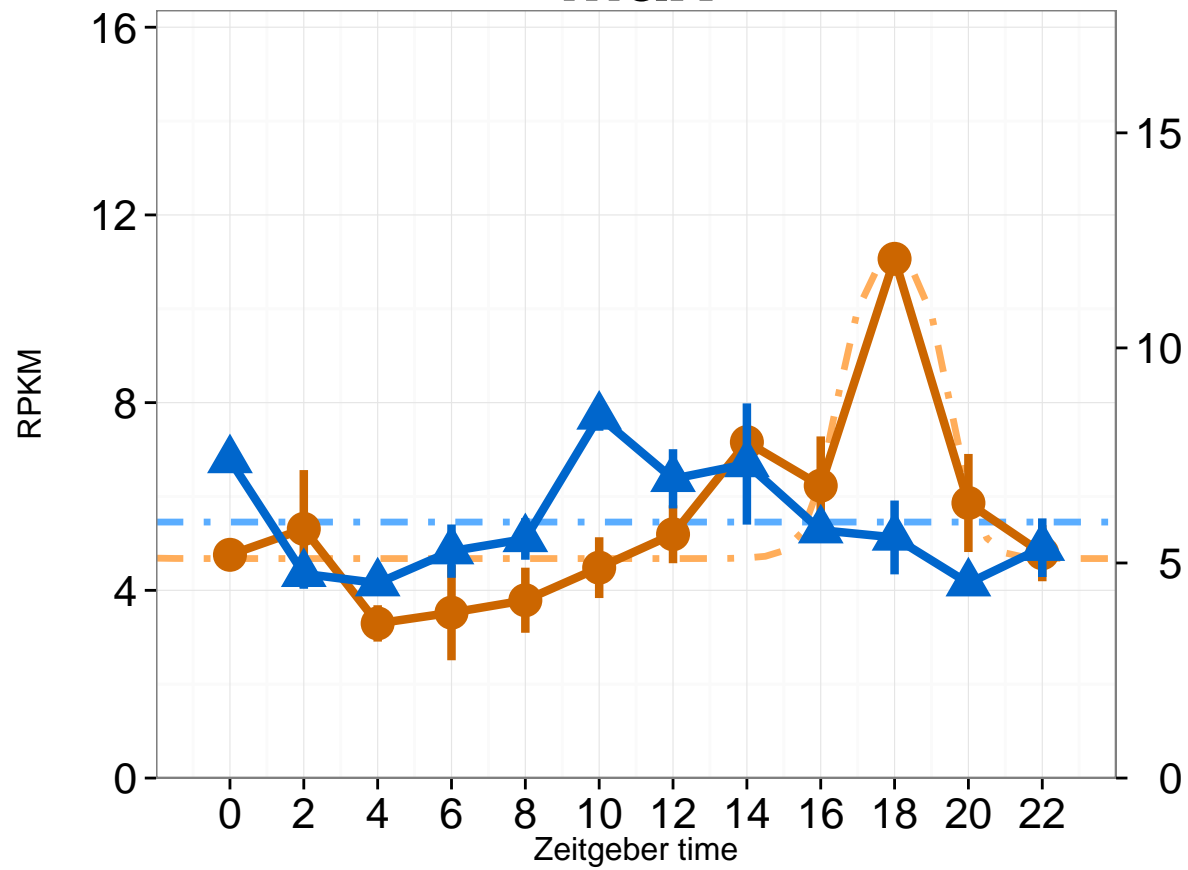

# Max

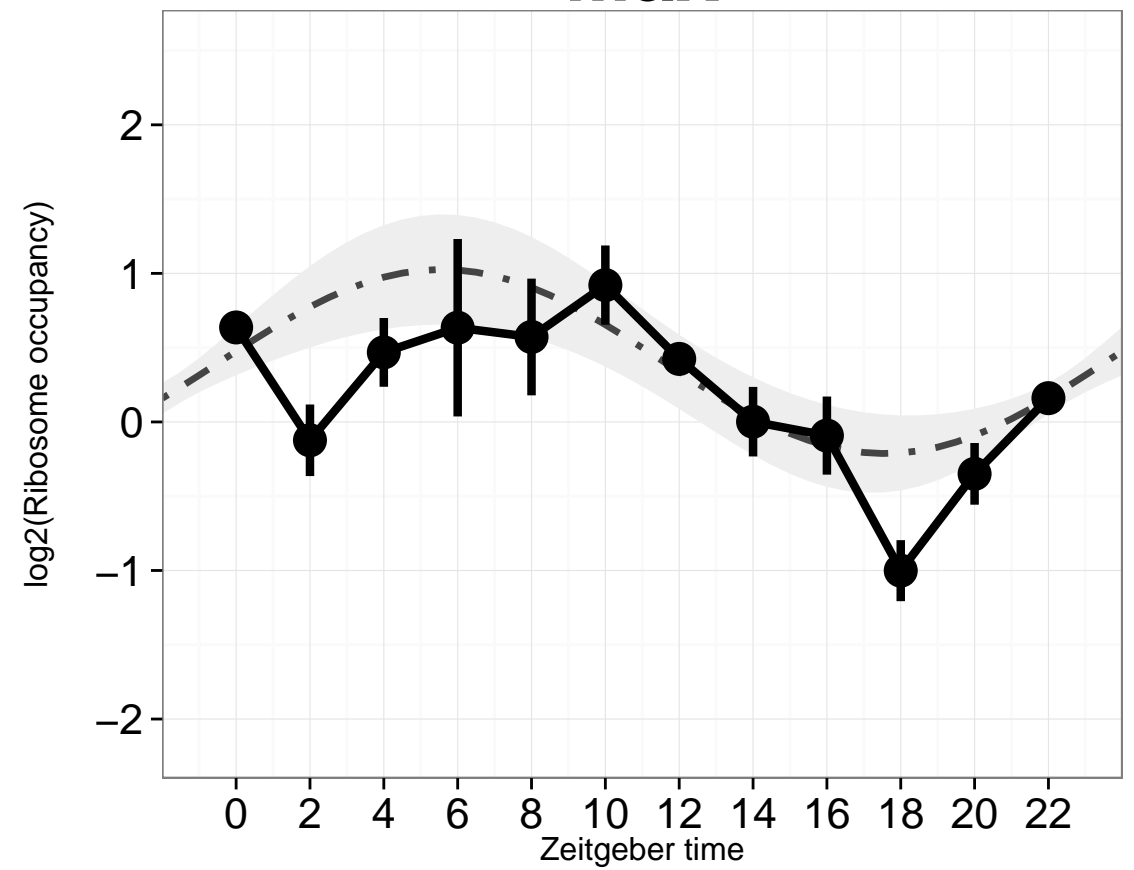

Supplement: SuppDataset_1.zip [file Max_set_B.pdf › Supplemental Dataset 1/B-mRNA_rhythm_translation_nonrhyth/Max_set_B.pdf]

## Mbnl2

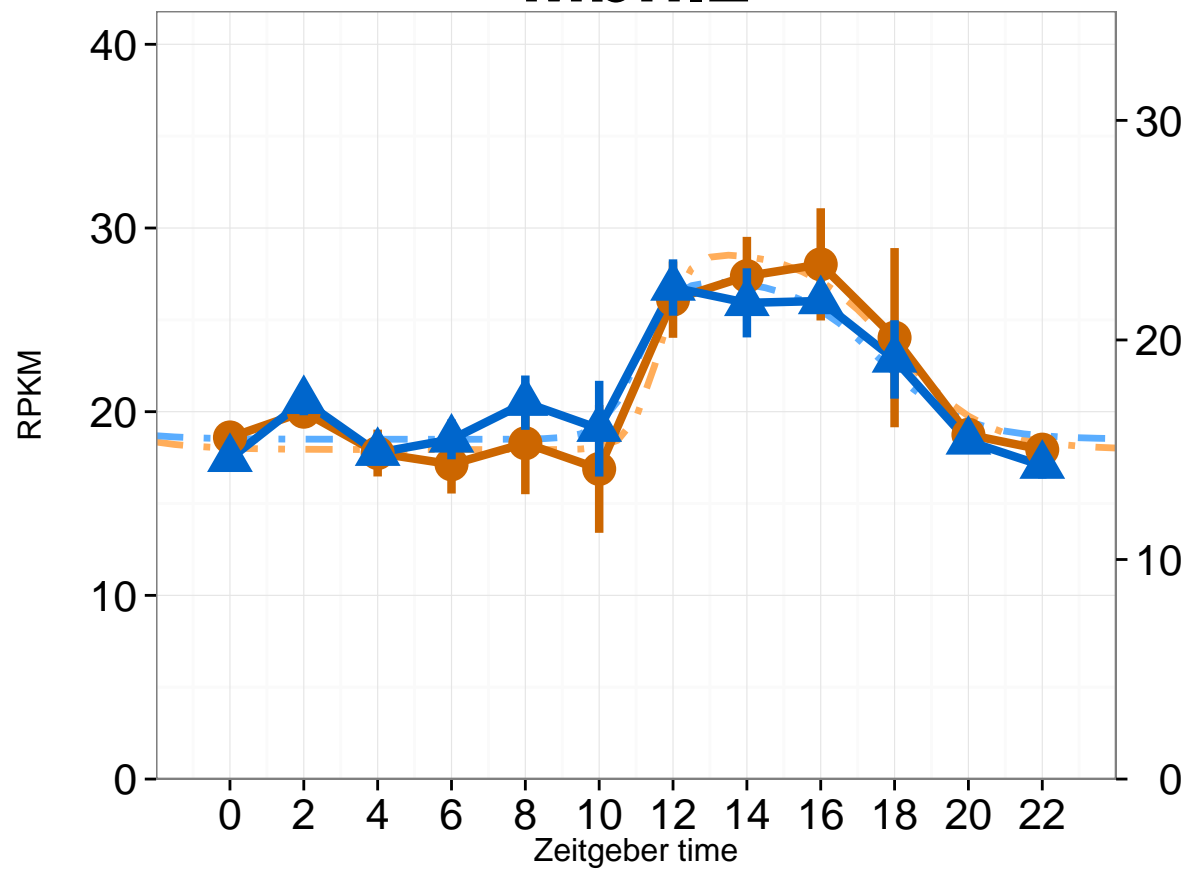

## Mbnl2

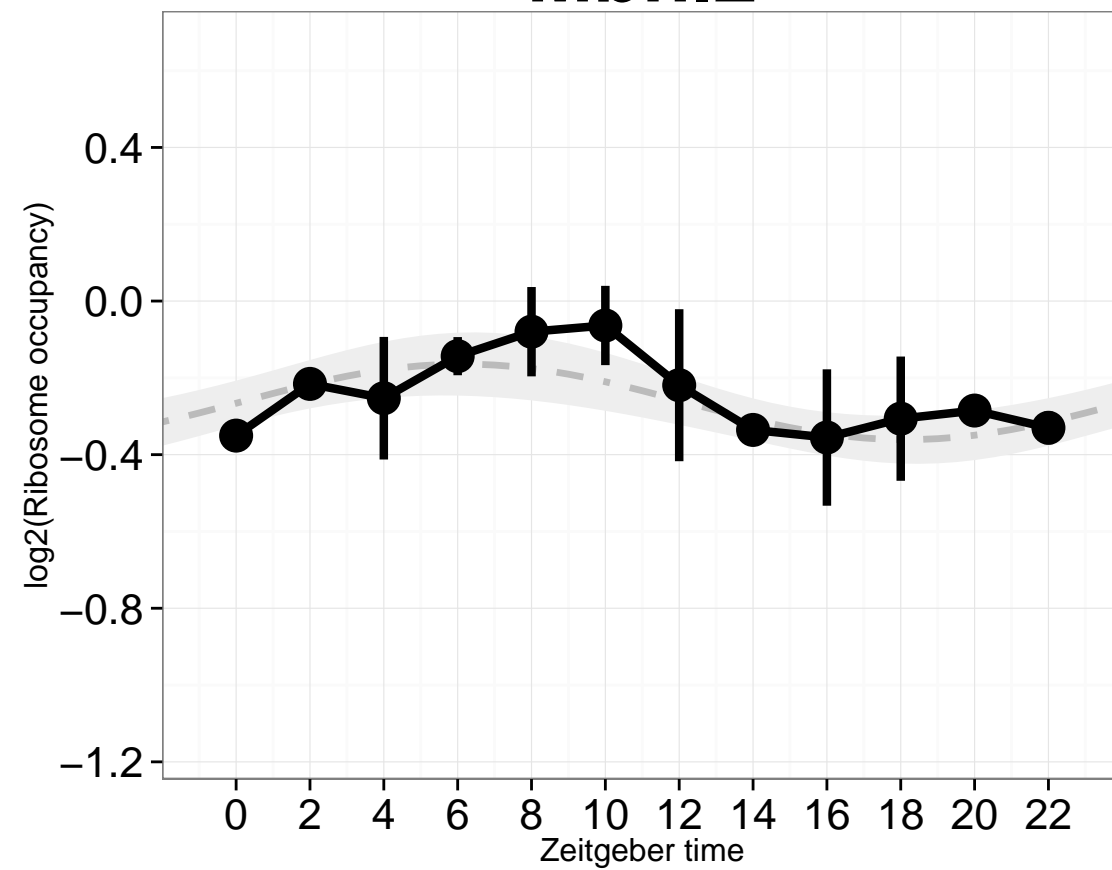

Supplement: SuppDataset_1.zip [file Mbnl2_set_B.pdf › Supplemental Dataset 1/B-mRNA_rhythm_translation_nonrhyth/Mbnl2_set_B.pdf]

## Mcfd2

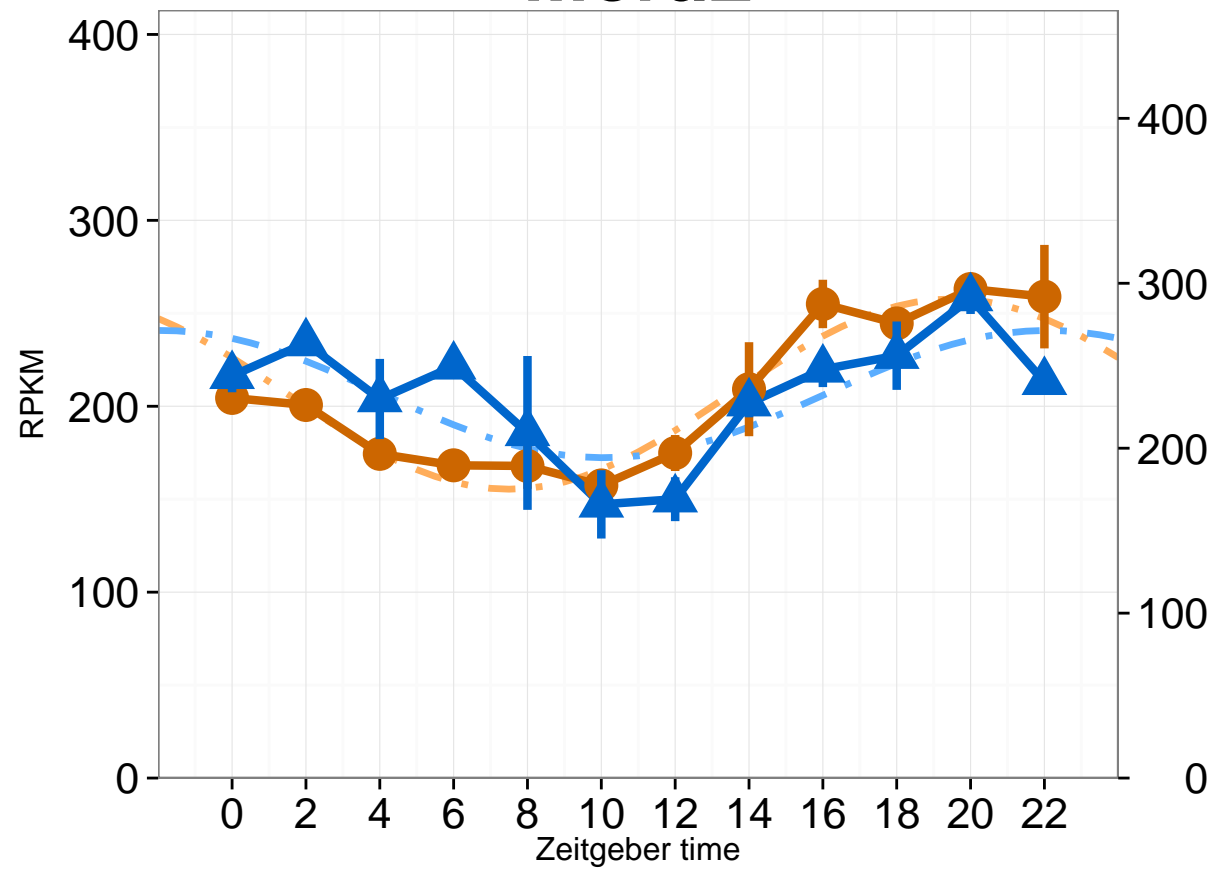

## Mcfd2

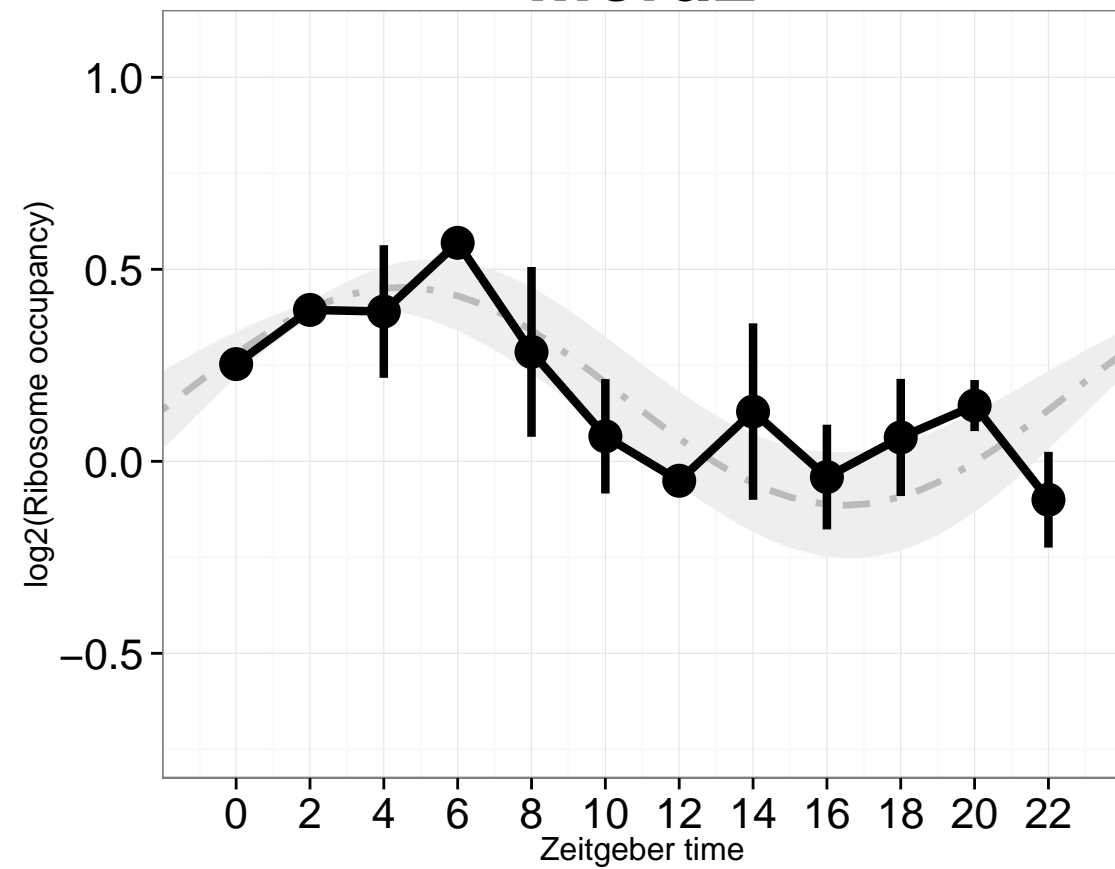

Supplement: SuppDataset_1.zip [file Mcfd2_set_B.pdf › Supplemental Dataset 1/B-mRNA_rhythm_translation_nonrhyth/Mcfd2_set_B.pdf]

# Mcm2

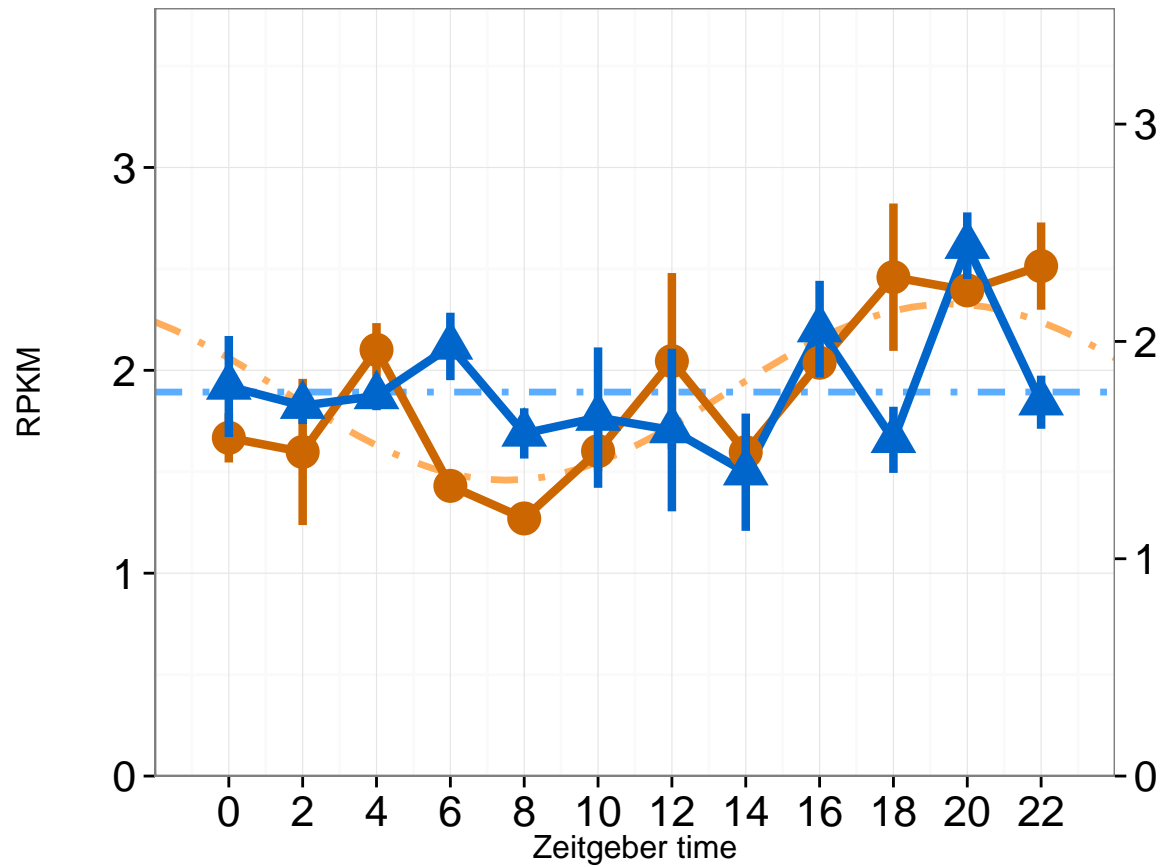

# Mcm2

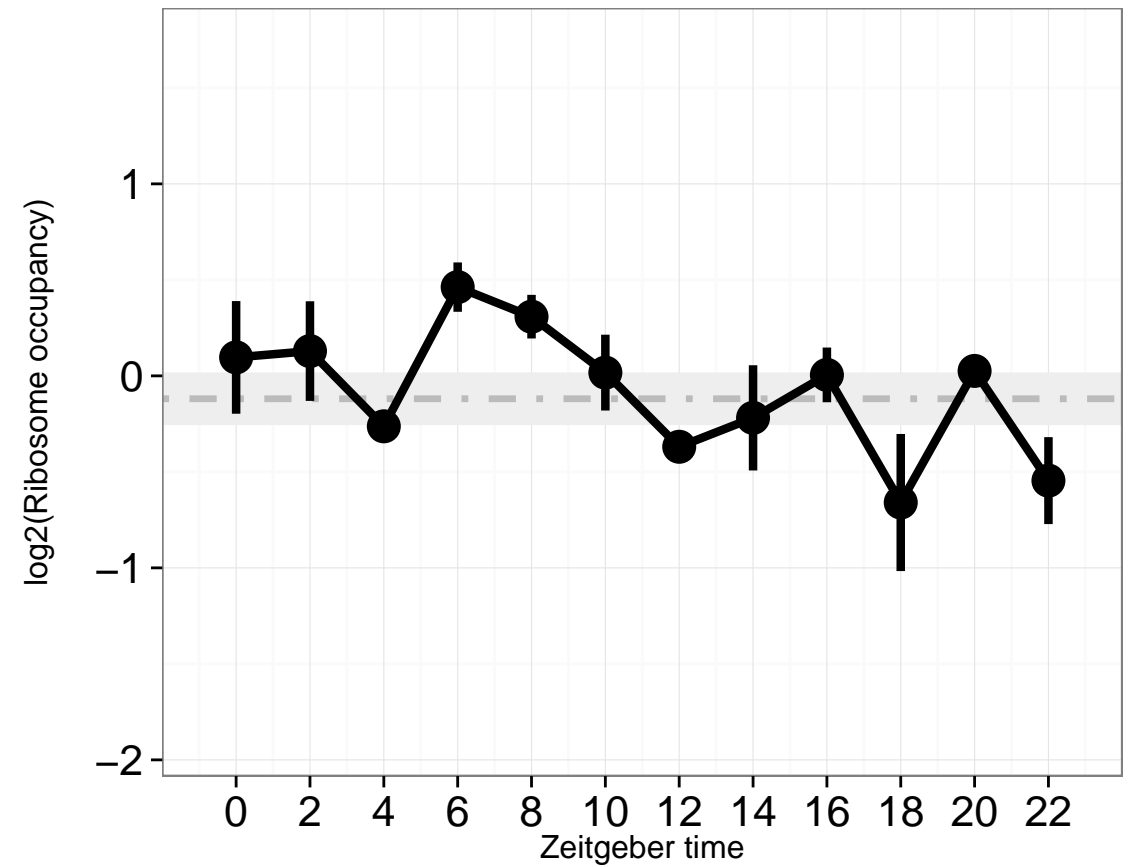

Supplement: SuppDataset_1.zip [file Mcm2_set_B.pdf › Supplemental Dataset 1/B-mRNA_rhythm_translation_nonrhyth/Mcm2_set_B.pdf]

## Mdfic

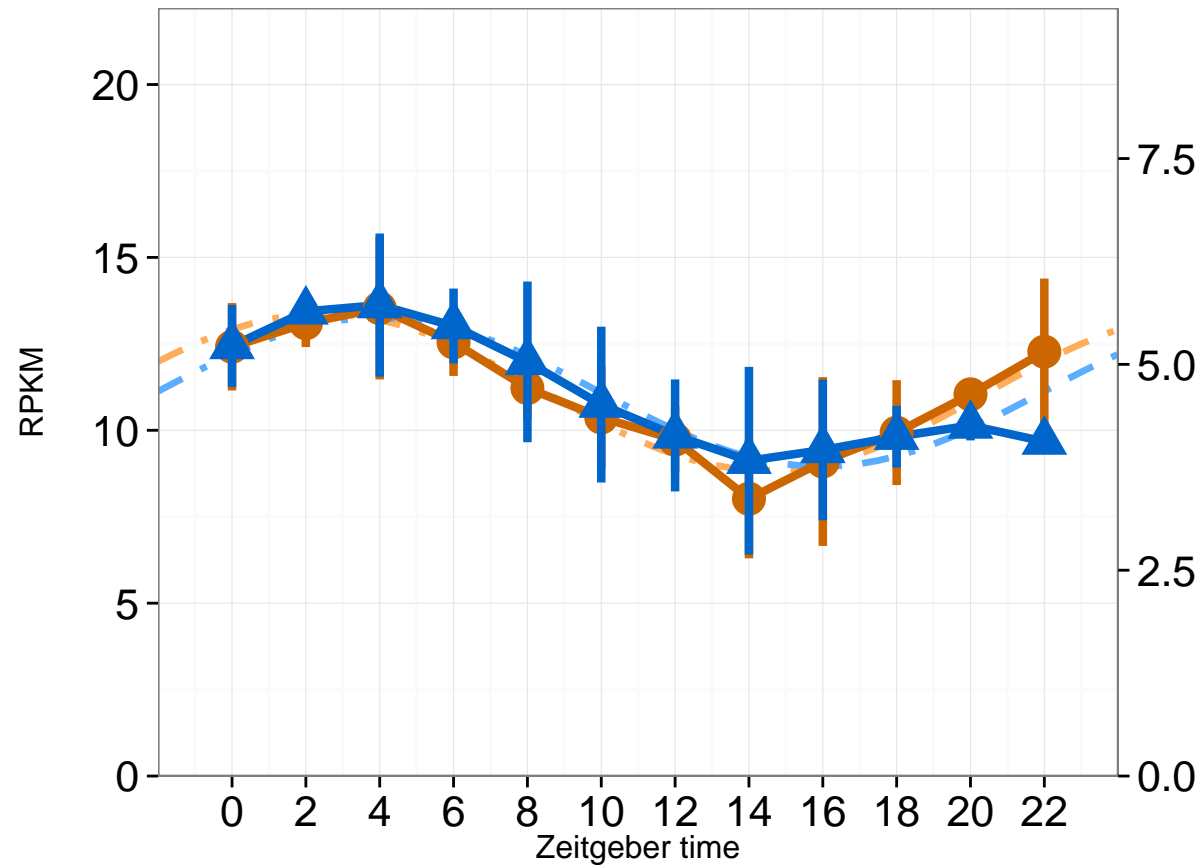

## Mdfic

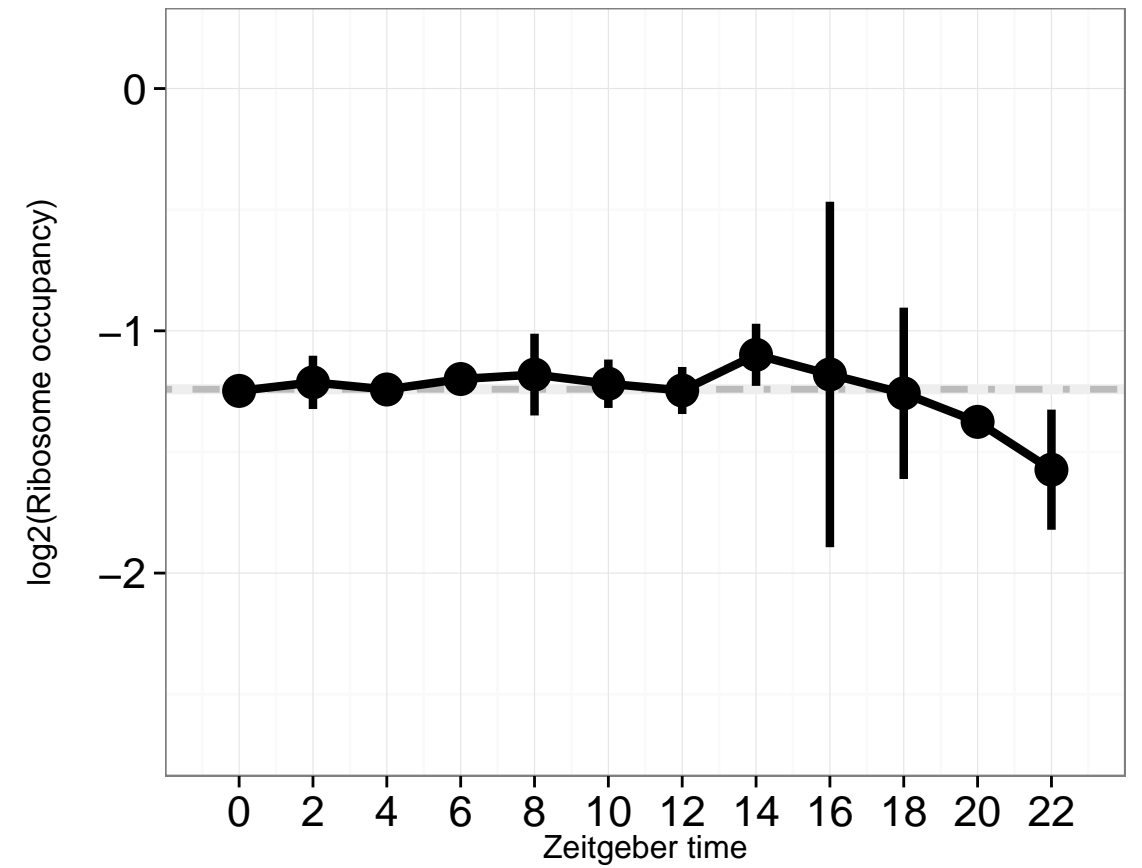

Supplement: SuppDataset_1.zip [file Mdfic_set_B.pdf › Supplemental Dataset 1/B-mRNA_rhythm_translation_nonrhyth/Mdfic_set_B.pdf]

# Mdm1

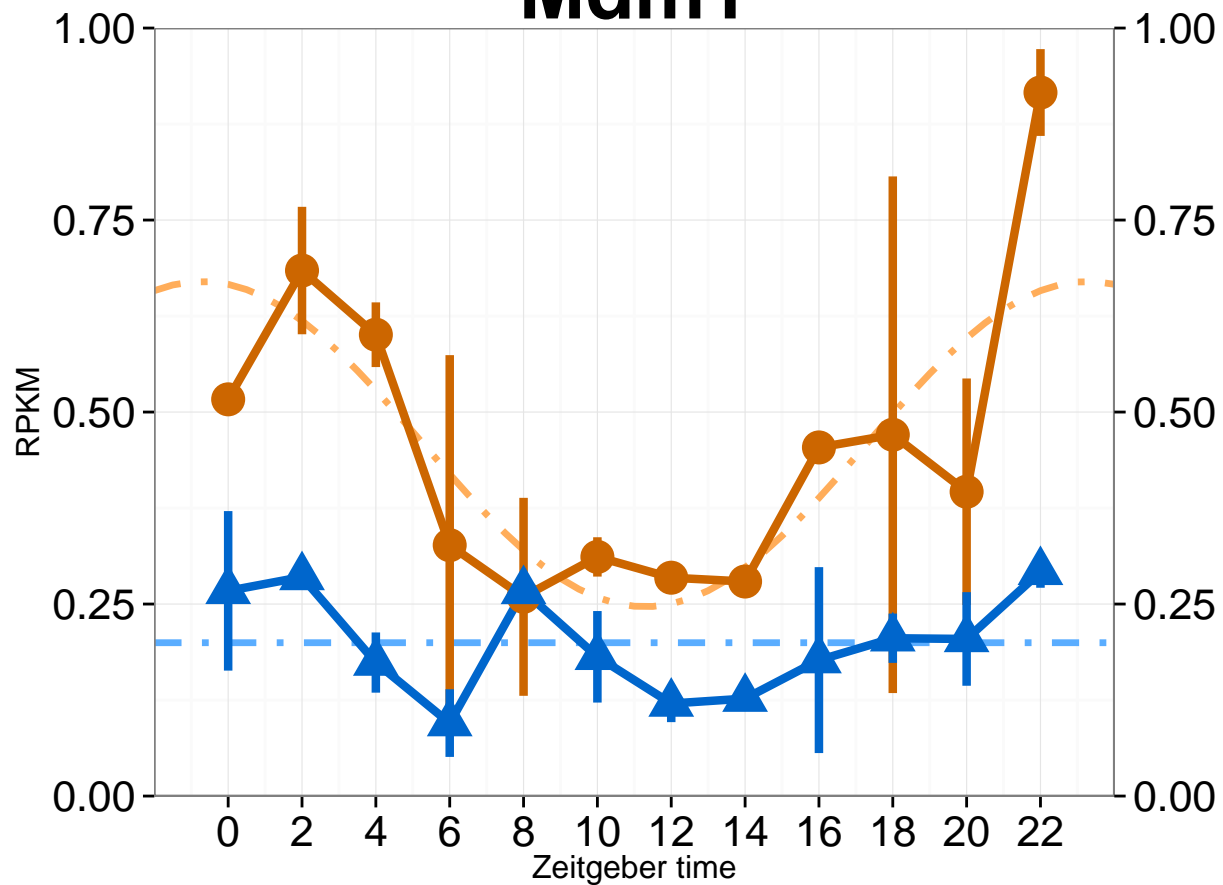

# Mdm1

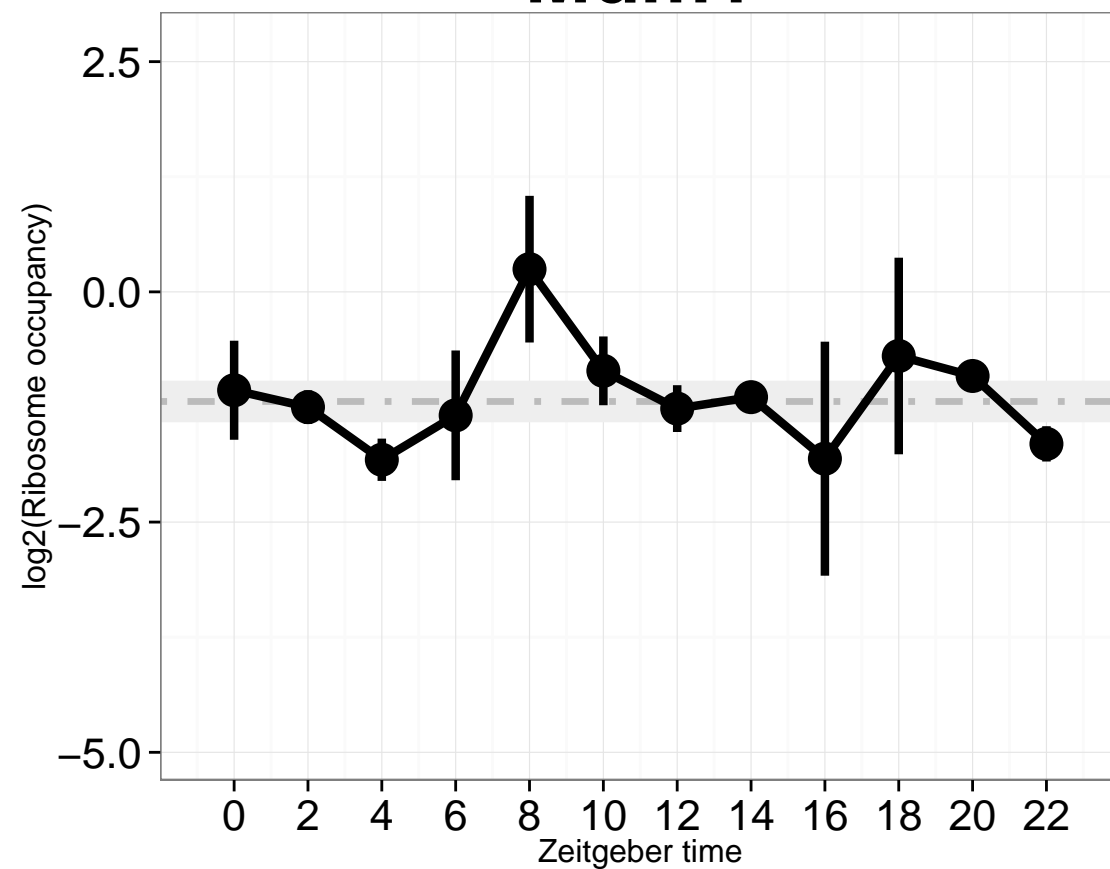

Supplement: SuppDataset_1.zip [file Mdm1_set_B.pdf › Supplemental Dataset 1/B-mRNA_rhythm_translation_nonrhyth/Mdm1_set_B.pdf]

## Med27

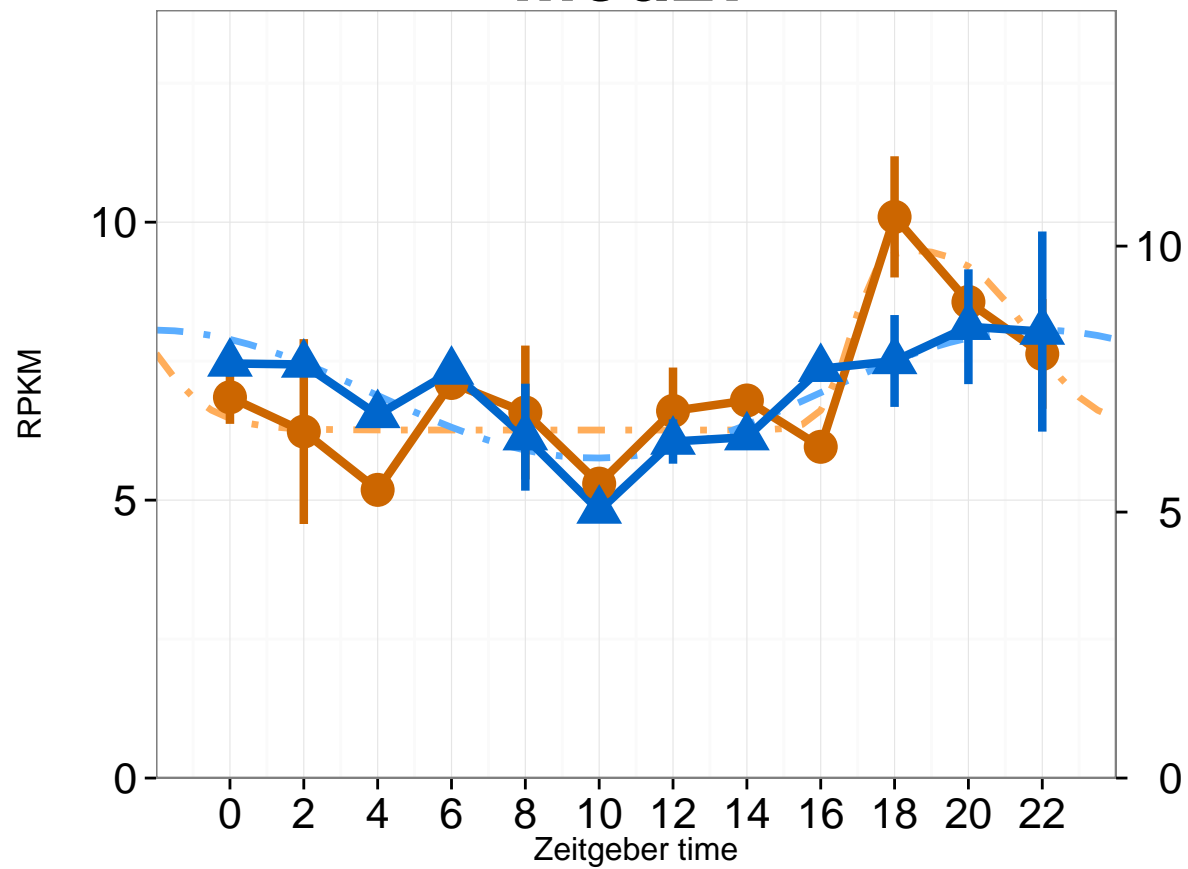

## Med27

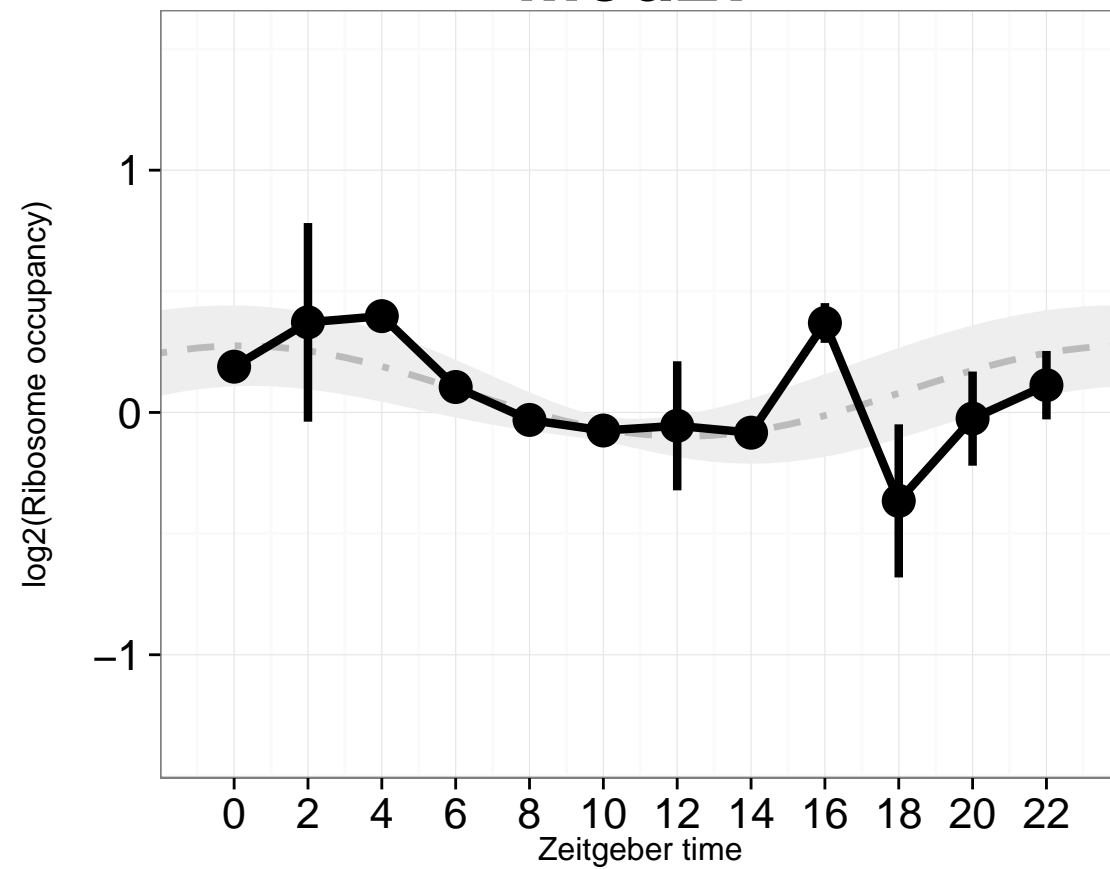

Supplement: SuppDataset_1.zip [file Med27_set_B.pdf › Supplemental Dataset 1/B-mRNA_rhythm_translation_nonrhyth/Med27_set_B.pdf]

## Mefv

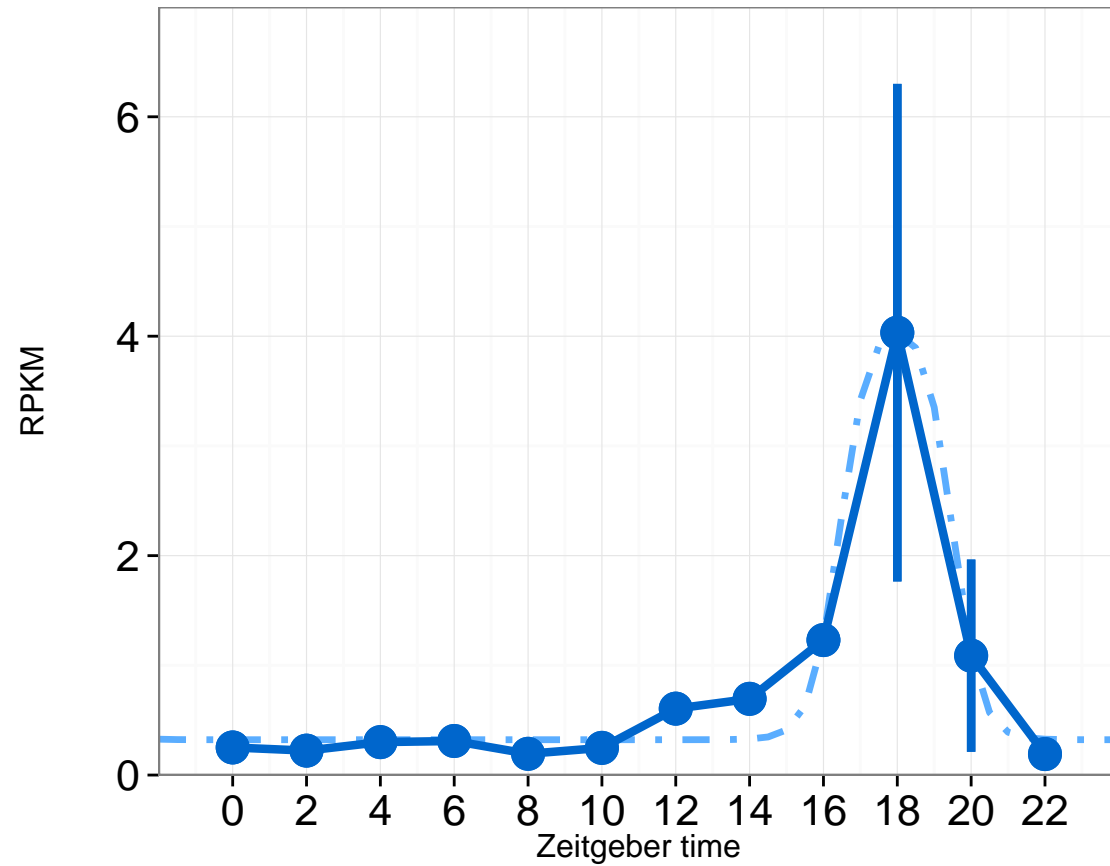

## Mefv log2(Ribosome occupancy)

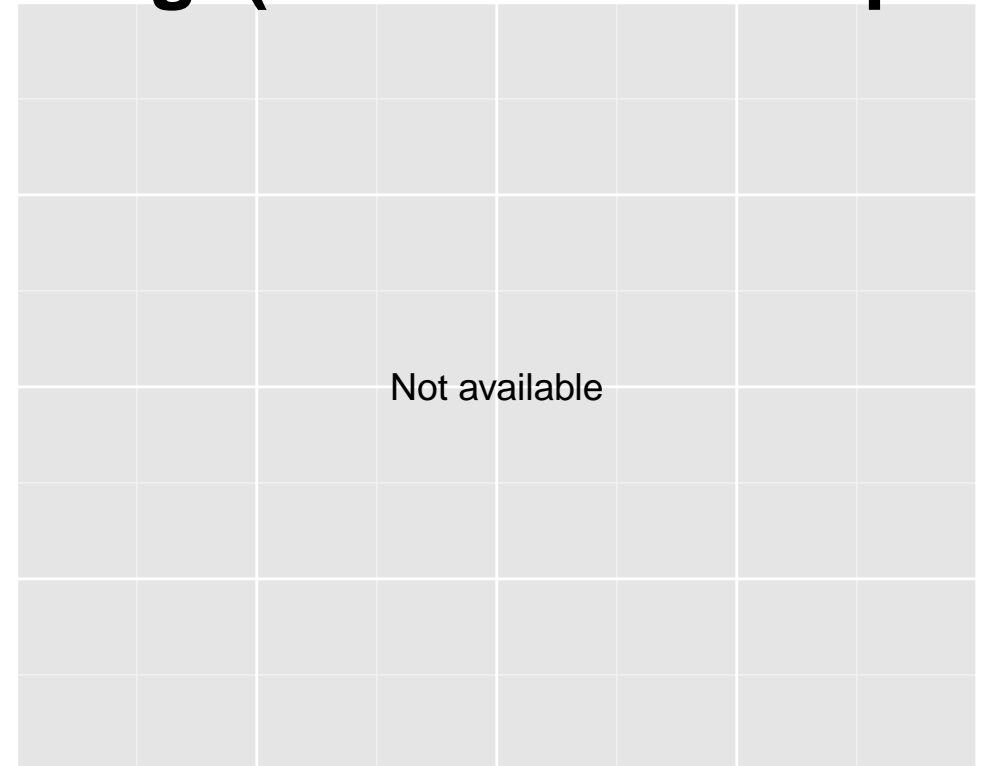

Supplement: SuppDataset_1.zip [file Mefv_set_B.pdf › Supplemental Dataset 1/B-mRNA_rhythm_translation_nonrhyth/Mefv_set_B.pdf]

# Mgat5

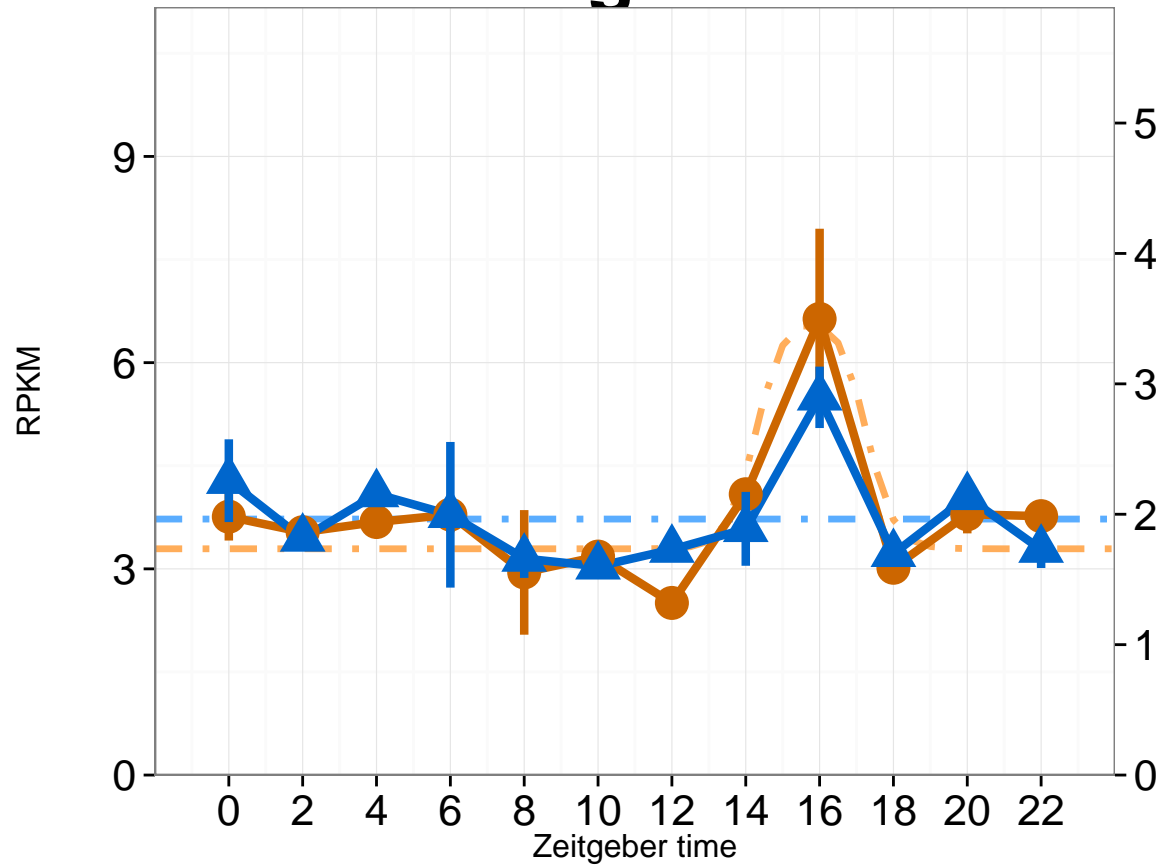

# Mgat5

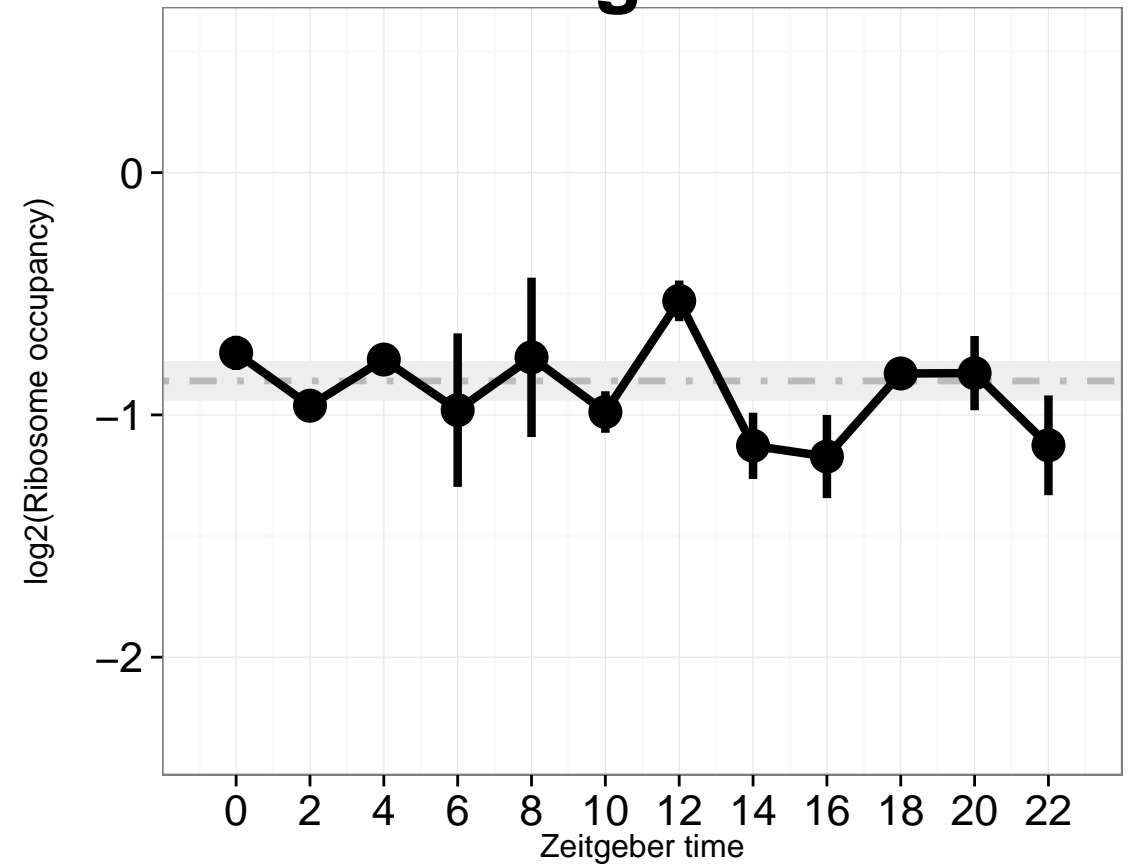

Supplement: SuppDataset_1.zip [file Mgat5_set_B.pdf › Supplemental Dataset 1/B-mRNA_rhythm_translation_nonrhyth/Mgat5_set_B.pdf]

# Mgea5

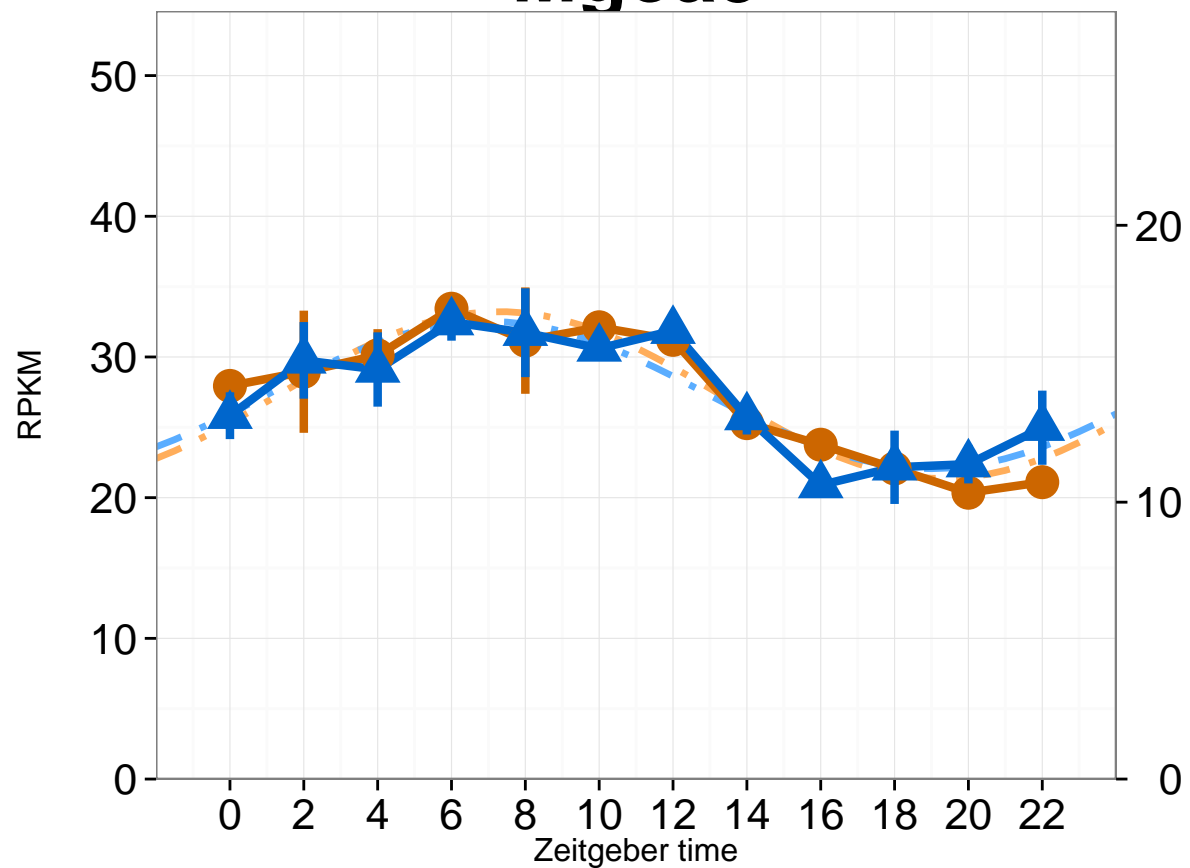

# Mgea5

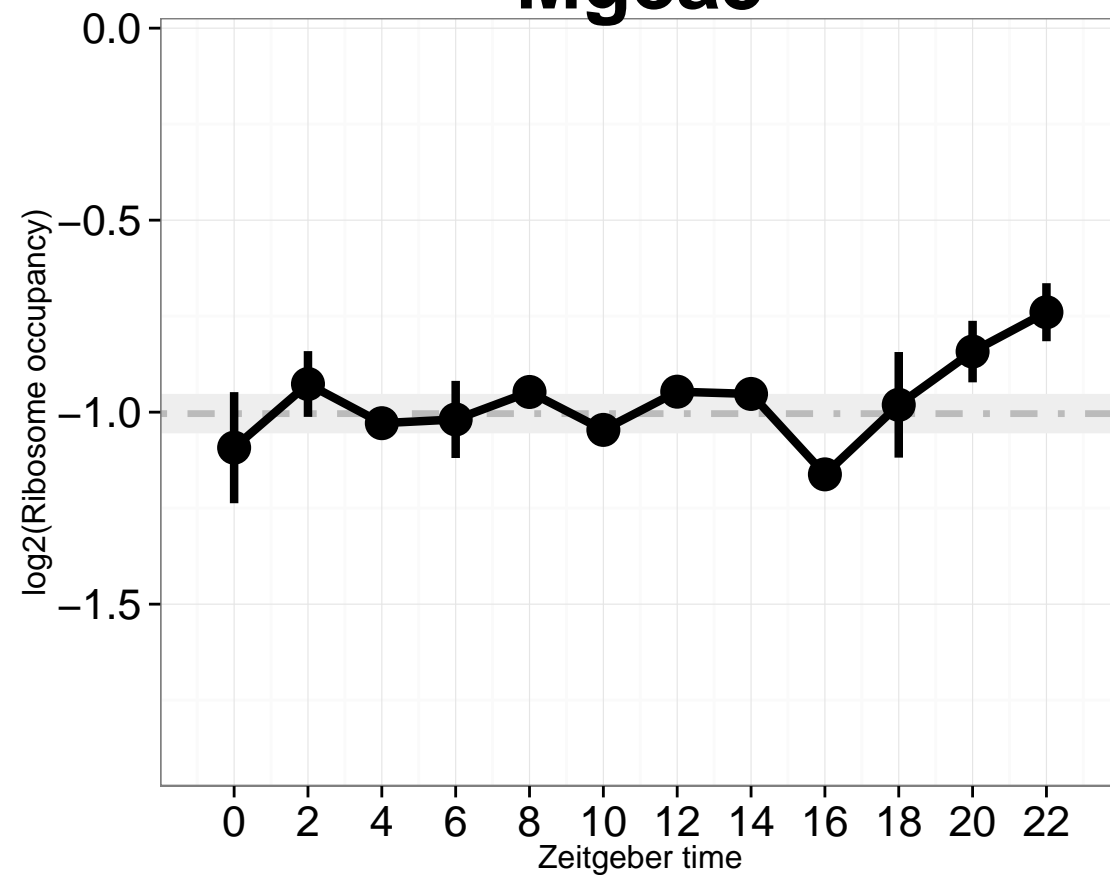

Supplement: SuppDataset_1.zip [file Mgea5_set_B.pdf › Supplemental Dataset 1/B-mRNA_rhythm_translation_nonrhyth/Mgea5_set_B.pdf]

## Mgst3

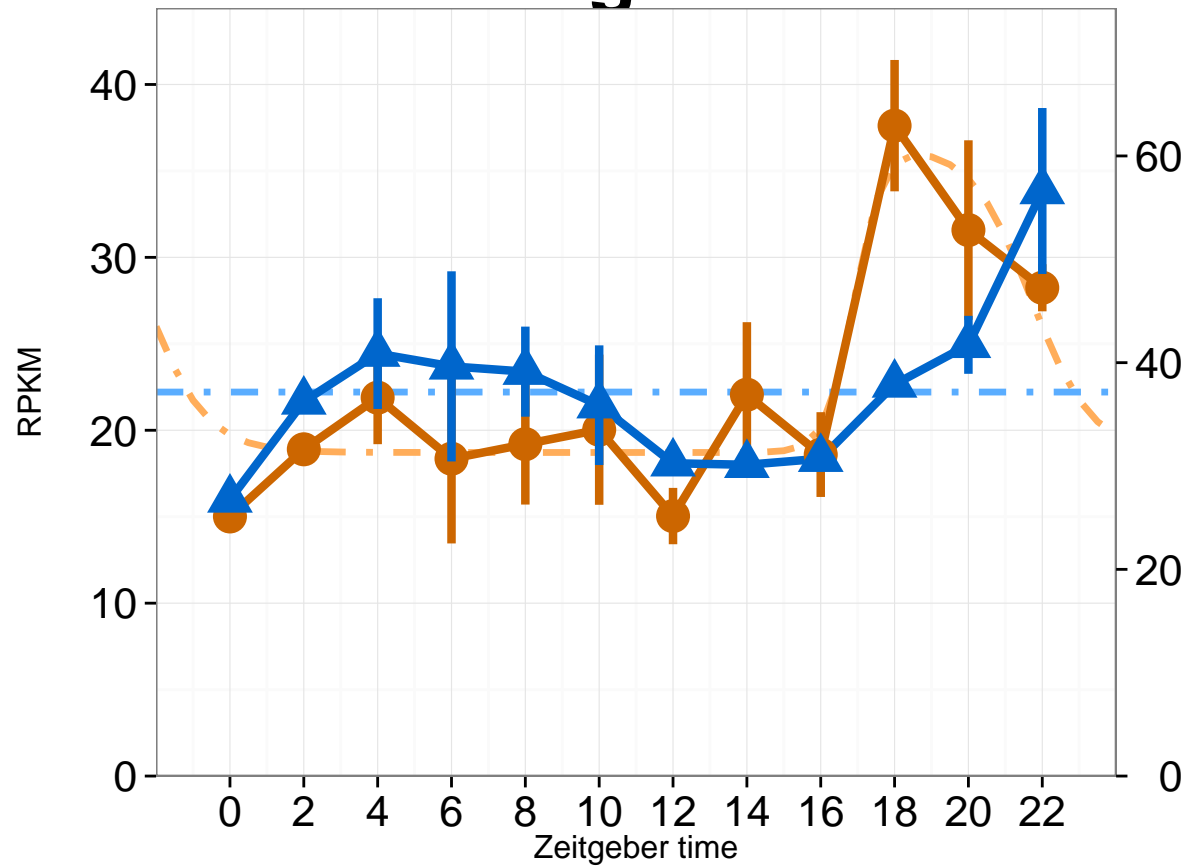

## Mgst3

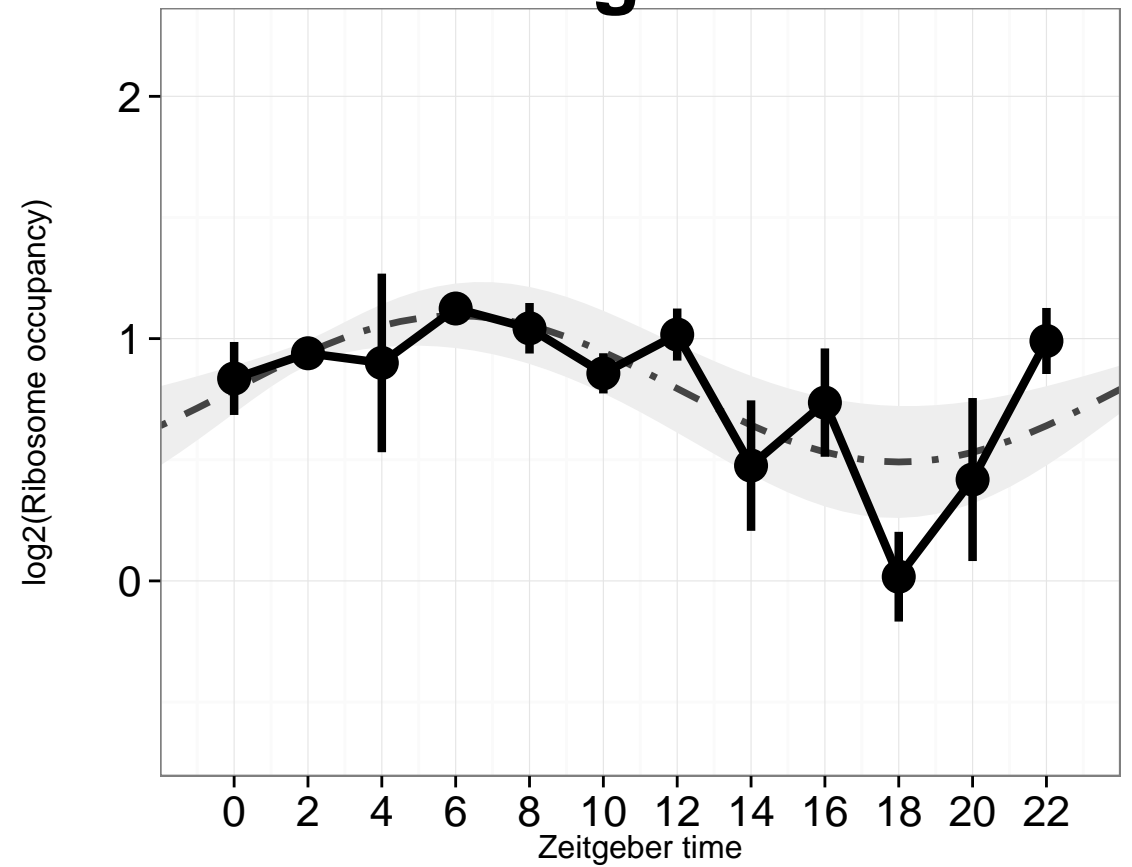

Supplement: SuppDataset_1.zip [file Mgst3_set_B.pdf › Supplemental Dataset 1/B-mRNA_rhythm_translation_nonrhyth/Mgst3_set_B.pdf]

## Mia2

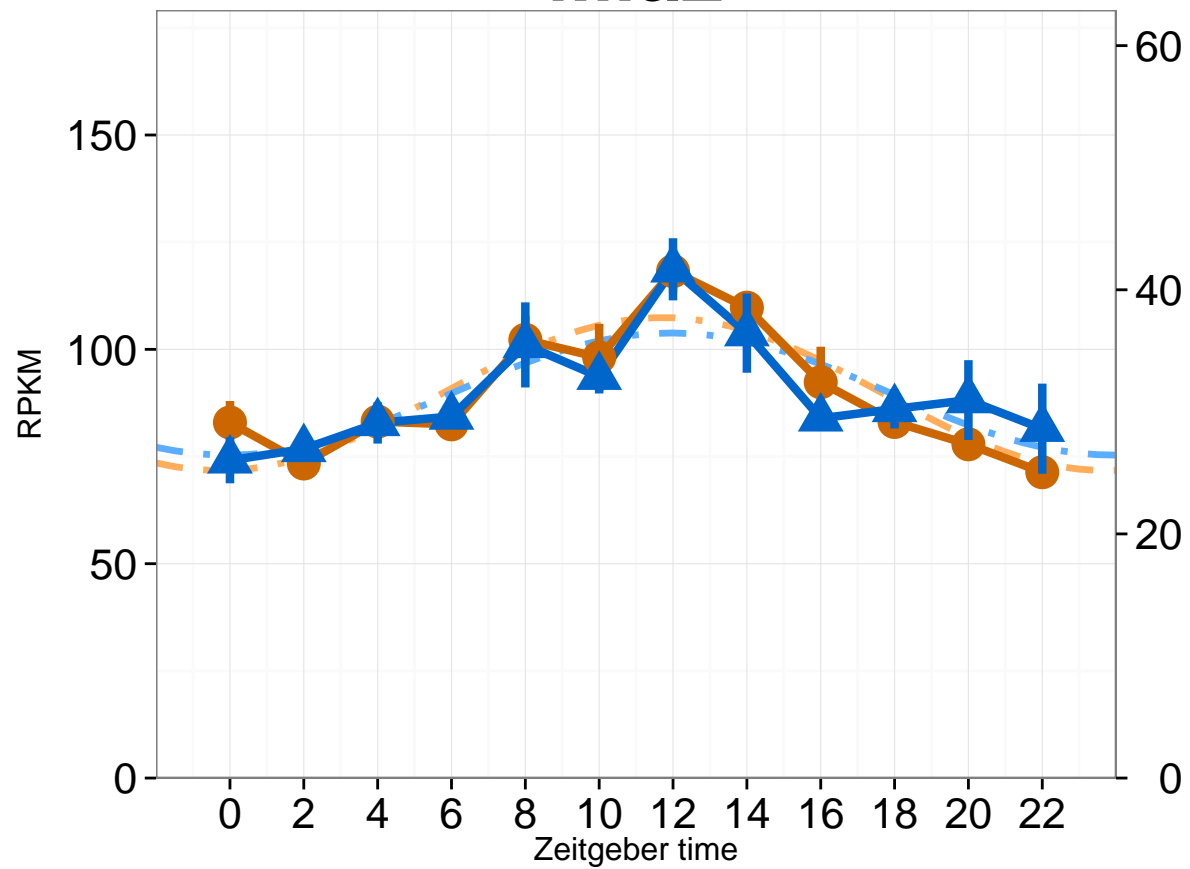

## Mia2

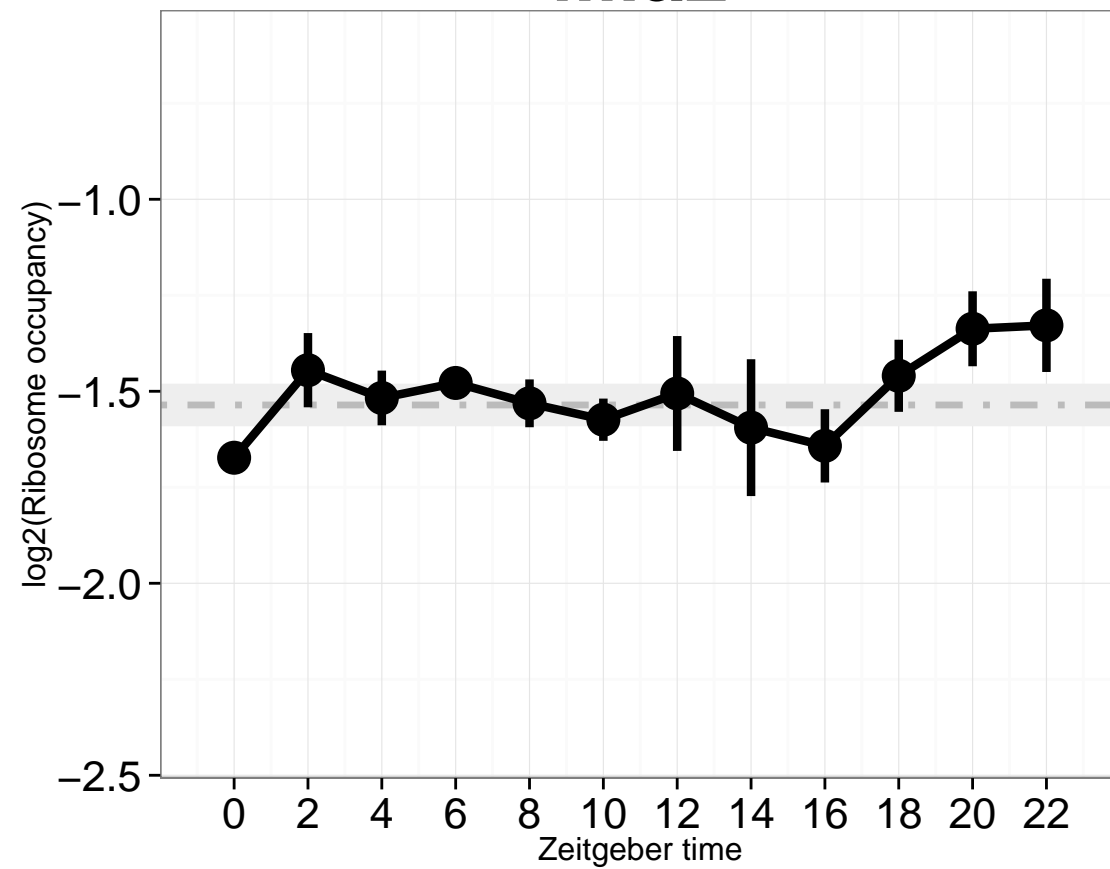

Supplement: SuppDataset_1.zip [file Mia2_set_B.pdf › Supplemental Dataset 1/B-mRNA_rhythm_translation_nonrhyth/Mia2_set_B.pdf]

## Mib2

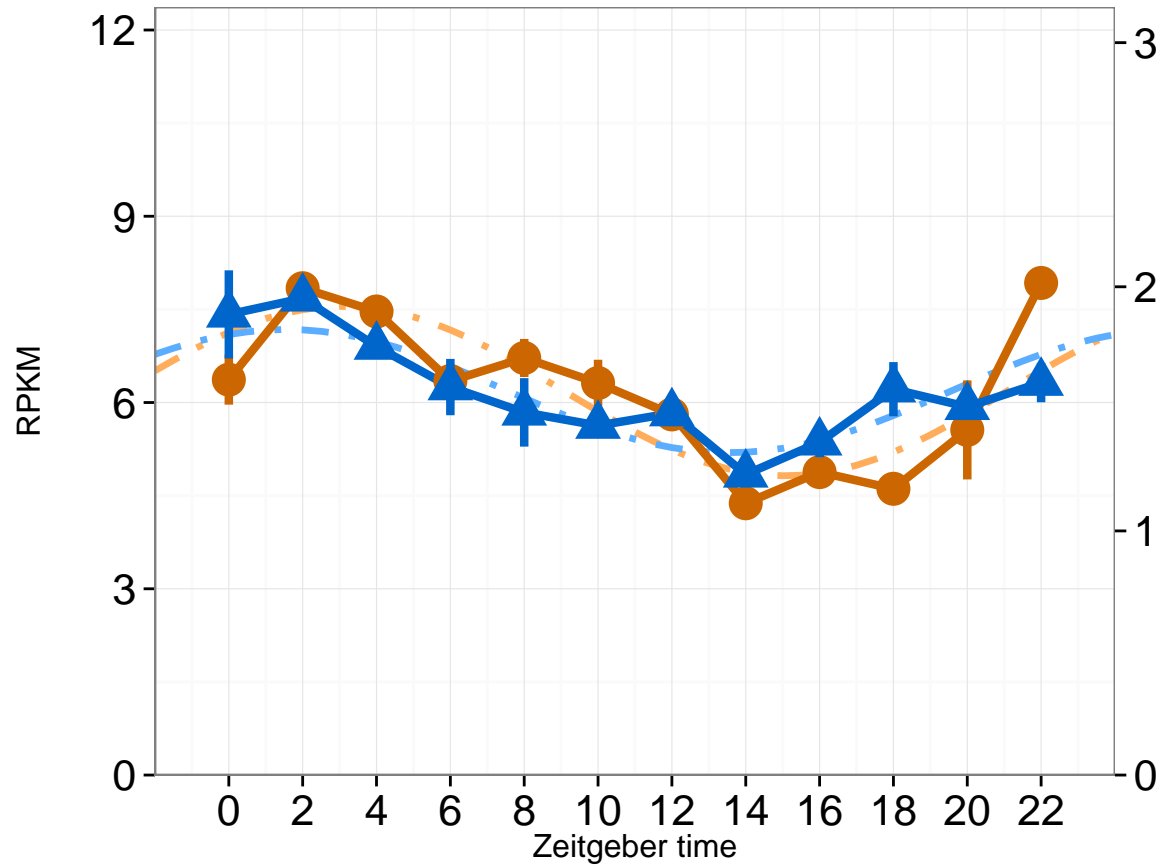

## Mib2

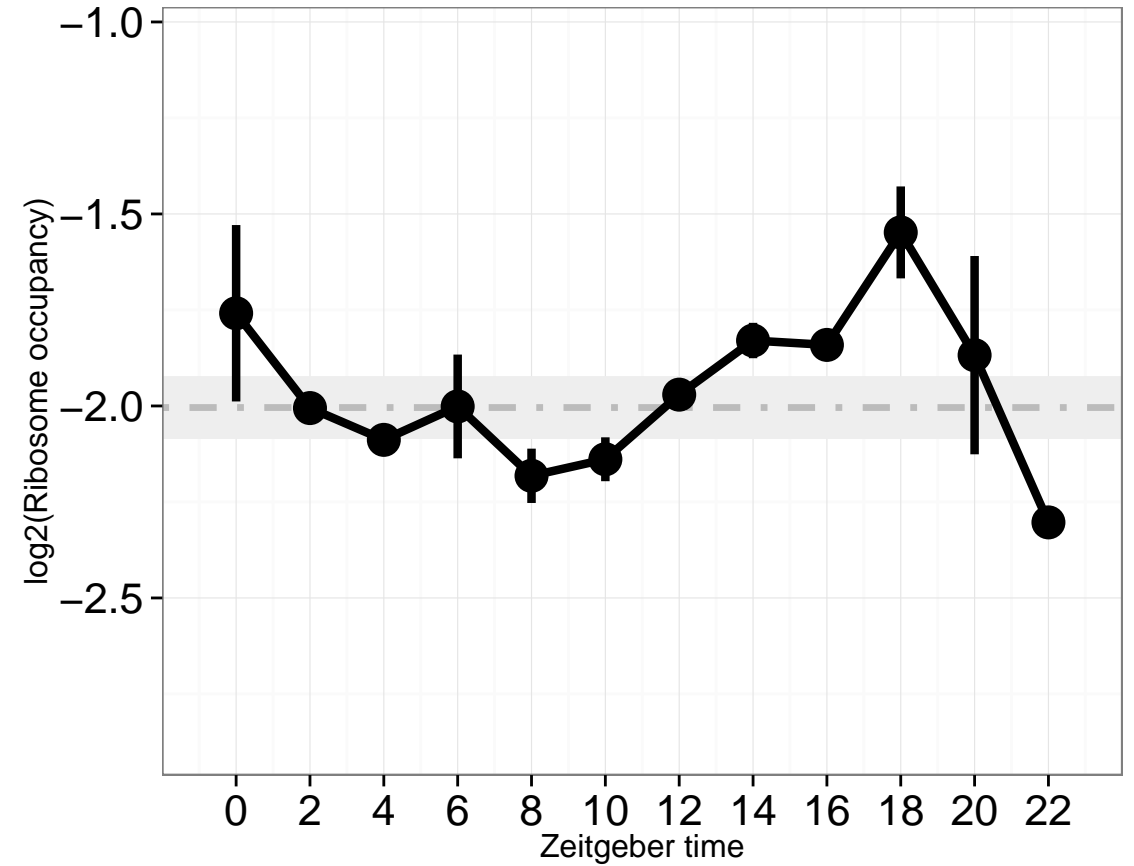

Supplement: SuppDataset_1.zip [file Mib2_set_B.pdf › Supplemental Dataset 1/B-mRNA_rhythm_translation_nonrhyth/Mib2_set_B.pdf]

## Mif

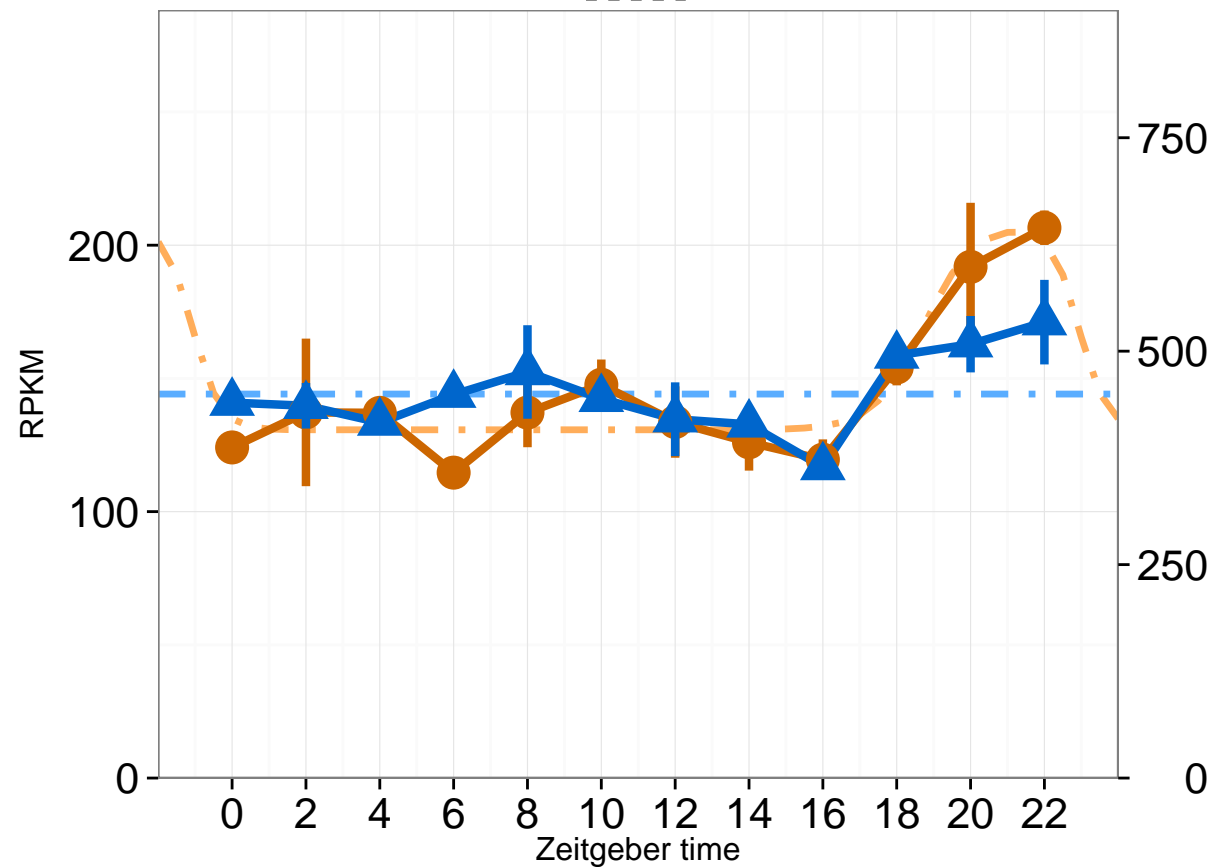

## Mif

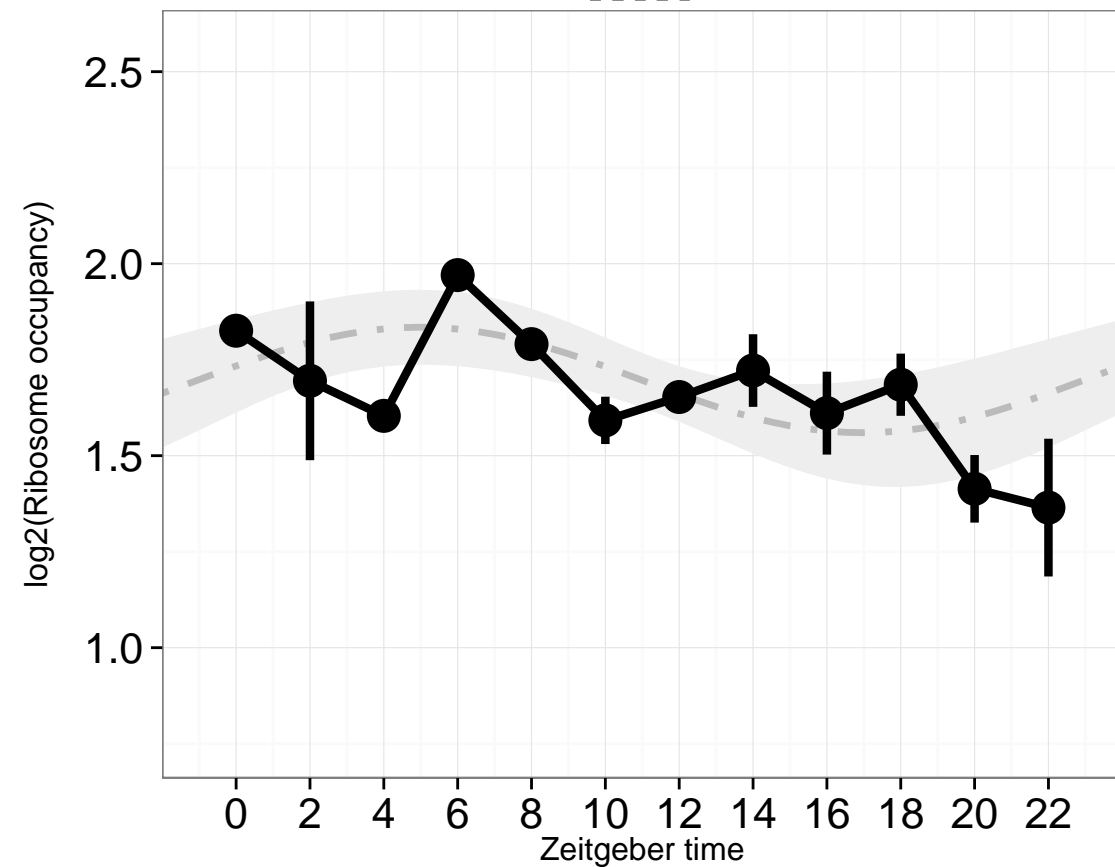

Supplement: SuppDataset_1.zip [file Mif_set_B.pdf › Supplemental Dataset 1/B-mRNA_rhythm_translation_nonrhyth/Mif_set_B.pdf]

## Mki67ip

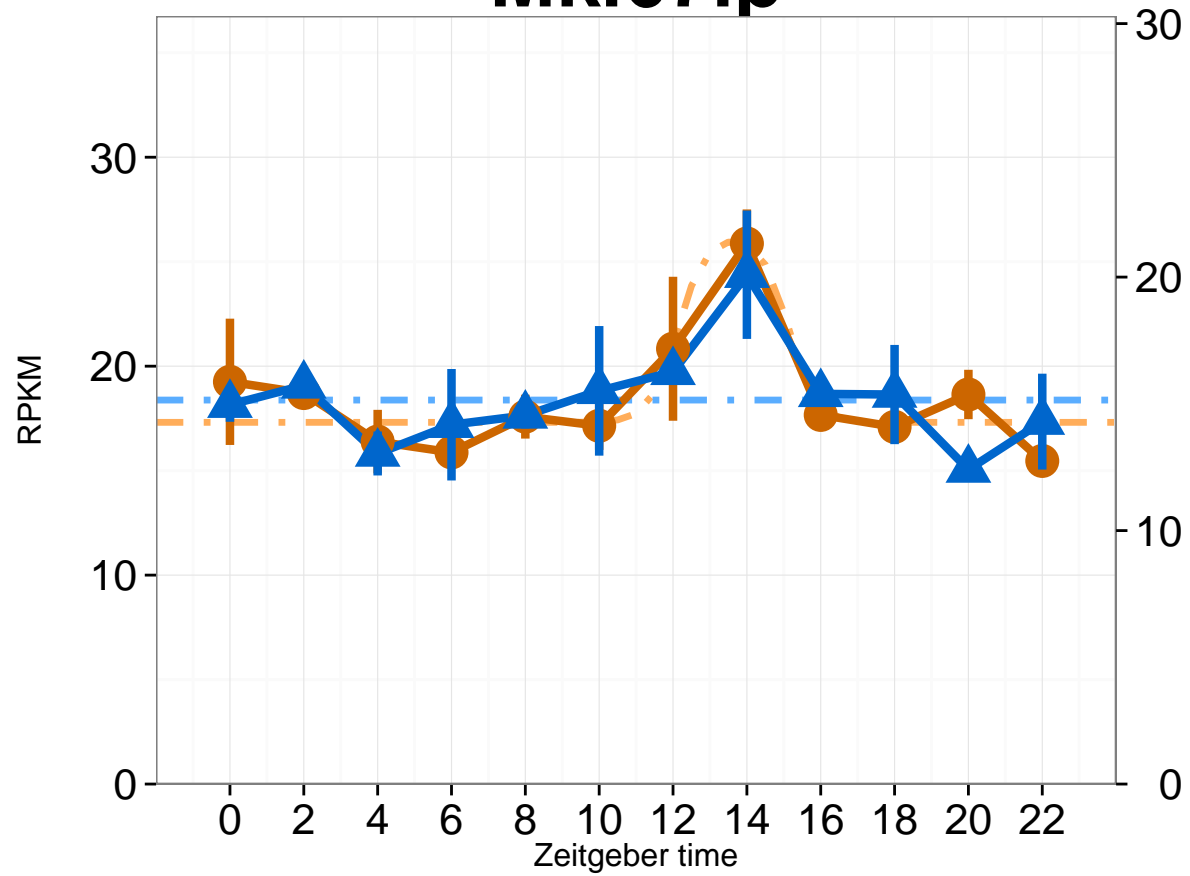

## Mki67ip

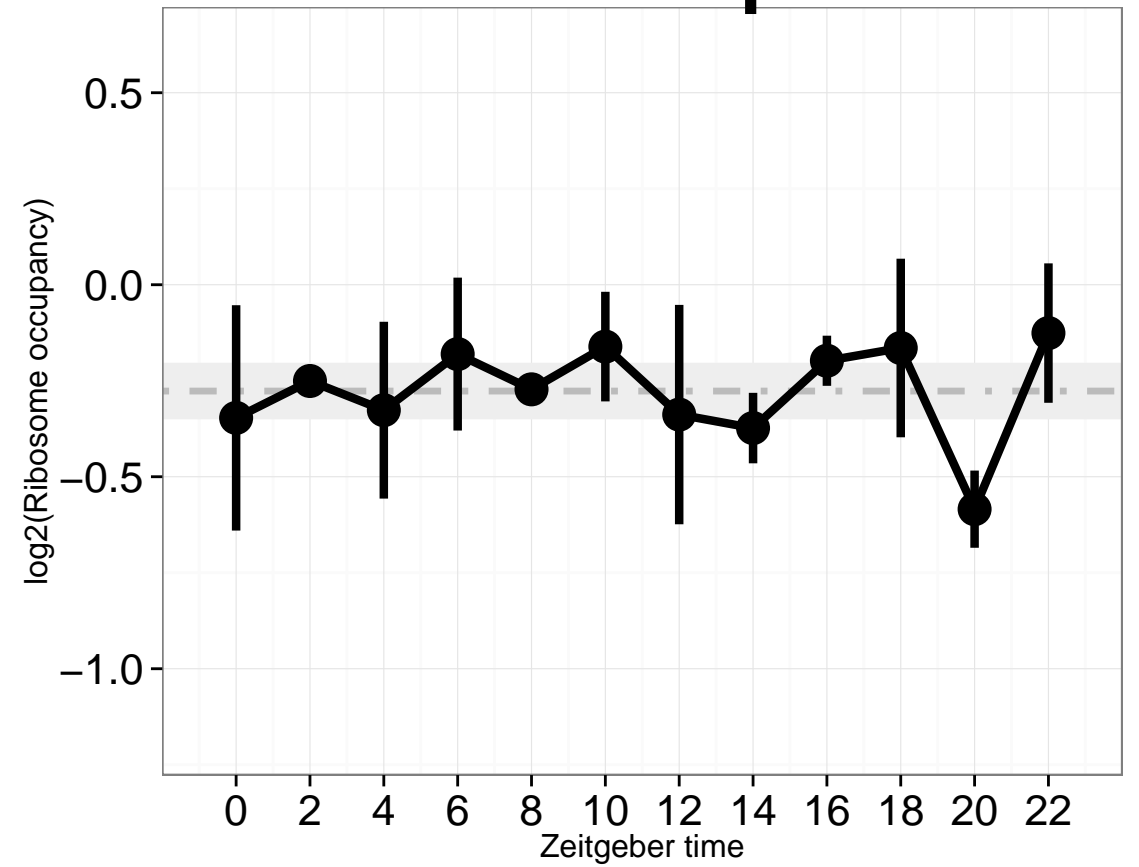

Supplement: SuppDataset_1.zip [file Mki67ip_set_B.pdf › Supplemental Dataset 1/B-mRNA_rhythm_translation_nonrhyth/Mki67ip_set_B.pdf]

## Mkl2

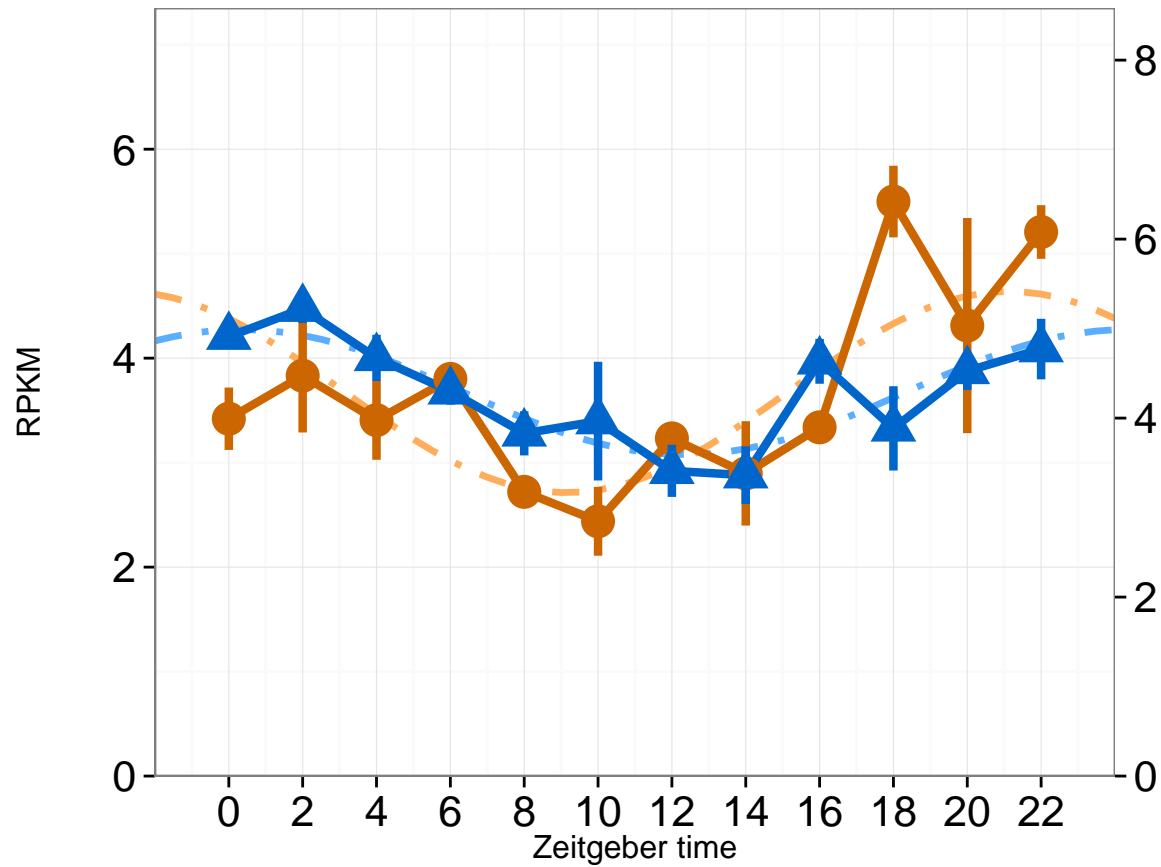

## Mkl2

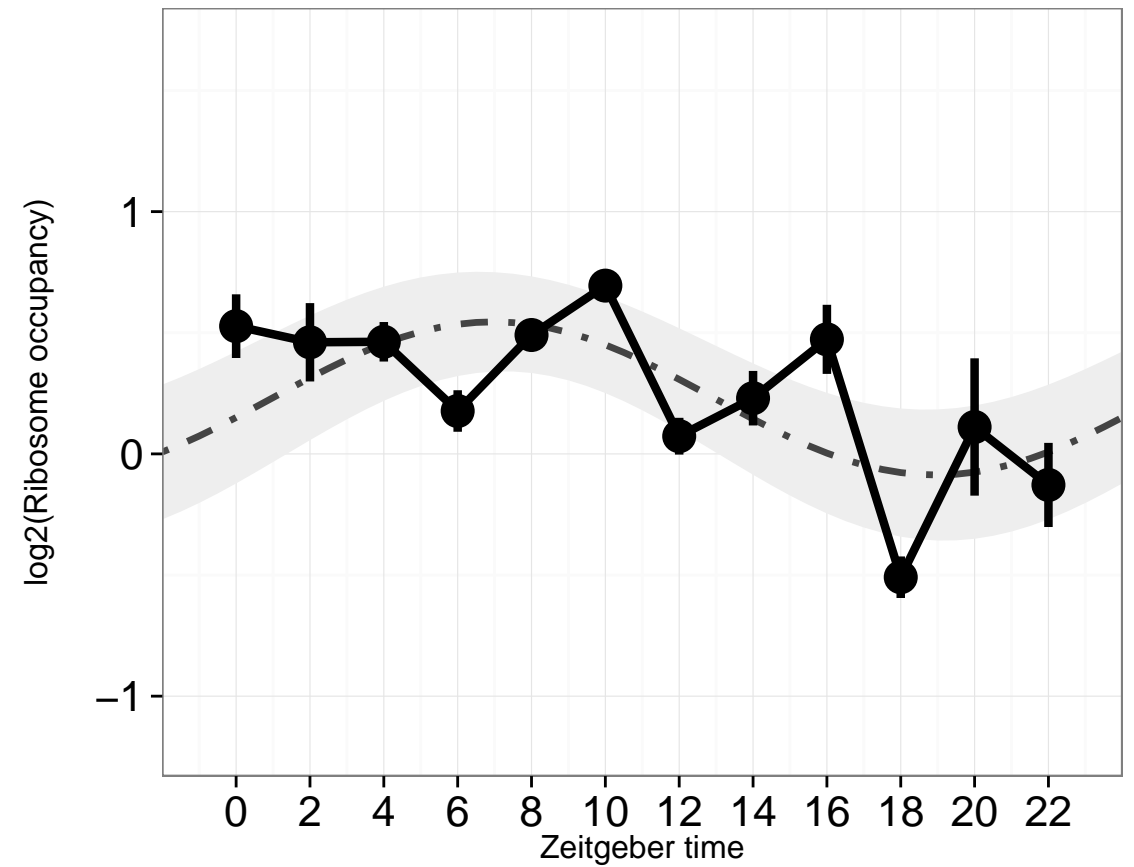

Supplement: SuppDataset_1.zip [file Mkl2_set_B.pdf › Supplemental Dataset 1/B-mRNA_rhythm_translation_nonrhyth/Mkl2_set_B.pdf]

## MIh3

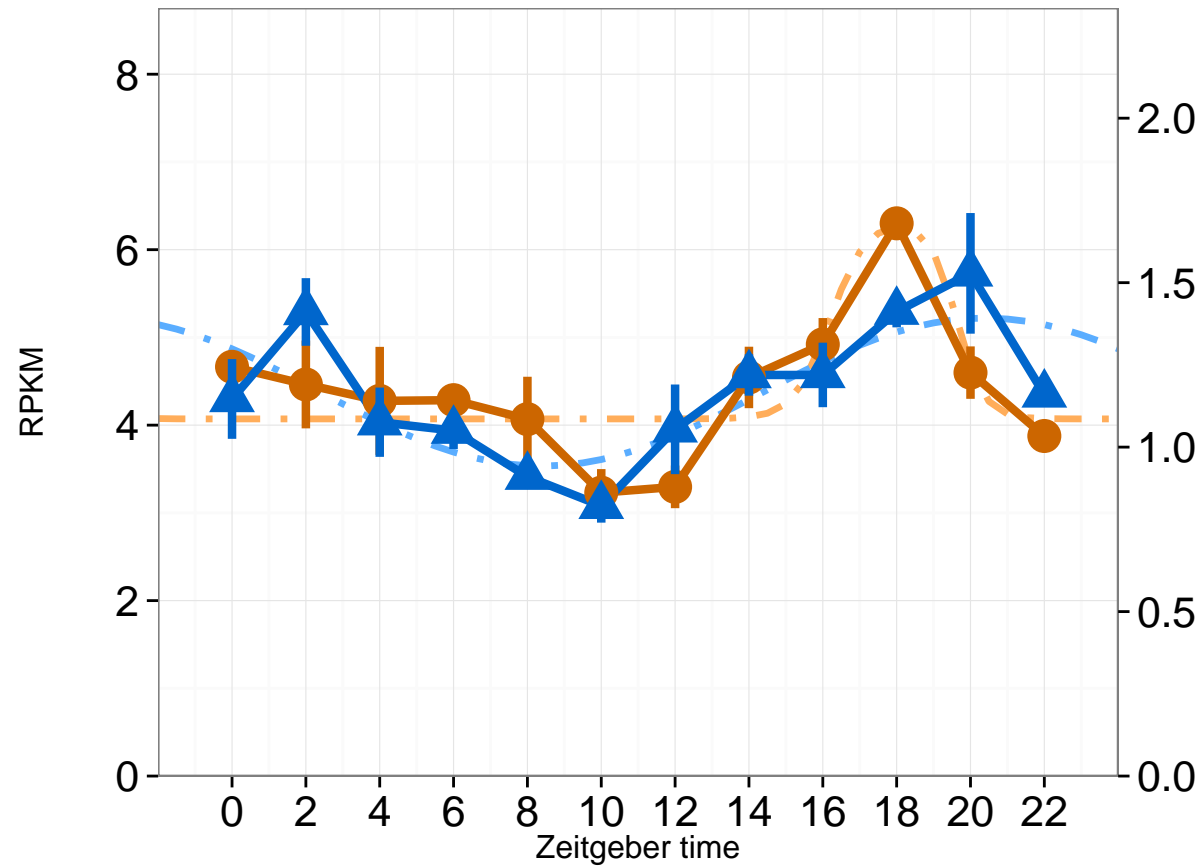

## MIh3

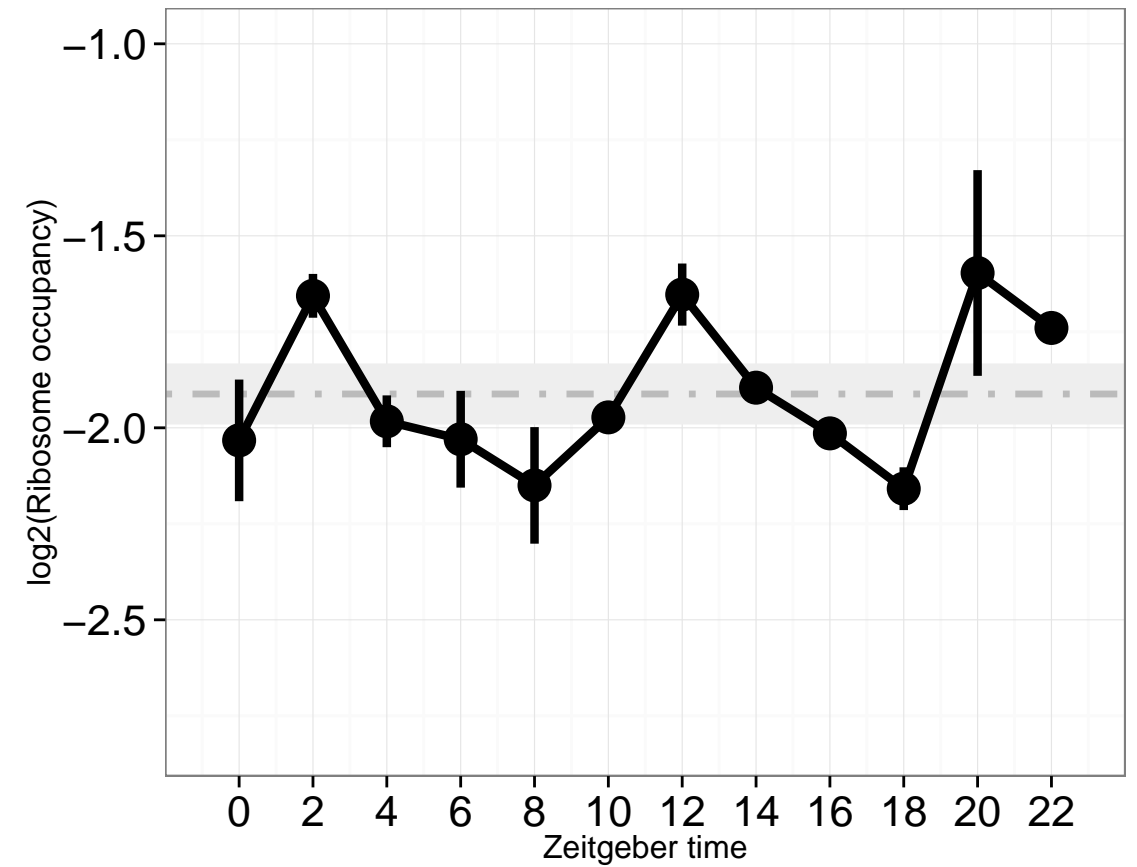

Supplement: SuppDataset_1.zip [file Mlh3_set_B.pdf › Supplemental Dataset 1/B-mRNA_rhythm_translation_nonrhyth/Mlh3_set_B.pdf]

## Mlst8

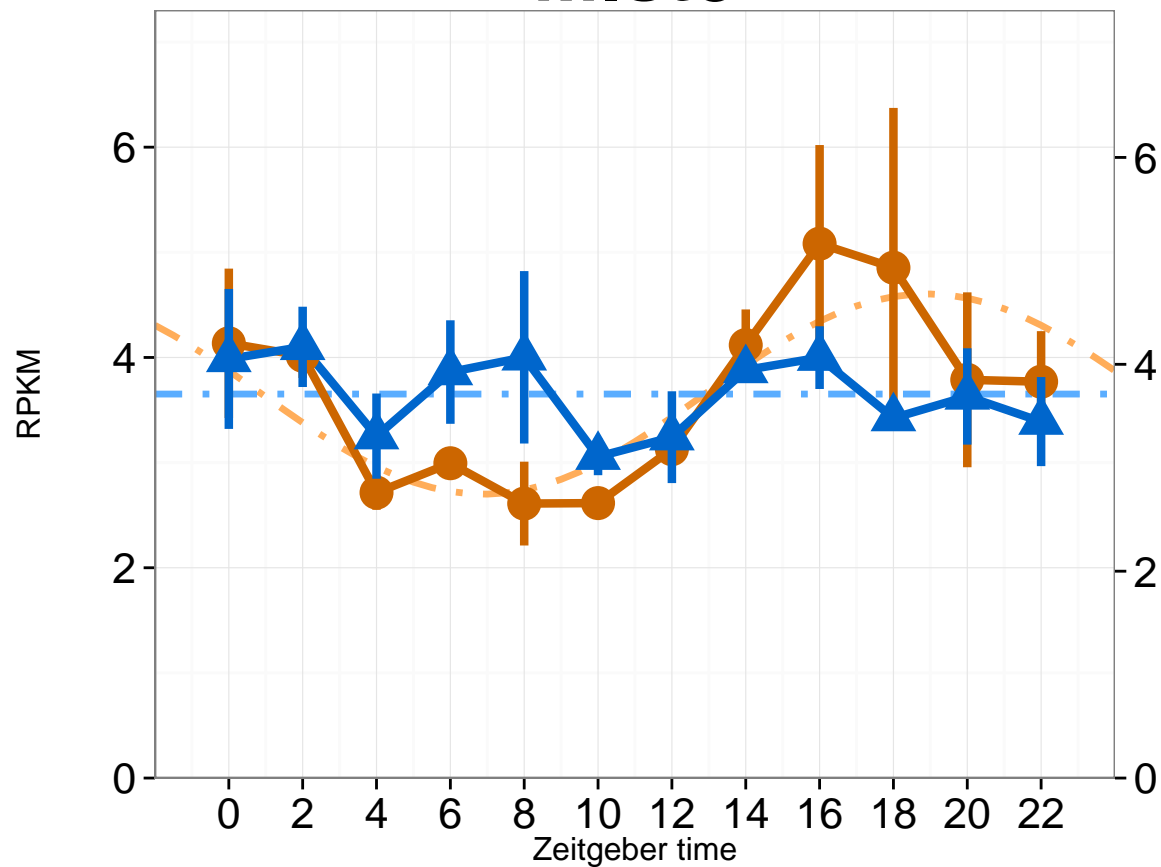

## Mlst8

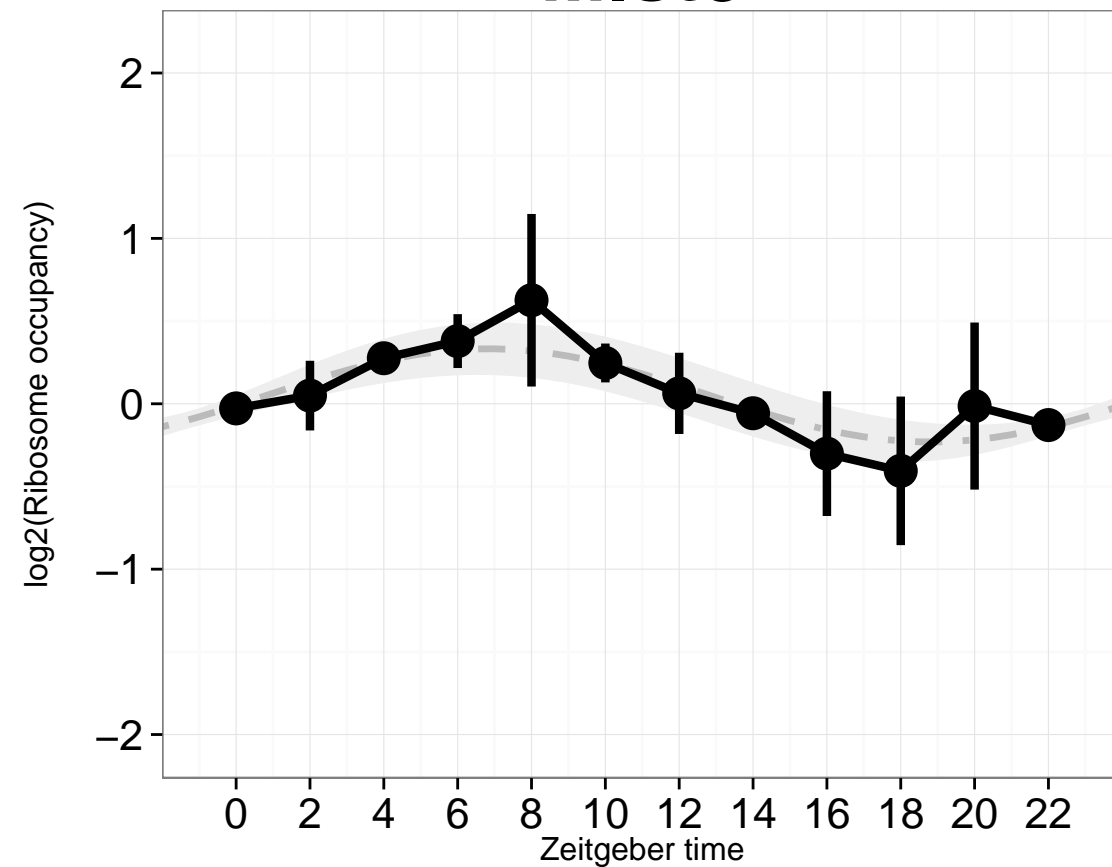

Supplement: SuppDataset_1.zip [file Mlst8_set_B.pdf › Supplemental Dataset 1/B-mRNA_rhythm_translation_nonrhyth/Mlst8_set_B.pdf]

## Mlx

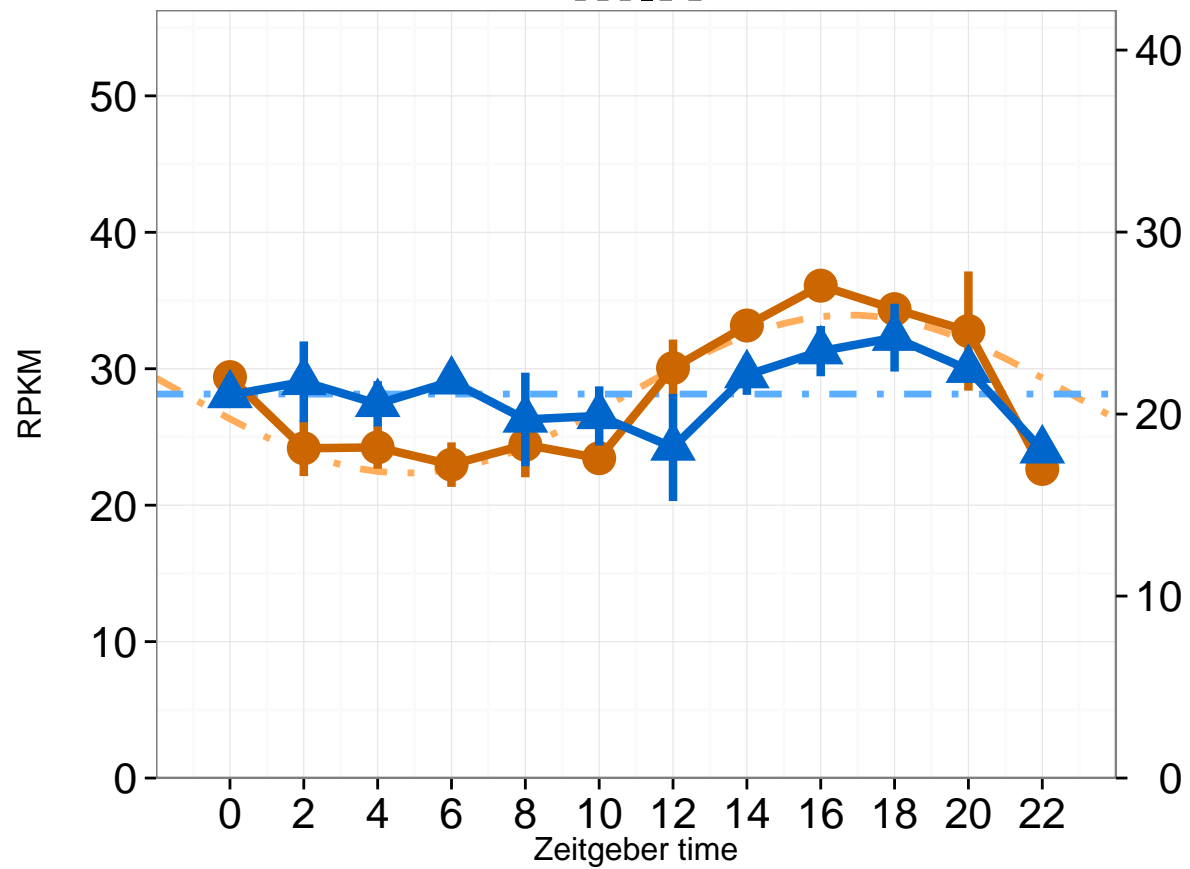

## Mlx

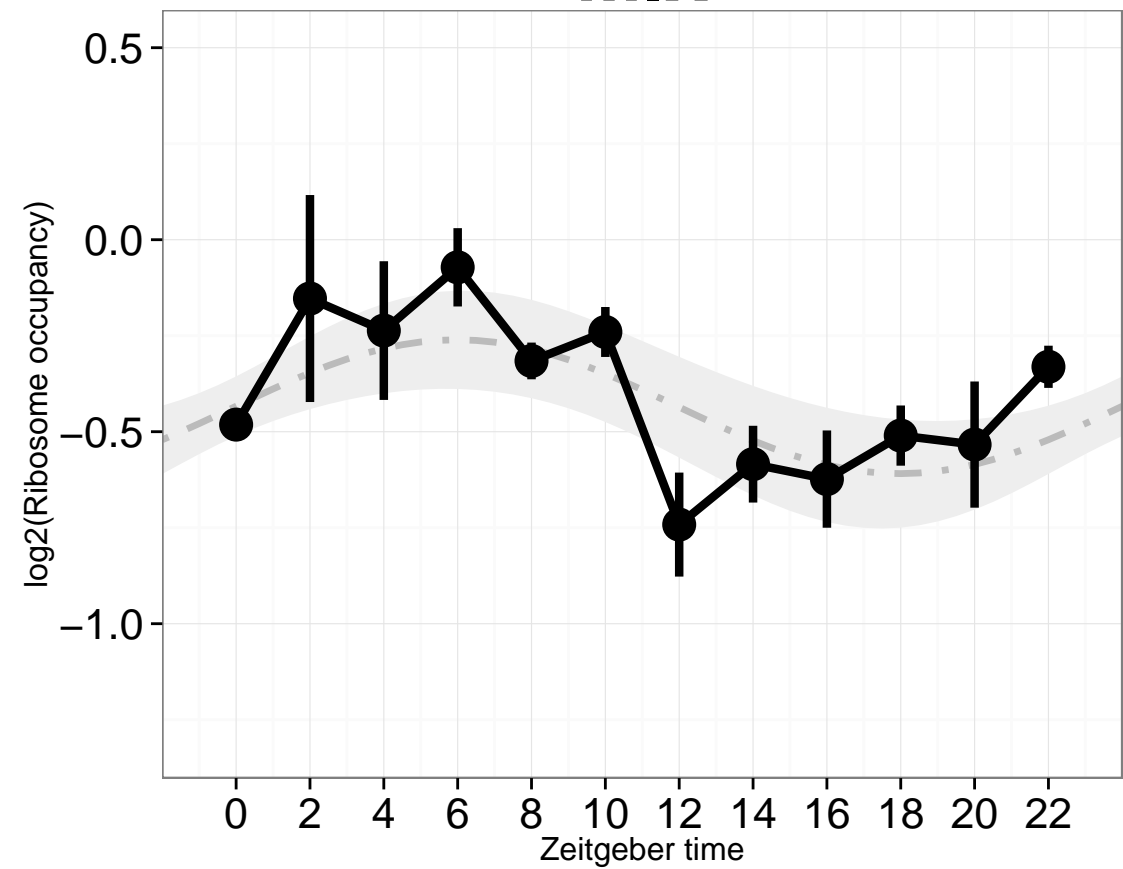

Supplement: SuppDataset_1.zip [file Mlx_set_B.pdf › Supplemental Dataset 1/B-mRNA_rhythm_translation_nonrhyth/Mlx_set_B.pdf]

## Mmab

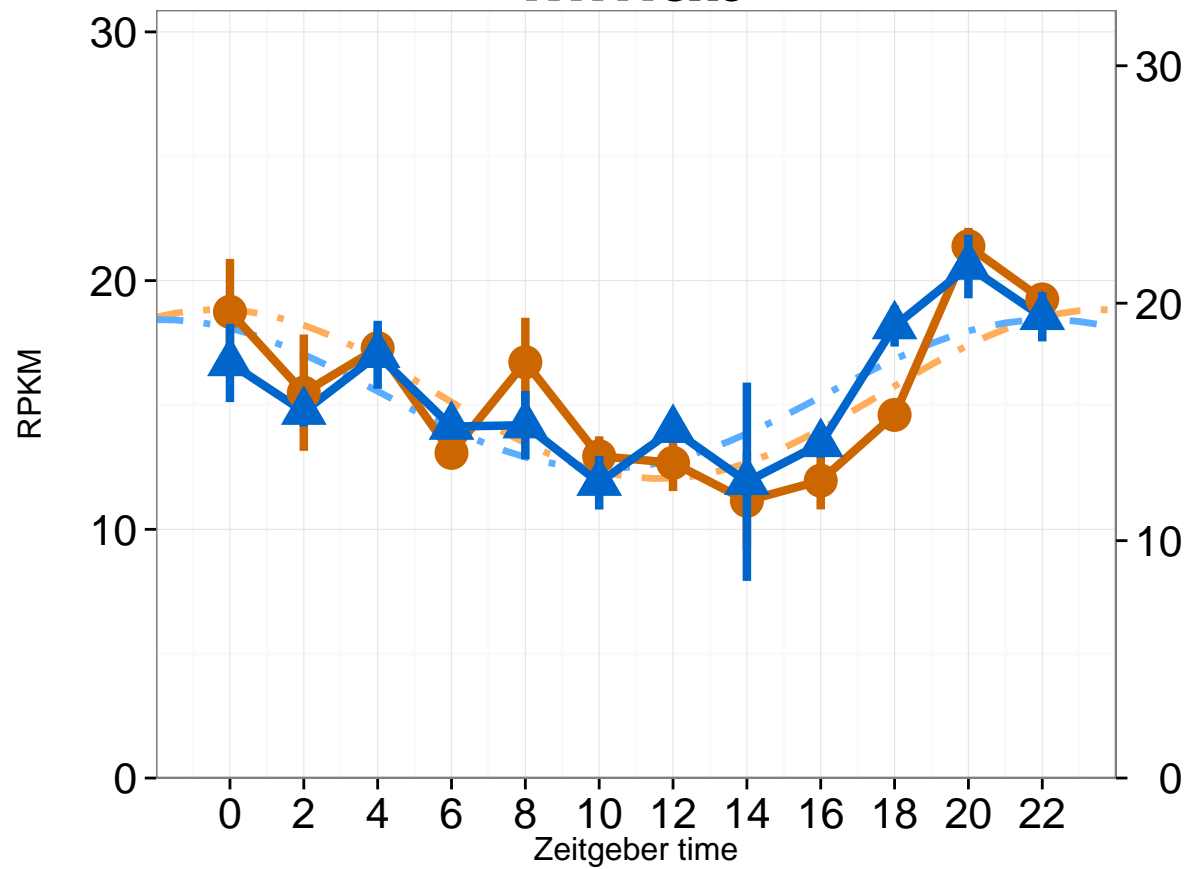

## Mmab

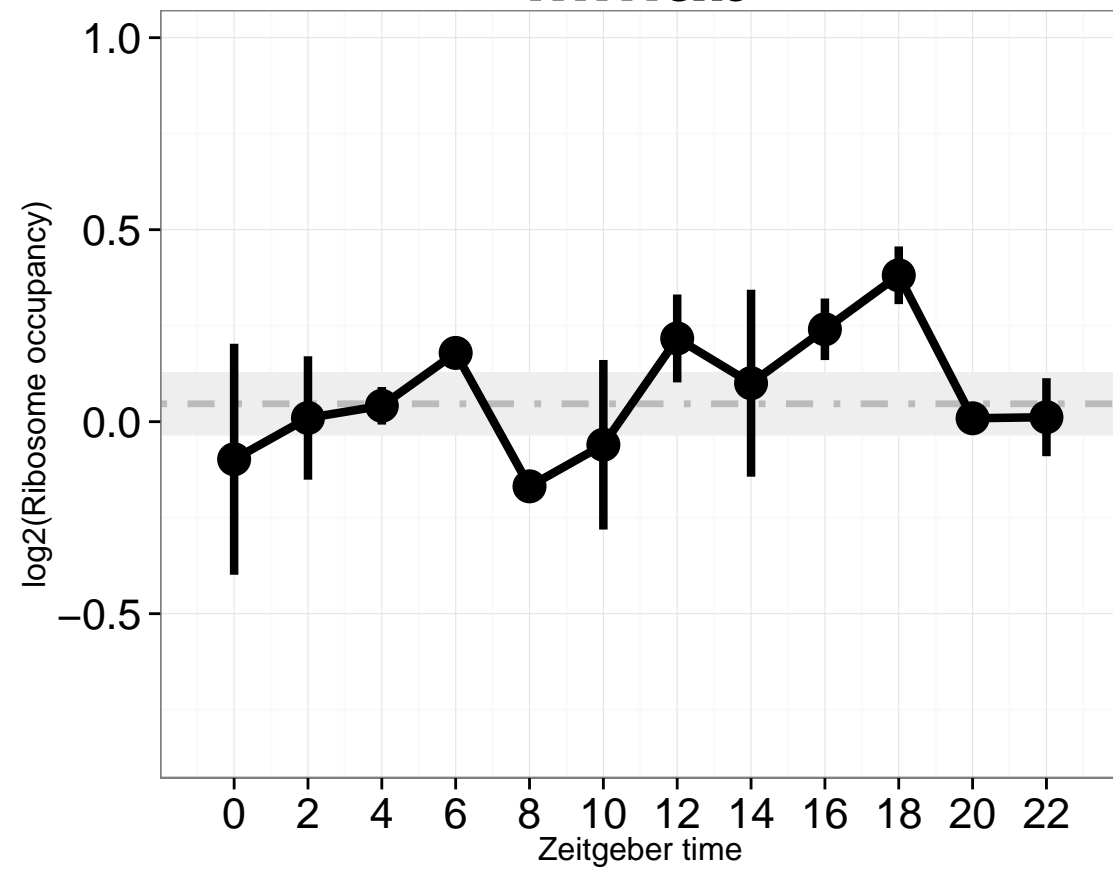

Supplement: SuppDataset_1.zip [file Mmab_set_B.pdf › Supplemental Dataset 1/B-mRNA_rhythm_translation_nonrhyth/Mmab_set_B.pdf]

# Mmgt1

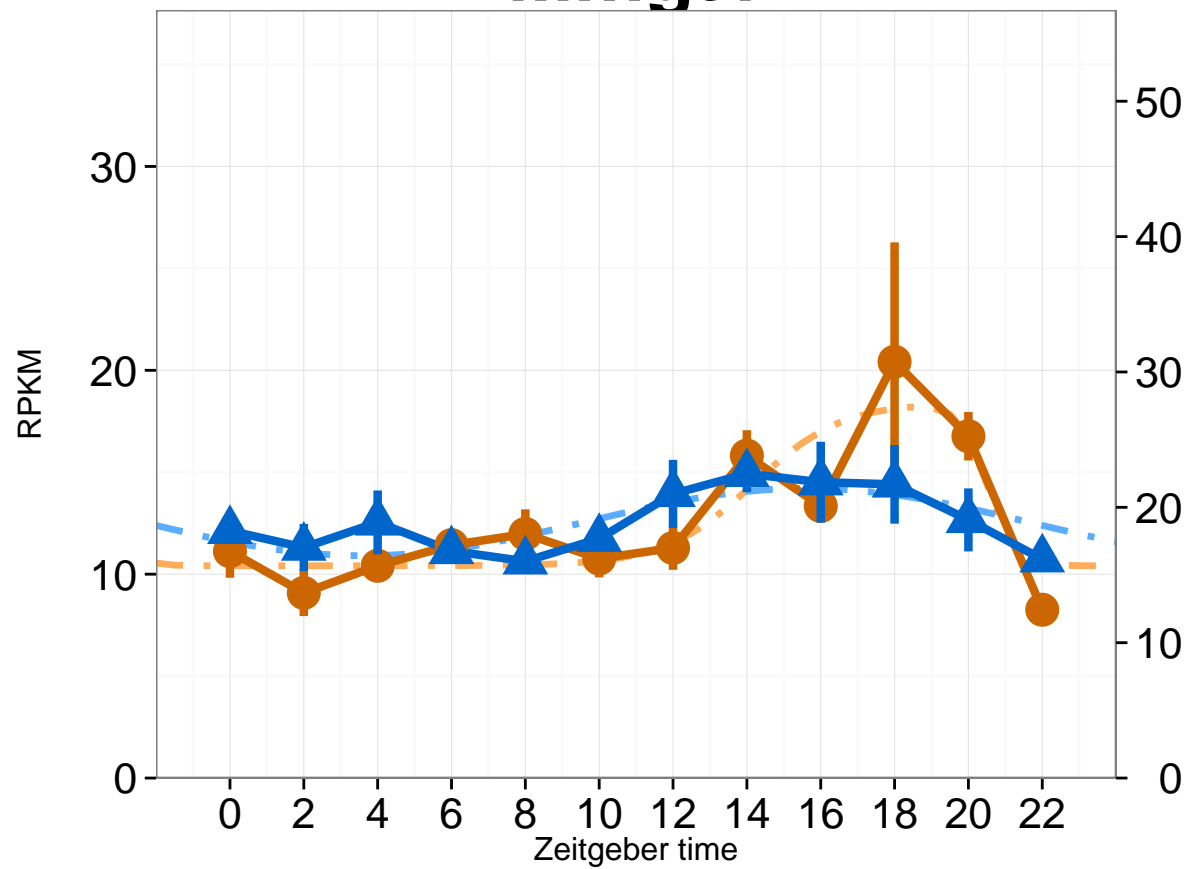

# Mmgt1

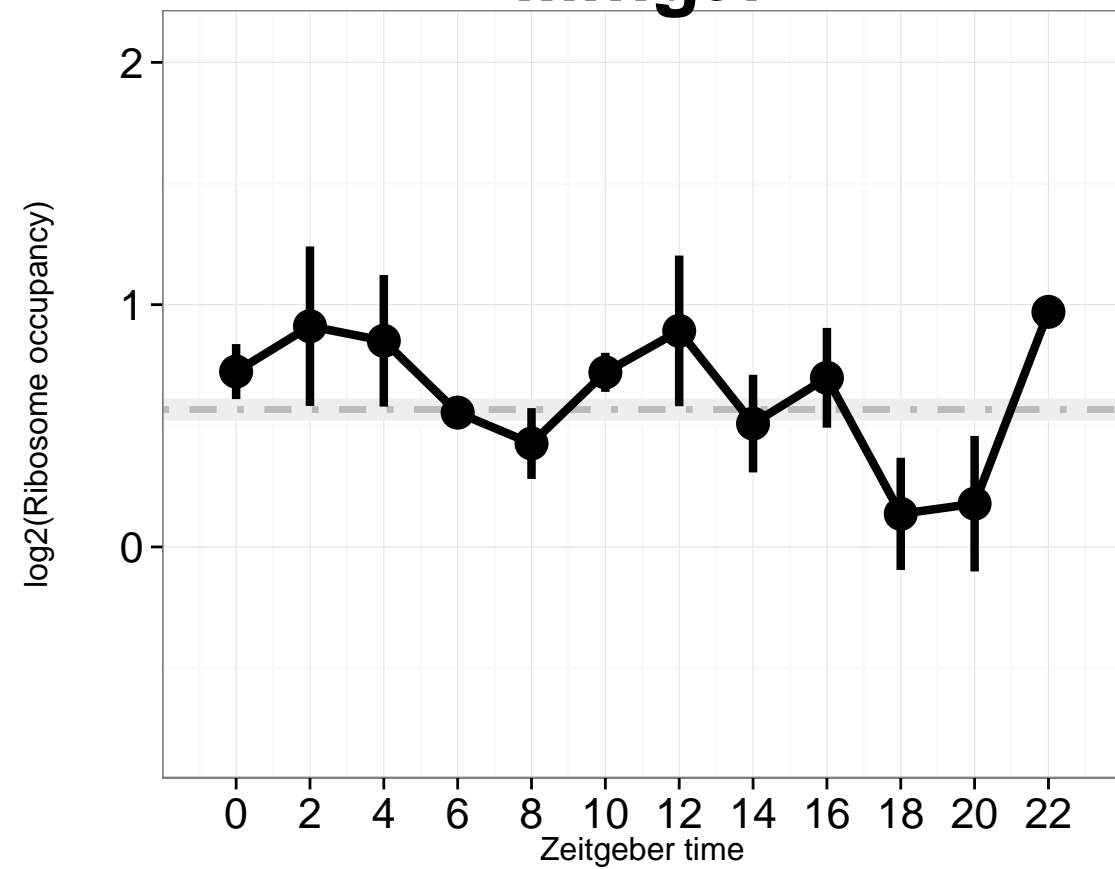

Supplement: SuppDataset_1.zip [file Mmgt1_set_B.pdf › Supplemental Dataset 1/B-mRNA_rhythm_translation_nonrhyth/Mmgt1_set_B.pdf]

# Mmrn1

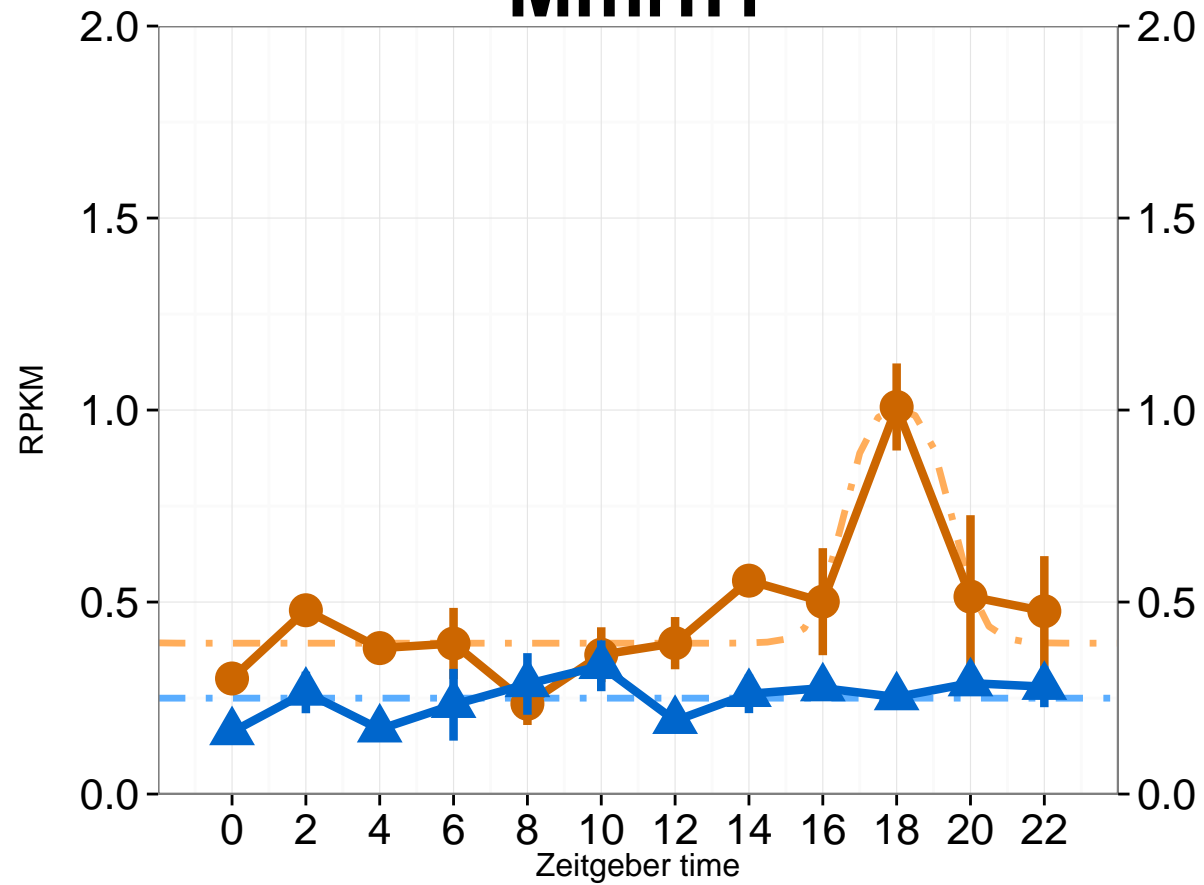

# Mmrn1

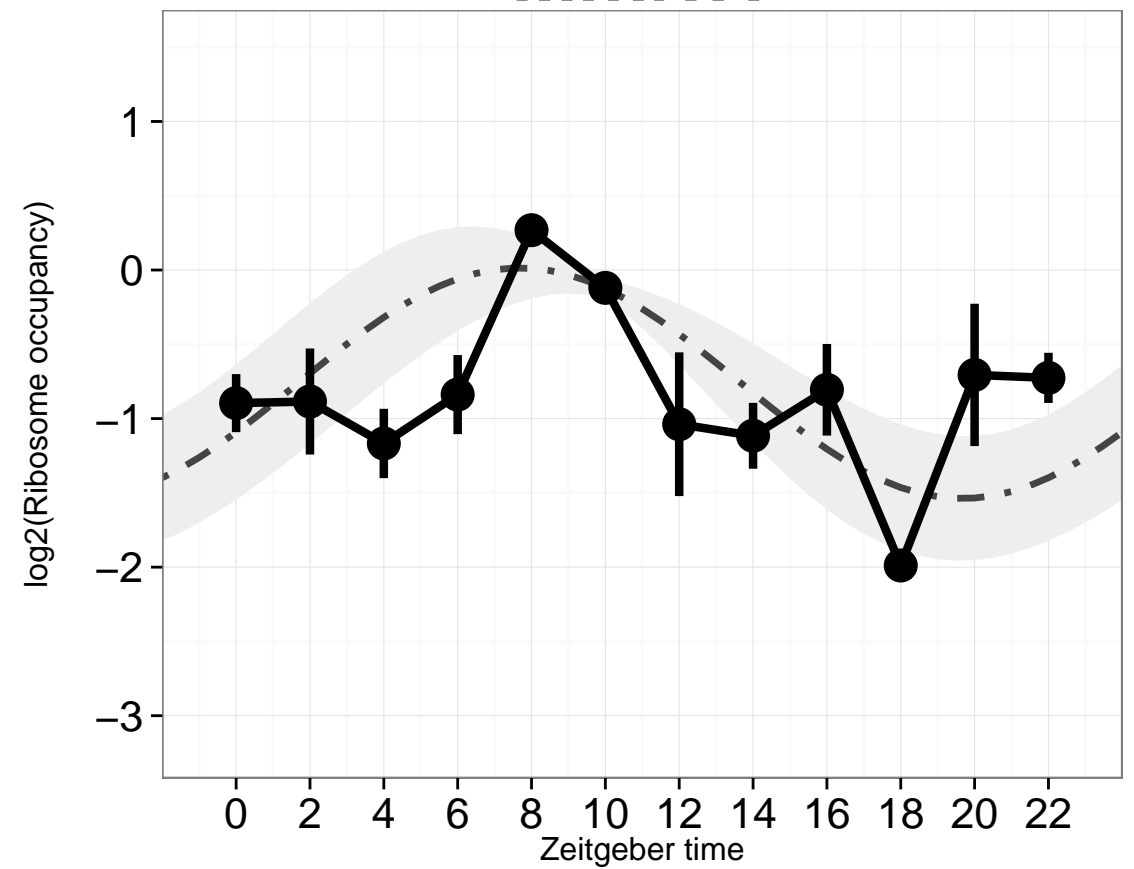

Supplement: SuppDataset_1.zip [file Mmrn1_set_B.pdf › Supplemental Dataset 1/B-mRNA_rhythm_translation_nonrhyth/Mmrn1_set_B.pdf]

# Mon1b

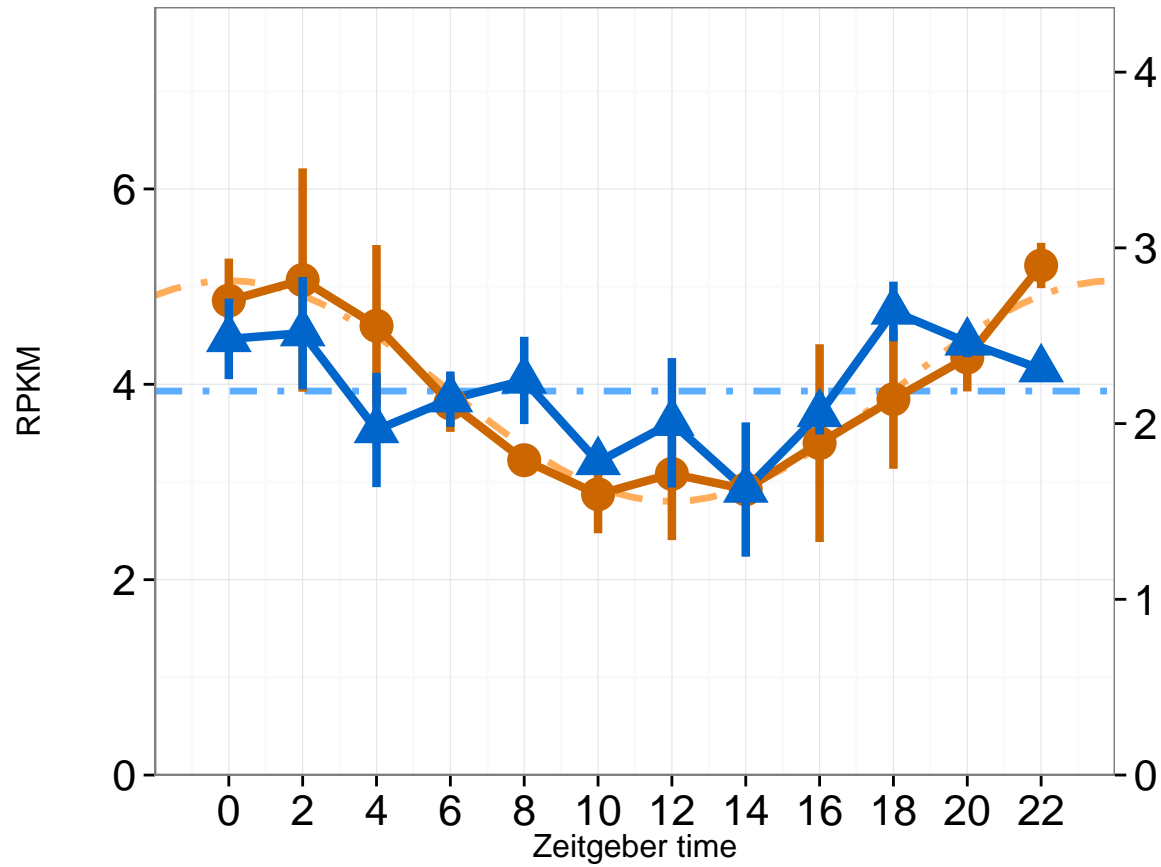

# Mon1b

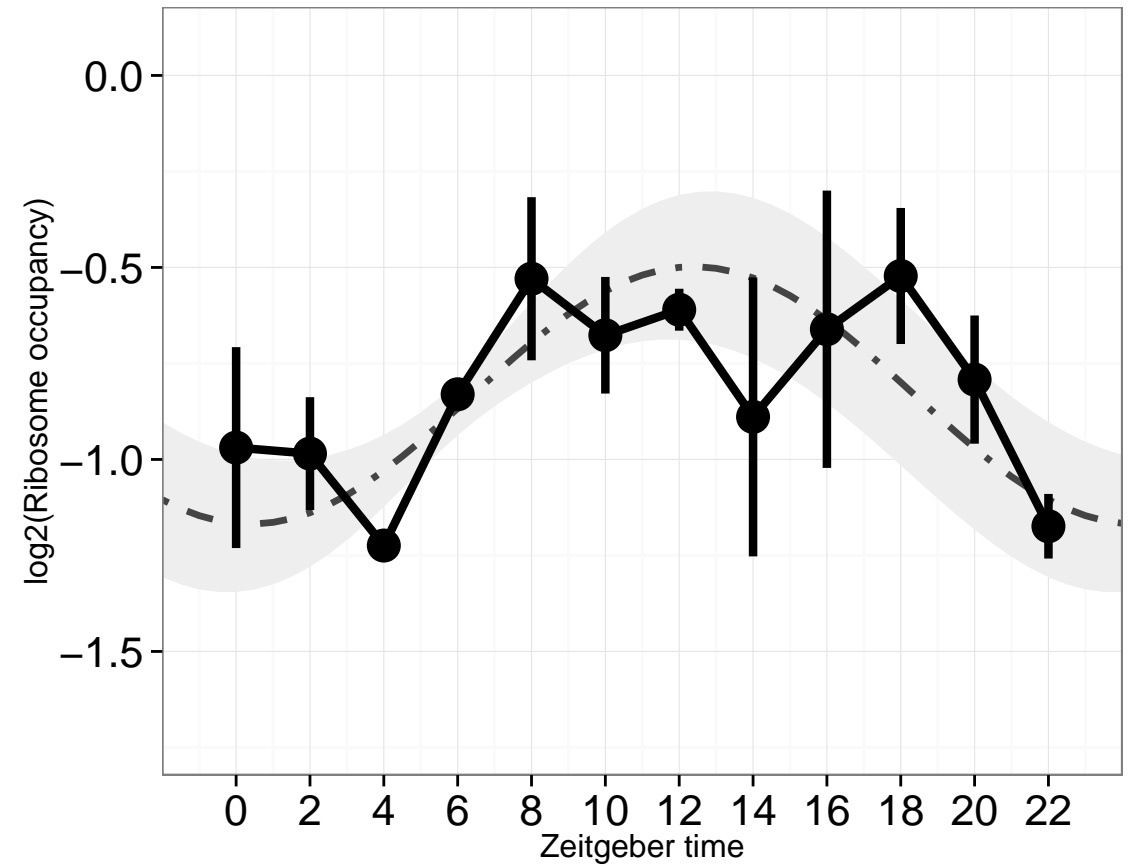

Supplement: SuppDataset_1.zip [file Mon1b_set_B.pdf › Supplemental Dataset 1/B-mRNA_rhythm_translation_nonrhyth/Mon1b_set_B.pdf]

## Morc4

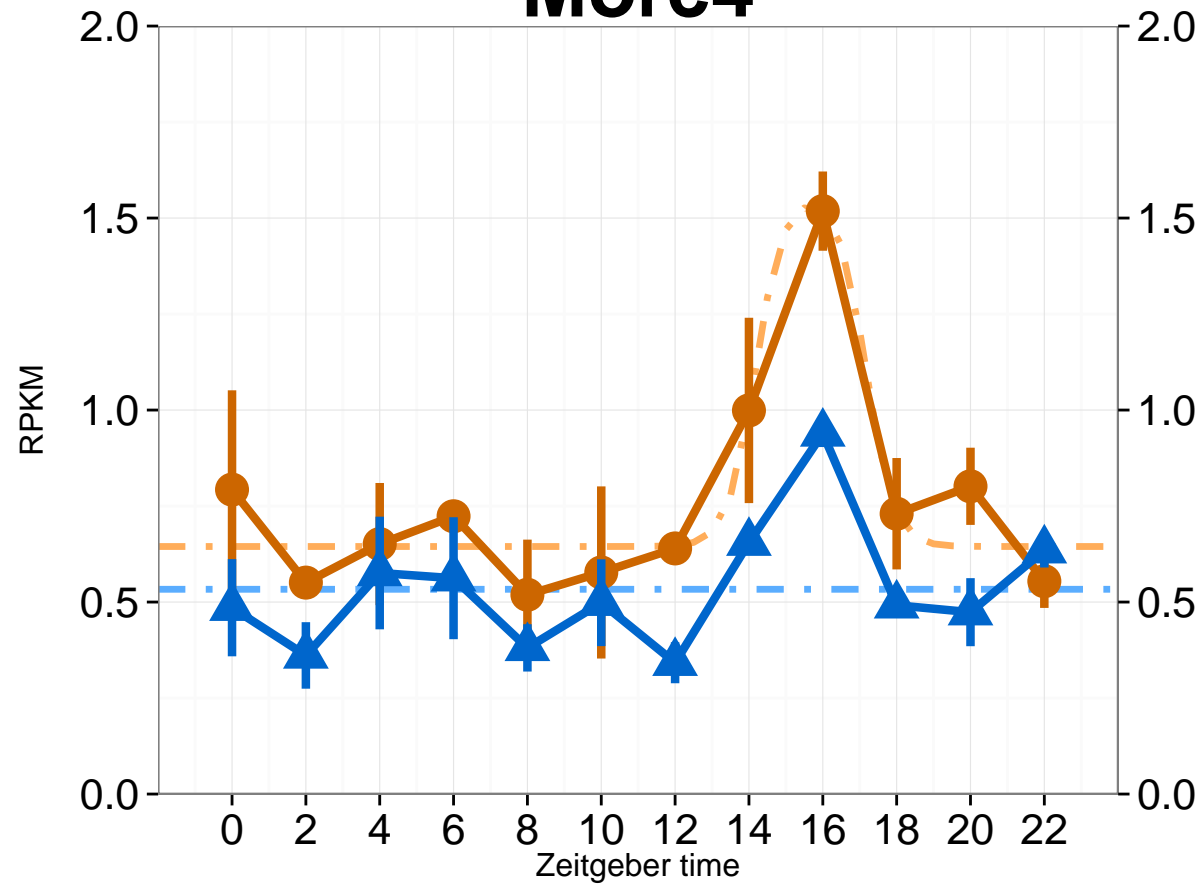

## Morc4

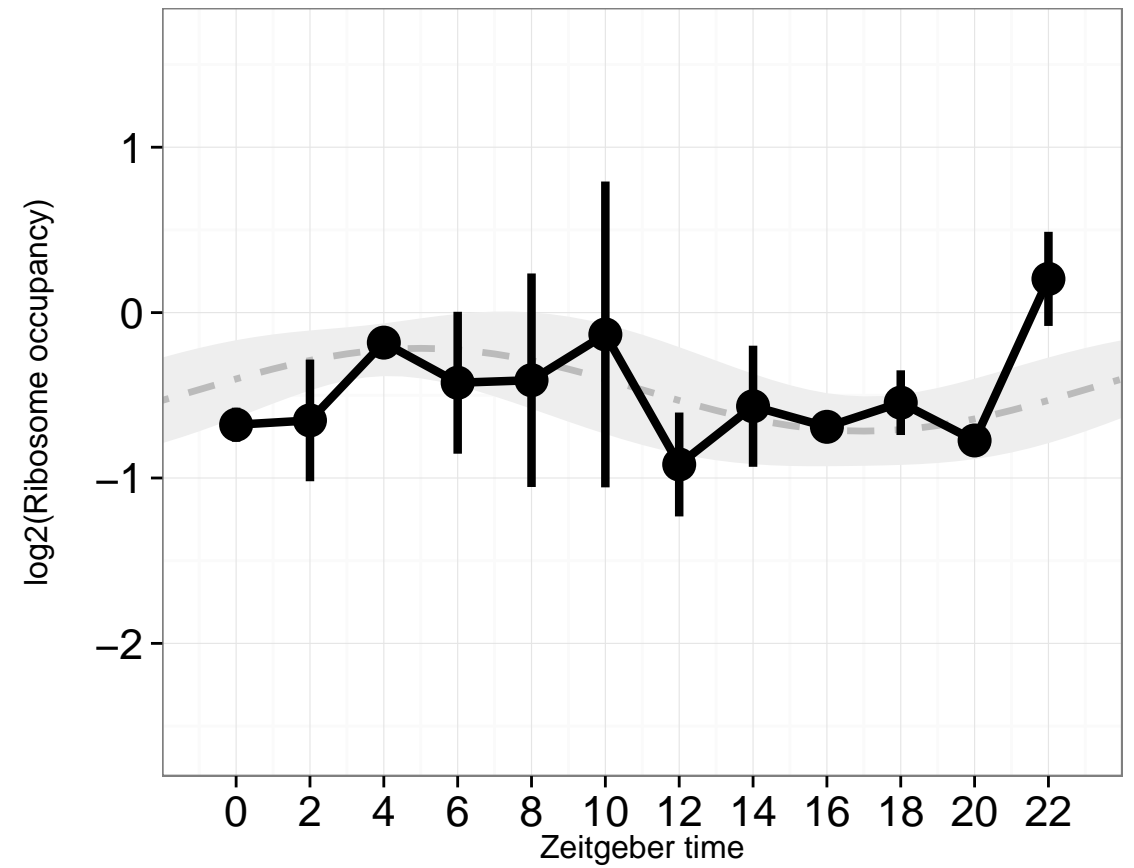

Supplement: SuppDataset_1.zip [file Morc4_set_B.pdf › Supplemental Dataset 1/B-mRNA_rhythm_translation_nonrhyth/Morc4_set_B.pdf]

# Moxd1

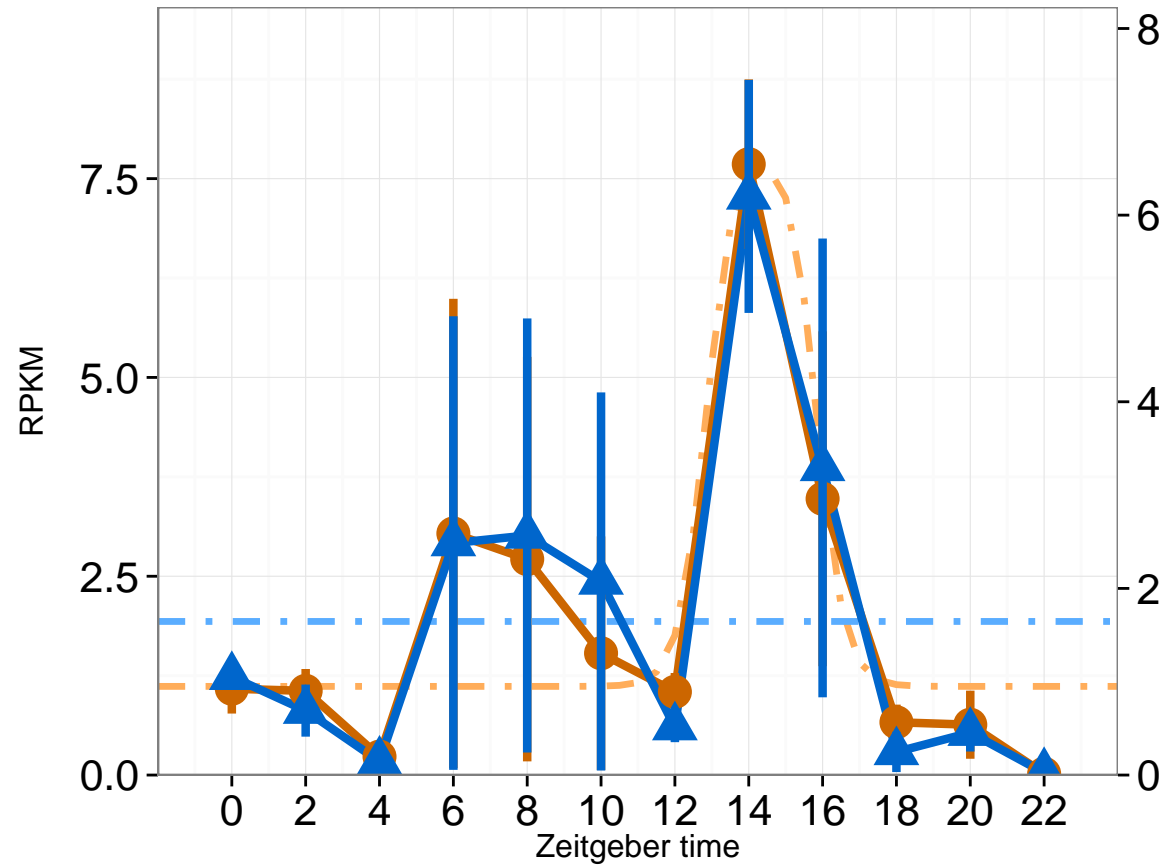

# Moxd1

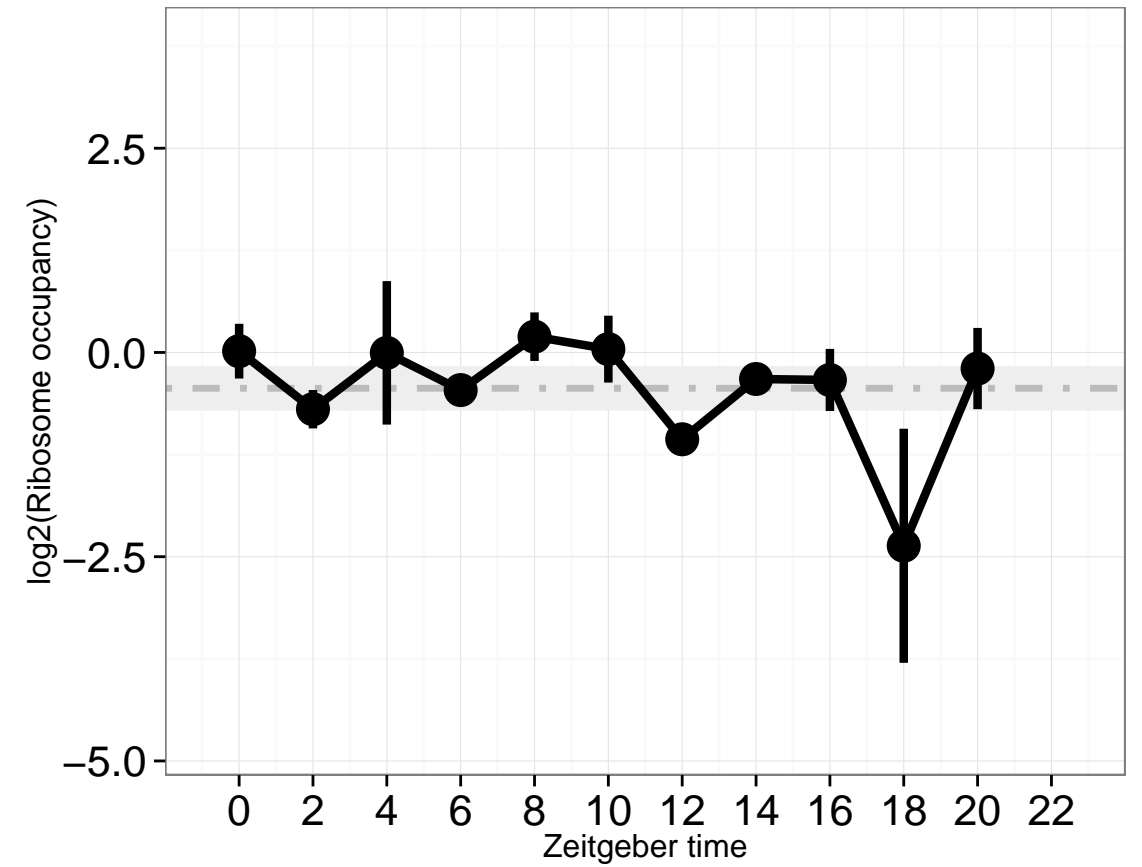

Supplement: SuppDataset_1.zip [file Moxd1_set_B.pdf › Supplemental Dataset 1/B-mRNA_rhythm_translation_nonrhyth/Moxd1_set_B.pdf]

## Mphosph10

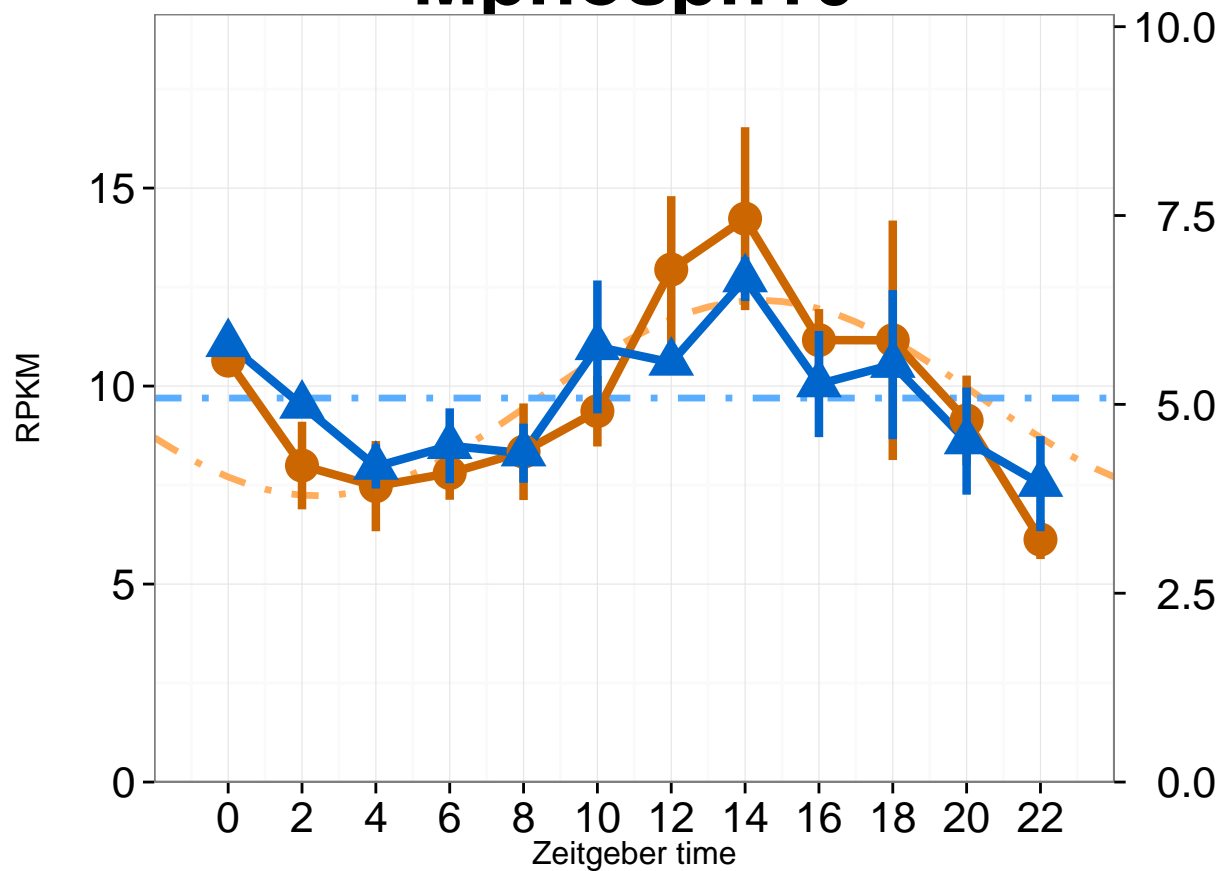

## Mphosph10

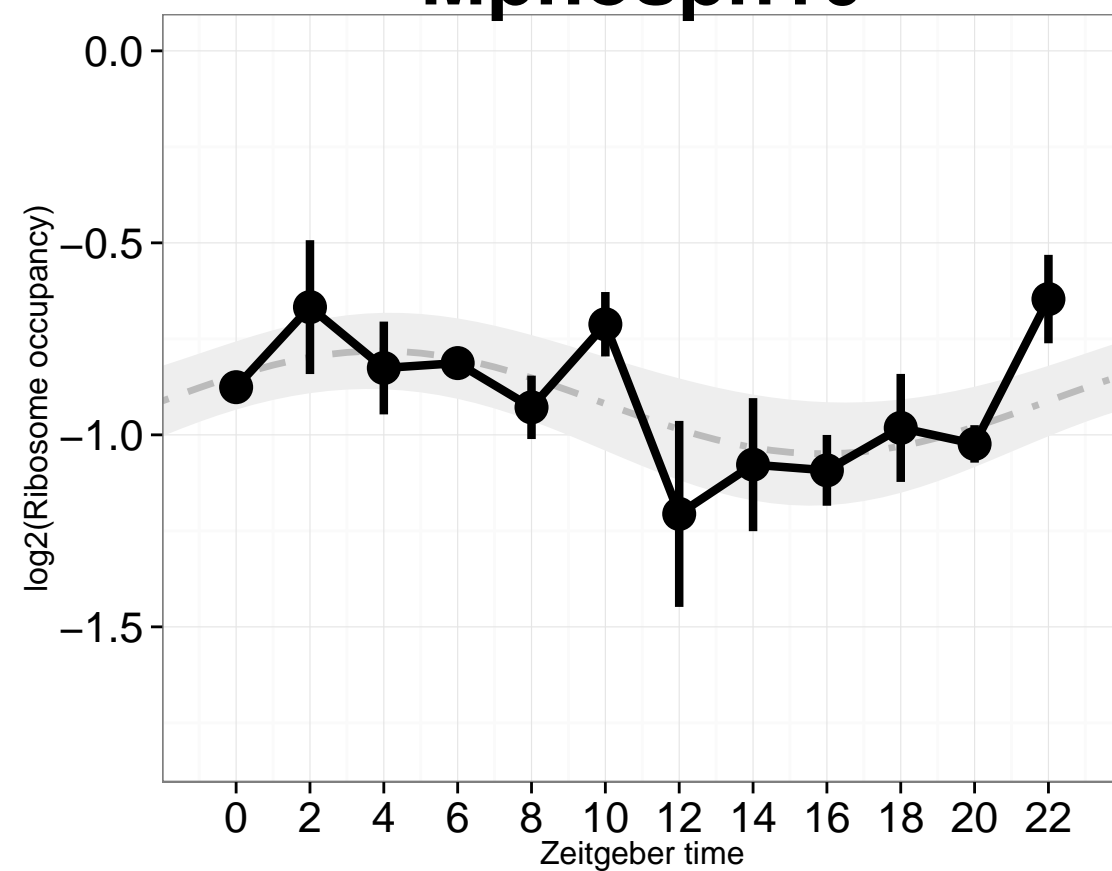

Supplement: SuppDataset_1.zip [file Mphosph10_set_B.pdf › Supplemental Dataset 1/B-mRNA_rhythm_translation_nonrhyth/Mphosph10_set_B.pdf]

## Mpp4

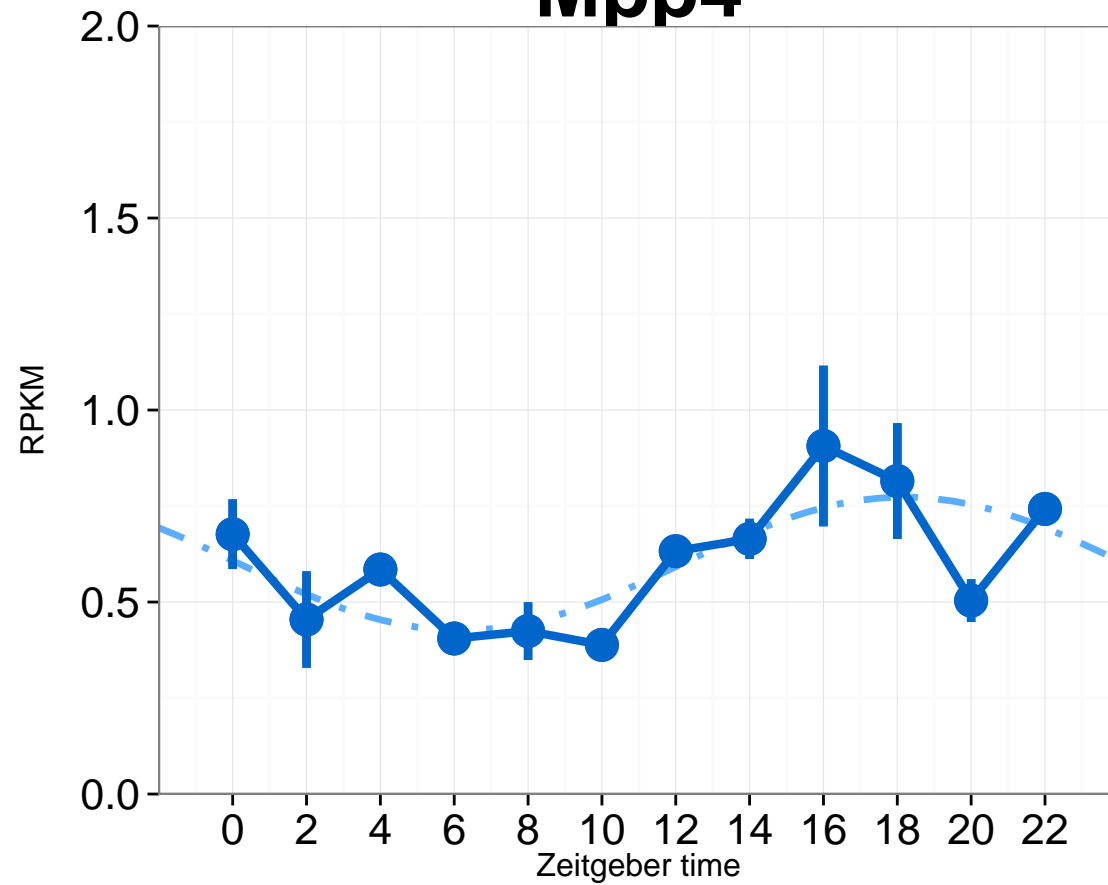

## Mpp4 log<sub>2</sub>(Ribosome occupancy)

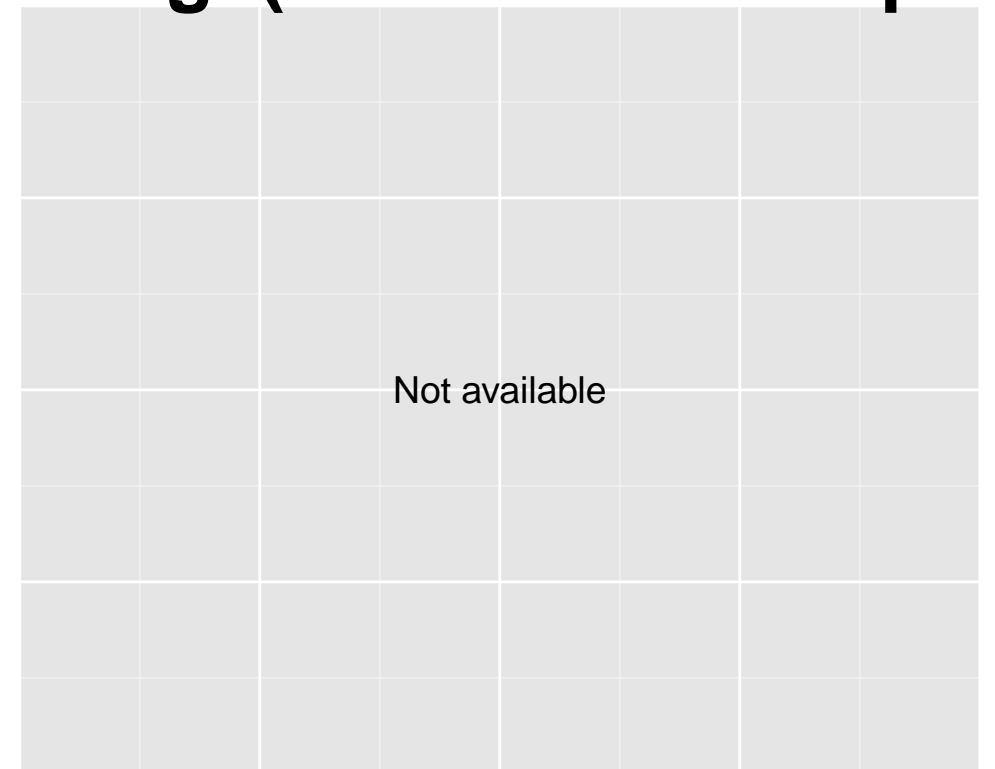

Supplement: SuppDataset_1.zip [file Mpp4_set_B.pdf › Supplemental Dataset 1/B-mRNA_rhythm_translation_nonrhyth/Mpp4_set_B.pdf]

## Mpst

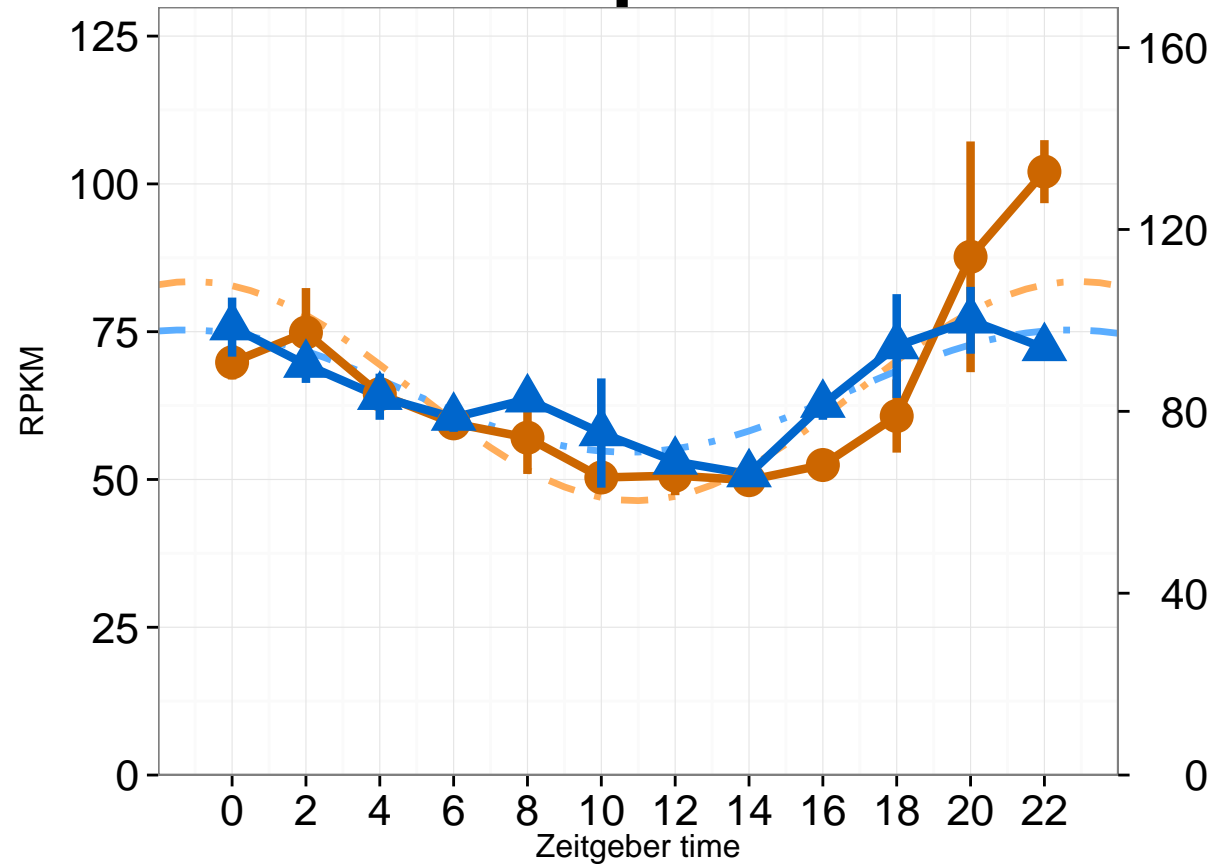

## Mpst

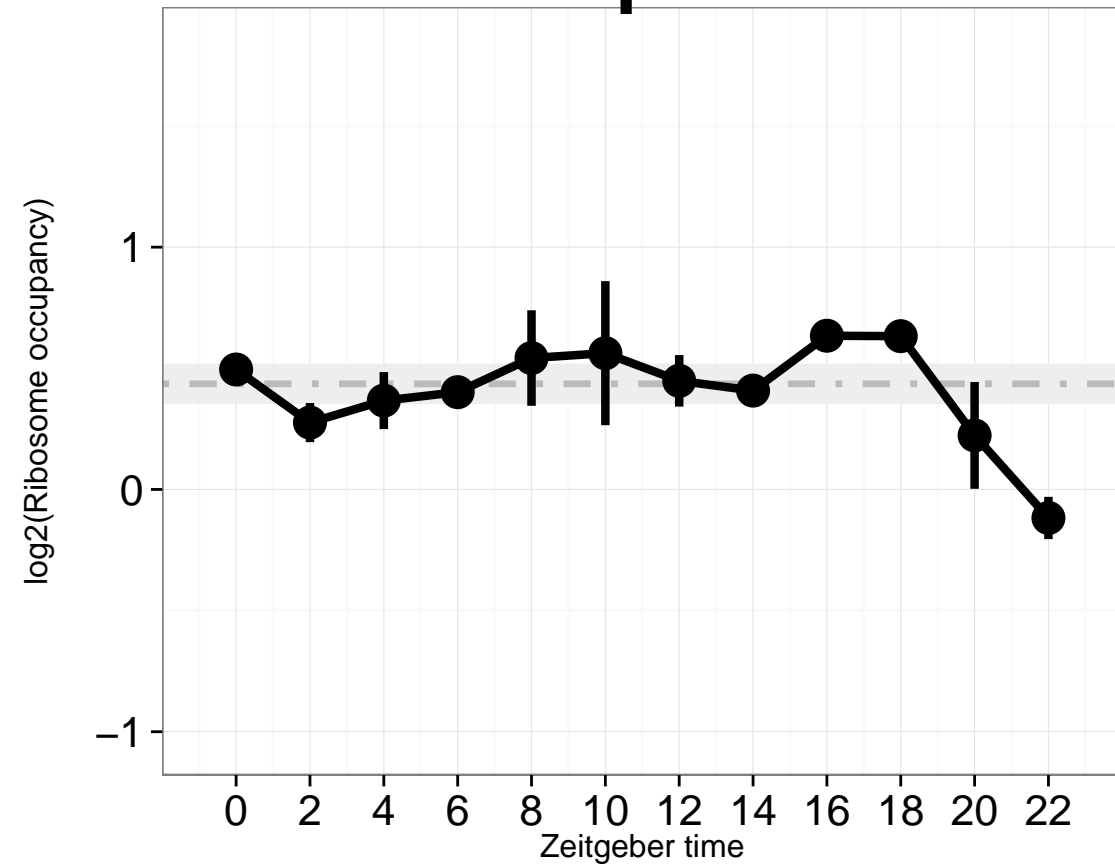

Supplement: SuppDataset_1.zip [file Mpst_set_B.pdf › Supplemental Dataset 1/B-mRNA_rhythm_translation_nonrhyth/Mpst_set_B.pdf]

Mr1

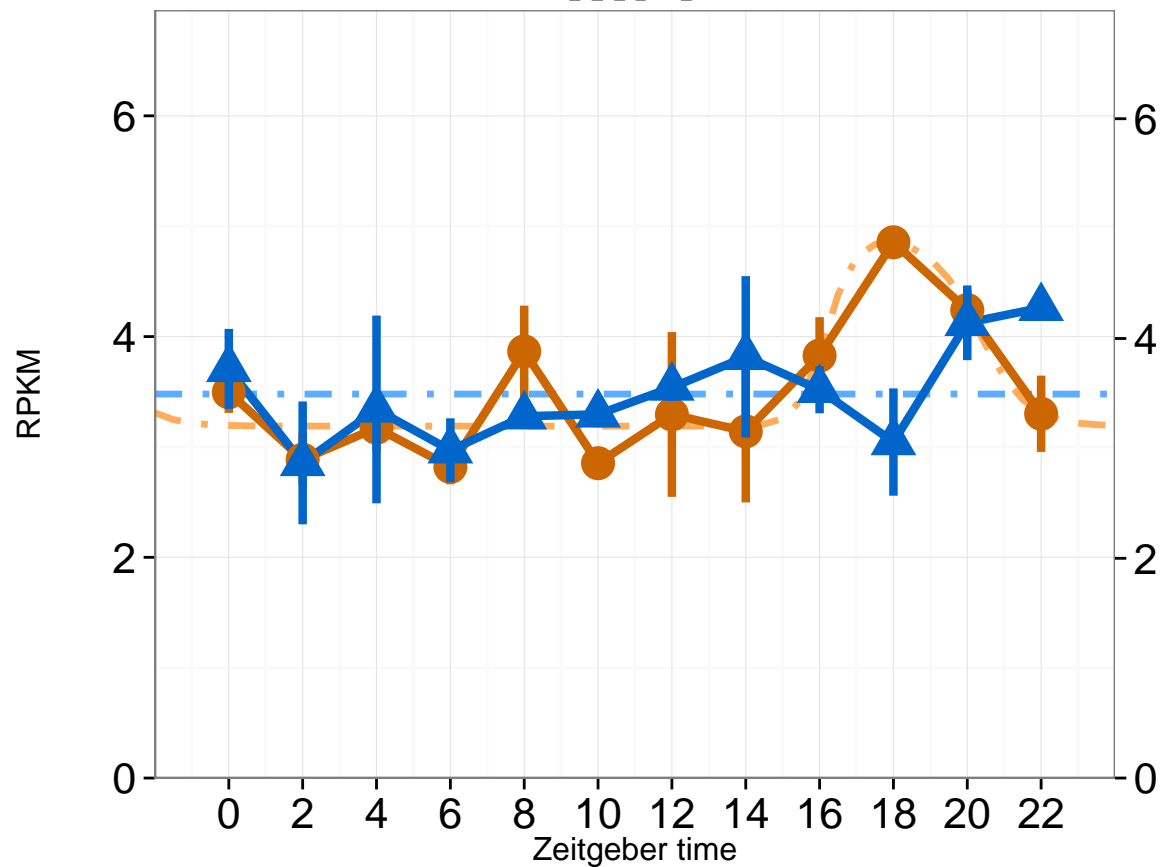

Mr1

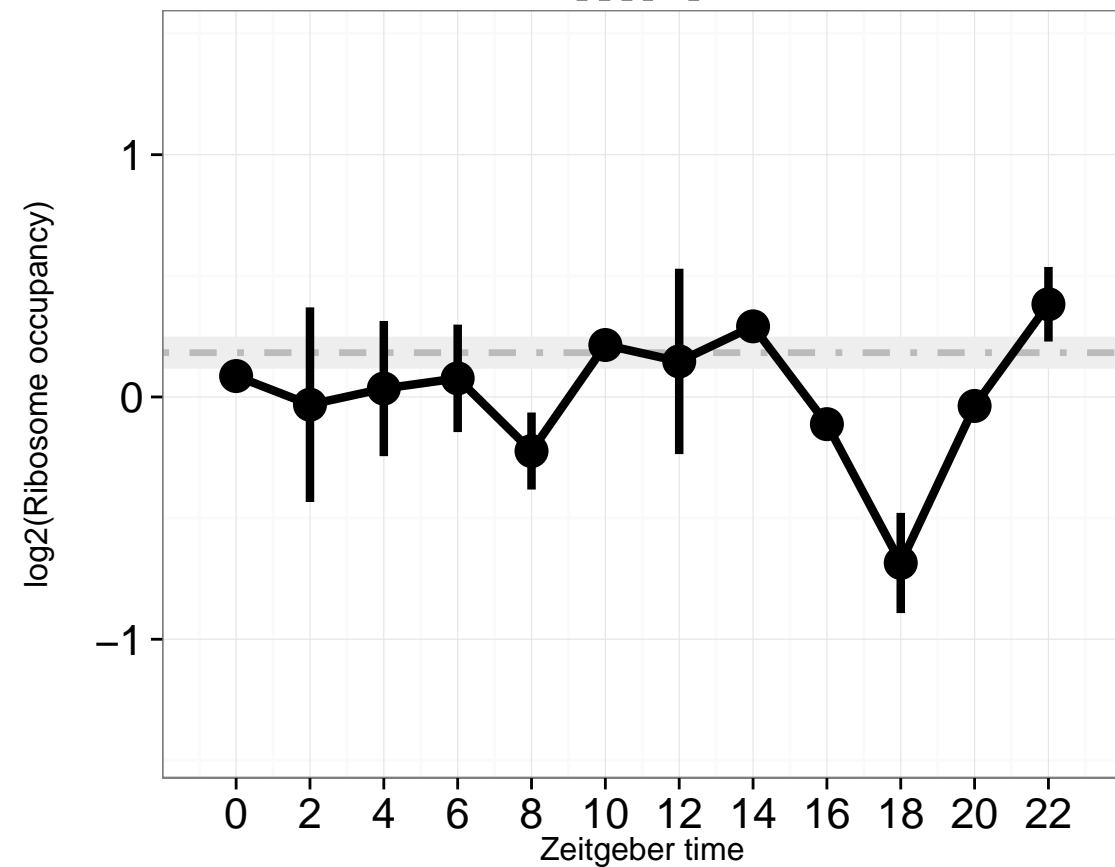

Supplement: SuppDataset_1.zip [file Mr1_set_B.pdf › Supplemental Dataset 1/B-mRNA_rhythm_translation_nonrhyth/Mr1_set_B.pdf]

# Mrpl28

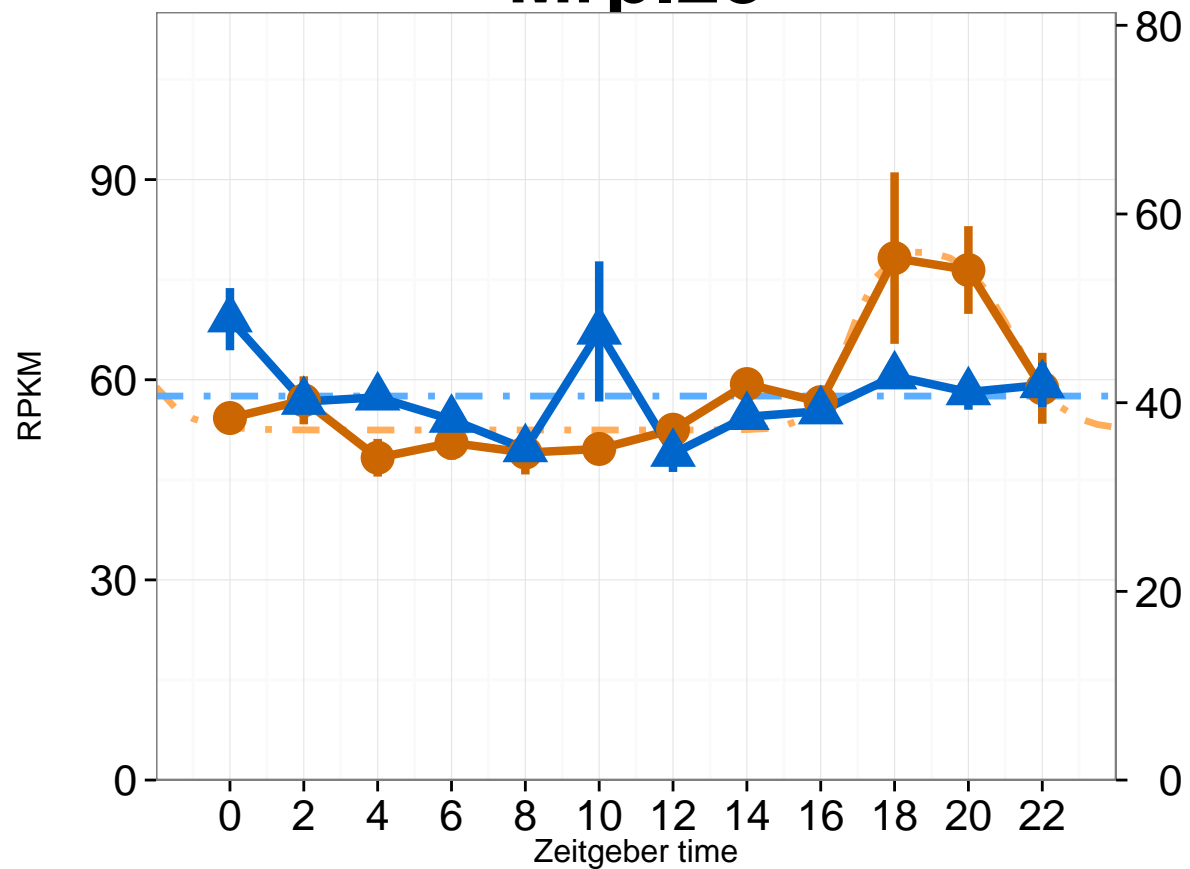

# Mrpl28

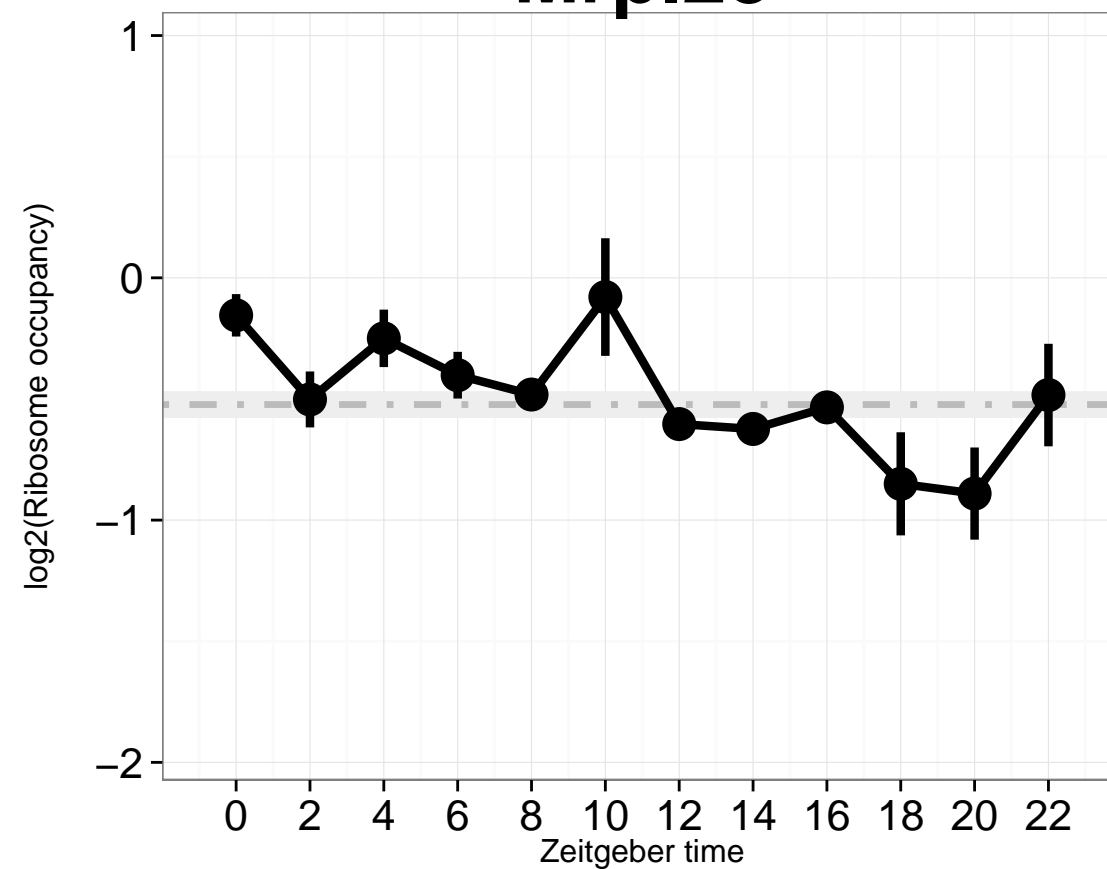

Supplement: SuppDataset_1.zip [file Mrpl28_set_B.pdf › Supplemental Dataset 1/B-mRNA_rhythm_translation_nonrhyth/Mrpl28_set_B.pdf]

# Mrpl36

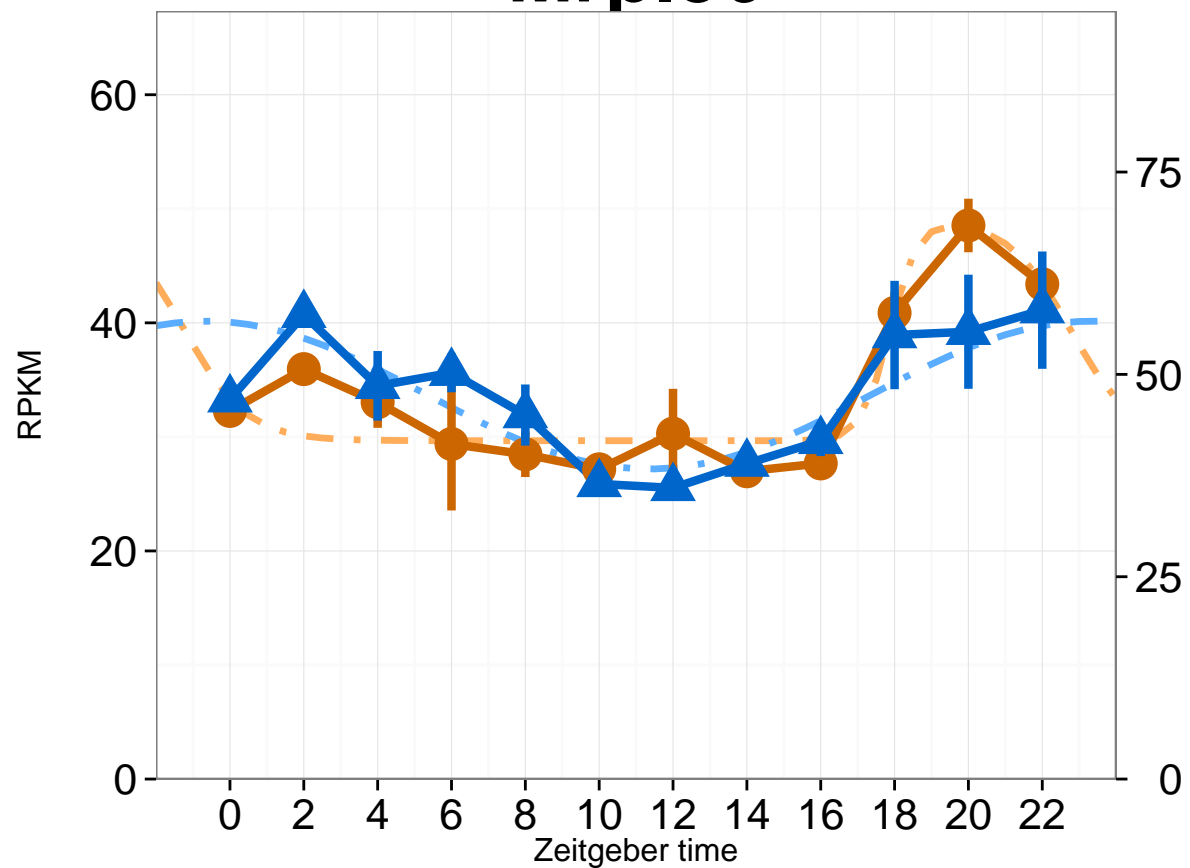

# Mrpl36

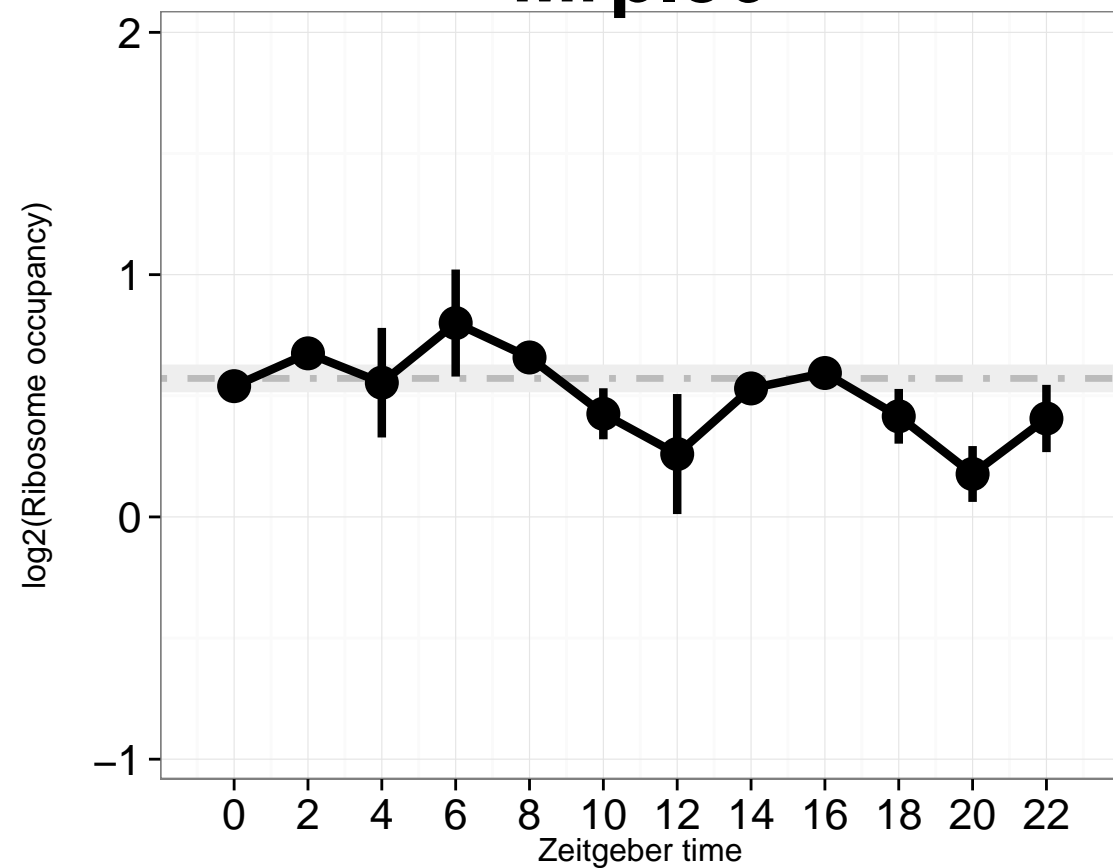

Supplement: SuppDataset_1.zip [file Mrpl36_set_B.pdf › Supplemental Dataset 1/B-mRNA_rhythm_translation_nonrhyth/Mrpl36_set_B.pdf]

# Mrpl4

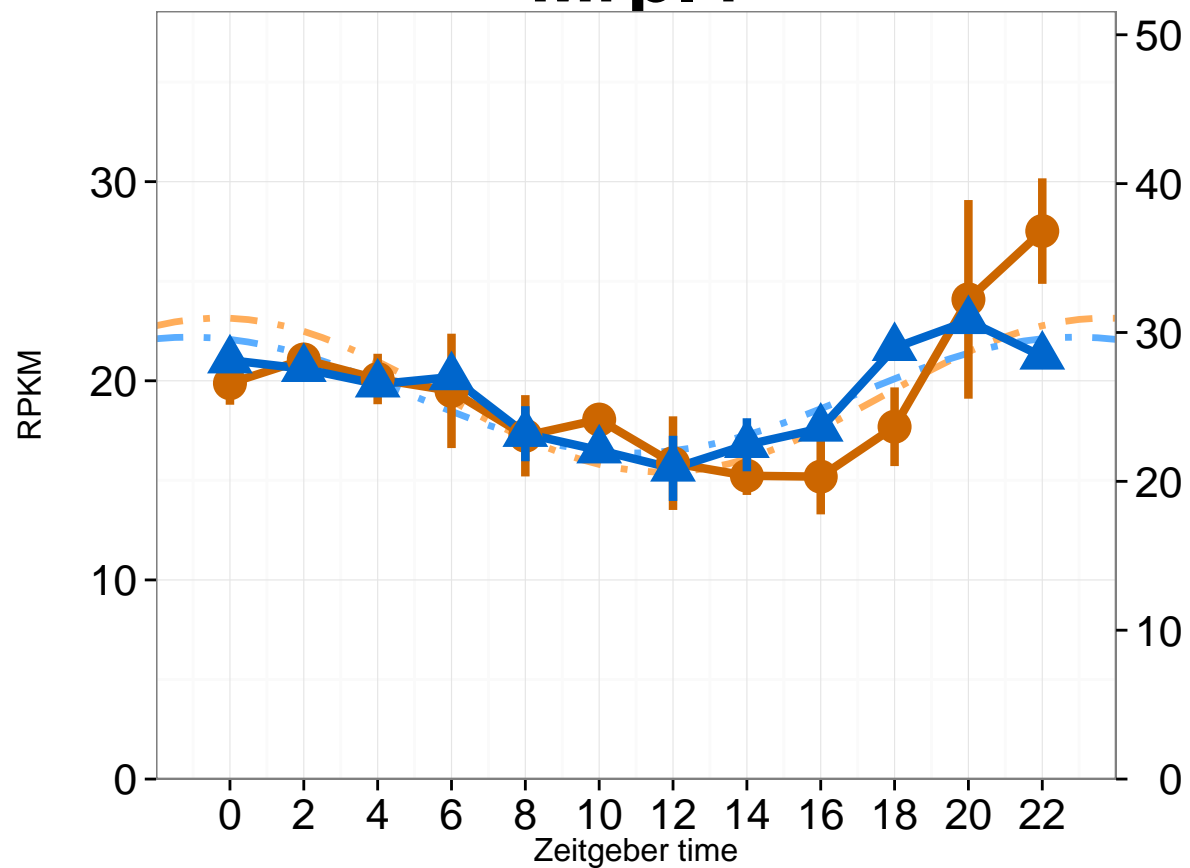

# Mrpl4

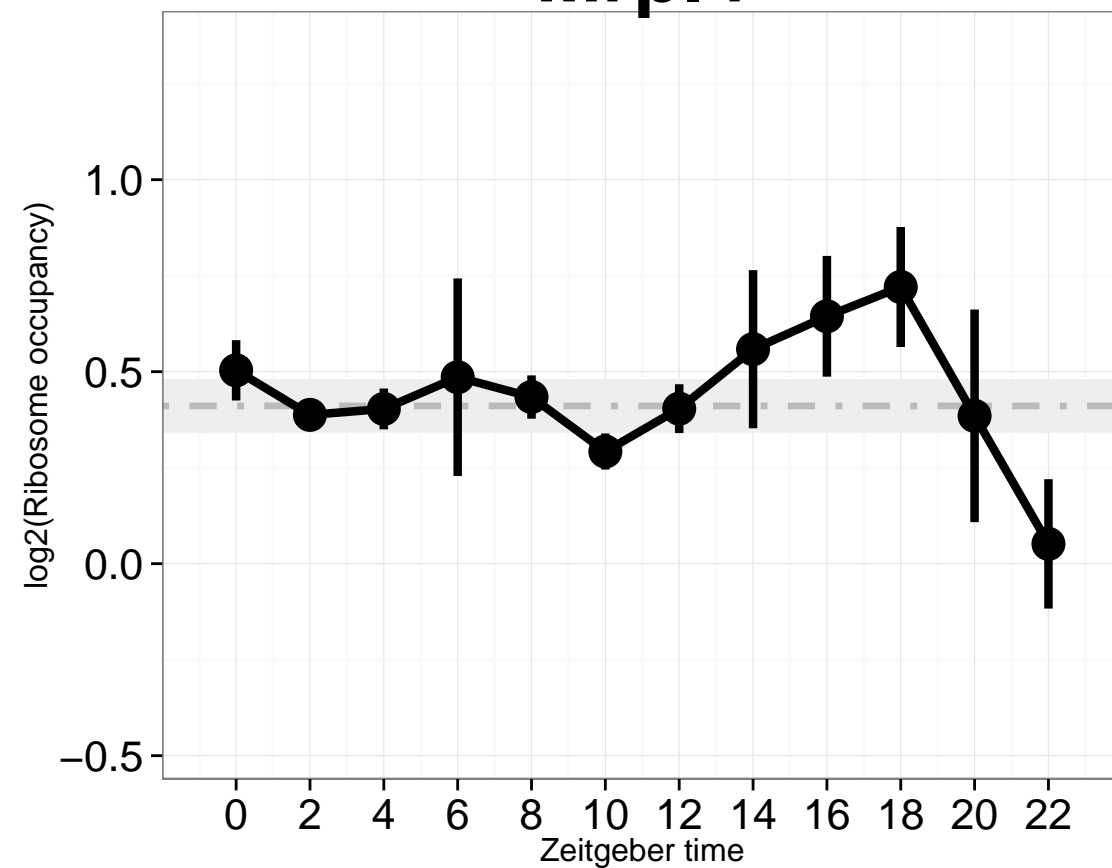

Supplement: SuppDataset_1.zip [file Mrpl4_set_B.pdf › Supplemental Dataset 1/B-mRNA_rhythm_translation_nonrhyth/Mrpl4_set_B.pdf]

# Mrps36

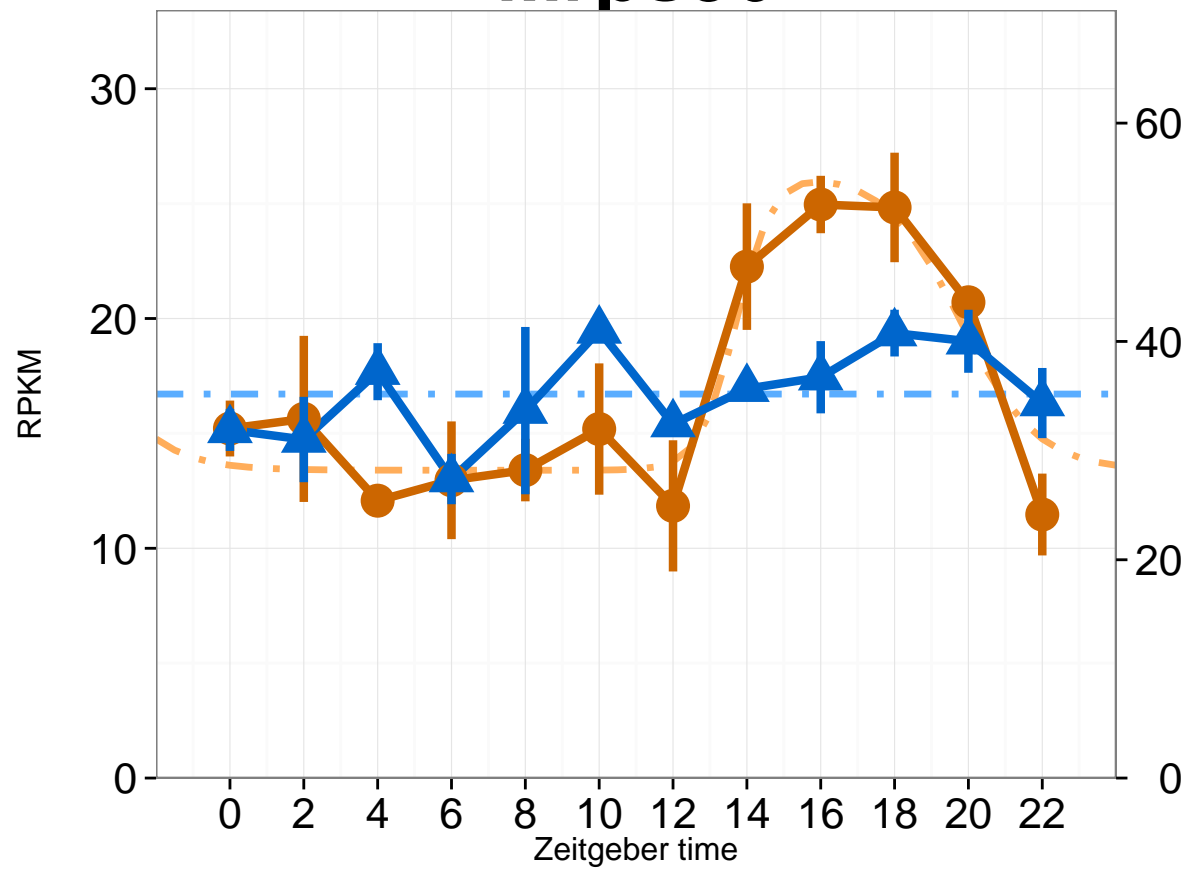

# Mrps36

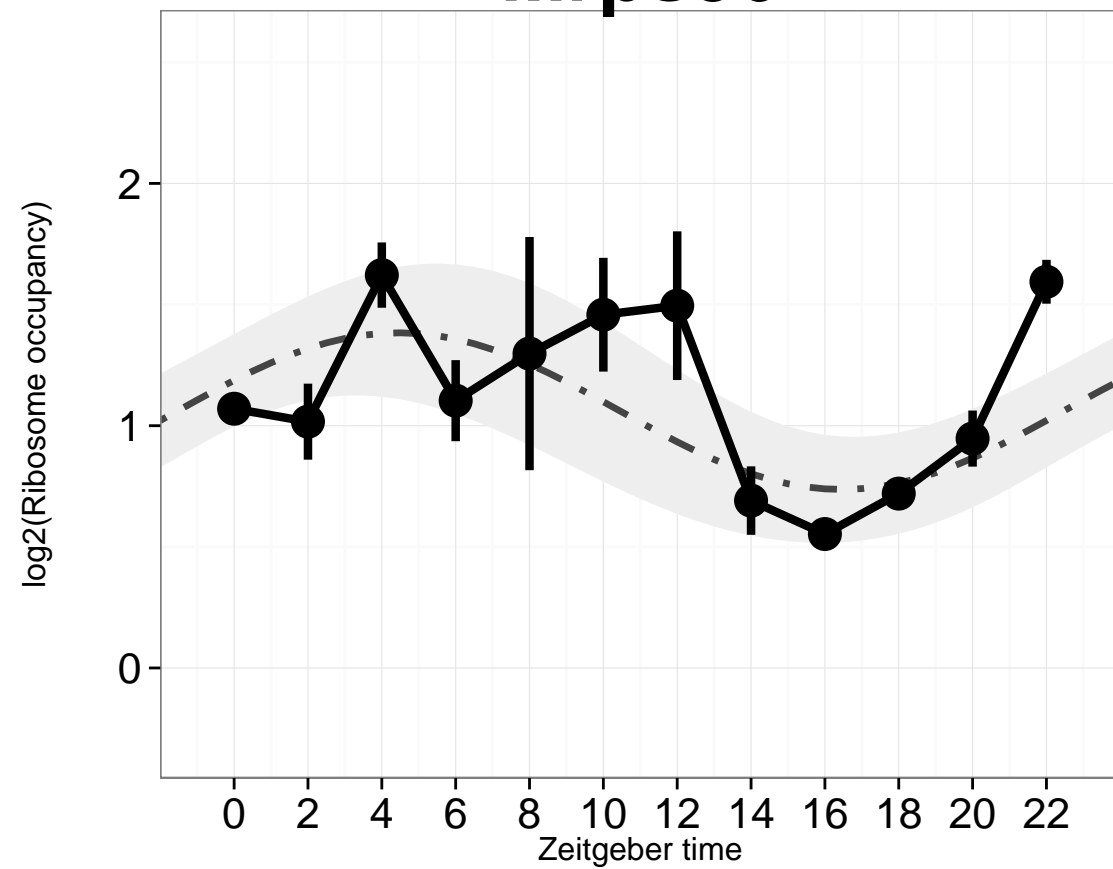

Supplement: SuppDataset_1.zip [file Mrps36_set_B.pdf › Supplemental Dataset 1/B-mRNA_rhythm_translation_nonrhyth/Mrps36_set_B.pdf]

## Mrto4

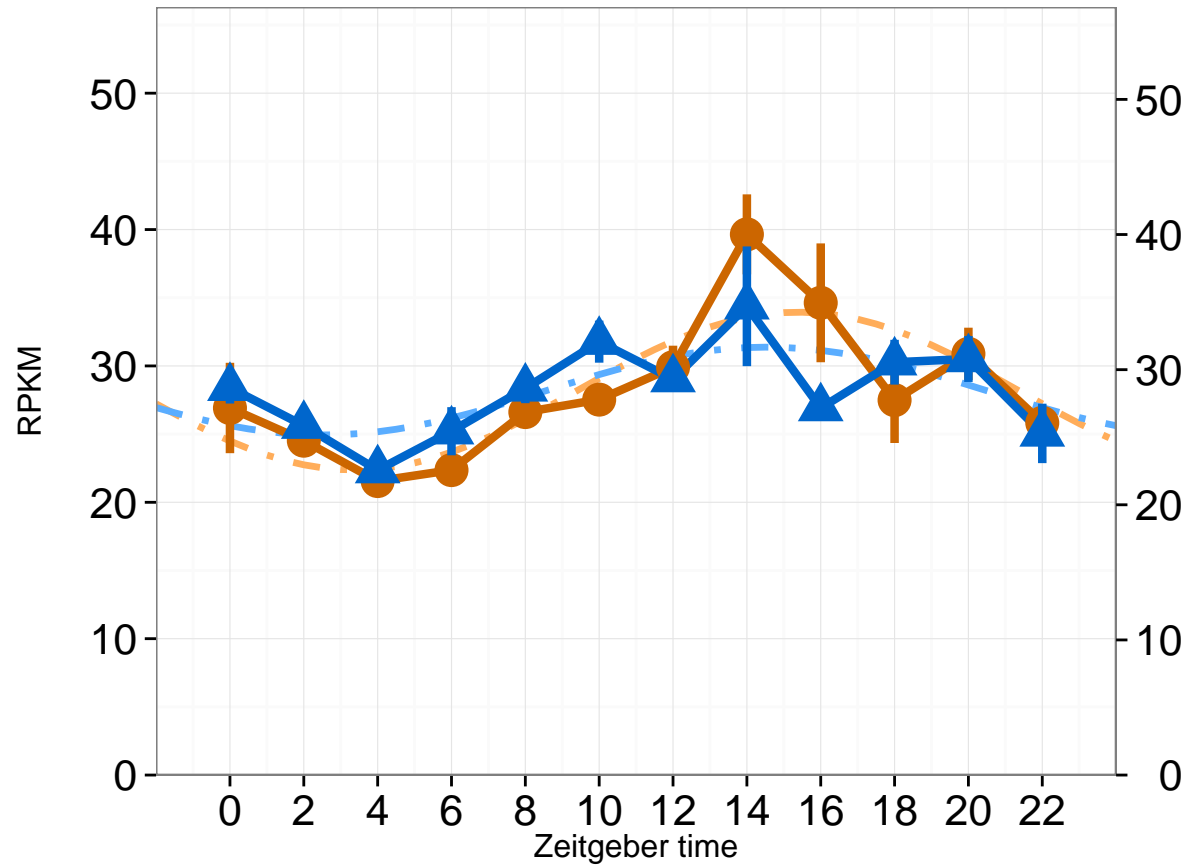

## Mrto4

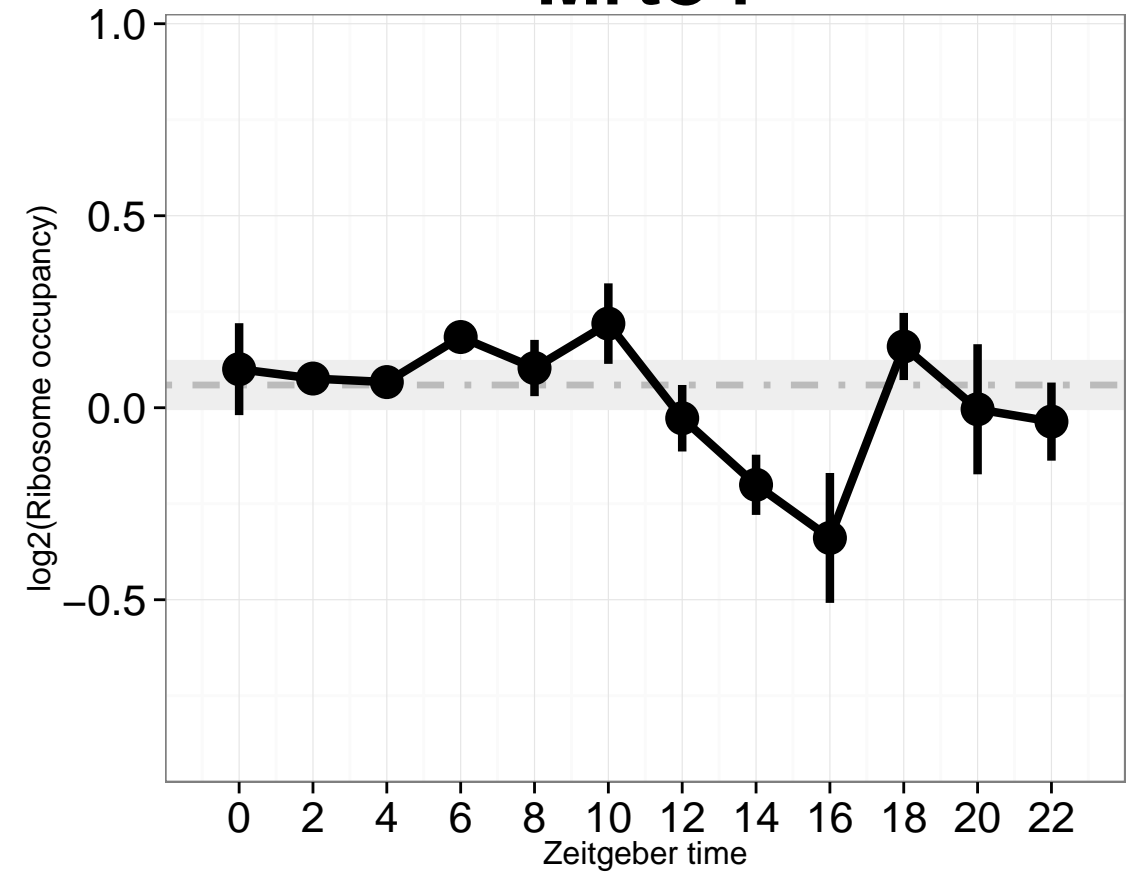

Supplement: SuppDataset_1.zip [file Mrto4_set_B.pdf › Supplemental Dataset 1/B-mRNA_rhythm_translation_nonrhyth/Mrto4_set_B.pdf]

# Mrvi1

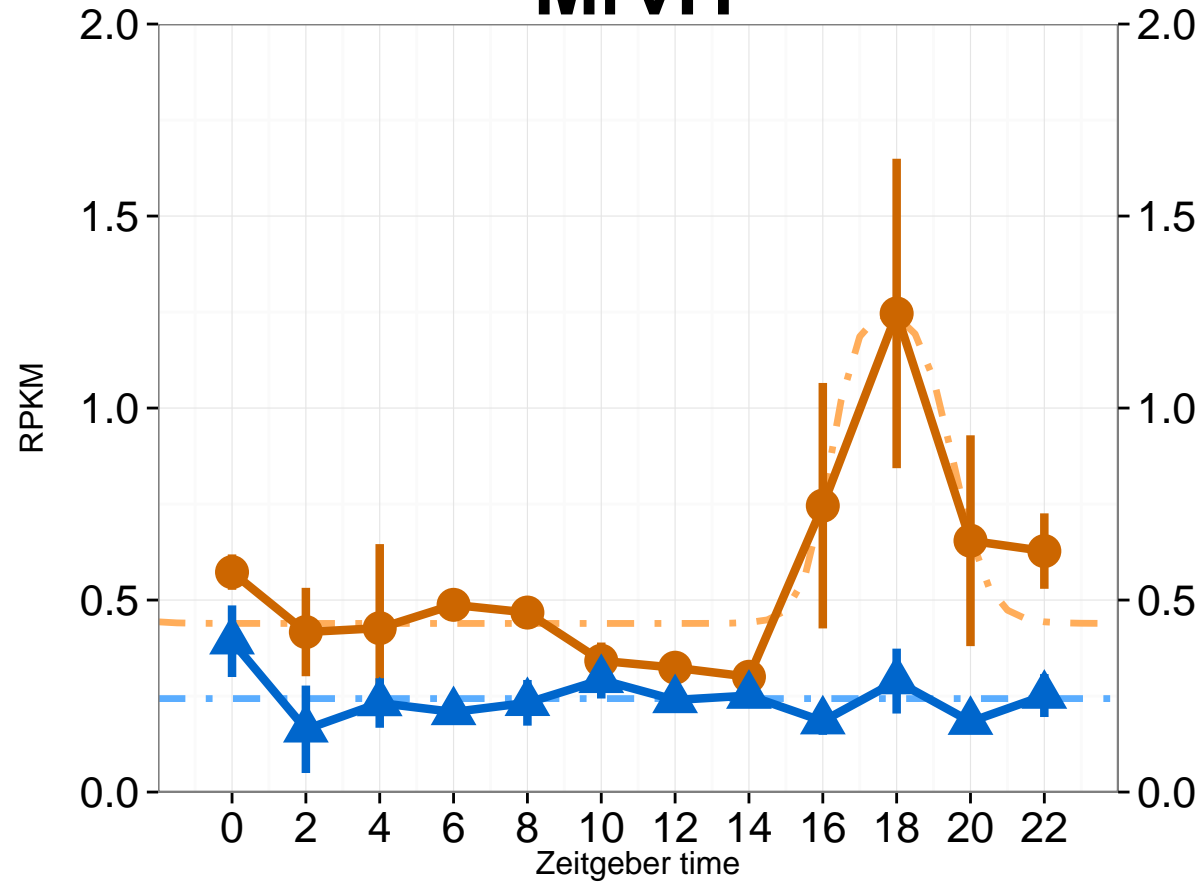

# Mrvi1

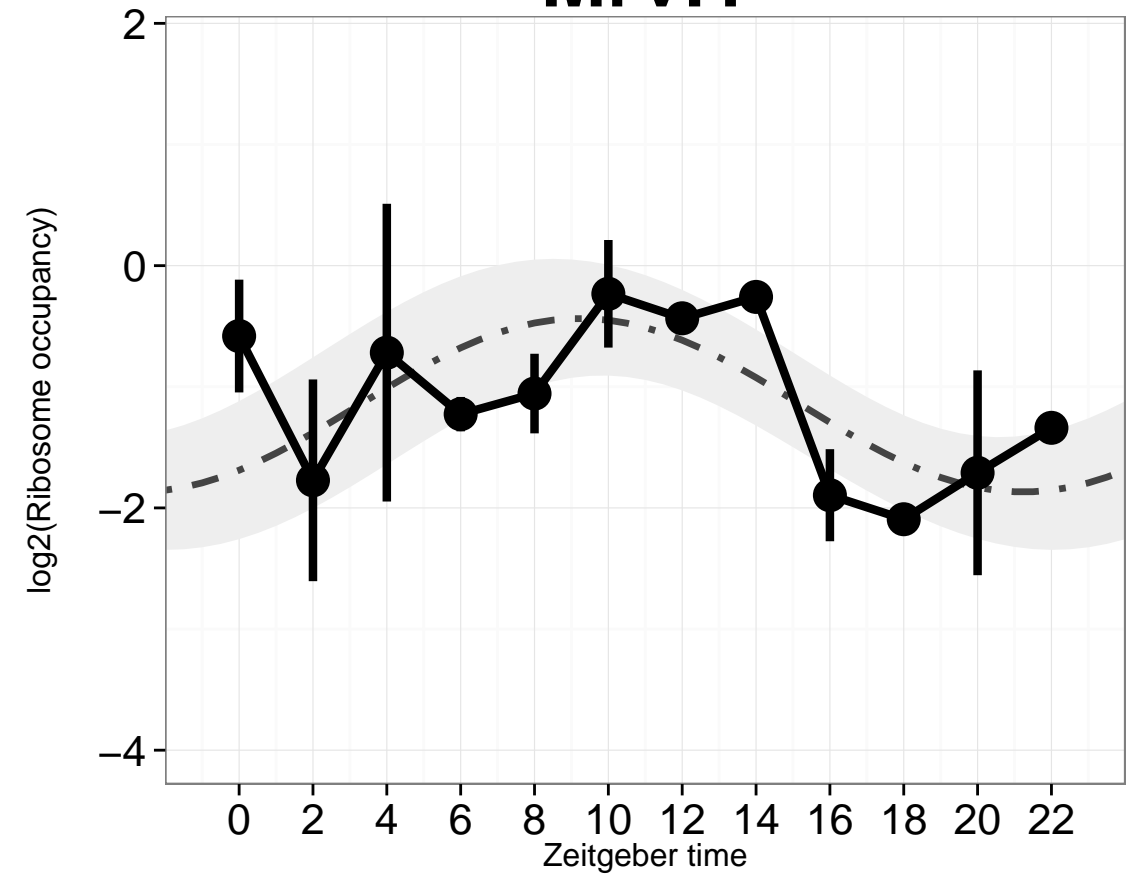

Supplement: SuppDataset_1.zip [file Mrvi1_set_B.pdf › Supplemental Dataset 1/B-mRNA_rhythm_translation_nonrhyth/Mrvi1_set_B.pdf]

## Msi2

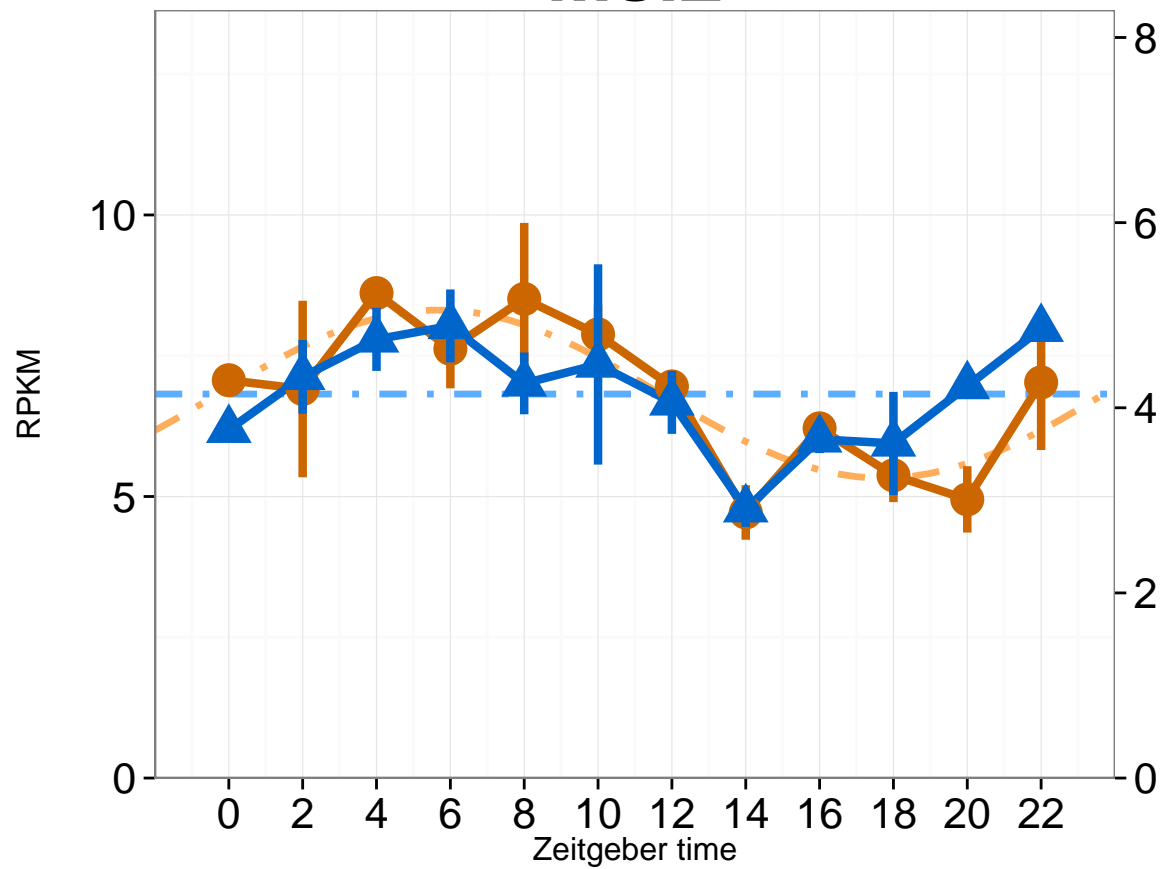

## Msi2

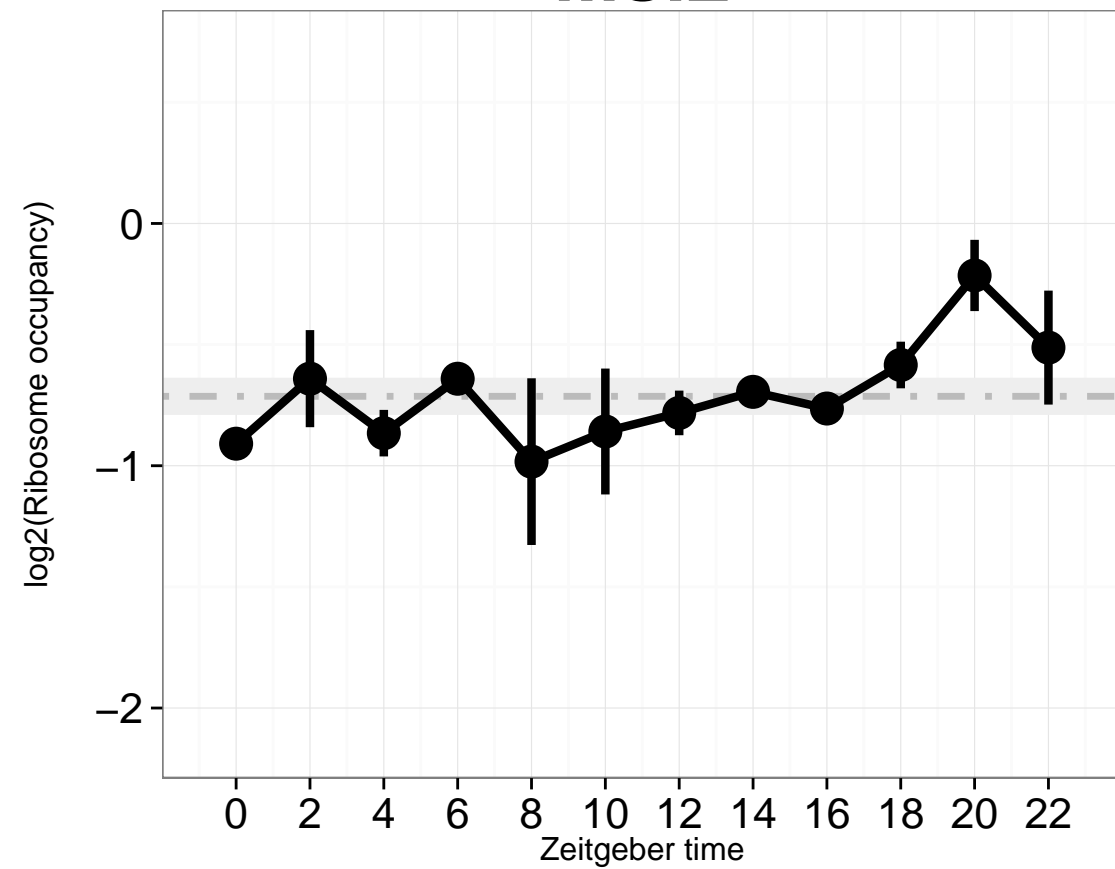

Supplement: SuppDataset_1.zip [file Msi2_set_B.pdf › Supplemental Dataset 1/B-mRNA_rhythm_translation_nonrhyth/Msi2_set_B.pdf]

## Msln

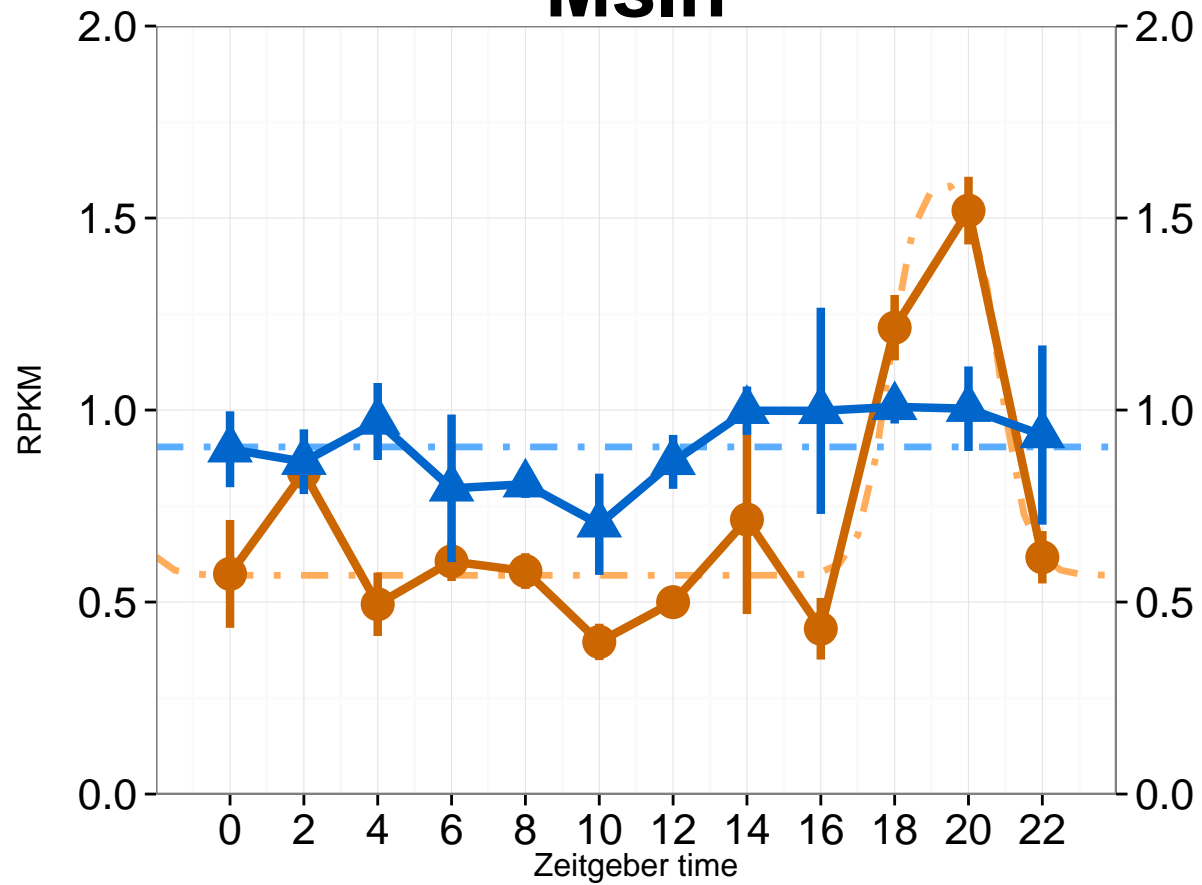

## Msln

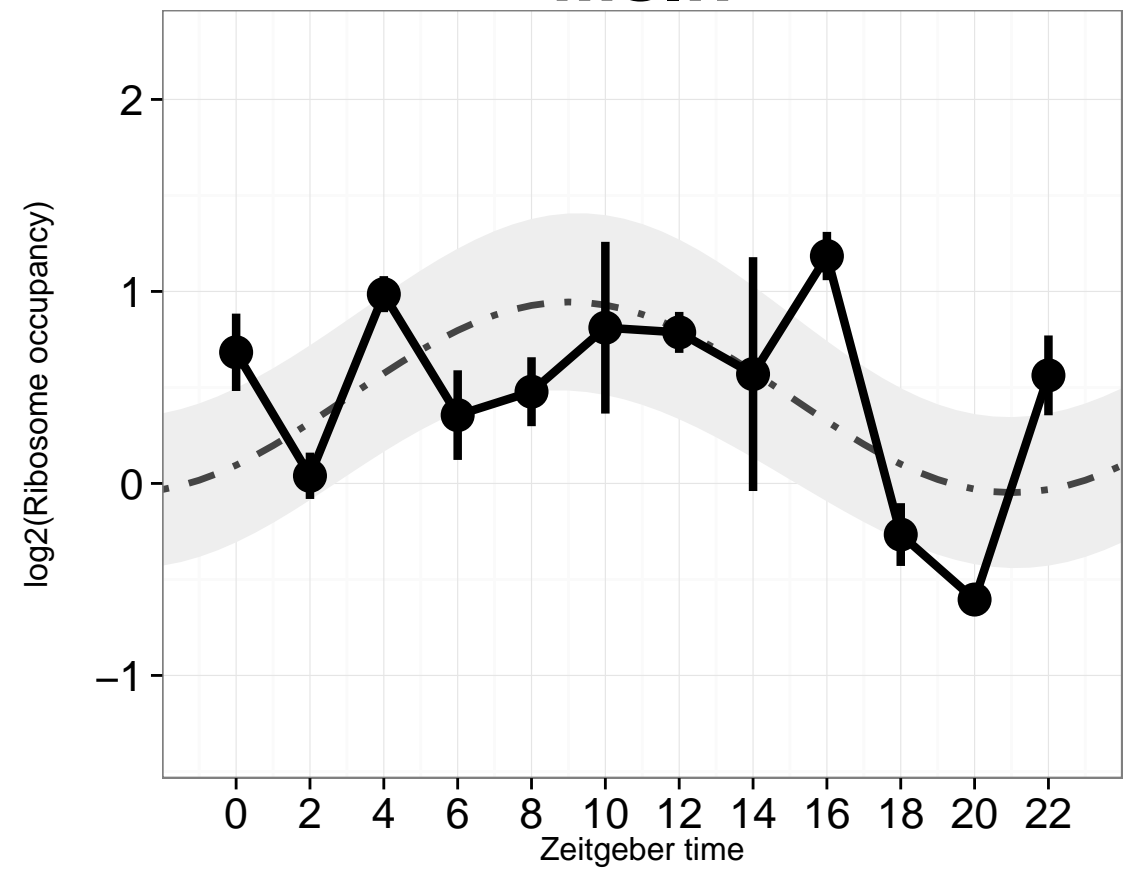

Supplement: SuppDataset_1.zip [file Msln_set_B.pdf › Supplemental Dataset 1/B-mRNA_rhythm_translation_nonrhyth/Msln_set_B.pdf]

## Mthfs

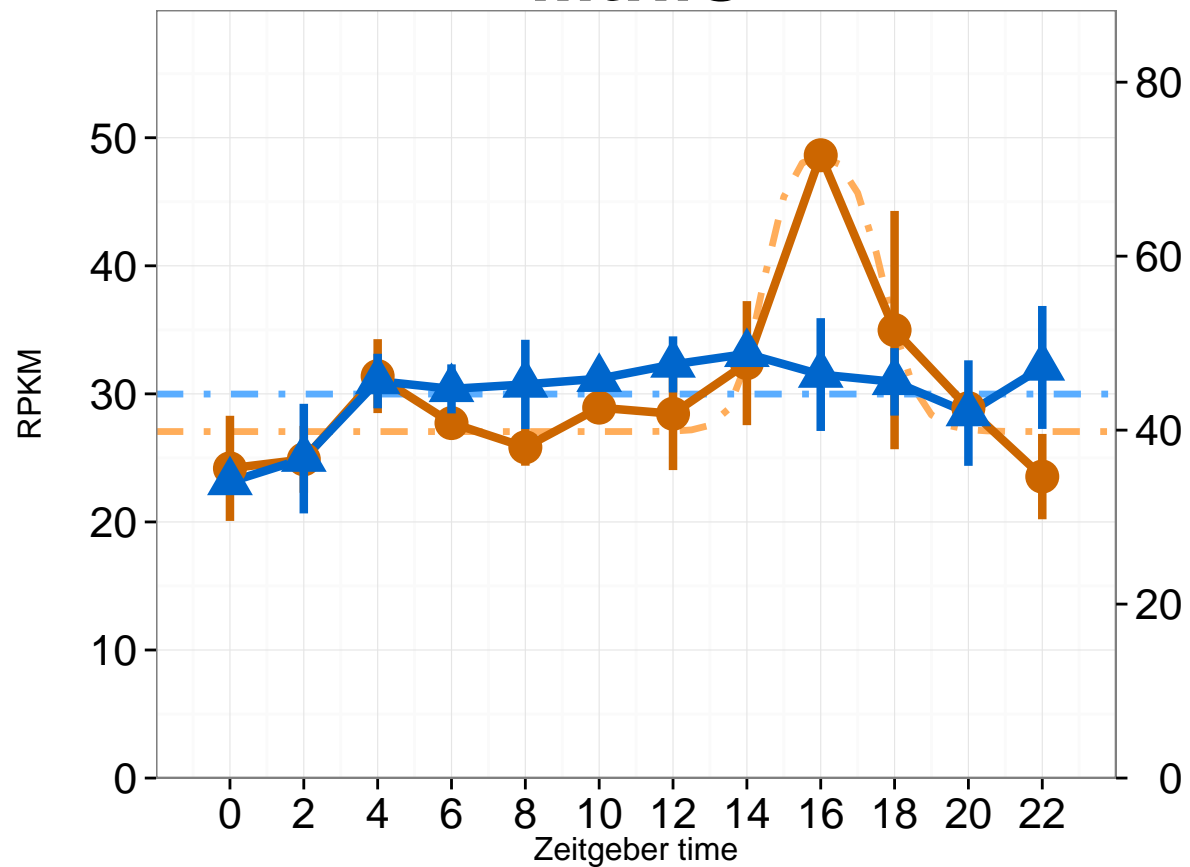

## Mthfs

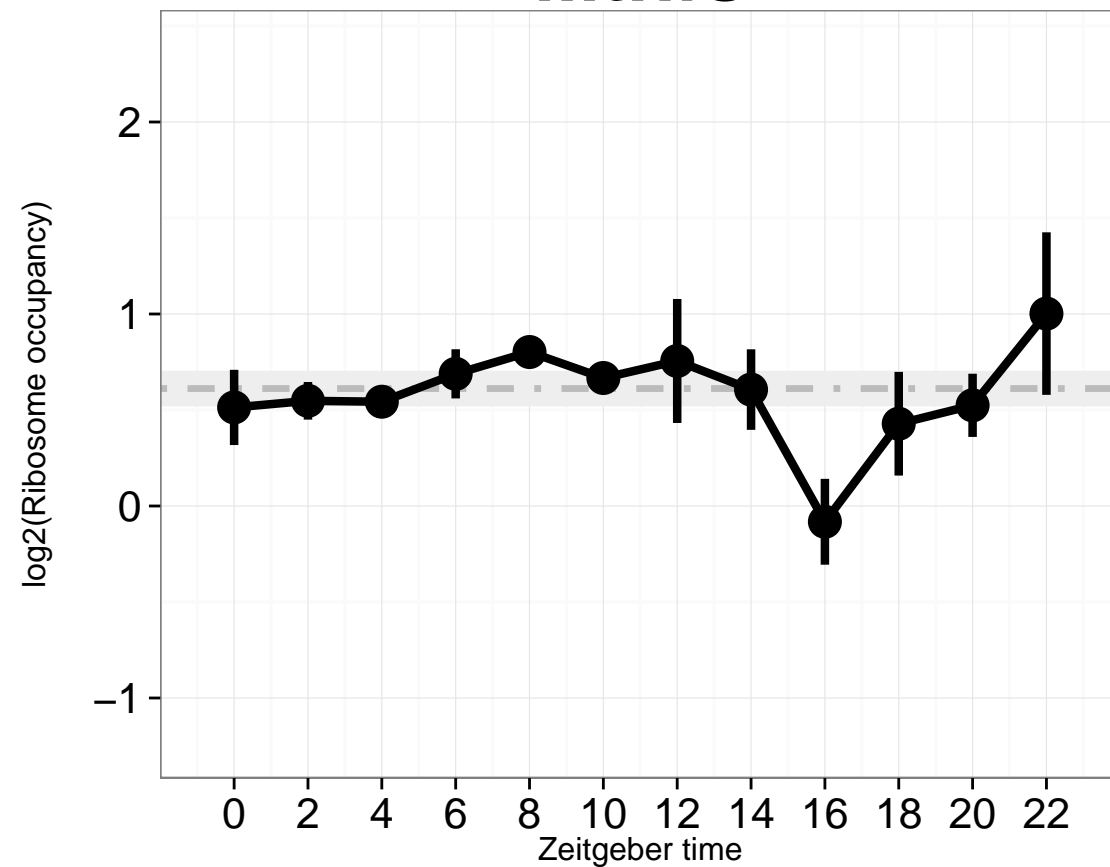

Supplement: SuppDataset_1.zip [file Mthfs_set_B.pdf › Supplemental Dataset 1/B-mRNA_rhythm_translation_nonrhyth/Mthfs_set_B.pdf]

# Mup13

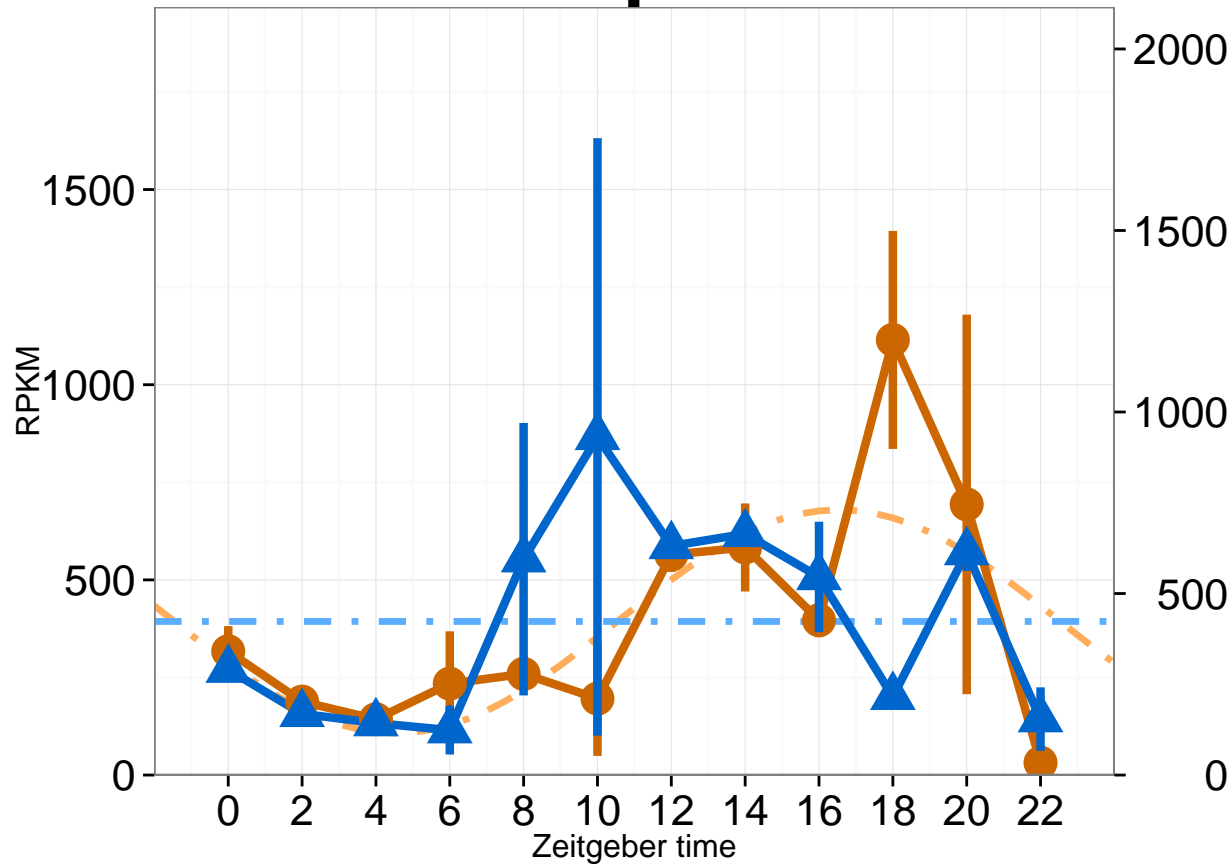

# Mup13

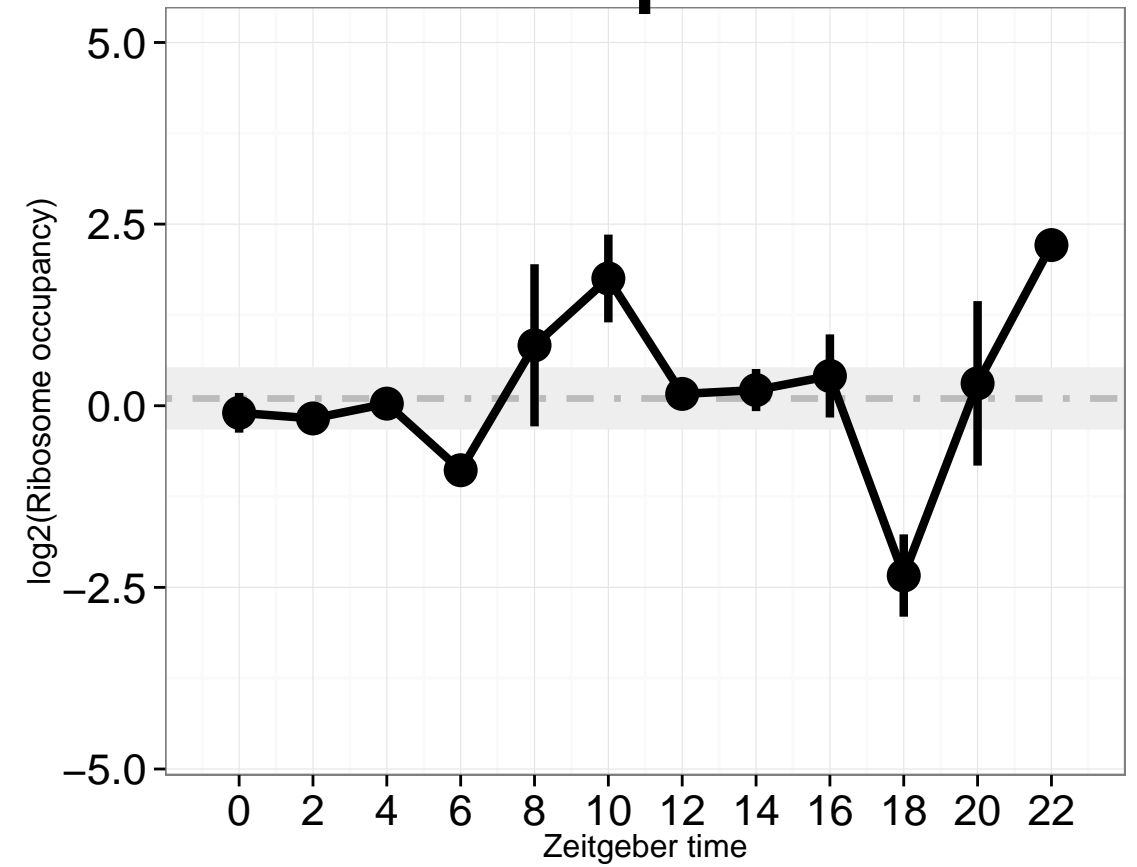

Supplement: SuppDataset_1.zip [file Mup13_set_B.pdf › Supplemental Dataset 1/B-mRNA_rhythm_translation_nonrhyth/Mup13_set_B.pdf]

# Mup5

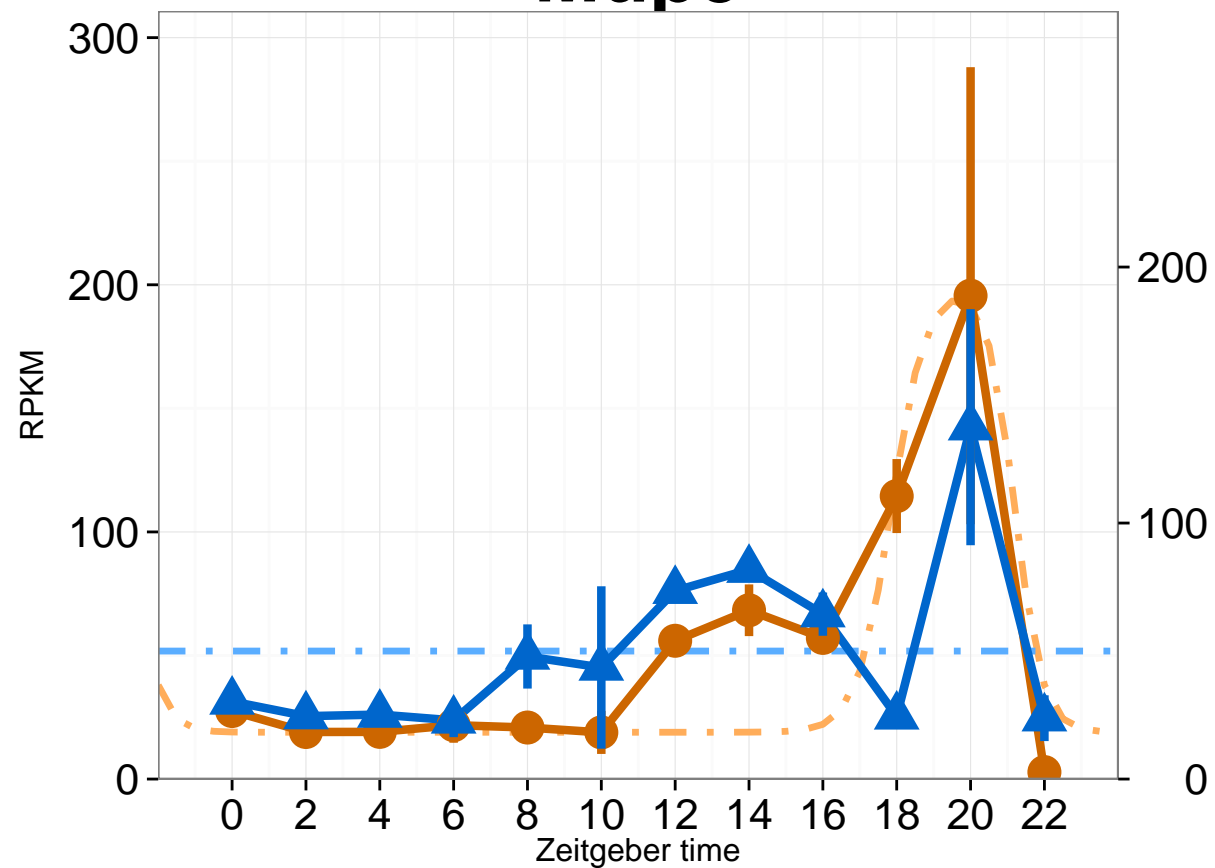

# Mup5

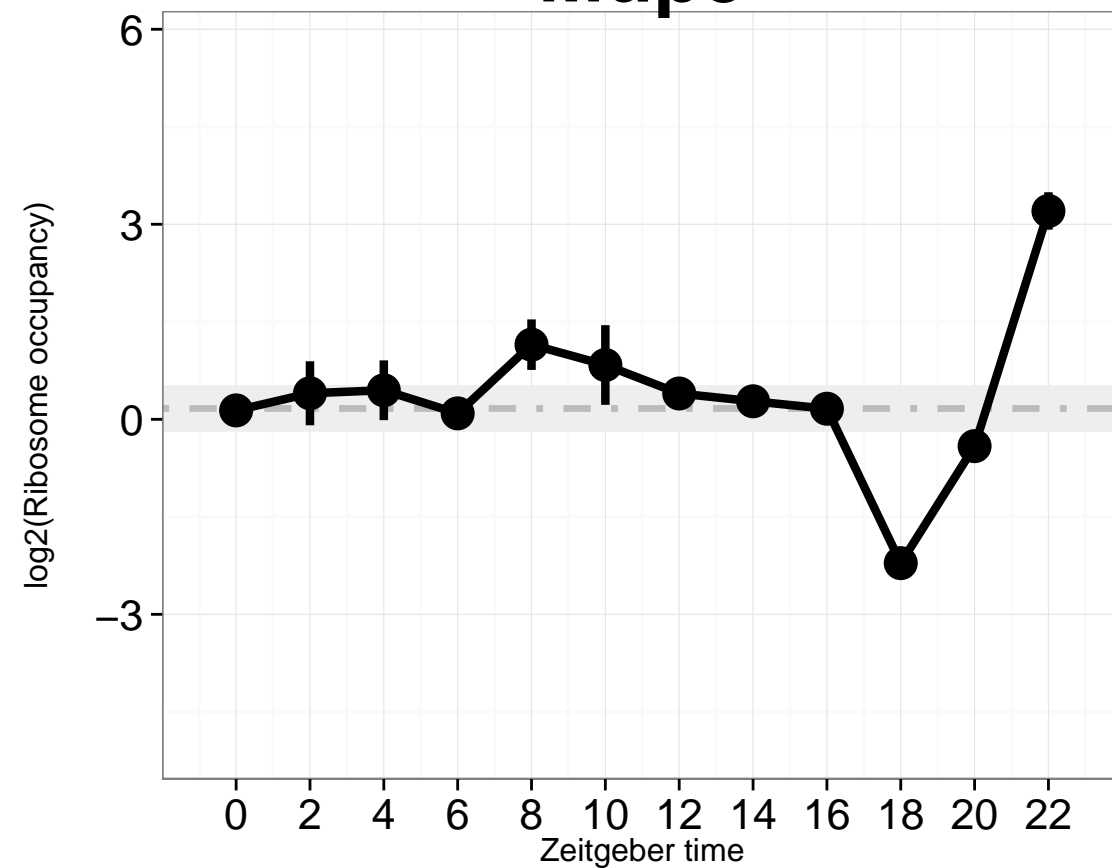

Supplement: SuppDataset_1.zip [file Mup5_set_B.pdf › Supplemental Dataset 1/B-mRNA_rhythm_translation_nonrhyth/Mup5_set_B.pdf]

# Mustn1

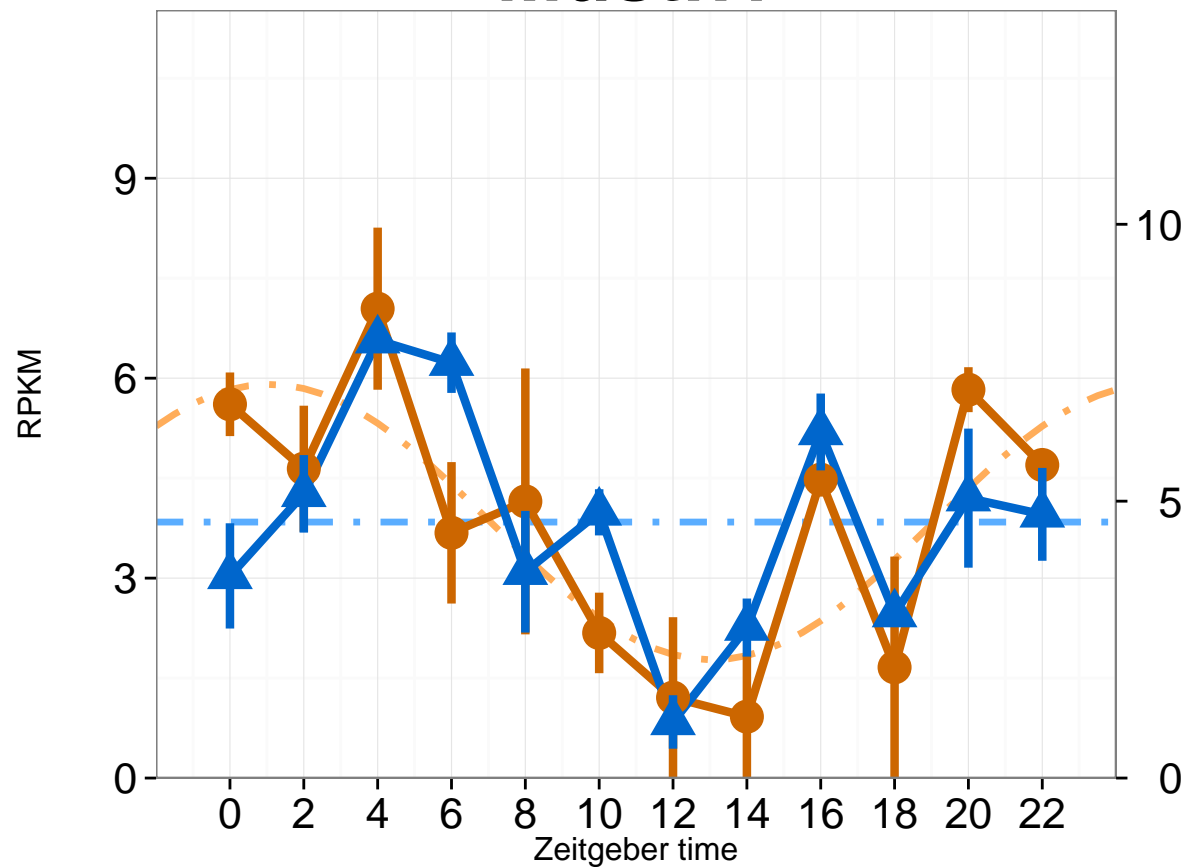

# Mustn1

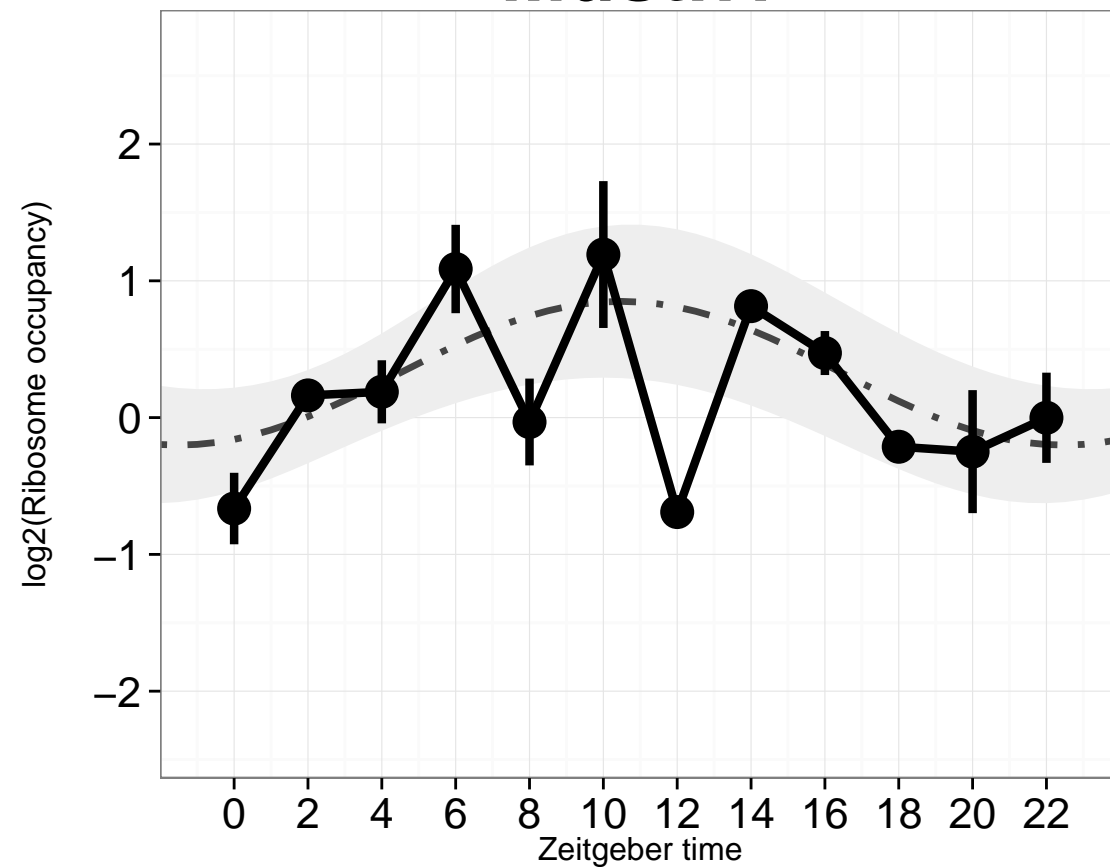

Supplement: SuppDataset_1.zip [file Mustn1_set_B.pdf › Supplemental Dataset 1/B-mRNA_rhythm_translation_nonrhyth/Mustn1_set_B.pdf]

## Mybl1

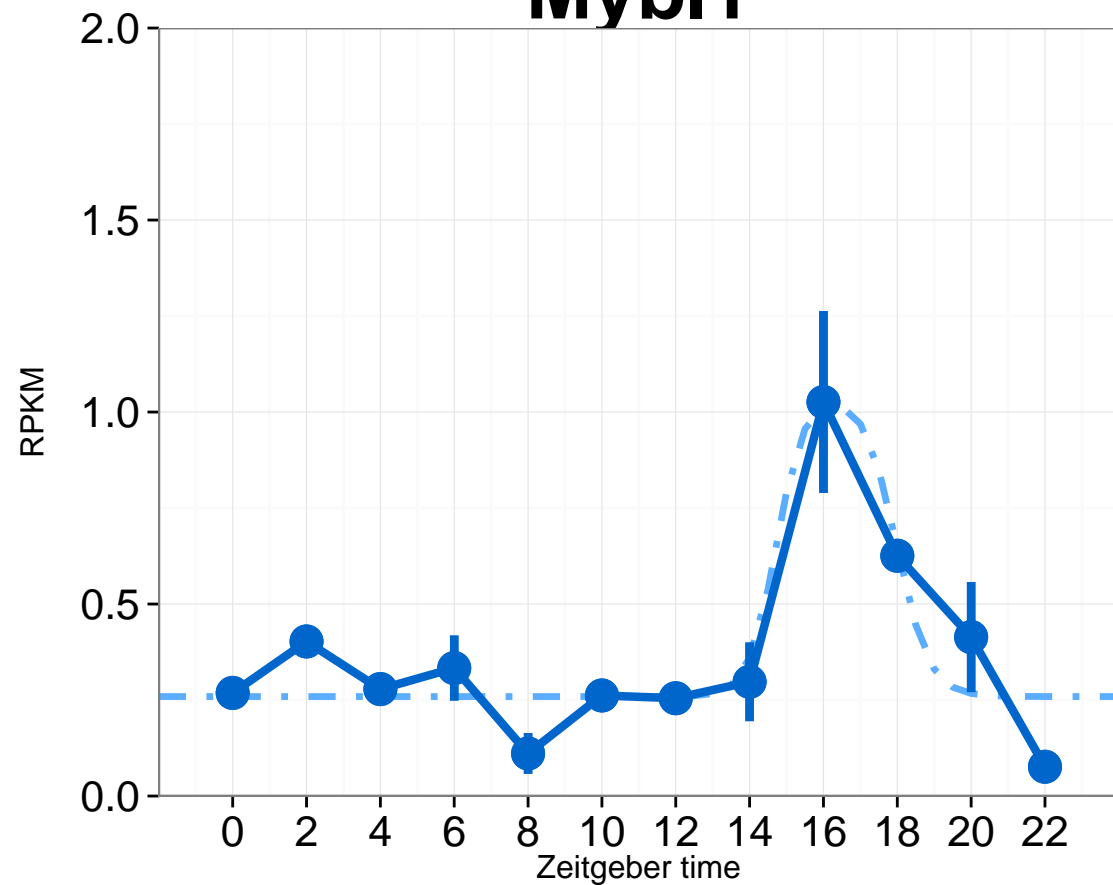

## Mybl1 log2(Ribosome occupancy

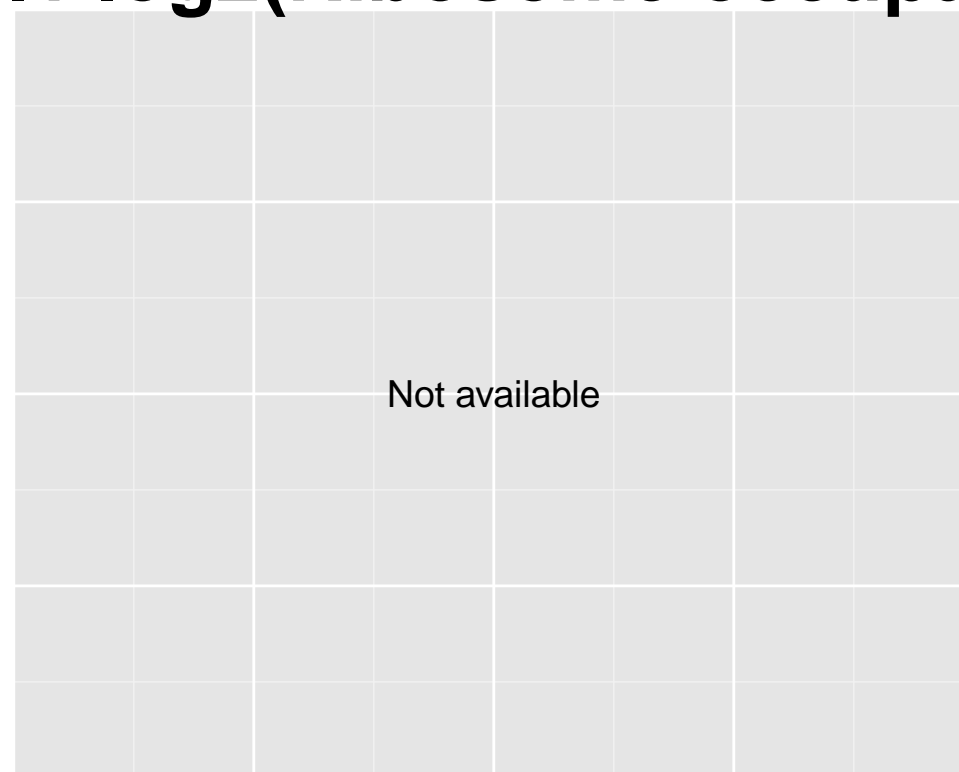

Supplement: SuppDataset_1.zip [file Mybl1_set_B.pdf › Supplemental Dataset 1/B-mRNA_rhythm_translation_nonrhyth/Mybl1_set_B.pdf]

## Mycbp

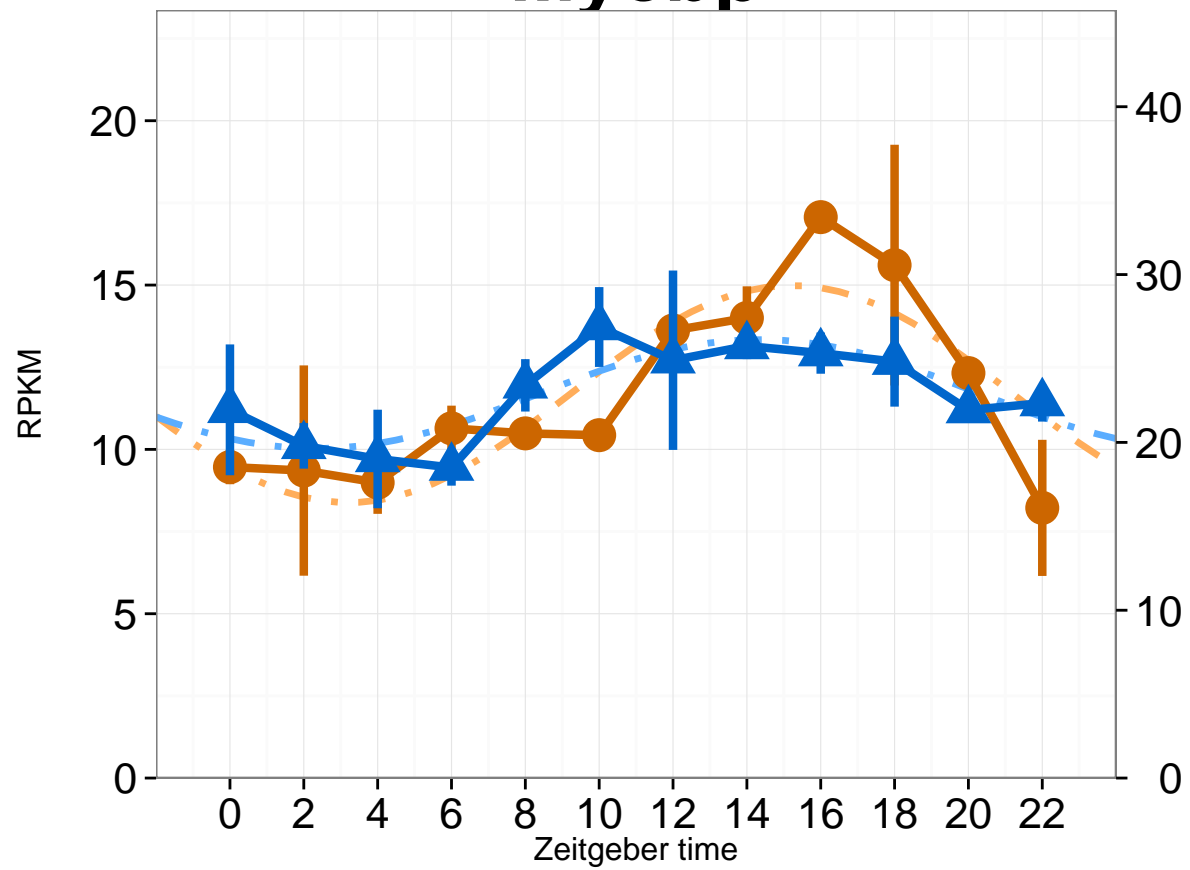

## Mycbp

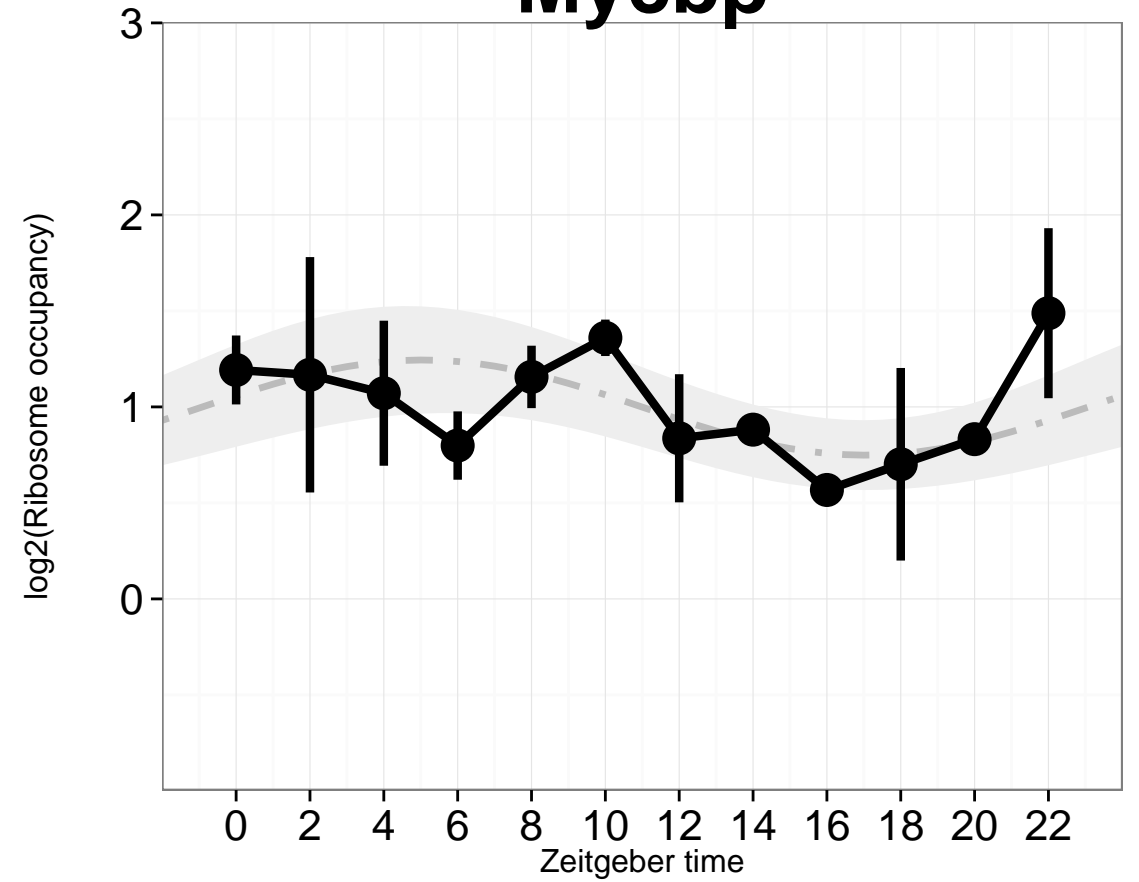

Supplement: SuppDataset_1.zip [file Mycbp_set_B.pdf › Supplemental Dataset 1/B-mRNA_rhythm_translation_nonrhyth/Mycbp_set_B.pdf]

# Mzt1

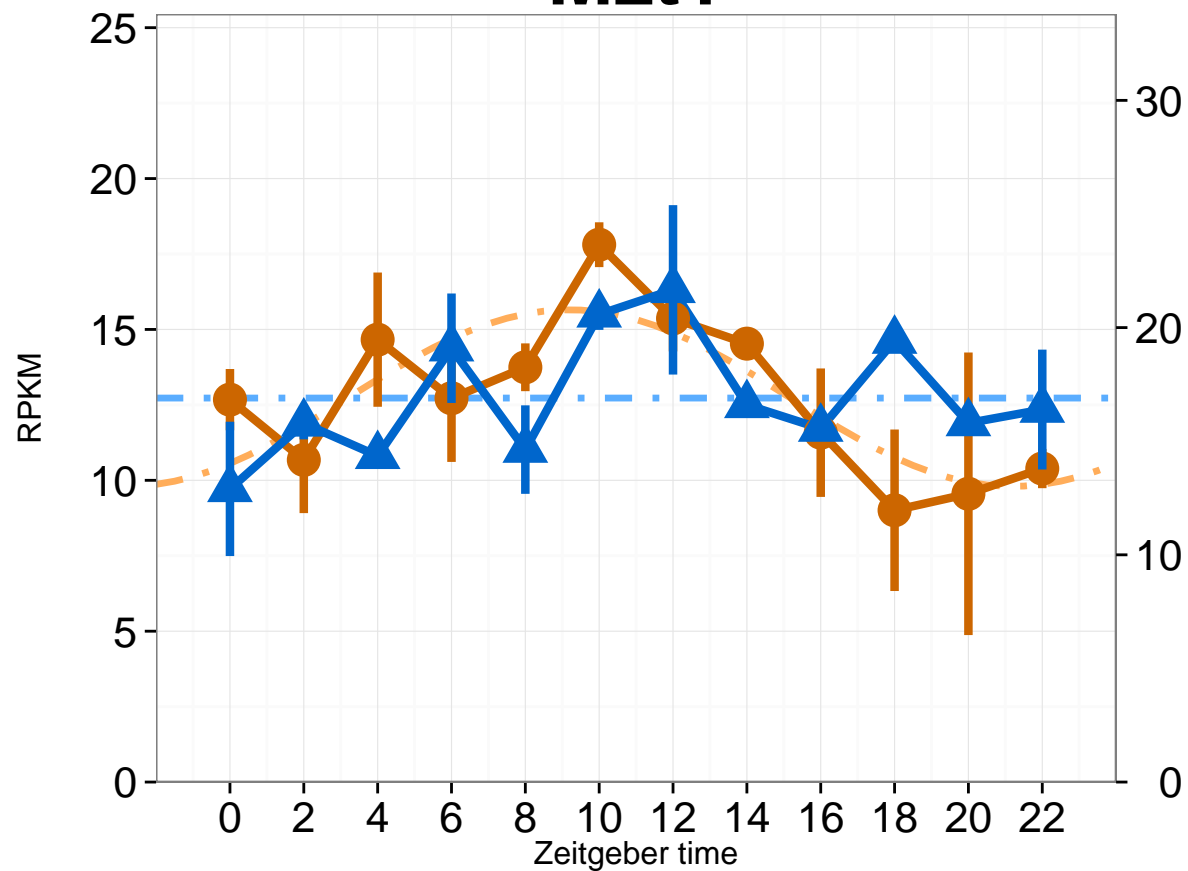

# Mzt1

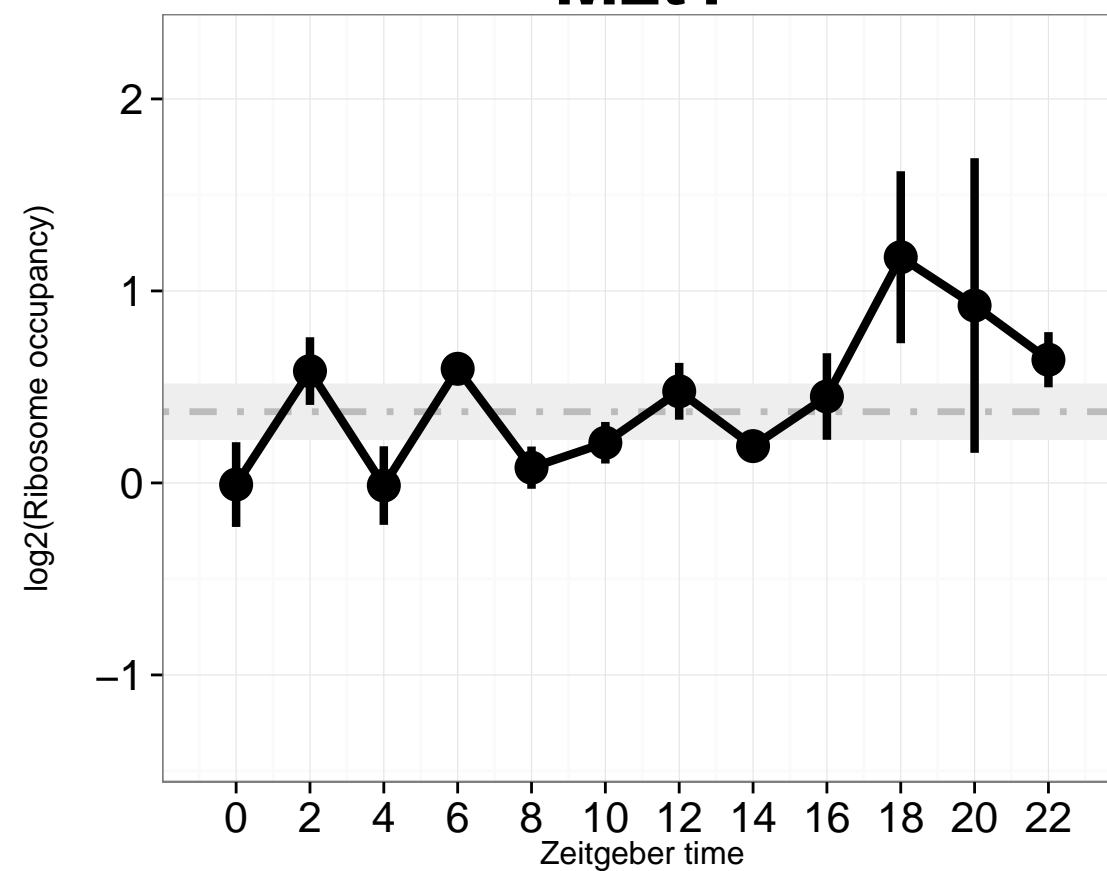

Supplement: SuppDataset_1.zip [file Mzt1_set_B.pdf › Supplemental Dataset 1/B-mRNA_rhythm_translation_nonrhyth/Mzt1_set_B.pdf]

# N4bp3

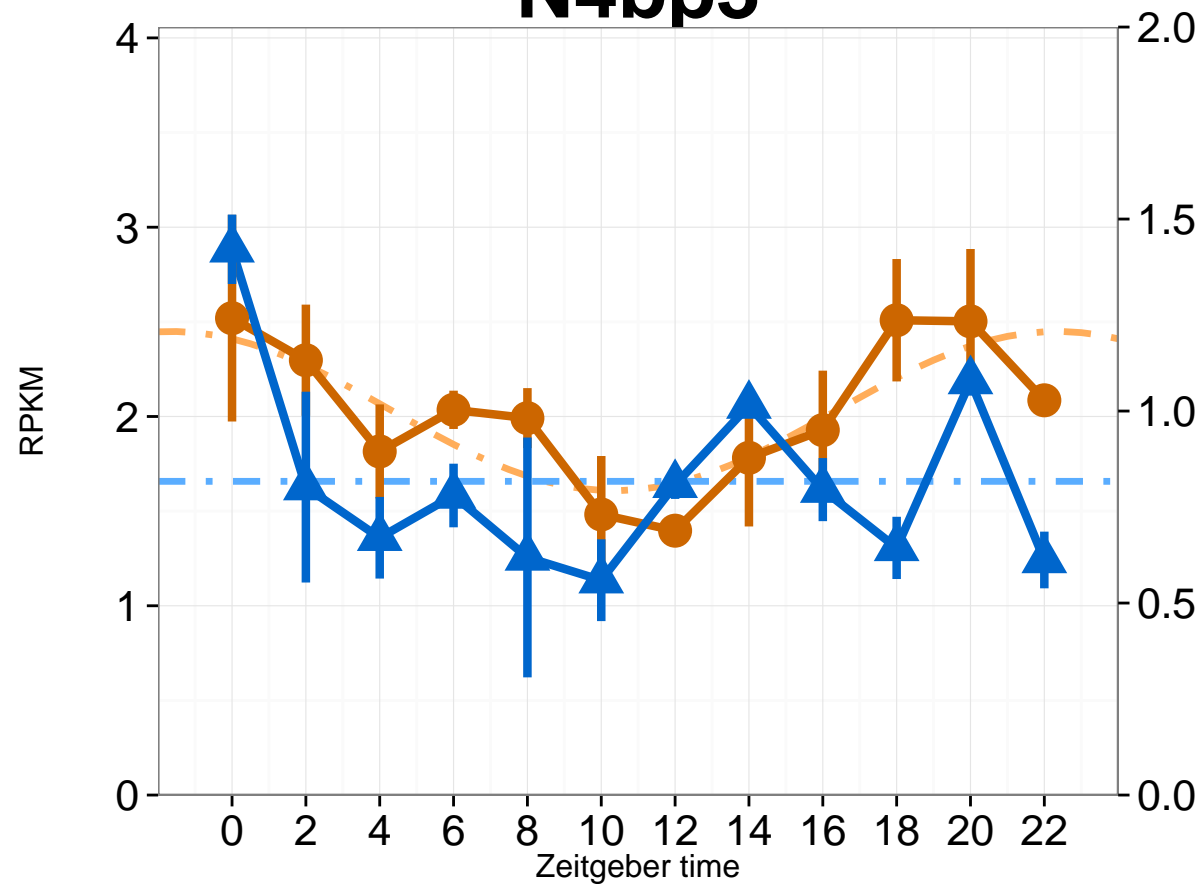

# N4bp3

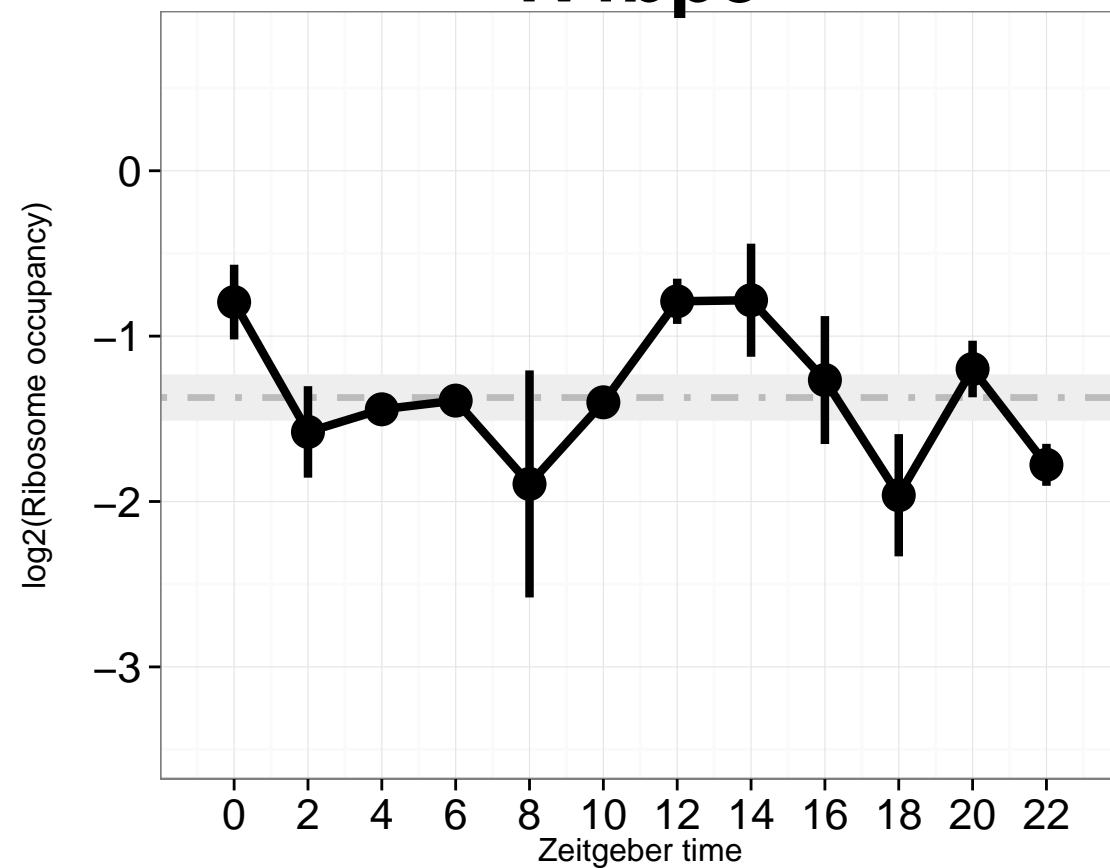

Supplement: SuppDataset_1.zip [file N4bp3_set_B.pdf › Supplemental Dataset 1/B-mRNA_rhythm_translation_nonrhyth/N4bp3_set_B.pdf]

## Naa16

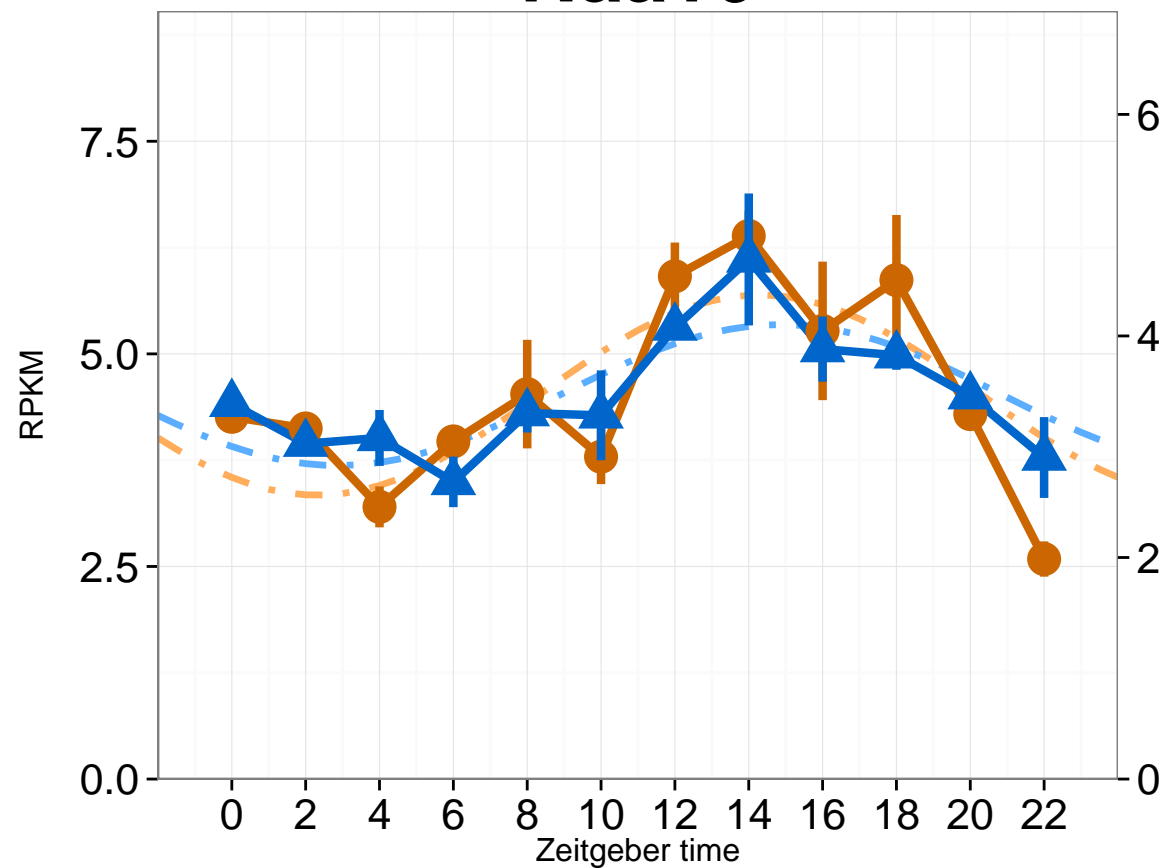

## Naa16

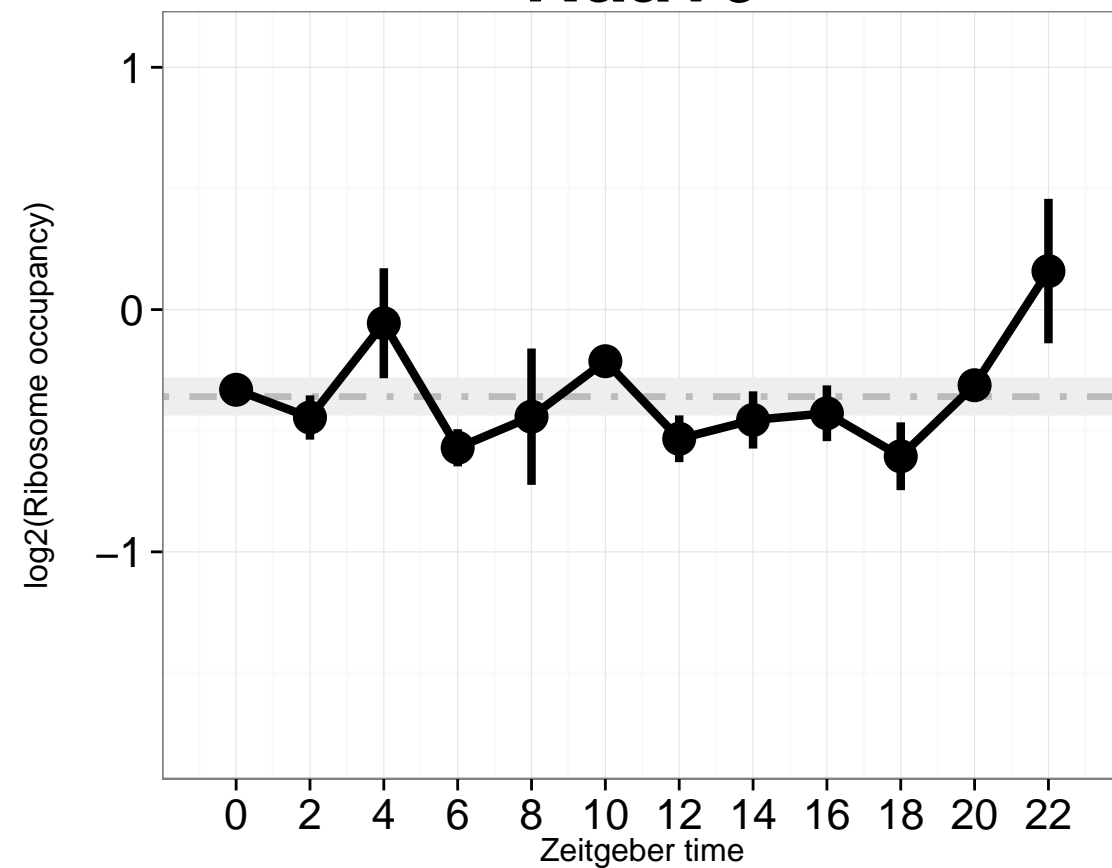

Supplement: SuppDataset_1.zip [file Naa16_set_B.pdf › Supplemental Dataset 1/B-mRNA_rhythm_translation_nonrhyth/Naa16_set_B.pdf]

## Naa50

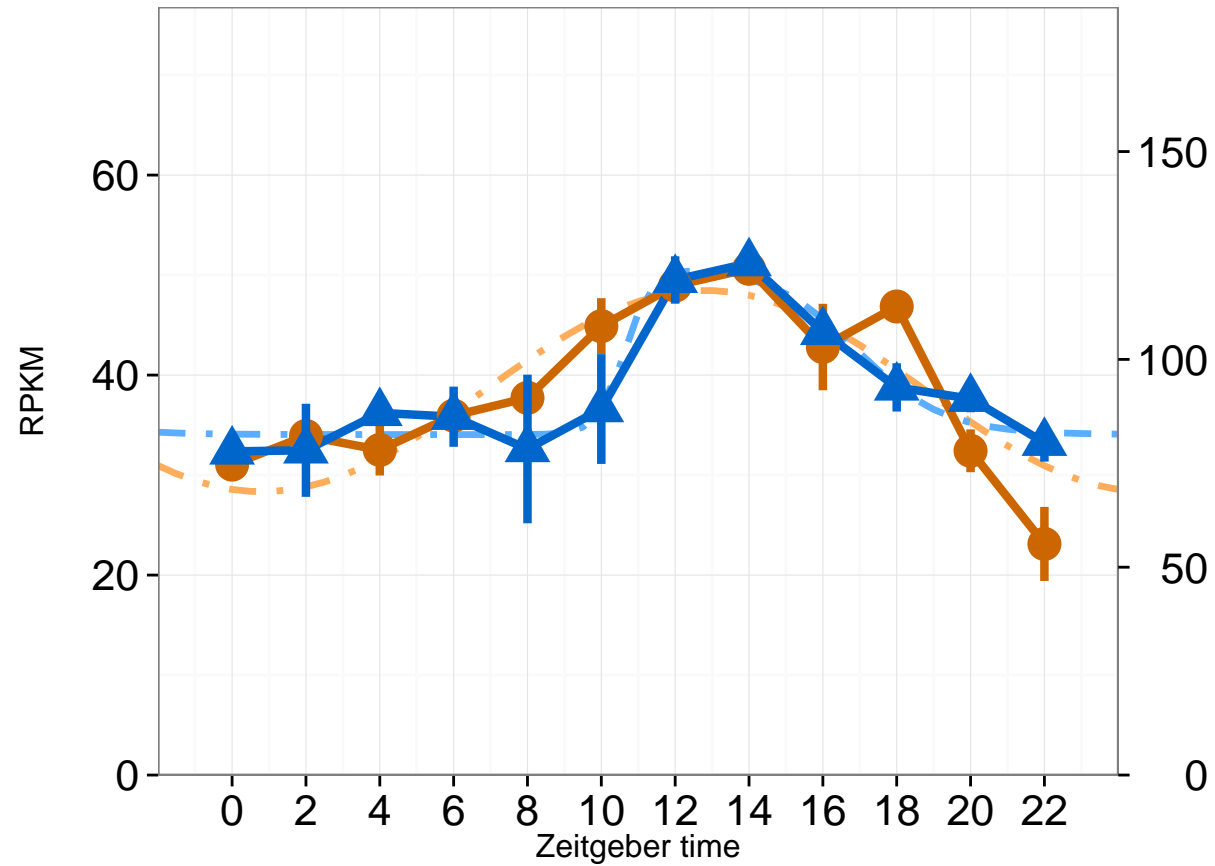

## Naa50

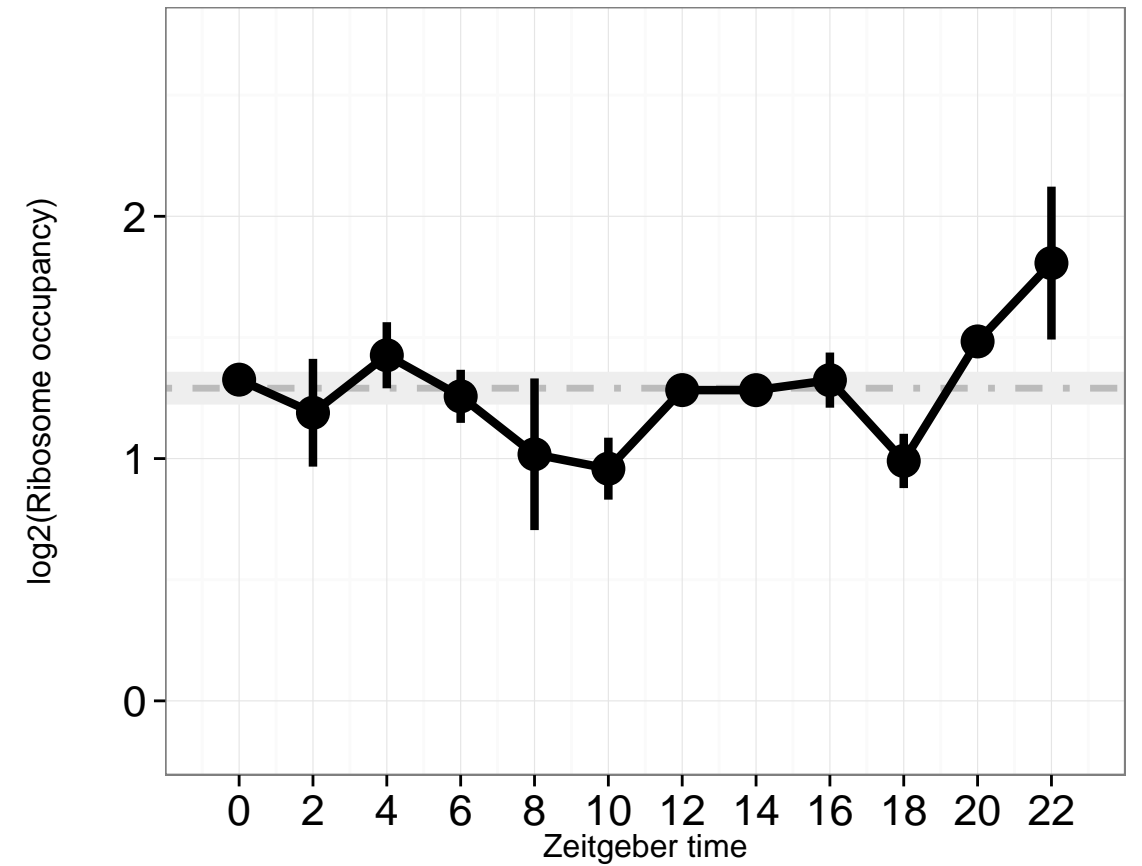

Supplement: SuppDataset_1.zip [file Naa50_set_B.pdf › Supplemental Dataset 1/B-mRNA_rhythm_translation_nonrhyth/Naa50_set_B.pdf]

## Naaa

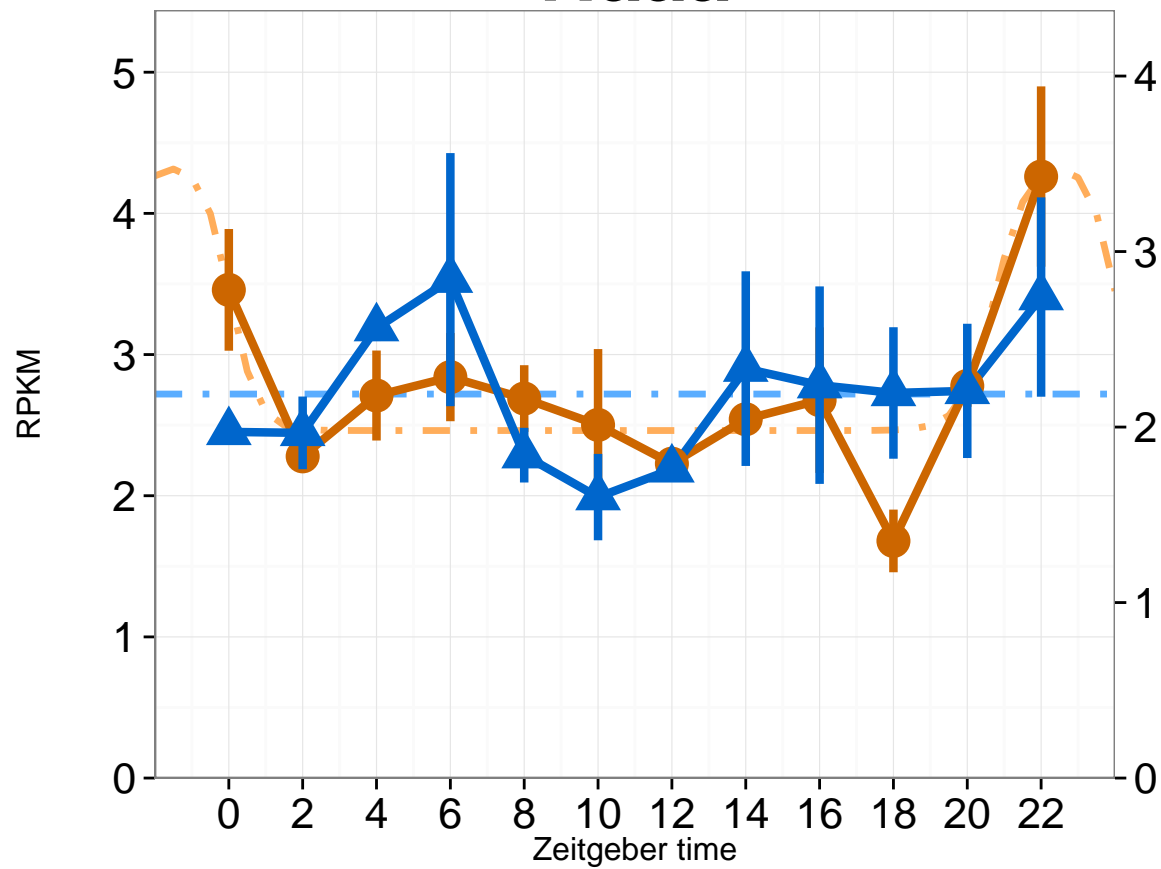

## Naaa

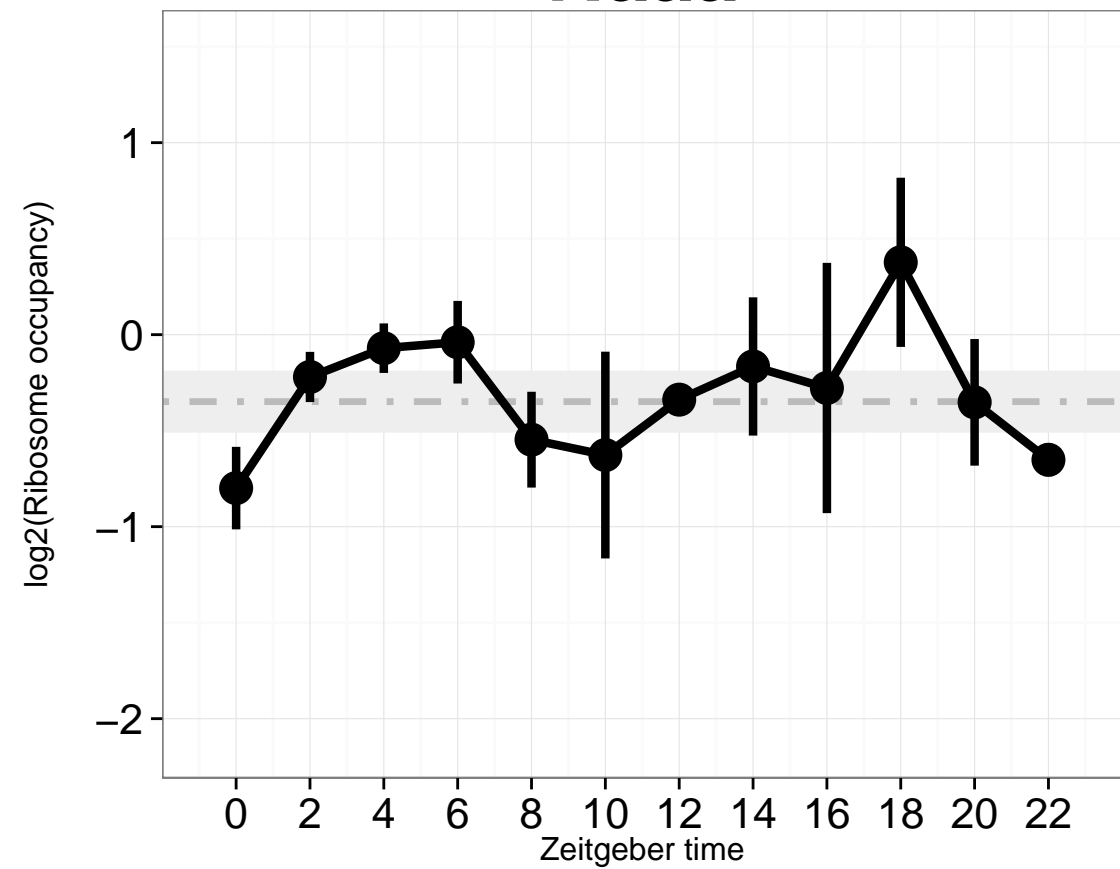

Supplement: SuppDataset_1.zip [file Naaa_set_B.pdf › Supplemental Dataset 1/B-mRNA_rhythm_translation_nonrhyth/Naaa_set_B.pdf]

## Naga

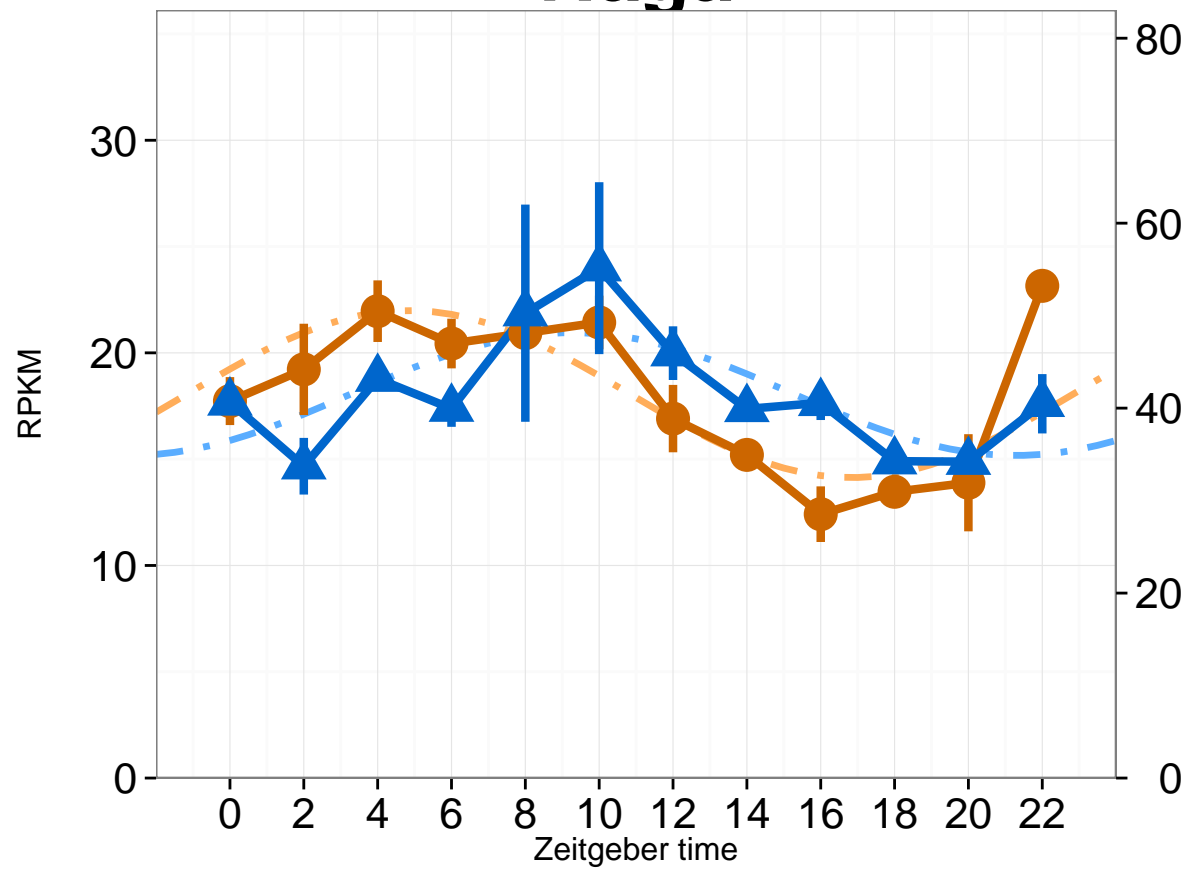

## Naga

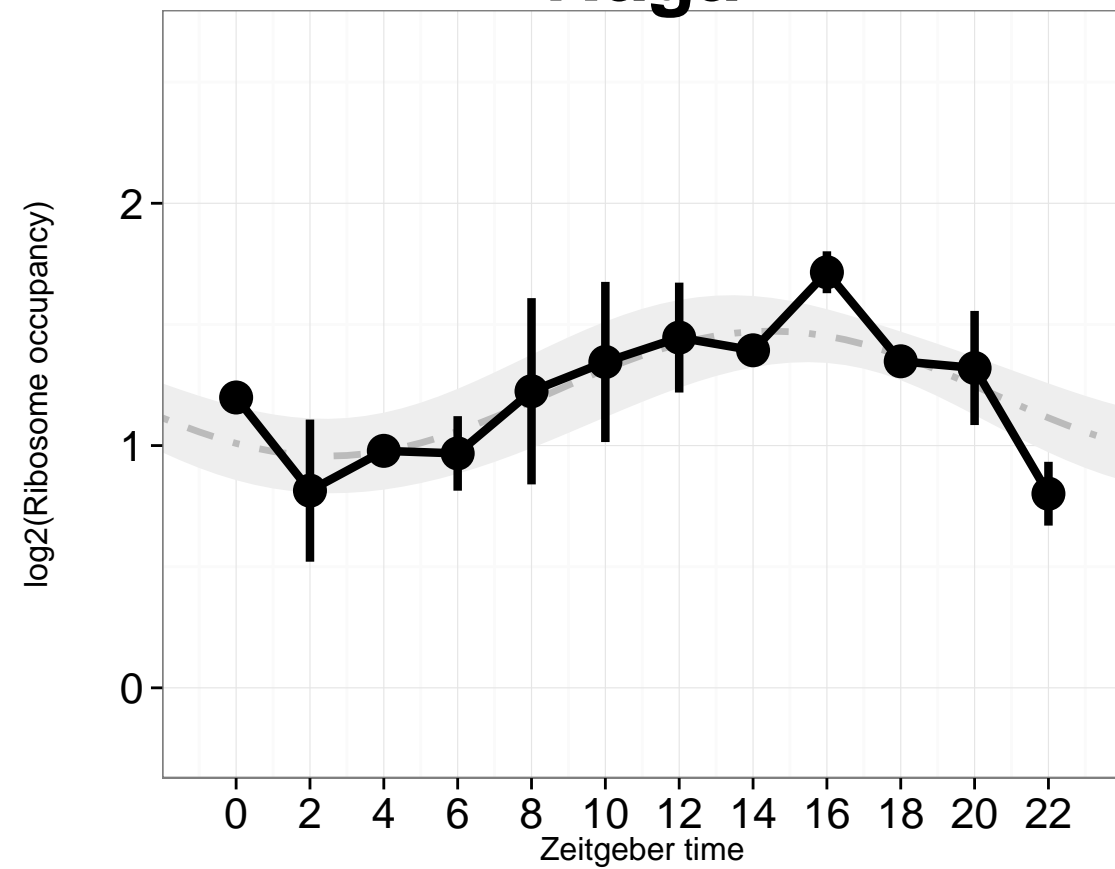

Supplement: SuppDataset_1.zip [file Naga_set_B.pdf › Supplemental Dataset 1/B-mRNA_rhythm_translation_nonrhyth/Naga_set_B.pdf]

## Nanp

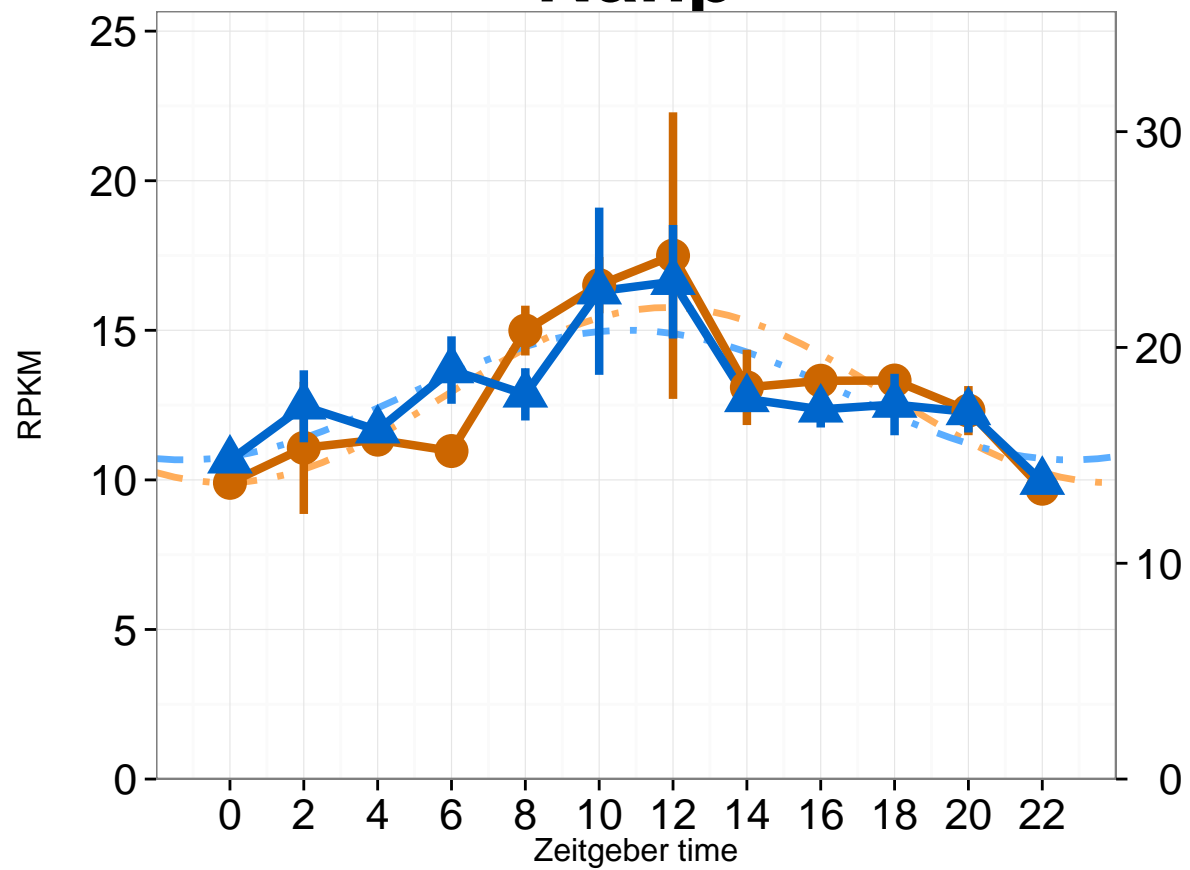

## Nanp

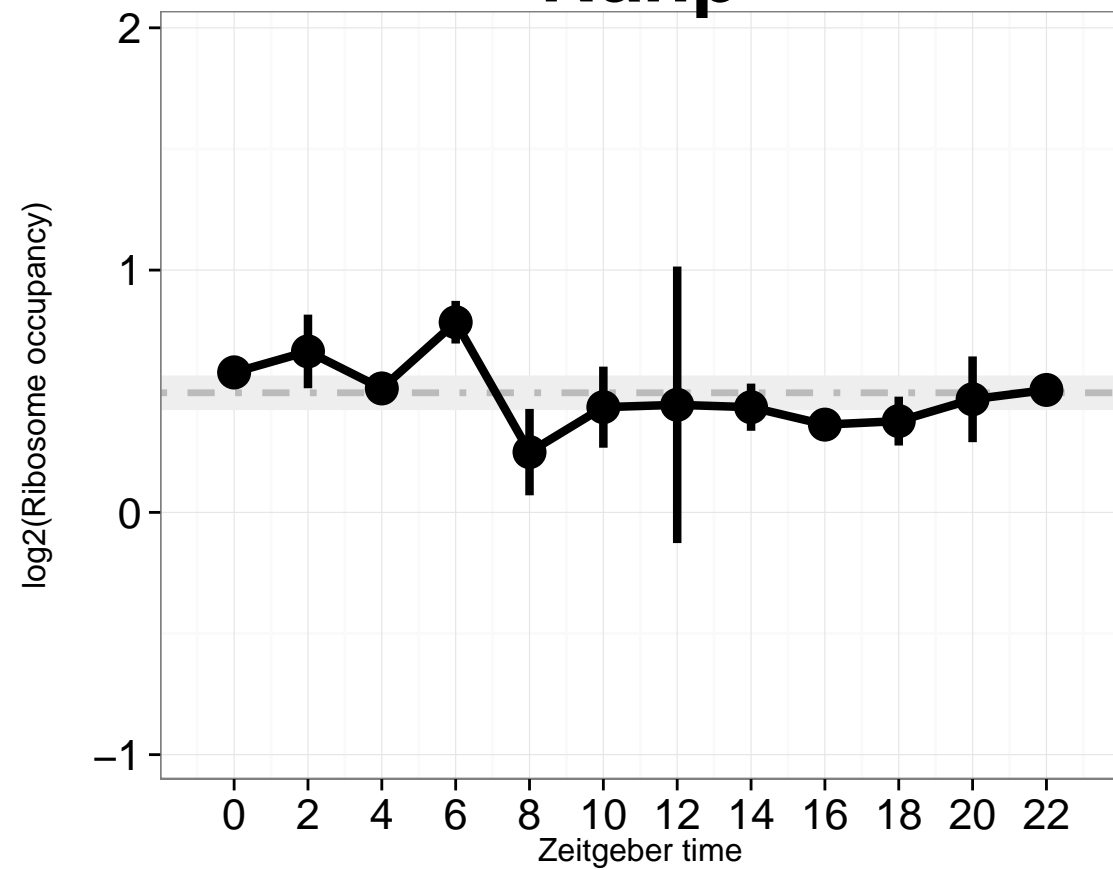

Supplement: SuppDataset_1.zip [file Nanp_set_B.pdf › Supplemental Dataset 1/B-mRNA_rhythm_translation_nonrhyth/Nanp_set_B.pdf]

## Nasp

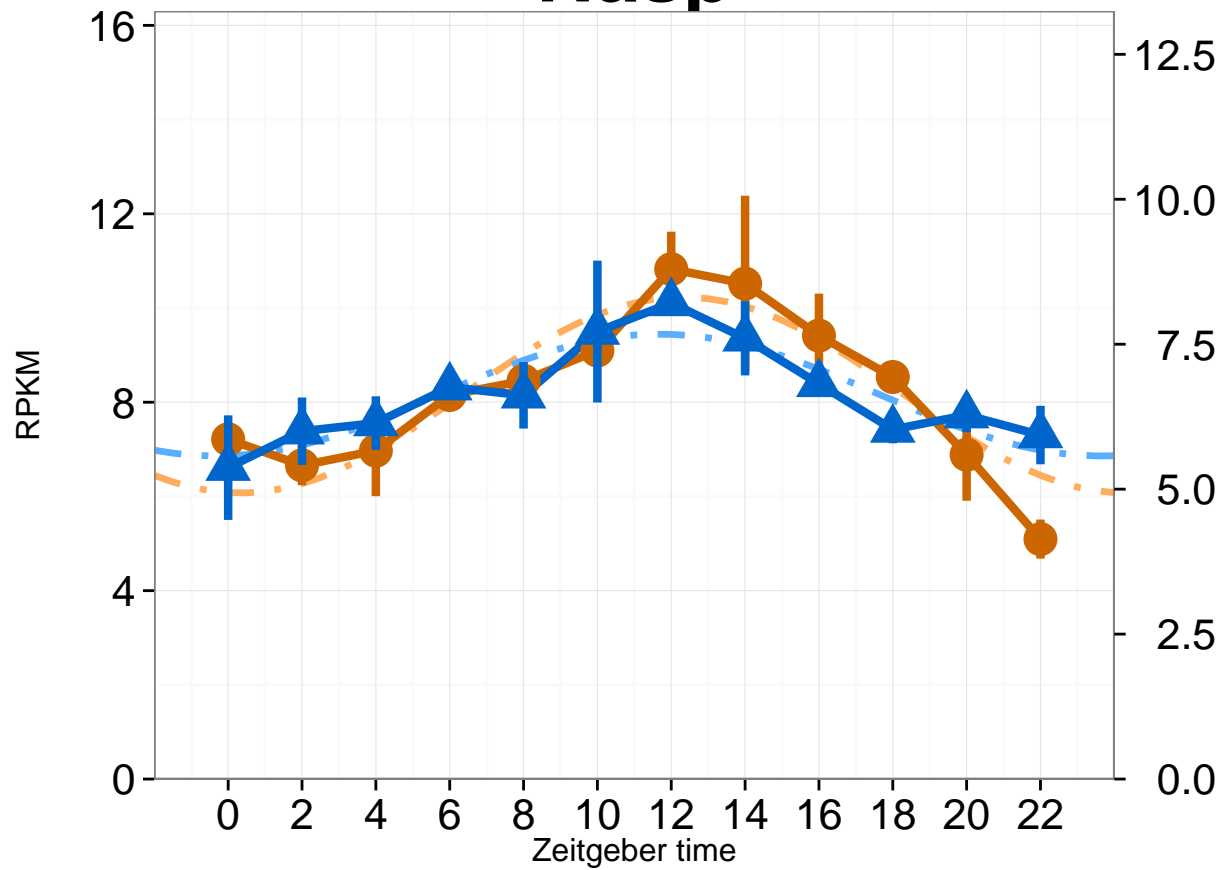

## Nasp

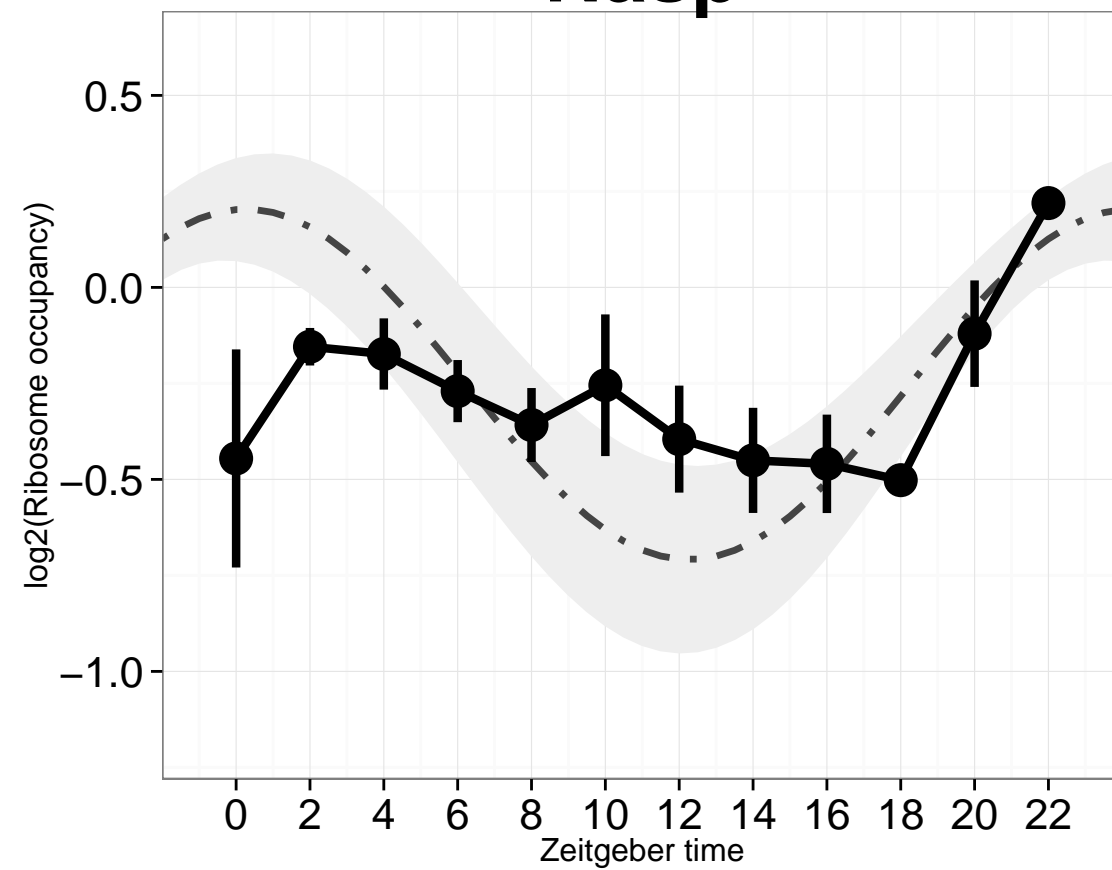

Supplement: SuppDataset_1.zip [file Nasp_set_B.pdf › Supplemental Dataset 1/B-mRNA_rhythm_translation_nonrhyth/Nasp_set_B.pdf]

## Ncf2

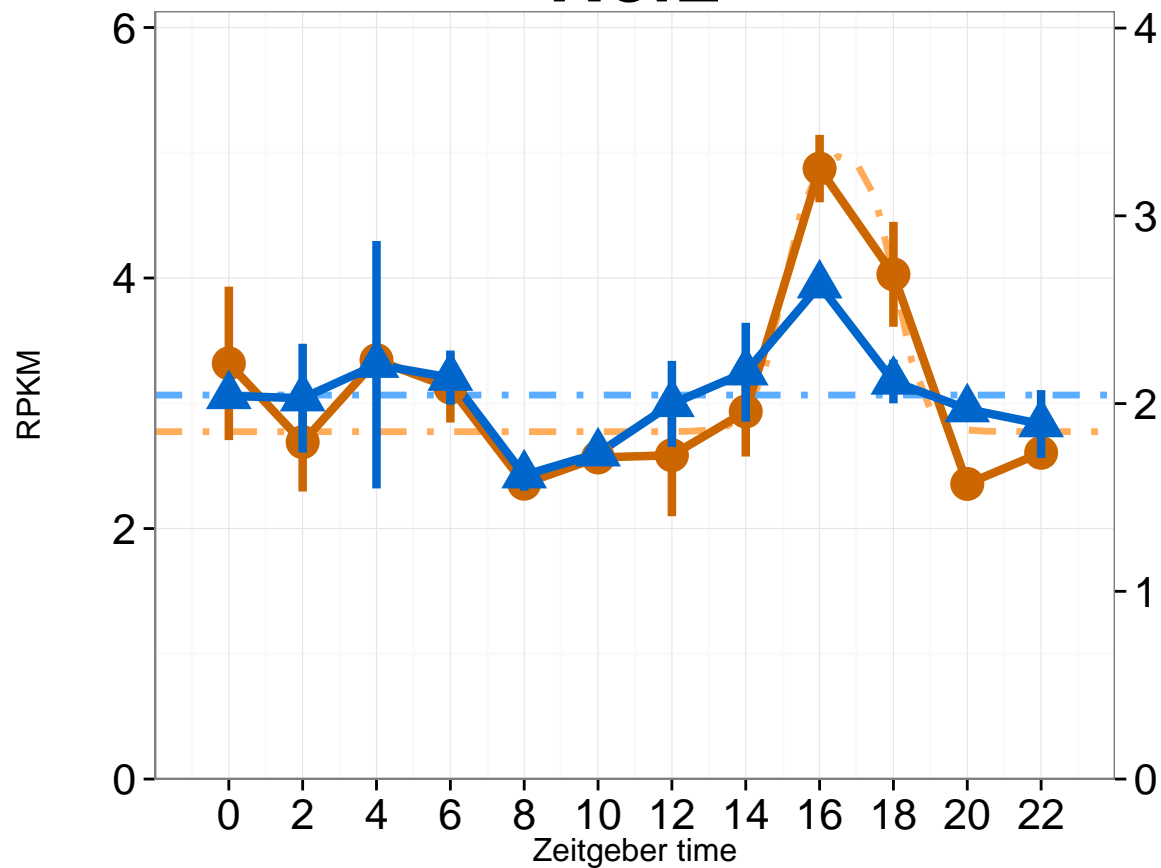

## Ncf2

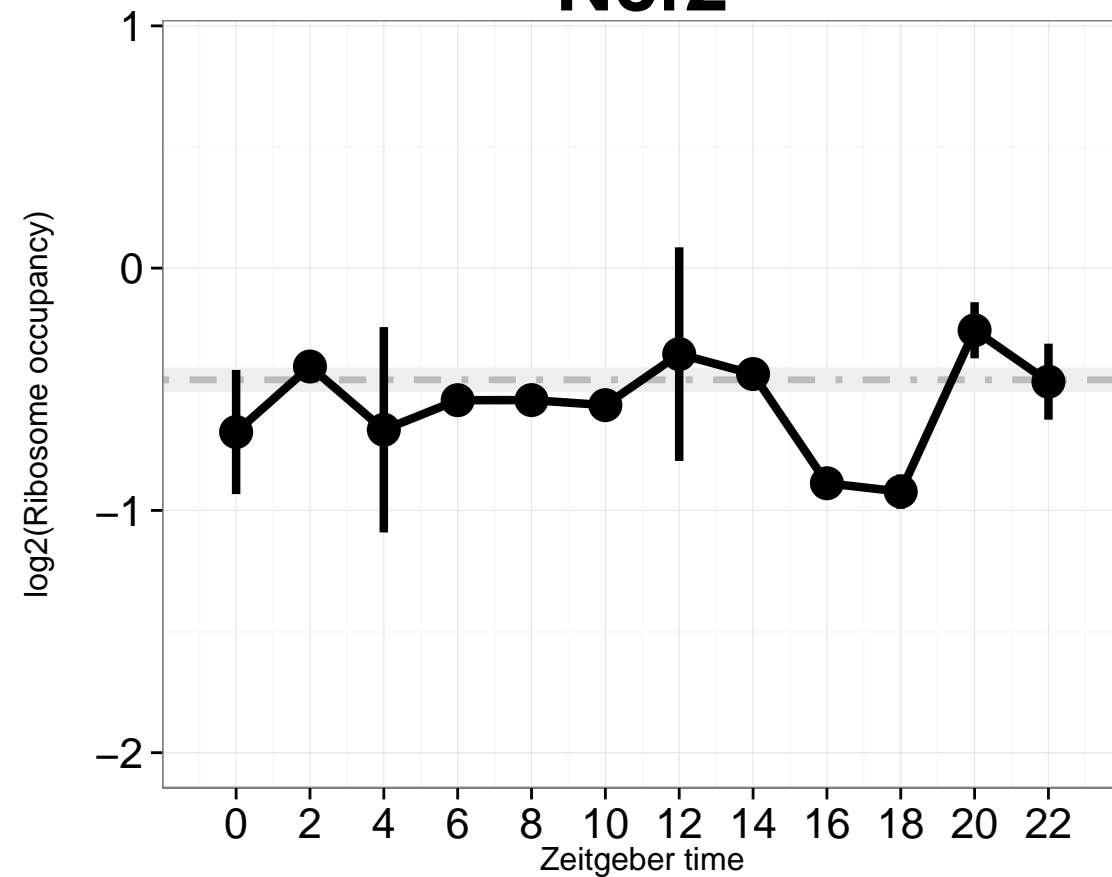

Supplement: SuppDataset_1.zip [file Ncf2_set_B.pdf › Supplemental Dataset 1/B-mRNA_rhythm_translation_nonrhyth/Ncf2_set_B.pdf]

## Ncf4

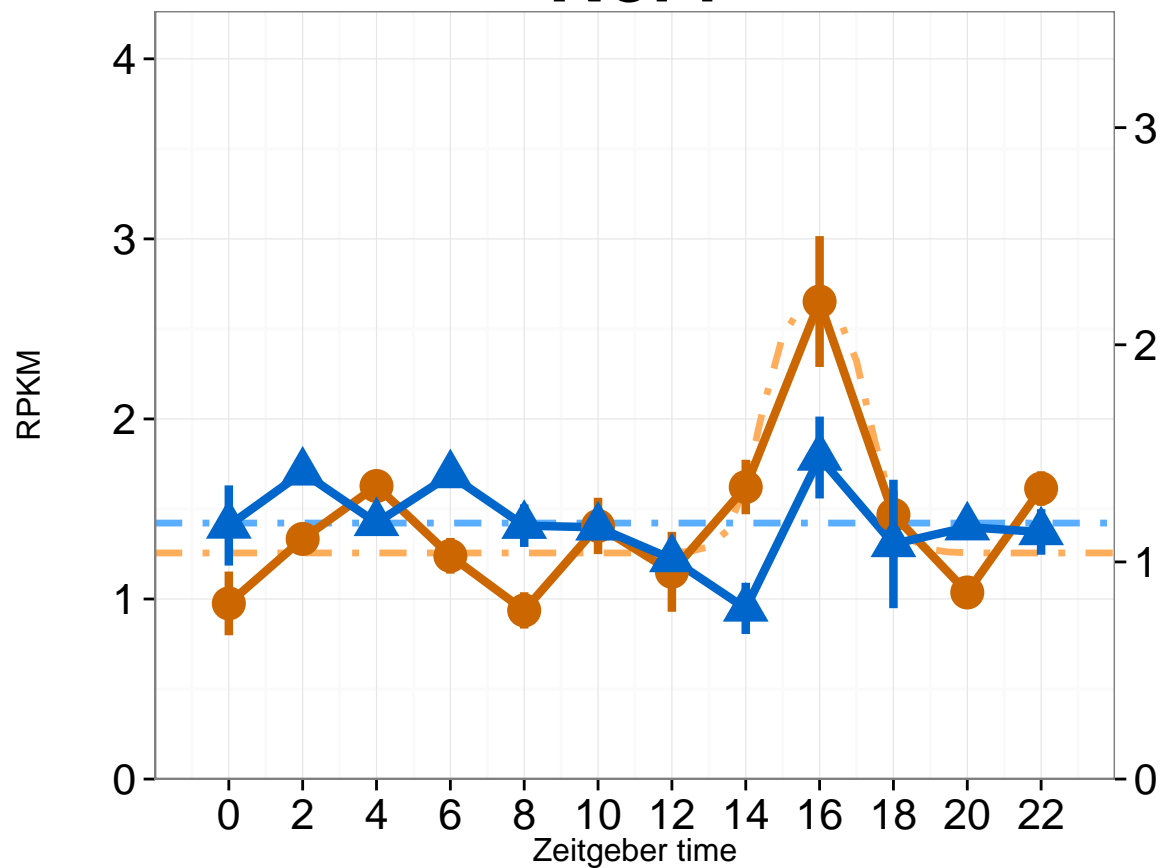

## Ncf4

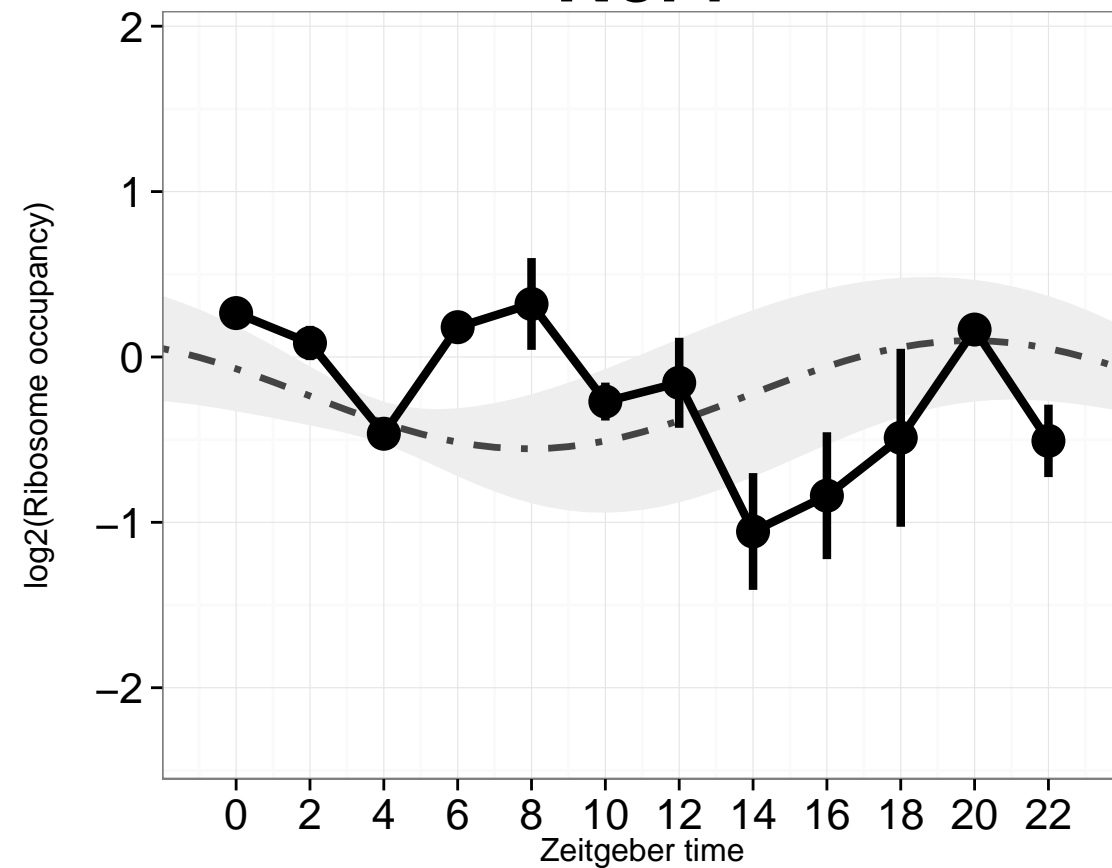

Supplement: SuppDataset_1.zip [file Ncf4_set_B.pdf › Supplemental Dataset 1/B-mRNA_rhythm_translation_nonrhyth/Ncf4_set_B.pdf]

# Ndufa7

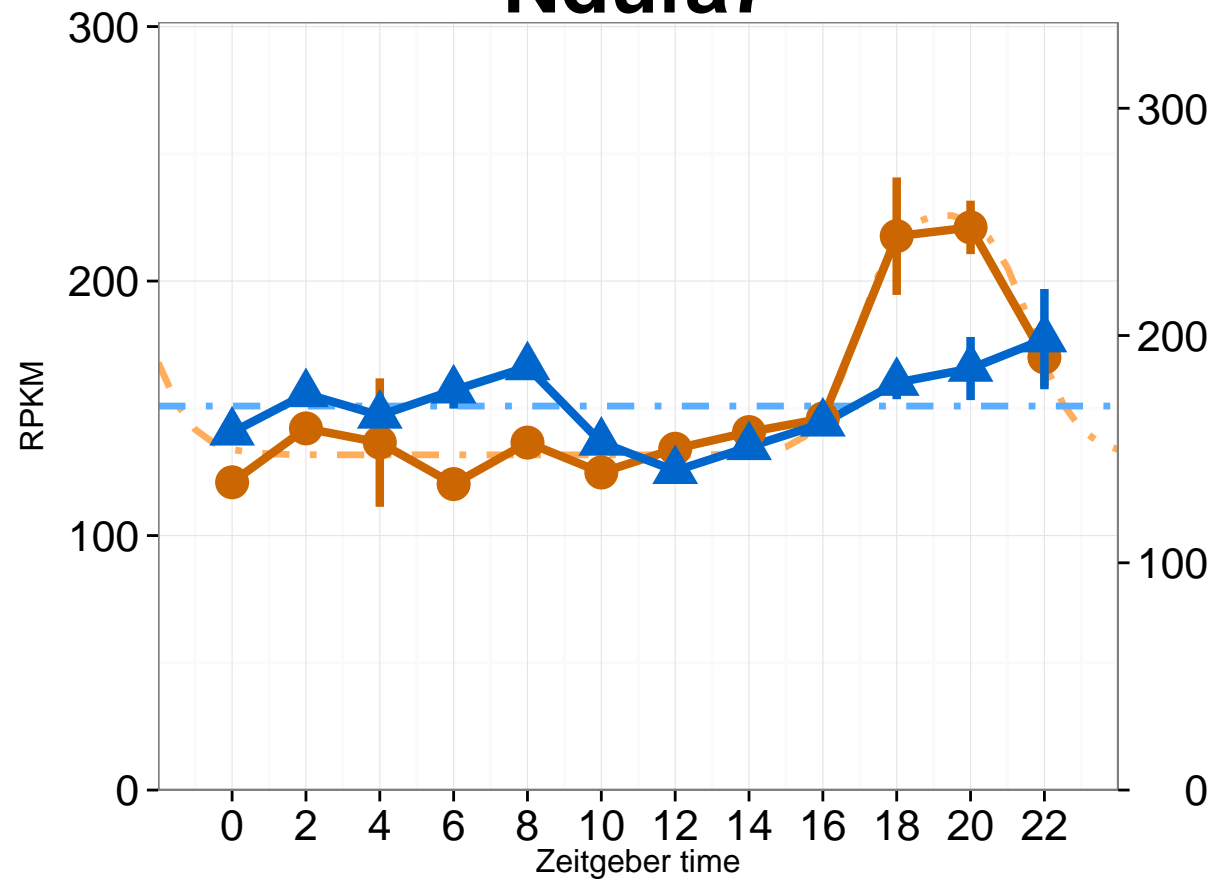

# Ndufa7

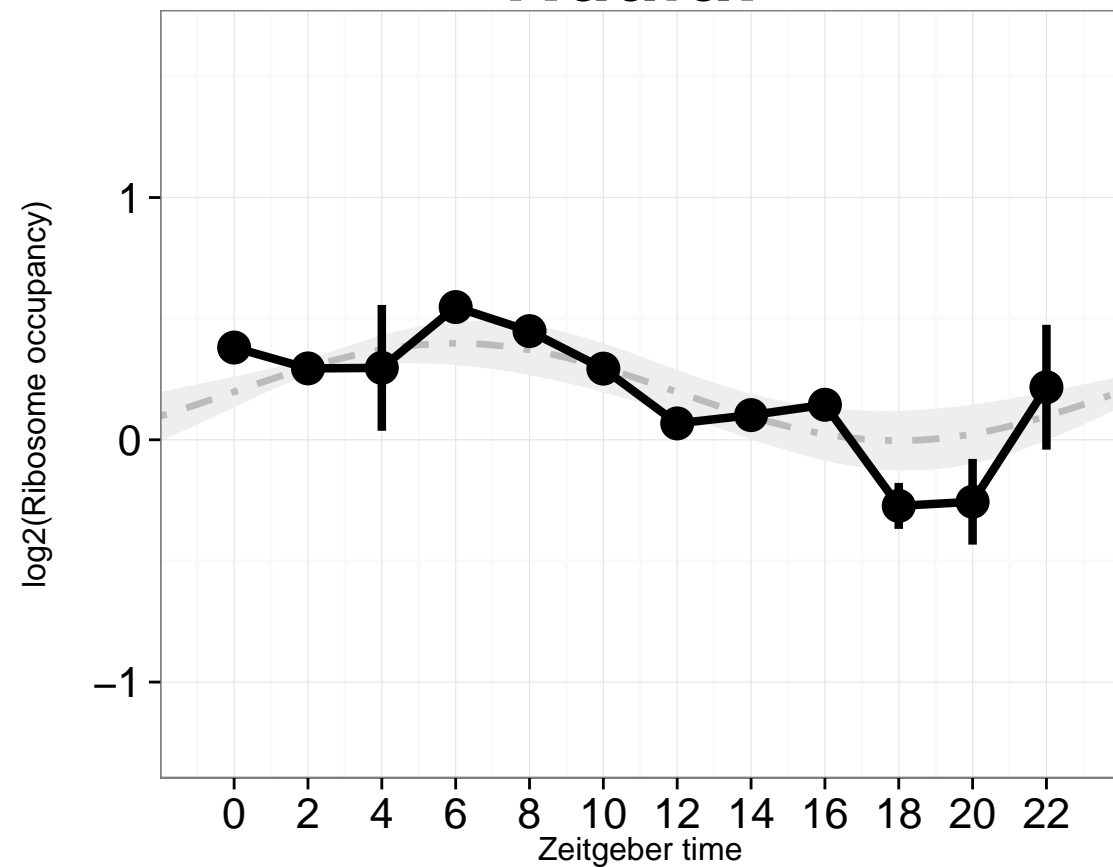

Supplement: SuppDataset_1.zip [file Ndufa7_set_B.pdf › Supplemental Dataset 1/B-mRNA_rhythm_translation_nonrhyth/Ndufa7_set_B.pdf]

## Ndufb7

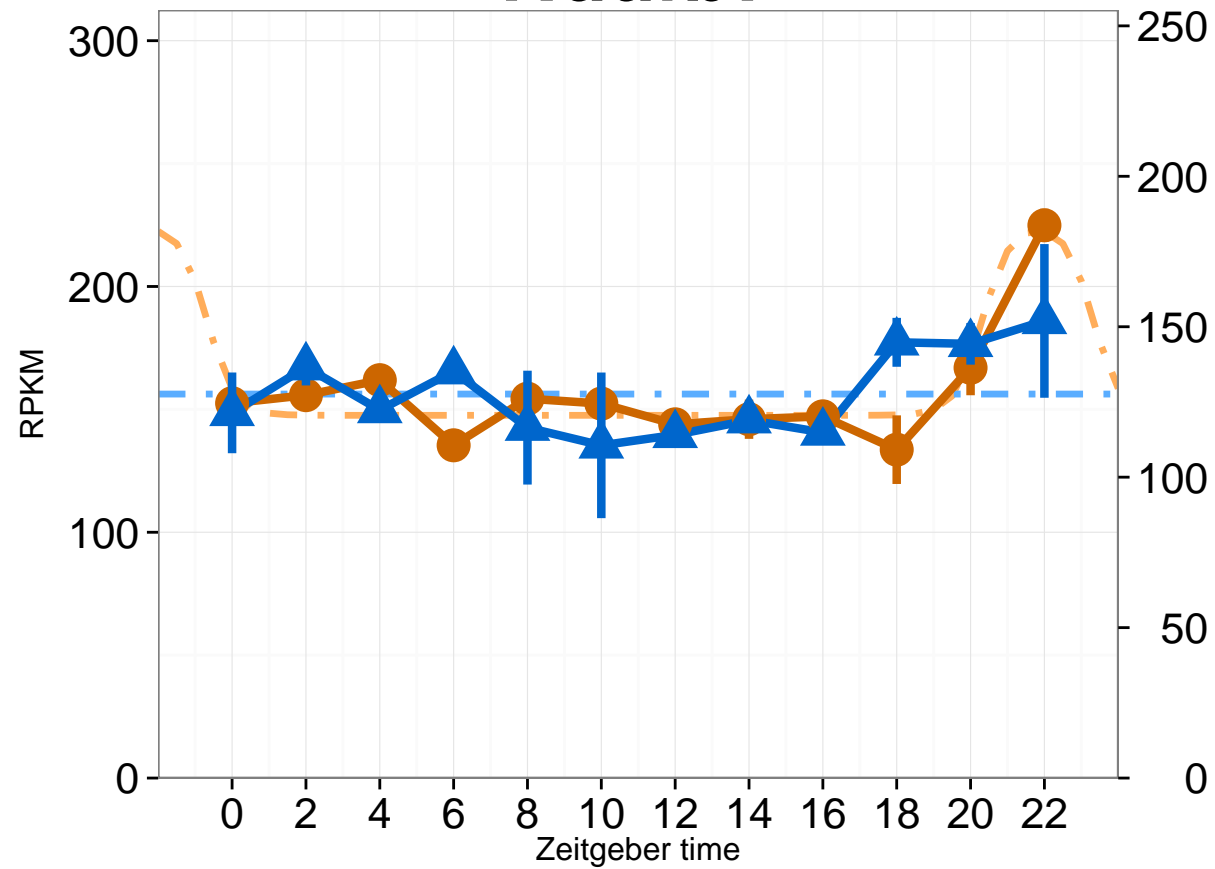

## Ndufb7

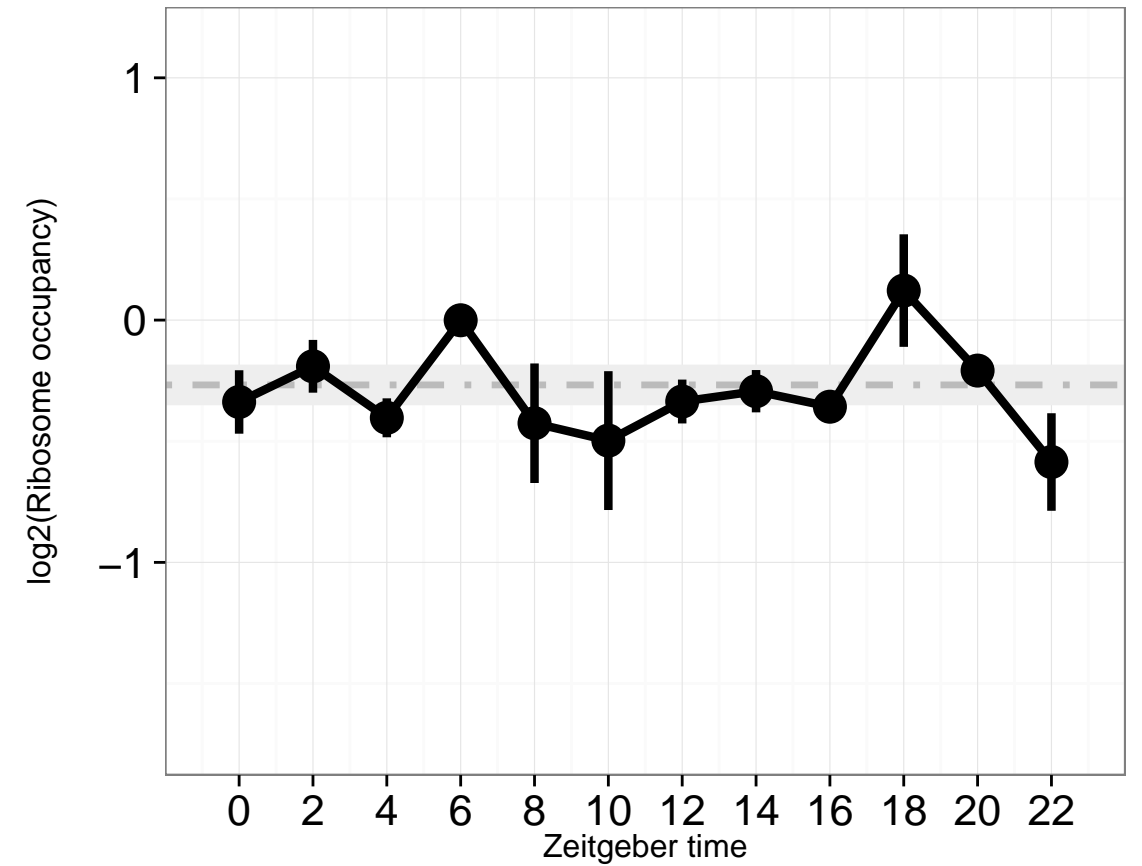

Supplement: SuppDataset_1.zip [file Ndufb7_set_B.pdf › Supplemental Dataset 1/B-mRNA_rhythm_translation_nonrhyth/Ndufb7_set_B.pdf]

## Ndufs7

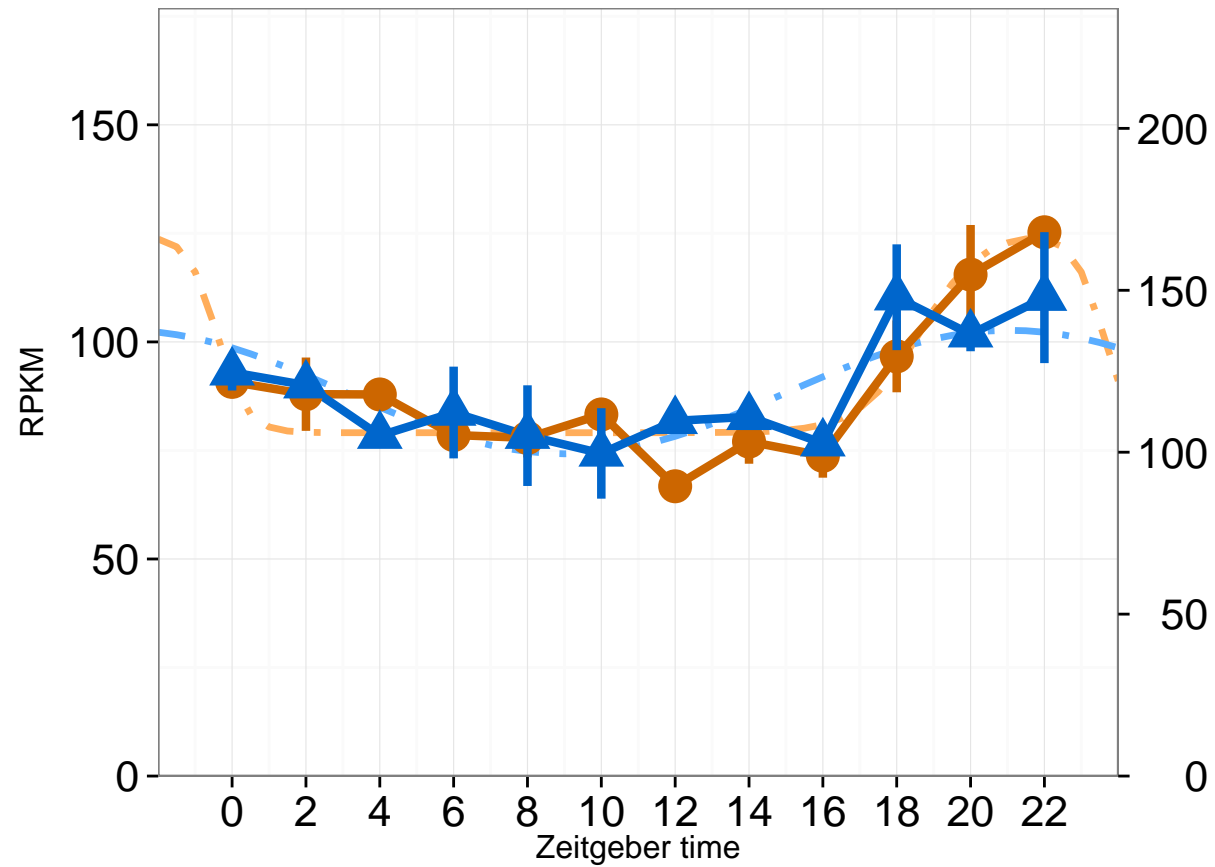

## Ndufs7

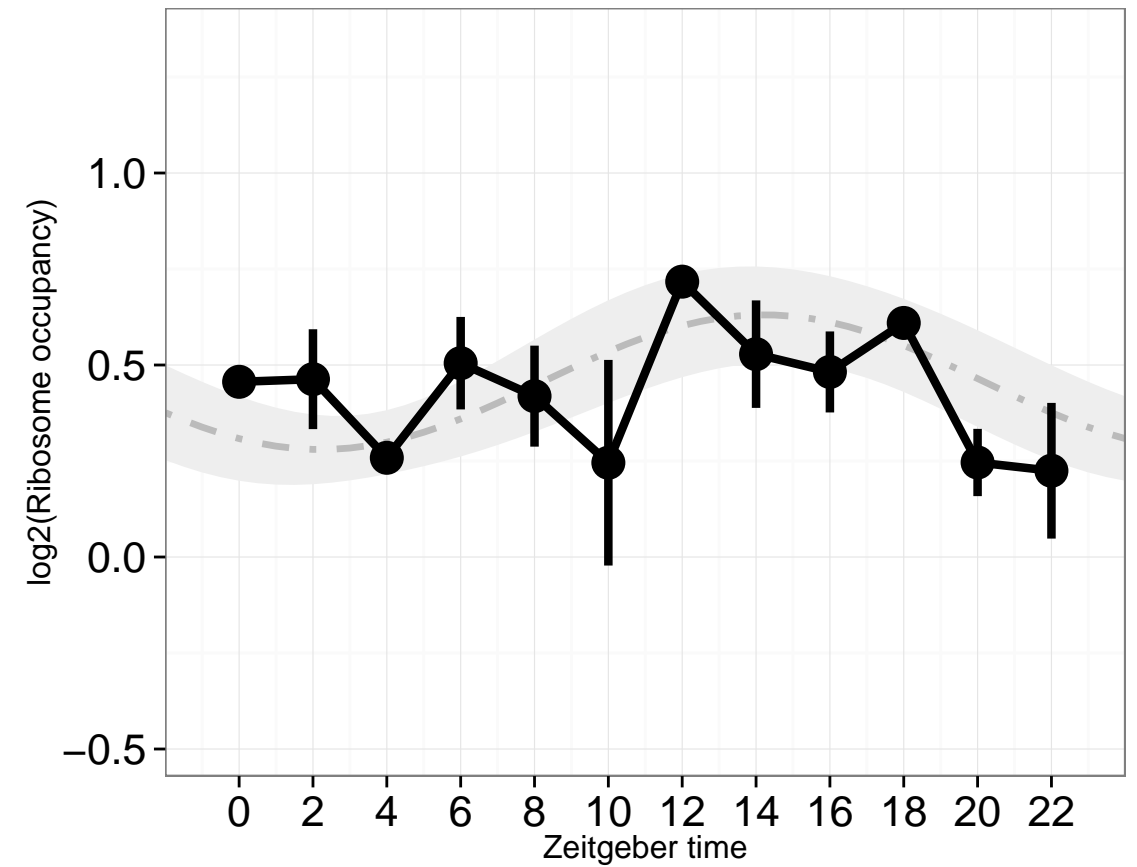

Supplement: SuppDataset_1.zip [file Ndufs7_set_B.pdf › Supplemental Dataset 1/B-mRNA_rhythm_translation_nonrhyth/Ndufs7_set_B.pdf]

## Nek2

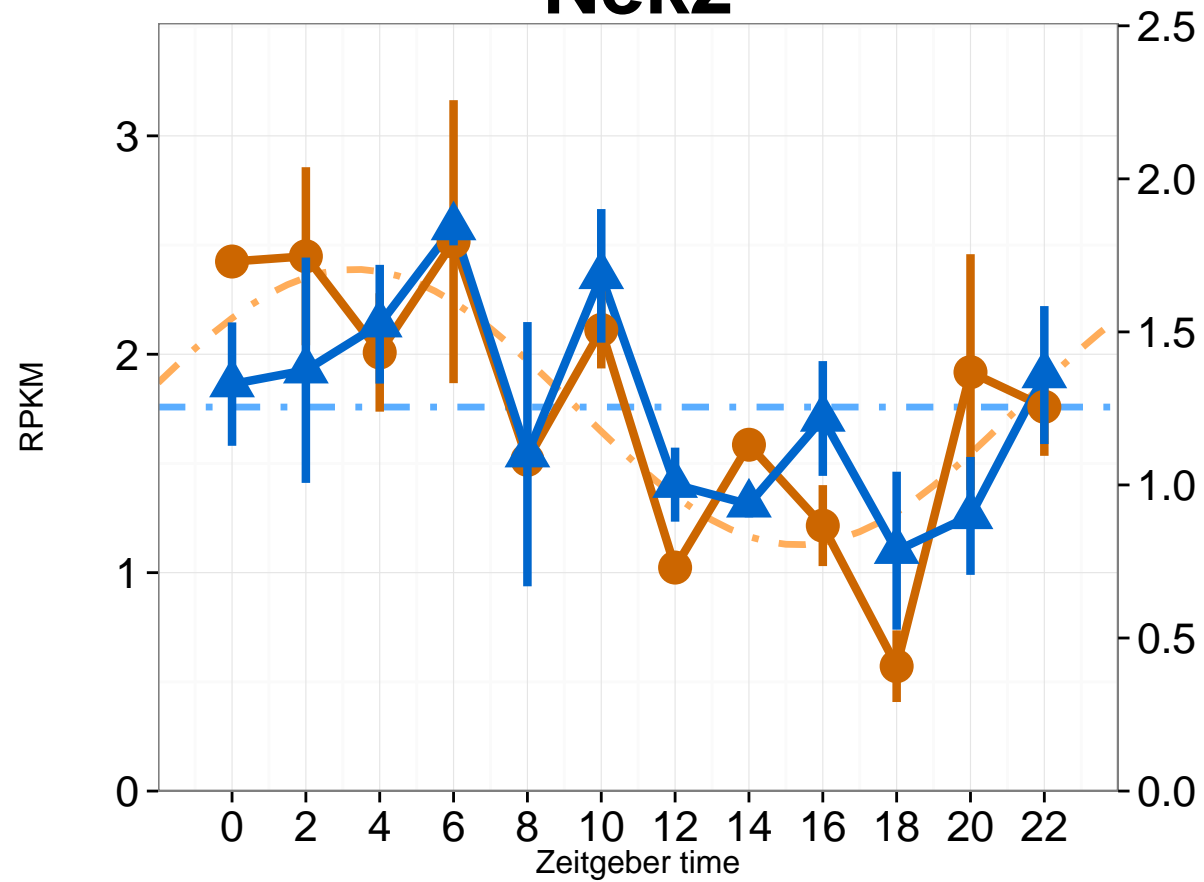

## Nek2

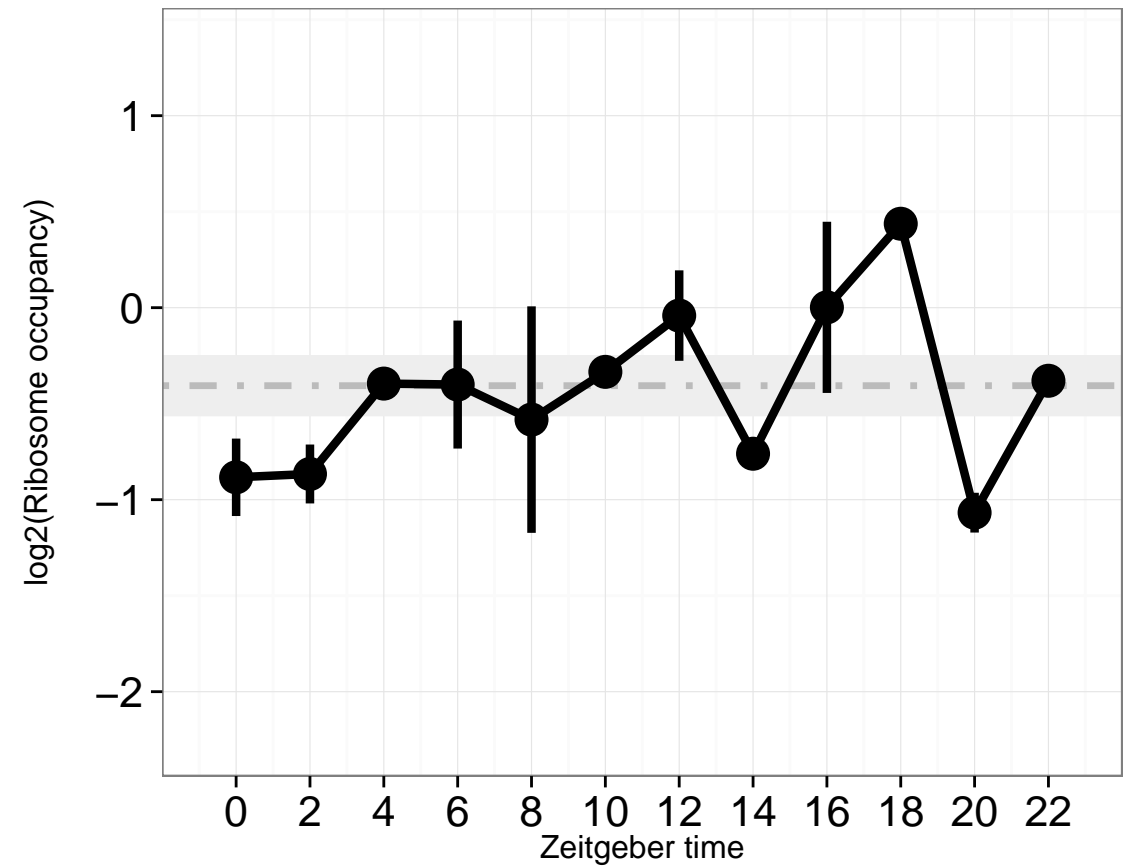

Supplement: SuppDataset_1.zip [file Nek2_set_B.pdf › Supplemental Dataset 1/B-mRNA_rhythm_translation_nonrhyth/Nek2_set_B.pdf]

## Nes

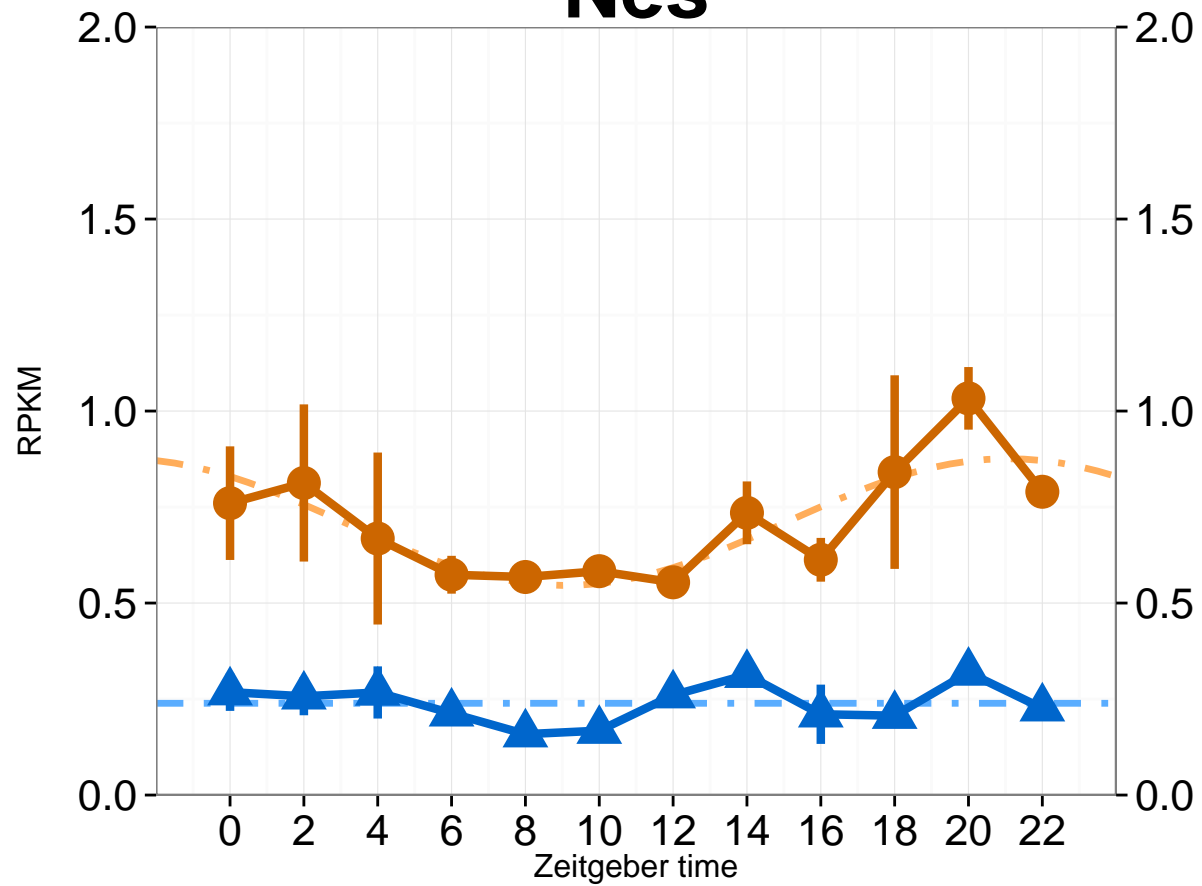

## Nes

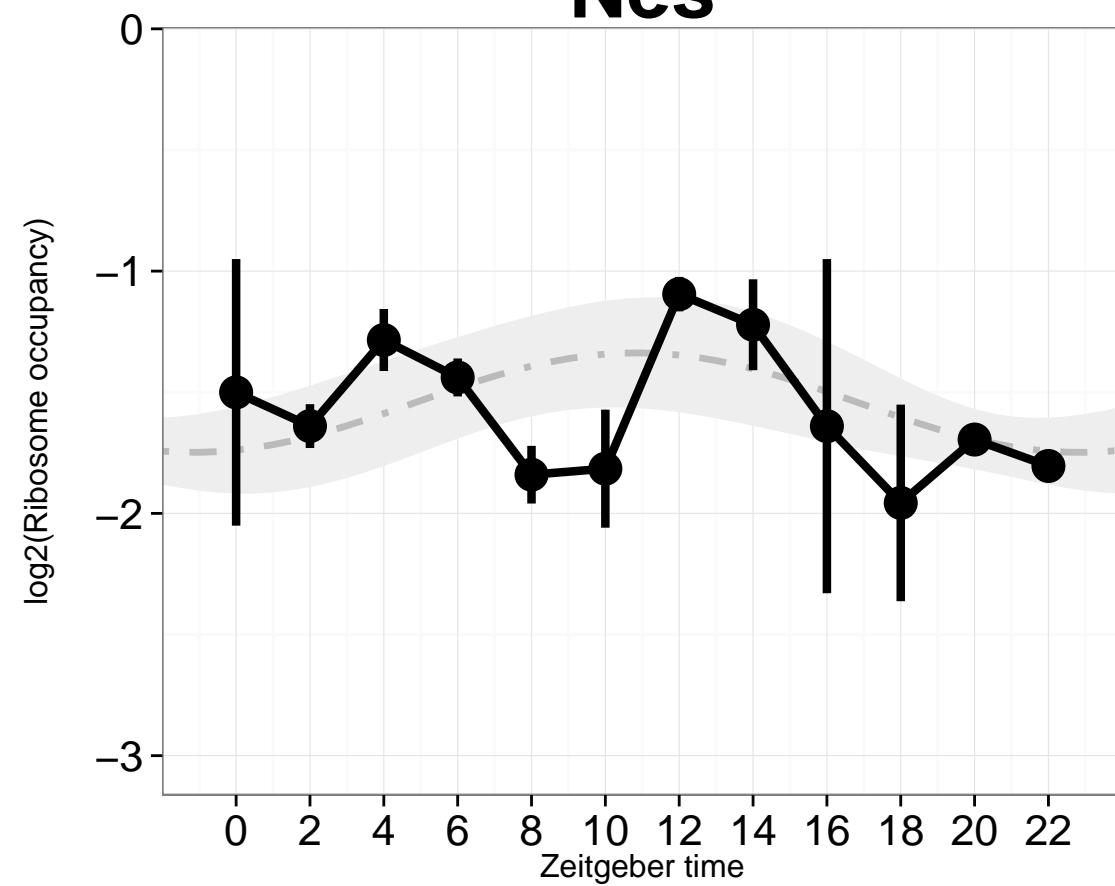

Supplement: SuppDataset_1.zip [file Nes_set_B.pdf › Supplemental Dataset 1/B-mRNA_rhythm_translation_nonrhyth/Nes_set_B.pdf]

## Nfam1

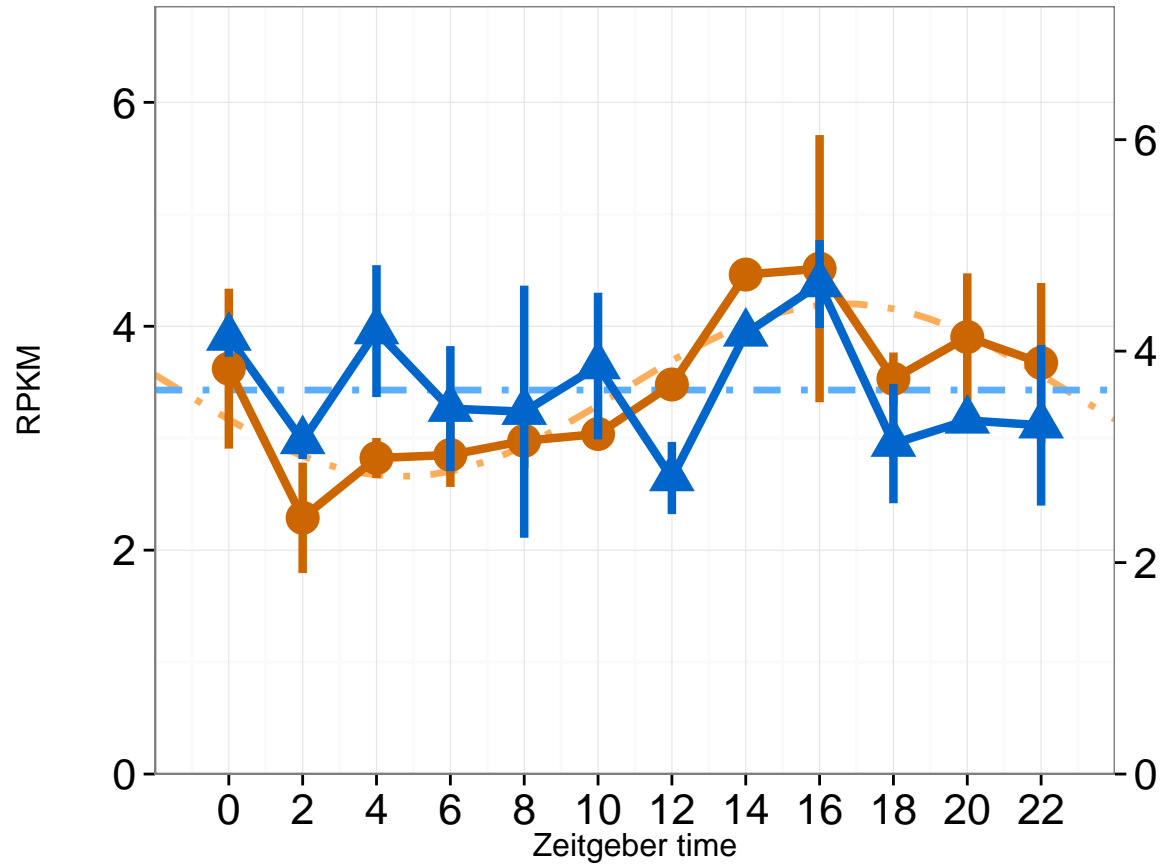

## Nfam1

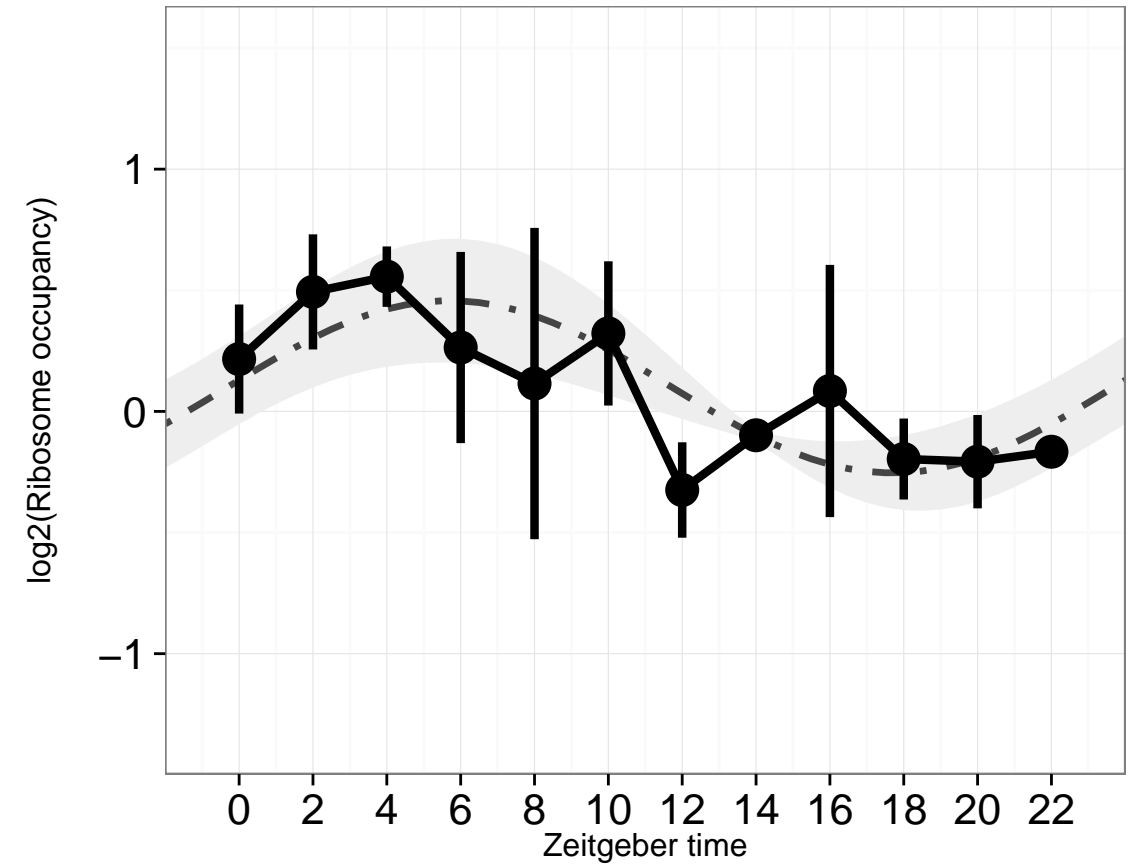

Supplement: SuppDataset_1.zip [file Nfam1_set_B.pdf › Supplemental Dataset 1/B-mRNA_rhythm_translation_nonrhyth/Nfam1_set_B.pdf]

## Nfkb2

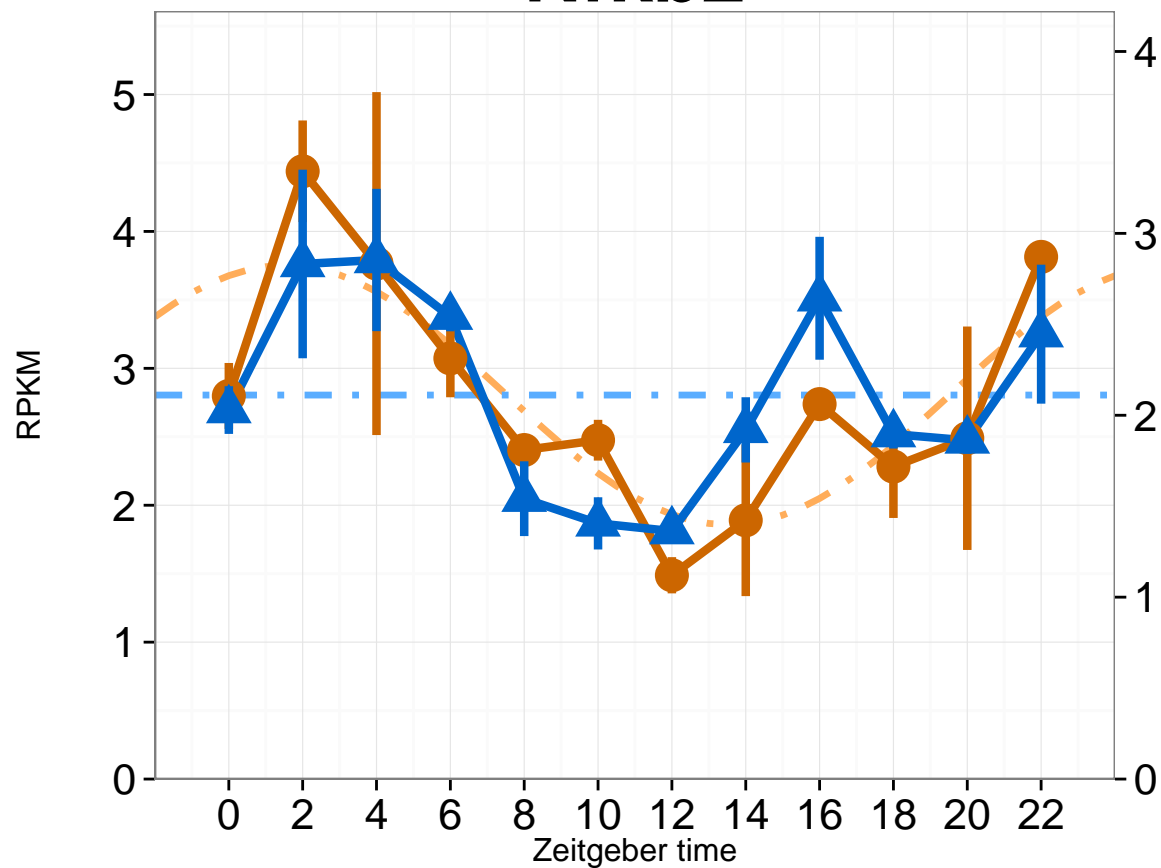

## Nfkb2

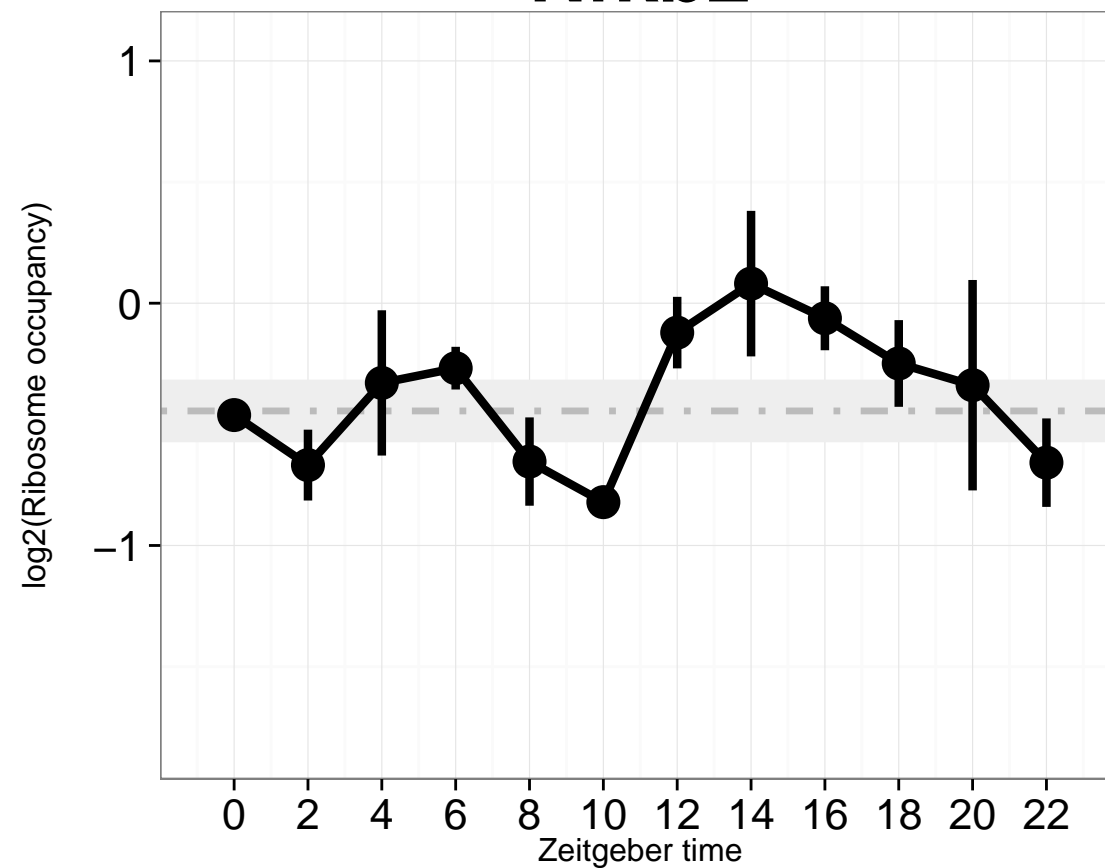

Supplement: SuppDataset_1.zip [file Nfkb2_set_B.pdf › Supplemental Dataset 1/B-mRNA_rhythm_translation_nonrhyth/Nfkb2_set_B.pdf]

## Nfkbib

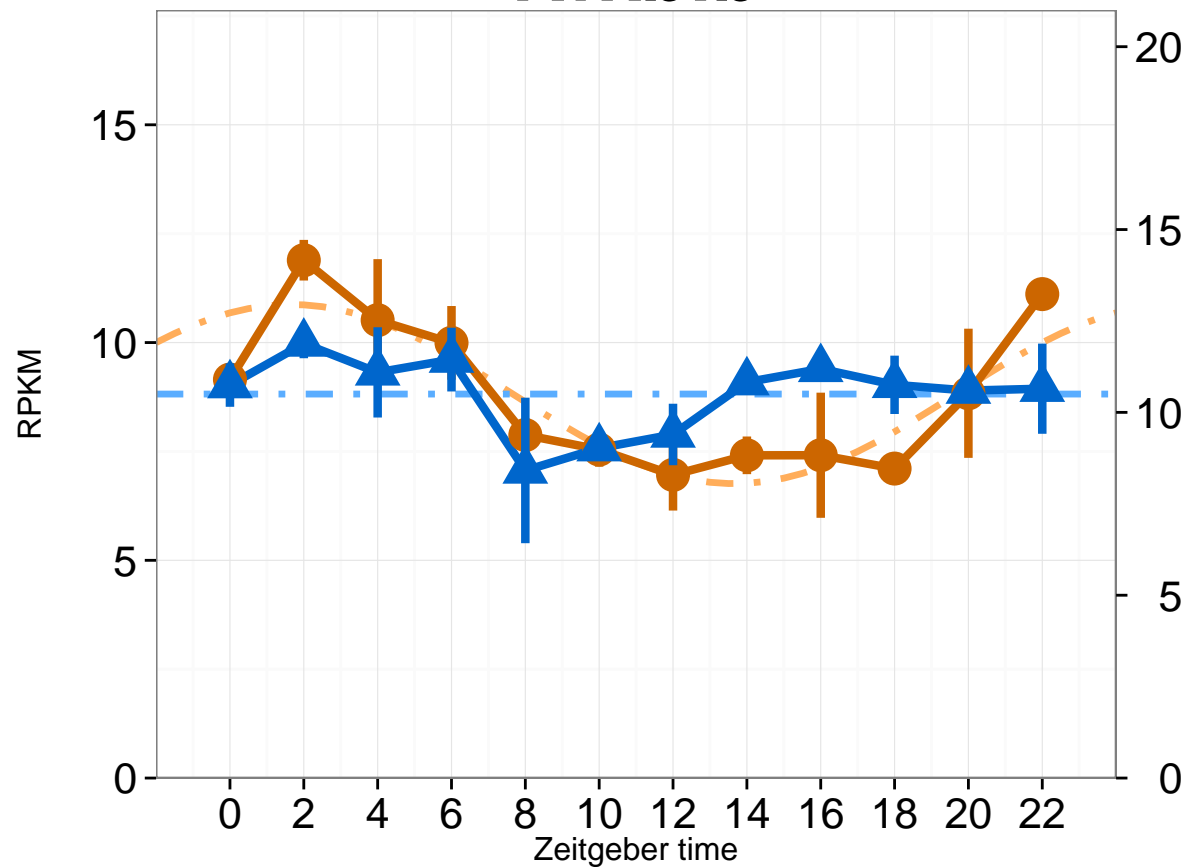

## Nfkbib

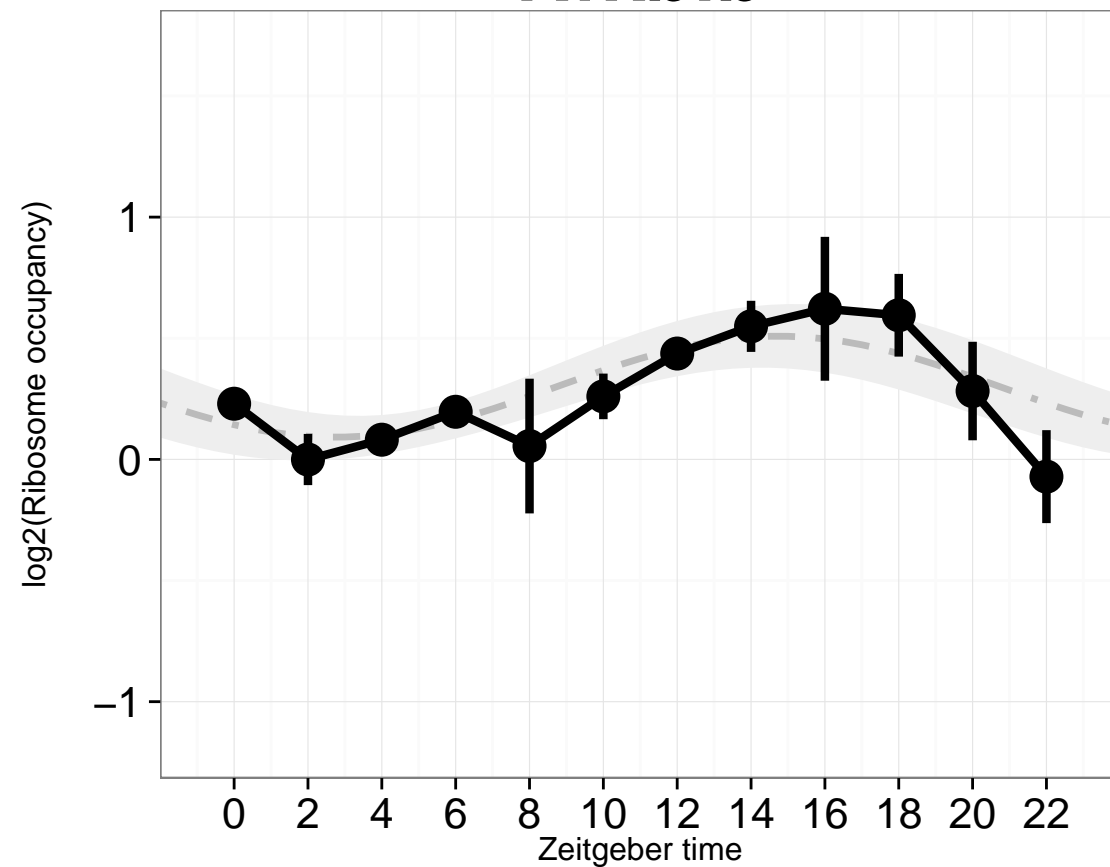

Supplement: SuppDataset_1.zip [file Nfkbib_set_B.pdf › Supplemental Dataset 1/B-mRNA_rhythm_translation_nonrhyth/Nfkbib_set_B.pdf]

## Nfkbie

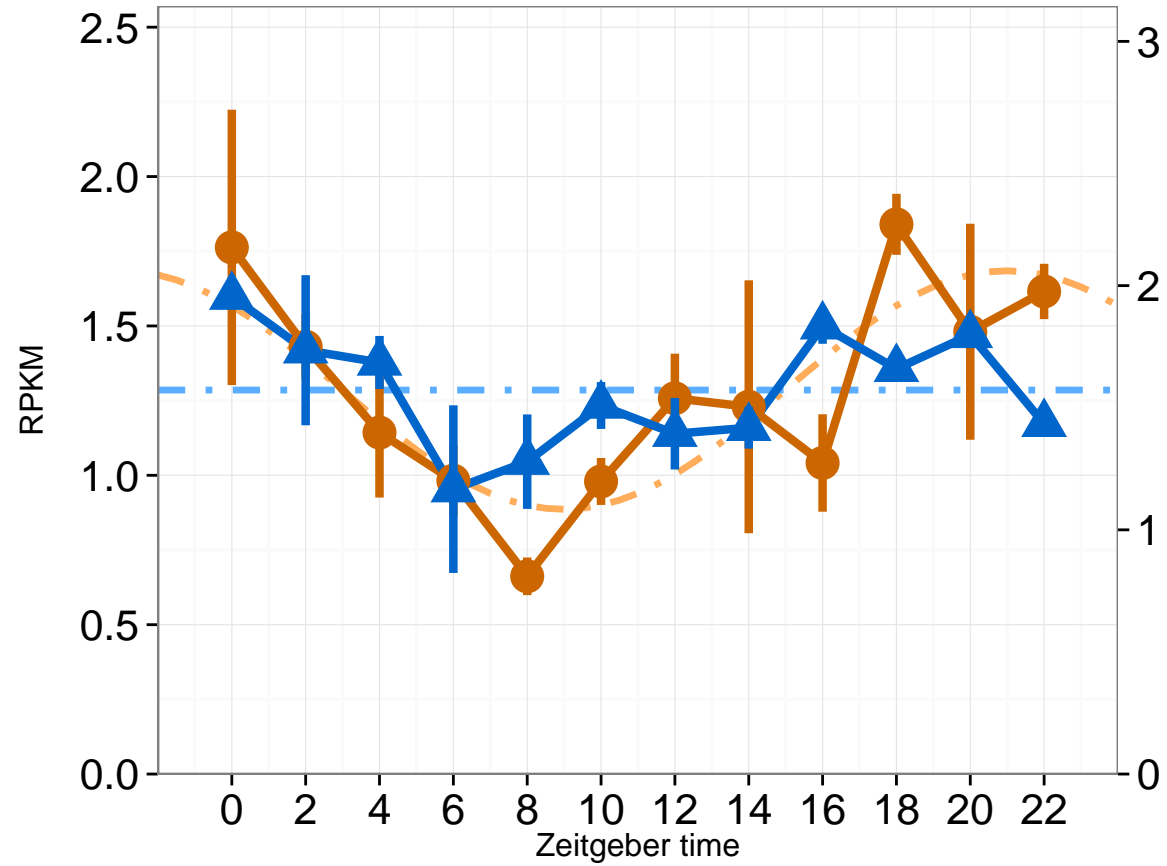

## Nfkbie

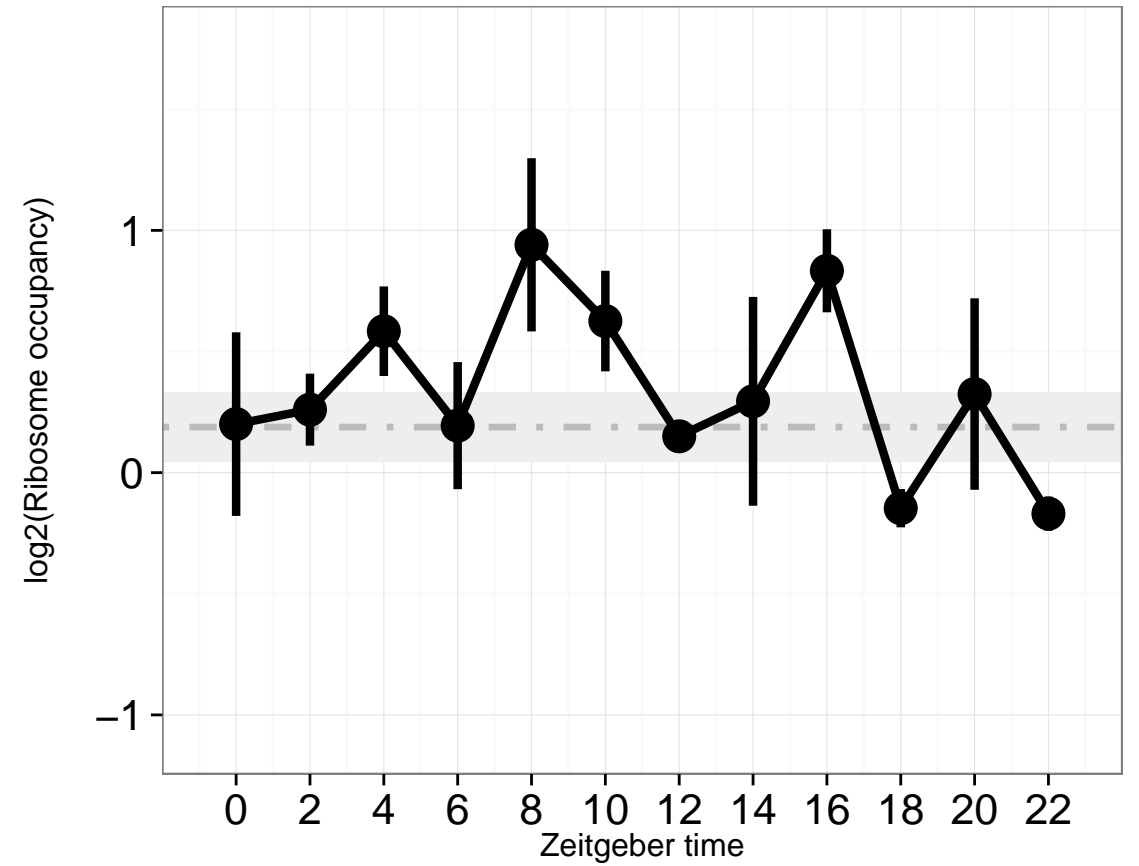

Supplement: SuppDataset_1.zip [file Nfkbie_set_B.pdf › Supplemental Dataset 1/B-mRNA_rhythm_translation_nonrhyth/Nfkbie_set_B.pdf]

## Nfkbil1

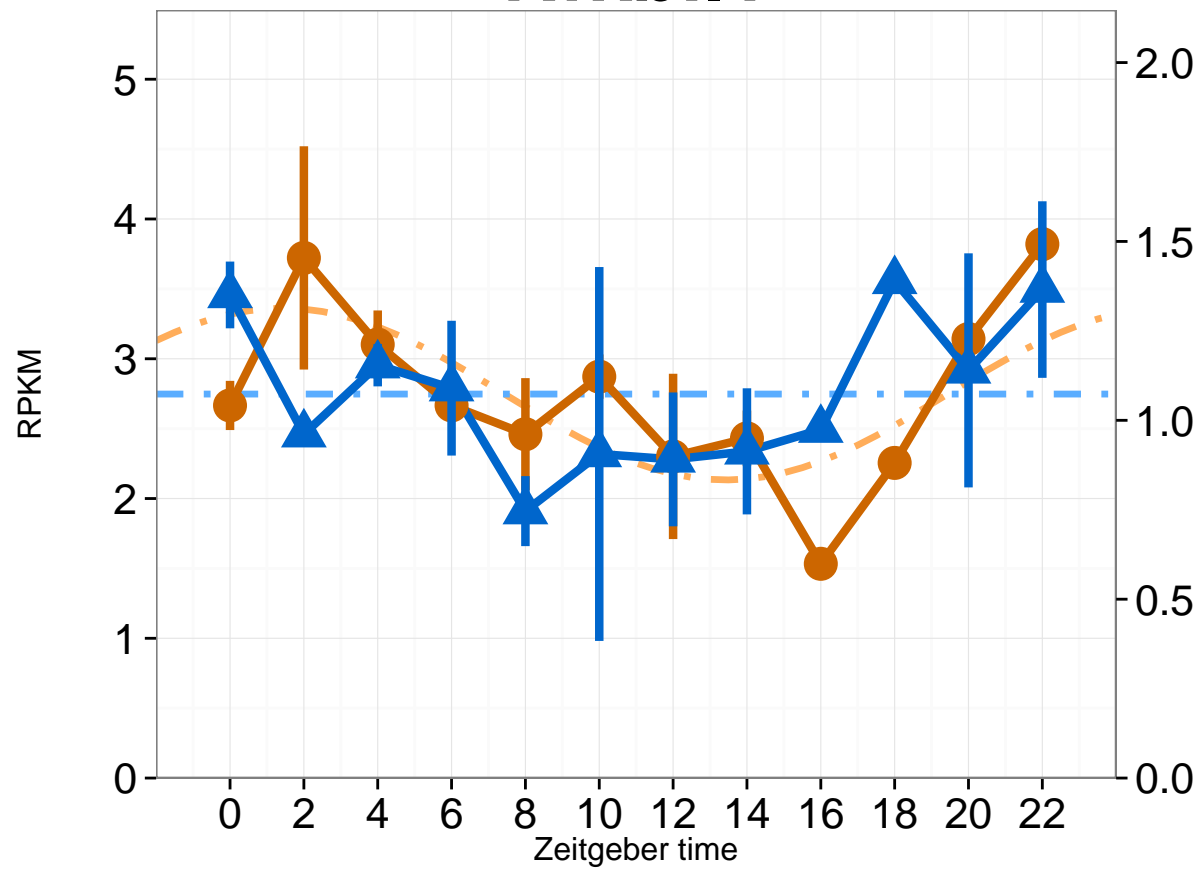

## Nfkbil1

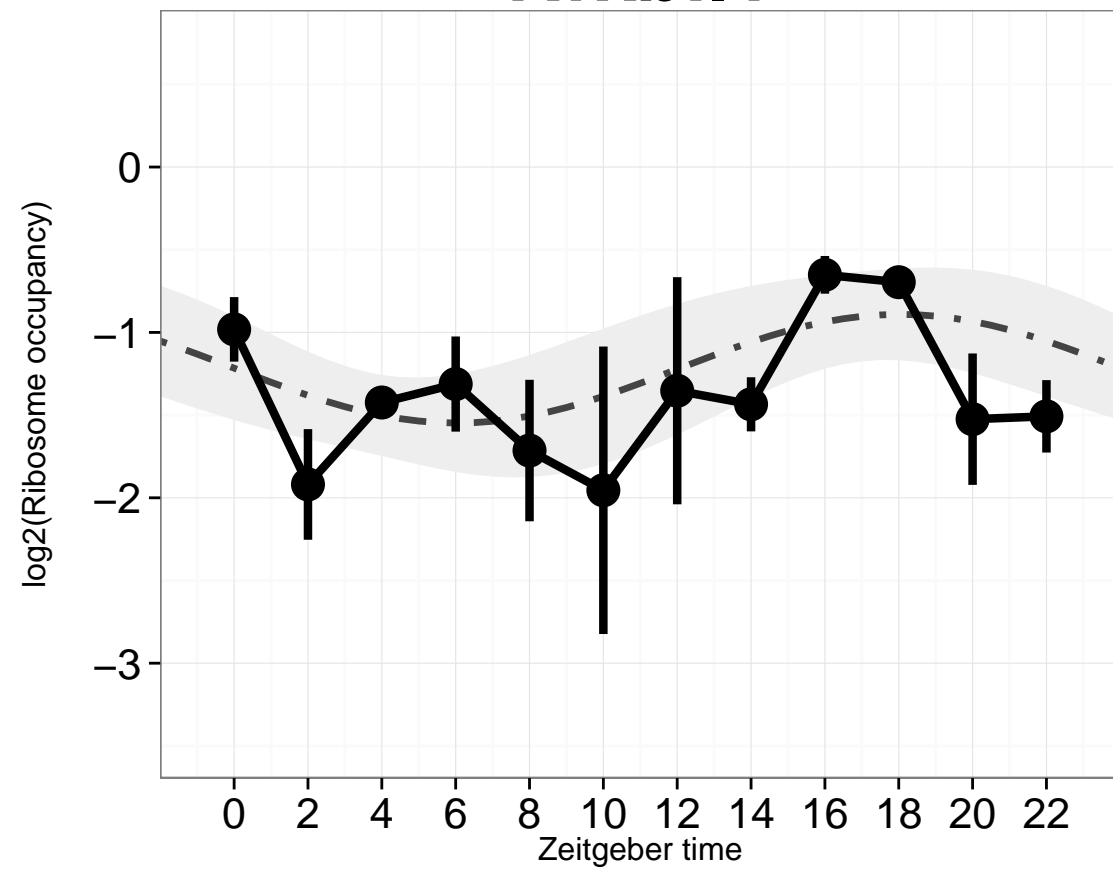

Supplement: SuppDataset_1.zip [file Nfkbil1_set_B.pdf › Supplemental Dataset 1/B-mRNA_rhythm_translation_nonrhyth/Nfkbil1_set_B.pdf]

## Nhs1

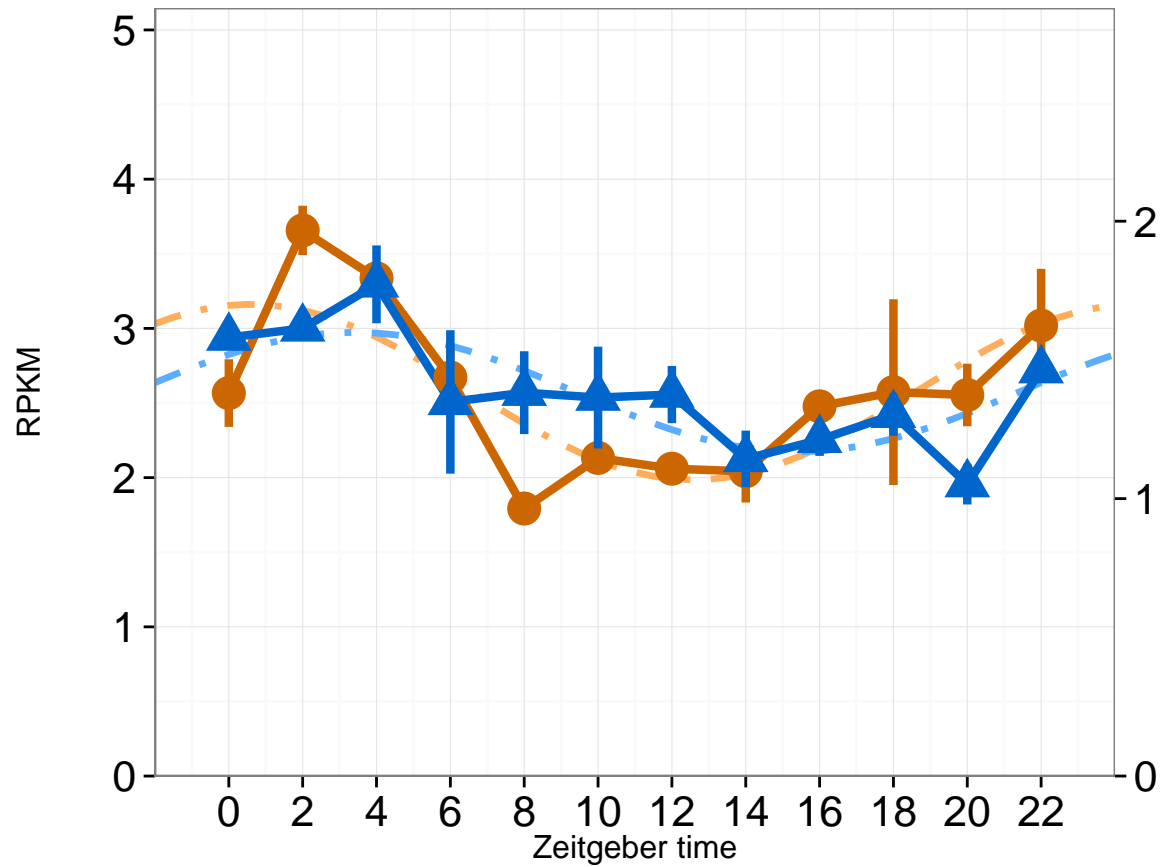

## Nhs1

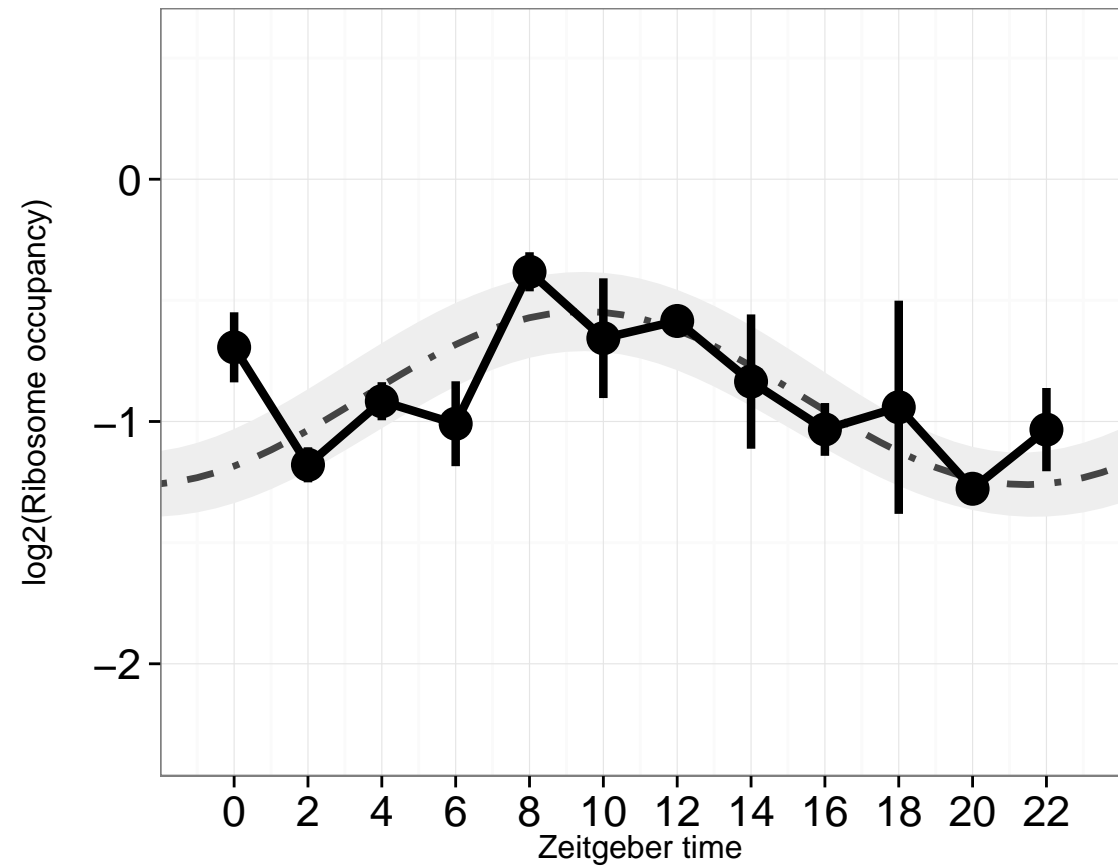

Supplement: SuppDataset_1.zip [file Nhsl1_set_B.pdf › Supplemental Dataset 1/B-mRNA_rhythm_translation_nonrhyth/Nhsl1_set_B.pdf]

## Nid2

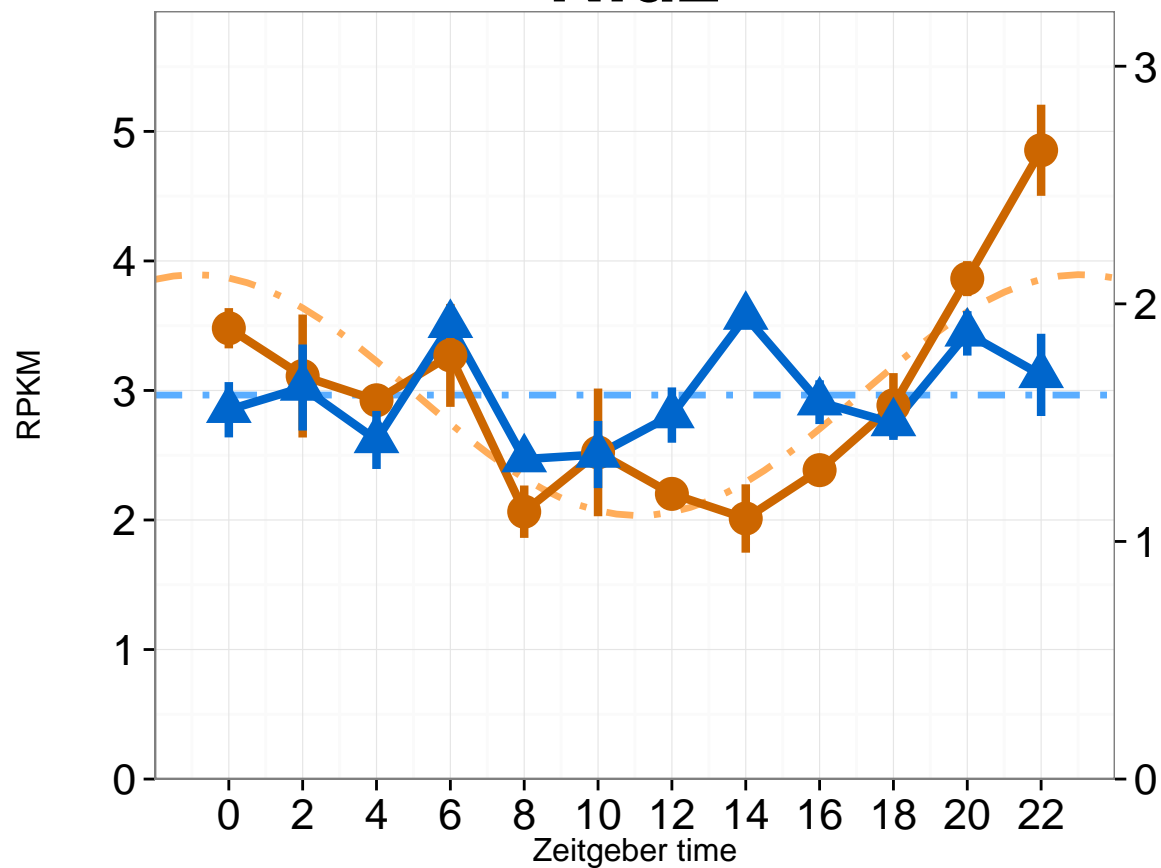

## Nid2

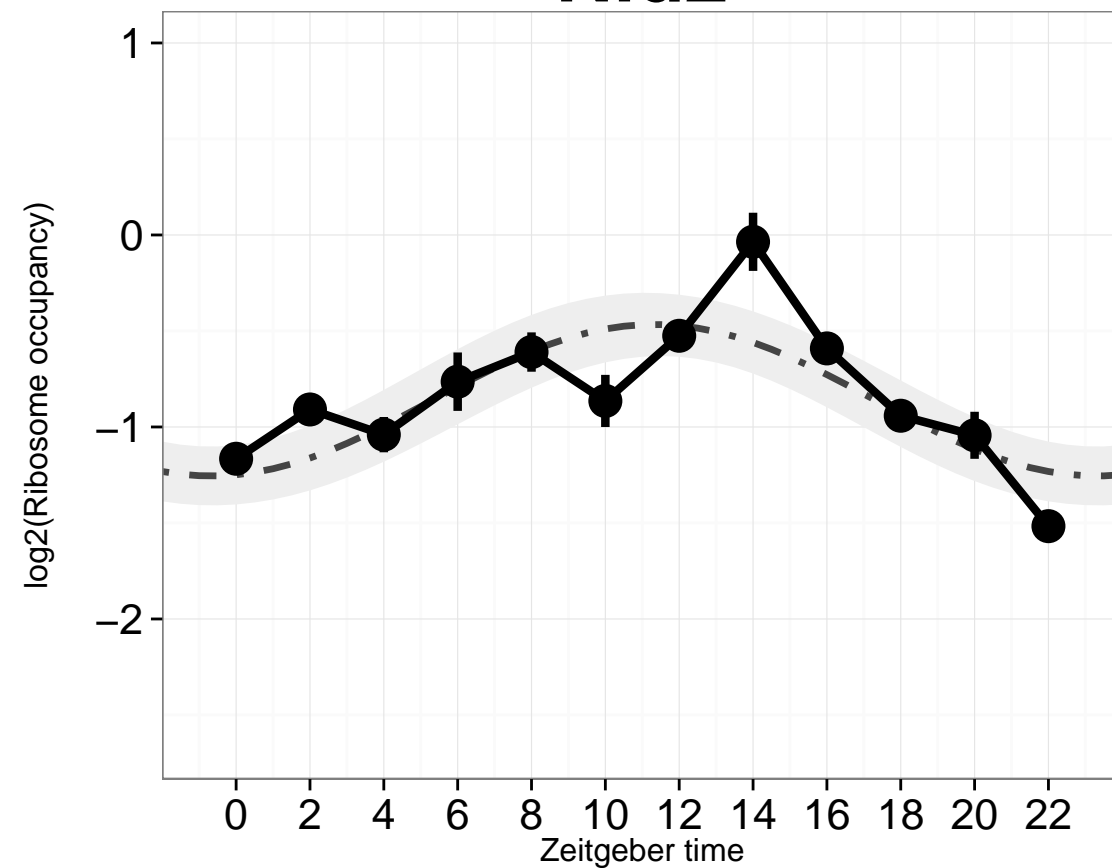

Supplement: SuppDataset_1.zip [file Nid2_set_B.pdf › Supplemental Dataset 1/B-mRNA_rhythm_translation_nonrhyth/Nid2_set_B.pdf]

# Ninj1

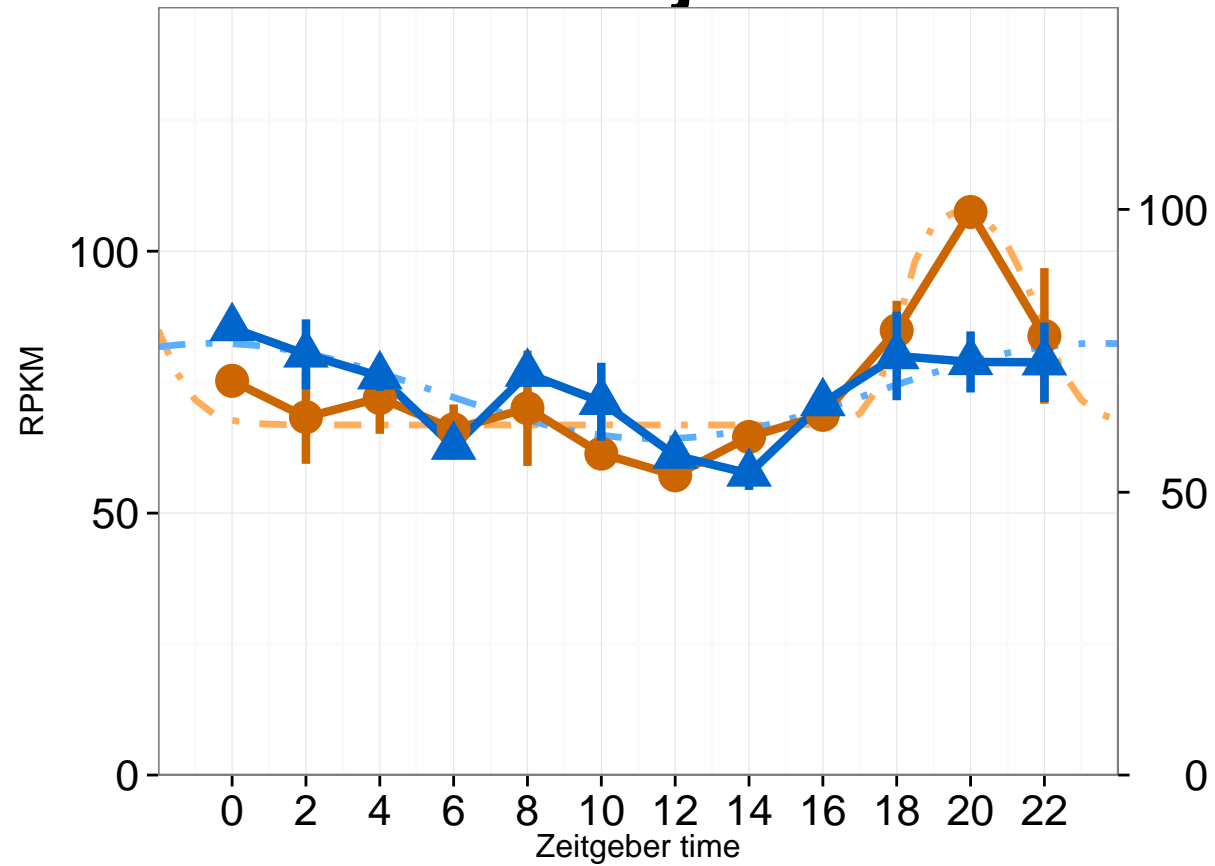

# Ninj1

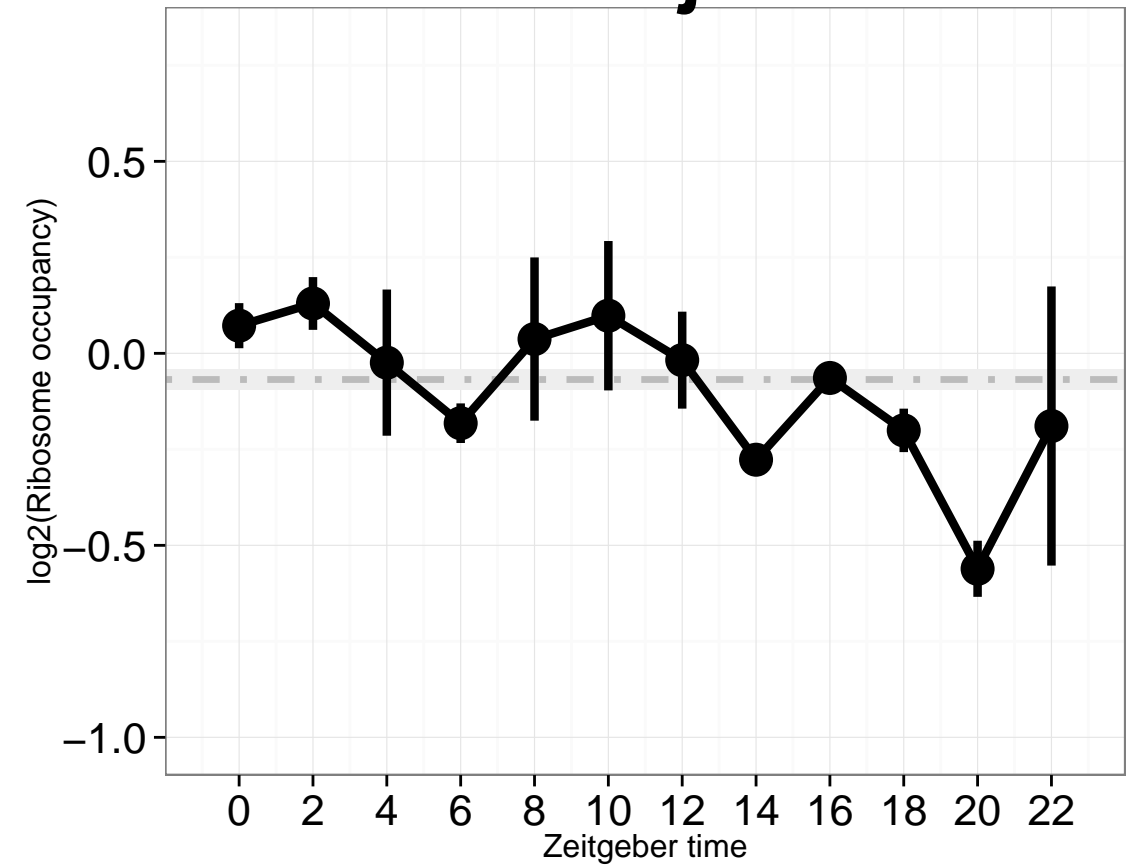

Supplement: SuppDataset_1.zip [file Ninj1_set_B.pdf › Supplemental Dataset 1/B-mRNA_rhythm_translation_nonrhyth/Ninj1_set_B.pdf]

## Nipa1

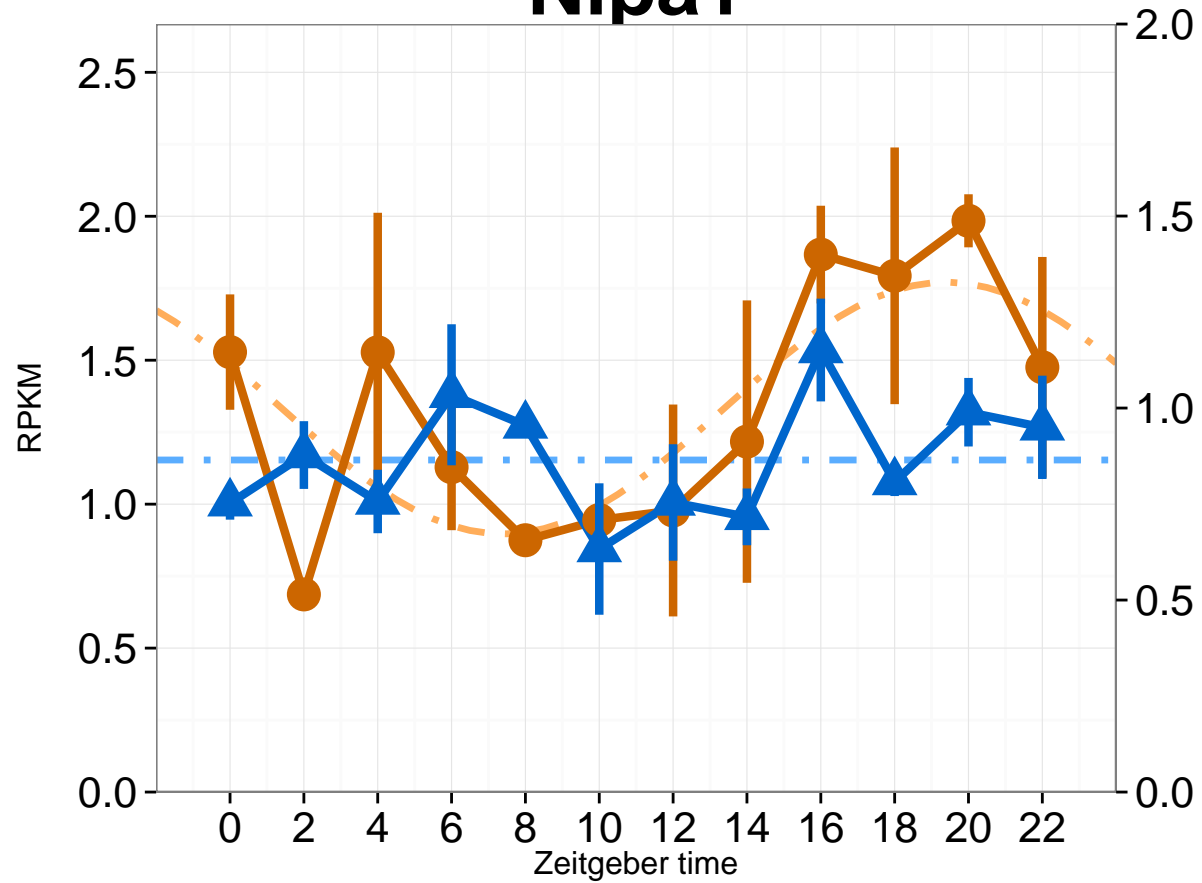

## Nipa1

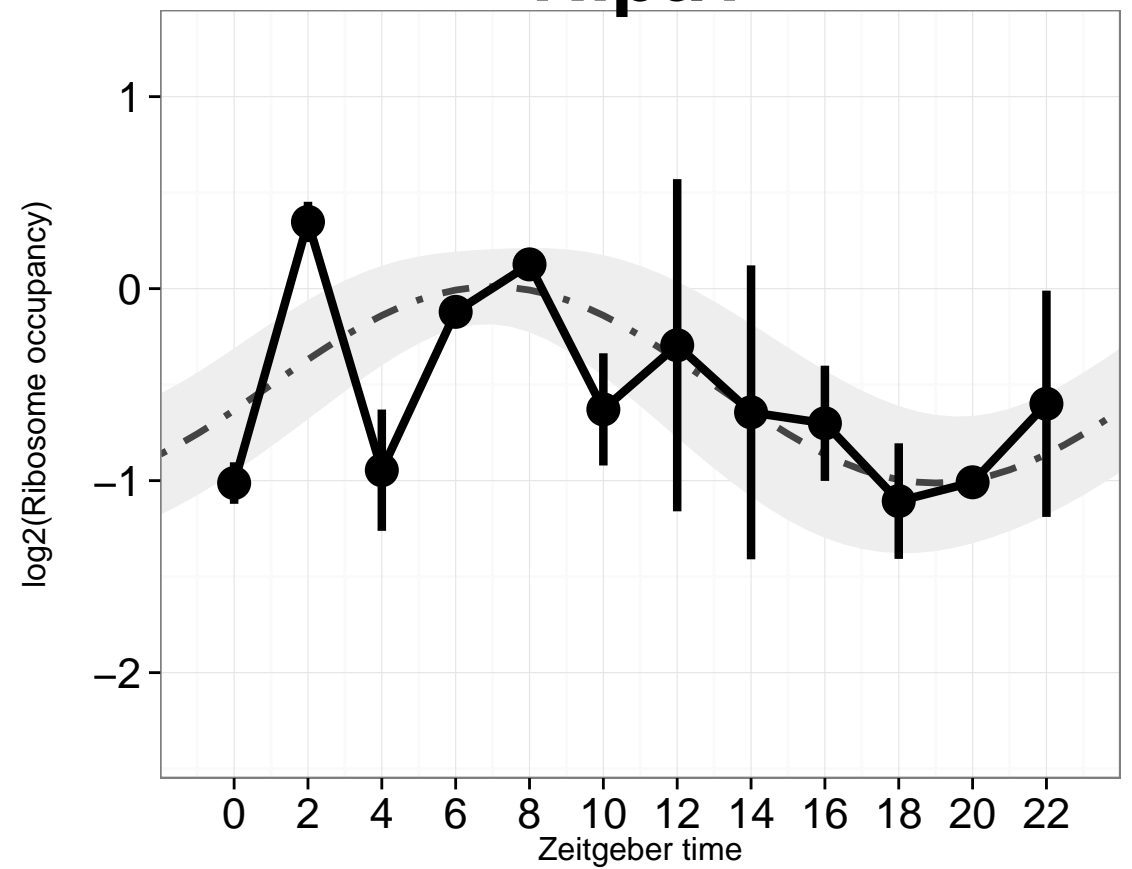

Supplement: SuppDataset_1.zip [file Nipa1_set_B.pdf › Supplemental Dataset 1/B-mRNA_rhythm_translation_nonrhyth/Nipa1_set_B.pdf]

## Nkiras2

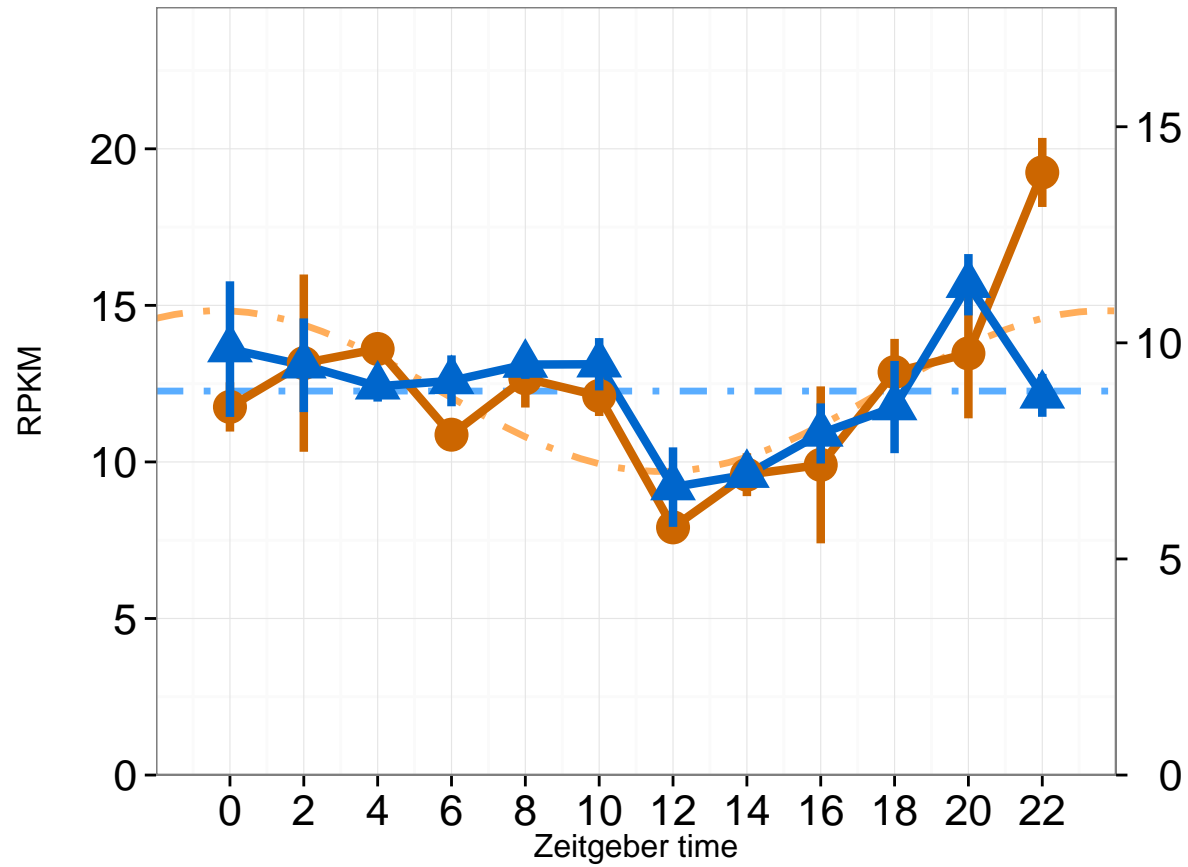

## Nkiras2

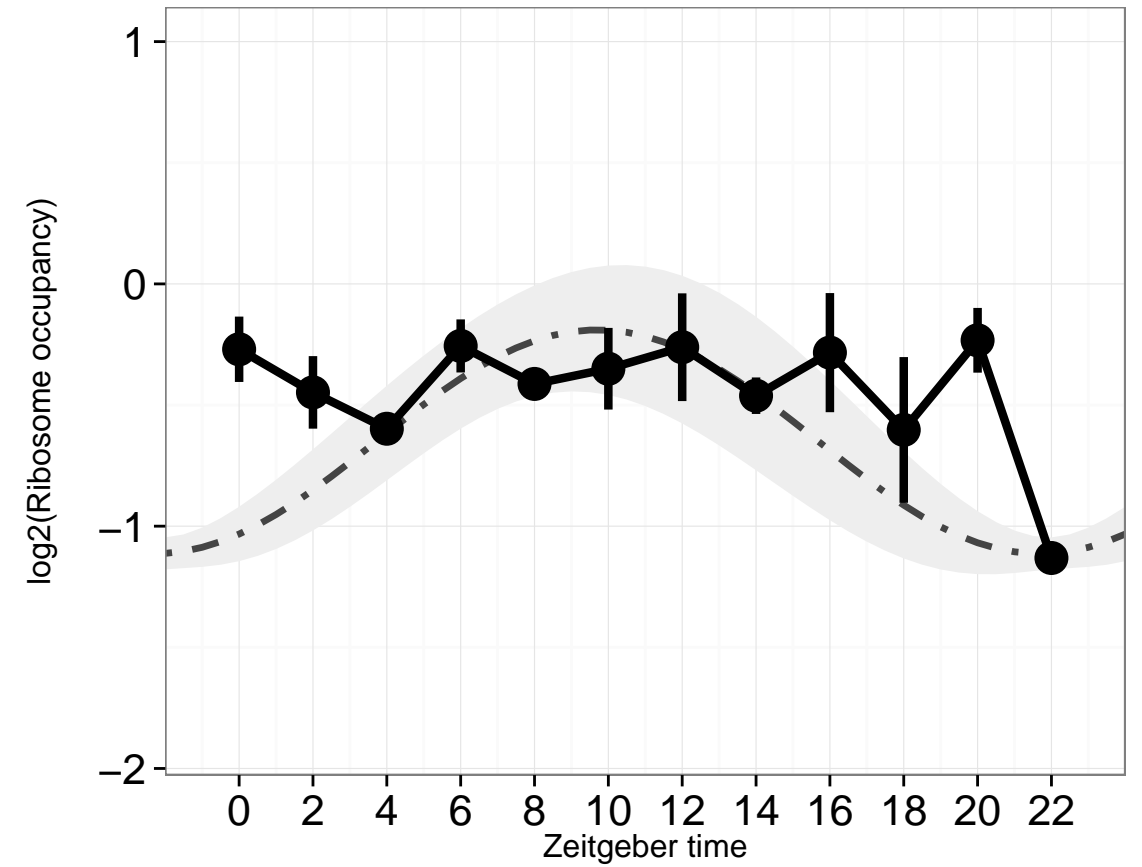

Supplement: SuppDataset_1.zip [file Nkiras2_set_B.pdf › Supplemental Dataset 1/B-mRNA_rhythm_translation_nonrhyth/Nkiras2_set_B.pdf]

## Nolc1

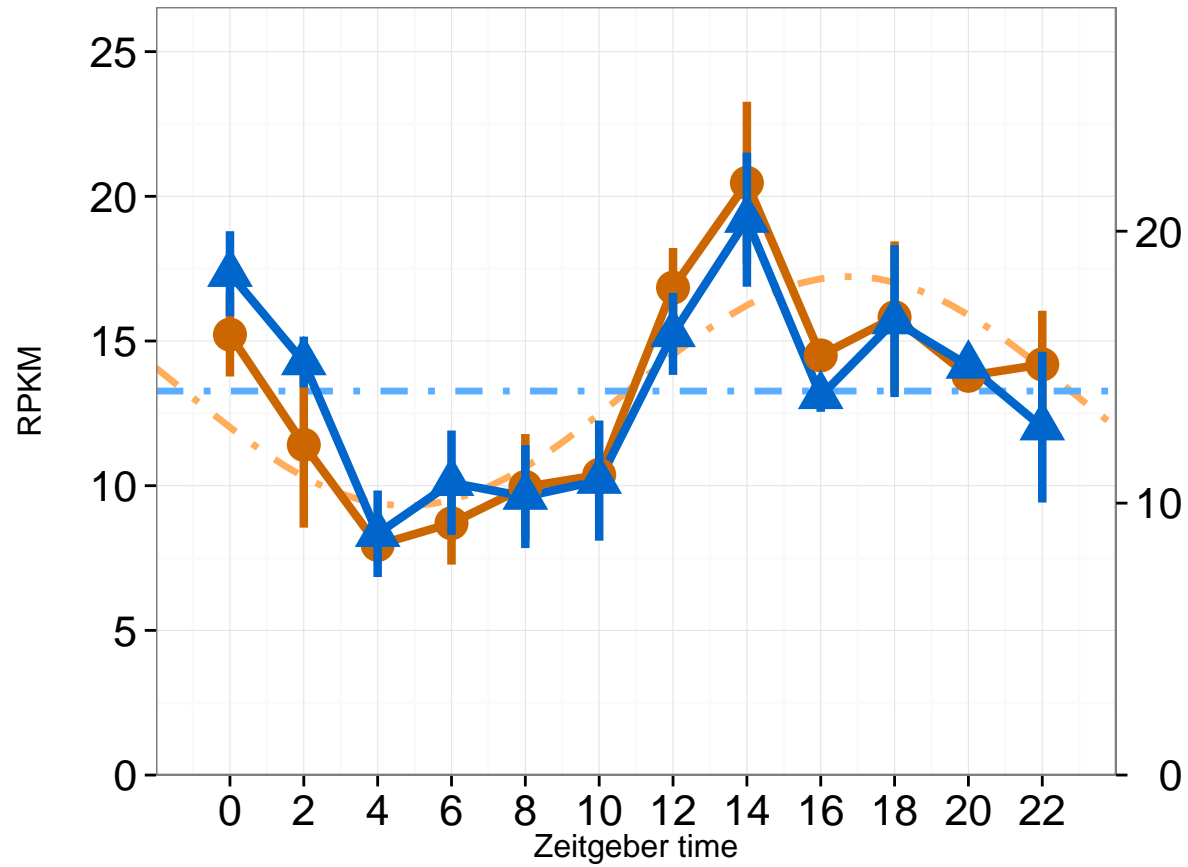

## Nolc1

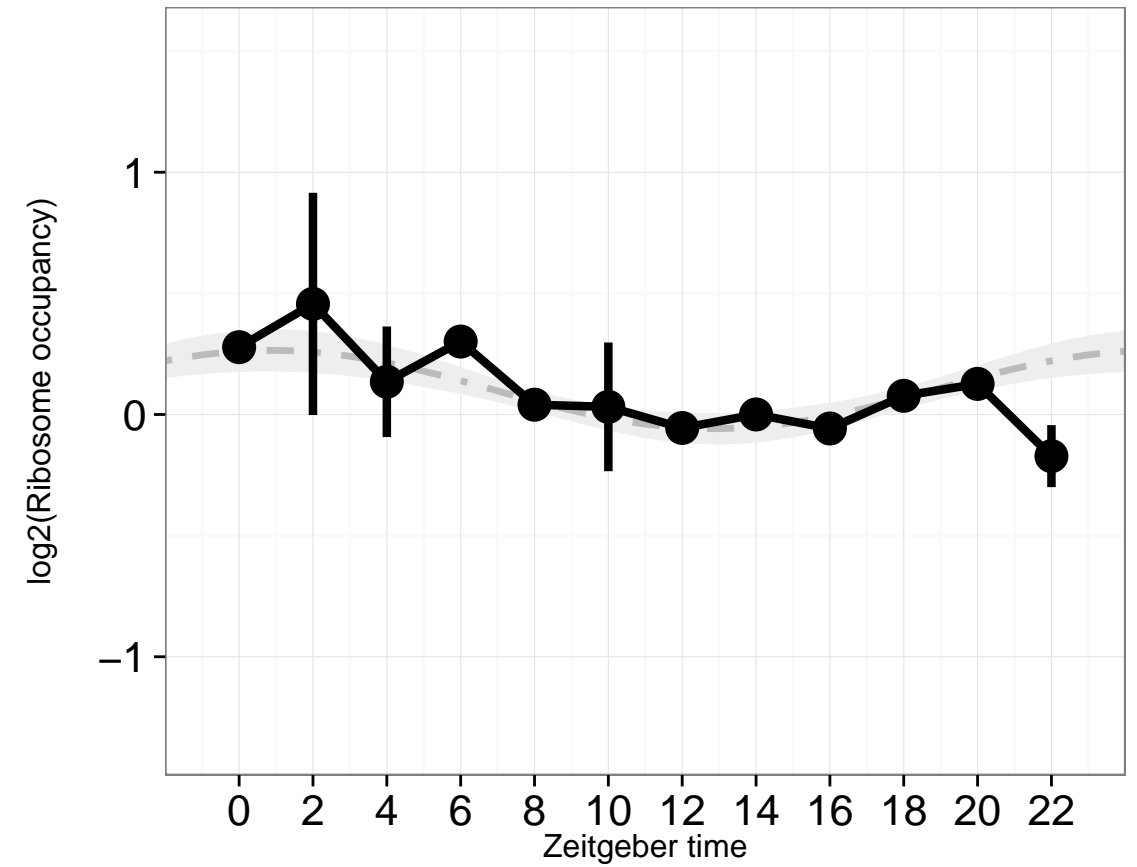

Supplement: SuppDataset_1.zip [file Nolc1_set_B.pdf › Supplemental Dataset 1/B-mRNA_rhythm_translation_nonrhyth/Nolc1_set_B.pdf]

## Nop10

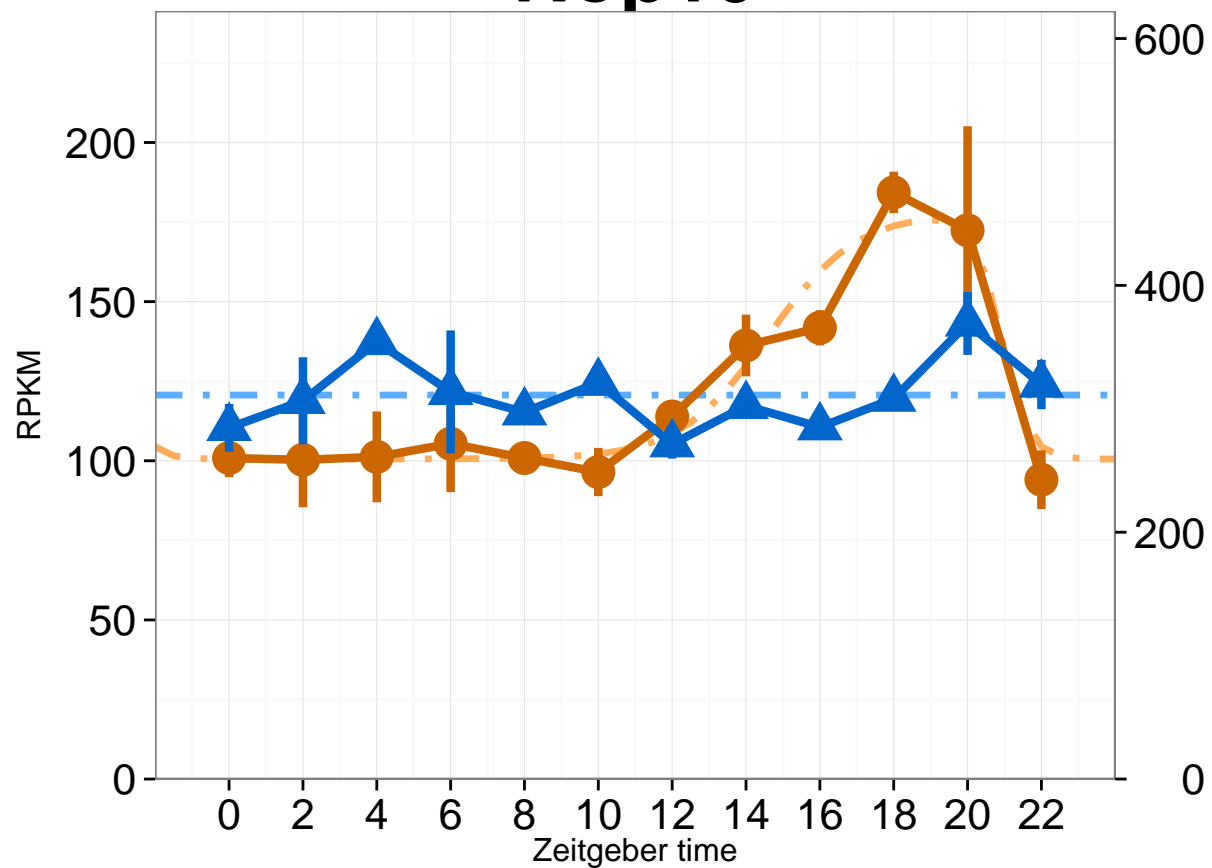

## Nop10

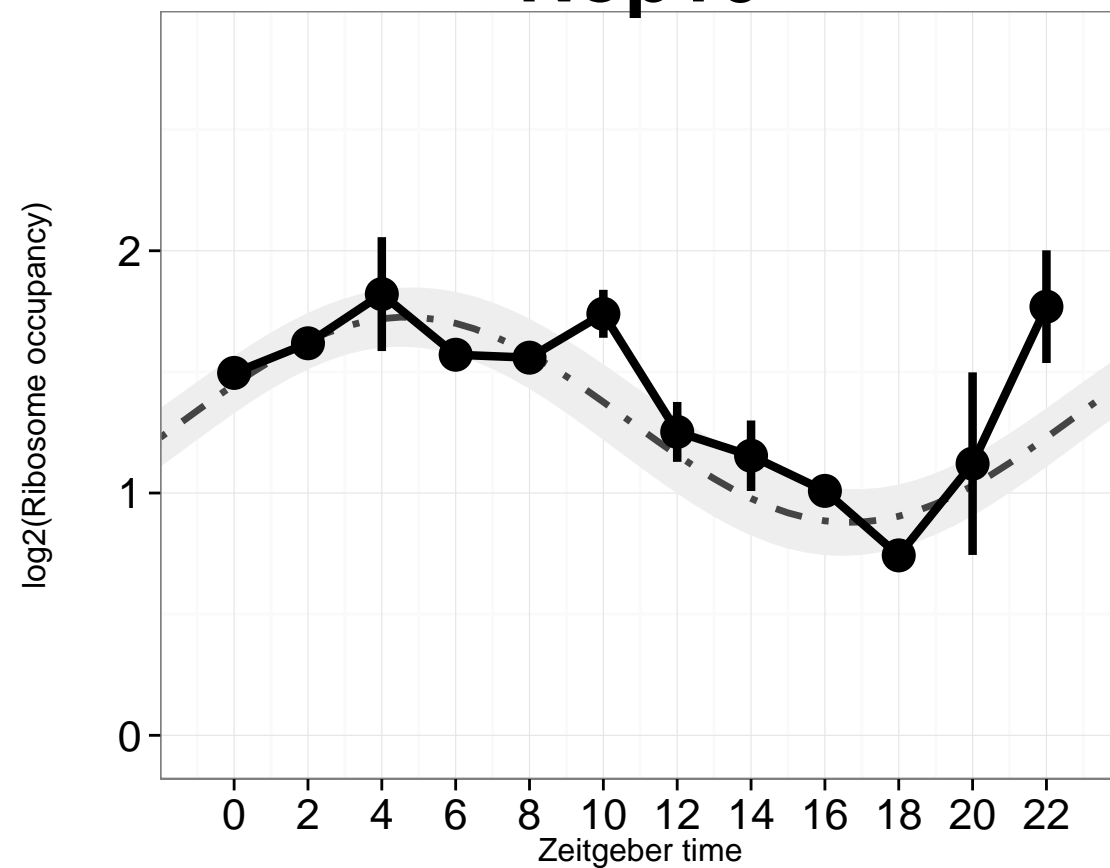

Supplement: SuppDataset_1.zip [file Nop10_set_B.pdf › Supplemental Dataset 1/B-mRNA_rhythm_translation_nonrhyth/Nop10_set_B.pdf]

## Nop56

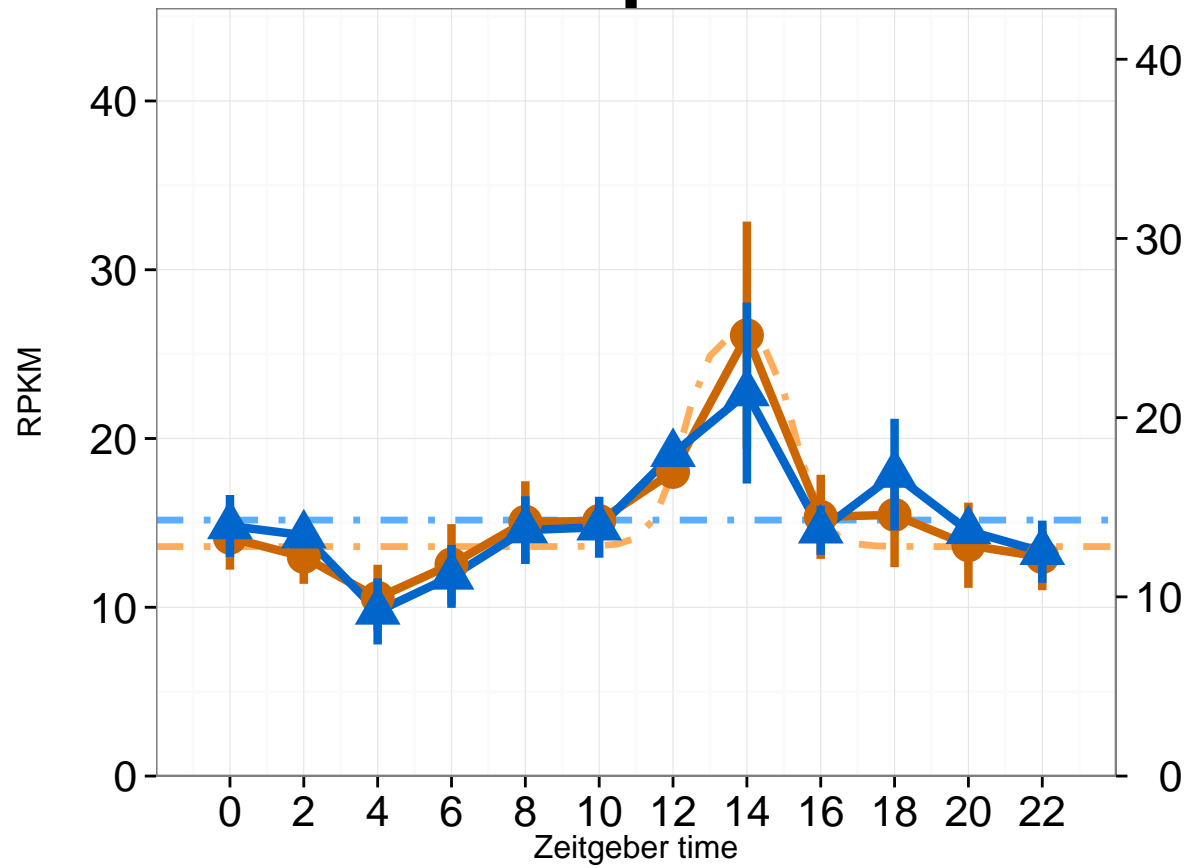

## Nop56

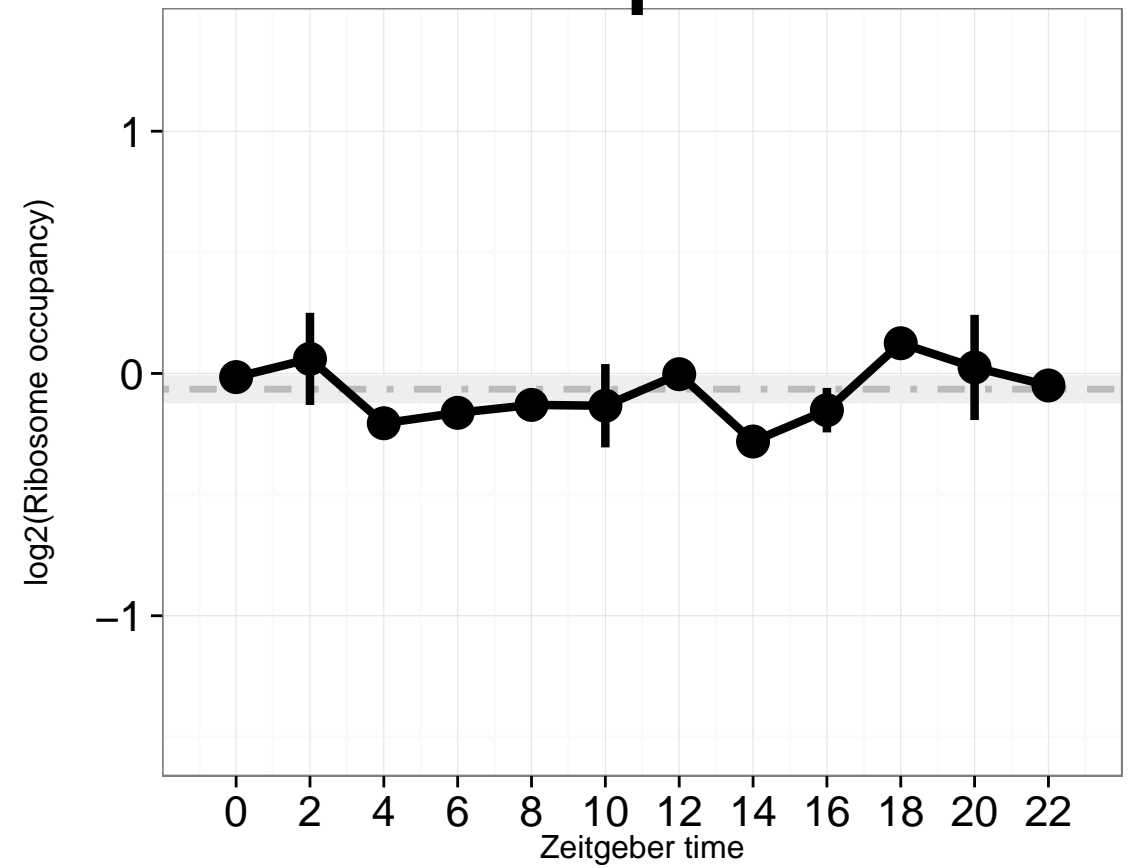

Supplement: SuppDataset_1.zip [file Nop56_set_B.pdf › Supplemental Dataset 1/B-mRNA_rhythm_translation_nonrhyth/Nop56_set_B.pdf]

## Notch1

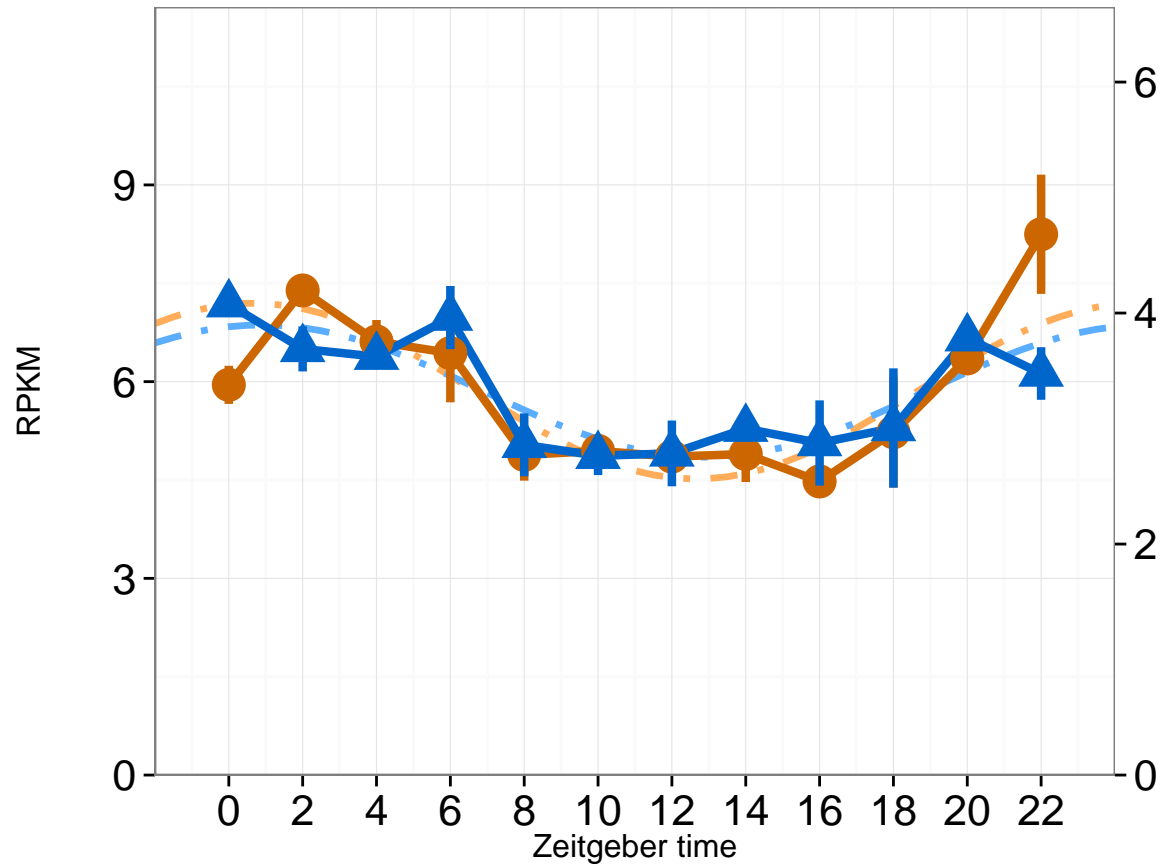

## Notch1

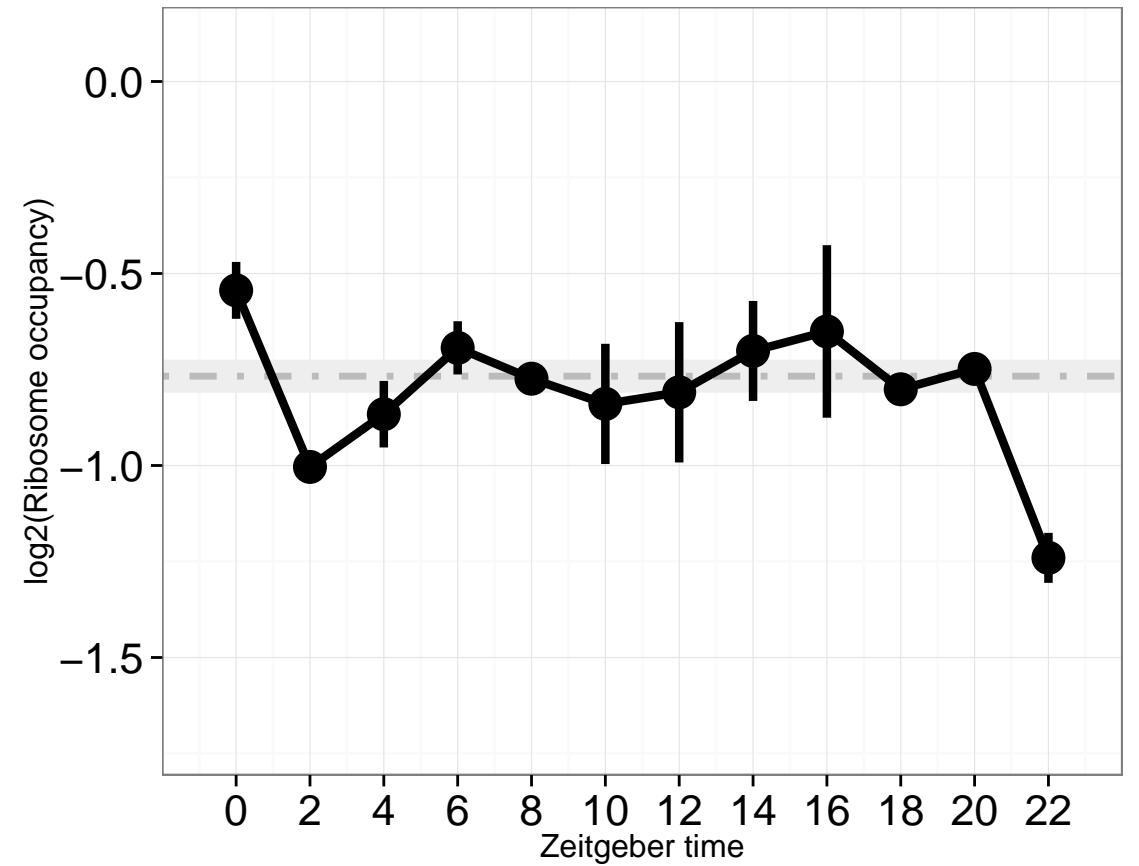

Supplement: SuppDataset_1.zip [file Notch1_set_B.pdf › Supplemental Dataset 1/B-mRNA_rhythm_translation_nonrhyth/Notch1_set_B.pdf]

## Npr2

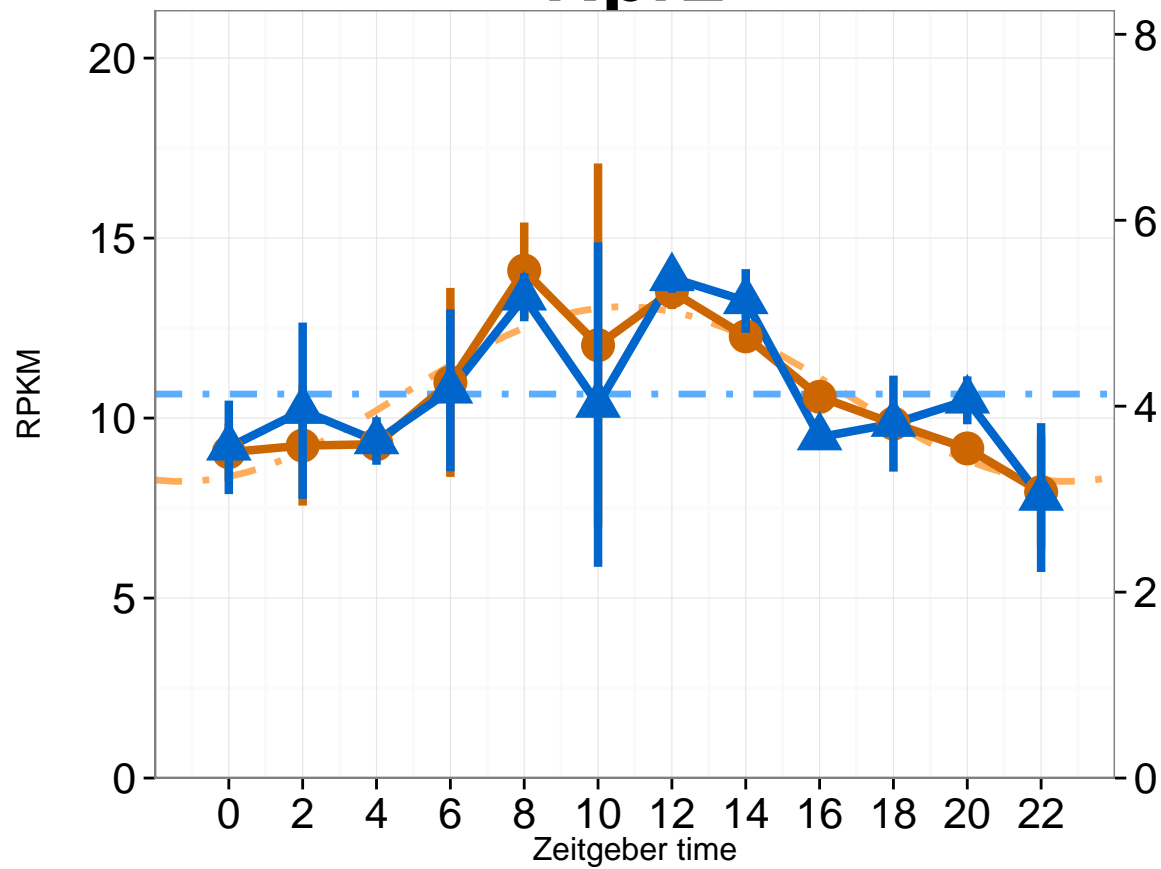

## Npr2

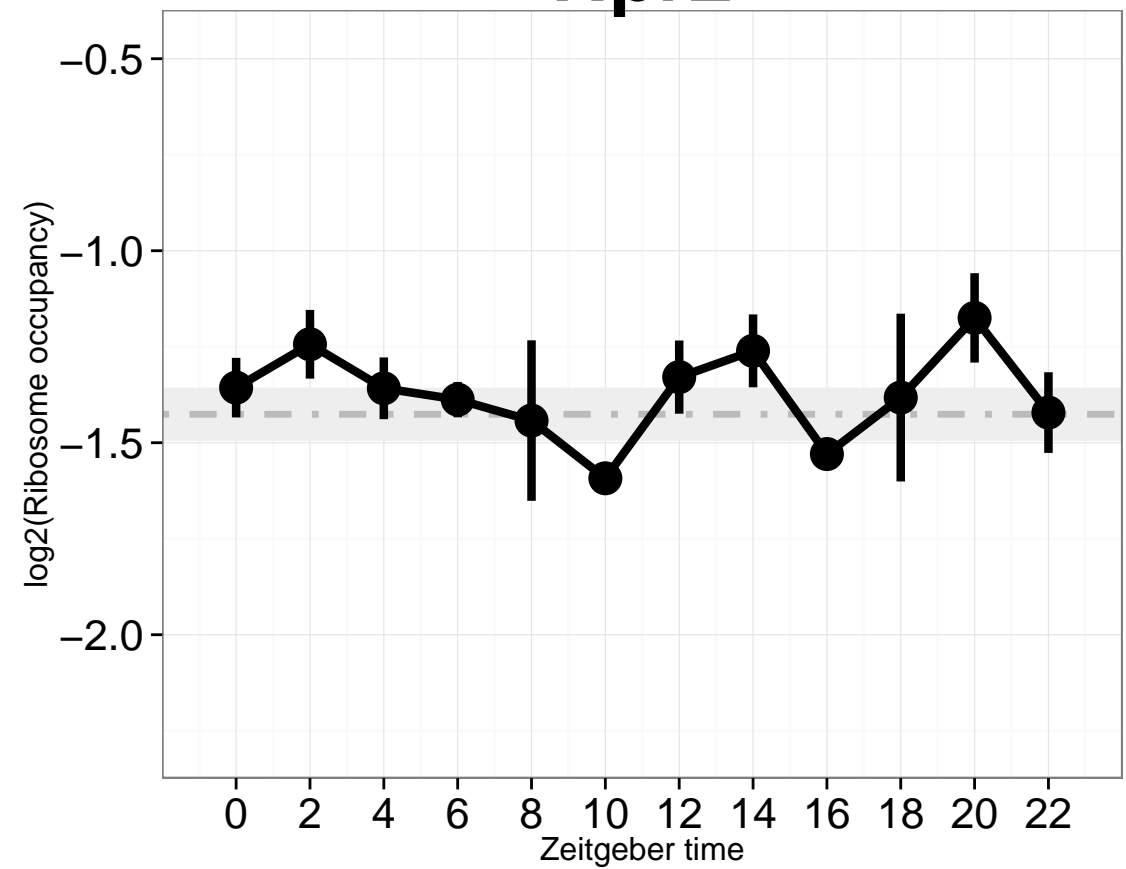

Supplement: SuppDataset_1.zip [file Npr2_set_B.pdf › Supplemental Dataset 1/B-mRNA_rhythm_translation_nonrhyth/Npr2_set_B.pdf]

# Npr3

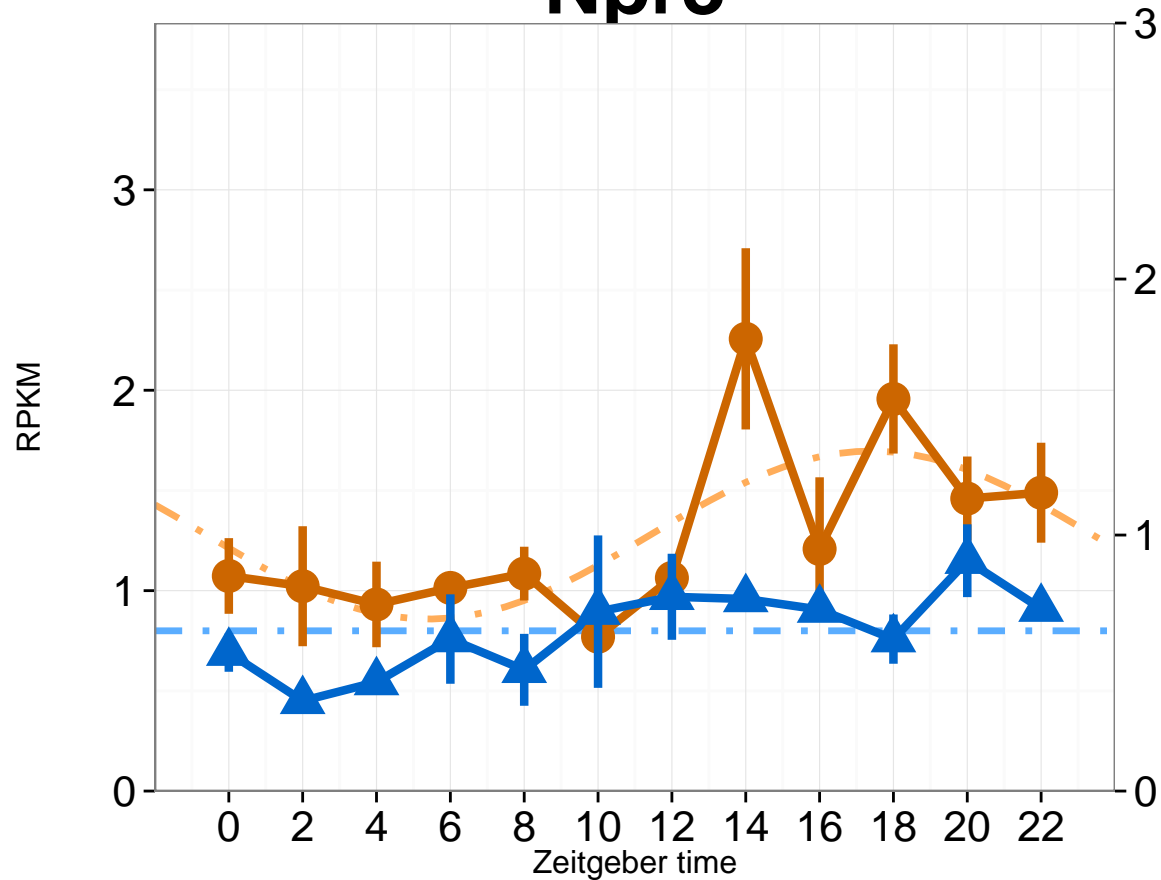

# Npr3

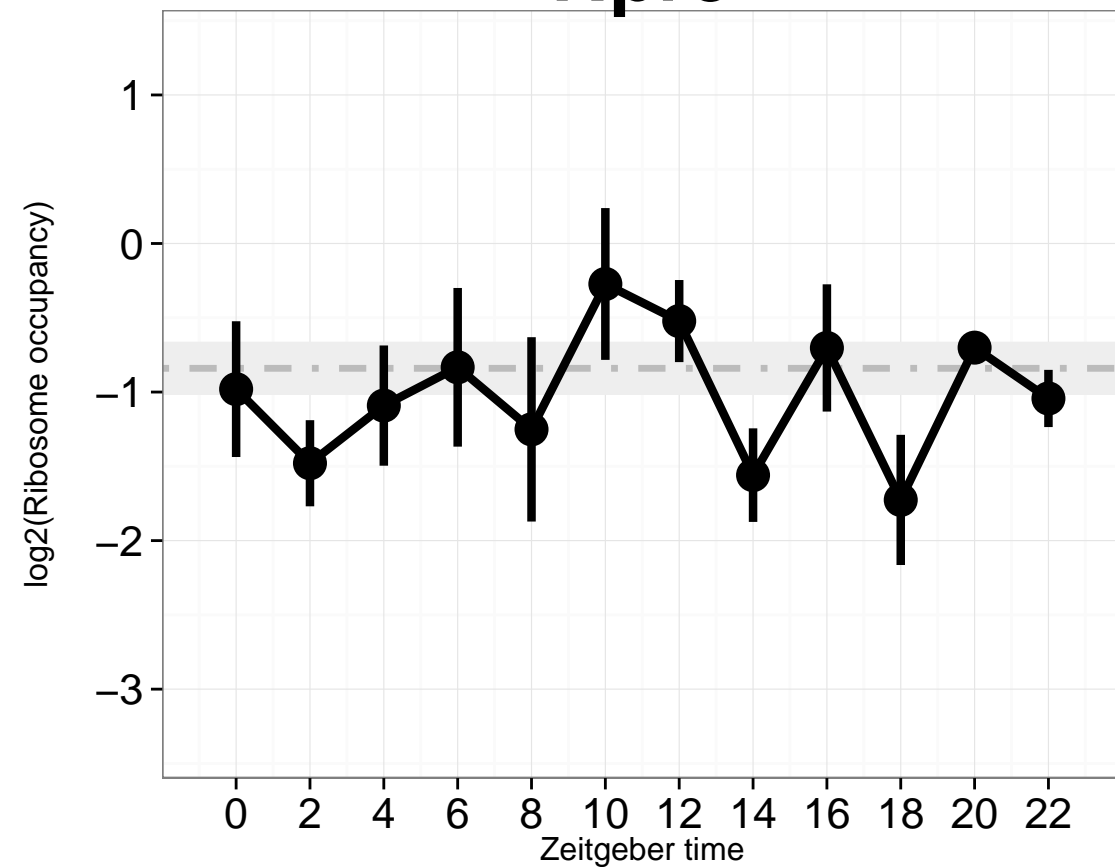

Supplement: SuppDataset_1.zip [file Npr3_set_B.pdf › Supplemental Dataset 1/B-mRNA_rhythm_translation_nonrhyth/Npr3_set_B.pdf]

# Nrbp2

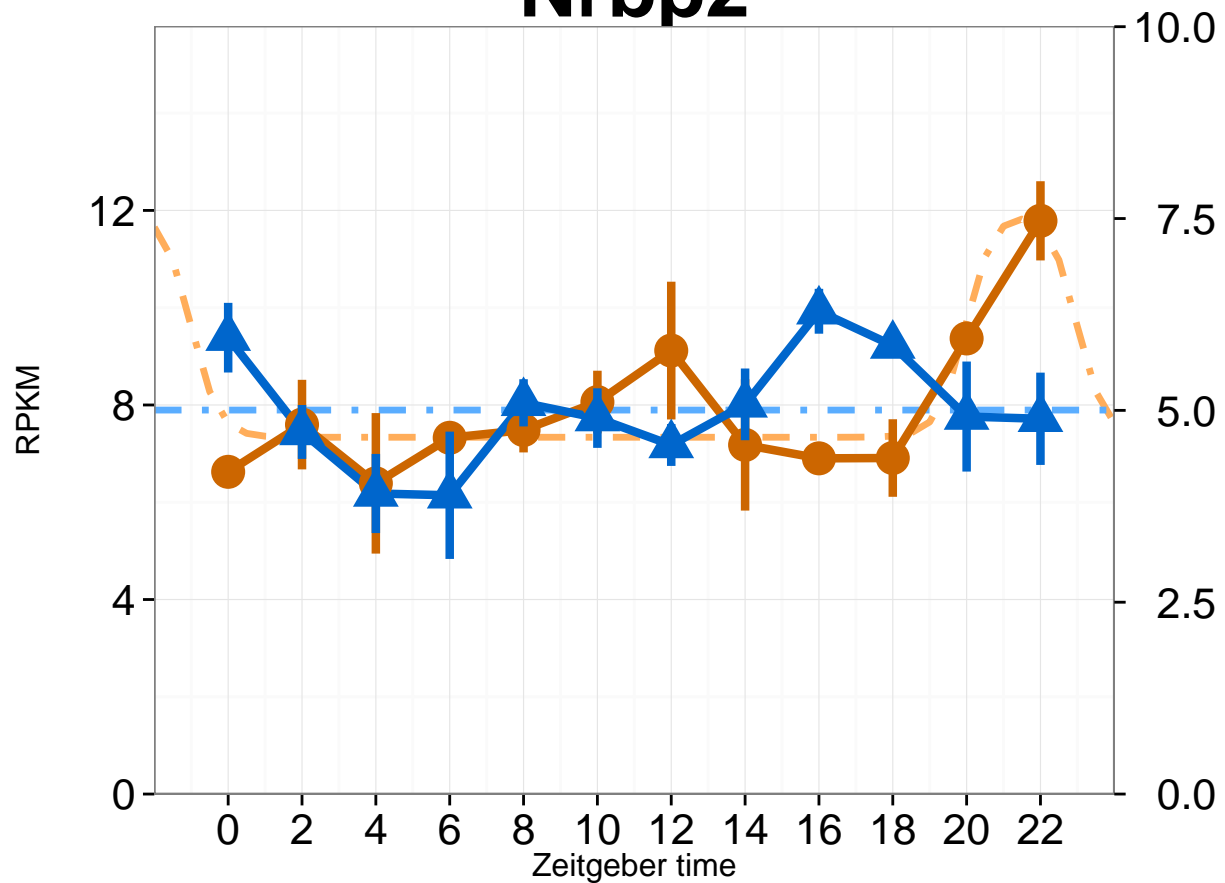

# Nrbp2

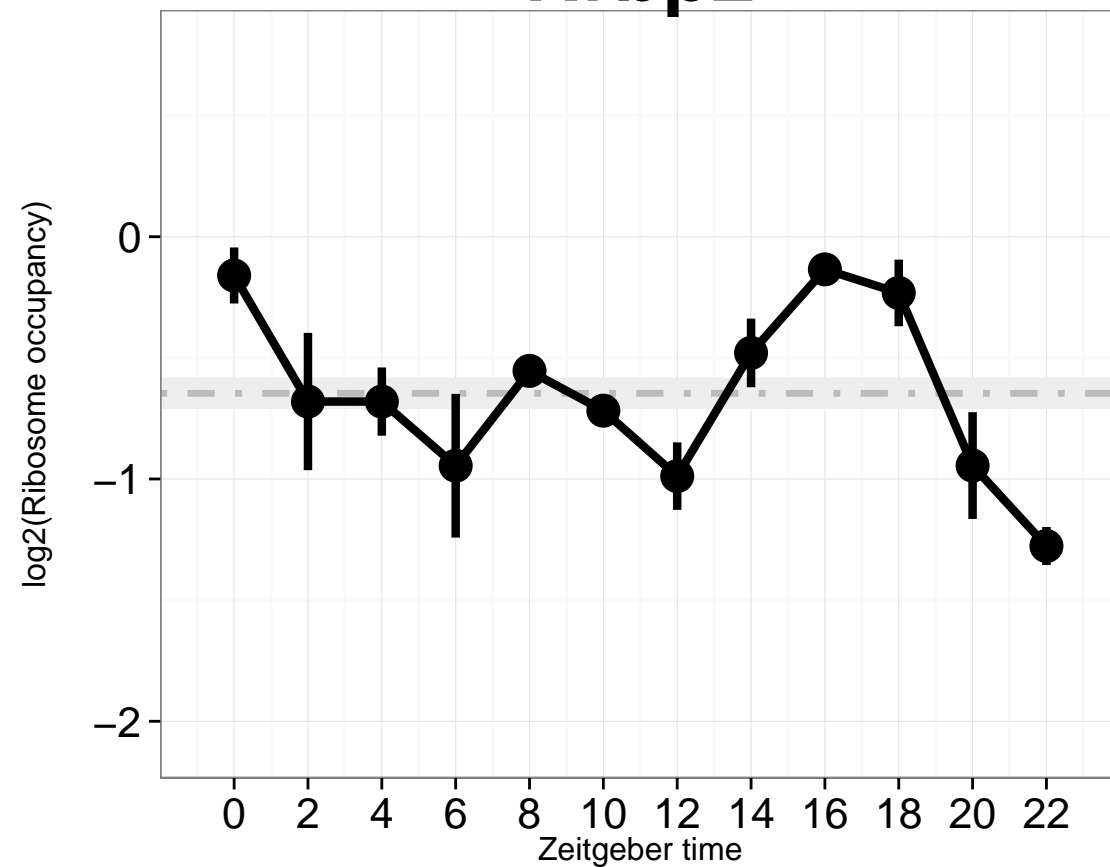

Supplement: SuppDataset_1.zip [file Nrbp2_set_B.pdf › Supplemental Dataset 1/B-mRNA_rhythm_translation_nonrhyth/Nrbp2_set_B.pdf]

## Ntf3

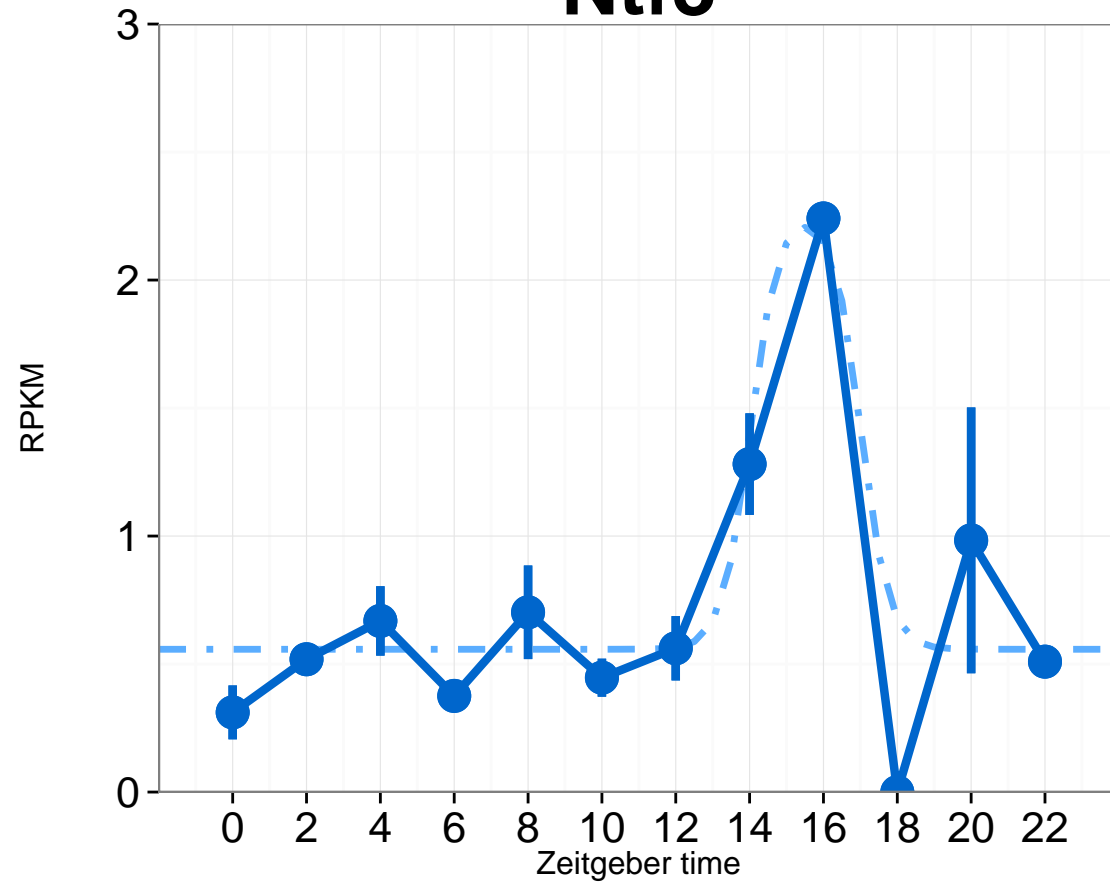

## Ntf3 log2(Ribosome occupancy)

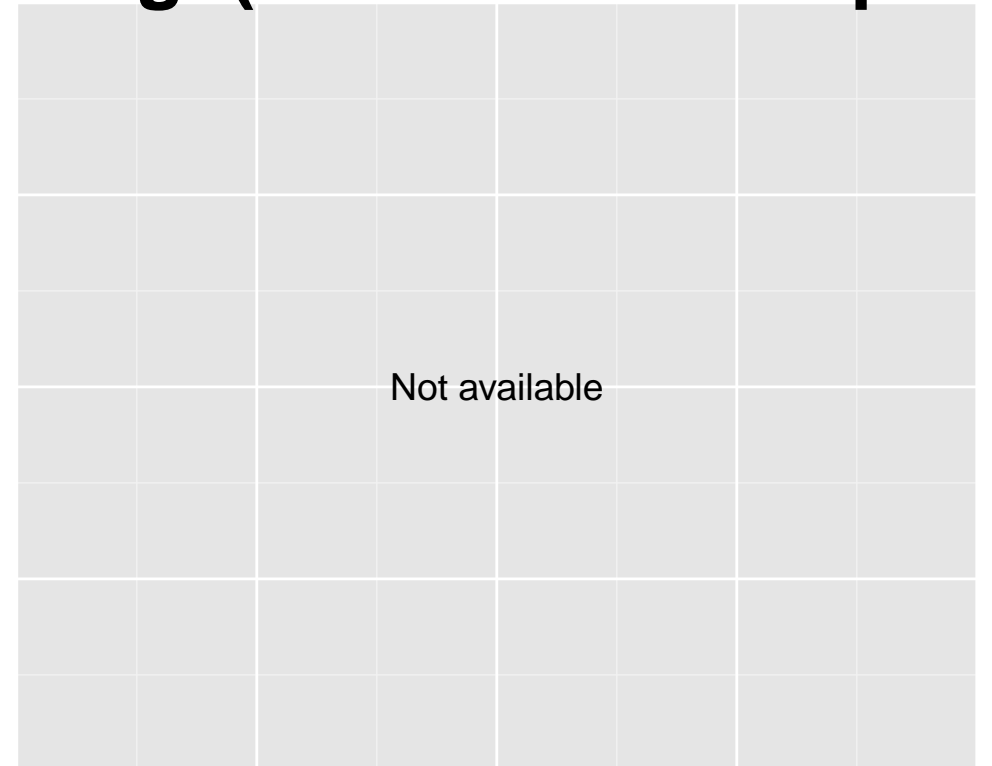

Supplement: SuppDataset_1.zip [file Ntf3_set_B.pdf › Supplemental Dataset 1/B-mRNA_rhythm_translation_nonrhyth/Ntf3_set_B.pdf]

## Nuak1

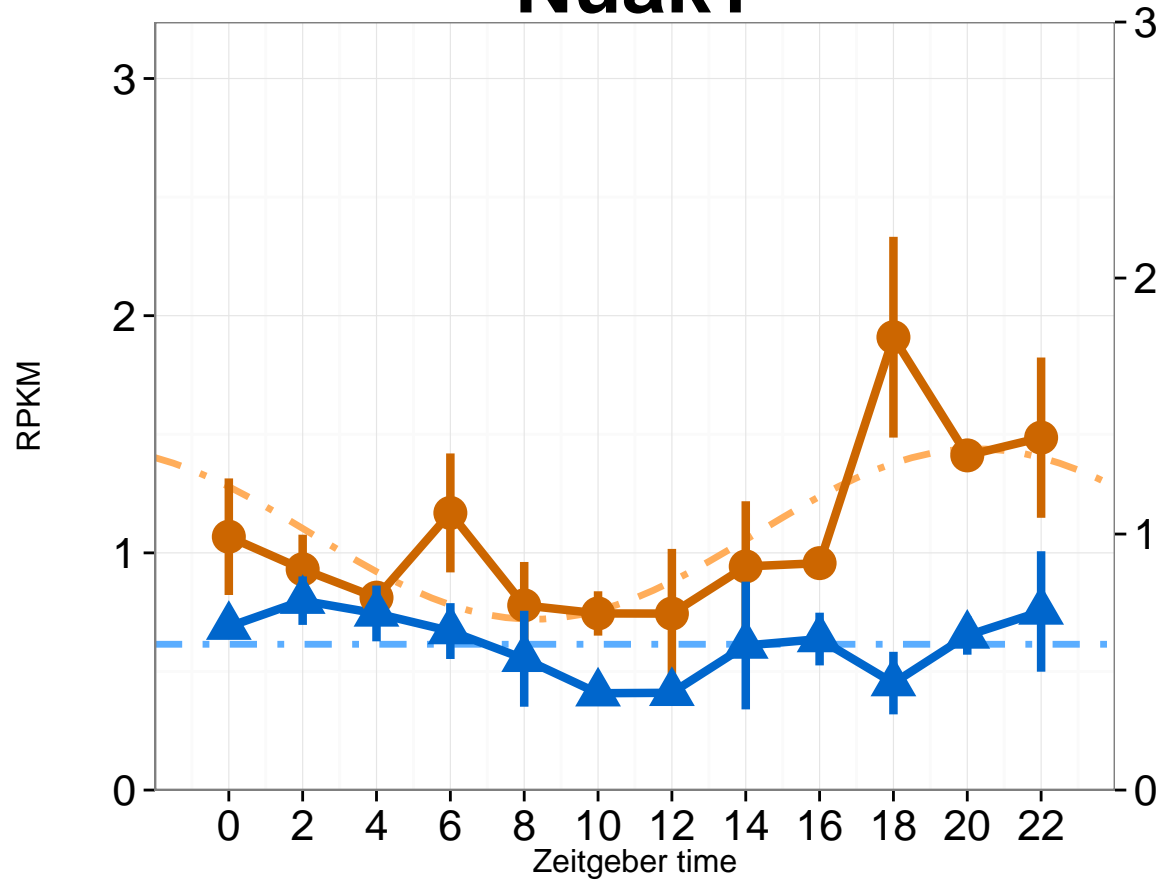

## Nuak1

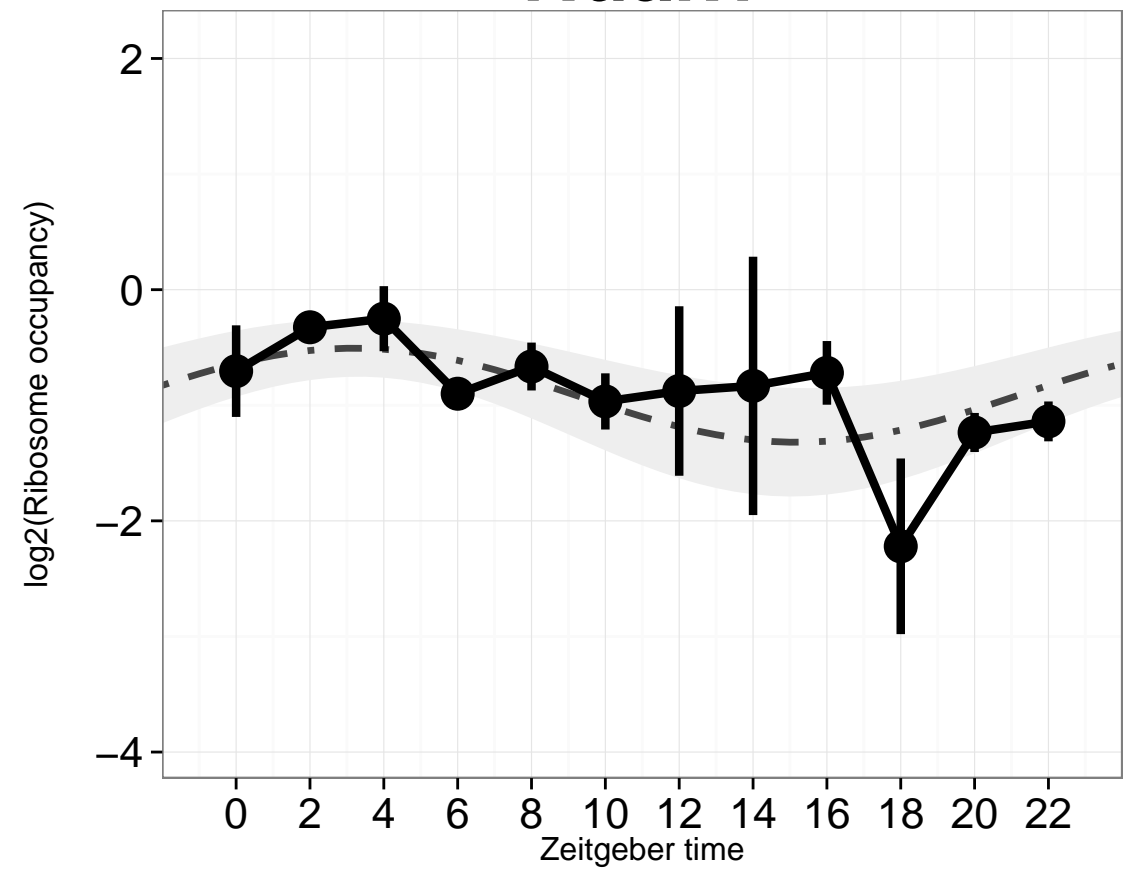

Supplement: SuppDataset_1.zip [file Nuak1_set_B.pdf › Supplemental Dataset 1/B-mRNA_rhythm_translation_nonrhyth/Nuak1_set_B.pdf]

Nucks1

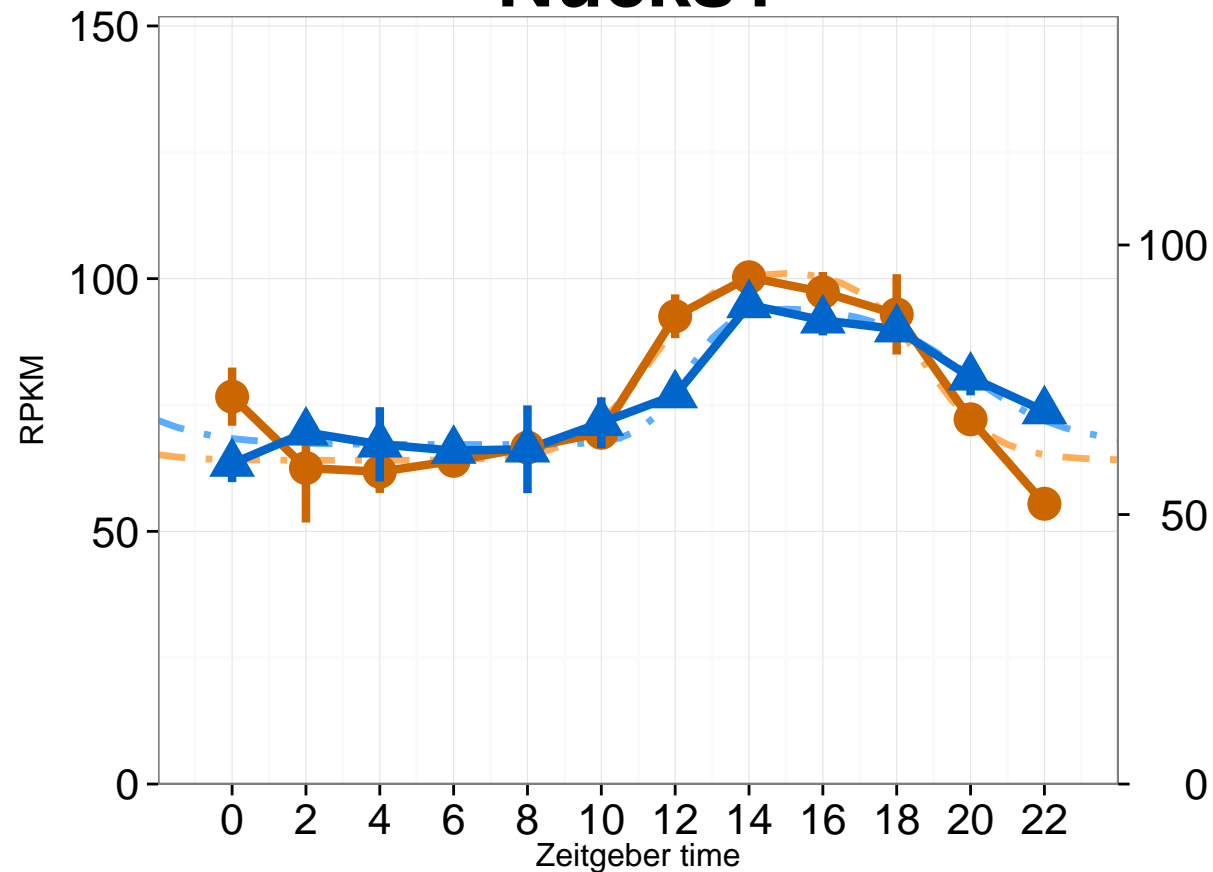

Nucks1

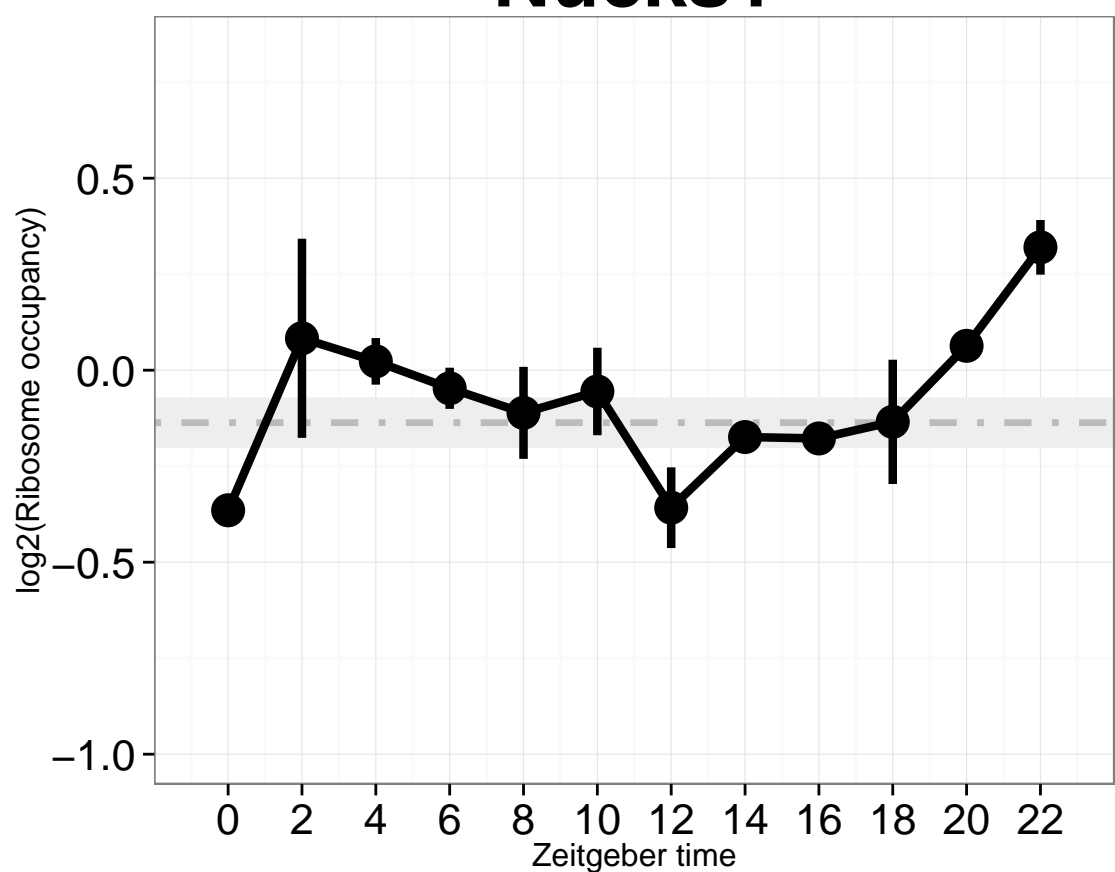

Supplement: SuppDataset_1.zip [file Nucks1_set_B.pdf › Supplemental Dataset 1/B-mRNA_rhythm_translation_nonrhyth/Nucks1_set_B.pdf]

## Nudt1

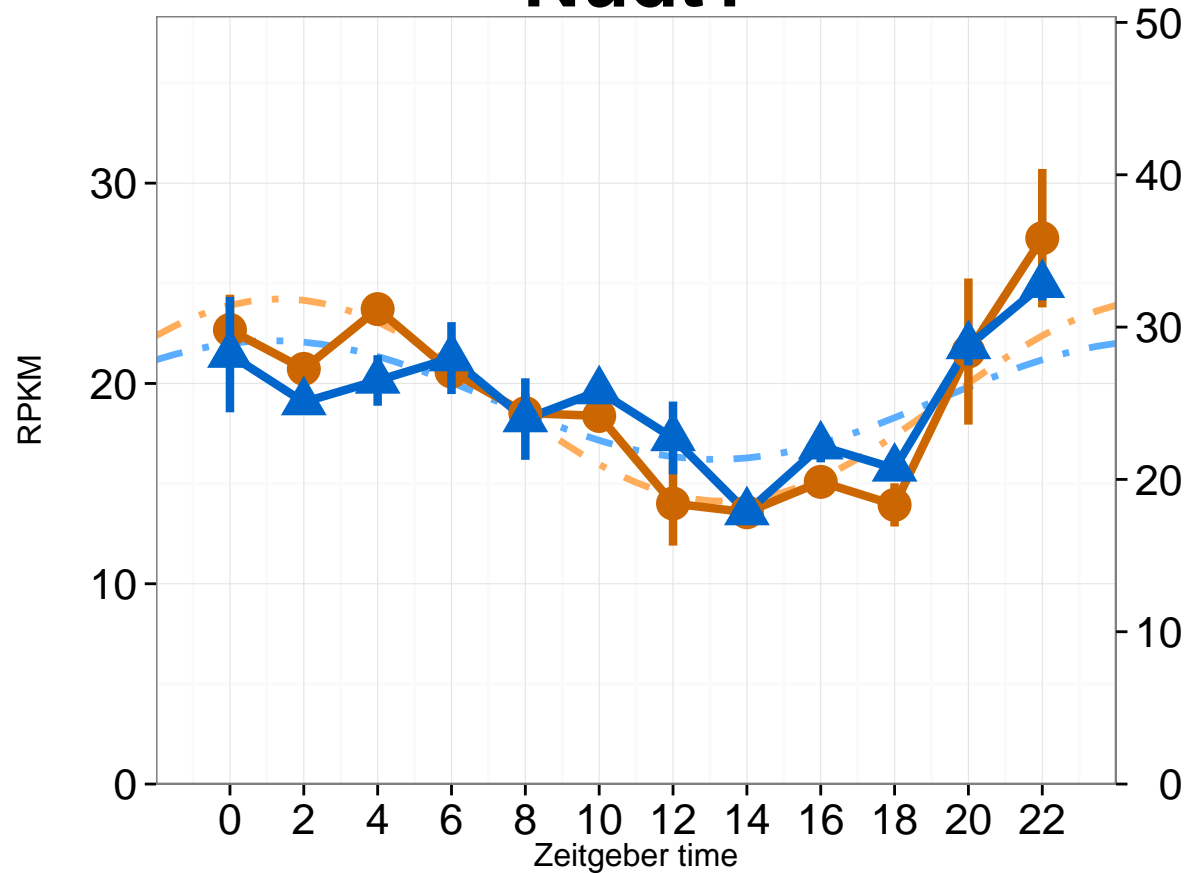

## Nudt1

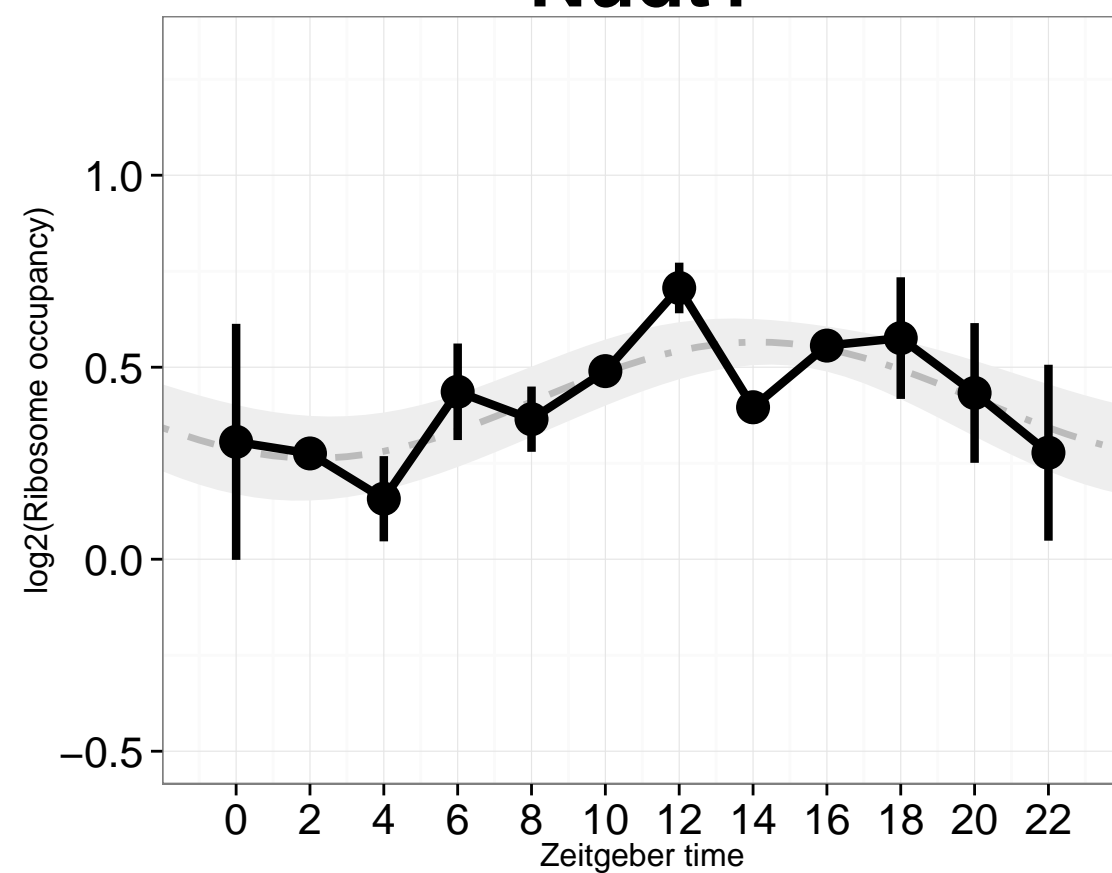

Supplement: SuppDataset_1.zip [file Nudt1_set_B.pdf › Supplemental Dataset 1/B-mRNA_rhythm_translation_nonrhyth/Nudt1_set_B.pdf]

## Nup35

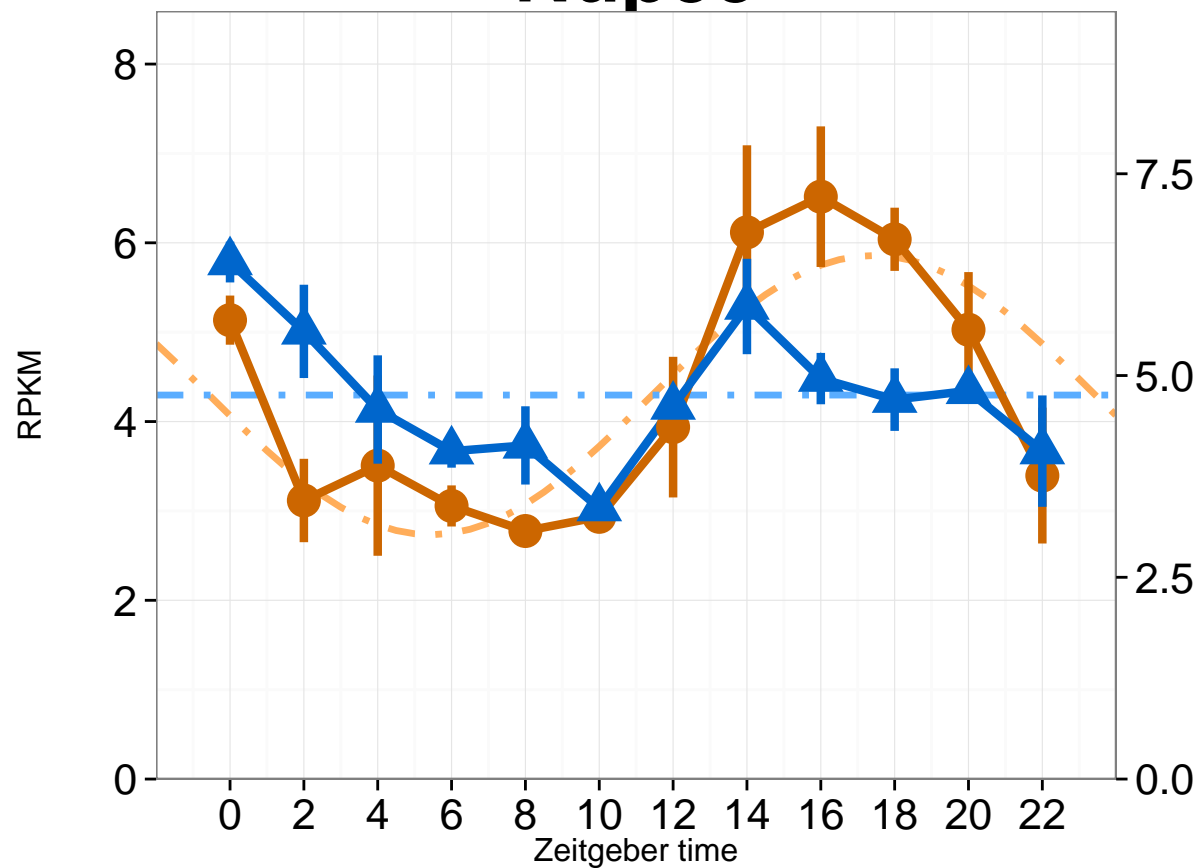

## Nup35

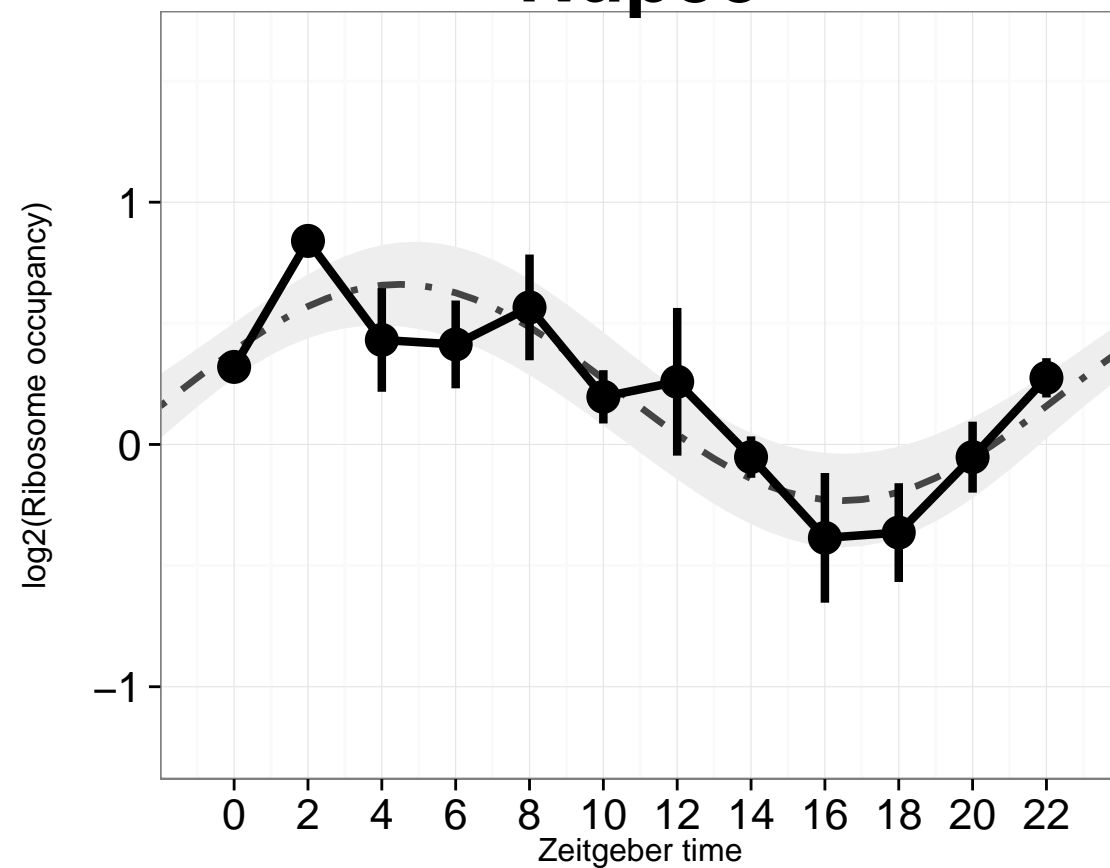

Supplement: SuppDataset_1.zip [file Nup35_set_B.pdf › Supplemental Dataset 1/B-mRNA_rhythm_translation_nonrhyth/Nup35_set_B.pdf]

## Nxpe3

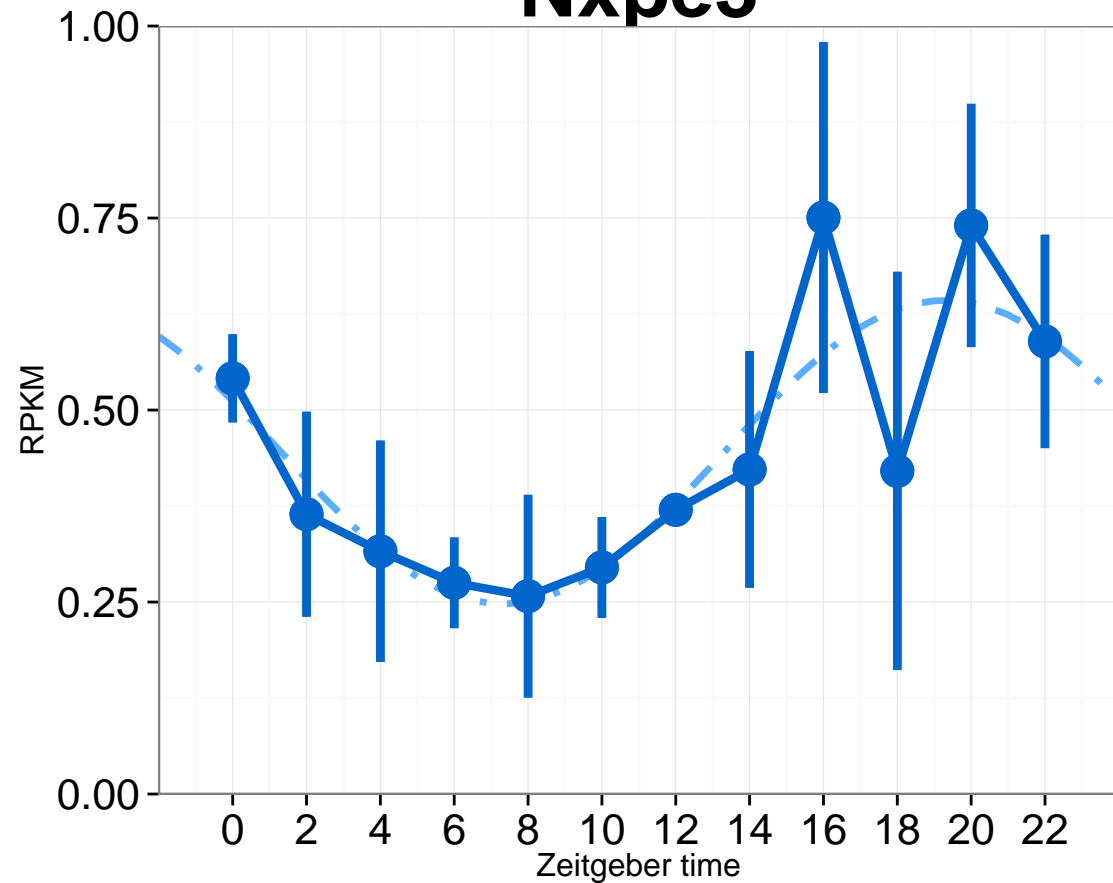

## Nxpe3 log2(Ribosome occupancy

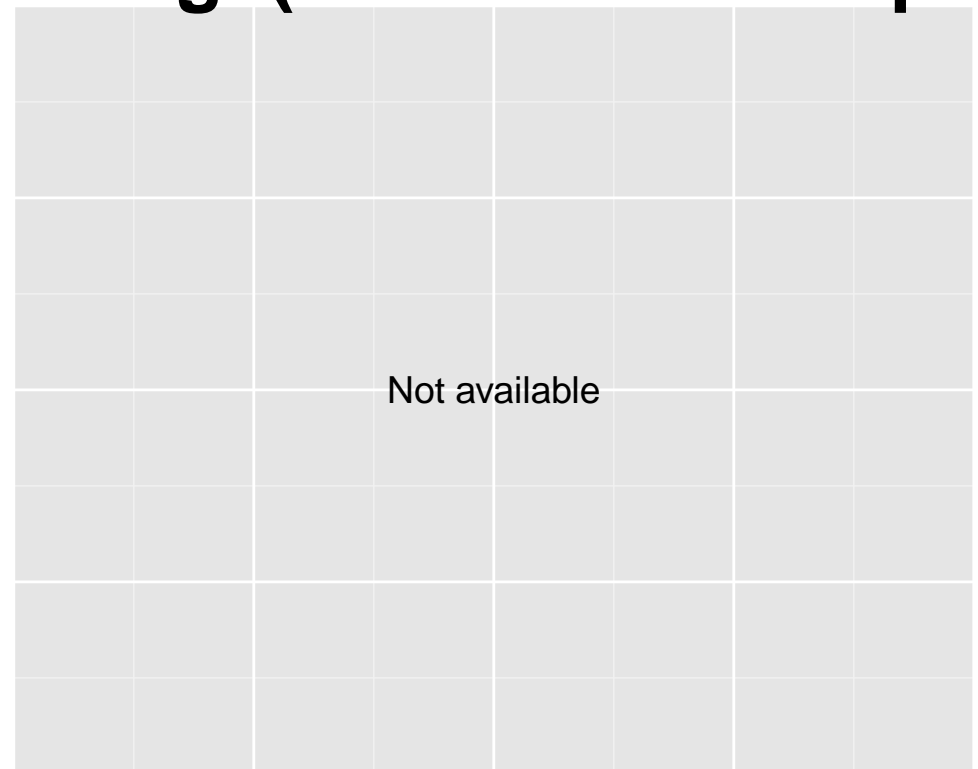

Supplement: SuppDataset_1.zip [file Nxpe3_set_B.pdf › Supplemental Dataset 1/B-mRNA_rhythm_translation_nonrhyth/Nxpe3_set_B.pdf]
