# Supplementary figures and images for: Ribosome profiling reveals the rhythmic liver translatome and circadian clock regulation by upstream open reading frames (part 42 of 113)
Source: HighWire-hosted journal article supplement (doi:10.1101/gr.195404.115), 2015-10-20

## Manba

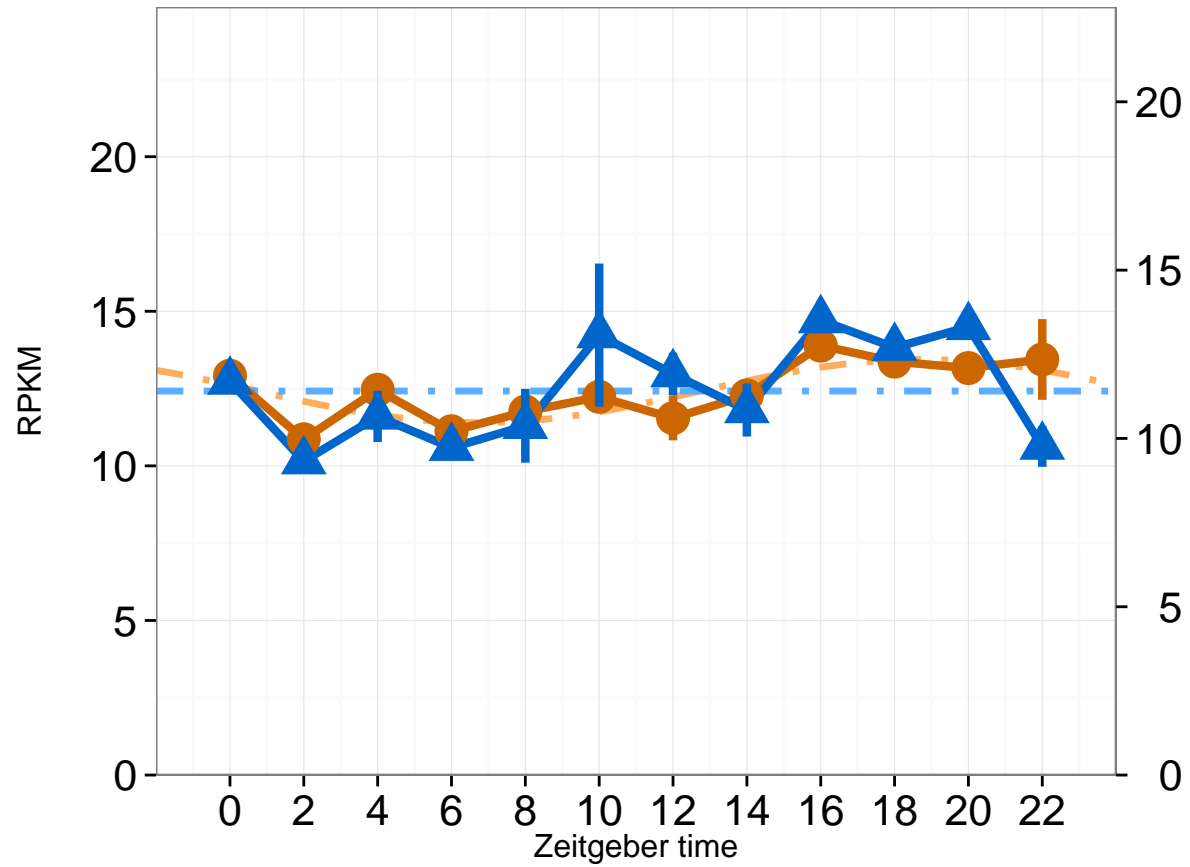

## Manba

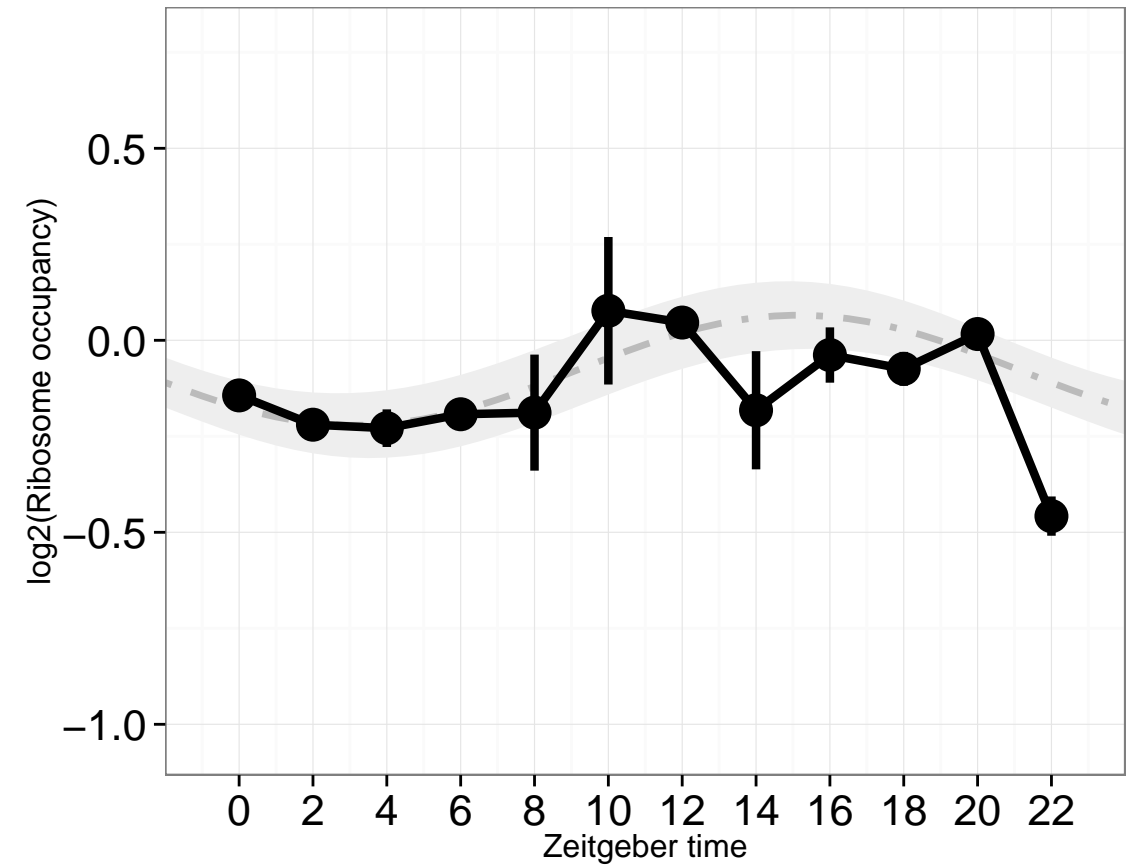

Supplement: SuppDataset_1.zip [file Manba_set_A.pdf › Supplemental Dataset 1/A-mRNA_nonrhyth_translation_nonrhyth/Manba_set_A.pdf]

## Manea

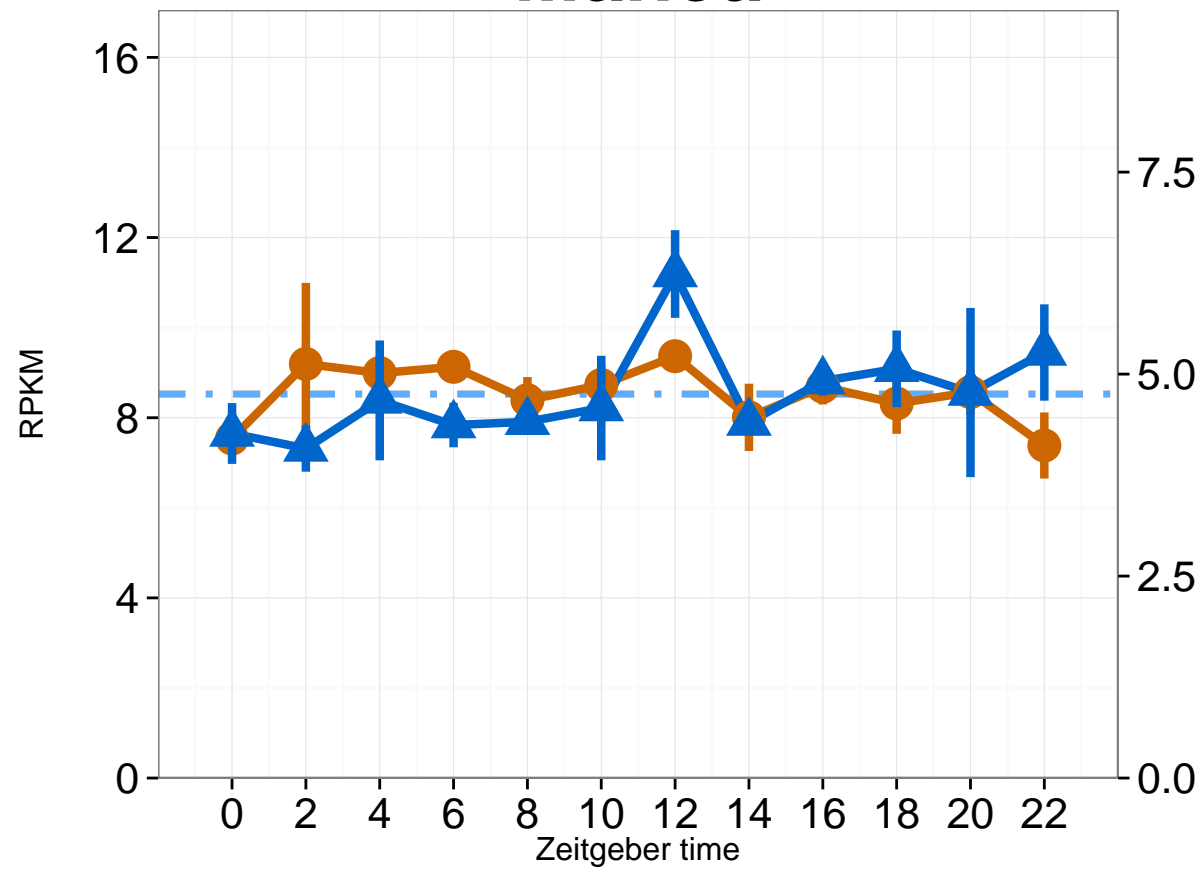

## Manea

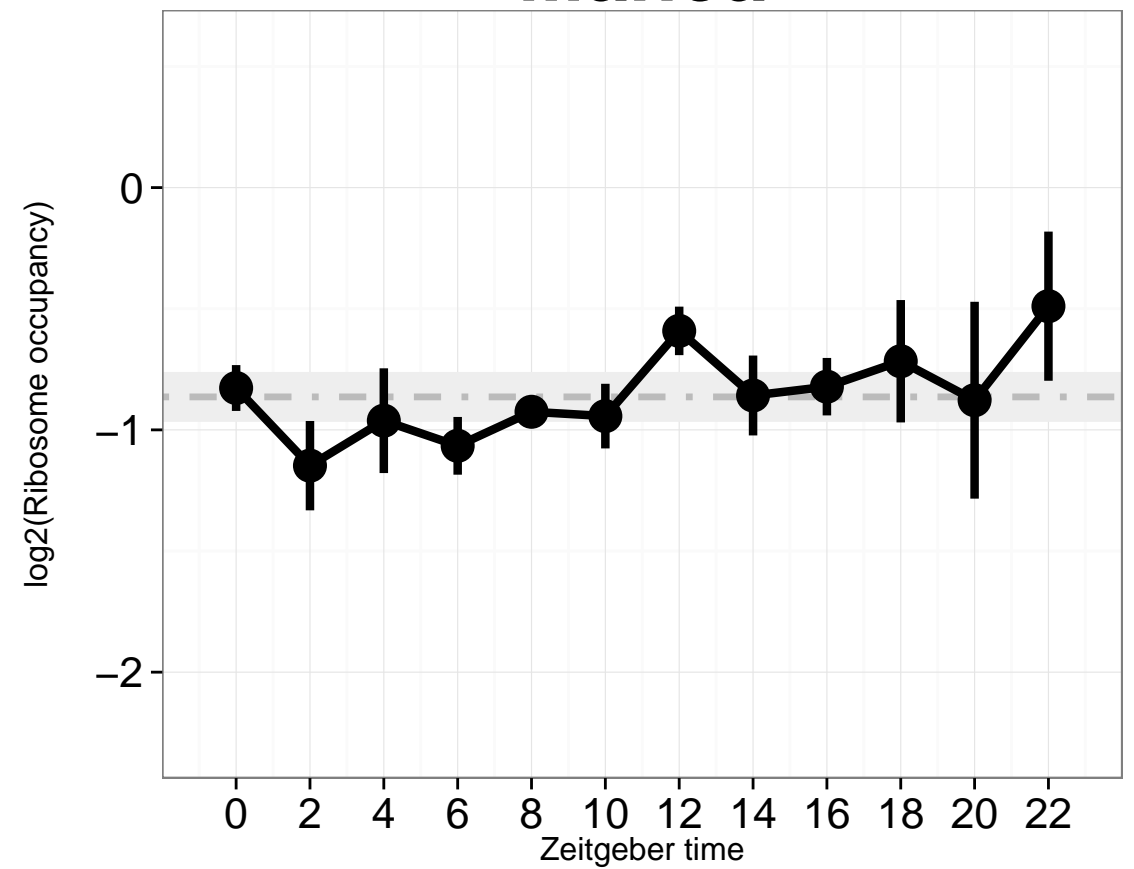

Supplement: SuppDataset_1.zip [file Manea_set_A.pdf › Supplemental Dataset 1/A-mRNA_nonrhyth_translation_nonrhyth/Manea_set_A.pdf]

# Manf

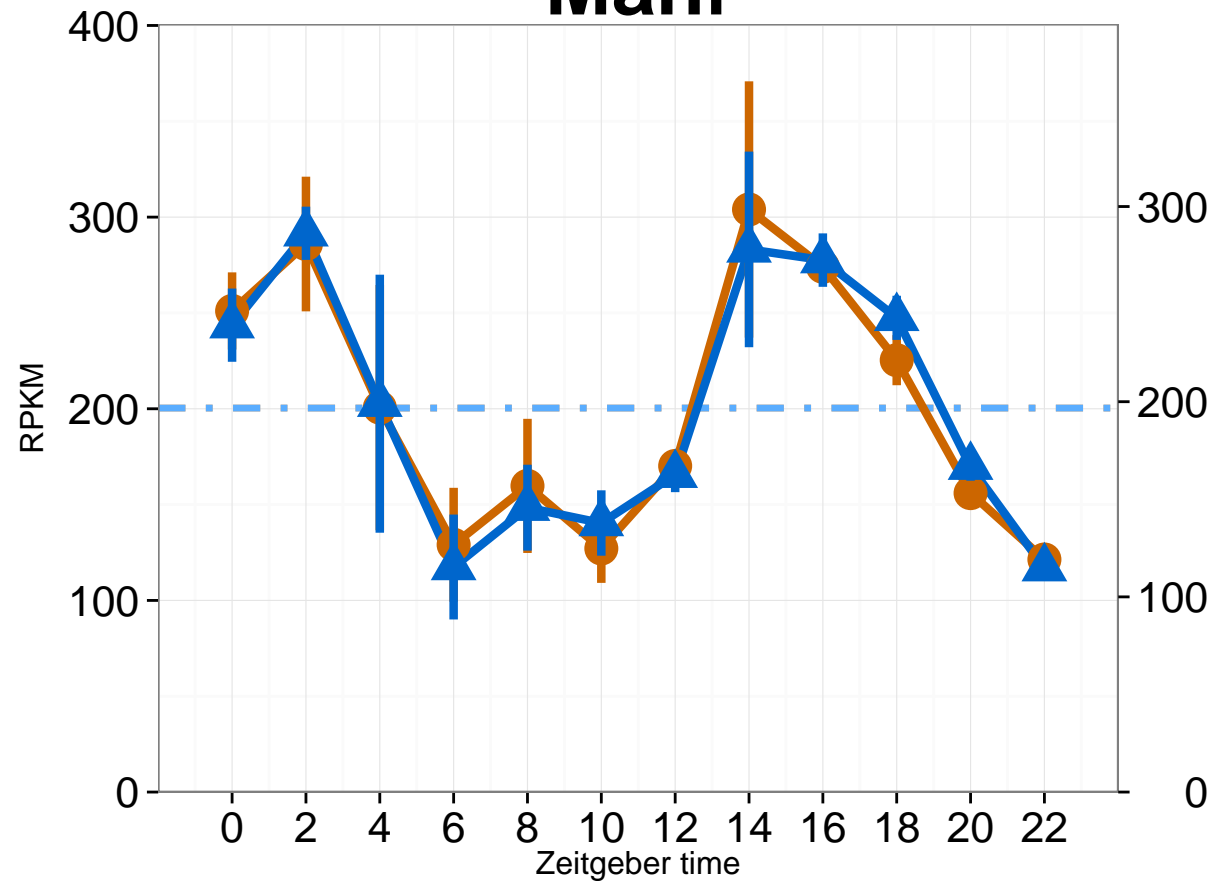

# Manf

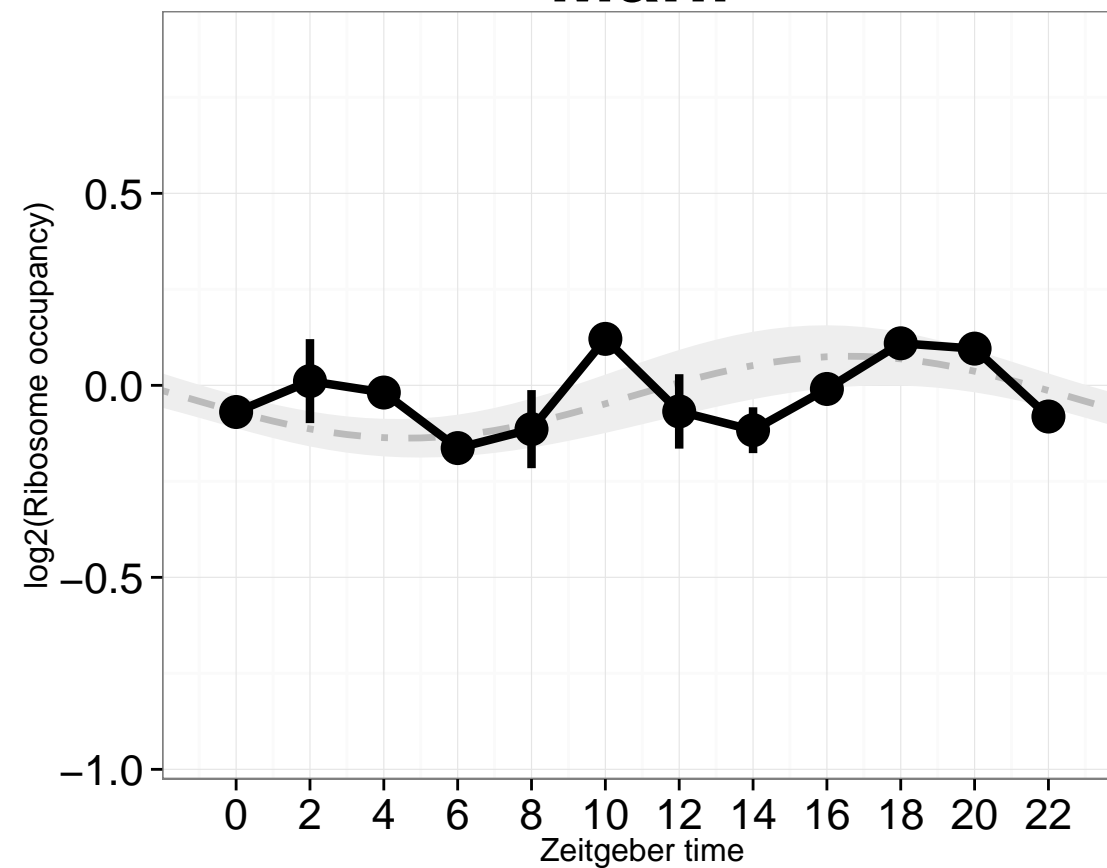

Supplement: SuppDataset_1.zip [file Manf_set_A.pdf › Supplemental Dataset 1/A-mRNA_nonrhyth_translation_nonrhyth/Manf_set_A.pdf]

# Mansc1

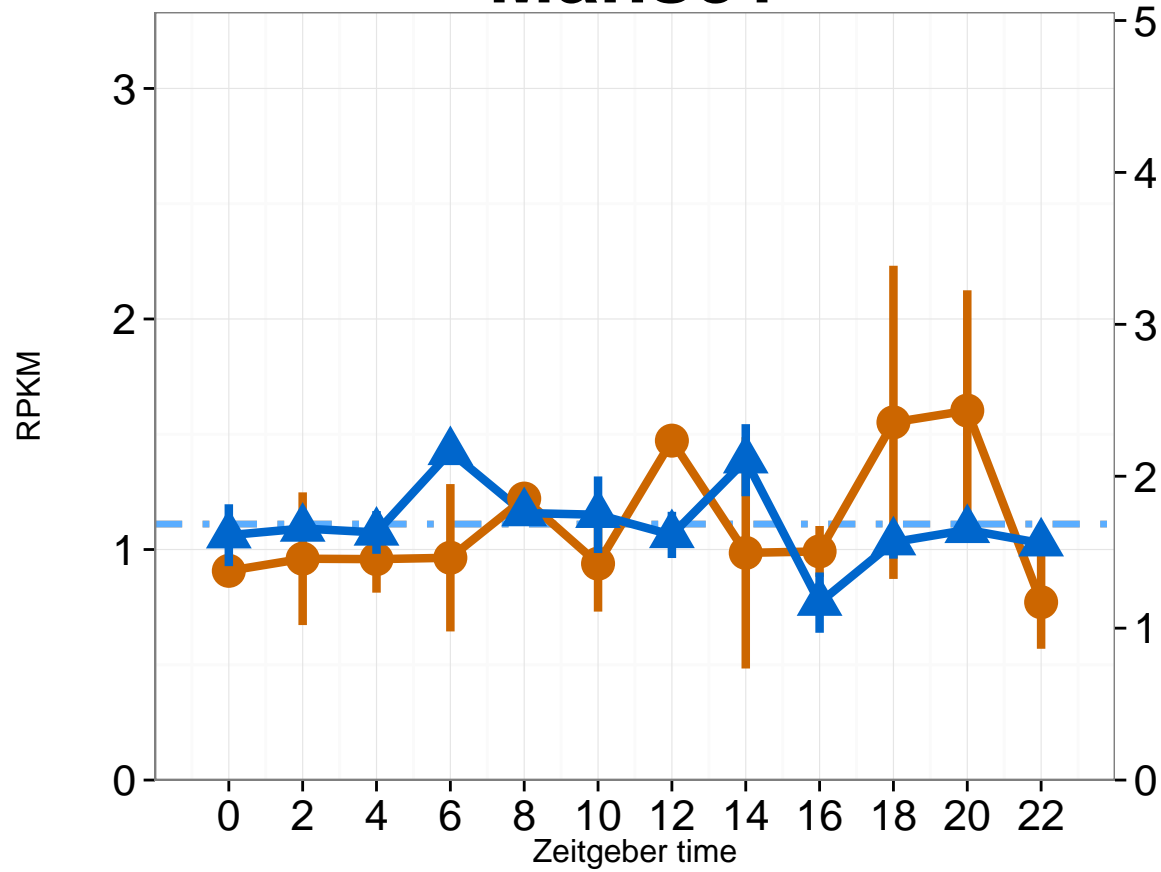

# Mansc1

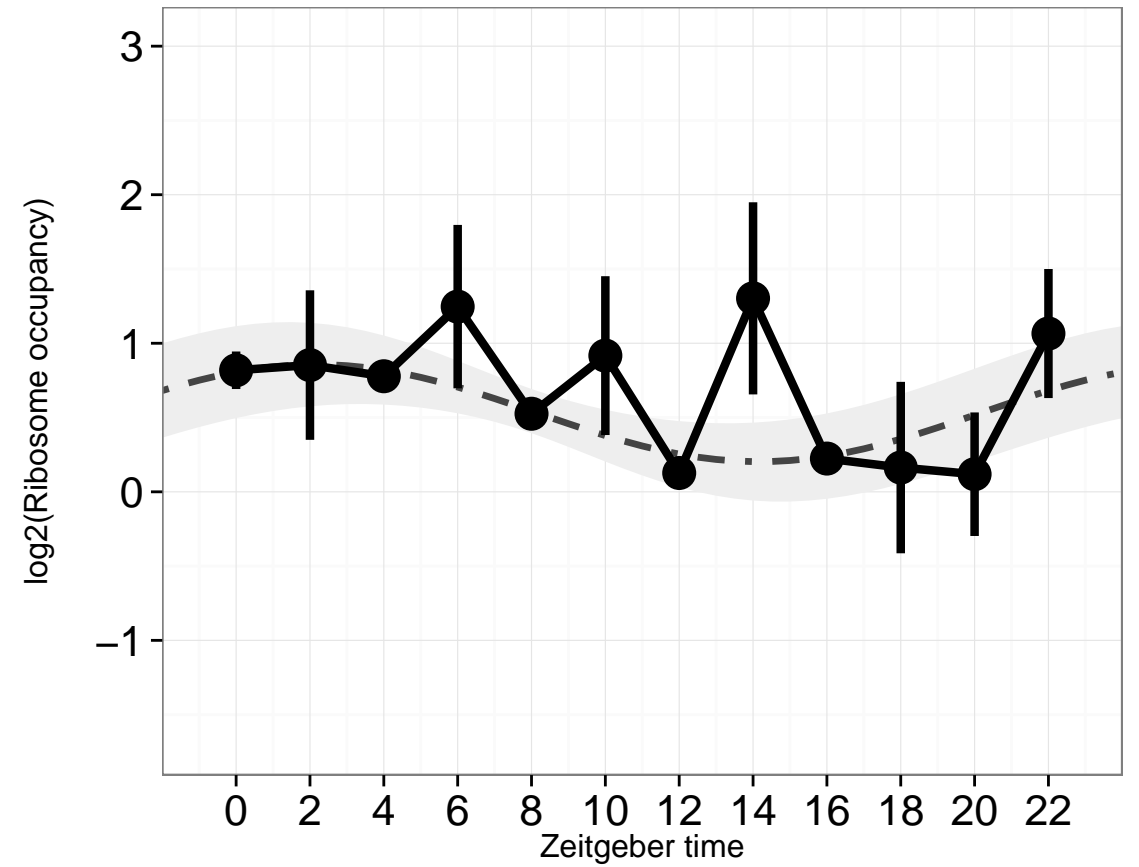

Supplement: SuppDataset_1.zip [file Mansc1_set_A.pdf › Supplemental Dataset 1/A-mRNA_nonrhyth_translation_nonrhyth/Mansc1_set_A.pdf]

## Maoa

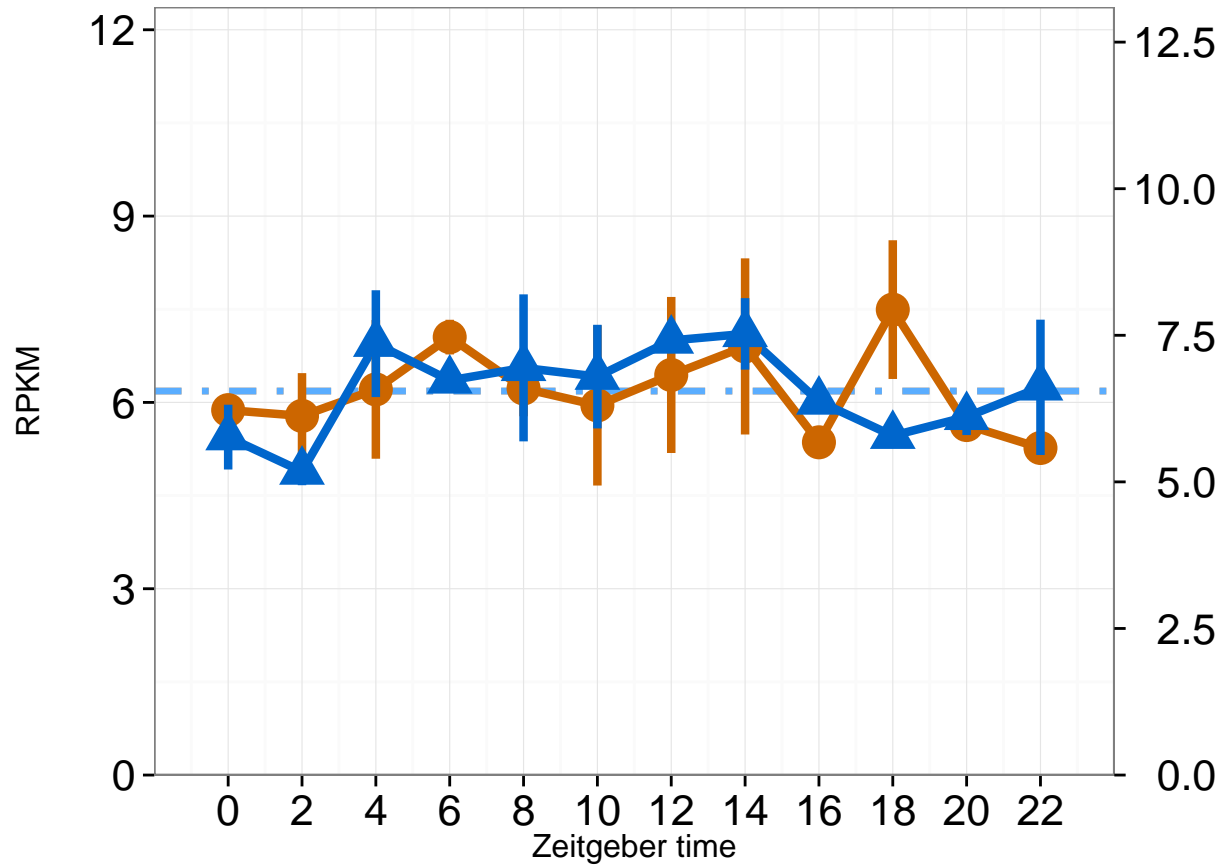

## Maoa

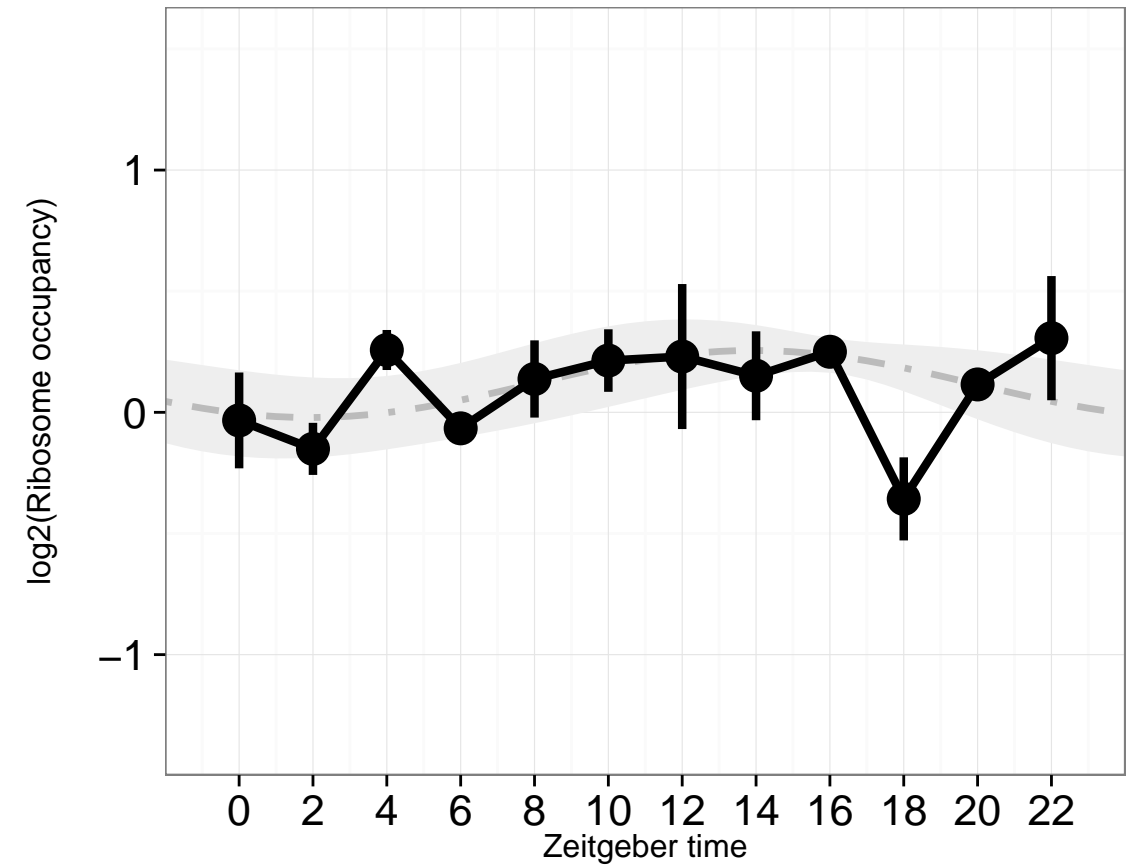

Supplement: SuppDataset_1.zip [file Maoa_set_A.pdf › Supplemental Dataset 1/A-mRNA_nonrhyth_translation_nonrhyth/Maoa_set_A.pdf]

## Maob

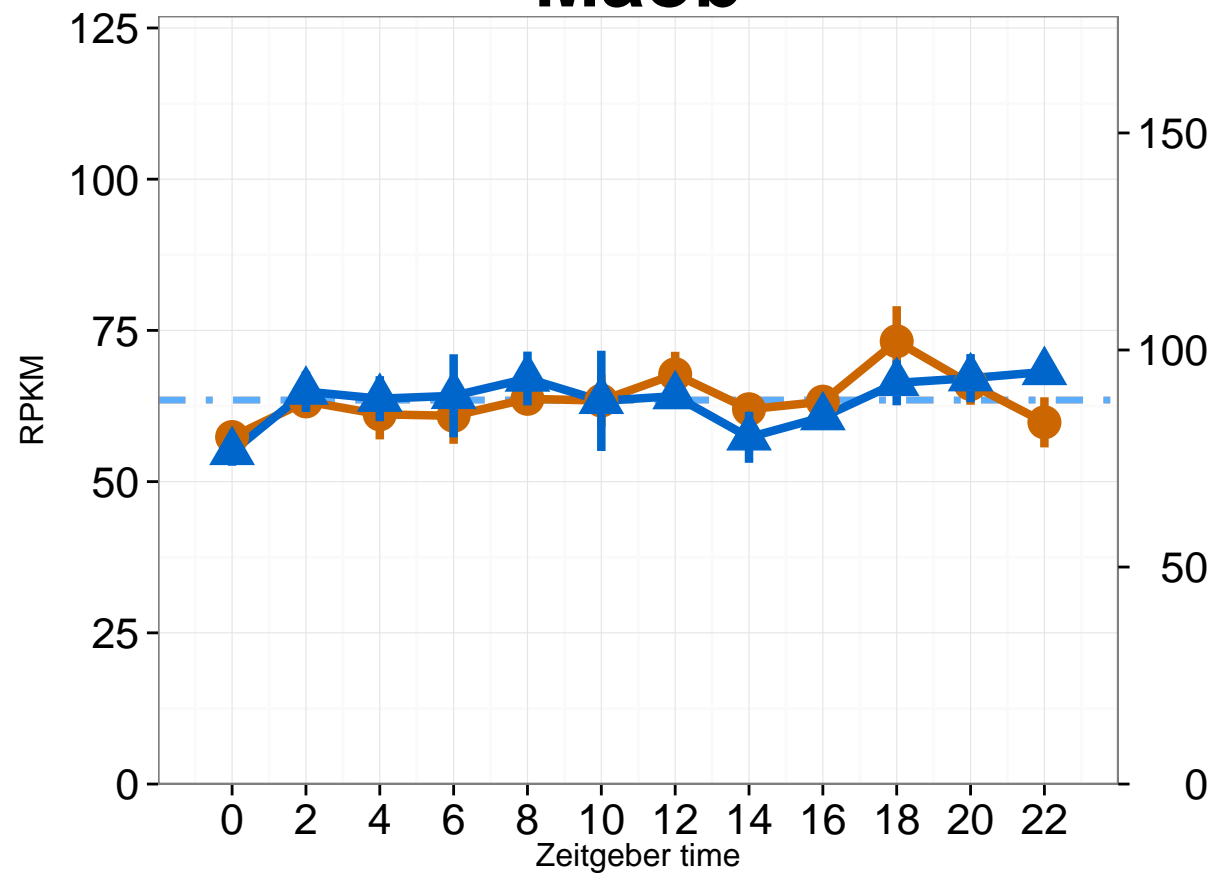

## Maob

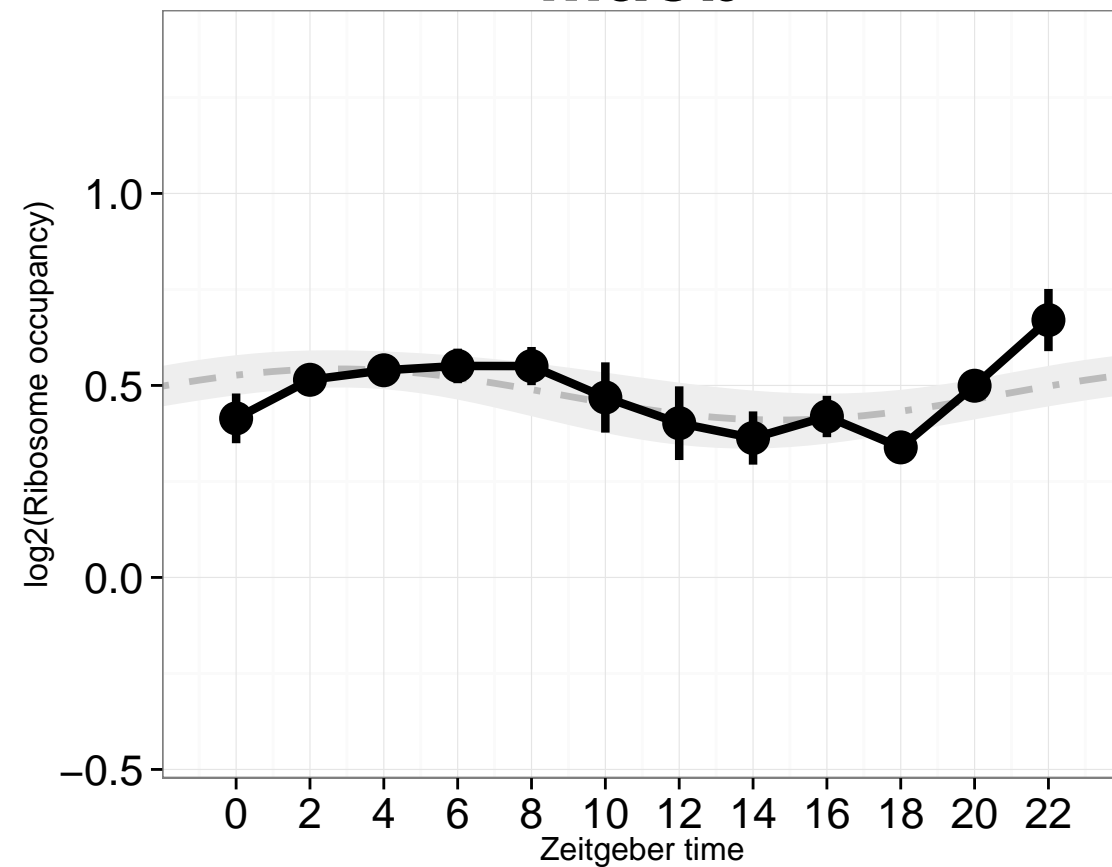

Supplement: SuppDataset_1.zip [file Maob_set_A.pdf › Supplemental Dataset 1/A-mRNA_nonrhyth_translation_nonrhyth/Maob_set_A.pdf]

# Map10

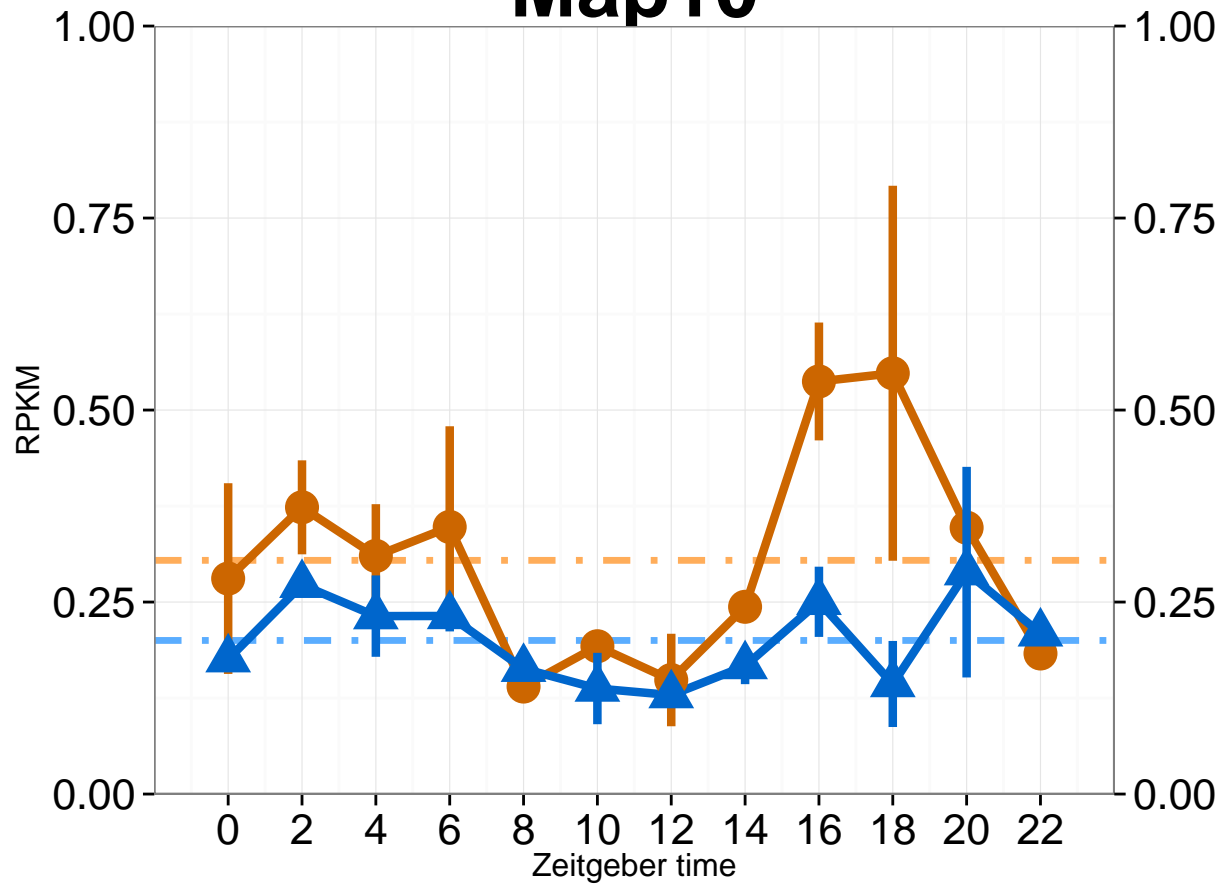

# Map10

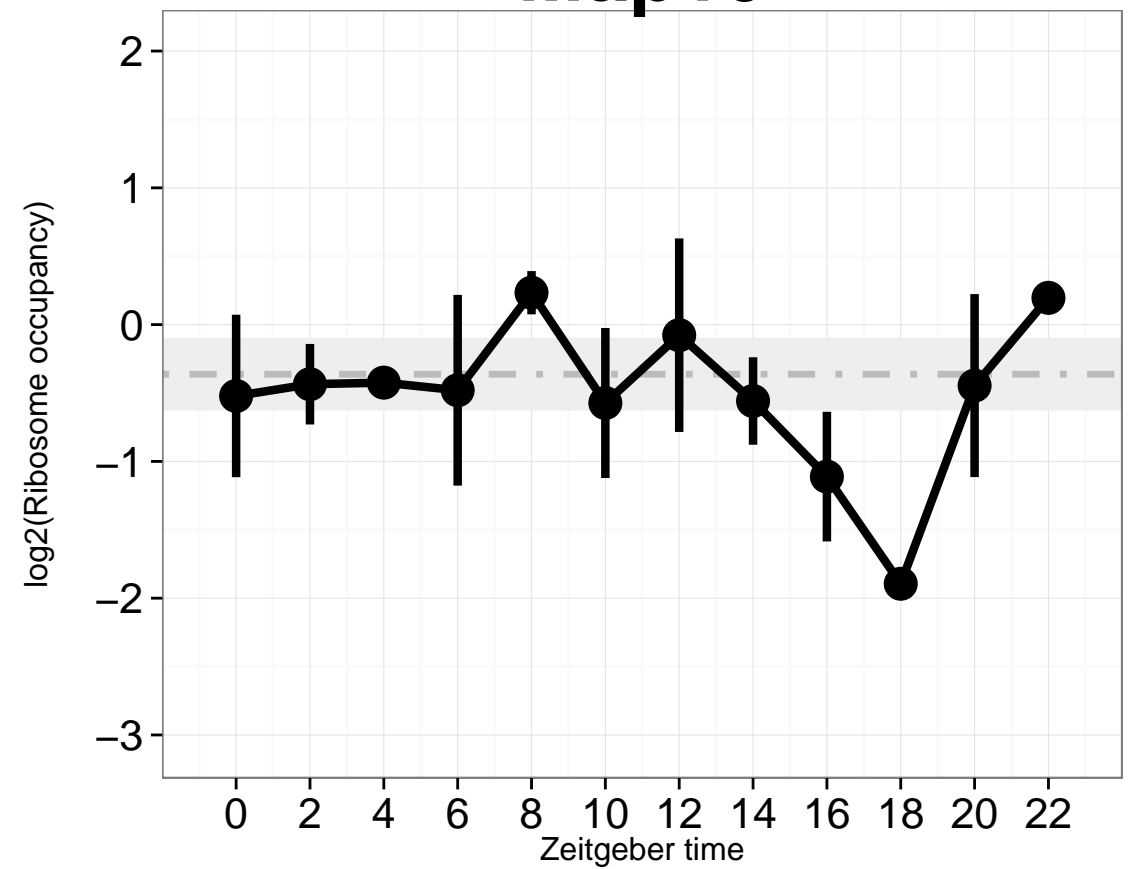

Supplement: SuppDataset_1.zip [file Map10_set_A.pdf › Supplemental Dataset 1/A-mRNA_nonrhyth_translation_nonrhyth/Map10_set_A.pdf]

# Map1s

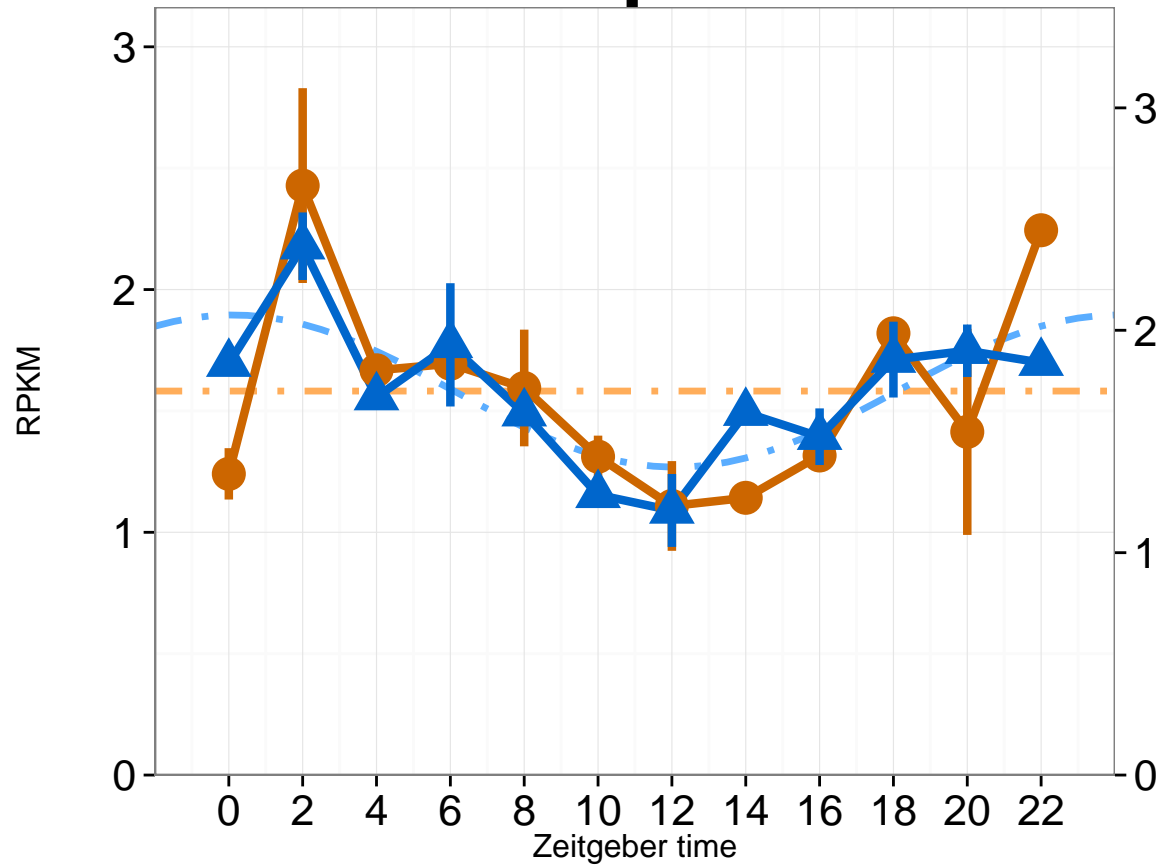

# Map1s

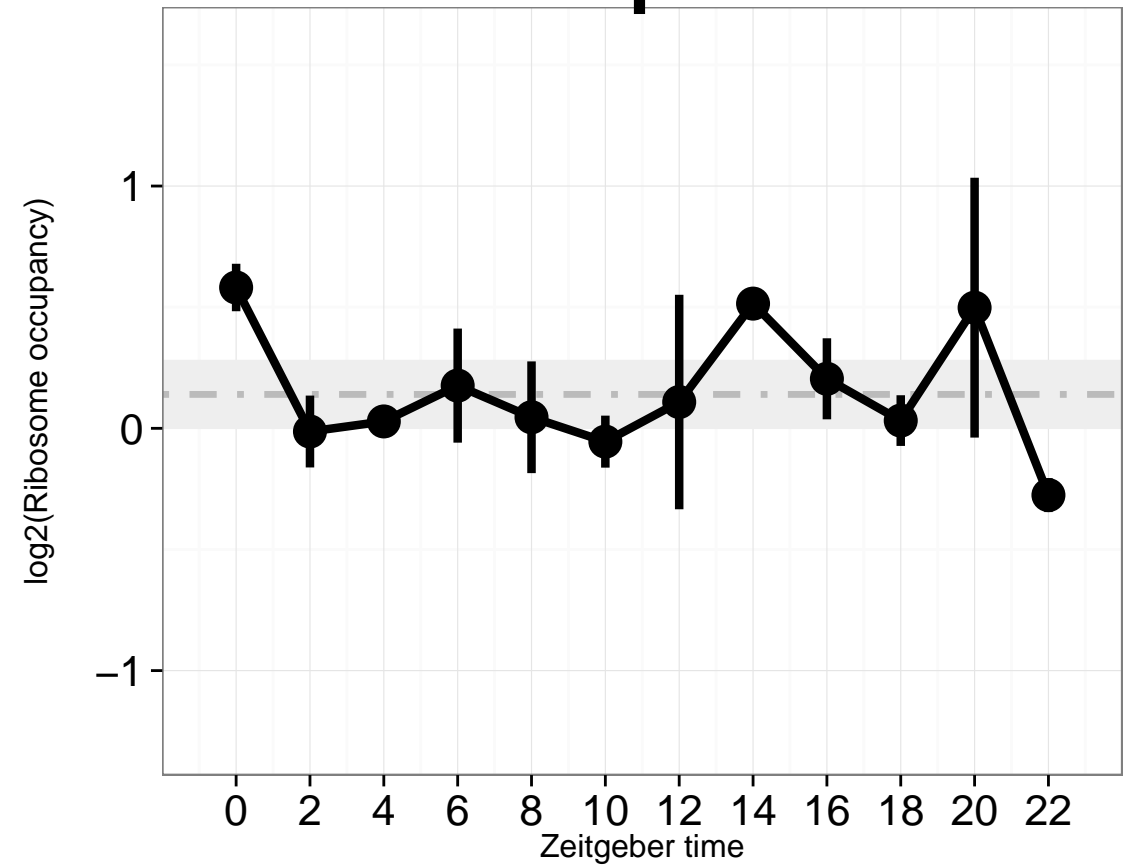

Supplement: SuppDataset_1.zip [file Map1s_set_A.pdf › Supplemental Dataset 1/A-mRNA_nonrhyth_translation_nonrhyth/Map1s_set_A.pdf]

# Map2k1

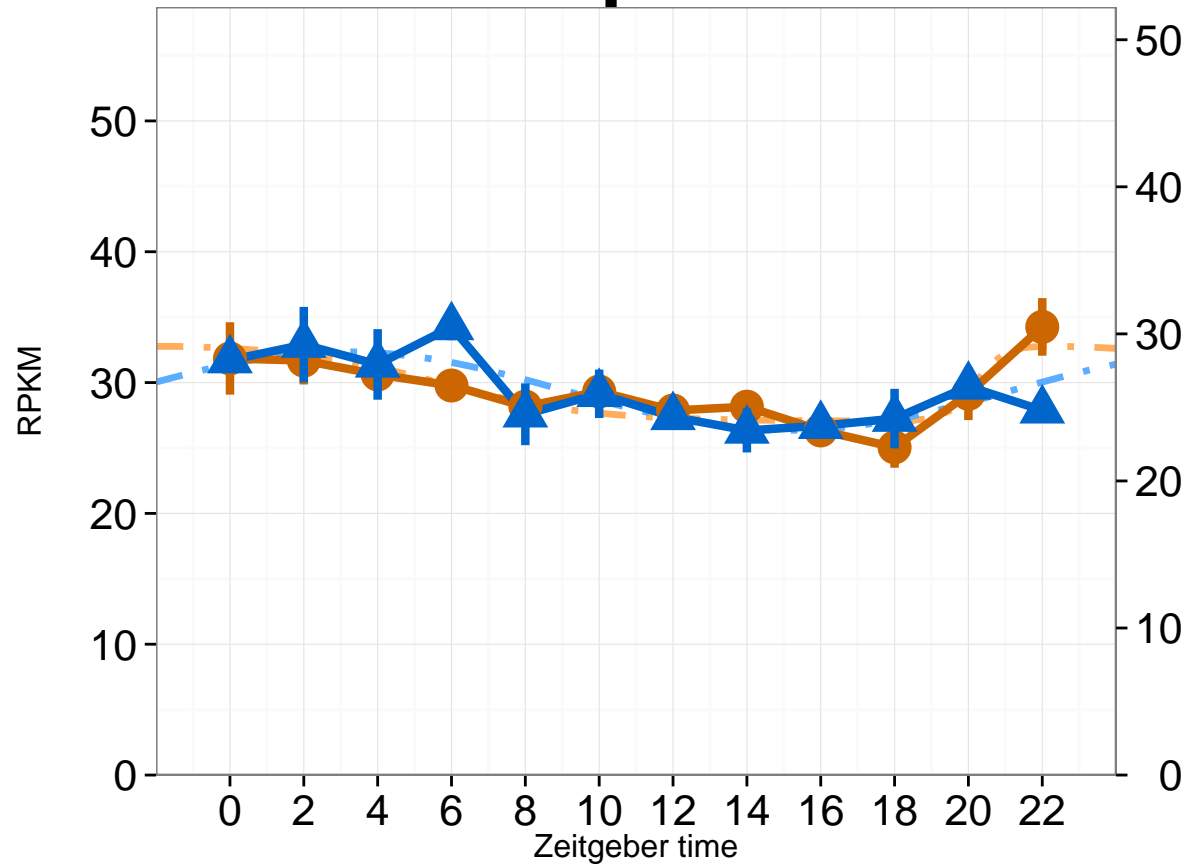

# Map2k1

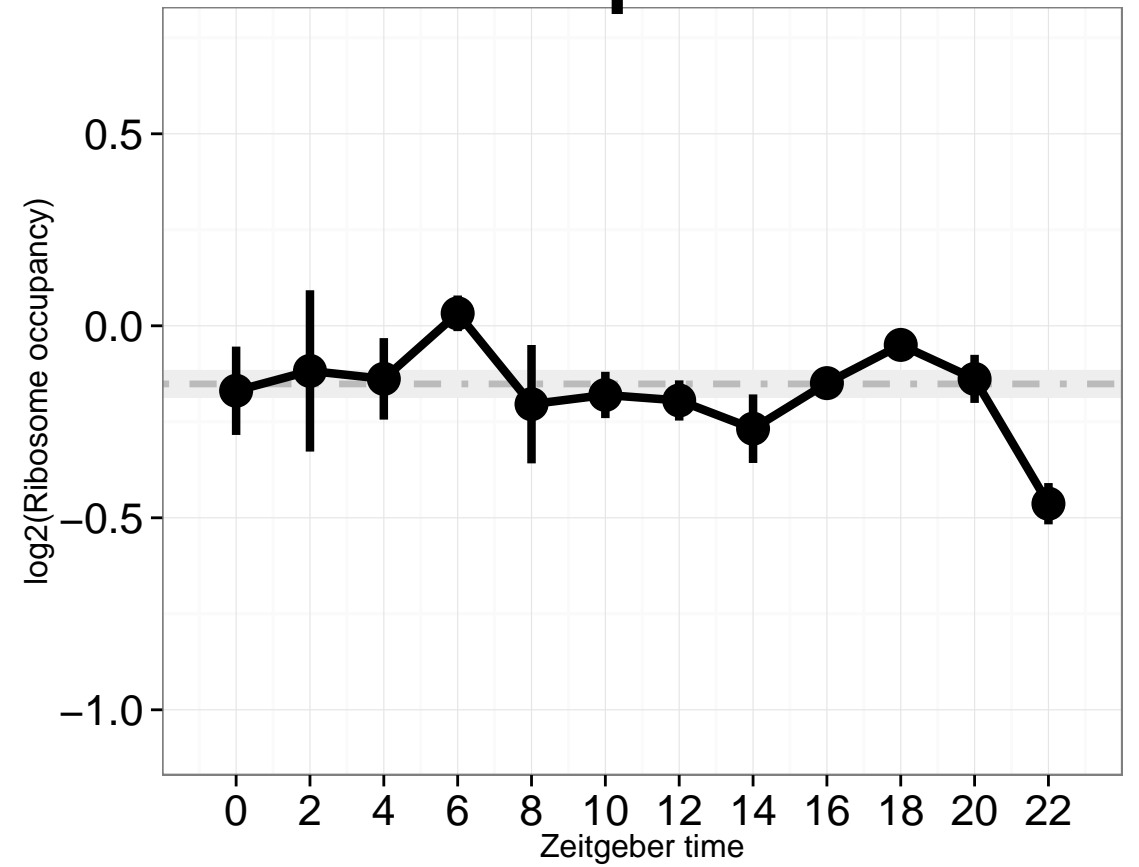

Supplement: SuppDataset_1.zip [file Map2k1_set_A.pdf › Supplemental Dataset 1/A-mRNA_nonrhyth_translation_nonrhyth/Map2k1_set_A.pdf]

# Map2k2

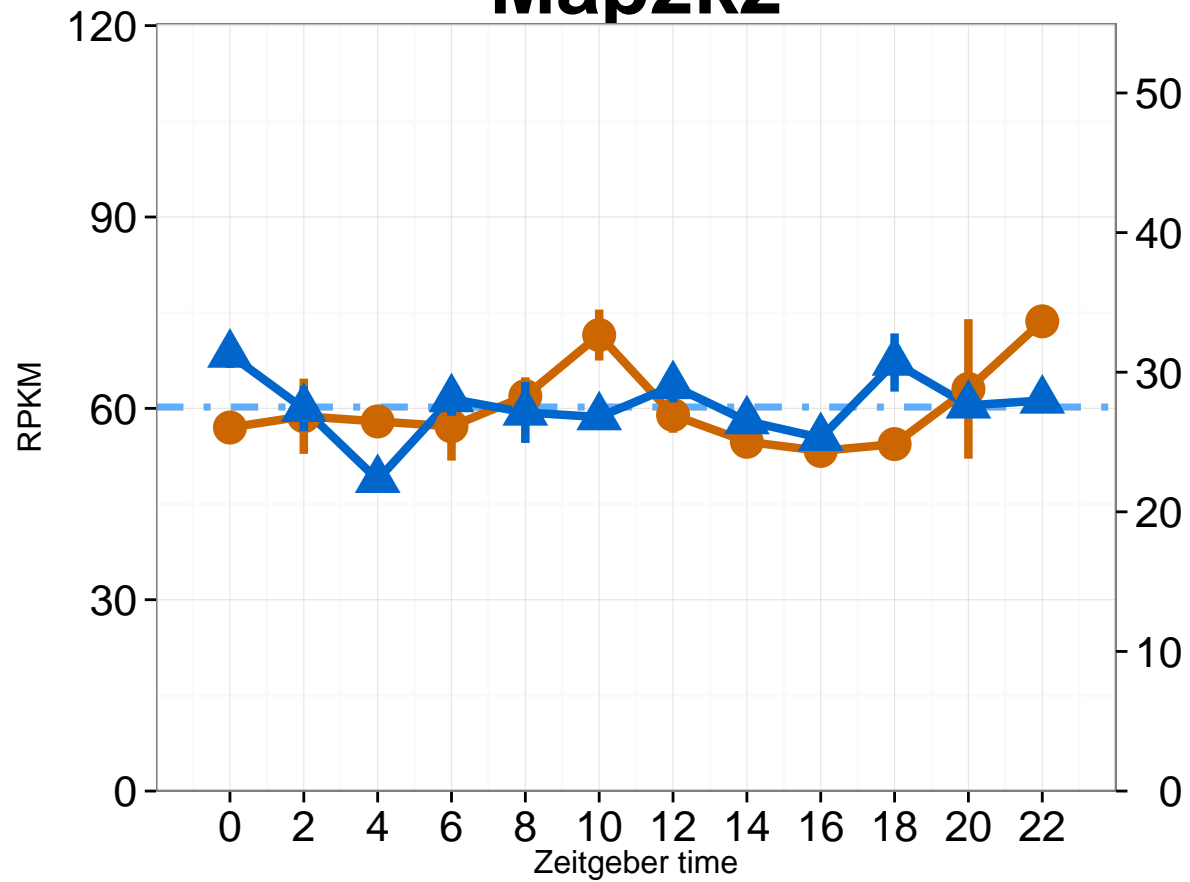

# Map2k2

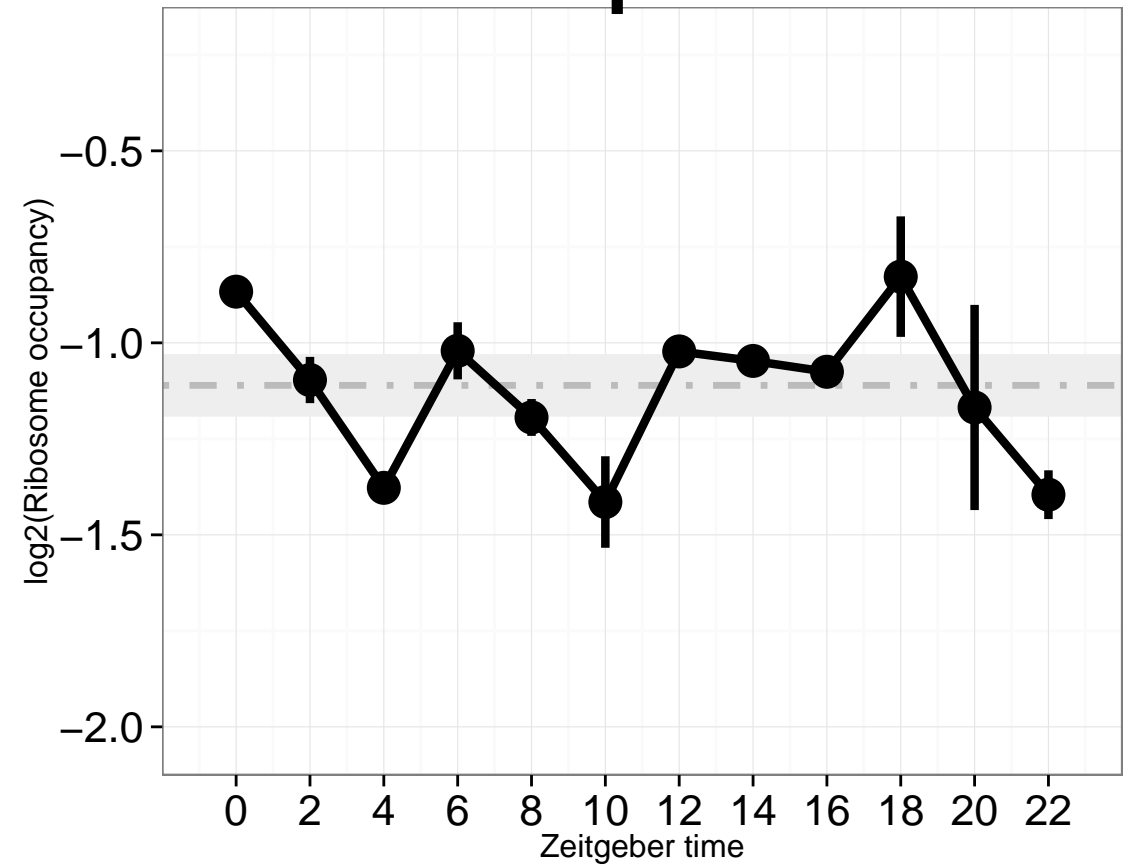

Supplement: SuppDataset_1.zip [file Map2k2_set_A.pdf › Supplemental Dataset 1/A-mRNA_nonrhyth_translation_nonrhyth/Map2k2_set_A.pdf]

# Map2k4

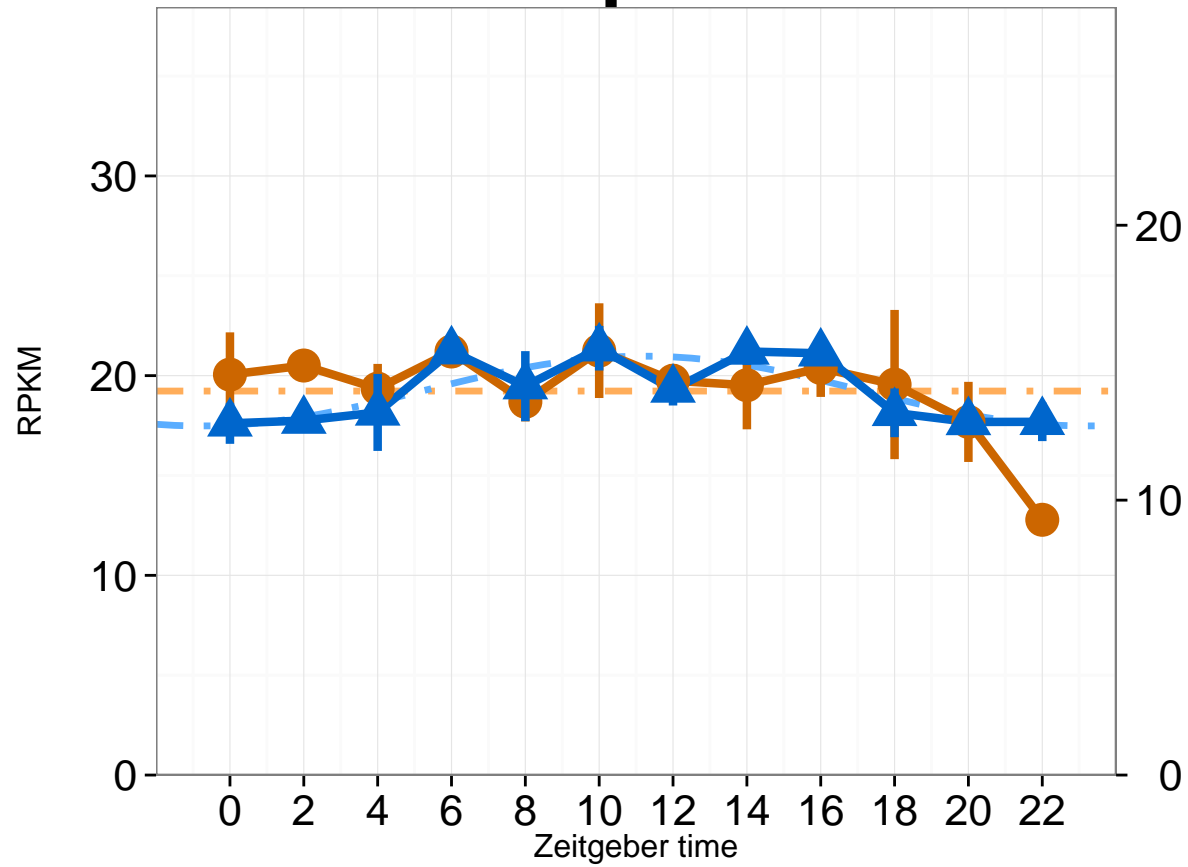

# Map2k4

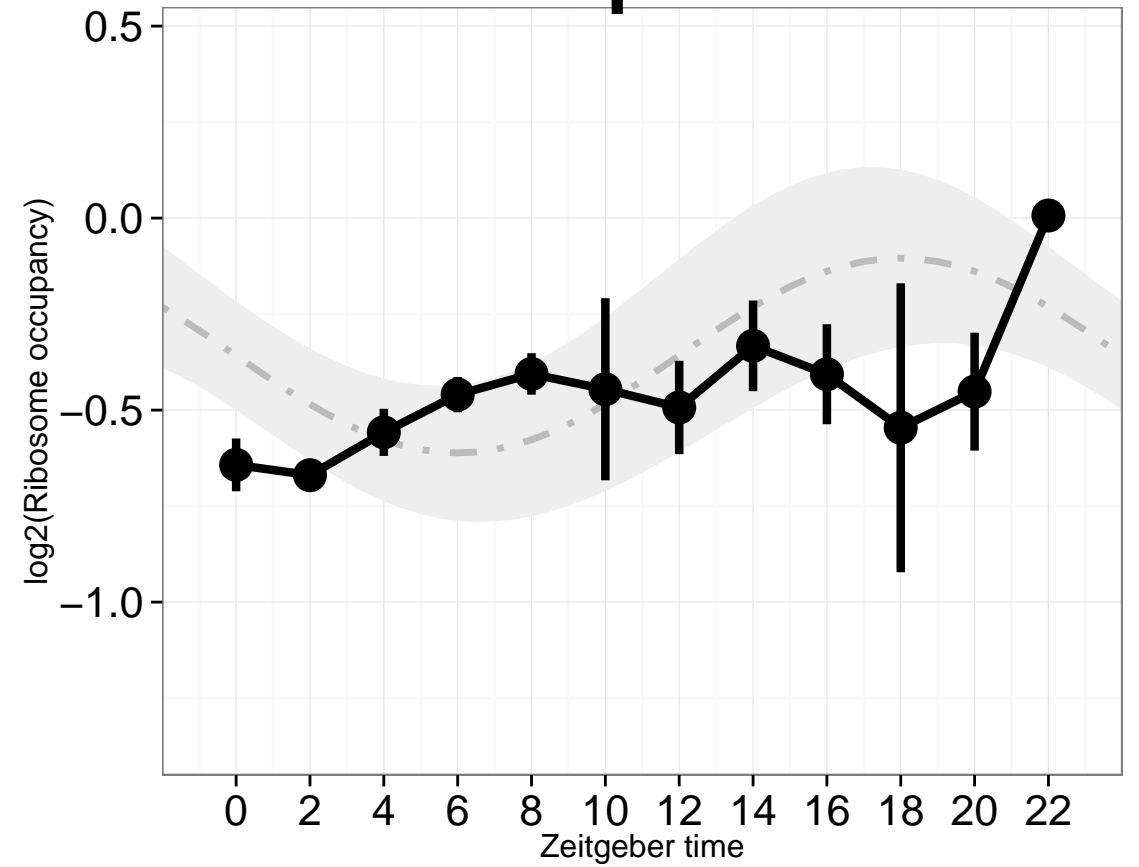

Supplement: SuppDataset_1.zip [file Map2k4_set_A.pdf › Supplemental Dataset 1/A-mRNA_nonrhyth_translation_nonrhyth/Map2k4_set_A.pdf]

# Map2k5

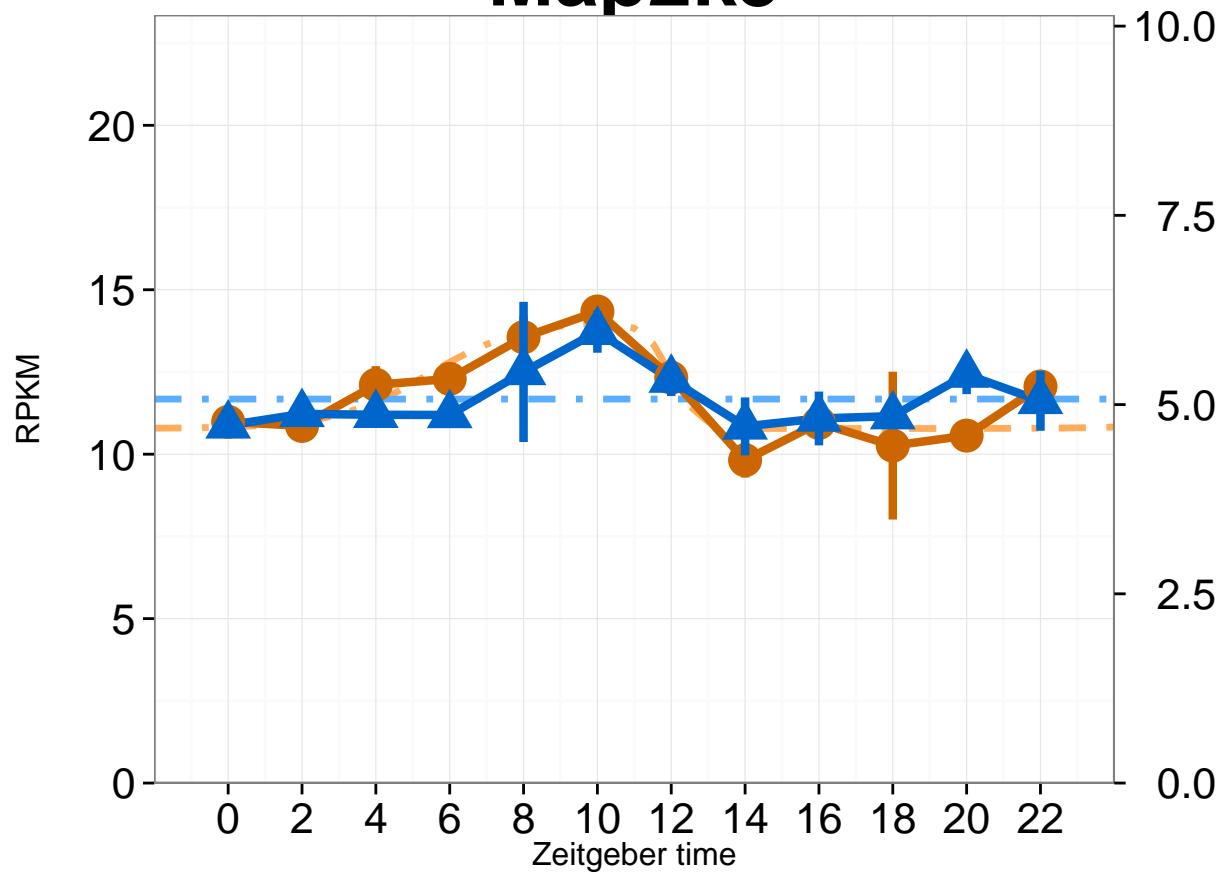

# Map2k5

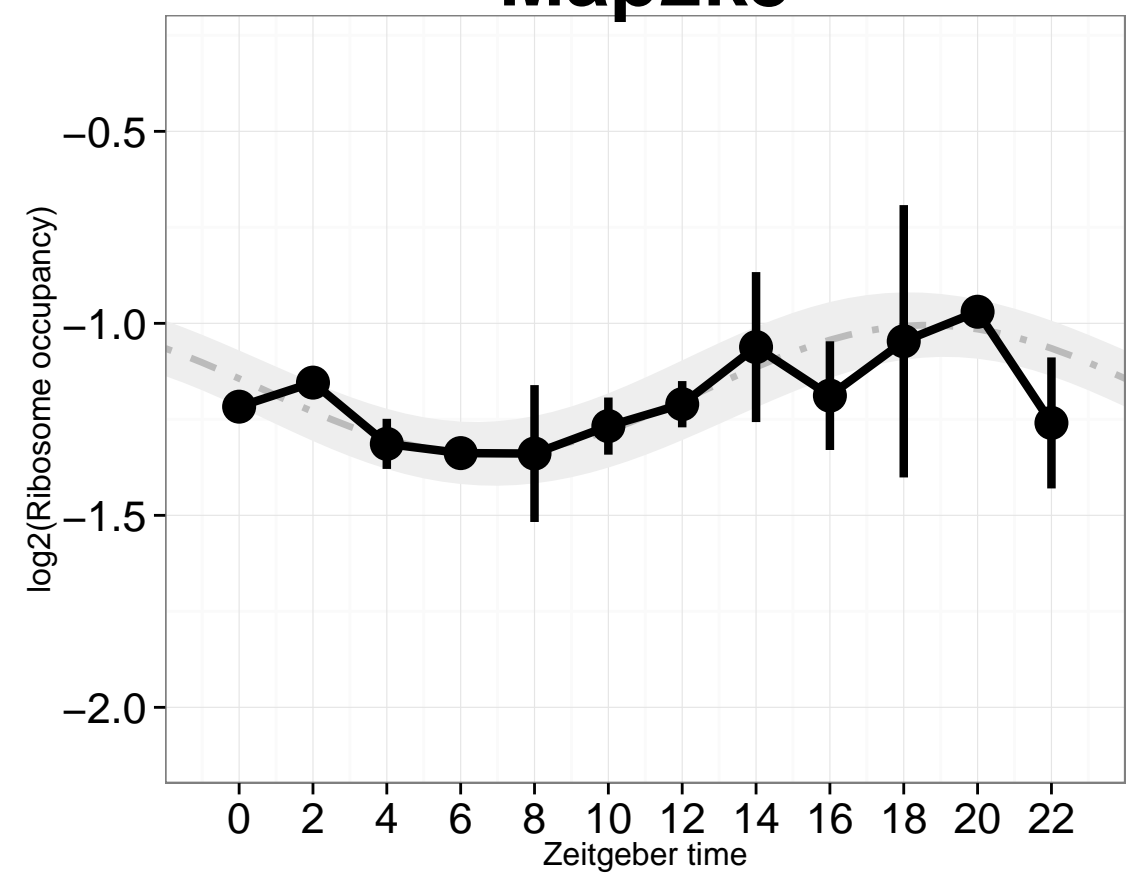

Supplement: SuppDataset_1.zip [file Map2k5_set_A.pdf › Supplemental Dataset 1/A-mRNA_nonrhyth_translation_nonrhyth/Map2k5_set_A.pdf]

# Map2k7

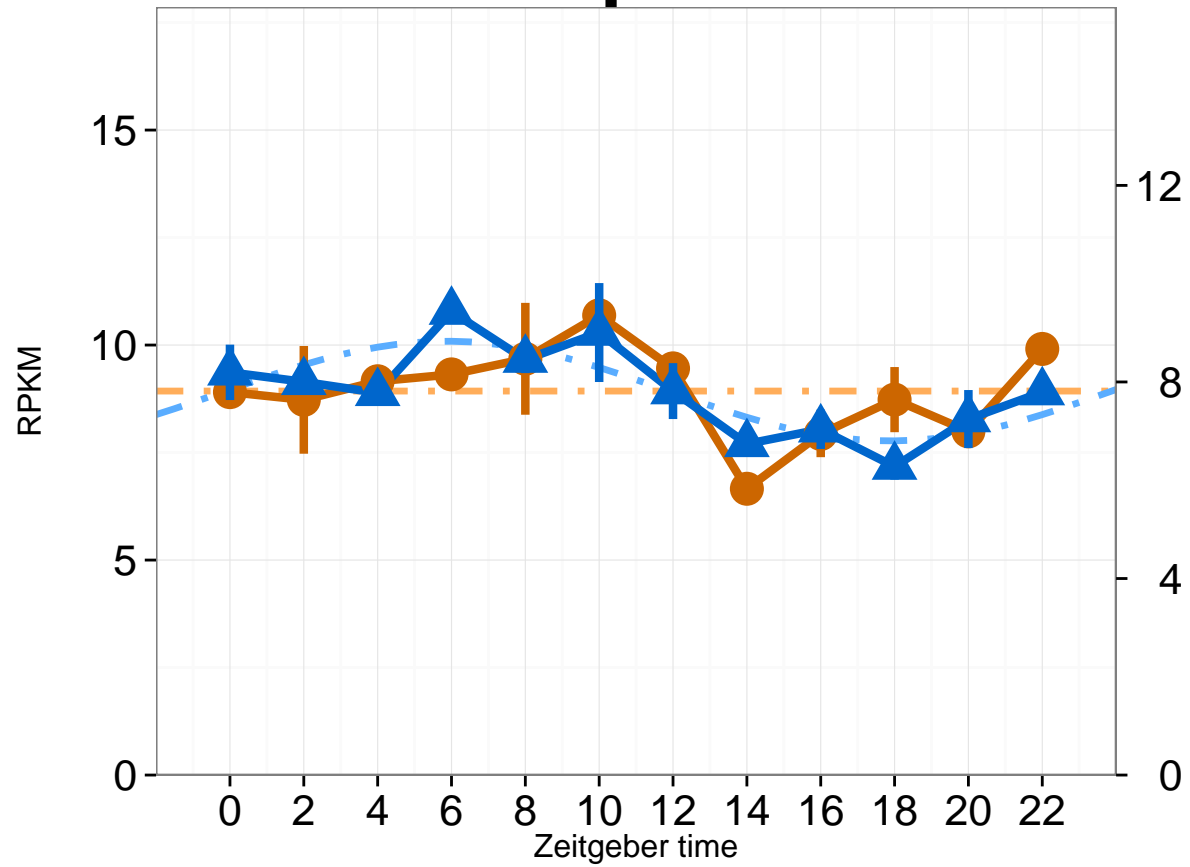

# Map2k7

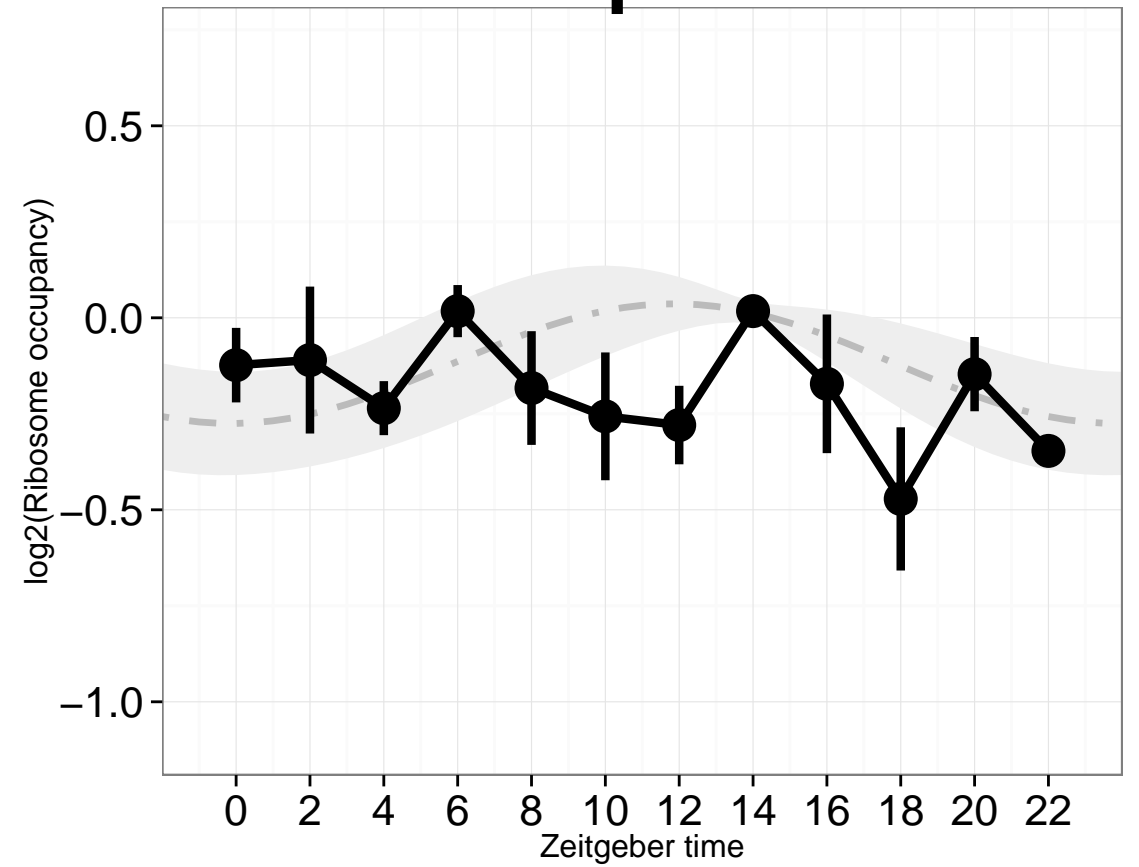

Supplement: SuppDataset_1.zip [file Map2k7_set_A.pdf › Supplemental Dataset 1/A-mRNA_nonrhyth_translation_nonrhyth/Map2k7_set_A.pdf]

# Map3k11

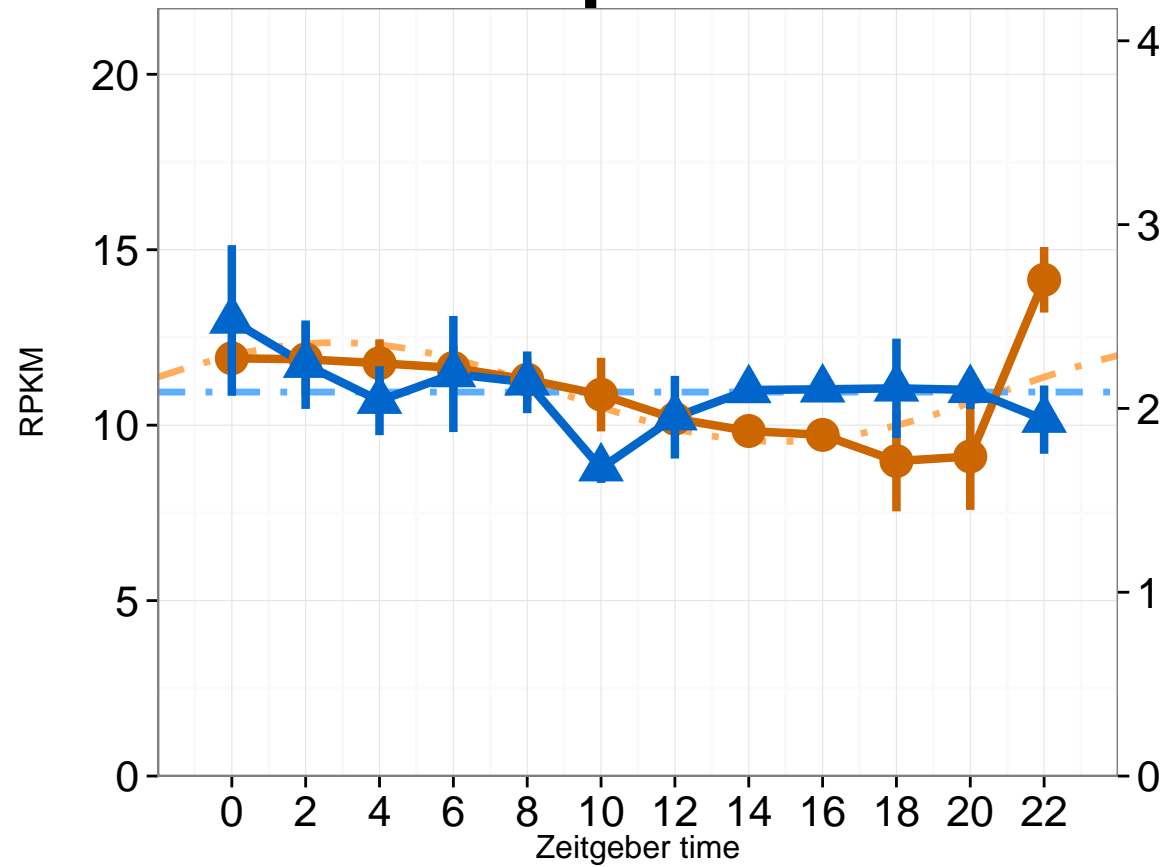

# Map3k11

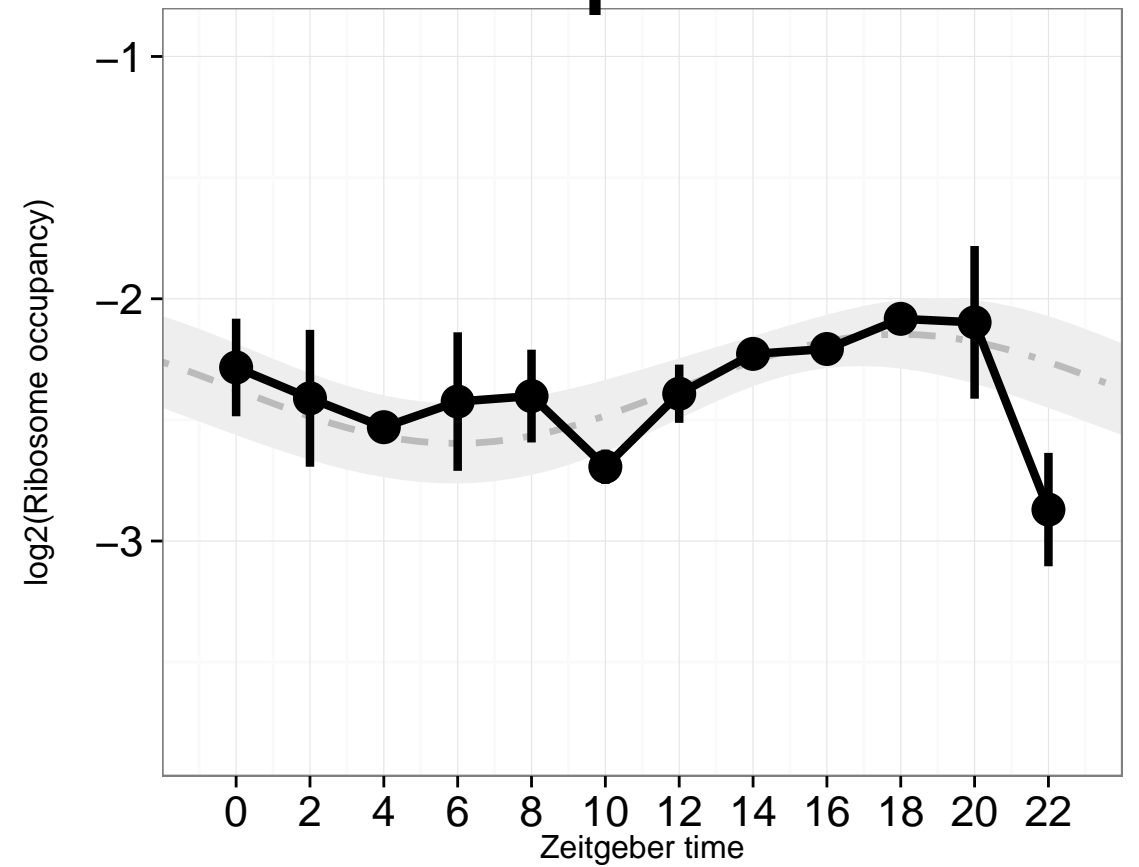

Supplement: SuppDataset_1.zip [file Map3k11_set_A.pdf › Supplemental Dataset 1/A-mRNA_nonrhyth_translation_nonrhyth/Map3k11_set_A.pdf]

# Map3k13

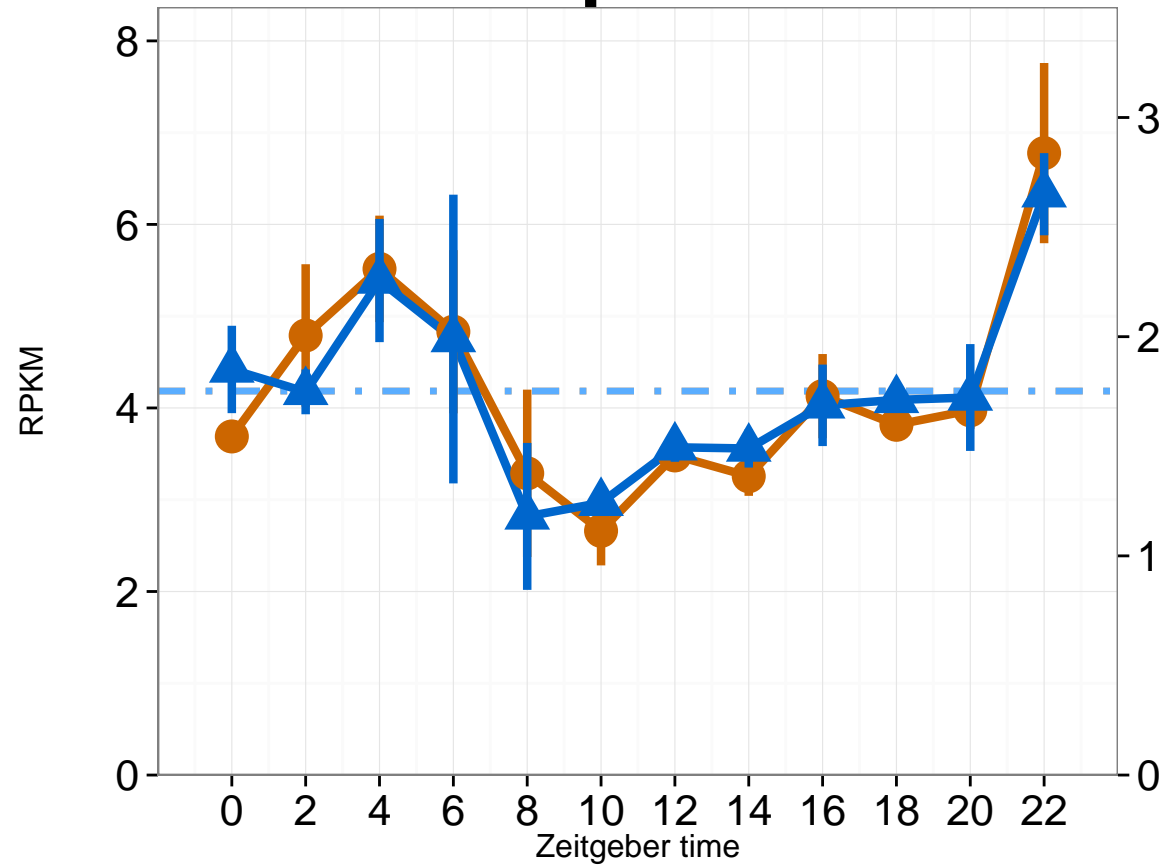

# Map3k13

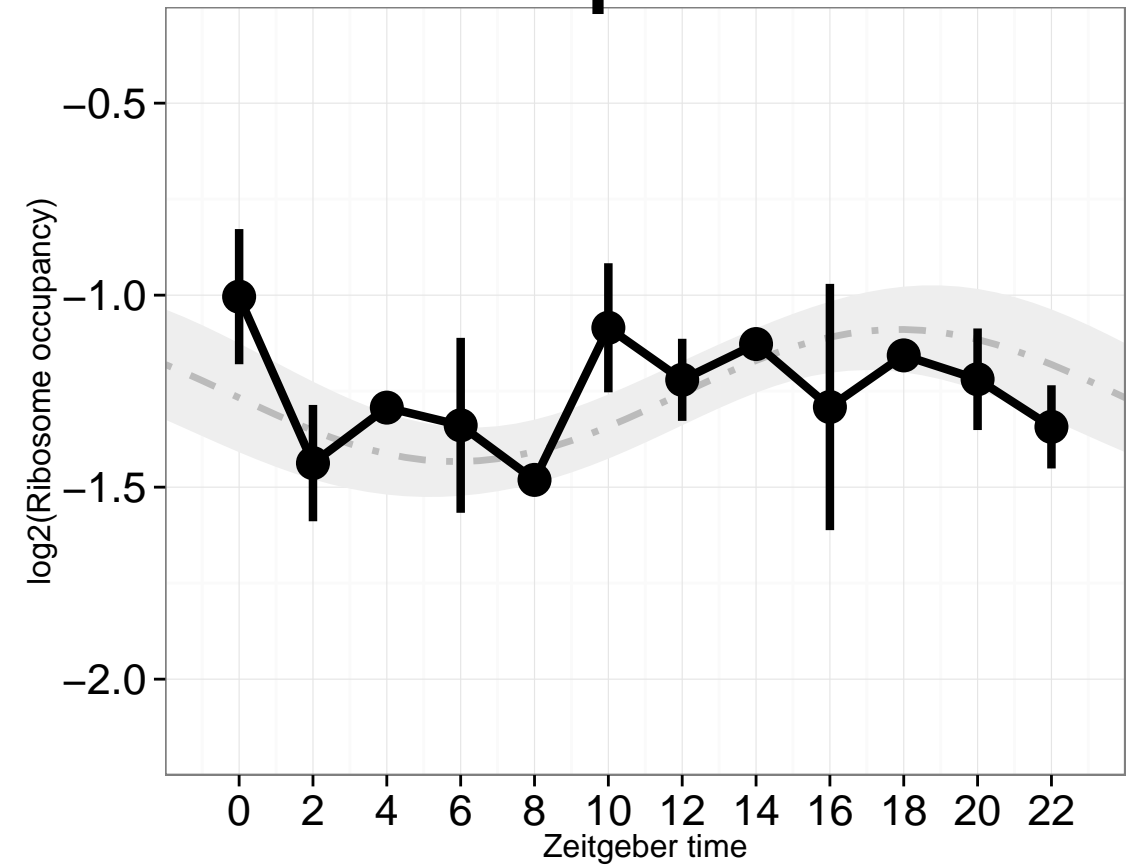

Supplement: SuppDataset_1.zip [file Map3k13_set_A.pdf › Supplemental Dataset 1/A-mRNA_nonrhyth_translation_nonrhyth/Map3k13_set_A.pdf]

# Map3k2

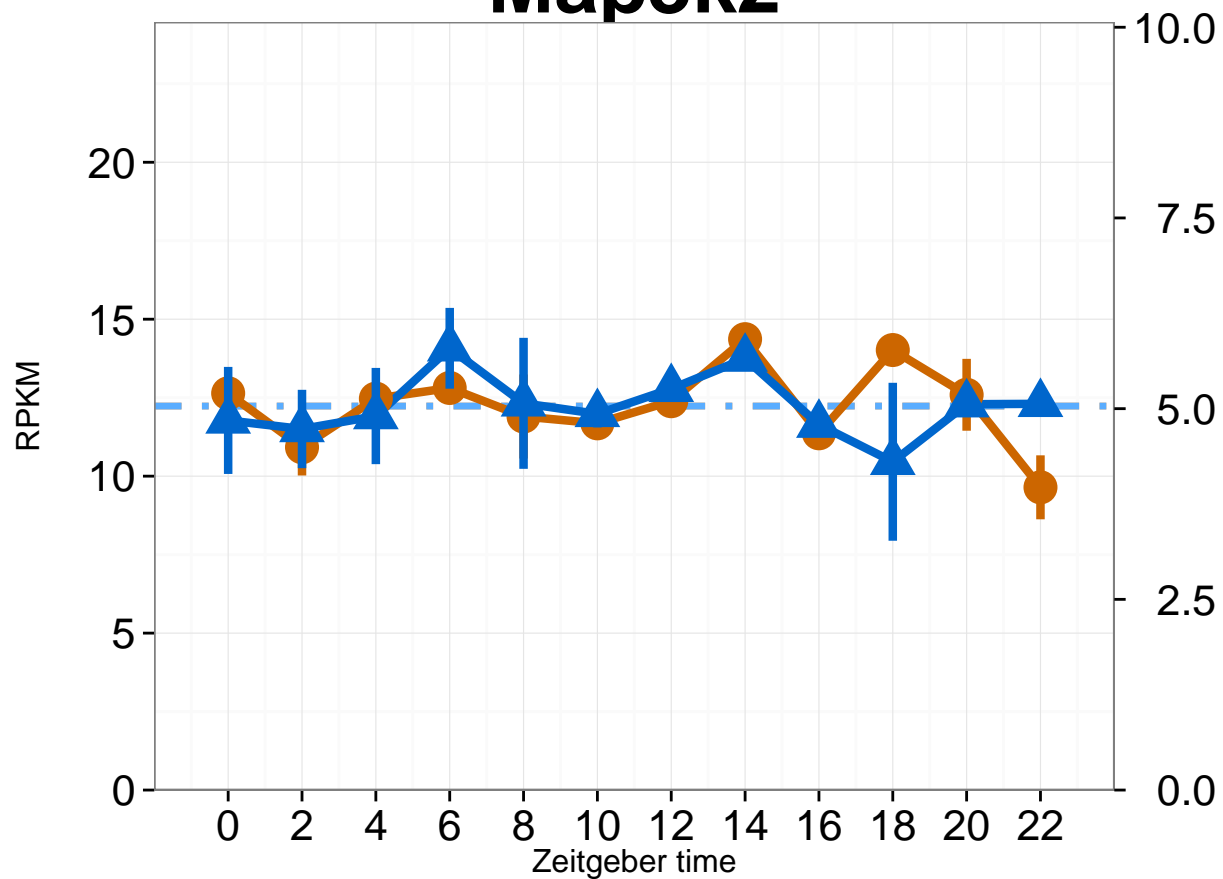

# Map3k2

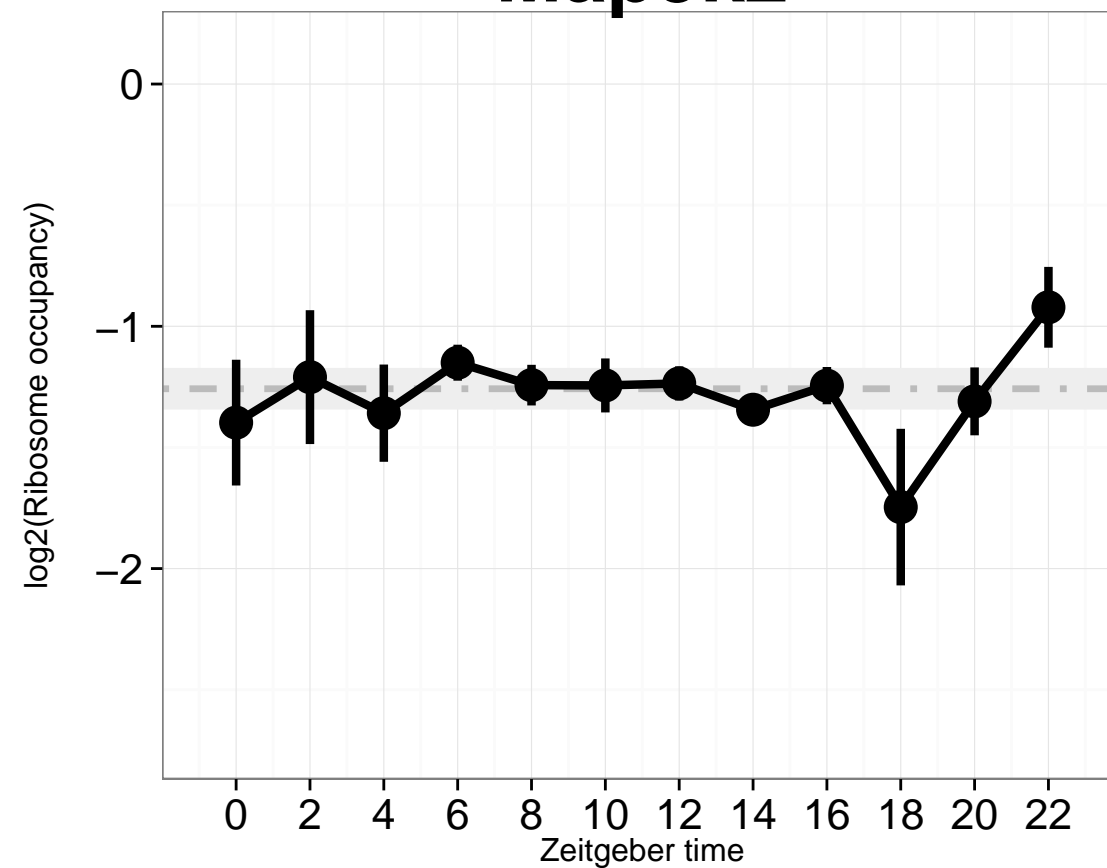

Supplement: SuppDataset_1.zip [file Map3k2_set_A.pdf › Supplemental Dataset 1/A-mRNA_nonrhyth_translation_nonrhyth/Map3k2_set_A.pdf]

# Map3k3

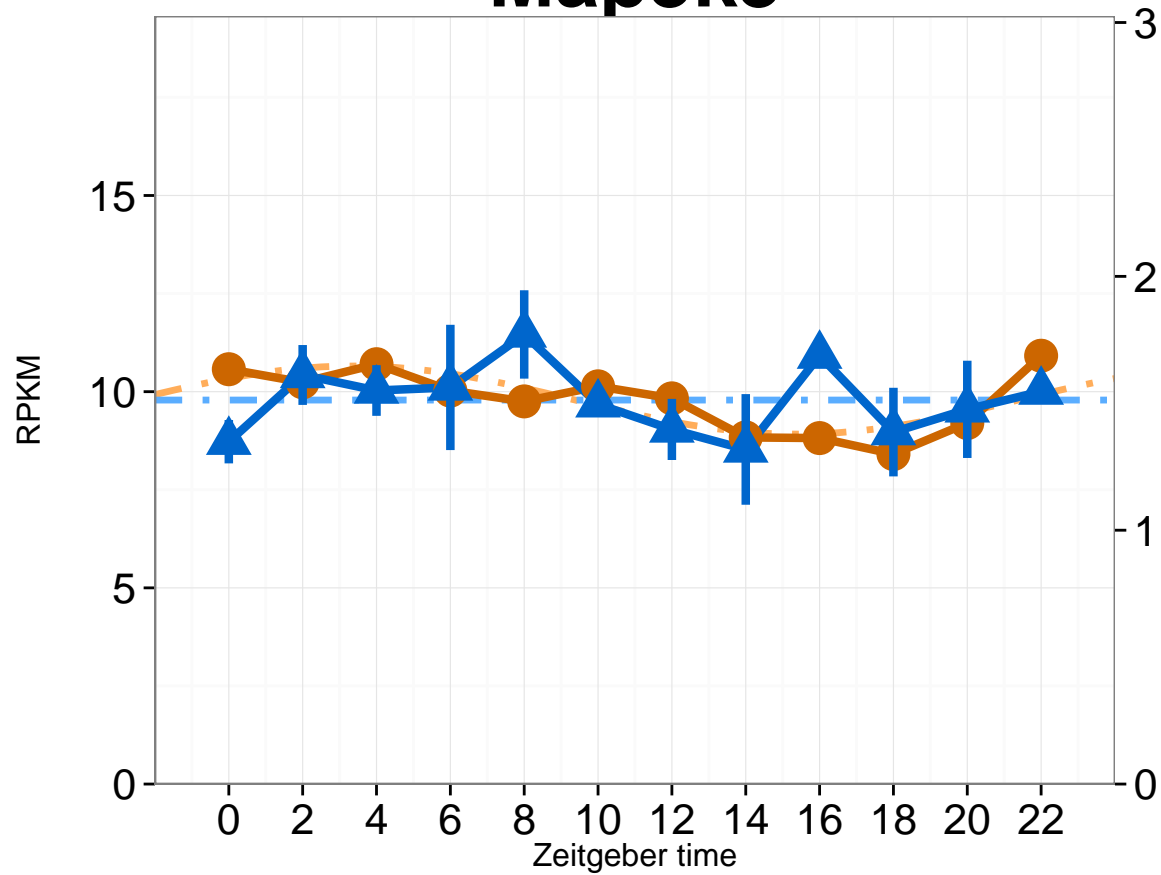

# Map3k3

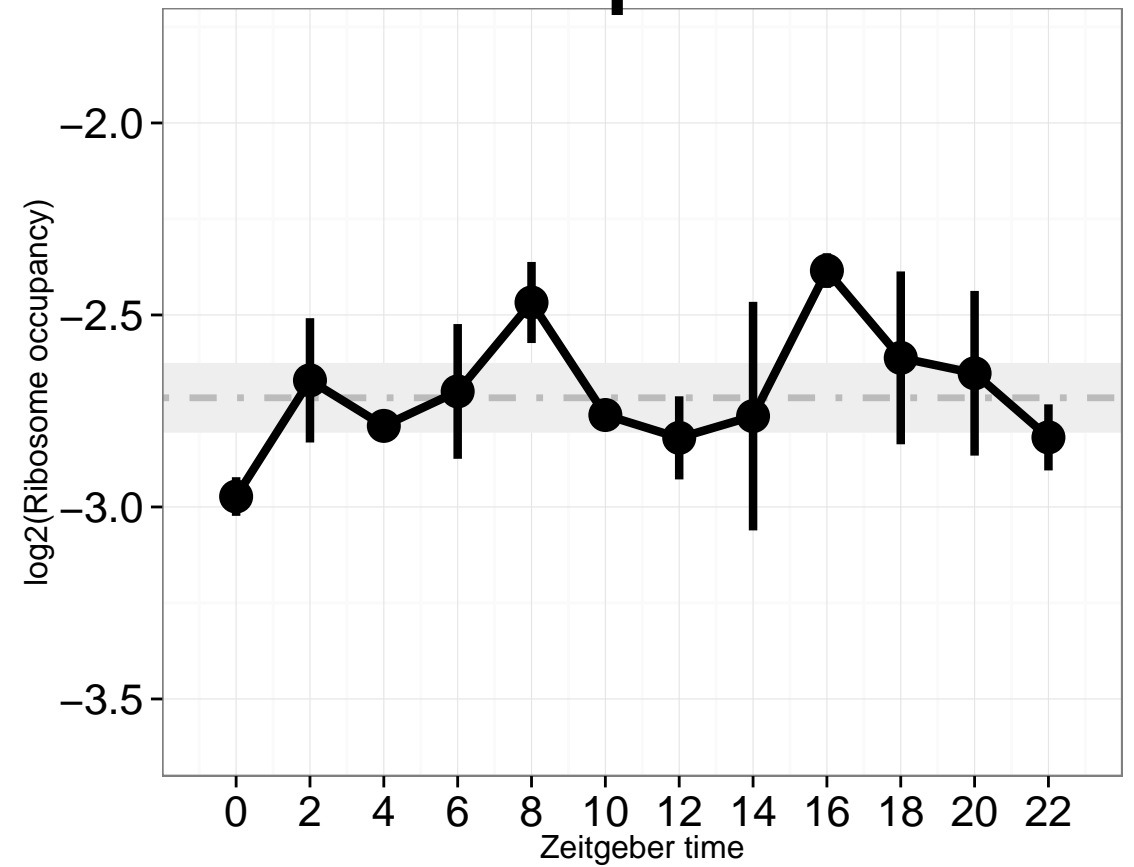

Supplement: SuppDataset_1.zip [file Map3k3_set_A.pdf › Supplemental Dataset 1/A-mRNA_nonrhyth_translation_nonrhyth/Map3k3_set_A.pdf]

# Map3k4

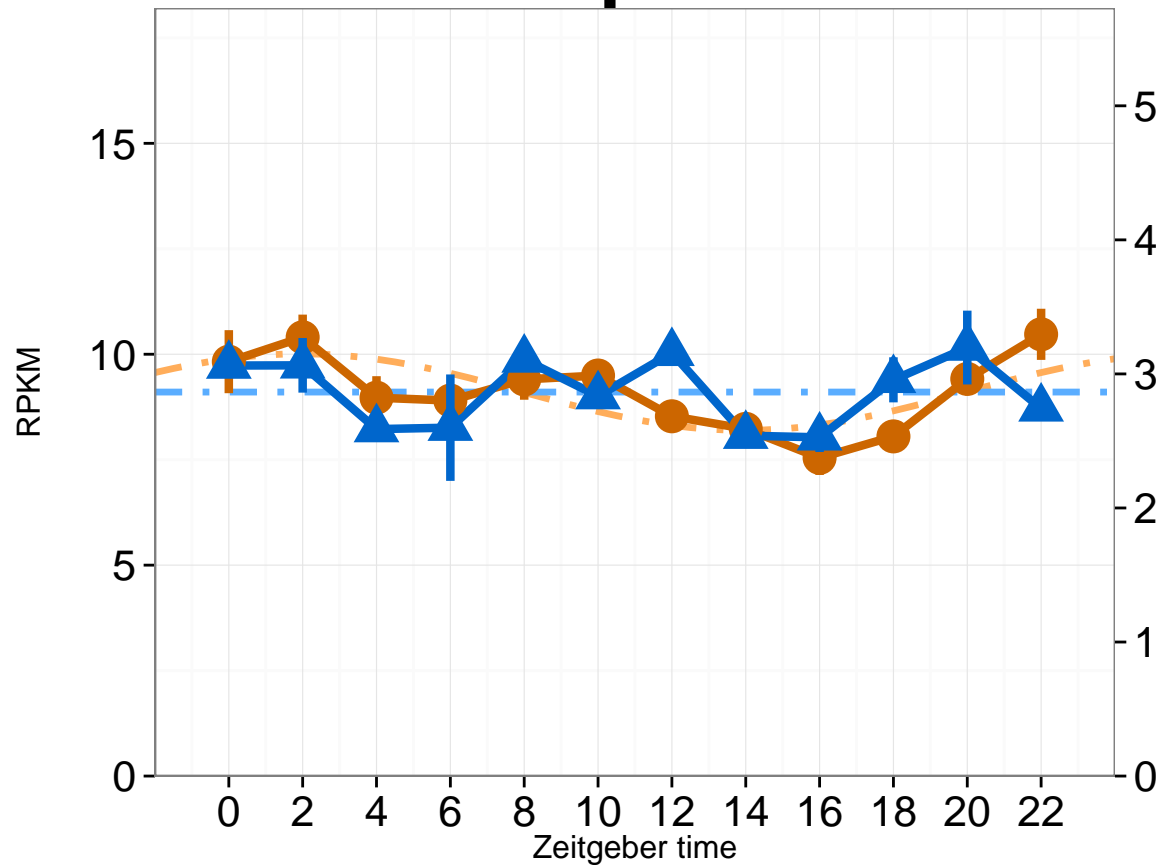

# Map3k4

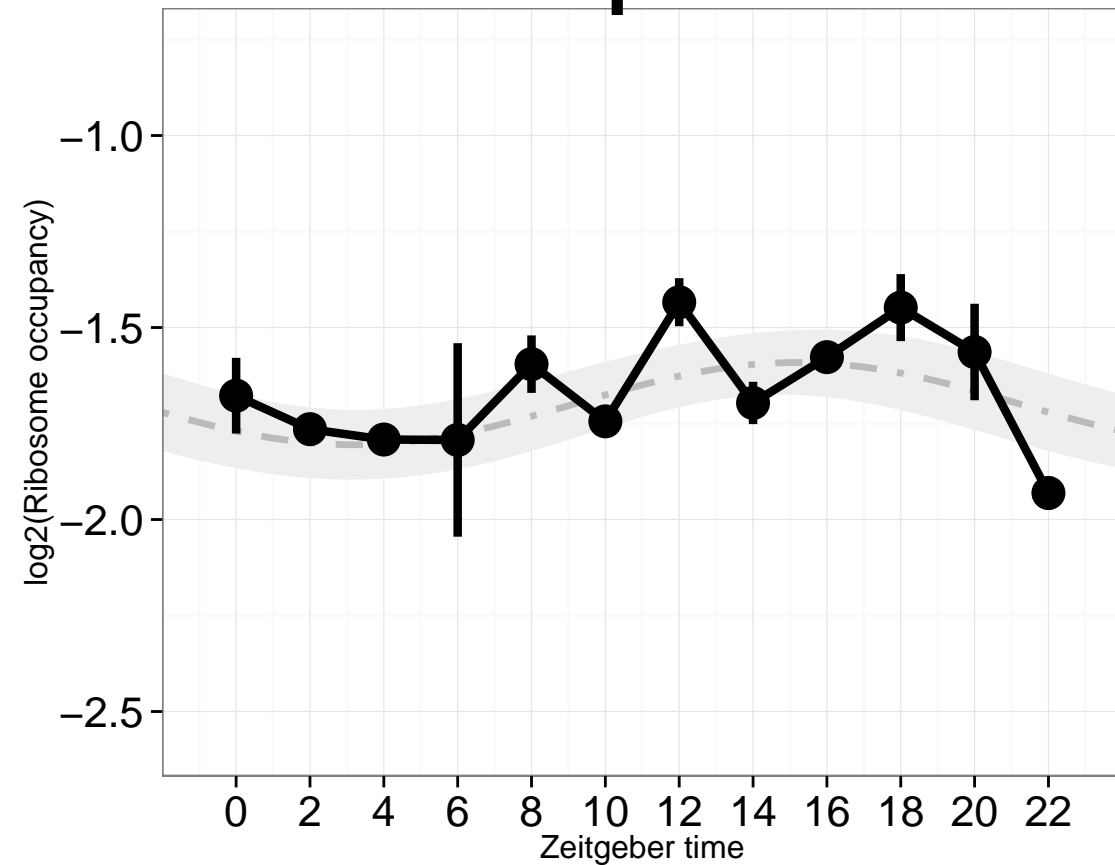

Supplement: SuppDataset_1.zip [file Map3k4_set_A.pdf › Supplemental Dataset 1/A-mRNA_nonrhyth_translation_nonrhyth/Map3k4_set_A.pdf]

# Map3k5

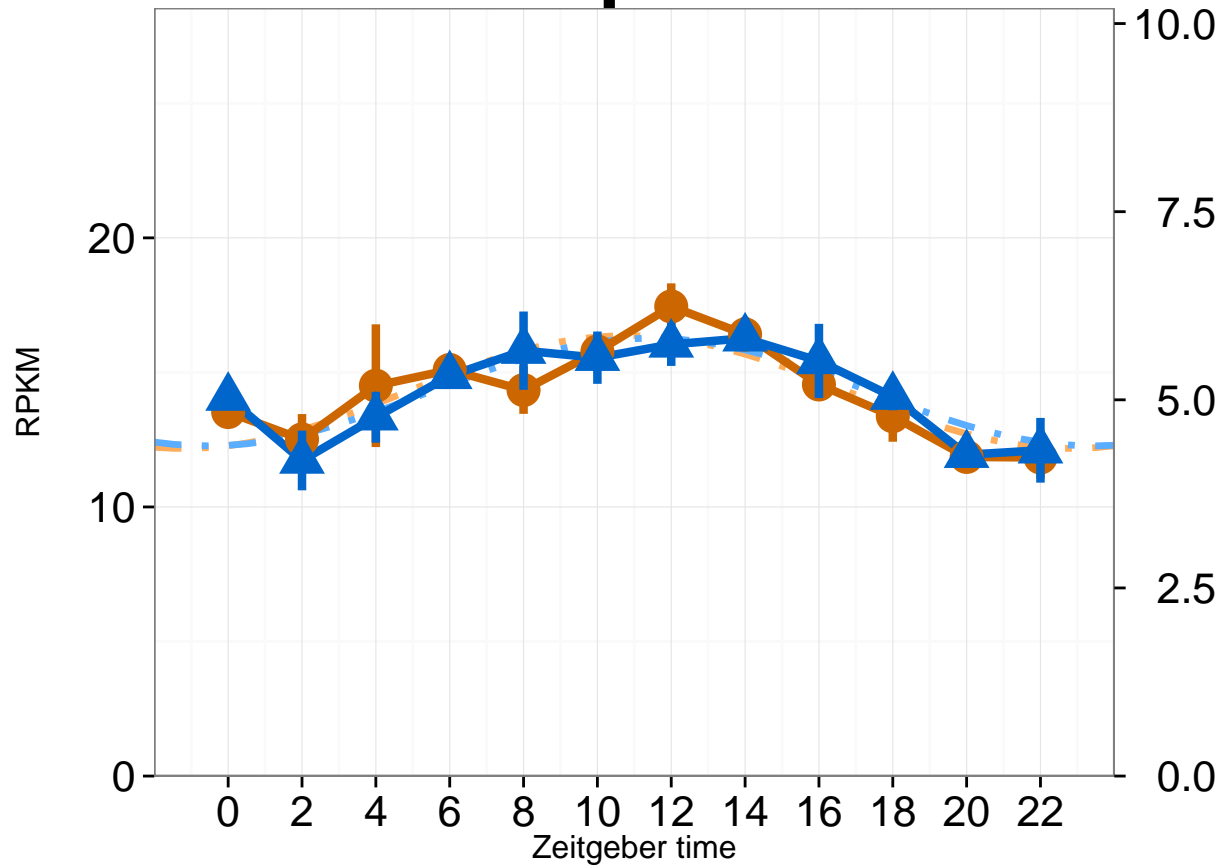

# Map3k5

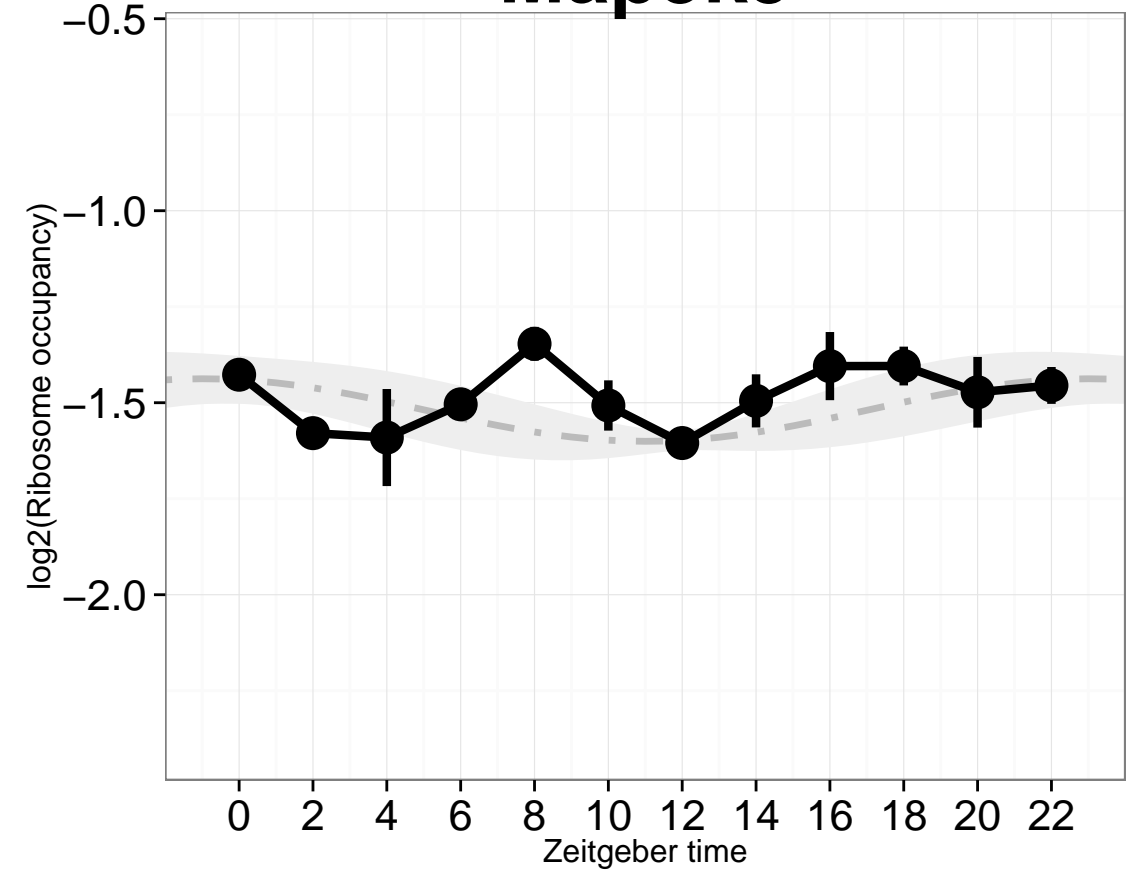

Supplement: SuppDataset_1.zip [file Map3k5_set_A.pdf › Supplemental Dataset 1/A-mRNA_nonrhyth_translation_nonrhyth/Map3k5_set_A.pdf]

# Map3k7

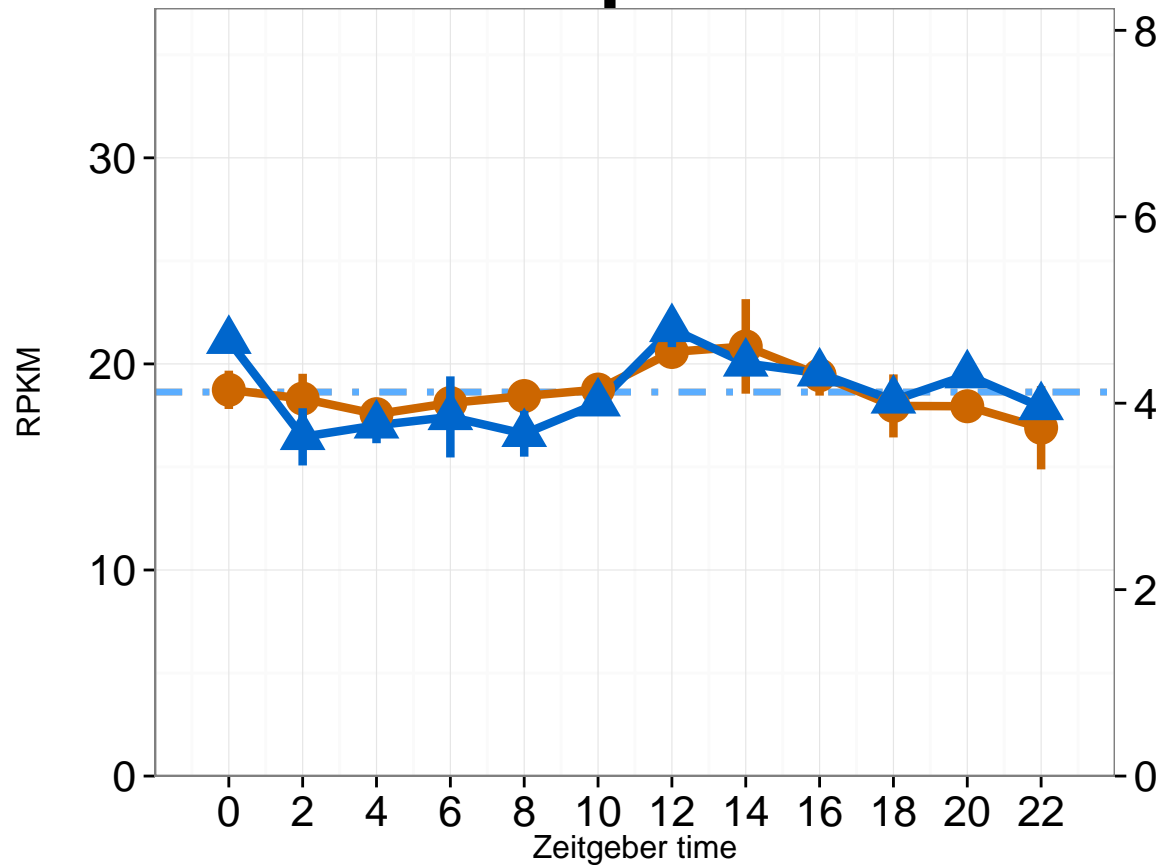

# Map3k7

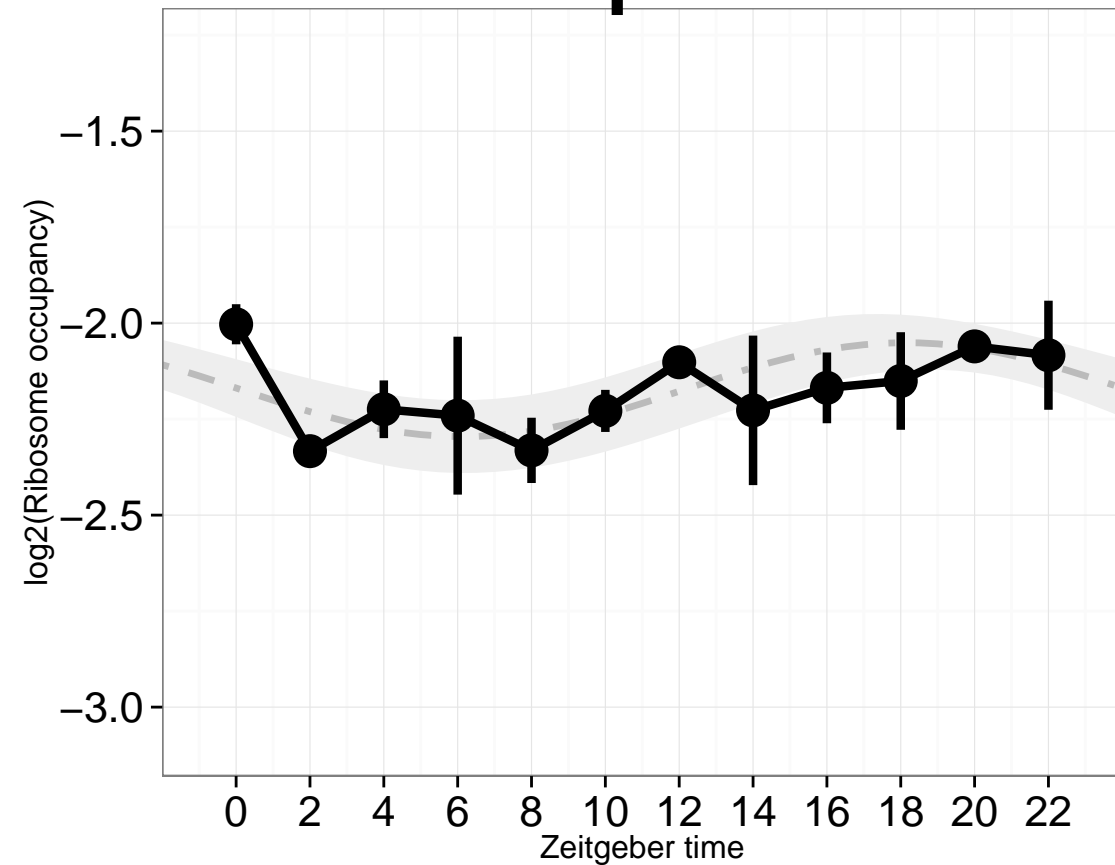

Supplement: SuppDataset_1.zip [file Map3k7_set_A.pdf › Supplemental Dataset 1/A-mRNA_nonrhyth_translation_nonrhyth/Map3k7_set_A.pdf]

# Map3k8

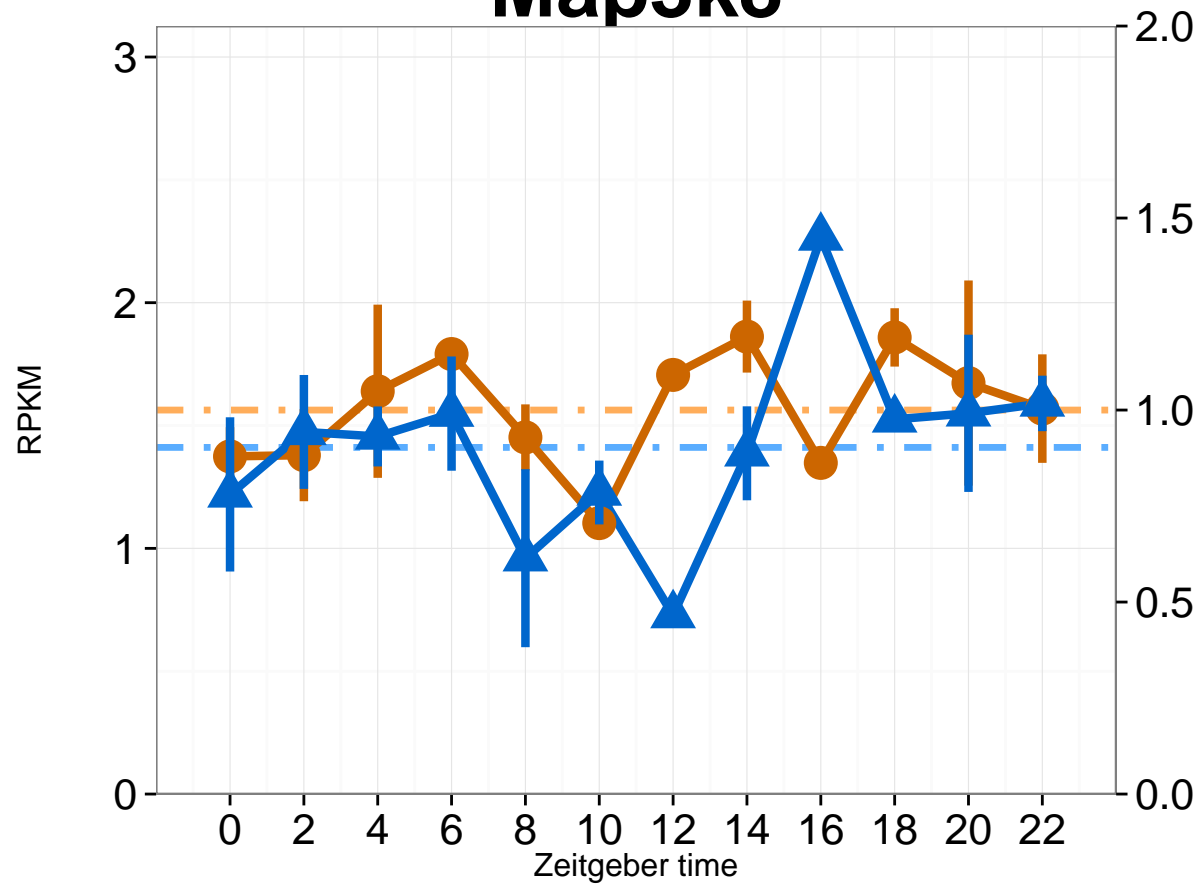

# Map3k8

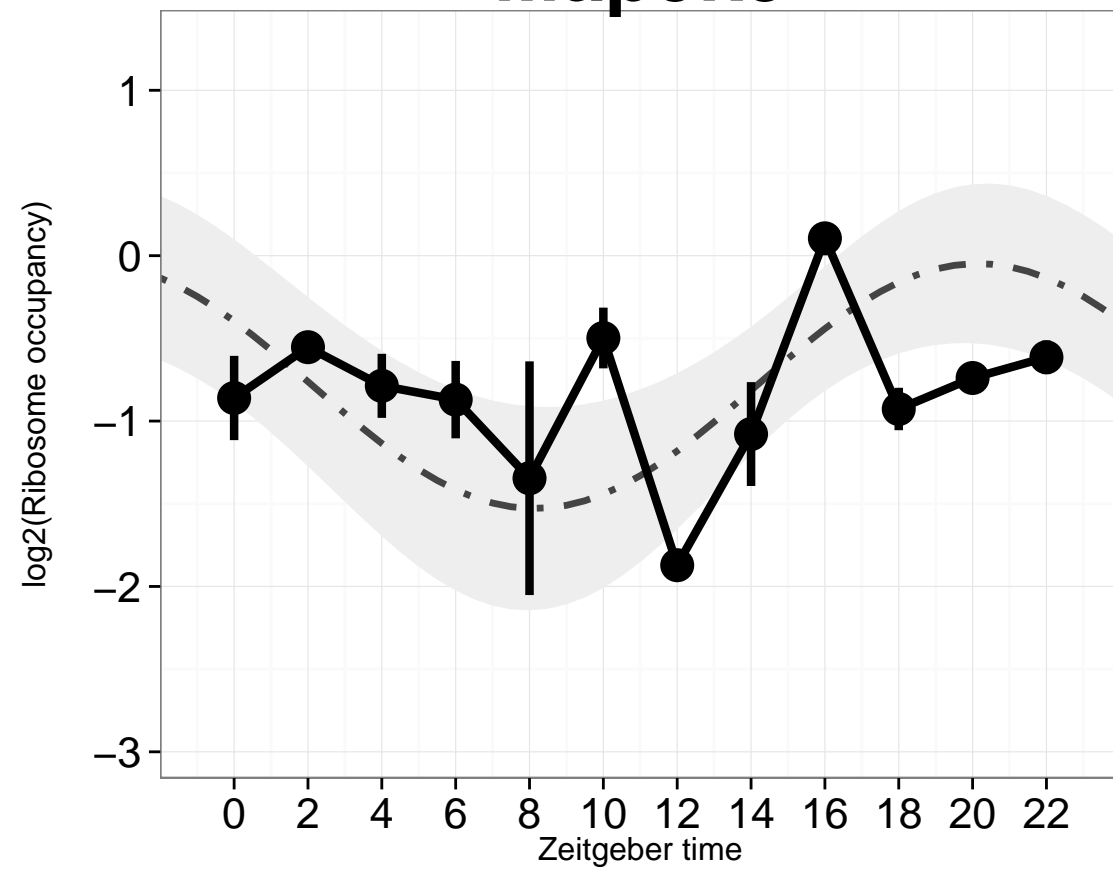

Supplement: SuppDataset_1.zip [file Map3k8_set_A.pdf › Supplemental Dataset 1/A-mRNA_nonrhyth_translation_nonrhyth/Map3k8_set_A.pdf]

# Map4

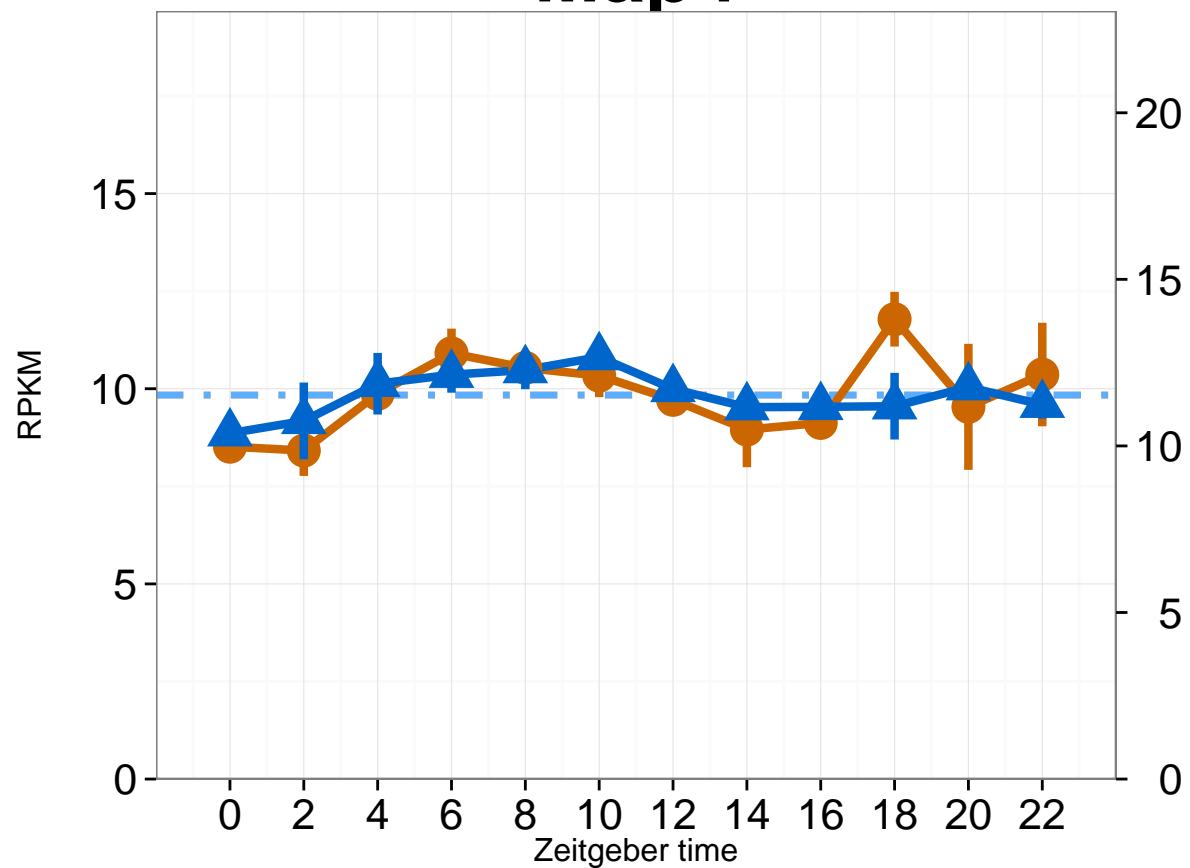

# Map4

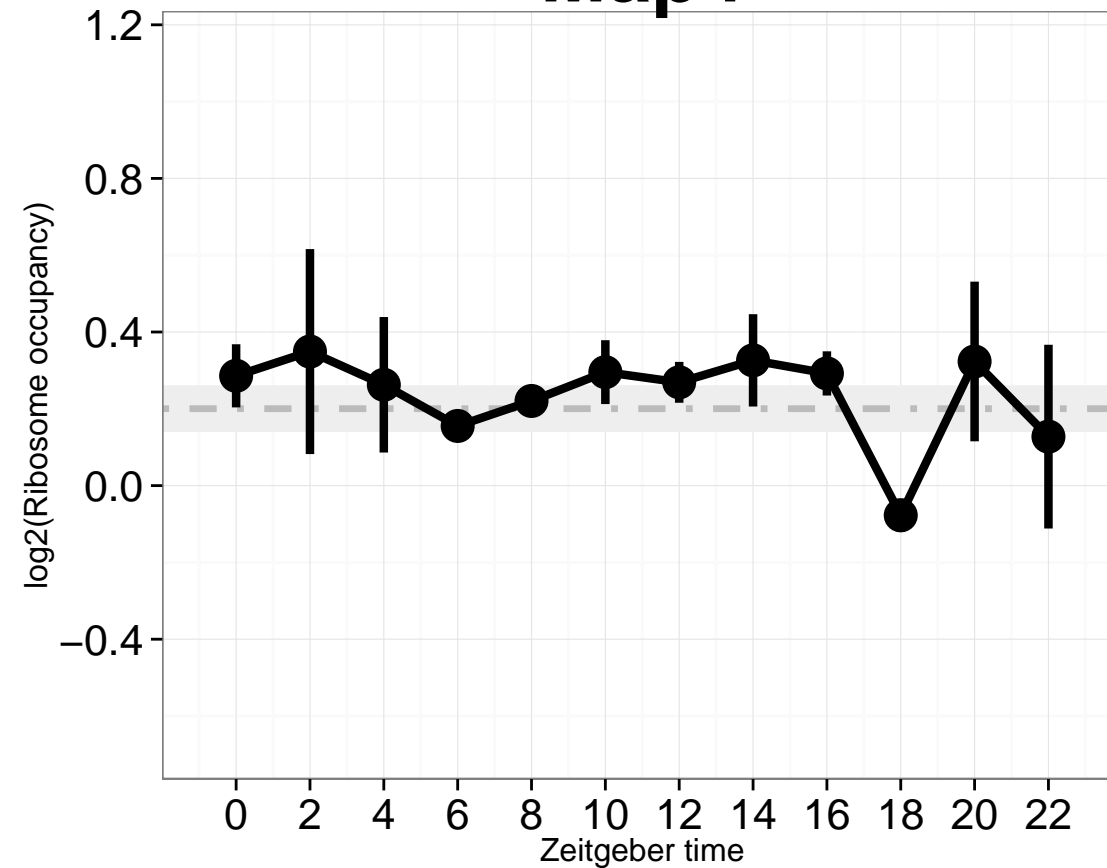

Supplement: SuppDataset_1.zip [file Map4_set_A.pdf › Supplemental Dataset 1/A-mRNA_nonrhyth_translation_nonrhyth/Map4_set_A.pdf]

## Map4k1

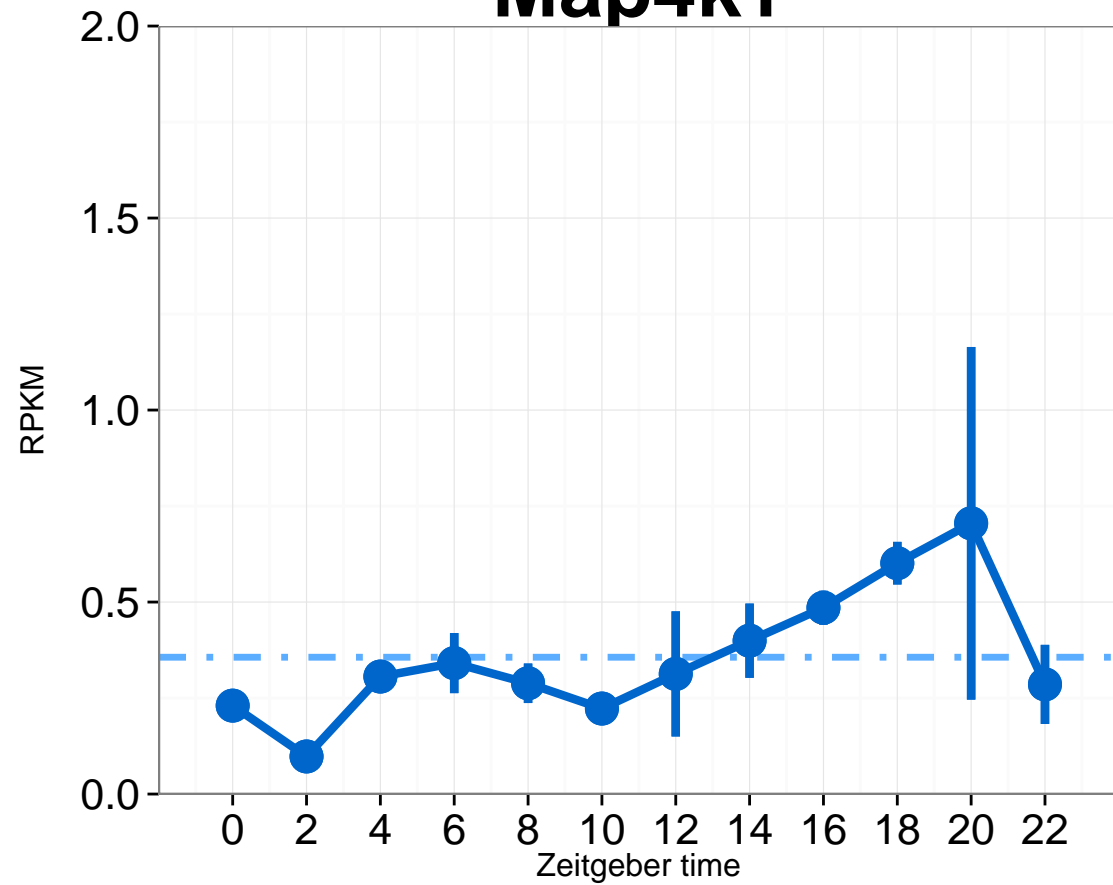

## Map4k1 log2(Ribosome occupancy)

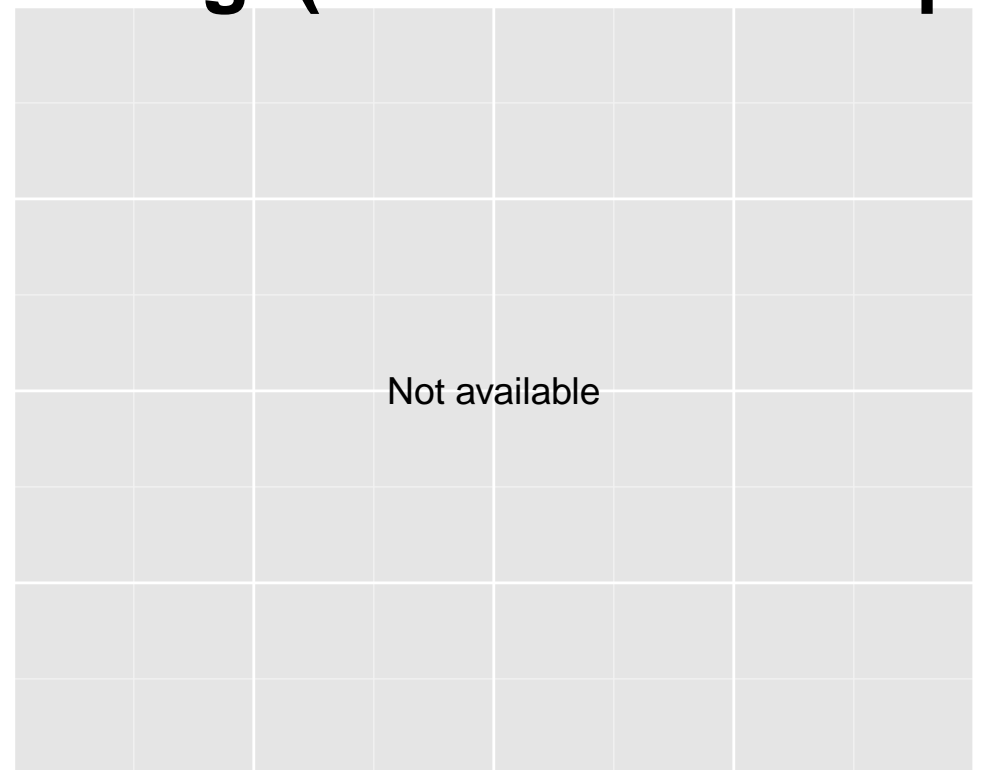

Supplement: SuppDataset_1.zip [file Map4k1_set_A.pdf › Supplemental Dataset 1/A-mRNA_nonrhyth_translation_nonrhyth/Map4k1_set_A.pdf]

# Map4k2

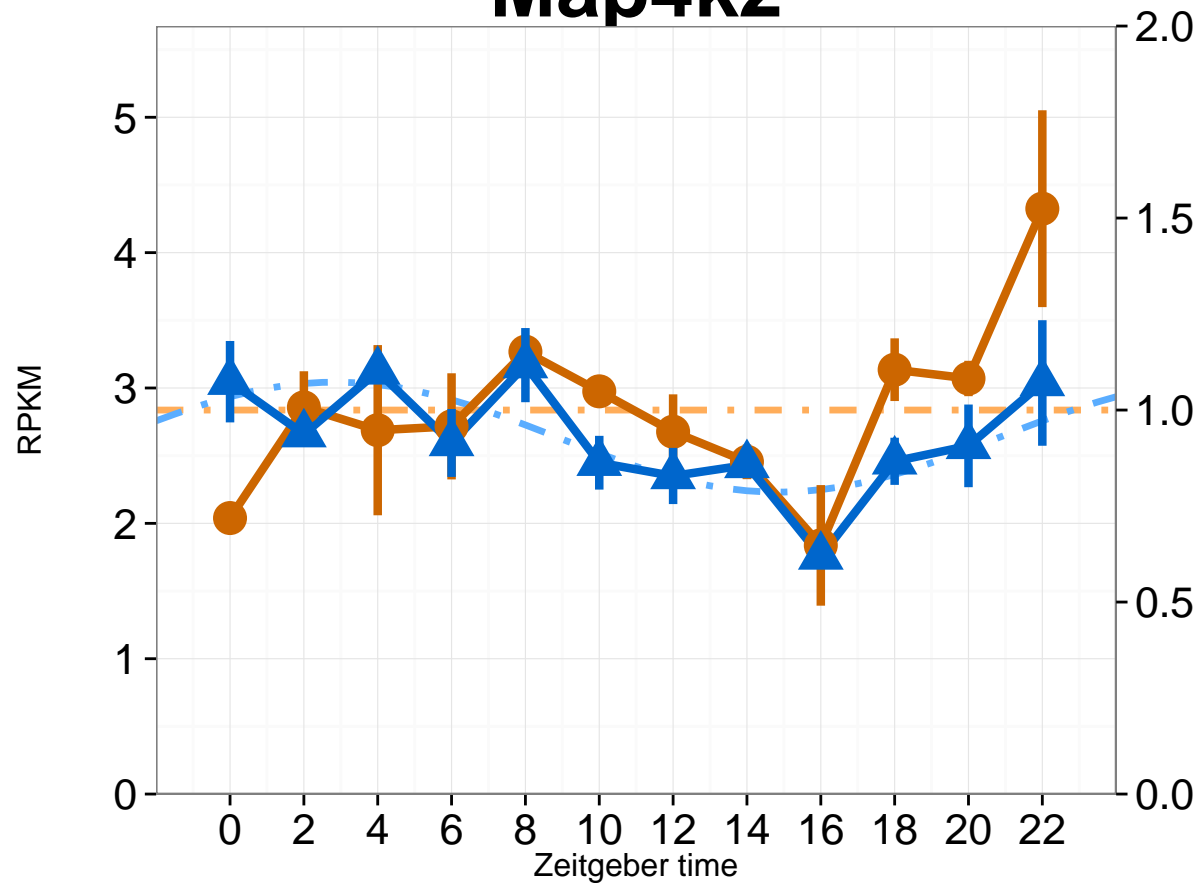

# Map4k2

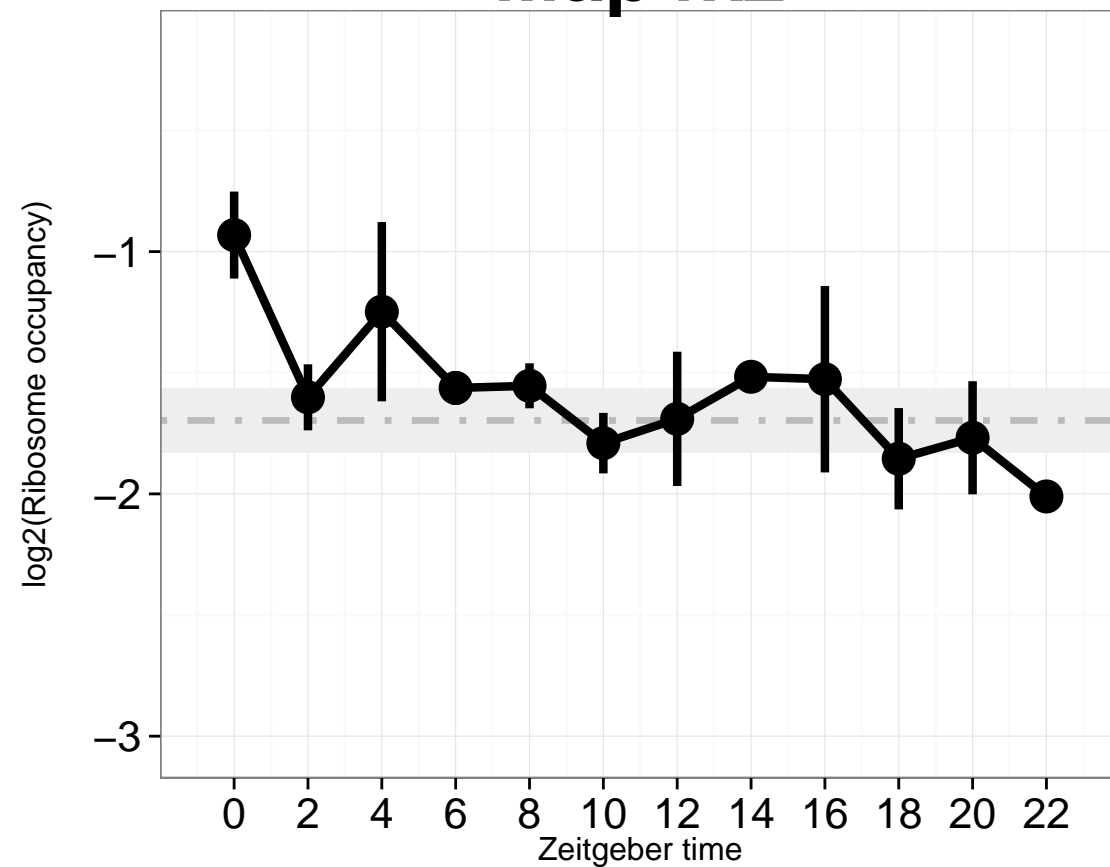

Supplement: SuppDataset_1.zip [file Map4k2_set_A.pdf › Supplemental Dataset 1/A-mRNA_nonrhyth_translation_nonrhyth/Map4k2_set_A.pdf]

# Map4k5

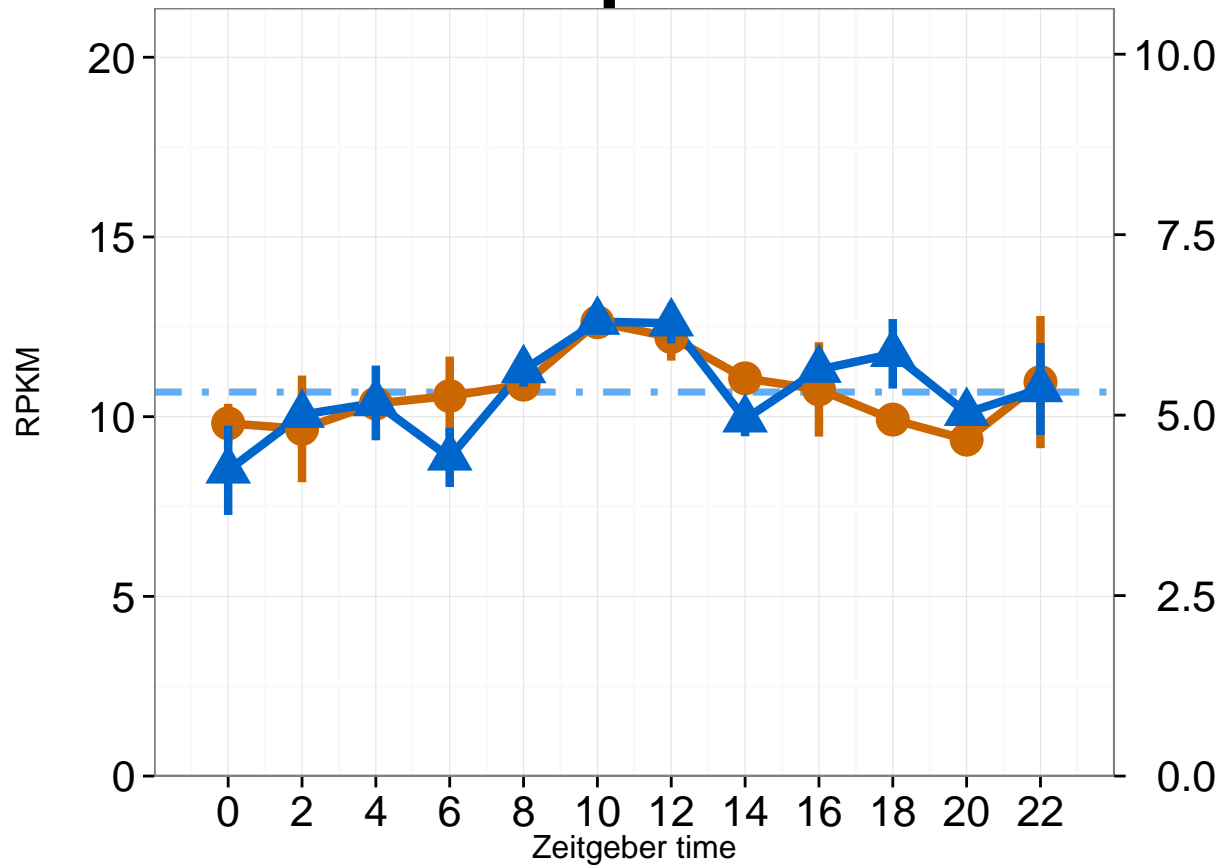

# Map4k5

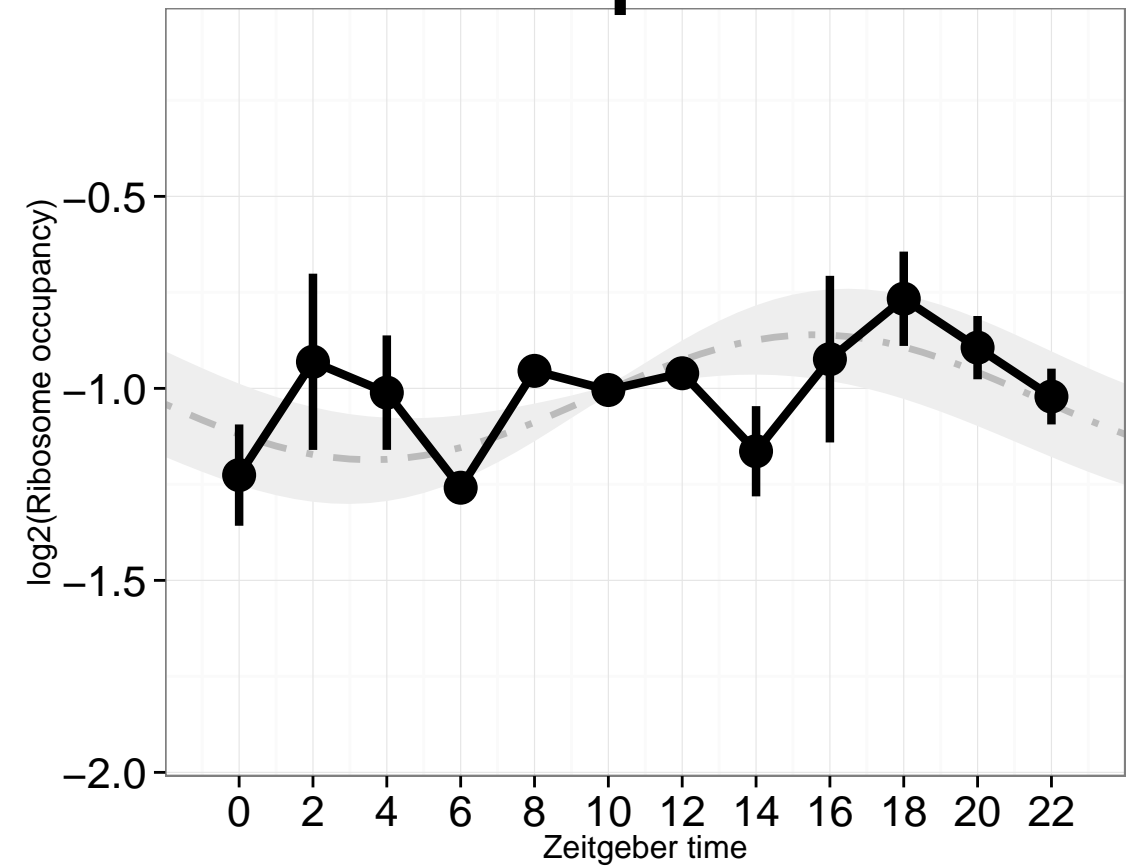

Supplement: SuppDataset_1.zip [file Map4k5_set_A.pdf › Supplemental Dataset 1/A-mRNA_nonrhyth_translation_nonrhyth/Map4k5_set_A.pdf]

# Map7

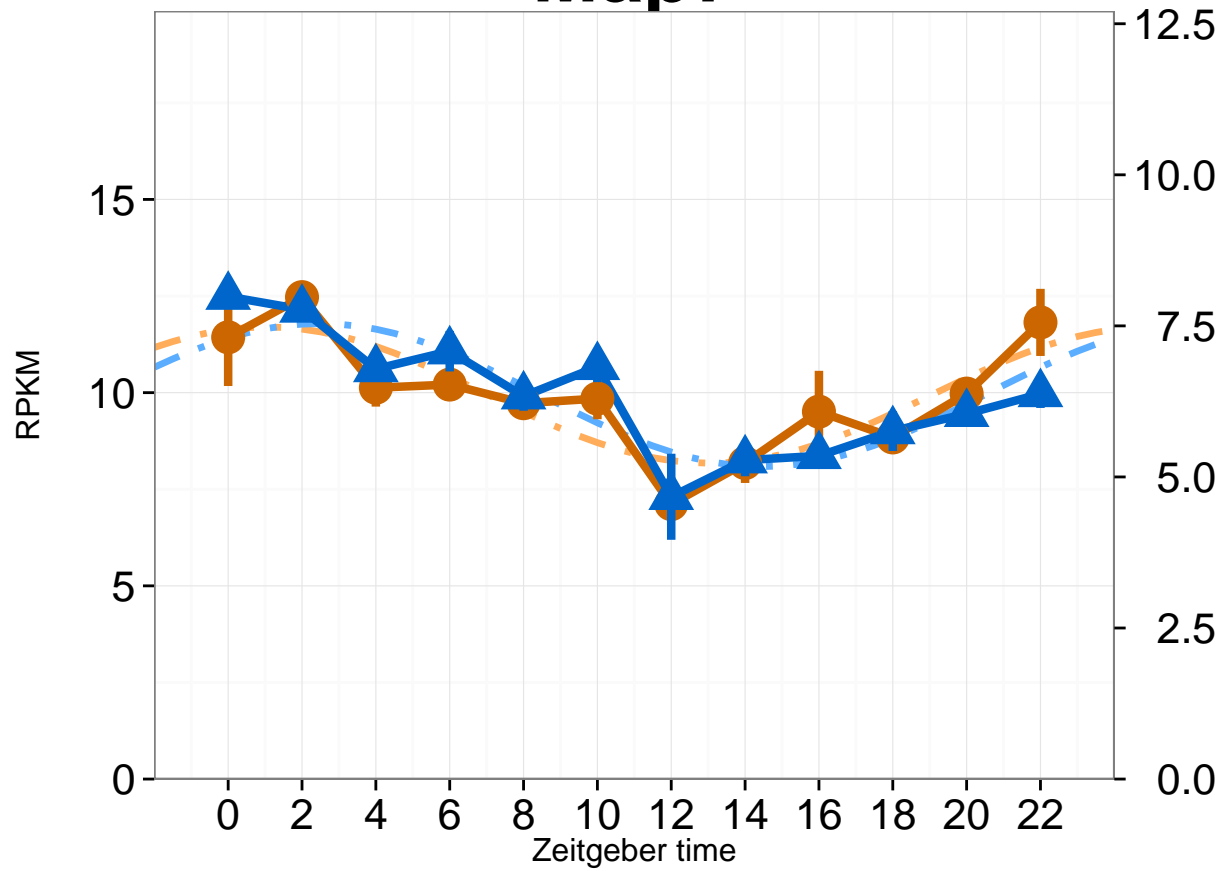

# Map7

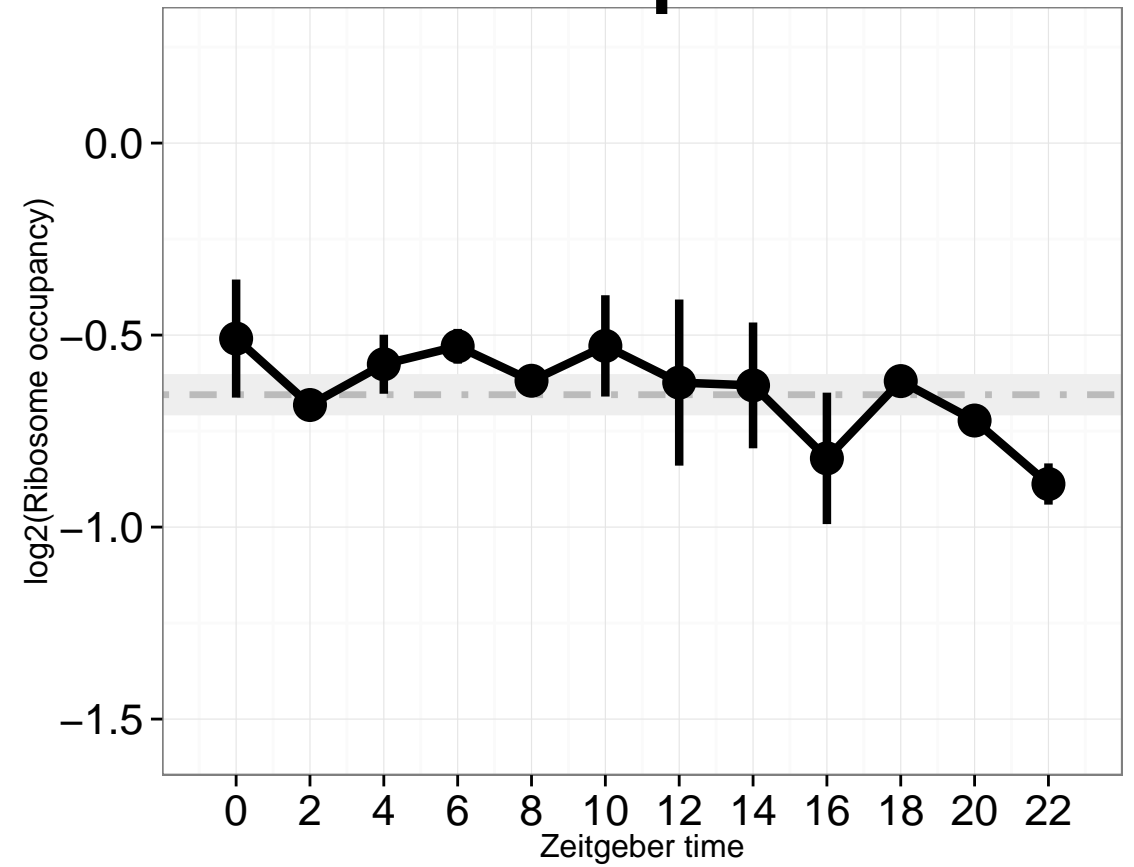

Supplement: SuppDataset_1.zip [file Map7_set_A.pdf › Supplemental Dataset 1/A-mRNA_nonrhyth_translation_nonrhyth/Map7_set_A.pdf]

## Mapk11

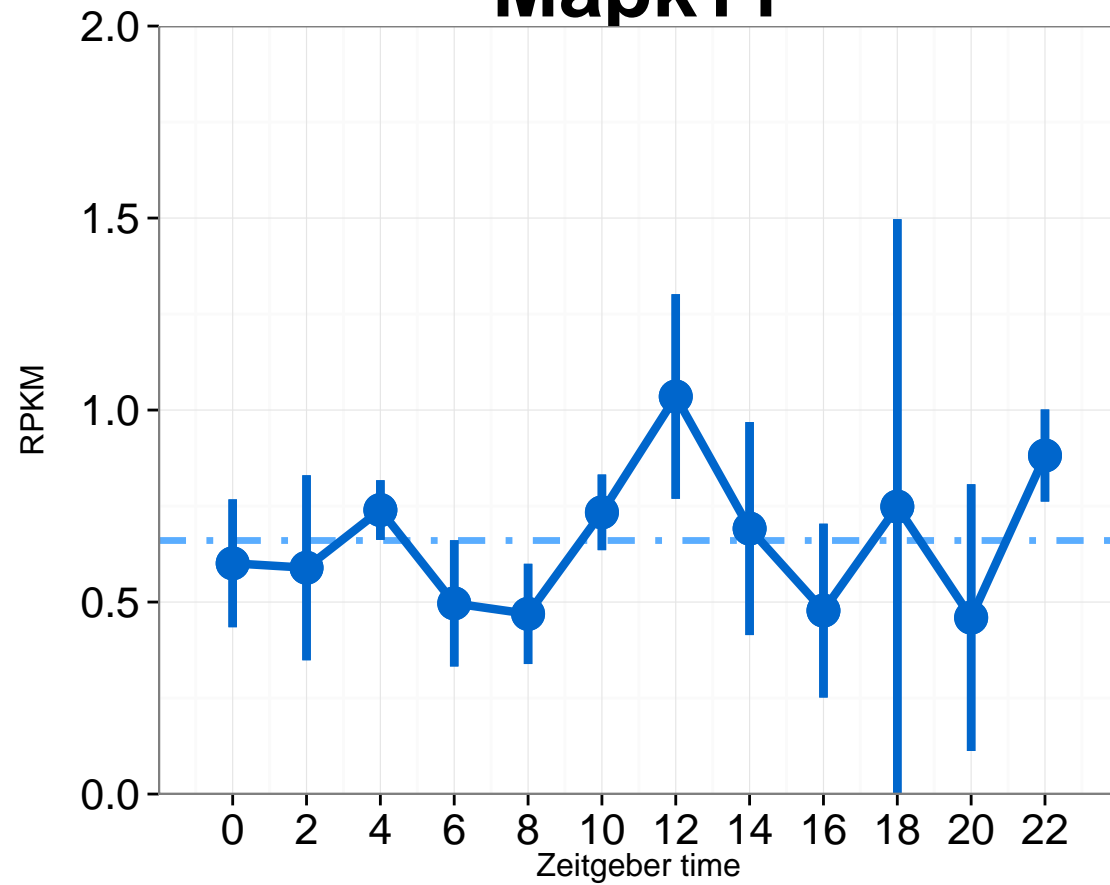

## Mapk11 log2(Ribosome occupancy)

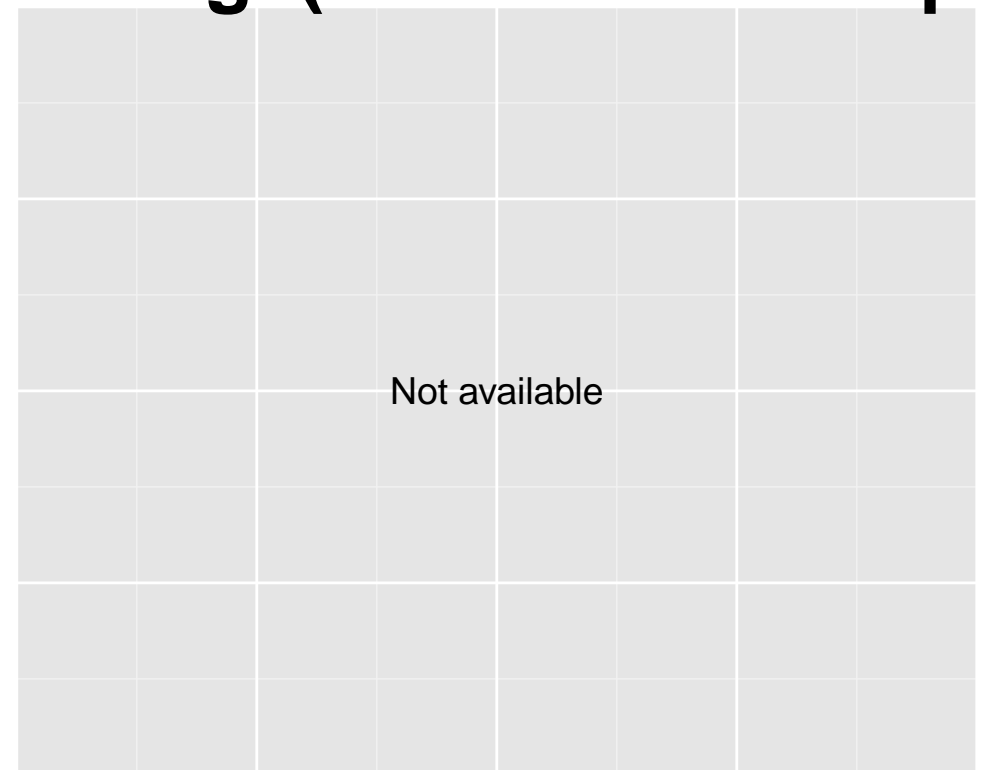

Supplement: SuppDataset_1.zip [file Mapk11_set_A.pdf › Supplemental Dataset 1/A-mRNA_nonrhyth_translation_nonrhyth/Mapk11_set_A.pdf]

# Mapk12

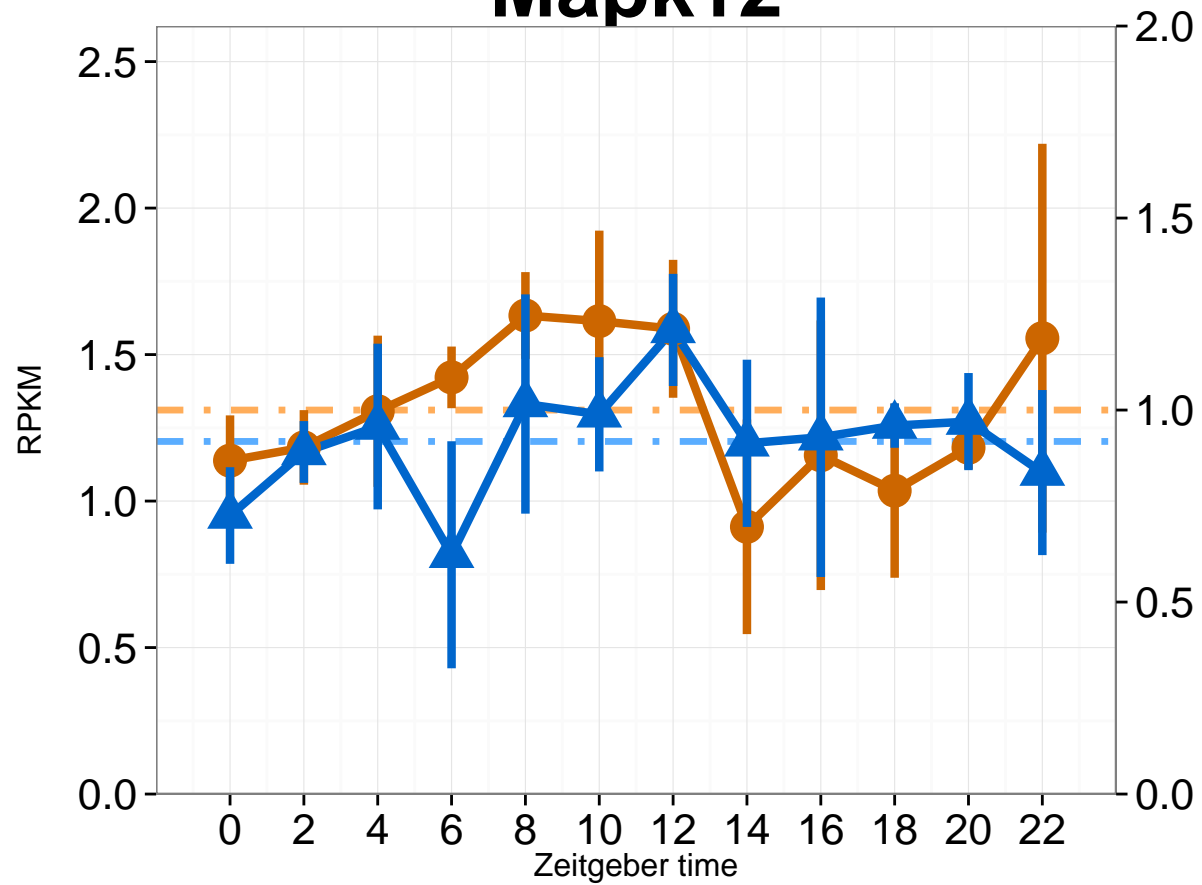

# Mapk12

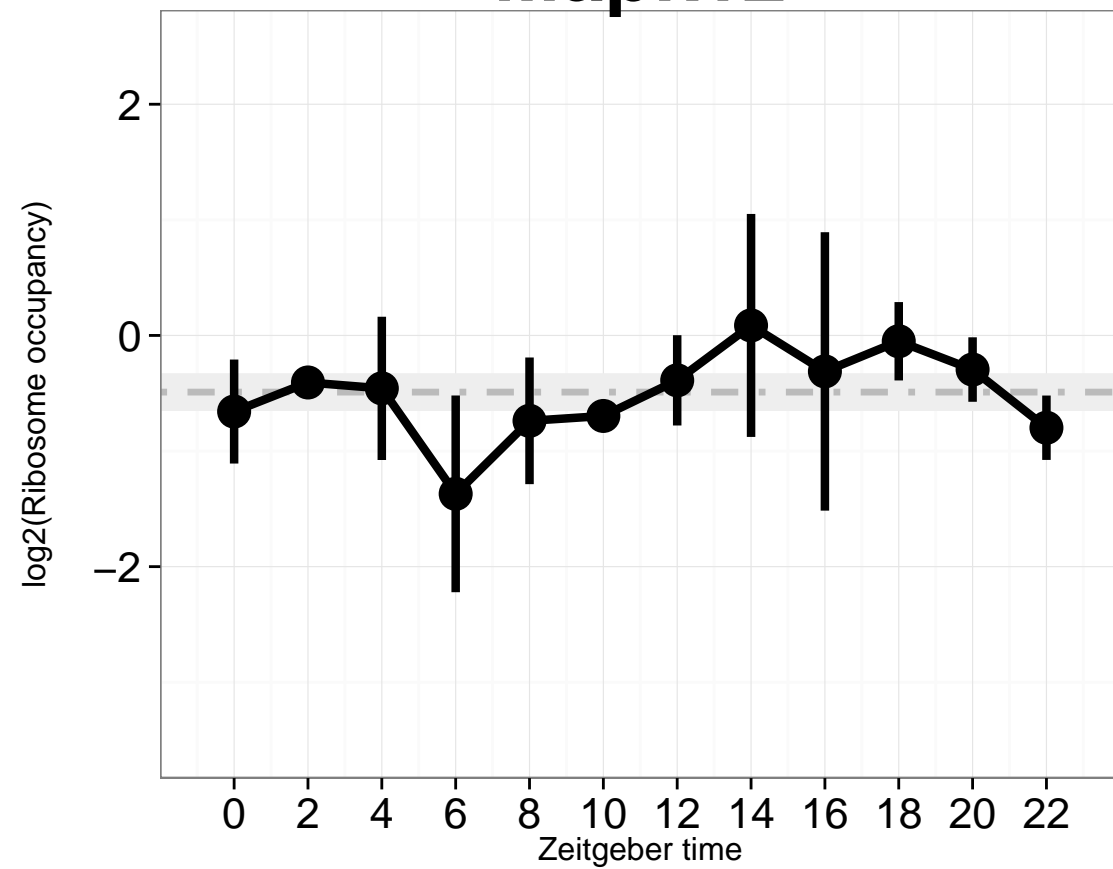

Supplement: SuppDataset_1.zip [file Mapk12_set_A.pdf › Supplemental Dataset 1/A-mRNA_nonrhyth_translation_nonrhyth/Mapk12_set_A.pdf]

# Mapk1

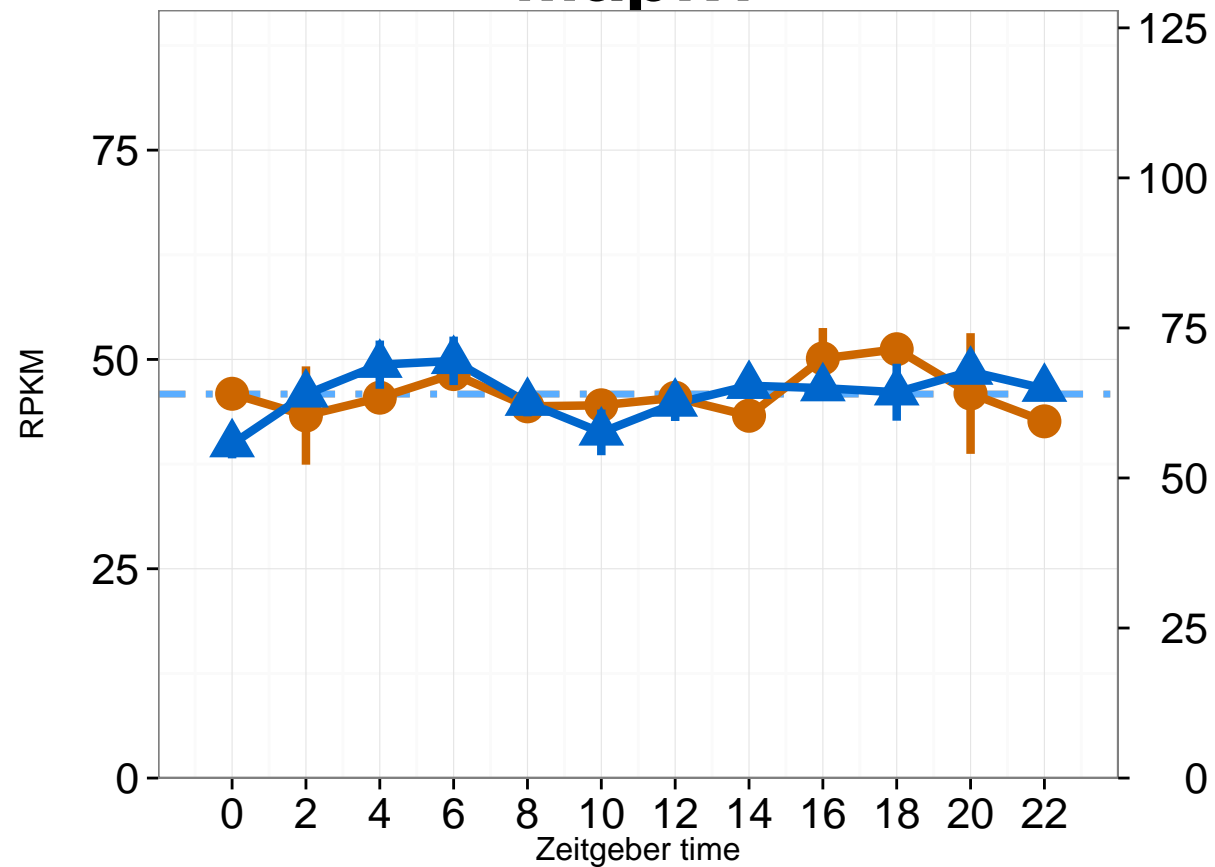

# Mapk1

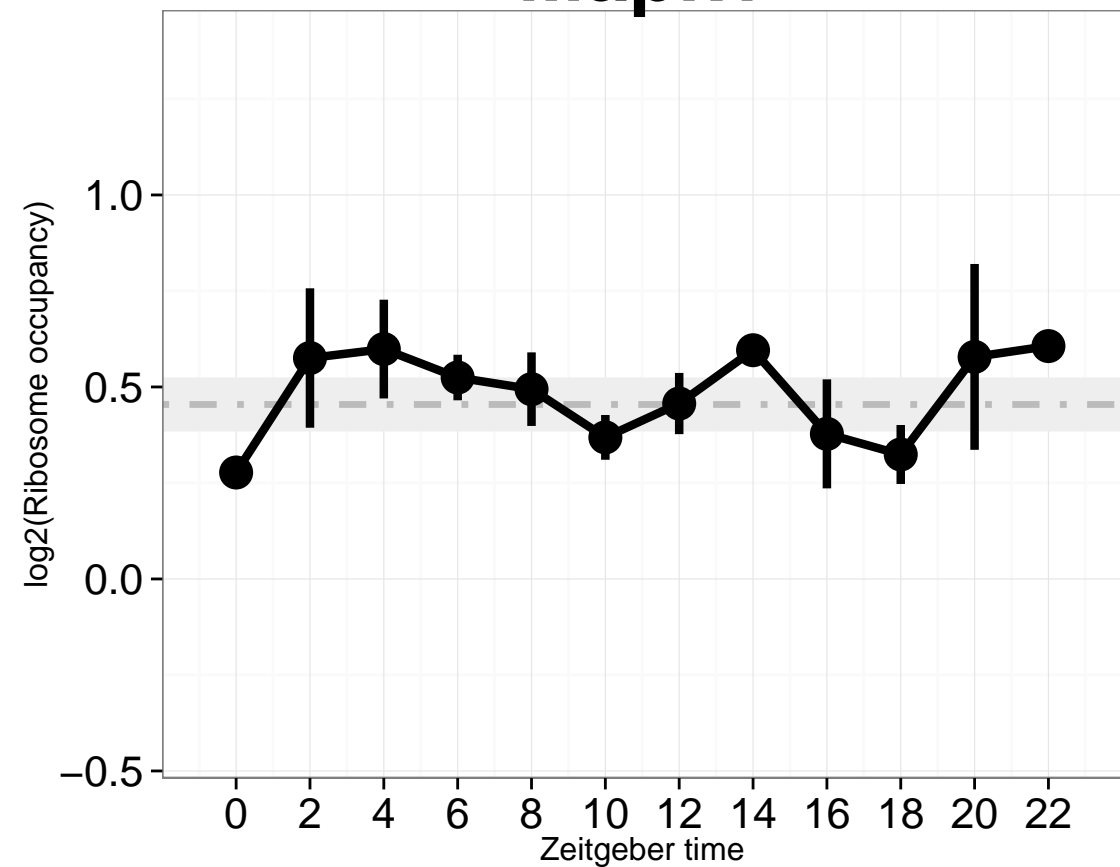

Supplement: SuppDataset_1.zip [file Mapk1_set_A.pdf › Supplemental Dataset 1/A-mRNA_nonrhyth_translation_nonrhyth/Mapk1_set_A.pdf]

# Mapk1ip1l

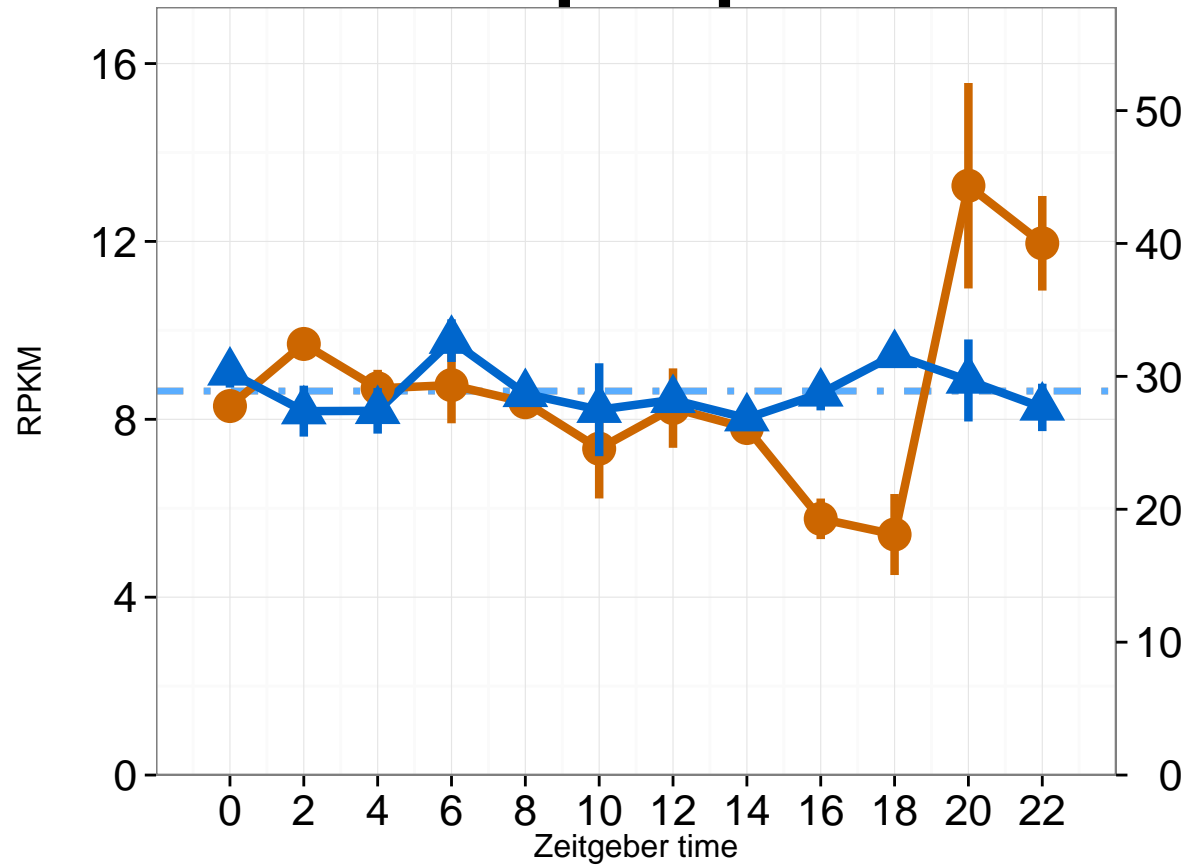

# Mapk1ip1l

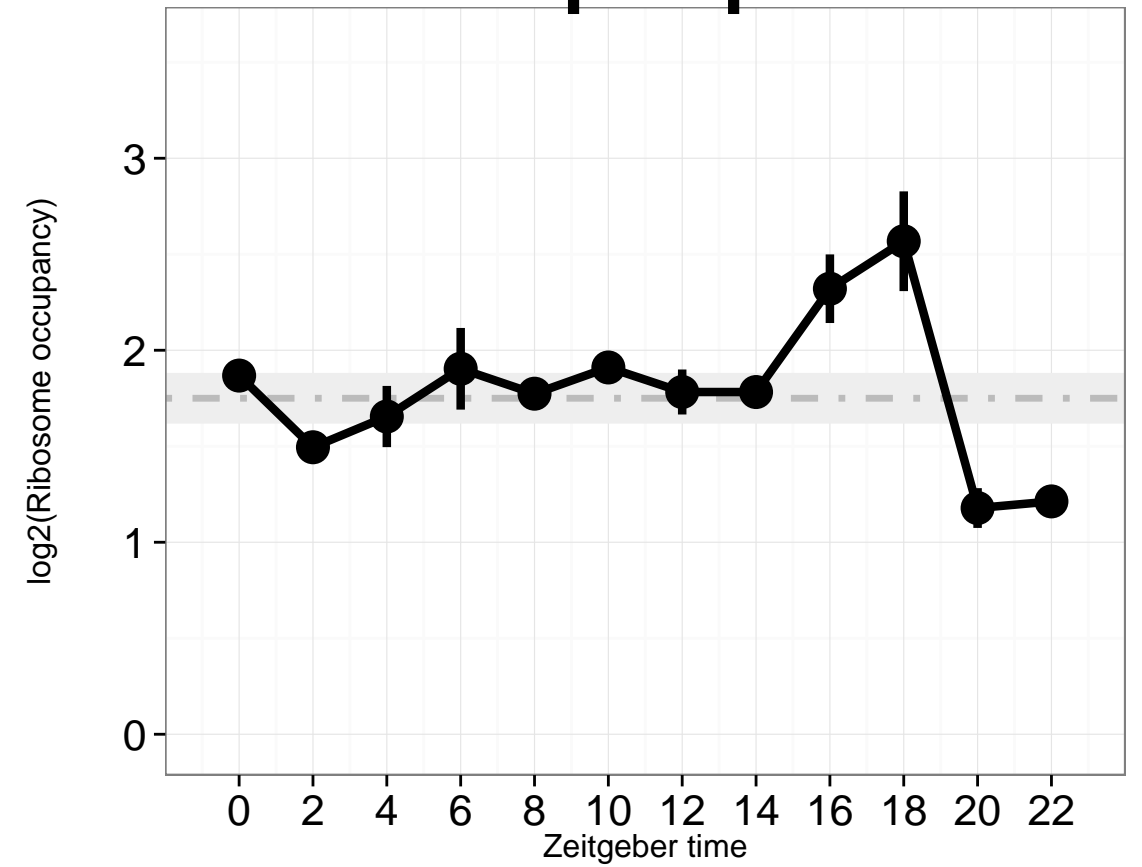

Supplement: SuppDataset_1.zip [file Mapk1ip1l_set_A.pdf › Supplemental Dataset 1/A-mRNA_nonrhyth_translation_nonrhyth/Mapk1ip1l_set_A.pdf]

## Mapk3

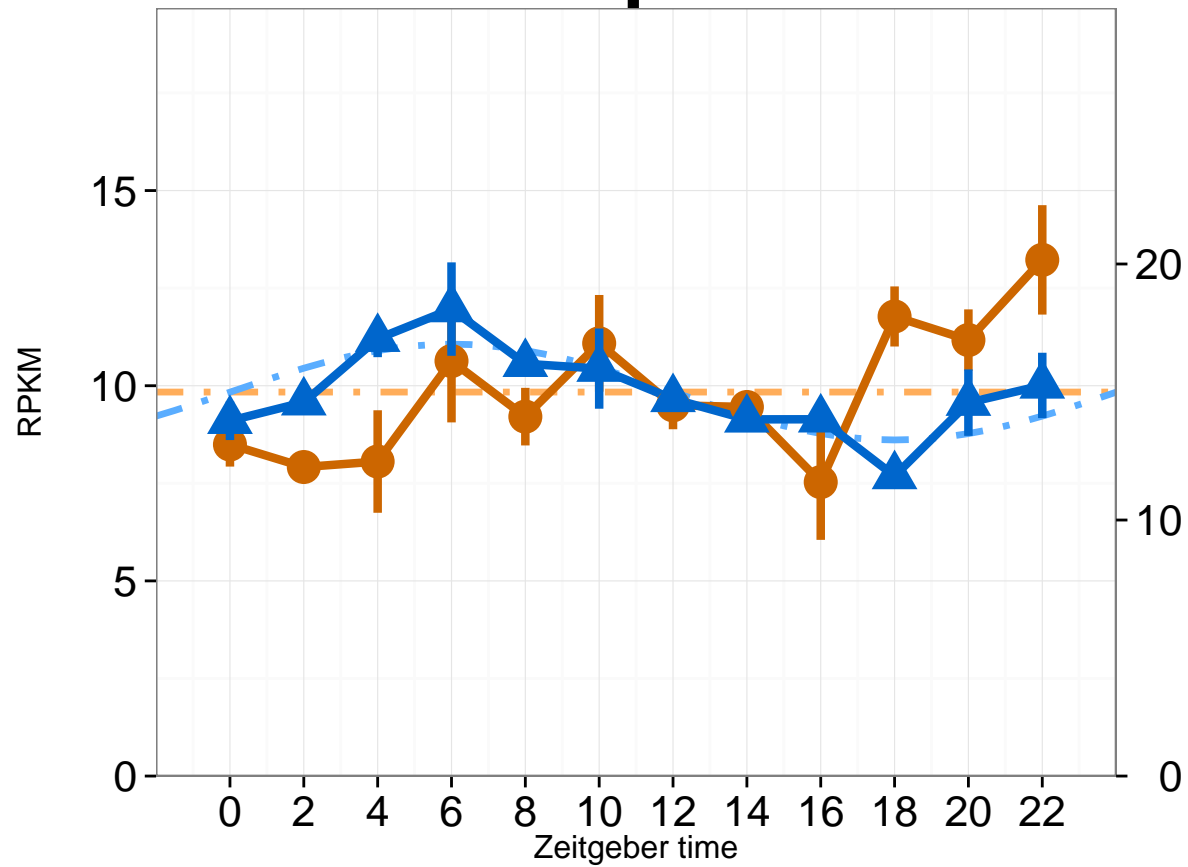

## Mapk3

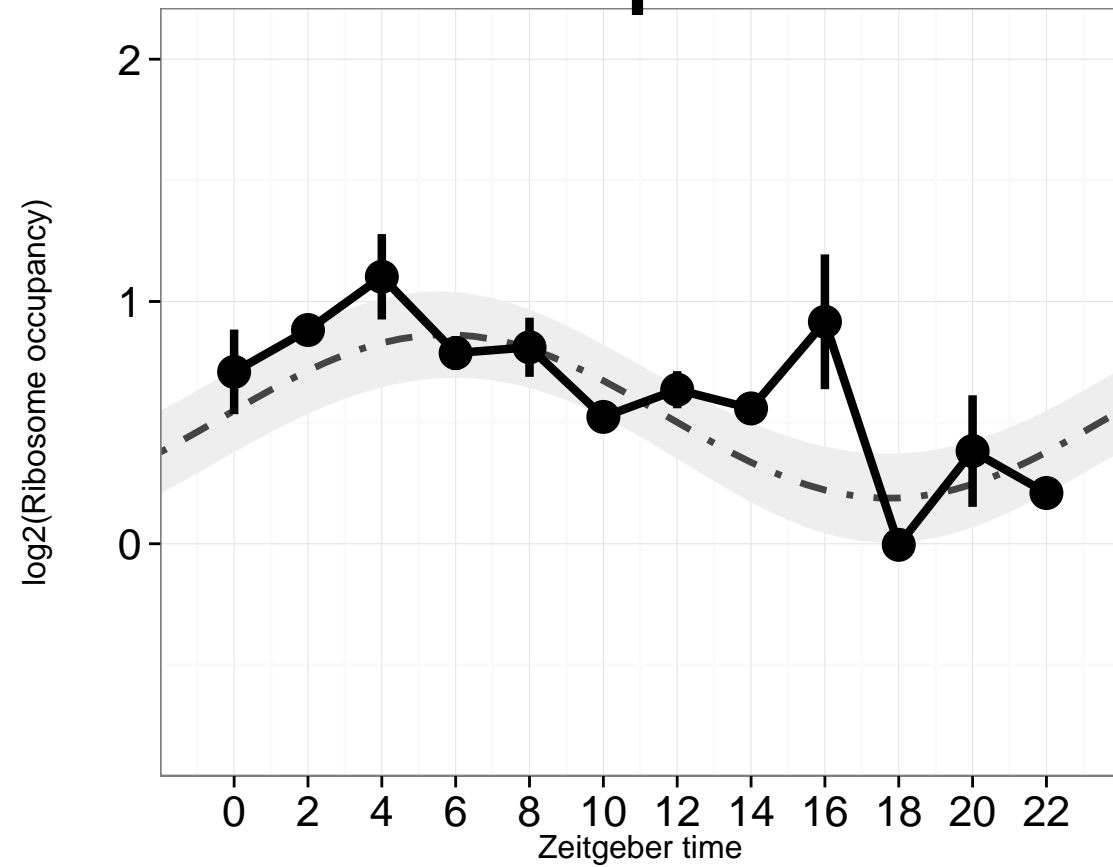

Supplement: SuppDataset_1.zip [file Mapk3_set_A.pdf › Supplemental Dataset 1/A-mRNA_nonrhyth_translation_nonrhyth/Mapk3_set_A.pdf]

## Mapk4

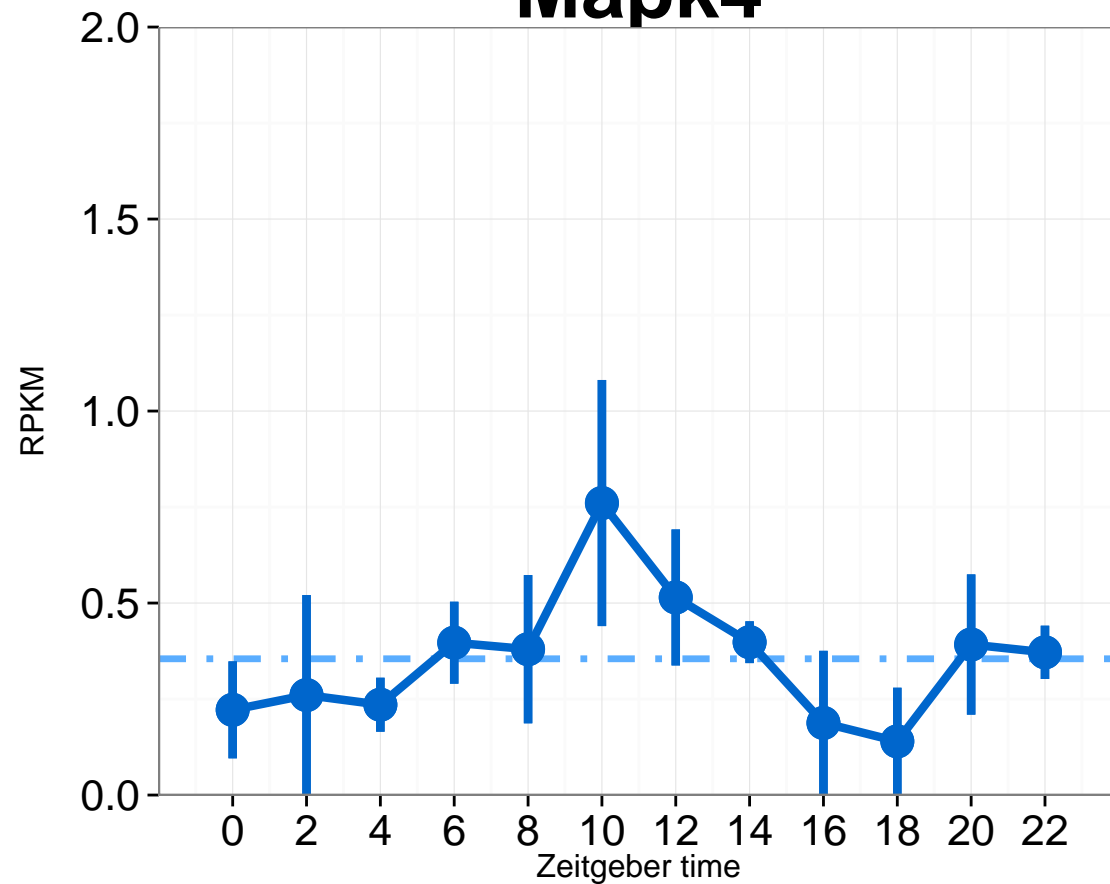

## Mapk4 log2(Ribosome occupancy

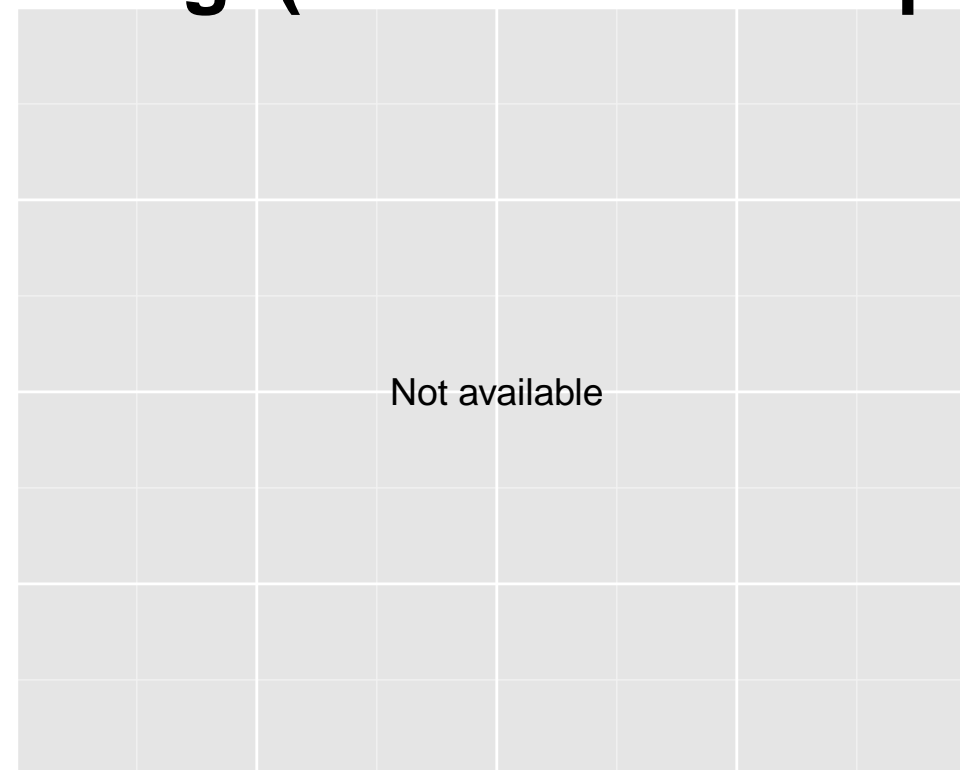

Supplement: SuppDataset_1.zip [file Mapk4_set_A.pdf › Supplemental Dataset 1/A-mRNA_nonrhyth_translation_nonrhyth/Mapk4_set_A.pdf]

# Mapk6

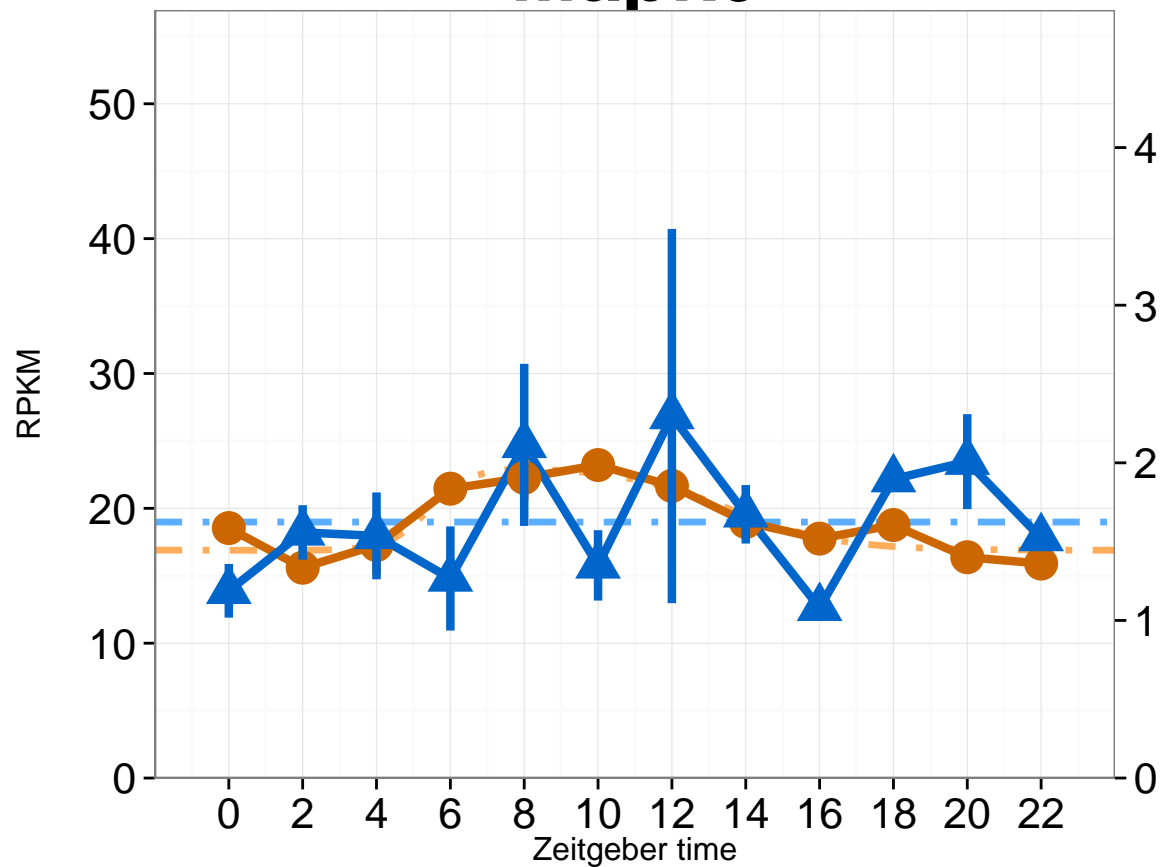

# Mapk6

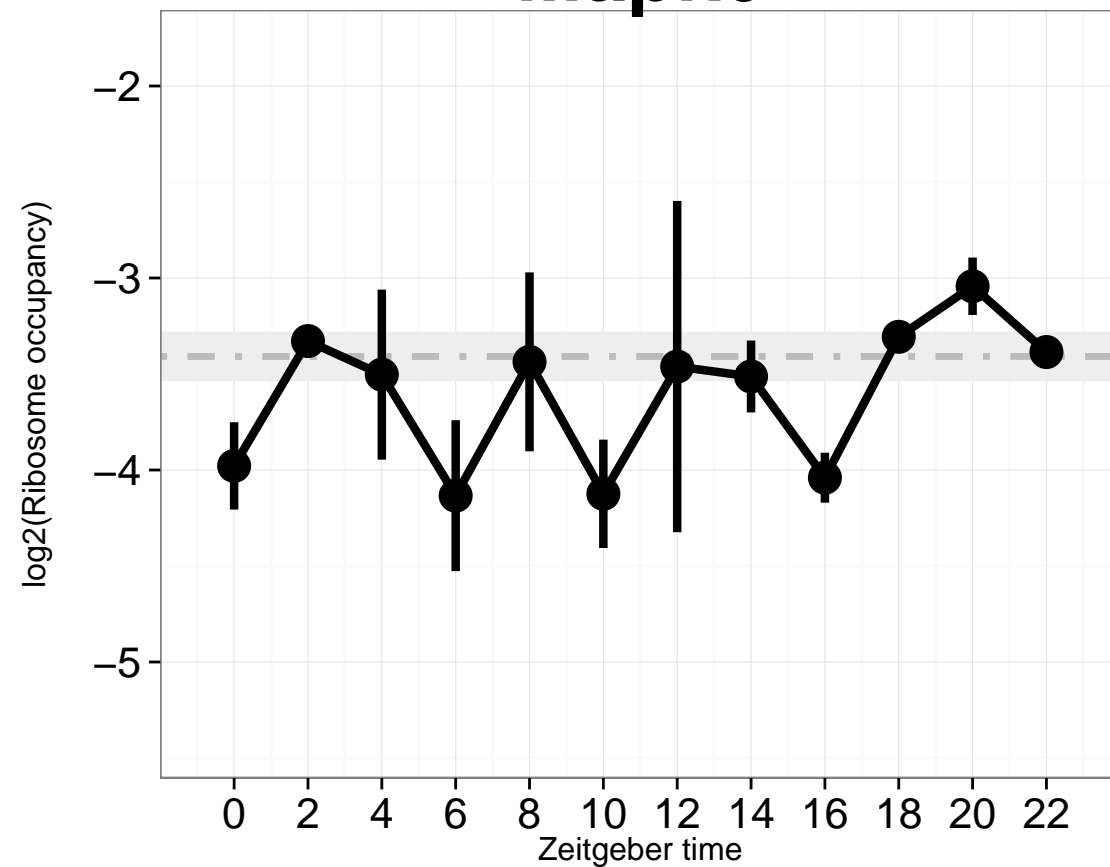

Supplement: SuppDataset_1.zip [file Mapk6_set_A.pdf › Supplemental Dataset 1/A-mRNA_nonrhyth_translation_nonrhyth/Mapk6_set_A.pdf]

# Mapk7

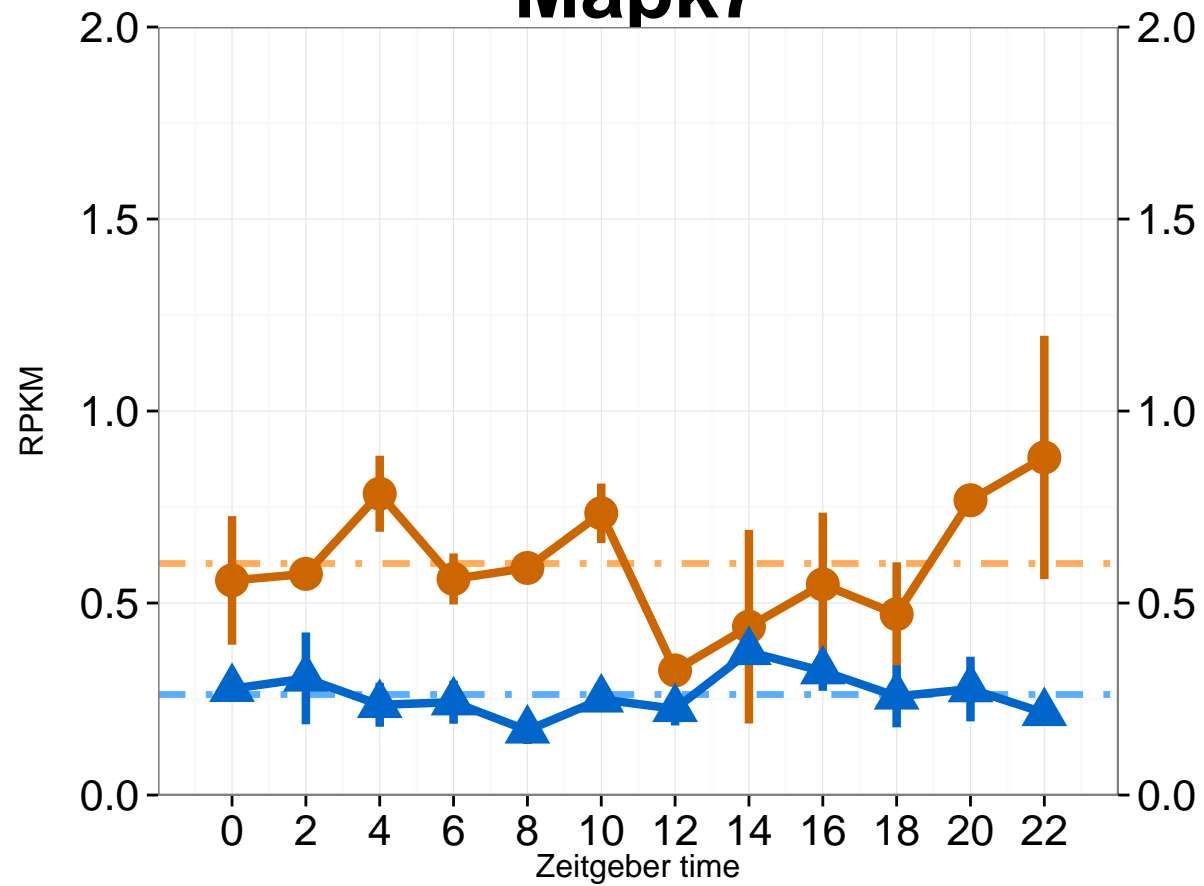

# Mapk7

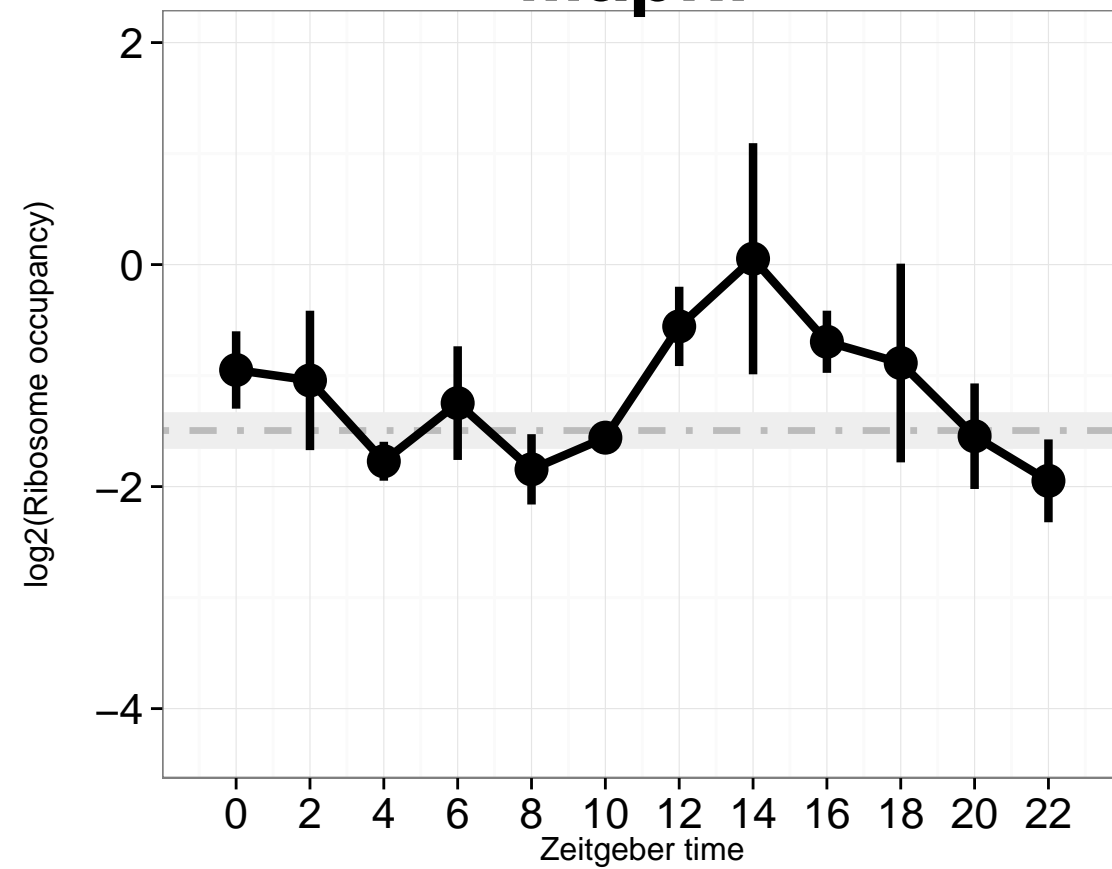

Supplement: SuppDataset_1.zip [file Mapk7_set_A.pdf › Supplemental Dataset 1/A-mRNA_nonrhyth_translation_nonrhyth/Mapk7_set_A.pdf]

# Mapk8

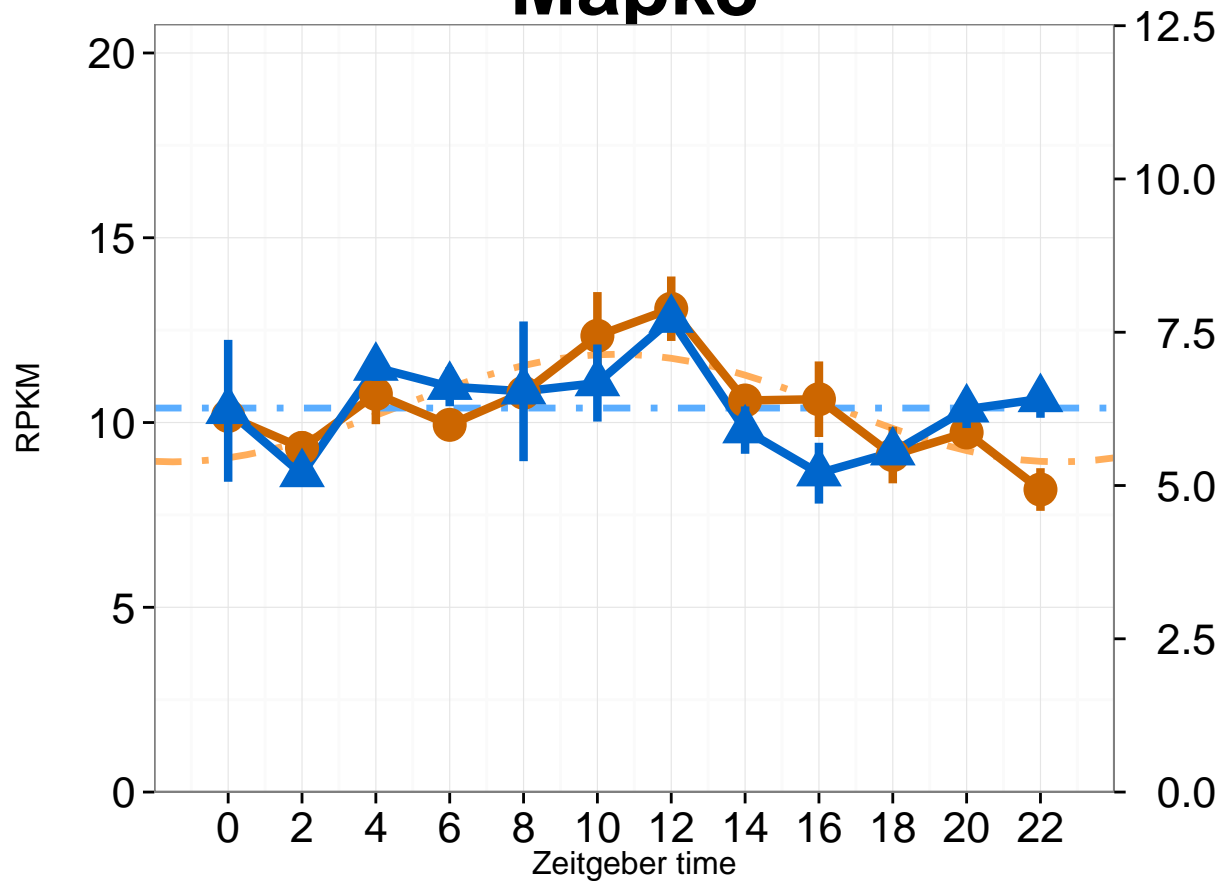

# Mapk8

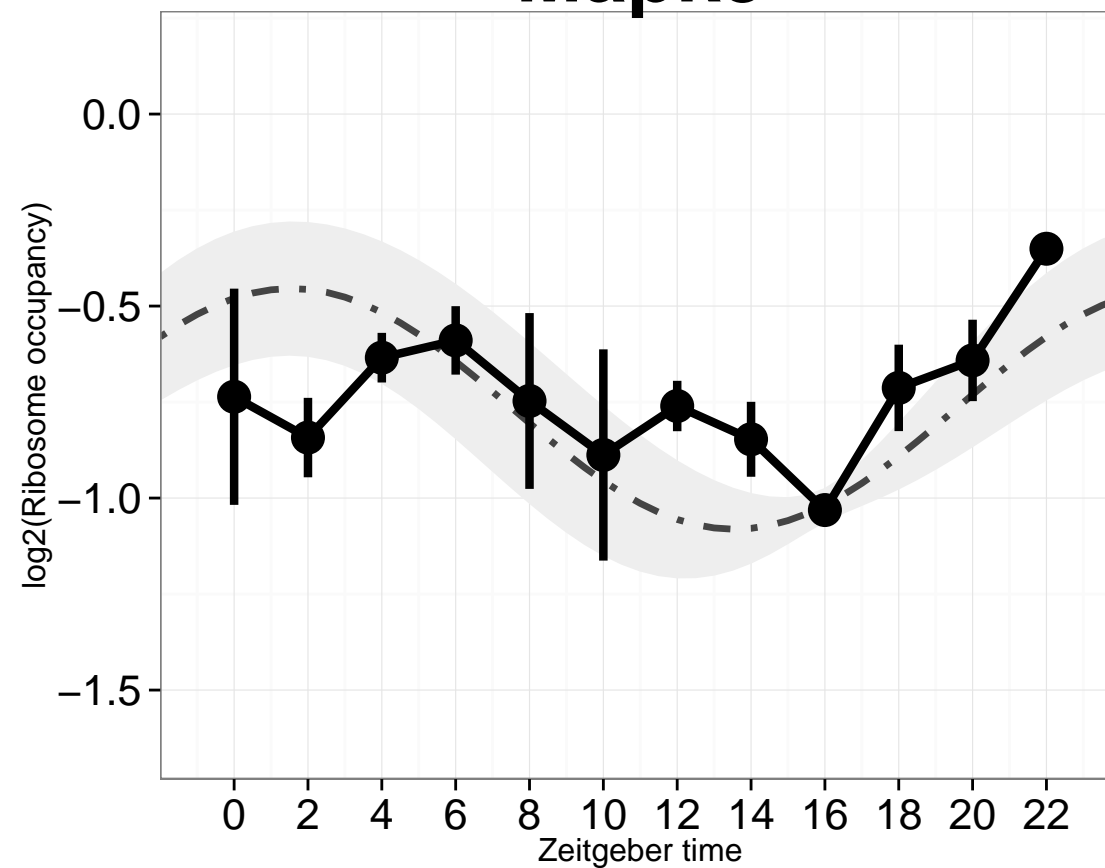

Supplement: SuppDataset_1.zip [file Mapk8_set_A.pdf › Supplemental Dataset 1/A-mRNA_nonrhyth_translation_nonrhyth/Mapk8_set_A.pdf]

## Mapk8ip1

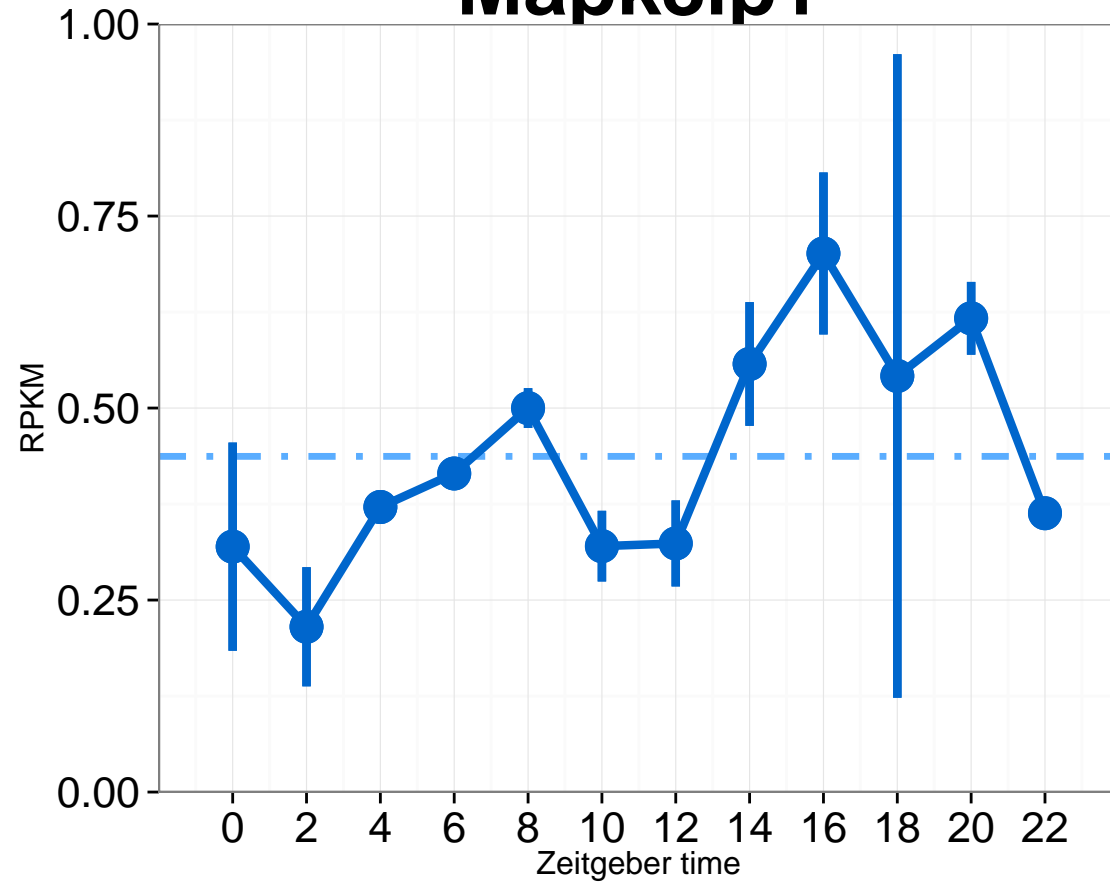

## Mapk8ip1 log2(Ribosome occupancy)

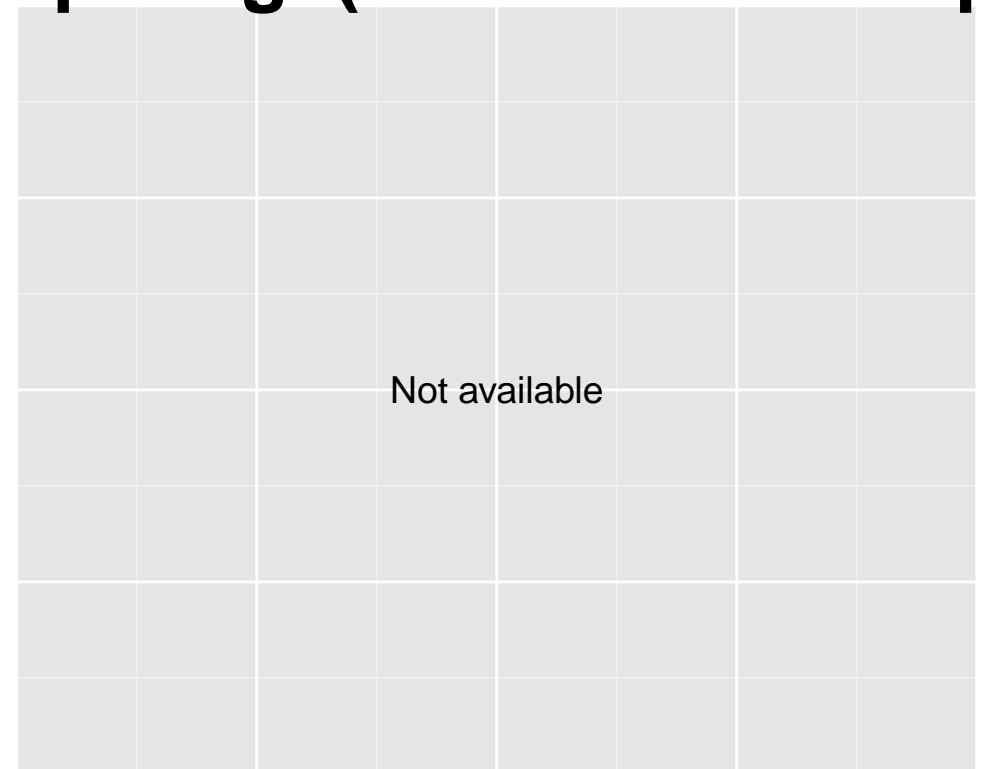

Supplement: SuppDataset_1.zip [file Mapk8ip1_set_A.pdf › Supplemental Dataset 1/A-mRNA_nonrhyth_translation_nonrhyth/Mapk8ip1_set_A.pdf]

## Mapk8ip3

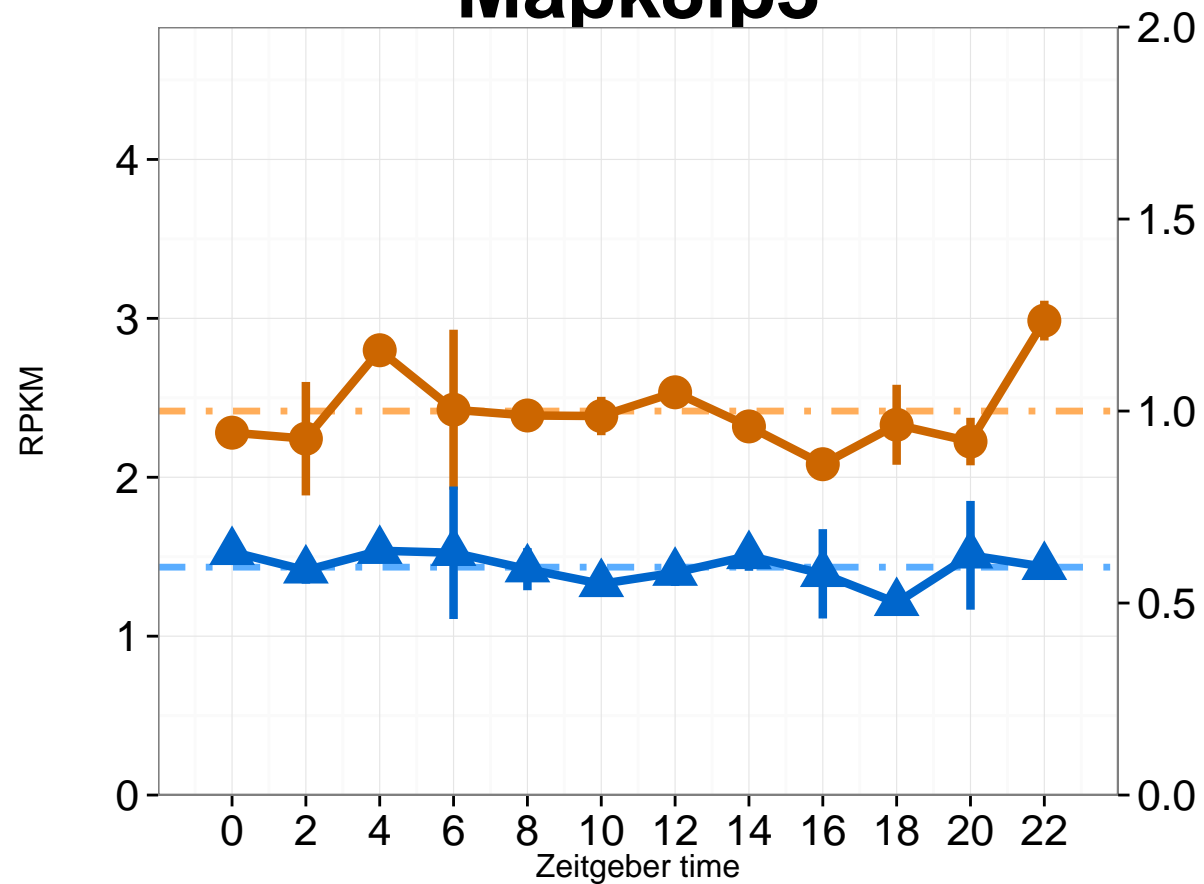

## Mapk8ip3

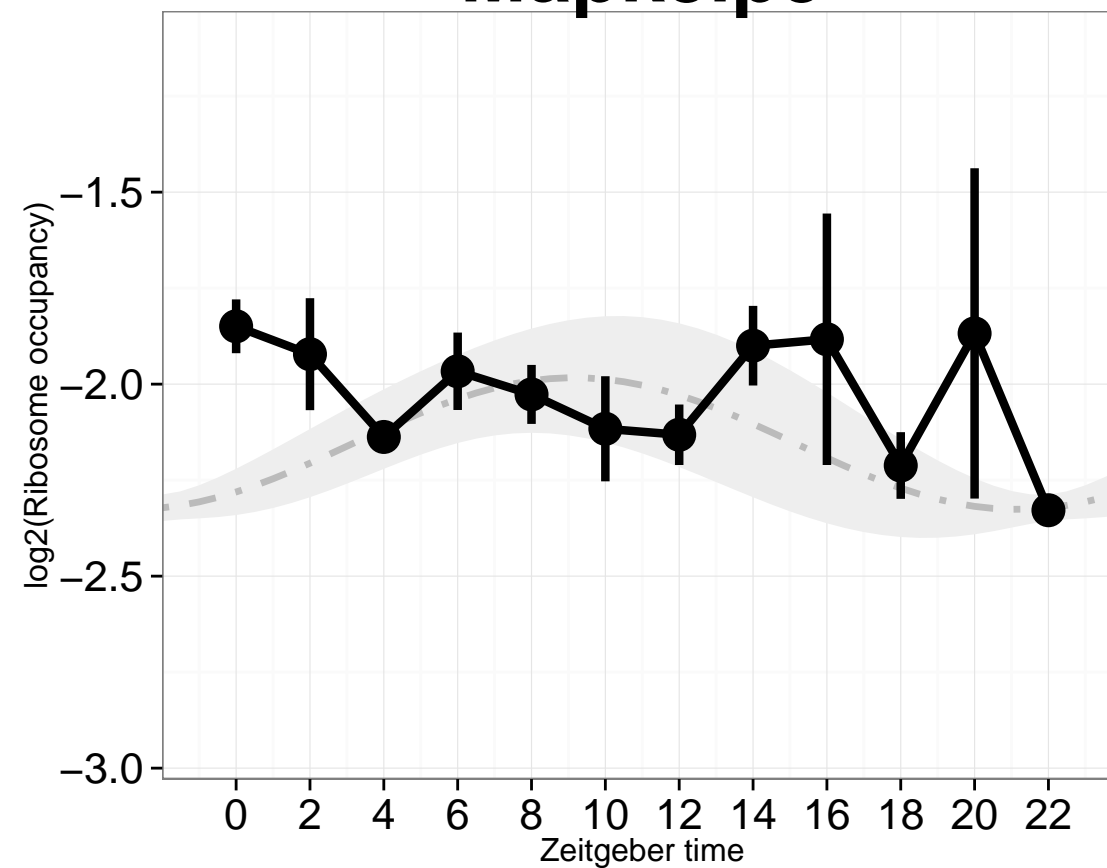

Supplement: SuppDataset_1.zip [file Mapk8ip3_set_A.pdf › Supplemental Dataset 1/A-mRNA_nonrhyth_translation_nonrhyth/Mapk8ip3_set_A.pdf]

# Mapk9

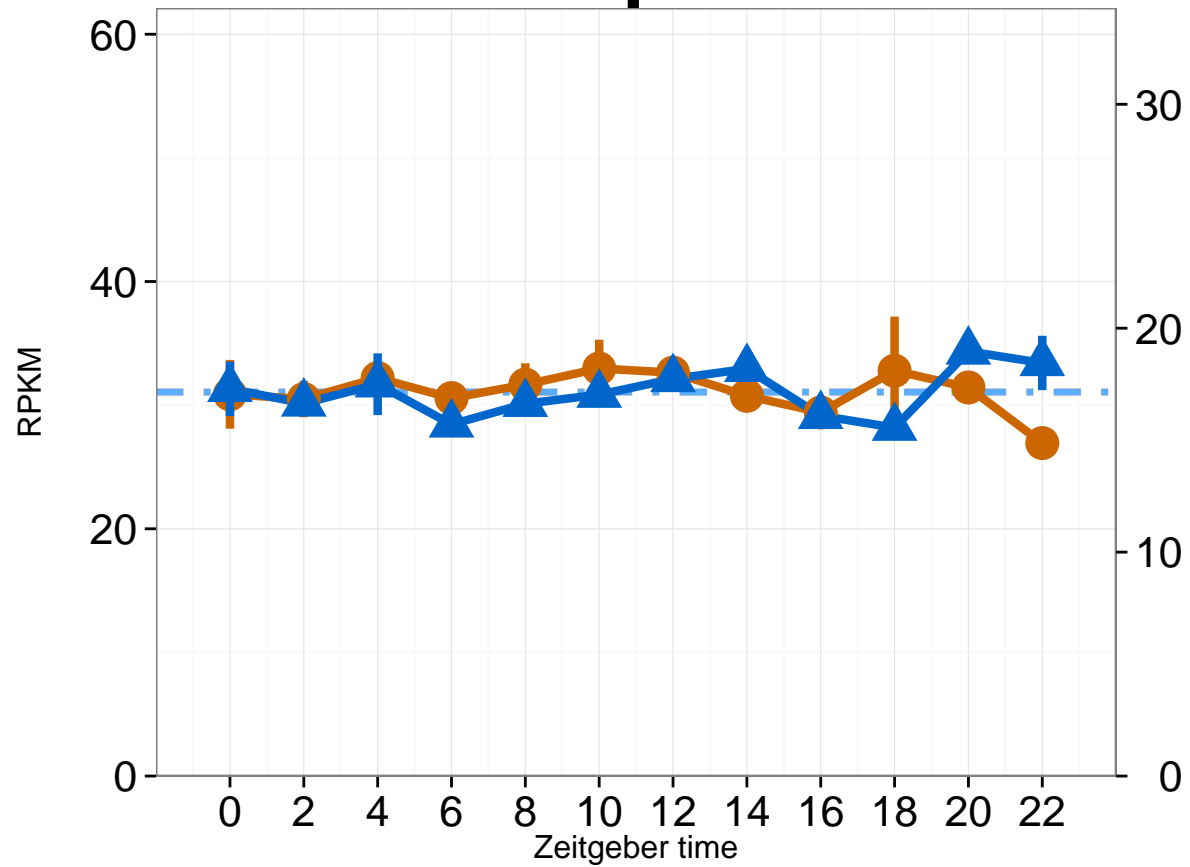

# Mapk9

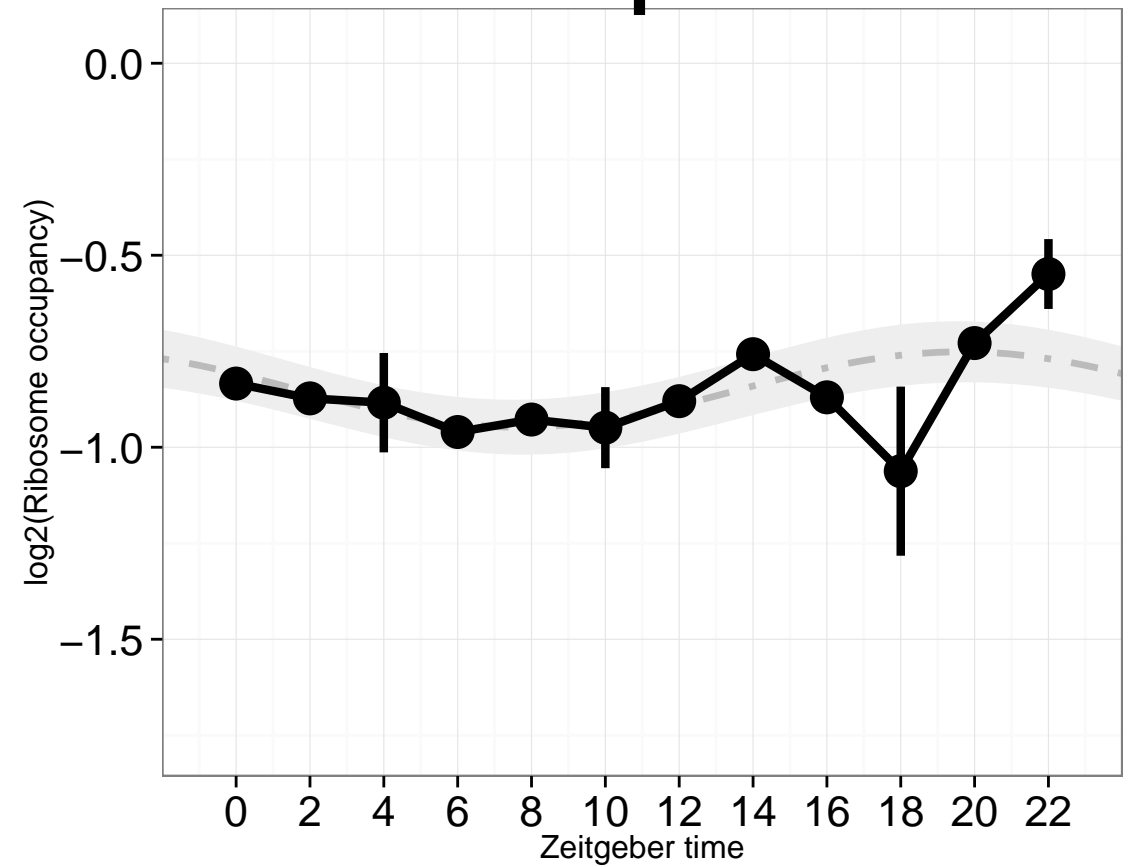

Supplement: SuppDataset_1.zip [file Mapk9_set_A.pdf › Supplemental Dataset 1/A-mRNA_nonrhyth_translation_nonrhyth/Mapk9_set_A.pdf]

# Mapkap1

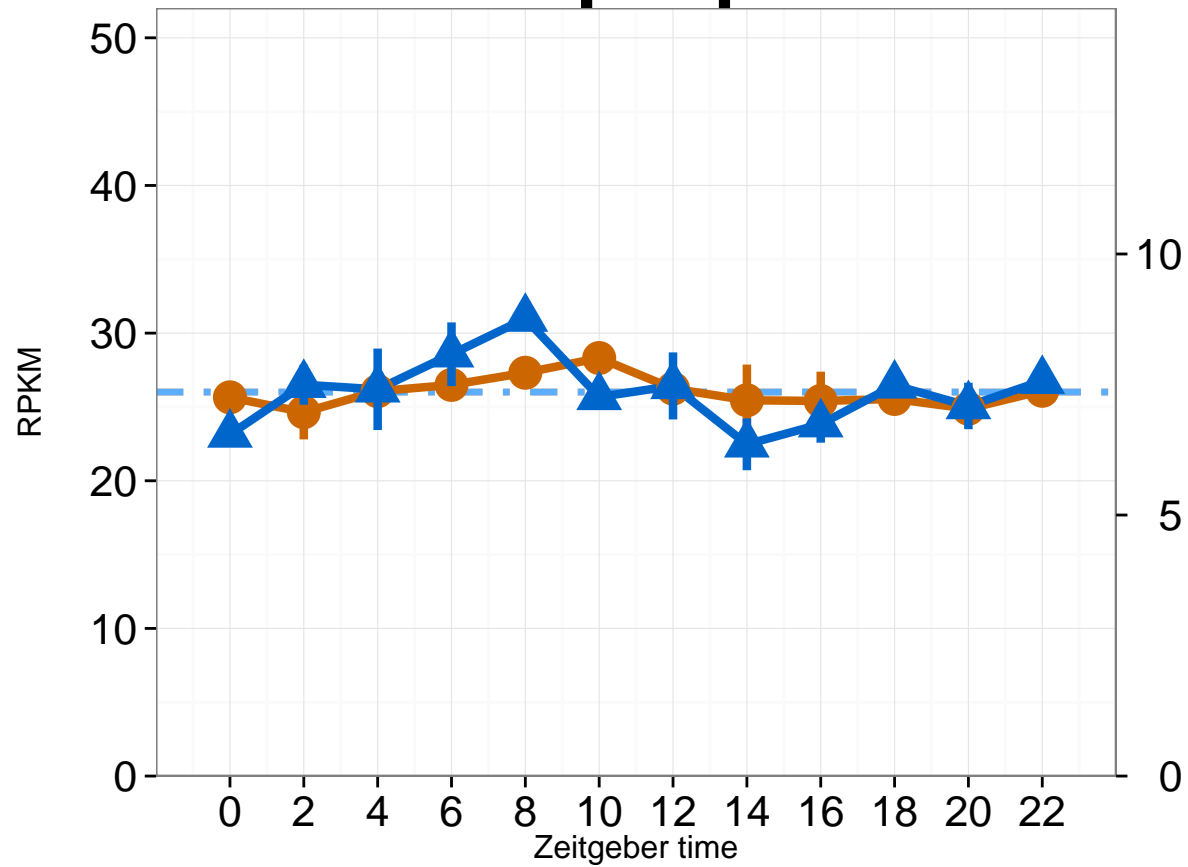

# Mapkap1

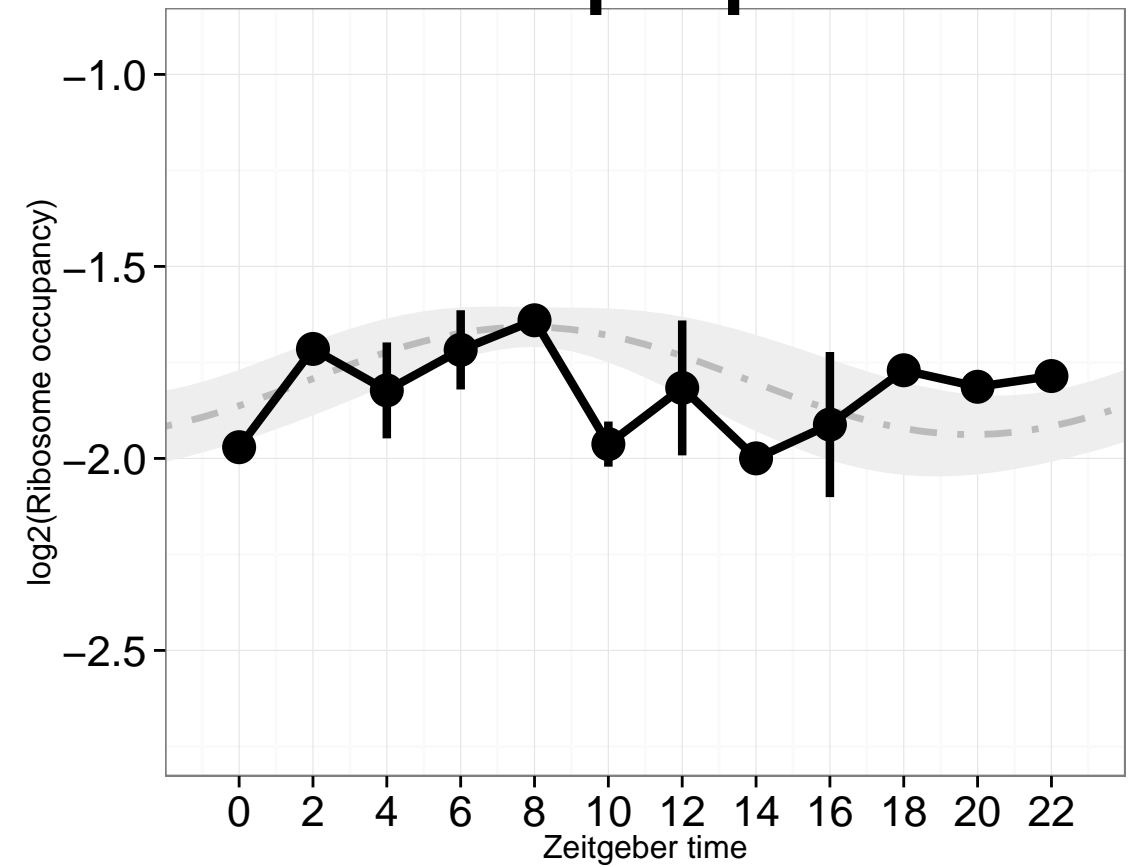

Supplement: SuppDataset_1.zip [file Mapkap1_set_A.pdf › Supplemental Dataset 1/A-mRNA_nonrhyth_translation_nonrhyth/Mapkap1_set_A.pdf]

## Mapkapk2

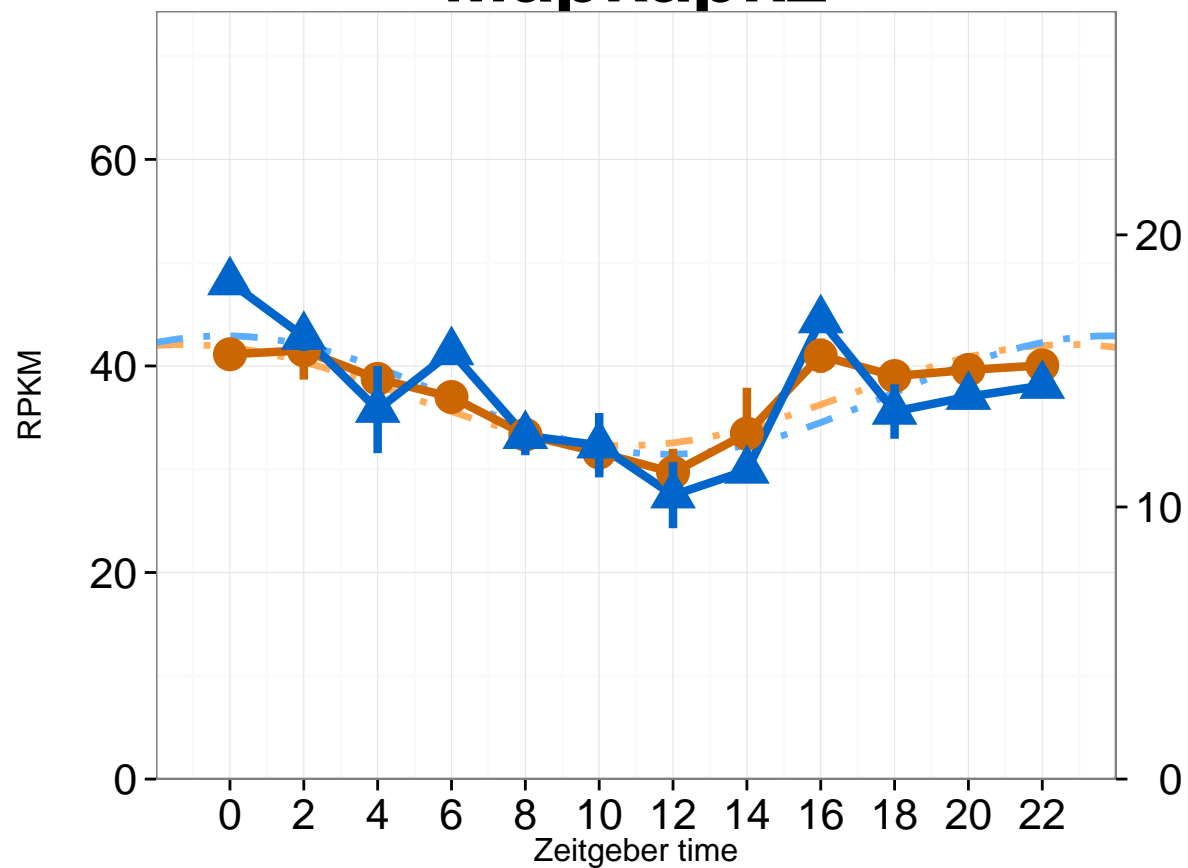

## Mapkapk2

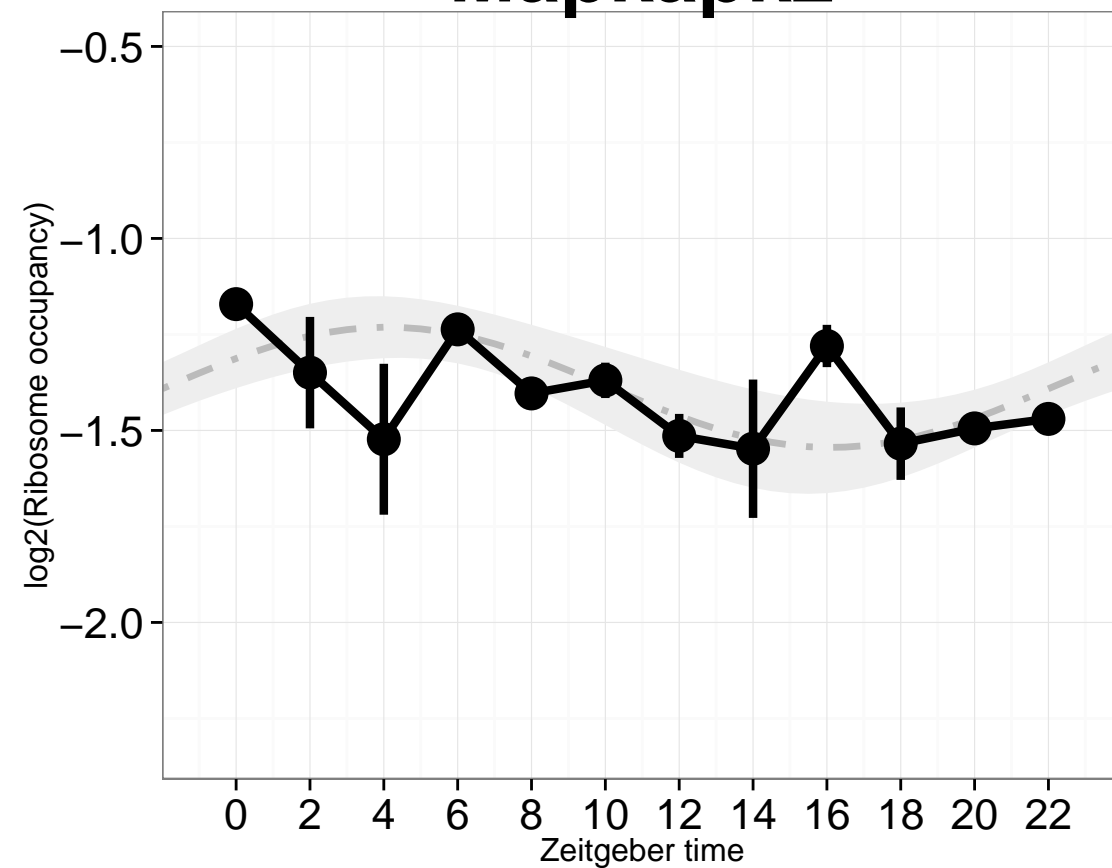

Supplement: SuppDataset_1.zip [file Mapkapk2_set_A.pdf › Supplemental Dataset 1/A-mRNA_nonrhyth_translation_nonrhyth/Mapkapk2_set_A.pdf]

## Mapkapk3

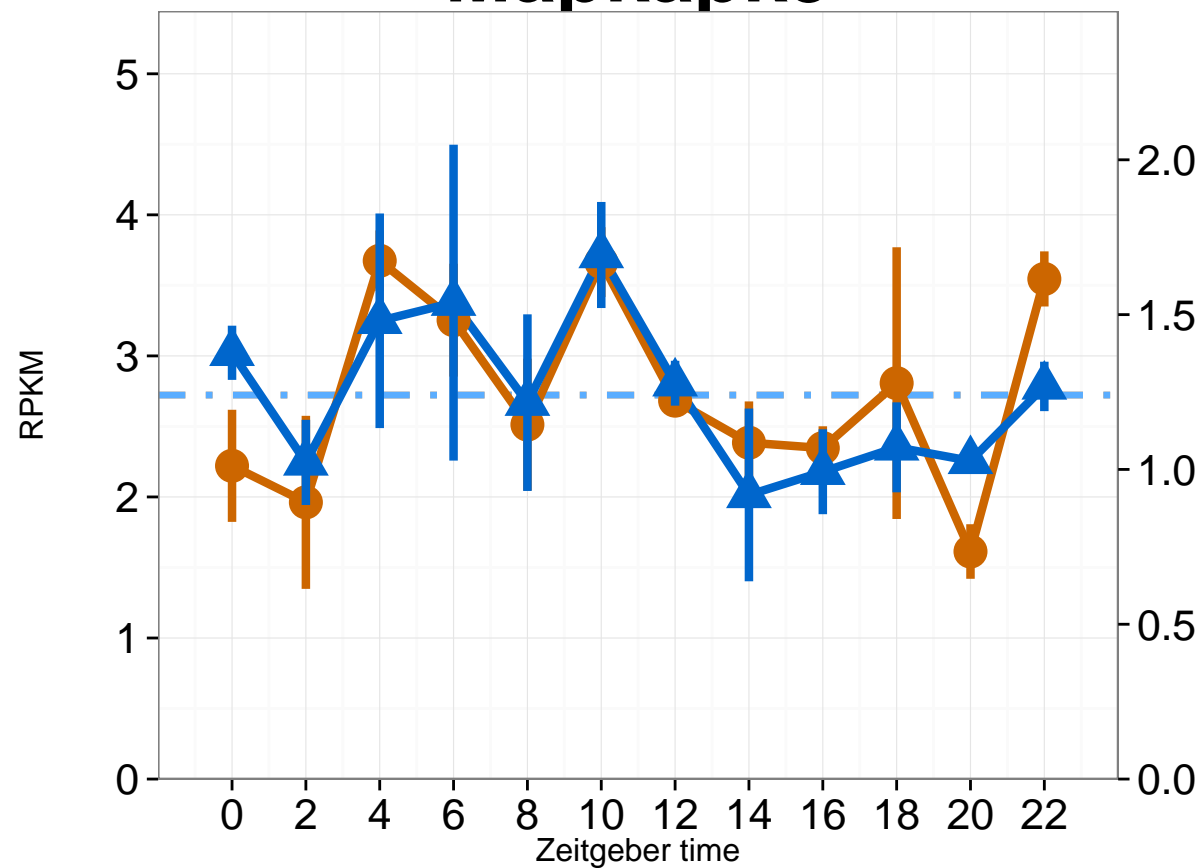

## Mapkapk3

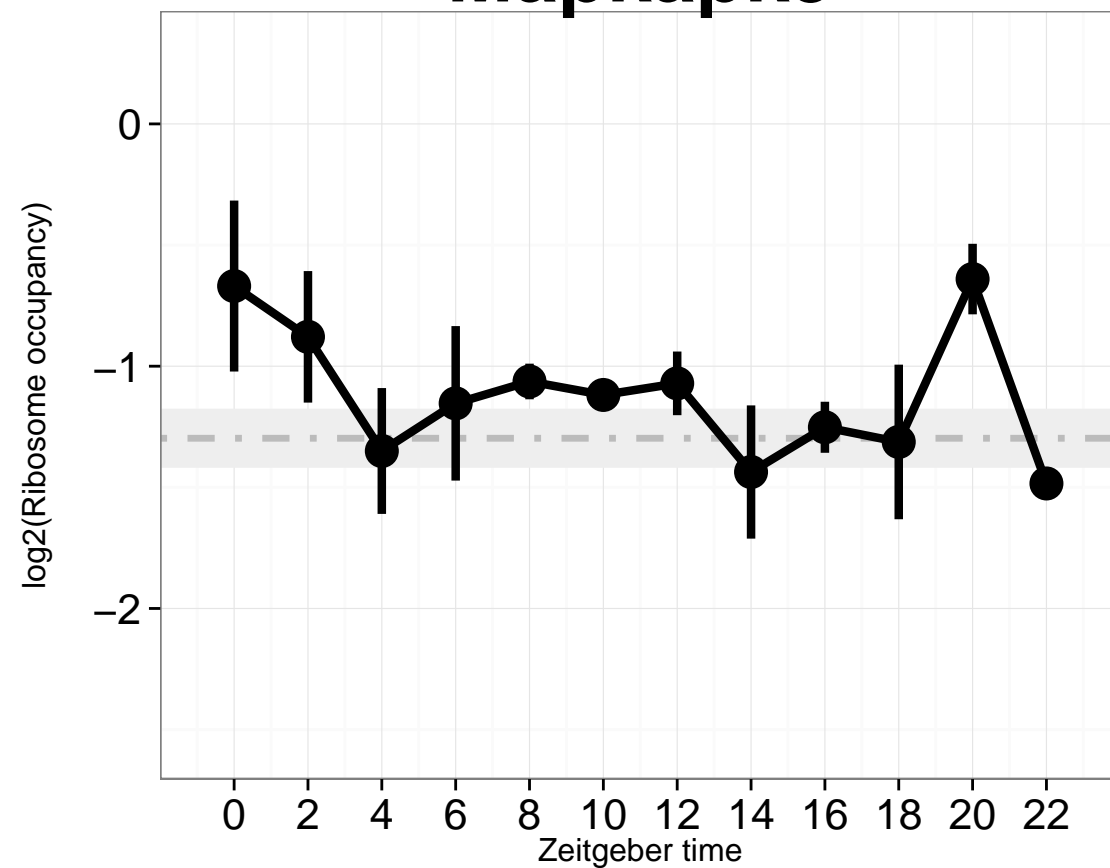

Supplement: SuppDataset_1.zip [file Mapkapk3_set_A.pdf › Supplemental Dataset 1/A-mRNA_nonrhyth_translation_nonrhyth/Mapkapk3_set_A.pdf]

# Mapkapk5

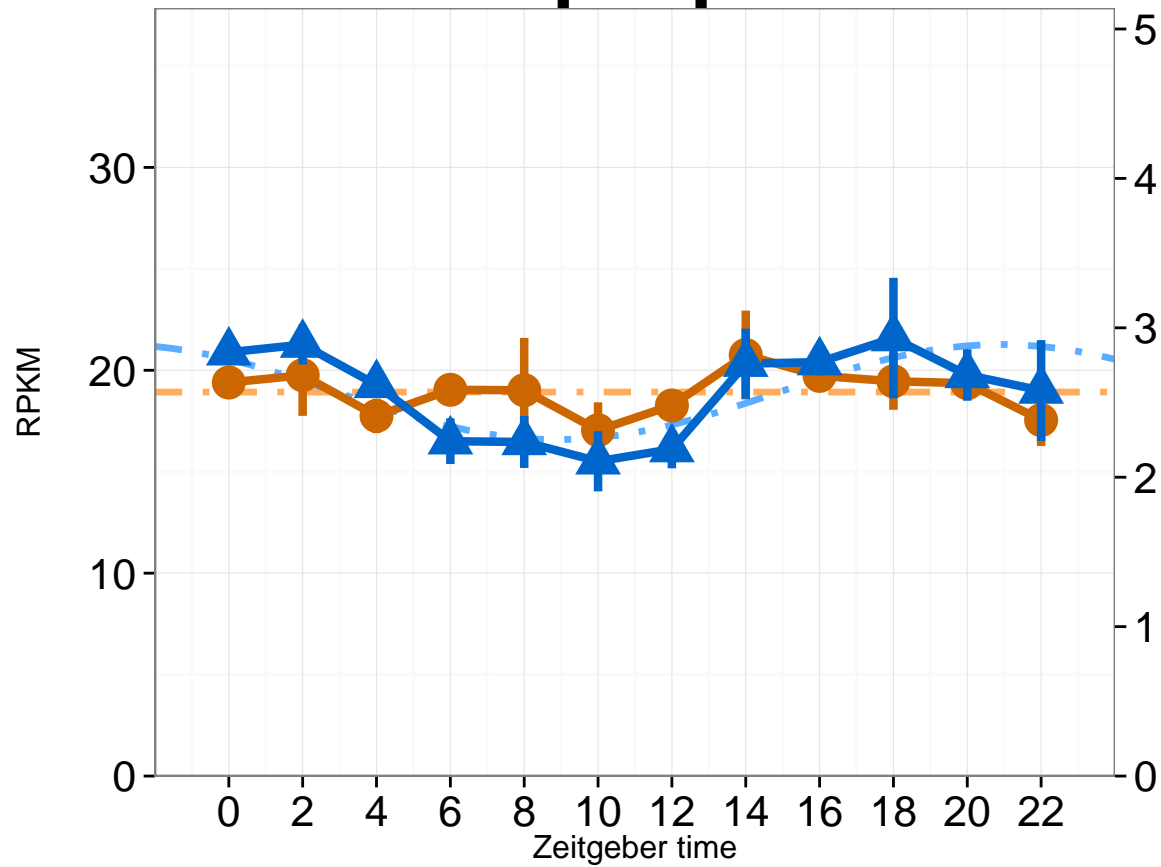

# Mapkapk5

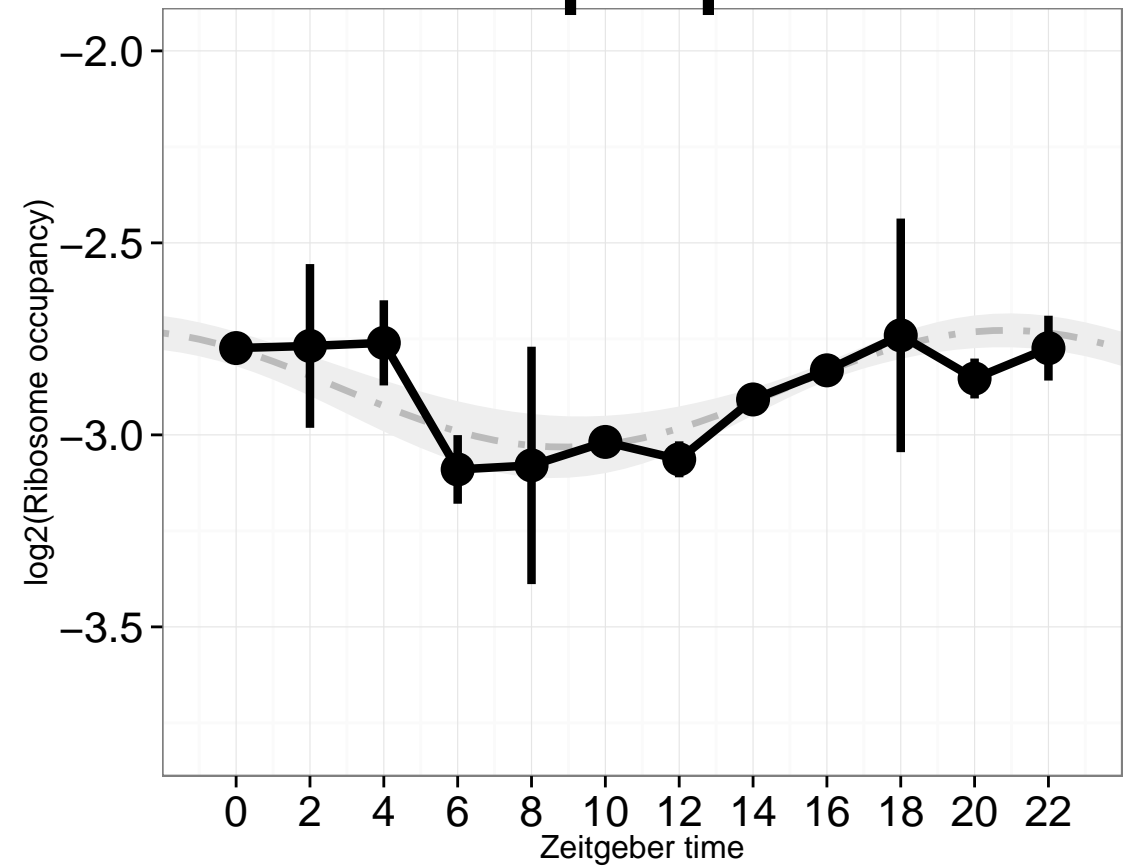

Supplement: SuppDataset_1.zip [file Mapkapk5_set_A.pdf › Supplemental Dataset 1/A-mRNA_nonrhyth_translation_nonrhyth/Mapkapk5_set_A.pdf]

# Mapkbp1

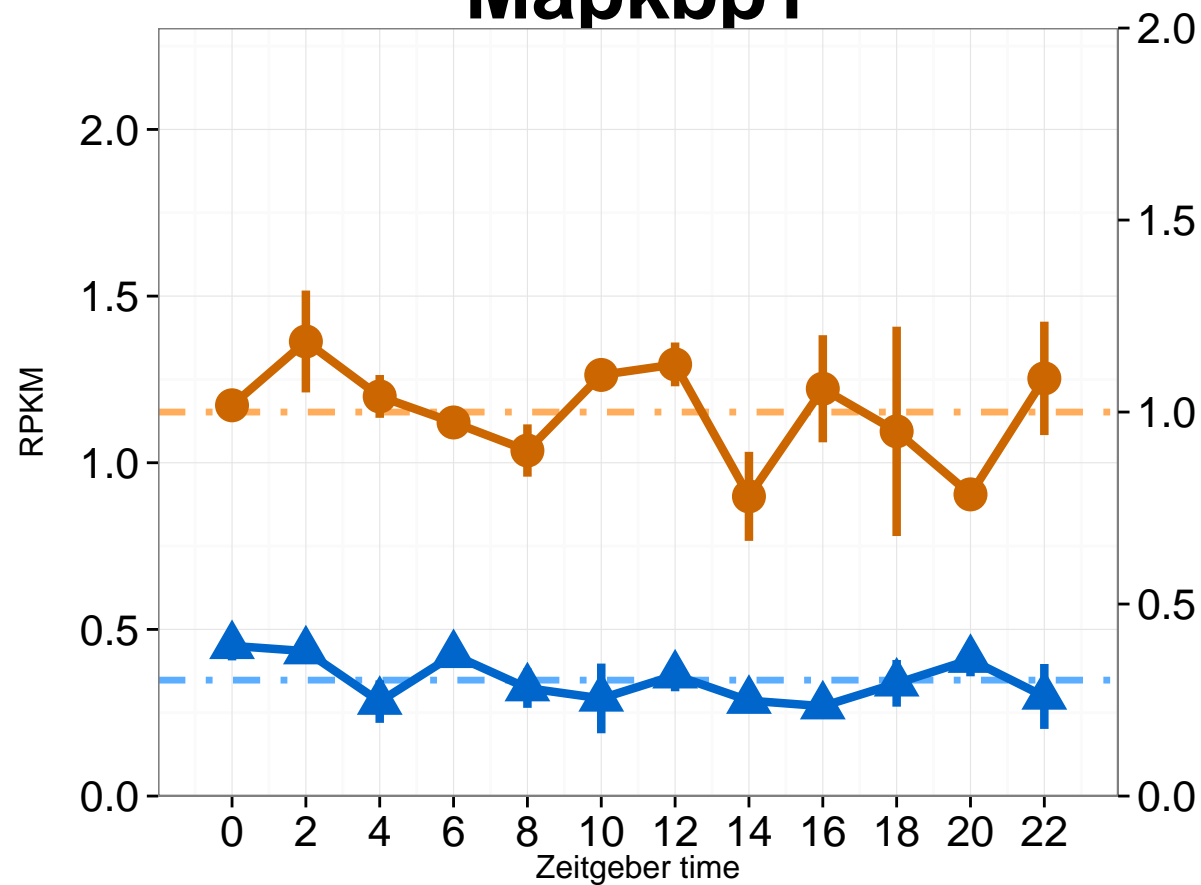

# Mapkbp1

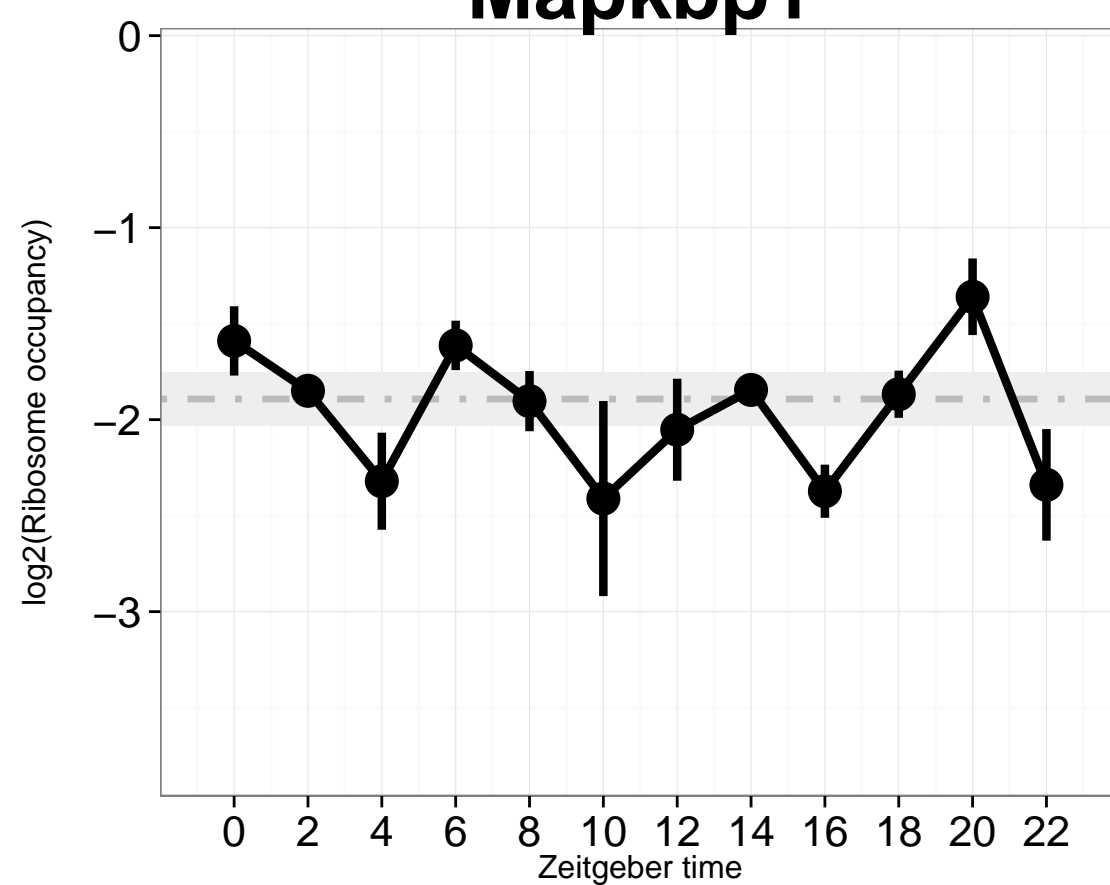

Supplement: SuppDataset_1.zip [file Mapkbp1_set_A.pdf › Supplemental Dataset 1/A-mRNA_nonrhyth_translation_nonrhyth/Mapkbp1_set_A.pdf]

# Mapre1

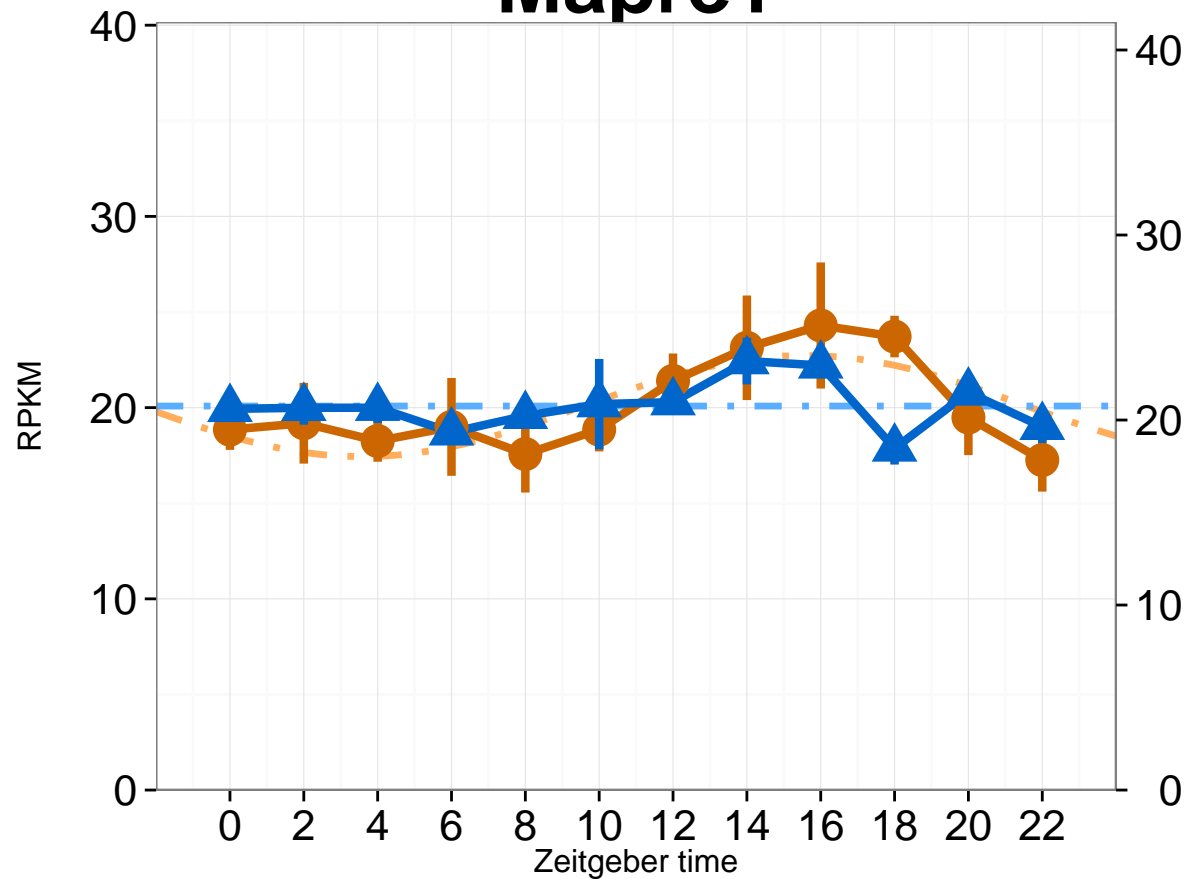

# Mapre1

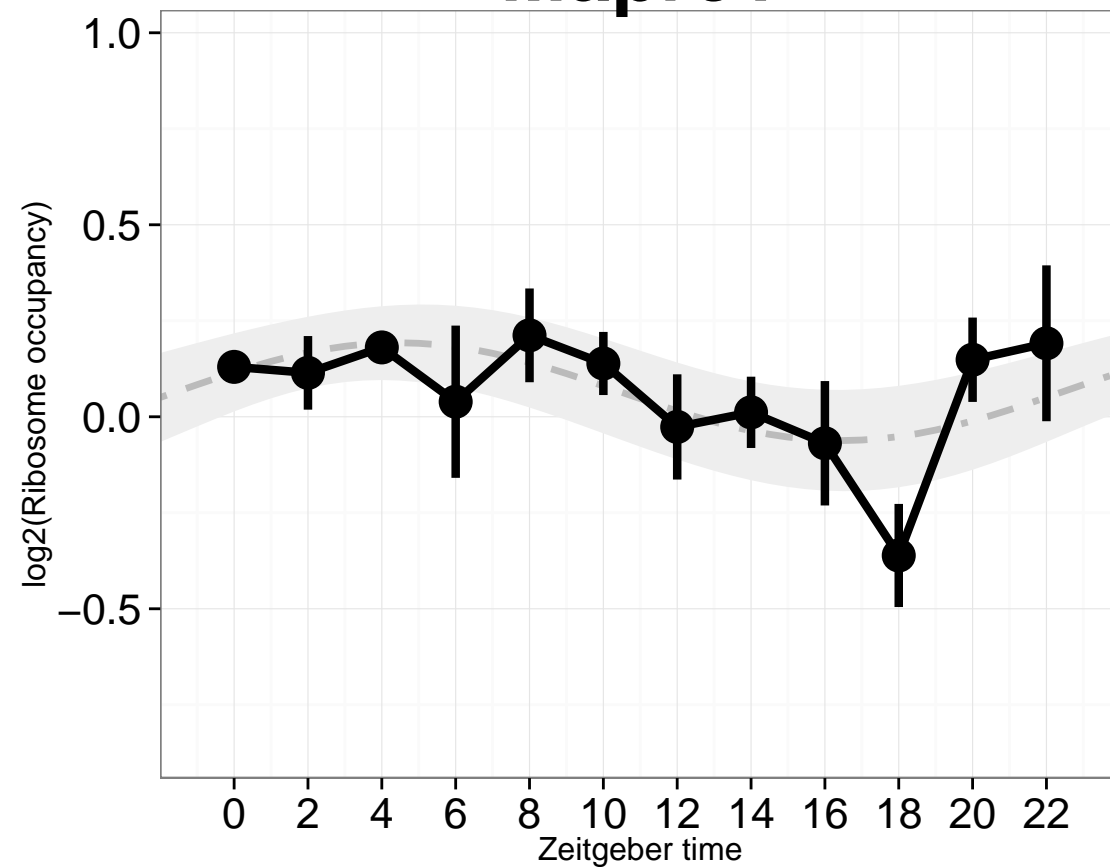

Supplement: SuppDataset_1.zip [file Mapre1_set_A.pdf › Supplemental Dataset 1/A-mRNA_nonrhyth_translation_nonrhyth/Mapre1_set_A.pdf]

## Mapre3

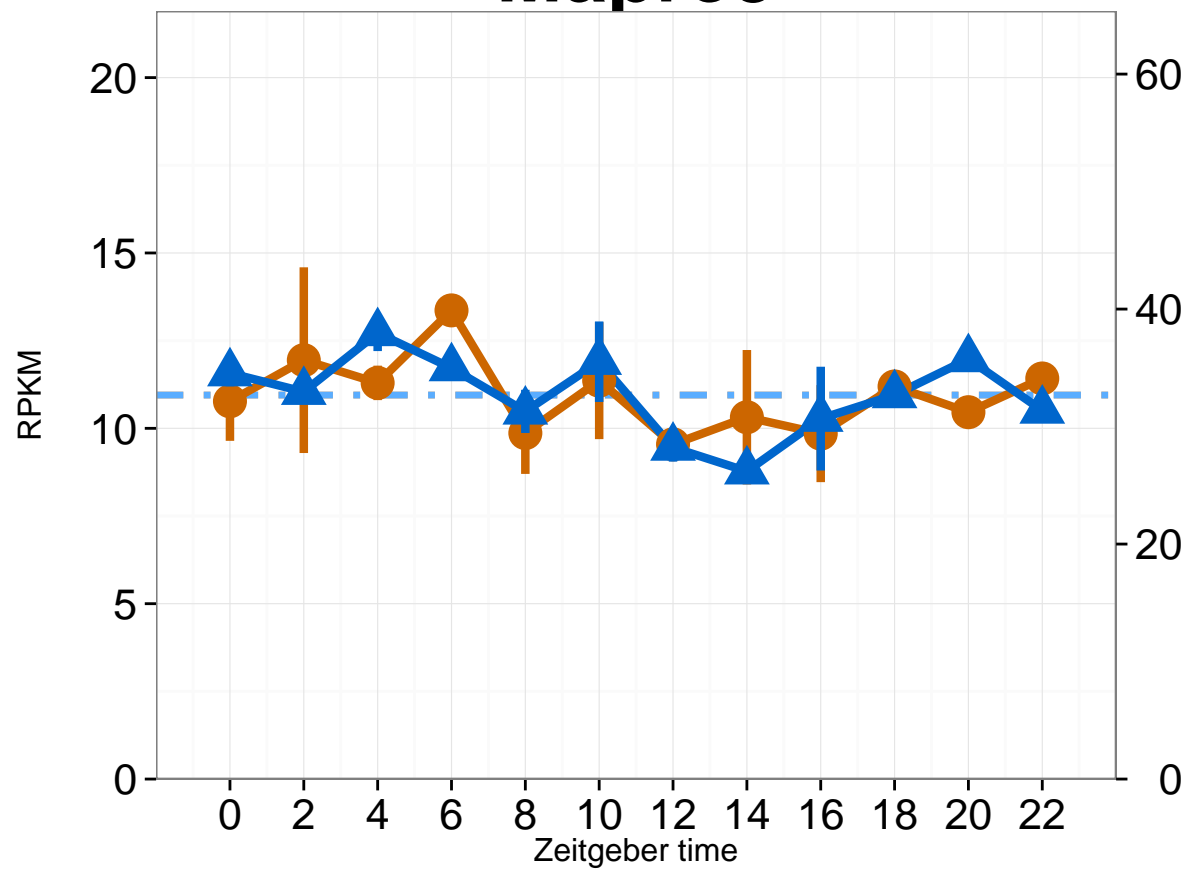

## Mapre3

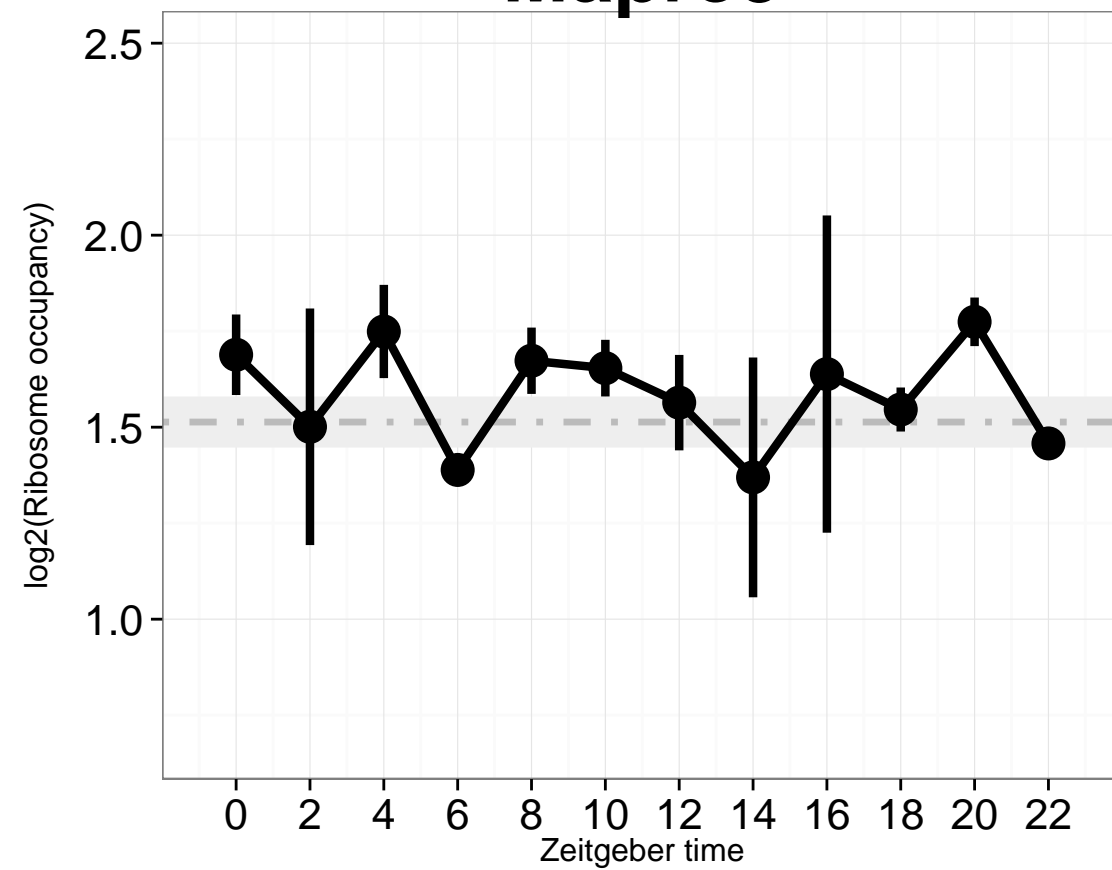

Supplement: SuppDataset_1.zip [file Mapre3_set_A.pdf › Supplemental Dataset 1/A-mRNA_nonrhyth_translation_nonrhyth/Mapre3_set_A.pdf]

**Mapt TR**

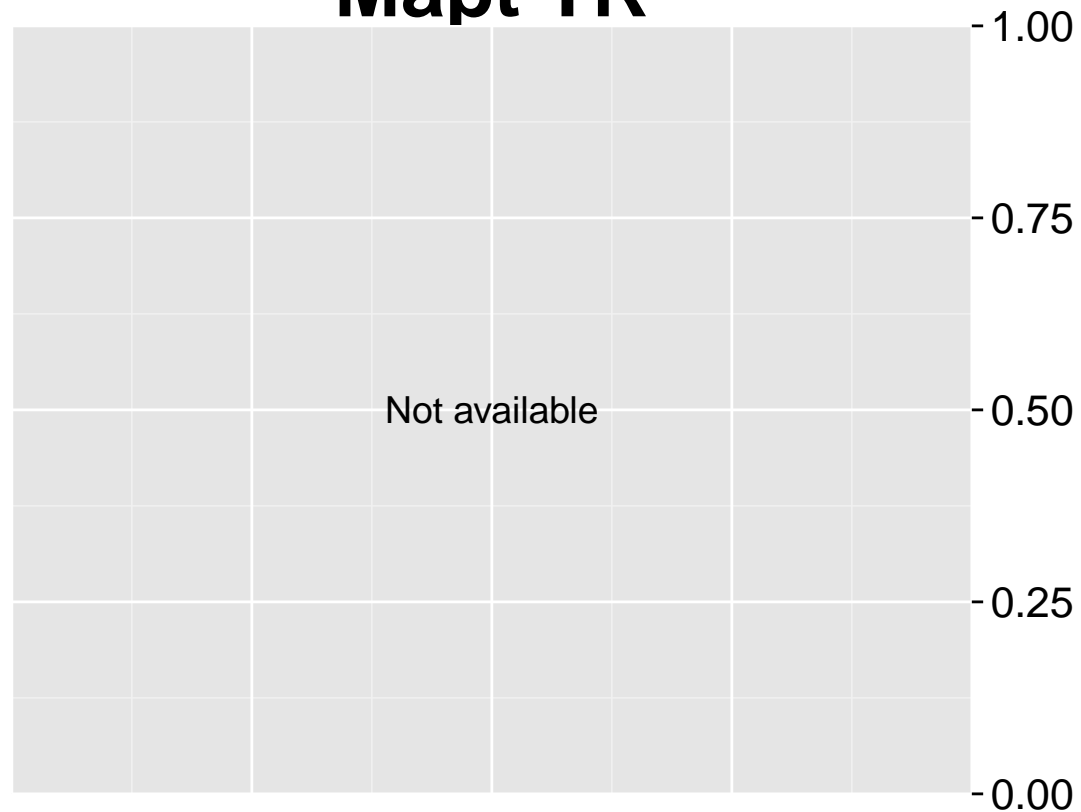

**Mapt log2(Ribosome occupancy)**

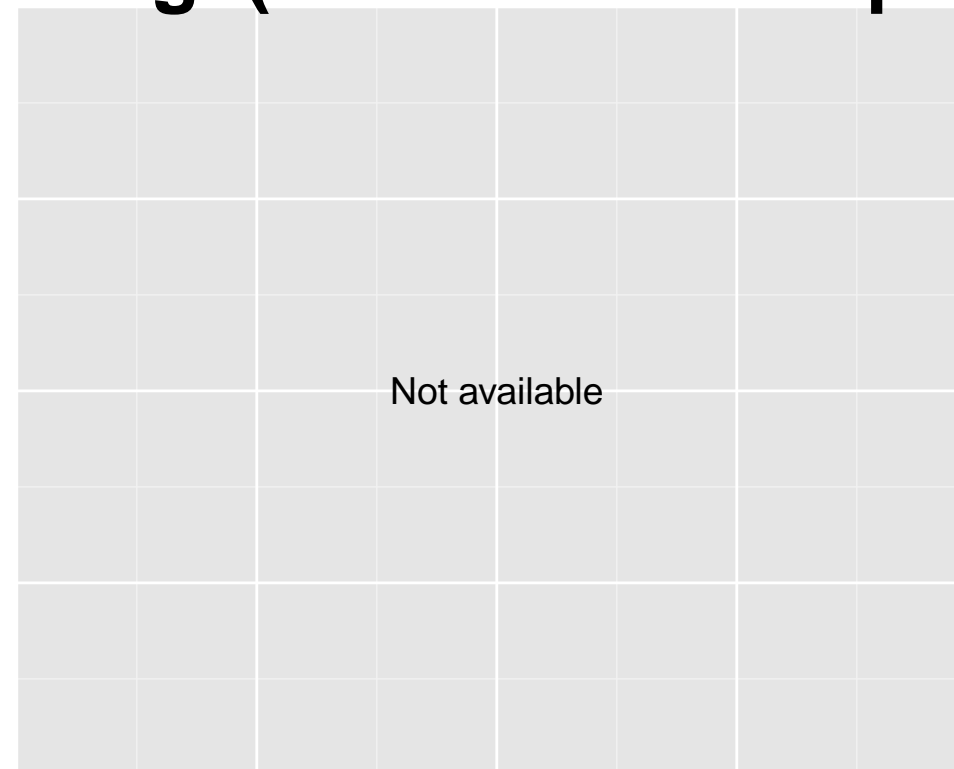

Supplement: SuppDataset_1.zip [file Mapt_set_A.pdf › Supplemental Dataset 1/A-mRNA_nonrhyth_translation_nonrhyth/Mapt_set_A.pdf]

## Marc1

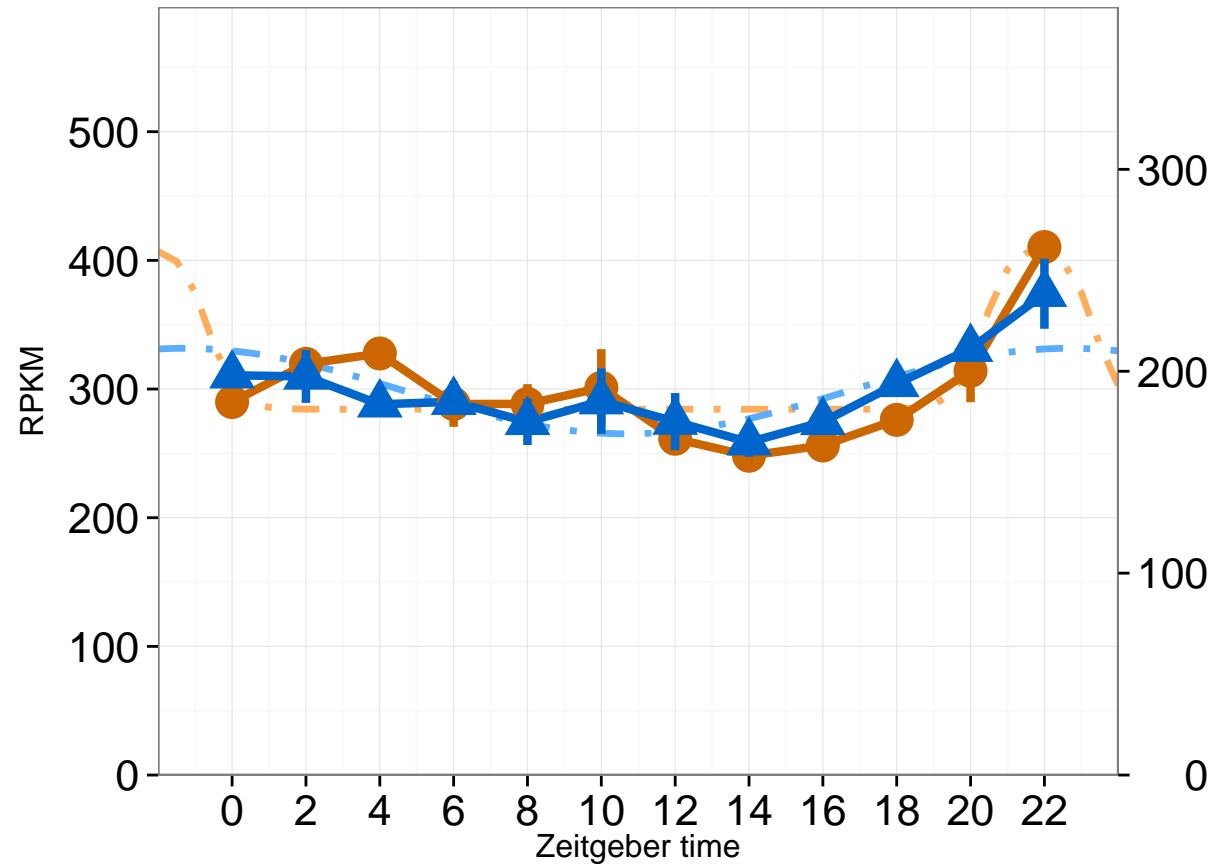

## Marc1

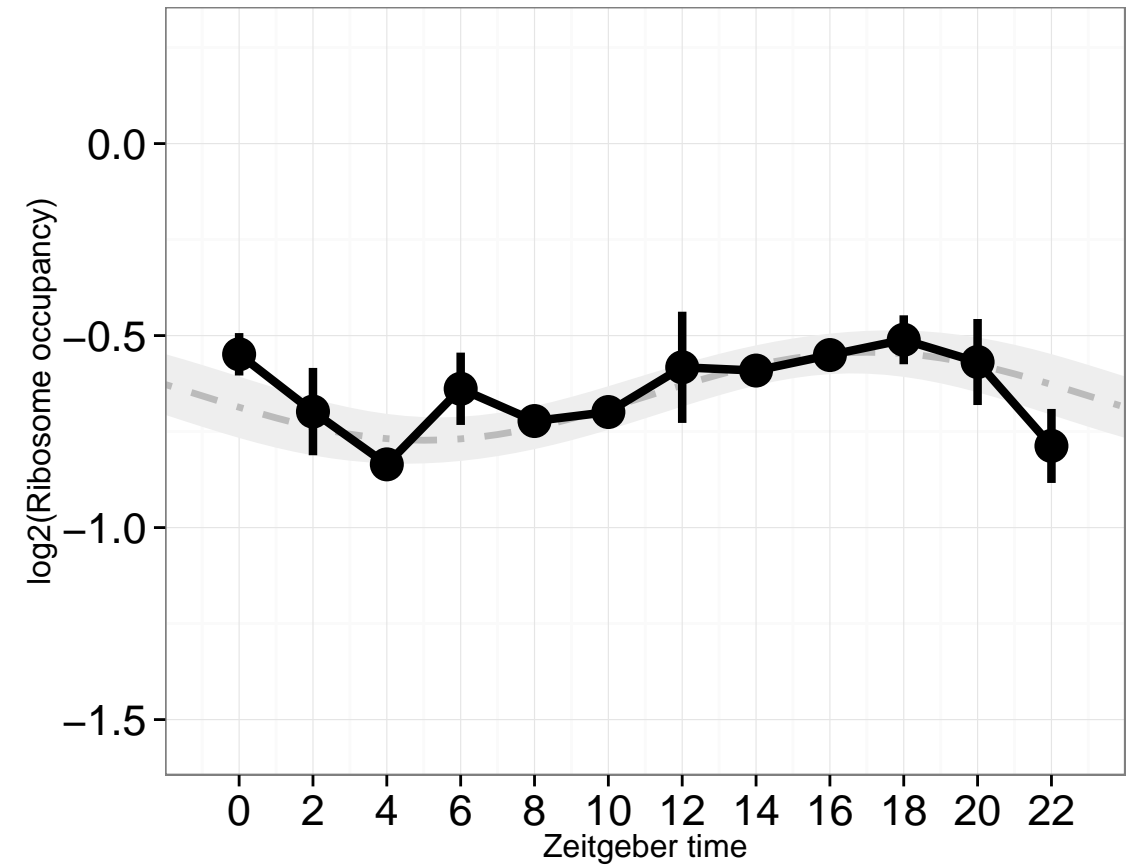

Supplement: SuppDataset_1.zip [file Marc1_set_A.pdf › Supplemental Dataset 1/A-mRNA_nonrhyth_translation_nonrhyth/Marc1_set_A.pdf]

# Marc2

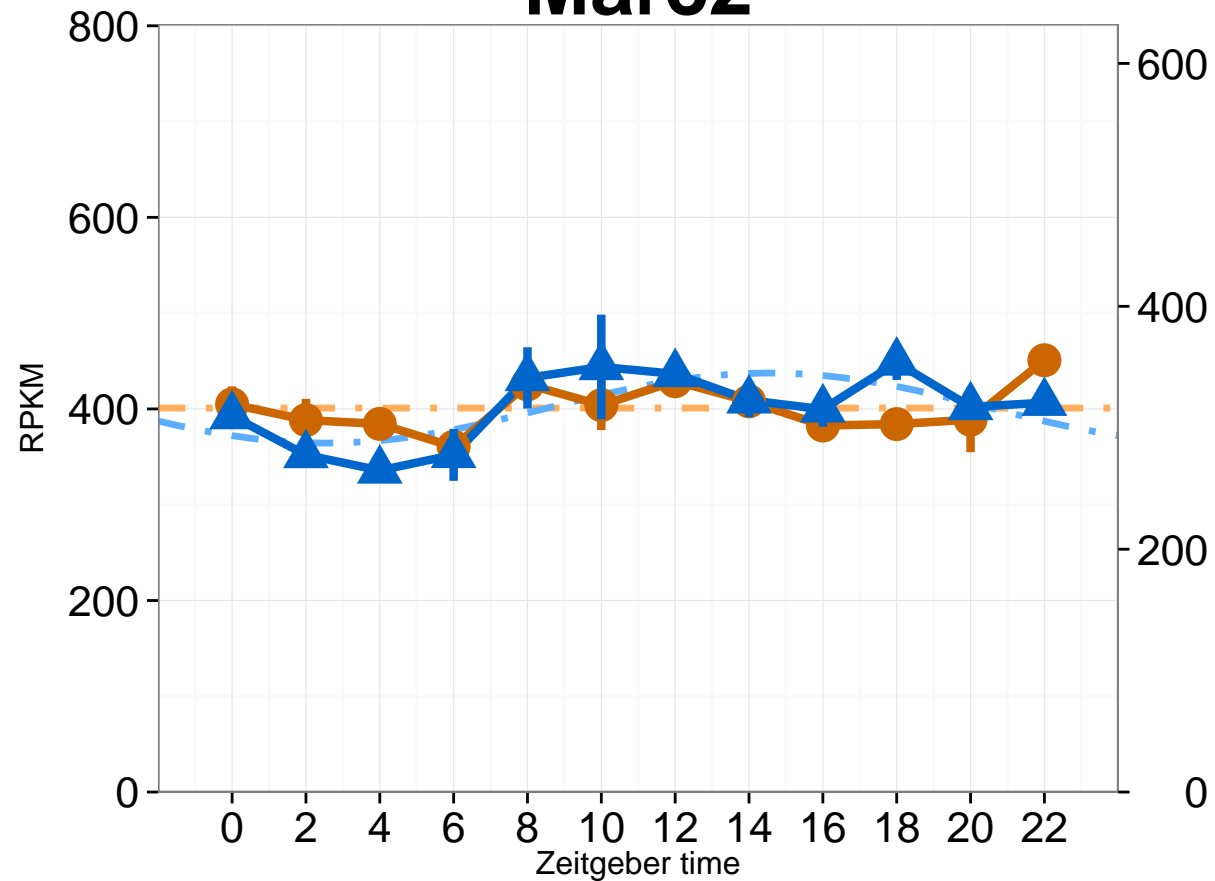

# Marc2

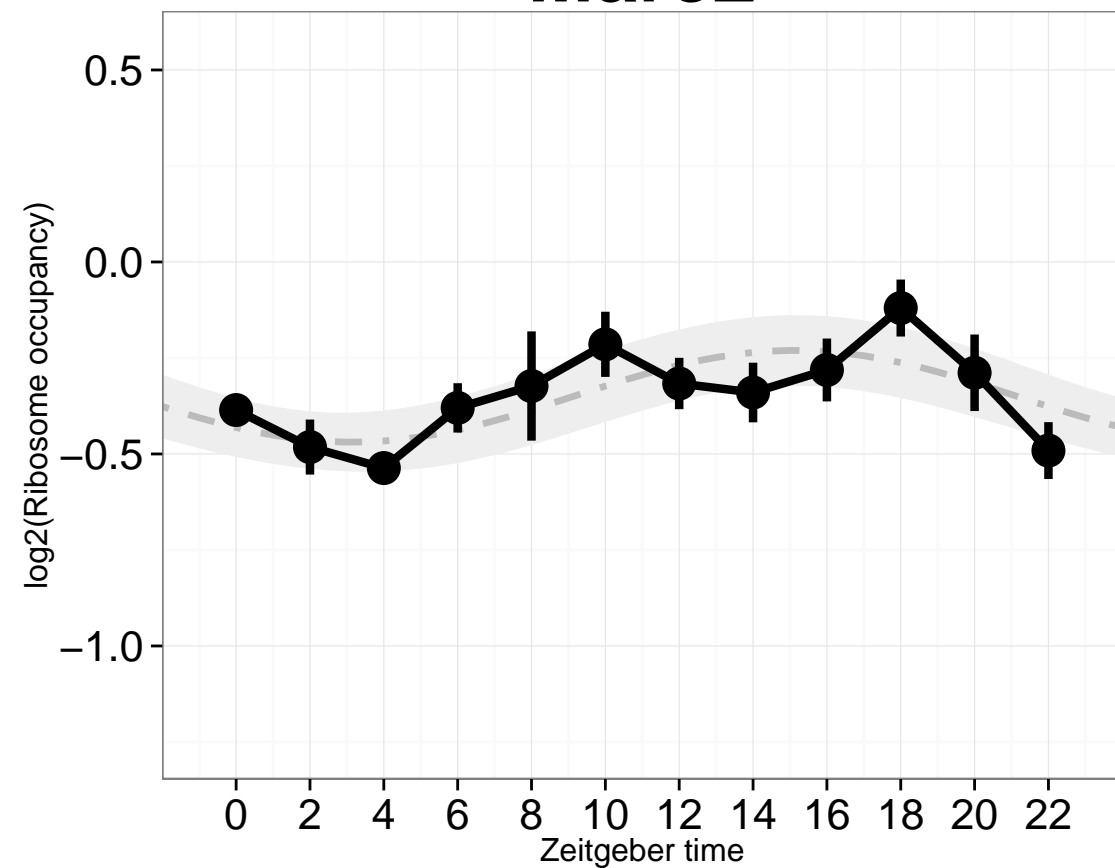

Supplement: SuppDataset_1.zip [file Marc2_set_A.pdf › Supplemental Dataset 1/A-mRNA_nonrhyth_translation_nonrhyth/Marc2_set_A.pdf]

# March2

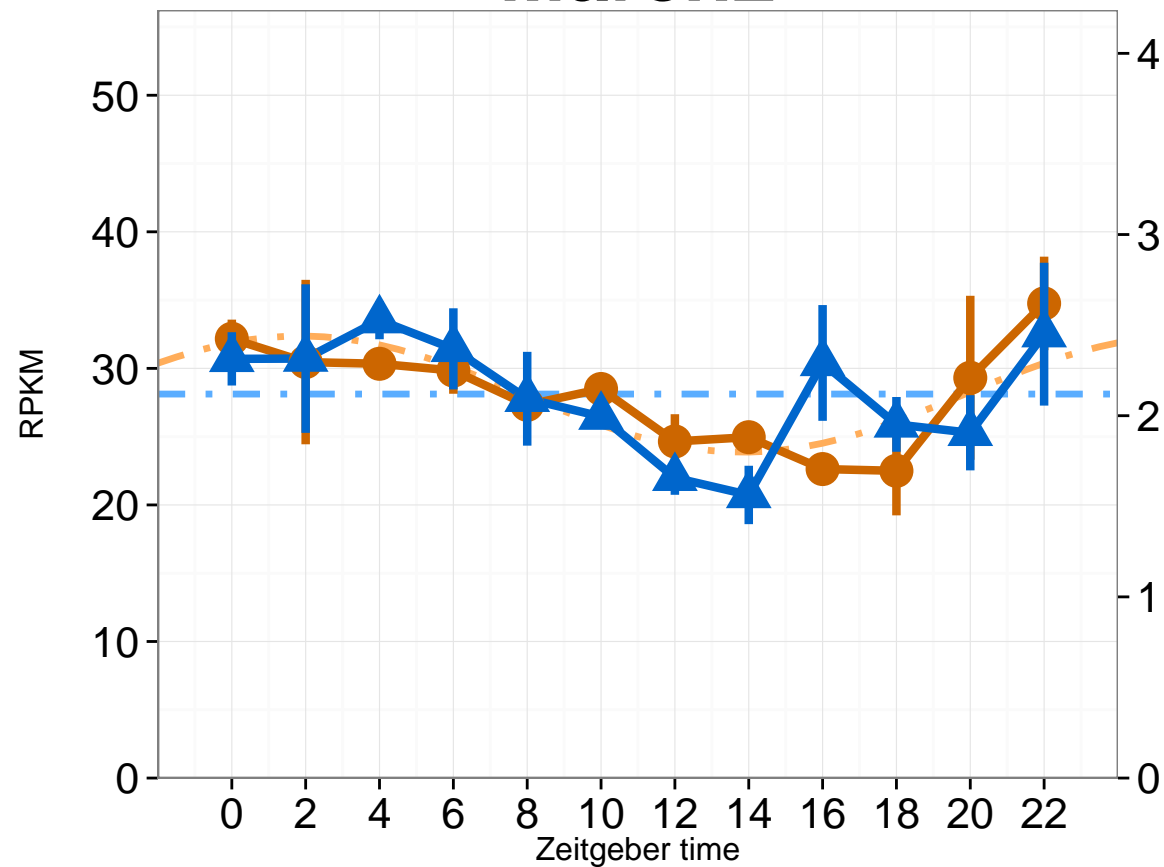

# March2

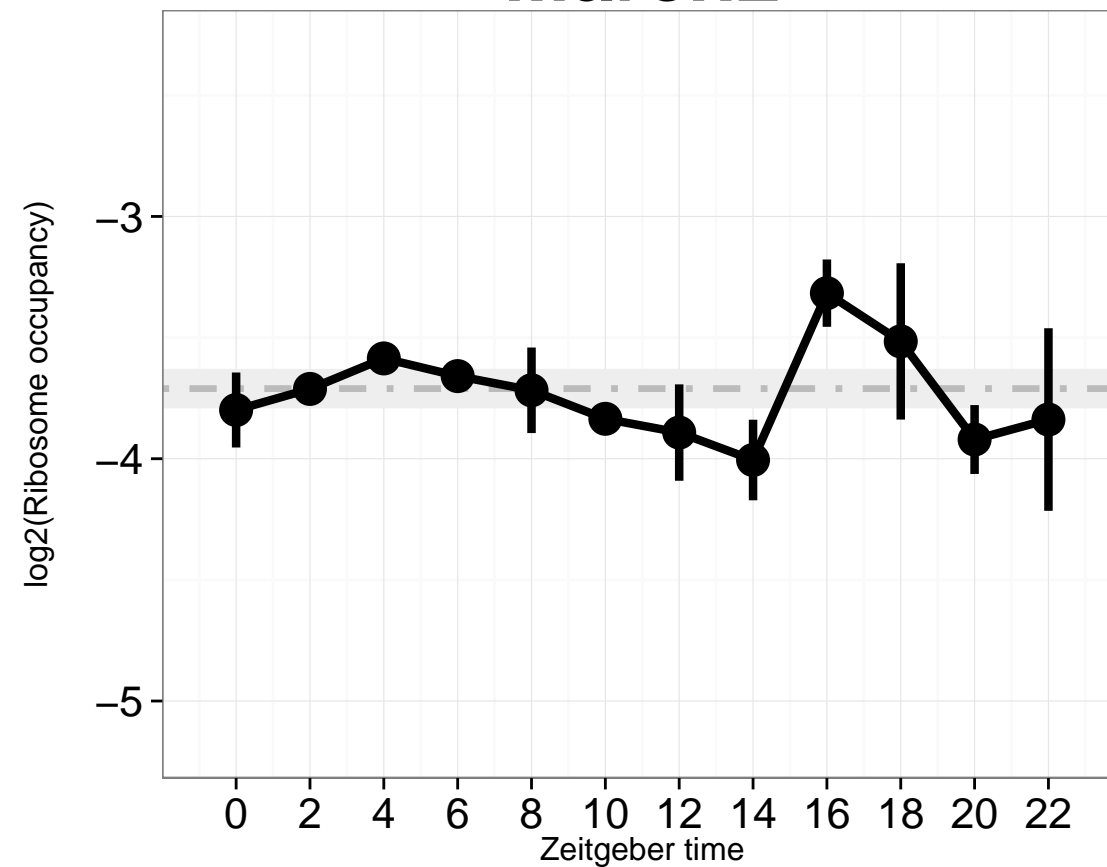

Supplement: SuppDataset_1.zip [file March2_set_A.pdf › Supplemental Dataset 1/A-mRNA_nonrhyth_translation_nonrhyth/March2_set_A.pdf]

# March3

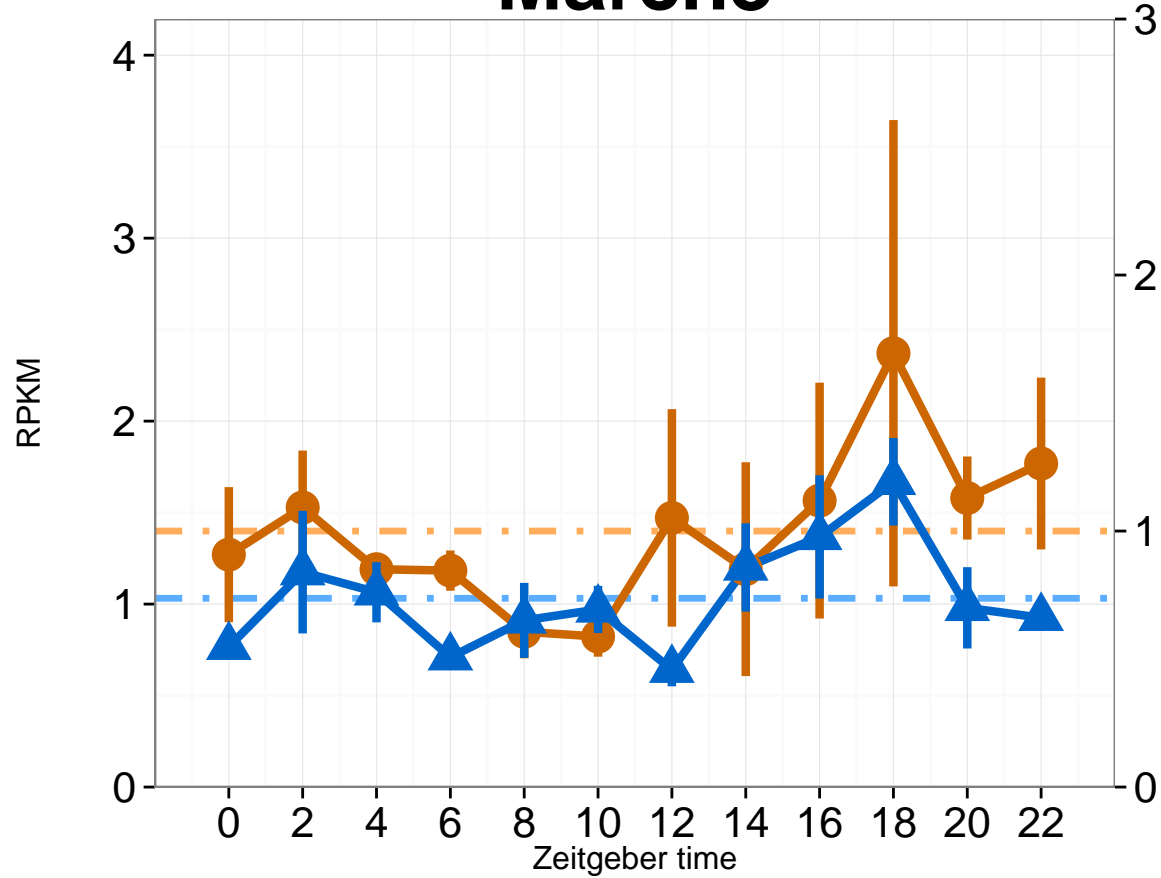

# March3

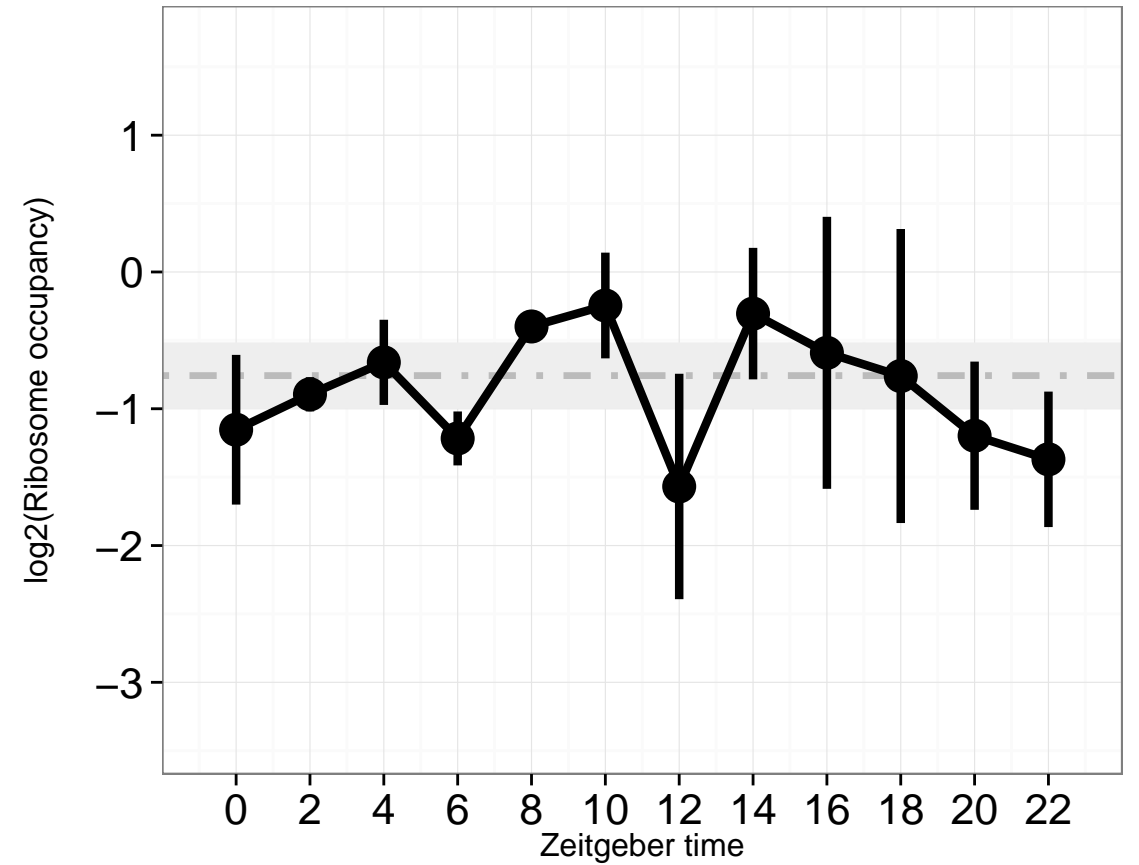

Supplement: SuppDataset_1.zip [file March3_set_A.pdf › Supplemental Dataset 1/A-mRNA_nonrhyth_translation_nonrhyth/March3_set_A.pdf]

# March5

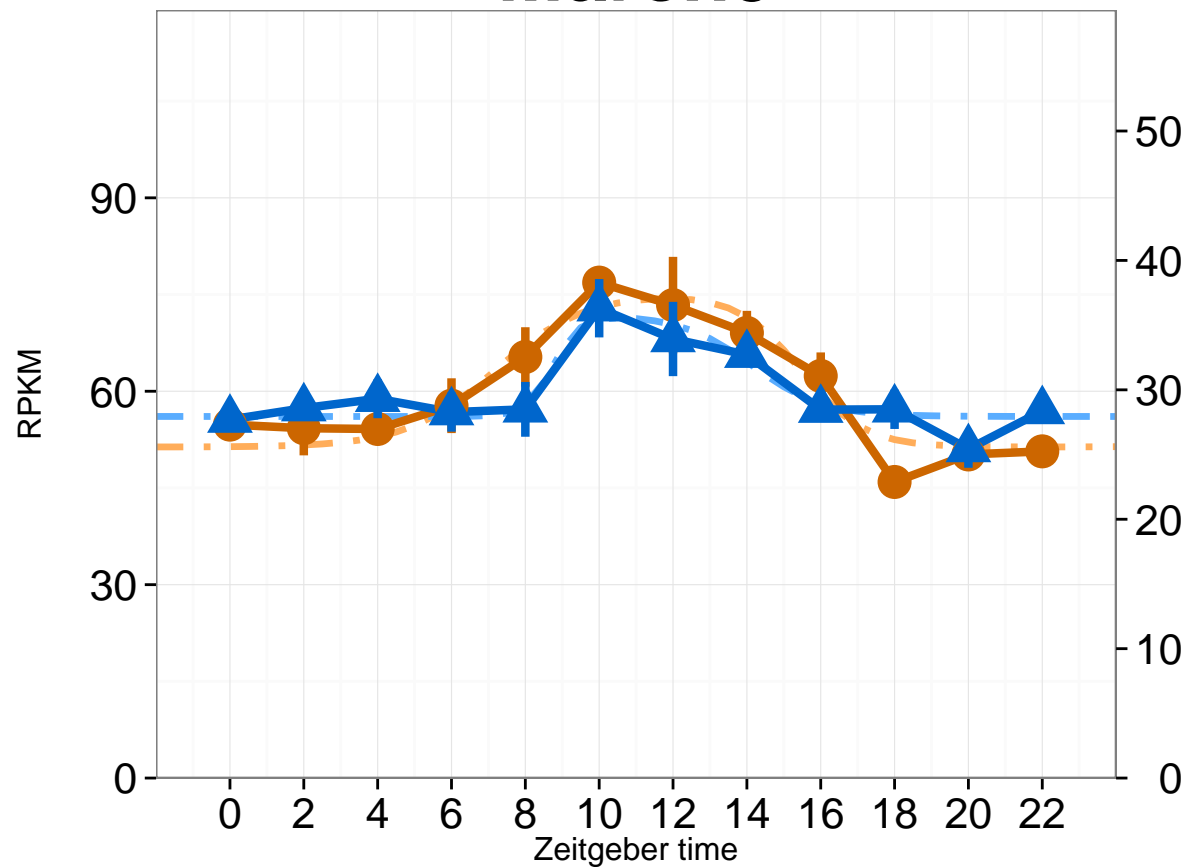

# March5

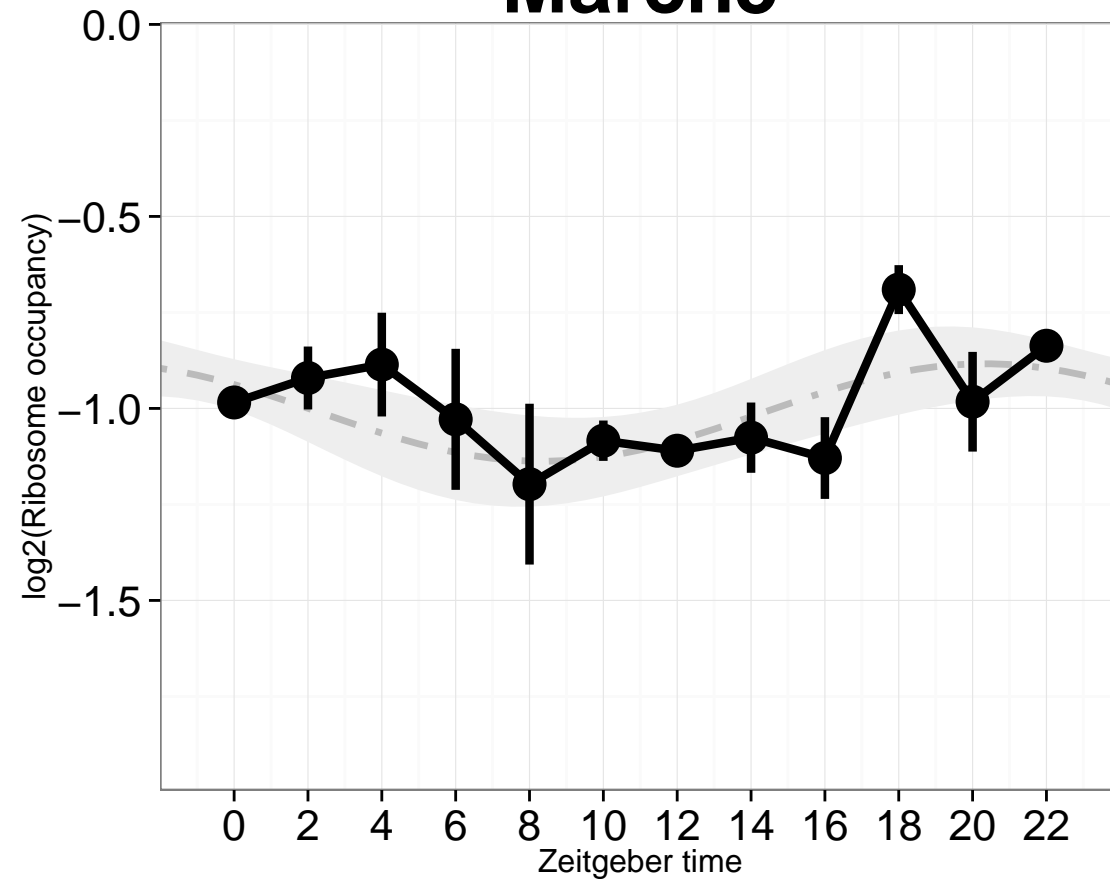

Supplement: SuppDataset_1.zip [file March5_set_A.pdf › Supplemental Dataset 1/A-mRNA_nonrhyth_translation_nonrhyth/March5_set_A.pdf]

# March6

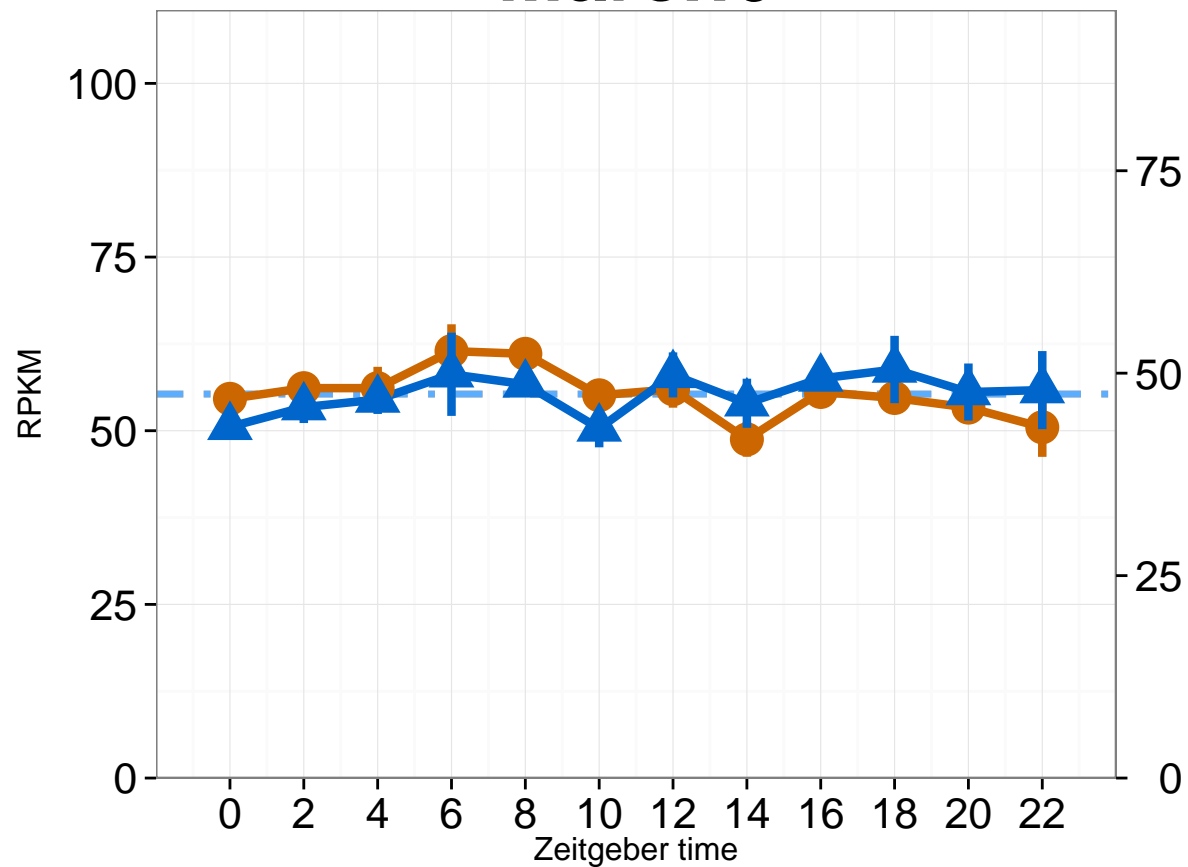

# March6

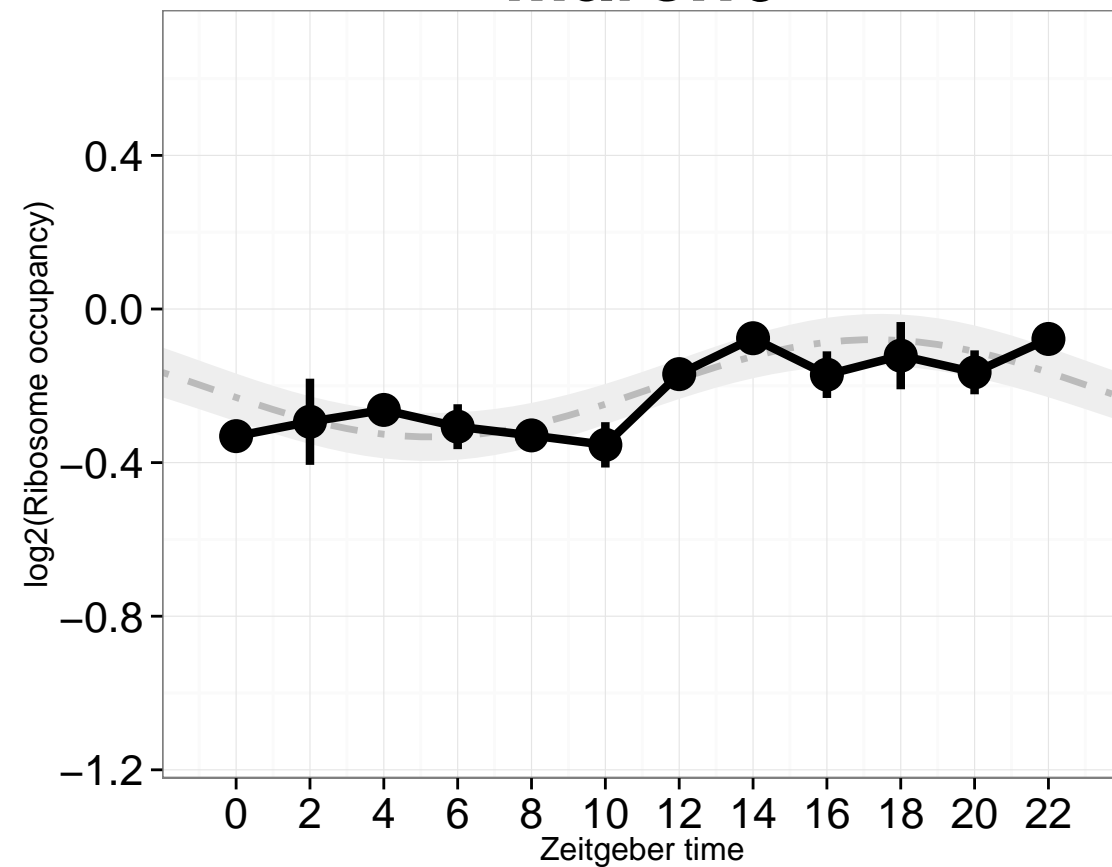

Supplement: SuppDataset_1.zip [file March6_set_A.pdf › Supplemental Dataset 1/A-mRNA_nonrhyth_translation_nonrhyth/March6_set_A.pdf]

# March8

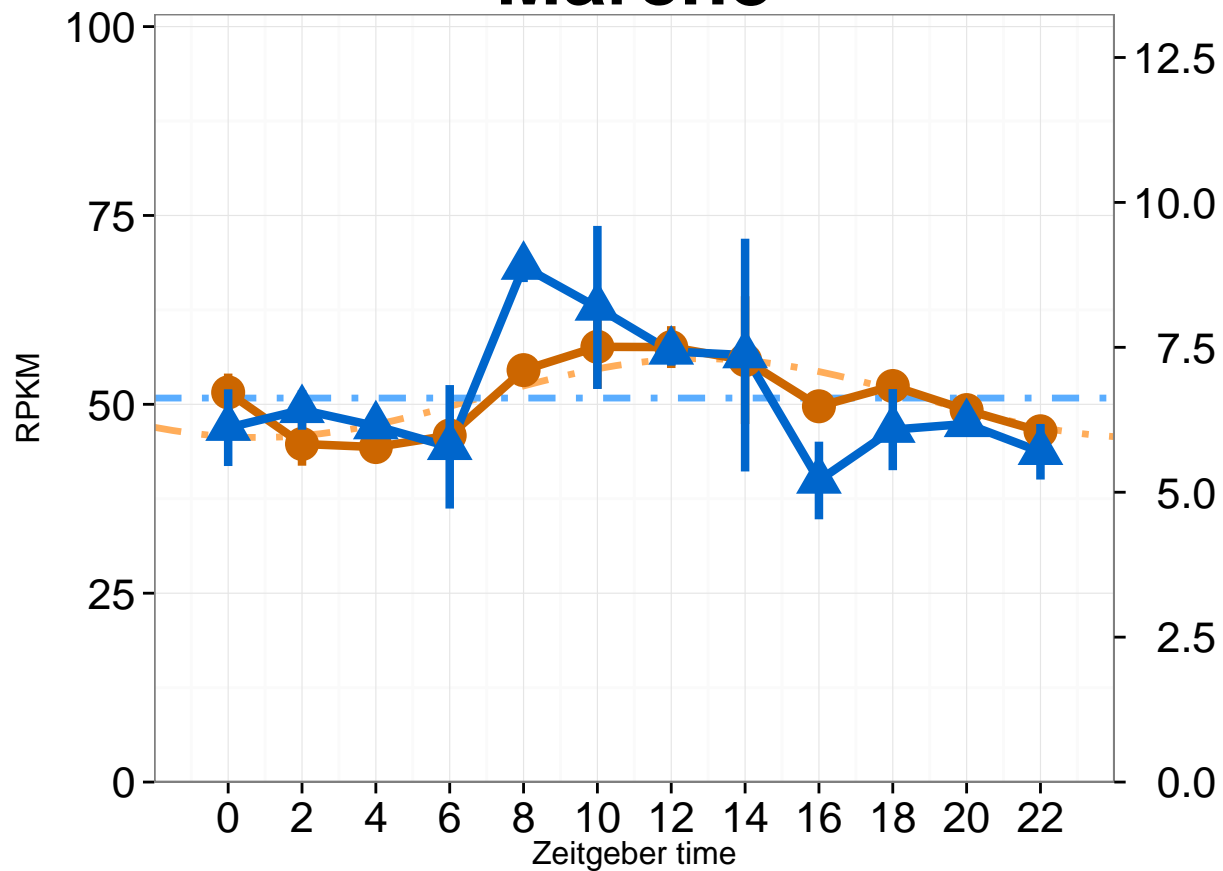

# March8

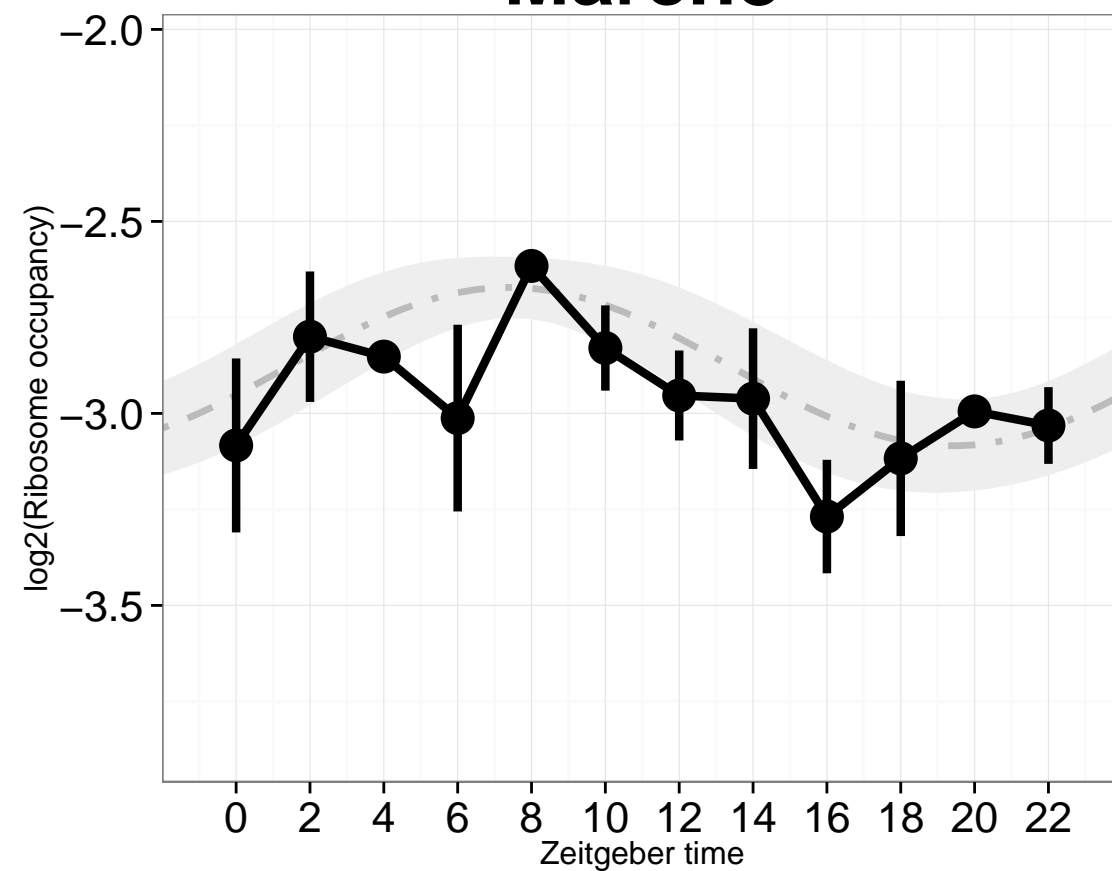

Supplement: SuppDataset_1.zip [file March8_set_A.pdf › Supplemental Dataset 1/A-mRNA_nonrhyth_translation_nonrhyth/March8_set_A.pdf]

# Marco

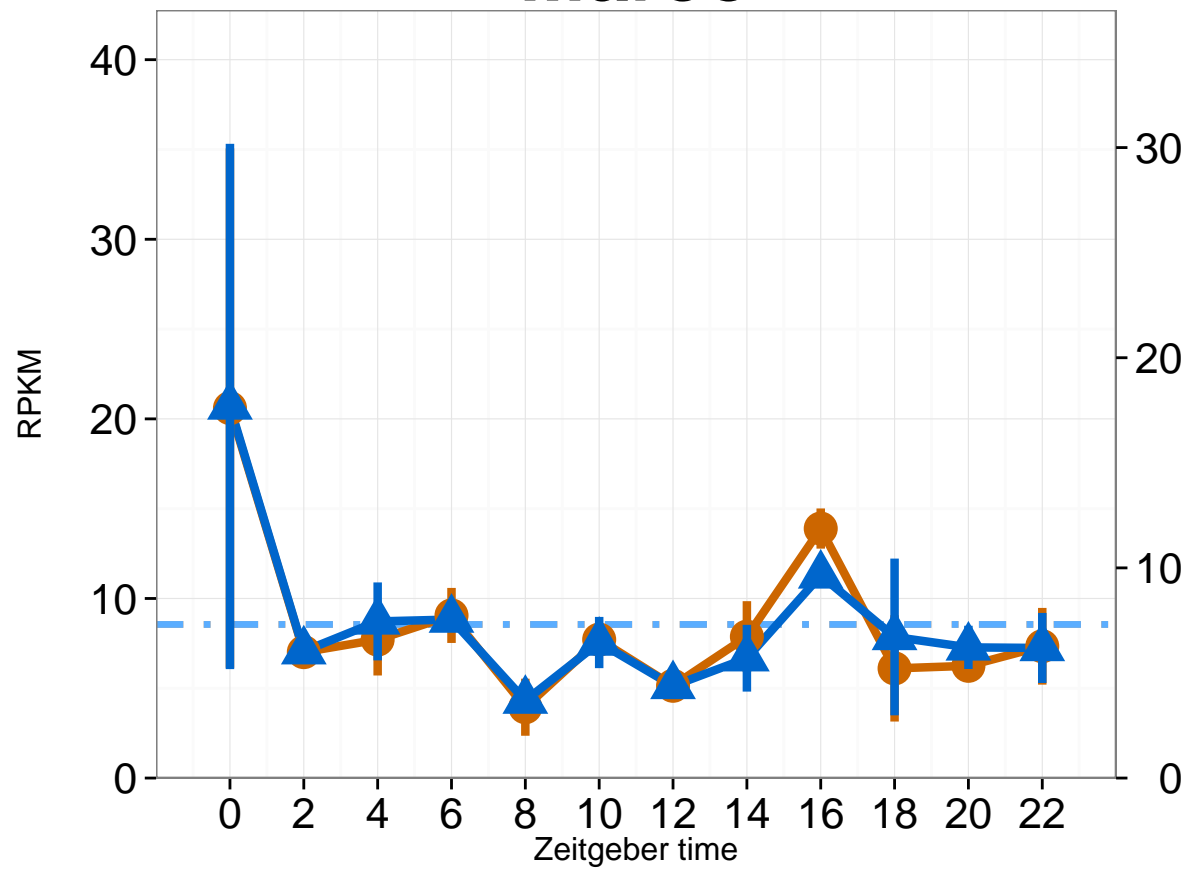

# Marco

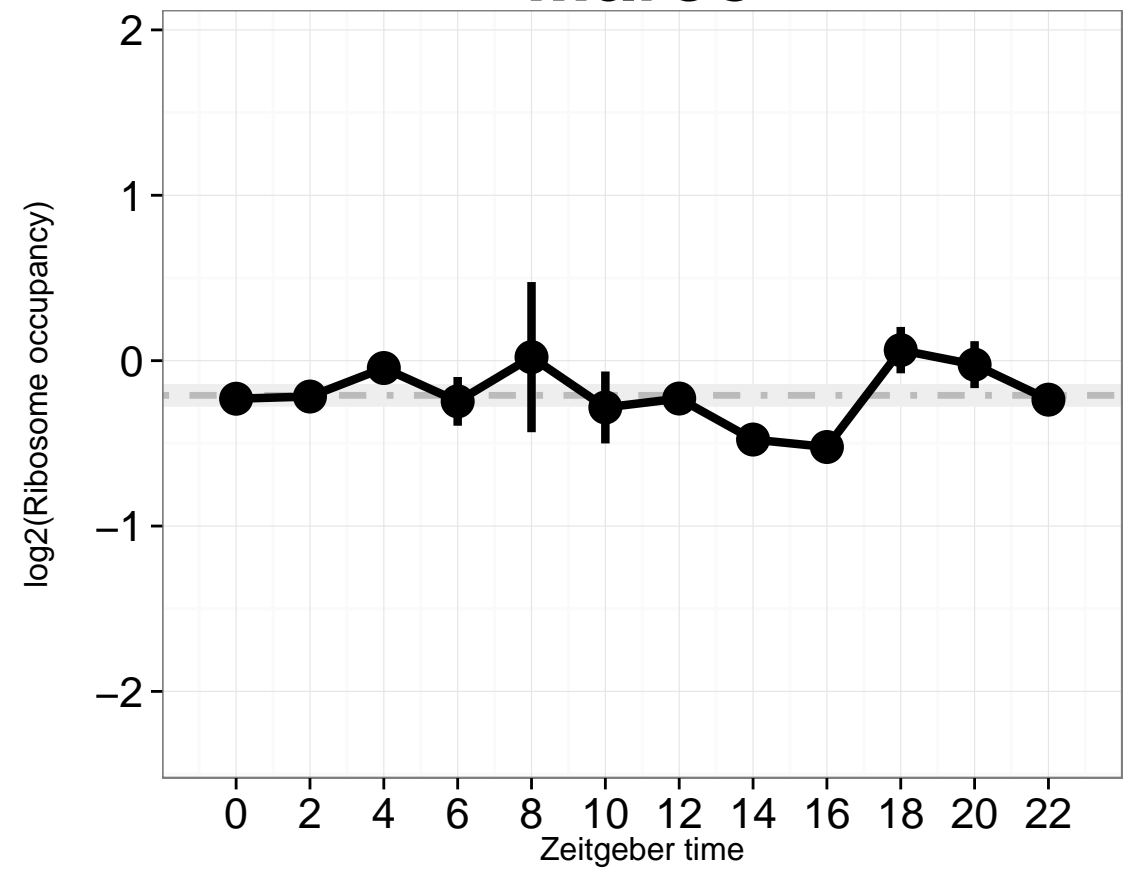

Supplement: SuppDataset_1.zip [file Marco_set_A.pdf › Supplemental Dataset 1/A-mRNA_nonrhyth_translation_nonrhyth/Marco_set_A.pdf]

# Marf1

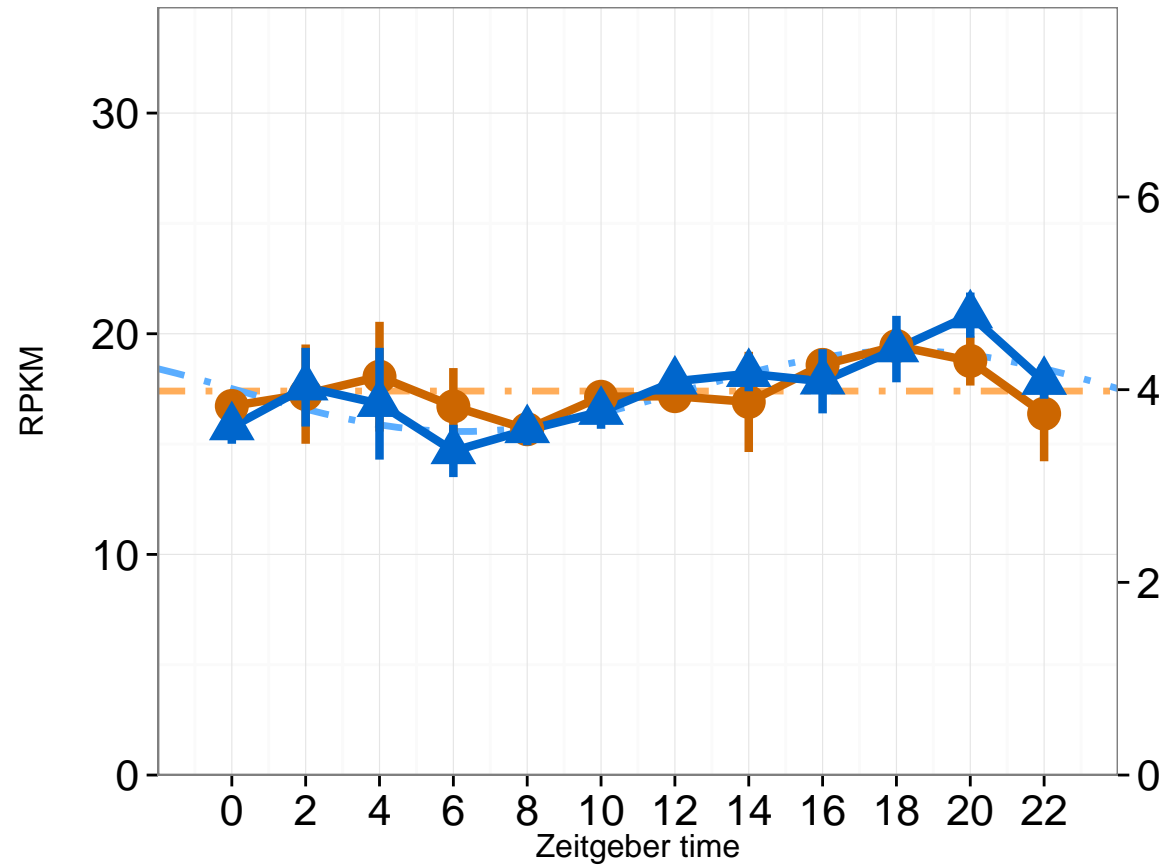

# Marf1

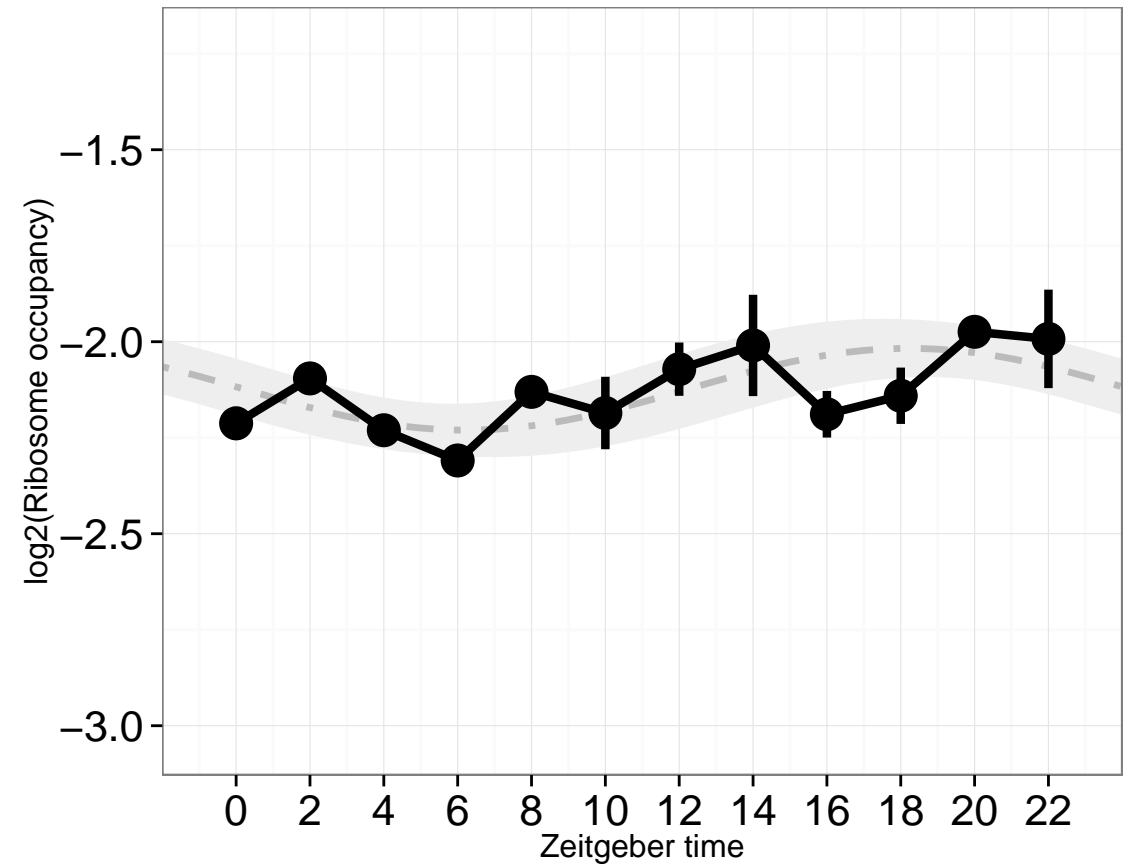

Supplement: SuppDataset_1.zip [file Marf1_set_A.pdf › Supplemental Dataset 1/A-mRNA_nonrhyth_translation_nonrhyth/Marf1_set_A.pdf]

## Mark1

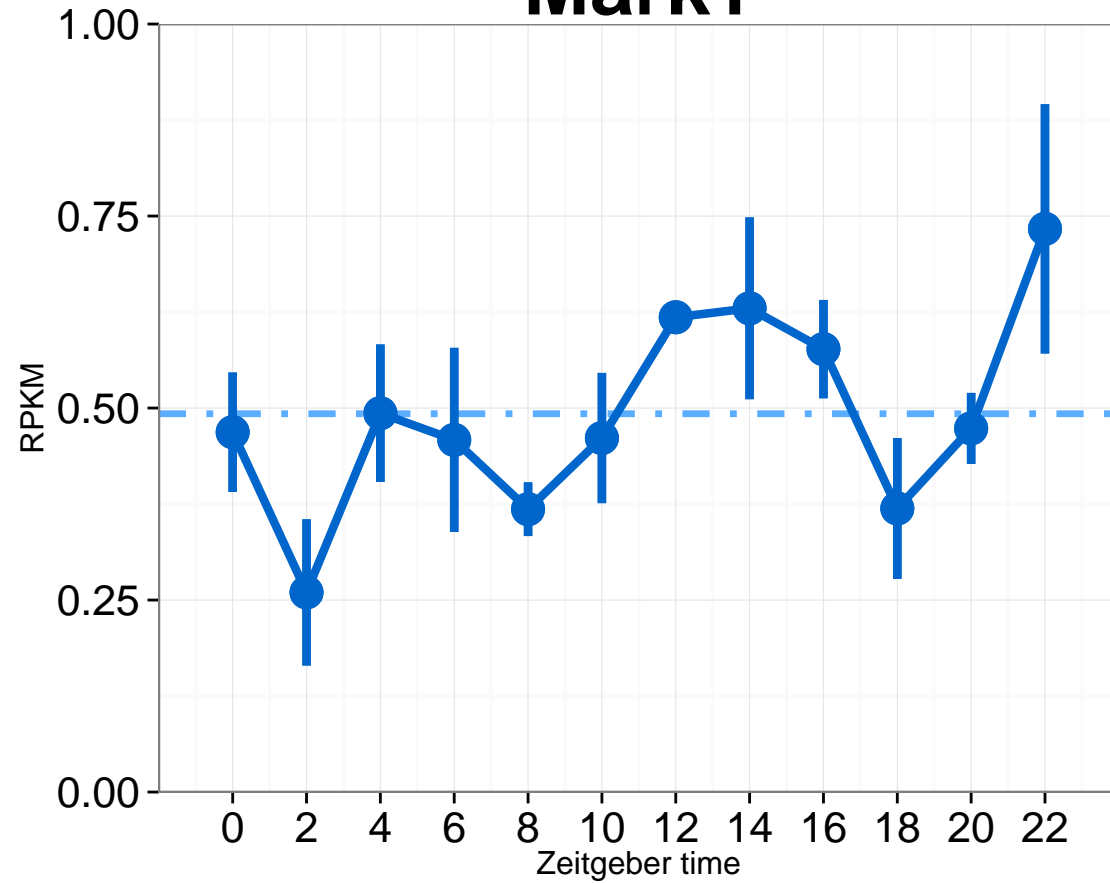

## Mark1 log2(Ribosome occupancy

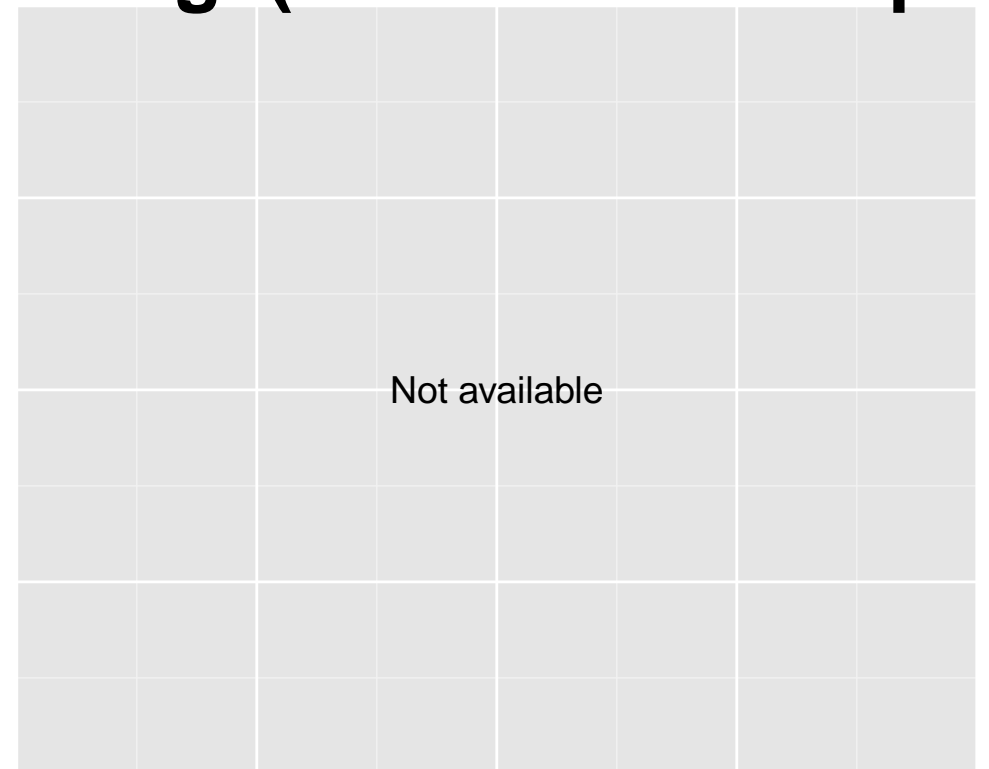

Supplement: SuppDataset_1.zip [file Mark1_set_A.pdf › Supplemental Dataset 1/A-mRNA_nonrhyth_translation_nonrhyth/Mark1_set_A.pdf]

# Mark2

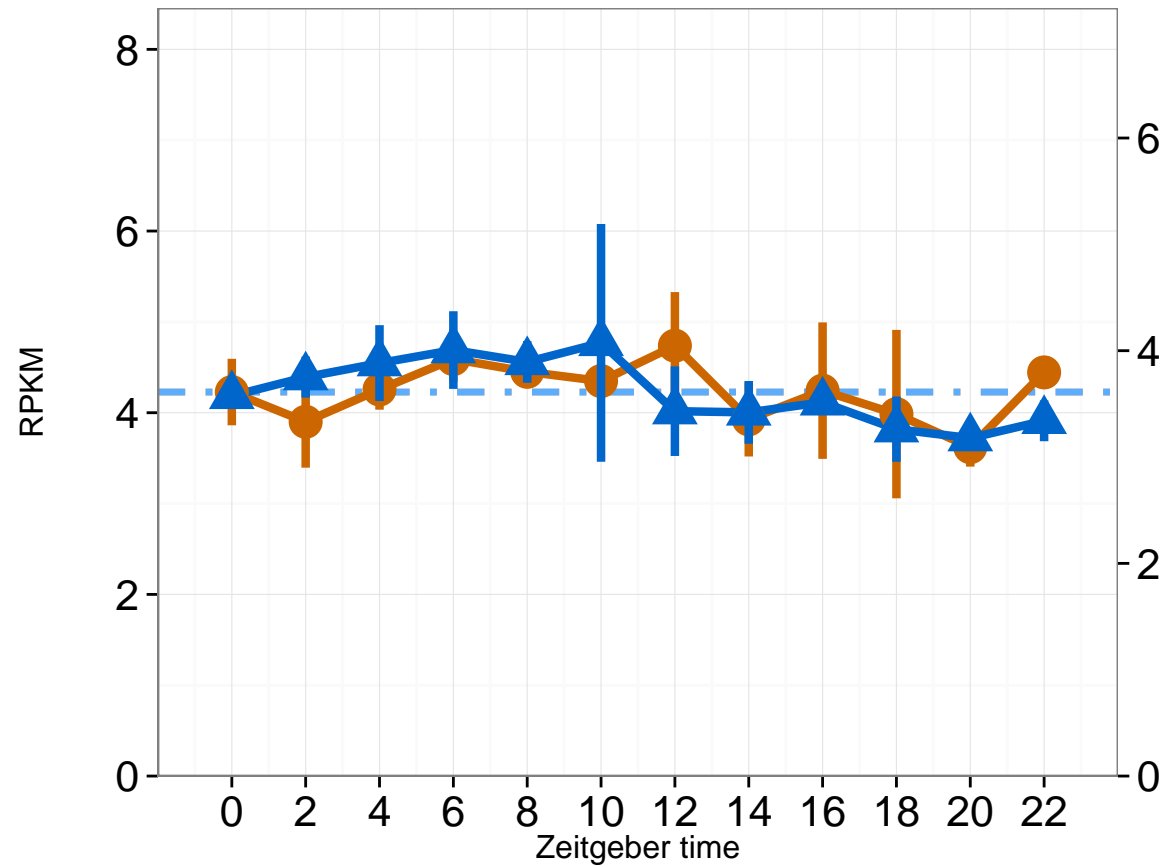

# Mark2

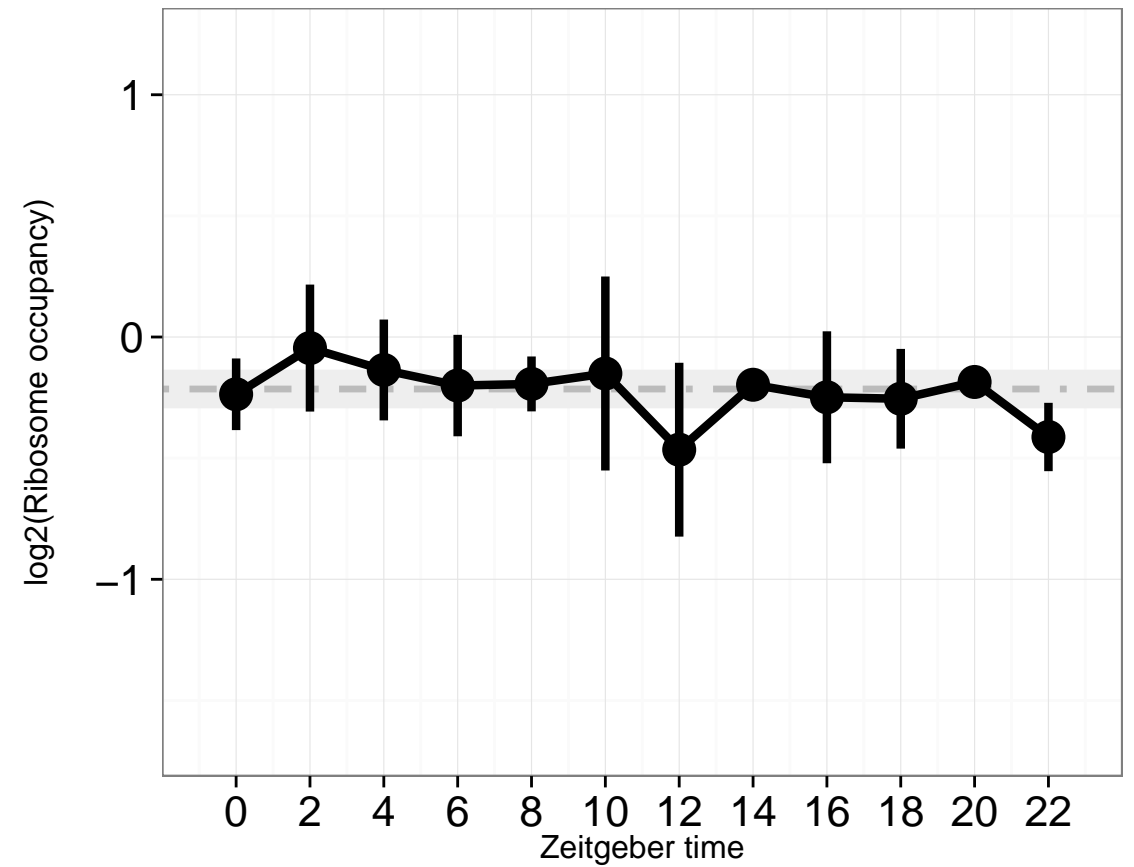

Supplement: SuppDataset_1.zip [file Mark2_set_A.pdf › Supplemental Dataset 1/A-mRNA_nonrhyth_translation_nonrhyth/Mark2_set_A.pdf]

## Mark3

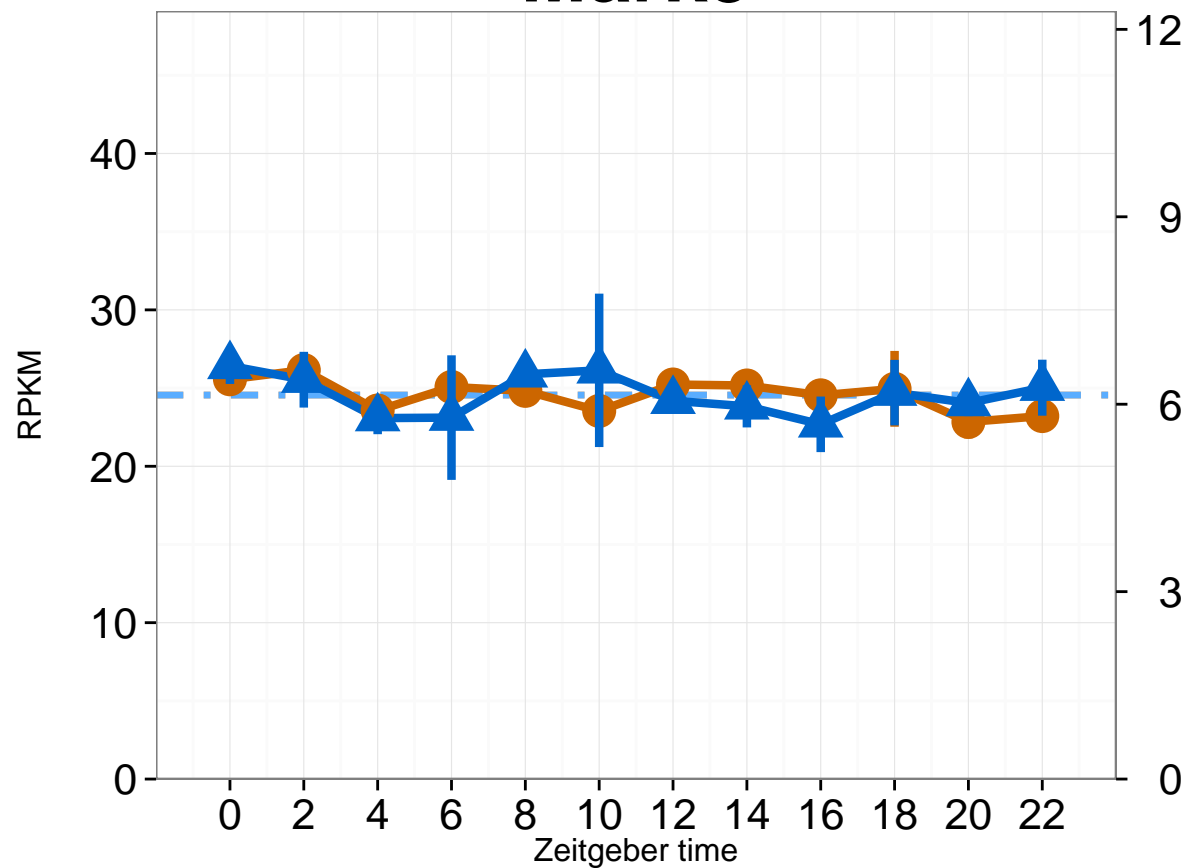

## Mark3

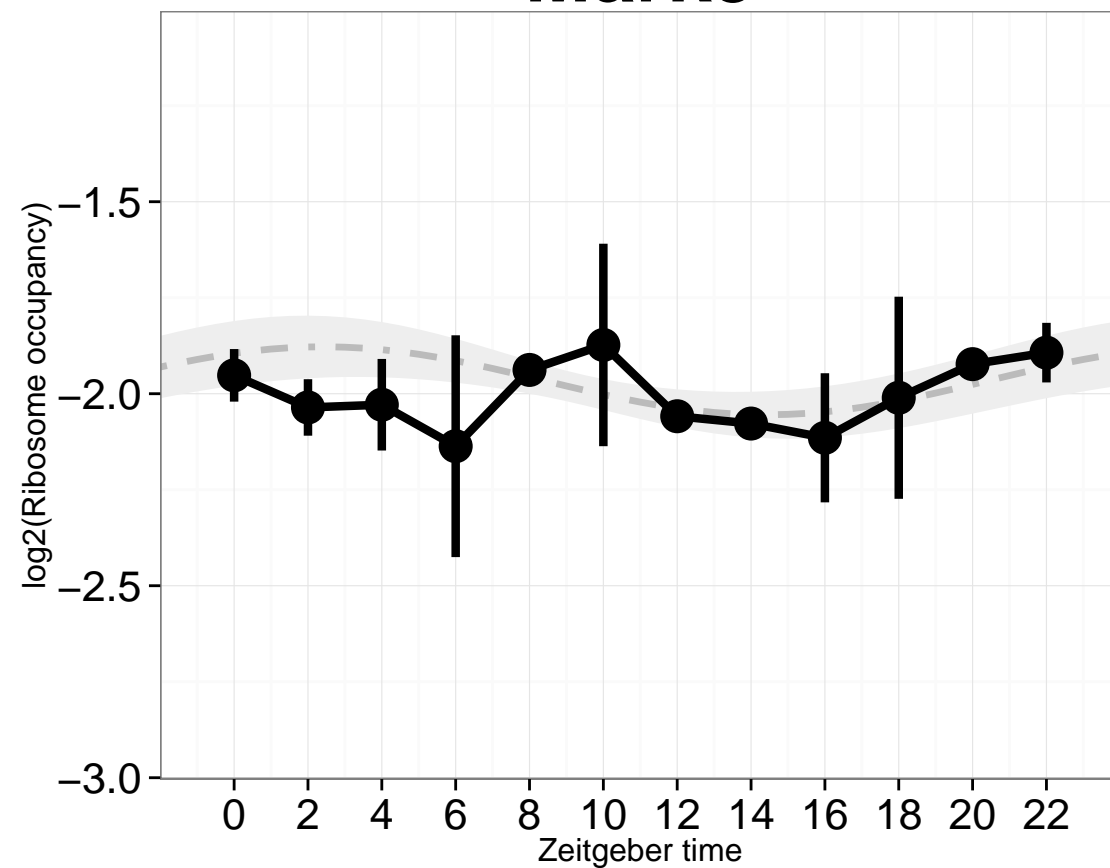

Supplement: SuppDataset_1.zip [file Mark3_set_A.pdf › Supplemental Dataset 1/A-mRNA_nonrhyth_translation_nonrhyth/Mark3_set_A.pdf]

# Mark4

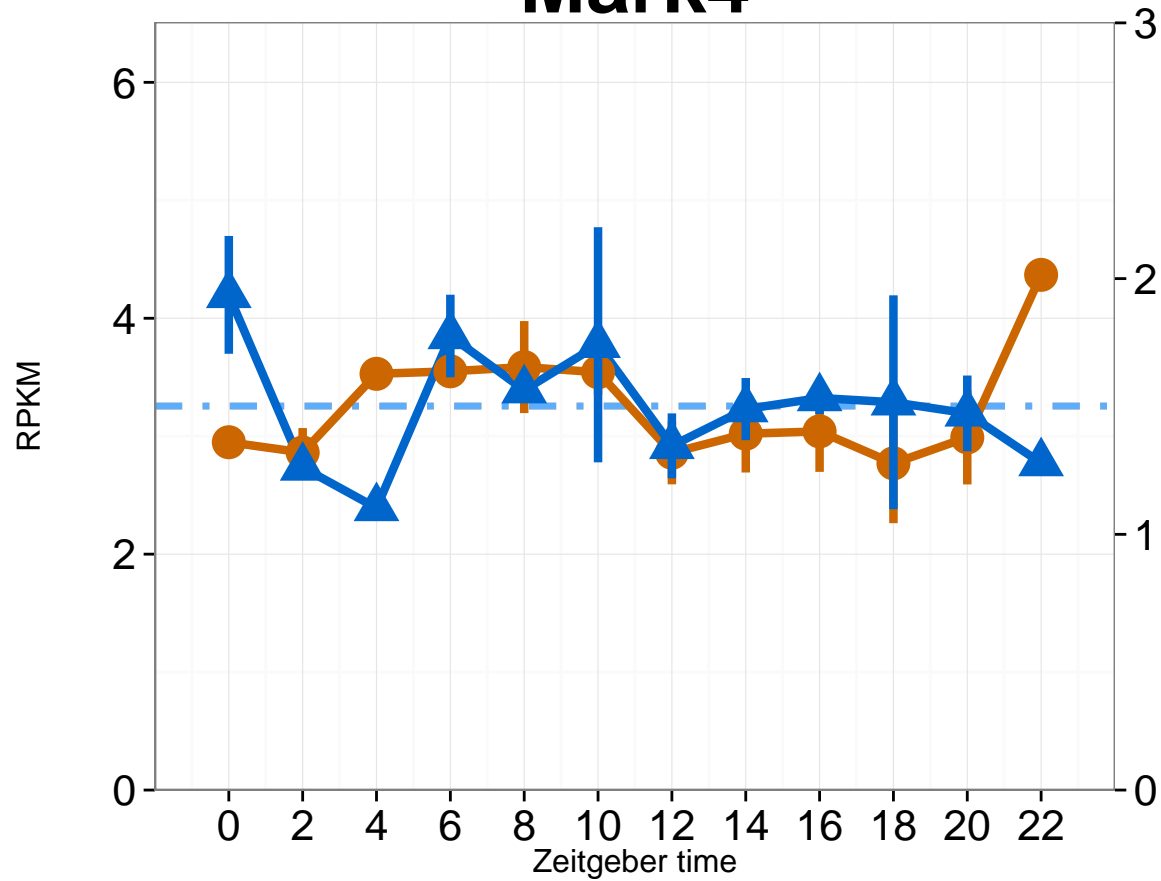

# Mark4

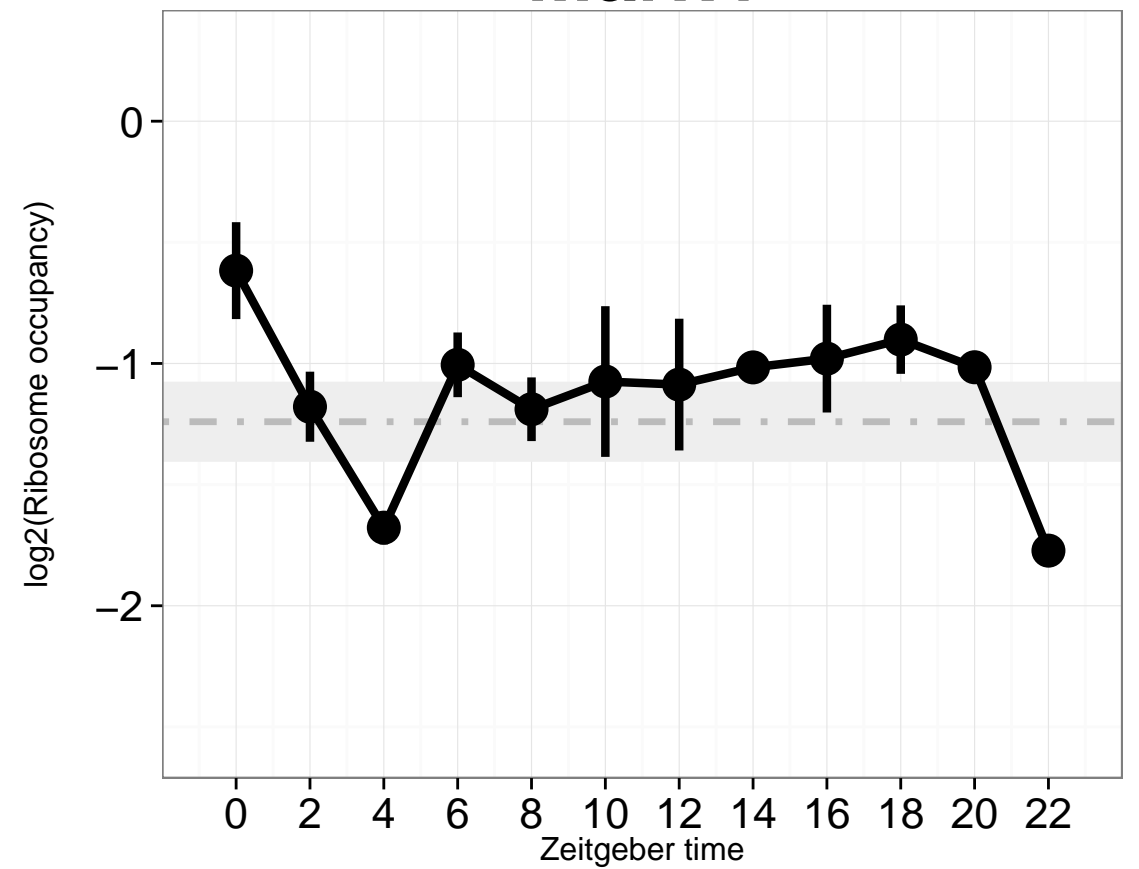

Supplement: SuppDataset_1.zip [file Mark4_set_A.pdf › Supplemental Dataset 1/A-mRNA_nonrhyth_translation_nonrhyth/Mark4_set_A.pdf]

# Mars2

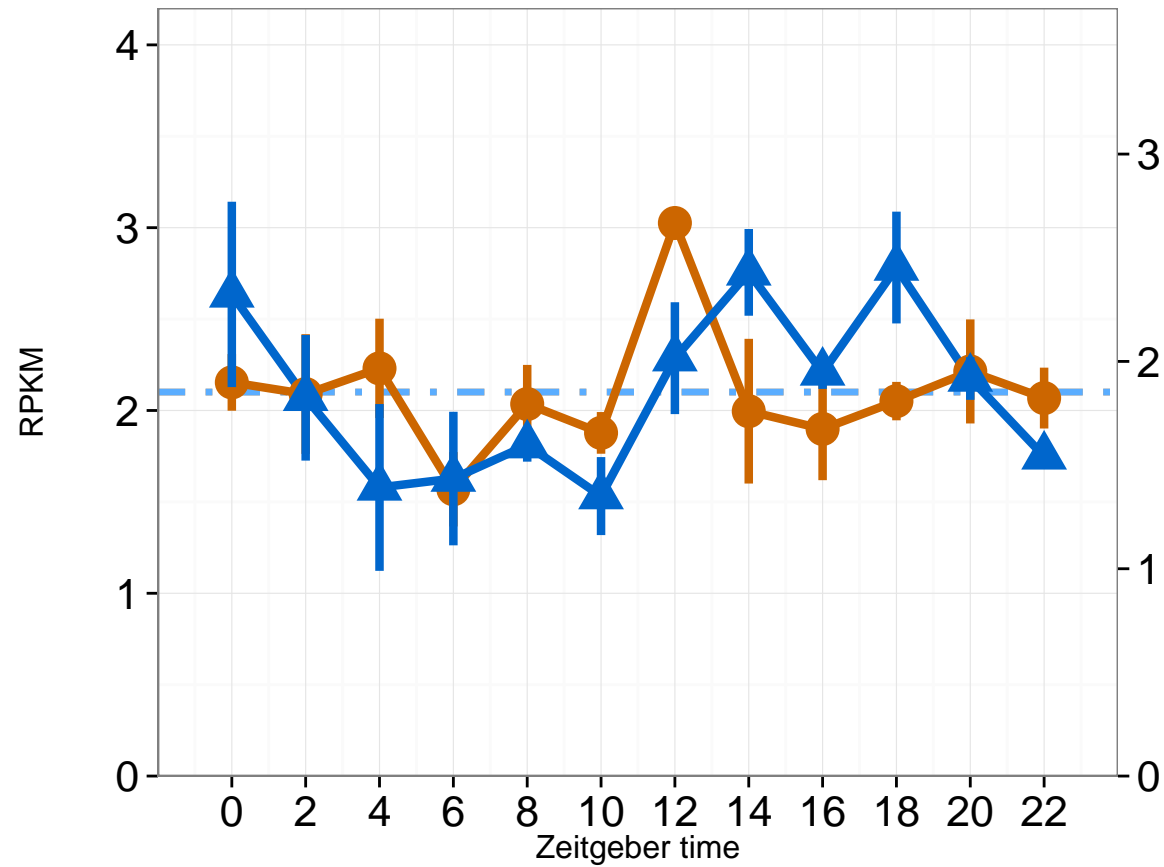

# Mars2

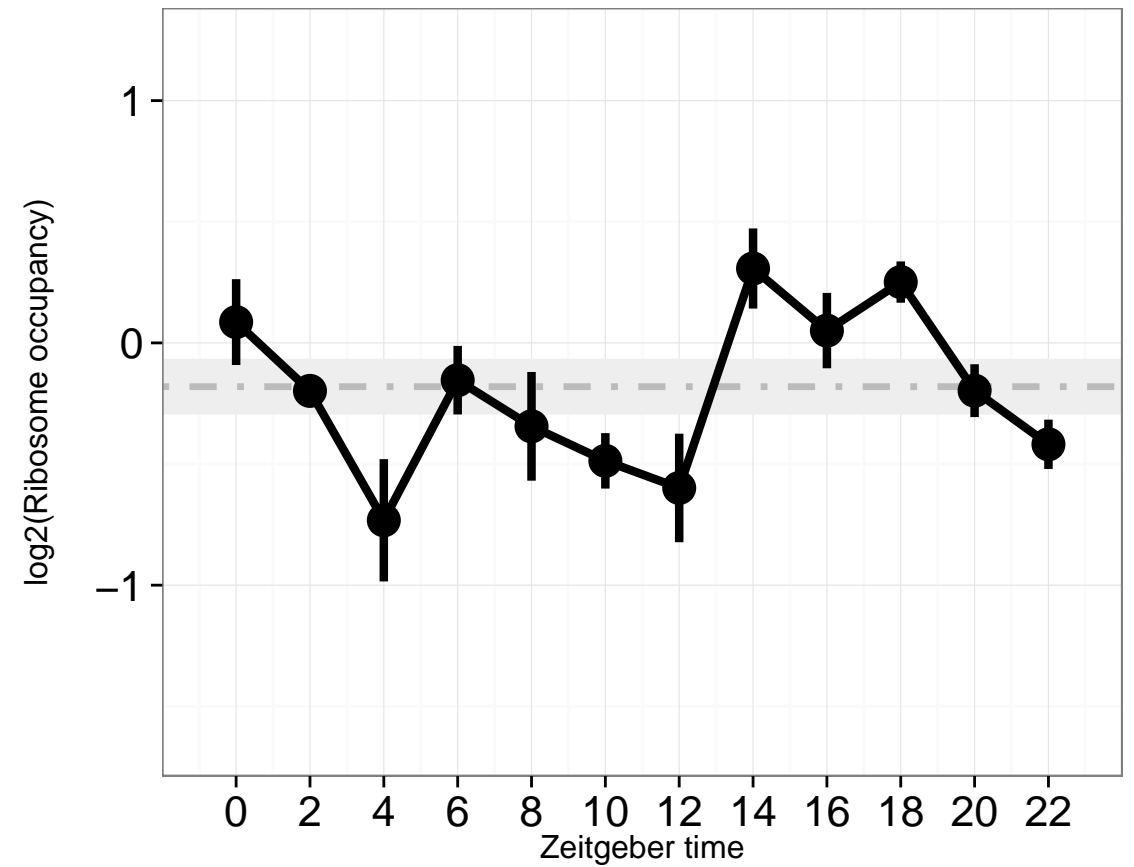

Supplement: SuppDataset_1.zip [file Mars2_set_A.pdf › Supplemental Dataset 1/A-mRNA_nonrhyth_translation_nonrhyth/Mars2_set_A.pdf]

## Mars

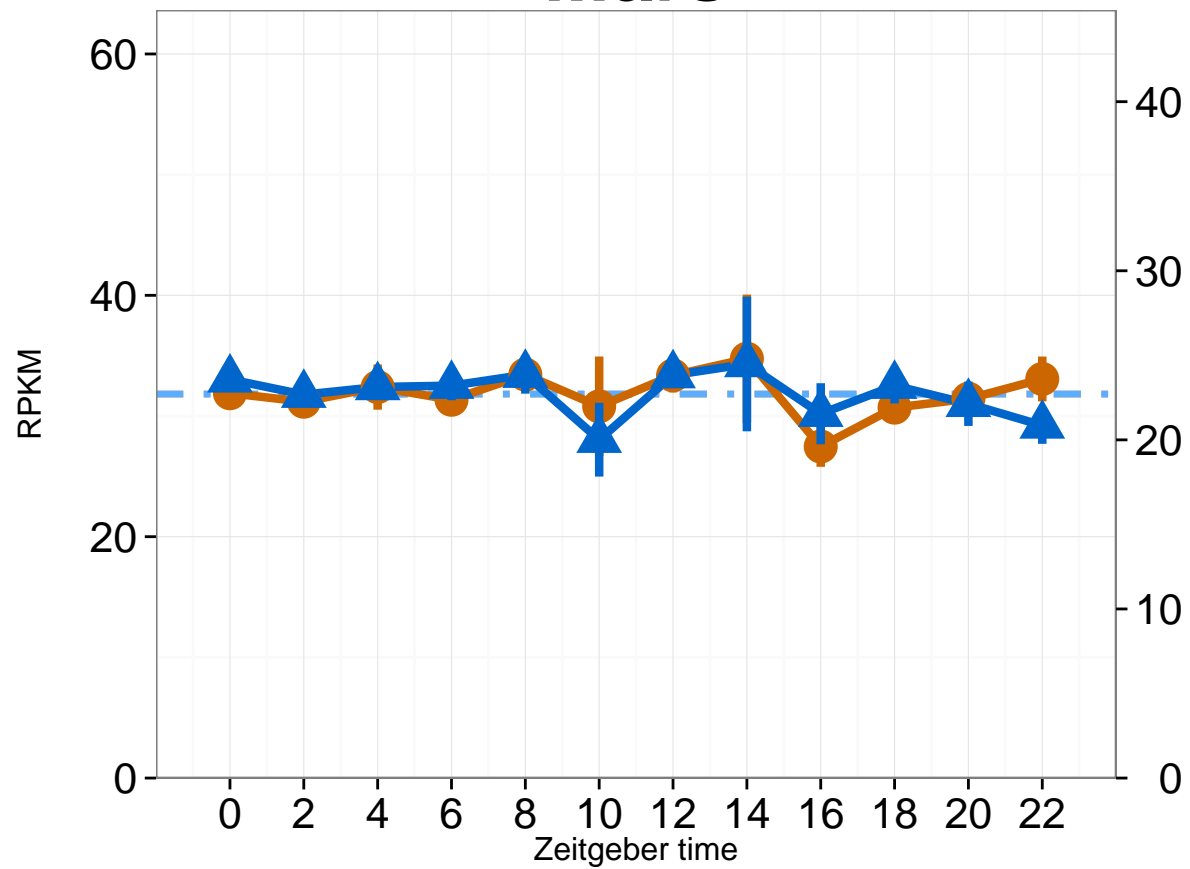

## Mars

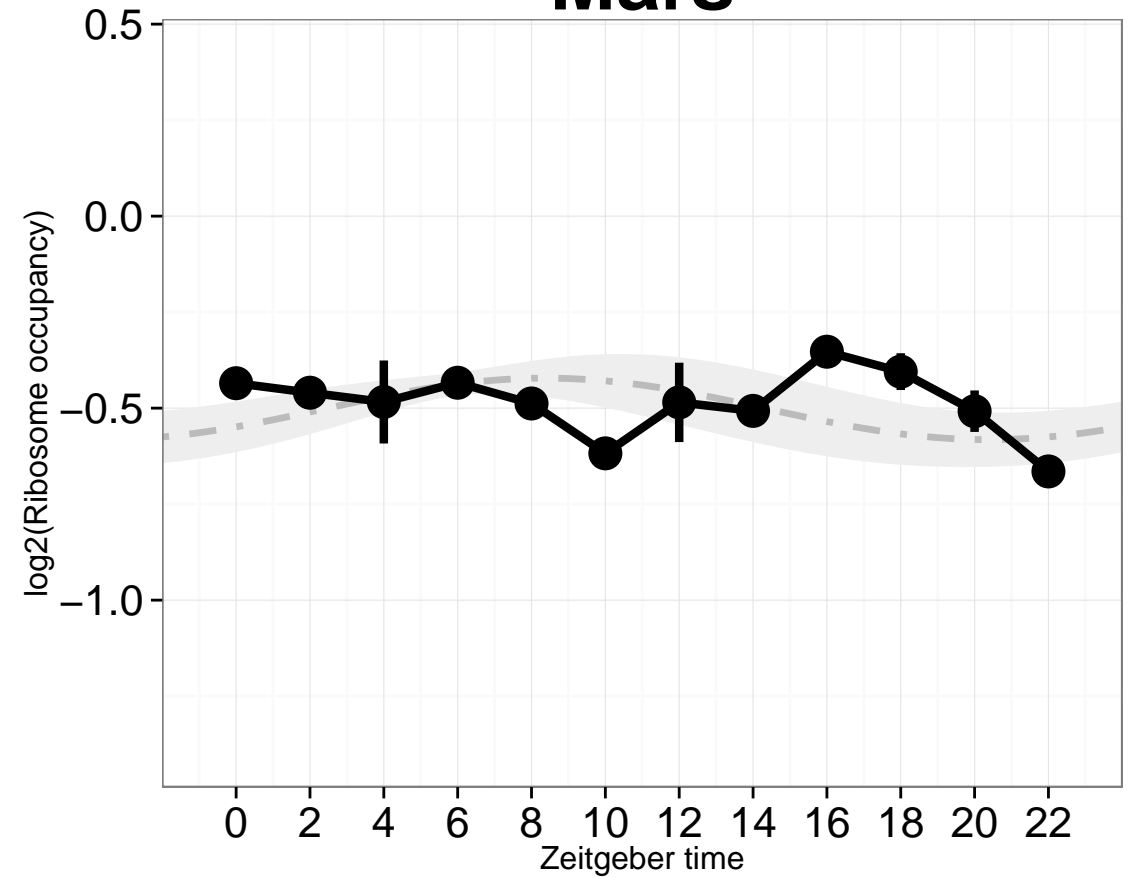

Supplement: SuppDataset_1.zip [file Mars_set_A.pdf › Supplemental Dataset 1/A-mRNA_nonrhyth_translation_nonrhyth/Mars_set_A.pdf]

## Marveld2

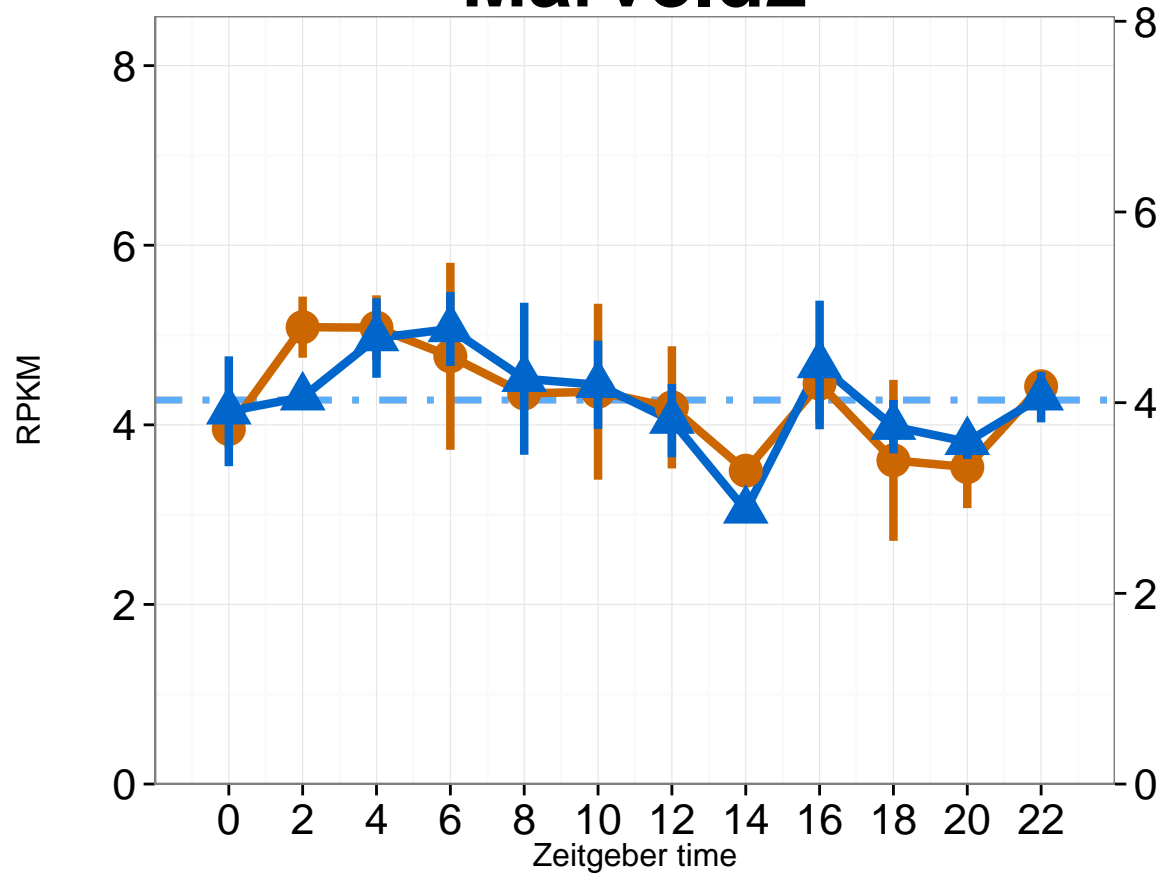

## Marveld2

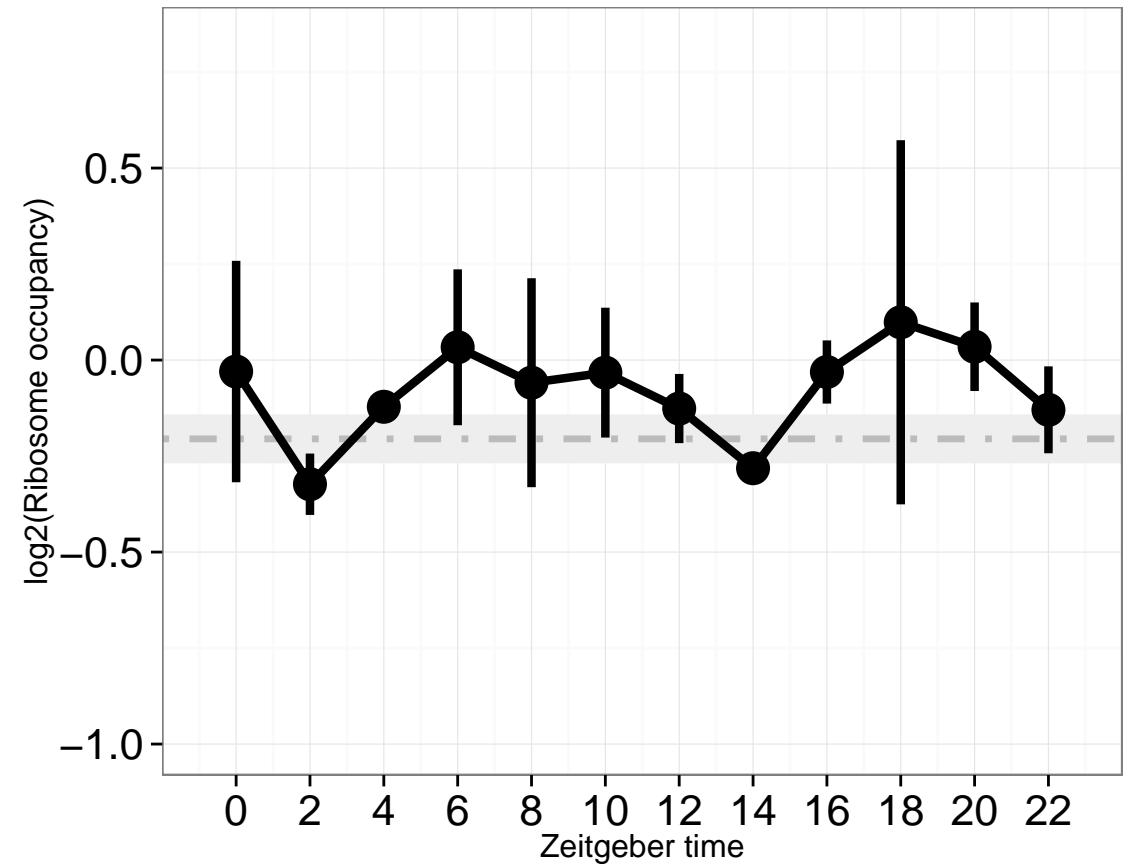

Supplement: SuppDataset_1.zip [file Marveld2_set_A.pdf › Supplemental Dataset 1/A-mRNA_nonrhyth_translation_nonrhyth/Marveld2_set_A.pdf]

# Masp1

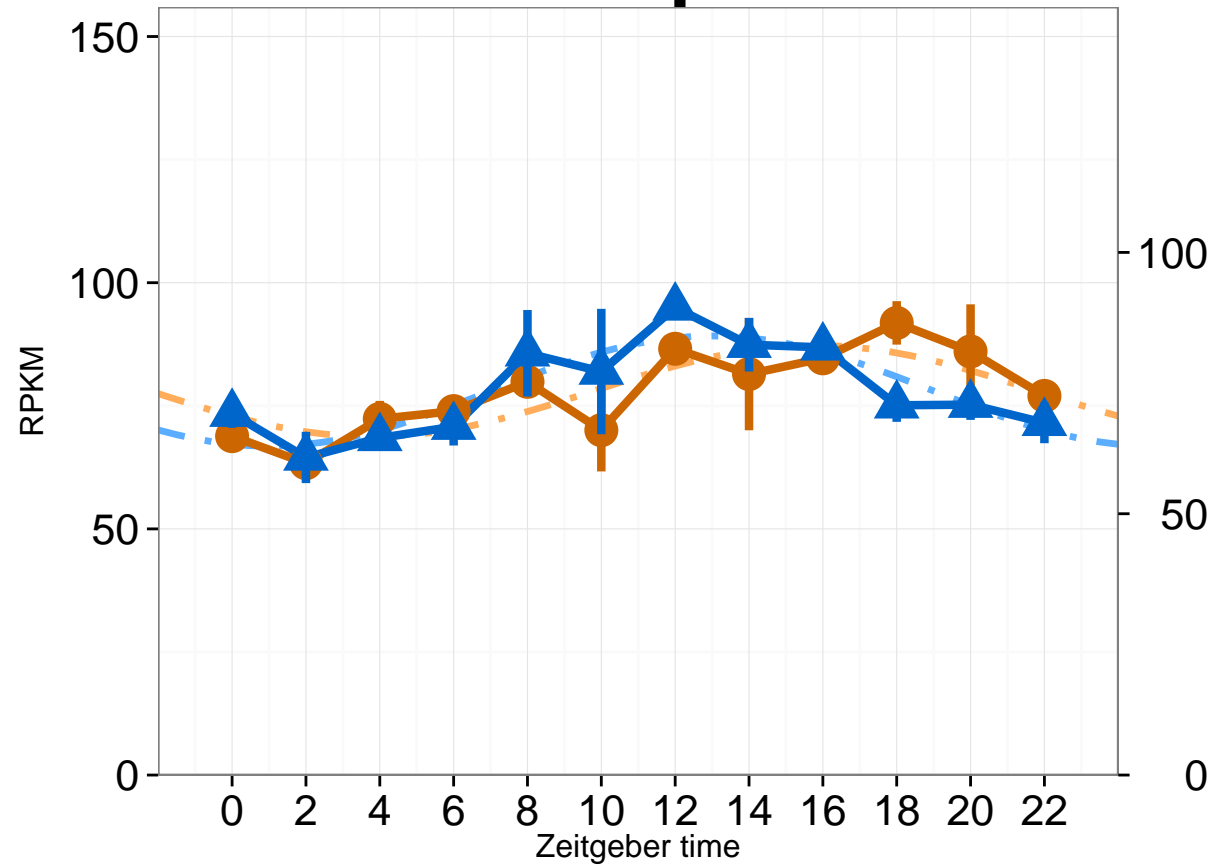

# Masp1

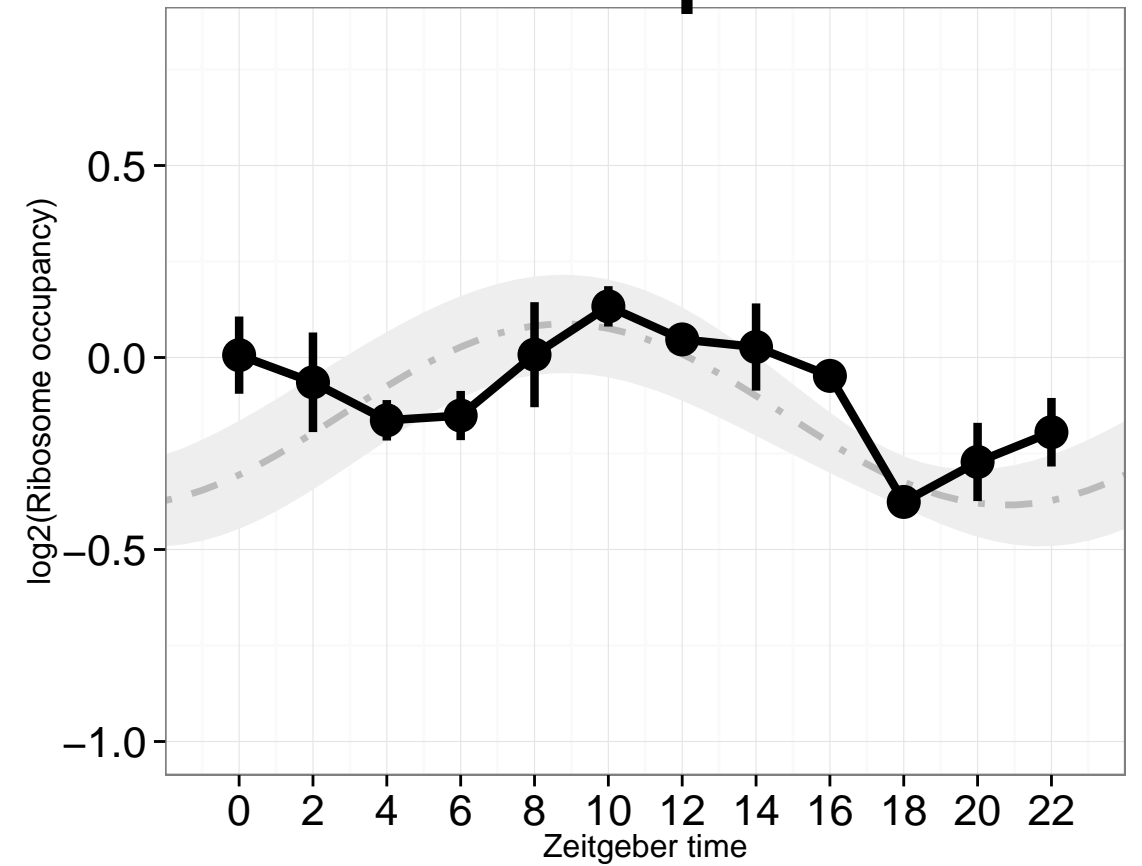

Supplement: SuppDataset_1.zip [file Masp1_set_A.pdf › Supplemental Dataset 1/A-mRNA_nonrhyth_translation_nonrhyth/Masp1_set_A.pdf]

## Masp2

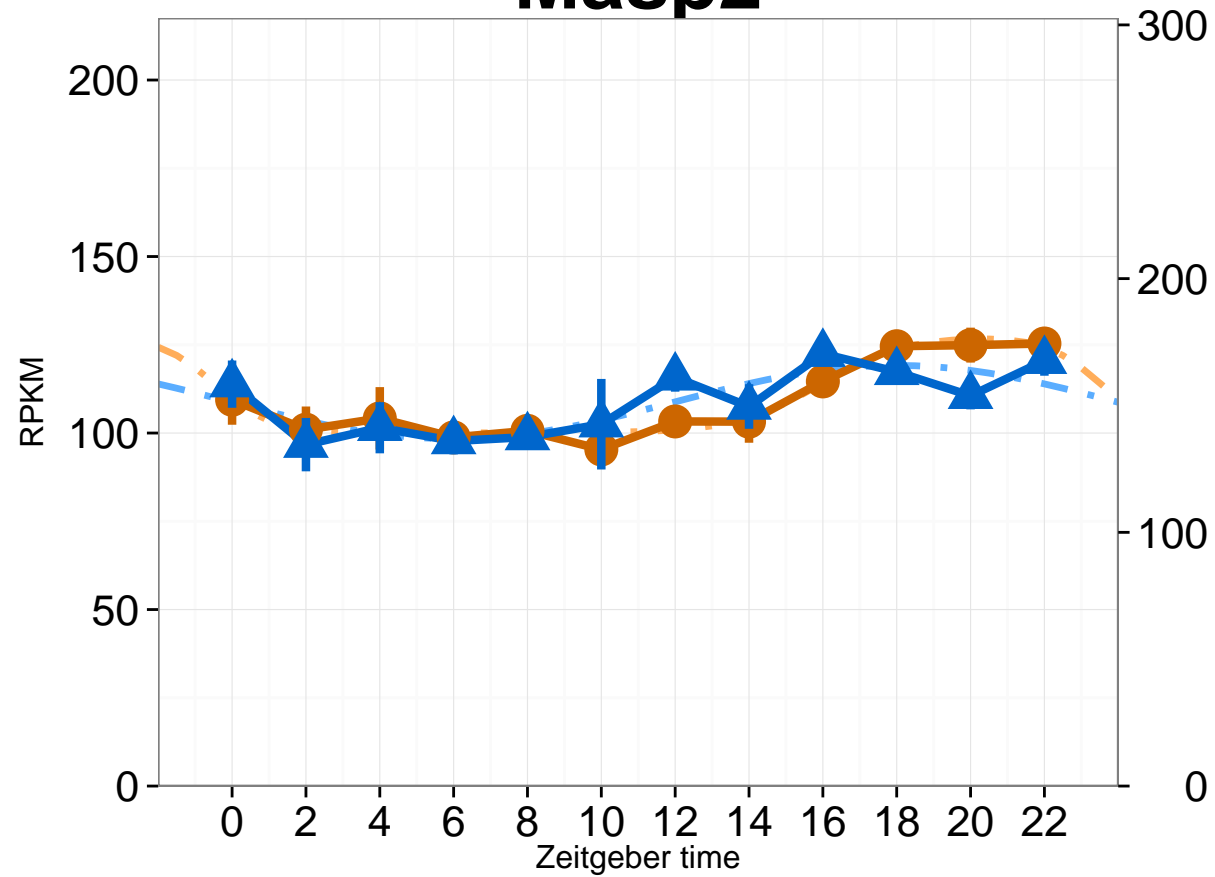

## Masp2

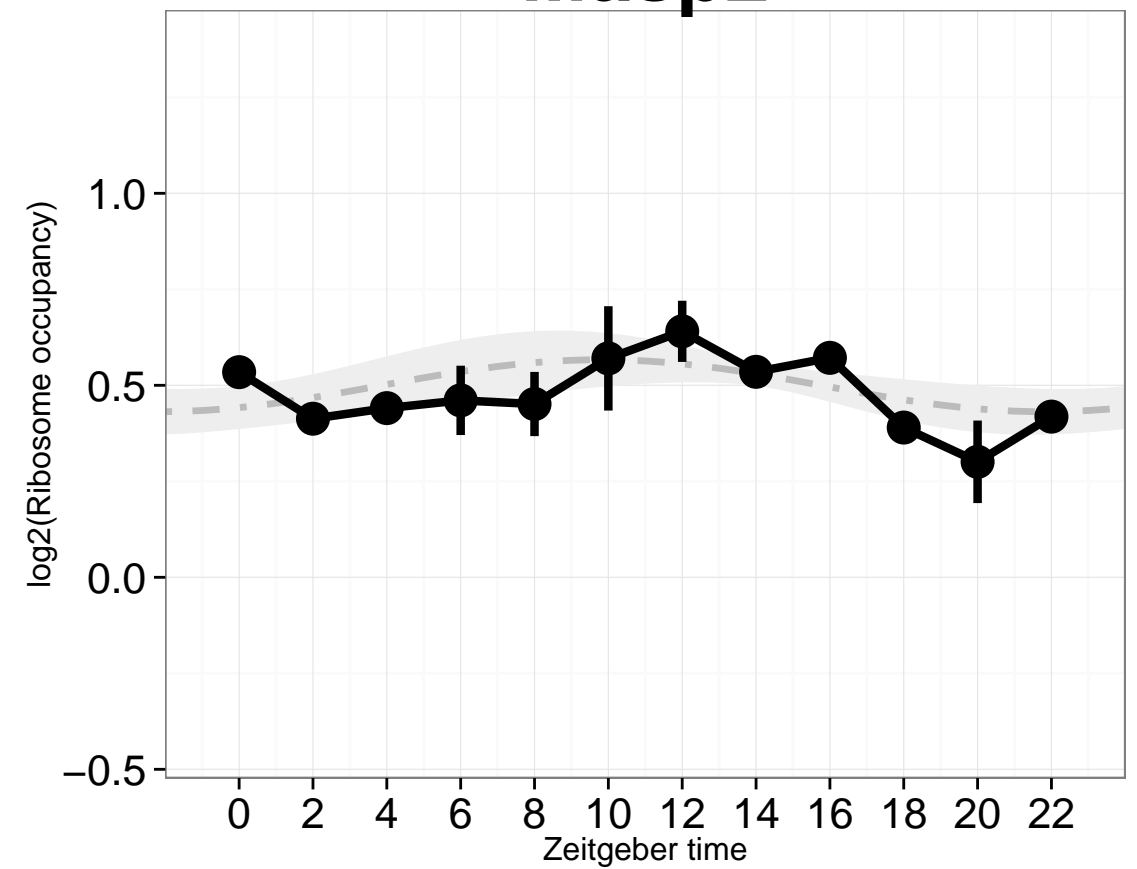

Supplement: SuppDataset_1.zip [file Masp2_set_A.pdf › Supplemental Dataset 1/A-mRNA_nonrhyth_translation_nonrhyth/Masp2_set_A.pdf]

# Mast2

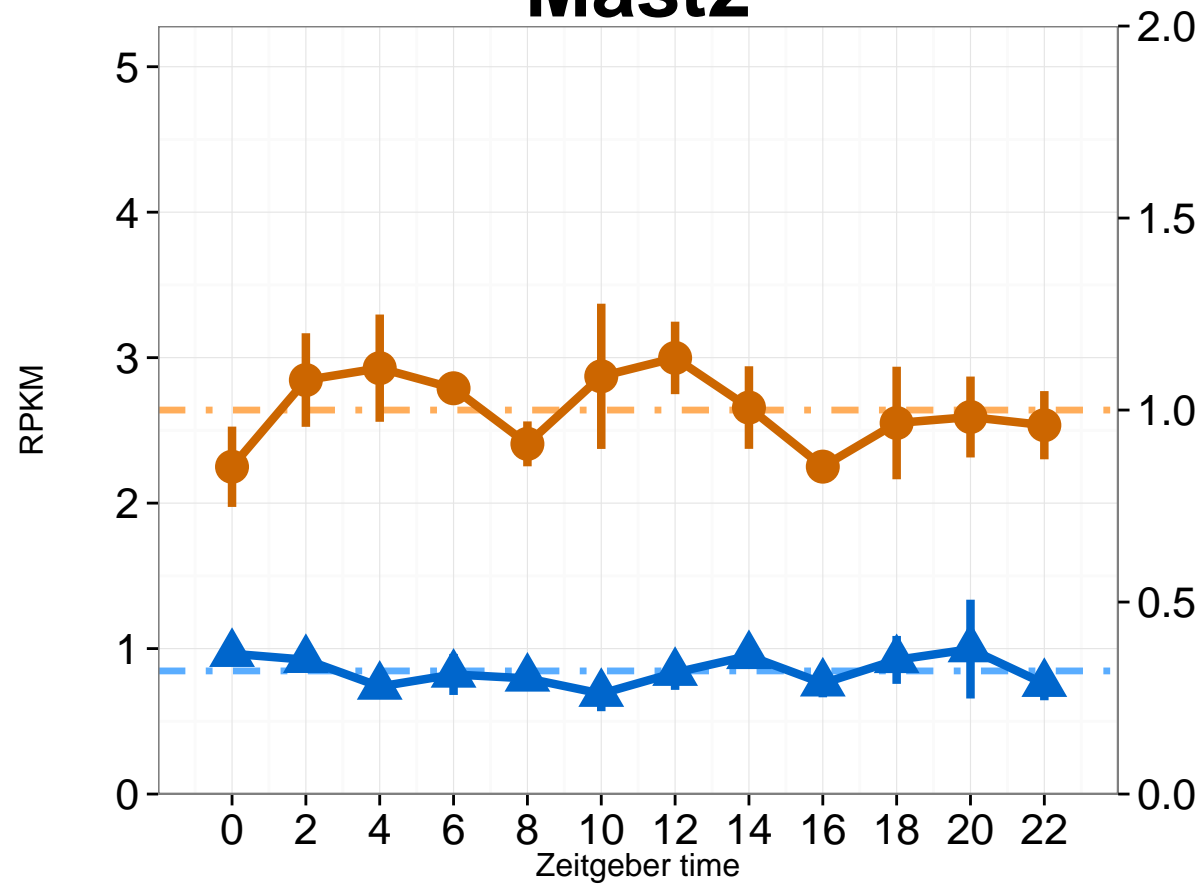

# Mast2

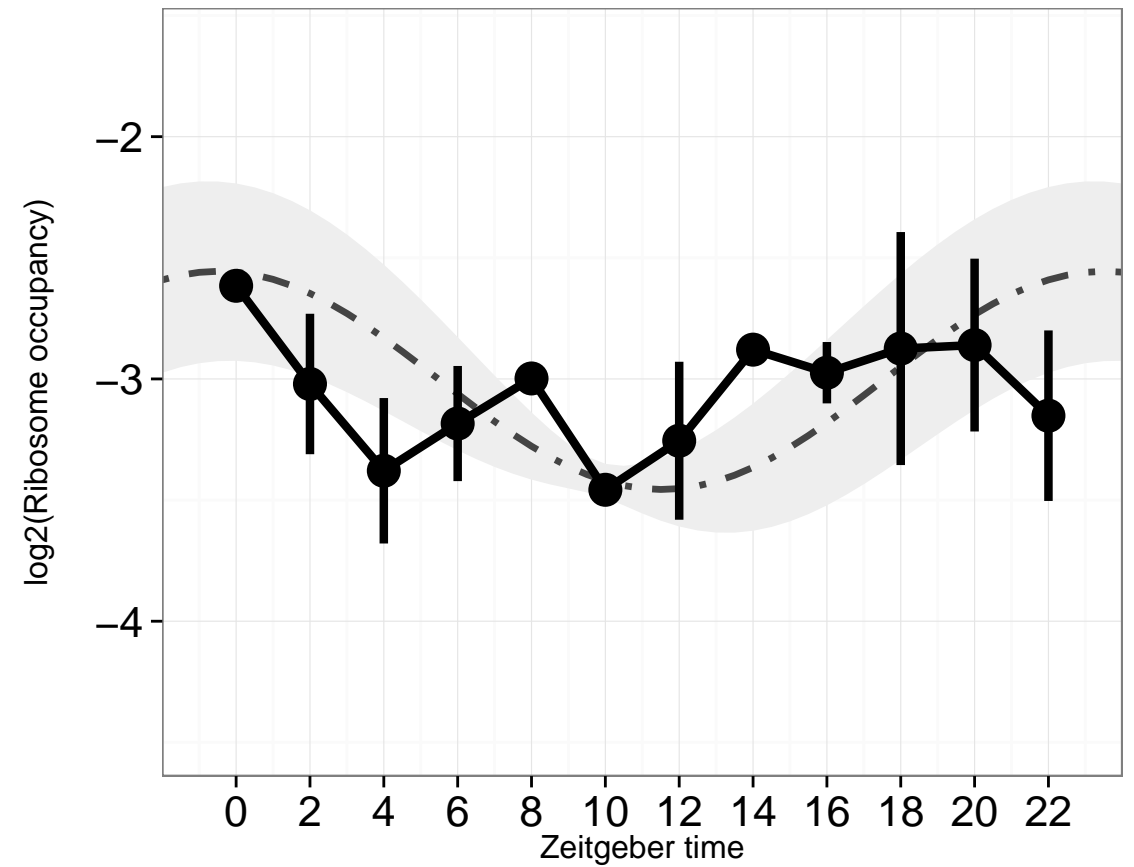

Supplement: SuppDataset_1.zip [file Mast2_set_A.pdf › Supplemental Dataset 1/A-mRNA_nonrhyth_translation_nonrhyth/Mast2_set_A.pdf]

# Mast3

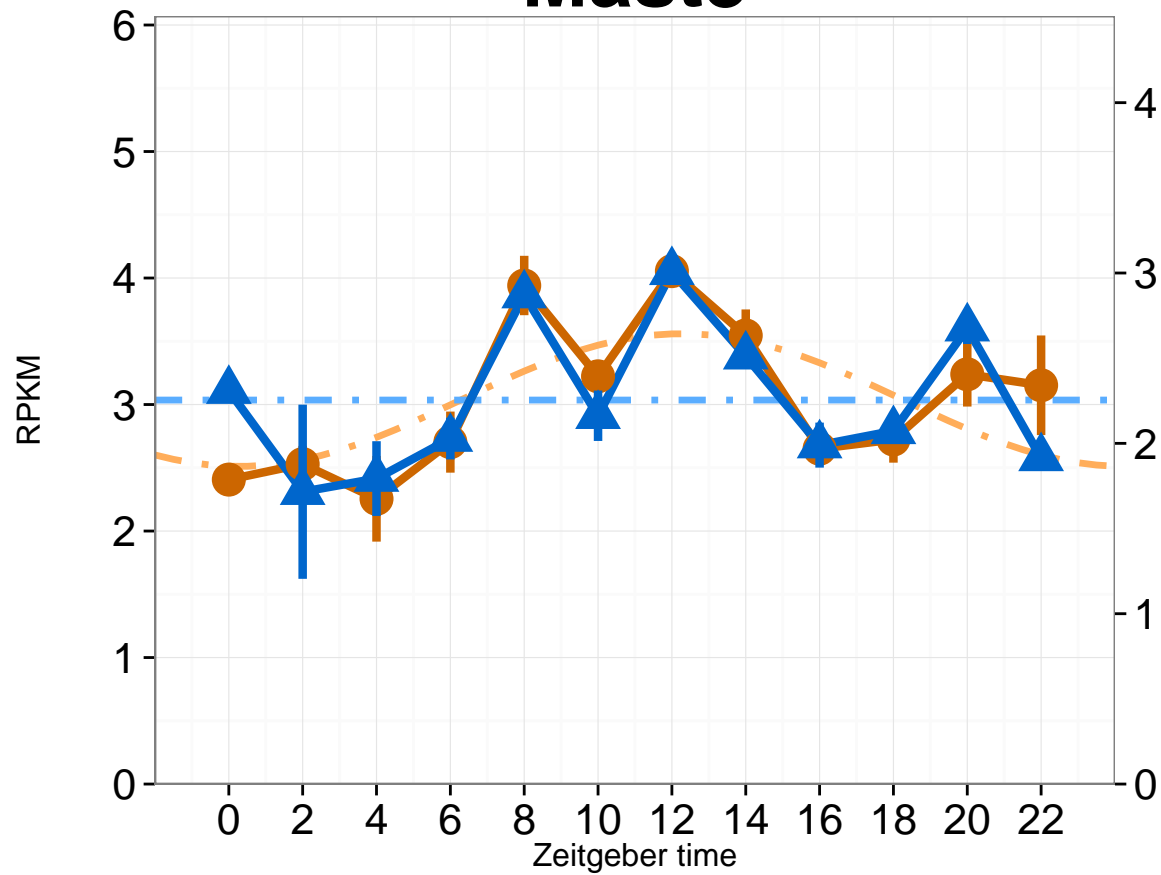

# Mast3

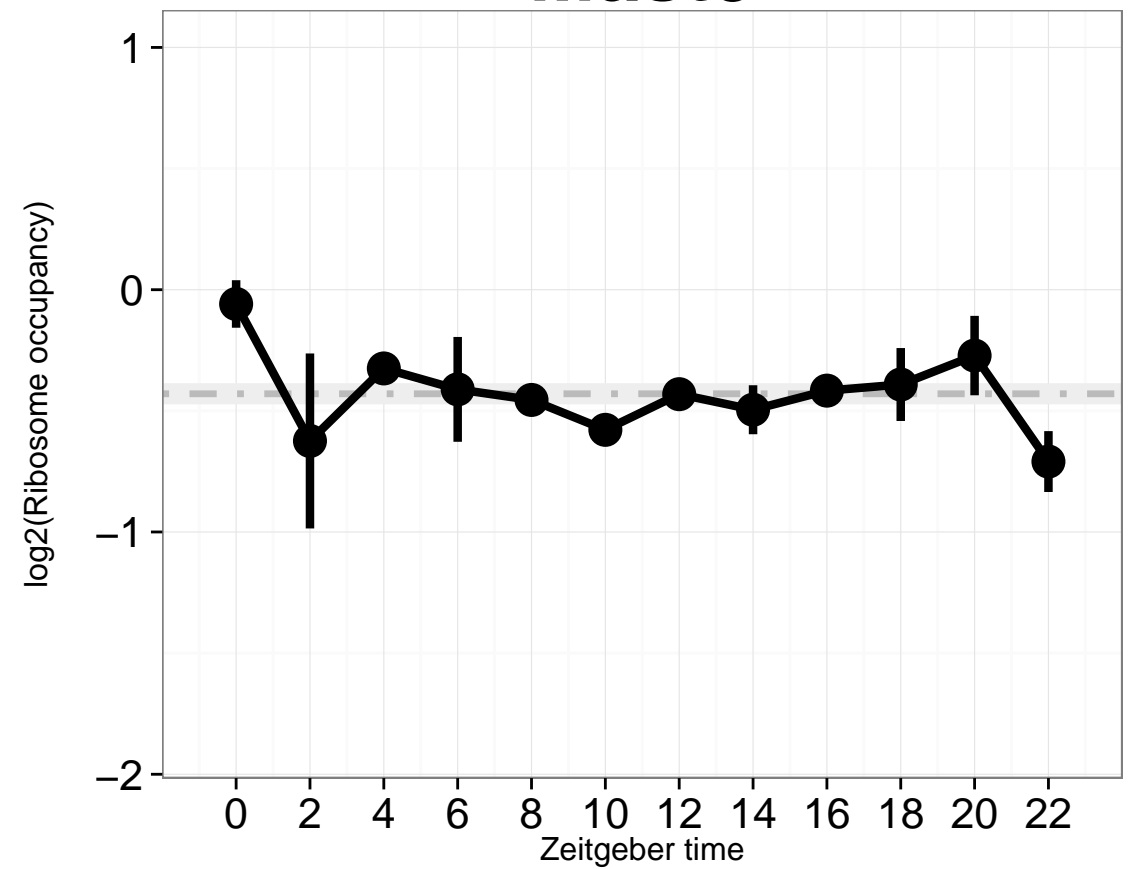

Supplement: SuppDataset_1.zip [file Mast3_set_A.pdf › Supplemental Dataset 1/A-mRNA_nonrhyth_translation_nonrhyth/Mast3_set_A.pdf]

## Mastl

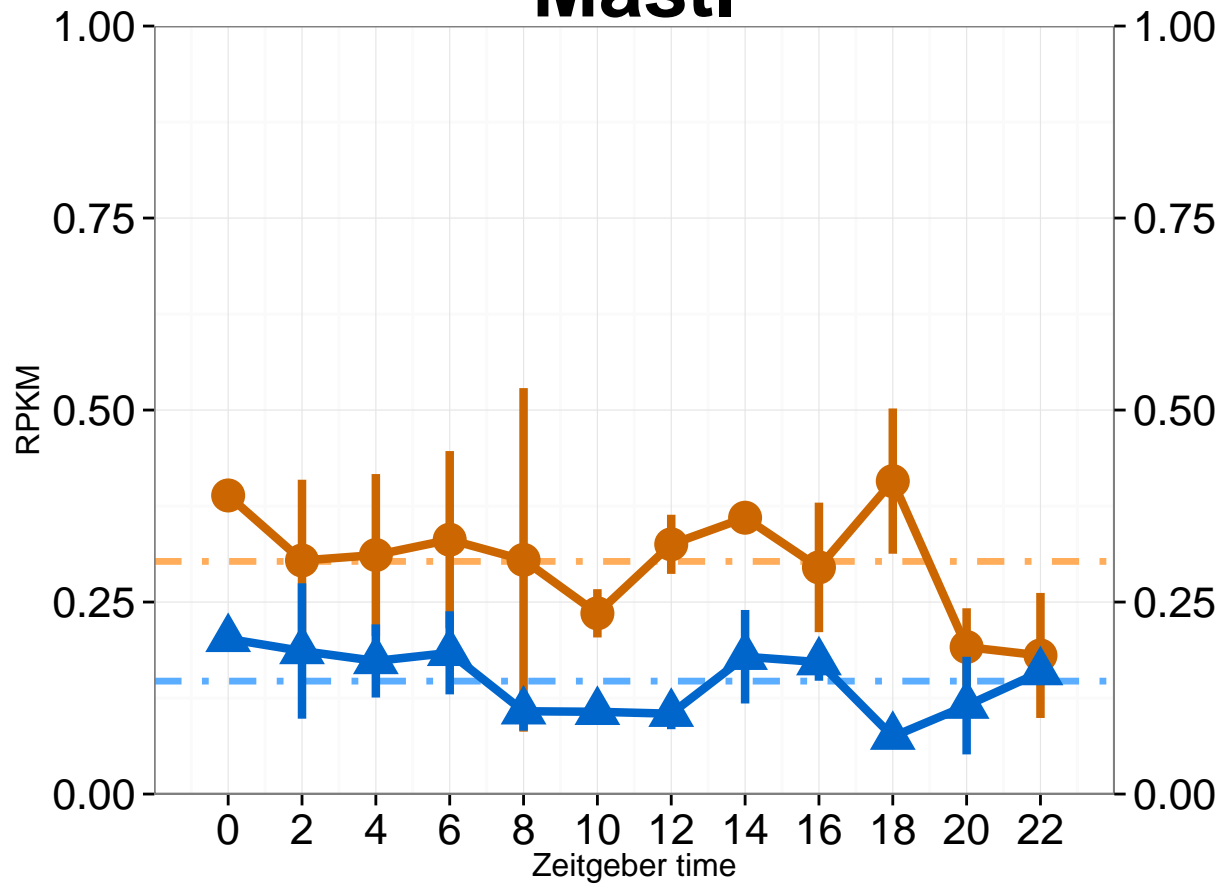

## Mastl

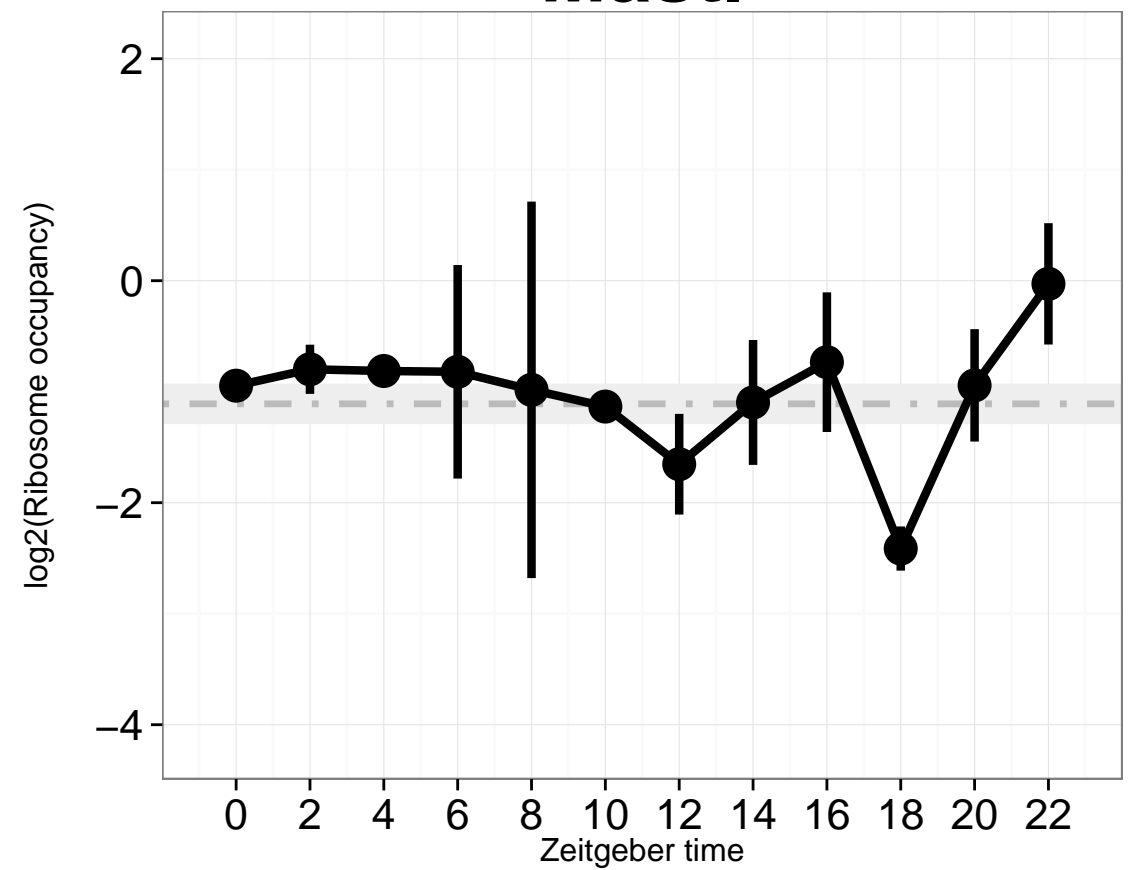

Supplement: SuppDataset_1.zip [file Mastl_set_A.pdf › Supplemental Dataset 1/A-mRNA_nonrhyth_translation_nonrhyth/Mastl_set_A.pdf]

# Mat2a

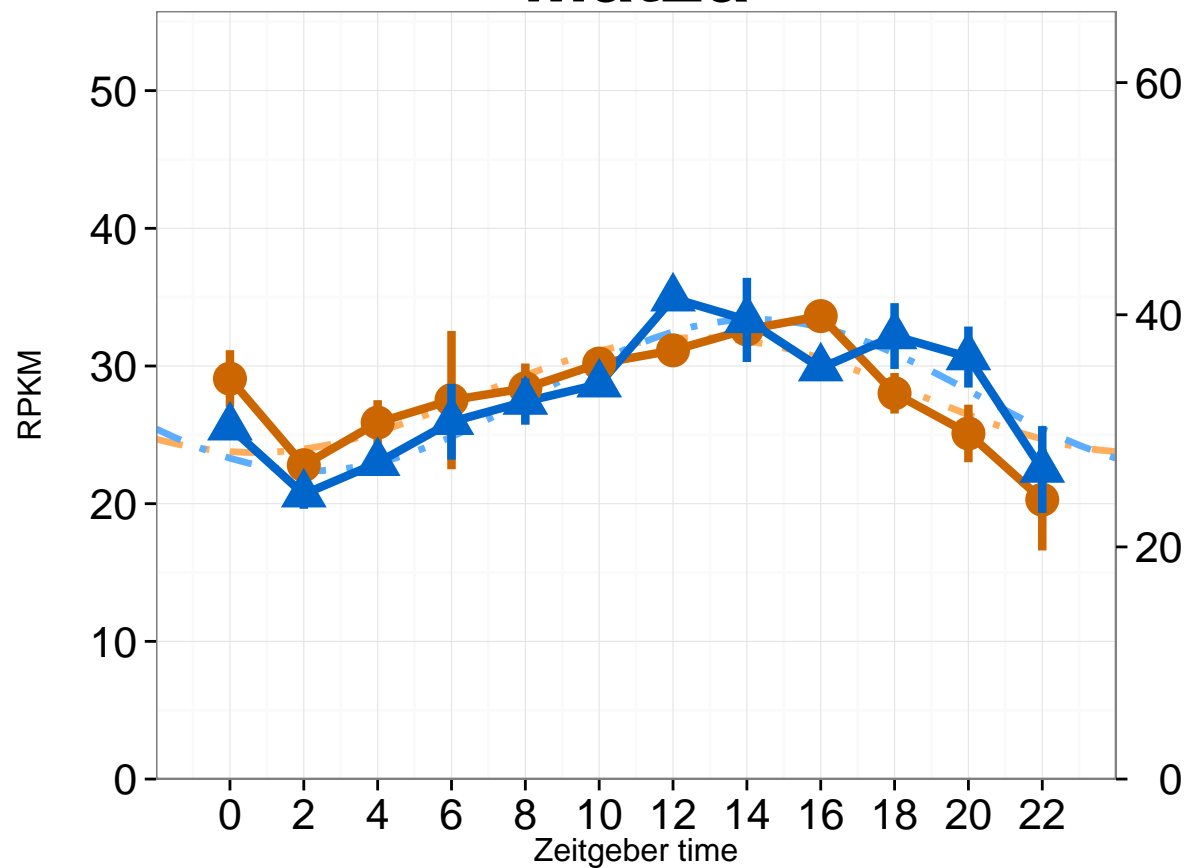

# Mat2a

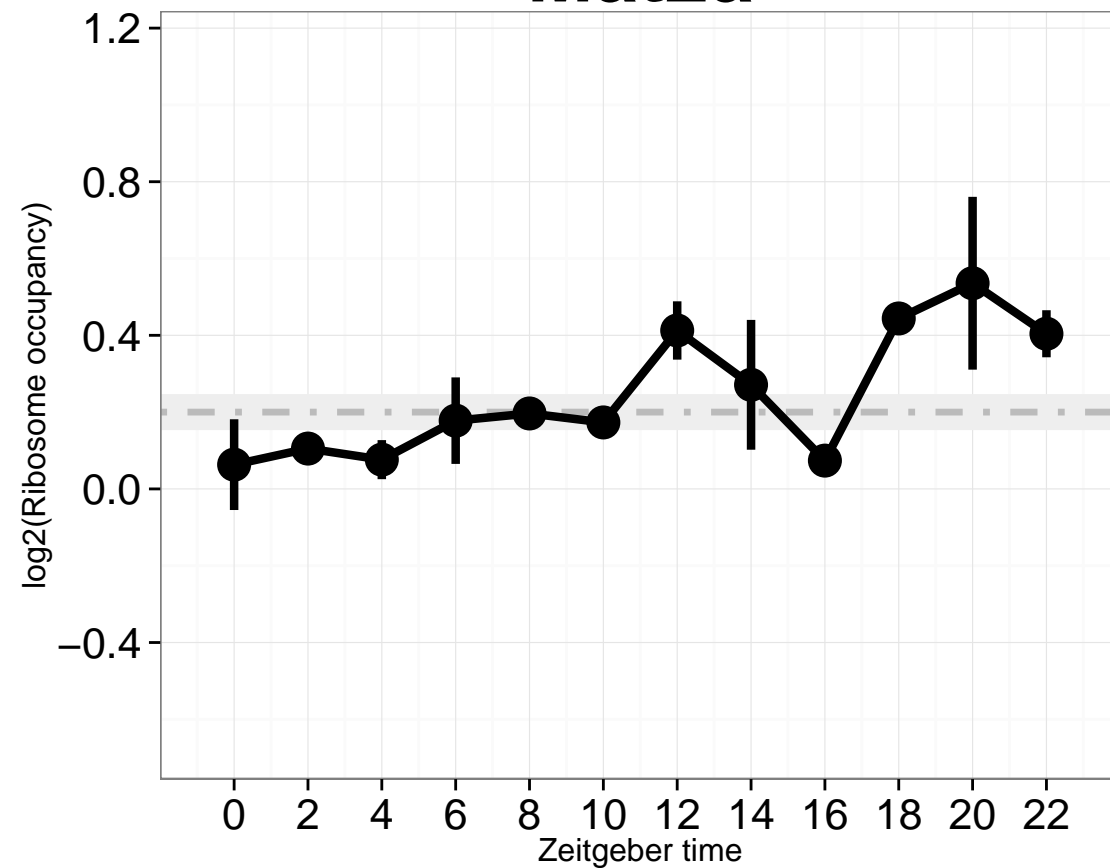

Supplement: SuppDataset_1.zip [file Mat2a_set_A.pdf › Supplemental Dataset 1/A-mRNA_nonrhyth_translation_nonrhyth/Mat2a_set_A.pdf]

# Mat2b

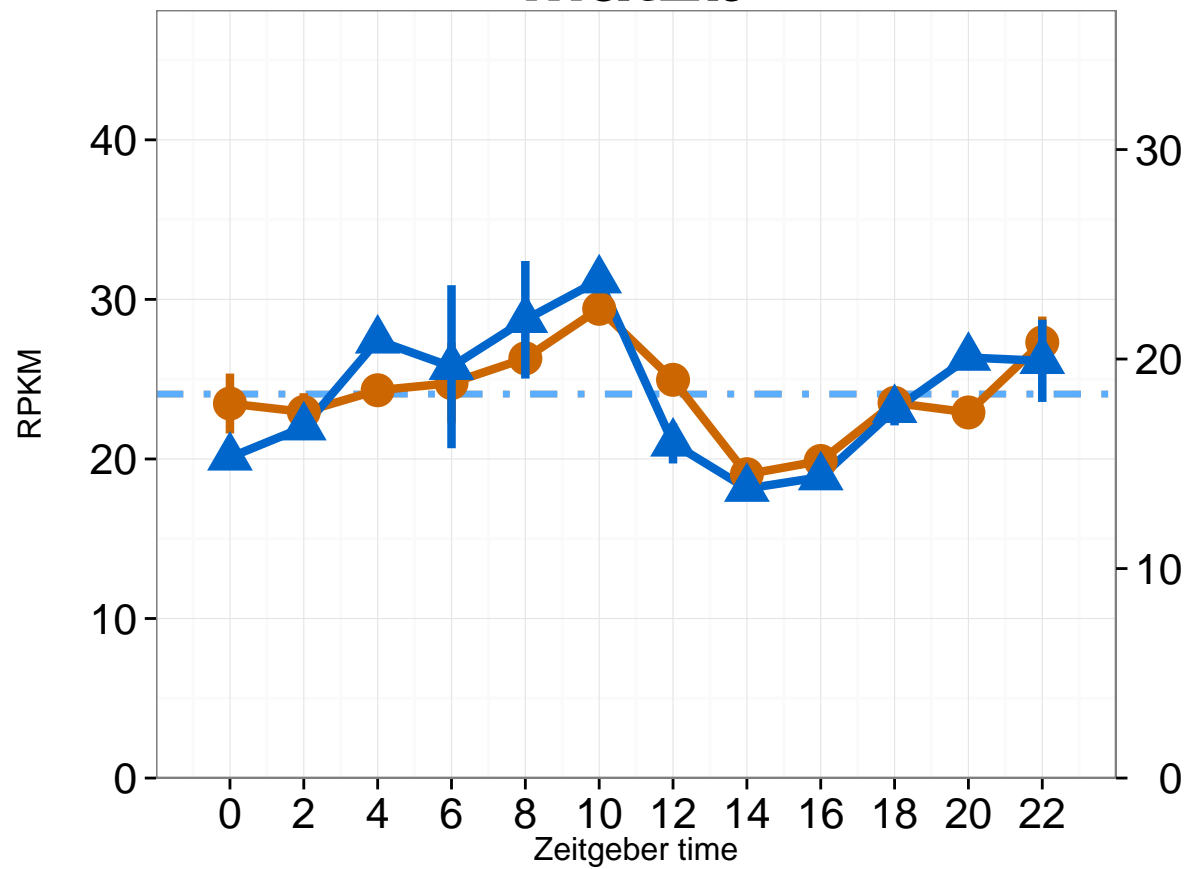

# Mat2b

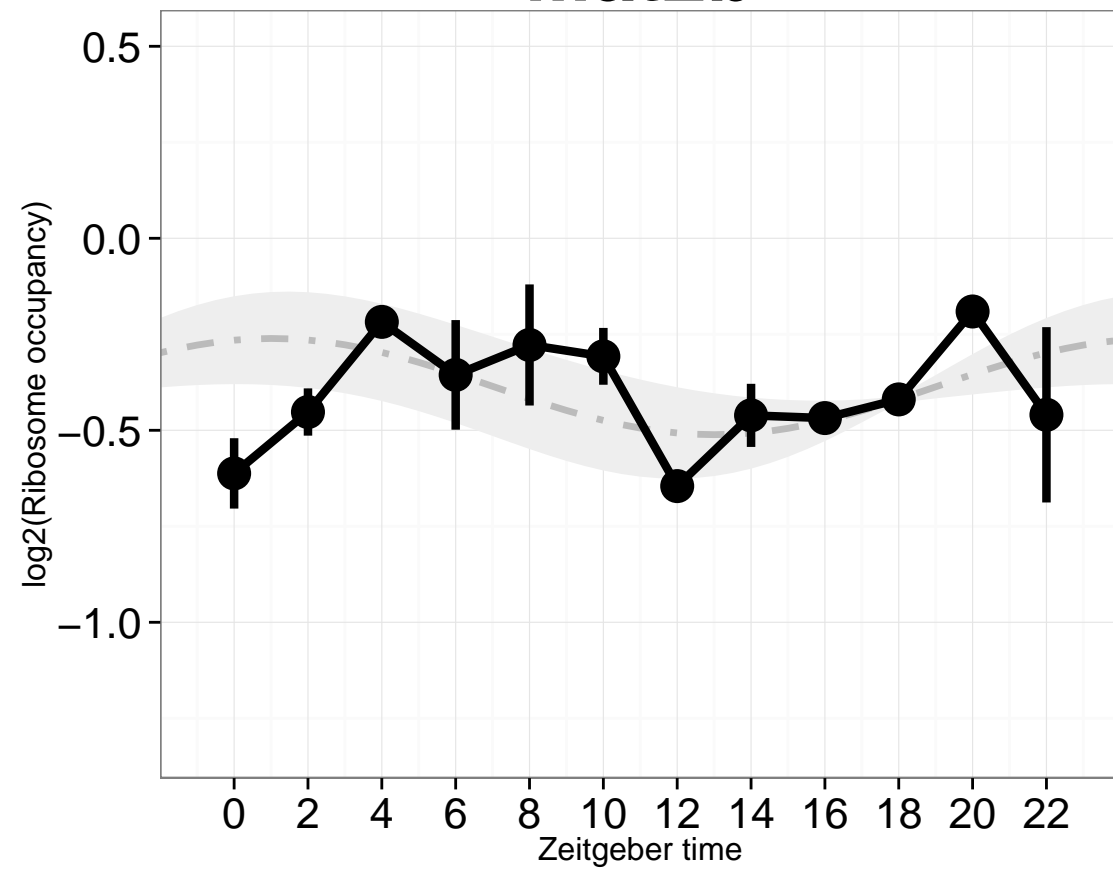

Supplement: SuppDataset_1.zip [file Mat2b_set_A.pdf › Supplemental Dataset 1/A-mRNA_nonrhyth_translation_nonrhyth/Mat2b_set_A.pdf]

# Matn2

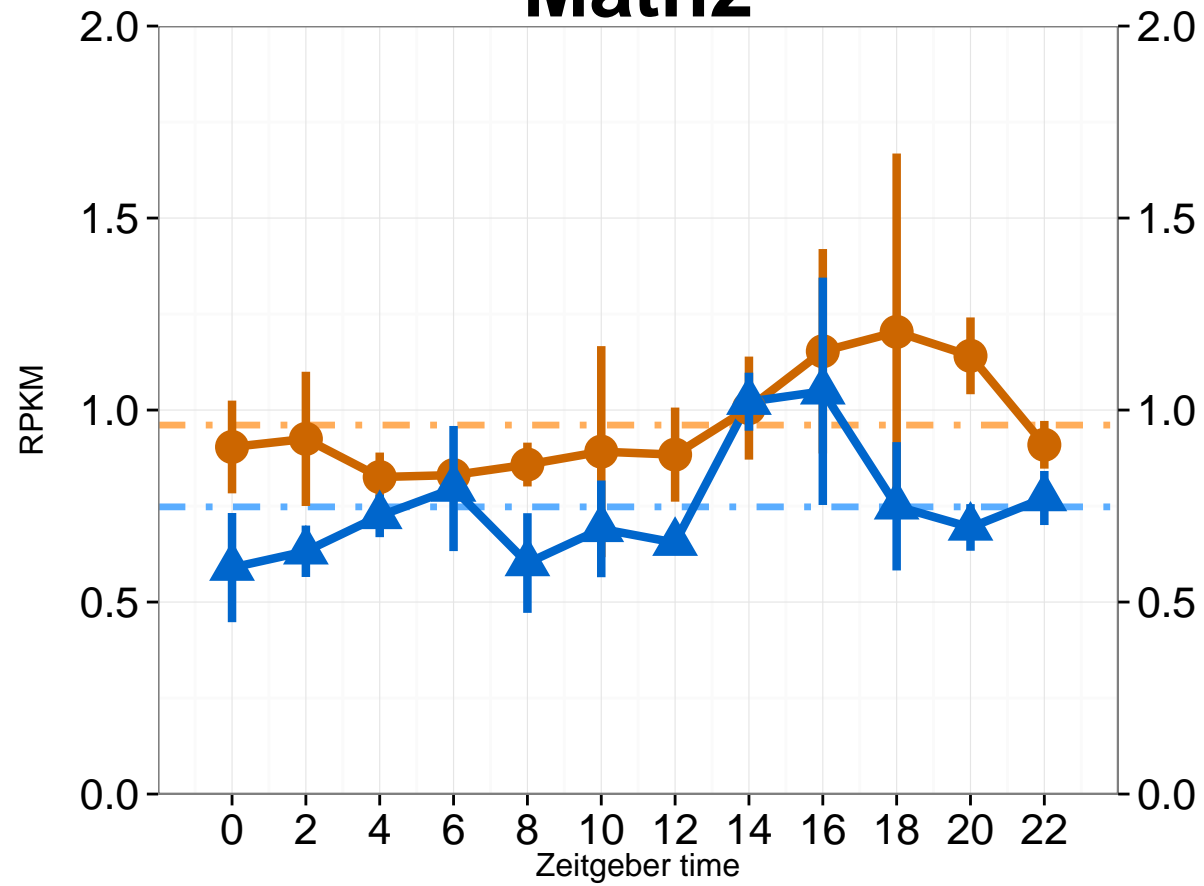

# Matn2

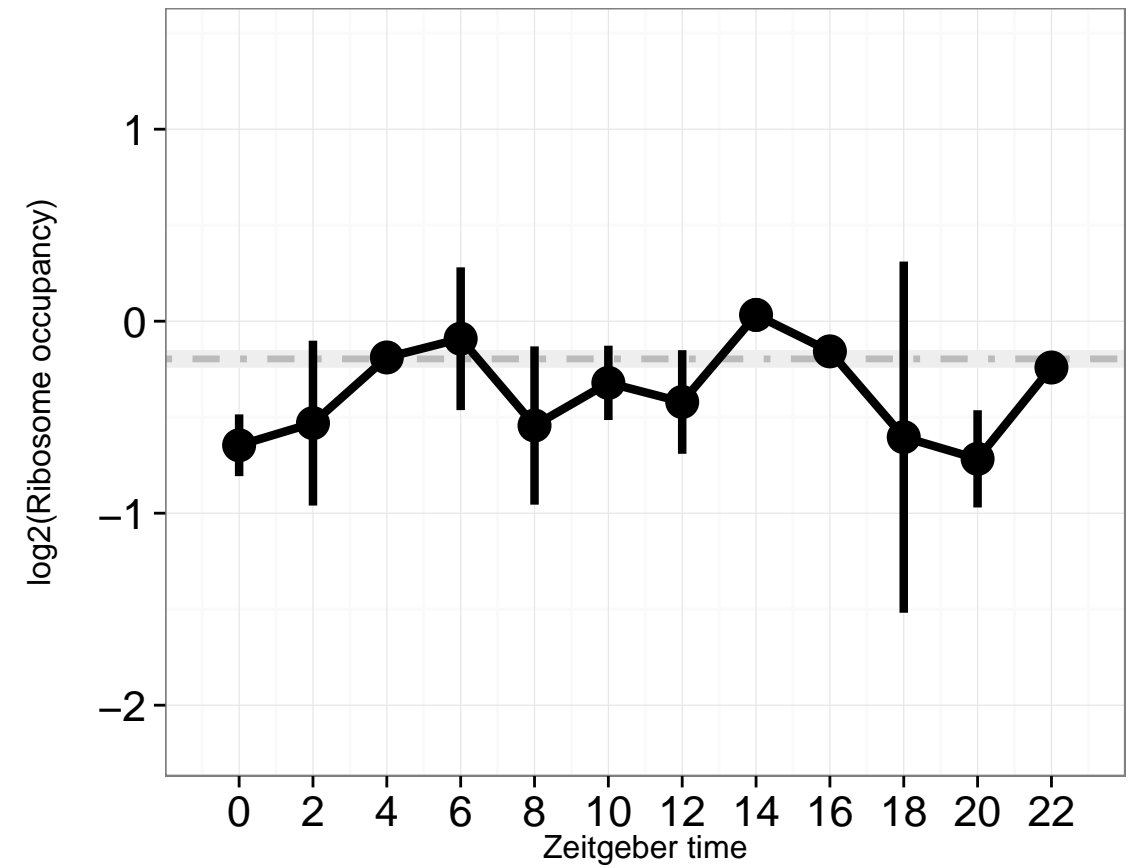

Supplement: SuppDataset_1.zip [file Matn2_set_A.pdf › Supplemental Dataset 1/A-mRNA_nonrhyth_translation_nonrhyth/Matn2_set_A.pdf]

# Matr3

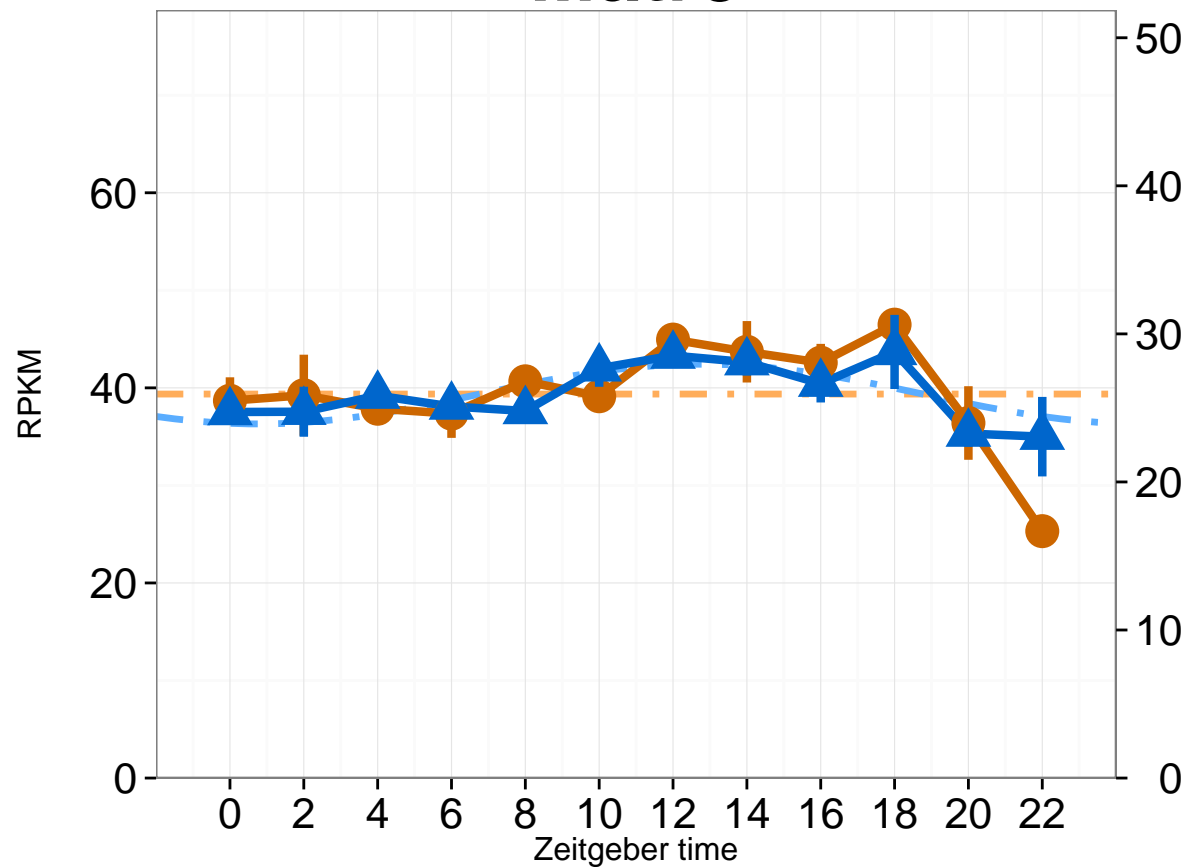

# Matr3

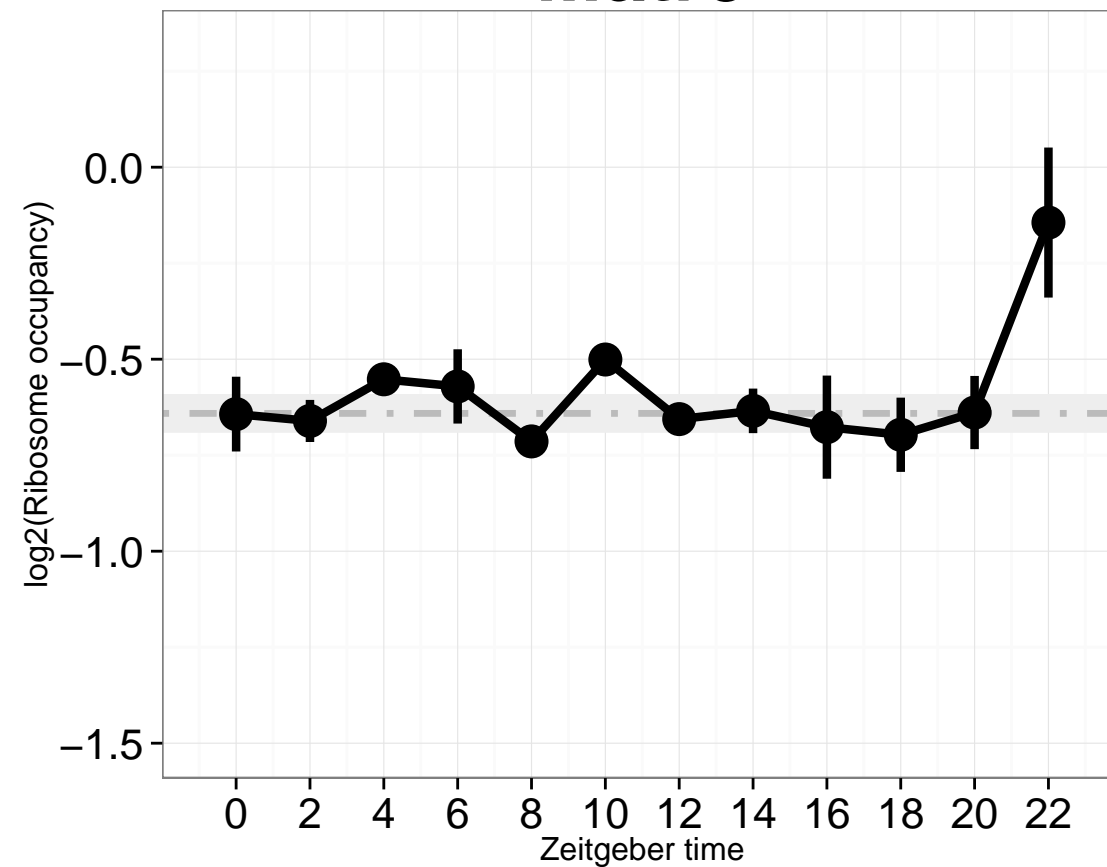

Supplement: SuppDataset_1.zip [file Matr3_set_A.pdf › Supplemental Dataset 1/A-mRNA_nonrhyth_translation_nonrhyth/Matr3_set_A.pdf]

## Mau2

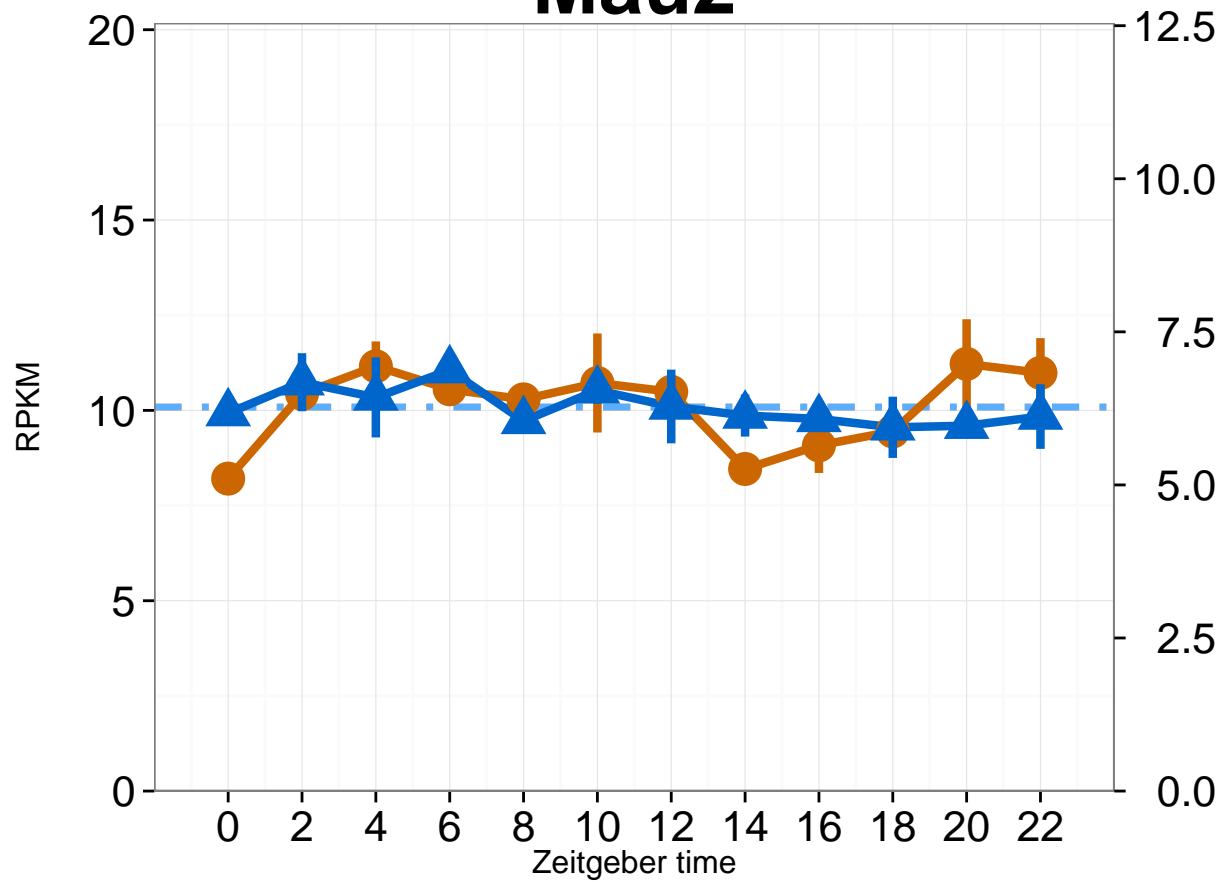

## Mau2

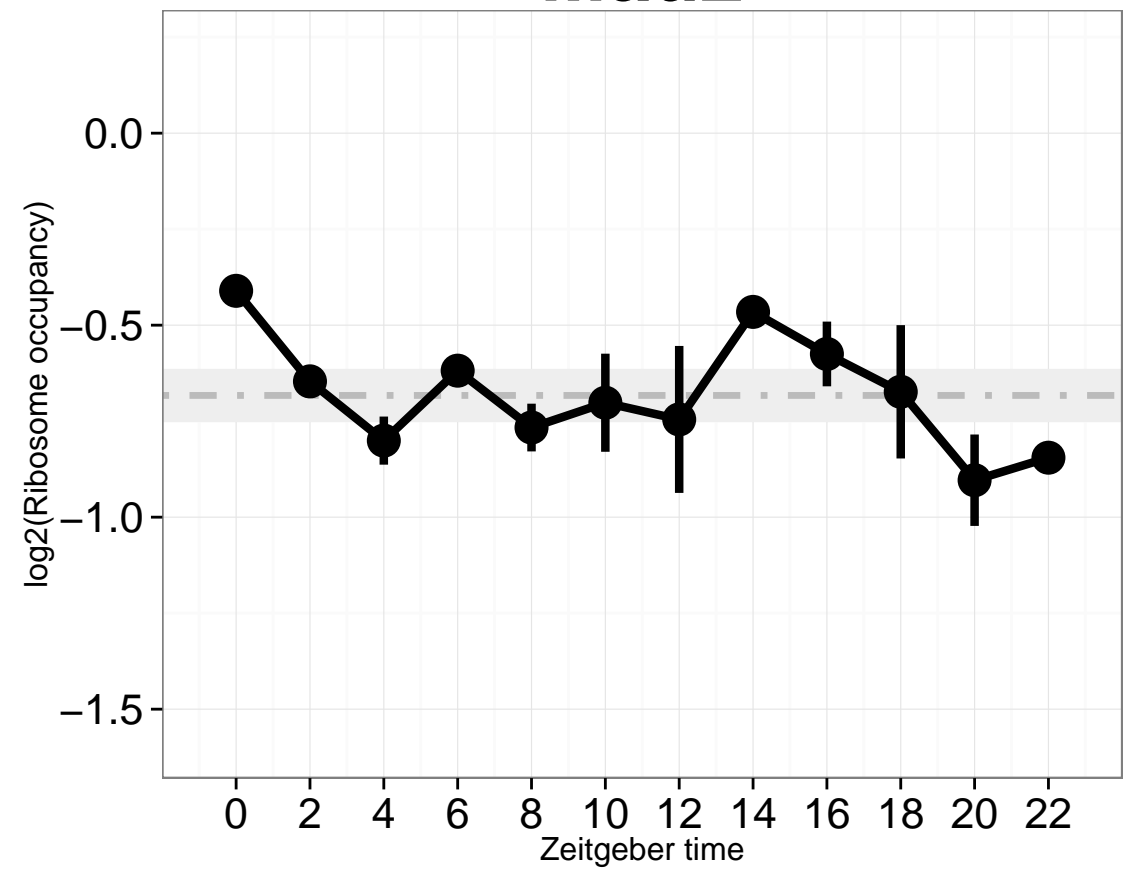

Supplement: SuppDataset_1.zip [file Mau2_set_A.pdf › Supplemental Dataset 1/A-mRNA_nonrhyth_translation_nonrhyth/Mau2_set_A.pdf]

## Maz

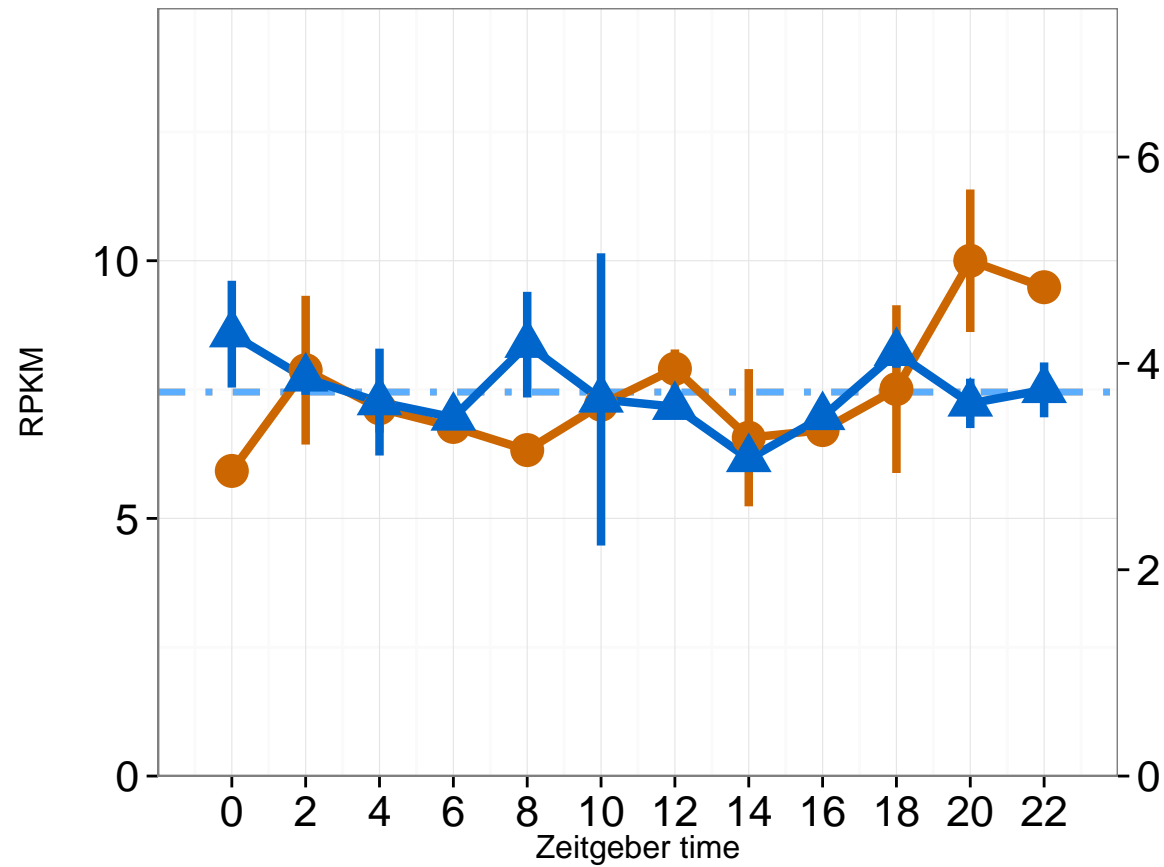

## Maz

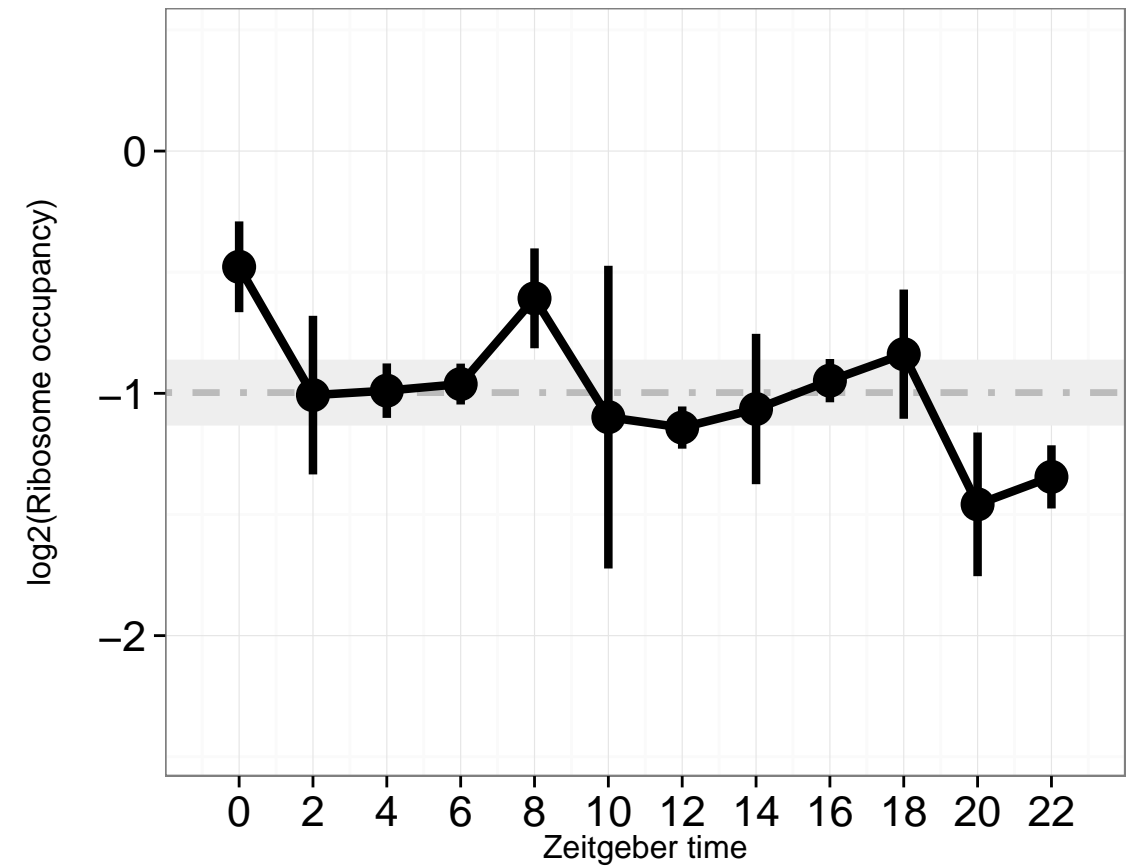

Supplement: SuppDataset_1.zip [file Maz_set_A.pdf › Supplemental Dataset 1/A-mRNA_nonrhyth_translation_nonrhyth/Maz_set_A.pdf]

# Mb21d2

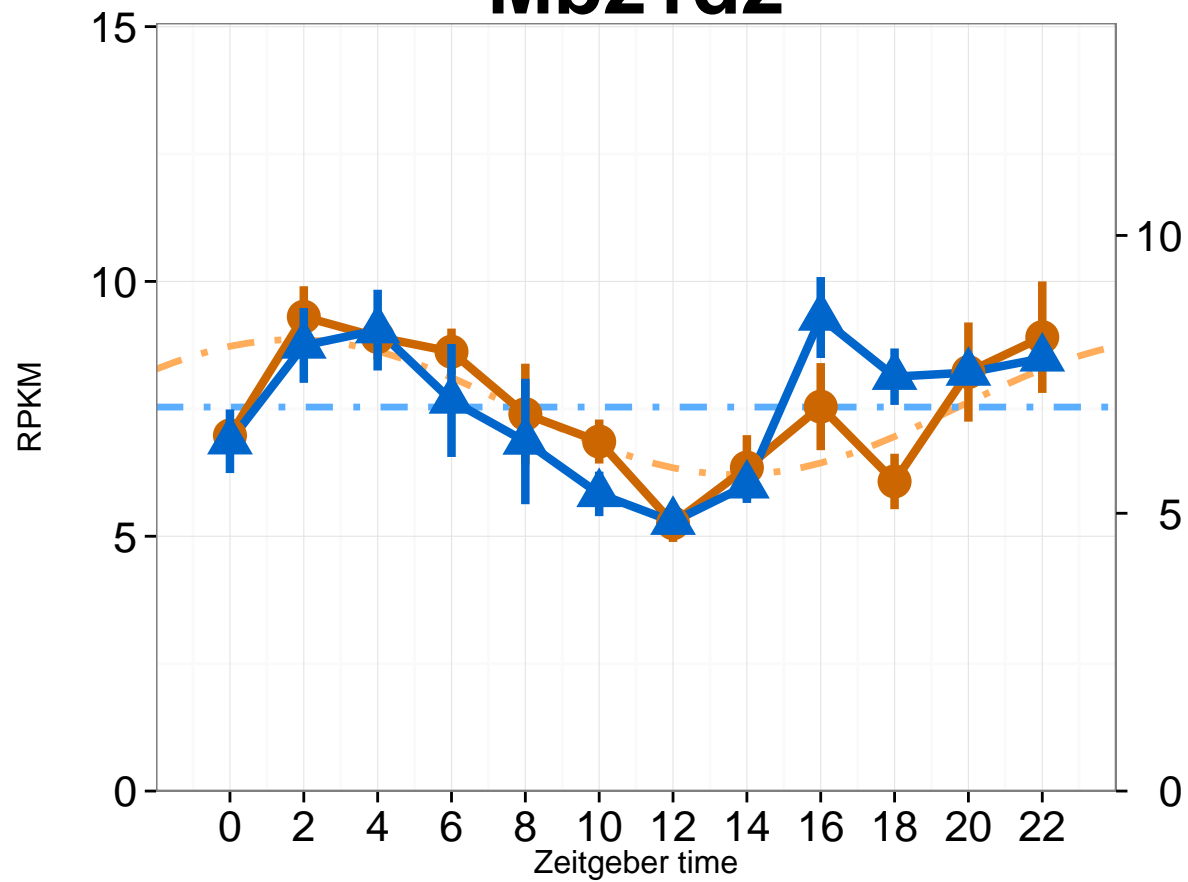

# Mb21d2

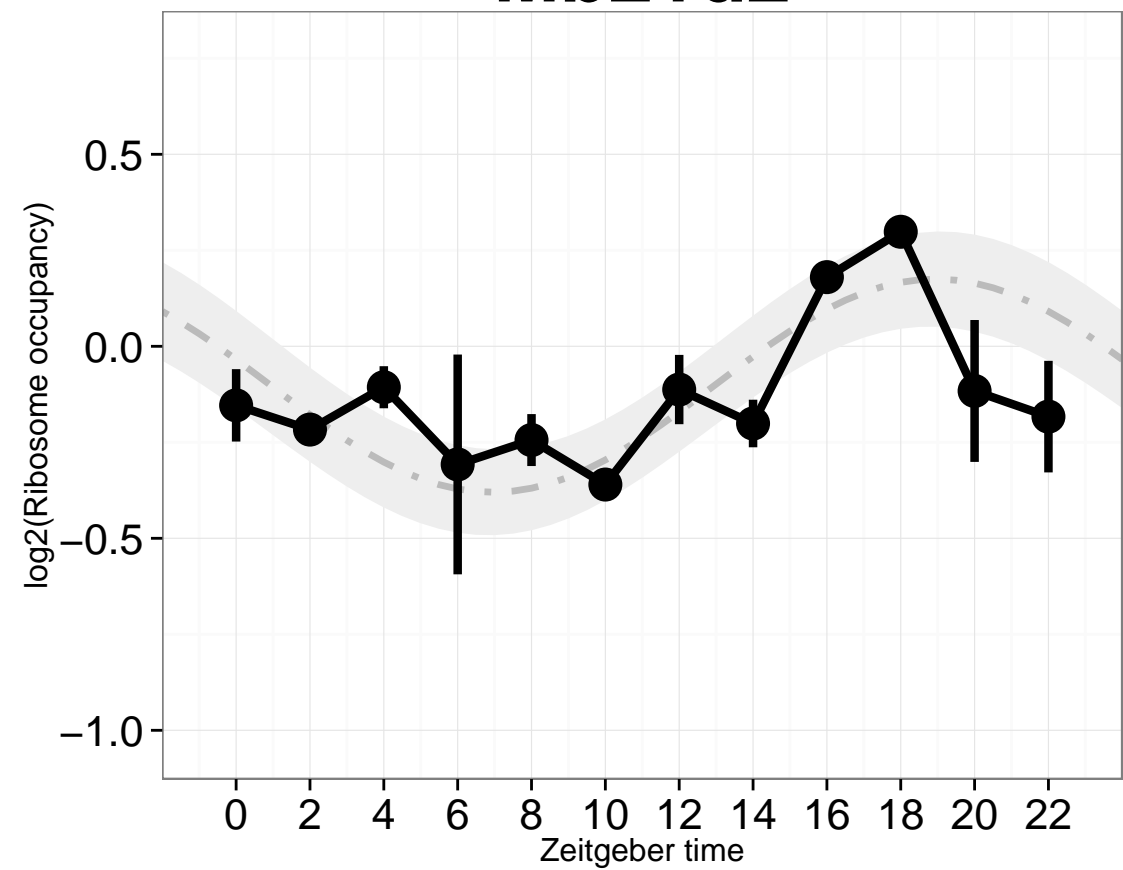

Supplement: SuppDataset_1.zip [file Mb21d2_set_A.pdf › Supplemental Dataset 1/A-mRNA_nonrhyth_translation_nonrhyth/Mb21d2_set_A.pdf]

## Mbd2

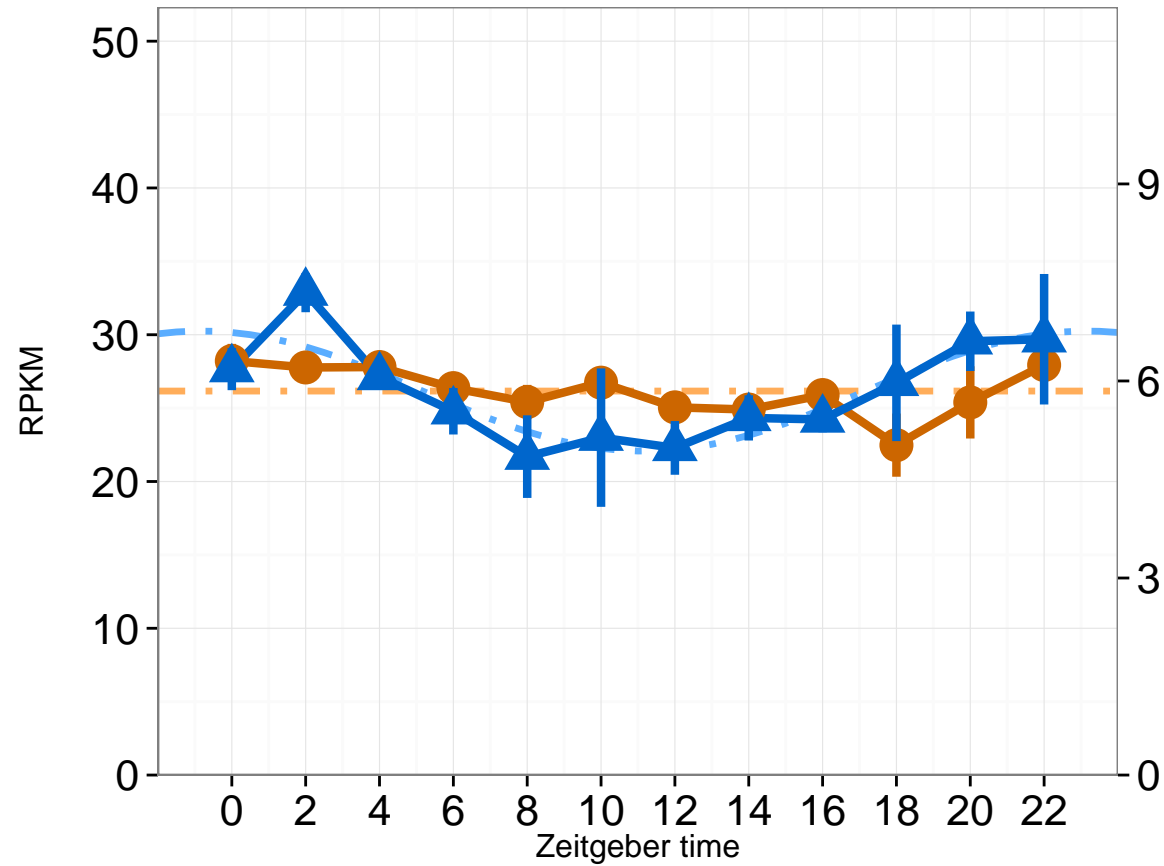

## Mbd2

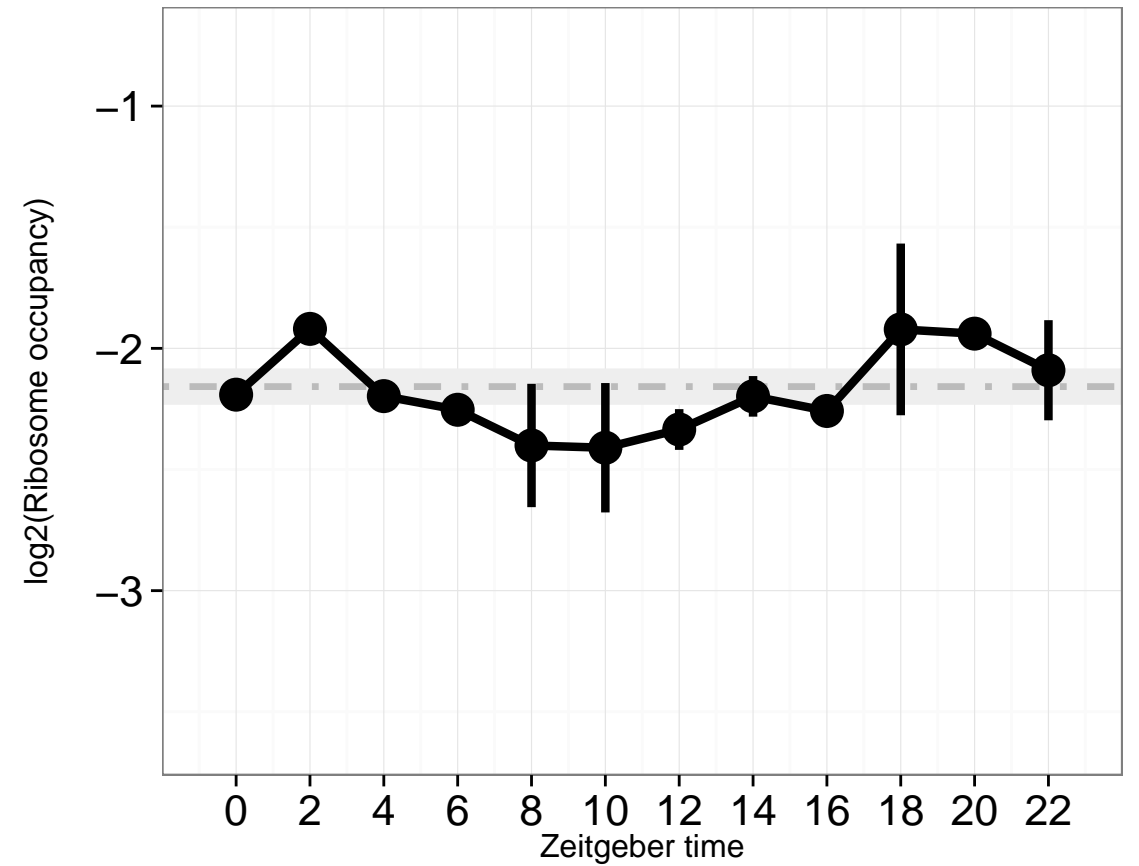

Supplement: SuppDataset_1.zip [file Mbd2_set_A.pdf › Supplemental Dataset 1/A-mRNA_nonrhyth_translation_nonrhyth/Mbd2_set_A.pdf]

## Mbd3

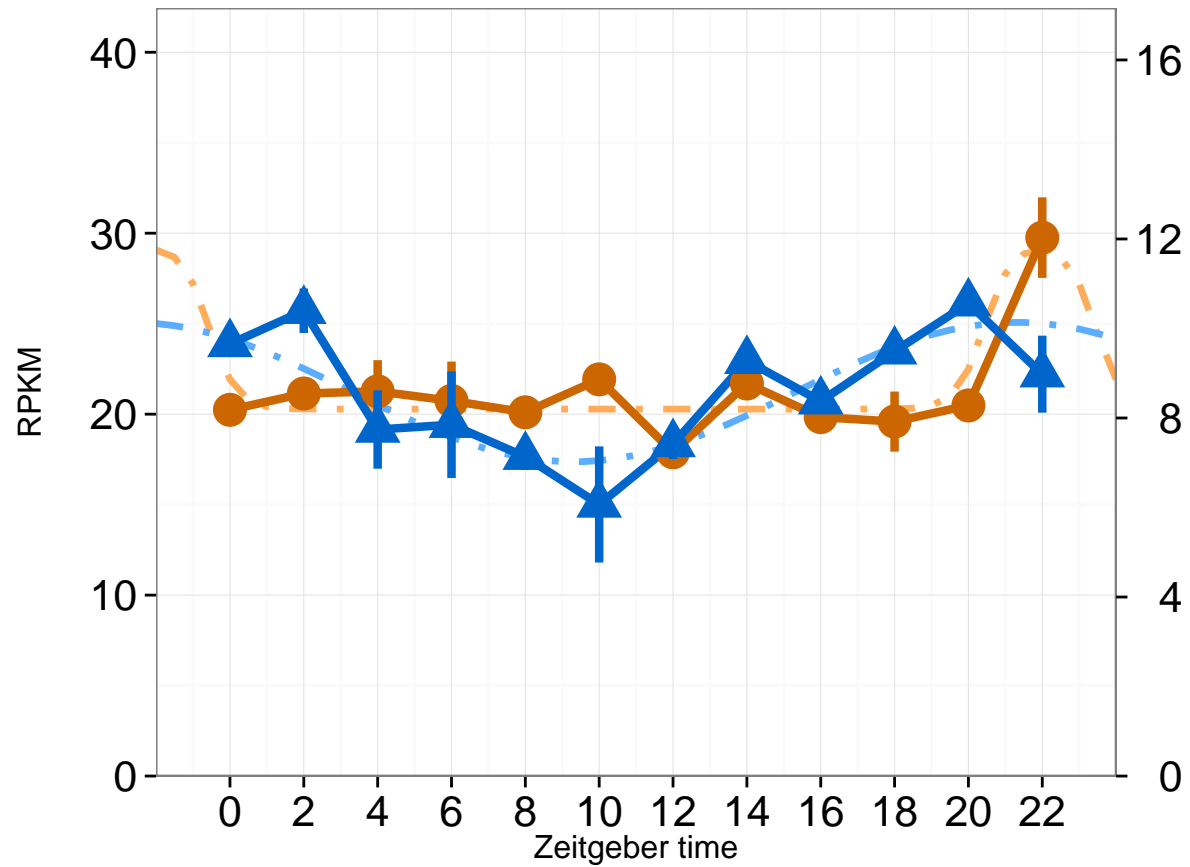

## Mbd3

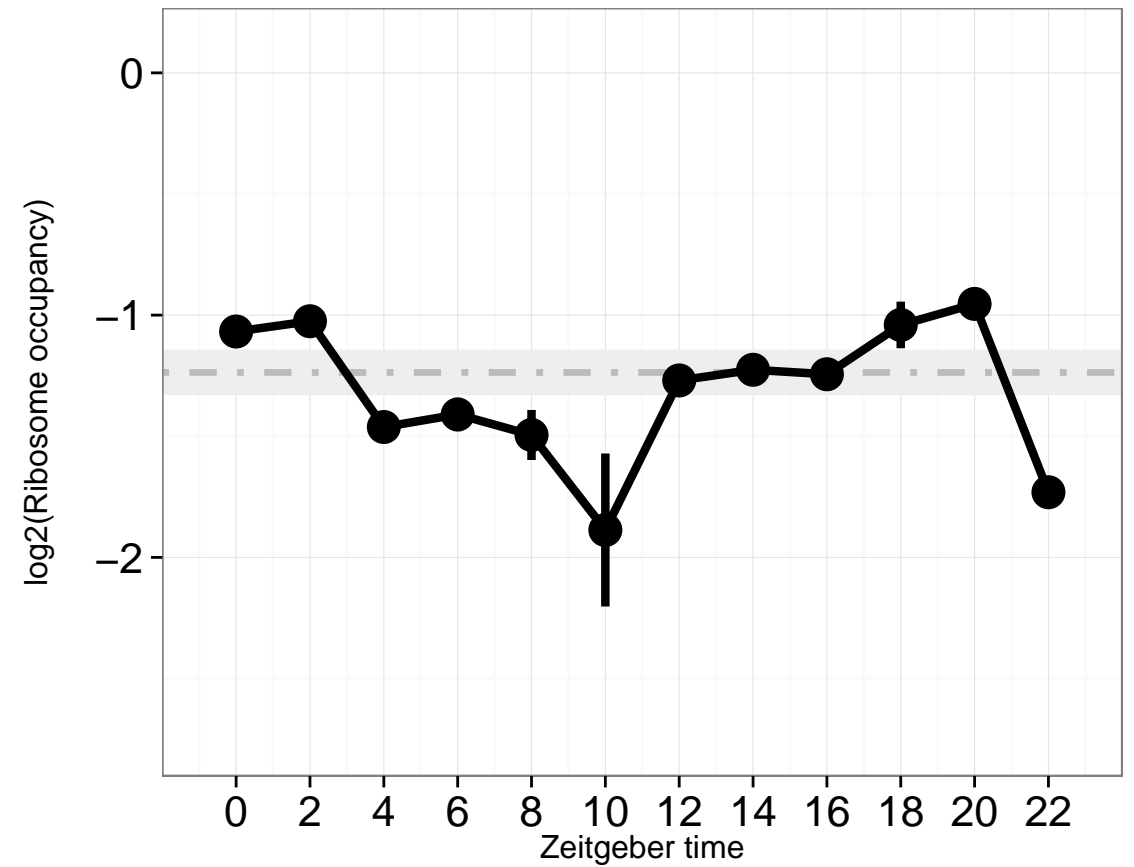

Supplement: SuppDataset_1.zip [file Mbd3_set_A.pdf › Supplemental Dataset 1/A-mRNA_nonrhyth_translation_nonrhyth/Mbd3_set_A.pdf]

## Mbd4

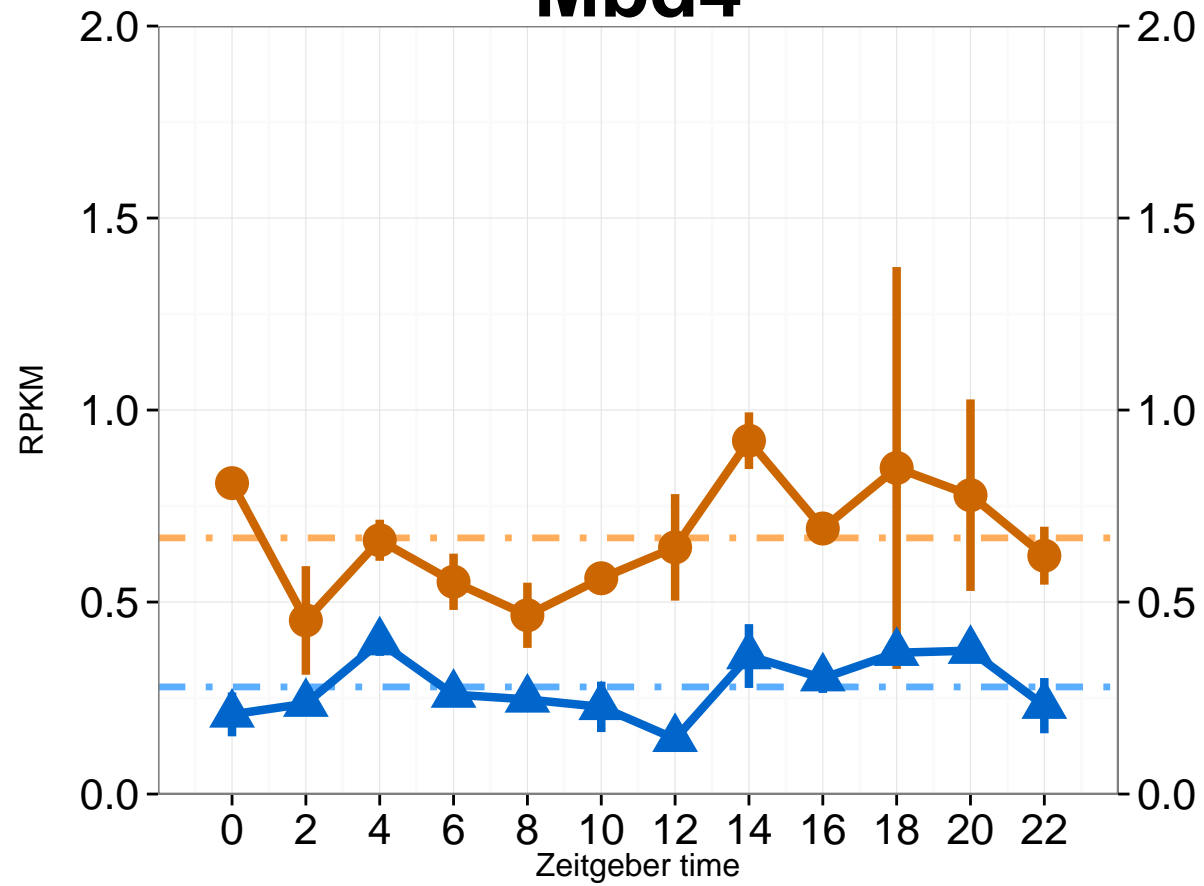

## Mbd4

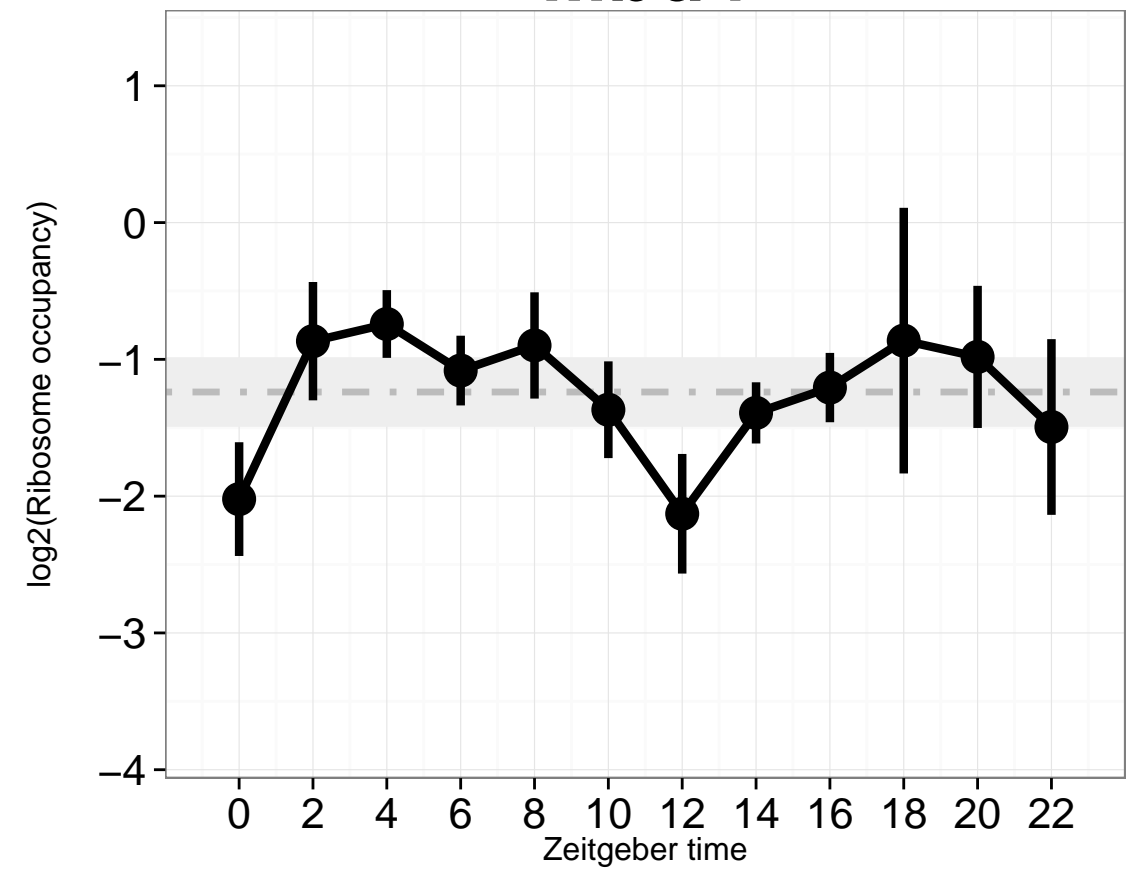

Supplement: SuppDataset_1.zip [file Mbd4_set_A.pdf › Supplemental Dataset 1/A-mRNA_nonrhyth_translation_nonrhyth/Mbd4_set_A.pdf]

## Mbd5

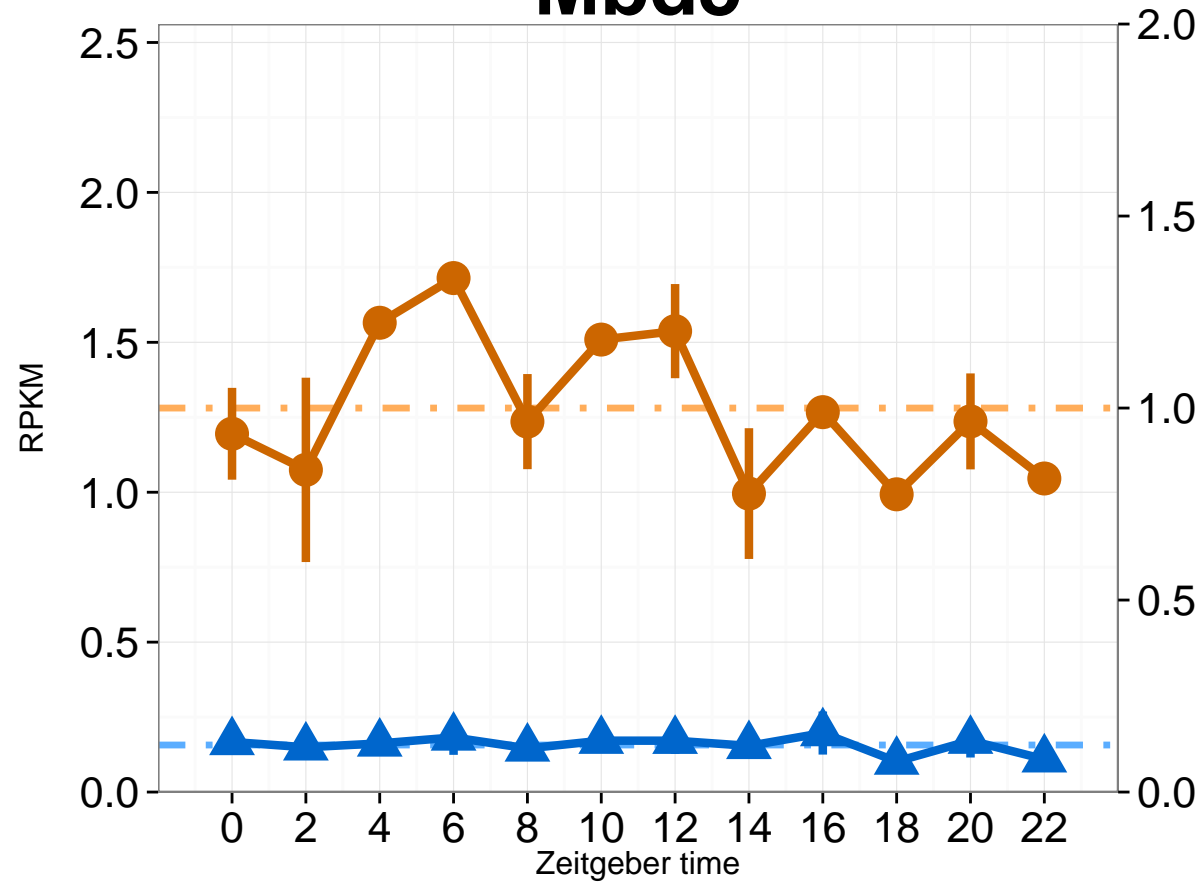

## Mbd5

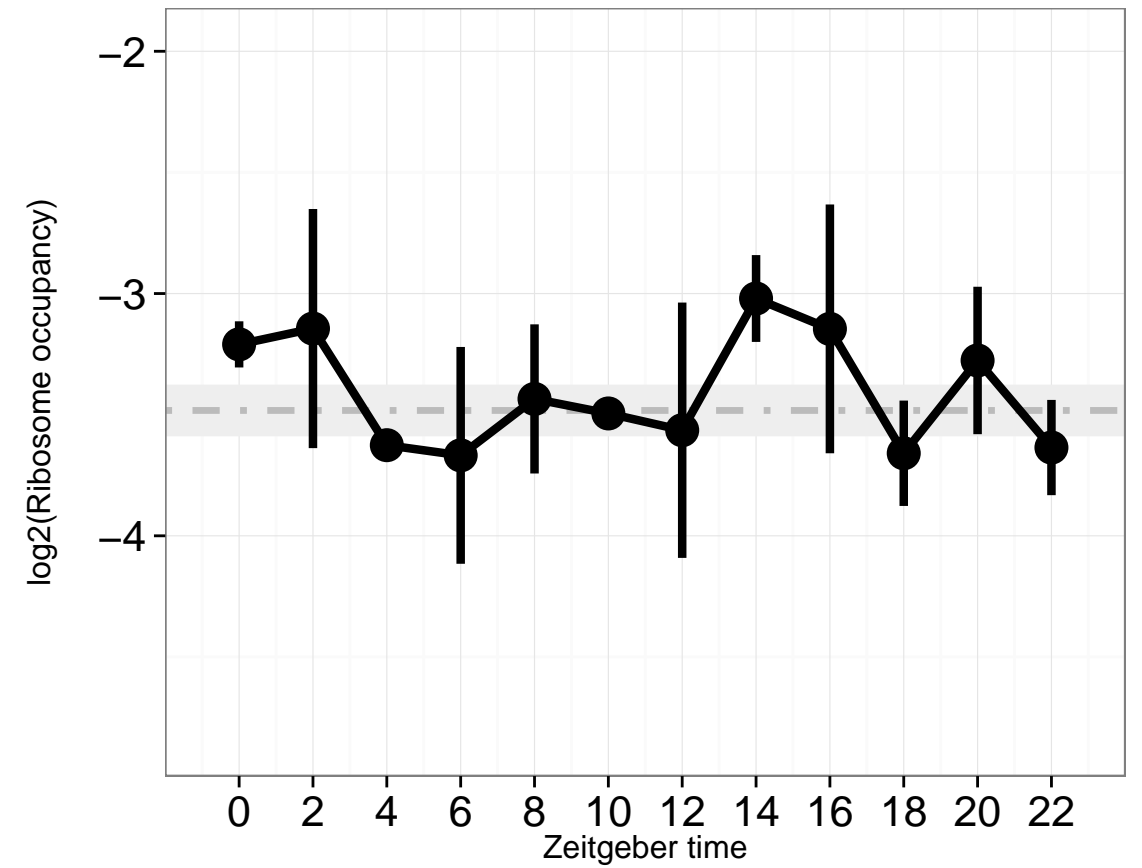

Supplement: SuppDataset_1.zip [file Mbd5_set_A.pdf › Supplemental Dataset 1/A-mRNA_nonrhyth_translation_nonrhyth/Mbd5_set_A.pdf]

# Mbd6

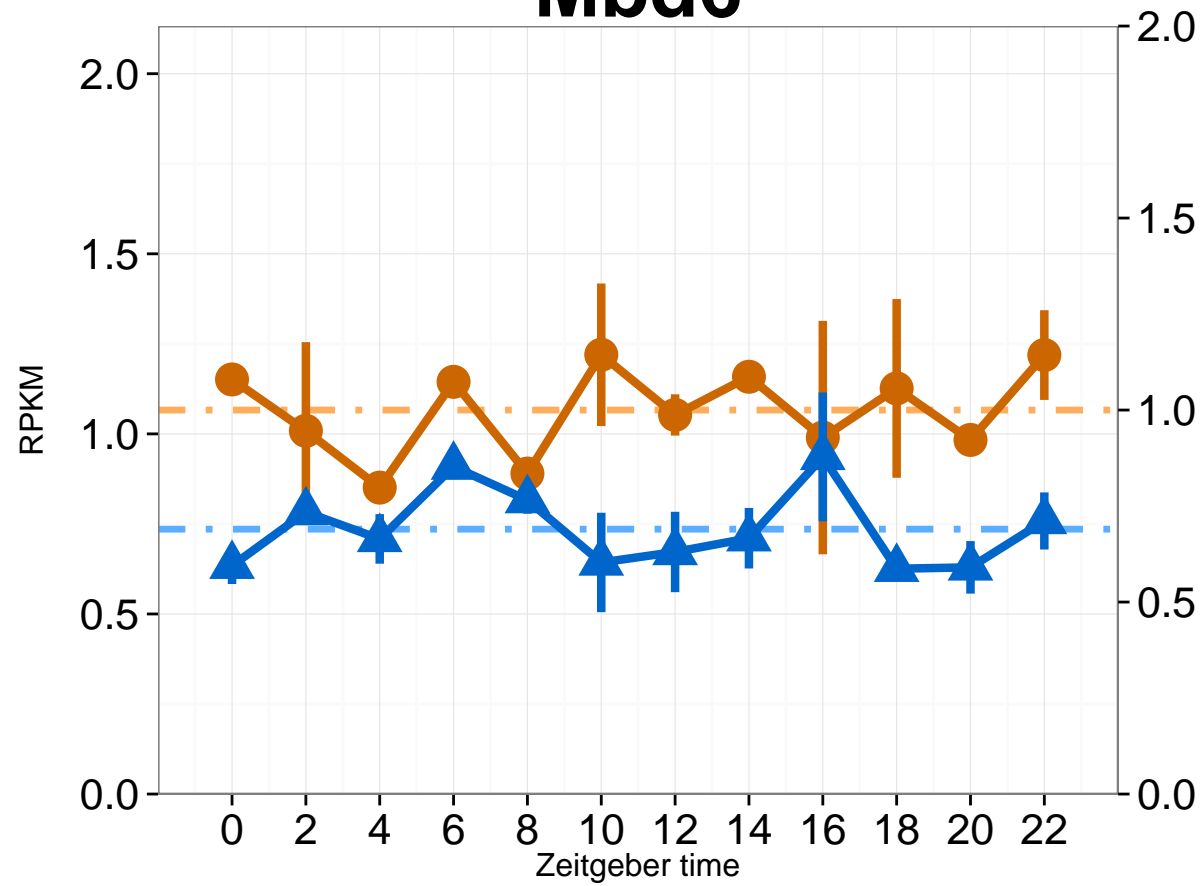

# Mbd6

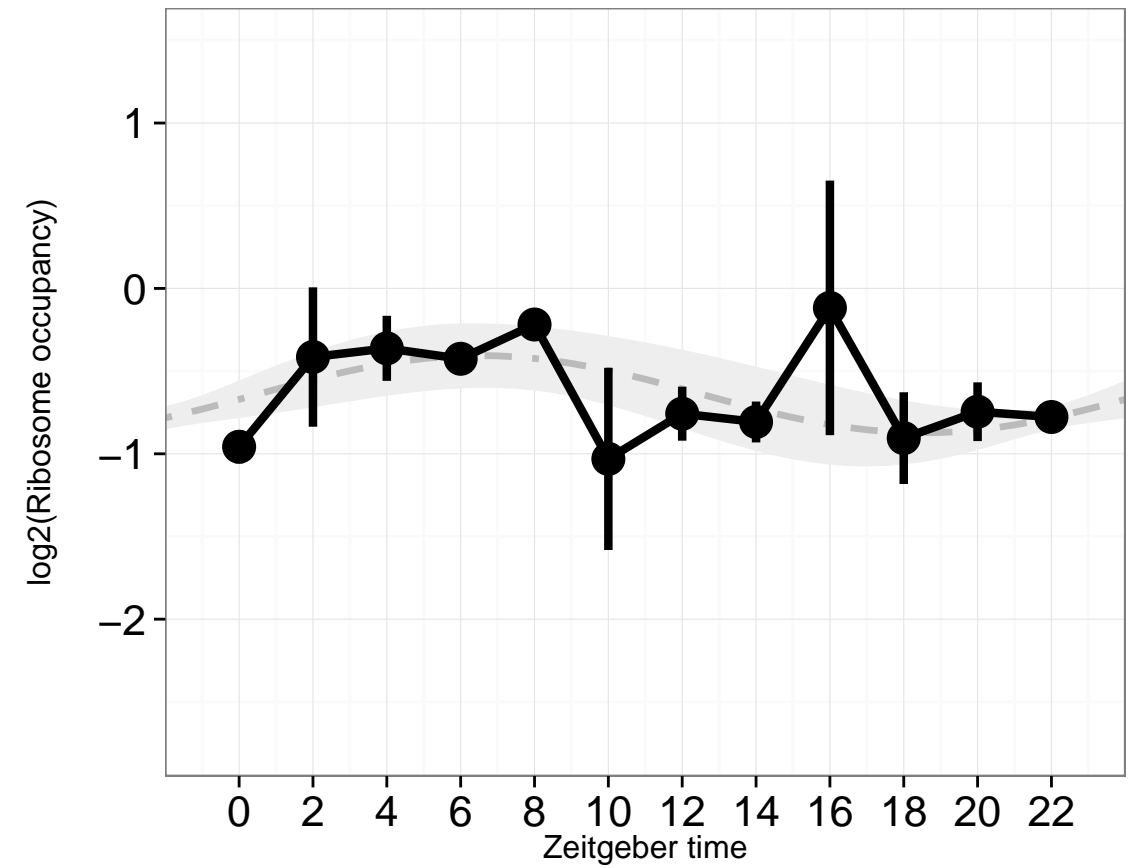

Supplement: SuppDataset_1.zip [file Mbd6_set_A.pdf › Supplemental Dataset 1/A-mRNA_nonrhyth_translation_nonrhyth/Mbd6_set_A.pdf]

## Mbip

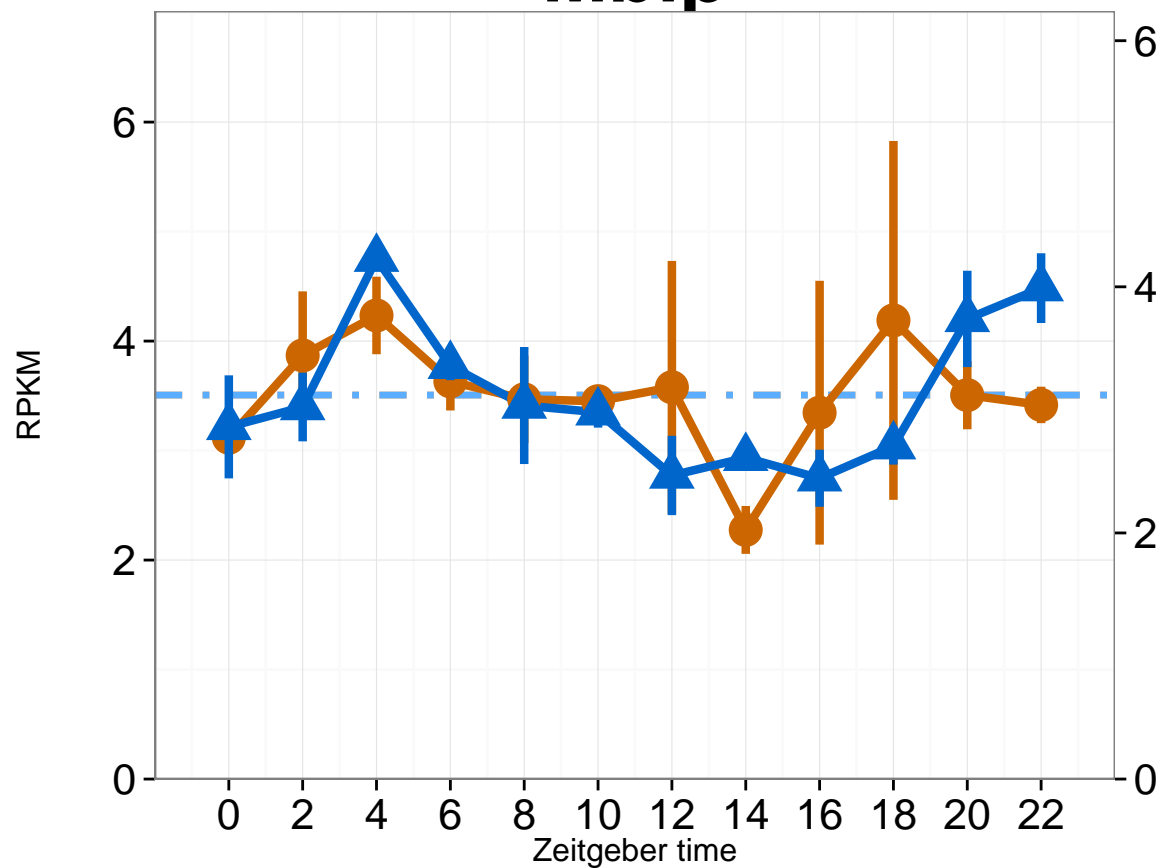

## Mbip

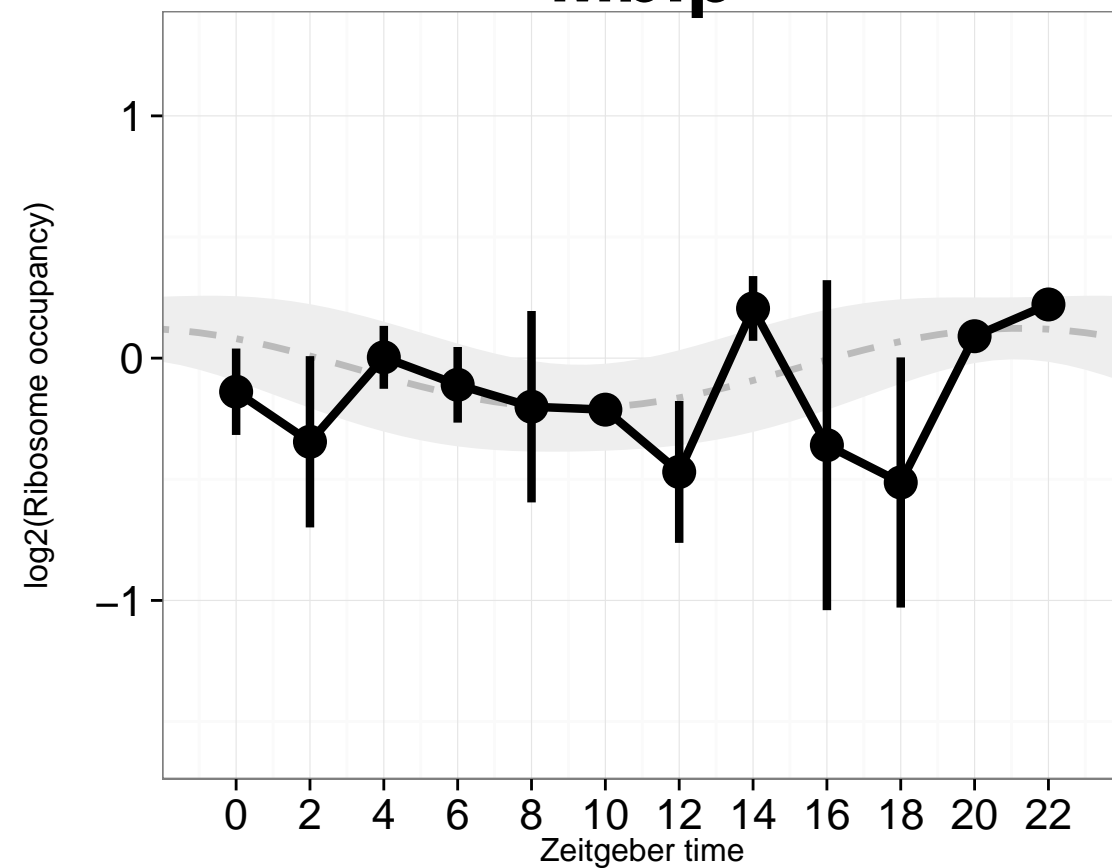

Supplement: SuppDataset_1.zip [file Mbip_set_A.pdf › Supplemental Dataset 1/A-mRNA_nonrhyth_translation_nonrhyth/Mbip_set_A.pdf]

## Mbl1

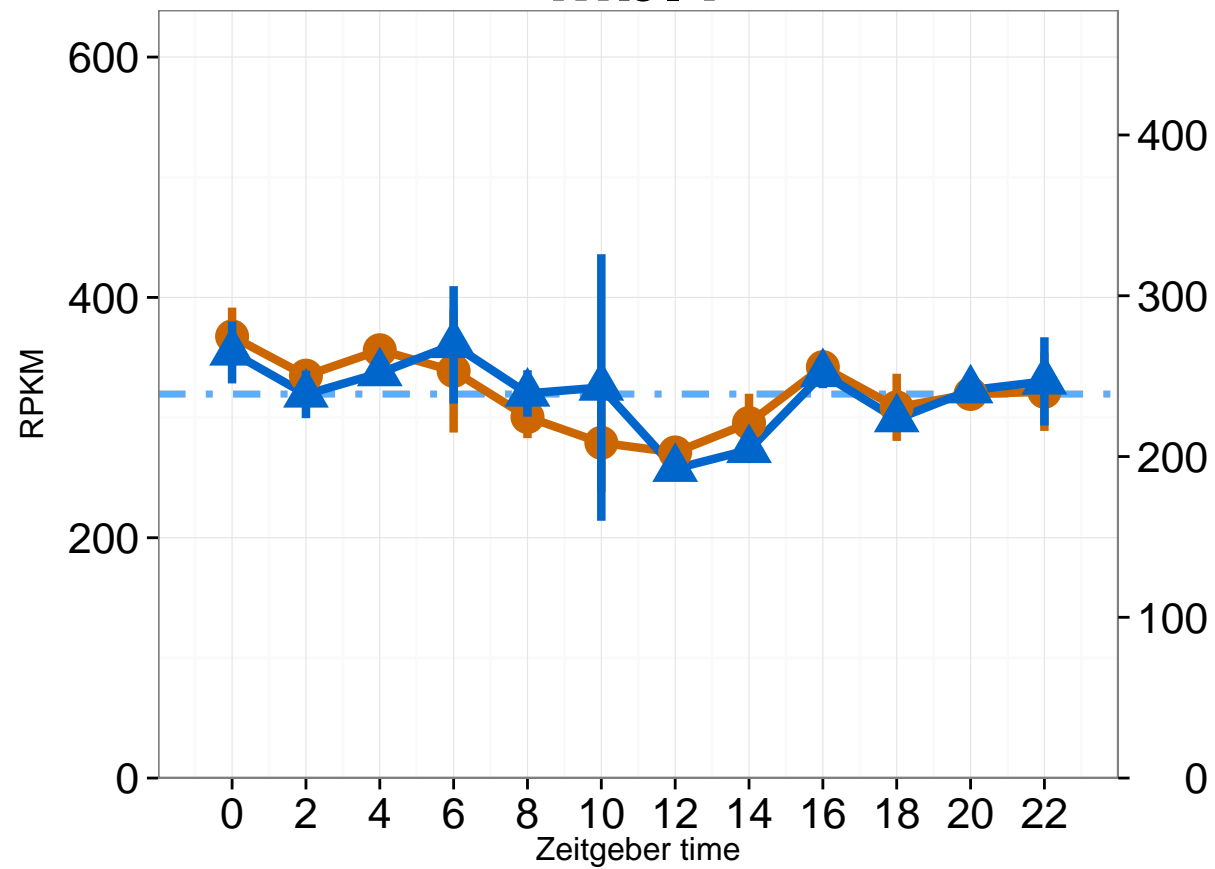

## Mbl1

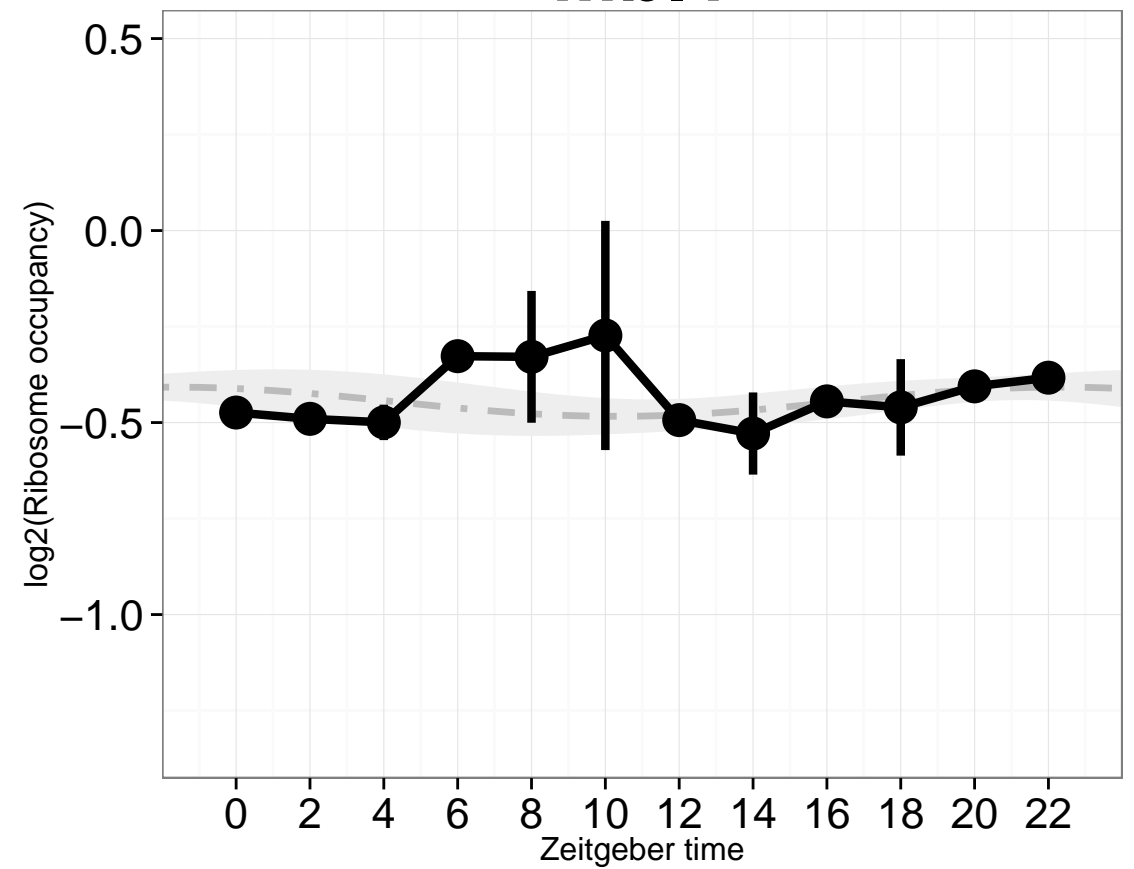

Supplement: SuppDataset_1.zip [file Mbl1_set_A.pdf › Supplemental Dataset 1/A-mRNA_nonrhyth_translation_nonrhyth/Mbl1_set_A.pdf]

## Mbl2

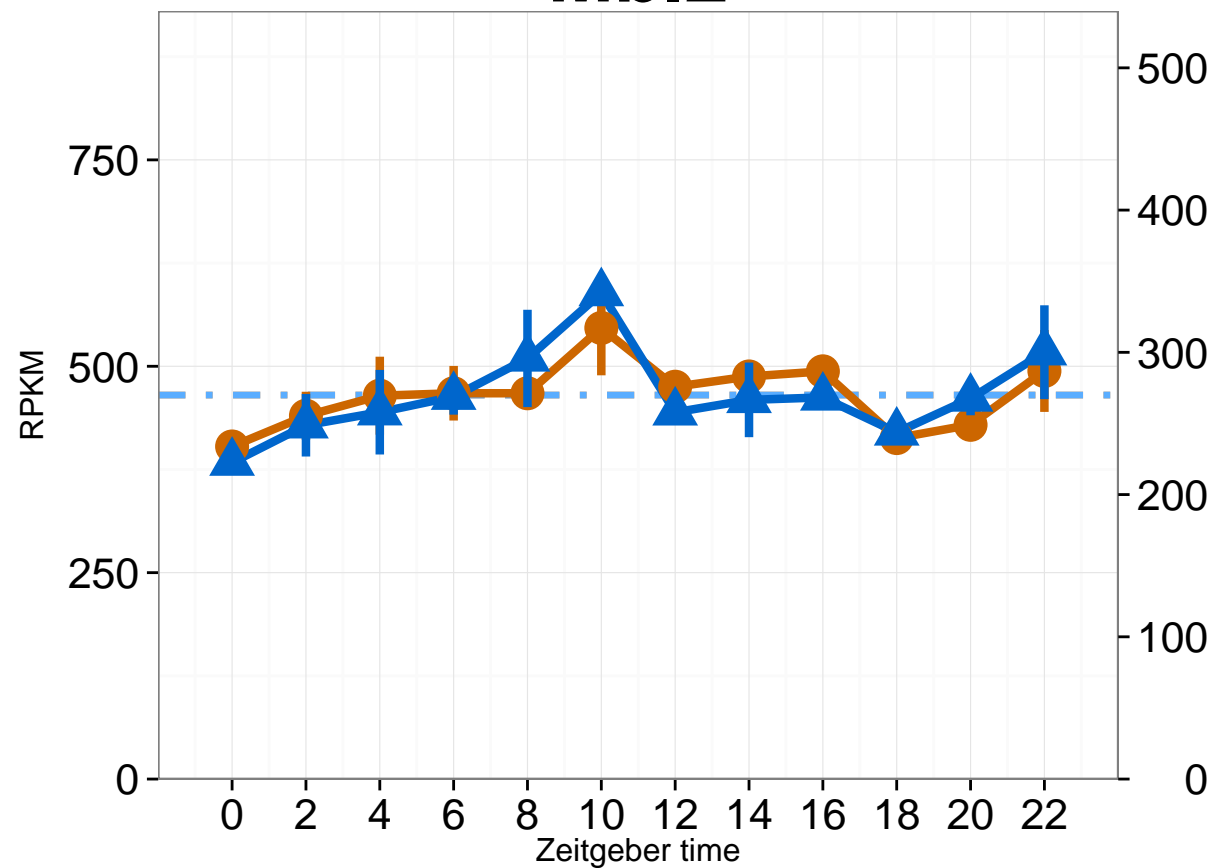

## Mbl2

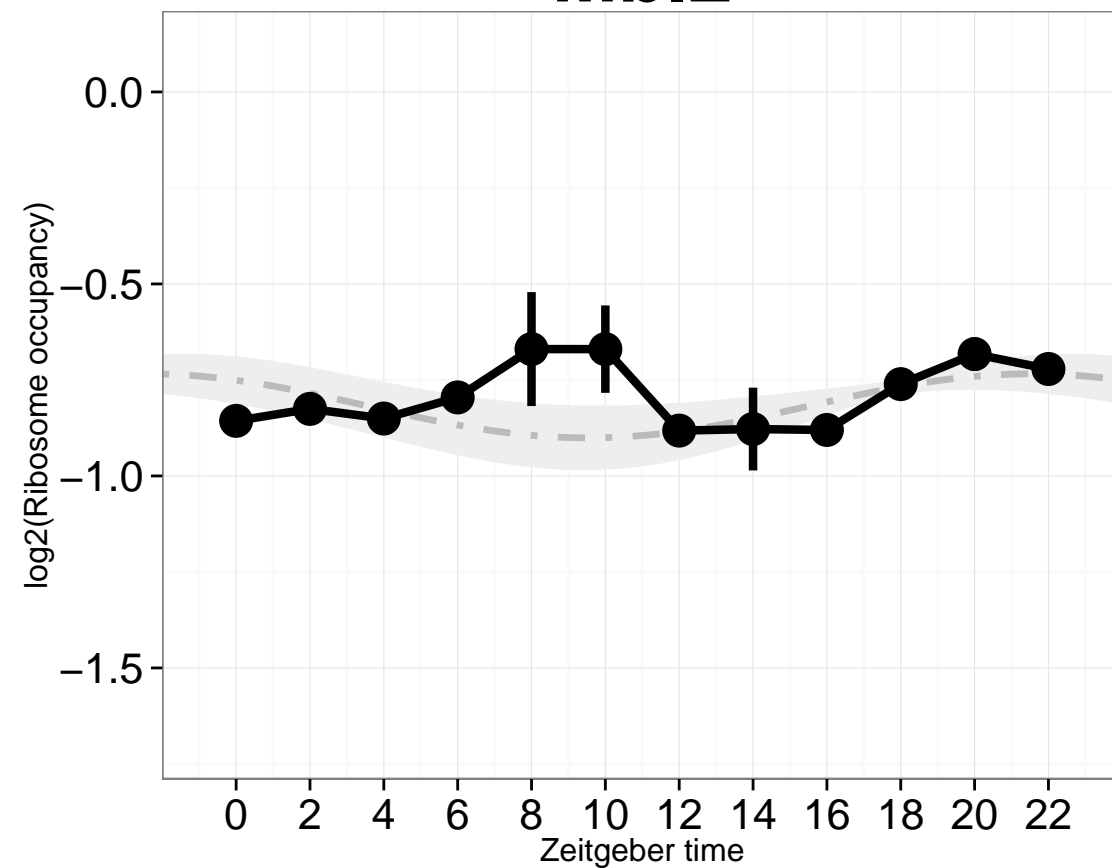

Supplement: SuppDataset_1.zip [file Mbl2_set_A.pdf › Supplemental Dataset 1/A-mRNA_nonrhyth_translation_nonrhyth/Mbl2_set_A.pdf]

## Mblac2

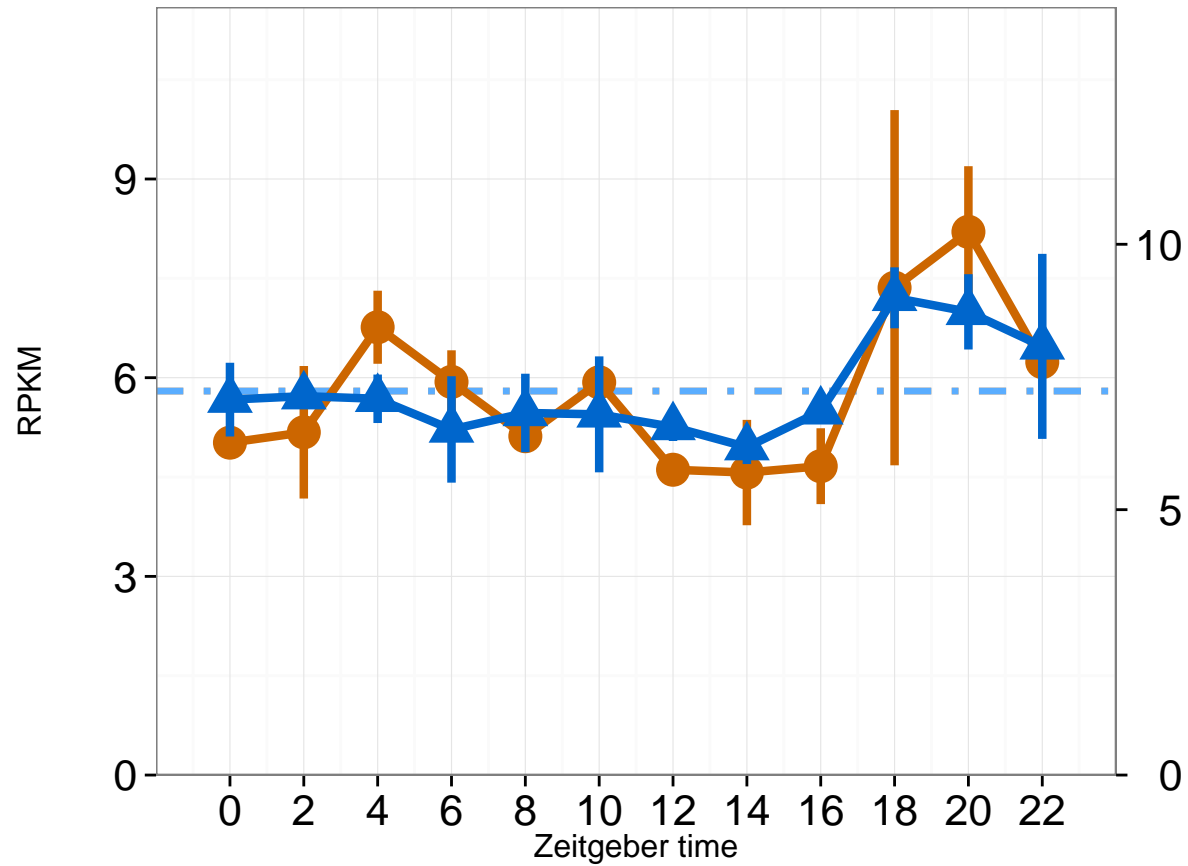

## Mblac2

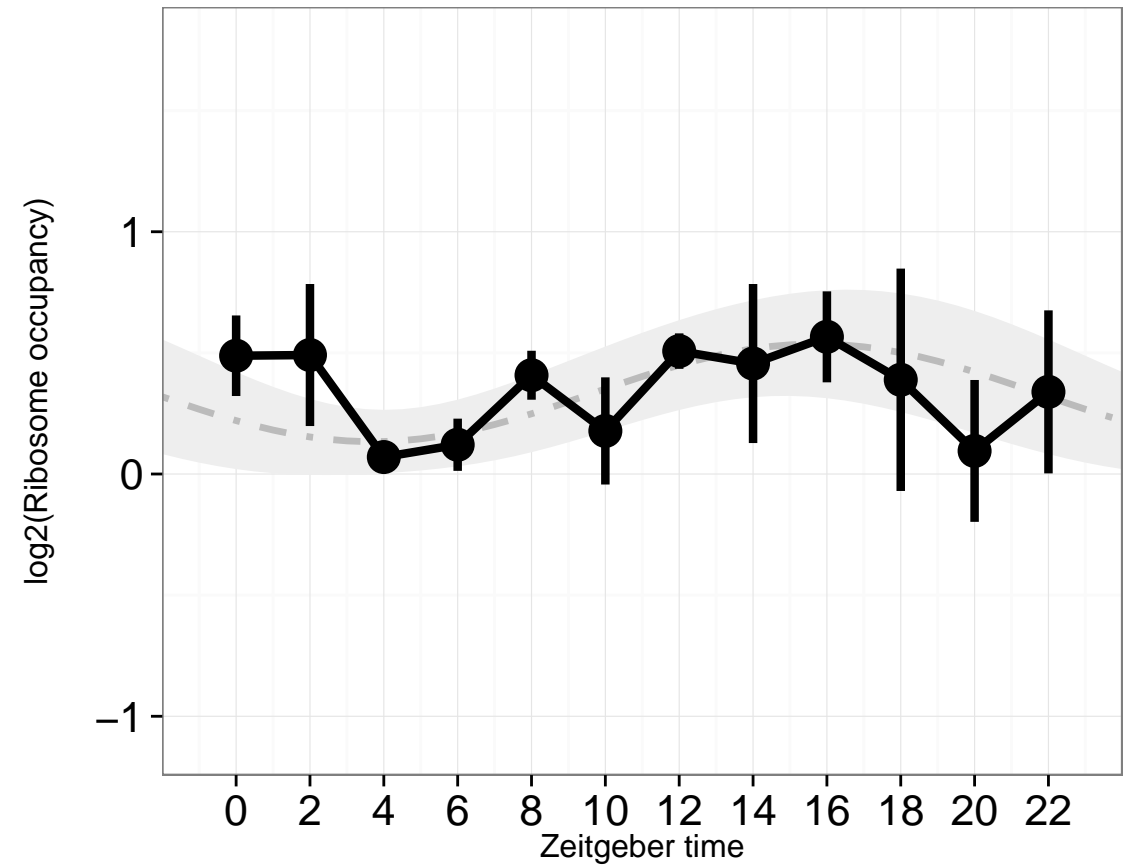

Supplement: SuppDataset_1.zip [file Mblac2_set_A.pdf › Supplemental Dataset 1/A-mRNA_nonrhyth_translation_nonrhyth/Mblac2_set_A.pdf]

## Mbnl1

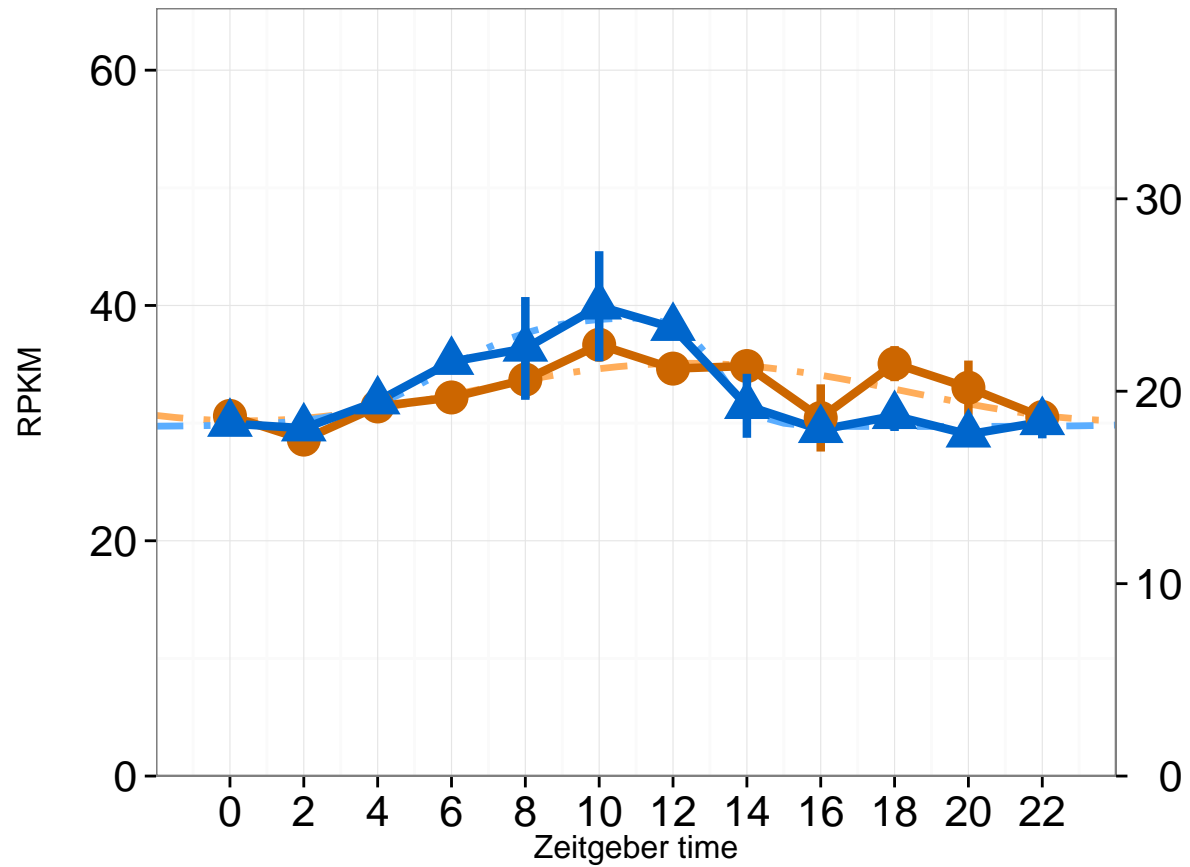

## Mbnl1

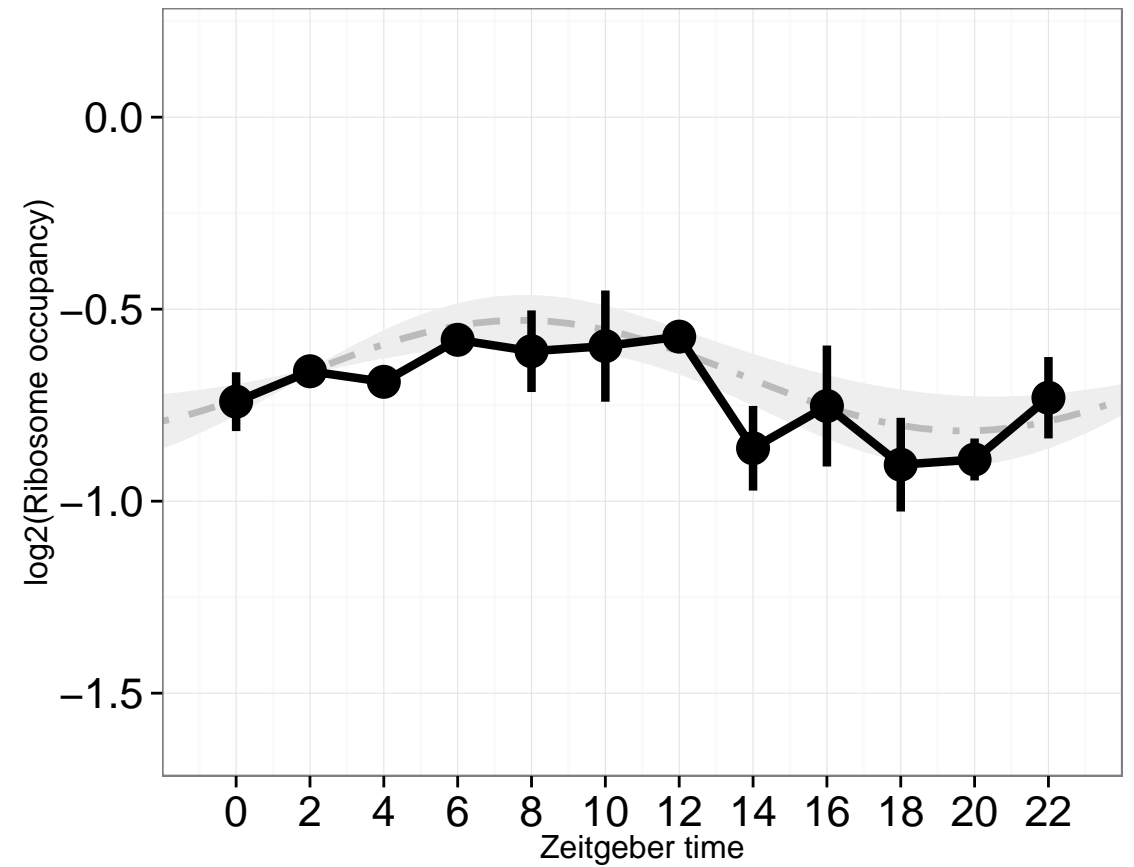

Supplement: SuppDataset_1.zip [file Mbnl1_set_A.pdf › Supplemental Dataset 1/A-mRNA_nonrhyth_translation_nonrhyth/Mbnl1_set_A.pdf]

## Mboat7

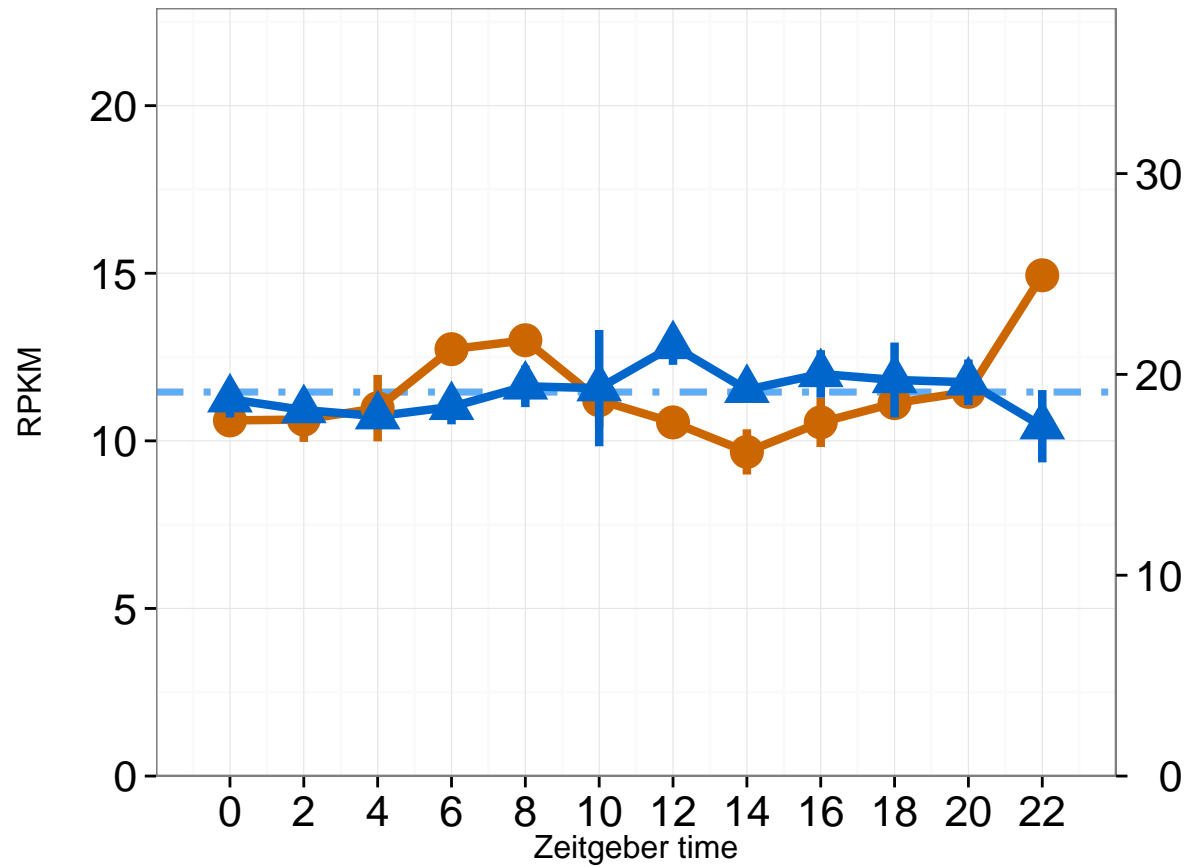

## Mboat7

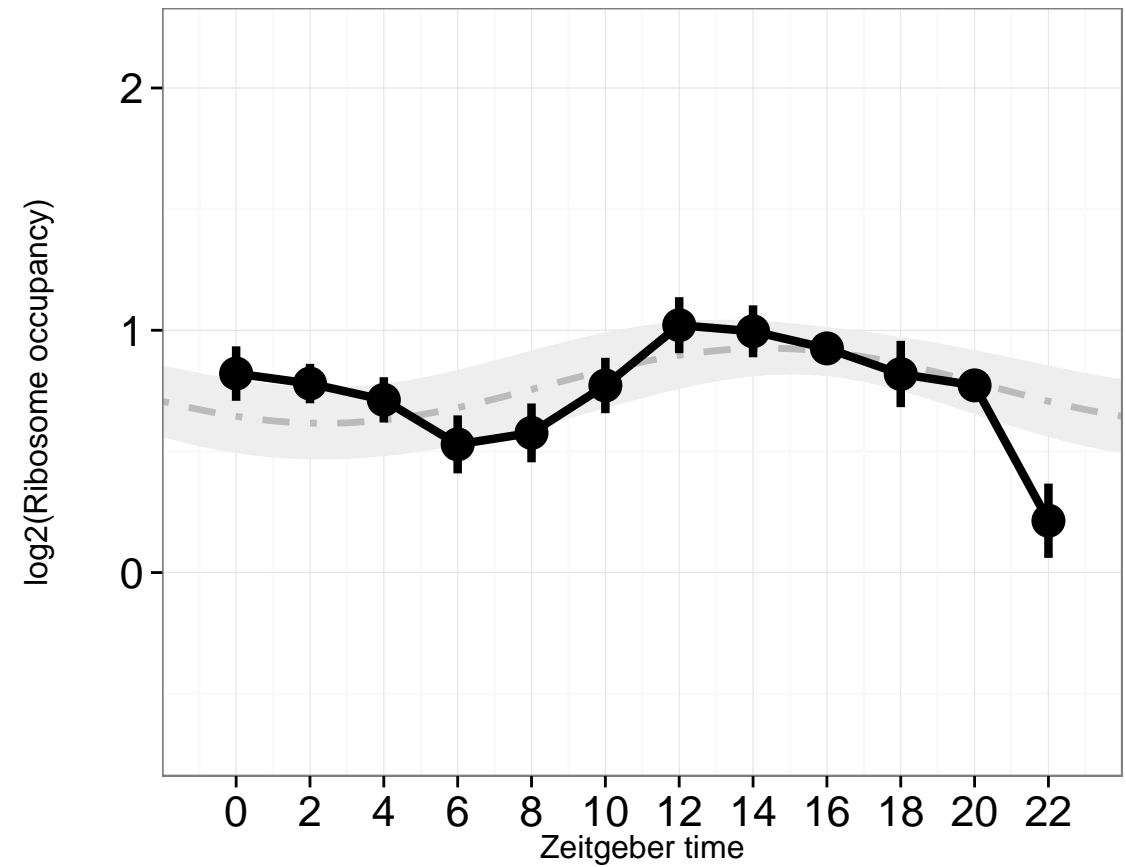

Supplement: SuppDataset_1.zip [file Mboat7_set_A.pdf › Supplemental Dataset 1/A-mRNA_nonrhyth_translation_nonrhyth/Mboat7_set_A.pdf]

# Mbtd1

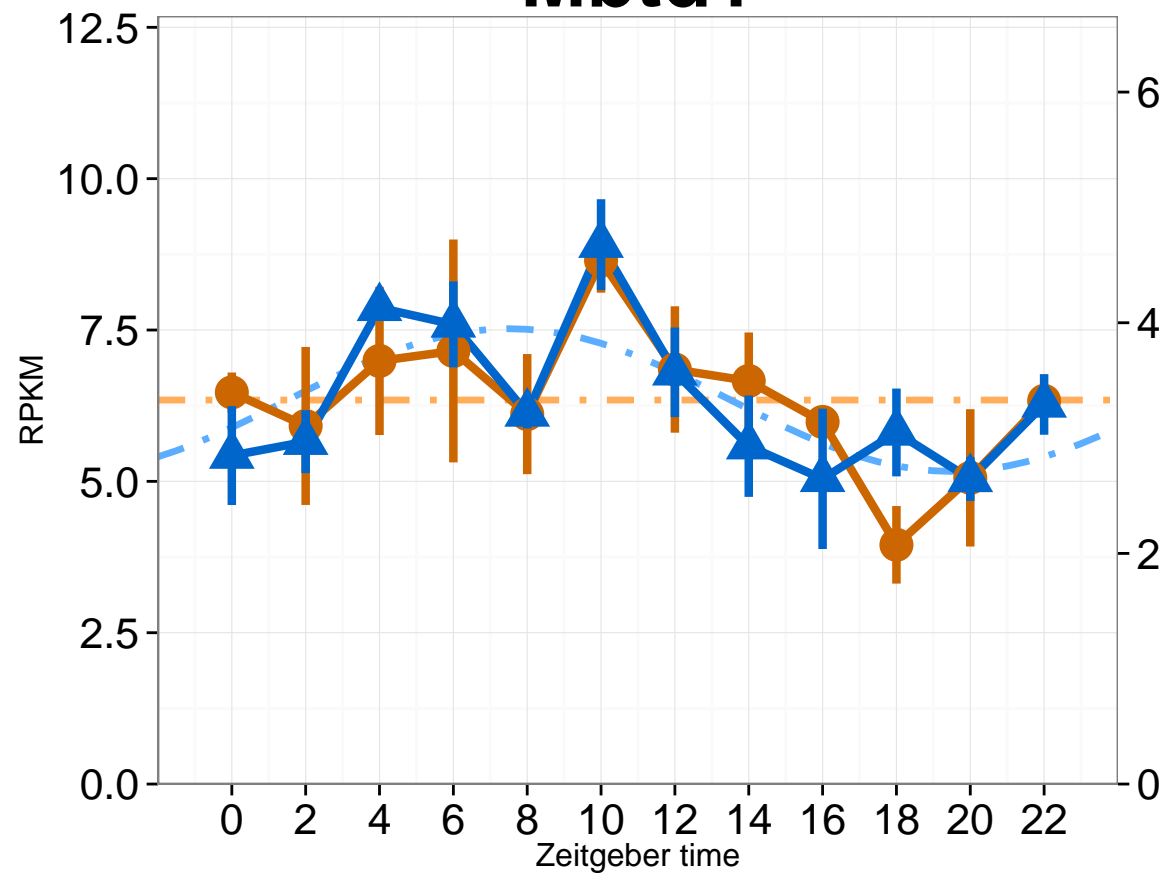

# Mbtd1

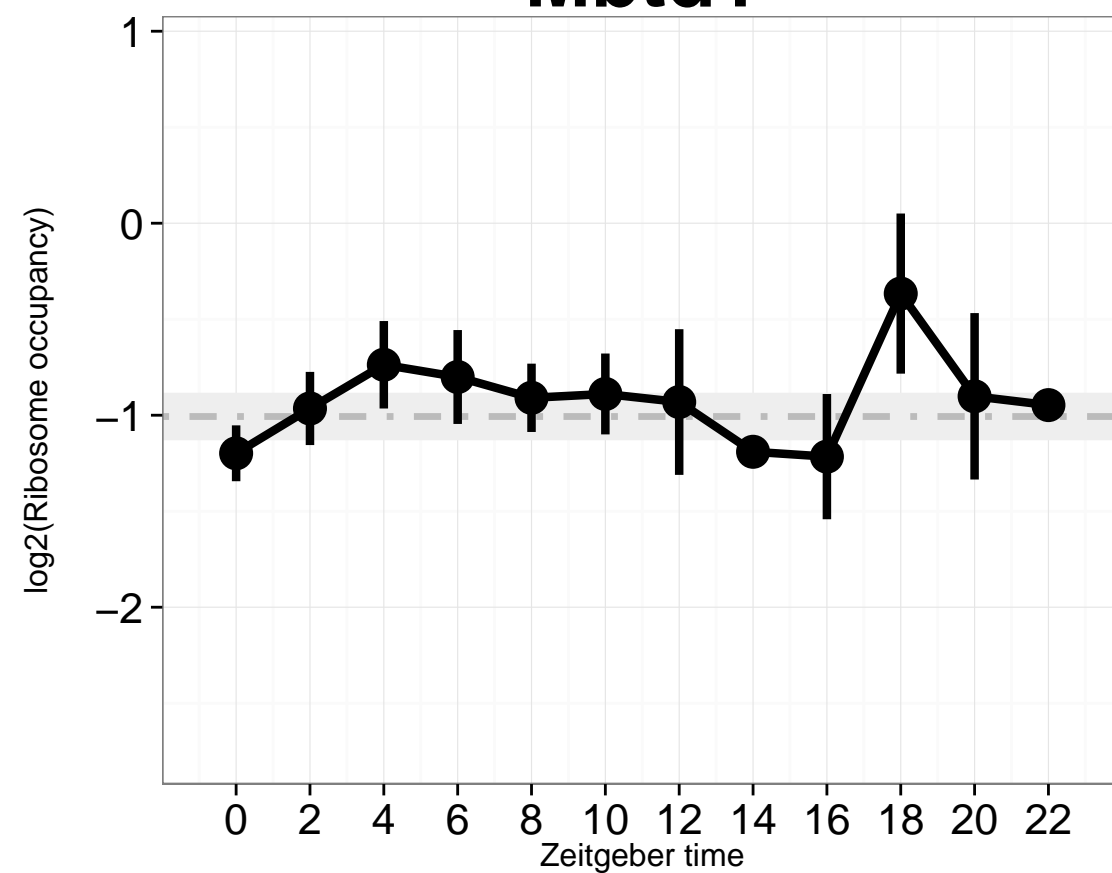

Supplement: SuppDataset_1.zip [file Mbtd1_set_A.pdf › Supplemental Dataset 1/A-mRNA_nonrhyth_translation_nonrhyth/Mbtd1_set_A.pdf]

# Mbtps1

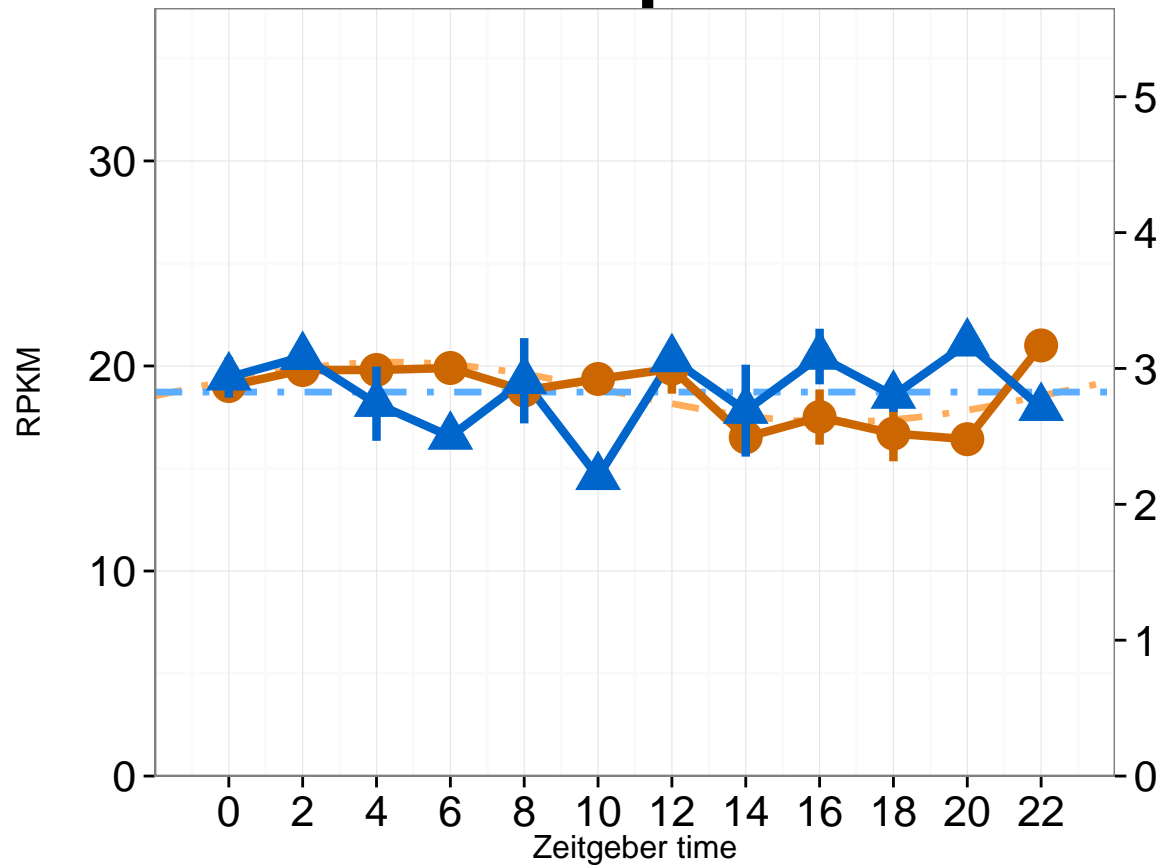

# Mbtps1

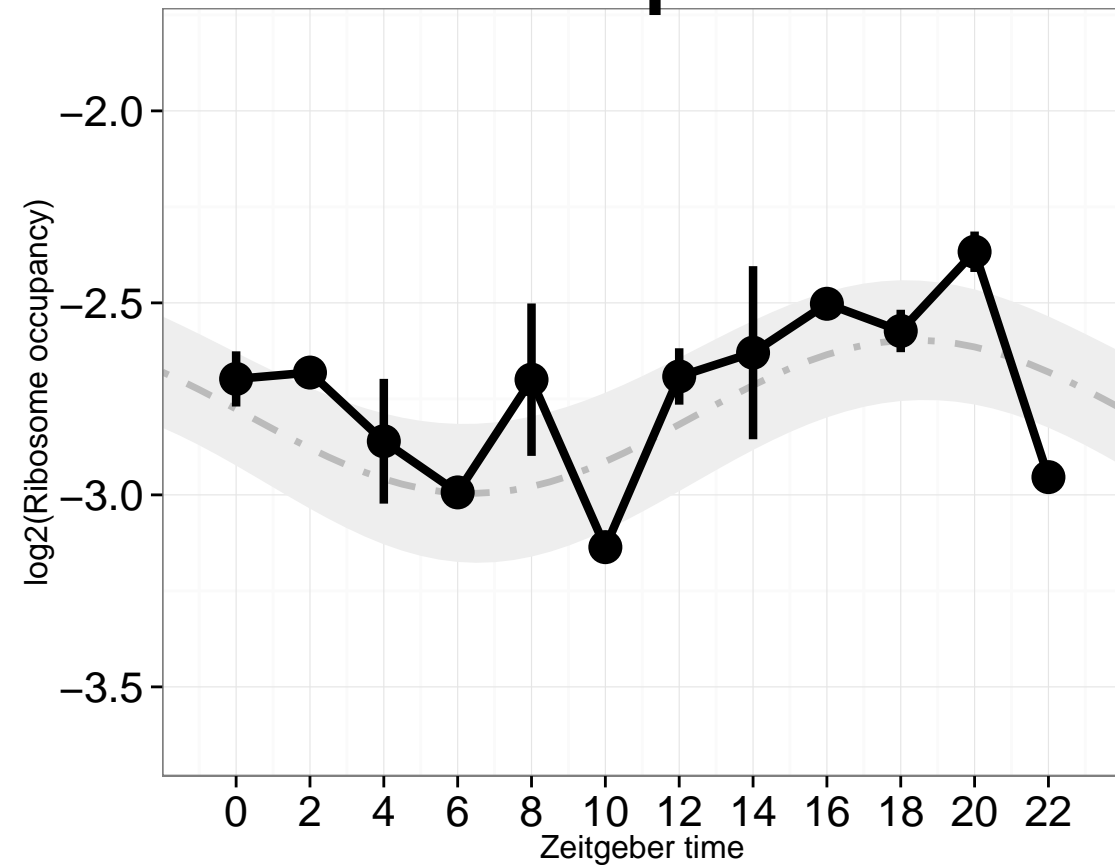

Supplement: SuppDataset_1.zip [file Mbtps1_set_A.pdf › Supplemental Dataset 1/A-mRNA_nonrhyth_translation_nonrhyth/Mbtps1_set_A.pdf]

# Mbtps2

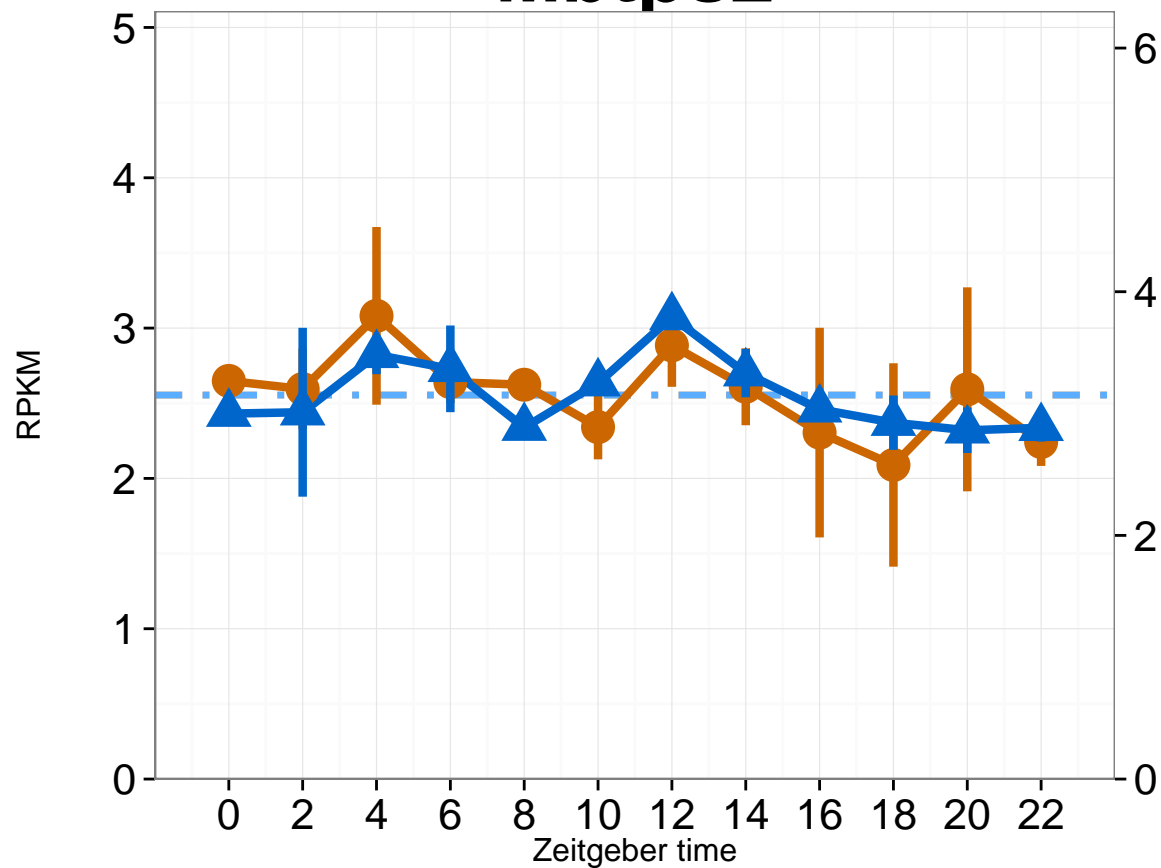

# Mbtps2

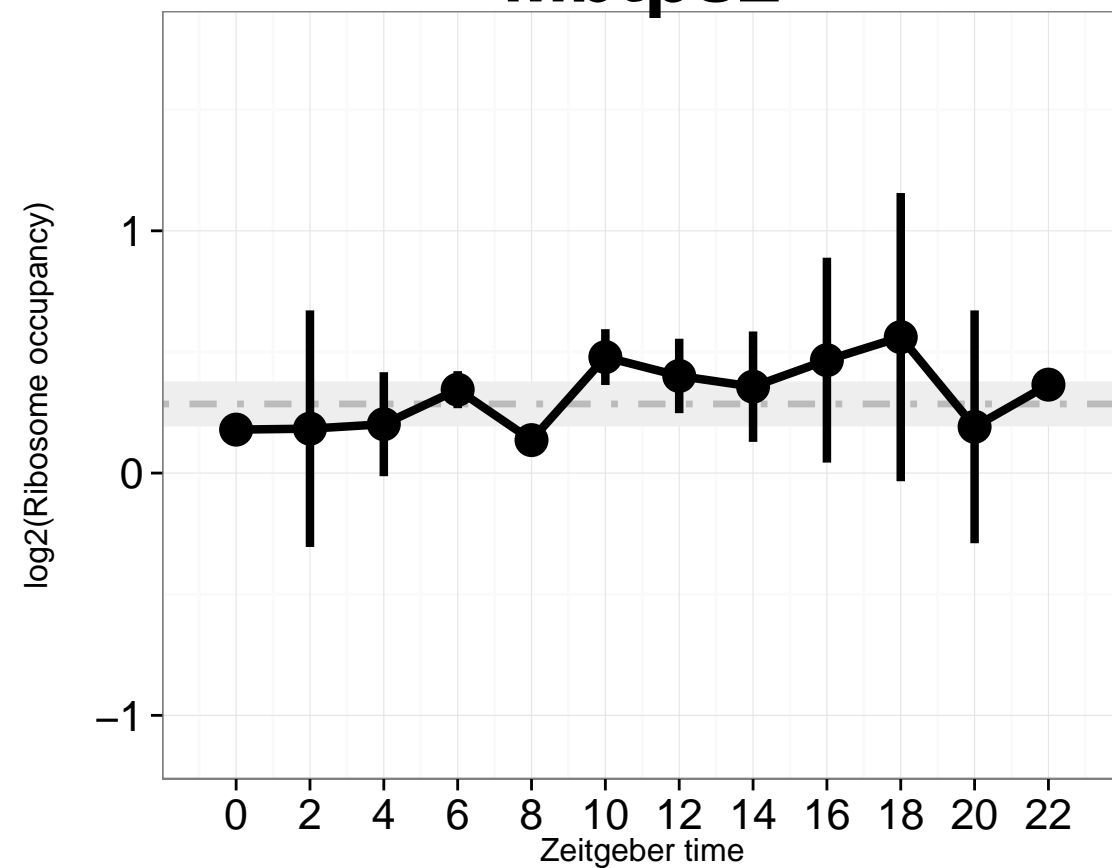

Supplement: SuppDataset_1.zip [file Mbtps2_set_A.pdf › Supplemental Dataset 1/A-mRNA_nonrhyth_translation_nonrhyth/Mbtps2_set_A.pdf]

# Mcam

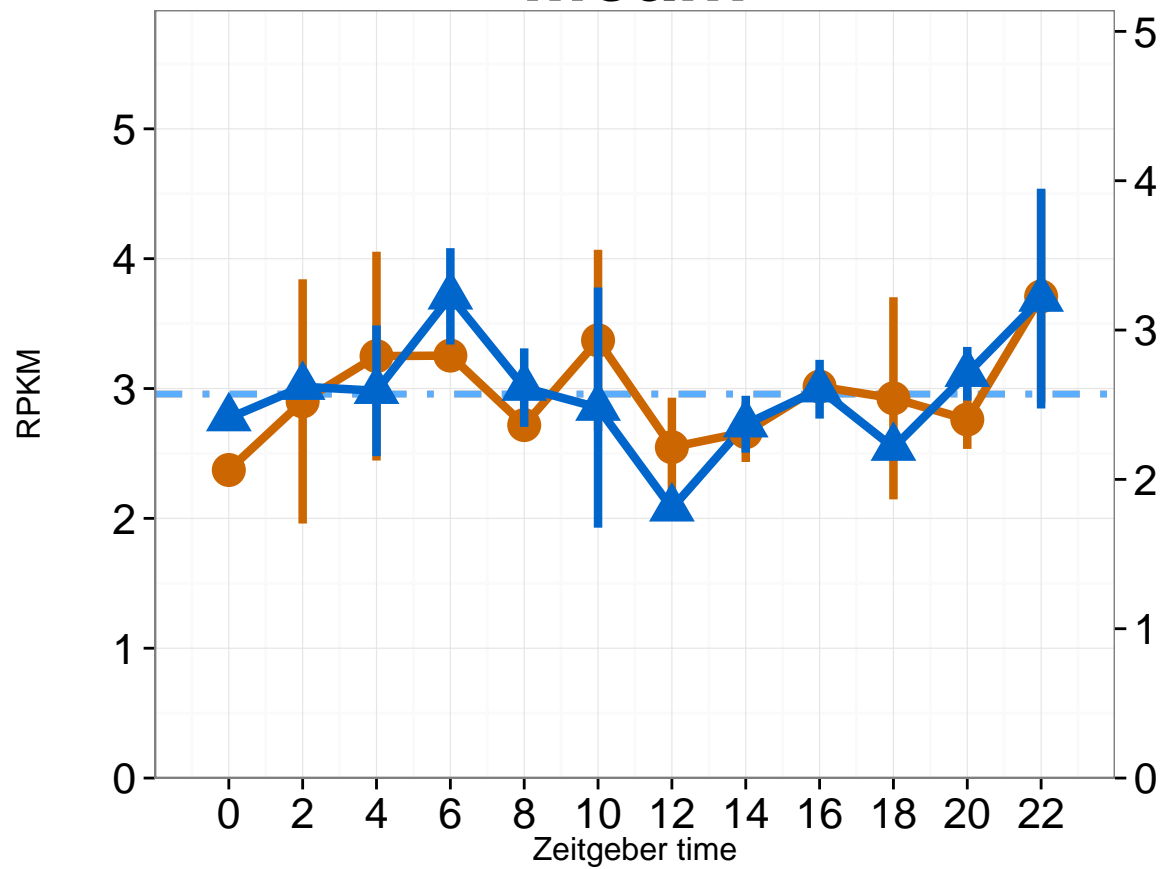

# Mcam

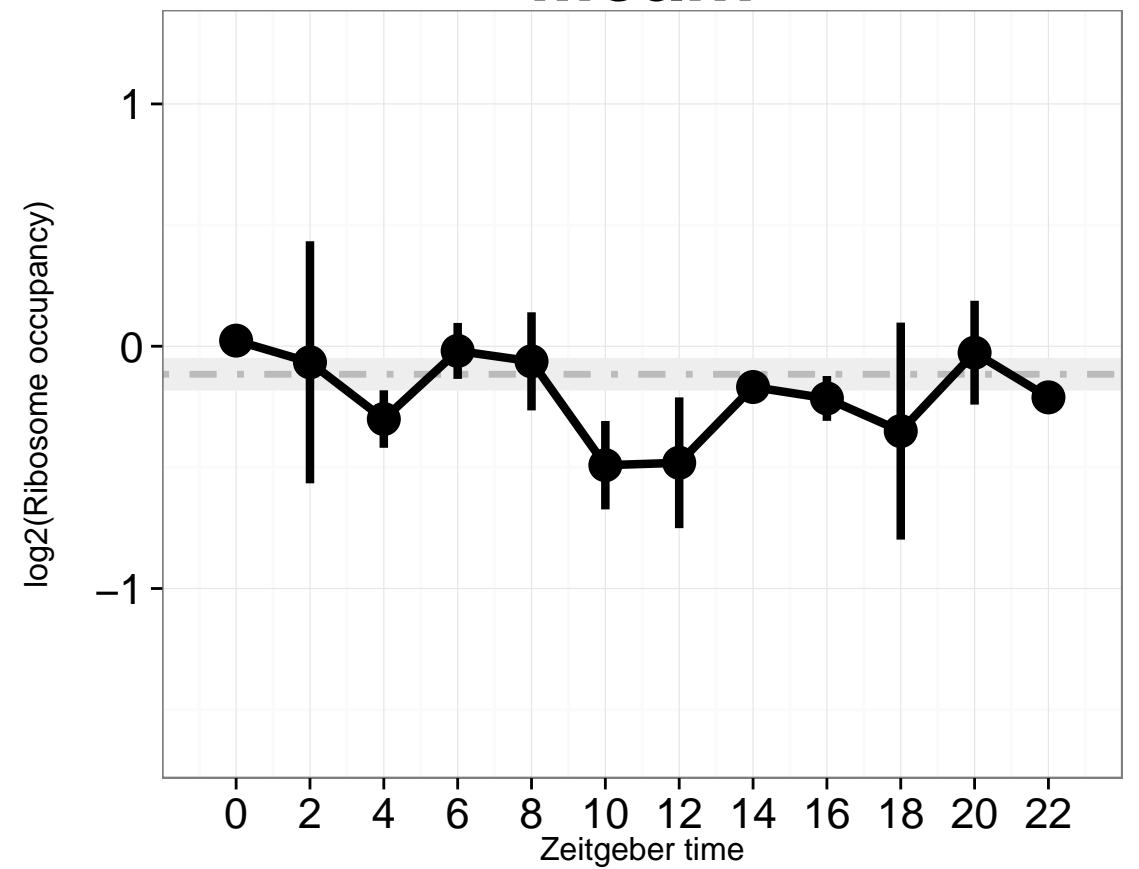

Supplement: SuppDataset_1.zip [file Mcam_set_A.pdf › Supplemental Dataset 1/A-mRNA_nonrhyth_translation_nonrhyth/Mcam_set_A.pdf]

## Mcat

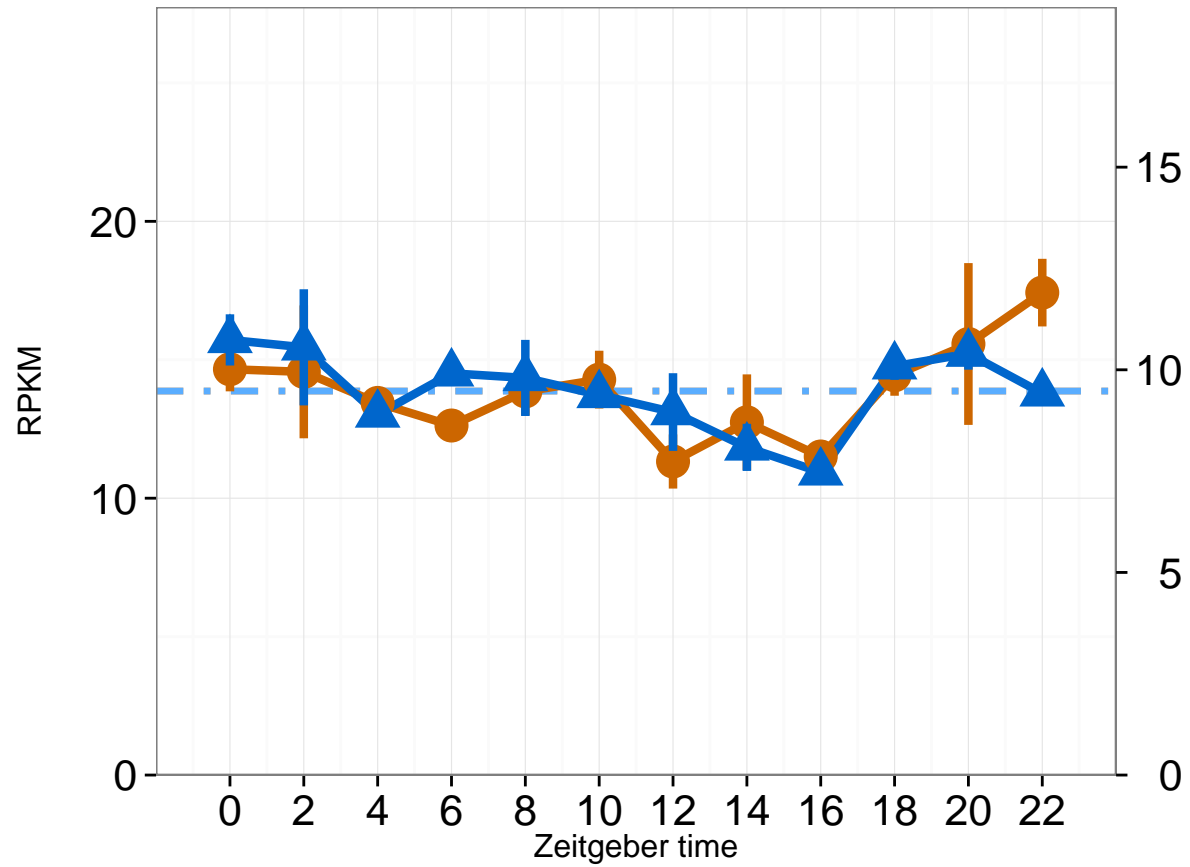

## Mcat

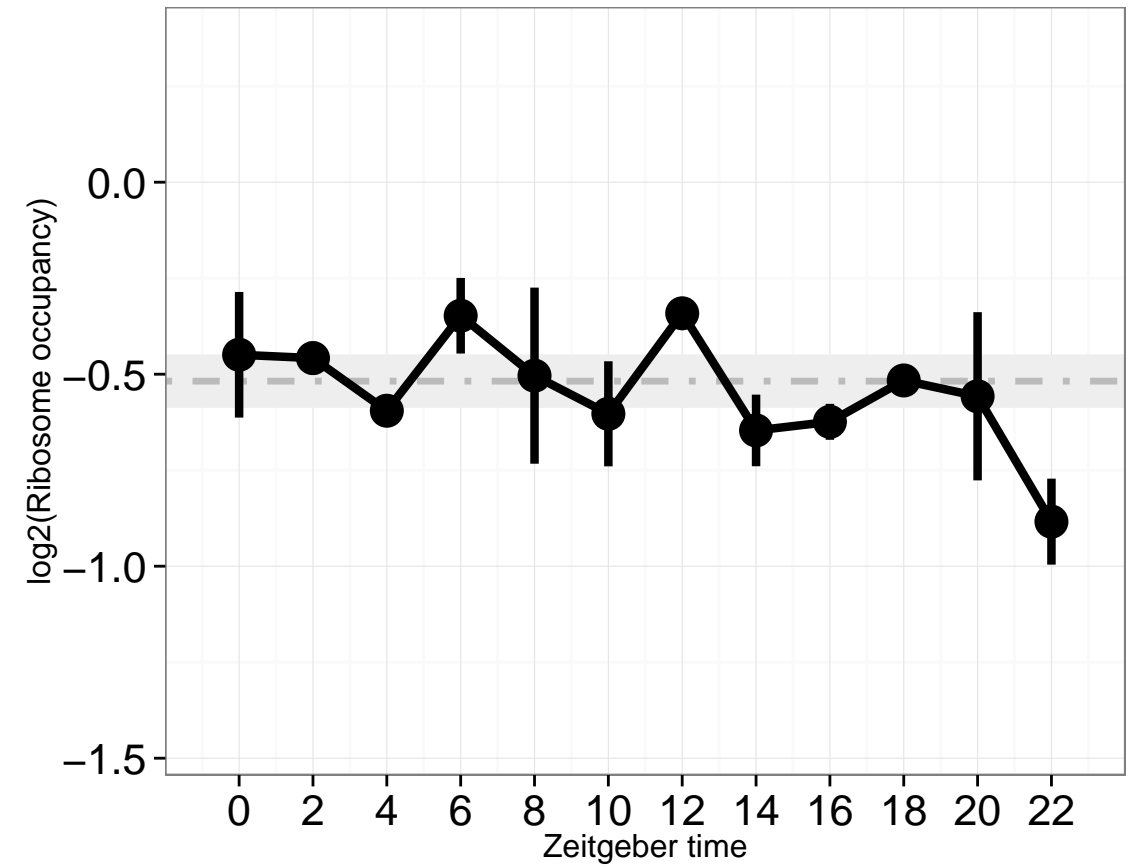

Supplement: SuppDataset_1.zip [file Mcat_set_A.pdf › Supplemental Dataset 1/A-mRNA_nonrhyth_translation_nonrhyth/Mcat_set_A.pdf]

## Mccc1

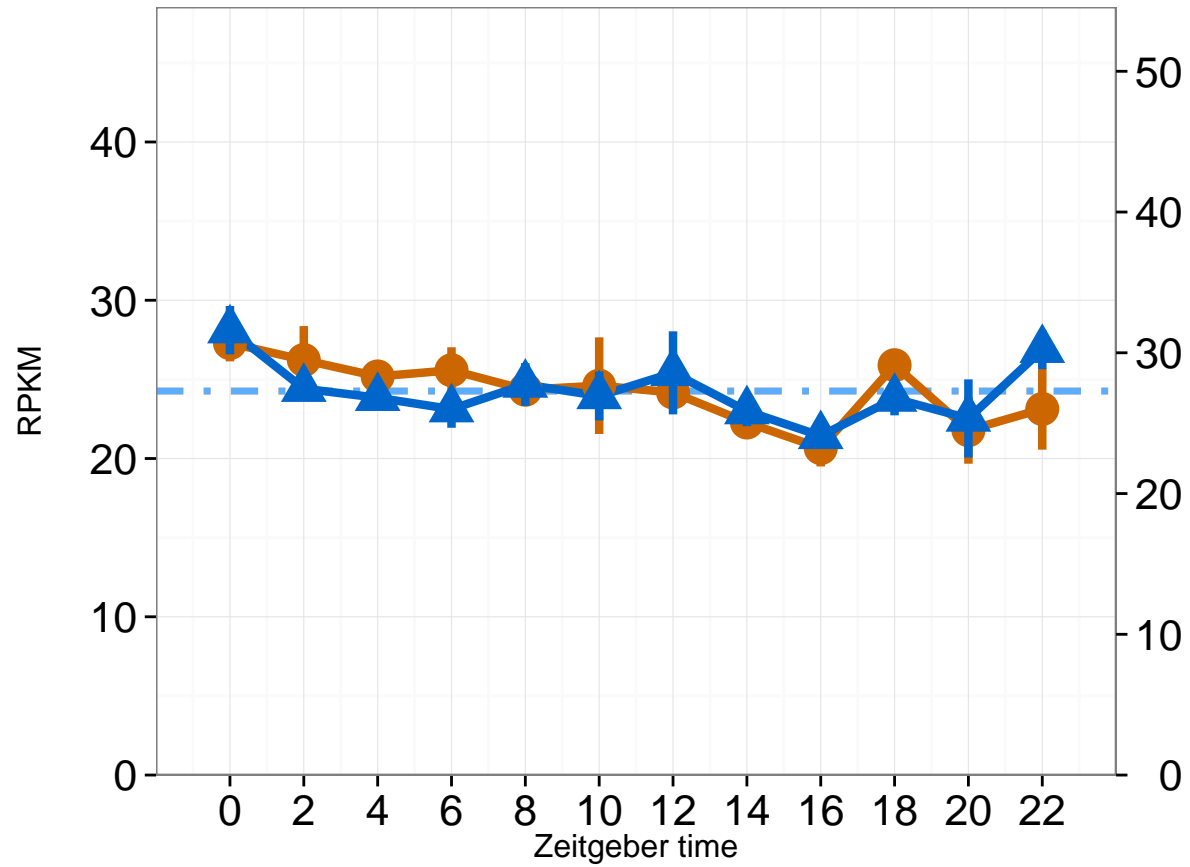

## Mccc1

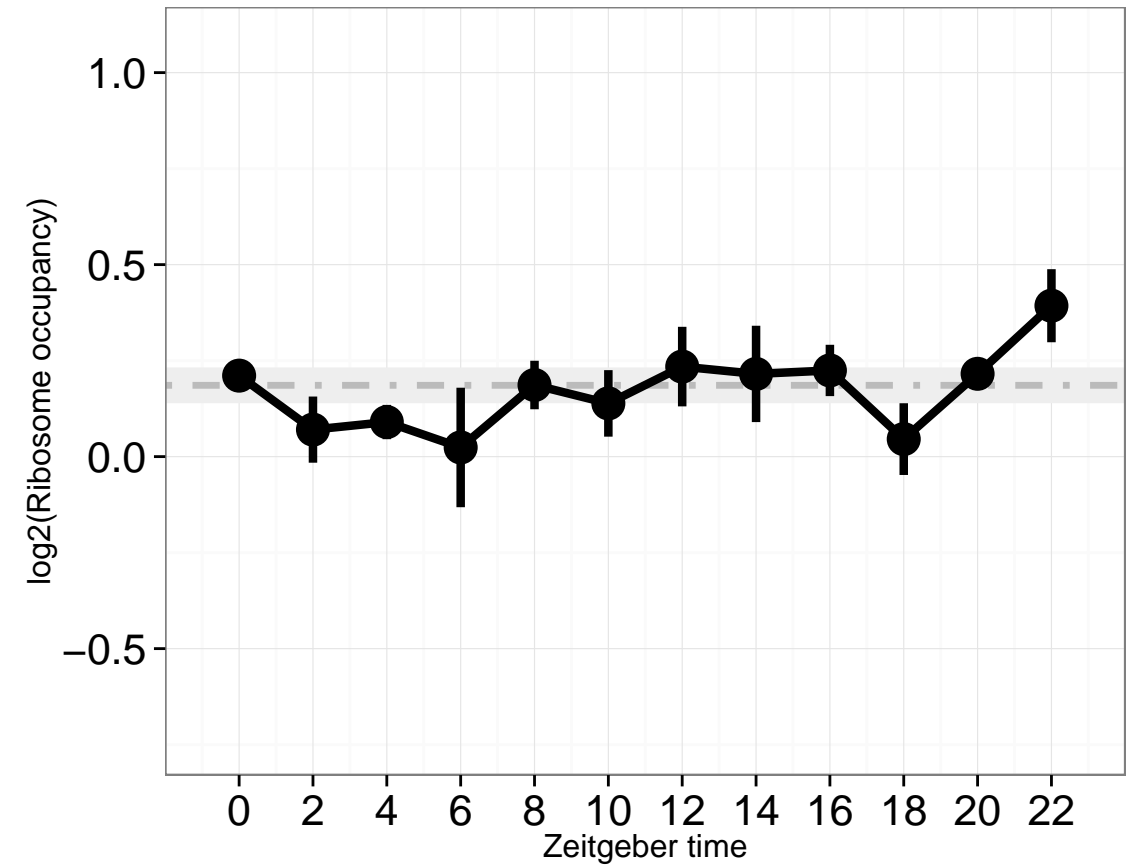

Supplement: SuppDataset_1.zip [file Mccc1_set_A.pdf › Supplemental Dataset 1/A-mRNA_nonrhyth_translation_nonrhyth/Mccc1_set_A.pdf]

## Mccc2

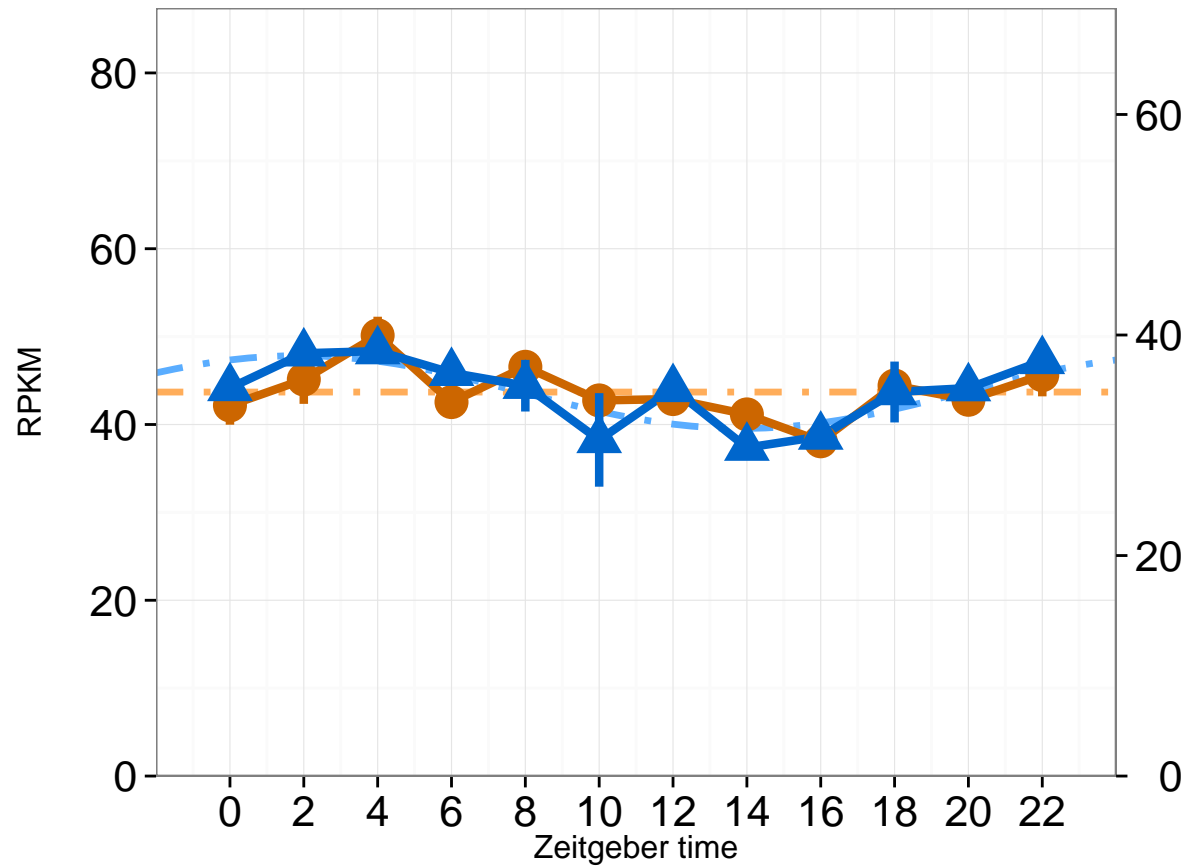

## Mccc2

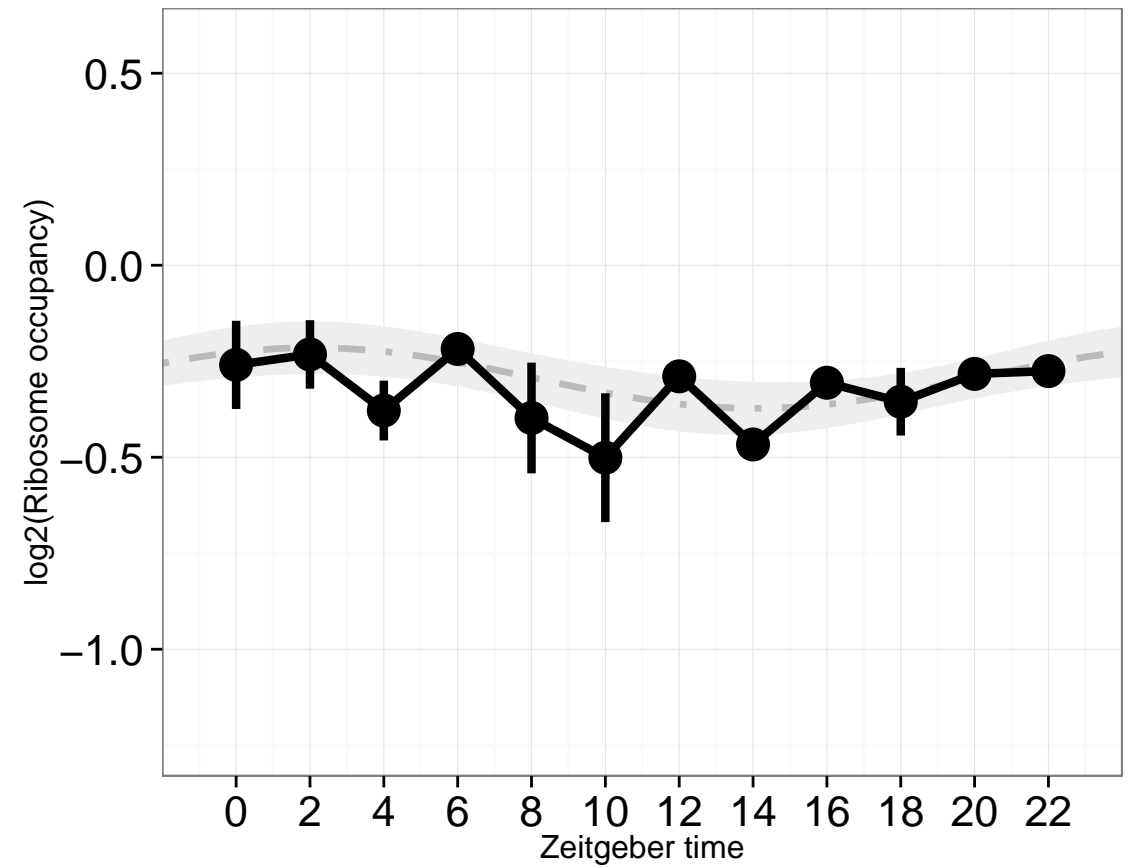

Supplement: SuppDataset_1.zip [file Mccc2_set_A.pdf › Supplemental Dataset 1/A-mRNA_nonrhyth_translation_nonrhyth/Mccc2_set_A.pdf]

## Mcee

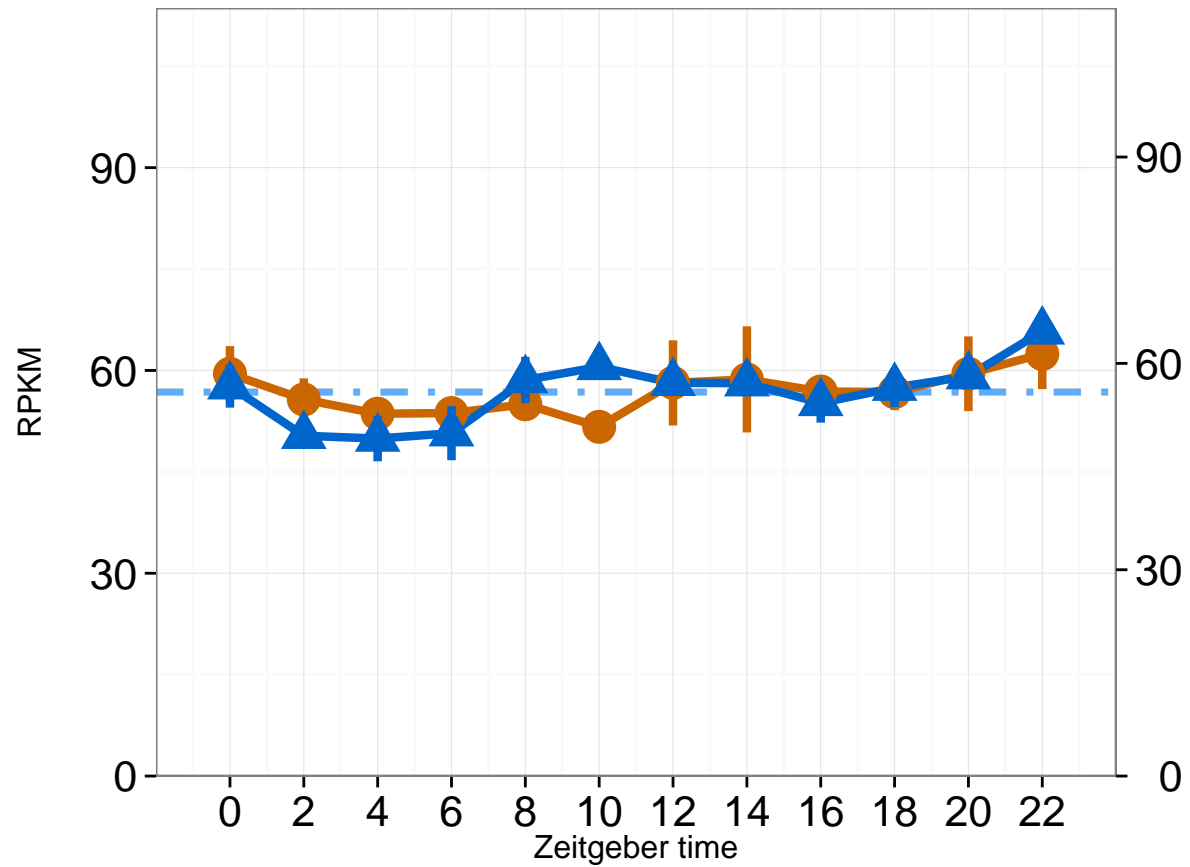

## Mcee

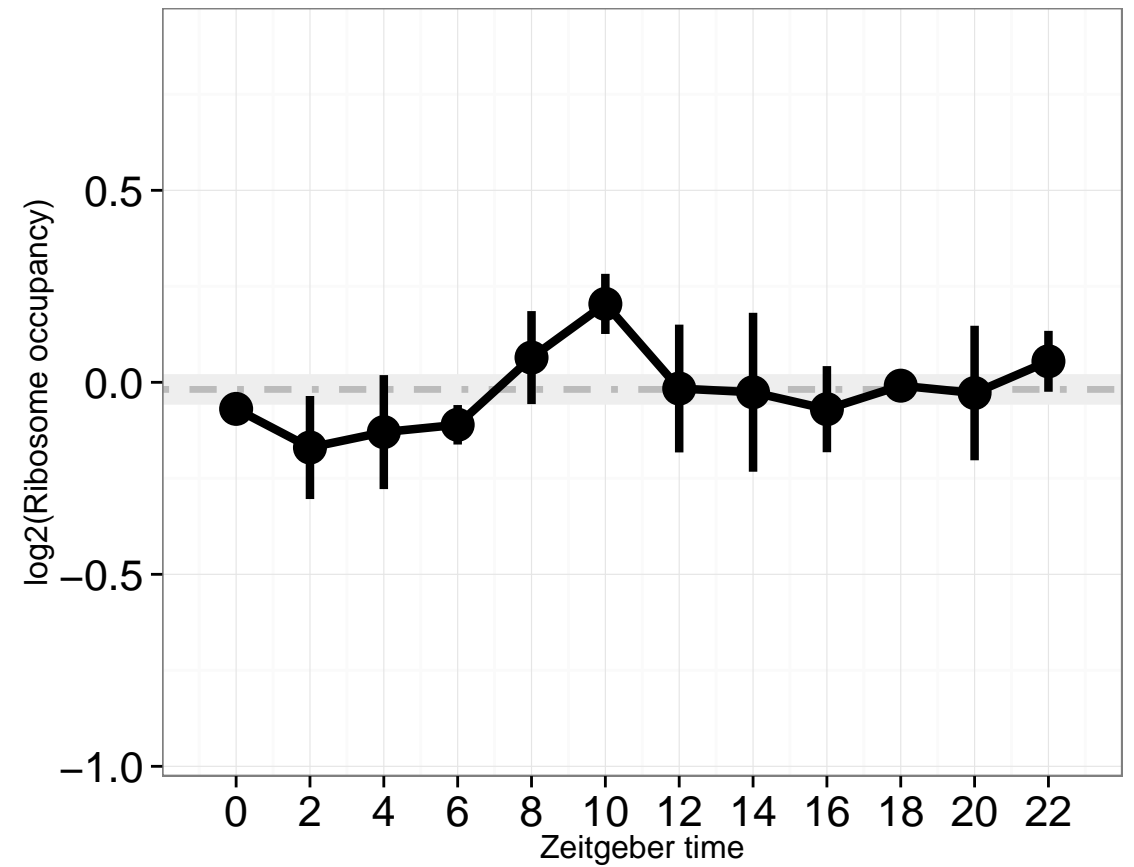

Supplement: SuppDataset_1.zip [file Mcee_set_A.pdf › Supplemental Dataset 1/A-mRNA_nonrhyth_translation_nonrhyth/Mcee_set_A.pdf]

## Mcl1

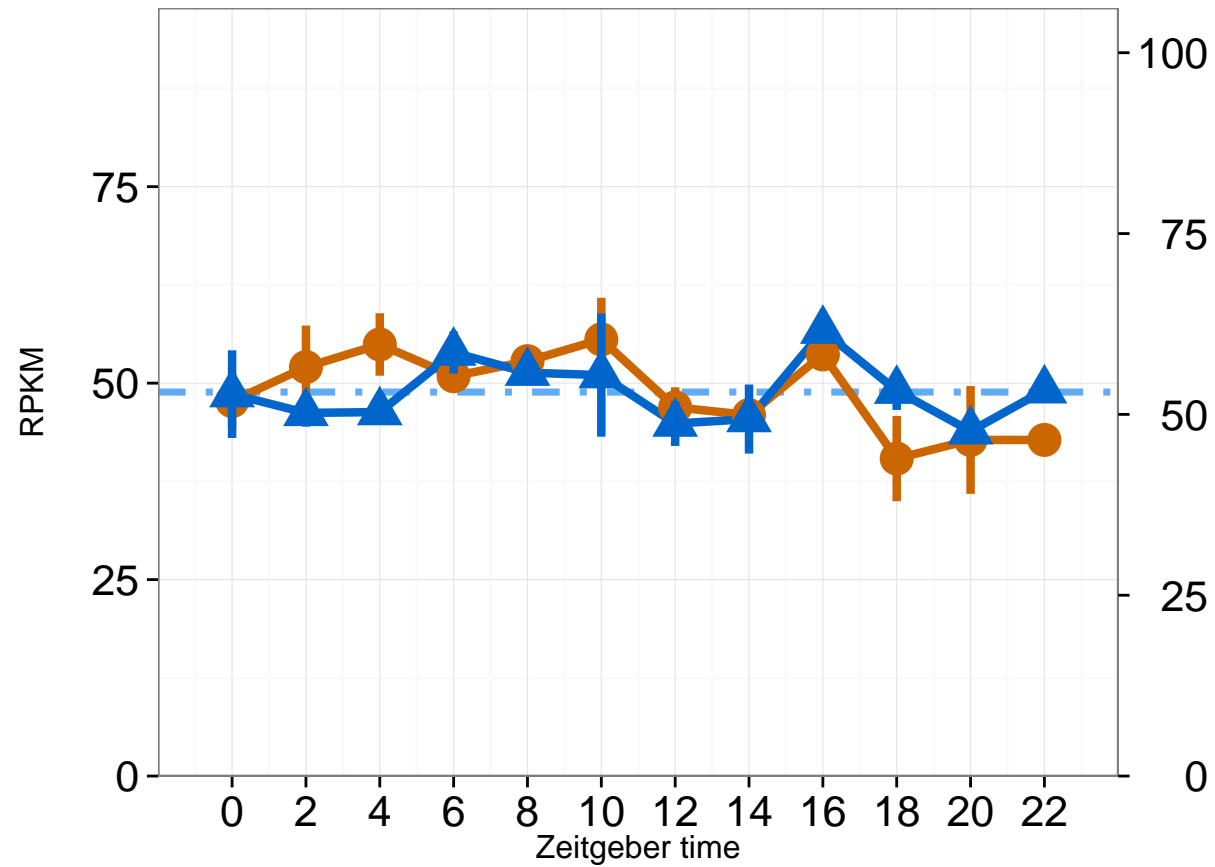

## Mcl1

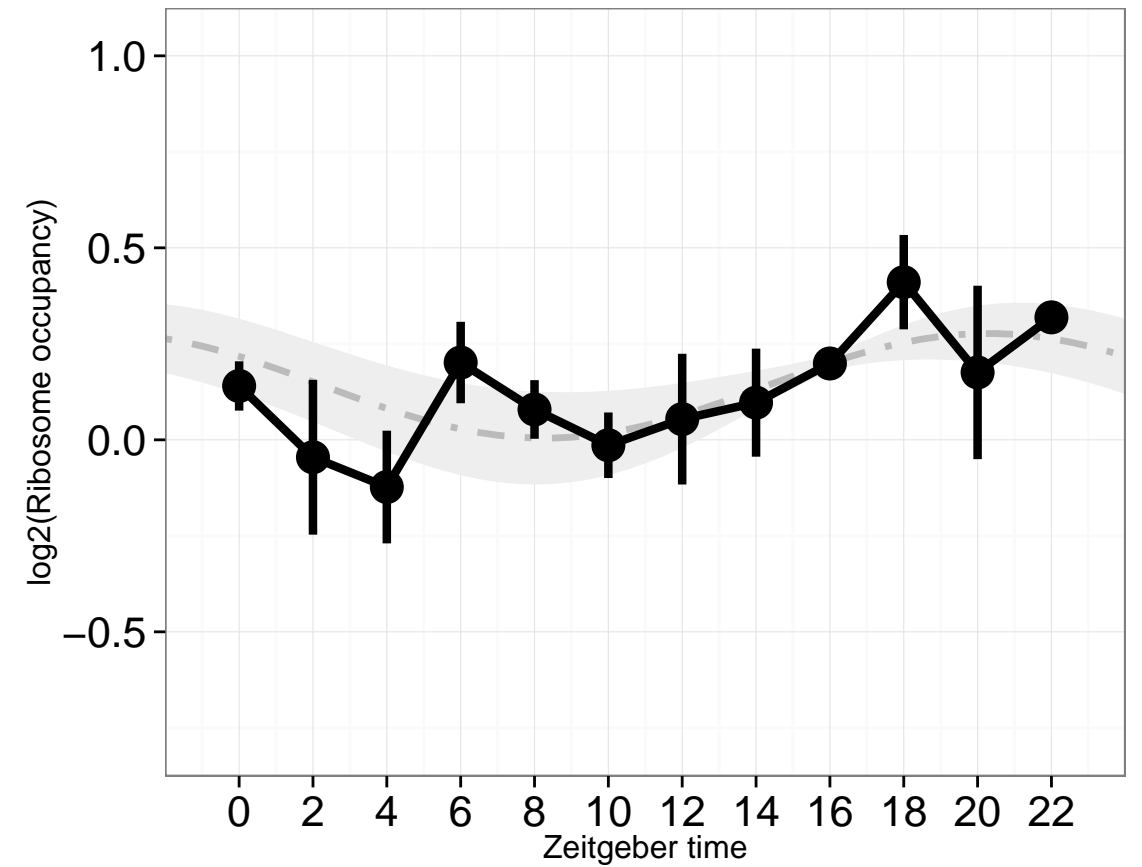

Supplement: SuppDataset_1.zip [file Mcl1_set_A.pdf › Supplemental Dataset 1/A-mRNA_nonrhyth_translation_nonrhyth/Mcl1_set_A.pdf]

## Mcm3

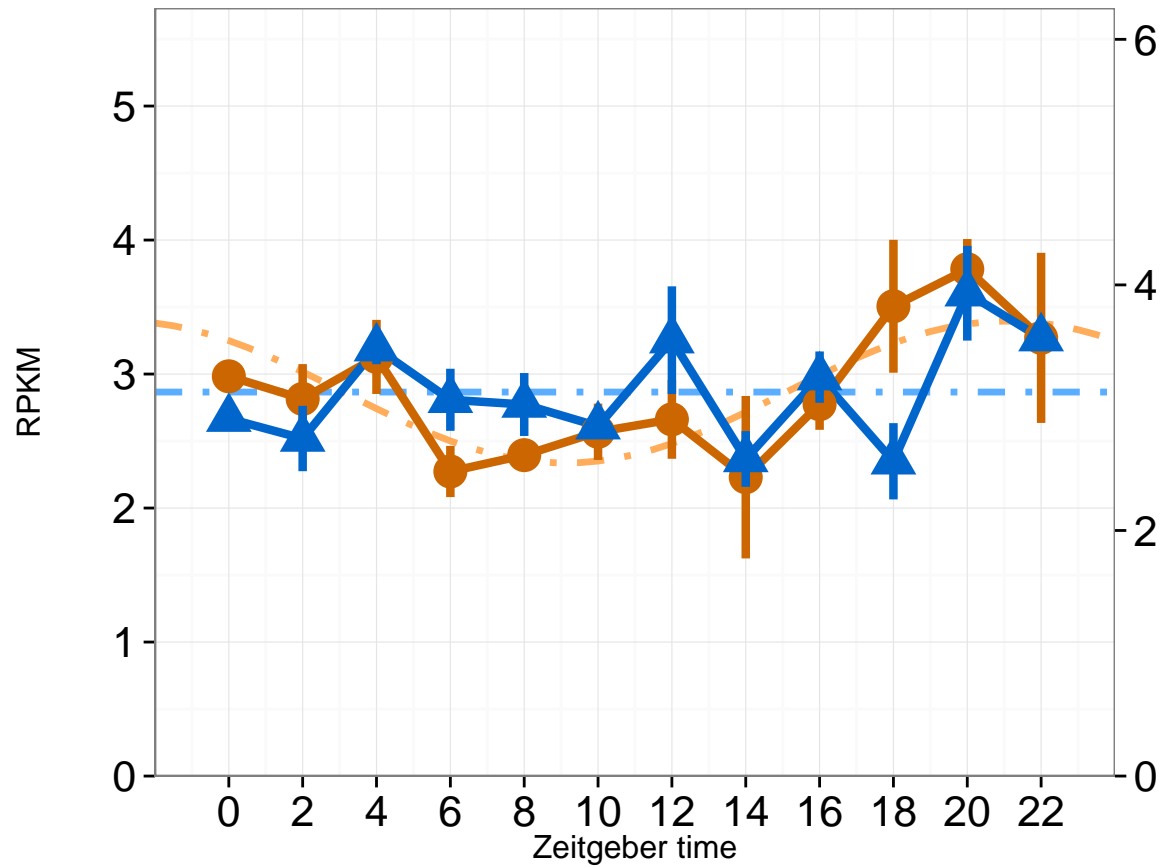

## Mcm3

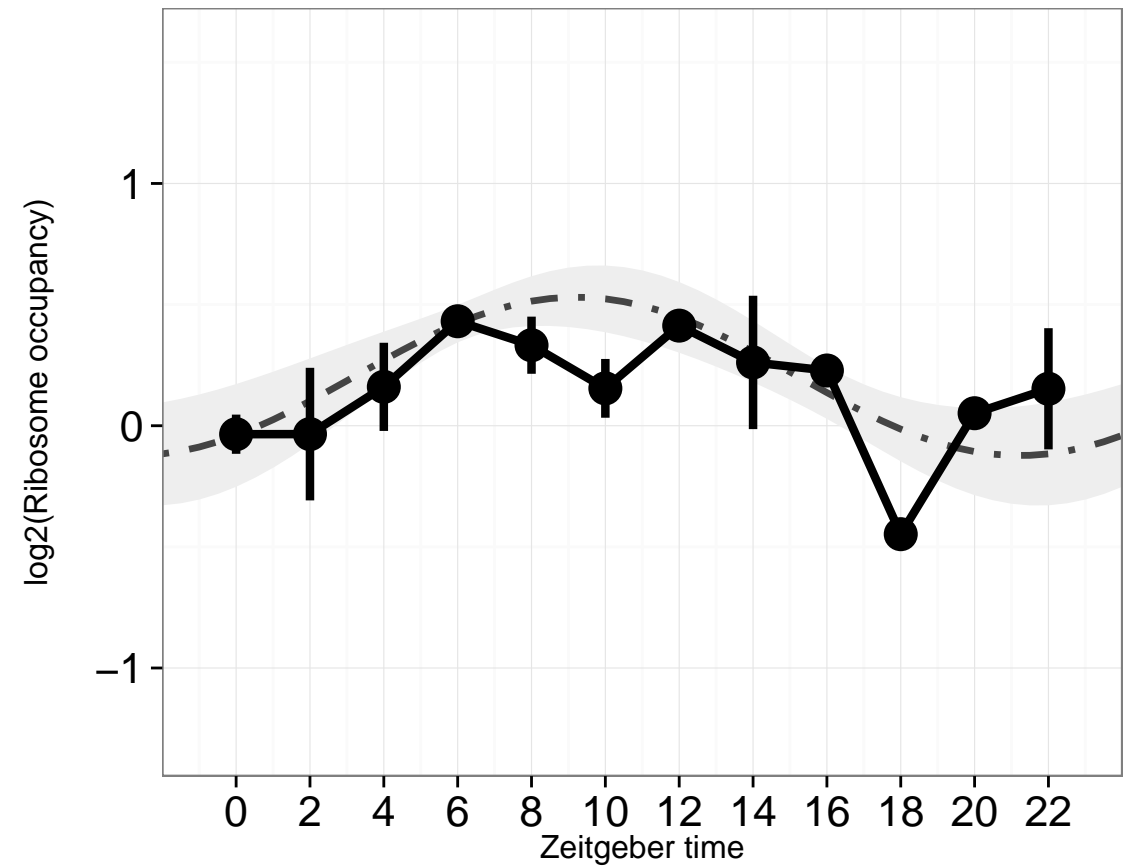

Supplement: SuppDataset_1.zip [file Mcm3_set_A.pdf › Supplemental Dataset 1/A-mRNA_nonrhyth_translation_nonrhyth/Mcm3_set_A.pdf]

# Mcm3ap

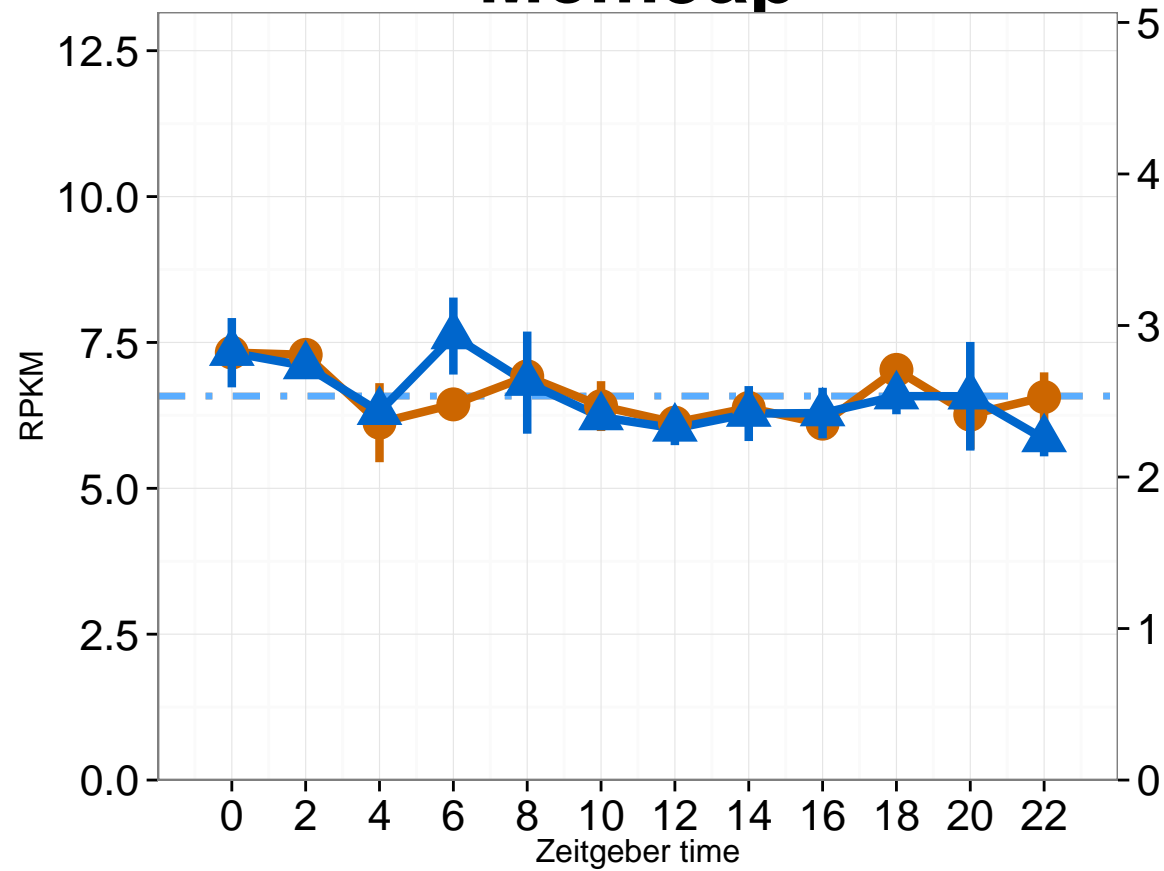

# Mcm3ap

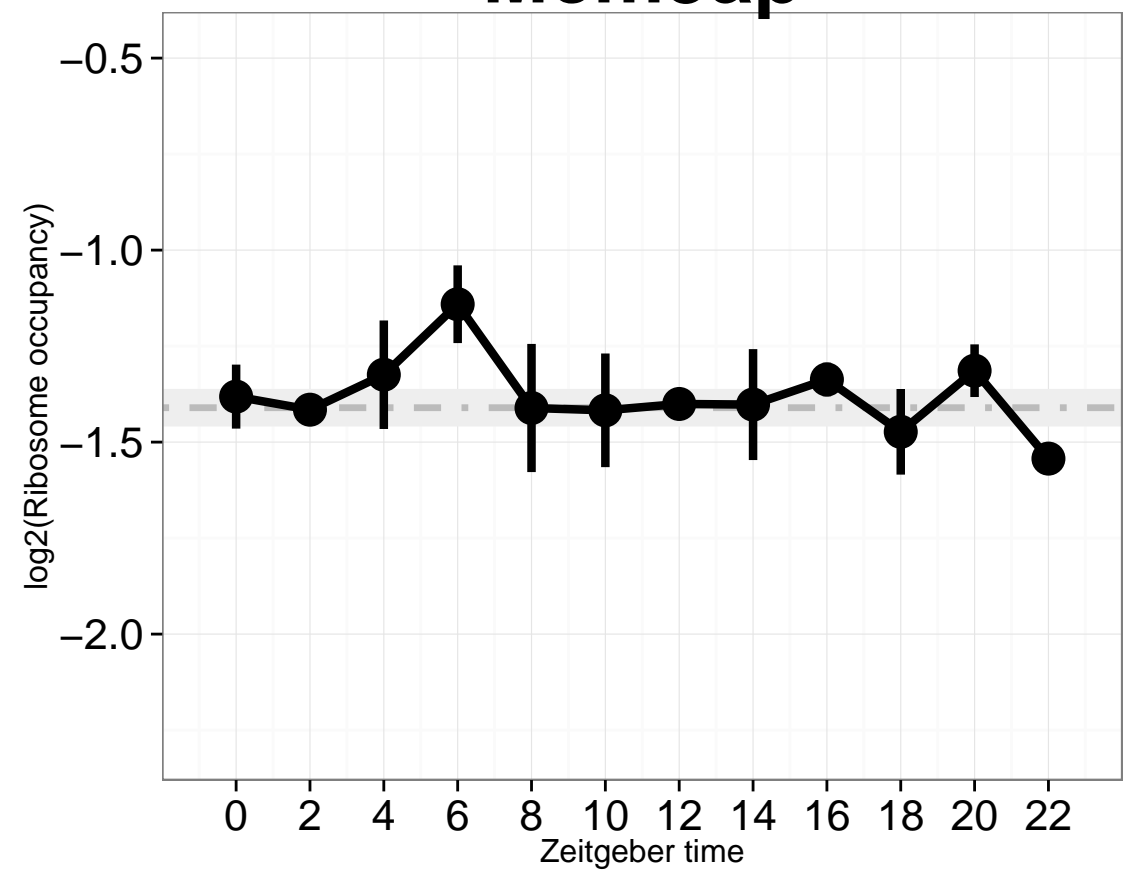

Supplement: SuppDataset_1.zip [file Mcm3ap_set_A.pdf › Supplemental Dataset 1/A-mRNA_nonrhyth_translation_nonrhyth/Mcm3ap_set_A.pdf]

## Mcm4

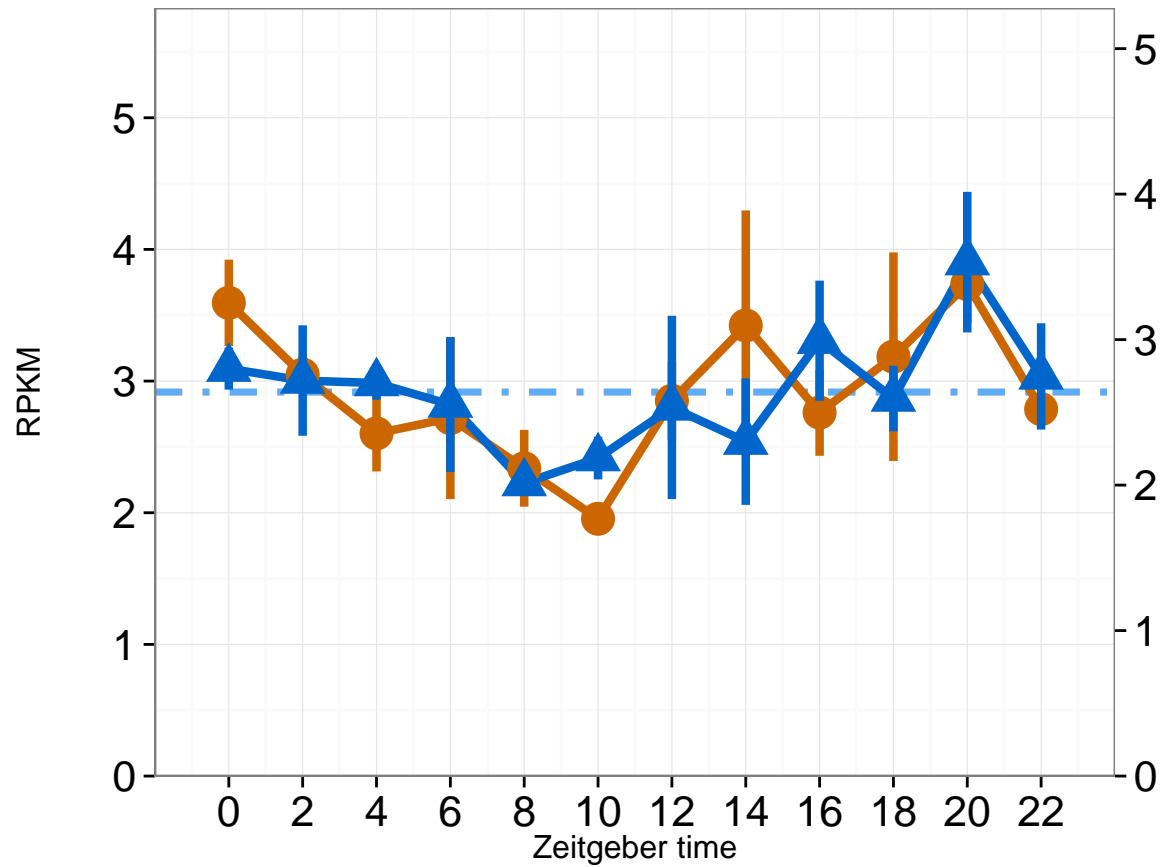

## Mcm4

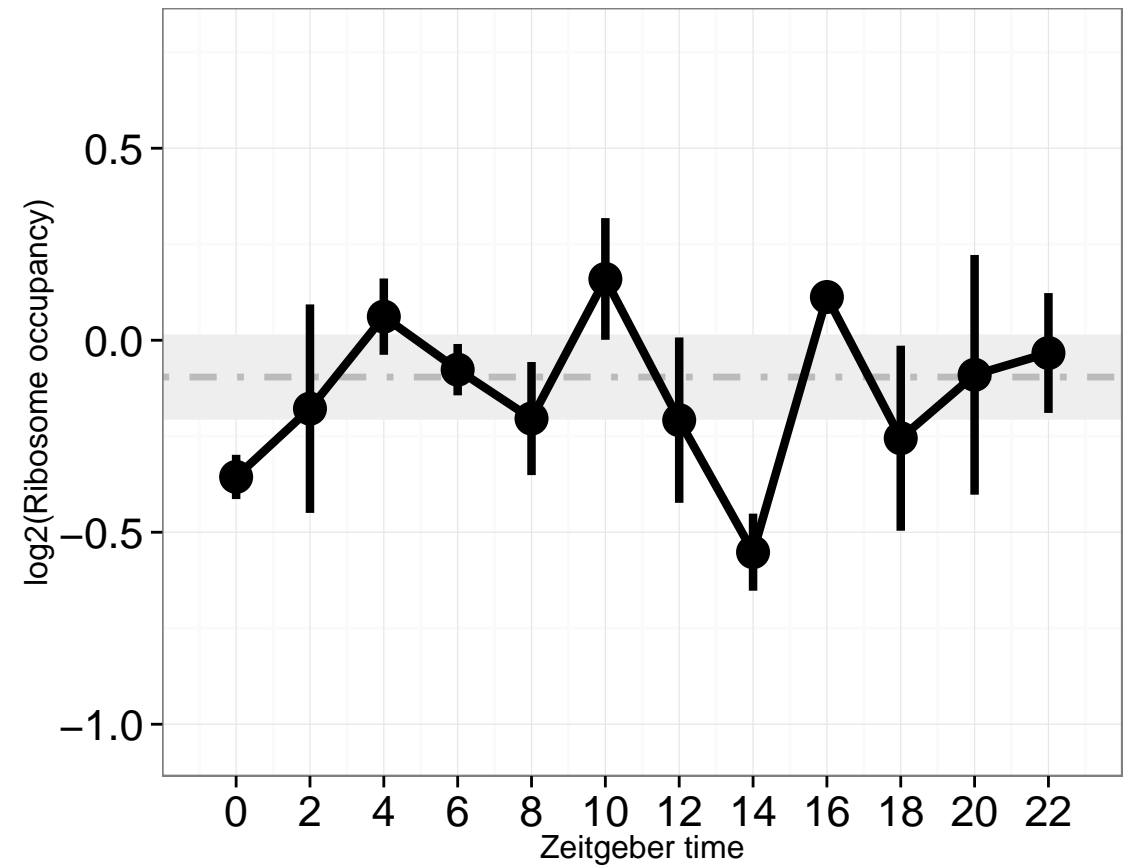

Supplement: SuppDataset_1.zip [file Mcm4_set_A.pdf › Supplemental Dataset 1/A-mRNA_nonrhyth_translation_nonrhyth/Mcm4_set_A.pdf]

# Mcm5

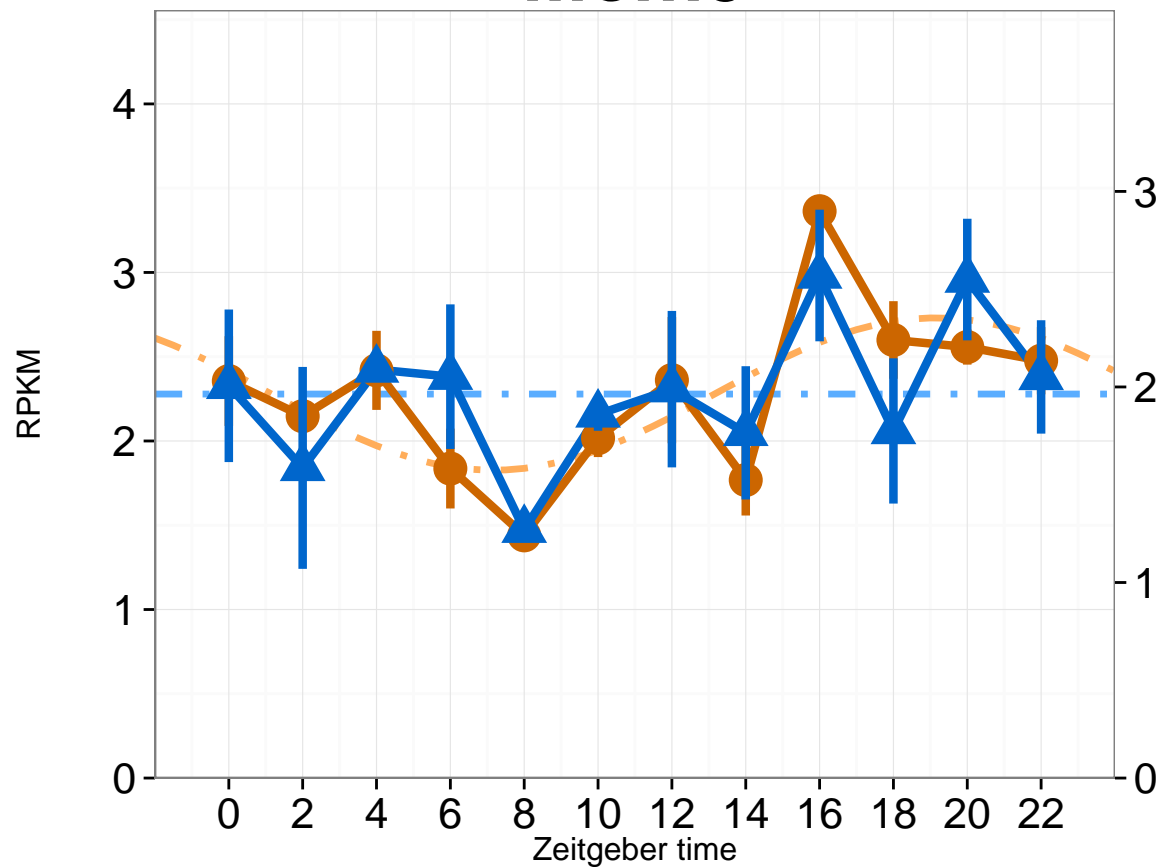

# Mcm5

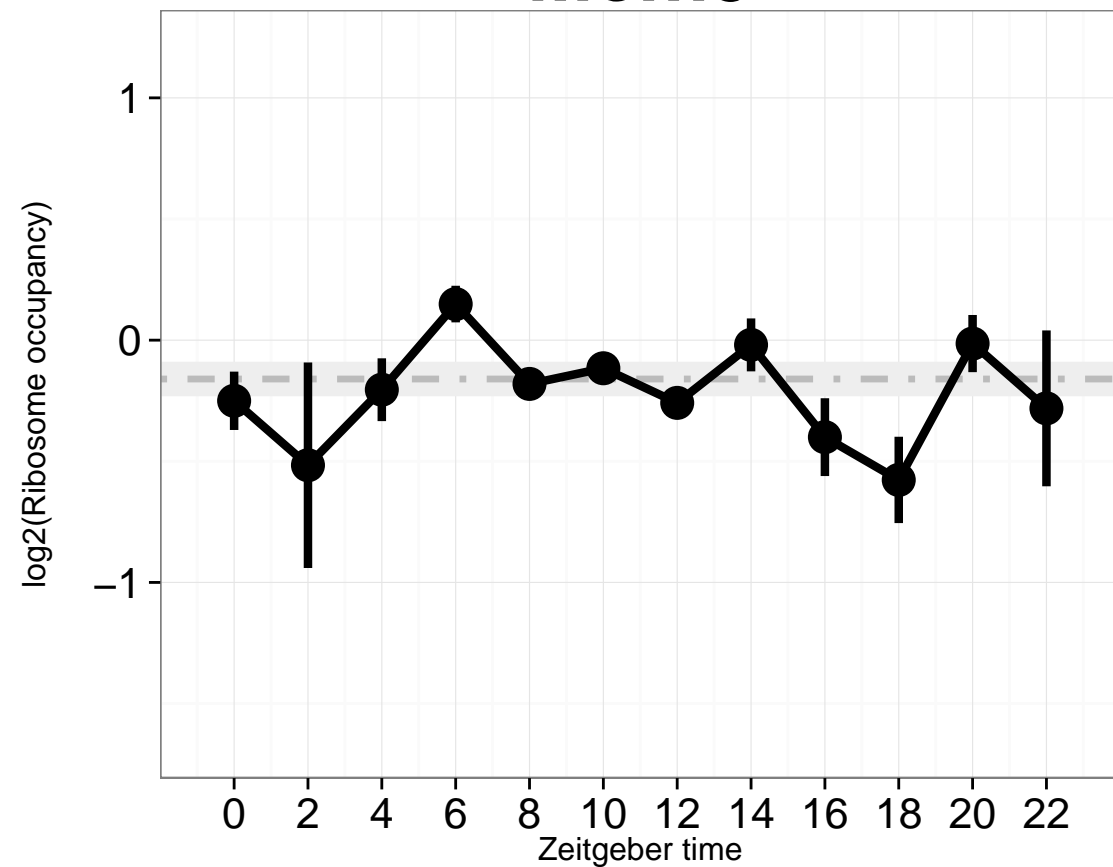

Supplement: SuppDataset_1.zip [file Mcm5_set_A.pdf › Supplemental Dataset 1/A-mRNA_nonrhyth_translation_nonrhyth/Mcm5_set_A.pdf]

# Mcm6

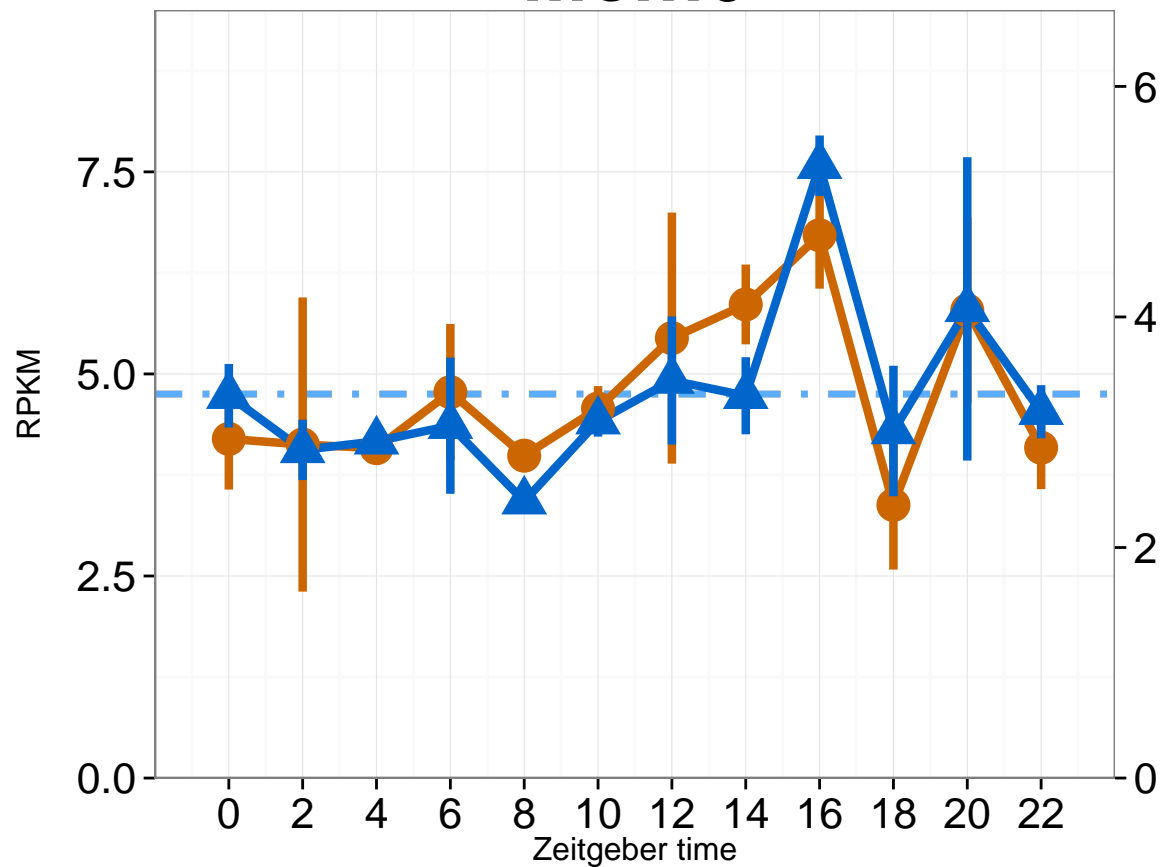

# Mcm6

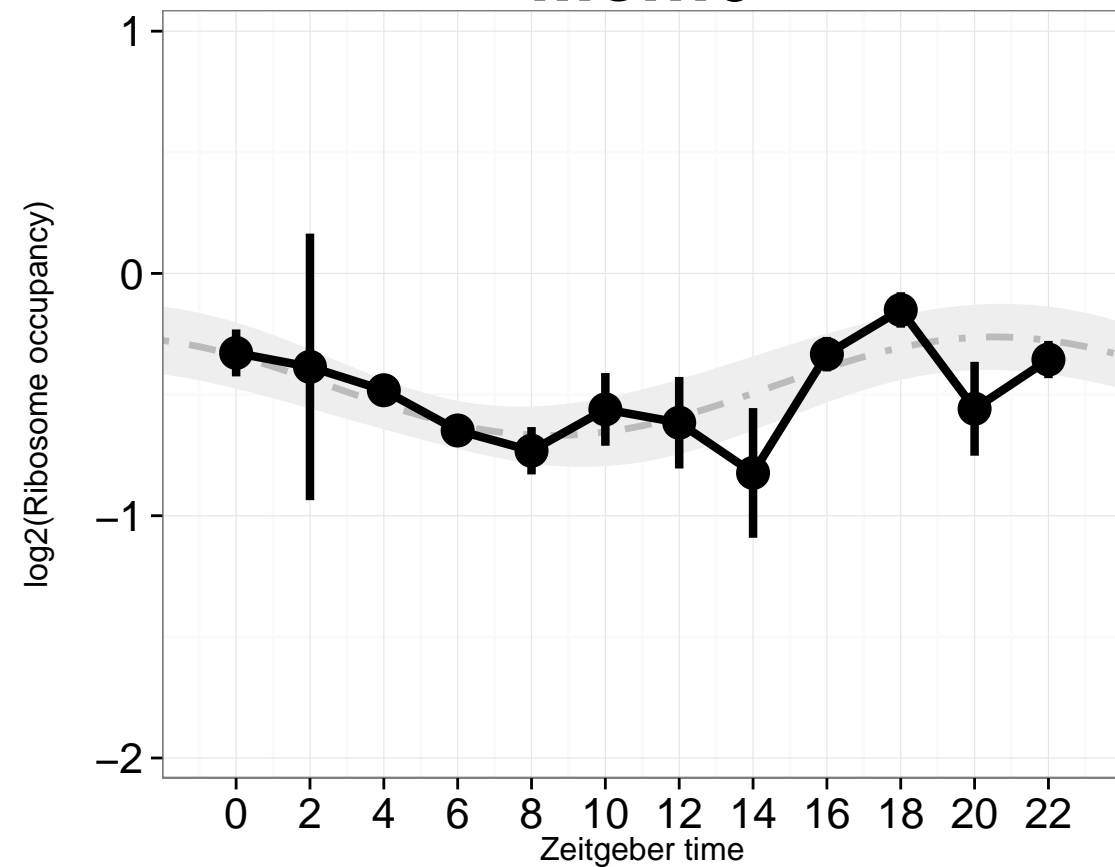

Supplement: SuppDataset_1.zip [file Mcm6_set_A.pdf › Supplemental Dataset 1/A-mRNA_nonrhyth_translation_nonrhyth/Mcm6_set_A.pdf]

## Mcm7

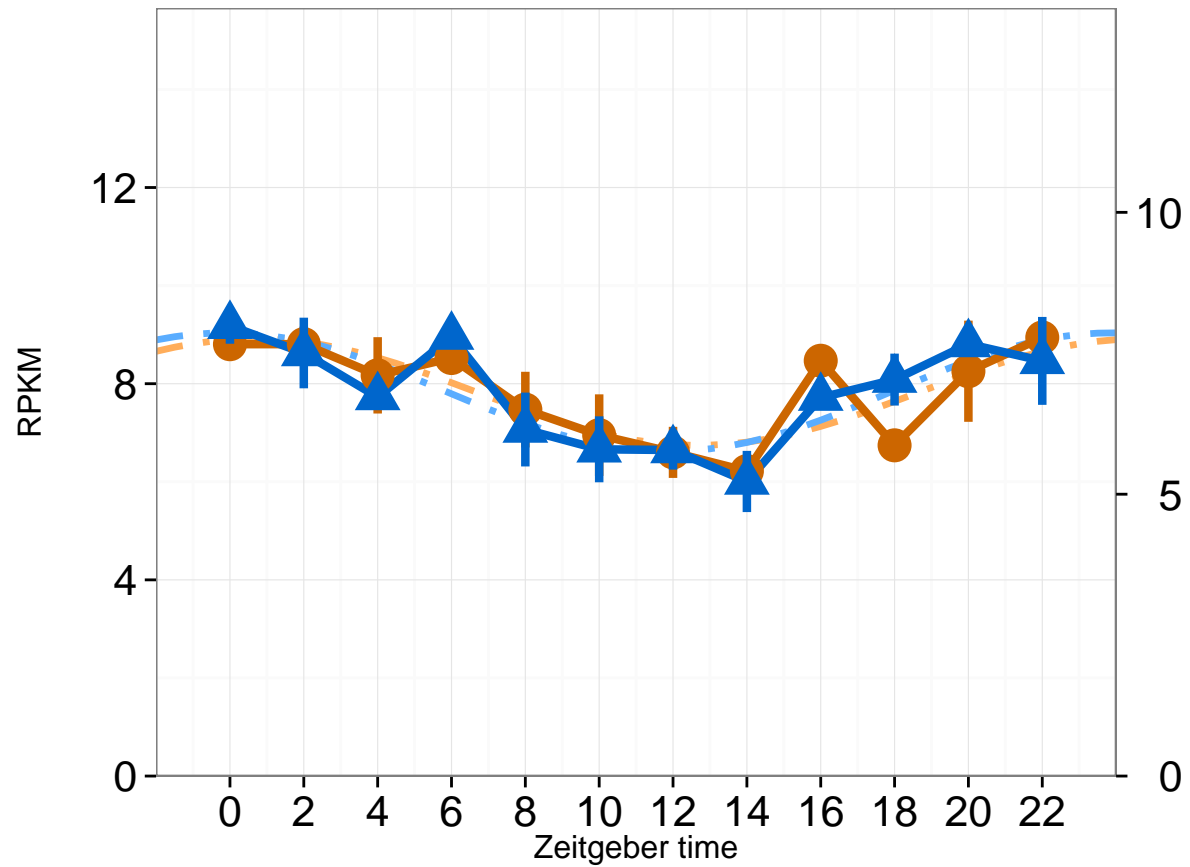

## Mcm7

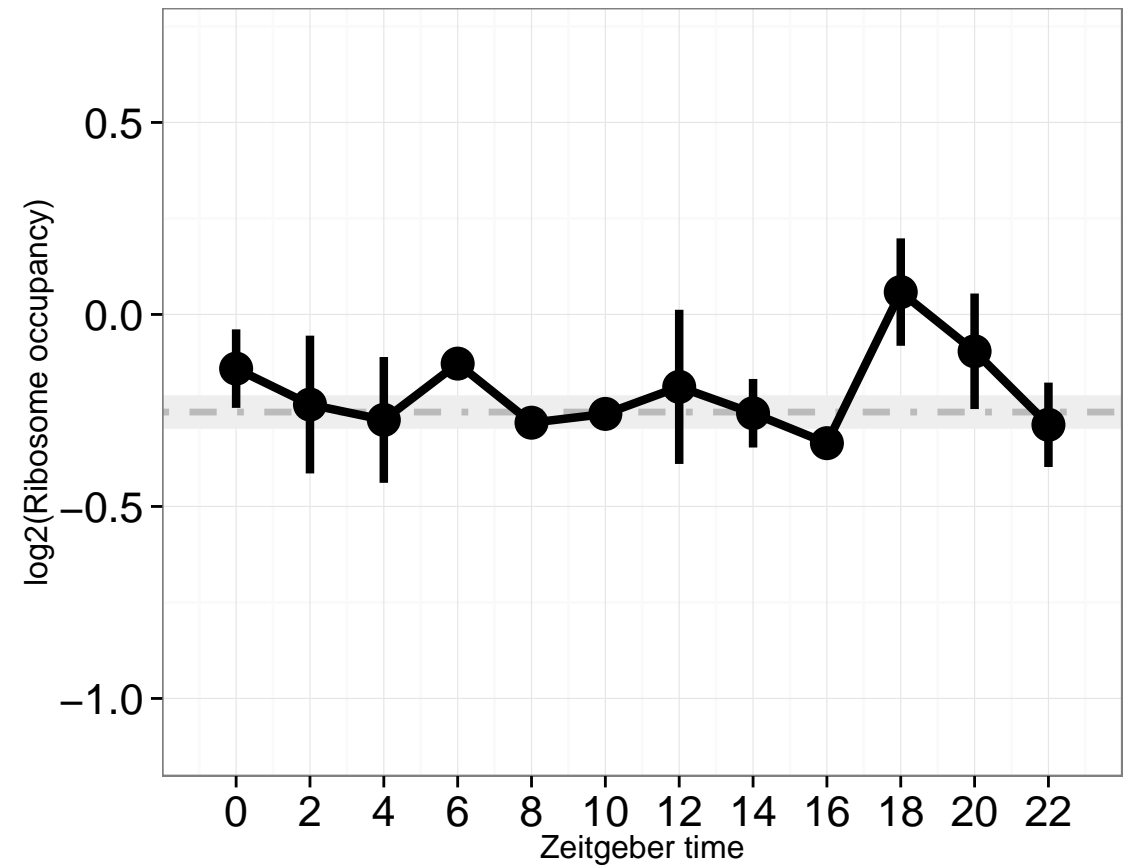

Supplement: SuppDataset_1.zip [file Mcm7_set_A.pdf › Supplemental Dataset 1/A-mRNA_nonrhyth_translation_nonrhyth/Mcm7_set_A.pdf]
