# Supplementary figures and images for: Ribosome profiling reveals the rhythmic liver translatome and circadian clock regulation by upstream open reading frames (part 108 of 113)
Source: HighWire-hosted journal article supplement (doi:10.1101/gr.195404.115), 2015-10-20

# Mapre2

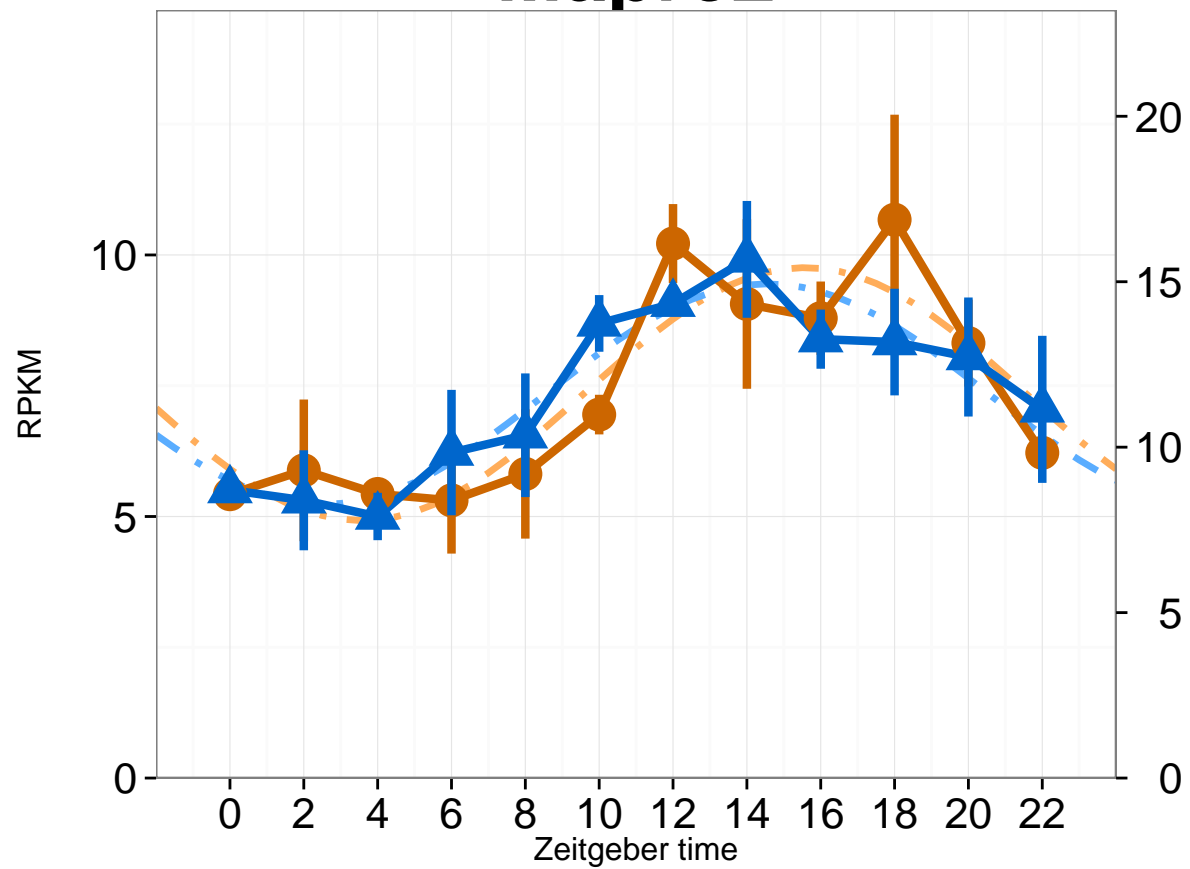

# Mapre2

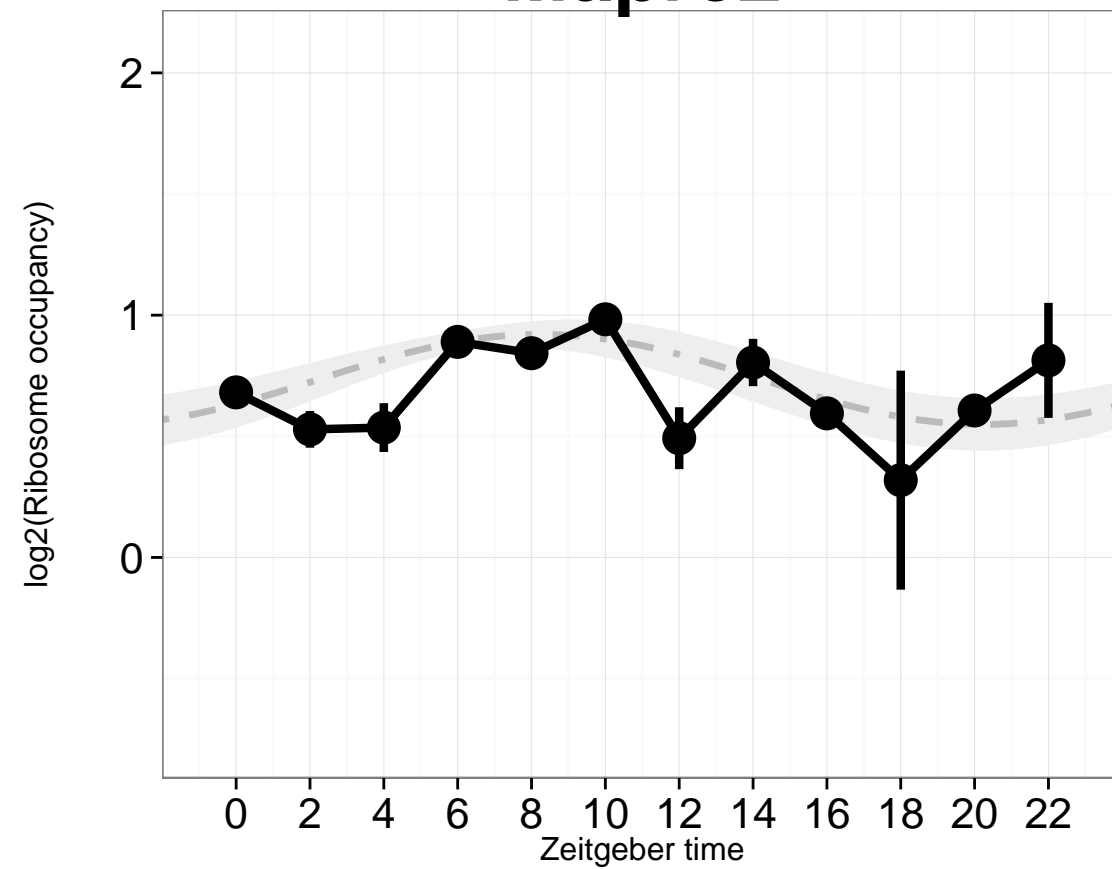

Supplement: SuppDataset_1.zip [file Mapre2_set_D.pdf › Supplemental Dataset 1/D-mRNA_rhythm_translation_rhyth/Mapre2_set_D.pdf]

**March7**

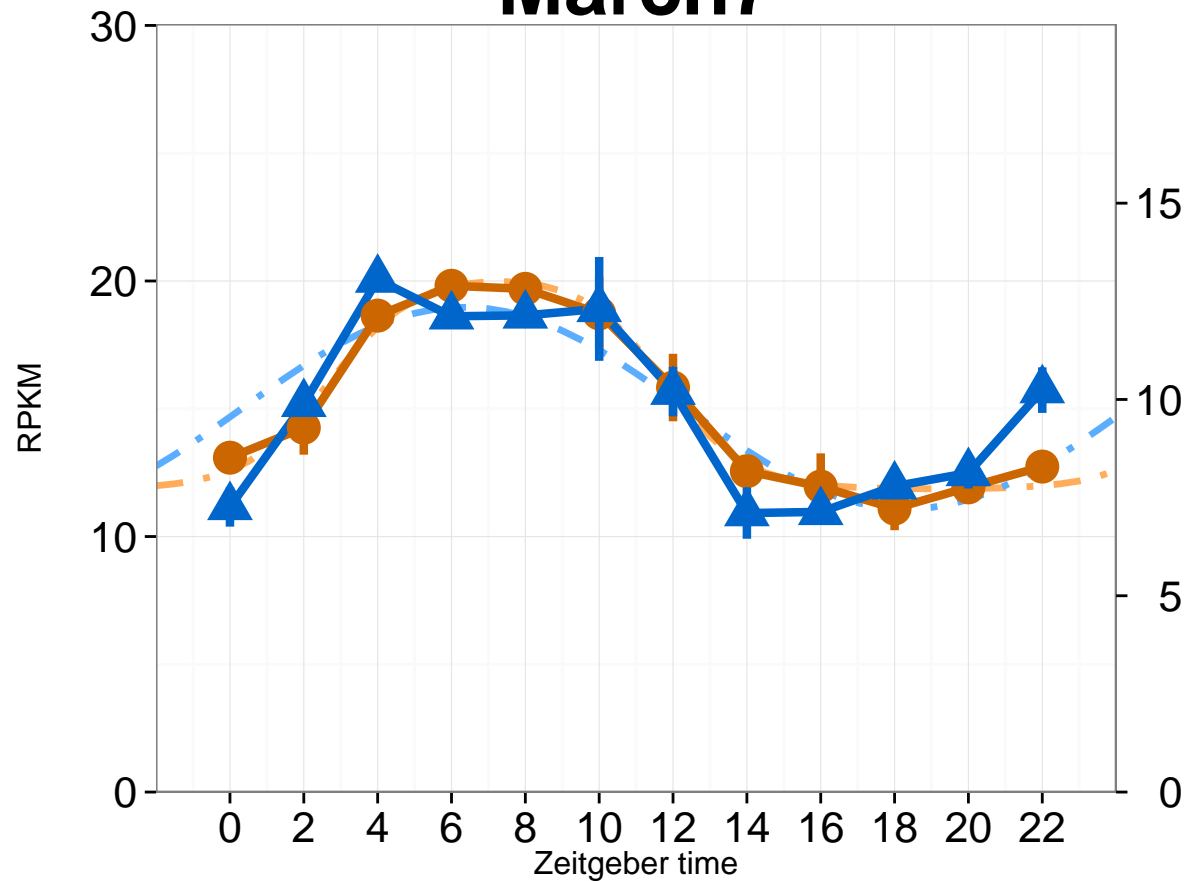

**March7**

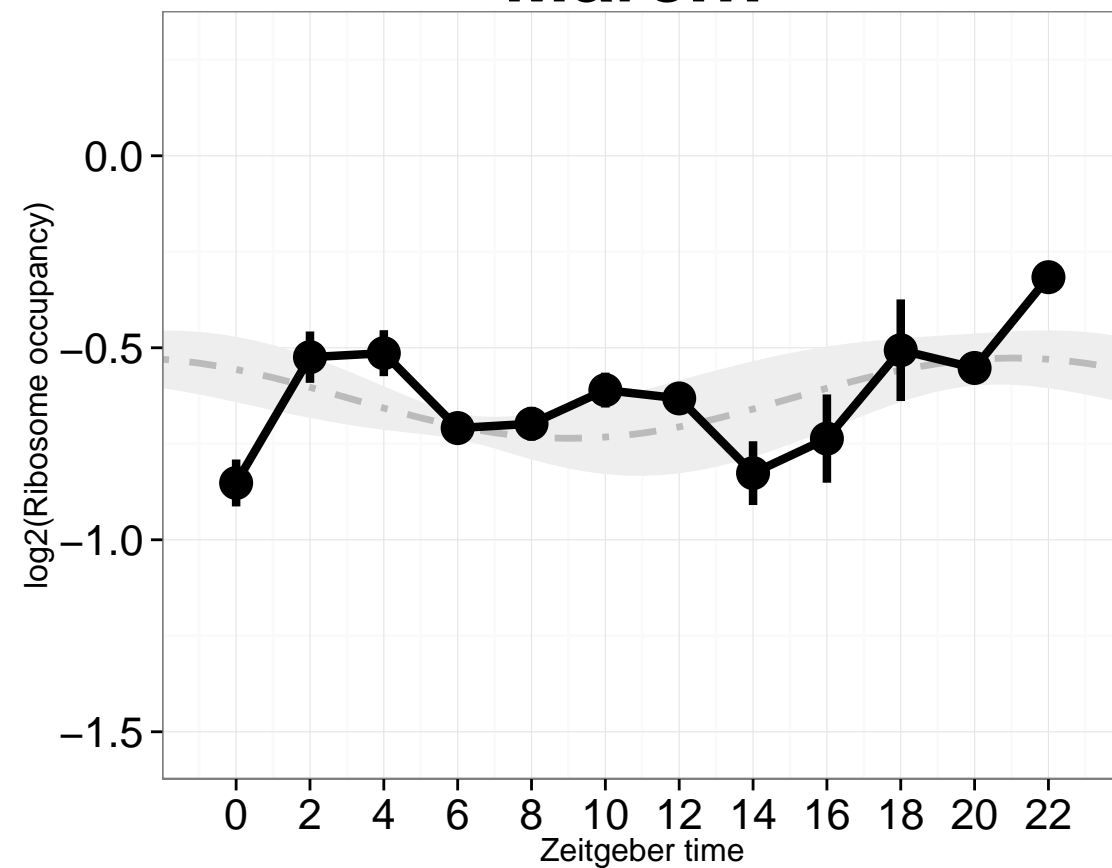

Supplement: SuppDataset_1.zip [file March7_set_D.pdf › Supplemental Dataset 1/D-mRNA_rhythm_translation_rhyth/March7_set_D.pdf]

# MarcksI1

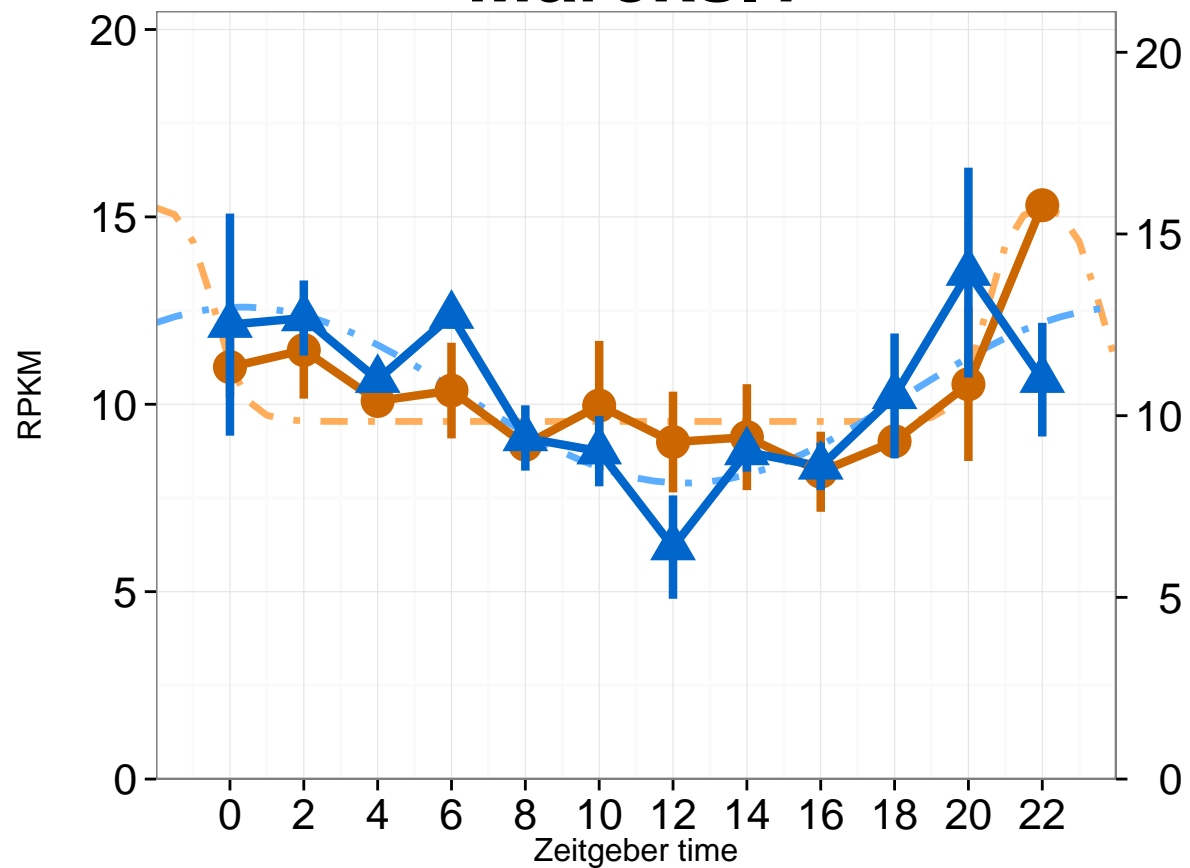

# MarcksI1

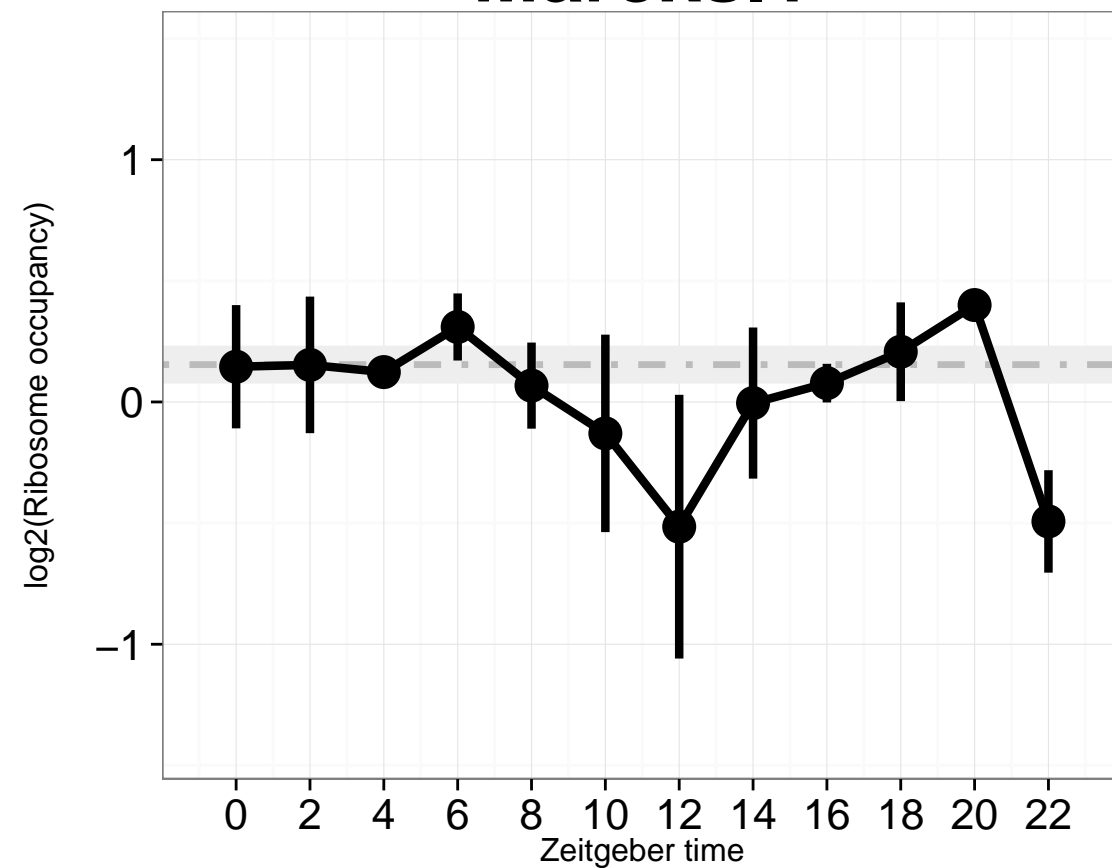

Supplement: SuppDataset_1.zip [file Marcksl1_set_D.pdf › Supplemental Dataset 1/D-mRNA_rhythm_translation_rhyth/Marcksl1_set_D.pdf]

# Mat1a

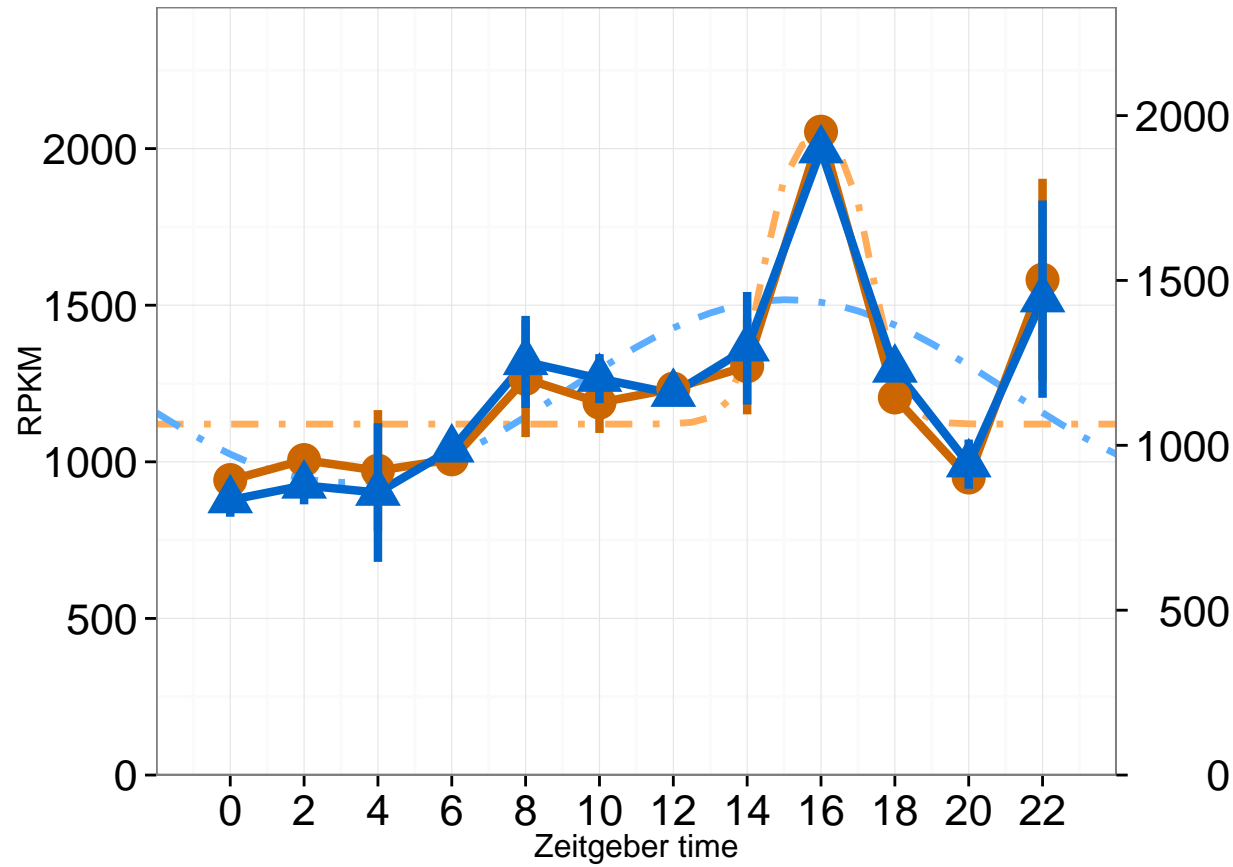

# Mat1a

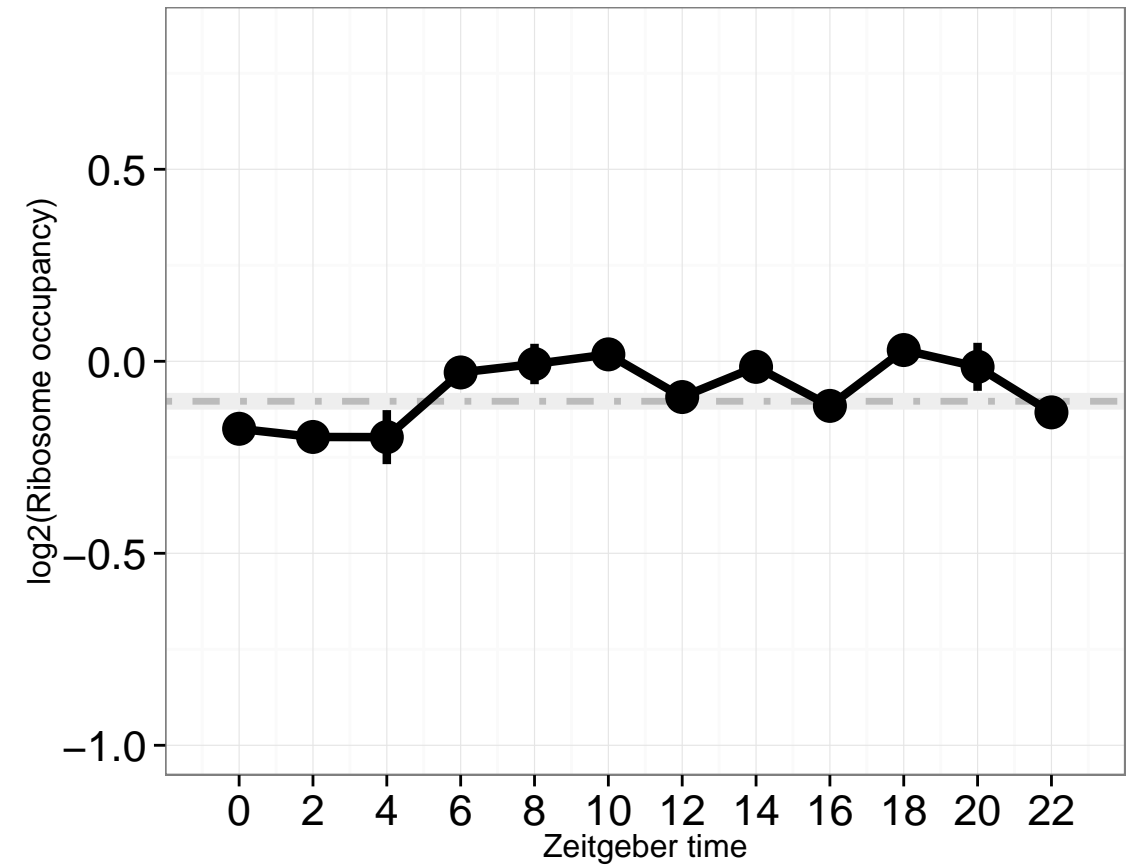

Supplement: SuppDataset_1.zip [file Mat1a_set_D.pdf › Supplemental Dataset 1/D-mRNA_rhythm_translation_rhyth/Mat1a_set_D.pdf]

## Mbd1

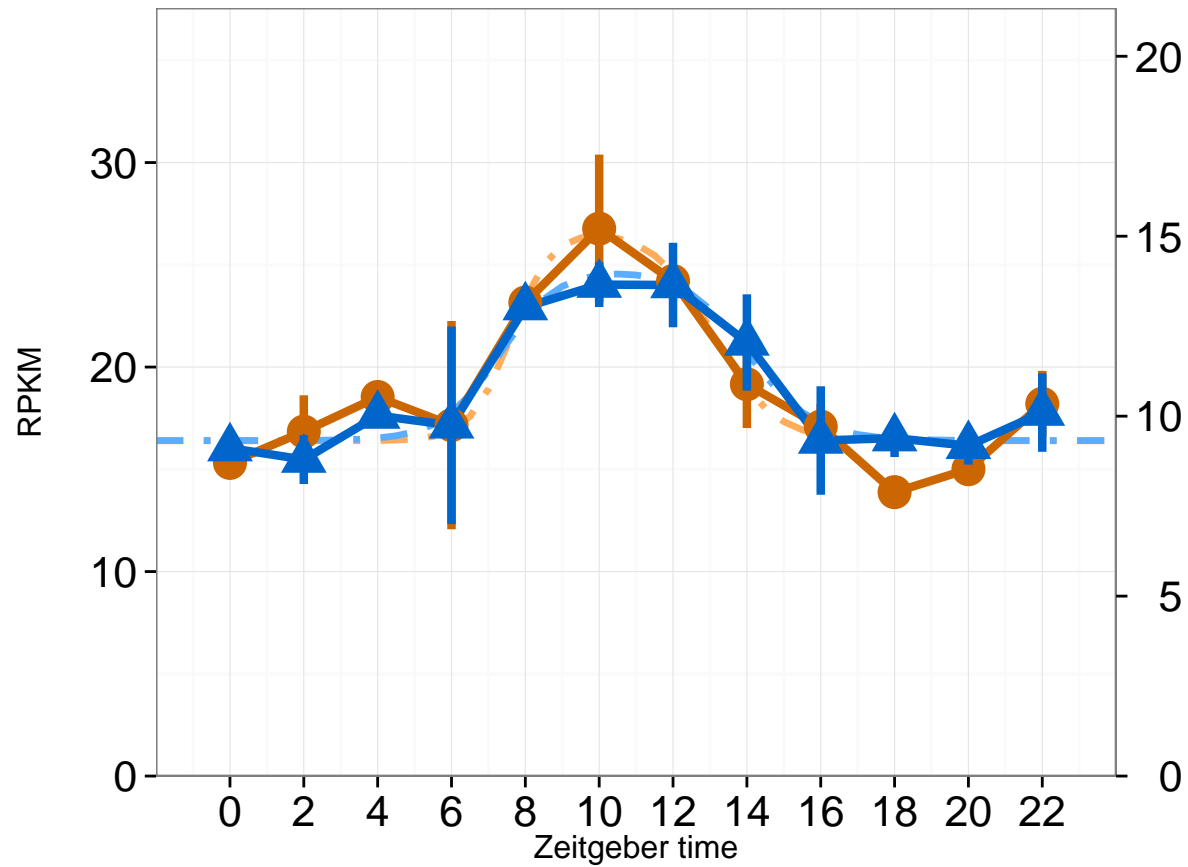

## Mbd1

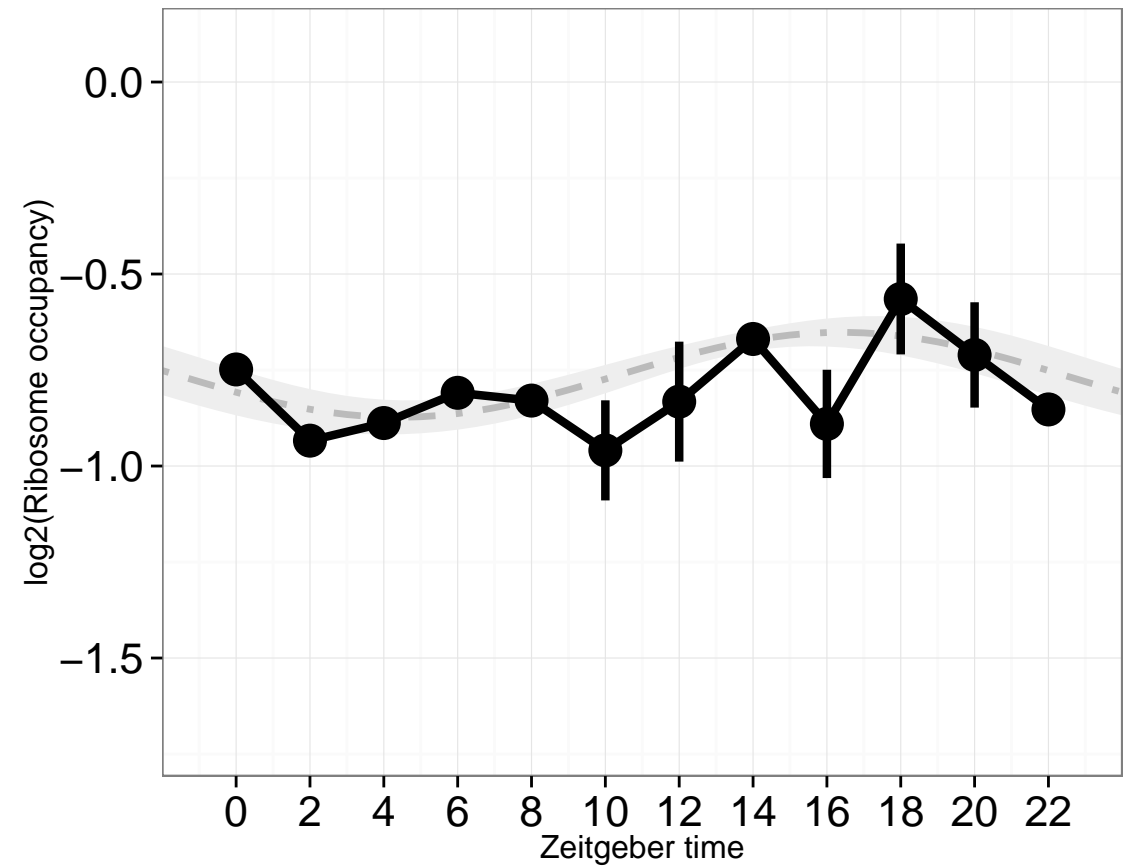

Supplement: SuppDataset_1.zip [file Mbd1_set_D.pdf › Supplemental Dataset 1/D-mRNA_rhythm_translation_rhyth/Mbd1_set_D.pdf]

# Mcc

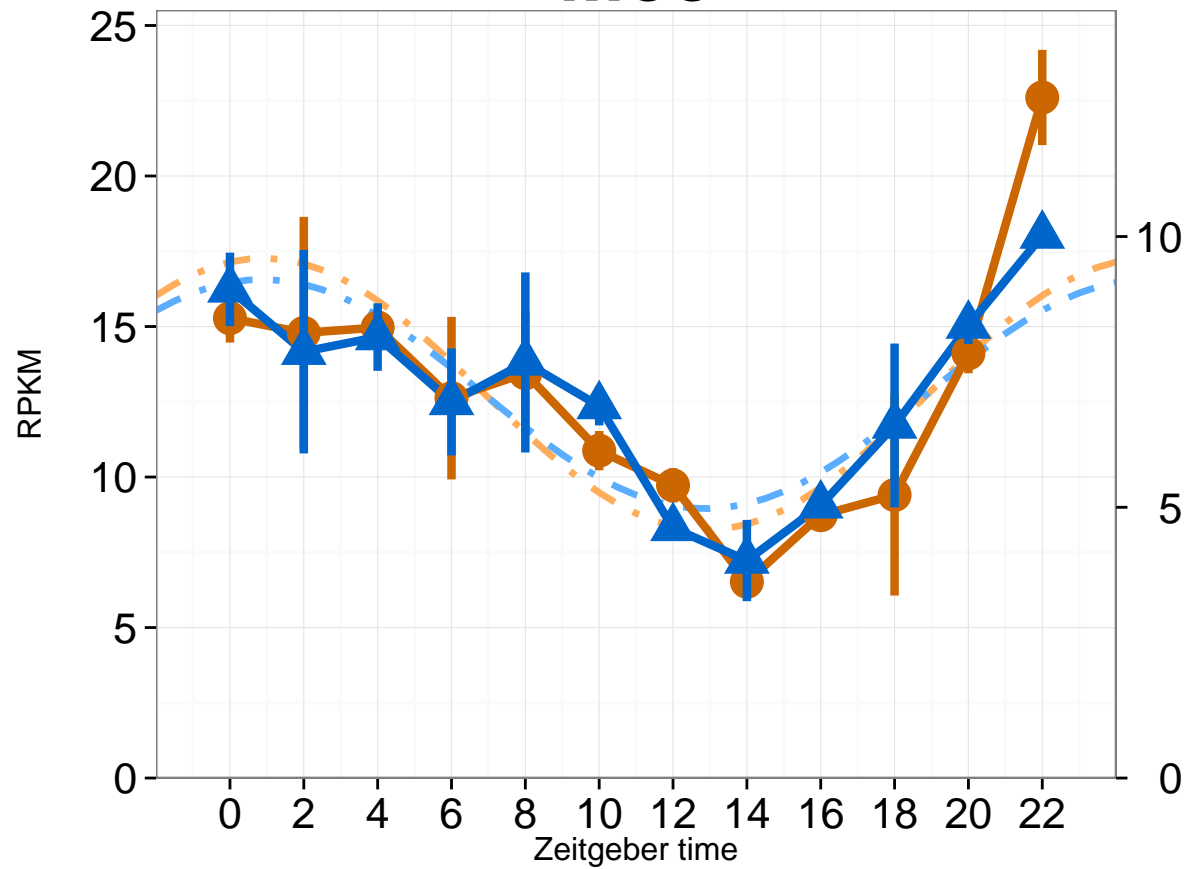

# Mcc

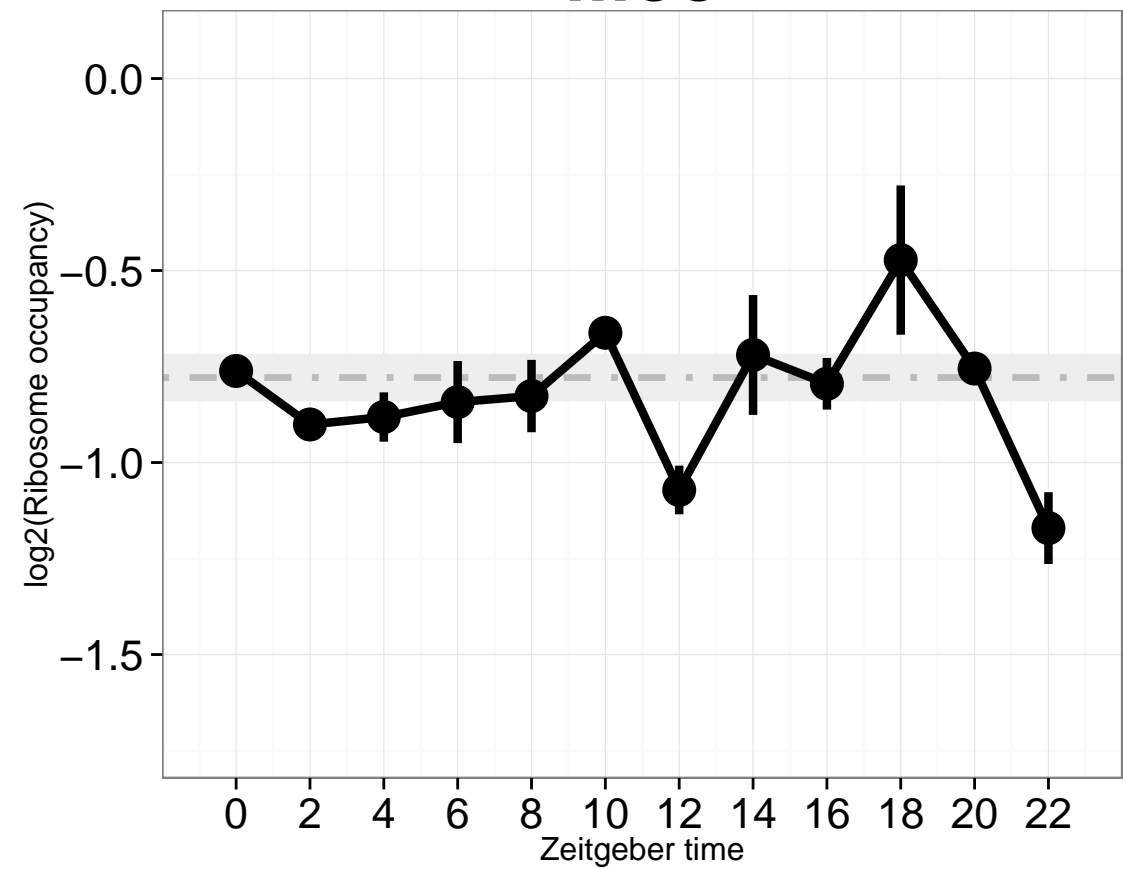

Supplement: SuppDataset_1.zip [file Mcc_set_D.pdf › Supplemental Dataset 1/D-mRNA_rhythm_translation_rhyth/Mcc_set_D.pdf]

## Mcm10

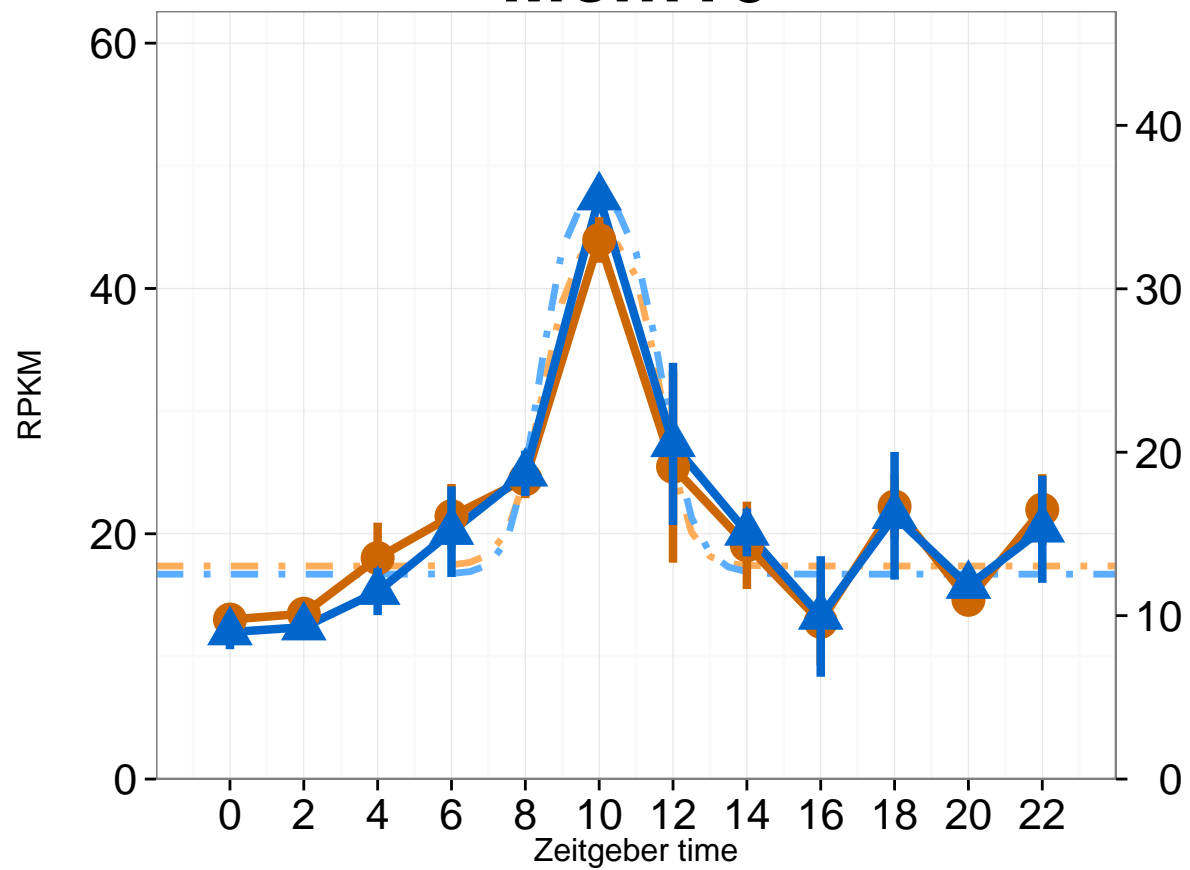

## Mcm10

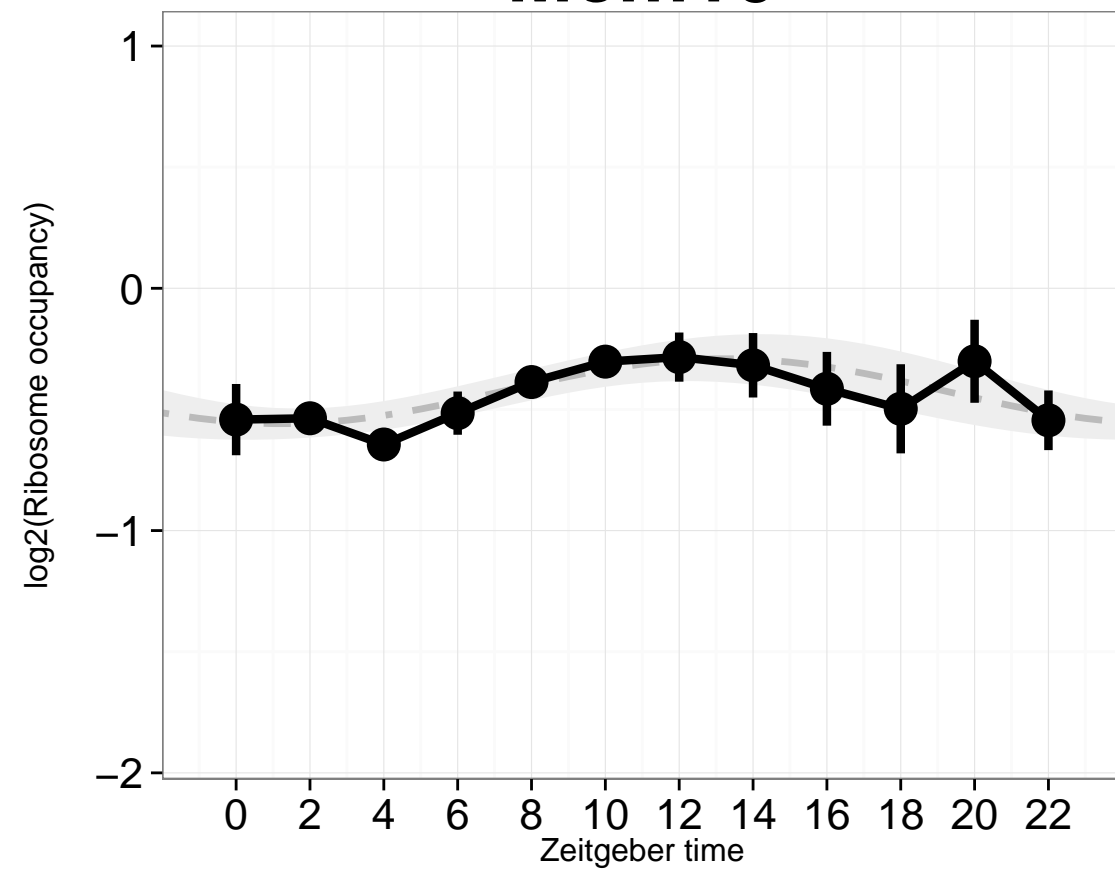

Supplement: SuppDataset_1.zip [file Mcm10_set_D.pdf › Supplemental Dataset 1/D-mRNA_rhythm_translation_rhyth/Mcm10_set_D.pdf]

## Mcu

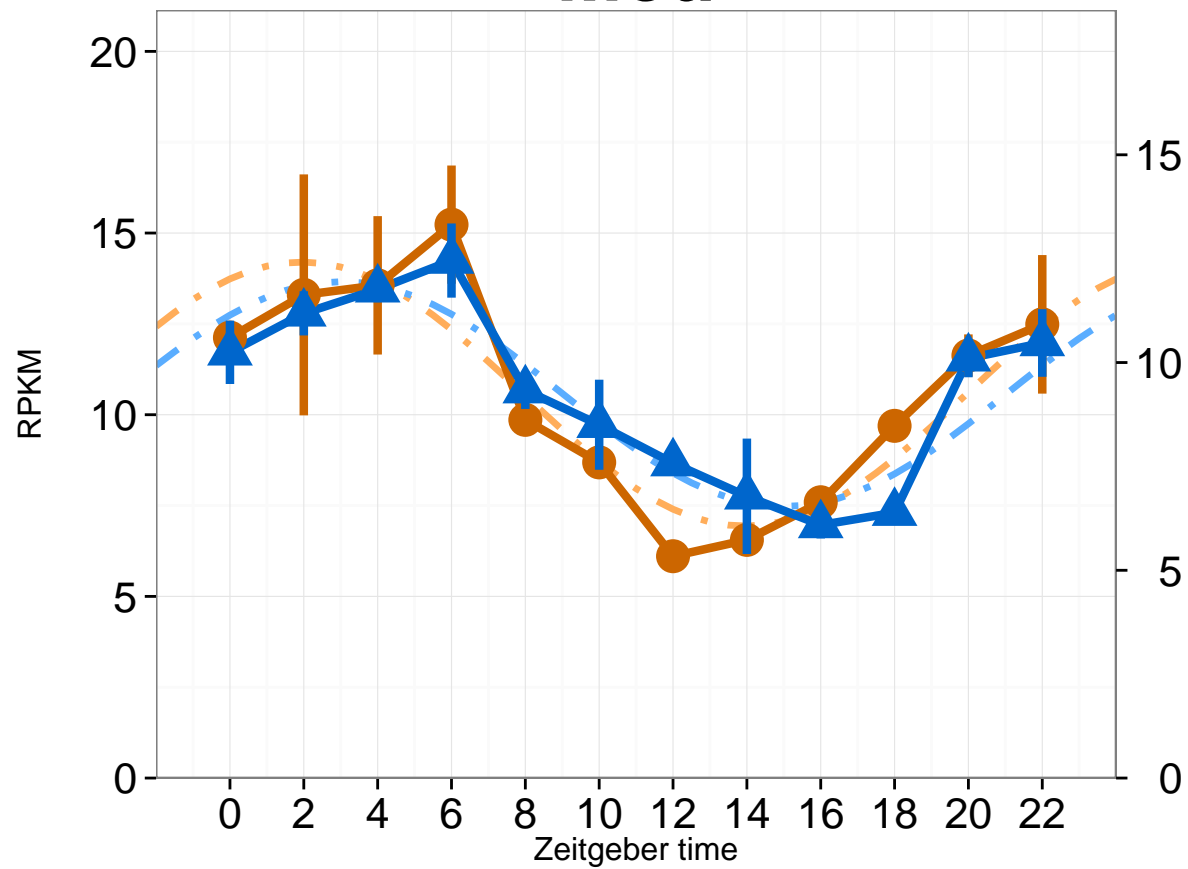

## Mcu

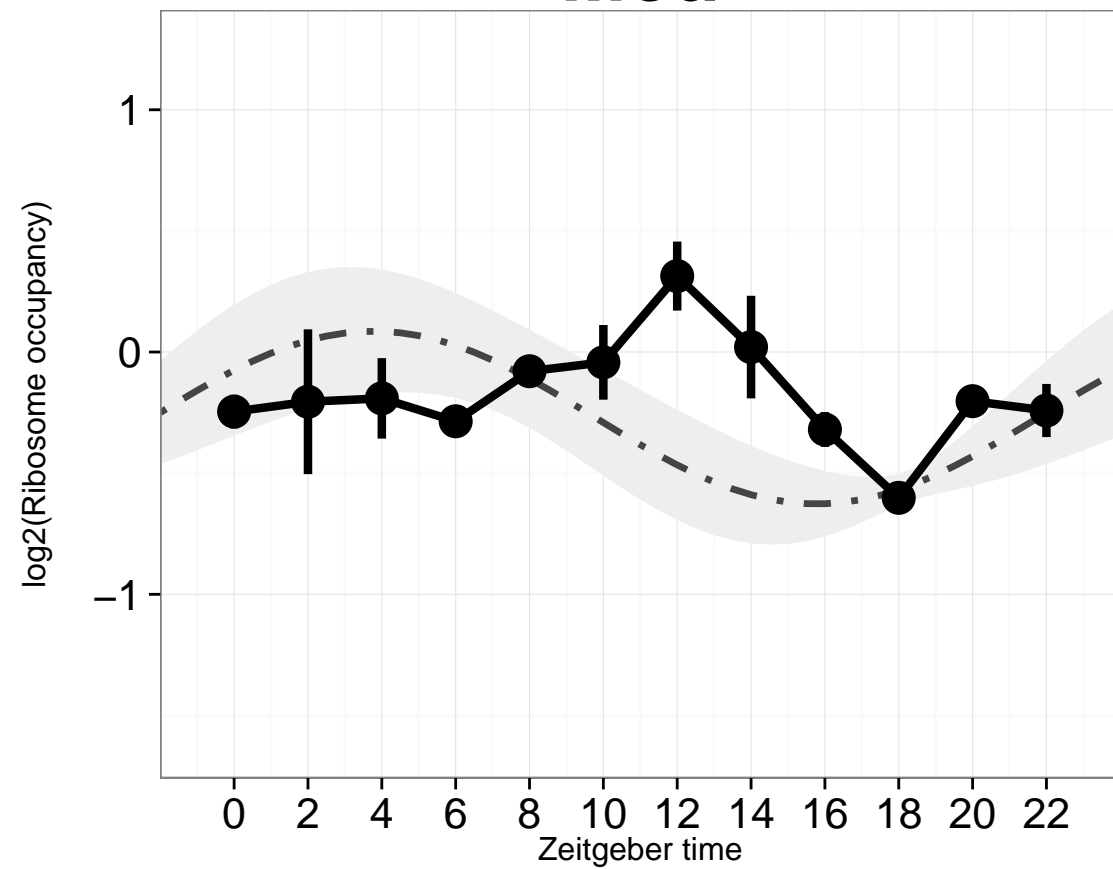

Supplement: SuppDataset_1.zip [file Mcu_set_D.pdf › Supplemental Dataset 1/D-mRNA_rhythm_translation_rhyth/Mcu_set_D.pdf]

# Med12l

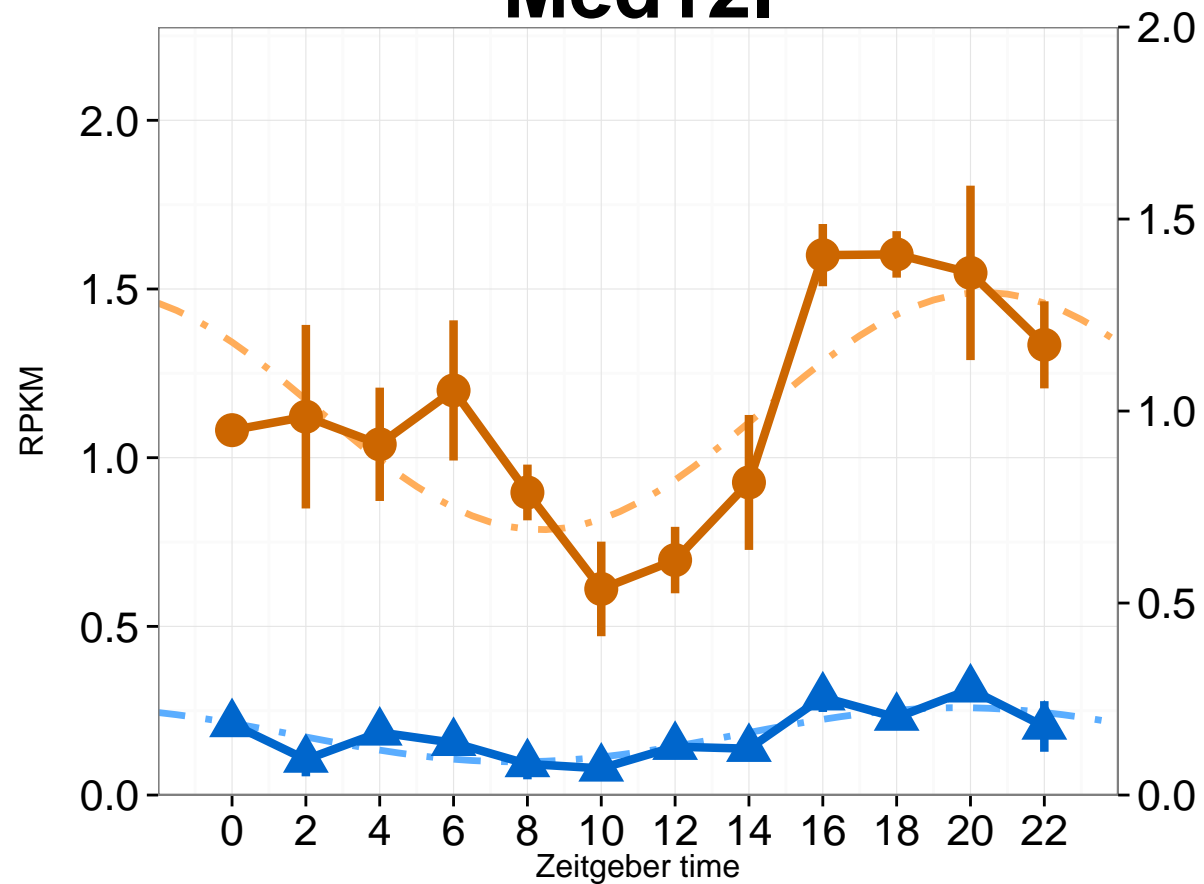

# Med12l

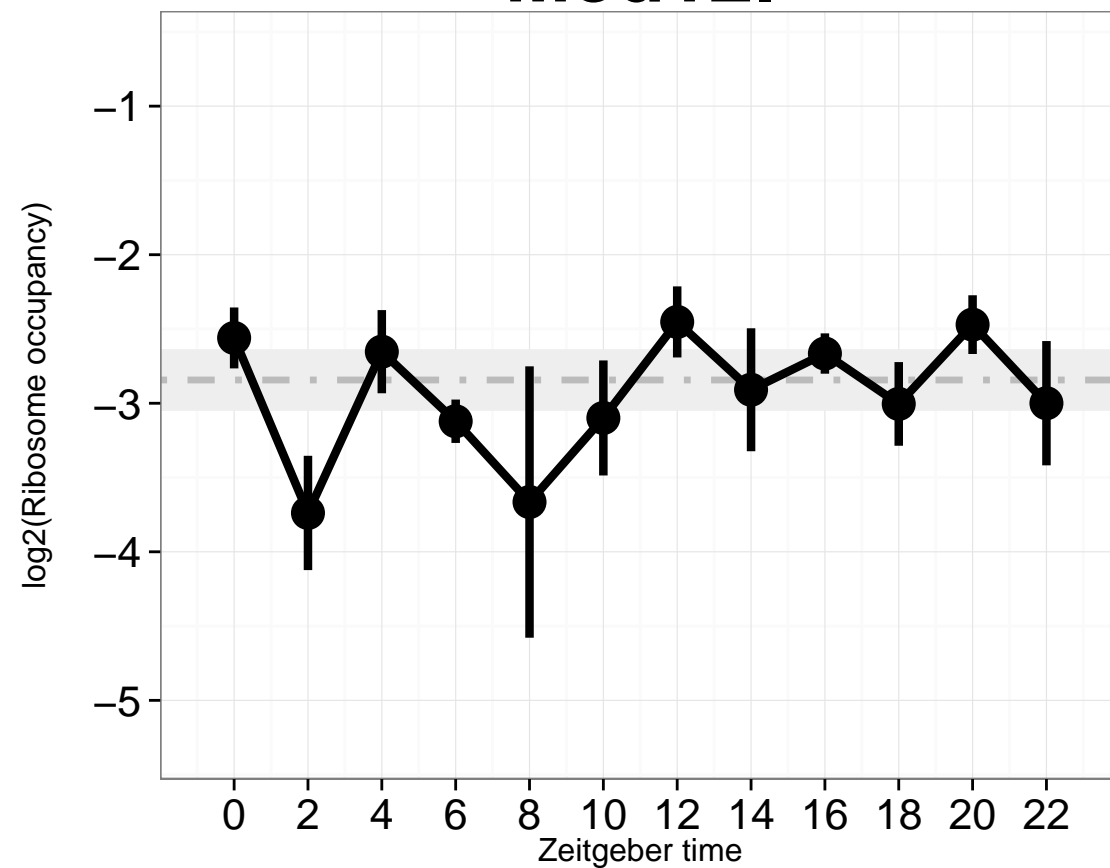

Supplement: SuppDataset_1.zip [file Med12l_set_D.pdf › Supplemental Dataset 1/D-mRNA_rhythm_translation_rhyth/Med12l_set_D.pdf]

## Meiob

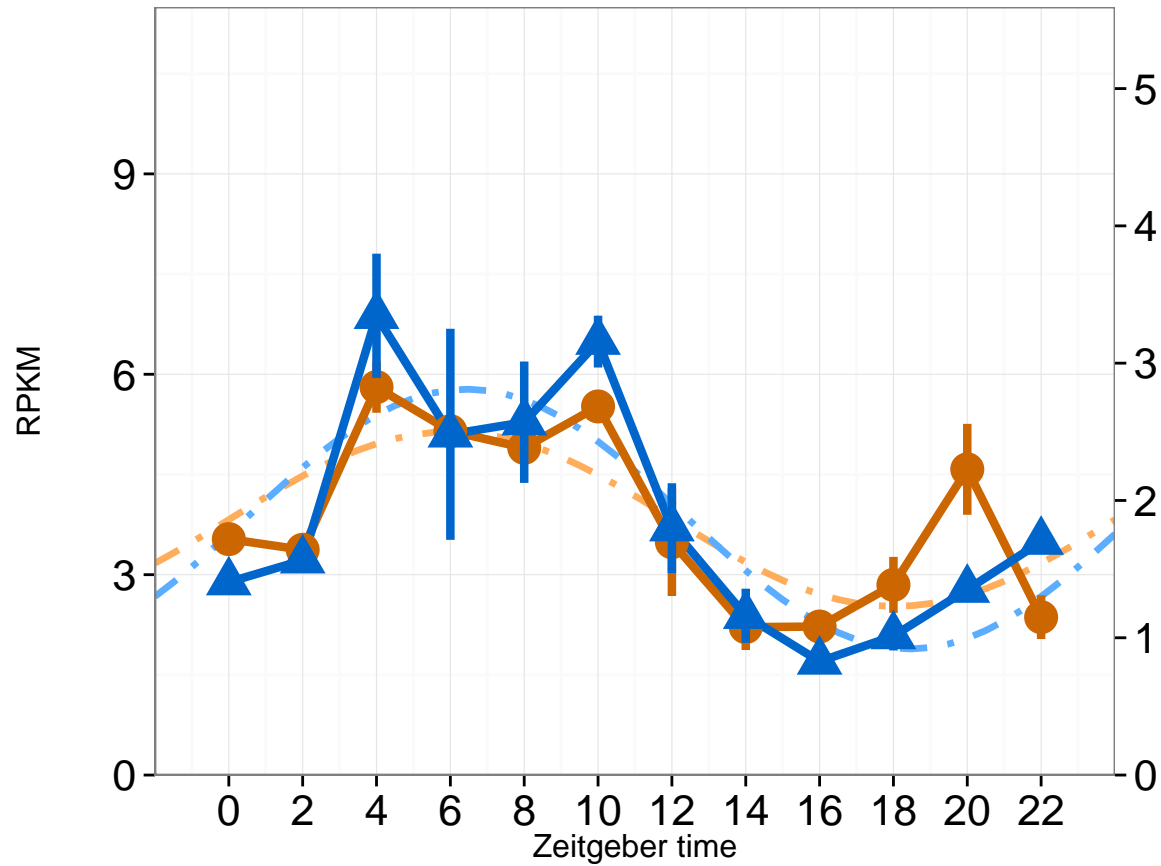

## Meiob

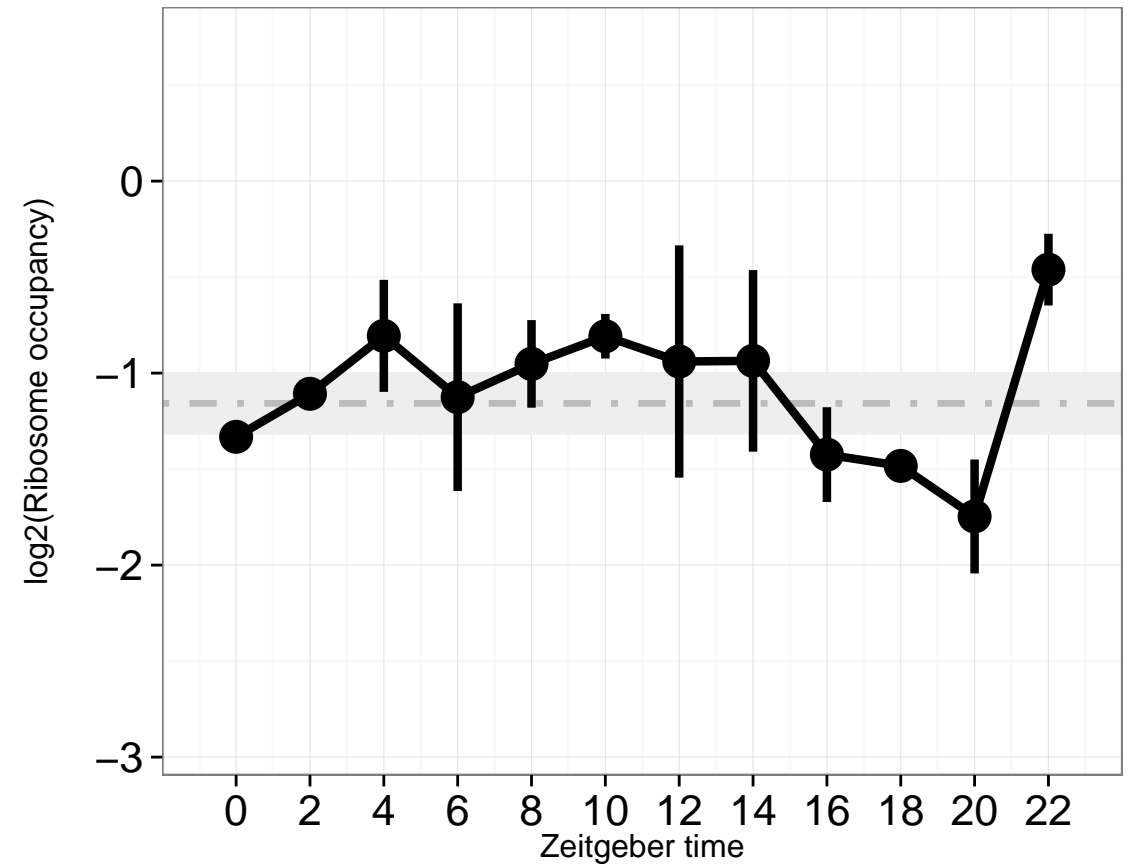

Supplement: SuppDataset_1.zip [file Meiob_set_D.pdf › Supplemental Dataset 1/D-mRNA_rhythm_translation_rhyth/Meiob_set_D.pdf]

# Mfhas1

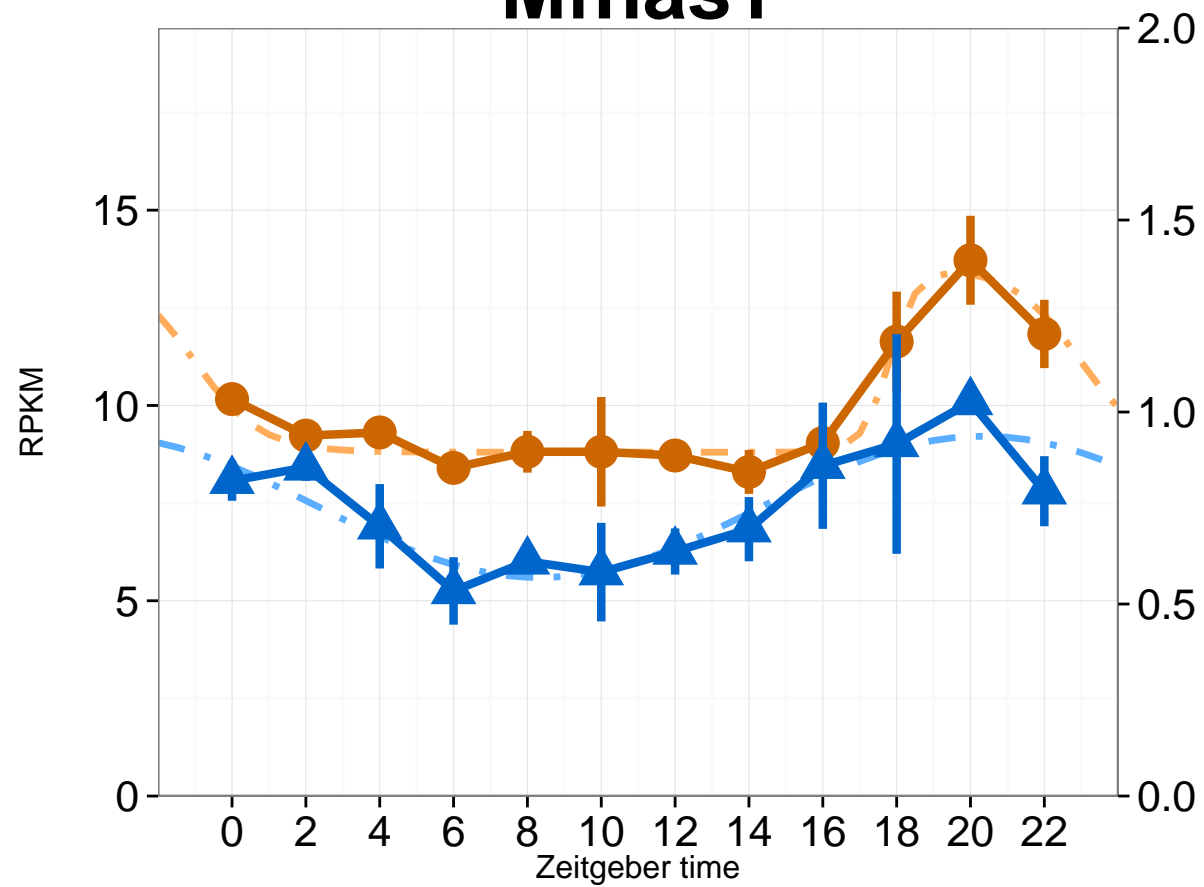

# Mfhas1

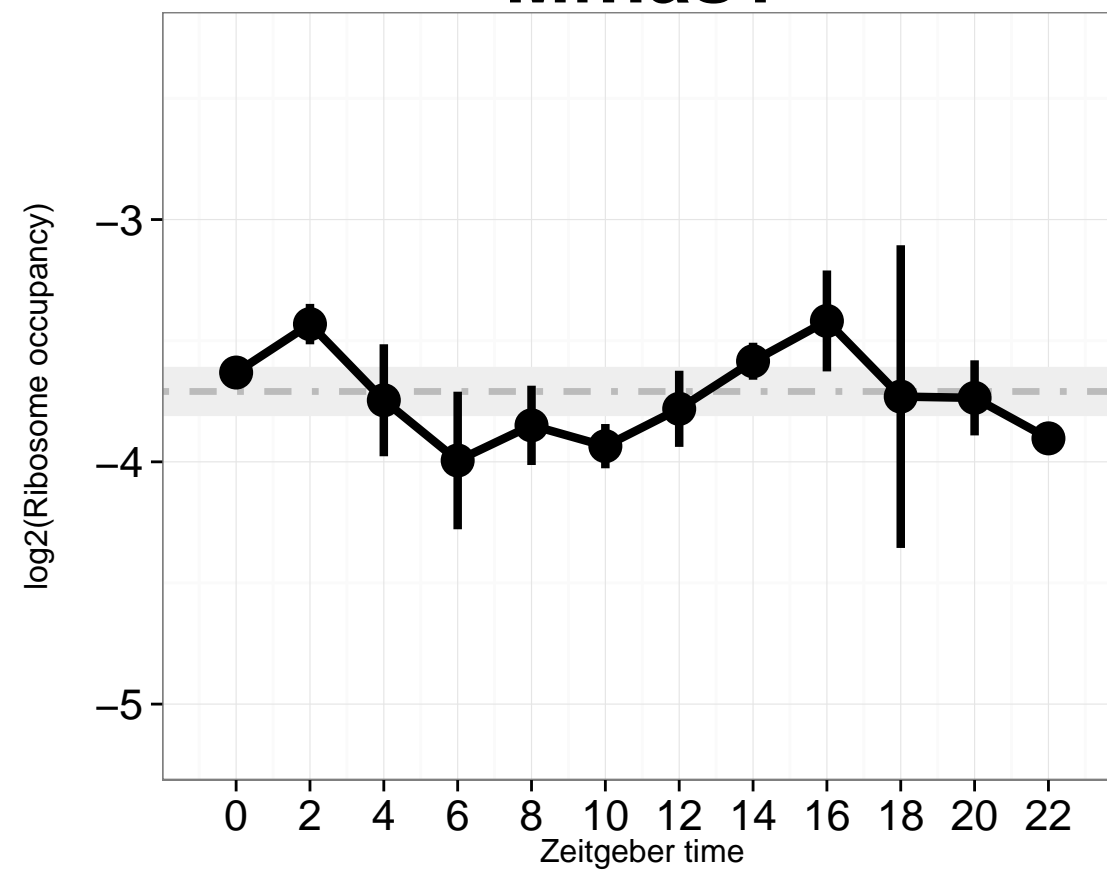

Supplement: SuppDataset_1.zip [file Mfhas1_set_D.pdf › Supplemental Dataset 1/D-mRNA_rhythm_translation_rhyth/Mfhas1_set_D.pdf]

# Mfsd2a

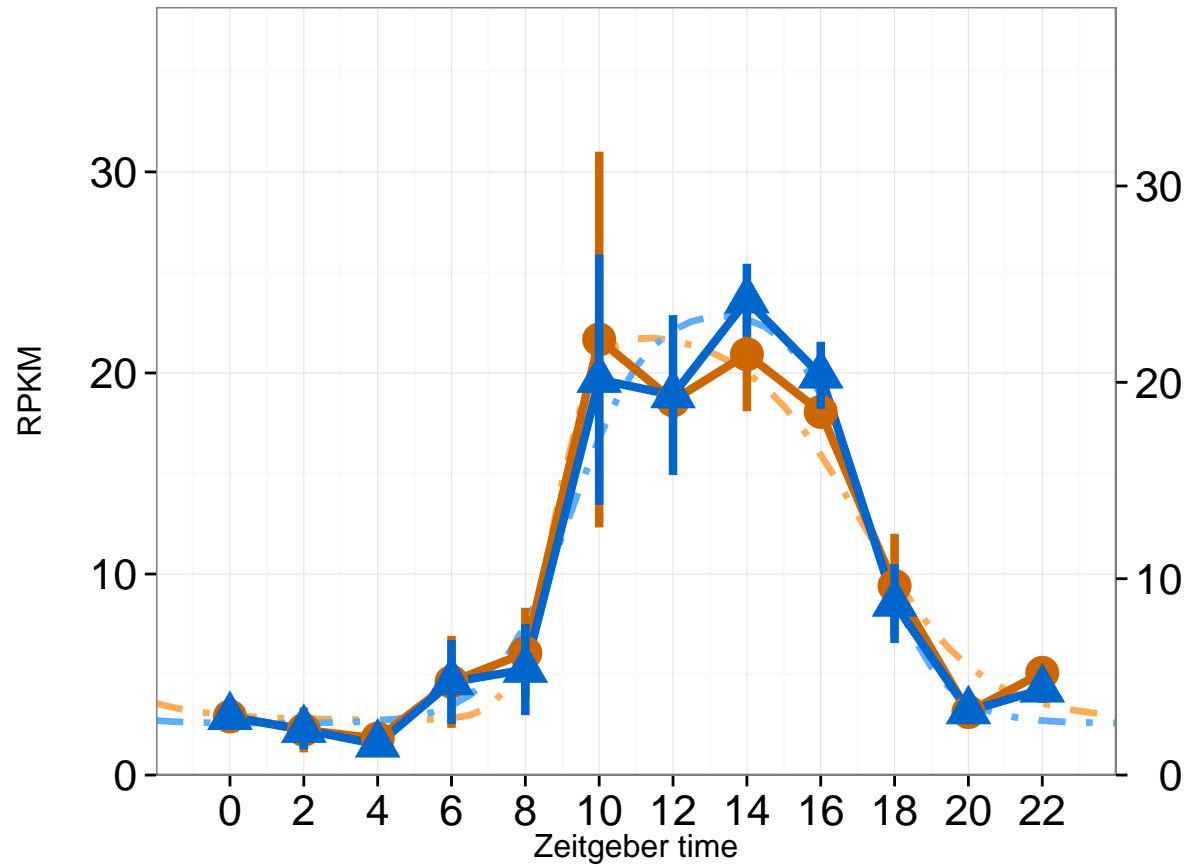

# Mfsd2a

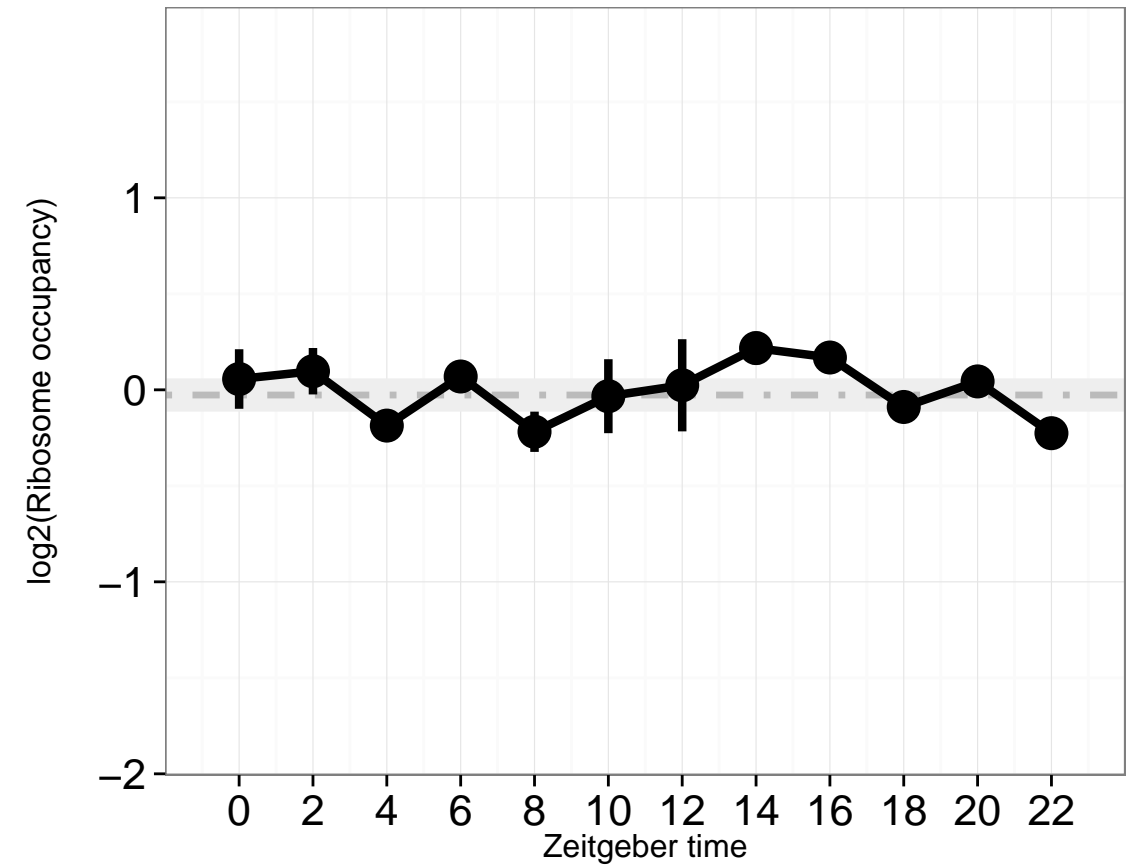

Supplement: SuppDataset_1.zip [file Mfsd2a_set_D.pdf › Supplemental Dataset 1/D-mRNA_rhythm_translation_rhyth/Mfsd2a_set_D.pdf]

# Mgat2

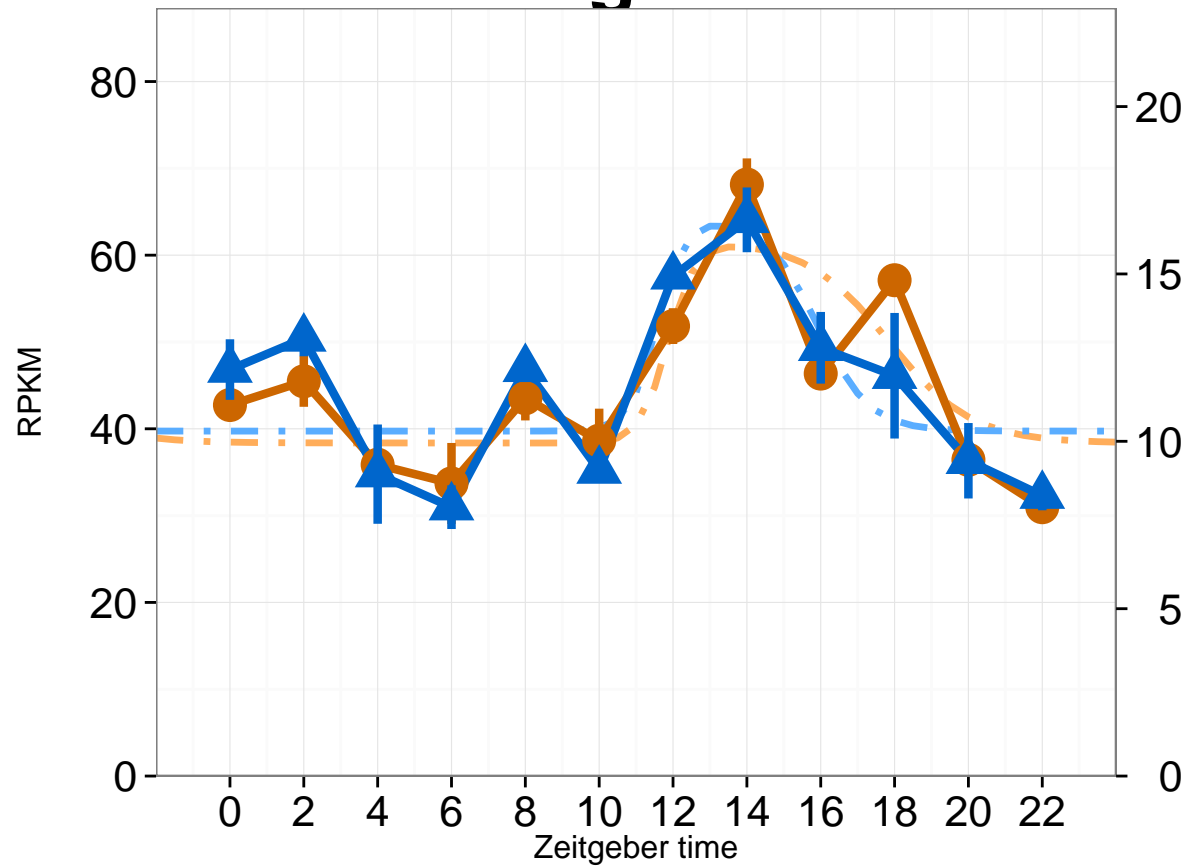

# Mgat2

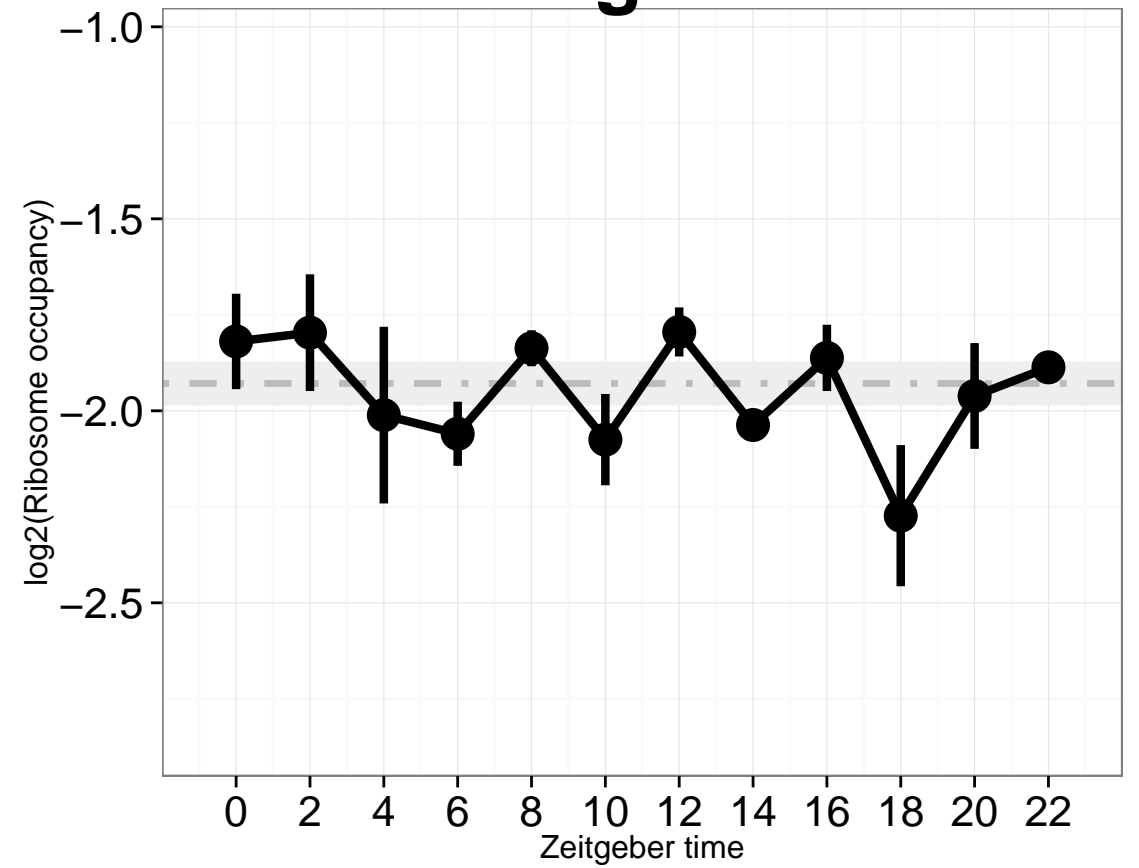

Supplement: SuppDataset_1.zip [file Mgat2_set_D.pdf › Supplemental Dataset 1/D-mRNA_rhythm_translation_rhyth/Mgat2_set_D.pdf]

## MgII

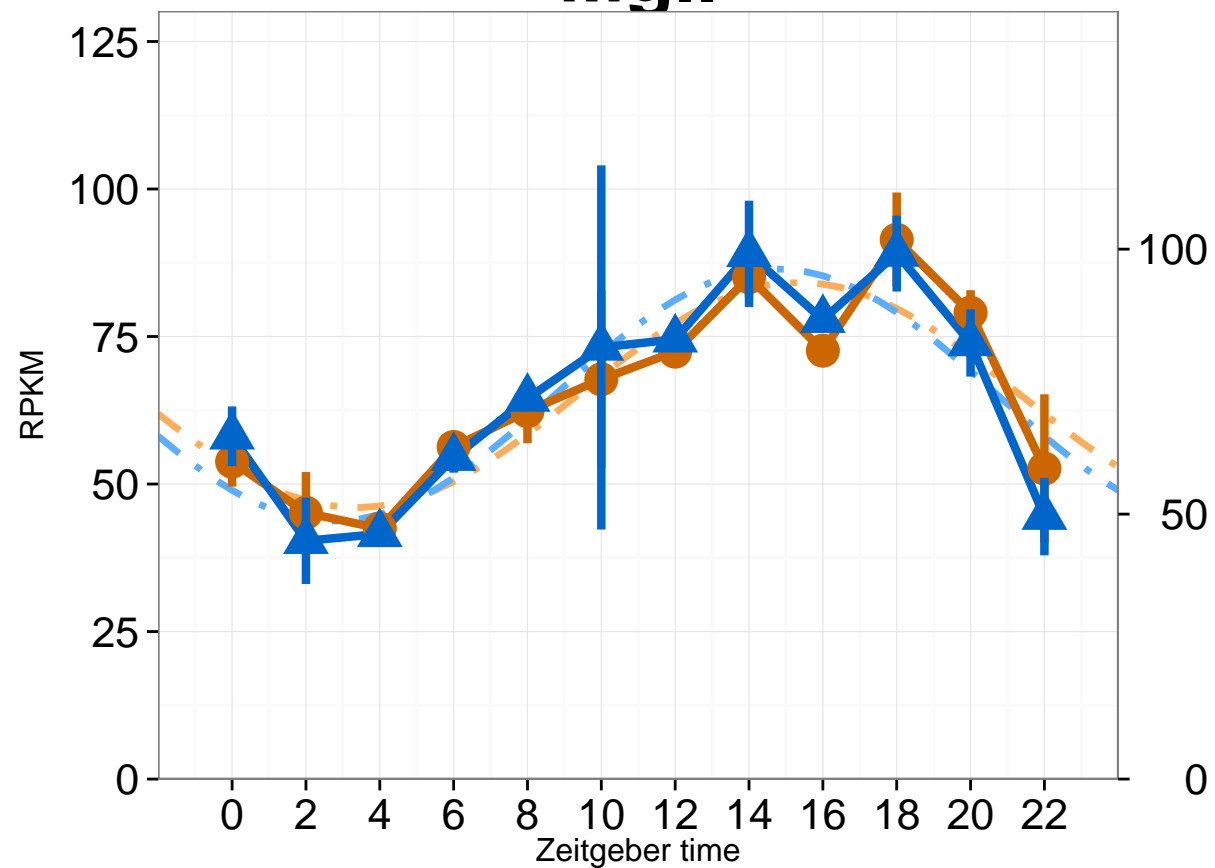

## MgII

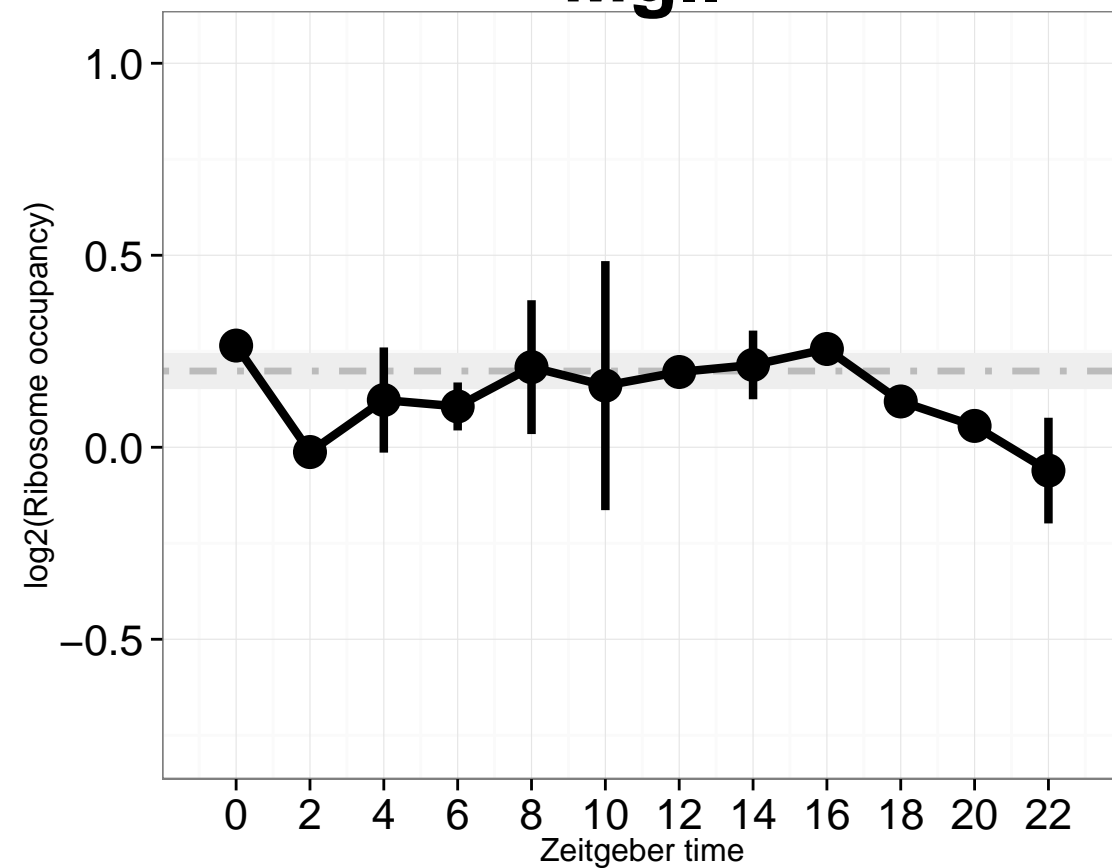

Supplement: SuppDataset_1.zip [file Mgll_set_D.pdf › Supplemental Dataset 1/D-mRNA_rhythm_translation_rhyth/Mgll_set_D.pdf]

## Mical2

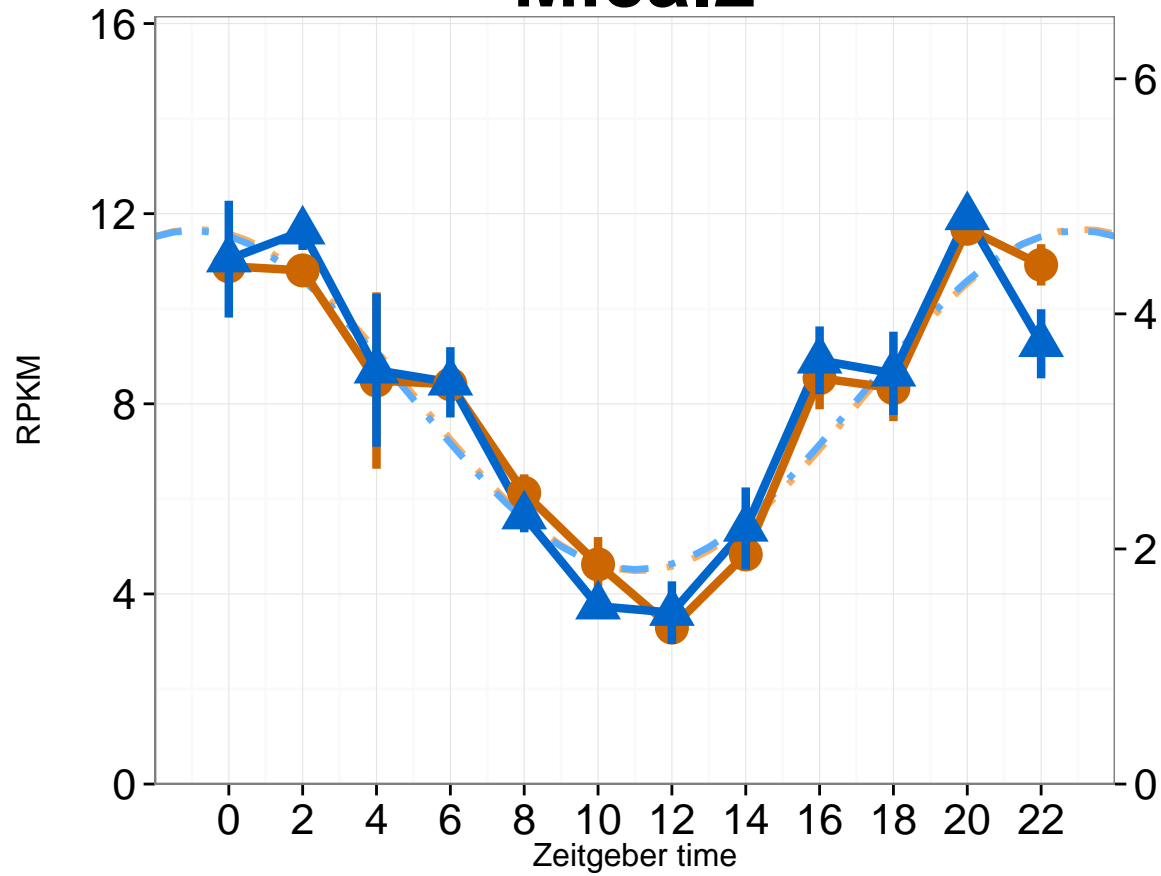

## Mical2

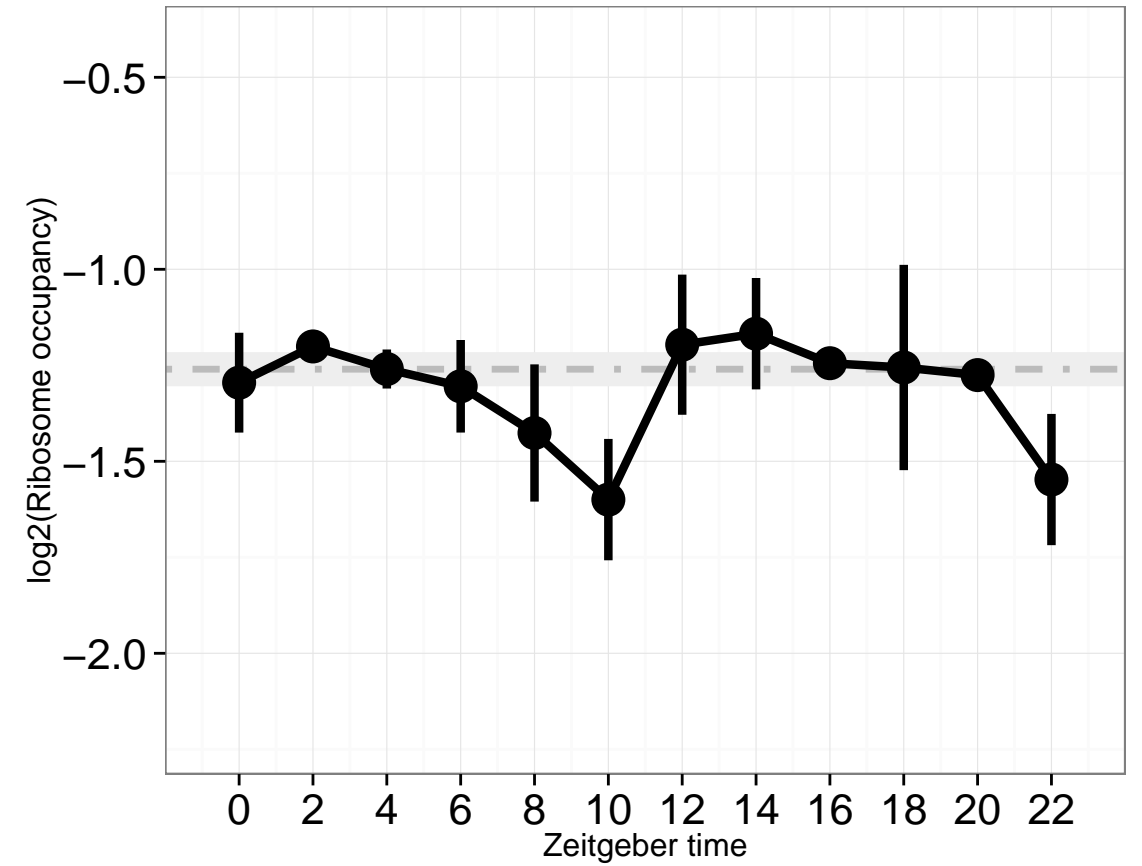

Supplement: SuppDataset_1.zip [file Mical2_set_D.pdf › Supplemental Dataset 1/D-mRNA_rhythm_translation_rhyth/Mical2_set_D.pdf]

# Mid1ip1

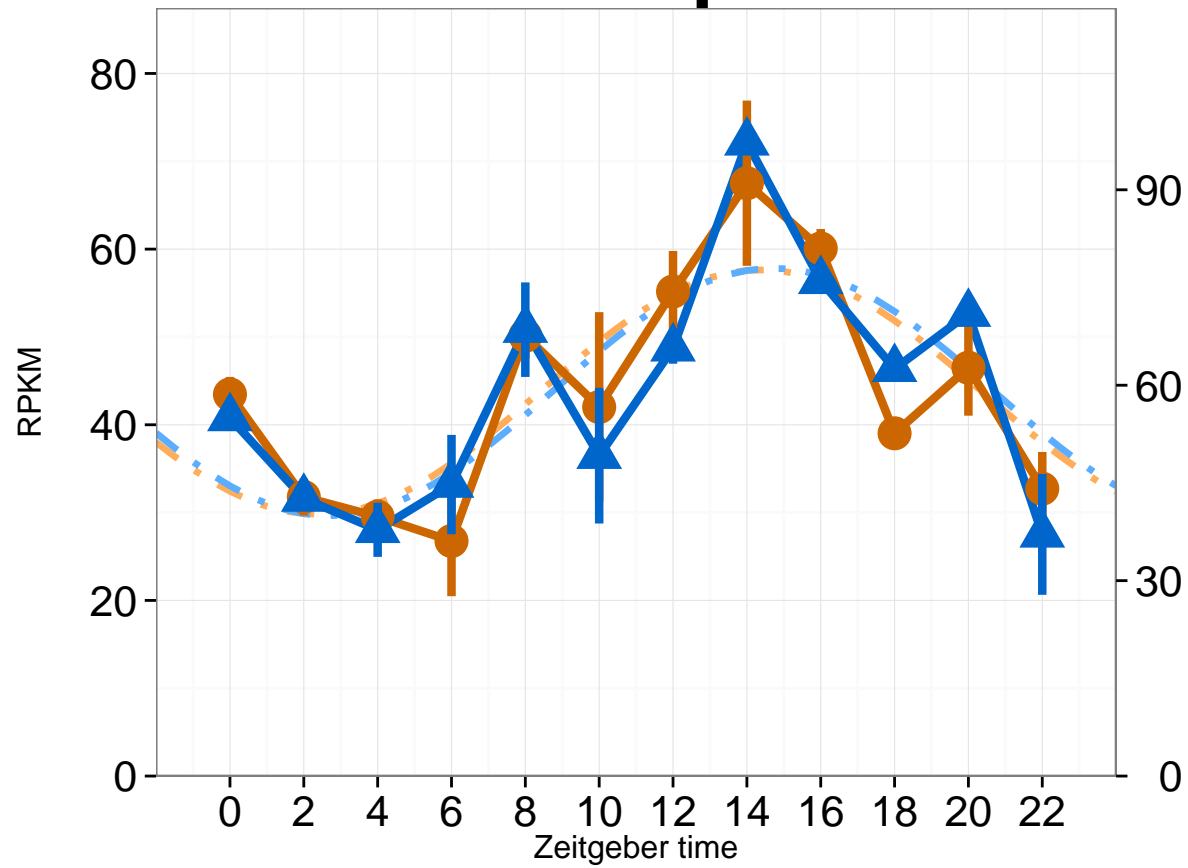

# Mid1ip1

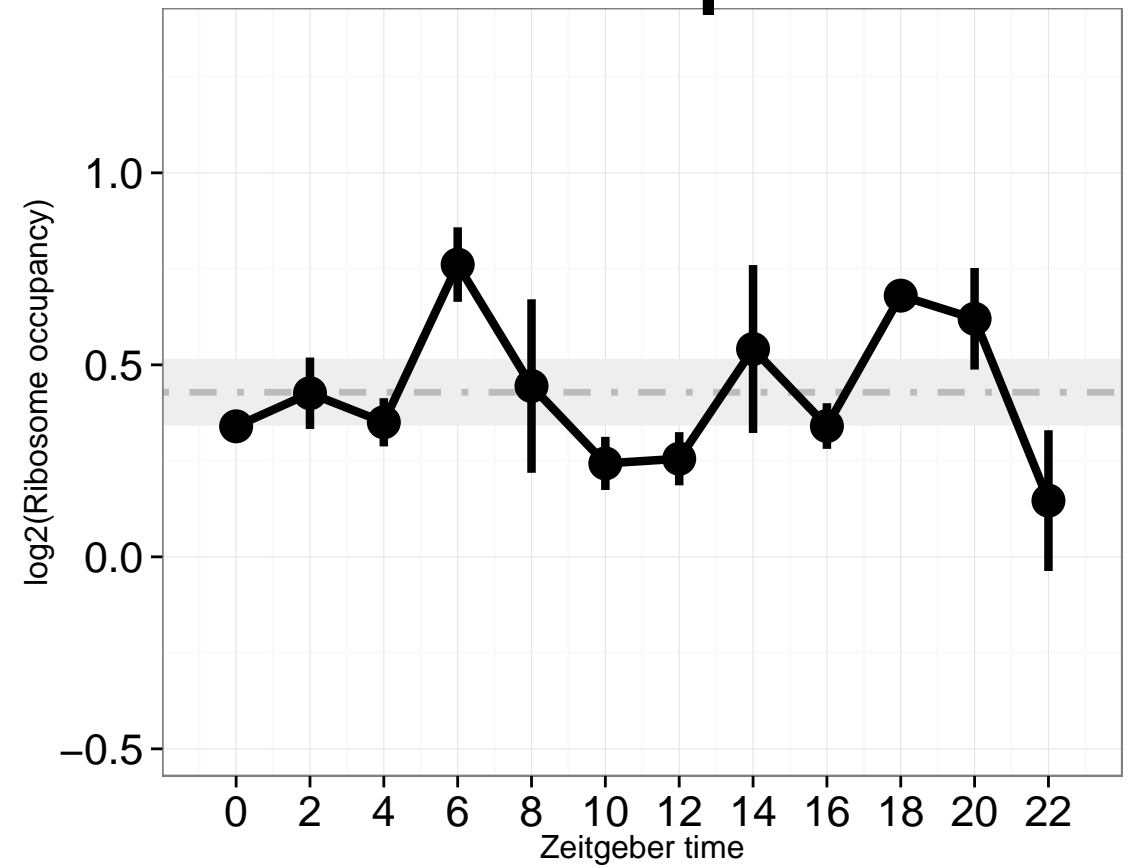

Supplement: SuppDataset_1.zip [file Mid1ip1_set_D.pdf › Supplemental Dataset 1/D-mRNA_rhythm_translation_rhyth/Mid1ip1_set_D.pdf]

## Midn

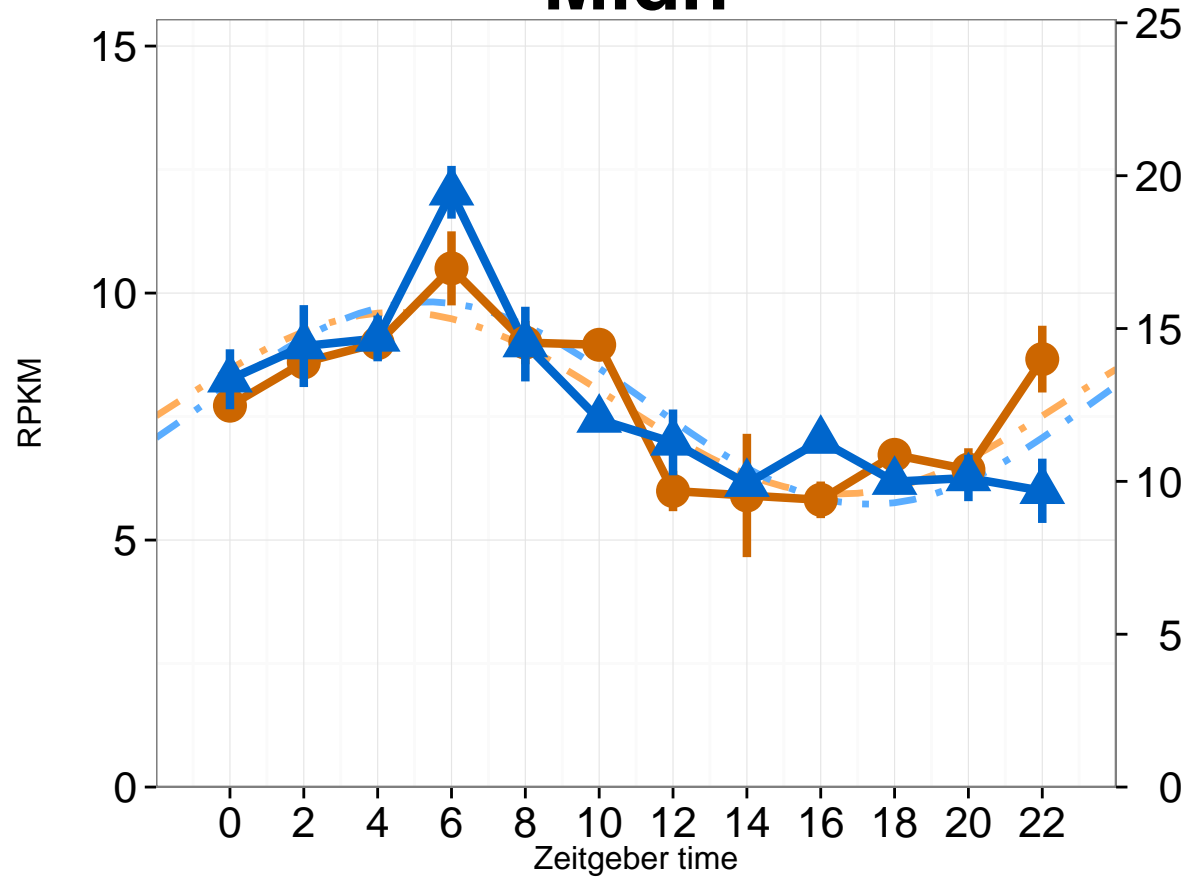

## Midn

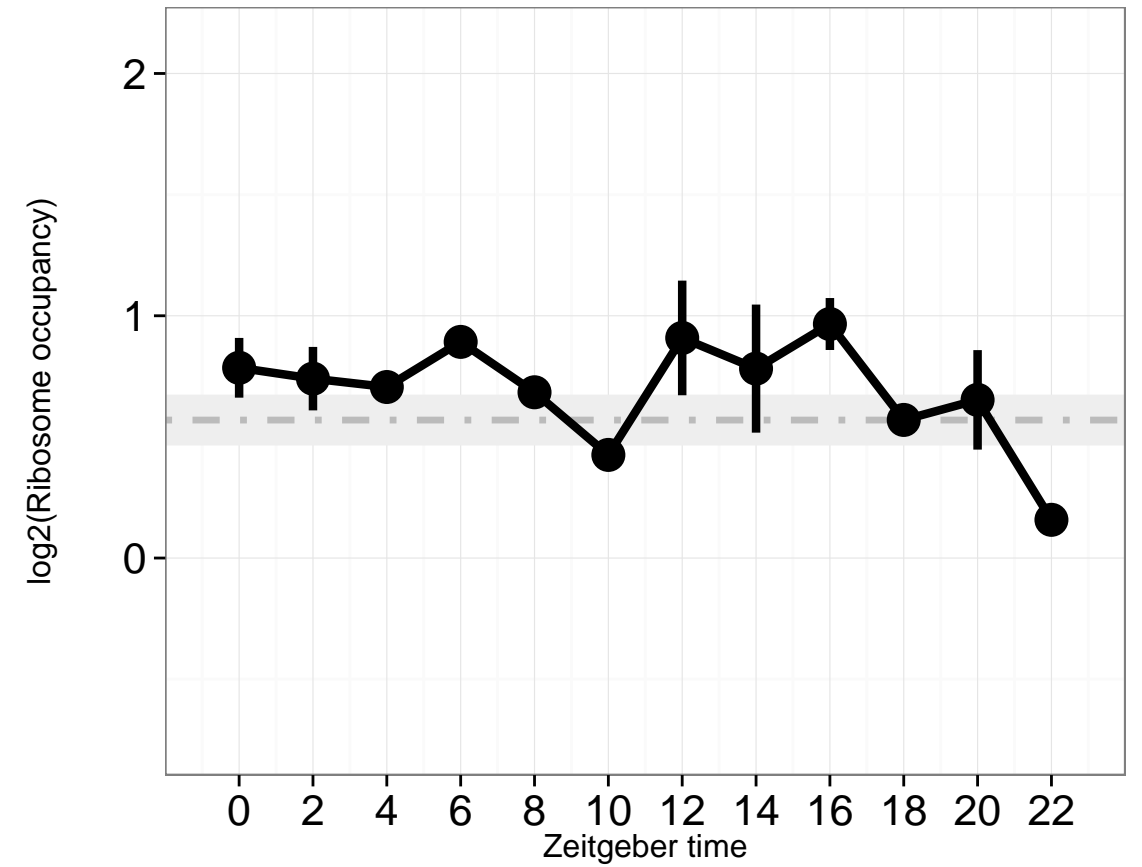

Supplement: SuppDataset_1.zip [file Midn_set_D.pdf › Supplemental Dataset 1/D-mRNA_rhythm_translation_rhyth/Midn_set_D.pdf]

## Mif4gd

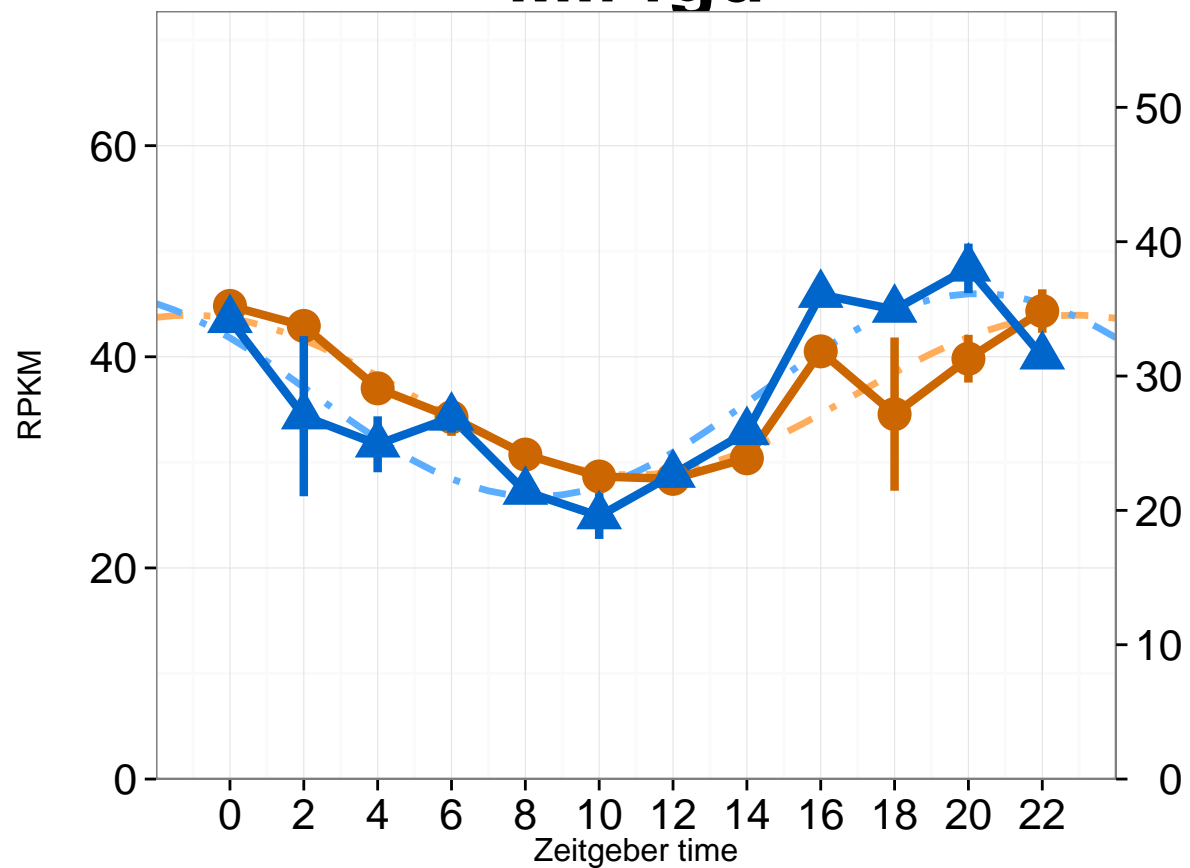

## Mif4gd

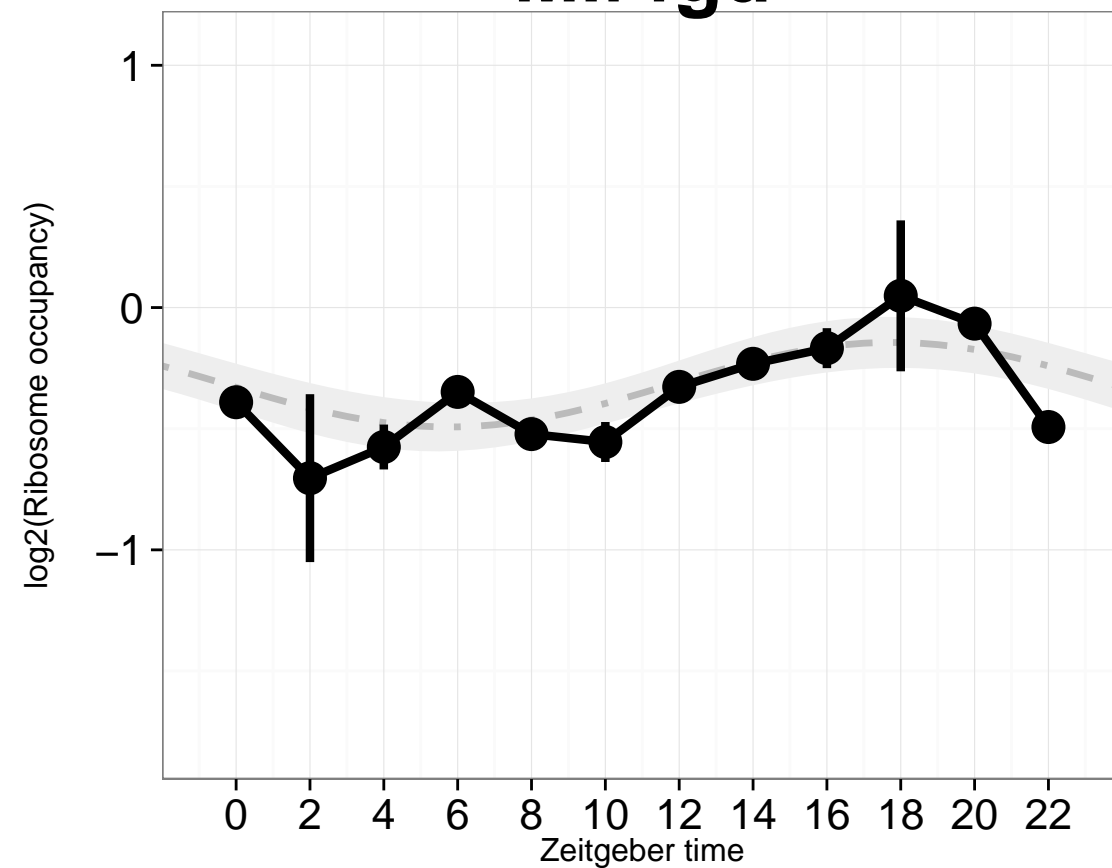

Supplement: SuppDataset_1.zip [file Mif4gd_set_D.pdf › Supplemental Dataset 1/D-mRNA_rhythm_translation_rhyth/Mif4gd_set_D.pdf]

## Mis12

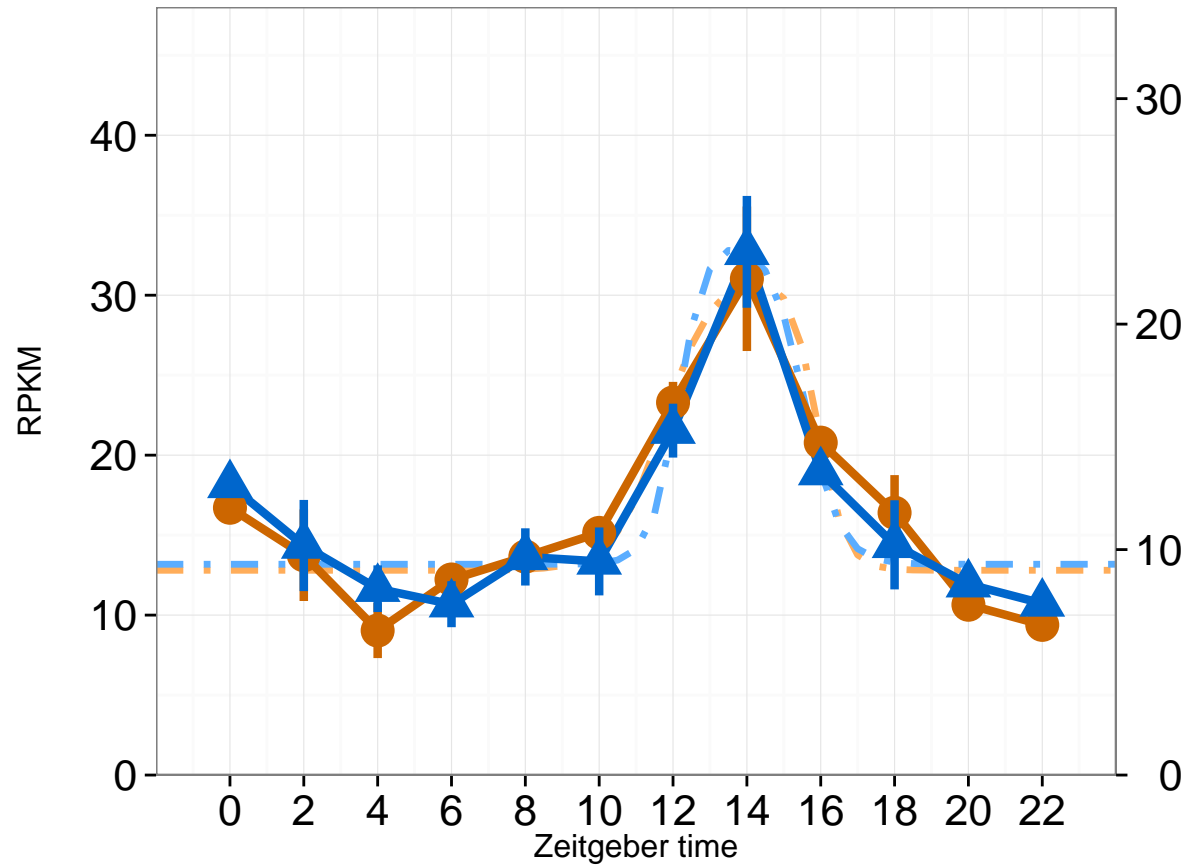

## Mis12

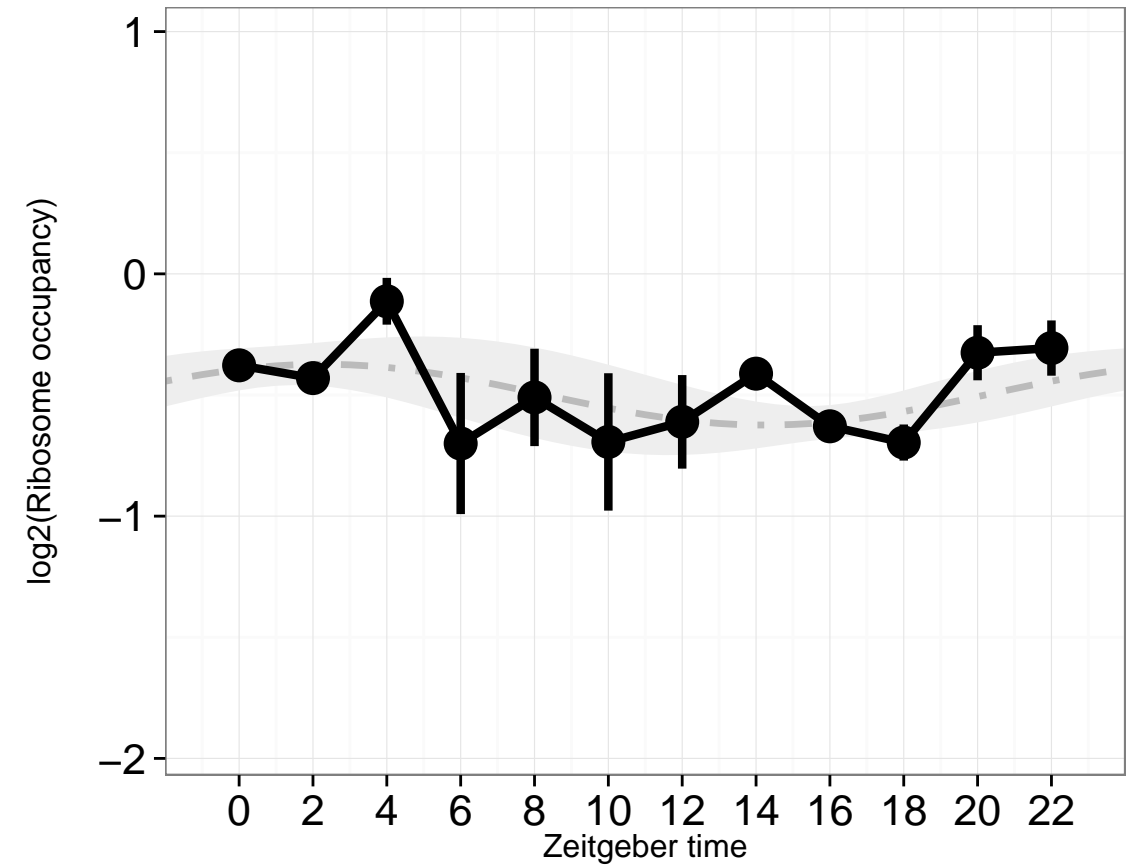

Supplement: SuppDataset_1.zip [file Mis12_set_D.pdf › Supplemental Dataset 1/D-mRNA_rhythm_translation_rhyth/Mis12_set_D.pdf]

## Mknk2

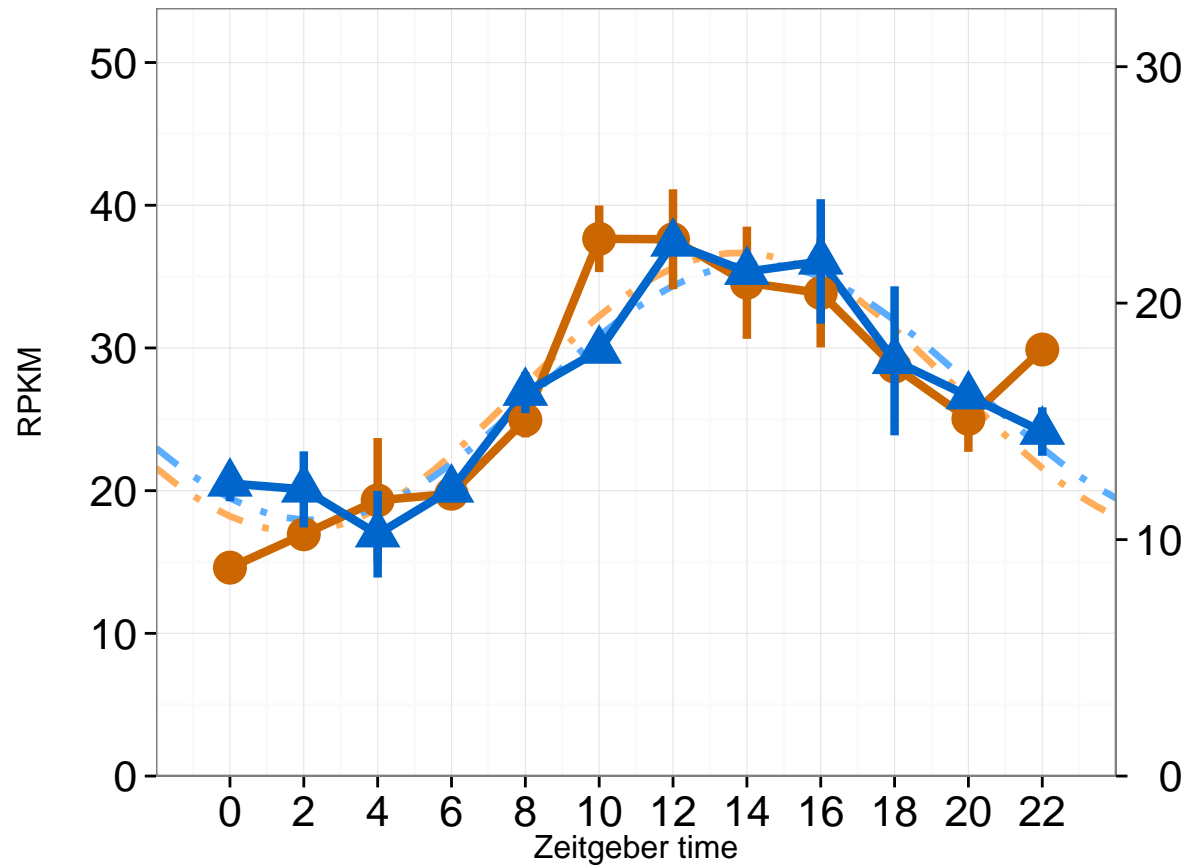

## Mknk2

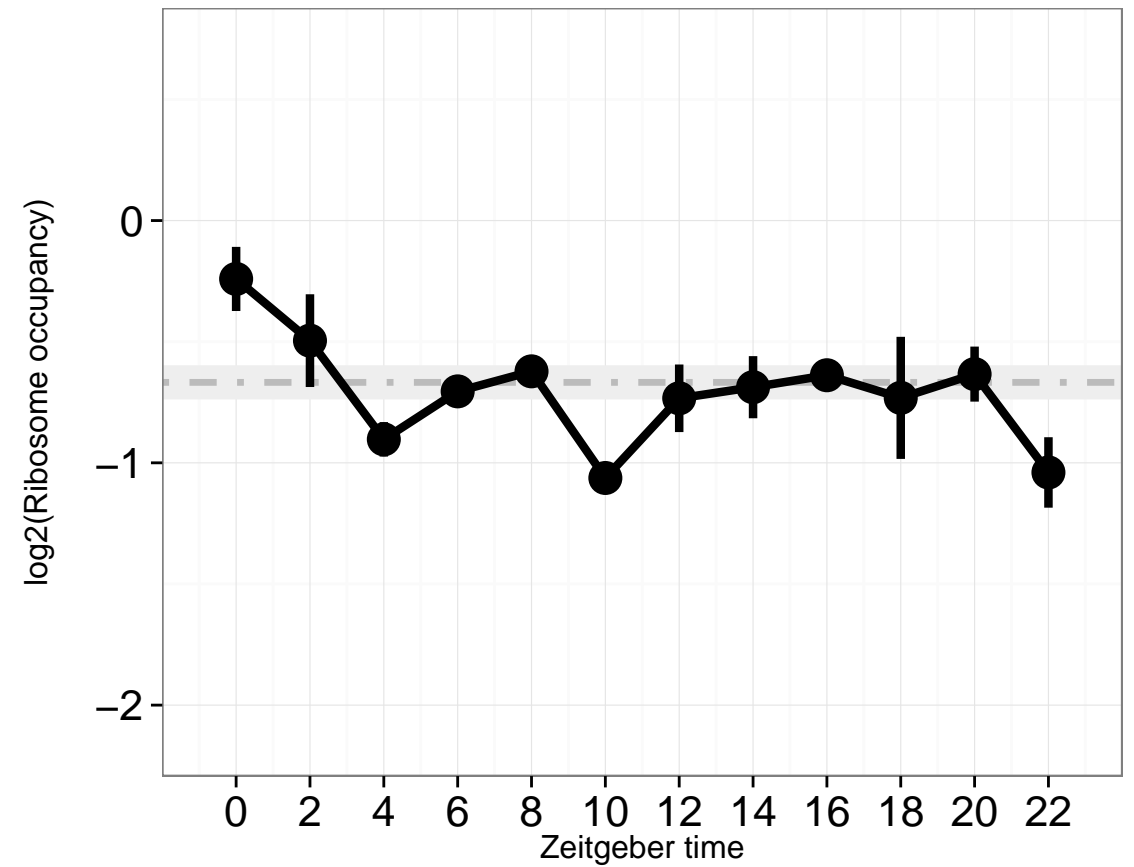

Supplement: SuppDataset_1.zip [file Mknk2_set_D.pdf › Supplemental Dataset 1/D-mRNA_rhythm_translation_rhyth/Mknk2_set_D.pdf]

## Mkl

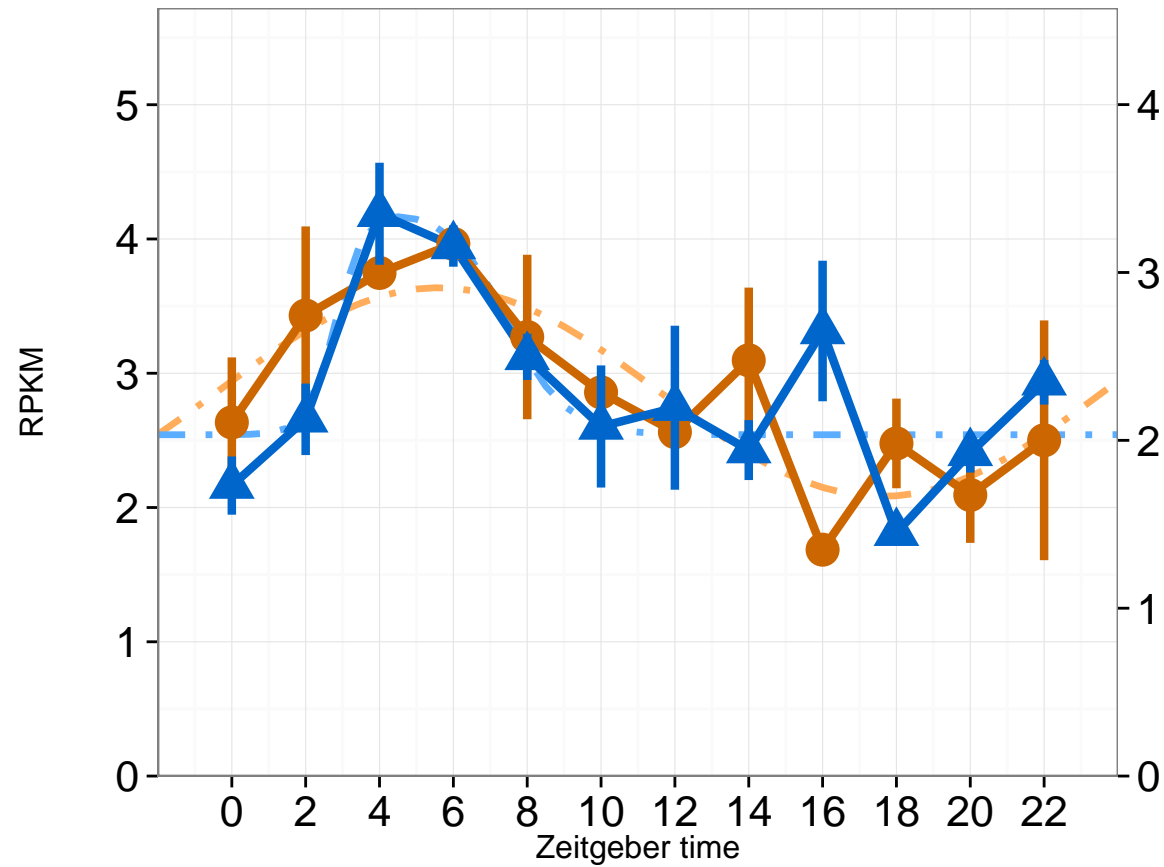

## Mkl

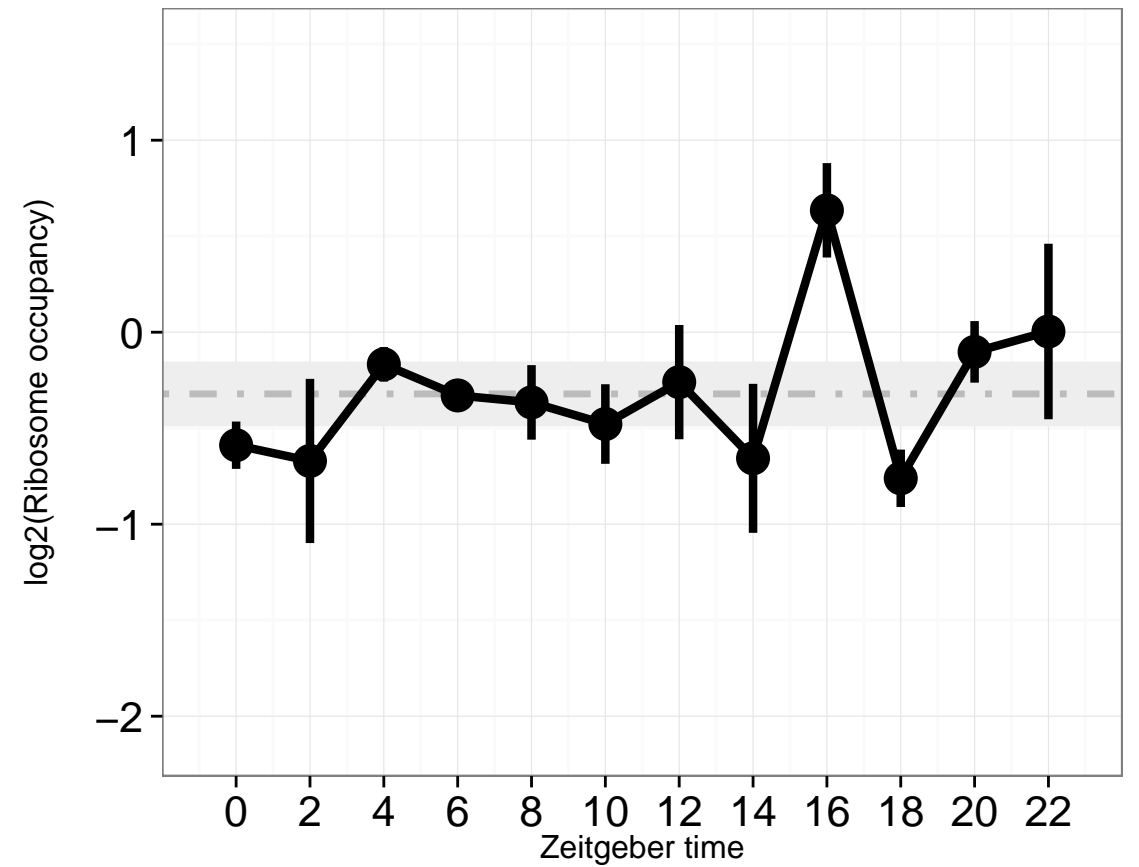

Supplement: SuppDataset_1.zip [file Mlkl_set_D.pdf › Supplemental Dataset 1/D-mRNA_rhythm_translation_rhyth/Mlkl_set_D.pdf]

# Mmaa

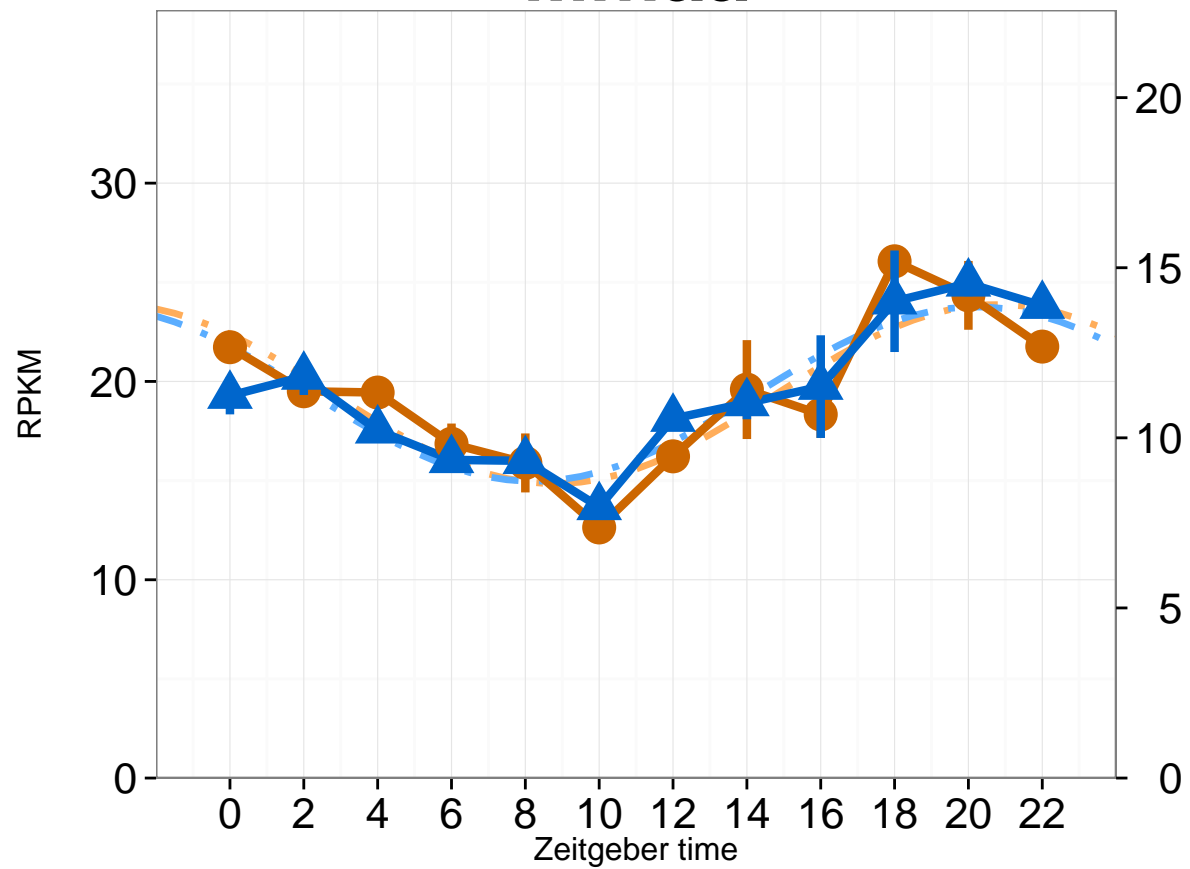

# Mmaa

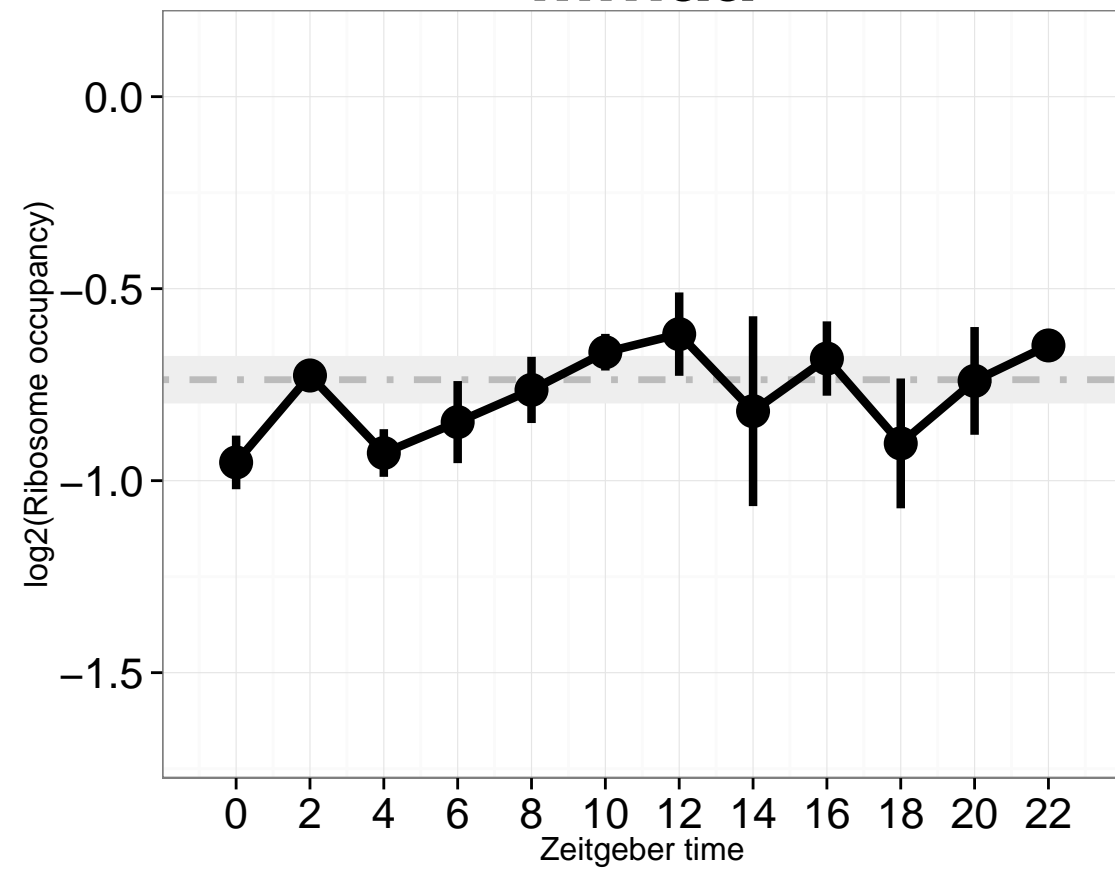

Supplement: SuppDataset_1.zip [file Mmaa_set_D.pdf › Supplemental Dataset 1/D-mRNA_rhythm_translation_rhyth/Mmaa_set_D.pdf]

## Mme

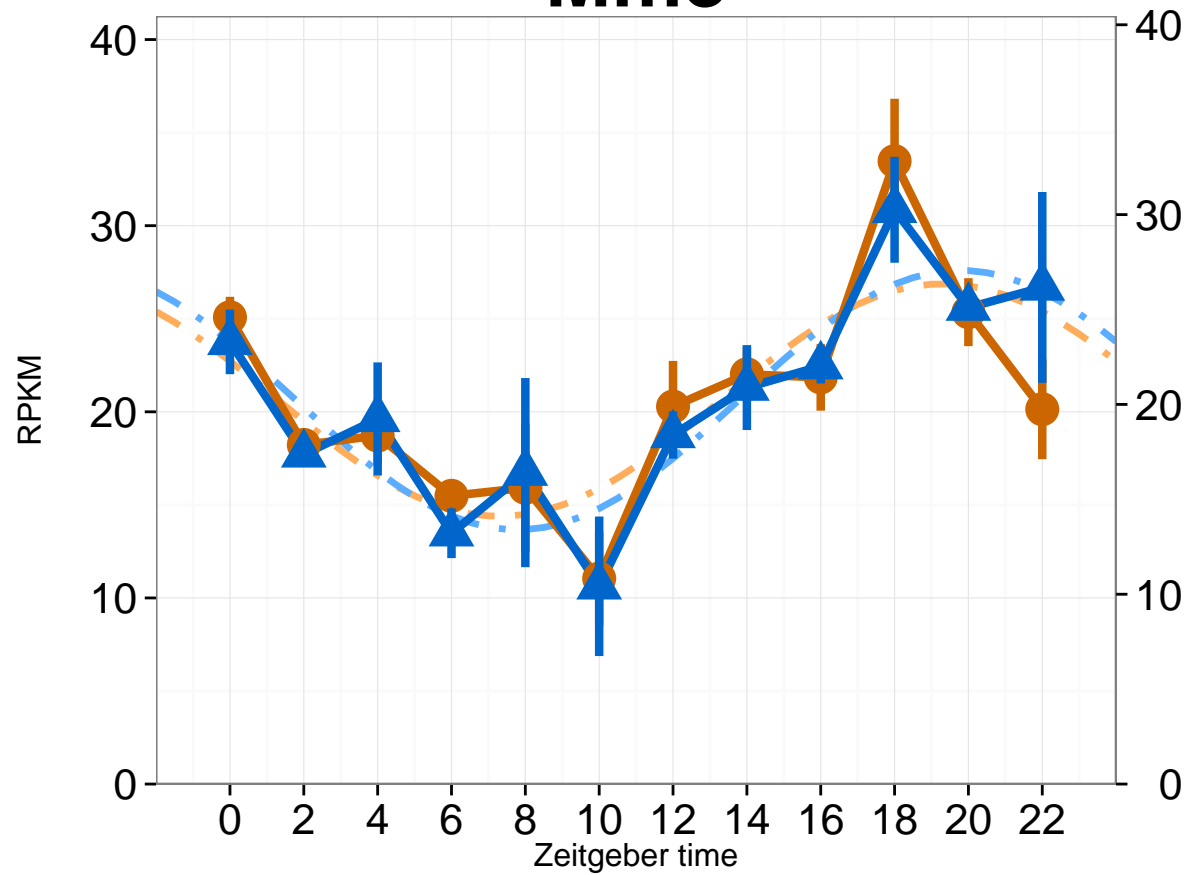

## Mme

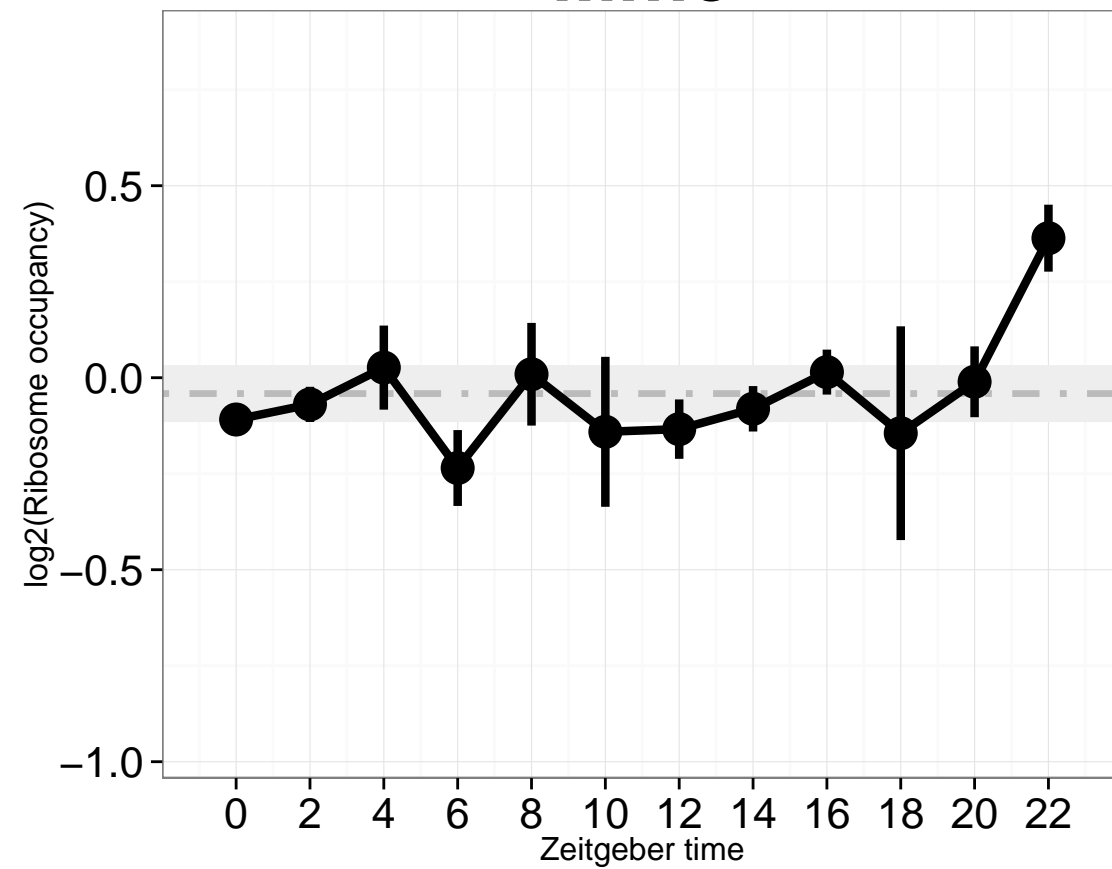

Supplement: SuppDataset_1.zip [file Mme_set_D.pdf › Supplemental Dataset 1/D-mRNA_rhythm_translation_rhyth/Mme_set_D.pdf]

# Mmp2

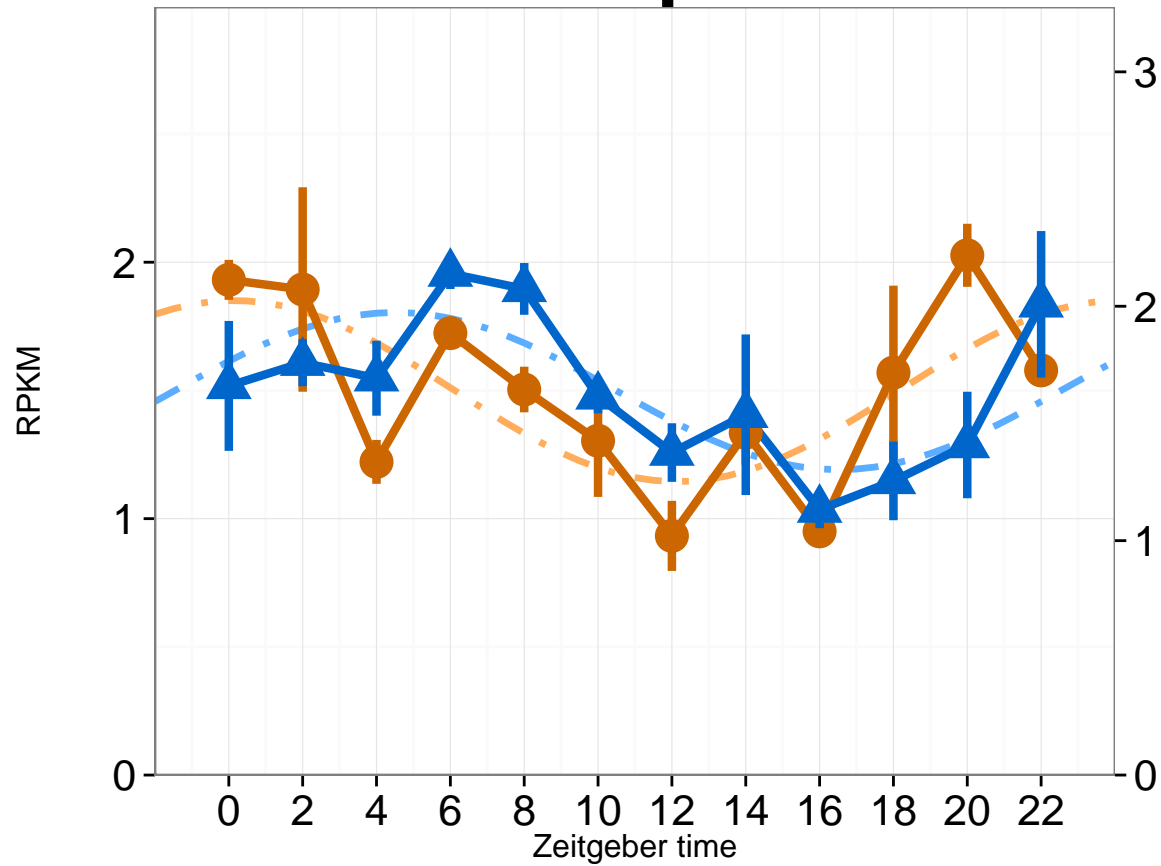

# Mmp2

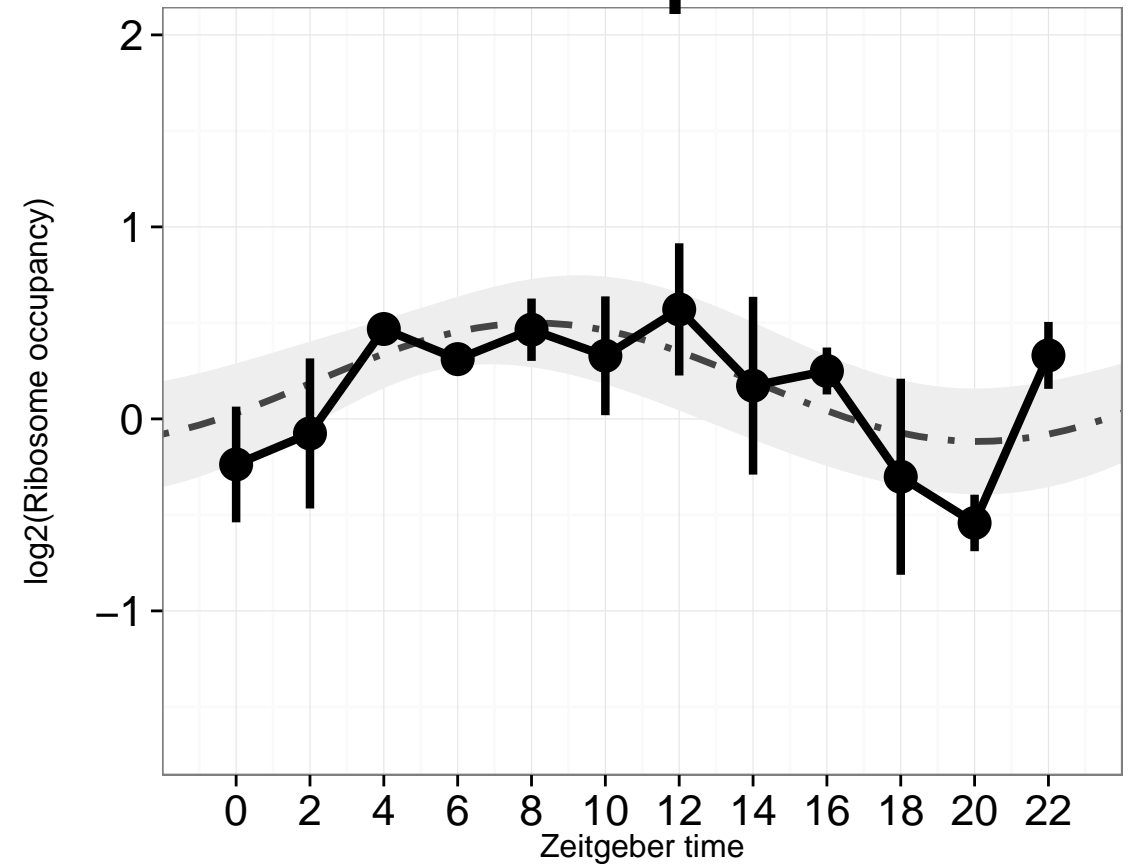

Supplement: SuppDataset_1.zip [file Mmp2_set_D.pdf › Supplemental Dataset 1/D-mRNA_rhythm_translation_rhyth/Mmp2_set_D.pdf]

## Mocos

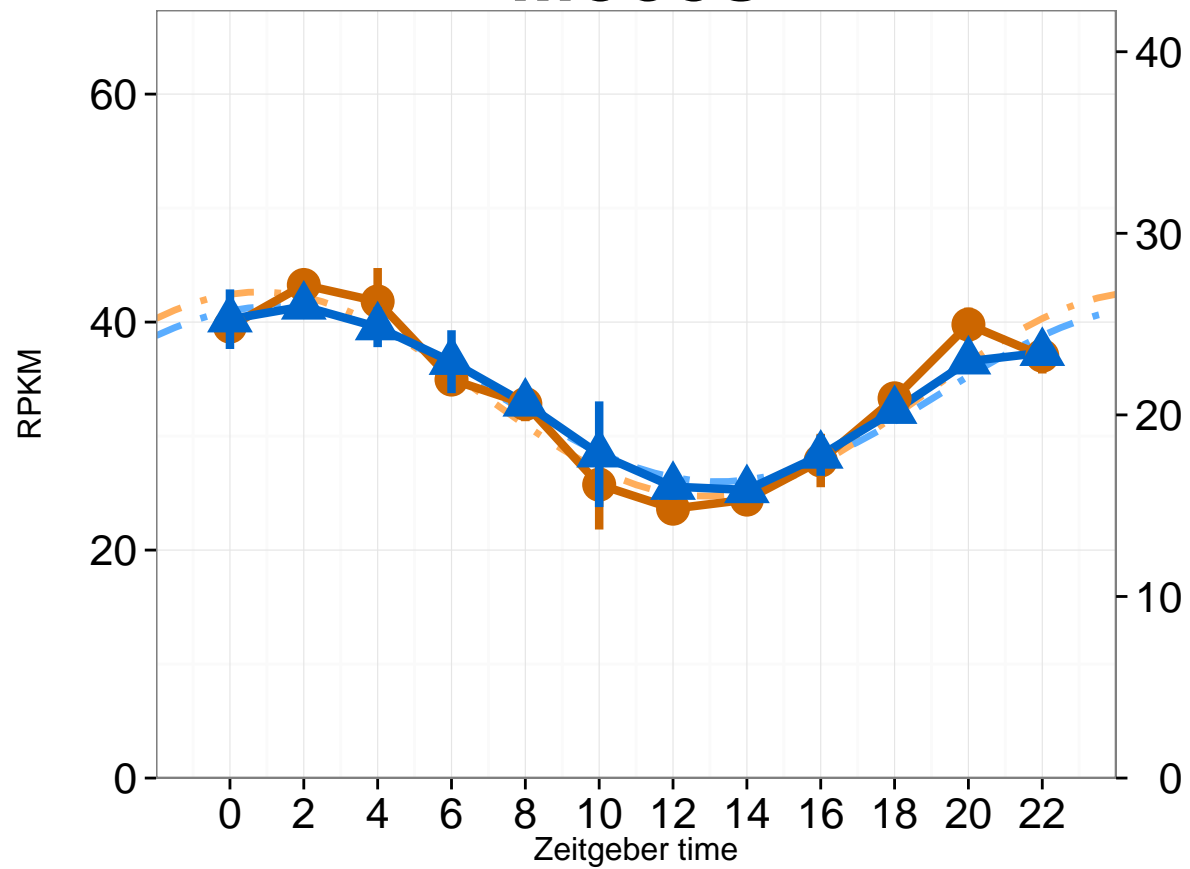

## Mocos

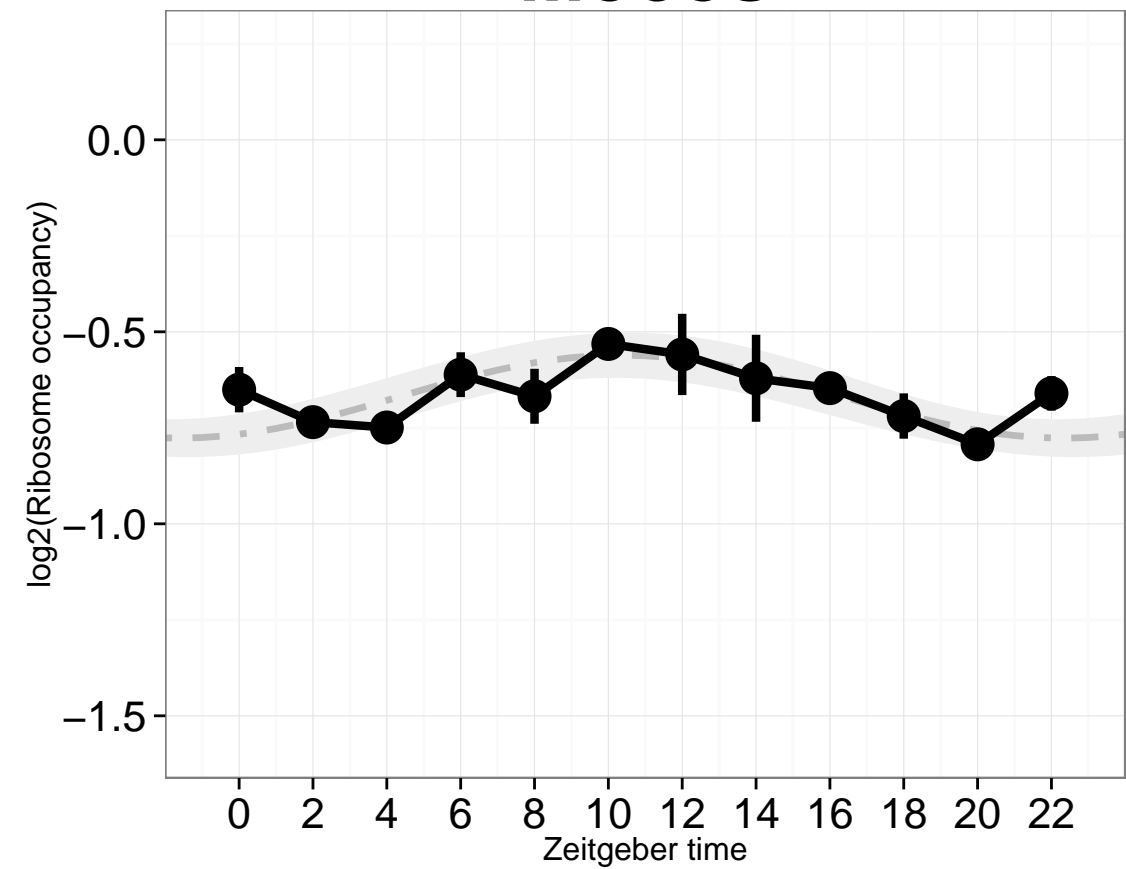

Supplement: SuppDataset_1.zip [file Mocos_set_D.pdf › Supplemental Dataset 1/D-mRNA_rhythm_translation_rhyth/Mocos_set_D.pdf]

## Morc3

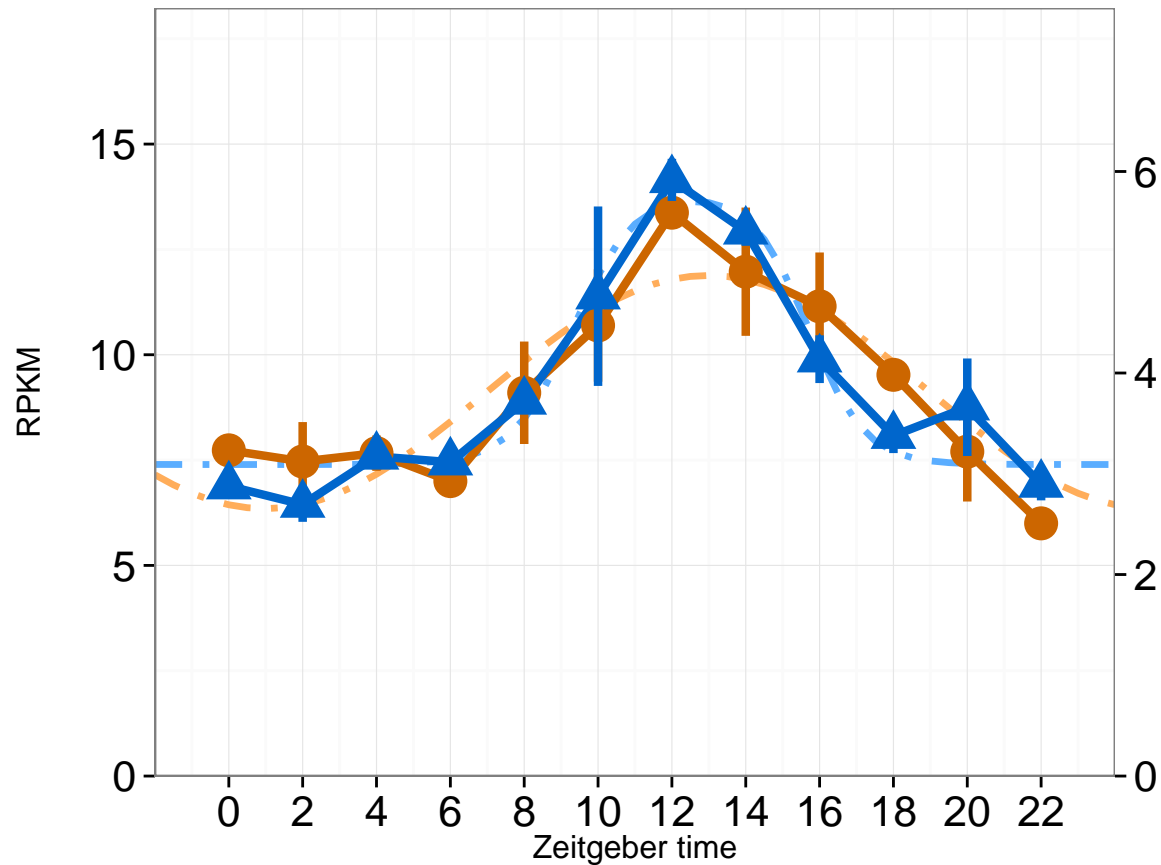

## Morc3

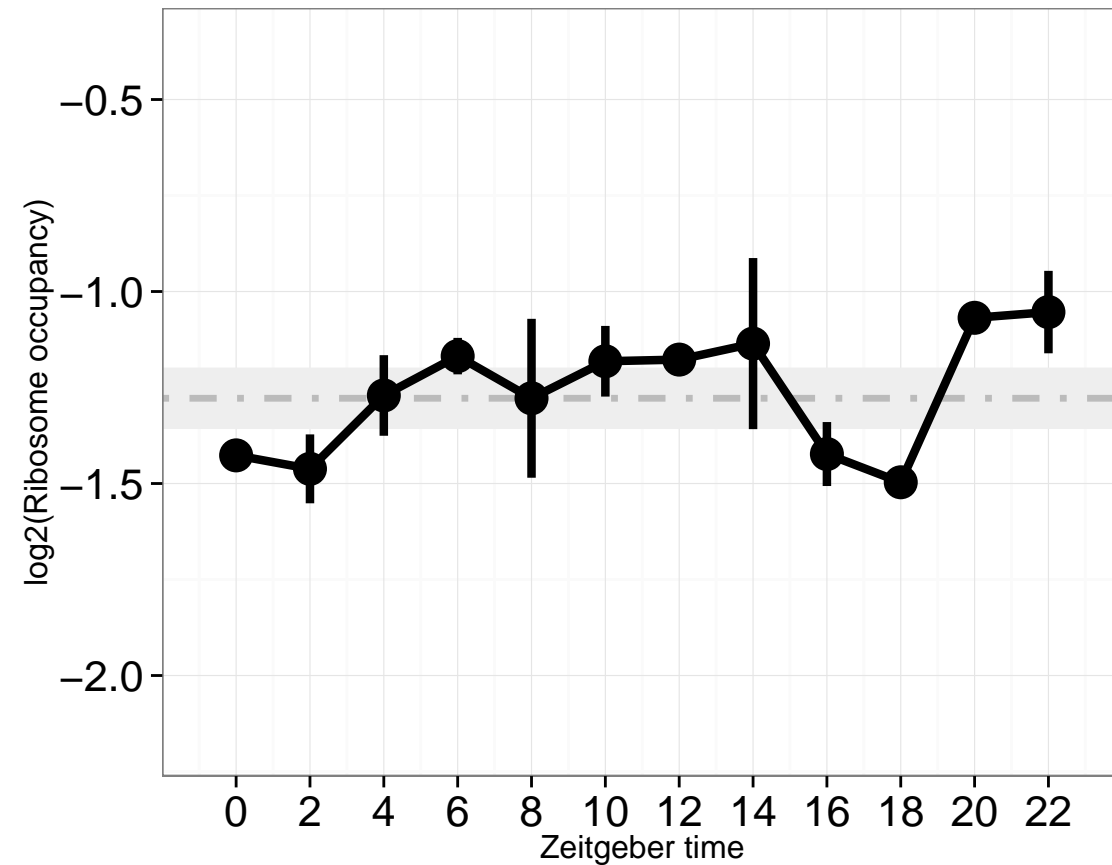

Supplement: SuppDataset_1.zip [file Morc3_set_D.pdf › Supplemental Dataset 1/D-mRNA_rhythm_translation_rhyth/Morc3_set_D.pdf]

# Mpp7

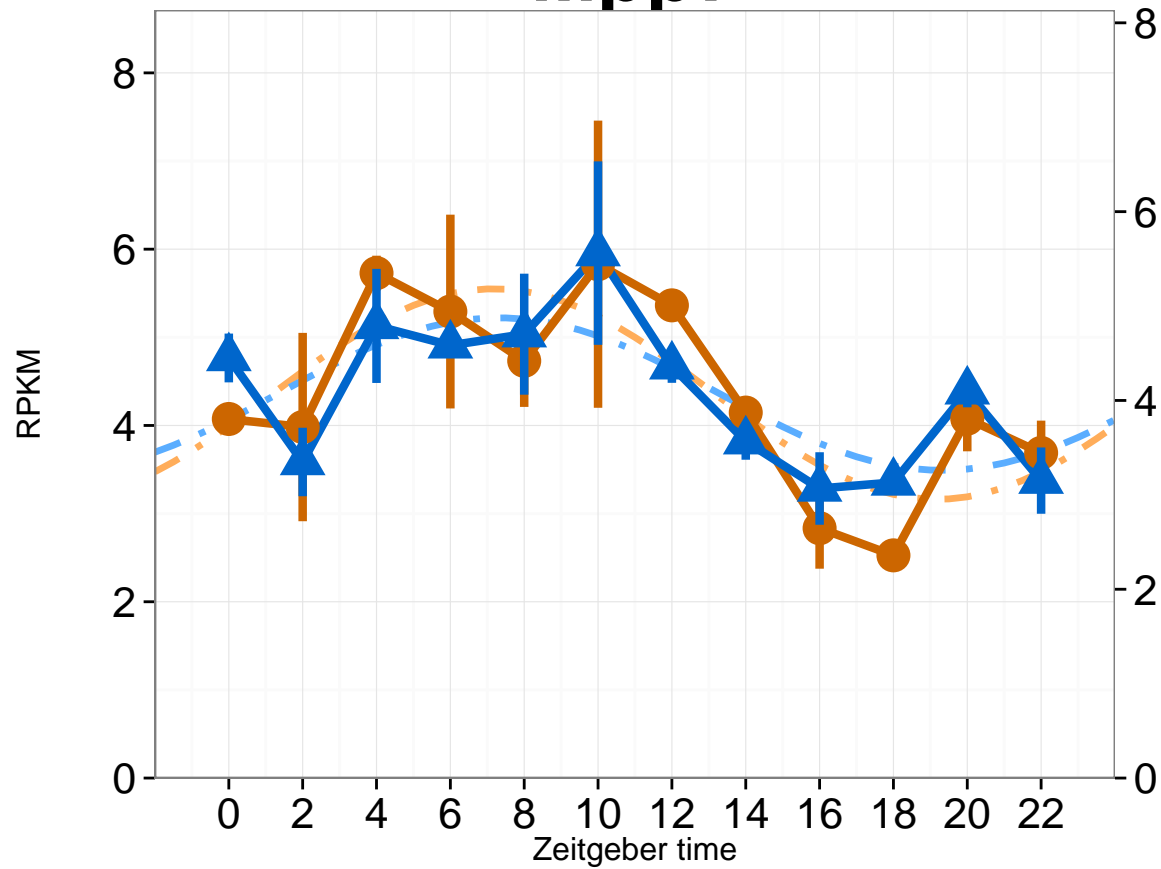

# Mpp7

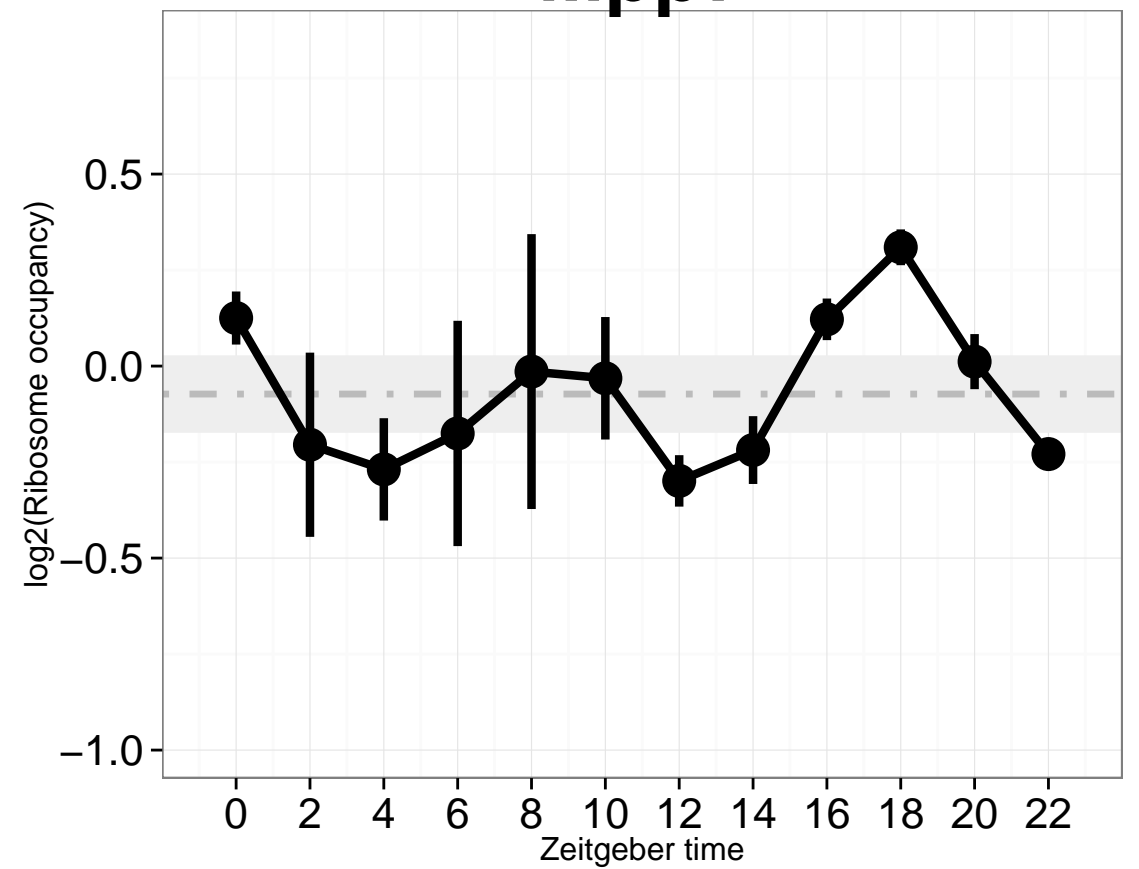

Supplement: SuppDataset_1.zip [file Mpp7_set_D.pdf › Supplemental Dataset 1/D-mRNA_rhythm_translation_rhyth/Mpp7_set_D.pdf]

# Mpzl1

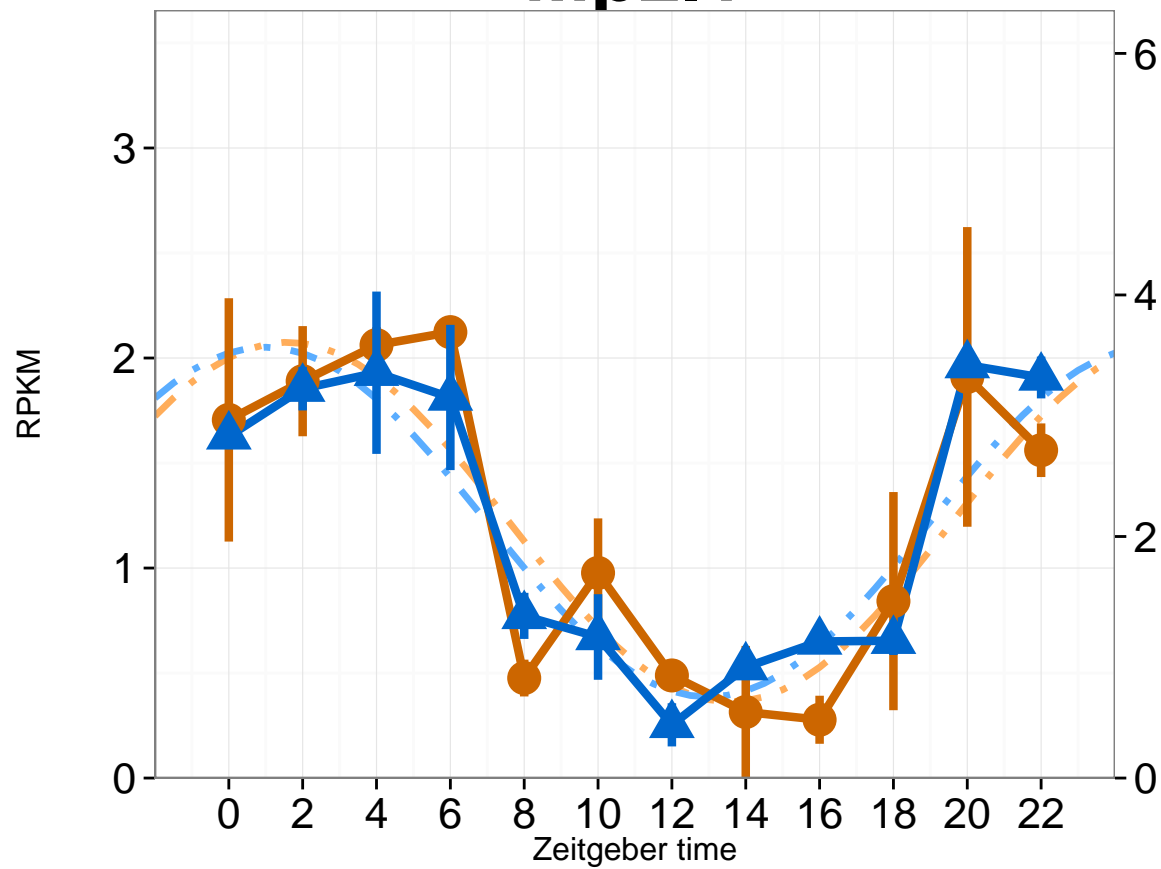

# Mpzl1

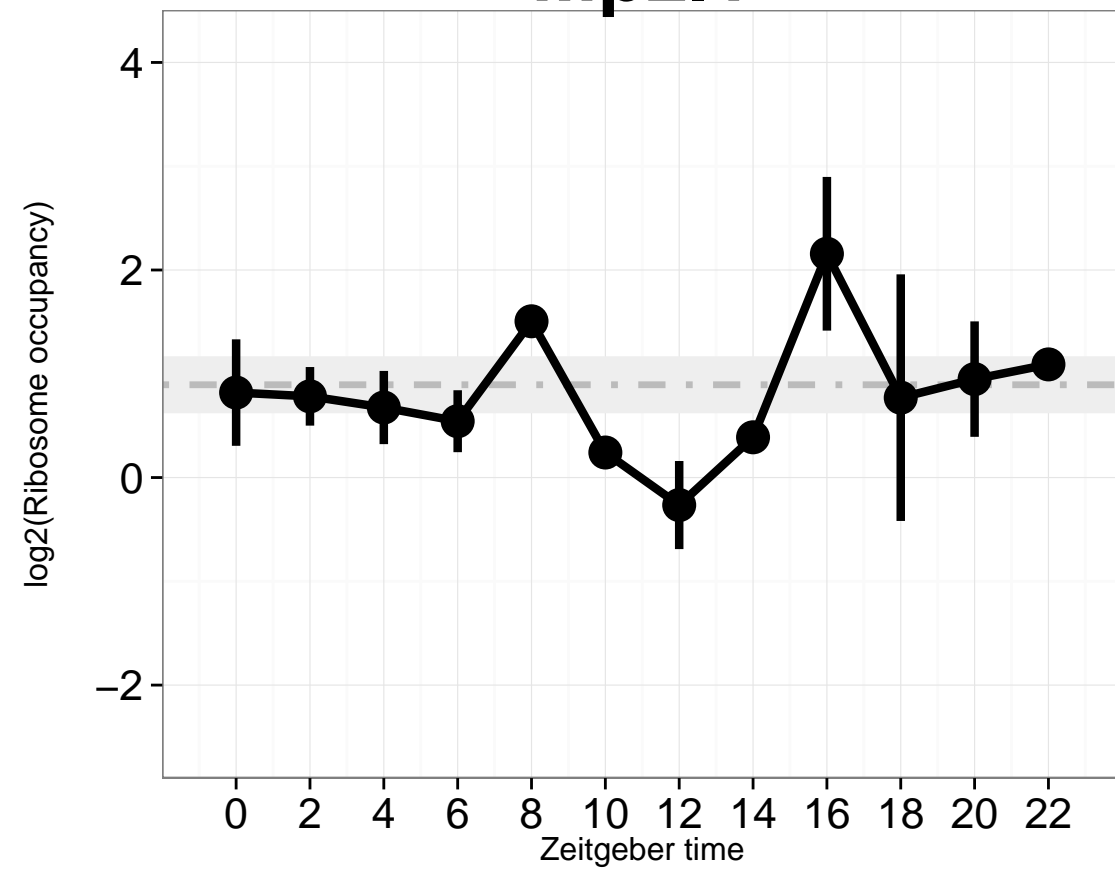

Supplement: SuppDataset_1.zip [file Mpzl1_set_D.pdf › Supplemental Dataset 1/D-mRNA_rhythm_translation_rhyth/Mpzl1_set_D.pdf]

## Mrap

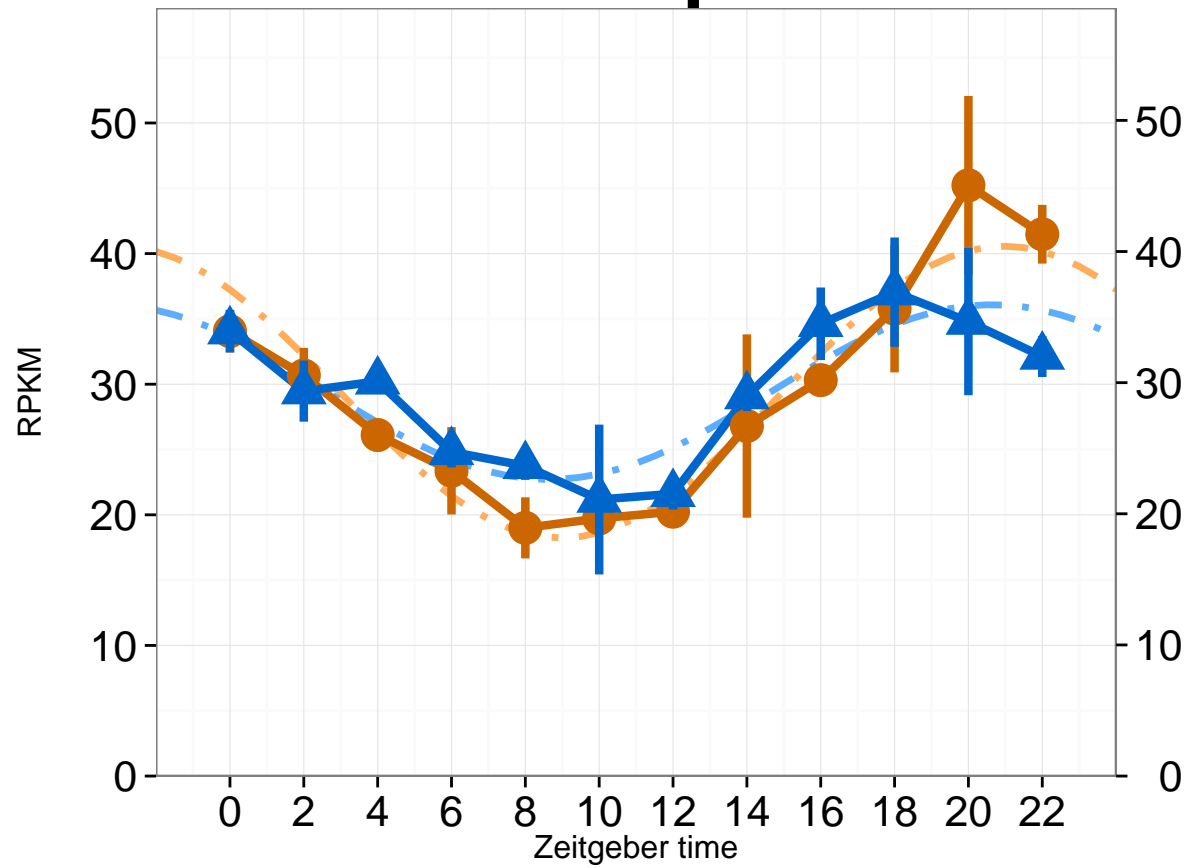

## Mrap

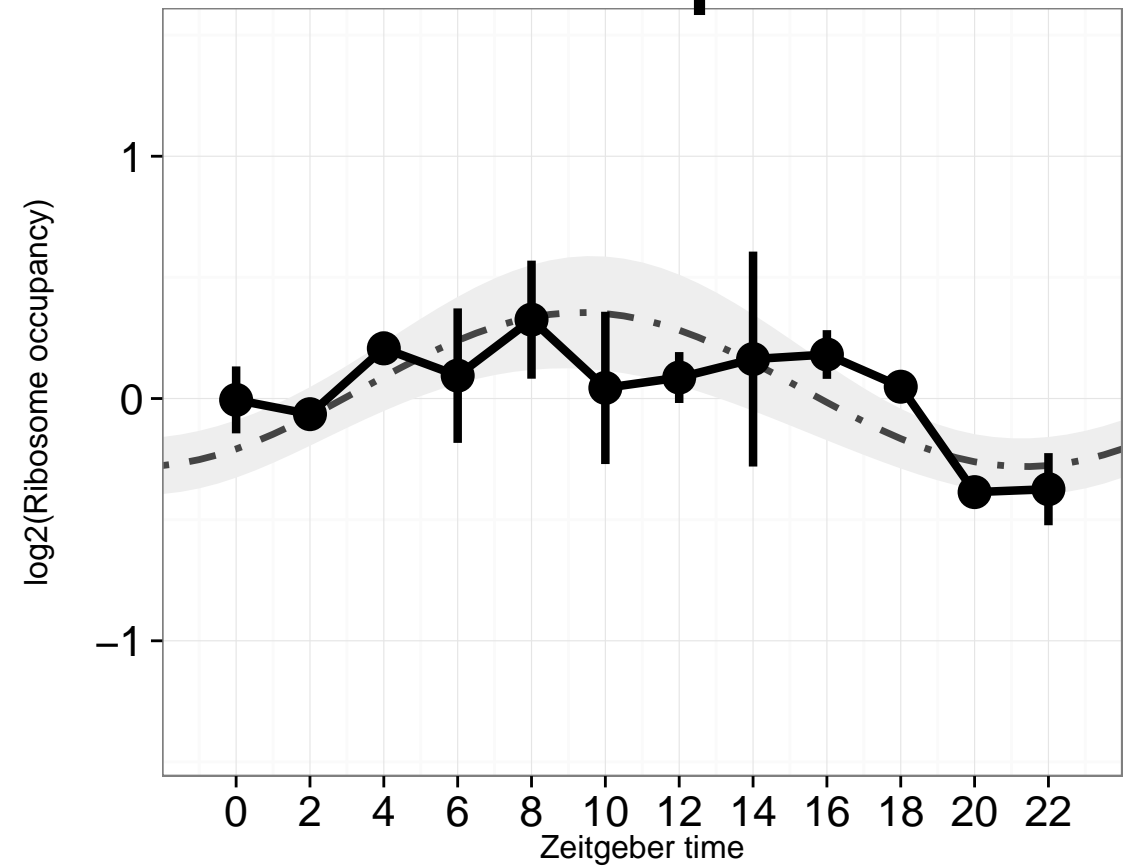

Supplement: SuppDataset_1.zip [file Mrap_set_D.pdf › Supplemental Dataset 1/D-mRNA_rhythm_translation_rhyth/Mrap_set_D.pdf]

## Mrc2

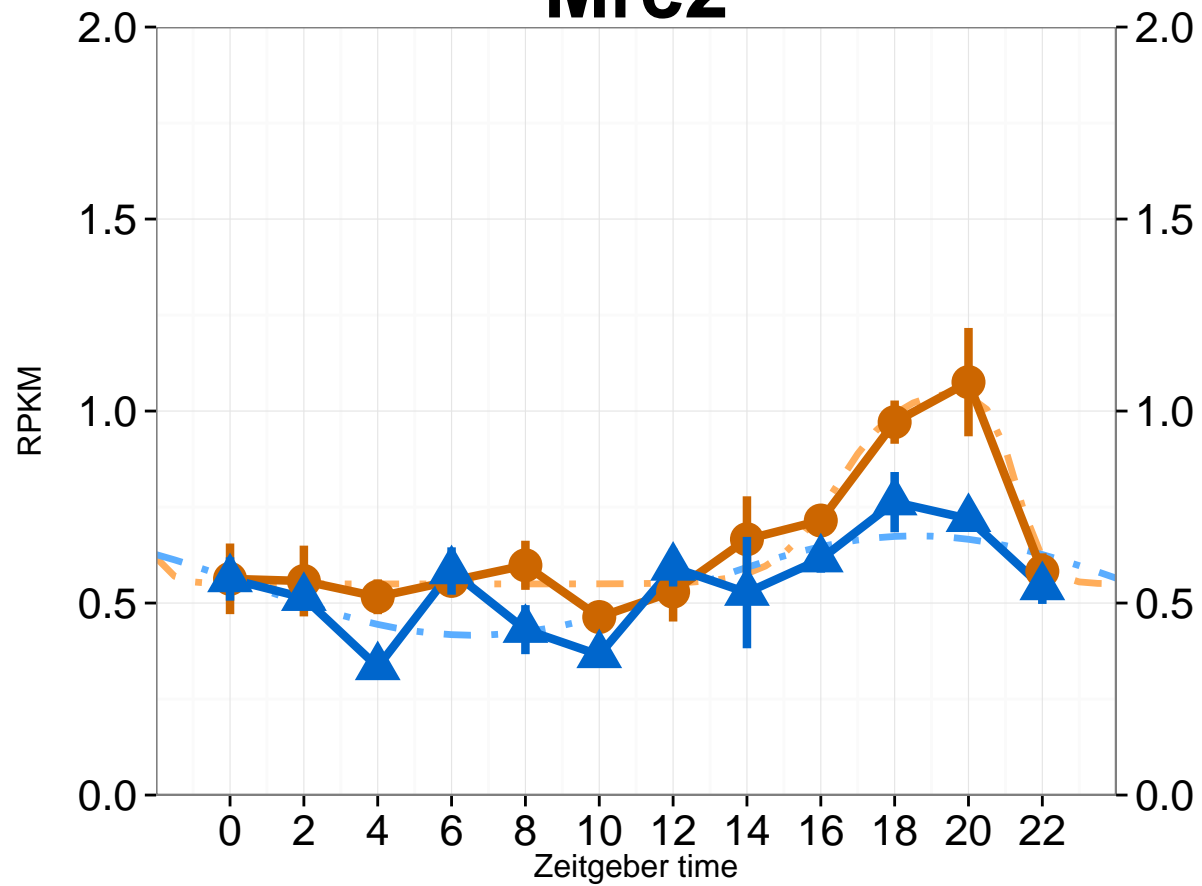

## Mrc2

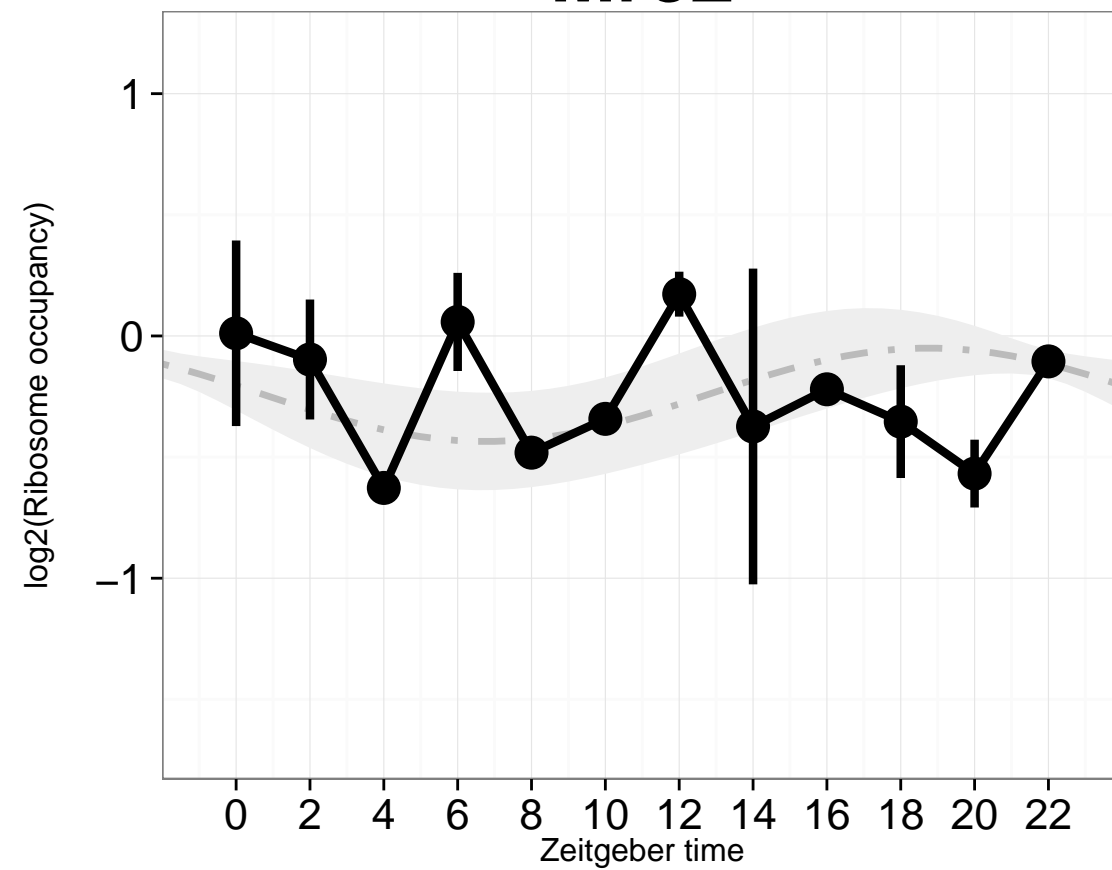

Supplement: SuppDataset_1.zip [file Mrc2_set_D.pdf › Supplemental Dataset 1/D-mRNA_rhythm_translation_rhyth/Mrc2_set_D.pdf]

# Mreg

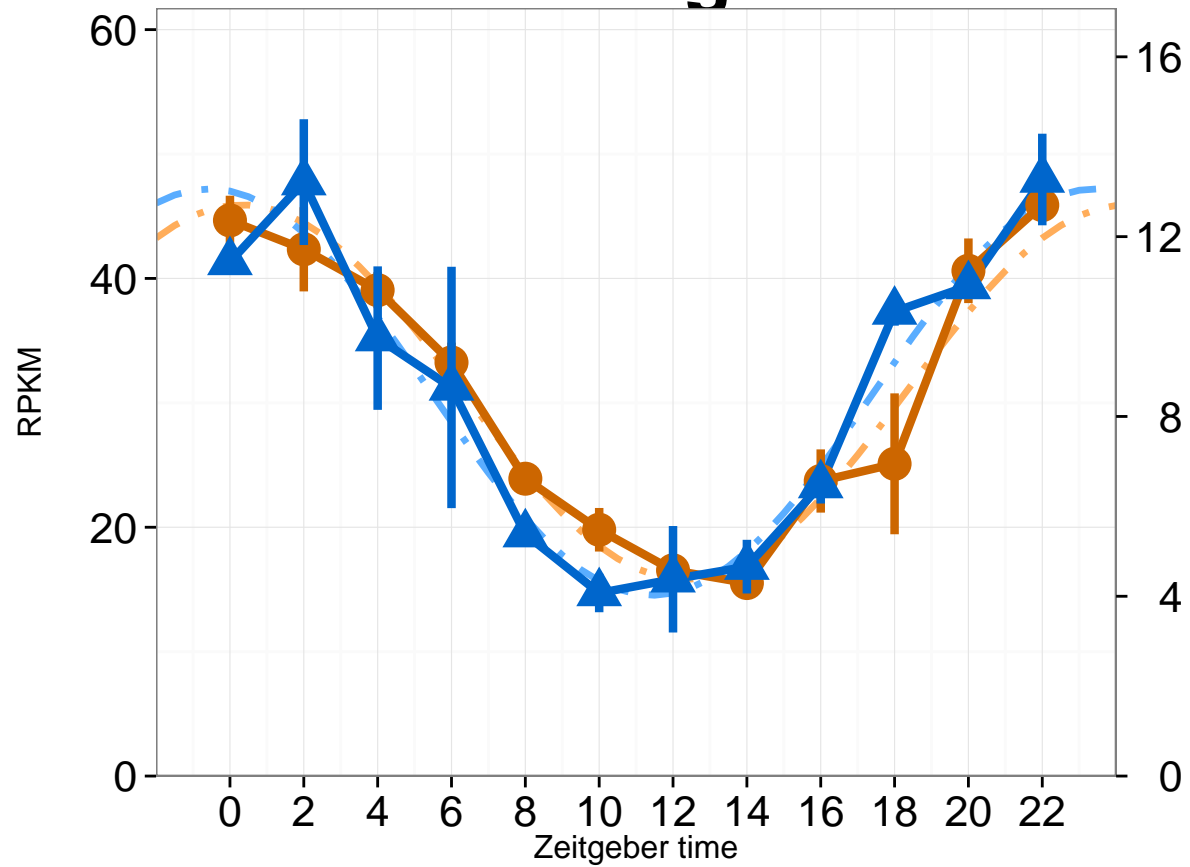

# Mreg

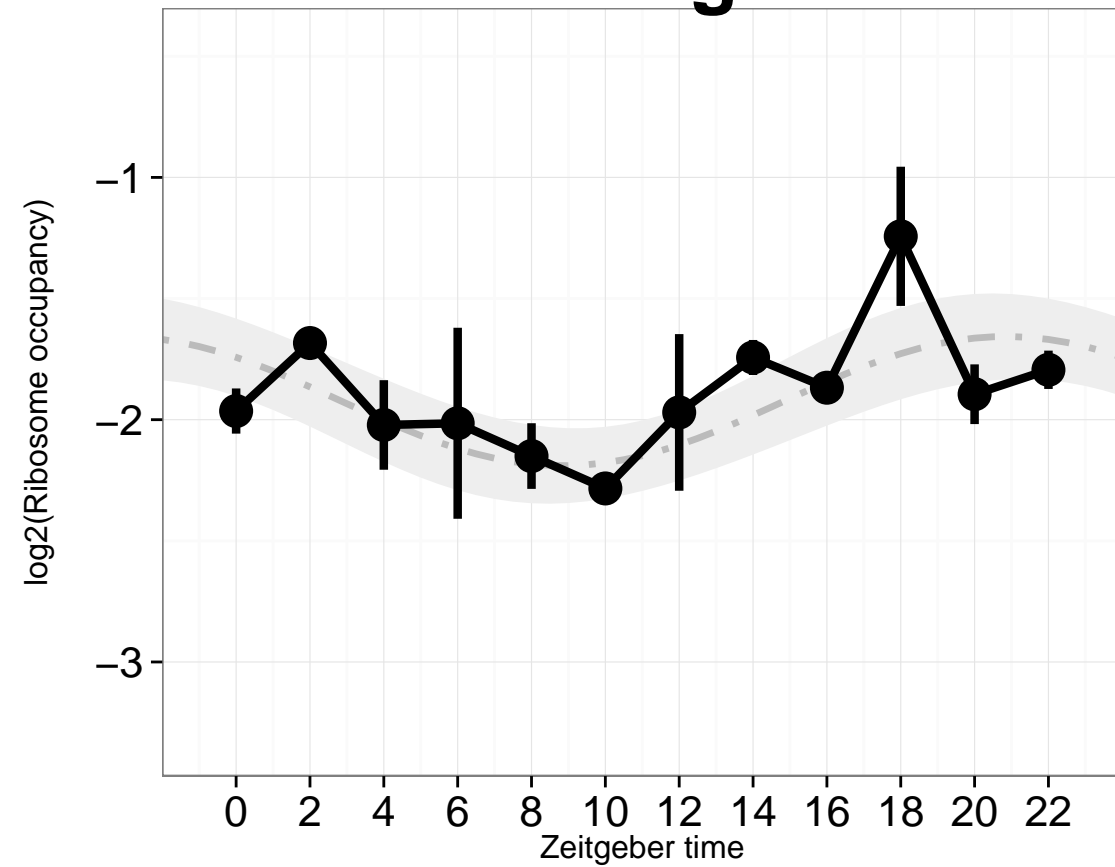

Supplement: SuppDataset_1.zip [file Mreg_set_D.pdf › Supplemental Dataset 1/D-mRNA_rhythm_translation_rhyth/Mreg_set_D.pdf]

# Mrpl34

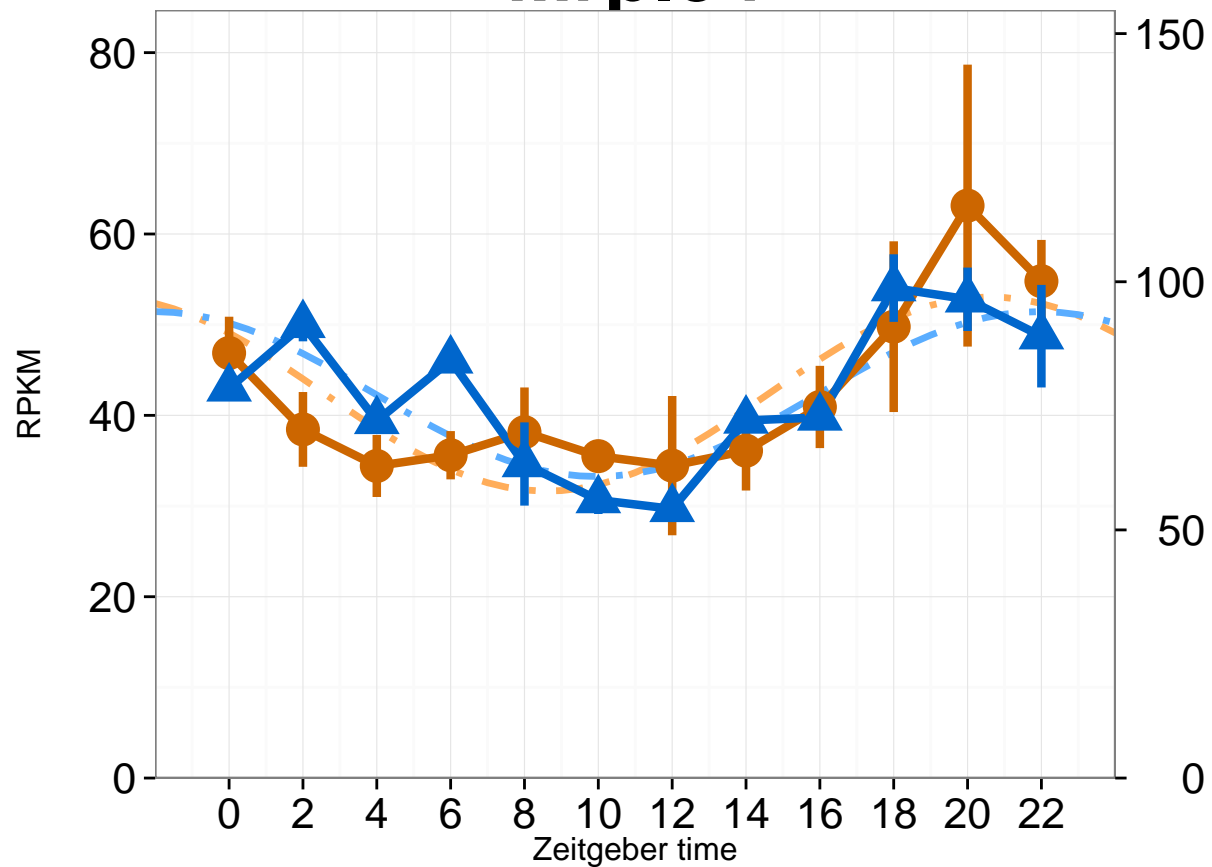

# Mrpl34

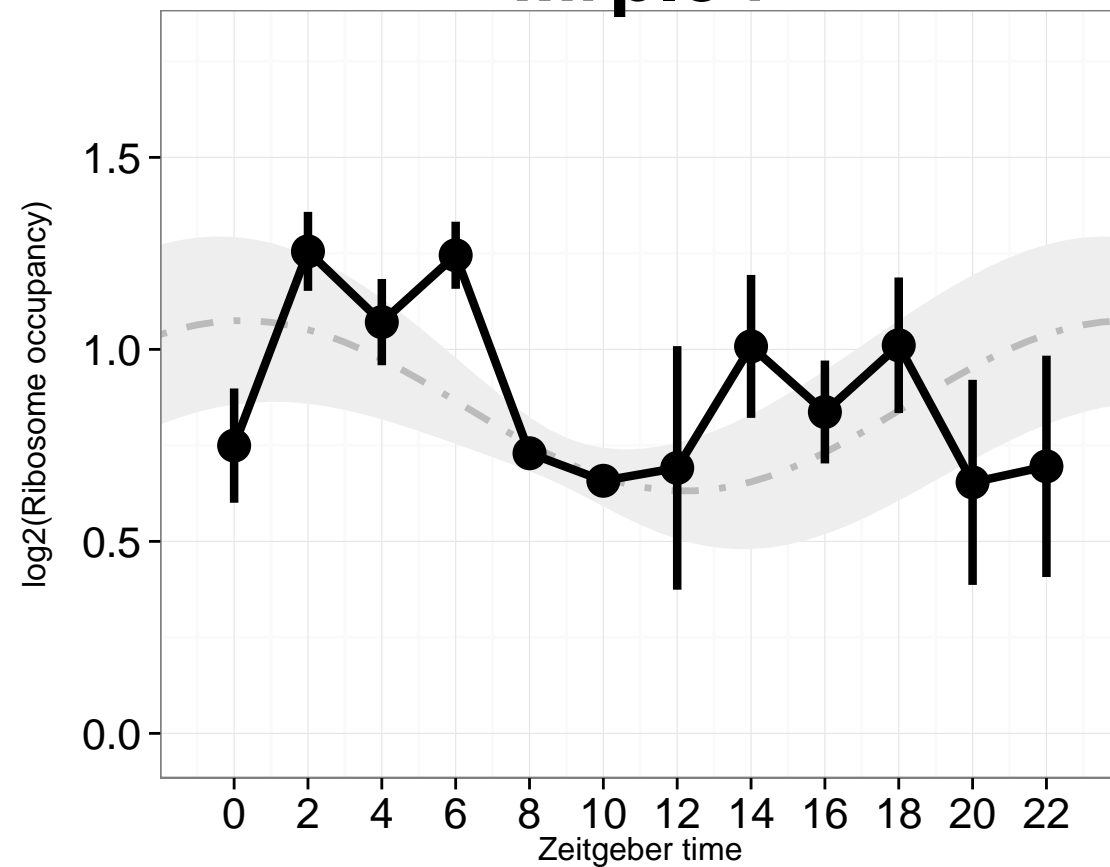

Supplement: SuppDataset_1.zip [file Mrpl34_set_D.pdf › Supplemental Dataset 1/D-mRNA_rhythm_translation_rhyth/Mrpl34_set_D.pdf]

# Mt1

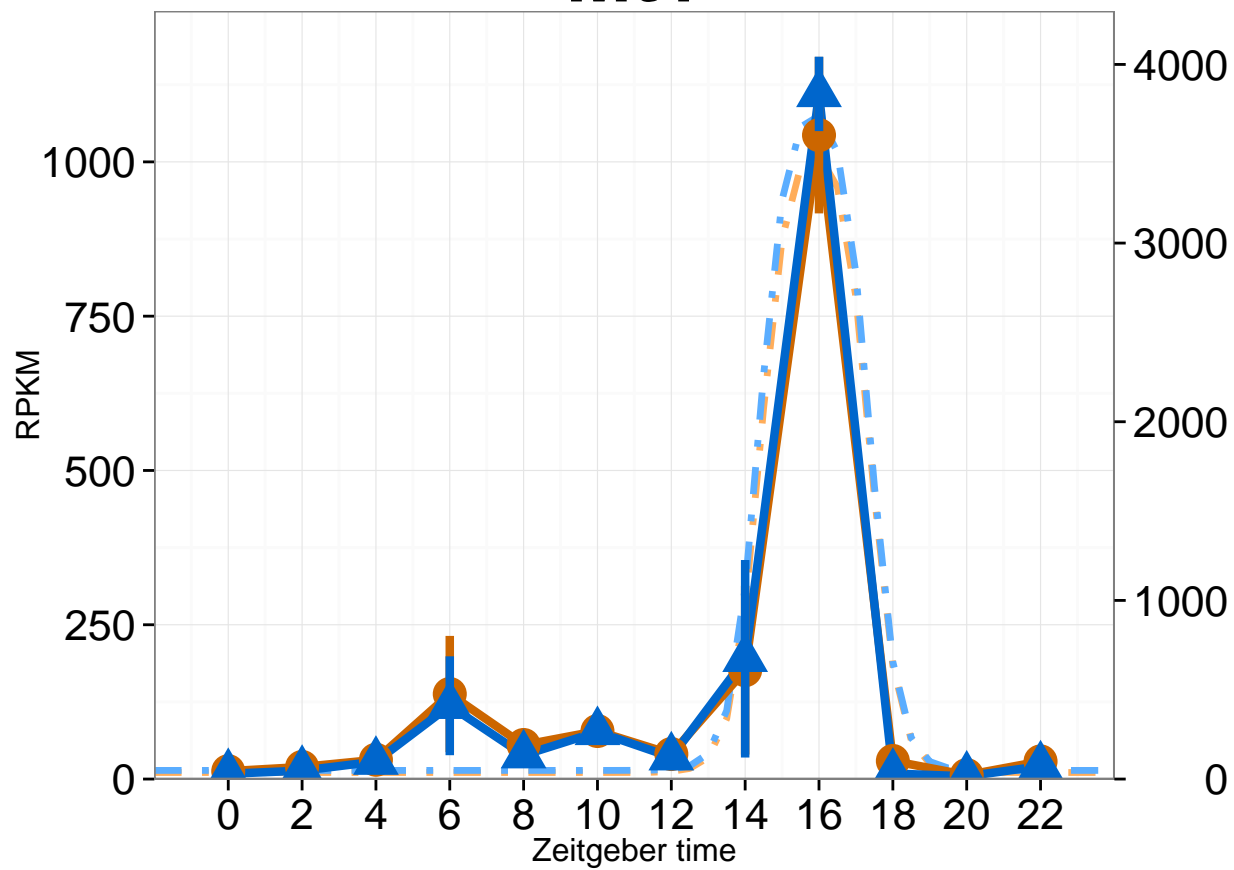

# Mt1

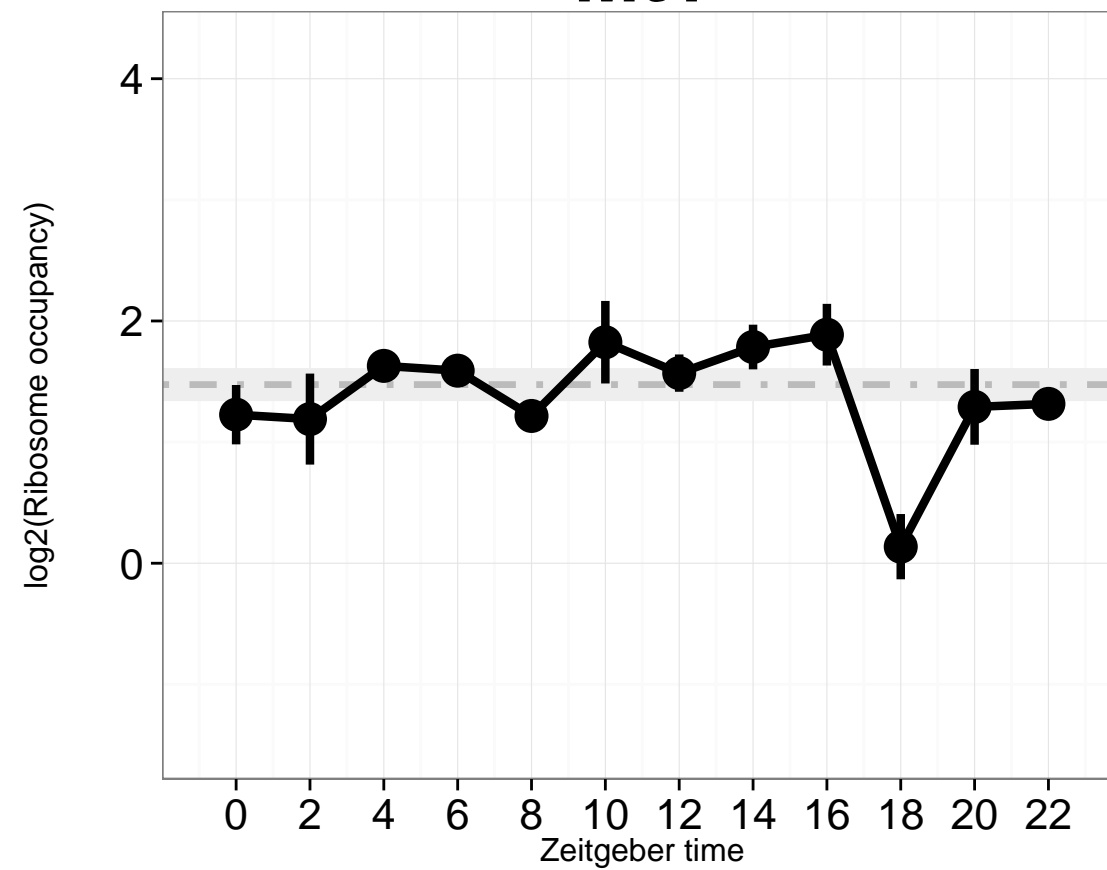

Supplement: SuppDataset_1.zip [file Mt1_set_D.pdf › Supplemental Dataset 1/D-mRNA_rhythm_translation_rhyth/Mt1_set_D.pdf]

# Mt2

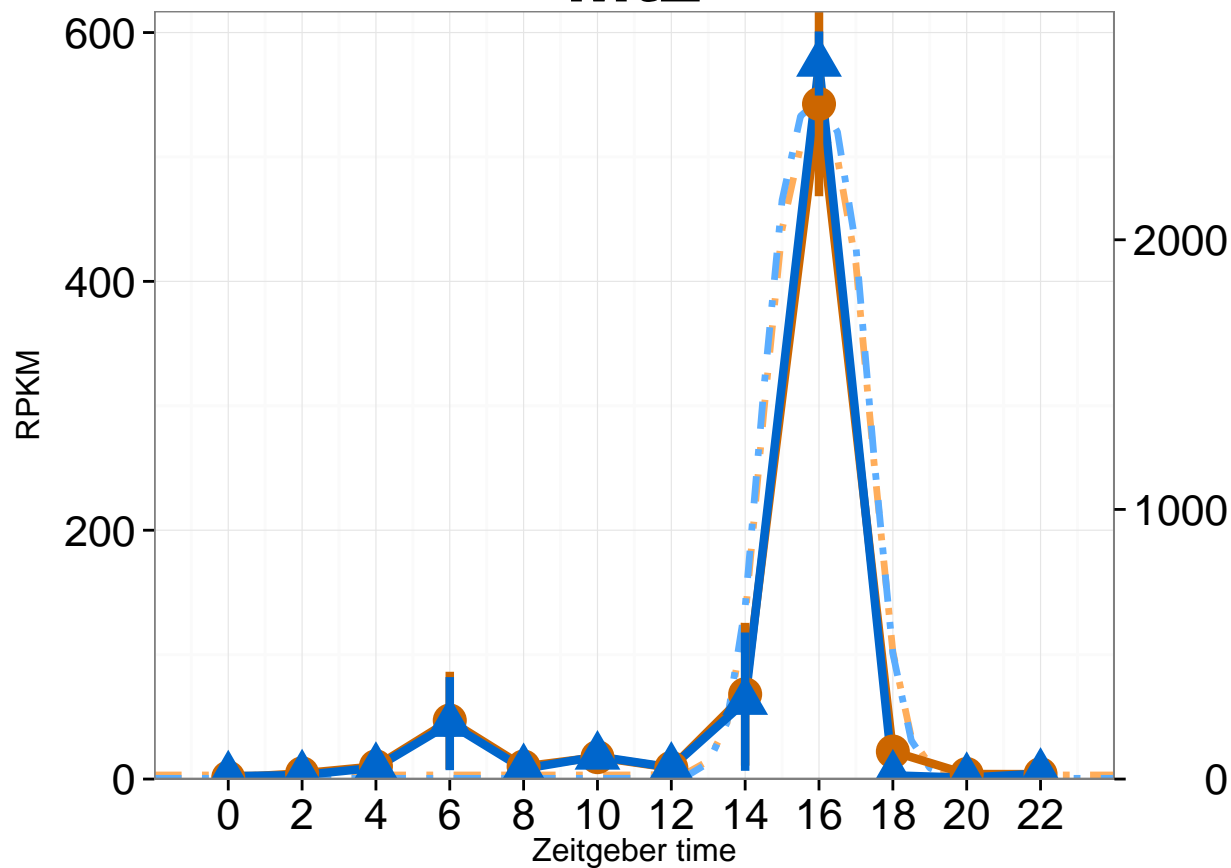

# Mt2

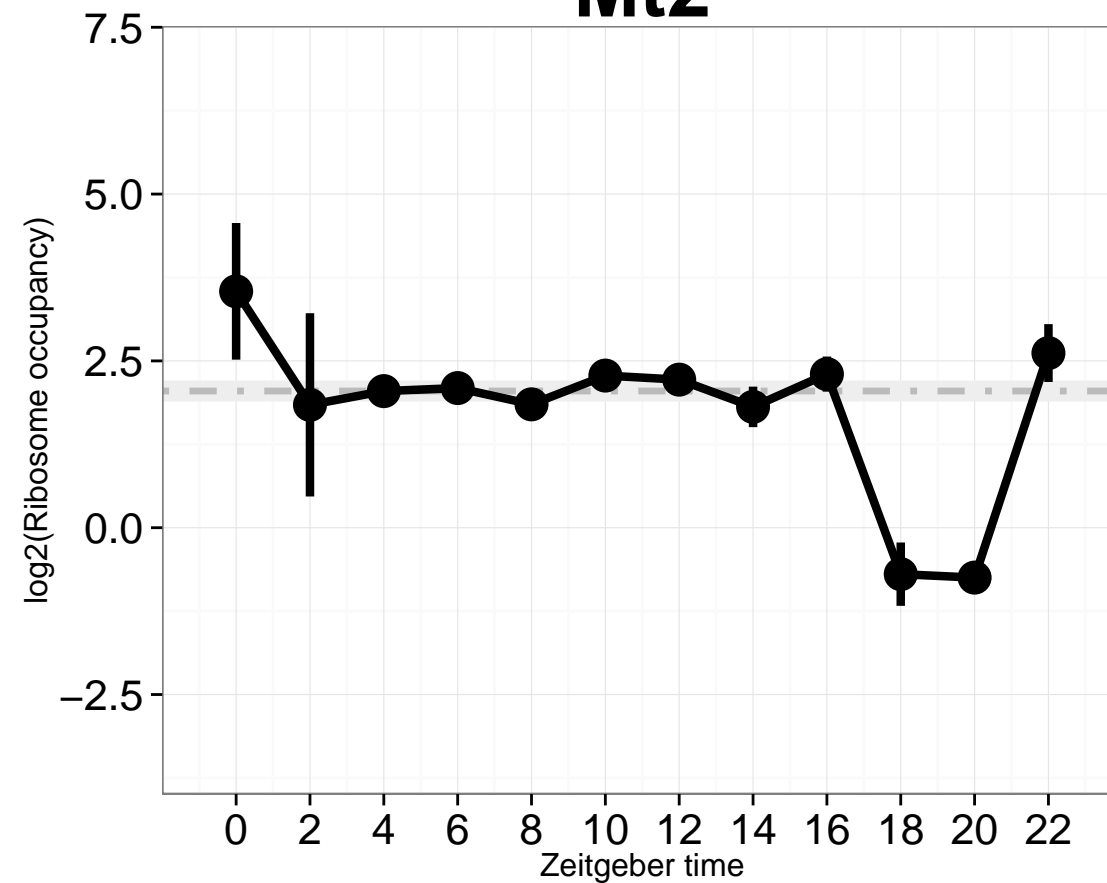

Supplement: SuppDataset_1.zip [file Mt2_set_D.pdf › Supplemental Dataset 1/D-mRNA_rhythm_translation_rhyth/Mt2_set_D.pdf]

# Mterfd3

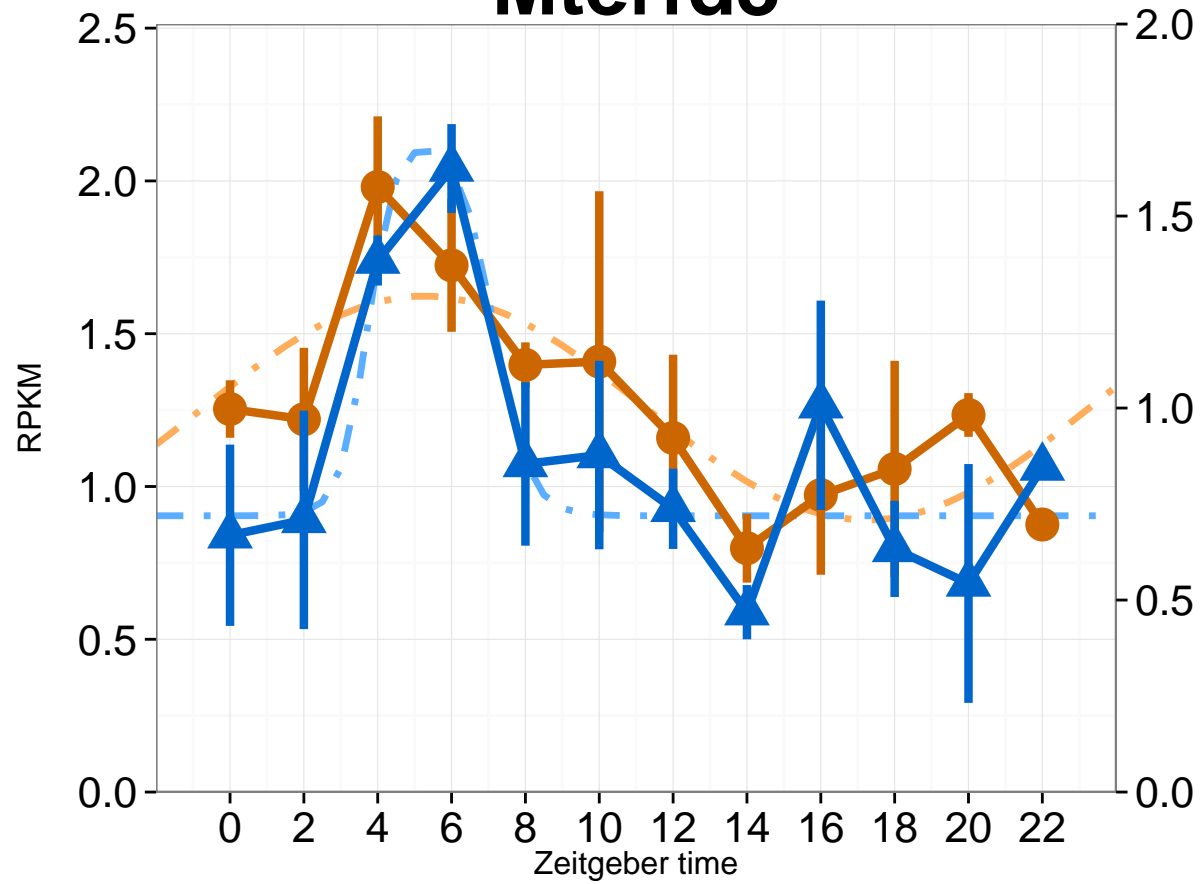

# Mterfd3

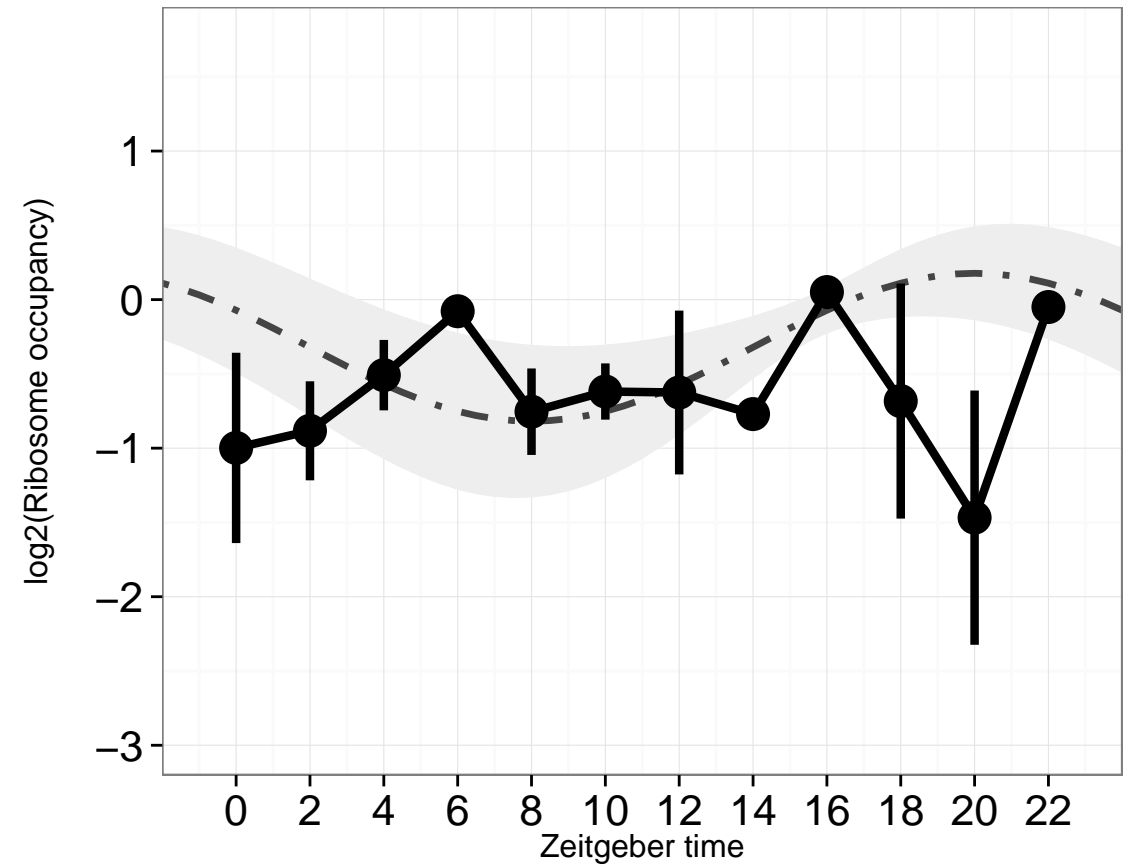

Supplement: SuppDataset_1.zip [file Mterfd3_set_D.pdf › Supplemental Dataset 1/D-mRNA_rhythm_translation_rhyth/Mterfd3_set_D.pdf]

## Mthfd1l

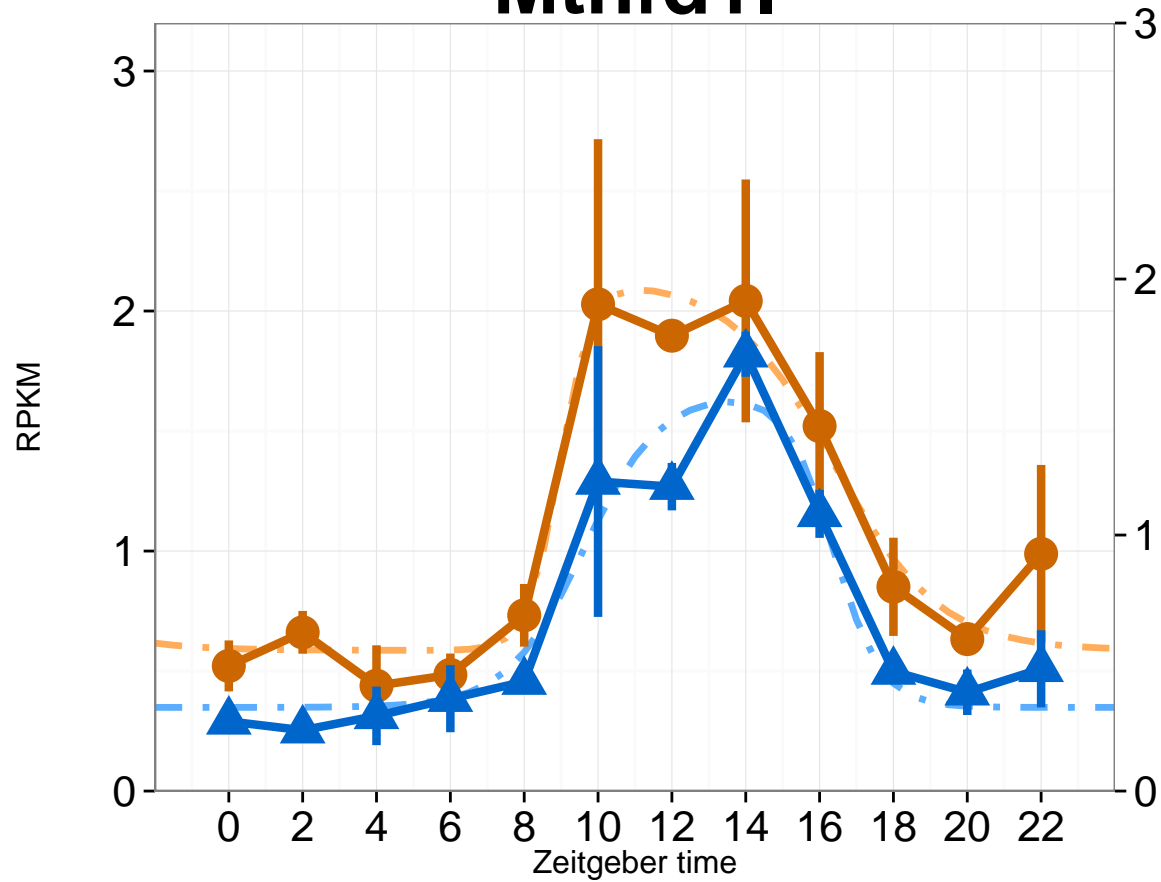

## Mthfd1l

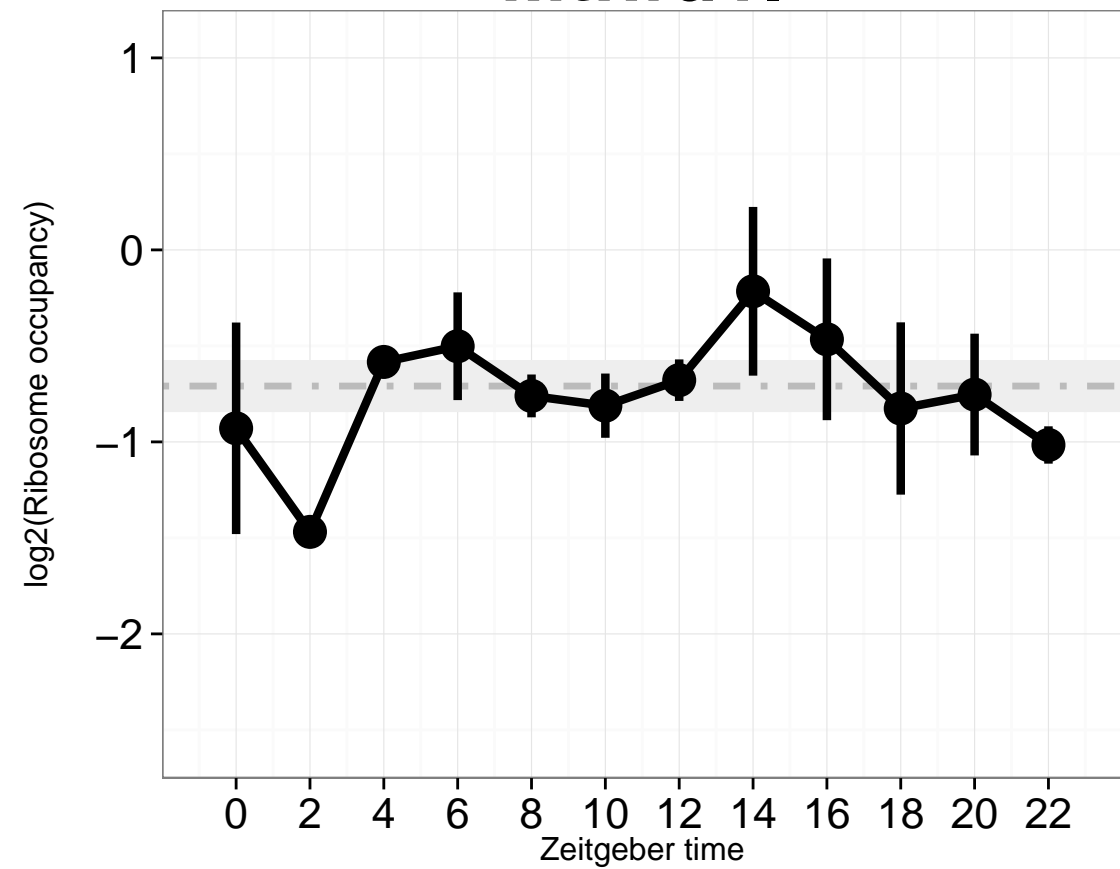

Supplement: SuppDataset_1.zip [file Mthfd1l_set_D.pdf › Supplemental Dataset 1/D-mRNA_rhythm_translation_rhyth/Mthfd1l_set_D.pdf]

## Mthfr

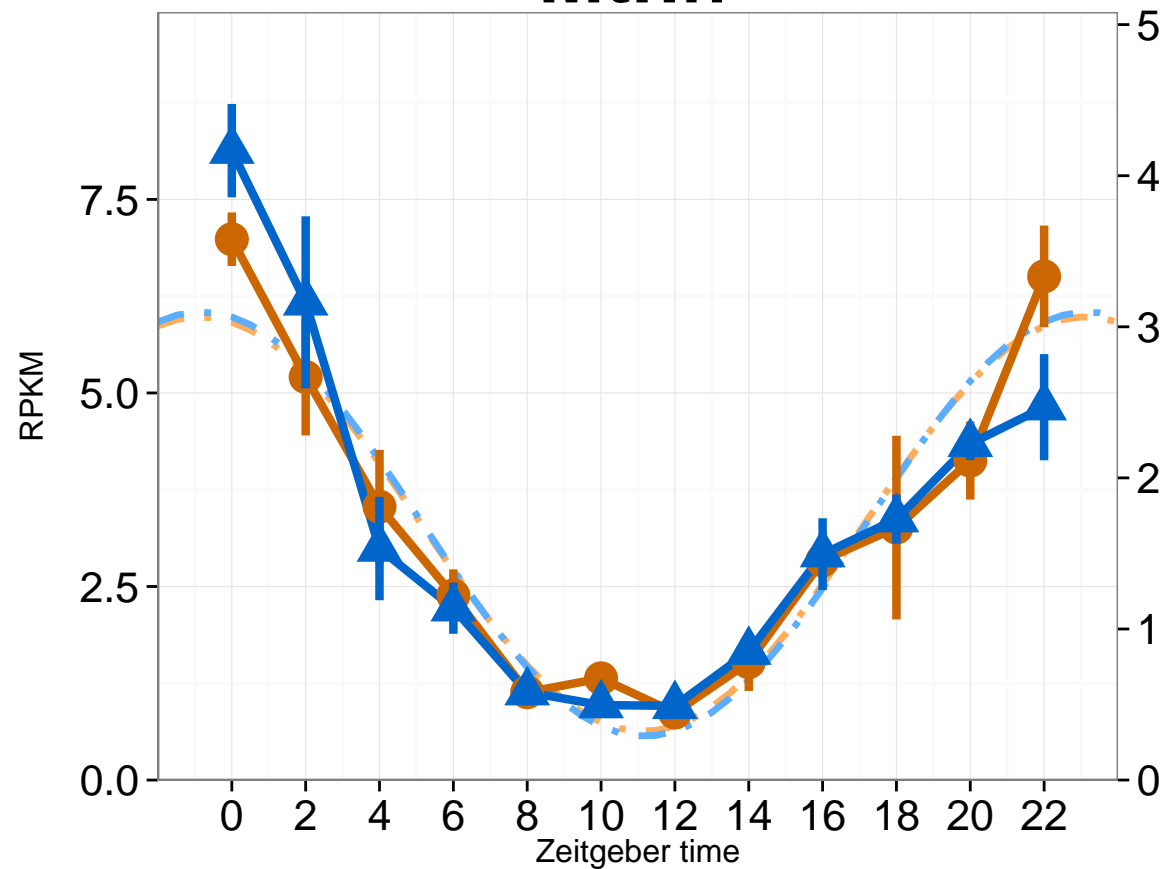

## Mthfr

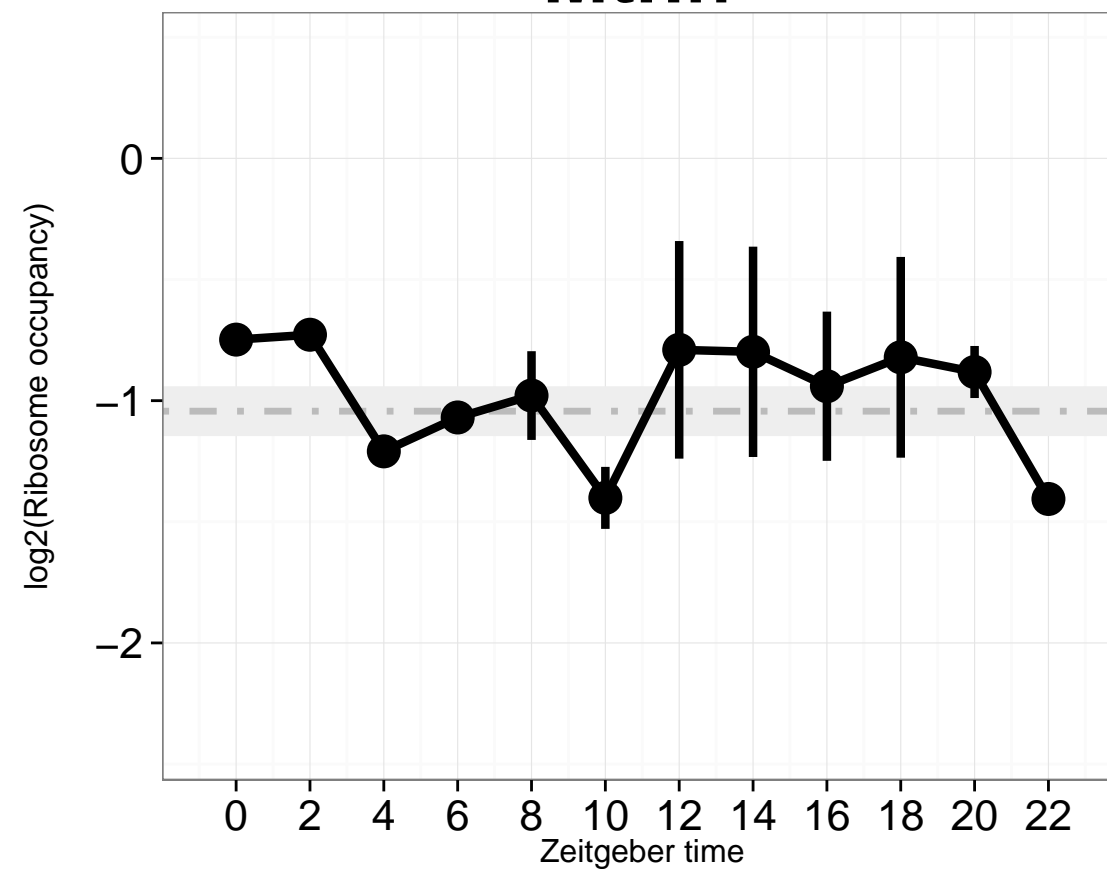

Supplement: SuppDataset_1.zip [file Mthfr_set_D.pdf › Supplemental Dataset 1/D-mRNA_rhythm_translation_rhyth/Mthfr_set_D.pdf]

# Mtm1

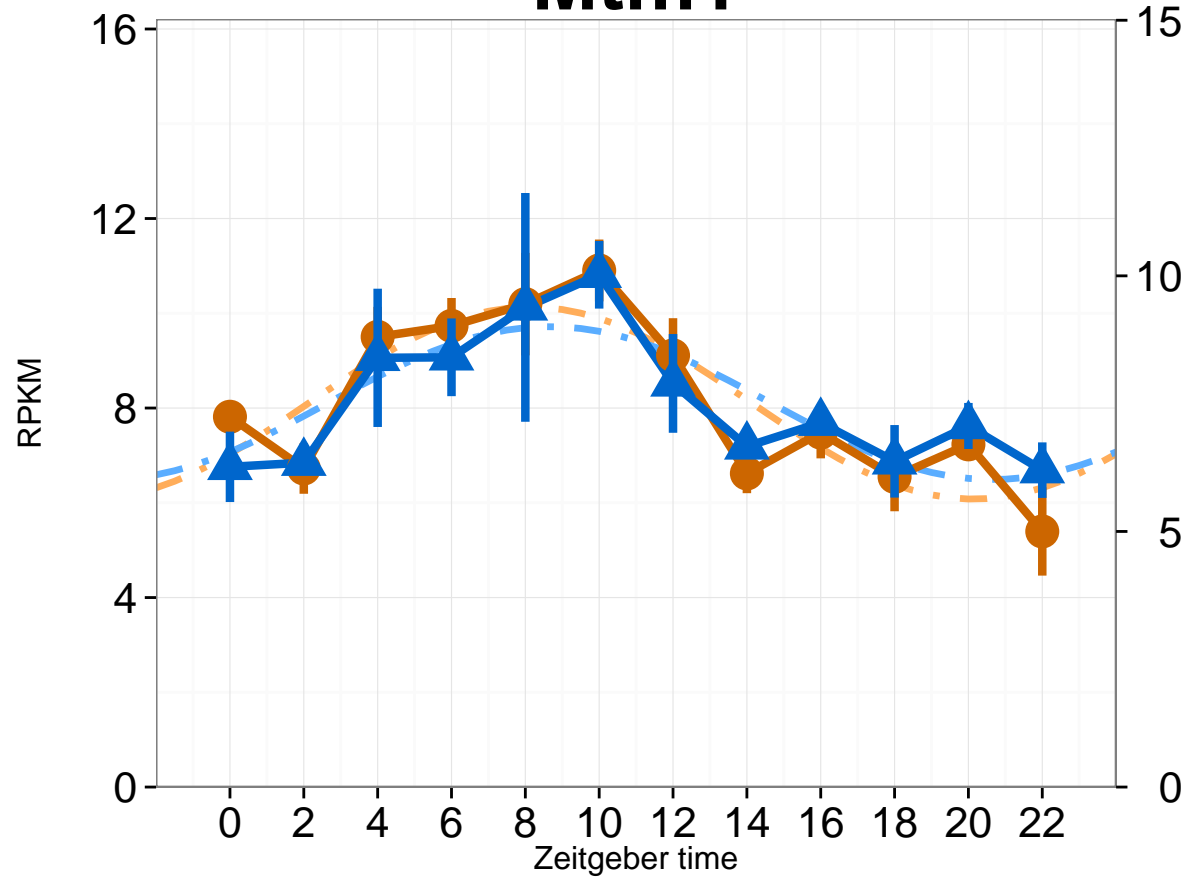

# Mtm1

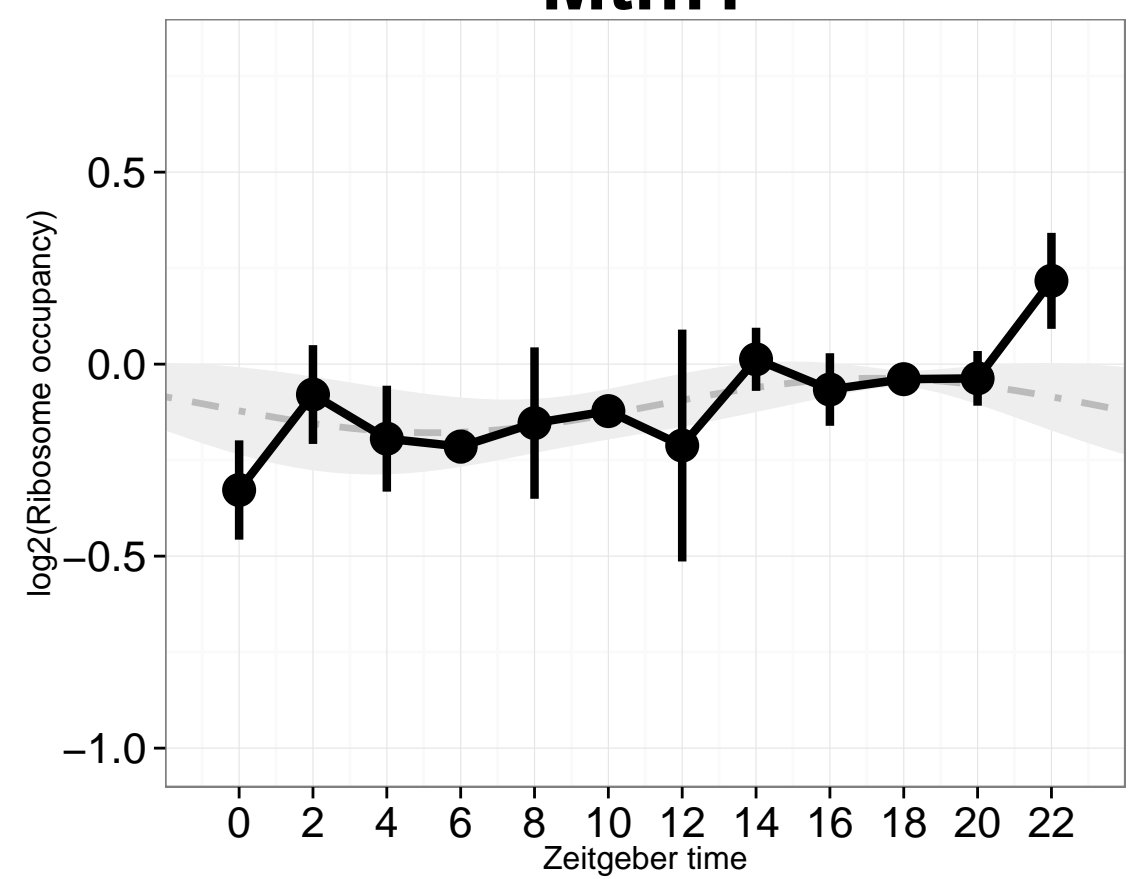

Supplement: SuppDataset_1.zip [file Mtm1_set_D.pdf › Supplemental Dataset 1/D-mRNA_rhythm_translation_rhyth/Mtm1_set_D.pdf]

## Mtor

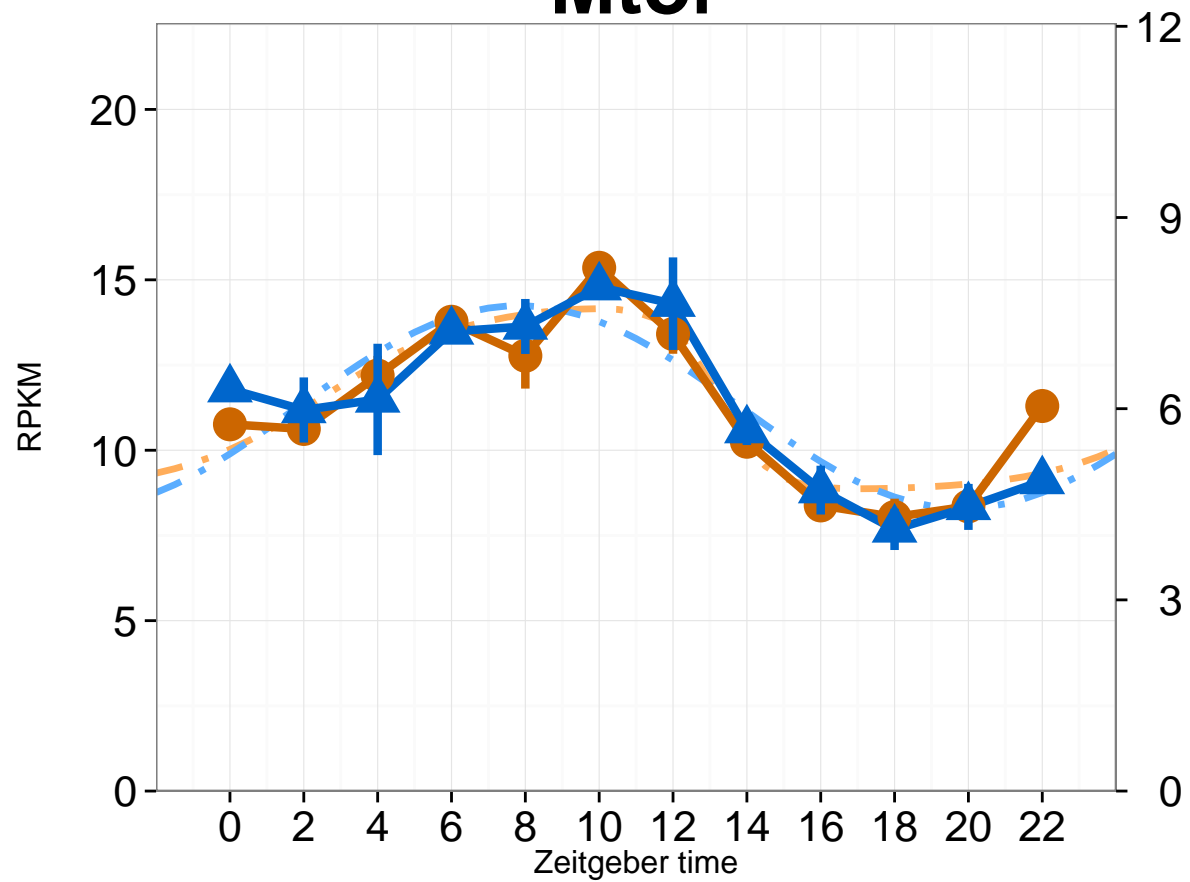

## Mtor

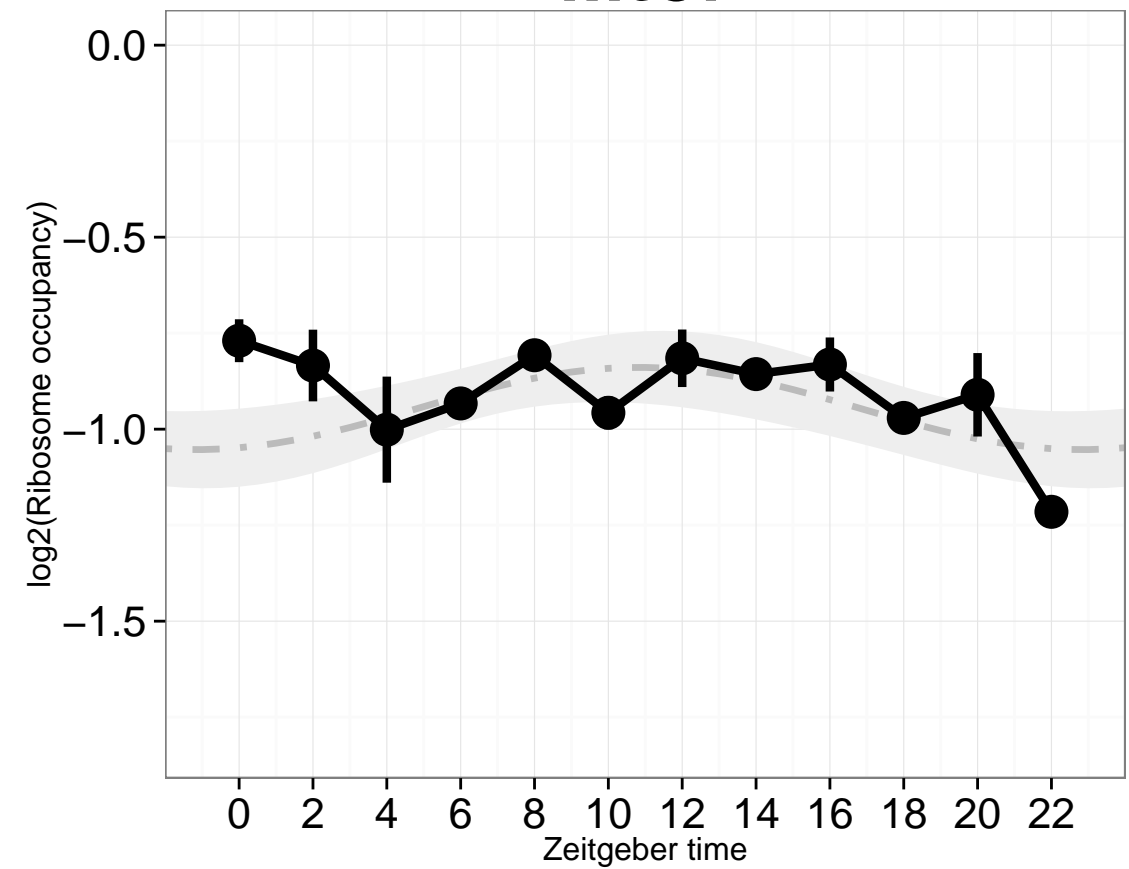

Supplement: SuppDataset_1.zip [file Mtor_set_D.pdf › Supplemental Dataset 1/D-mRNA_rhythm_translation_rhyth/Mtor_set_D.pdf]

# Mtrr

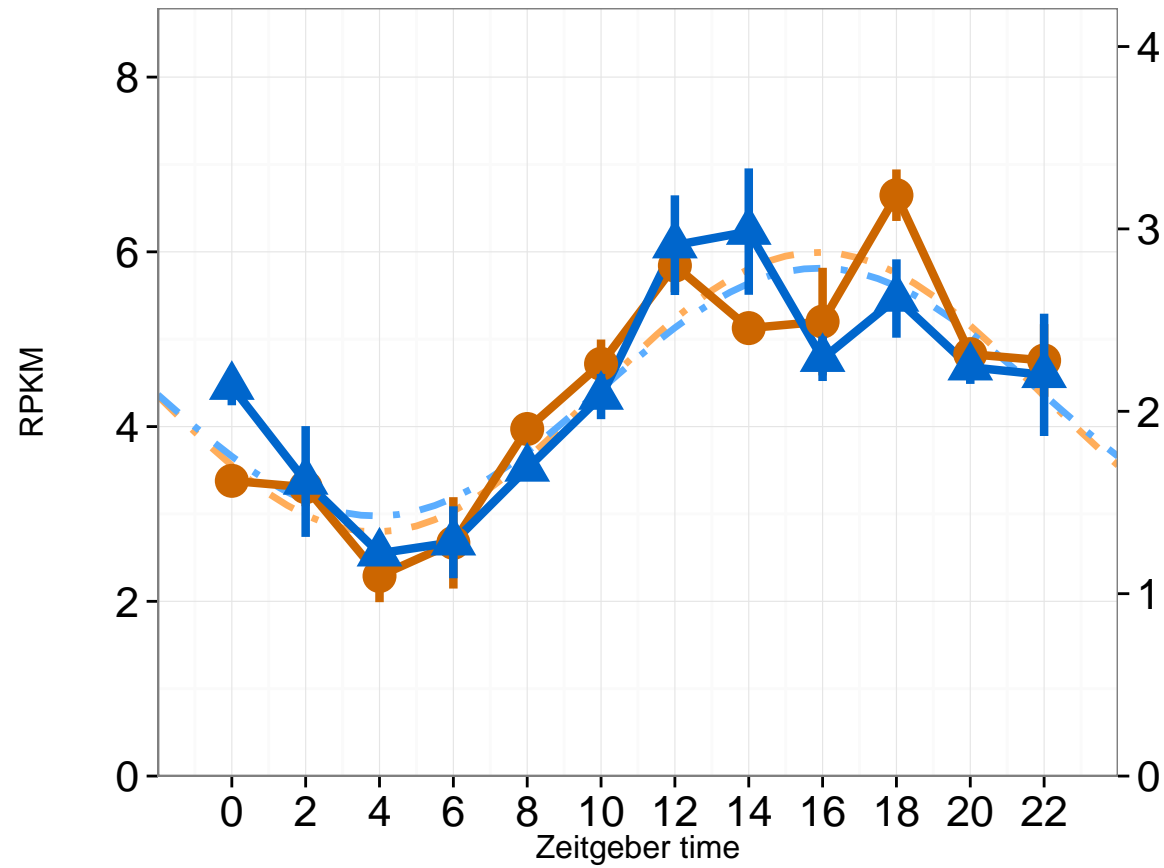

# Mtrr

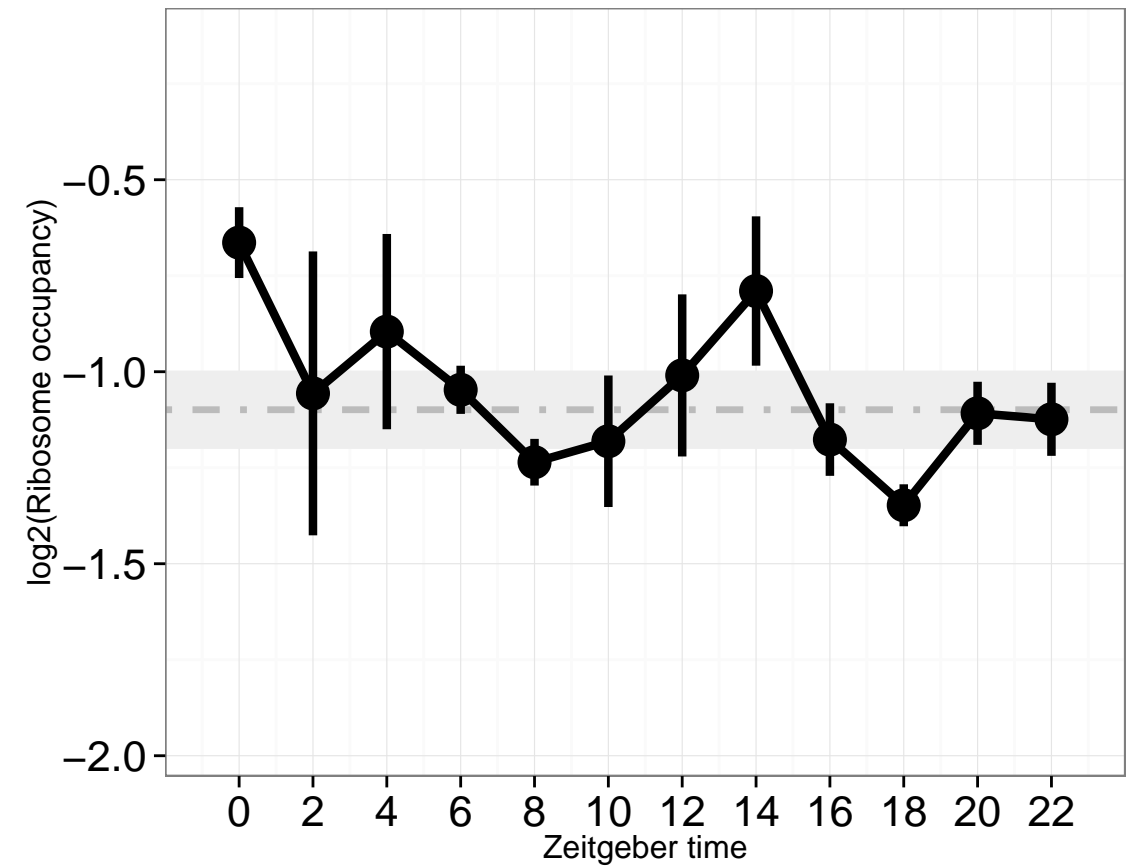

Supplement: SuppDataset_1.zip [file Mtrr_set_D.pdf › Supplemental Dataset 1/D-mRNA_rhythm_translation_rhyth/Mtrr_set_D.pdf]

## Mtss1

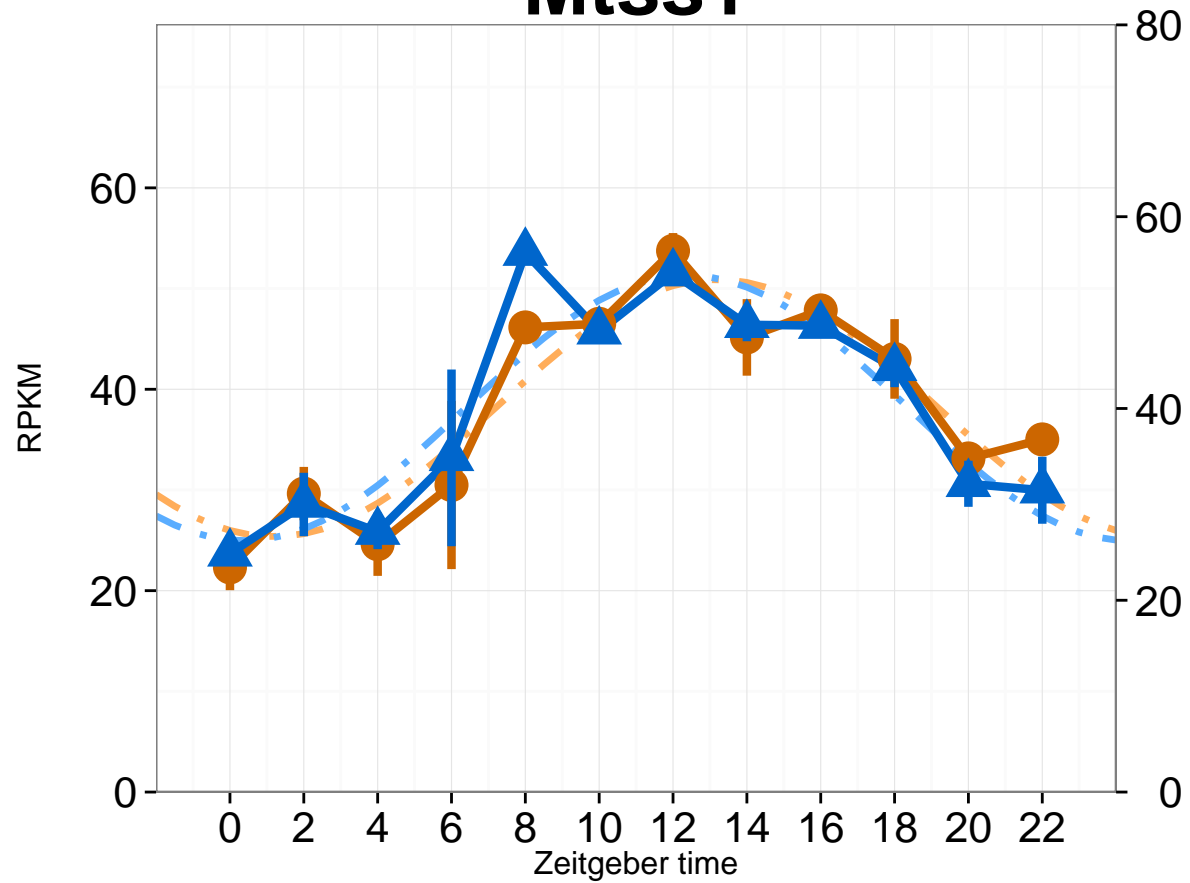

## Mtss1

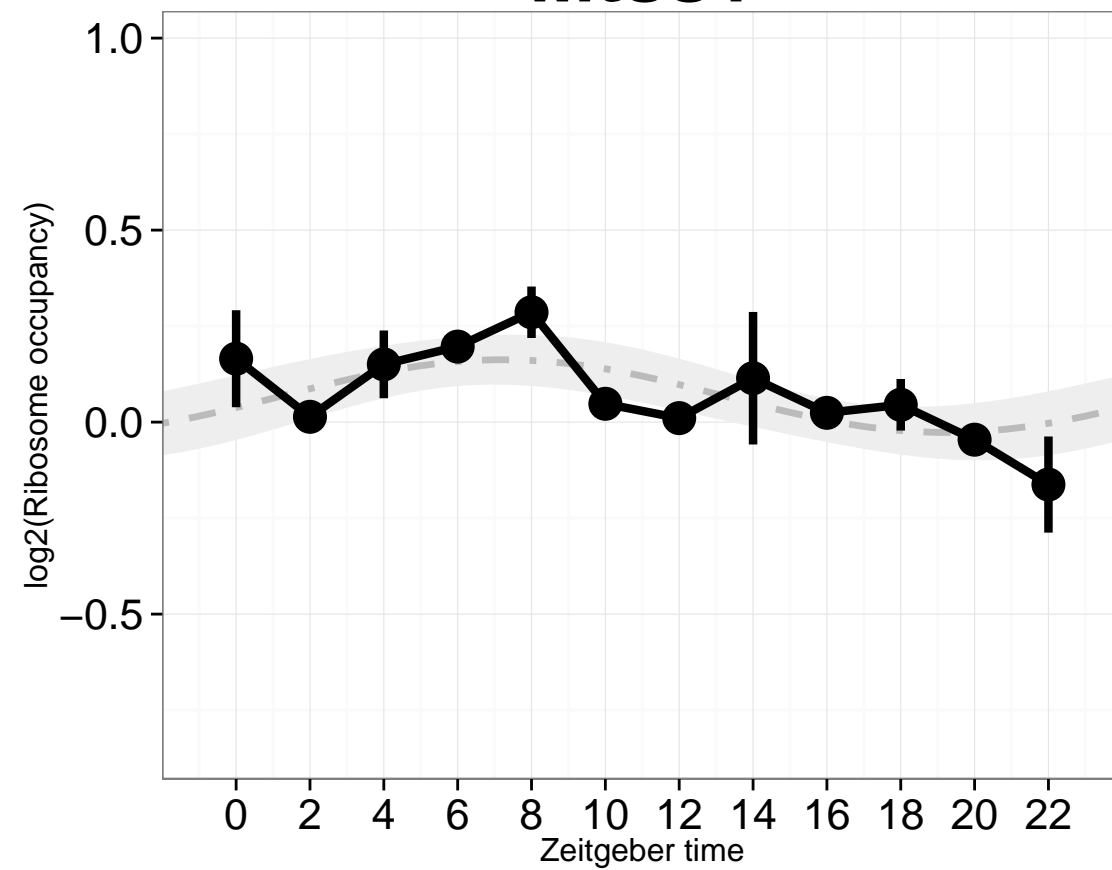

Supplement: SuppDataset_1.zip [file Mtss1_set_D.pdf › Supplemental Dataset 1/D-mRNA_rhythm_translation_rhyth/Mtss1_set_D.pdf]

# Mtx3

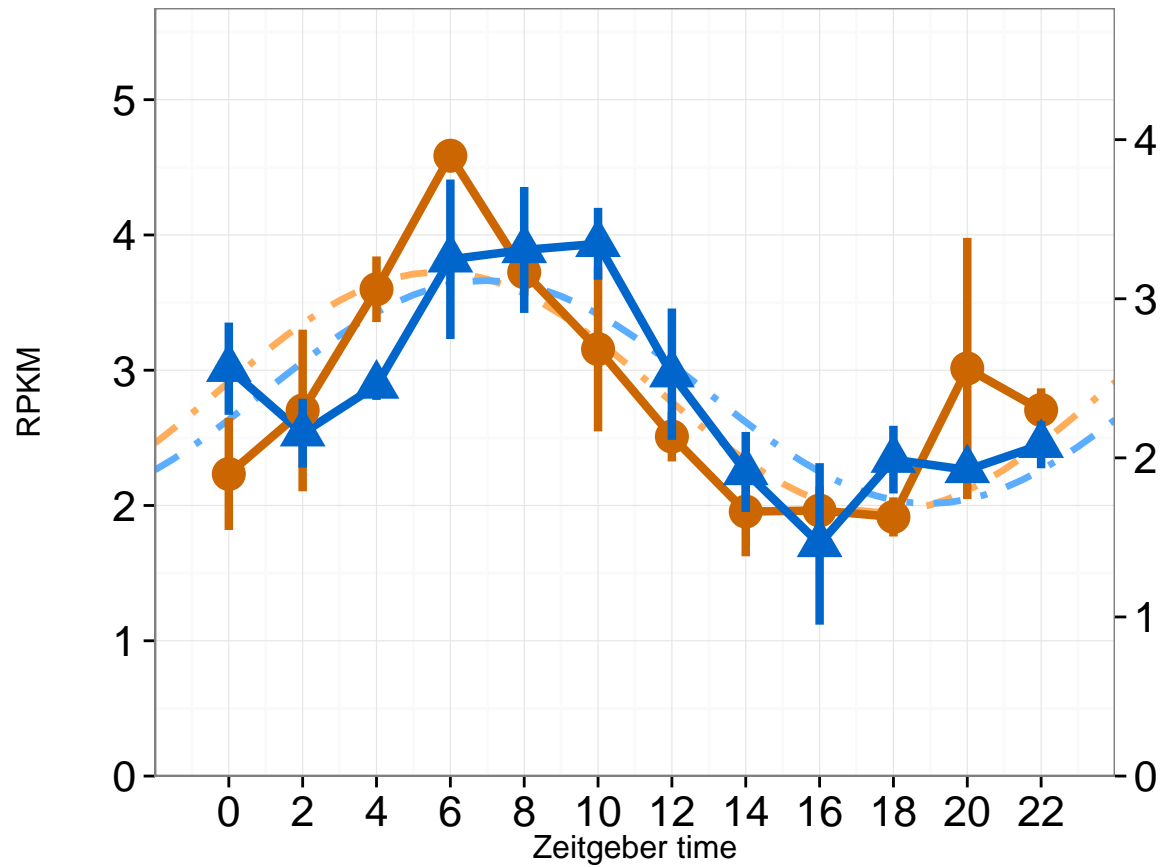

# Mtx3

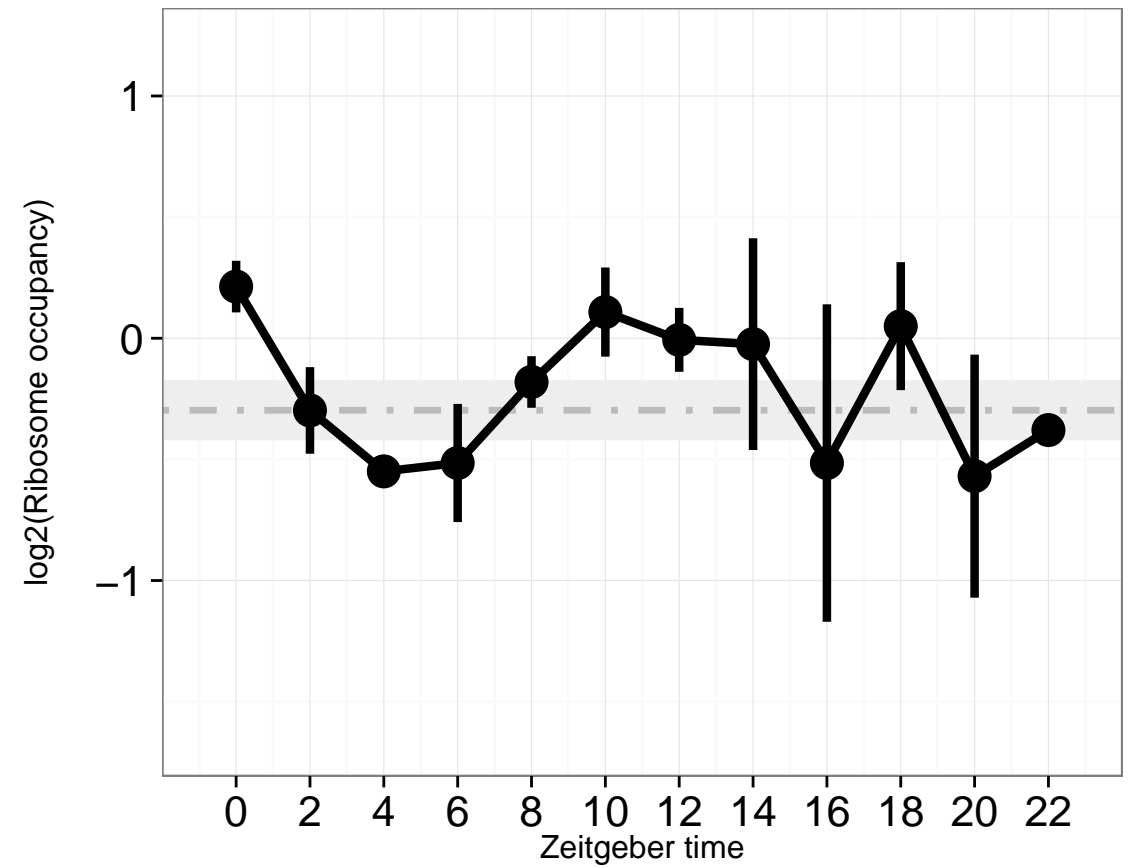

Supplement: SuppDataset_1.zip [file Mtx3_set_D.pdf › Supplemental Dataset 1/D-mRNA_rhythm_translation_rhyth/Mtx3_set_D.pdf]

# Mup4

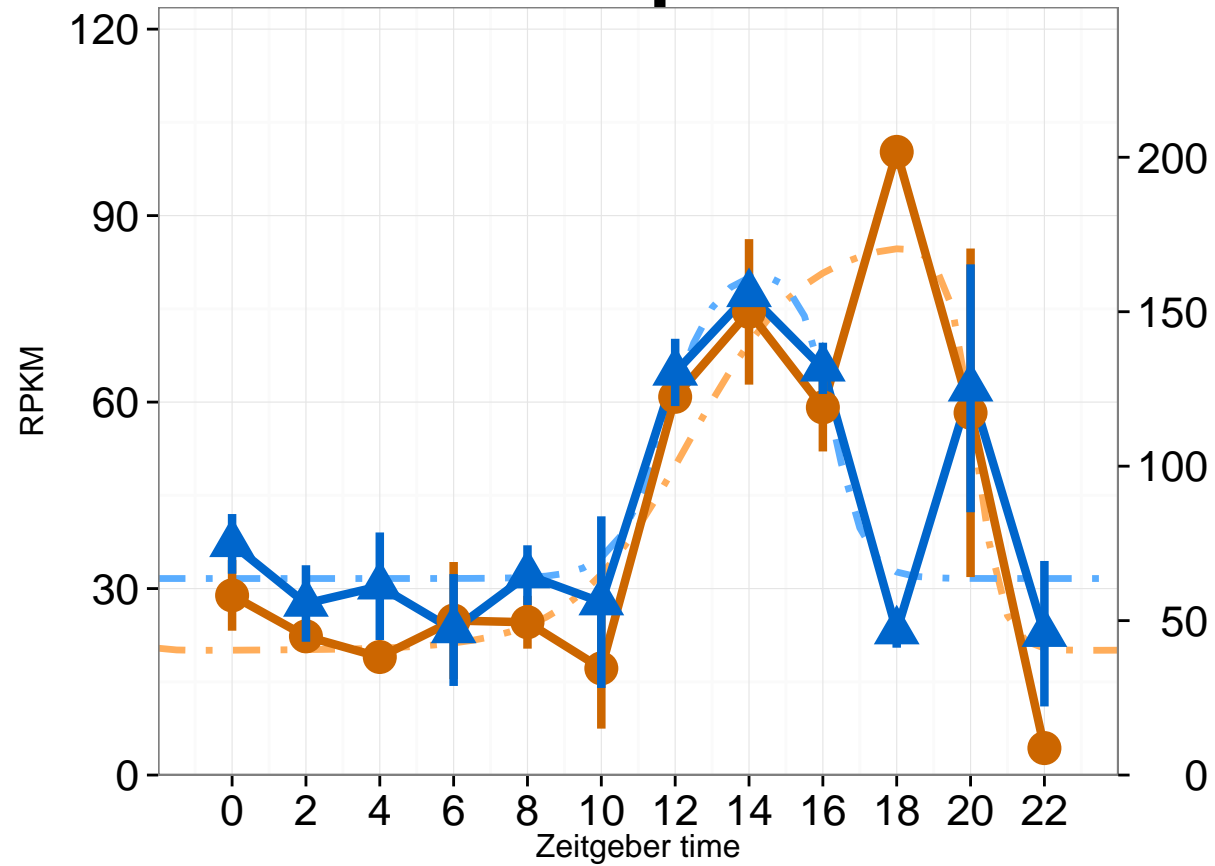

# Mup4

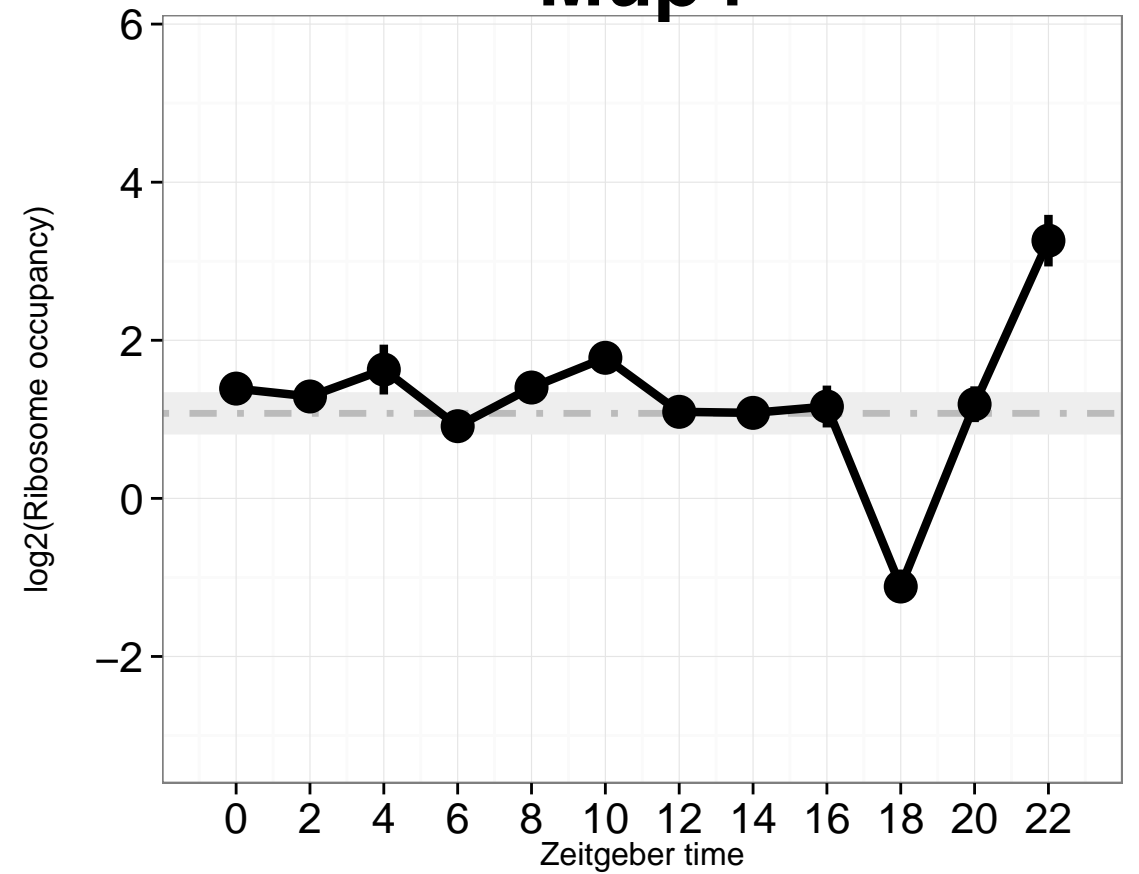

Supplement: SuppDataset_1.zip [file Mup4_set_D.pdf › Supplemental Dataset 1/D-mRNA_rhythm_translation_rhyth/Mup4_set_D.pdf]

# Mup6

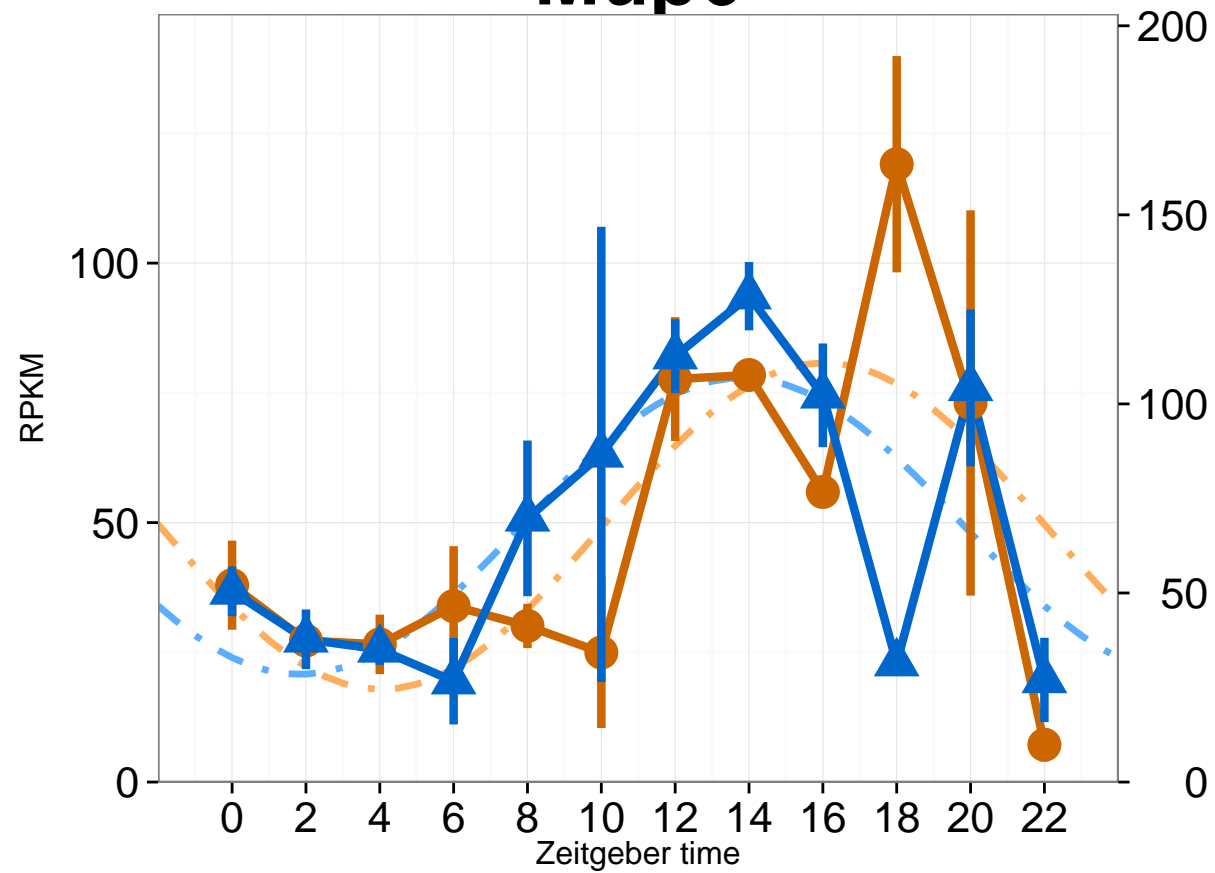

# Mup6

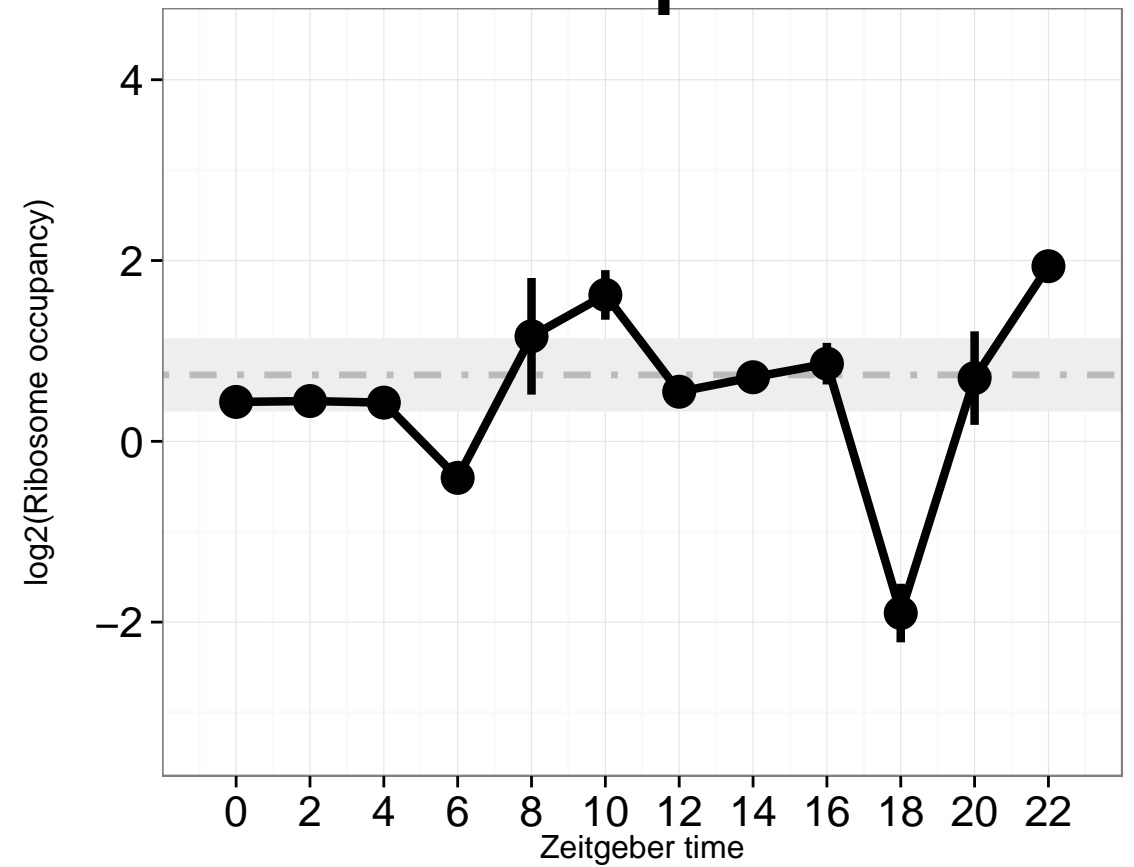

Supplement: SuppDataset_1.zip [file Mup6_set_D.pdf › Supplemental Dataset 1/D-mRNA_rhythm_translation_rhyth/Mup6_set_D.pdf]

# Mup8

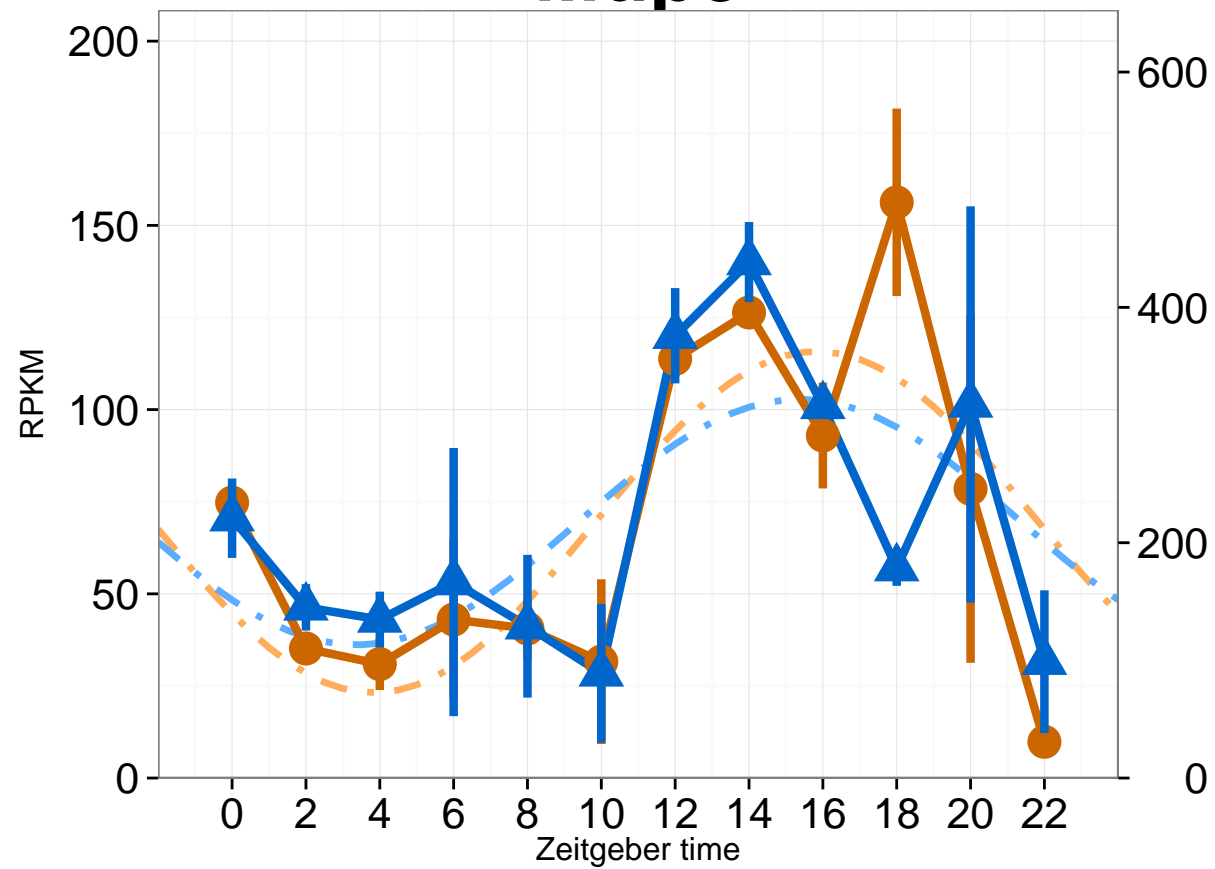

# Mup8

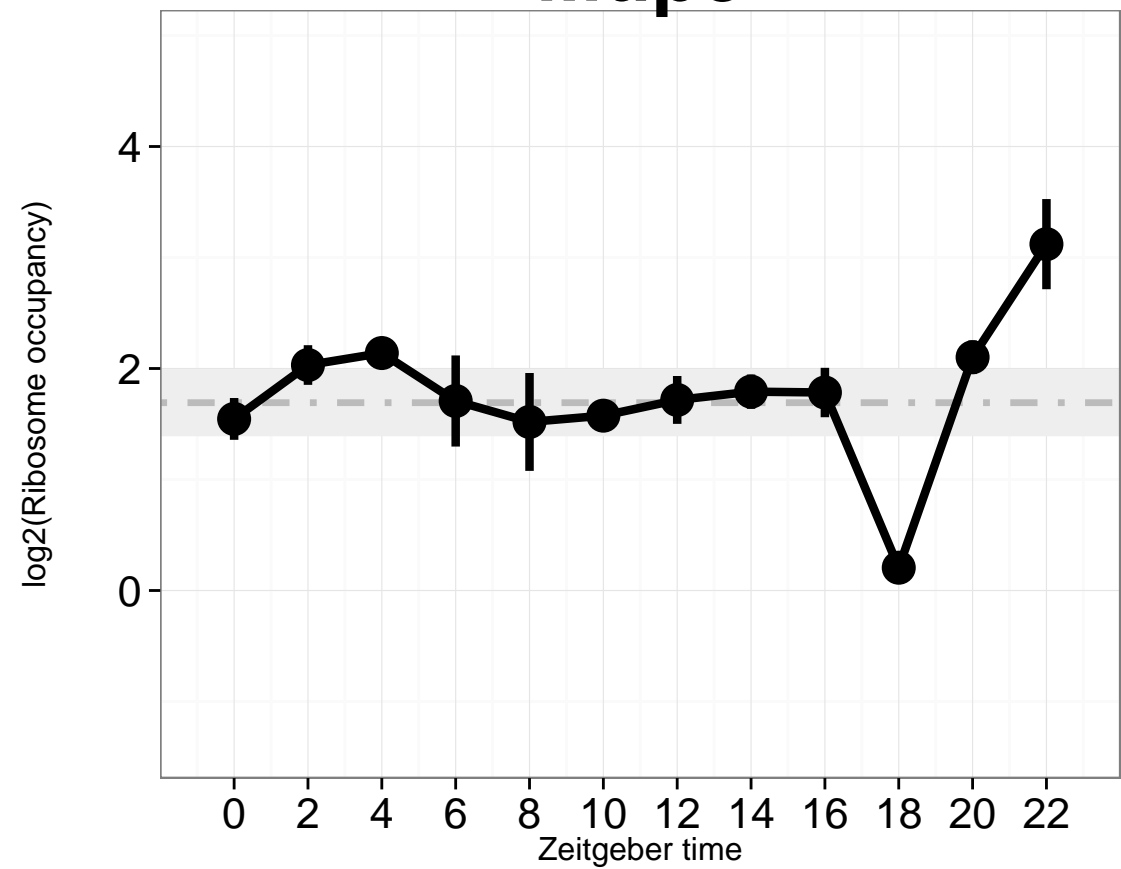

Supplement: SuppDataset_1.zip [file Mup8_set_D.pdf › Supplemental Dataset 1/D-mRNA_rhythm_translation_rhyth/Mup8_set_D.pdf]

## Mvk

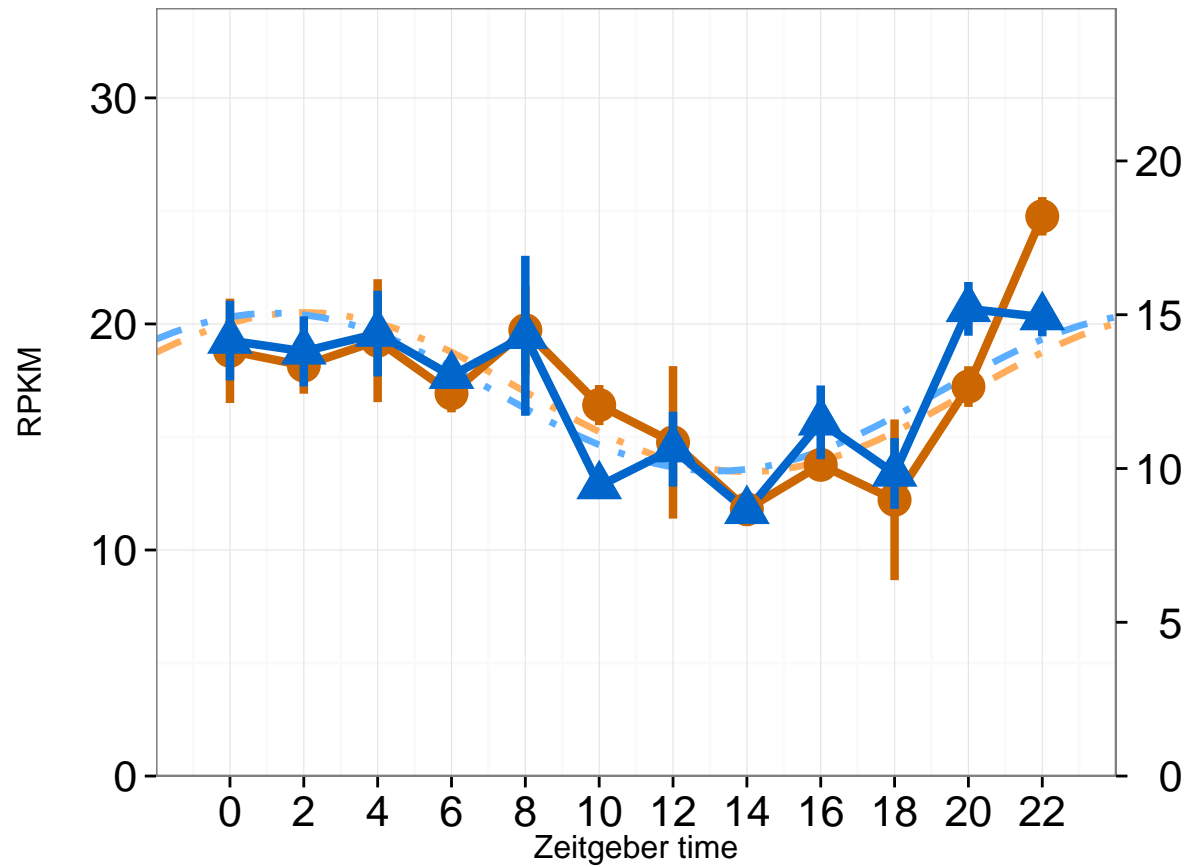

## Mvk

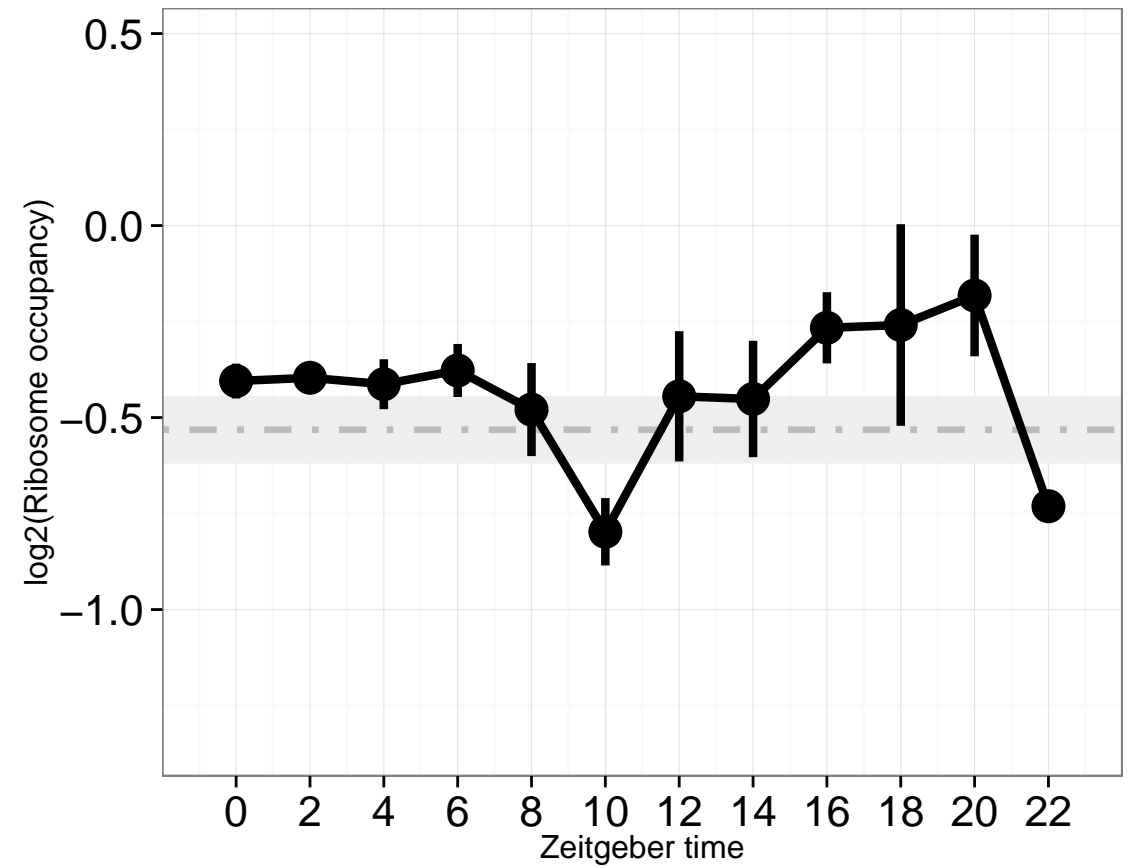

Supplement: SuppDataset_1.zip [file Mvk_set_D.pdf › Supplemental Dataset 1/D-mRNA_rhythm_translation_rhyth/Mvk_set_D.pdf]

# Mx2

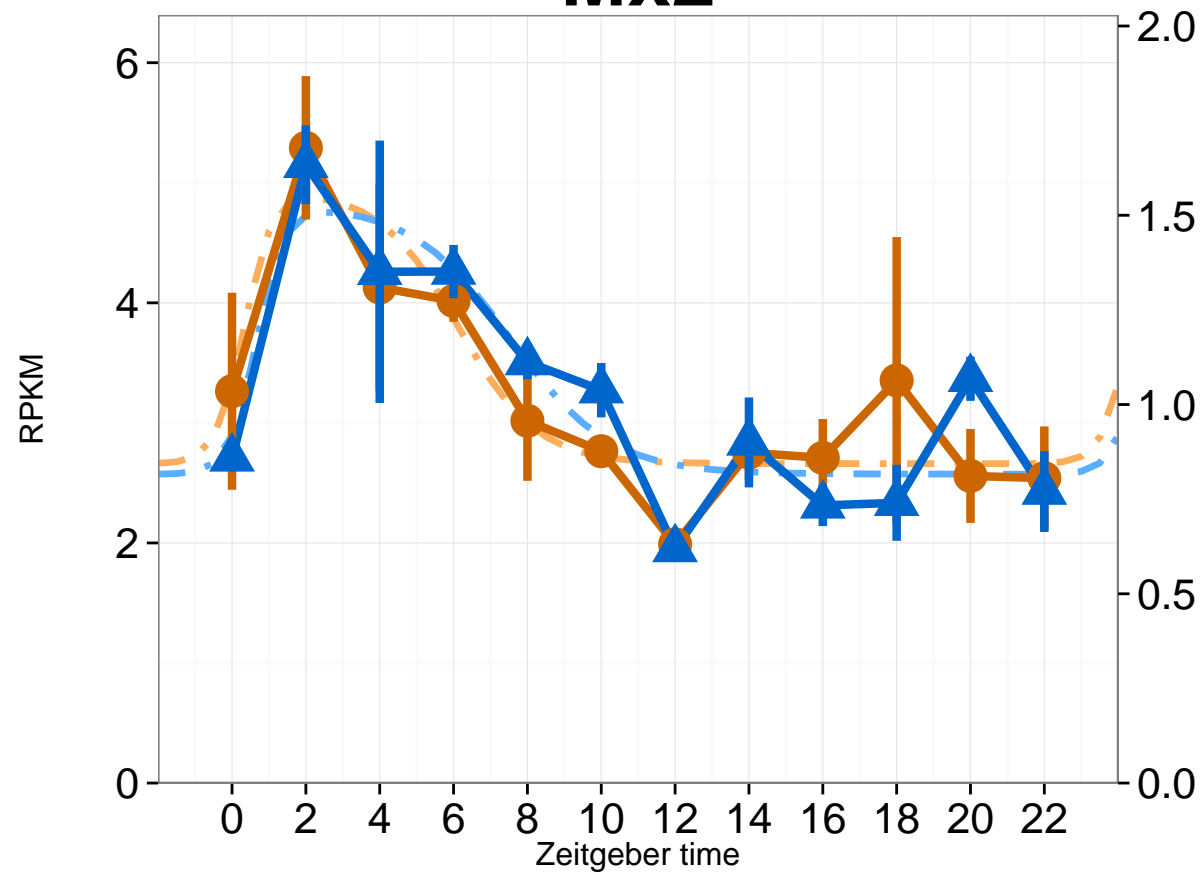

# Mx2

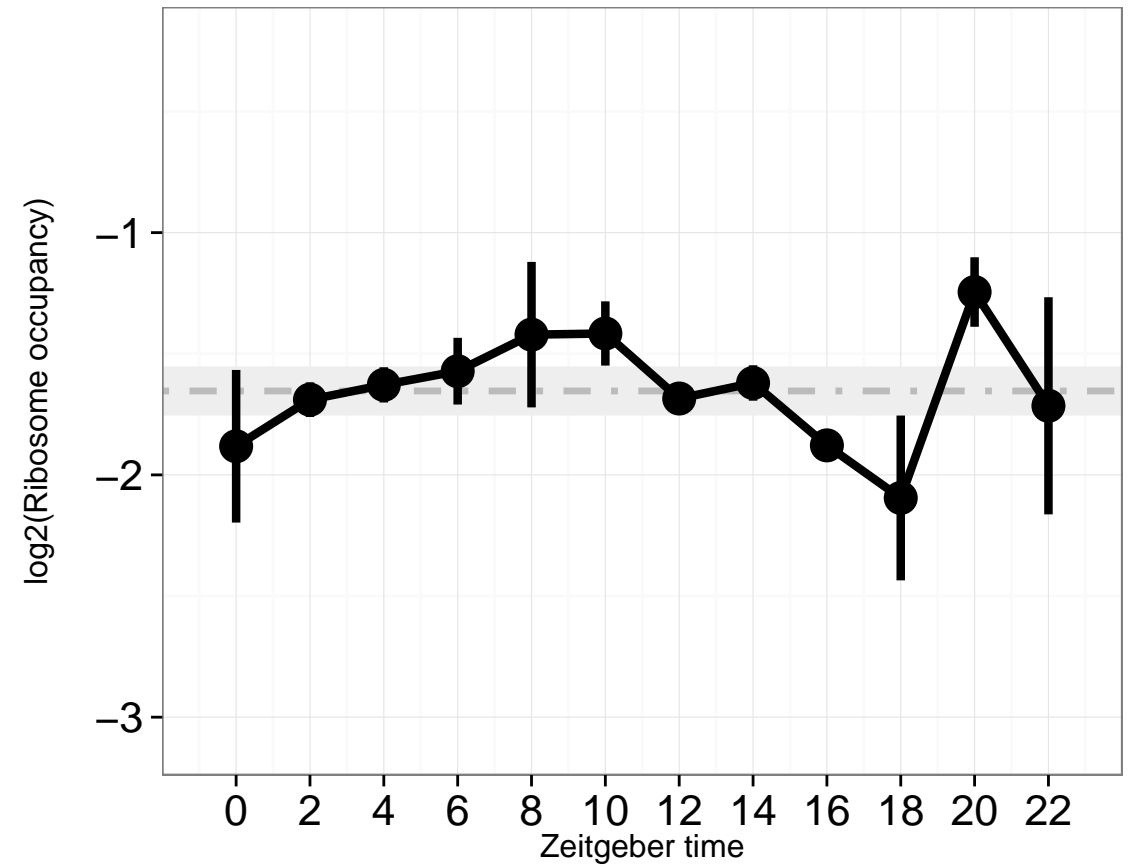

Supplement: SuppDataset_1.zip [file Mx2_set_D.pdf › Supplemental Dataset 1/D-mRNA_rhythm_translation_rhyth/Mx2_set_D.pdf]

N4bp2l1

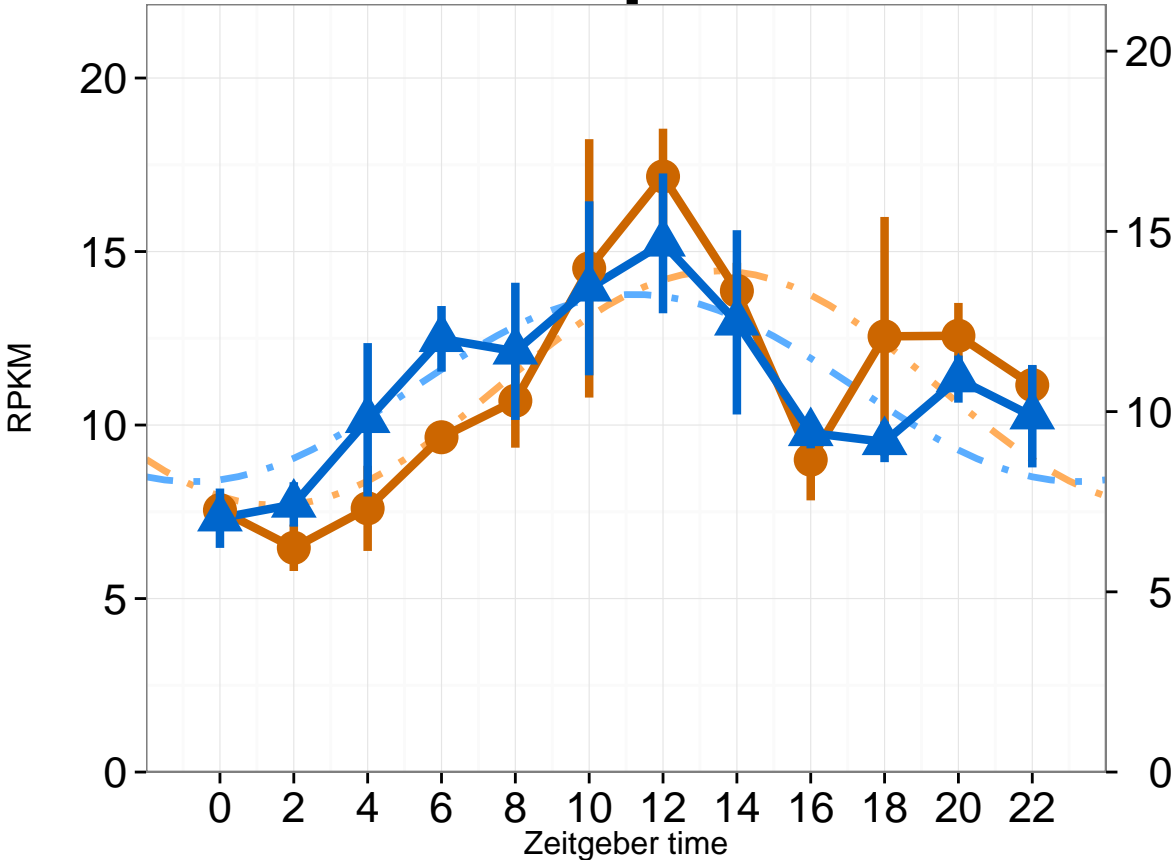

N4bp2l1

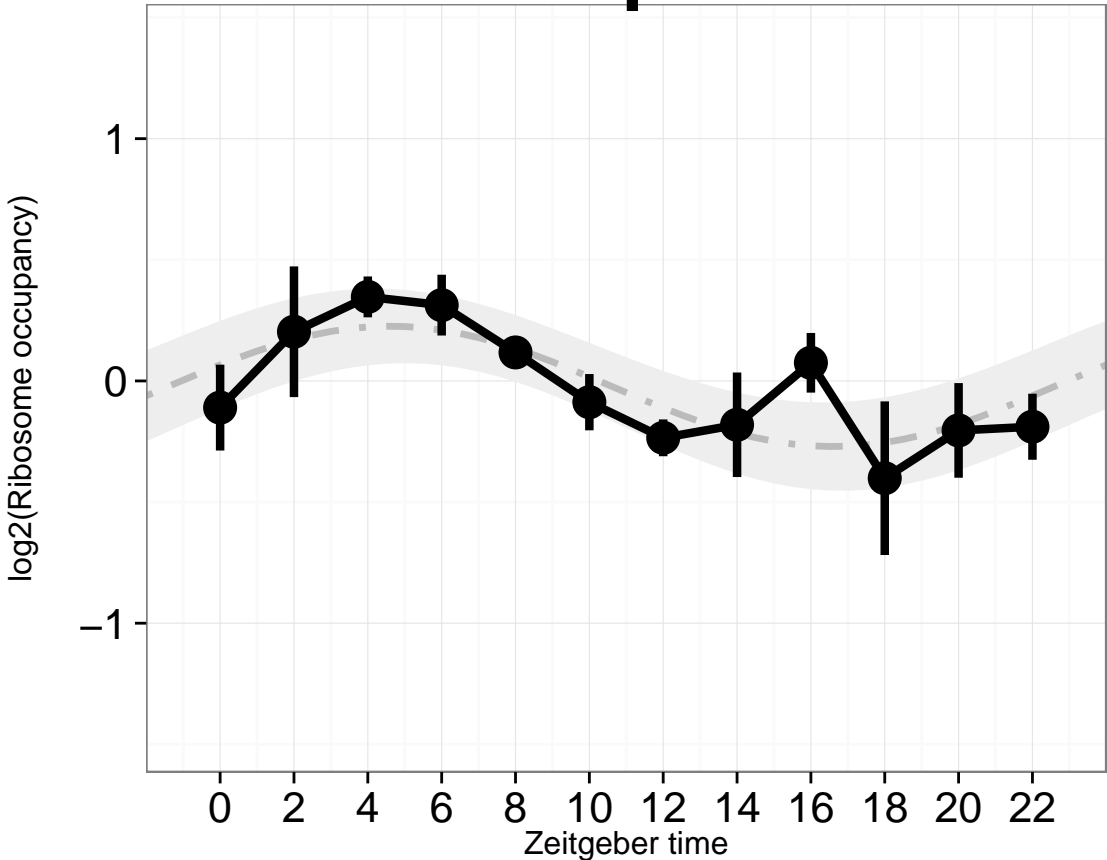

Supplement: SuppDataset_1.zip [file N4bp2l1_set_D.pdf › Supplemental Dataset 1/D-mRNA_rhythm_translation_rhyth/N4bp2l1_set_D.pdf]

## N6amt2

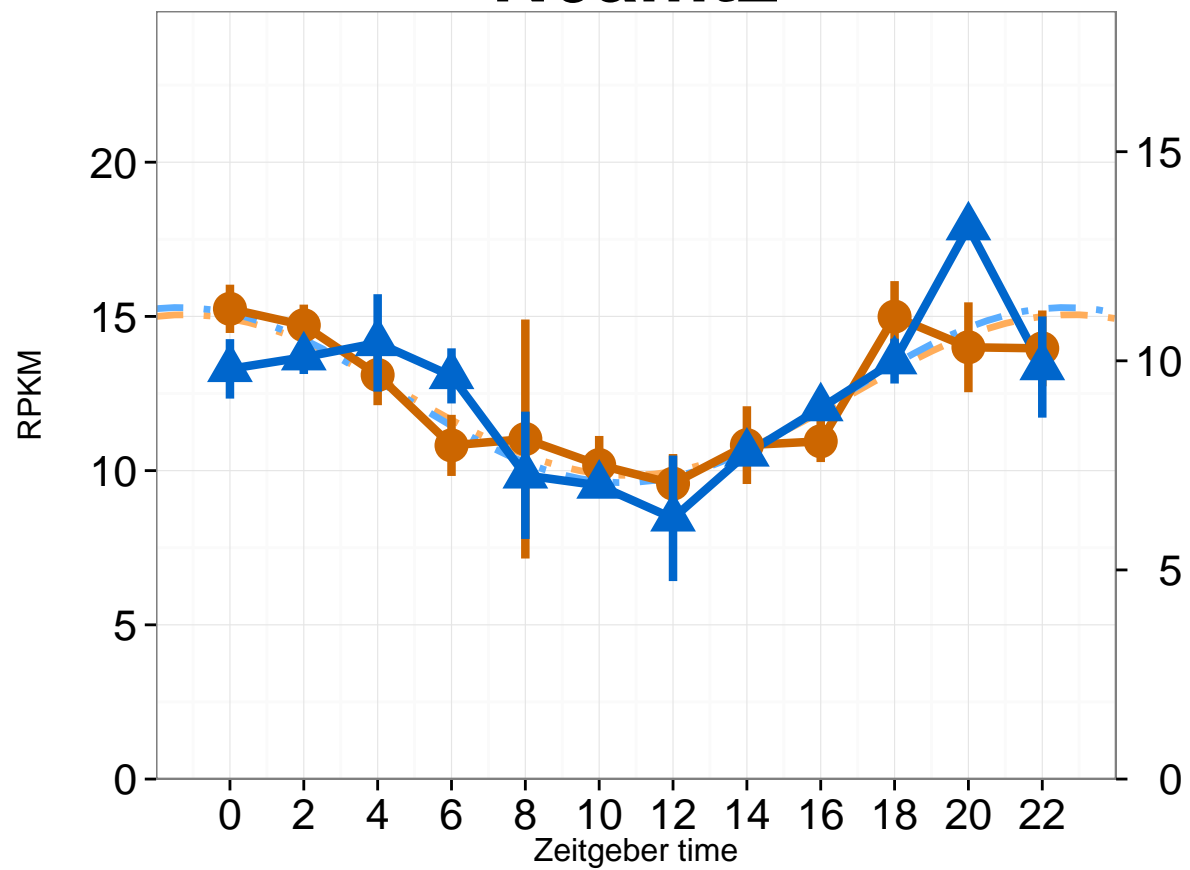

## N6amt2

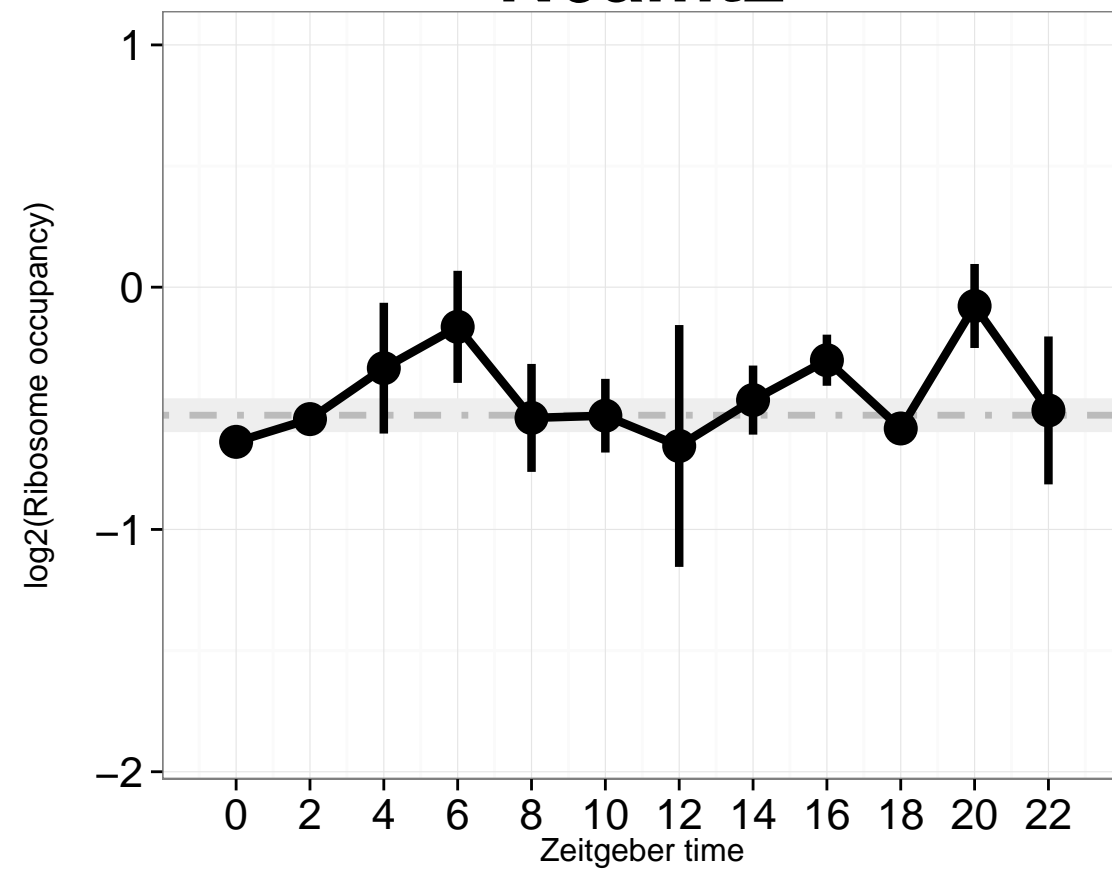

Supplement: SuppDataset_1.zip [file N6amt2_set_D.pdf › Supplemental Dataset 1/D-mRNA_rhythm_translation_rhyth/N6amt2_set_D.pdf]

## Naa60

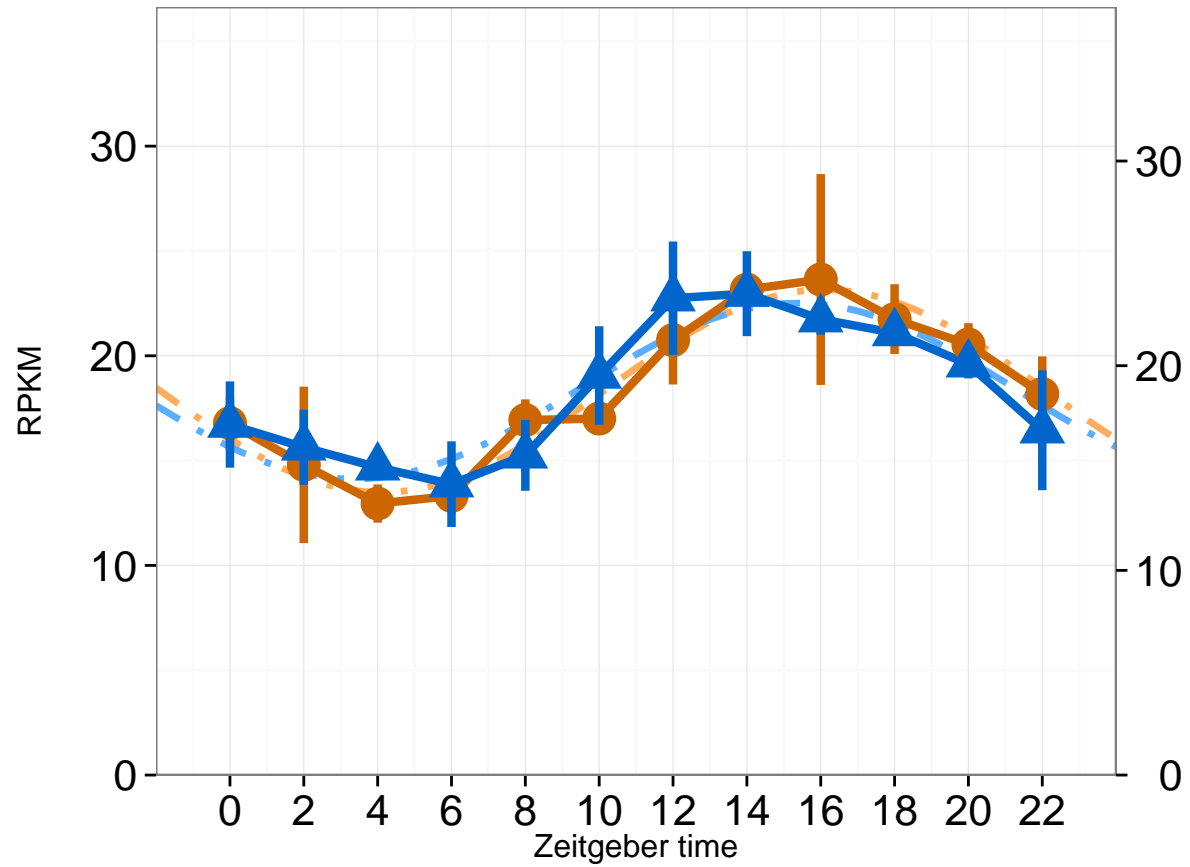

## Naa60

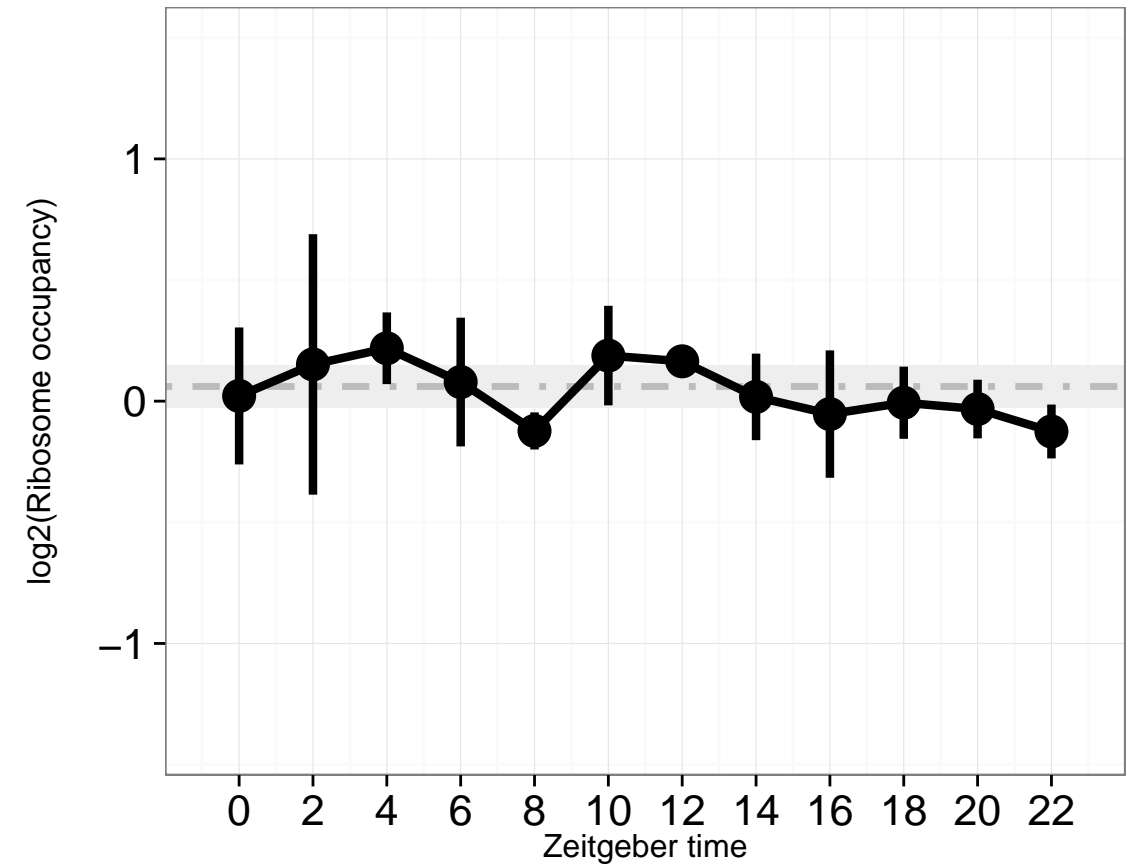

Supplement: SuppDataset_1.zip [file Naa60_set_D.pdf › Supplemental Dataset 1/D-mRNA_rhythm_translation_rhyth/Naa60_set_D.pdf]

## Nab2

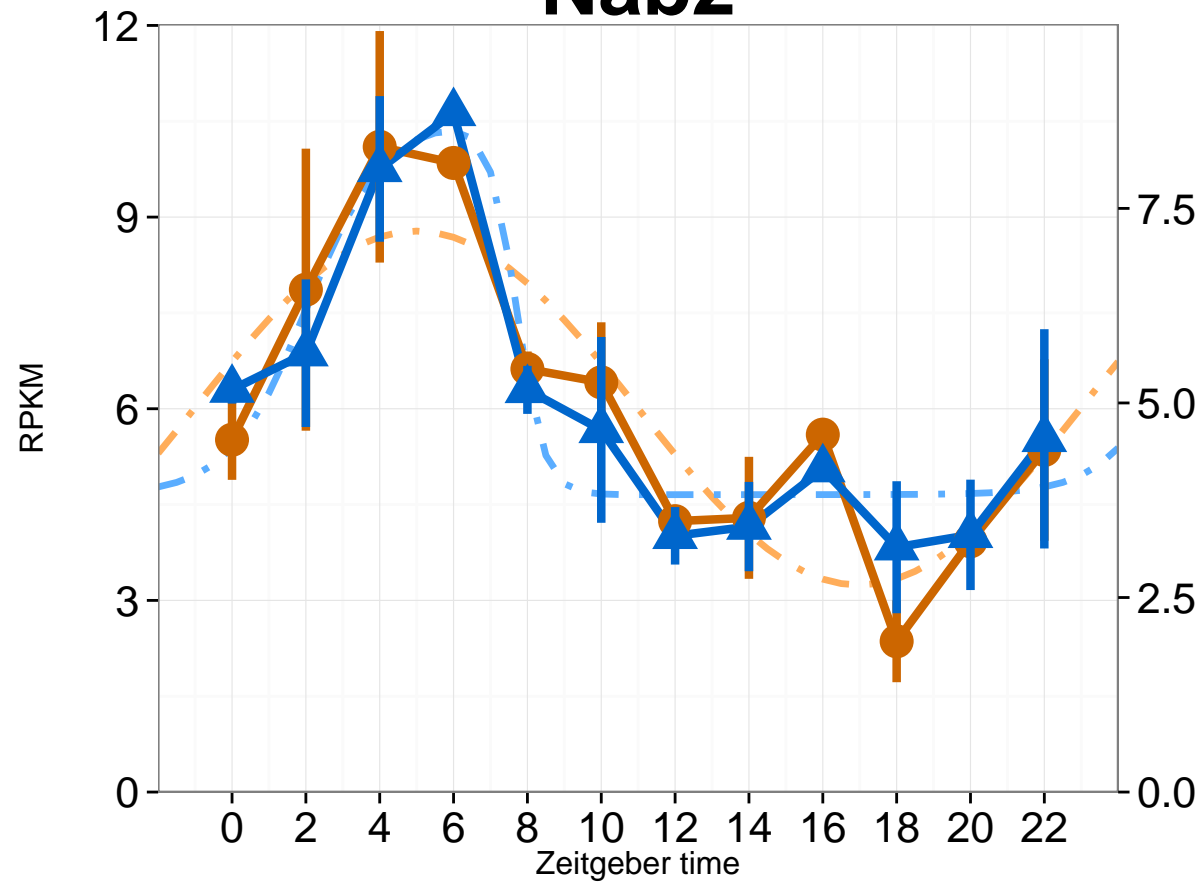

## Nab2

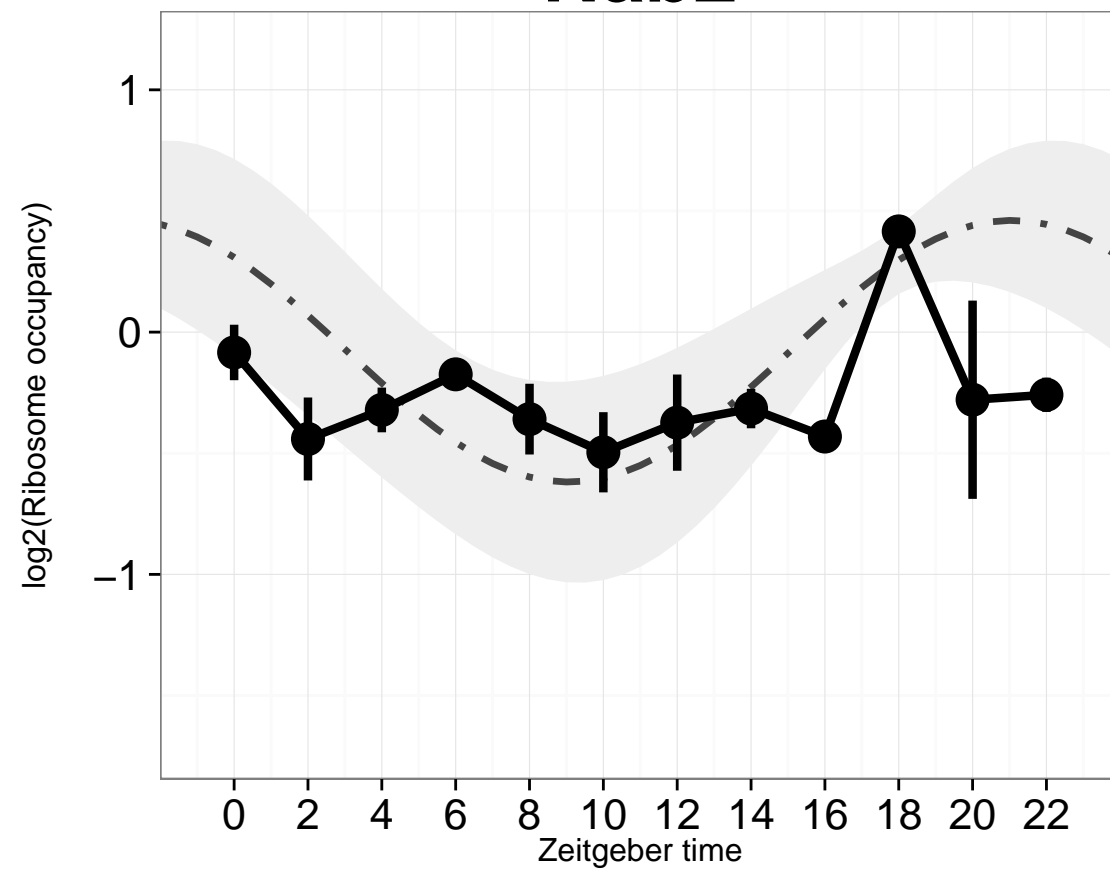

Supplement: SuppDataset_1.zip [file Nab2_set_D.pdf › Supplemental Dataset 1/D-mRNA_rhythm_translation_rhyth/Nab2_set_D.pdf]

## Nabp1

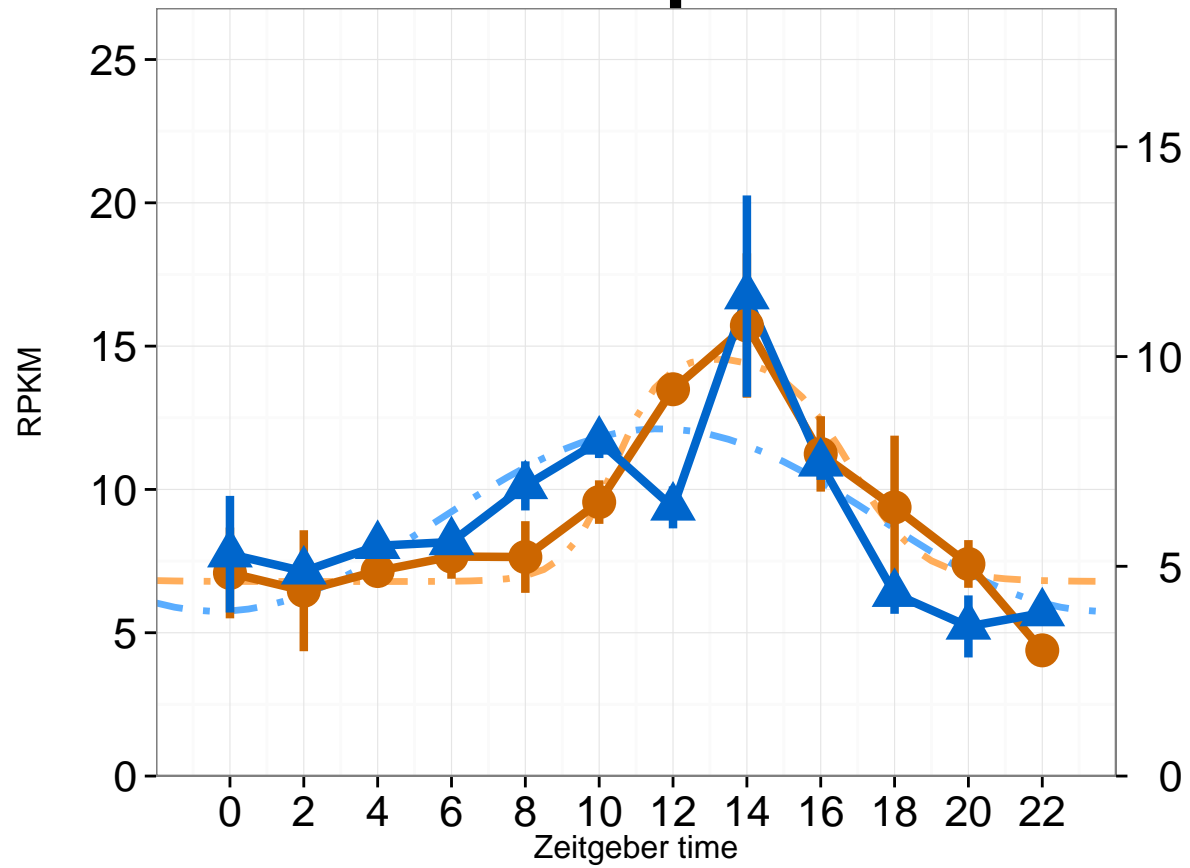

## Nabp1

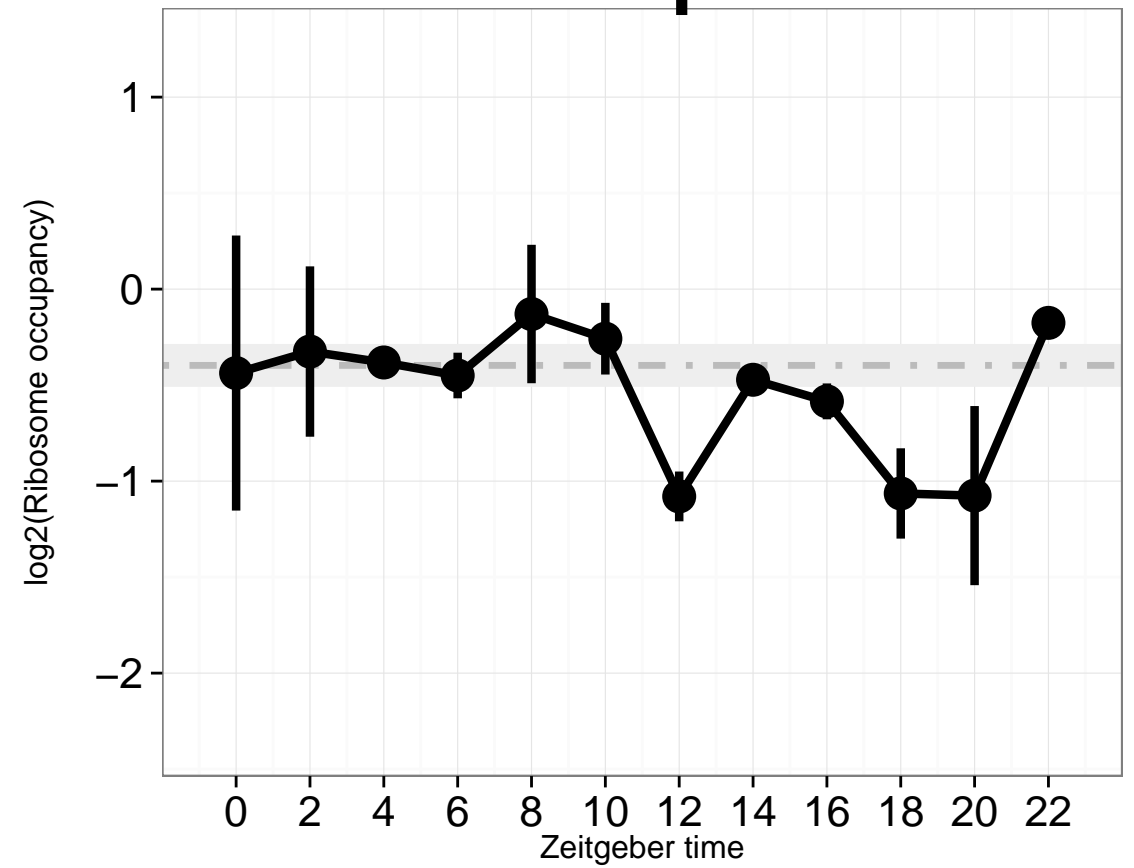

Supplement: SuppDataset_1.zip [file Nabp1_set_D.pdf › Supplemental Dataset 1/D-mRNA_rhythm_translation_rhyth/Nabp1_set_D.pdf]

## Nampt

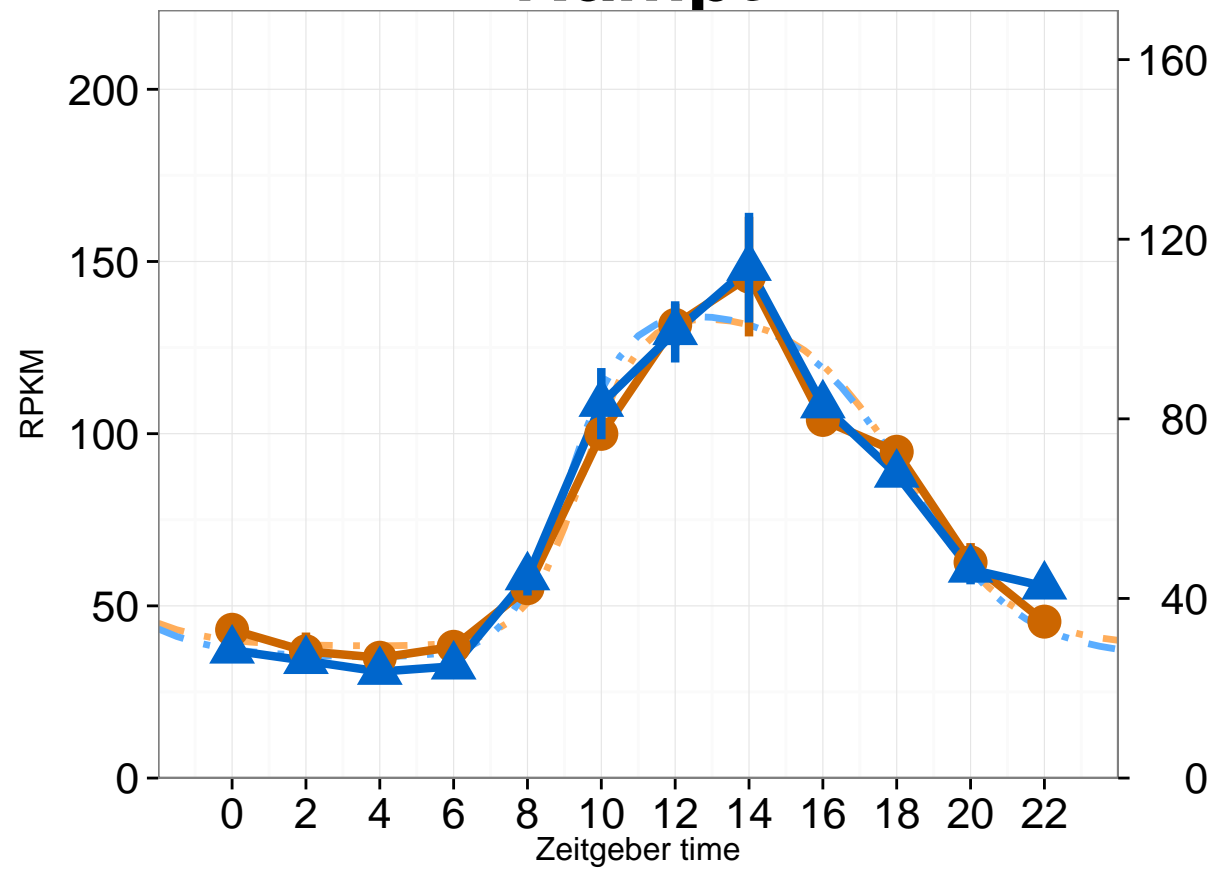

## Nampt

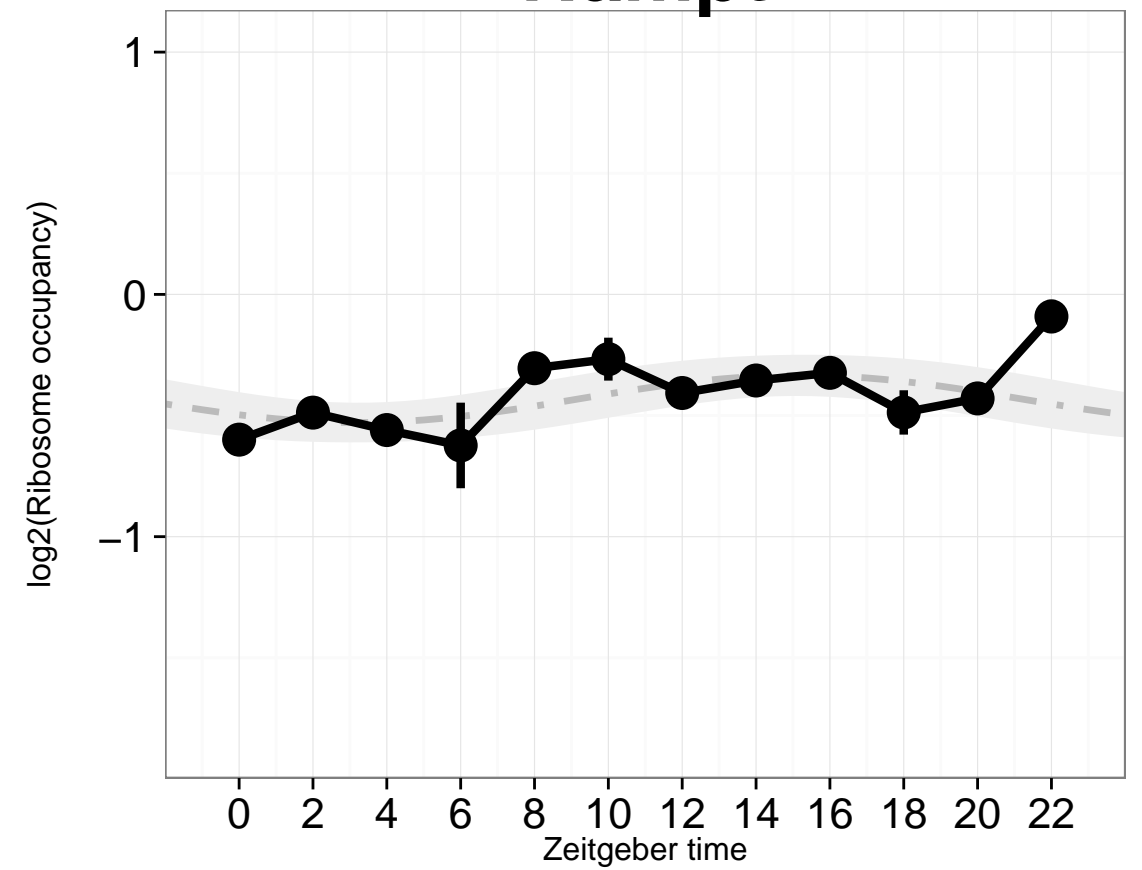

Supplement: SuppDataset_1.zip [file Nampt_set_D.pdf › Supplemental Dataset 1/D-mRNA_rhythm_translation_rhyth/Nampt_set_D.pdf]

# Nap1l3

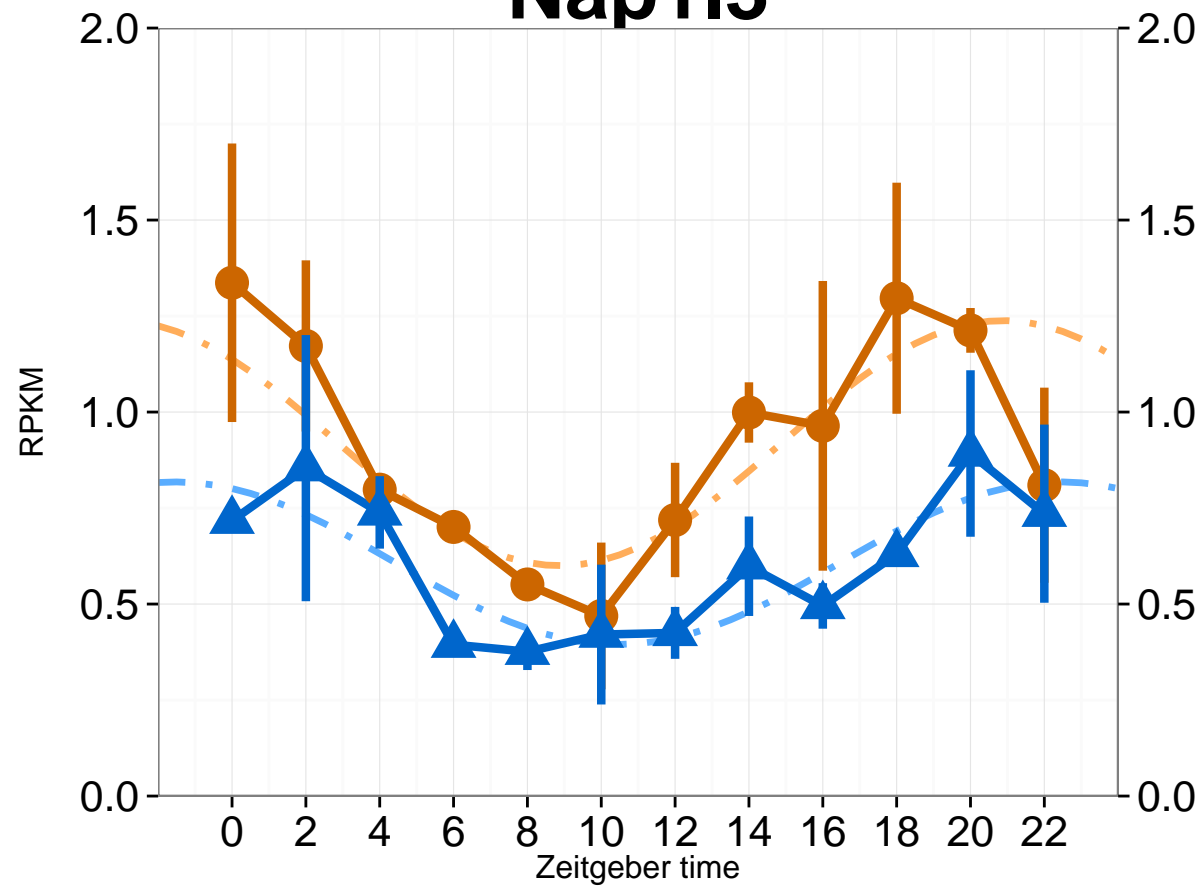

# Nap1l3

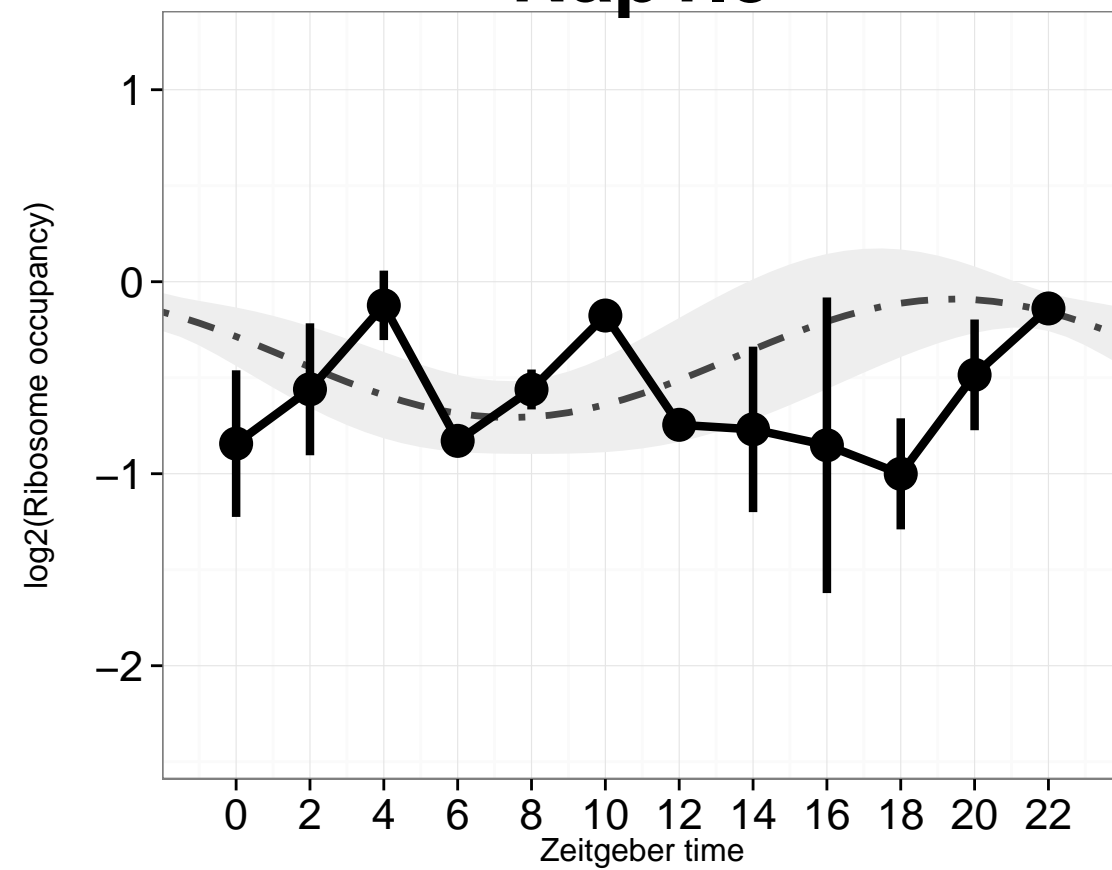

Supplement: SuppDataset_1.zip [file Nap1l3_set_D.pdf › Supplemental Dataset 1/D-mRNA_rhythm_translation_rhyth/Nap1l3_set_D.pdf]

## Narf

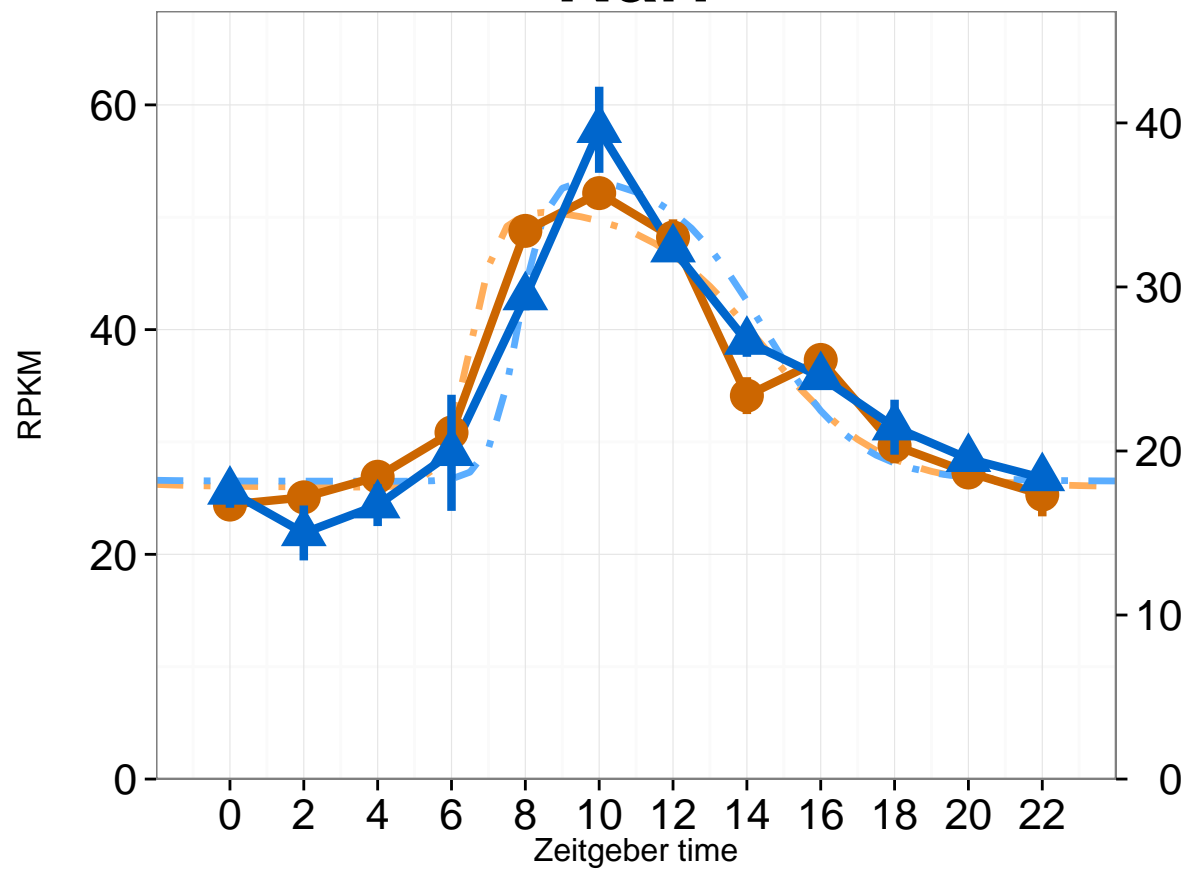

## Narf

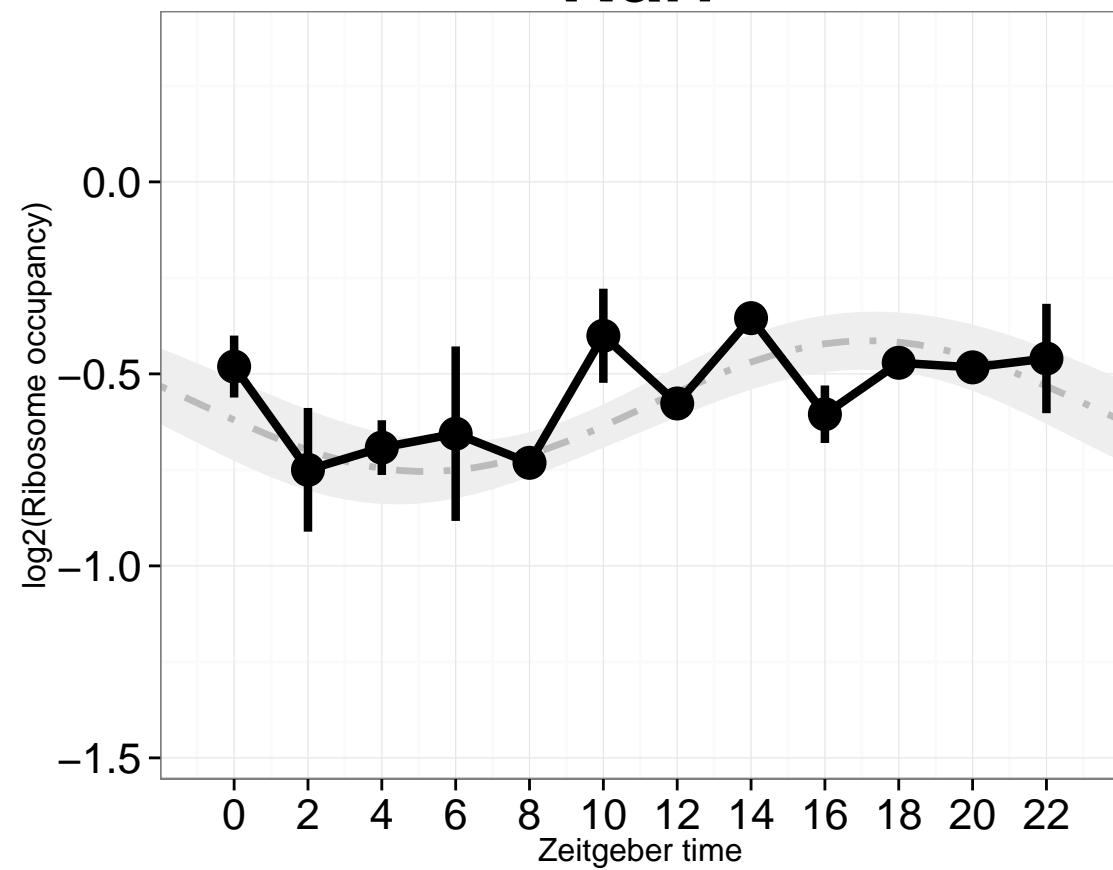

Supplement: SuppDataset_1.zip [file Narf_set_D.pdf › Supplemental Dataset 1/D-mRNA_rhythm_translation_rhyth/Narf_set_D.pdf]

## Nat6

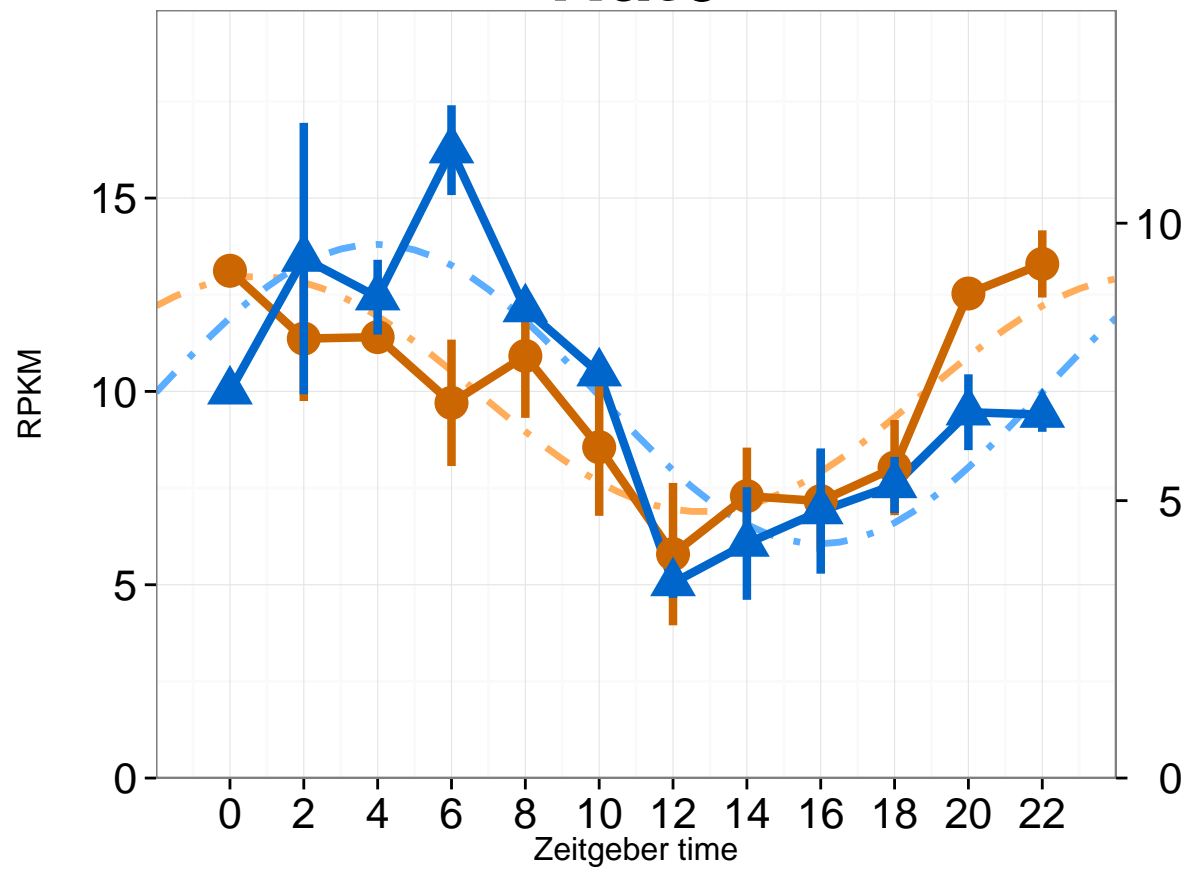

## Nat6

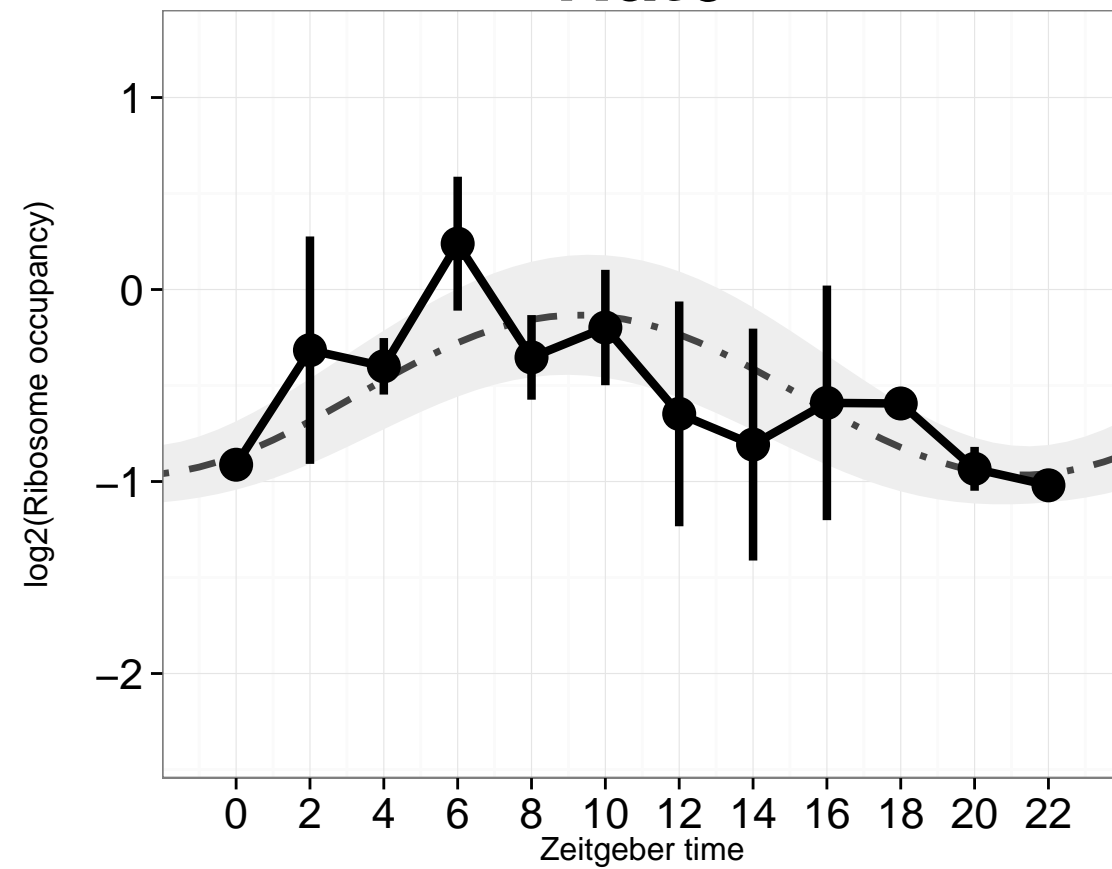

Supplement: SuppDataset_1.zip [file Nat6_set_D.pdf › Supplemental Dataset 1/D-mRNA_rhythm_translation_rhyth/Nat6_set_D.pdf]

## Nat8

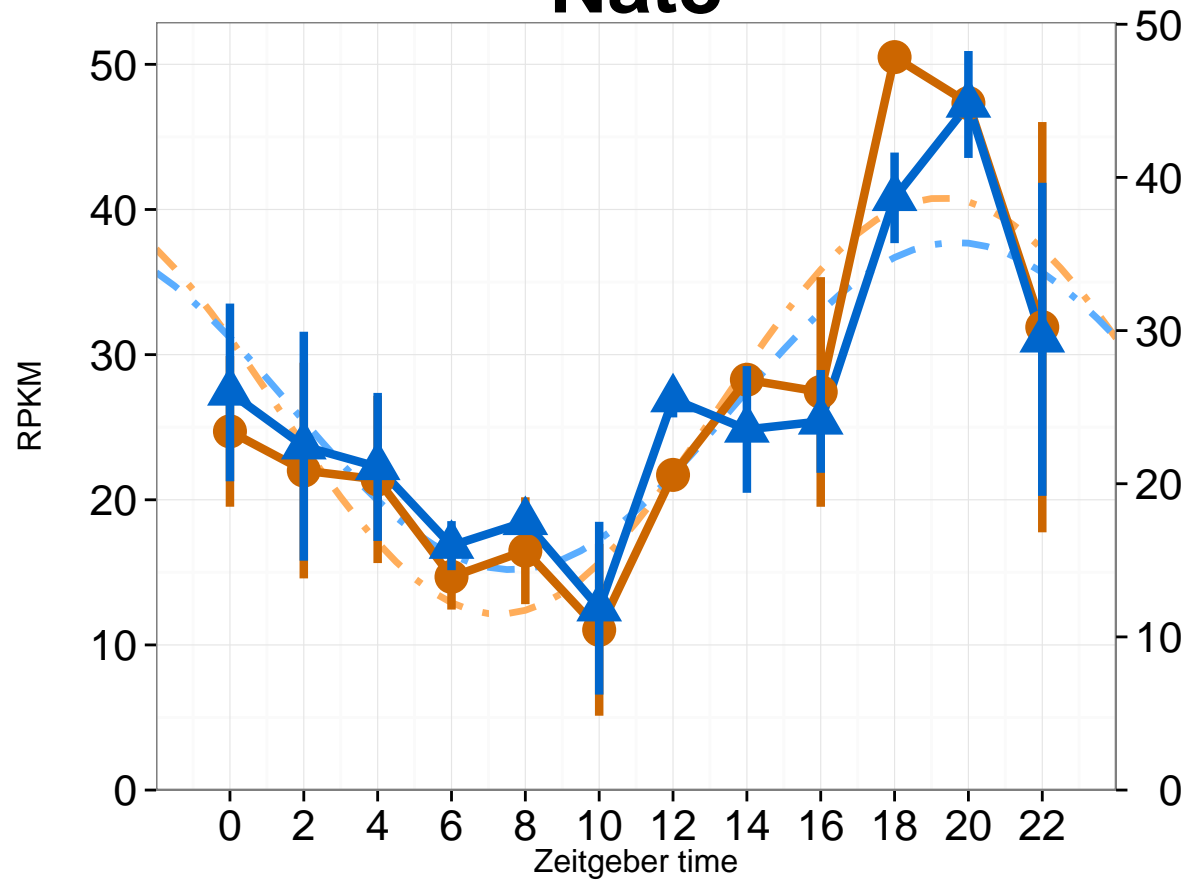

## Nat8

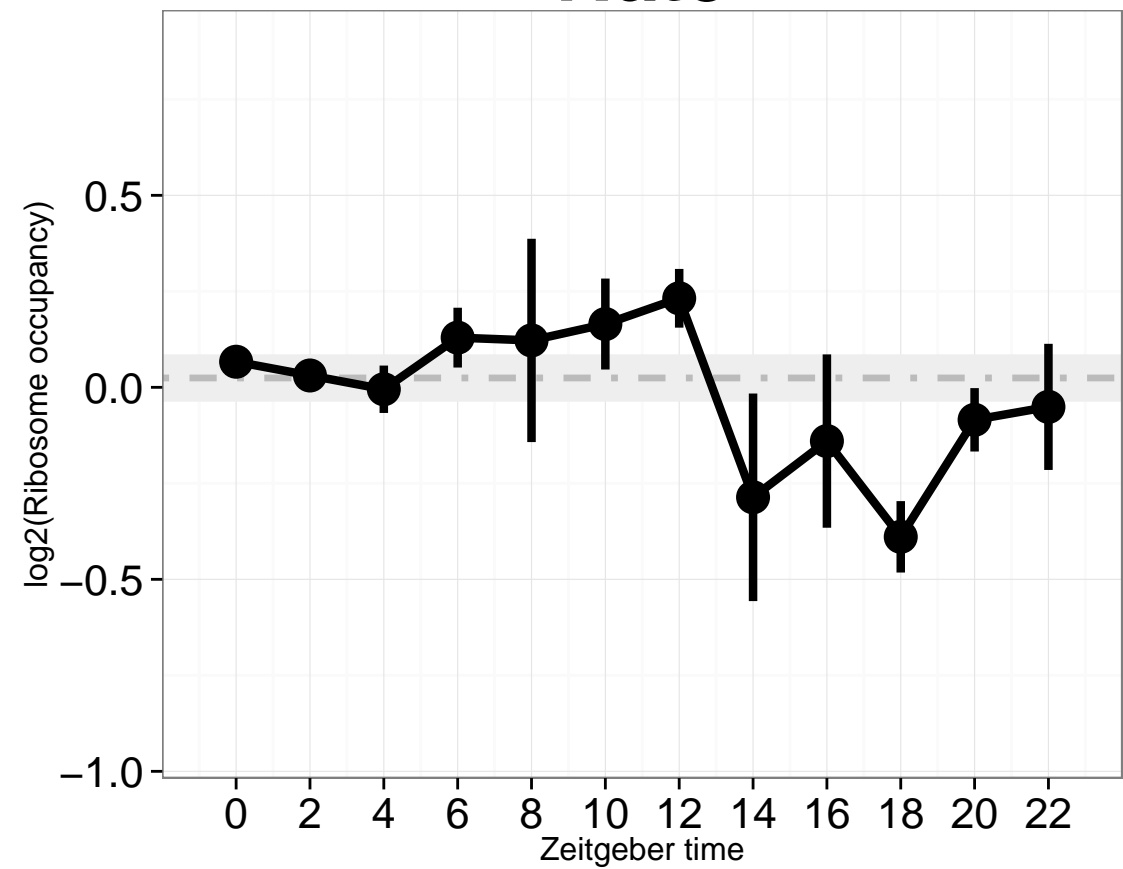

Supplement: SuppDataset_1.zip [file Nat8_set_D.pdf › Supplemental Dataset 1/D-mRNA_rhythm_translation_rhyth/Nat8_set_D.pdf]

## Nbeal2

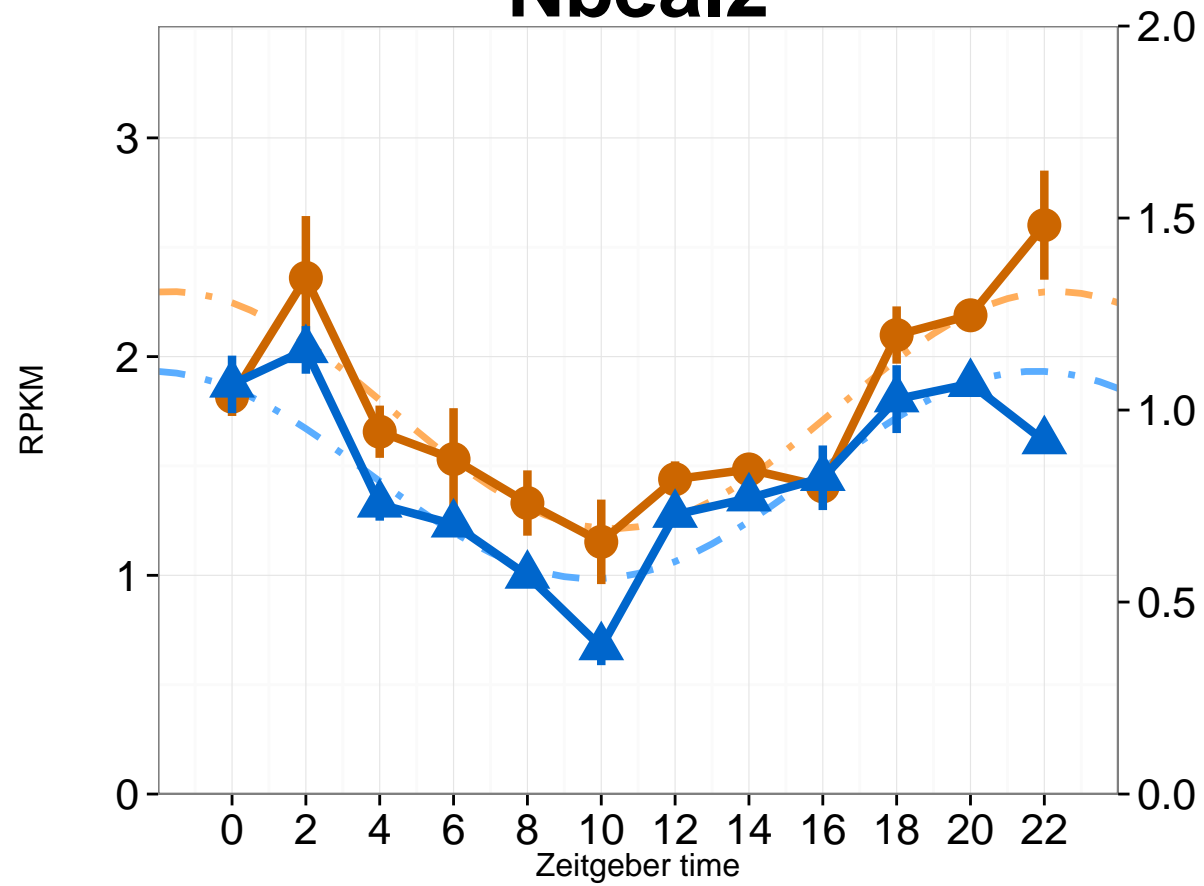

## Nbeal2

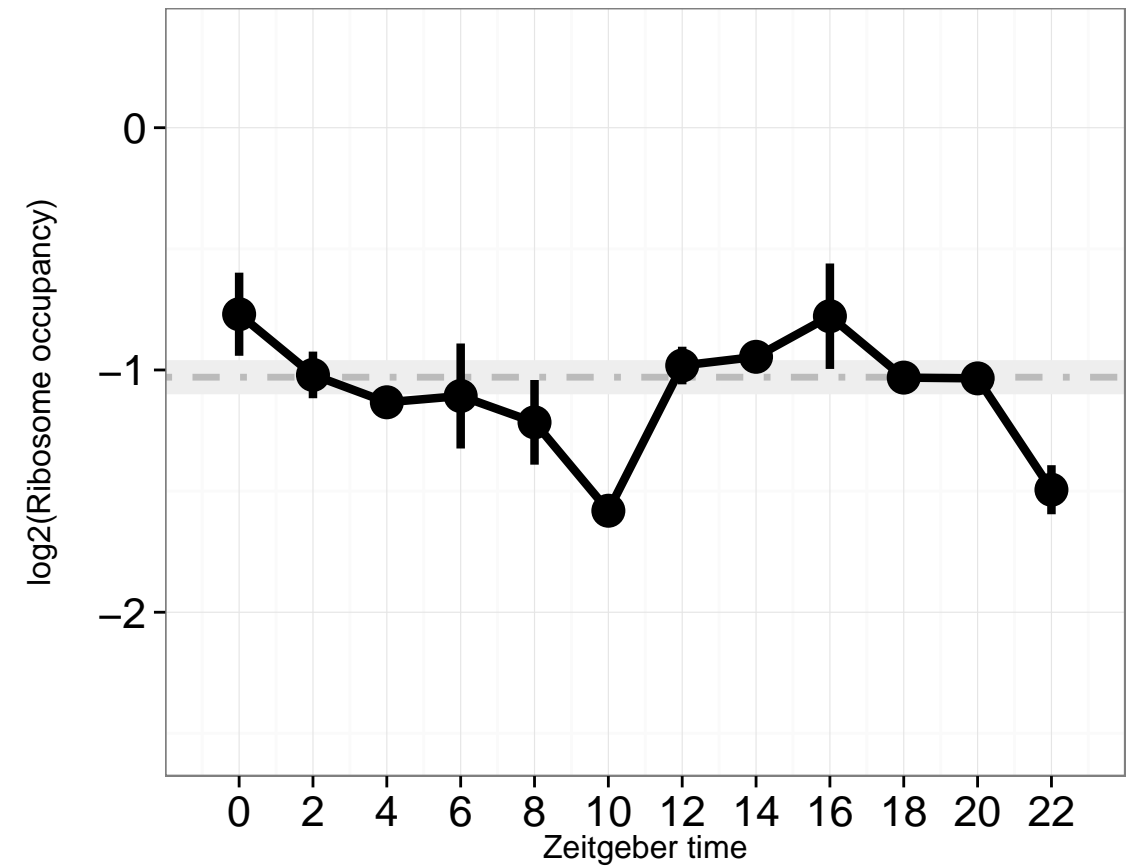

Supplement: SuppDataset_1.zip [file Nbeal2_set_D.pdf › Supplemental Dataset 1/D-mRNA_rhythm_translation_rhyth/Nbeal2_set_D.pdf]

## Ncald

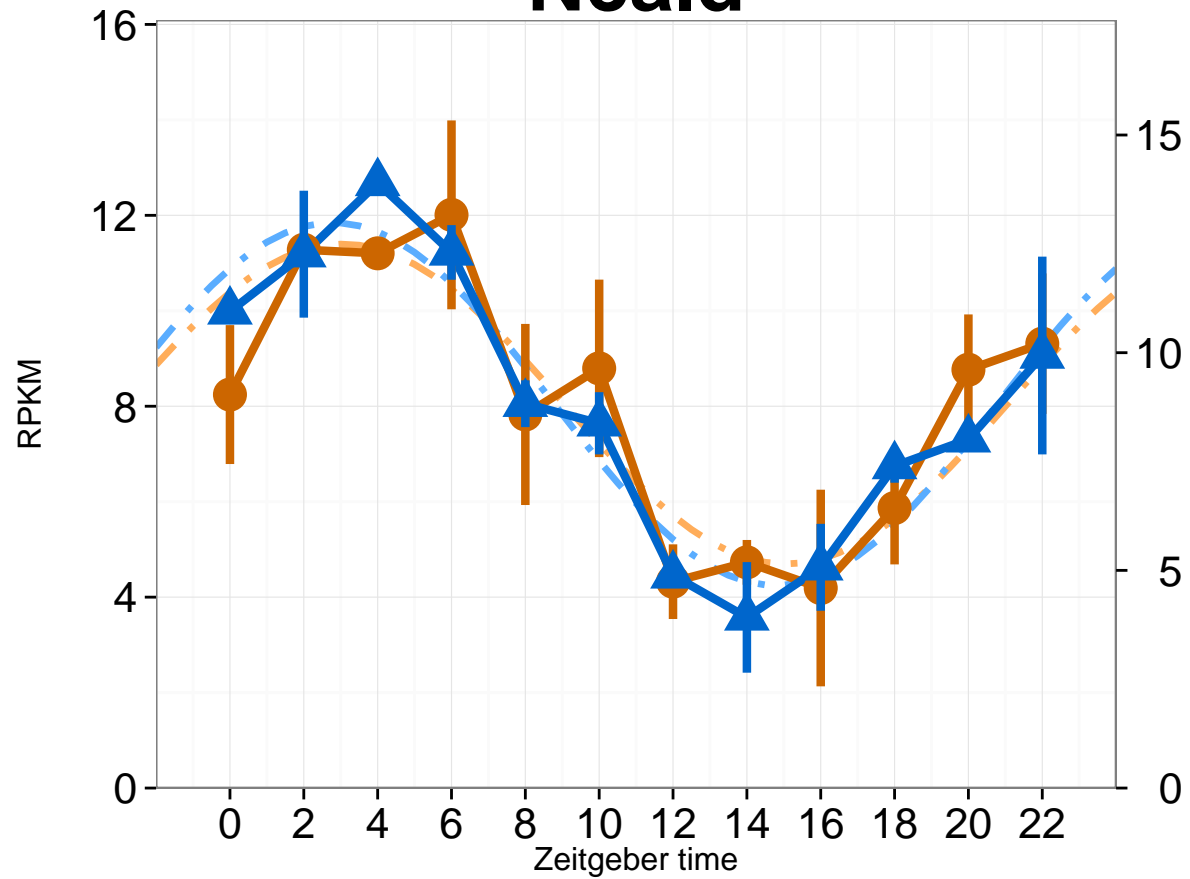

## Ncald

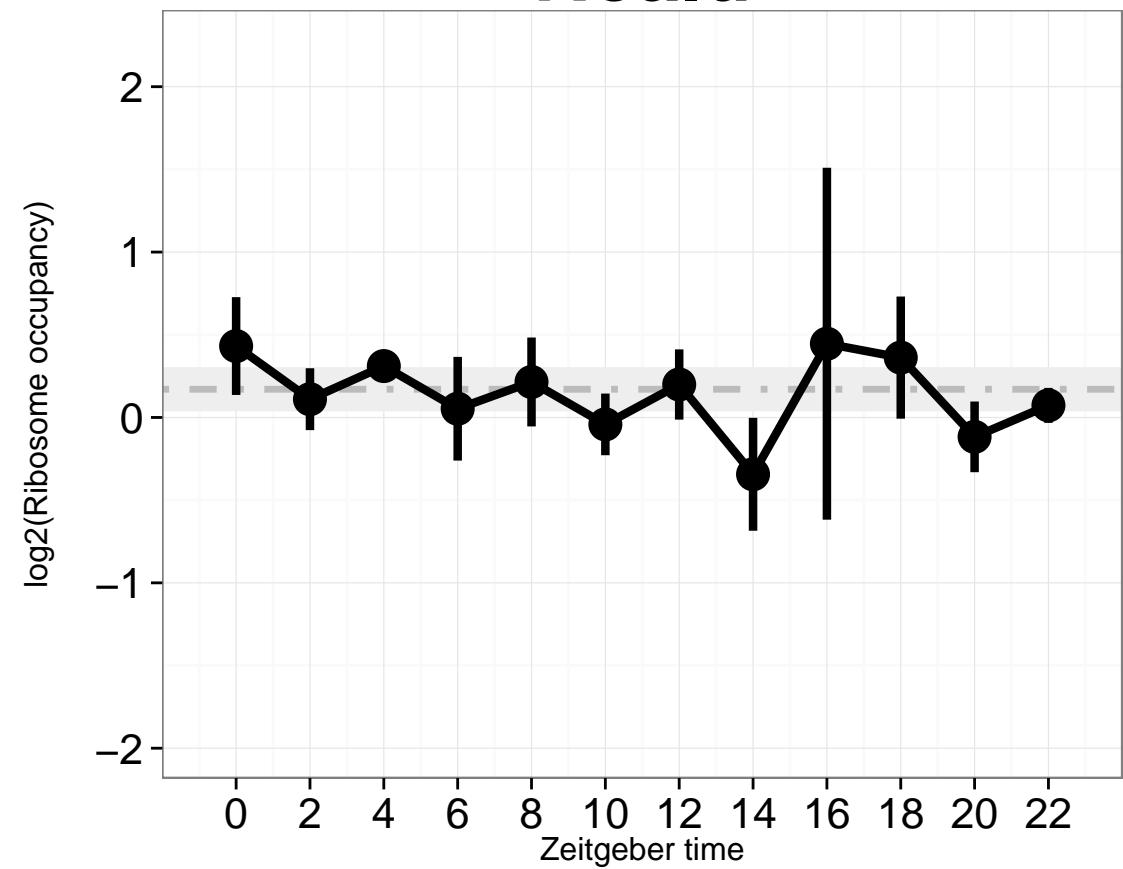

Supplement: SuppDataset_1.zip [file Ncald_set_D.pdf › Supplemental Dataset 1/D-mRNA_rhythm_translation_rhyth/Ncald_set_D.pdf]

# Ncl

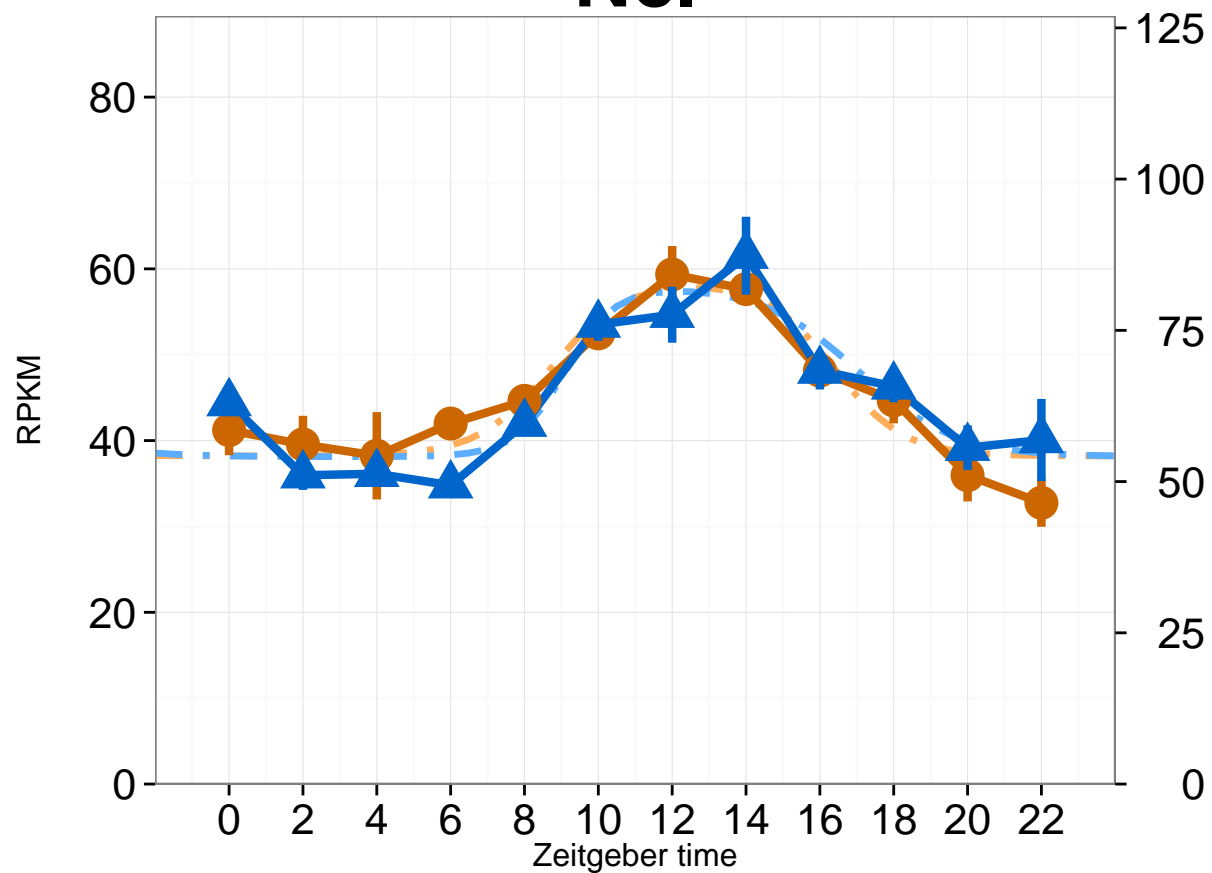

# Ncl

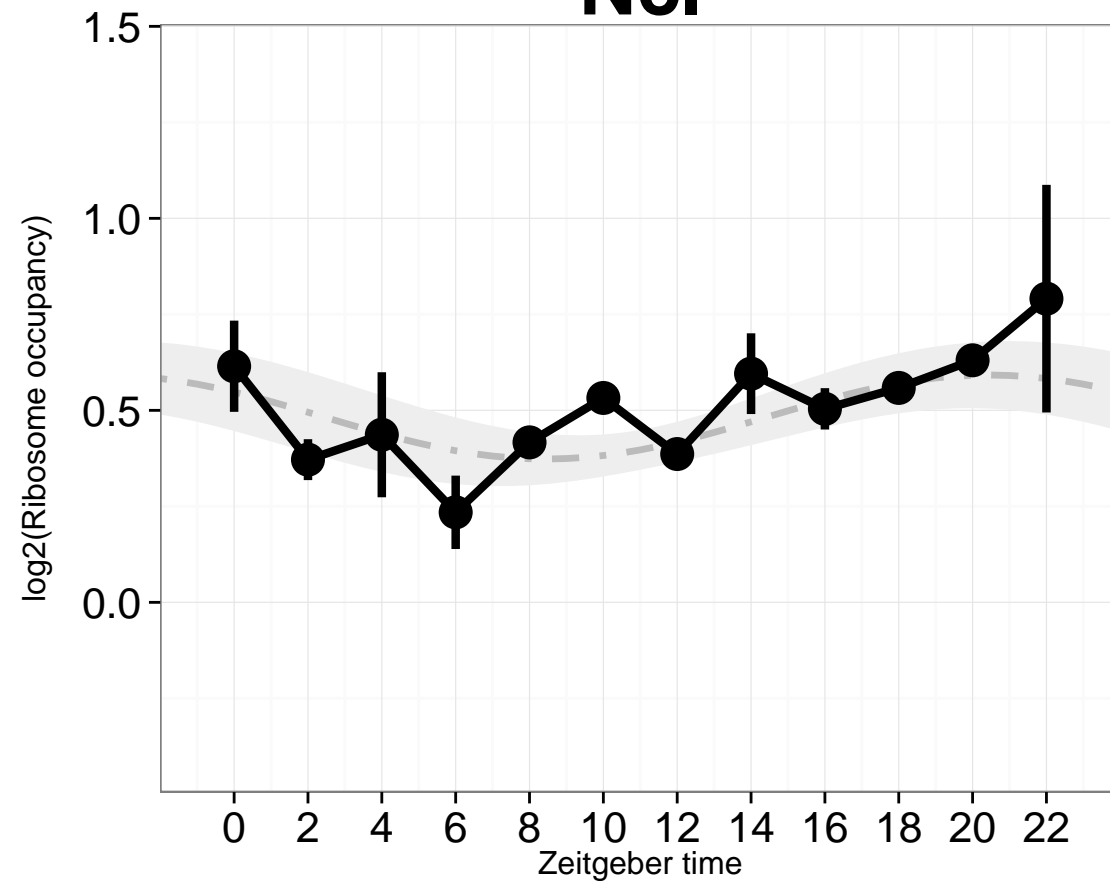

Supplement: SuppDataset_1.zip [file Ncl_set_D.pdf › Supplemental Dataset 1/D-mRNA_rhythm_translation_rhyth/Ncl_set_D.pdf]

# Ncoa5

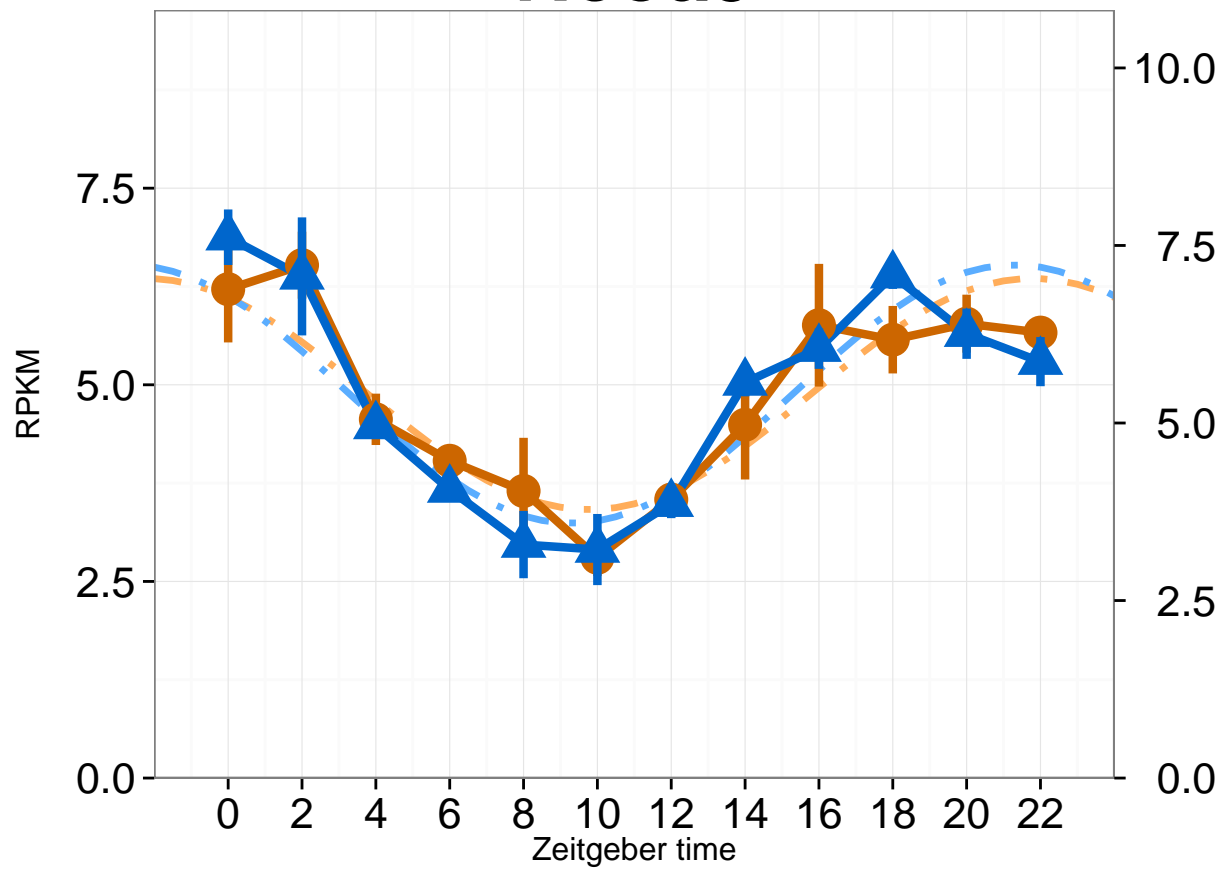

# Ncoa5

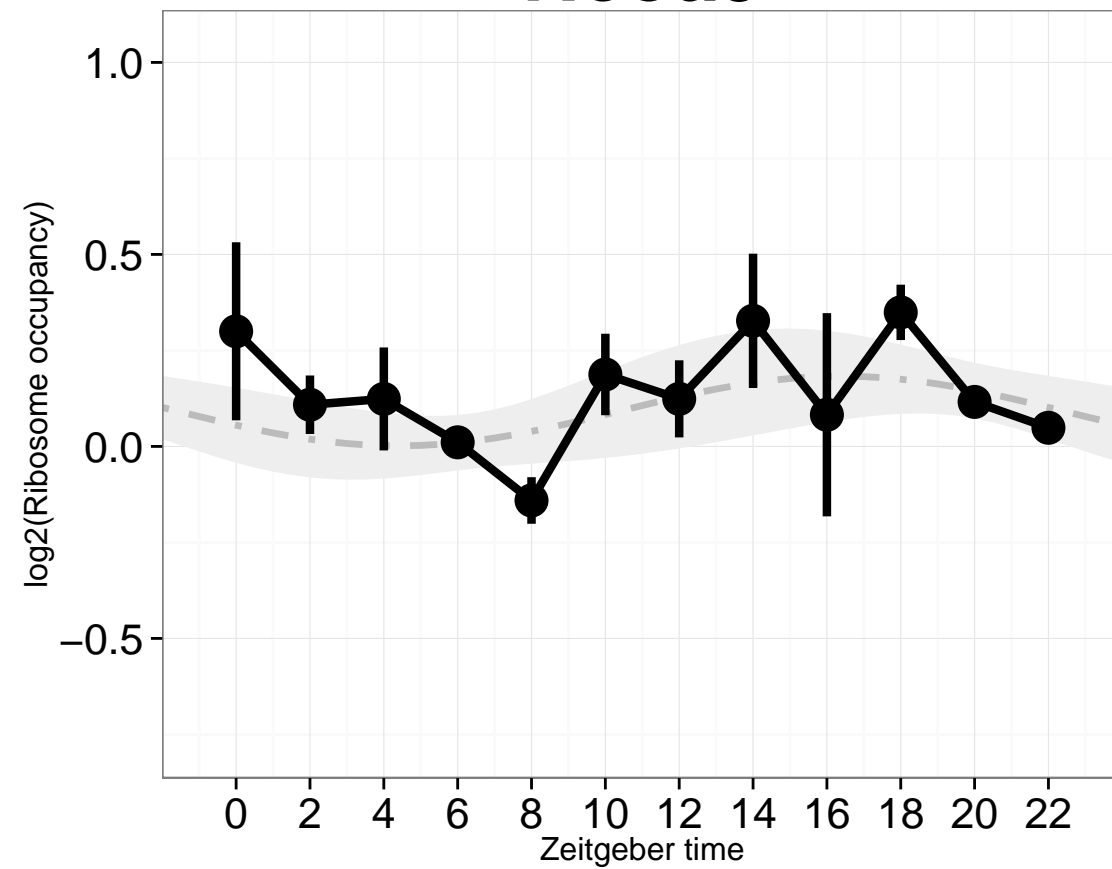

Supplement: SuppDataset_1.zip [file Ncoa5_set_D.pdf › Supplemental Dataset 1/D-mRNA_rhythm_translation_rhyth/Ncoa5_set_D.pdf]

# NdeI1

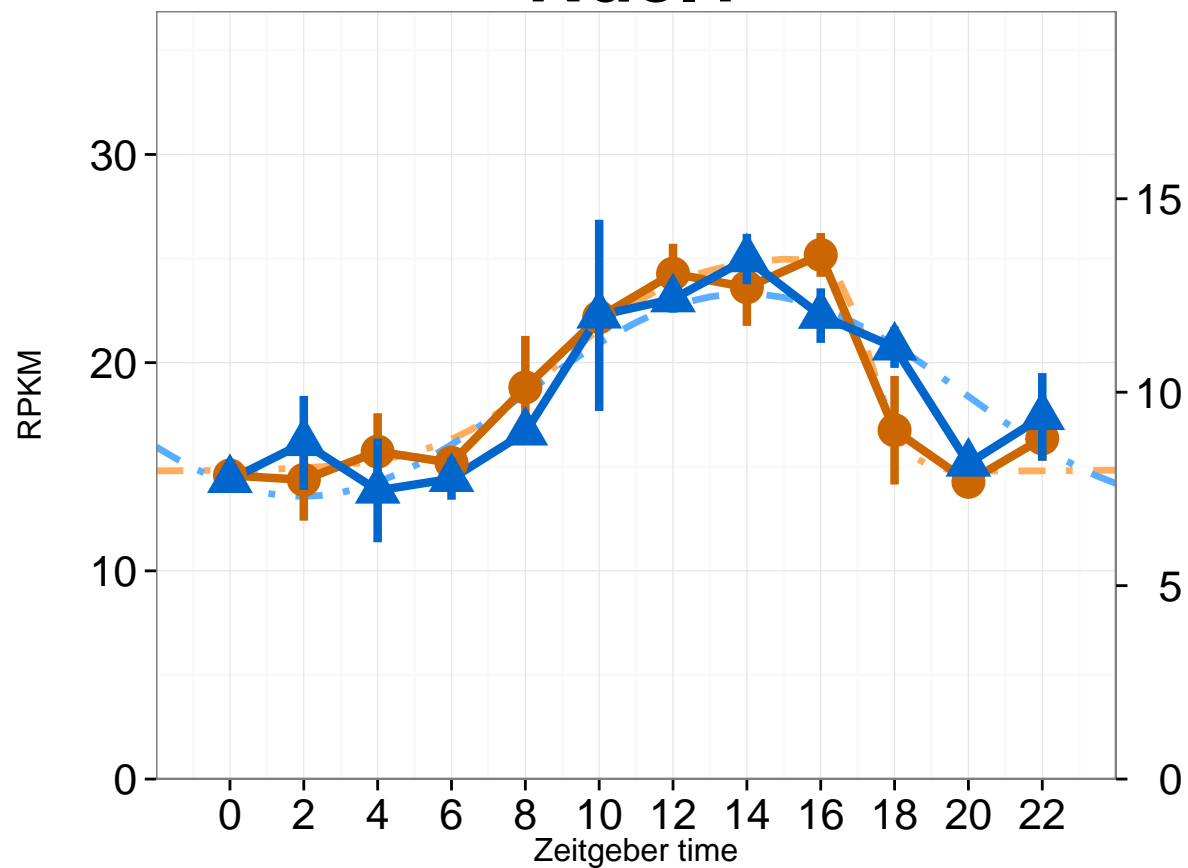

# NdeI1

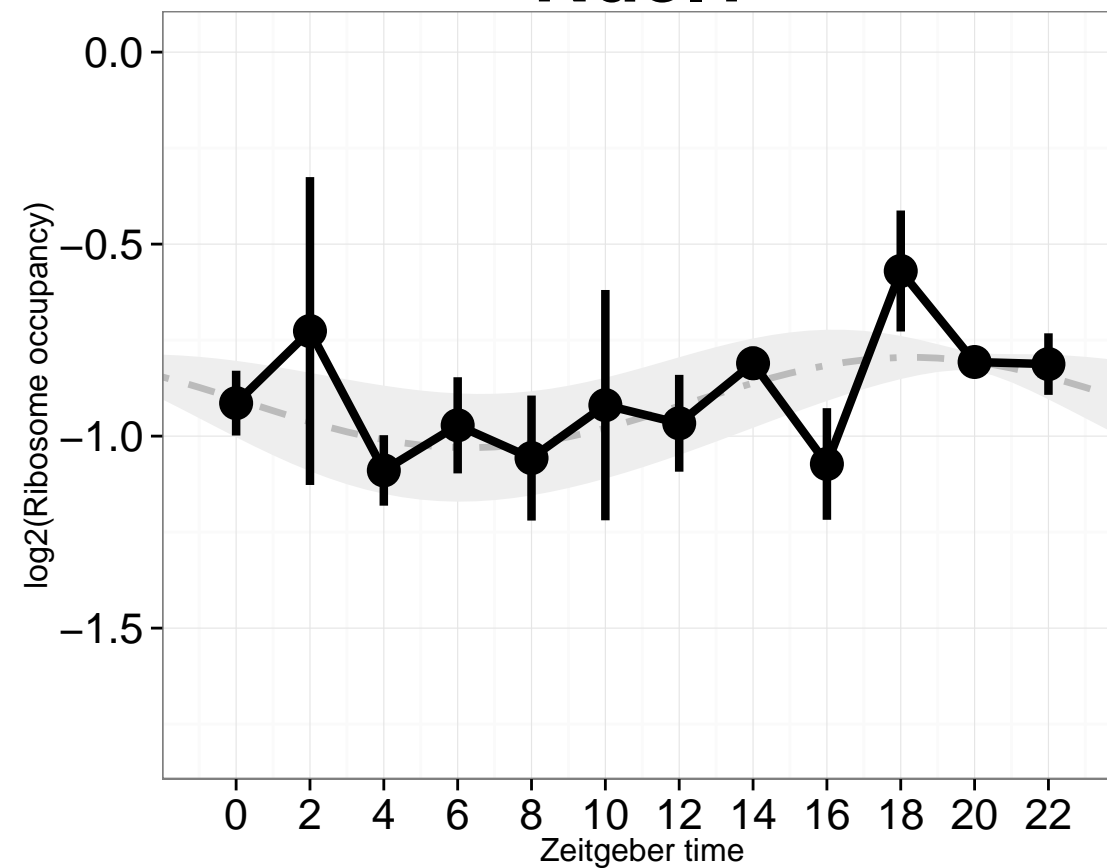

Supplement: SuppDataset_1.zip [file Ndel1_set_D.pdf › Supplemental Dataset 1/D-mRNA_rhythm_translation_rhyth/Ndel1_set_D.pdf]

# Ndrp1

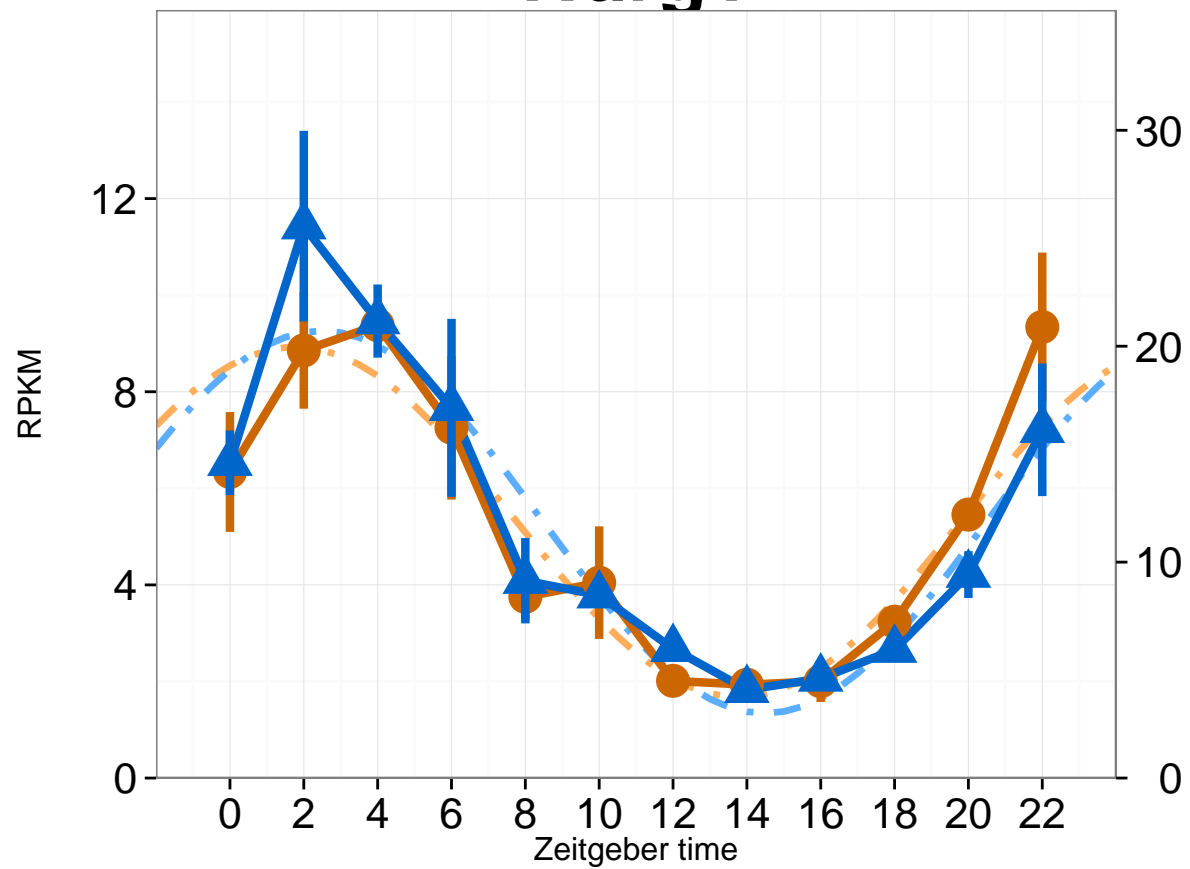

# Ndrp1

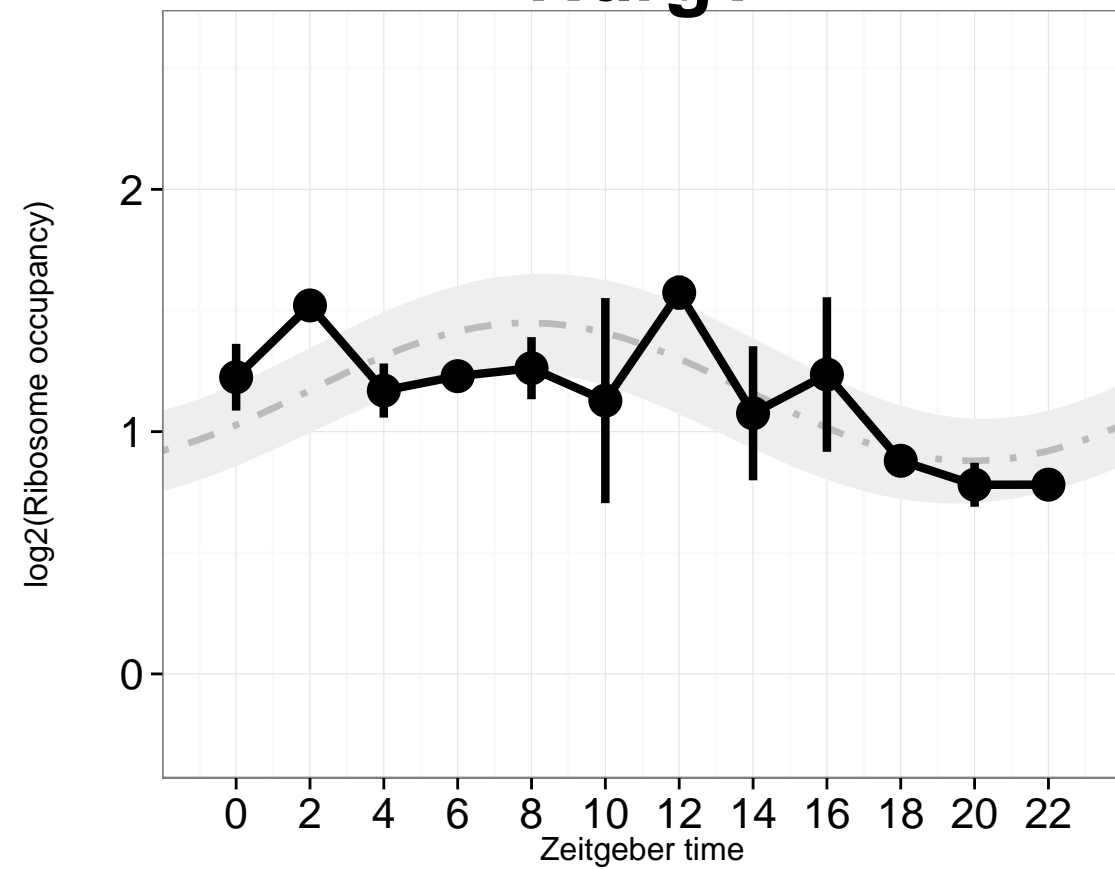

Supplement: SuppDataset_1.zip [file Ndrg1_set_D.pdf › Supplemental Dataset 1/D-mRNA_rhythm_translation_rhyth/Ndrg1_set_D.pdf]

# Ndufaf4

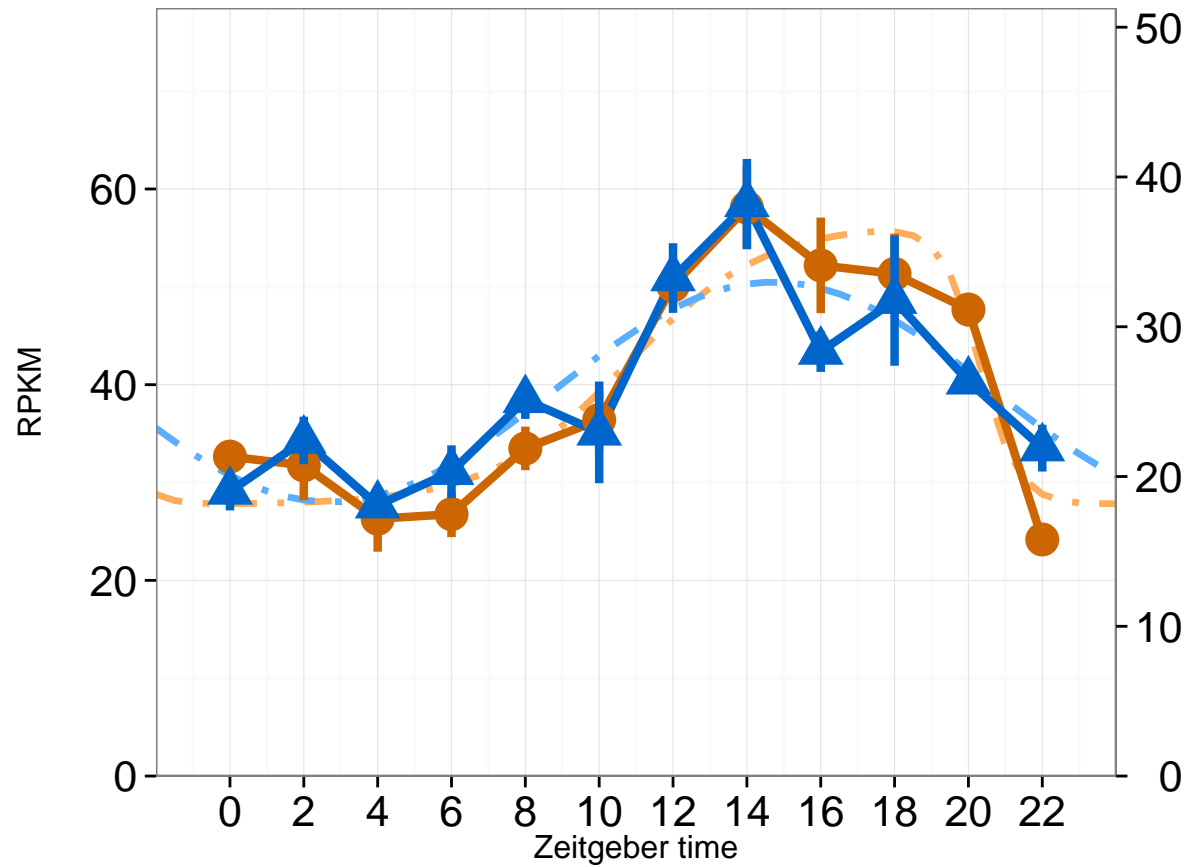

# Ndufaf4

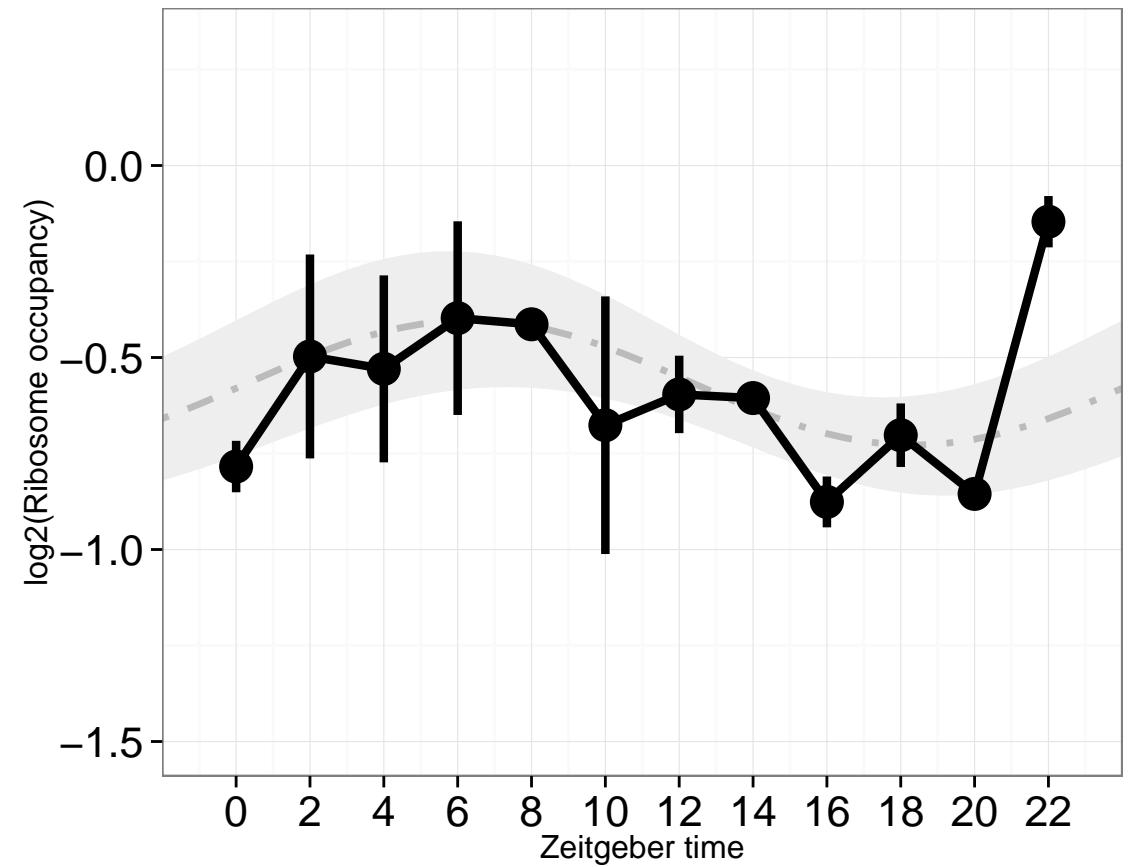

Supplement: SuppDataset_1.zip [file Ndufaf4_set_D.pdf › Supplemental Dataset 1/D-mRNA_rhythm_translation_rhyth/Ndufaf4_set_D.pdf]

## Nedd4l

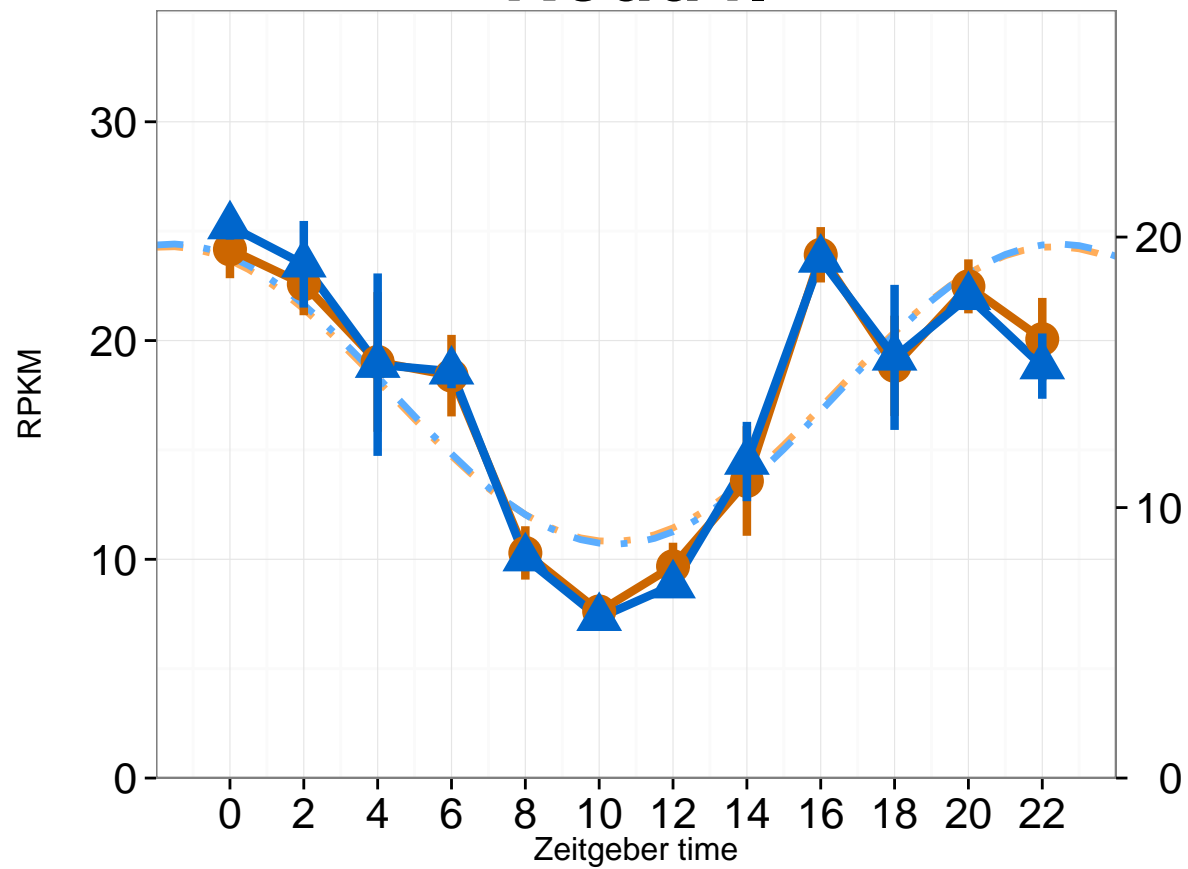

## Nedd4l

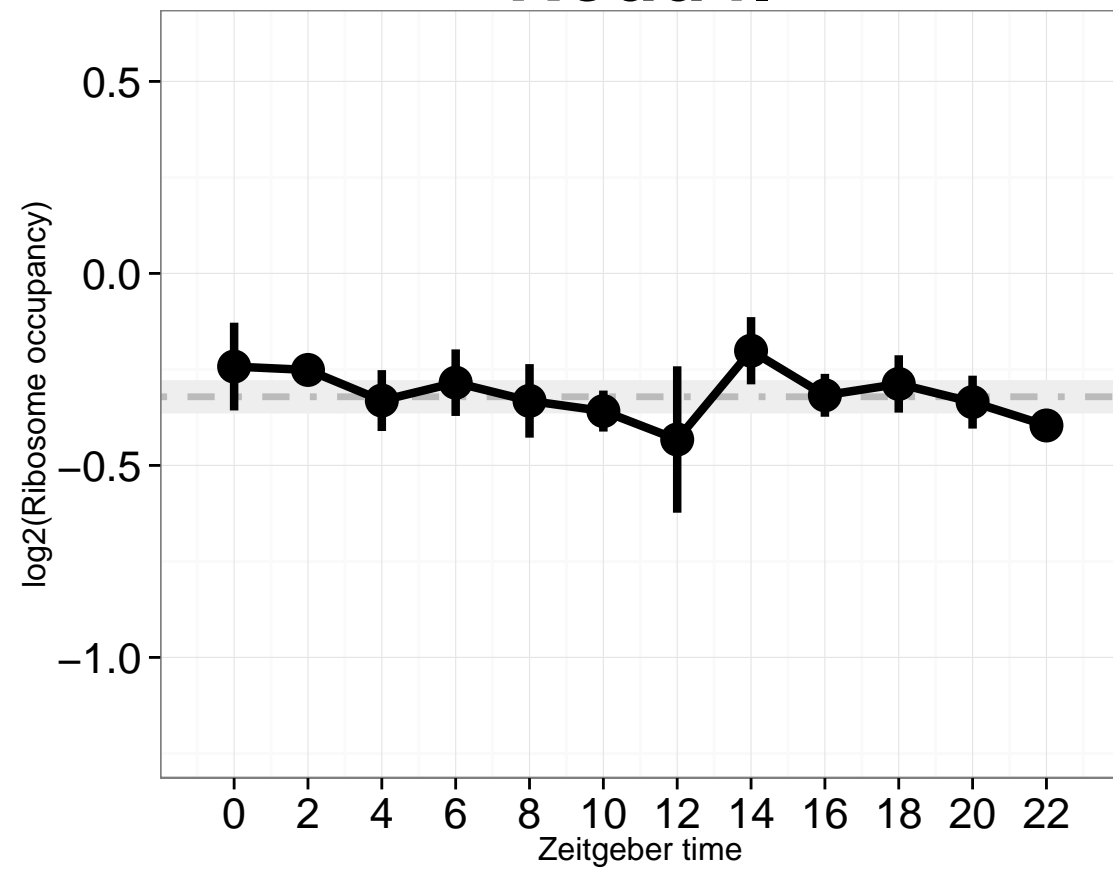

Supplement: SuppDataset_1.zip [file Nedd4l_set_D.pdf › Supplemental Dataset 1/D-mRNA_rhythm_translation_rhyth/Nedd4l_set_D.pdf]

## Nelfa

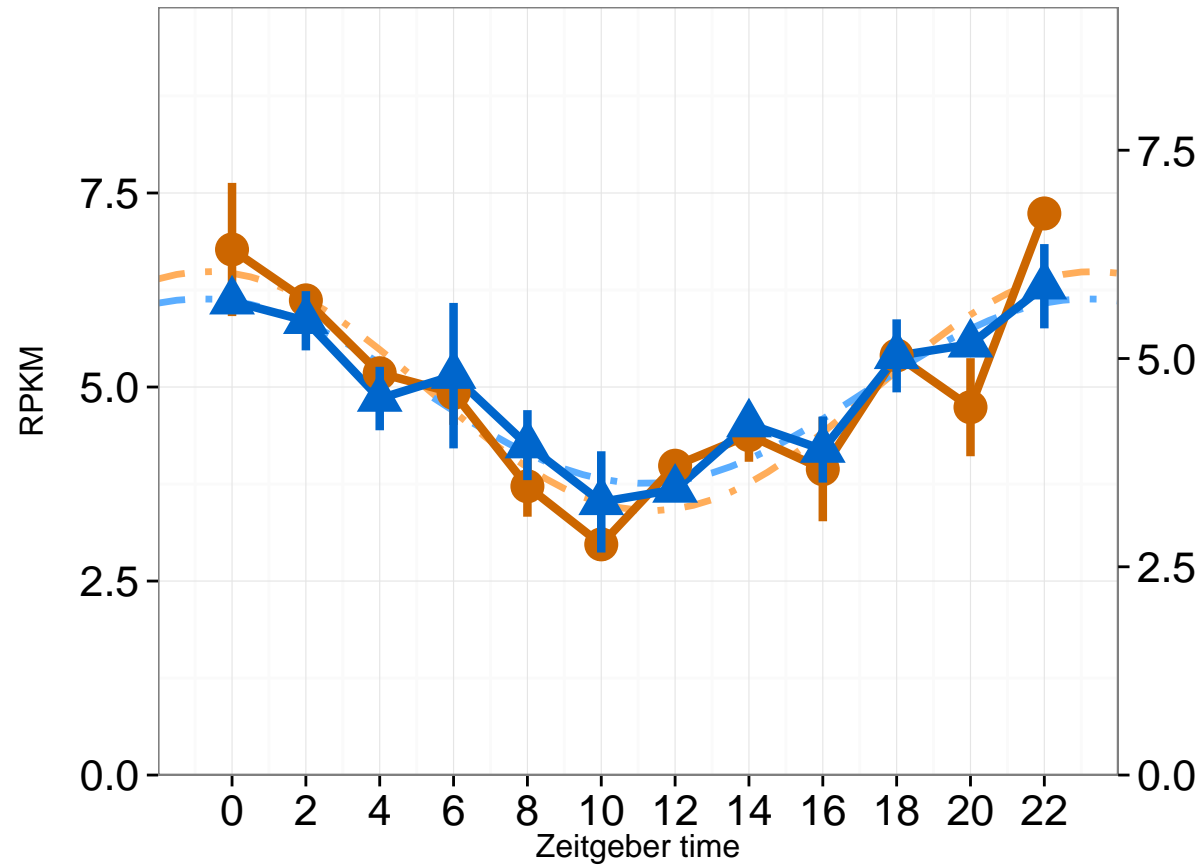

## Nelfa

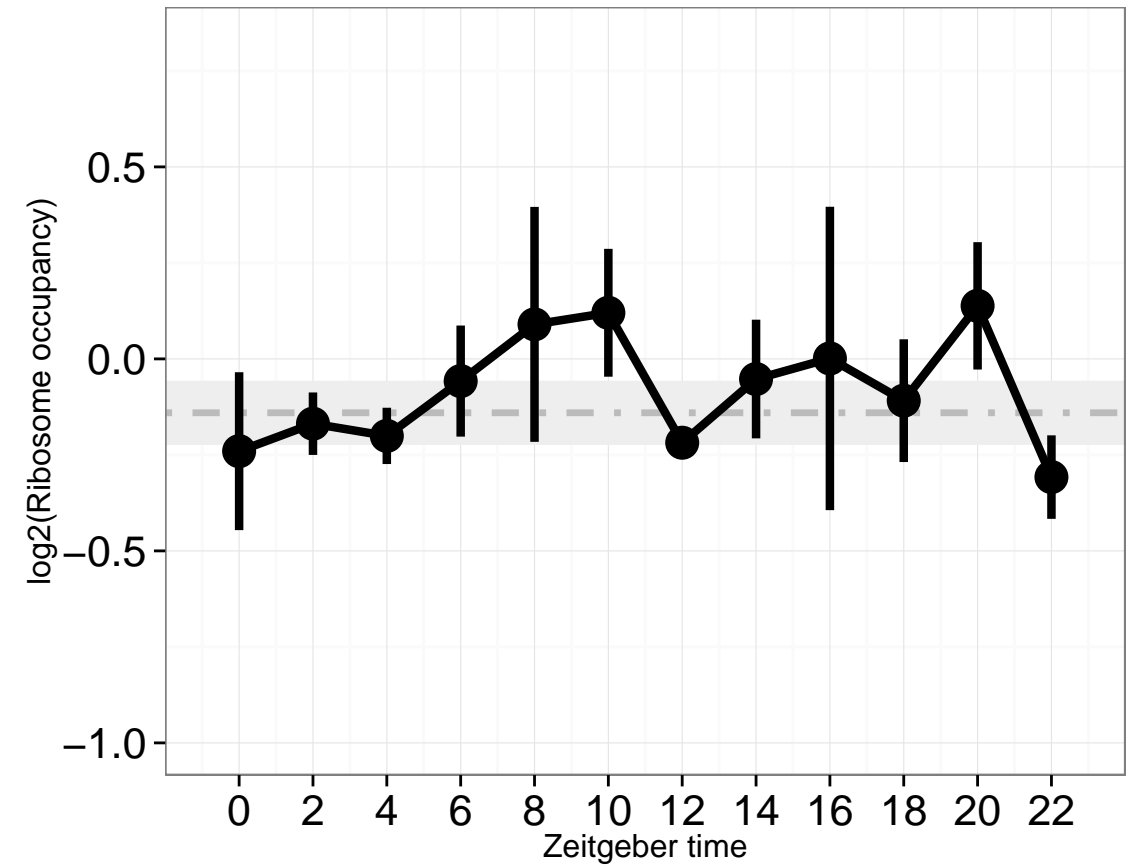

Supplement: SuppDataset_1.zip [file Nelfa_set_D.pdf › Supplemental Dataset 1/D-mRNA_rhythm_translation_rhyth/Nelfa_set_D.pdf]

# Net1

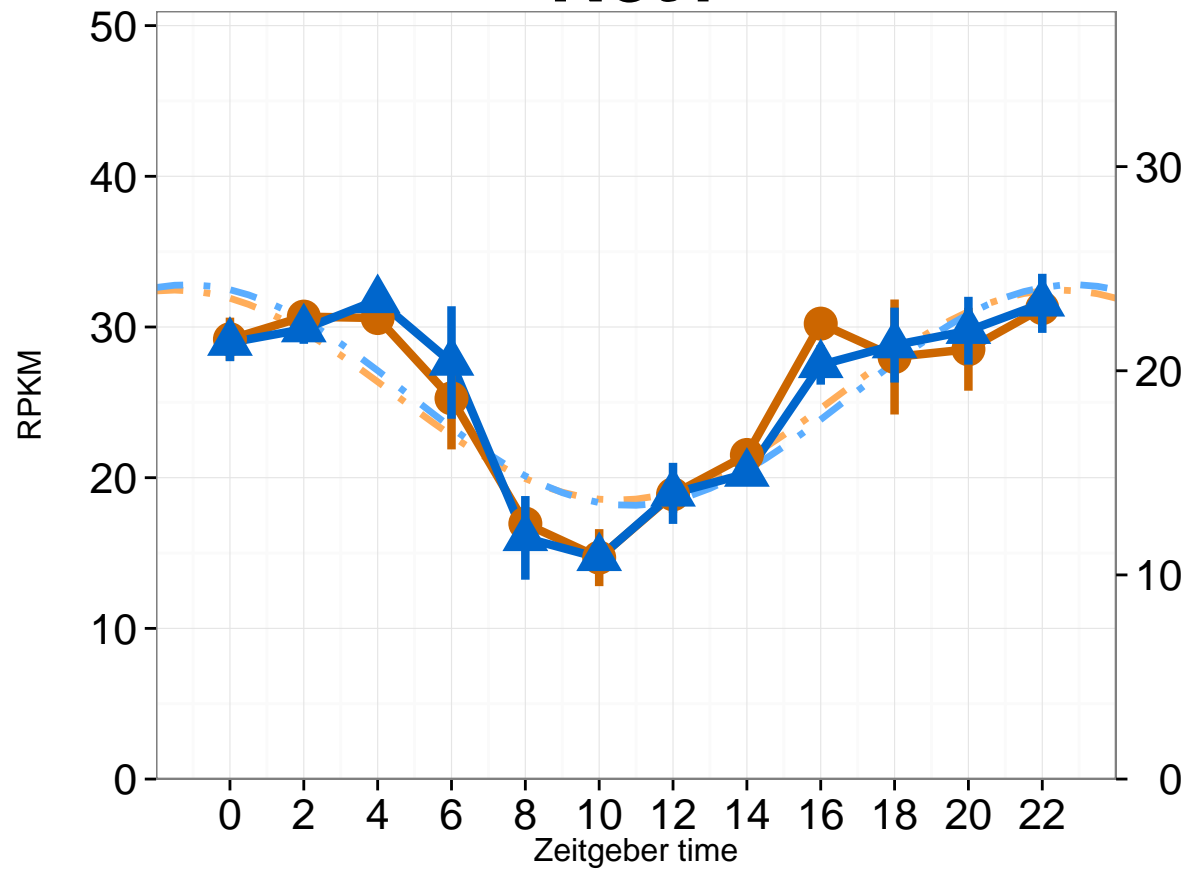

# Net1

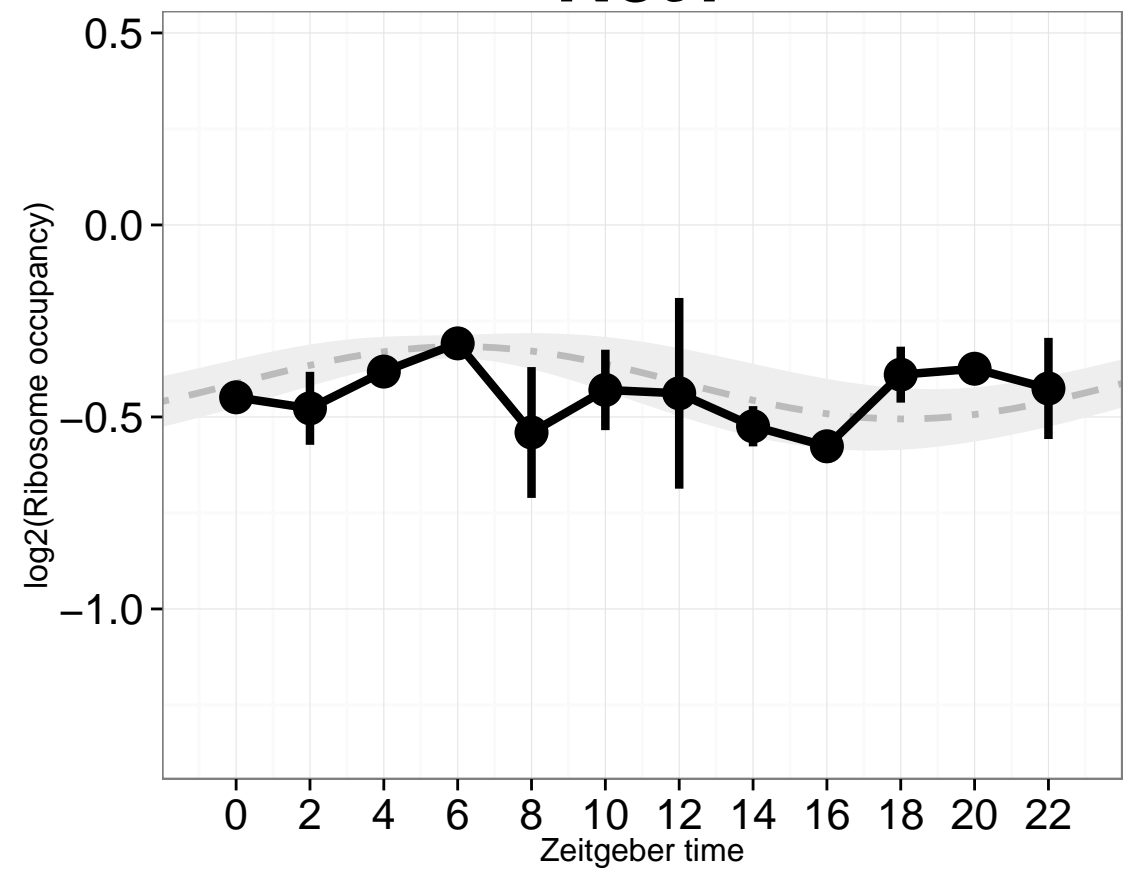

Supplement: SuppDataset_1.zip [file Net1_set_D.pdf › Supplemental Dataset 1/D-mRNA_rhythm_translation_rhyth/Net1_set_D.pdf]

## Neu2

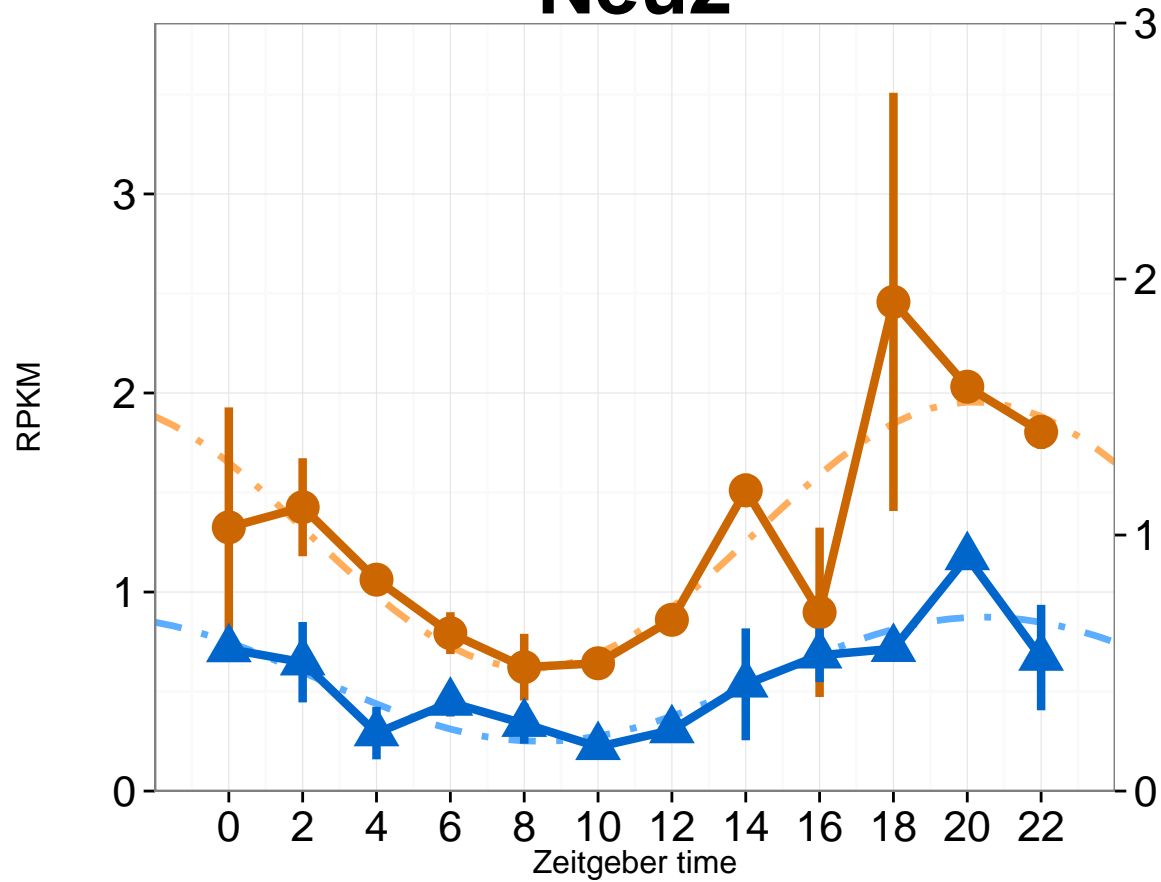

## Neu2

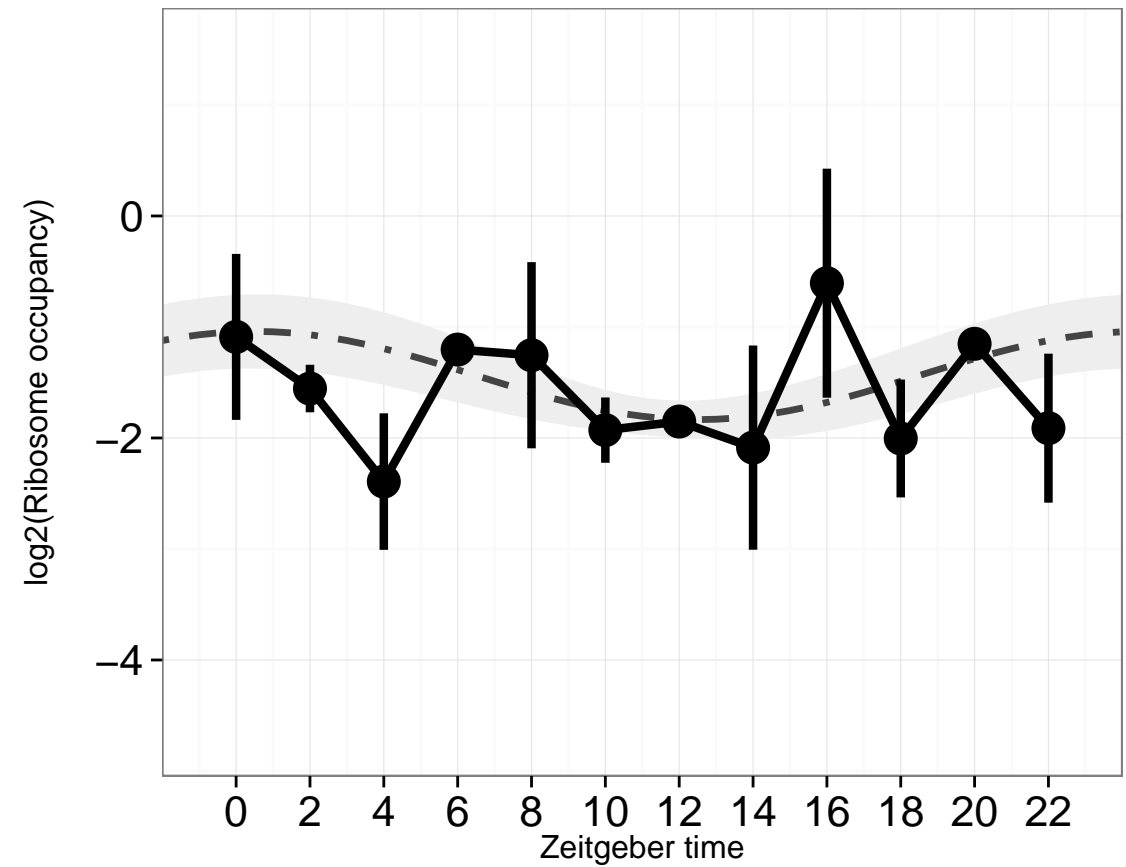

Supplement: SuppDataset_1.zip [file Neu2_set_D.pdf › Supplemental Dataset 1/D-mRNA_rhythm_translation_rhyth/Neu2_set_D.pdf]

## Nfil3

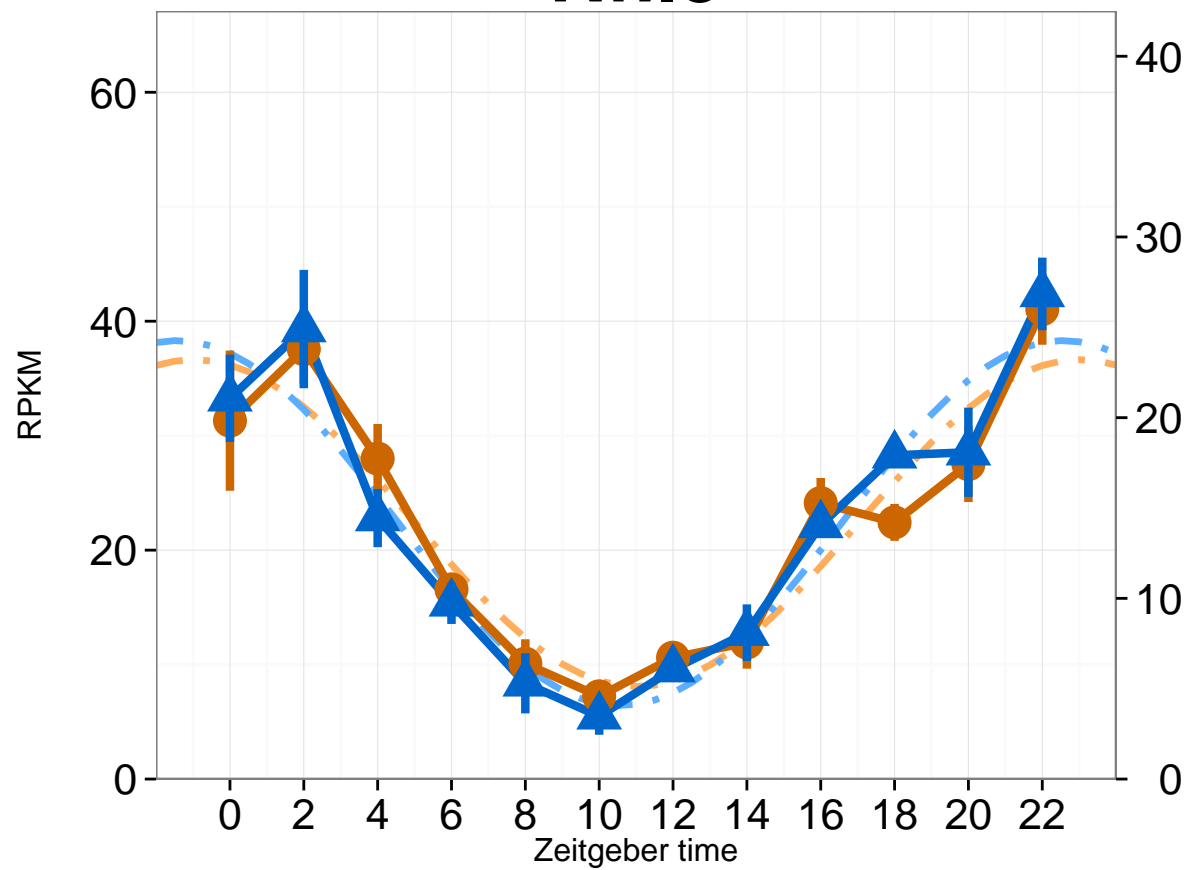

## Nfil3

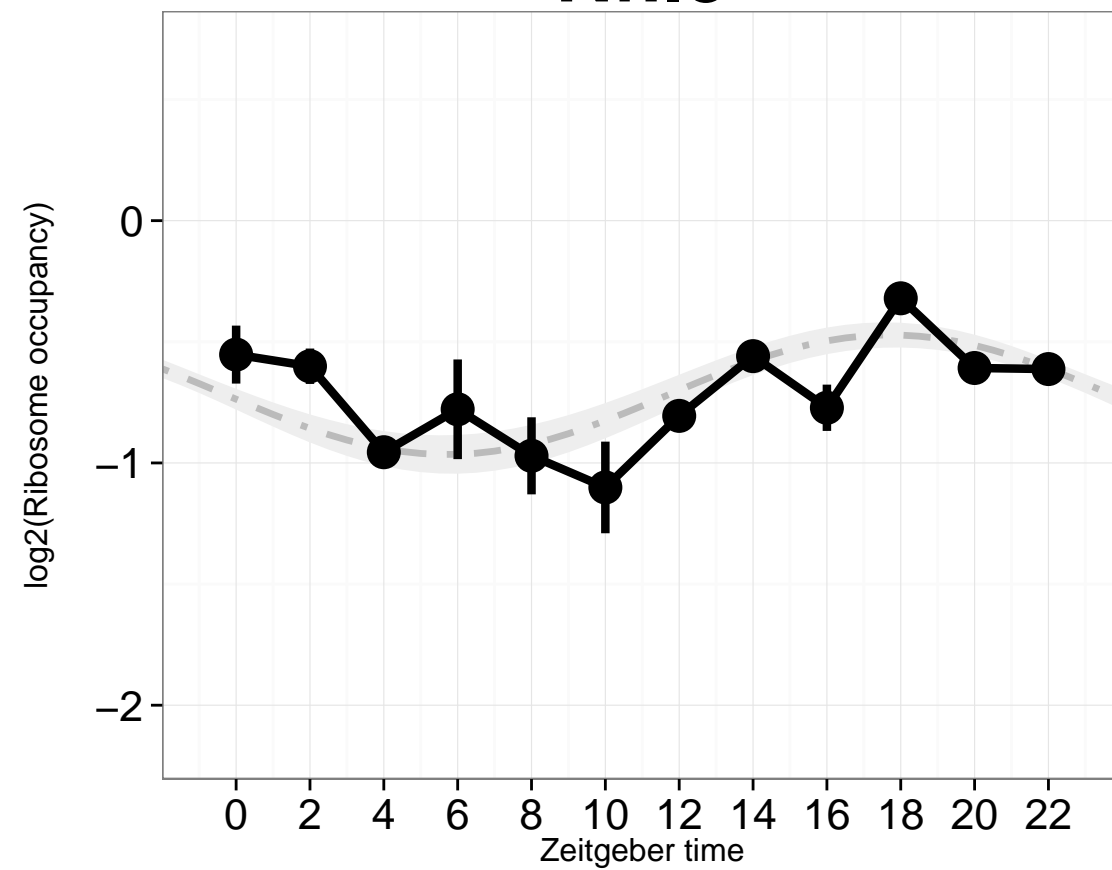

Supplement: SuppDataset_1.zip [file Nfil3_set_D.pdf › Supplemental Dataset 1/D-mRNA_rhythm_translation_rhyth/Nfil3_set_D.pdf]

# Nfx1

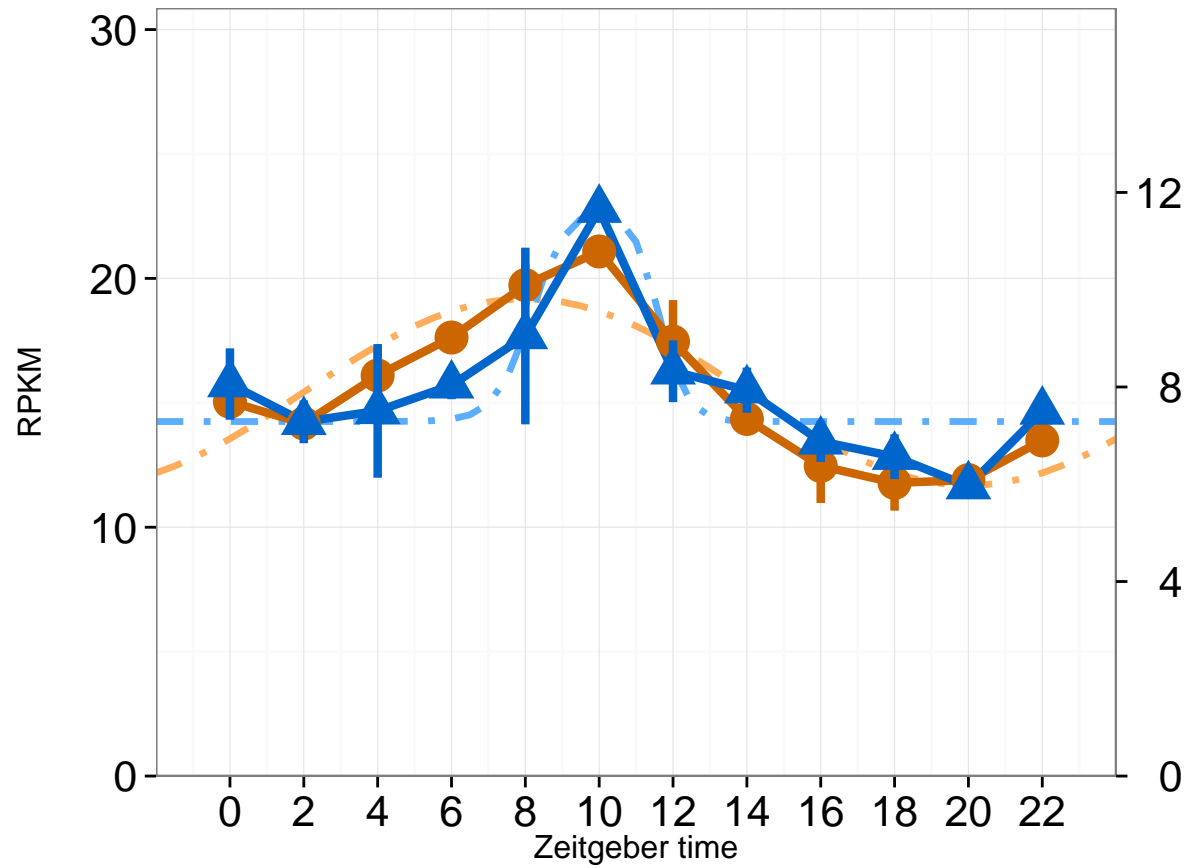

# Nfx1

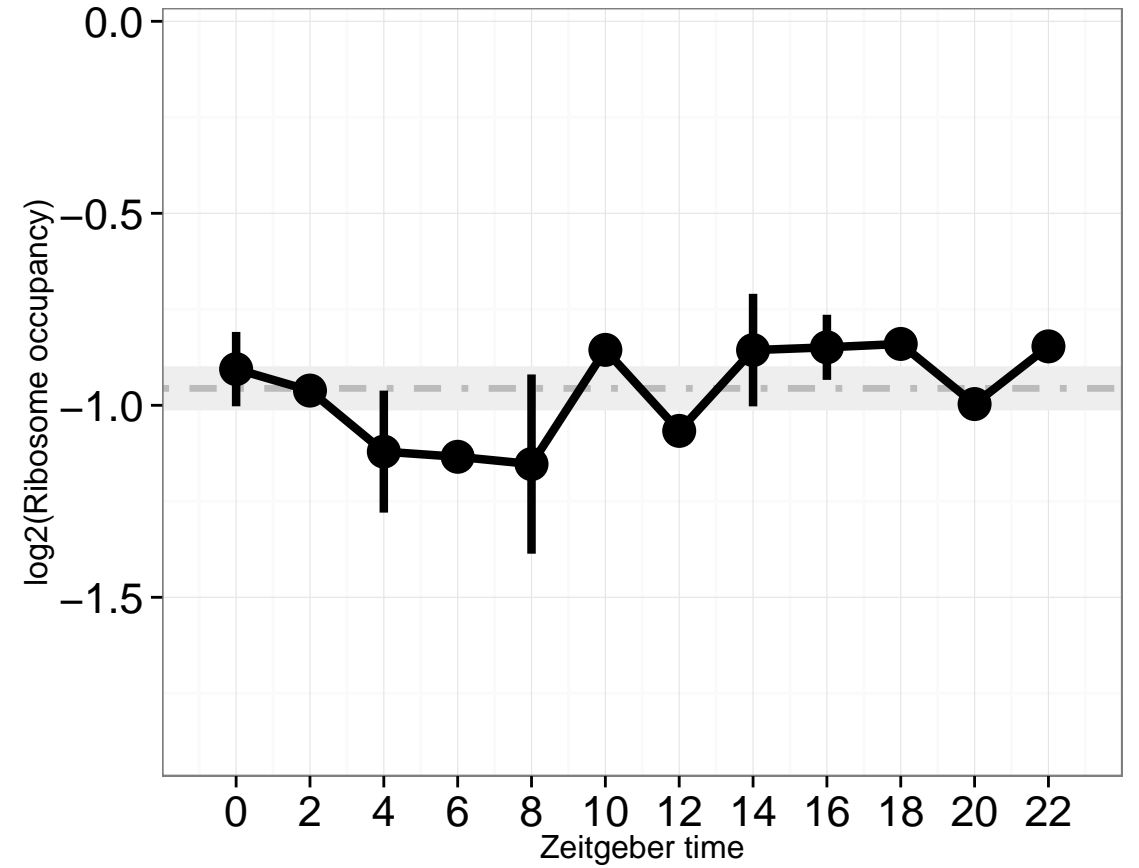

Supplement: SuppDataset_1.zip [file Nfx1_set_D.pdf › Supplemental Dataset 1/D-mRNA_rhythm_translation_rhyth/Nfx1_set_D.pdf]

## Ngef

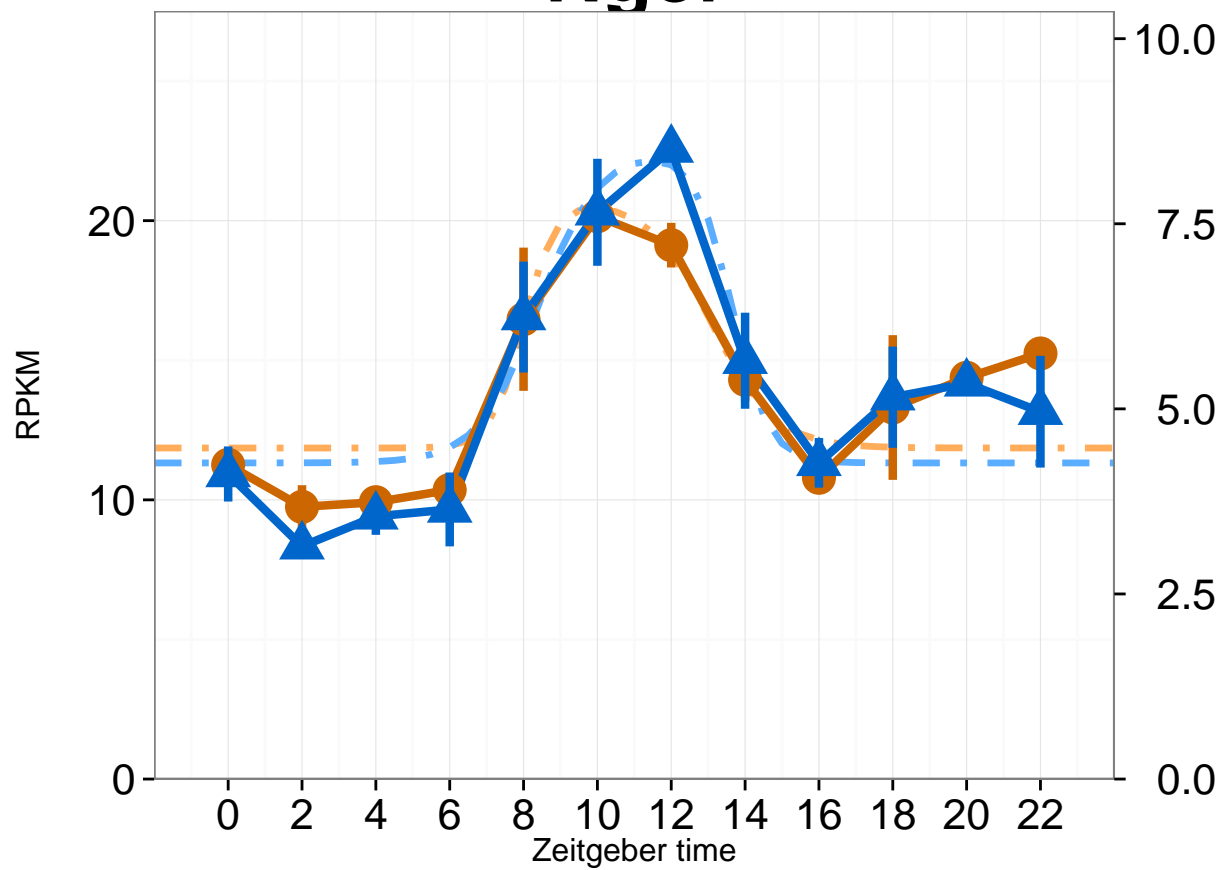

## Ngef

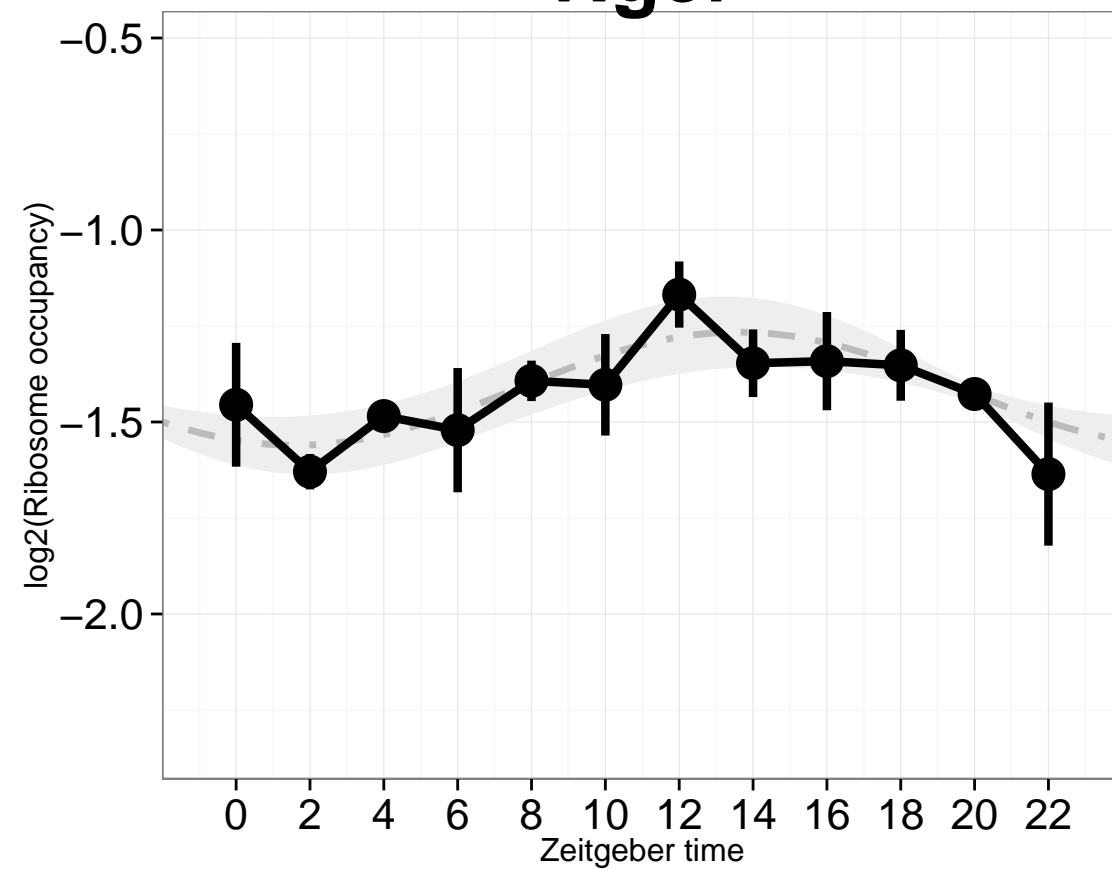

Supplement: SuppDataset_1.zip [file Ngef_set_D.pdf › Supplemental Dataset 1/D-mRNA_rhythm_translation_rhyth/Ngef_set_D.pdf]

## Ngfr

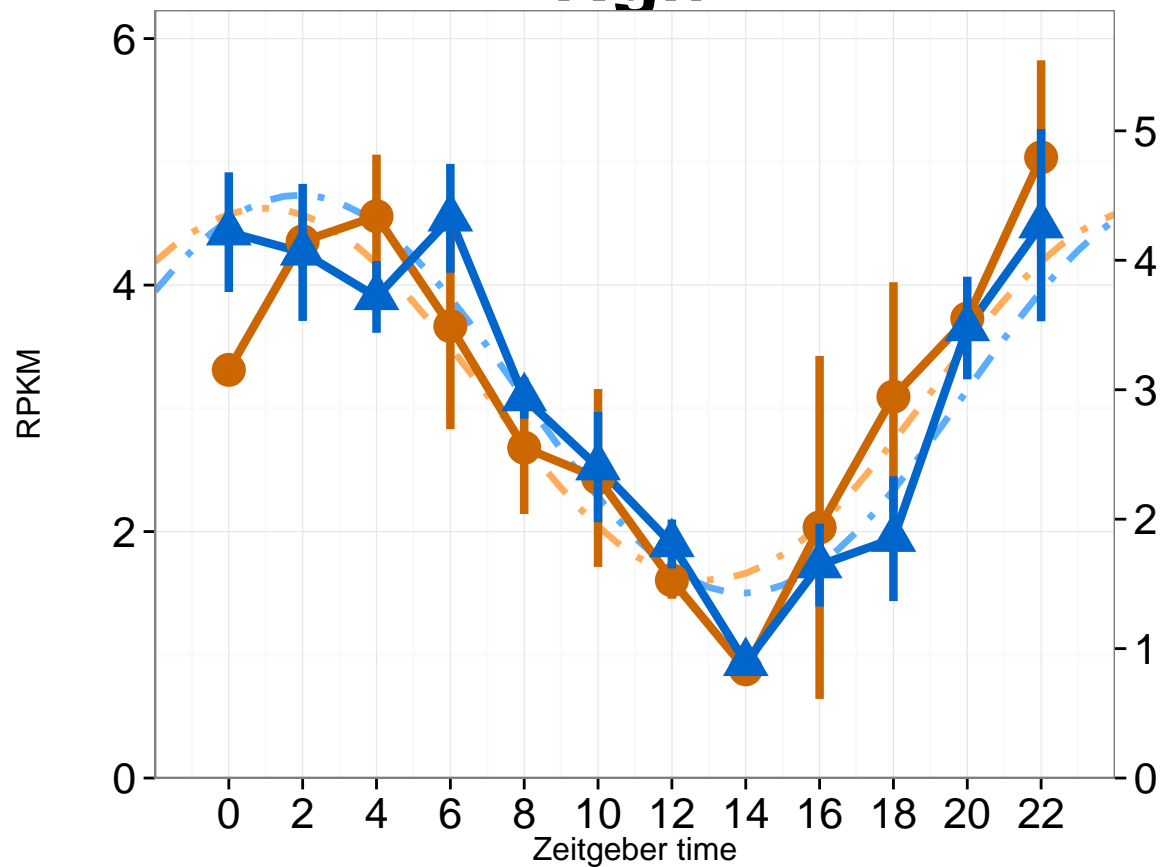

## Ngfr

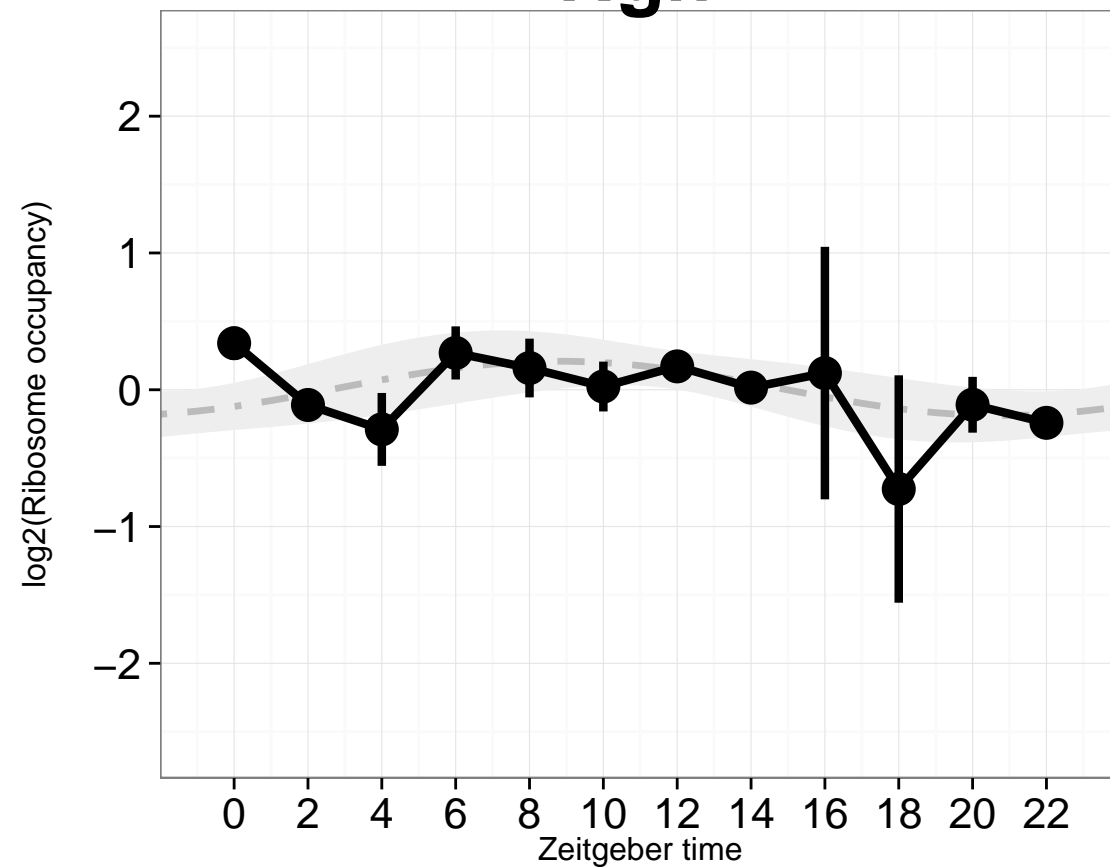

Supplement: SuppDataset_1.zip [file Ngfr_set_D.pdf › Supplemental Dataset 1/D-mRNA_rhythm_translation_rhyth/Ngfr_set_D.pdf]

## Nhlrc2

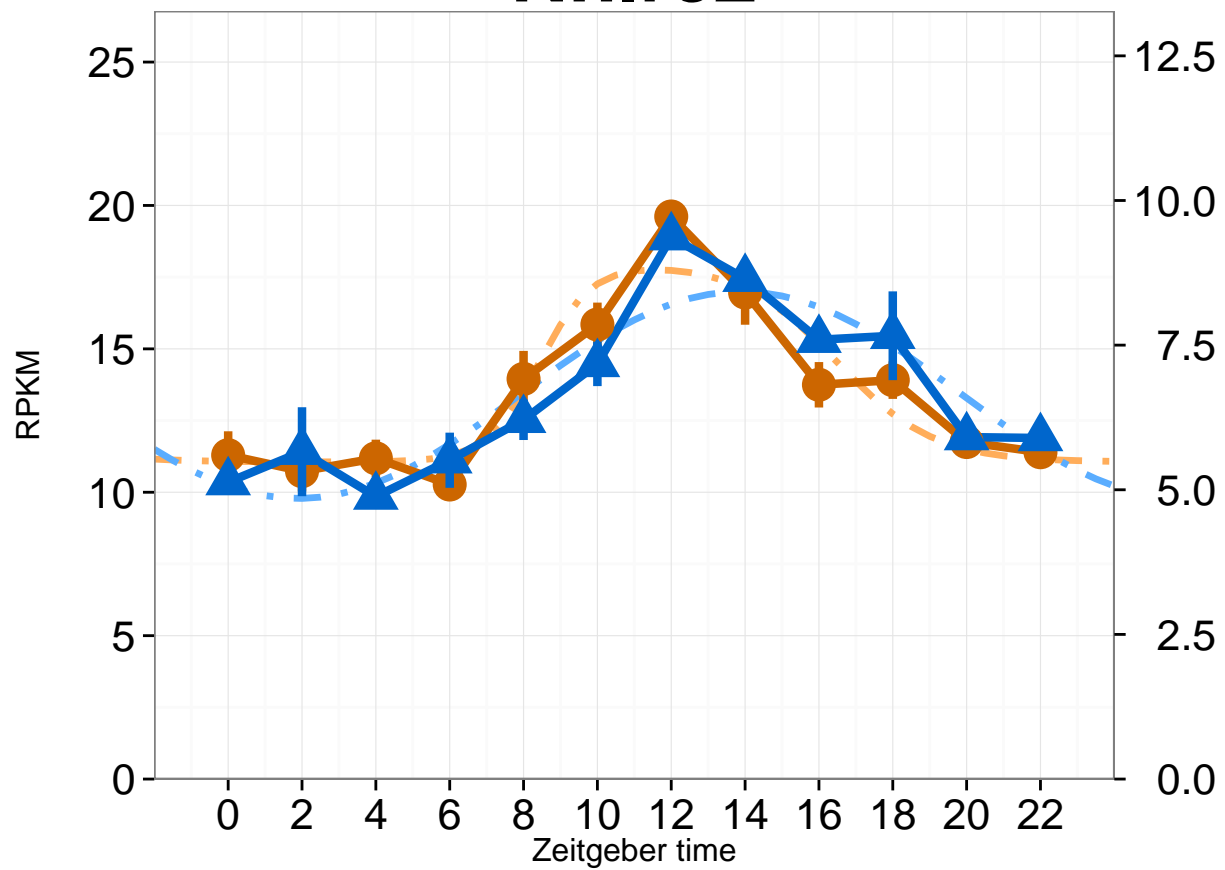

## Nhlrc2

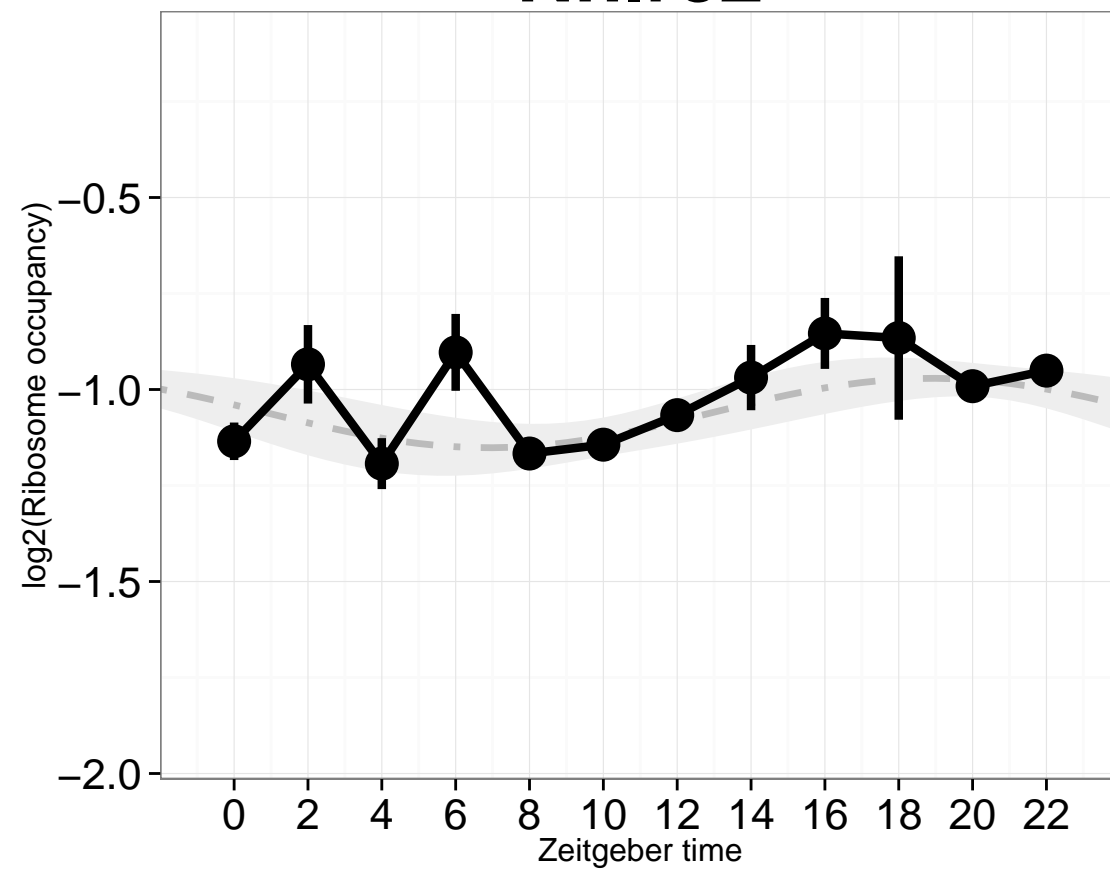

Supplement: SuppDataset_1.zip [file Nhlrc2_set_D.pdf › Supplemental Dataset 1/D-mRNA_rhythm_translation_rhyth/Nhlrc2_set_D.pdf]

# Nmrk1

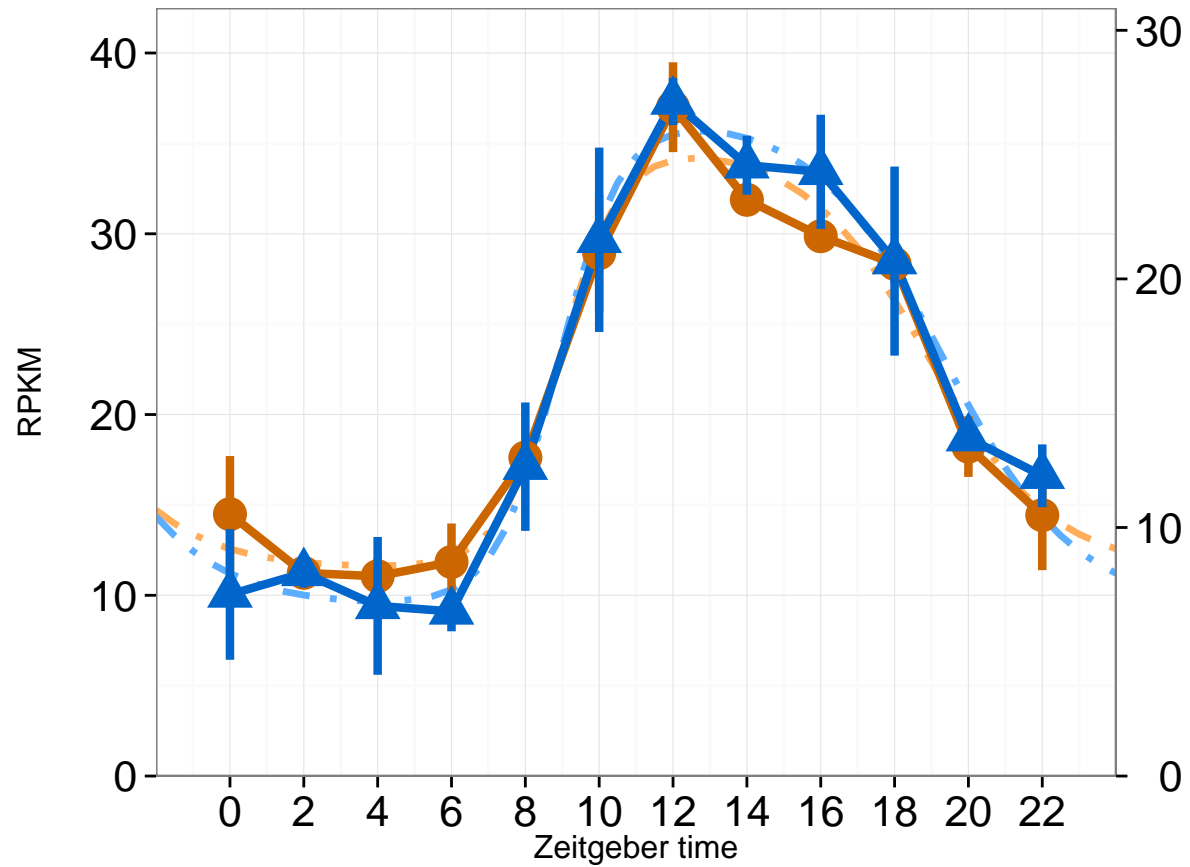

# Nmrk1

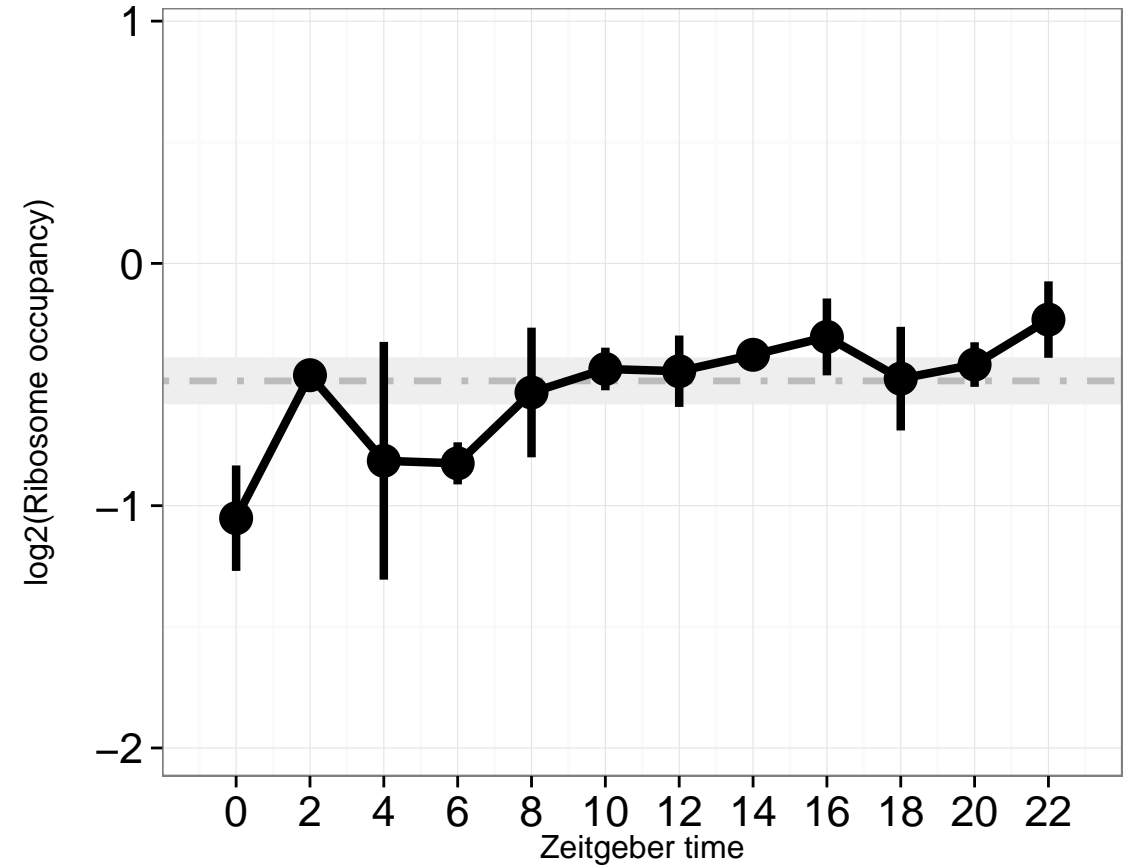

Supplement: SuppDataset_1.zip [file Nmrk1_set_D.pdf › Supplemental Dataset 1/D-mRNA_rhythm_translation_rhyth/Nmrk1_set_D.pdf]

## Nnmt

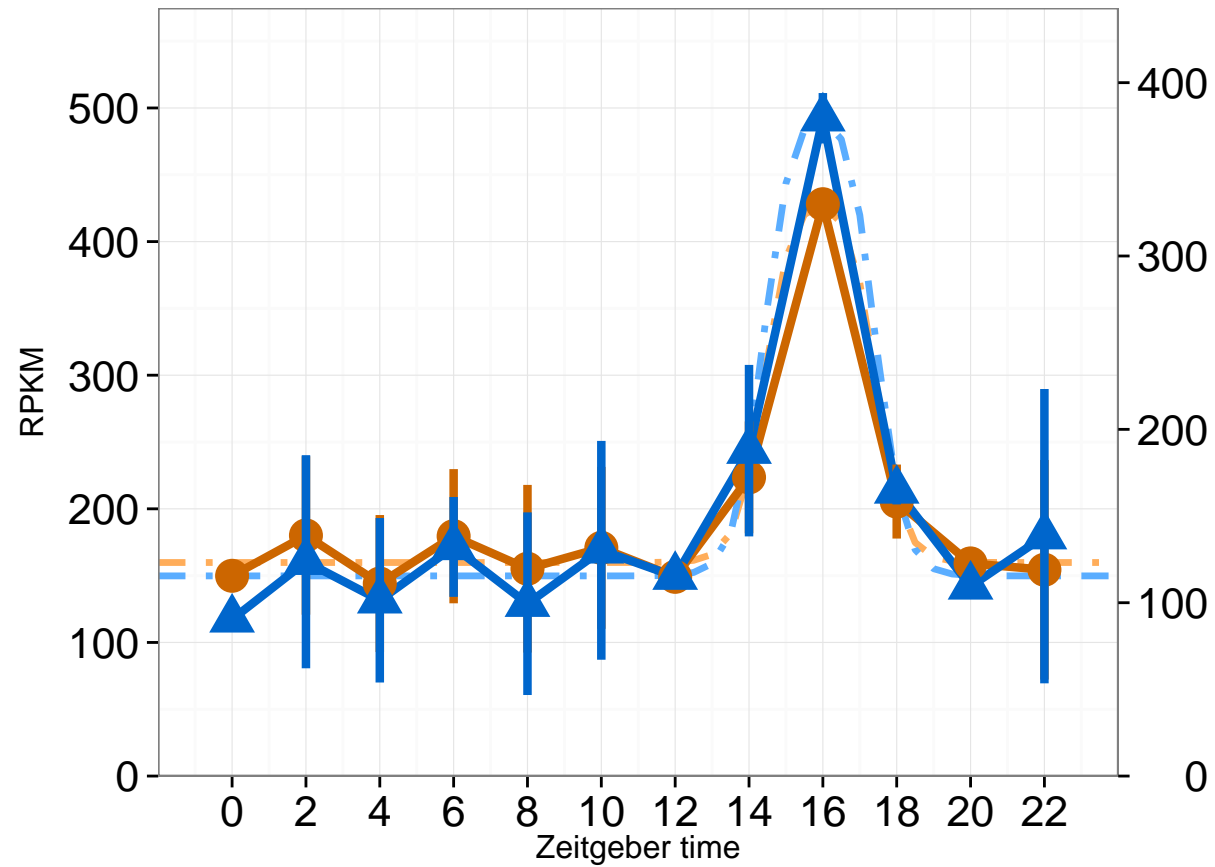

## Nnmt

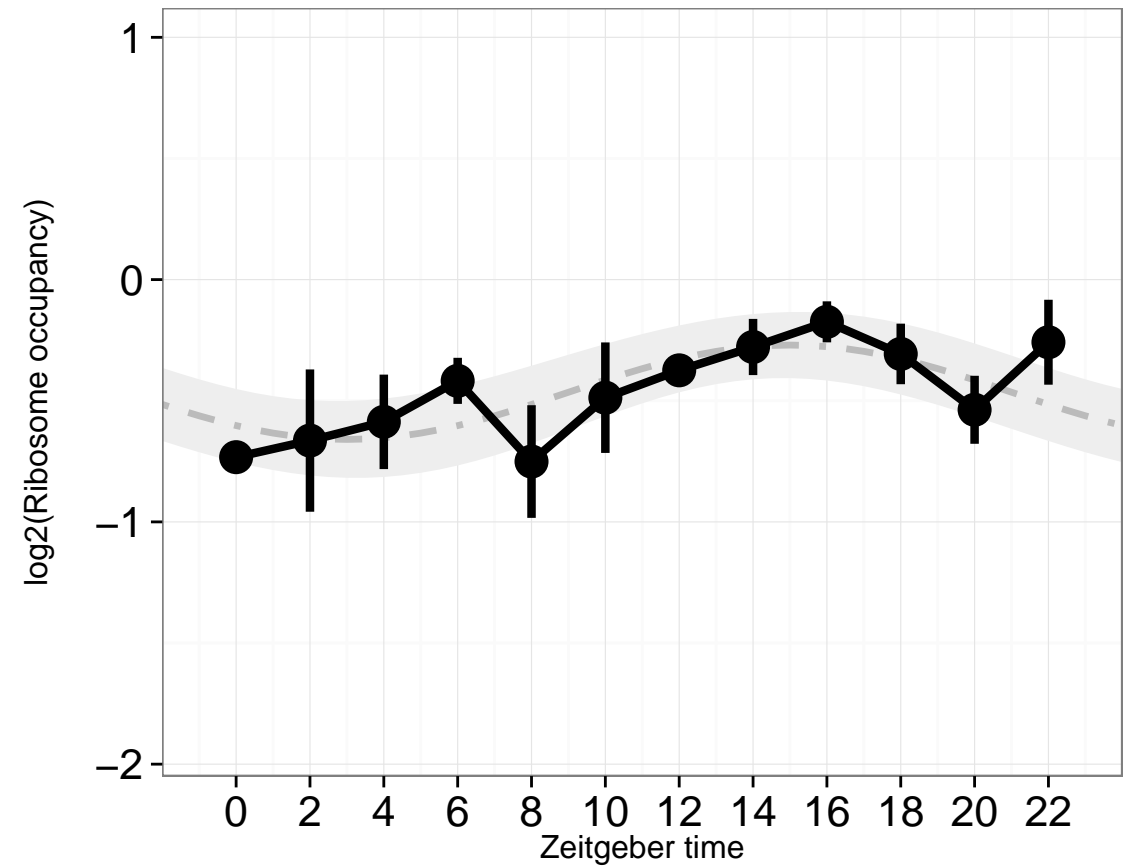

Supplement: SuppDataset_1.zip [file Nnmt_set_D.pdf › Supplemental Dataset 1/D-mRNA_rhythm_translation_rhyth/Nnmt_set_D.pdf]

## NoI10

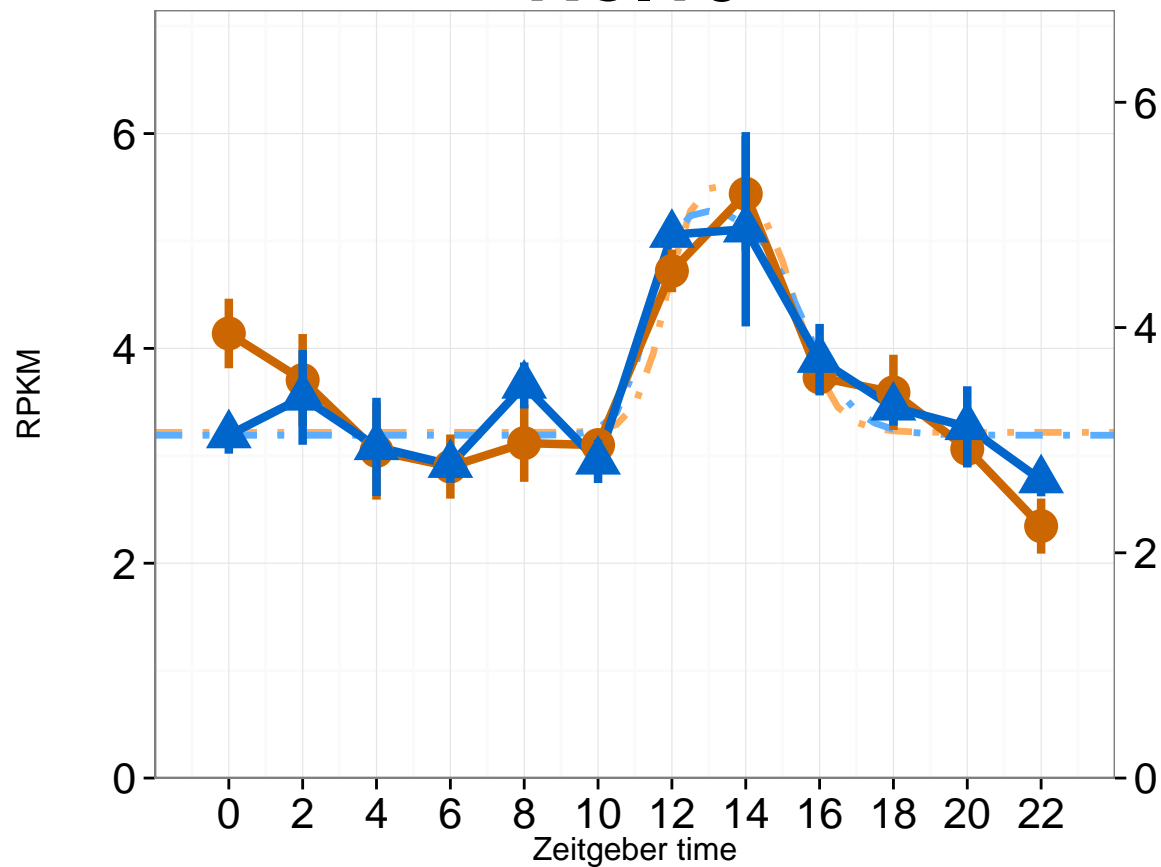

## NoI10

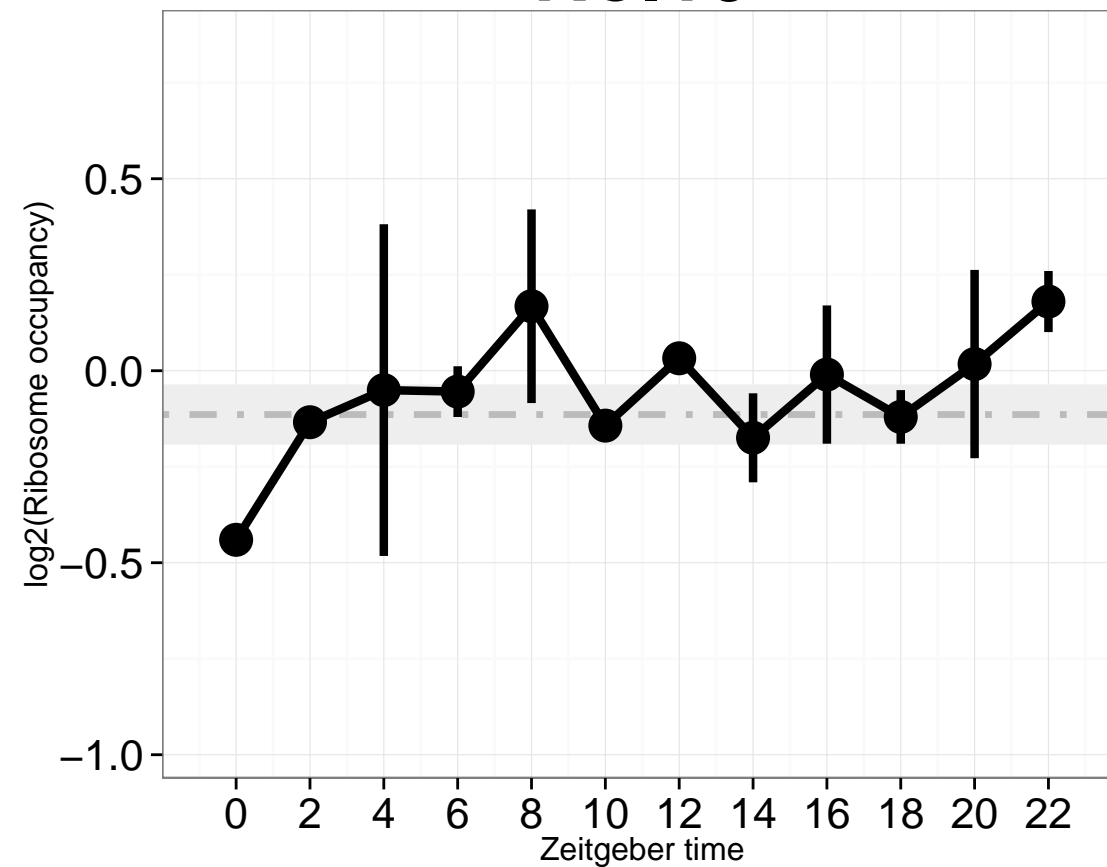

Supplement: SuppDataset_1.zip [file Nol10_set_D.pdf › Supplemental Dataset 1/D-mRNA_rhythm_translation_rhyth/Nol10_set_D.pdf]

## NoI8

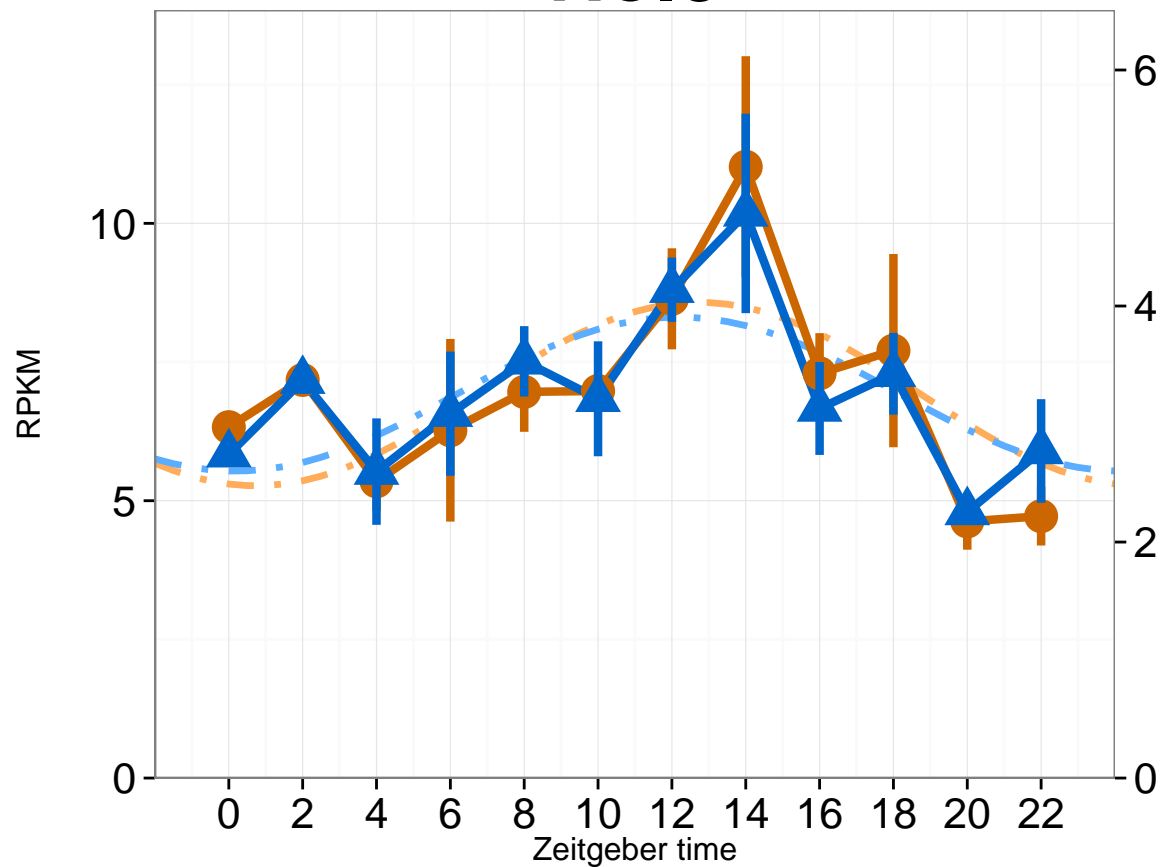

## NoI8

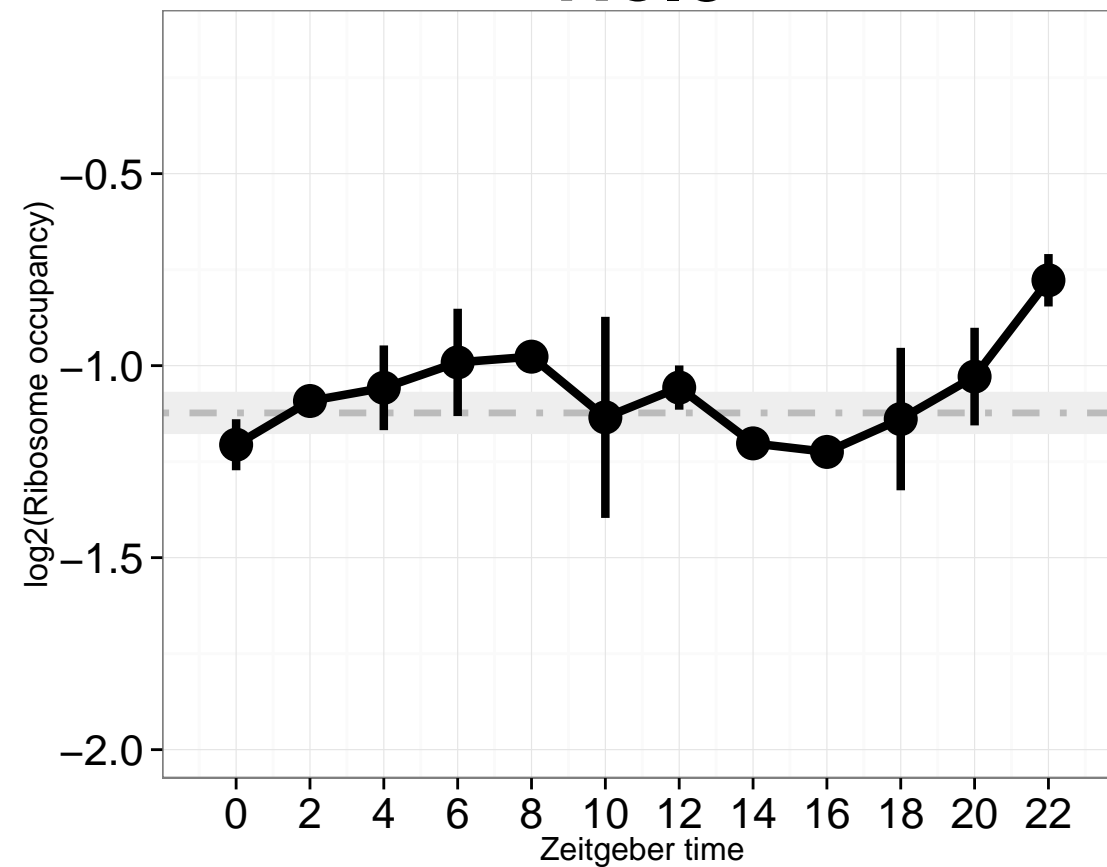

Supplement: SuppDataset_1.zip [file Nol8_set_D.pdf › Supplemental Dataset 1/D-mRNA_rhythm_translation_rhyth/Nol8_set_D.pdf]

## Nop16

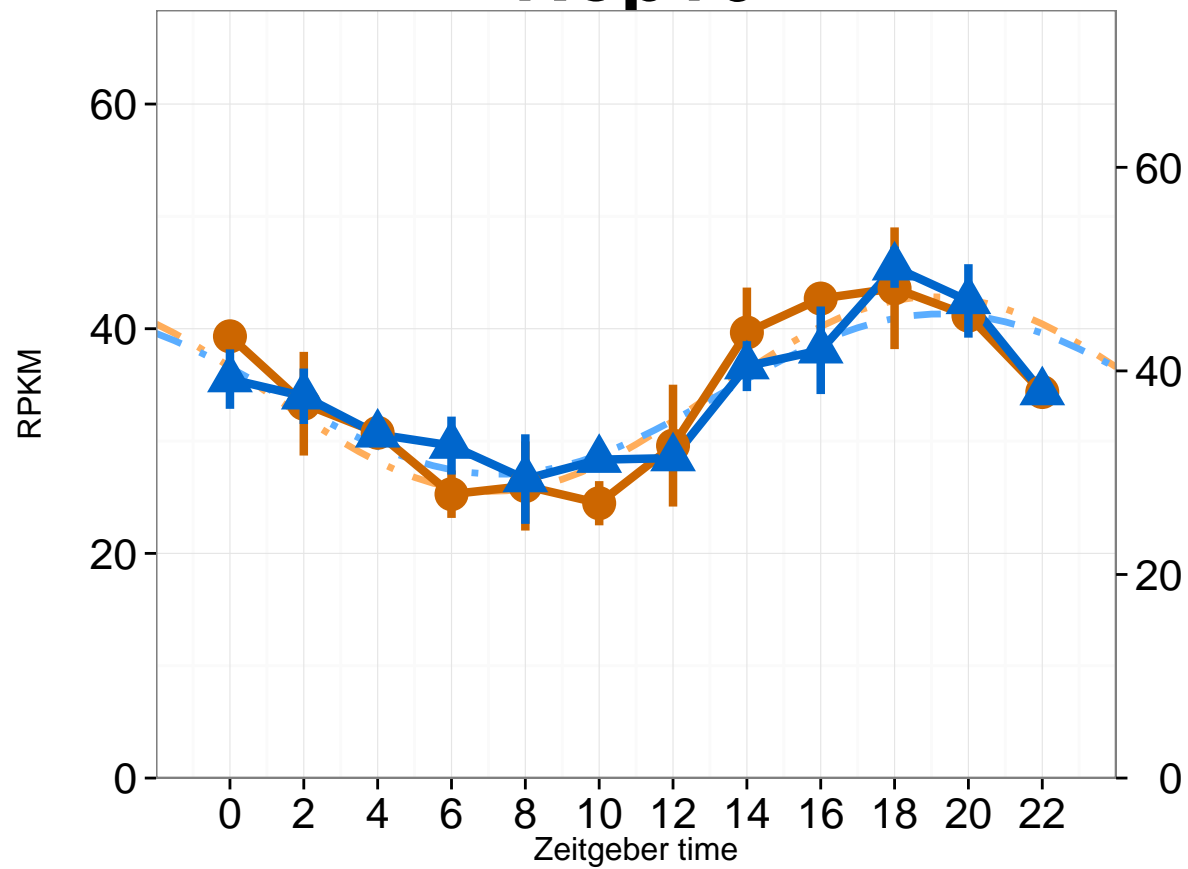

## Nop16

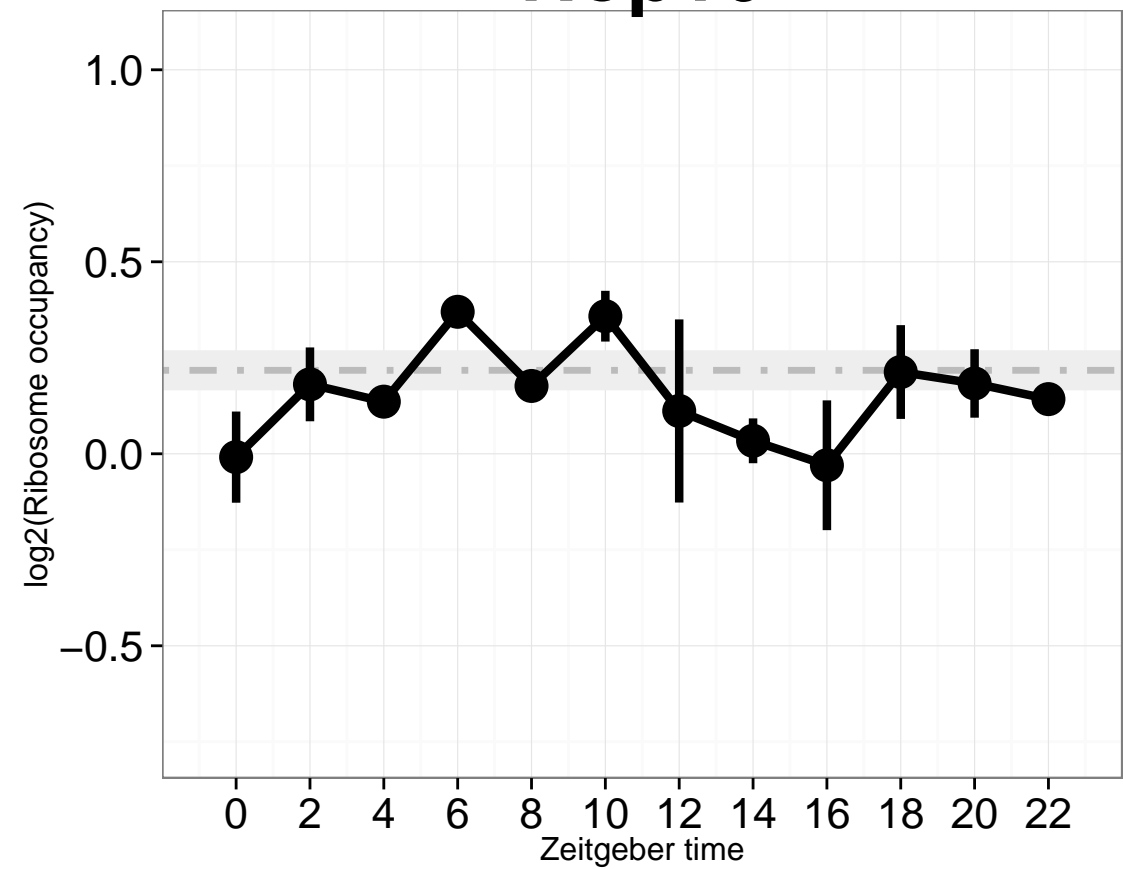

Supplement: SuppDataset_1.zip [file Nop16_set_D.pdf › Supplemental Dataset 1/D-mRNA_rhythm_translation_rhyth/Nop16_set_D.pdf]

## Nop2

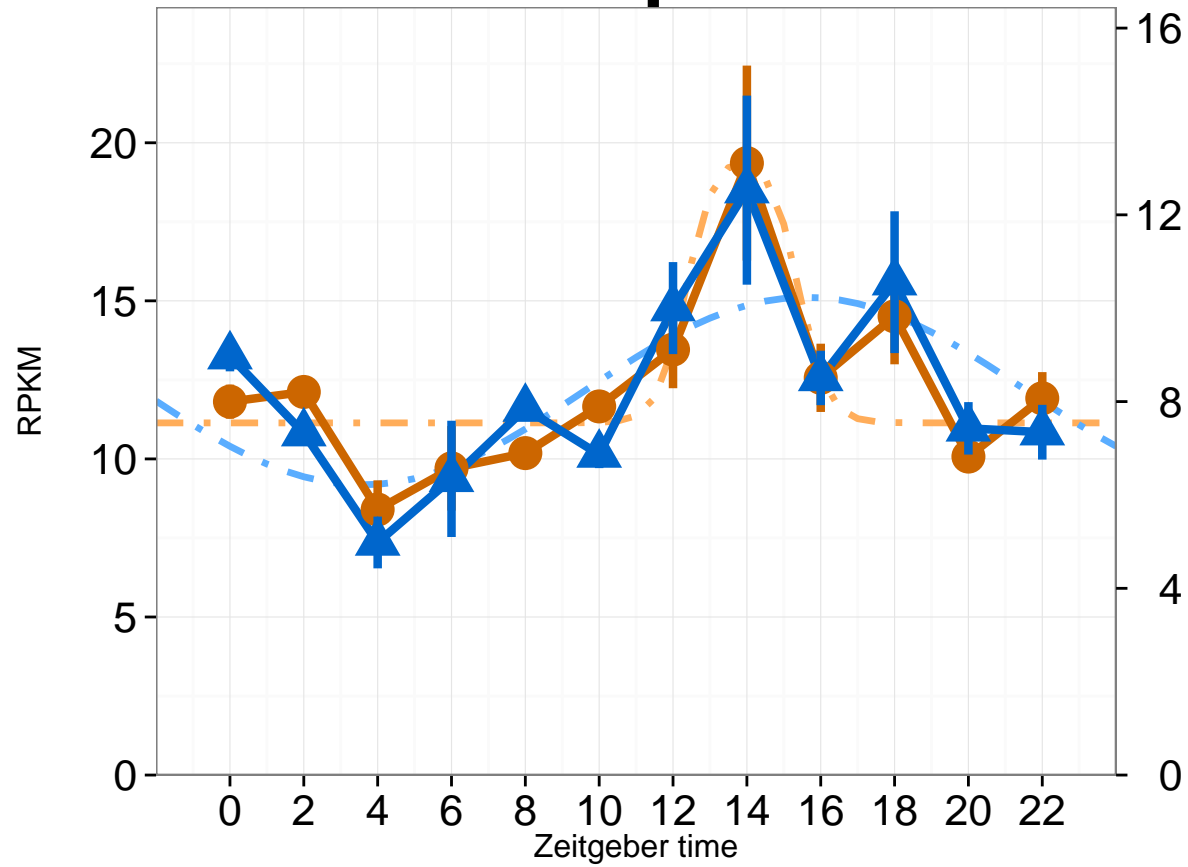

## Nop2

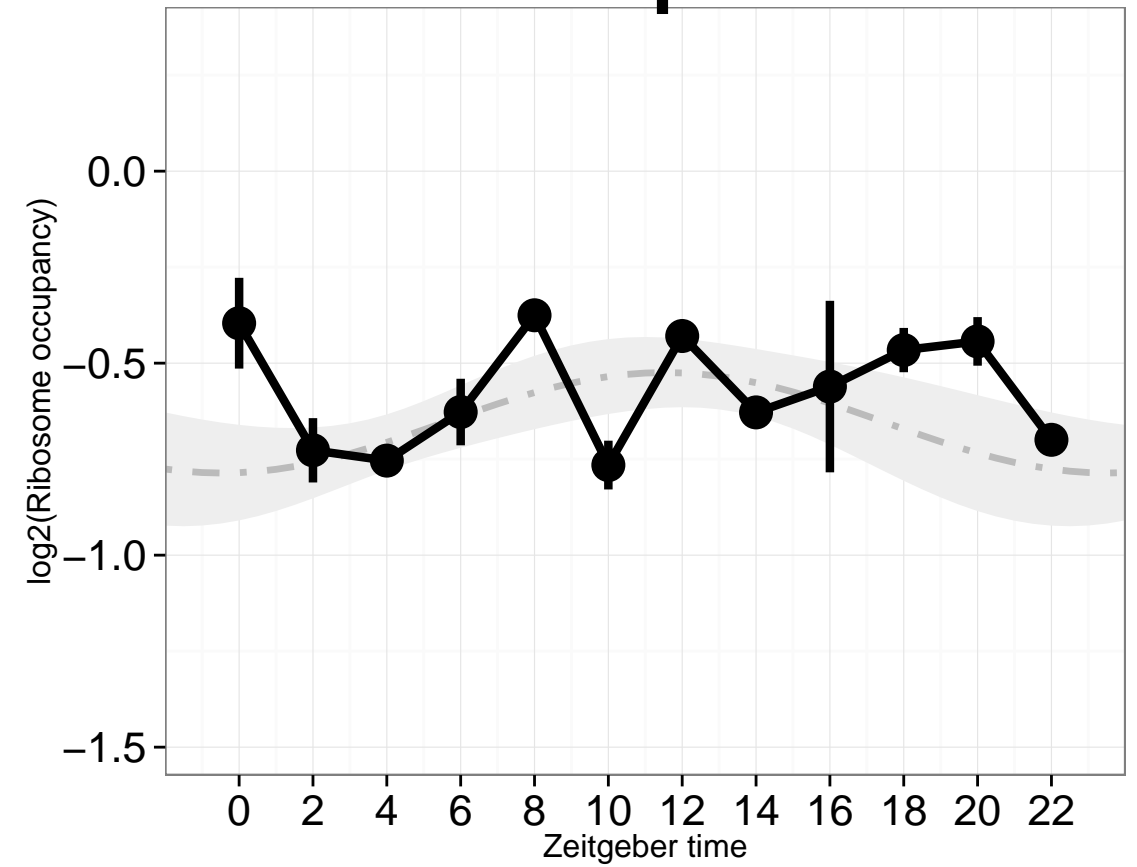

Supplement: SuppDataset_1.zip [file Nop2_set_D.pdf › Supplemental Dataset 1/D-mRNA_rhythm_translation_rhyth/Nop2_set_D.pdf]

## Nox4

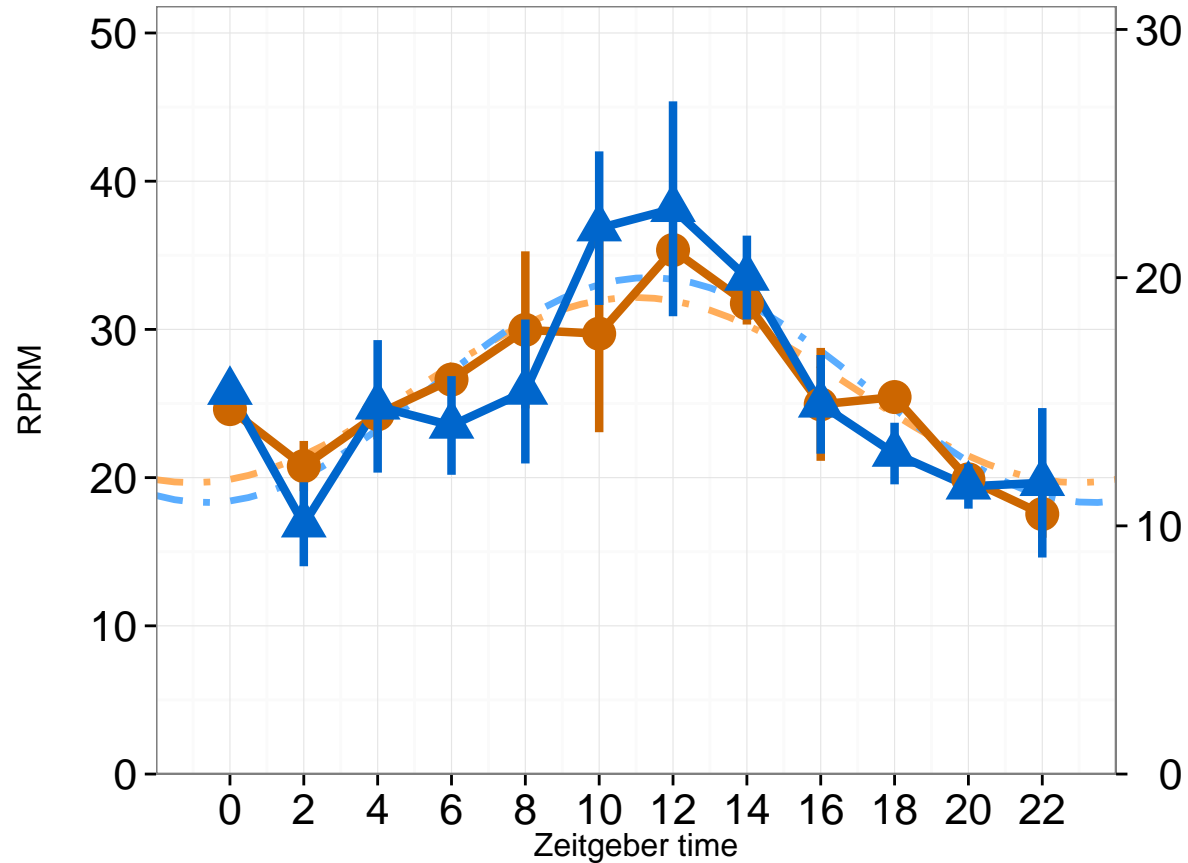

## Nox4

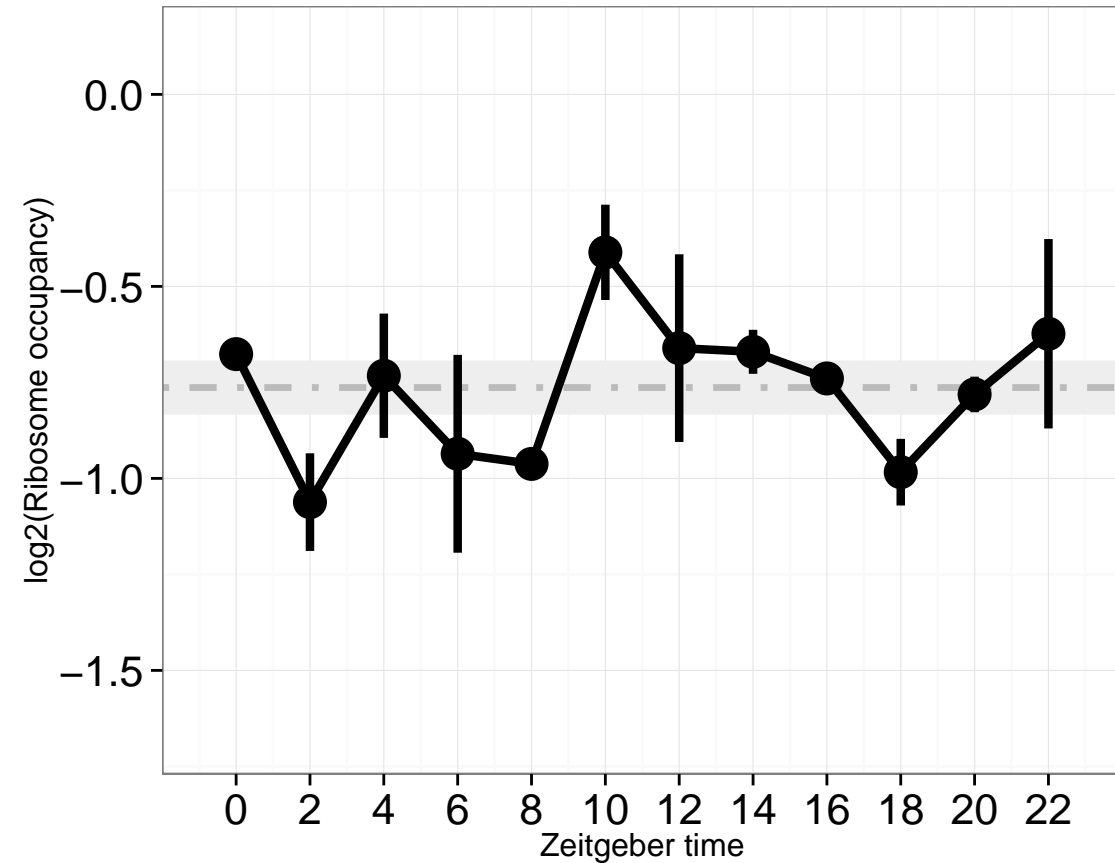

Supplement: SuppDataset_1.zip [file Nox4_set_D.pdf › Supplemental Dataset 1/D-mRNA_rhythm_translation_rhyth/Nox4_set_D.pdf]

## Npas2

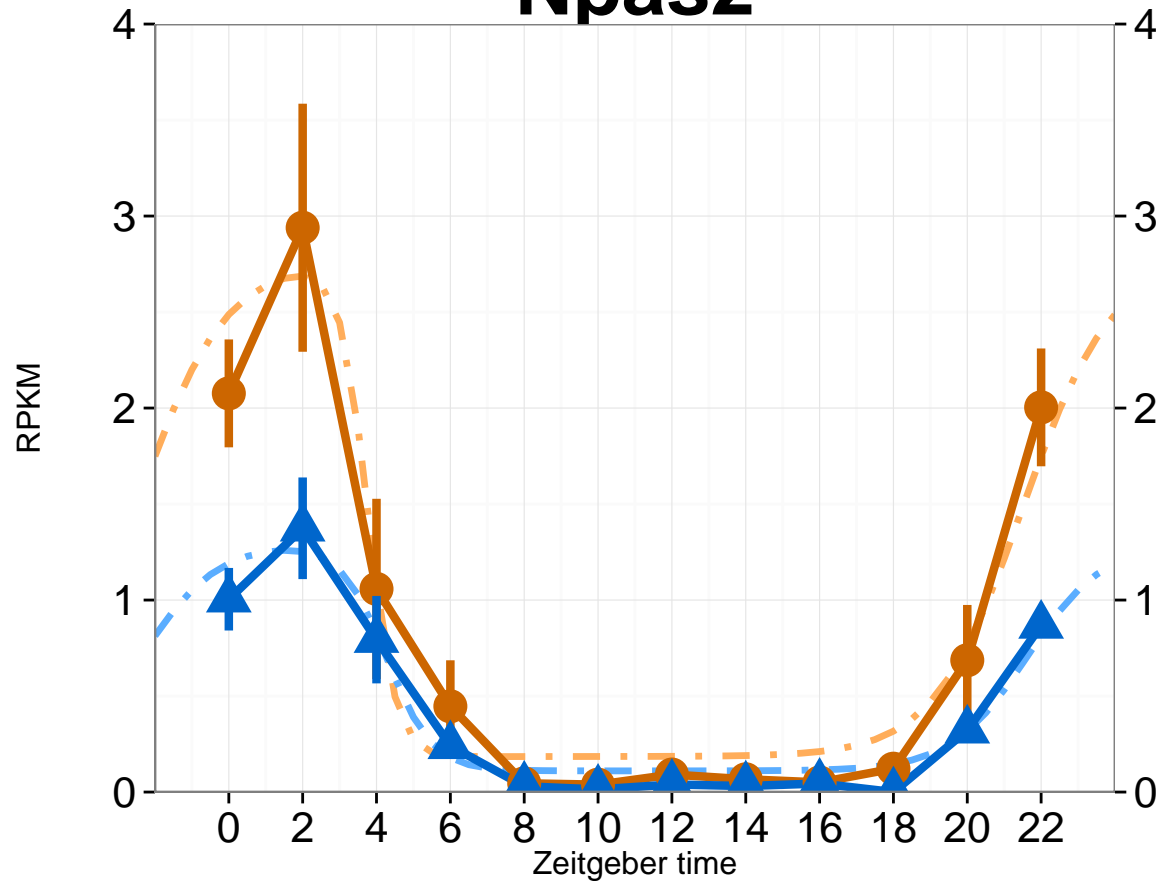

## Npas2

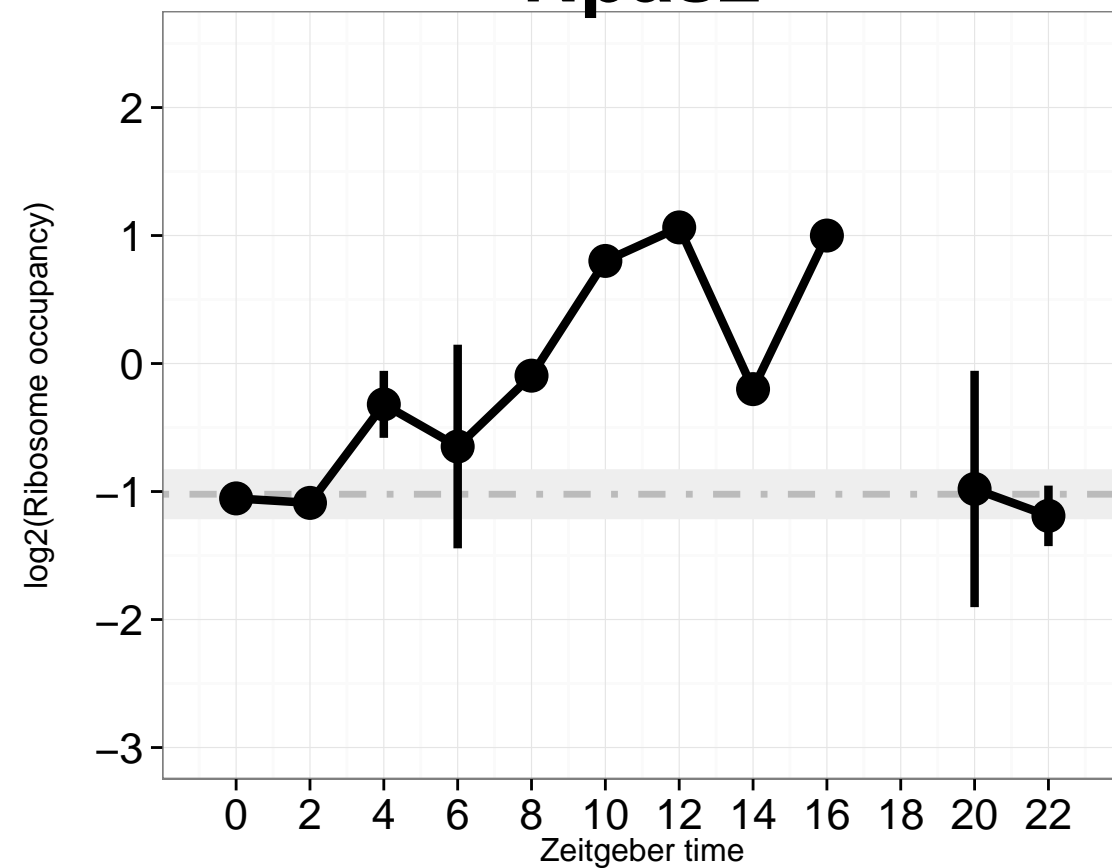

Supplement: SuppDataset_1.zip [file Npas2_set_D.pdf › Supplemental Dataset 1/D-mRNA_rhythm_translation_rhyth/Npas2_set_D.pdf]

# Npc1

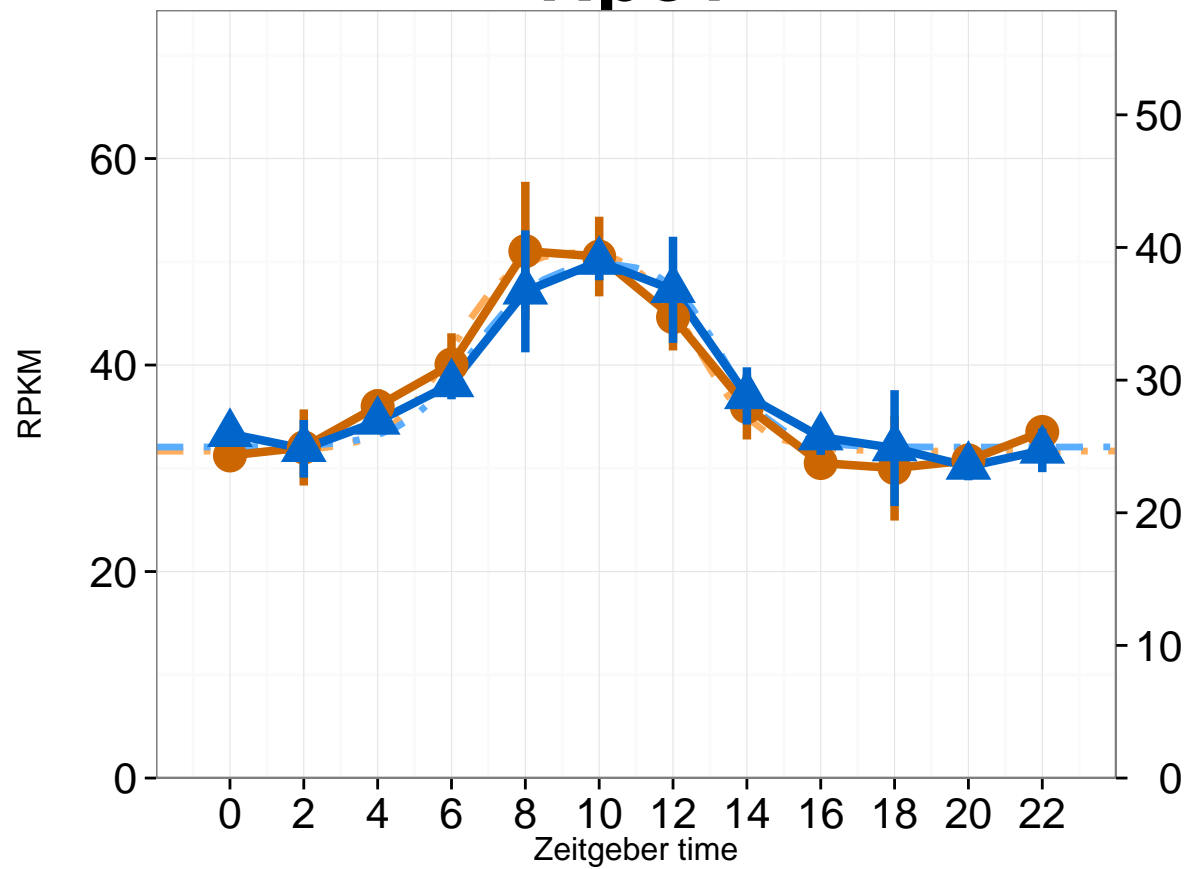

# Npc1

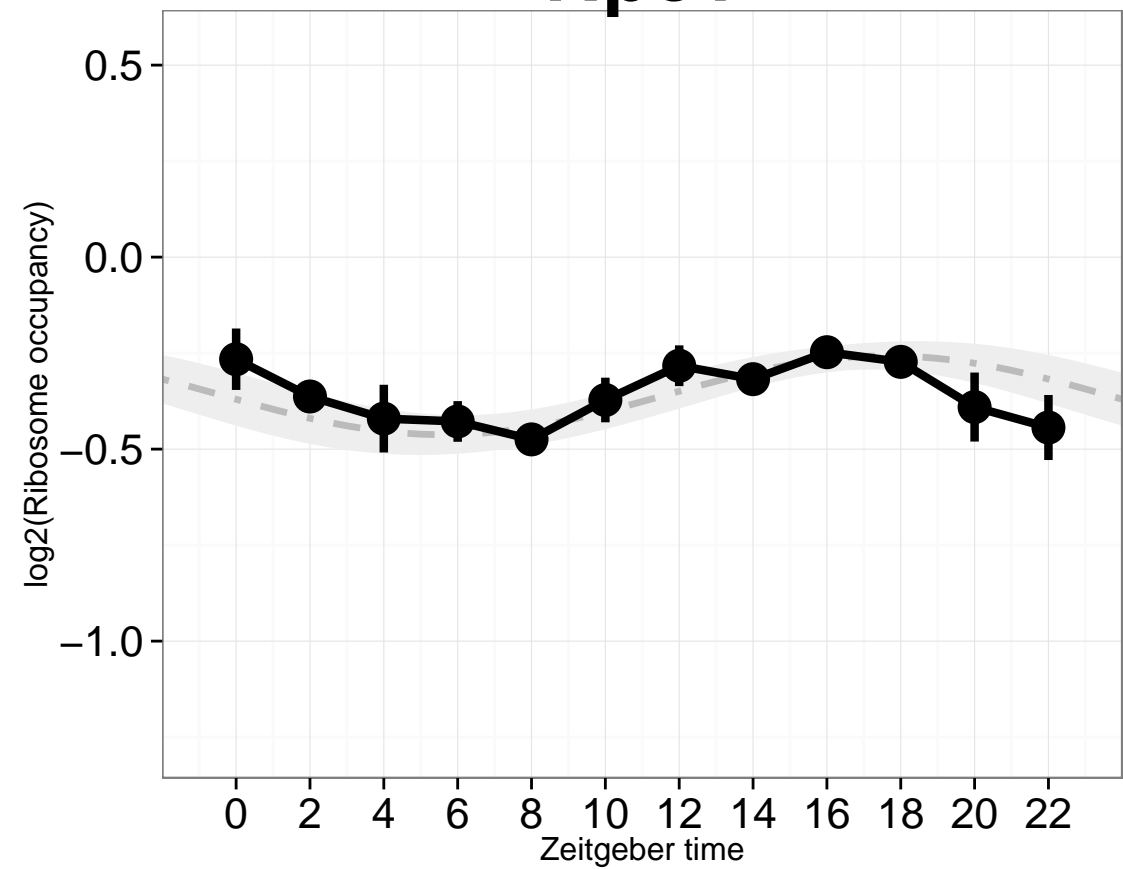

Supplement: SuppDataset_1.zip [file Npc1_set_D.pdf › Supplemental Dataset 1/D-mRNA_rhythm_translation_rhyth/Npc1_set_D.pdf]

## Nr0b2

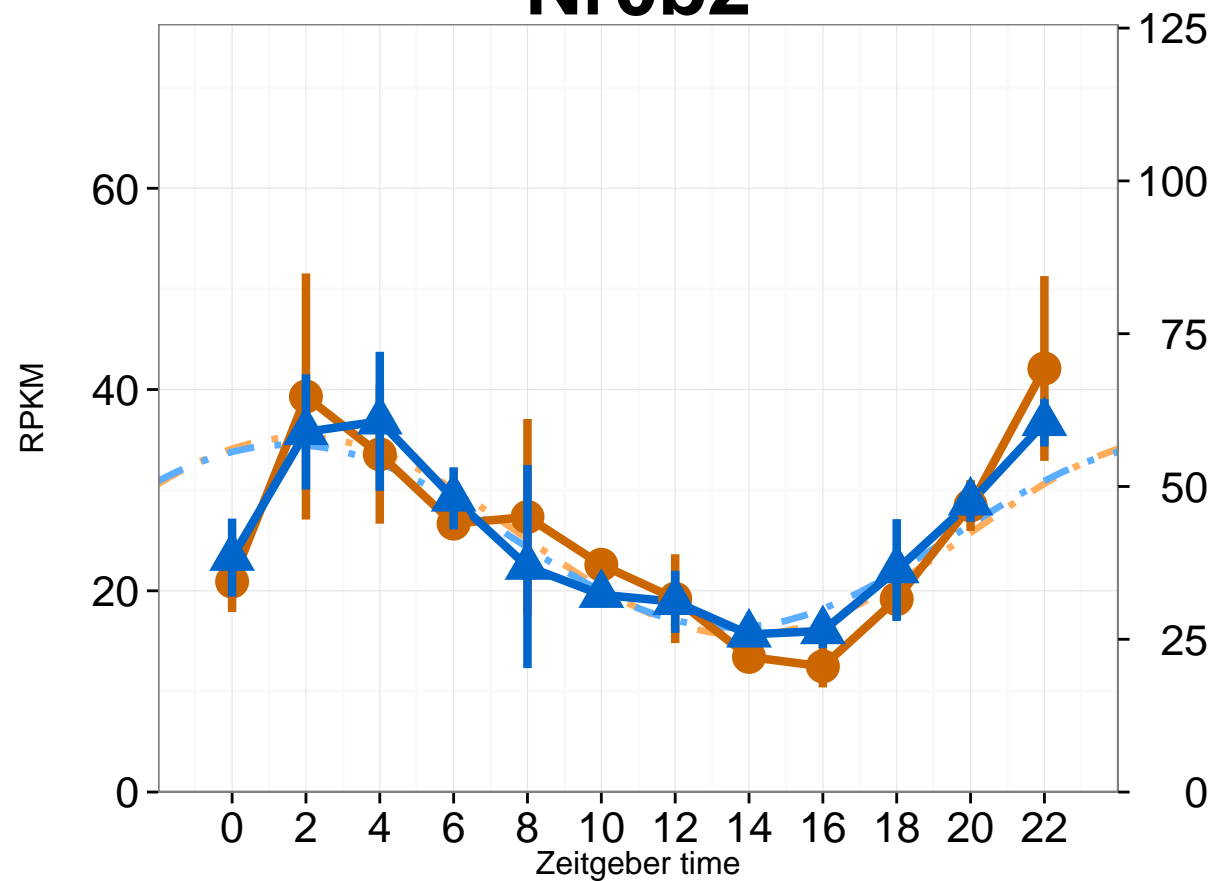

## Nr0b2

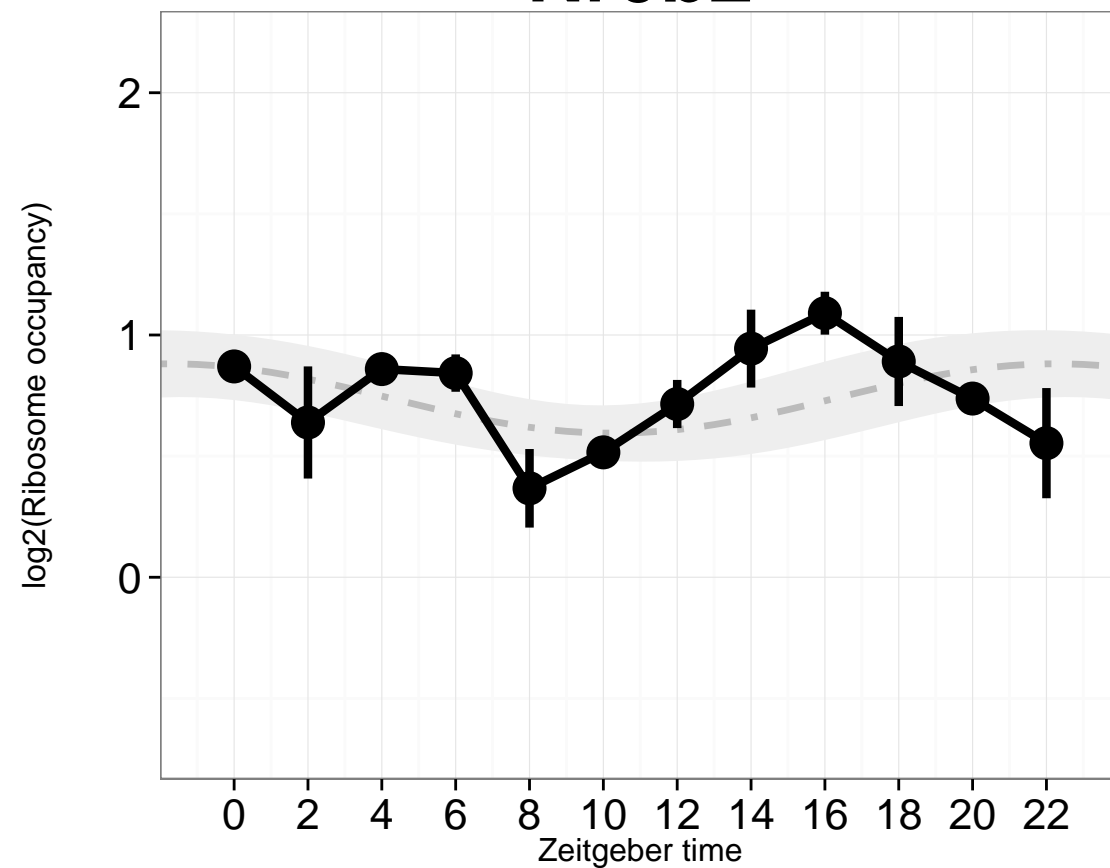

Supplement: SuppDataset_1.zip [file Nr0b2_set_D.pdf › Supplemental Dataset 1/D-mRNA_rhythm_translation_rhyth/Nr0b2_set_D.pdf]

# Nr1d1

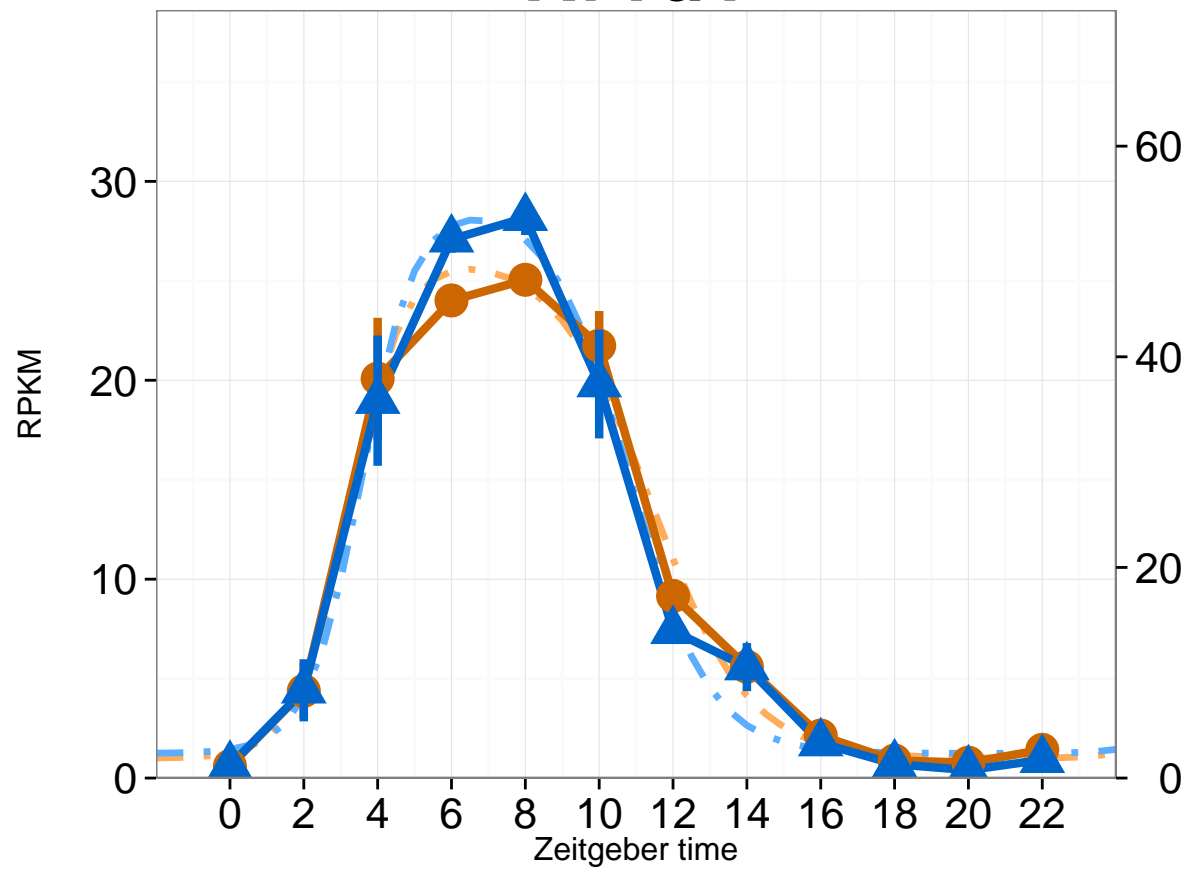

# Nr1d1

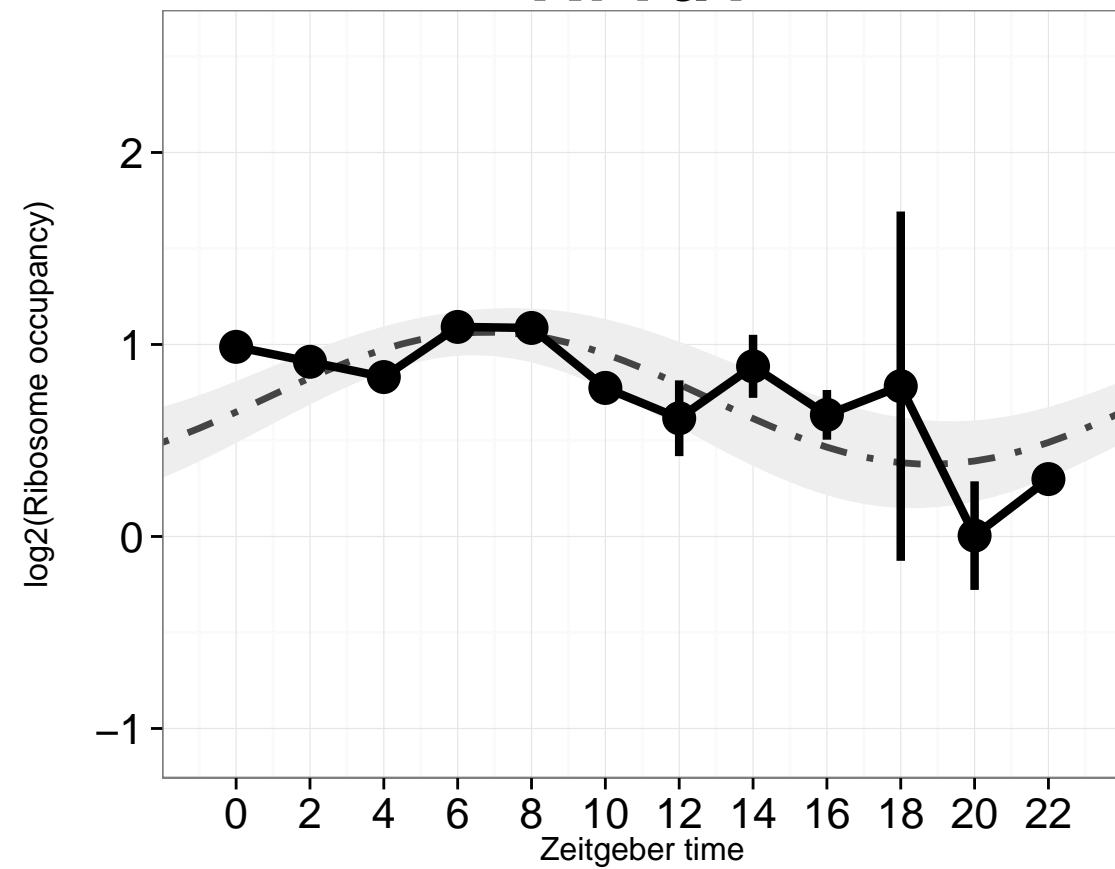

Supplement: SuppDataset_1.zip [file Nr1d1_set_D.pdf › Supplemental Dataset 1/D-mRNA_rhythm_translation_rhyth/Nr1d1_set_D.pdf]

# Nr1d2

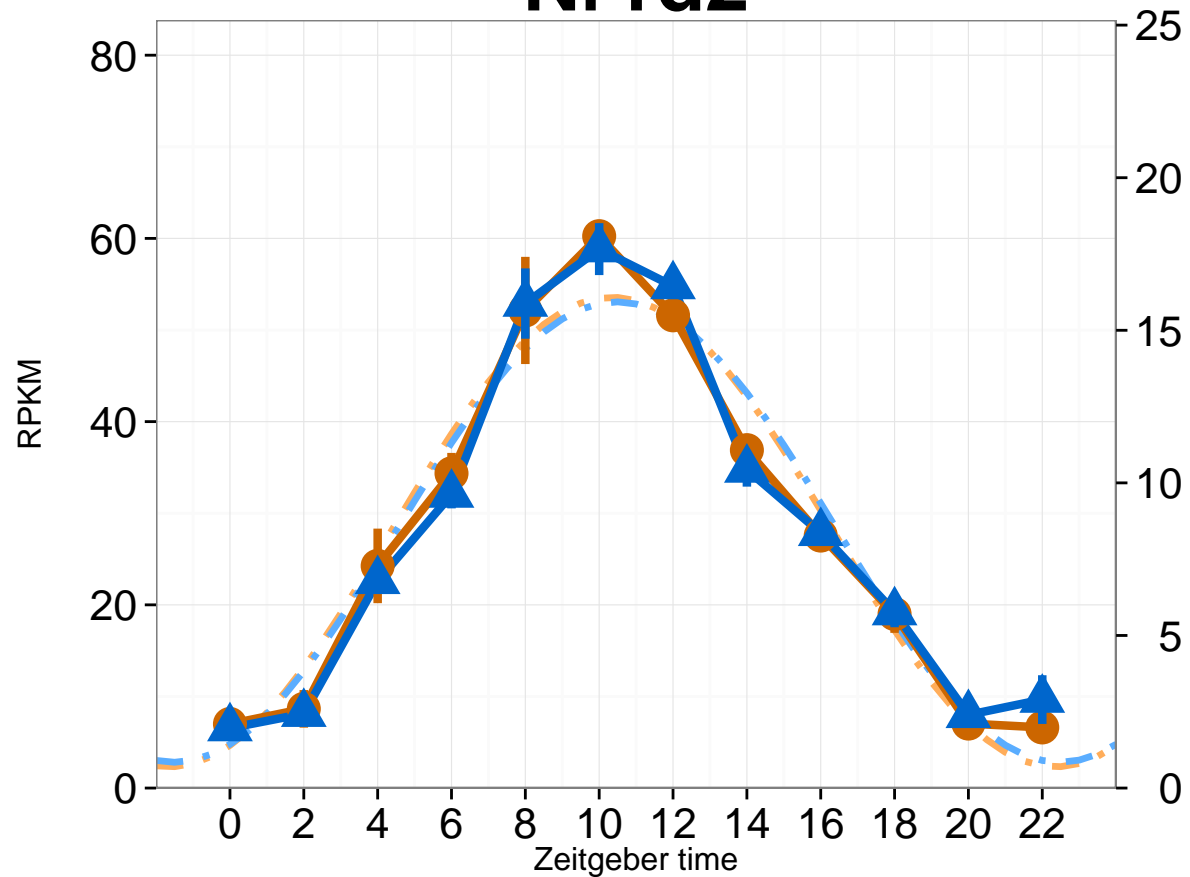

# Nr1d2

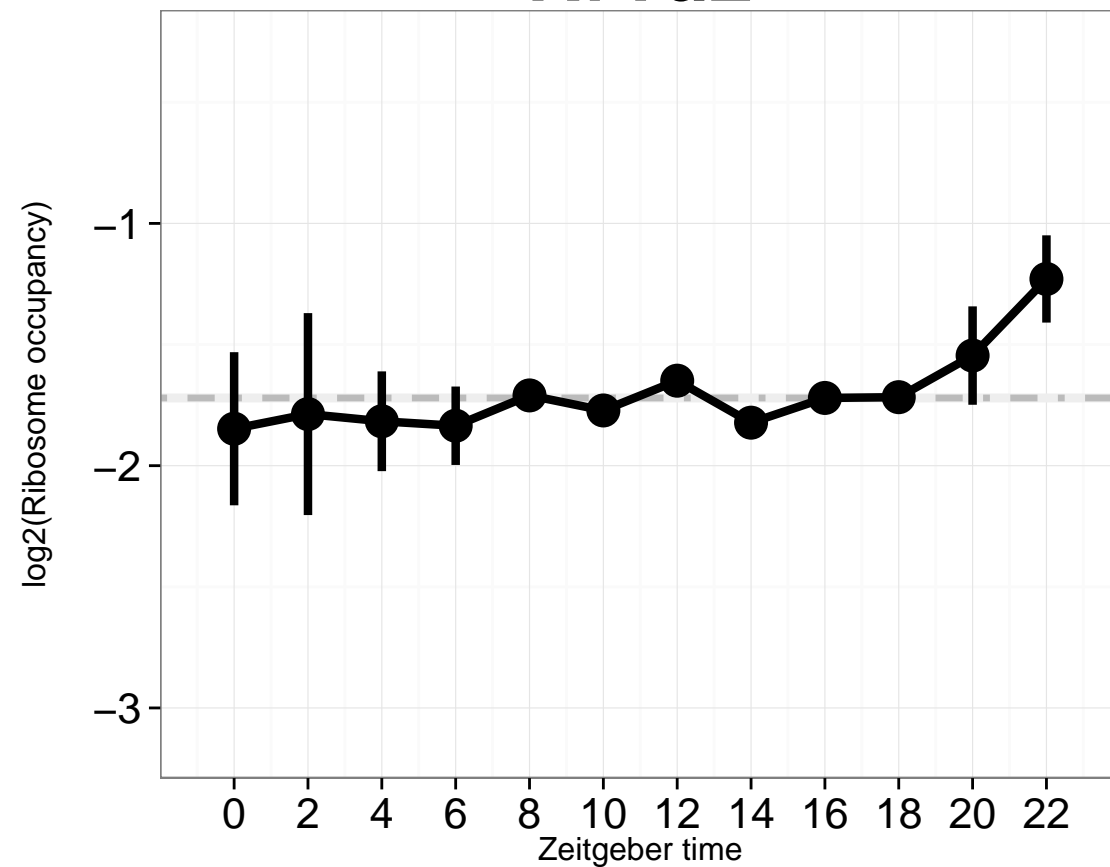

Supplement: SuppDataset_1.zip [file Nr1d2_set_D.pdf › Supplemental Dataset 1/D-mRNA_rhythm_translation_rhyth/Nr1d2_set_D.pdf]

# Nr1h4

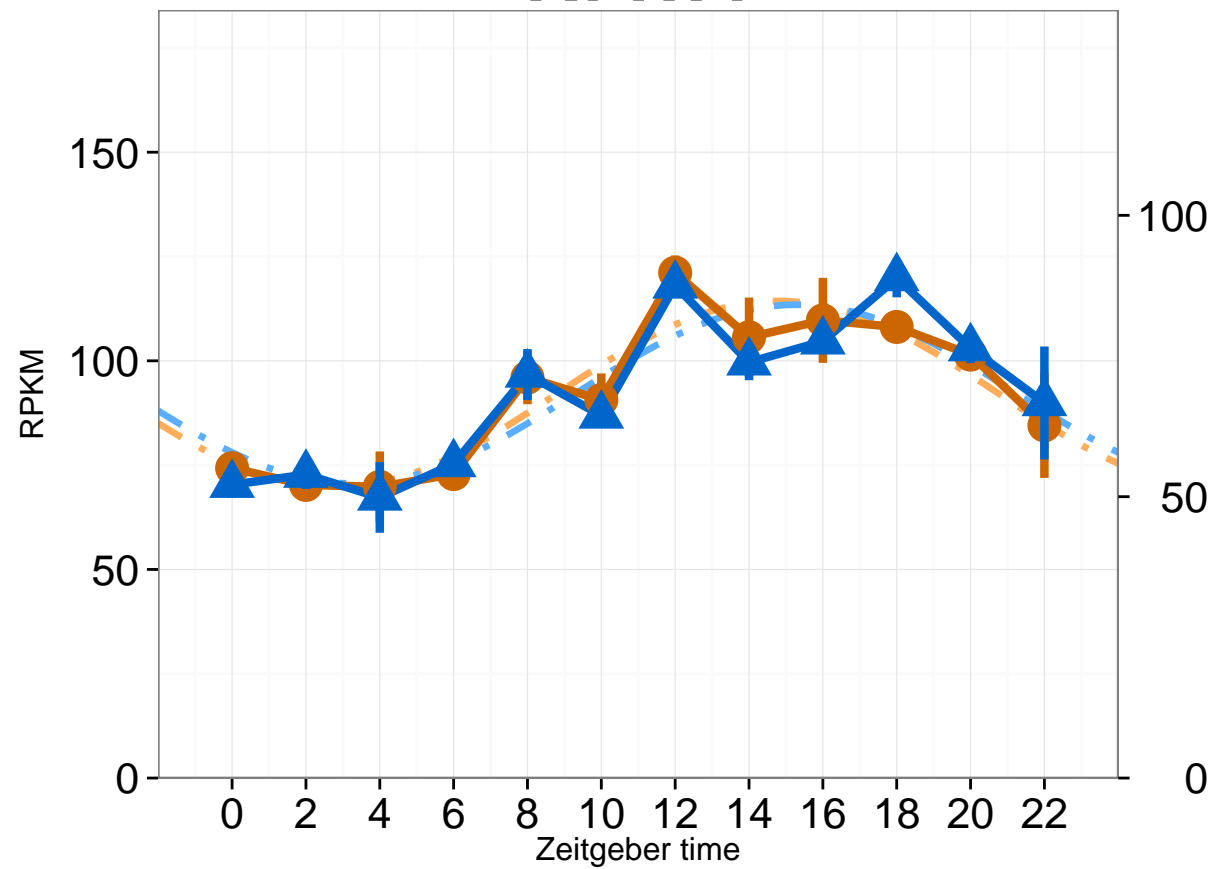

# Nr1h4

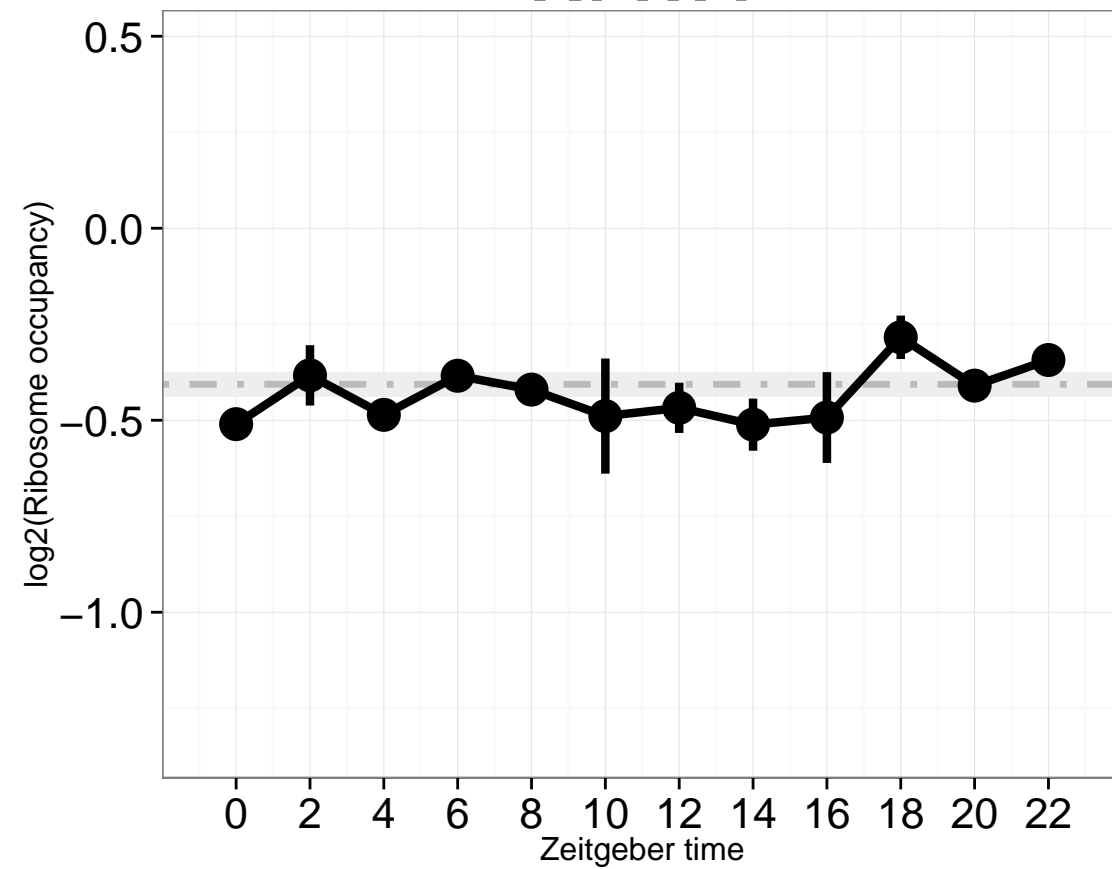

Supplement: SuppDataset_1.zip [file Nr1h4_set_D.pdf › Supplemental Dataset 1/D-mRNA_rhythm_translation_rhyth/Nr1h4_set_D.pdf]

# Nr1i3

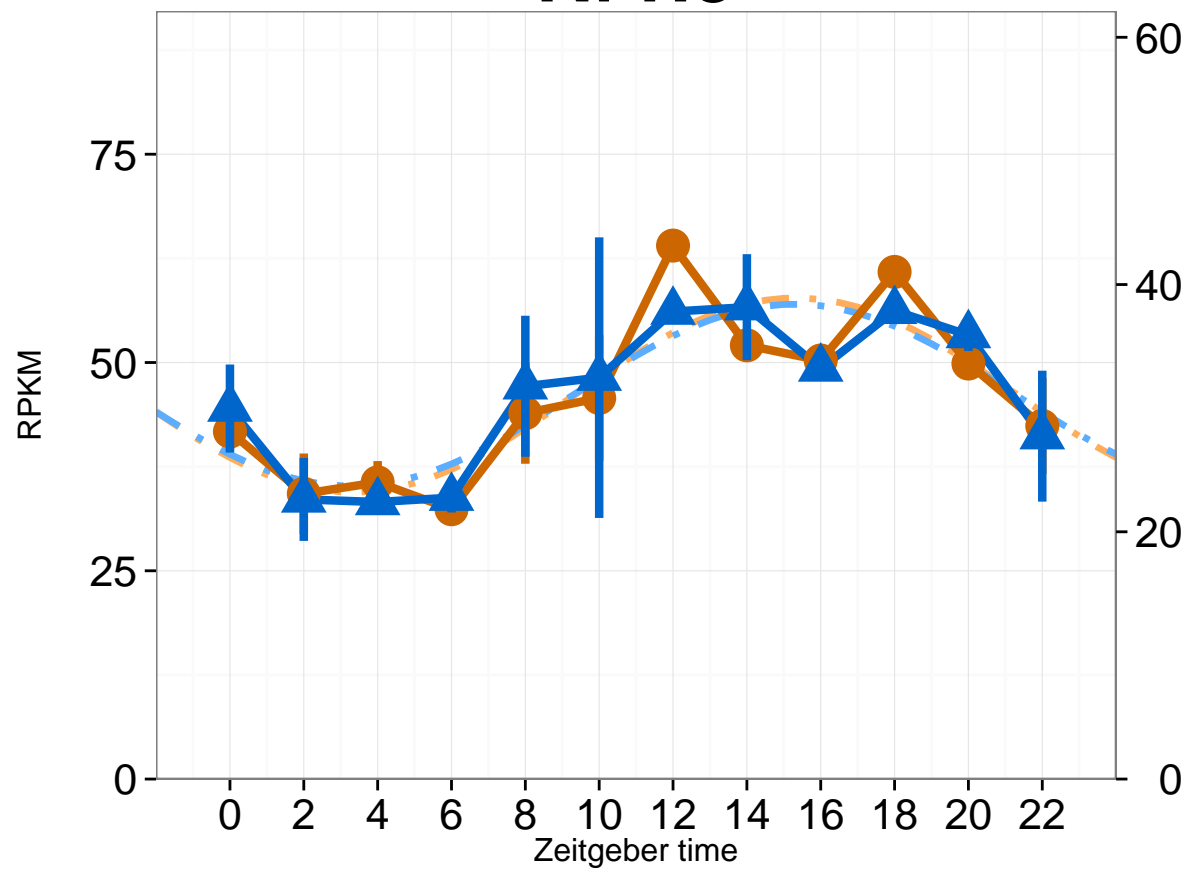

# Nr1i3

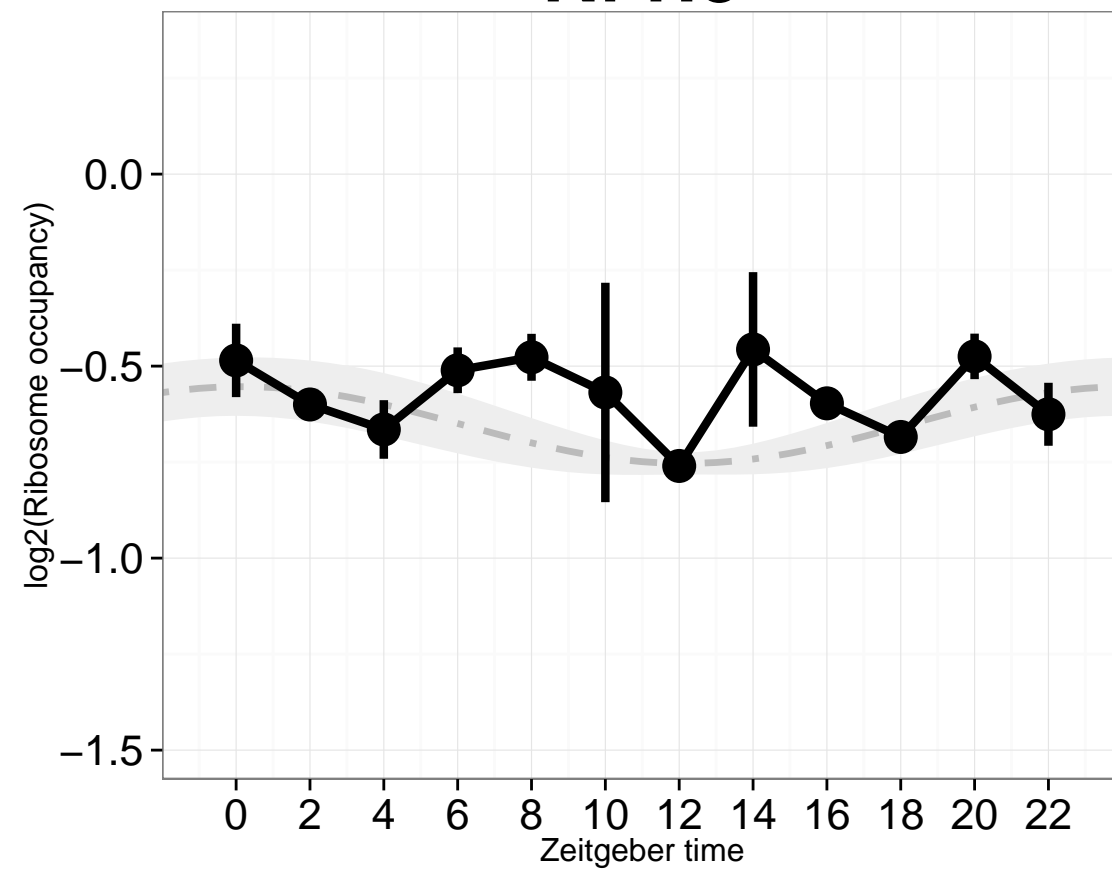

Supplement: SuppDataset_1.zip [file Nr1i3_set_D.pdf › Supplemental Dataset 1/D-mRNA_rhythm_translation_rhyth/Nr1i3_set_D.pdf]

# Nr2f6

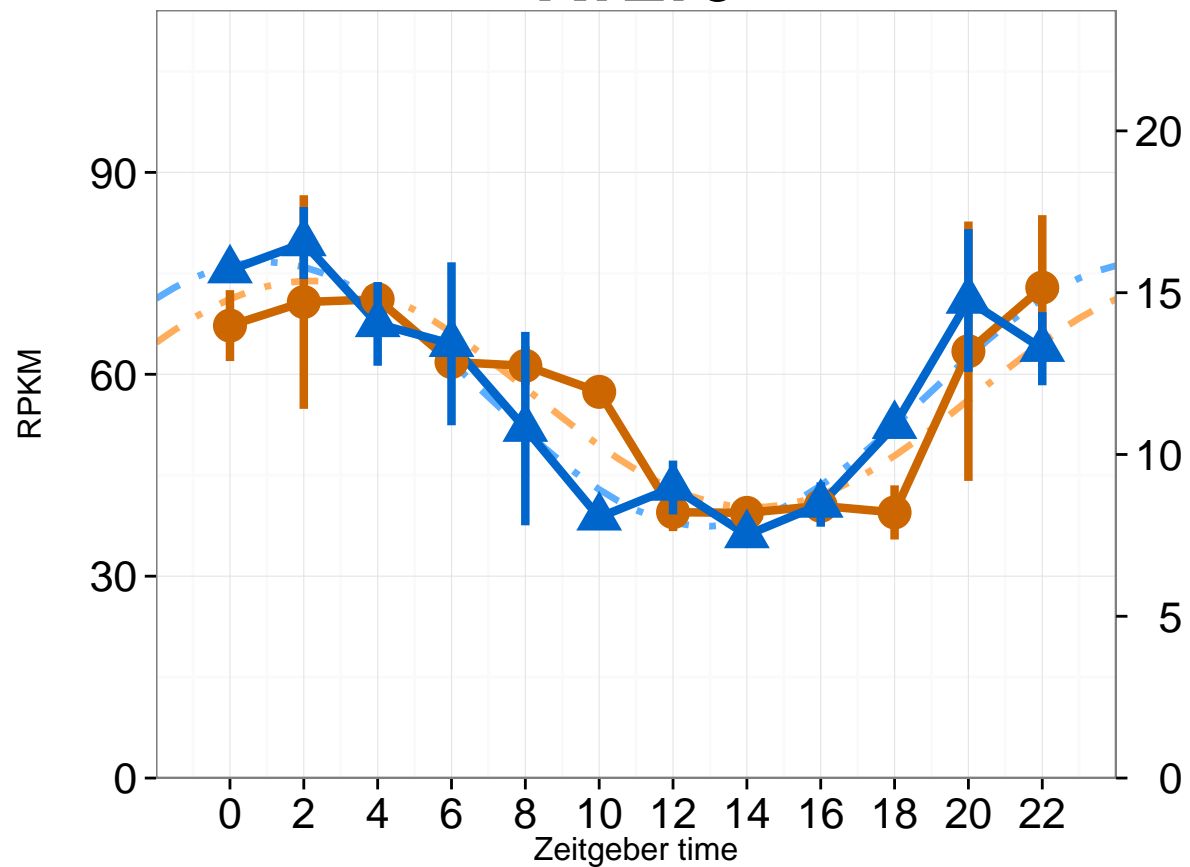

# Nr2f6

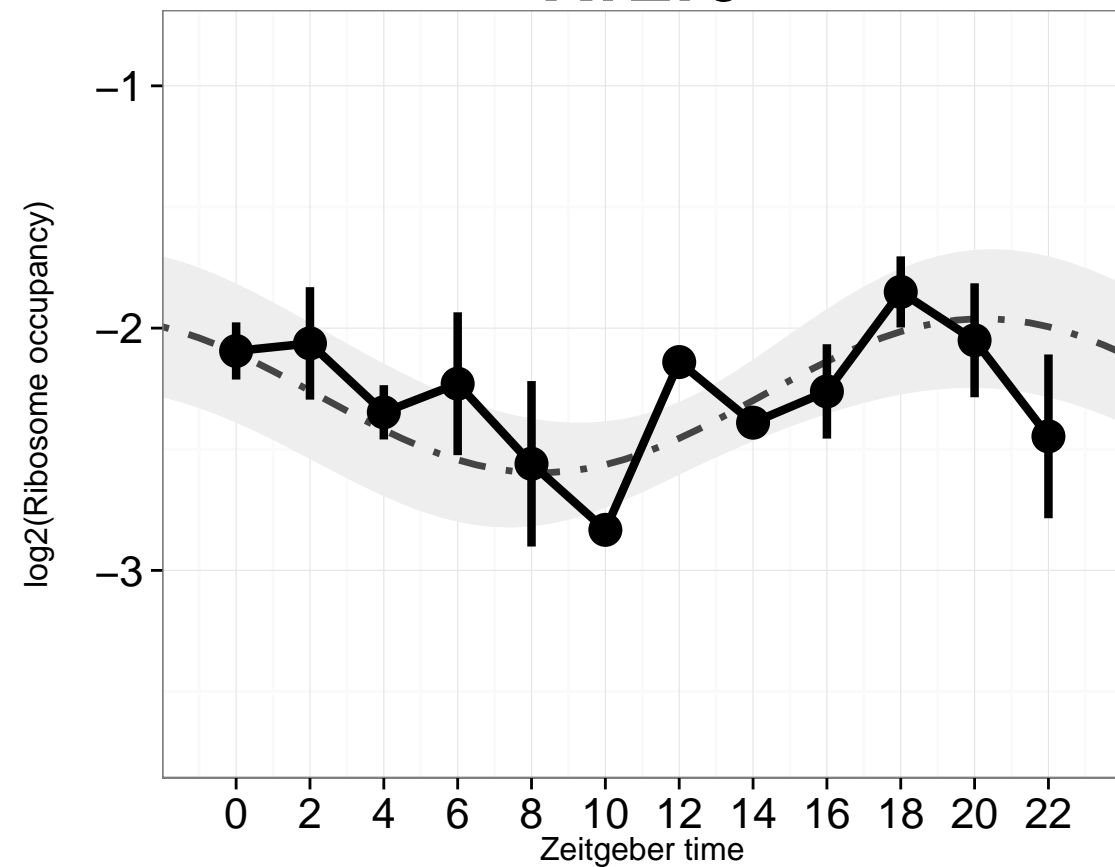

Supplement: SuppDataset_1.zip [file Nr2f6_set_D.pdf › Supplemental Dataset 1/D-mRNA_rhythm_translation_rhyth/Nr2f6_set_D.pdf]

# Nr3c2

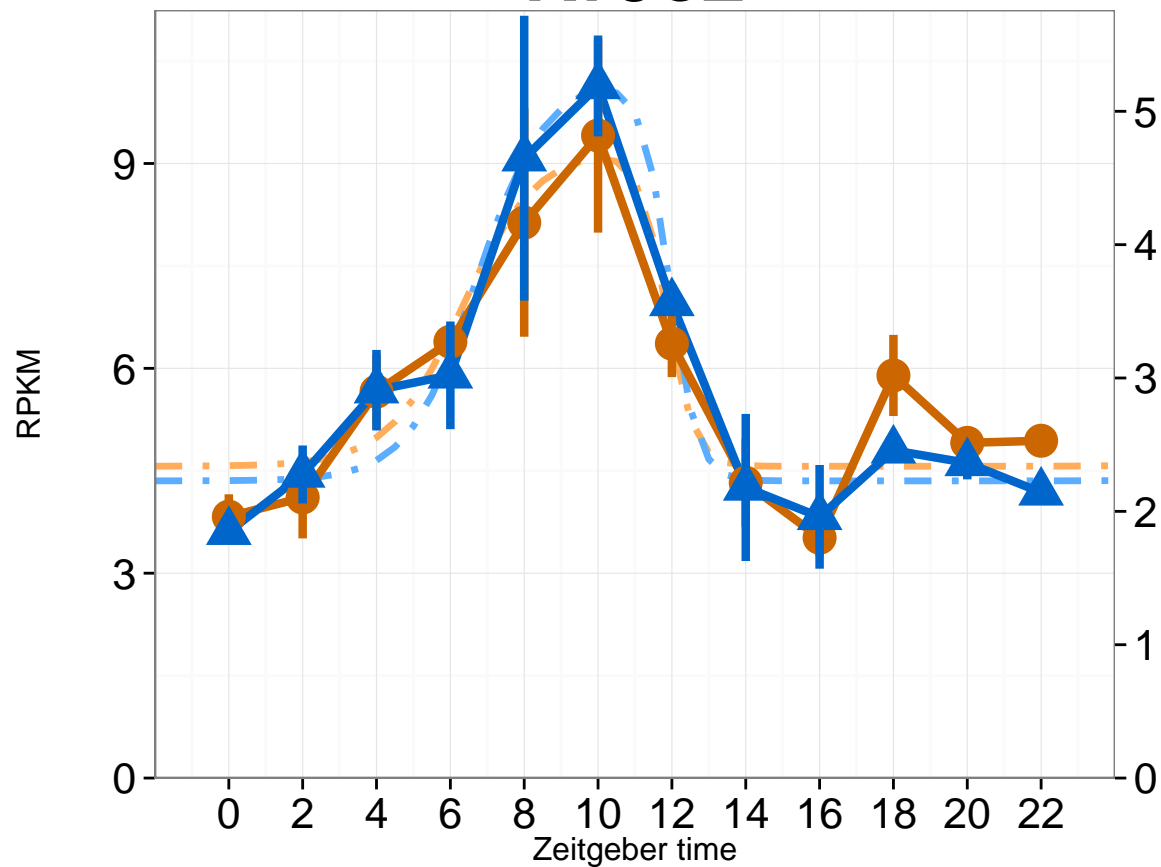

# Nr3c2

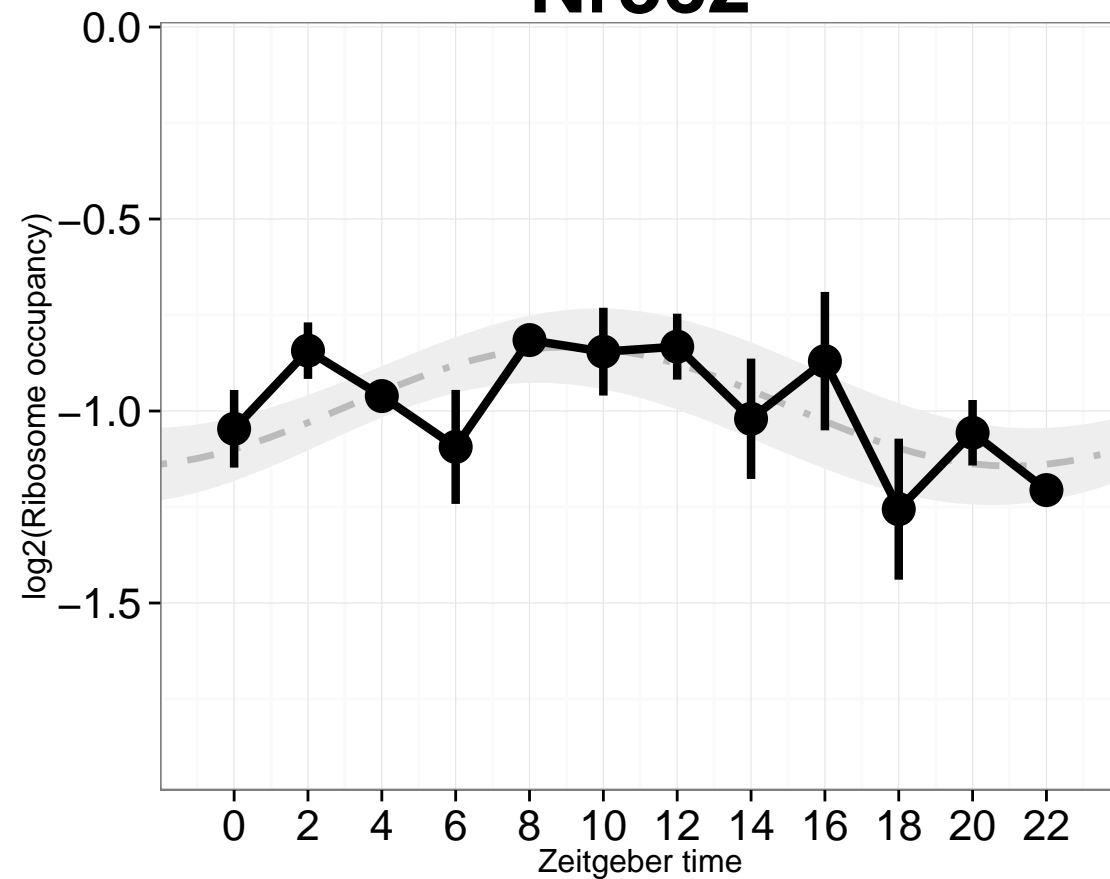

Supplement: SuppDataset_1.zip [file Nr3c2_set_D.pdf › Supplemental Dataset 1/D-mRNA_rhythm_translation_rhyth/Nr3c2_set_D.pdf]

## Nrep

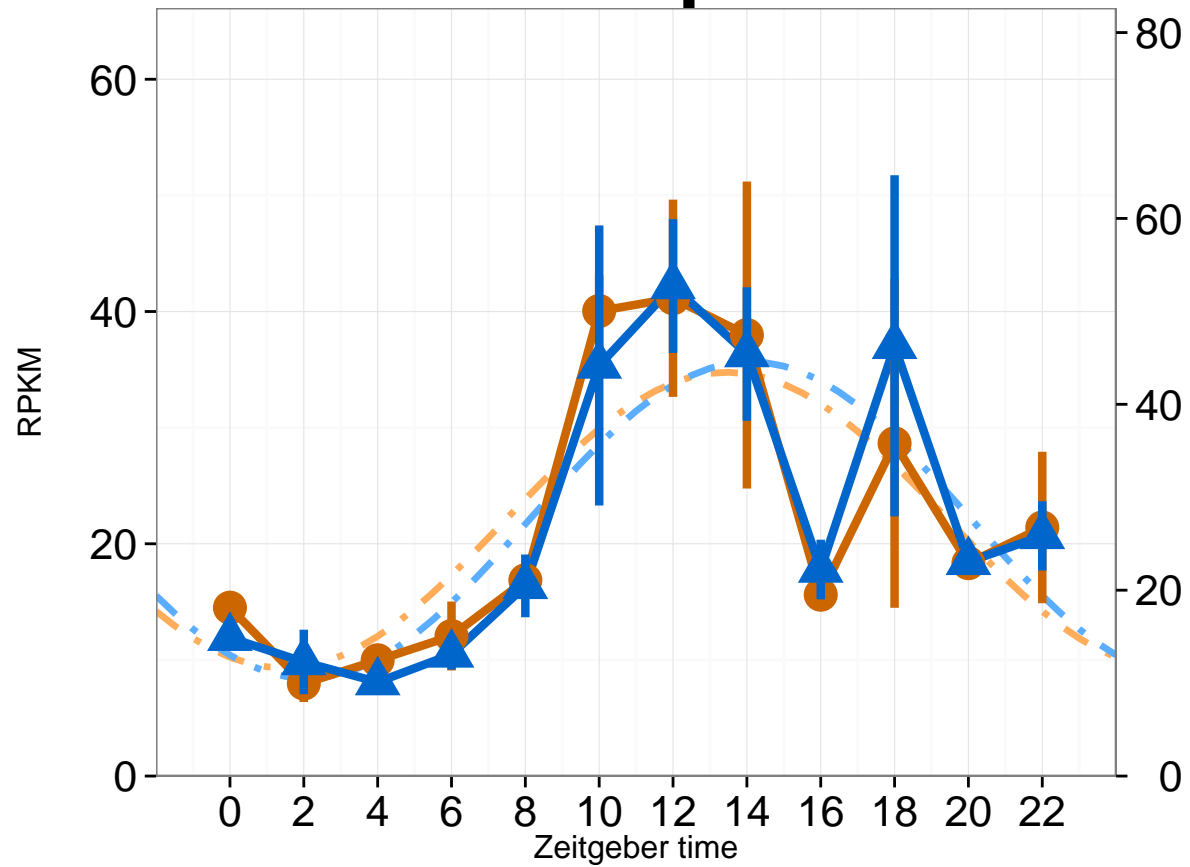

## Nrep

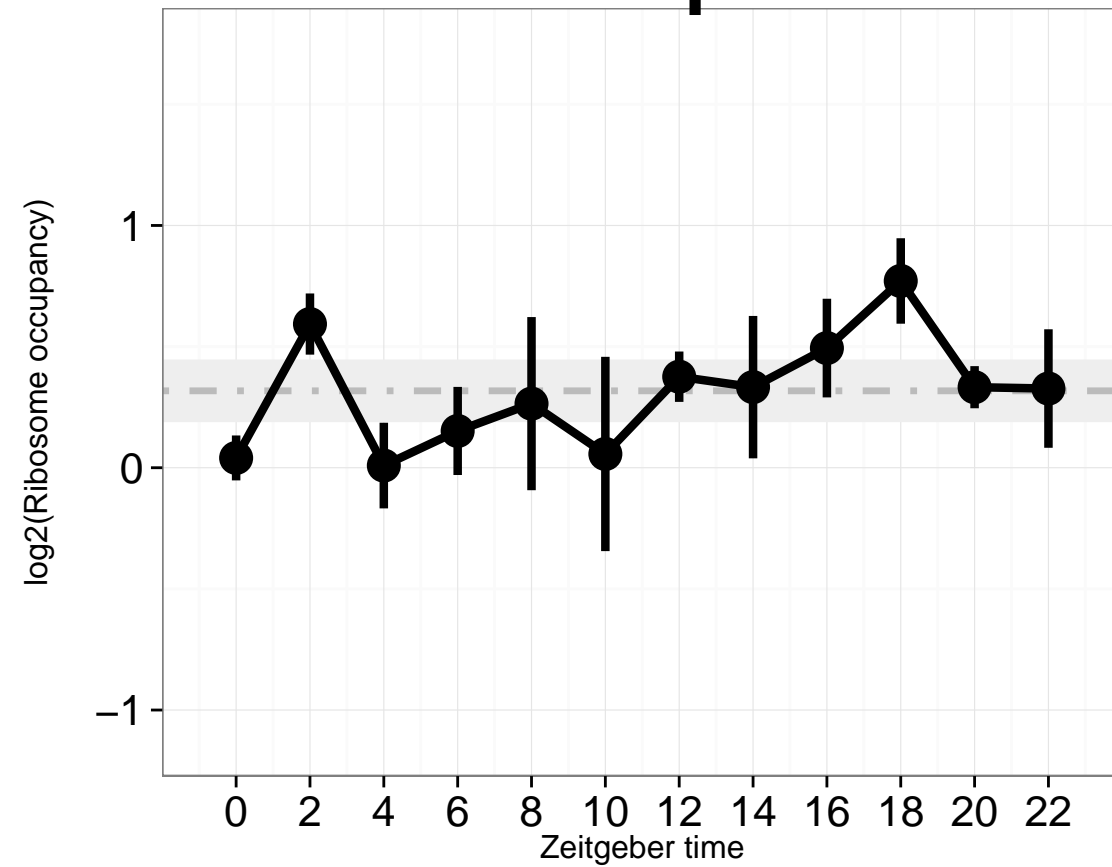

Supplement: SuppDataset_1.zip [file Nrep_set_D.pdf › Supplemental Dataset 1/D-mRNA_rhythm_translation_rhyth/Nrep_set_D.pdf]

# Nrg4

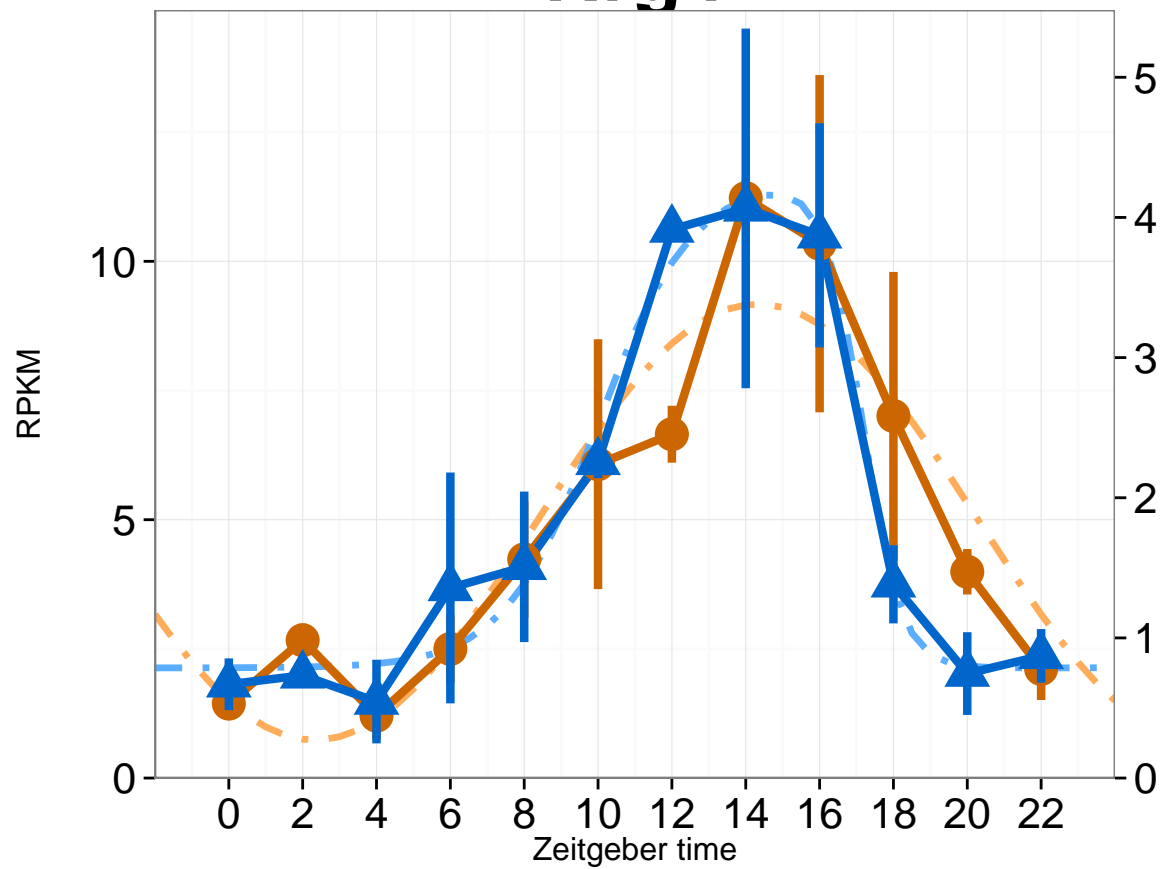

# Nrg4

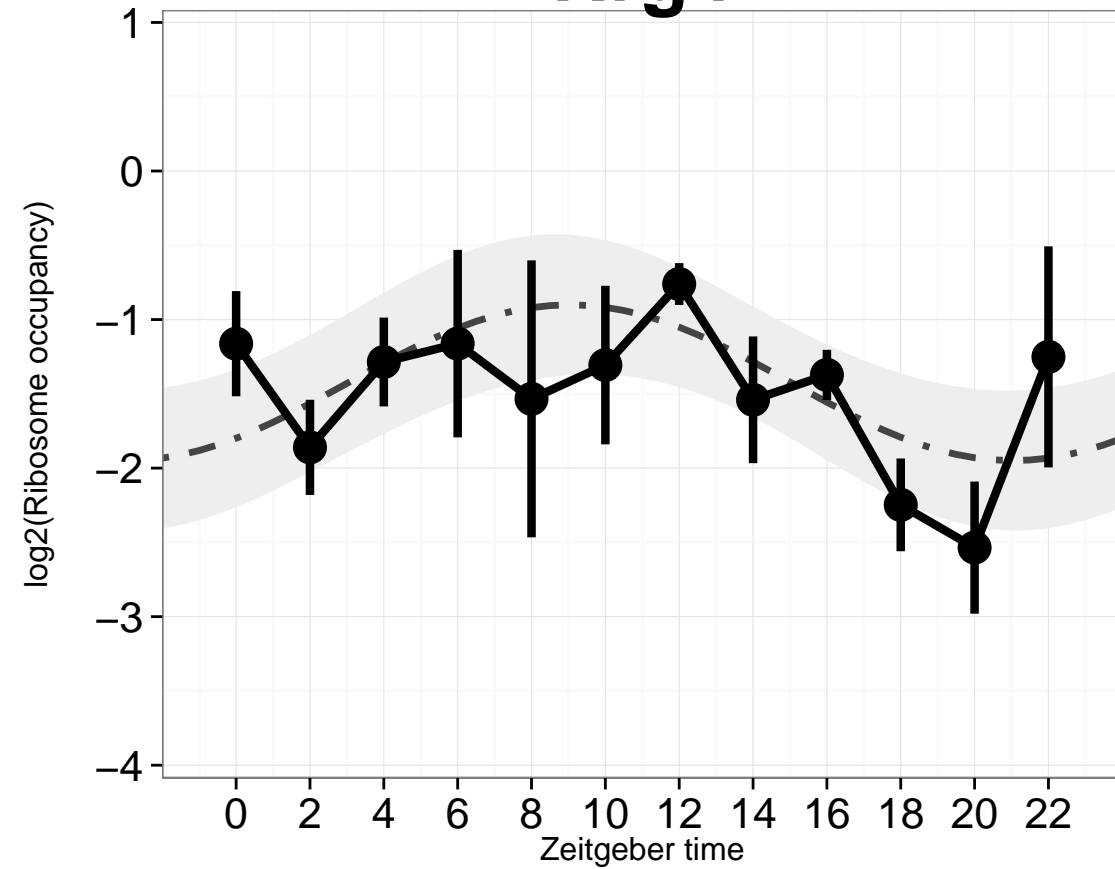

Supplement: SuppDataset_1.zip [file Nrg4_set_D.pdf › Supplemental Dataset 1/D-mRNA_rhythm_translation_rhyth/Nrg4_set_D.pdf]

## Nrip1

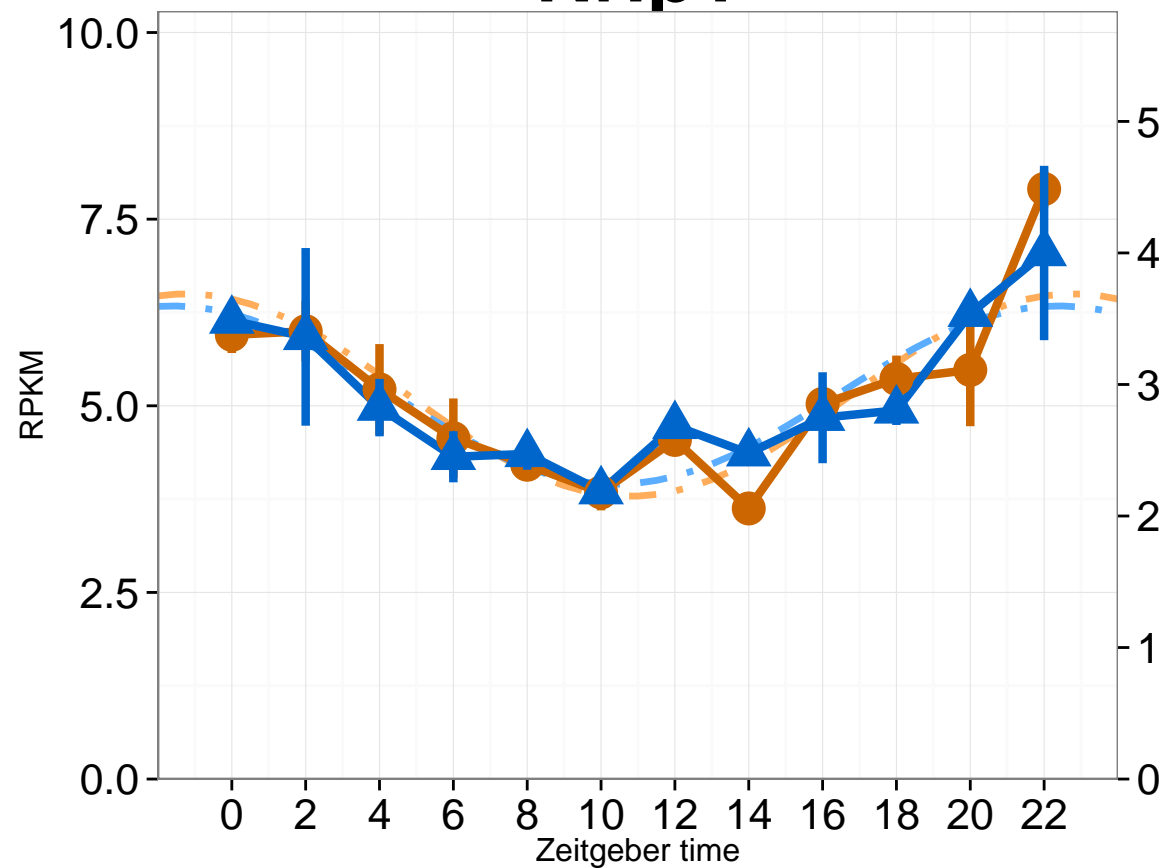

## Nrip1

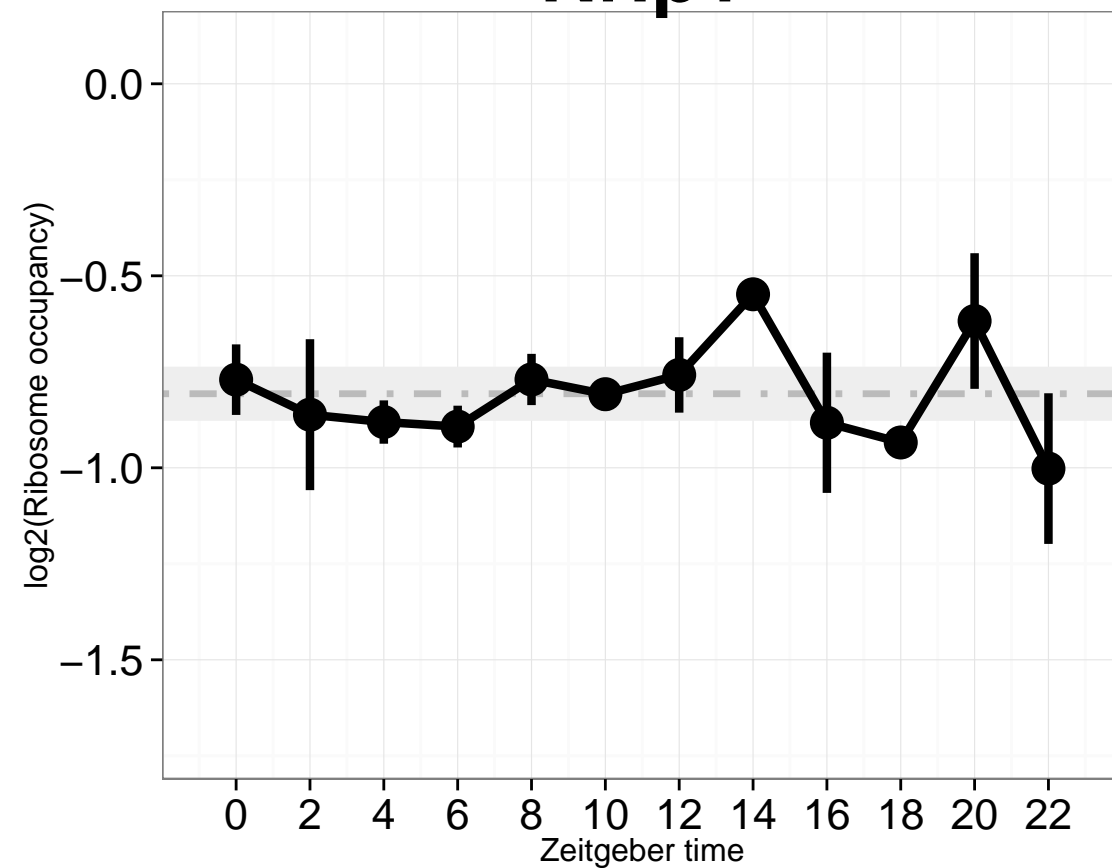

Supplement: SuppDataset_1.zip [file Nrip1_set_D.pdf › Supplemental Dataset 1/D-mRNA_rhythm_translation_rhyth/Nrip1_set_D.pdf]

# Nt5e

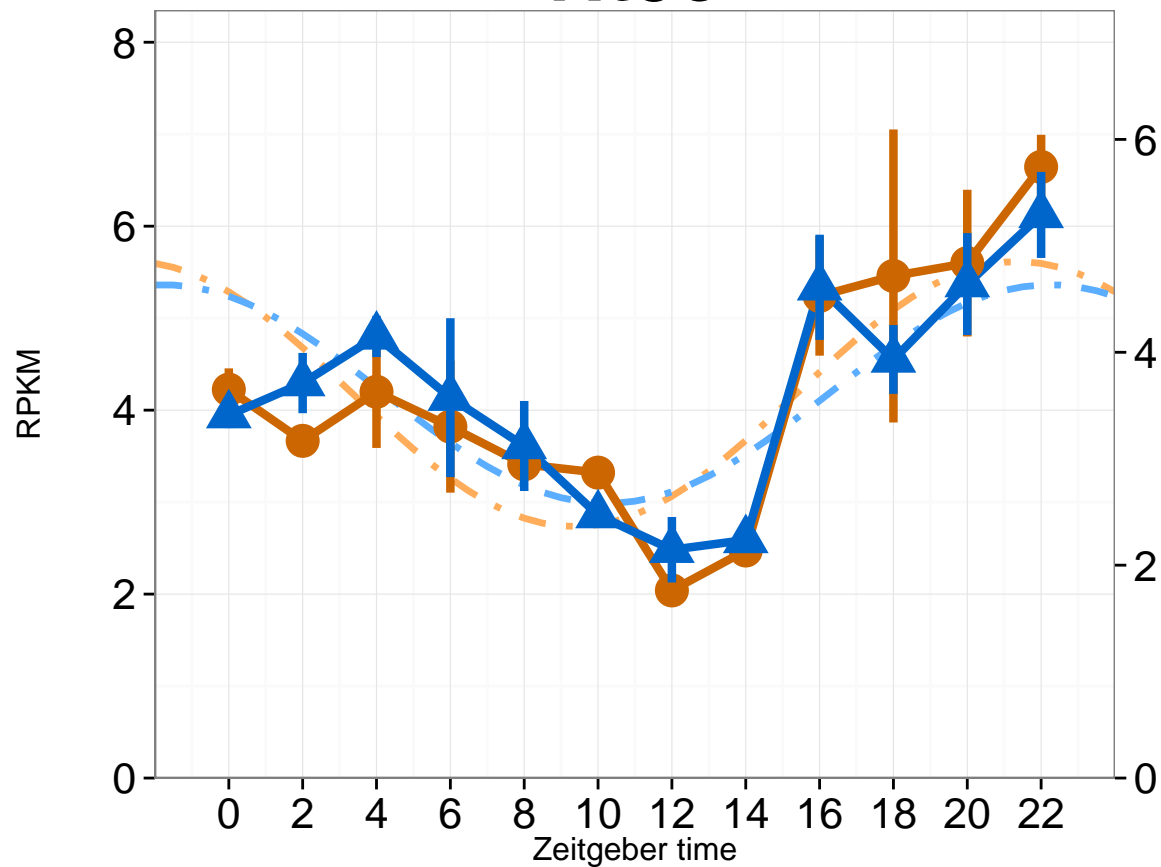

# Nt5e

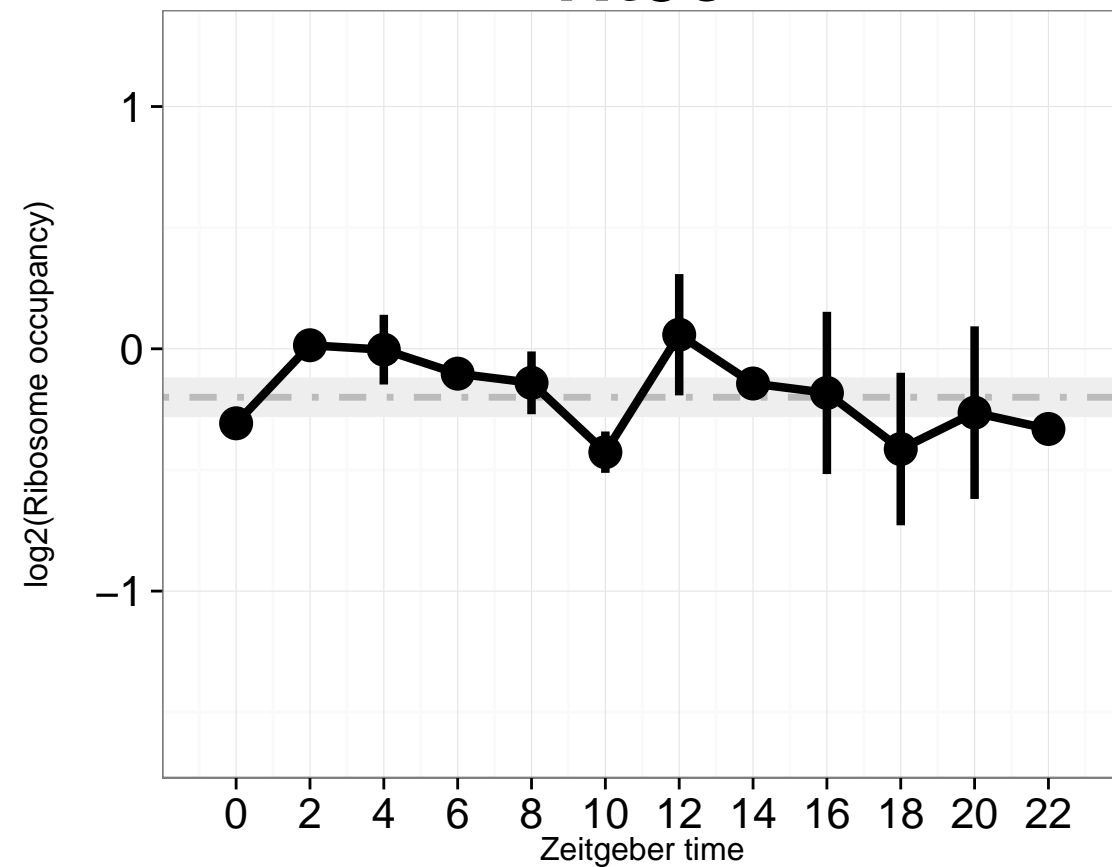

Supplement: SuppDataset_1.zip [file Nt5e_set_D.pdf › Supplemental Dataset 1/D-mRNA_rhythm_translation_rhyth/Nt5e_set_D.pdf]

# Nt5m

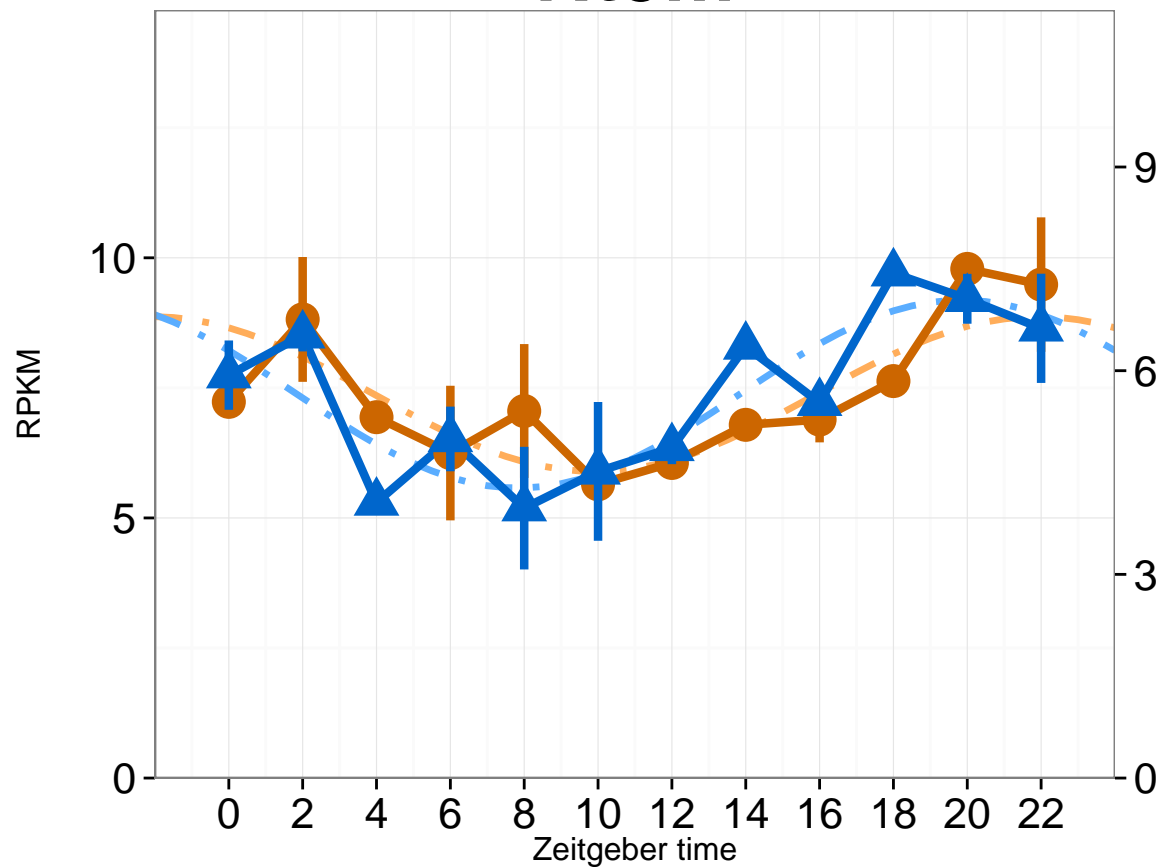

# Nt5m

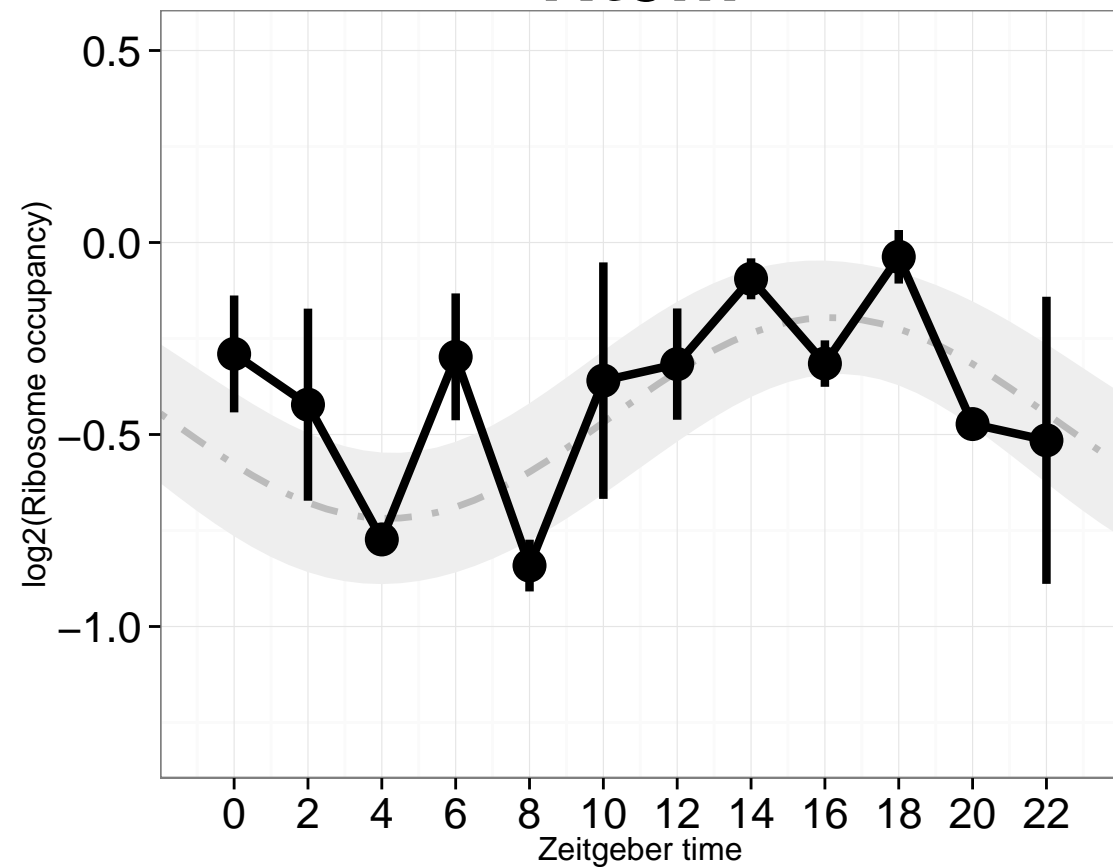

Supplement: SuppDataset_1.zip [file Nt5m_set_D.pdf › Supplemental Dataset 1/D-mRNA_rhythm_translation_rhyth/Nt5m_set_D.pdf]

## Nthl1

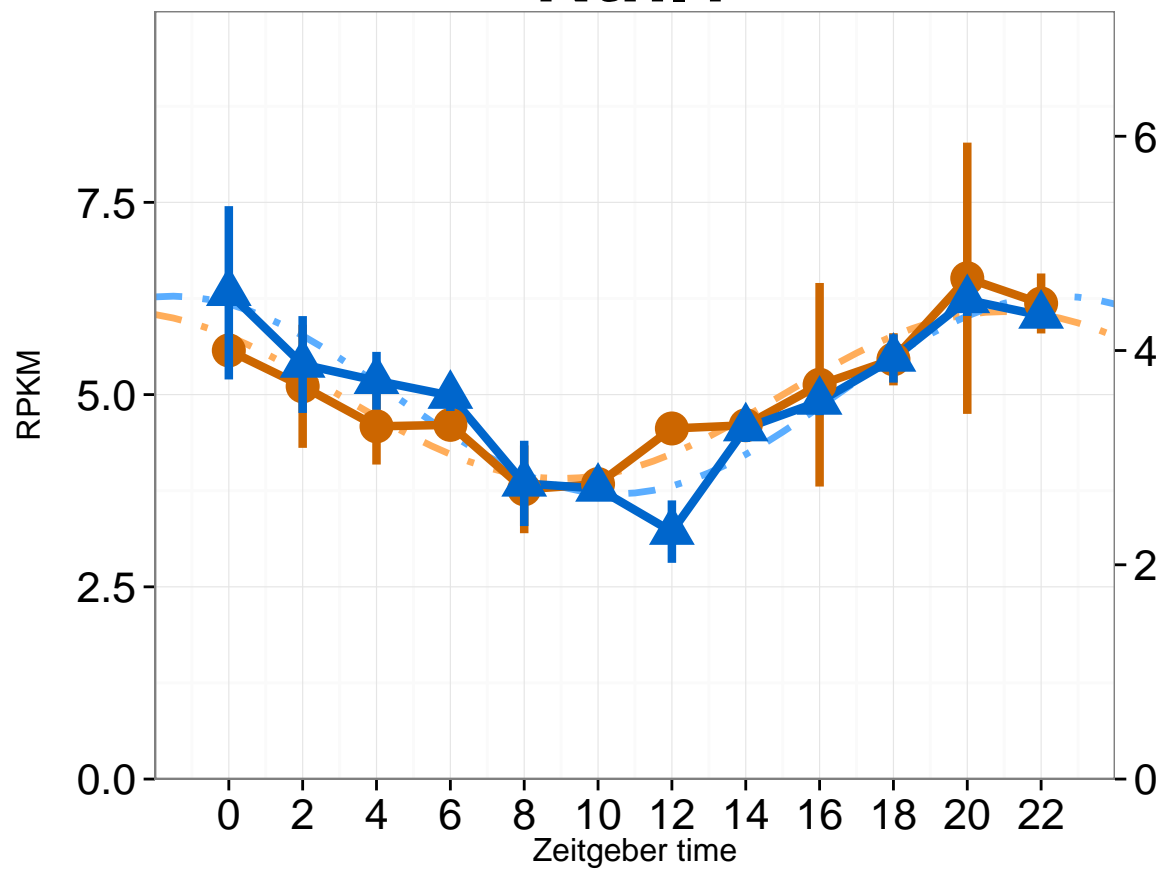

## Nthl1

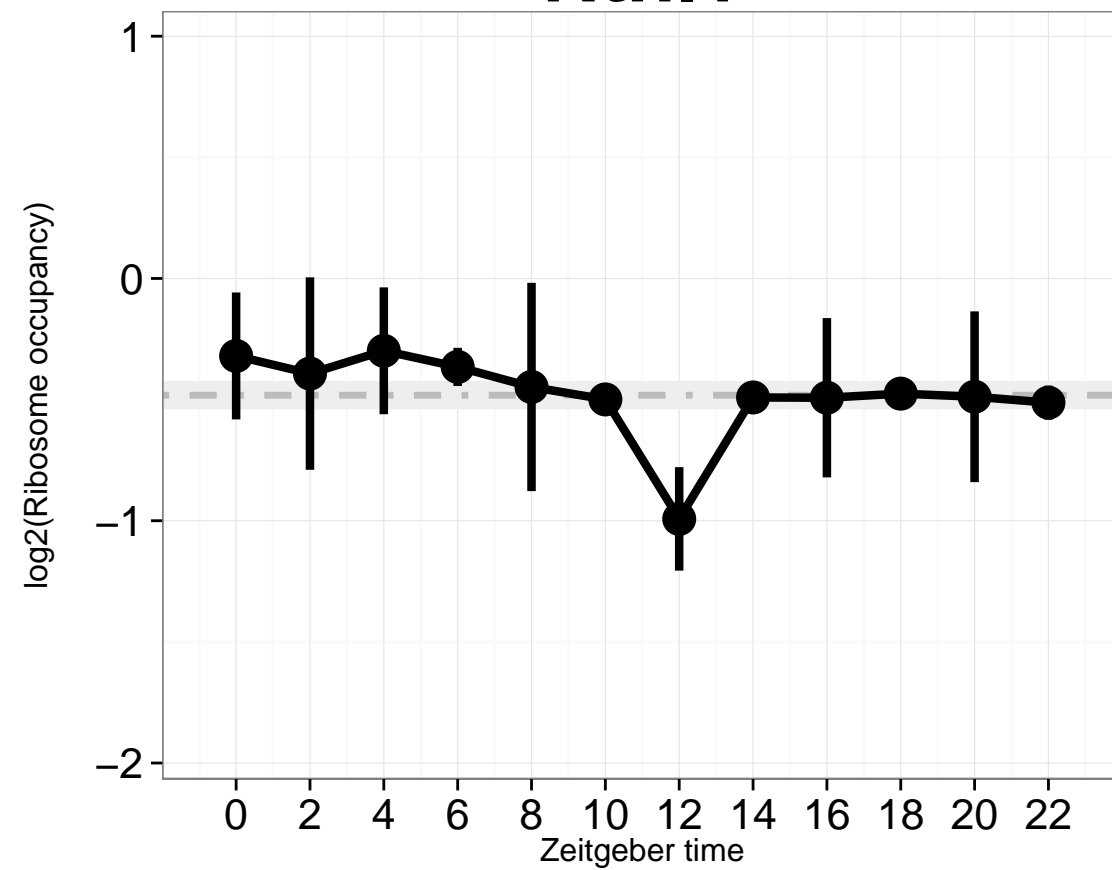

Supplement: SuppDataset_1.zip [file Nthl1_set_D.pdf › Supplemental Dataset 1/D-mRNA_rhythm_translation_rhyth/Nthl1_set_D.pdf]

## Ntn3

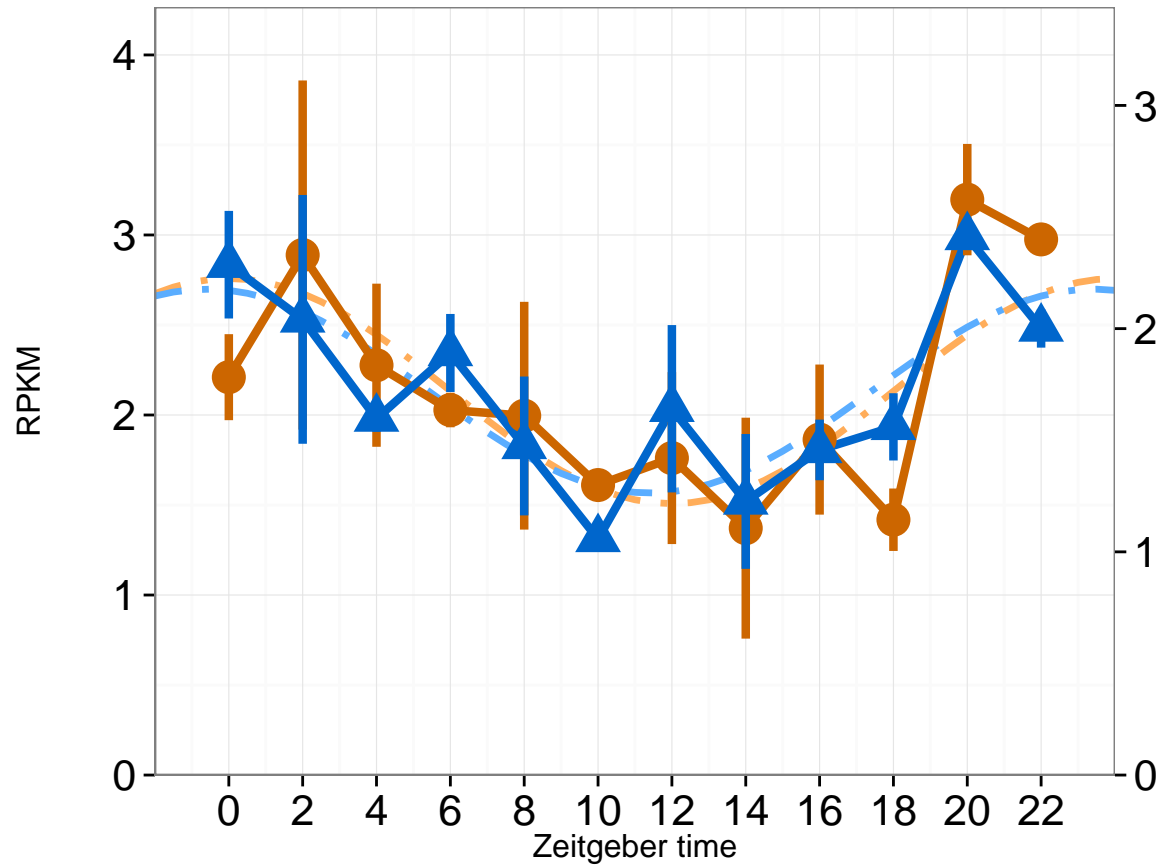

## Ntn3

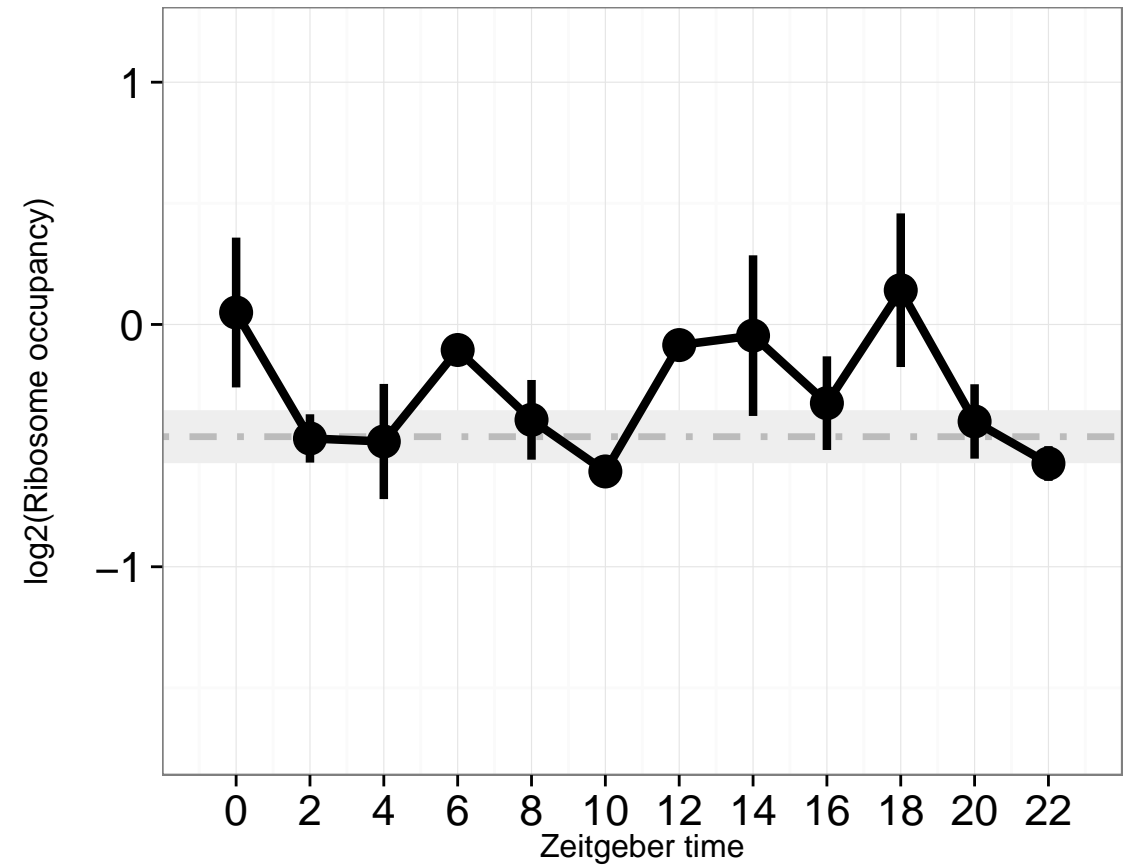

Supplement: SuppDataset_1.zip [file Ntn3_set_D.pdf › Supplemental Dataset 1/D-mRNA_rhythm_translation_rhyth/Ntn3_set_D.pdf]

# Ntpcr

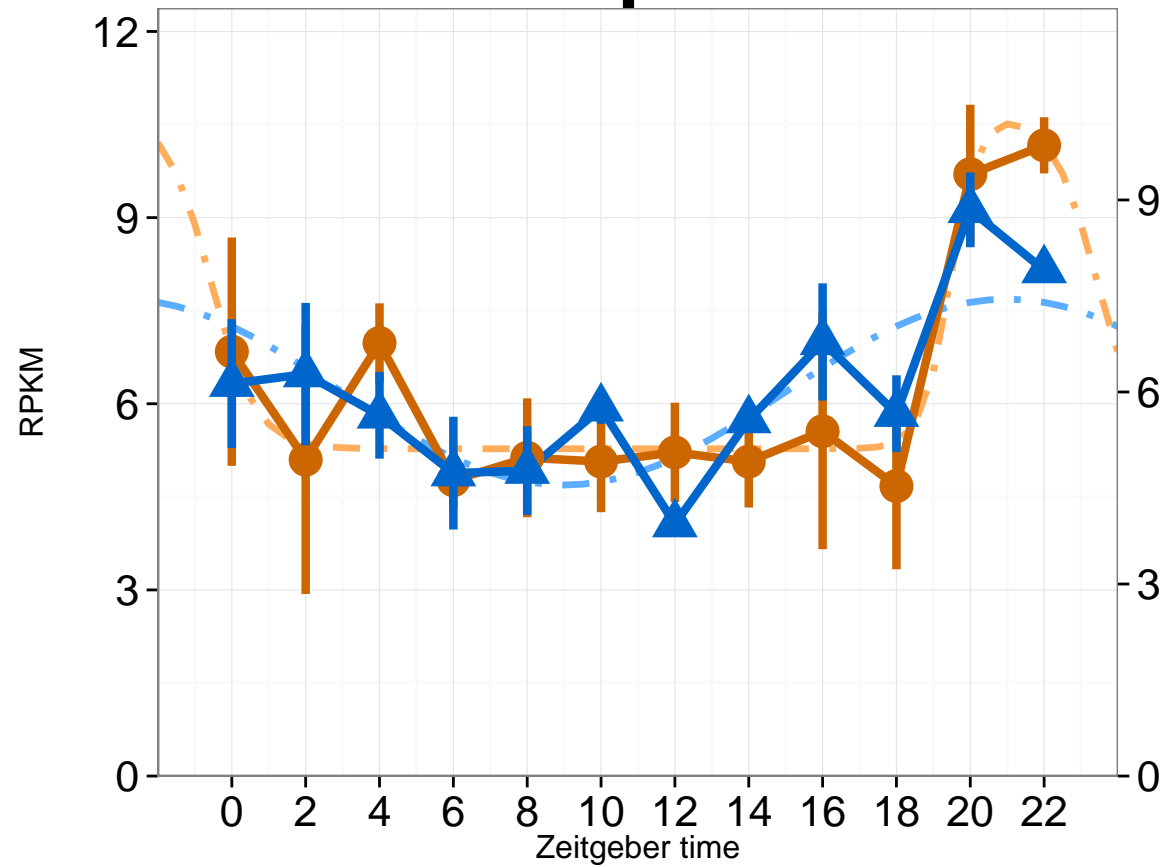

# Ntpcr

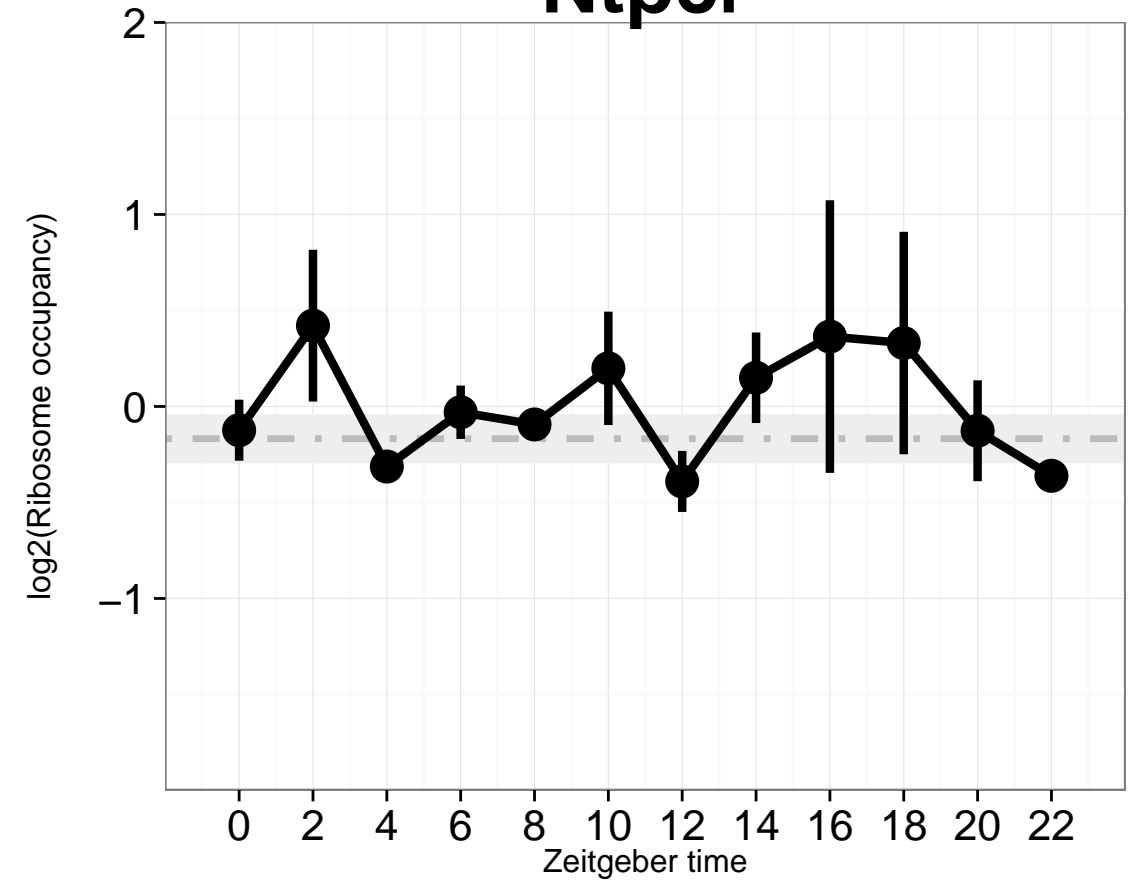

Supplement: SuppDataset_1.zip [file Ntpcr_set_D.pdf › Supplemental Dataset 1/D-mRNA_rhythm_translation_rhyth/Ntpcr_set_D.pdf]

# Nup62

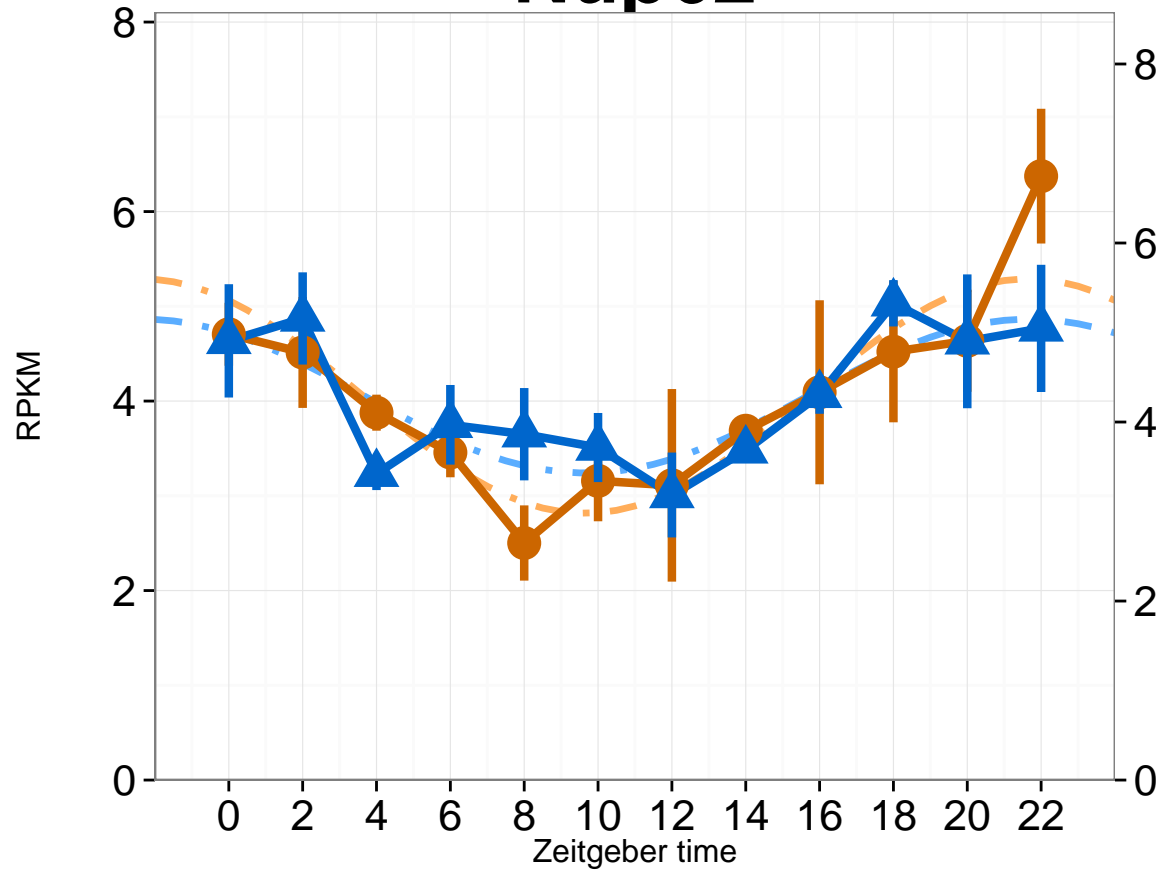

# Nup62

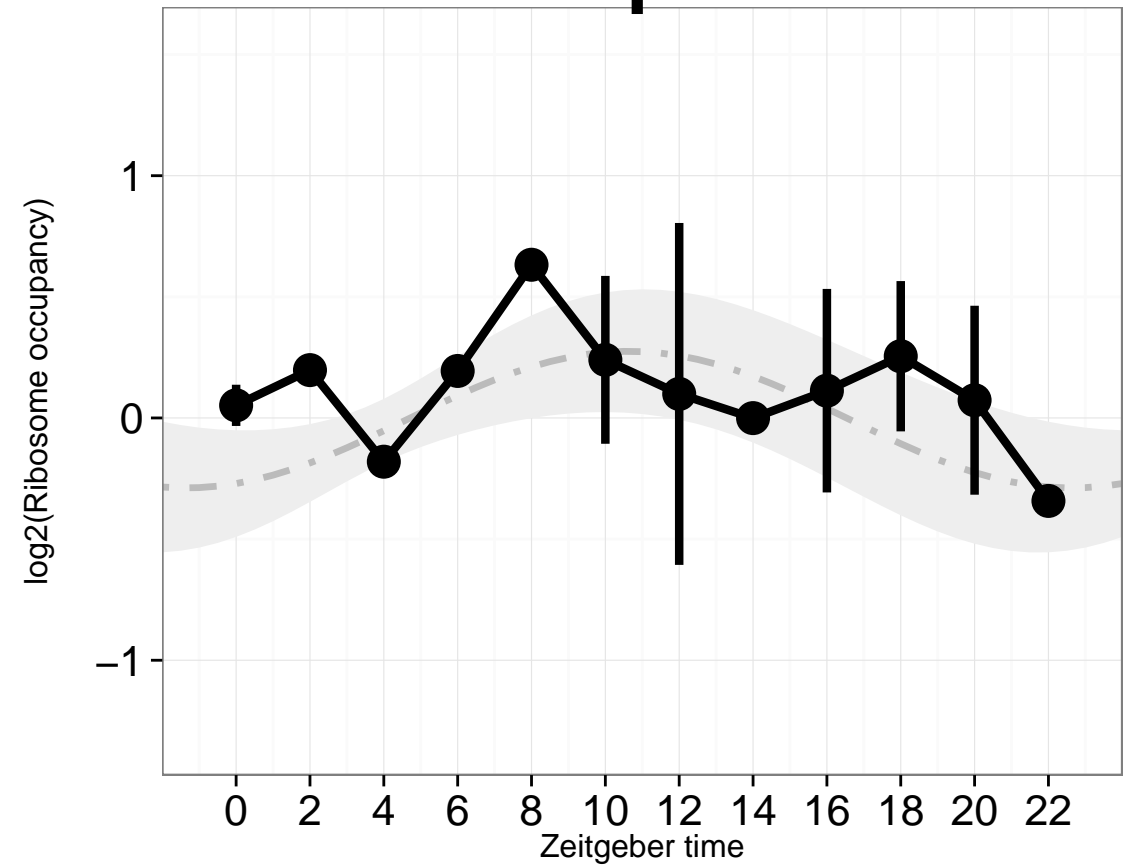

Supplement: SuppDataset_1.zip [file Nup62_set_D.pdf › Supplemental Dataset 1/D-mRNA_rhythm_translation_rhyth/Nup62_set_D.pdf]

# Oas1a

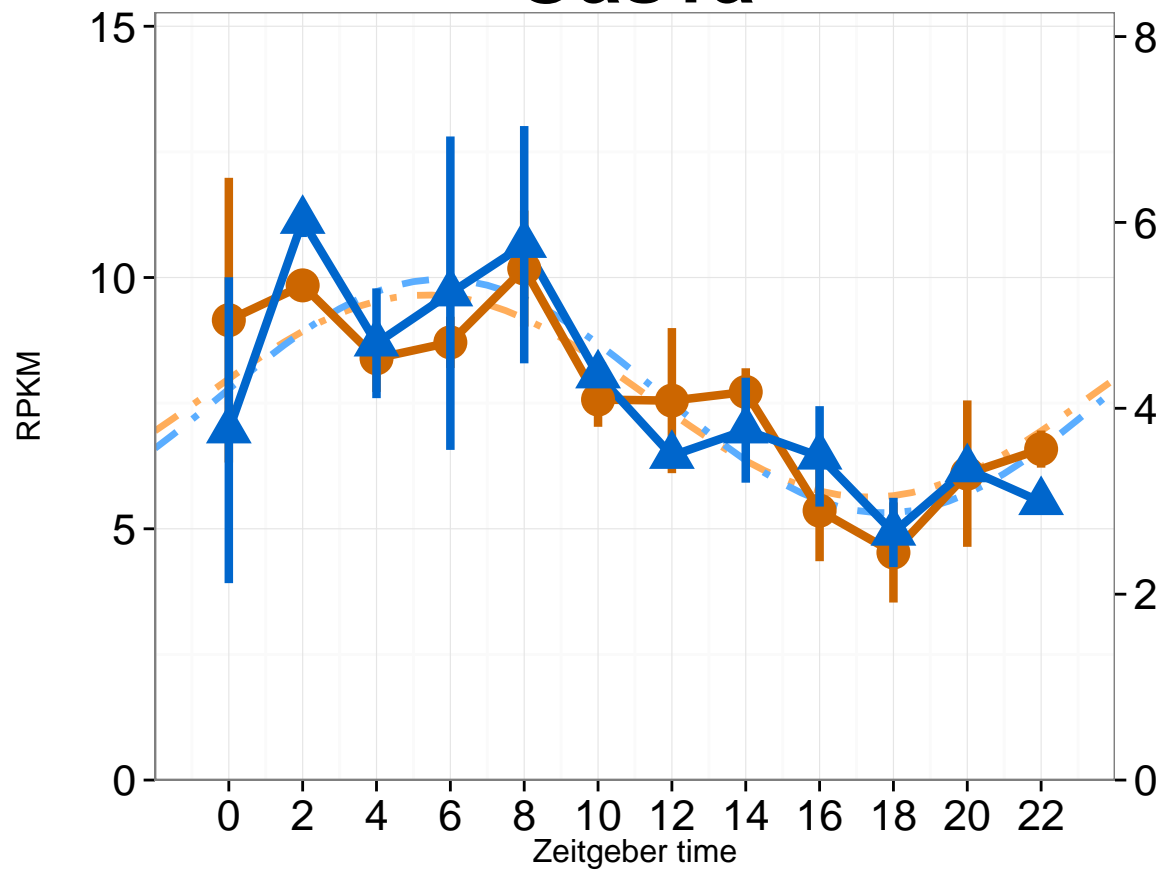

# Oas1a

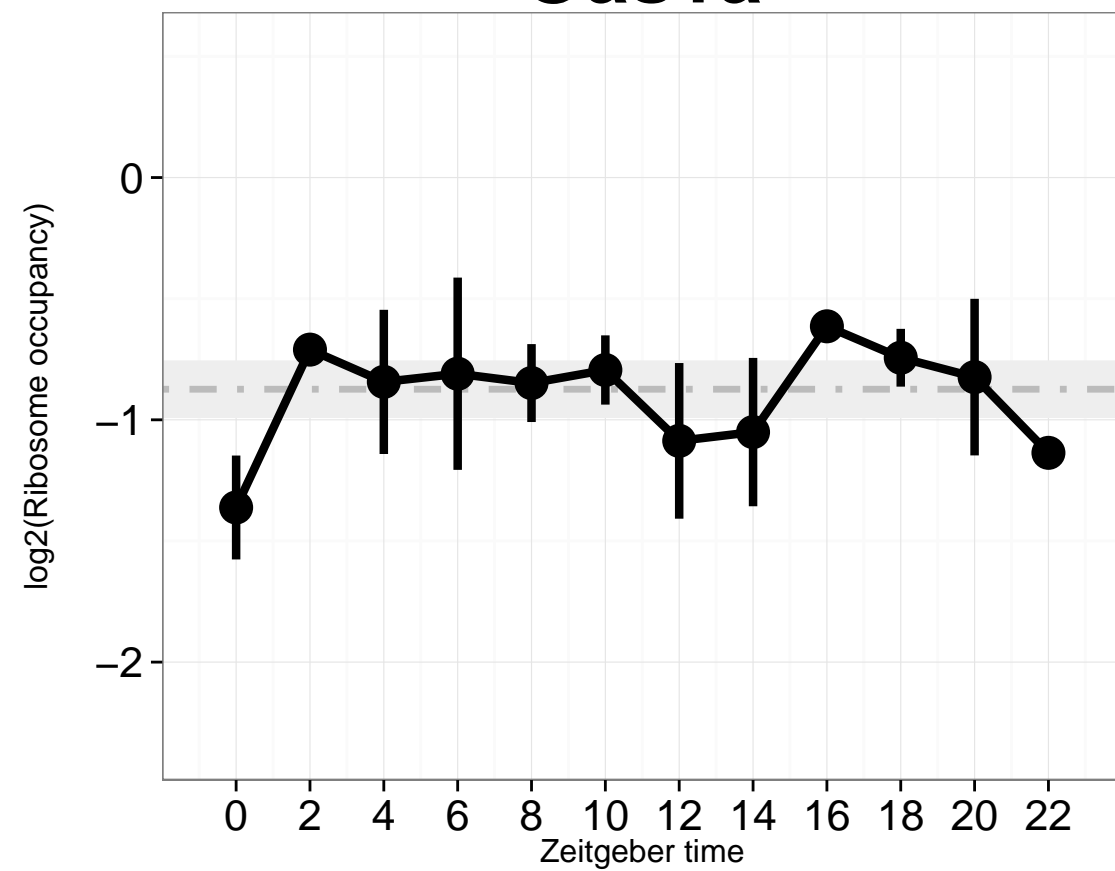

Supplement: SuppDataset_1.zip [file Oas1a_set_D.pdf › Supplemental Dataset 1/D-mRNA_rhythm_translation_rhyth/Oas1a_set_D.pdf]

# Oasl1

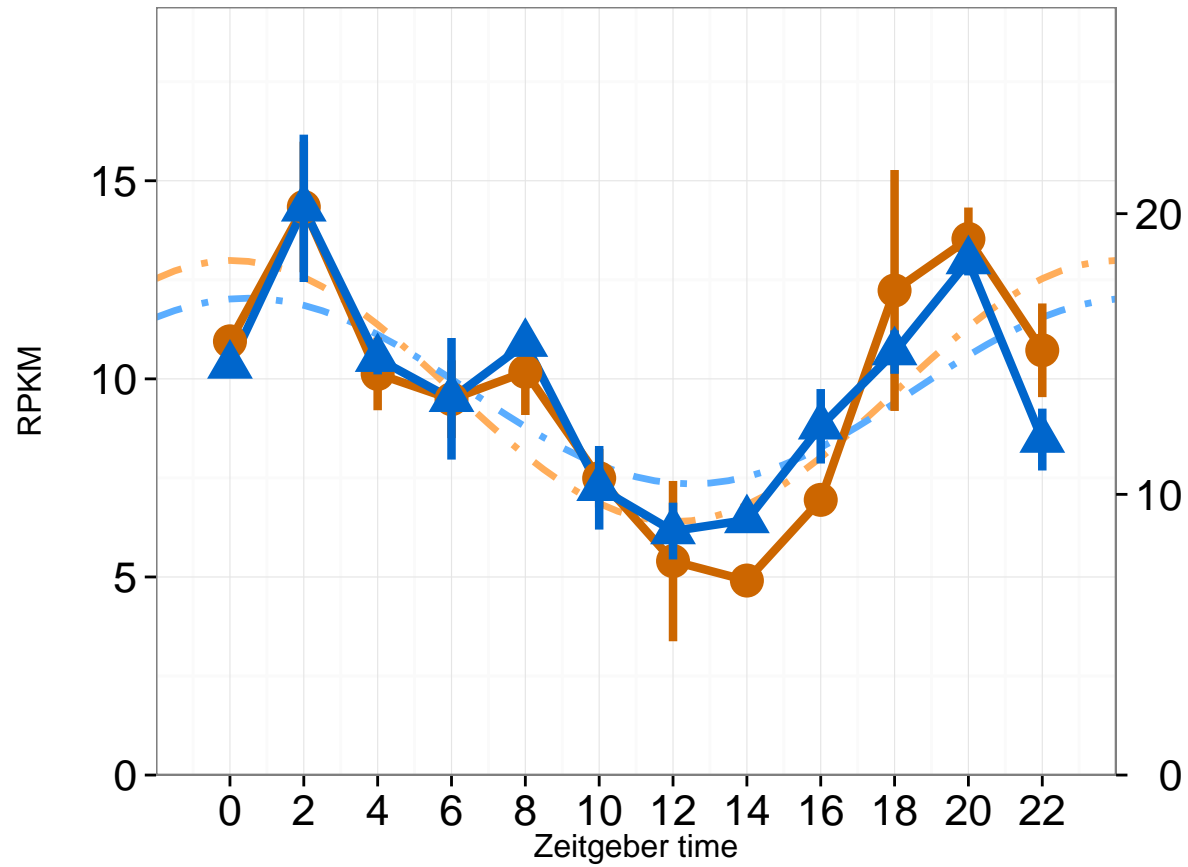

# Oasl1

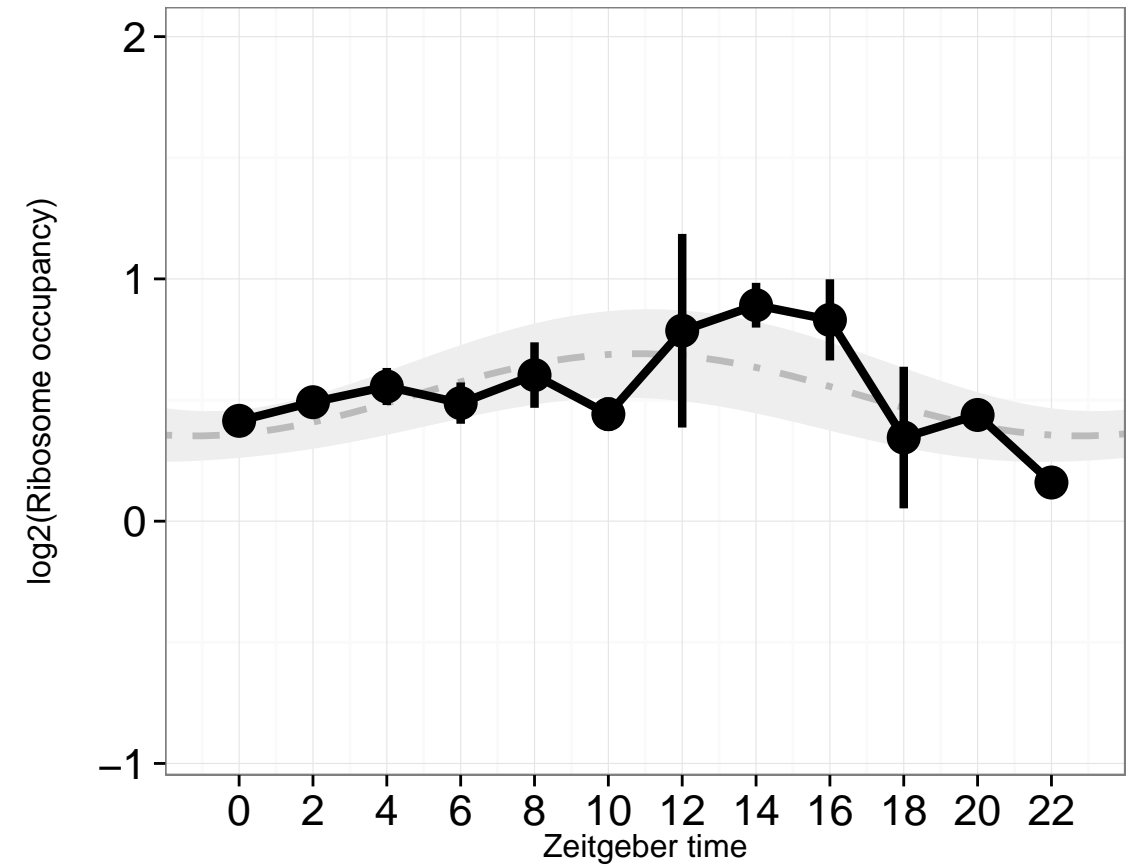

Supplement: SuppDataset_1.zip [file Oasl1_set_D.pdf › Supplemental Dataset 1/D-mRNA_rhythm_translation_rhyth/Oasl1_set_D.pdf]
