# Supplementary figures and images for: Ribosome profiling reveals the rhythmic liver translatome and circadian clock regulation by upstream open reading frames (part 43 of 113)
Source: HighWire-hosted journal article supplement (doi:10.1101/gr.195404.115), 2015-10-20

## Mcm8

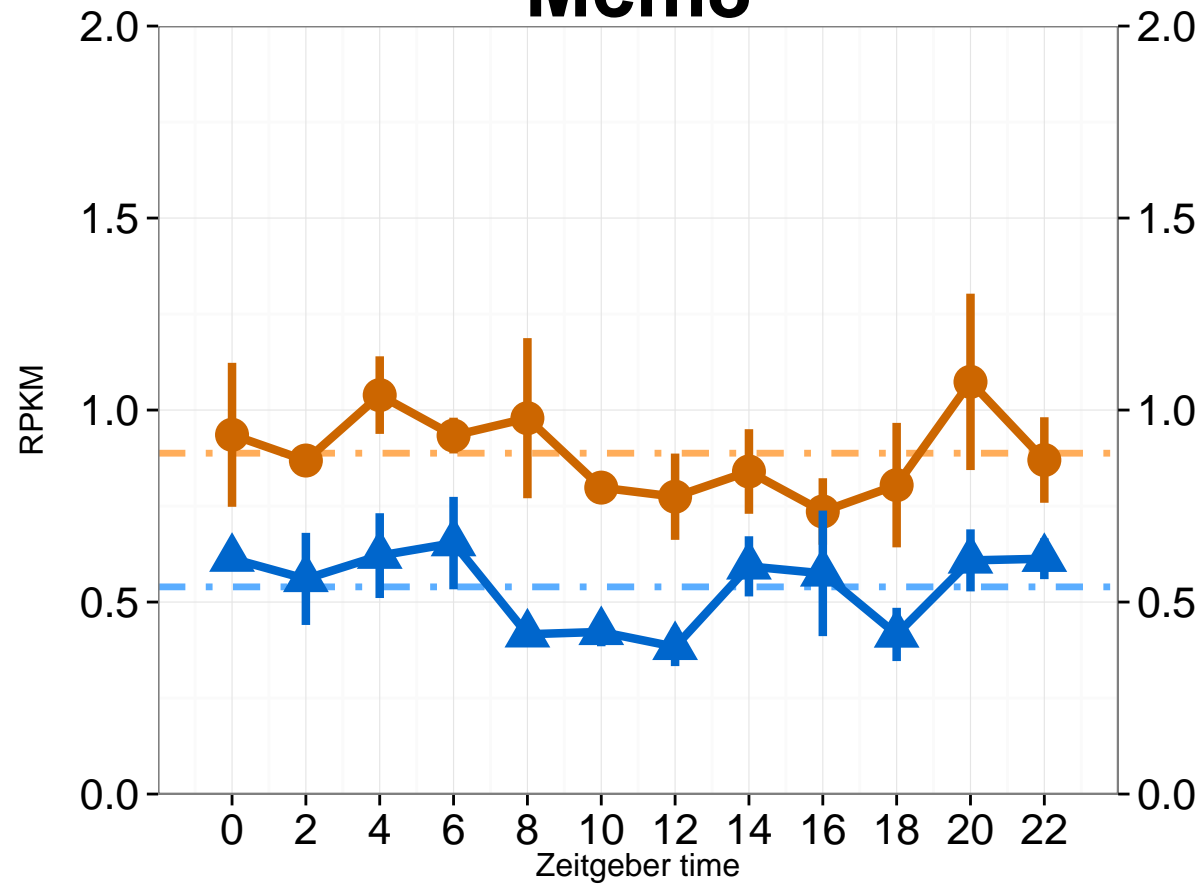

## Mcm8

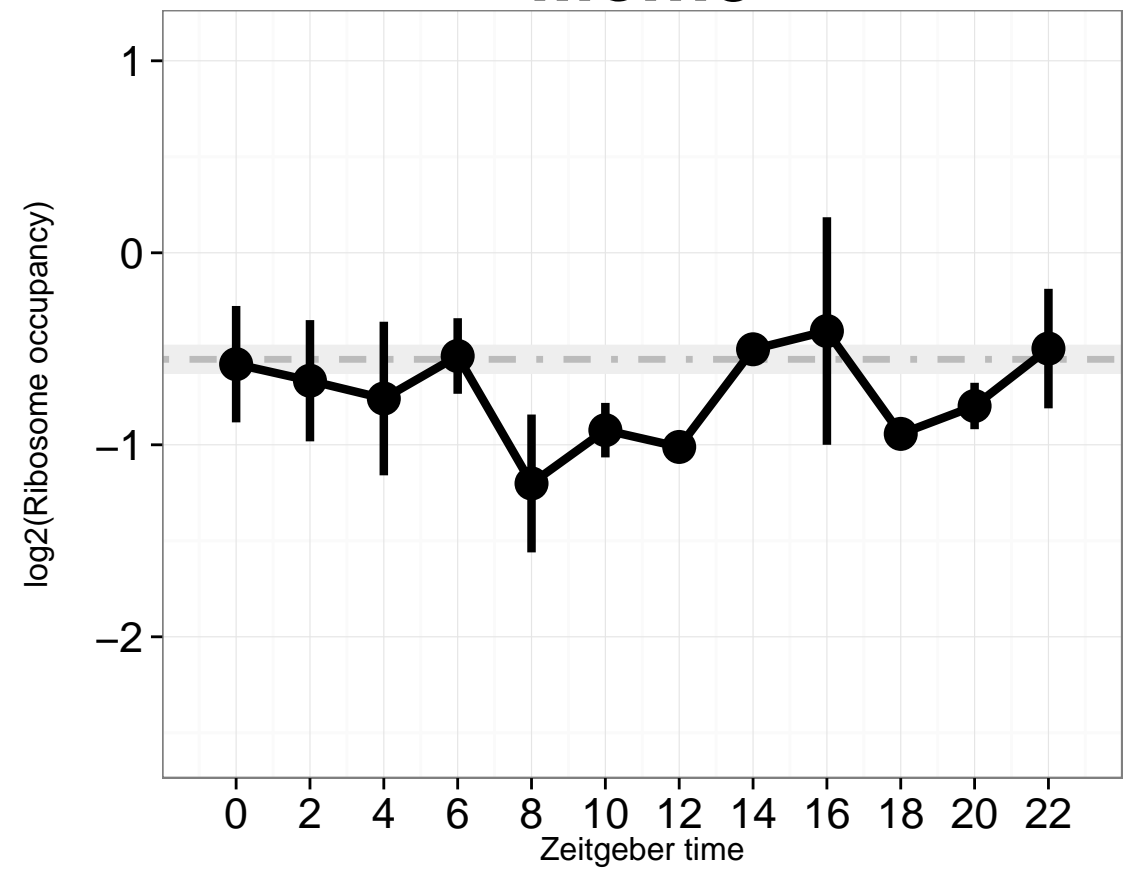

Supplement: SuppDataset_1.zip [file Mcm8_set_A.pdf › Supplemental Dataset 1/A-mRNA_nonrhyth_translation_nonrhyth/Mcm8_set_A.pdf]

## Mcm9

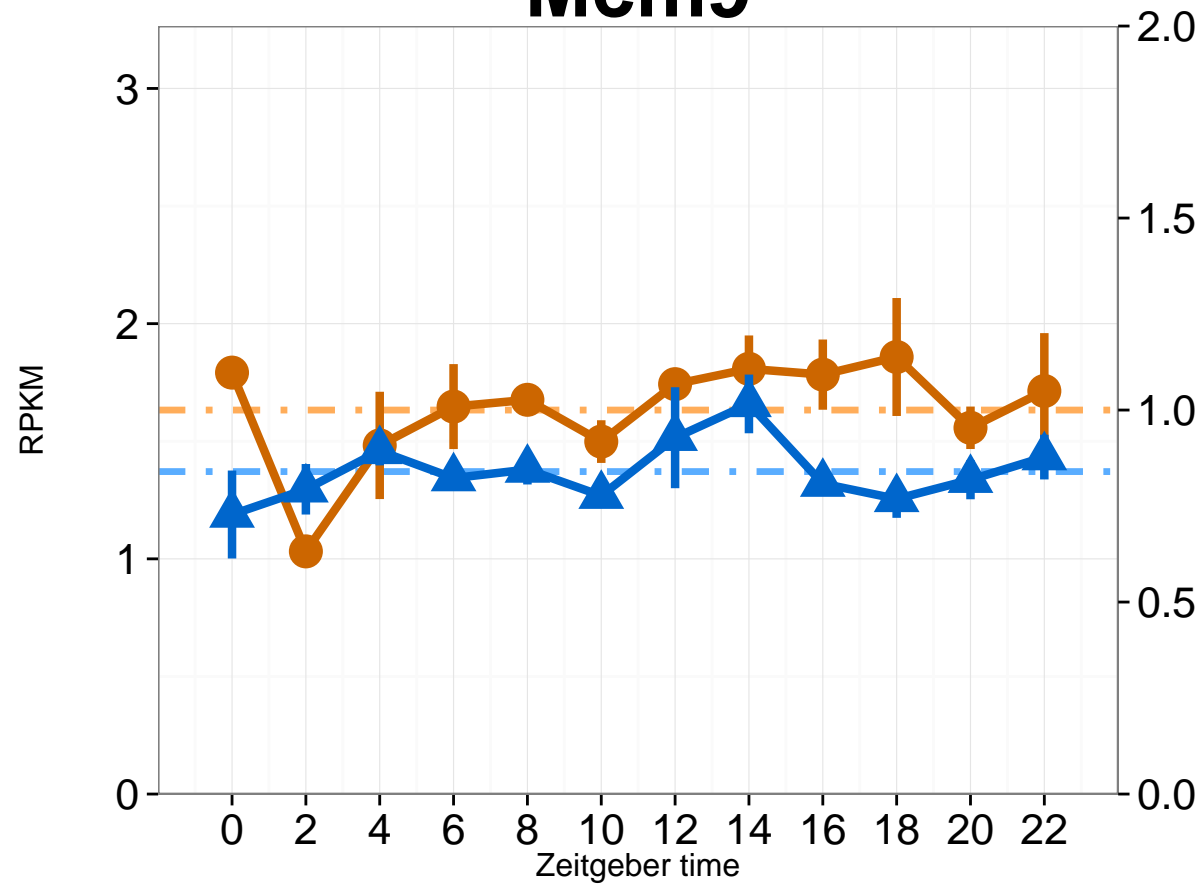

## Mcm9

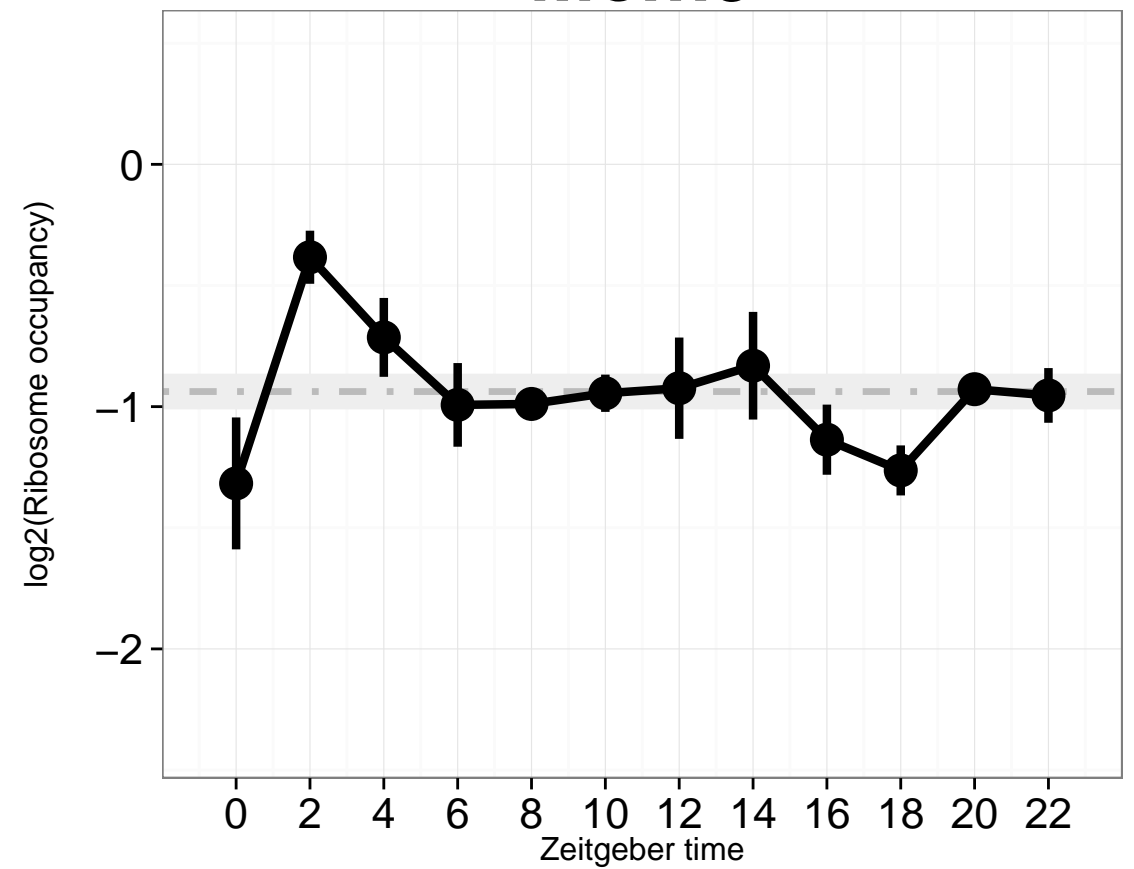

Supplement: SuppDataset_1.zip [file Mcm9_set_A.pdf › Supplemental Dataset 1/A-mRNA_nonrhyth_translation_nonrhyth/Mcm9_set_A.pdf]

## Mcmbp

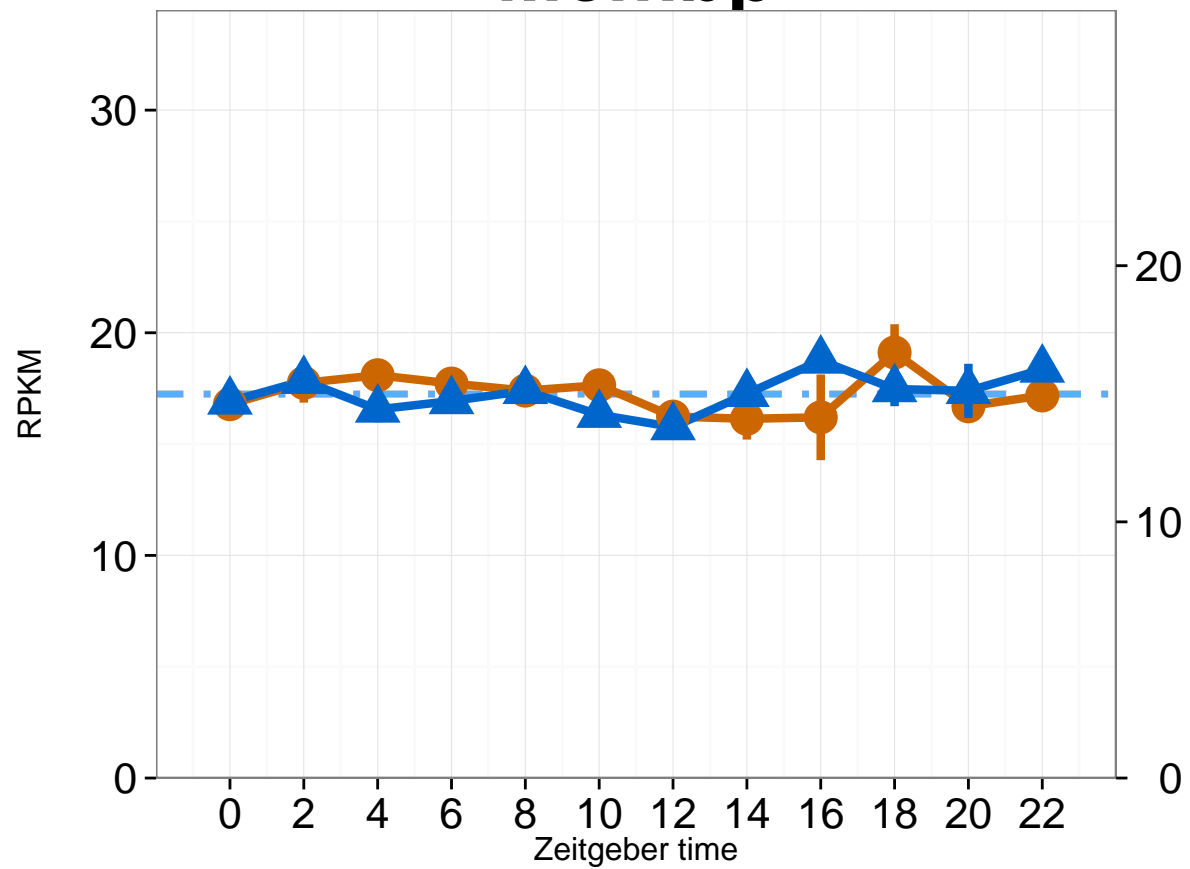

## Mcmbp

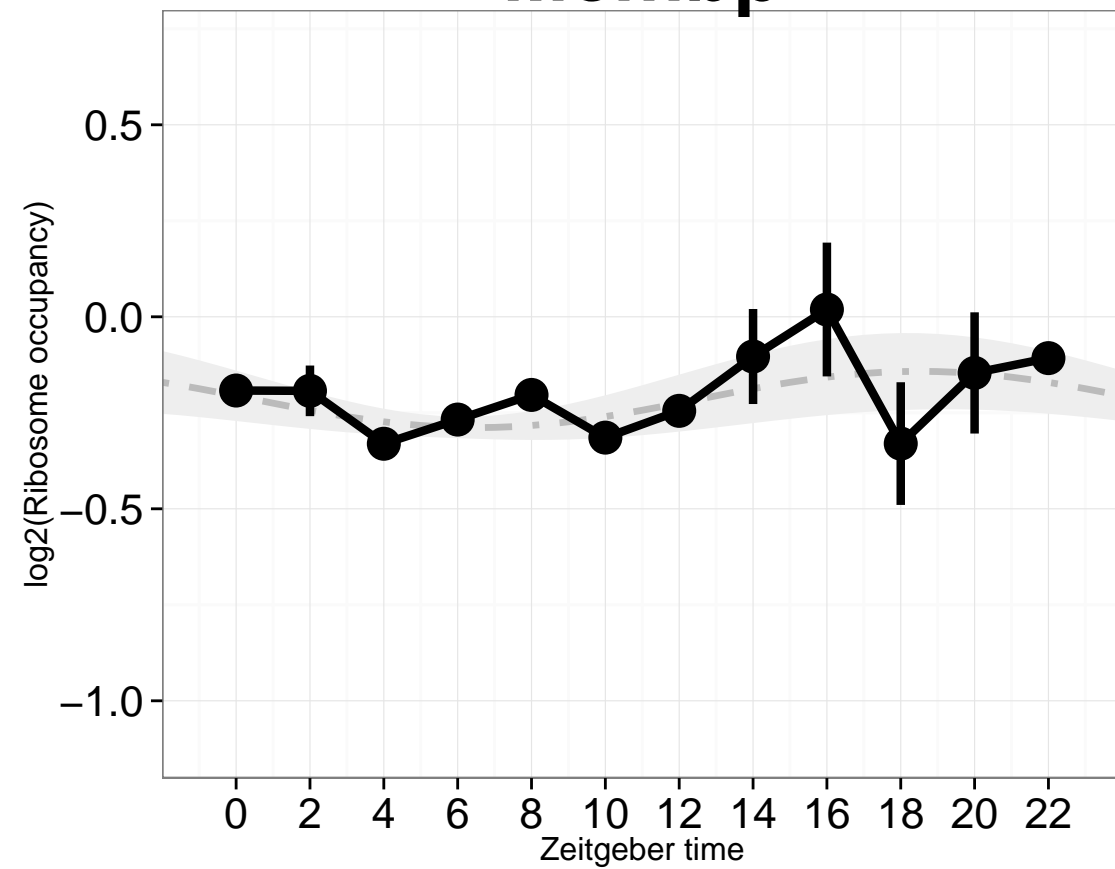

Supplement: SuppDataset_1.zip [file Mcmbp_set_A.pdf › Supplemental Dataset 1/A-mRNA_nonrhyth_translation_nonrhyth/Mcmbp_set_A.pdf]

## Mcoln1

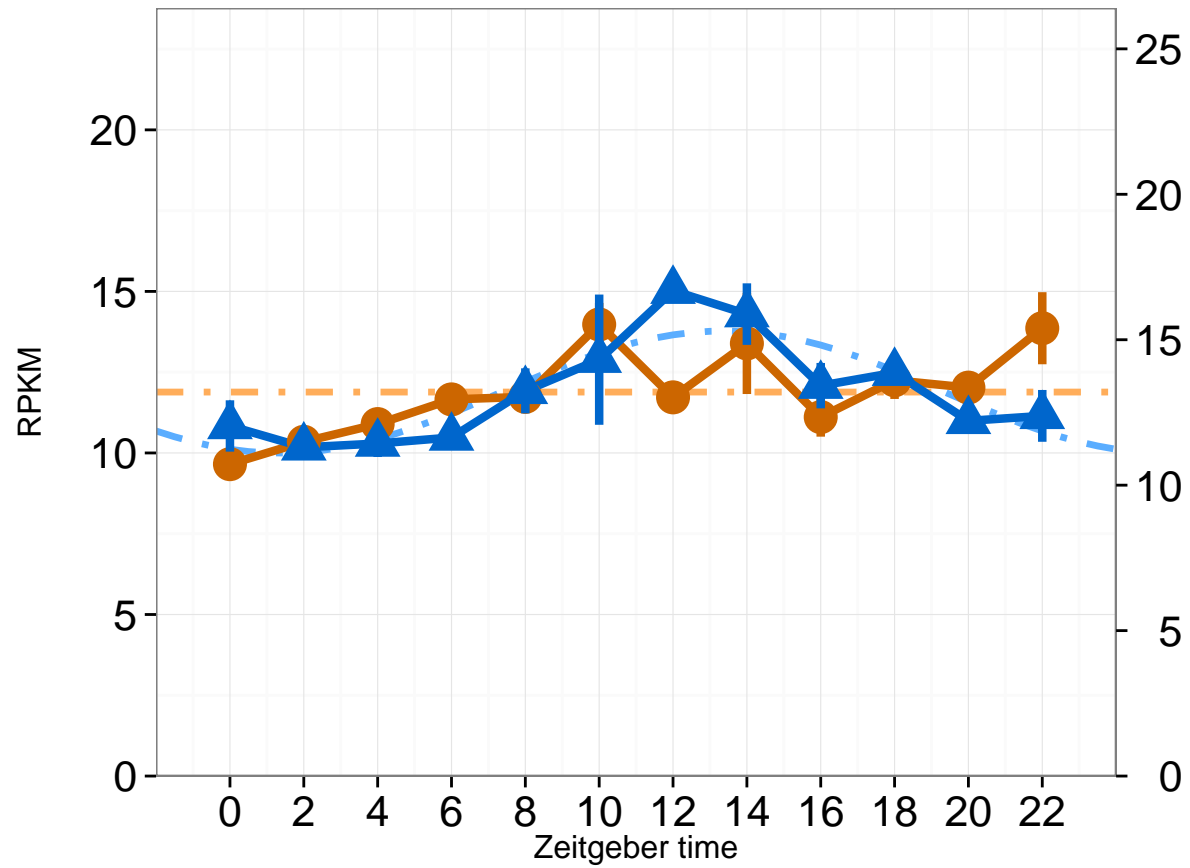

## Mcoln1

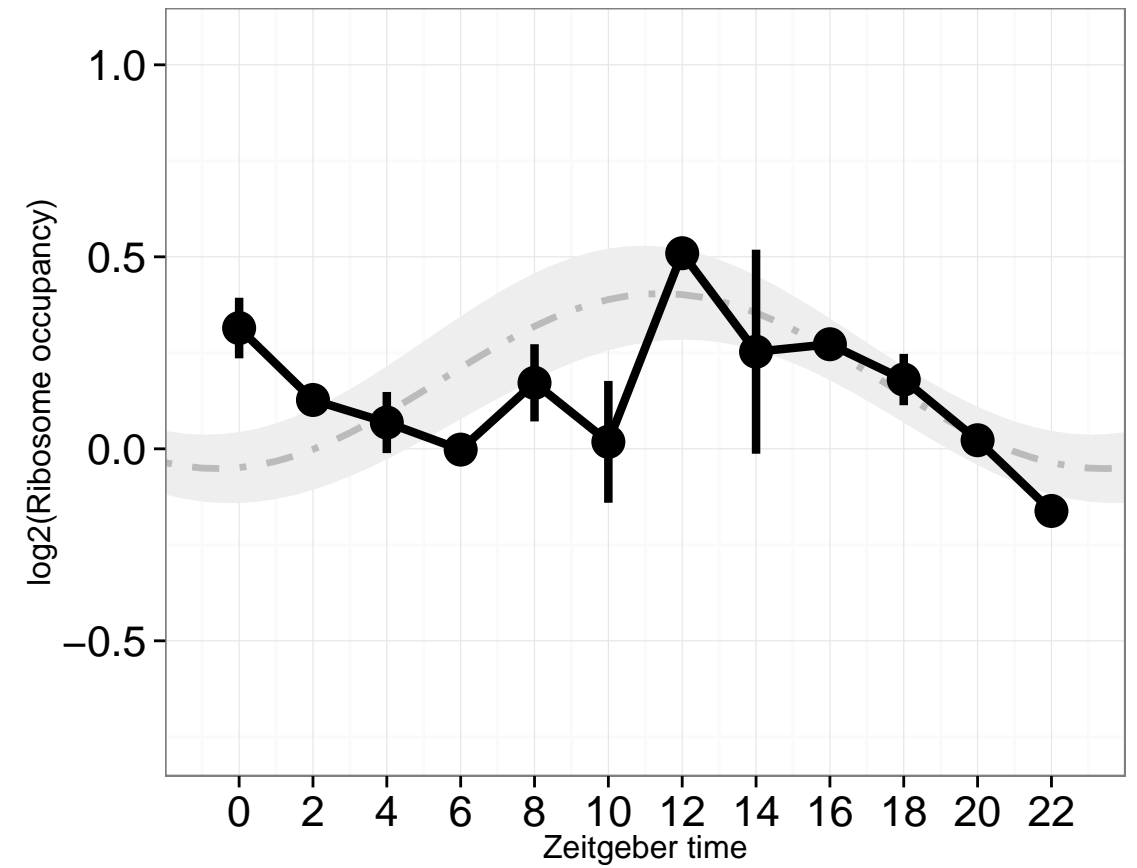

Supplement: SuppDataset_1.zip [file Mcoln1_set_A.pdf › Supplemental Dataset 1/A-mRNA_nonrhyth_translation_nonrhyth/Mcoln1_set_A.pdf]

# Mcph1

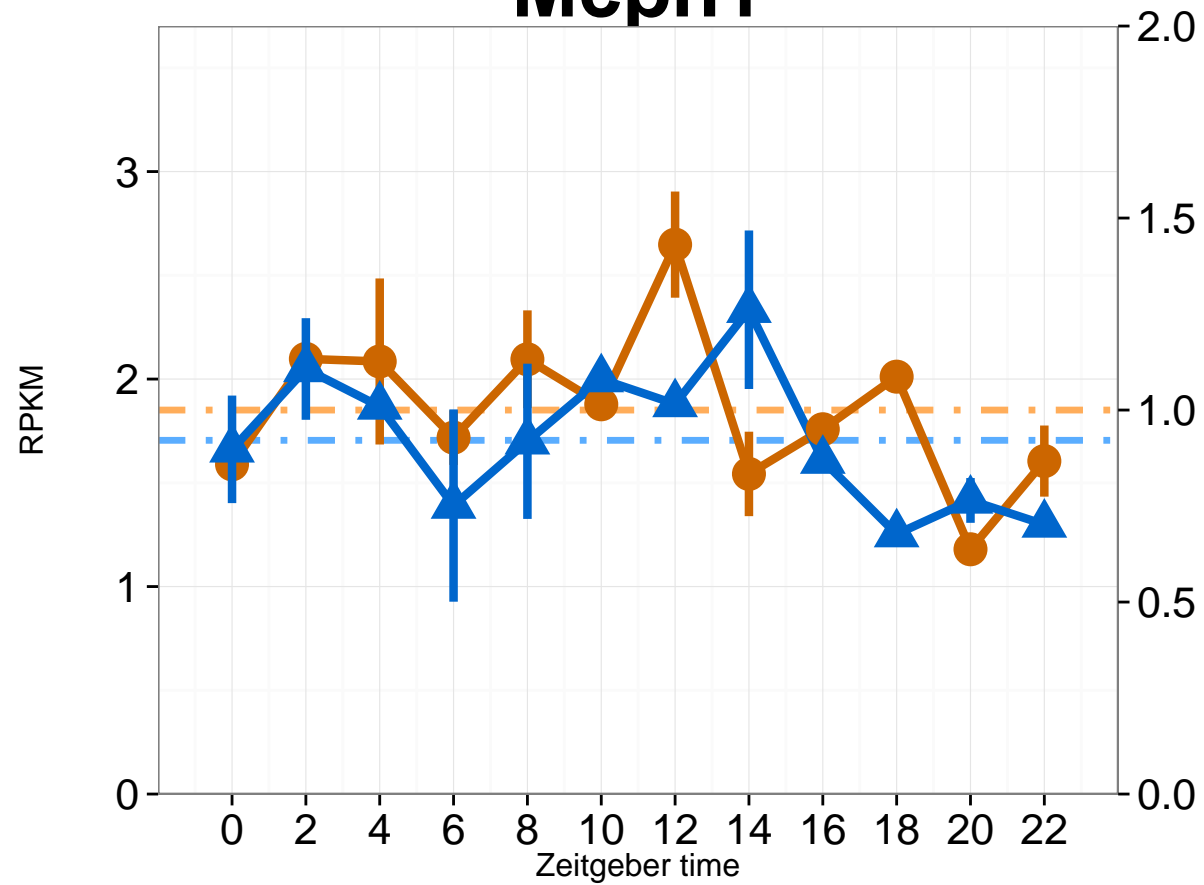

# Mcph1

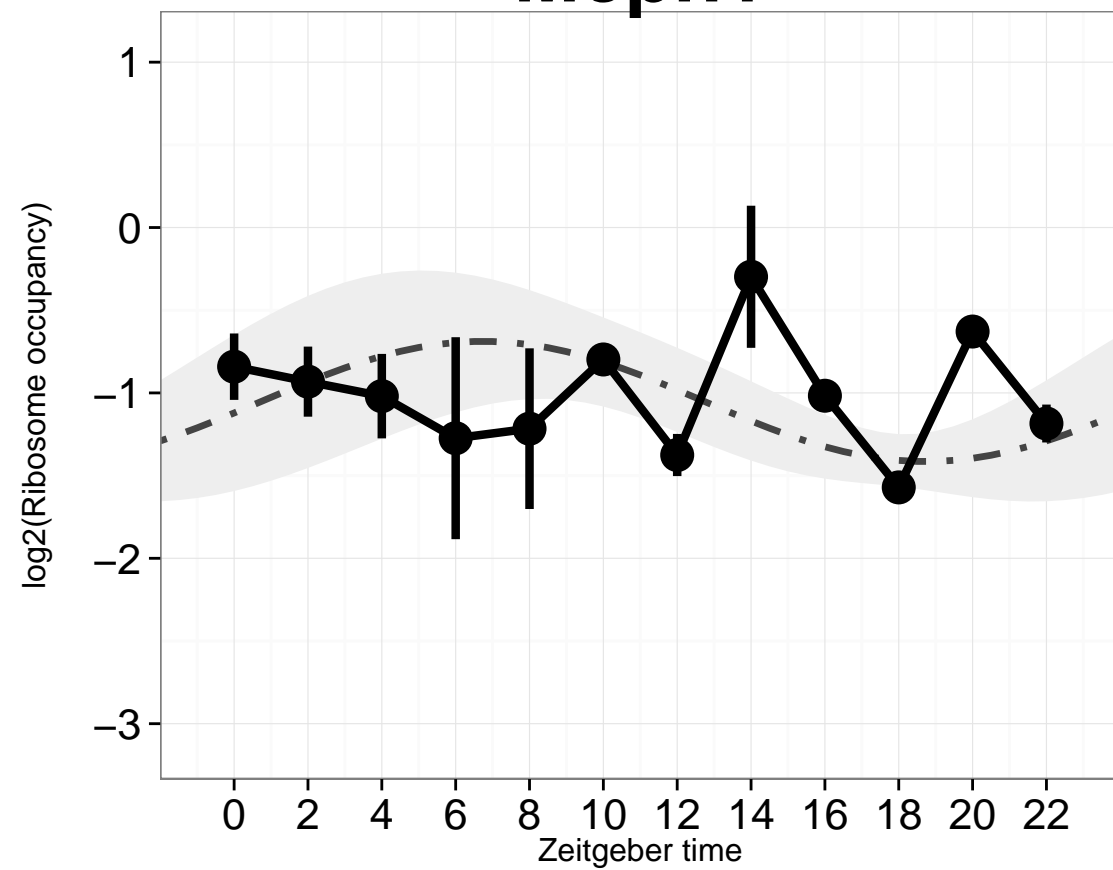

Supplement: SuppDataset_1.zip [file Mcph1_set_A.pdf › Supplemental Dataset 1/A-mRNA_nonrhyth_translation_nonrhyth/Mcph1_set_A.pdf]

# Mcrs1

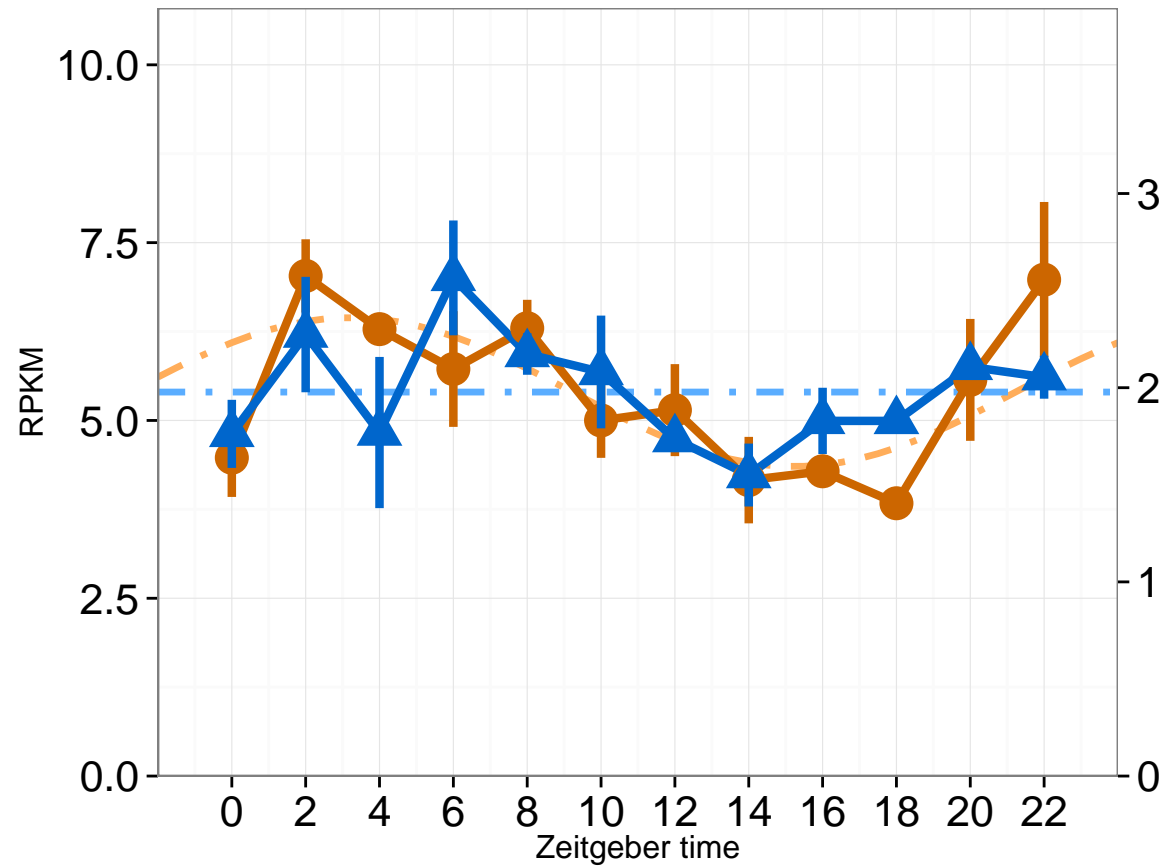

# Mcrs1

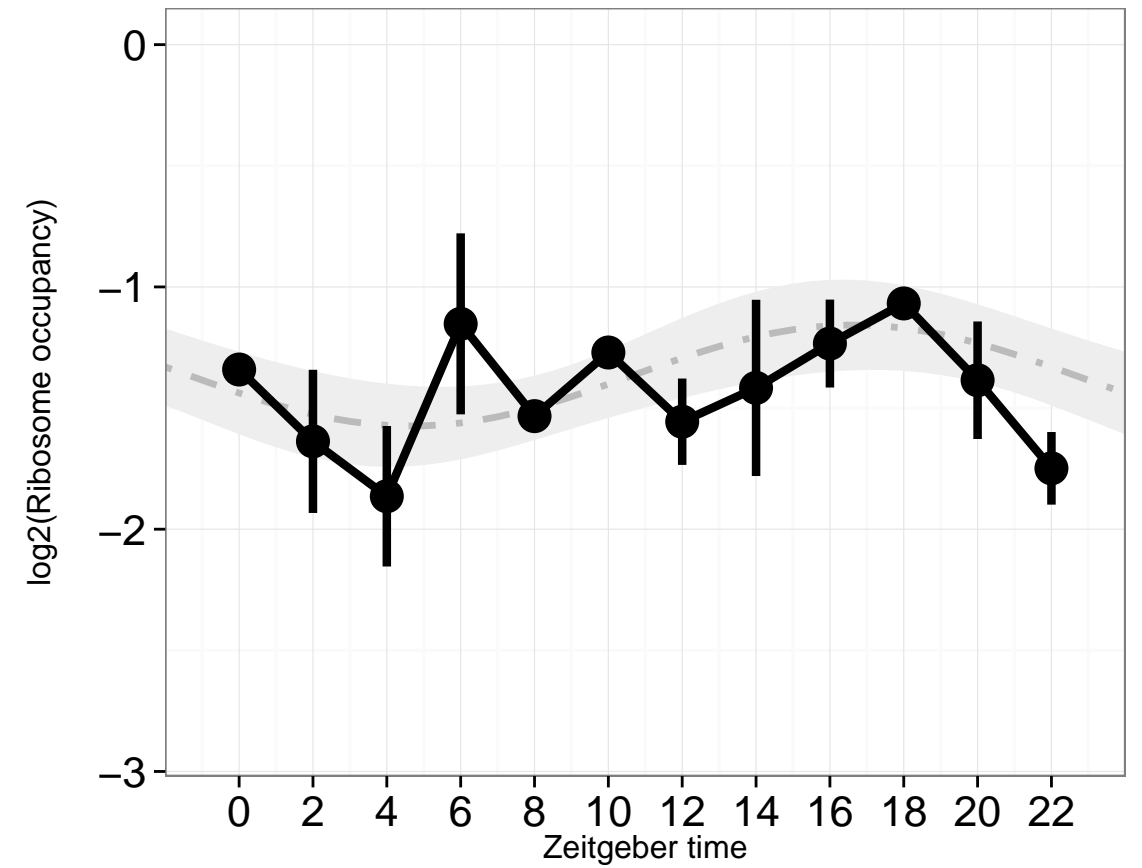

Supplement: SuppDataset_1.zip [file Mcrs1_set_A.pdf › Supplemental Dataset 1/A-mRNA_nonrhyth_translation_nonrhyth/Mcrs1_set_A.pdf]

# Mctp2

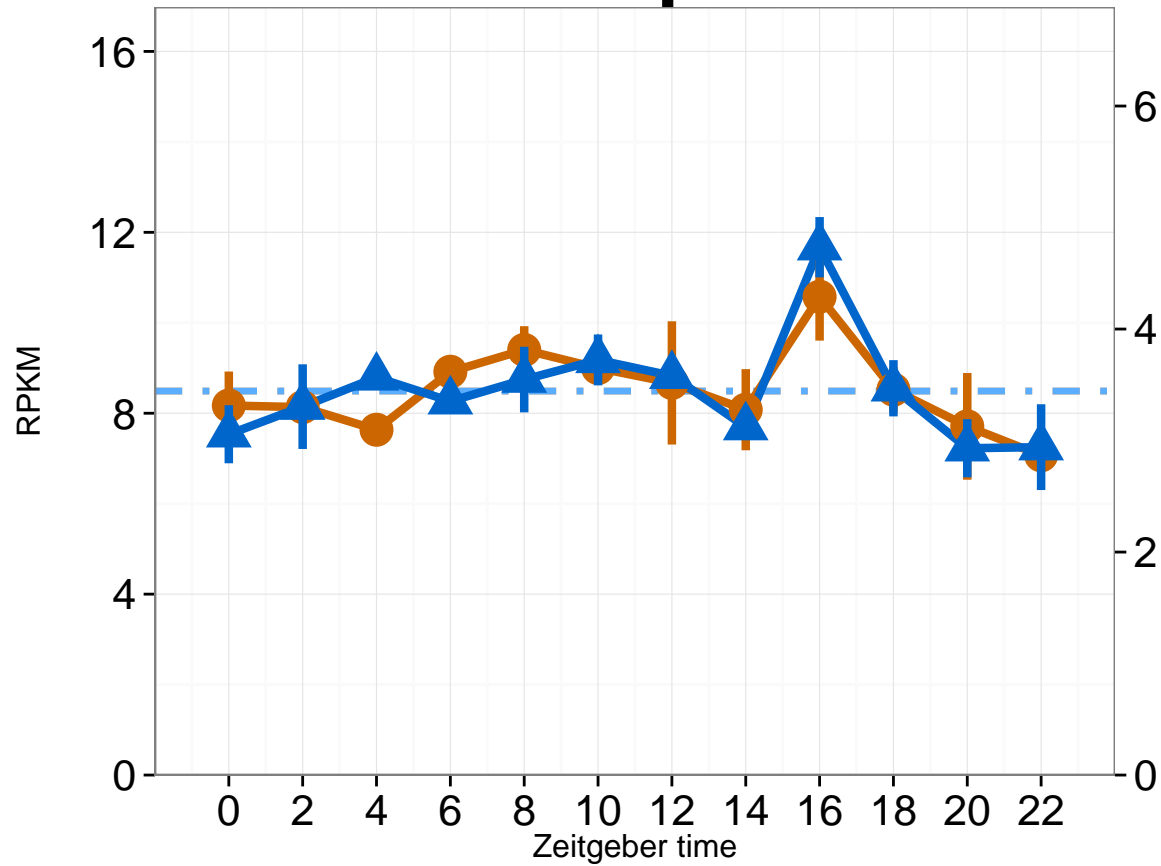

# Mctp2

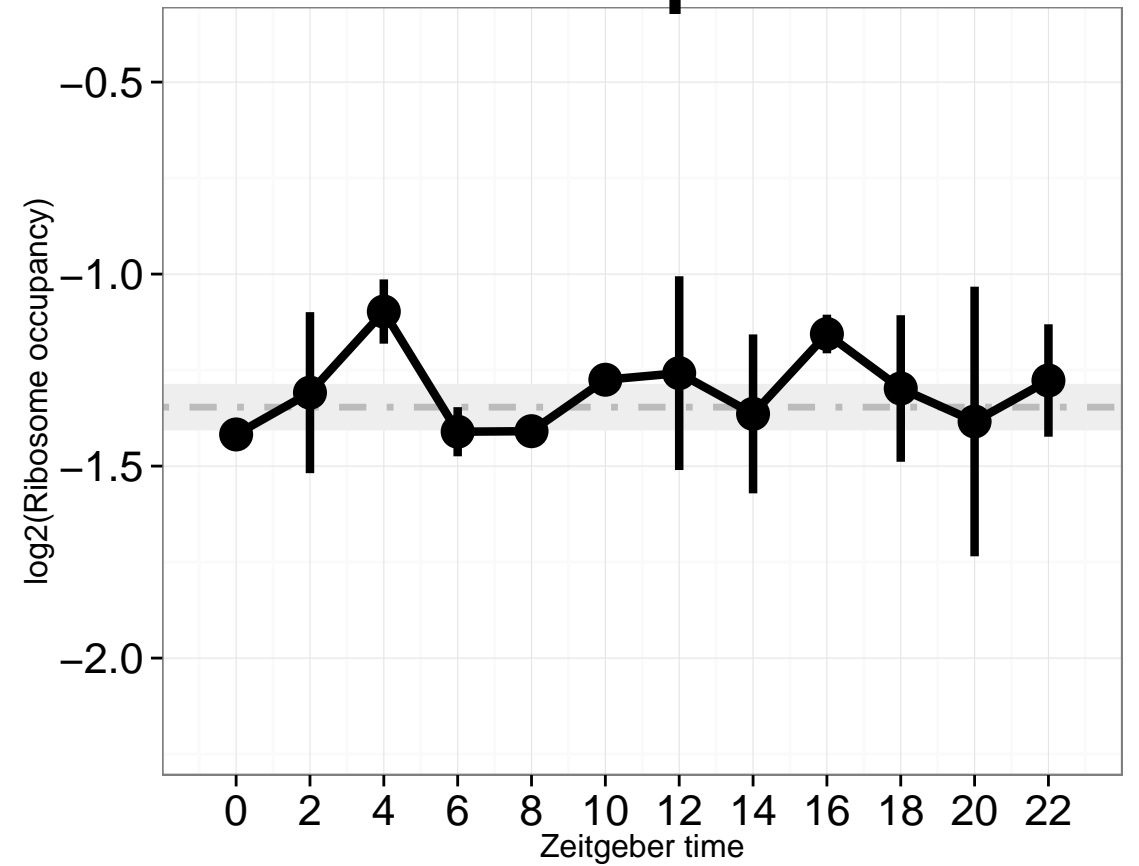

Supplement: SuppDataset_1.zip [file Mctp2_set_A.pdf › Supplemental Dataset 1/A-mRNA_nonrhyth_translation_nonrhyth/Mctp2_set_A.pdf]

## Mcts1

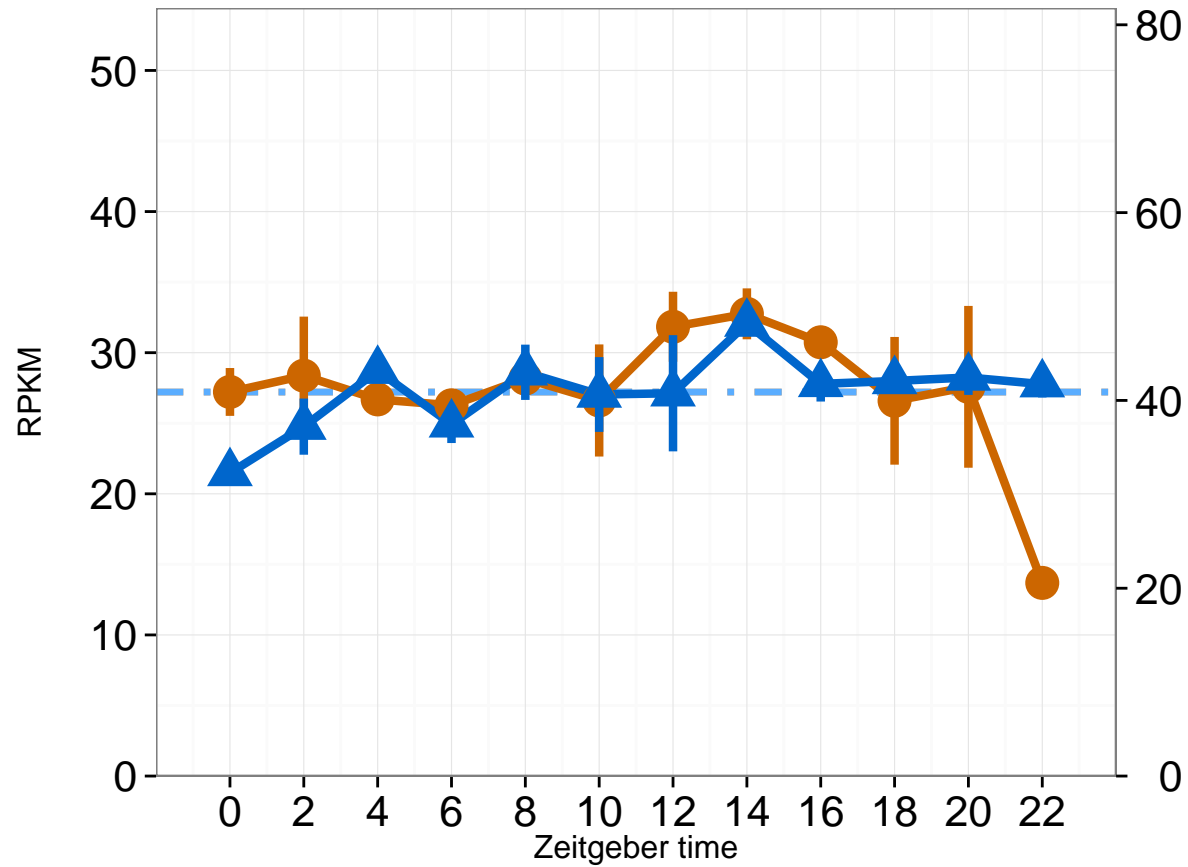

## Mcts1

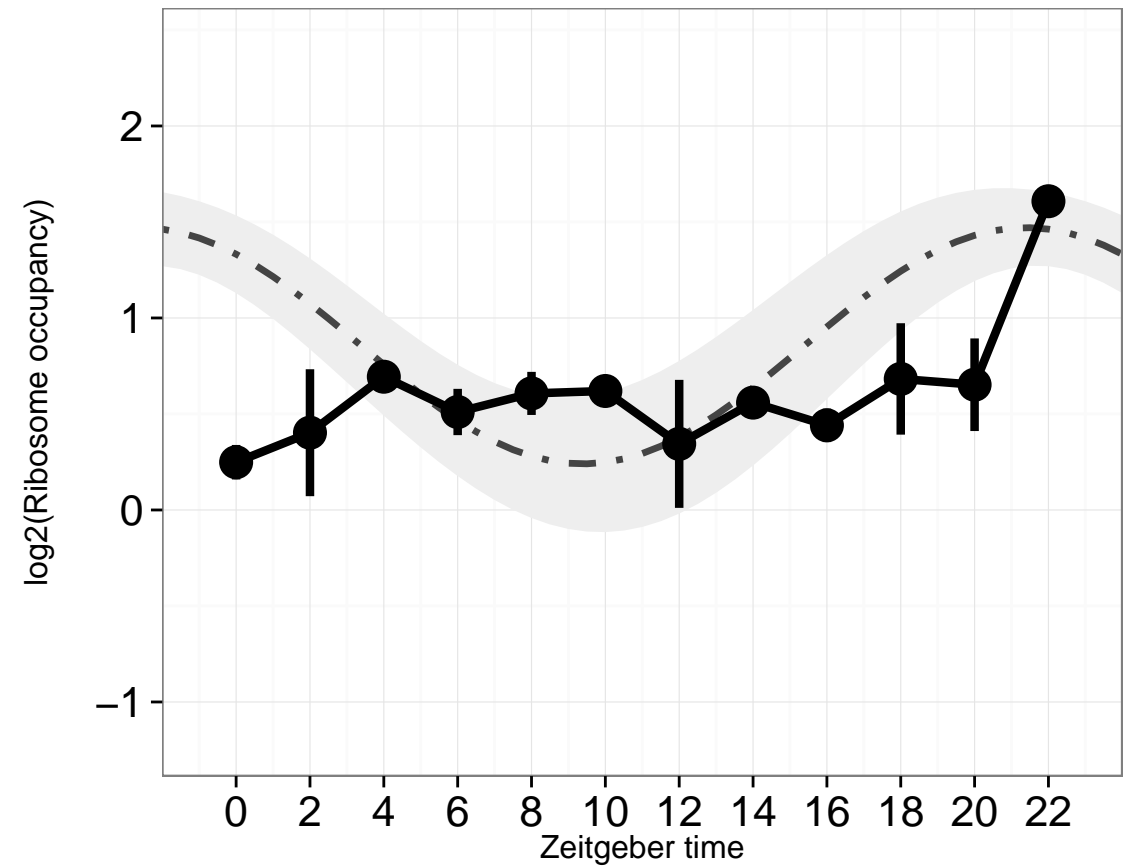

Supplement: SuppDataset_1.zip [file Mcts1_set_A.pdf › Supplemental Dataset 1/A-mRNA_nonrhyth_translation_nonrhyth/Mcts1_set_A.pdf]

## Mcts2

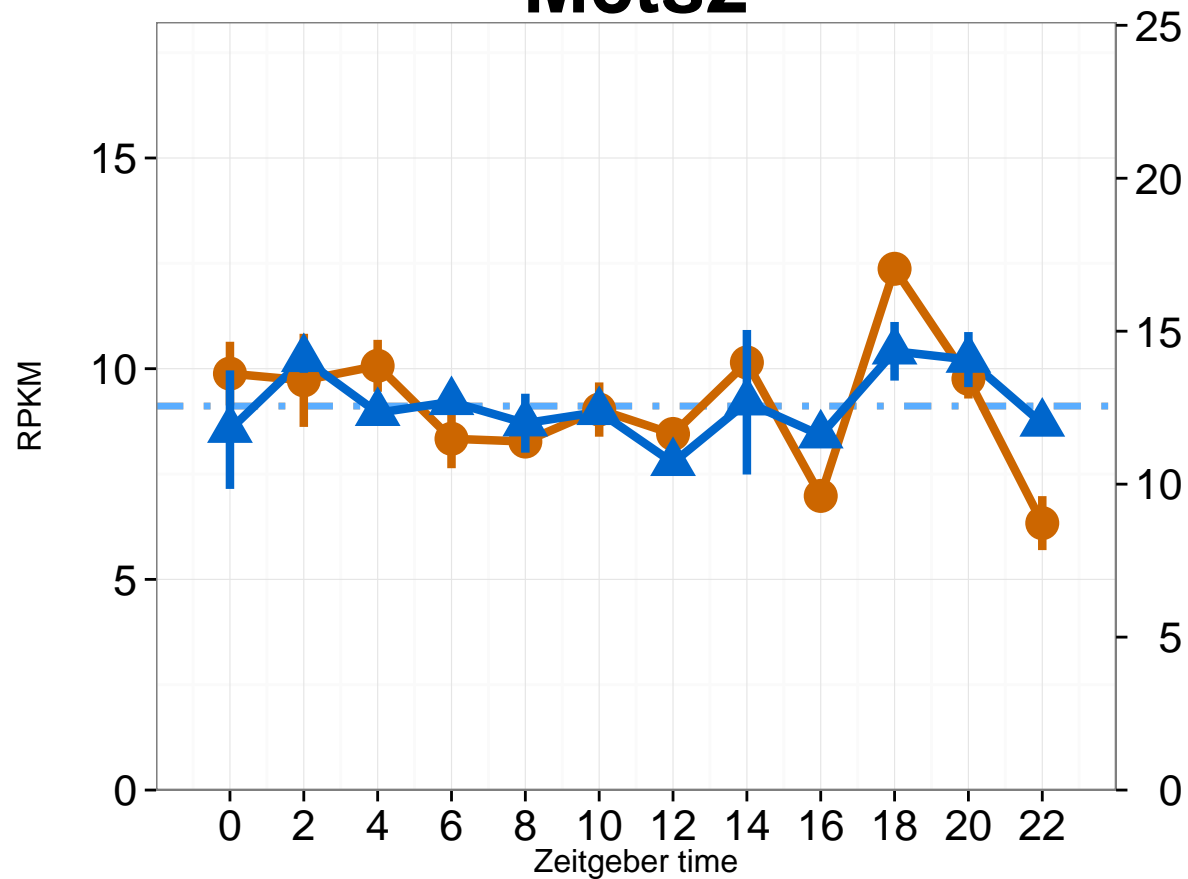

## Mcts2

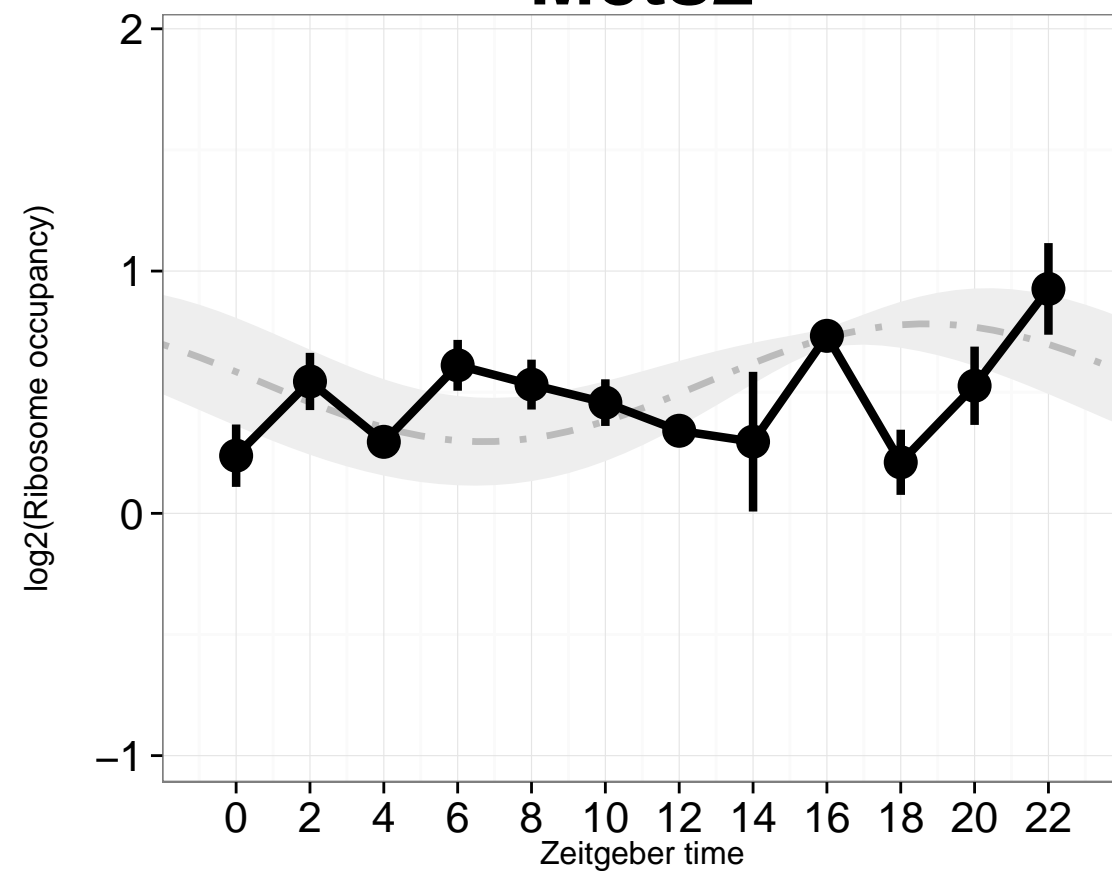

Supplement: SuppDataset_1.zip [file Mcts2_set_A.pdf › Supplemental Dataset 1/A-mRNA_nonrhyth_translation_nonrhyth/Mcts2_set_A.pdf]

## Mcur1

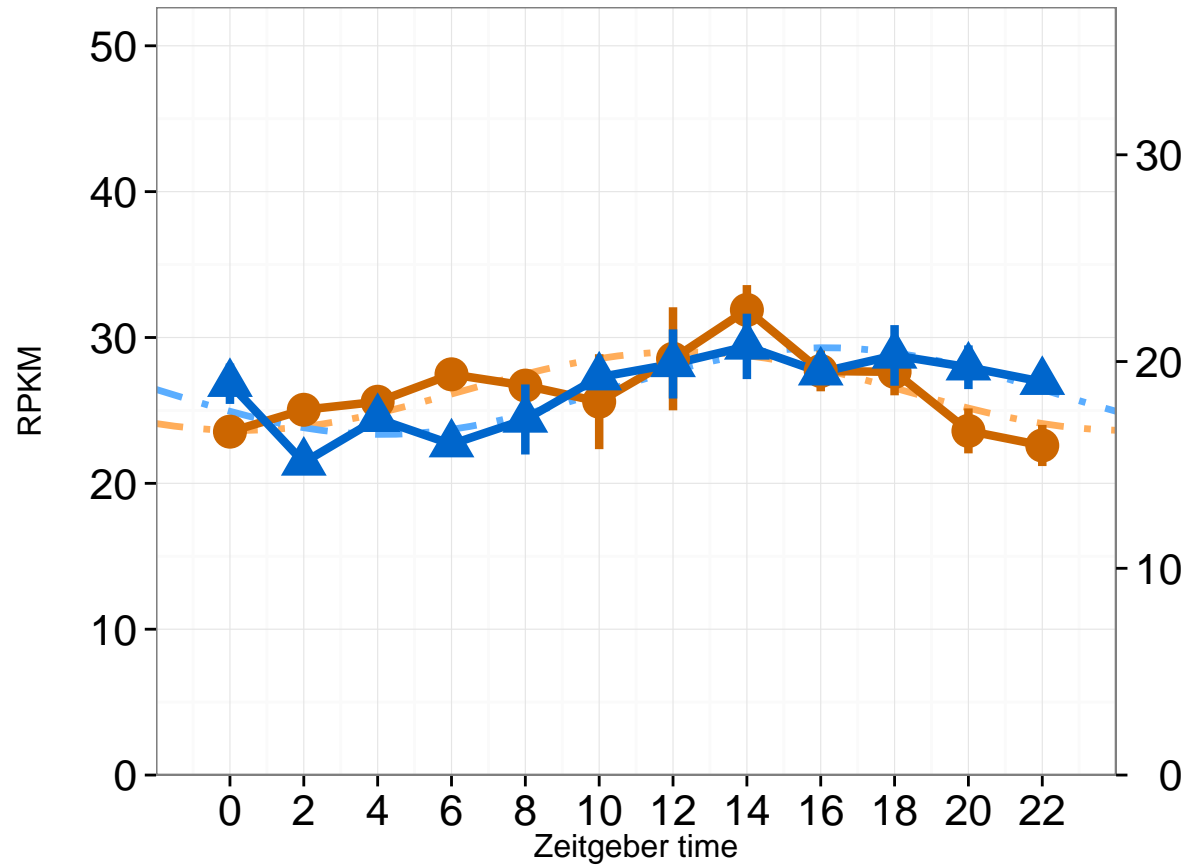

## Mcur1

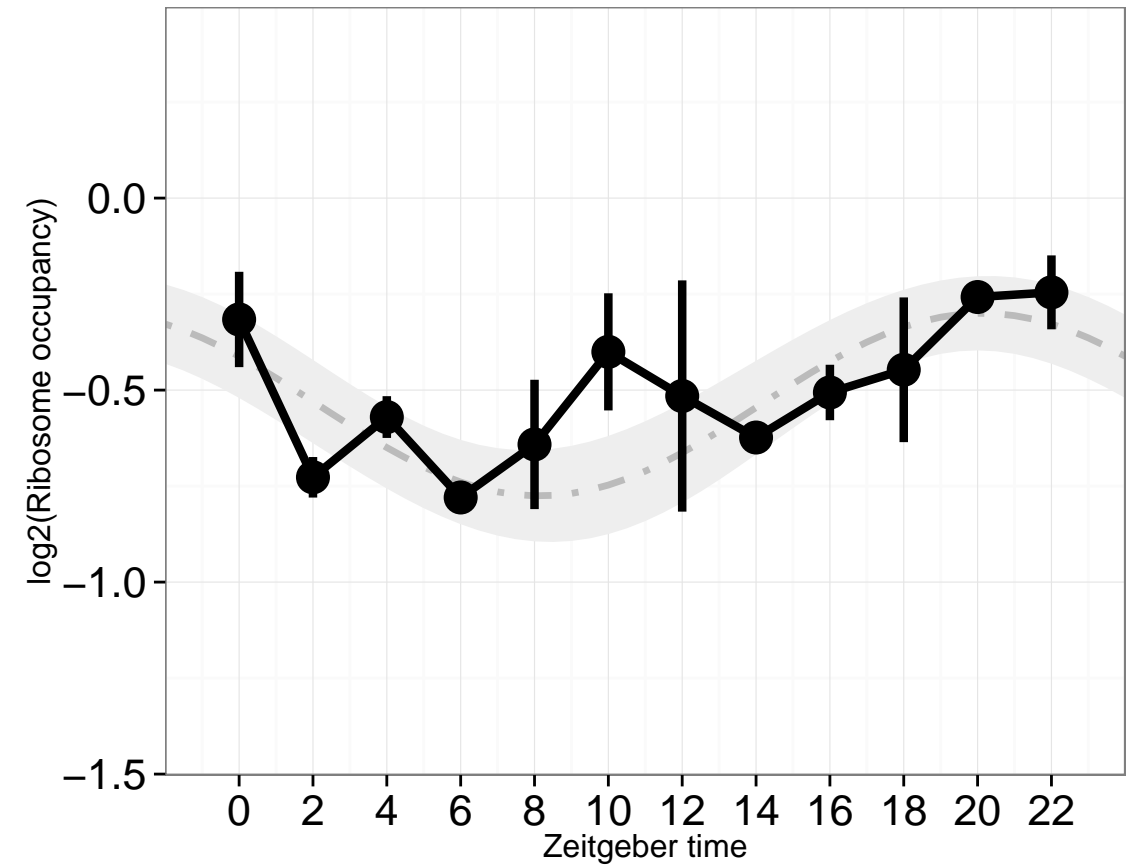

Supplement: SuppDataset_1.zip [file Mcur1_set_A.pdf › Supplemental Dataset 1/A-mRNA_nonrhyth_translation_nonrhyth/Mcur1_set_A.pdf]

# Mdc1

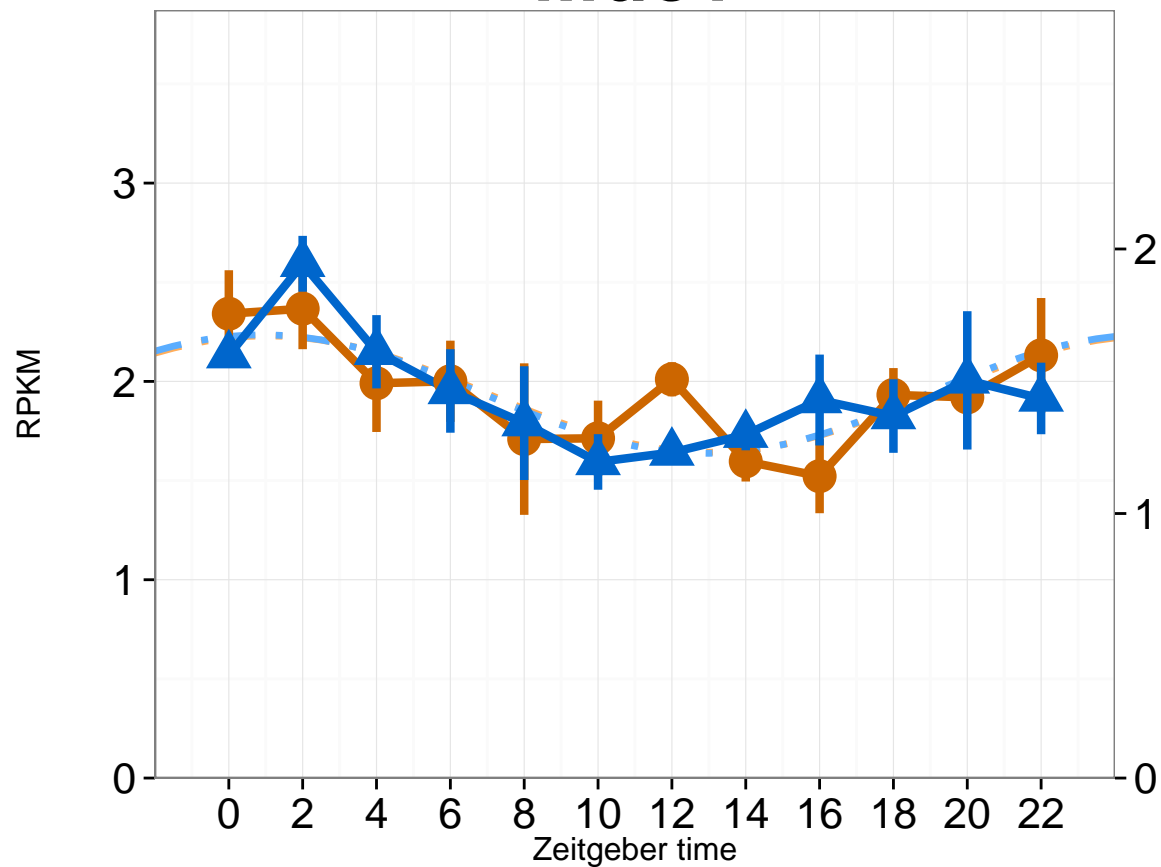

# Mdc1

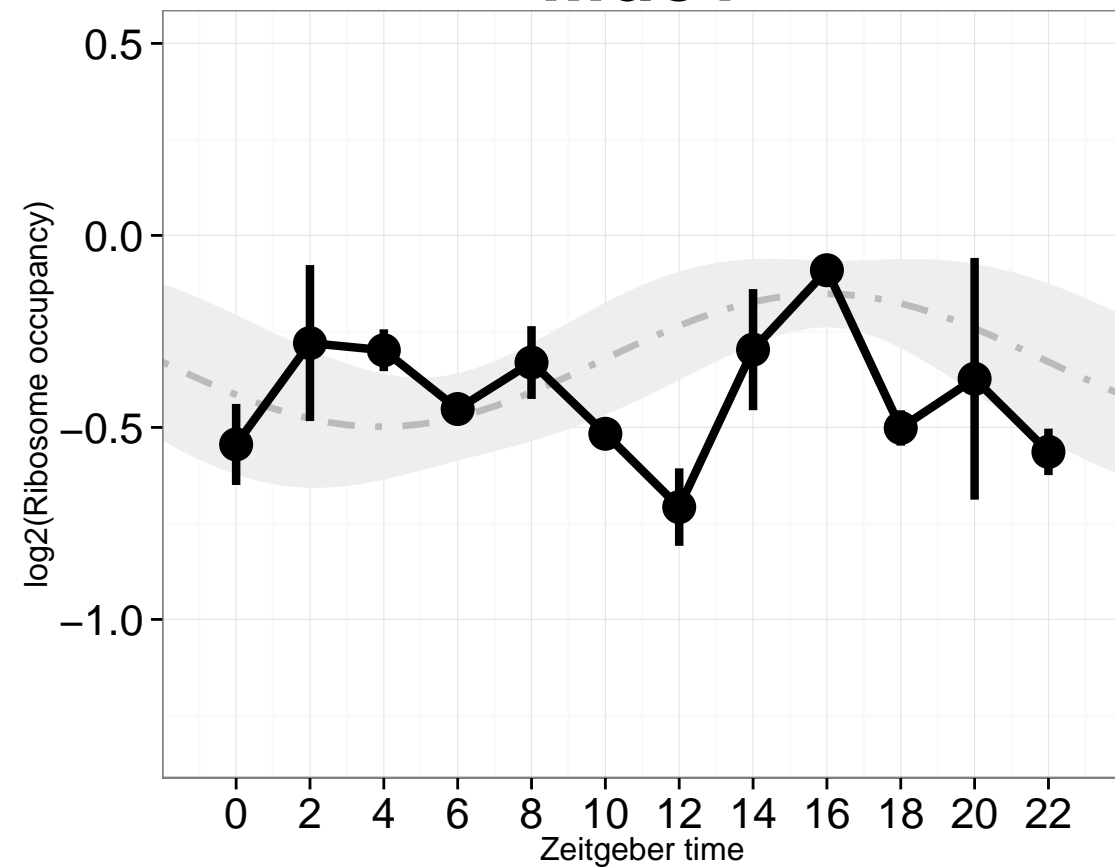

Supplement: SuppDataset_1.zip [file Mdc1_set_A.pdf › Supplemental Dataset 1/A-mRNA_nonrhyth_translation_nonrhyth/Mdc1_set_A.pdf]

## Mdh1

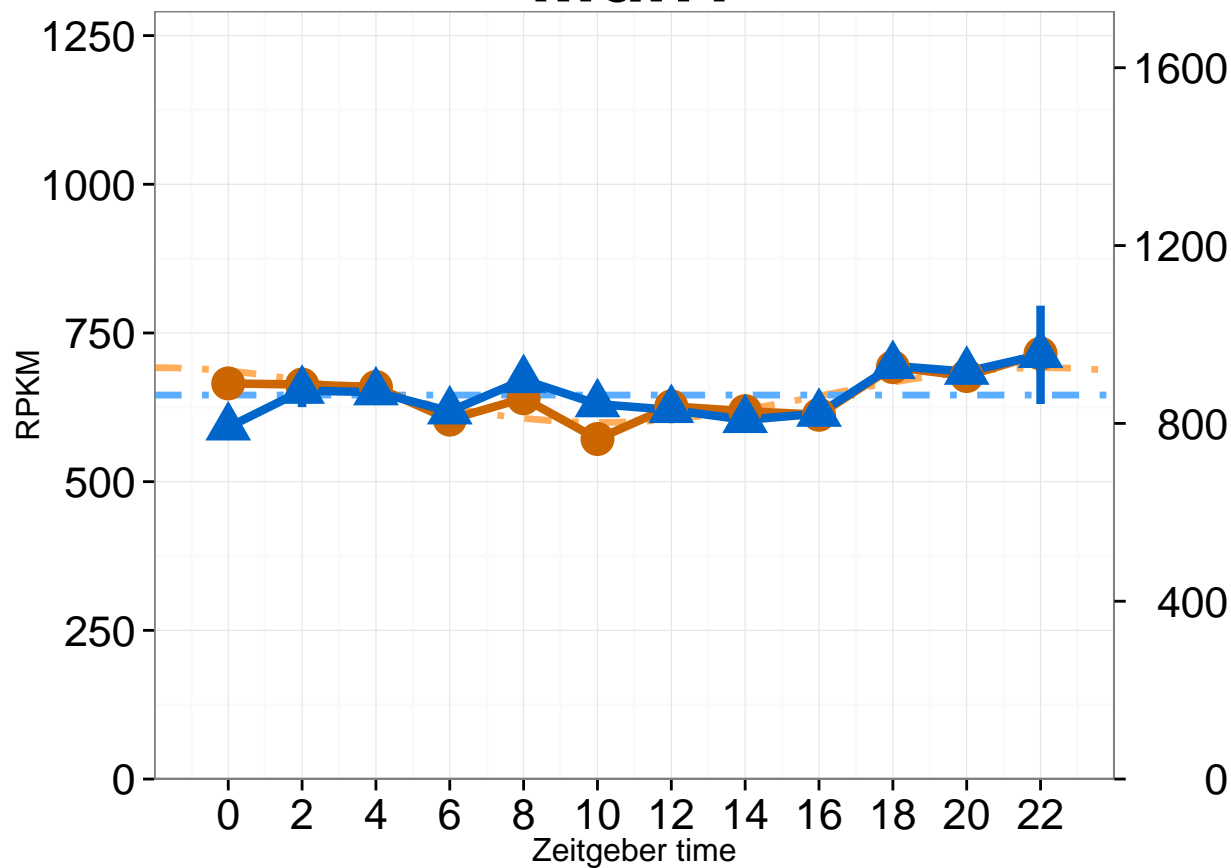

## Mdh1

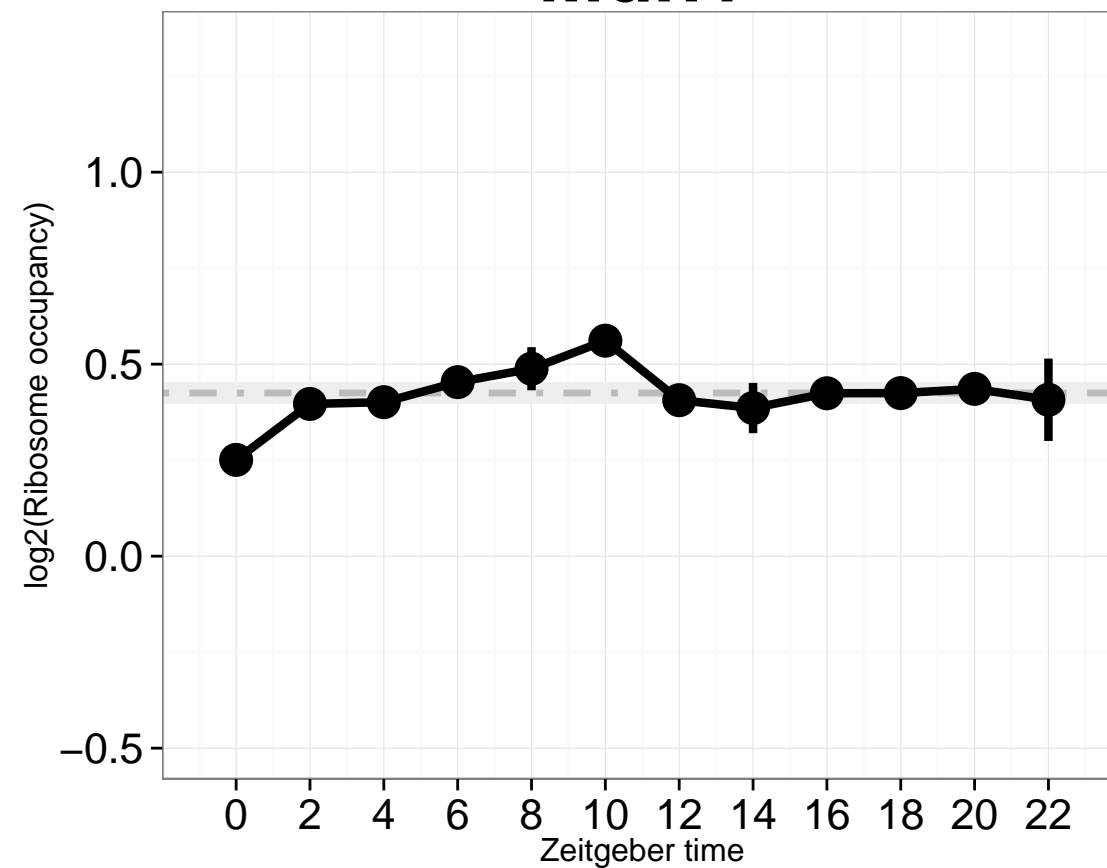

Supplement: SuppDataset_1.zip [file Mdh1_set_A.pdf › Supplemental Dataset 1/A-mRNA_nonrhyth_translation_nonrhyth/Mdh1_set_A.pdf]

## Mdh2

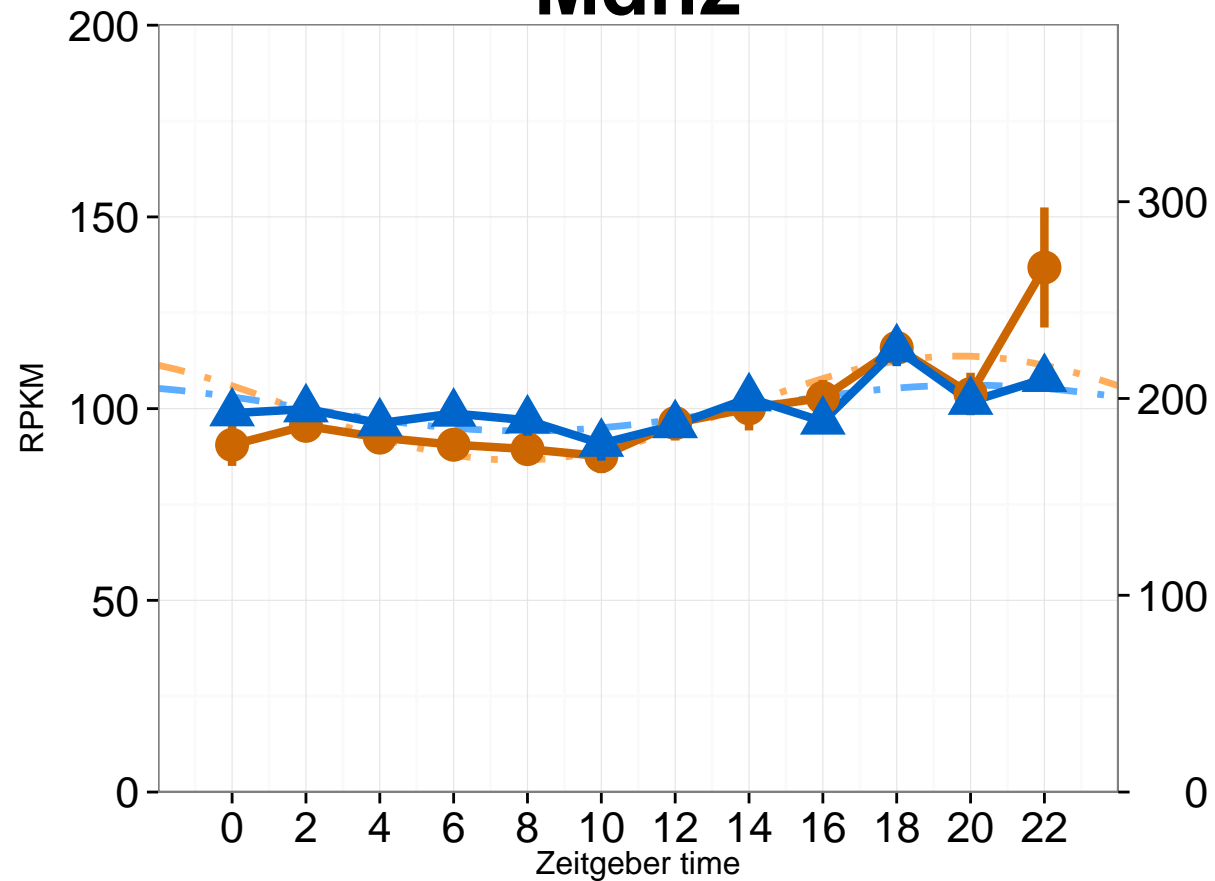

## Mdh2

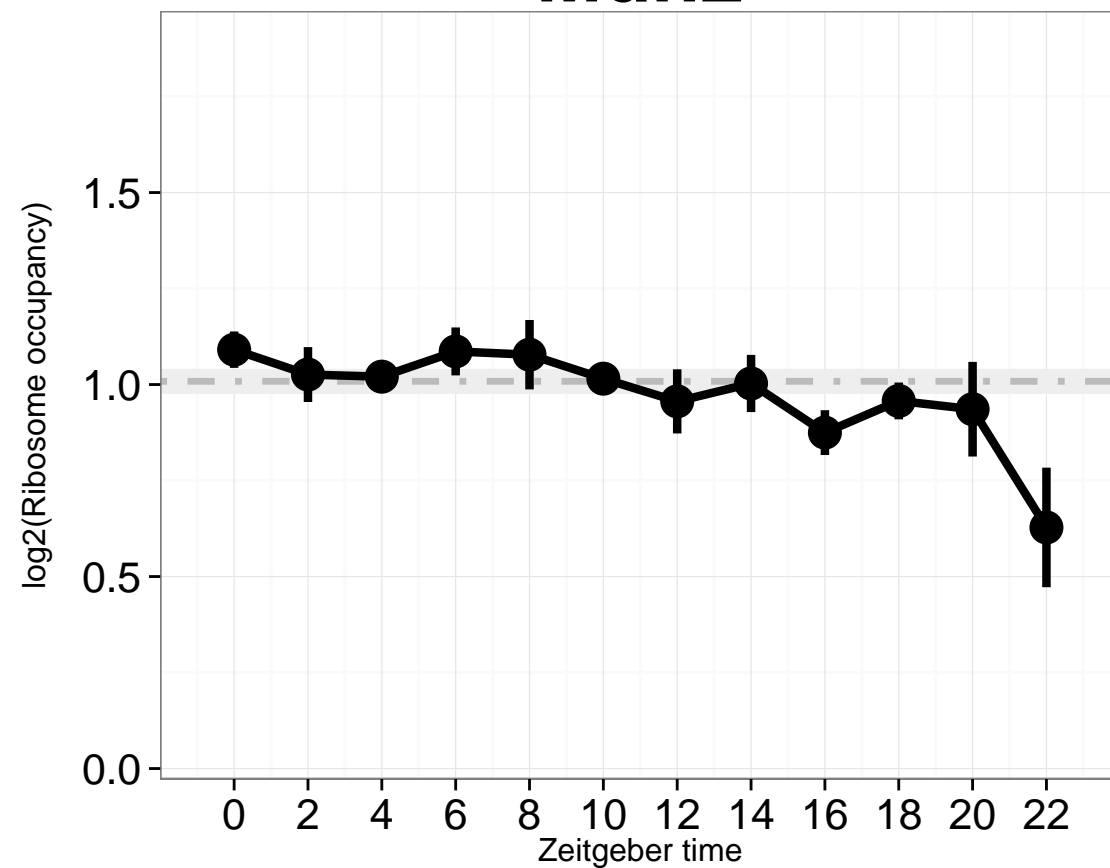

Supplement: SuppDataset_1.zip [file Mdh2_set_A.pdf › Supplemental Dataset 1/A-mRNA_nonrhyth_translation_nonrhyth/Mdh2_set_A.pdf]

## Mdm2

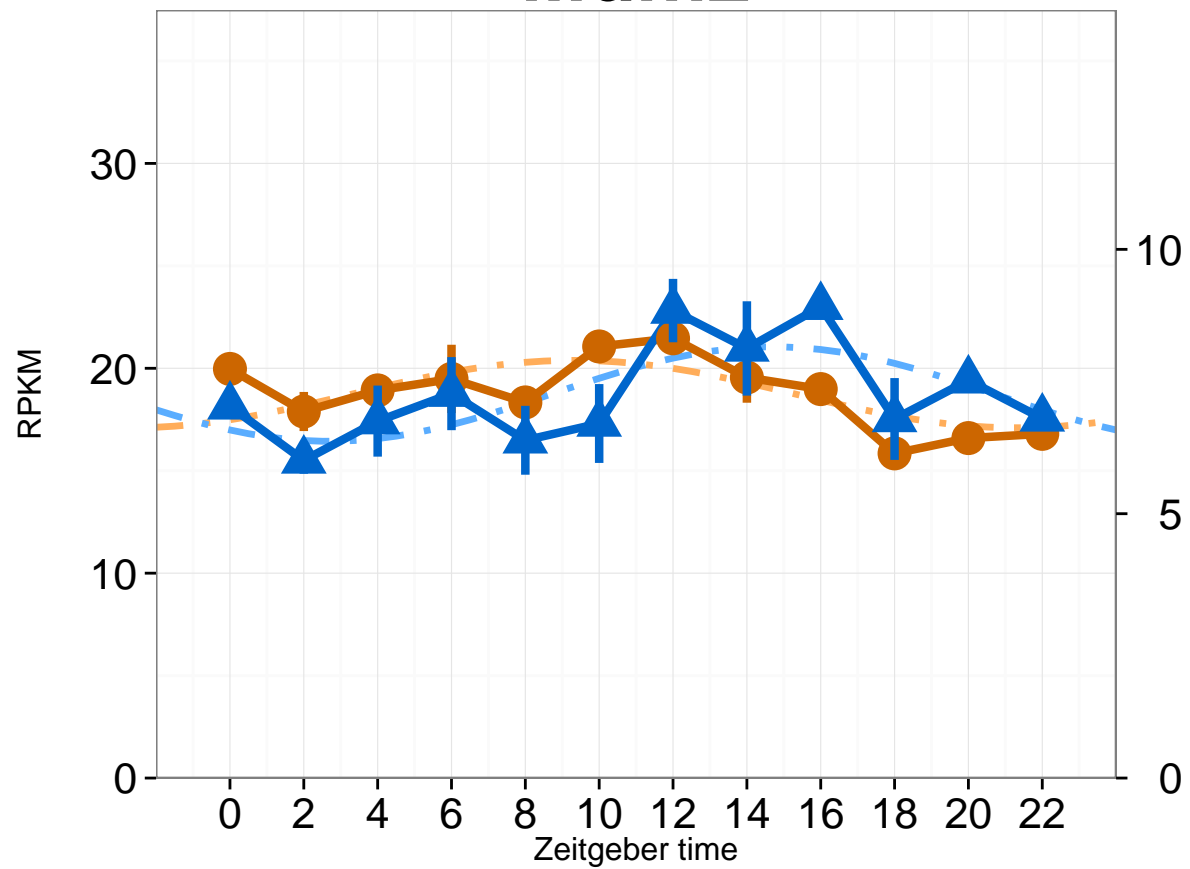

## Mdm2

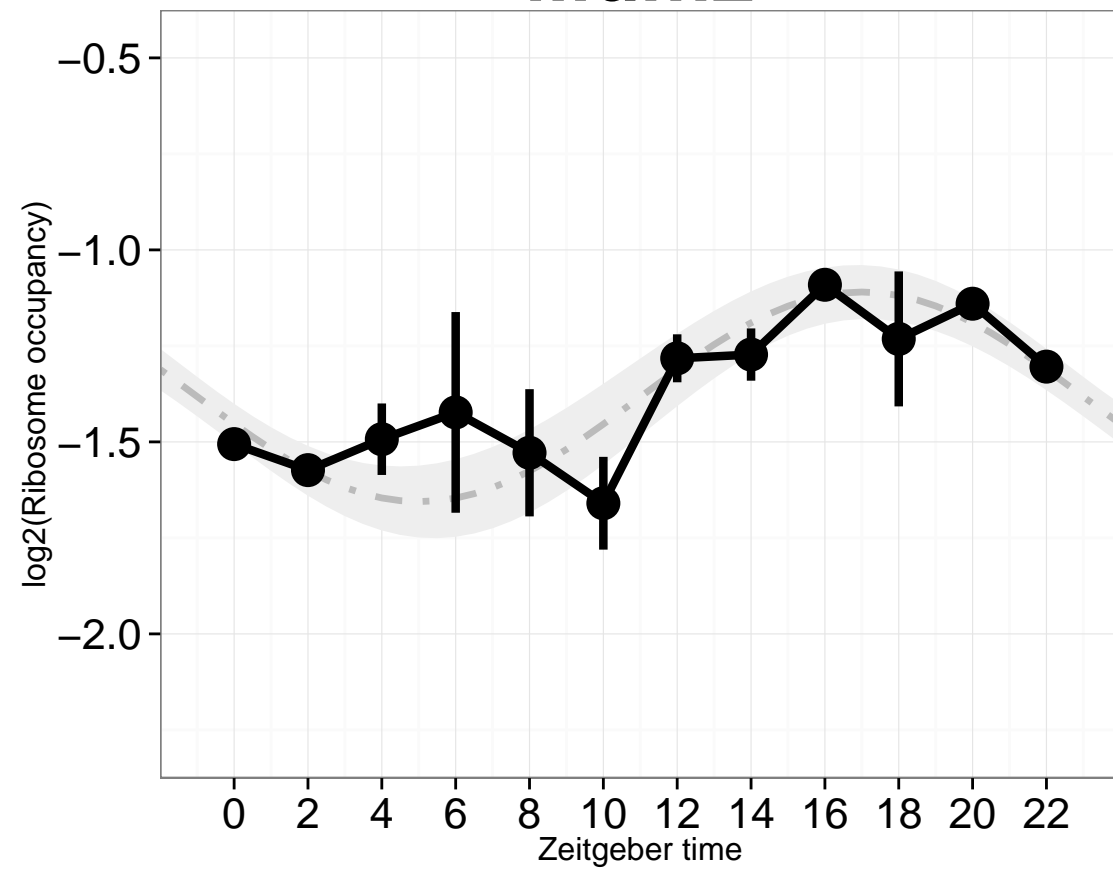

Supplement: SuppDataset_1.zip [file Mdm2_set_A.pdf › Supplemental Dataset 1/A-mRNA_nonrhyth_translation_nonrhyth/Mdm2_set_A.pdf]

## Mdm4

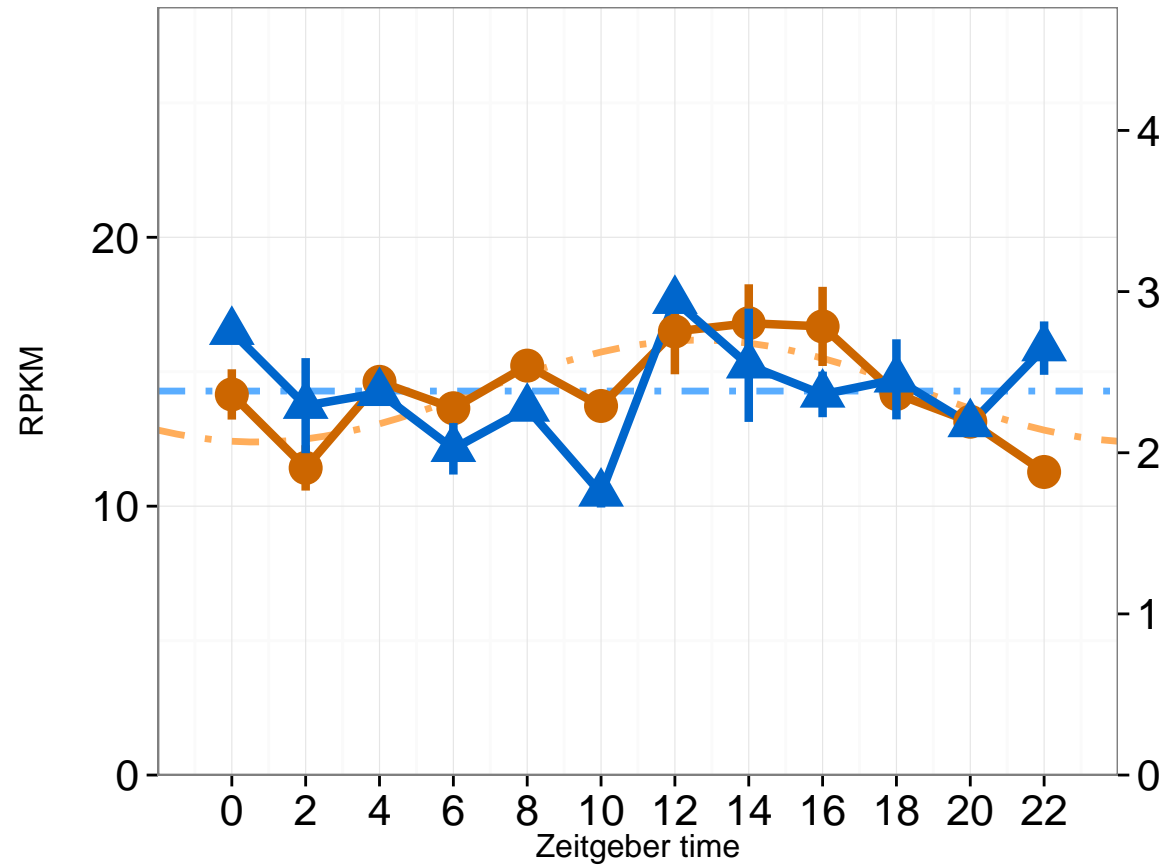

## Mdm4

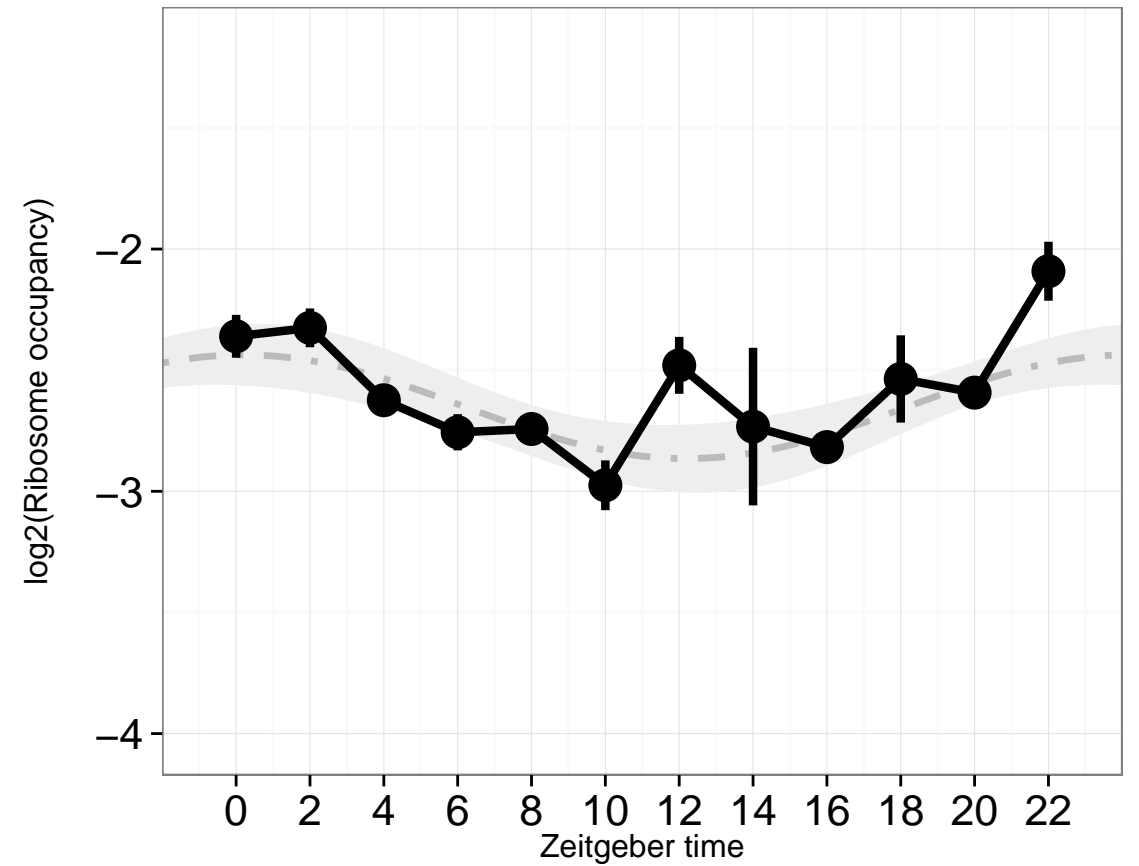

Supplement: SuppDataset_1.zip [file Mdm4_set_A.pdf › Supplemental Dataset 1/A-mRNA_nonrhyth_translation_nonrhyth/Mdm4_set_A.pdf]

# Mdn1

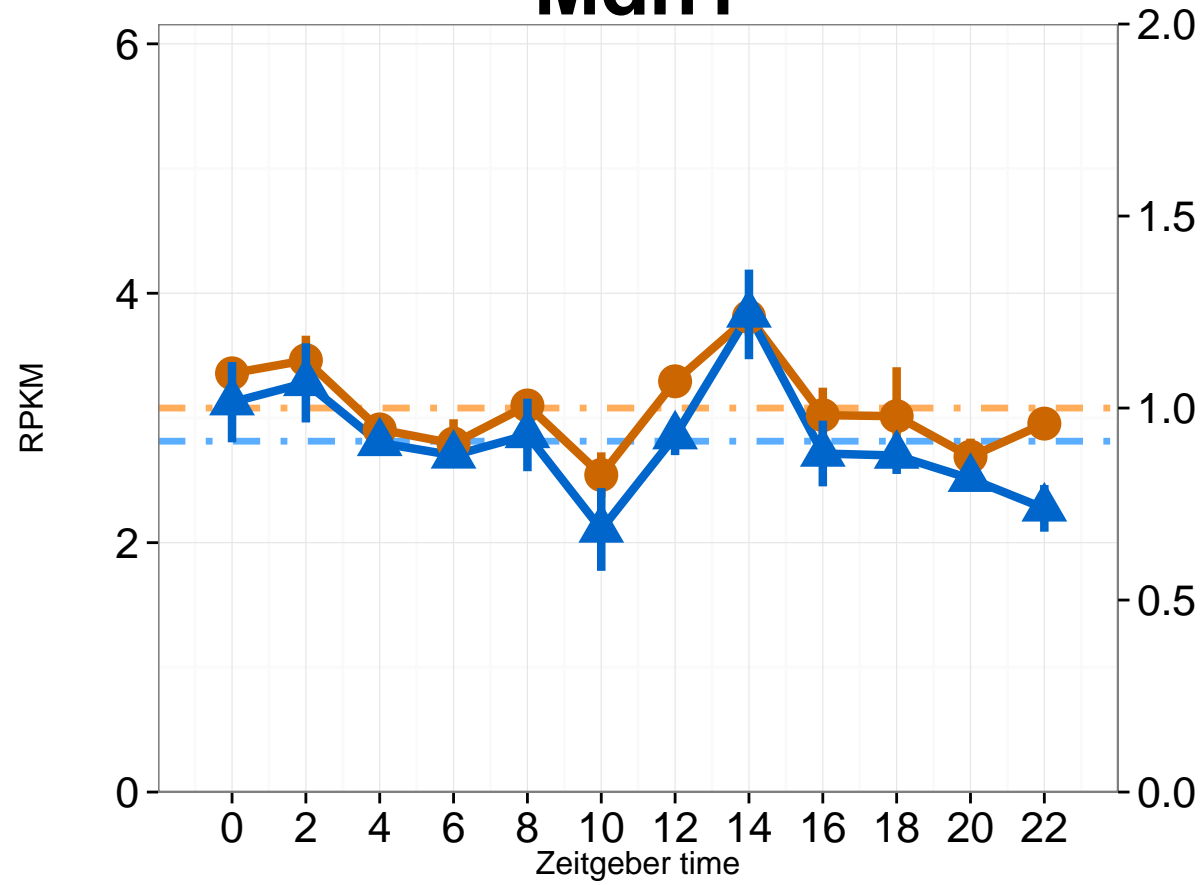

# Mdn1

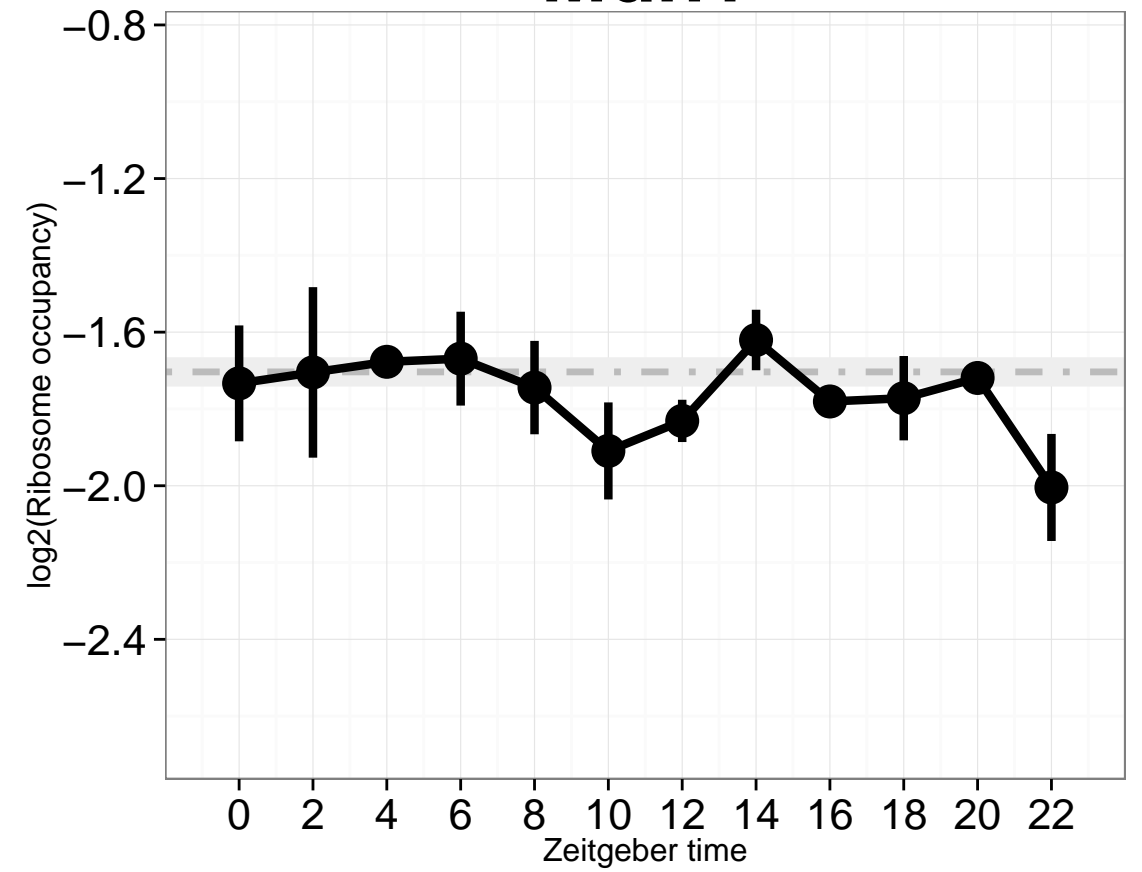

Supplement: SuppDataset_1.zip [file Mdn1_set_A.pdf › Supplemental Dataset 1/A-mRNA_nonrhyth_translation_nonrhyth/Mdn1_set_A.pdf]

## Mdp1

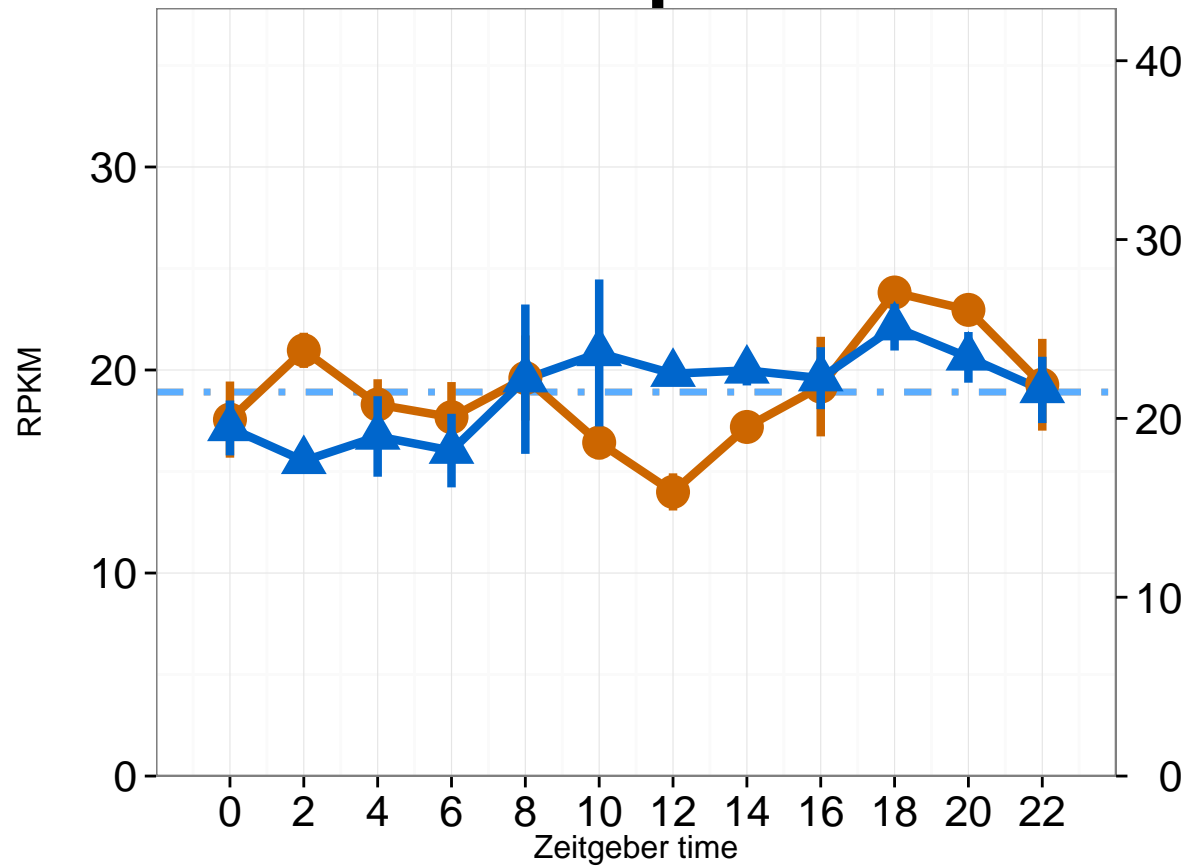

## Mdp1

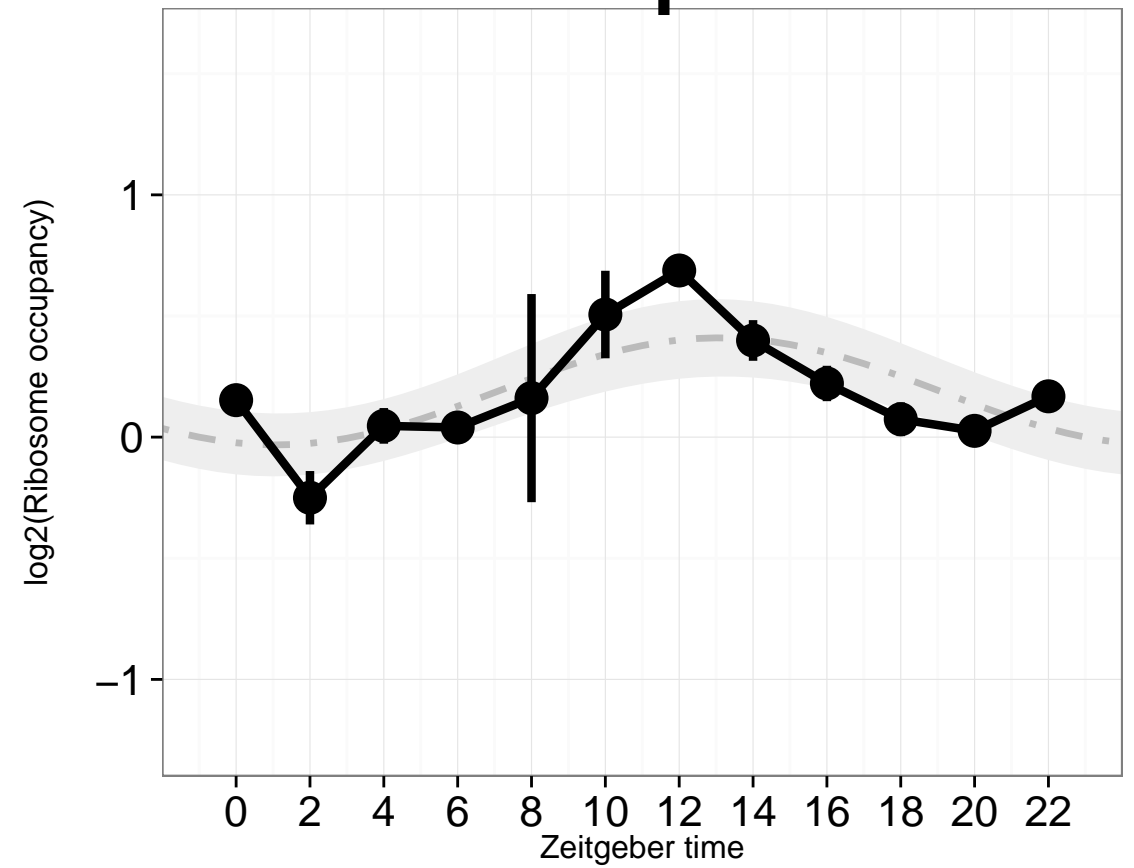

Supplement: SuppDataset_1.zip [file Mdp1_set_A.pdf › Supplemental Dataset 1/A-mRNA_nonrhyth_translation_nonrhyth/Mdp1_set_A.pdf]

# Me1

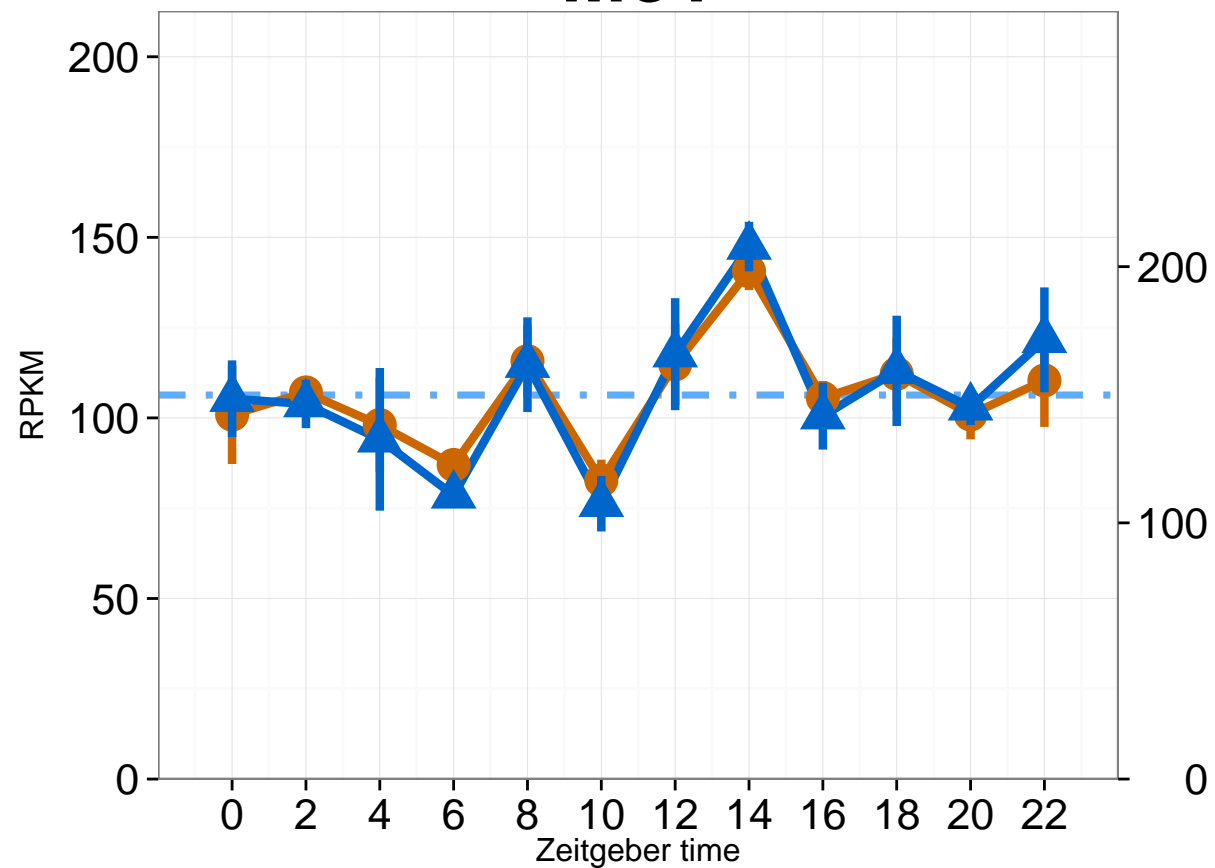

# Me1

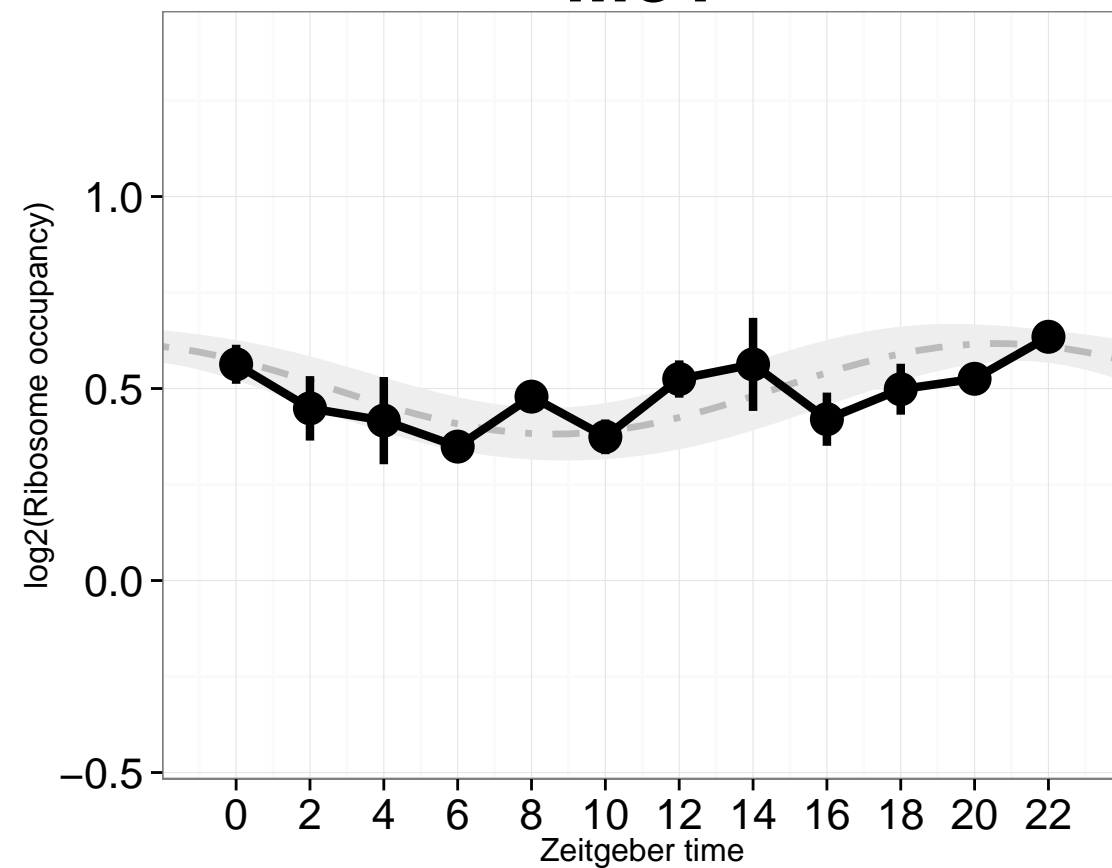

Supplement: SuppDataset_1.zip [file Me1_set_A.pdf › Supplemental Dataset 1/A-mRNA_nonrhyth_translation_nonrhyth/Me1_set_A.pdf]

## Me2

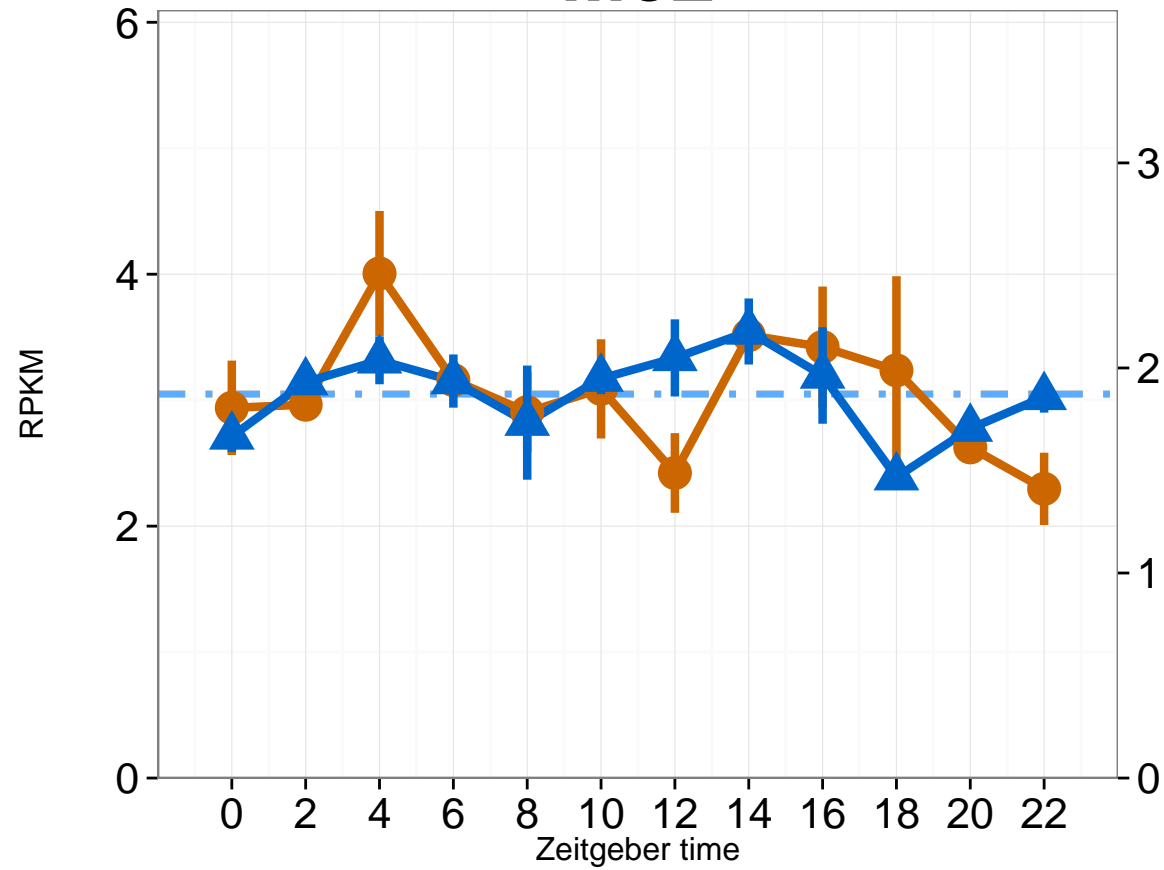

## Me2

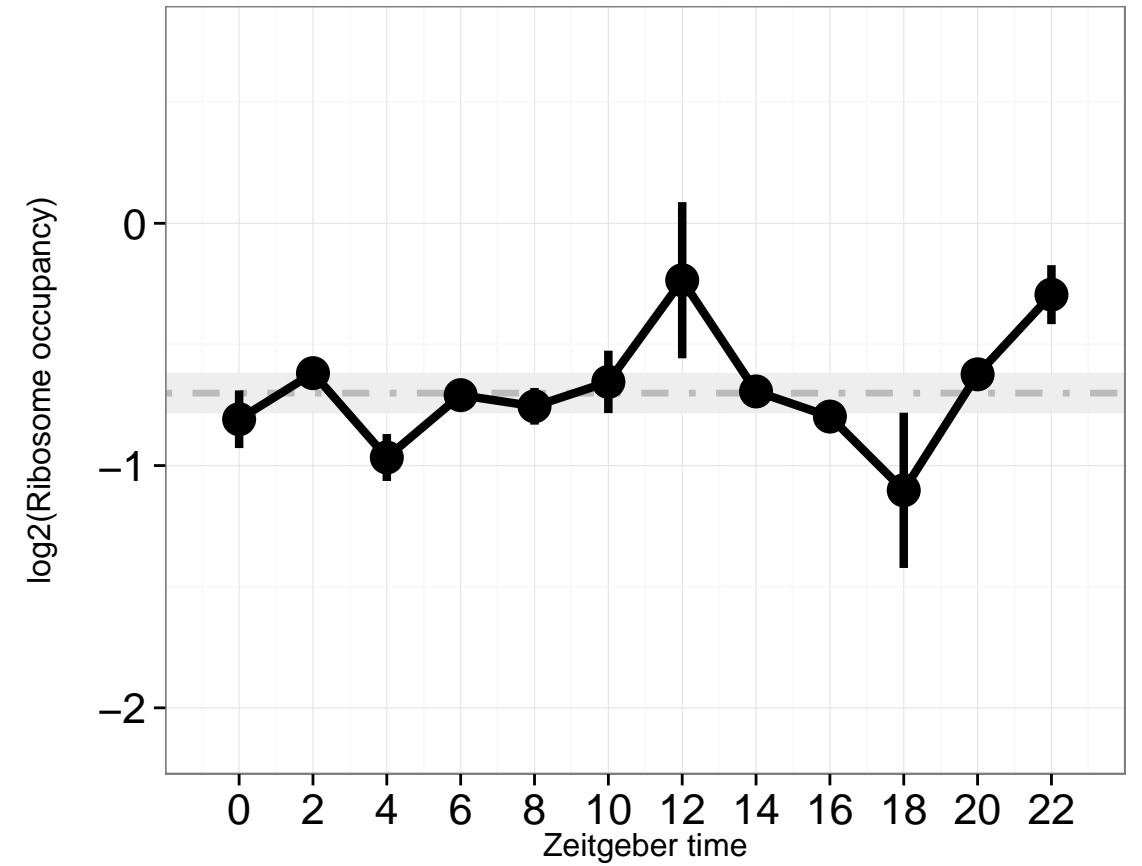

Supplement: SuppDataset_1.zip [file Me2_set_A.pdf › Supplemental Dataset 1/A-mRNA_nonrhyth_translation_nonrhyth/Me2_set_A.pdf]

# Mea1

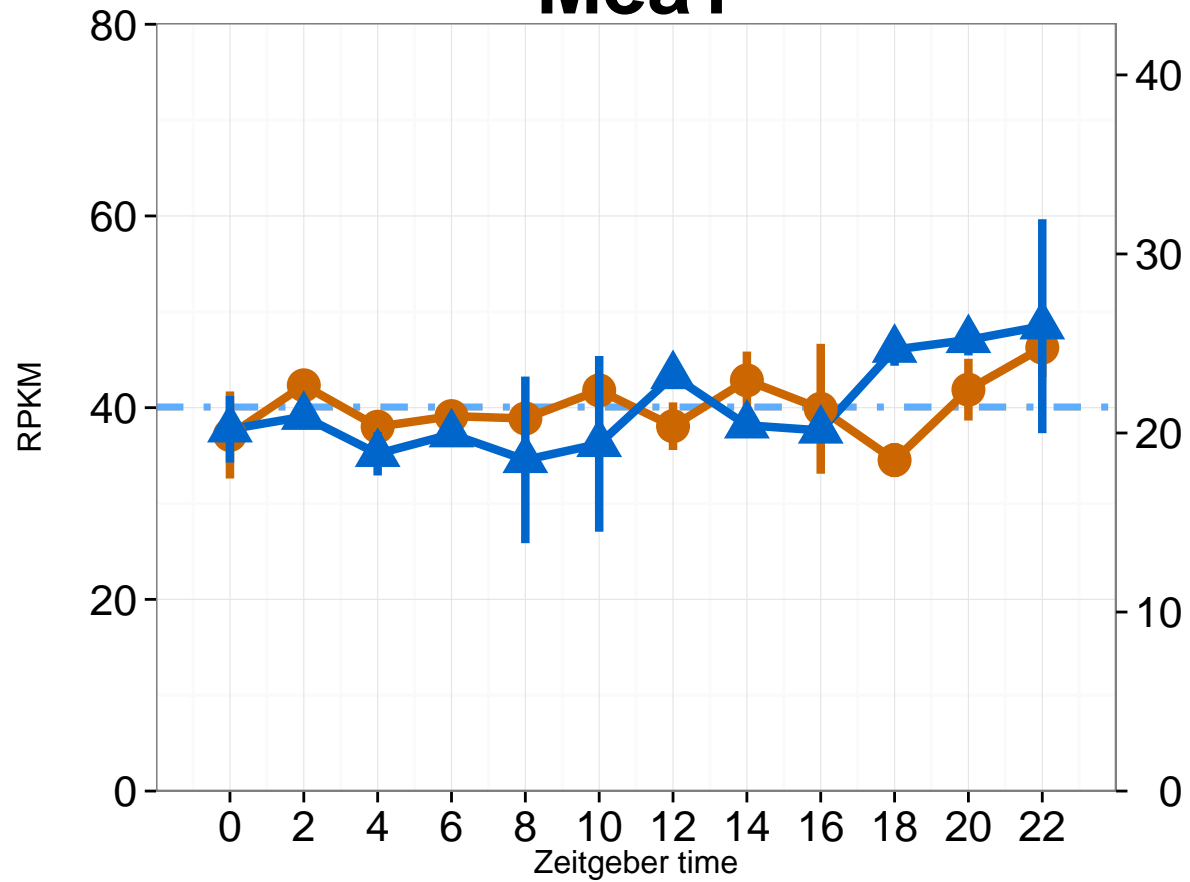

# Mea1

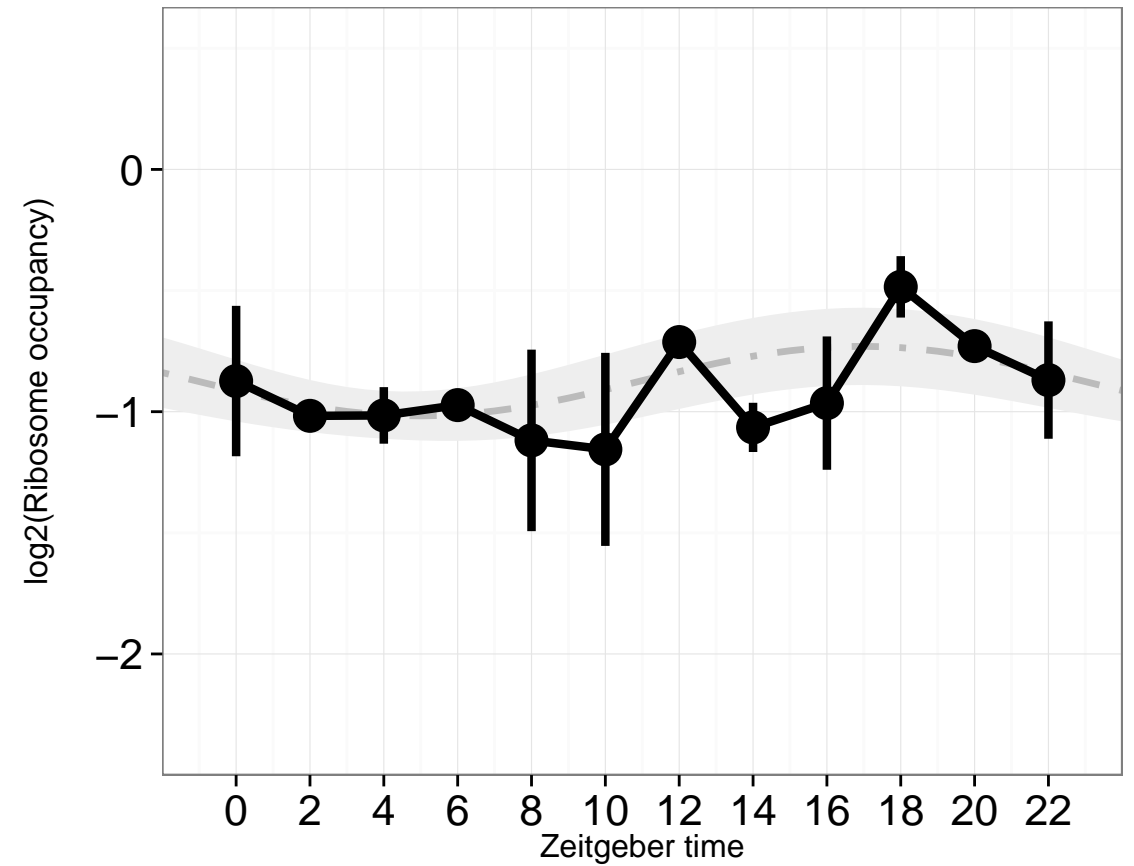

Supplement: SuppDataset_1.zip [file Mea1_set_A.pdf › Supplemental Dataset 1/A-mRNA_nonrhyth_translation_nonrhyth/Mea1_set_A.pdf]

# Meaf6

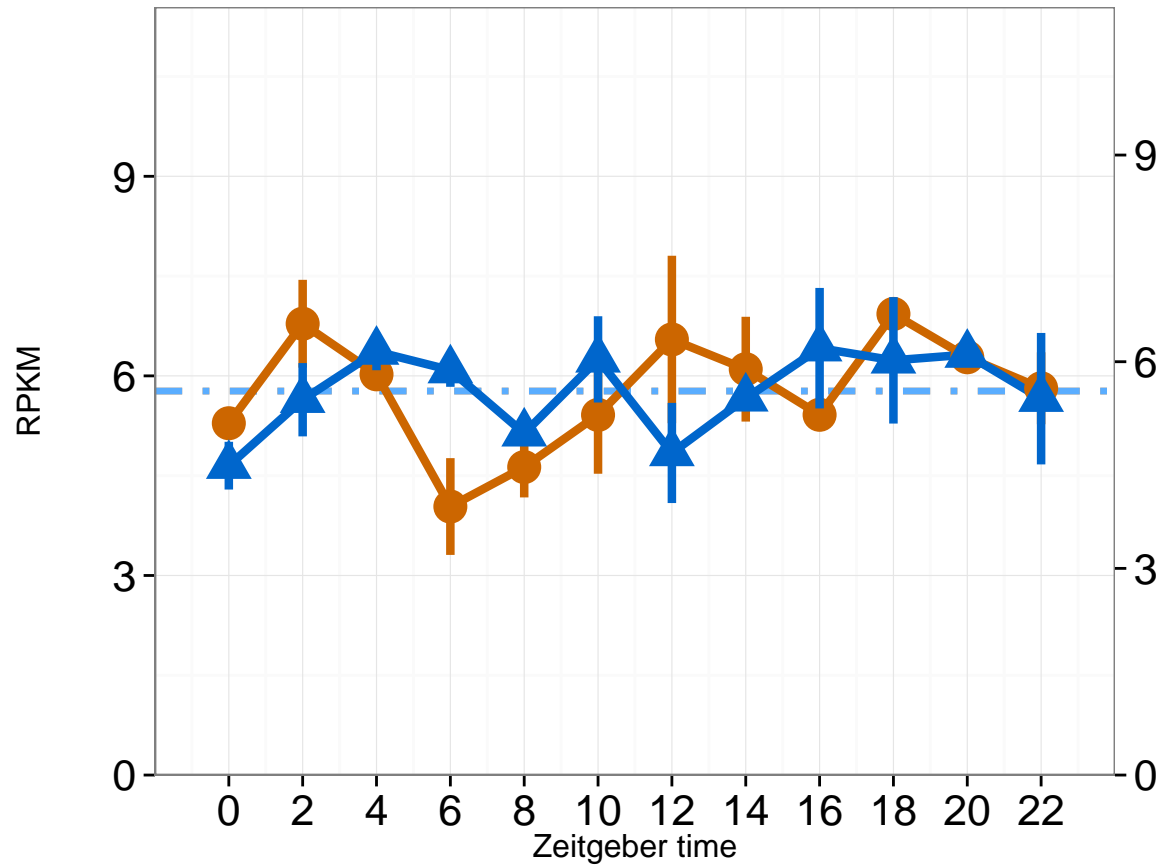

# Meaf6

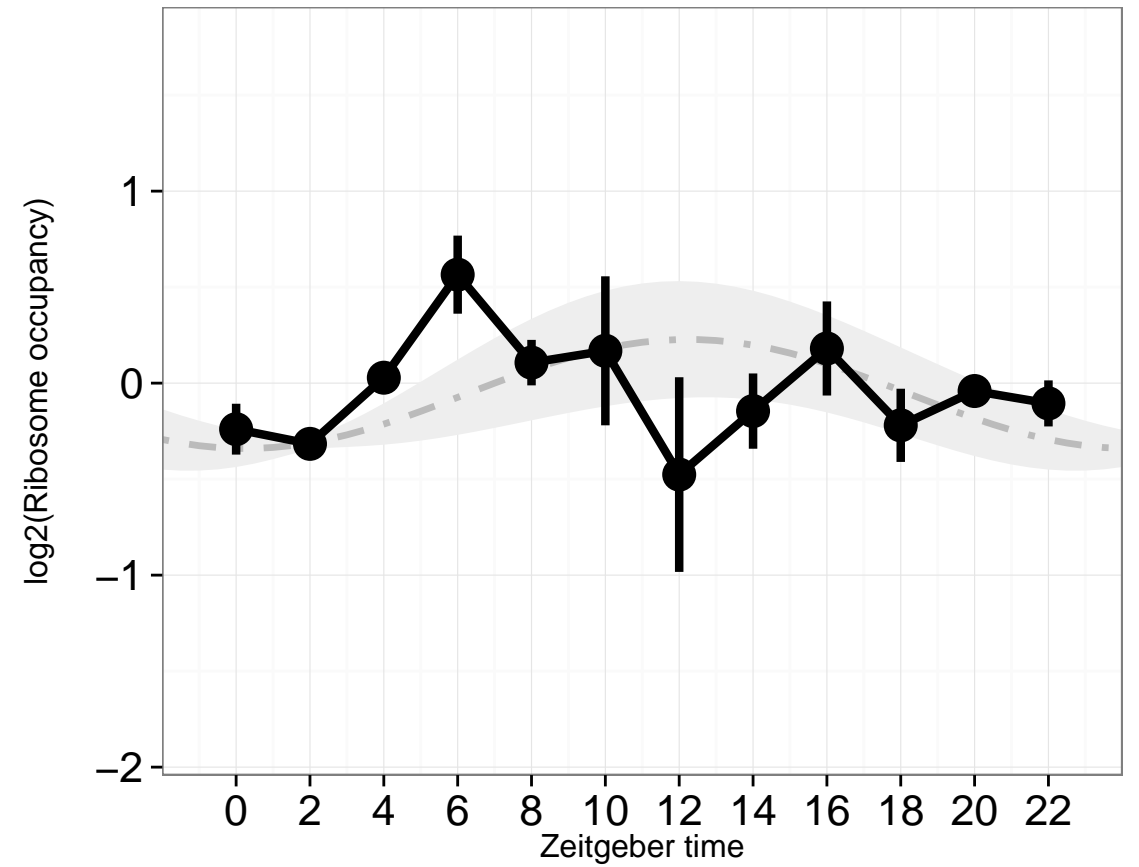

Supplement: SuppDataset_1.zip [file Meaf6_set_A.pdf › Supplemental Dataset 1/A-mRNA_nonrhyth_translation_nonrhyth/Meaf6_set_A.pdf]

## Mecom

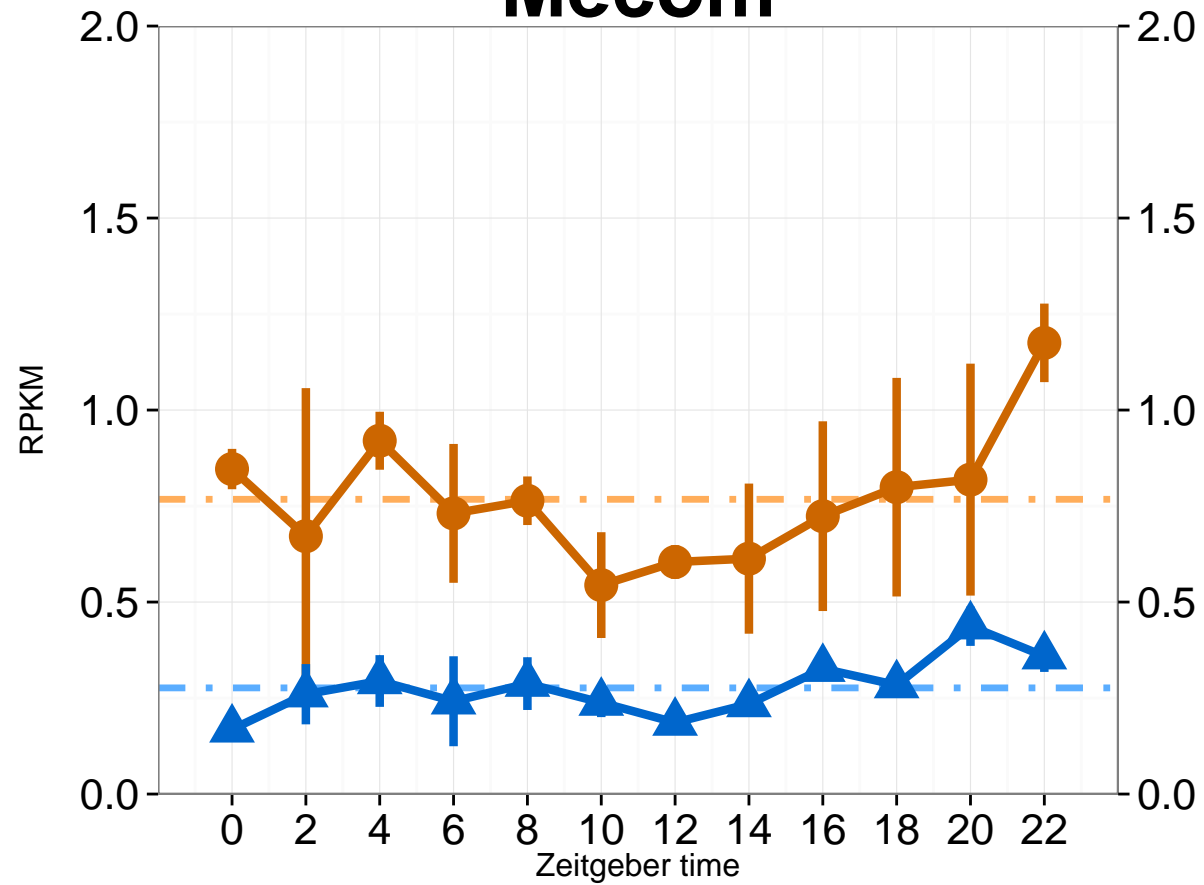

## Mecom

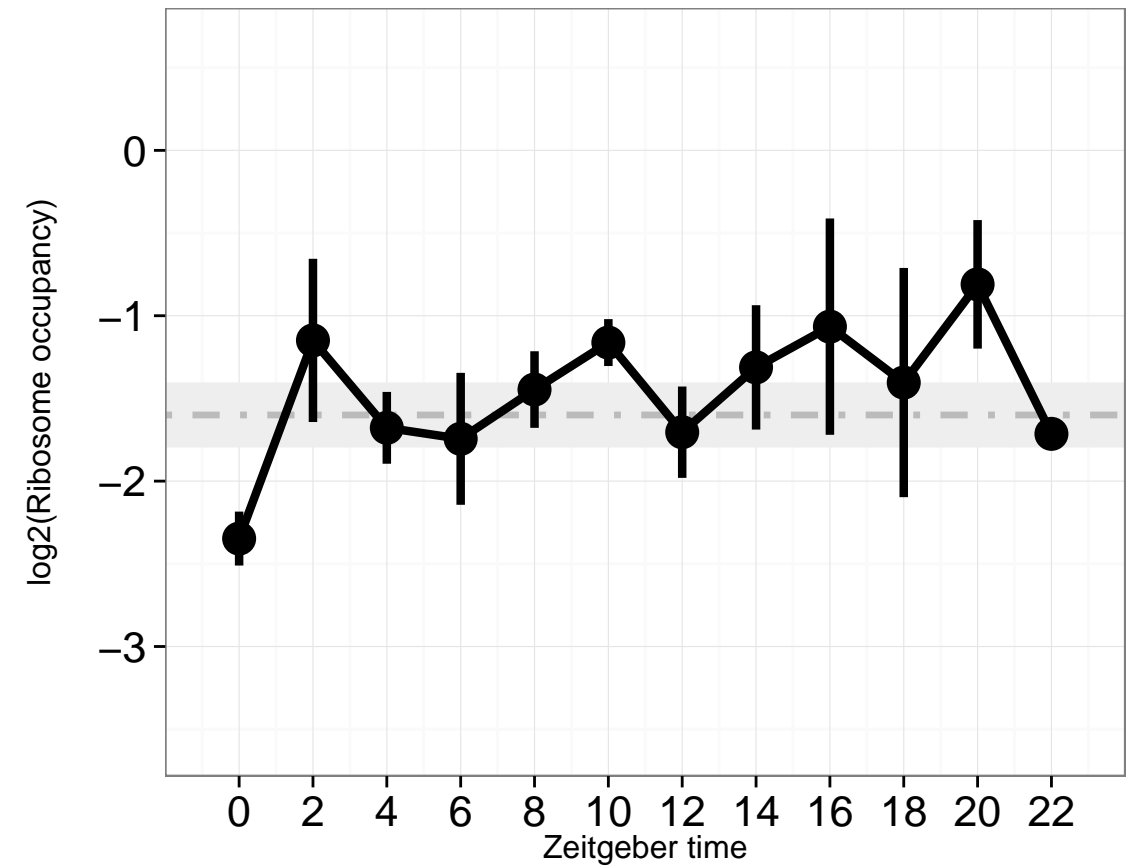

Supplement: SuppDataset_1.zip [file Mecom_set_A.pdf › Supplemental Dataset 1/A-mRNA_nonrhyth_translation_nonrhyth/Mecom_set_A.pdf]

# Mecp2

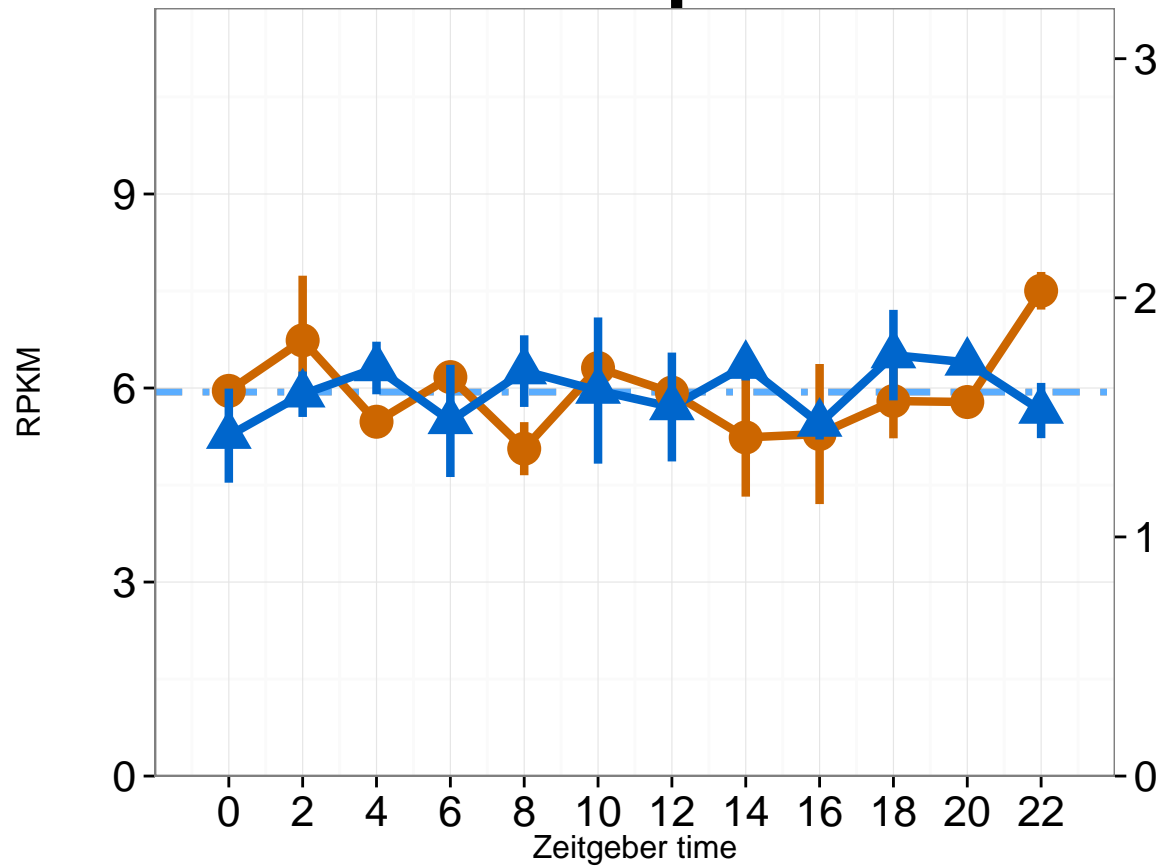

# Mecp2

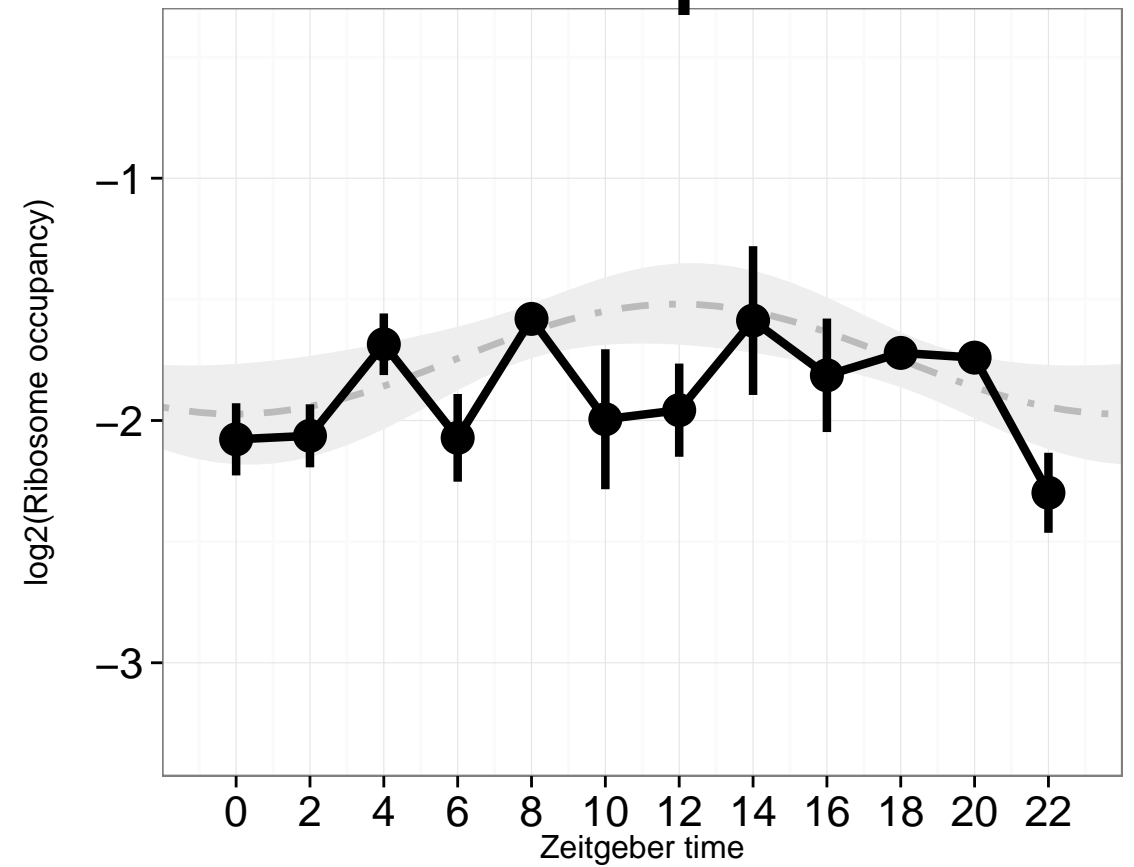

Supplement: SuppDataset_1.zip [file Mecp2_set_A.pdf › Supplemental Dataset 1/A-mRNA_nonrhyth_translation_nonrhyth/Mecp2_set_A.pdf]

## Mecr

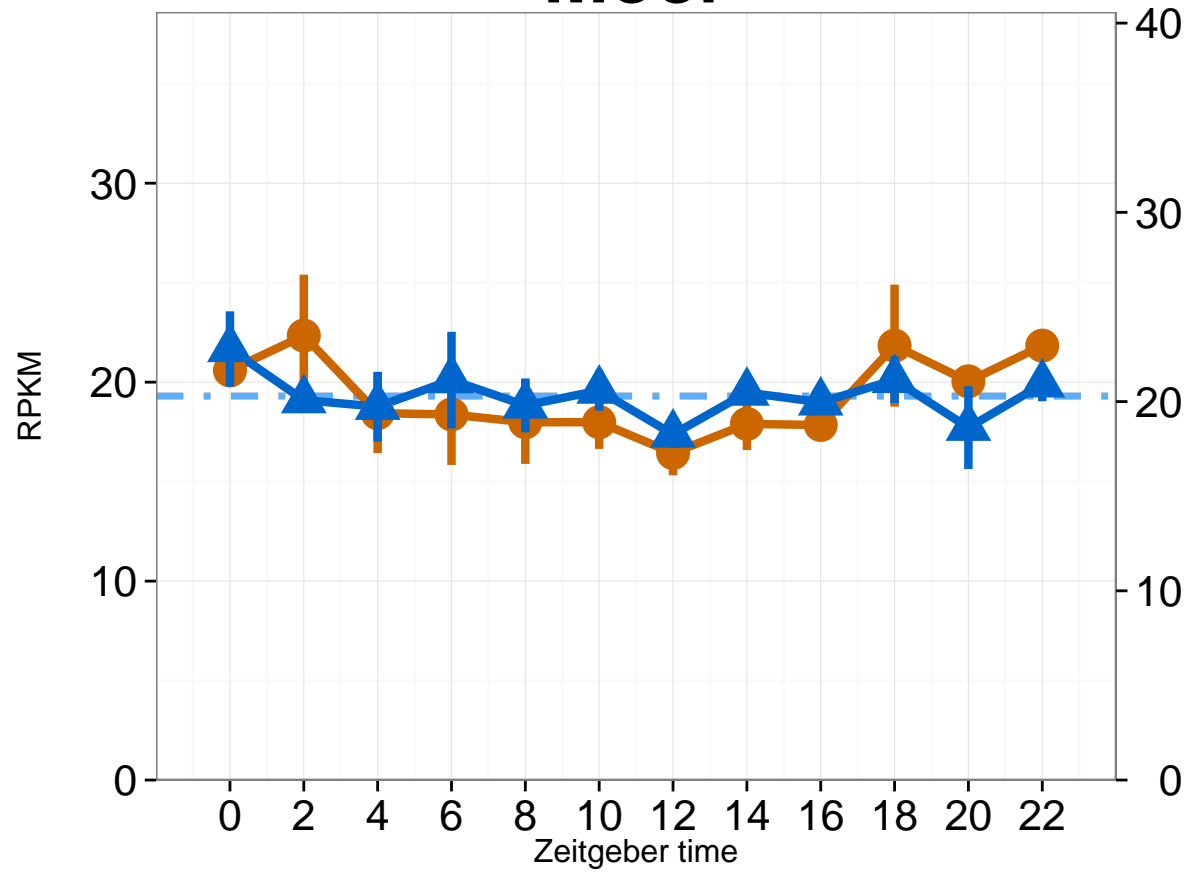

## Mecr

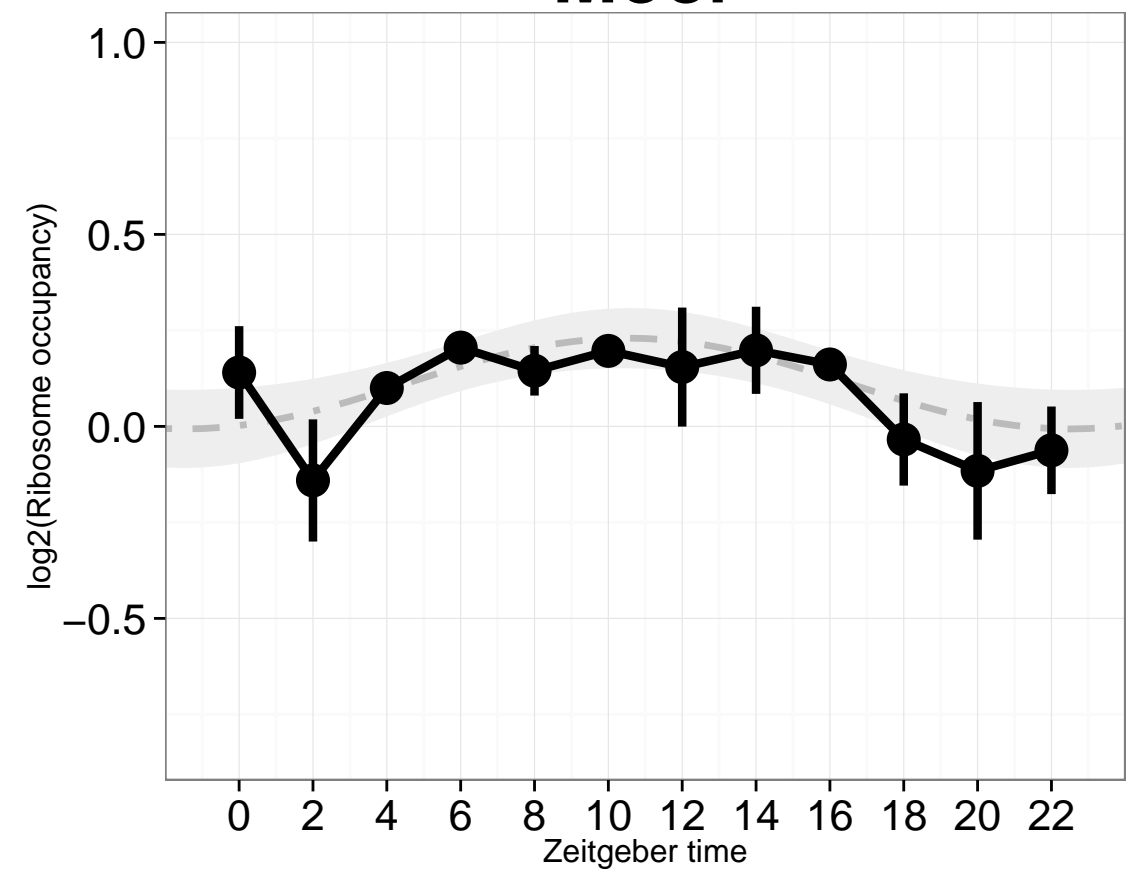

Supplement: SuppDataset_1.zip [file Mecr_set_A.pdf › Supplemental Dataset 1/A-mRNA_nonrhyth_translation_nonrhyth/Mecr_set_A.pdf]

# Med10

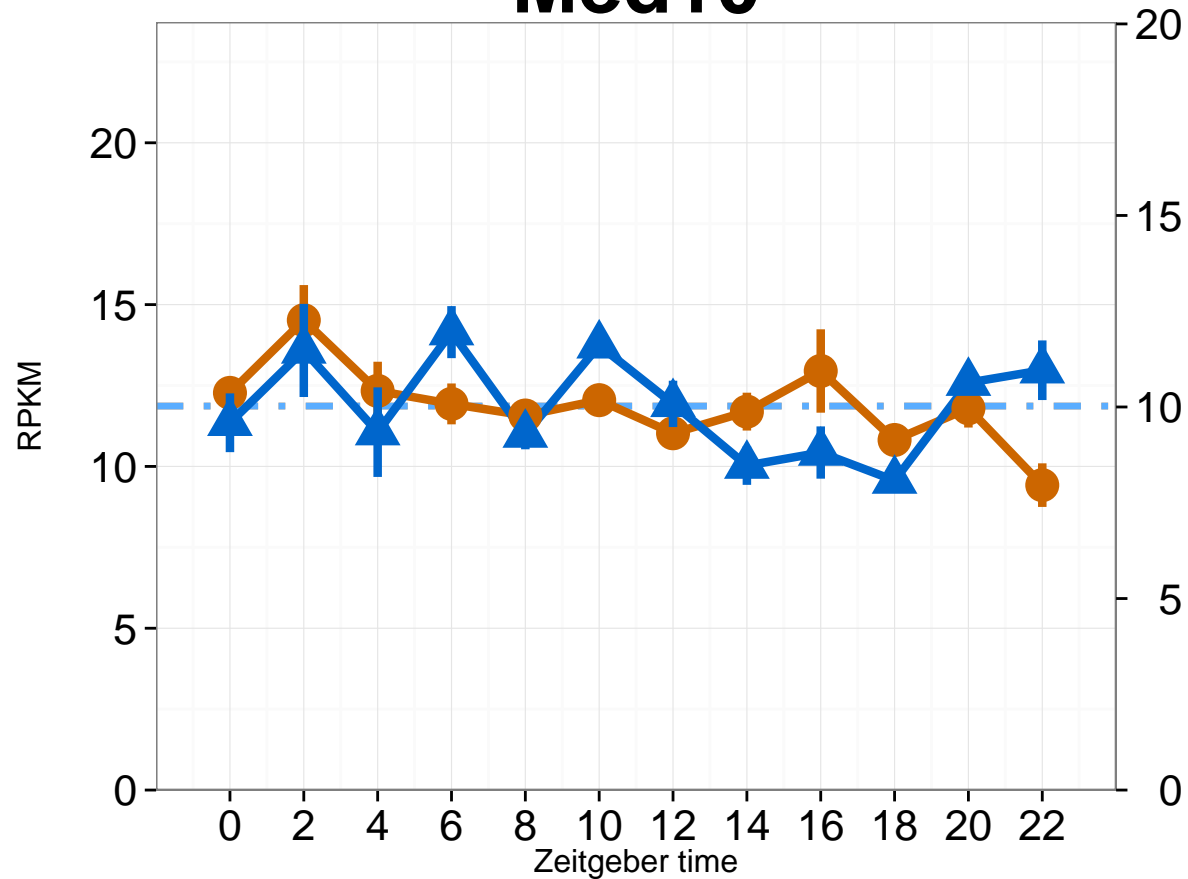

# Med10

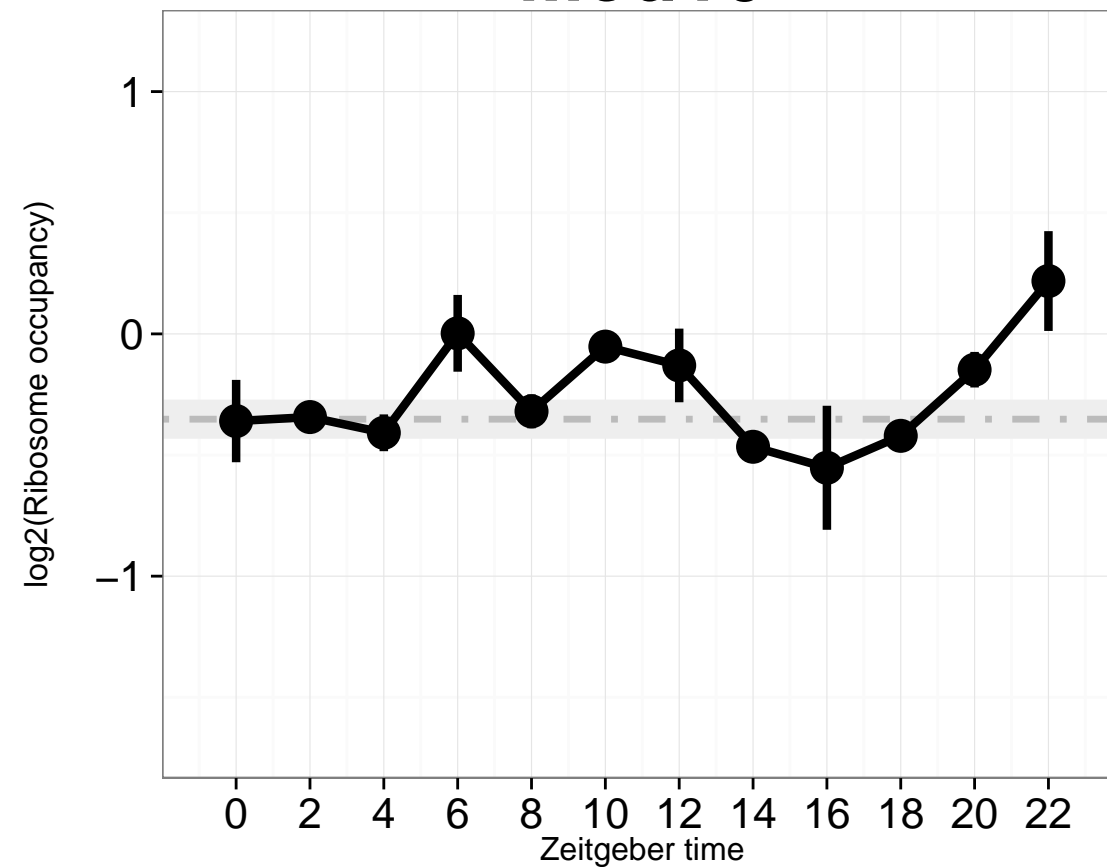

Supplement: SuppDataset_1.zip [file Med10_set_A.pdf › Supplemental Dataset 1/A-mRNA_nonrhyth_translation_nonrhyth/Med10_set_A.pdf]

## Med11

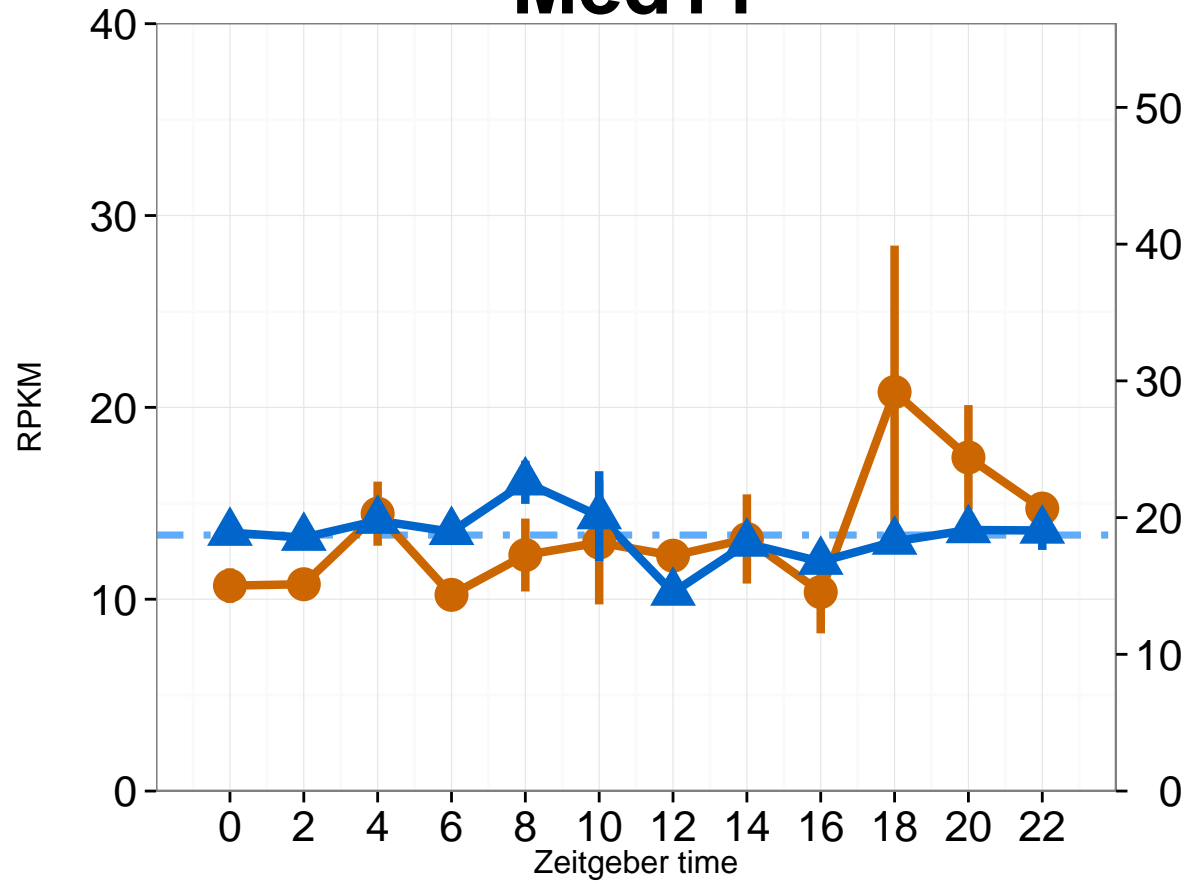

## Med11

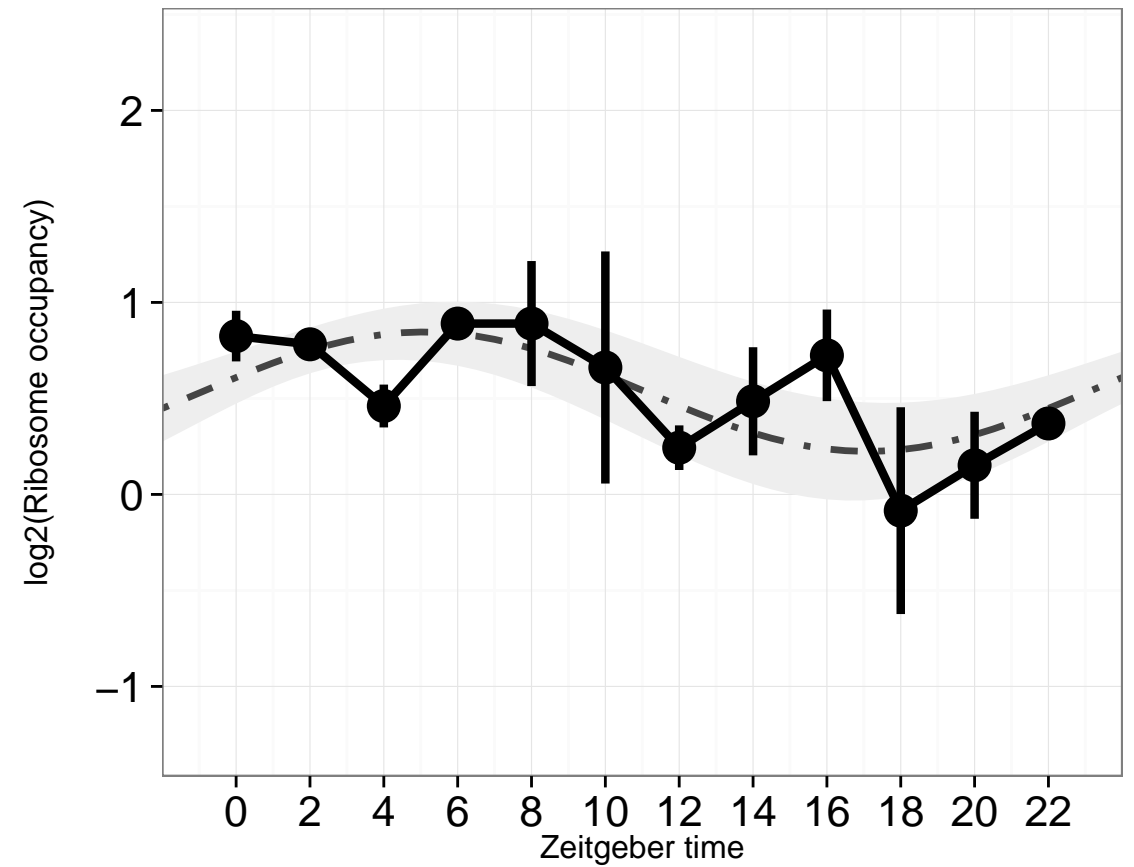

Supplement: SuppDataset_1.zip [file Med11_set_A.pdf › Supplemental Dataset 1/A-mRNA_nonrhyth_translation_nonrhyth/Med11_set_A.pdf]

## Med13

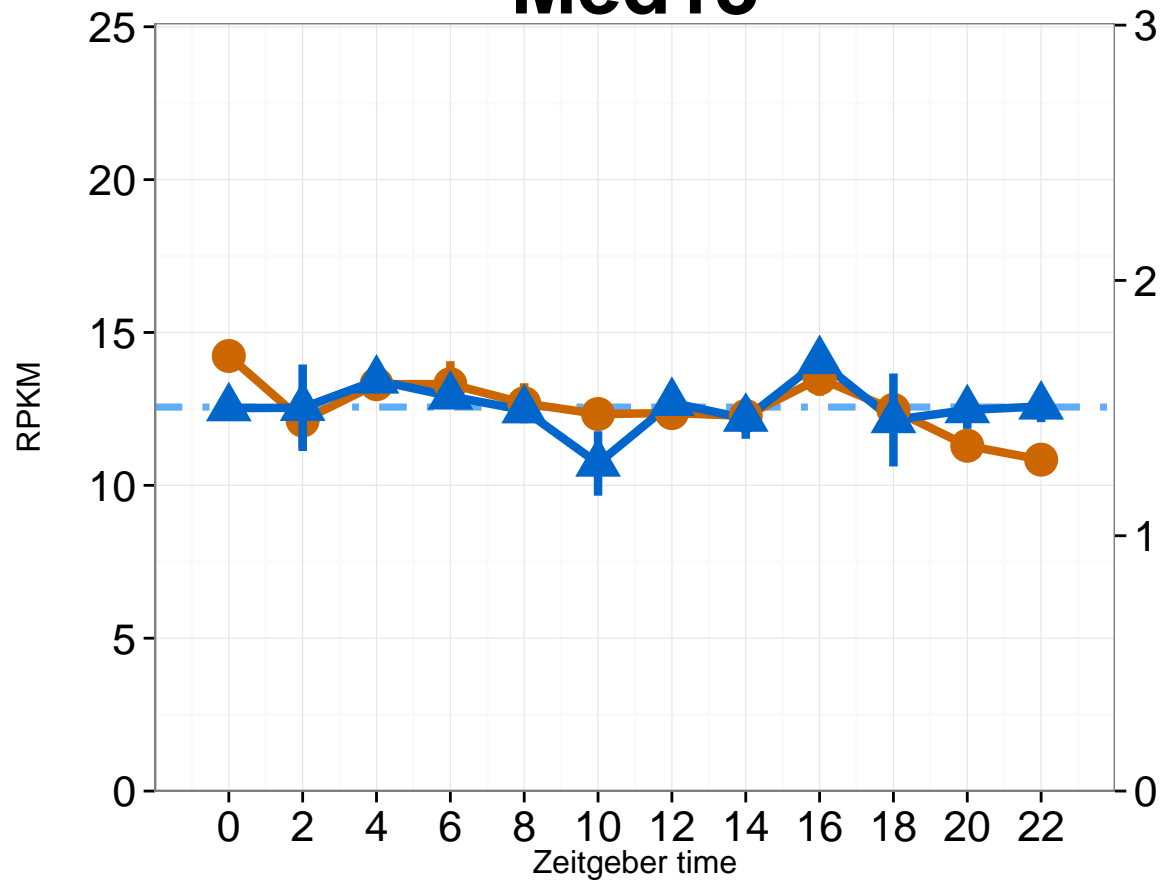

## Med13

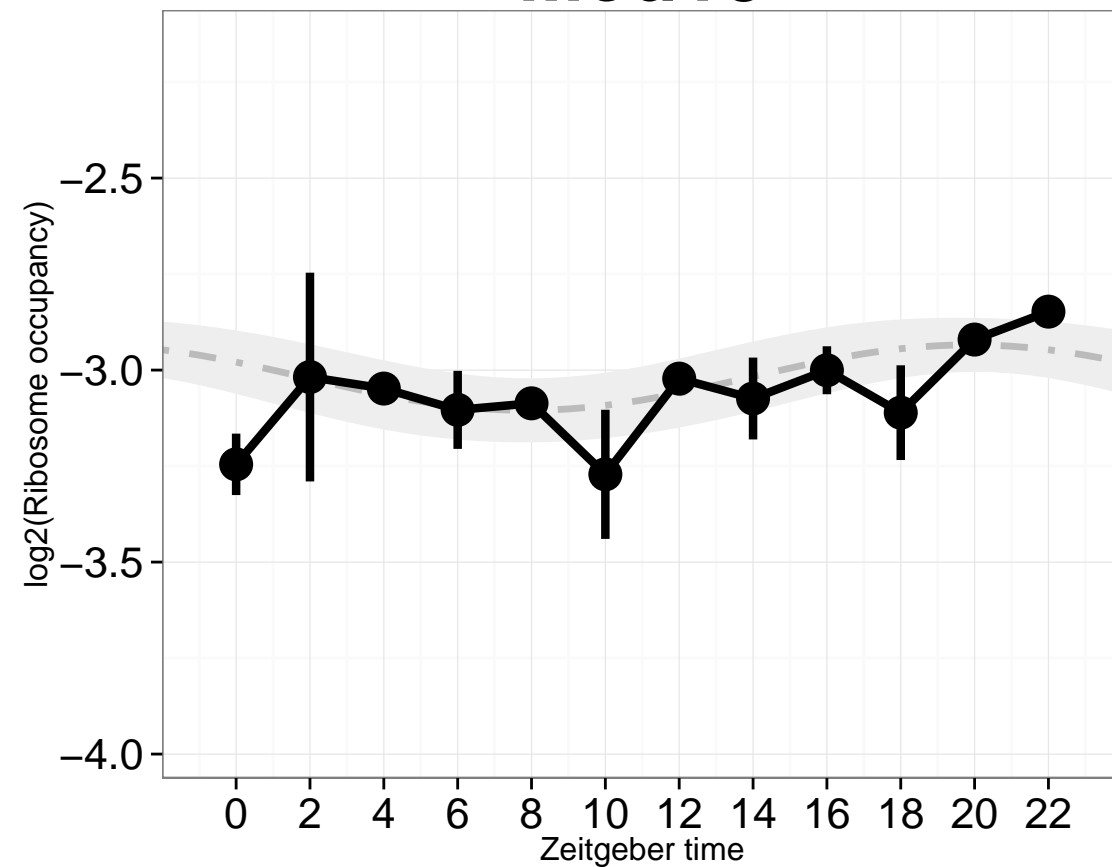

Supplement: SuppDataset_1.zip [file Med13_set_A.pdf › Supplemental Dataset 1/A-mRNA_nonrhyth_translation_nonrhyth/Med13_set_A.pdf]

## Med13l

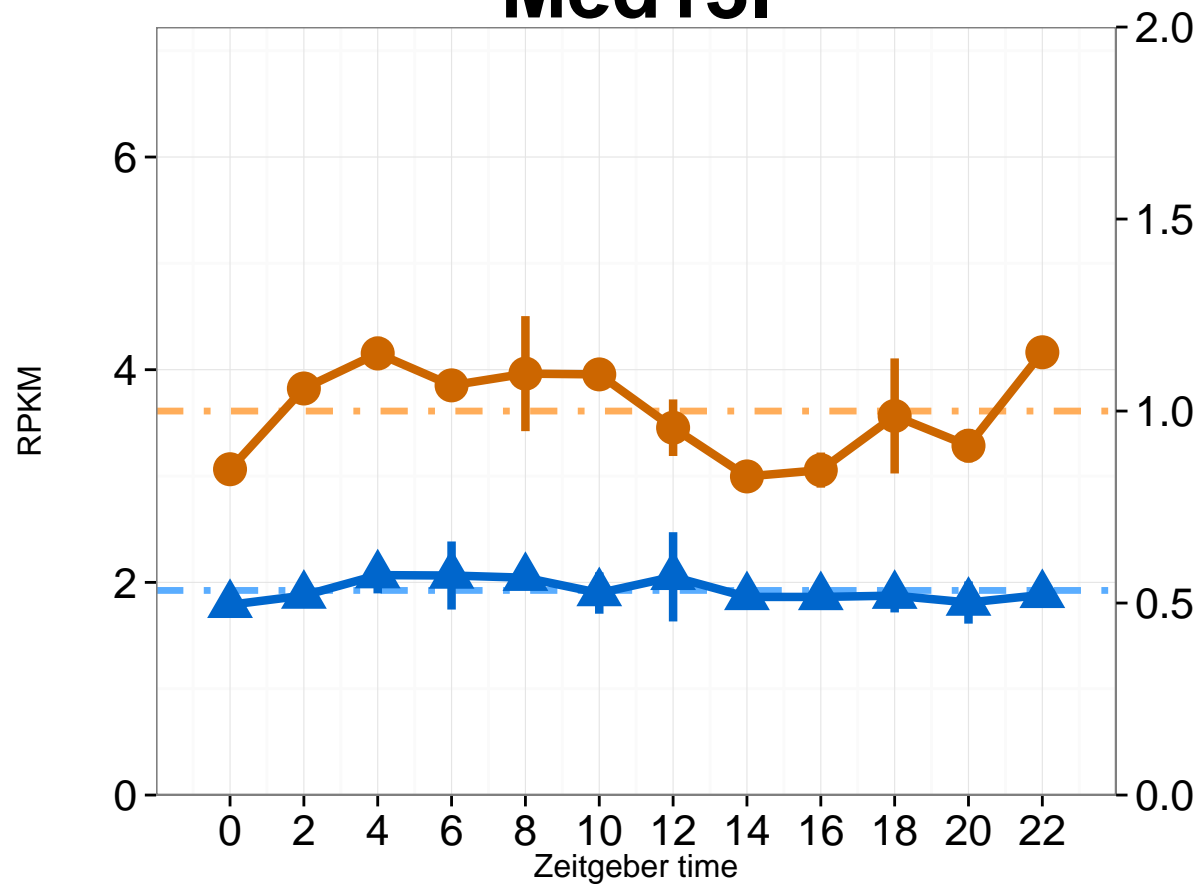

## Med13l

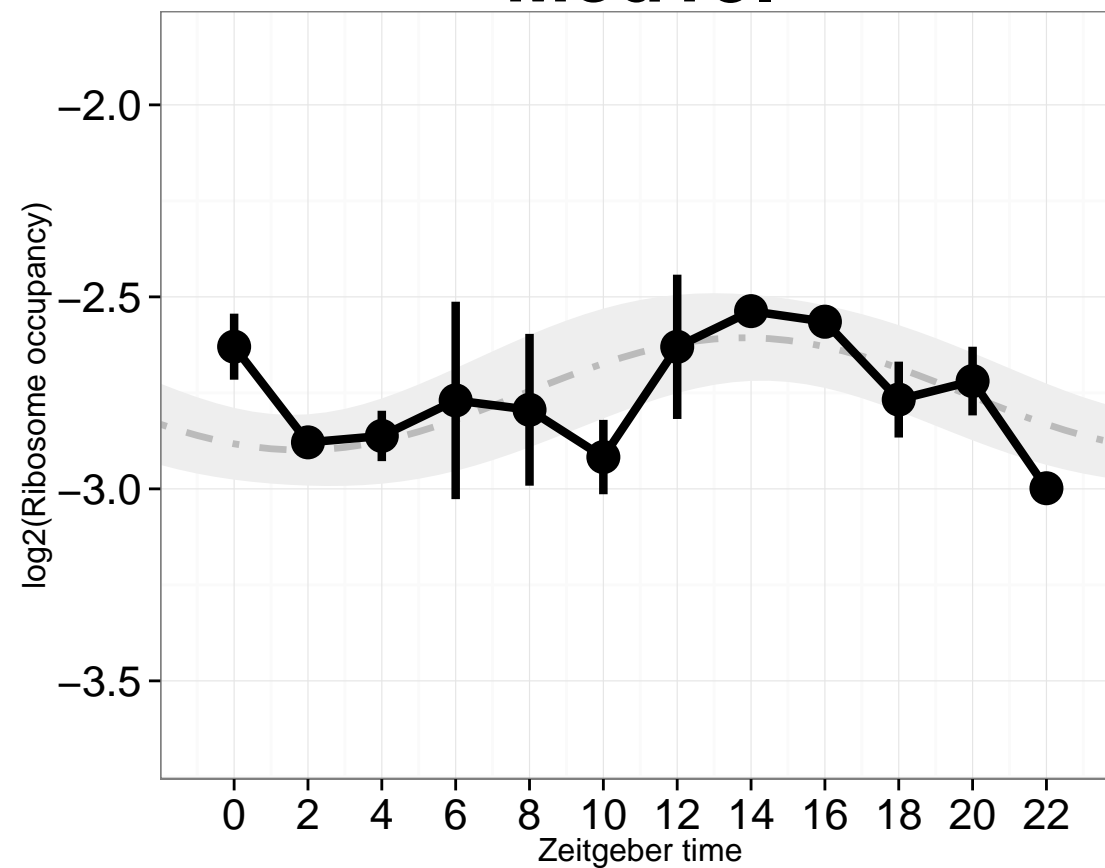

Supplement: SuppDataset_1.zip [file Med13l_set_A.pdf › Supplemental Dataset 1/A-mRNA_nonrhyth_translation_nonrhyth/Med13l_set_A.pdf]

# Med14

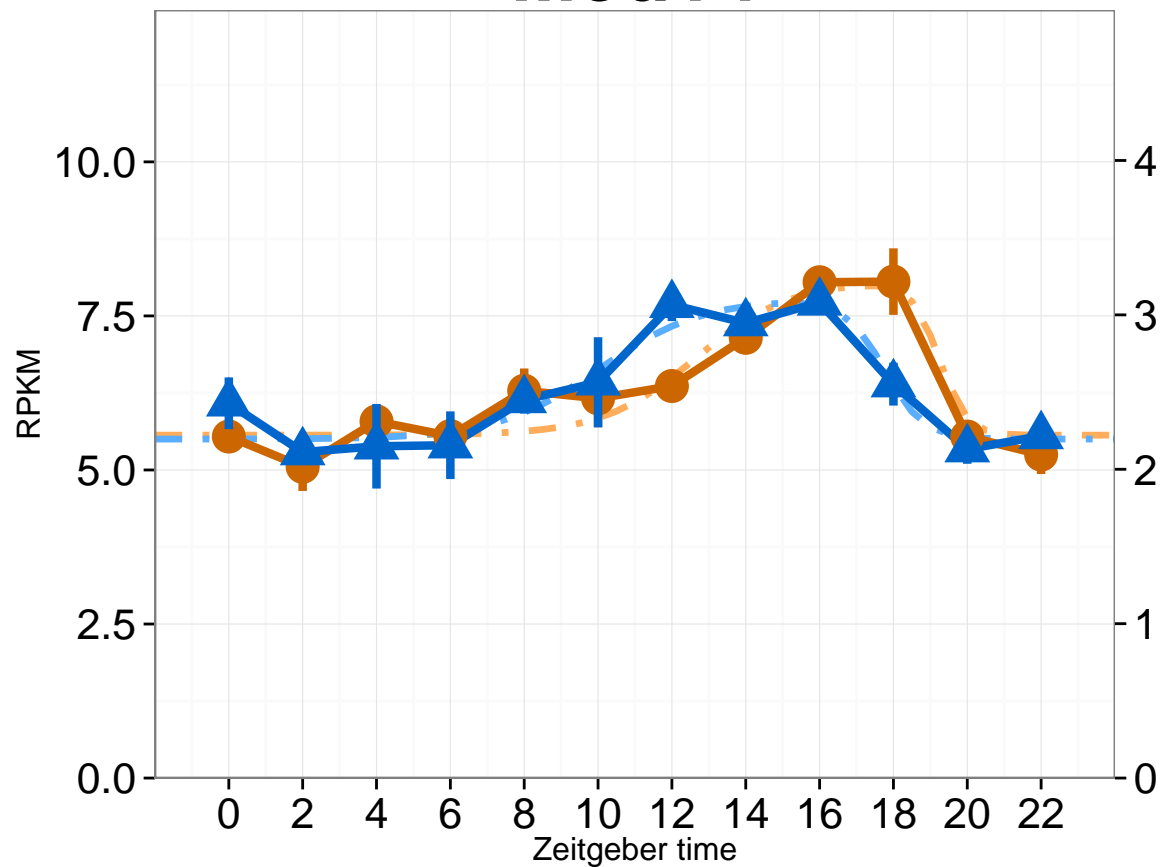

# Med14

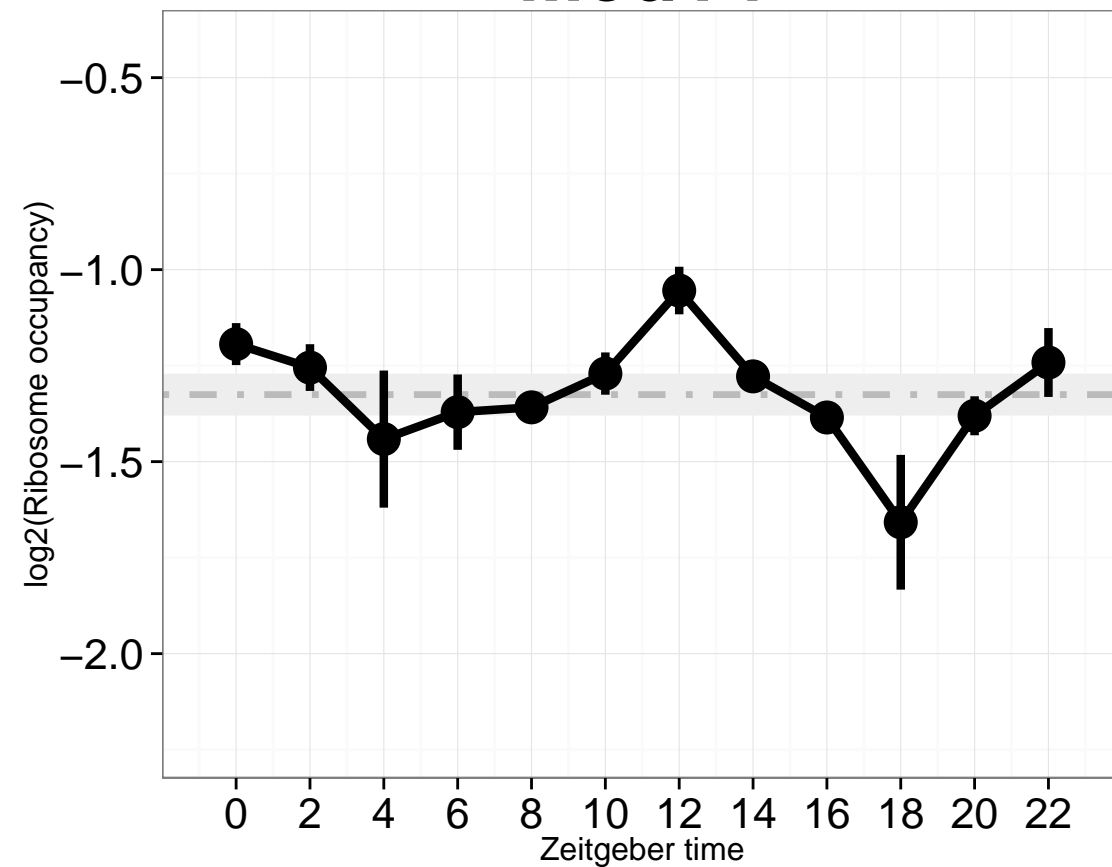

Supplement: SuppDataset_1.zip [file Med14_set_A.pdf › Supplemental Dataset 1/A-mRNA_nonrhyth_translation_nonrhyth/Med14_set_A.pdf]

# Med15

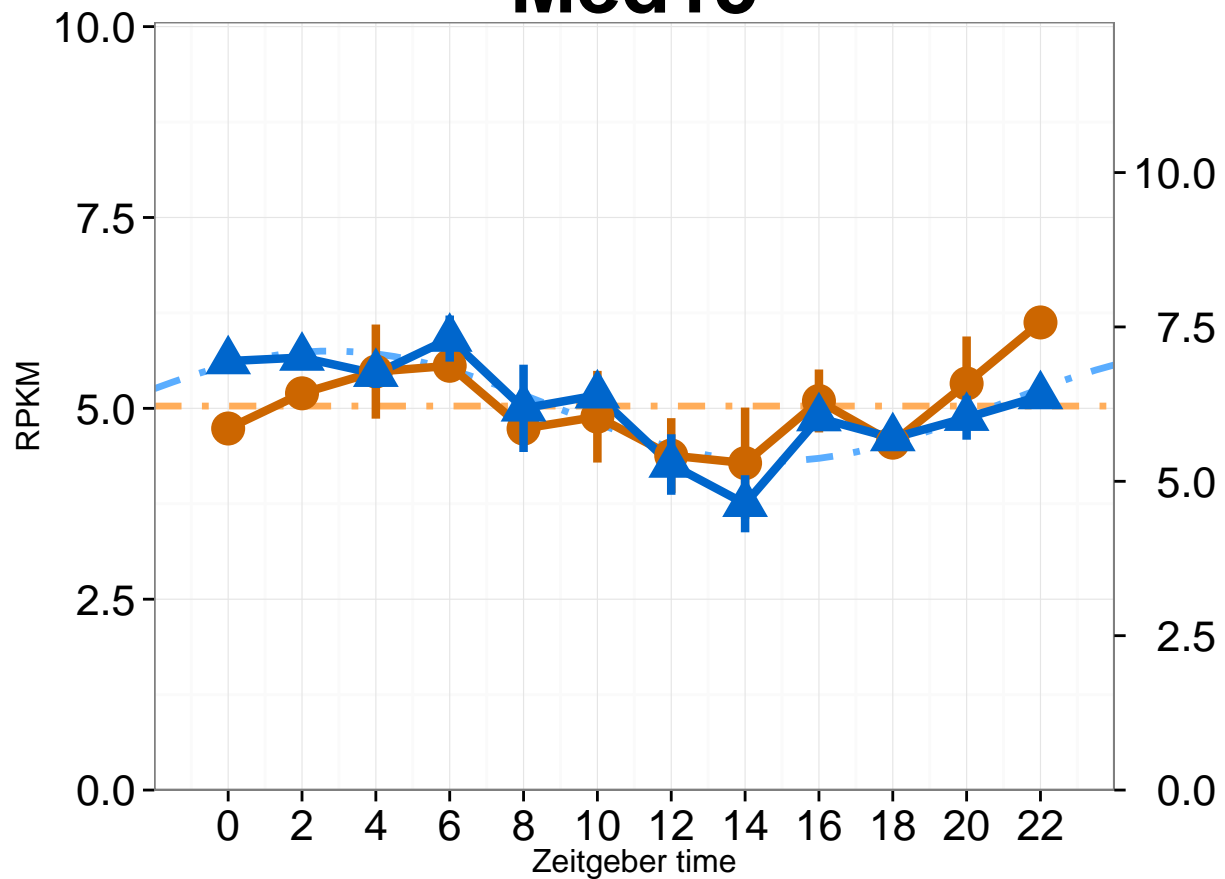

# Med15

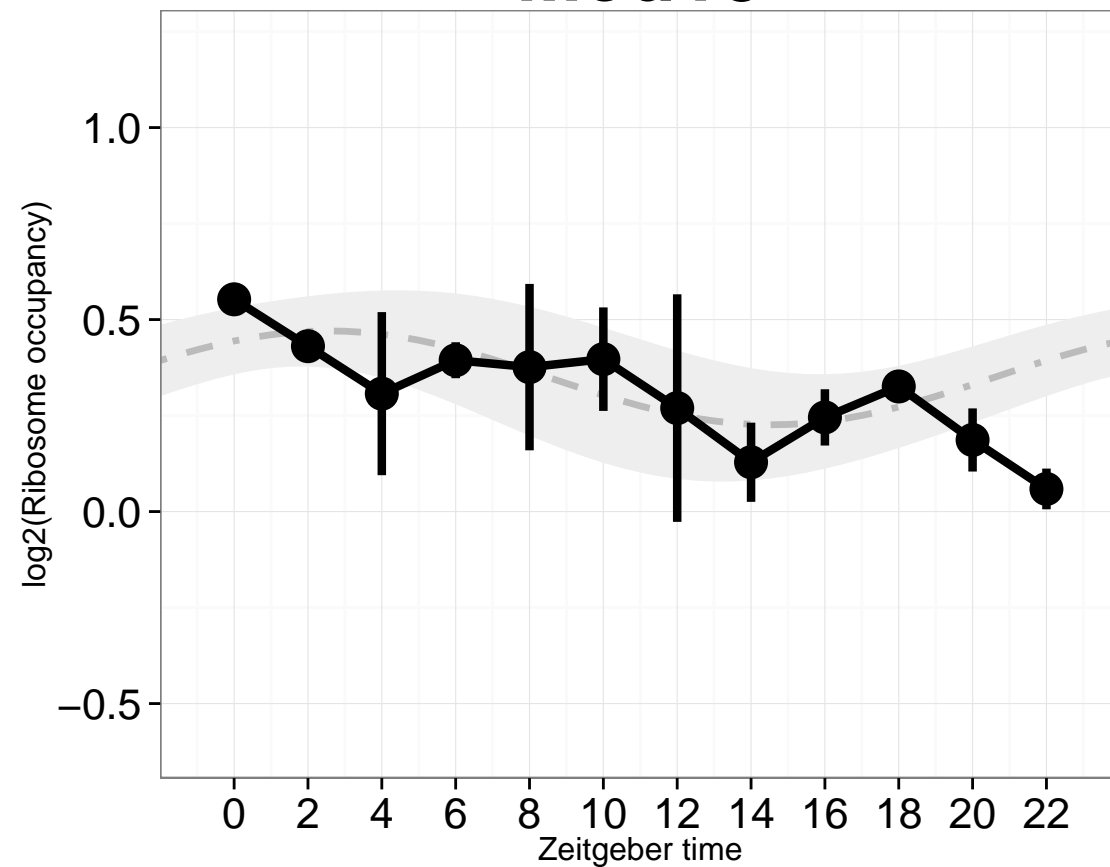

Supplement: SuppDataset_1.zip [file Med15_set_A.pdf › Supplemental Dataset 1/A-mRNA_nonrhyth_translation_nonrhyth/Med15_set_A.pdf]

# Med16

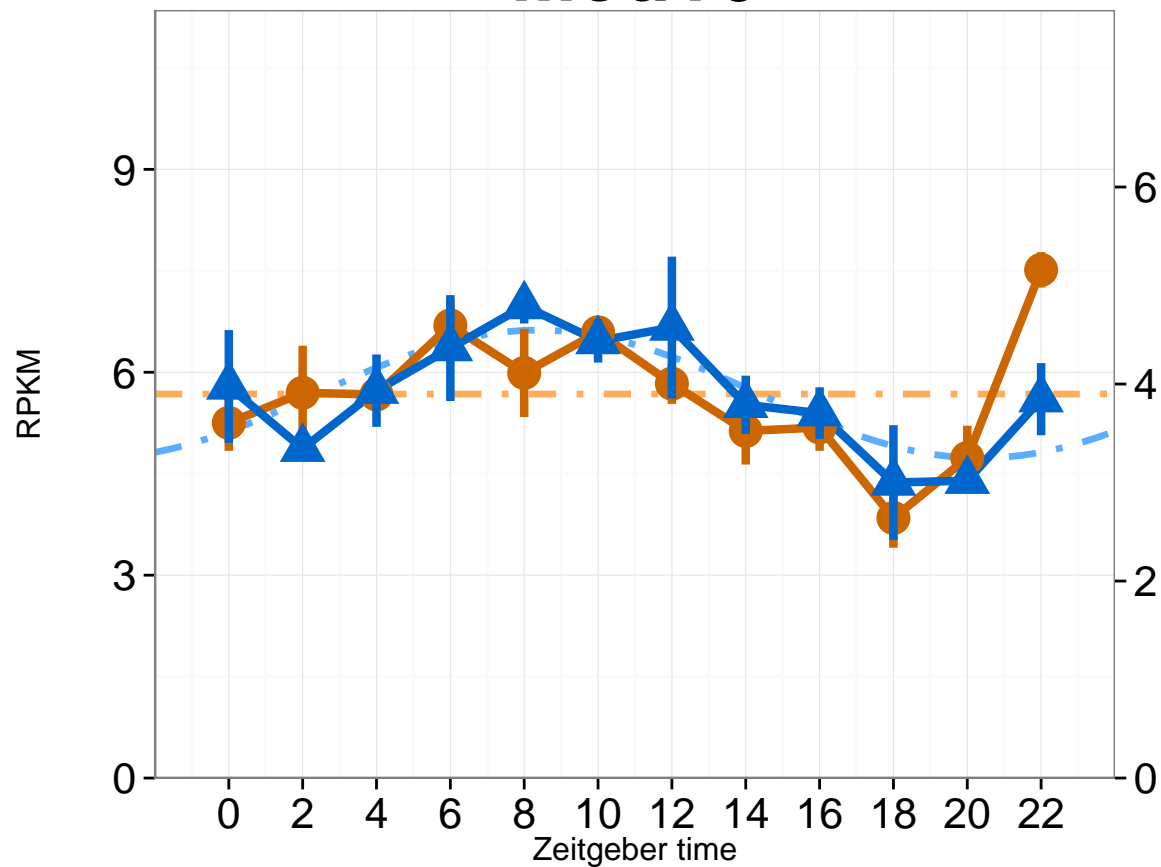

# Med16

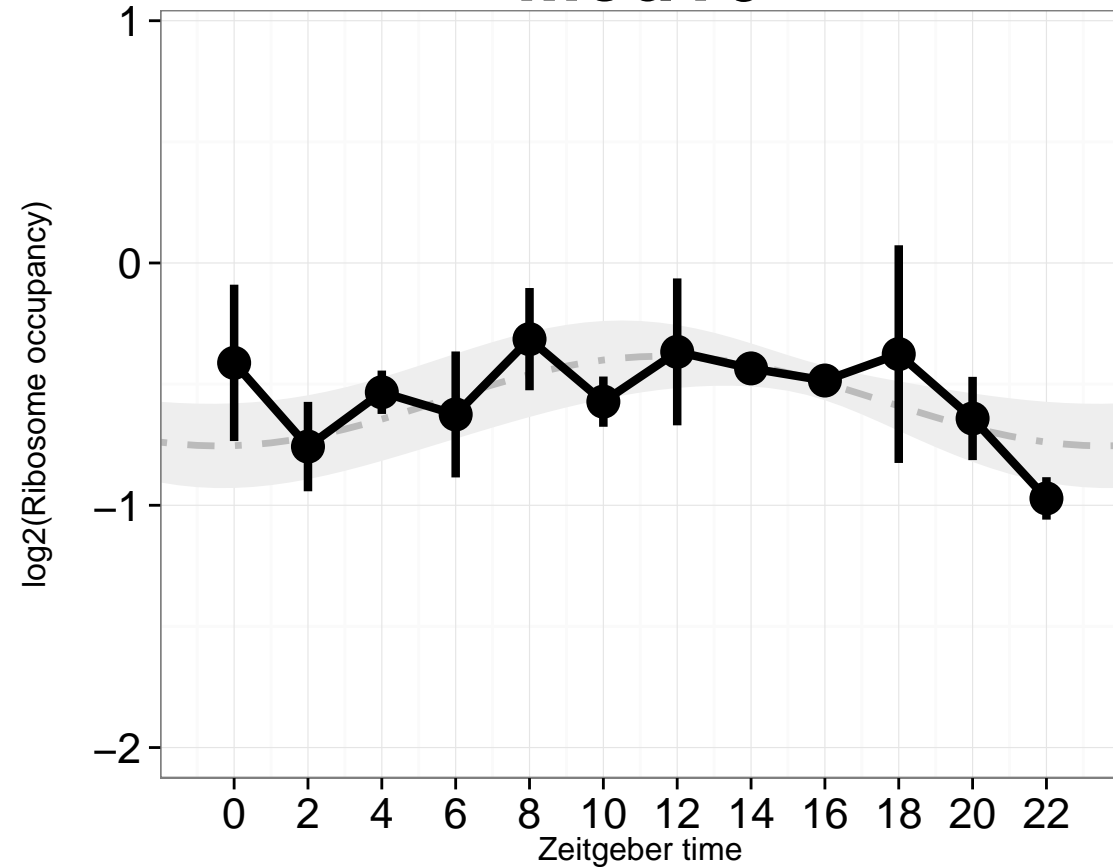

Supplement: SuppDataset_1.zip [file Med16_set_A.pdf › Supplemental Dataset 1/A-mRNA_nonrhyth_translation_nonrhyth/Med16_set_A.pdf]

## Med17

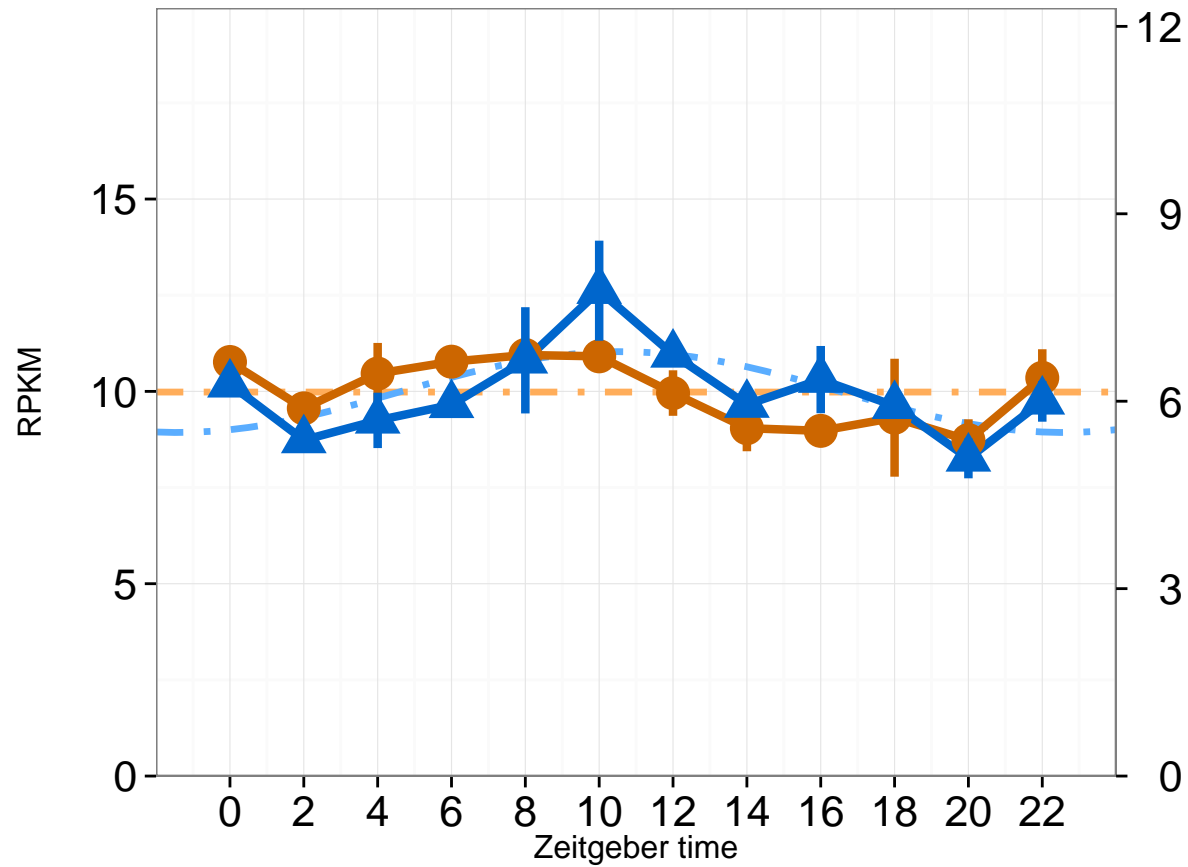

## Med17

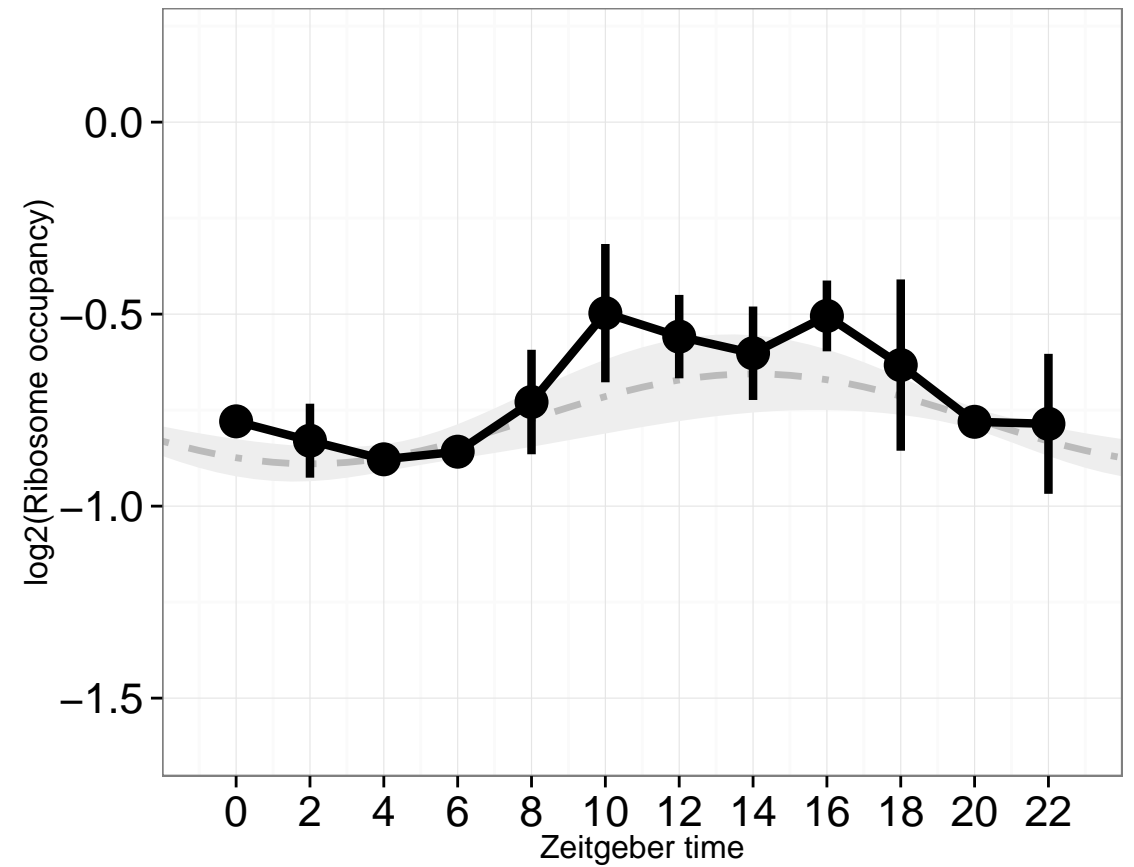

Supplement: SuppDataset_1.zip [file Med17_set_A.pdf › Supplemental Dataset 1/A-mRNA_nonrhyth_translation_nonrhyth/Med17_set_A.pdf]

## Med18

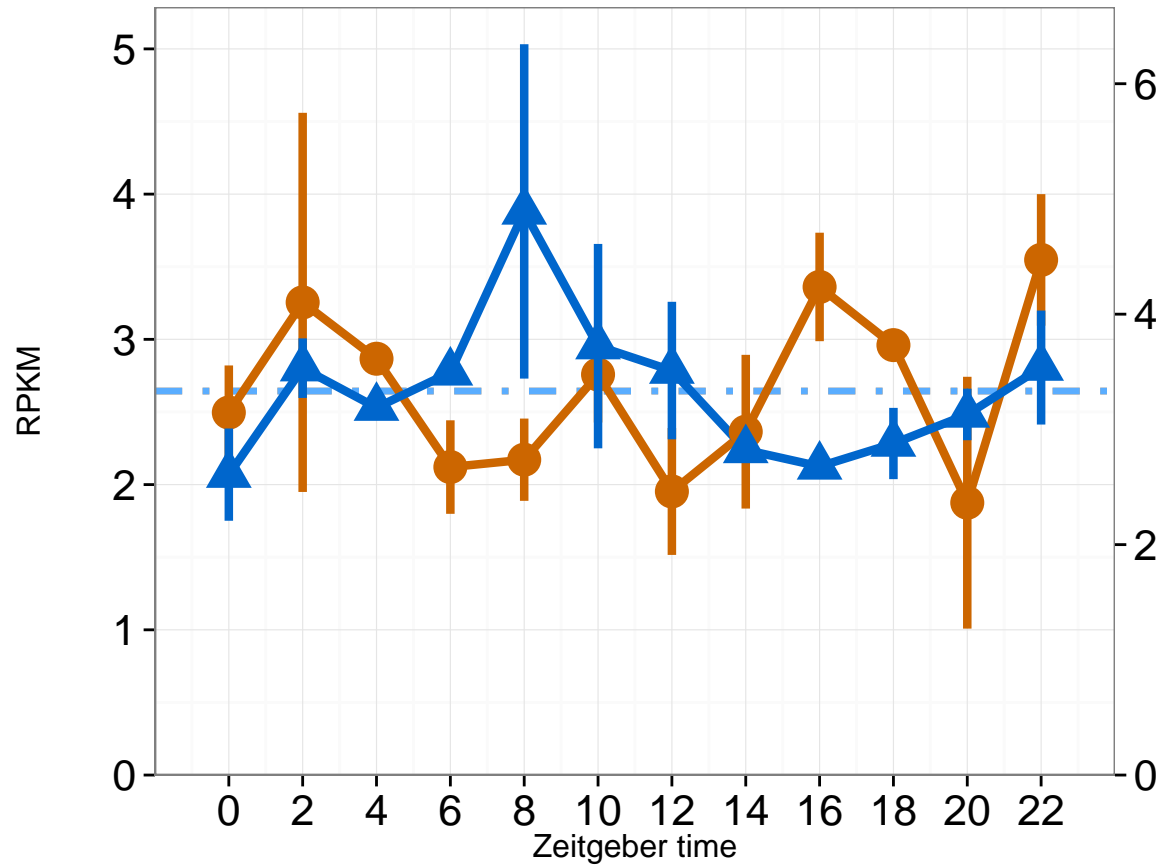

## Med18

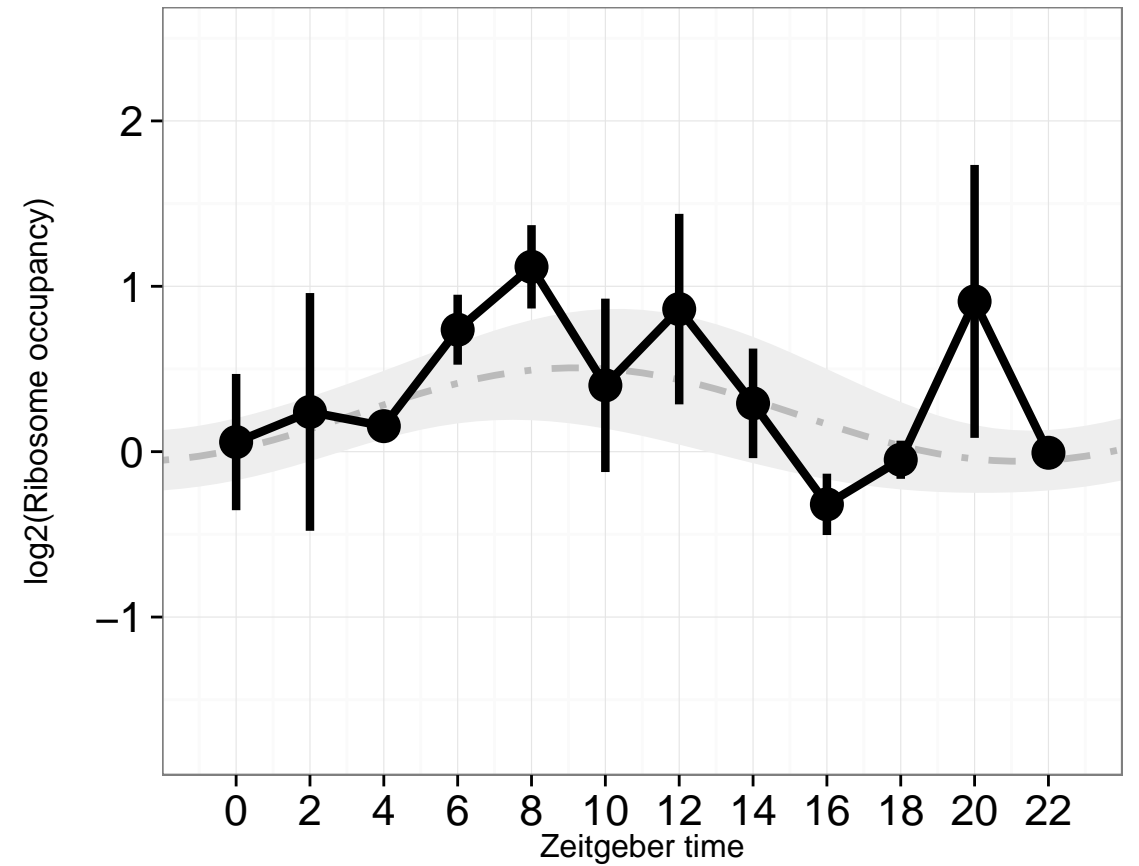

Supplement: SuppDataset_1.zip [file Med18_set_A.pdf › Supplemental Dataset 1/A-mRNA_nonrhyth_translation_nonrhyth/Med18_set_A.pdf]

## Med19

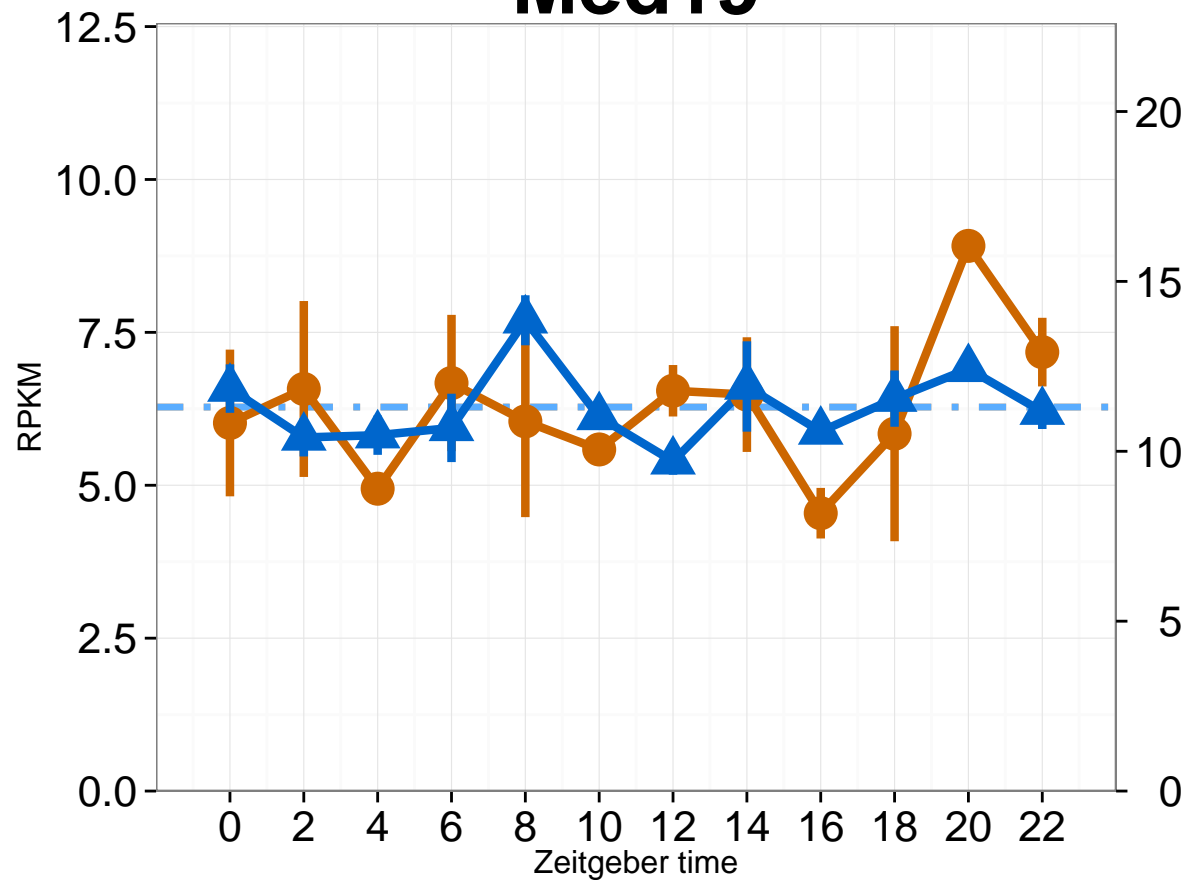

## Med19

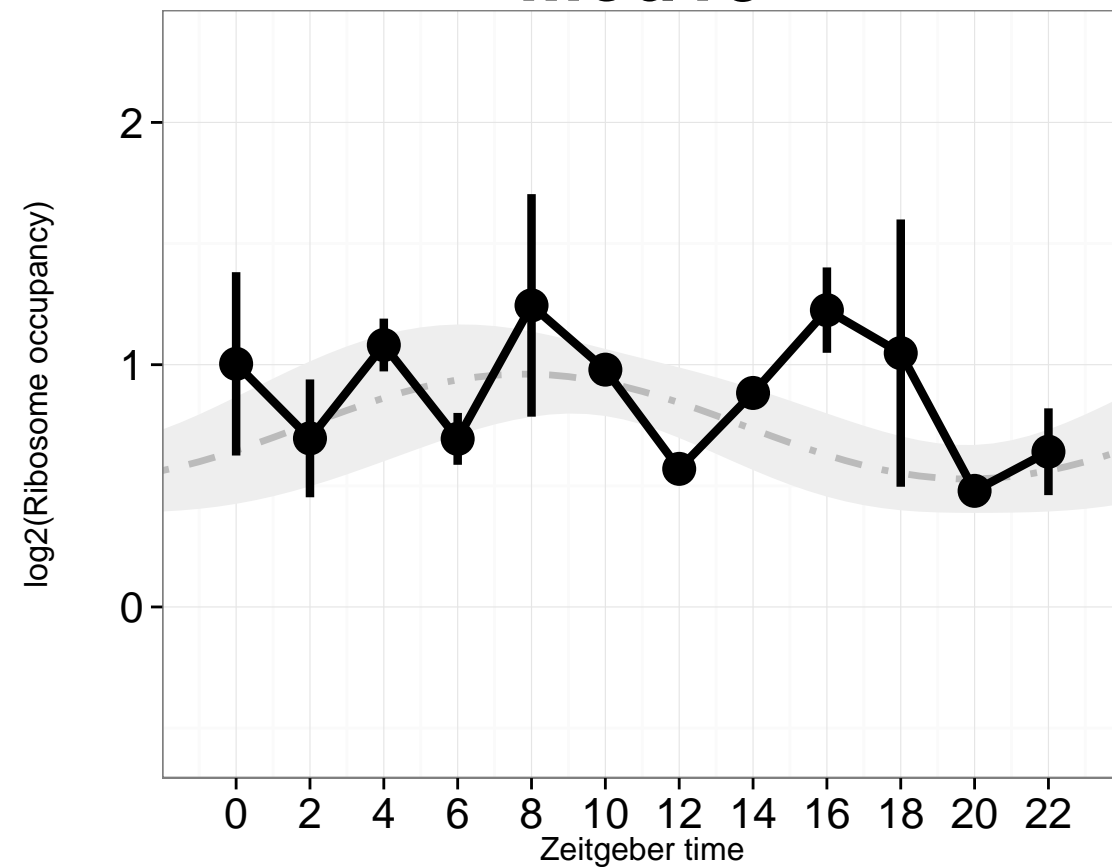

Supplement: SuppDataset_1.zip [file Med19_set_A.pdf › Supplemental Dataset 1/A-mRNA_nonrhyth_translation_nonrhyth/Med19_set_A.pdf]

# Med1

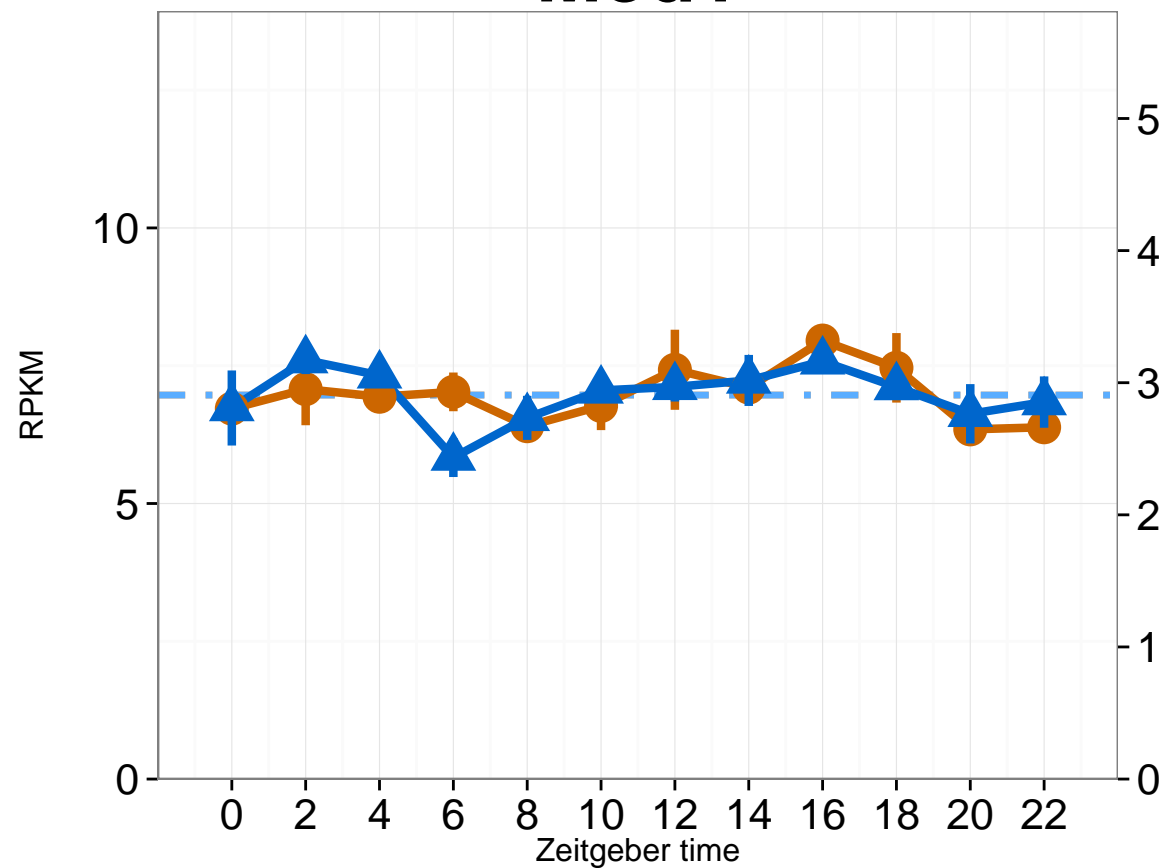

# Med1

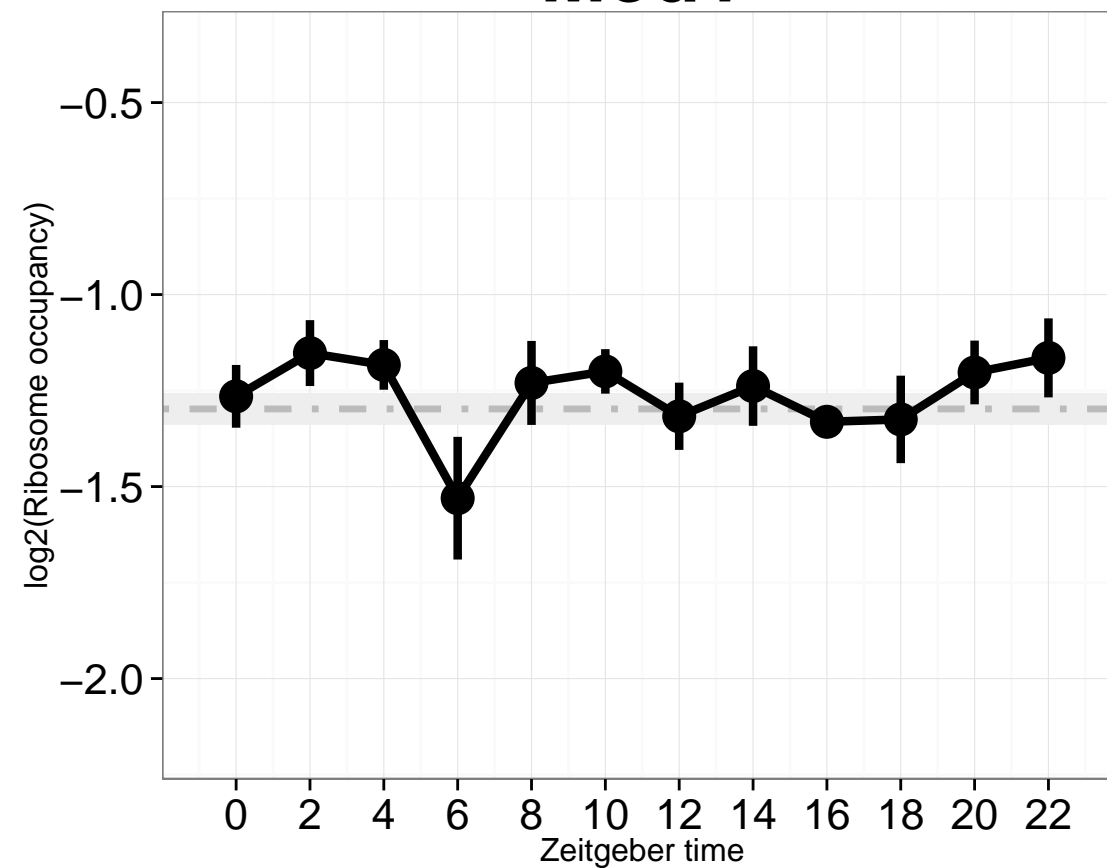

Supplement: SuppDataset_1.zip [file Med1_set_A.pdf › Supplemental Dataset 1/A-mRNA_nonrhyth_translation_nonrhyth/Med1_set_A.pdf]

## Med20

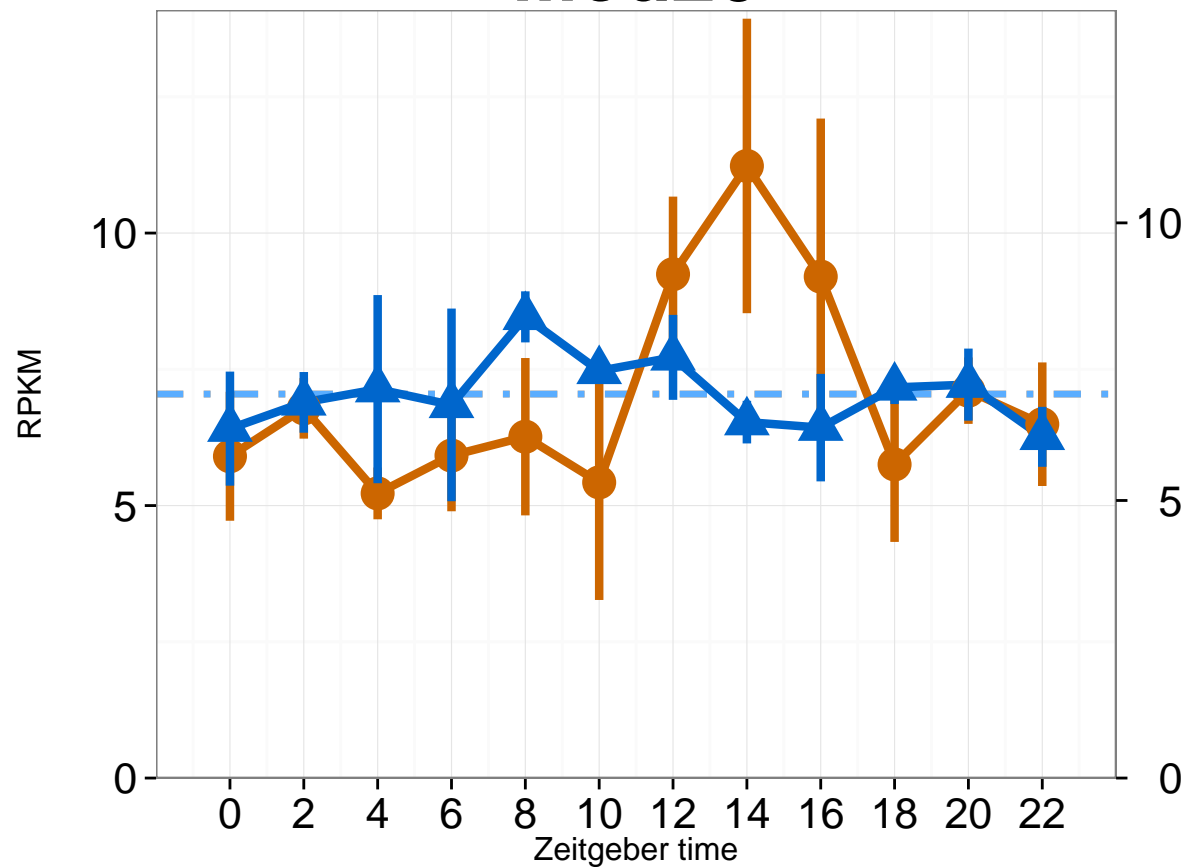

## Med20

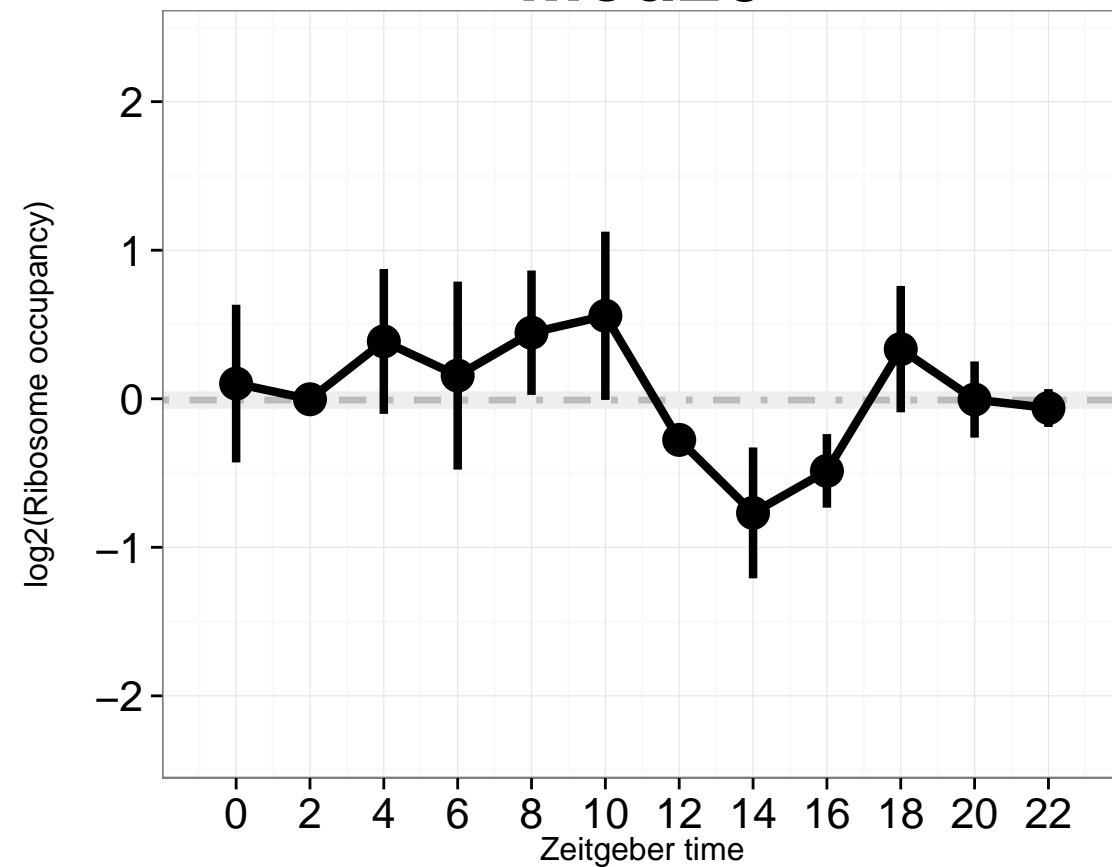

Supplement: SuppDataset_1.zip [file Med20_set_A.pdf › Supplemental Dataset 1/A-mRNA_nonrhyth_translation_nonrhyth/Med20_set_A.pdf]

## Med21

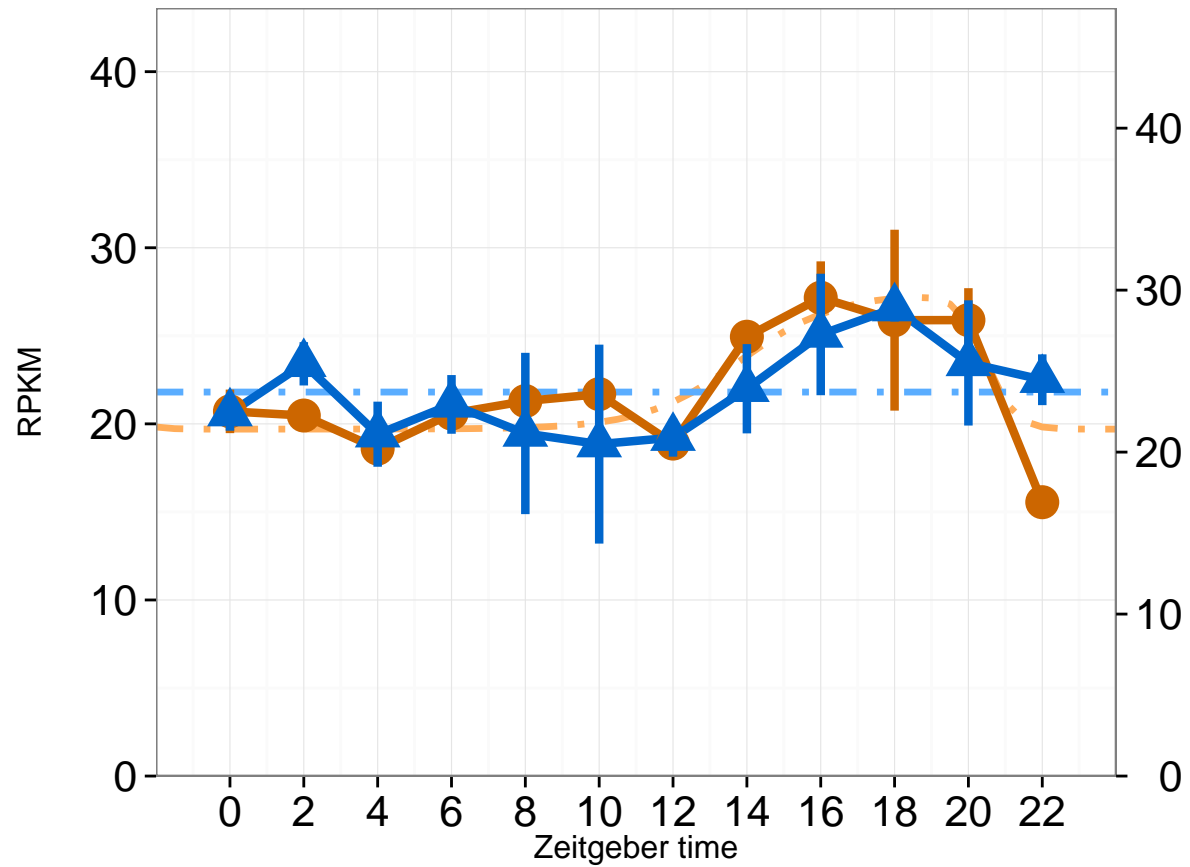

## Med21

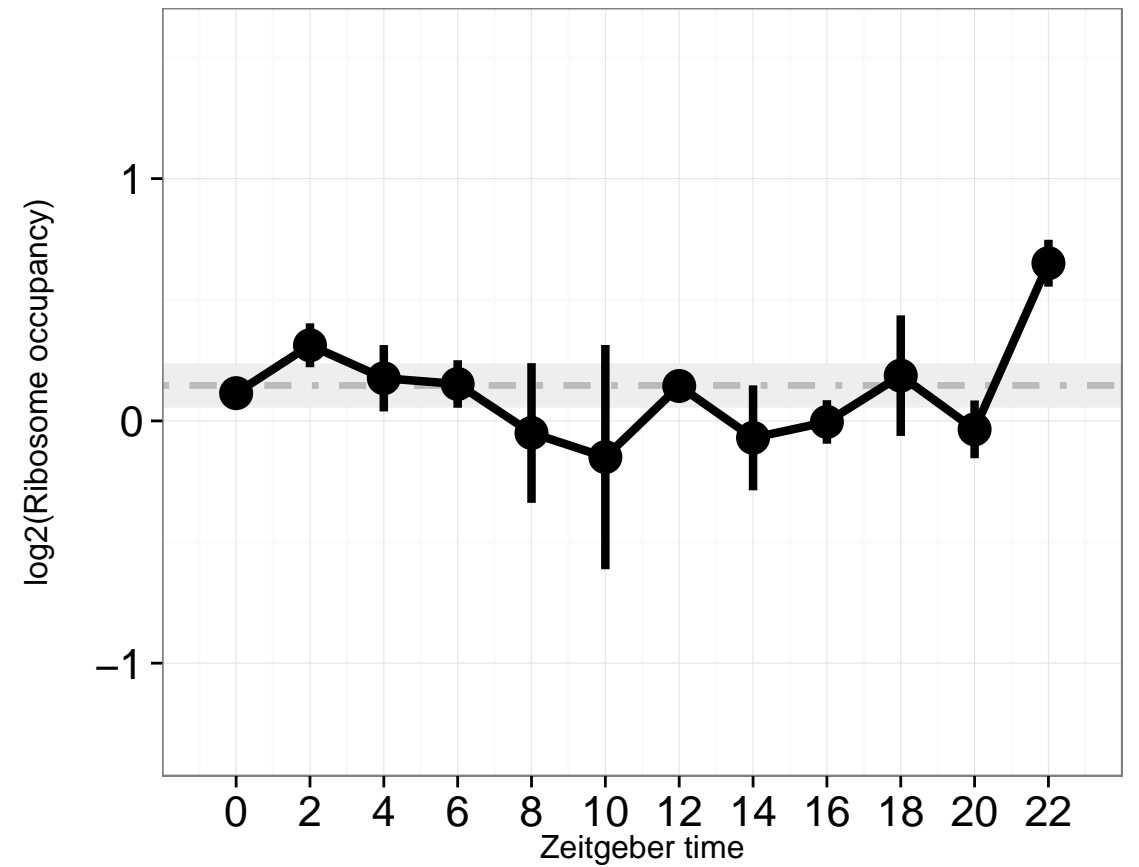

Supplement: SuppDataset_1.zip [file Med21_set_A.pdf › Supplemental Dataset 1/A-mRNA_nonrhyth_translation_nonrhyth/Med21_set_A.pdf]

## Med22

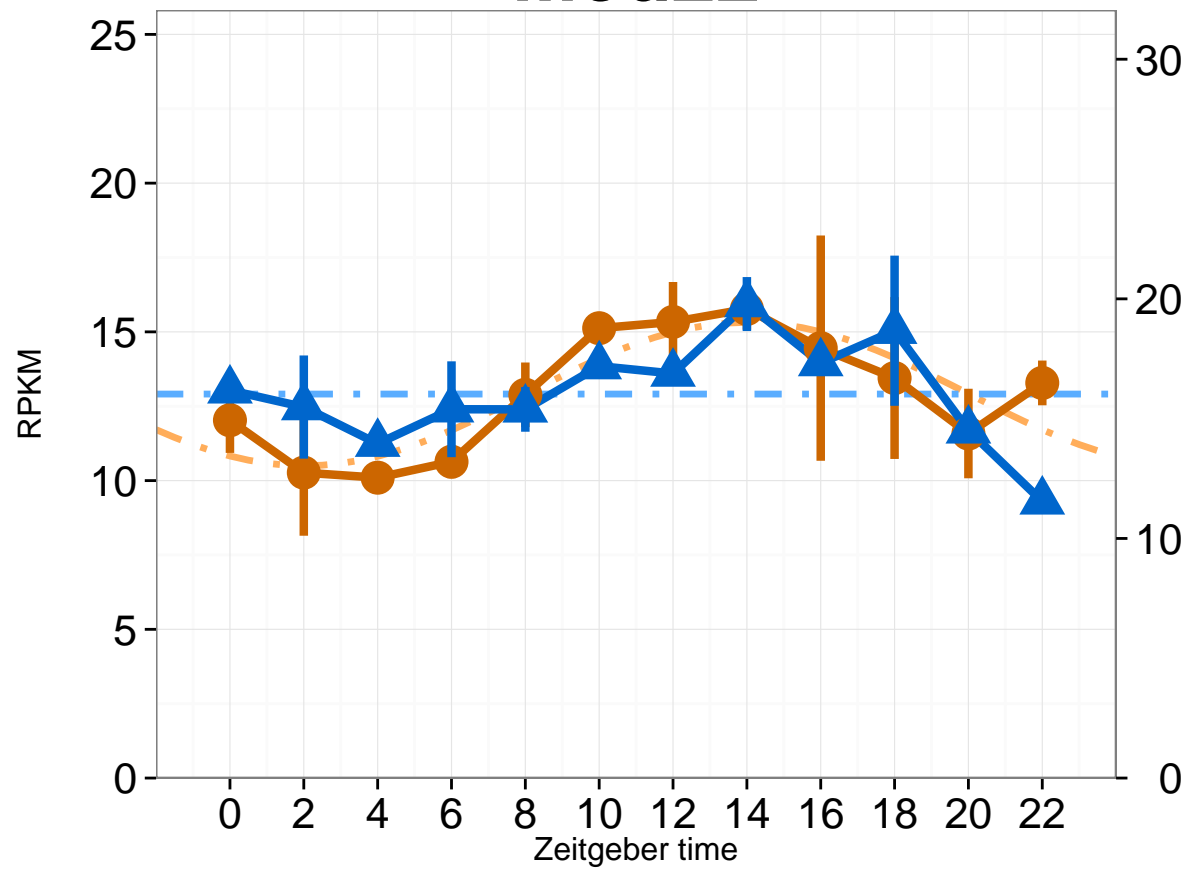

## Med22

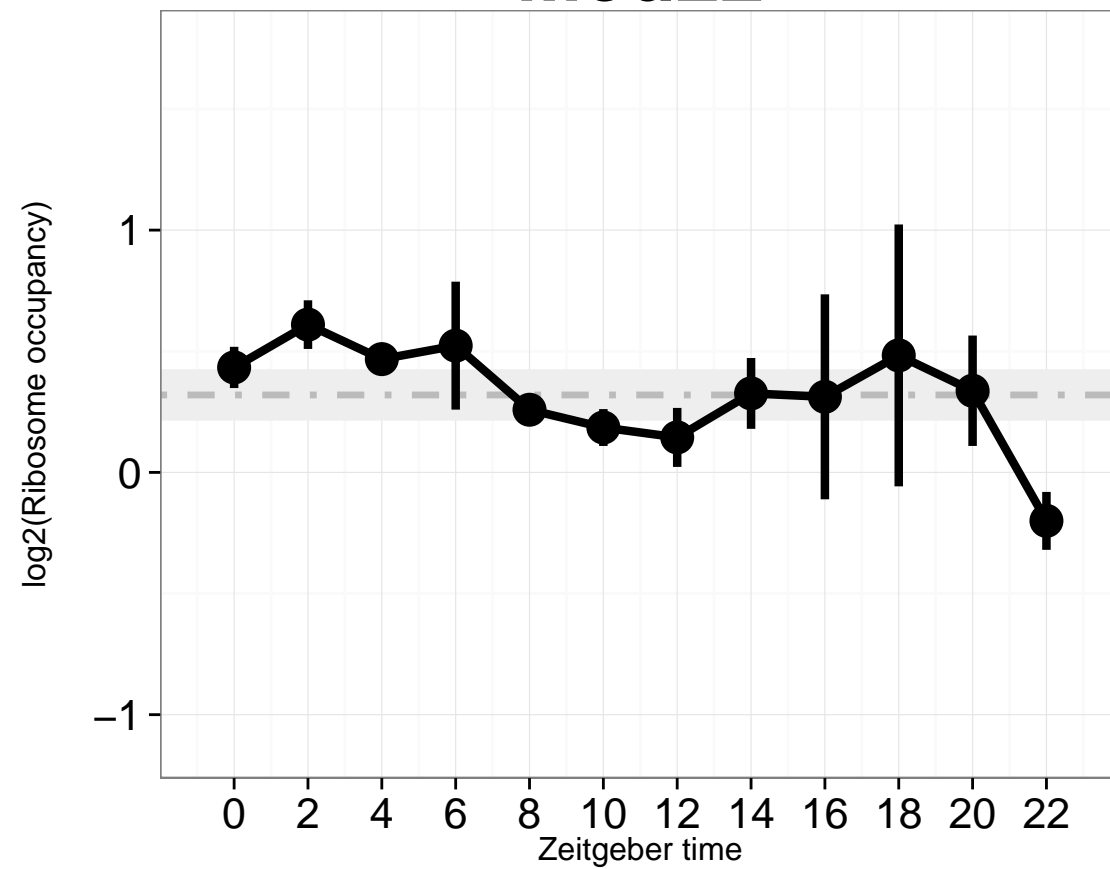

Supplement: SuppDataset_1.zip [file Med22_set_A.pdf › Supplemental Dataset 1/A-mRNA_nonrhyth_translation_nonrhyth/Med22_set_A.pdf]

# Med23

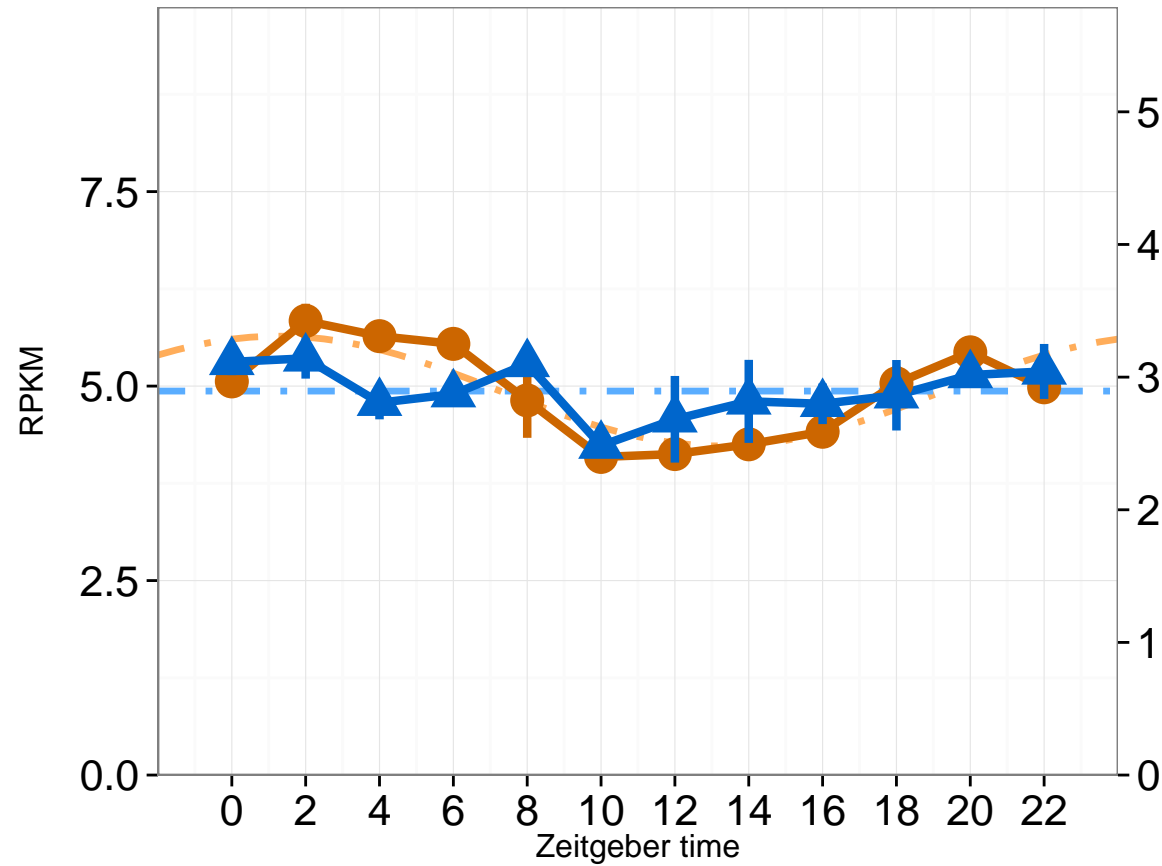

# Med23

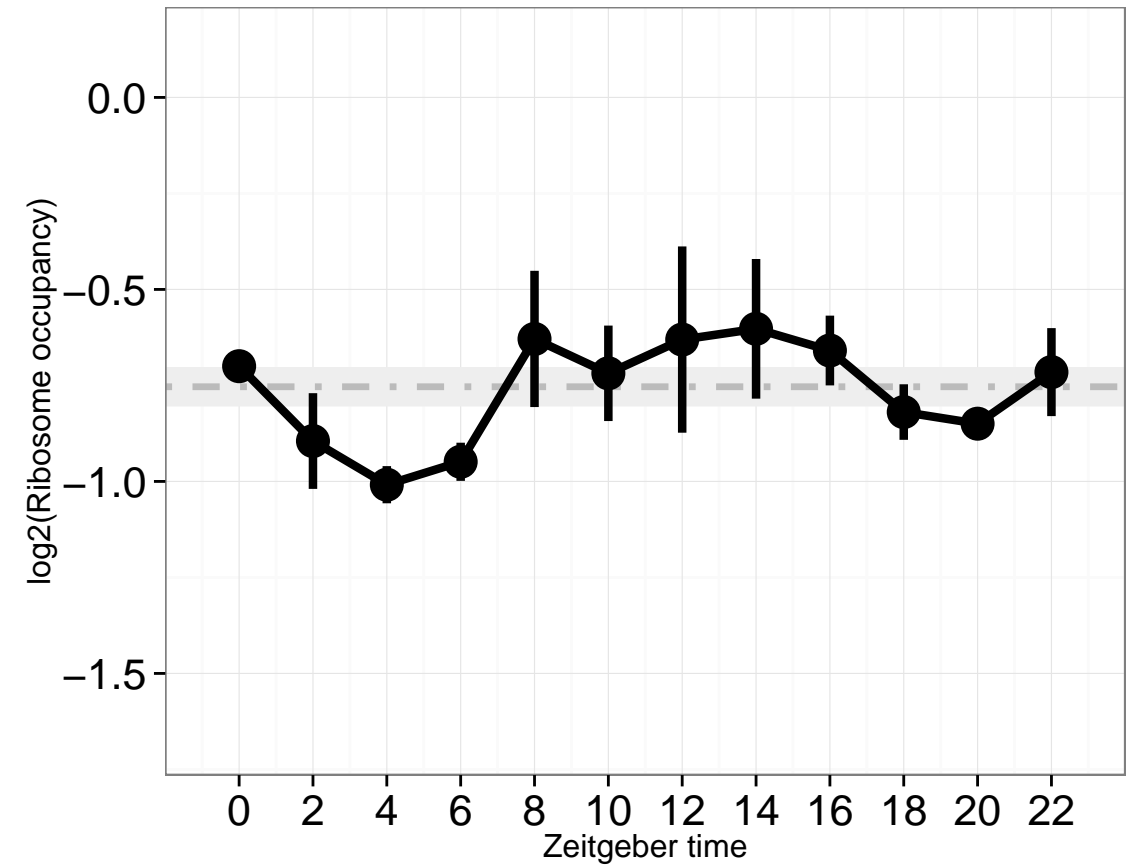

Supplement: SuppDataset_1.zip [file Med23_set_A.pdf › Supplemental Dataset 1/A-mRNA_nonrhyth_translation_nonrhyth/Med23_set_A.pdf]

## Med24

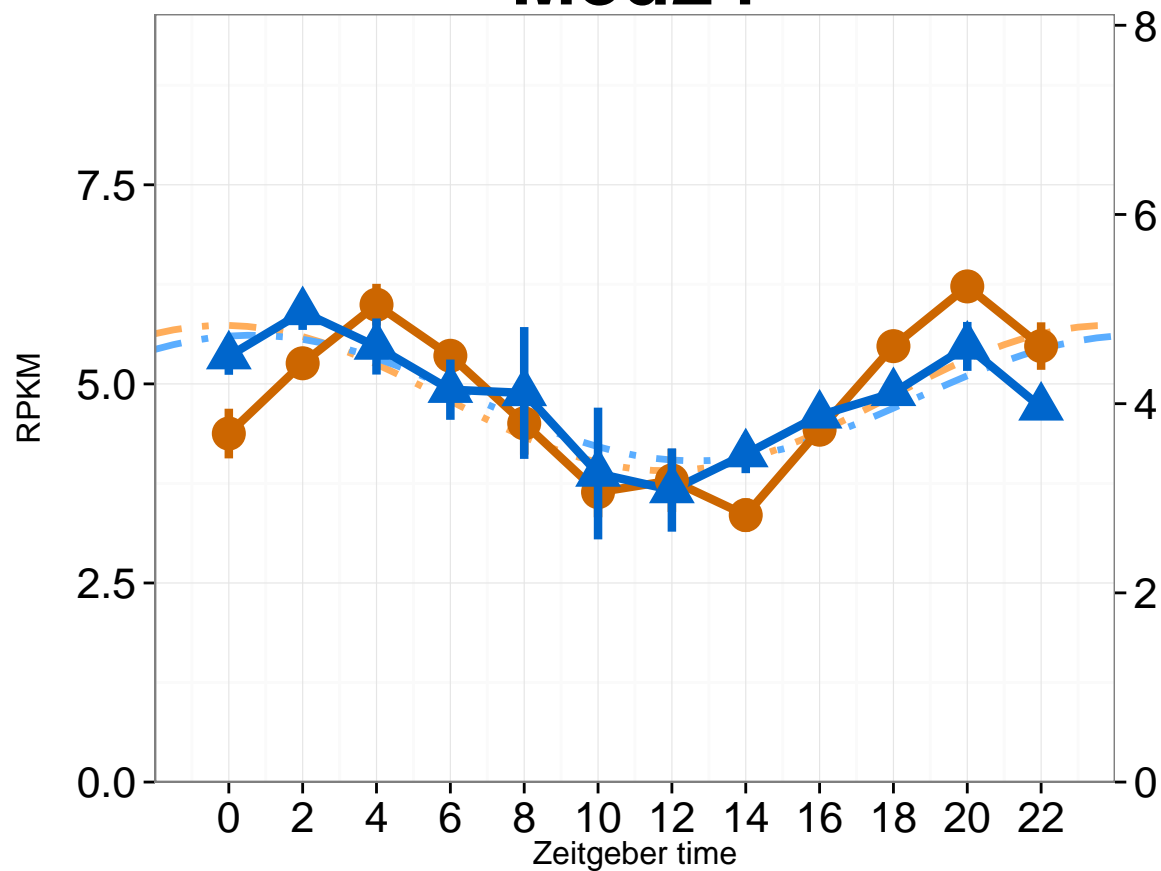

## Med24

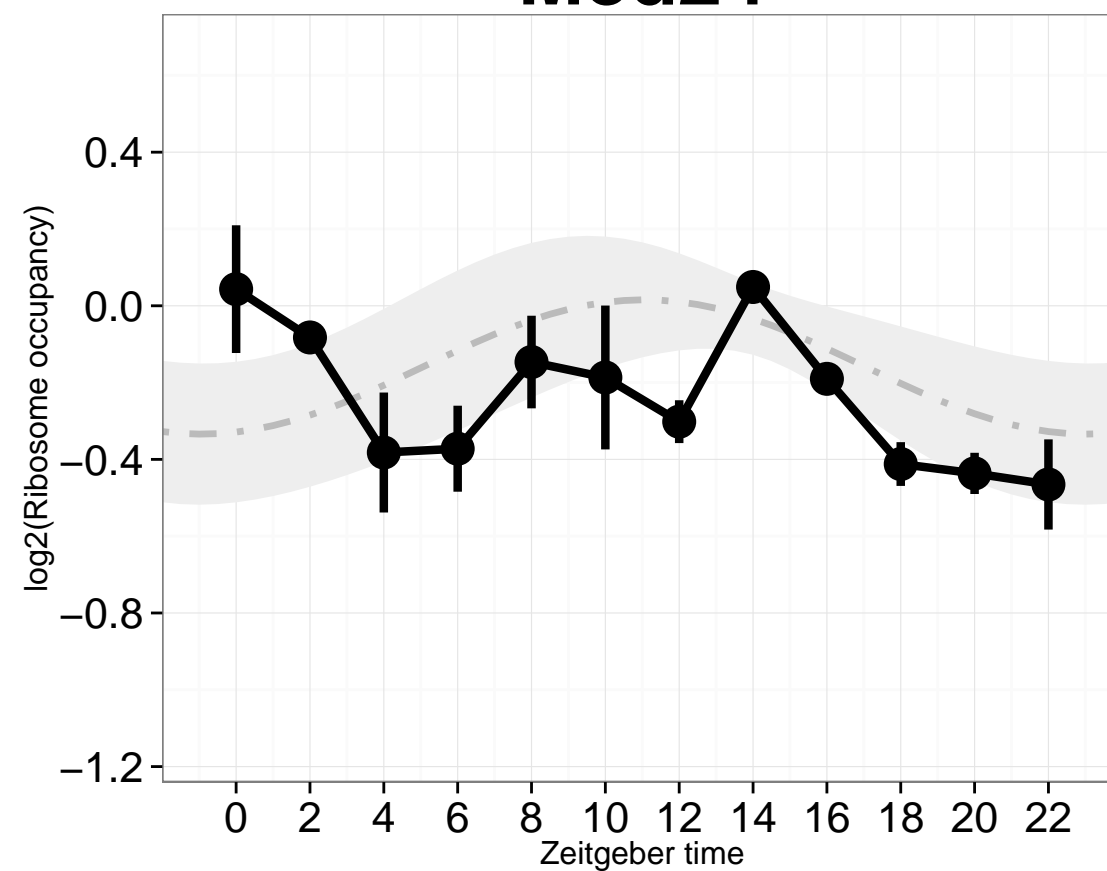

Supplement: SuppDataset_1.zip [file Med24_set_A.pdf › Supplemental Dataset 1/A-mRNA_nonrhyth_translation_nonrhyth/Med24_set_A.pdf]

## Med25

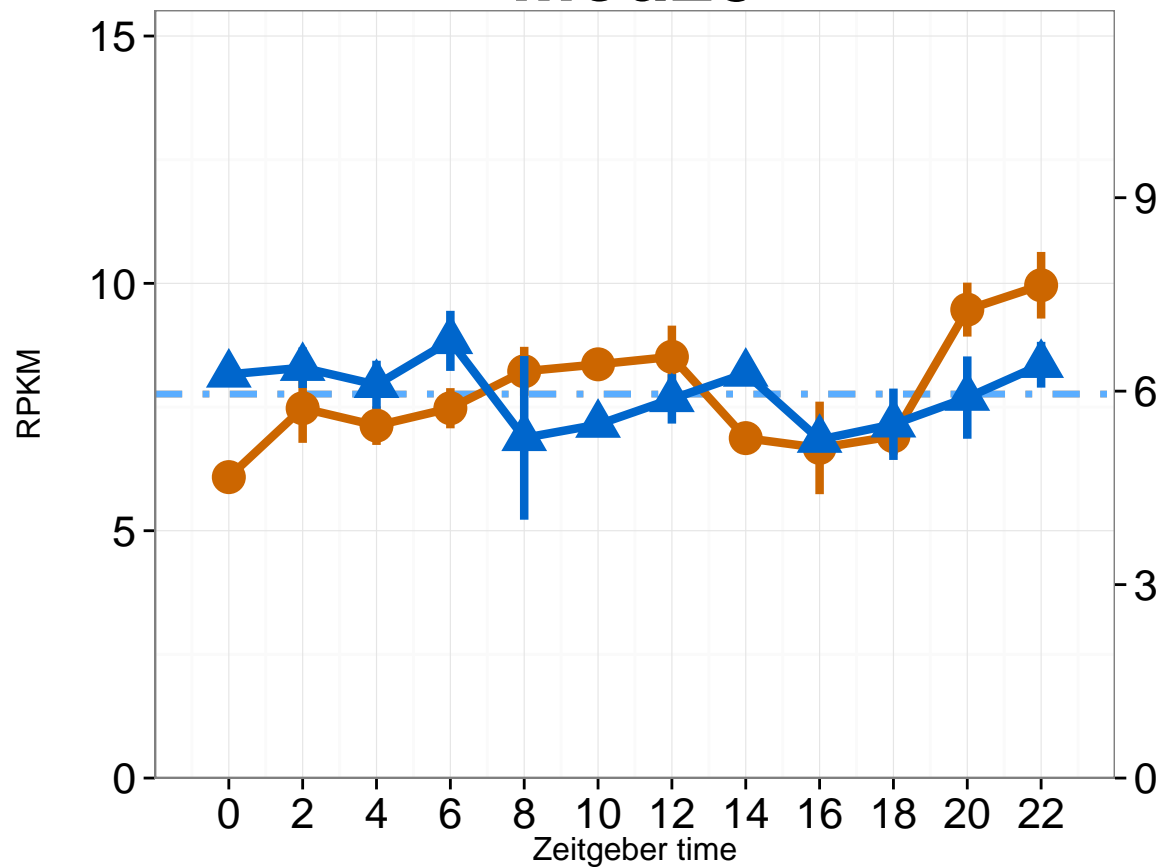

## Med25

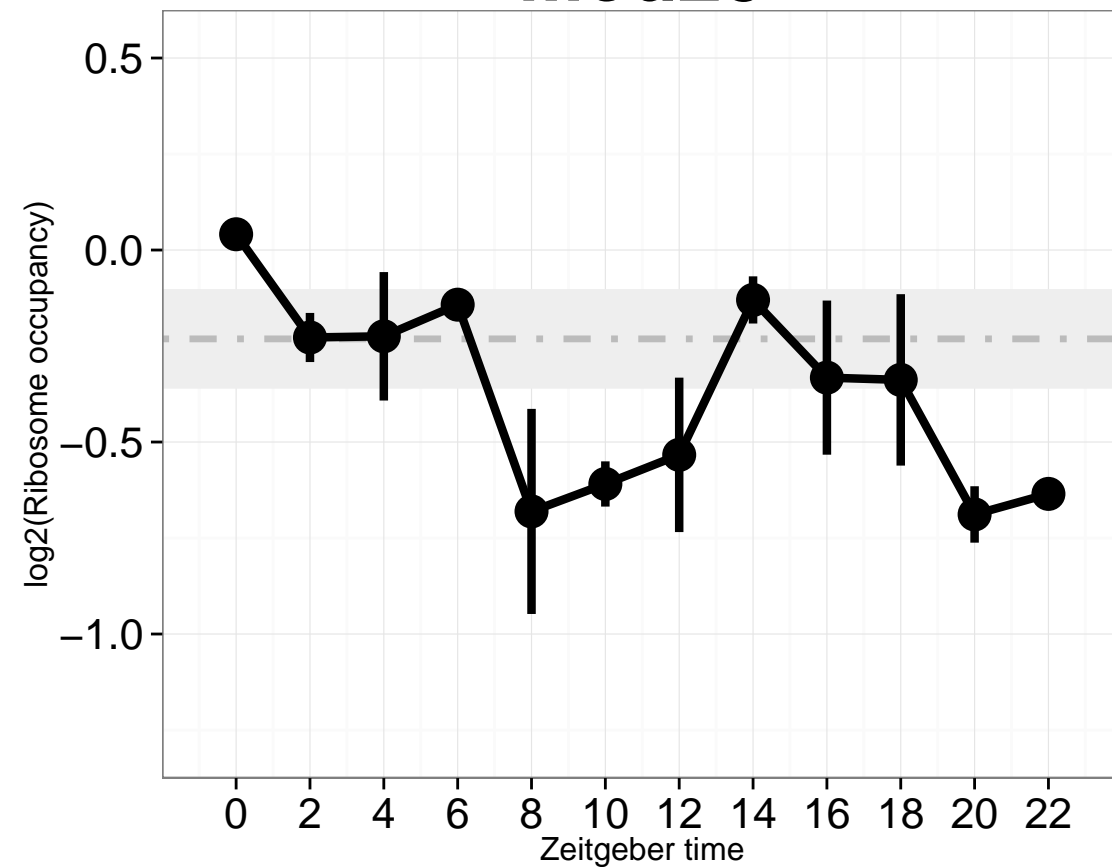

Supplement: SuppDataset_1.zip [file Med25_set_A.pdf › Supplemental Dataset 1/A-mRNA_nonrhyth_translation_nonrhyth/Med25_set_A.pdf]

## Med26

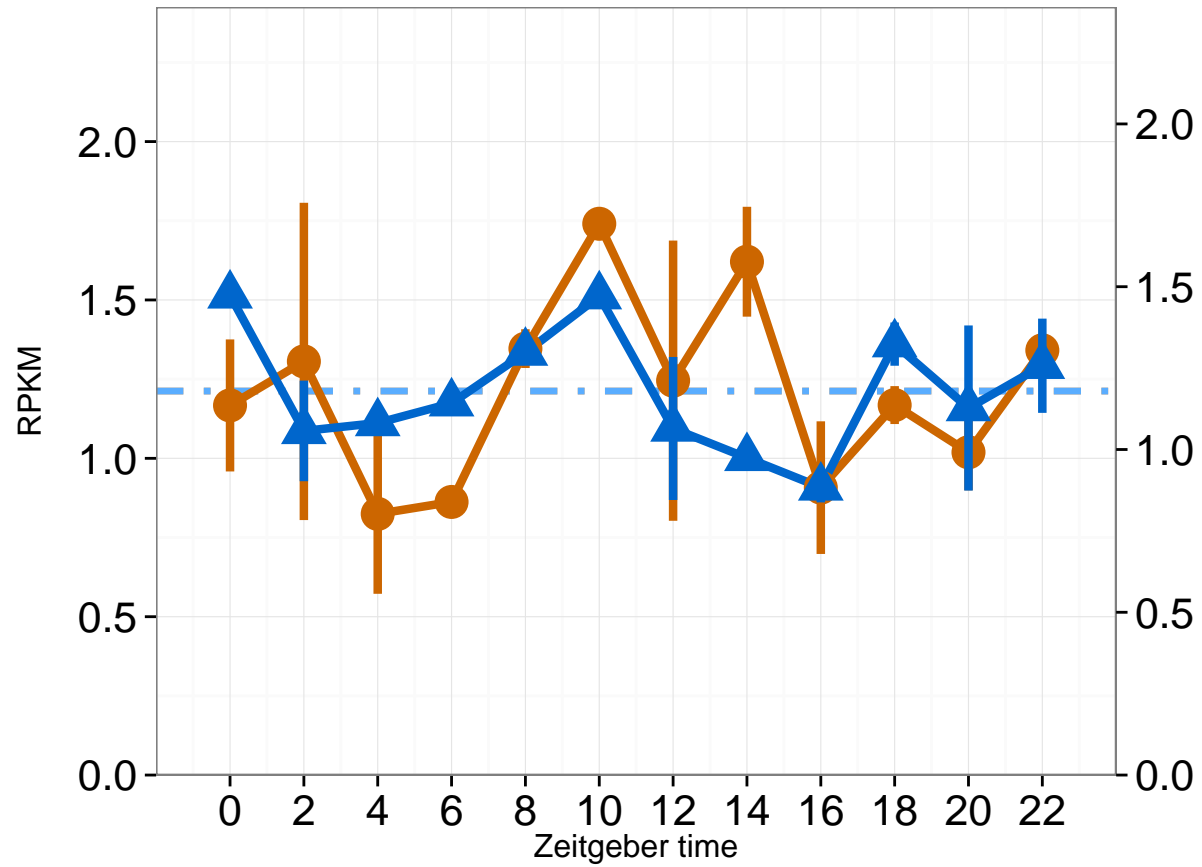

## Med26

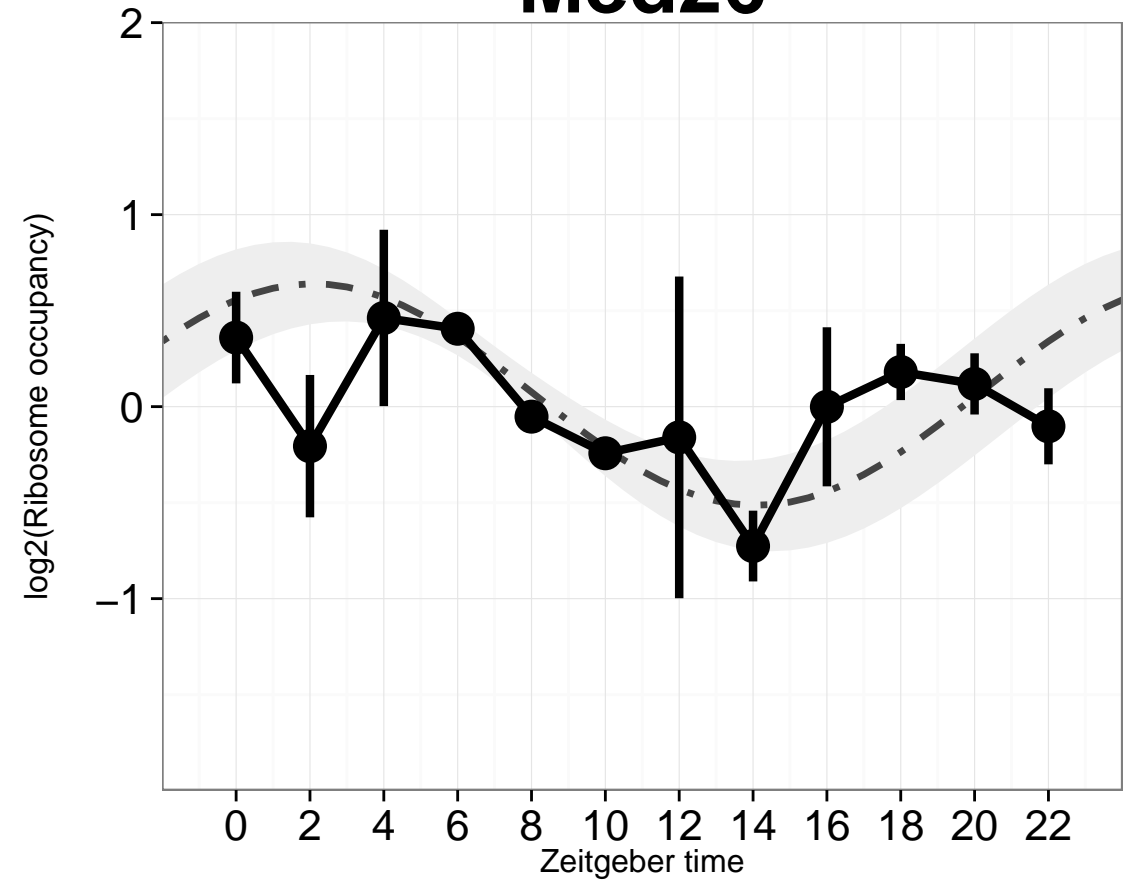

Supplement: SuppDataset_1.zip [file Med26_set_A.pdf › Supplemental Dataset 1/A-mRNA_nonrhyth_translation_nonrhyth/Med26_set_A.pdf]

# Med28

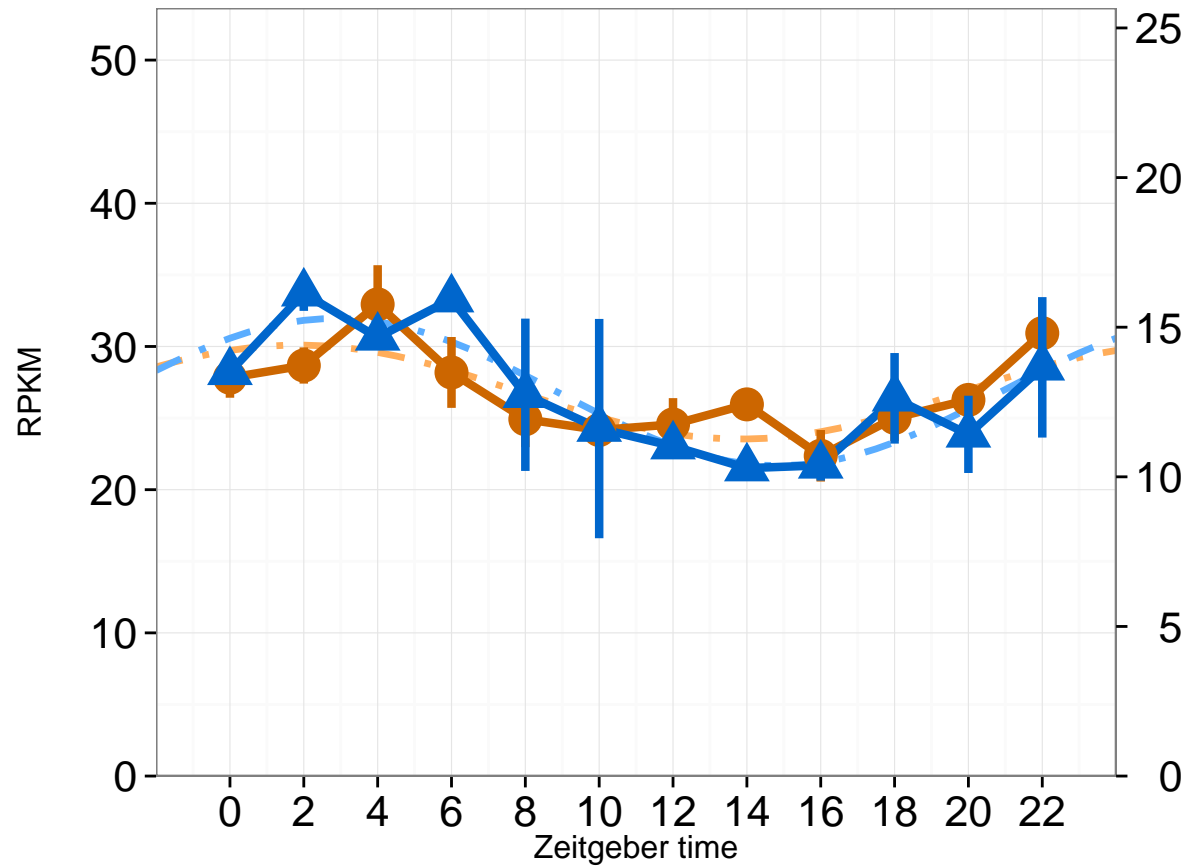

# Med28

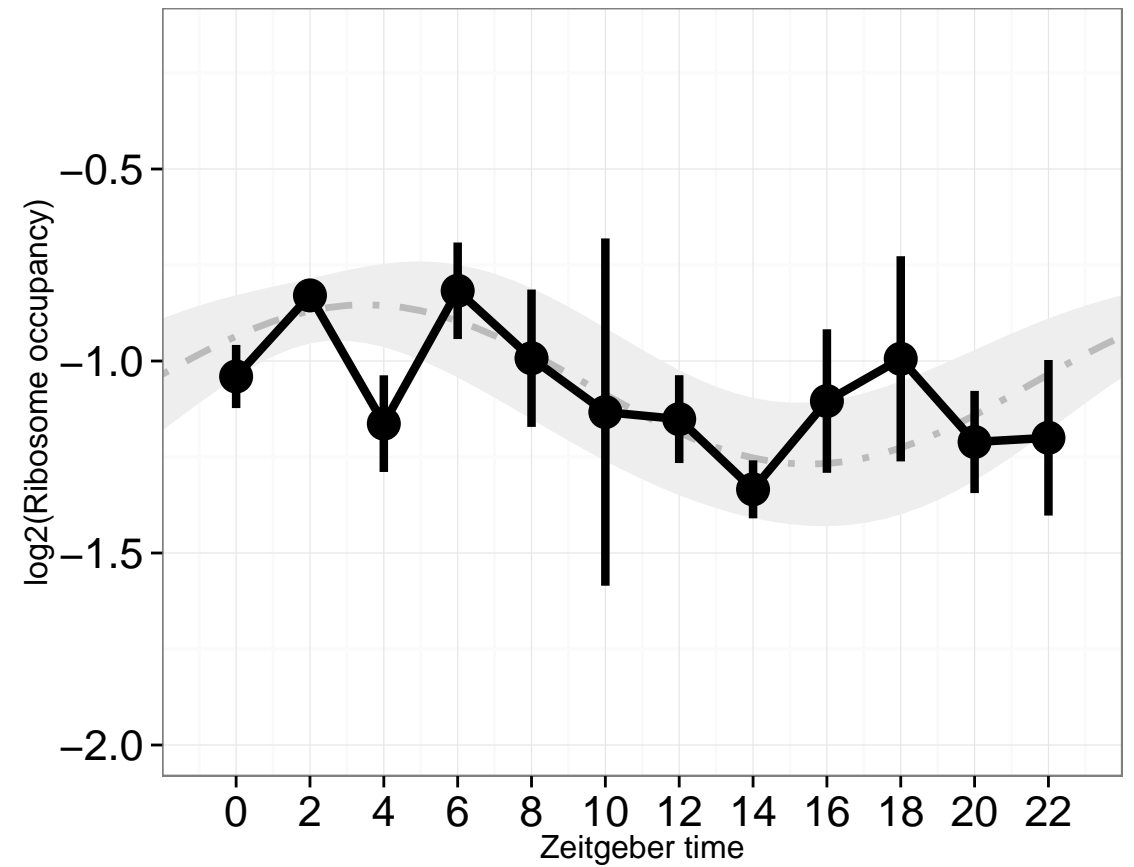

Supplement: SuppDataset_1.zip [file Med28_set_A.pdf › Supplemental Dataset 1/A-mRNA_nonrhyth_translation_nonrhyth/Med28_set_A.pdf]

## Med29

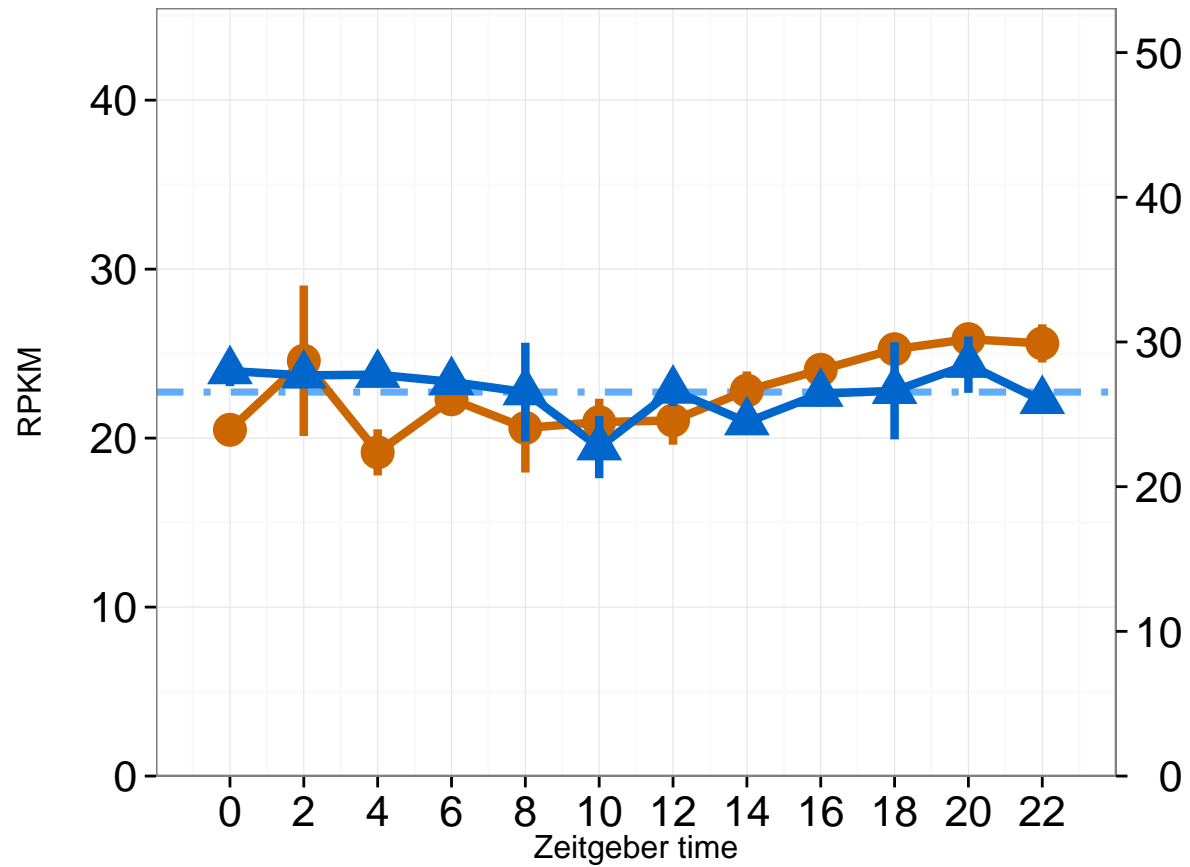

## Med29

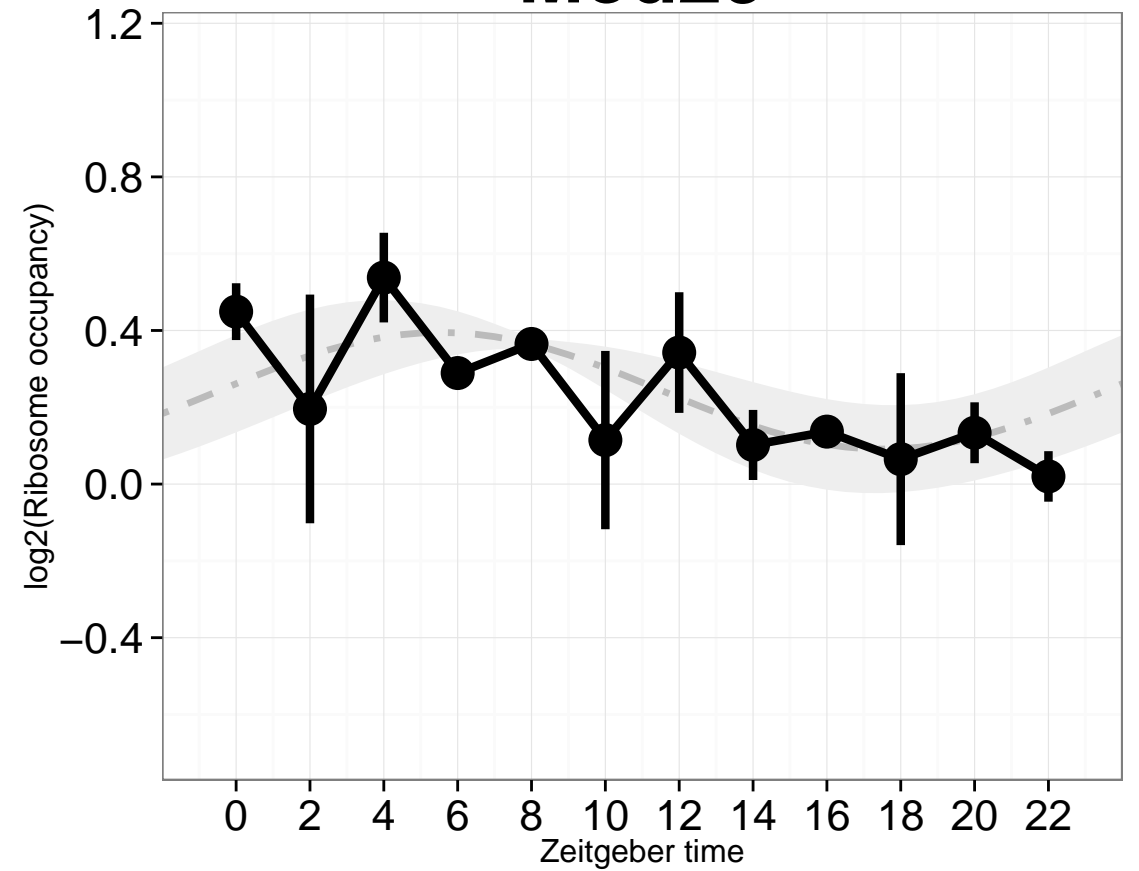

Supplement: SuppDataset_1.zip [file Med29_set_A.pdf › Supplemental Dataset 1/A-mRNA_nonrhyth_translation_nonrhyth/Med29_set_A.pdf]

## Med30

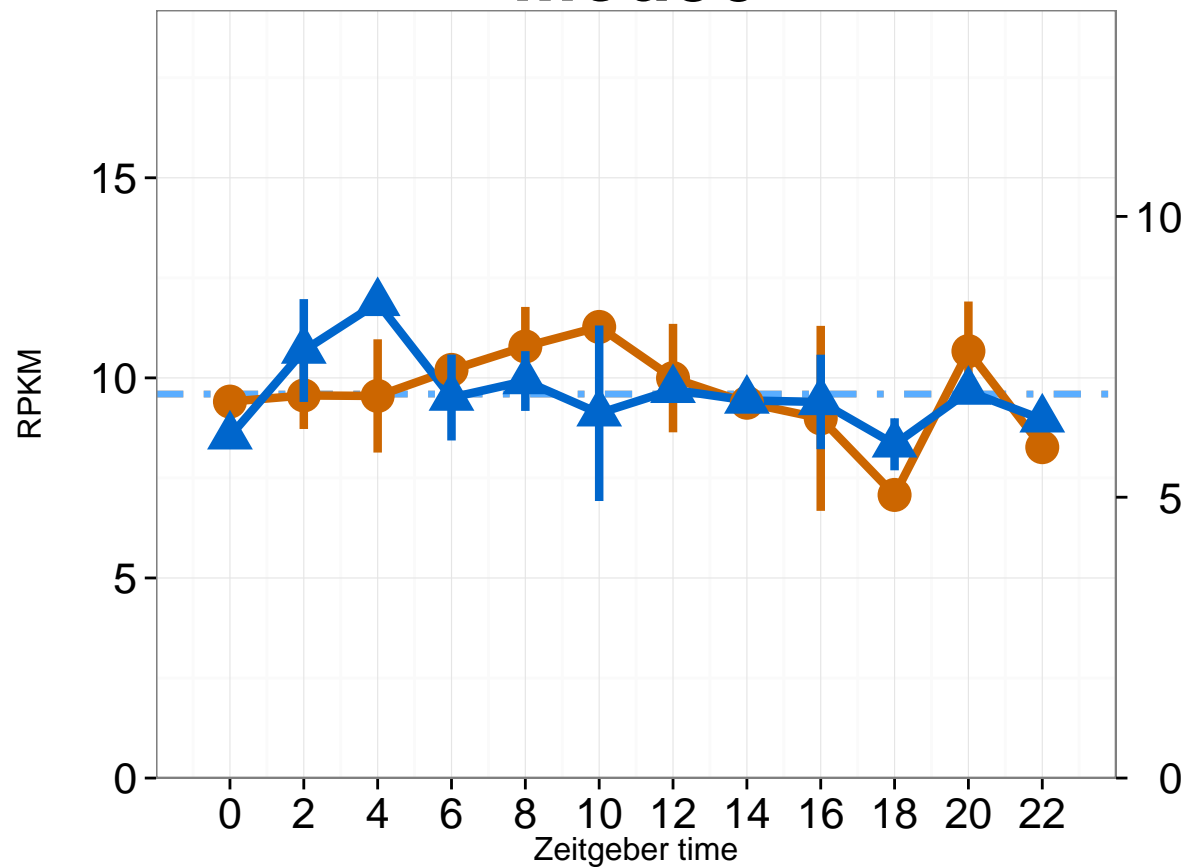

## Med30

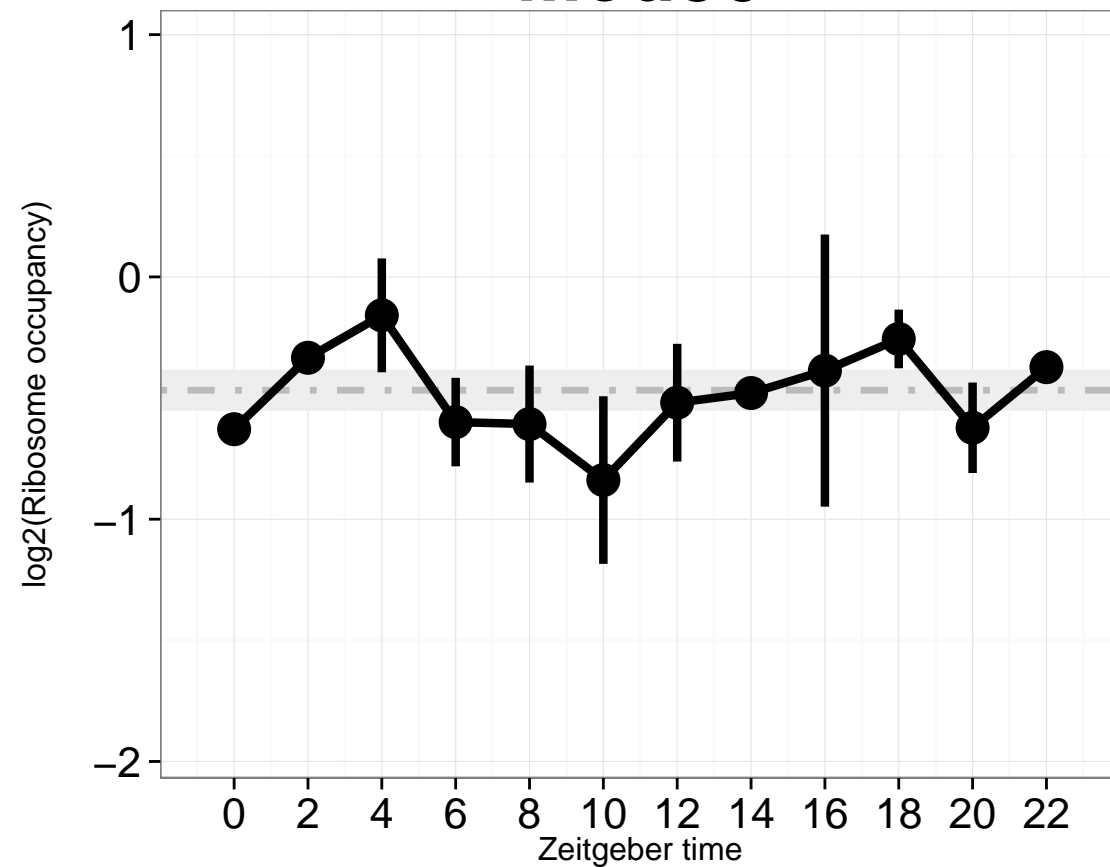

Supplement: SuppDataset_1.zip [file Med30_set_A.pdf › Supplemental Dataset 1/A-mRNA_nonrhyth_translation_nonrhyth/Med30_set_A.pdf]

# Med31

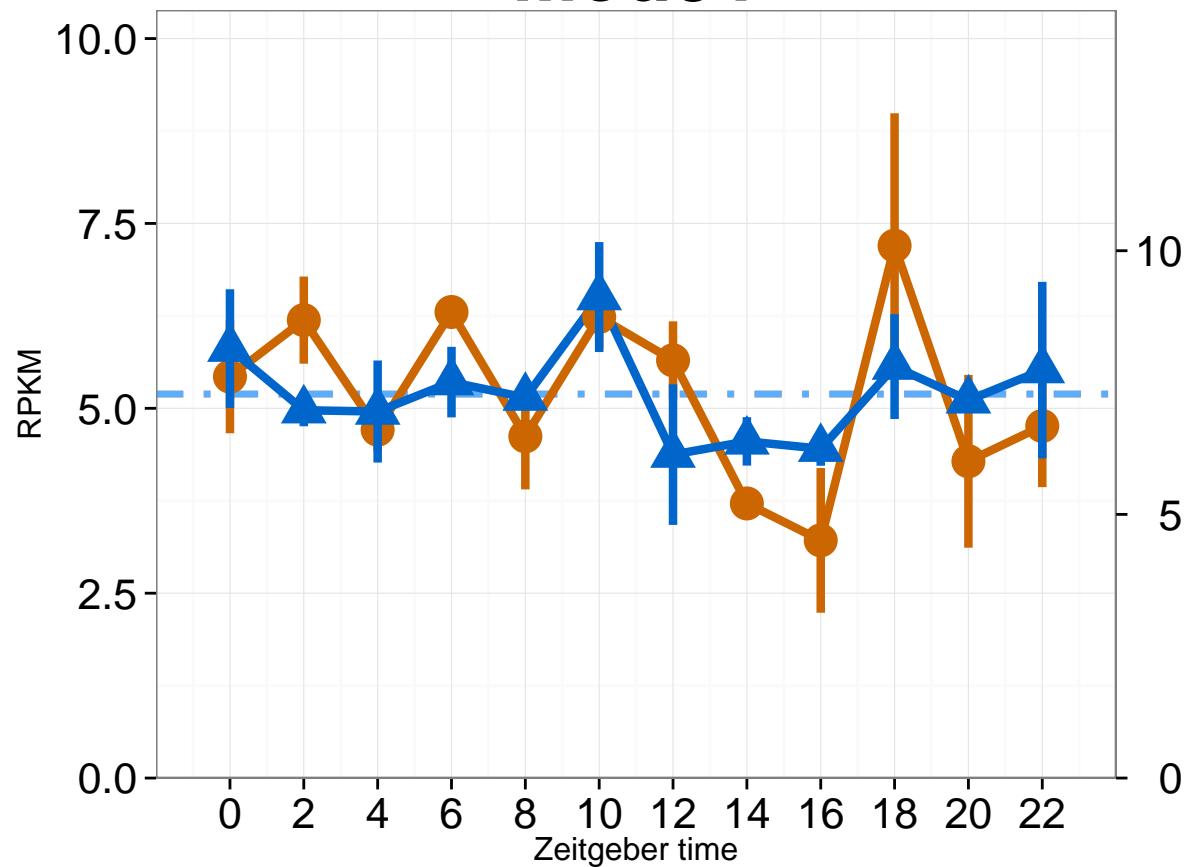

# Med31

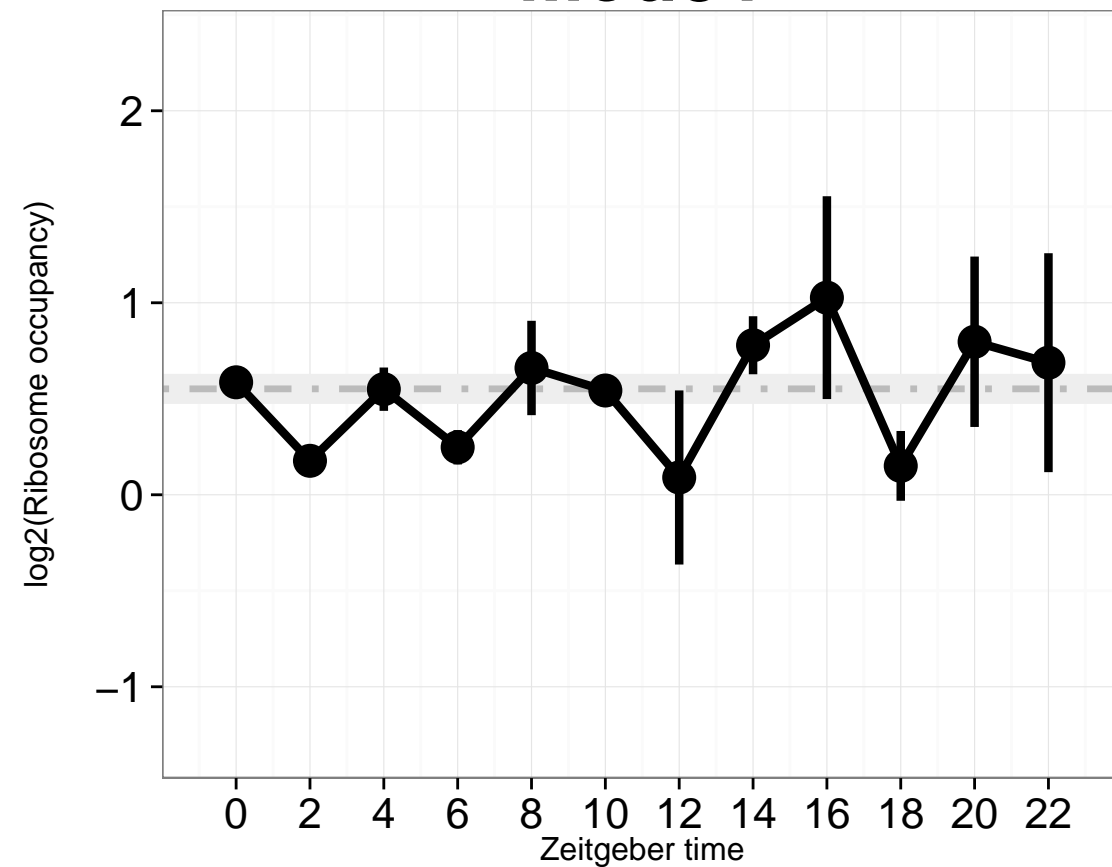

Supplement: SuppDataset_1.zip [file Med31_set_A.pdf › Supplemental Dataset 1/A-mRNA_nonrhyth_translation_nonrhyth/Med31_set_A.pdf]

## Med4

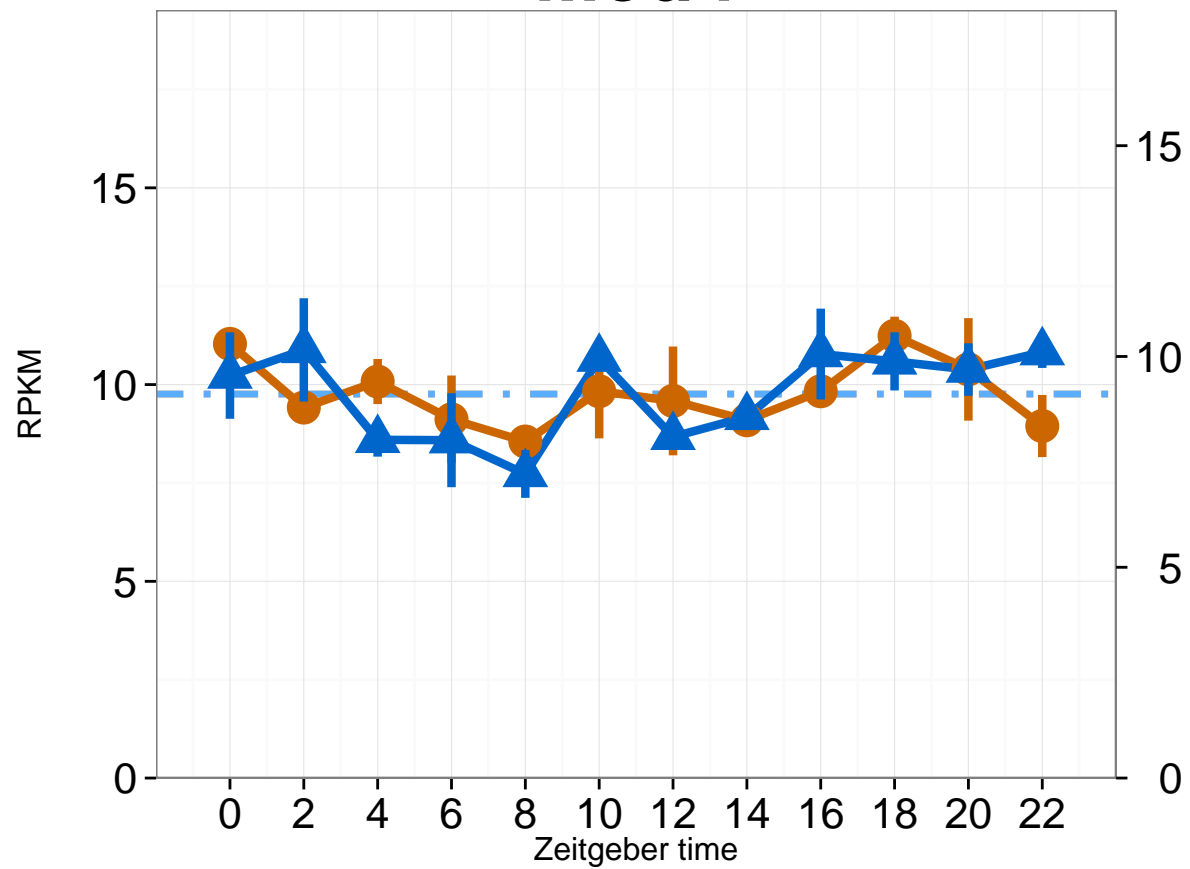

## Med4

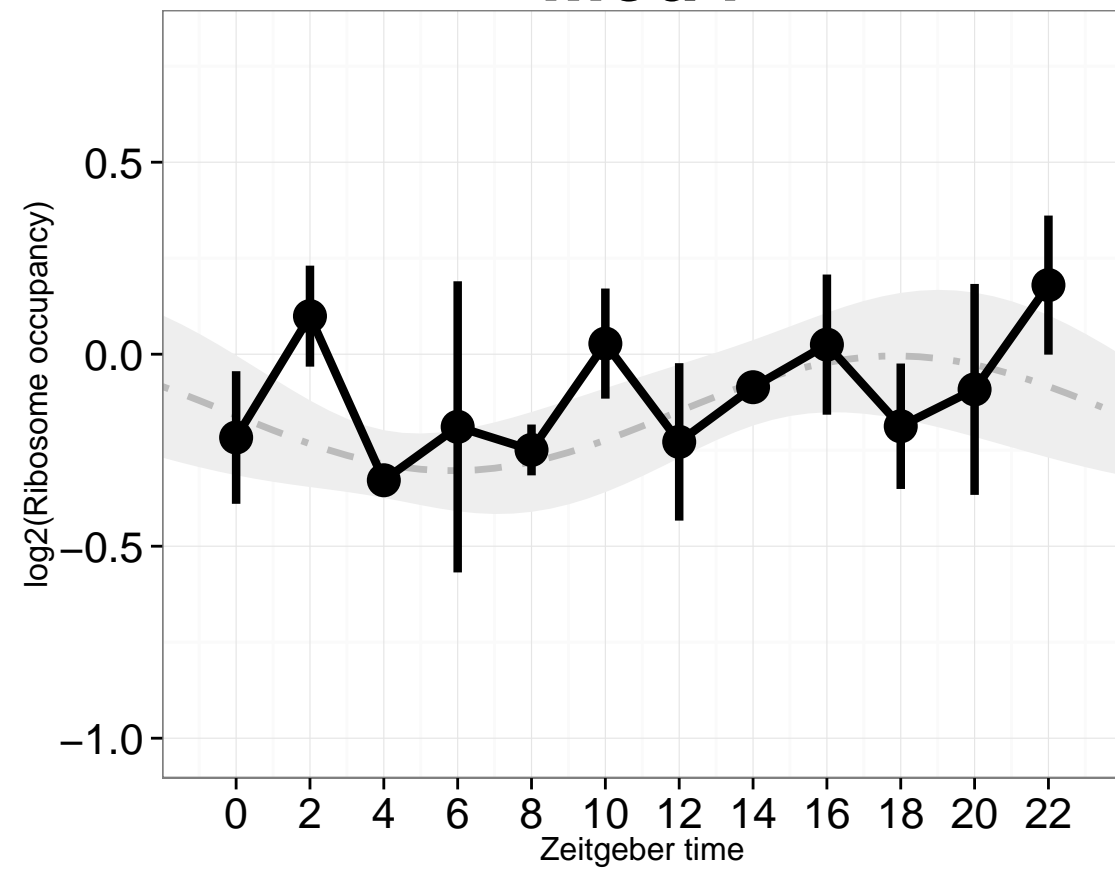

Supplement: SuppDataset_1.zip [file Med4_set_A.pdf › Supplemental Dataset 1/A-mRNA_nonrhyth_translation_nonrhyth/Med4_set_A.pdf]

## Med6

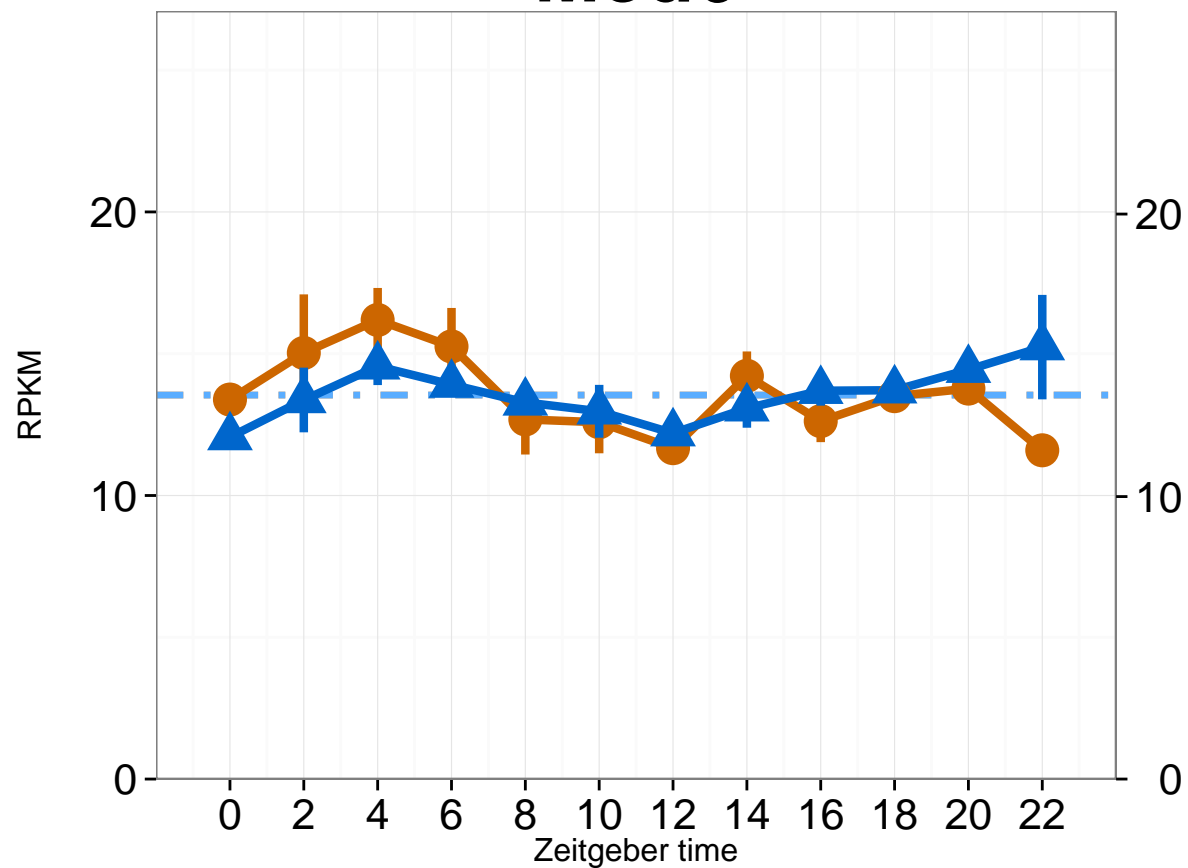

## Med6

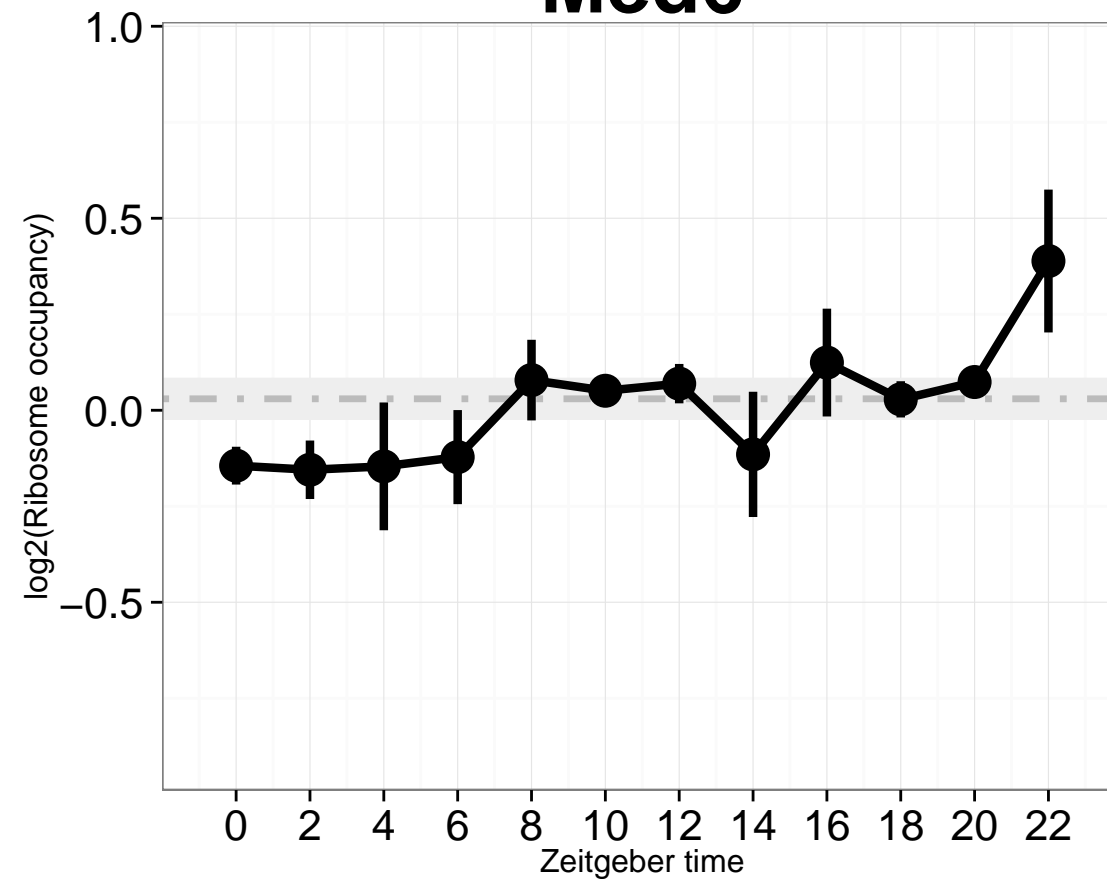

Supplement: SuppDataset_1.zip [file Med6_set_A.pdf › Supplemental Dataset 1/A-mRNA_nonrhyth_translation_nonrhyth/Med6_set_A.pdf]

## Med7

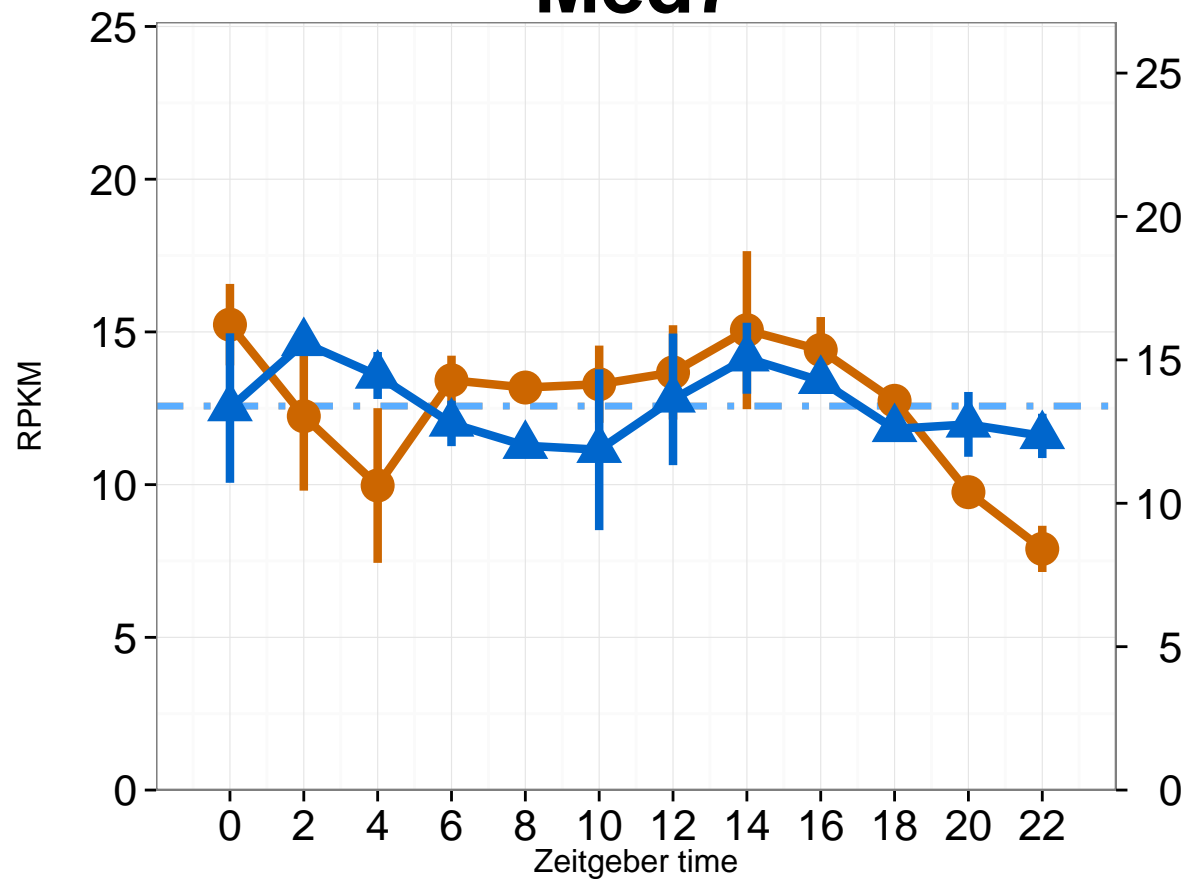

## Med7

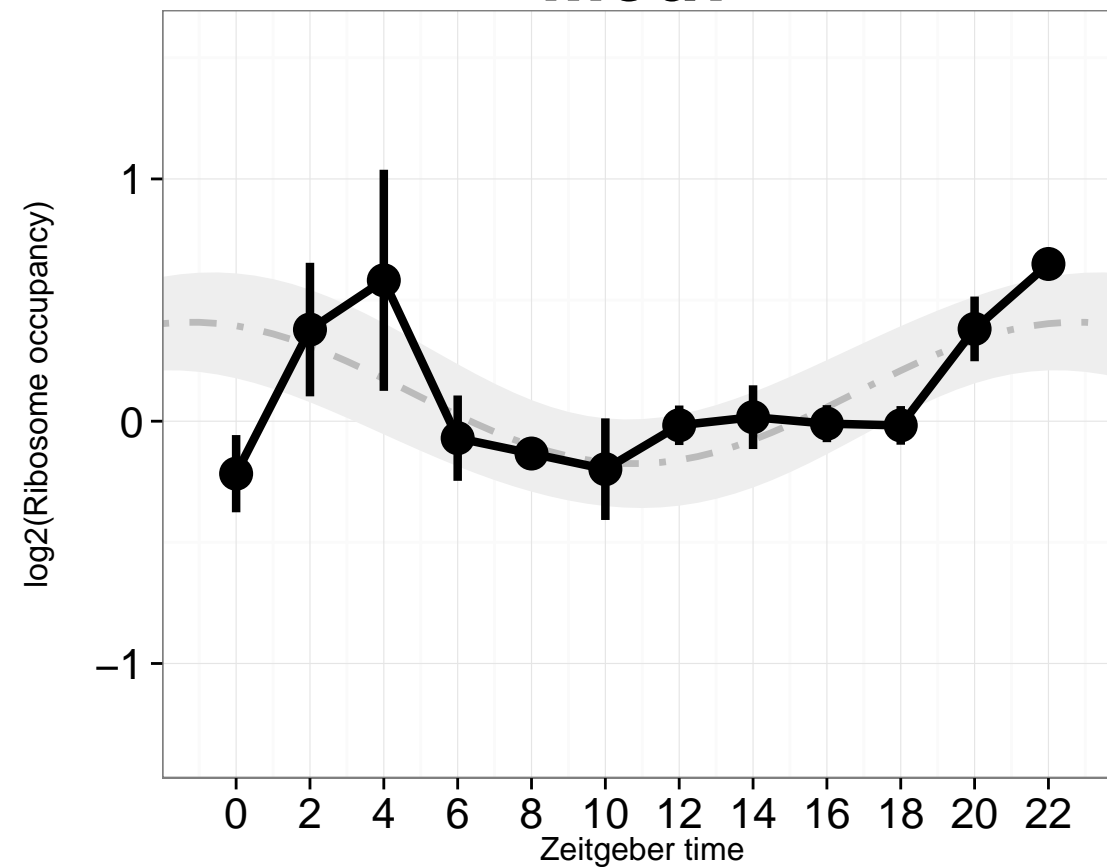

Supplement: SuppDataset_1.zip [file Med7_set_A.pdf › Supplemental Dataset 1/A-mRNA_nonrhyth_translation_nonrhyth/Med7_set_A.pdf]

## Med8

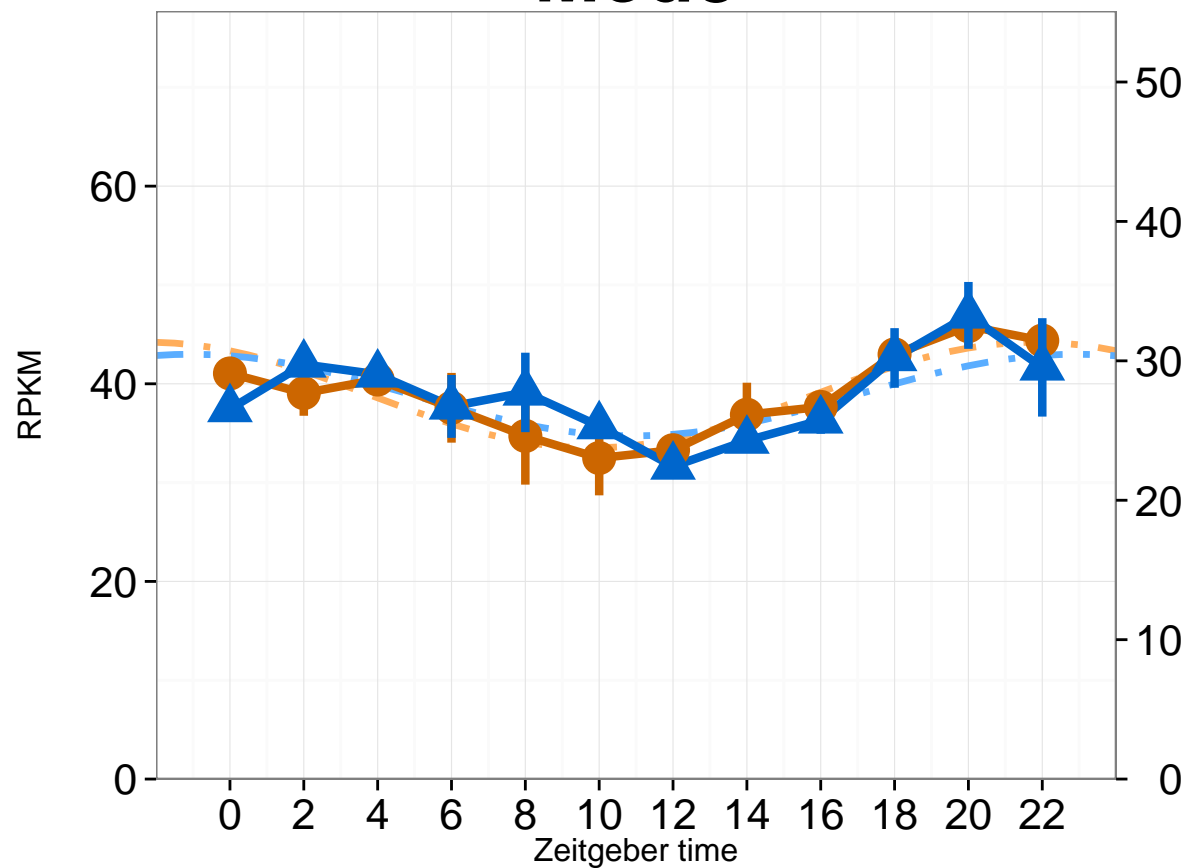

## Med8

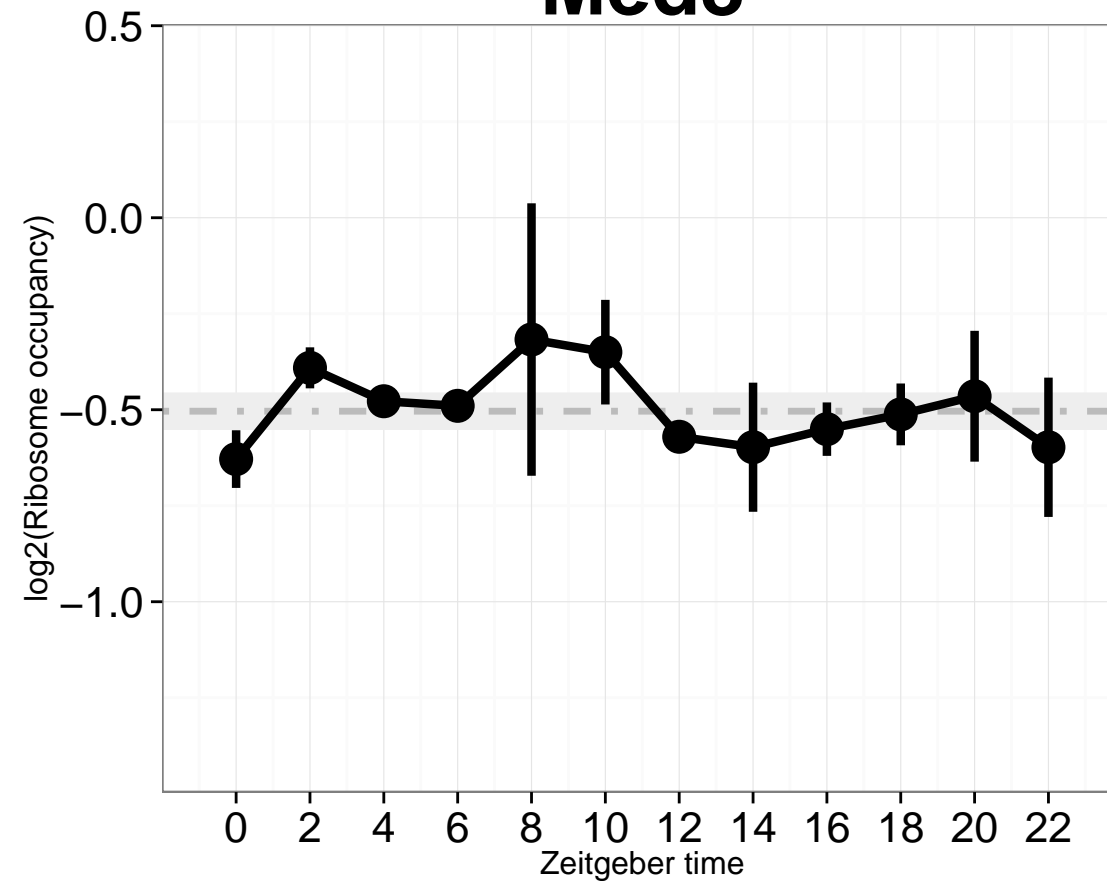

Supplement: SuppDataset_1.zip [file Med8_set_A.pdf › Supplemental Dataset 1/A-mRNA_nonrhyth_translation_nonrhyth/Med8_set_A.pdf]

# Mef2a

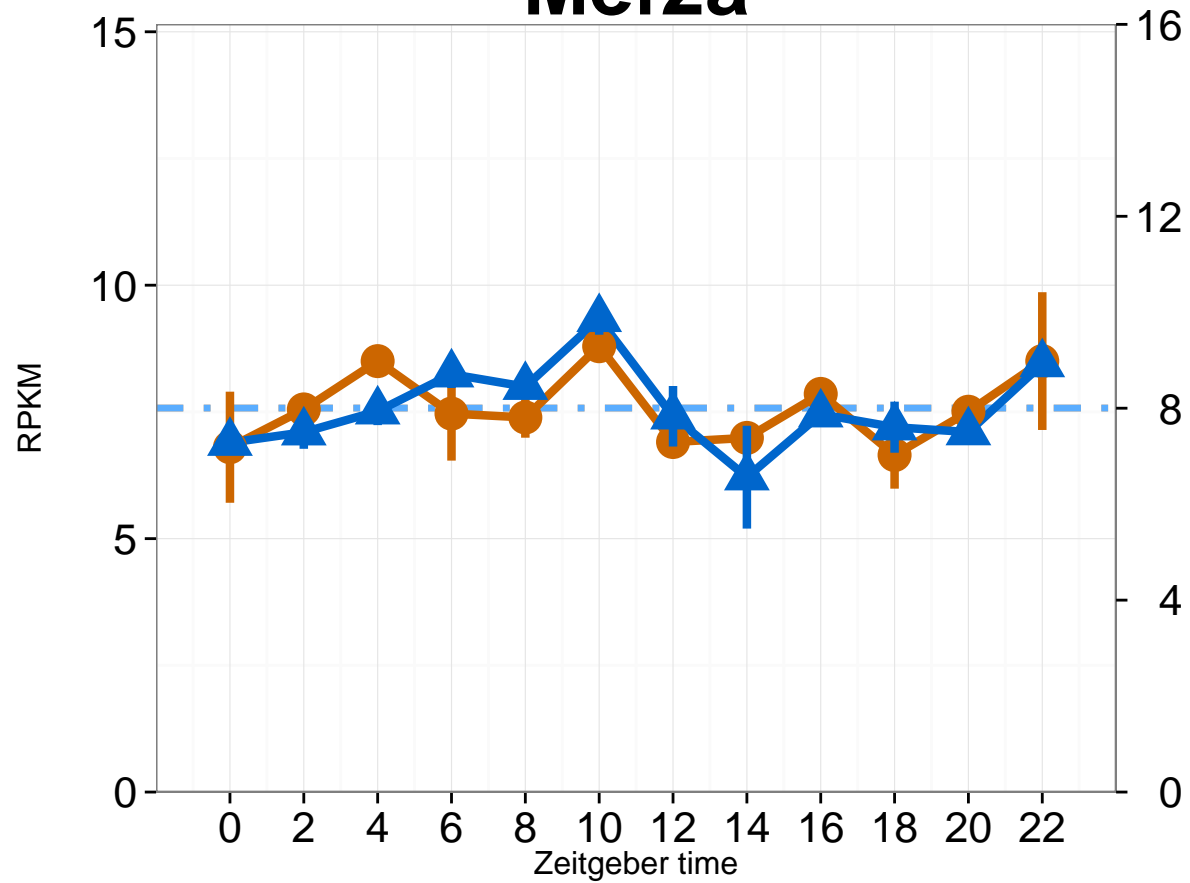

# Mef2a

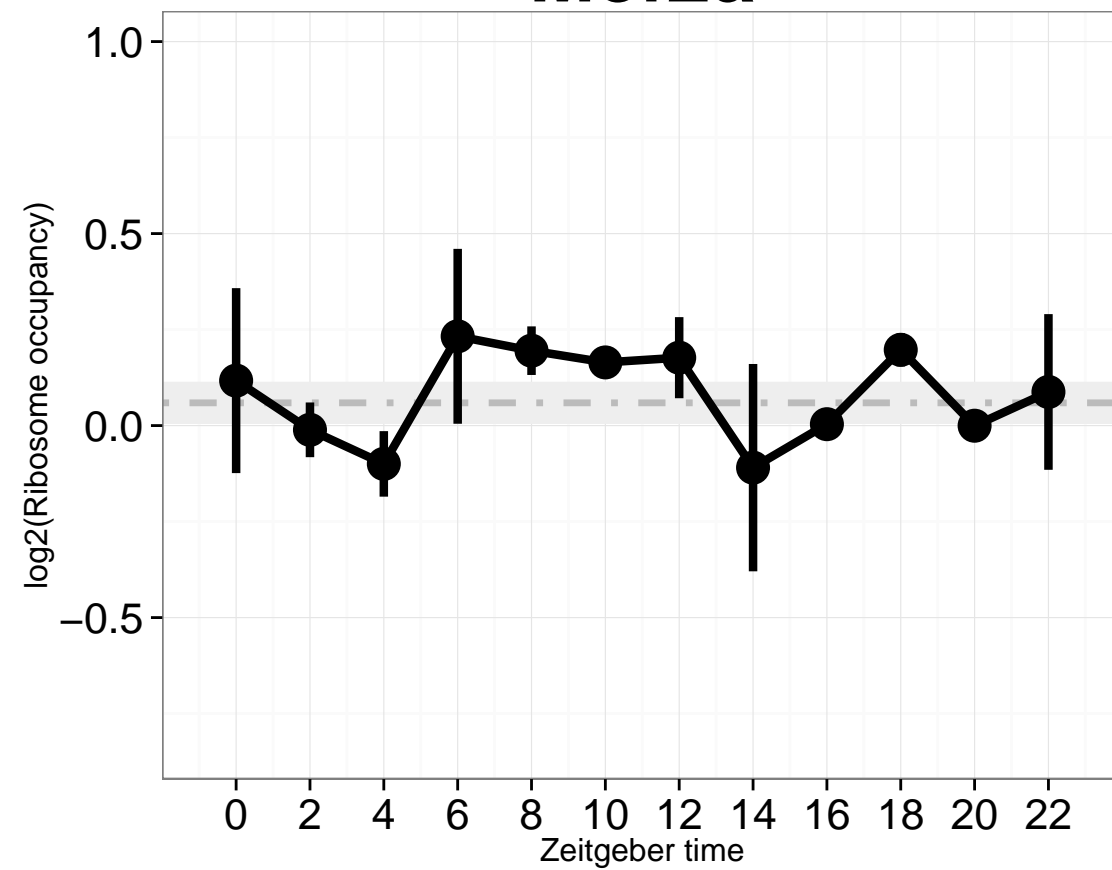

Supplement: SuppDataset_1.zip [file Mef2a_set_A.pdf › Supplemental Dataset 1/A-mRNA_nonrhyth_translation_nonrhyth/Mef2a_set_A.pdf]

## Mef2c

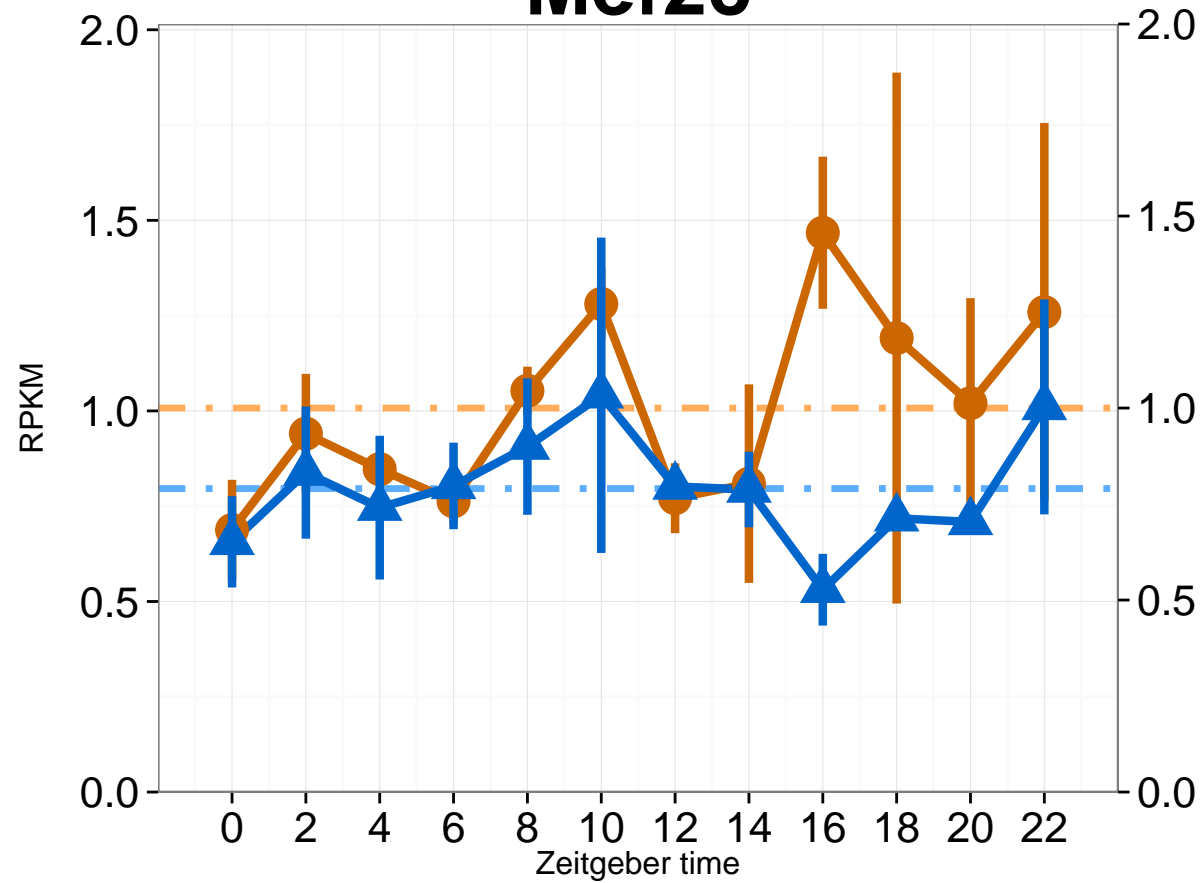

## Mef2c

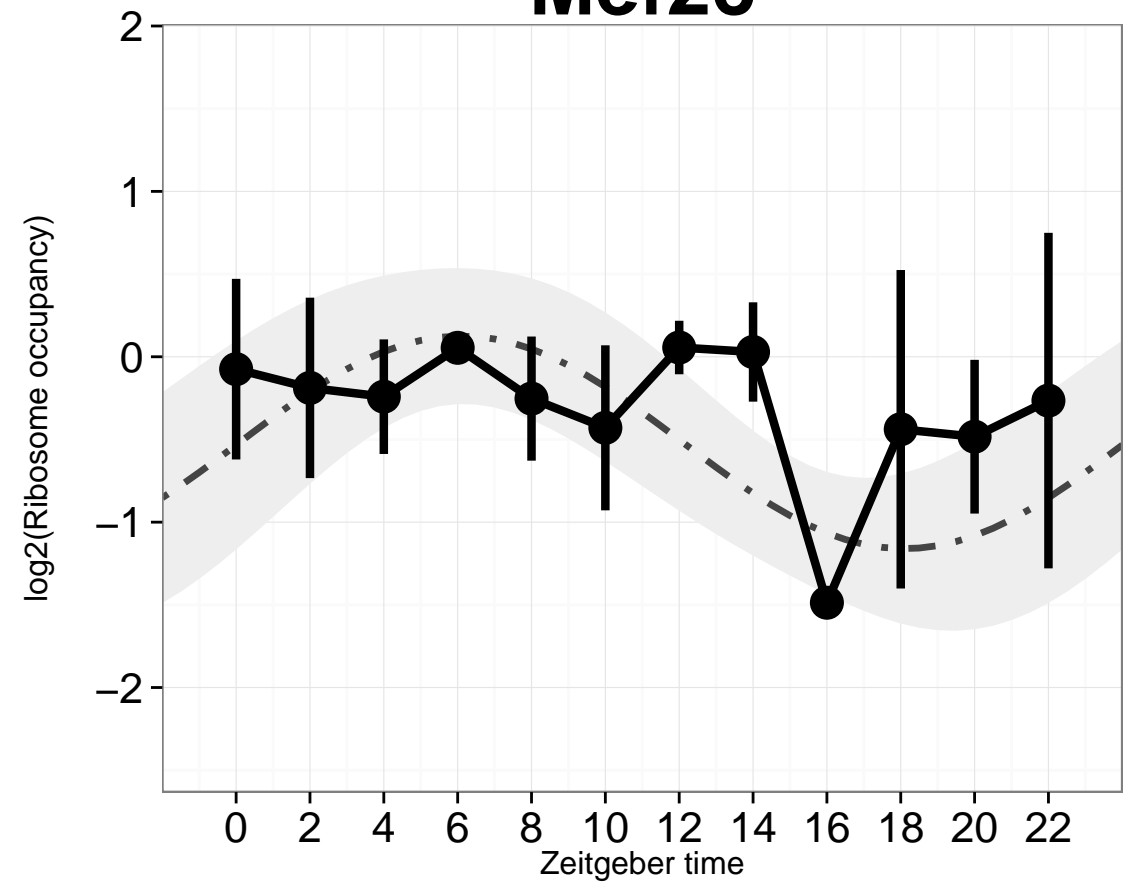

Supplement: SuppDataset_1.zip [file Mef2c_set_A.pdf › Supplemental Dataset 1/A-mRNA_nonrhyth_translation_nonrhyth/Mef2c_set_A.pdf]

## Mef2d

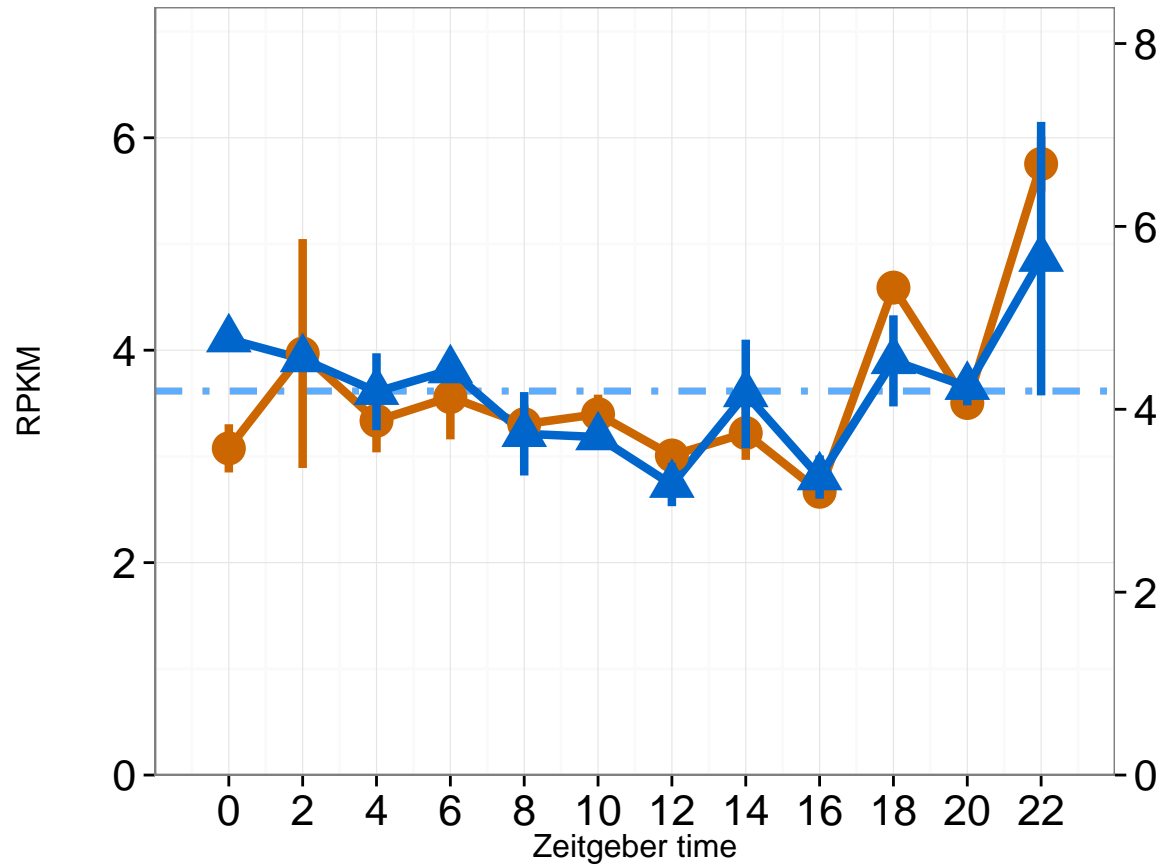

## Mef2d

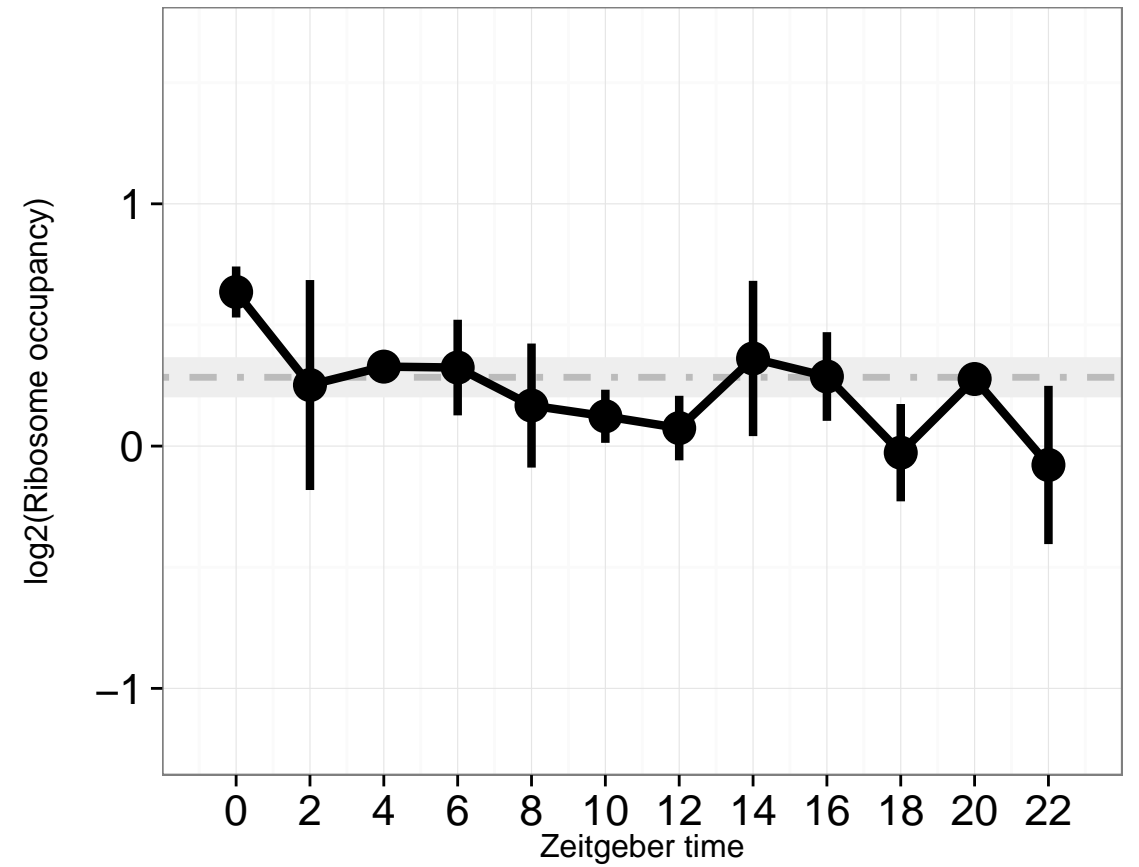

Supplement: SuppDataset_1.zip [file Mef2d_set_A.pdf › Supplemental Dataset 1/A-mRNA_nonrhyth_translation_nonrhyth/Mef2d_set_A.pdf]

# Megf6

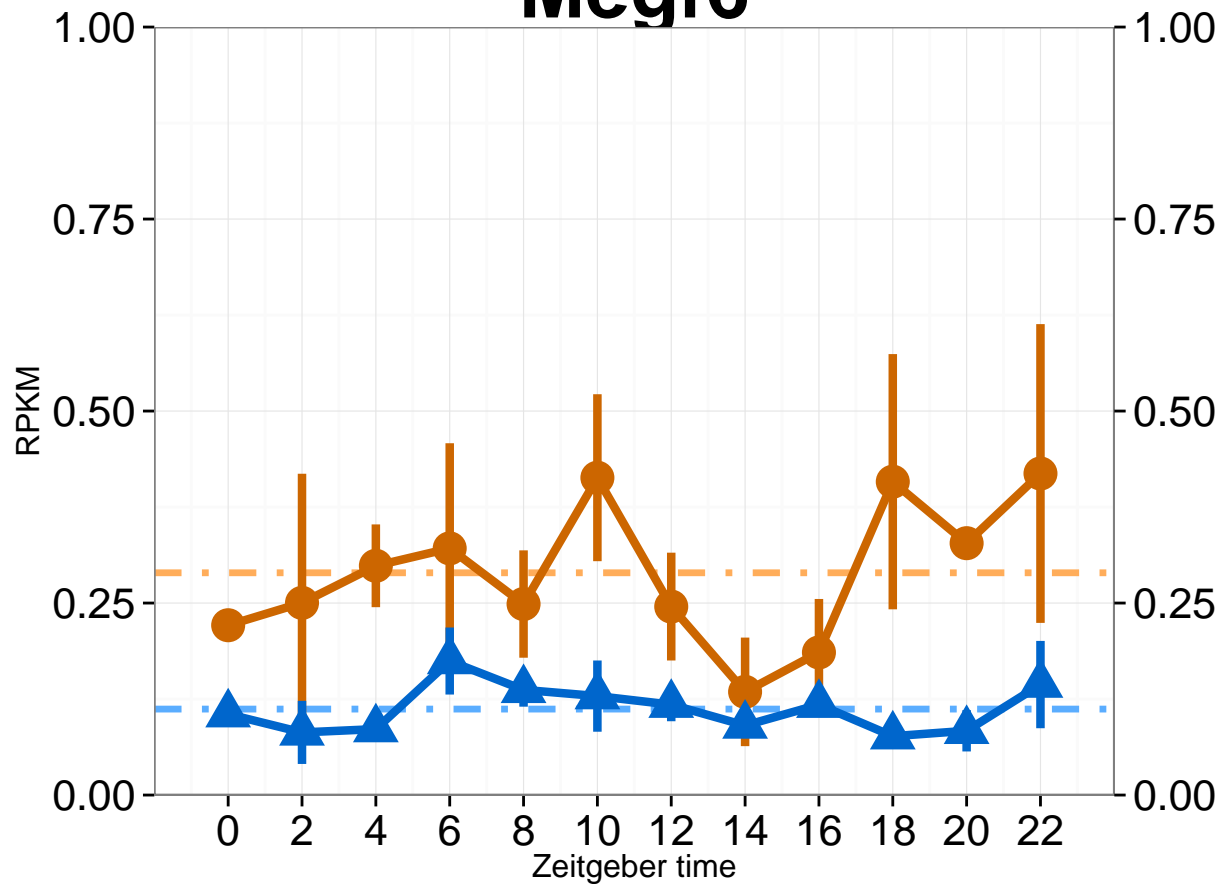

# Megf6

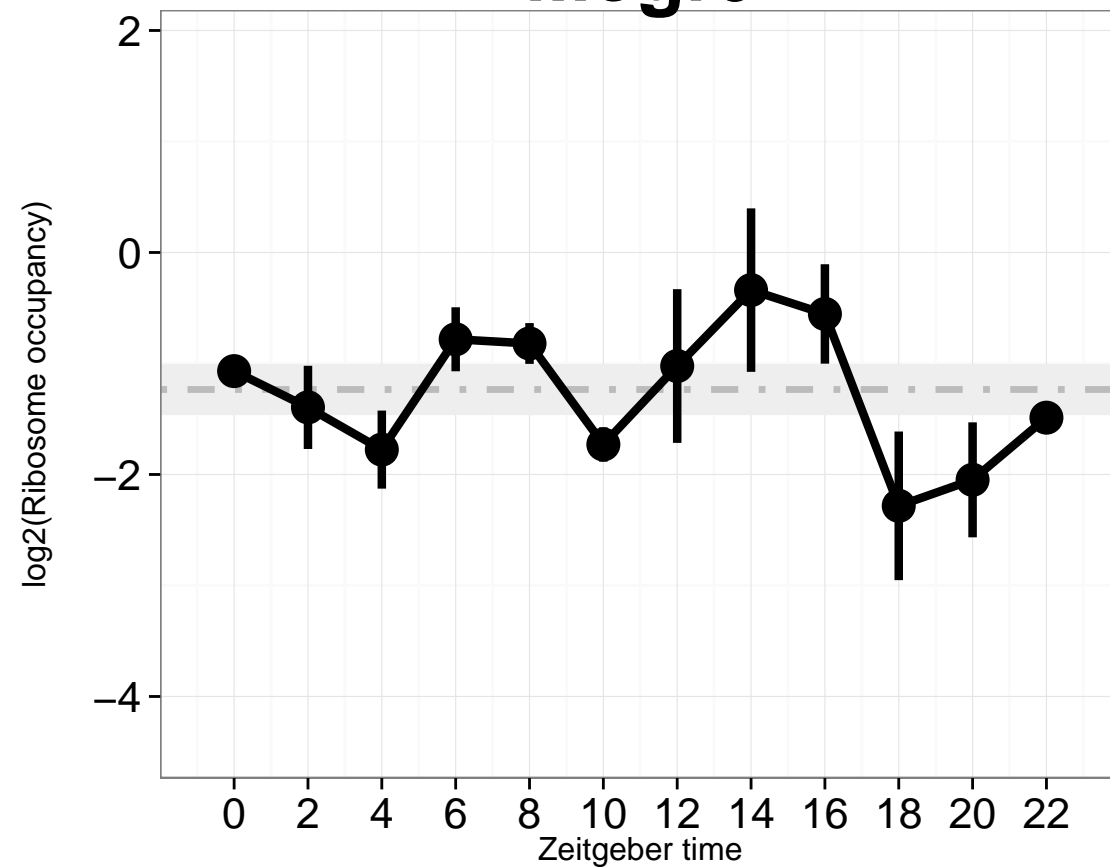

Supplement: SuppDataset_1.zip [file Megf6_set_A.pdf › Supplemental Dataset 1/A-mRNA_nonrhyth_translation_nonrhyth/Megf6_set_A.pdf]

## Meis1

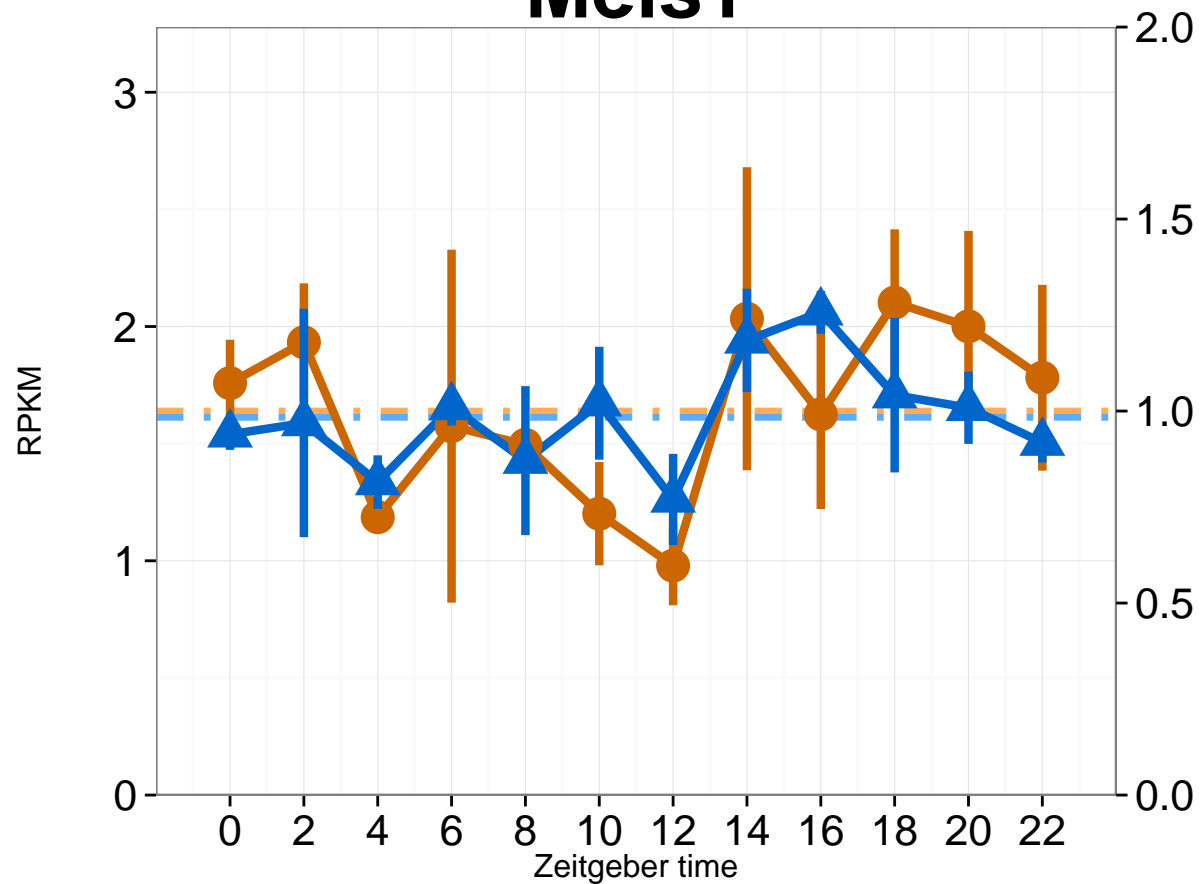

## Meis1

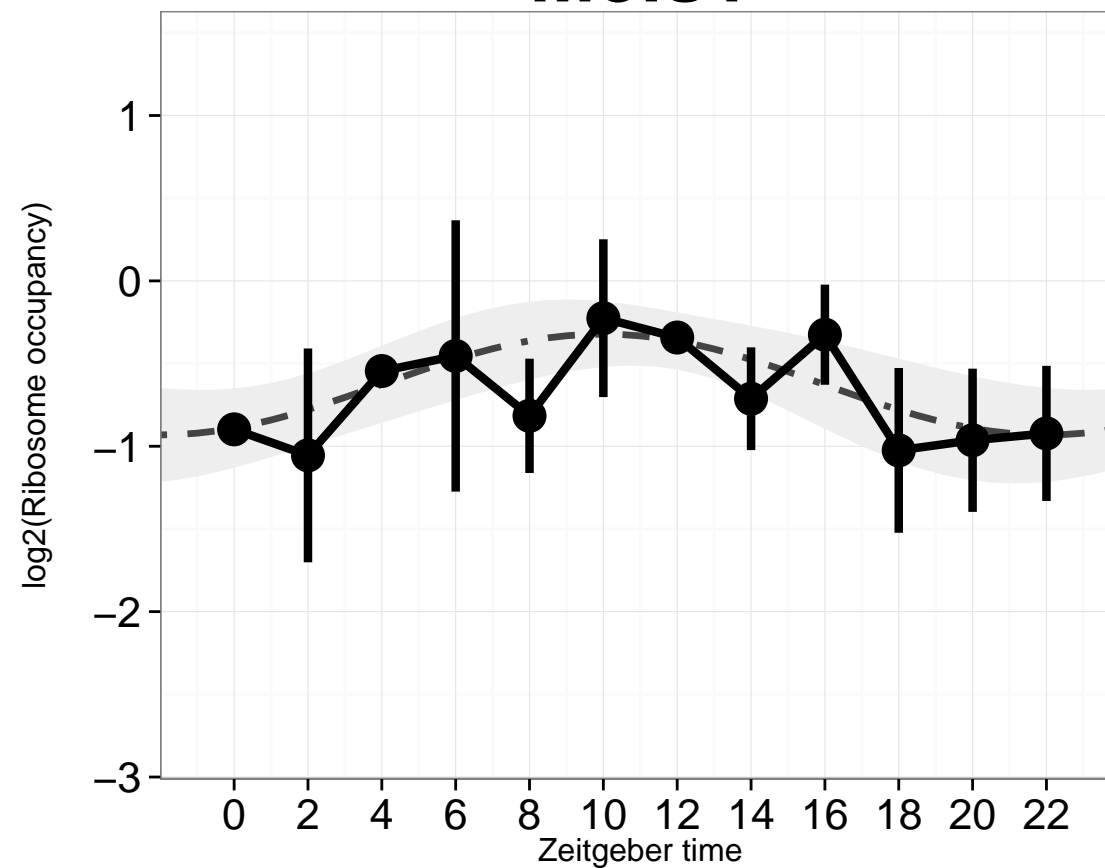

Supplement: SuppDataset_1.zip [file Meis1_set_A.pdf › Supplemental Dataset 1/A-mRNA_nonrhyth_translation_nonrhyth/Meis1_set_A.pdf]

## Meis2

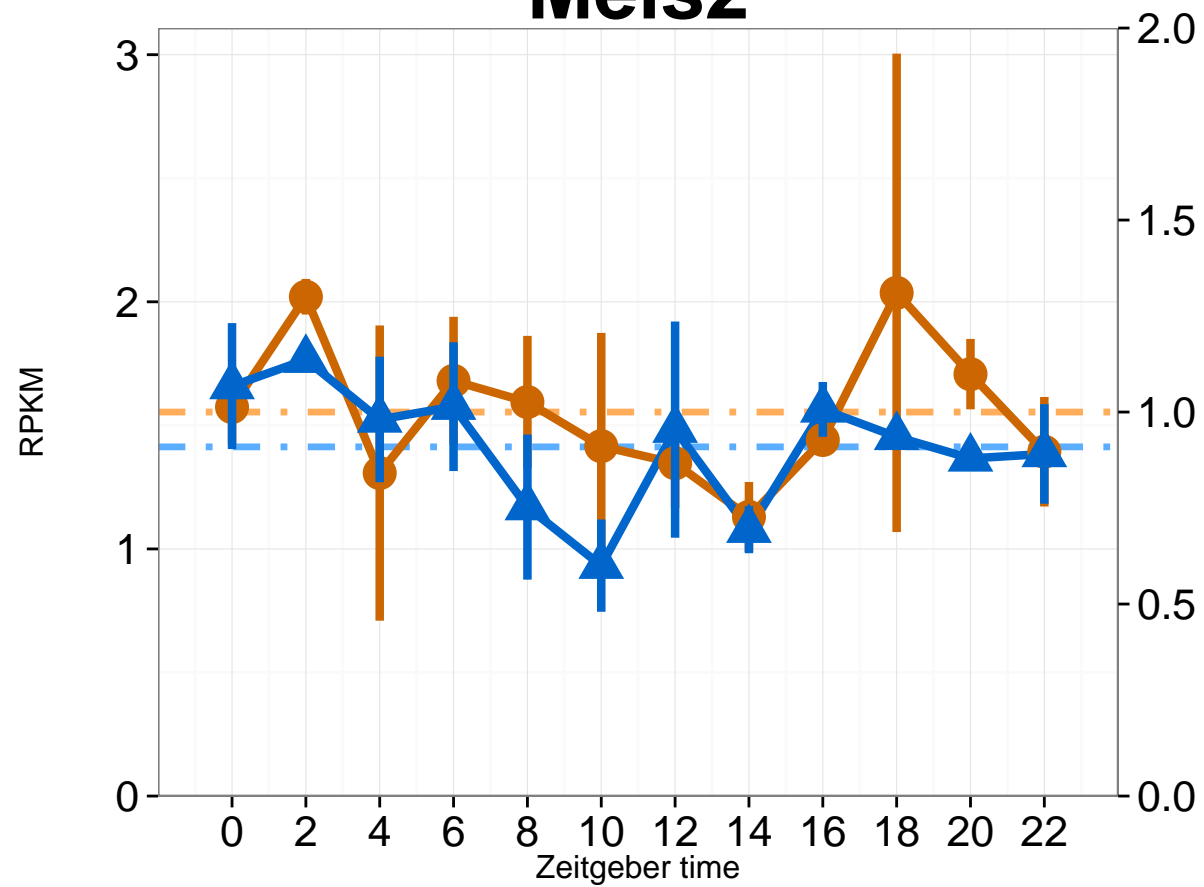

## Meis2

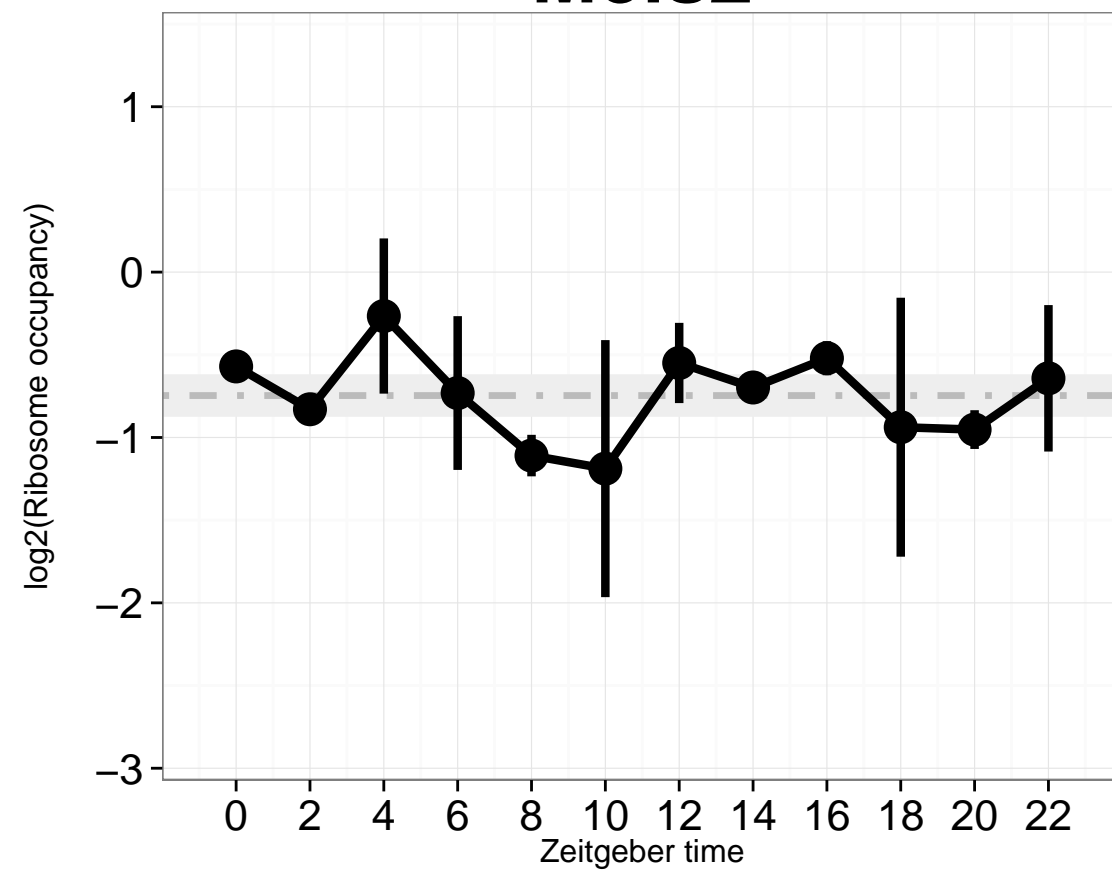

Supplement: SuppDataset_1.zip [file Meis2_set_A.pdf › Supplemental Dataset 1/A-mRNA_nonrhyth_translation_nonrhyth/Meis2_set_A.pdf]

# Memo1

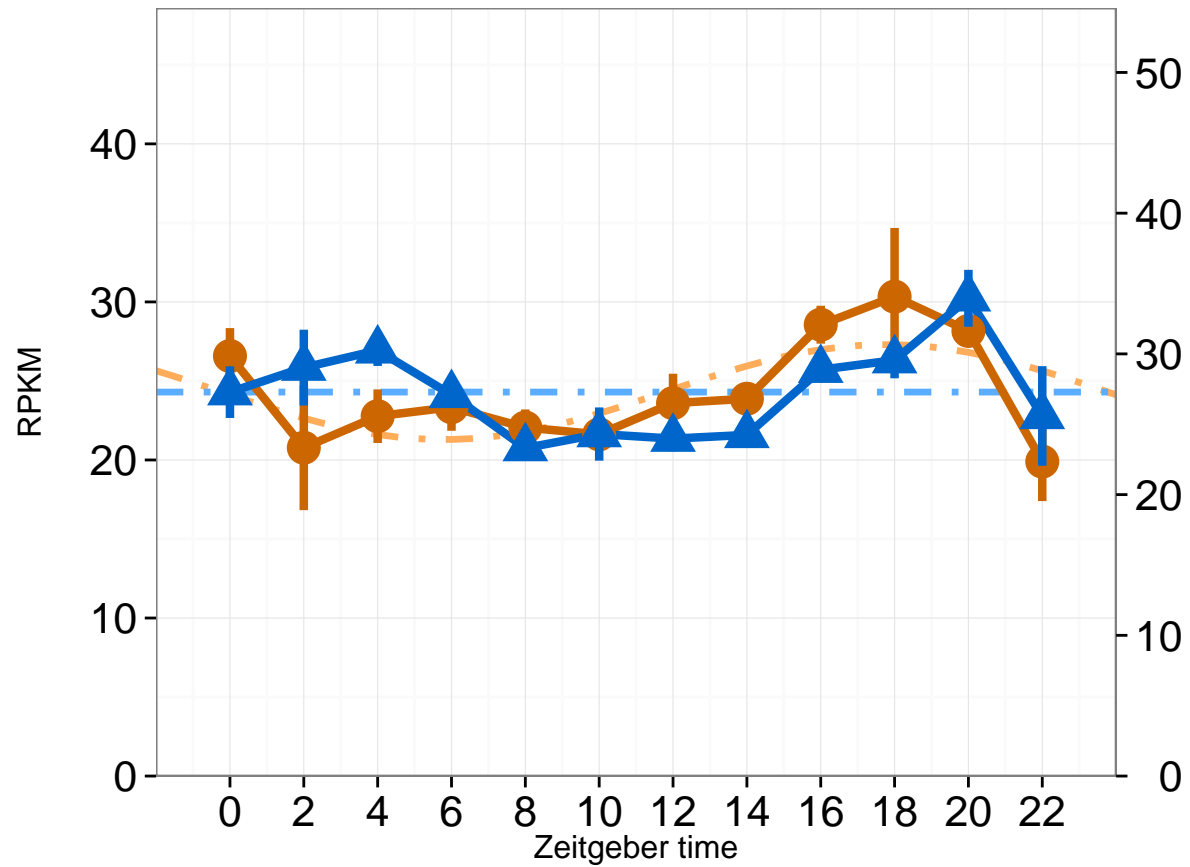

# Memo1

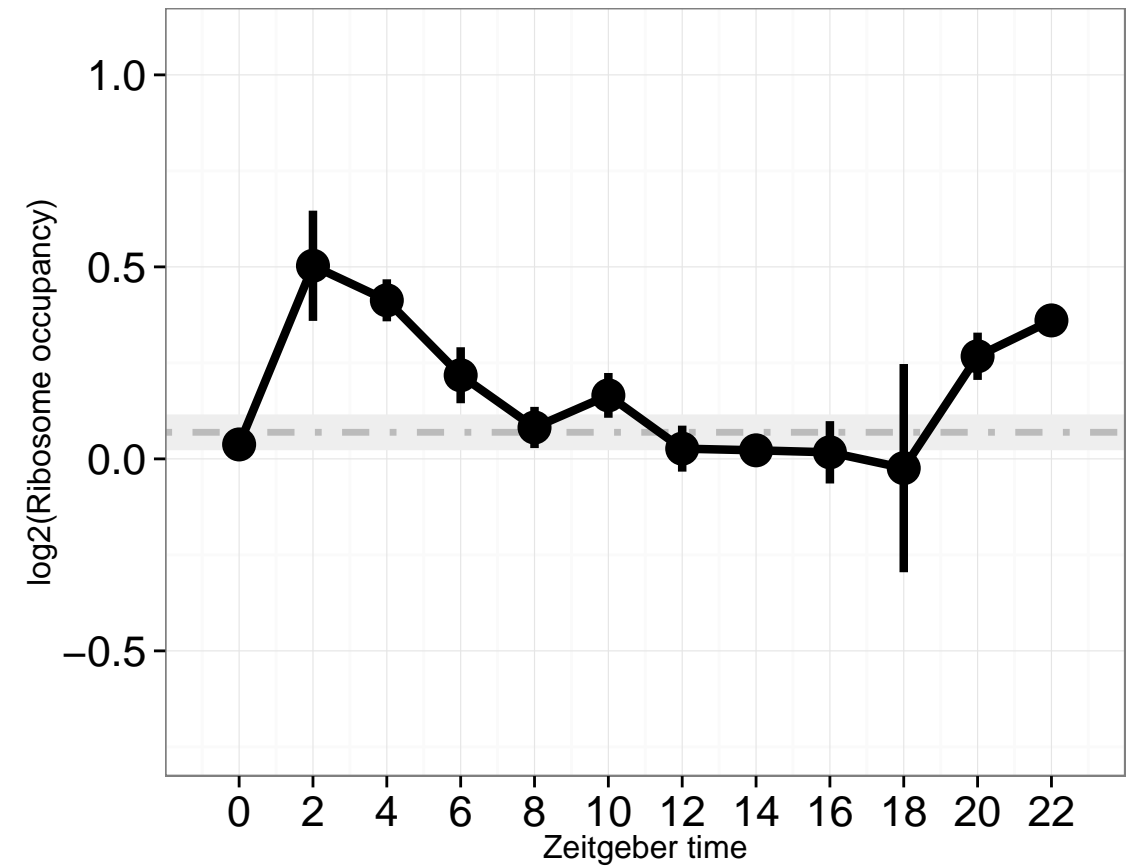

Supplement: SuppDataset_1.zip [file Memo1_set_A.pdf › Supplemental Dataset 1/A-mRNA_nonrhyth_translation_nonrhyth/Memo1_set_A.pdf]

## Men1

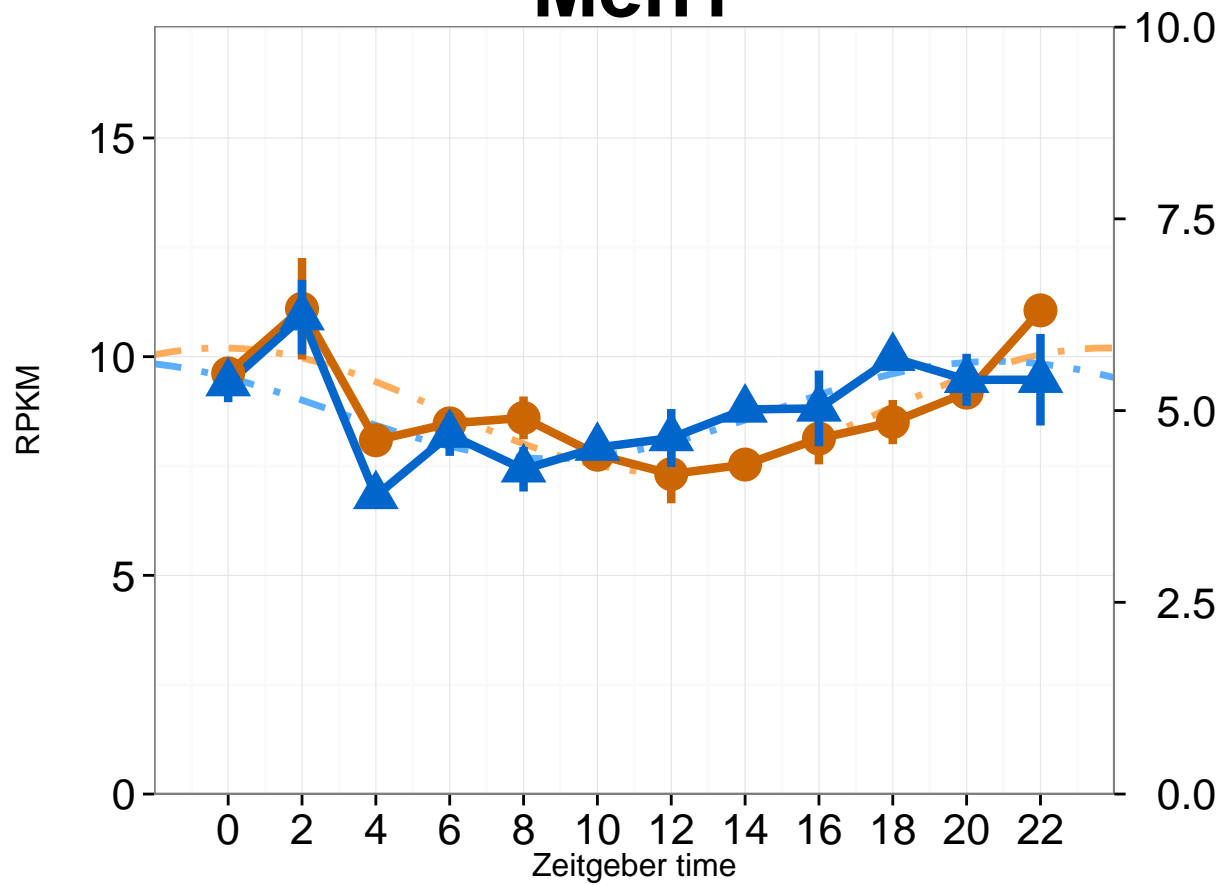

## Men1

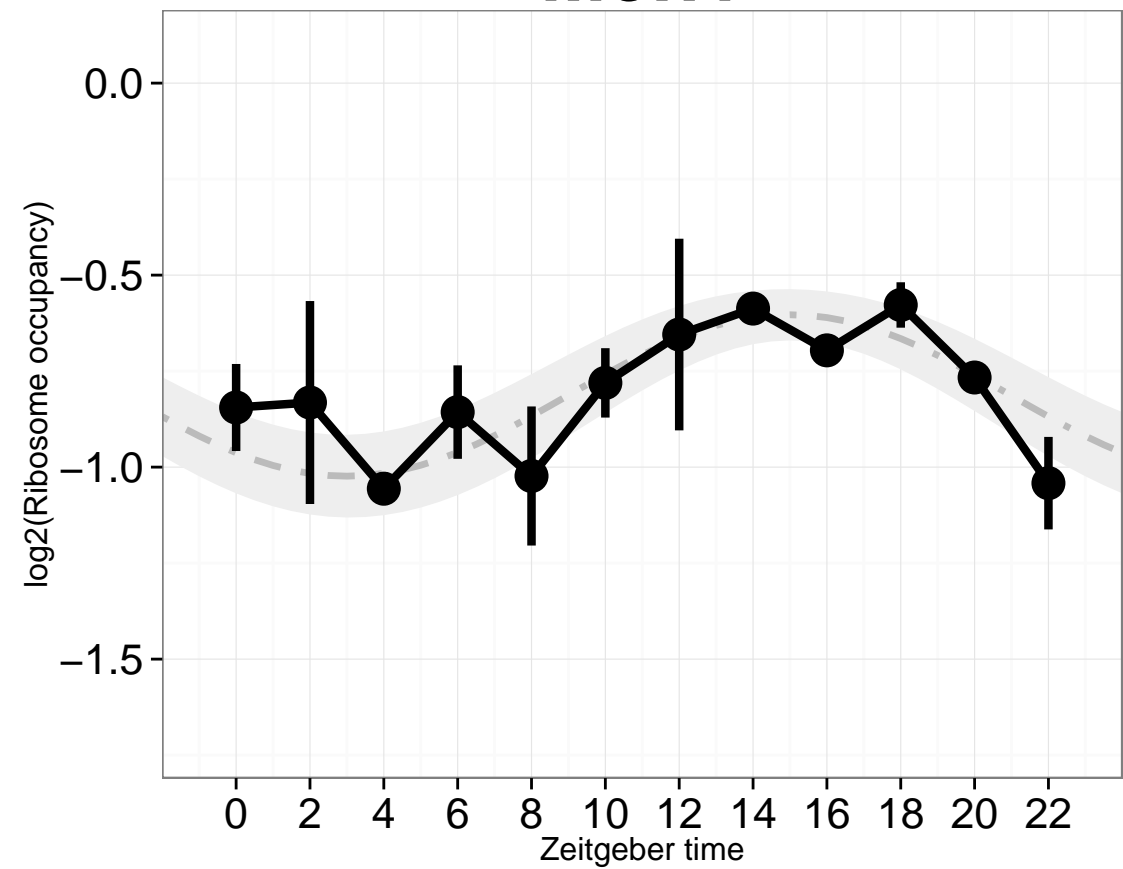

Supplement: SuppDataset_1.zip [file Men1_set_A.pdf › Supplemental Dataset 1/A-mRNA_nonrhyth_translation_nonrhyth/Men1_set_A.pdf]

## Mepce

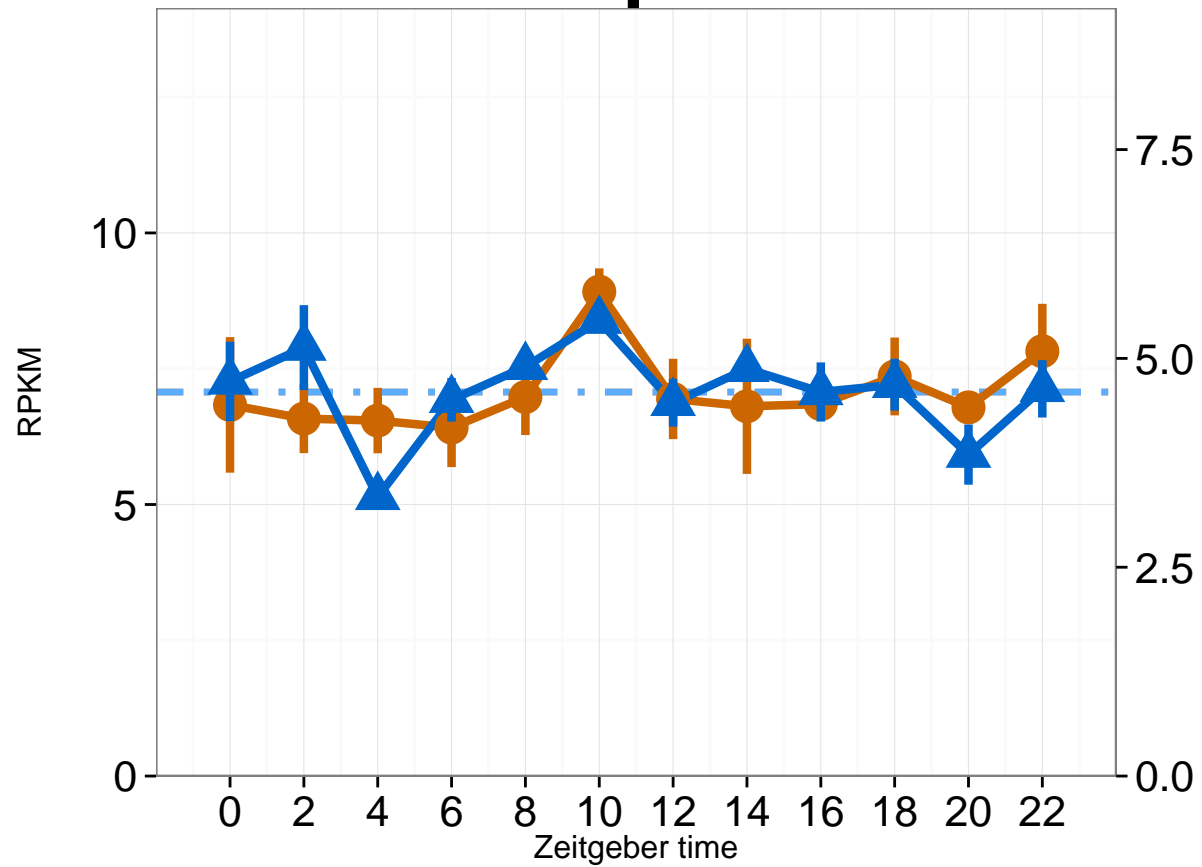

## Mepce

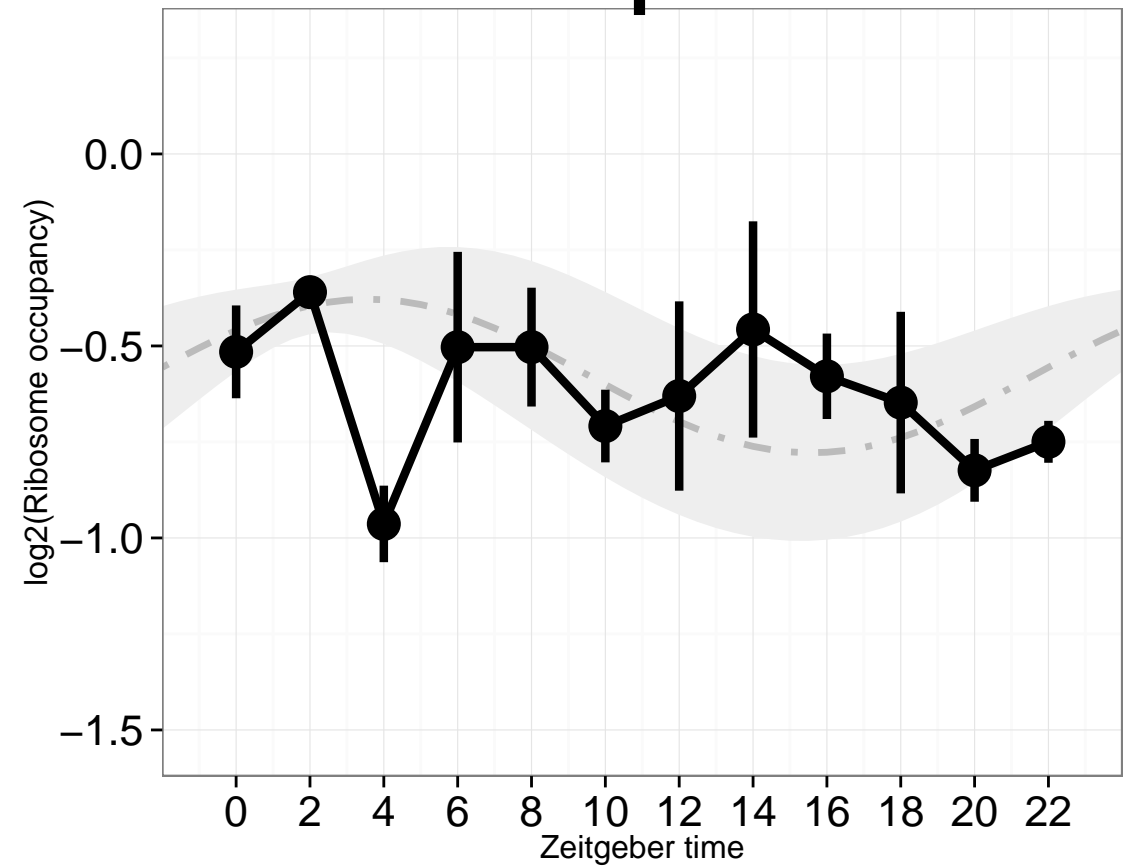

Supplement: SuppDataset_1.zip [file Mepce_set_A.pdf › Supplemental Dataset 1/A-mRNA_nonrhyth_translation_nonrhyth/Mepce_set_A.pdf]

## Mesdc1

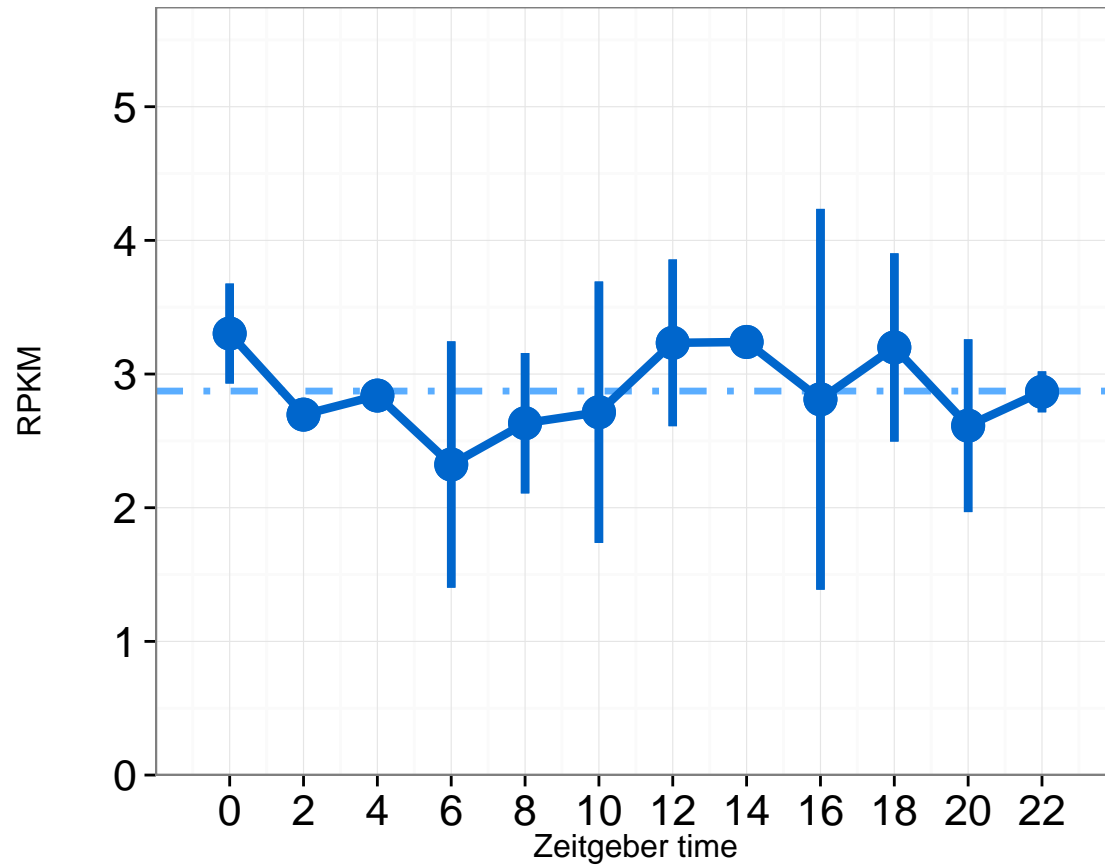

## Mesdc1 log2(Ribosome occupancy)

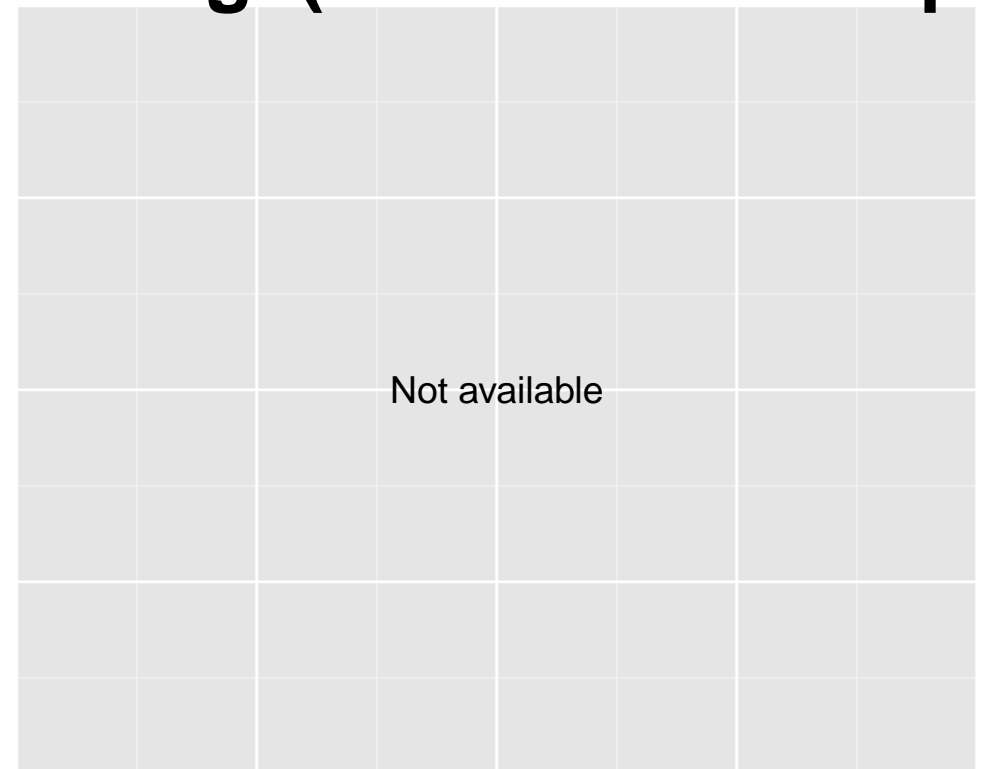

Supplement: SuppDataset_1.zip [file Mesdc1_set_A.pdf › Supplemental Dataset 1/A-mRNA_nonrhyth_translation_nonrhyth/Mesdc1_set_A.pdf]

## Mesdc2

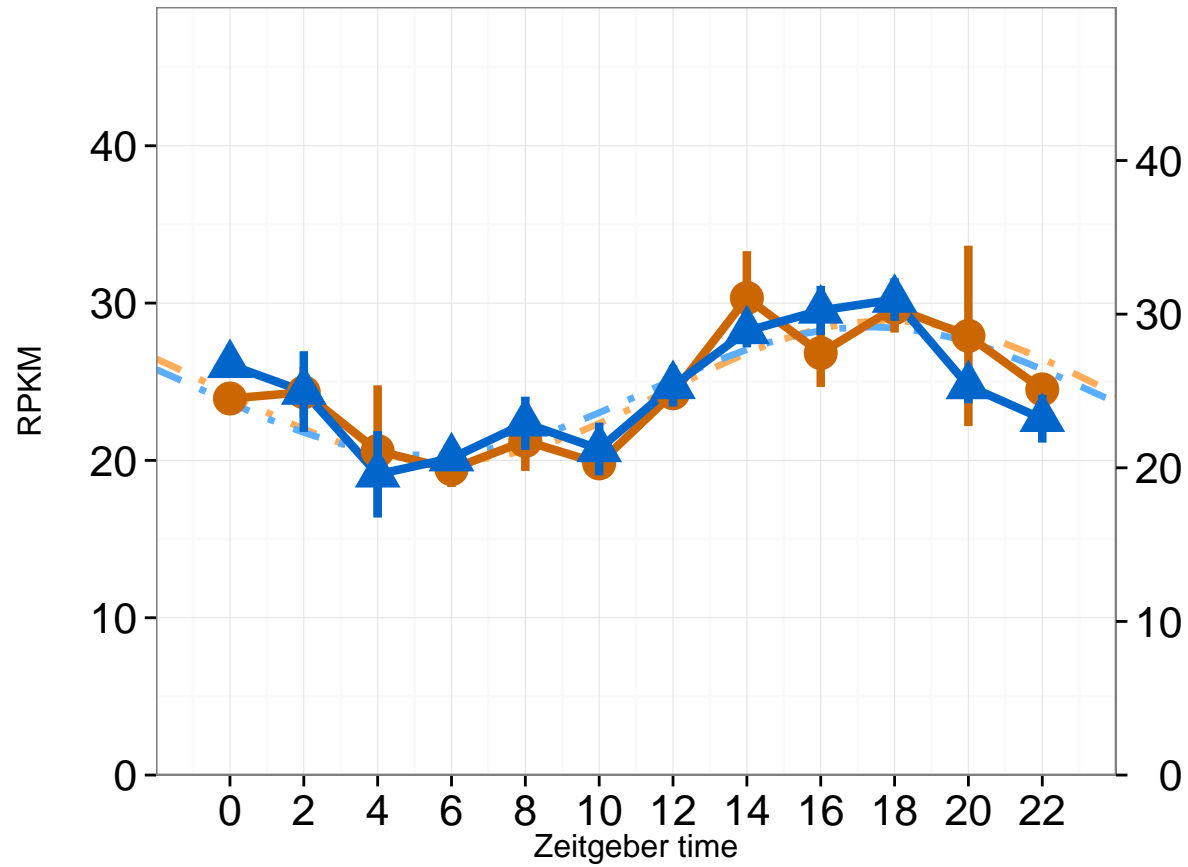

## Mesdc2

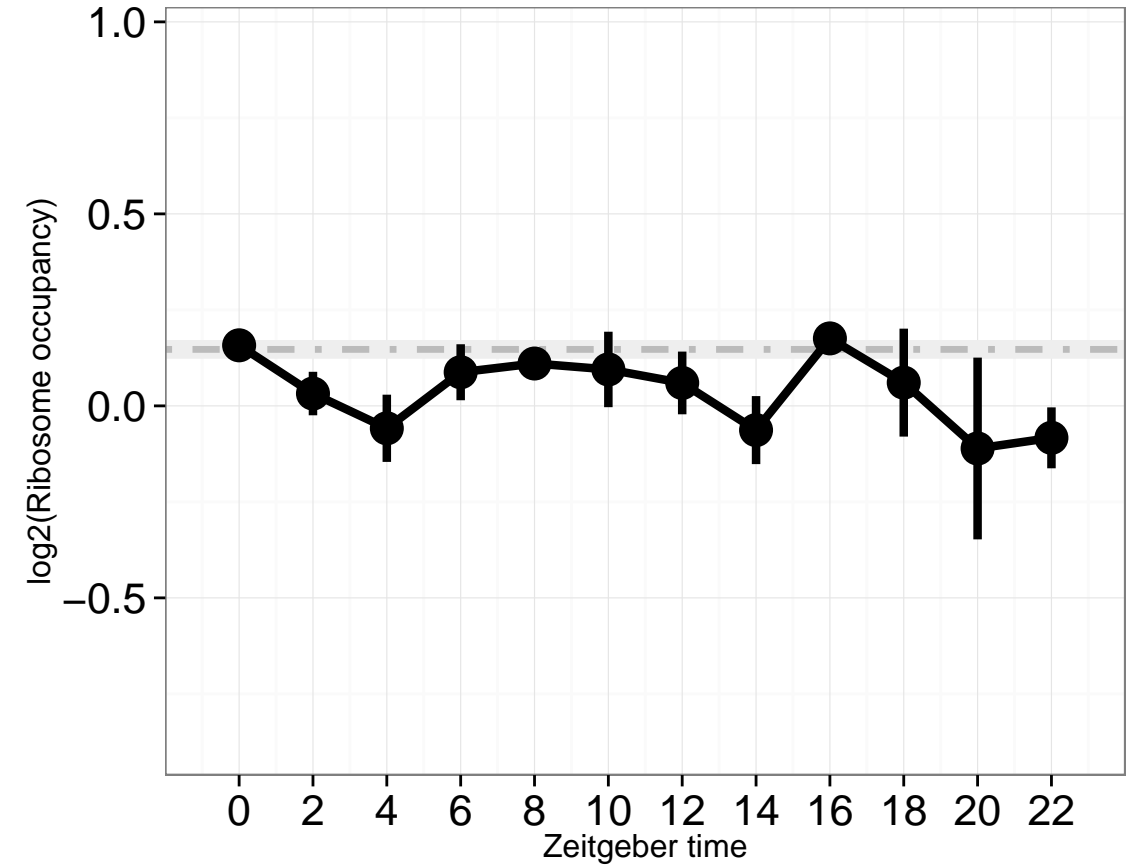

Supplement: SuppDataset_1.zip [file Mesdc2_set_A.pdf › Supplemental Dataset 1/A-mRNA_nonrhyth_translation_nonrhyth/Mesdc2_set_A.pdf]

## Met

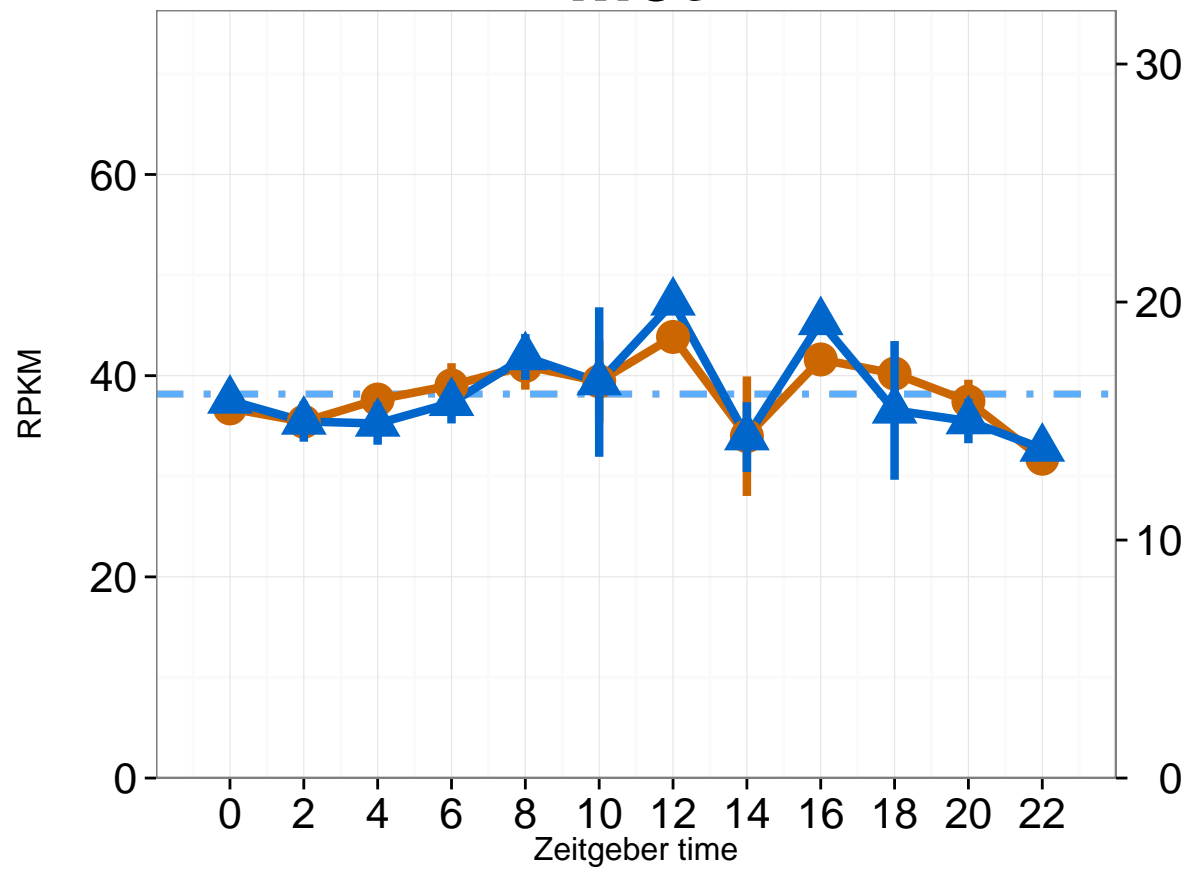

## Met

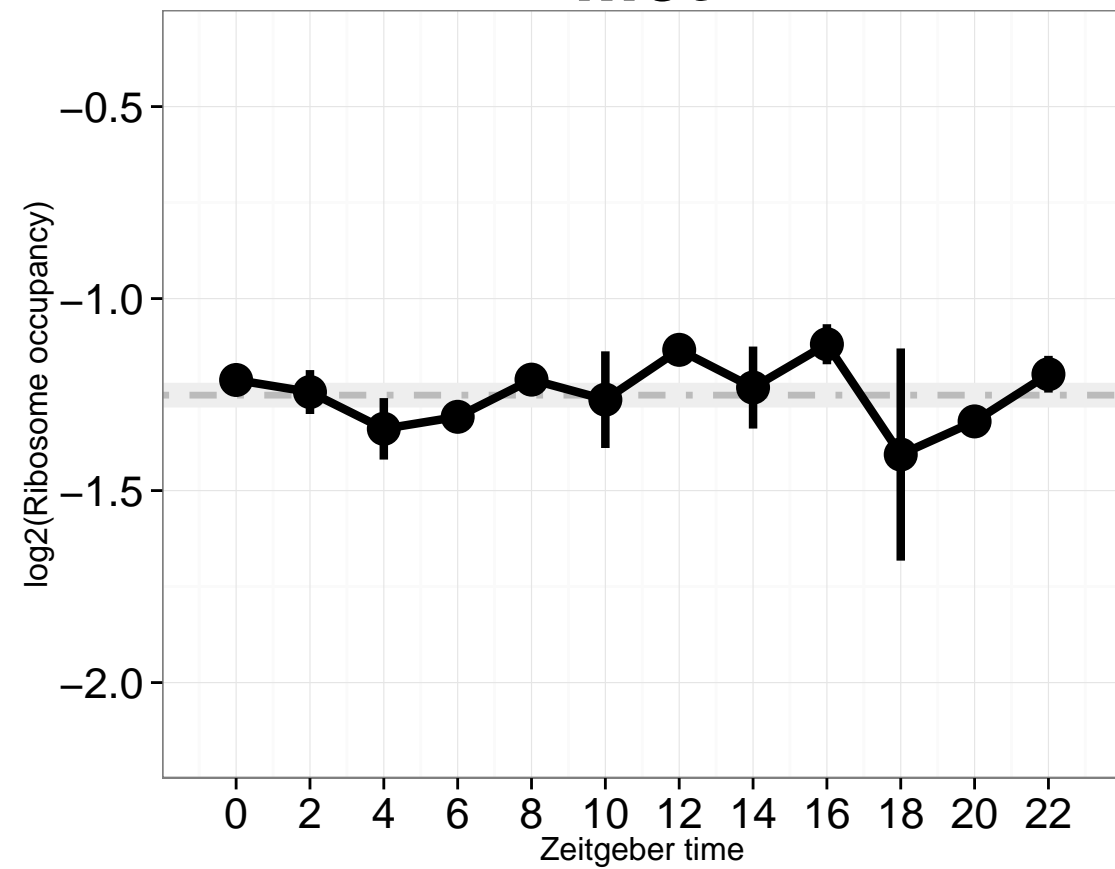

Supplement: SuppDataset_1.zip [file Met_set_A.pdf › Supplemental Dataset 1/A-mRNA_nonrhyth_translation_nonrhyth/Met_set_A.pdf]

# Metap1

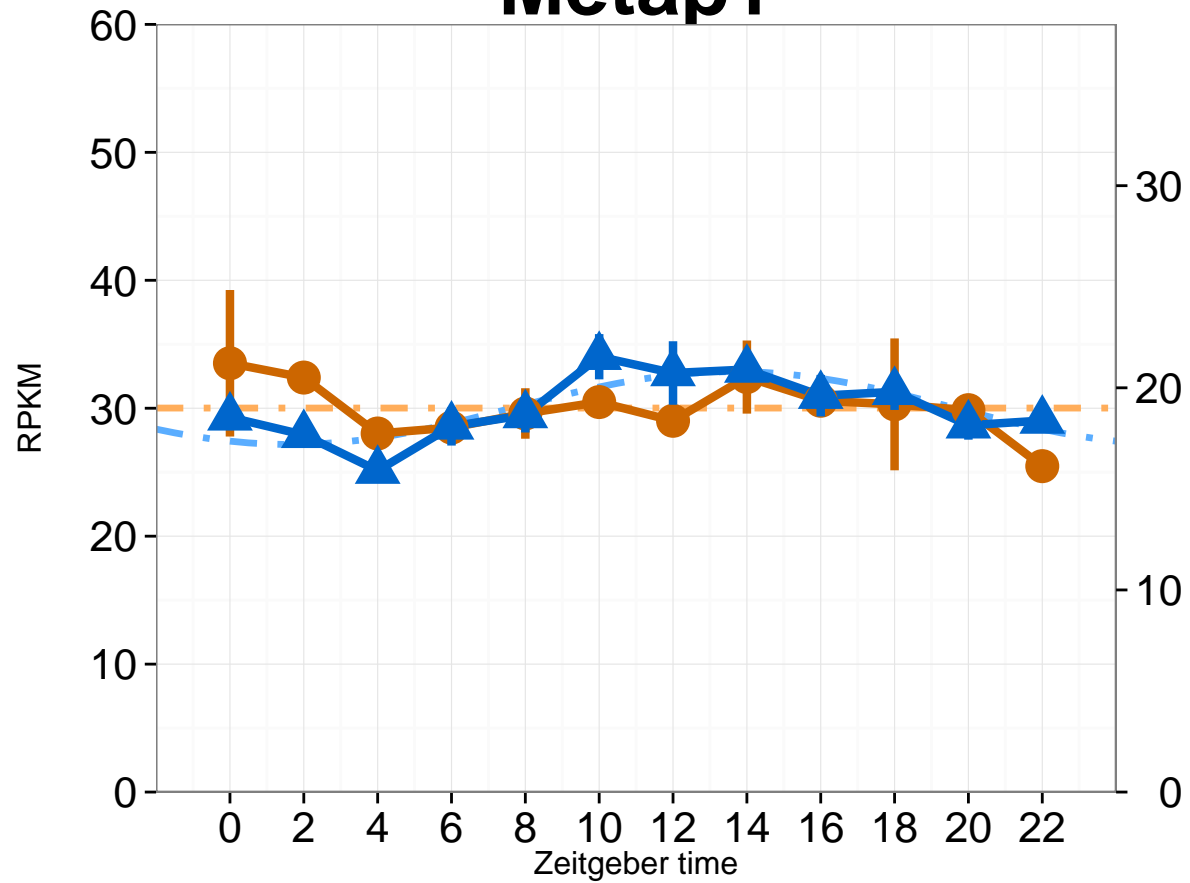

# Metap1

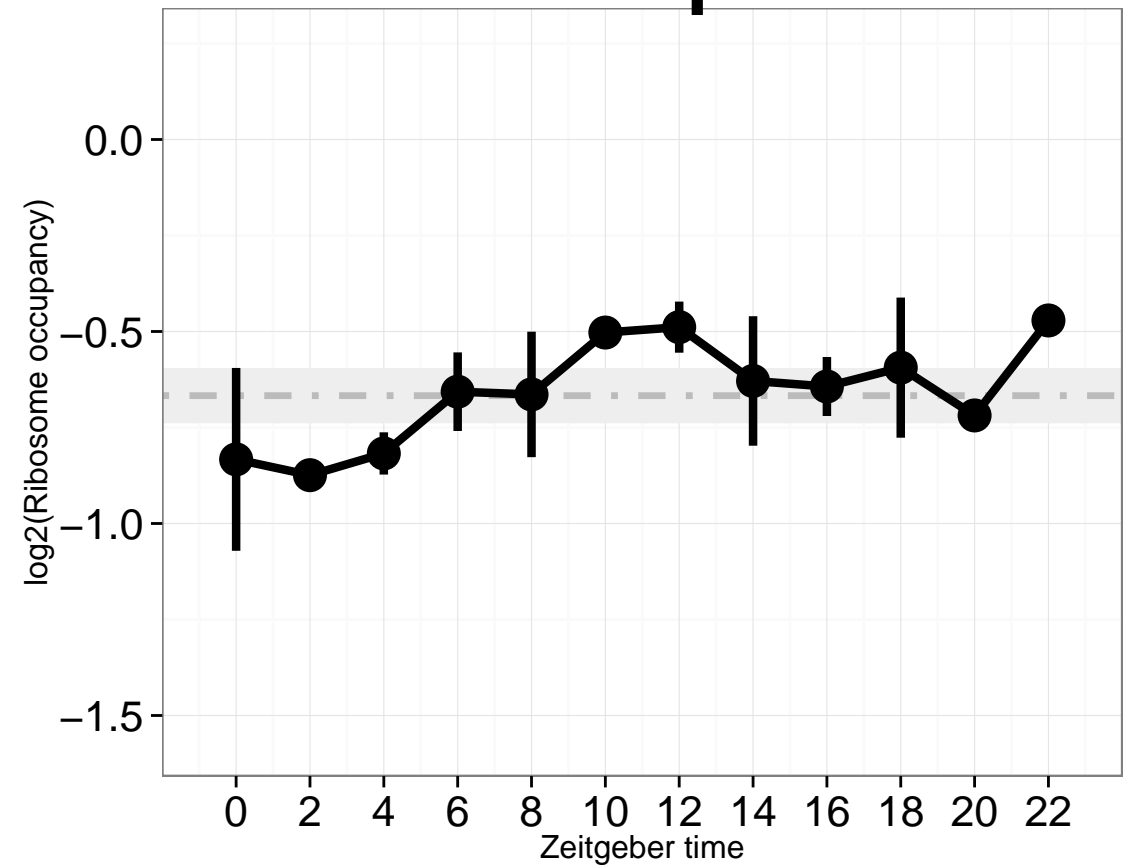

Supplement: SuppDataset_1.zip [file Metap1_set_A.pdf › Supplemental Dataset 1/A-mRNA_nonrhyth_translation_nonrhyth/Metap1_set_A.pdf]

# Metap1d

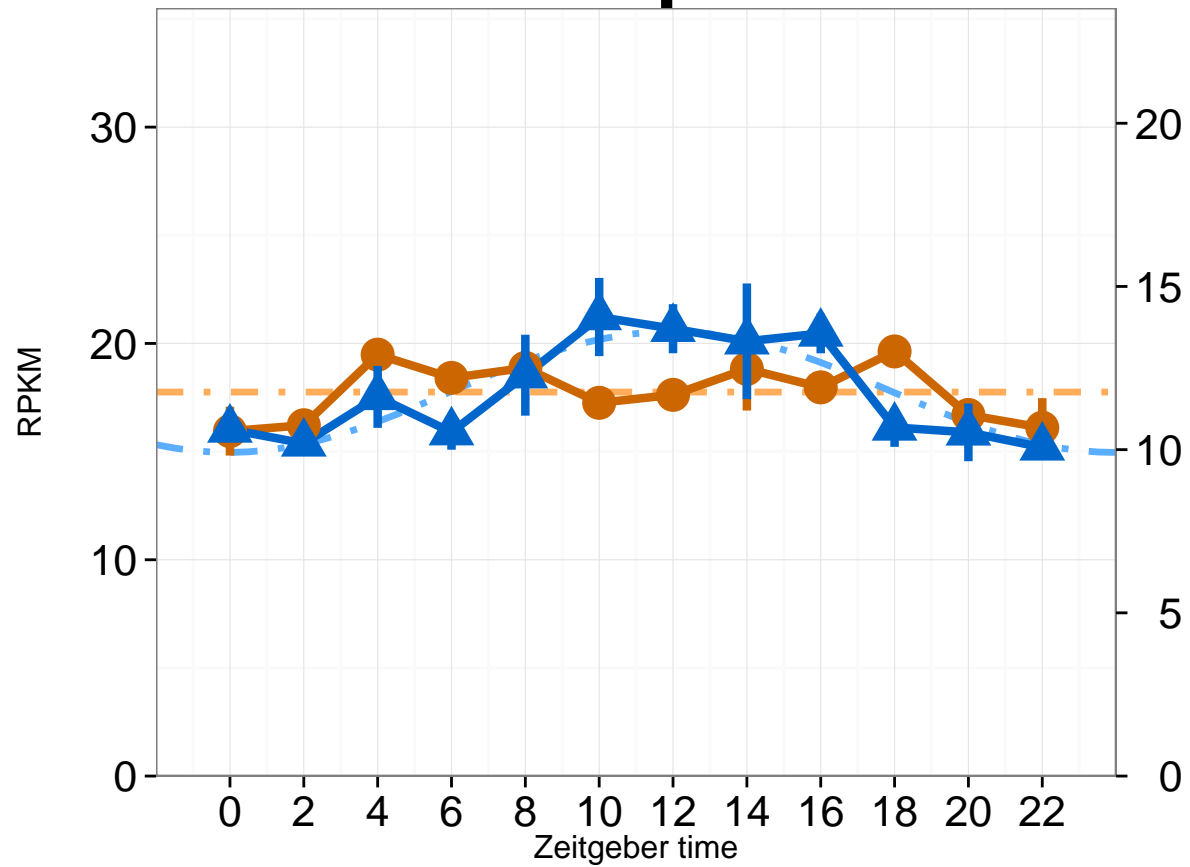

# Metap1d

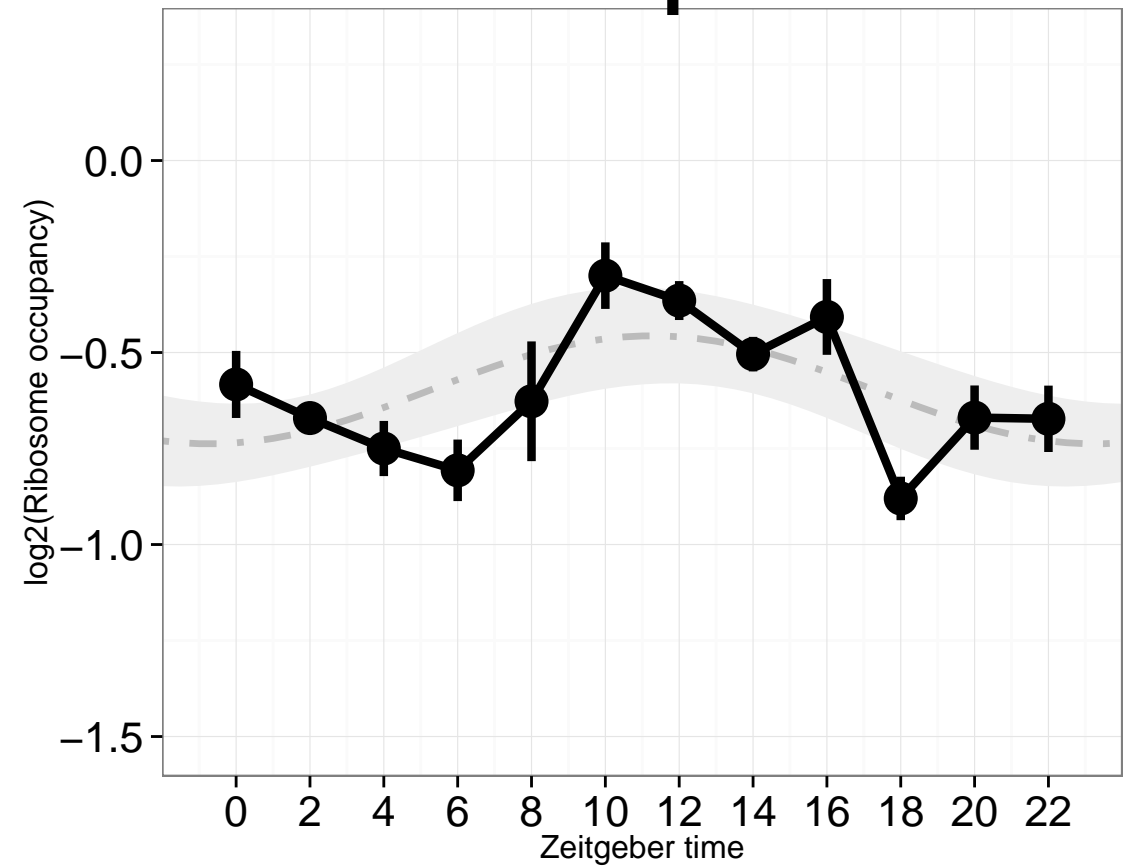

Supplement: SuppDataset_1.zip [file Metap1d_set_A.pdf › Supplemental Dataset 1/A-mRNA_nonrhyth_translation_nonrhyth/Metap1d_set_A.pdf]

# Metap2

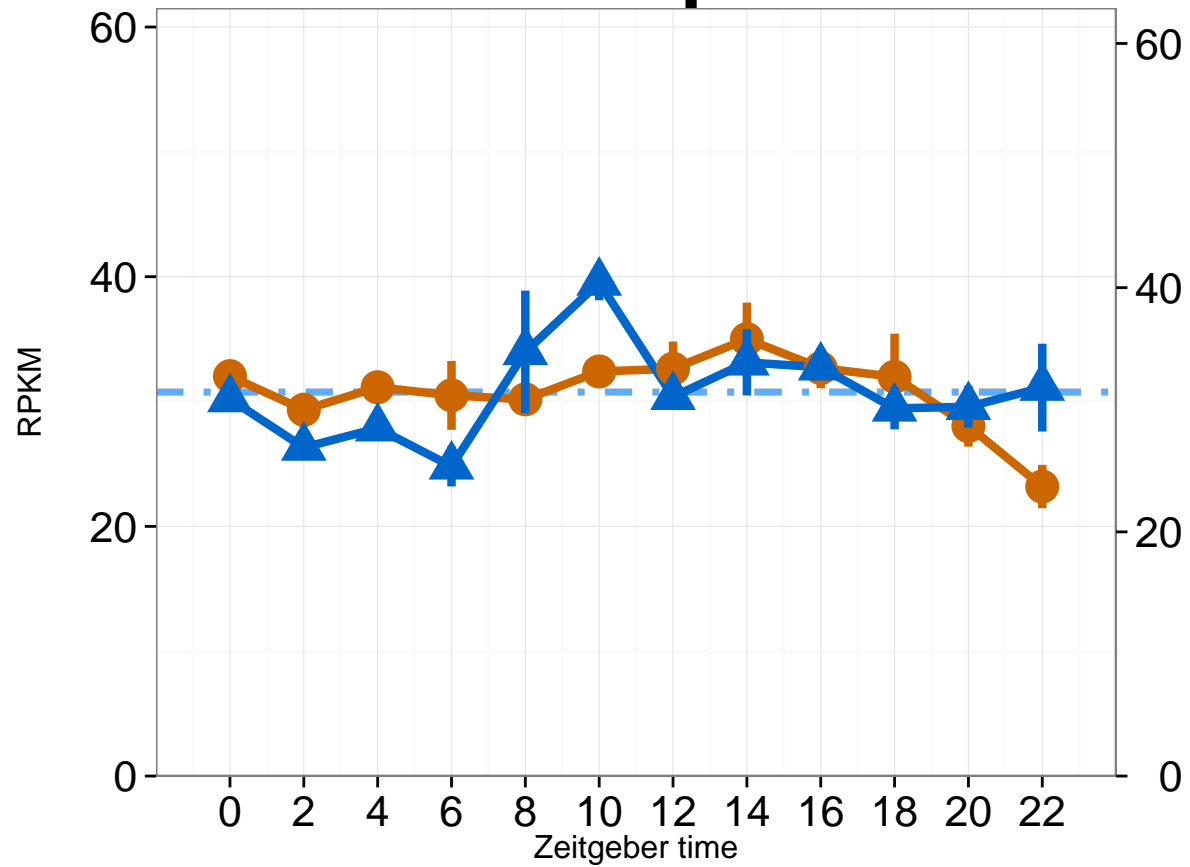

# Metap2

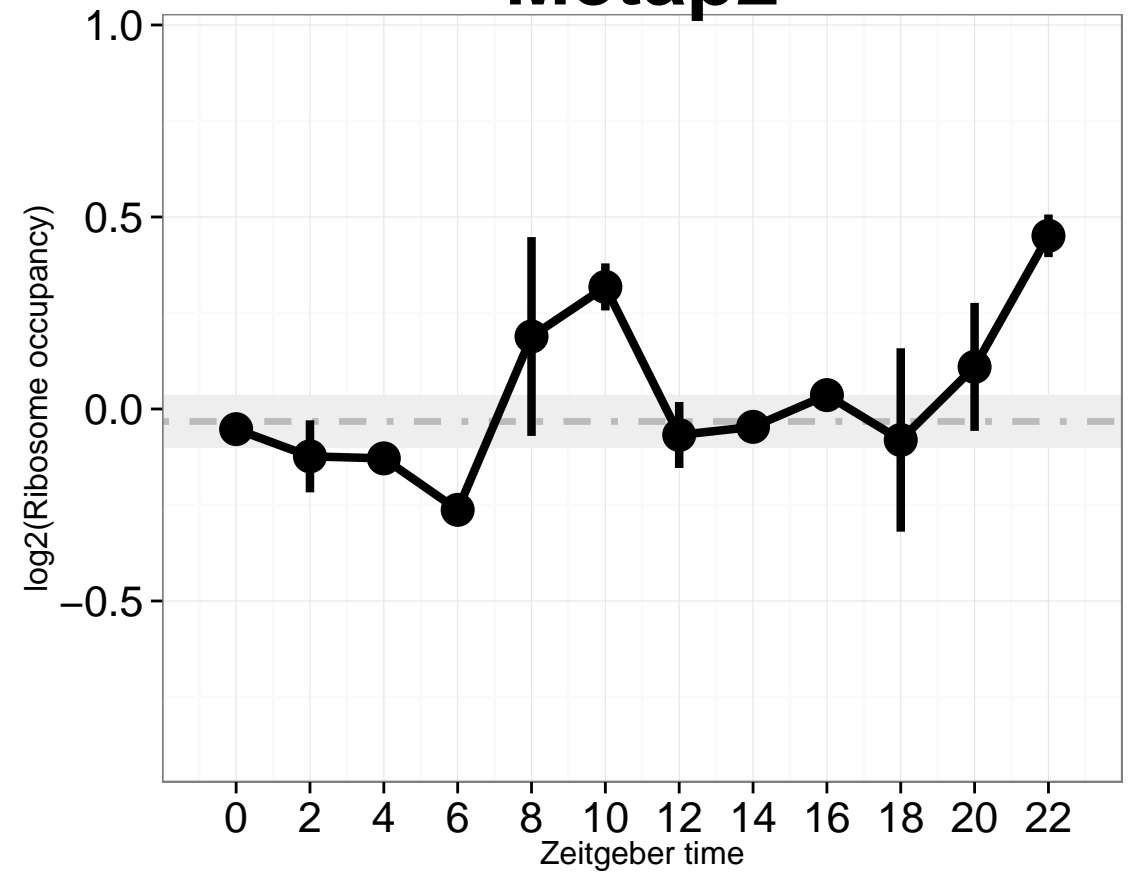

Supplement: SuppDataset_1.zip [file Metap2_set_A.pdf › Supplemental Dataset 1/A-mRNA_nonrhyth_translation_nonrhyth/Metap2_set_A.pdf]

## Metrn

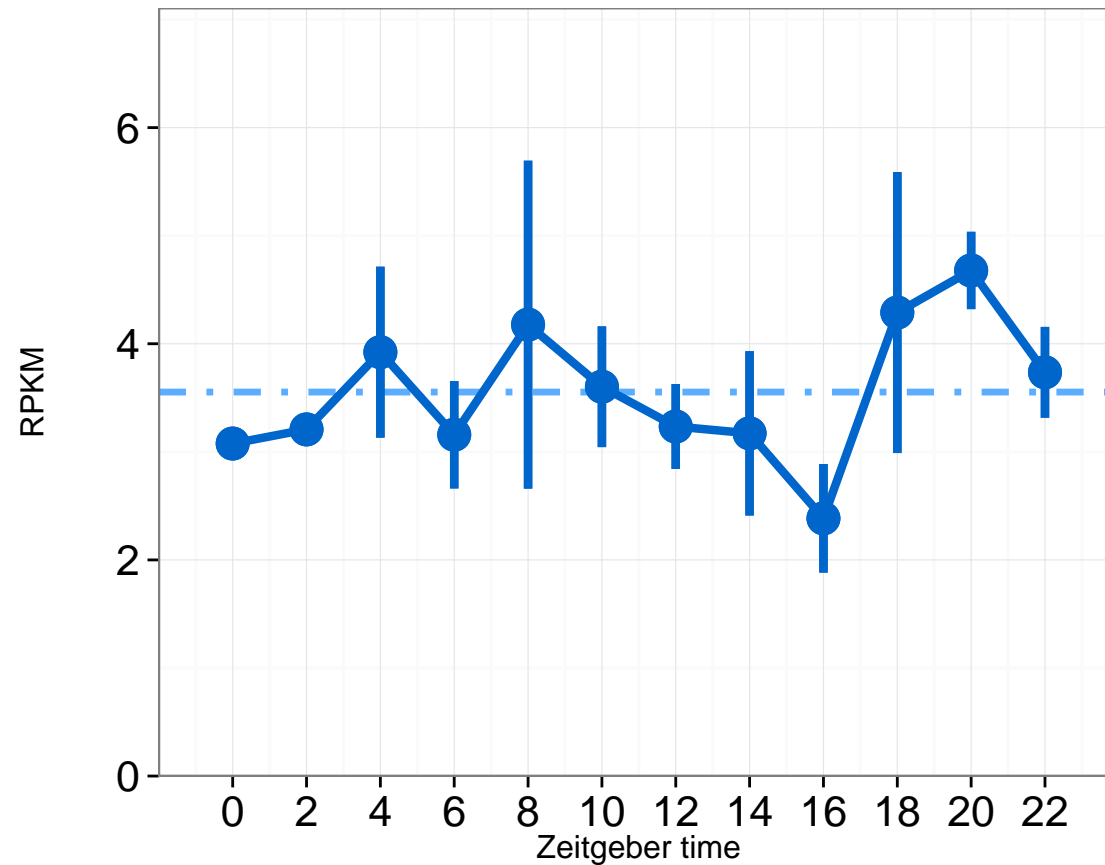

## Metrn log2(Ribosome occupancy)

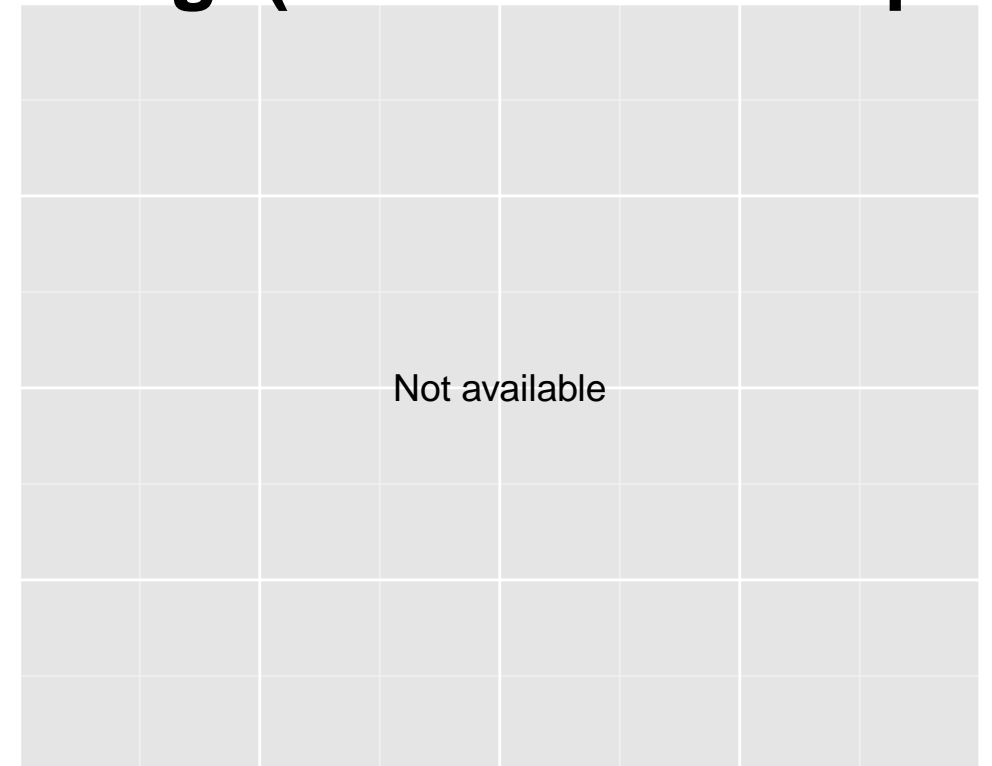

Supplement: SuppDataset_1.zip [file Metrn_set_A.pdf › Supplemental Dataset 1/A-mRNA_nonrhyth_translation_nonrhyth/Metrn_set_A.pdf]

## Metrnl

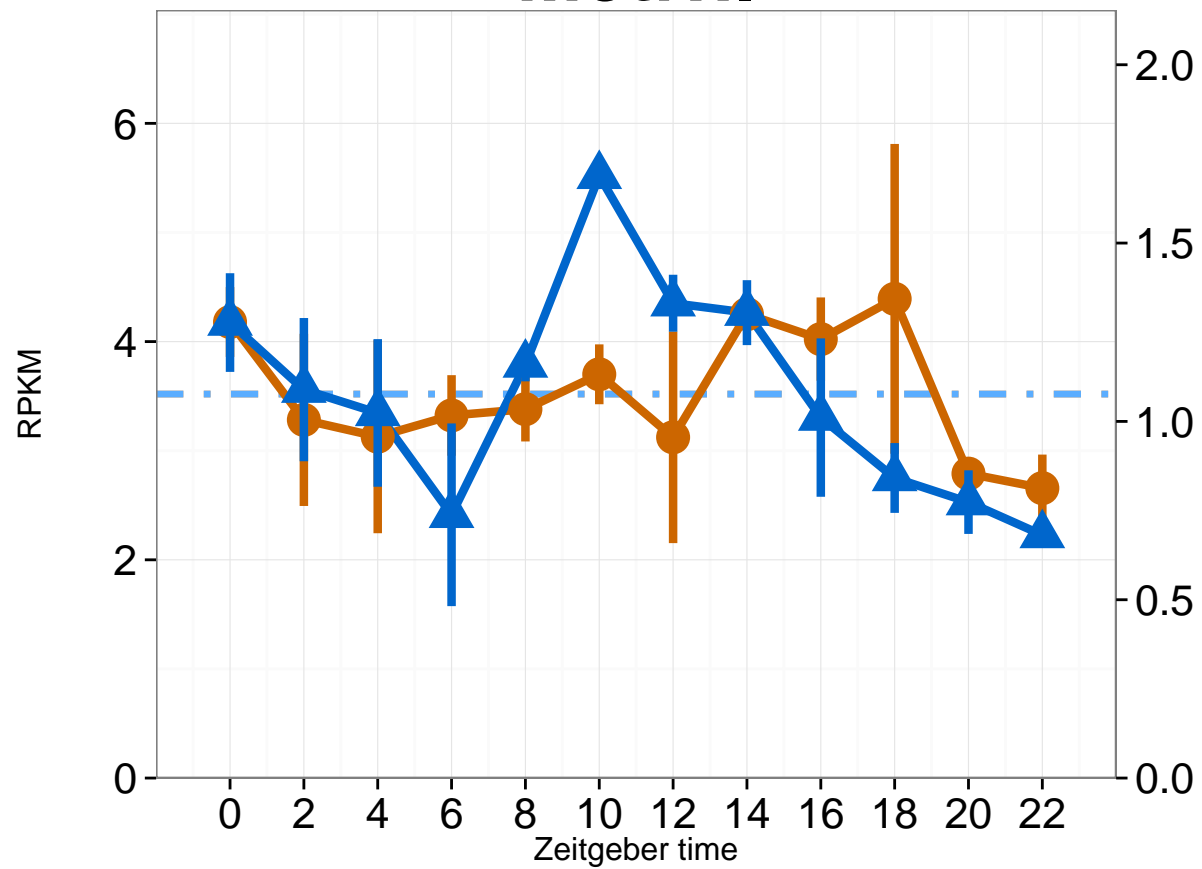

## Metrnl

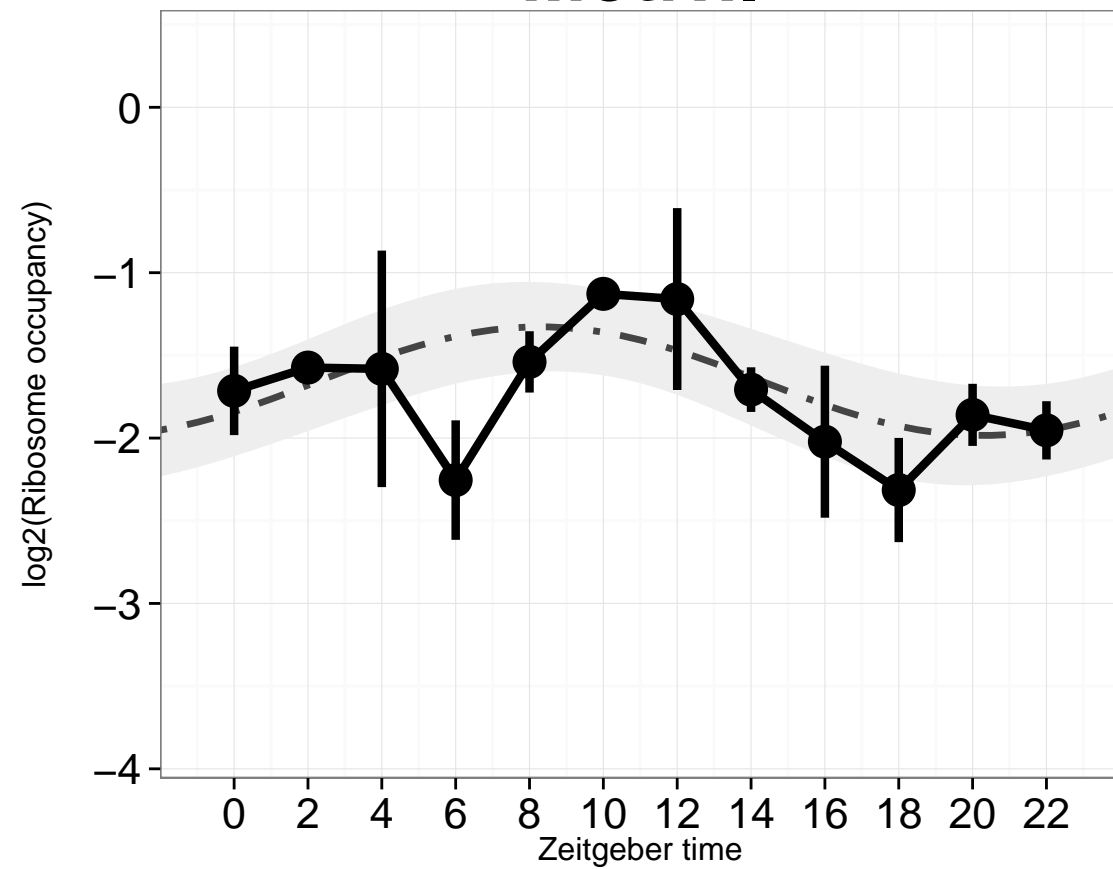

Supplement: SuppDataset_1.zip [file Metrnl_set_A.pdf › Supplemental Dataset 1/A-mRNA_nonrhyth_translation_nonrhyth/Metrnl_set_A.pdf]

## Mettl10

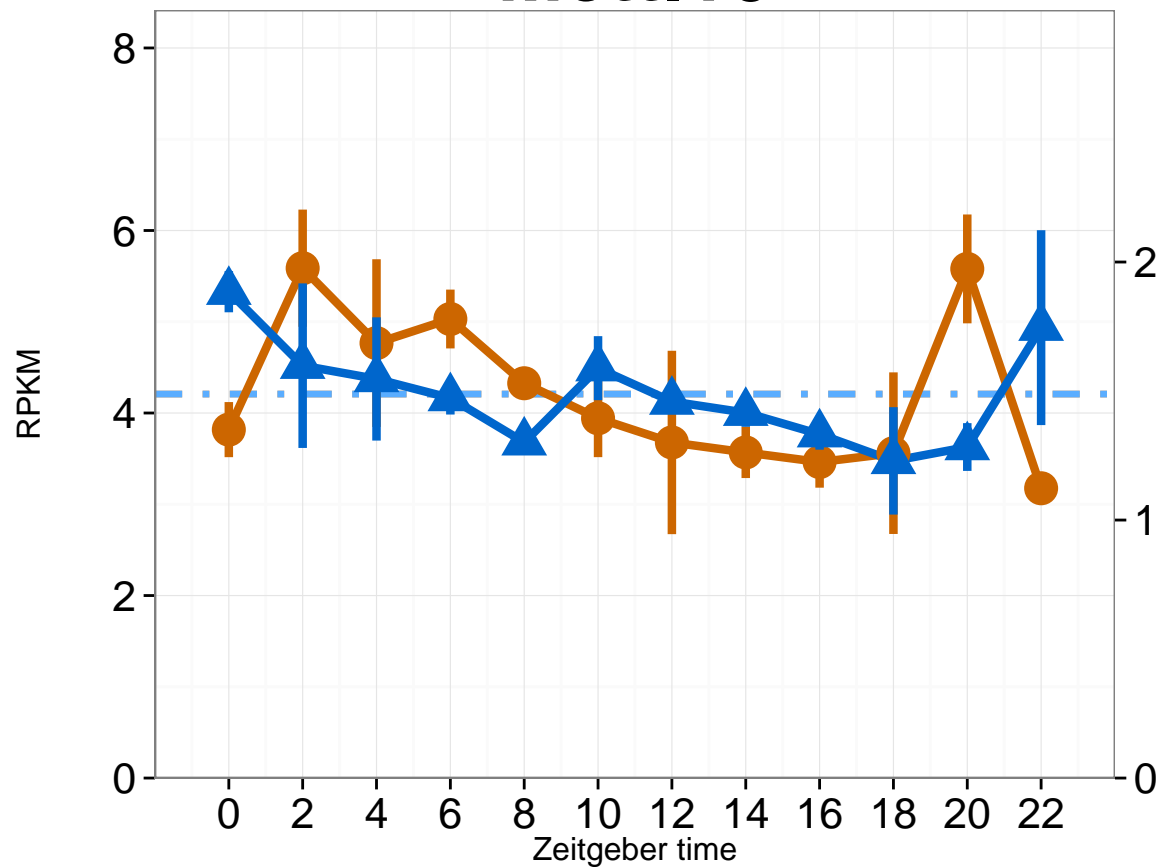

## Mettl10

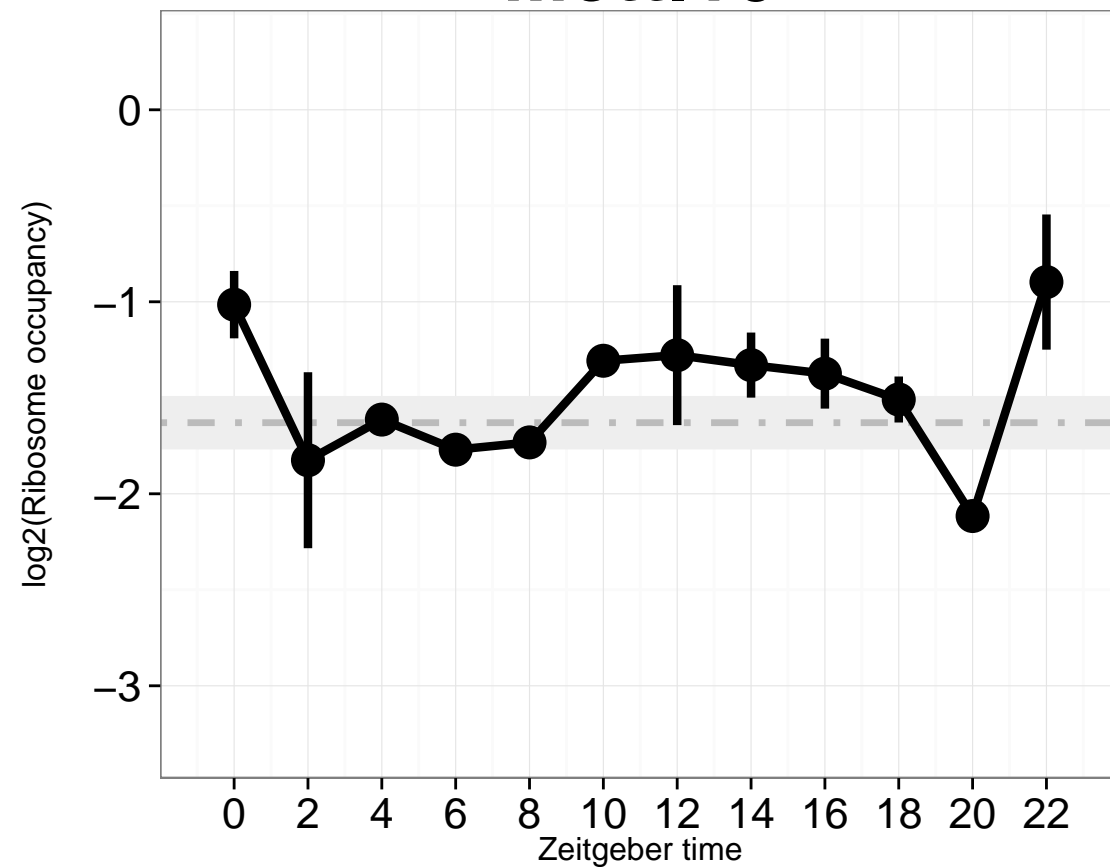

Supplement: SuppDataset_1.zip [file Mettl10_set_A.pdf › Supplemental Dataset 1/A-mRNA_nonrhyth_translation_nonrhyth/Mettl10_set_A.pdf]

# Mettl14

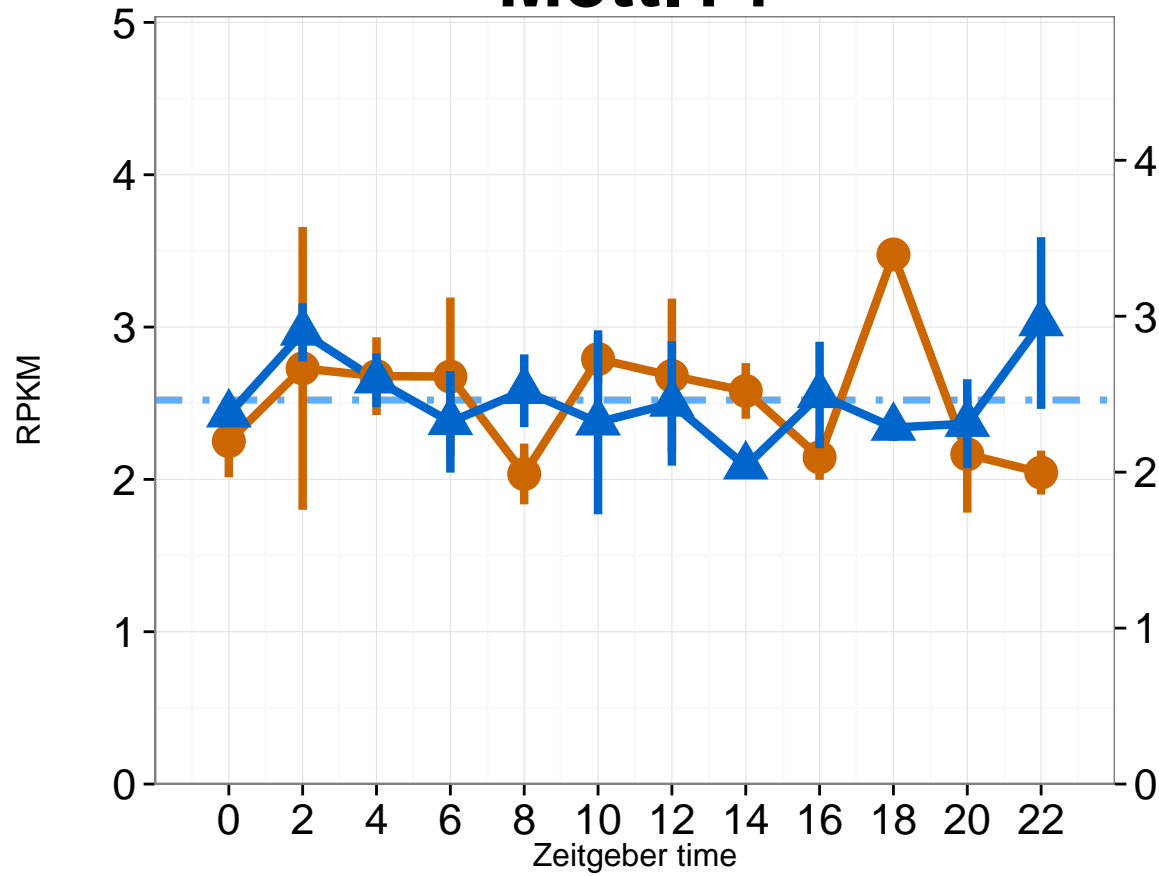

# Mettl14

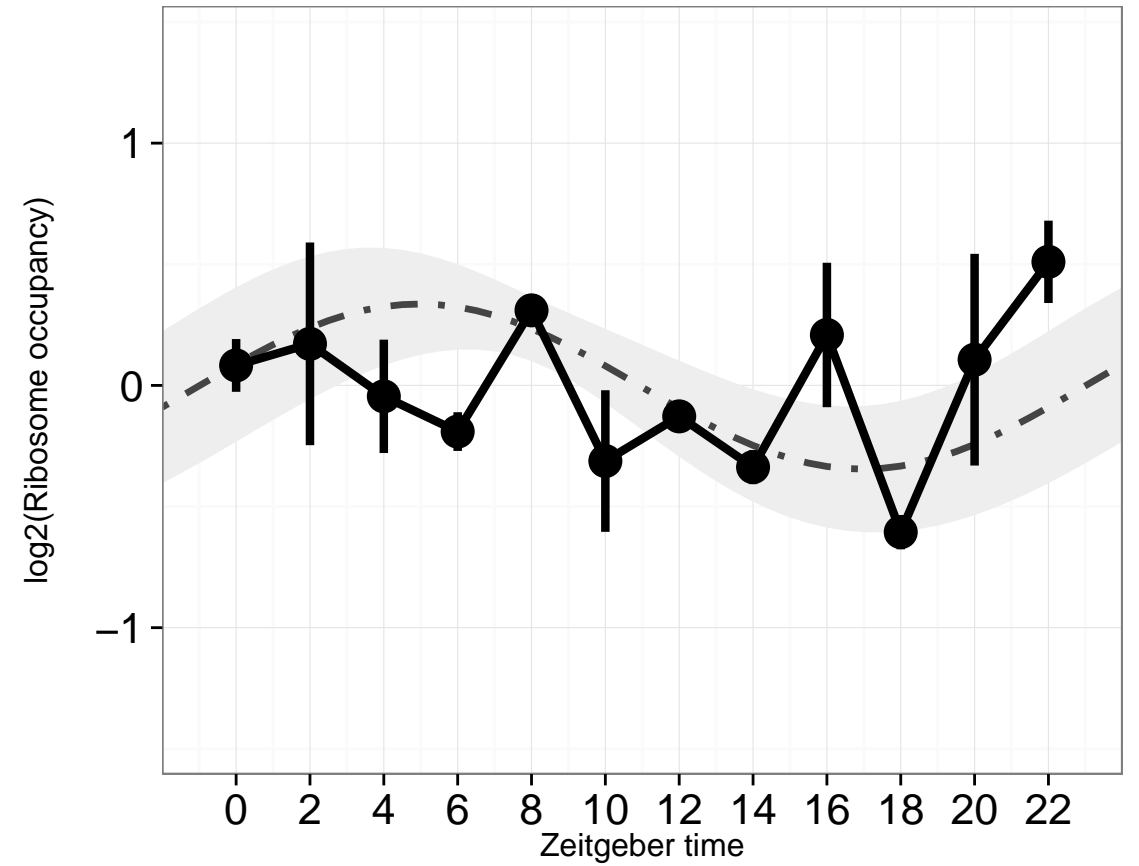

Supplement: SuppDataset_1.zip [file Mettl14_set_A.pdf › Supplemental Dataset 1/A-mRNA_nonrhyth_translation_nonrhyth/Mettl14_set_A.pdf]

## Mettl15

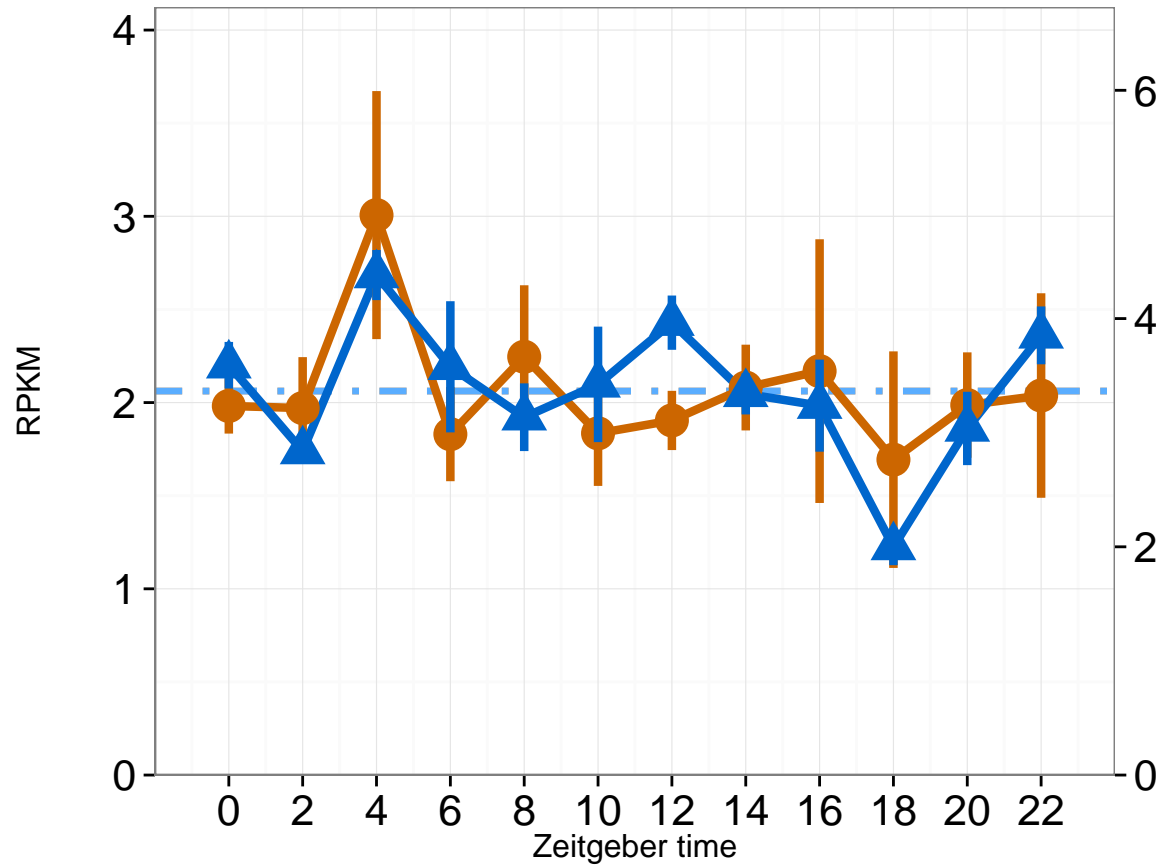

## Mettl15

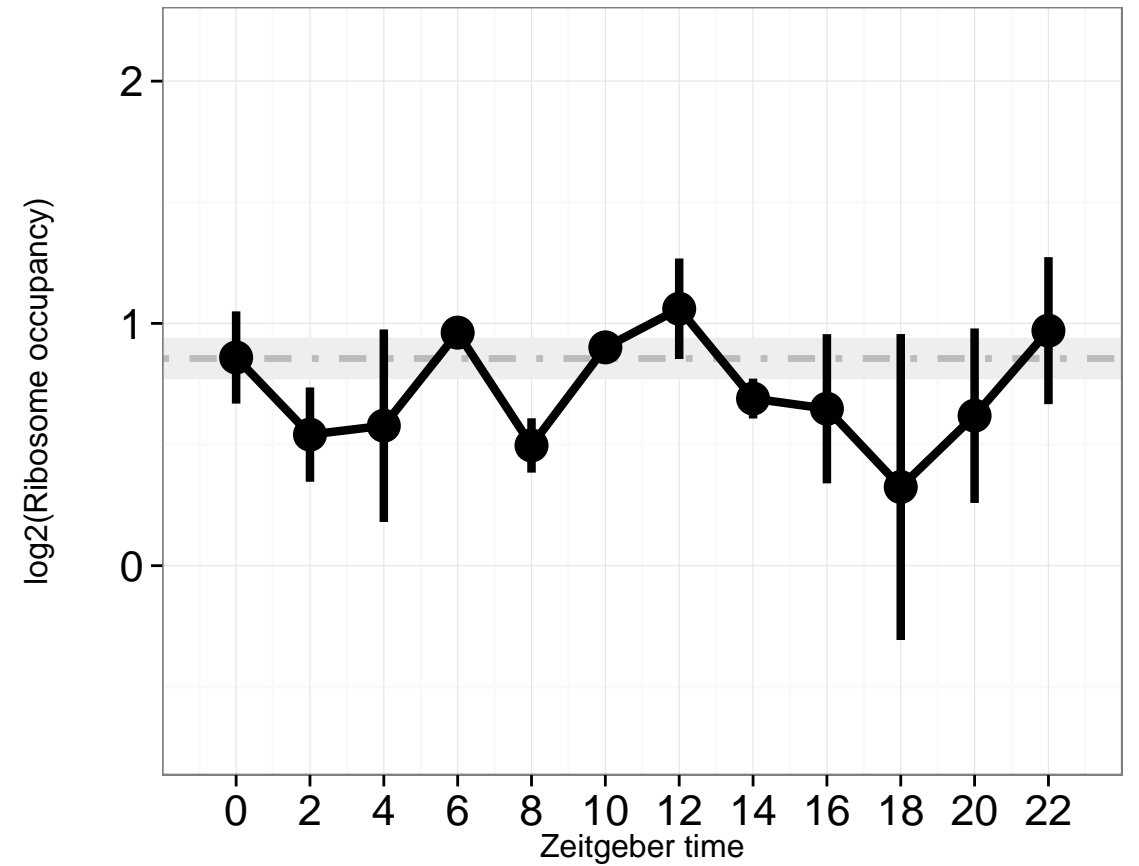

Supplement: SuppDataset_1.zip [file Mettl15_set_A.pdf › Supplemental Dataset 1/A-mRNA_nonrhyth_translation_nonrhyth/Mettl15_set_A.pdf]

# Mettl16

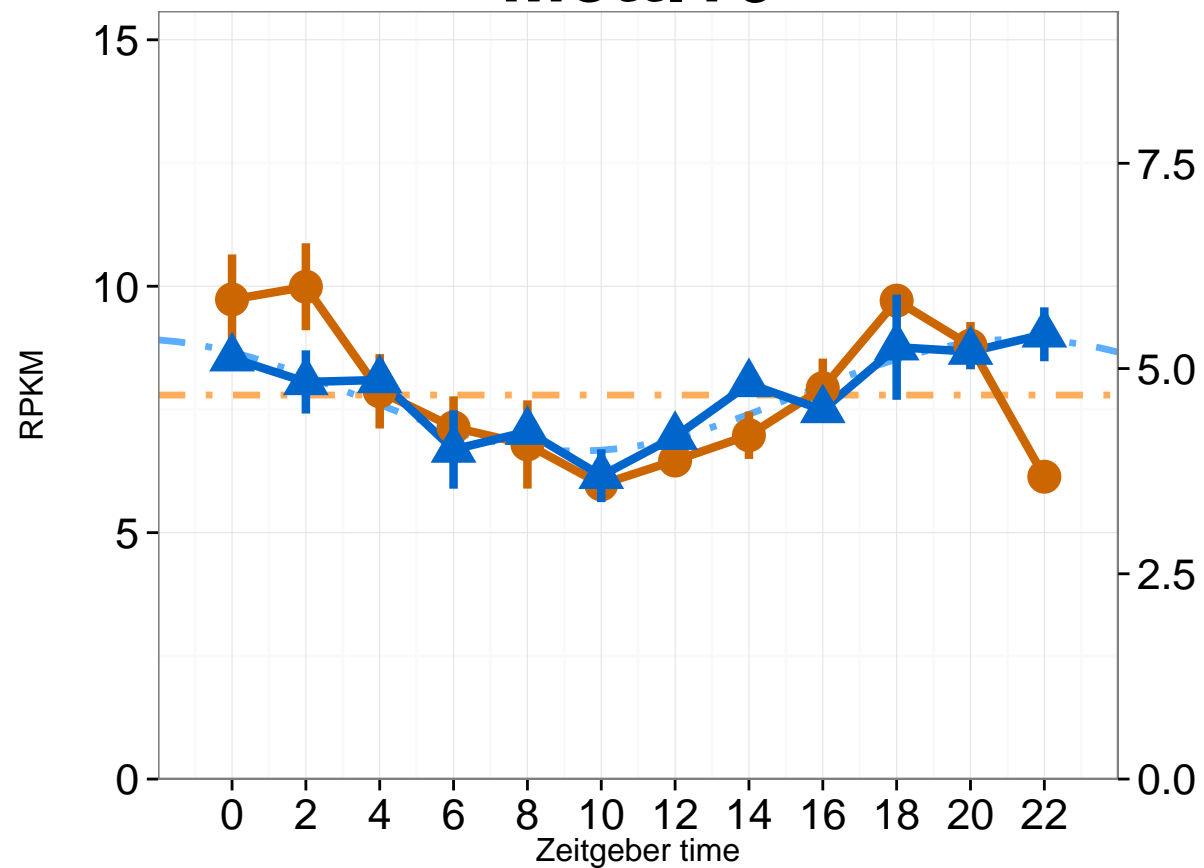

# Mettl16

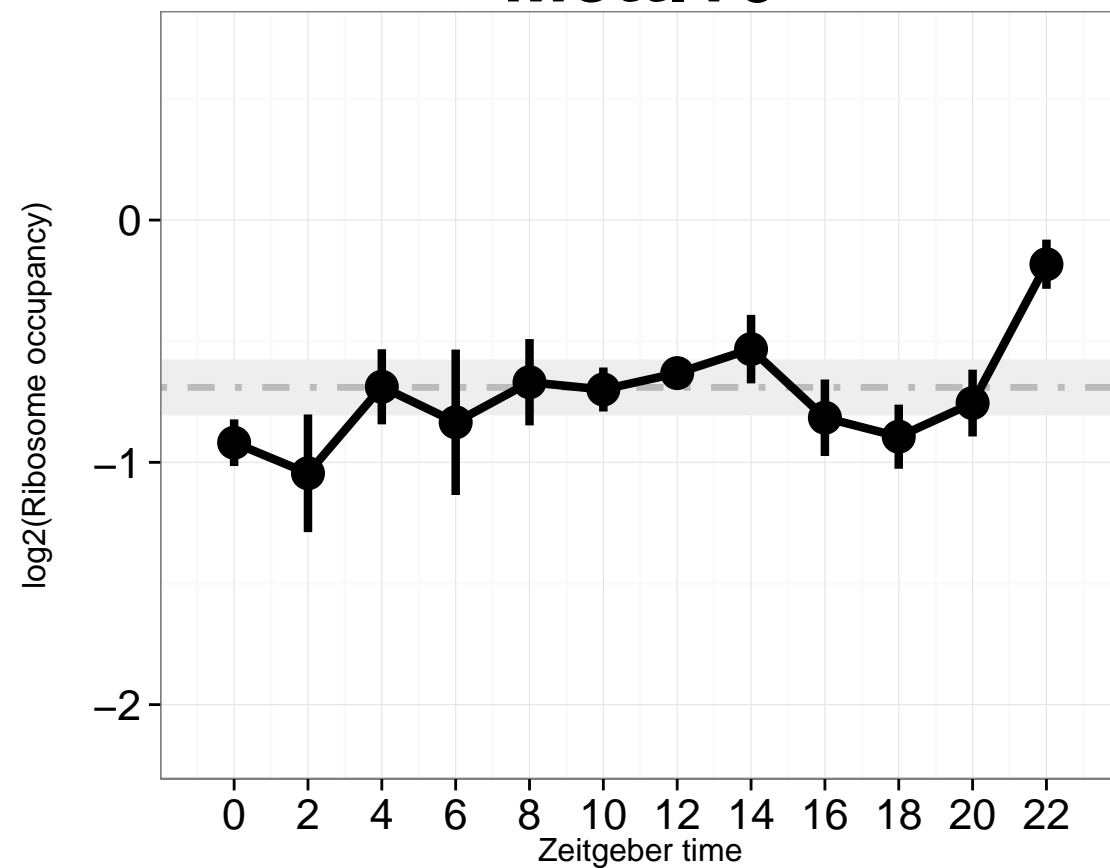

Supplement: SuppDataset_1.zip [file Mettl16_set_A.pdf › Supplemental Dataset 1/A-mRNA_nonrhyth_translation_nonrhyth/Mettl16_set_A.pdf]

# Mettl17

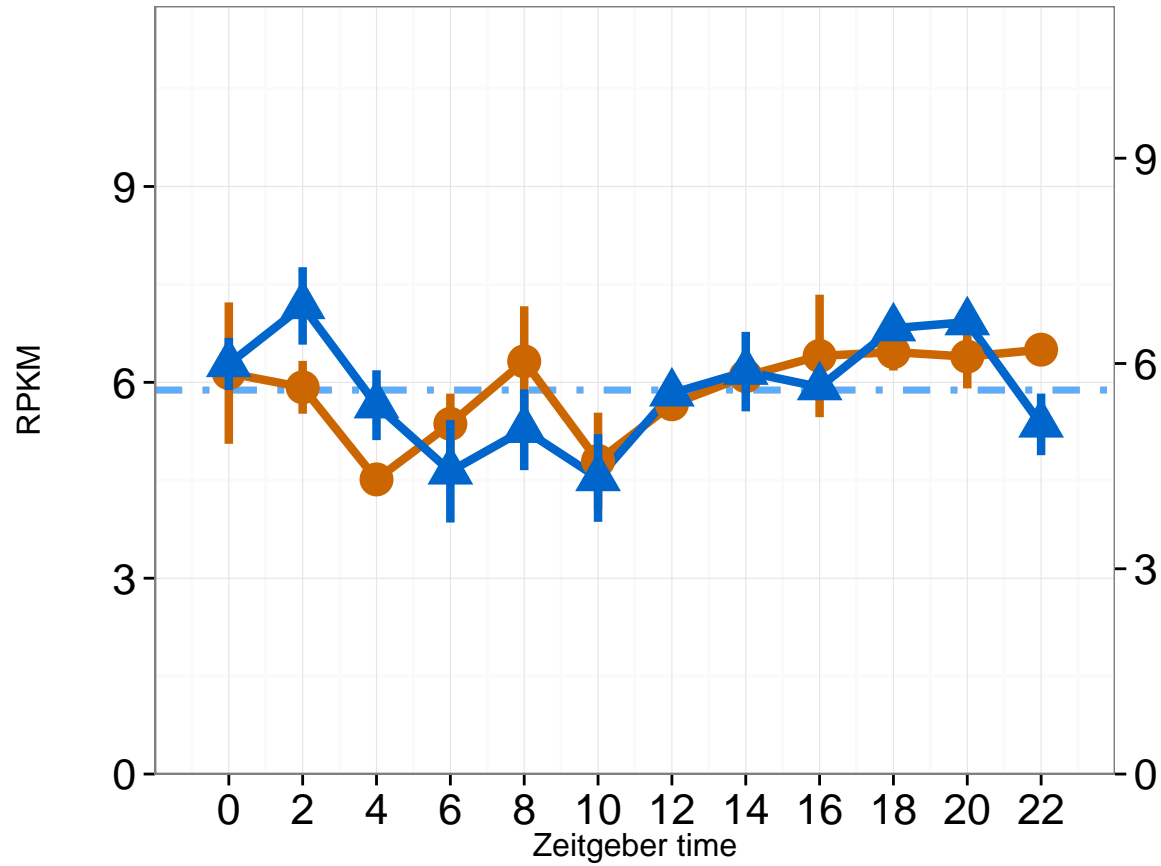

# Mettl17

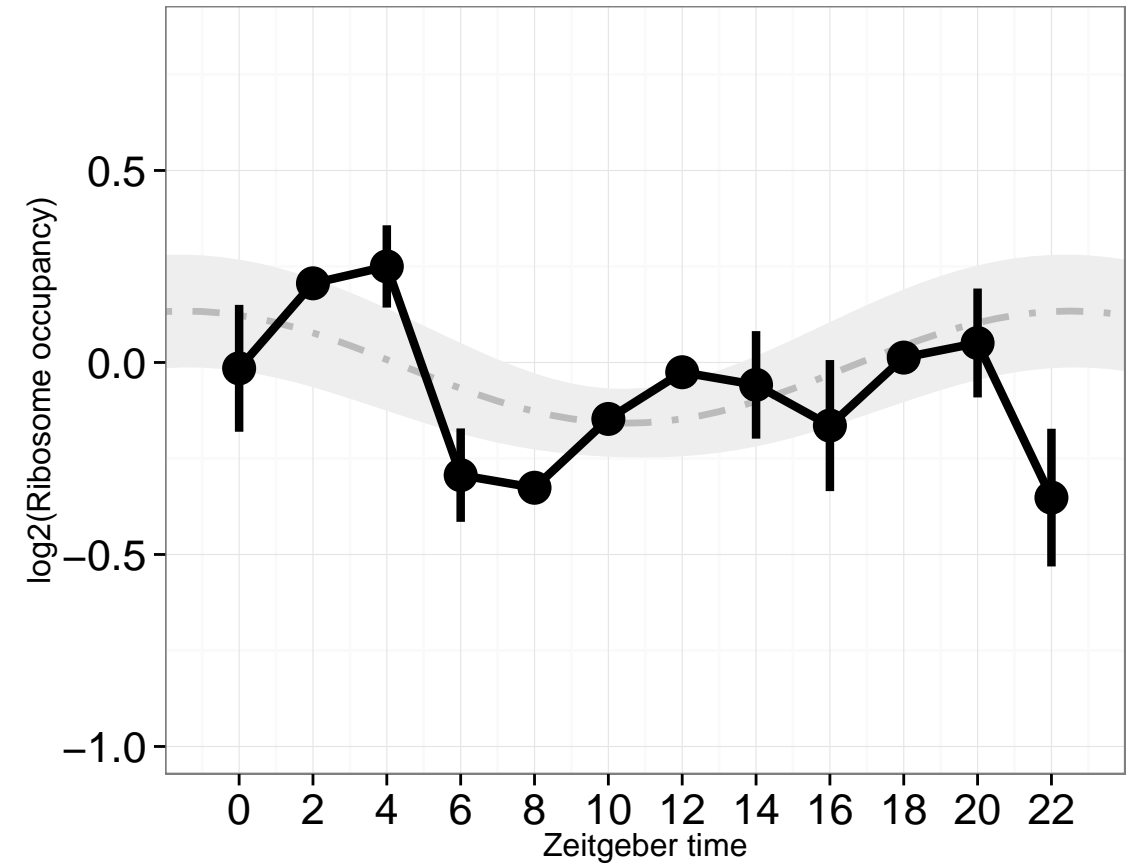

Supplement: SuppDataset_1.zip [file Mettl17_set_A.pdf › Supplemental Dataset 1/A-mRNA_nonrhyth_translation_nonrhyth/Mettl17_set_A.pdf]

# Mettl18

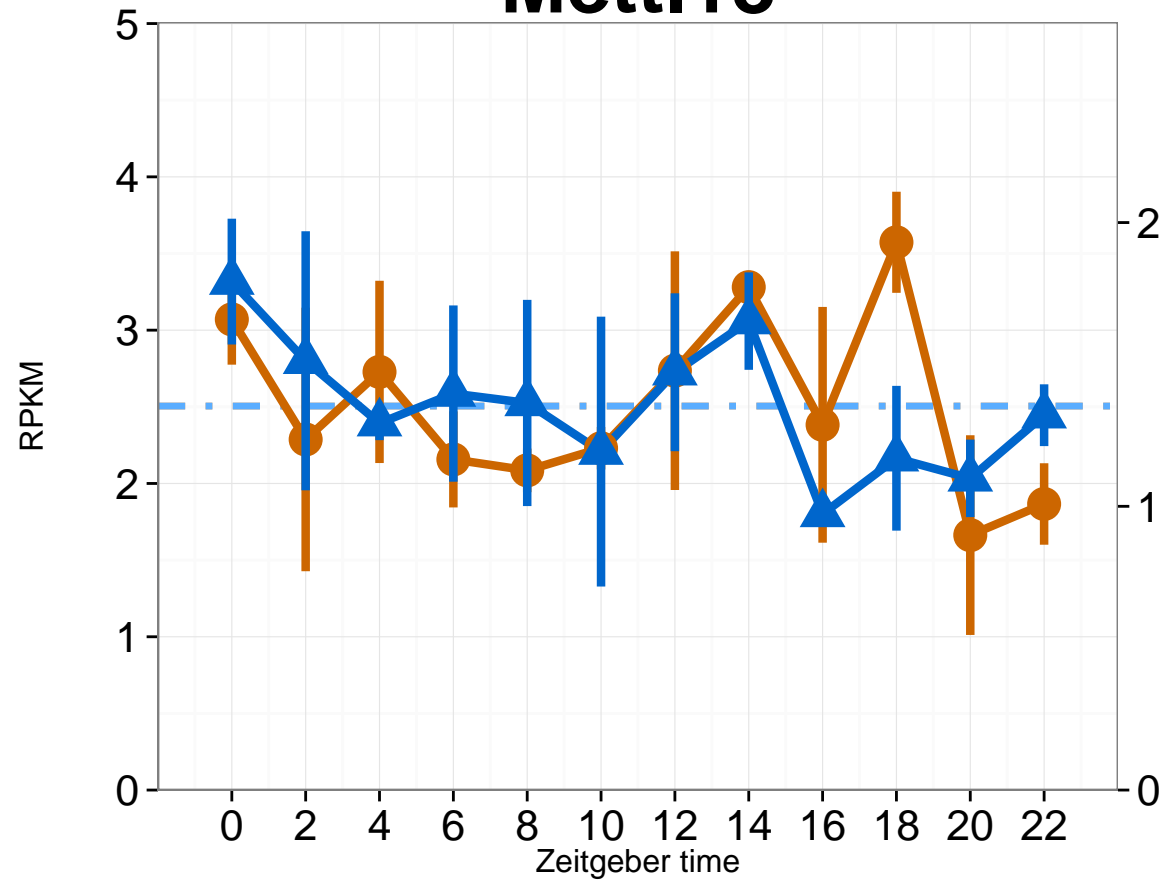

# Mettl18

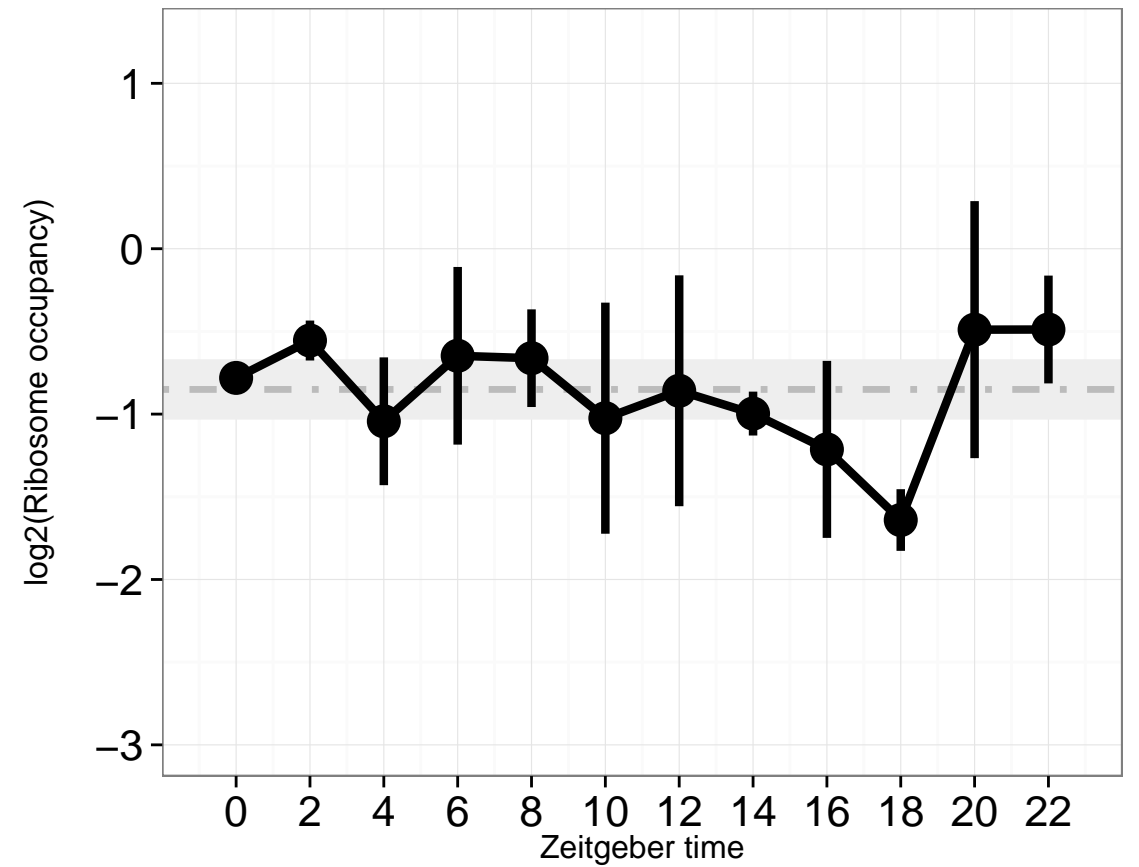

Supplement: SuppDataset_1.zip [file Mettl18_set_A.pdf › Supplemental Dataset 1/A-mRNA_nonrhyth_translation_nonrhyth/Mettl18_set_A.pdf]

# Mettl1

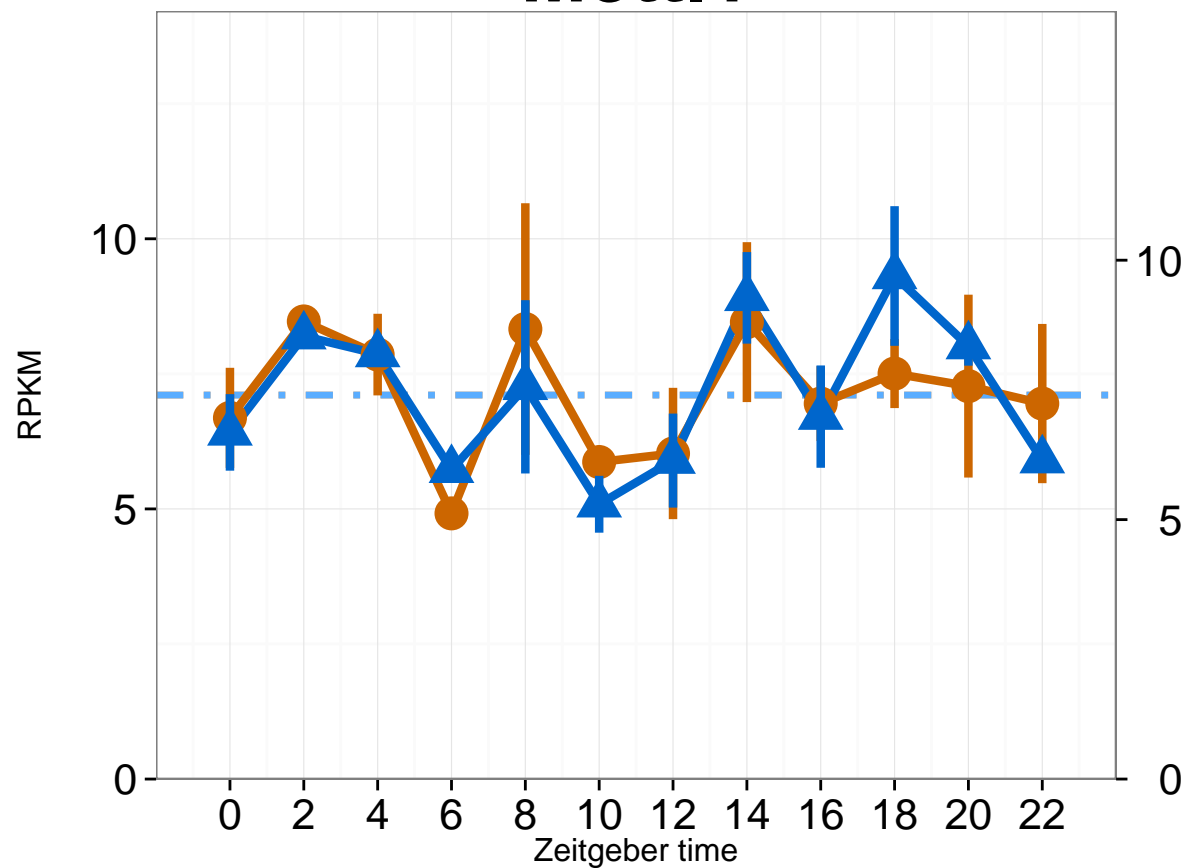

# Mettl1

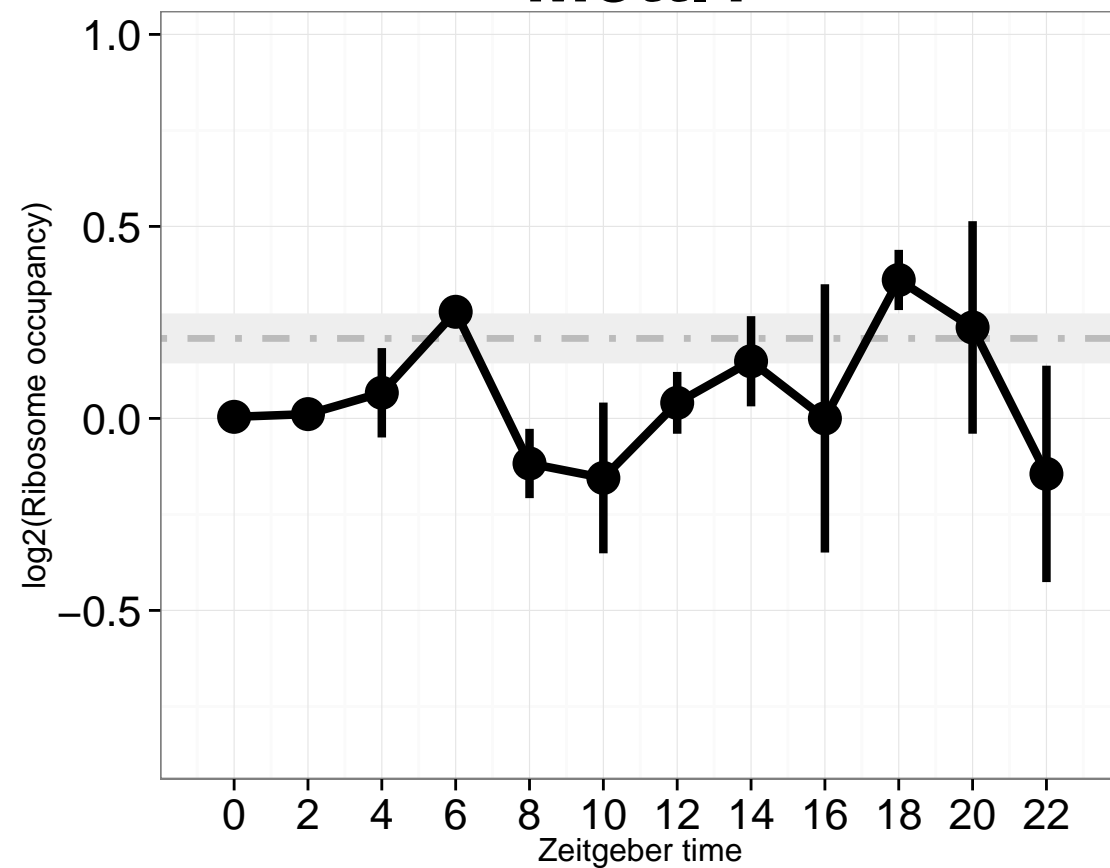

Supplement: SuppDataset_1.zip [file Mettl1_set_A.pdf › Supplemental Dataset 1/A-mRNA_nonrhyth_translation_nonrhyth/Mettl1_set_A.pdf]

# Mettl20

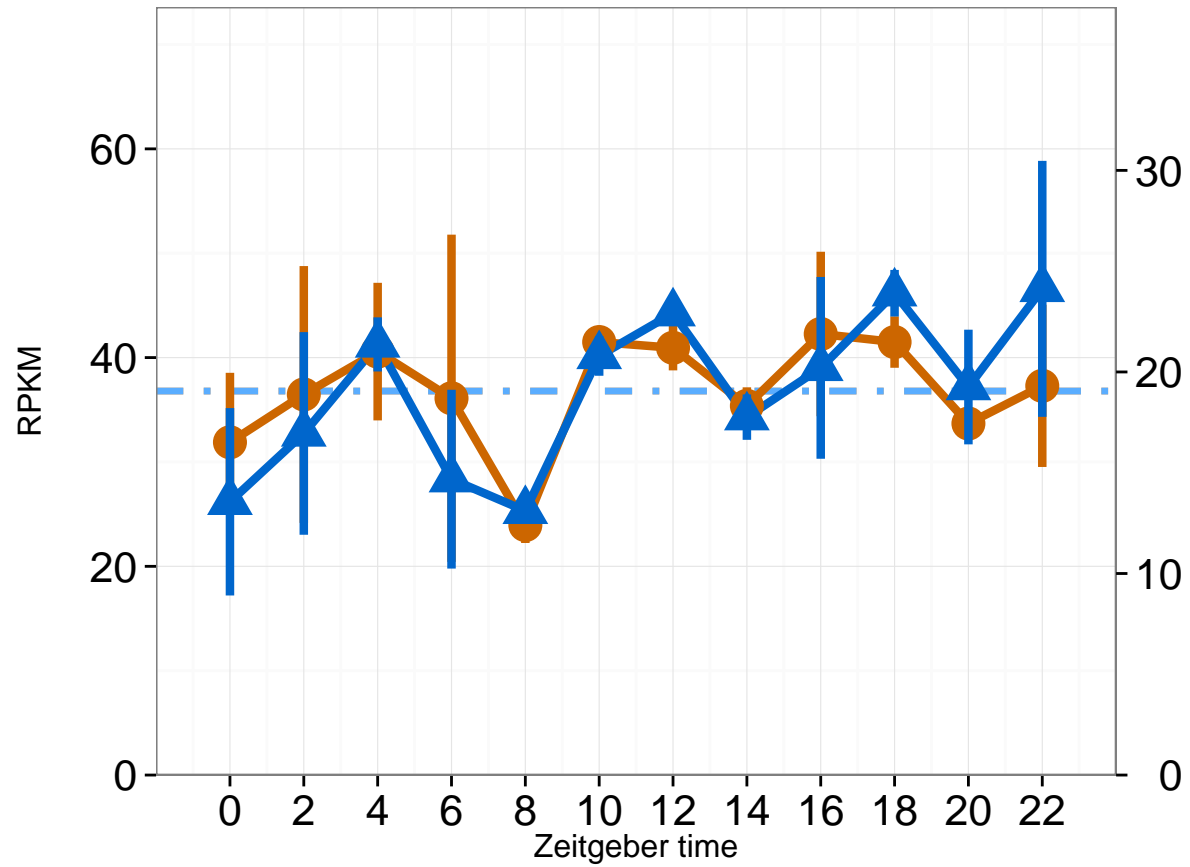

# Mettl20

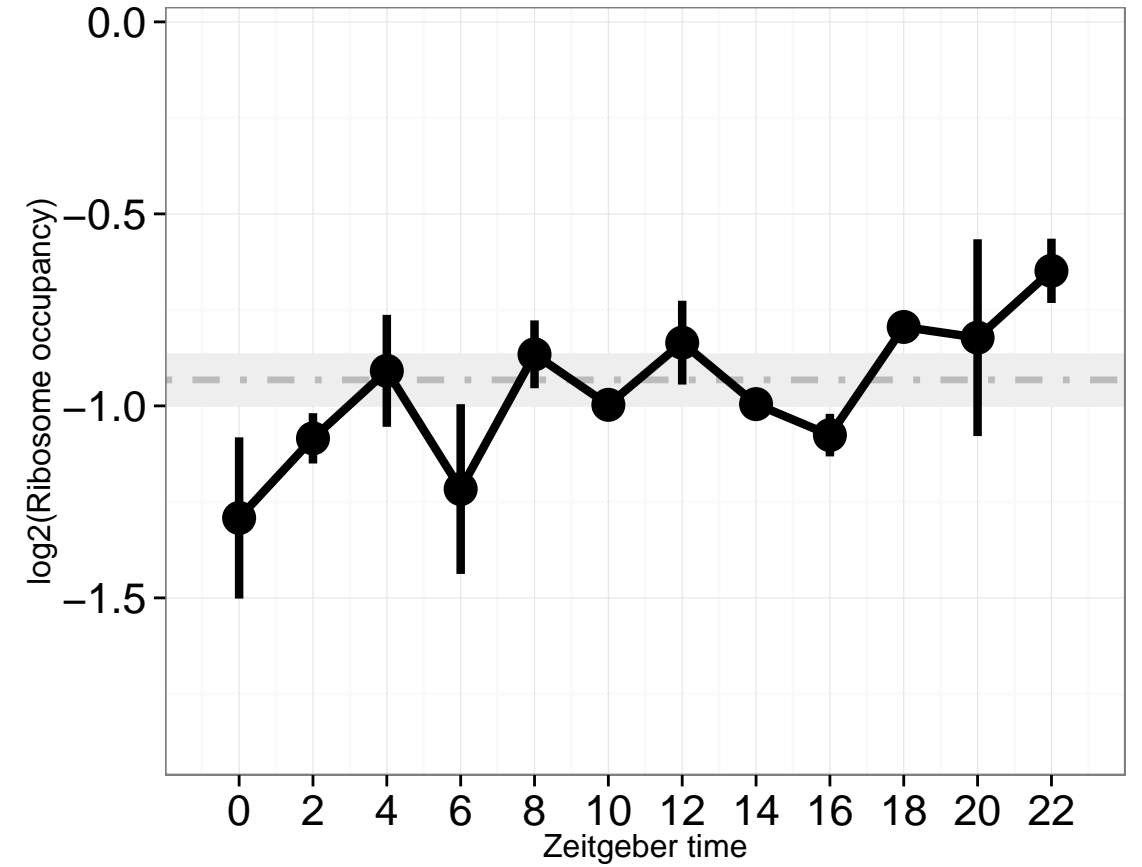

Supplement: SuppDataset_1.zip [file Mettl20_set_A.pdf › Supplemental Dataset 1/A-mRNA_nonrhyth_translation_nonrhyth/Mettl20_set_A.pdf]

# Mettl21a

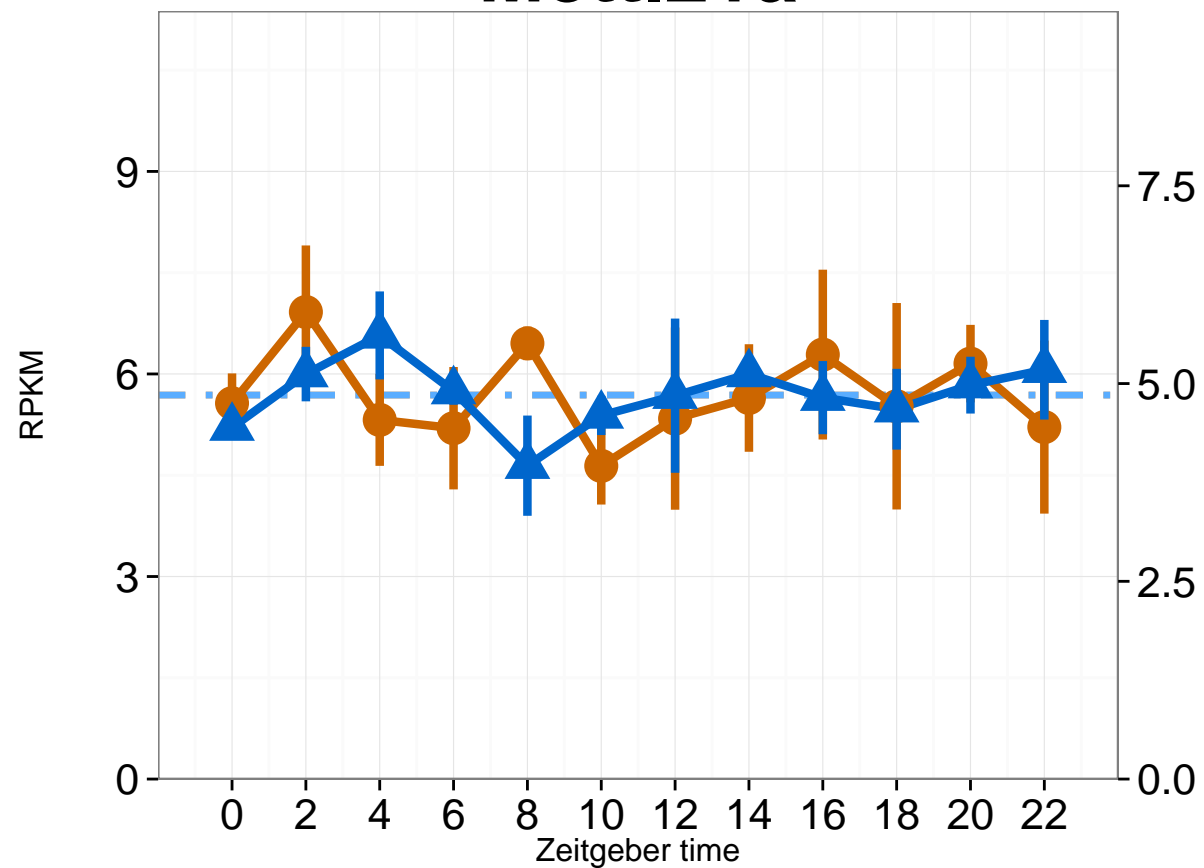

# Mettl21a

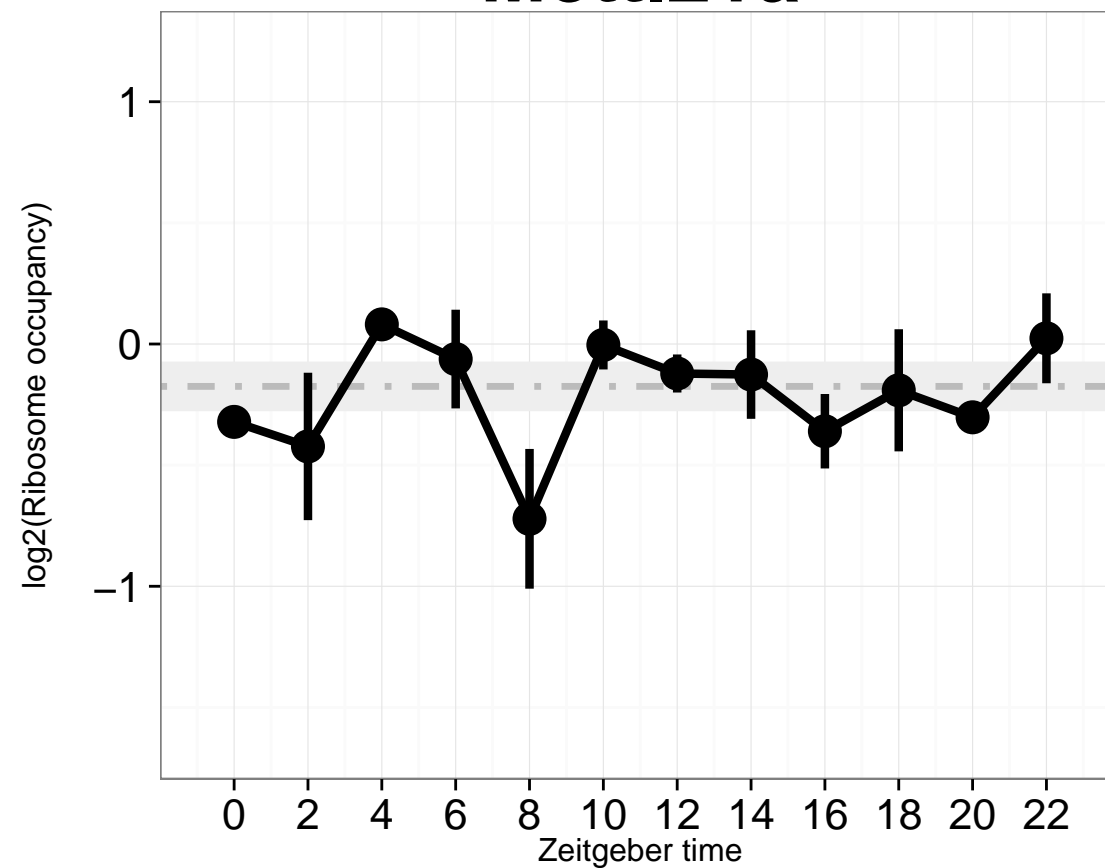

Supplement: SuppDataset_1.zip [file Mettl21a_set_A.pdf › Supplemental Dataset 1/A-mRNA_nonrhyth_translation_nonrhyth/Mettl21a_set_A.pdf]

## Mettl21d

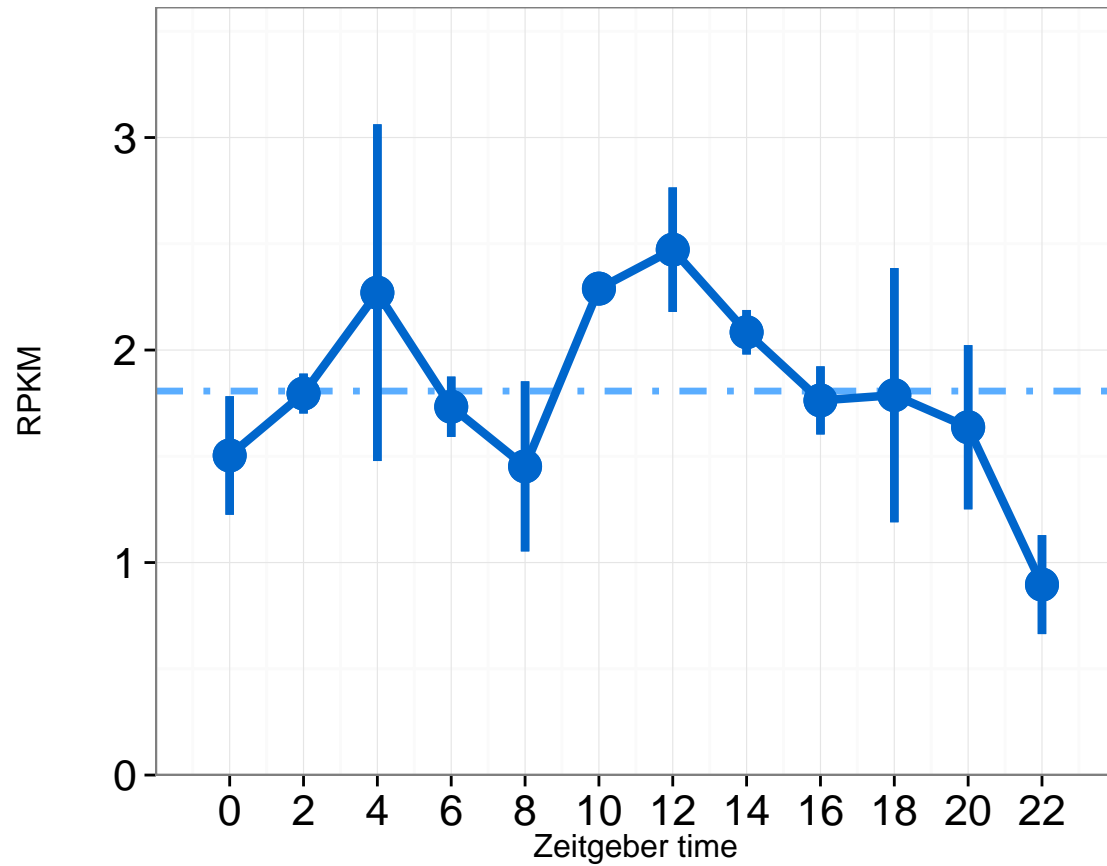

## Mettl21d log2(Ribosome occupanc

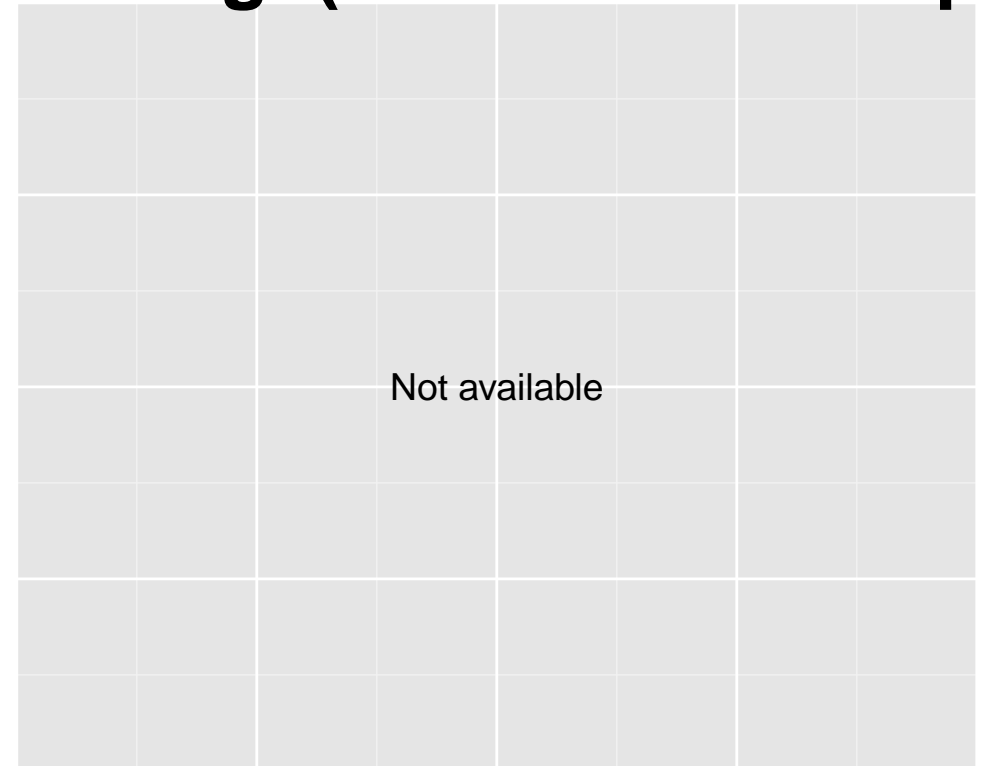

Supplement: SuppDataset_1.zip [file Mettl21d_set_A.pdf › Supplemental Dataset 1/A-mRNA_nonrhyth_translation_nonrhyth/Mettl21d_set_A.pdf]

## Mettl22

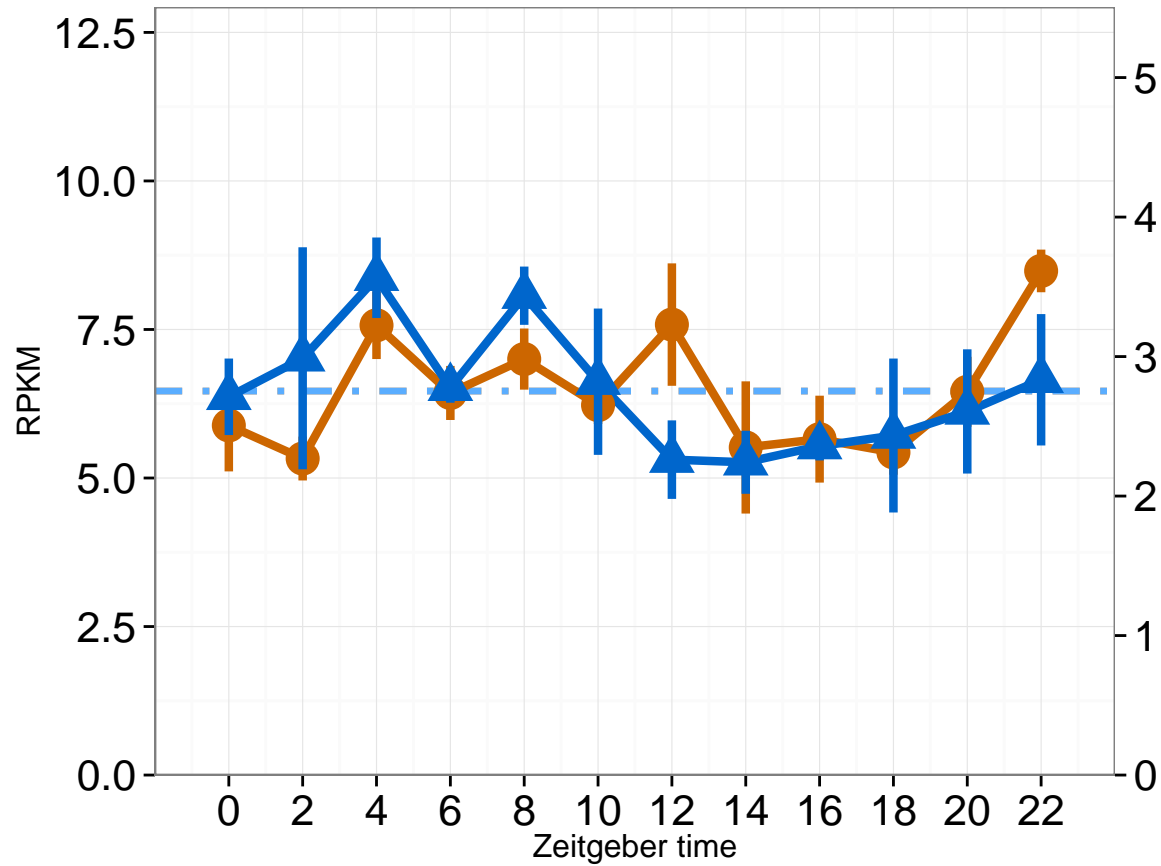

## Mettl22

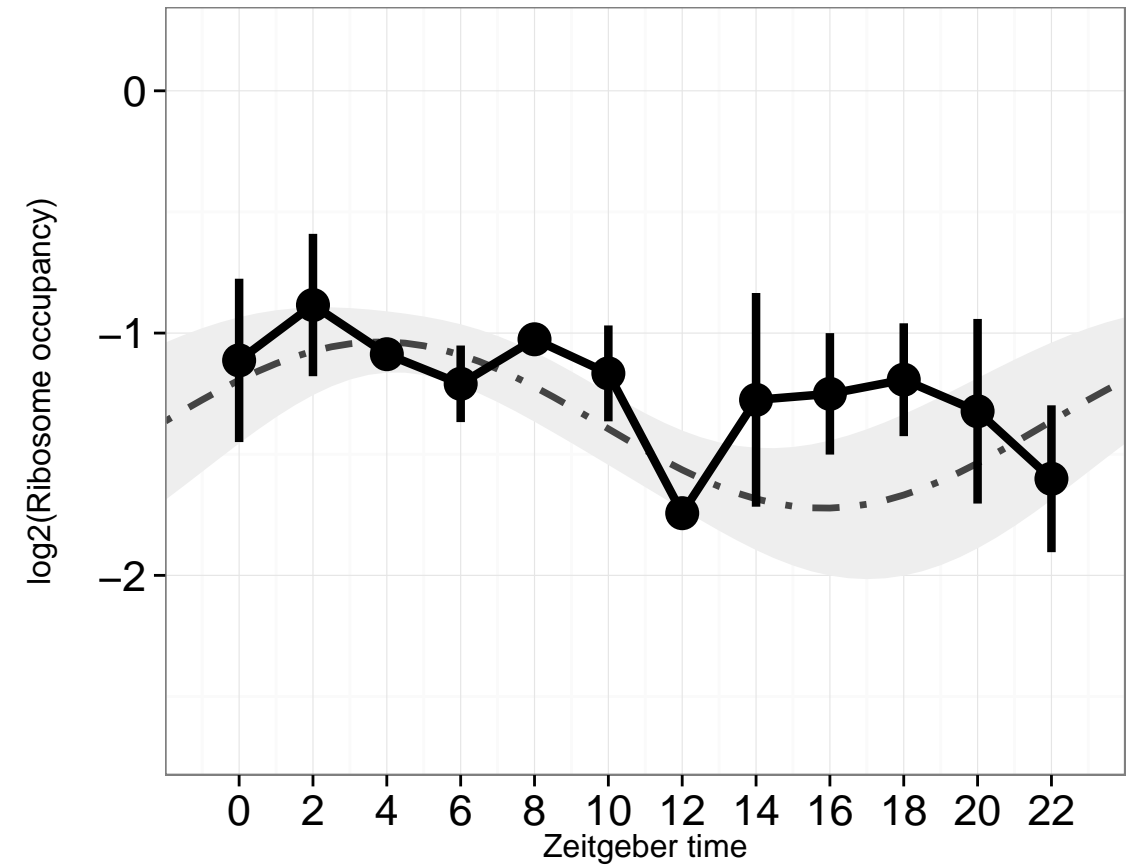

Supplement: SuppDataset_1.zip [file Mettl22_set_A.pdf › Supplemental Dataset 1/A-mRNA_nonrhyth_translation_nonrhyth/Mettl22_set_A.pdf]

# Mettl23

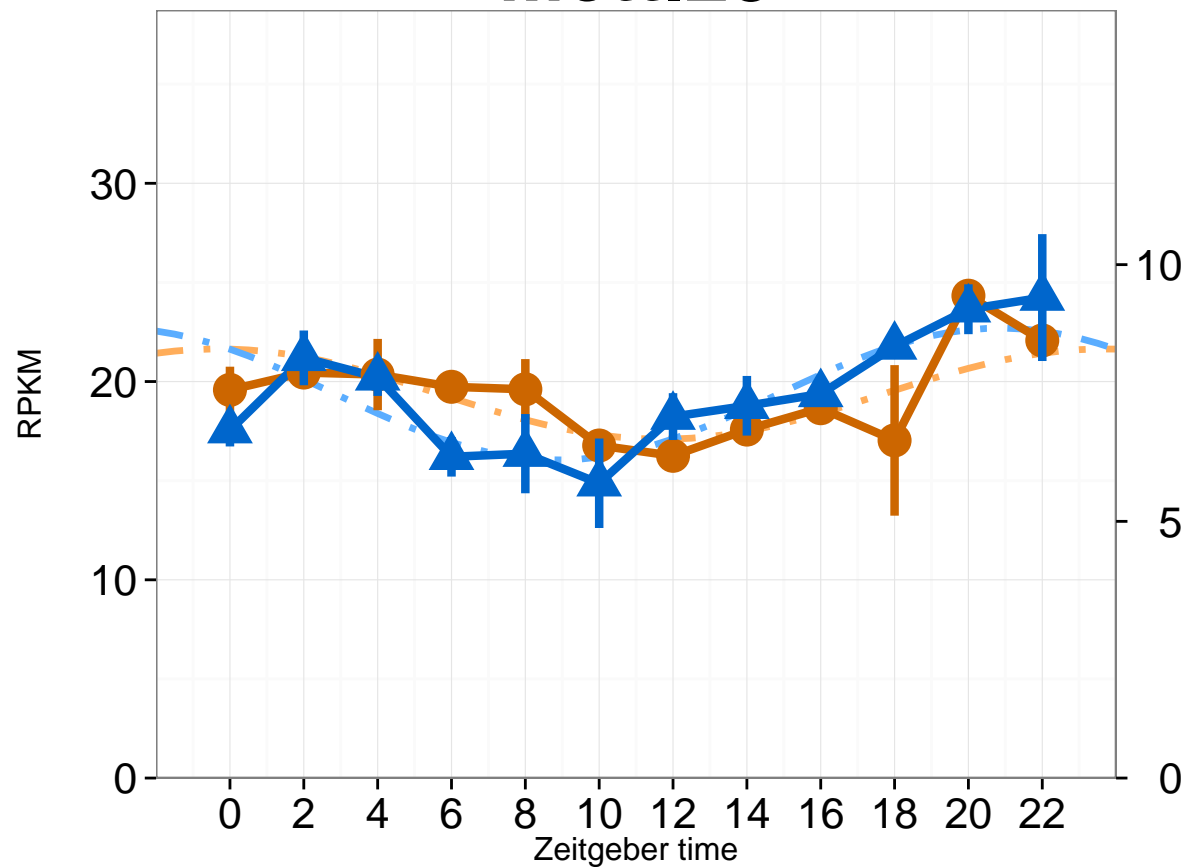

# Mettl23

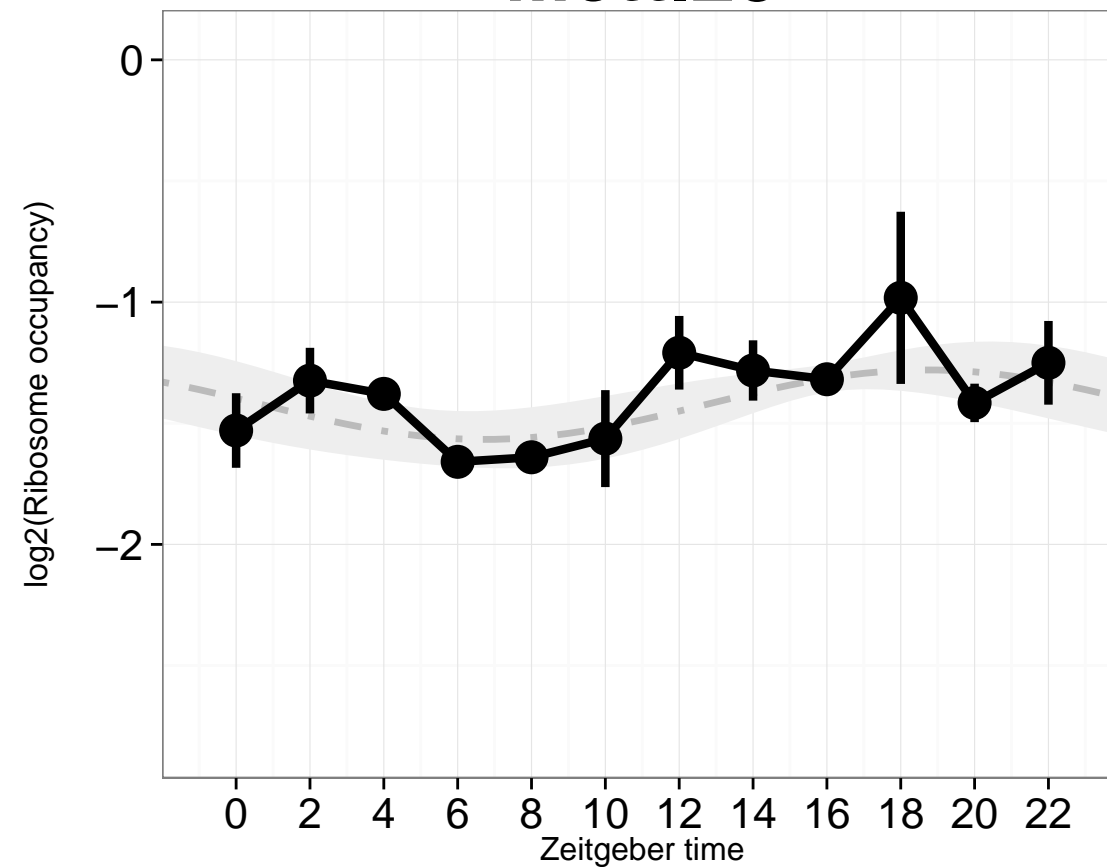

Supplement: SuppDataset_1.zip [file Mettl23_set_A.pdf › Supplemental Dataset 1/A-mRNA_nonrhyth_translation_nonrhyth/Mettl23_set_A.pdf]

## Mettl25

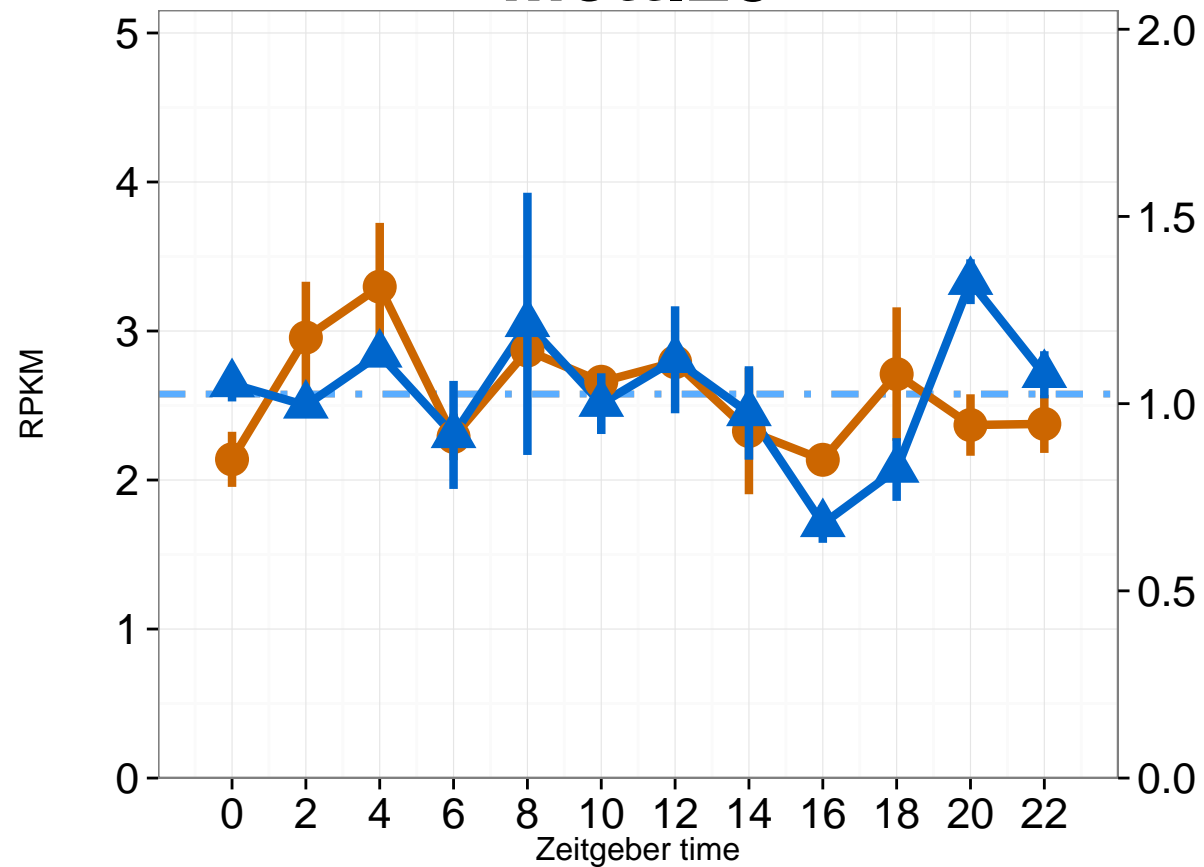

## Mettl25

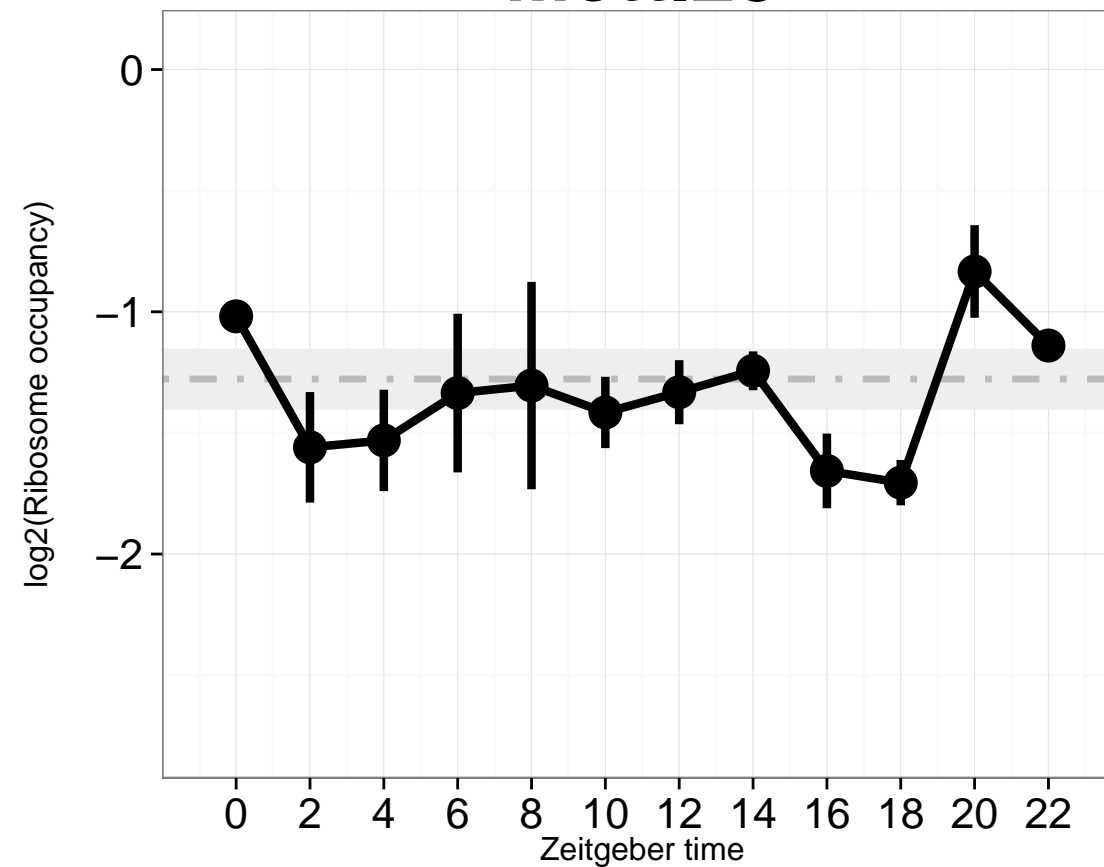

Supplement: SuppDataset_1.zip [file Mettl25_set_A.pdf › Supplemental Dataset 1/A-mRNA_nonrhyth_translation_nonrhyth/Mettl25_set_A.pdf]

# Mettl2

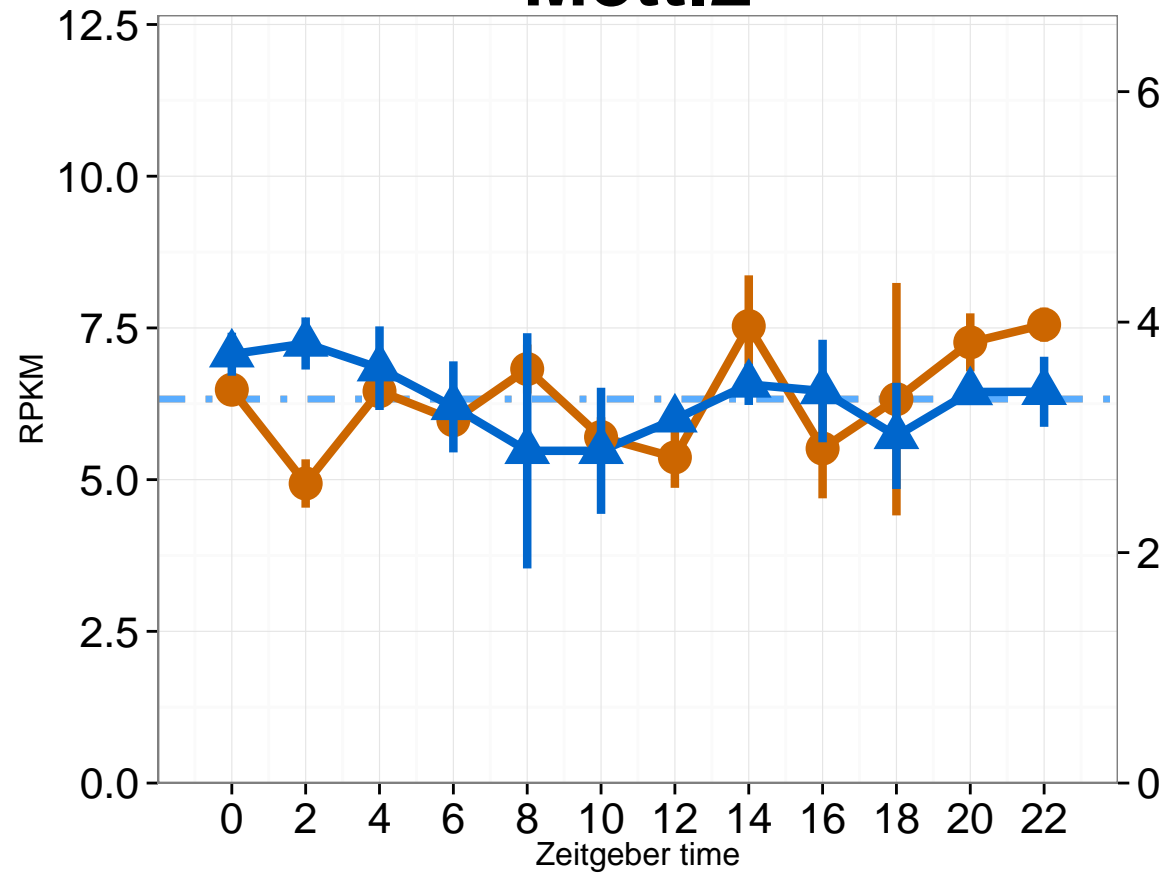

# Mettl2

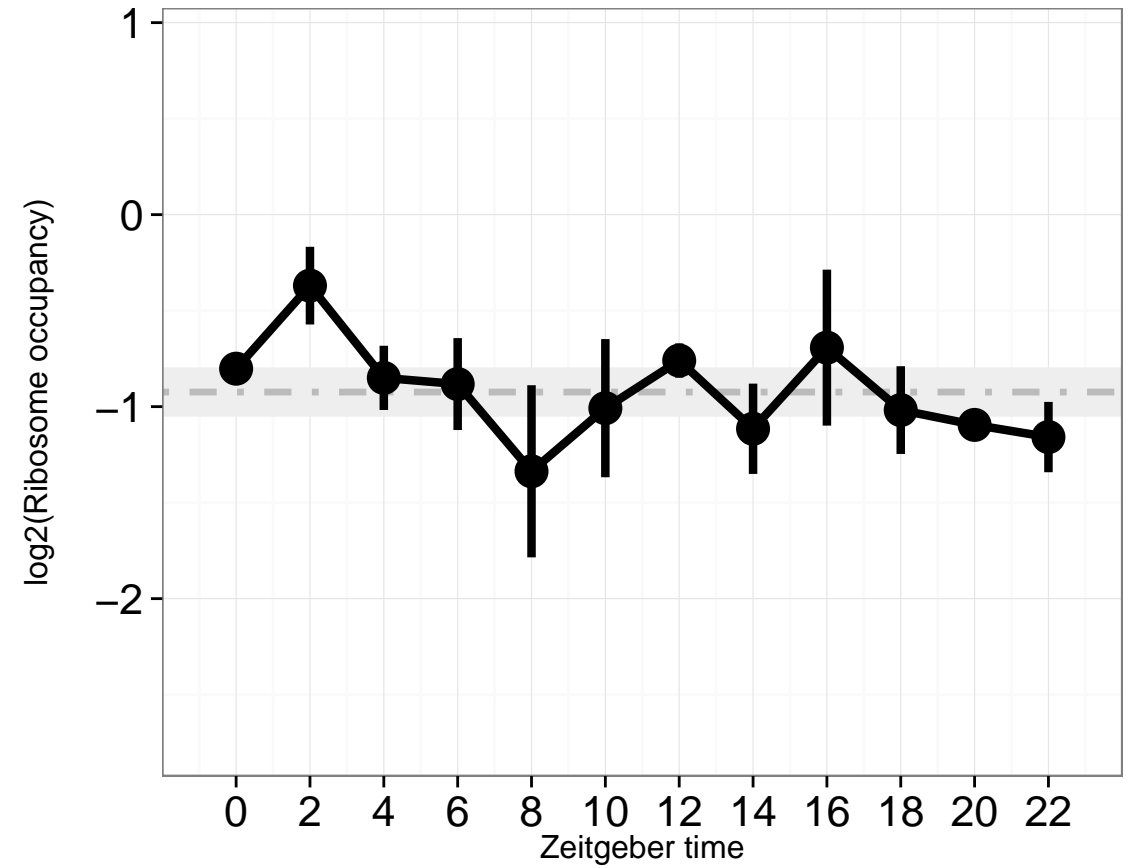

Supplement: SuppDataset_1.zip [file Mettl2_set_A.pdf › Supplemental Dataset 1/A-mRNA_nonrhyth_translation_nonrhyth/Mettl2_set_A.pdf]

## Mettl3

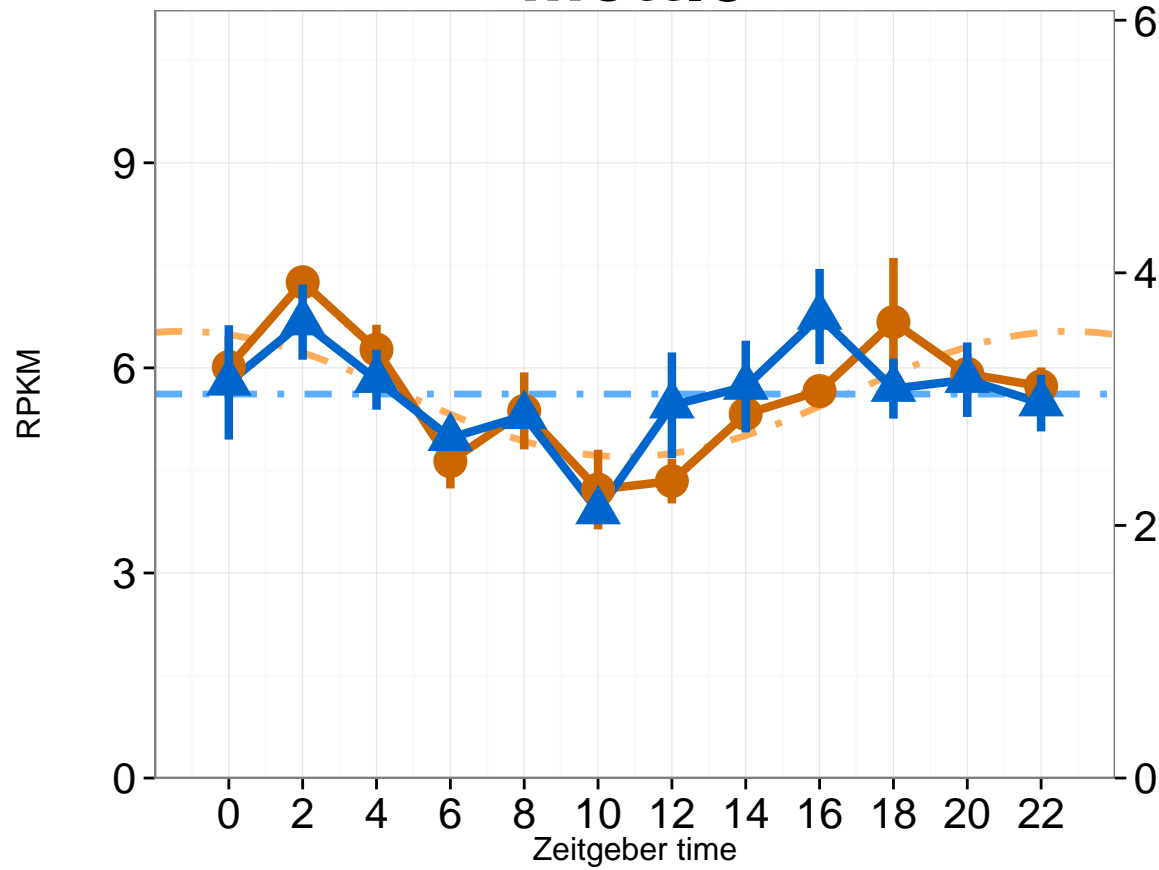

## Mettl3

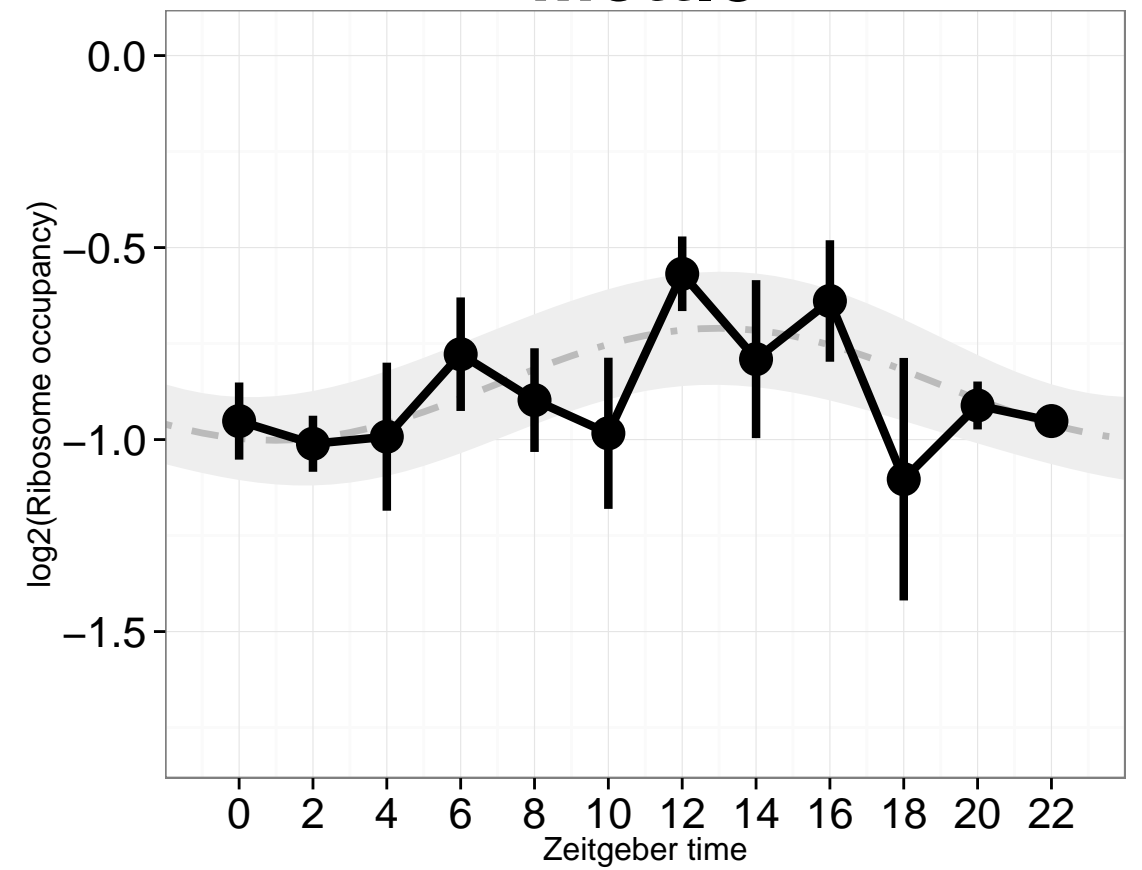

Supplement: SuppDataset_1.zip [file Mettl3_set_A.pdf › Supplemental Dataset 1/A-mRNA_nonrhyth_translation_nonrhyth/Mettl3_set_A.pdf]

## Mettl4

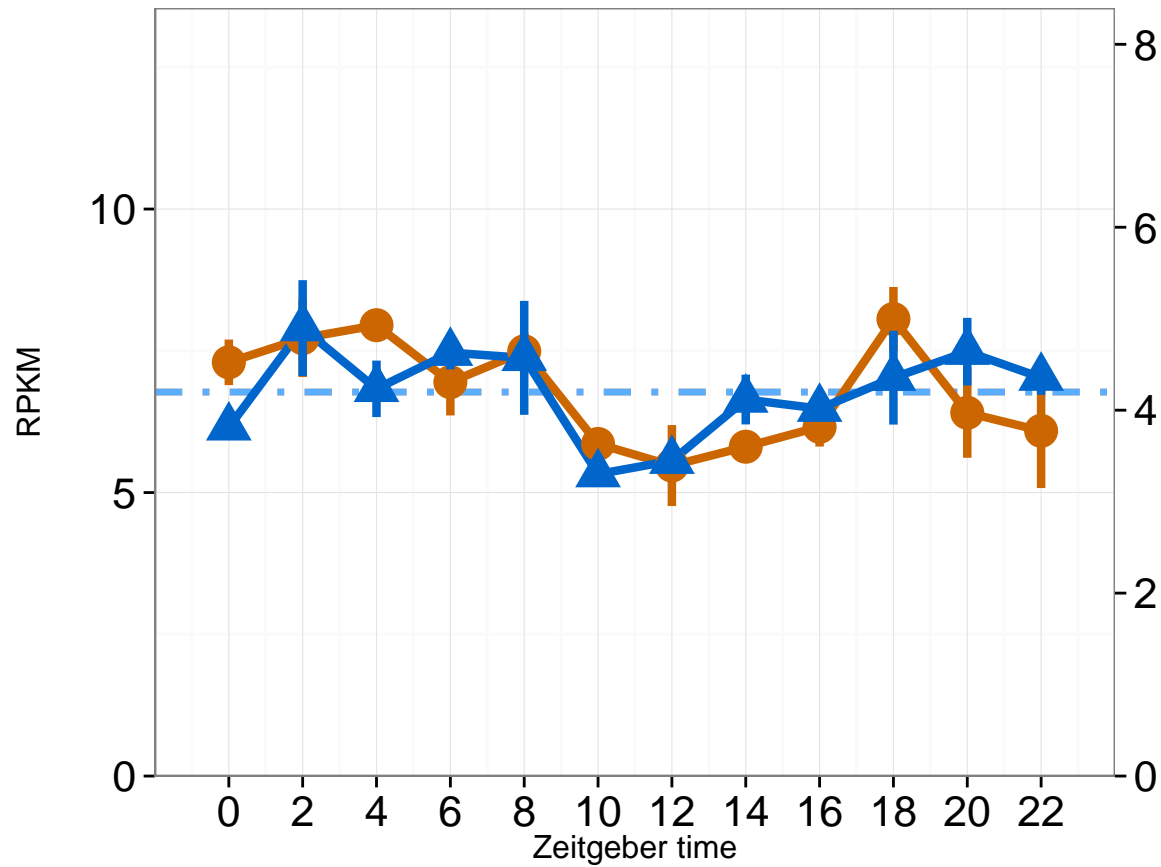

## Mettl4

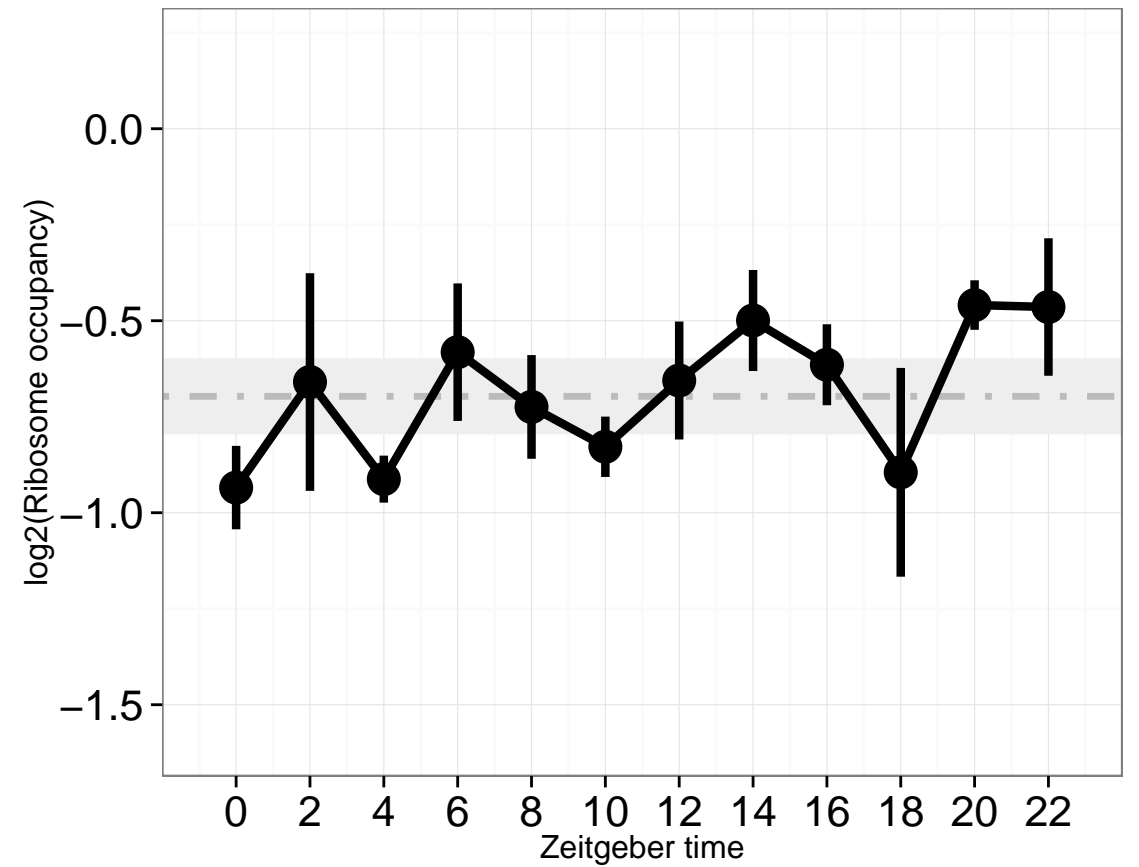

Supplement: SuppDataset_1.zip [file Mettl4_set_A.pdf › Supplemental Dataset 1/A-mRNA_nonrhyth_translation_nonrhyth/Mettl4_set_A.pdf]

## Mettl5

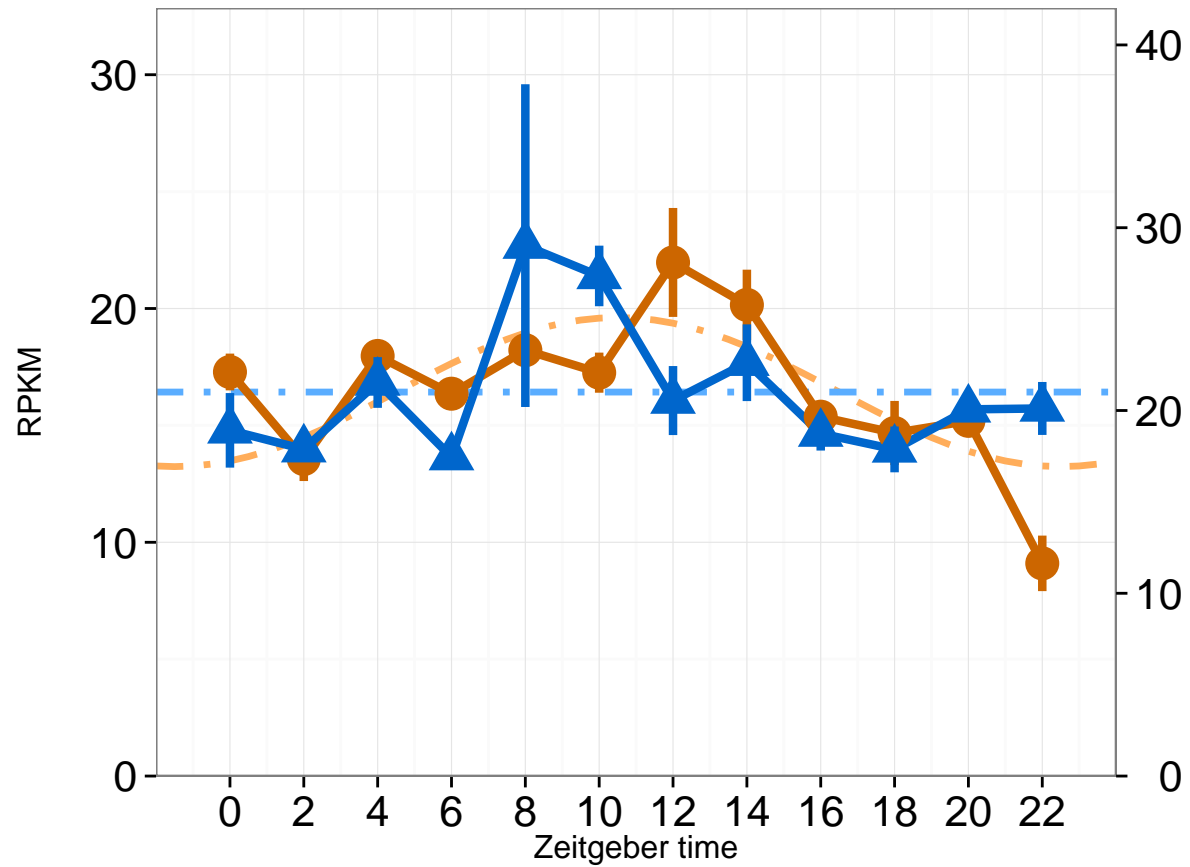

## Mettl5

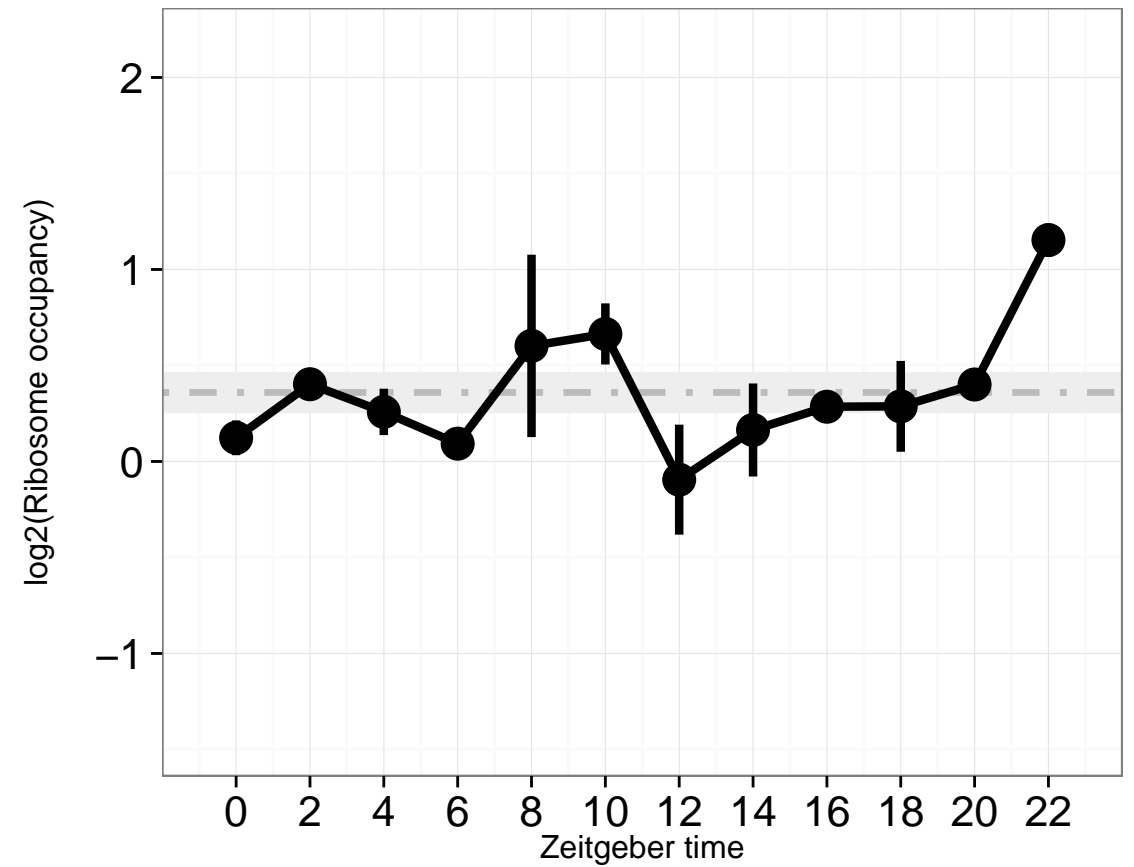

Supplement: SuppDataset_1.zip [file Mettl5_set_A.pdf › Supplemental Dataset 1/A-mRNA_nonrhyth_translation_nonrhyth/Mettl5_set_A.pdf]

## Mettl6

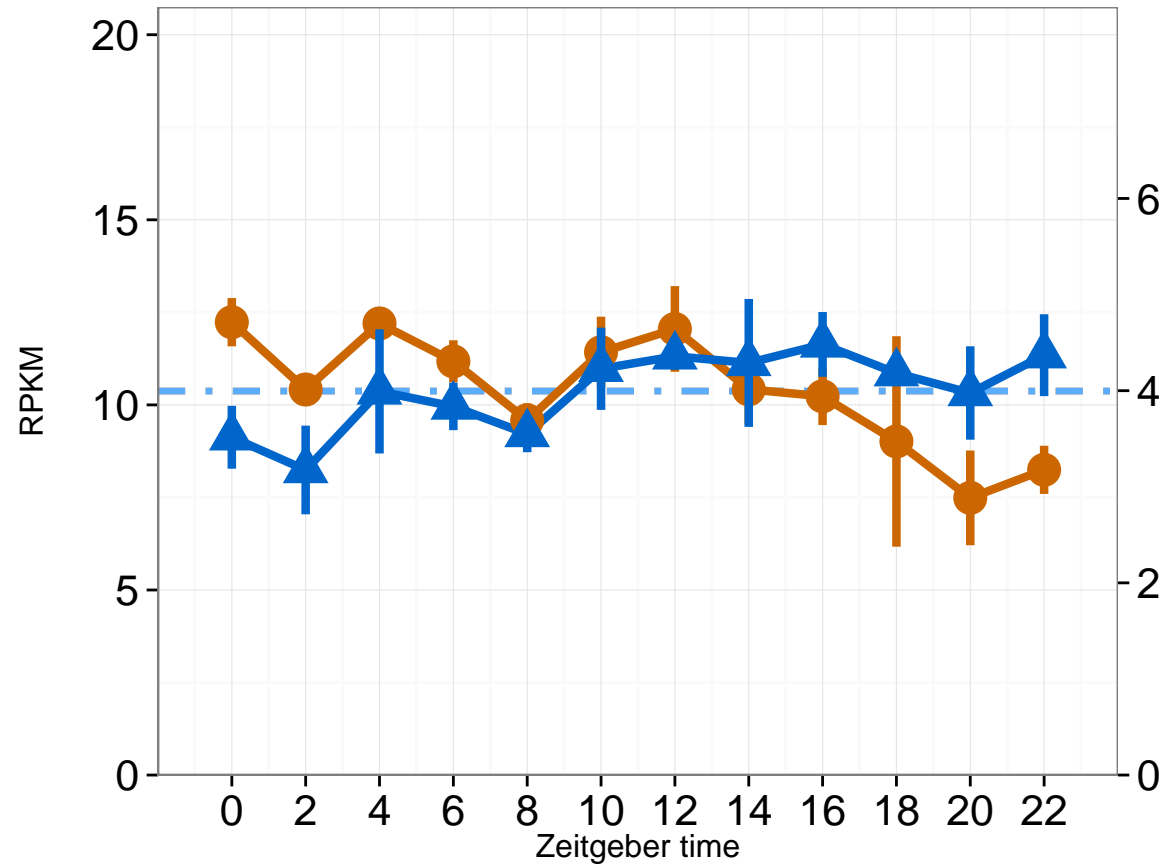

## Mettl6

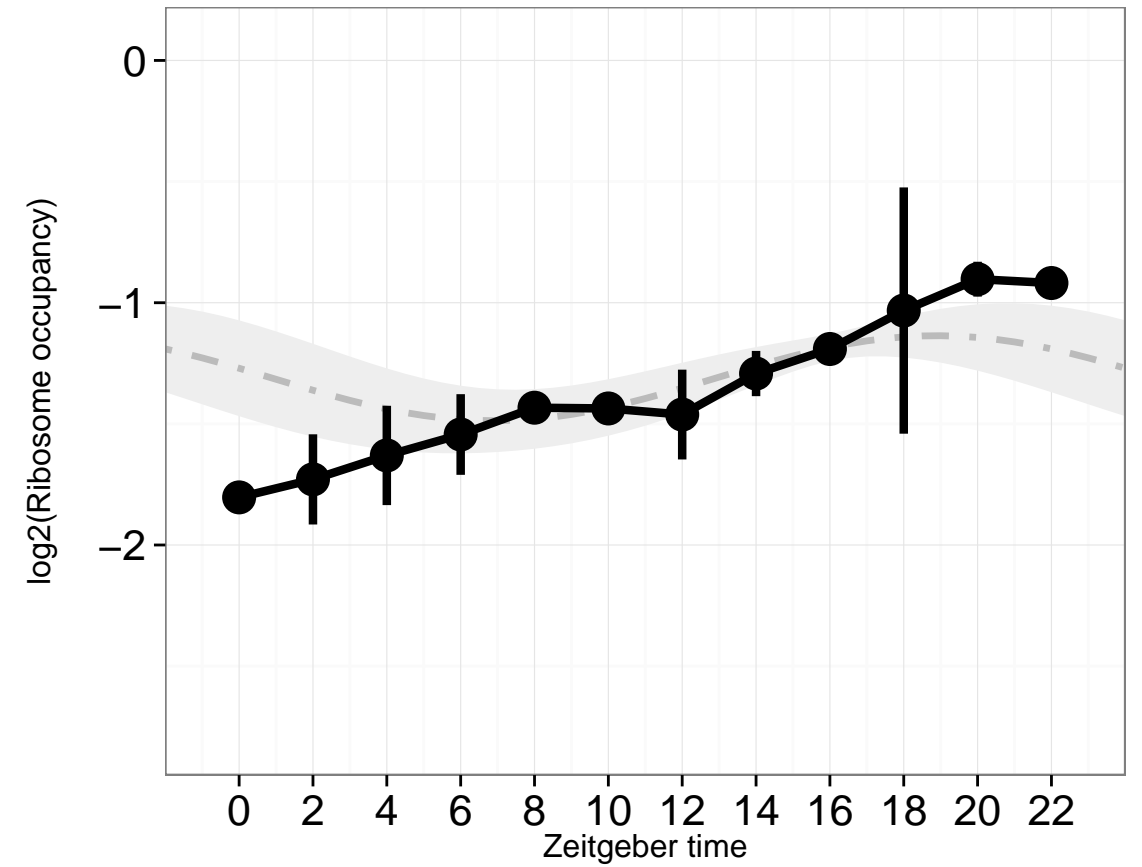

Supplement: SuppDataset_1.zip [file Mettl6_set_A.pdf › Supplemental Dataset 1/A-mRNA_nonrhyth_translation_nonrhyth/Mettl6_set_A.pdf]

# Mettl7a1

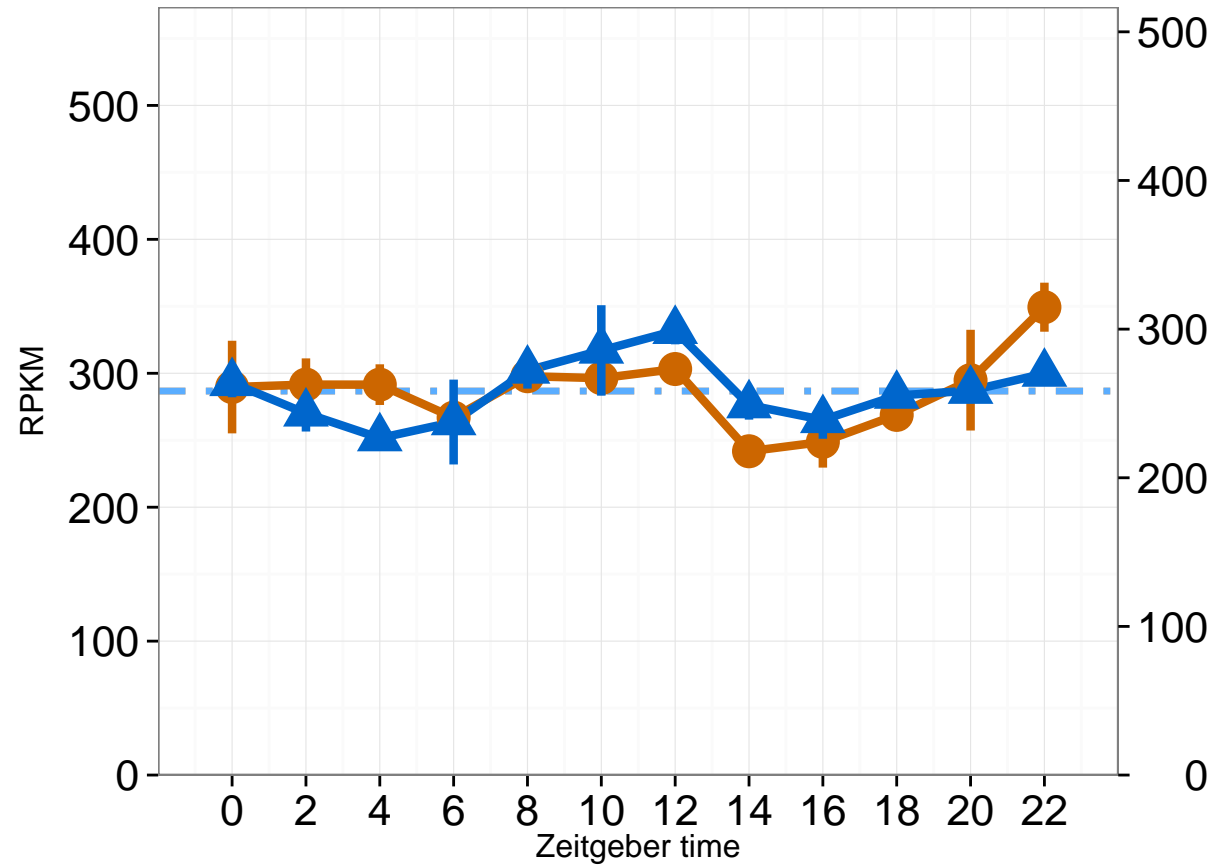

# Mettl7a1

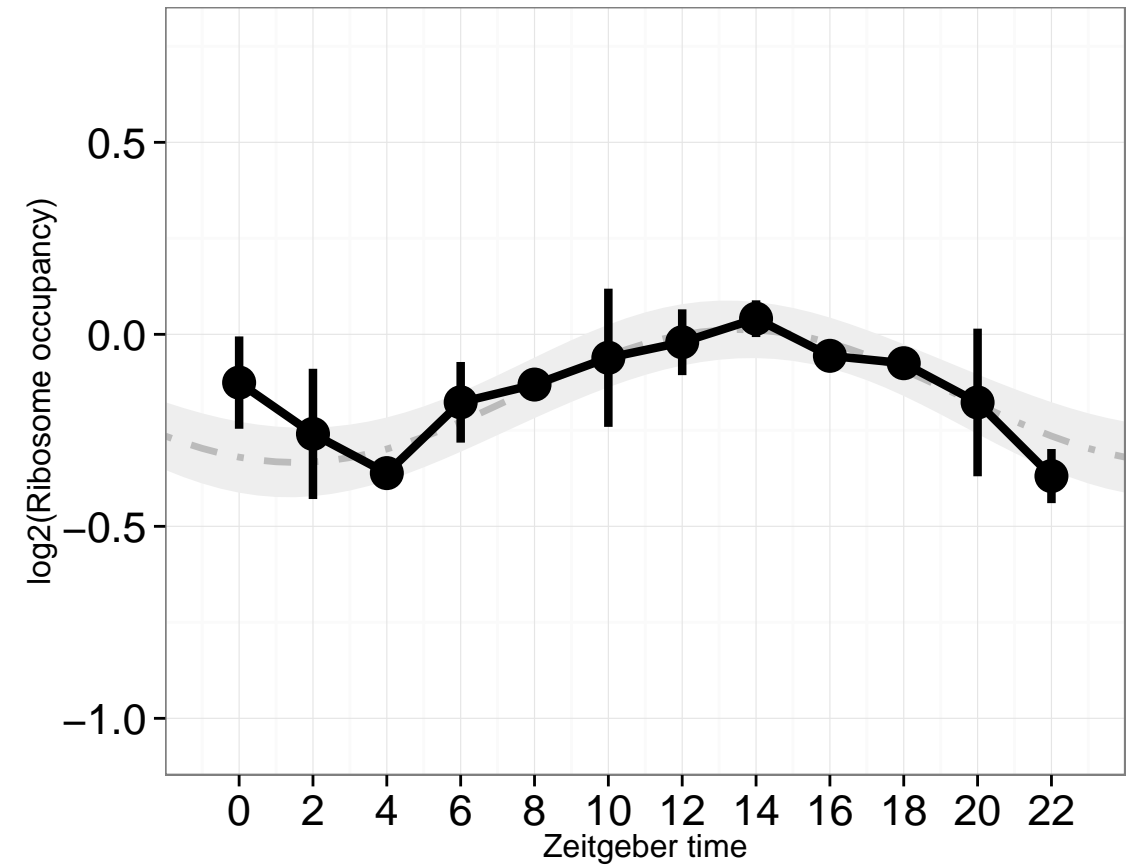

Supplement: SuppDataset_1.zip [file Mettl7a1_set_A.pdf › Supplemental Dataset 1/A-mRNA_nonrhyth_translation_nonrhyth/Mettl7a1_set_A.pdf]

# Mettl7b

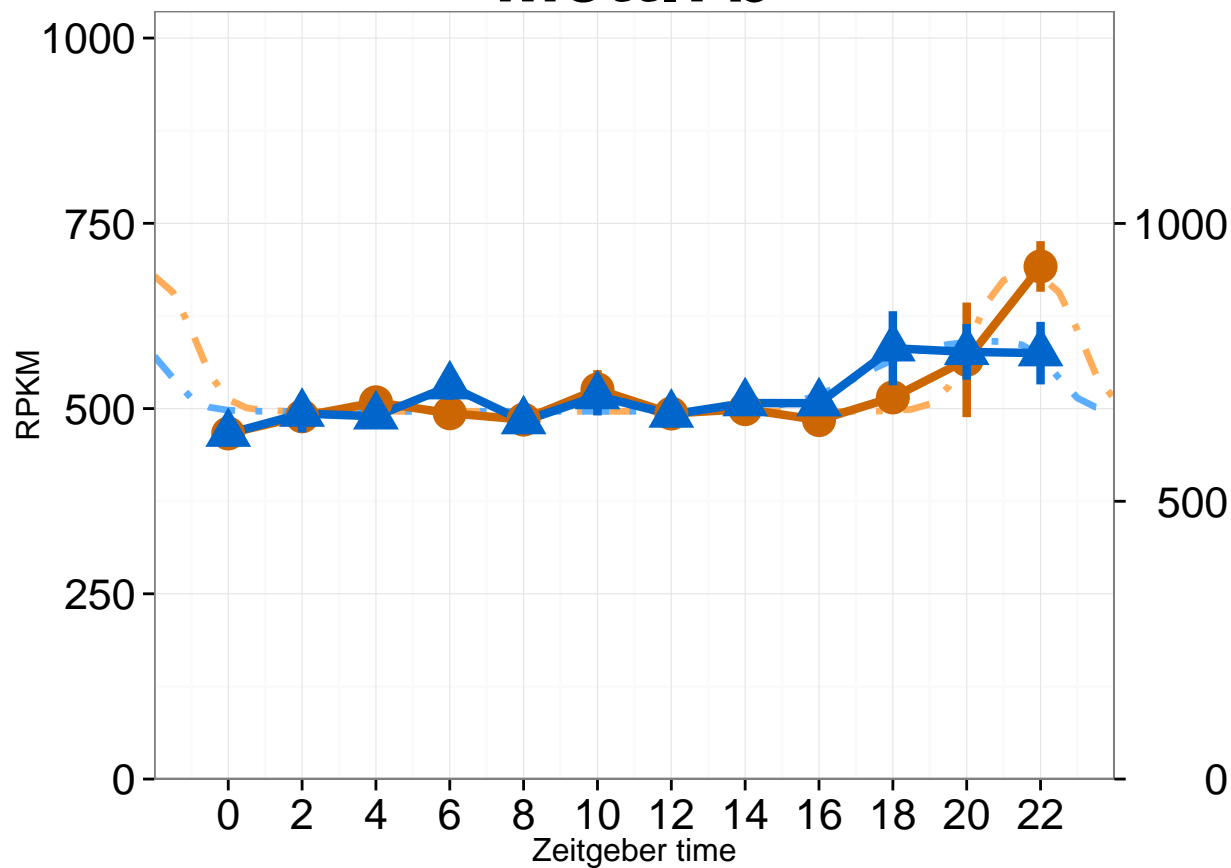

# Mettl7b

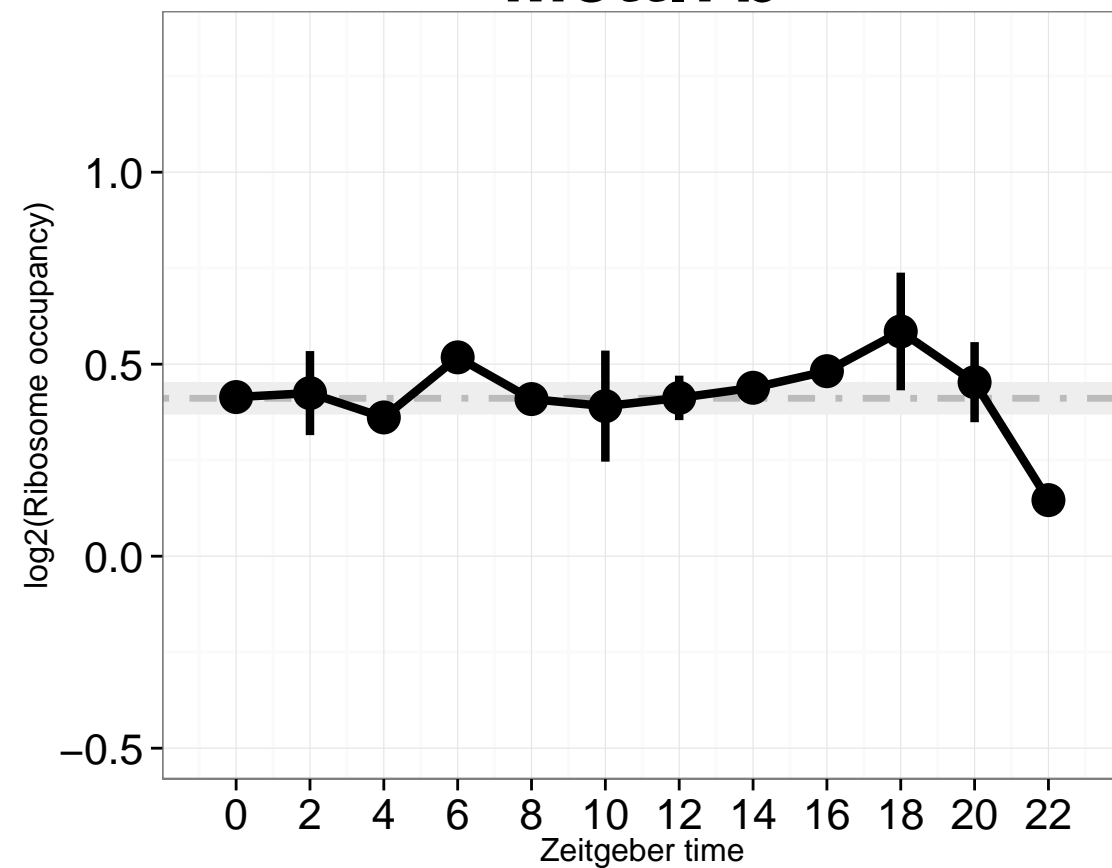

Supplement: SuppDataset_1.zip [file Mettl7b_set_A.pdf › Supplemental Dataset 1/A-mRNA_nonrhyth_translation_nonrhyth/Mettl7b_set_A.pdf]

## Mettl8

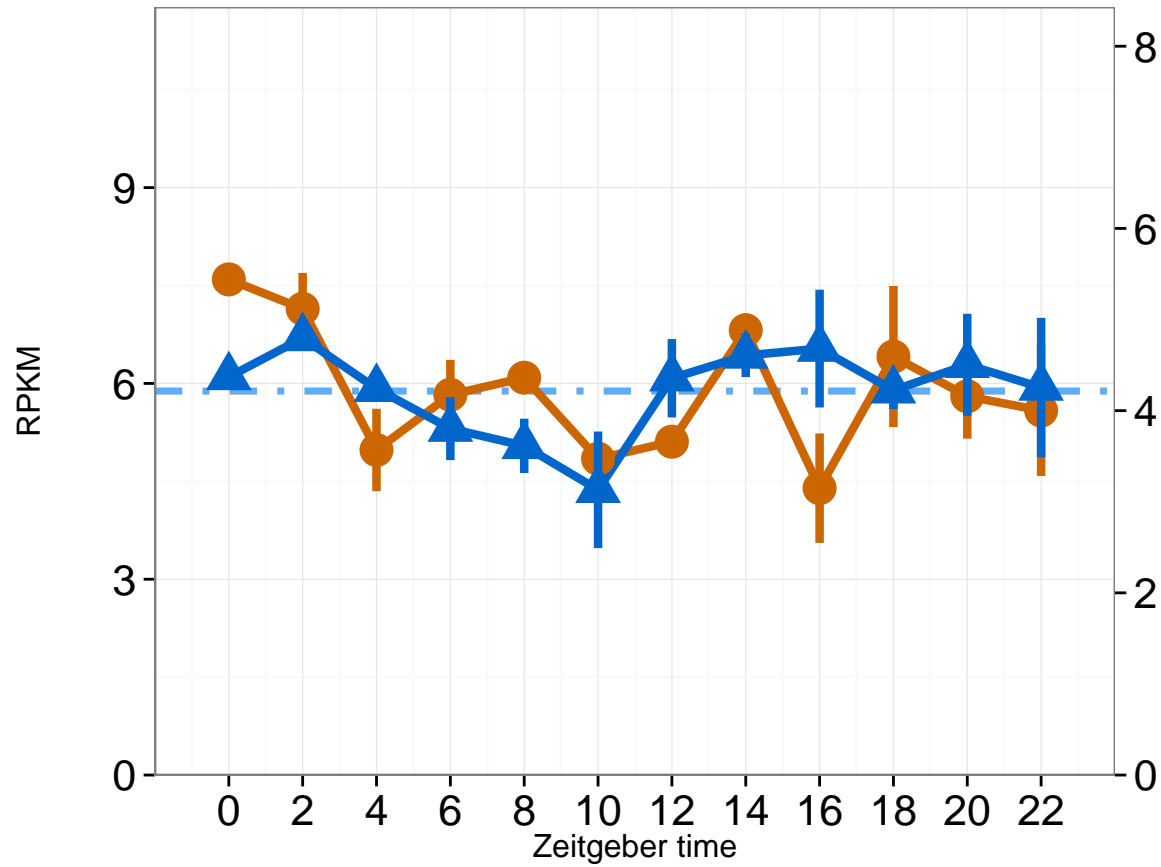

## Mettl8

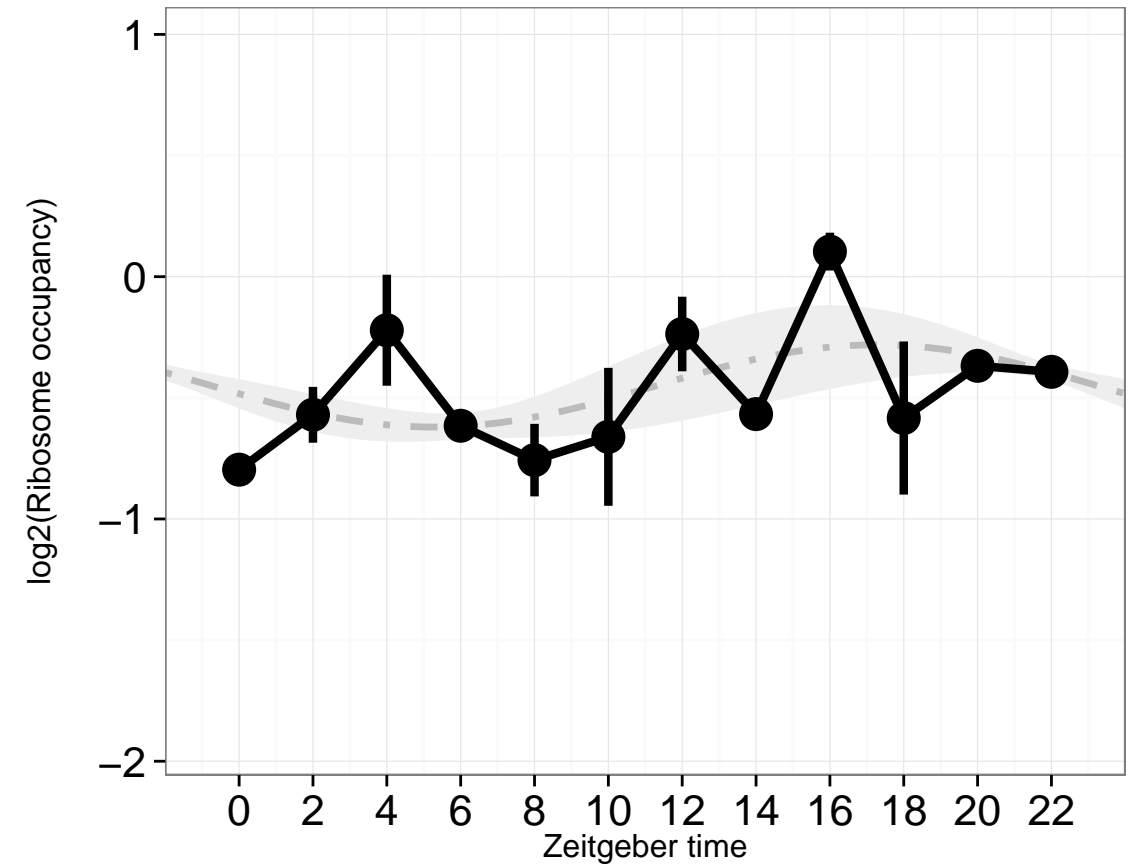

Supplement: SuppDataset_1.zip [file Mettl8_set_A.pdf › Supplemental Dataset 1/A-mRNA_nonrhyth_translation_nonrhyth/Mettl8_set_A.pdf]

## Mettl9

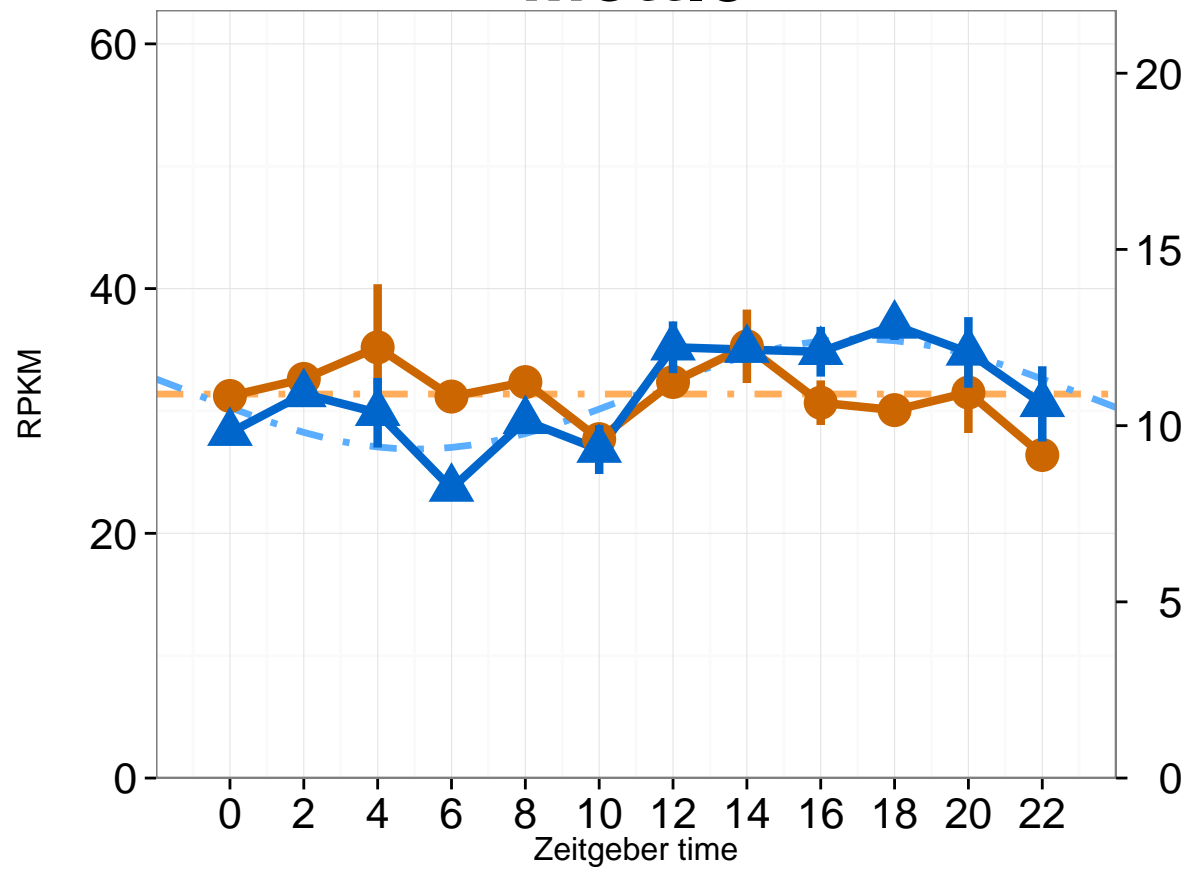

## Mettl9

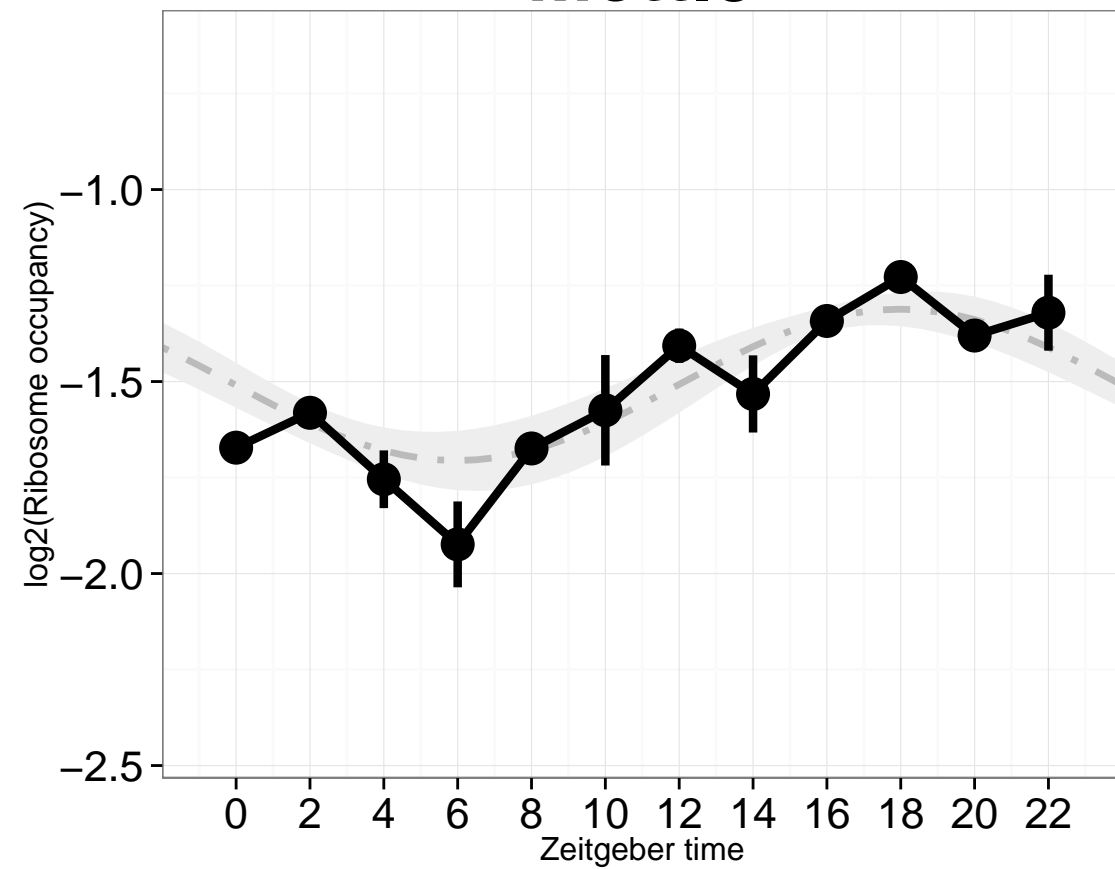

Supplement: SuppDataset_1.zip [file Mettl9_set_A.pdf › Supplemental Dataset 1/A-mRNA_nonrhyth_translation_nonrhyth/Mettl9_set_A.pdf]

## Mex3c

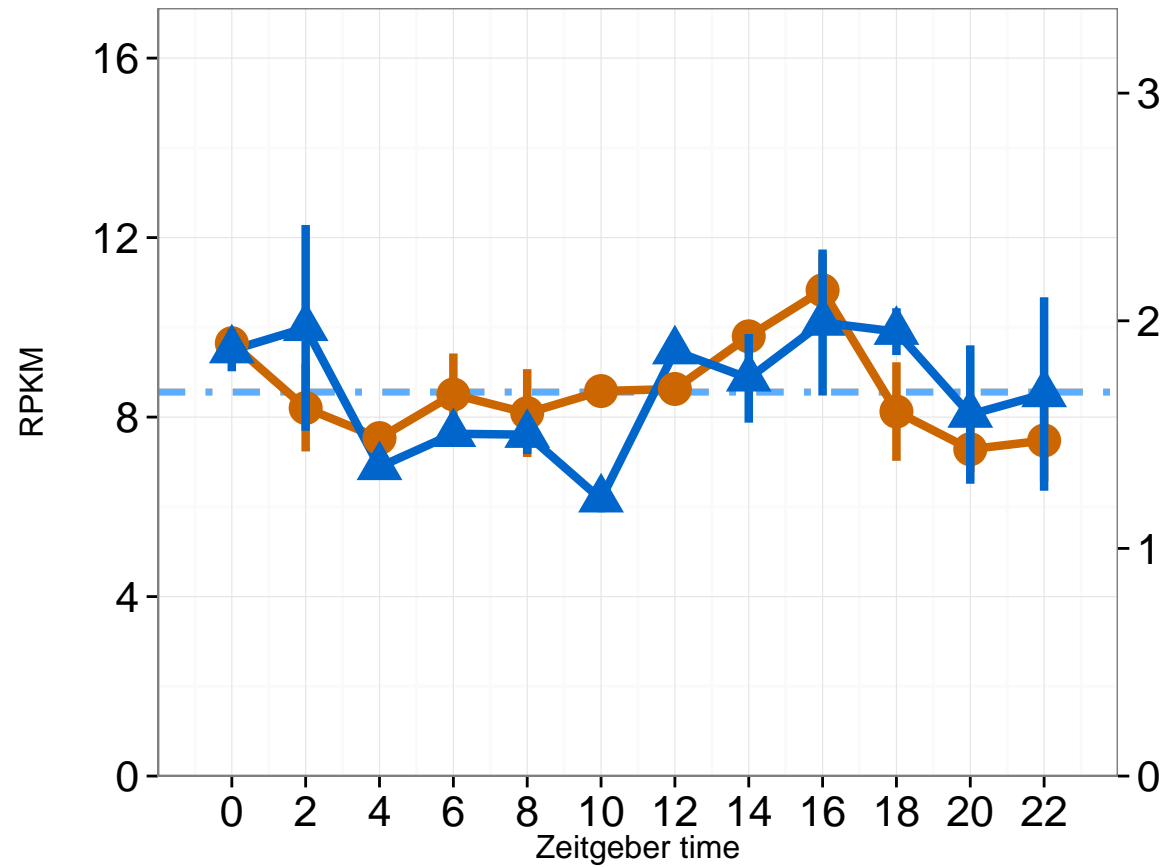

## Mex3c

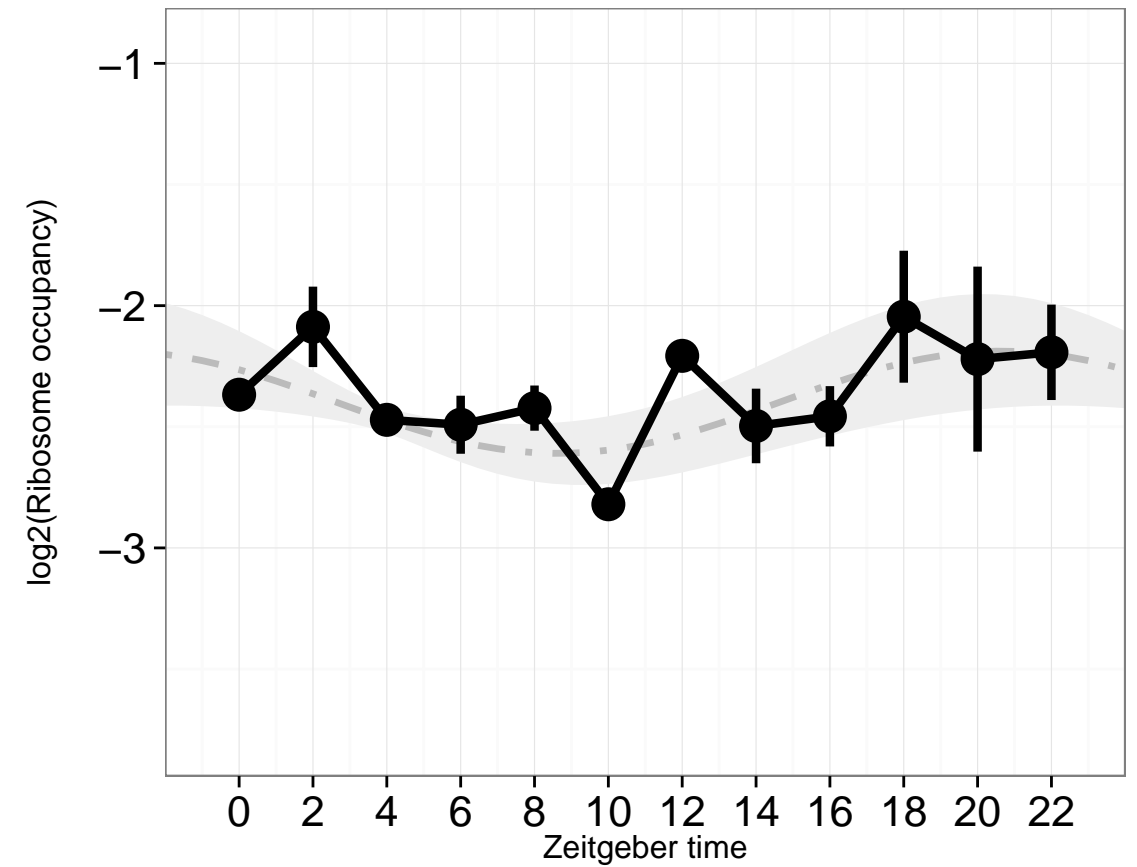

Supplement: SuppDataset_1.zip [file Mex3c_set_A.pdf › Supplemental Dataset 1/A-mRNA_nonrhyth_translation_nonrhyth/Mex3c_set_A.pdf]

## Mfap3

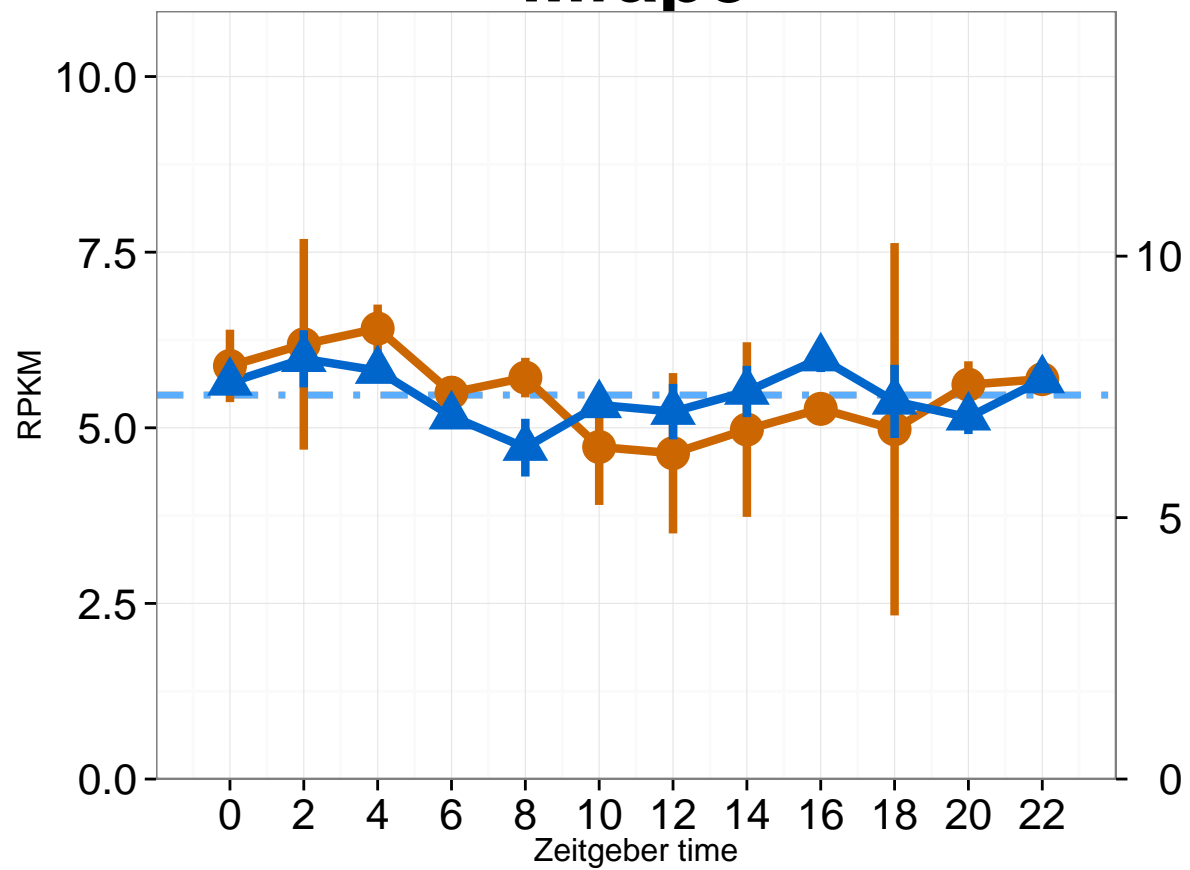

## Mfap3

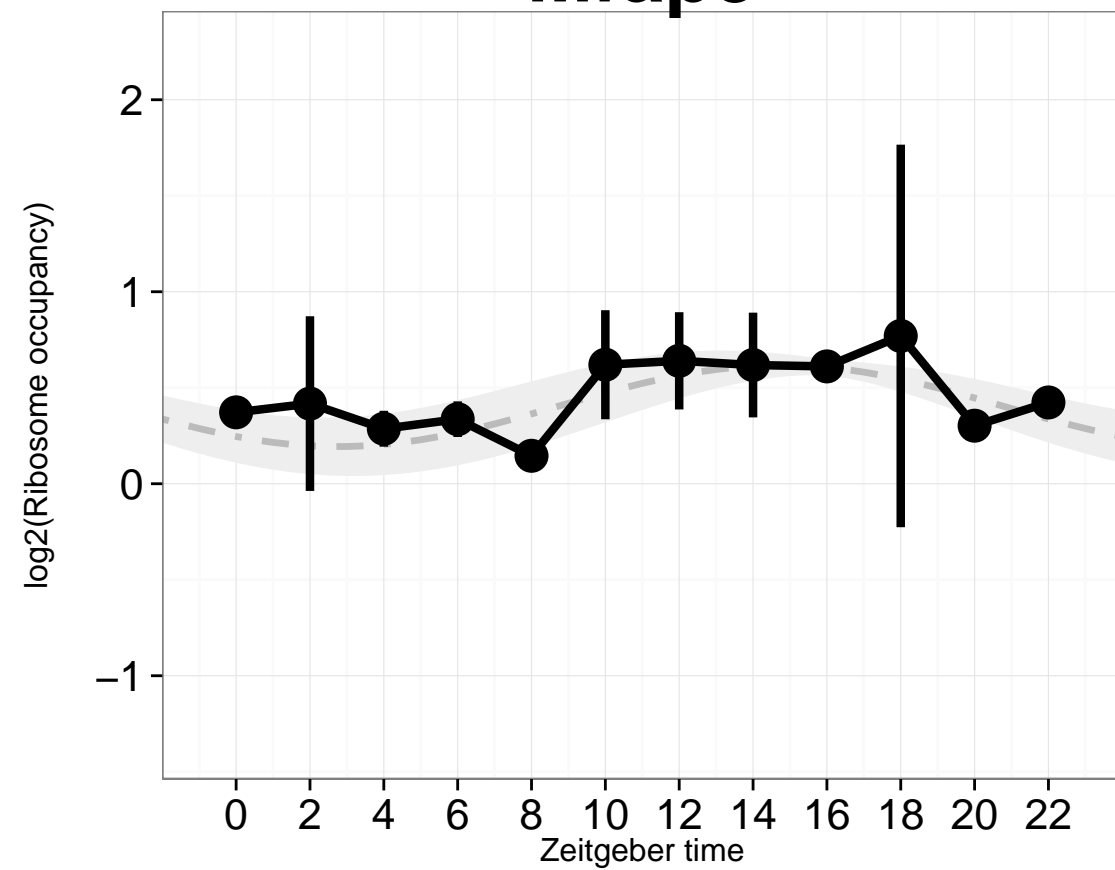

Supplement: SuppDataset_1.zip [file Mfap3_set_A.pdf › Supplemental Dataset 1/A-mRNA_nonrhyth_translation_nonrhyth/Mfap3_set_A.pdf]

## Mff

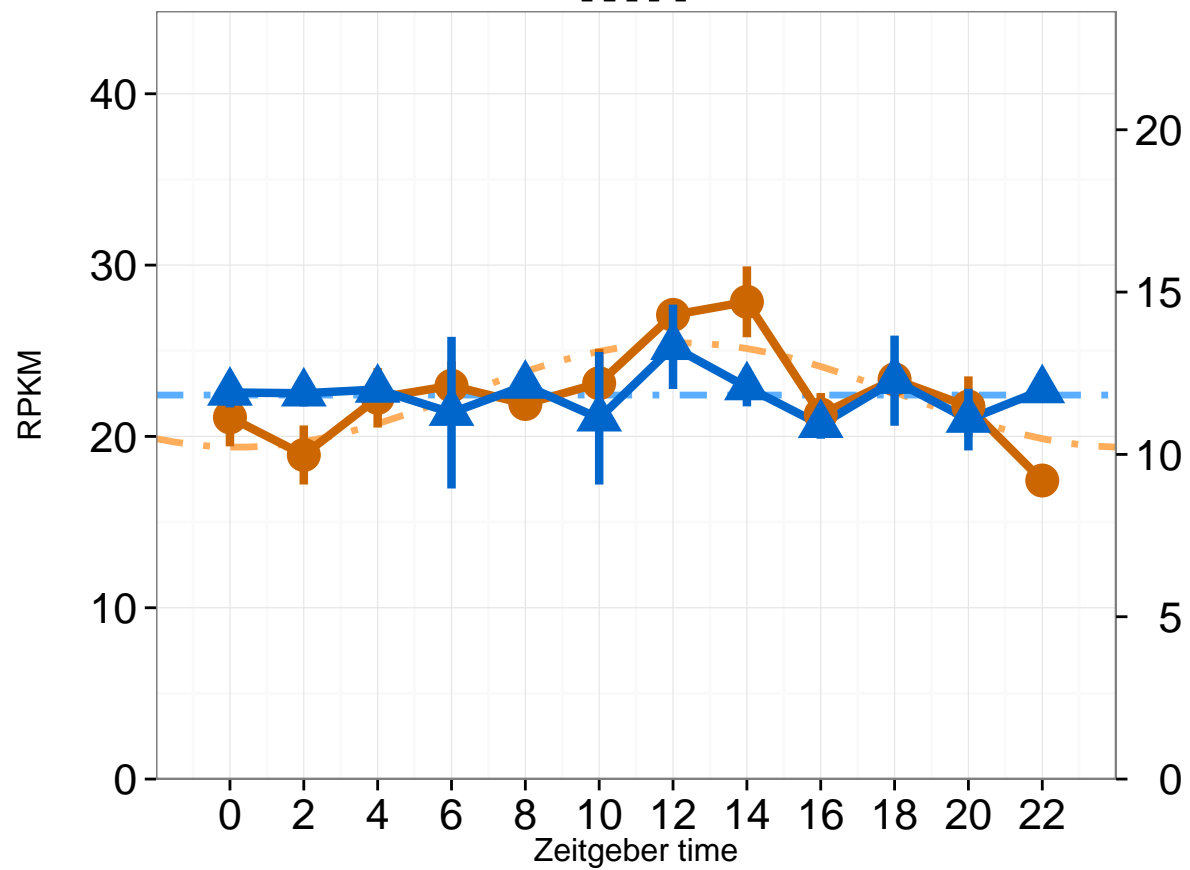

## Mff

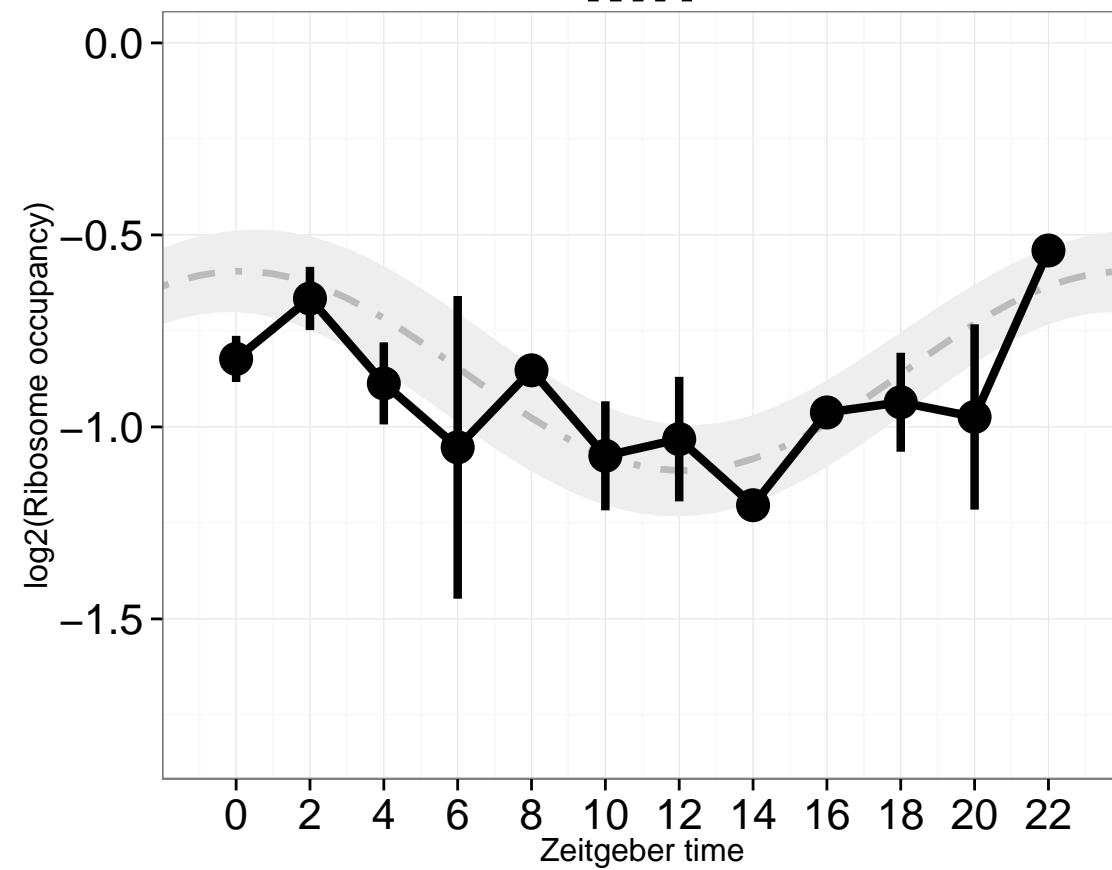

Supplement: SuppDataset_1.zip [file Mff_set_A.pdf › Supplemental Dataset 1/A-mRNA_nonrhyth_translation_nonrhyth/Mff_set_A.pdf]

# Mfge8

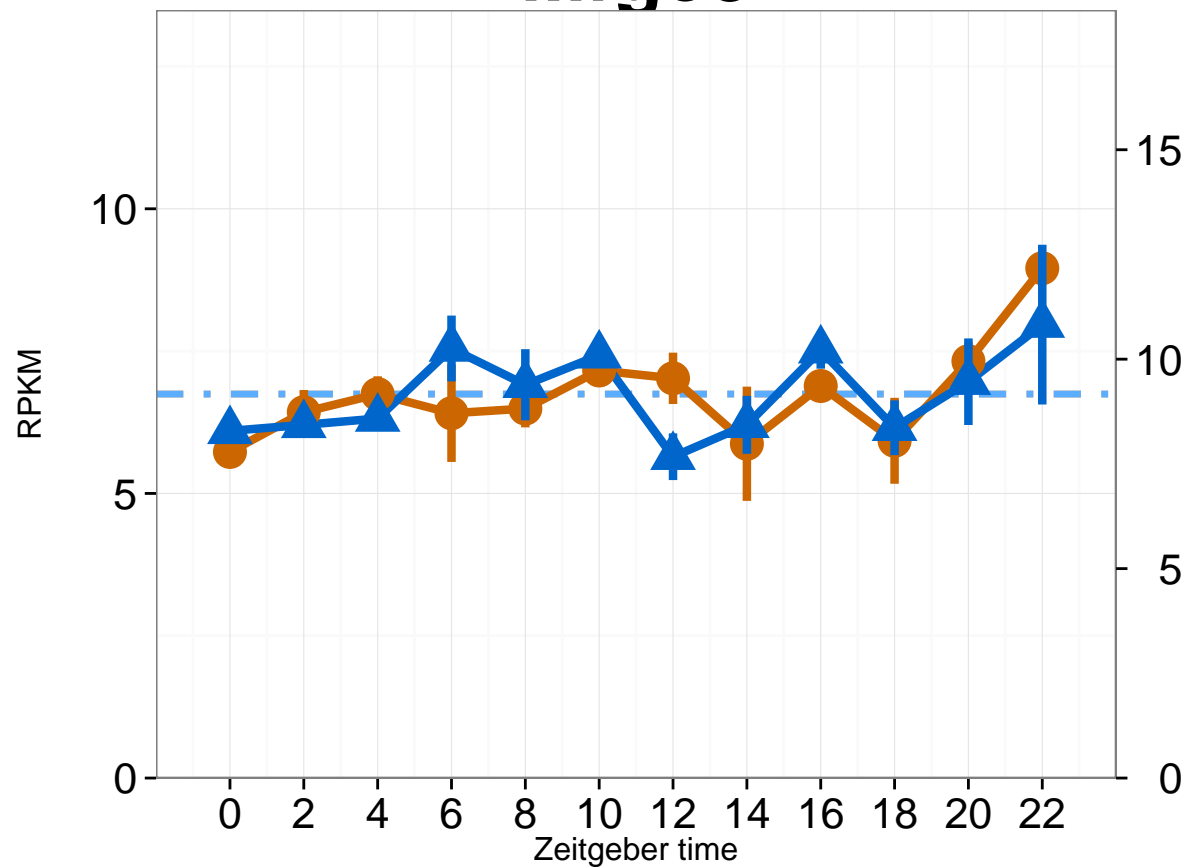

# Mfge8

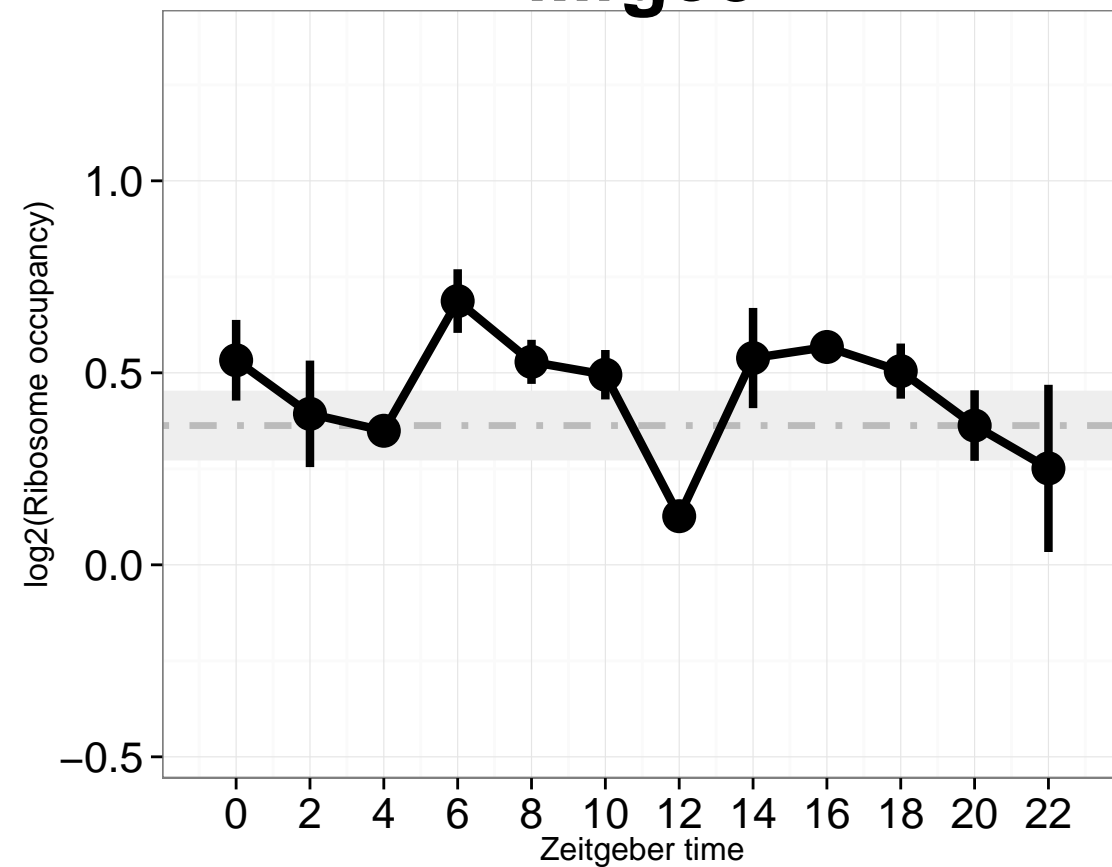

Supplement: SuppDataset_1.zip [file Mfge8_set_A.pdf › Supplemental Dataset 1/A-mRNA_nonrhyth_translation_nonrhyth/Mfge8_set_A.pdf]

# Mfn1

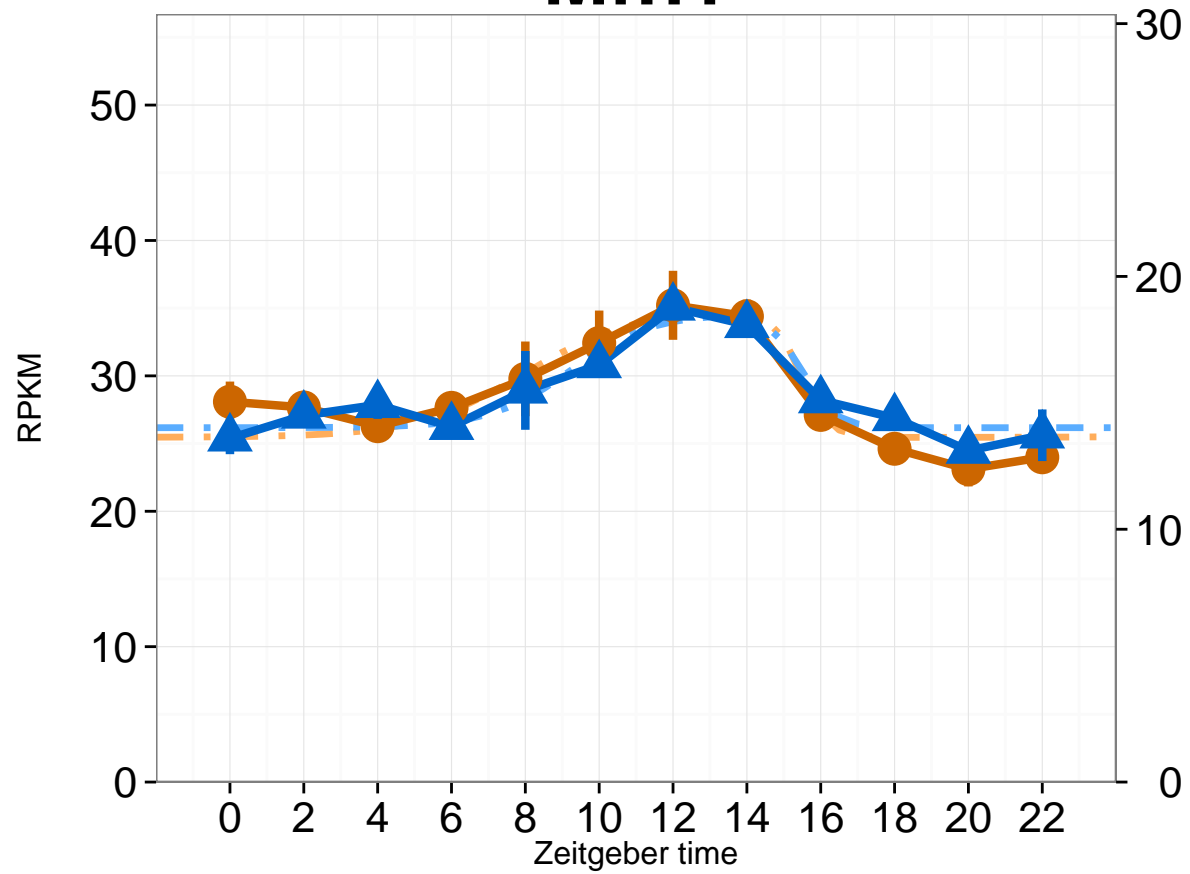

# Mfn1

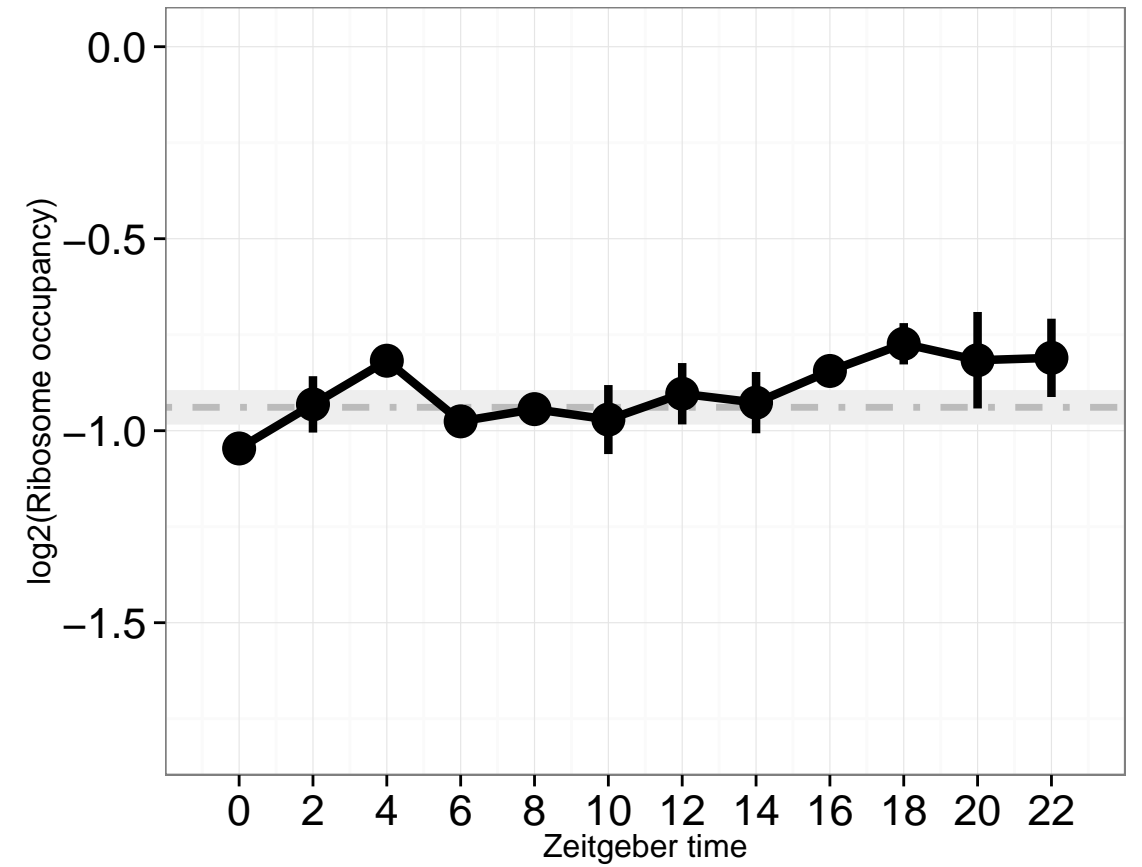

Supplement: SuppDataset_1.zip [file Mfn1_set_A.pdf › Supplemental Dataset 1/A-mRNA_nonrhyth_translation_nonrhyth/Mfn1_set_A.pdf]

## Mfn2

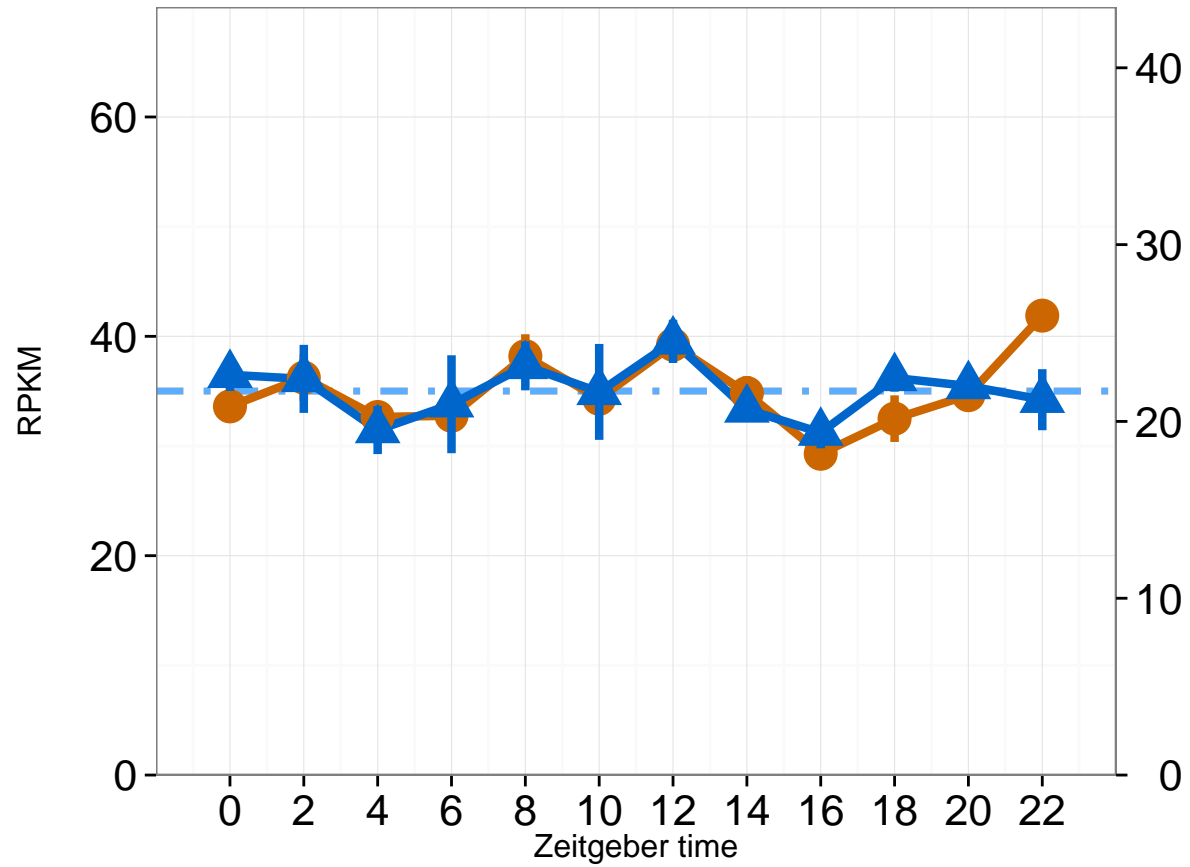

## Mfn2

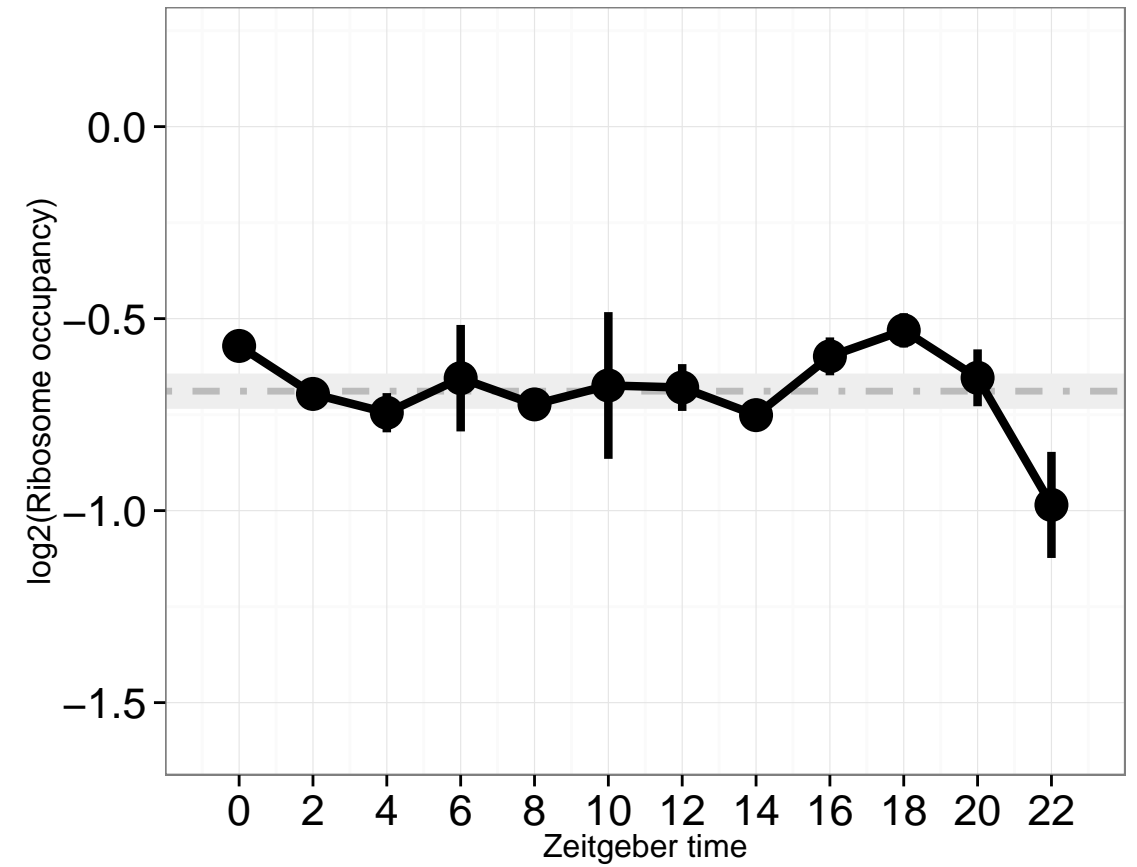

Supplement: SuppDataset_1.zip [file Mfn2_set_A.pdf › Supplemental Dataset 1/A-mRNA_nonrhyth_translation_nonrhyth/Mfn2_set_A.pdf]

# Mfsd10

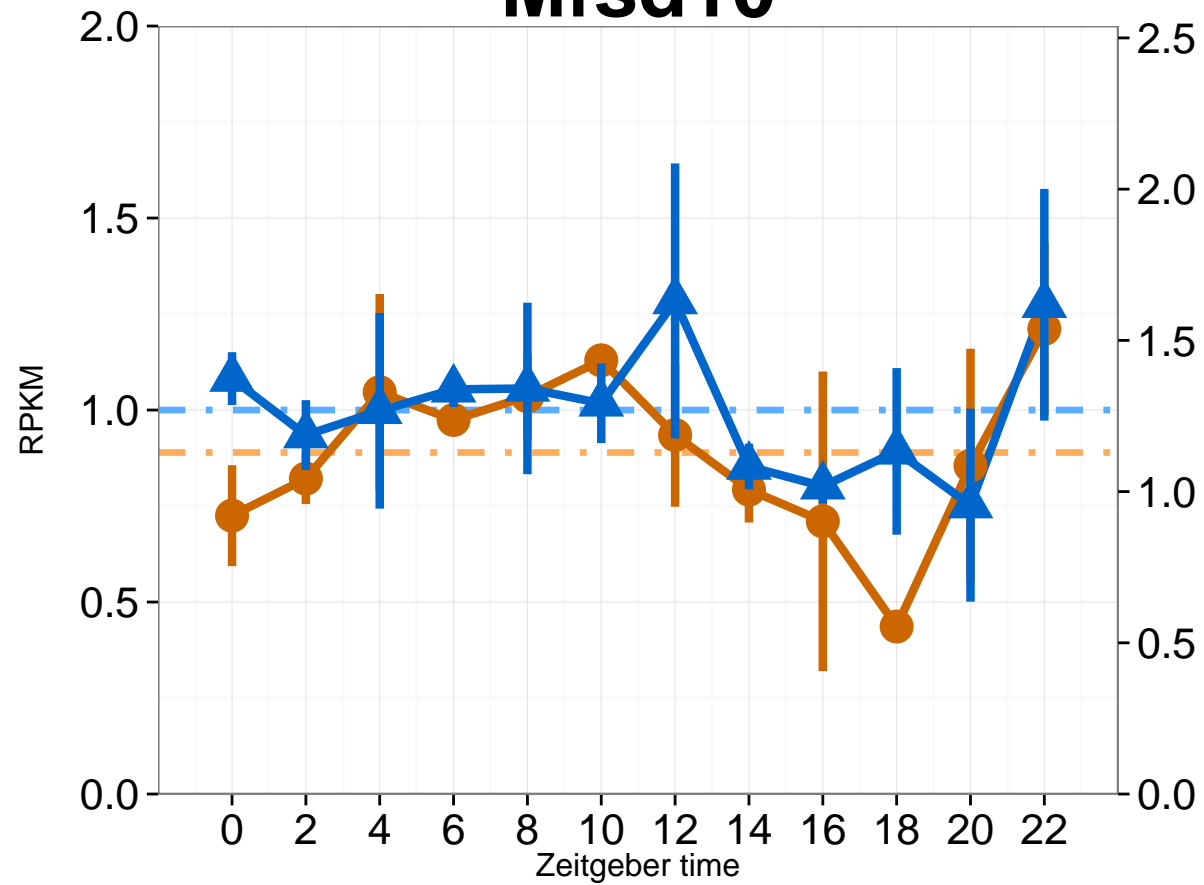

# Mfsd10

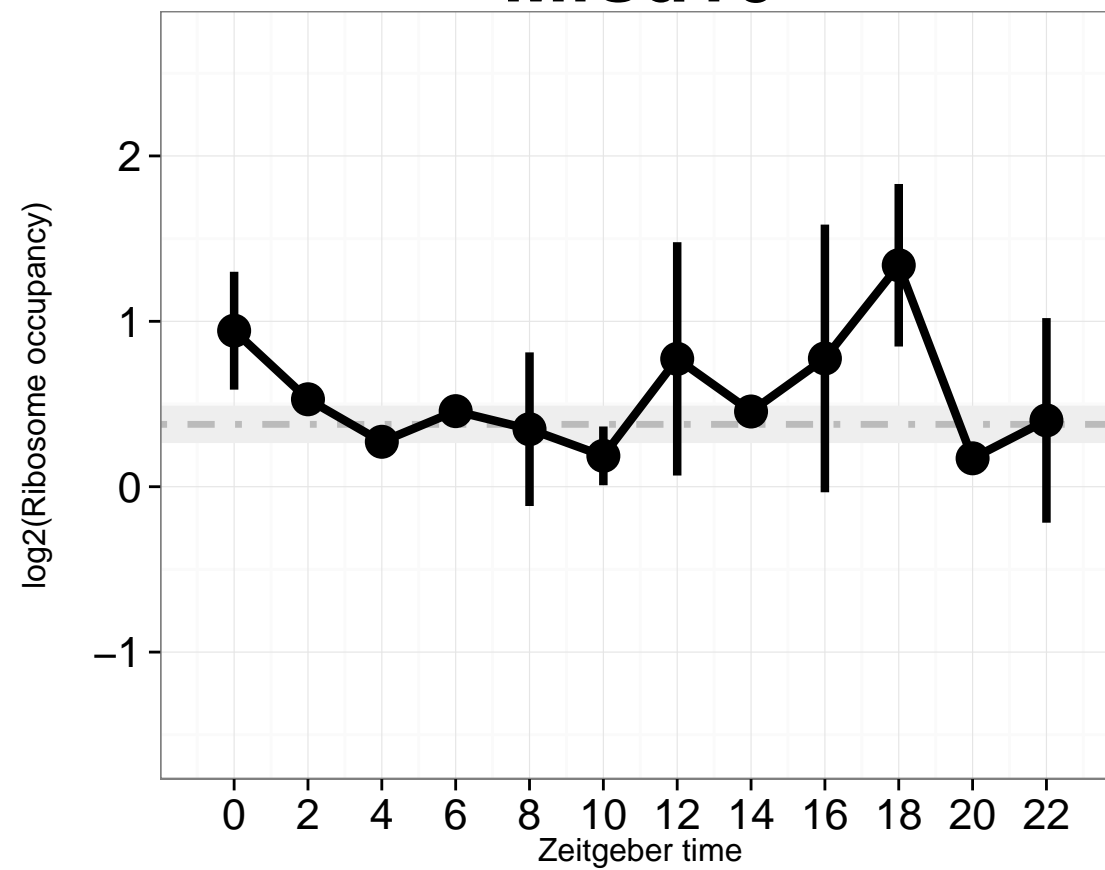

Supplement: SuppDataset_1.zip [file Mfsd10_set_A.pdf › Supplemental Dataset 1/A-mRNA_nonrhyth_translation_nonrhyth/Mfsd10_set_A.pdf]

# Mfsd11

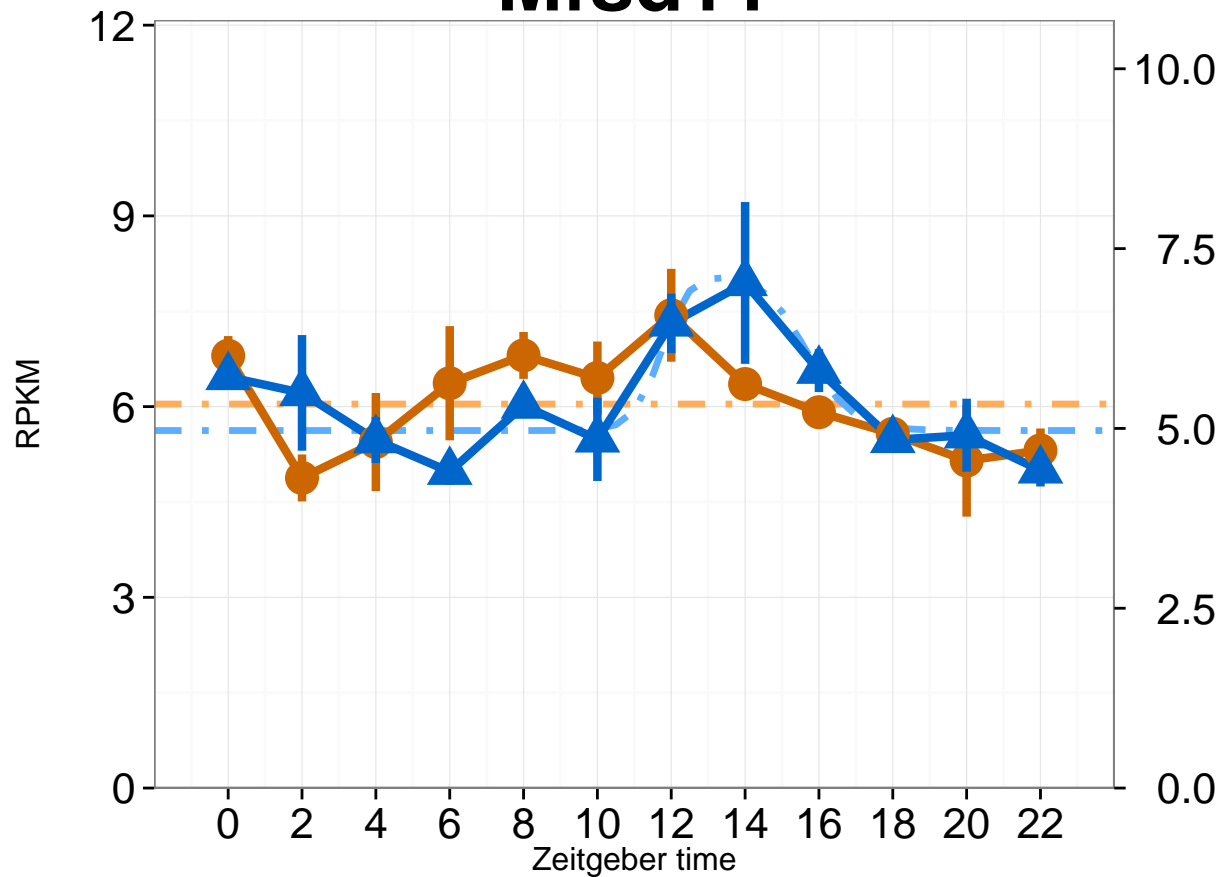

# Mfsd11

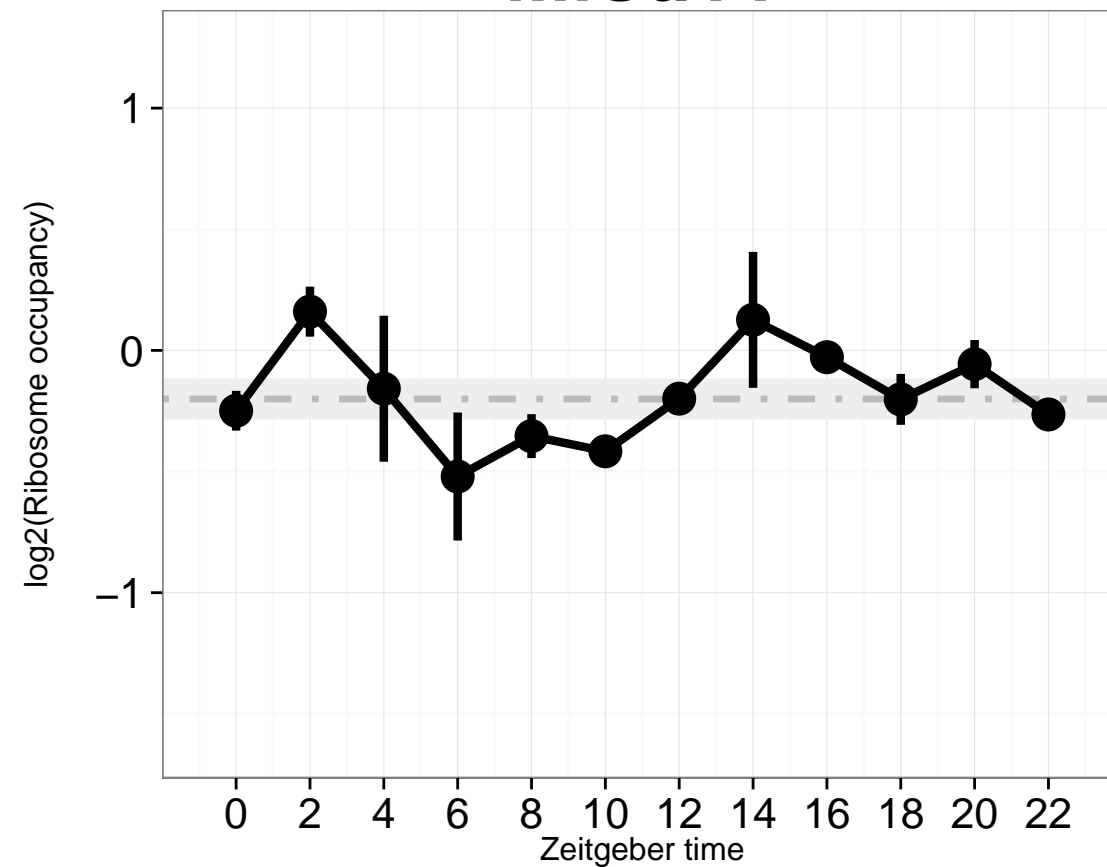

Supplement: SuppDataset_1.zip [file Mfsd11_set_A.pdf › Supplemental Dataset 1/A-mRNA_nonrhyth_translation_nonrhyth/Mfsd11_set_A.pdf]

# Mfsd12

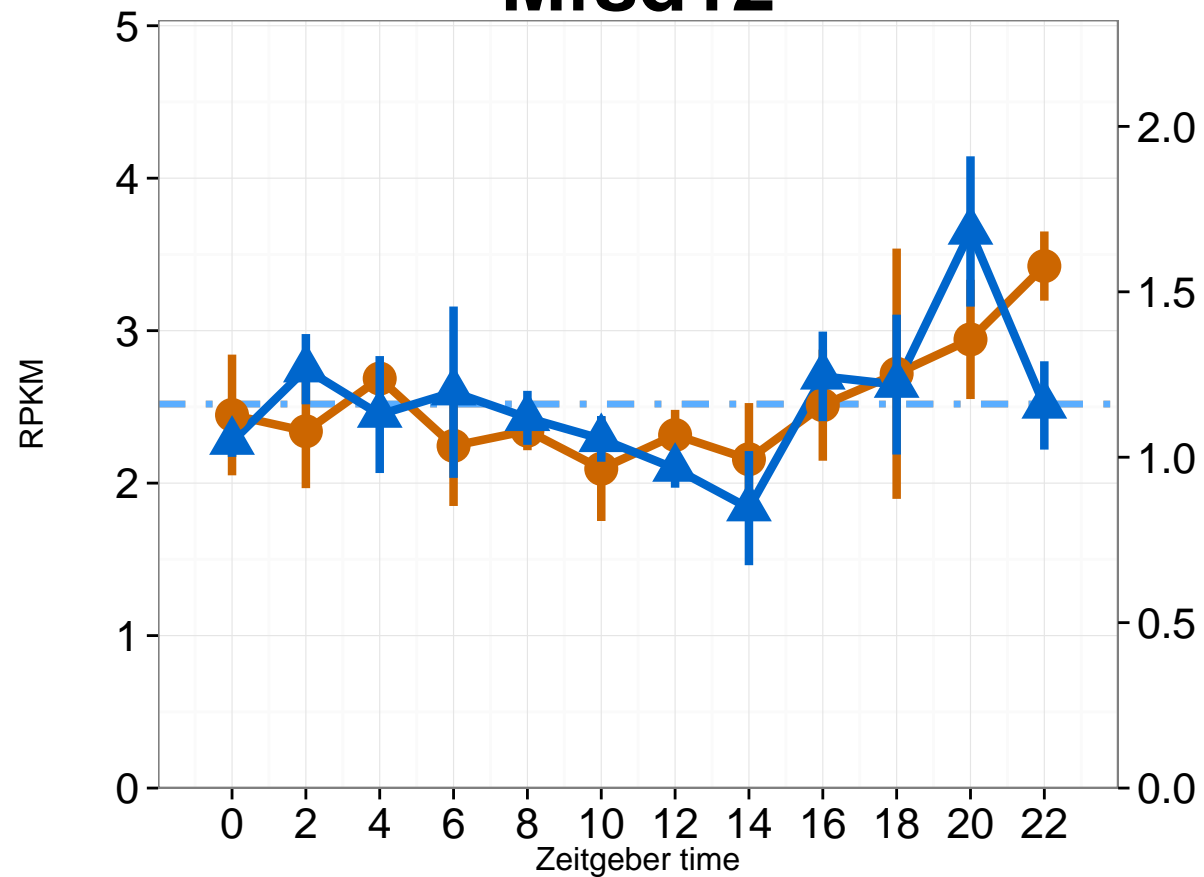

# Mfsd12

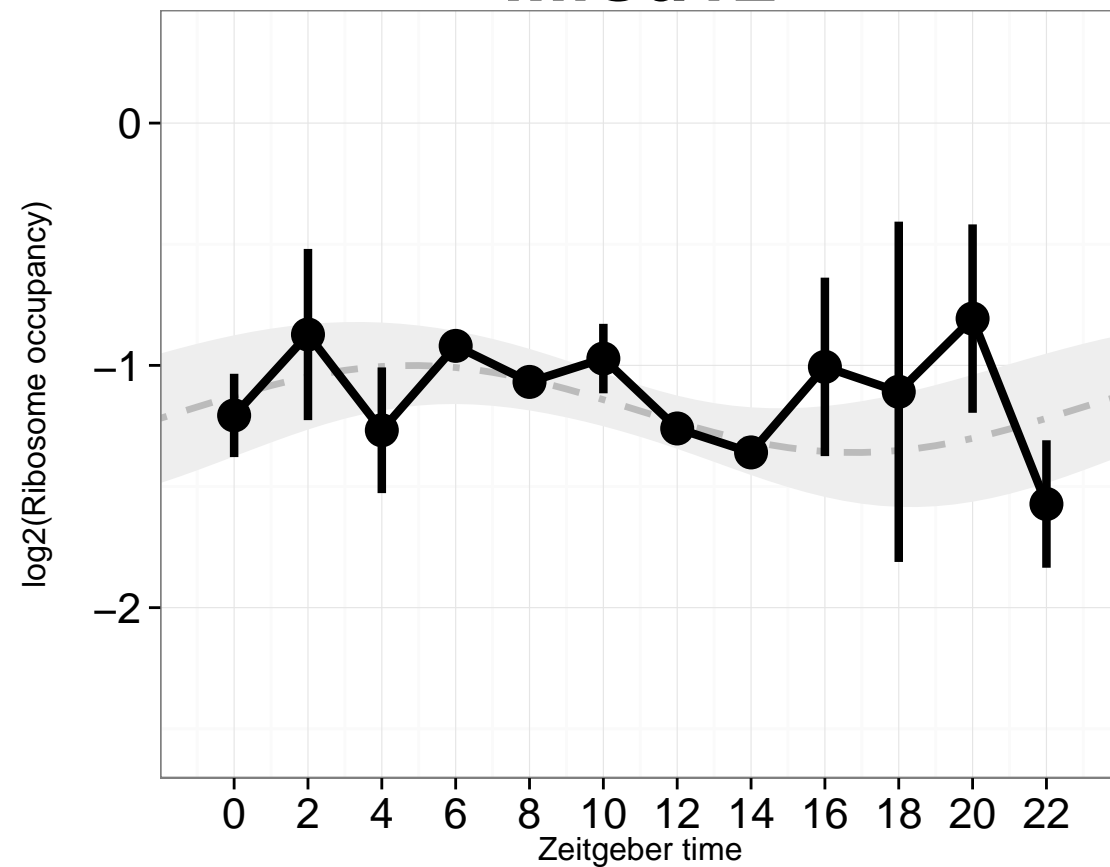

Supplement: SuppDataset_1.zip [file Mfsd12_set_A.pdf › Supplemental Dataset 1/A-mRNA_nonrhyth_translation_nonrhyth/Mfsd12_set_A.pdf]

# Mfsd1

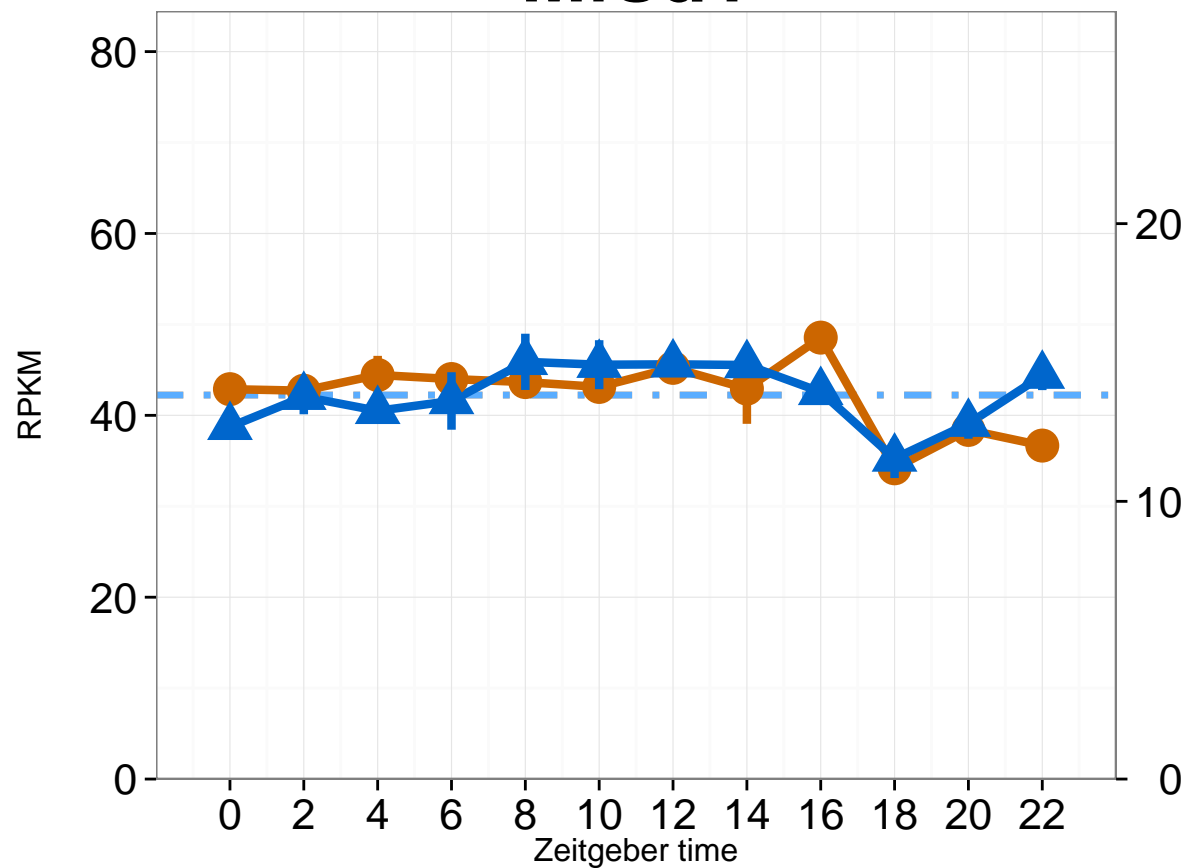

# Mfsd1

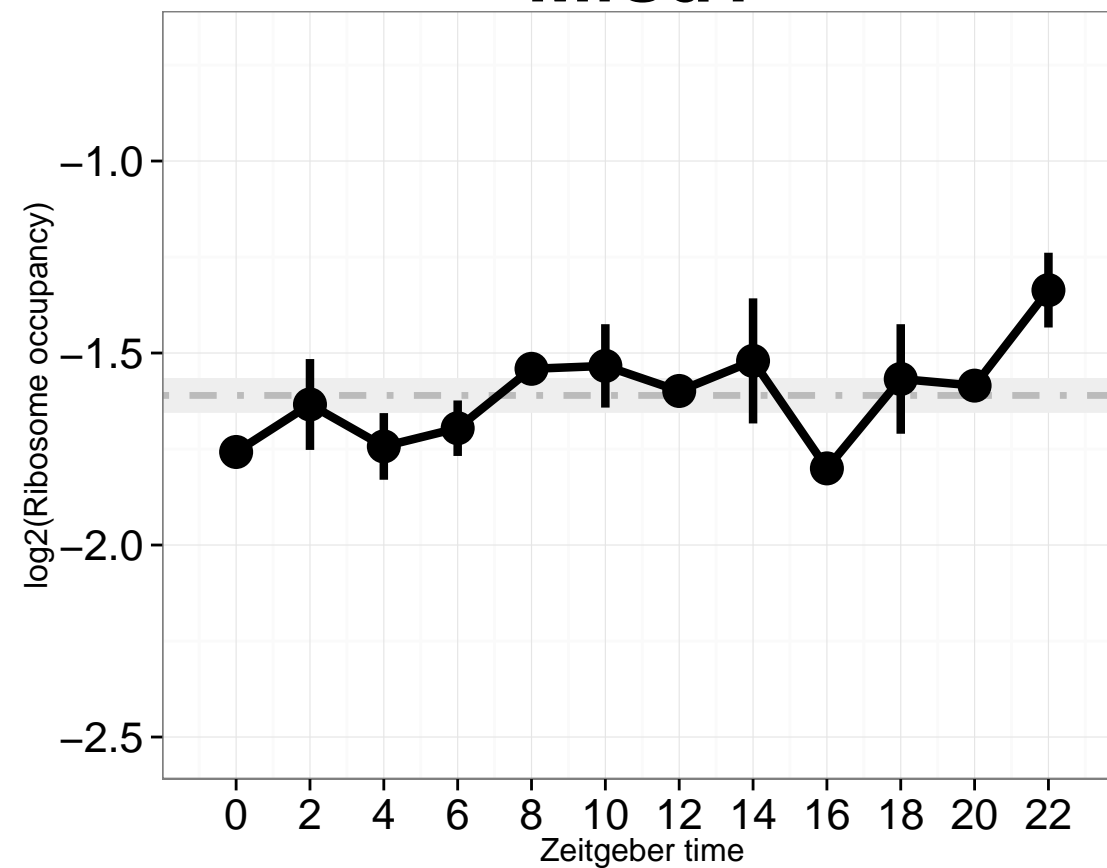

Supplement: SuppDataset_1.zip [file Mfsd1_set_A.pdf › Supplemental Dataset 1/A-mRNA_nonrhyth_translation_nonrhyth/Mfsd1_set_A.pdf]

# Mfsd3

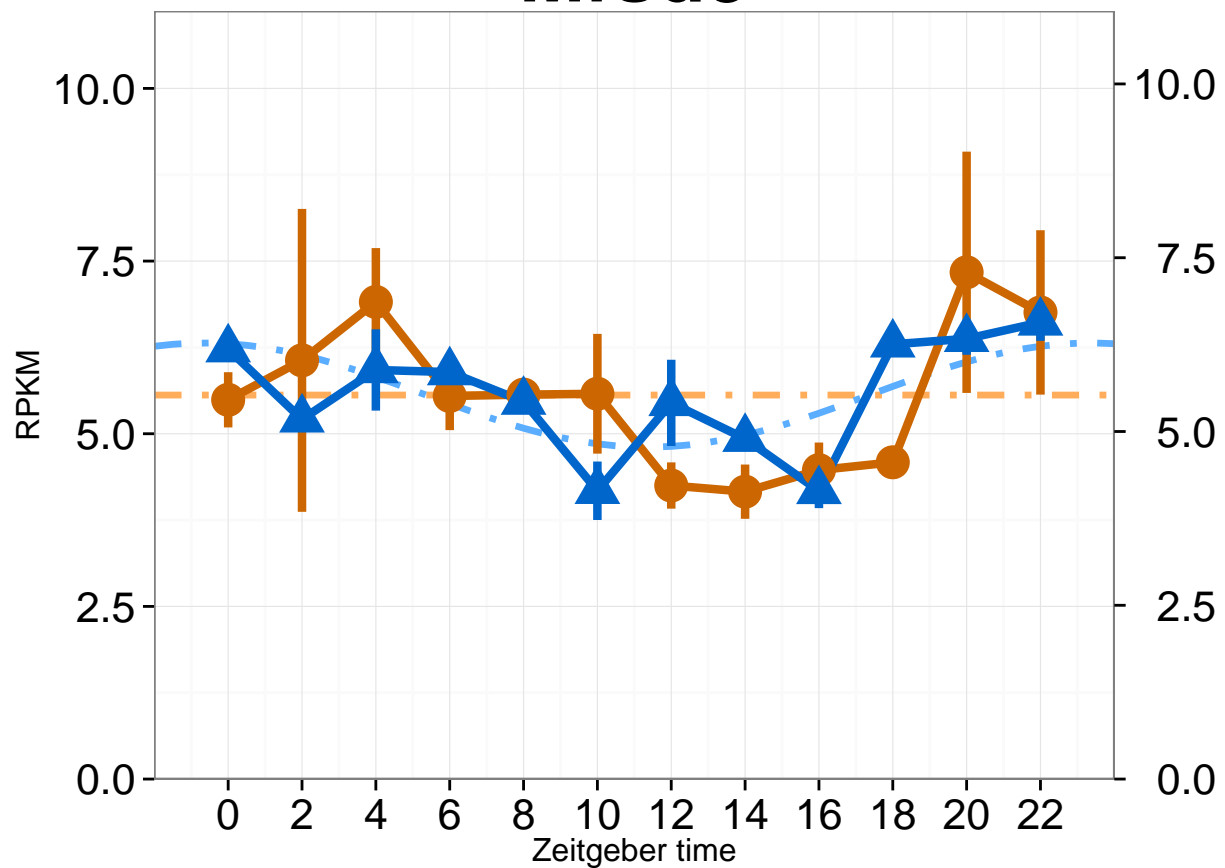

# Mfsd3

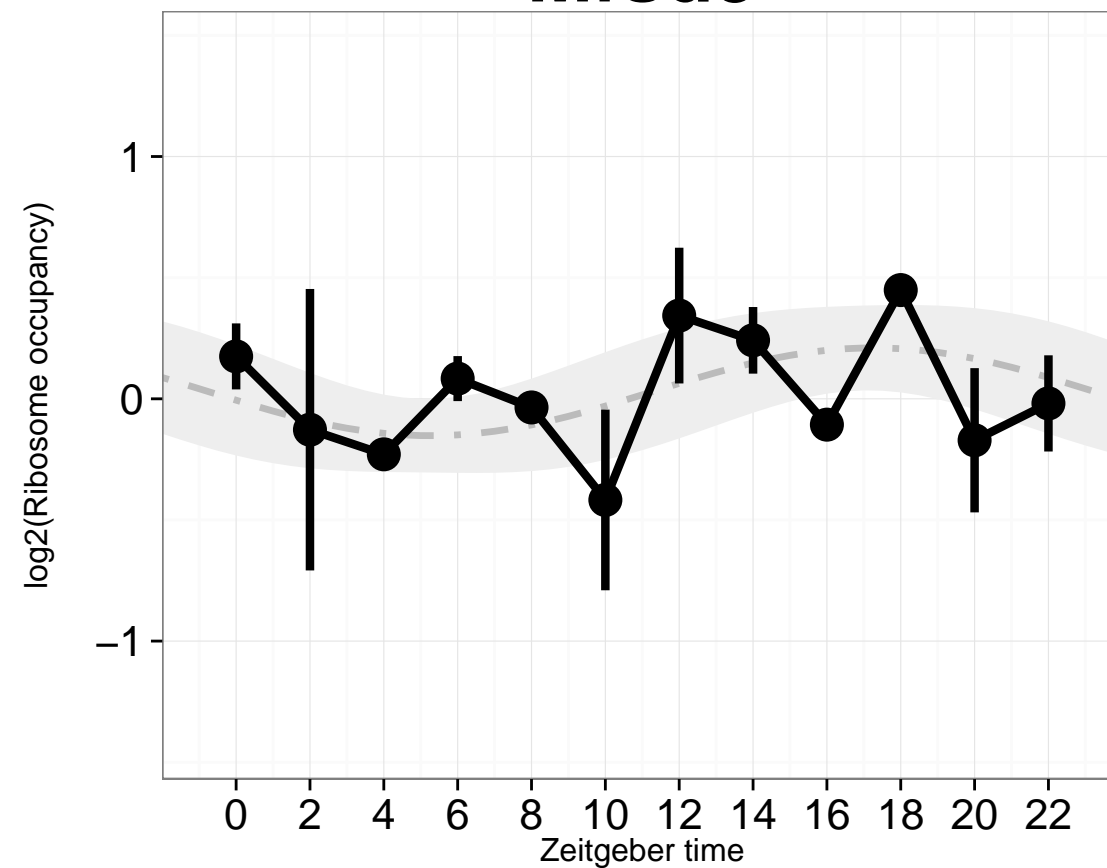

Supplement: SuppDataset_1.zip [file Mfsd3_set_A.pdf › Supplemental Dataset 1/A-mRNA_nonrhyth_translation_nonrhyth/Mfsd3_set_A.pdf]
