# Supplementary figures and images for: Ribosome profiling reveals the rhythmic liver translatome and circadian clock regulation by upstream open reading frames (part 44 of 113)
Source: HighWire-hosted journal article supplement (doi:10.1101/gr.195404.115), 2015-10-20

# Mfsd5

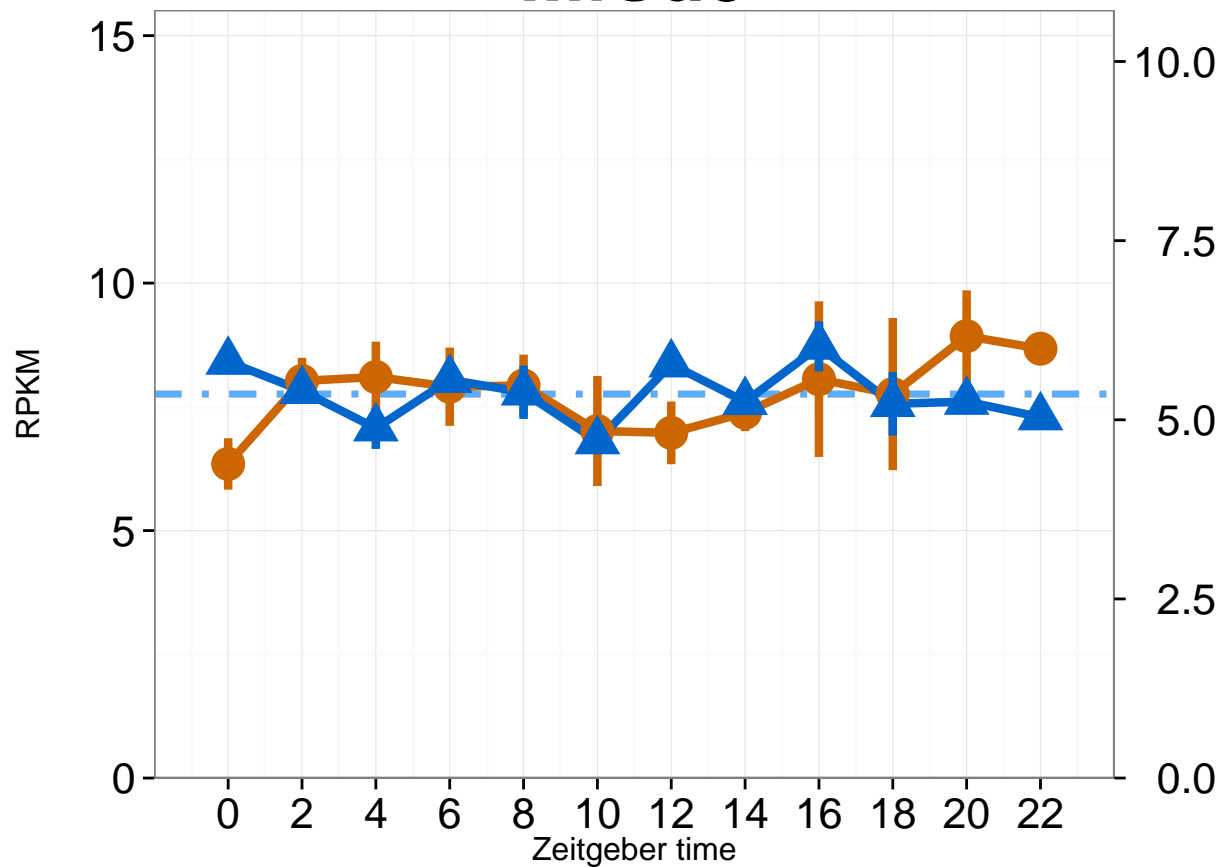

# Mfsd5

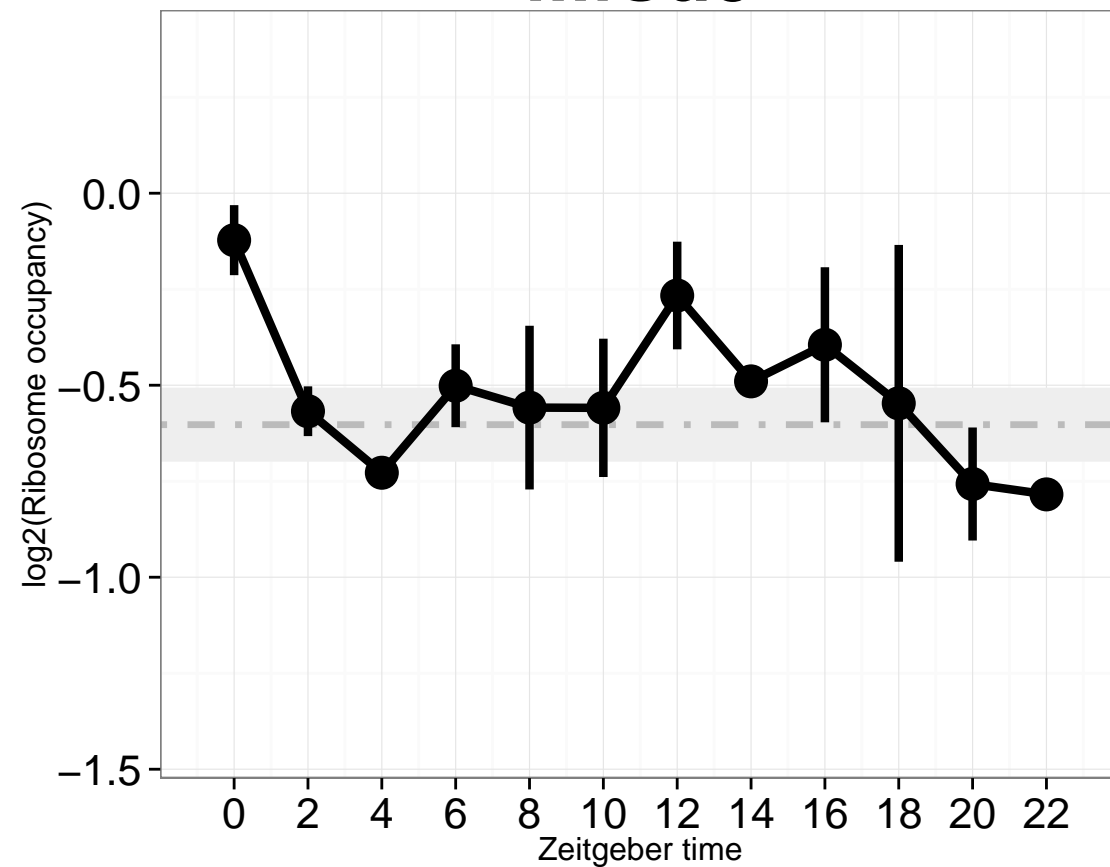

Supplement: SuppDataset_1.zip [file Mfsd5_set_A.pdf › Supplemental Dataset 1/A-mRNA_nonrhyth_translation_nonrhyth/Mfsd5_set_A.pdf]

# Mfsd6

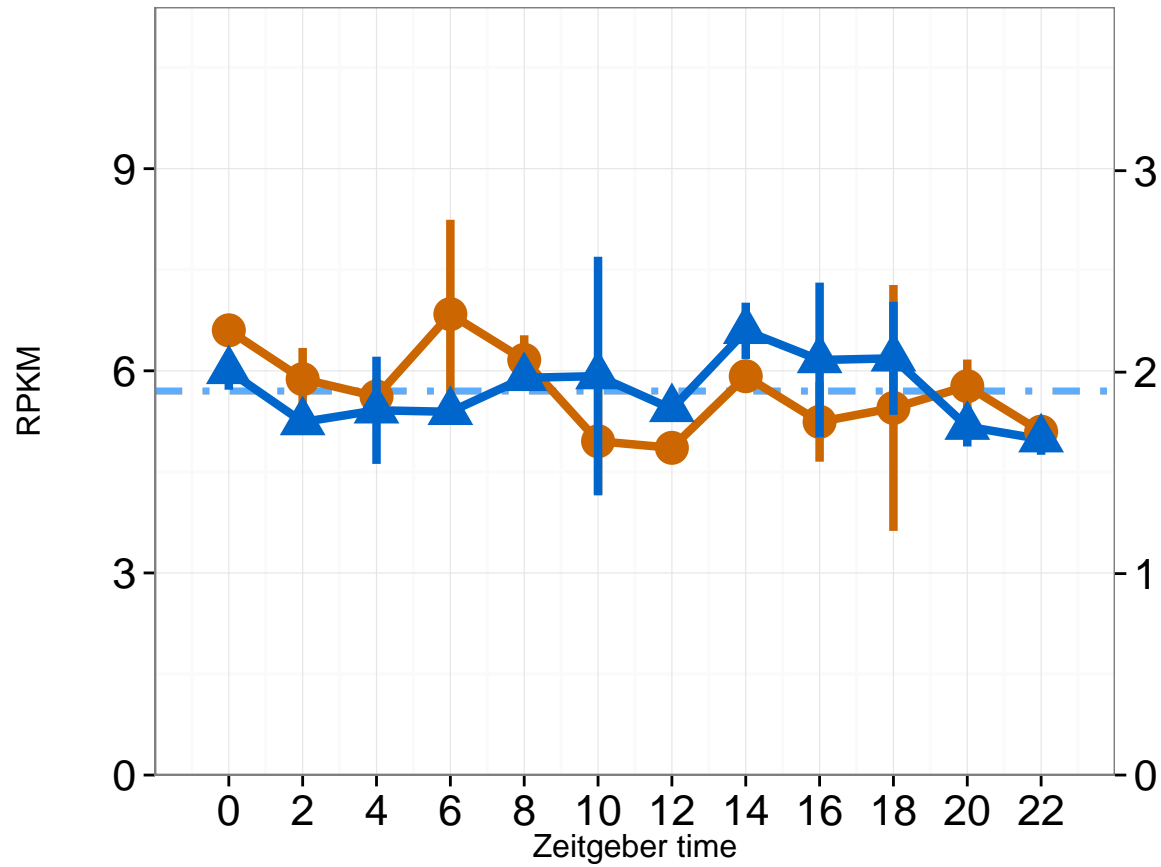

# Mfsd6

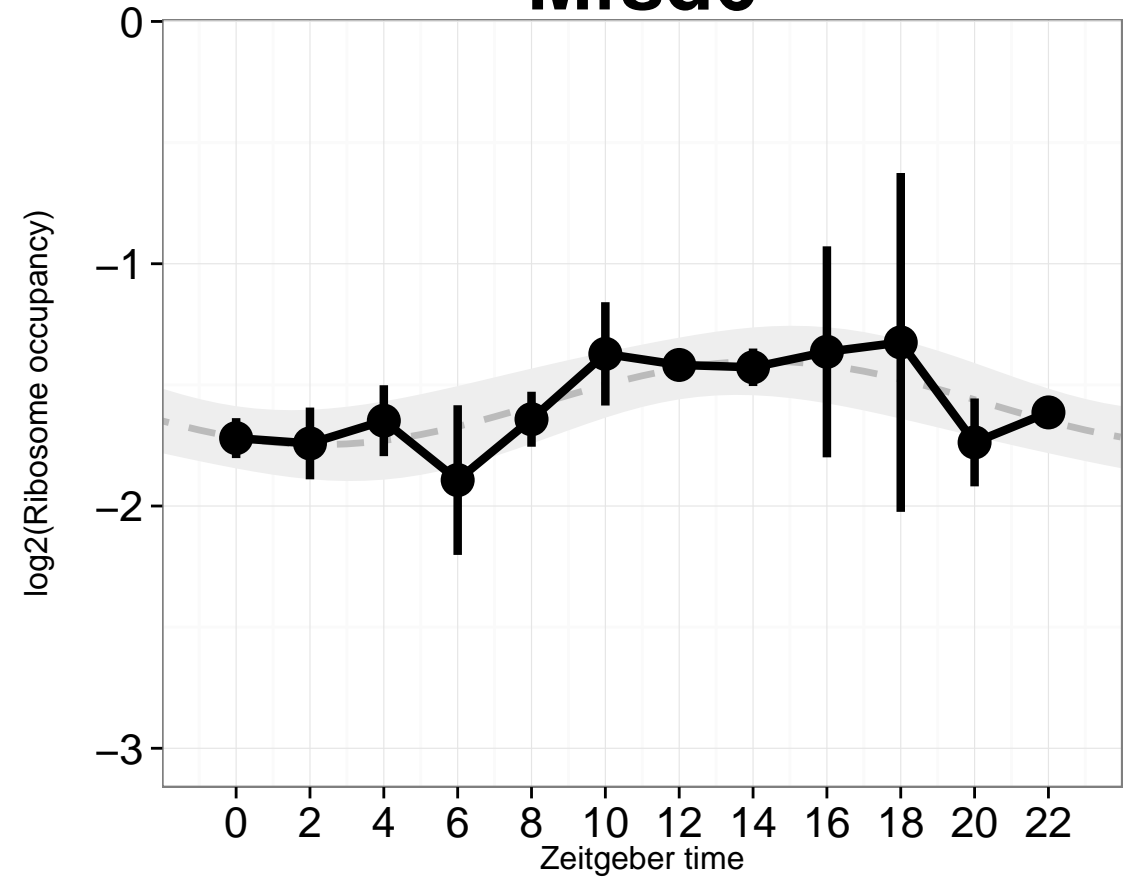

Supplement: SuppDataset_1.zip [file Mfsd6_set_A.pdf › Supplemental Dataset 1/A-mRNA_nonrhyth_translation_nonrhyth/Mfsd6_set_A.pdf]

# Mfsd7a

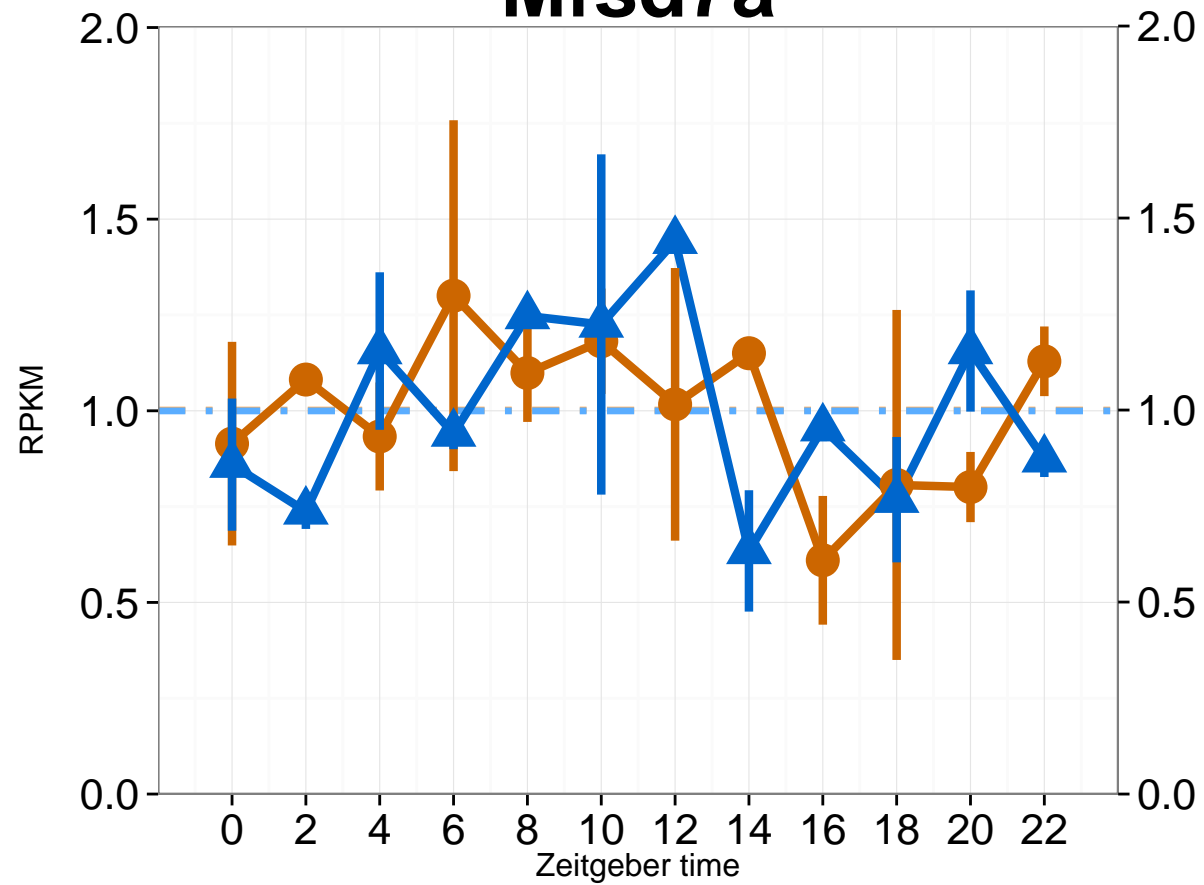

# Mfsd7a

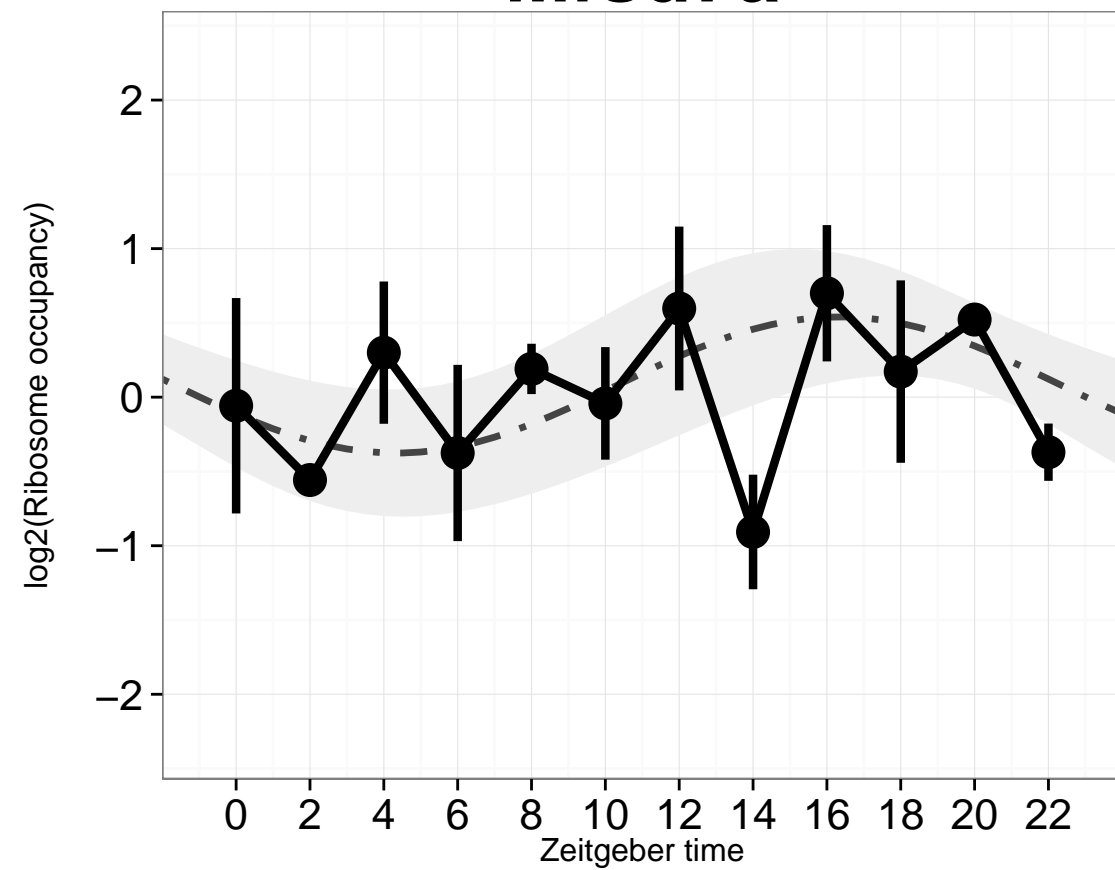

Supplement: SuppDataset_1.zip [file Mfsd7a_set_A.pdf › Supplemental Dataset 1/A-mRNA_nonrhyth_translation_nonrhyth/Mfsd7a_set_A.pdf]

# Mfsd7c

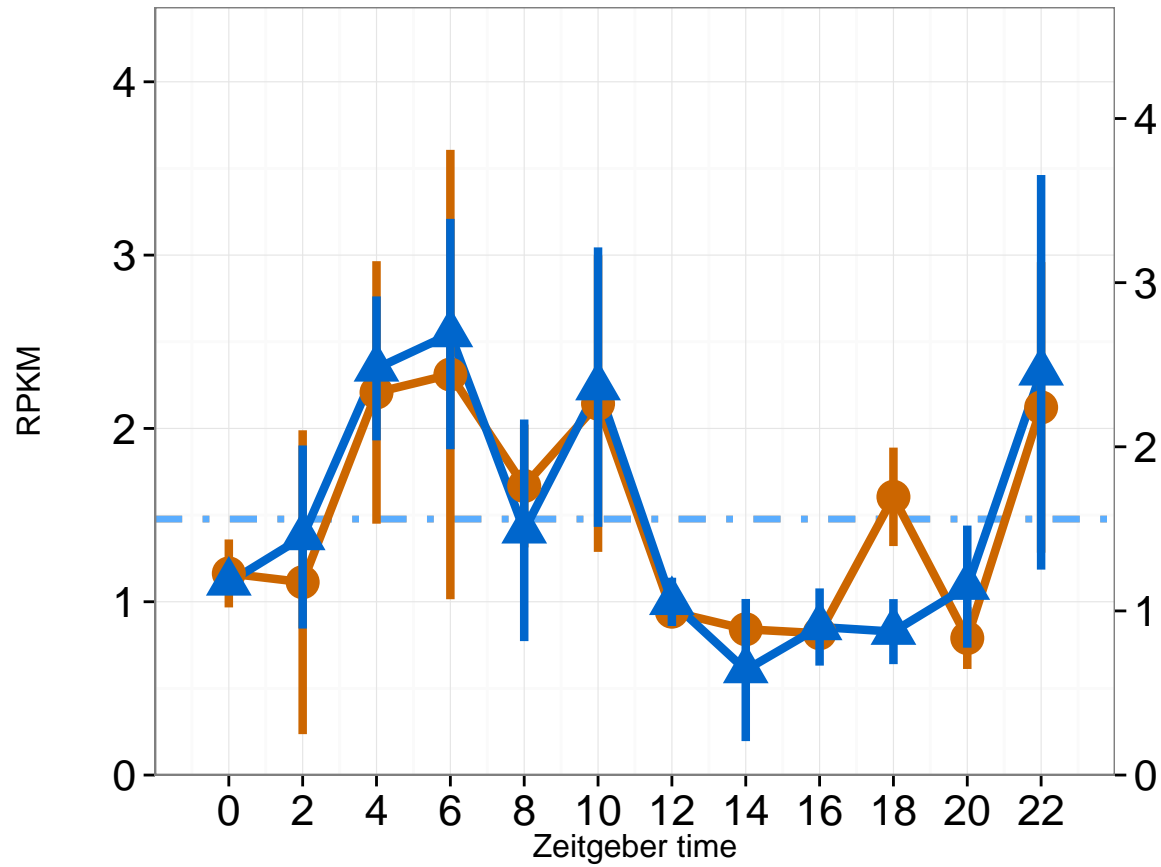

# Mfsd7c

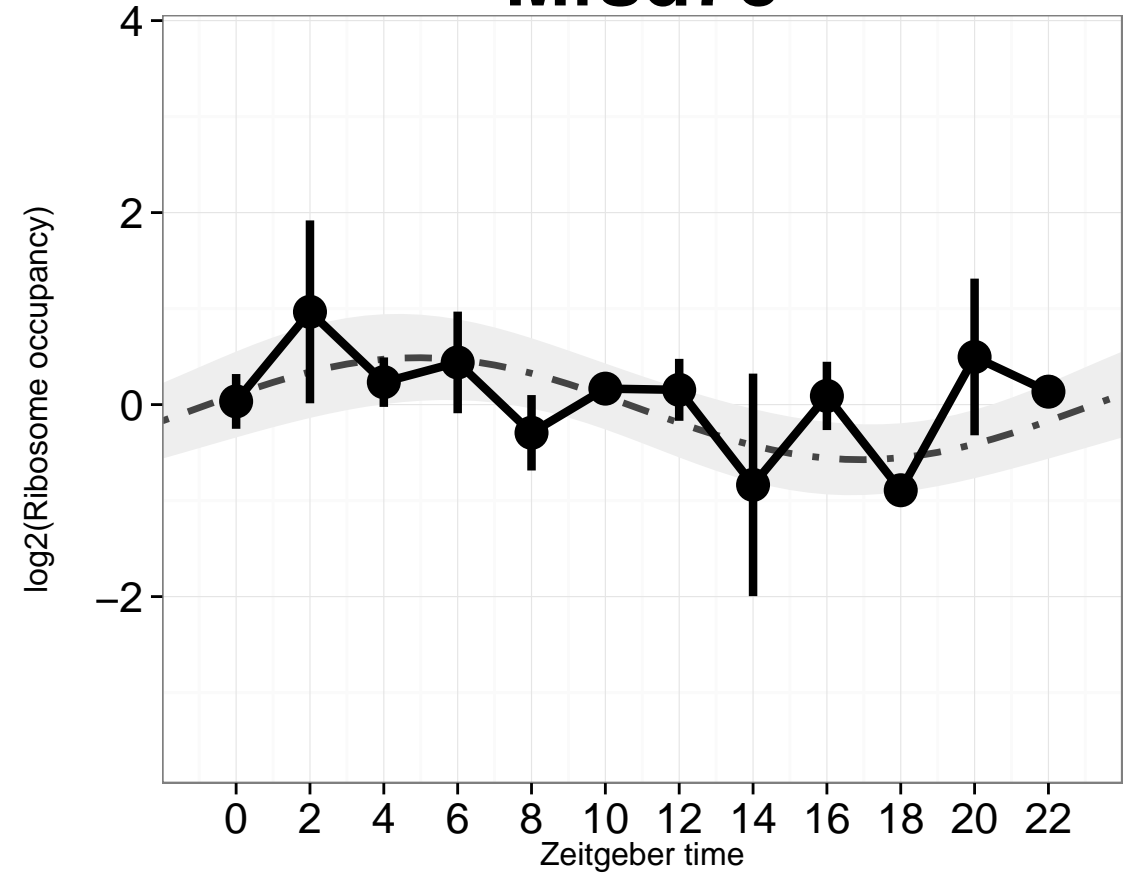

Supplement: SuppDataset_1.zip [file Mfsd7c_set_A.pdf › Supplemental Dataset 1/A-mRNA_nonrhyth_translation_nonrhyth/Mfsd7c_set_A.pdf]

# Mfsd9

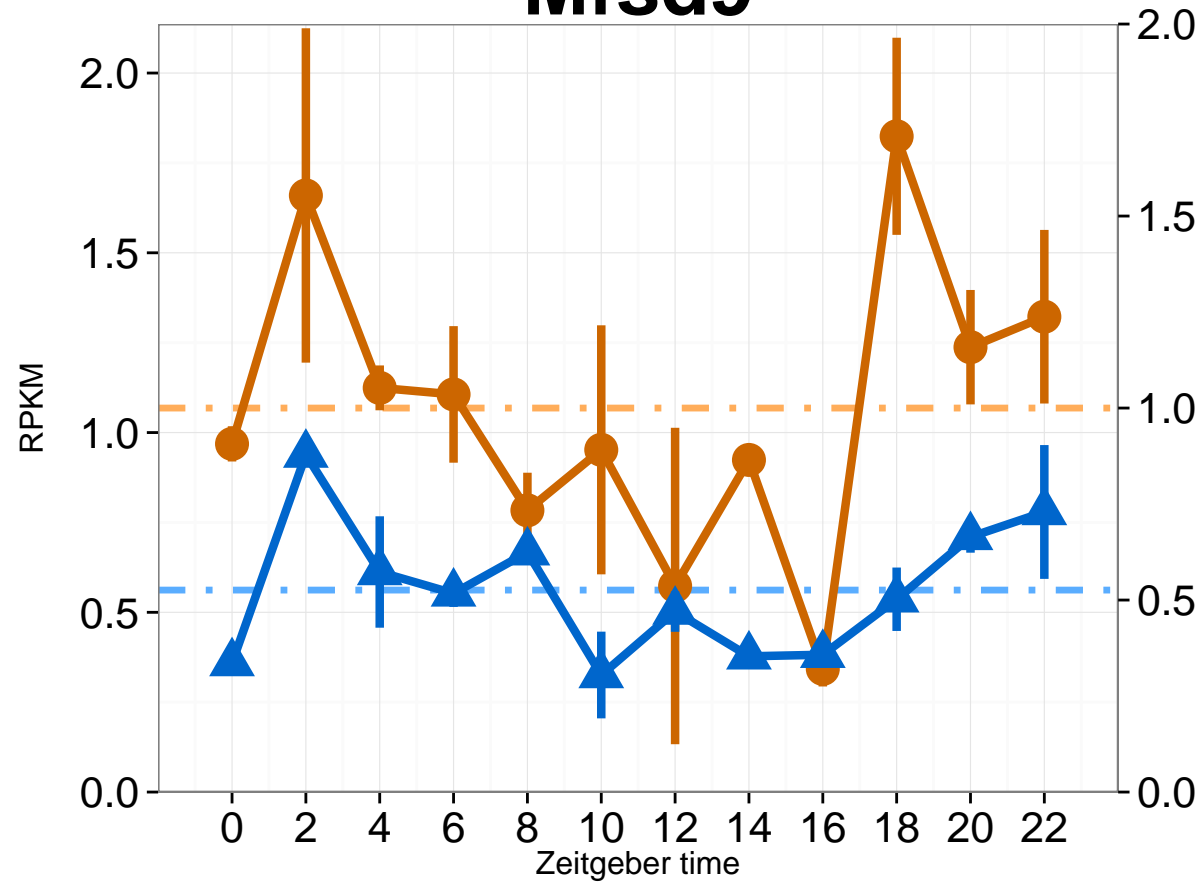

# Mfsd9

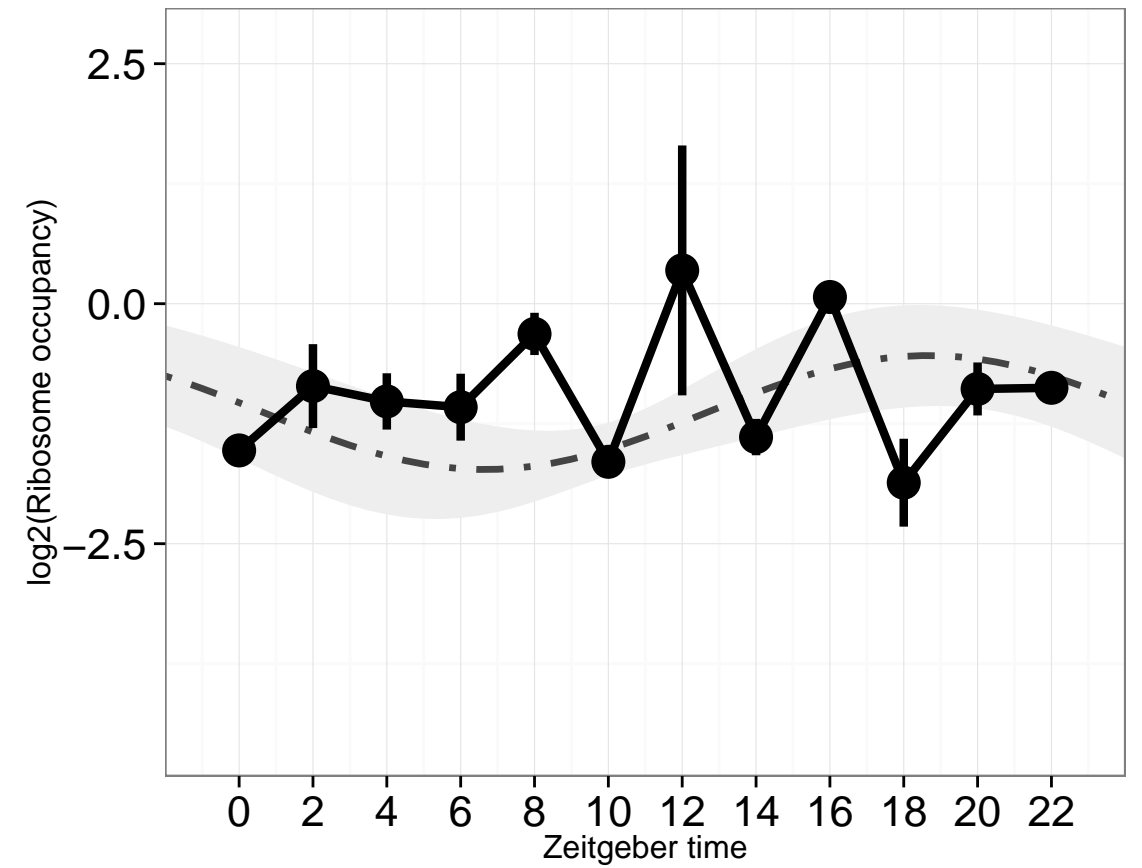

Supplement: SuppDataset_1.zip [file Mfsd9_set_A.pdf › Supplemental Dataset 1/A-mRNA_nonrhyth_translation_nonrhyth/Mfsd9_set_A.pdf]

## Mga

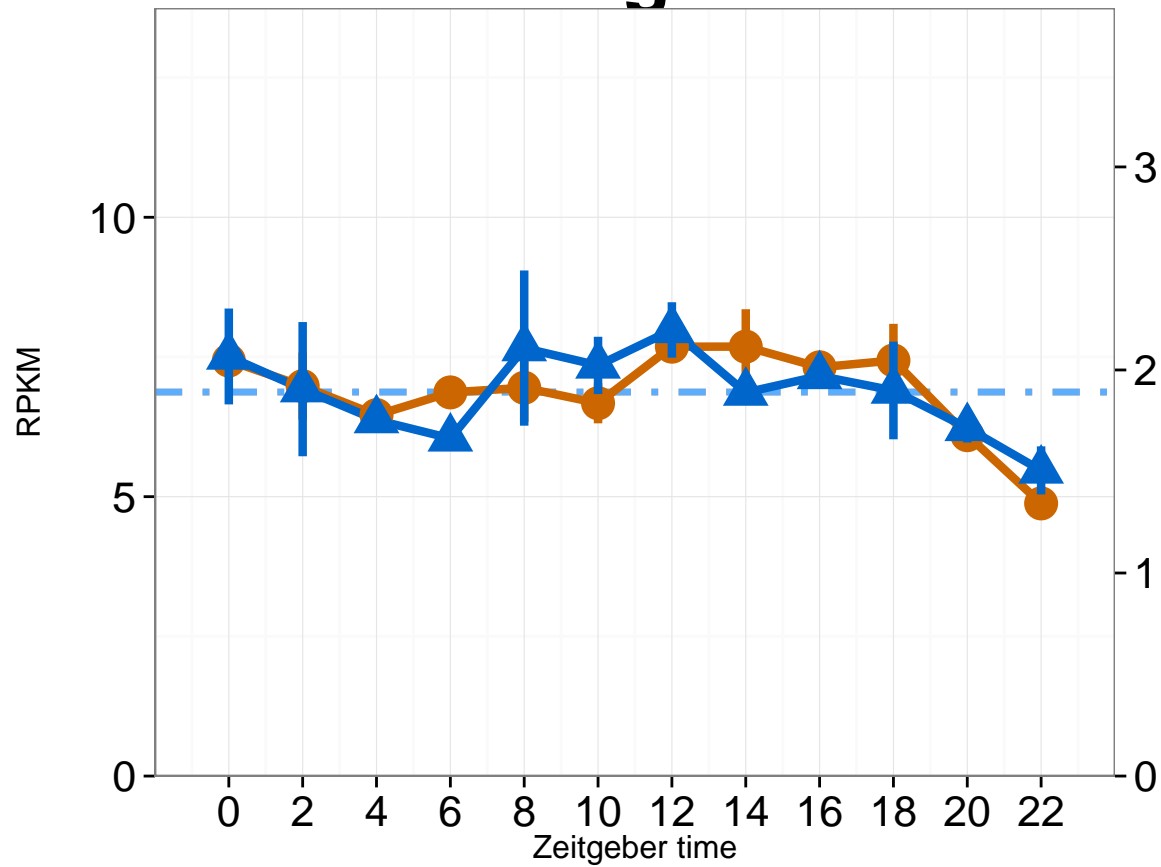

## Mga

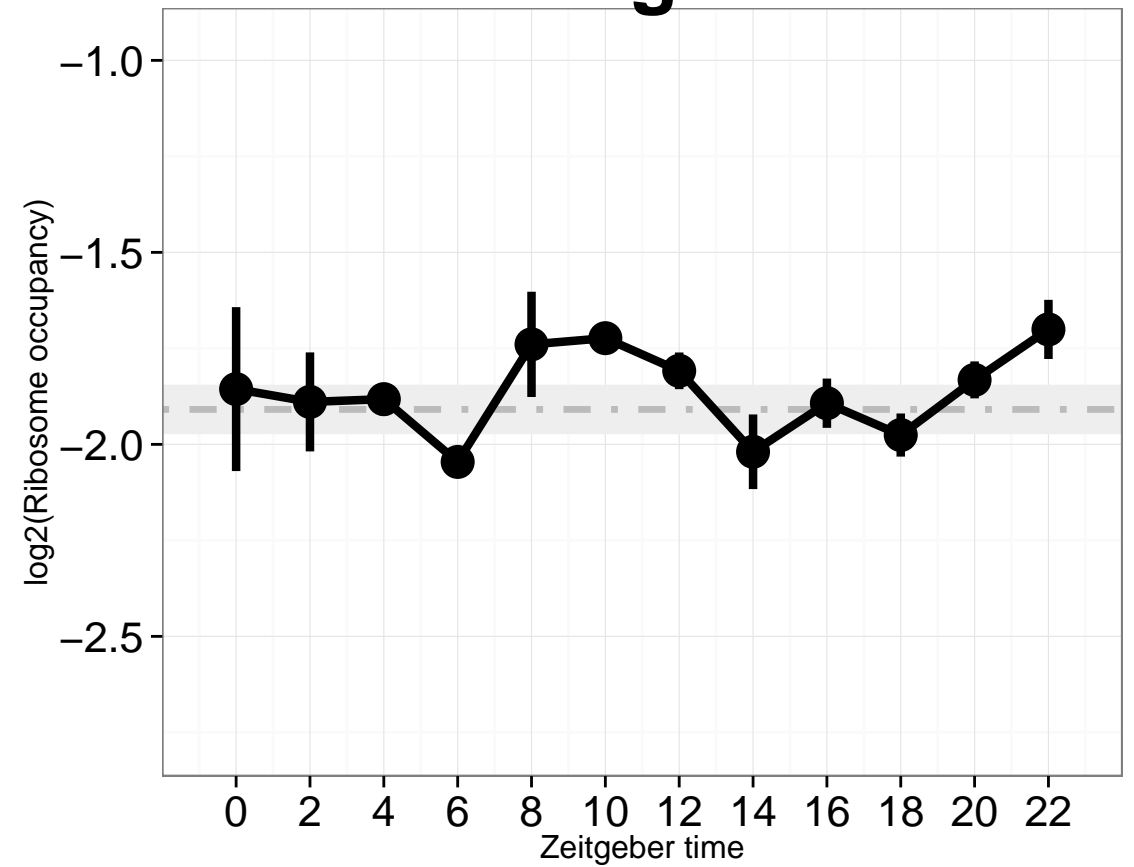

Supplement: SuppDataset_1.zip [file Mga_set_A.pdf › Supplemental Dataset 1/A-mRNA_nonrhyth_translation_nonrhyth/Mga_set_A.pdf]

## Mgam

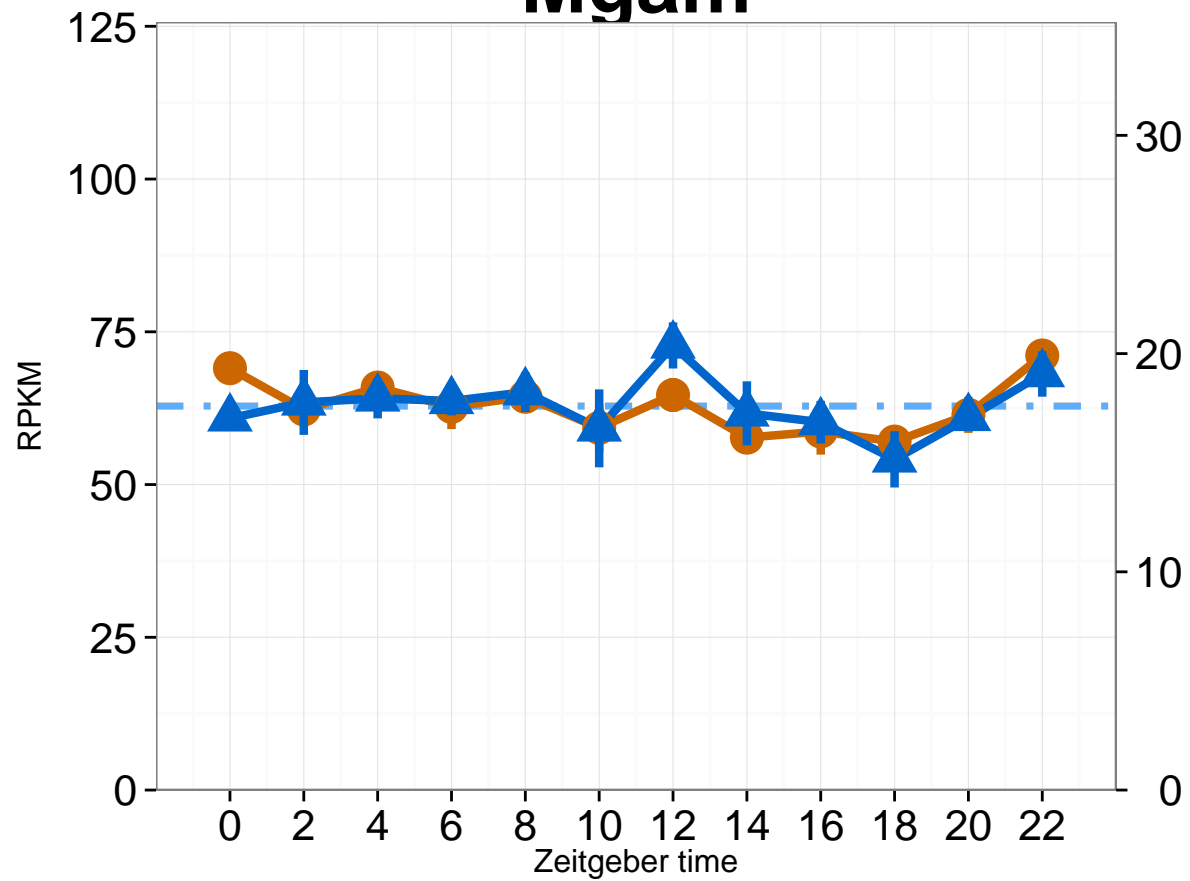

## Mgam

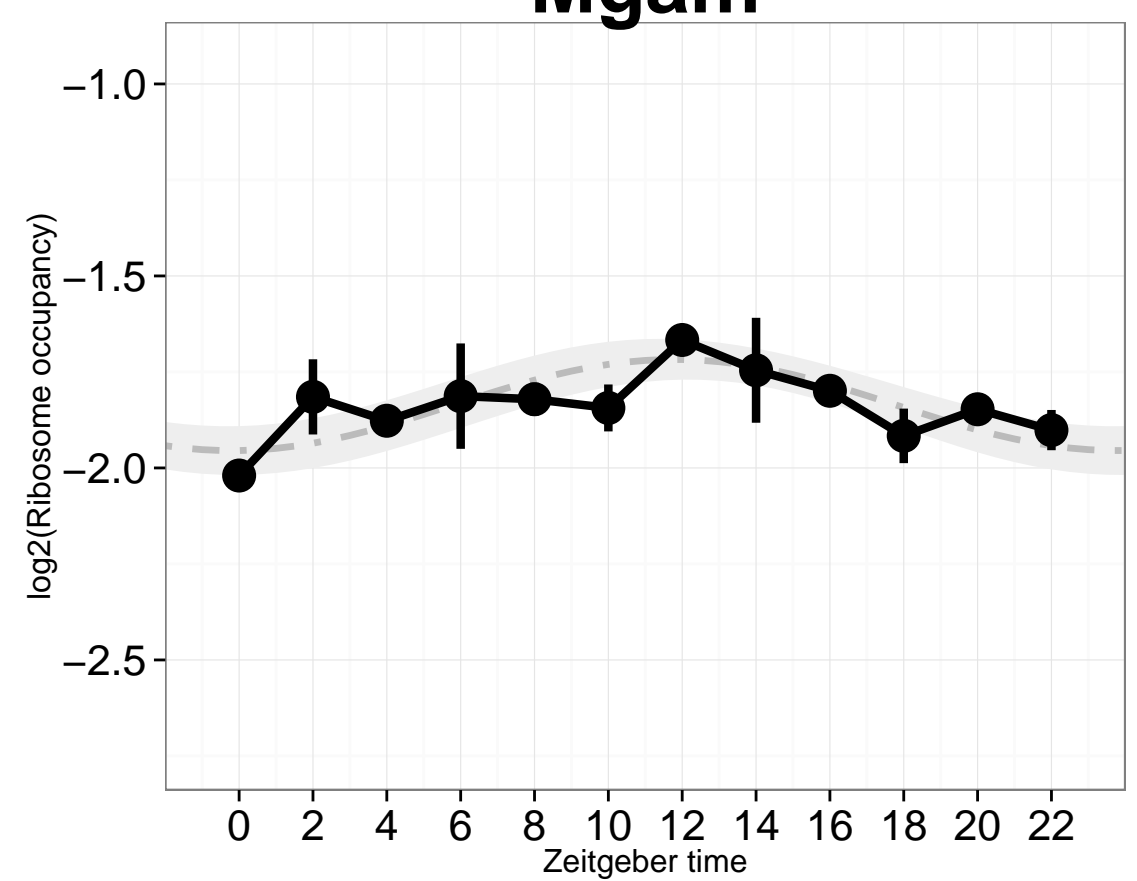

Supplement: SuppDataset_1.zip [file Mgam_set_A.pdf › Supplemental Dataset 1/A-mRNA_nonrhyth_translation_nonrhyth/Mgam_set_A.pdf]

## Mgat1

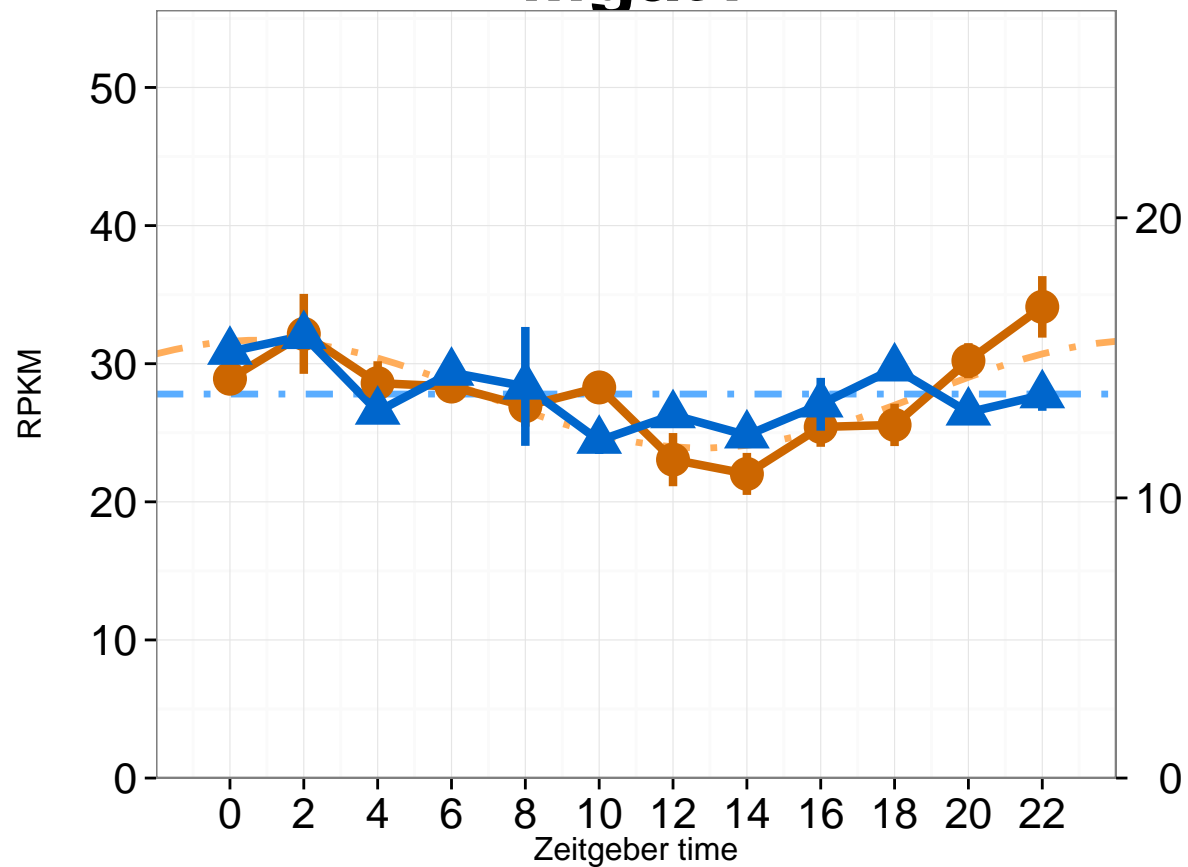

## Mgat1

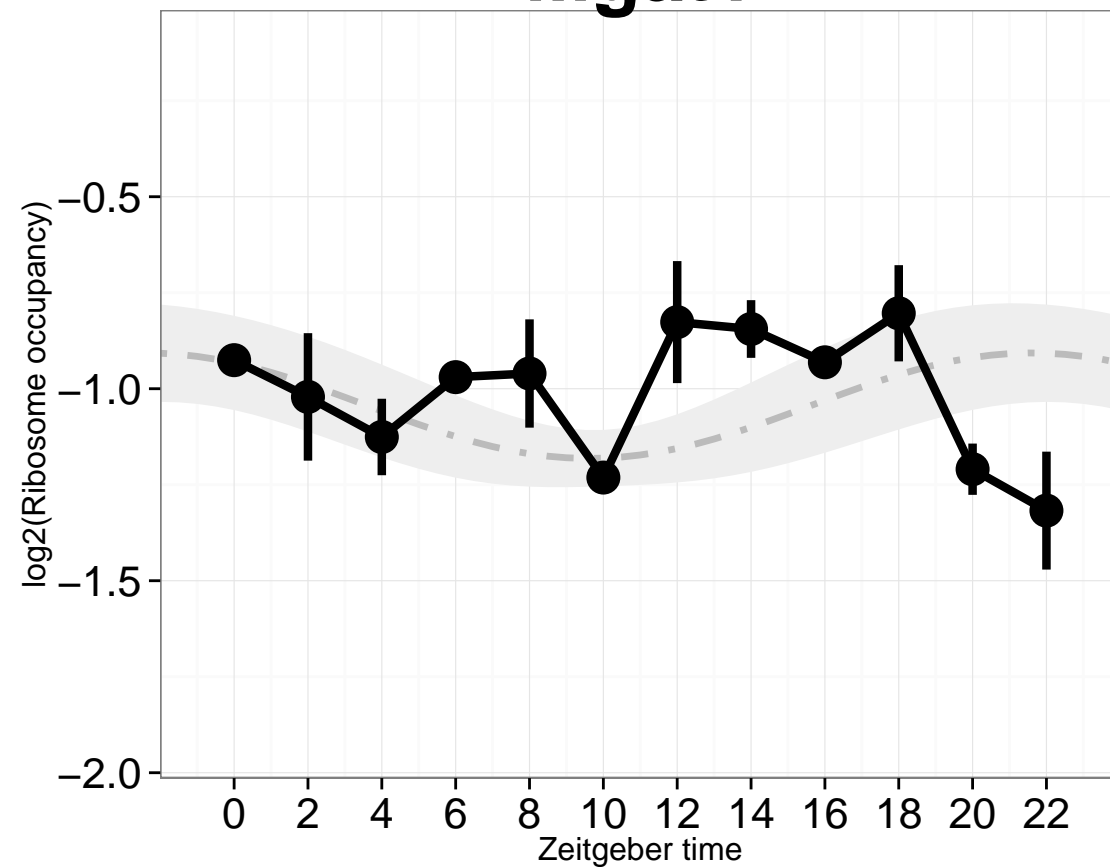

Supplement: SuppDataset_1.zip [file Mgat1_set_A.pdf › Supplemental Dataset 1/A-mRNA_nonrhyth_translation_nonrhyth/Mgat1_set_A.pdf]

## Mgat4a

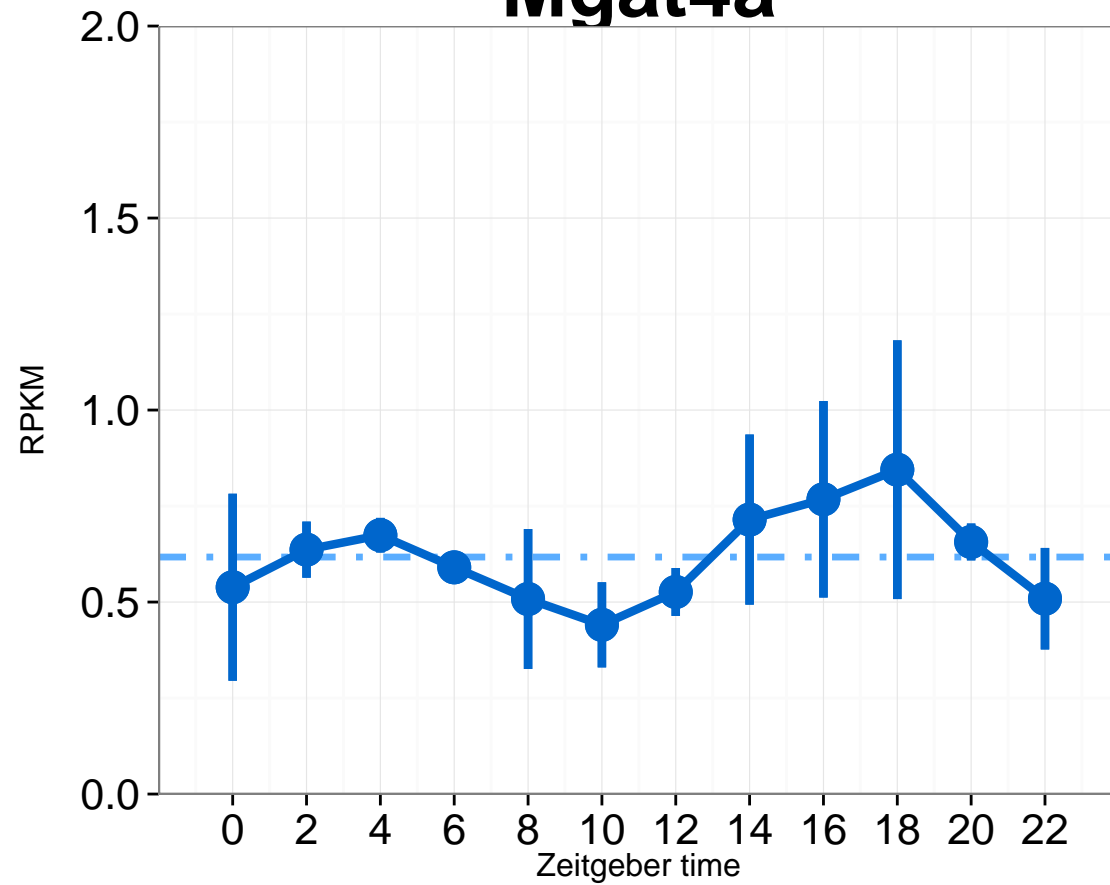

## Mgat4a log2(Ribosome occupancy

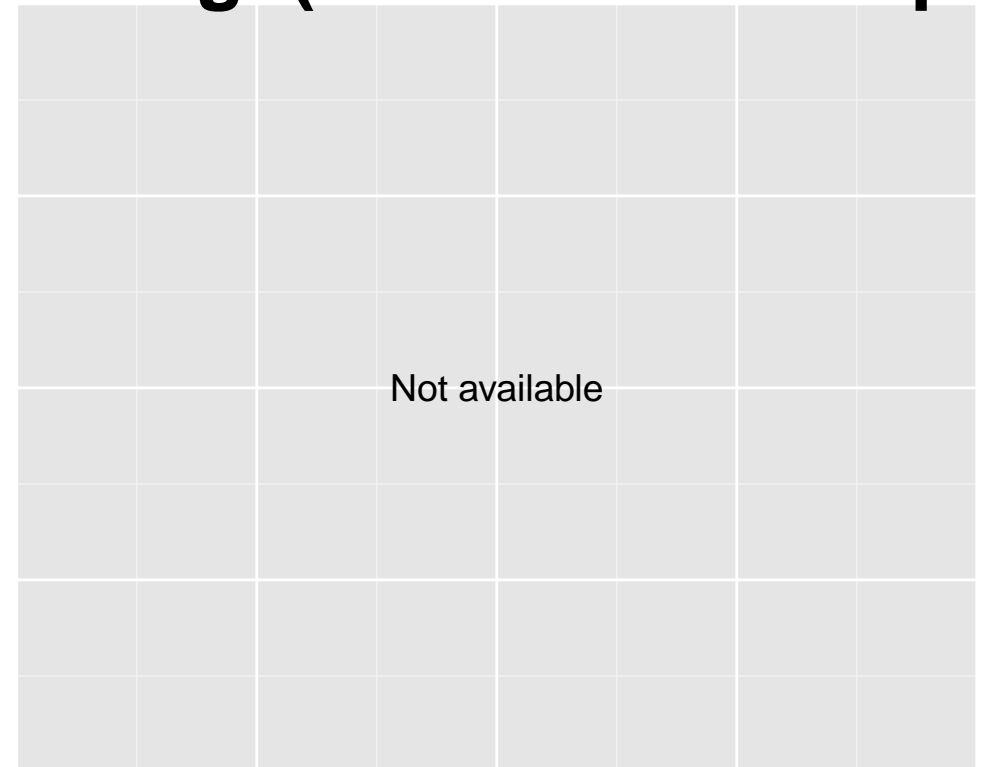

Supplement: SuppDataset_1.zip [file Mgat4a_set_A.pdf › Supplemental Dataset 1/A-mRNA_nonrhyth_translation_nonrhyth/Mgat4a_set_A.pdf]

# Mgat4b

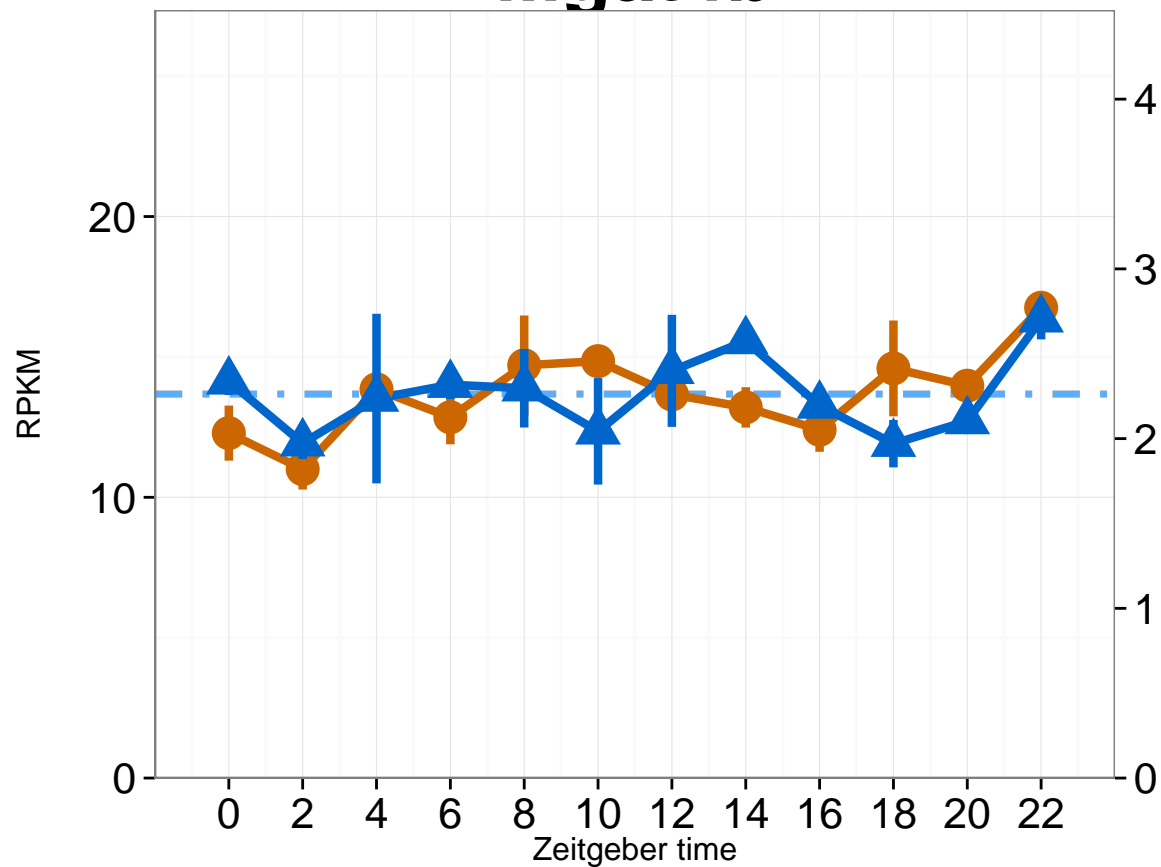

# Mgat4b

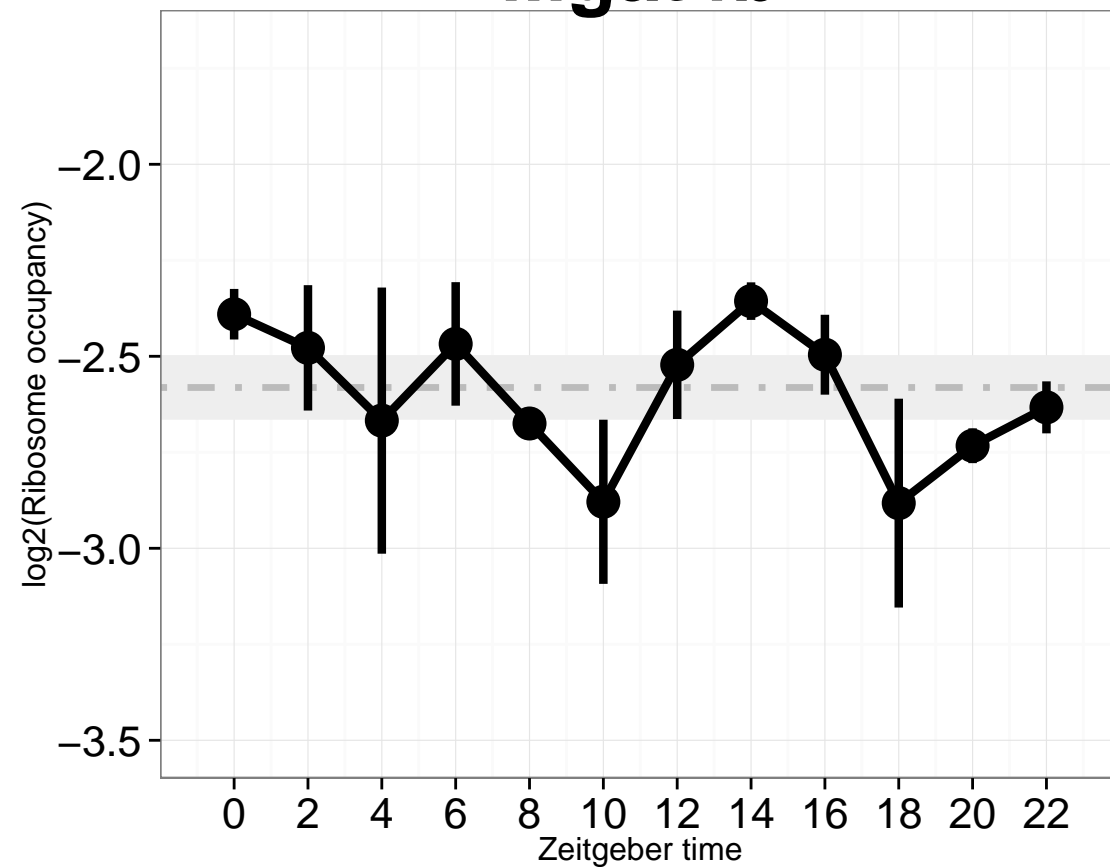

Supplement: SuppDataset_1.zip [file Mgat4b_set_A.pdf › Supplemental Dataset 1/A-mRNA_nonrhyth_translation_nonrhyth/Mgat4b_set_A.pdf]

# Mgme1

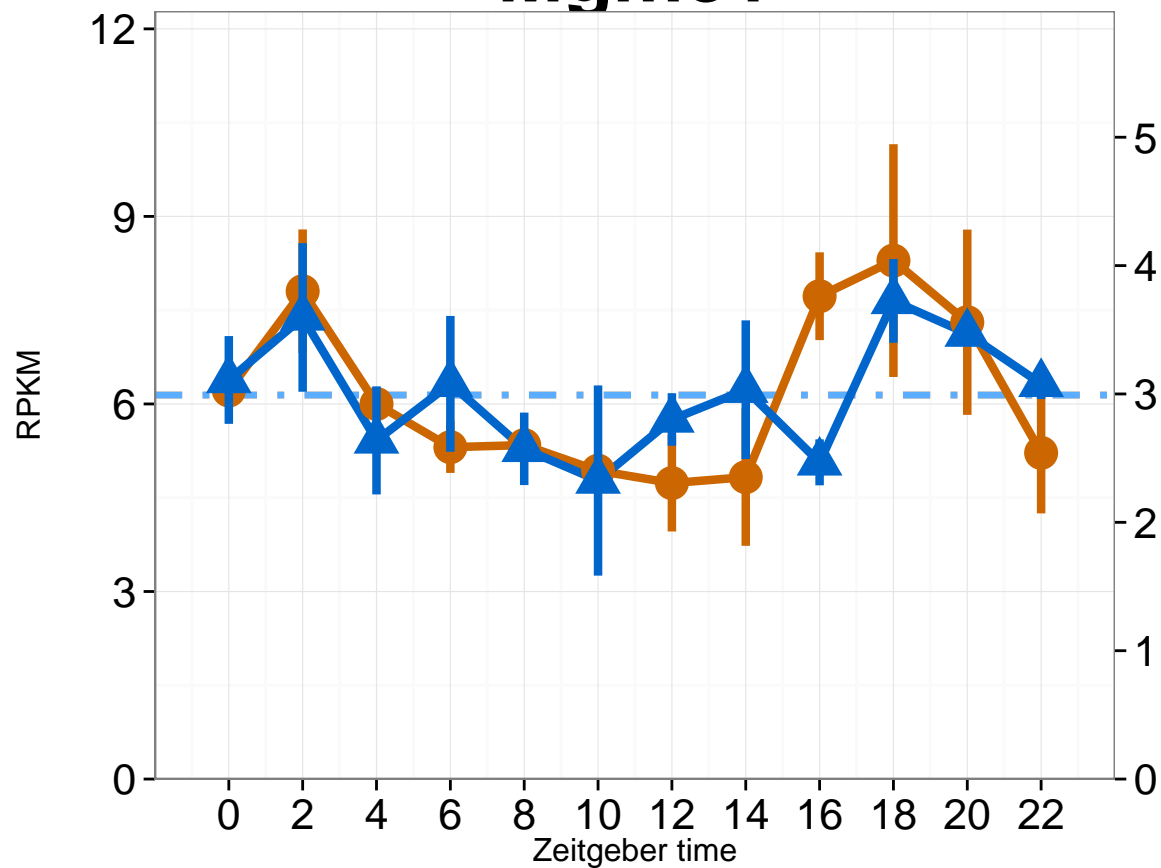

# Mgme1

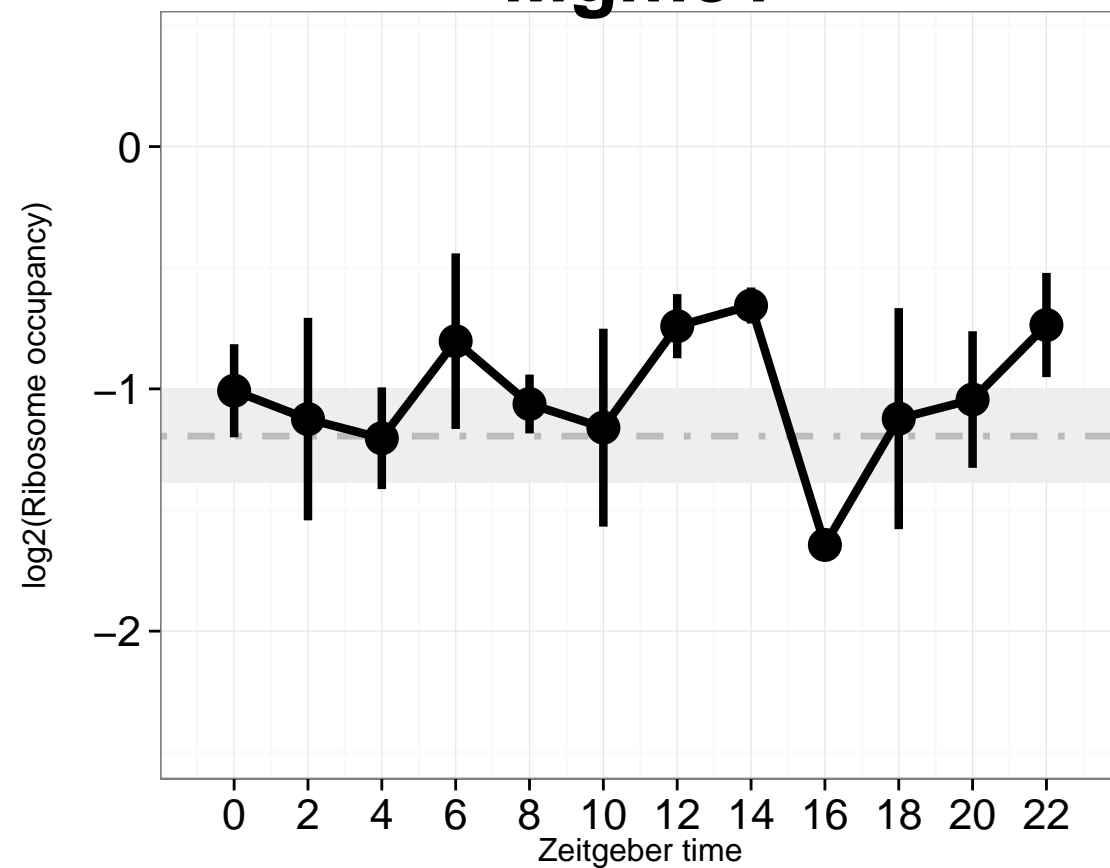

Supplement: SuppDataset_1.zip [file Mgme1_set_A.pdf › Supplemental Dataset 1/A-mRNA_nonrhyth_translation_nonrhyth/Mgme1_set_A.pdf]

## Mgmt

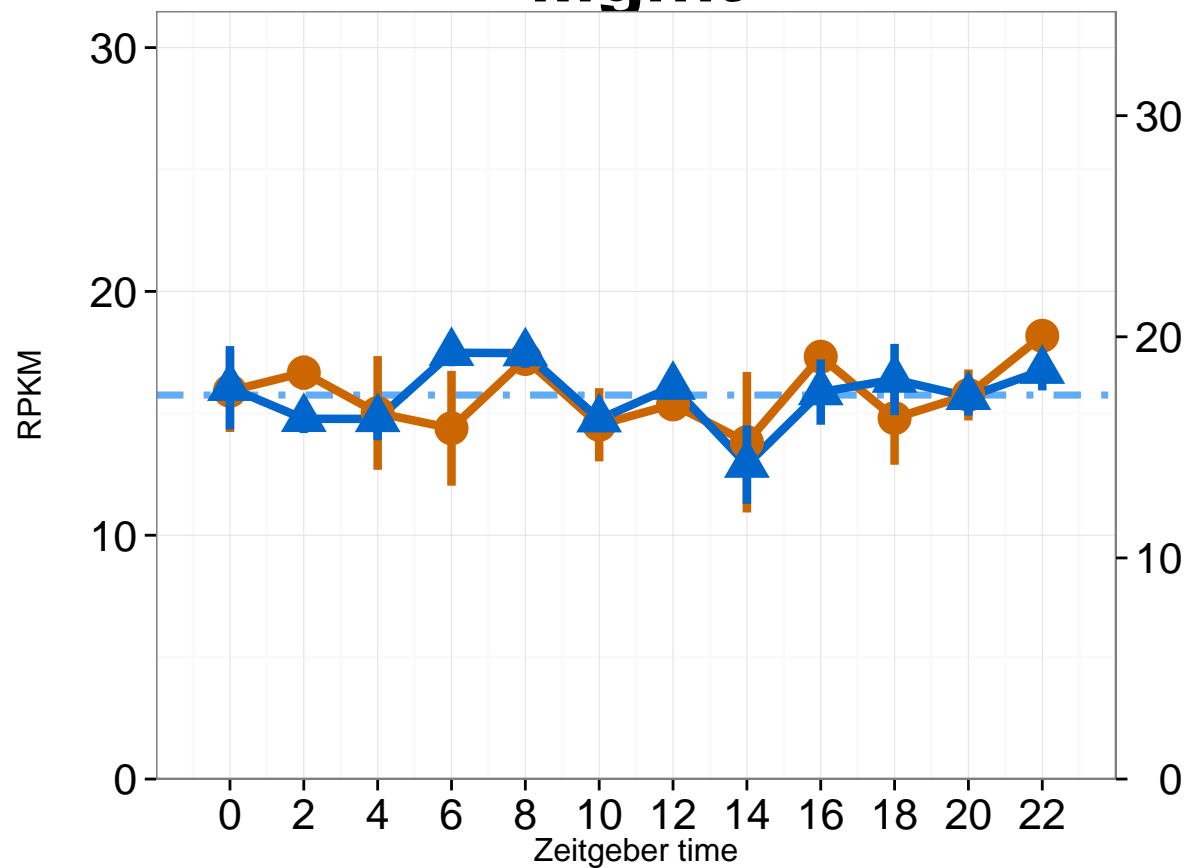

## Mgmt

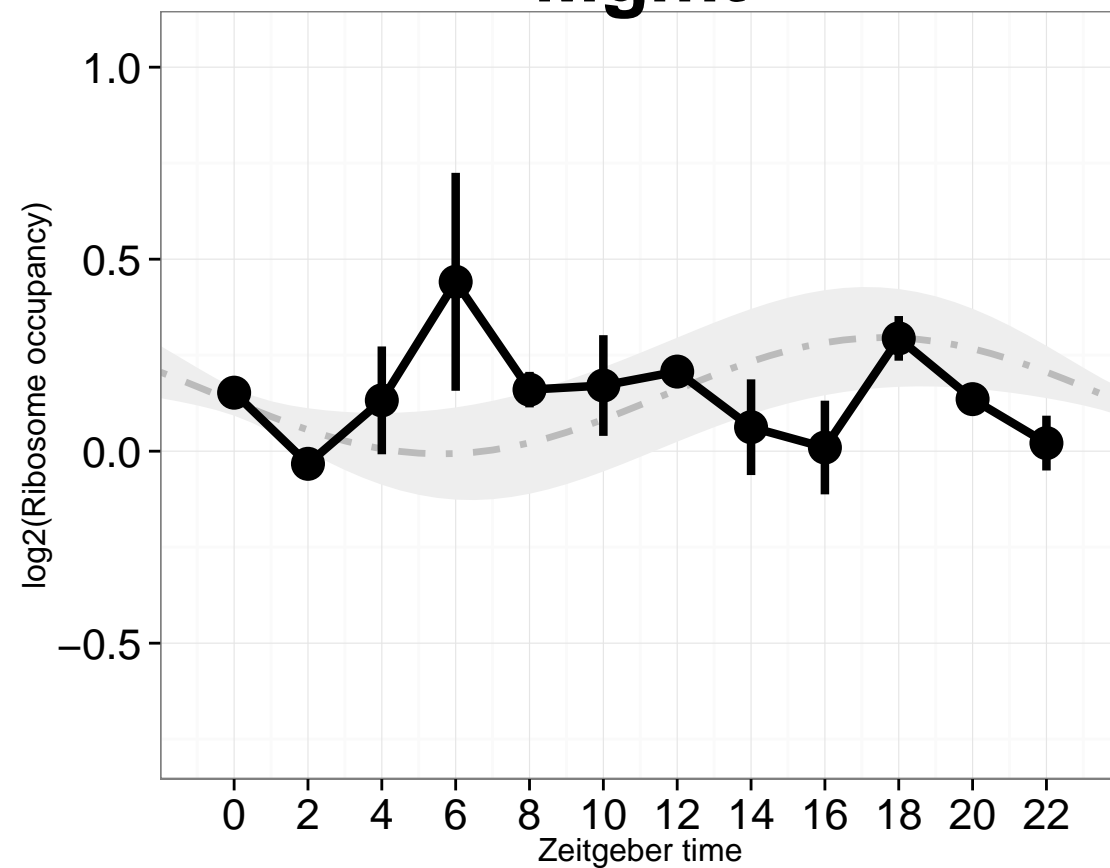

Supplement: SuppDataset_1.zip [file Mgmt_set_A.pdf › Supplemental Dataset 1/A-mRNA_nonrhyth_translation_nonrhyth/Mgmt_set_A.pdf]

## Mgp

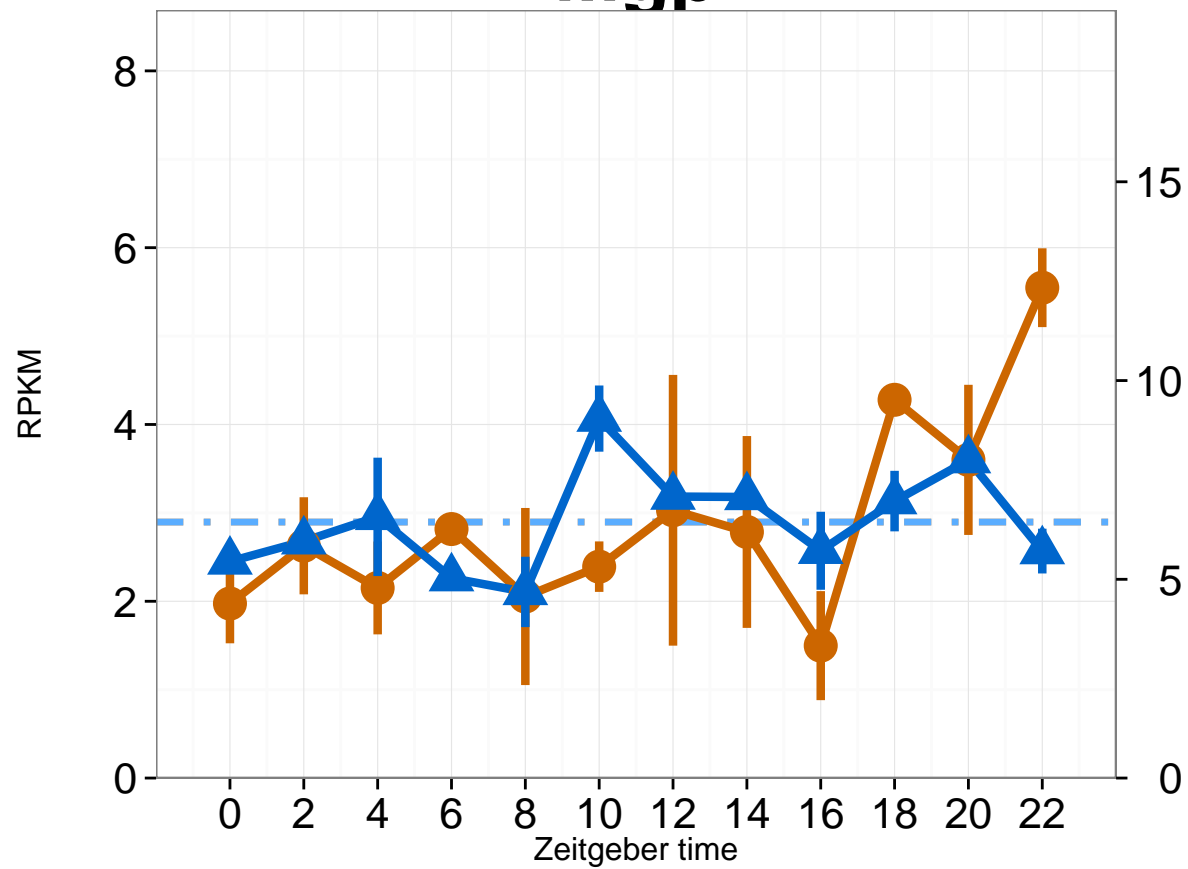

## Mgp

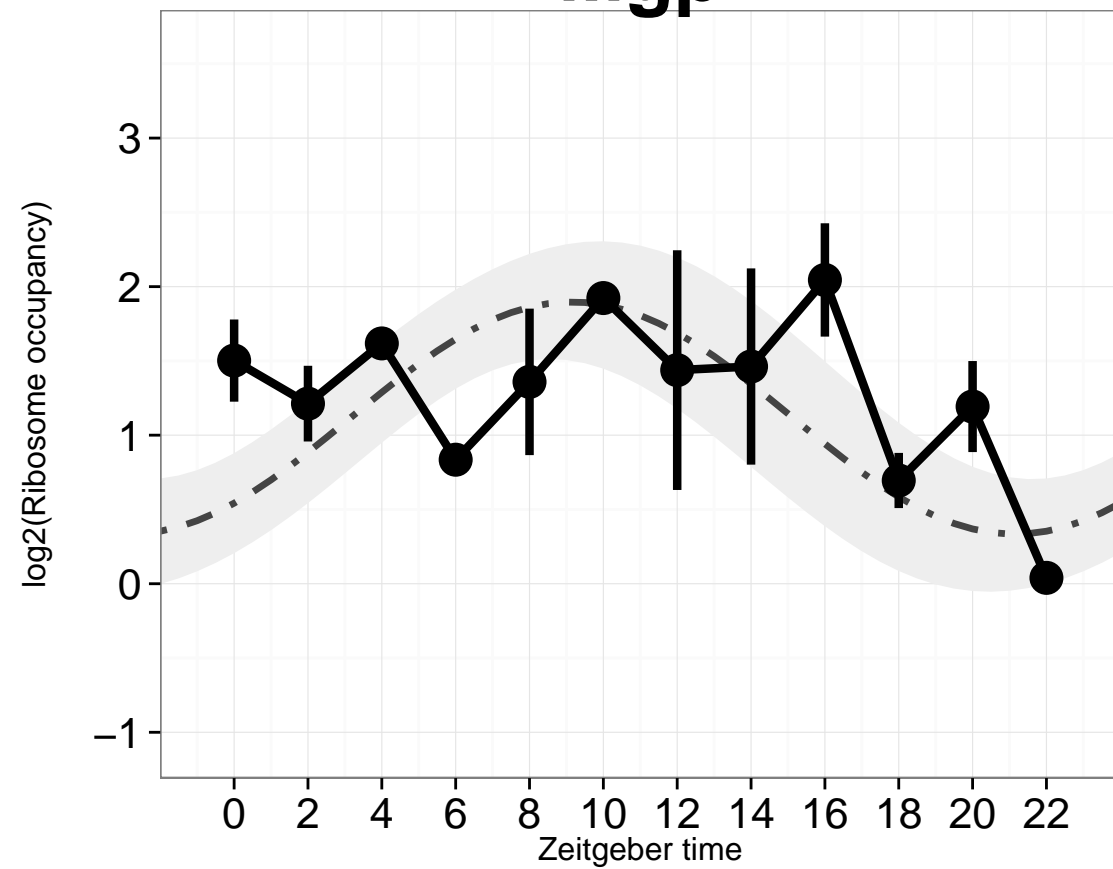

Supplement: SuppDataset_1.zip [file Mgp_set_A.pdf › Supplemental Dataset 1/A-mRNA_nonrhyth_translation_nonrhyth/Mgp_set_A.pdf]

# Mgrn1

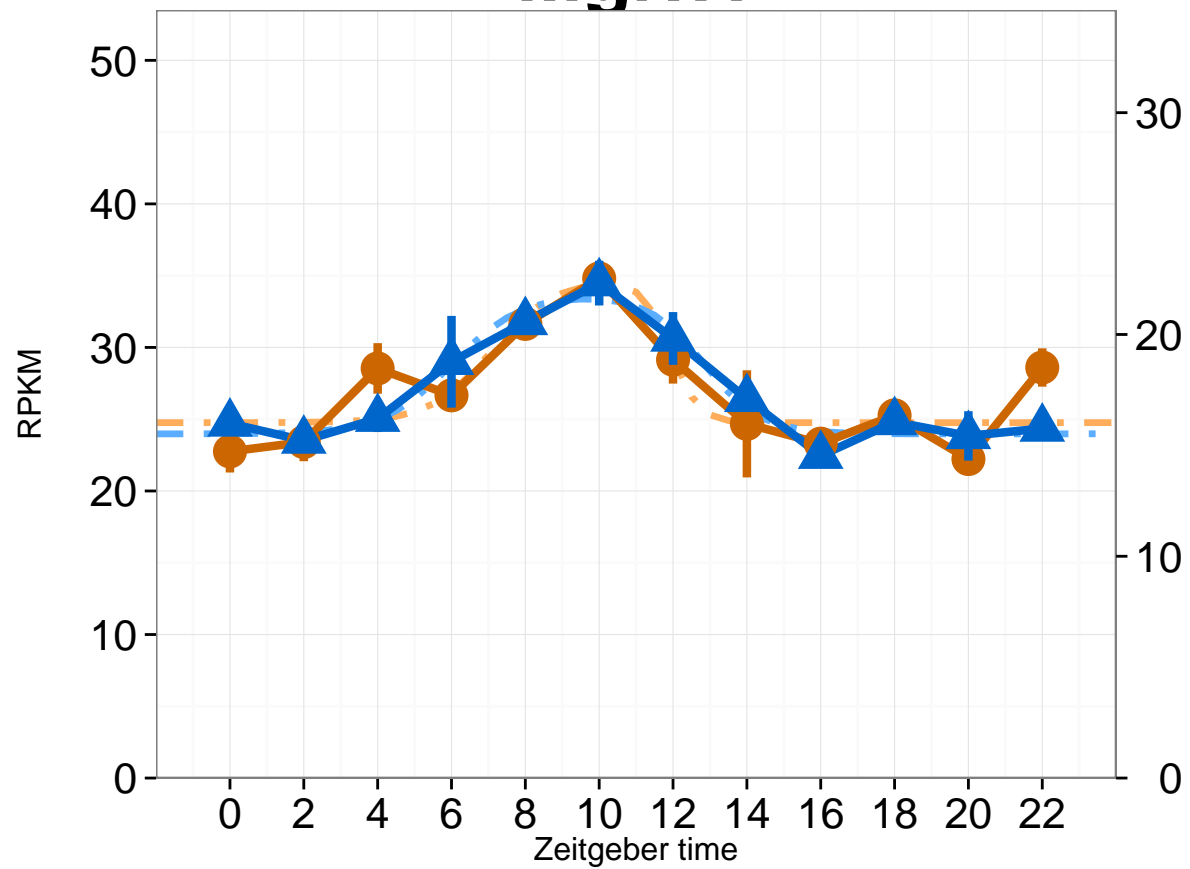

# Mgrn1

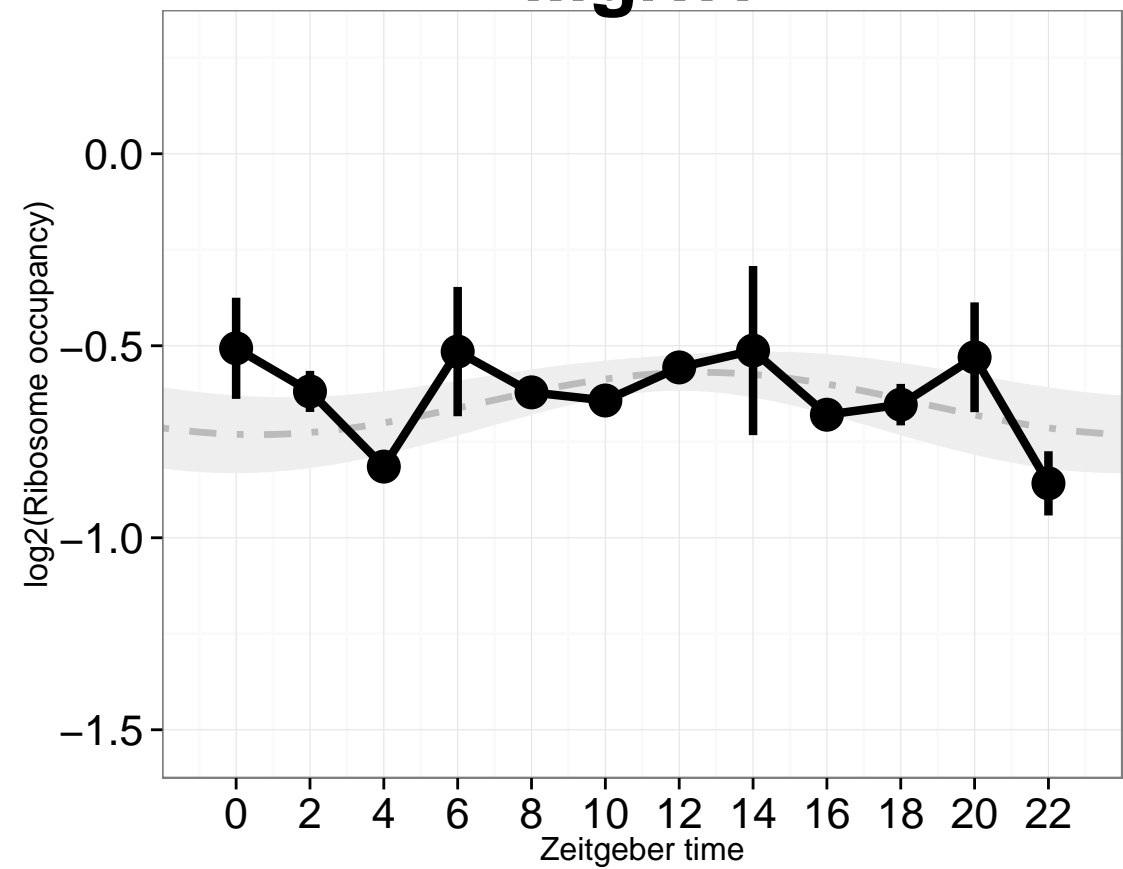

Supplement: SuppDataset_1.zip [file Mgrn1_set_A.pdf › Supplemental Dataset 1/A-mRNA_nonrhyth_translation_nonrhyth/Mgrn1_set_A.pdf]

# Mgst1

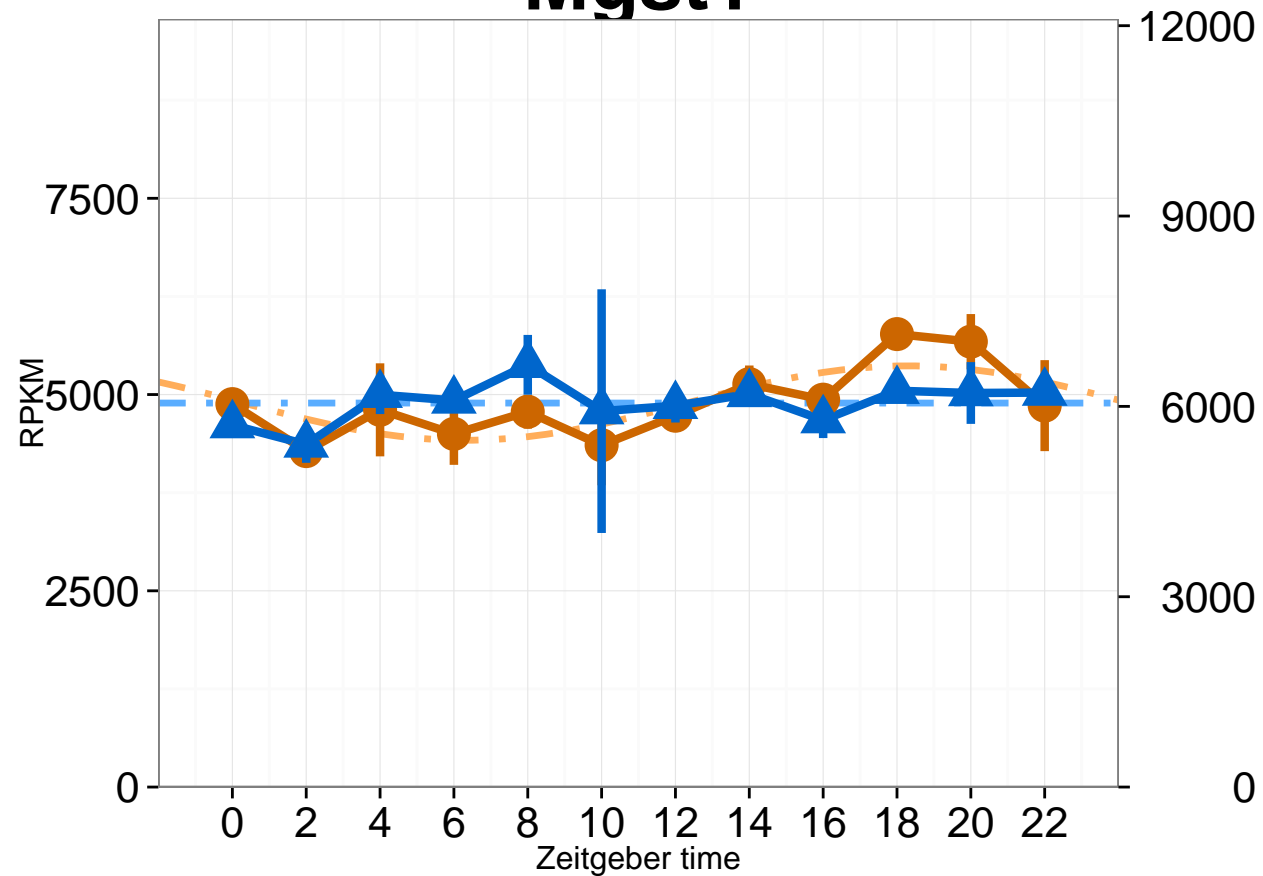

# Mgst1

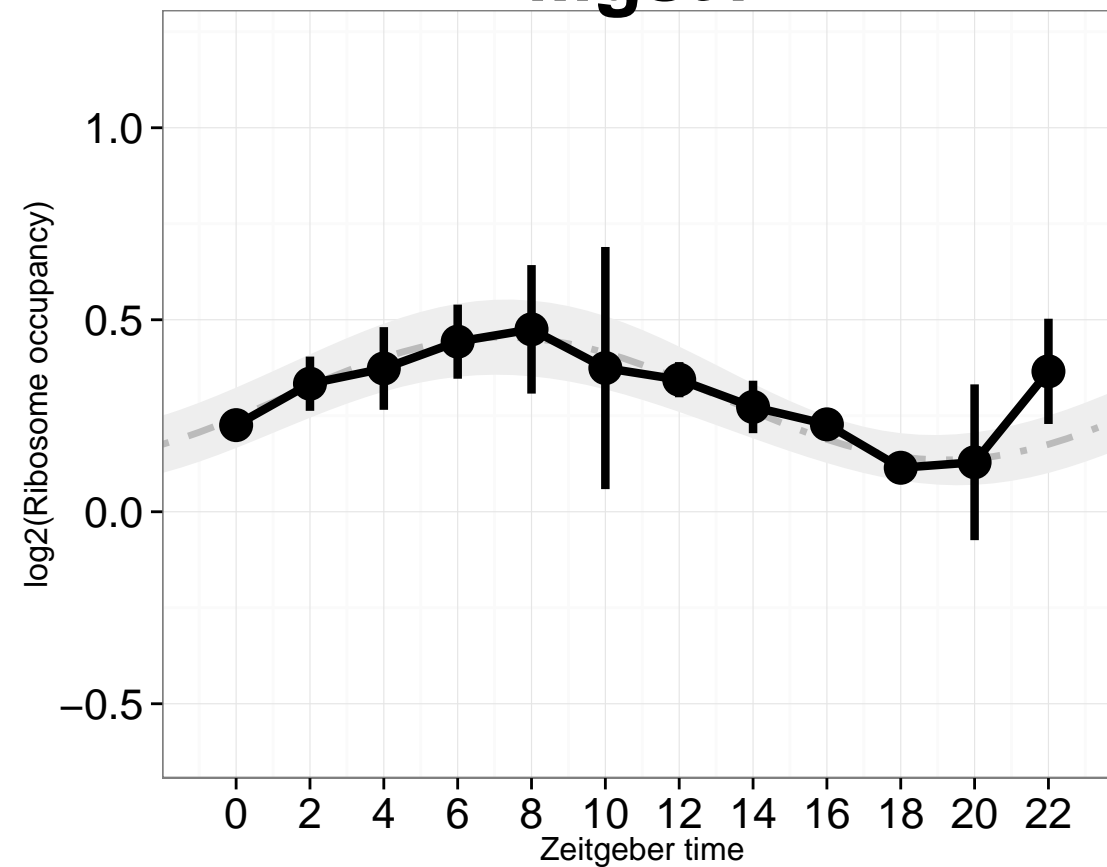

Supplement: SuppDataset_1.zip [file Mgst1_set_A.pdf › Supplemental Dataset 1/A-mRNA_nonrhyth_translation_nonrhyth/Mgst1_set_A.pdf]

## Mia3

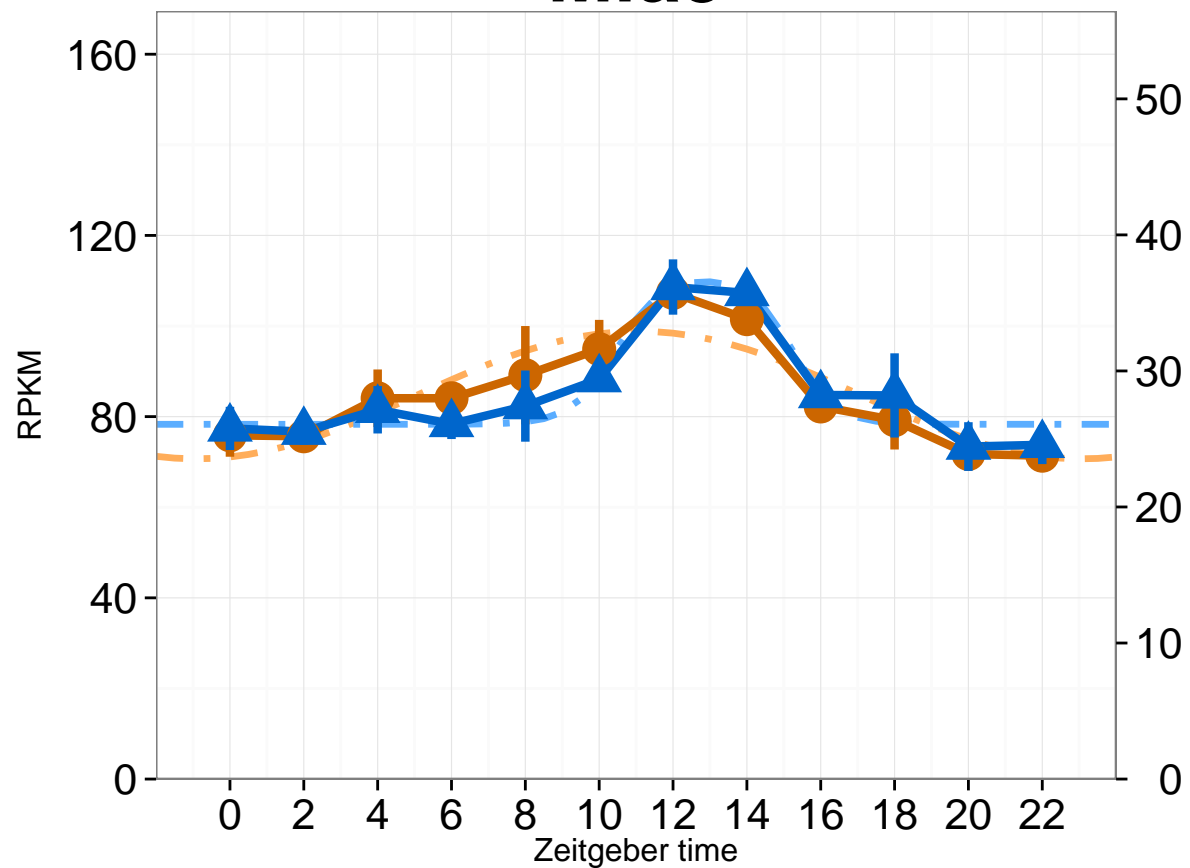

## Mia3

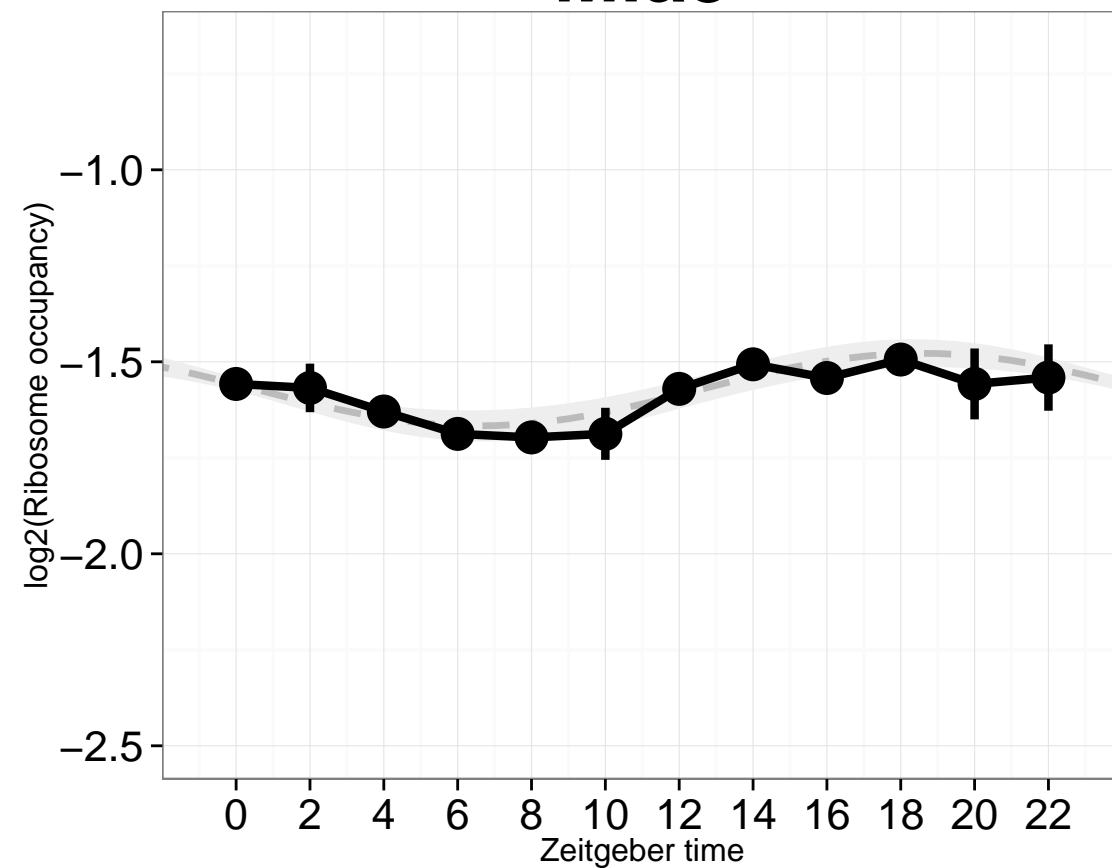

Supplement: SuppDataset_1.zip [file Mia3_set_A.pdf › Supplemental Dataset 1/A-mRNA_nonrhyth_translation_nonrhyth/Mia3_set_A.pdf]

# Mib1

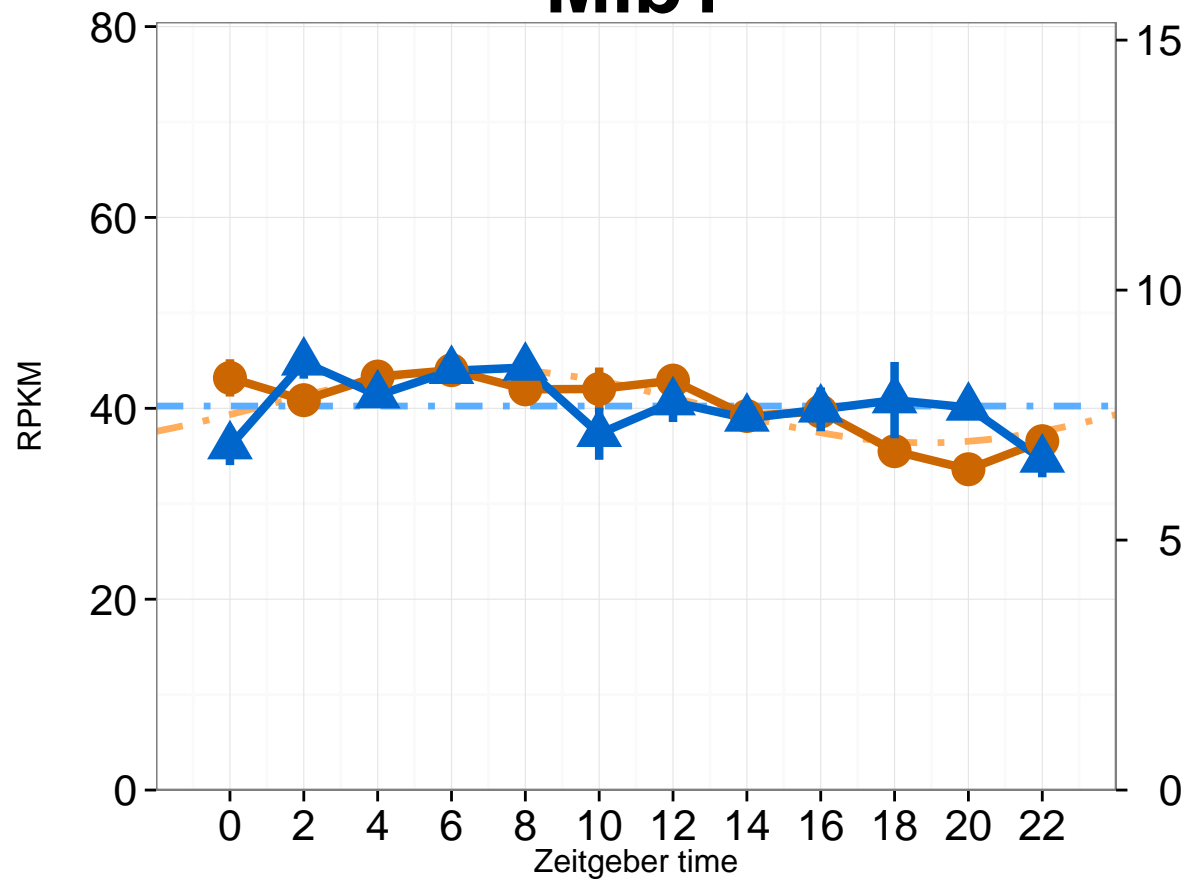

# Mib1

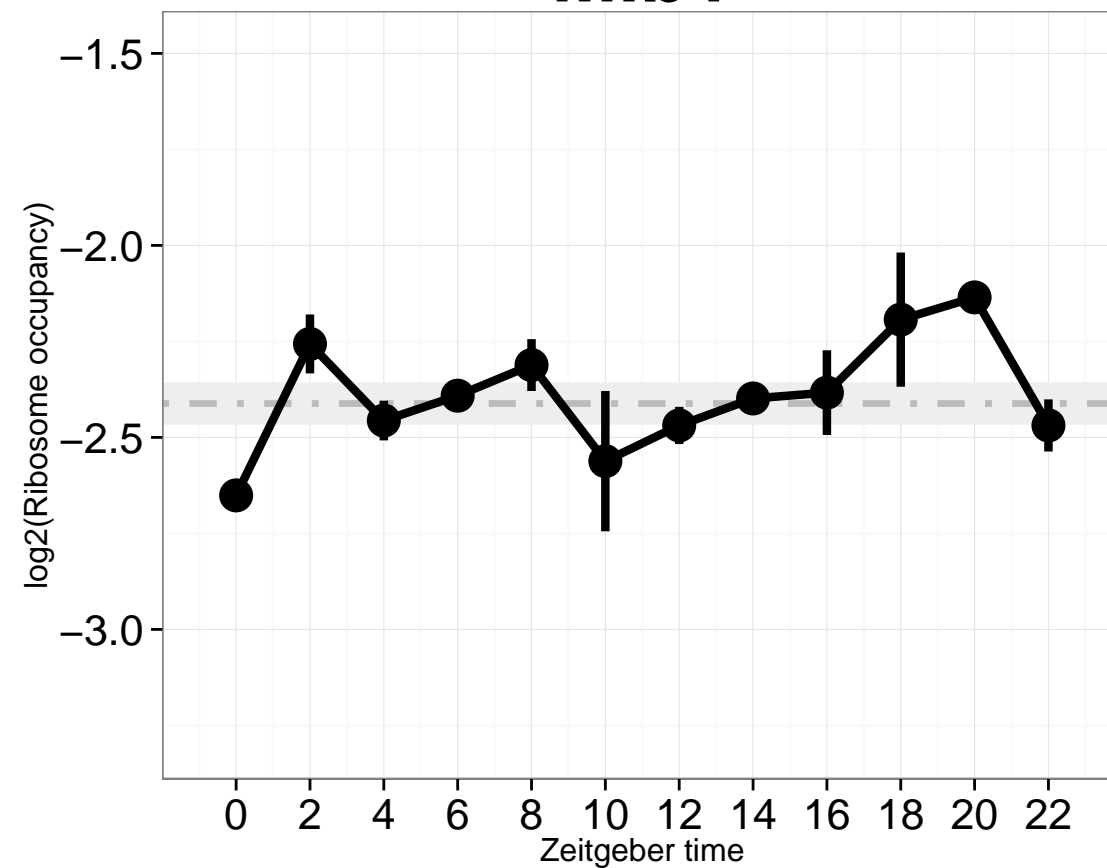

Supplement: SuppDataset_1.zip [file Mib1_set_A.pdf › Supplemental Dataset 1/A-mRNA_nonrhyth_translation_nonrhyth/Mib1_set_A.pdf]

# Mical3

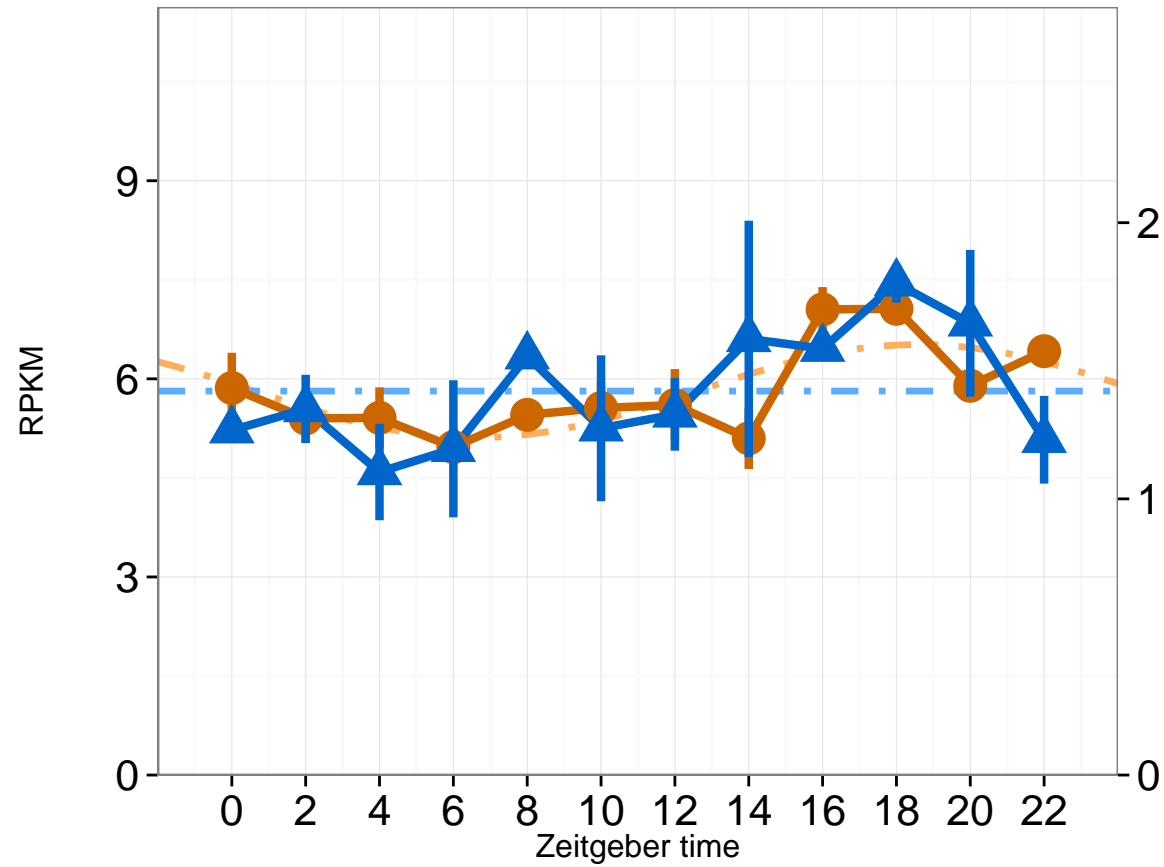

# Mical3

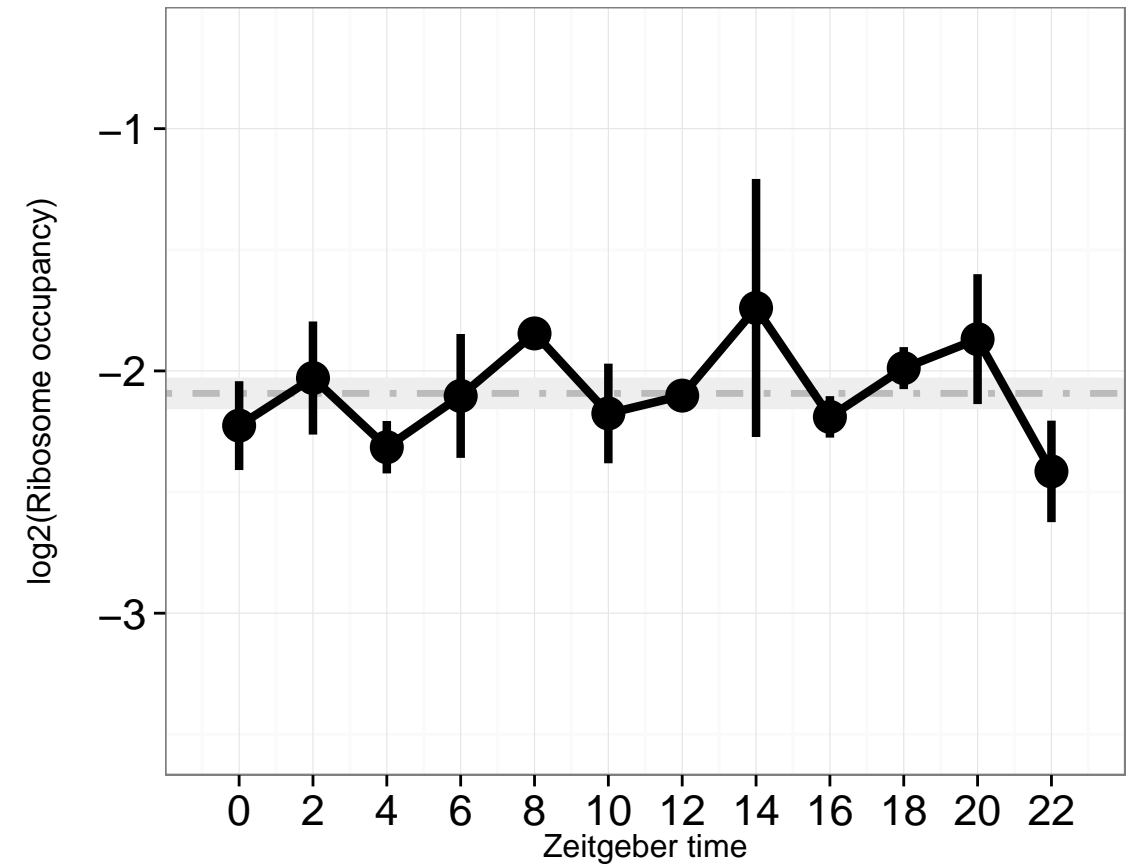

Supplement: SuppDataset_1.zip [file Mical3_set_A.pdf › Supplemental Dataset 1/A-mRNA_nonrhyth_translation_nonrhyth/Mical3_set_A.pdf]

# Micall1

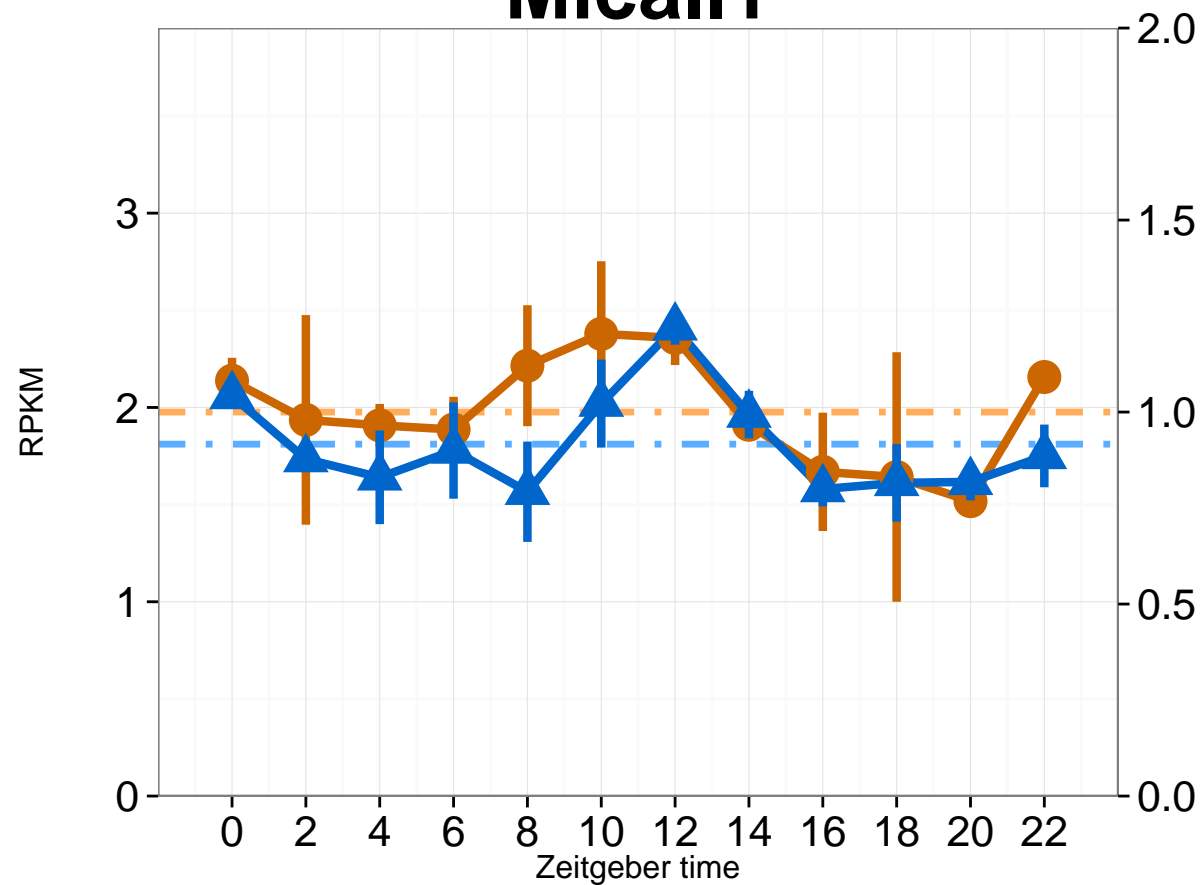

# Micall1

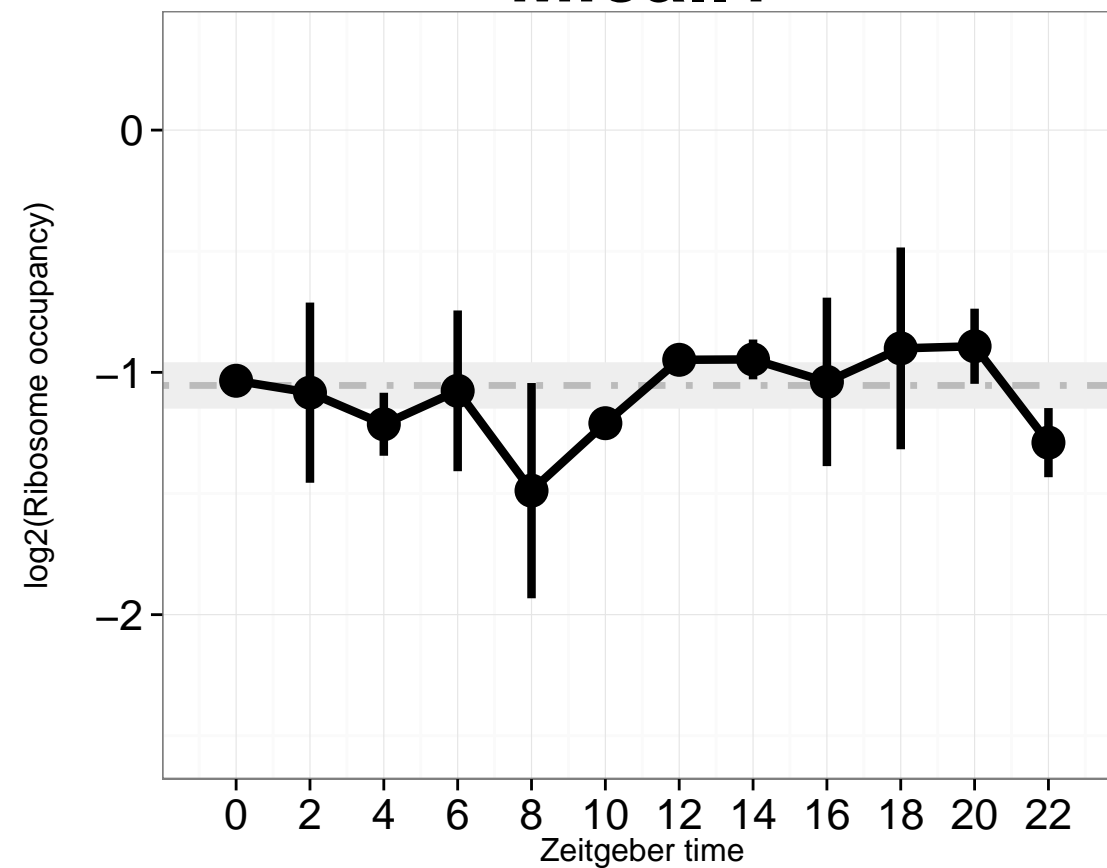

Supplement: SuppDataset_1.zip [file Micall1_set_A.pdf › Supplemental Dataset 1/A-mRNA_nonrhyth_translation_nonrhyth/Micall1_set_A.pdf]

# Micall2

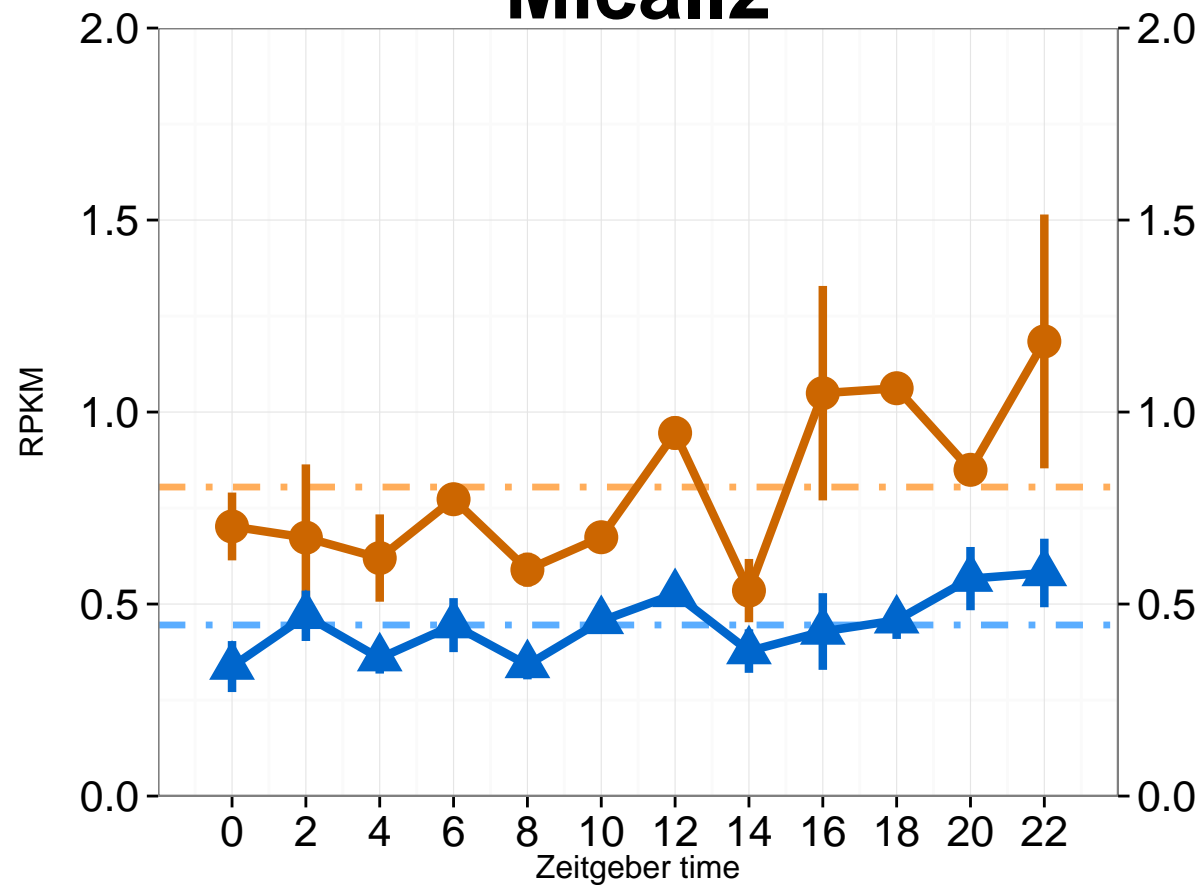

# Micall2

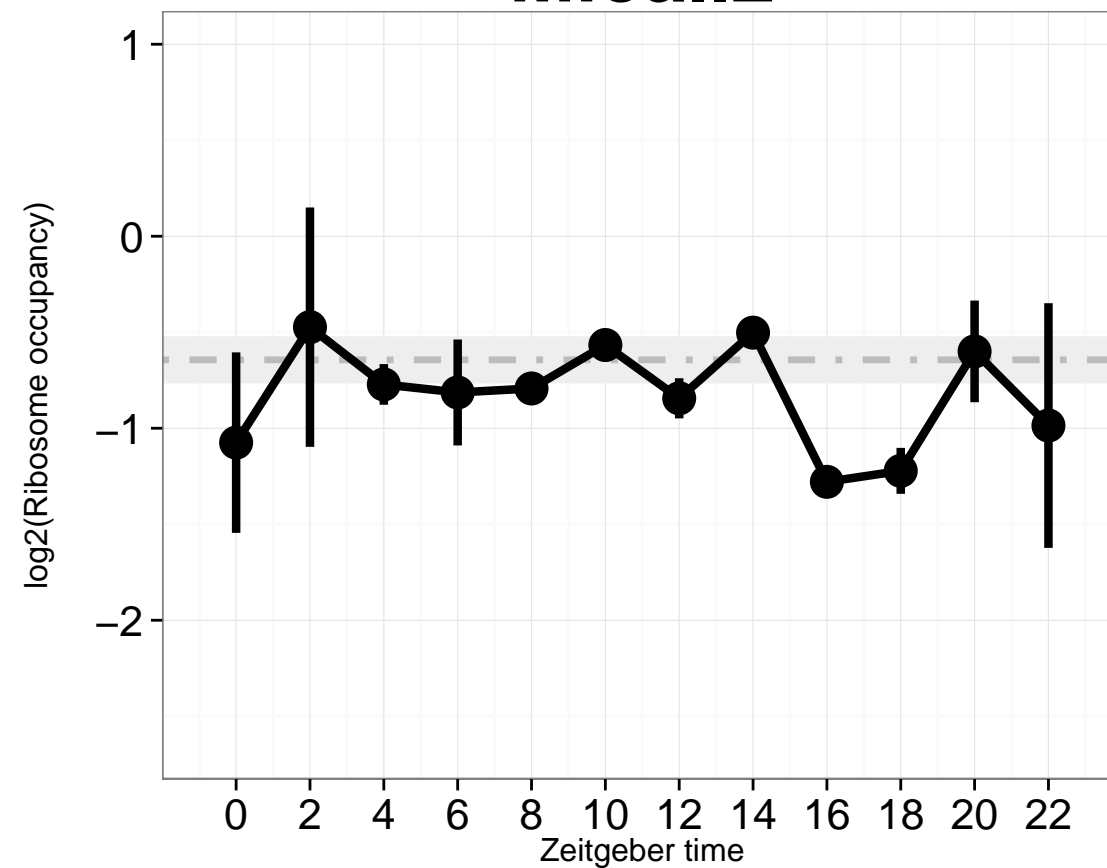

Supplement: SuppDataset_1.zip [file Micall2_set_A.pdf › Supplemental Dataset 1/A-mRNA_nonrhyth_translation_nonrhyth/Micall2_set_A.pdf]

# Micu1

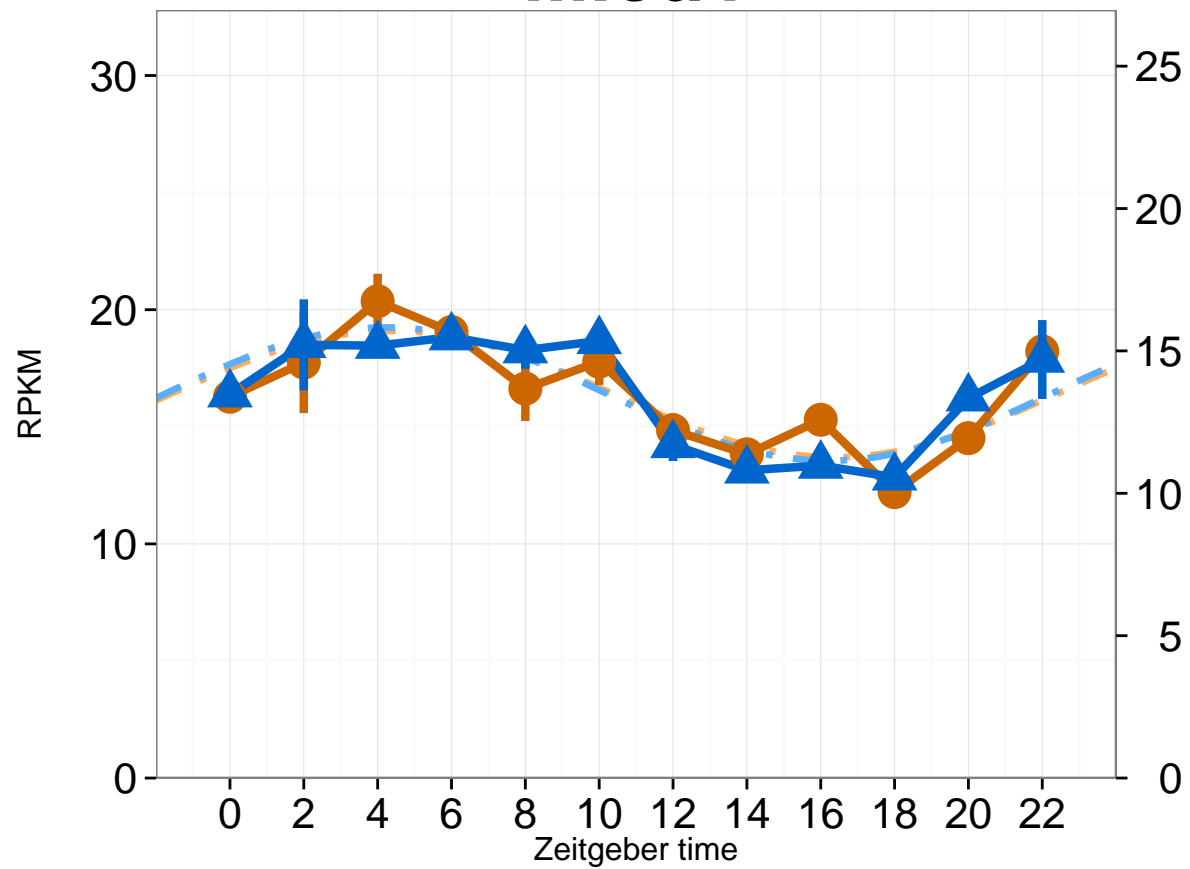

# Micu1

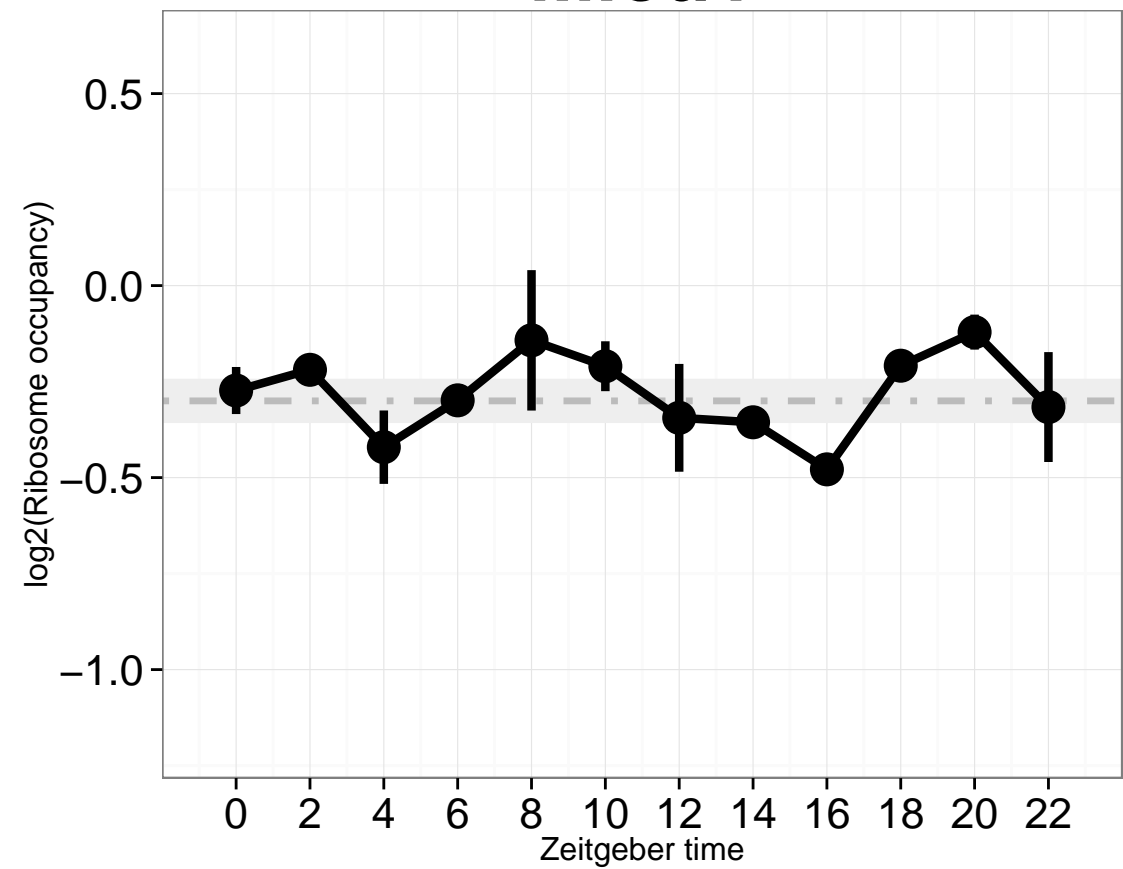

Supplement: SuppDataset_1.zip [file Micu1_set_A.pdf › Supplemental Dataset 1/A-mRNA_nonrhyth_translation_nonrhyth/Micu1_set_A.pdf]

## Micu2

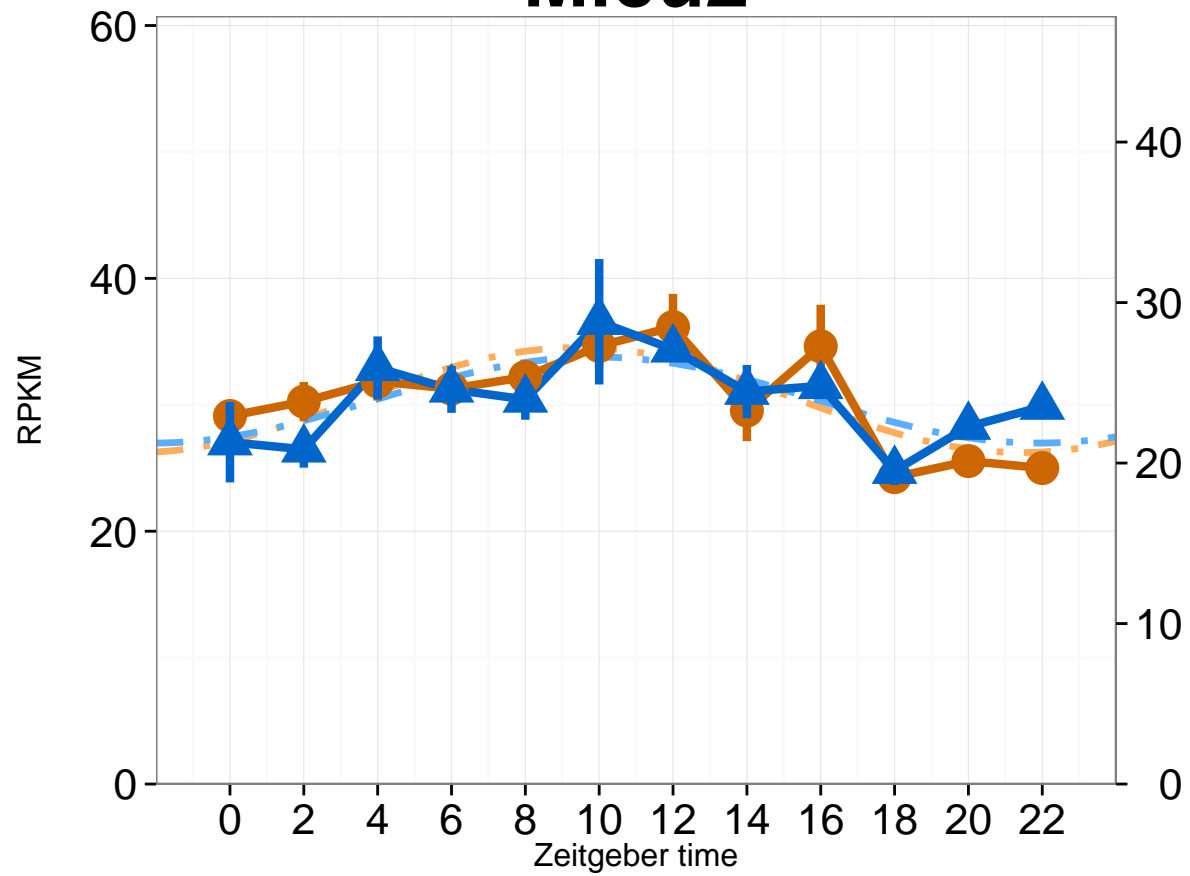

## Micu2

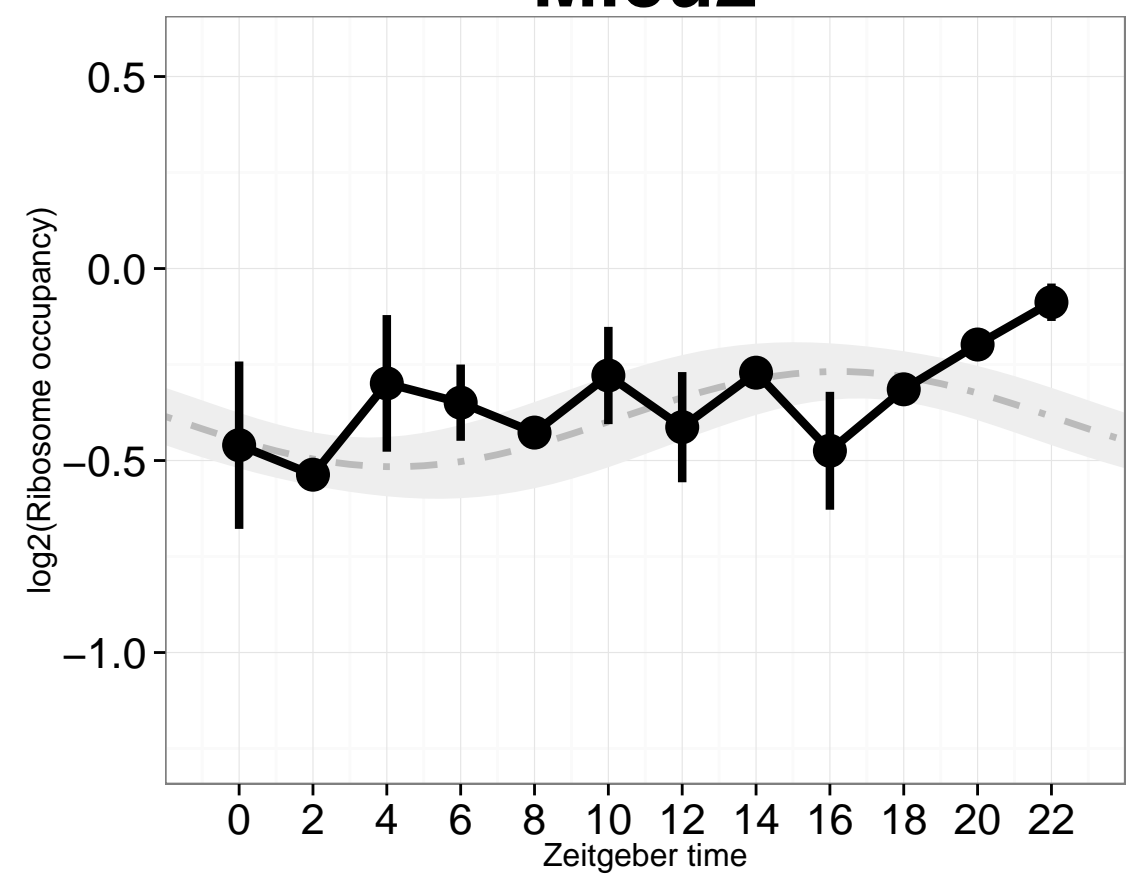

Supplement: SuppDataset_1.zip [file Micu2_set_A.pdf › Supplemental Dataset 1/A-mRNA_nonrhyth_translation_nonrhyth/Micu2_set_A.pdf]

## Micu3

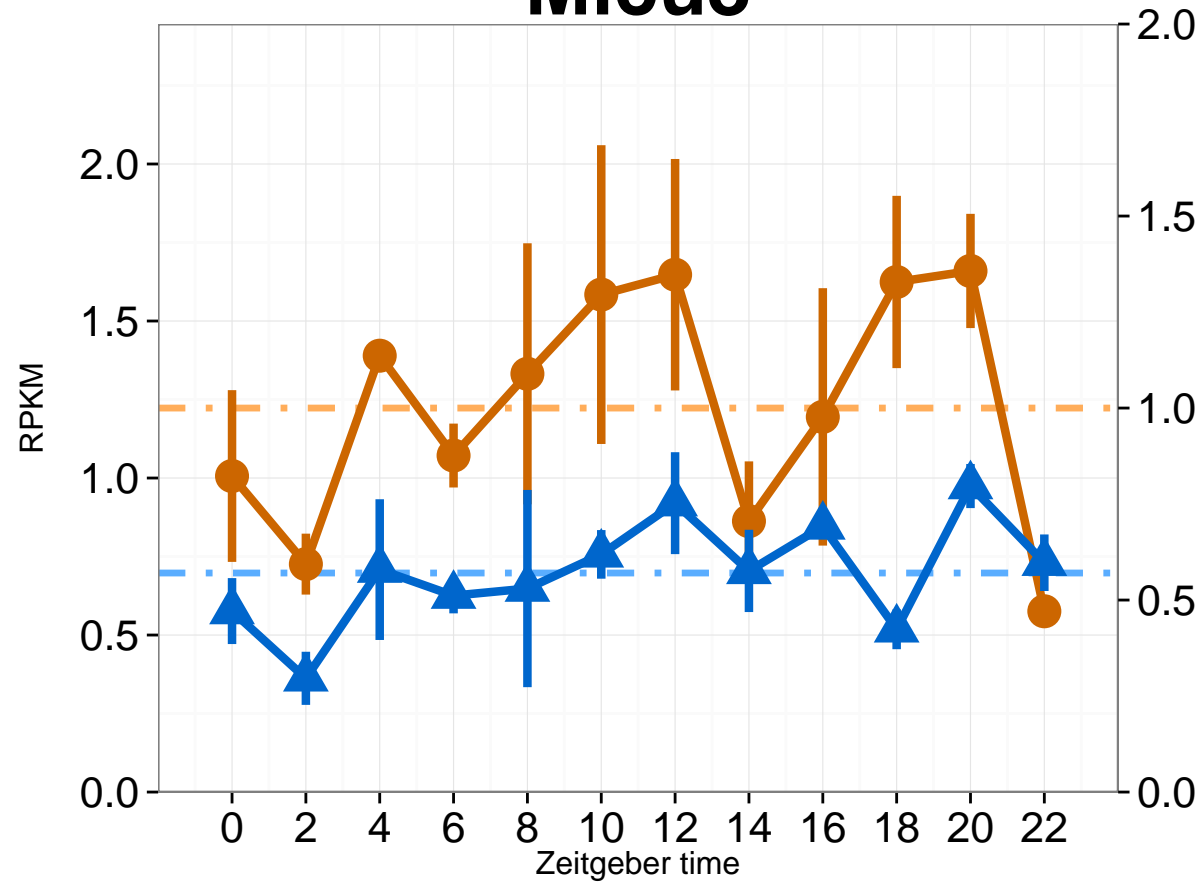

## Micu3

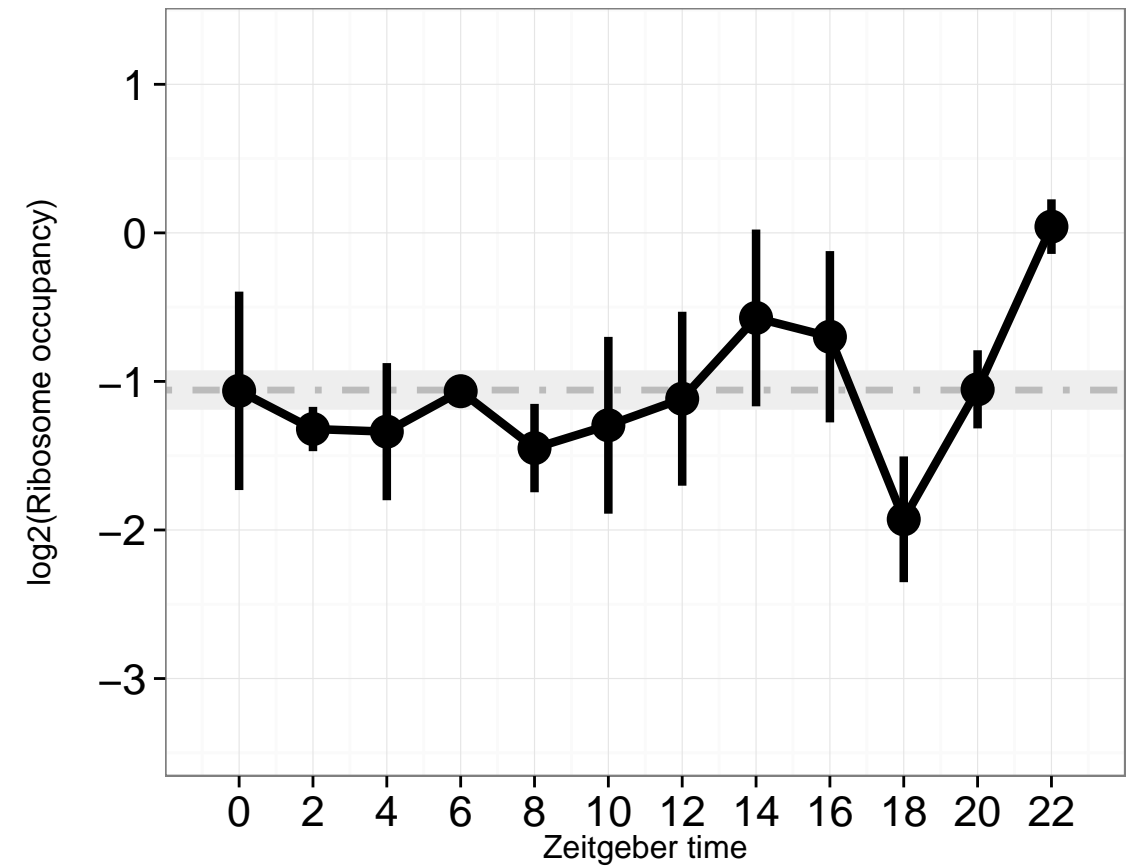

Supplement: SuppDataset_1.zip [file Micu3_set_A.pdf › Supplemental Dataset 1/A-mRNA_nonrhyth_translation_nonrhyth/Micu3_set_A.pdf]

## Mid1

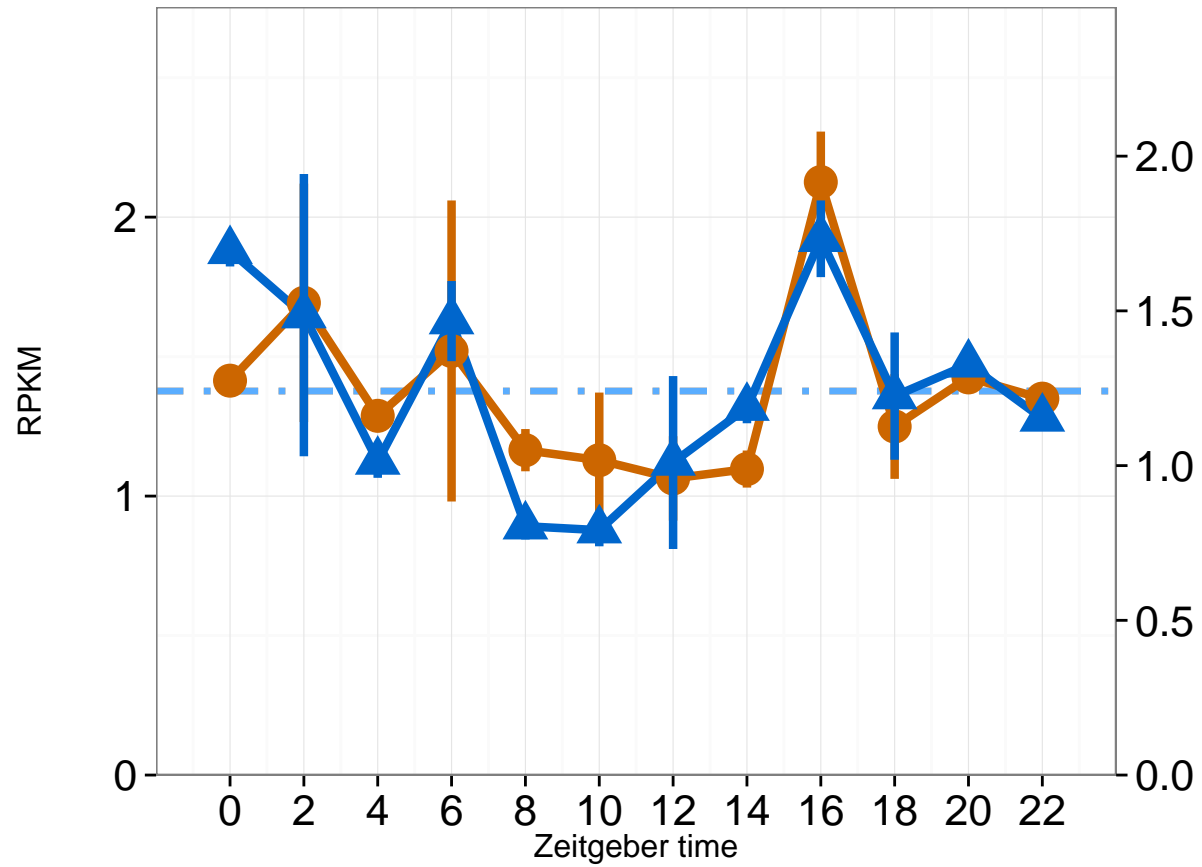

## Mid1

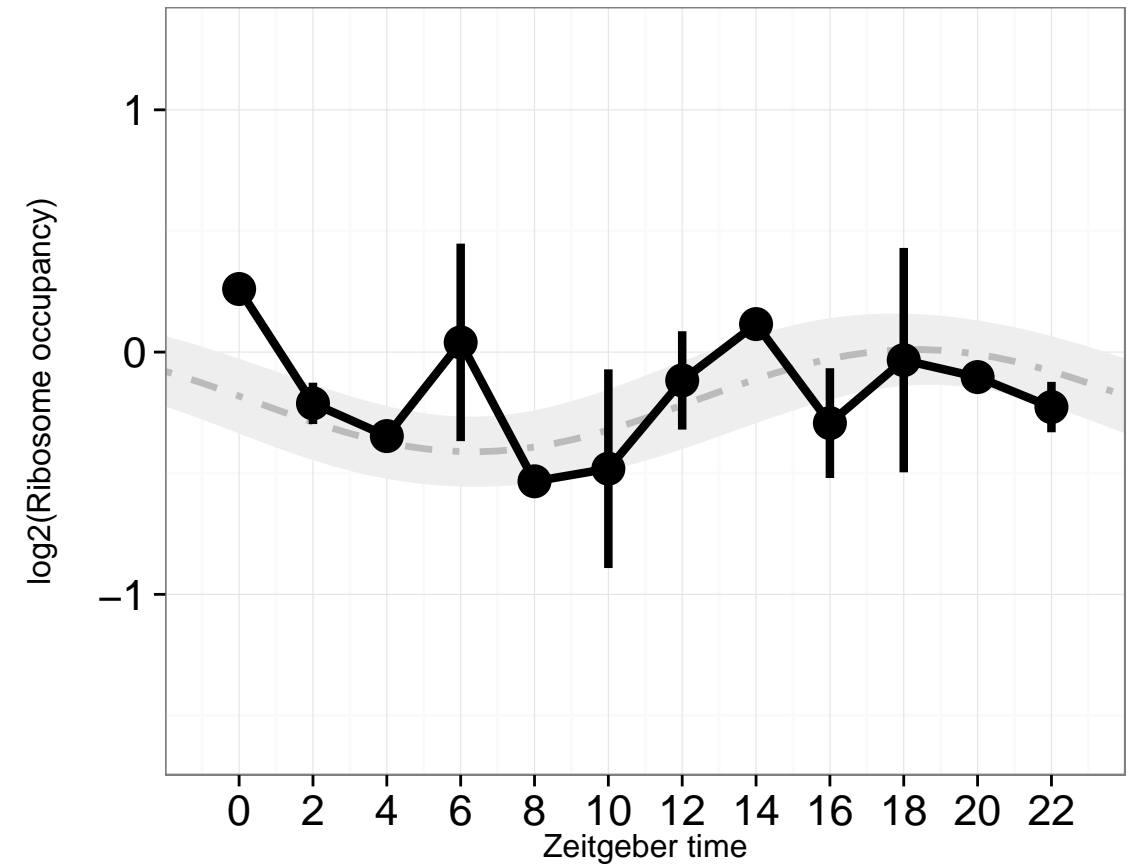

Supplement: SuppDataset_1.zip [file Mid1_set_A.pdf › Supplemental Dataset 1/A-mRNA_nonrhyth_translation_nonrhyth/Mid1_set_A.pdf]

## Mid2

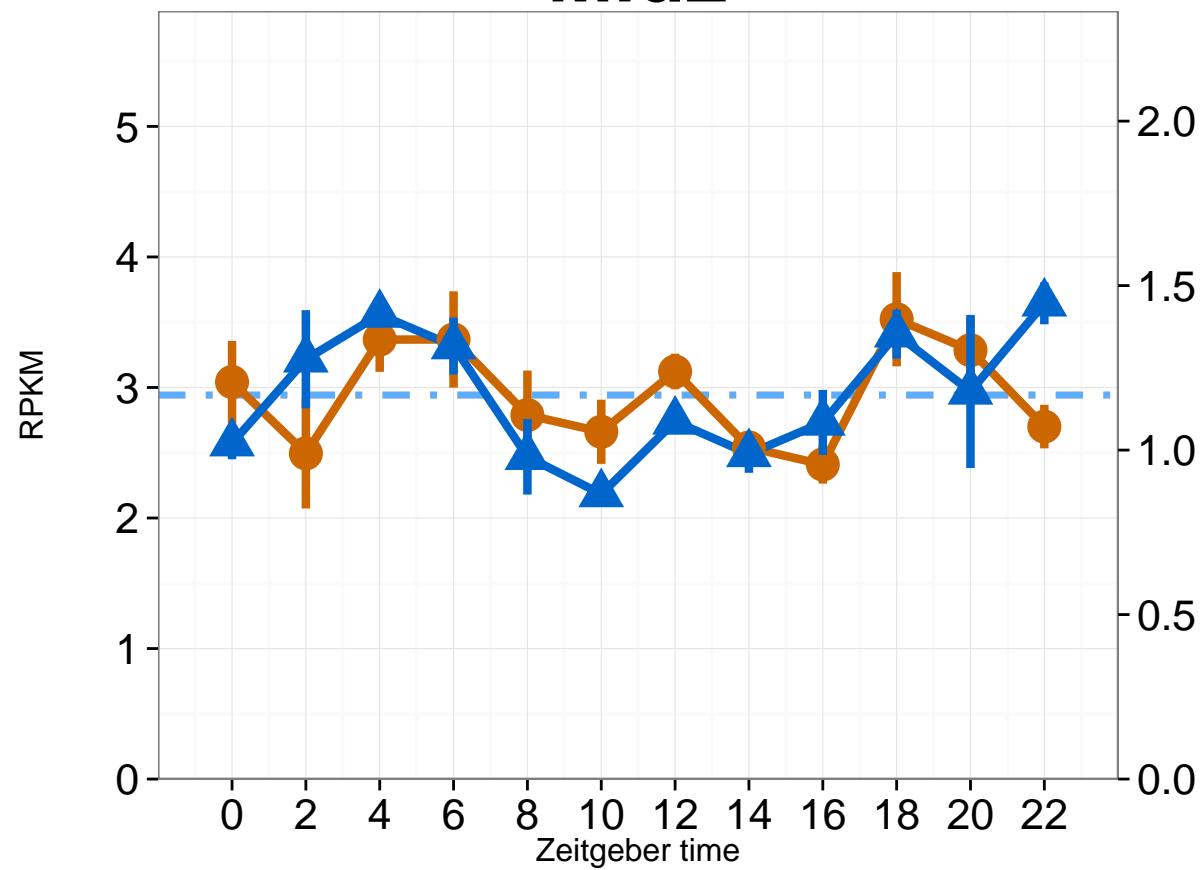

## Mid2

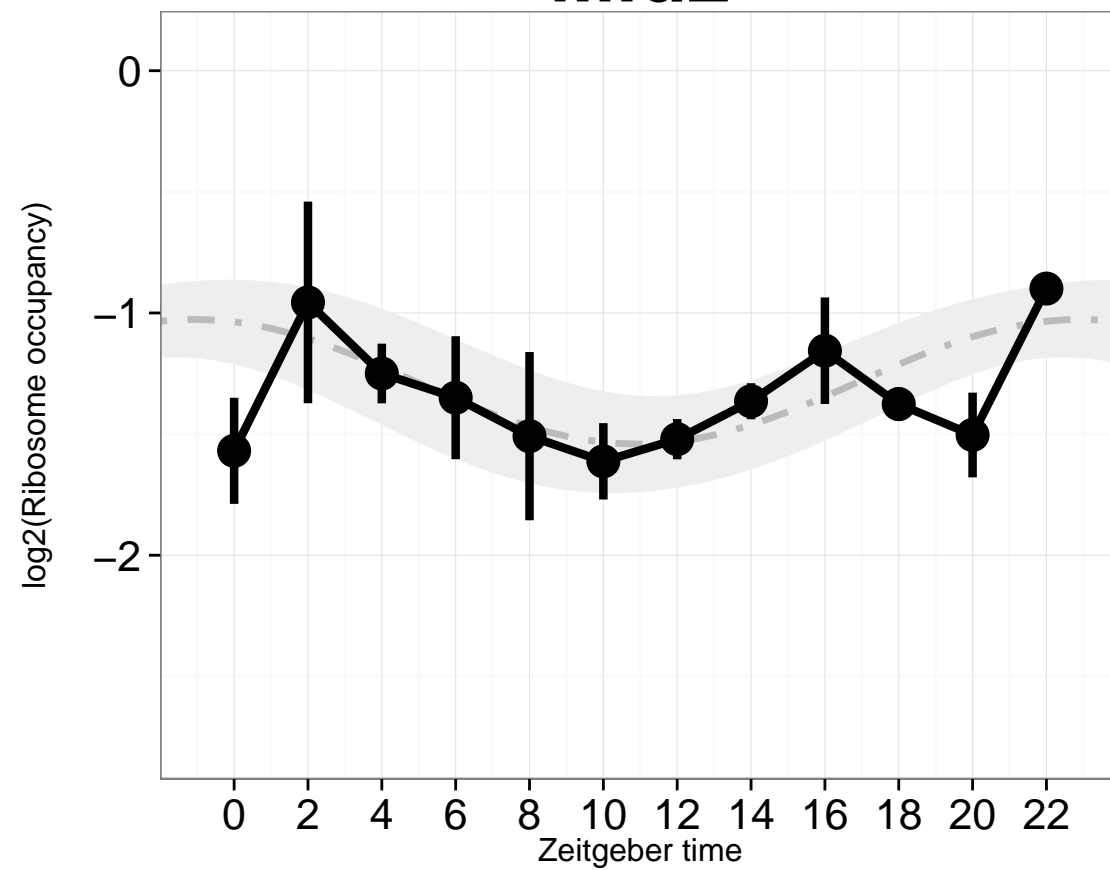

Supplement: SuppDataset_1.zip [file Mid2_set_A.pdf › Supplemental Dataset 1/A-mRNA_nonrhyth_translation_nonrhyth/Mid2_set_A.pdf]

# Mief1

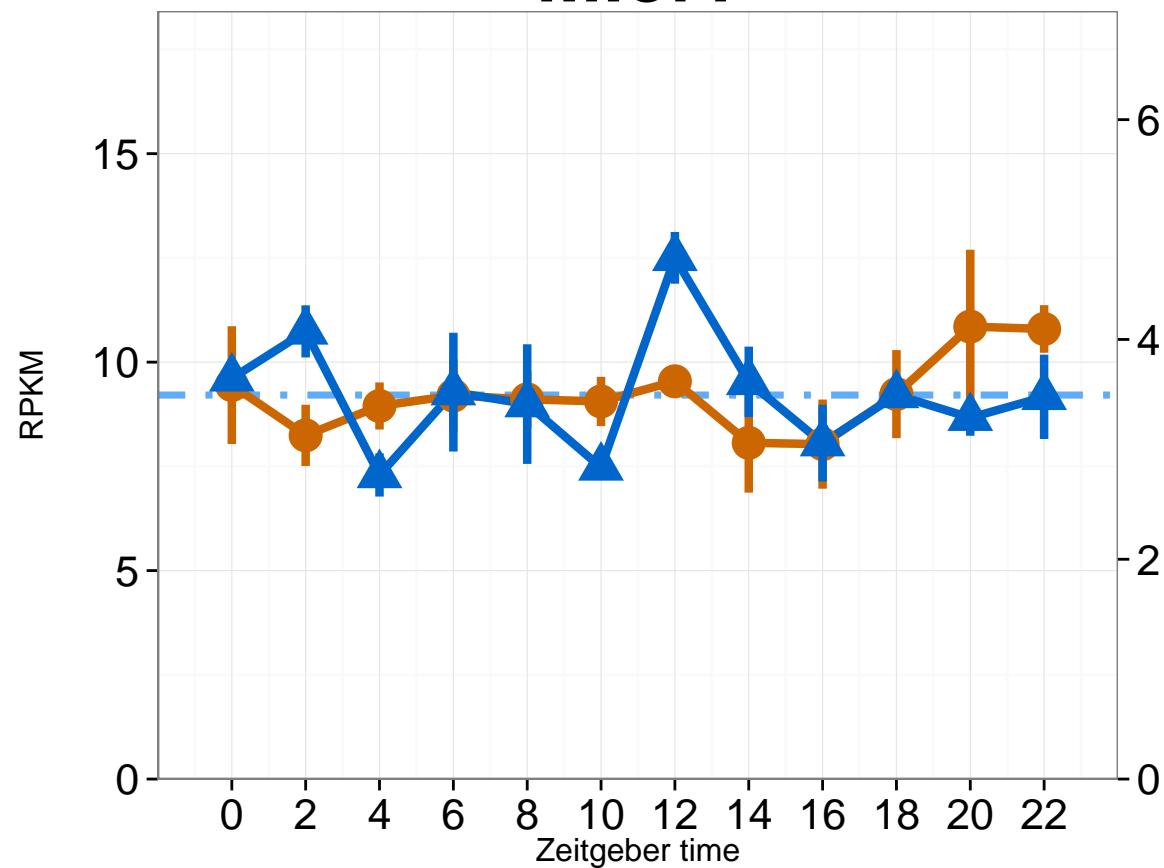

# Mief1

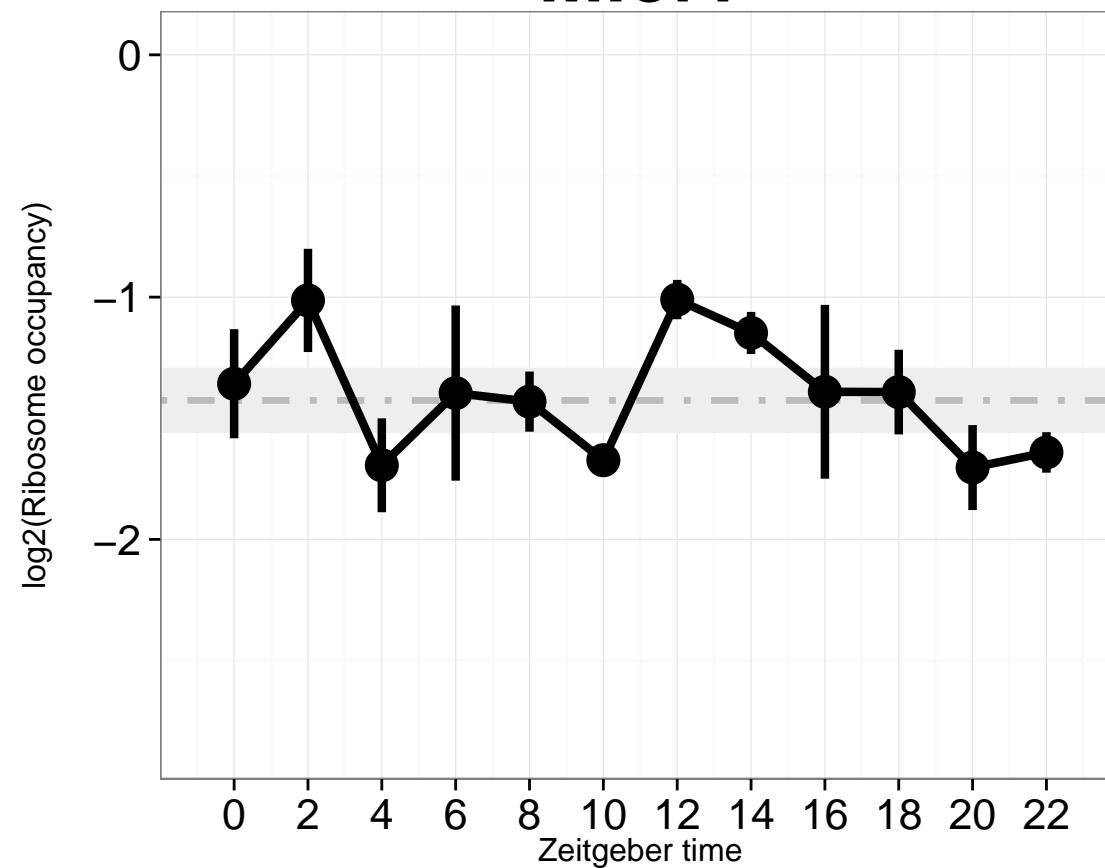

Supplement: SuppDataset_1.zip [file Mief1_set_A.pdf › Supplemental Dataset 1/A-mRNA_nonrhyth_translation_nonrhyth/Mief1_set_A.pdf]

# Mief2

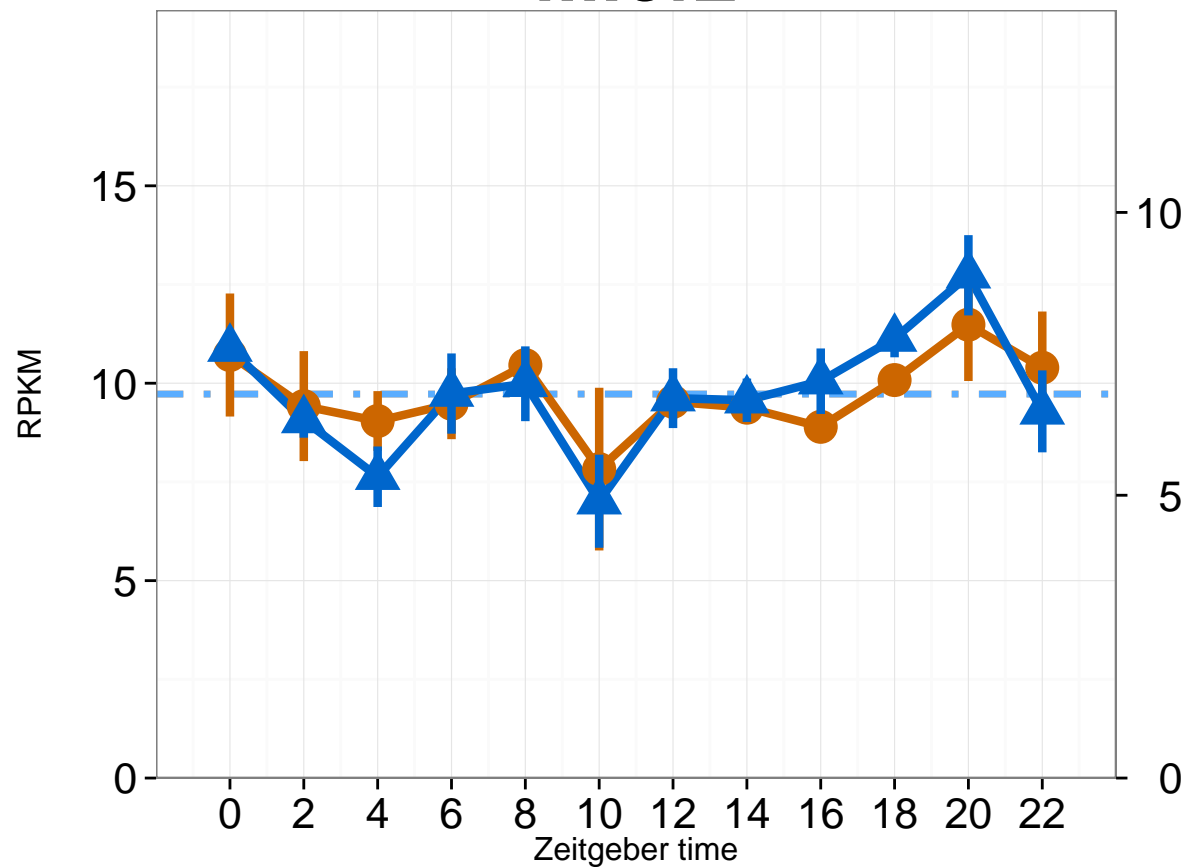

# Mief2

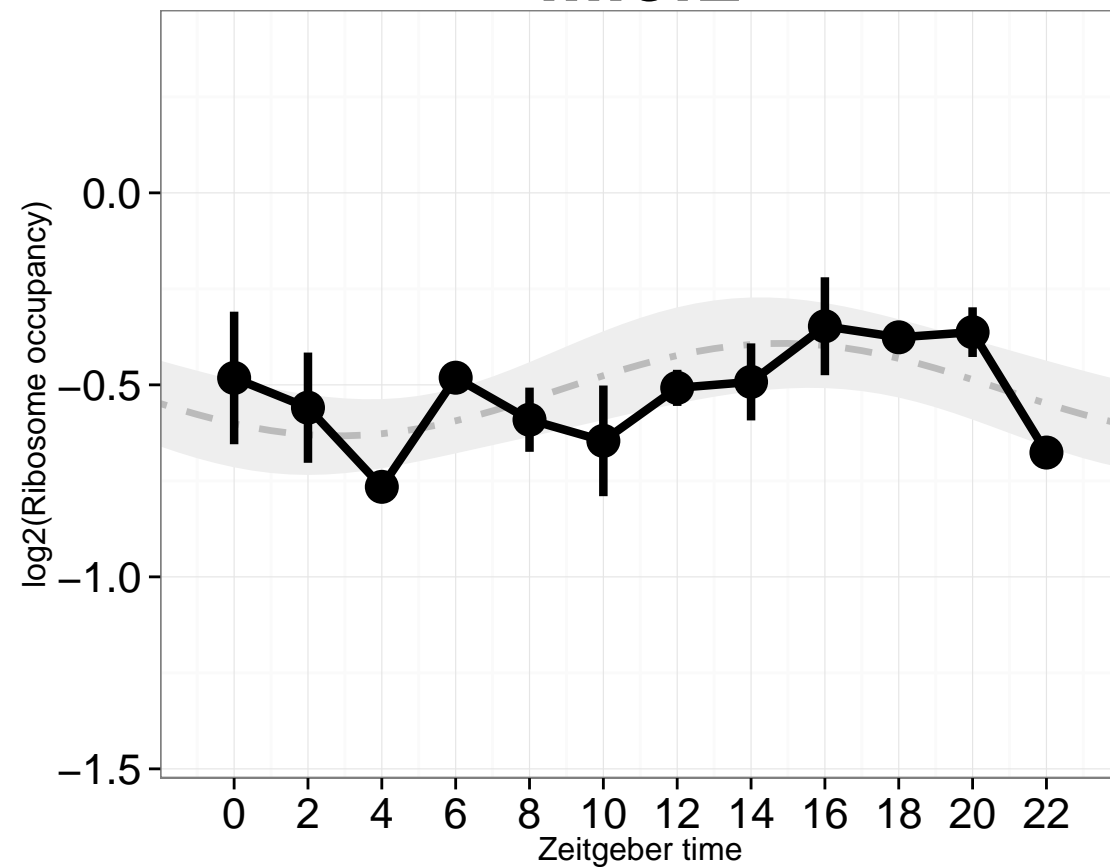

Supplement: SuppDataset_1.zip [file Mief2_set_A.pdf › Supplemental Dataset 1/A-mRNA_nonrhyth_translation_nonrhyth/Mief2_set_A.pdf]

# Mien1

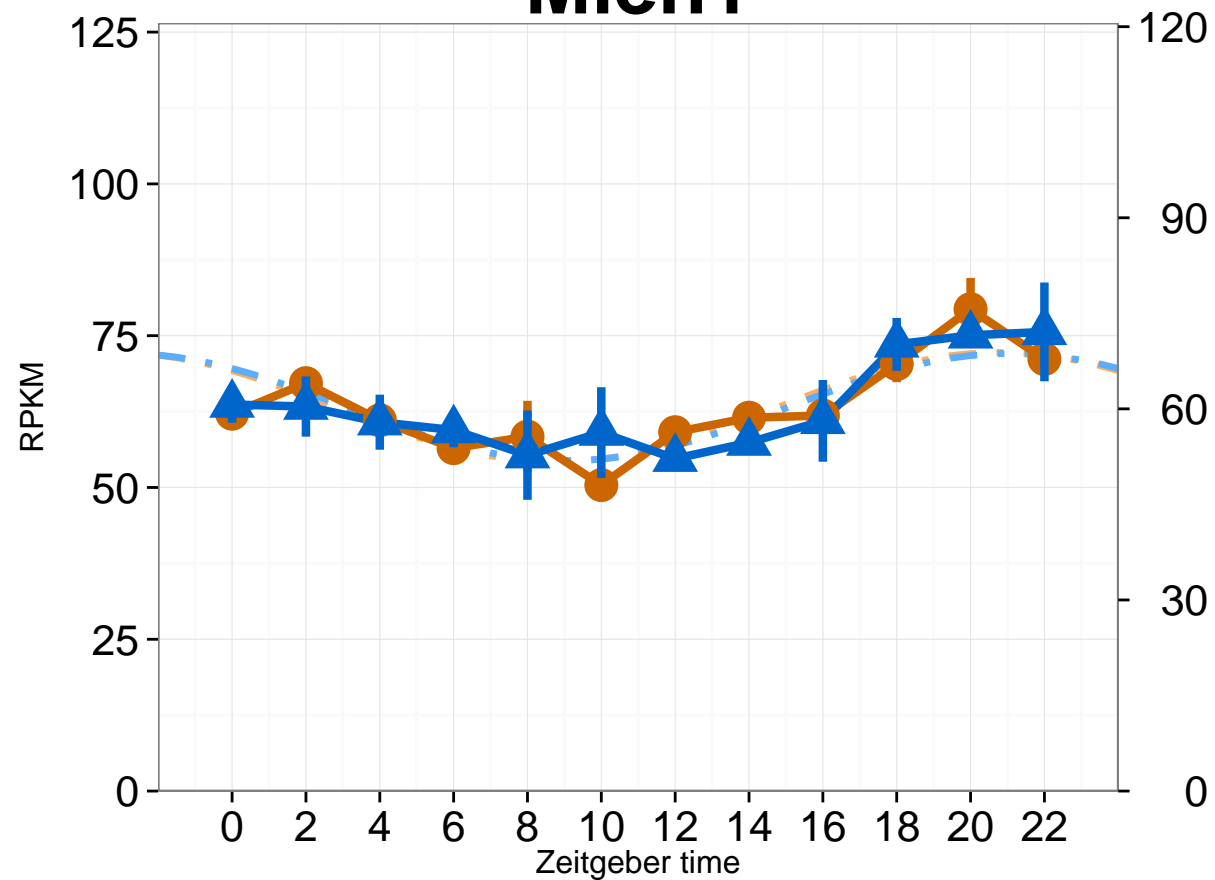

# Mien1

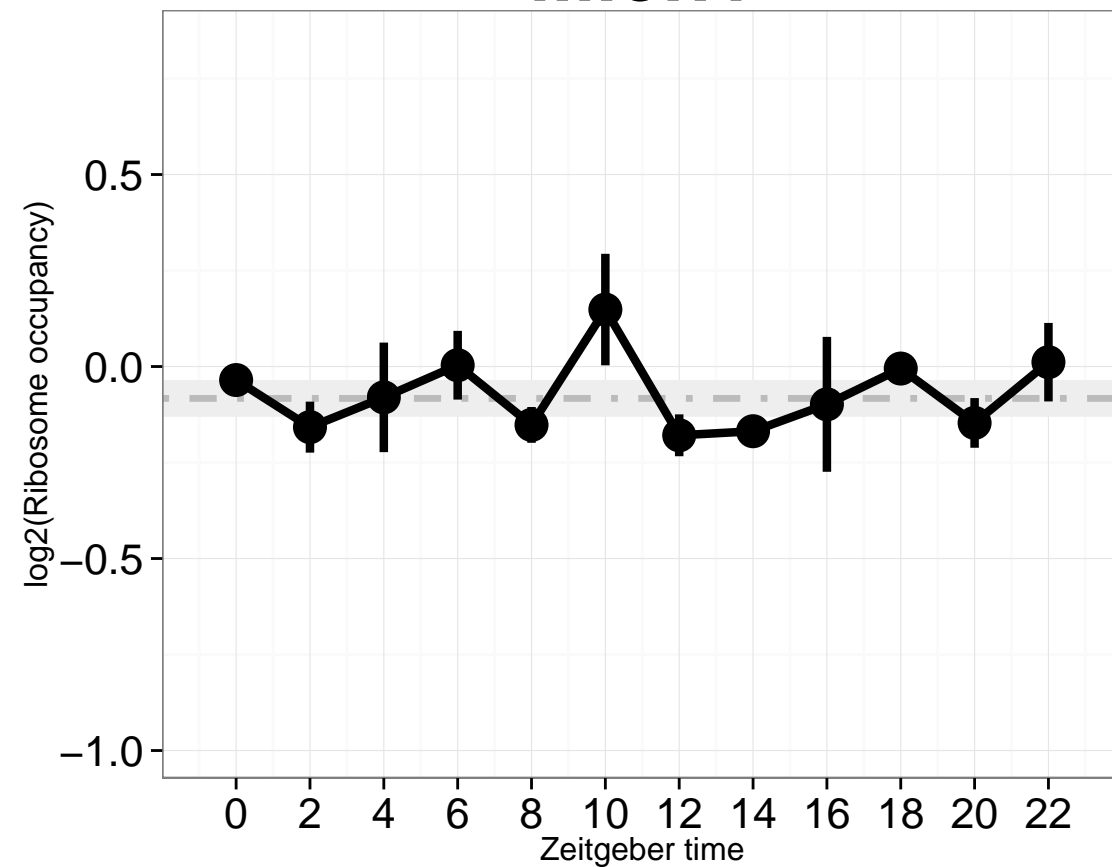

Supplement: SuppDataset_1.zip [file Mien1_set_A.pdf › Supplemental Dataset 1/A-mRNA_nonrhyth_translation_nonrhyth/Mien1_set_A.pdf]

# Mier1

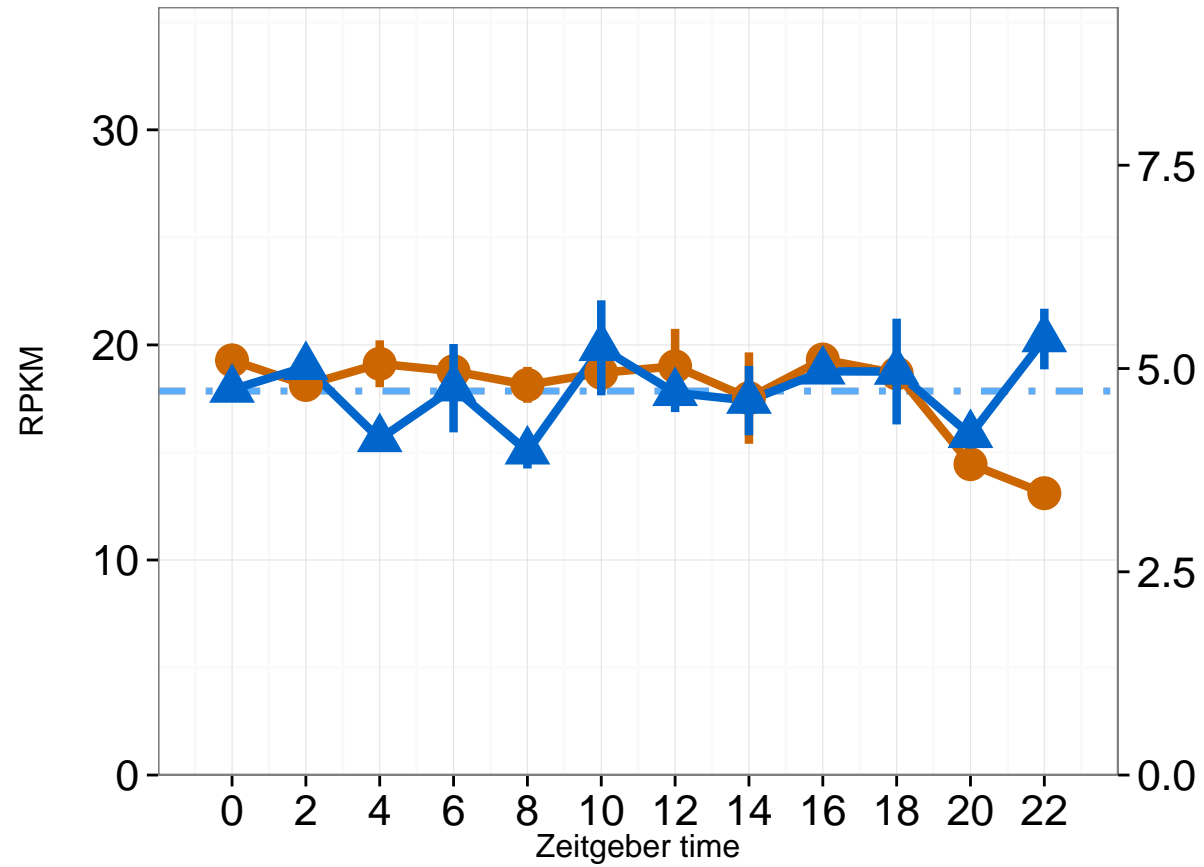

# Mier1

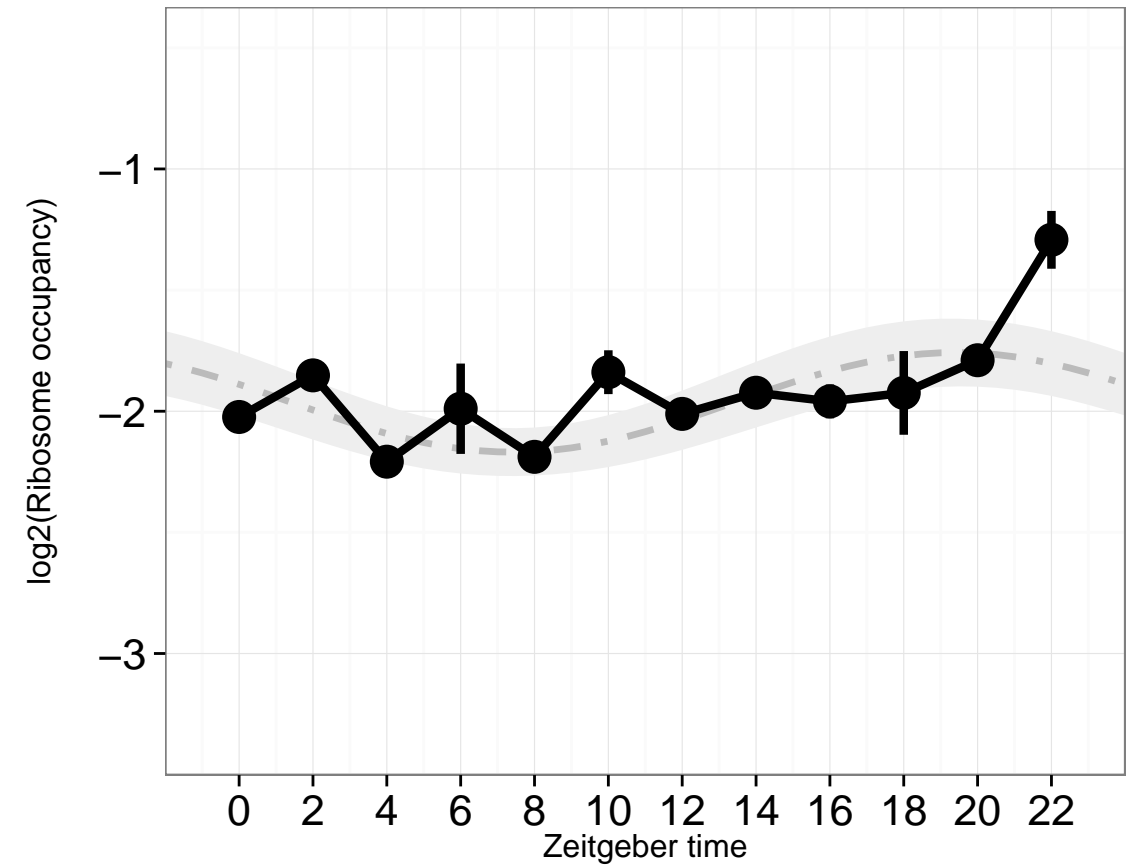

Supplement: SuppDataset_1.zip [file Mier1_set_A.pdf › Supplemental Dataset 1/A-mRNA_nonrhyth_translation_nonrhyth/Mier1_set_A.pdf]

## Mier2

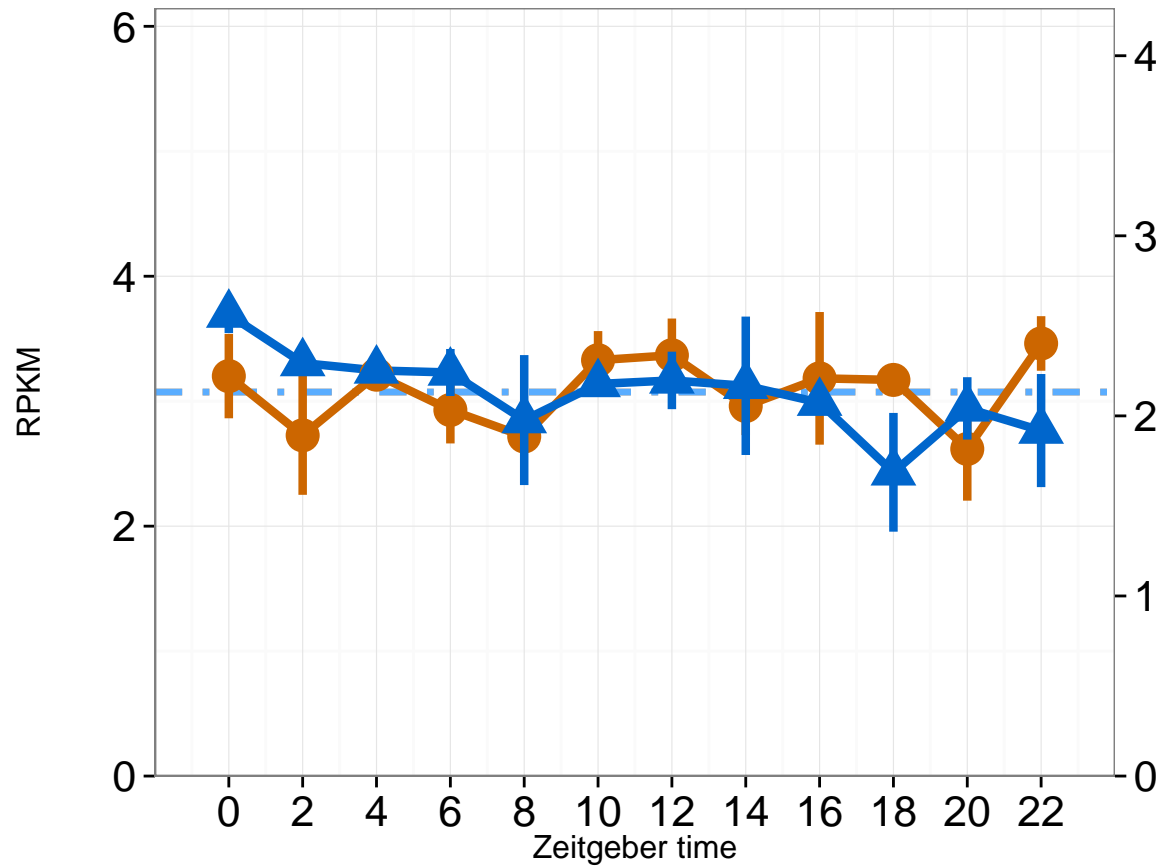

## Mier2

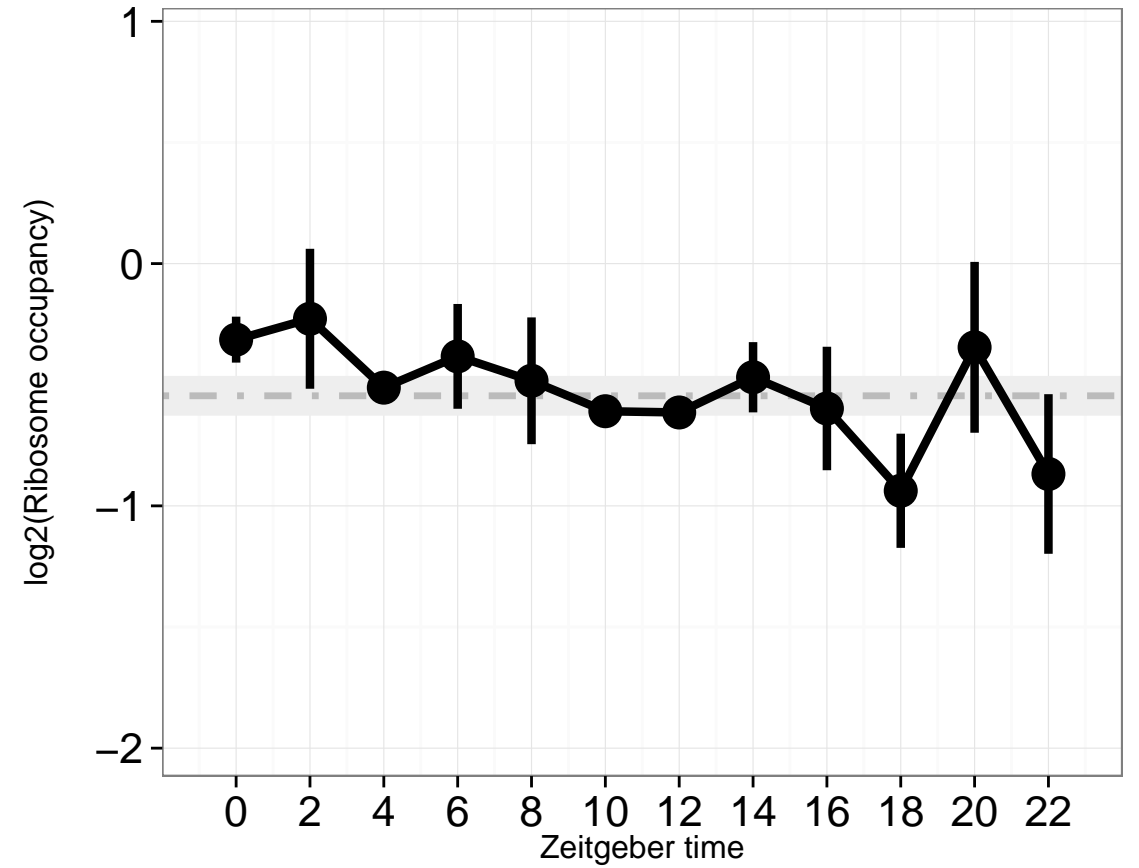

Supplement: SuppDataset_1.zip [file Mier2_set_A.pdf › Supplemental Dataset 1/A-mRNA_nonrhyth_translation_nonrhyth/Mier2_set_A.pdf]

# Mier3

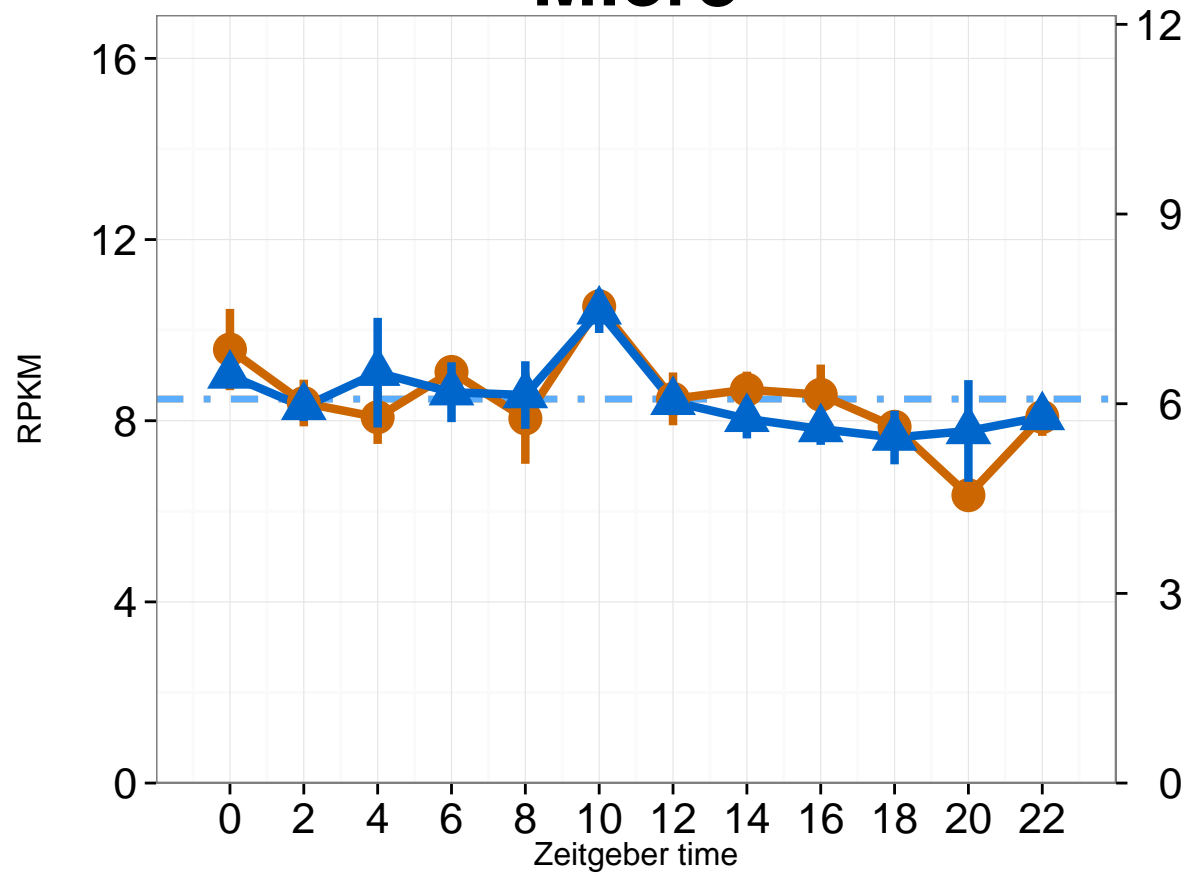

# Mier3

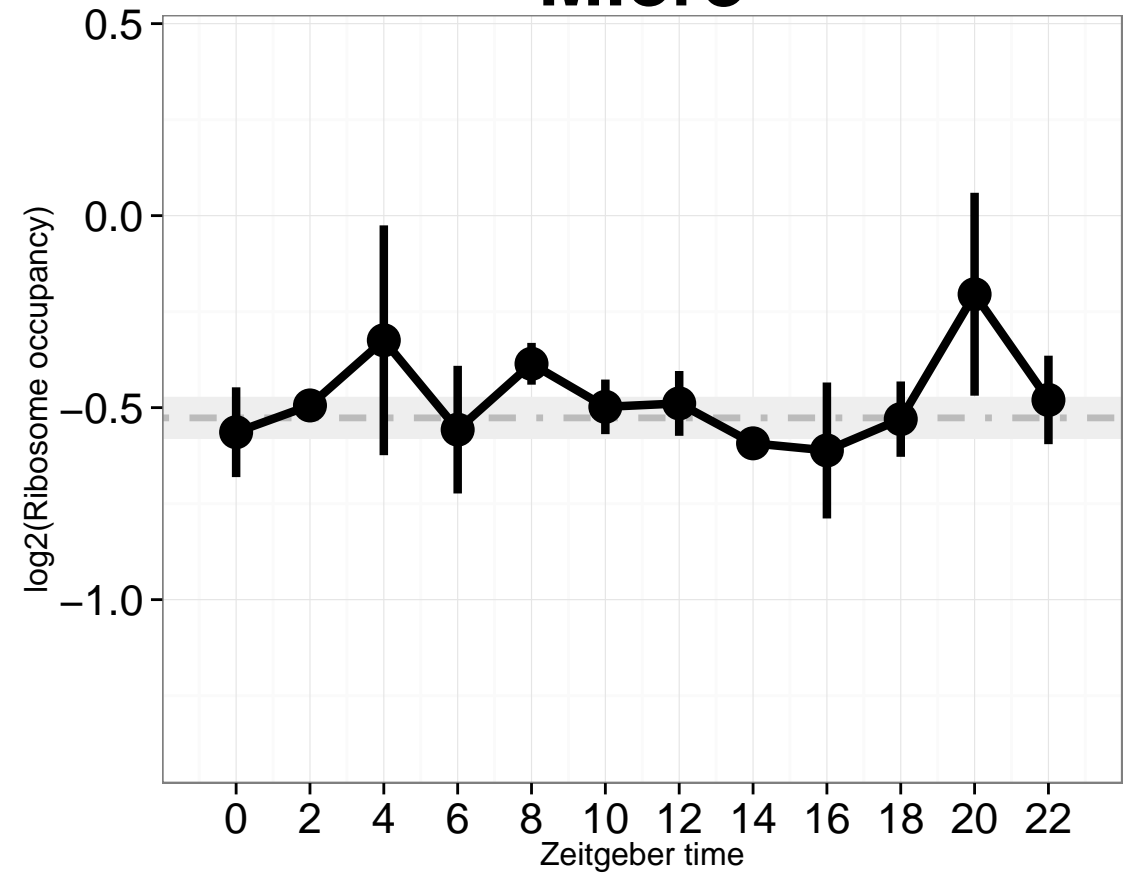

Supplement: SuppDataset_1.zip [file Mier3_set_A.pdf › Supplemental Dataset 1/A-mRNA_nonrhyth_translation_nonrhyth/Mier3_set_A.pdf]

## Mina

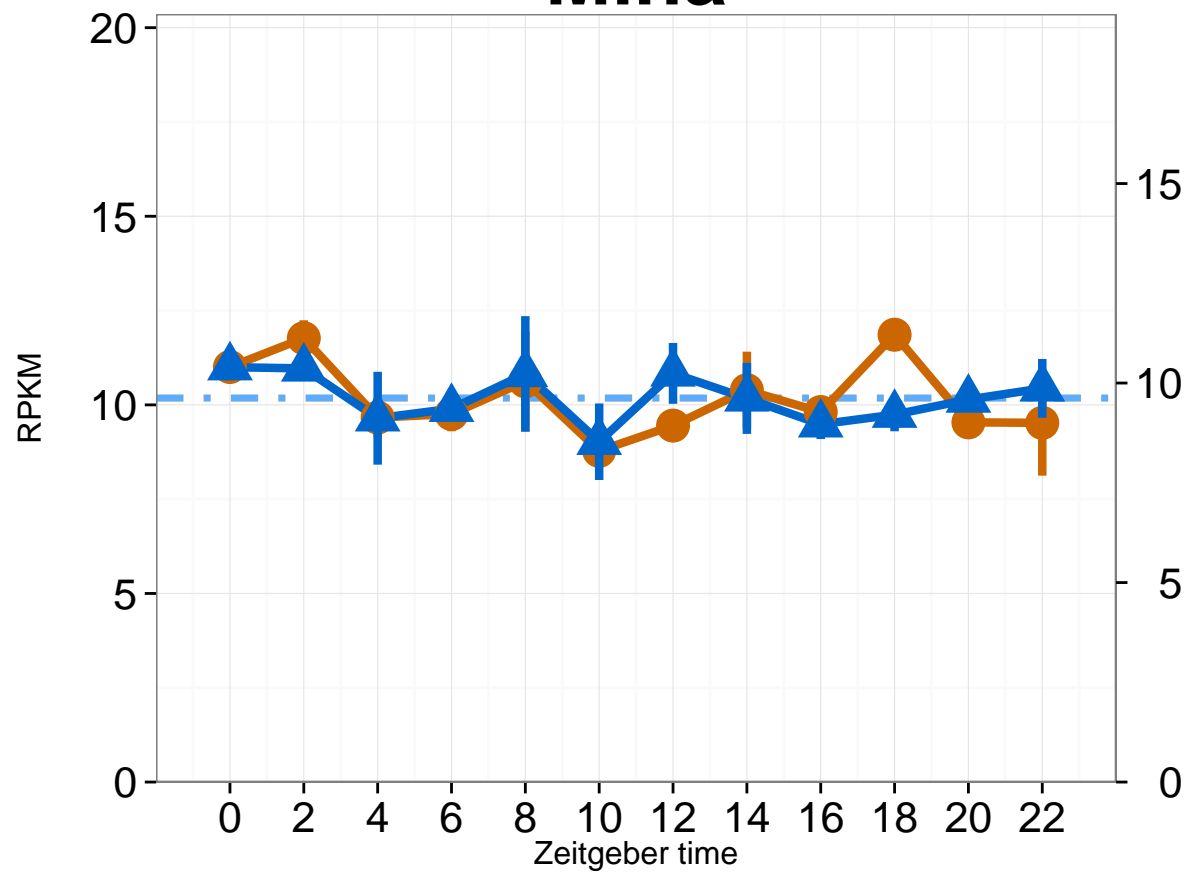

## Mina

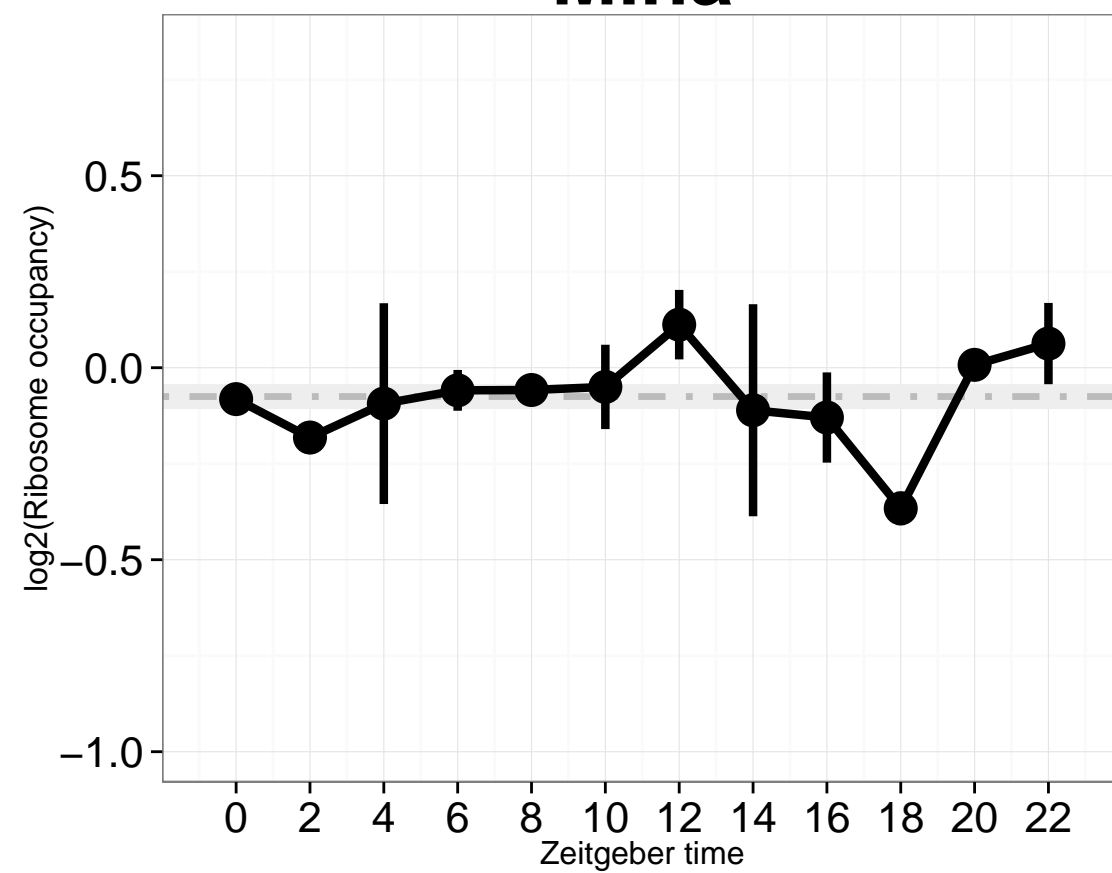

Supplement: SuppDataset_1.zip [file Mina_set_A.pdf › Supplemental Dataset 1/A-mRNA_nonrhyth_translation_nonrhyth/Mina_set_A.pdf]

## Mink1

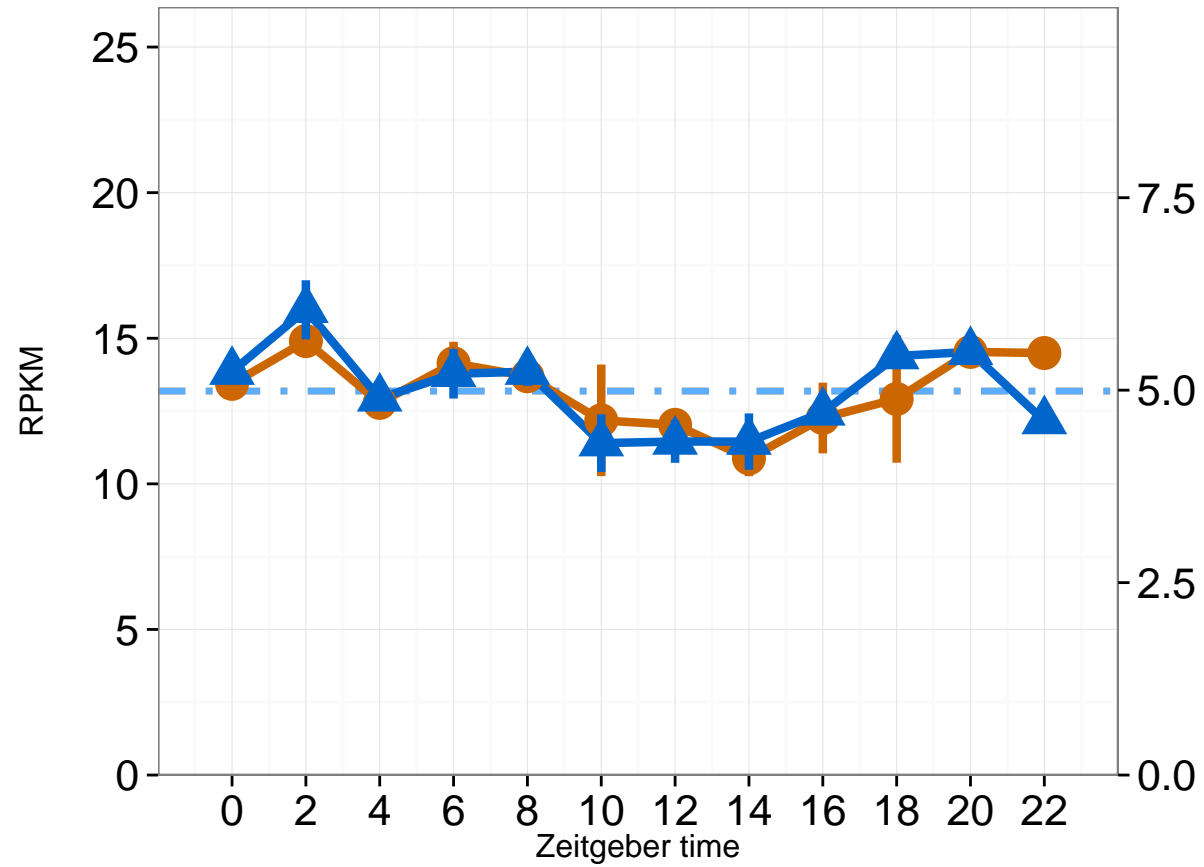

## Mink1

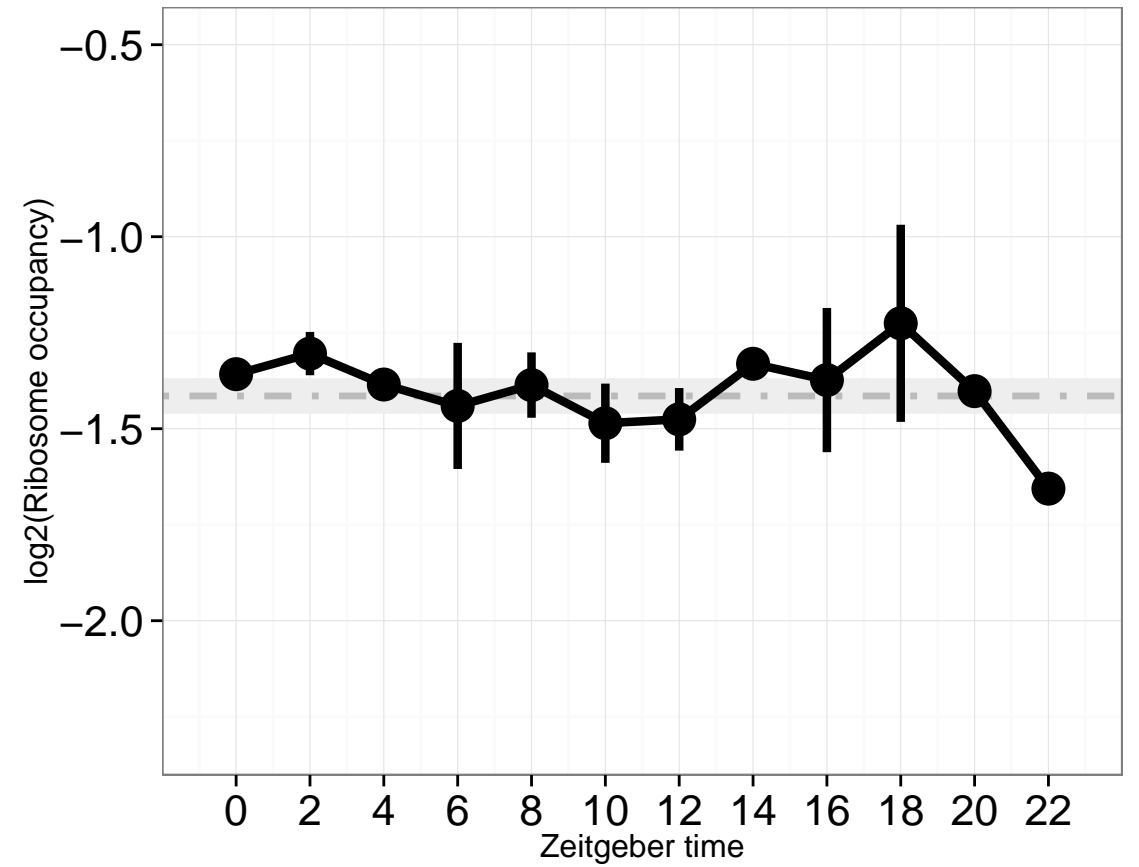

Supplement: SuppDataset_1.zip [file Mink1_set_A.pdf › Supplemental Dataset 1/A-mRNA_nonrhyth_translation_nonrhyth/Mink1_set_A.pdf]

# Minos1

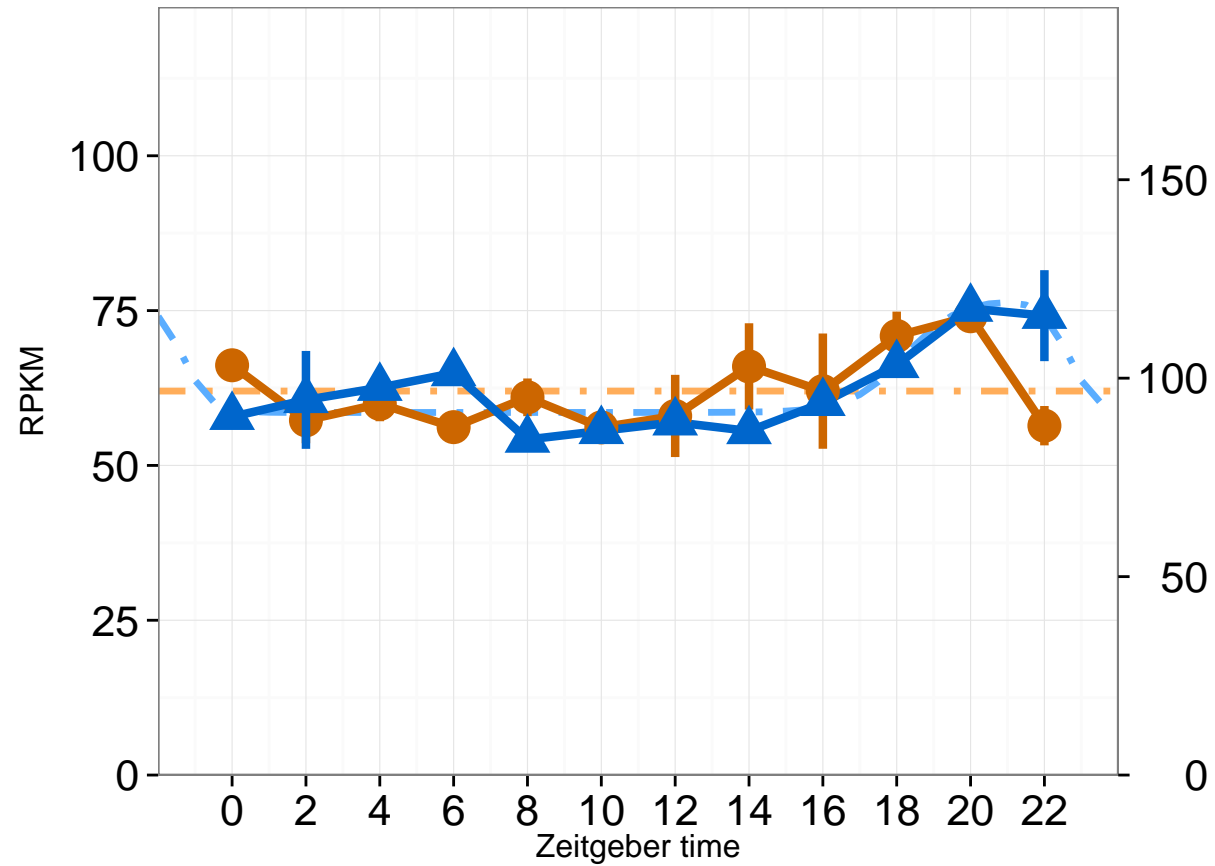

# Minos1

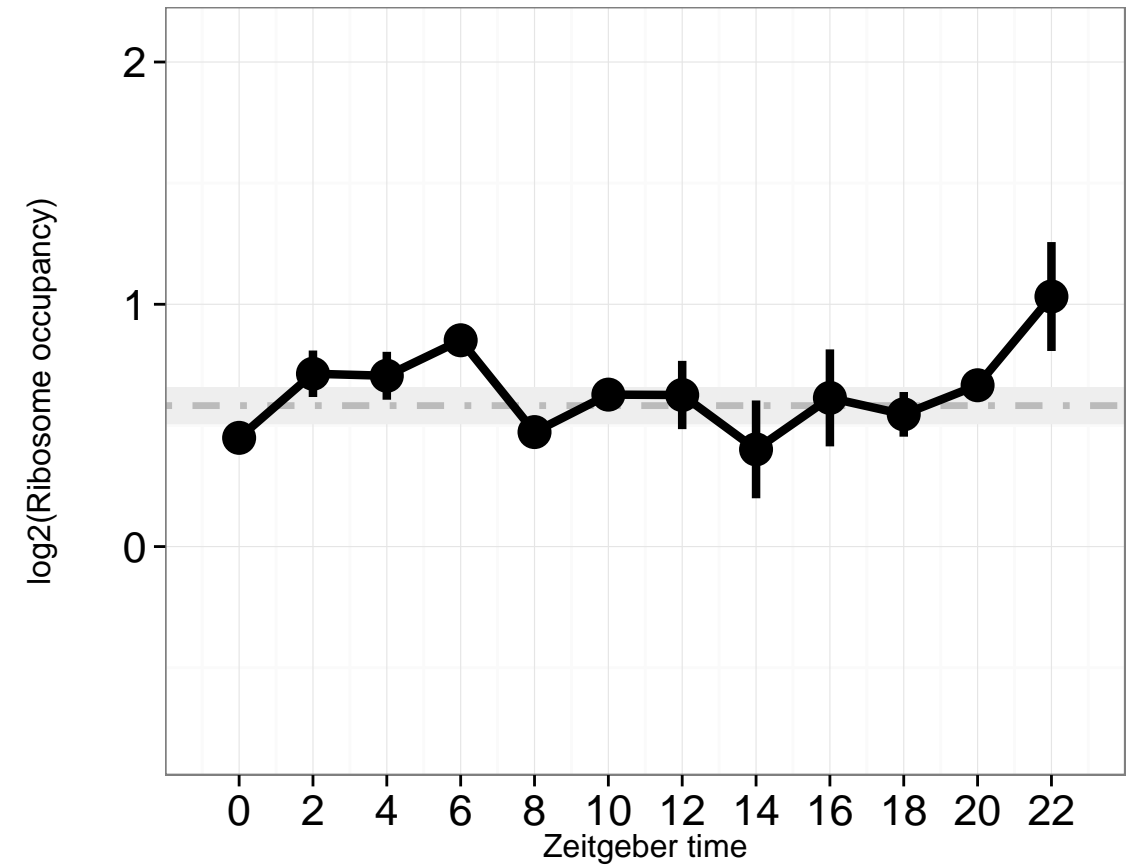

Supplement: SuppDataset_1.zip [file Minos1_set_A.pdf › Supplemental Dataset 1/A-mRNA_nonrhyth_translation_nonrhyth/Minos1_set_A.pdf]

# Minpp1

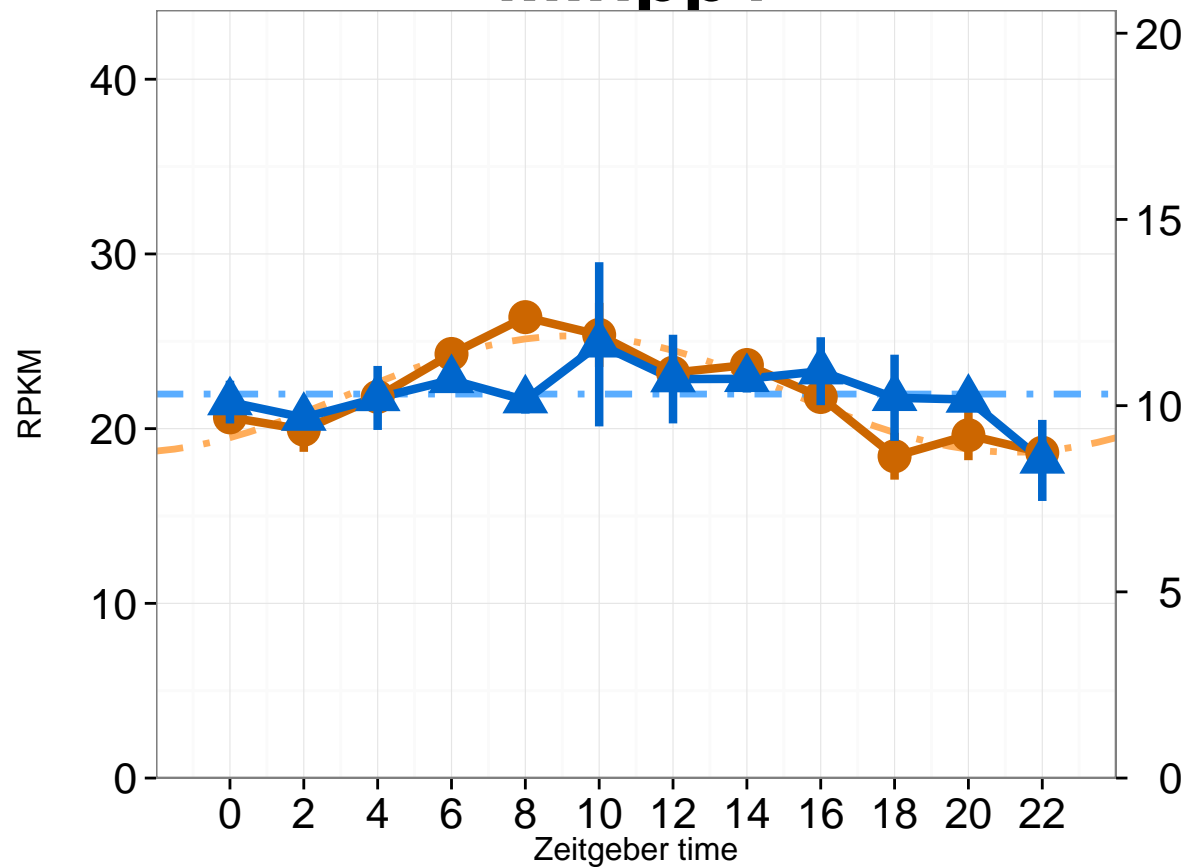

# Minpp1

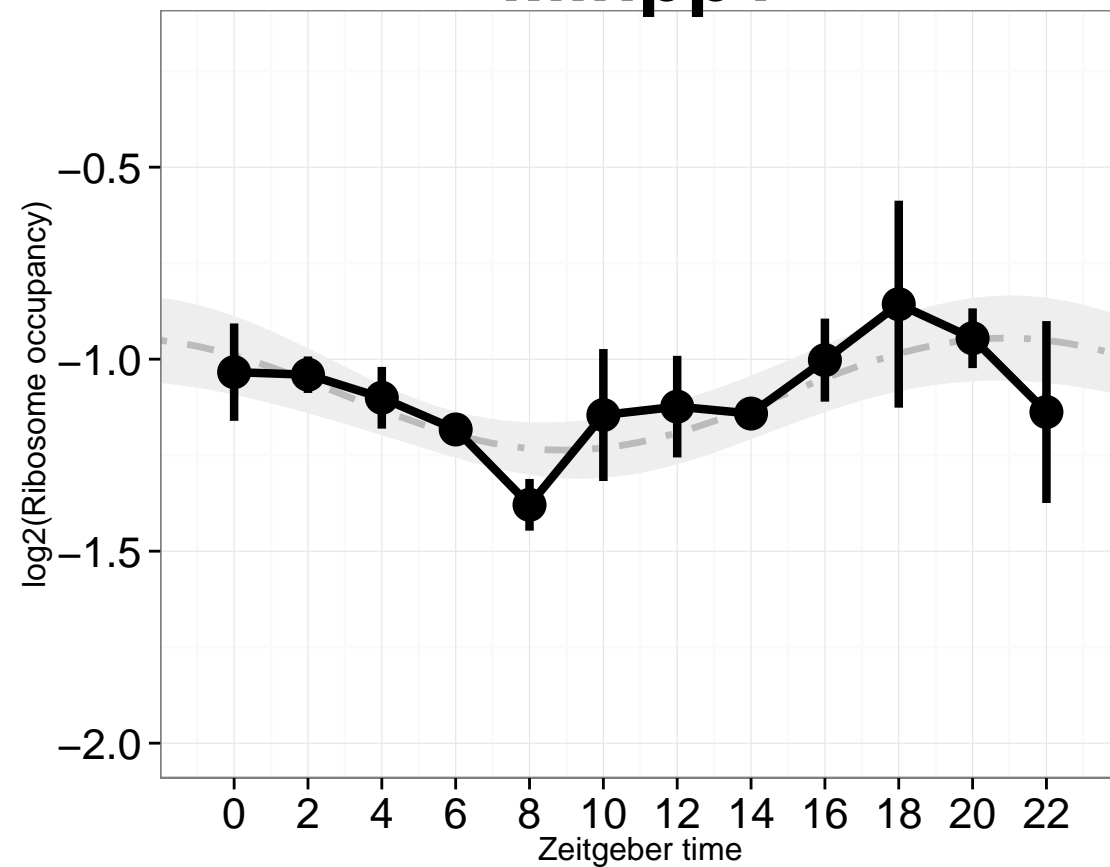

Supplement: SuppDataset_1.zip [file Minpp1_set_A.pdf › Supplemental Dataset 1/A-mRNA_nonrhyth_translation_nonrhyth/Minpp1_set_A.pdf]

## Mipep

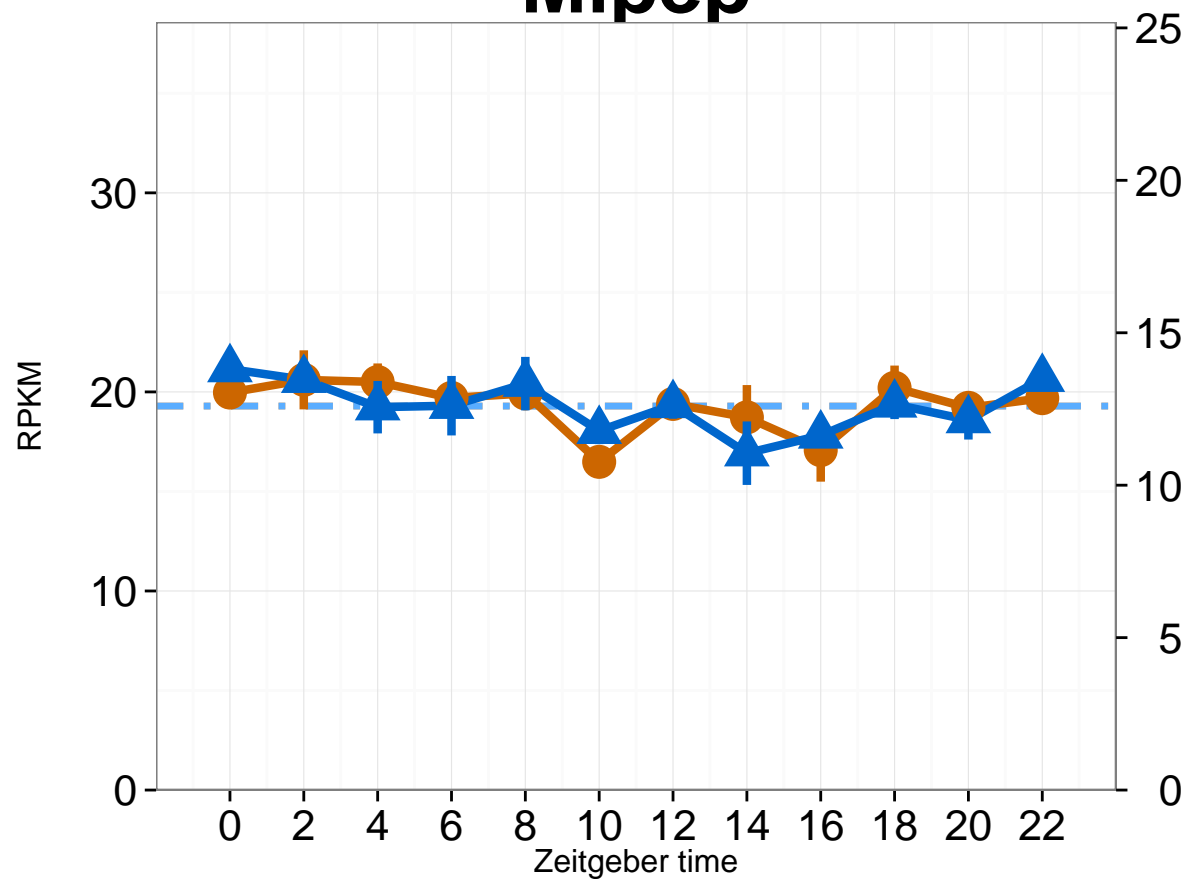

## Mipep

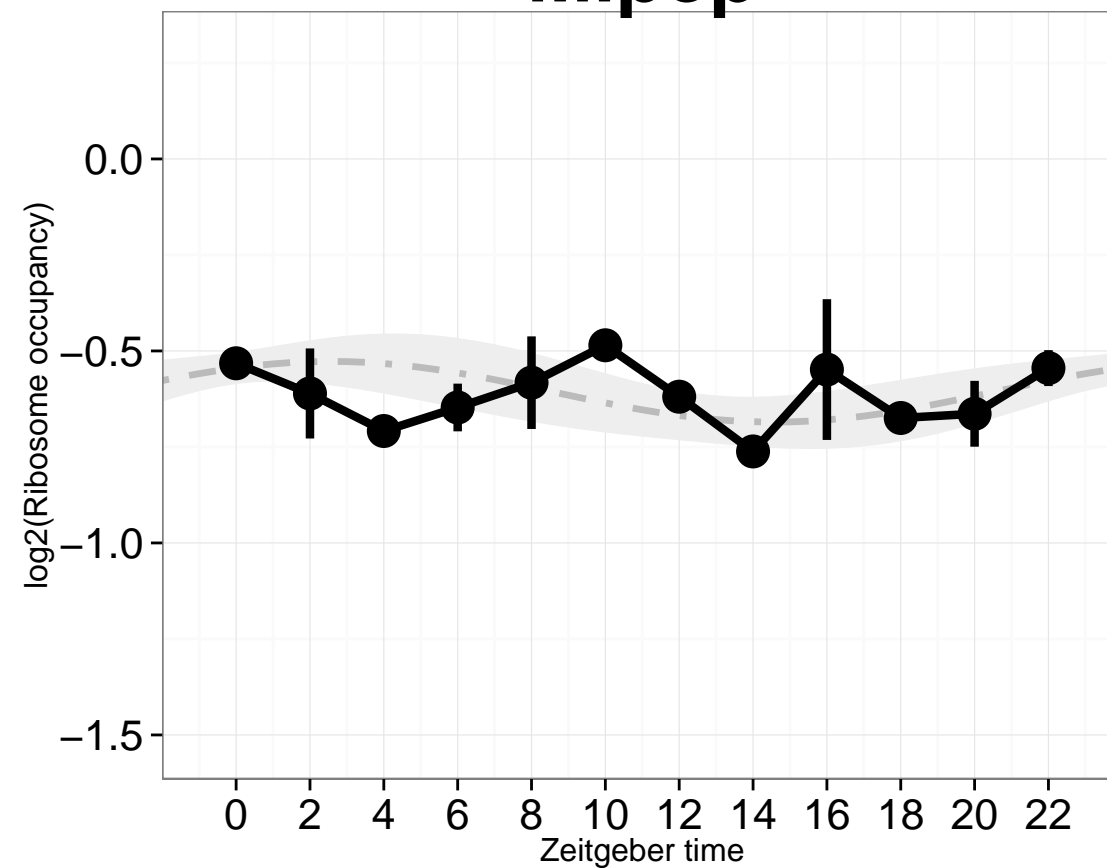

Supplement: SuppDataset_1.zip [file Mipep_set_A.pdf › Supplemental Dataset 1/A-mRNA_nonrhyth_translation_nonrhyth/Mipep_set_A.pdf]

# Mis18a

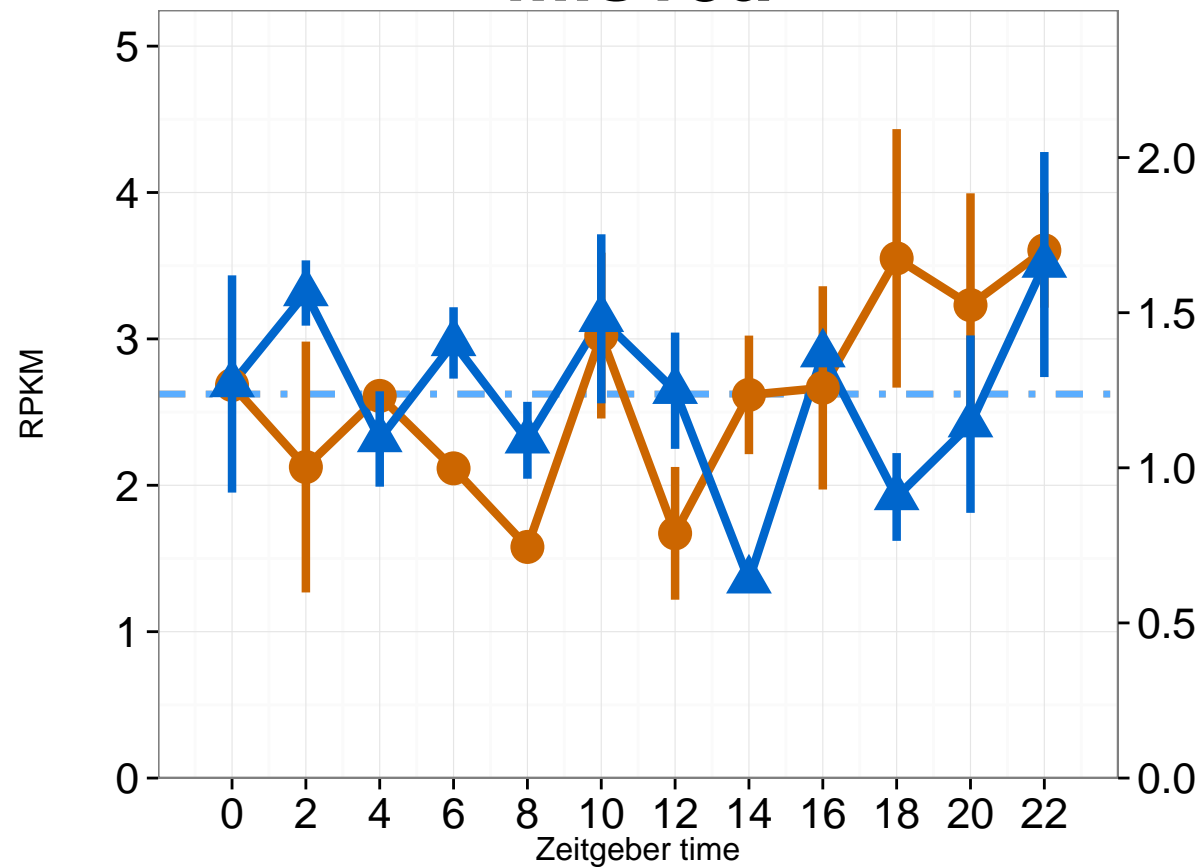

# Mis18a

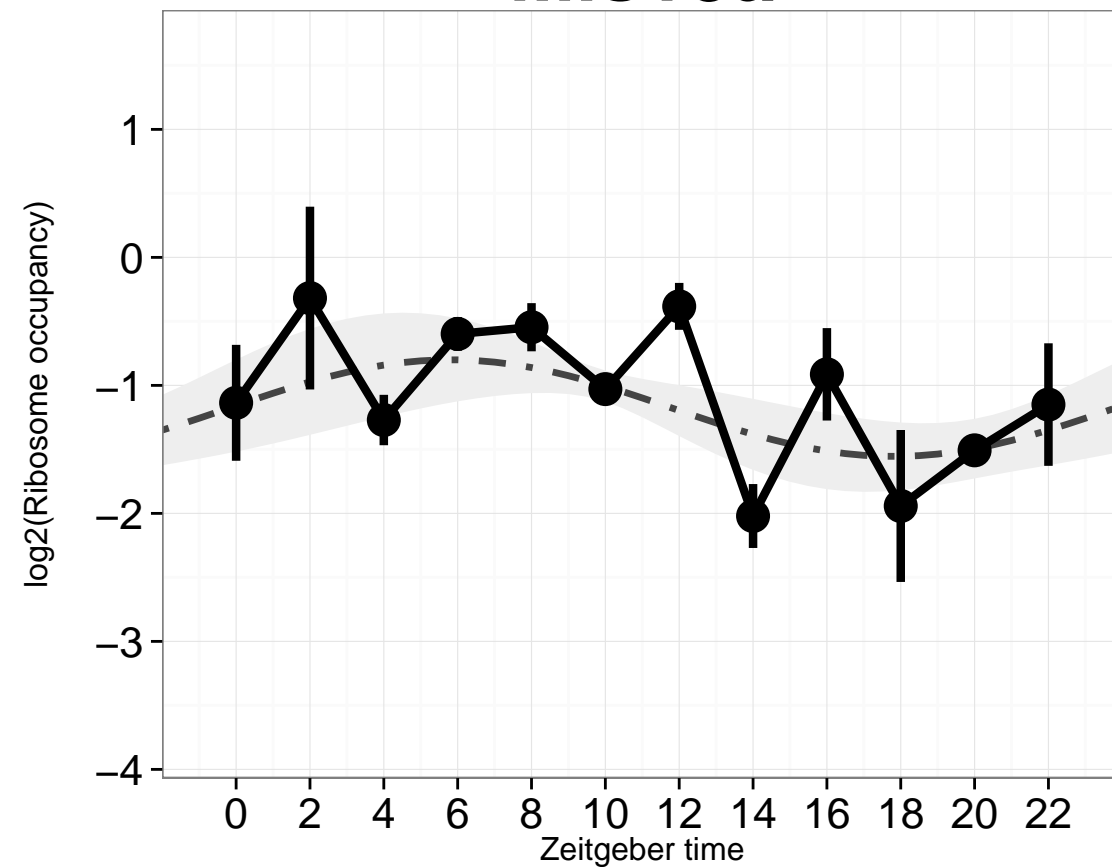

Supplement: SuppDataset_1.zip [file Mis18a_set_A.pdf › Supplemental Dataset 1/A-mRNA_nonrhyth_translation_nonrhyth/Mis18a_set_A.pdf]

## Mitd1

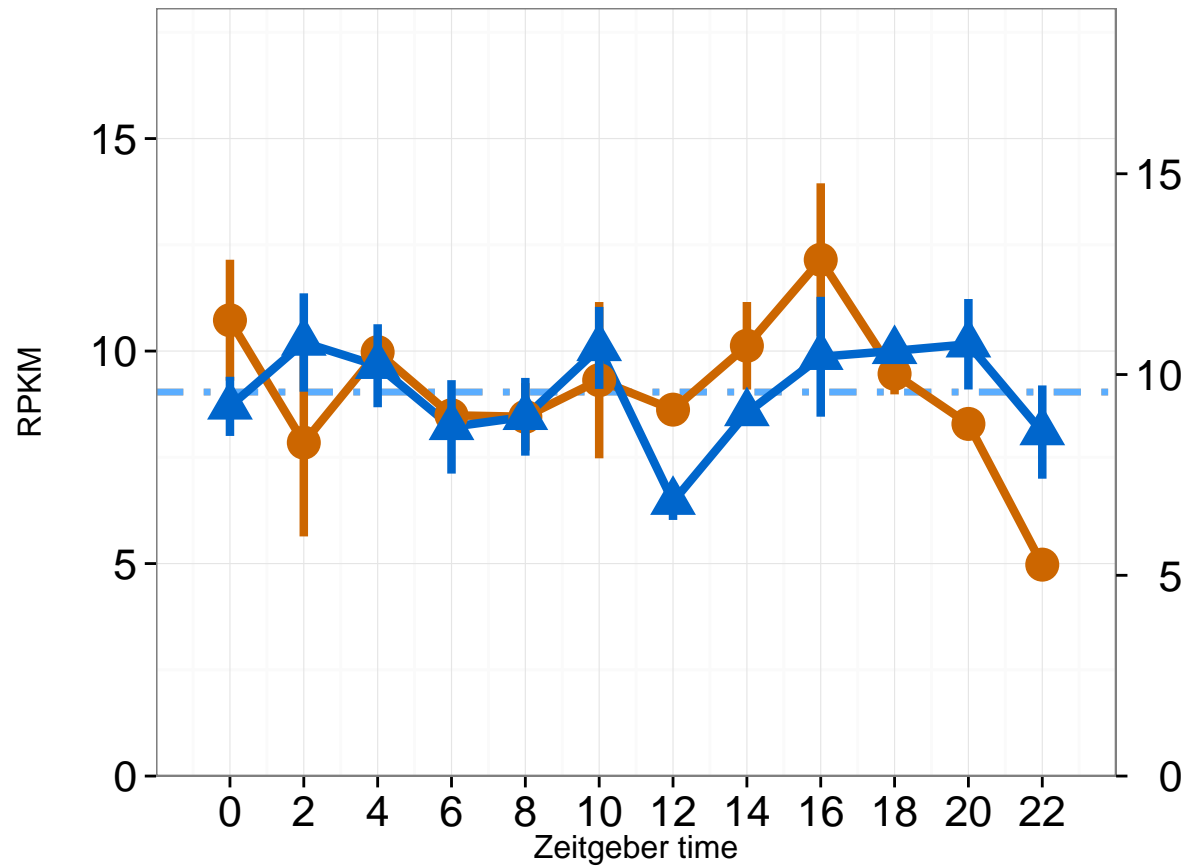

## Mitd1

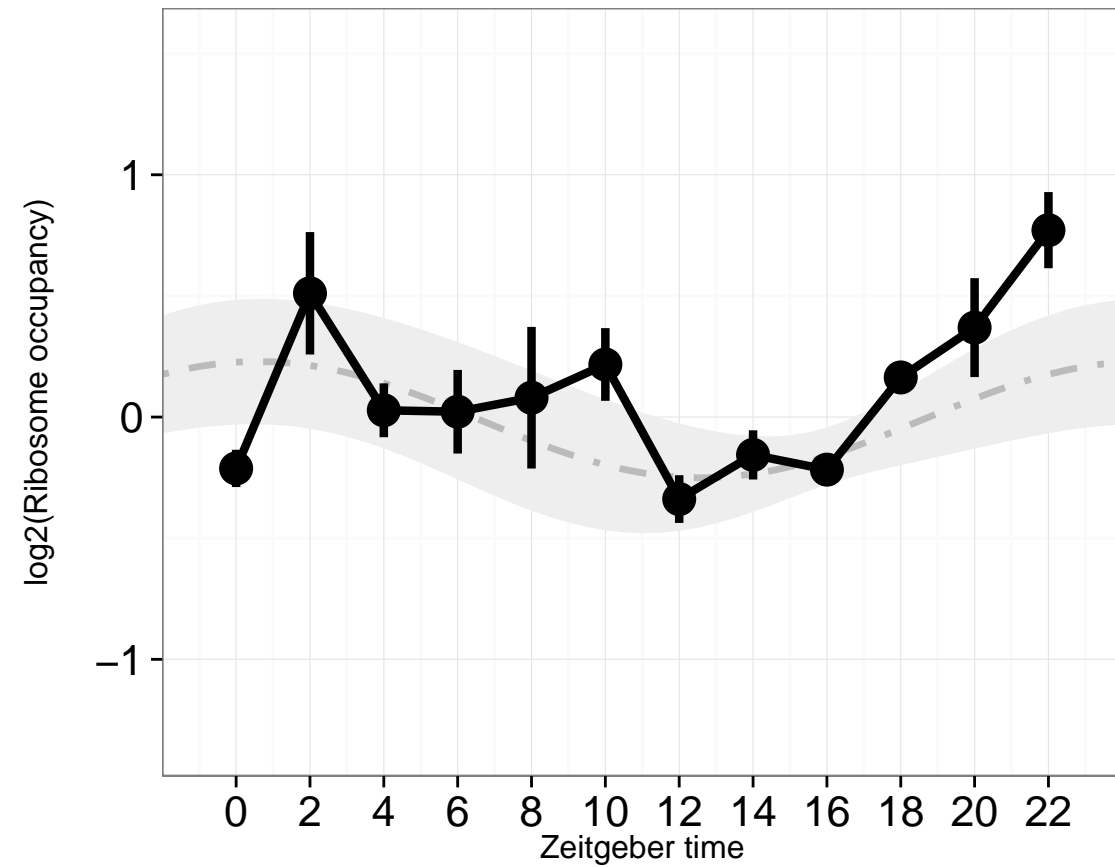

Supplement: SuppDataset_1.zip [file Mitd1_set_A.pdf › Supplemental Dataset 1/A-mRNA_nonrhyth_translation_nonrhyth/Mitd1_set_A.pdf]

## Mki67

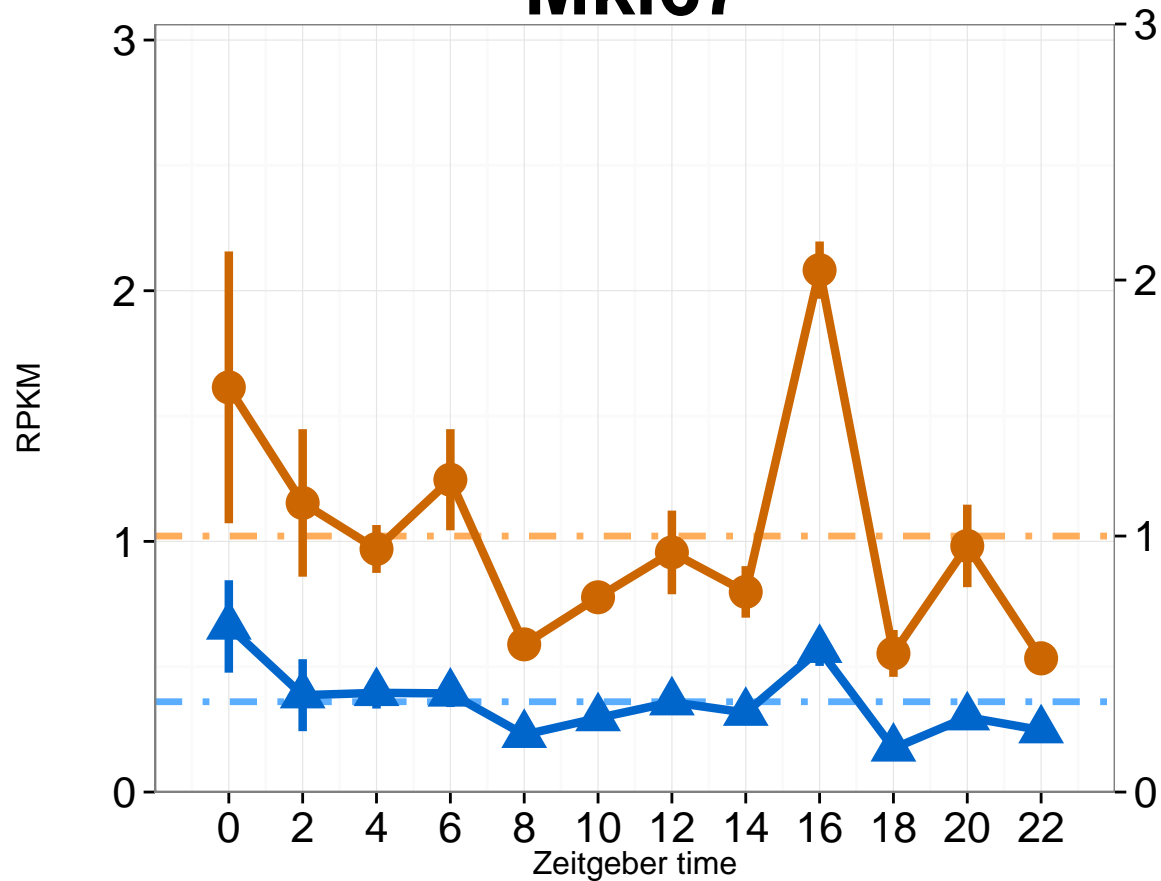

## Mki67

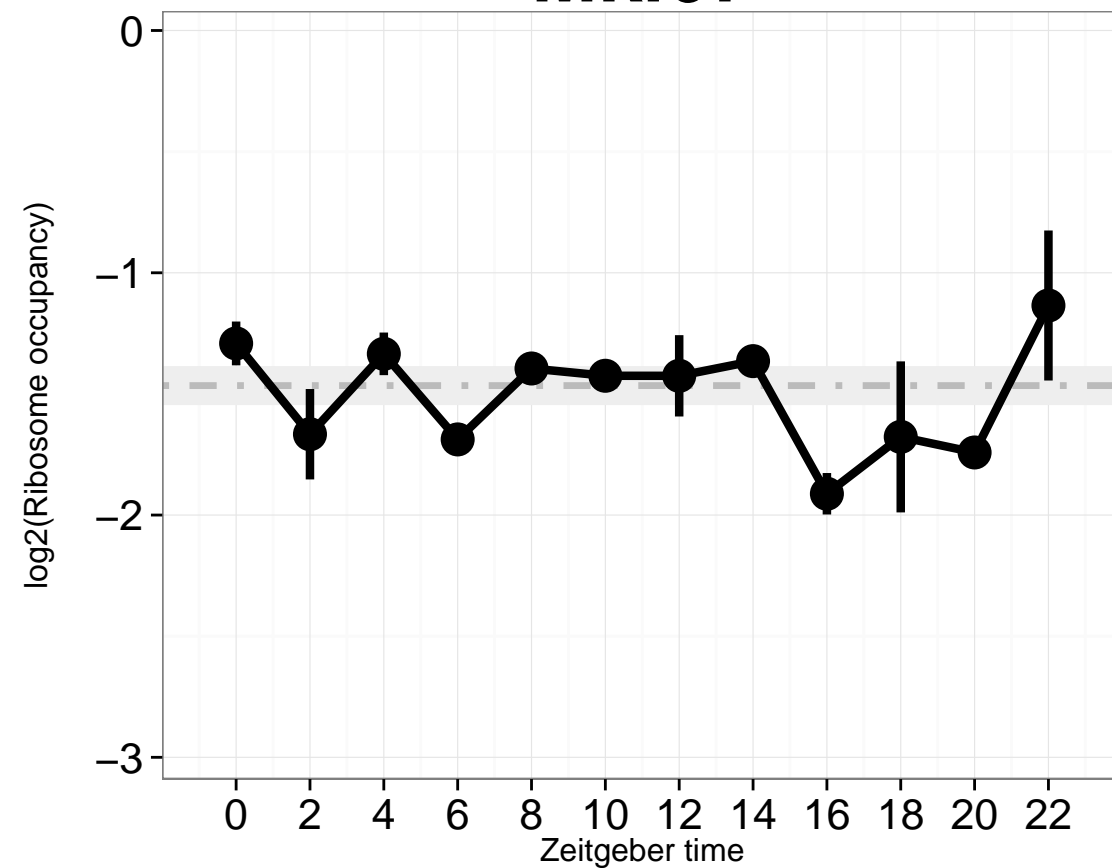

Supplement: SuppDataset_1.zip [file Mki67_set_A.pdf › Supplemental Dataset 1/A-mRNA_nonrhyth_translation_nonrhyth/Mki67_set_A.pdf]

## Mkks

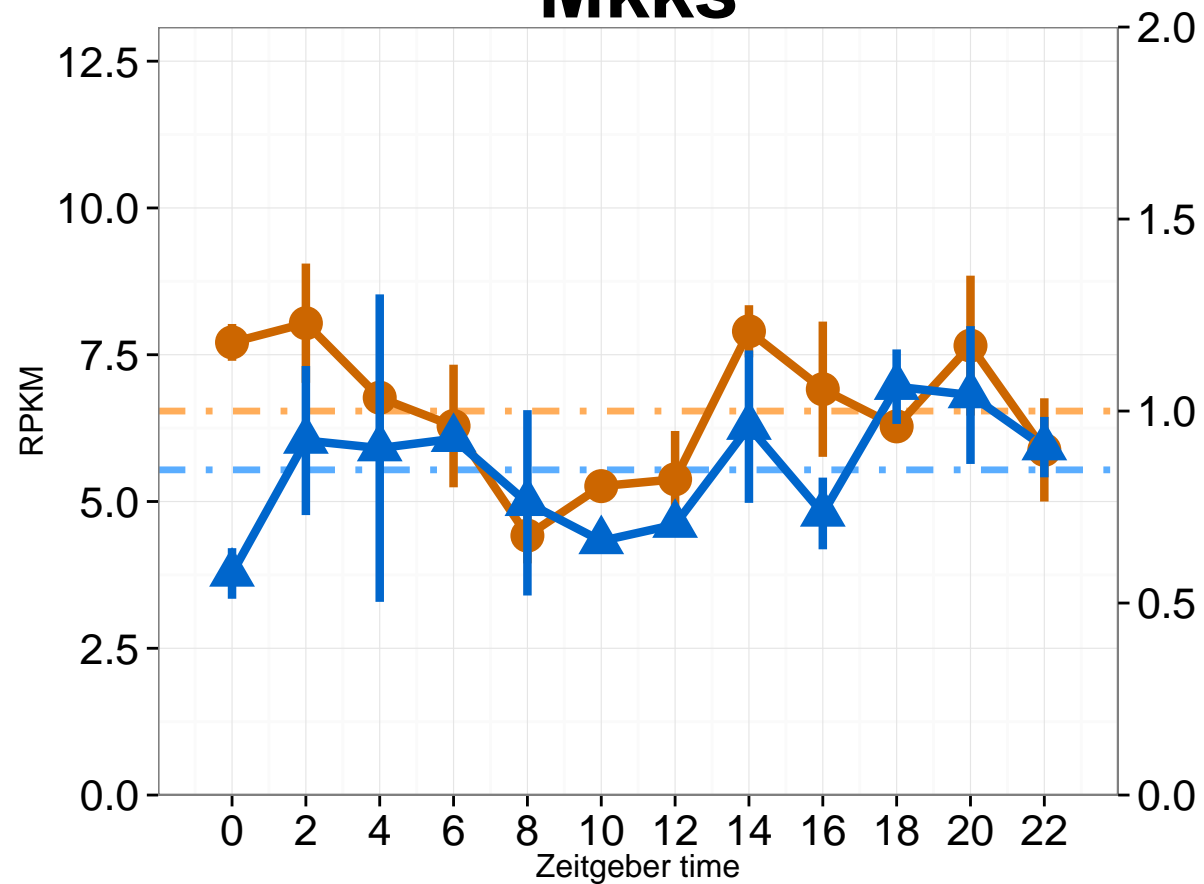

## Mkks

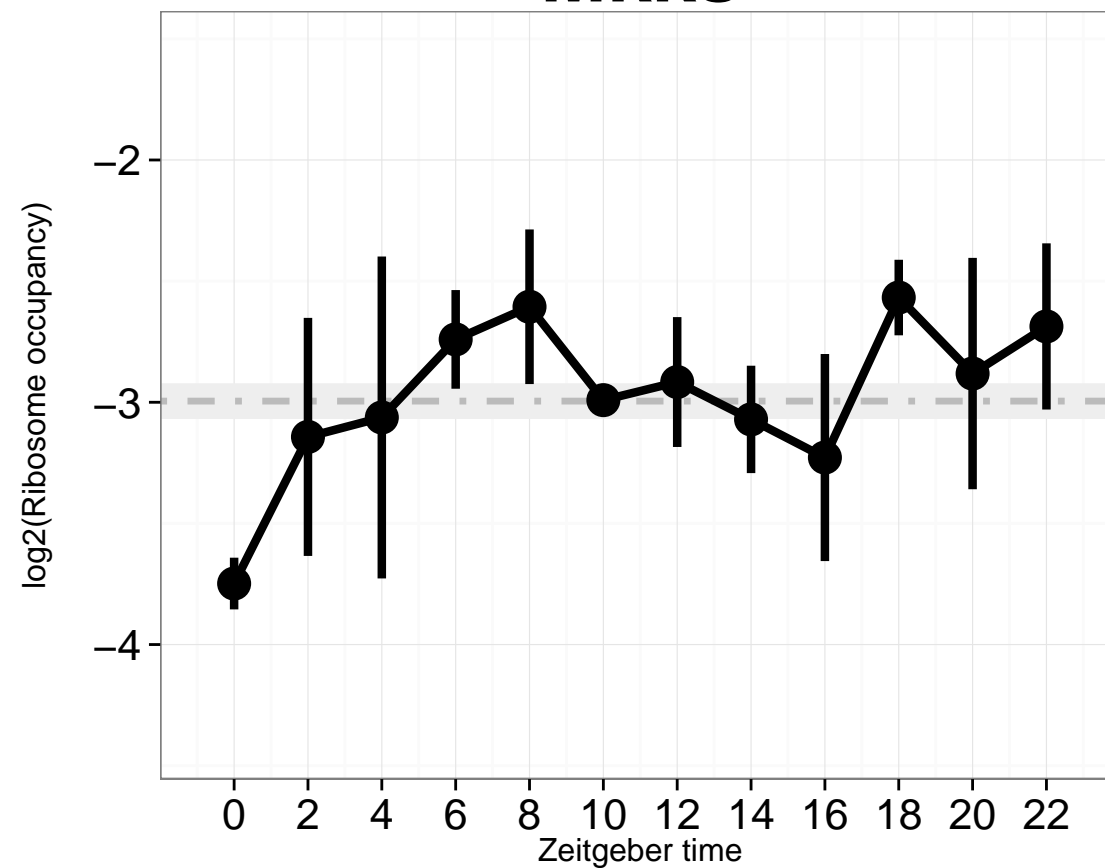

Supplement: SuppDataset_1.zip [file Mkks_set_A.pdf › Supplemental Dataset 1/A-mRNA_nonrhyth_translation_nonrhyth/Mkks_set_A.pdf]

## Mkl1

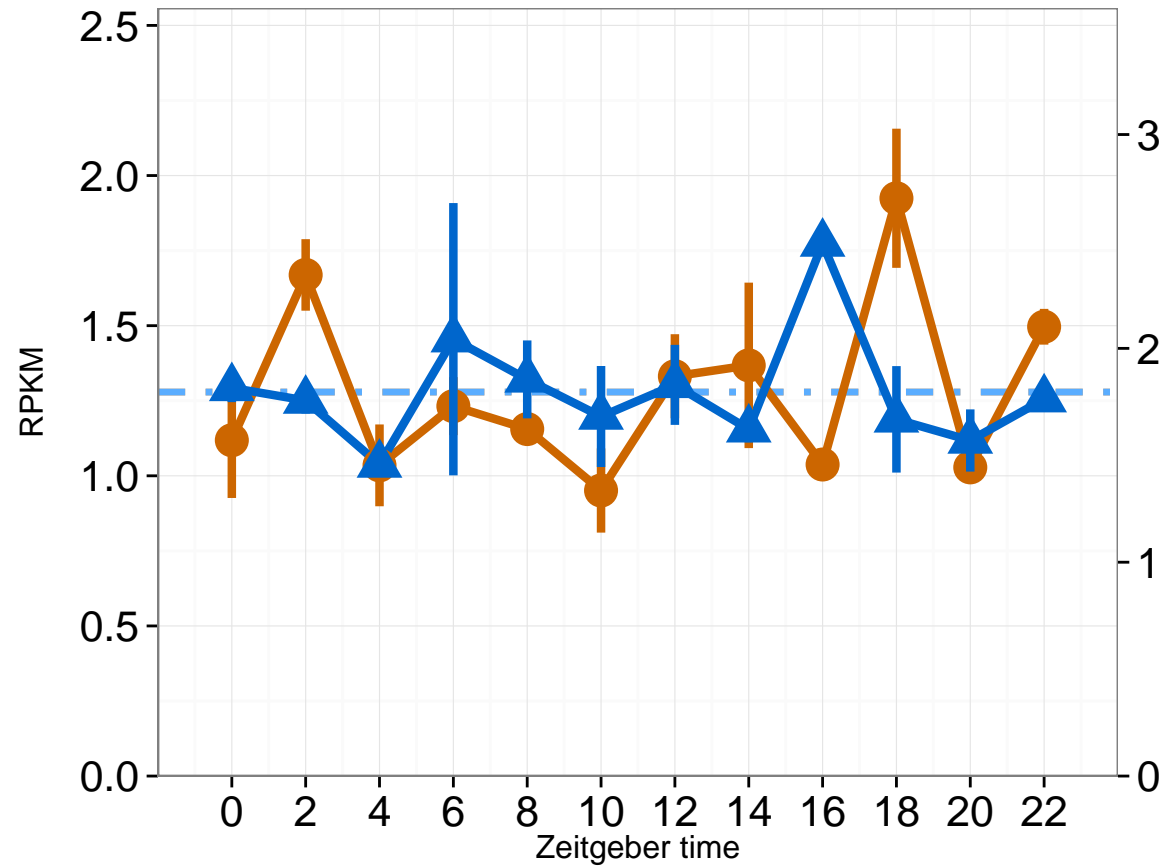

## Mkl1

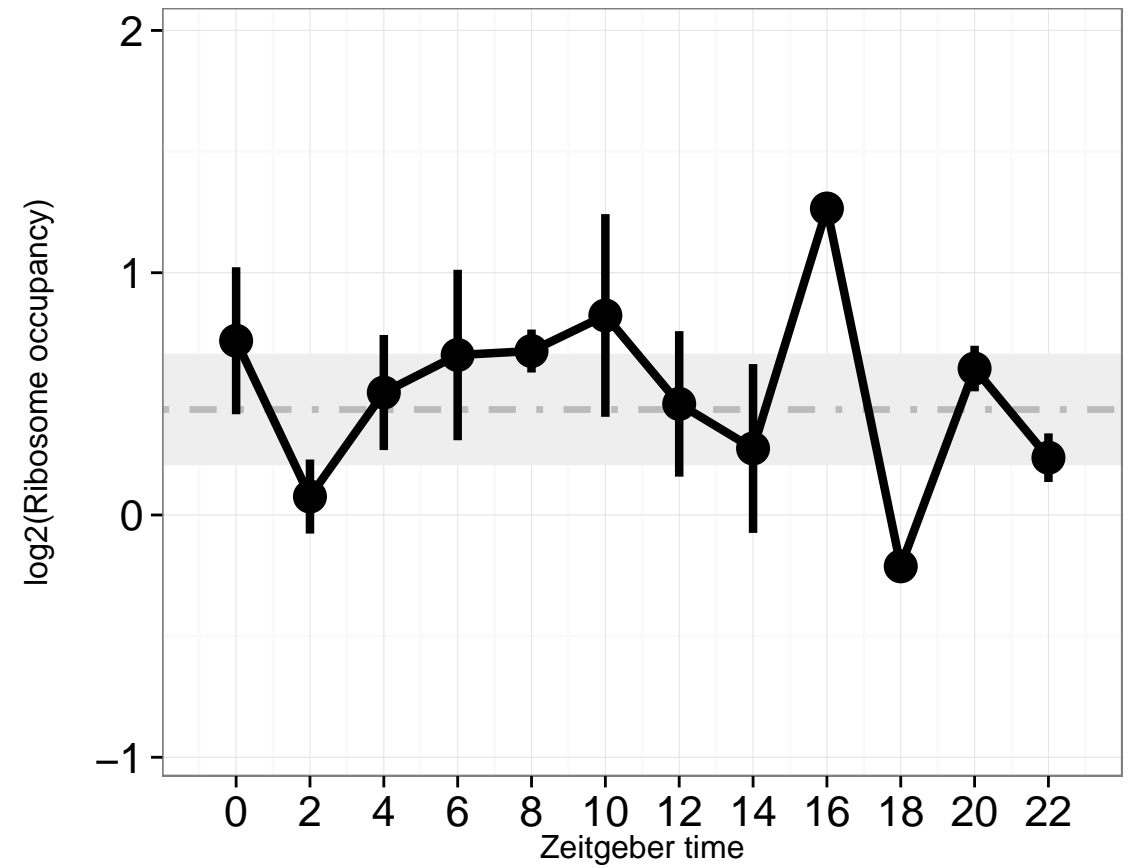

Supplement: SuppDataset_1.zip [file Mkl1_set_A.pdf › Supplemental Dataset 1/A-mRNA_nonrhyth_translation_nonrhyth/Mkl1_set_A.pdf]

# Mkln1

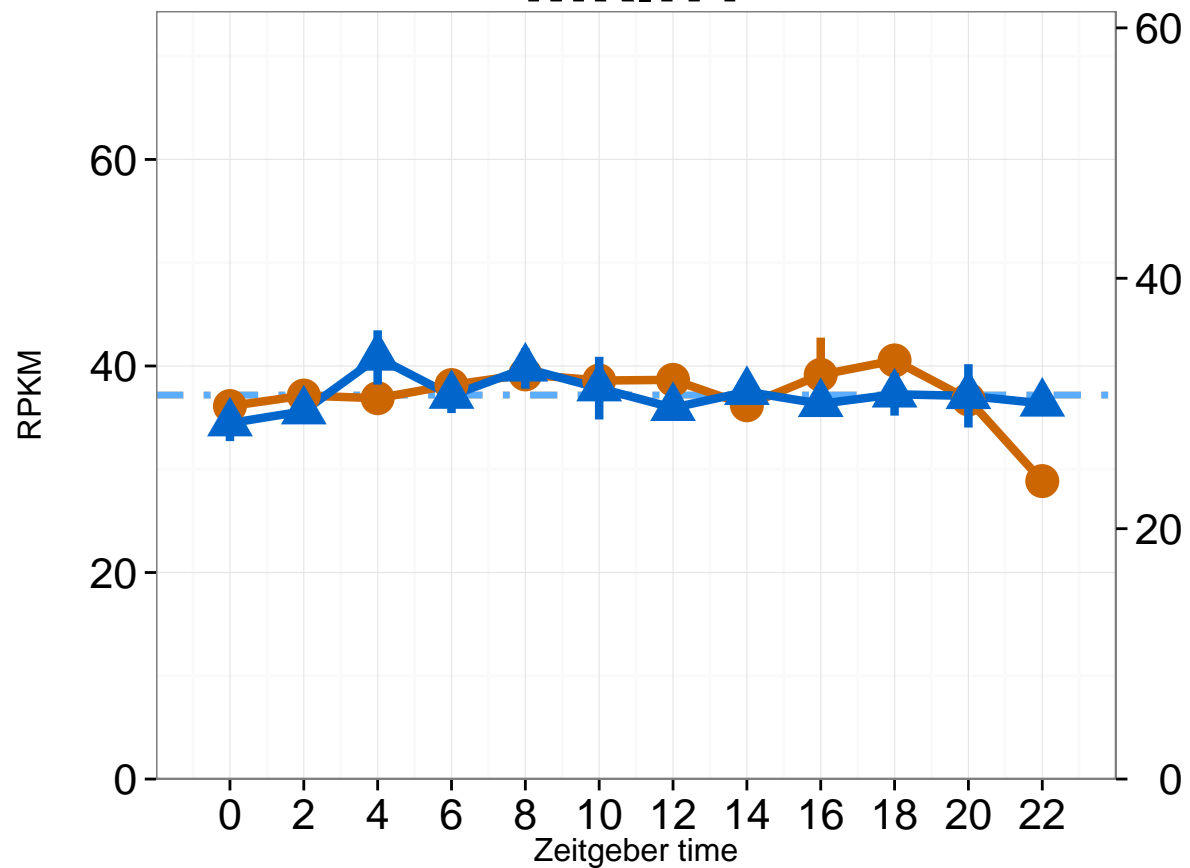

# Mkln1

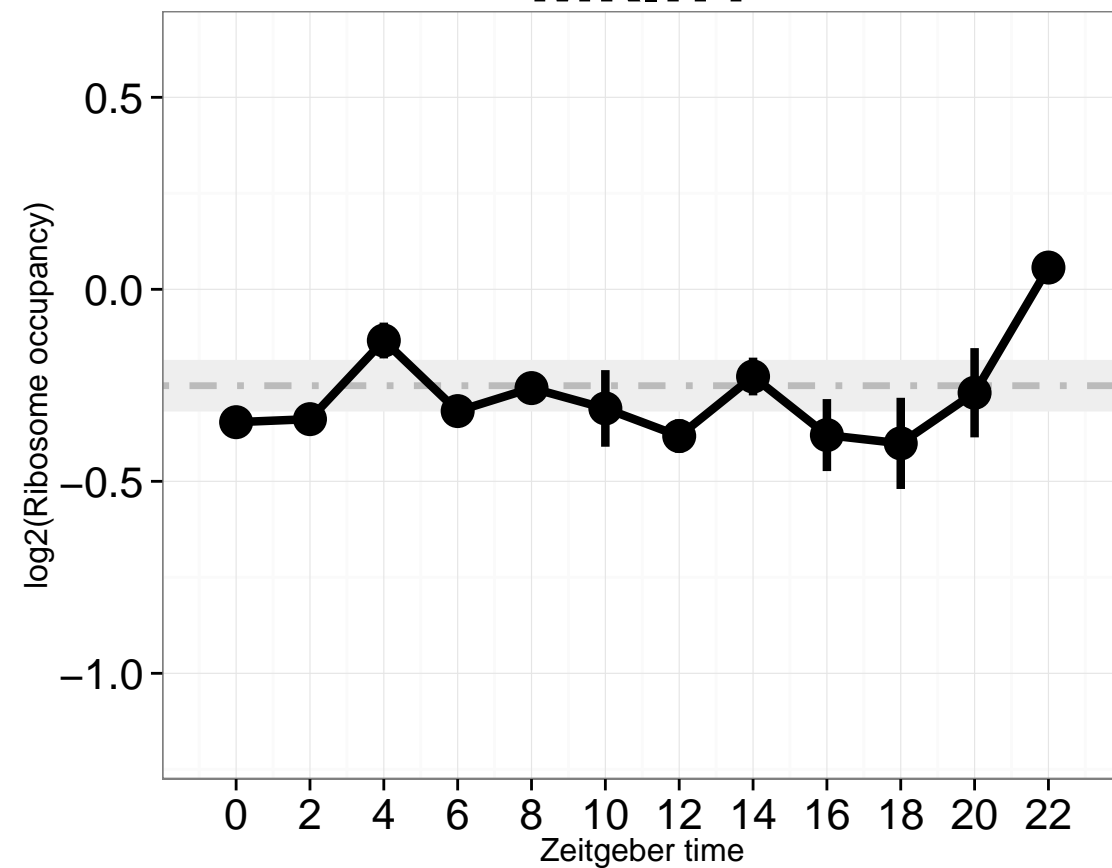

Supplement: SuppDataset_1.zip [file Mkln1_set_A.pdf › Supplemental Dataset 1/A-mRNA_nonrhyth_translation_nonrhyth/Mkln1_set_A.pdf]

## Mknk1

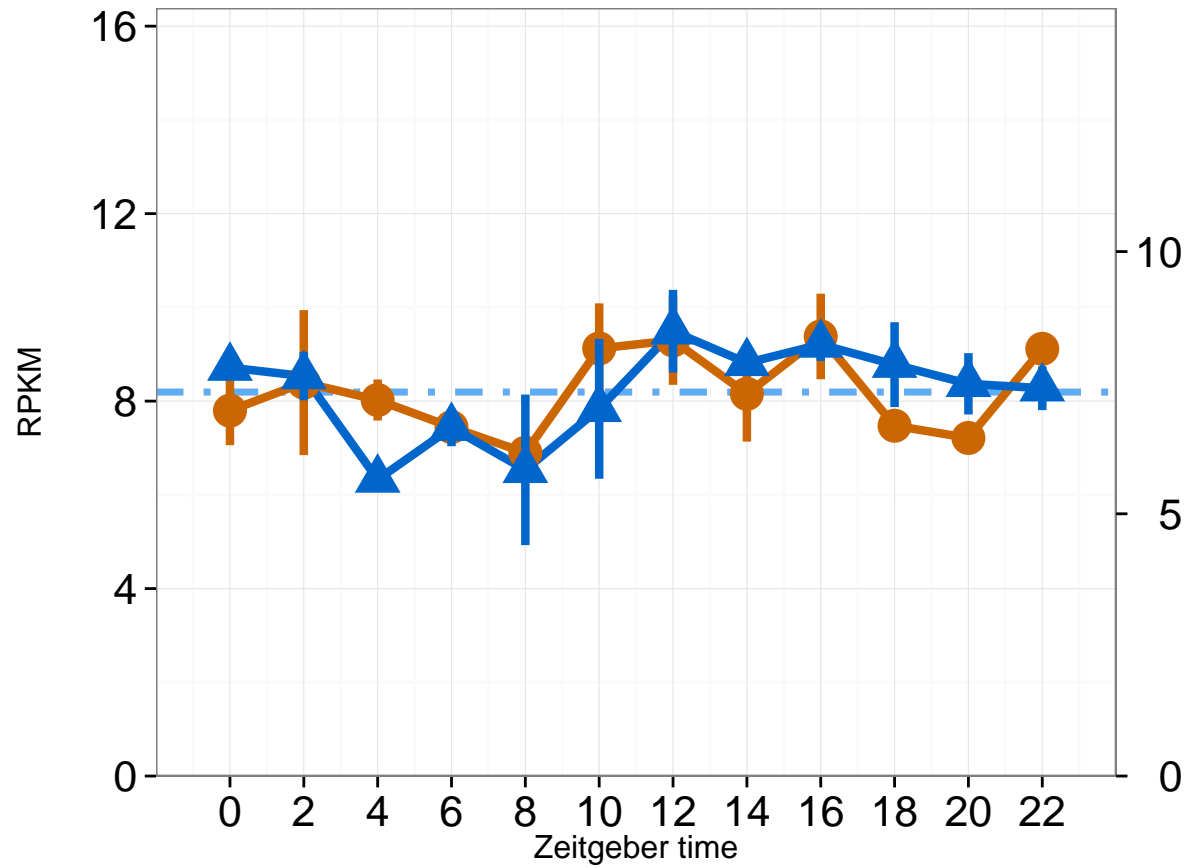

## Mknk1

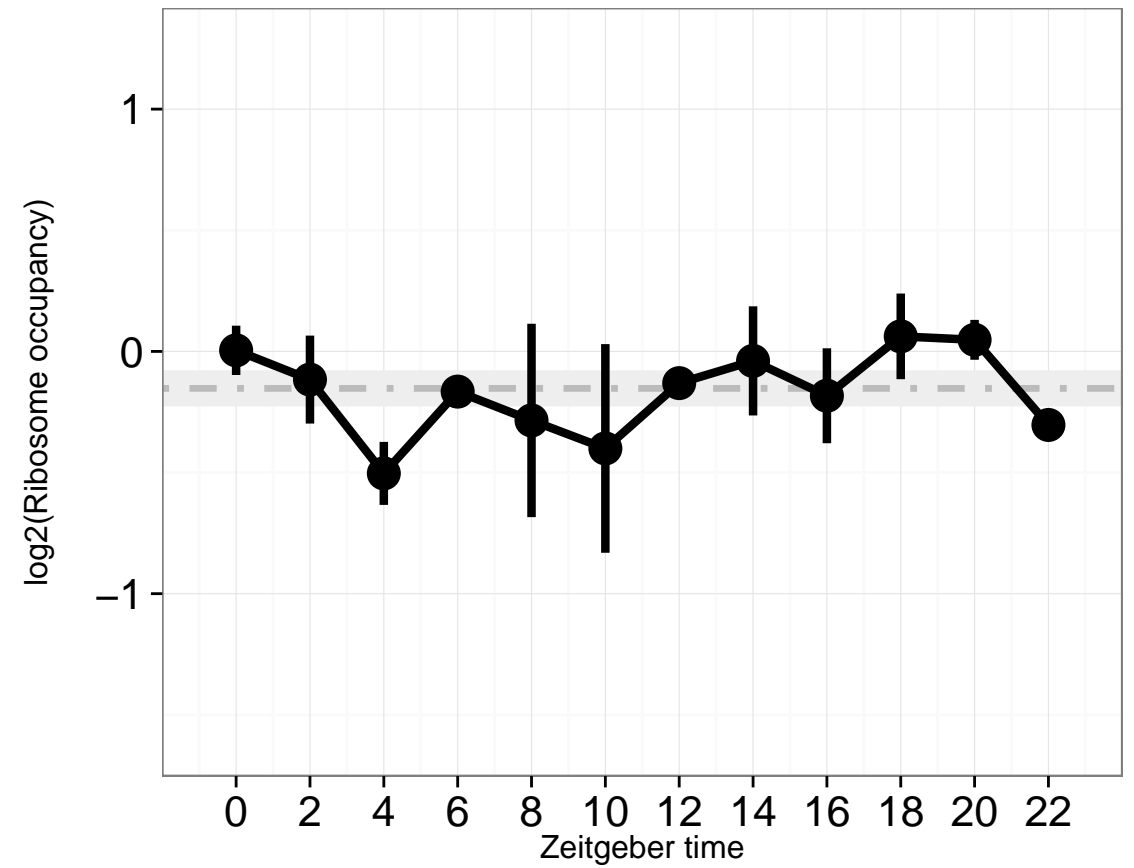

Supplement: SuppDataset_1.zip [file Mknk1_set_A.pdf › Supplemental Dataset 1/A-mRNA_nonrhyth_translation_nonrhyth/Mknk1_set_A.pdf]

# Mkrn1

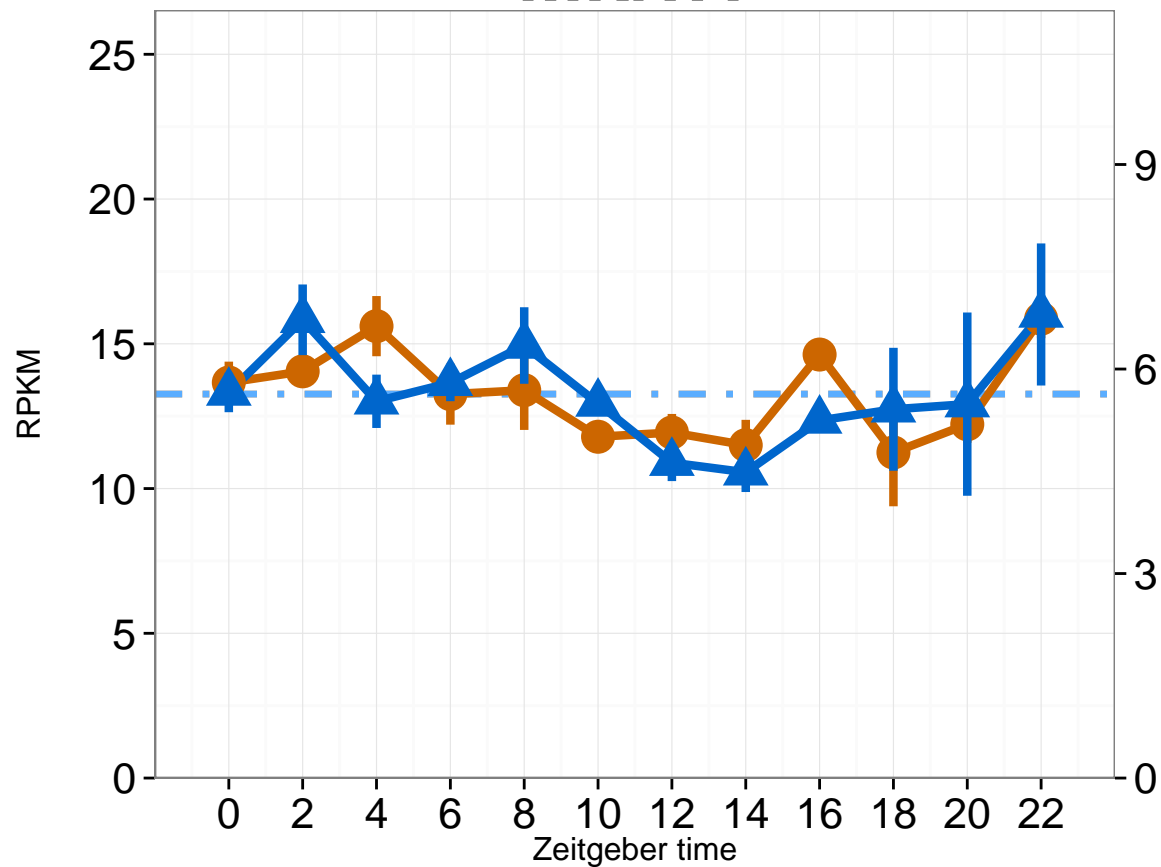

# Mkrn1

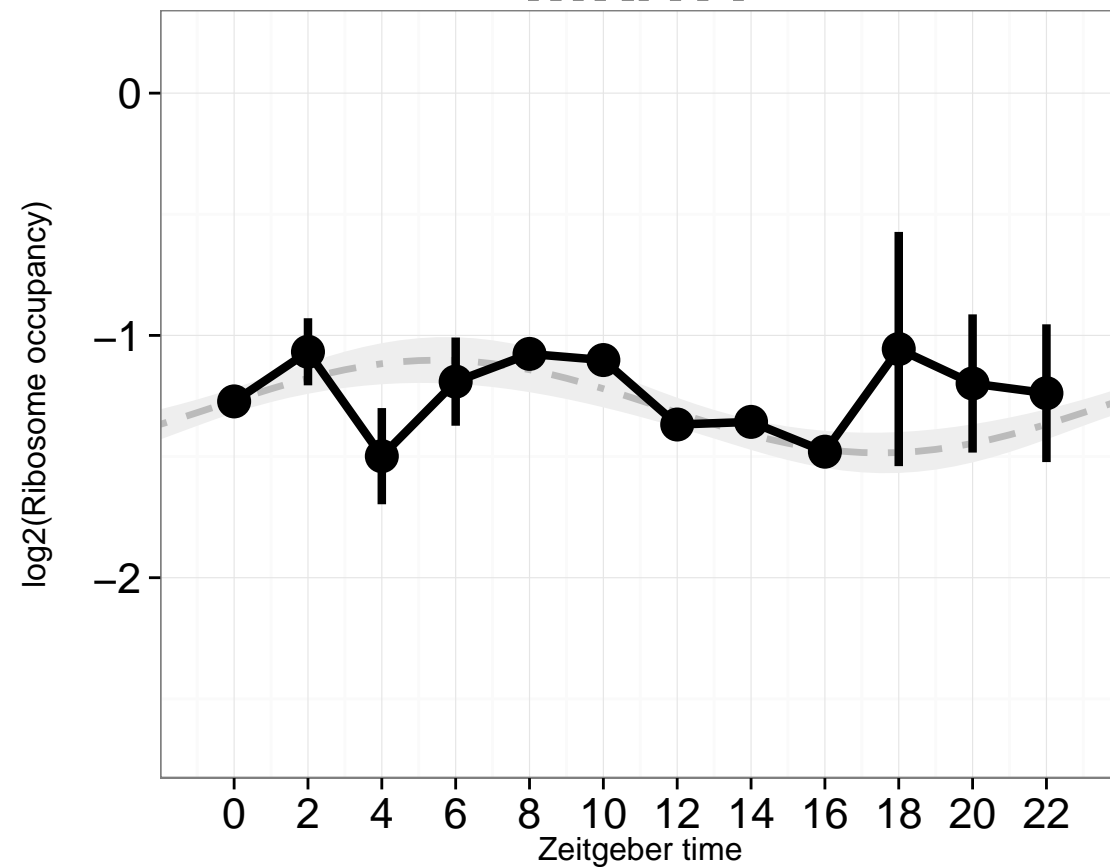

Supplement: SuppDataset_1.zip [file Mkrn1_set_A.pdf › Supplemental Dataset 1/A-mRNA_nonrhyth_translation_nonrhyth/Mkrn1_set_A.pdf]

## Mkrn2

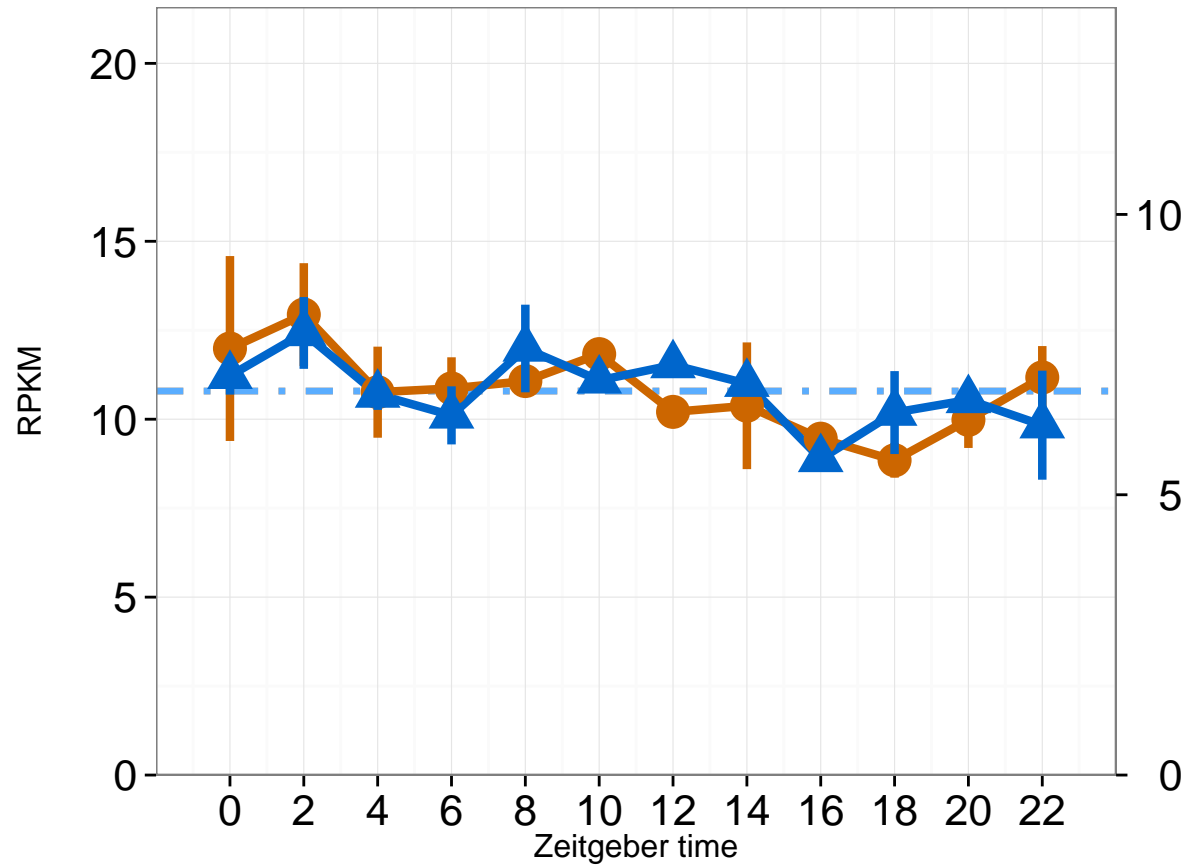

## Mkrn2

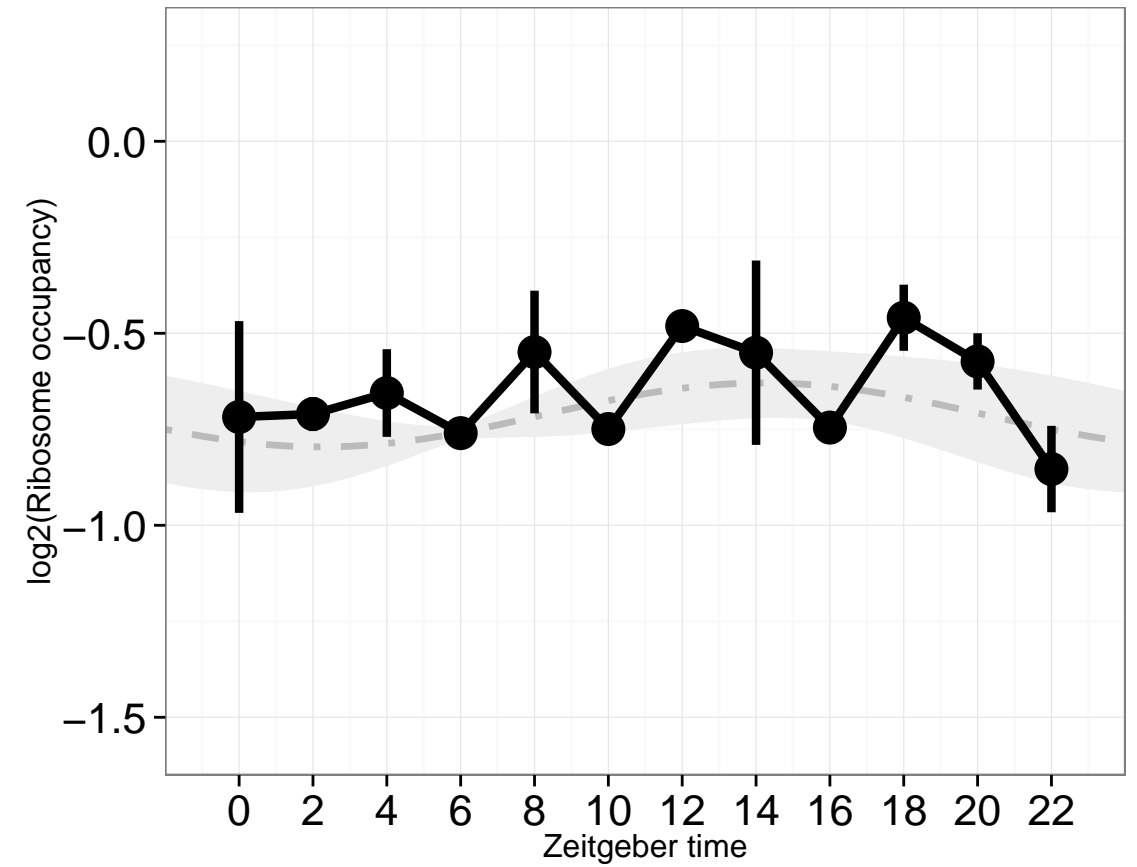

Supplement: SuppDataset_1.zip [file Mkrn2_set_A.pdf › Supplemental Dataset 1/A-mRNA_nonrhyth_translation_nonrhyth/Mkrn2_set_A.pdf]

## Mlec

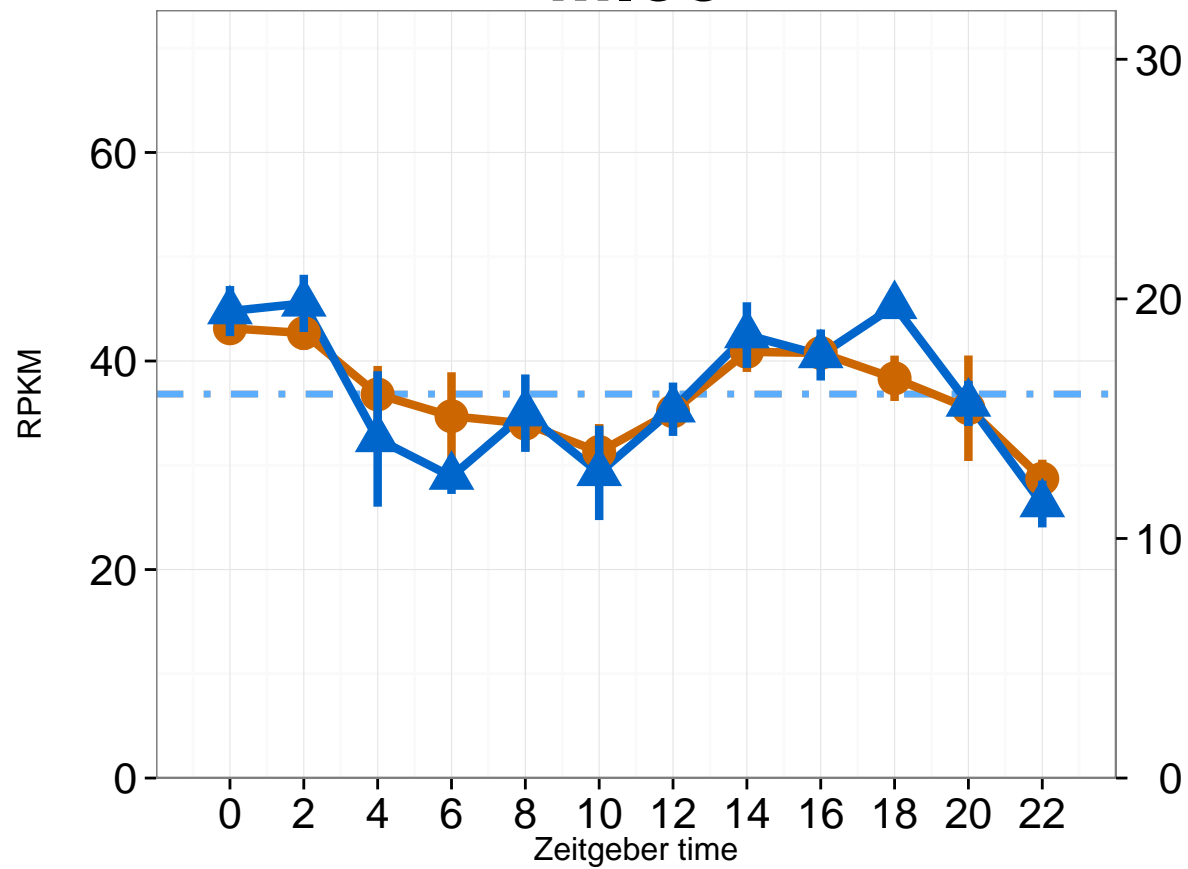

## Mlec

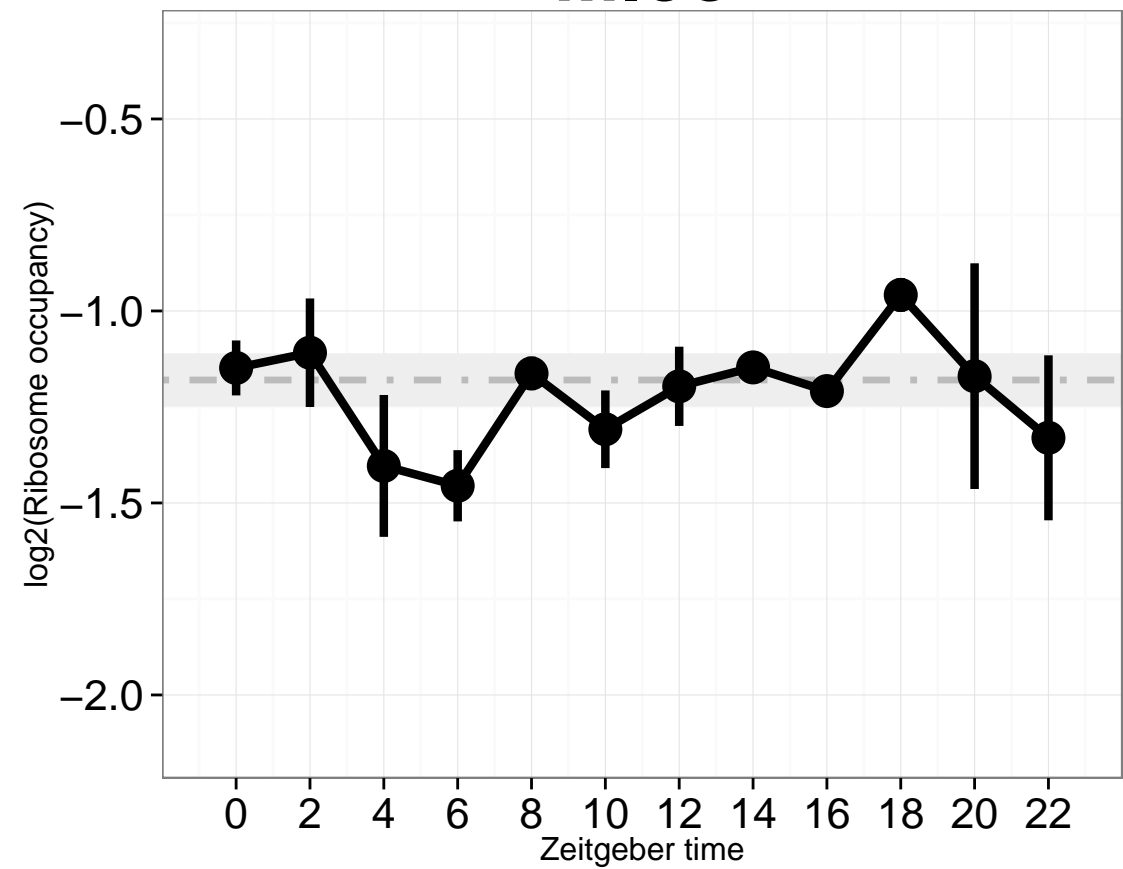

Supplement: SuppDataset_1.zip [file Mlec_set_A.pdf › Supplemental Dataset 1/A-mRNA_nonrhyth_translation_nonrhyth/Mlec_set_A.pdf]

## Mlf2

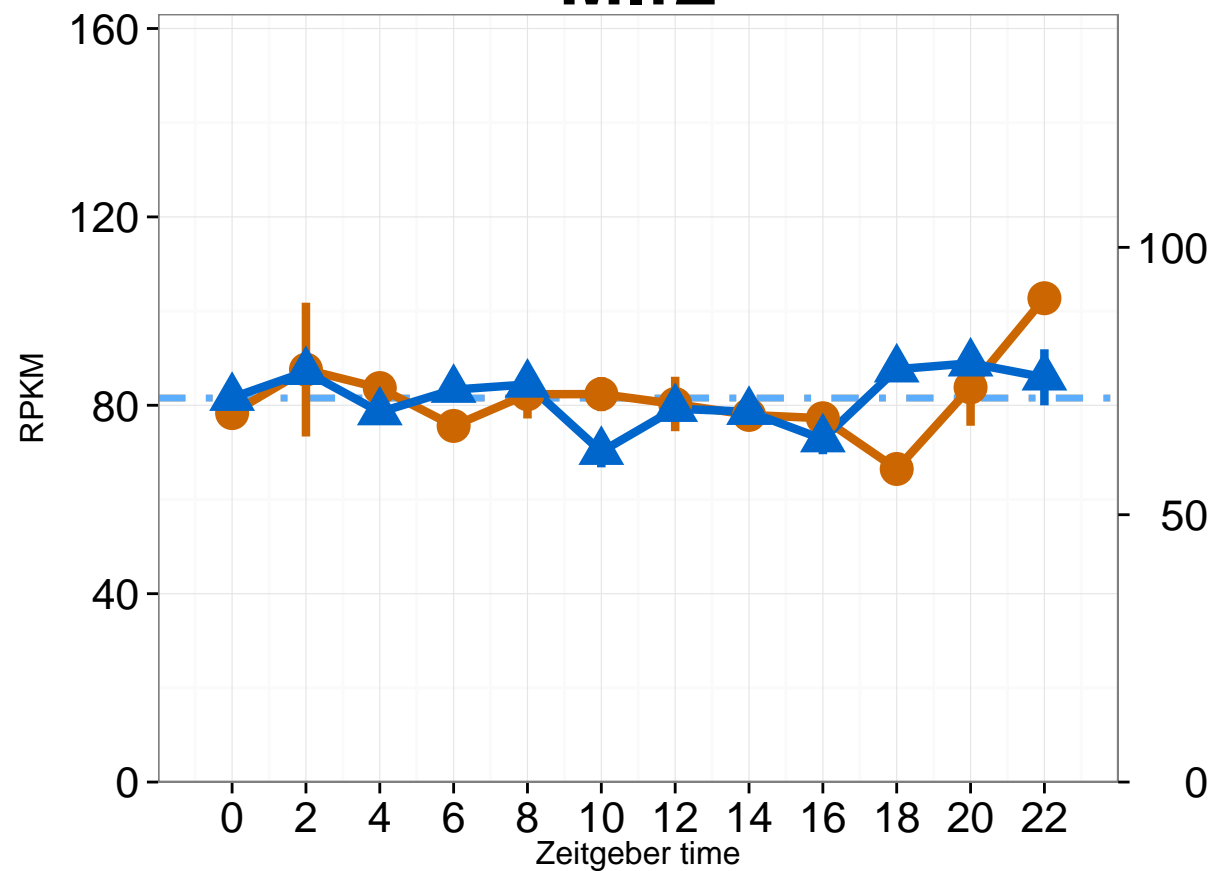

## Mlf2

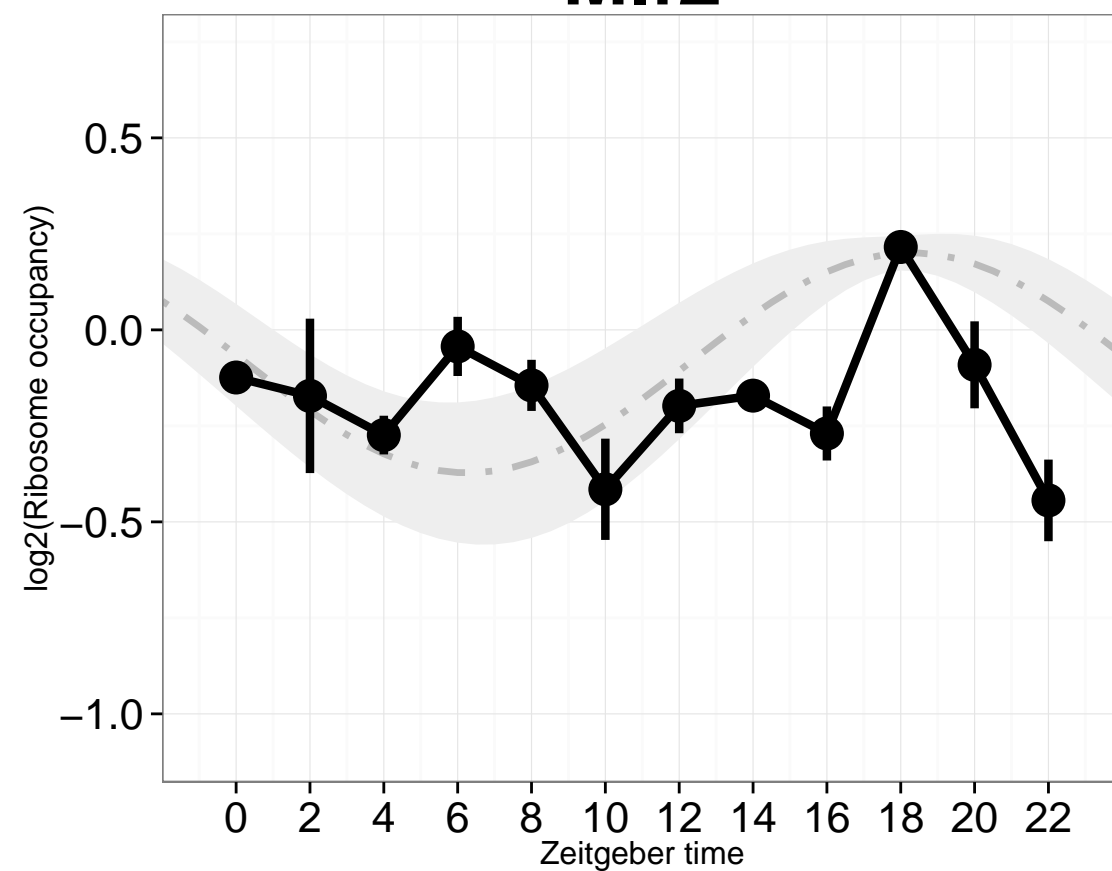

Supplement: SuppDataset_1.zip [file Mlf2_set_A.pdf › Supplemental Dataset 1/A-mRNA_nonrhyth_translation_nonrhyth/Mlf2_set_A.pdf]

## MIh1

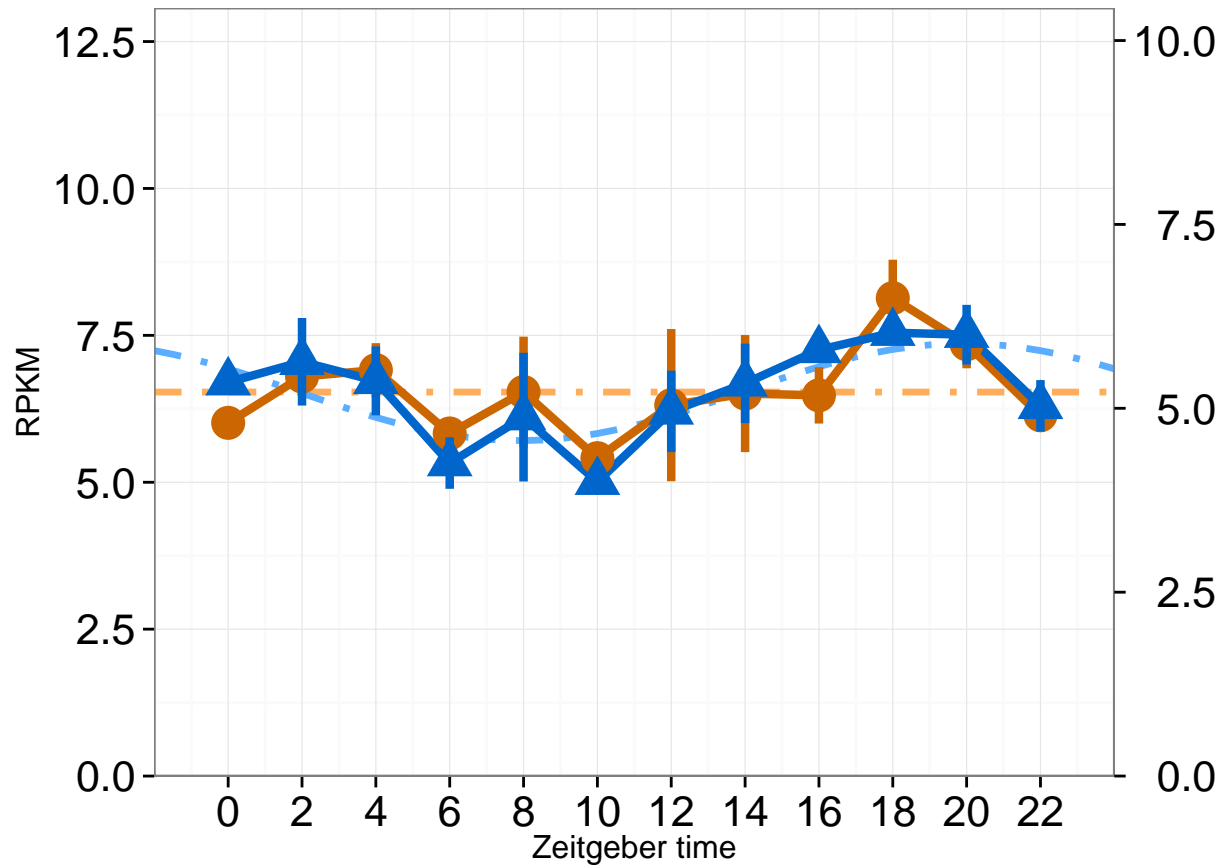

## MIh1

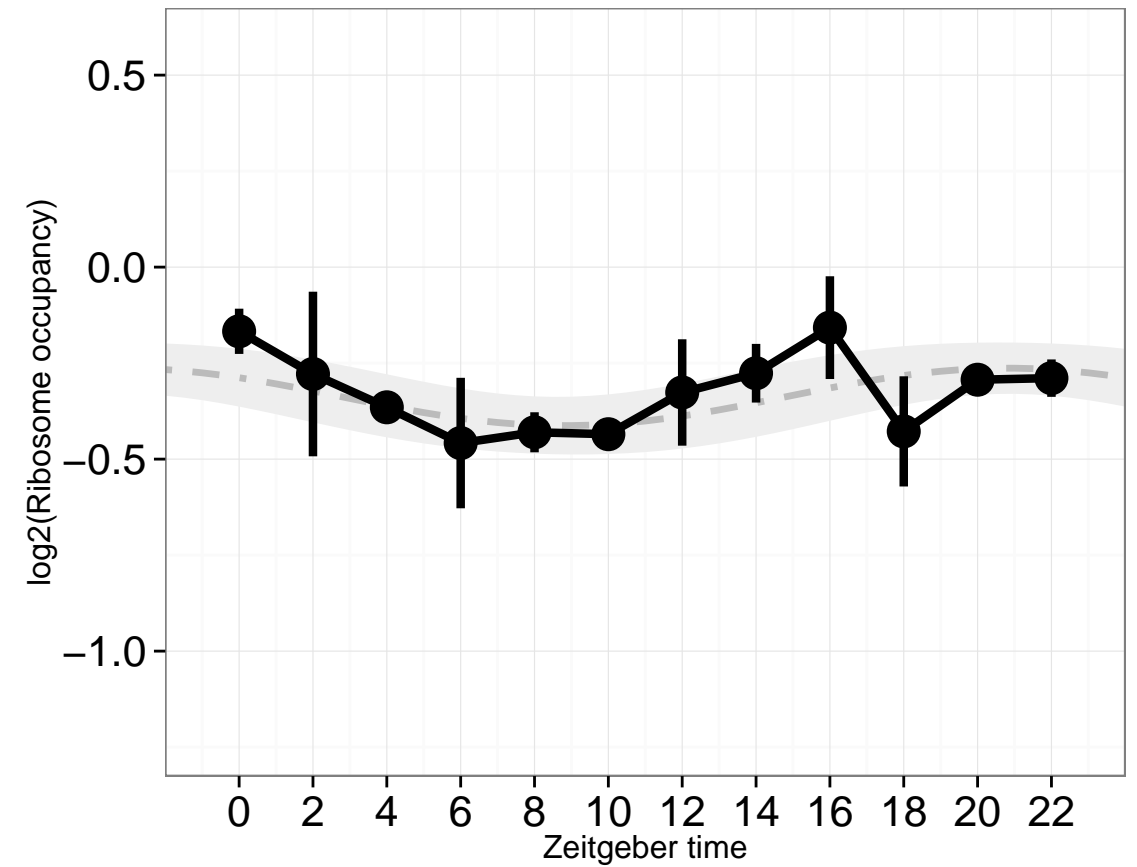

Supplement: SuppDataset_1.zip [file Mlh1_set_A.pdf › Supplemental Dataset 1/A-mRNA_nonrhyth_translation_nonrhyth/Mlh1_set_A.pdf]

## Mlt10

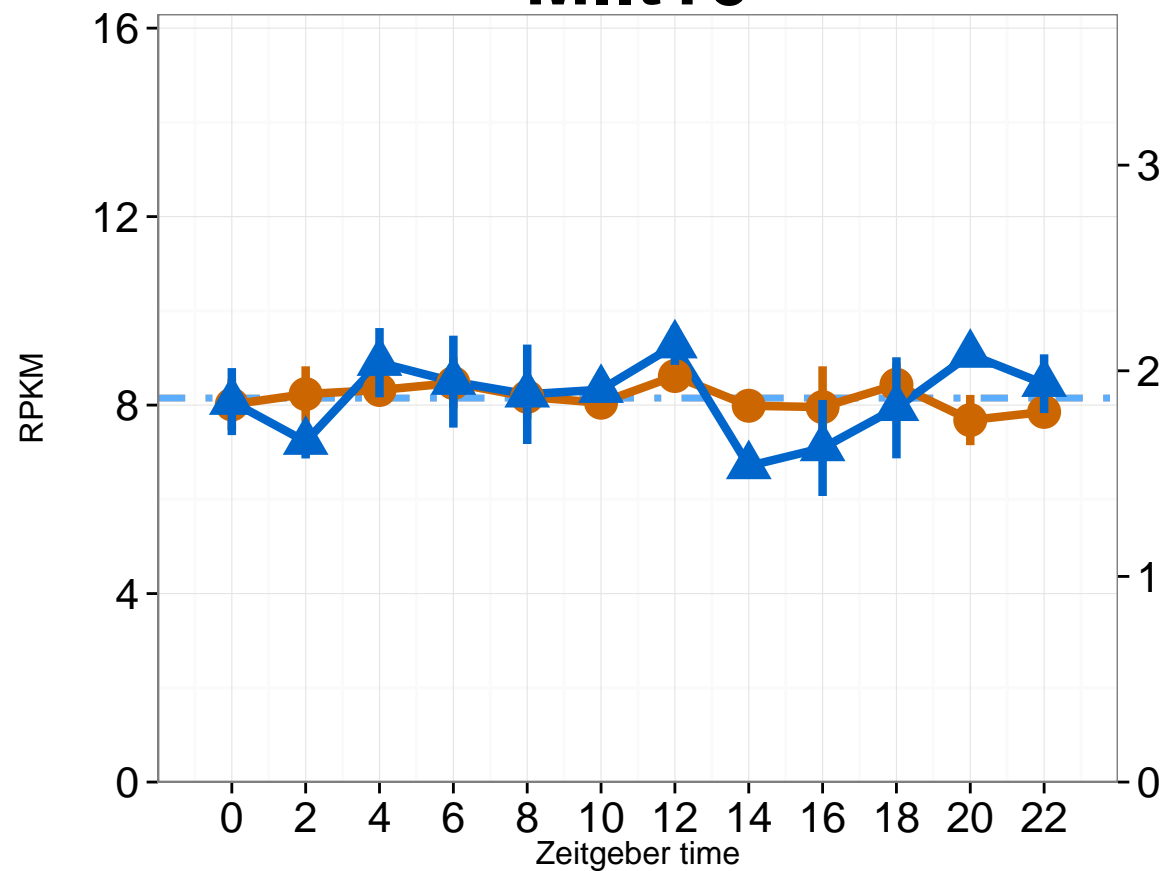

## Mlt10

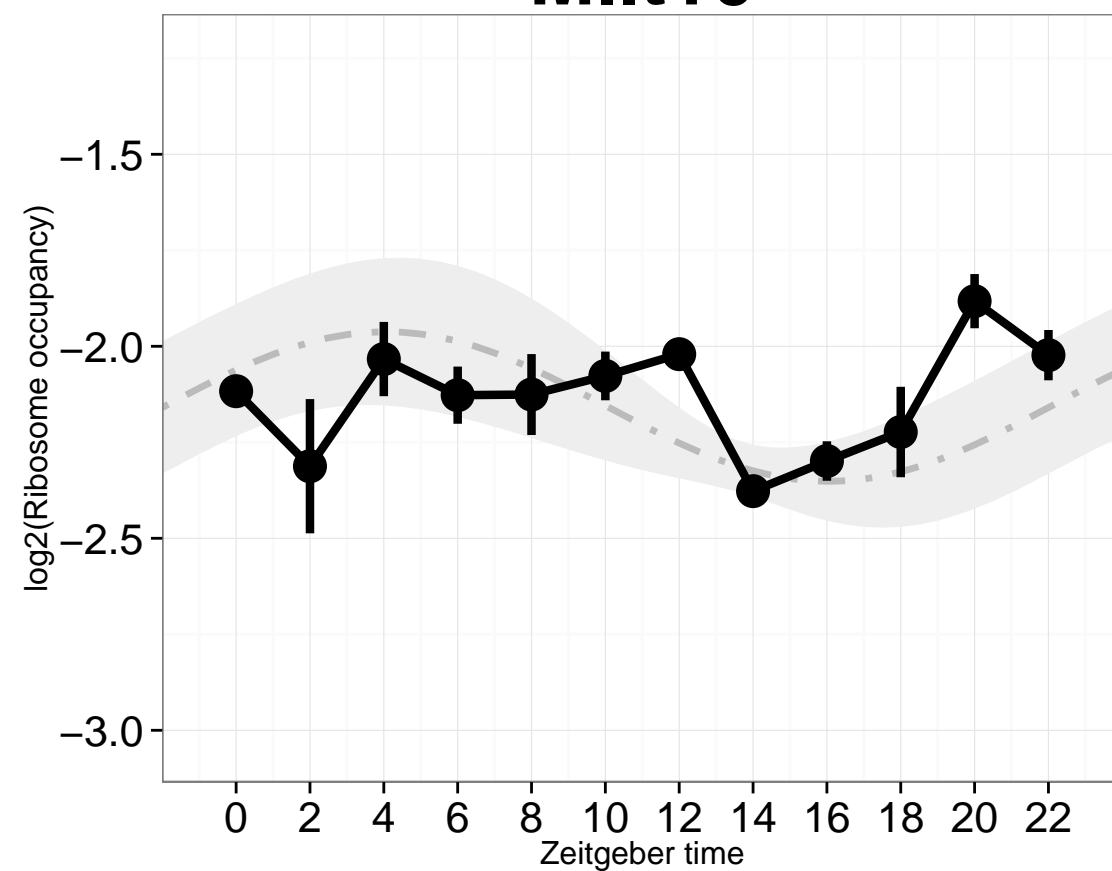

Supplement: SuppDataset_1.zip [file Mllt10_set_A.pdf › Supplemental Dataset 1/A-mRNA_nonrhyth_translation_nonrhyth/Mllt10_set_A.pdf]

## MiIt1

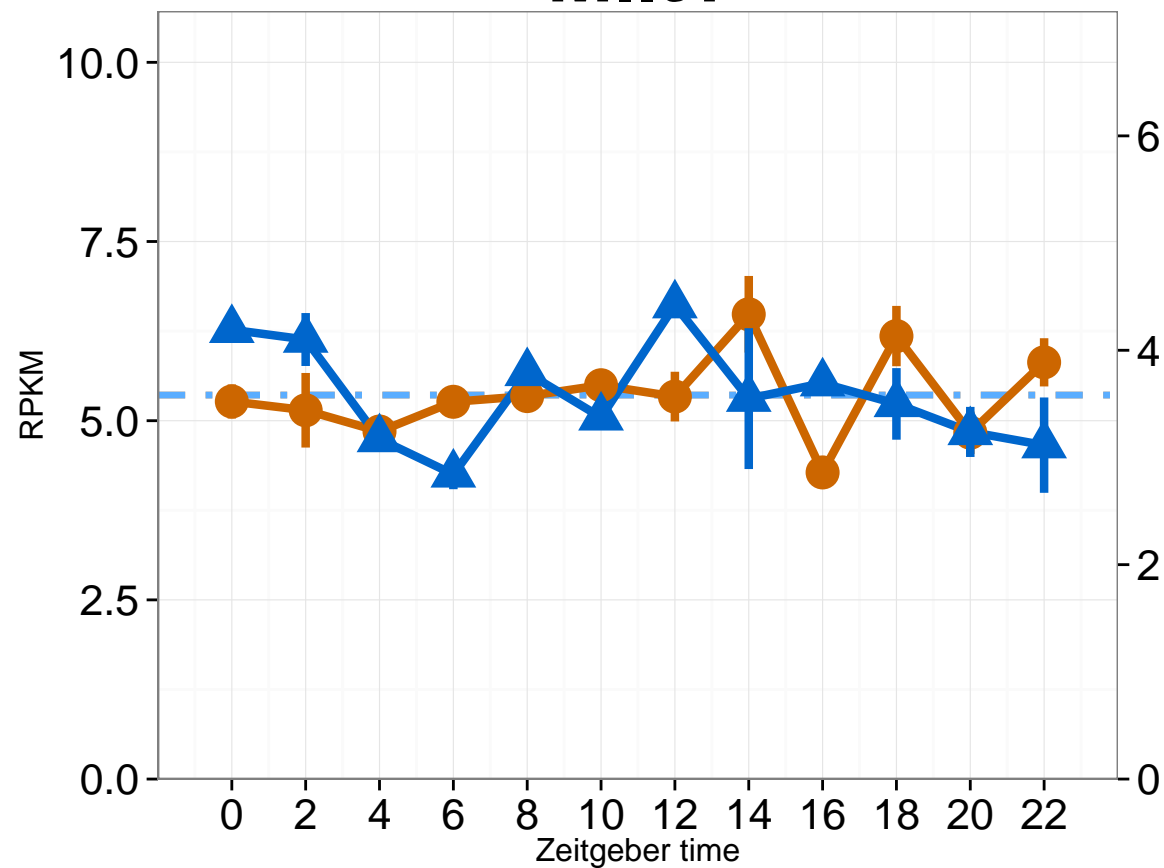

## MiIt1

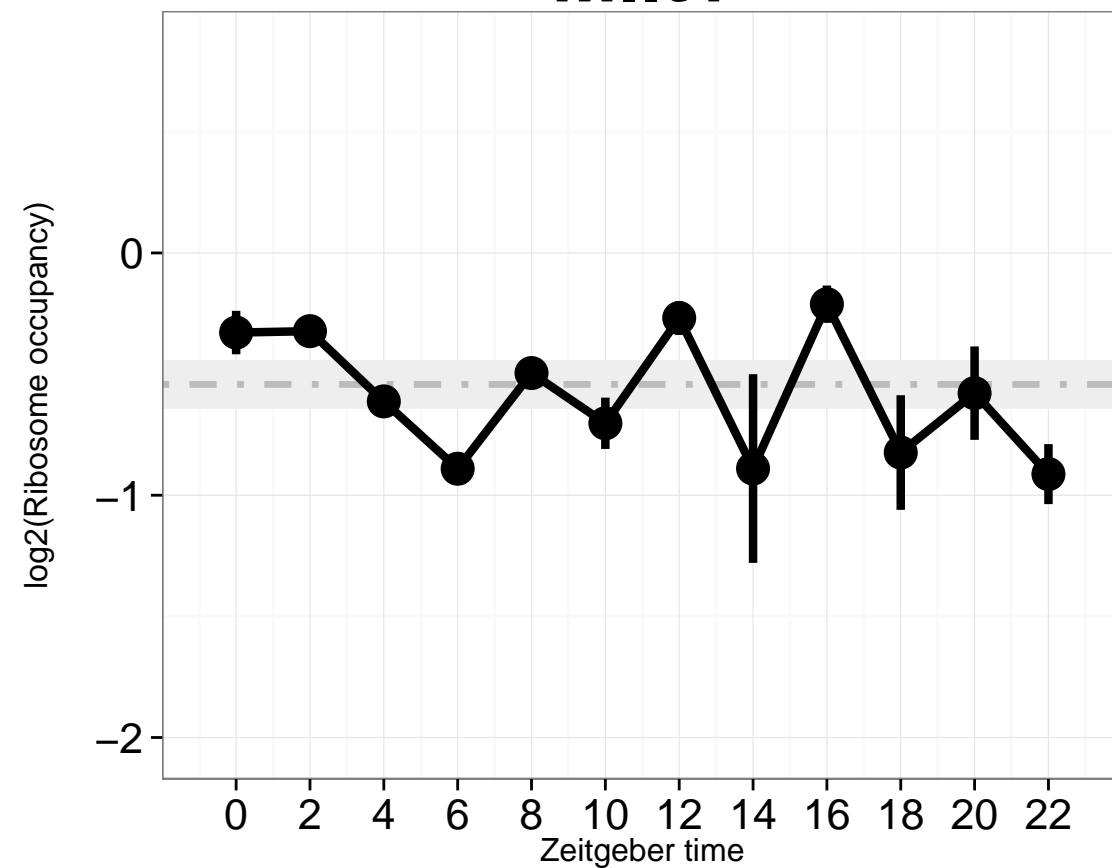

Supplement: SuppDataset_1.zip [file Mllt1_set_A.pdf › Supplemental Dataset 1/A-mRNA_nonrhyth_translation_nonrhyth/Mllt1_set_A.pdf]

## MiIt3

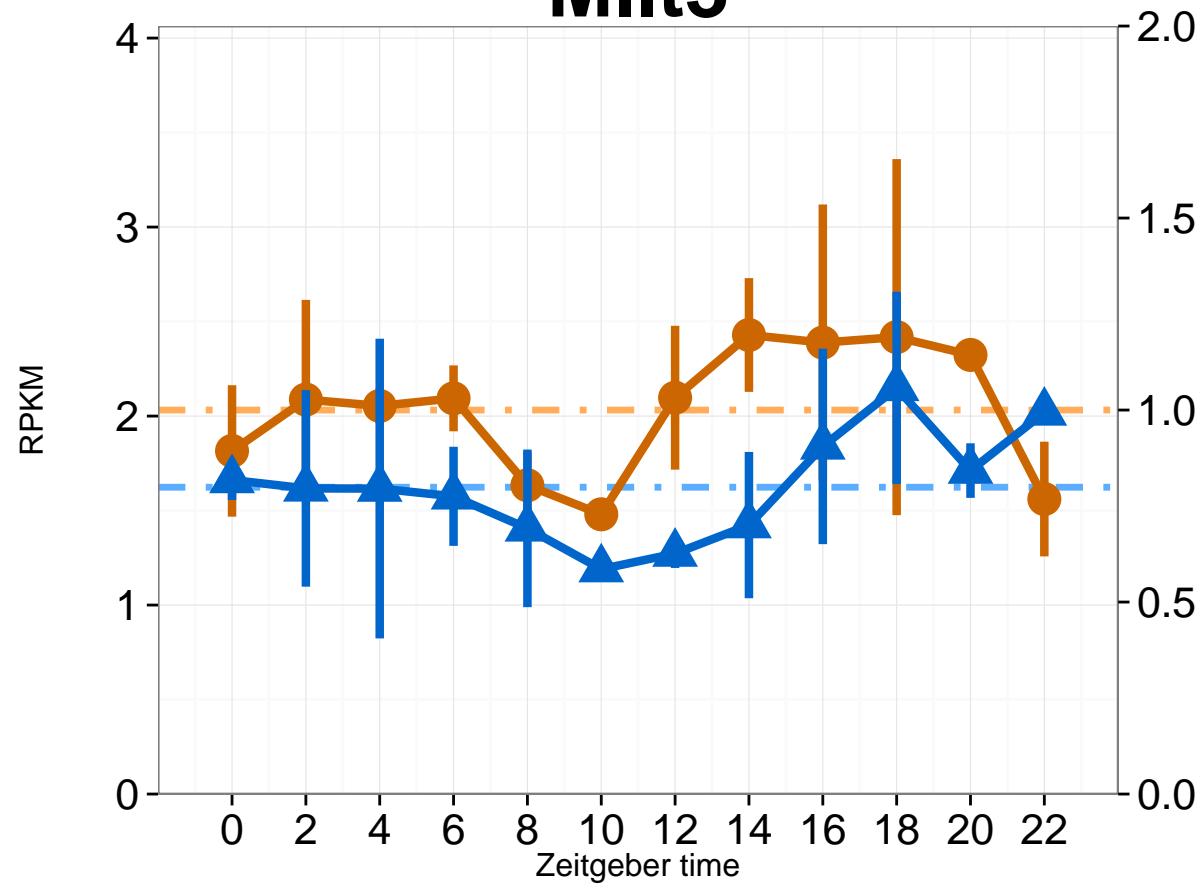

## MiIt3

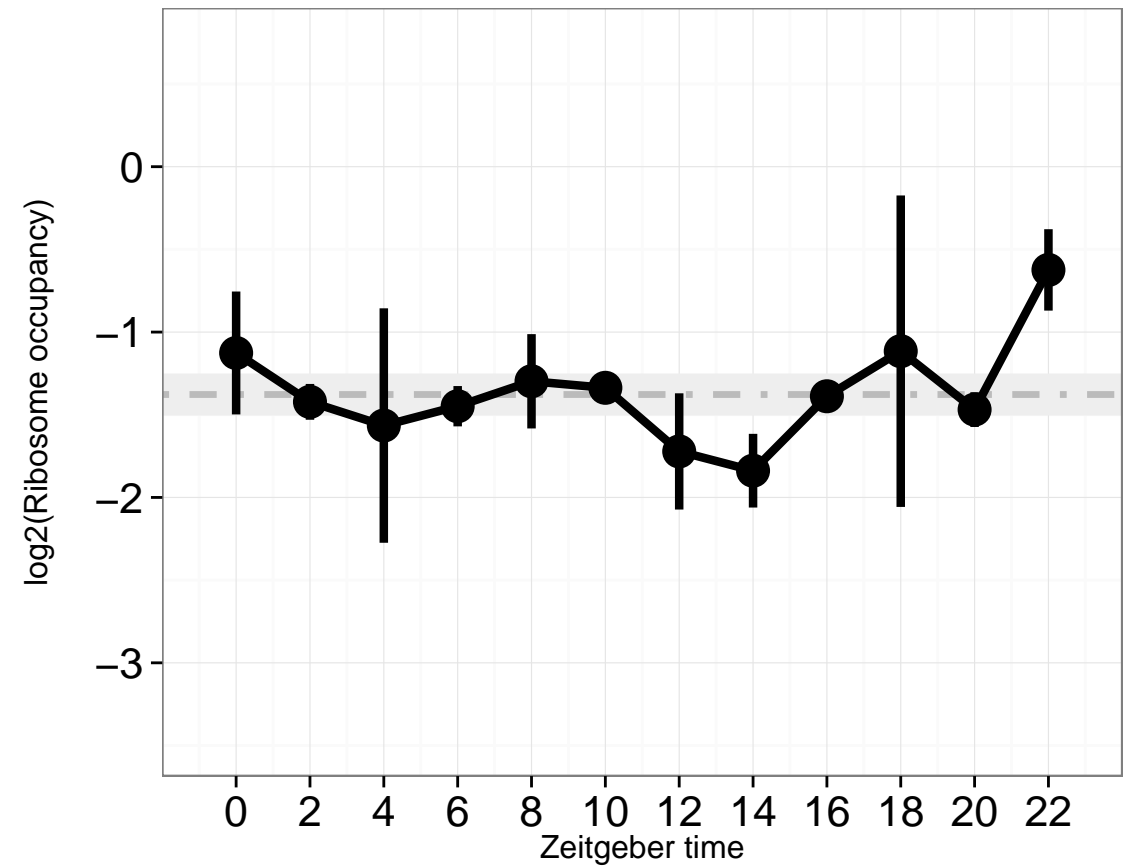

Supplement: SuppDataset_1.zip [file Mllt3_set_A.pdf › Supplemental Dataset 1/A-mRNA_nonrhyth_translation_nonrhyth/Mllt3_set_A.pdf]

## Mlt4

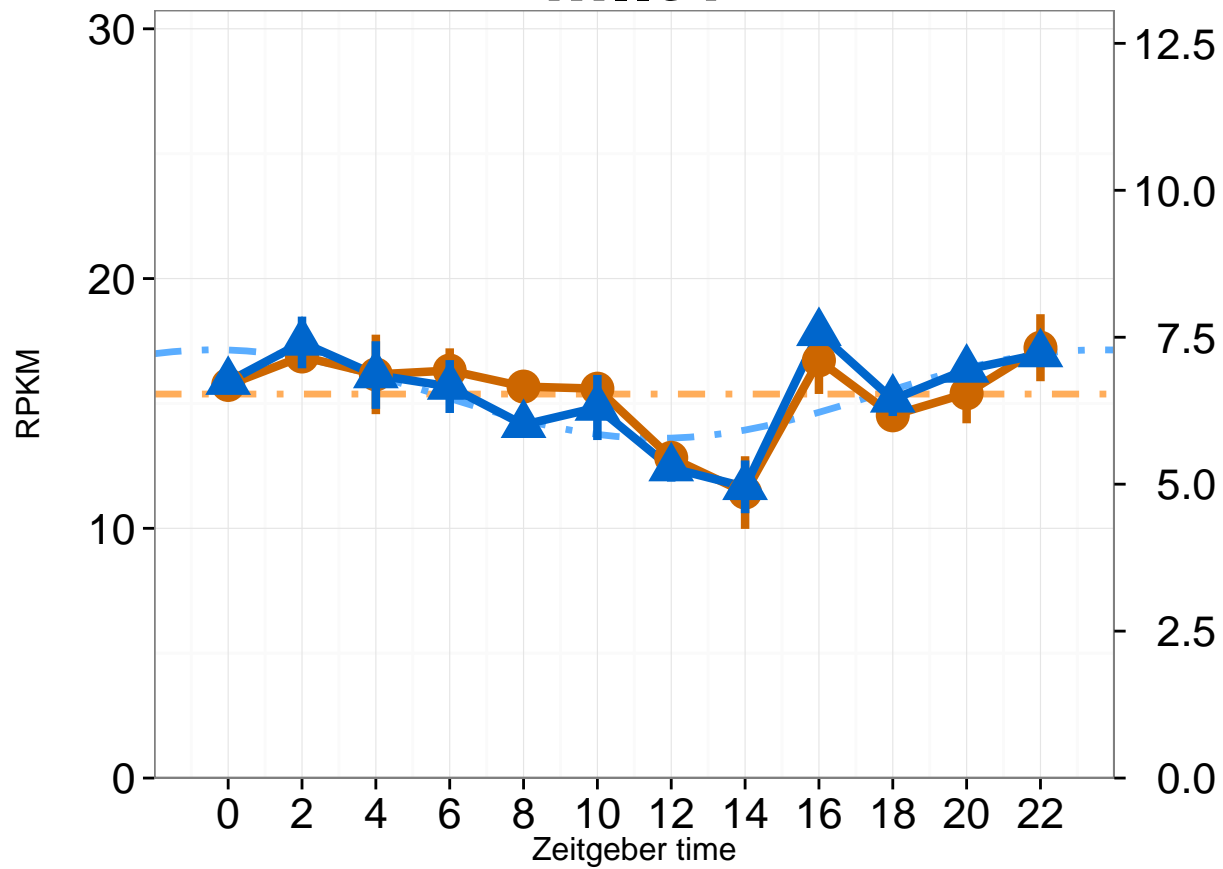

## Mlt4

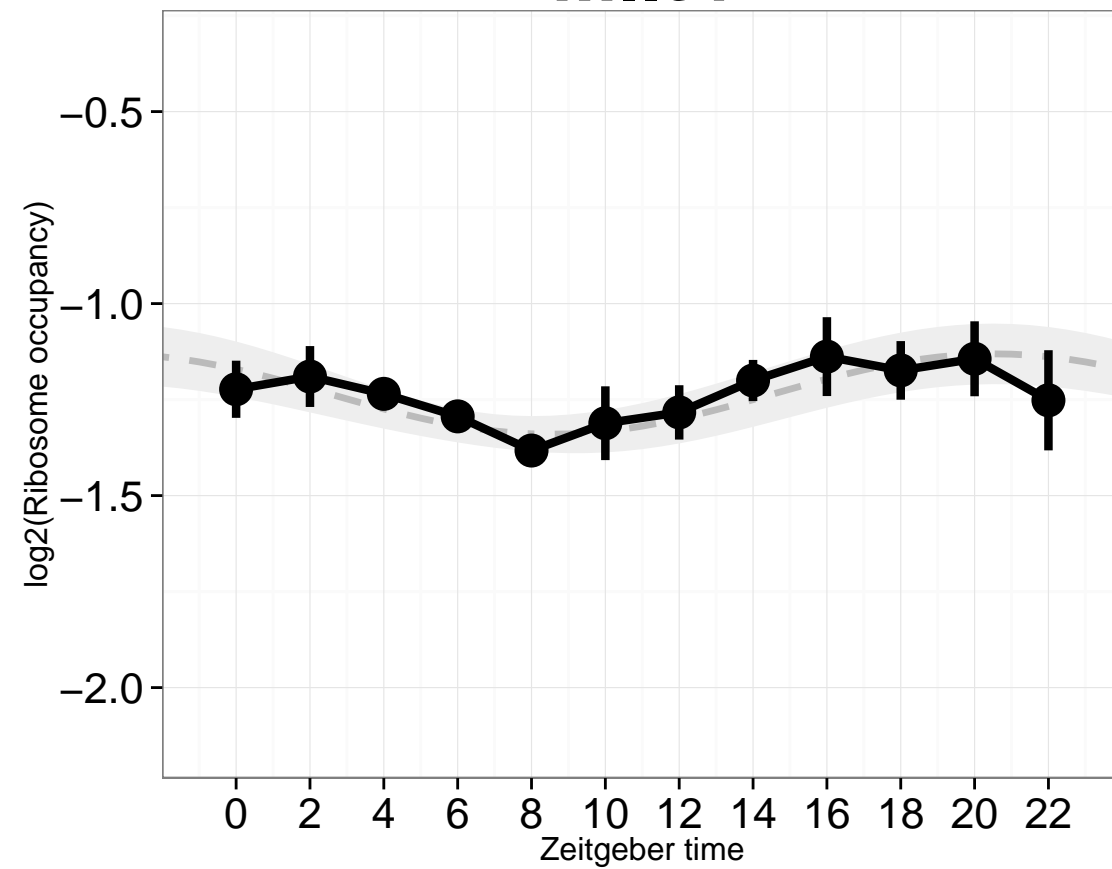

Supplement: SuppDataset_1.zip [file Mllt4_set_A.pdf › Supplemental Dataset 1/A-mRNA_nonrhyth_translation_nonrhyth/Mllt4_set_A.pdf]

## MiIt6

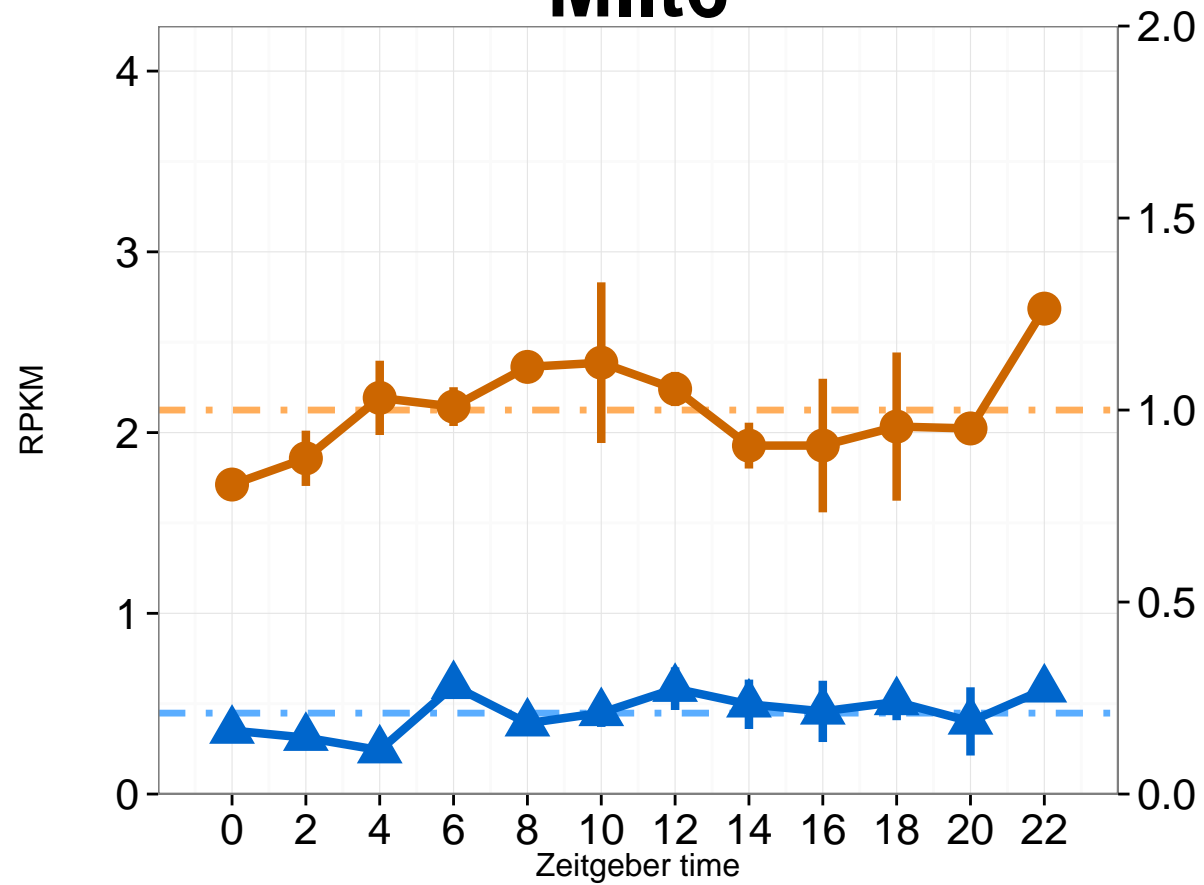

## MiIt6

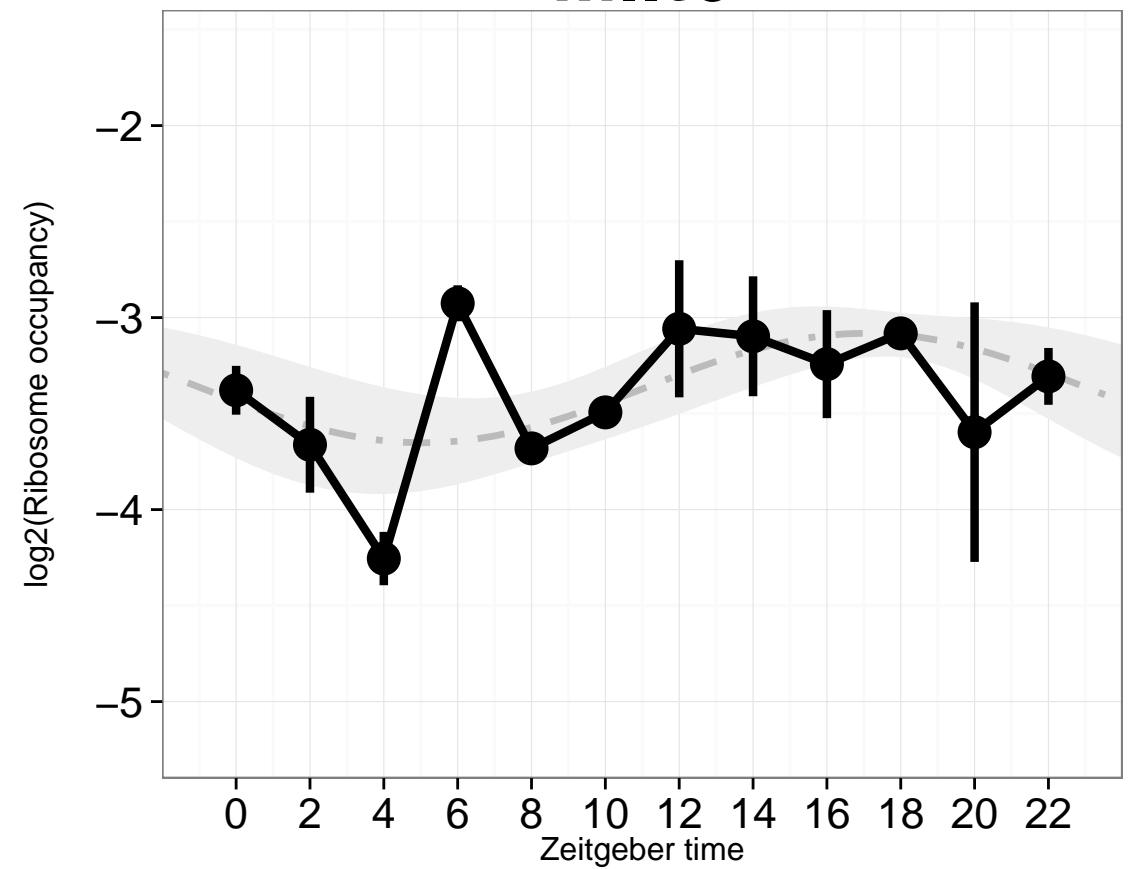

Supplement: SuppDataset_1.zip [file Mllt6_set_A.pdf › Supplemental Dataset 1/A-mRNA_nonrhyth_translation_nonrhyth/Mllt6_set_A.pdf]

## Mlph

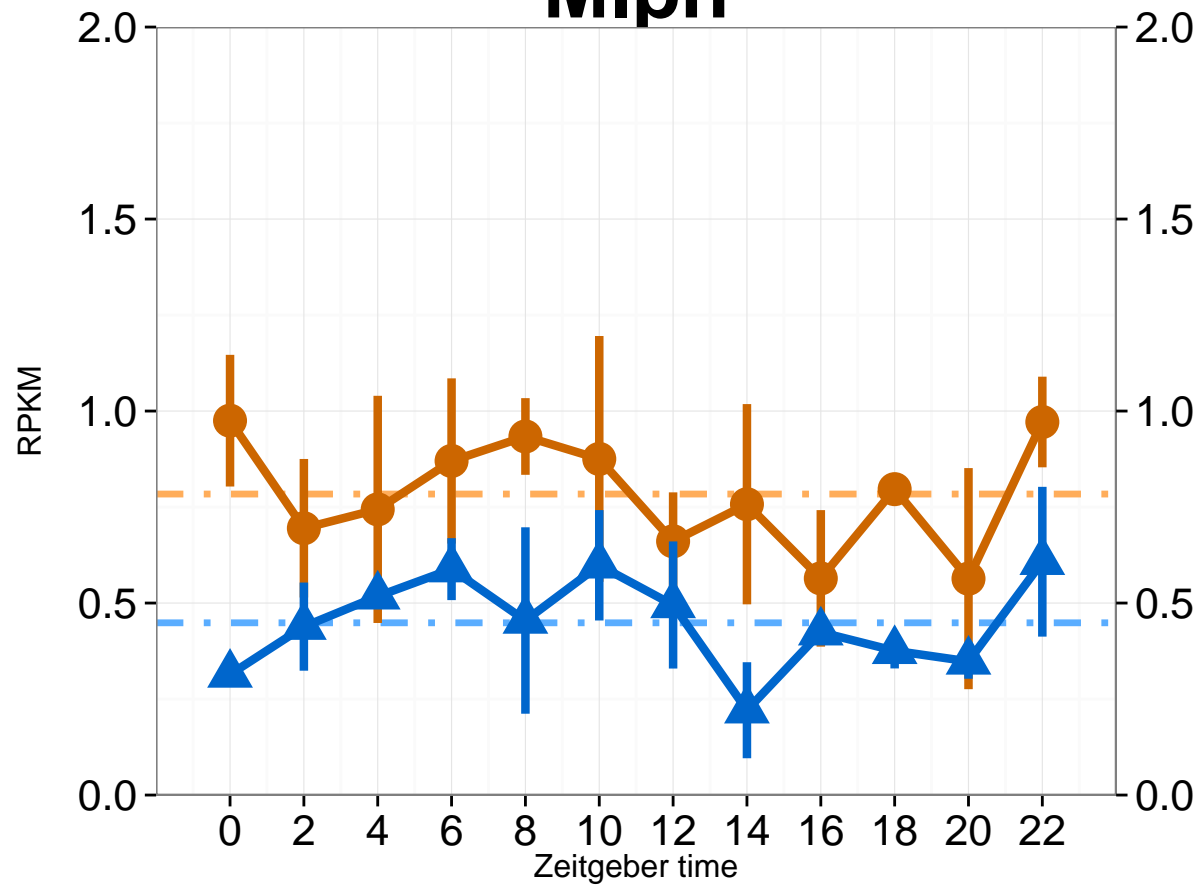

## Mlph

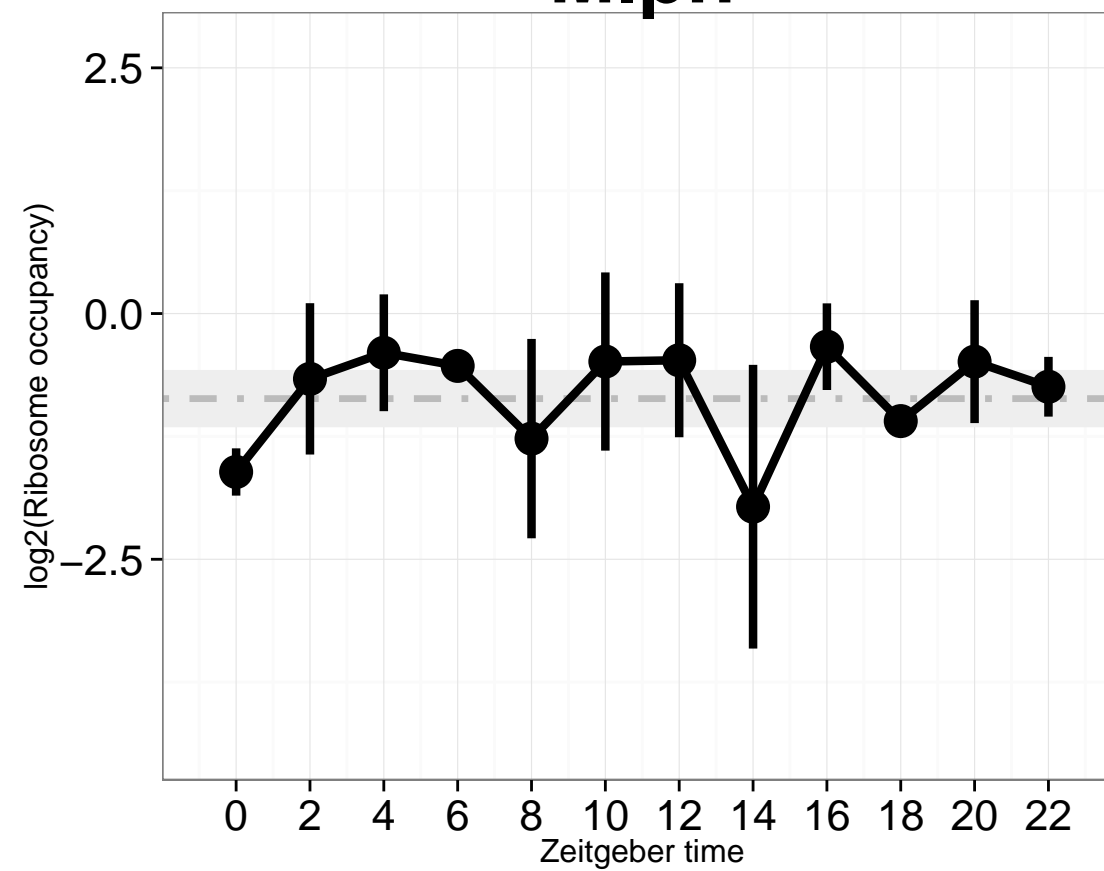

Supplement: SuppDataset_1.zip [file Mlph_set_A.pdf › Supplemental Dataset 1/A-mRNA_nonrhyth_translation_nonrhyth/Mlph_set_A.pdf]

## Mlxip

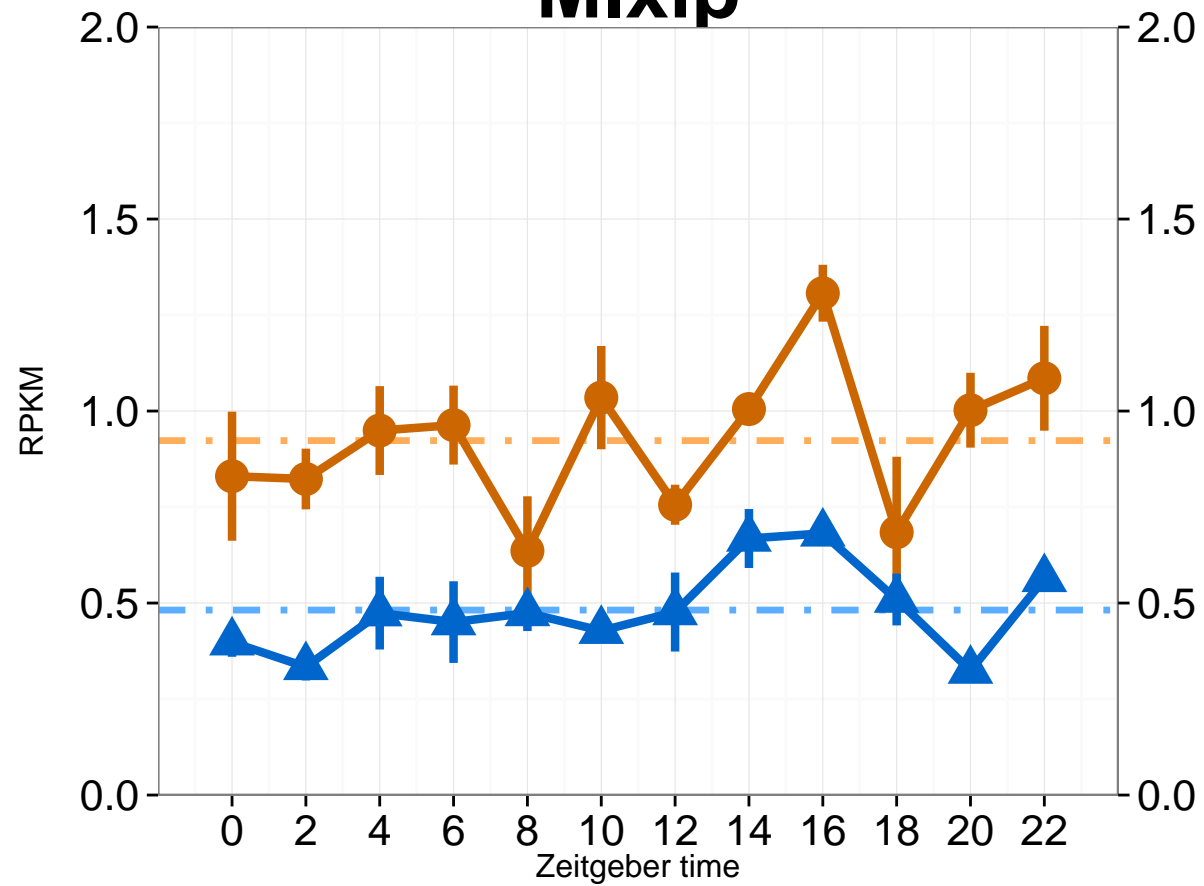

## Mlxip

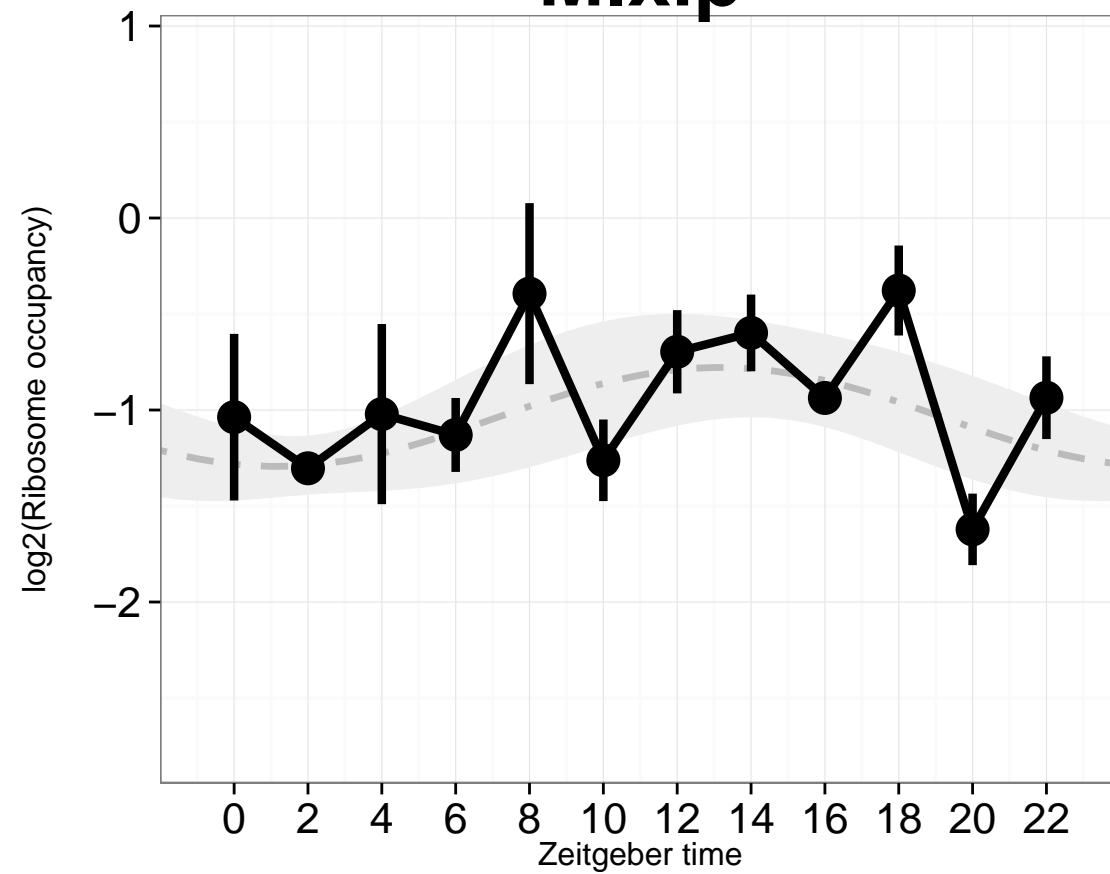

Supplement: SuppDataset_1.zip [file Mlxip_set_A.pdf › Supplemental Dataset 1/A-mRNA_nonrhyth_translation_nonrhyth/Mlxip_set_A.pdf]

## Mlycd

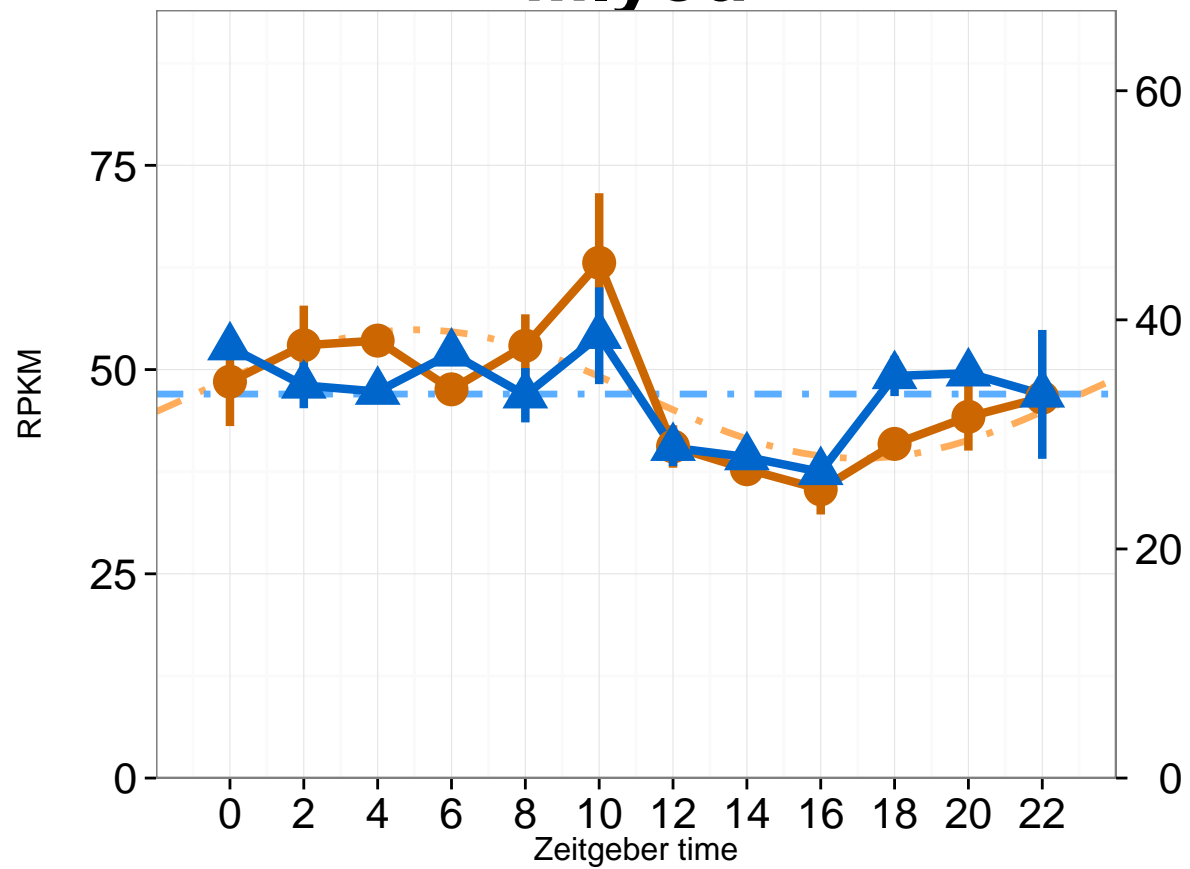

## Mlycd

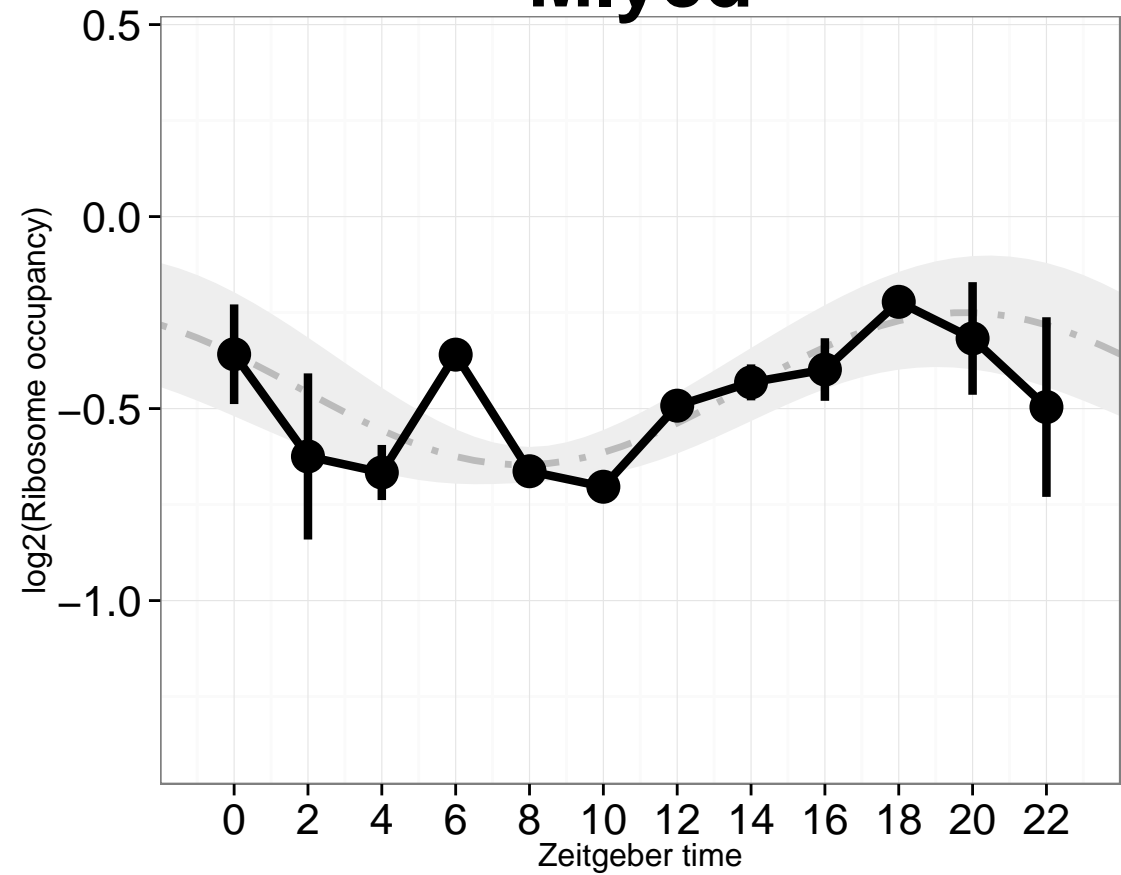

Supplement: SuppDataset_1.zip [file Mlycd_set_A.pdf › Supplemental Dataset 1/A-mRNA_nonrhyth_translation_nonrhyth/Mlycd_set_A.pdf]

## Mmachc

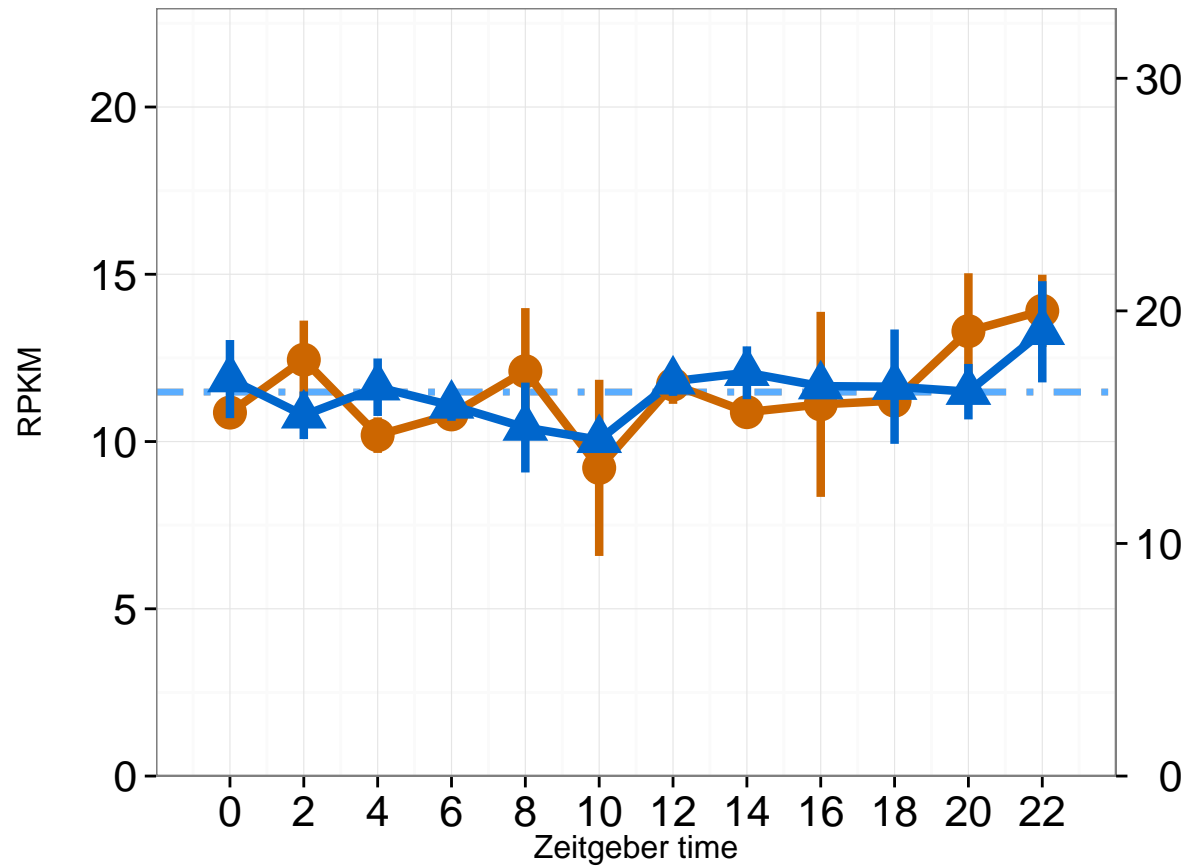

## Mmachc

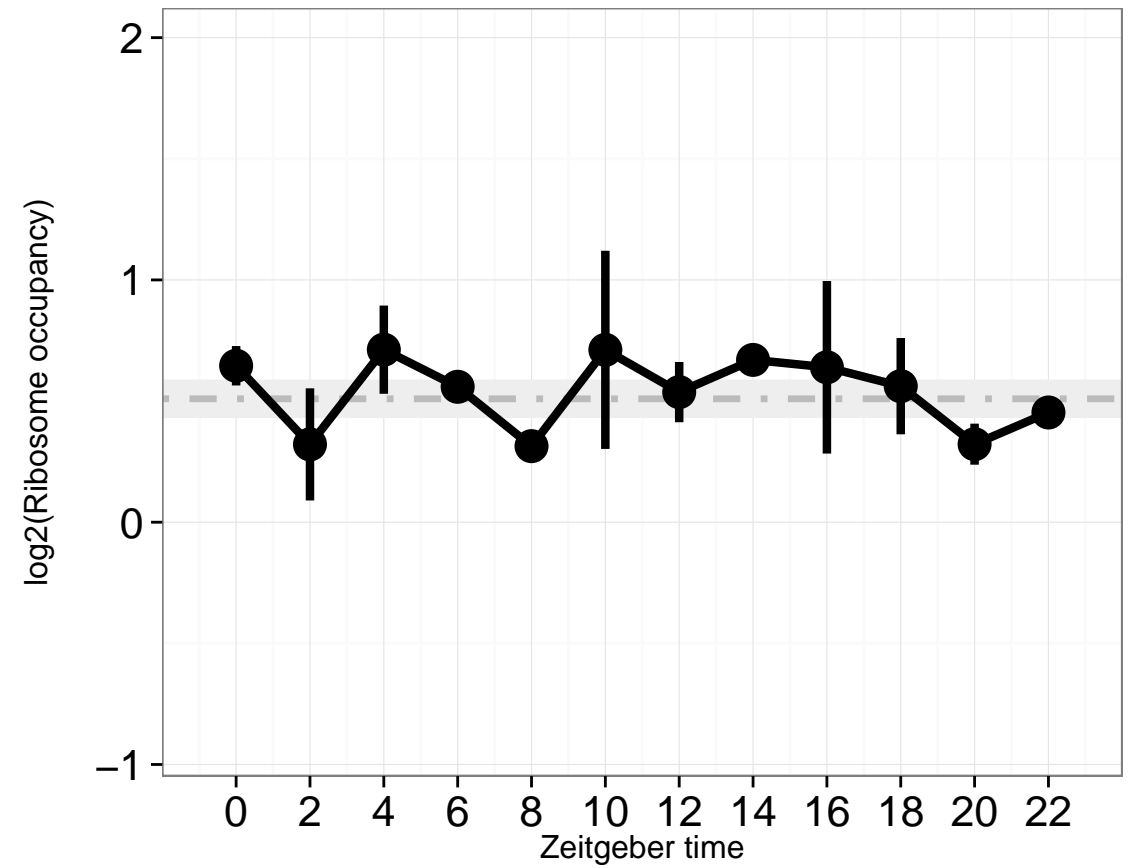

Supplement: SuppDataset_1.zip [file Mmachc_set_A.pdf › Supplemental Dataset 1/A-mRNA_nonrhyth_translation_nonrhyth/Mmachc_set_A.pdf]

## Mmadhc

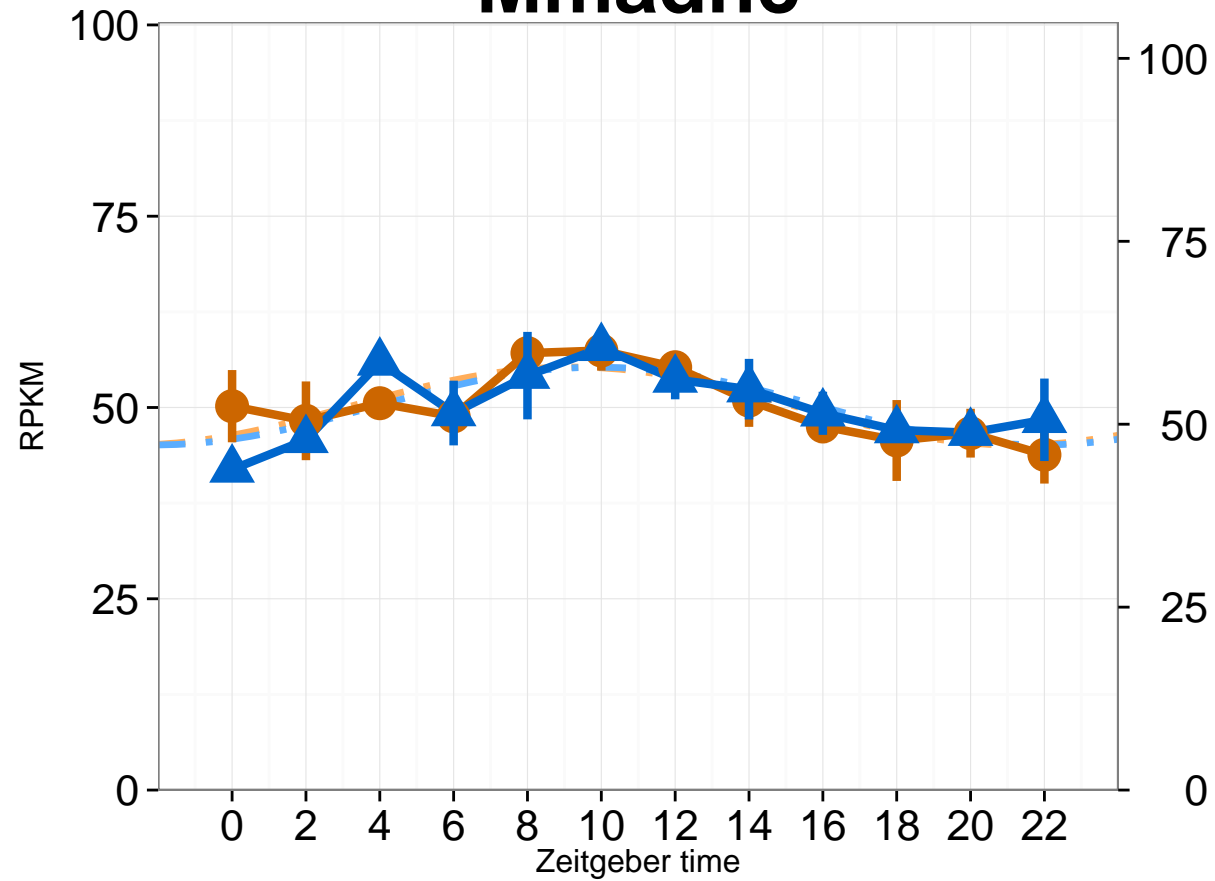

## Mmadhc

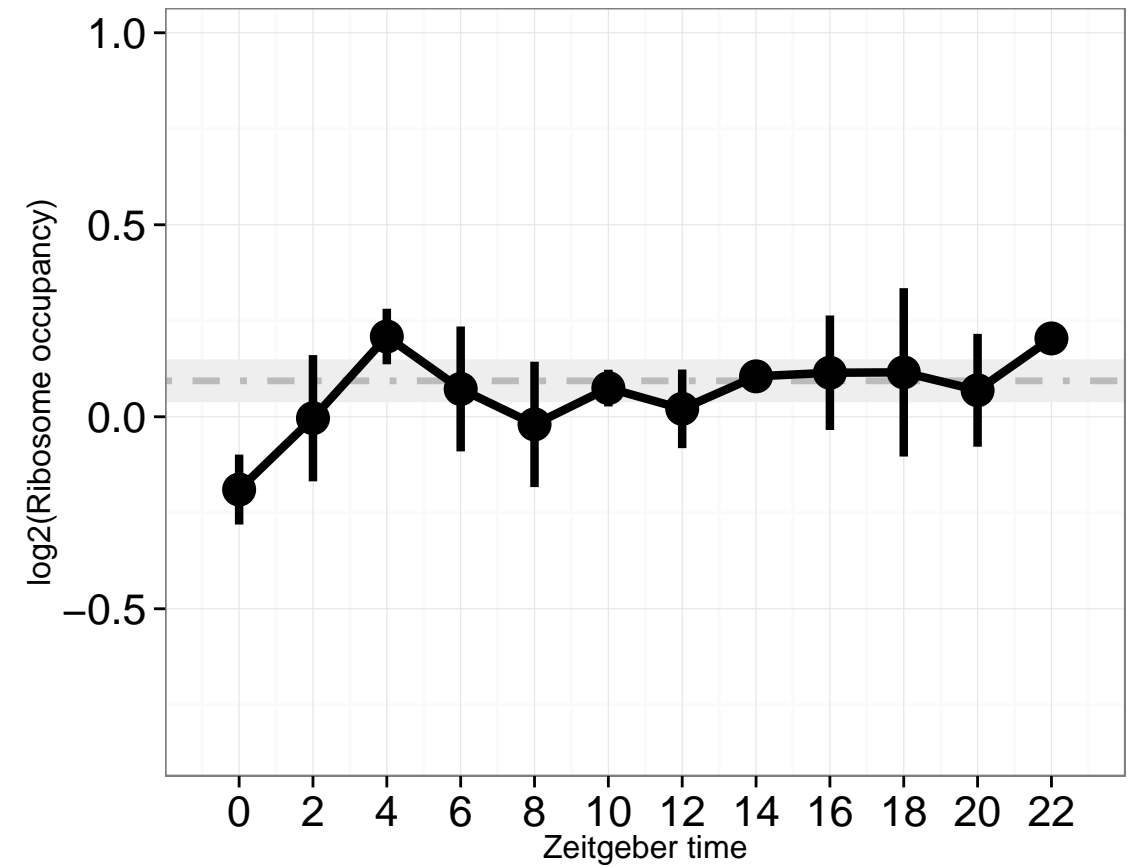

Supplement: SuppDataset_1.zip [file Mmadhc_set_A.pdf › Supplemental Dataset 1/A-mRNA_nonrhyth_translation_nonrhyth/Mmadhc_set_A.pdf]

## Mmd2

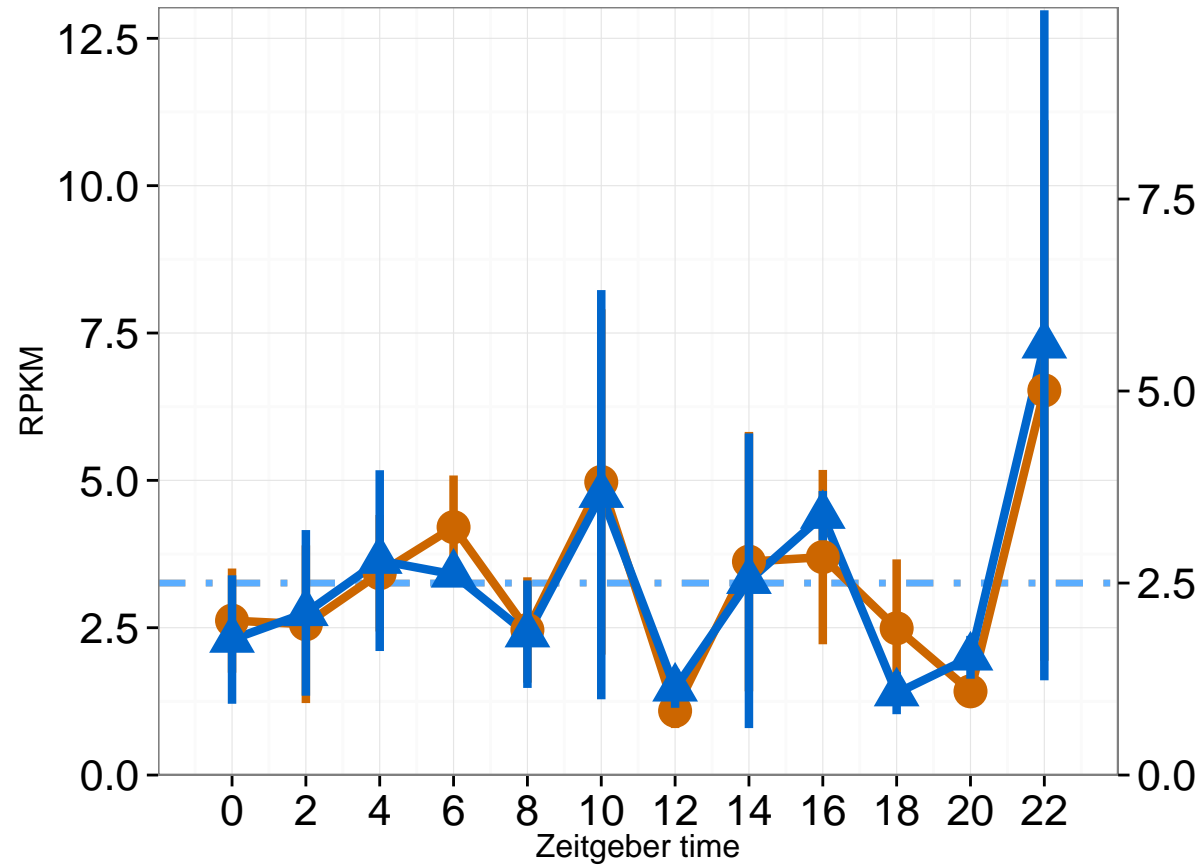

## Mmd2

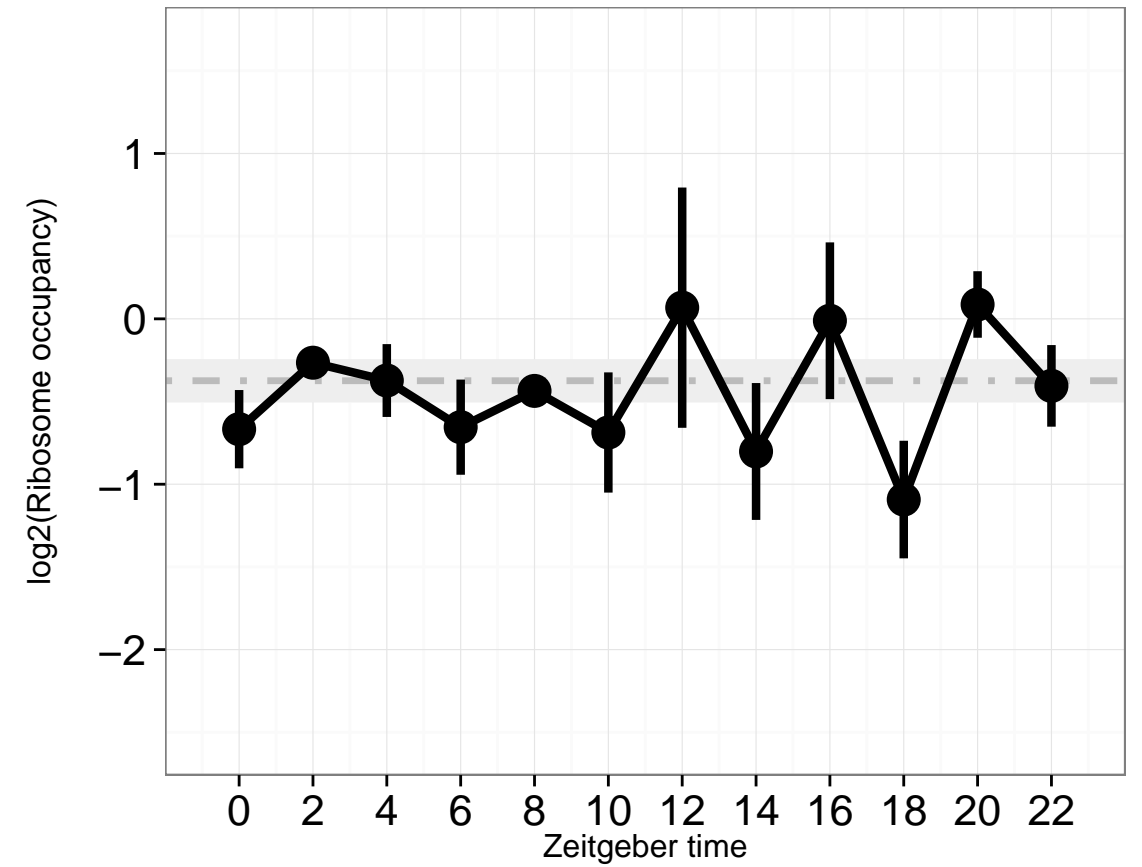

Supplement: SuppDataset_1.zip [file Mmd2_set_A.pdf › Supplemental Dataset 1/A-mRNA_nonrhyth_translation_nonrhyth/Mmd2_set_A.pdf]

## Mmd

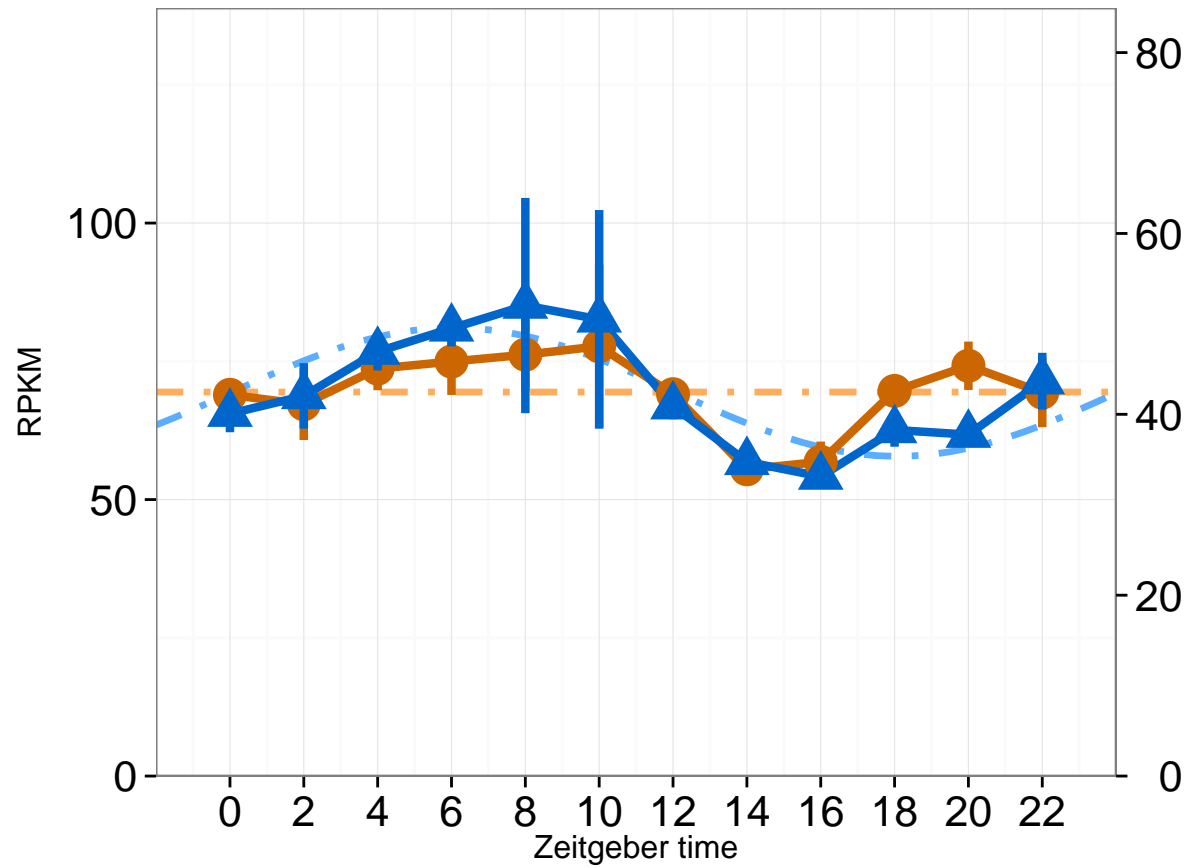

## Mmd

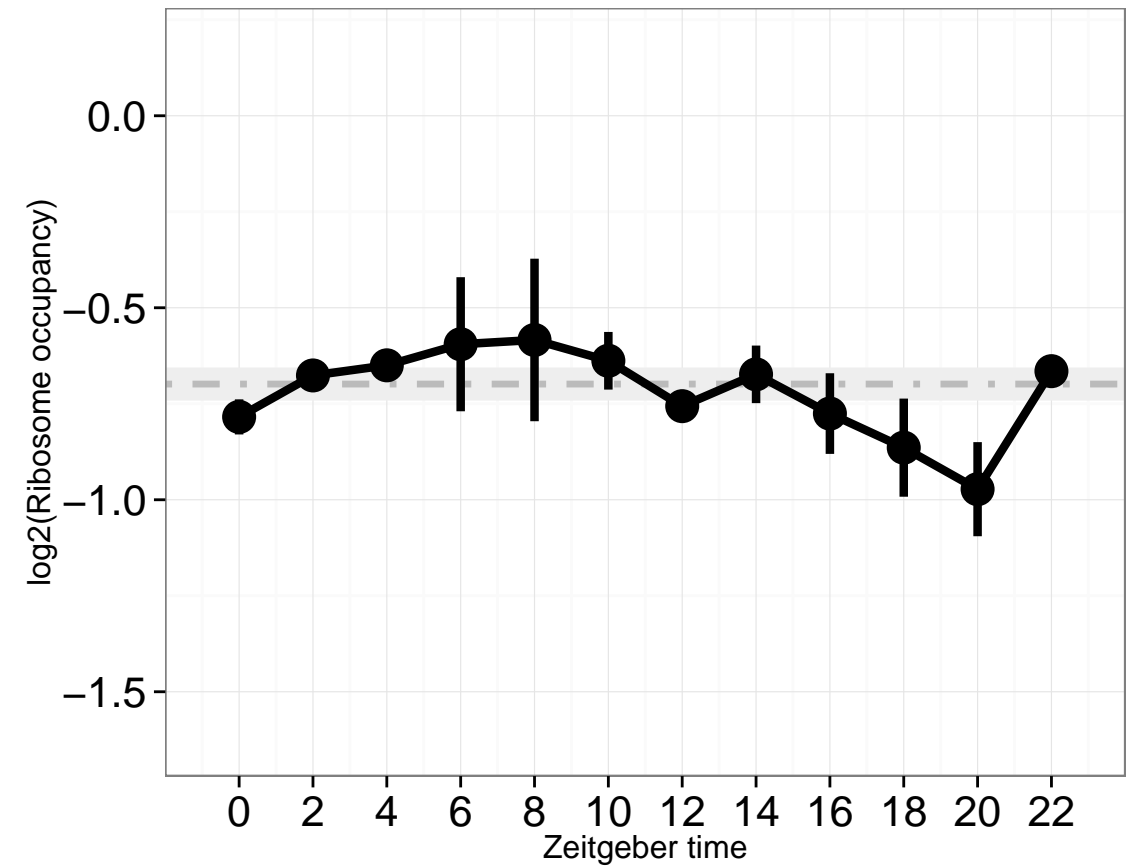

Supplement: SuppDataset_1.zip [file Mmd_set_A.pdf › Supplemental Dataset 1/A-mRNA_nonrhyth_translation_nonrhyth/Mmd_set_A.pdf]

**Mmgt2 TR**

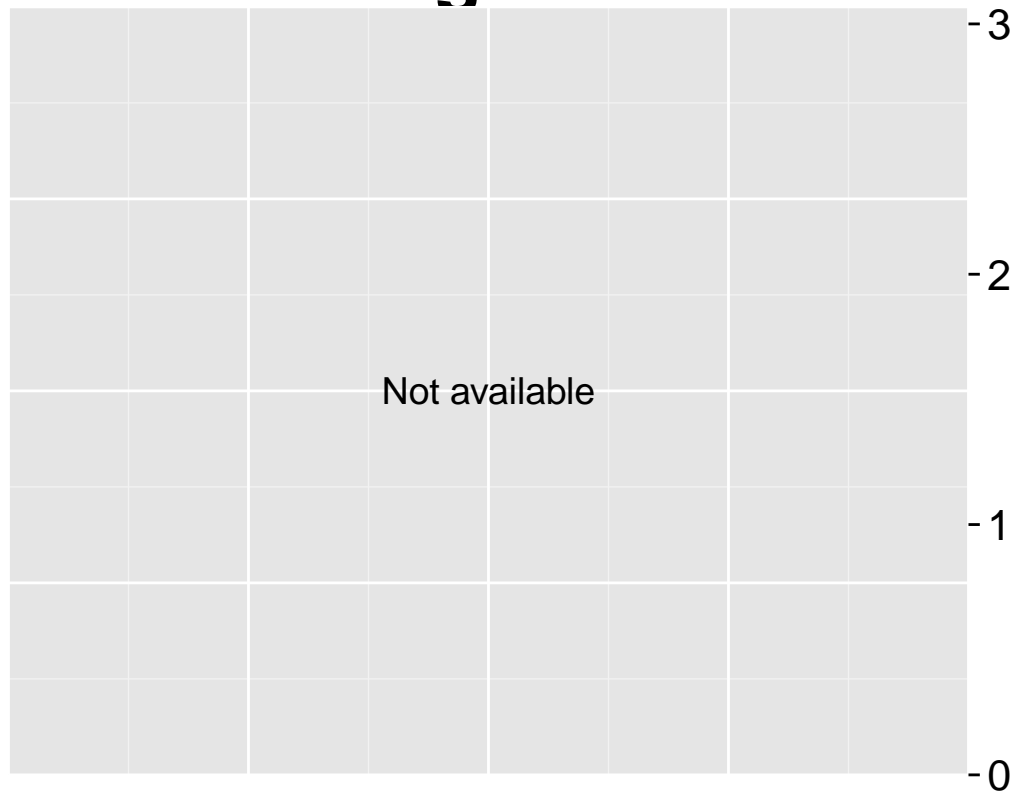

**Mmgt2 log2(Ribosome occupancy**

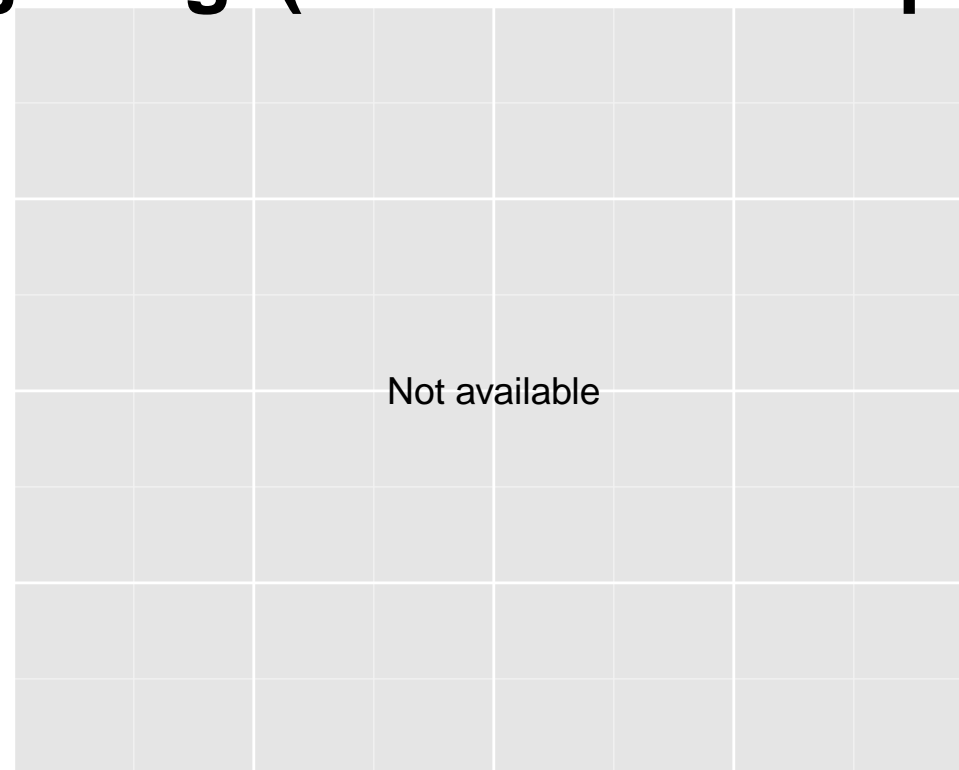

Supplement: SuppDataset_1.zip [file Mmgt2_set_A.pdf › Supplemental Dataset 1/A-mRNA_nonrhyth_translation_nonrhyth/Mmgt2_set_A.pdf]

## Mmp14

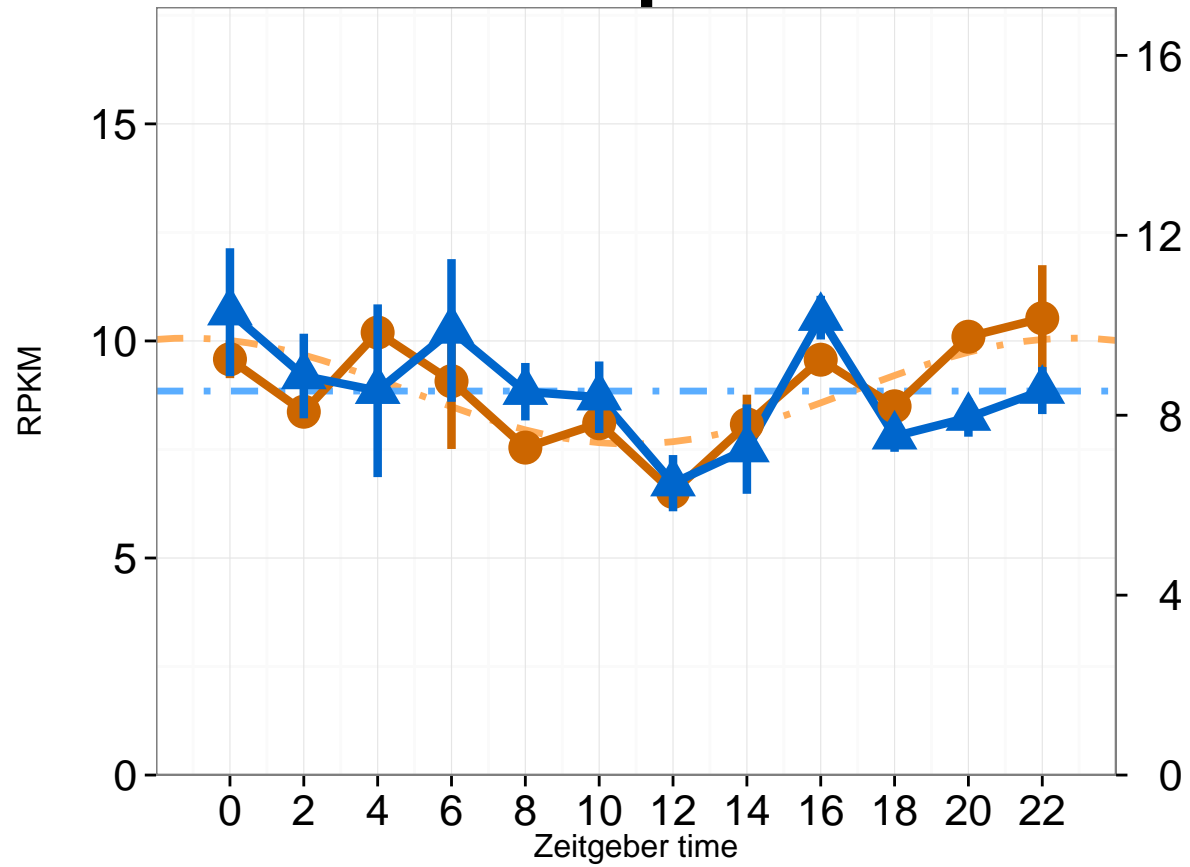

## Mmp14

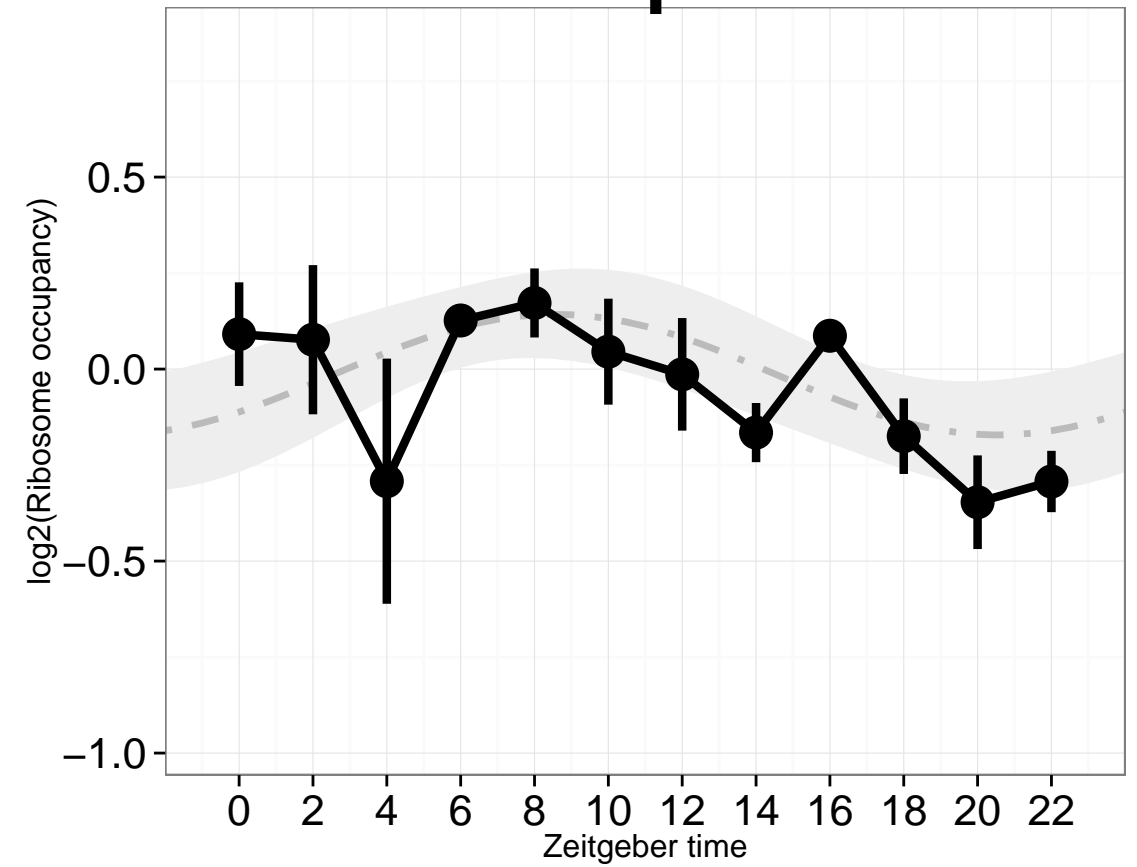

Supplement: SuppDataset_1.zip [file Mmp14_set_A.pdf › Supplemental Dataset 1/A-mRNA_nonrhyth_translation_nonrhyth/Mmp14_set_A.pdf]

# Mmp15

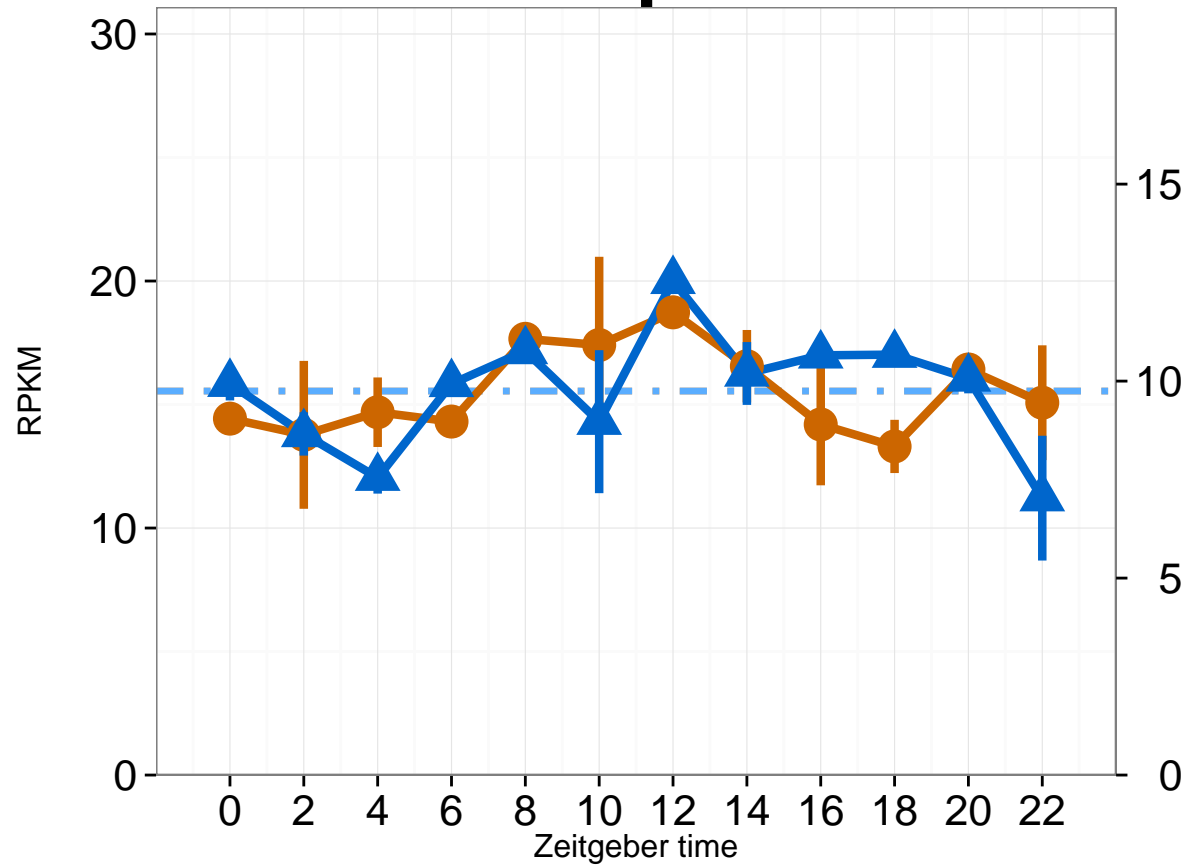

# Mmp15

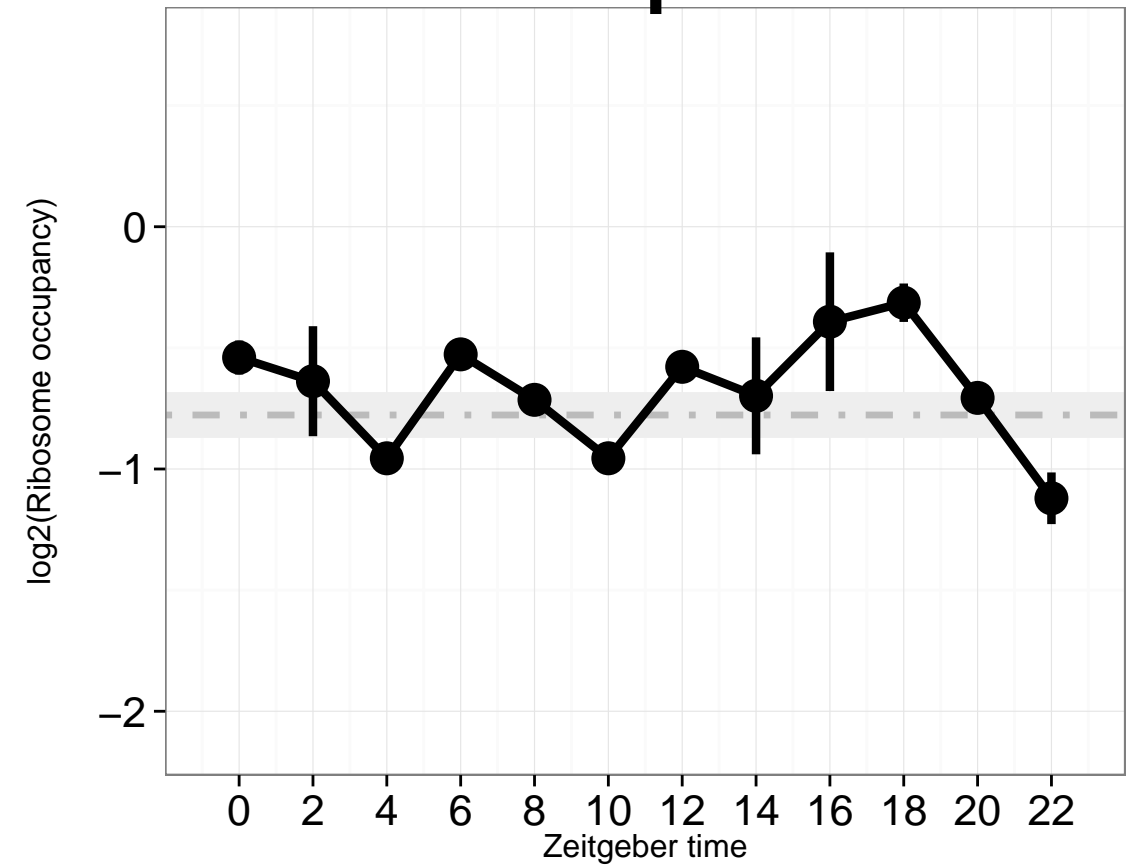

Supplement: SuppDataset_1.zip [file Mmp15_set_A.pdf › Supplemental Dataset 1/A-mRNA_nonrhyth_translation_nonrhyth/Mmp15_set_A.pdf]

# Mmp19

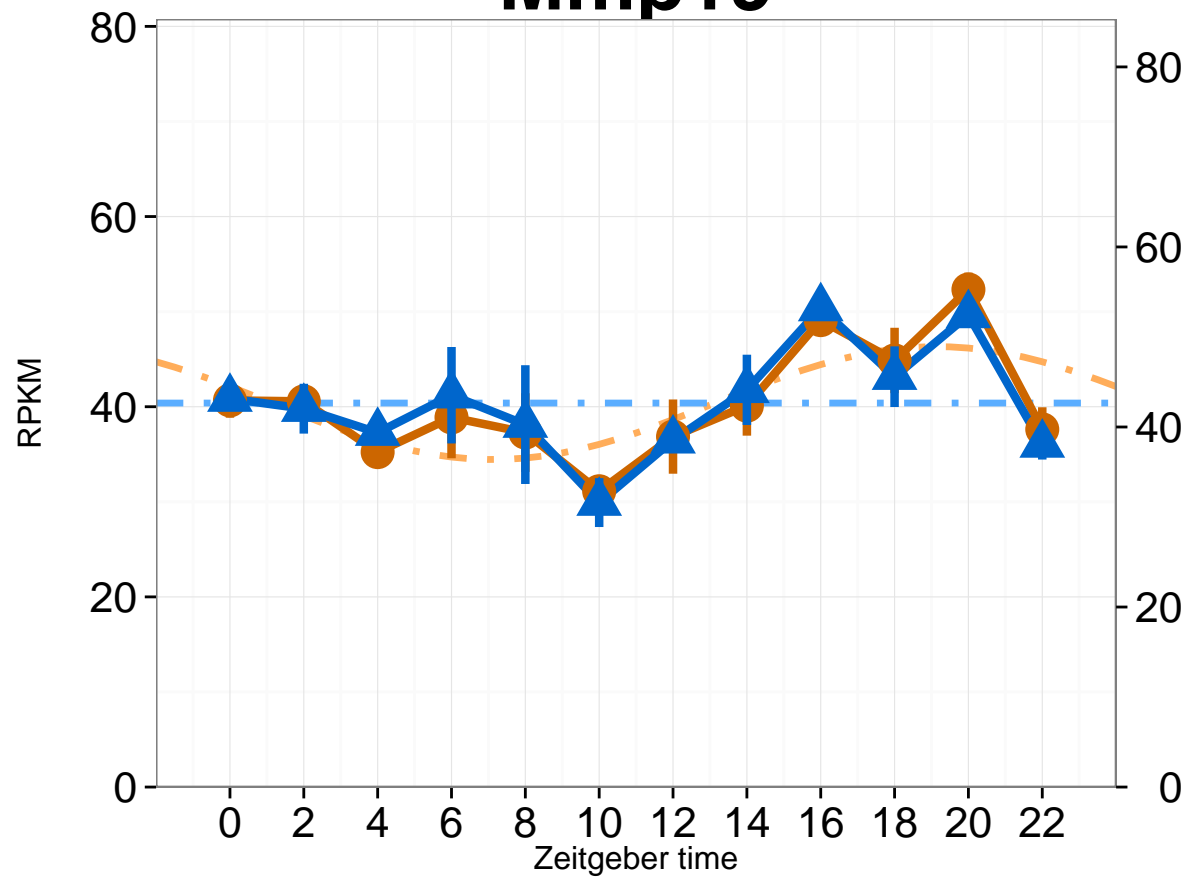

# Mmp19

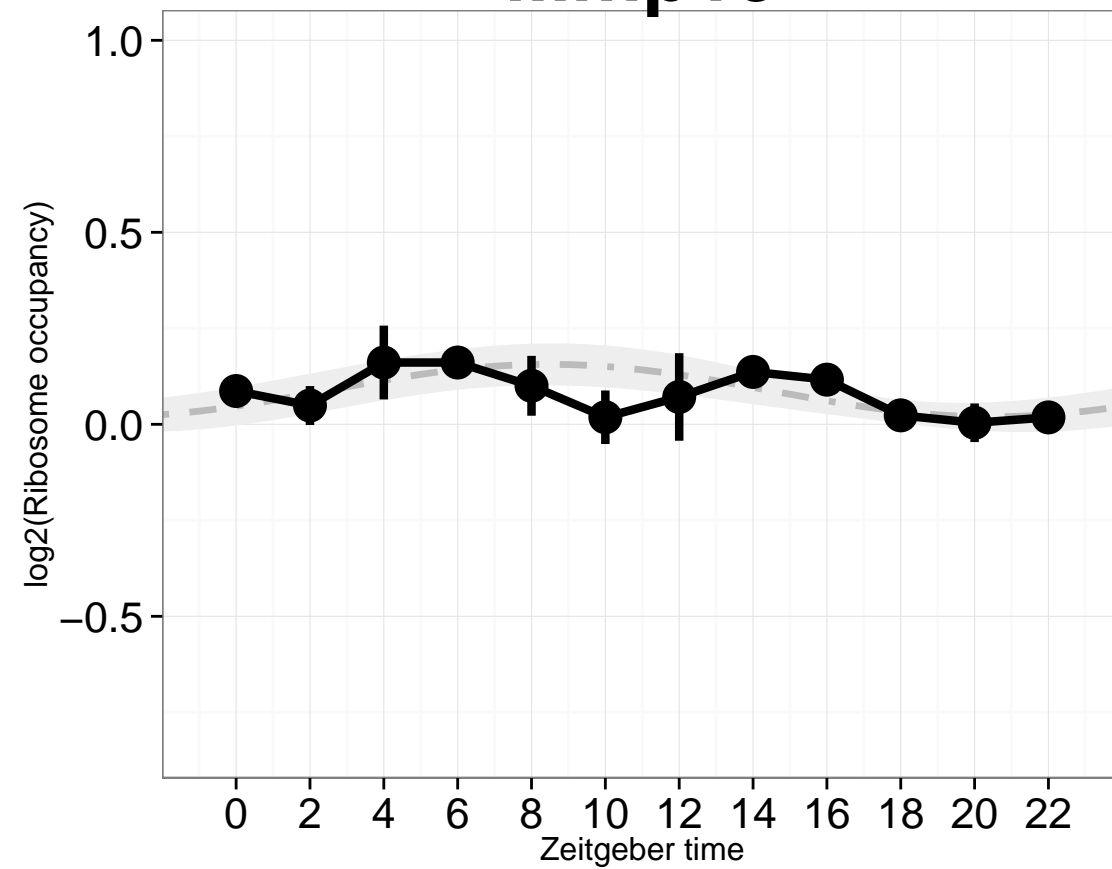

Supplement: SuppDataset_1.zip [file Mmp19_set_A.pdf › Supplemental Dataset 1/A-mRNA_nonrhyth_translation_nonrhyth/Mmp19_set_A.pdf]

# Mmp23

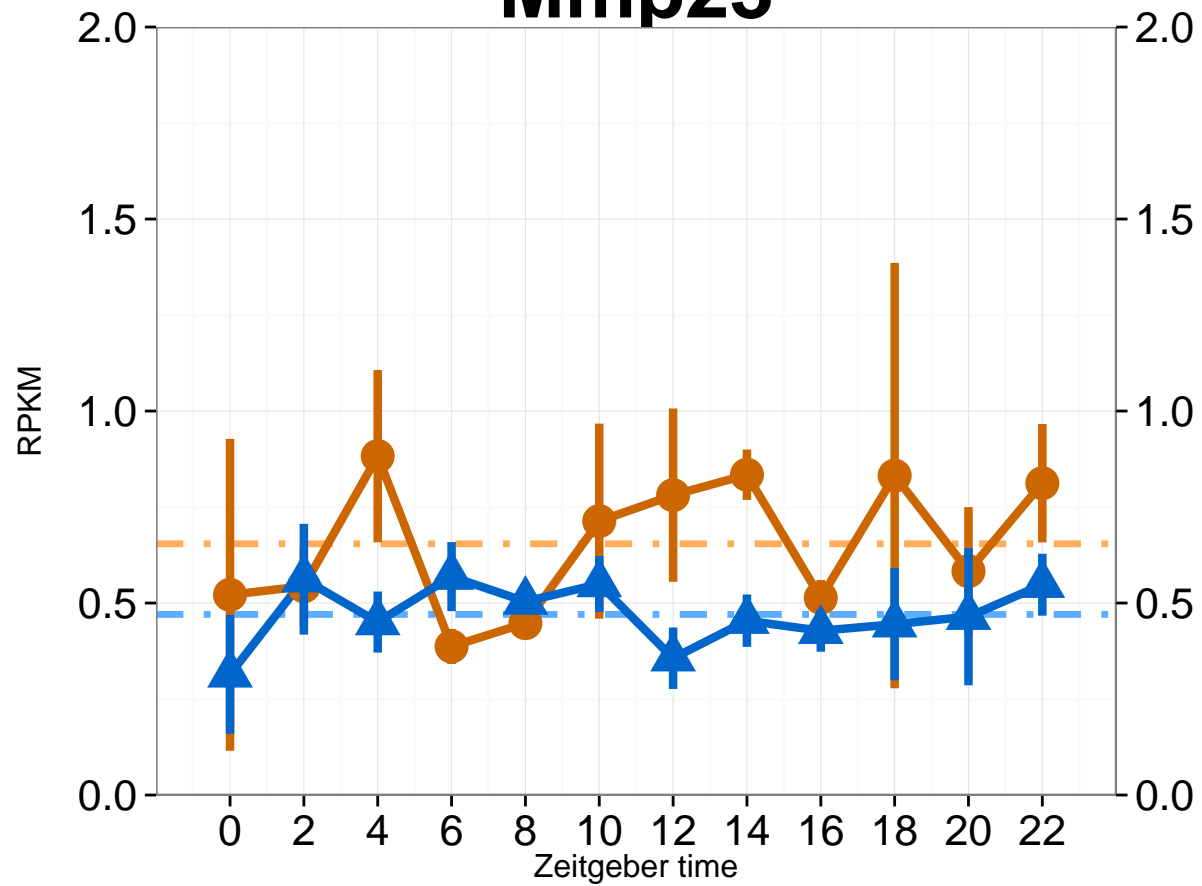

# Mmp23

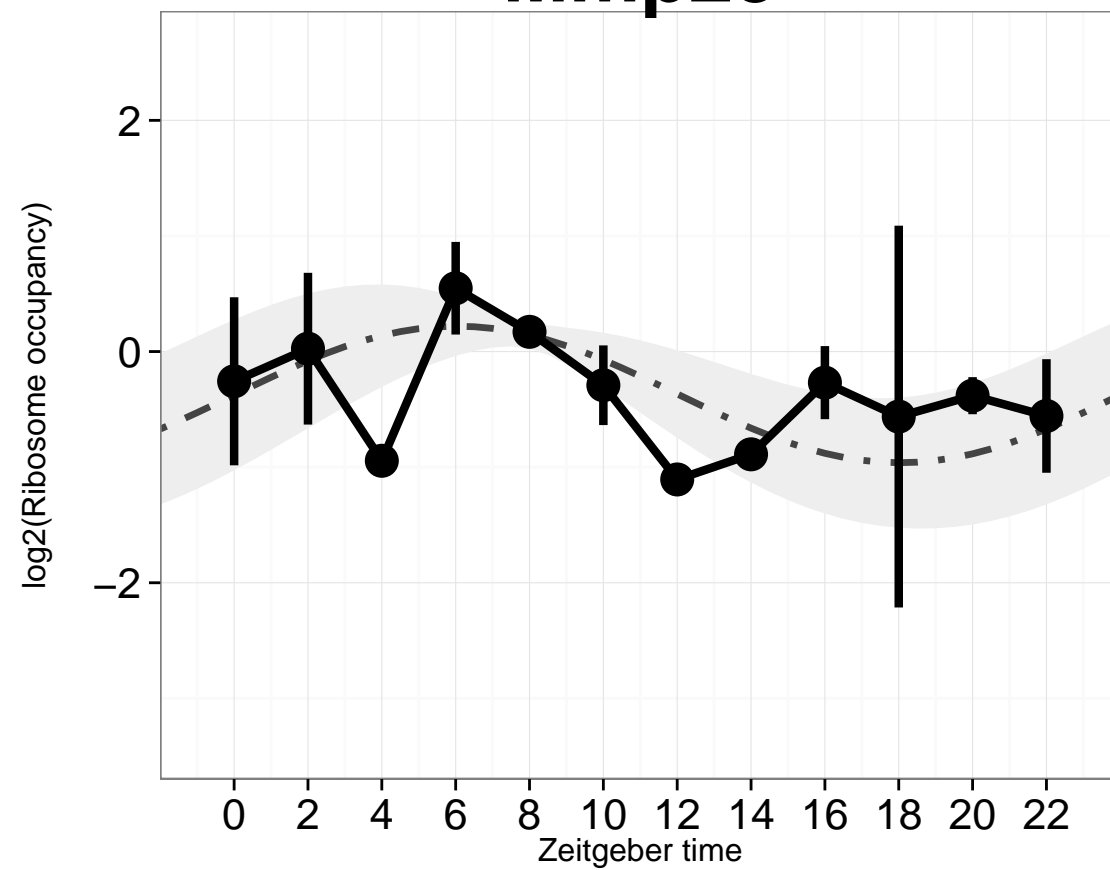

Supplement: SuppDataset_1.zip [file Mmp23_set_A.pdf › Supplemental Dataset 1/A-mRNA_nonrhyth_translation_nonrhyth/Mmp23_set_A.pdf]

# Mmp9

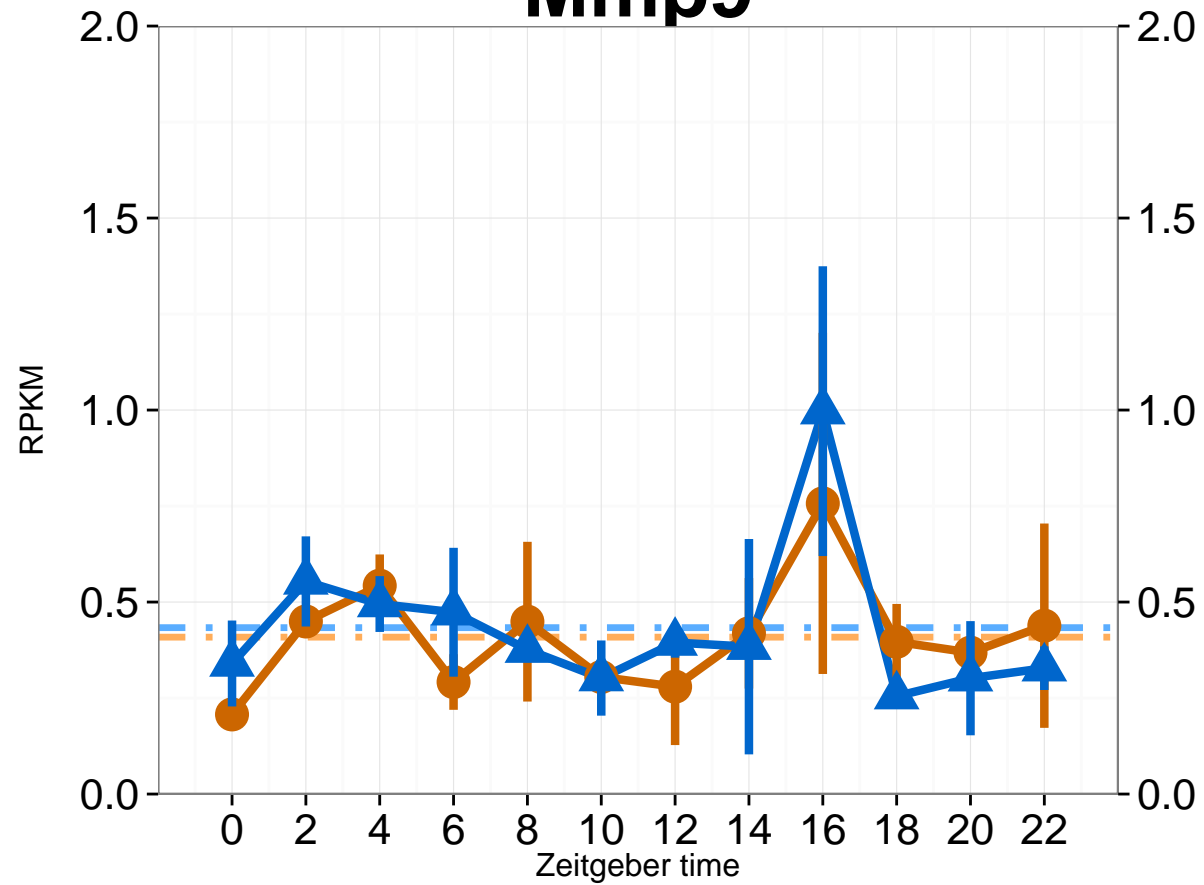

# Mmp9

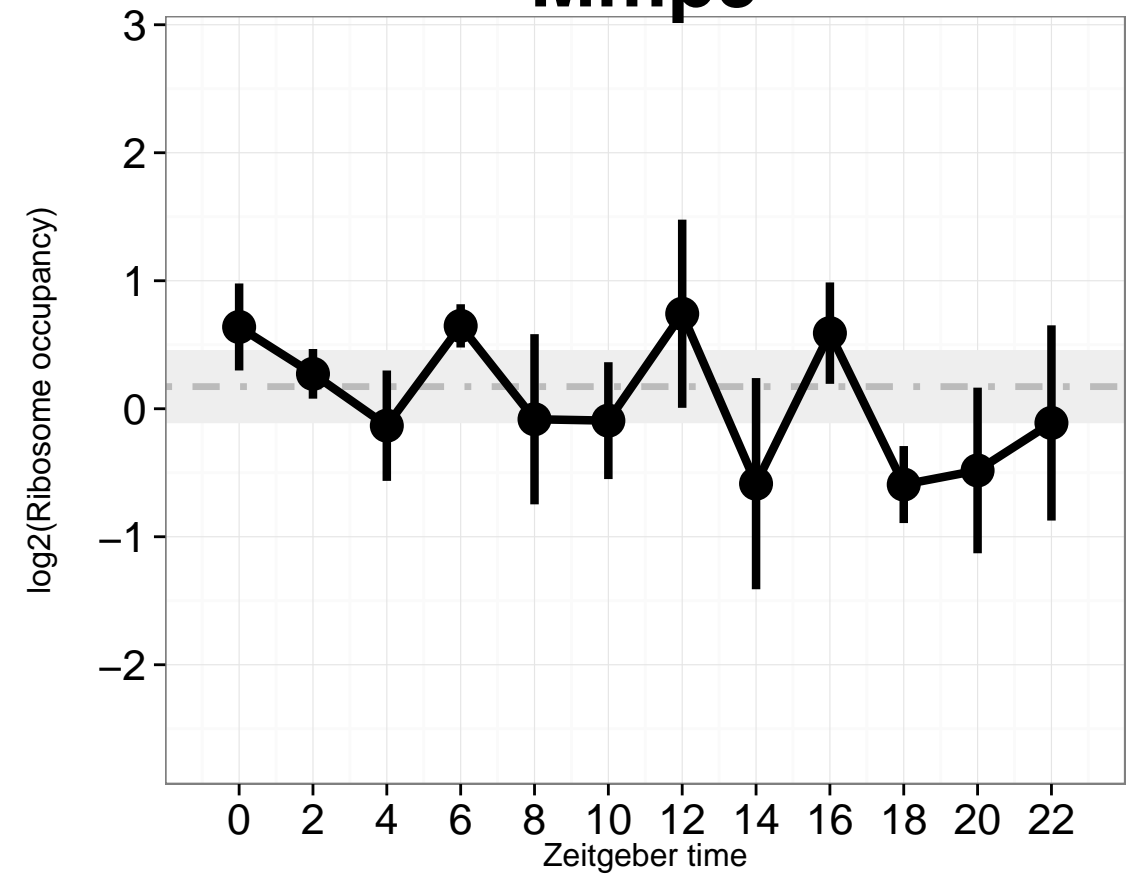

Supplement: SuppDataset_1.zip [file Mmp9_set_A.pdf › Supplemental Dataset 1/A-mRNA_nonrhyth_translation_nonrhyth/Mmp9_set_A.pdf]

## Mmrn2

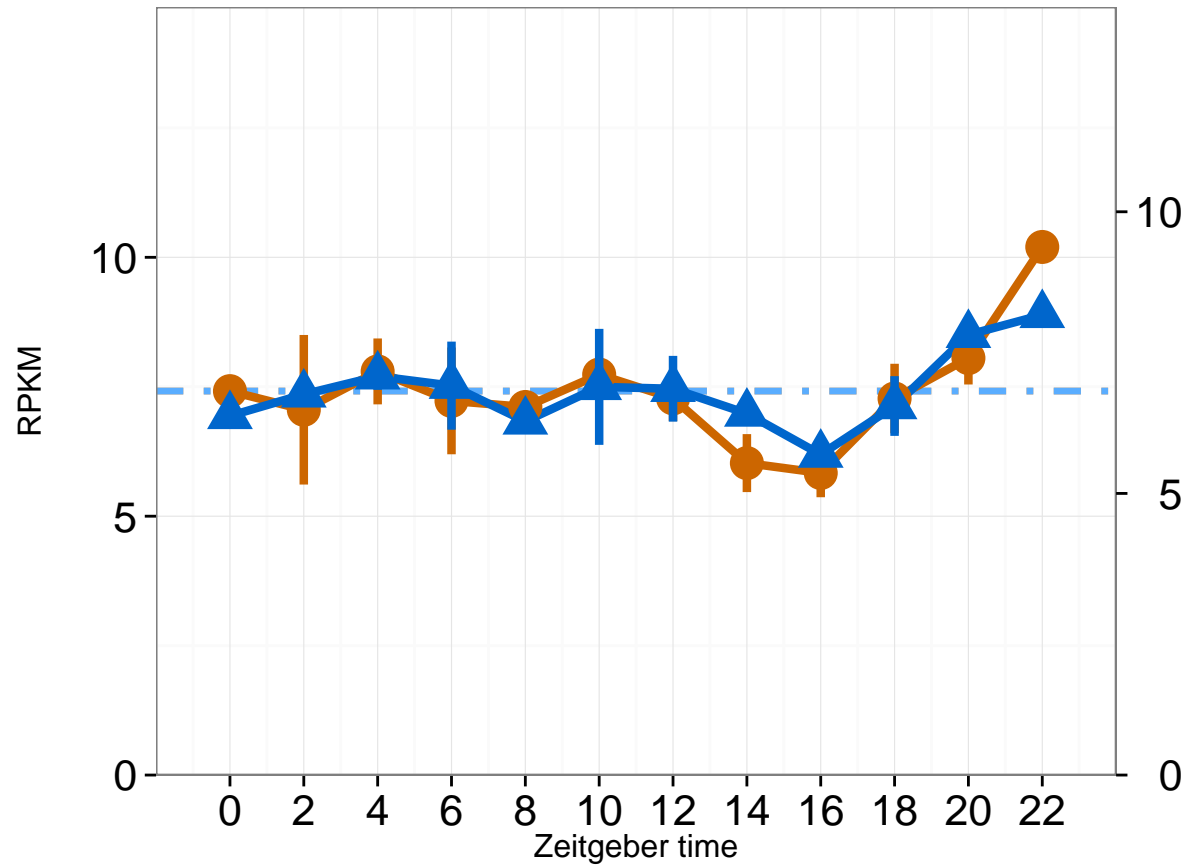

## Mmrn2

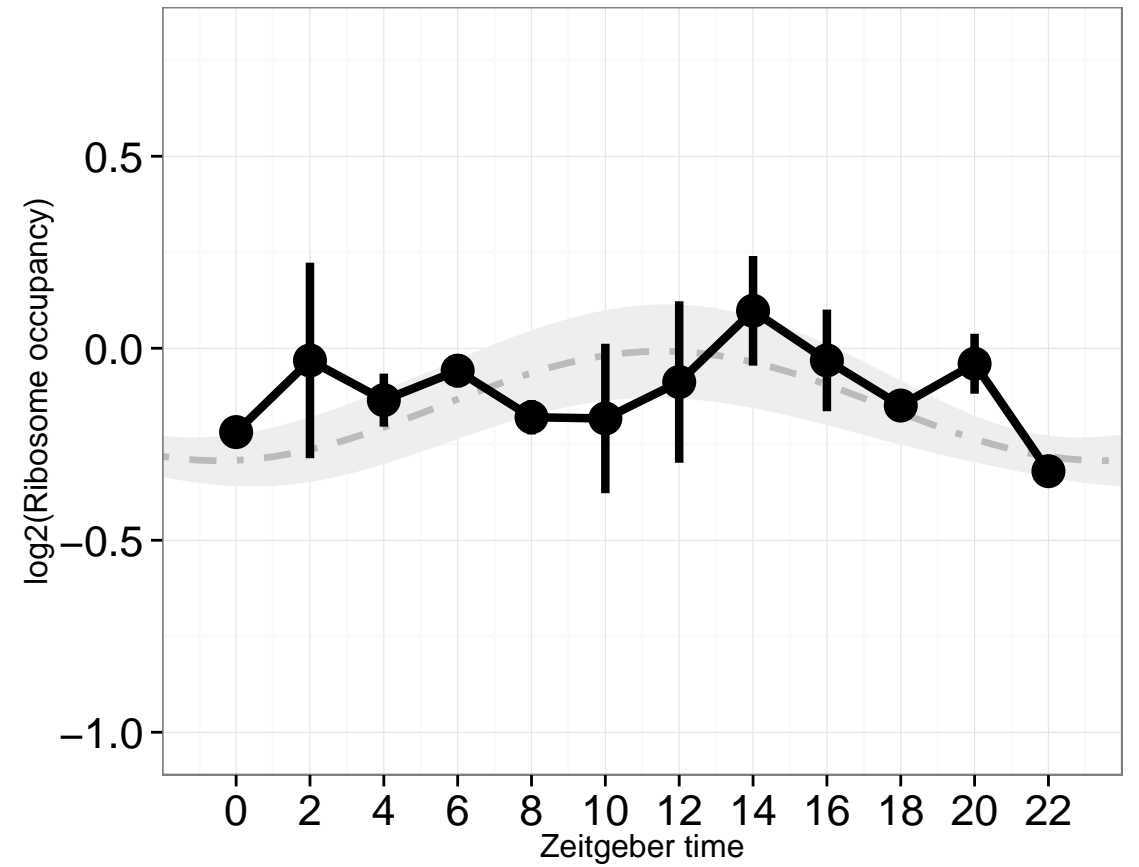

Supplement: SuppDataset_1.zip [file Mmrn2_set_A.pdf › Supplemental Dataset 1/A-mRNA_nonrhyth_translation_nonrhyth/Mmrn2_set_A.pdf]

## Mms19

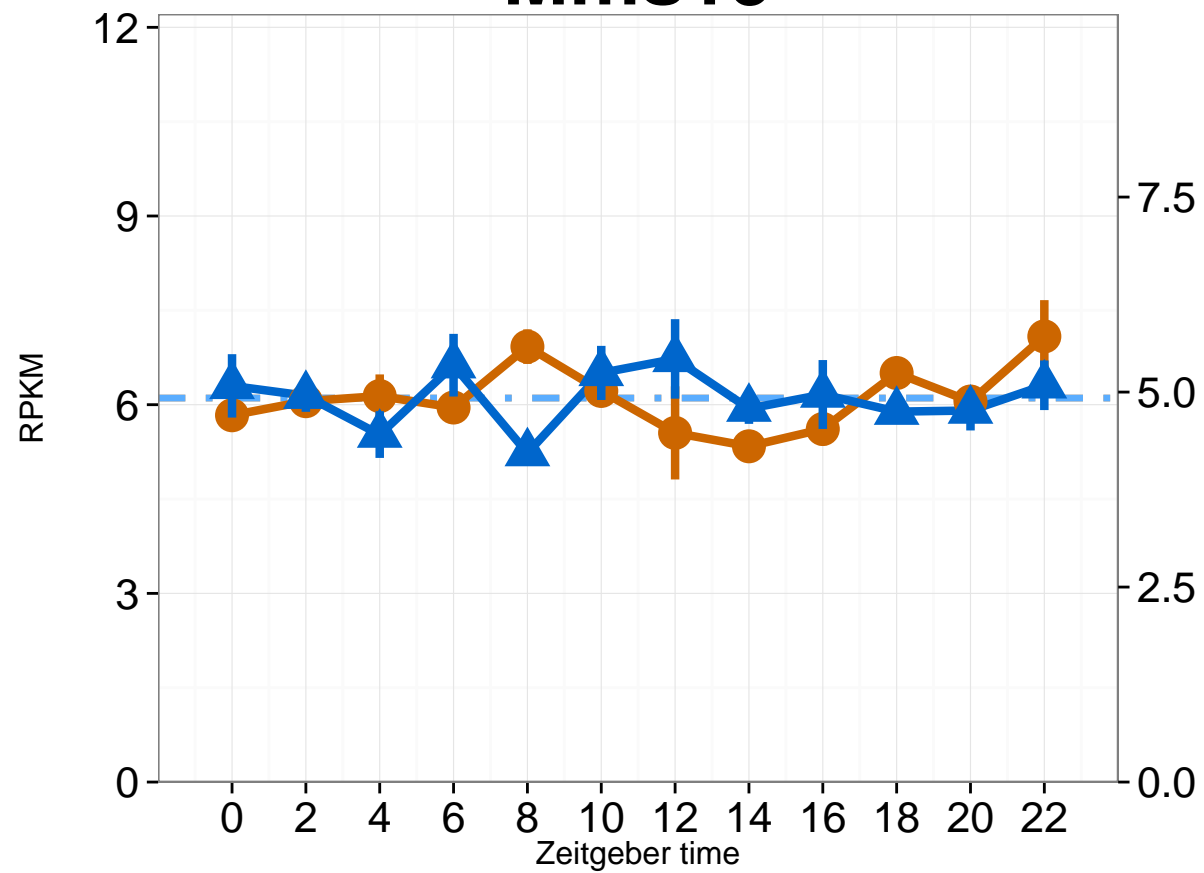

## Mms19

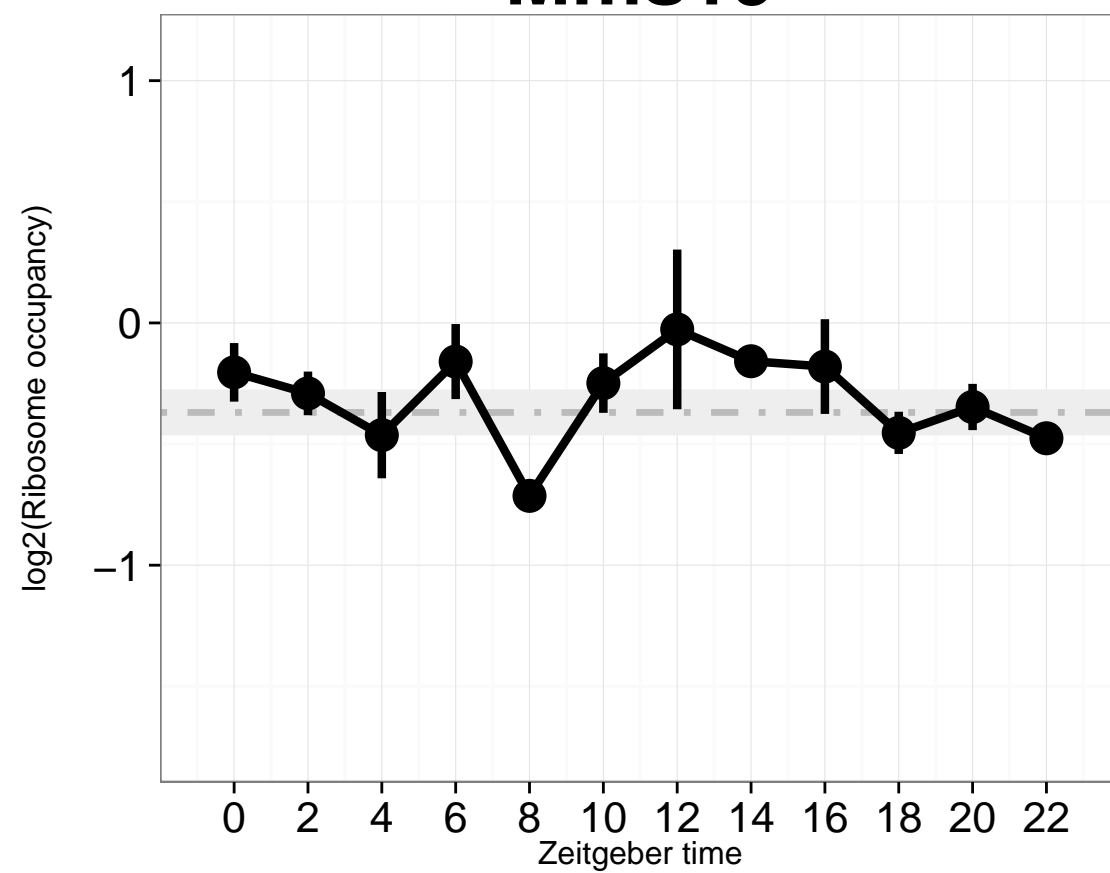

Supplement: SuppDataset_1.zip [file Mms19_set_A.pdf › Supplemental Dataset 1/A-mRNA_nonrhyth_translation_nonrhyth/Mms19_set_A.pdf]

## Mms22l

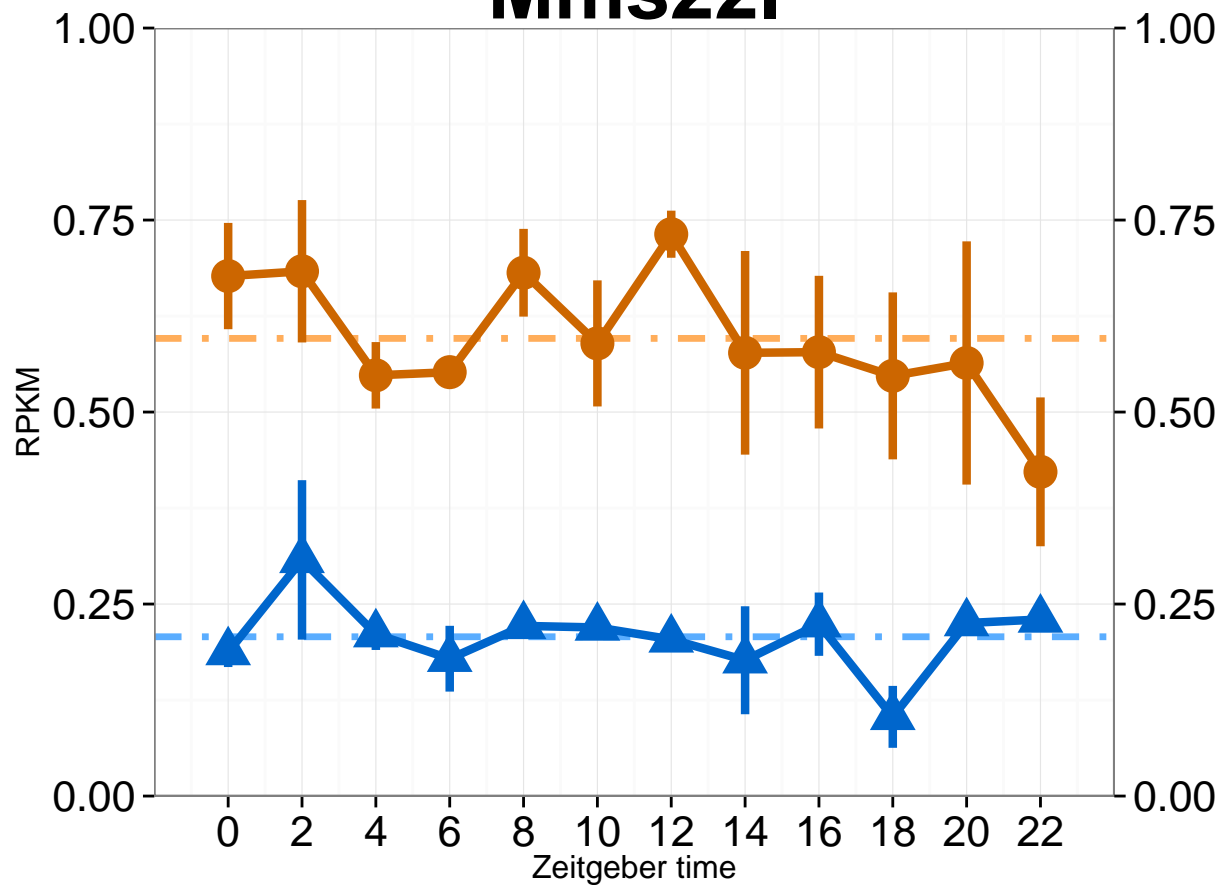

## Mms22l

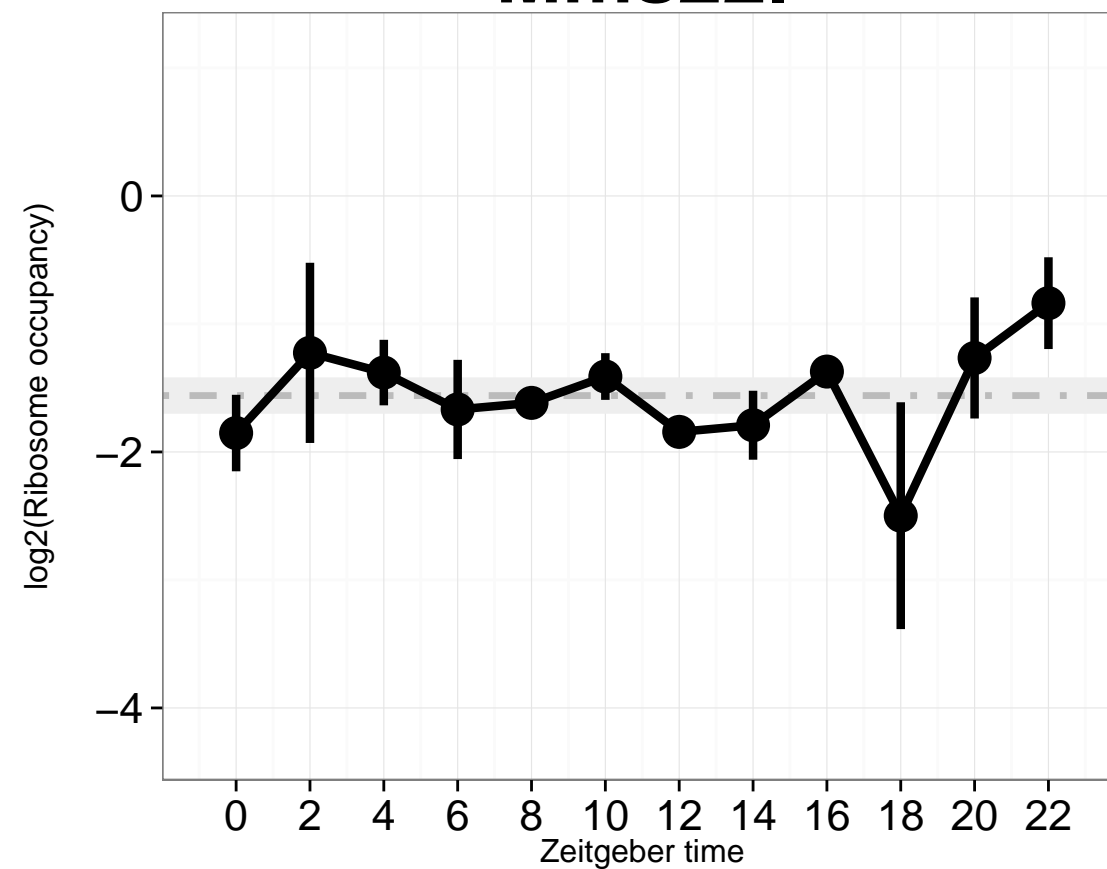

Supplement: SuppDataset_1.zip [file Mms22l_set_A.pdf › Supplemental Dataset 1/A-mRNA_nonrhyth_translation_nonrhyth/Mms22l_set_A.pdf]

# Mnat1

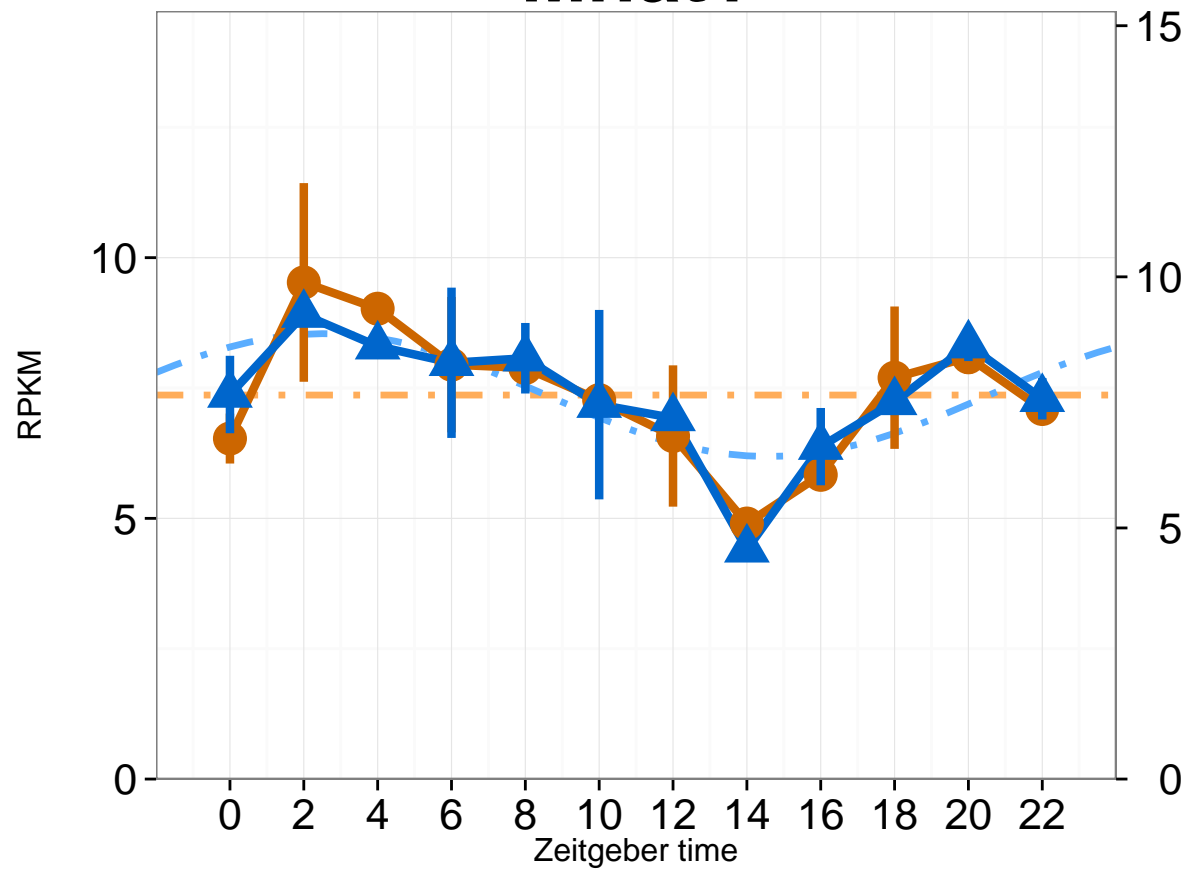

# Mnat1

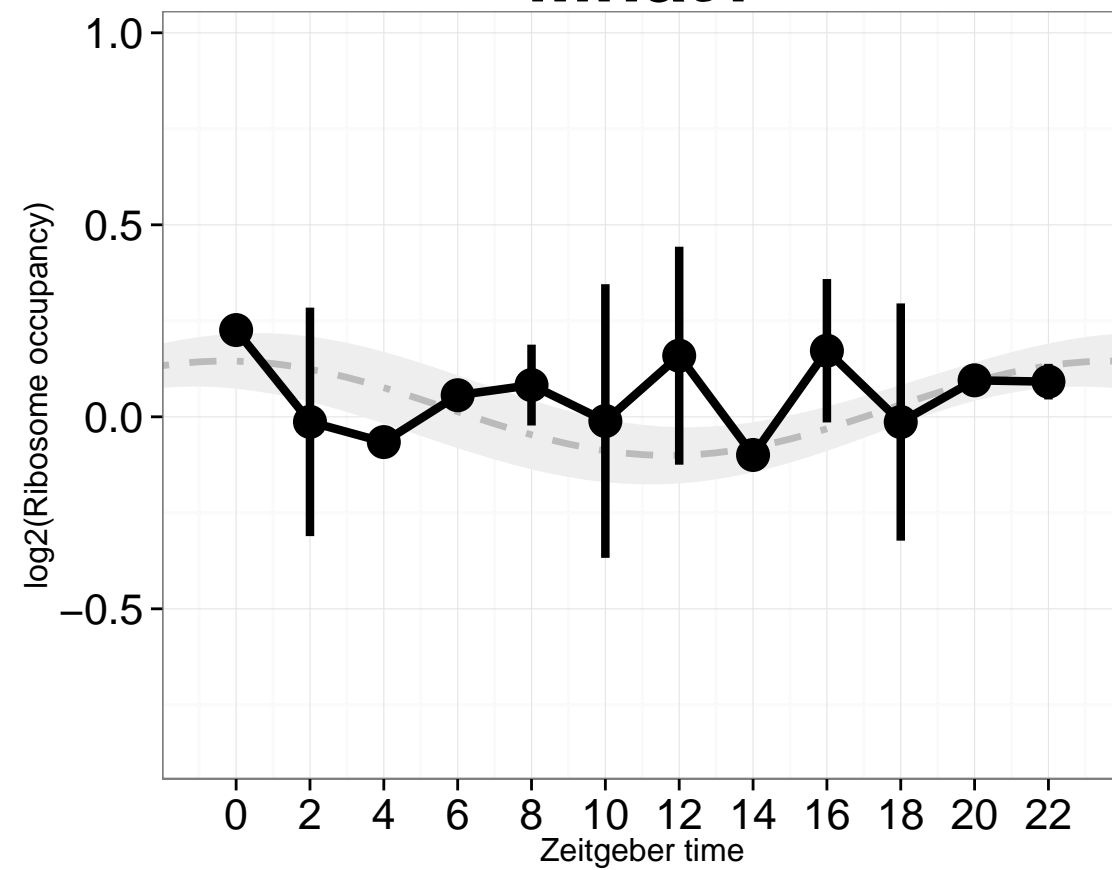

Supplement: SuppDataset_1.zip [file Mnat1_set_A.pdf › Supplemental Dataset 1/A-mRNA_nonrhyth_translation_nonrhyth/Mnat1_set_A.pdf]

## Mnd1

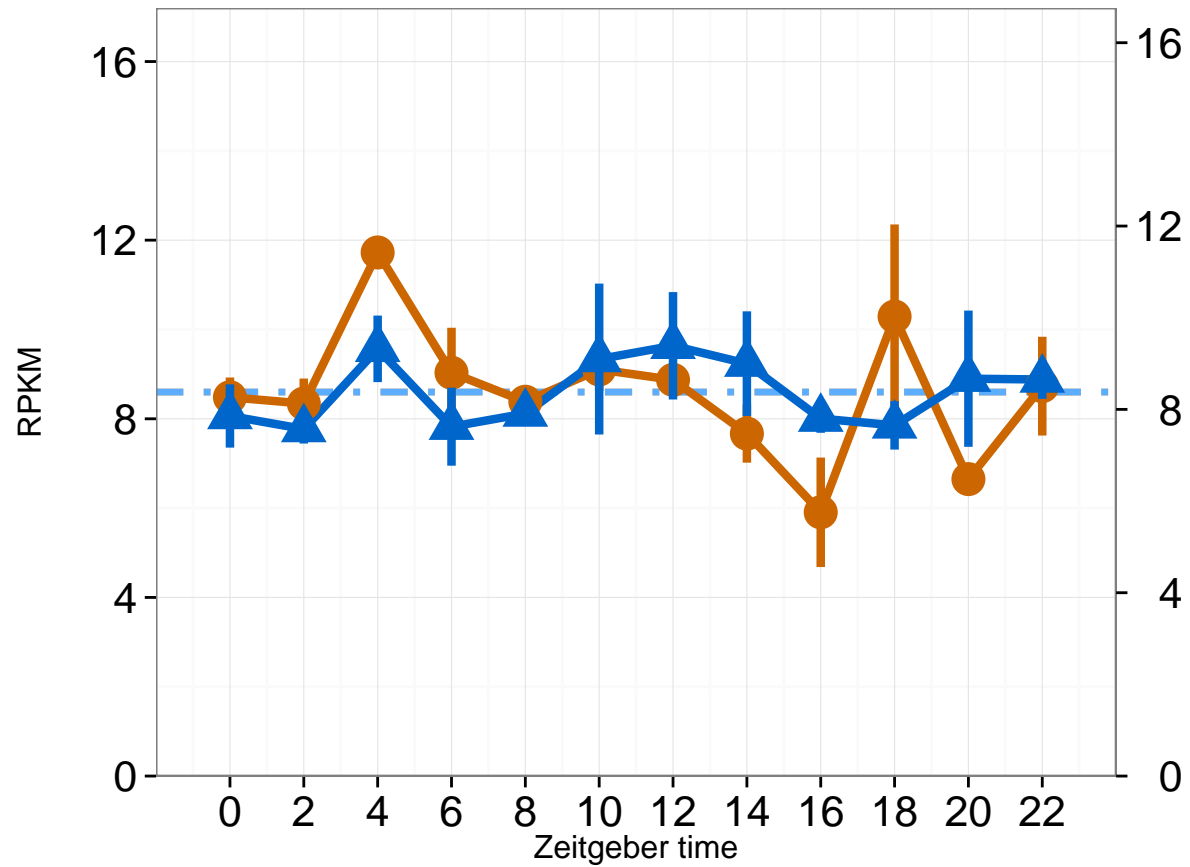

## Mnd1

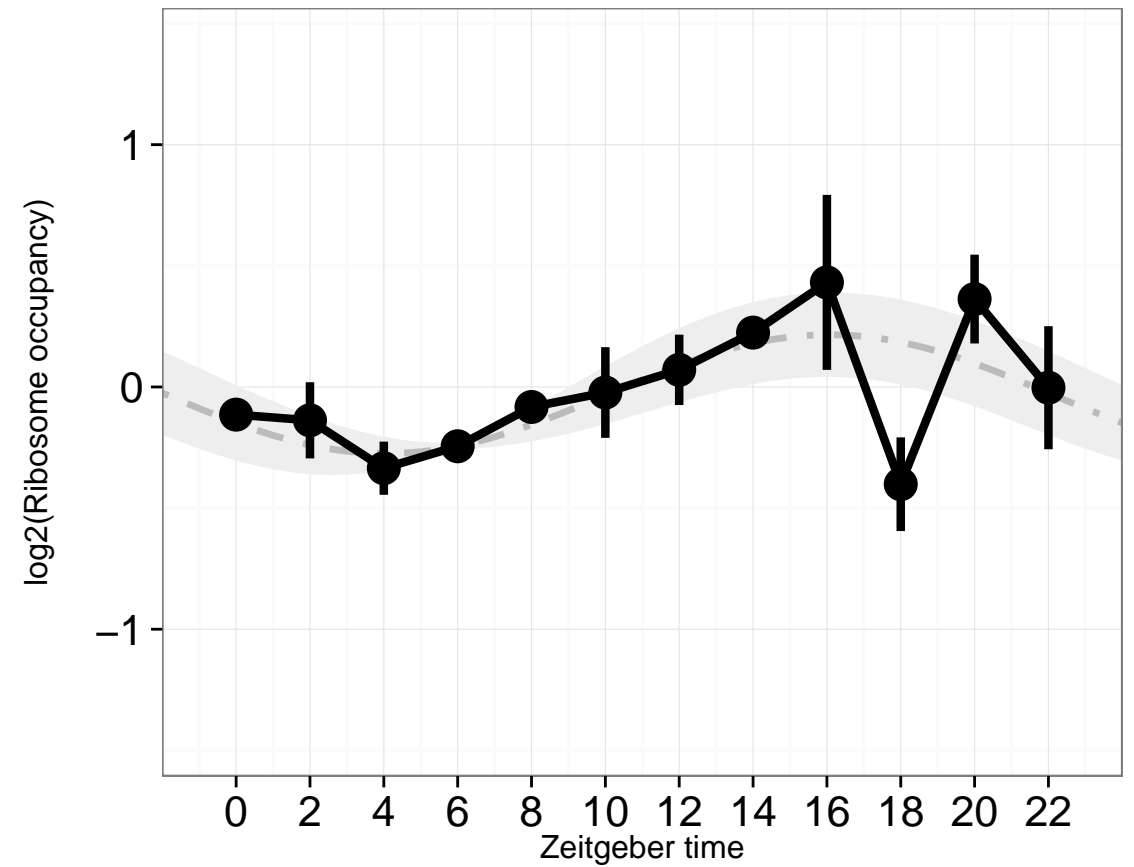

Supplement: SuppDataset_1.zip [file Mnd1_set_A.pdf › Supplemental Dataset 1/A-mRNA_nonrhyth_translation_nonrhyth/Mnd1_set_A.pdf]

# Mnda

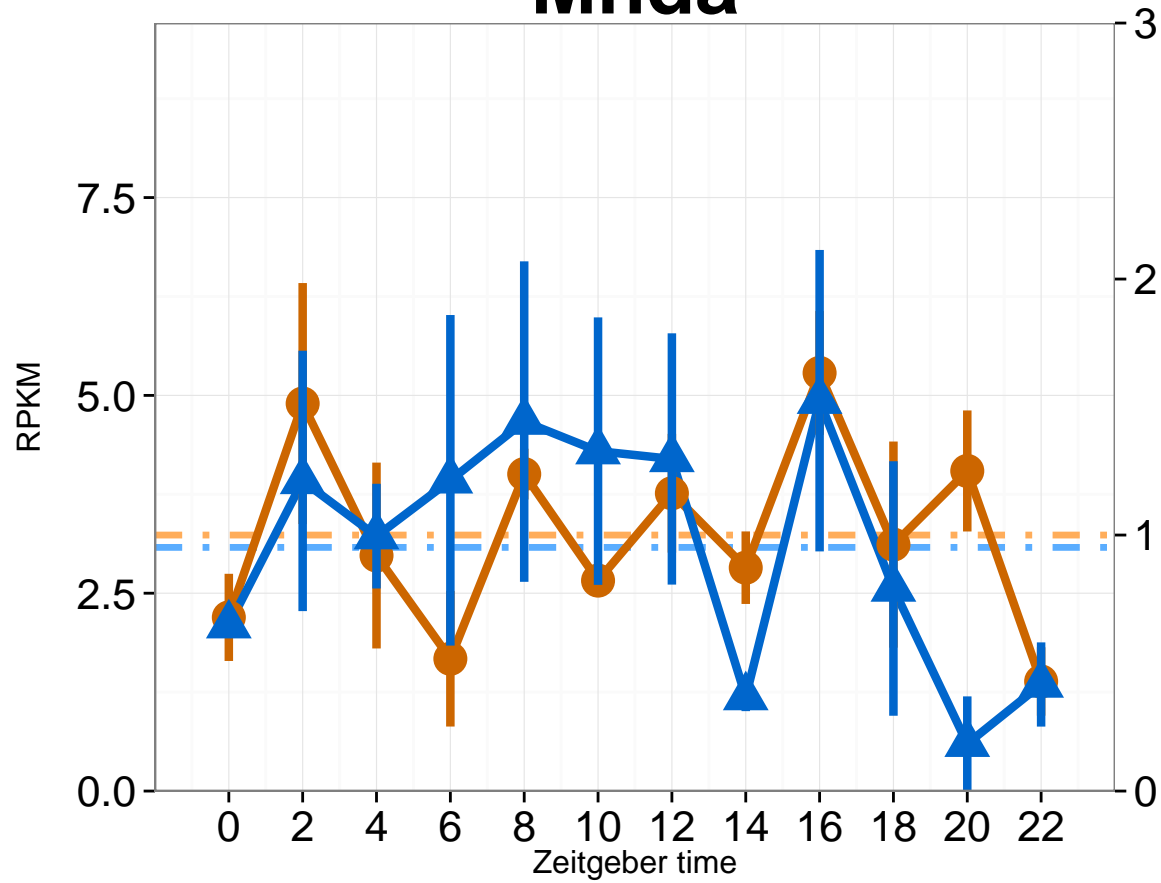

# Mnda

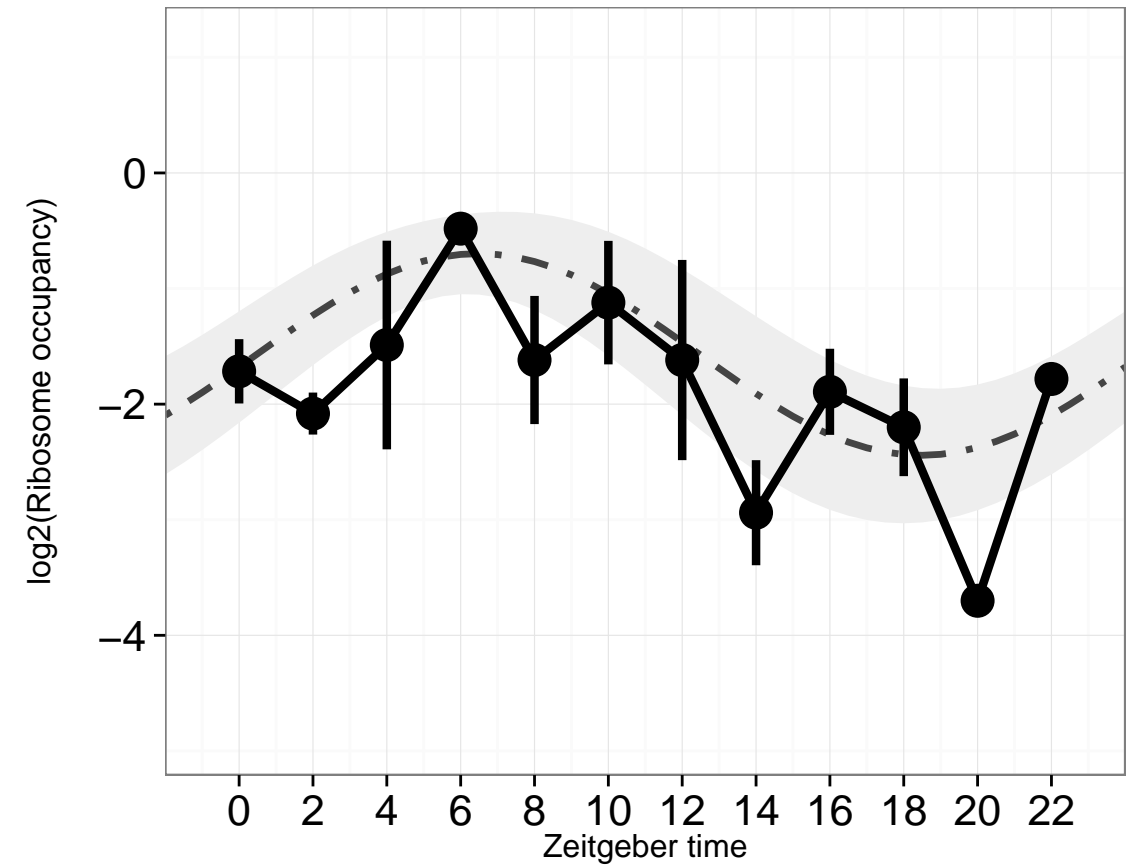

Supplement: SuppDataset_1.zip [file Mnda_set_A.pdf › Supplemental Dataset 1/A-mRNA_nonrhyth_translation_nonrhyth/Mnda_set_A.pdf]

## Mndal

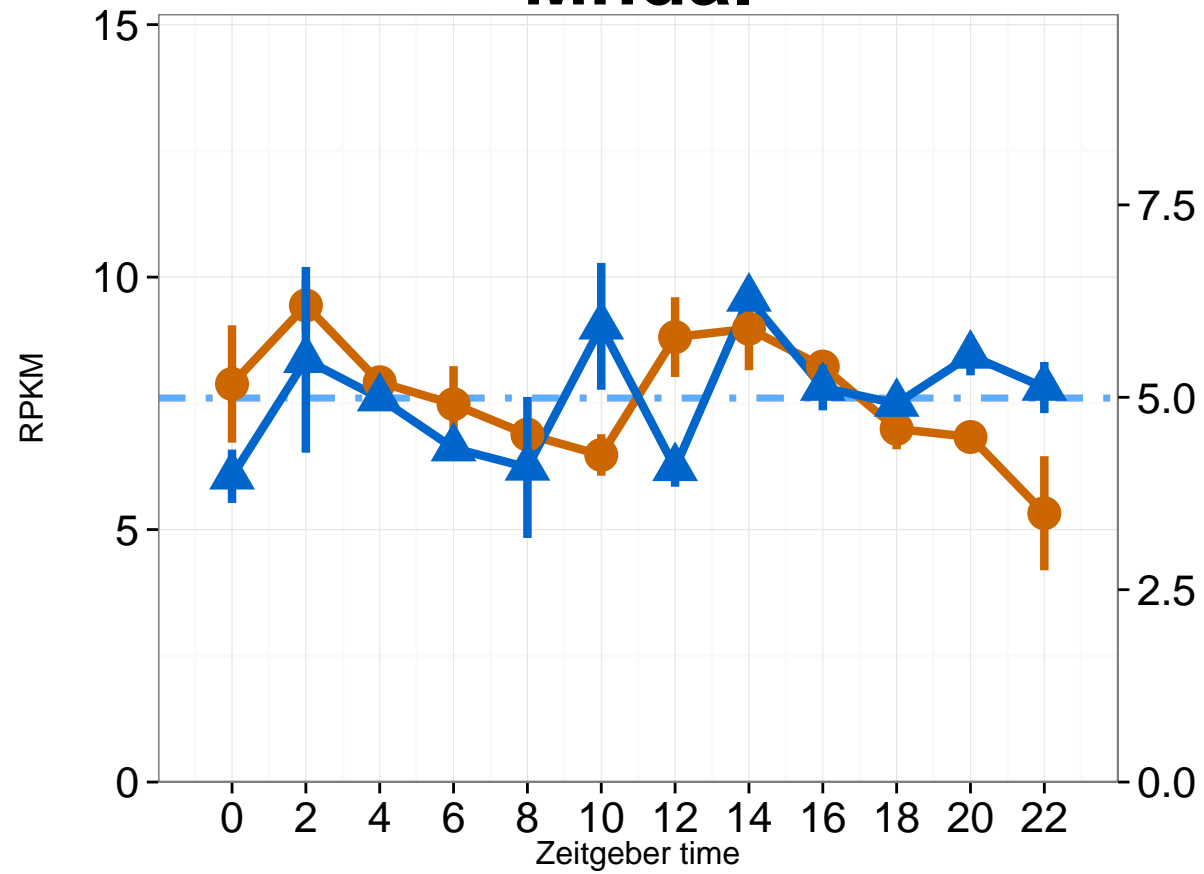

## Mndal

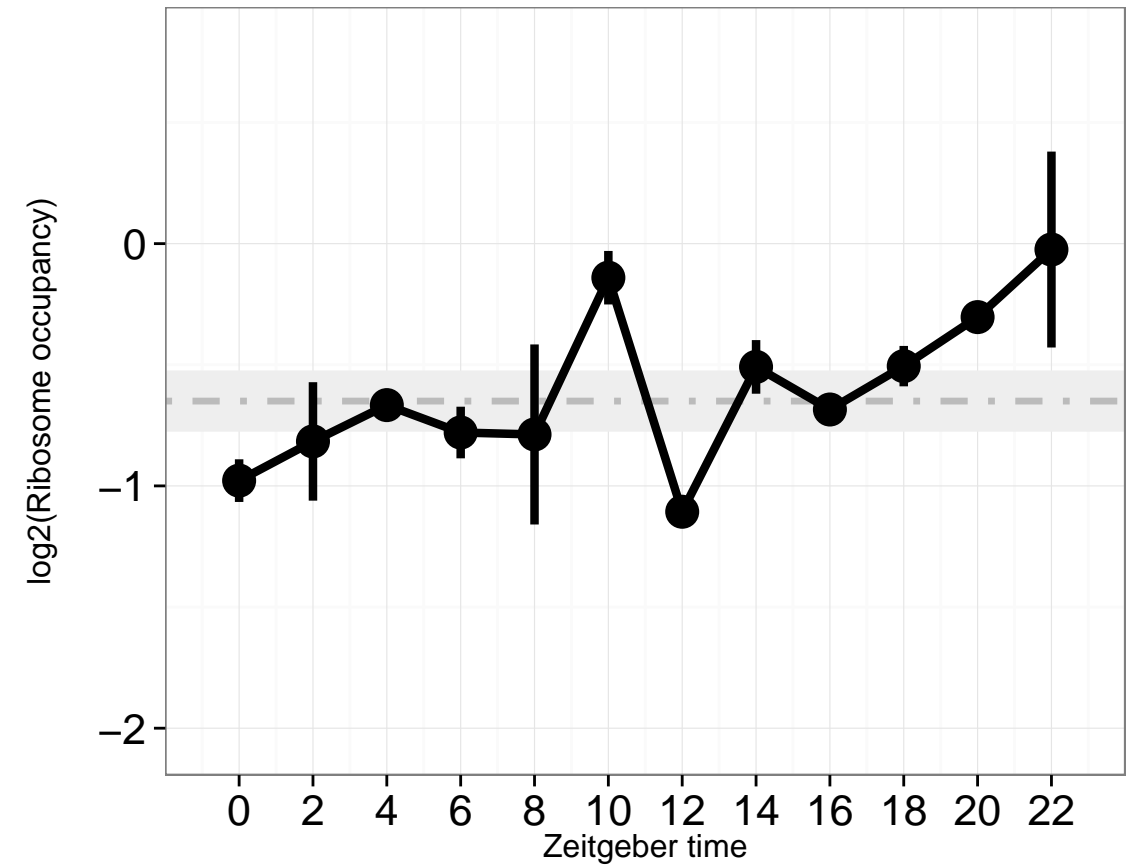

Supplement: SuppDataset_1.zip [file Mndal_set_A.pdf › Supplemental Dataset 1/A-mRNA_nonrhyth_translation_nonrhyth/Mndal_set_A.pdf]

## Mnt

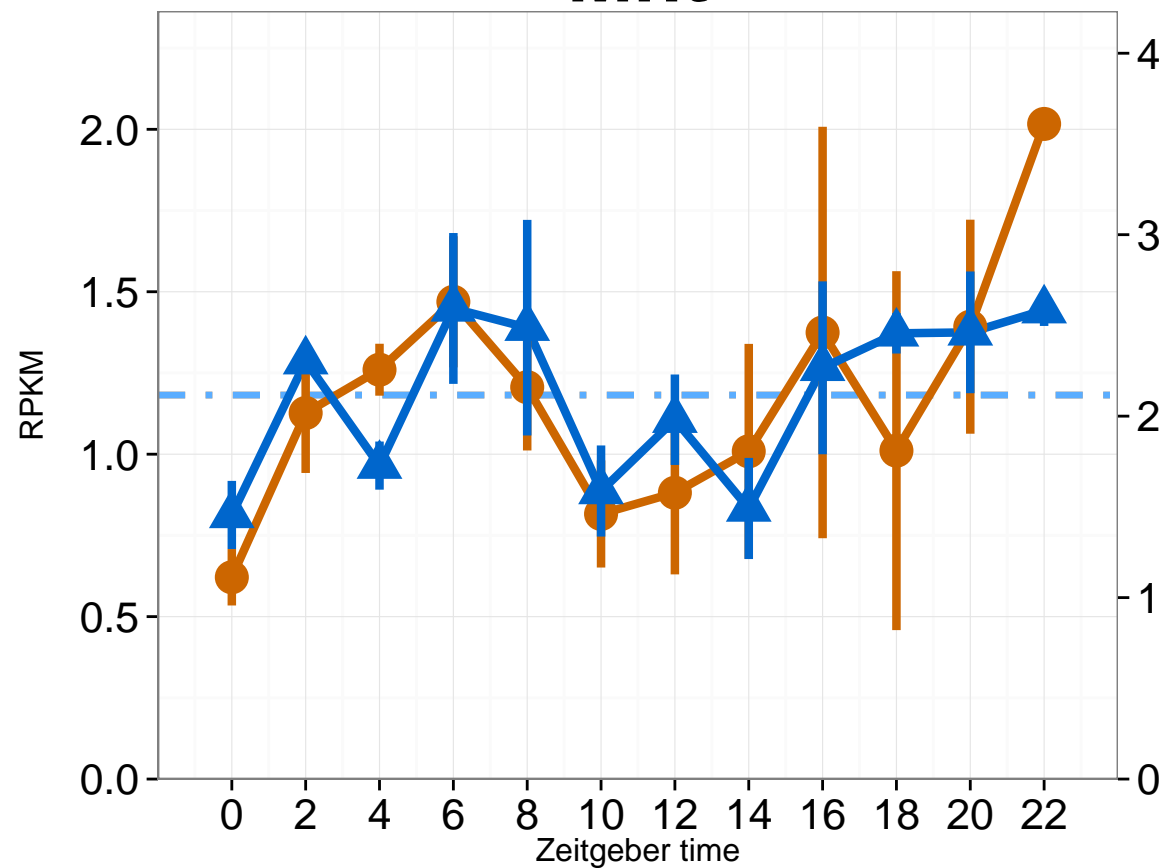

## Mnt

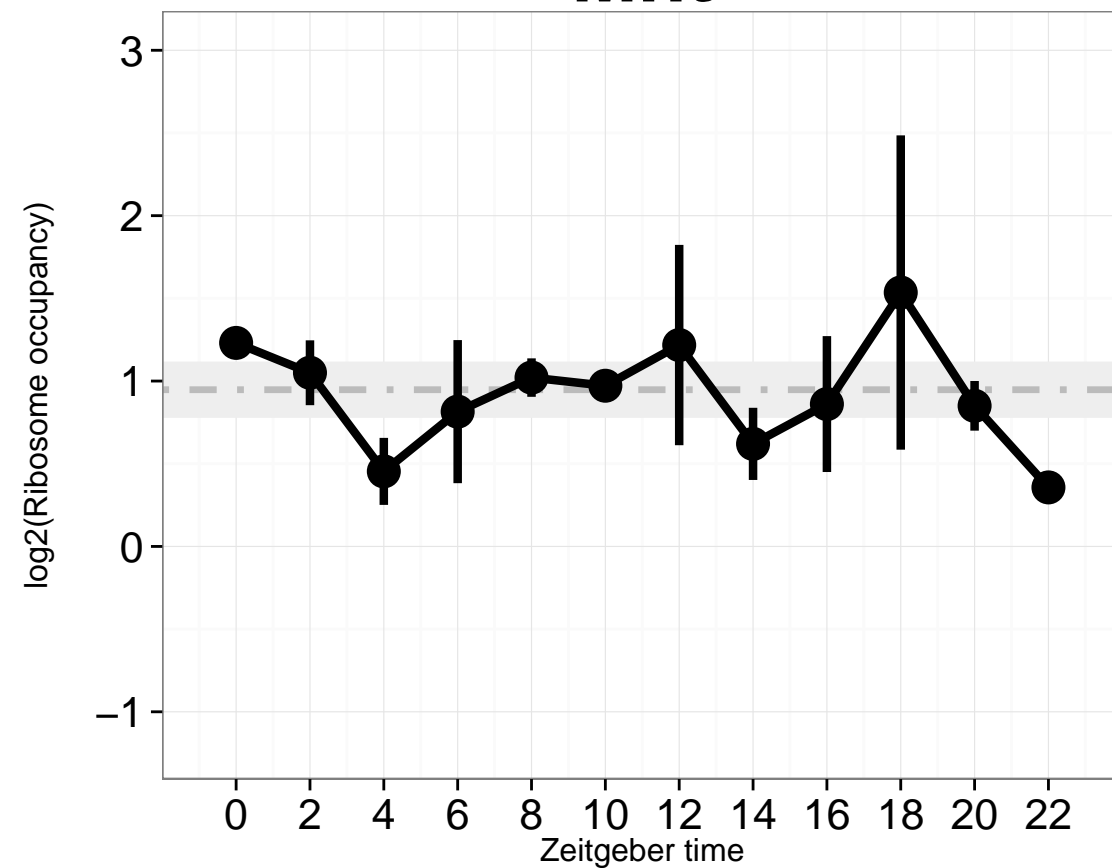

Supplement: SuppDataset_1.zip [file Mnt_set_A.pdf › Supplemental Dataset 1/A-mRNA_nonrhyth_translation_nonrhyth/Mnt_set_A.pdf]

# Mob1a

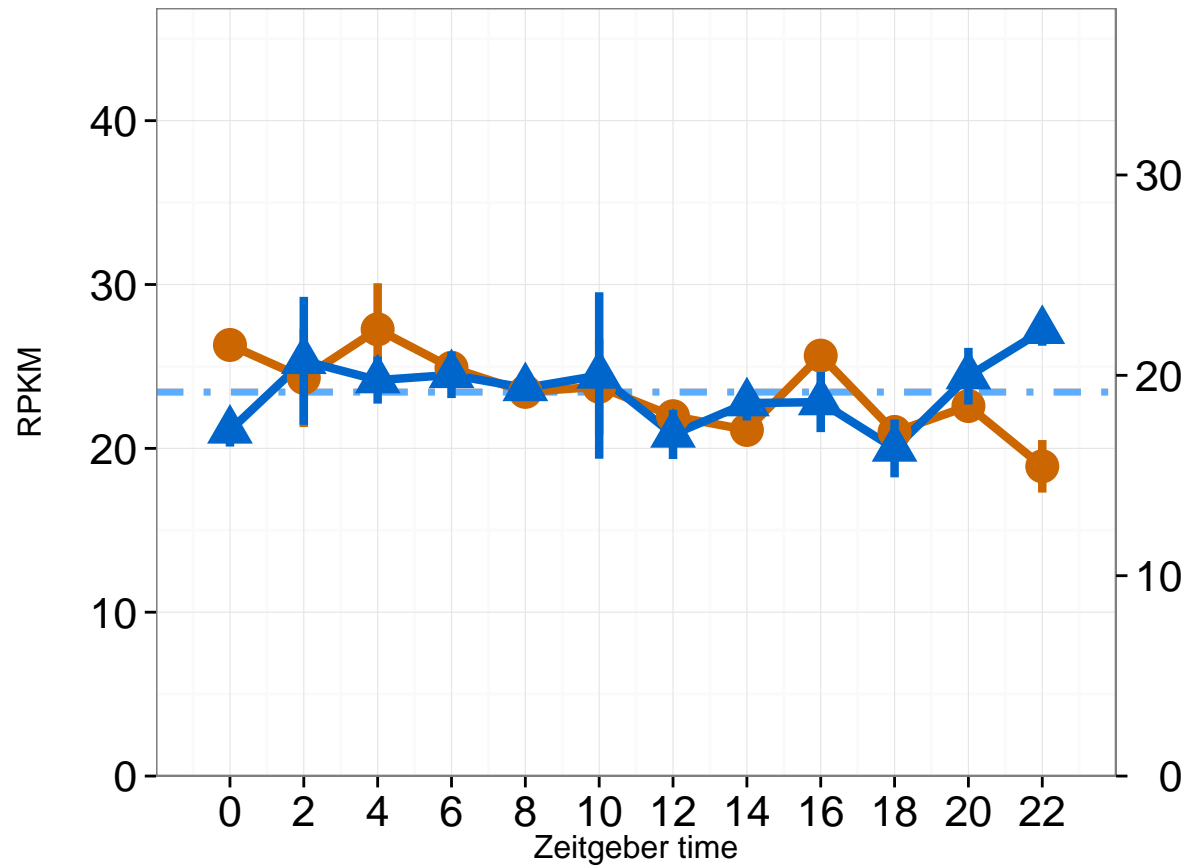

# Mob1a

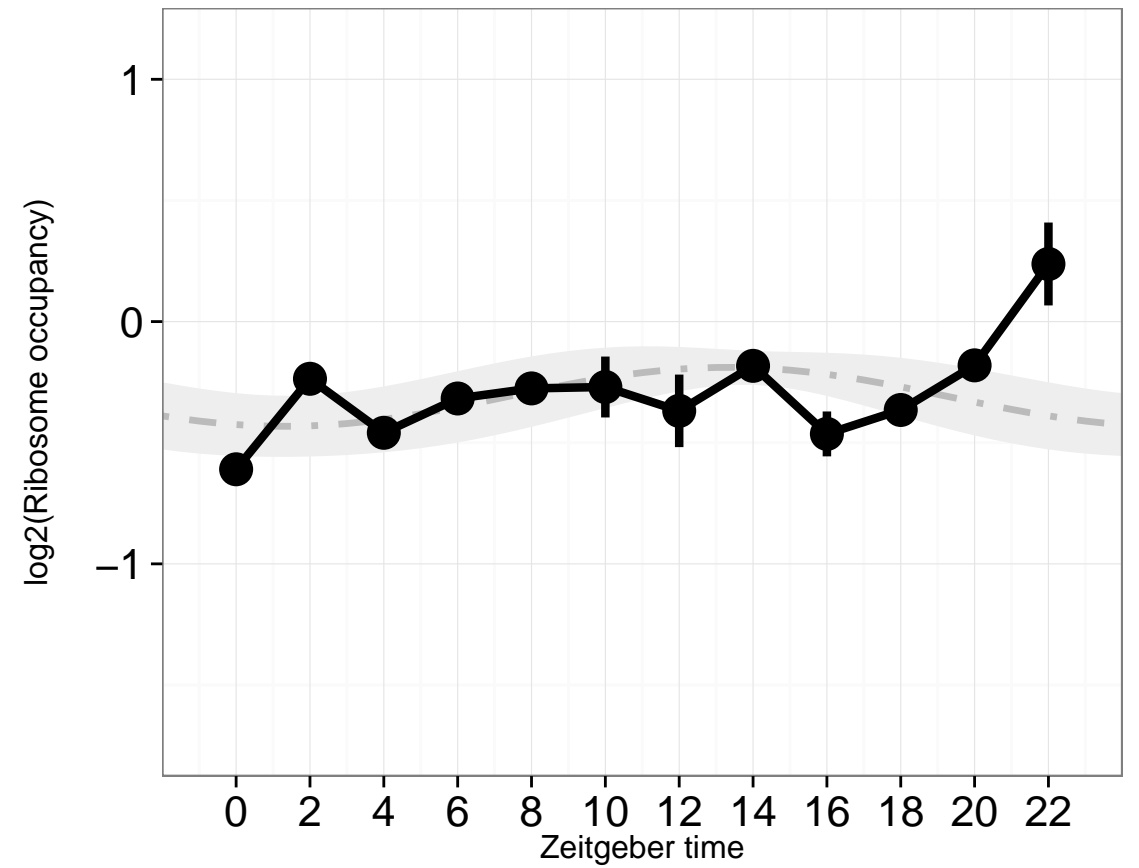

Supplement: SuppDataset_1.zip [file Mob1a_set_A.pdf › Supplemental Dataset 1/A-mRNA_nonrhyth_translation_nonrhyth/Mob1a_set_A.pdf]

# Mob1b

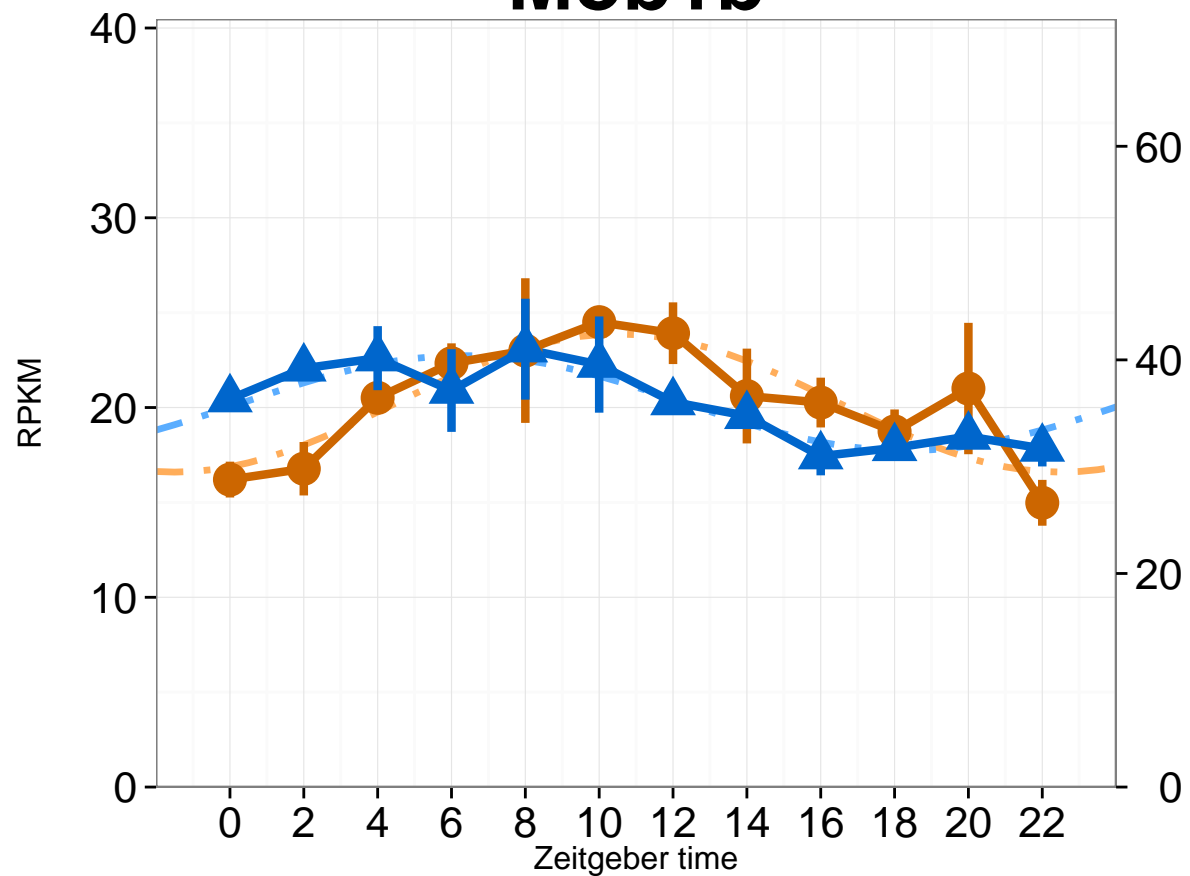

# Mob1b

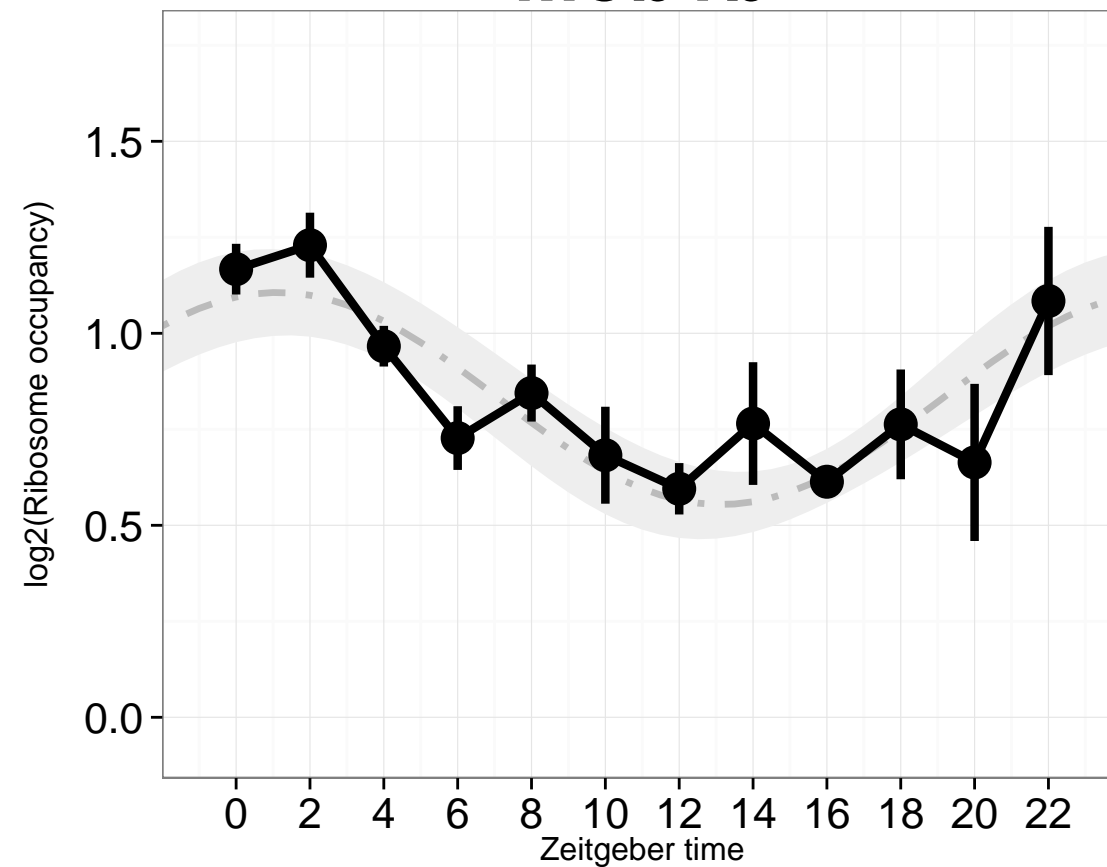

Supplement: SuppDataset_1.zip [file Mob1b_set_A.pdf › Supplemental Dataset 1/A-mRNA_nonrhyth_translation_nonrhyth/Mob1b_set_A.pdf]

## Mob2

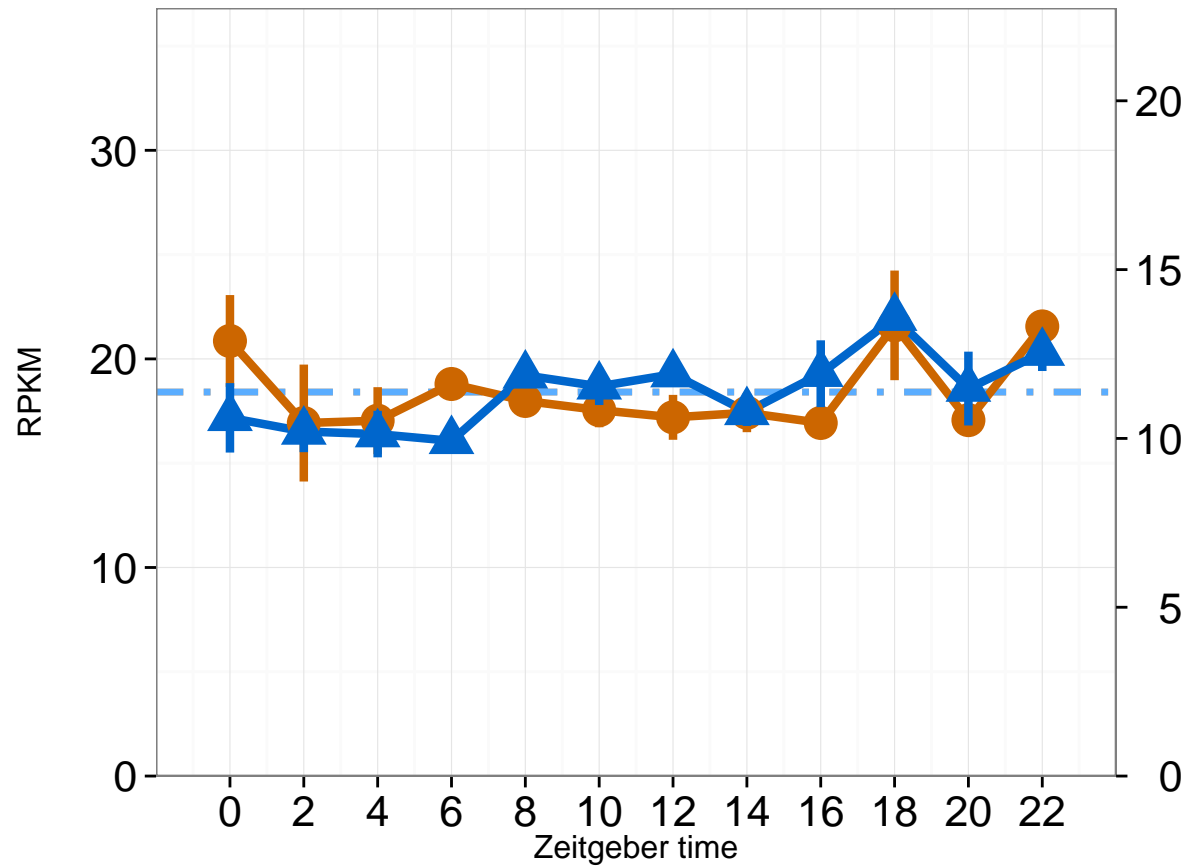

## Mob2

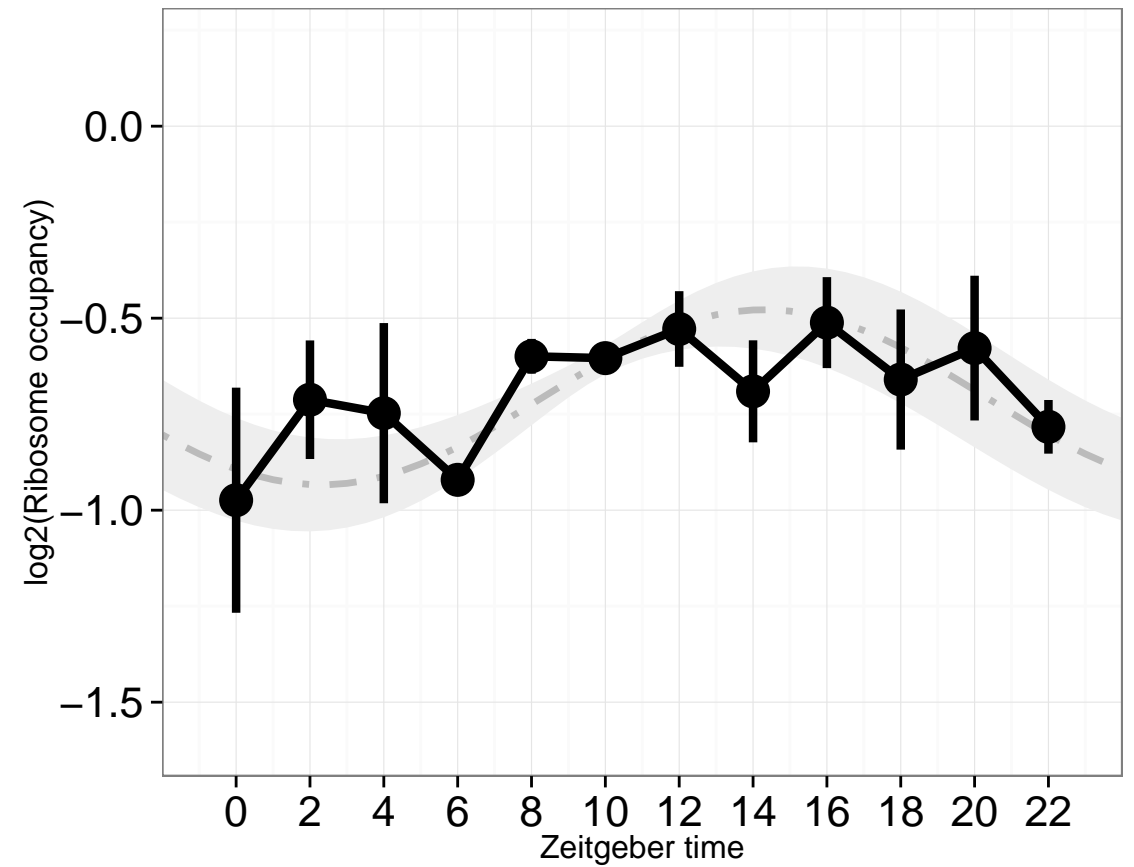

Supplement: SuppDataset_1.zip [file Mob2_set_A.pdf › Supplemental Dataset 1/A-mRNA_nonrhyth_translation_nonrhyth/Mob2_set_A.pdf]

# Mob3a

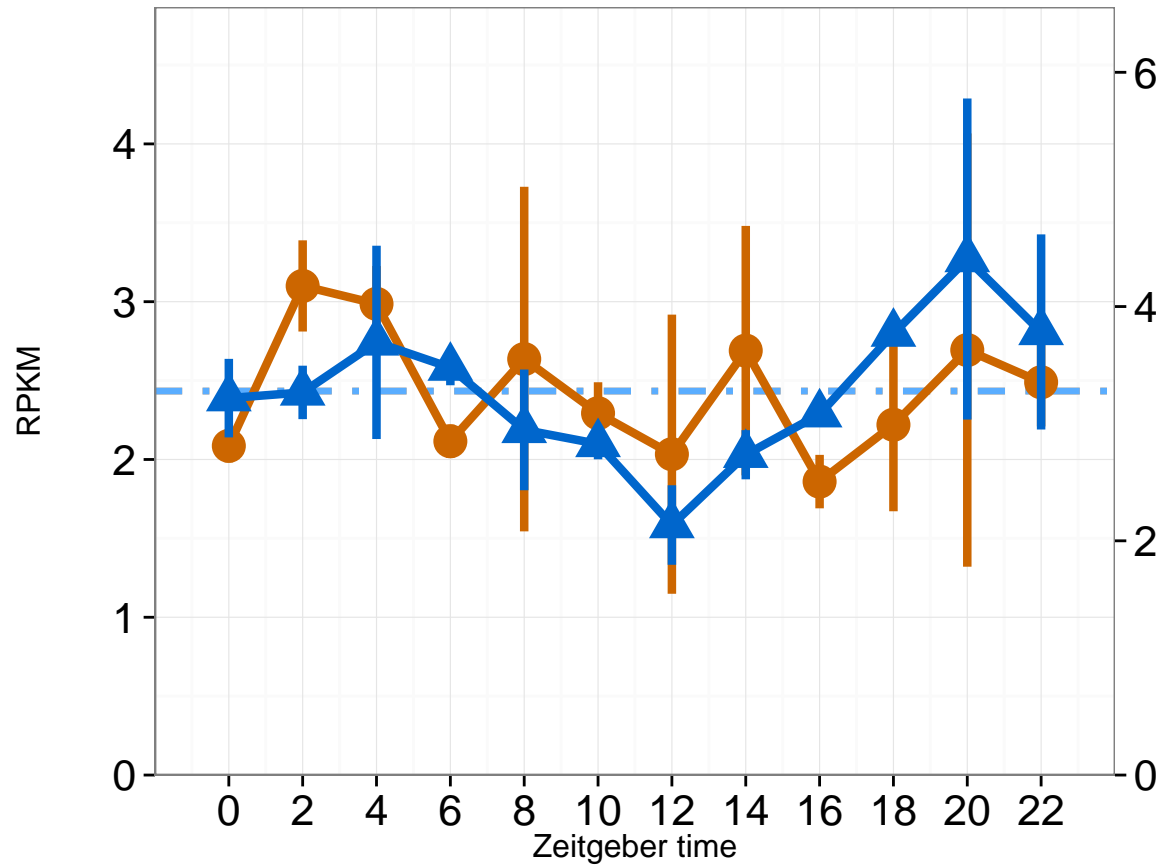

# Mob3a

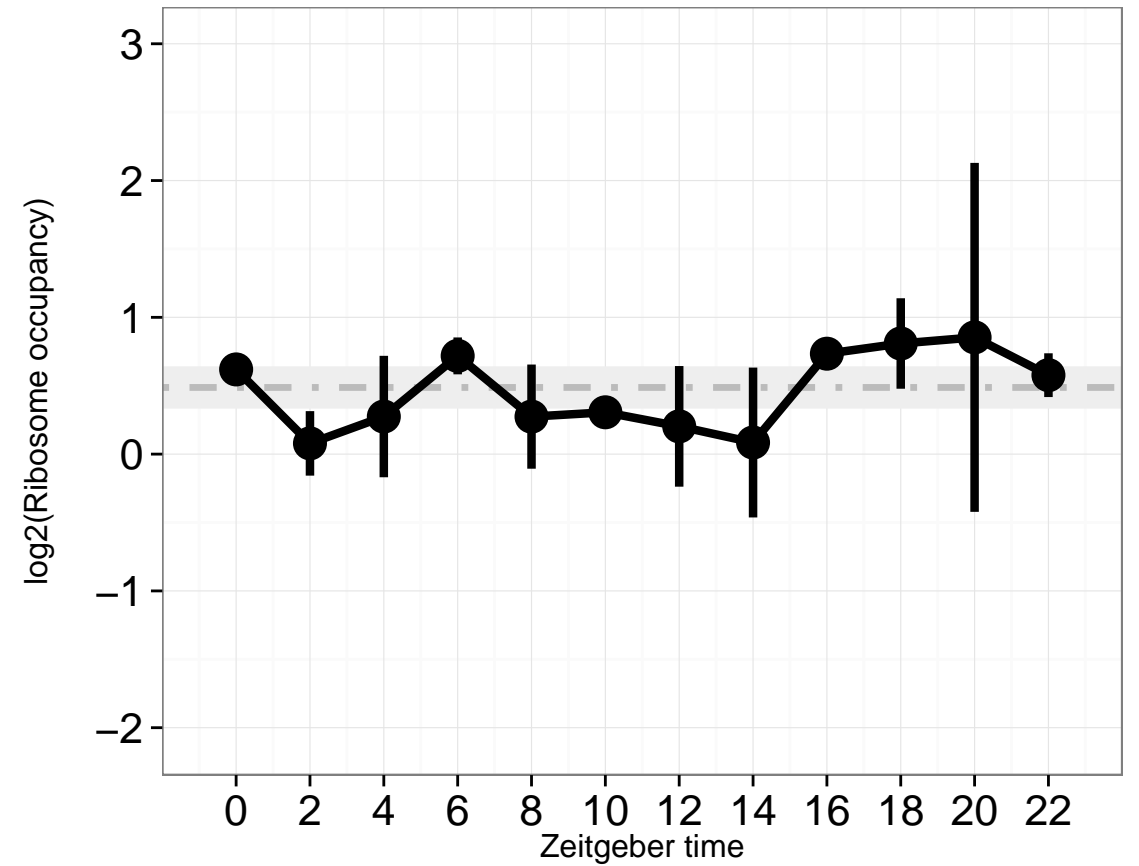

Supplement: SuppDataset_1.zip [file Mob3a_set_A.pdf › Supplemental Dataset 1/A-mRNA_nonrhyth_translation_nonrhyth/Mob3a_set_A.pdf]

## Mob3b

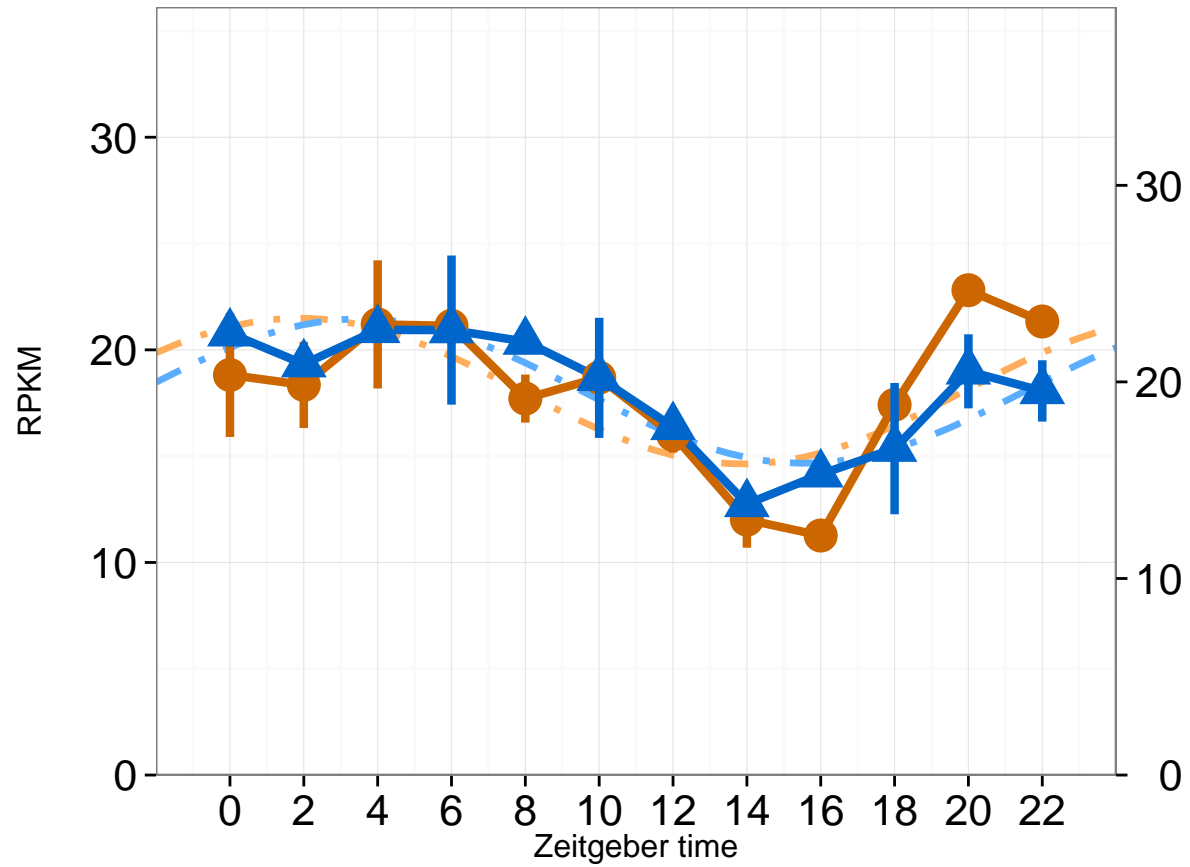

## Mob3b

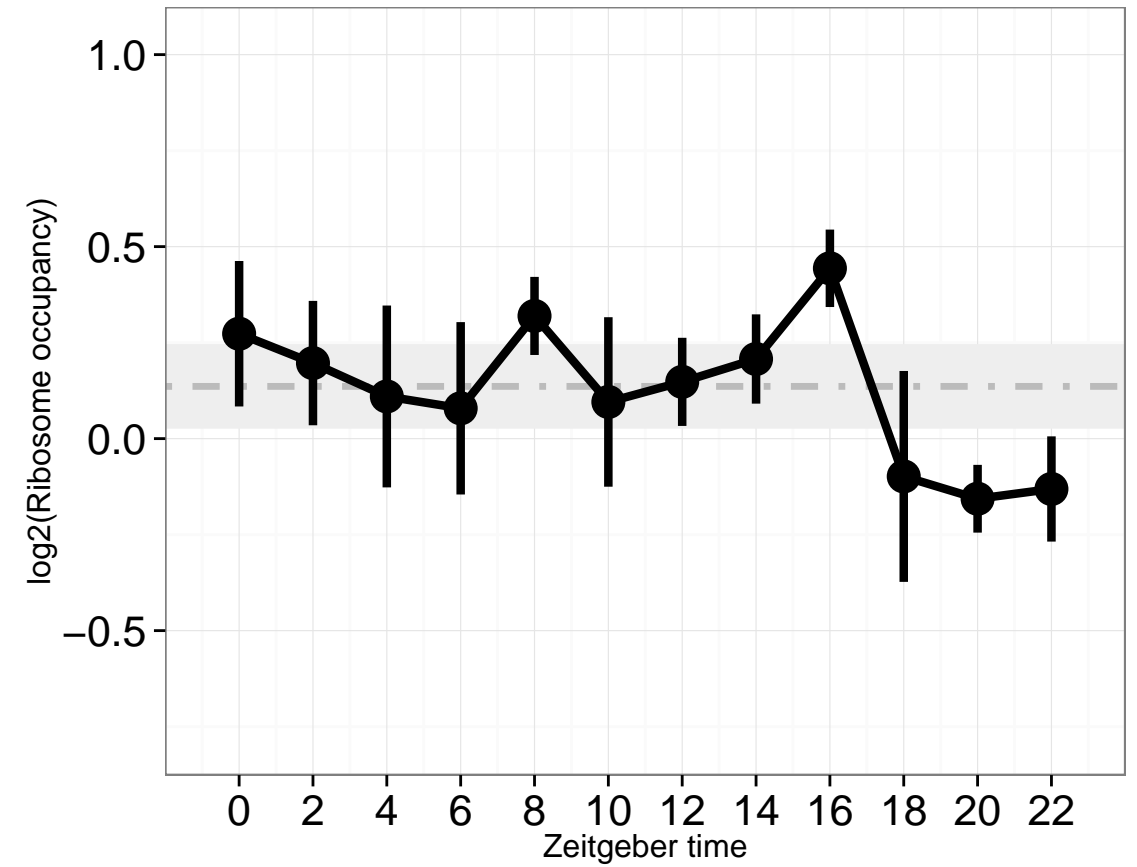

Supplement: SuppDataset_1.zip [file Mob3b_set_A.pdf › Supplemental Dataset 1/A-mRNA_nonrhyth_translation_nonrhyth/Mob3b_set_A.pdf]

## Mob3c

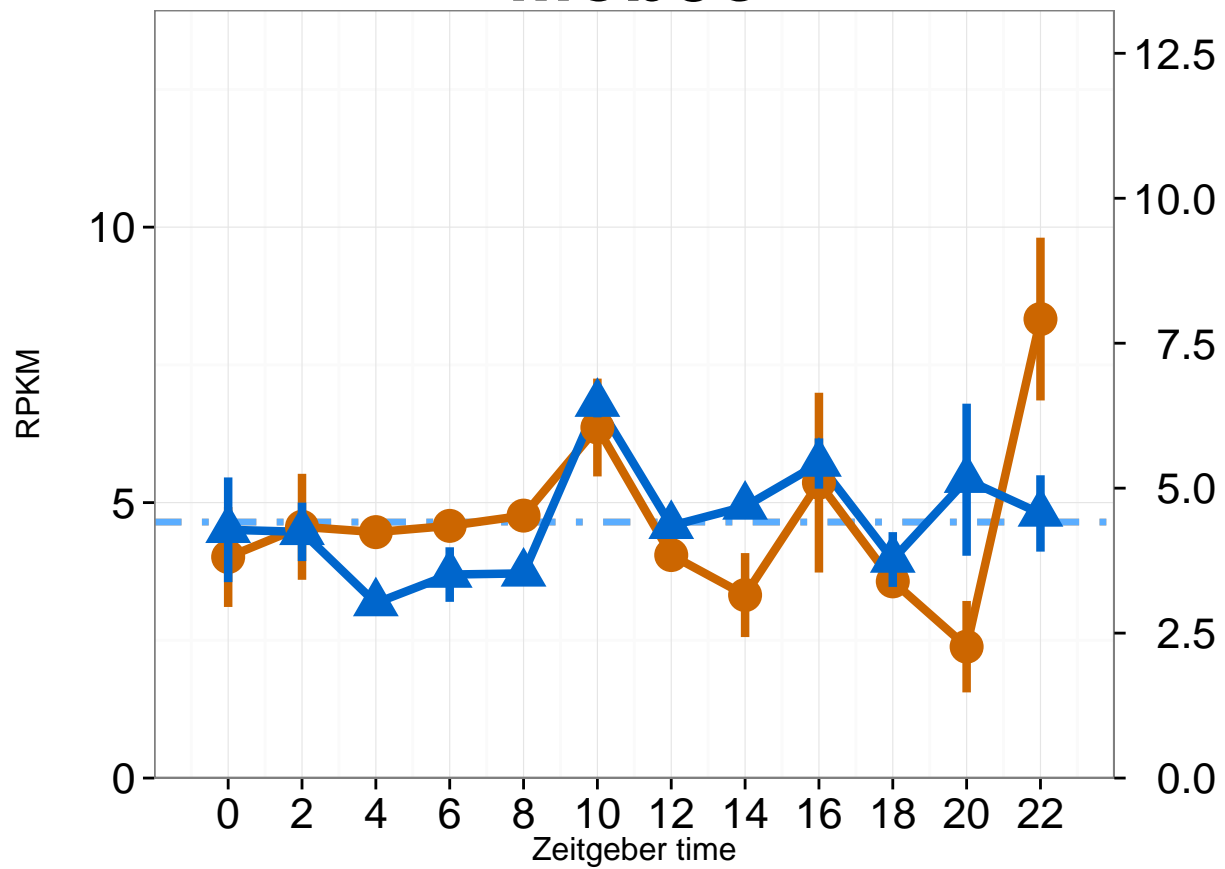

## Mob3c

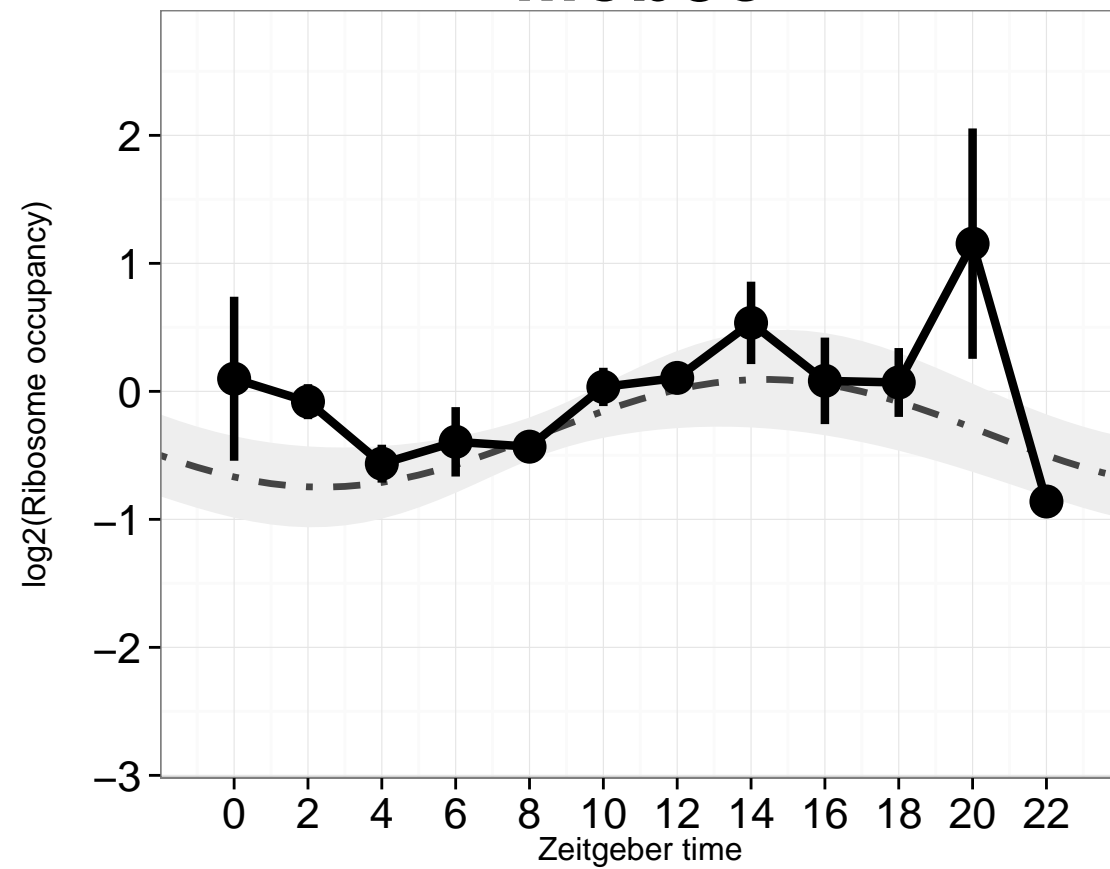

Supplement: SuppDataset_1.zip [file Mob3c_set_A.pdf › Supplemental Dataset 1/A-mRNA_nonrhyth_translation_nonrhyth/Mob3c_set_A.pdf]

## Mob4

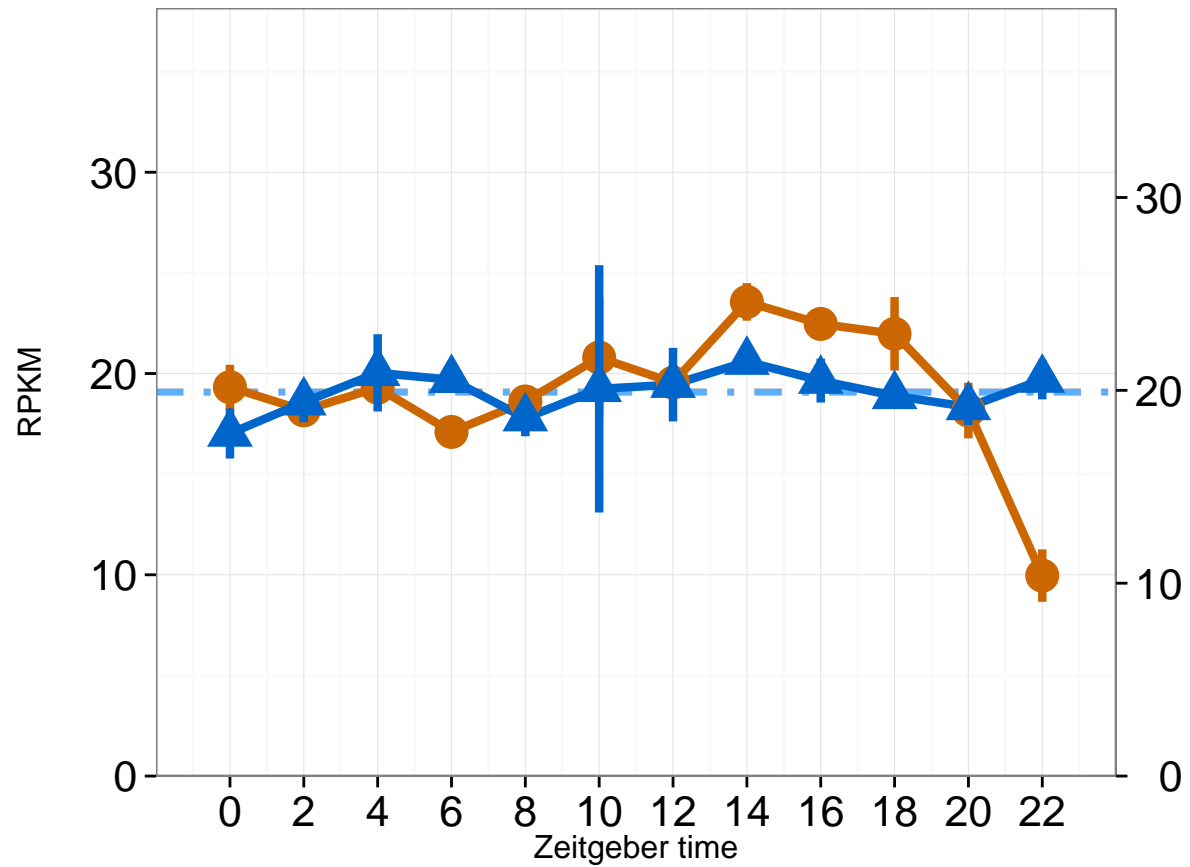

## Mob4

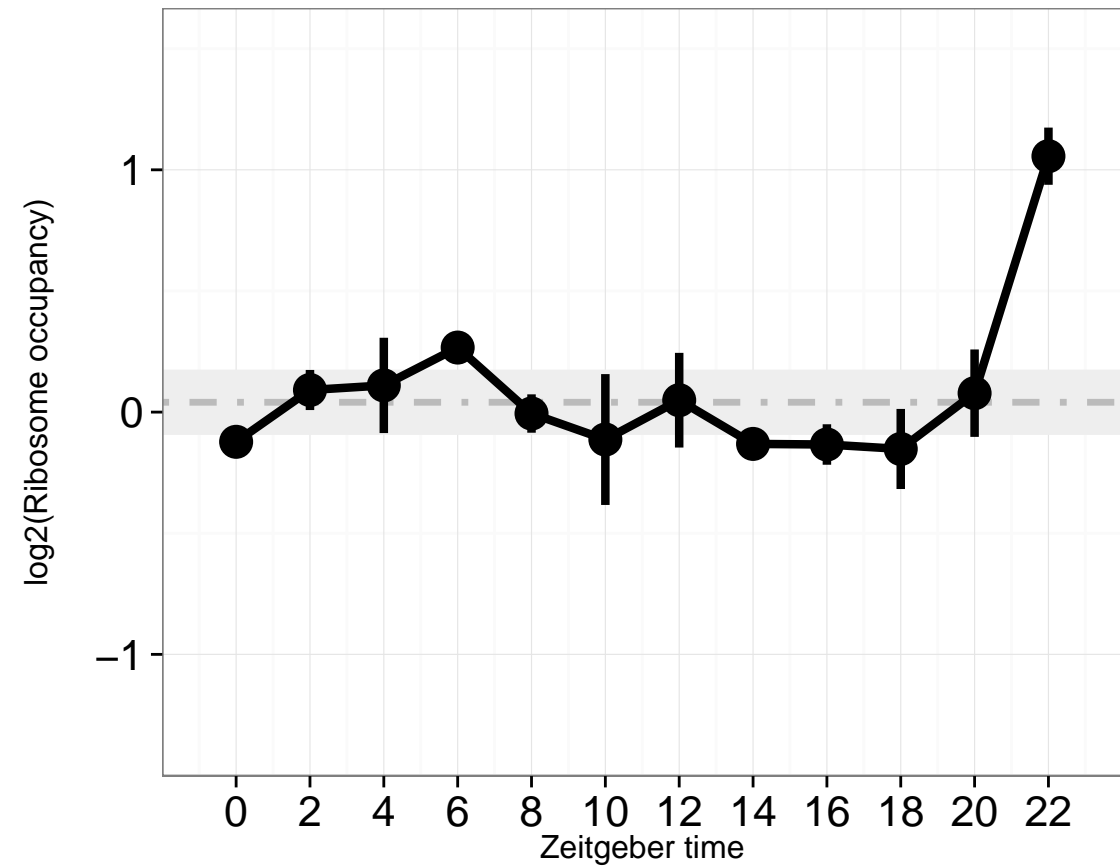

Supplement: SuppDataset_1.zip [file Mob4_set_A.pdf › Supplemental Dataset 1/A-mRNA_nonrhyth_translation_nonrhyth/Mob4_set_A.pdf]

## Mocs1

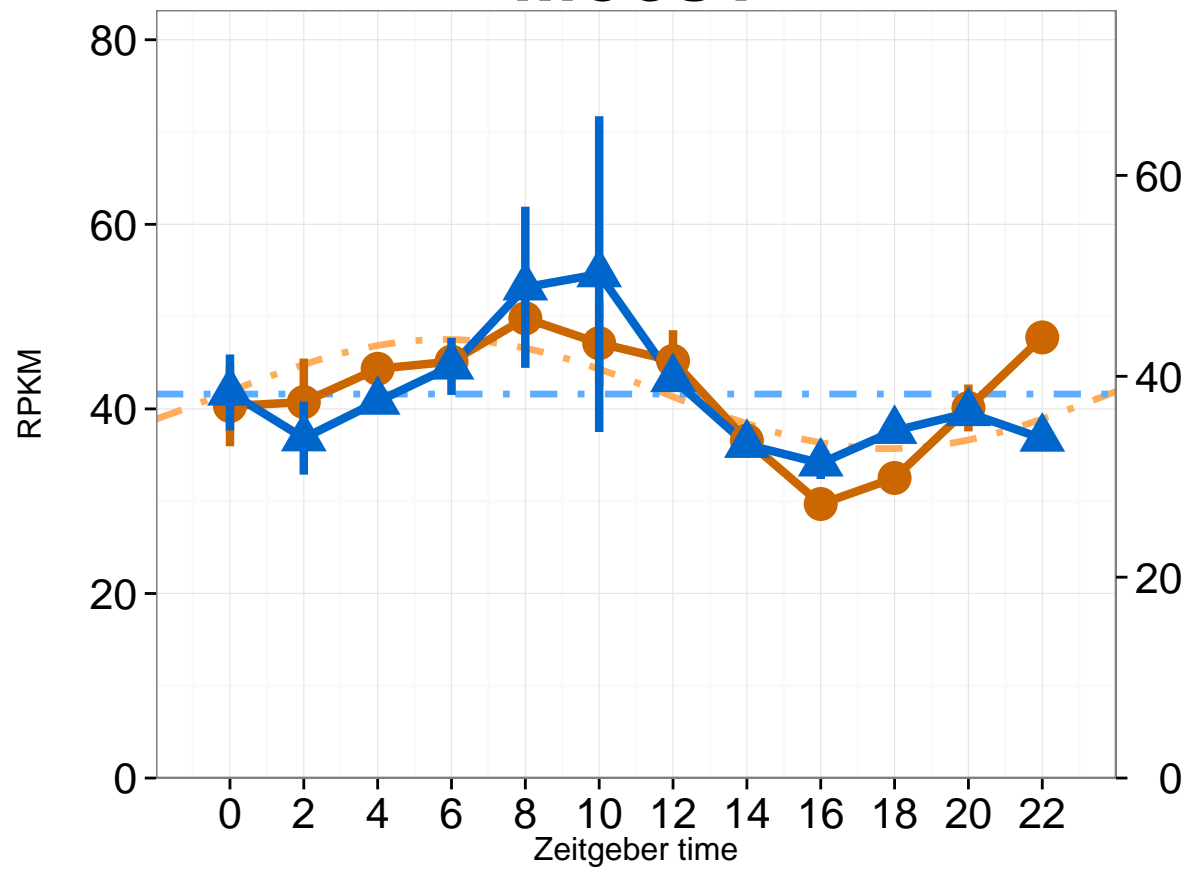

## Mocs1

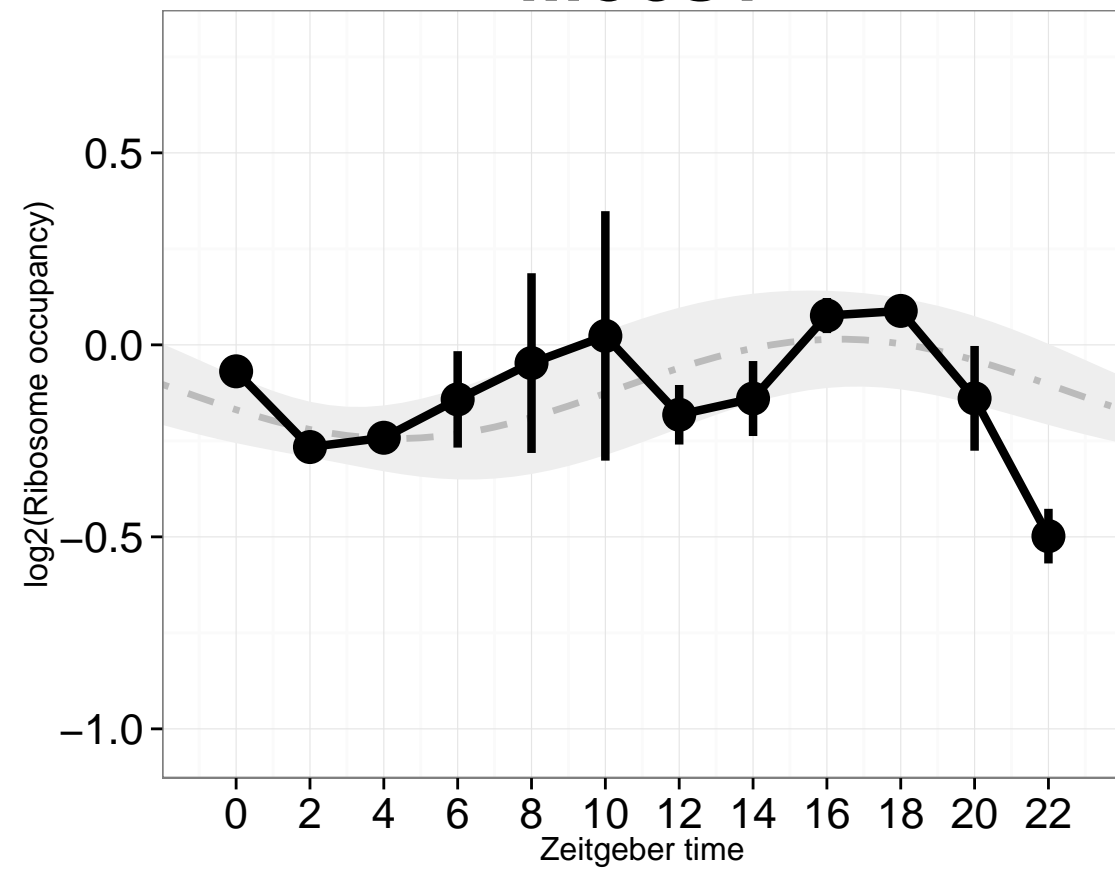

Supplement: SuppDataset_1.zip [file Mocs1_set_A.pdf › Supplemental Dataset 1/A-mRNA_nonrhyth_translation_nonrhyth/Mocs1_set_A.pdf]

## Mocs2

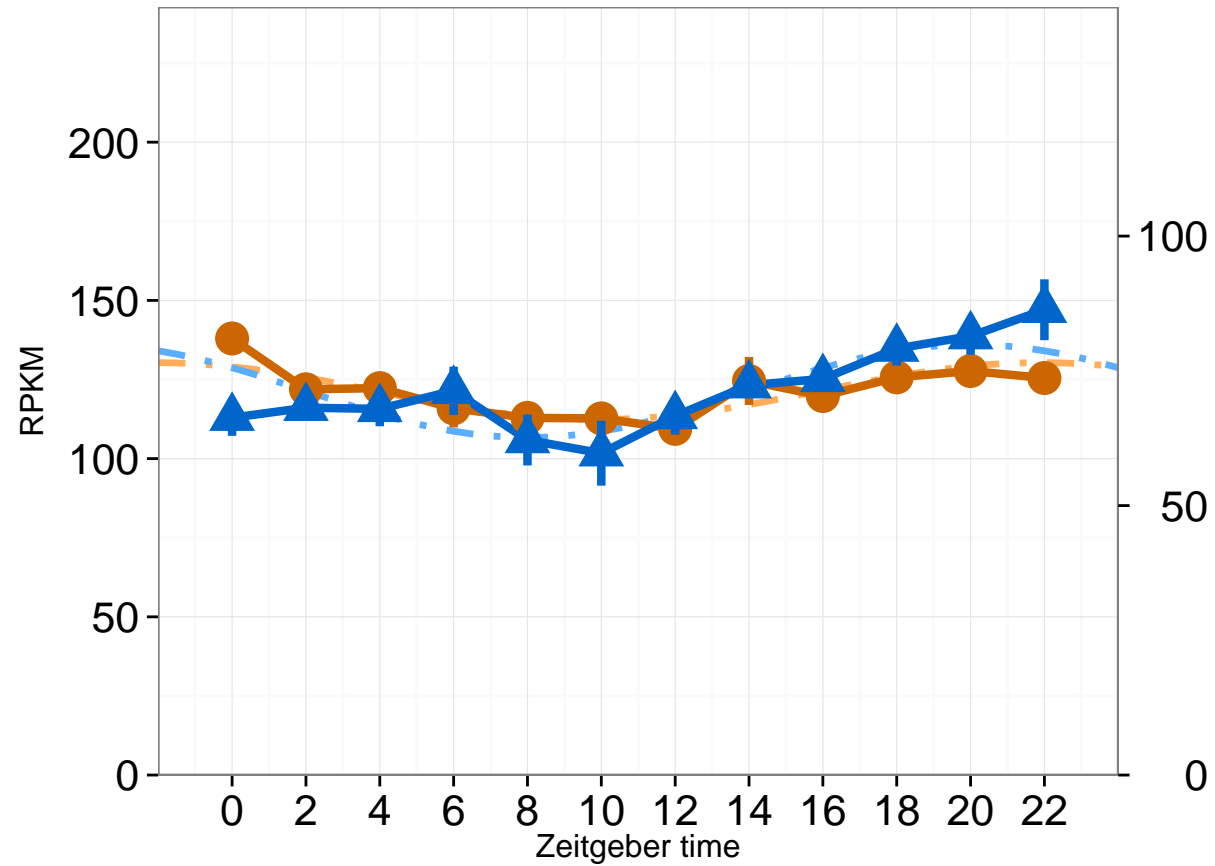

## Mocs2

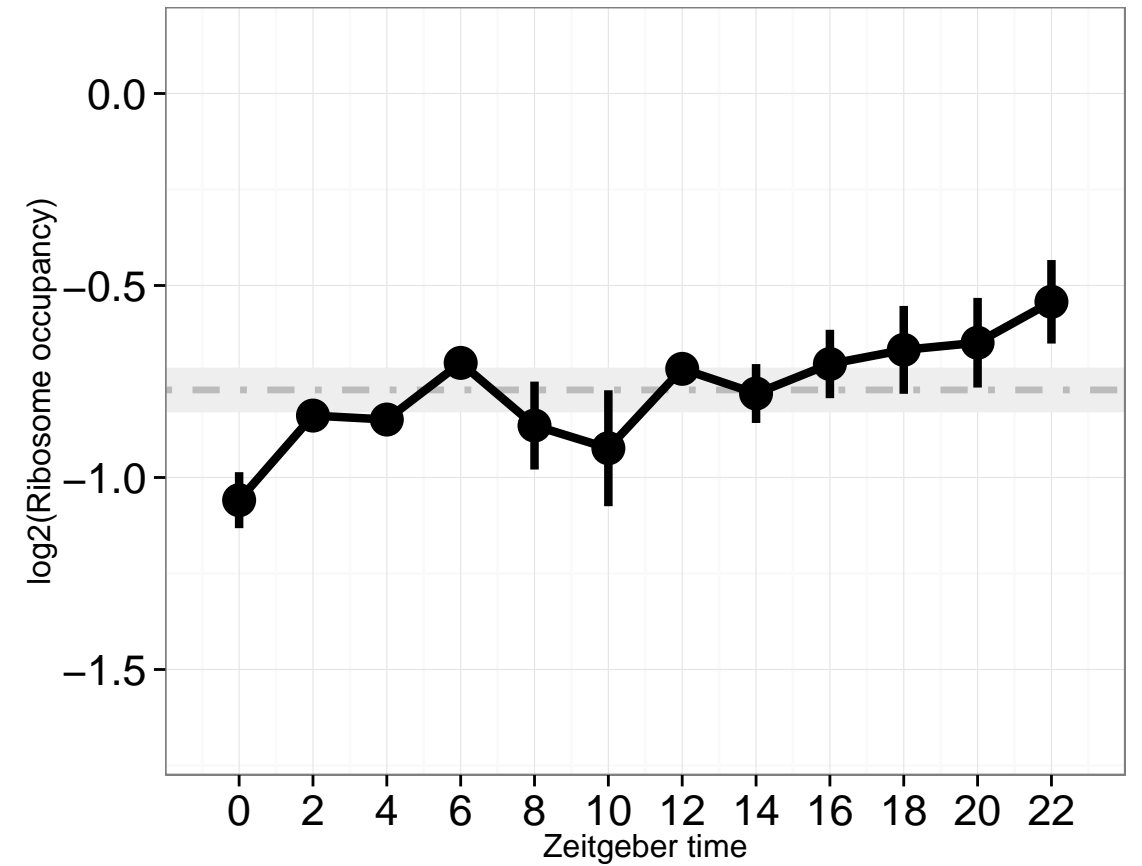

Supplement: SuppDataset_1.zip [file Mocs2_set_A.pdf › Supplemental Dataset 1/A-mRNA_nonrhyth_translation_nonrhyth/Mocs2_set_A.pdf]

## Mogs

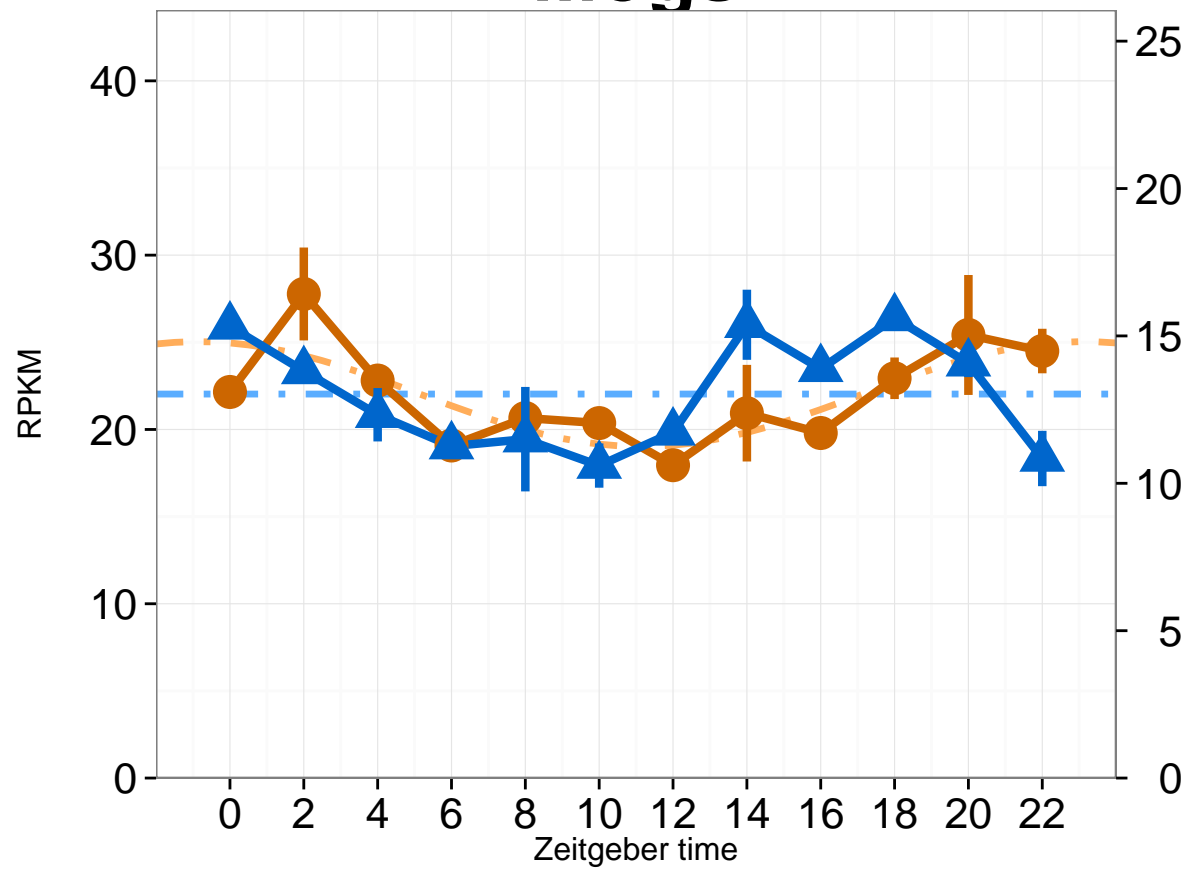

## Mogs

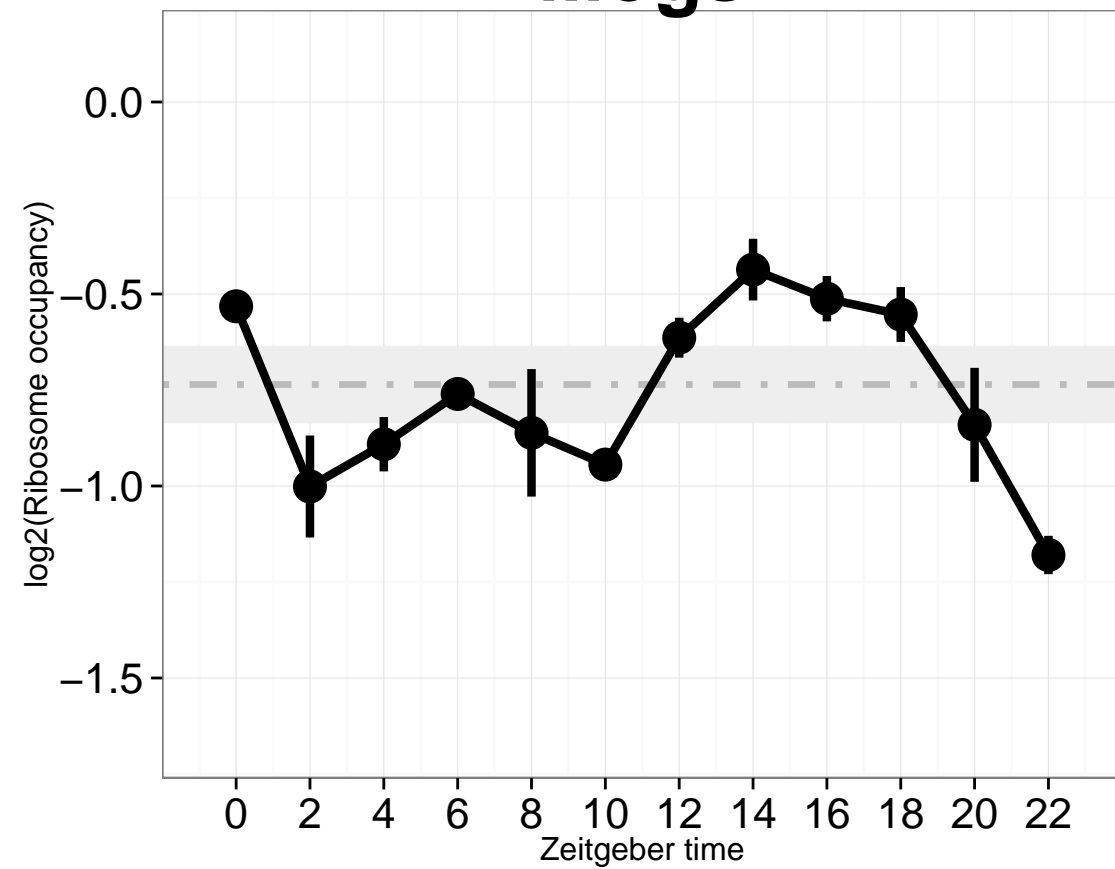

Supplement: SuppDataset_1.zip [file Mogs_set_A.pdf › Supplemental Dataset 1/A-mRNA_nonrhyth_translation_nonrhyth/Mogs_set_A.pdf]

# Mon1a

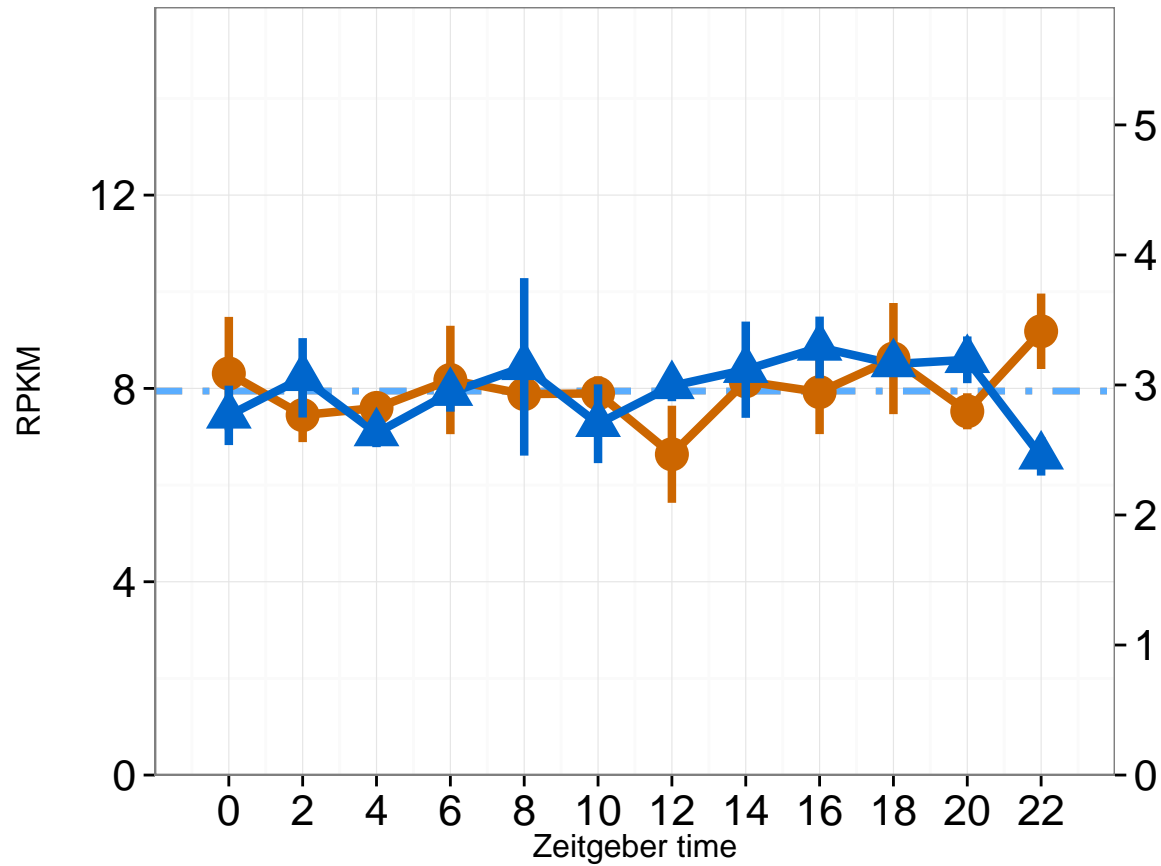

# Mon1a

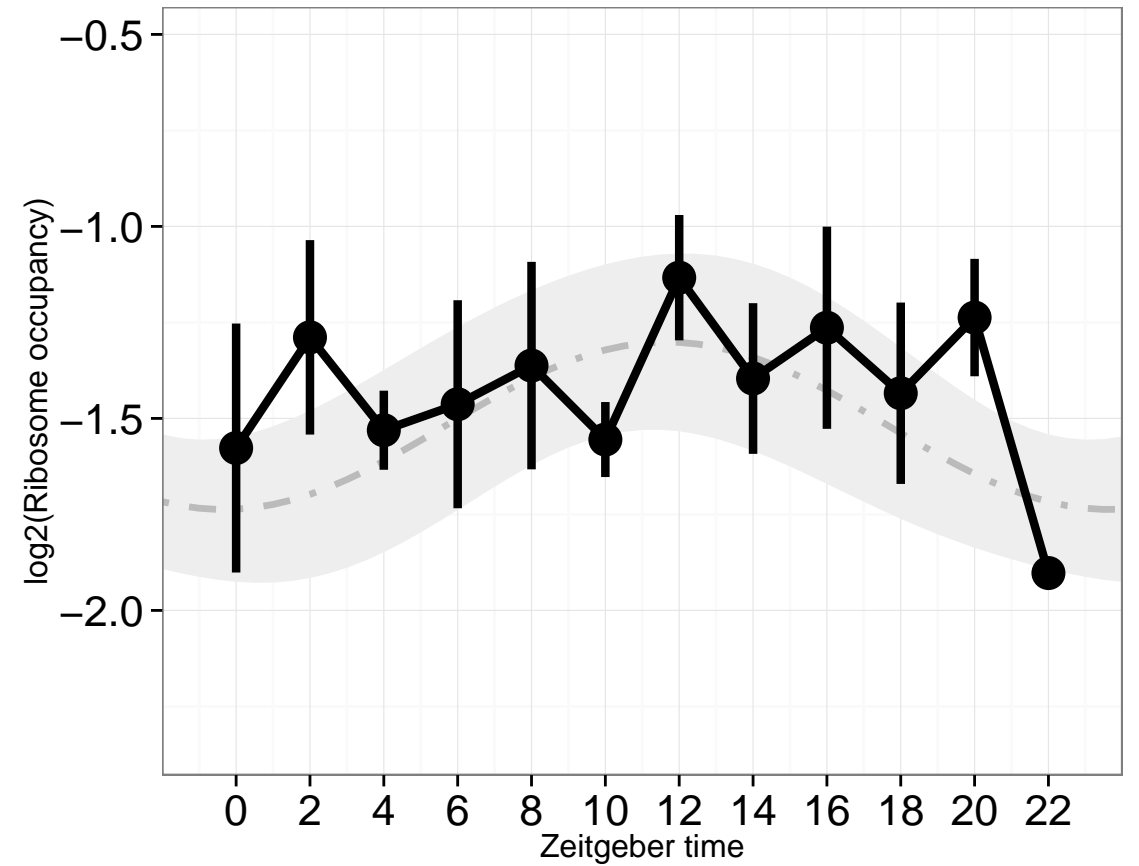

Supplement: SuppDataset_1.zip [file Mon1a_set_A.pdf › Supplemental Dataset 1/A-mRNA_nonrhyth_translation_nonrhyth/Mon1a_set_A.pdf]

# Mon2

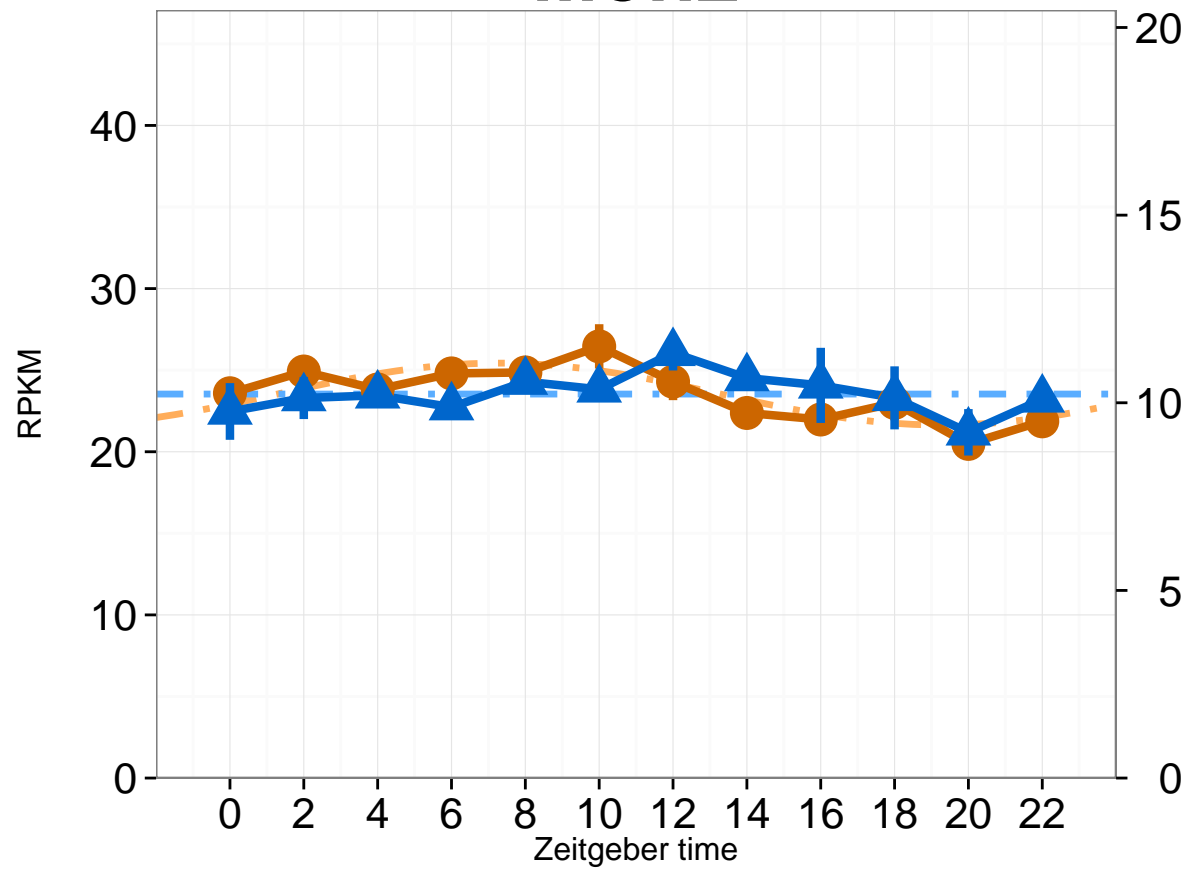

# Mon2

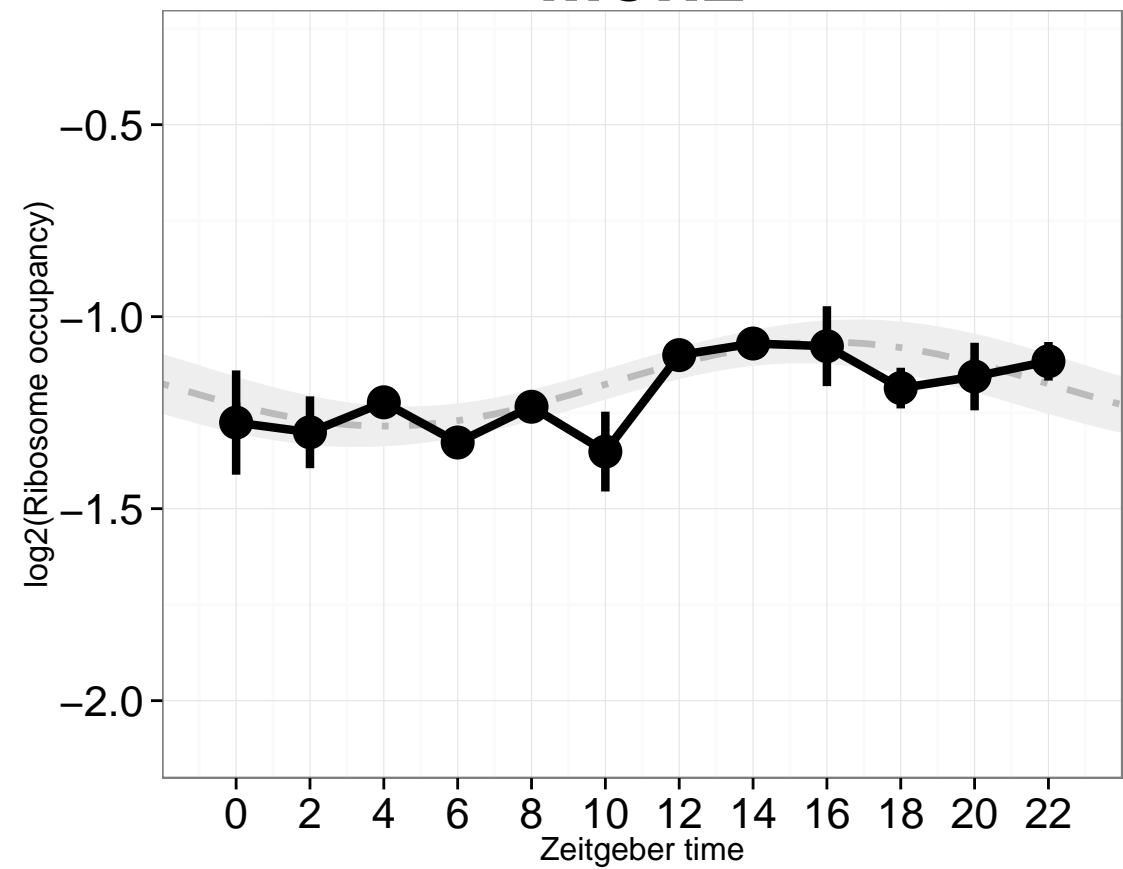

Supplement: SuppDataset_1.zip [file Mon2_set_A.pdf › Supplemental Dataset 1/A-mRNA_nonrhyth_translation_nonrhyth/Mon2_set_A.pdf]

# Morc2a

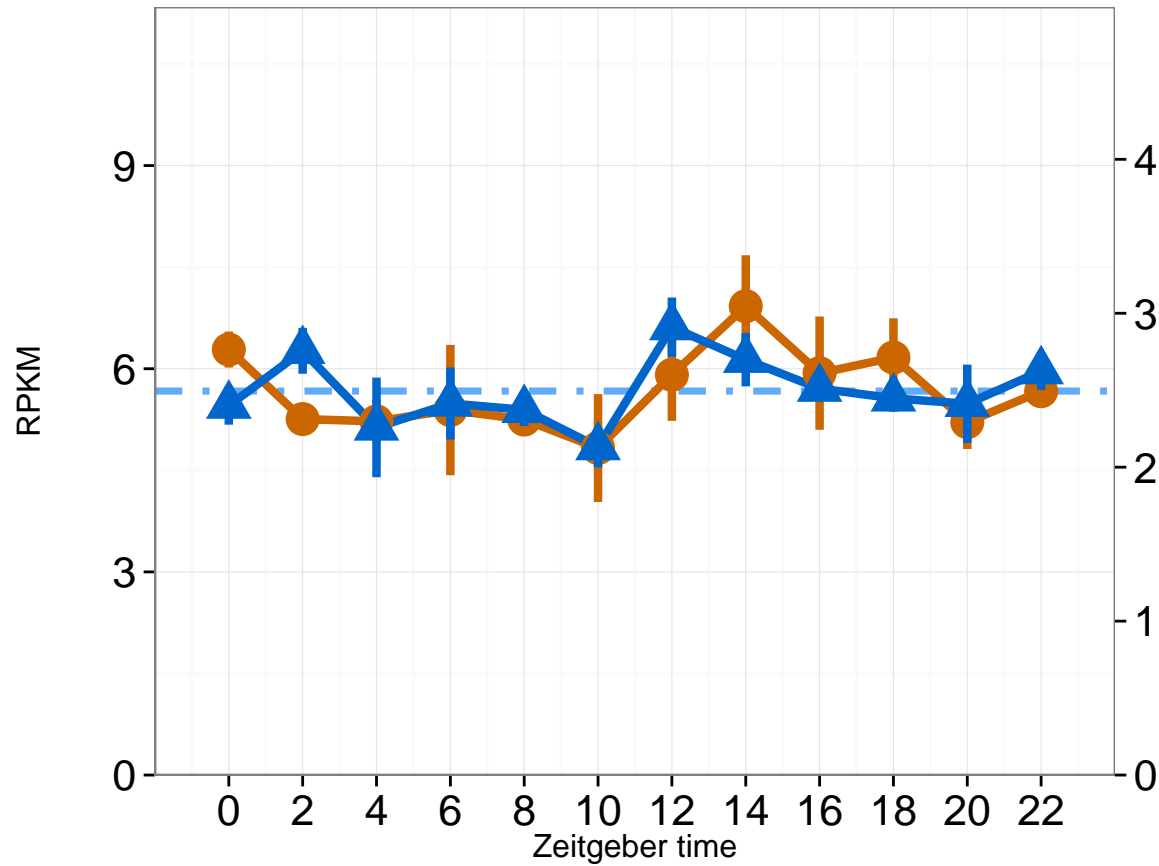

# Morc2a

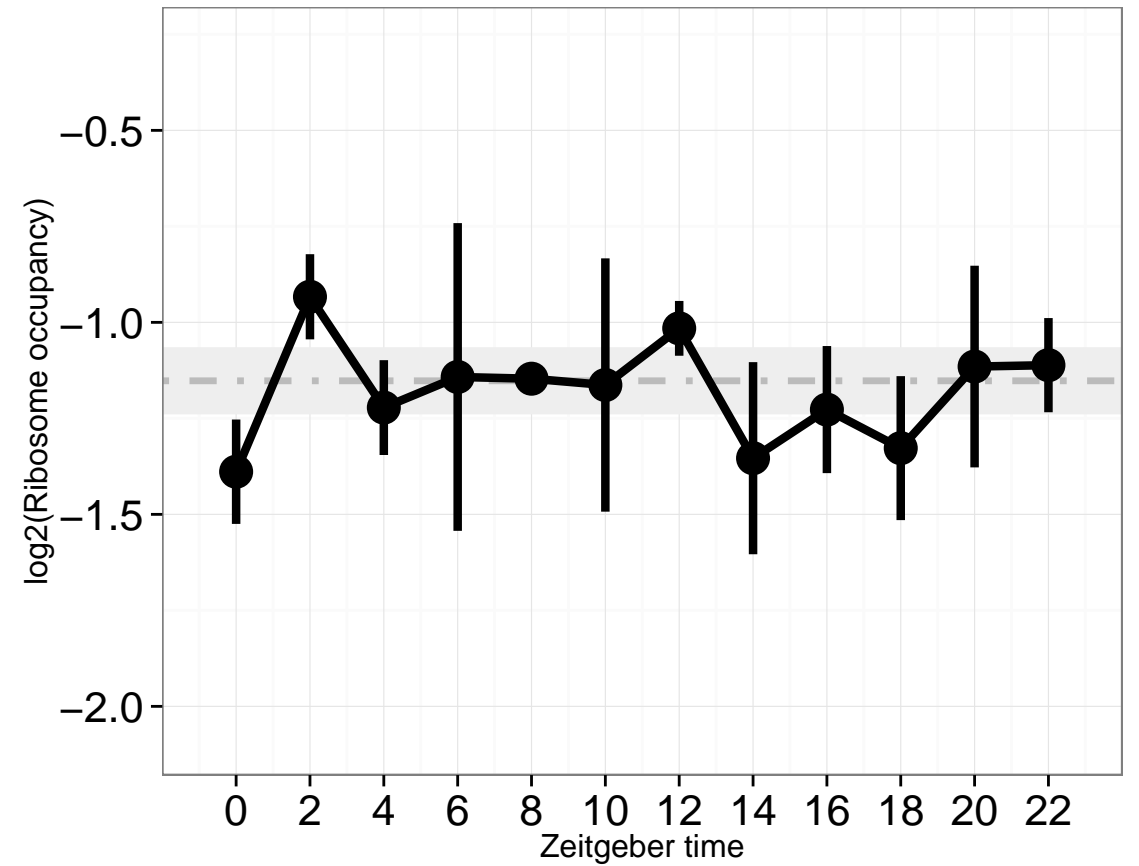

Supplement: SuppDataset_1.zip [file Morc2a_set_A.pdf › Supplemental Dataset 1/A-mRNA_nonrhyth_translation_nonrhyth/Morc2a_set_A.pdf]

## Morf4l1

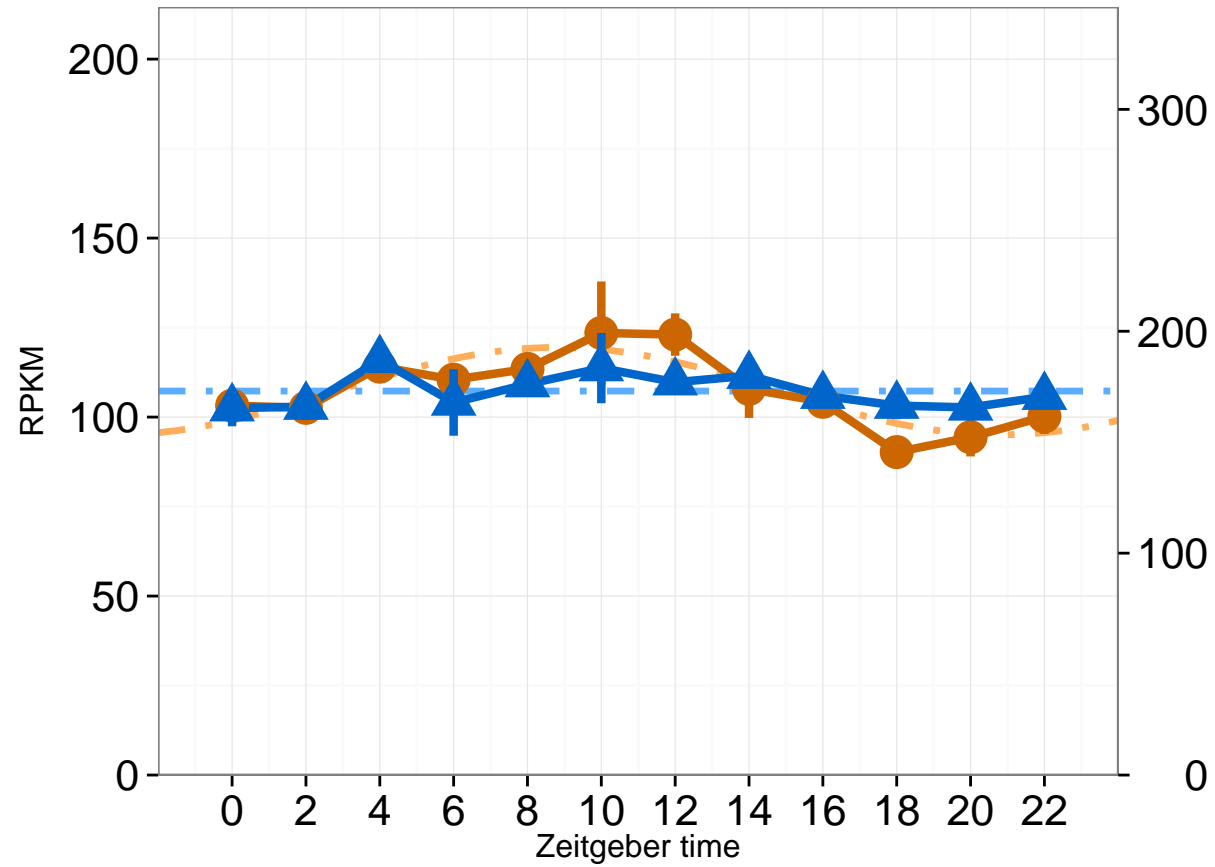

## Morf4l1

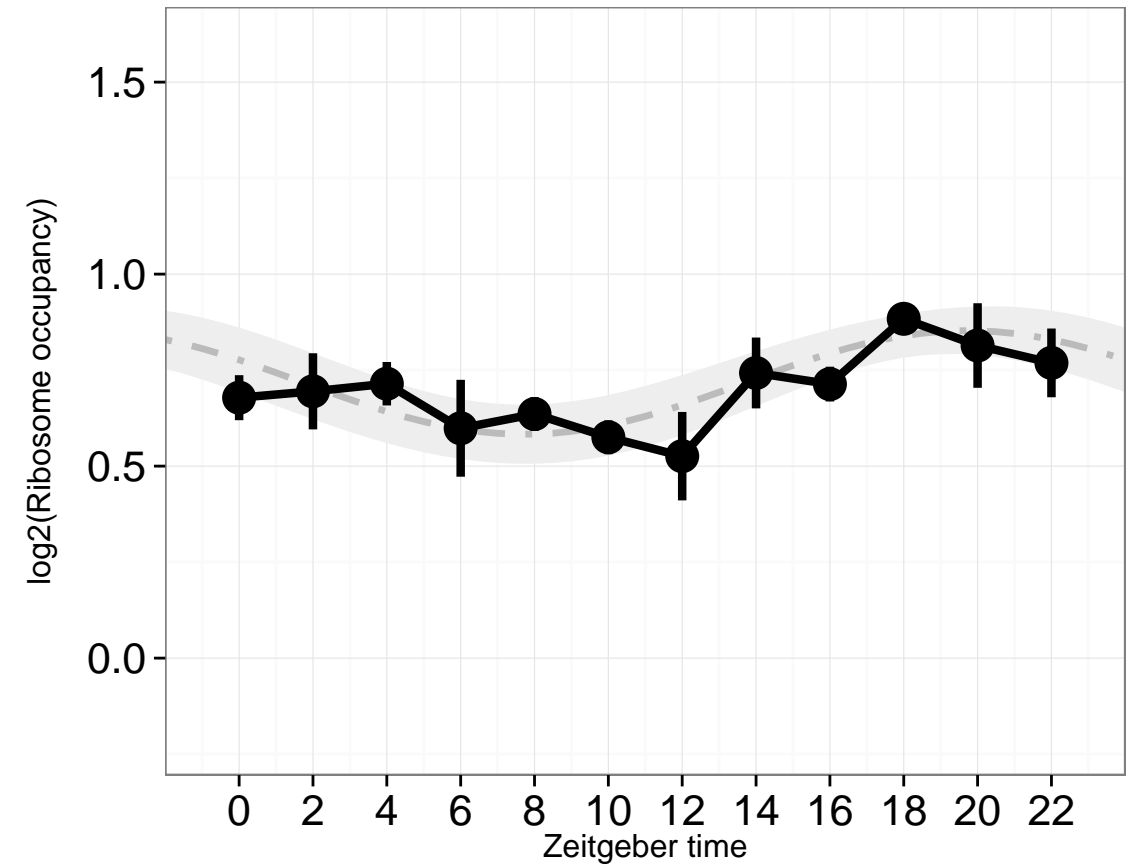

Supplement: SuppDataset_1.zip [file Morf4l1_set_A.pdf › Supplemental Dataset 1/A-mRNA_nonrhyth_translation_nonrhyth/Morf4l1_set_A.pdf]

## Morf4l2

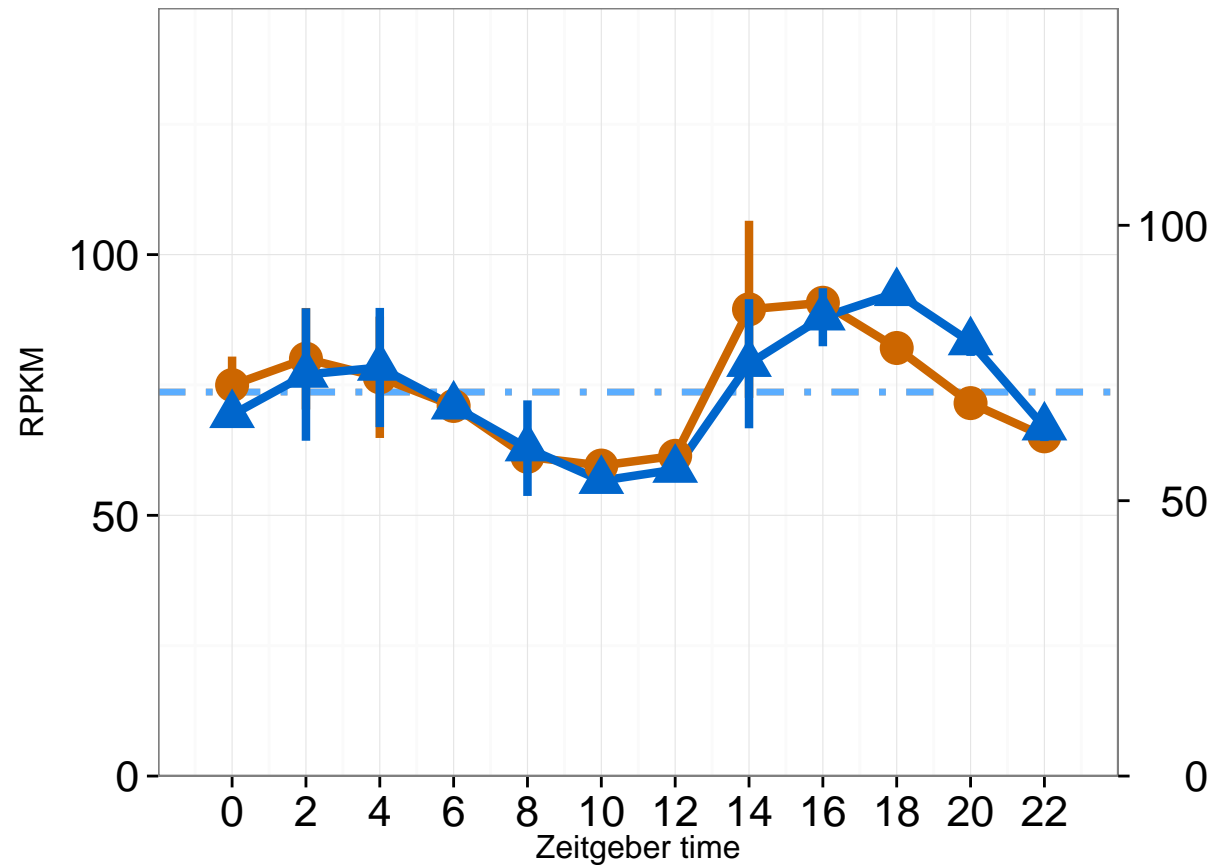

## Morf4l2

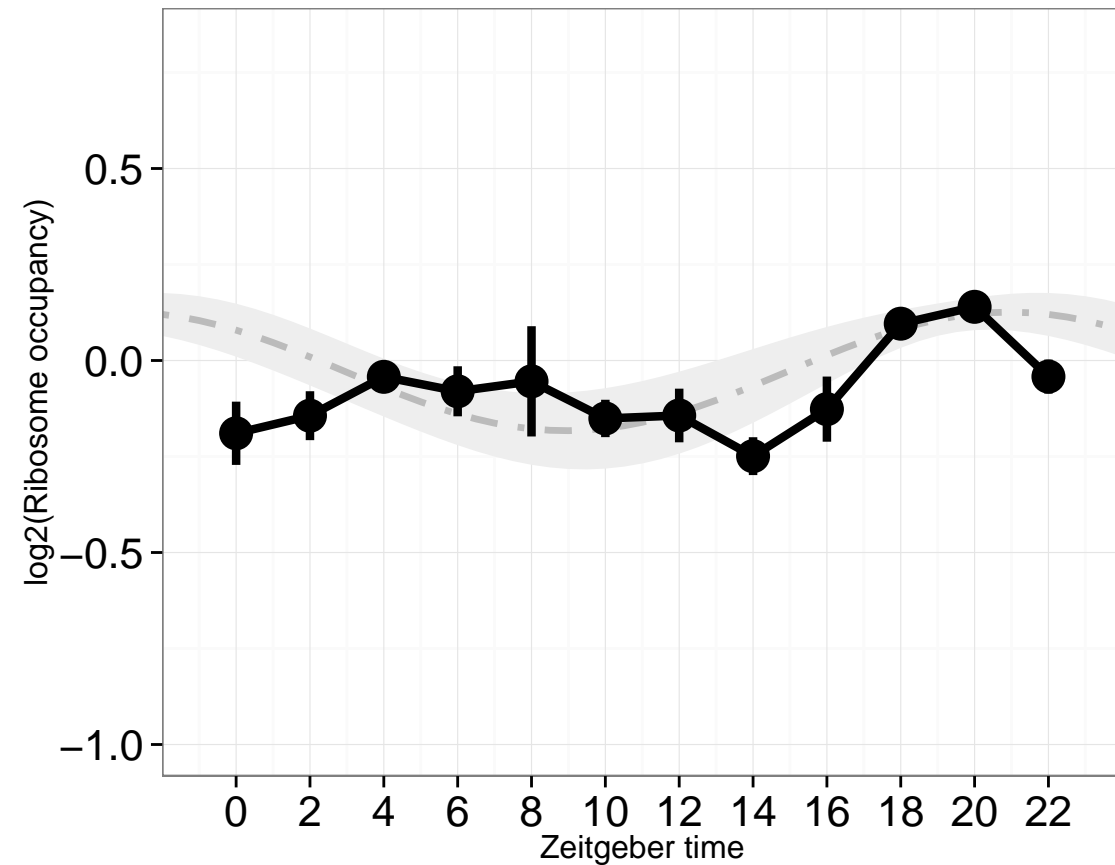

Supplement: SuppDataset_1.zip [file Morf4l2_set_A.pdf › Supplemental Dataset 1/A-mRNA_nonrhyth_translation_nonrhyth/Morf4l2_set_A.pdf]

# Morn1

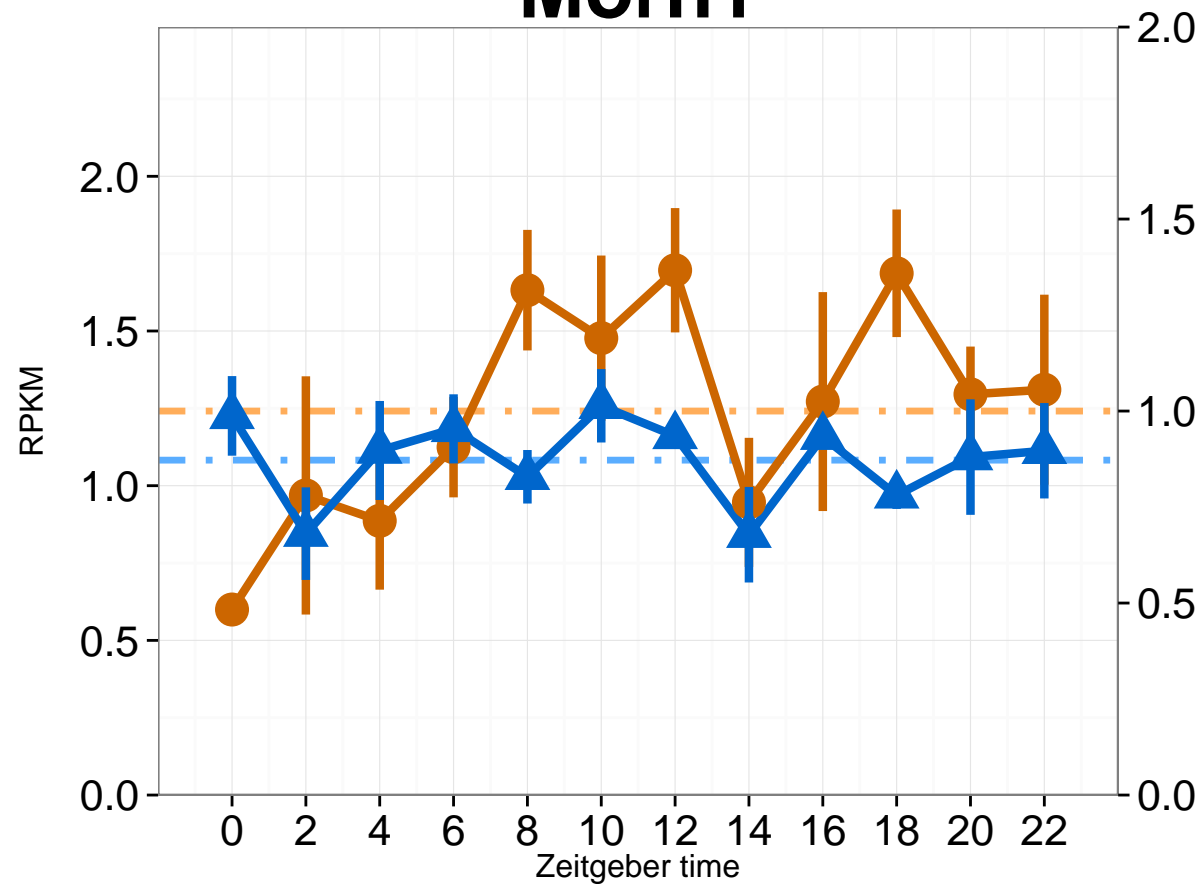

# Morn1

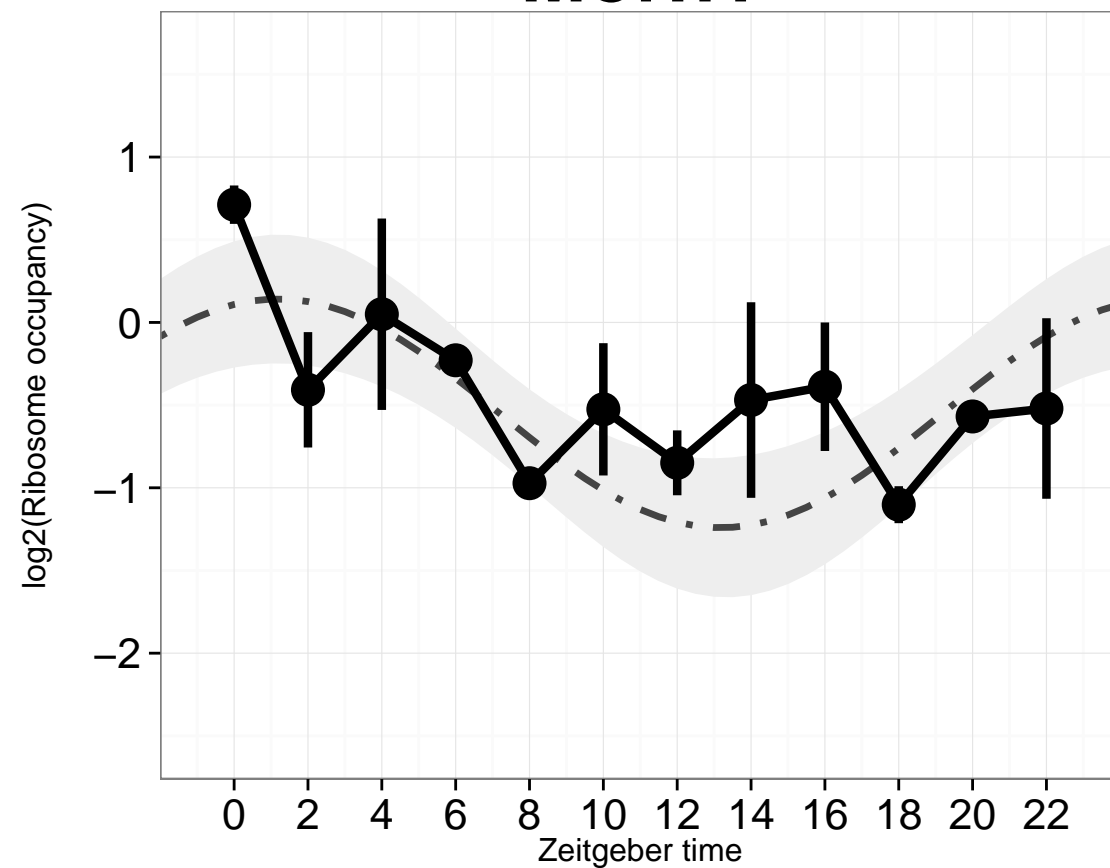

Supplement: SuppDataset_1.zip [file Morn1_set_A.pdf › Supplemental Dataset 1/A-mRNA_nonrhyth_translation_nonrhyth/Morn1_set_A.pdf]

## Morn2

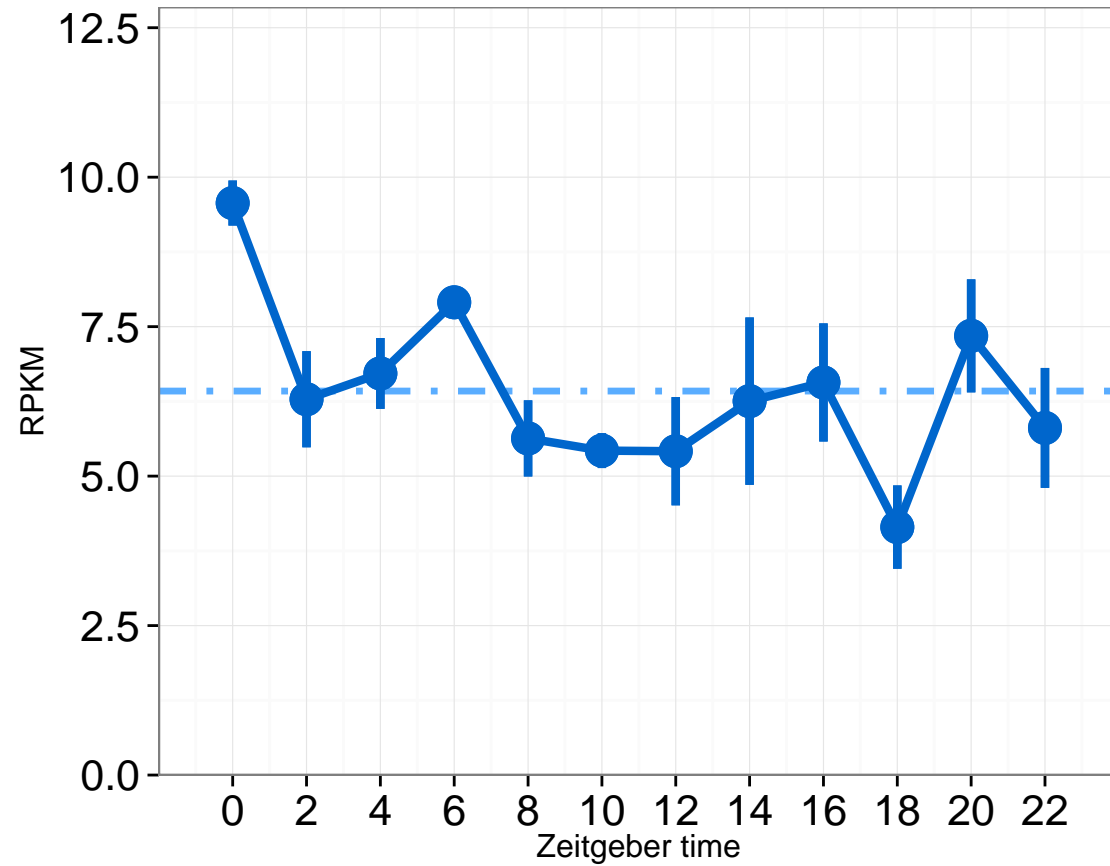

## Morn2 log2(Ribosome occupancy

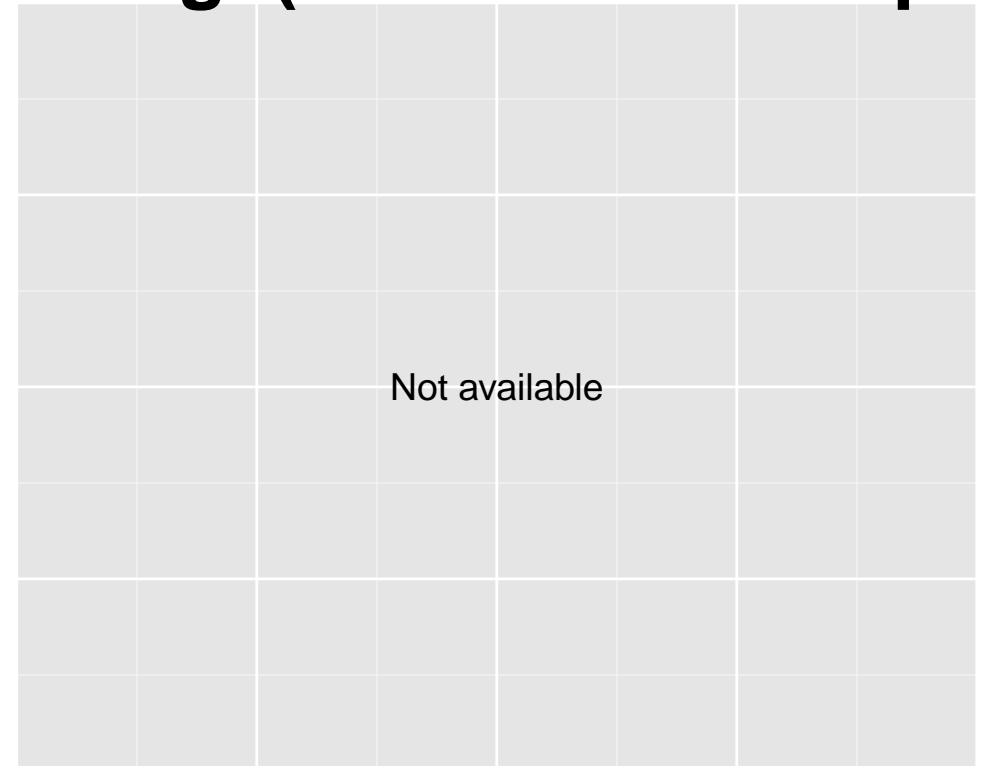

Supplement: SuppDataset_1.zip [file Morn2_set_A.pdf › Supplemental Dataset 1/A-mRNA_nonrhyth_translation_nonrhyth/Morn2_set_A.pdf]

# Mospd1

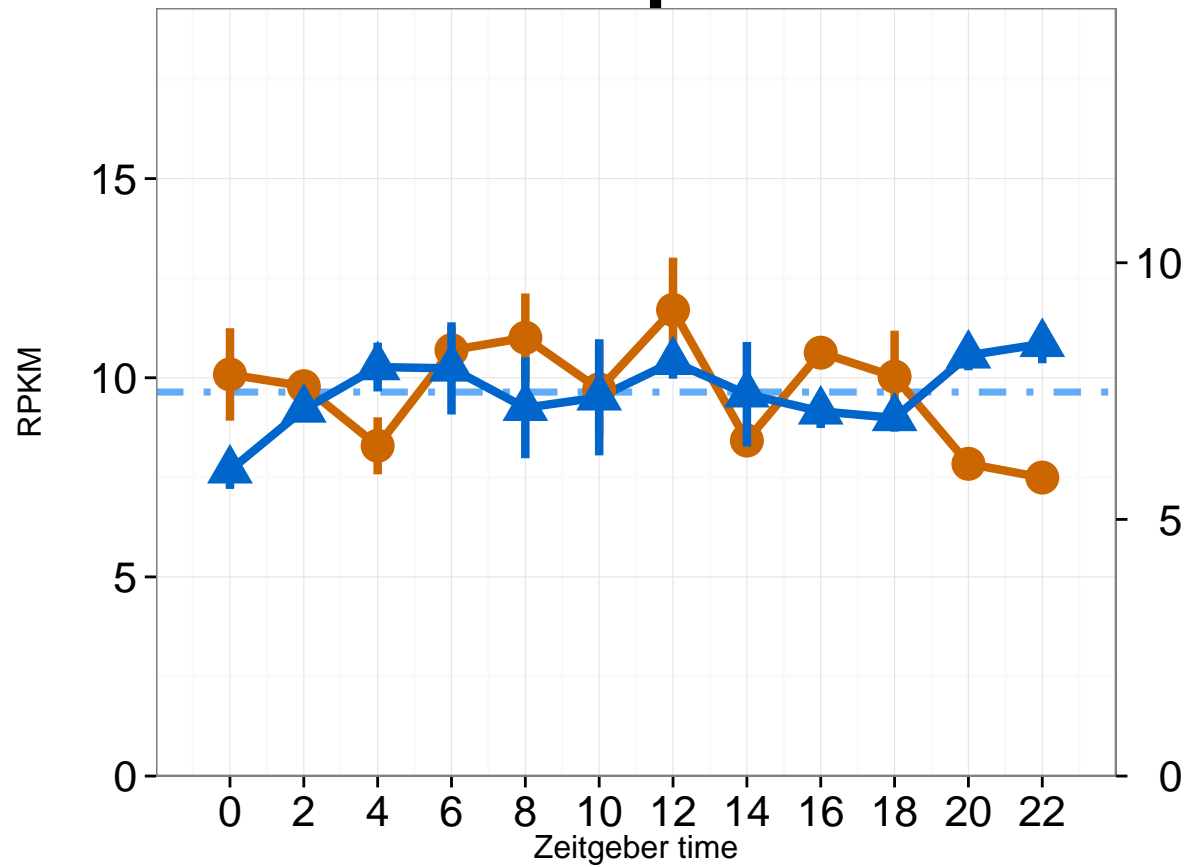

# Mospd1

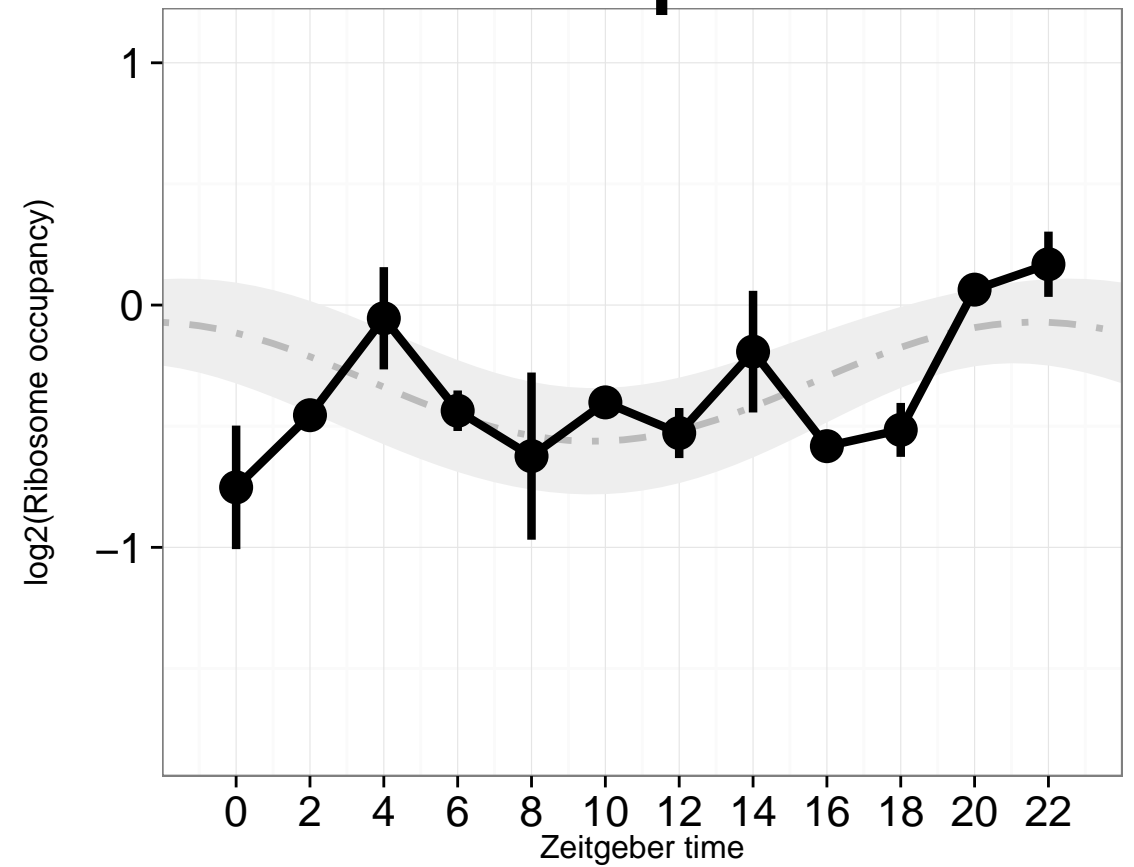

Supplement: SuppDataset_1.zip [file Mospd1_set_A.pdf › Supplemental Dataset 1/A-mRNA_nonrhyth_translation_nonrhyth/Mospd1_set_A.pdf]

## Mospd2

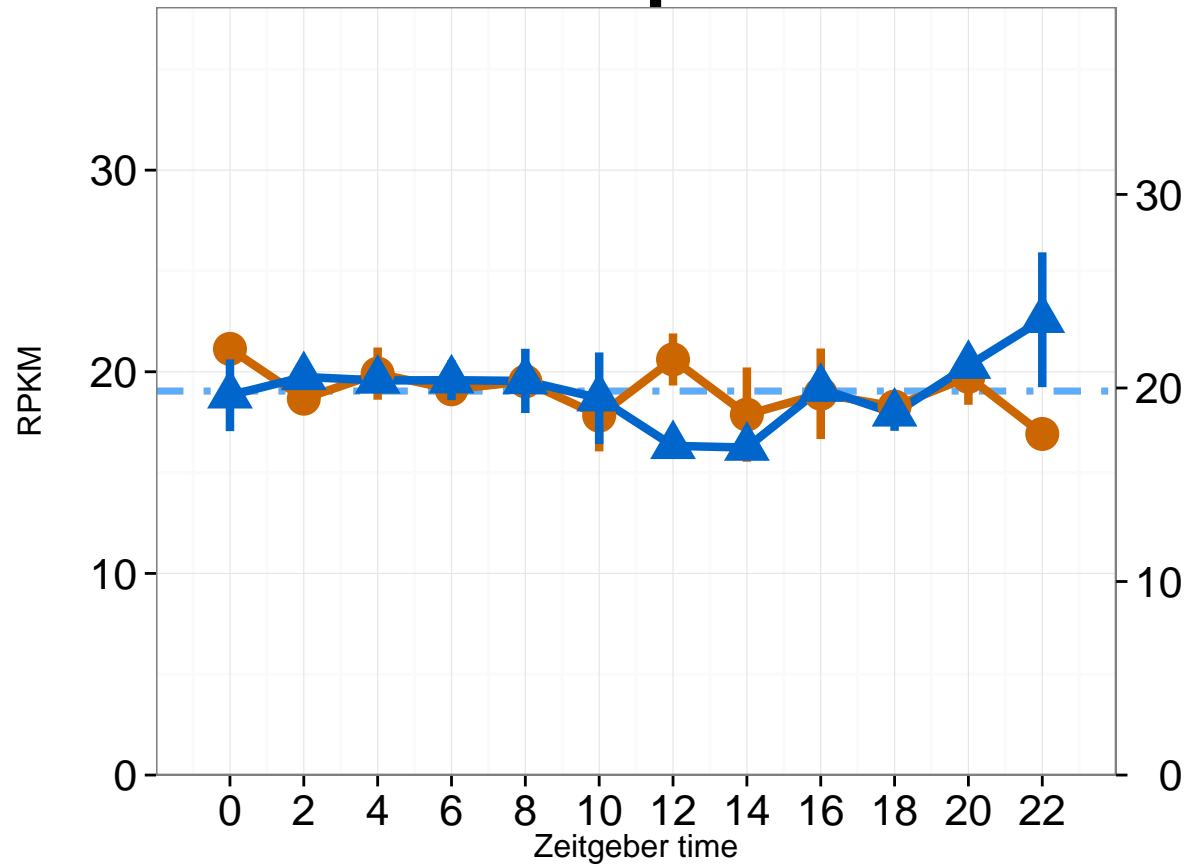

## Mospd2

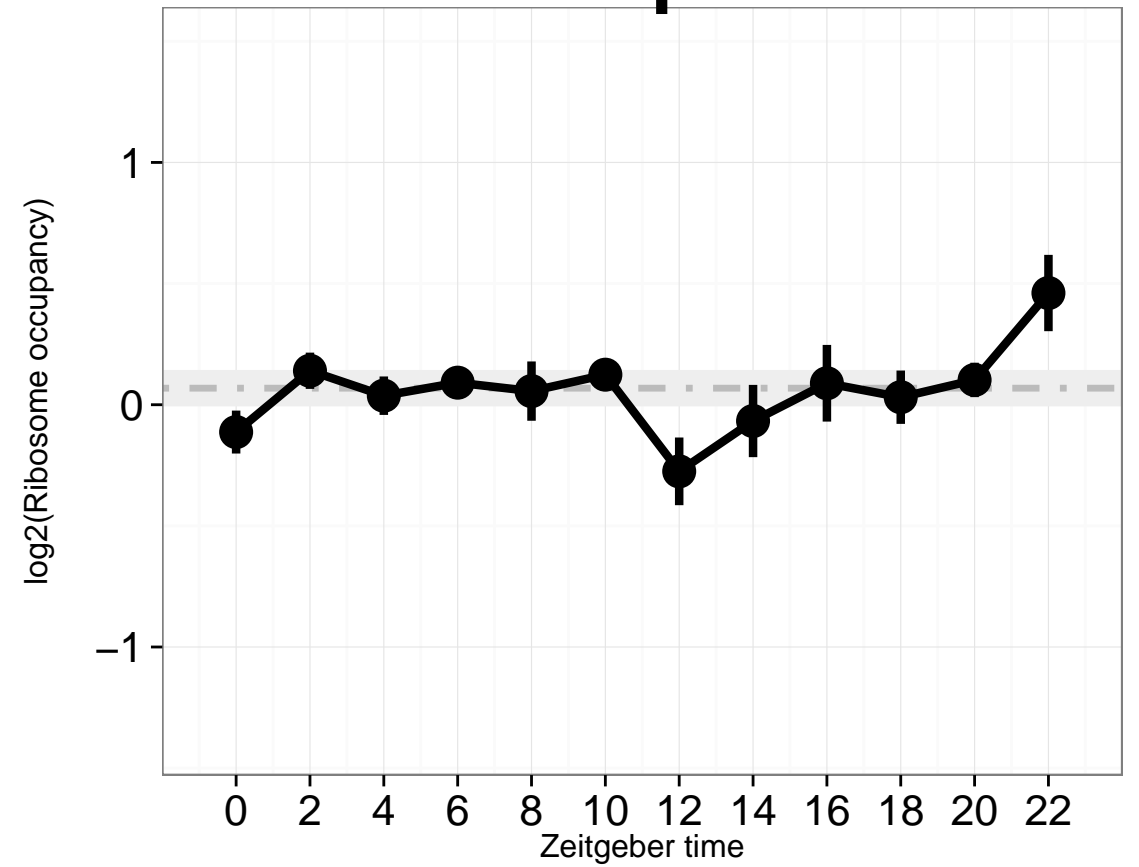

Supplement: SuppDataset_1.zip [file Mospd2_set_A.pdf › Supplemental Dataset 1/A-mRNA_nonrhyth_translation_nonrhyth/Mospd2_set_A.pdf]

# Mospd3

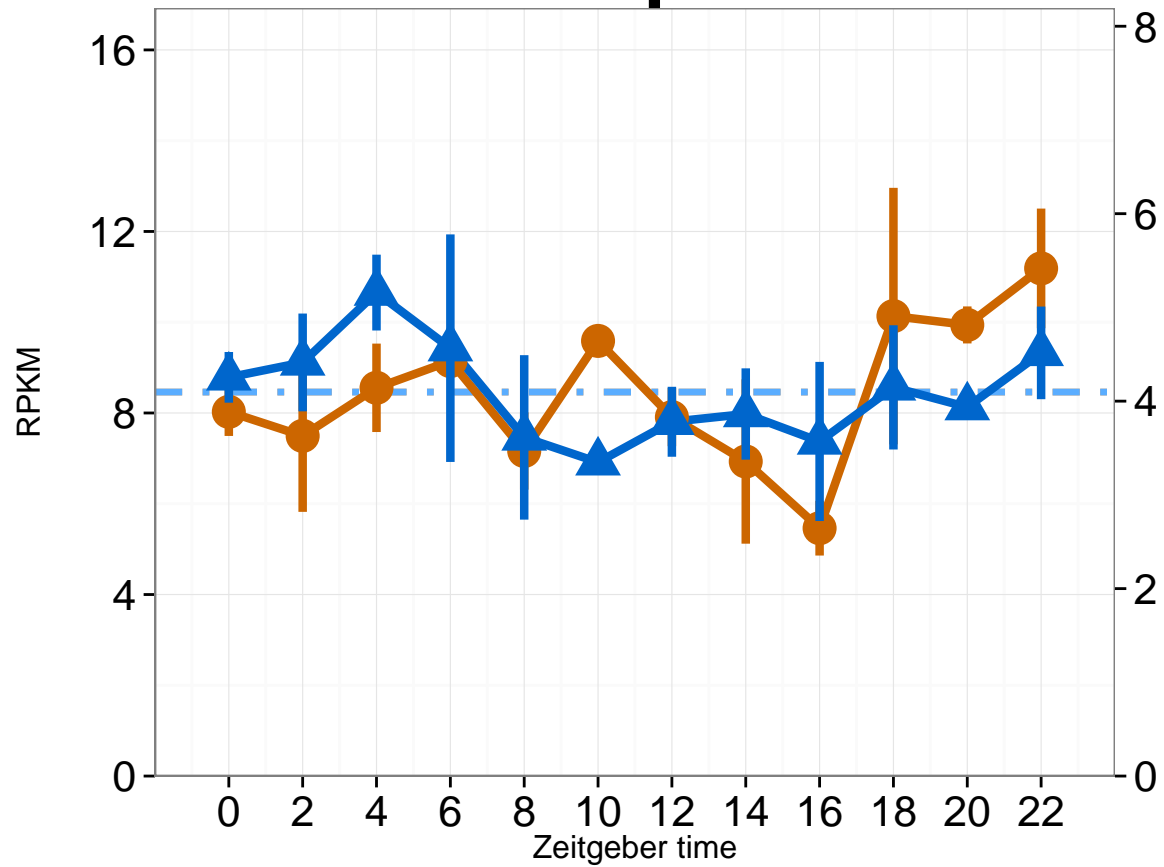

# Mospd3

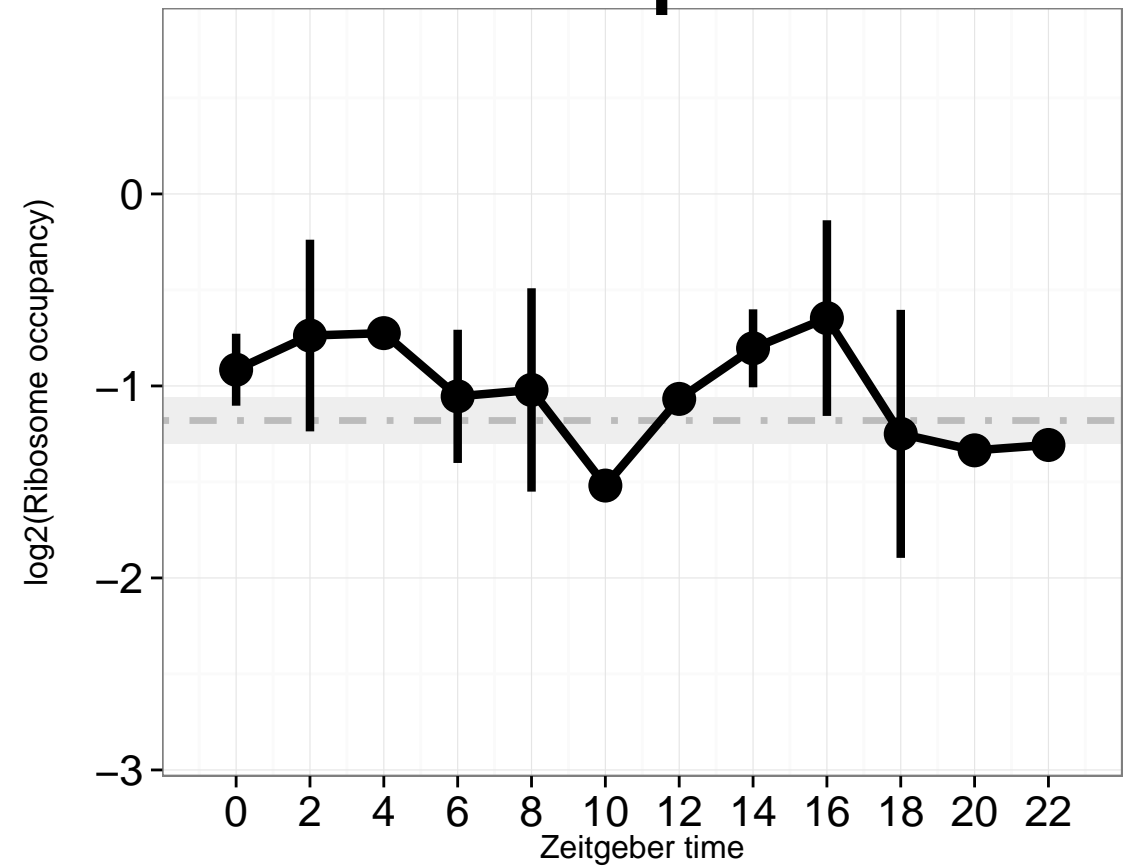

Supplement: SuppDataset_1.zip [file Mospd3_set_A.pdf › Supplemental Dataset 1/A-mRNA_nonrhyth_translation_nonrhyth/Mospd3_set_A.pdf]

# Mpc1

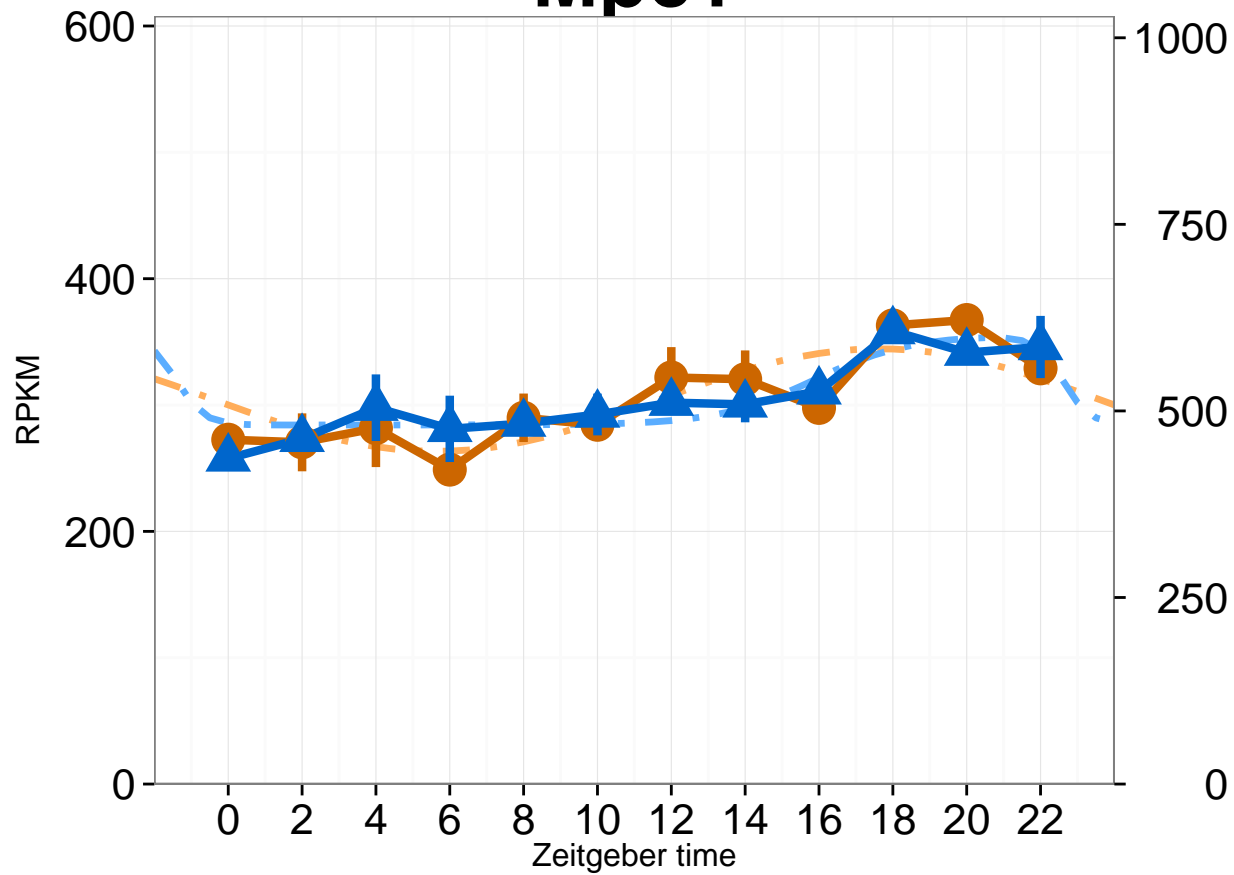

# Mpc1

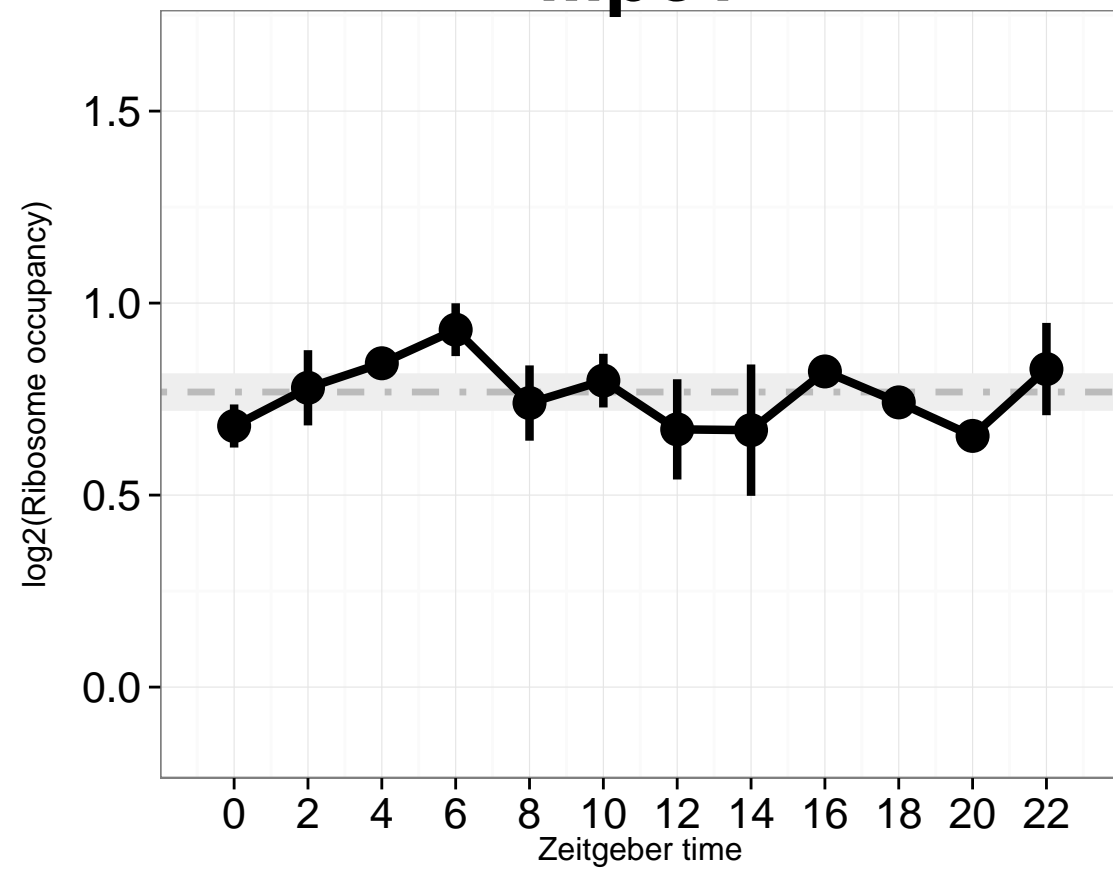

Supplement: SuppDataset_1.zip [file Mpc1_set_A.pdf › Supplemental Dataset 1/A-mRNA_nonrhyth_translation_nonrhyth/Mpc1_set_A.pdf]

## Mpc2

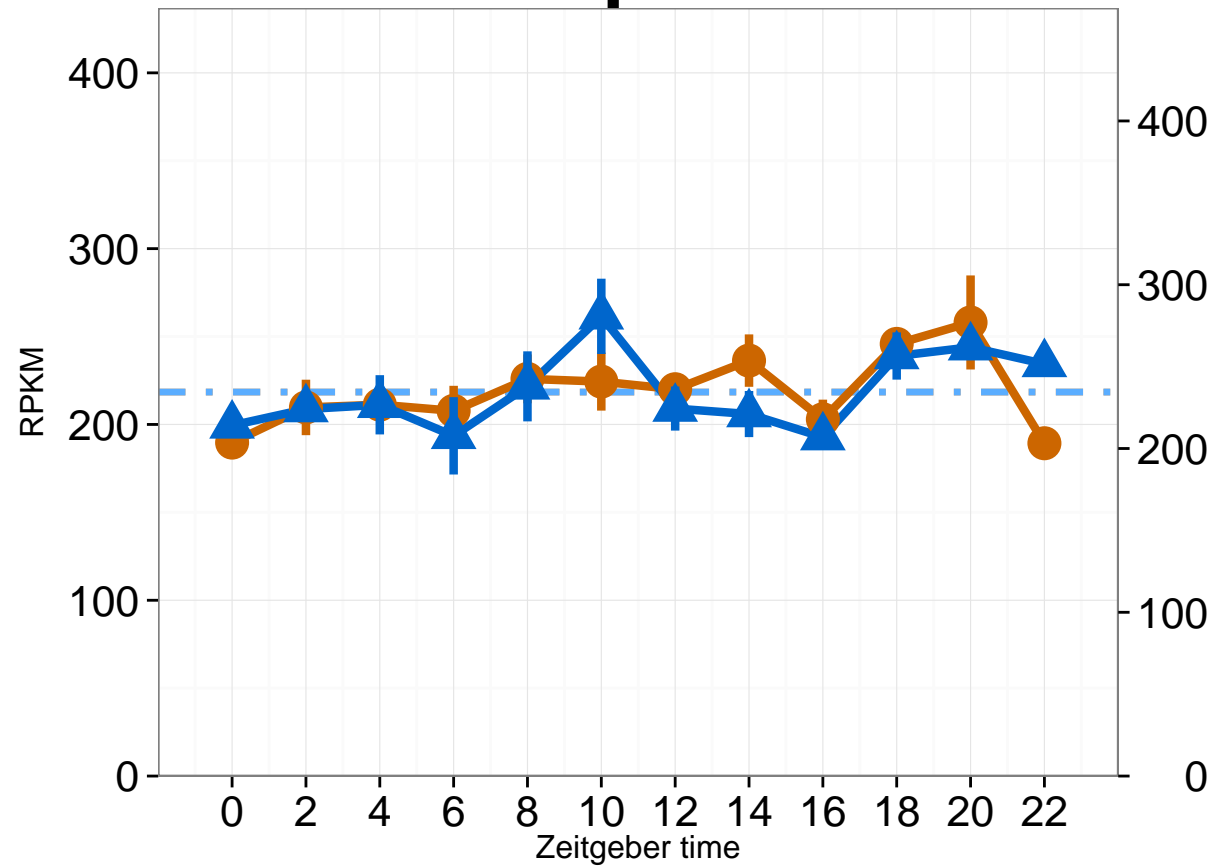

## Mpc2

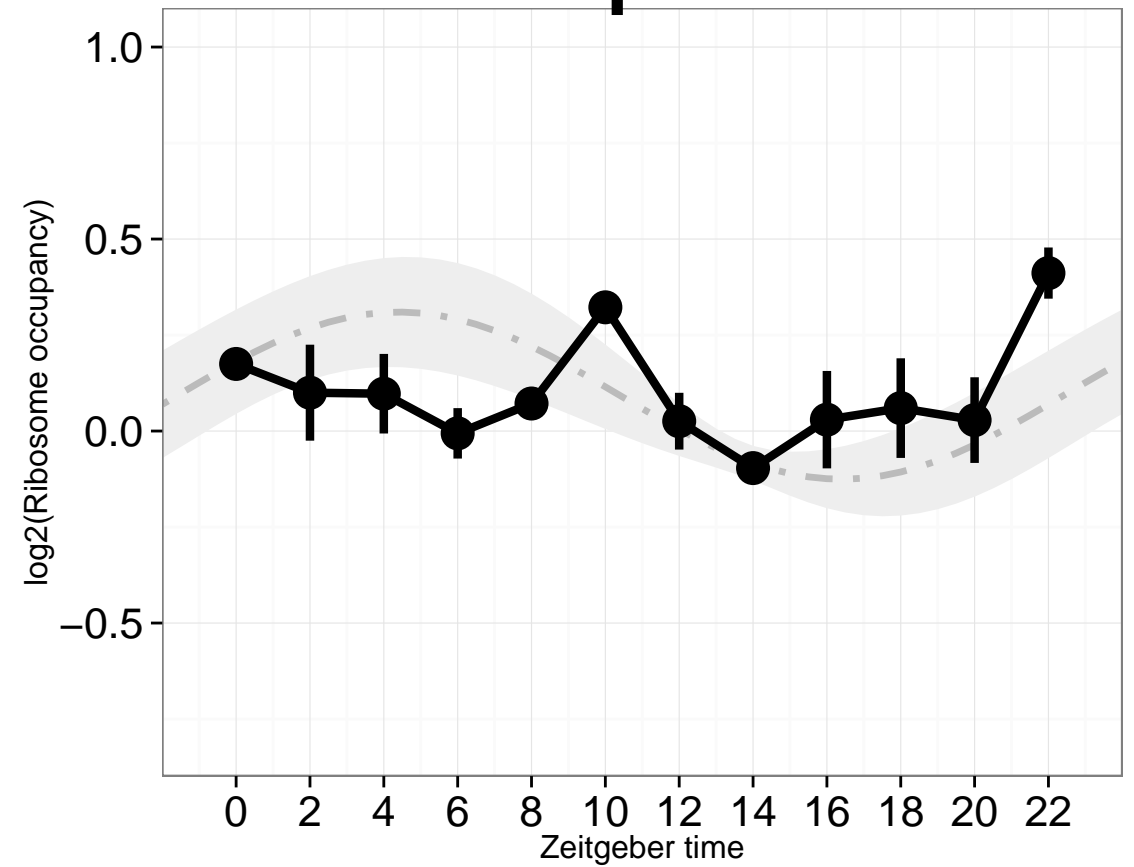

Supplement: SuppDataset_1.zip [file Mpc2_set_A.pdf › Supplemental Dataset 1/A-mRNA_nonrhyth_translation_nonrhyth/Mpc2_set_A.pdf]

# Mpdu1

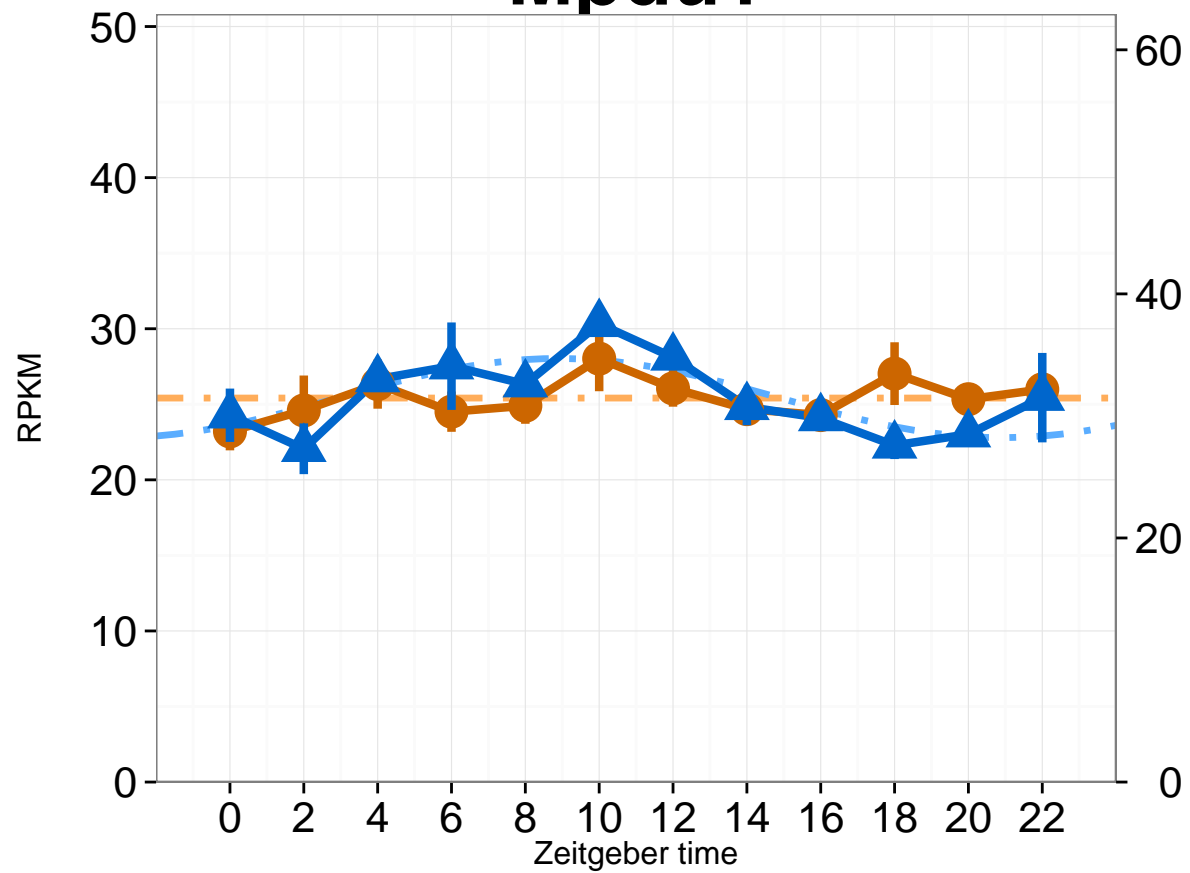

# Mpdu1

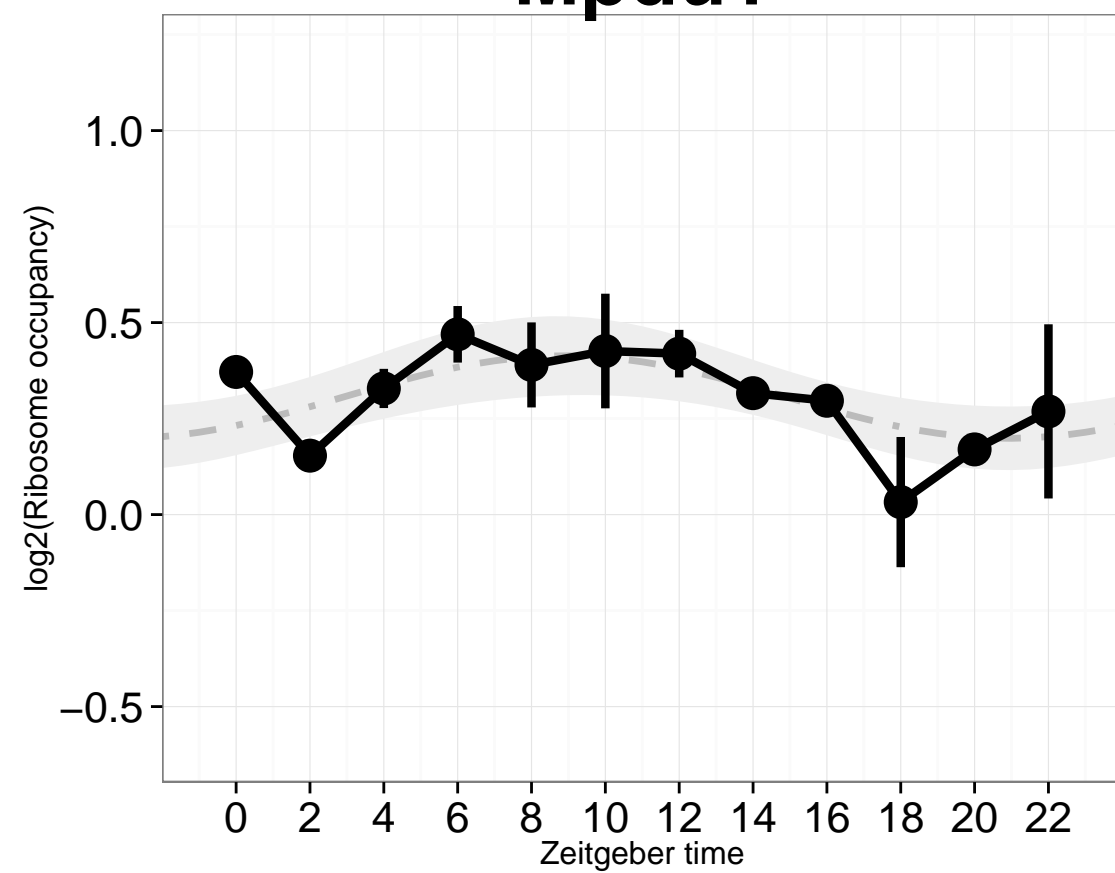

Supplement: SuppDataset_1.zip [file Mpdu1_set_A.pdf › Supplemental Dataset 1/A-mRNA_nonrhyth_translation_nonrhyth/Mpdu1_set_A.pdf]

## Mpdz

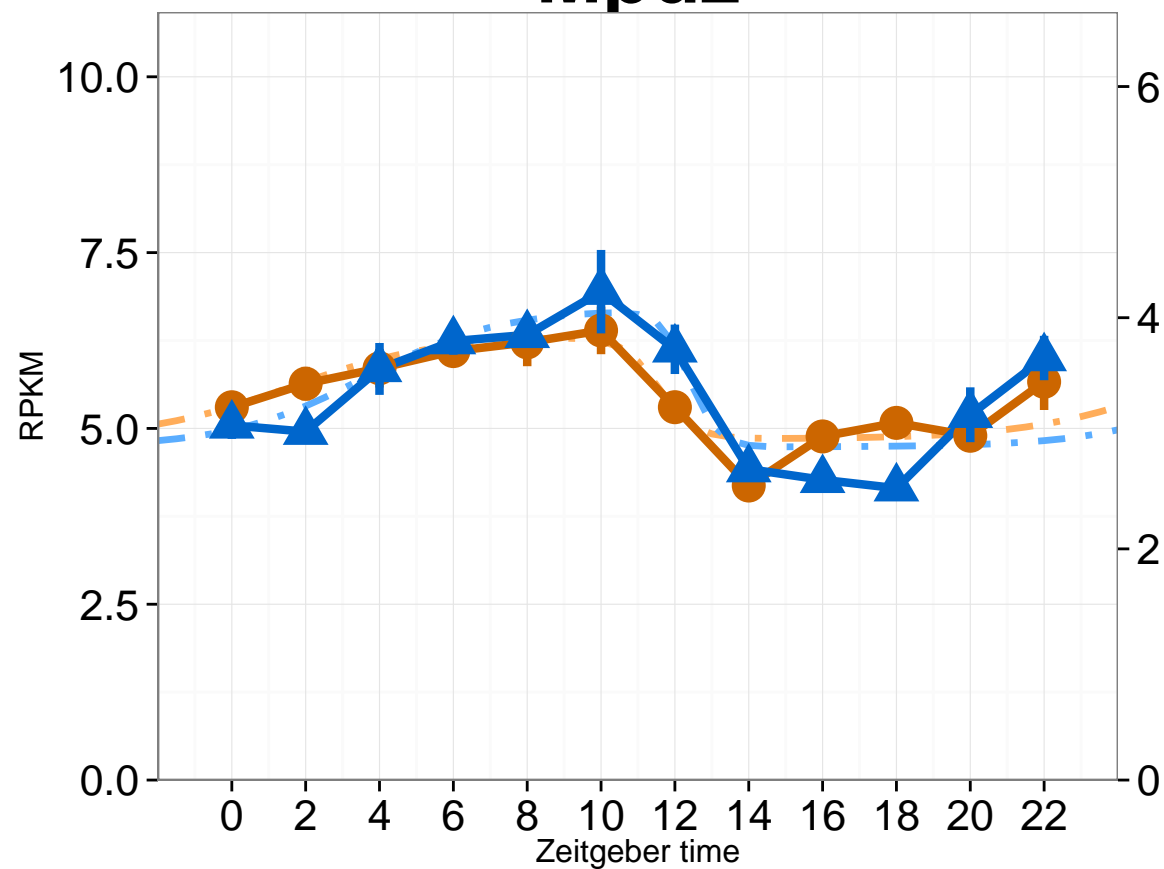

## Mpdz

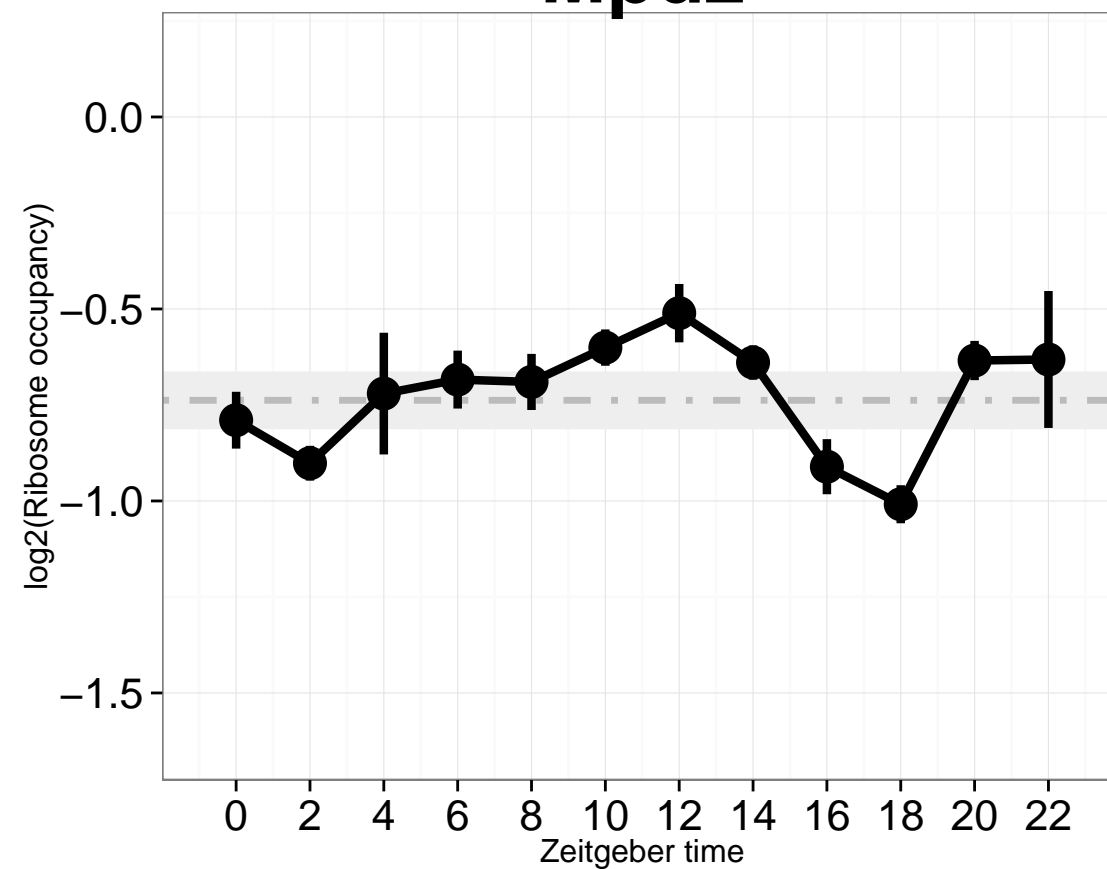

Supplement: SuppDataset_1.zip [file Mpdz_set_A.pdf › Supplemental Dataset 1/A-mRNA_nonrhyth_translation_nonrhyth/Mpdz_set_A.pdf]

# Mpeg1

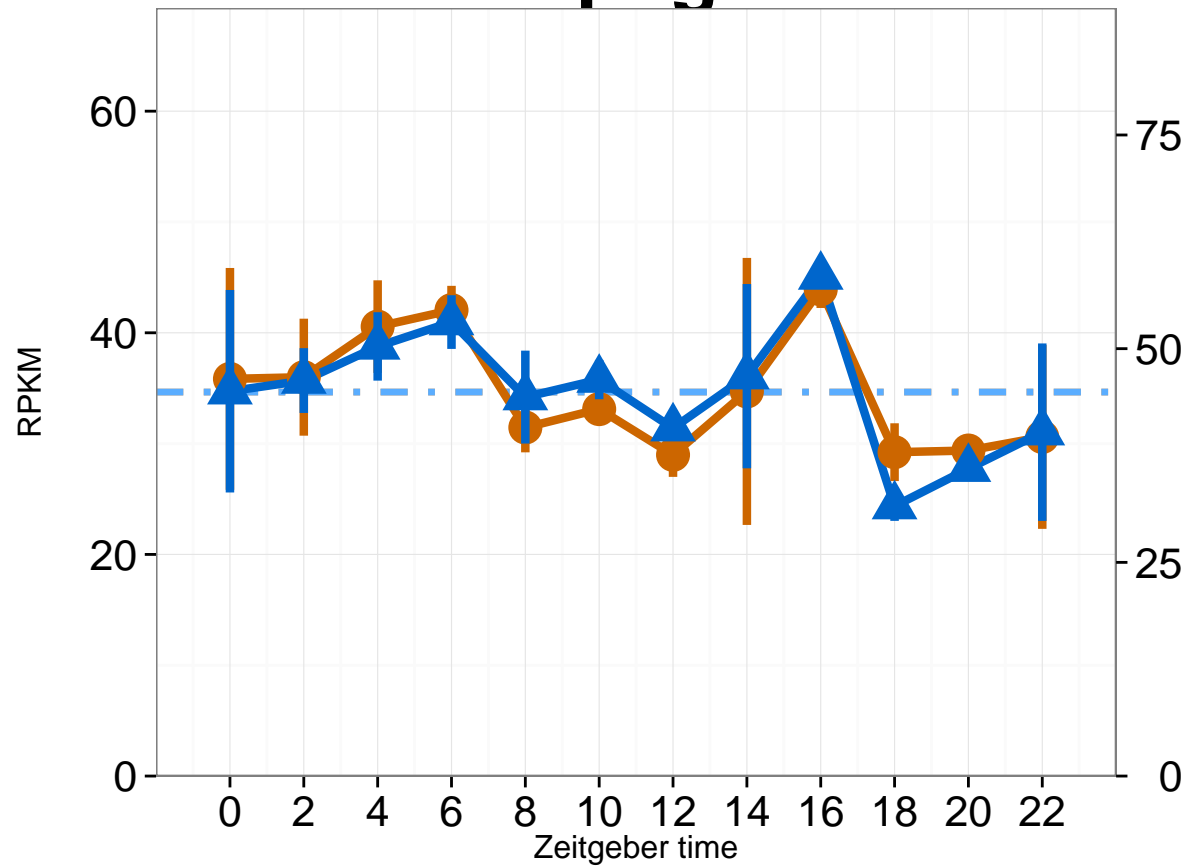

# Mpeg1

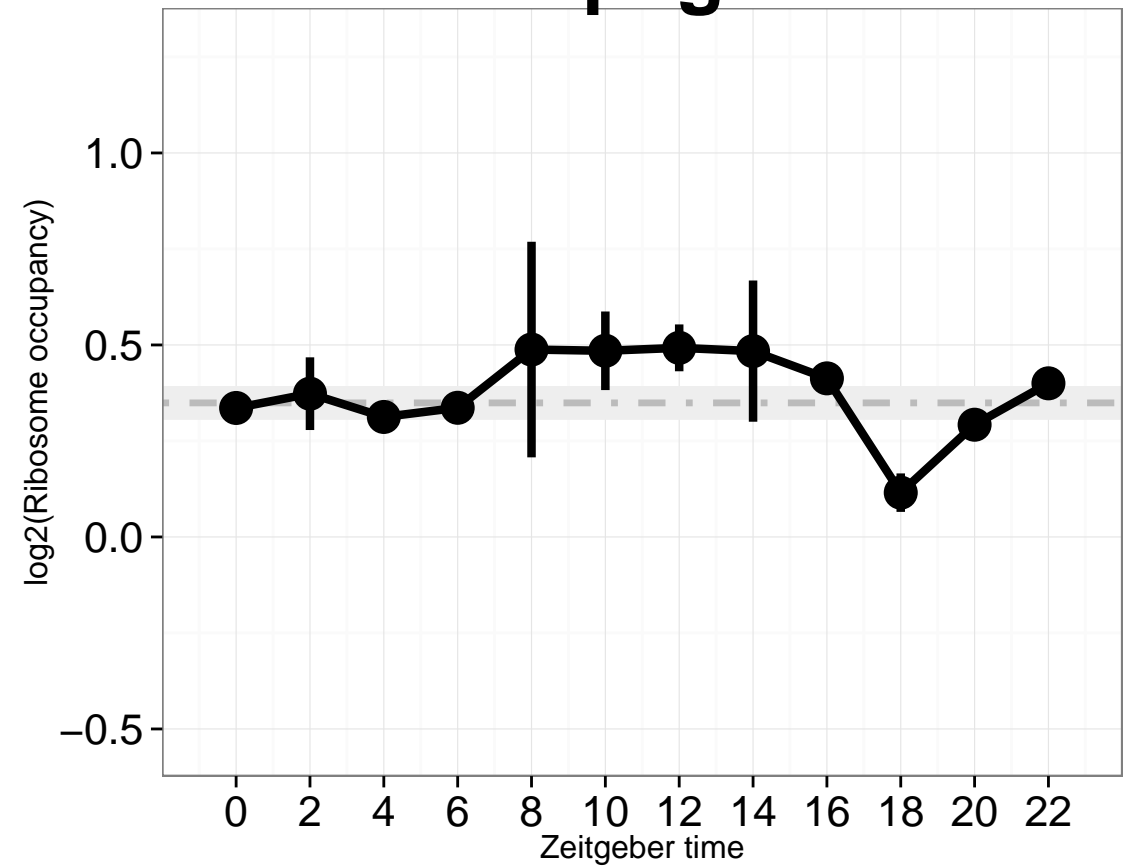

Supplement: SuppDataset_1.zip [file Mpeg1_set_A.pdf › Supplemental Dataset 1/A-mRNA_nonrhyth_translation_nonrhyth/Mpeg1_set_A.pdf]

## Mphosph6

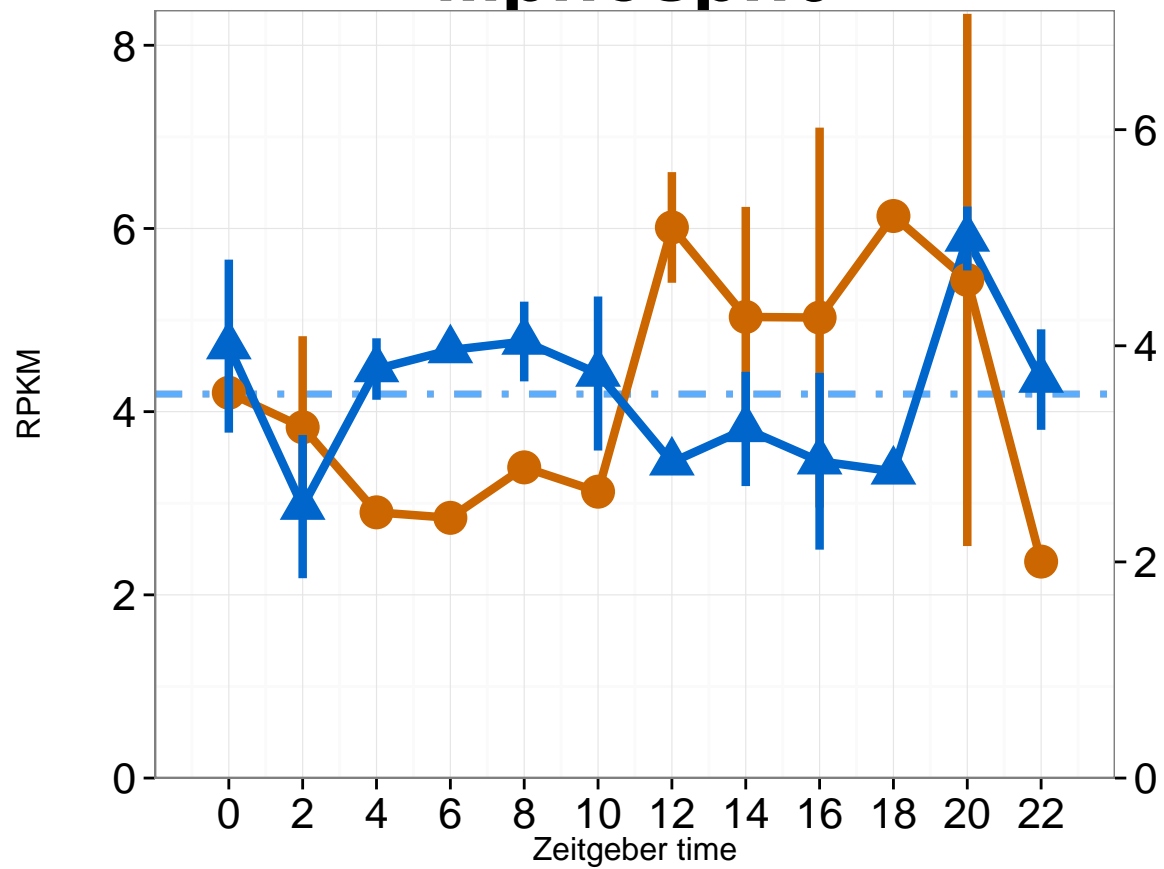

## Mphosph6

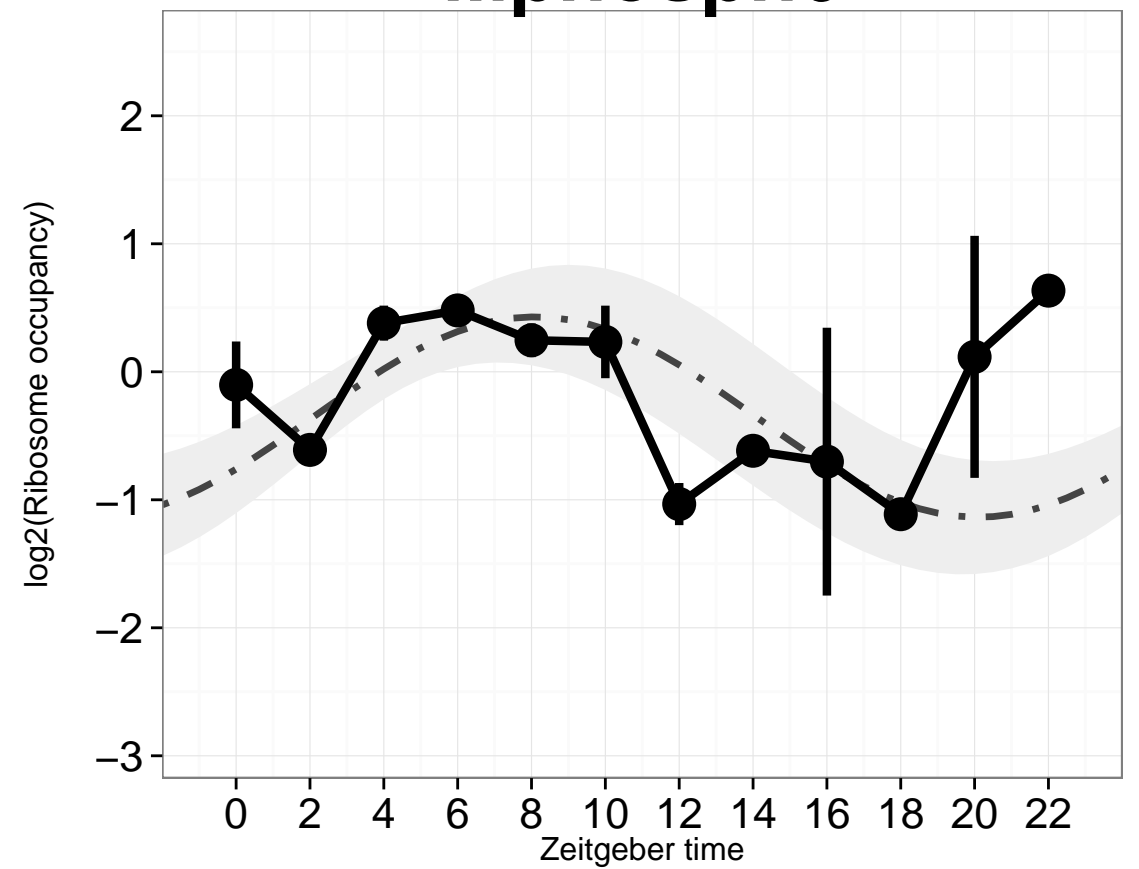

Supplement: SuppDataset_1.zip [file Mphosph6_set_A.pdf › Supplemental Dataset 1/A-mRNA_nonrhyth_translation_nonrhyth/Mphosph6_set_A.pdf]
