# Supplementary figures and images for: Ribosome profiling reveals the rhythmic liver translatome and circadian clock regulation by upstream open reading frames (part 45 of 113)
Source: HighWire-hosted journal article supplement (doi:10.1101/gr.195404.115), 2015-10-20

## Mphosph9

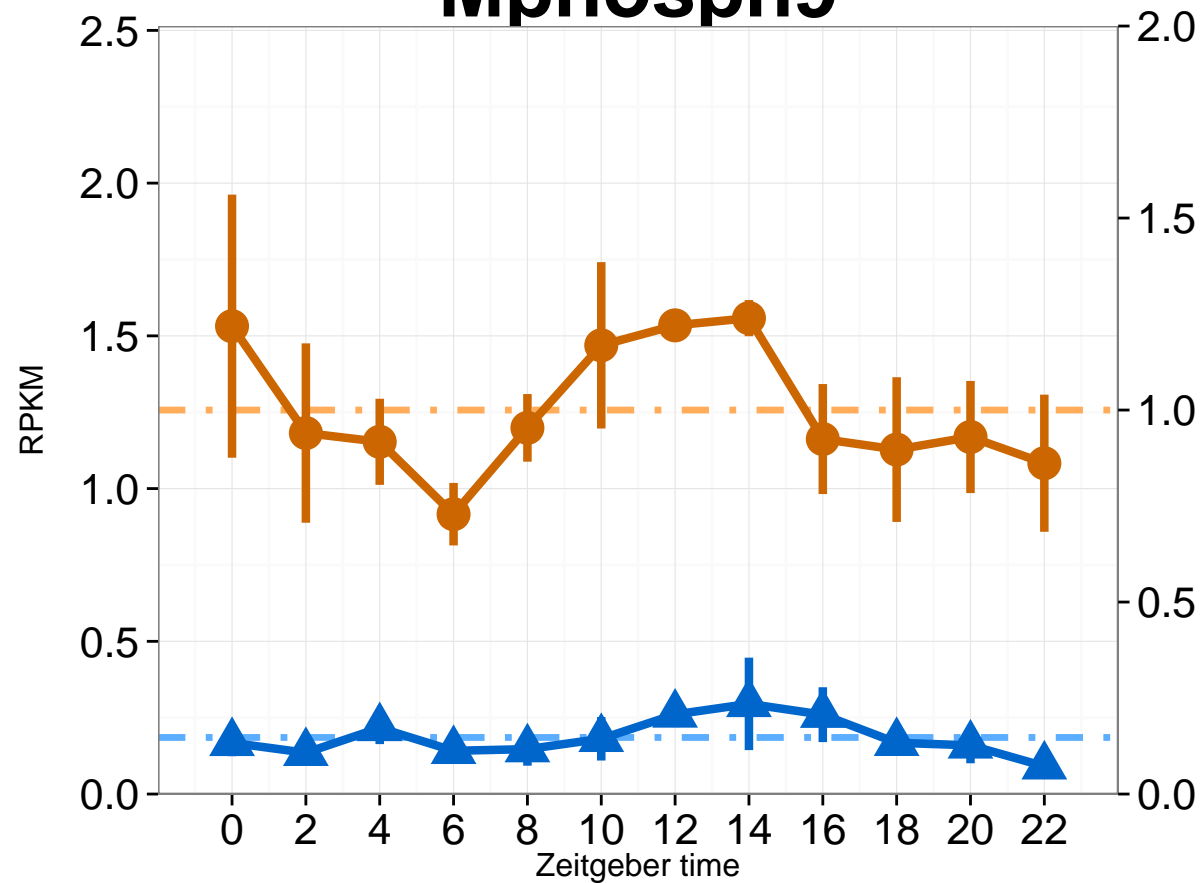

## Mphosph9

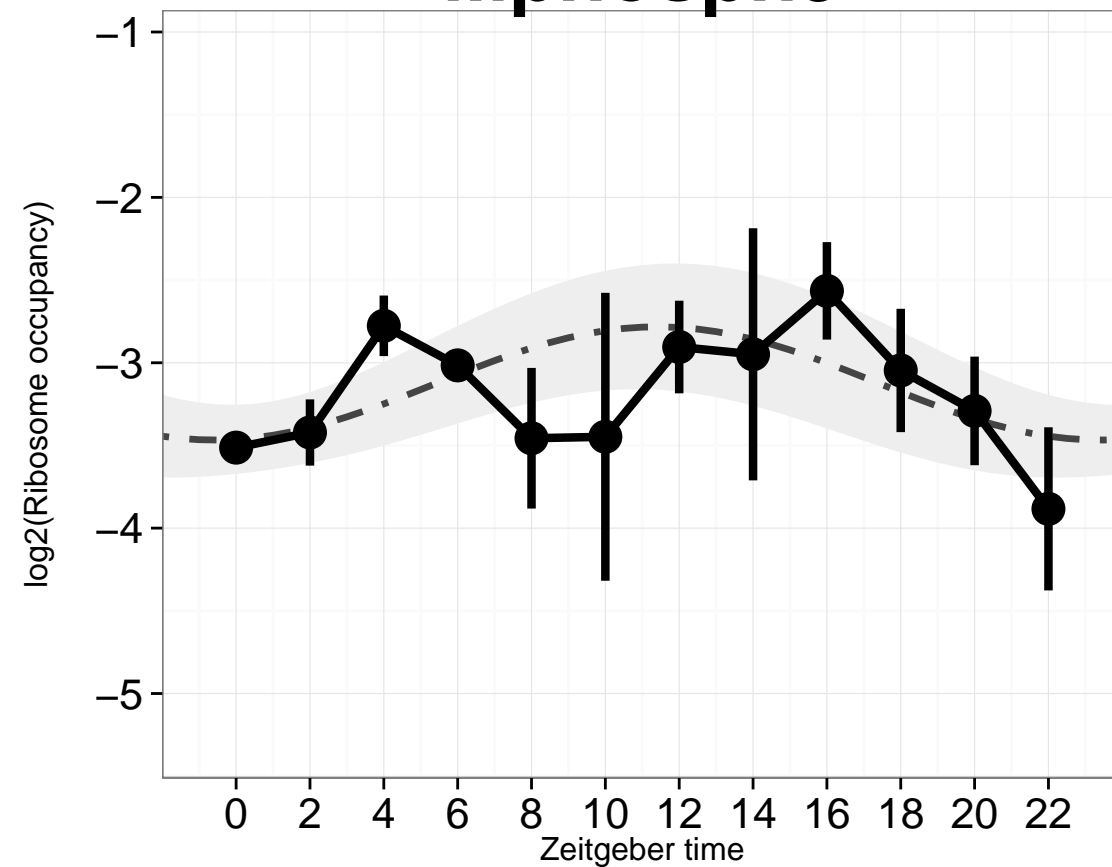

Supplement: SuppDataset_1.zip [file Mphosph9_set_A.pdf › Supplemental Dataset 1/A-mRNA_nonrhyth_translation_nonrhyth/Mphosph9_set_A.pdf]

## Mpi

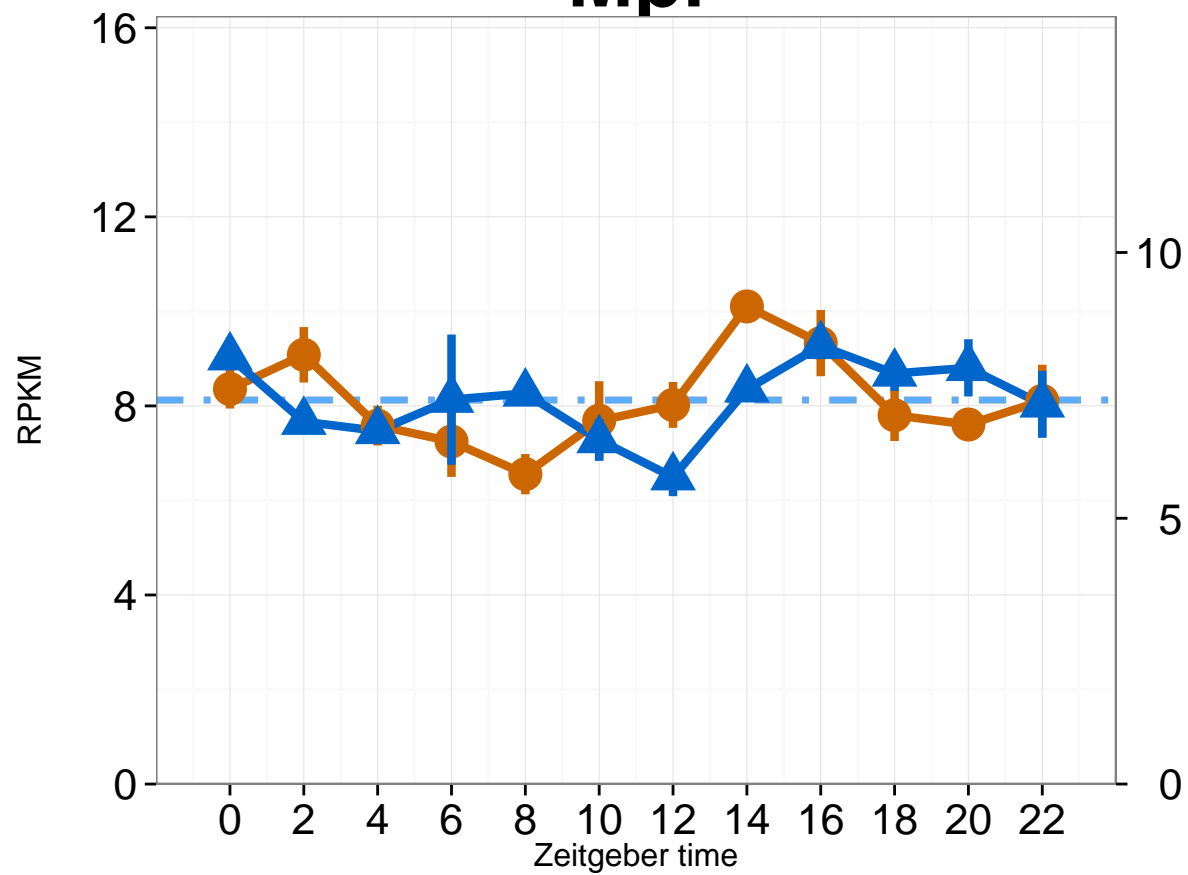

## Mpi

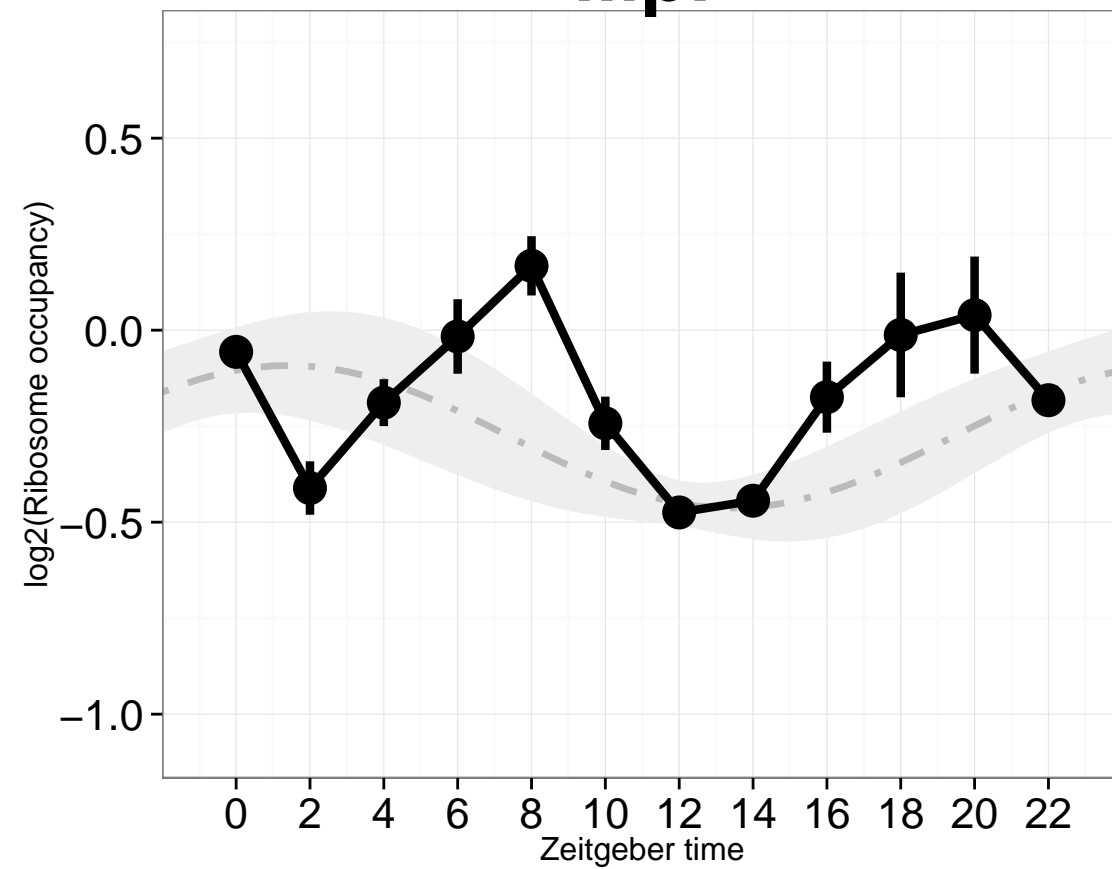

Supplement: SuppDataset_1.zip [file Mpi_set_A.pdf › Supplemental Dataset 1/A-mRNA_nonrhyth_translation_nonrhyth/Mpi_set_A.pdf]

## Mplkip

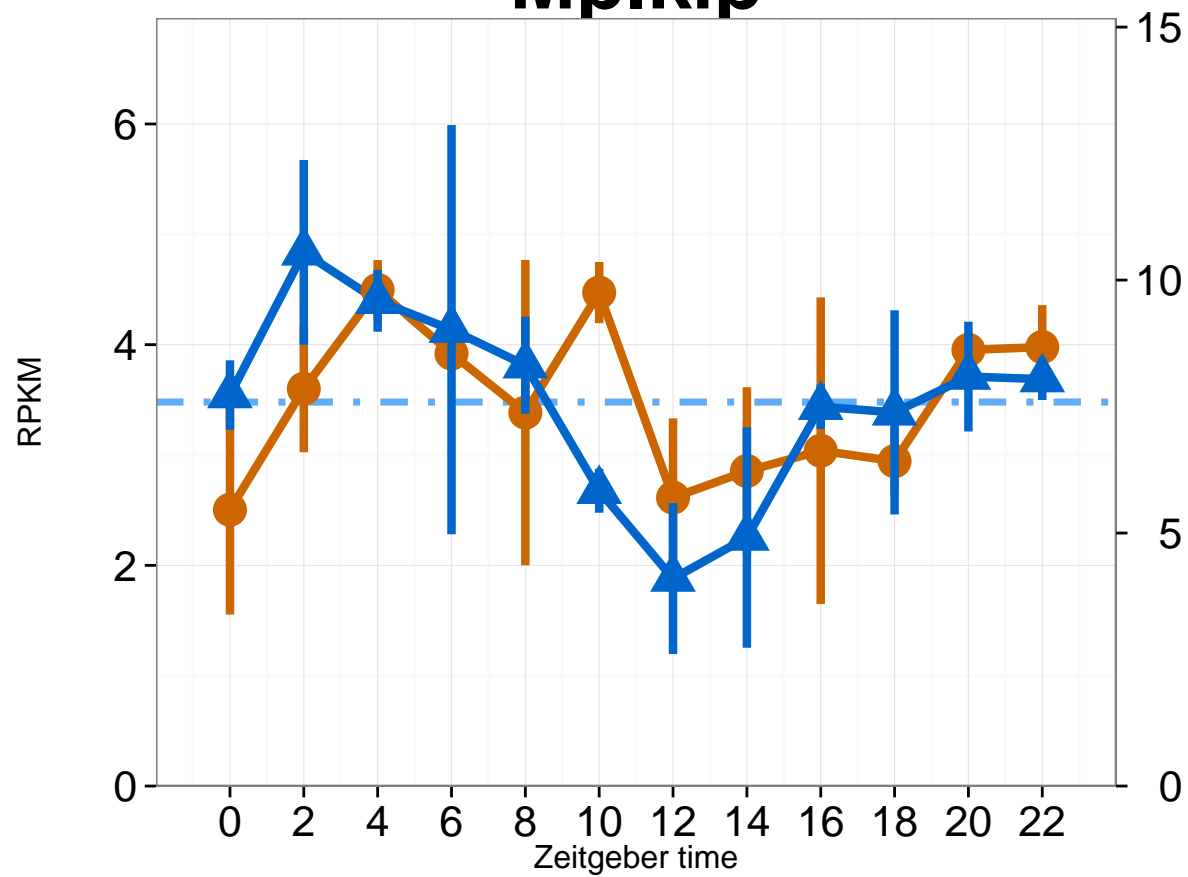

## Mplkip

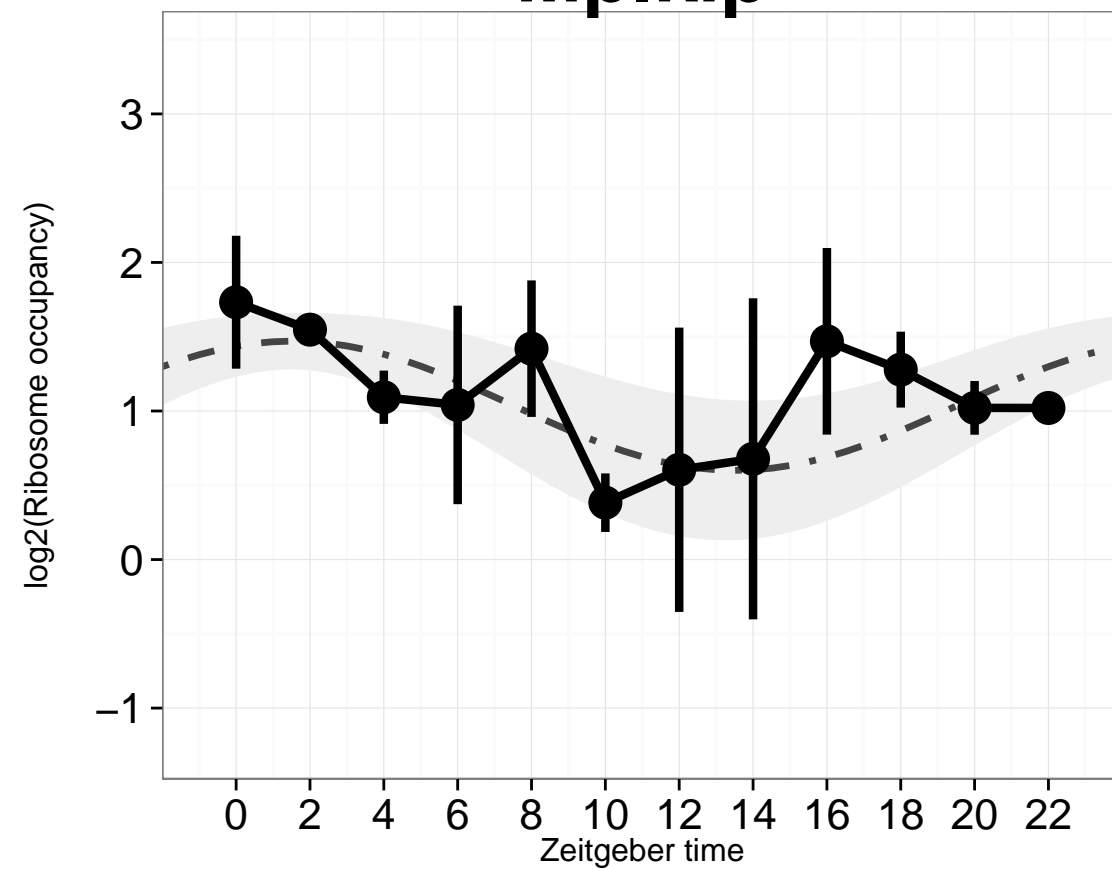

Supplement: SuppDataset_1.zip [file Mplkip_set_A.pdf › Supplemental Dataset 1/A-mRNA_nonrhyth_translation_nonrhyth/Mplkip_set_A.pdf]

## Mpnd

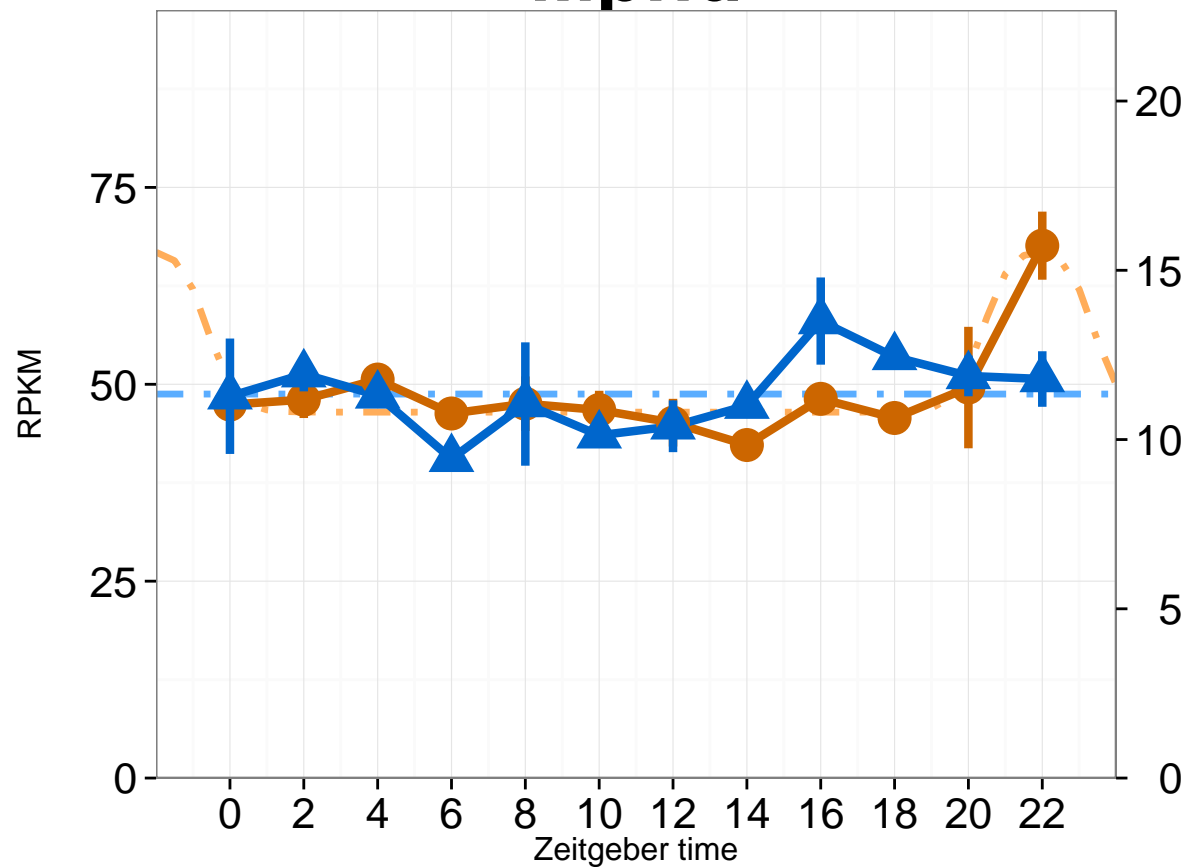

## Mpnd

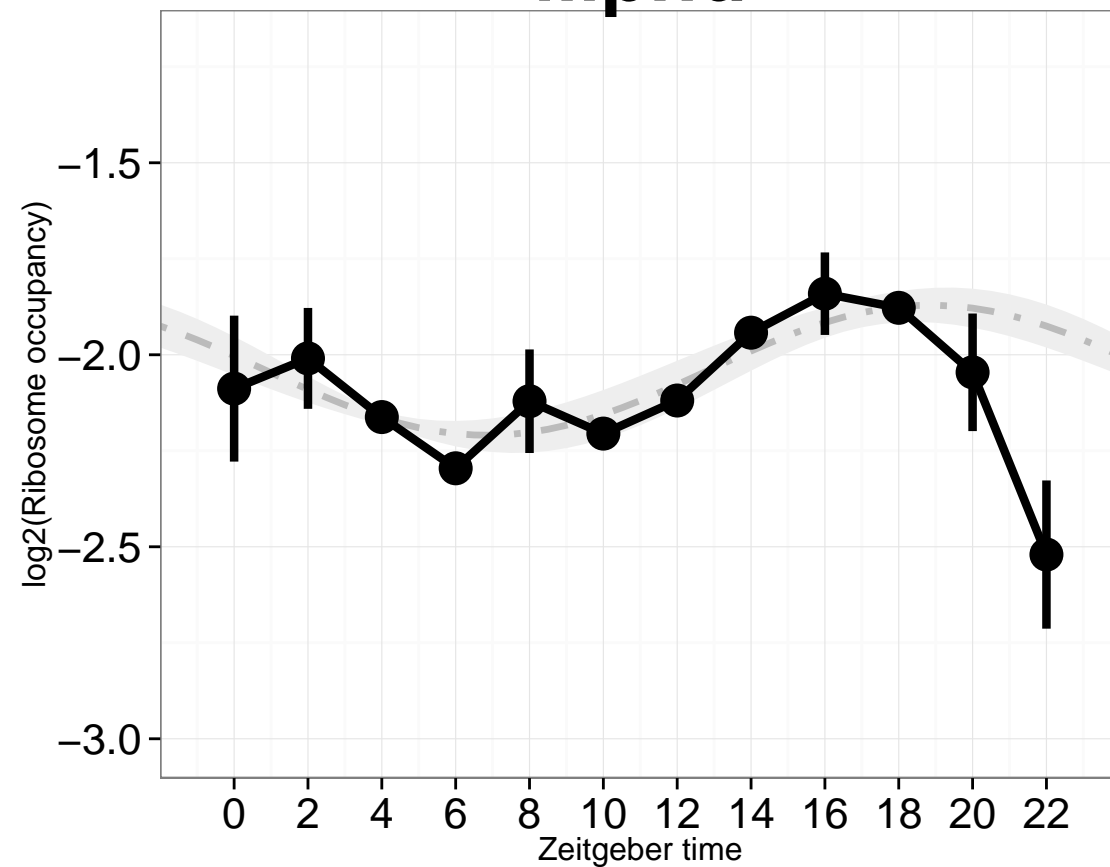

Supplement: SuppDataset_1.zip [file Mpnd_set_A.pdf › Supplemental Dataset 1/A-mRNA_nonrhyth_translation_nonrhyth/Mpnd_set_A.pdf]

# Mpp5

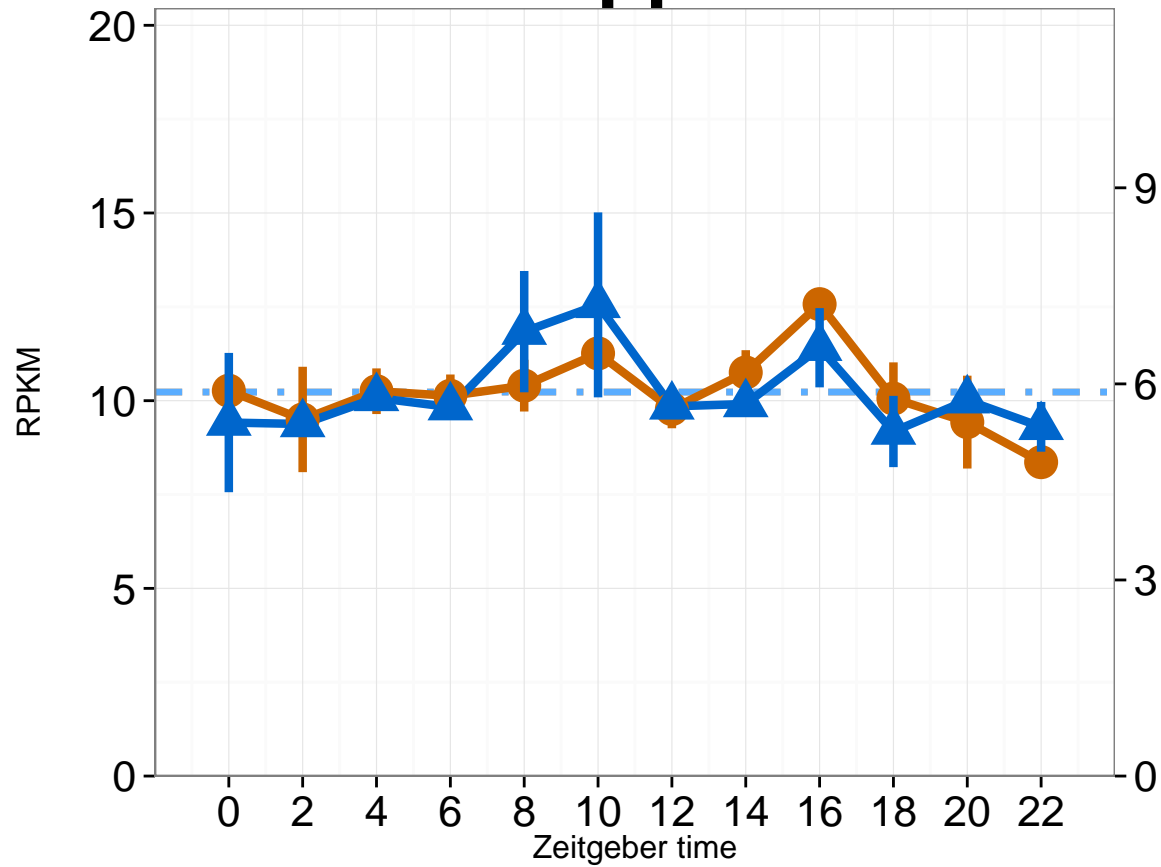

# Mpp5

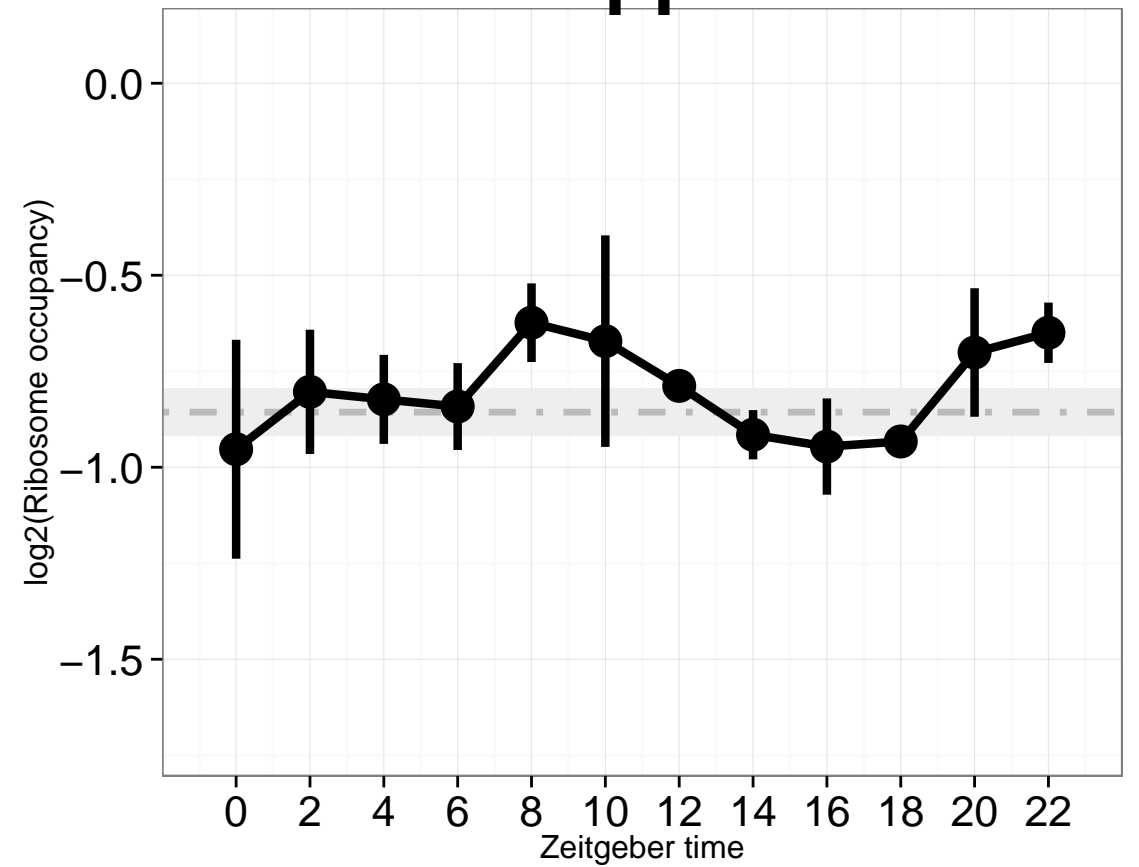

Supplement: SuppDataset_1.zip [file Mpp5_set_A.pdf › Supplemental Dataset 1/A-mRNA_nonrhyth_translation_nonrhyth/Mpp5_set_A.pdf]

## Mpp6

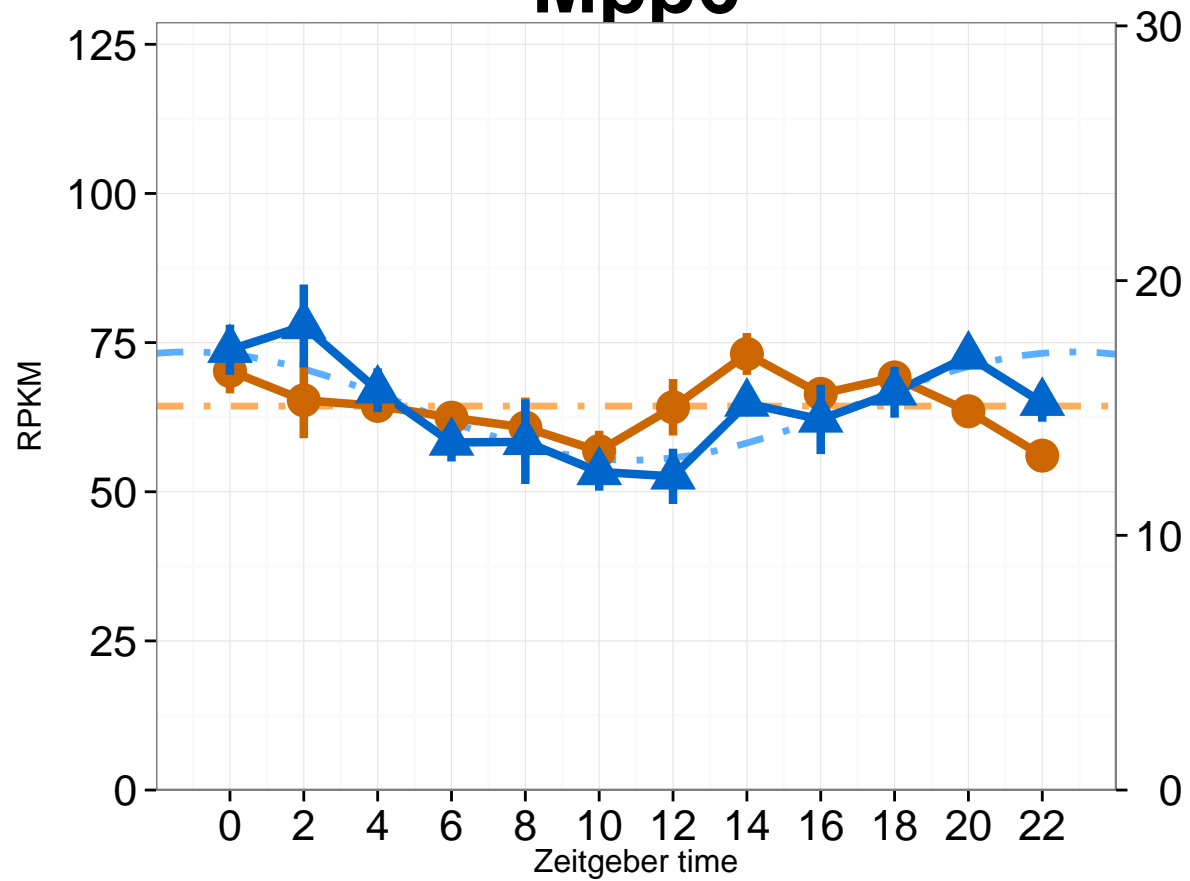

## Mpp6

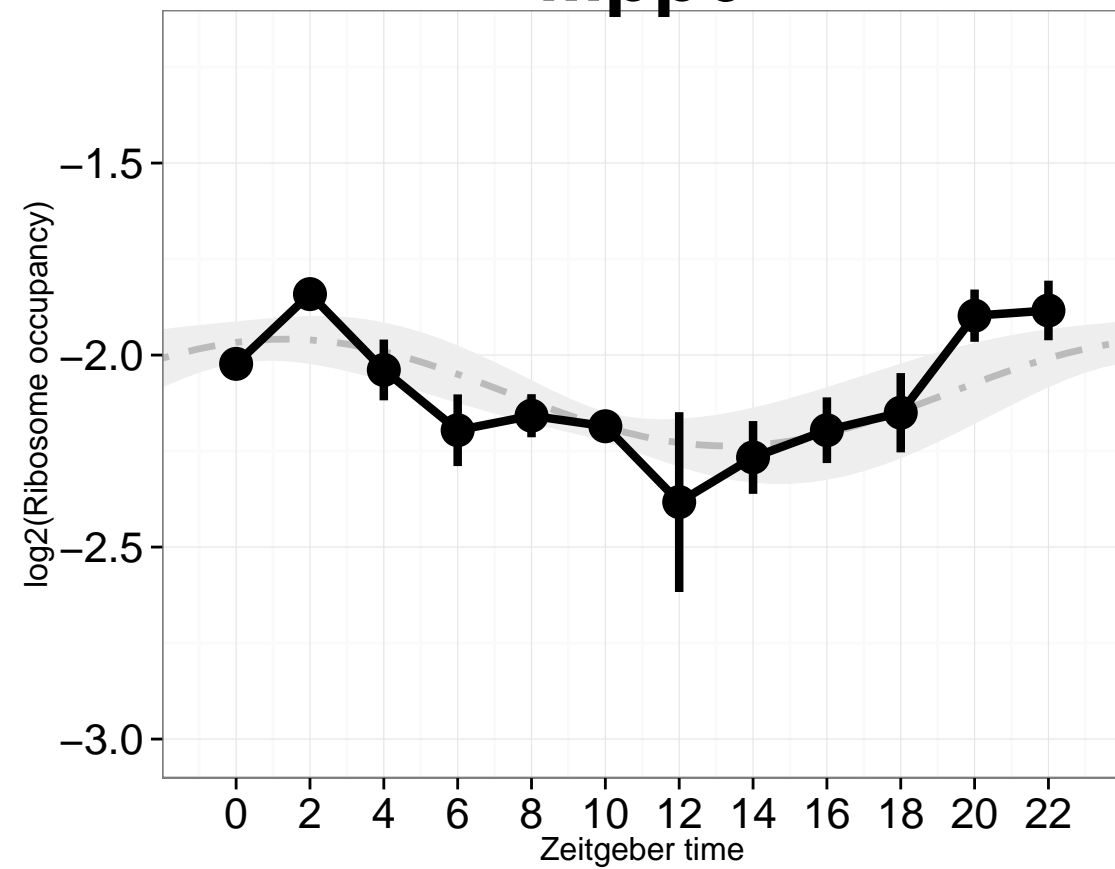

Supplement: SuppDataset_1.zip [file Mpp6_set_A.pdf › Supplemental Dataset 1/A-mRNA_nonrhyth_translation_nonrhyth/Mpp6_set_A.pdf]

# Mppe1

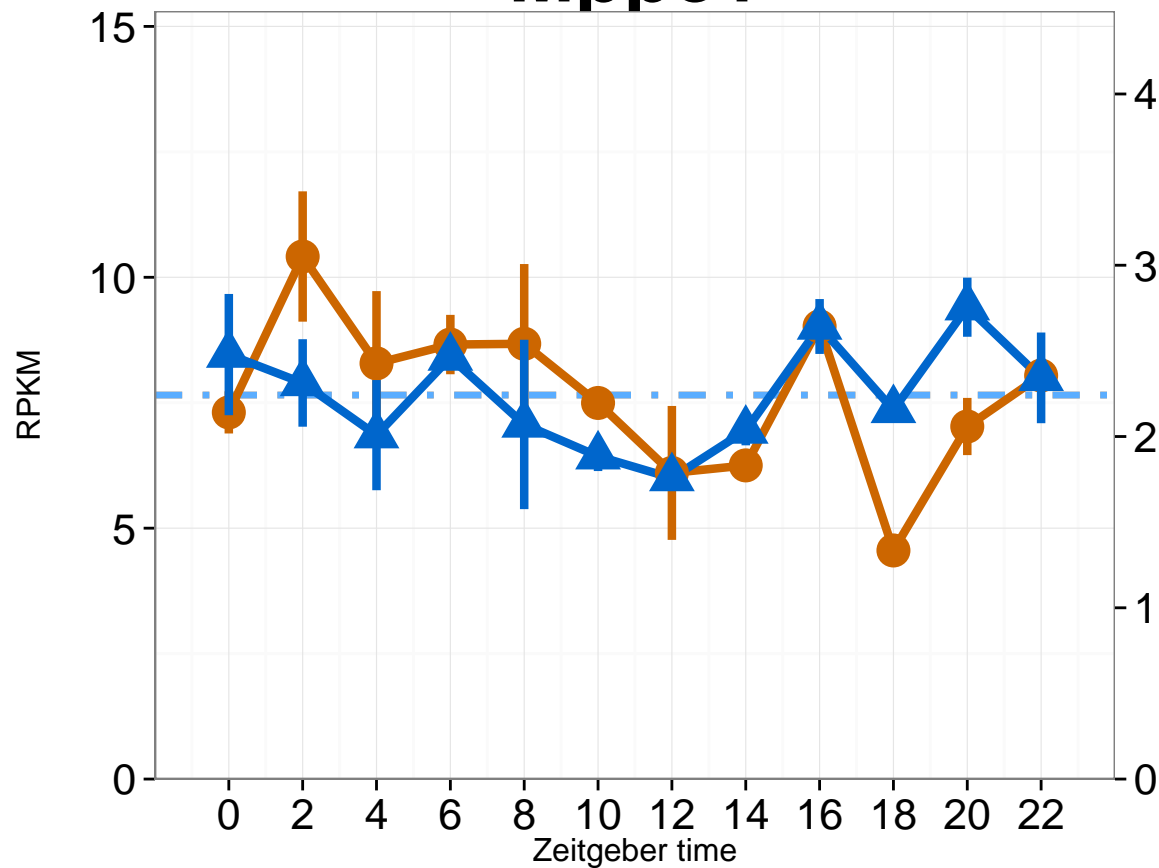

# Mppe1

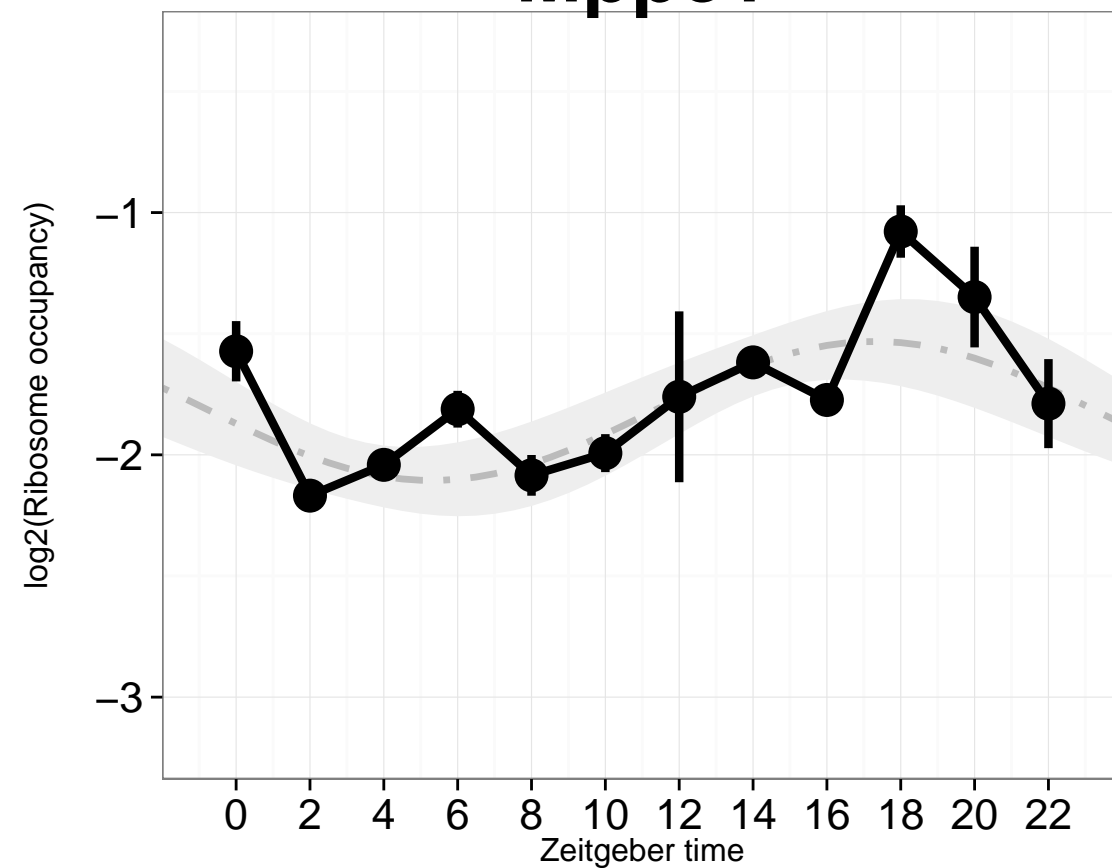

Supplement: SuppDataset_1.zip [file Mppe1_set_A.pdf › Supplemental Dataset 1/A-mRNA_nonrhyth_translation_nonrhyth/Mppe1_set_A.pdf]

# Mprip

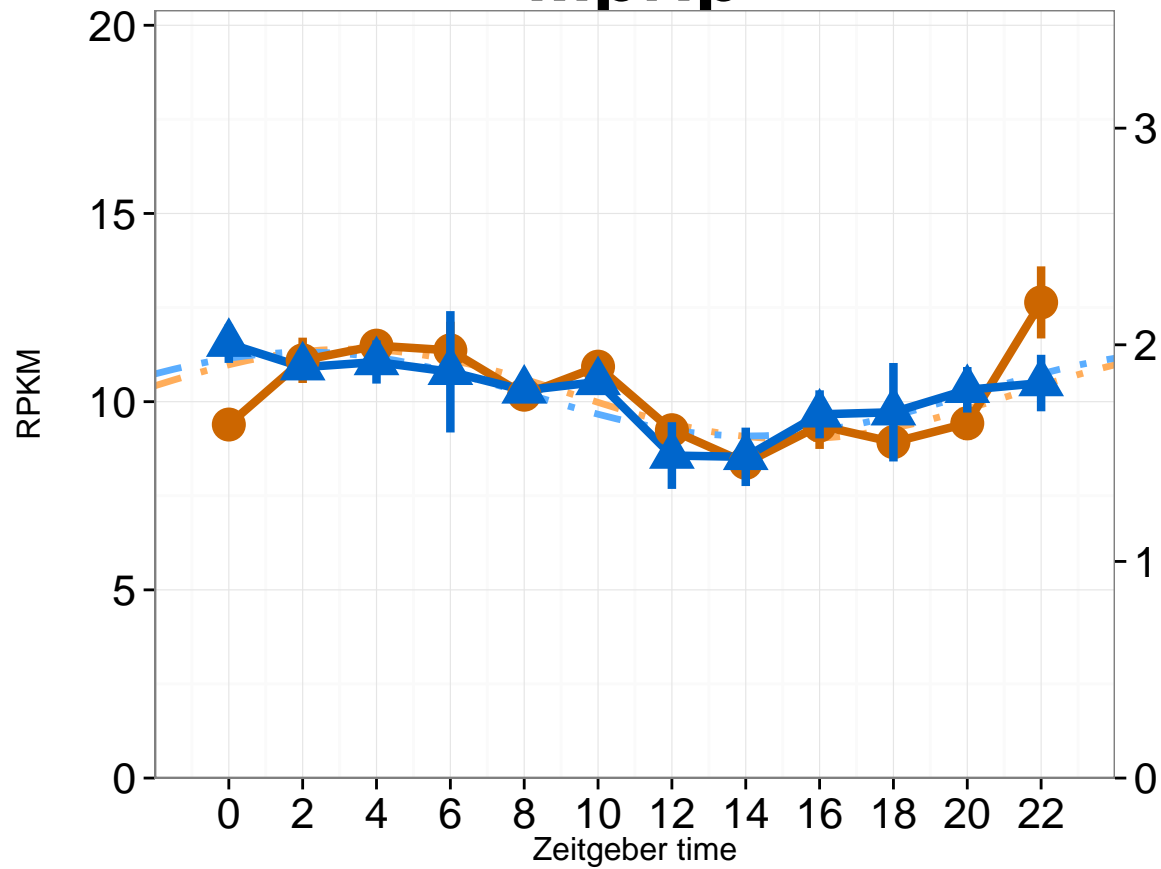

# Mprip

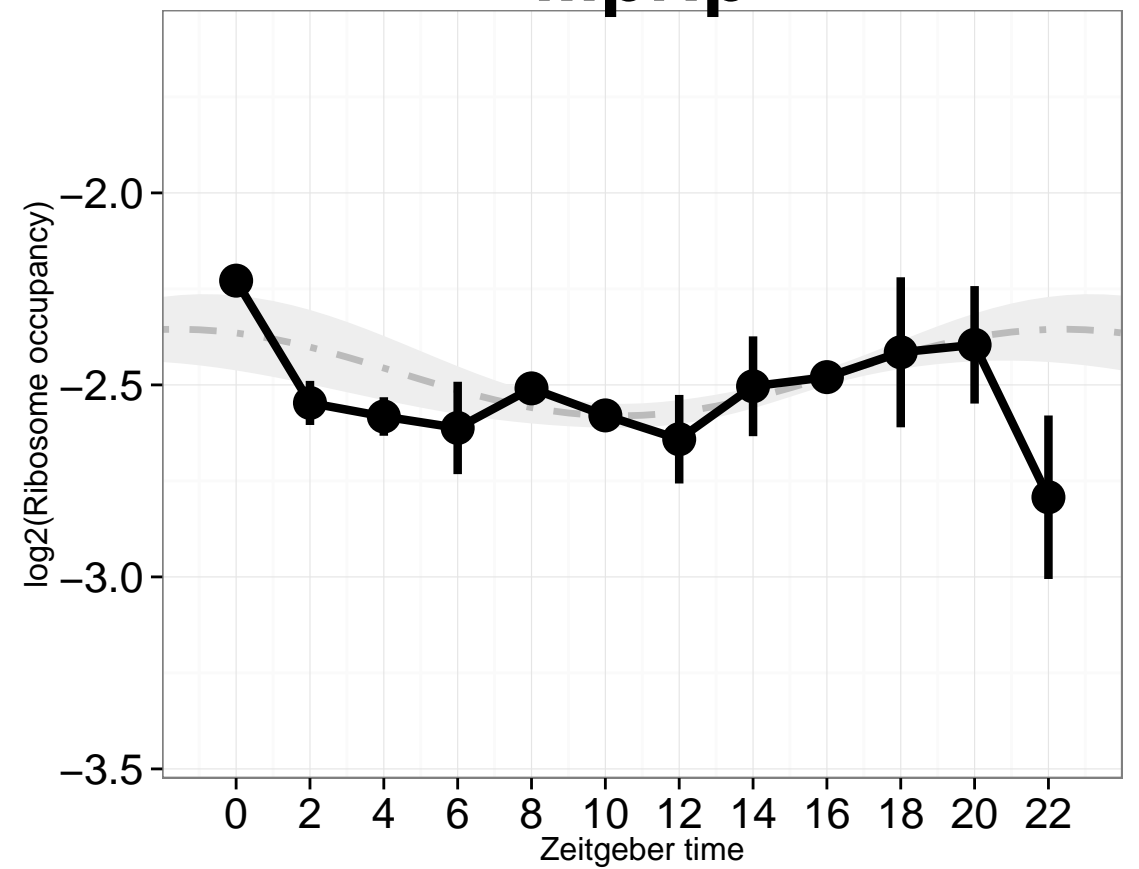

Supplement: SuppDataset_1.zip [file Mprip_set_A.pdf › Supplemental Dataset 1/A-mRNA_nonrhyth_translation_nonrhyth/Mprip_set_A.pdf]

## Mpv17

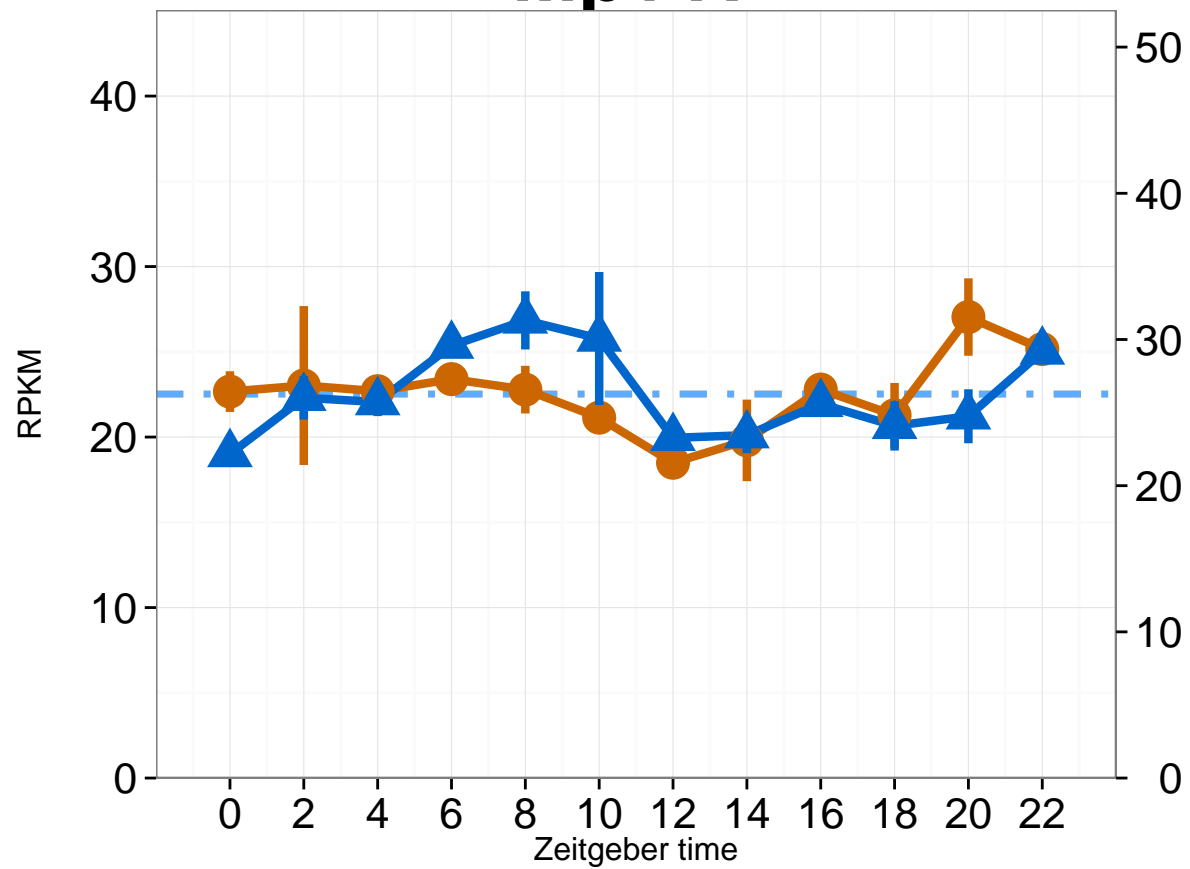

## Mpv17

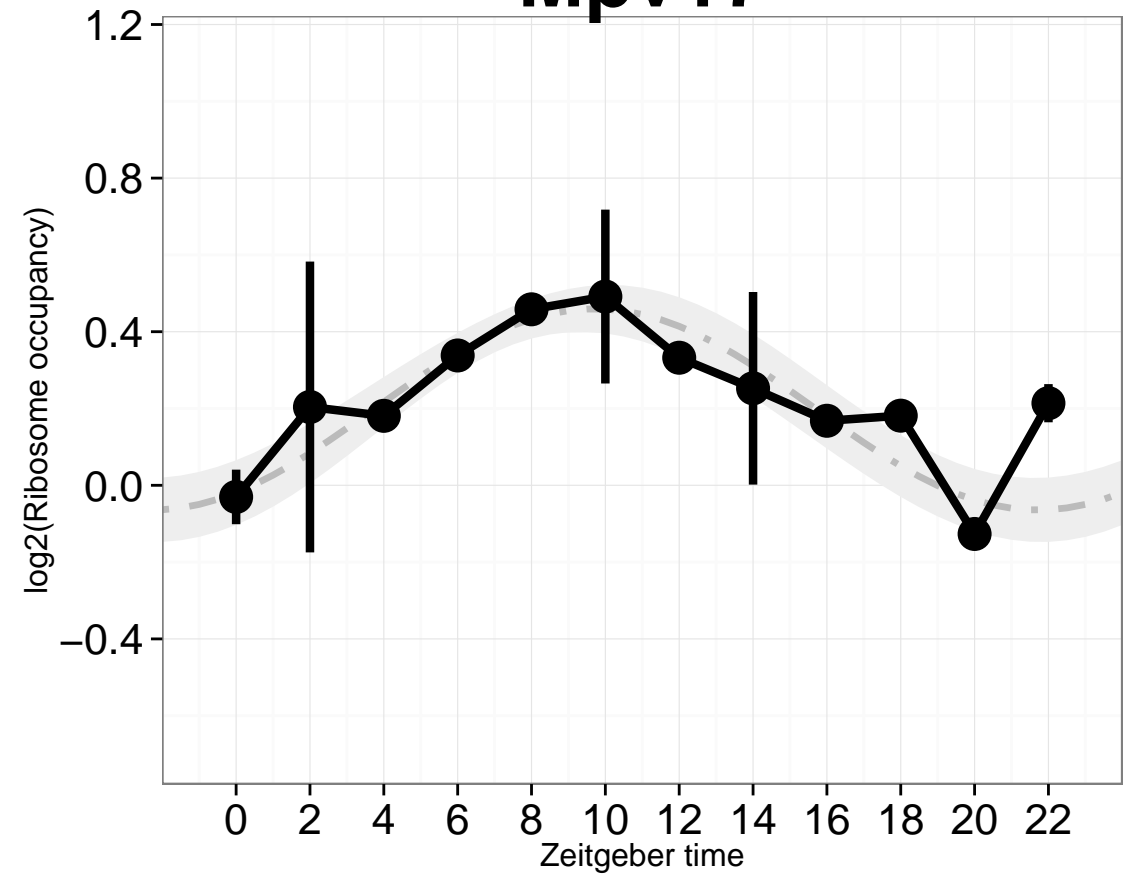

Supplement: SuppDataset_1.zip [file Mpv17_set_A.pdf › Supplemental Dataset 1/A-mRNA_nonrhyth_translation_nonrhyth/Mpv17_set_A.pdf]

# Mpv17l2

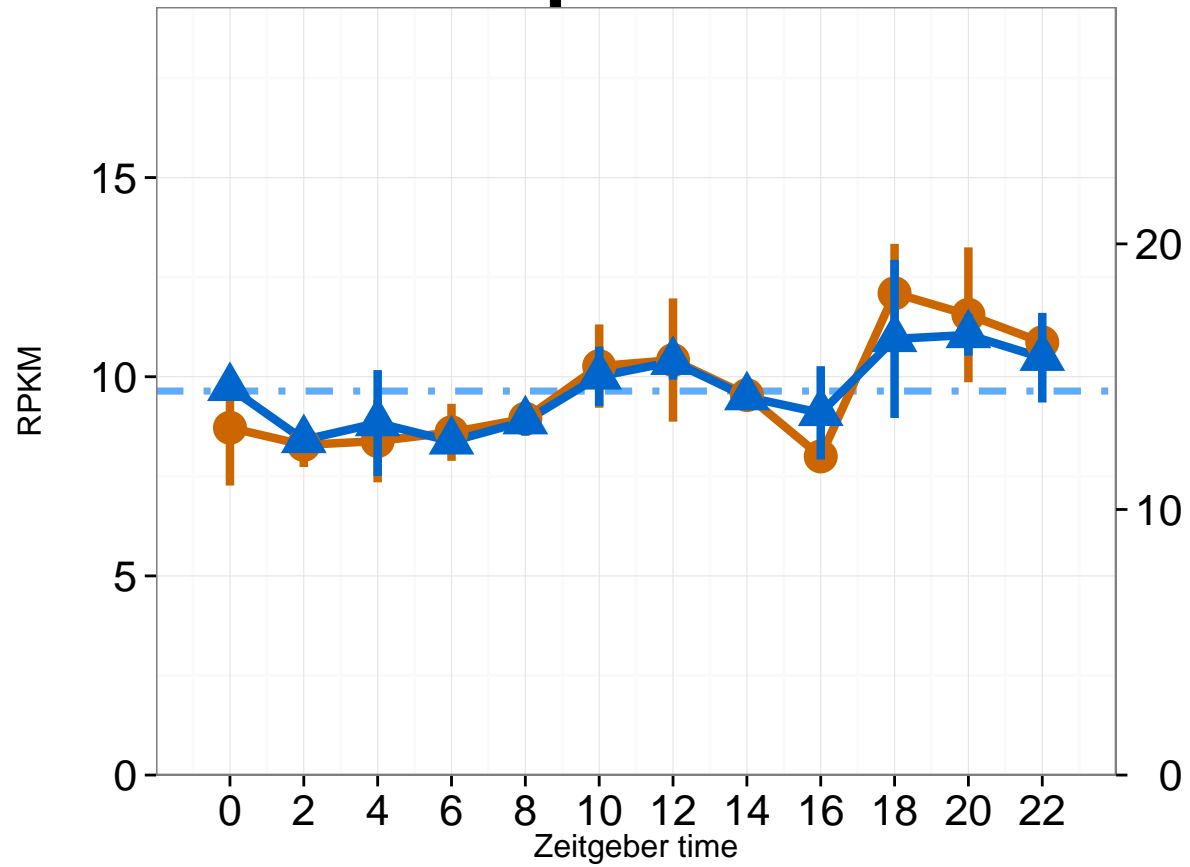

# Mpv17l2

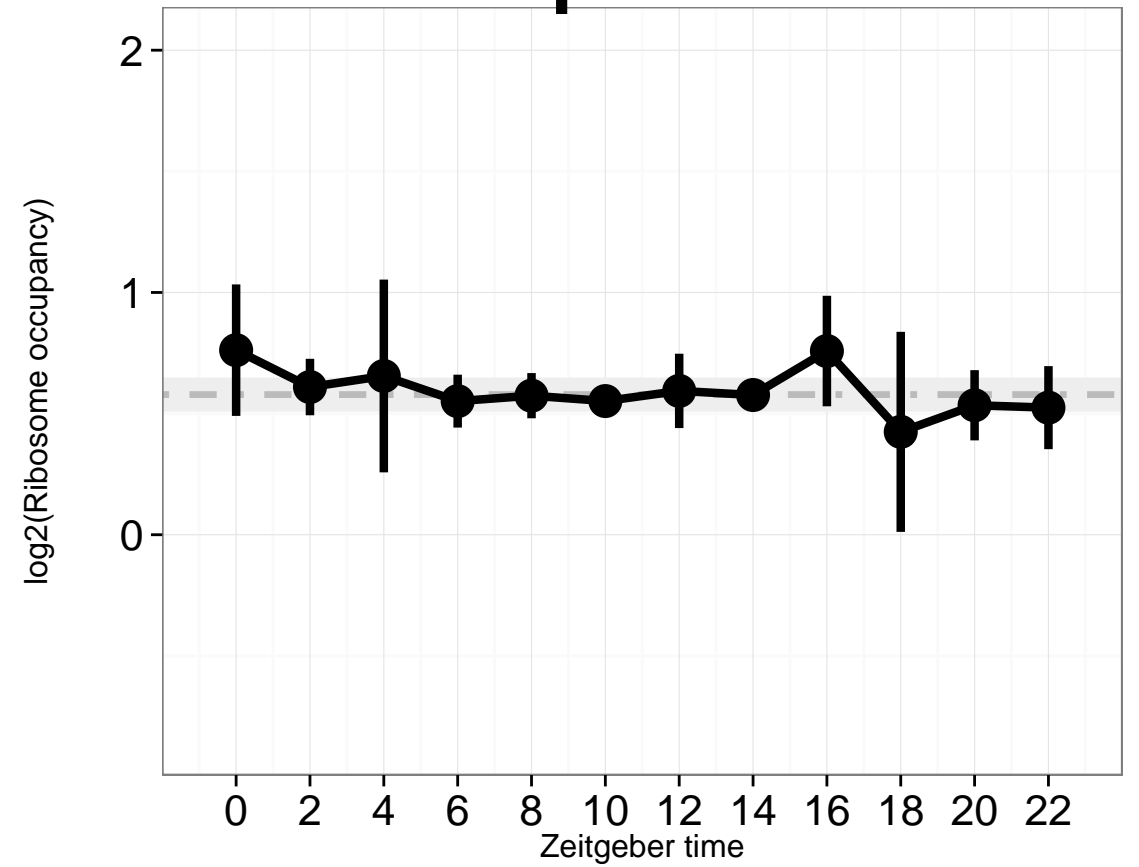

Supplement: SuppDataset_1.zip [file Mpv17l2_set_A.pdf › Supplemental Dataset 1/A-mRNA_nonrhyth_translation_nonrhyth/Mpv17l2_set_A.pdf]

# Mpv17l

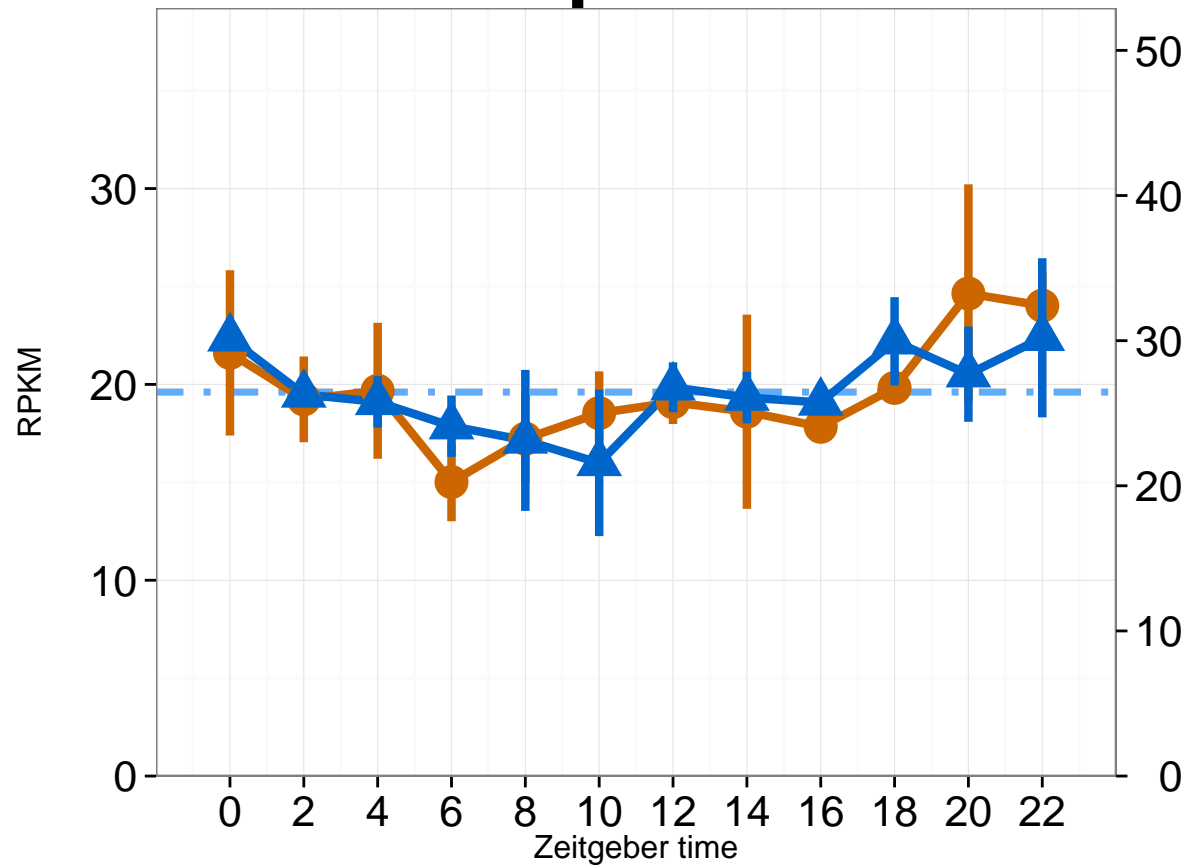

# Mpv17l

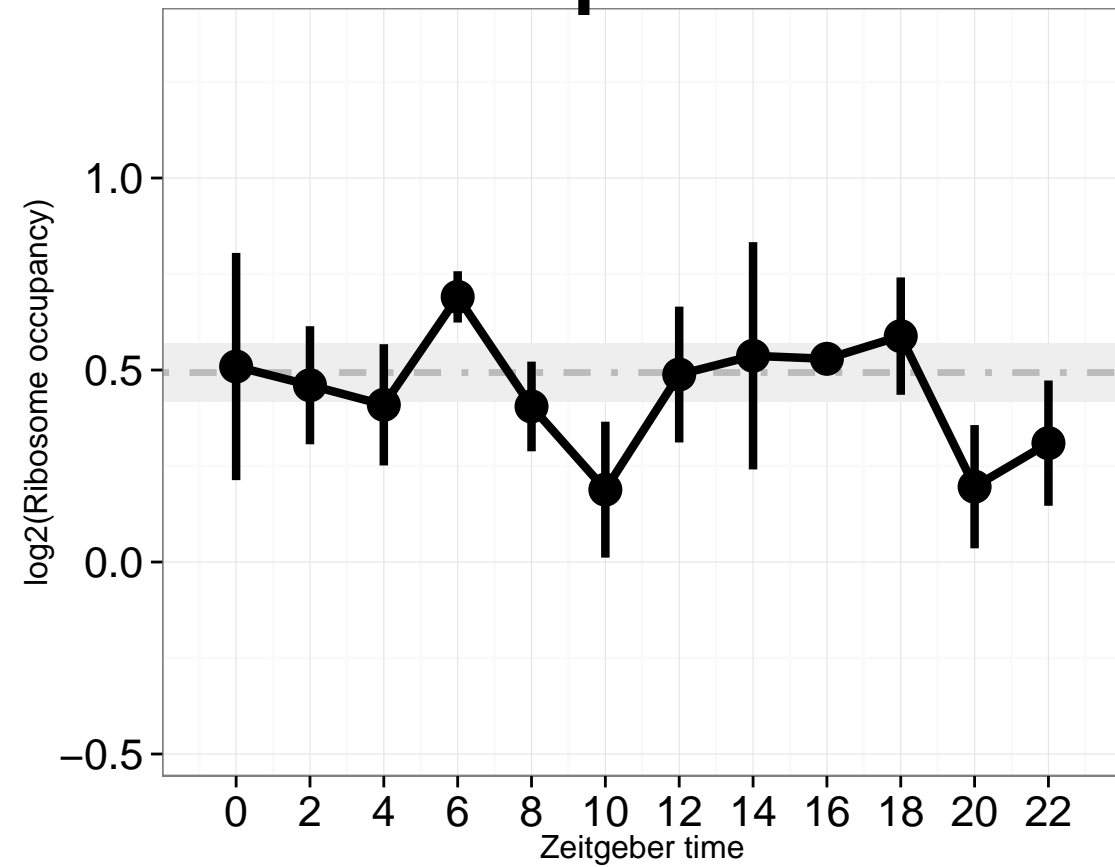

Supplement: SuppDataset_1.zip [file Mpv17l_set_A.pdf › Supplemental Dataset 1/A-mRNA_nonrhyth_translation_nonrhyth/Mpv17l_set_A.pdf]

## Mpzi3

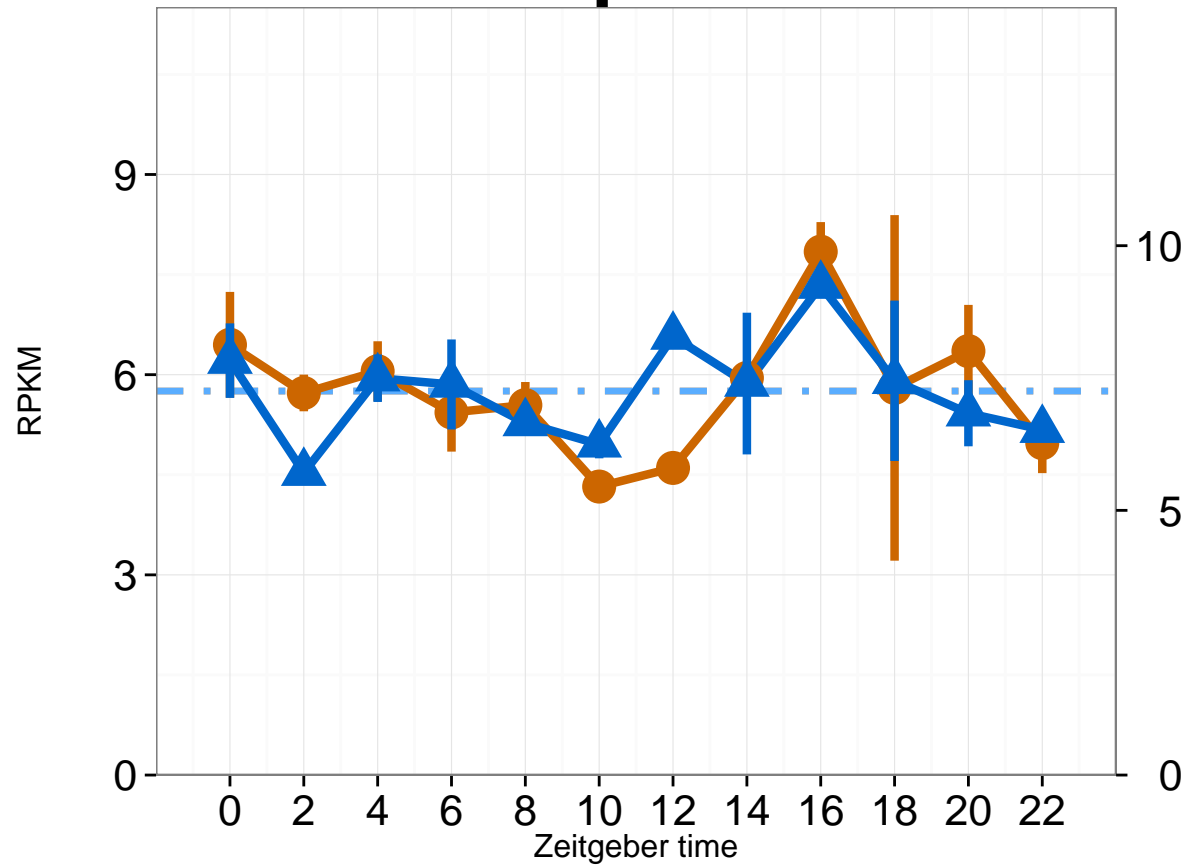

## Mpzi3

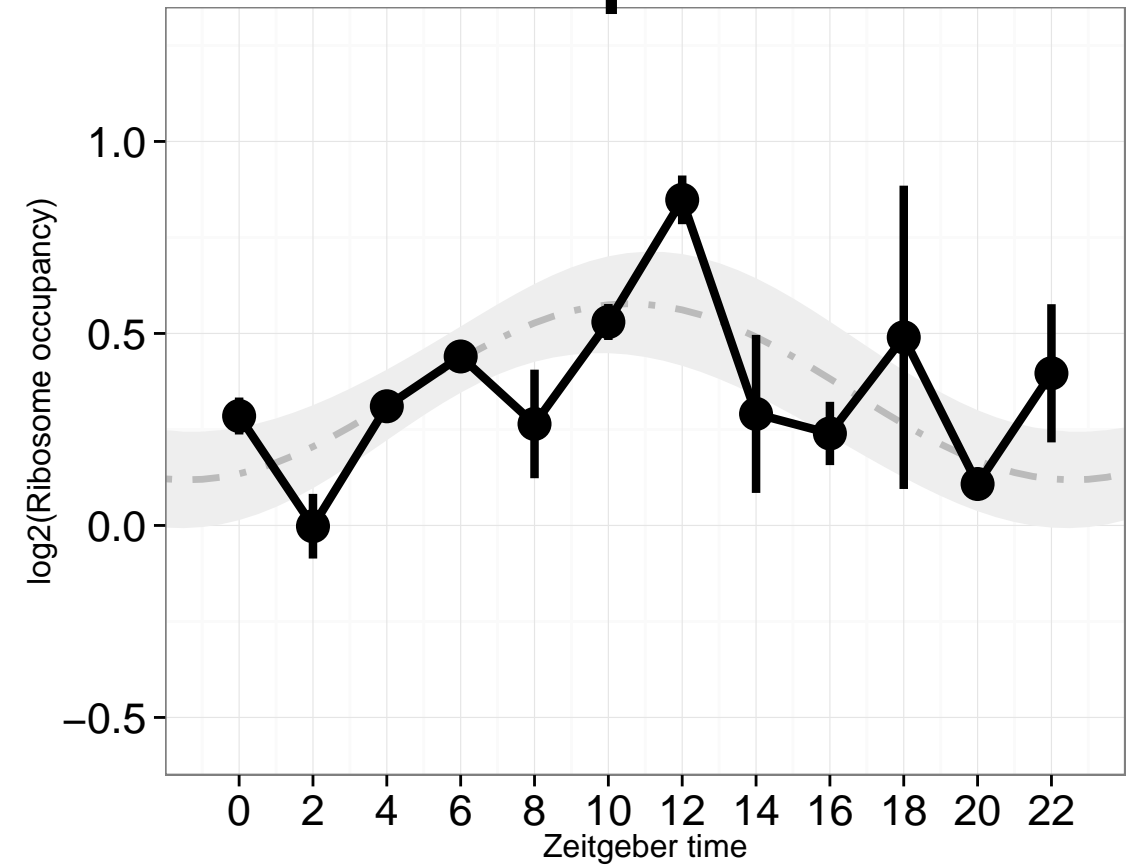

Supplement: SuppDataset_1.zip [file Mpzl3_set_A.pdf › Supplemental Dataset 1/A-mRNA_nonrhyth_translation_nonrhyth/Mpzl3_set_A.pdf]

## Mras

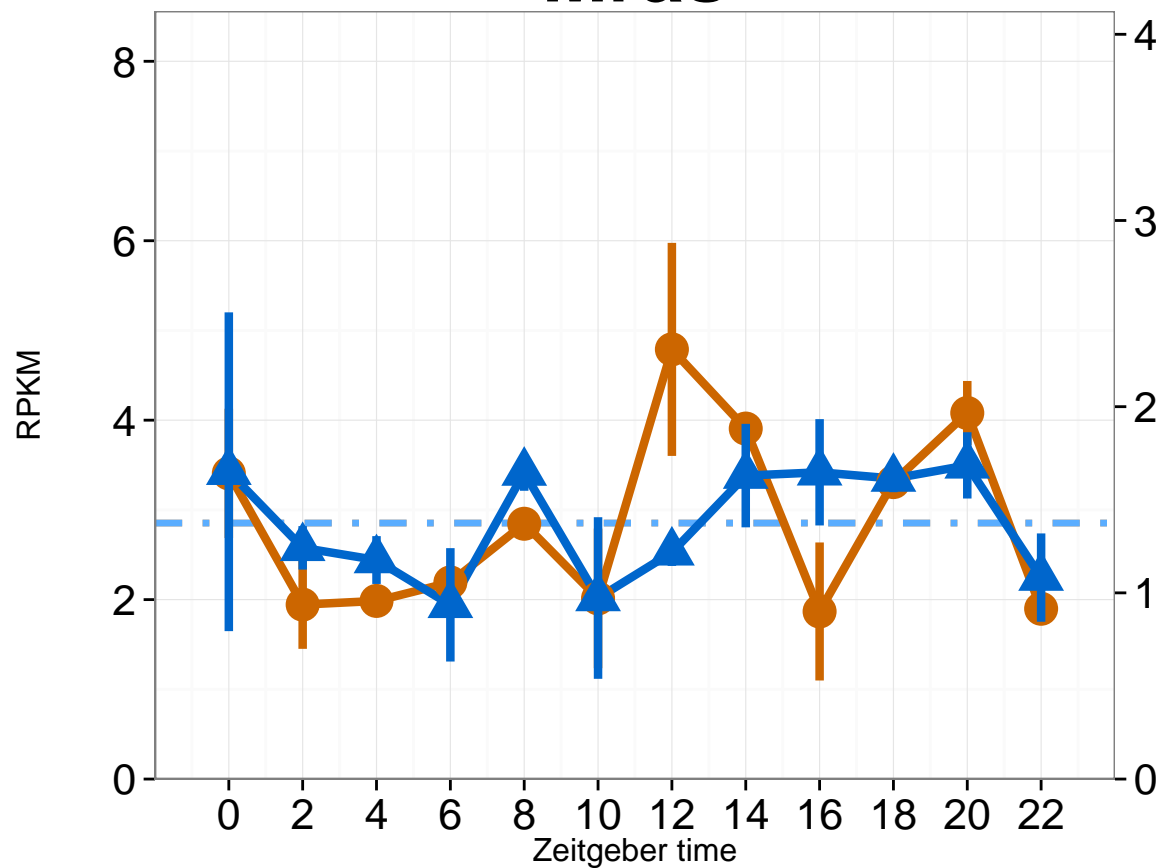

## Mras

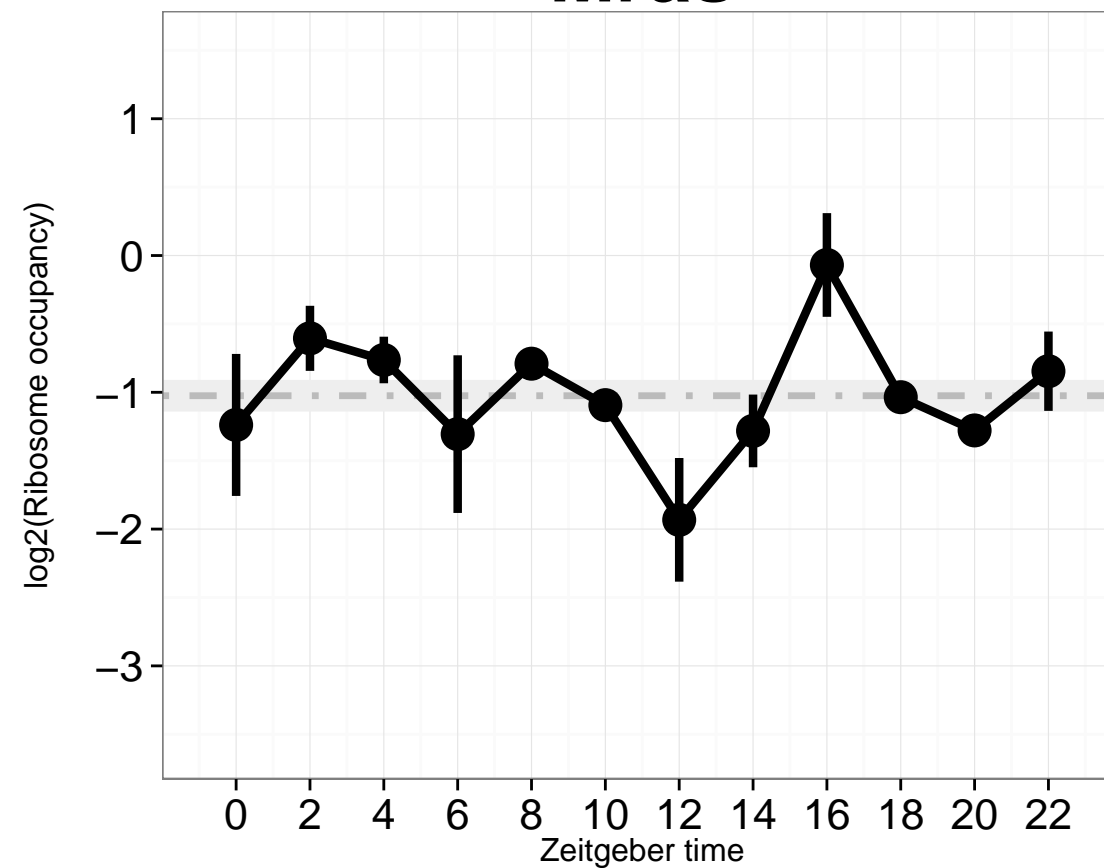

Supplement: SuppDataset_1.zip [file Mras_set_A.pdf › Supplemental Dataset 1/A-mRNA_nonrhyth_translation_nonrhyth/Mras_set_A.pdf]

## Mrc1

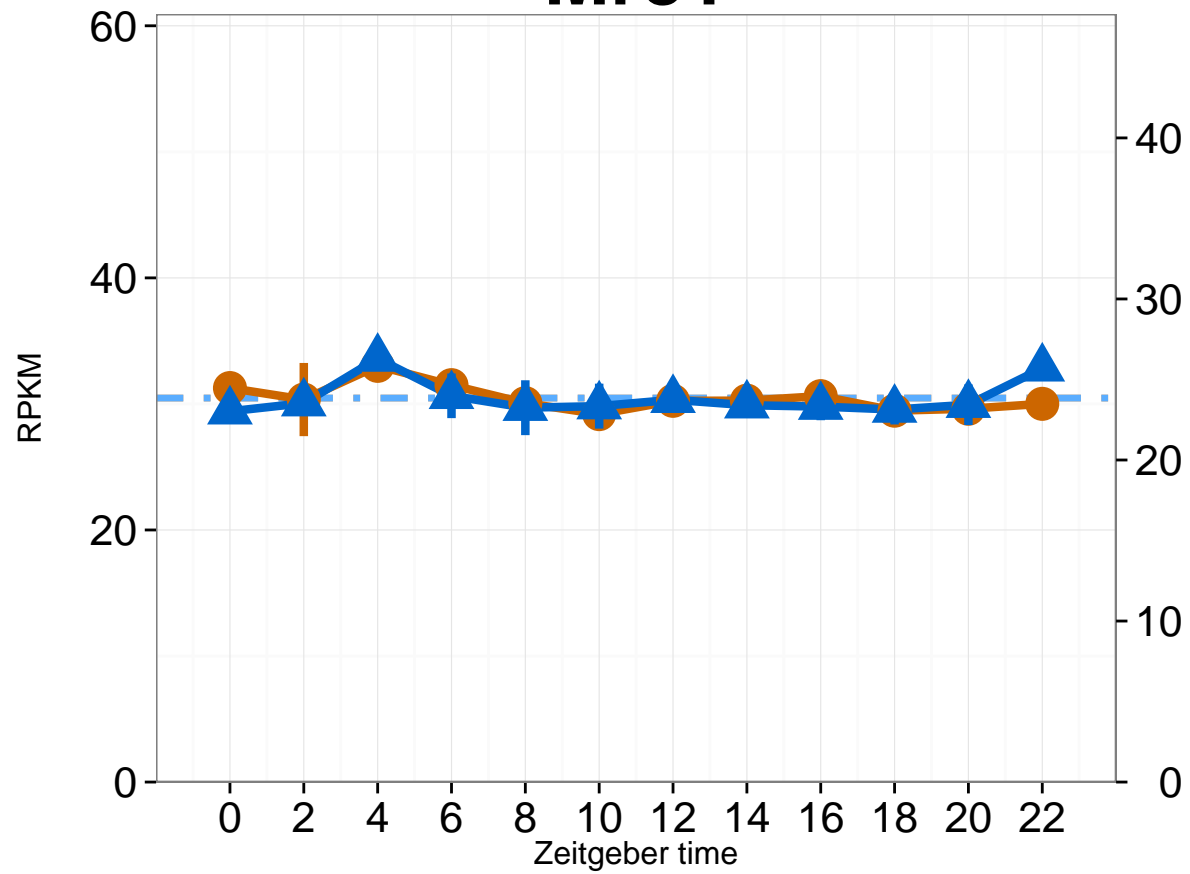

## Mrc1

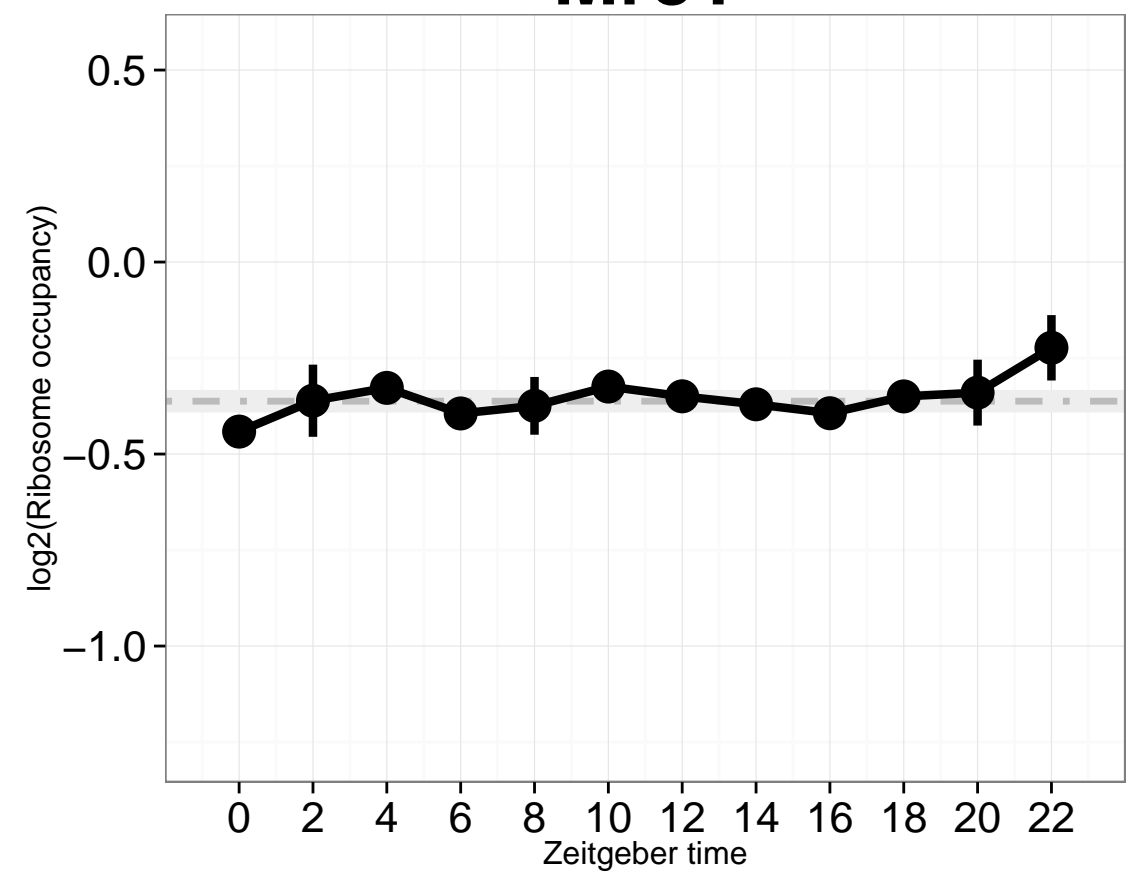

Supplement: SuppDataset_1.zip [file Mrc1_set_A.pdf › Supplemental Dataset 1/A-mRNA_nonrhyth_translation_nonrhyth/Mrc1_set_A.pdf]

# Mre11a

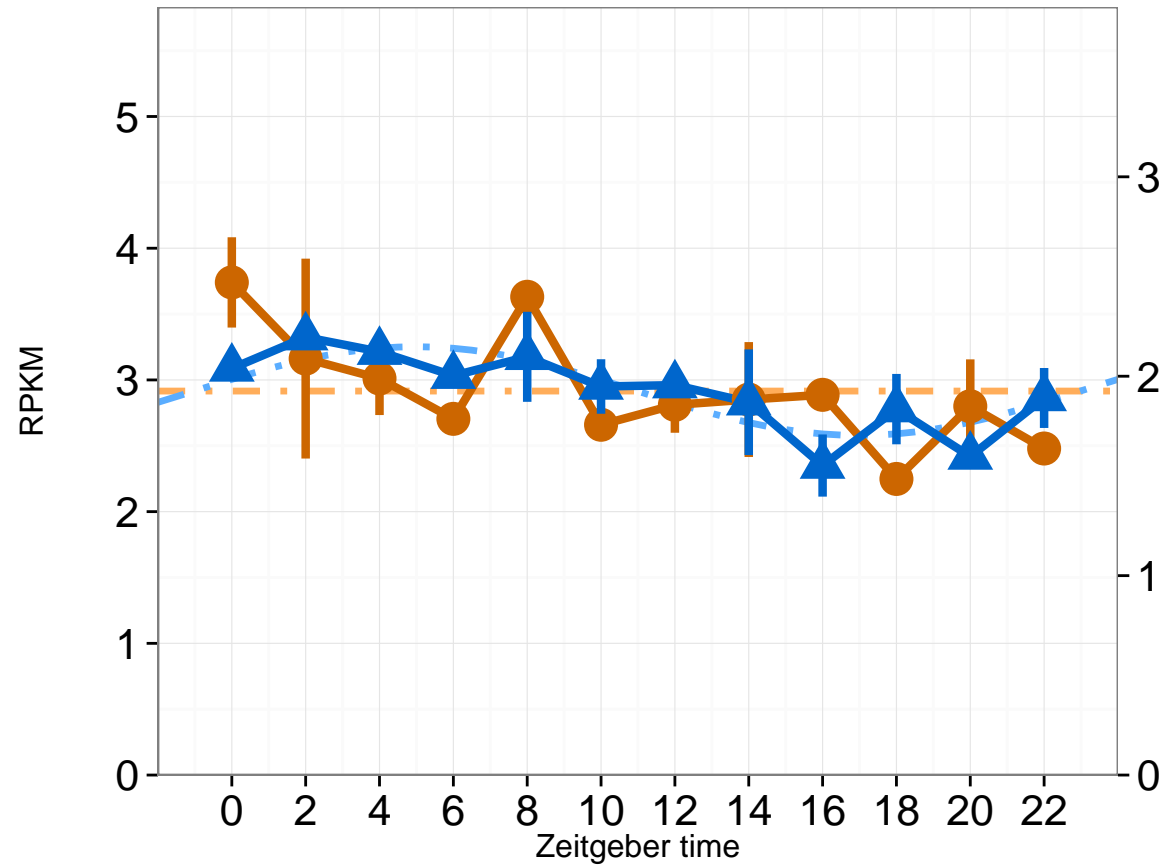

# Mre11a

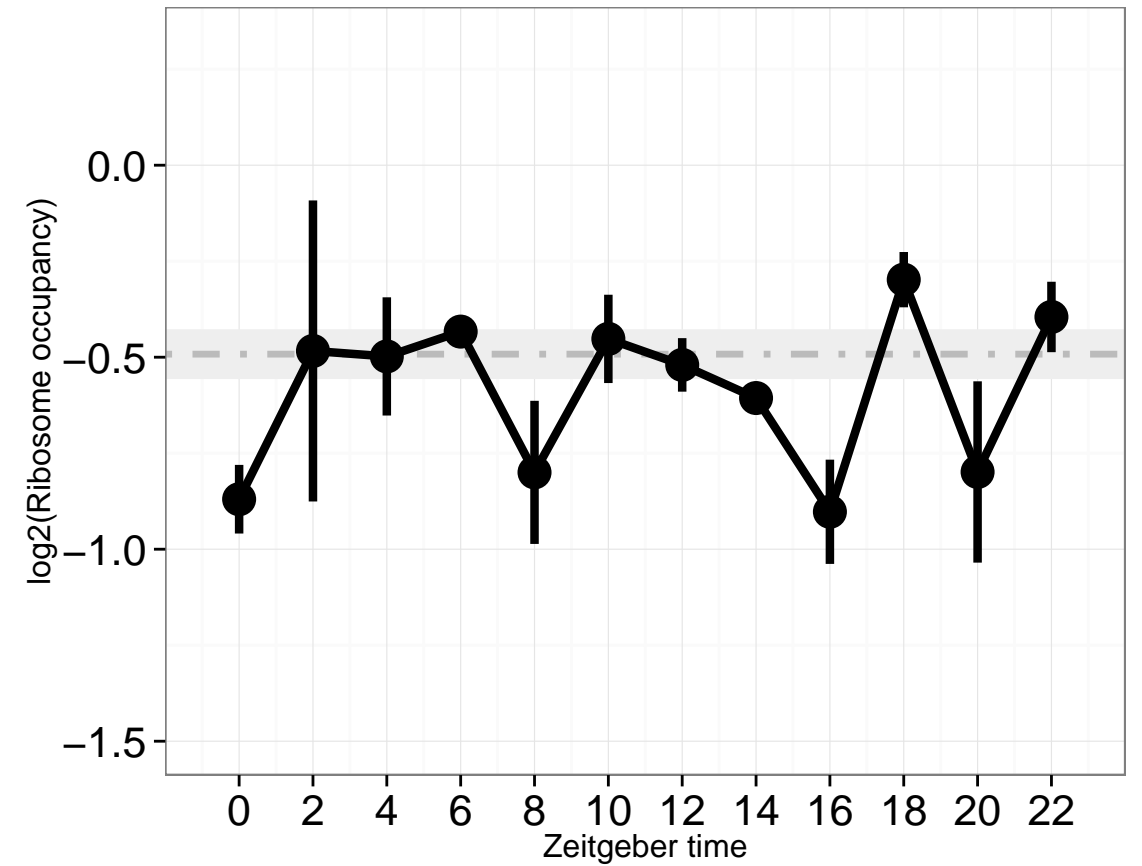

Supplement: SuppDataset_1.zip [file Mre11a_set_A.pdf › Supplemental Dataset 1/A-mRNA_nonrhyth_translation_nonrhyth/Mre11a_set_A.pdf]

# Mrfap1

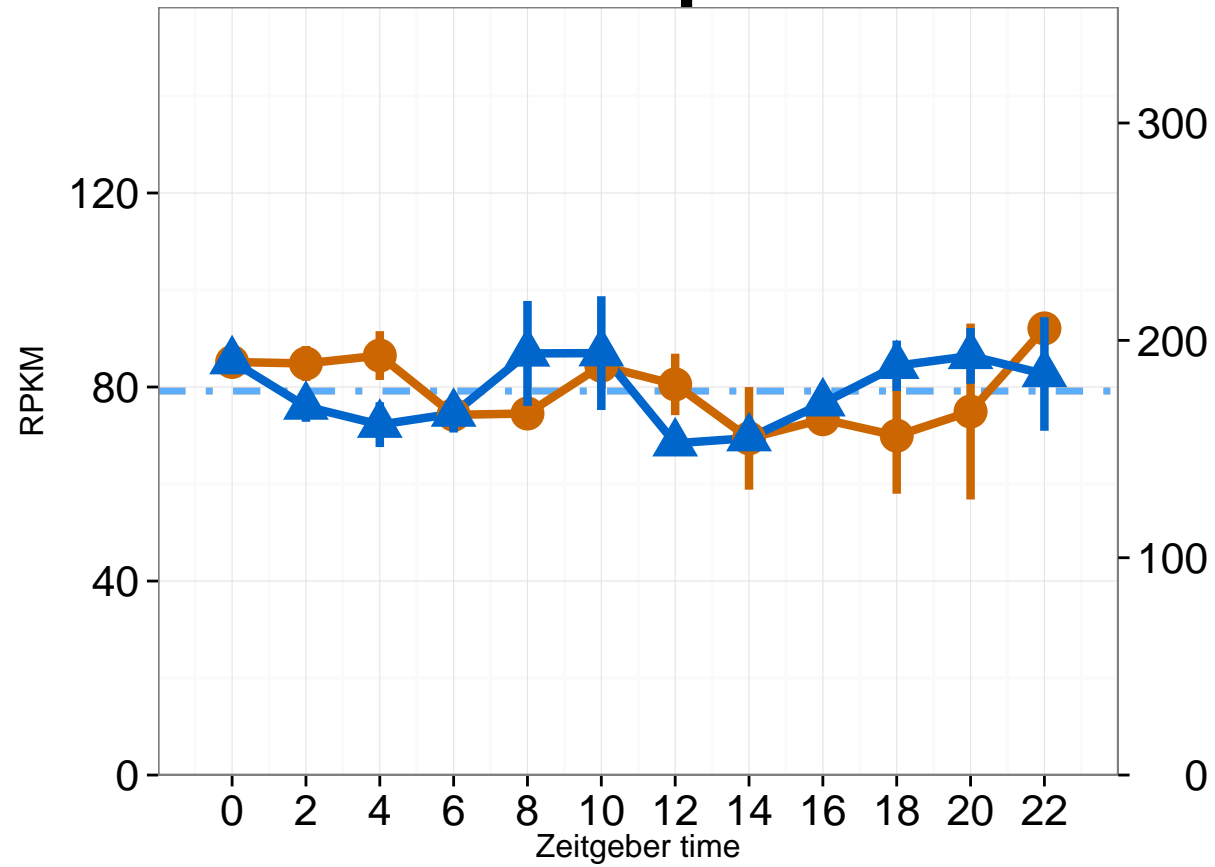

# Mrfap1

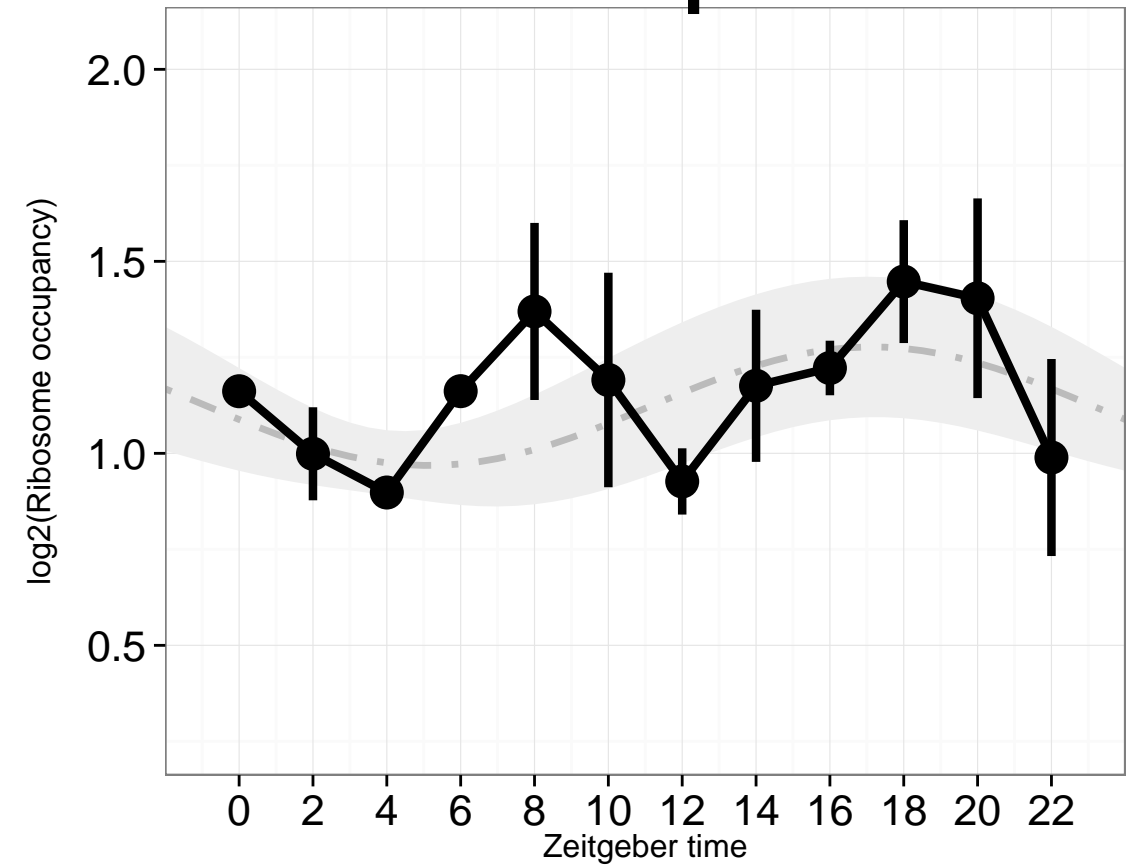

Supplement: SuppDataset_1.zip [file Mrfap1_set_A.pdf › Supplemental Dataset 1/A-mRNA_nonrhyth_translation_nonrhyth/Mrfap1_set_A.pdf]

**Mrgpre TR**

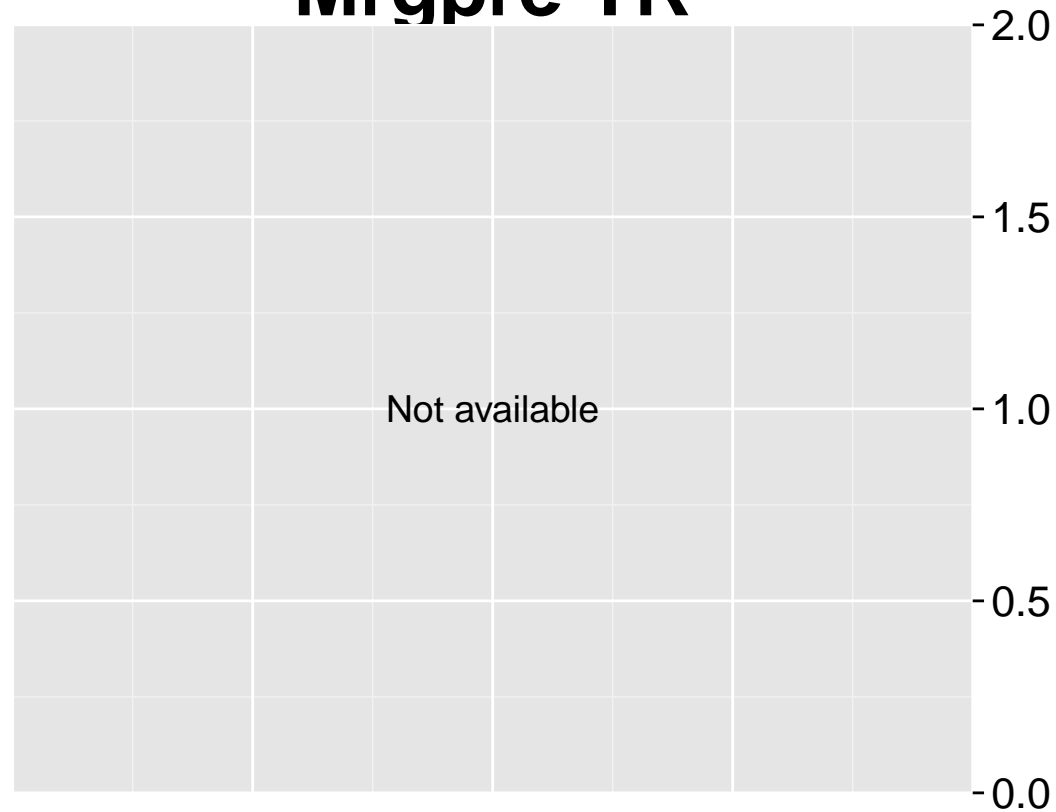

**Mrgpre log2(Ribosome occupancy**

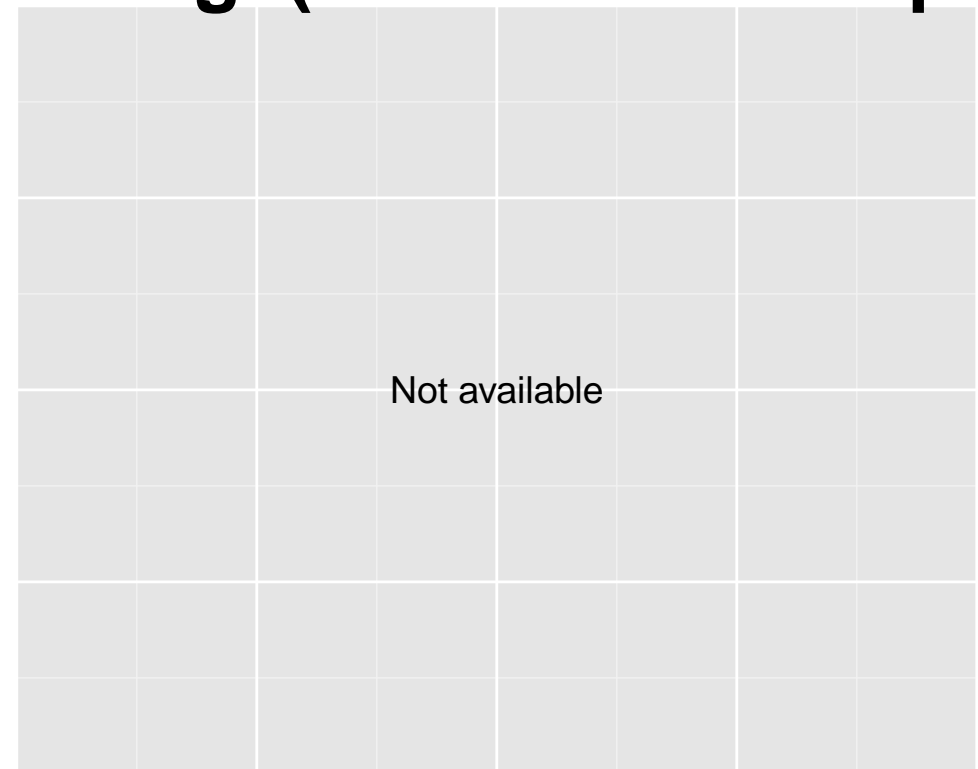

Supplement: SuppDataset_1.zip [file Mrgpre_set_A.pdf › Supplemental Dataset 1/A-mRNA_nonrhyth_translation_nonrhyth/Mrgpre_set_A.pdf]

## Mri1

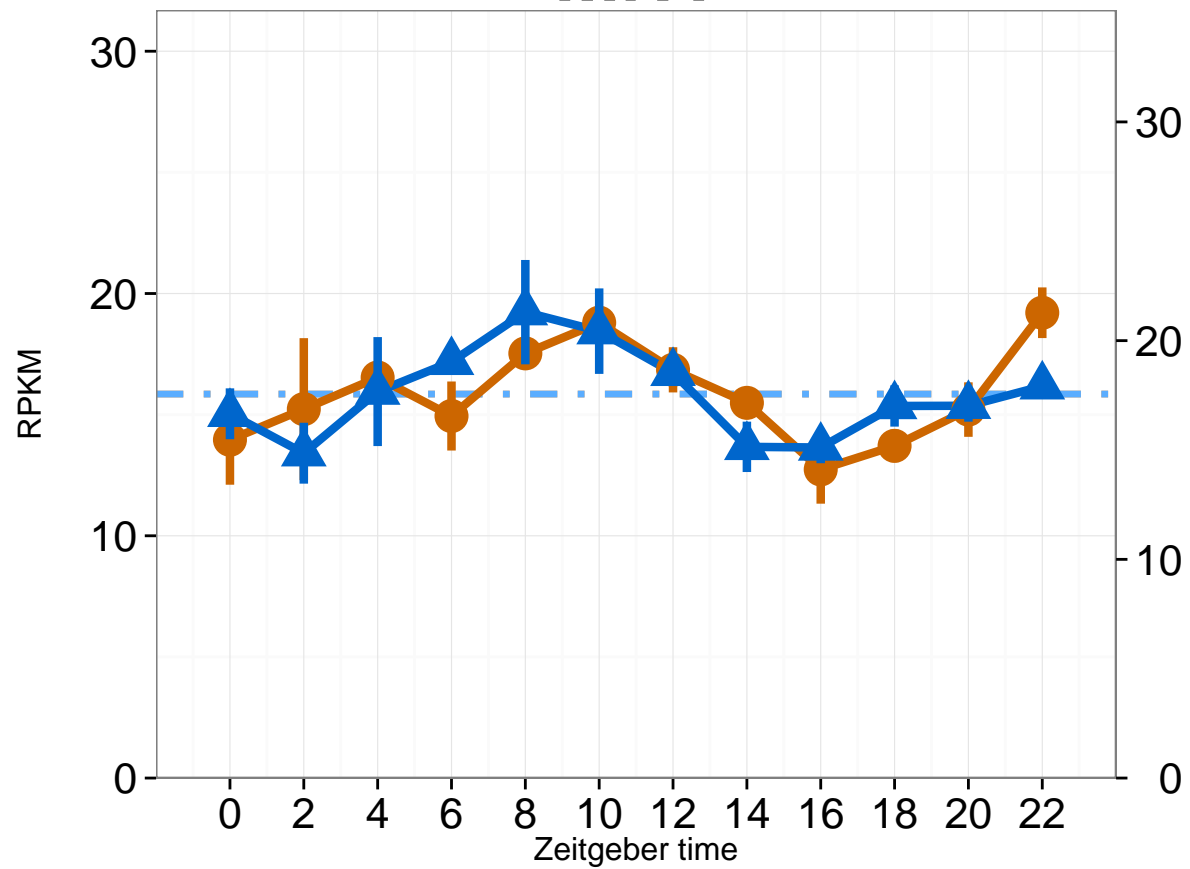

## Mri1

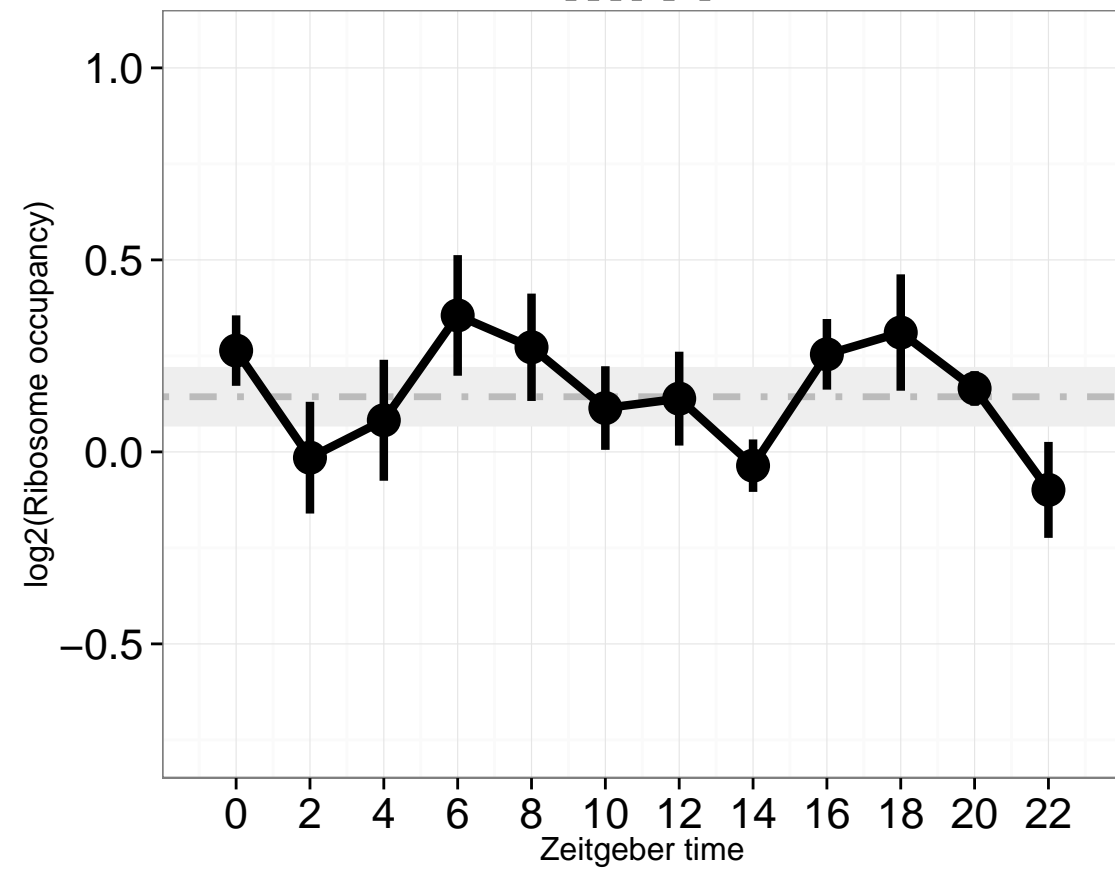

Supplement: SuppDataset_1.zip [file Mri1_set_A.pdf › Supplemental Dataset 1/A-mRNA_nonrhyth_translation_nonrhyth/Mri1_set_A.pdf]

# Mrm1

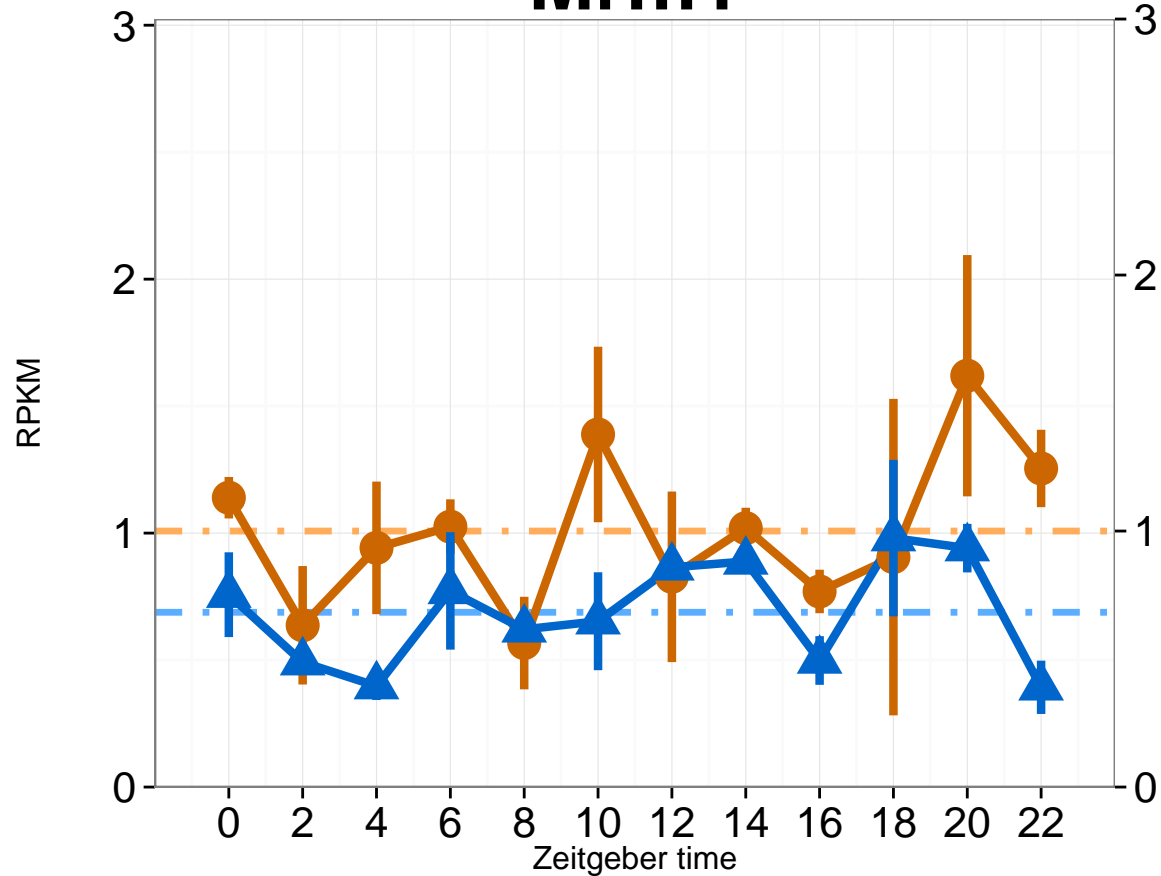

# Mrm1

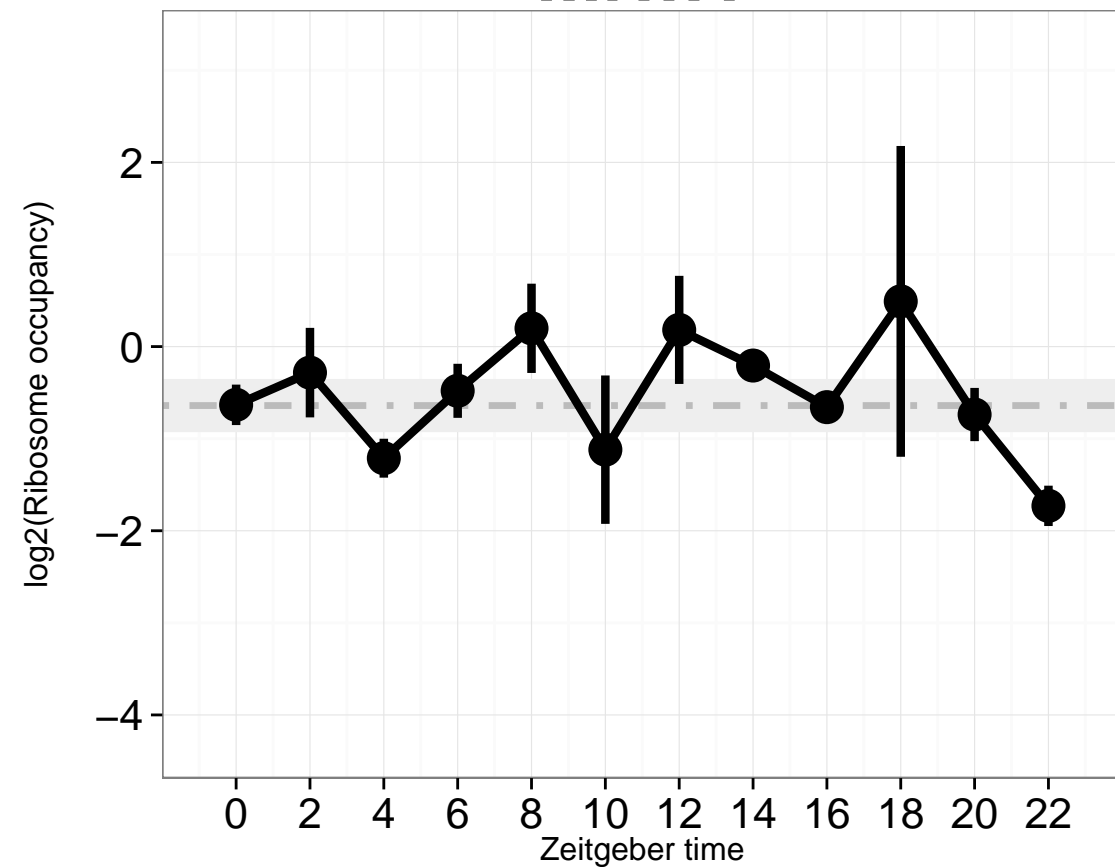

Supplement: SuppDataset_1.zip [file Mrm1_set_A.pdf › Supplemental Dataset 1/A-mRNA_nonrhyth_translation_nonrhyth/Mrm1_set_A.pdf]

## Mroh1

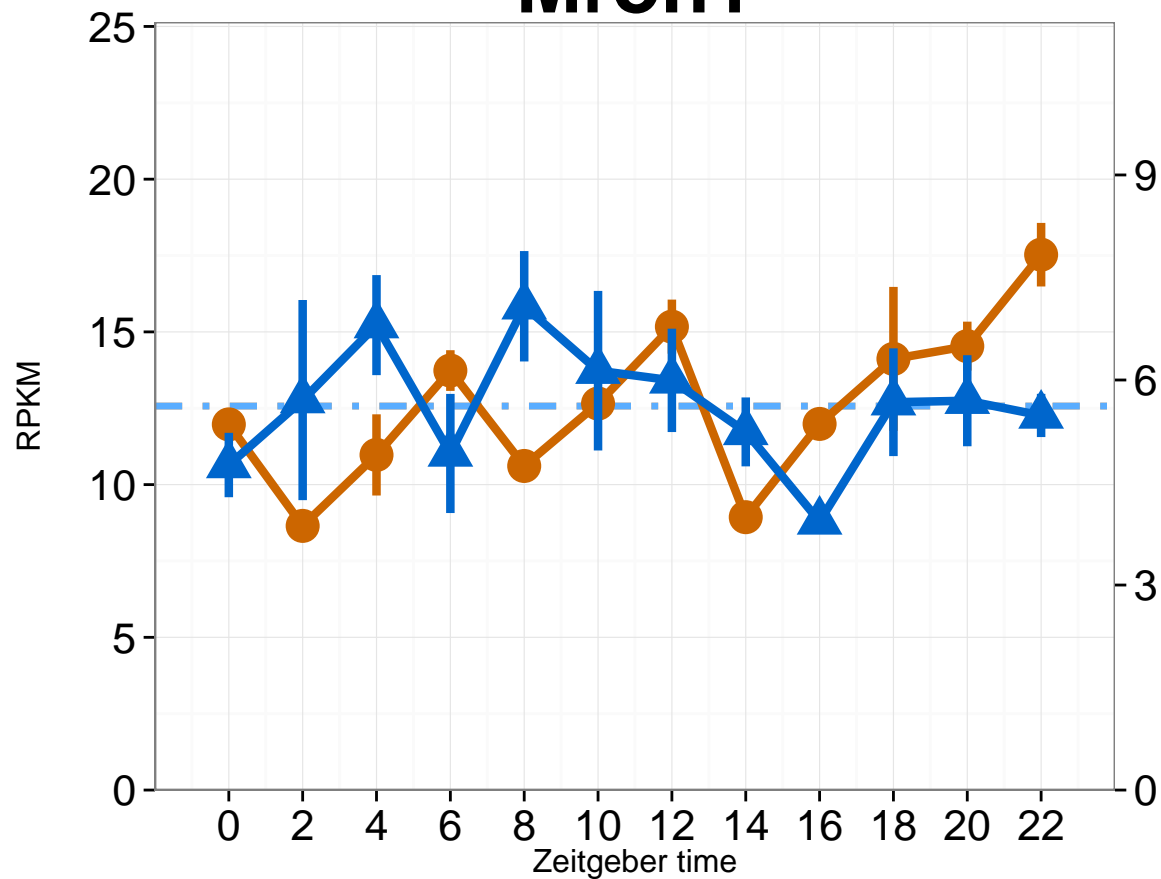

## Mroh1

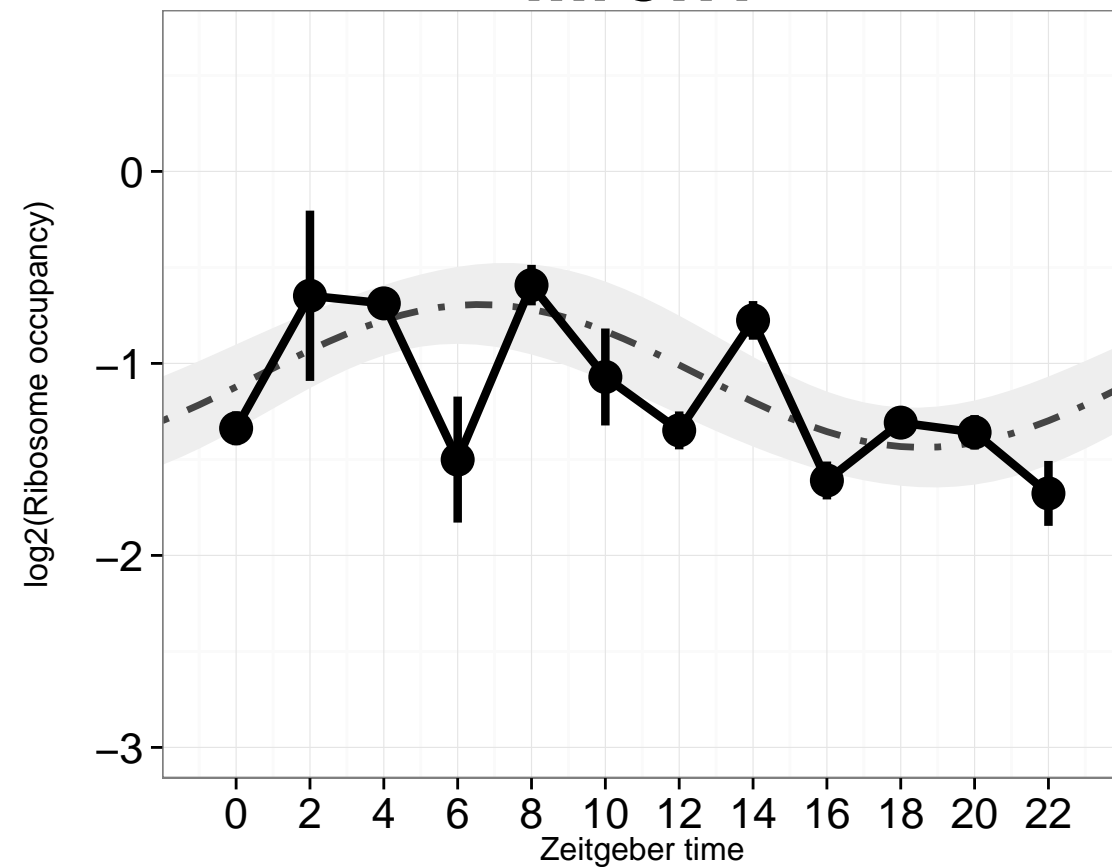

Supplement: SuppDataset_1.zip [file Mroh1_set_A.pdf › Supplemental Dataset 1/A-mRNA_nonrhyth_translation_nonrhyth/Mroh1_set_A.pdf]

# Mrp63

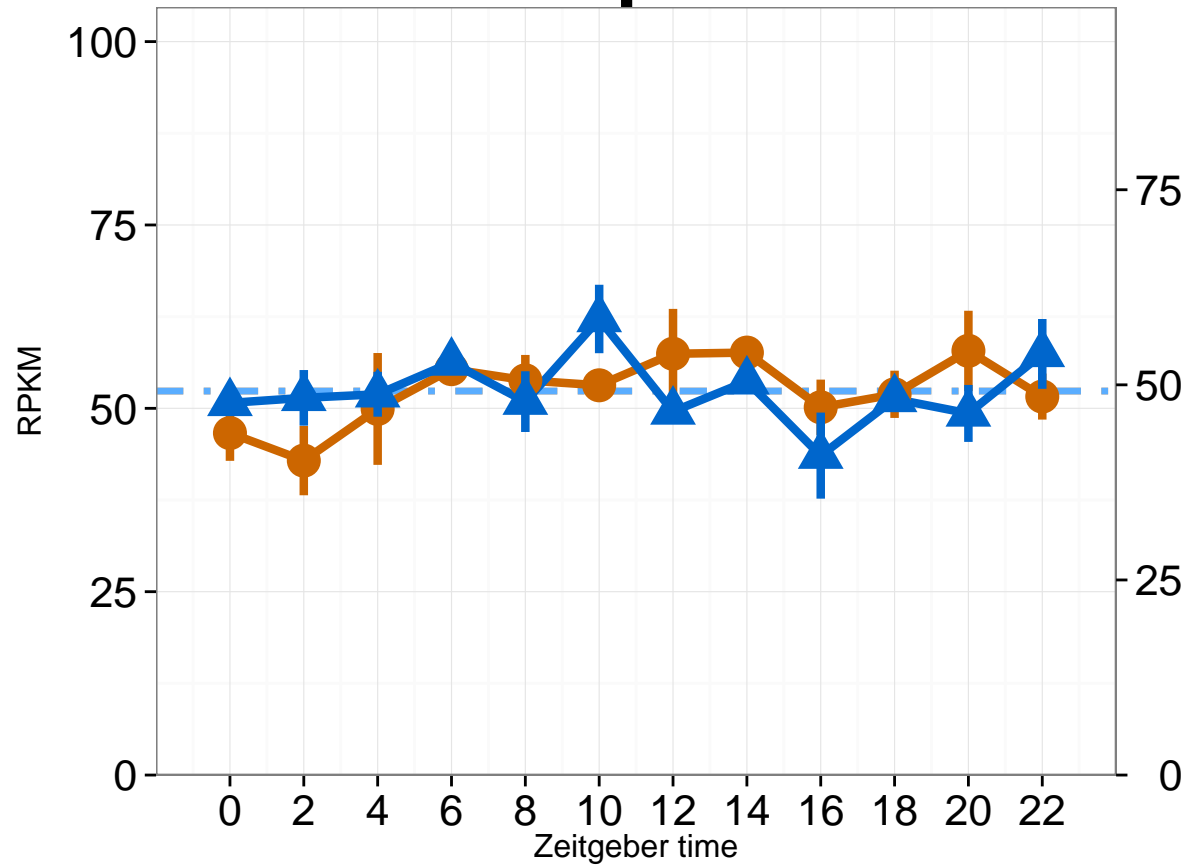

# Mrp63

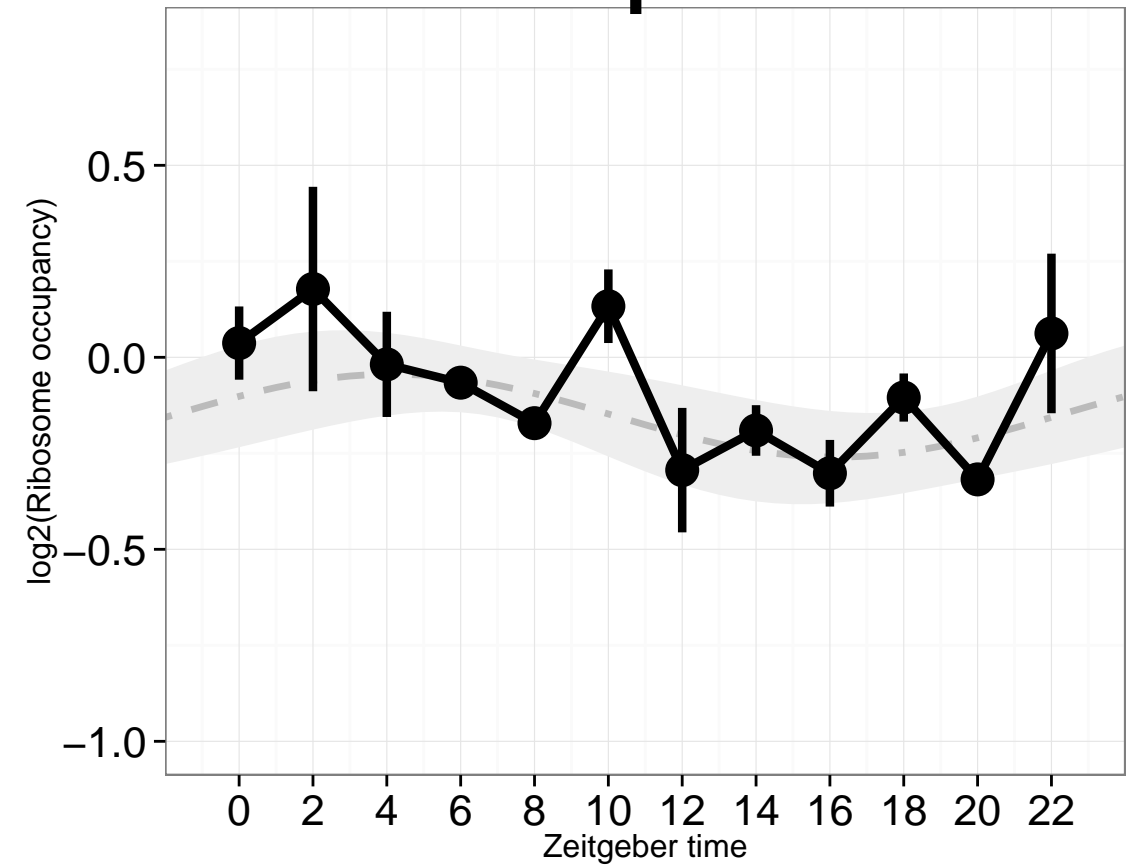

Supplement: SuppDataset_1.zip [file Mrp63_set_A.pdf › Supplemental Dataset 1/A-mRNA_nonrhyth_translation_nonrhyth/Mrp63_set_A.pdf]

## Mrpl10

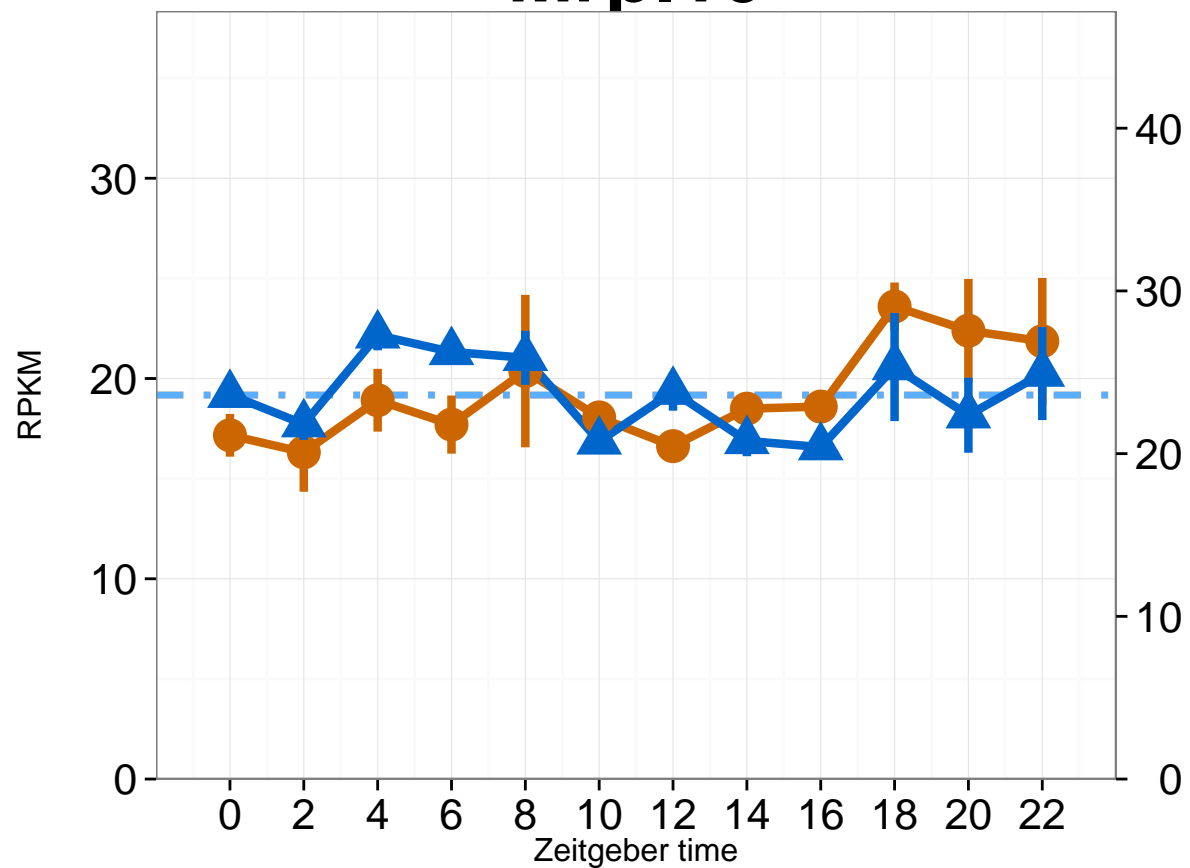

## Mrpl10

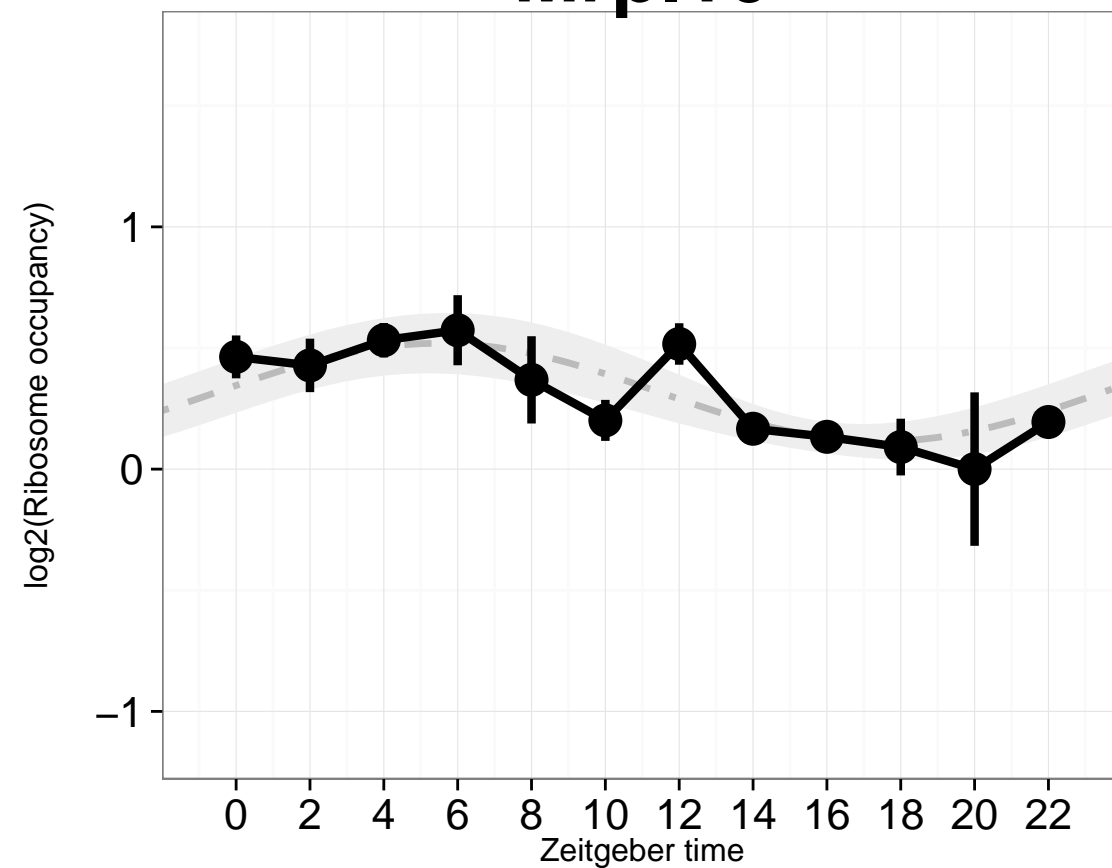

Supplement: SuppDataset_1.zip [file Mrpl10_set_A.pdf › Supplemental Dataset 1/A-mRNA_nonrhyth_translation_nonrhyth/Mrpl10_set_A.pdf]

## Mrpl11

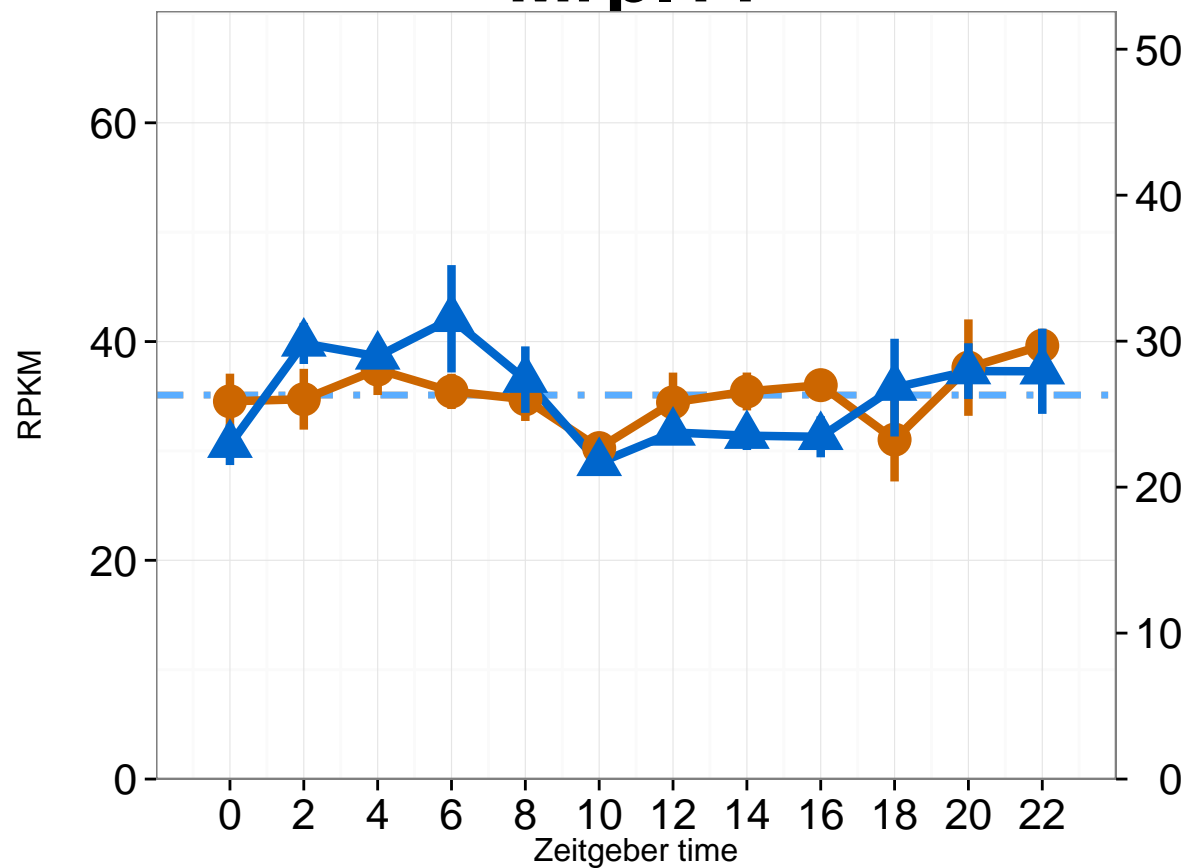

## Mrpl11

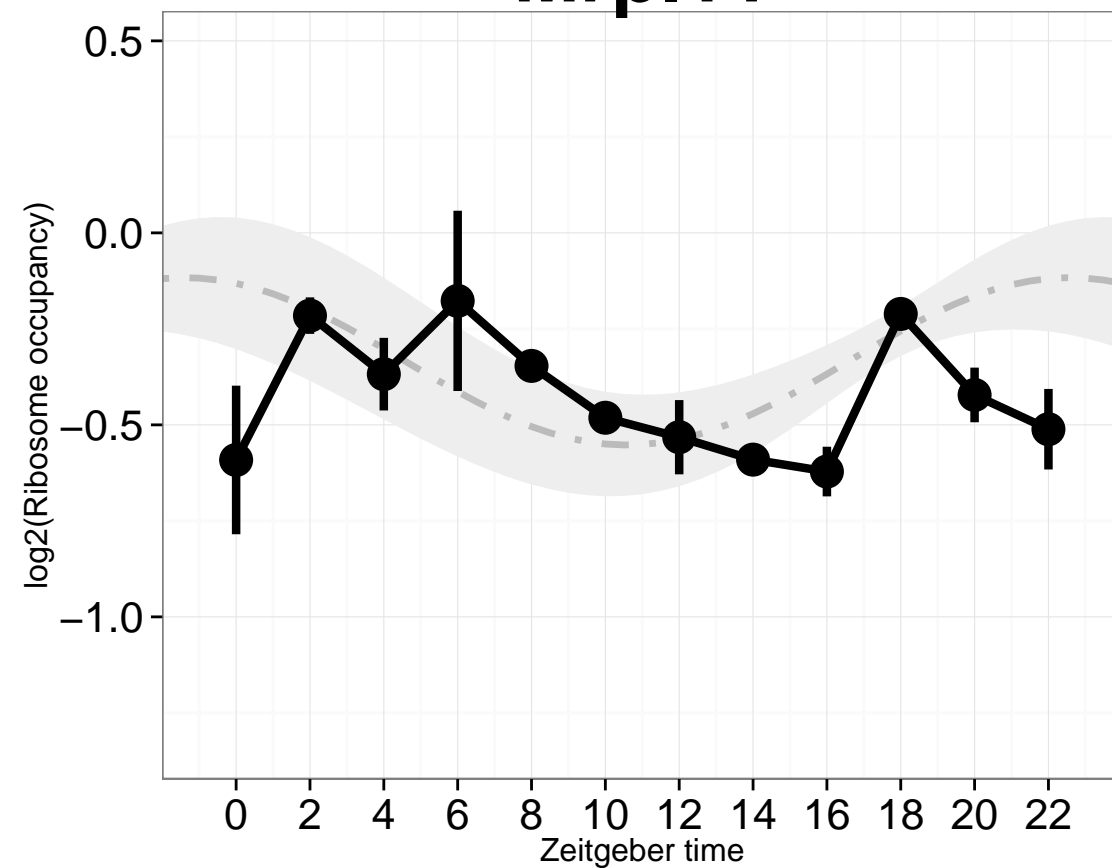

Supplement: SuppDataset_1.zip [file Mrpl11_set_A.pdf › Supplemental Dataset 1/A-mRNA_nonrhyth_translation_nonrhyth/Mrpl11_set_A.pdf]

# Mrpl12

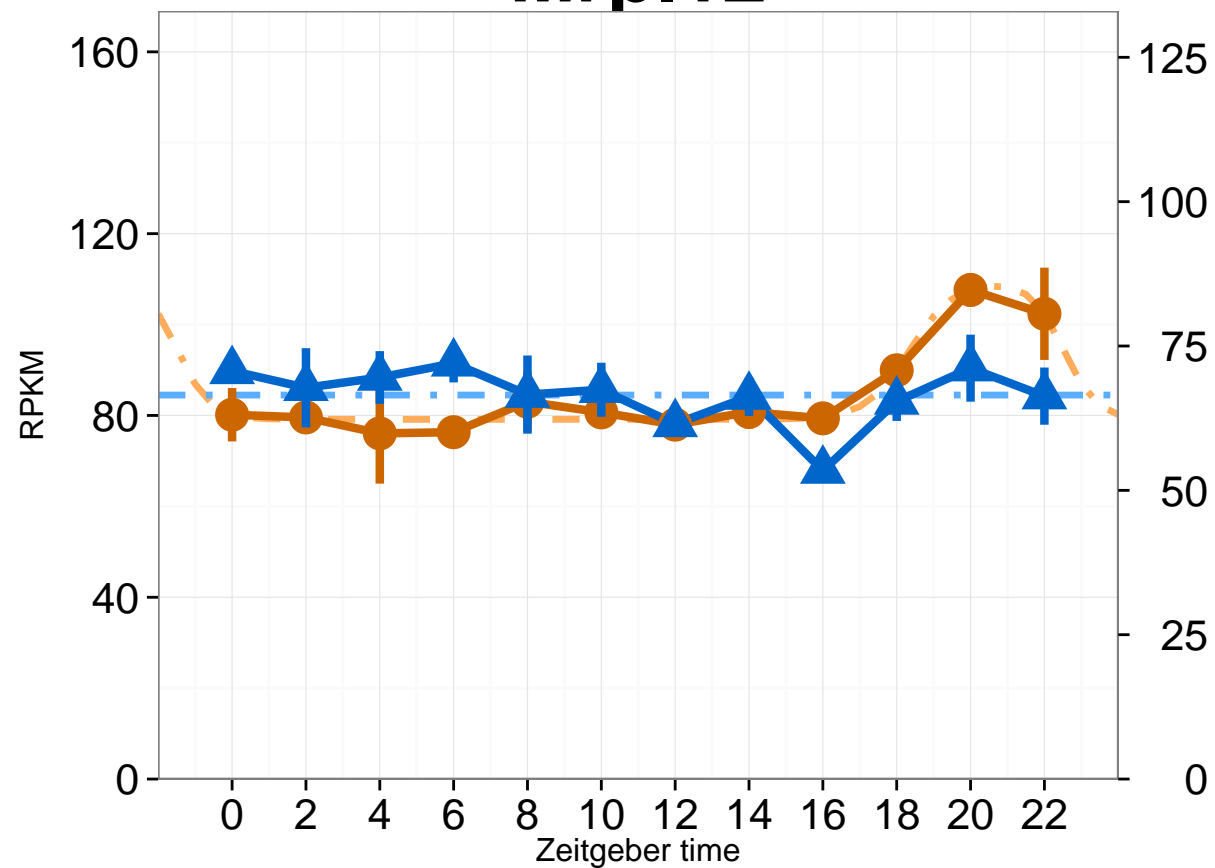

# Mrpl12

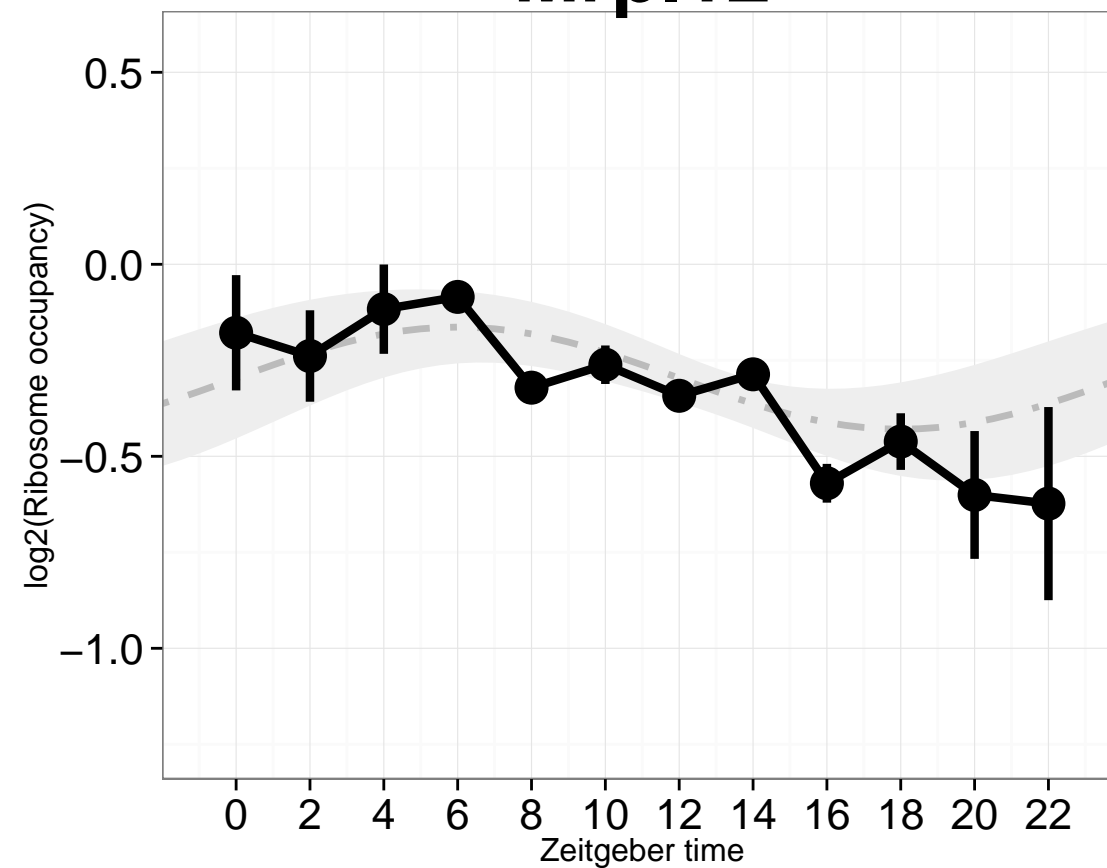

Supplement: SuppDataset_1.zip [file Mrpl12_set_A.pdf › Supplemental Dataset 1/A-mRNA_nonrhyth_translation_nonrhyth/Mrpl12_set_A.pdf]

# Mrpl13

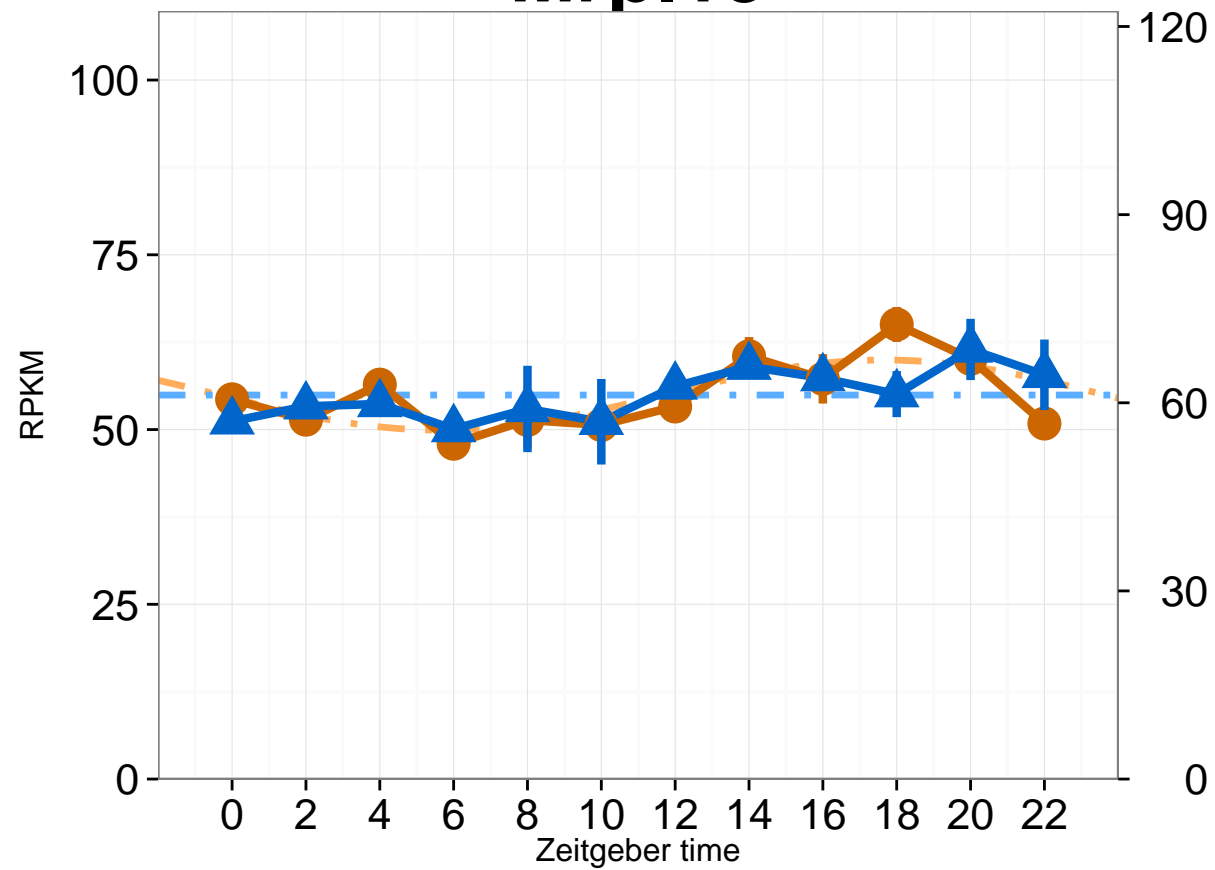

# Mrpl13

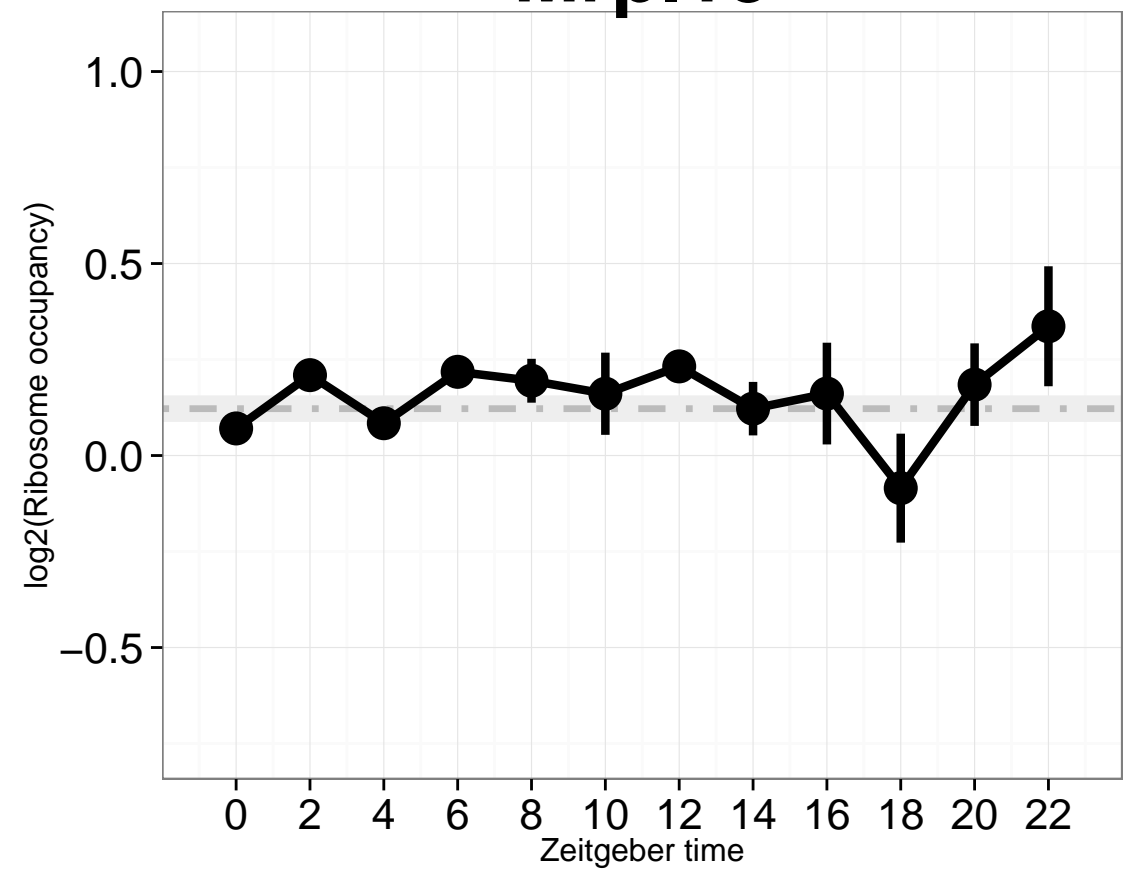

Supplement: SuppDataset_1.zip [file Mrpl13_set_A.pdf › Supplemental Dataset 1/A-mRNA_nonrhyth_translation_nonrhyth/Mrpl13_set_A.pdf]

# Mrpl14

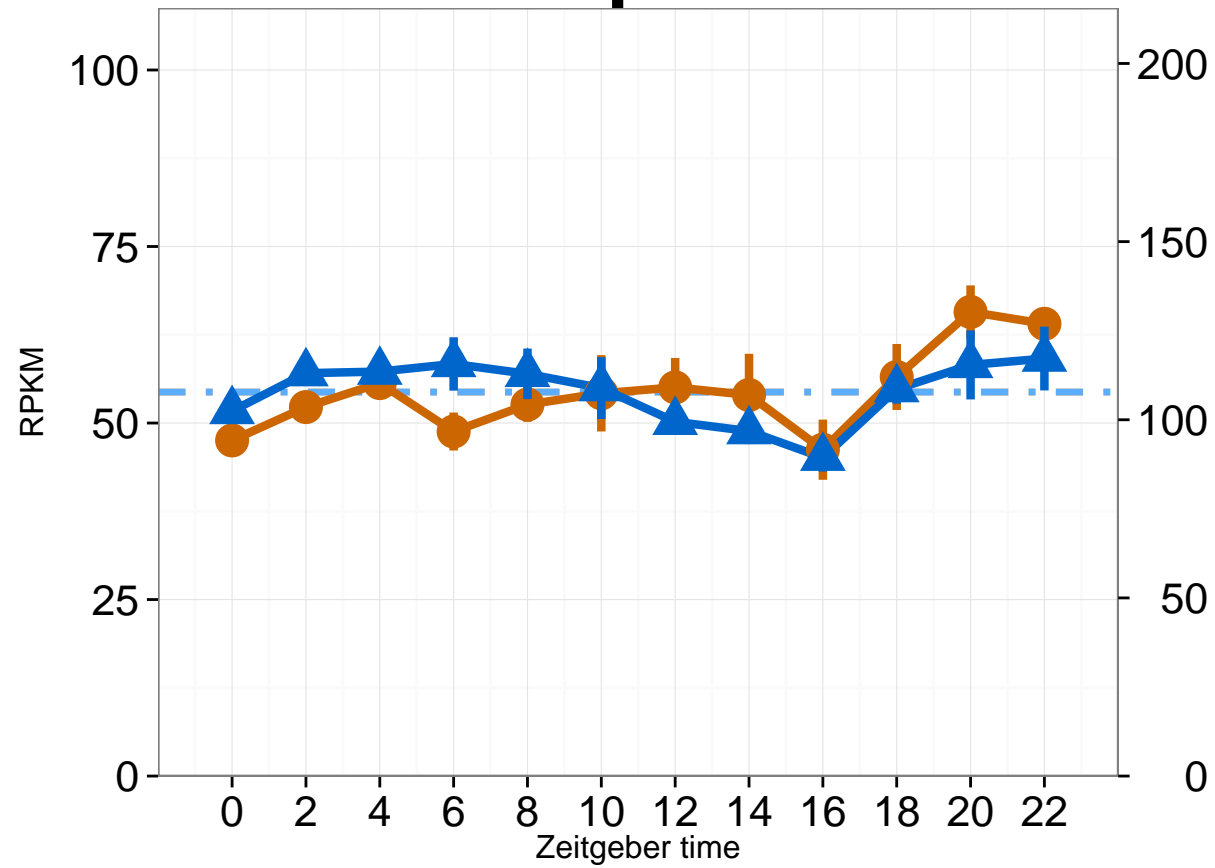

# Mrpl14

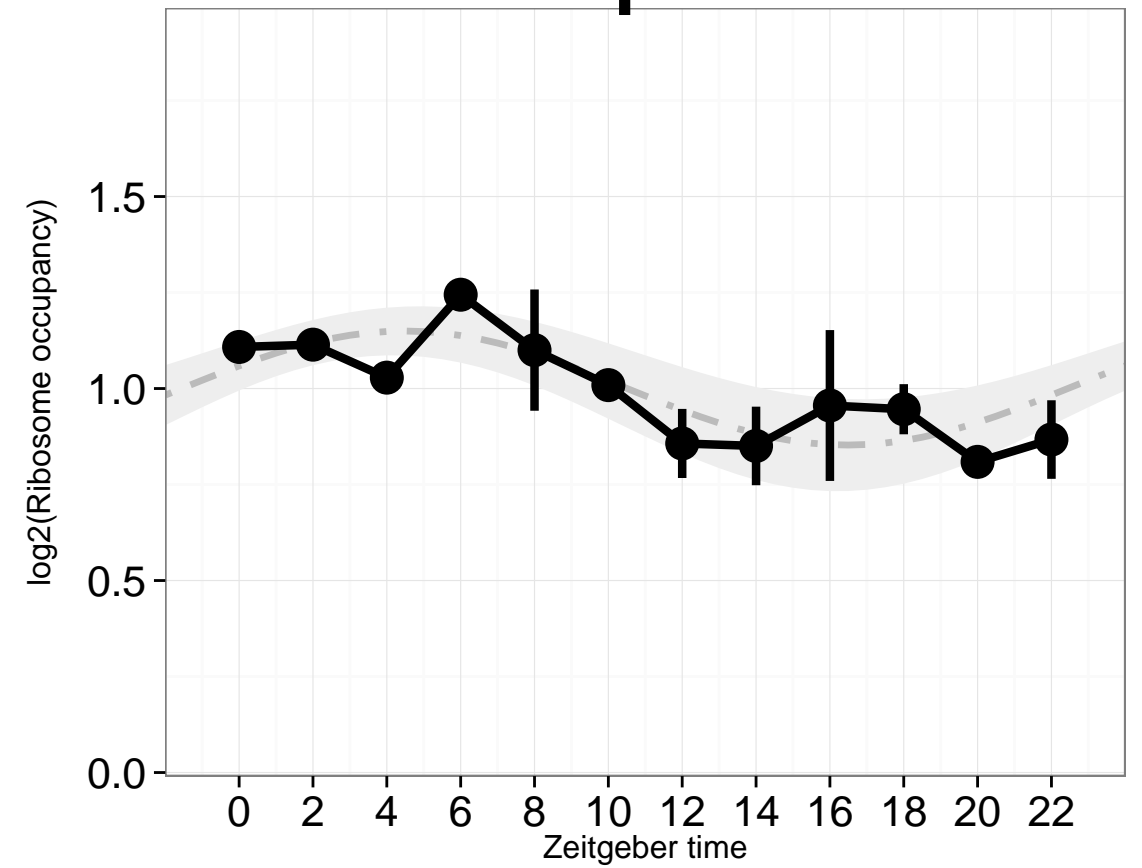

Supplement: SuppDataset_1.zip [file Mrpl14_set_A.pdf › Supplemental Dataset 1/A-mRNA_nonrhyth_translation_nonrhyth/Mrpl14_set_A.pdf]

# Mrpl15

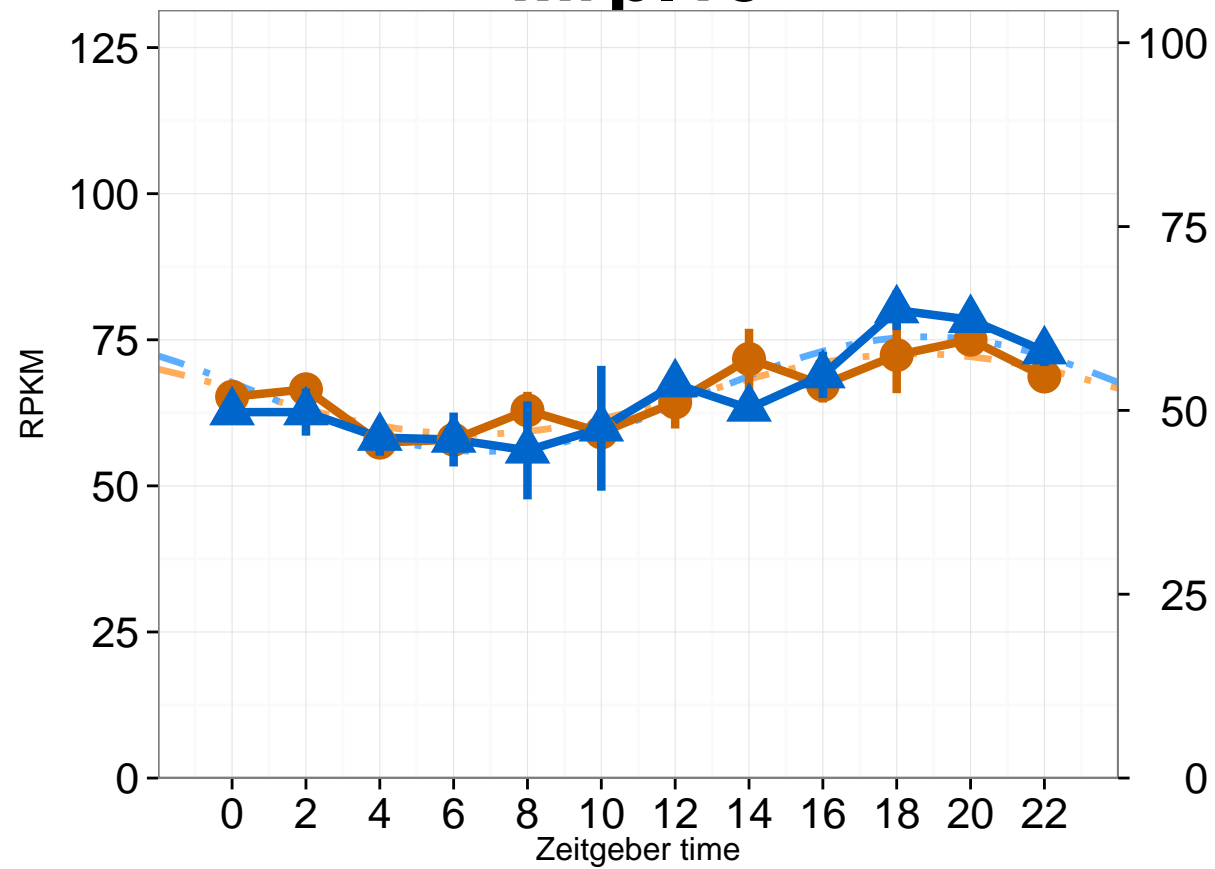

# Mrpl15

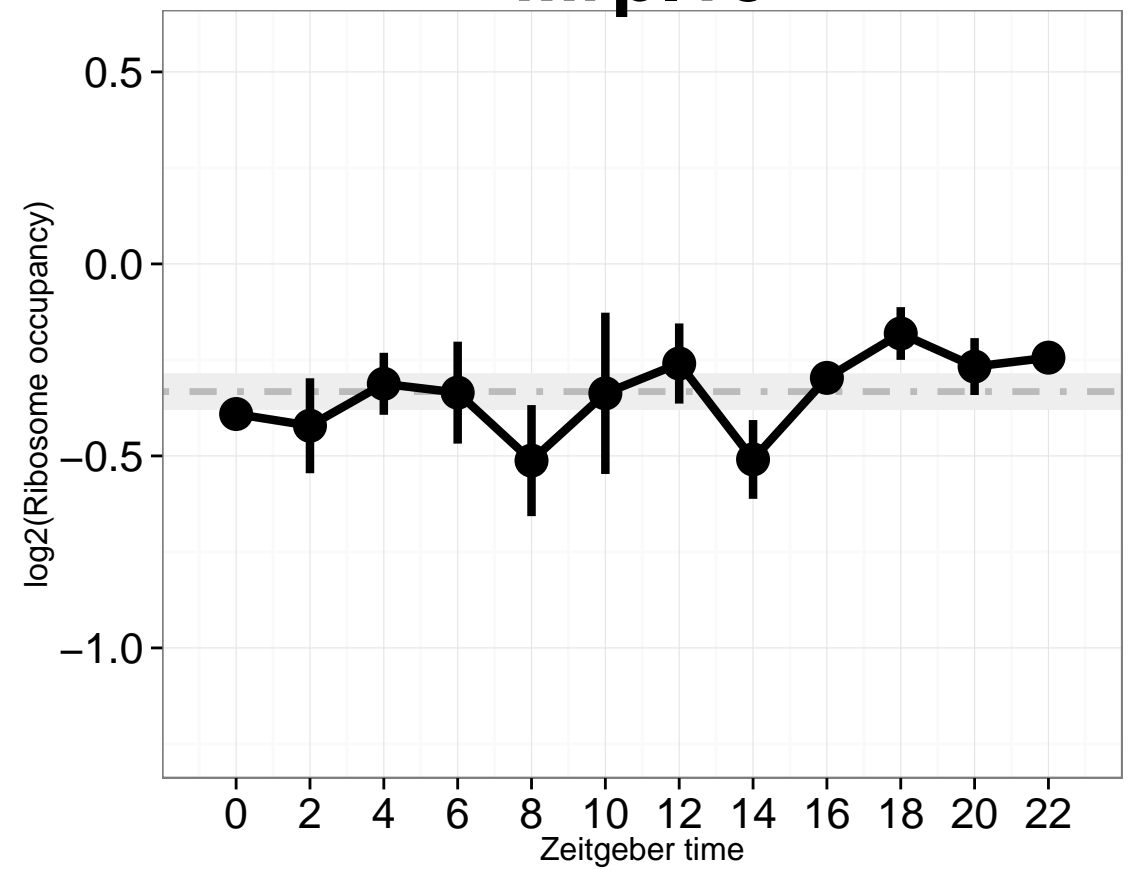

Supplement: SuppDataset_1.zip [file Mrpl15_set_A.pdf › Supplemental Dataset 1/A-mRNA_nonrhyth_translation_nonrhyth/Mrpl15_set_A.pdf]

# Mrpl16

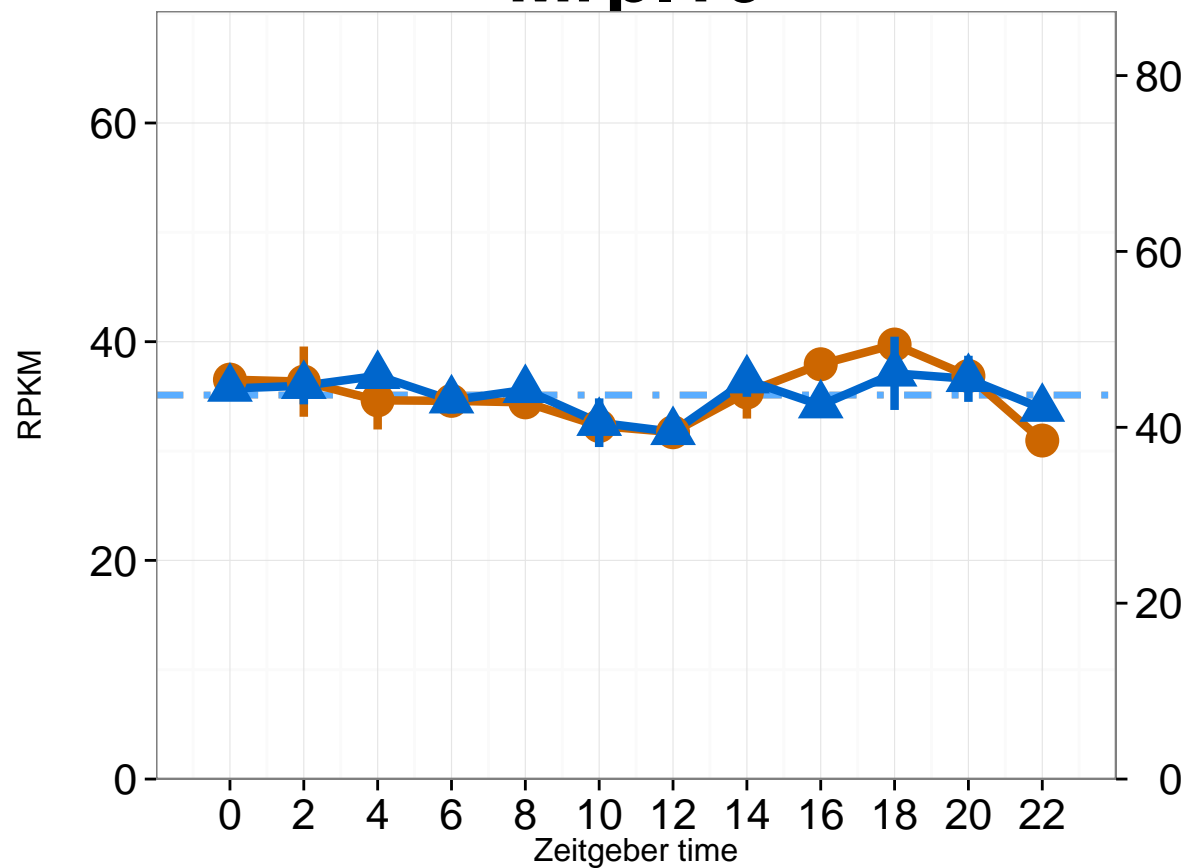

# Mrpl16

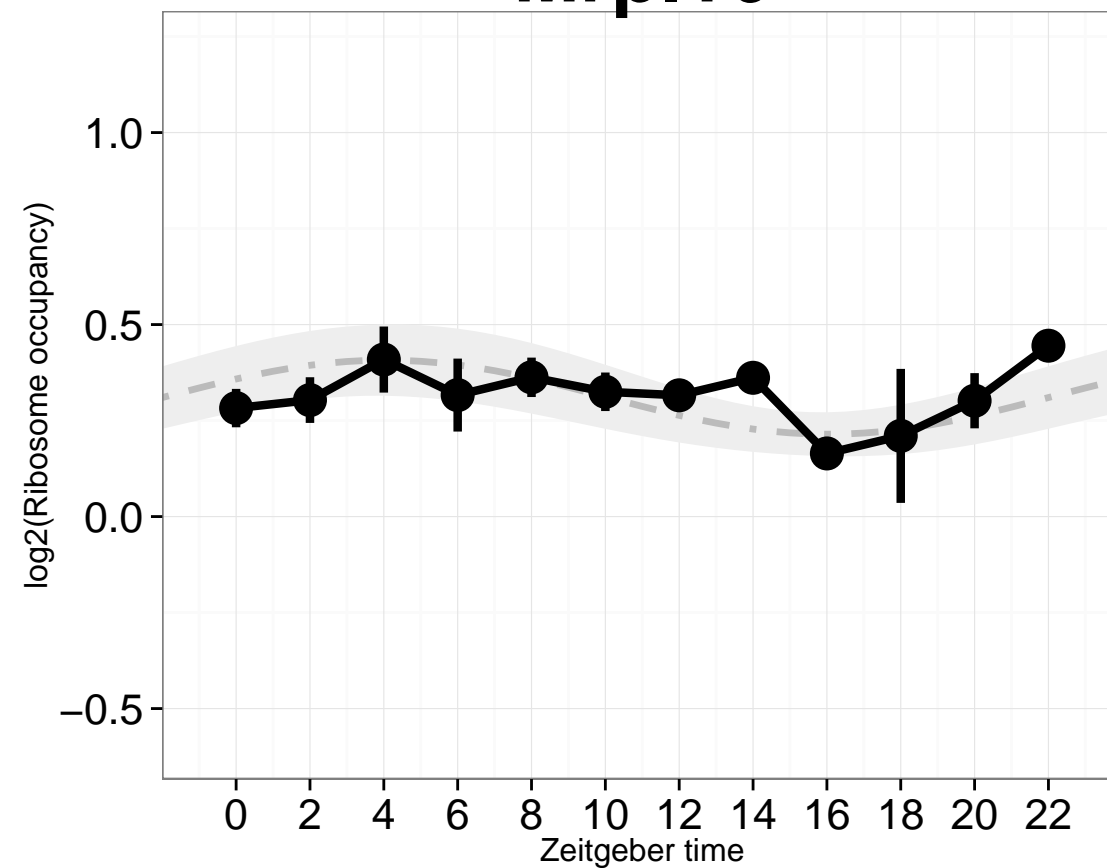

Supplement: SuppDataset_1.zip [file Mrpl16_set_A.pdf › Supplemental Dataset 1/A-mRNA_nonrhyth_translation_nonrhyth/Mrpl16_set_A.pdf]

# Mrpl17

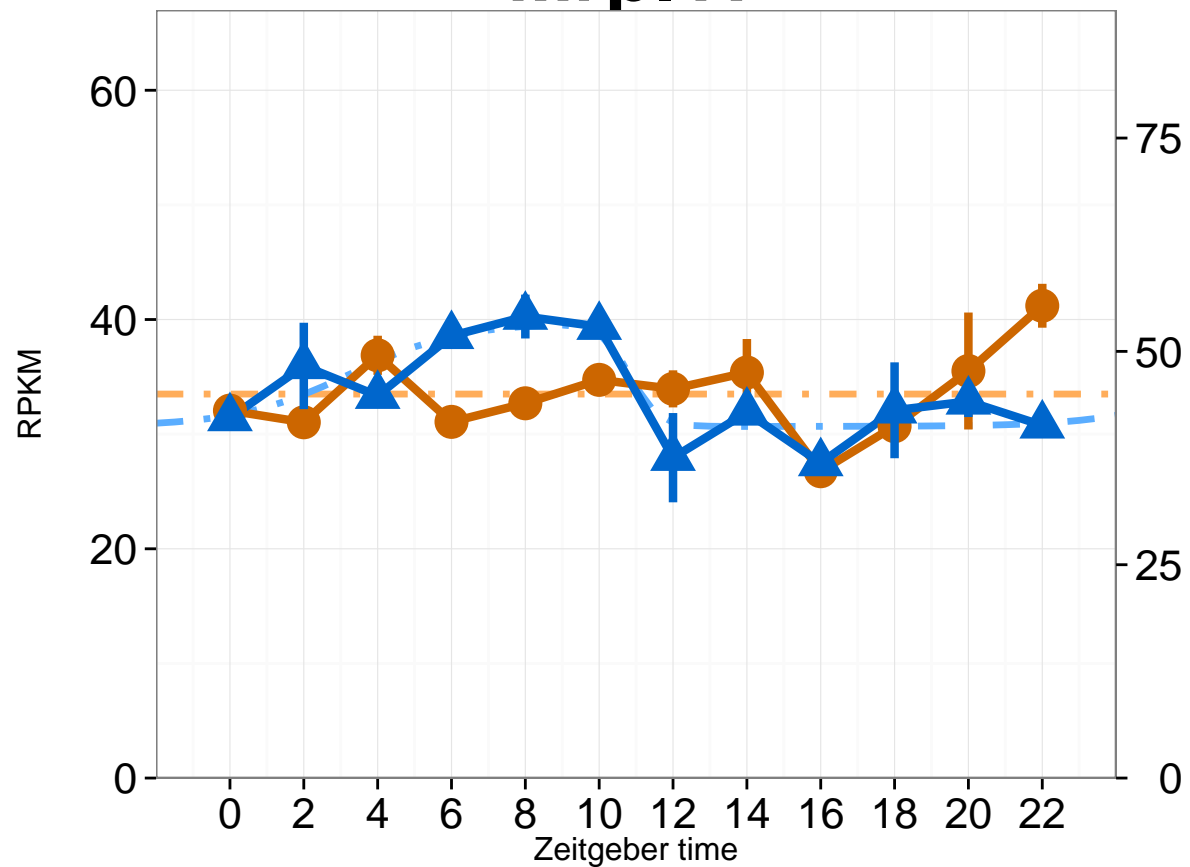

# Mrpl17

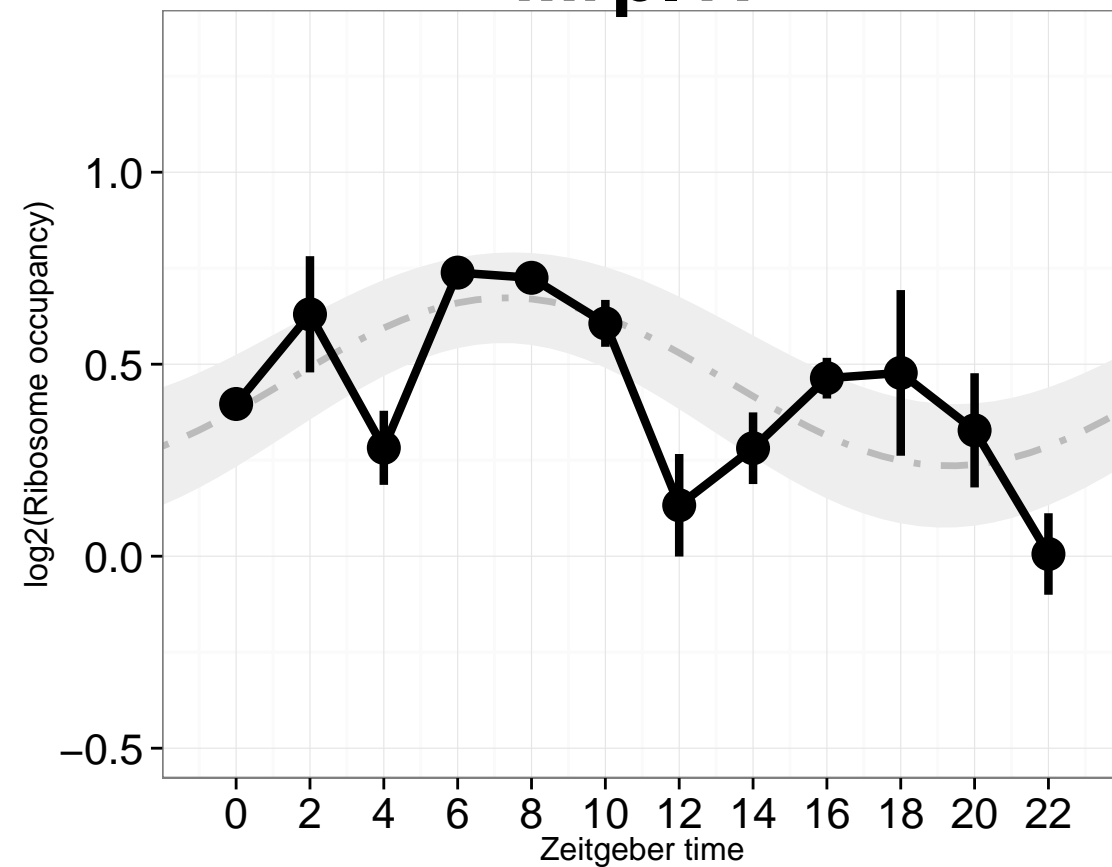

Supplement: SuppDataset_1.zip [file Mrpl17_set_A.pdf › Supplemental Dataset 1/A-mRNA_nonrhyth_translation_nonrhyth/Mrpl17_set_A.pdf]

# Mrpl18

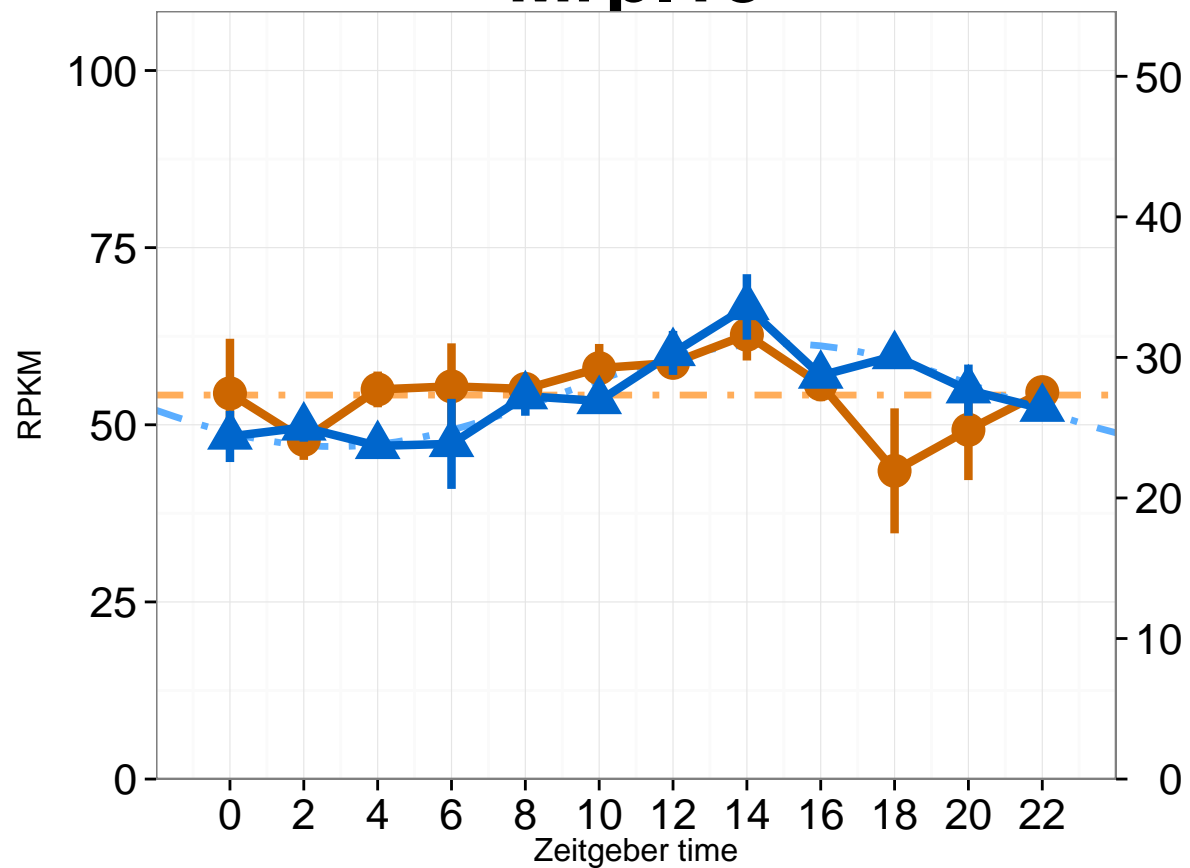

# Mrpl18

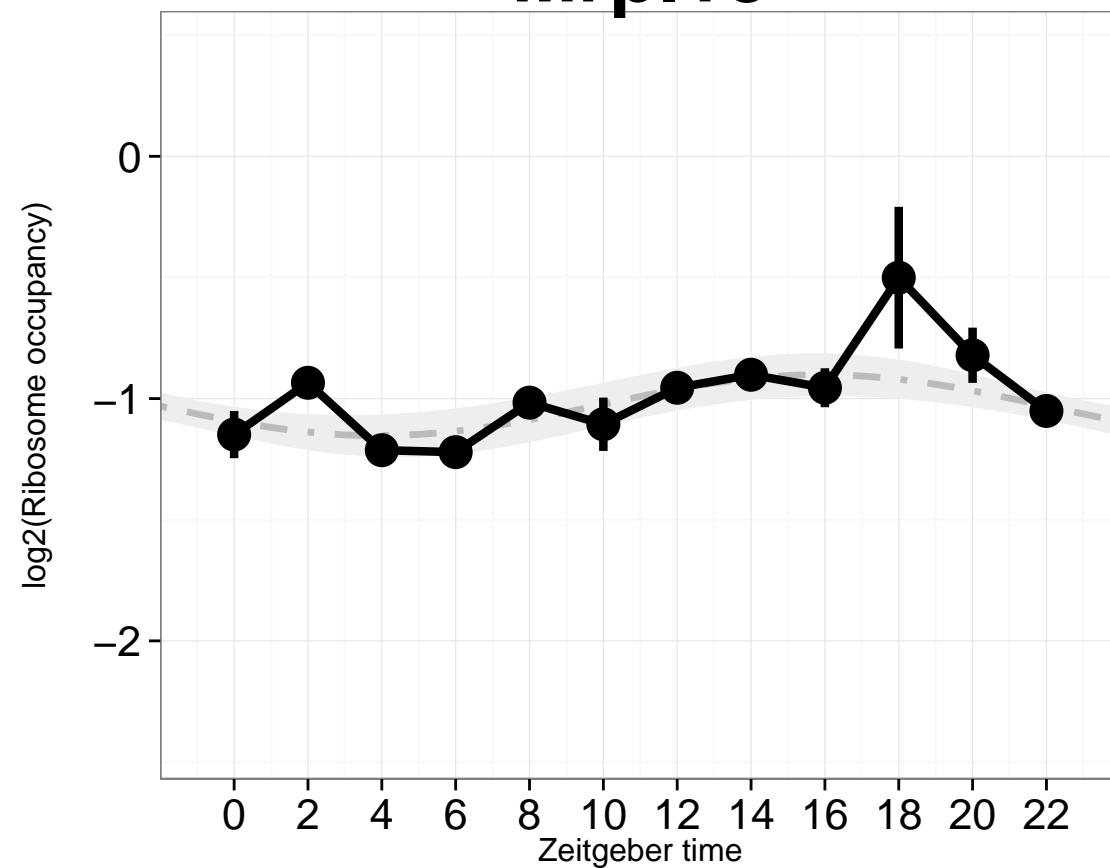

Supplement: SuppDataset_1.zip [file Mrpl18_set_A.pdf › Supplemental Dataset 1/A-mRNA_nonrhyth_translation_nonrhyth/Mrpl18_set_A.pdf]

# Mrpl19

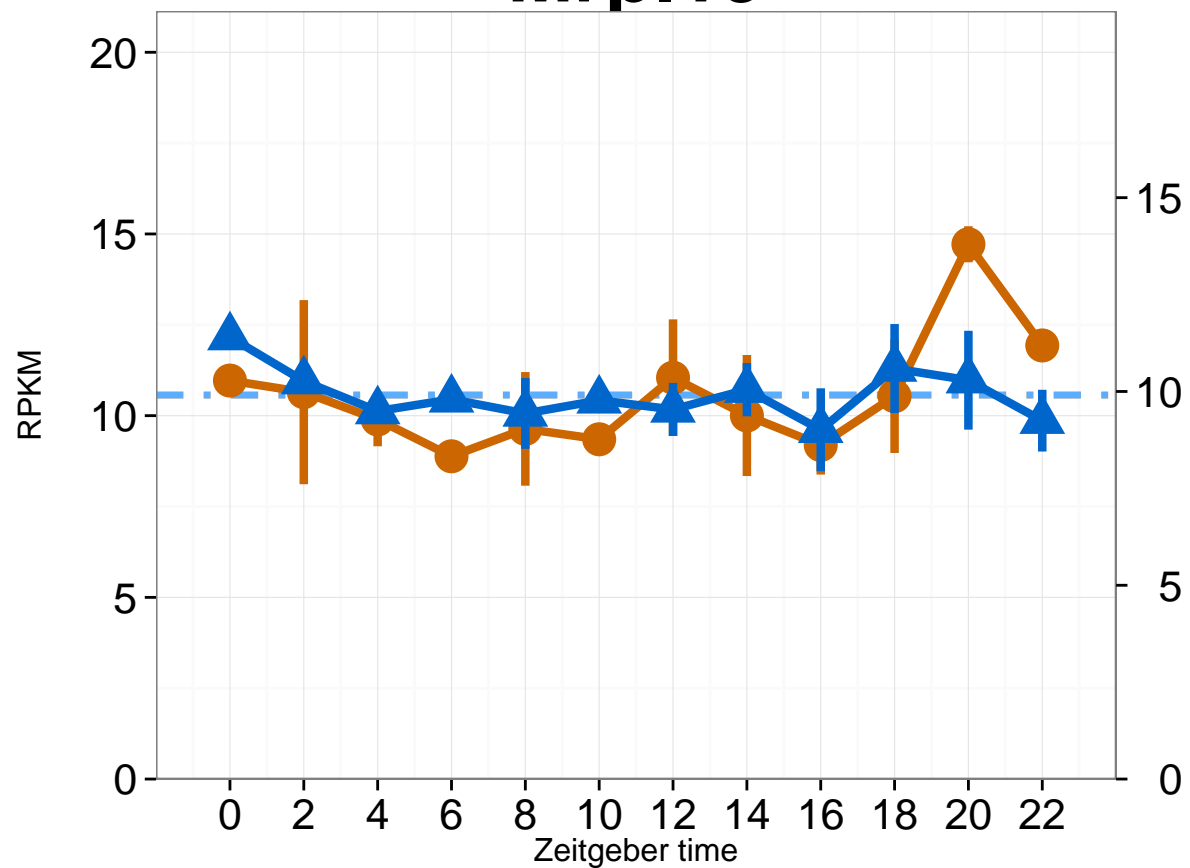

# Mrpl19

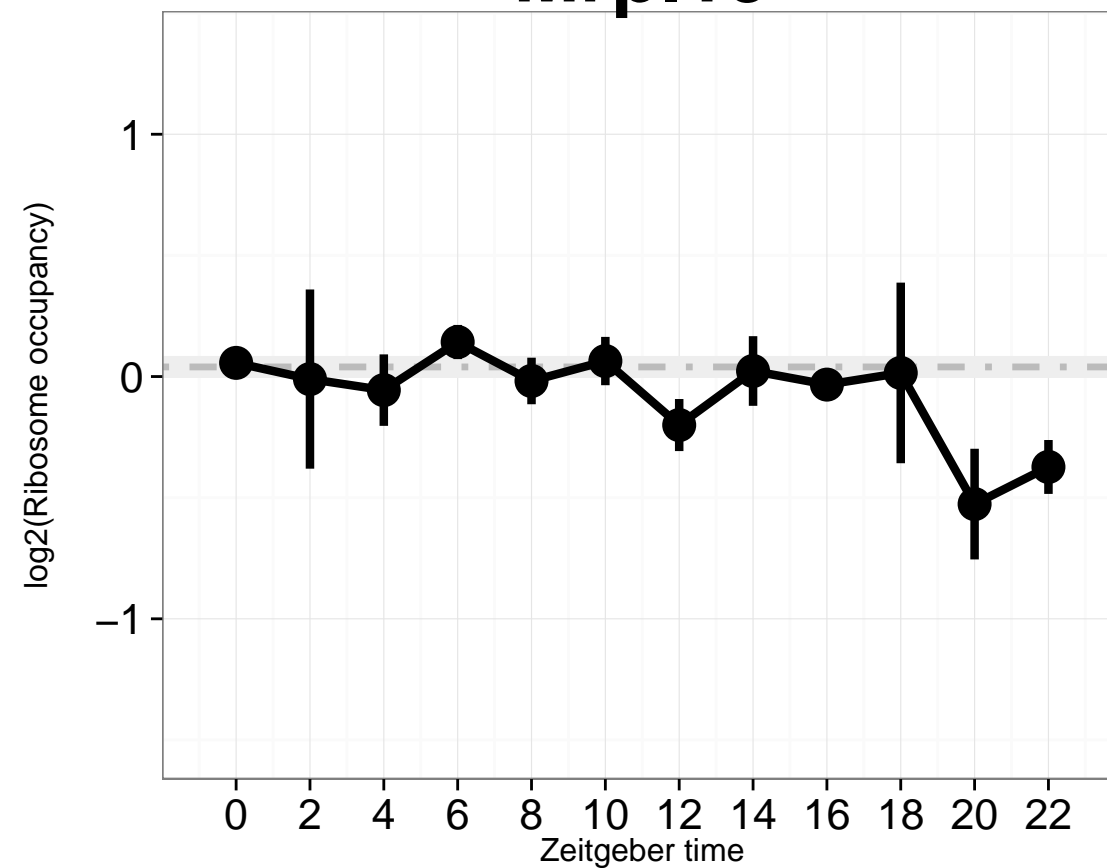

Supplement: SuppDataset_1.zip [file Mrpl19_set_A.pdf › Supplemental Dataset 1/A-mRNA_nonrhyth_translation_nonrhyth/Mrpl19_set_A.pdf]

# Mrpl1

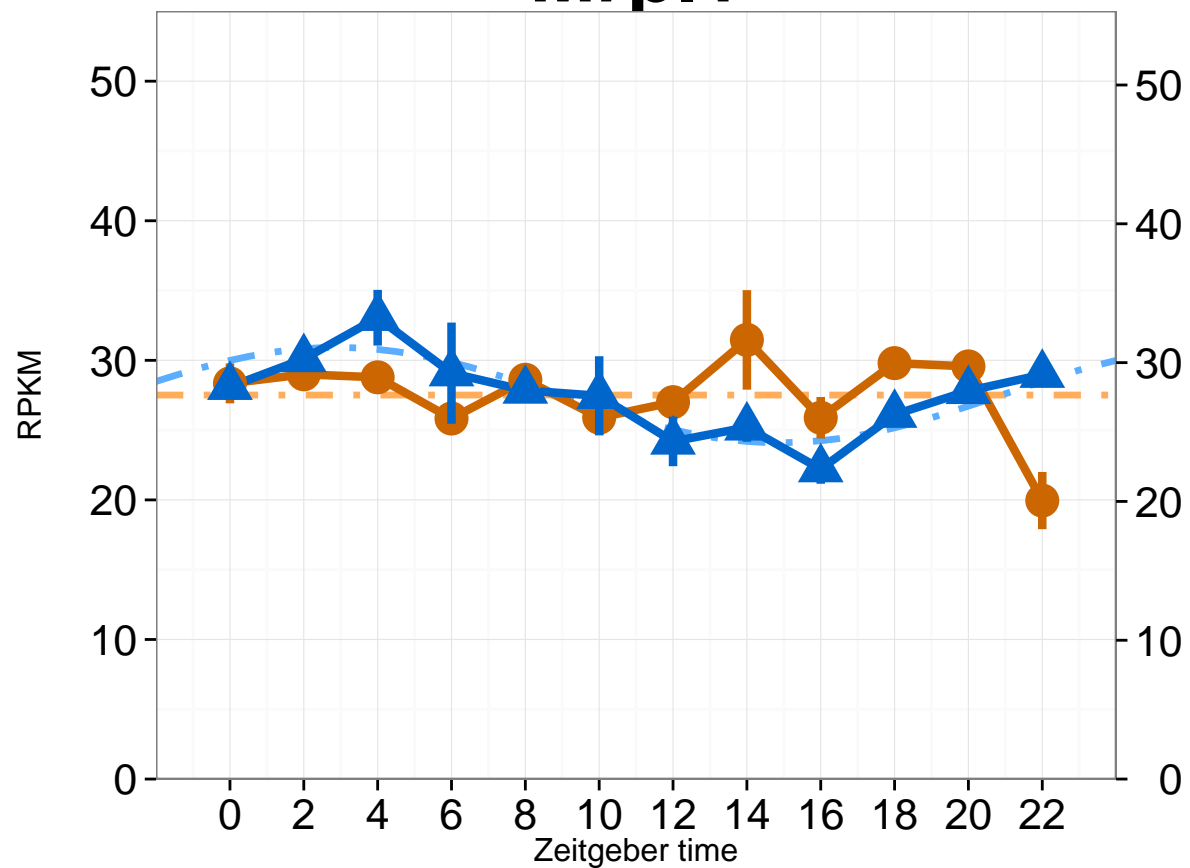

# Mrpl1

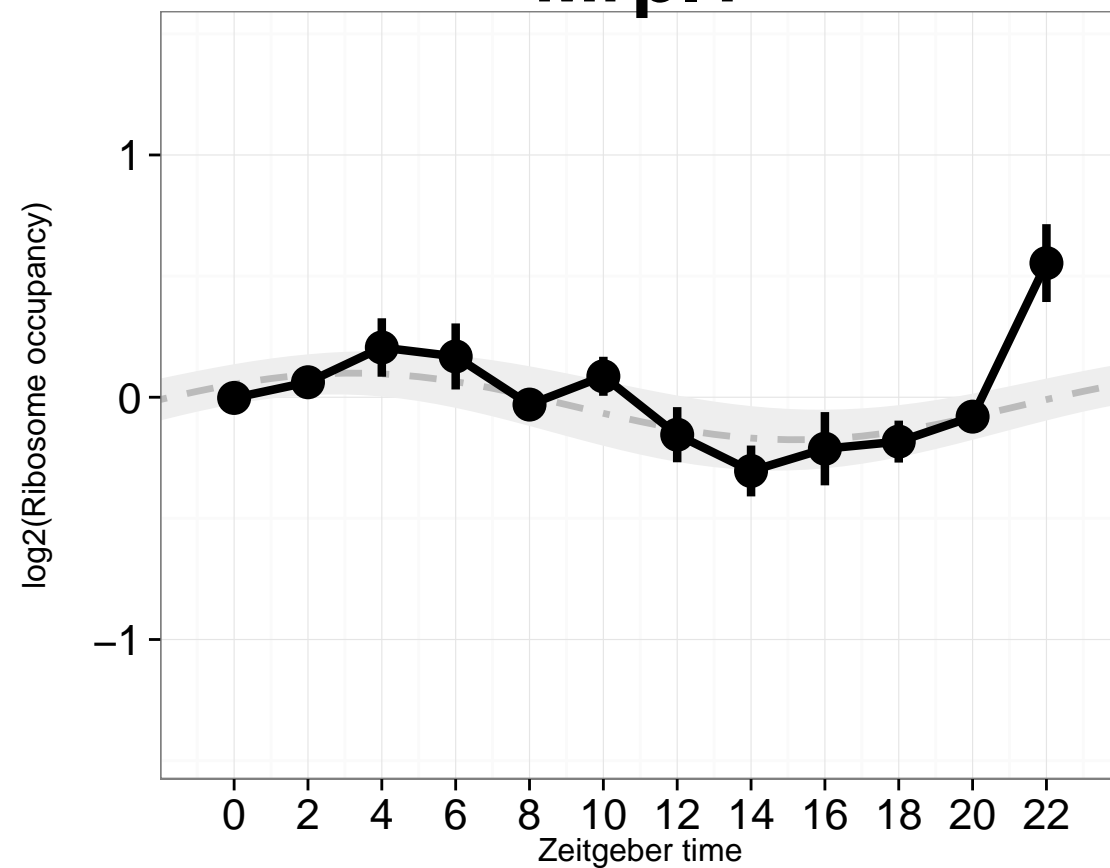

Supplement: SuppDataset_1.zip [file Mrpl1_set_A.pdf › Supplemental Dataset 1/A-mRNA_nonrhyth_translation_nonrhyth/Mrpl1_set_A.pdf]

# Mrpl20

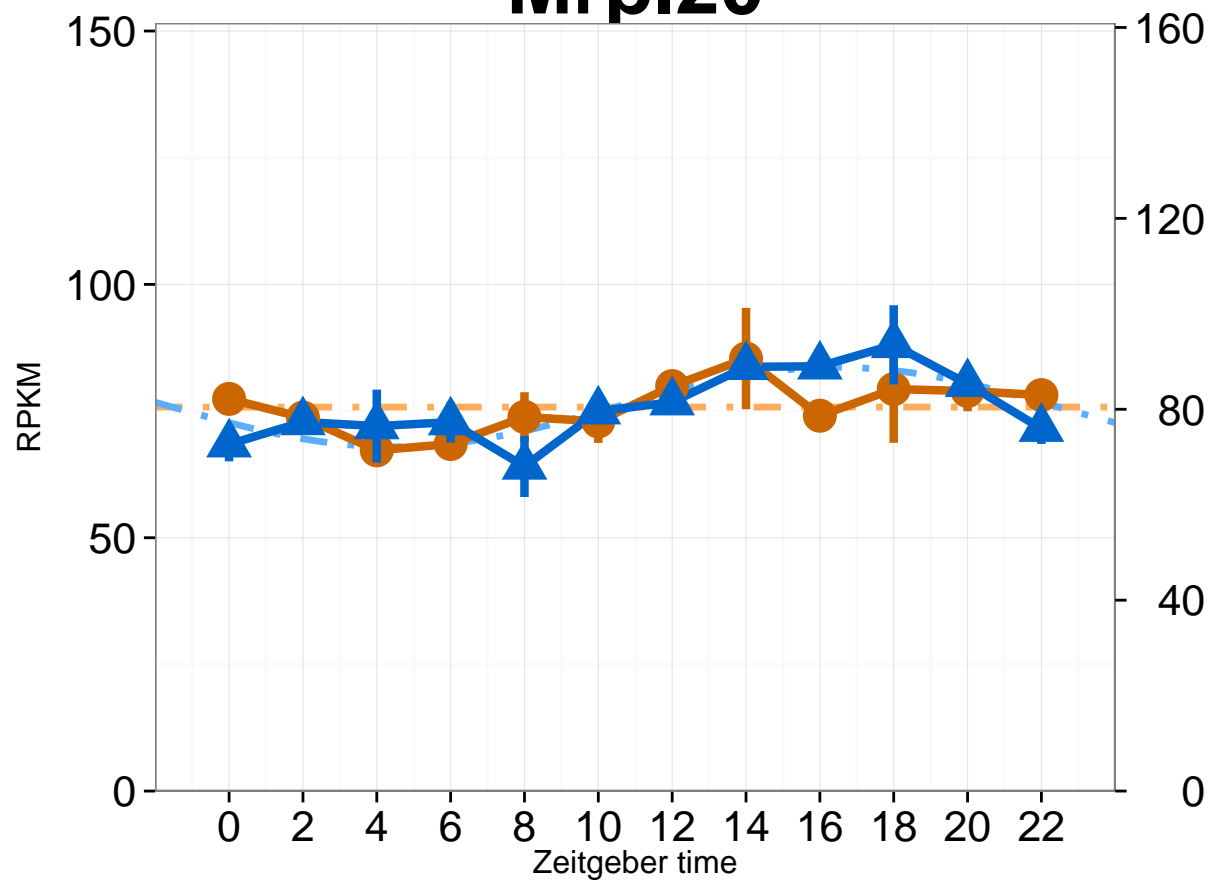

# Mrpl20

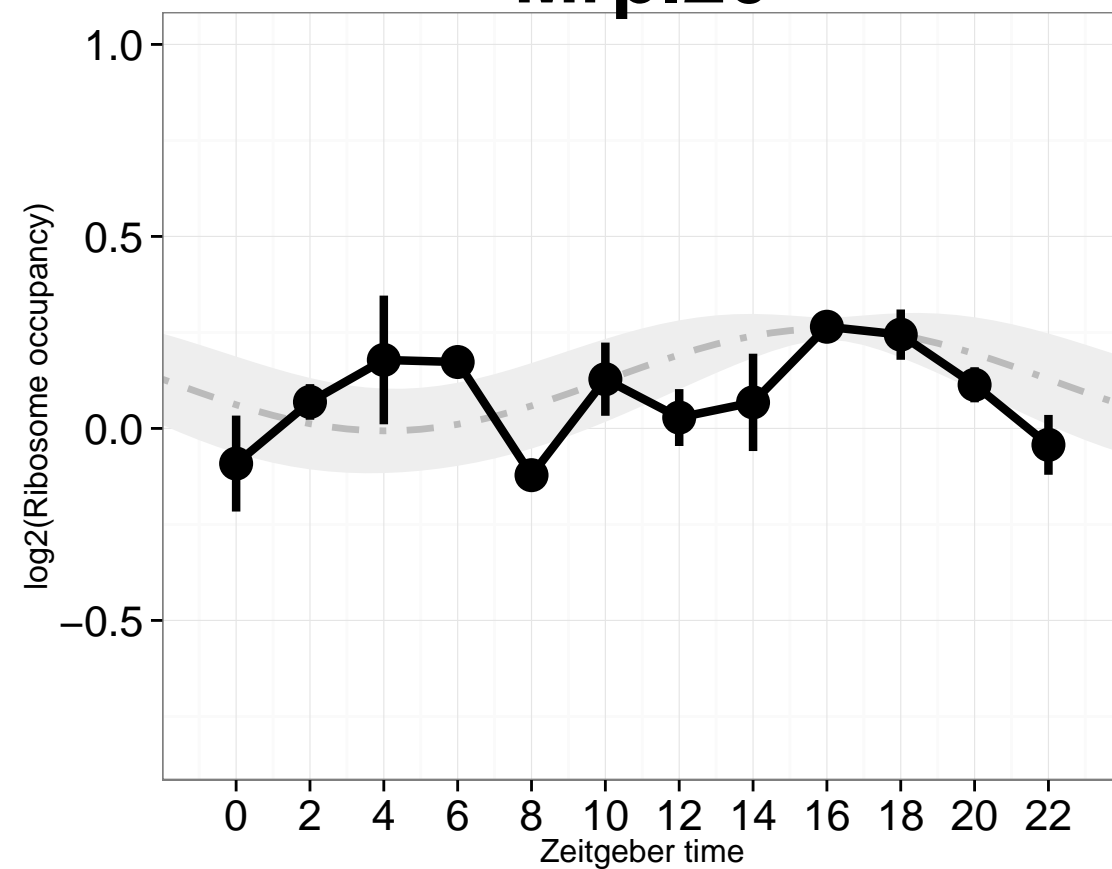

Supplement: SuppDataset_1.zip [file Mrpl20_set_A.pdf › Supplemental Dataset 1/A-mRNA_nonrhyth_translation_nonrhyth/Mrpl20_set_A.pdf]

# Mrpl21

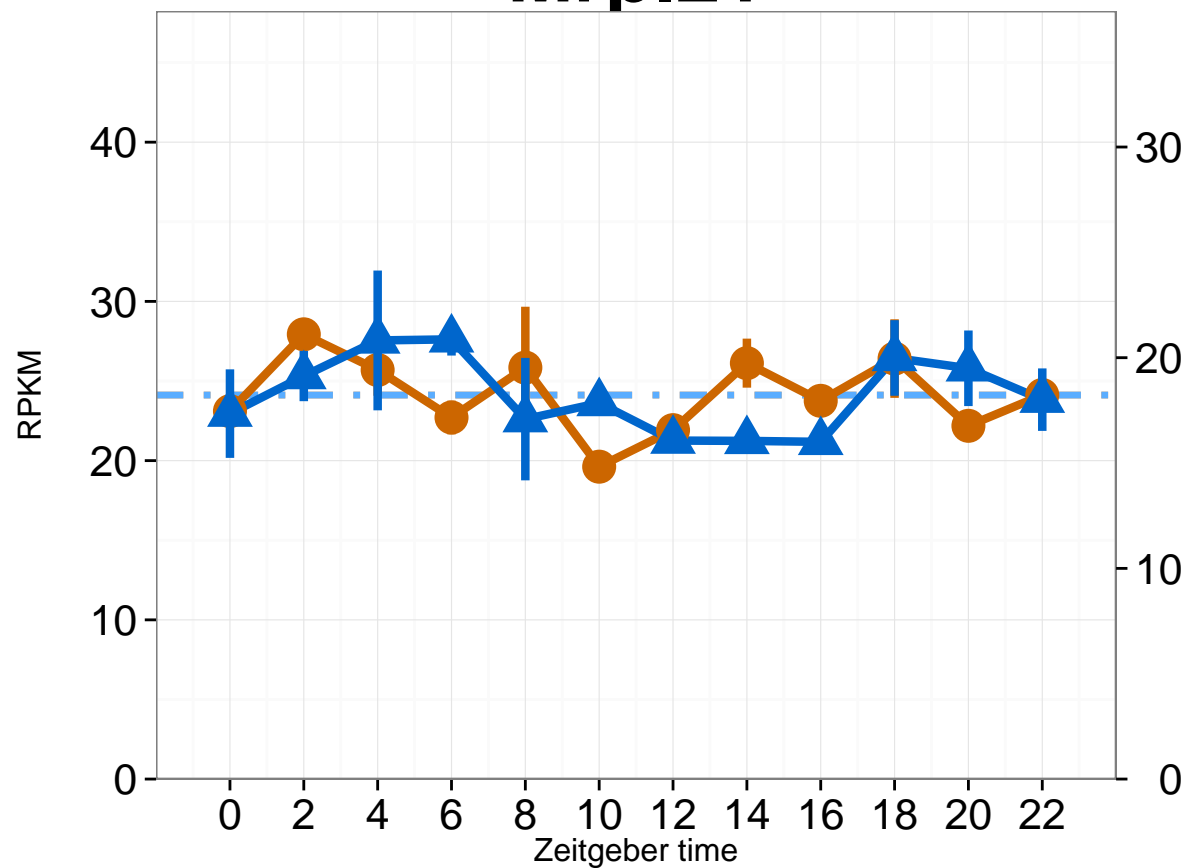

# Mrpl21

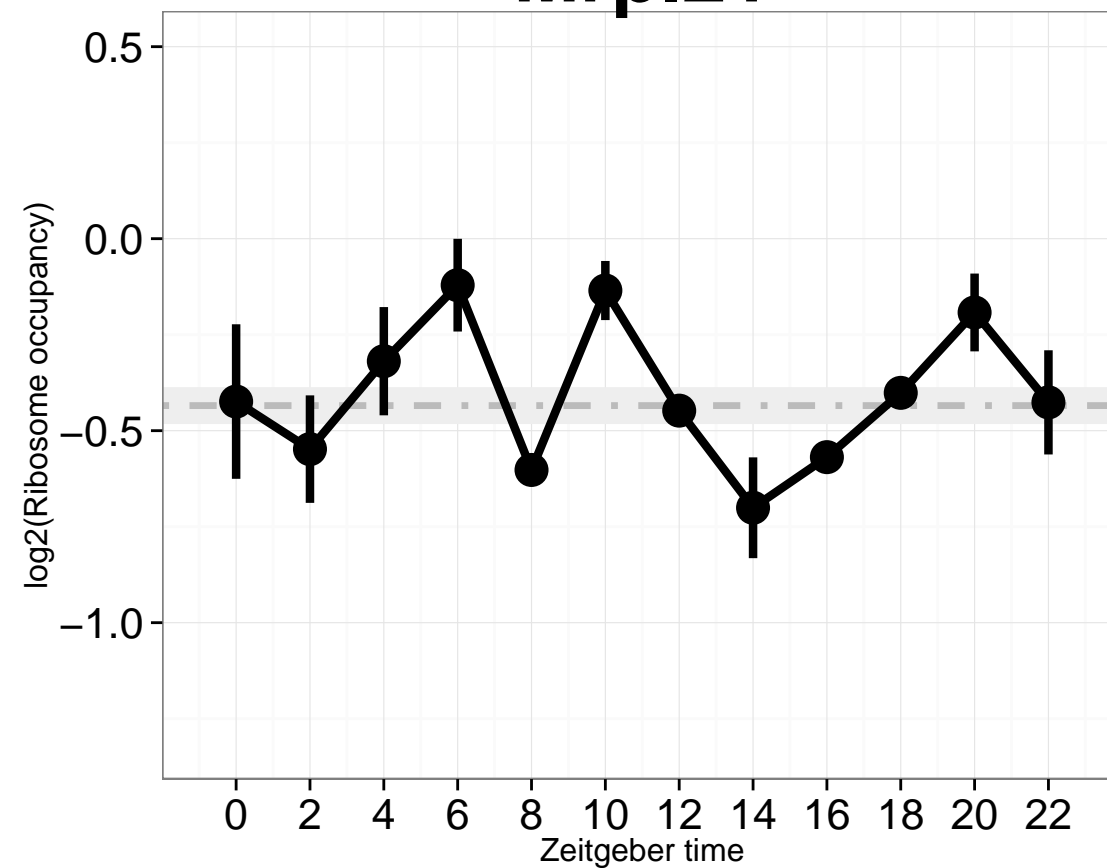

Supplement: SuppDataset_1.zip [file Mrpl21_set_A.pdf › Supplemental Dataset 1/A-mRNA_nonrhyth_translation_nonrhyth/Mrpl21_set_A.pdf]

# Mrpl22

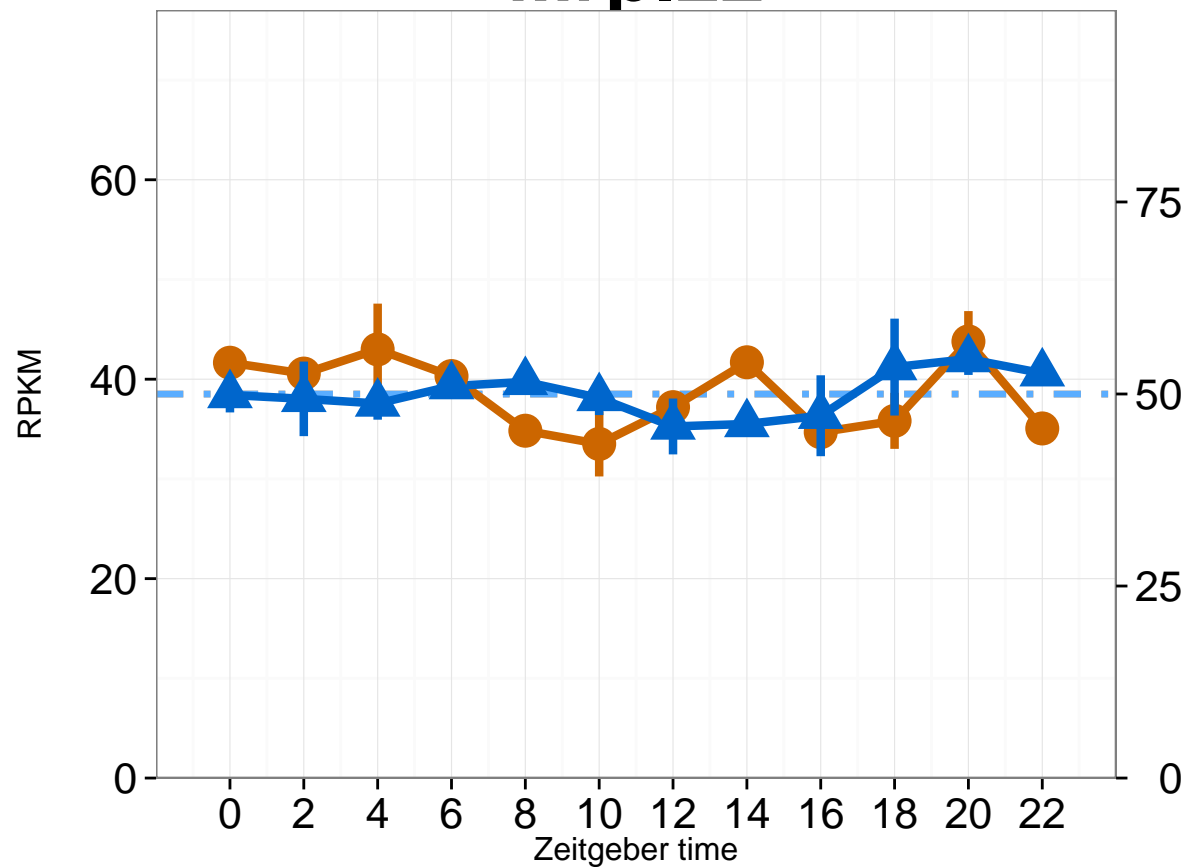

# Mrpl22

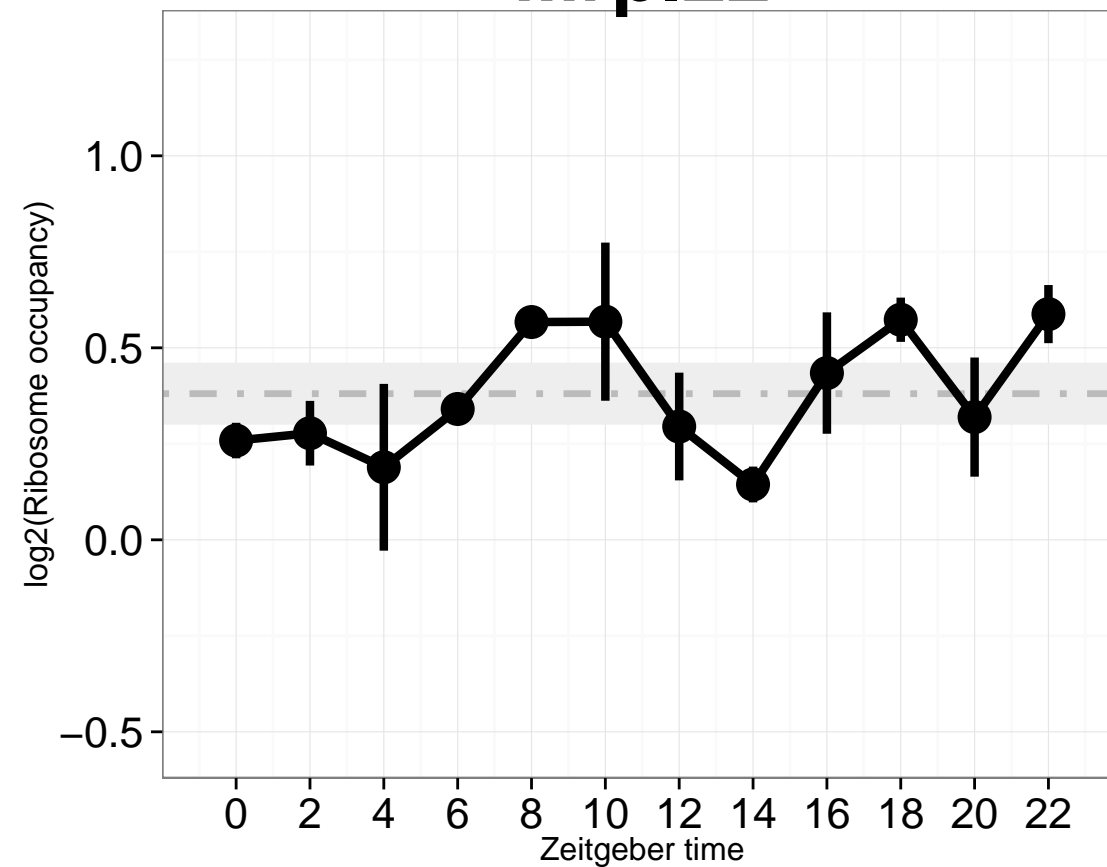

Supplement: SuppDataset_1.zip [file Mrpl22_set_A.pdf › Supplemental Dataset 1/A-mRNA_nonrhyth_translation_nonrhyth/Mrpl22_set_A.pdf]

# Mrpl23

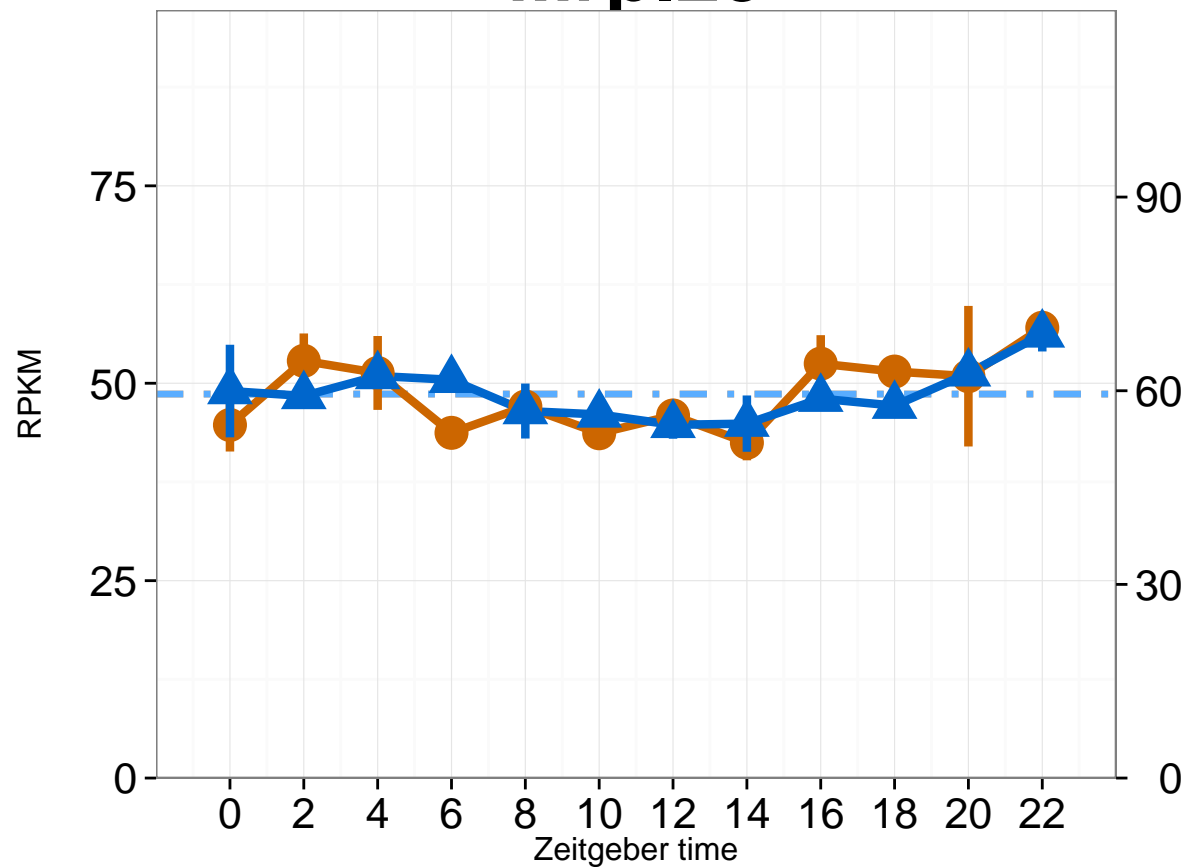

# Mrpl23

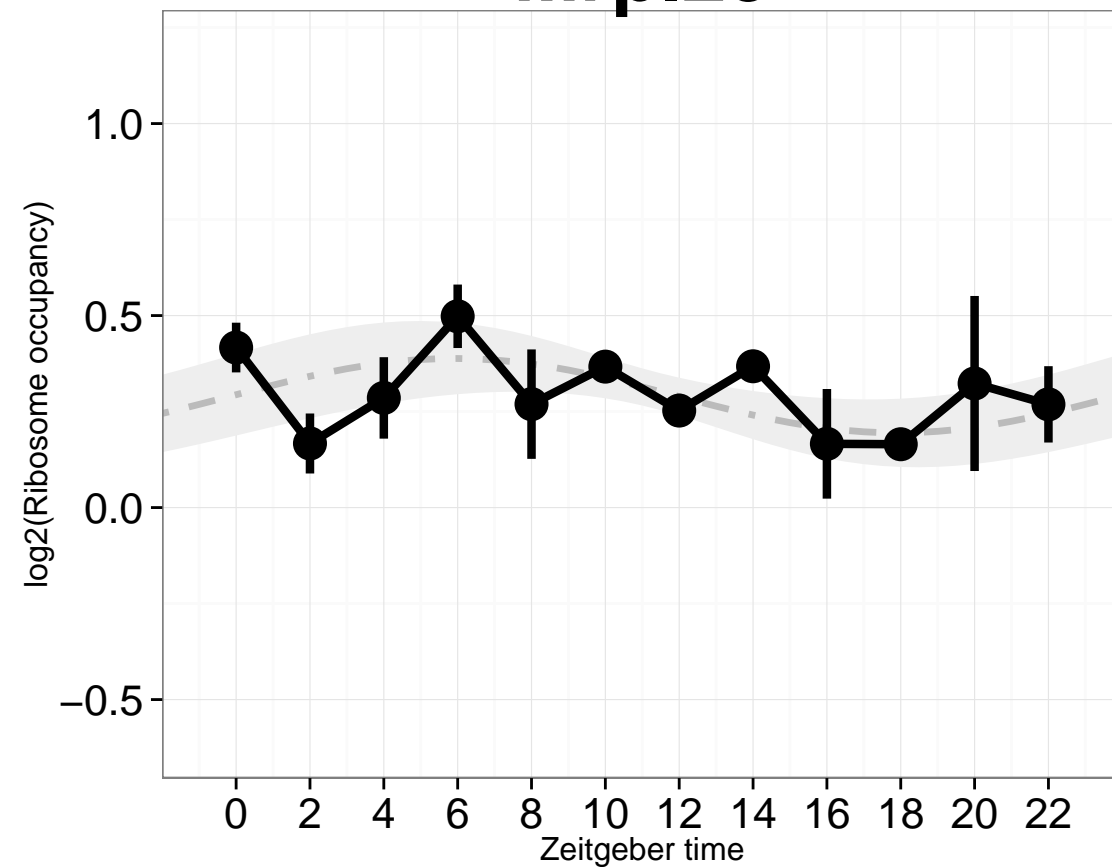

Supplement: SuppDataset_1.zip [file Mrpl23_set_A.pdf › Supplemental Dataset 1/A-mRNA_nonrhyth_translation_nonrhyth/Mrpl23_set_A.pdf]

# Mrpl24

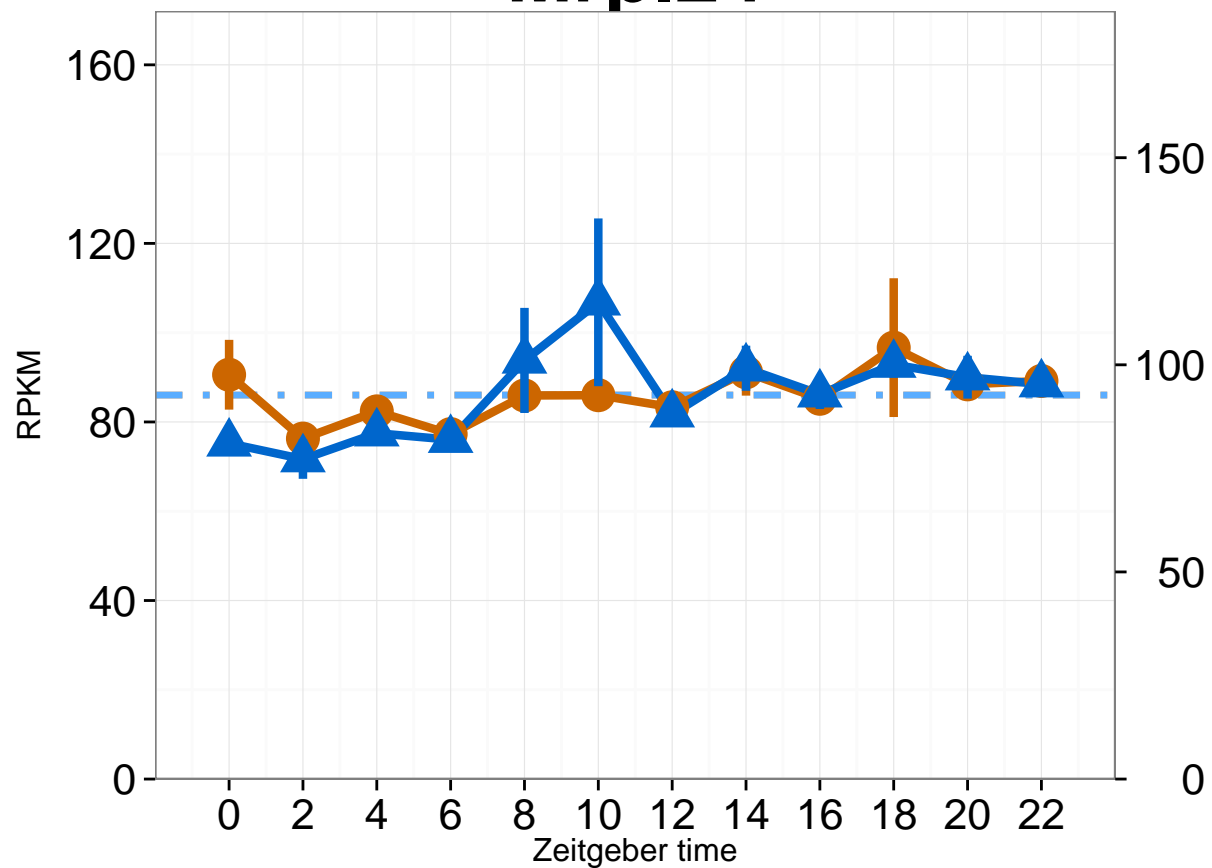

# Mrpl24

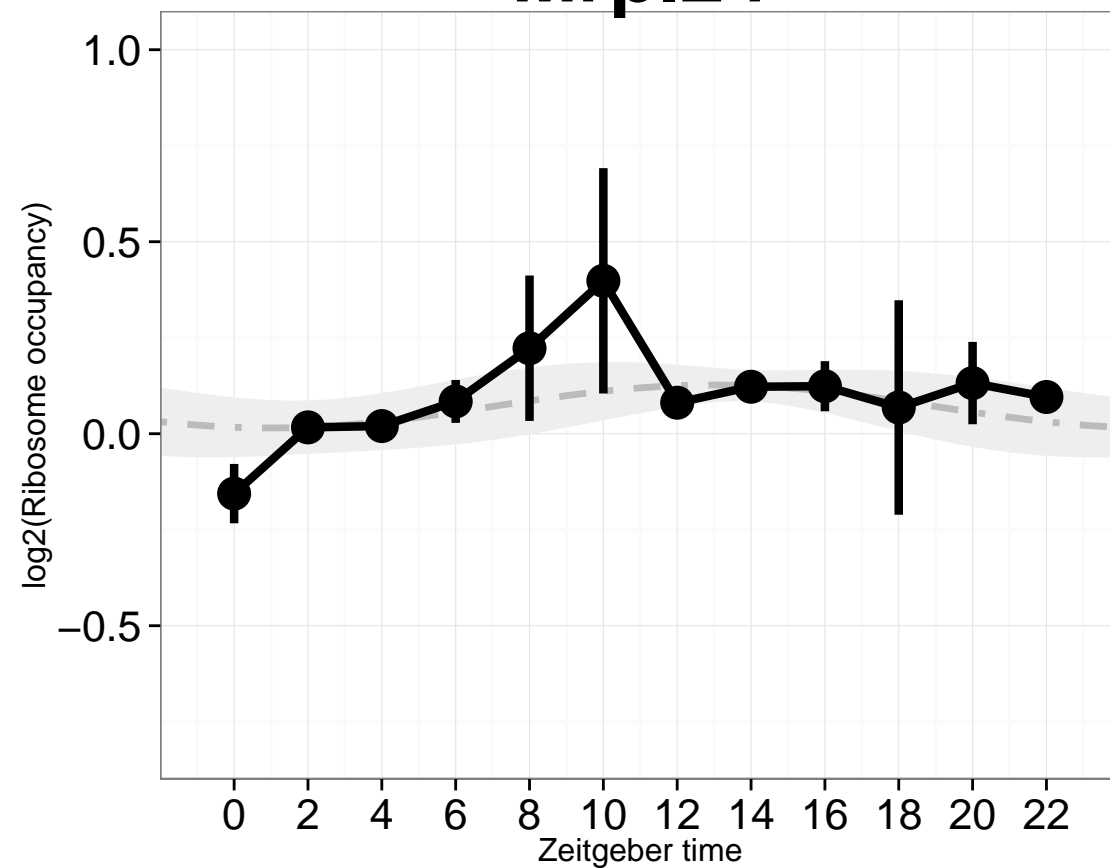

Supplement: SuppDataset_1.zip [file Mrpl24_set_A.pdf › Supplemental Dataset 1/A-mRNA_nonrhyth_translation_nonrhyth/Mrpl24_set_A.pdf]

# Mrpl27

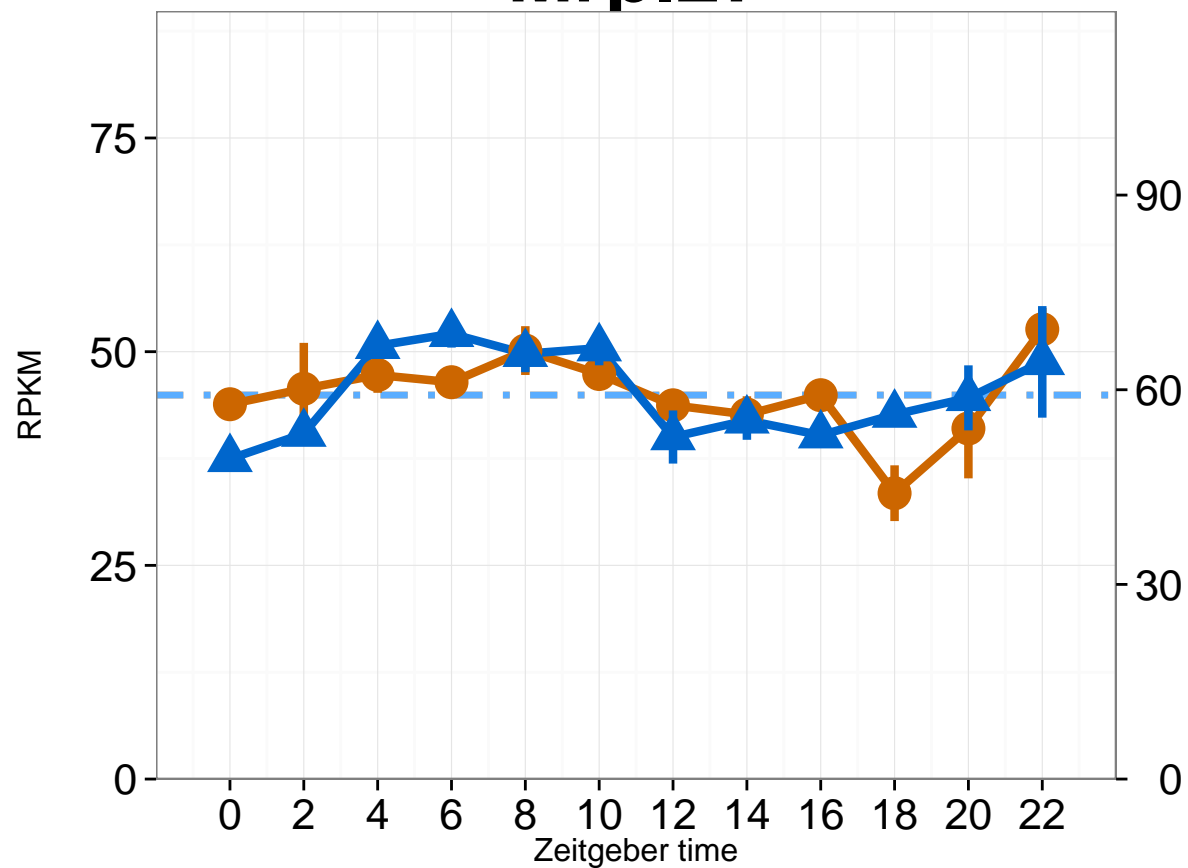

# Mrpl27

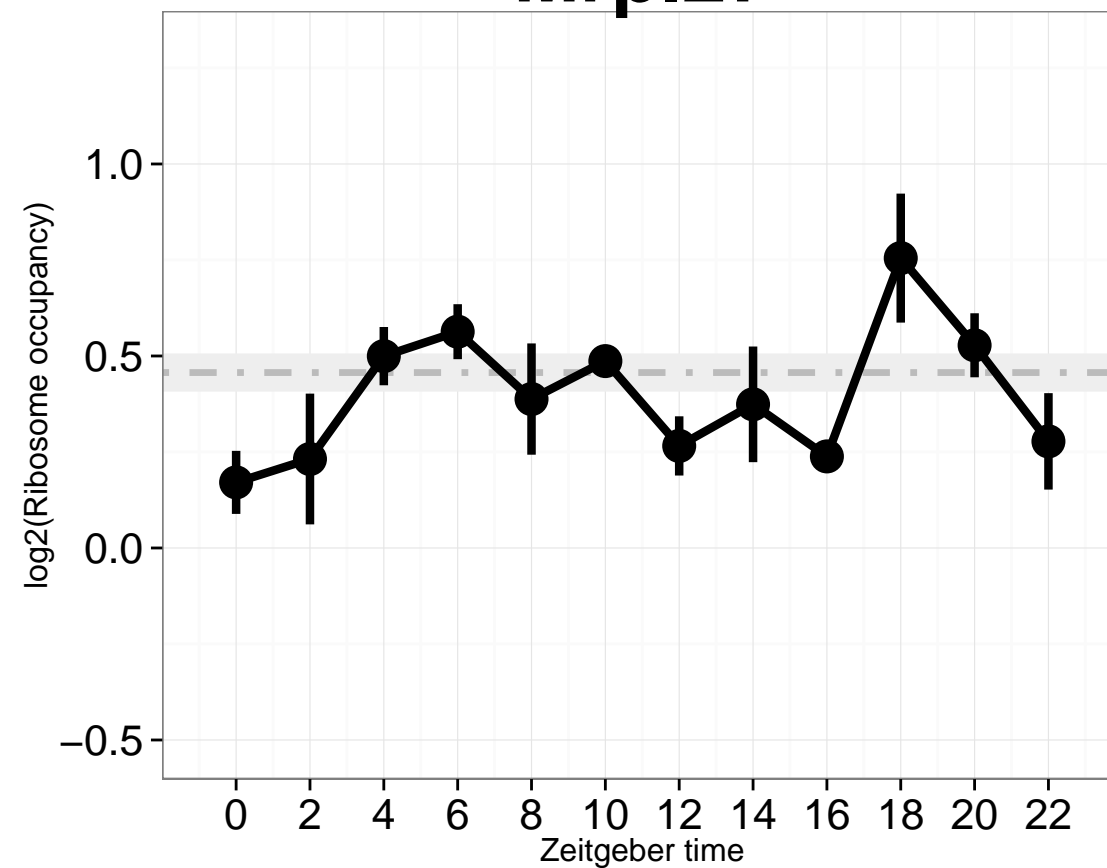

Supplement: SuppDataset_1.zip [file Mrpl27_set_A.pdf › Supplemental Dataset 1/A-mRNA_nonrhyth_translation_nonrhyth/Mrpl27_set_A.pdf]

# Mrpl2

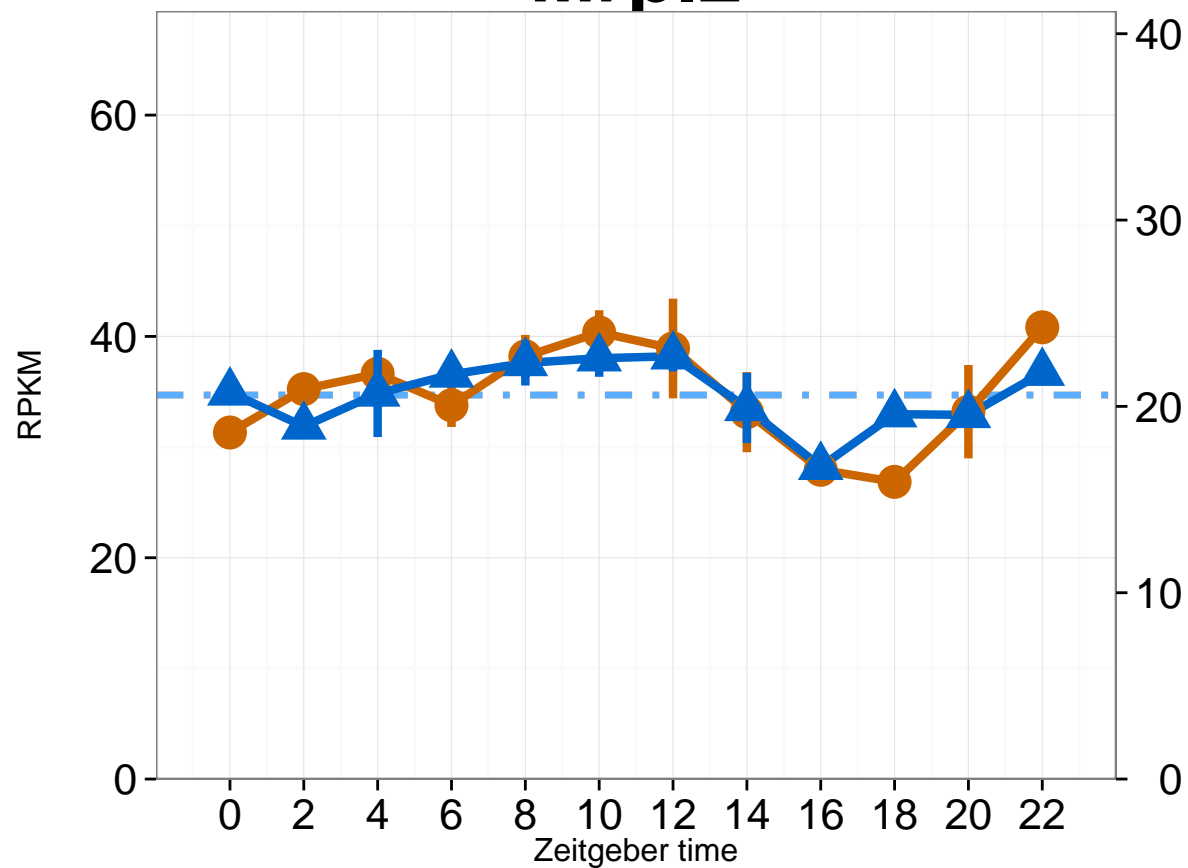

# Mrpl2

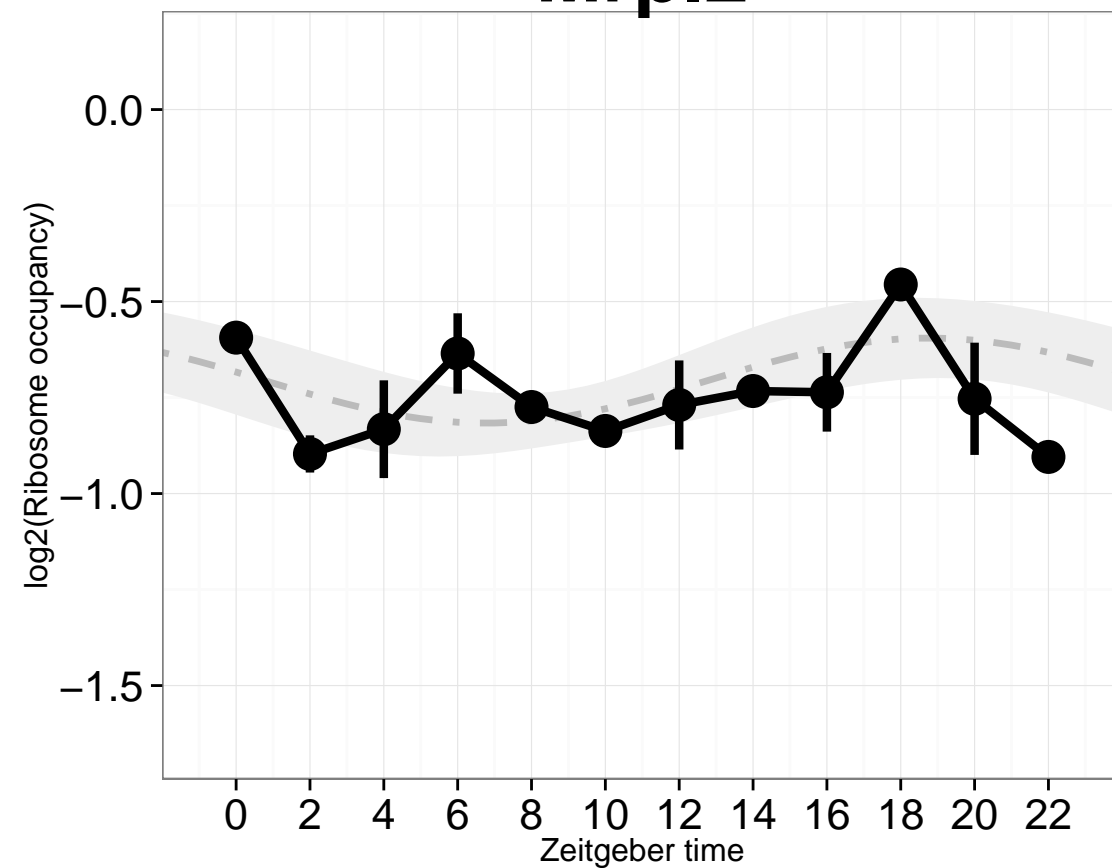

Supplement: SuppDataset_1.zip [file Mrpl2_set_A.pdf › Supplemental Dataset 1/A-mRNA_nonrhyth_translation_nonrhyth/Mrpl2_set_A.pdf]

# Mrpl30

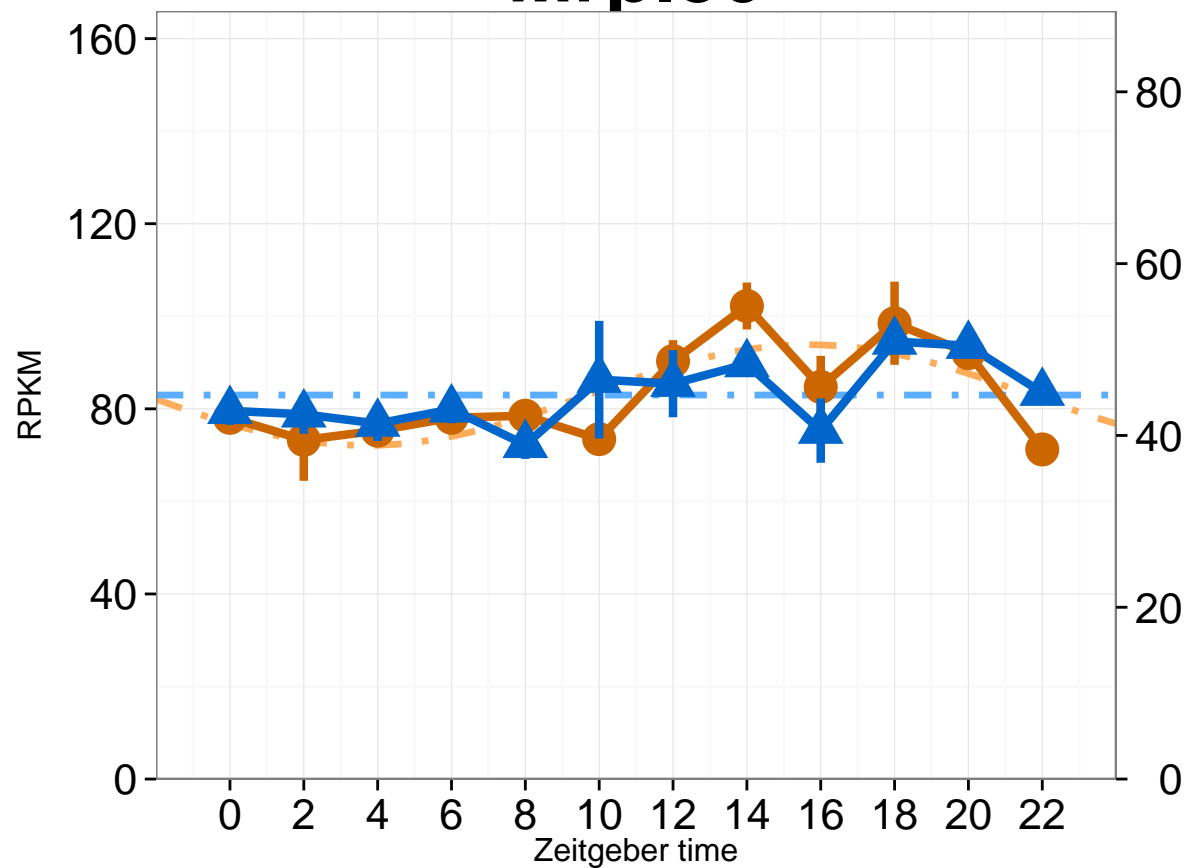

# Mrpl30

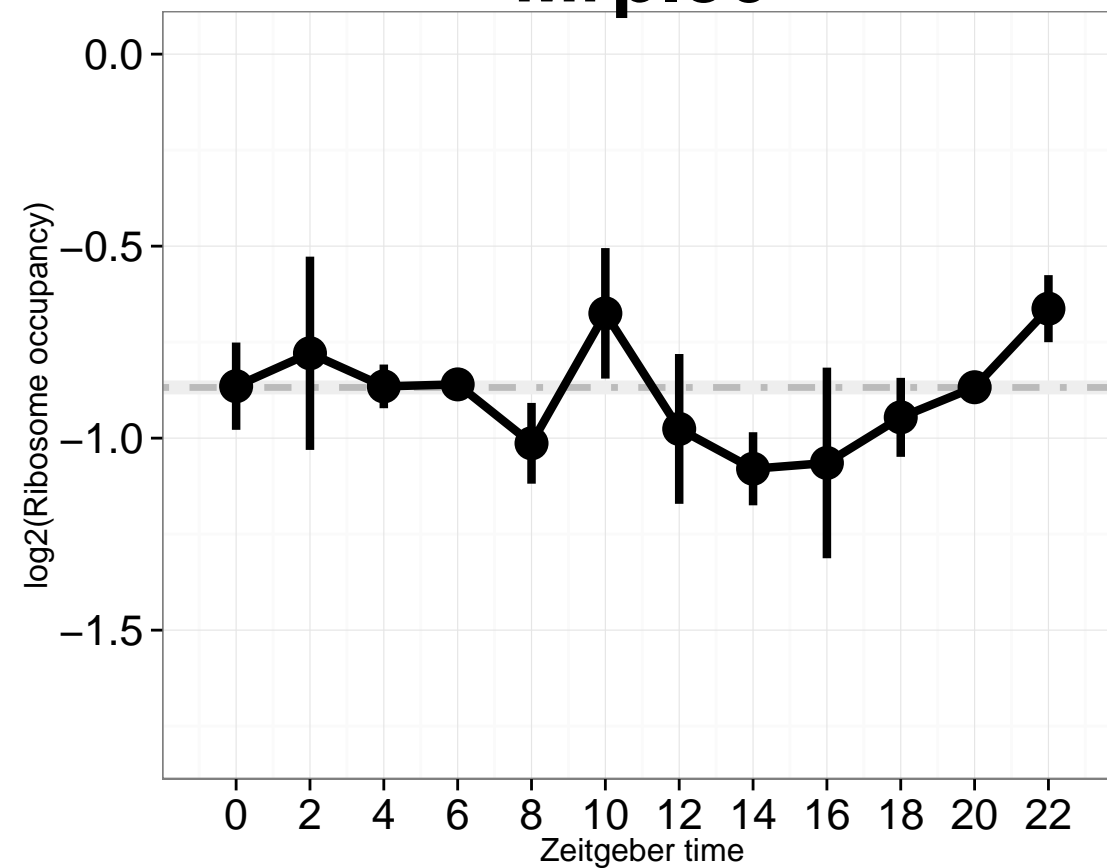

Supplement: SuppDataset_1.zip [file Mrpl30_set_A.pdf › Supplemental Dataset 1/A-mRNA_nonrhyth_translation_nonrhyth/Mrpl30_set_A.pdf]

# Mrpl32

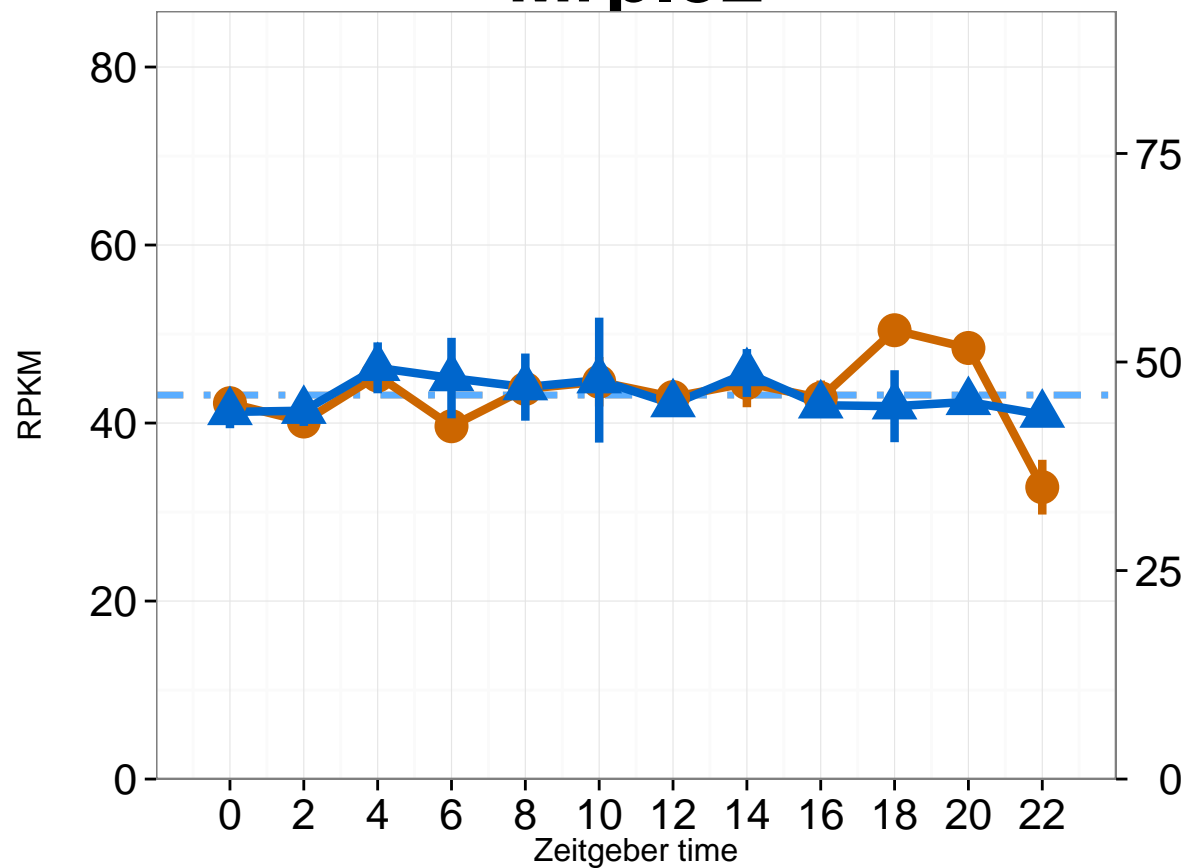

# Mrpl32

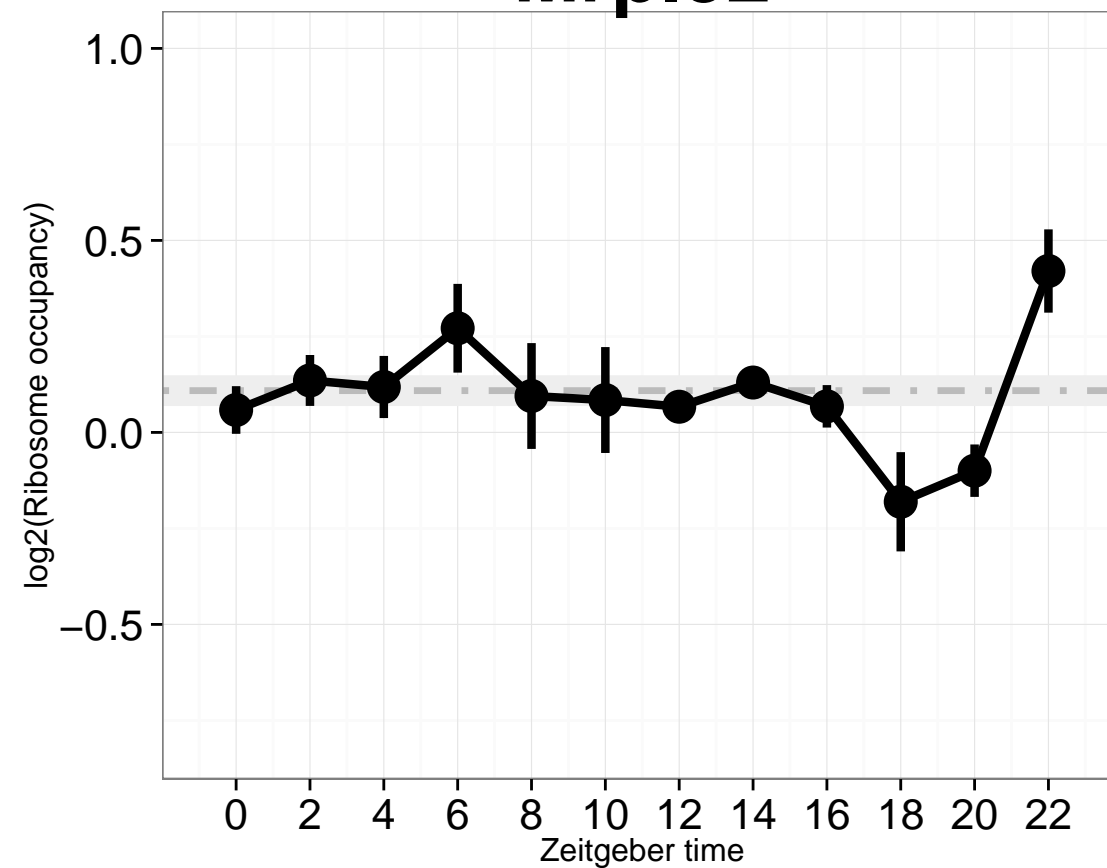

Supplement: SuppDataset_1.zip [file Mrpl32_set_A.pdf › Supplemental Dataset 1/A-mRNA_nonrhyth_translation_nonrhyth/Mrpl32_set_A.pdf]

# Mrpl33

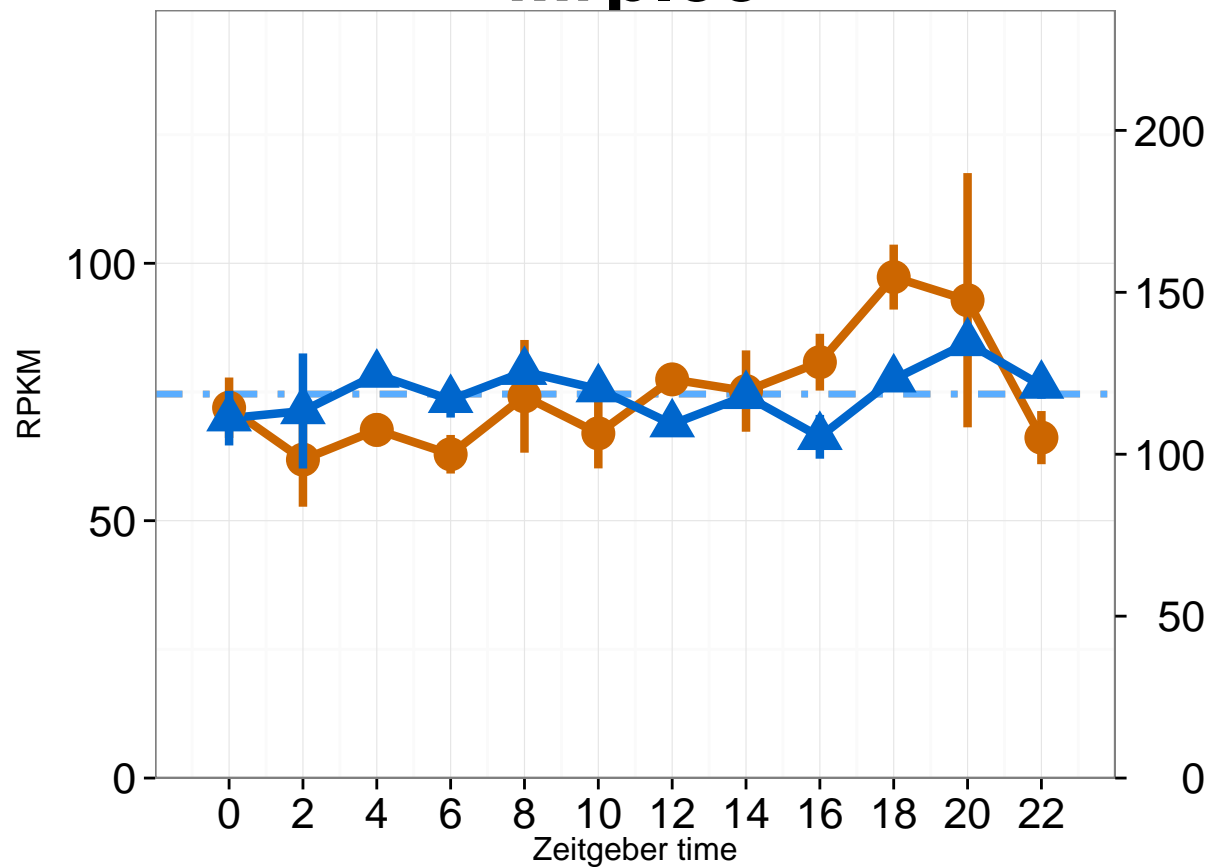

# Mrpl33

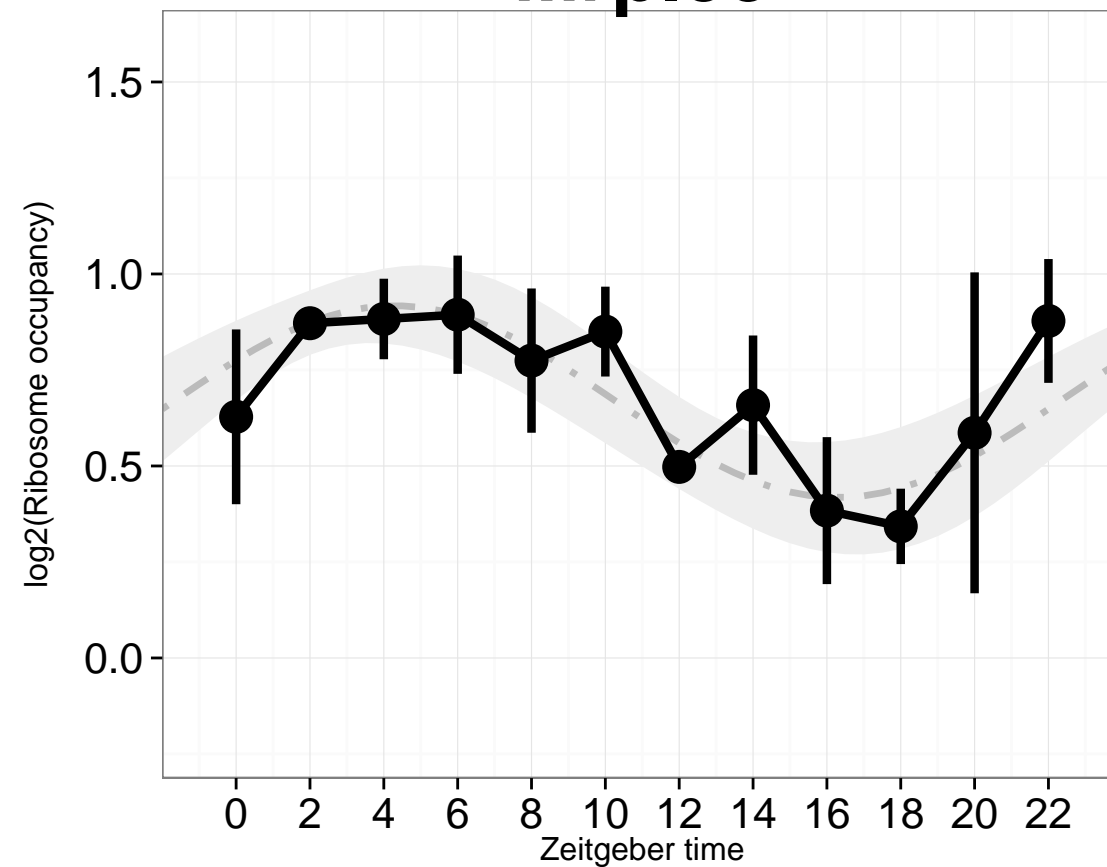

Supplement: SuppDataset_1.zip [file Mrpl33_set_A.pdf › Supplemental Dataset 1/A-mRNA_nonrhyth_translation_nonrhyth/Mrpl33_set_A.pdf]

## Mrpl35

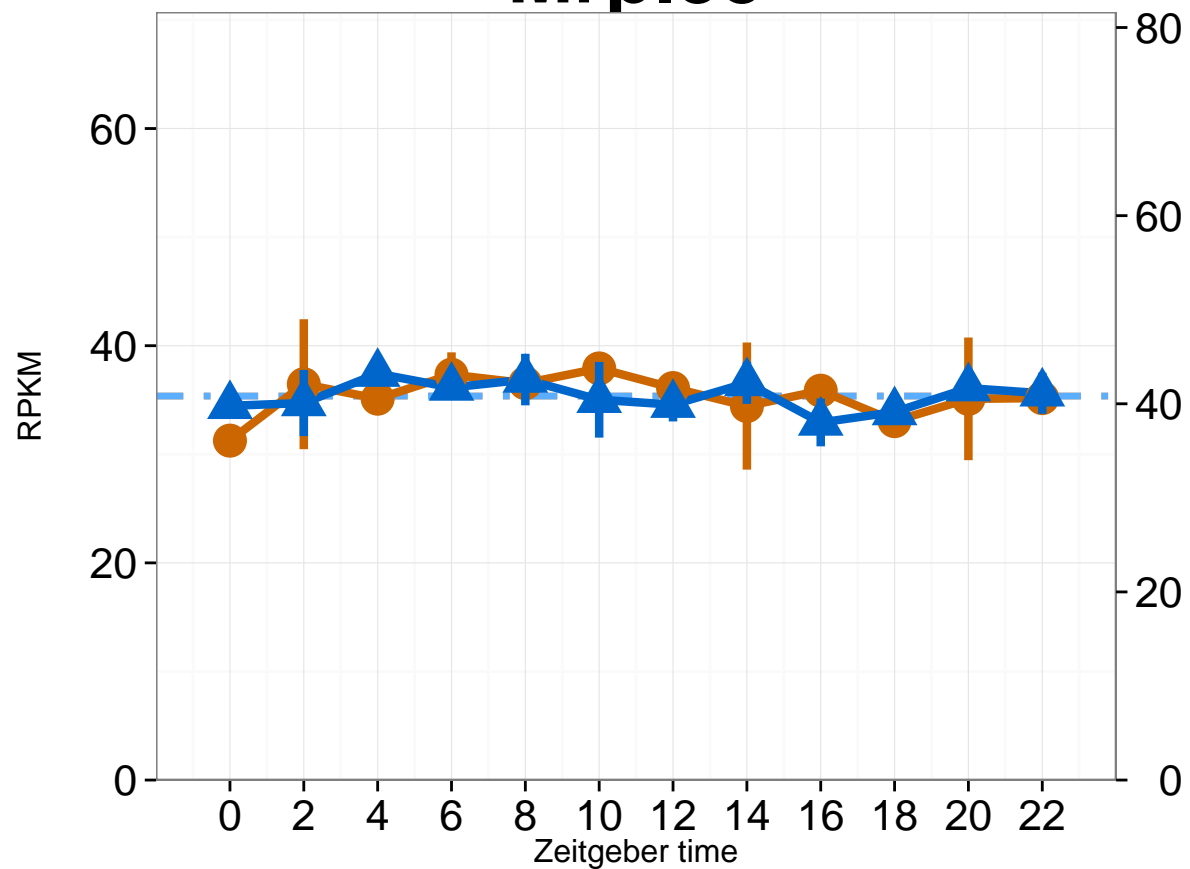

## Mrpl35

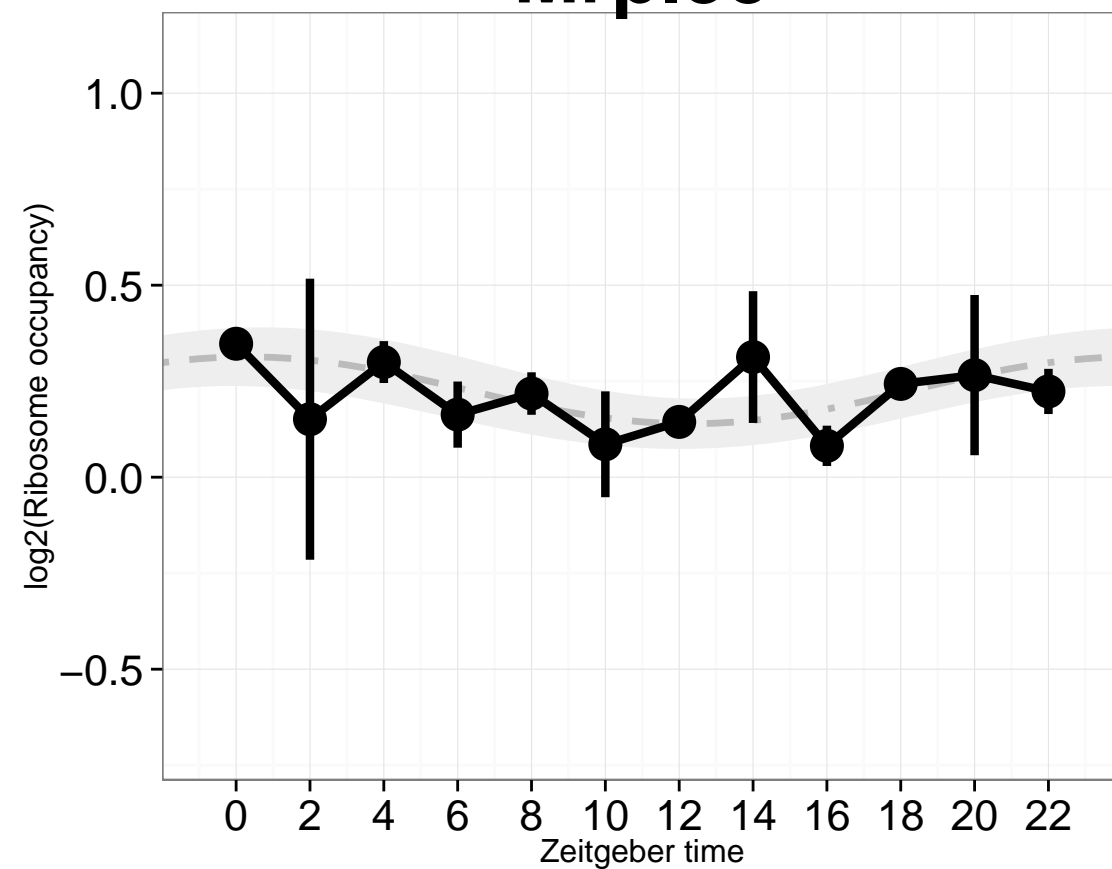

Supplement: SuppDataset_1.zip [file Mrpl35_set_A.pdf › Supplemental Dataset 1/A-mRNA_nonrhyth_translation_nonrhyth/Mrpl35_set_A.pdf]

# Mrpl37

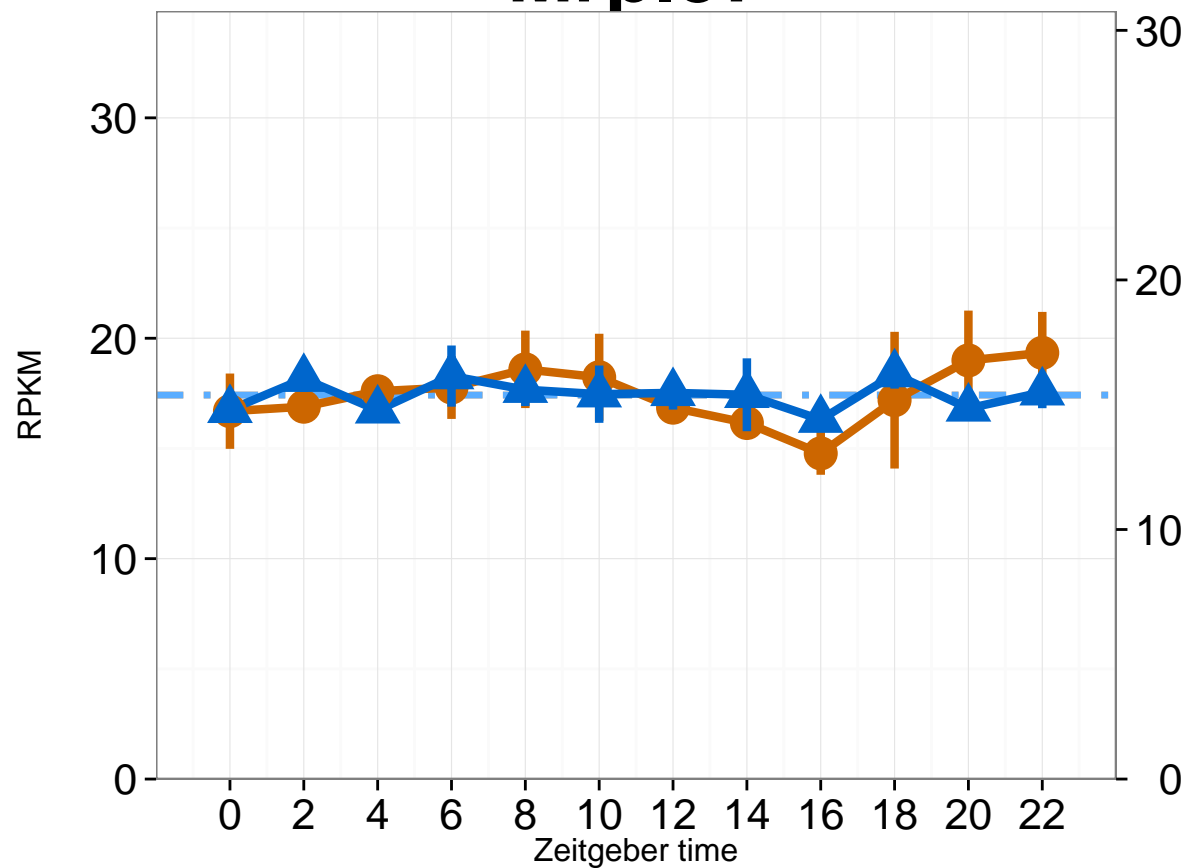

# Mrpl37

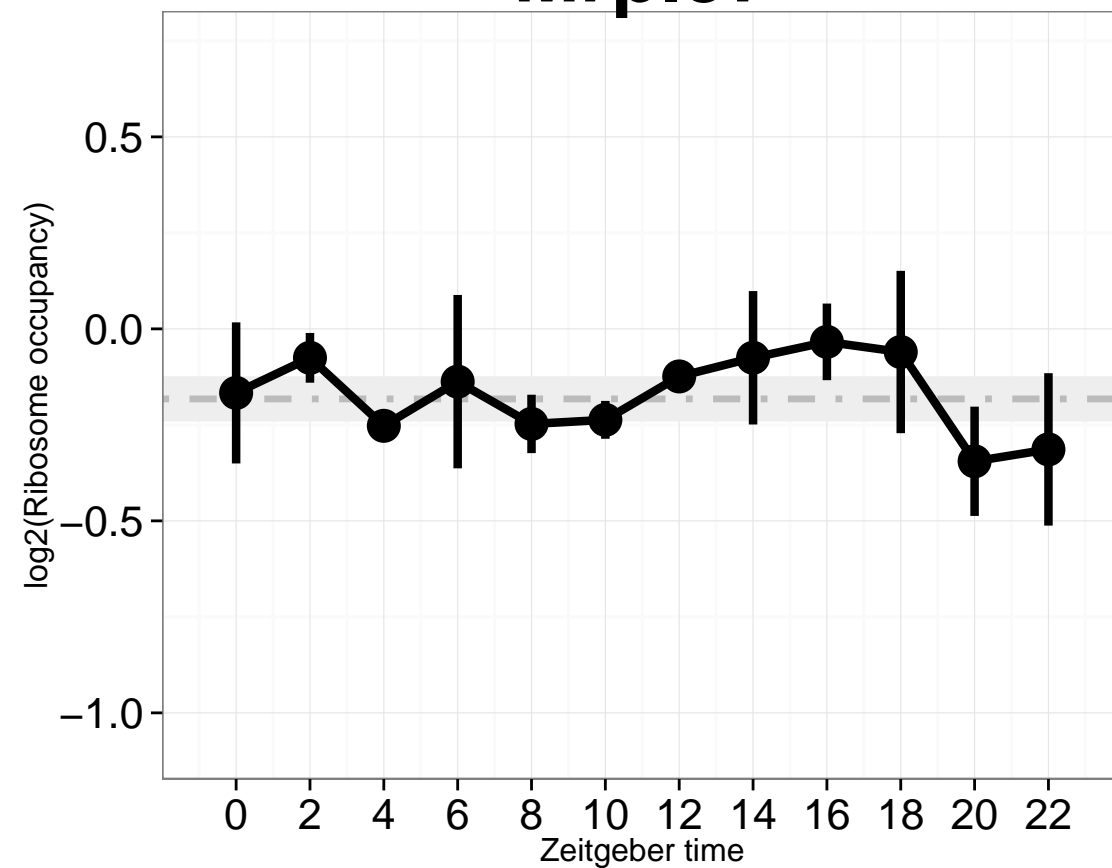

Supplement: SuppDataset_1.zip [file Mrpl37_set_A.pdf › Supplemental Dataset 1/A-mRNA_nonrhyth_translation_nonrhyth/Mrpl37_set_A.pdf]

# Mrpl38

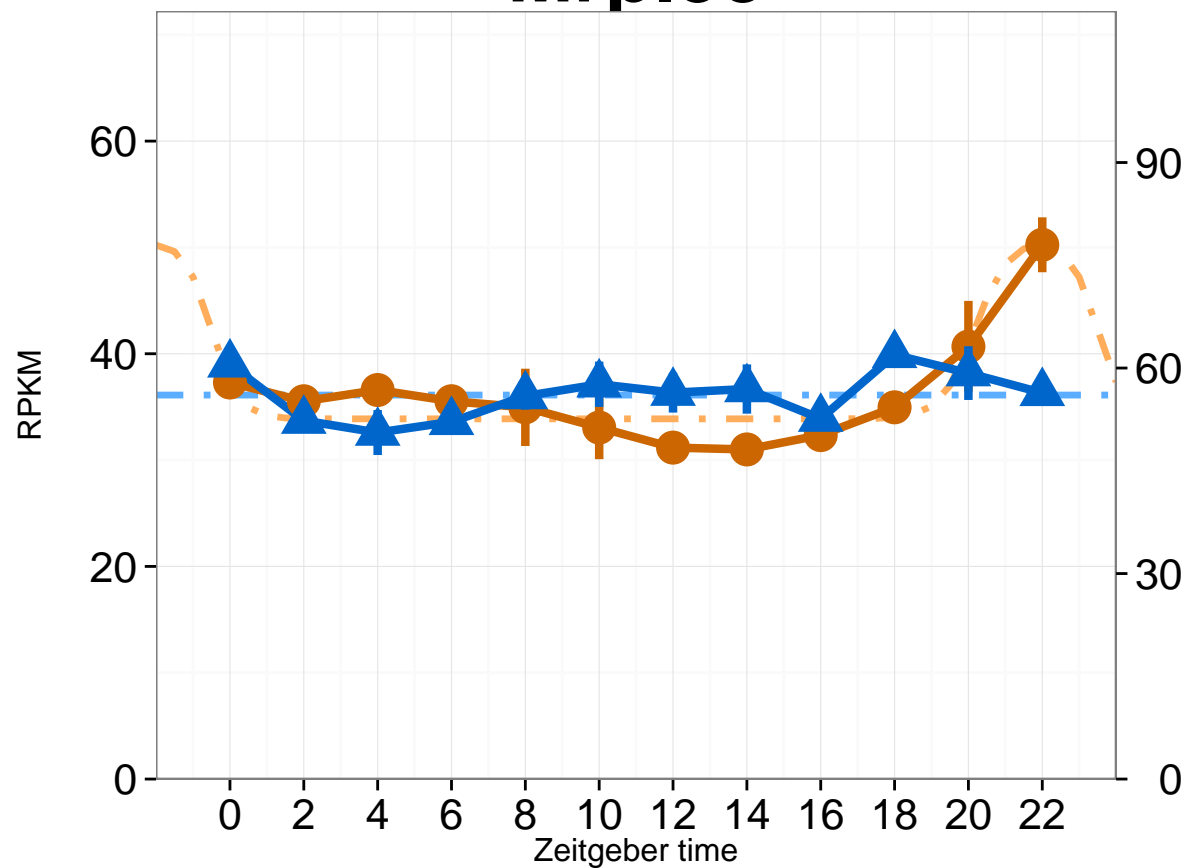

# Mrpl38

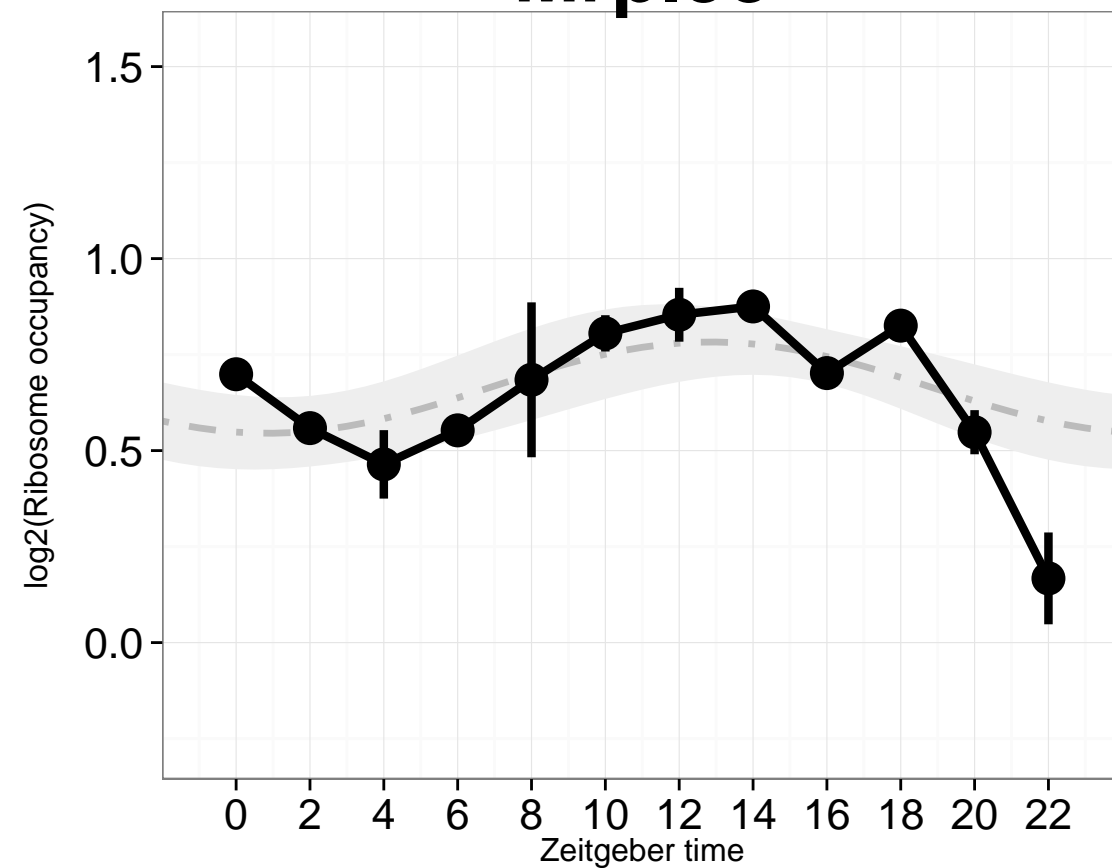

Supplement: SuppDataset_1.zip [file Mrpl38_set_A.pdf › Supplemental Dataset 1/A-mRNA_nonrhyth_translation_nonrhyth/Mrpl38_set_A.pdf]

# Mrpl39

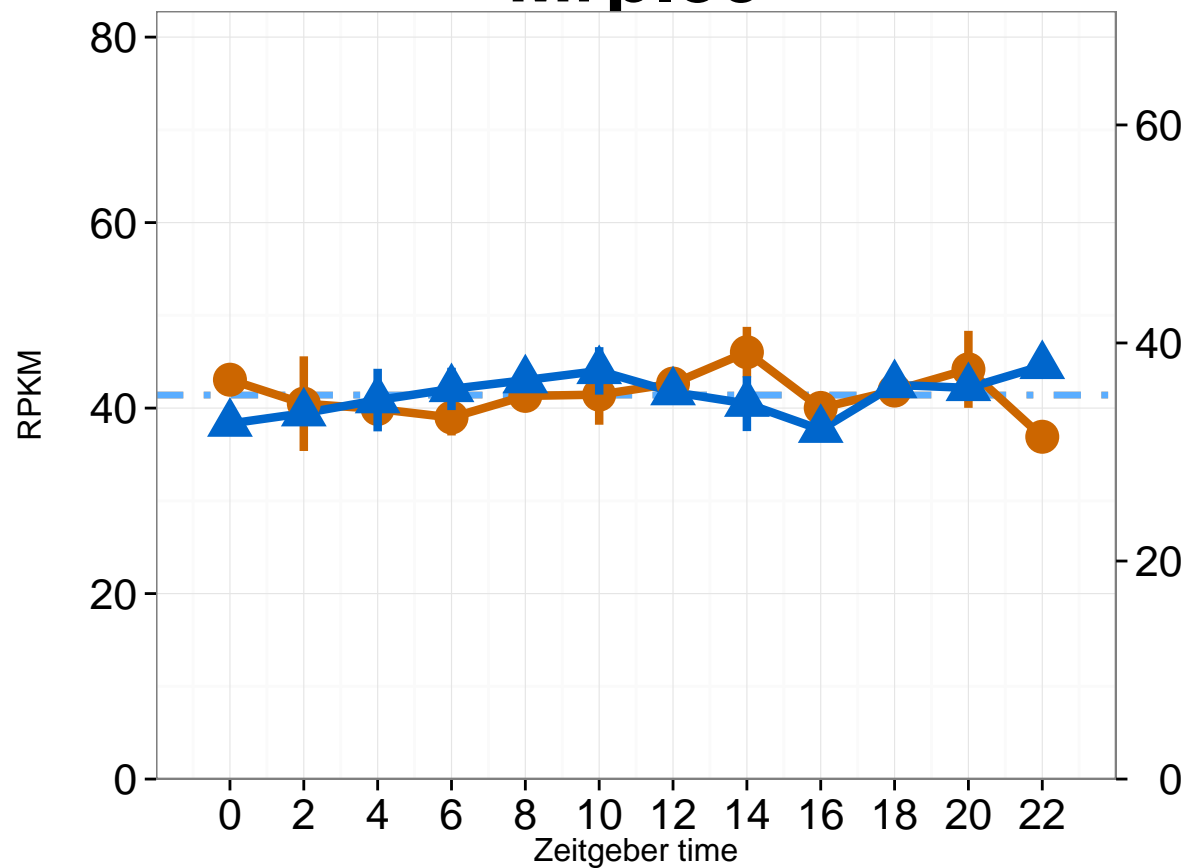

# Mrpl39

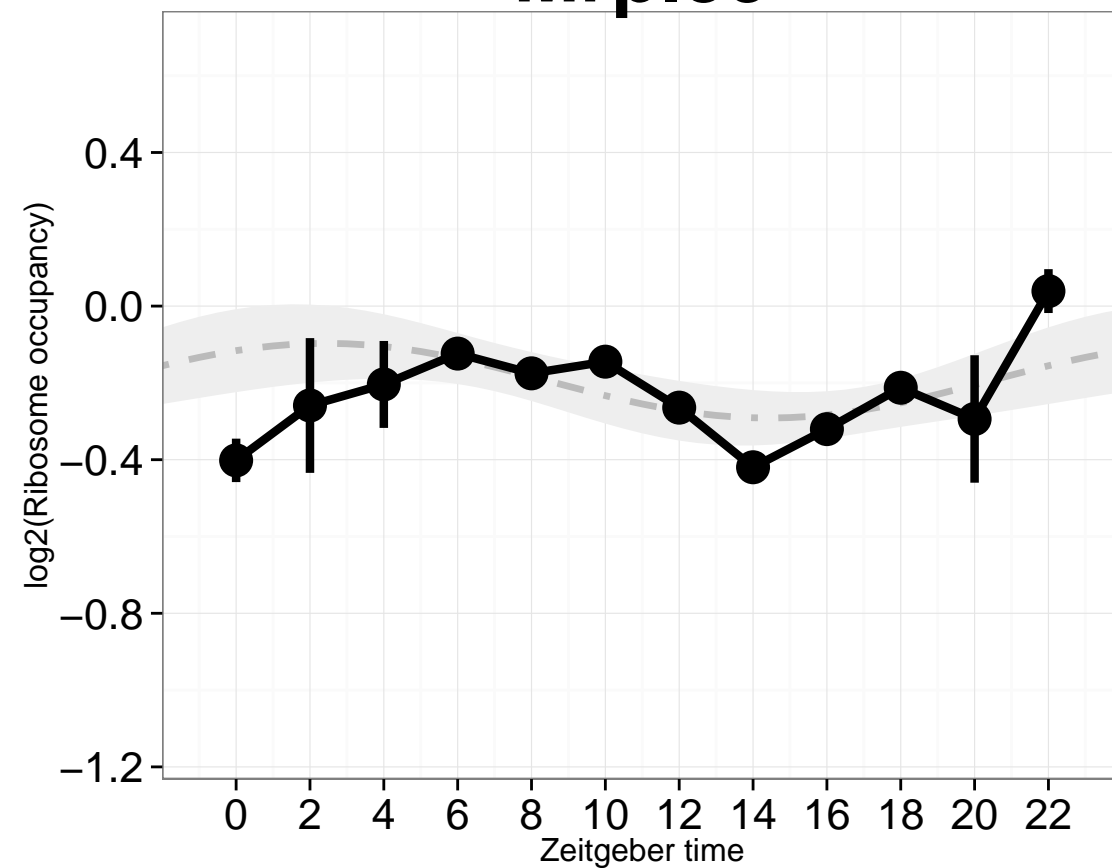

Supplement: SuppDataset_1.zip [file Mrpl39_set_A.pdf › Supplemental Dataset 1/A-mRNA_nonrhyth_translation_nonrhyth/Mrpl39_set_A.pdf]

# Mrpl3

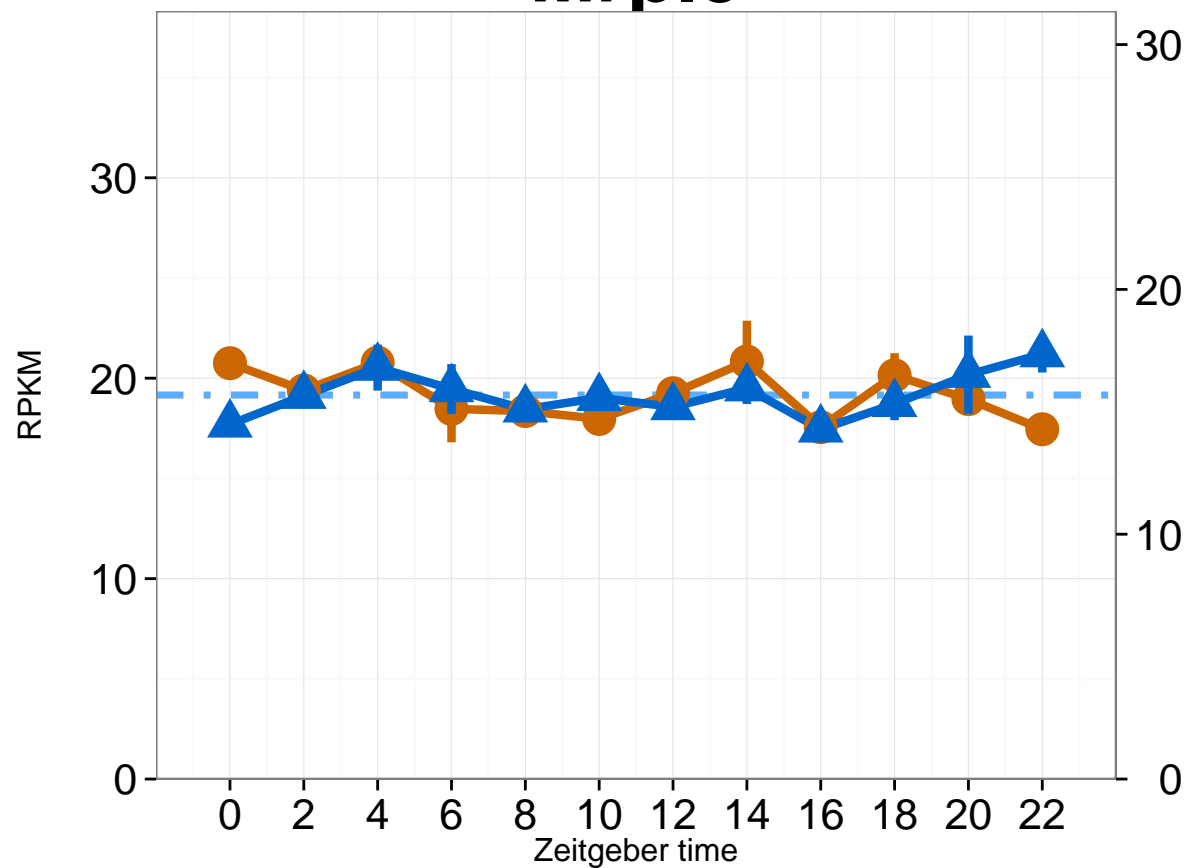

# Mrpl3

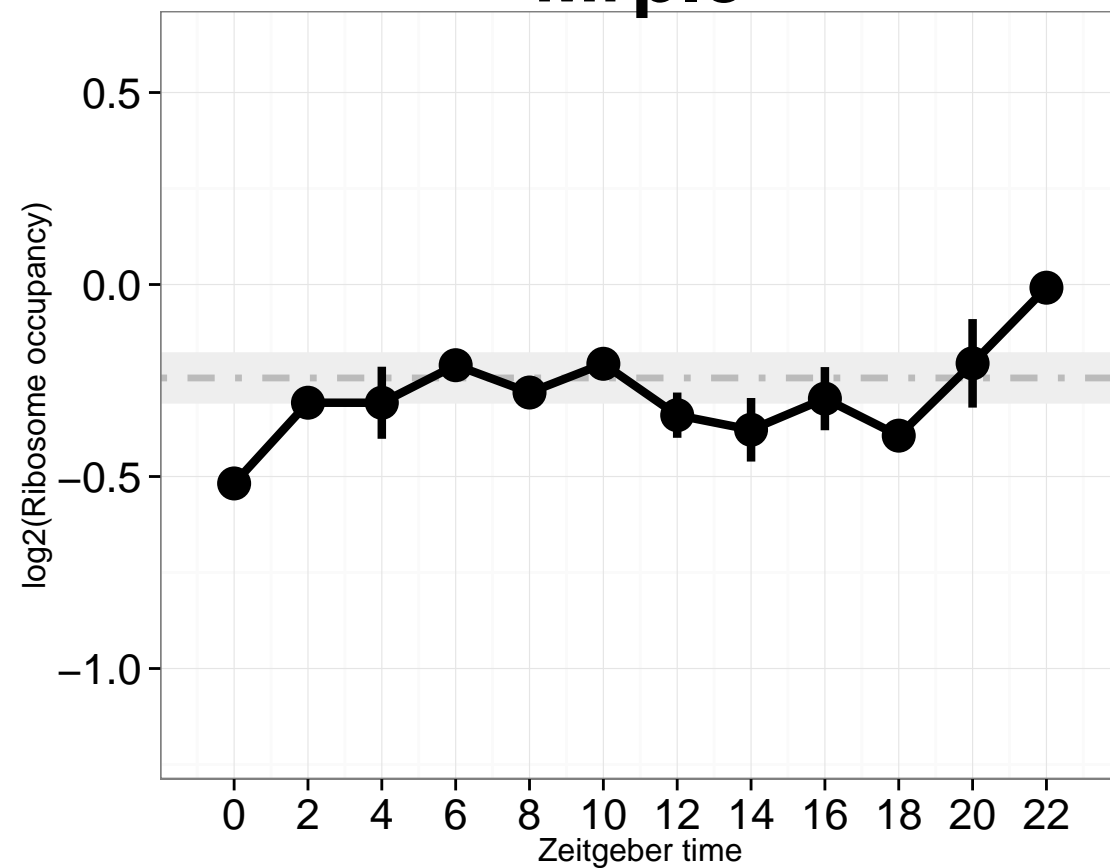

Supplement: SuppDataset_1.zip [file Mrpl3_set_A.pdf › Supplemental Dataset 1/A-mRNA_nonrhyth_translation_nonrhyth/Mrpl3_set_A.pdf]

## Mrpl40

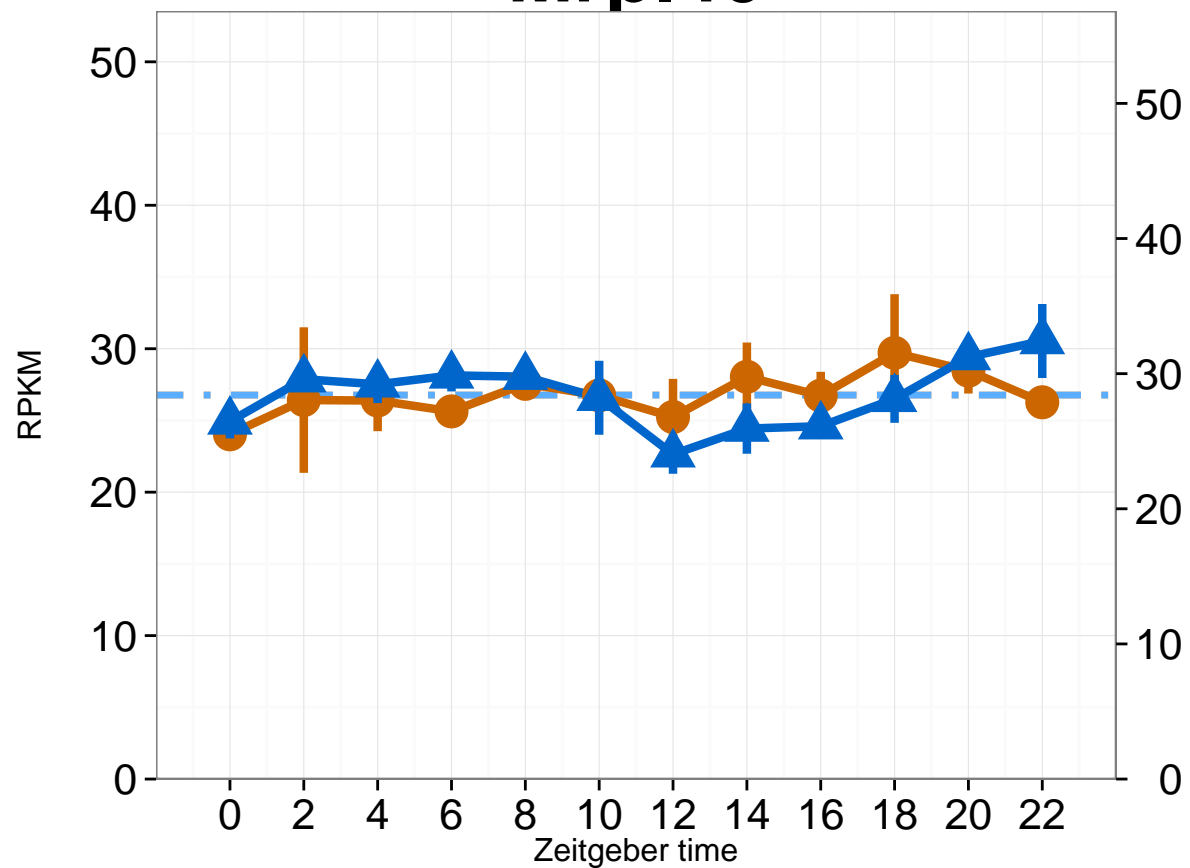

## Mrpl40

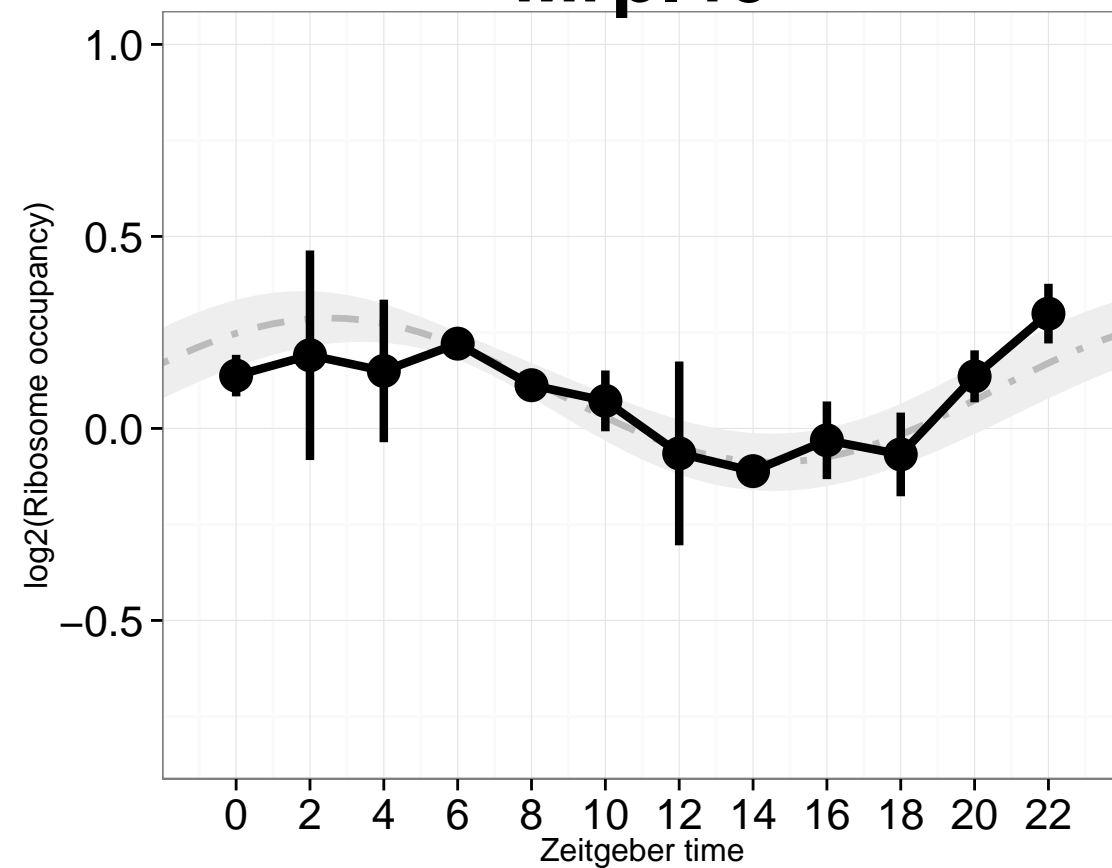

Supplement: SuppDataset_1.zip [file Mrpl40_set_A.pdf › Supplemental Dataset 1/A-mRNA_nonrhyth_translation_nonrhyth/Mrpl40_set_A.pdf]

# Mrpl41

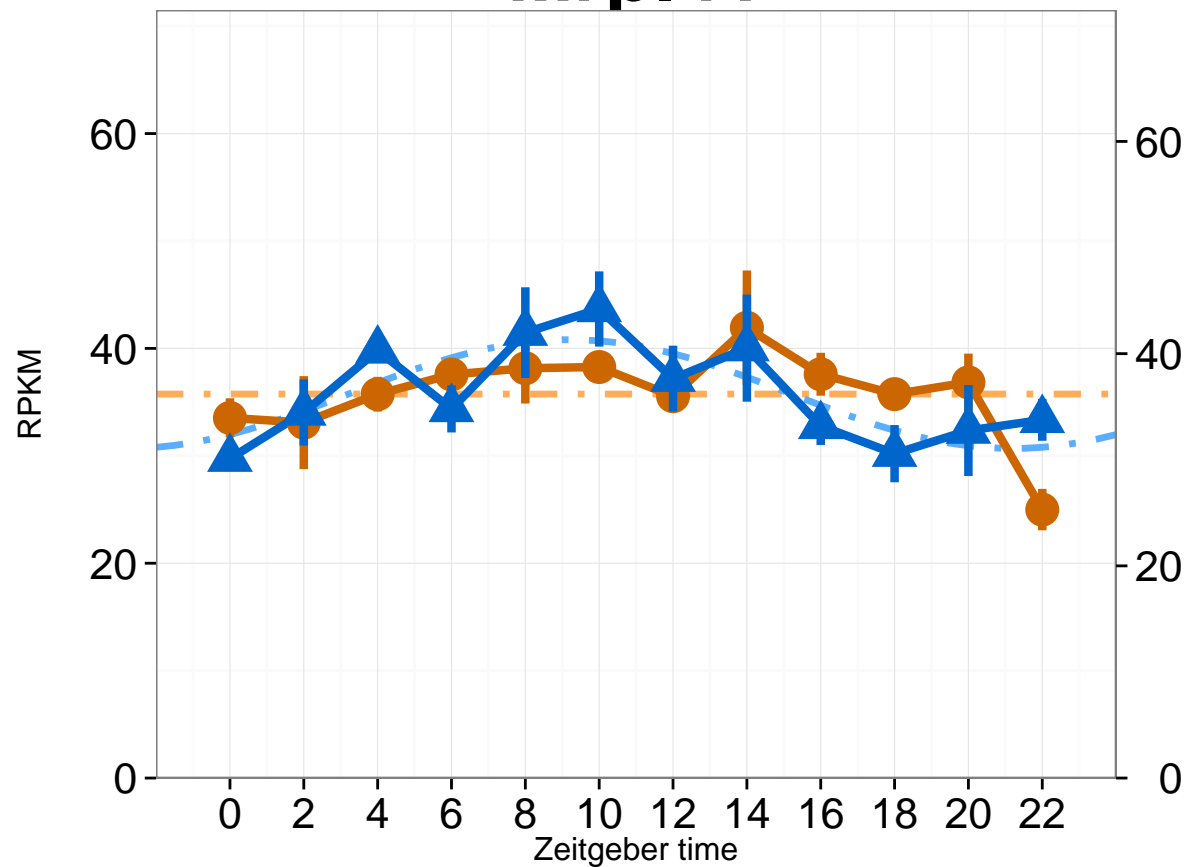

# Mrpl41

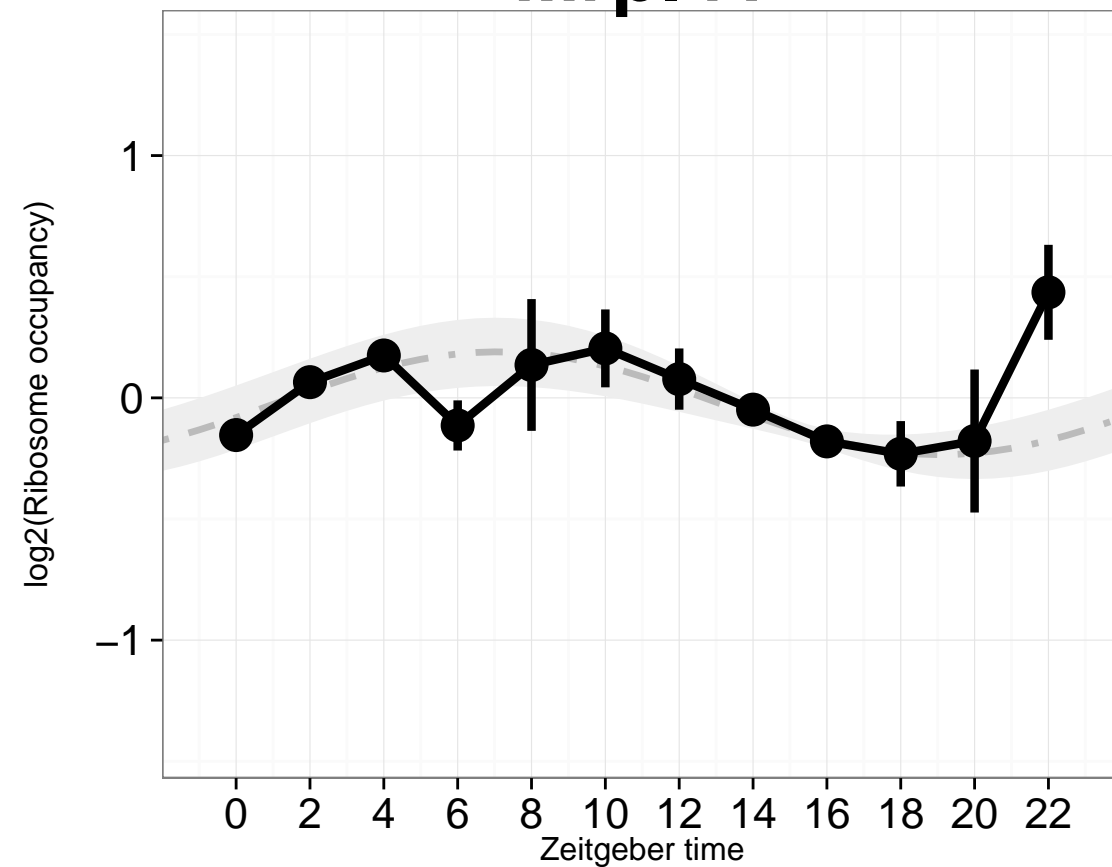

Supplement: SuppDataset_1.zip [file Mrpl41_set_A.pdf › Supplemental Dataset 1/A-mRNA_nonrhyth_translation_nonrhyth/Mrpl41_set_A.pdf]

# Mrpl42

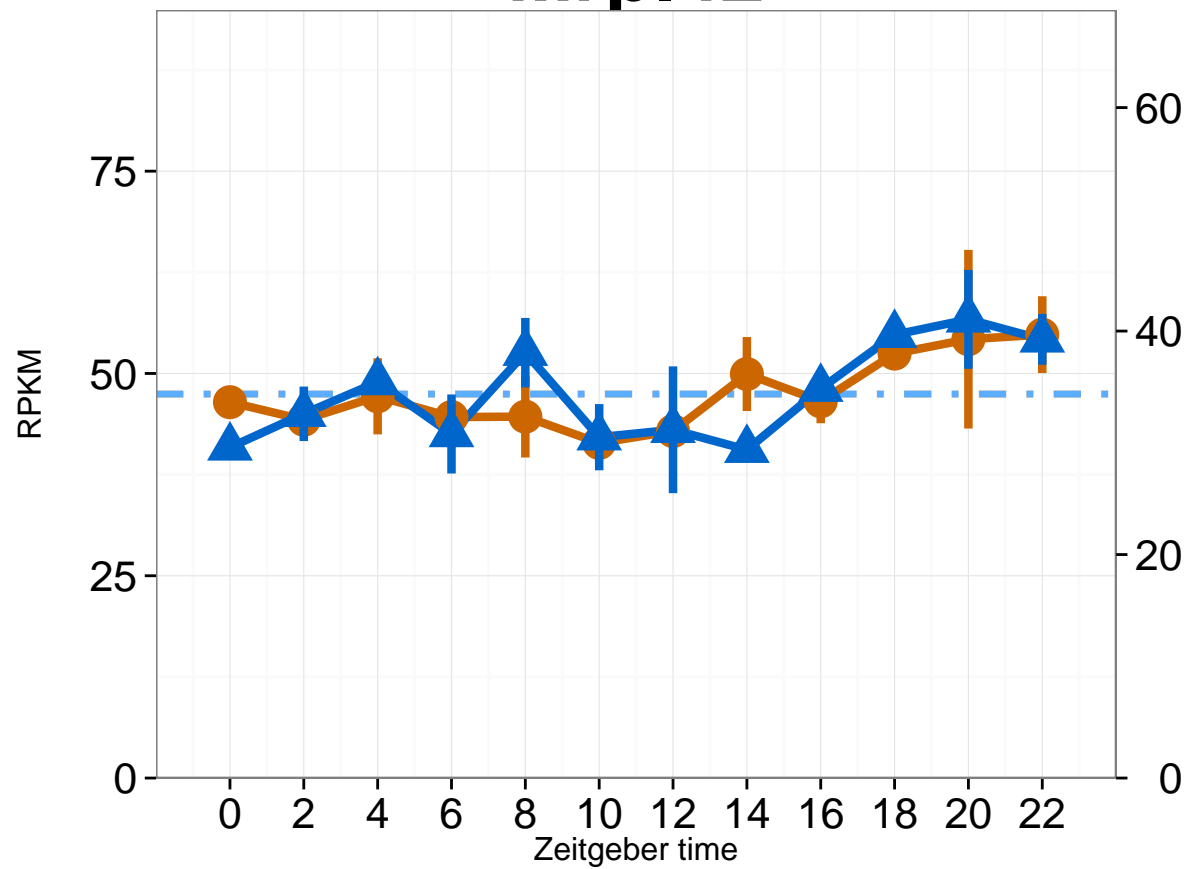

# Mrpl42

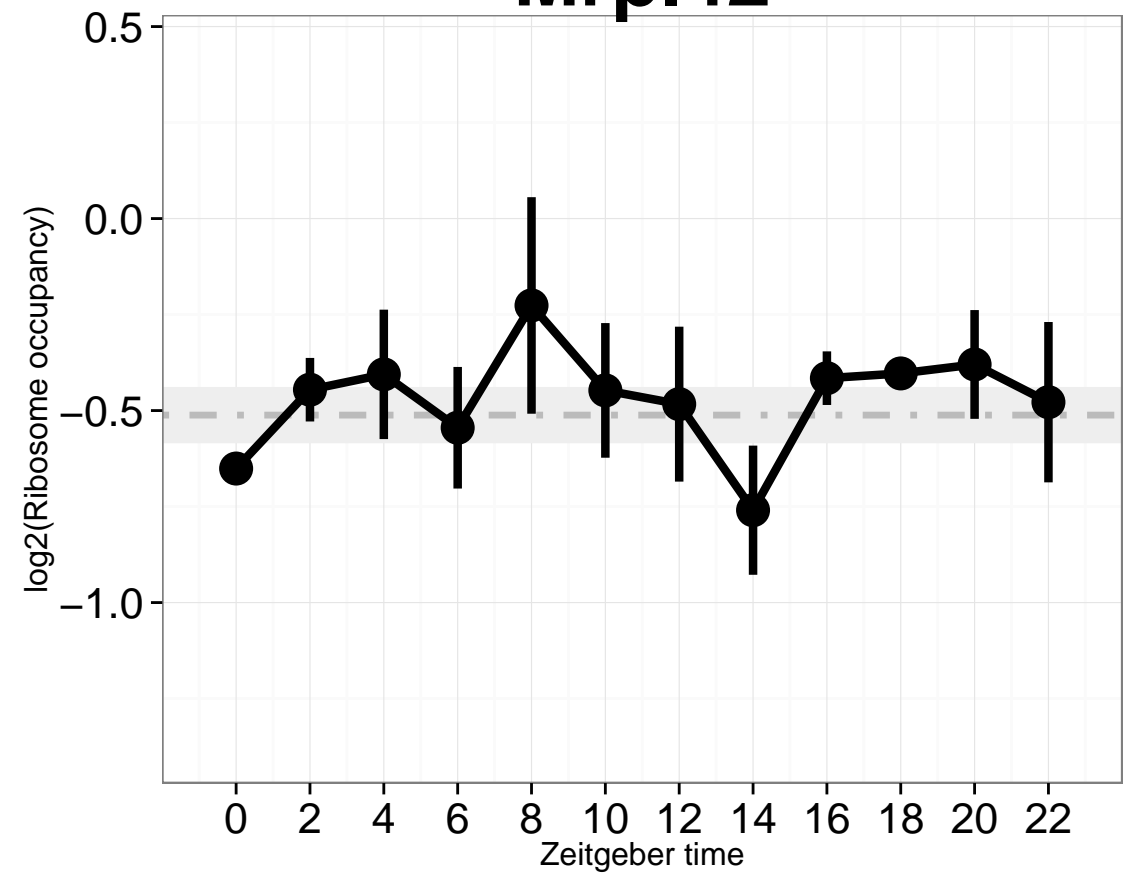

Supplement: SuppDataset_1.zip [file Mrpl42_set_A.pdf › Supplemental Dataset 1/A-mRNA_nonrhyth_translation_nonrhyth/Mrpl42_set_A.pdf]

# Mrpl43

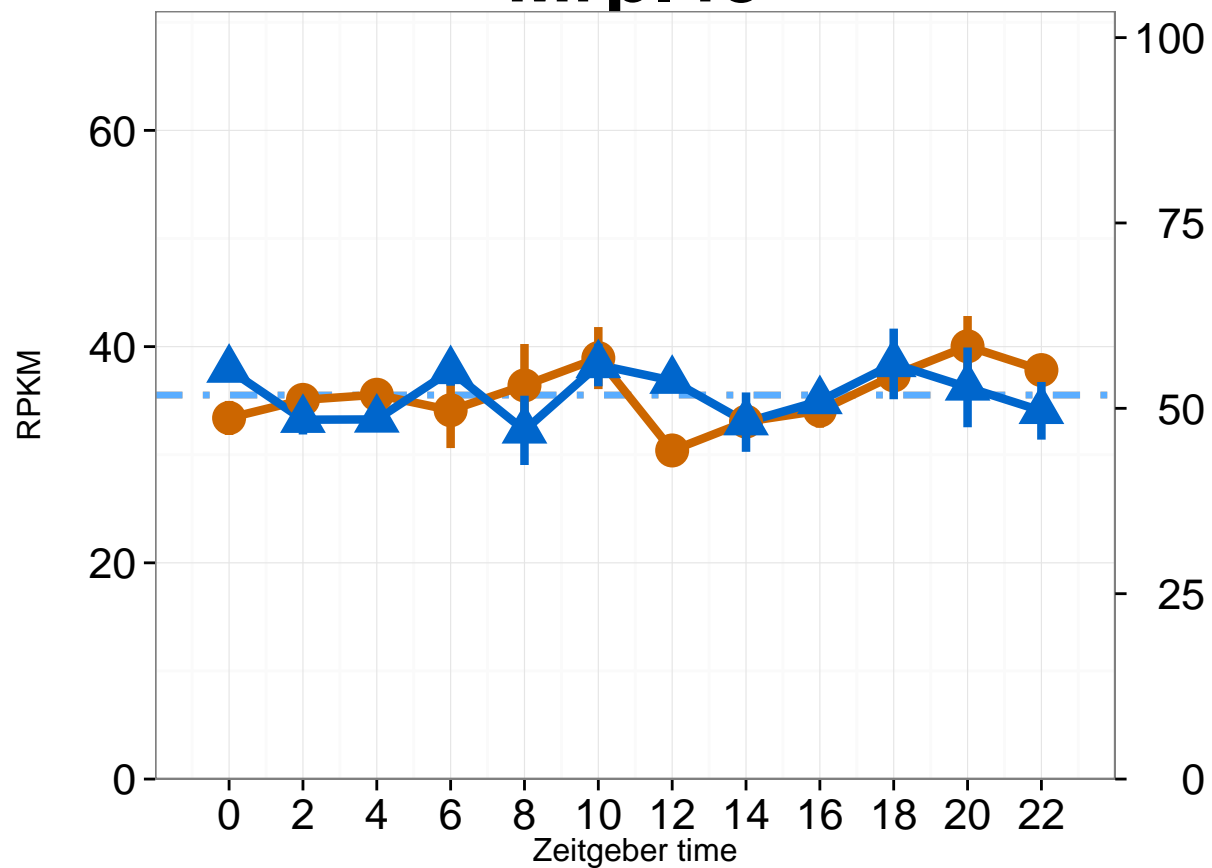

# Mrpl43

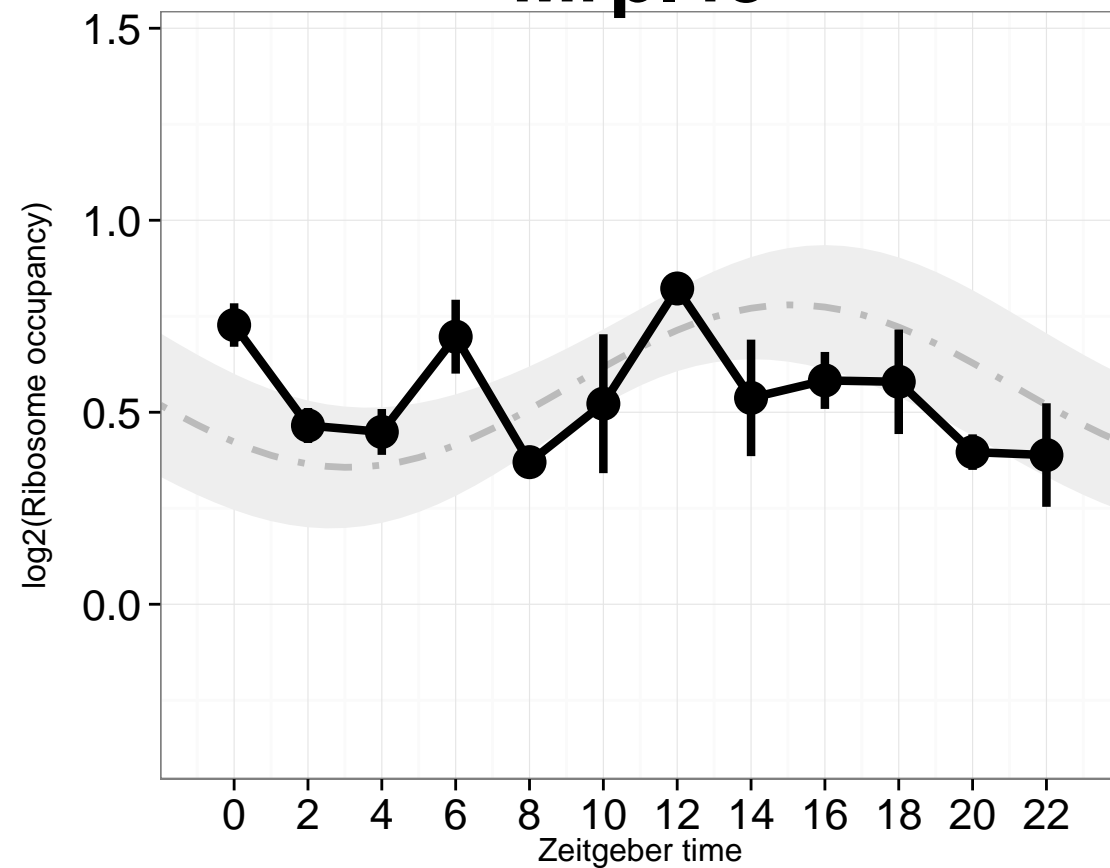

Supplement: SuppDataset_1.zip [file Mrpl43_set_A.pdf › Supplemental Dataset 1/A-mRNA_nonrhyth_translation_nonrhyth/Mrpl43_set_A.pdf]

# Mrpl44

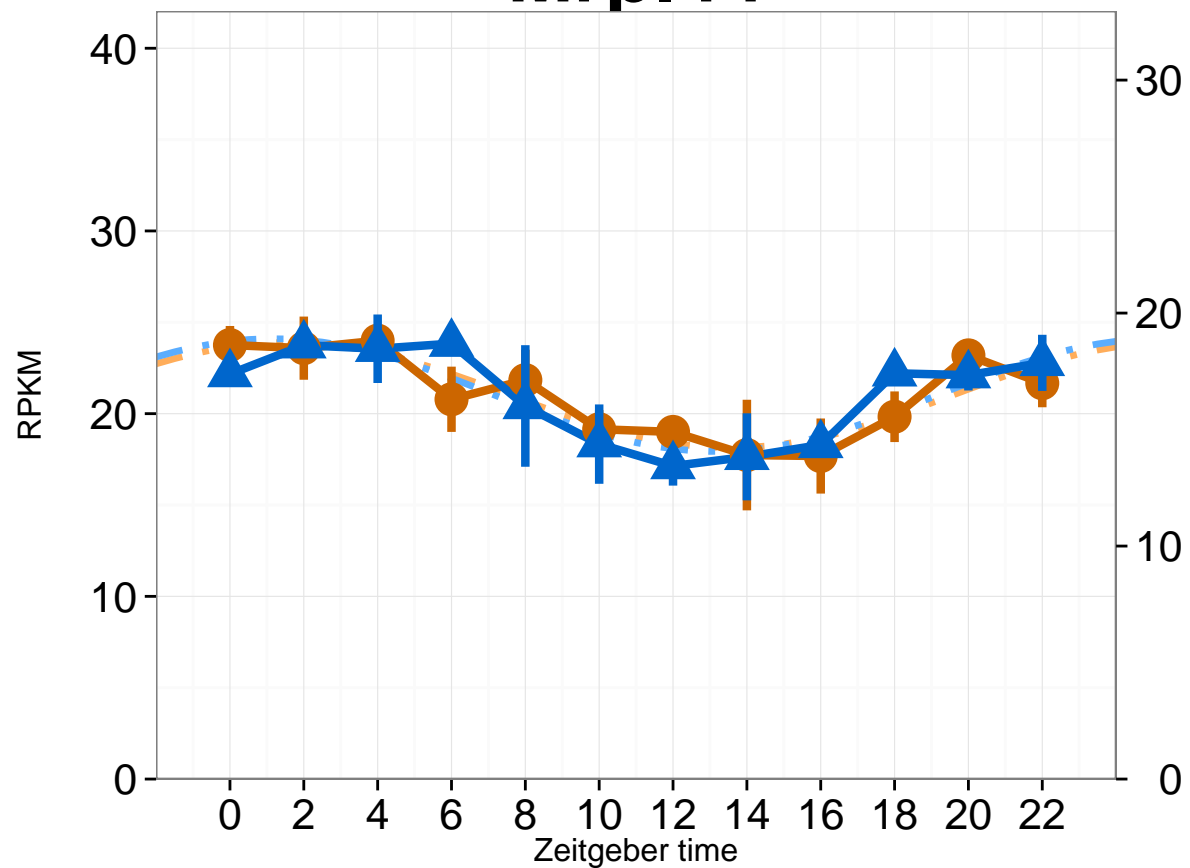

# Mrpl44

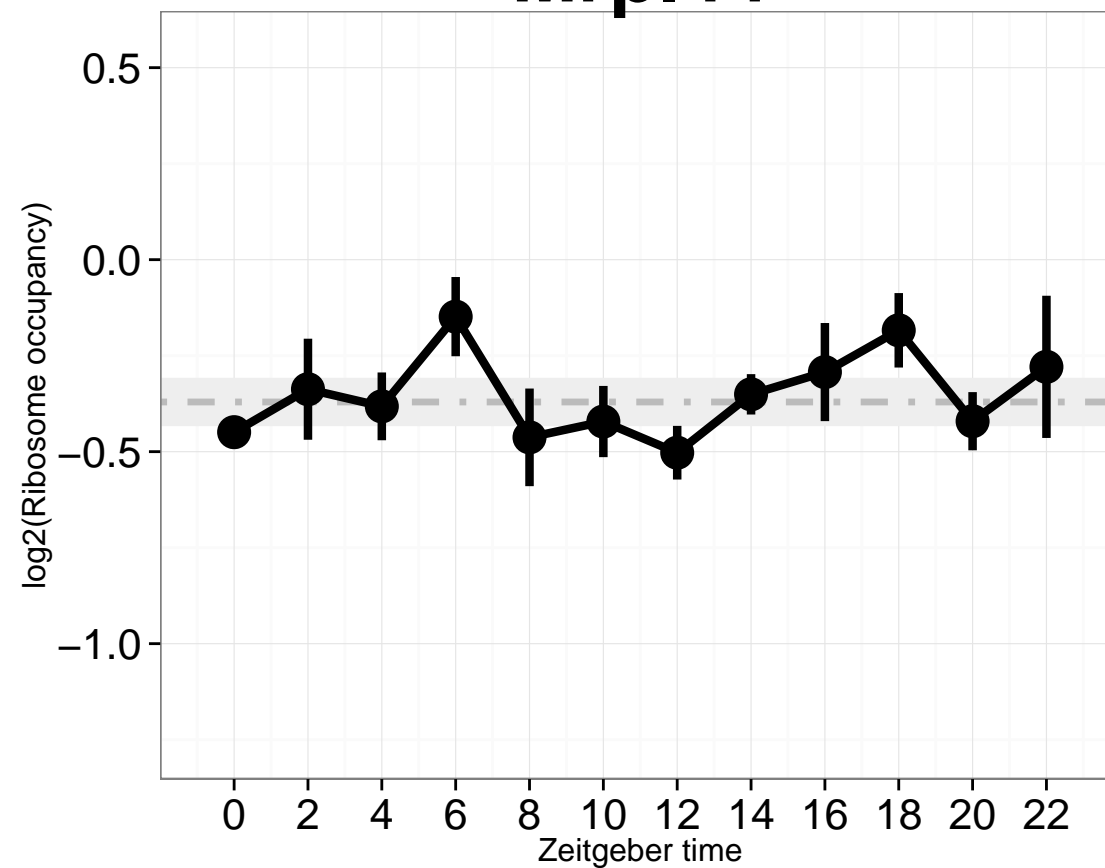

Supplement: SuppDataset_1.zip [file Mrpl44_set_A.pdf › Supplemental Dataset 1/A-mRNA_nonrhyth_translation_nonrhyth/Mrpl44_set_A.pdf]

## Mrpl45

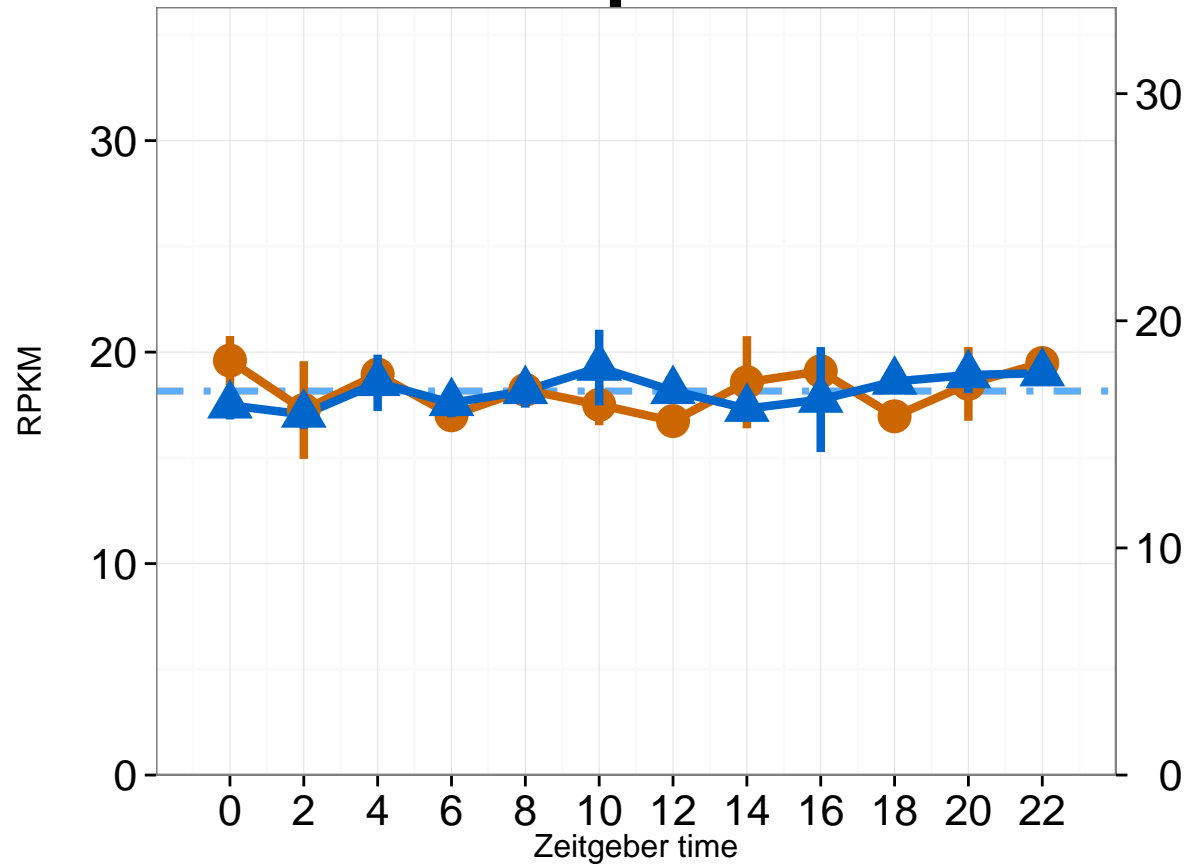

## Mrpl45

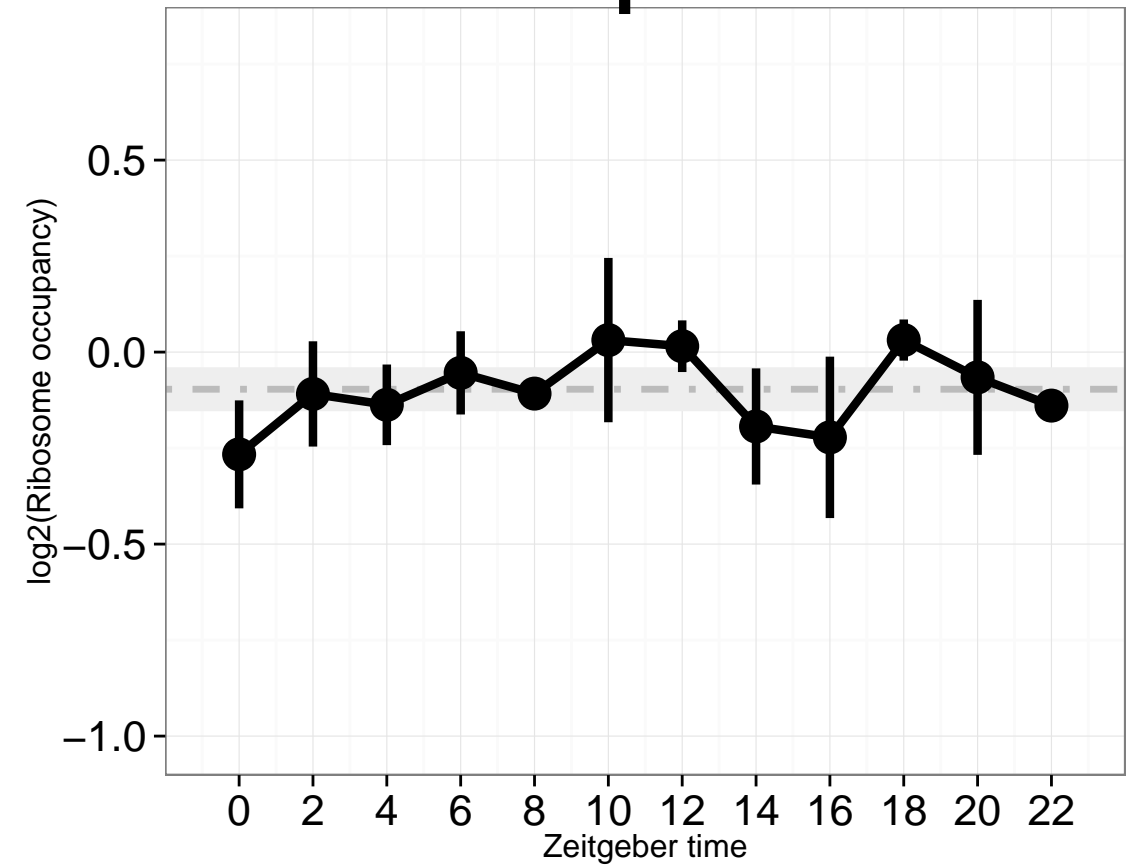

Supplement: SuppDataset_1.zip [file Mrpl45_set_A.pdf › Supplemental Dataset 1/A-mRNA_nonrhyth_translation_nonrhyth/Mrpl45_set_A.pdf]

# Mrpl46

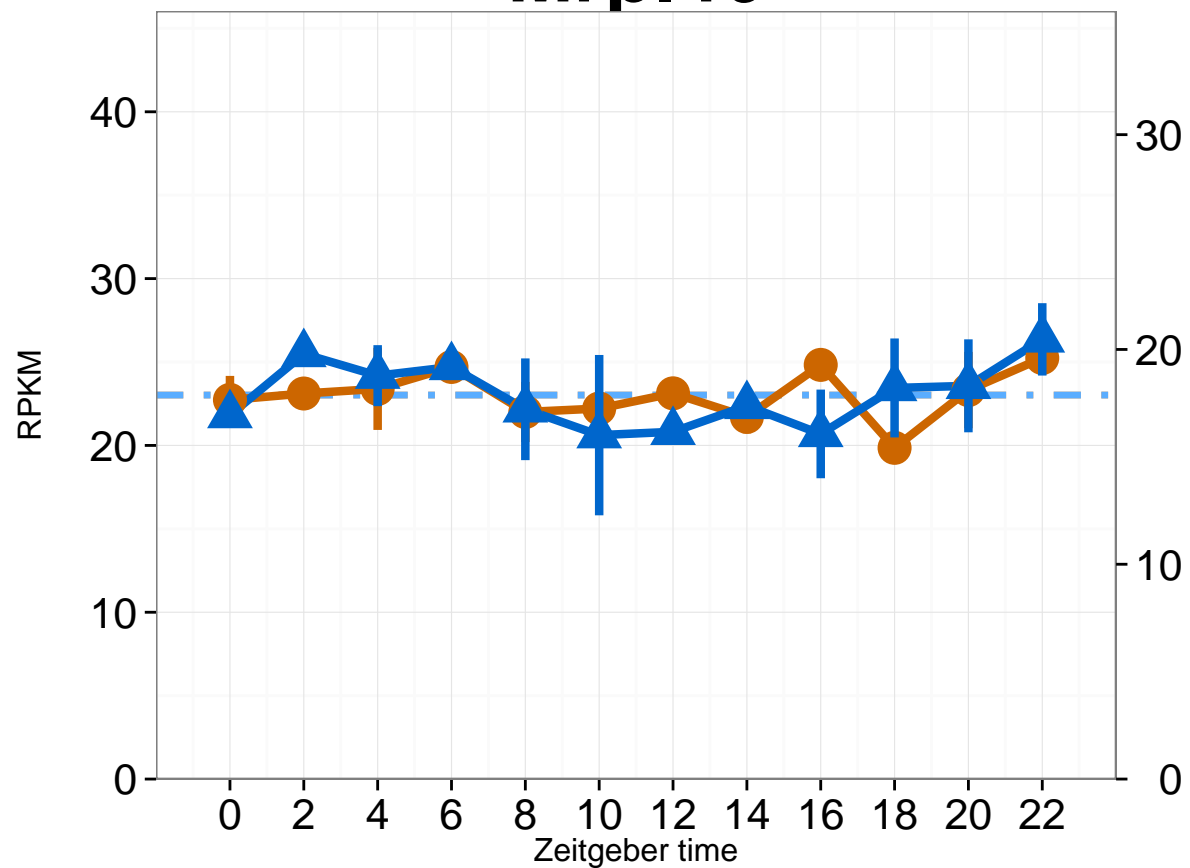

# Mrpl46

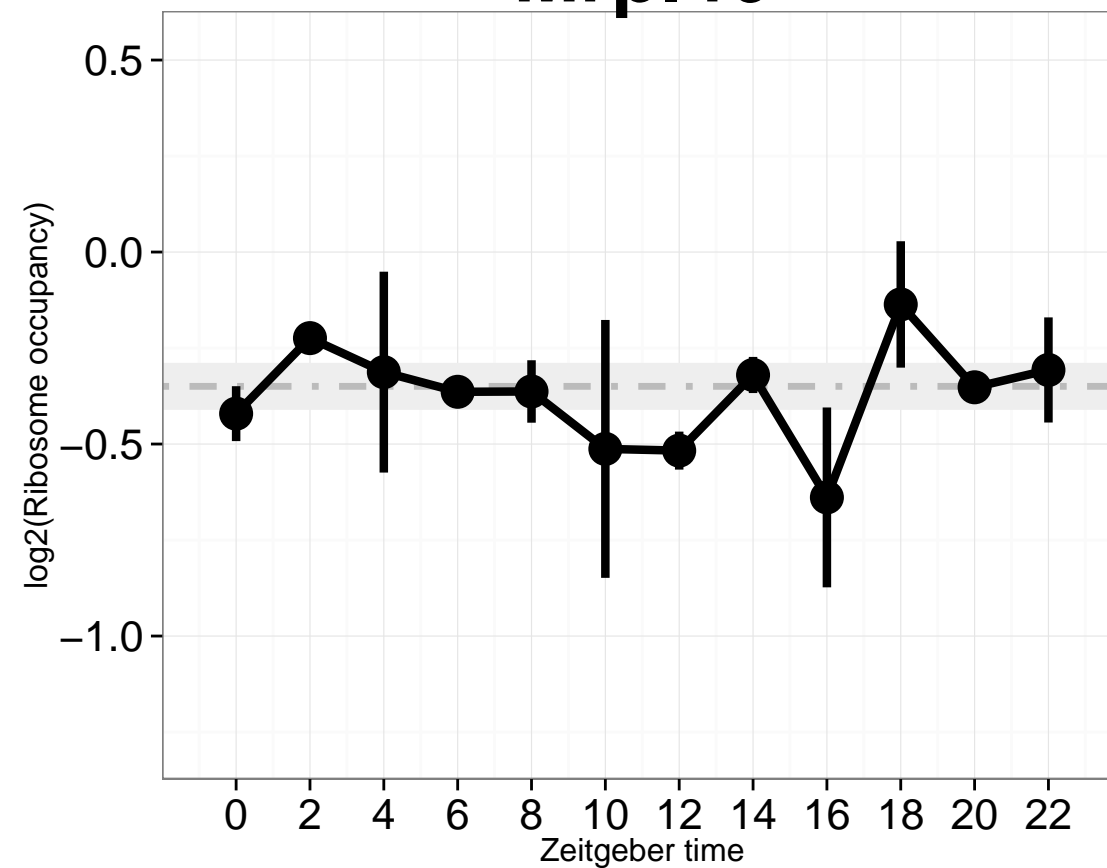

Supplement: SuppDataset_1.zip [file Mrpl46_set_A.pdf › Supplemental Dataset 1/A-mRNA_nonrhyth_translation_nonrhyth/Mrpl46_set_A.pdf]

# Mrpl47

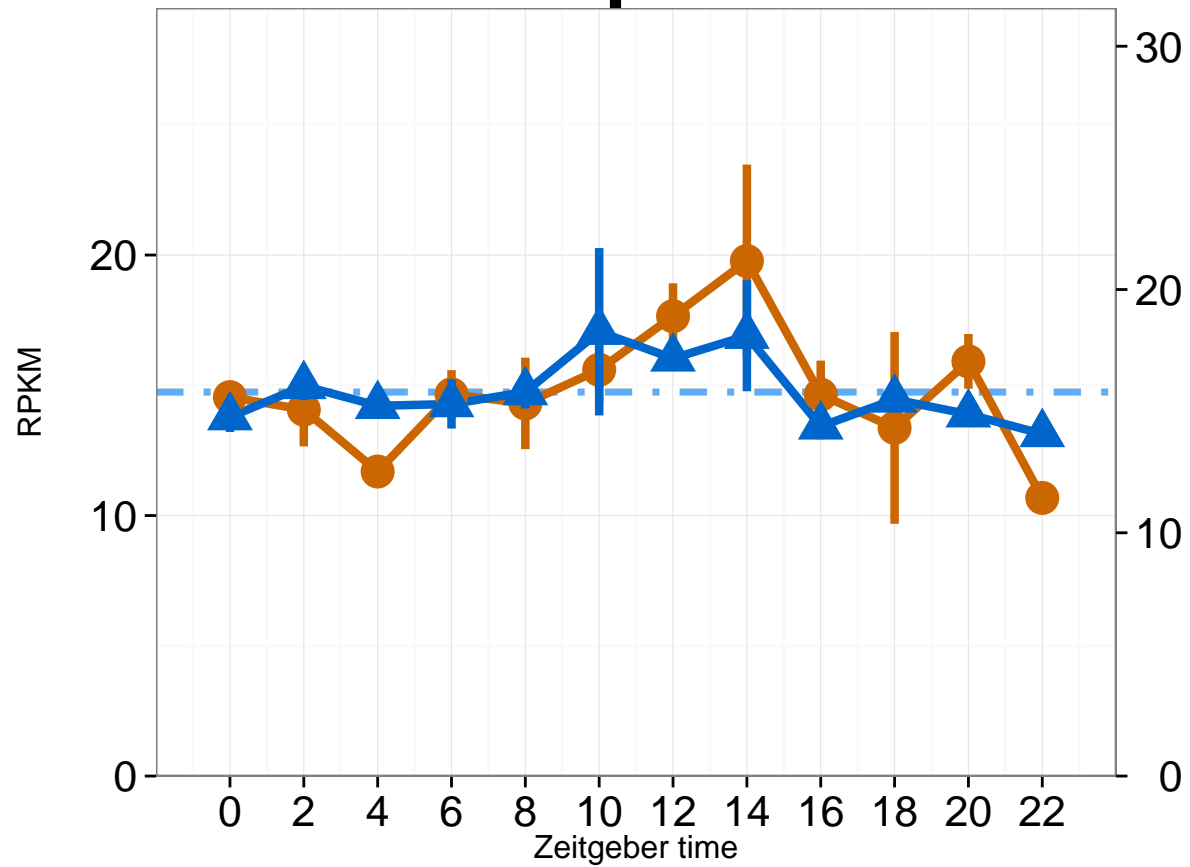

# Mrpl47

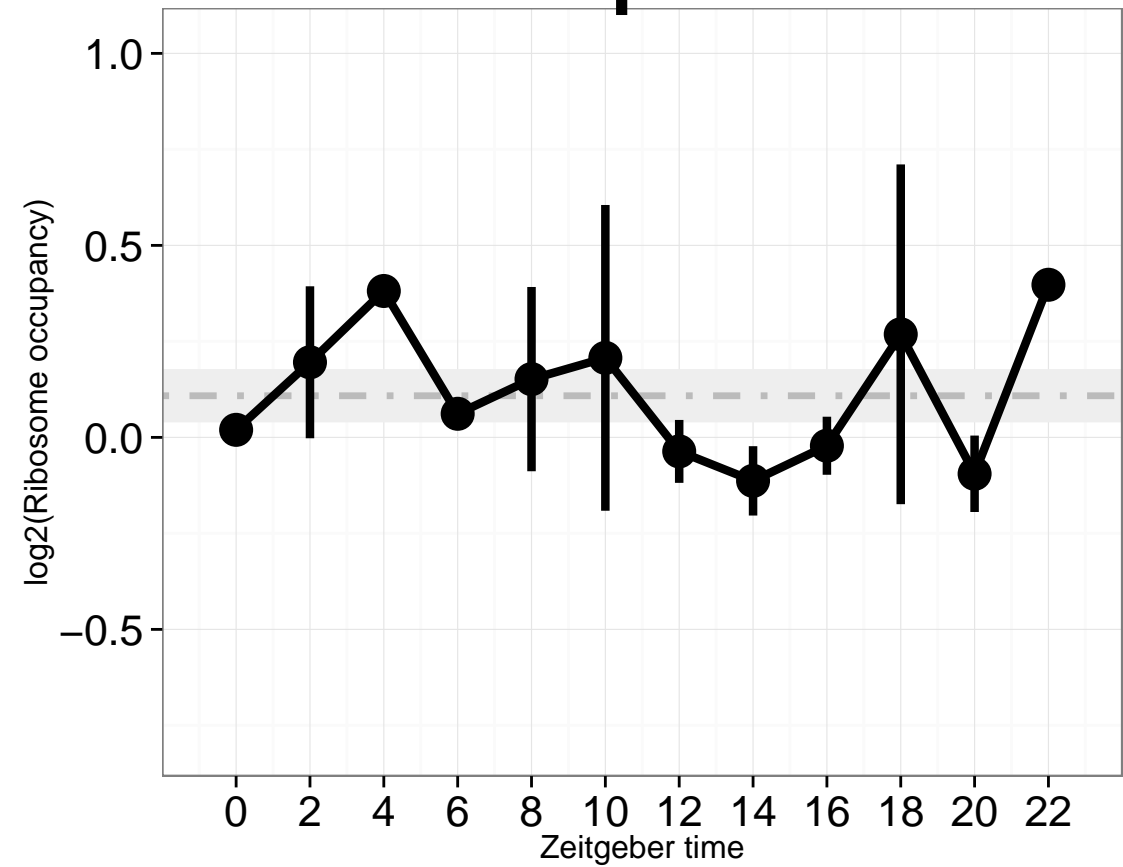

Supplement: SuppDataset_1.zip [file Mrpl47_set_A.pdf › Supplemental Dataset 1/A-mRNA_nonrhyth_translation_nonrhyth/Mrpl47_set_A.pdf]

# Mrpl48

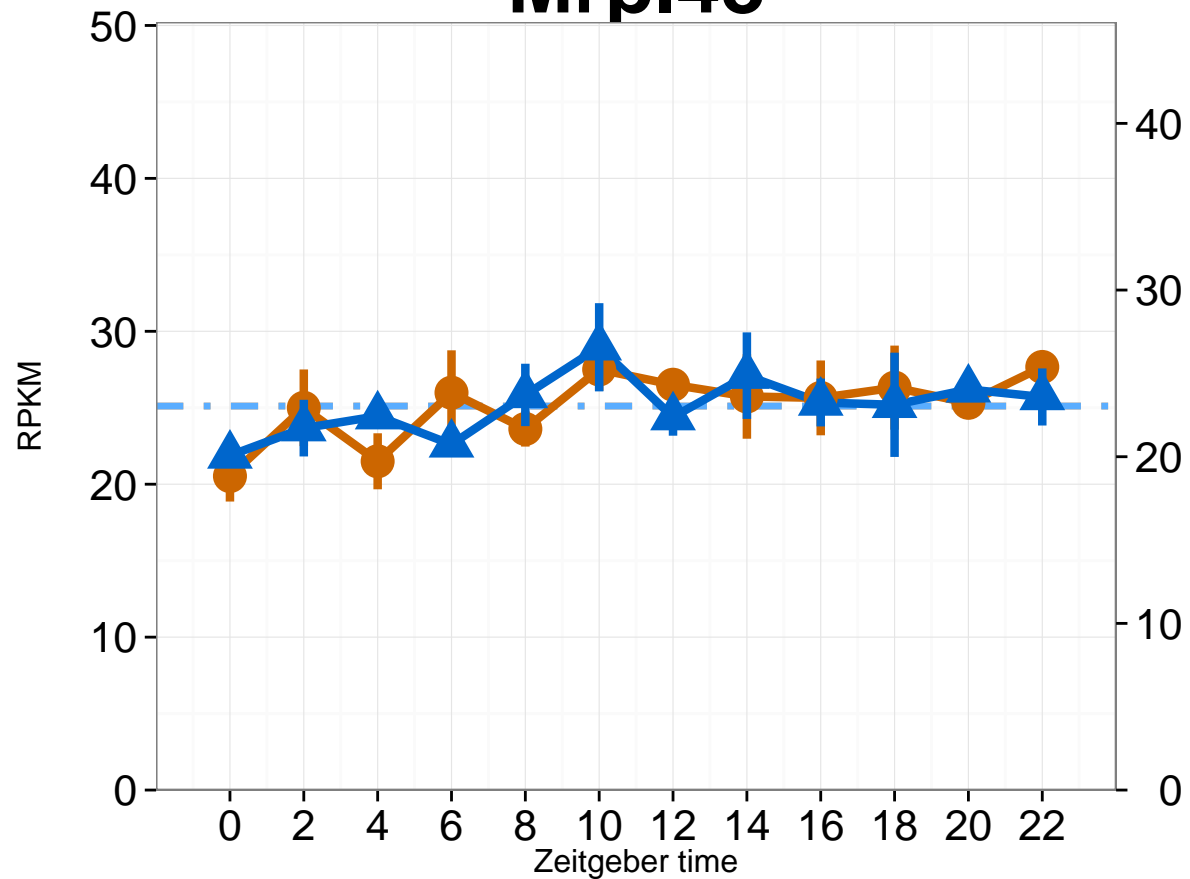

# Mrpl48

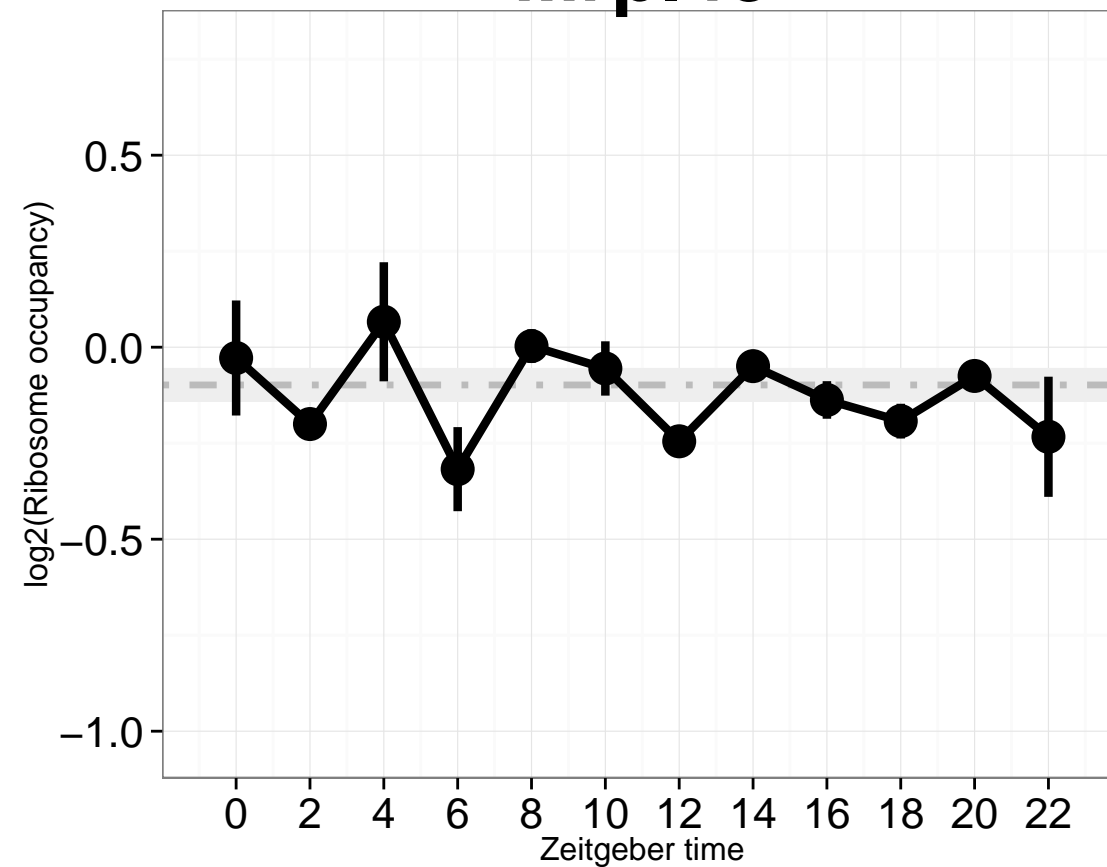

Supplement: SuppDataset_1.zip [file Mrpl48_set_A.pdf › Supplemental Dataset 1/A-mRNA_nonrhyth_translation_nonrhyth/Mrpl48_set_A.pdf]

# Mrpl49

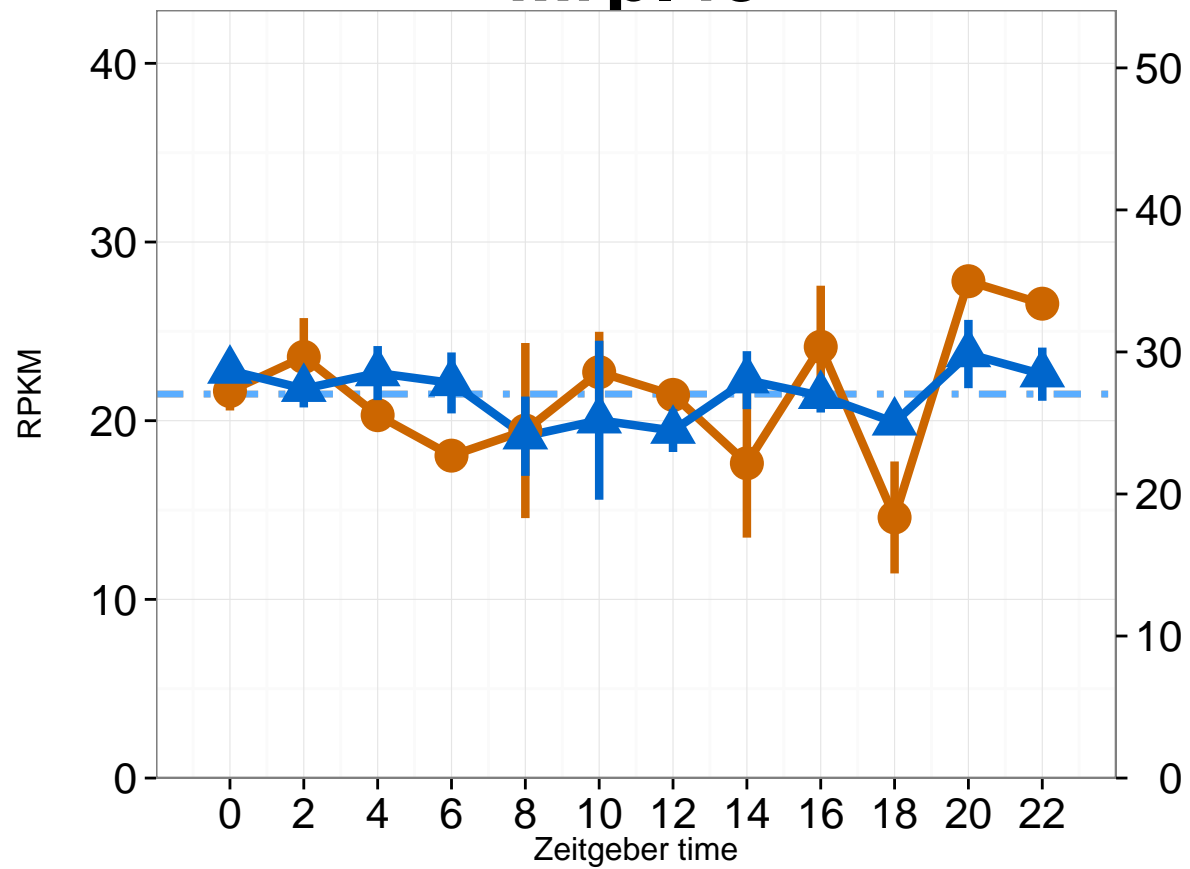

# Mrpl49

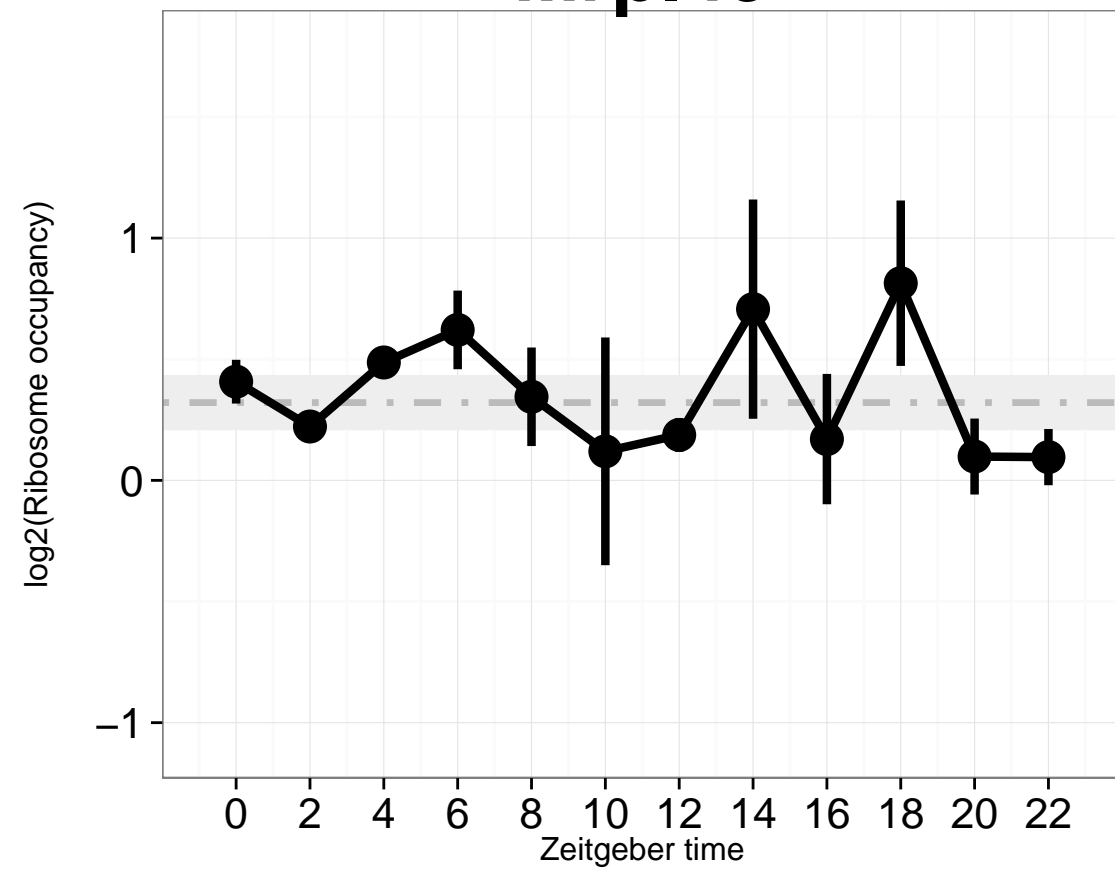

Supplement: SuppDataset_1.zip [file Mrpl49_set_A.pdf › Supplemental Dataset 1/A-mRNA_nonrhyth_translation_nonrhyth/Mrpl49_set_A.pdf]

# Mrpl50

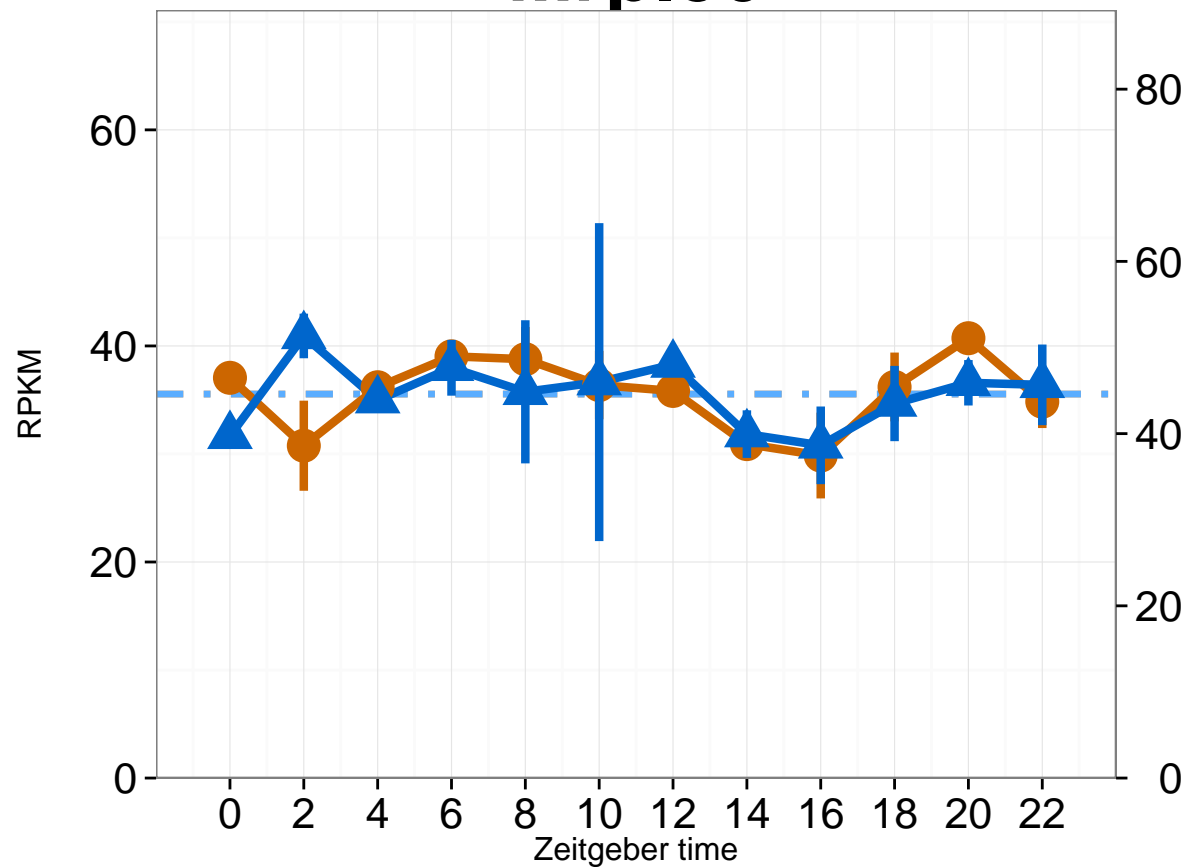

# Mrpl50

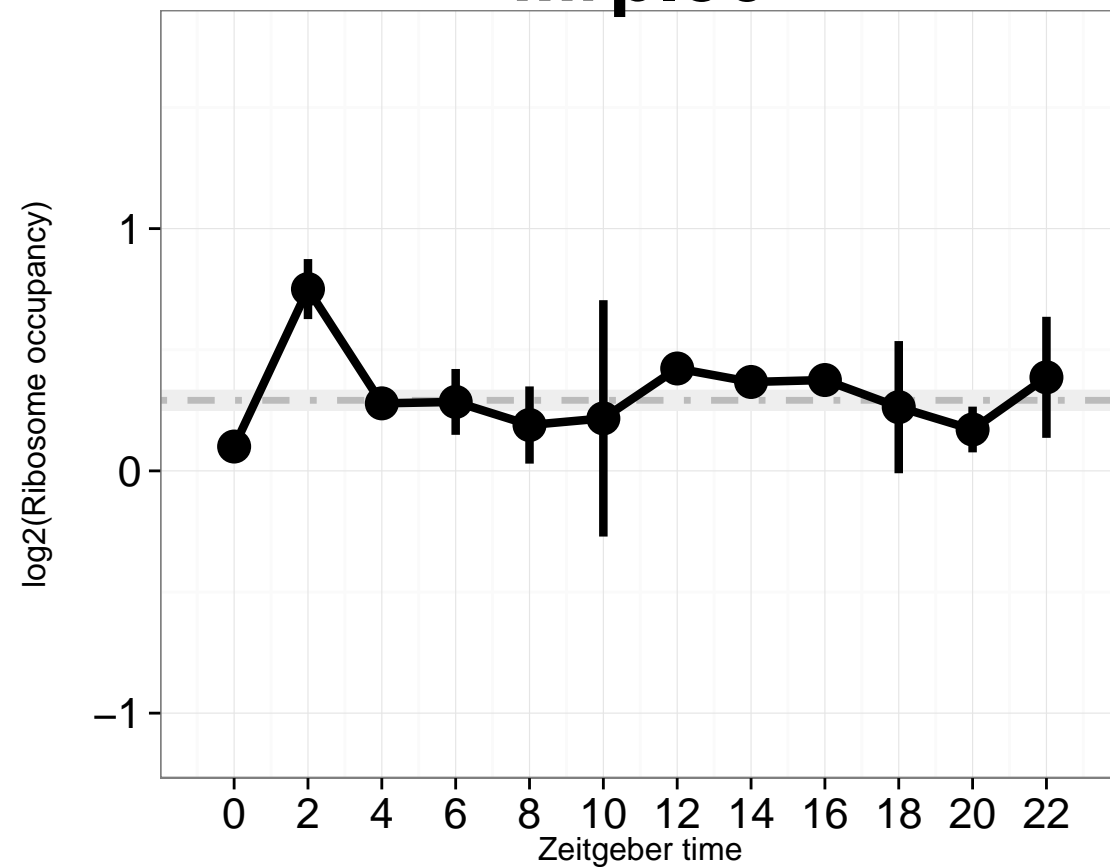

Supplement: SuppDataset_1.zip [file Mrpl50_set_A.pdf › Supplemental Dataset 1/A-mRNA_nonrhyth_translation_nonrhyth/Mrpl50_set_A.pdf]

# Mrpl51

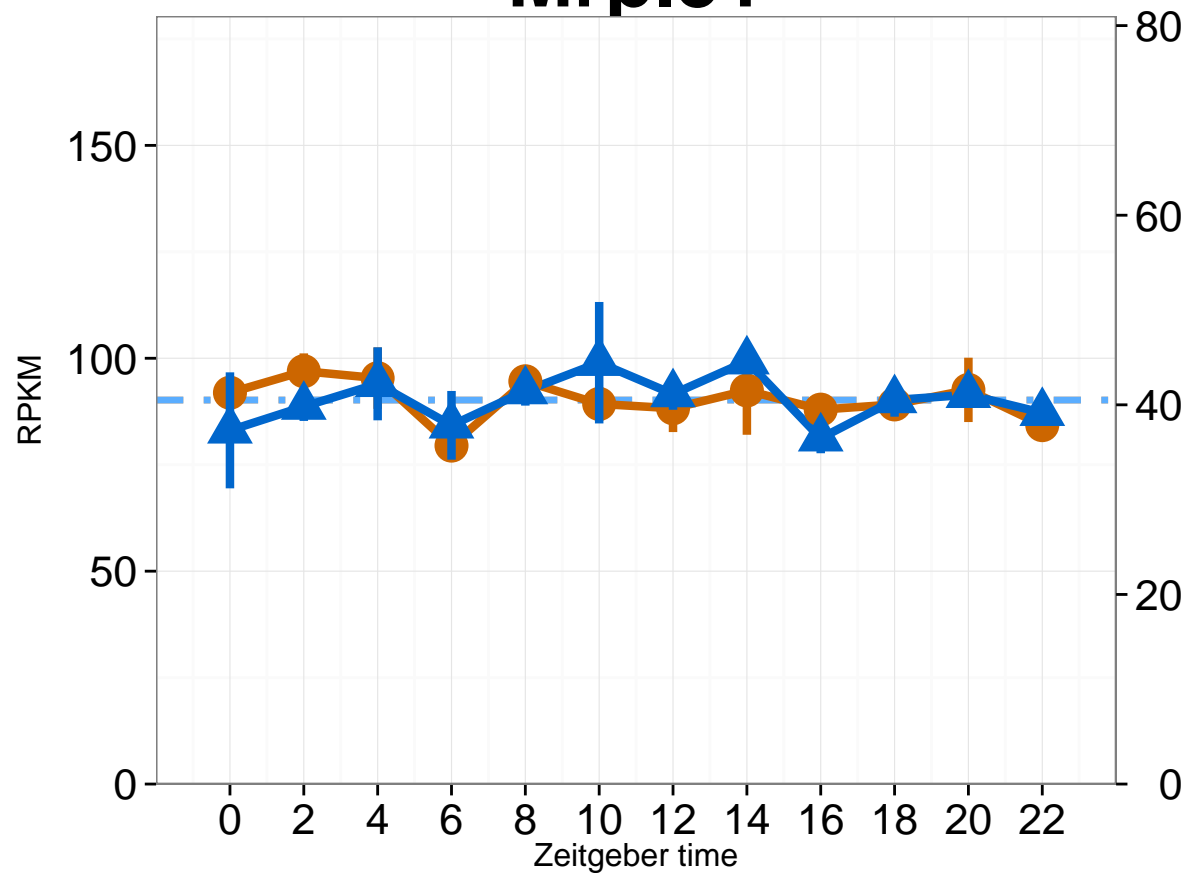

# Mrpl51

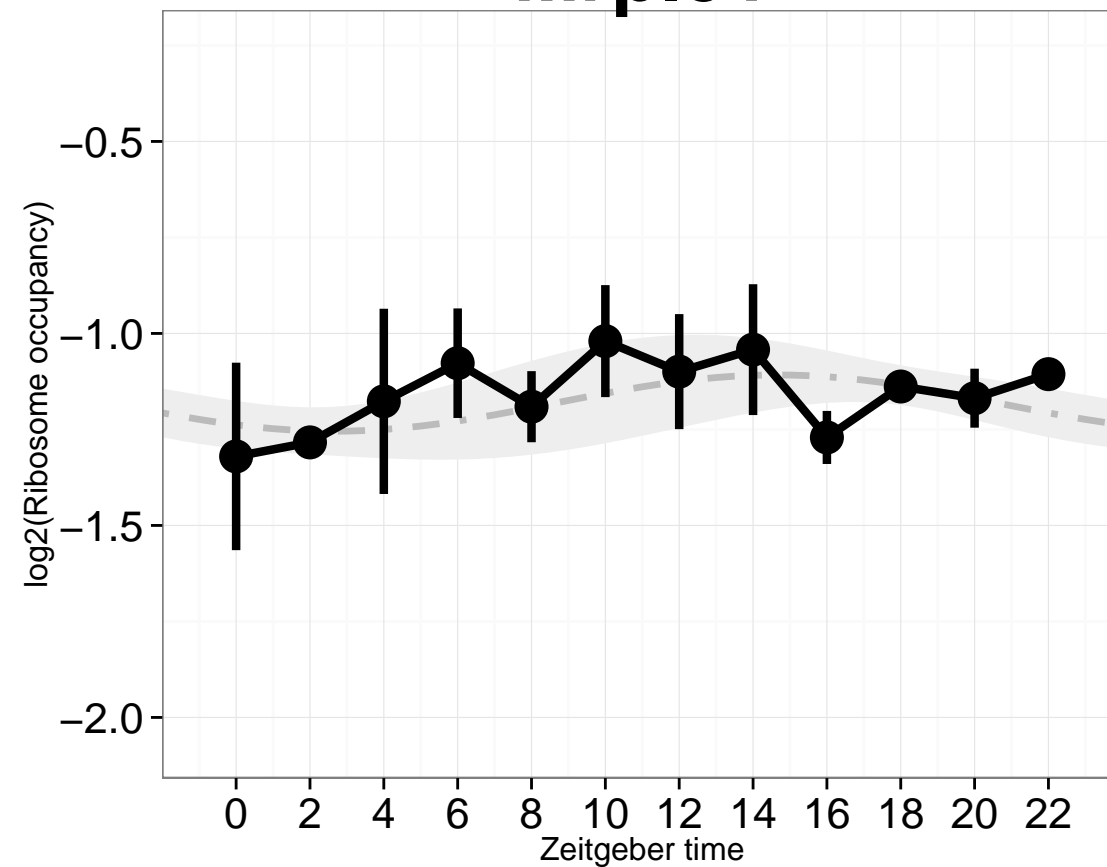

Supplement: SuppDataset_1.zip [file Mrpl51_set_A.pdf › Supplemental Dataset 1/A-mRNA_nonrhyth_translation_nonrhyth/Mrpl51_set_A.pdf]

# Mrpl52

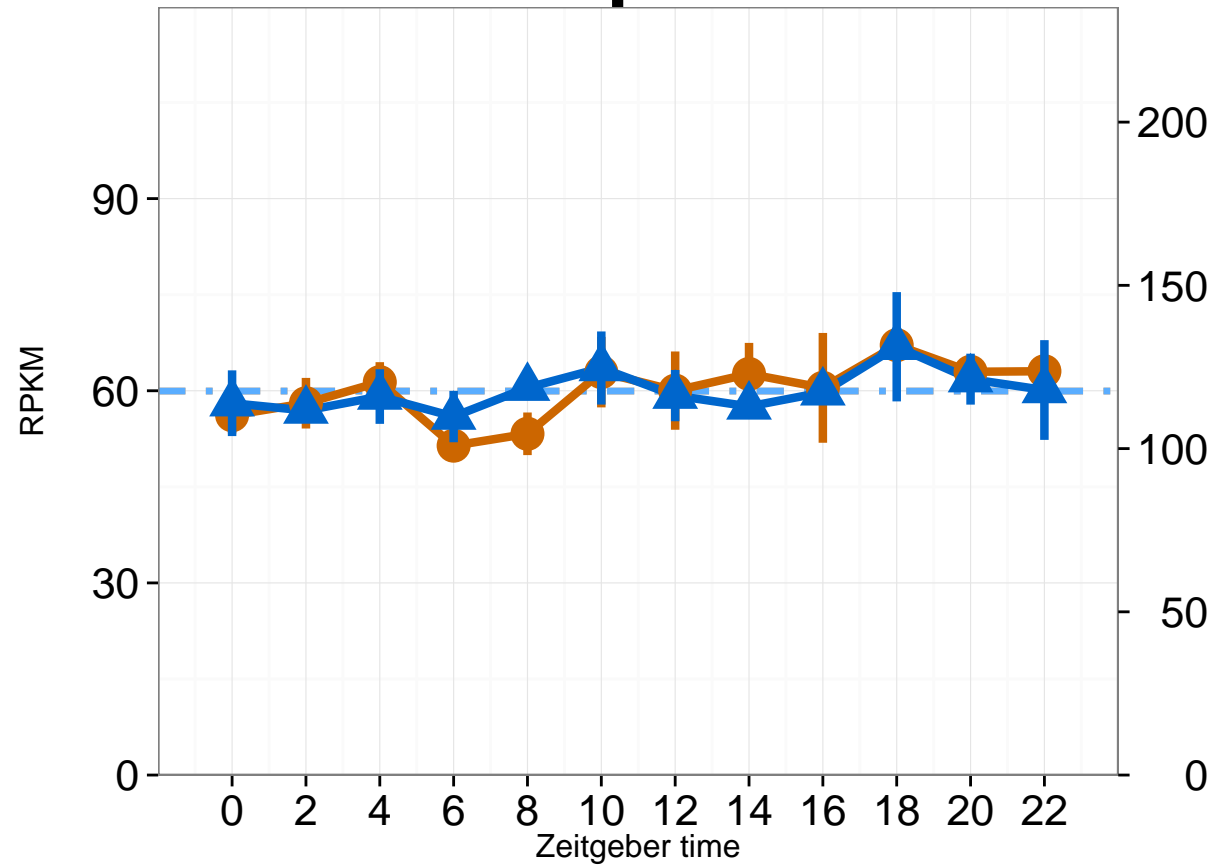

# Mrpl52

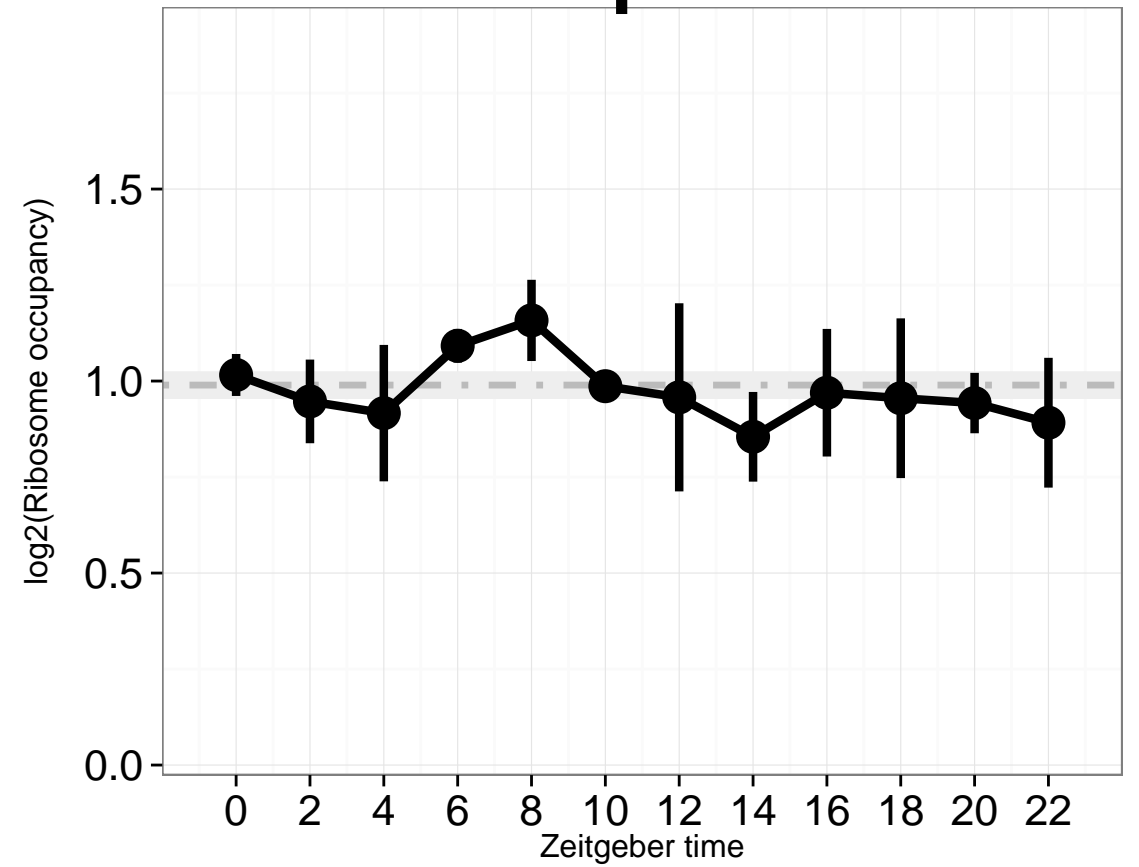

Supplement: SuppDataset_1.zip [file Mrpl52_set_A.pdf › Supplemental Dataset 1/A-mRNA_nonrhyth_translation_nonrhyth/Mrpl52_set_A.pdf]

# Mrpl54

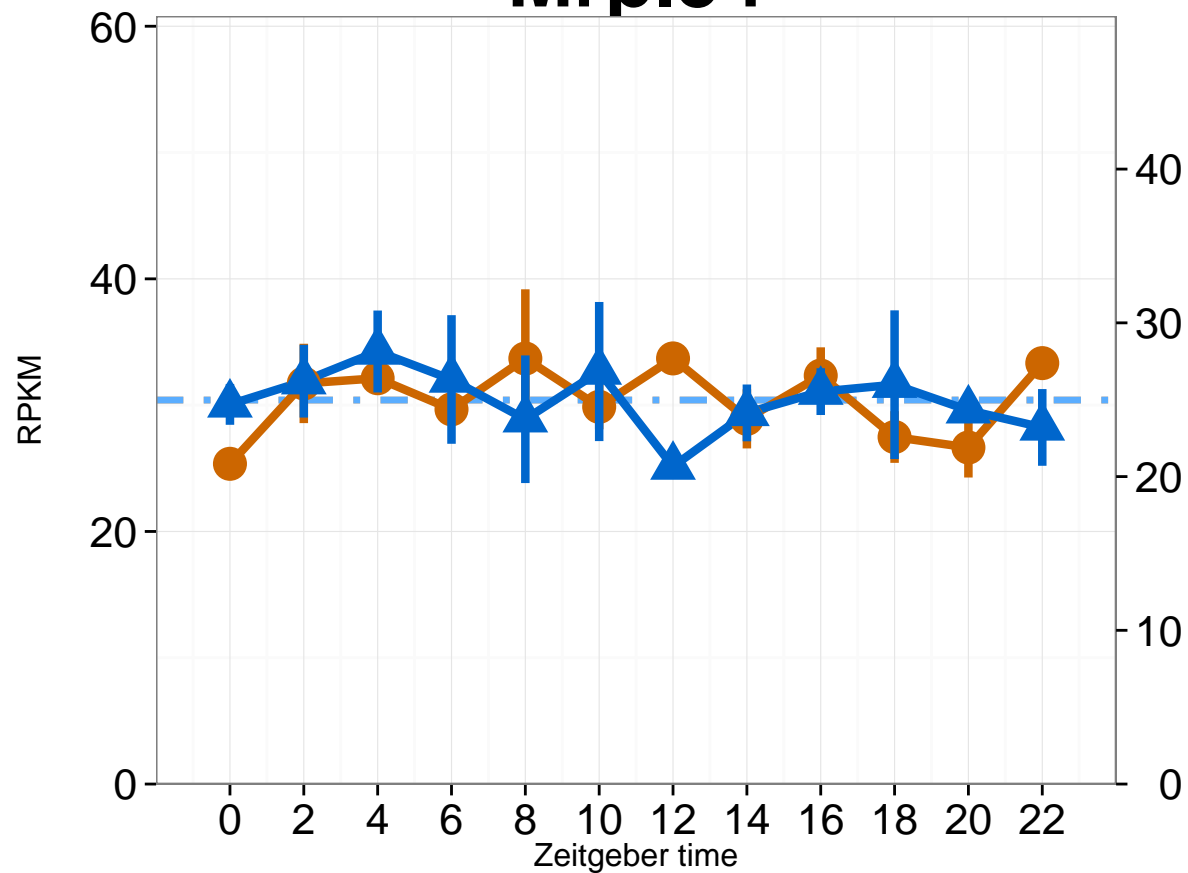

# Mrpl54

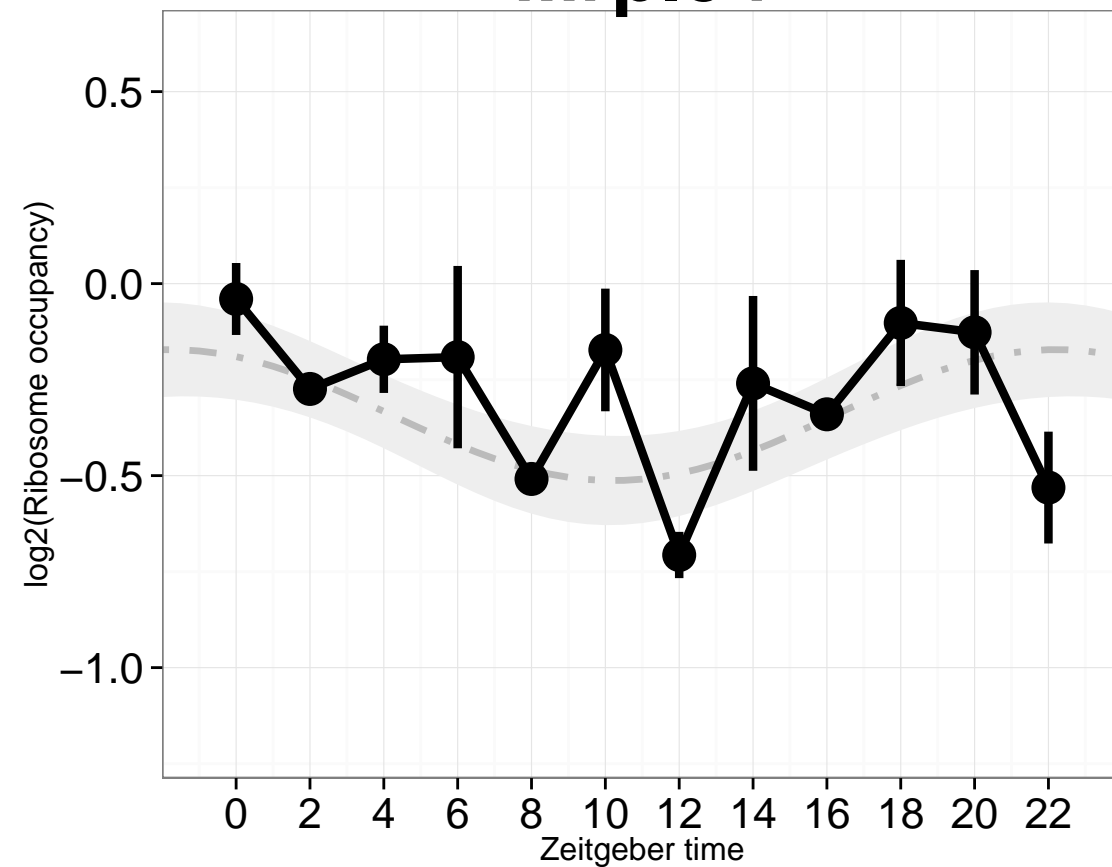

Supplement: SuppDataset_1.zip [file Mrpl54_set_A.pdf › Supplemental Dataset 1/A-mRNA_nonrhyth_translation_nonrhyth/Mrpl54_set_A.pdf]

# Mrpl55

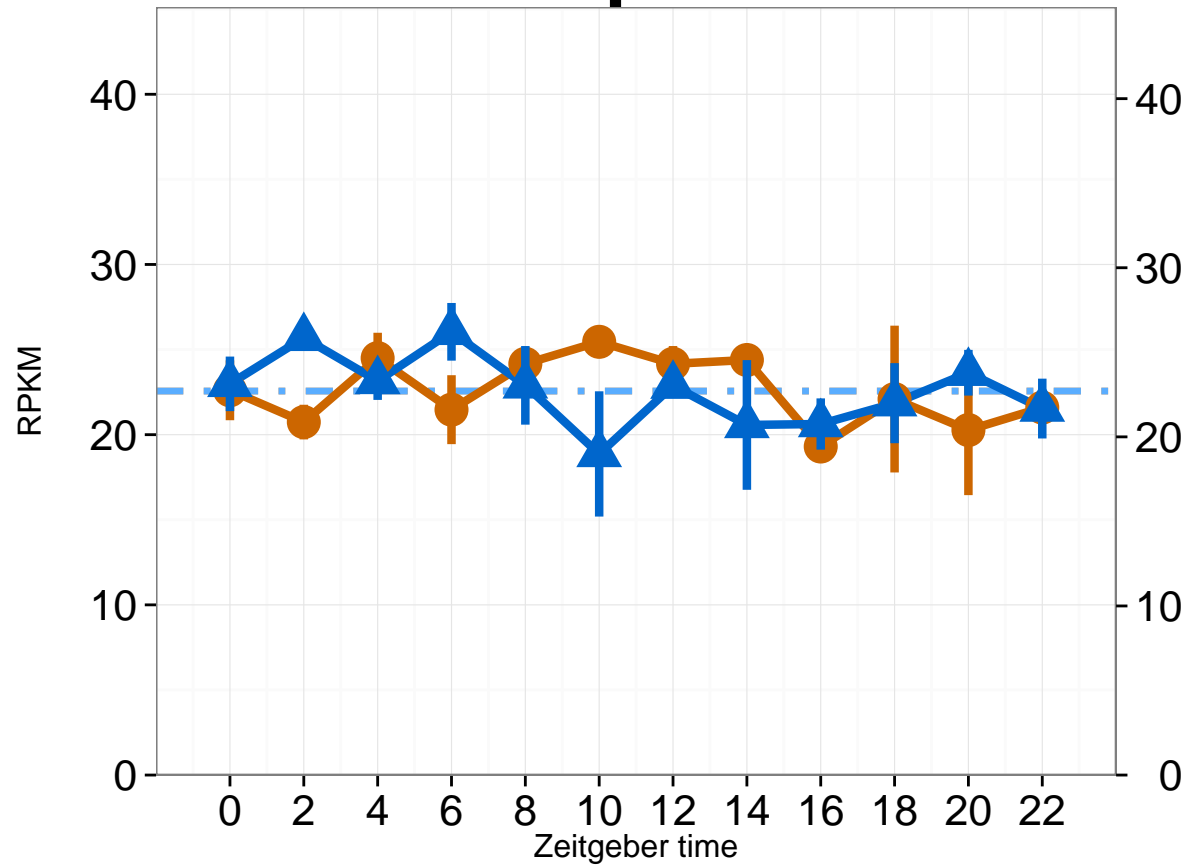

# Mrpl55

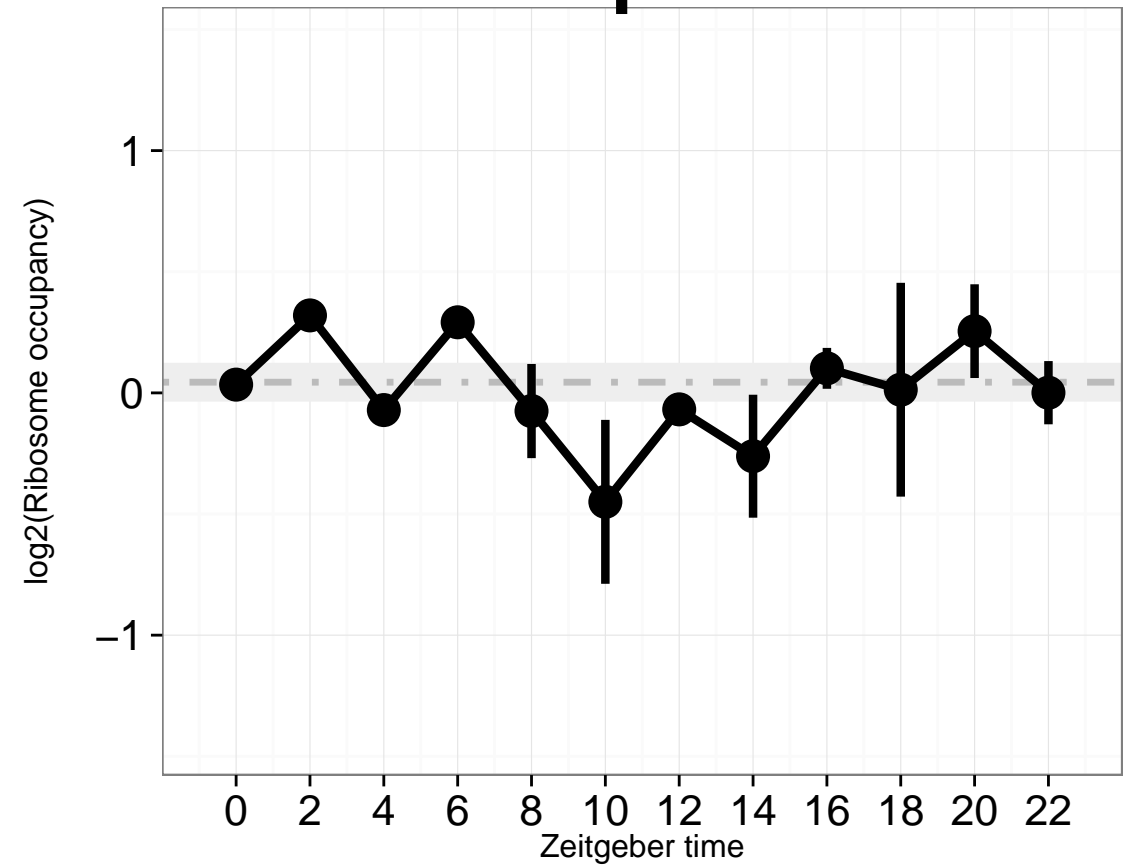

Supplement: SuppDataset_1.zip [file Mrpl55_set_A.pdf › Supplemental Dataset 1/A-mRNA_nonrhyth_translation_nonrhyth/Mrpl55_set_A.pdf]

# Mrpl9

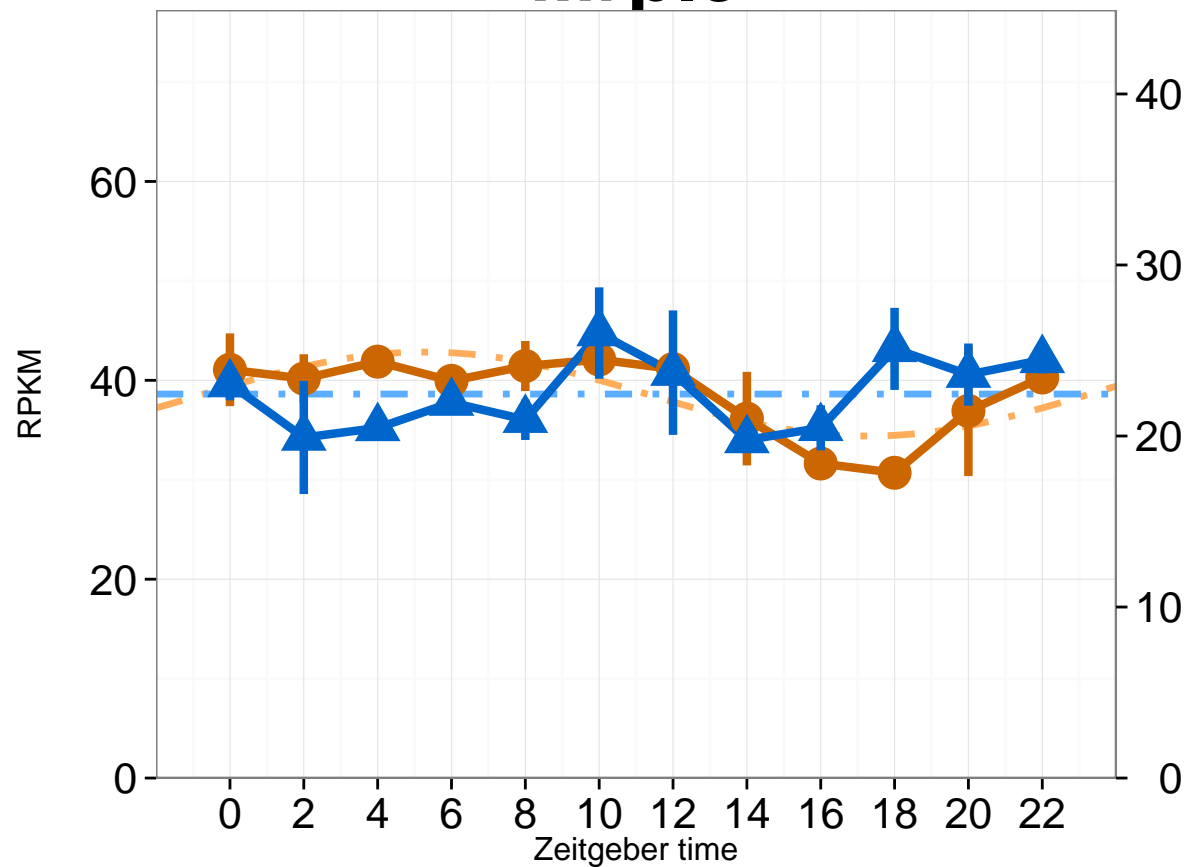

# Mrpl9

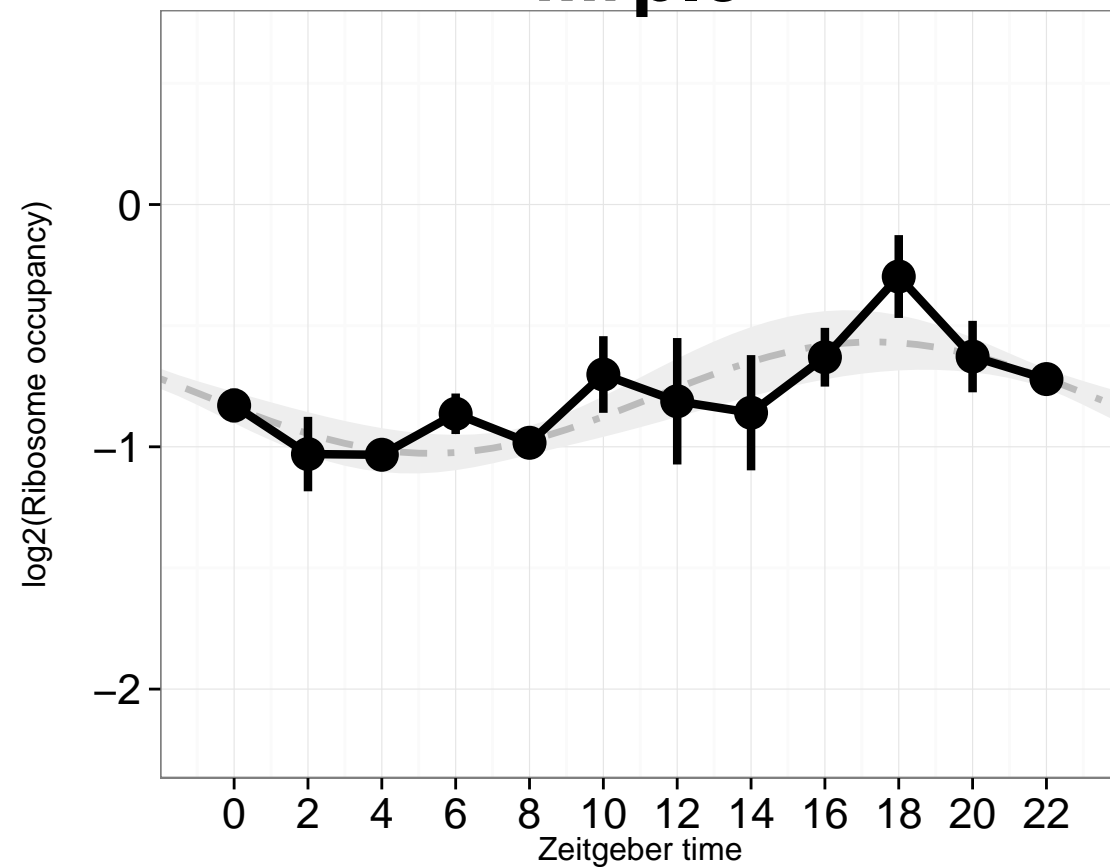

Supplement: SuppDataset_1.zip [file Mrpl9_set_A.pdf › Supplemental Dataset 1/A-mRNA_nonrhyth_translation_nonrhyth/Mrpl9_set_A.pdf]

# Mrps10

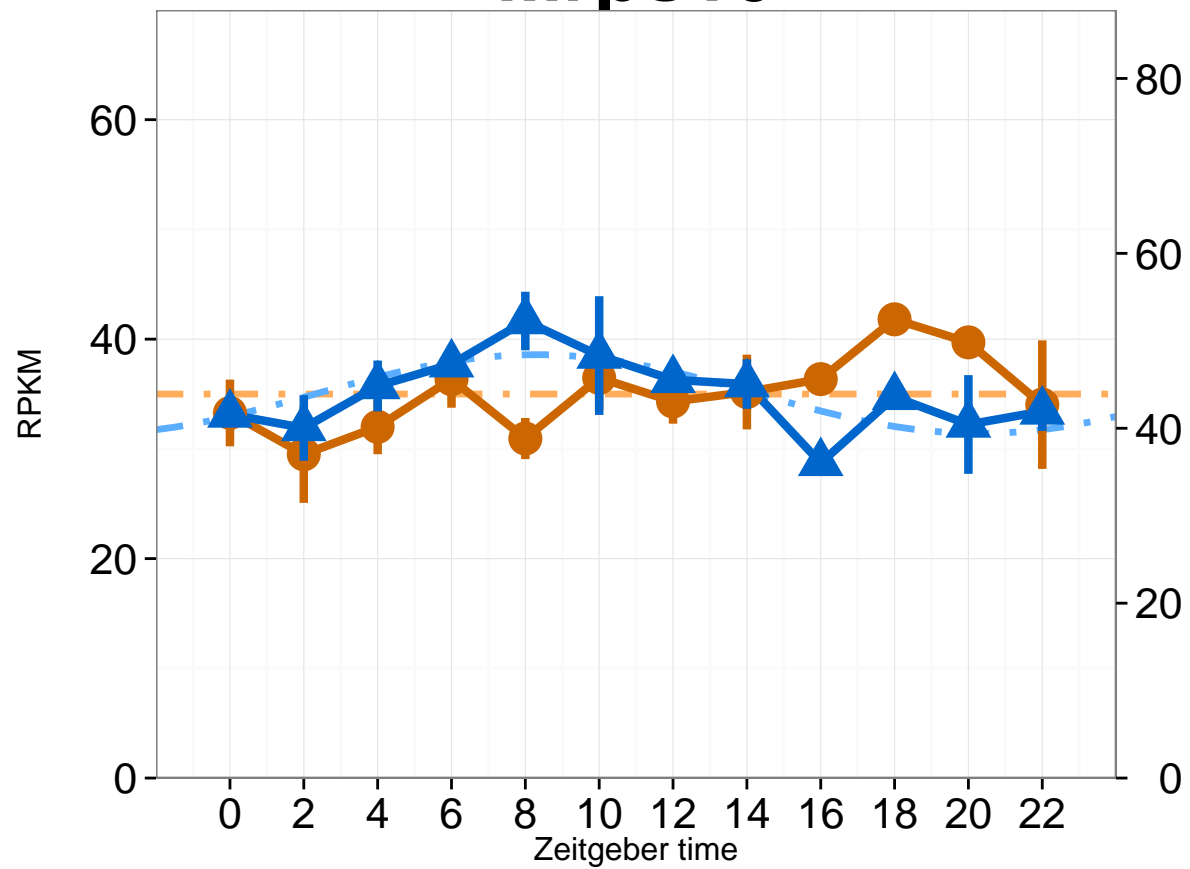

# Mrps10

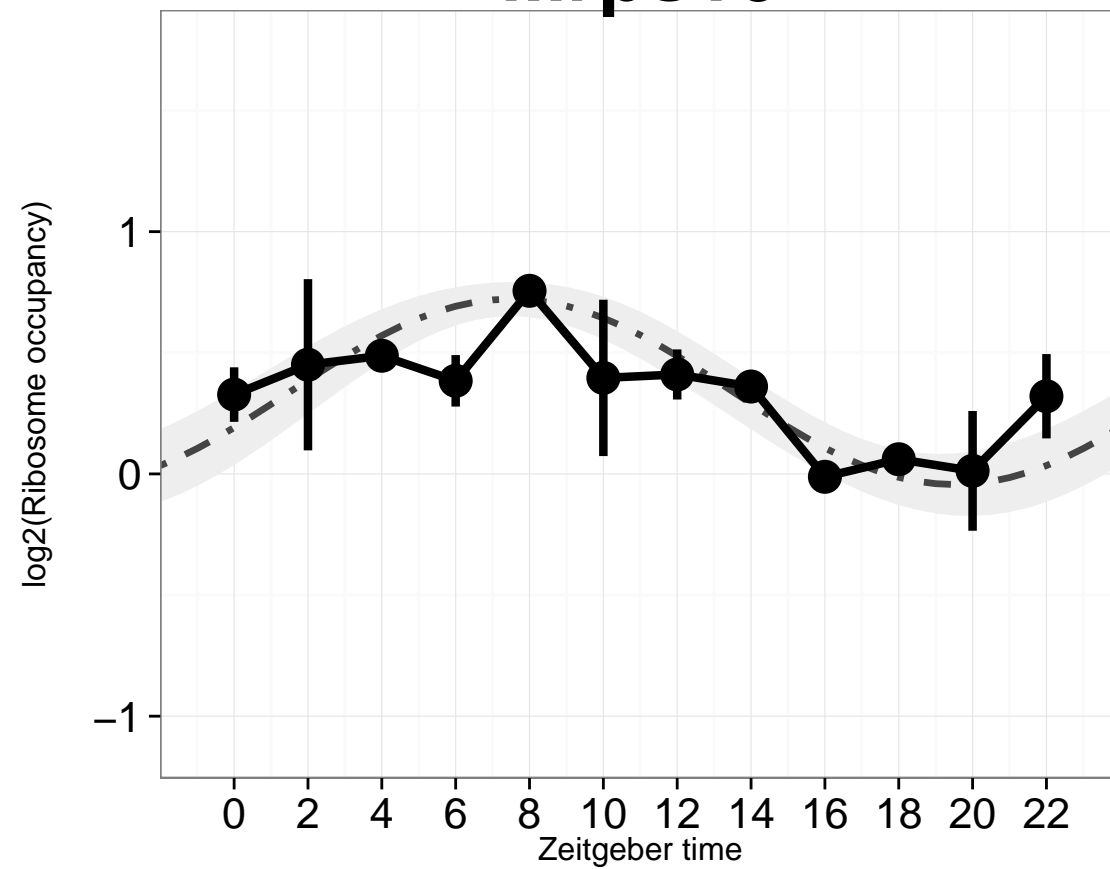

Supplement: SuppDataset_1.zip [file Mrps10_set_A.pdf › Supplemental Dataset 1/A-mRNA_nonrhyth_translation_nonrhyth/Mrps10_set_A.pdf]

## Mrps11

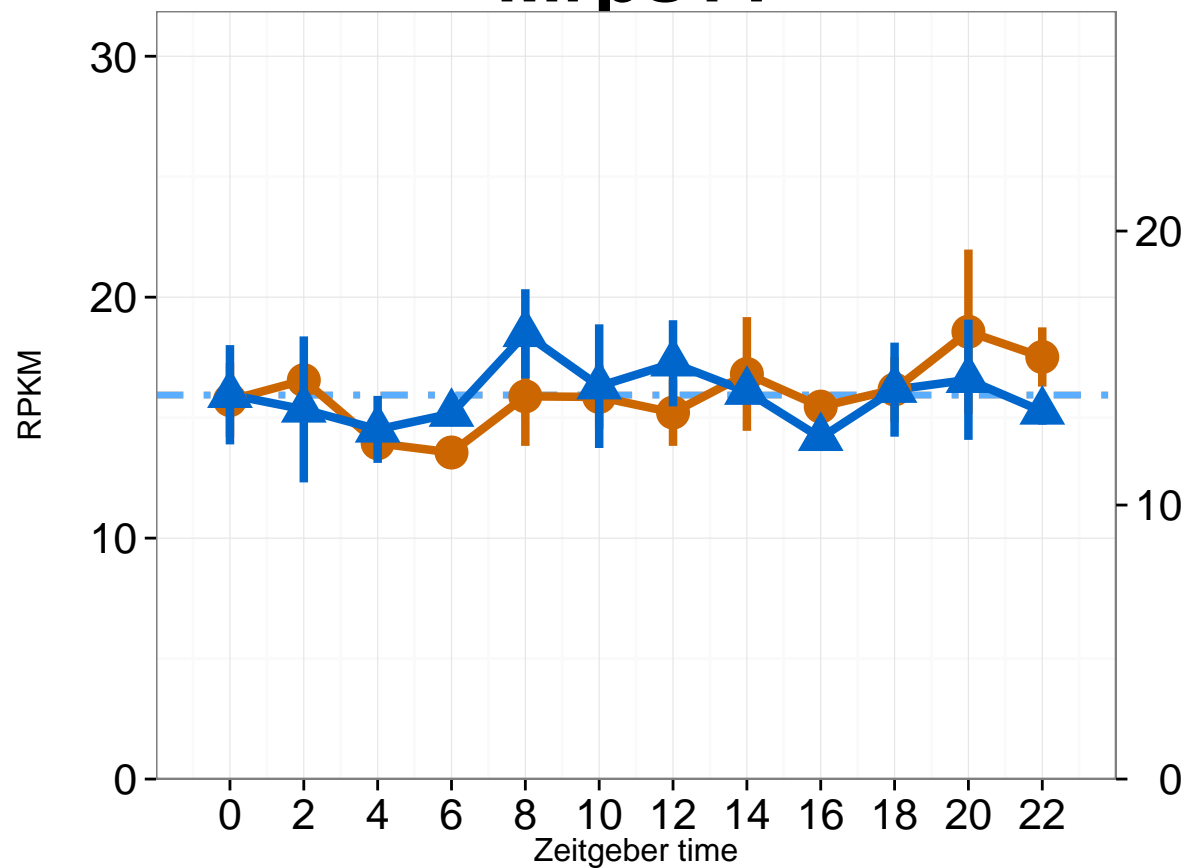

## Mrps11

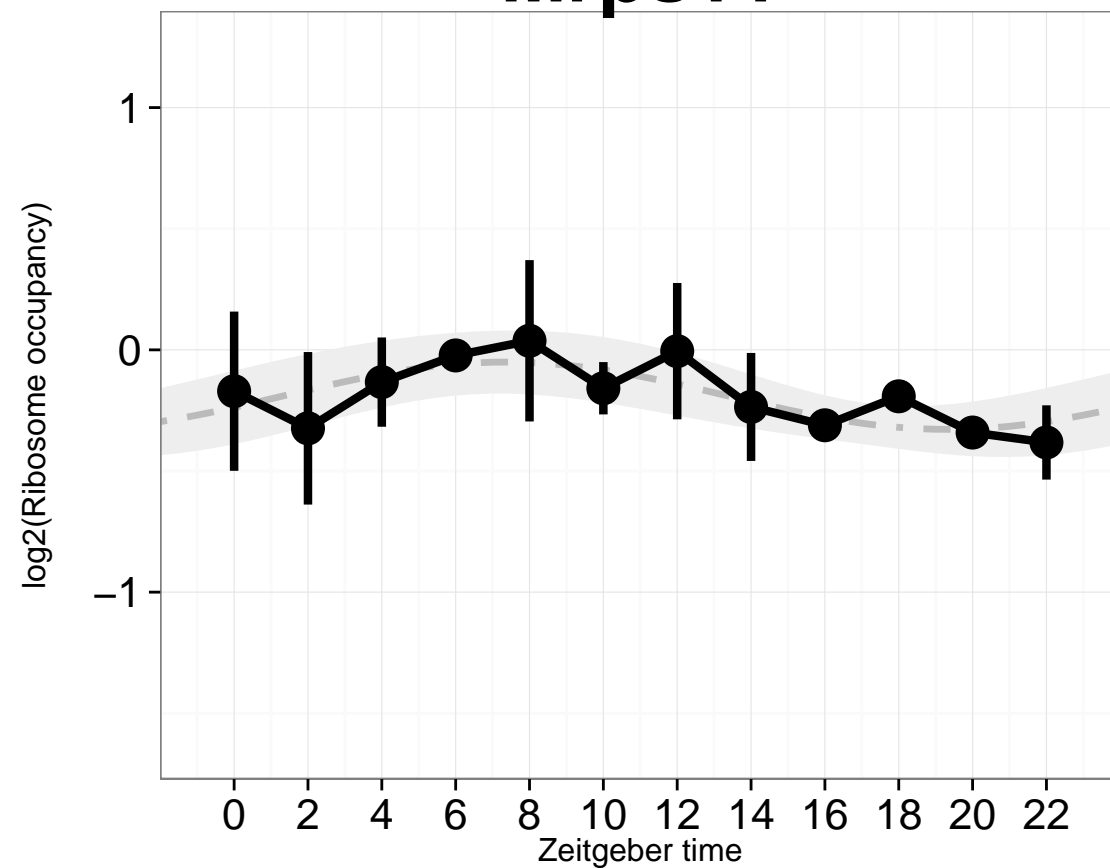

Supplement: SuppDataset_1.zip [file Mrps11_set_A.pdf › Supplemental Dataset 1/A-mRNA_nonrhyth_translation_nonrhyth/Mrps11_set_A.pdf]

# Mrps12

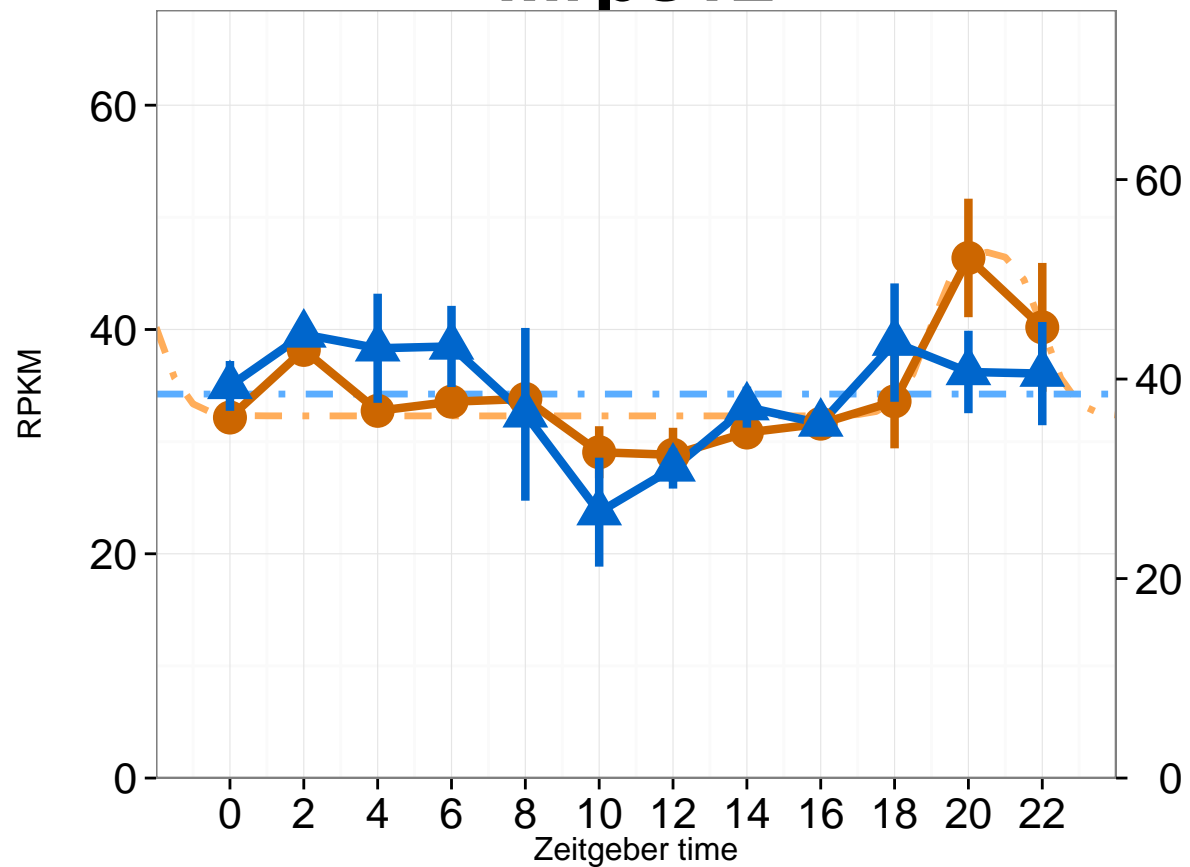

# Mrps12

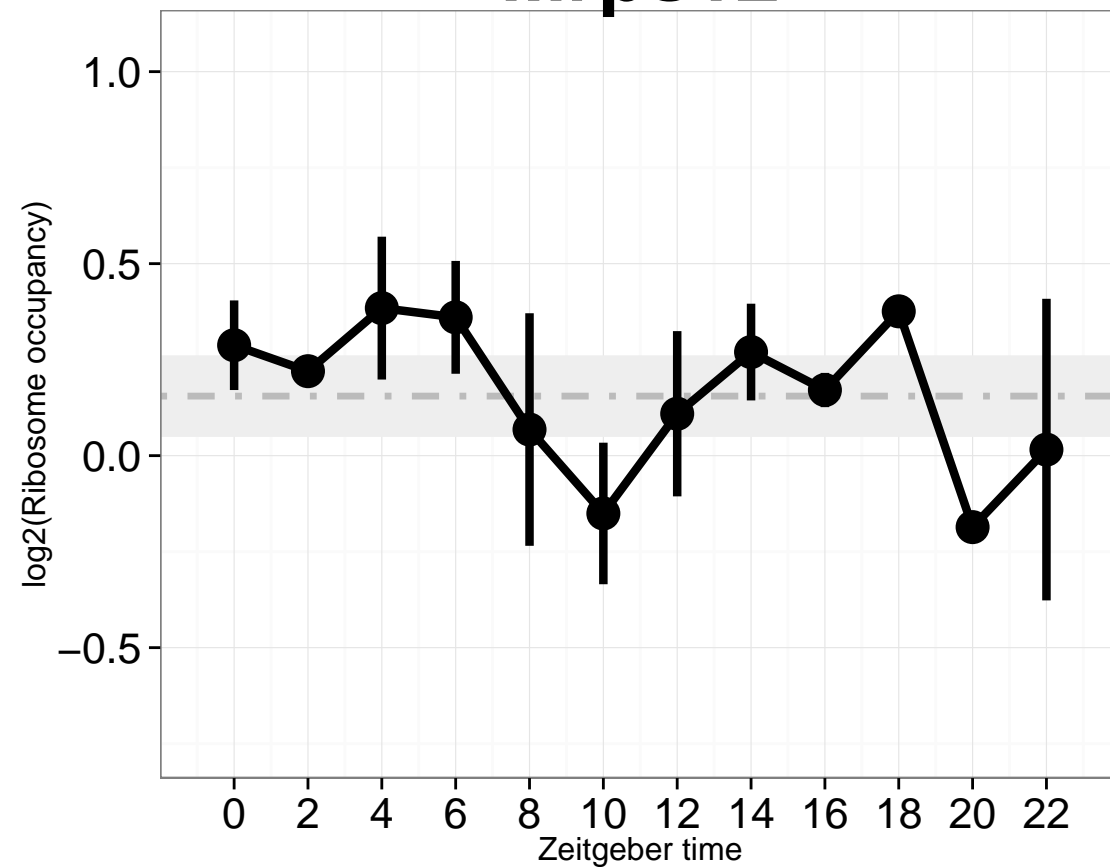

Supplement: SuppDataset_1.zip [file Mrps12_set_A.pdf › Supplemental Dataset 1/A-mRNA_nonrhyth_translation_nonrhyth/Mrps12_set_A.pdf]

# Mrps14

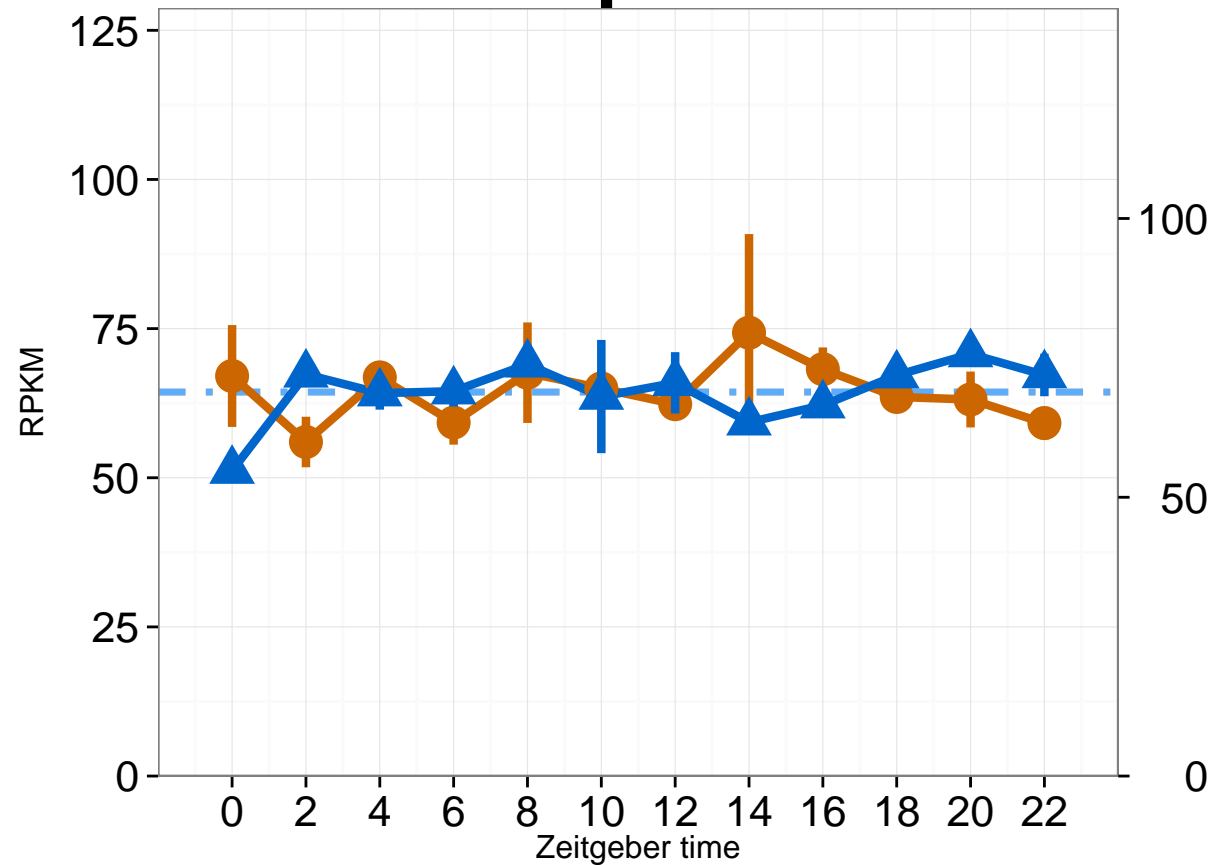

# Mrps14

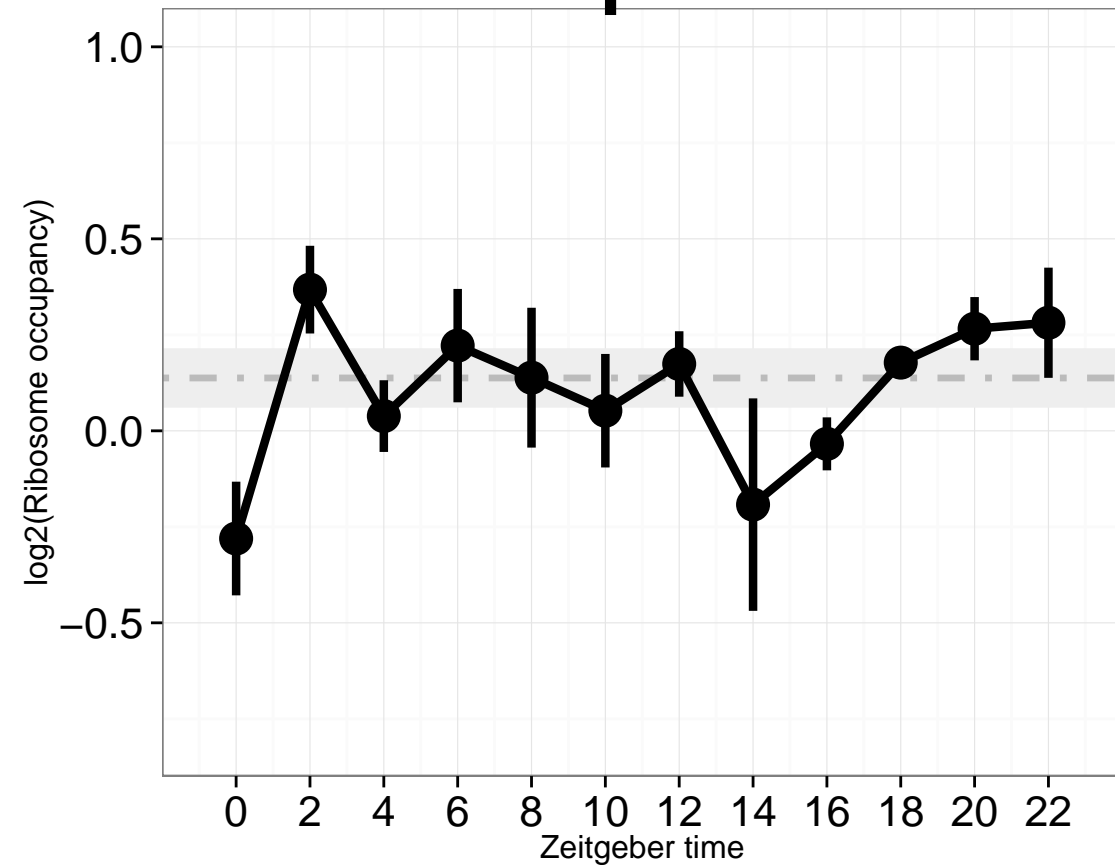

Supplement: SuppDataset_1.zip [file Mrps14_set_A.pdf › Supplemental Dataset 1/A-mRNA_nonrhyth_translation_nonrhyth/Mrps14_set_A.pdf]

# Mrps15

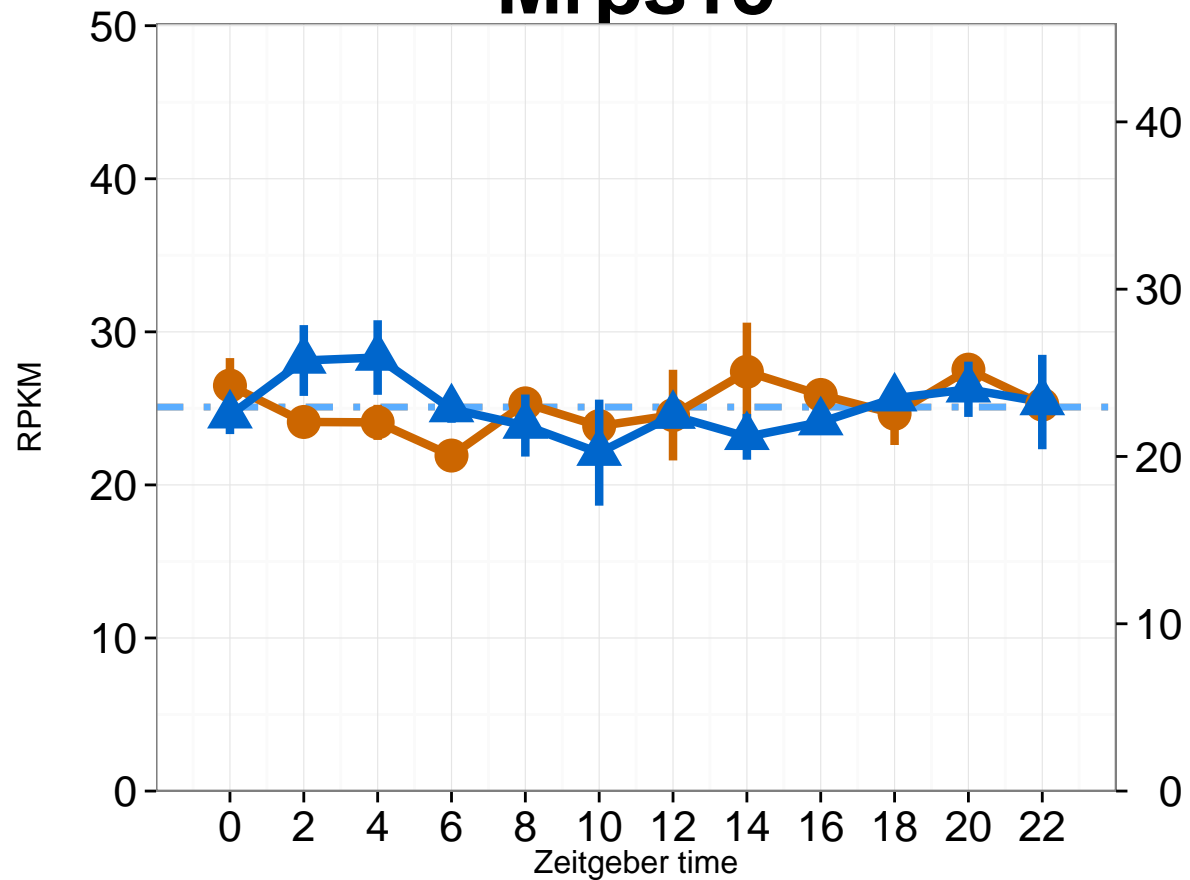

# Mrps15

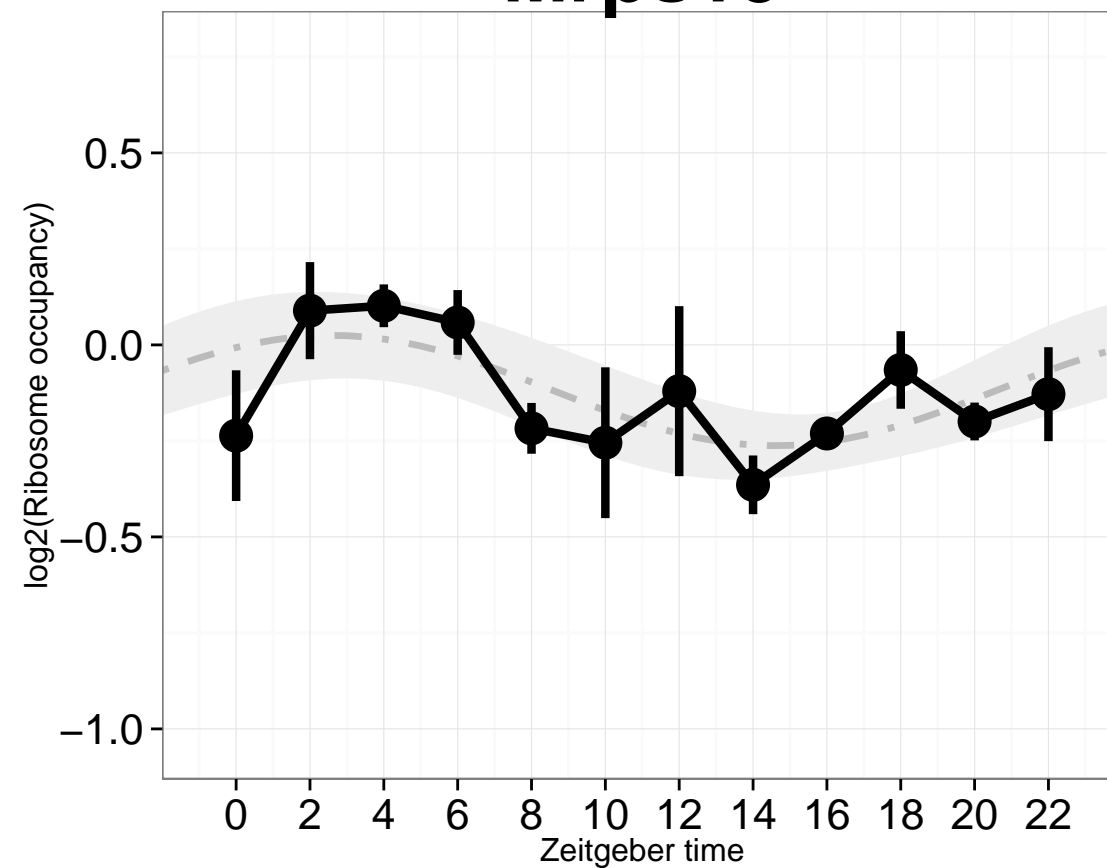

Supplement: SuppDataset_1.zip [file Mrps15_set_A.pdf › Supplemental Dataset 1/A-mRNA_nonrhyth_translation_nonrhyth/Mrps15_set_A.pdf]

# Mrps16

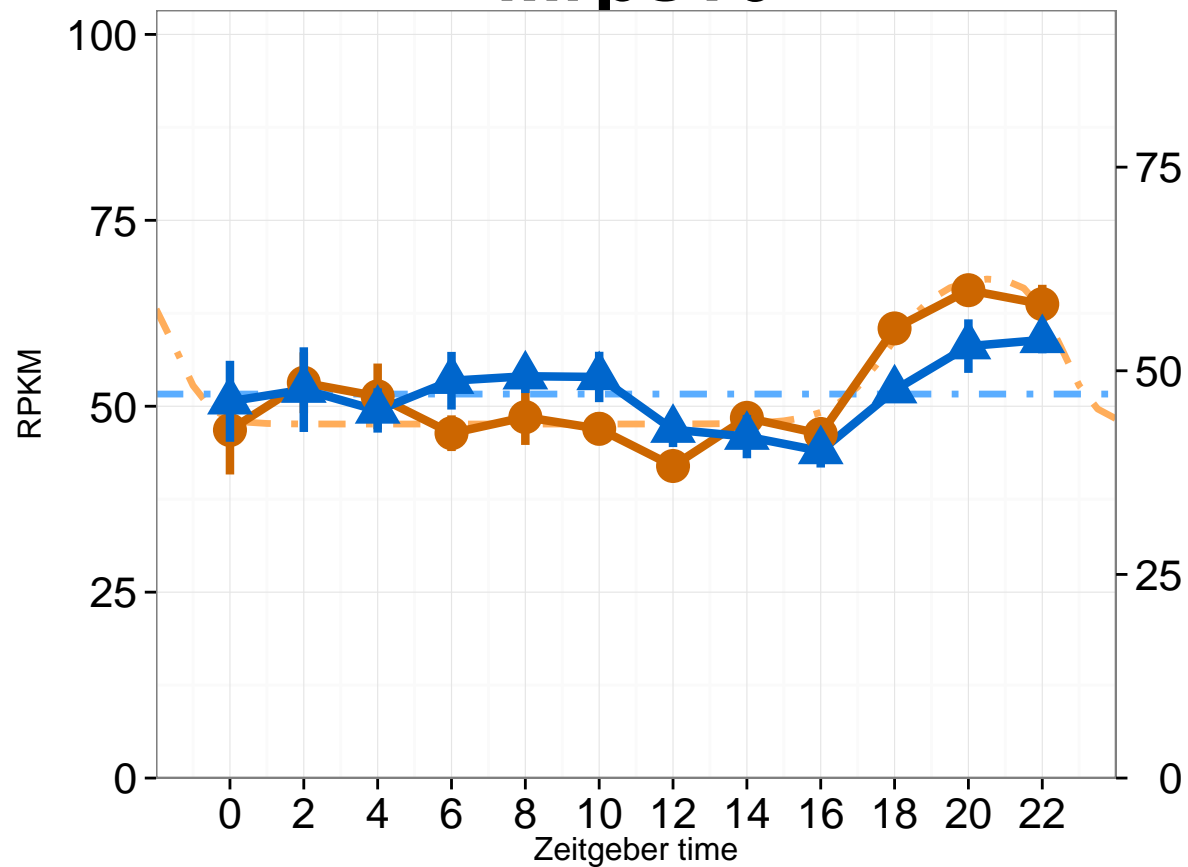

# Mrps16

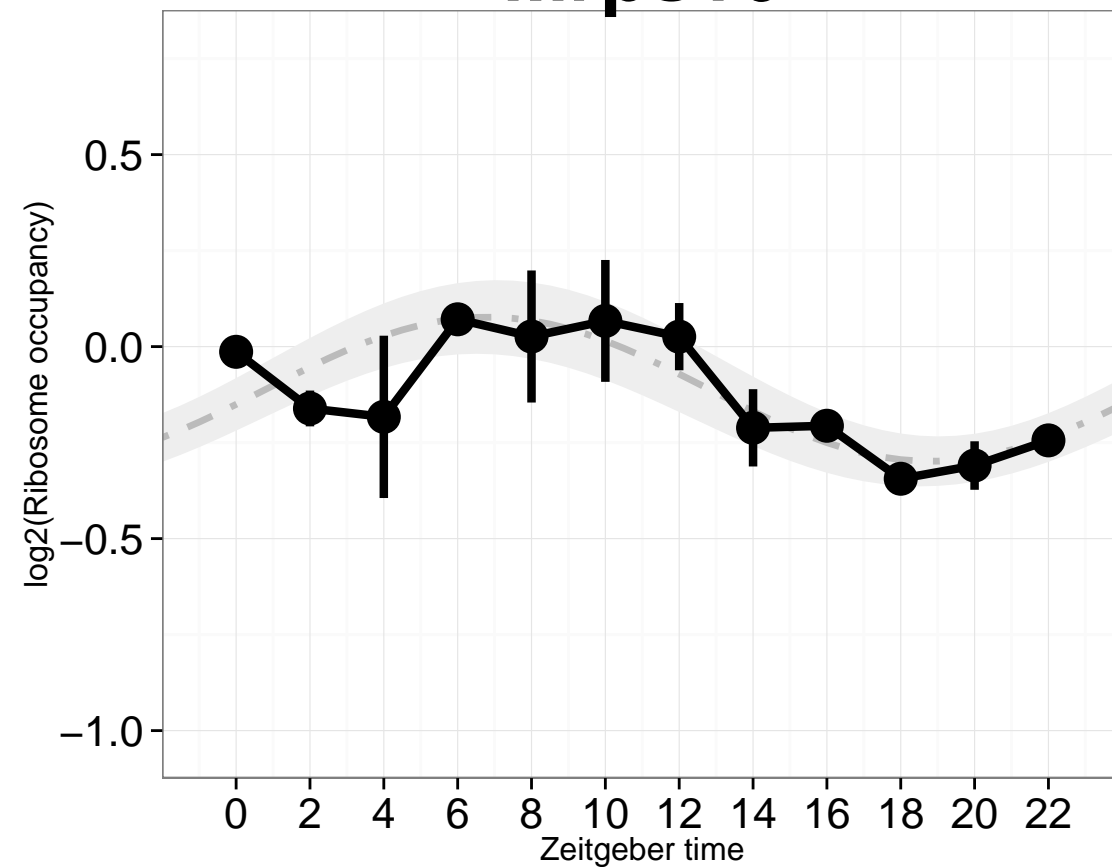

Supplement: SuppDataset_1.zip [file Mrps16_set_A.pdf › Supplemental Dataset 1/A-mRNA_nonrhyth_translation_nonrhyth/Mrps16_set_A.pdf]

# Mrps17

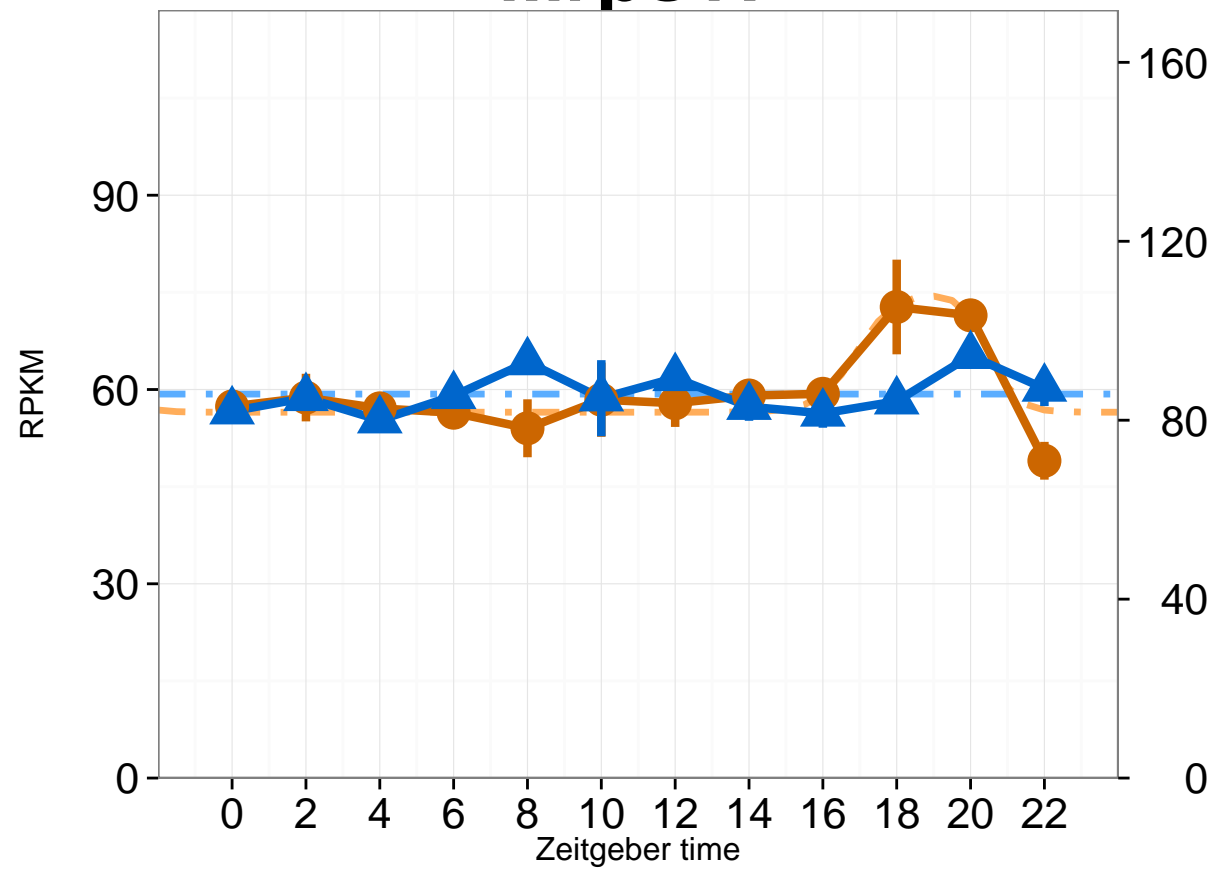

# Mrps17

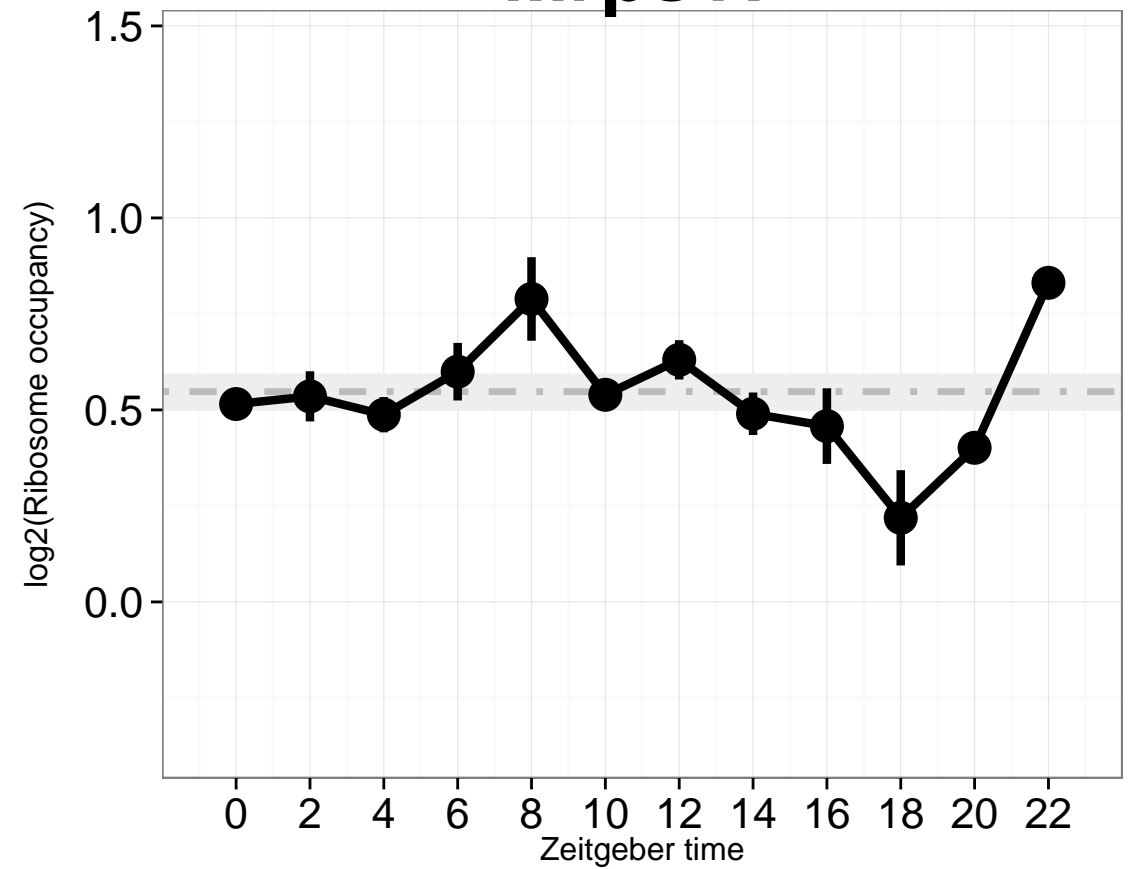

Supplement: SuppDataset_1.zip [file Mrps17_set_A.pdf › Supplemental Dataset 1/A-mRNA_nonrhyth_translation_nonrhyth/Mrps17_set_A.pdf]

# Mrps18a

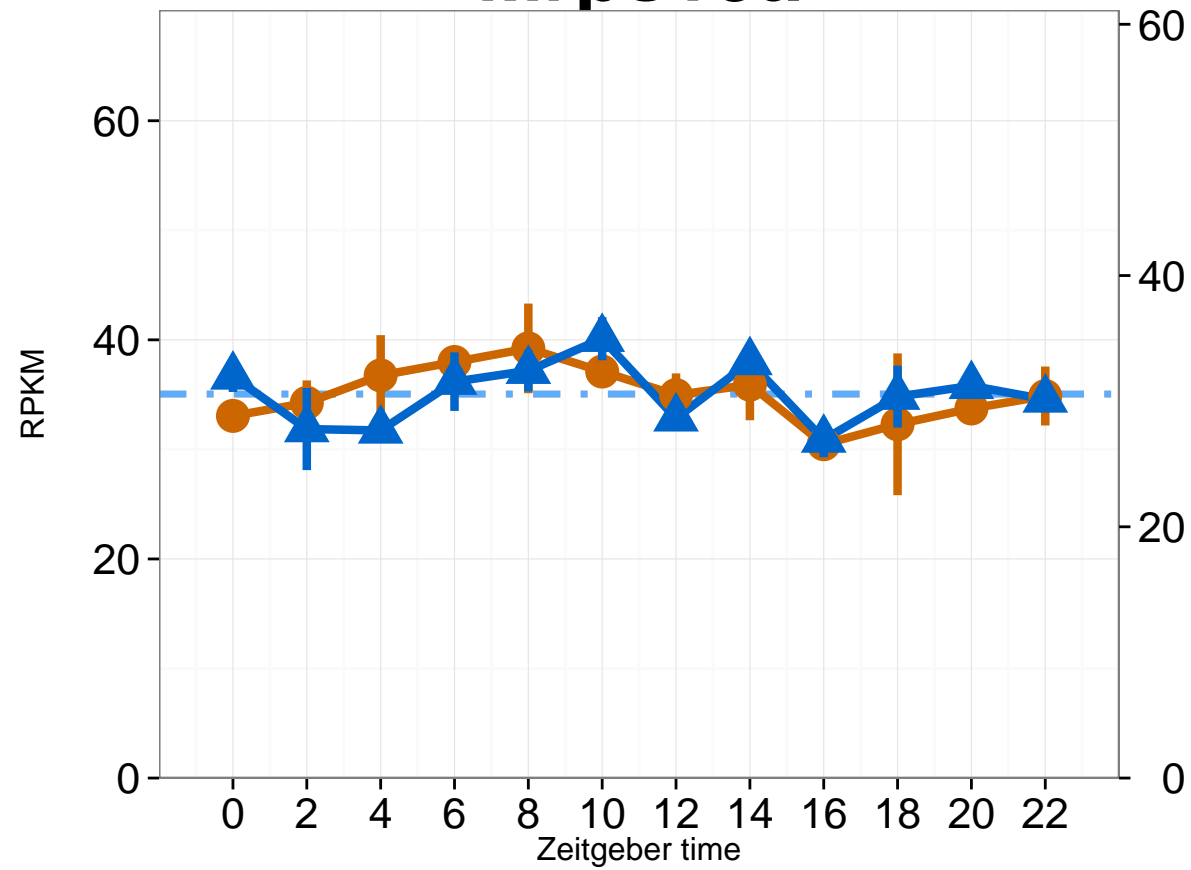

# Mrps18a

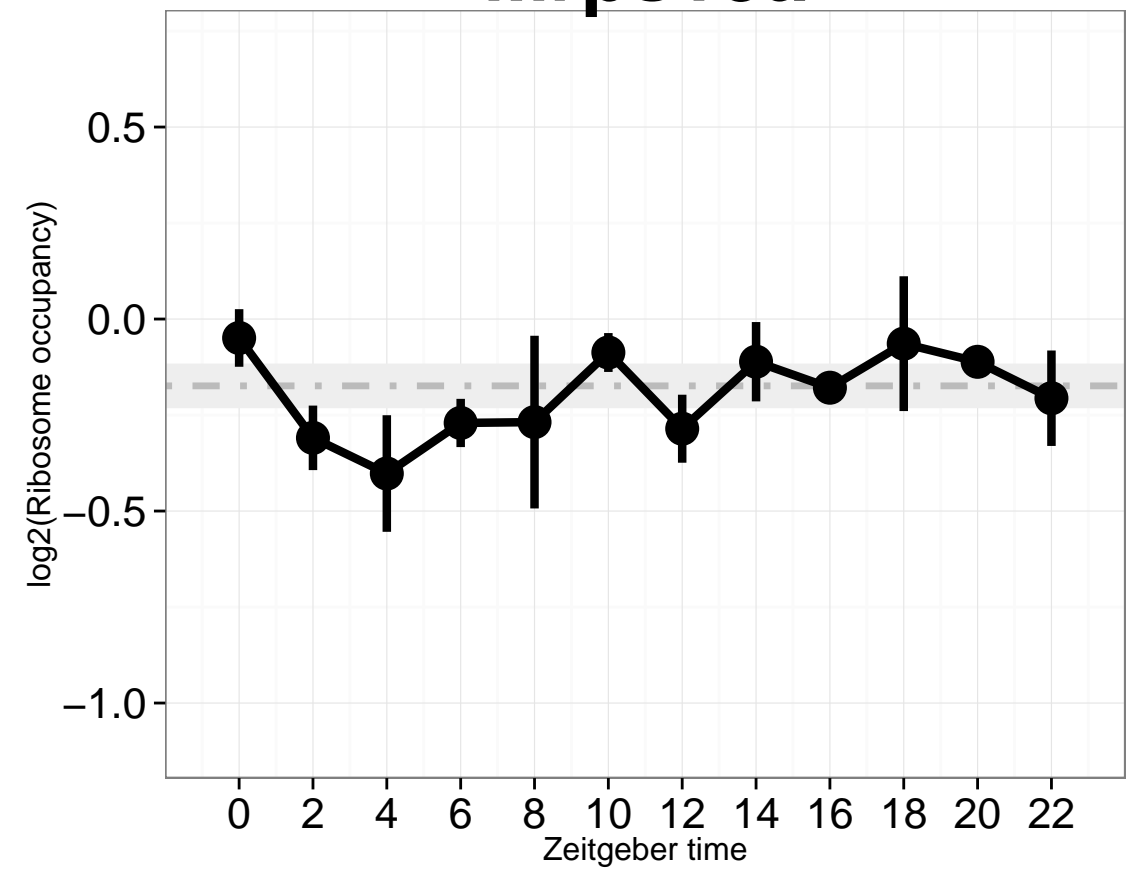

Supplement: SuppDataset_1.zip [file Mrps18a_set_A.pdf › Supplemental Dataset 1/A-mRNA_nonrhyth_translation_nonrhyth/Mrps18a_set_A.pdf]

# Mrps18b

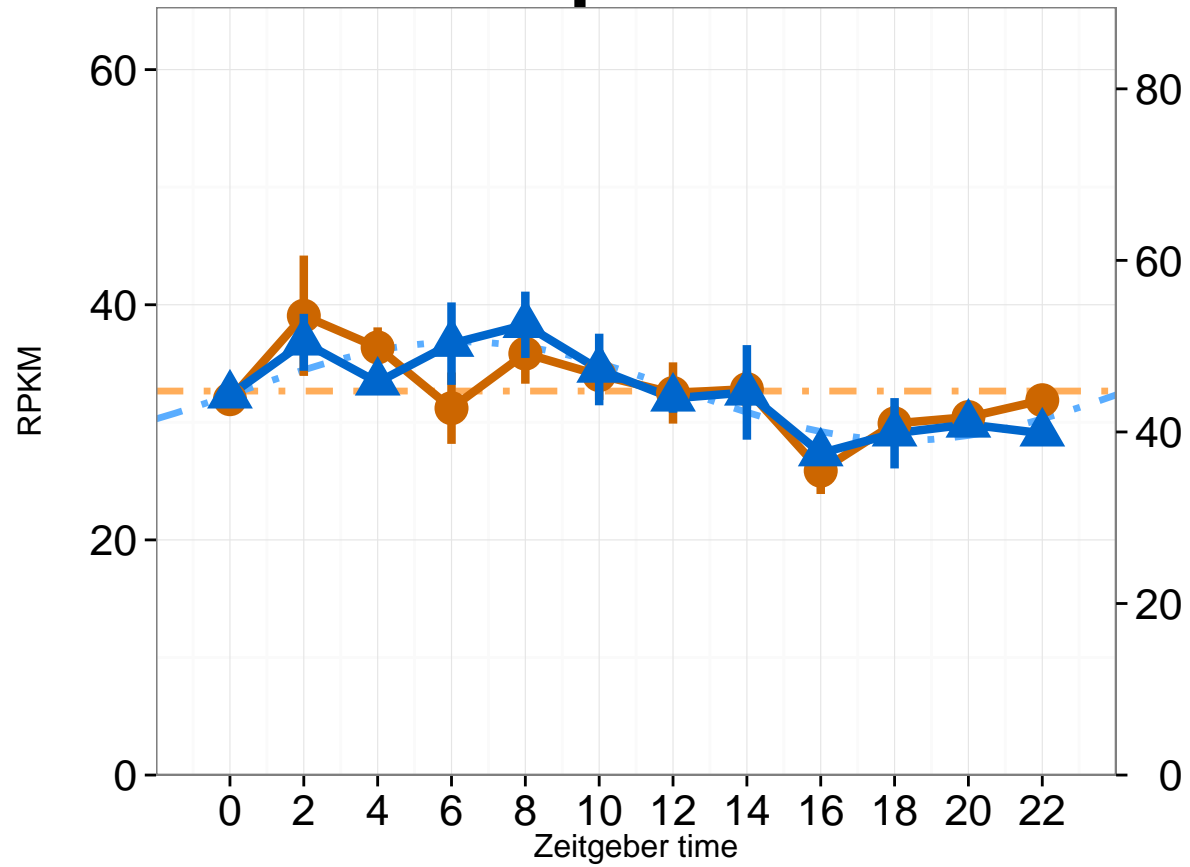

# Mrps18b

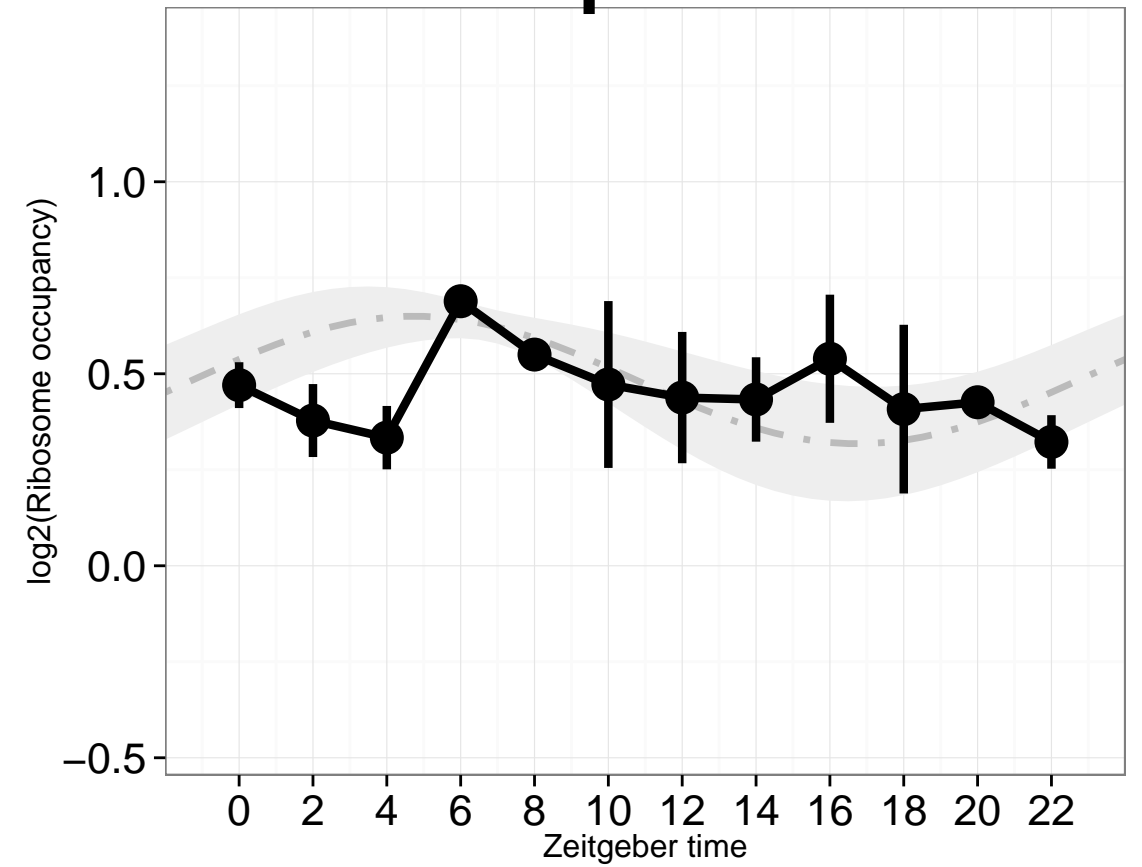

Supplement: SuppDataset_1.zip [file Mrps18b_set_A.pdf › Supplemental Dataset 1/A-mRNA_nonrhyth_translation_nonrhyth/Mrps18b_set_A.pdf]

# Mrps18c

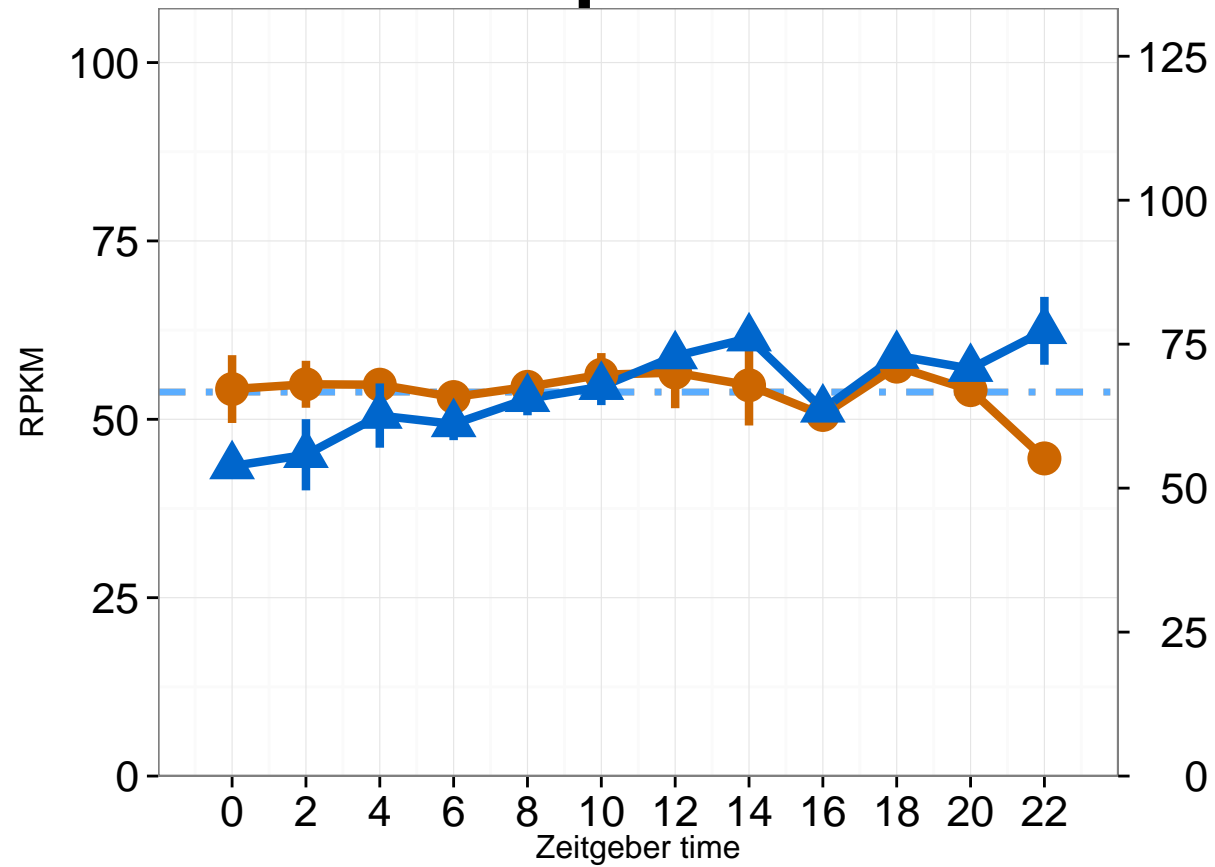

# Mrps18c

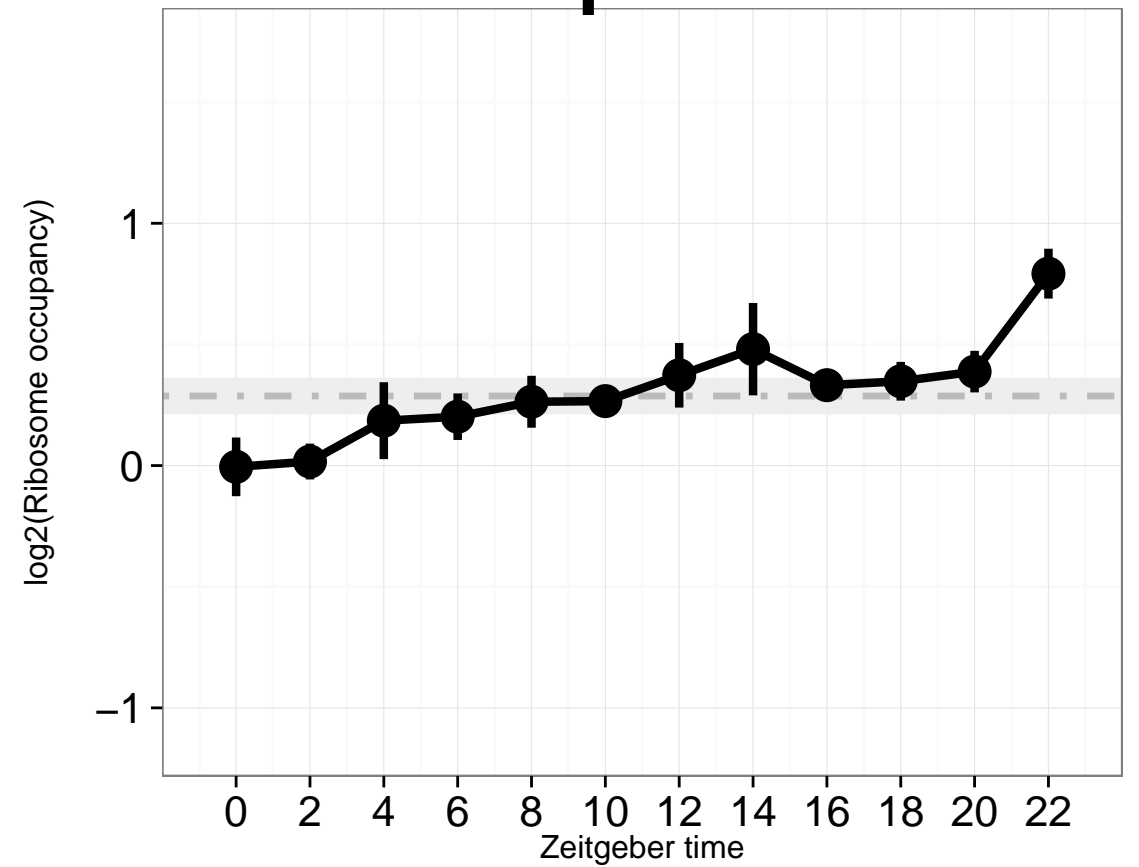

Supplement: SuppDataset_1.zip [file Mrps18c_set_A.pdf › Supplemental Dataset 1/A-mRNA_nonrhyth_translation_nonrhyth/Mrps18c_set_A.pdf]

# Mrps21

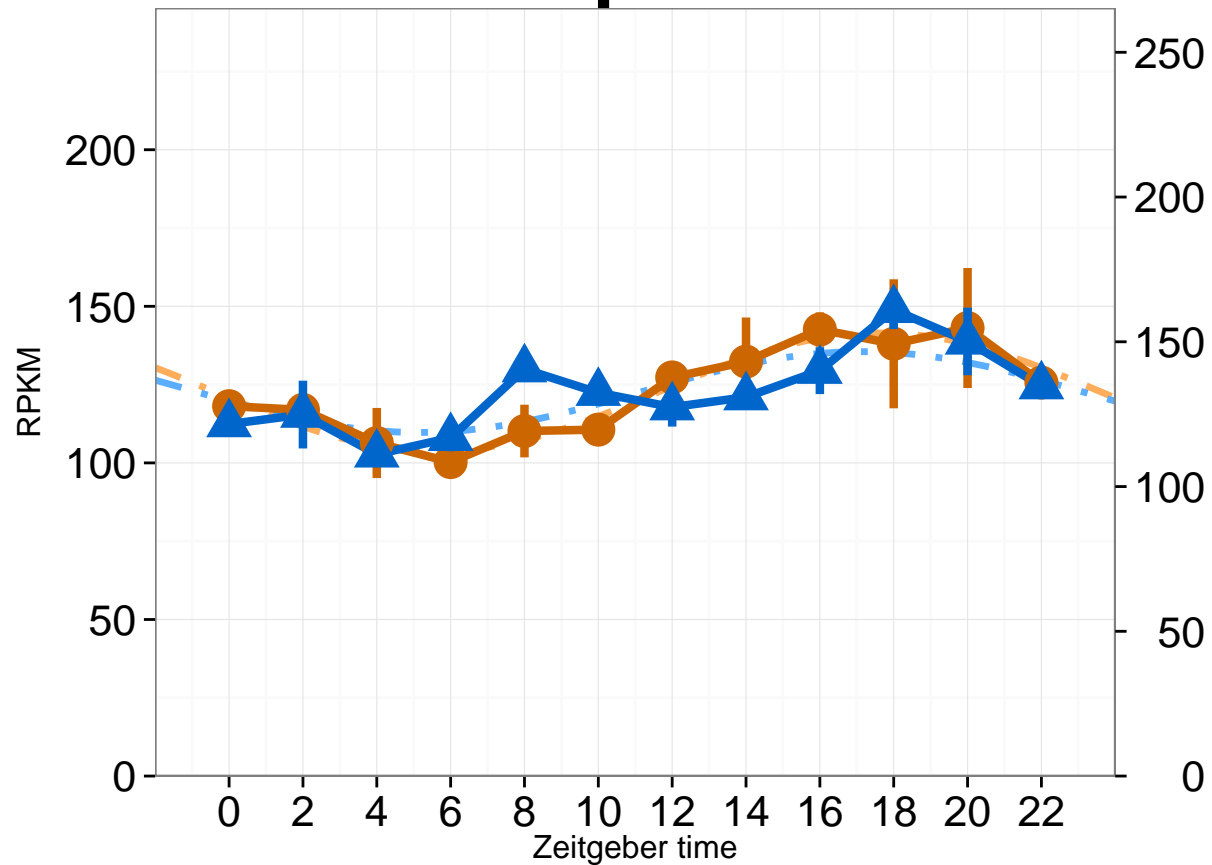

# Mrps21

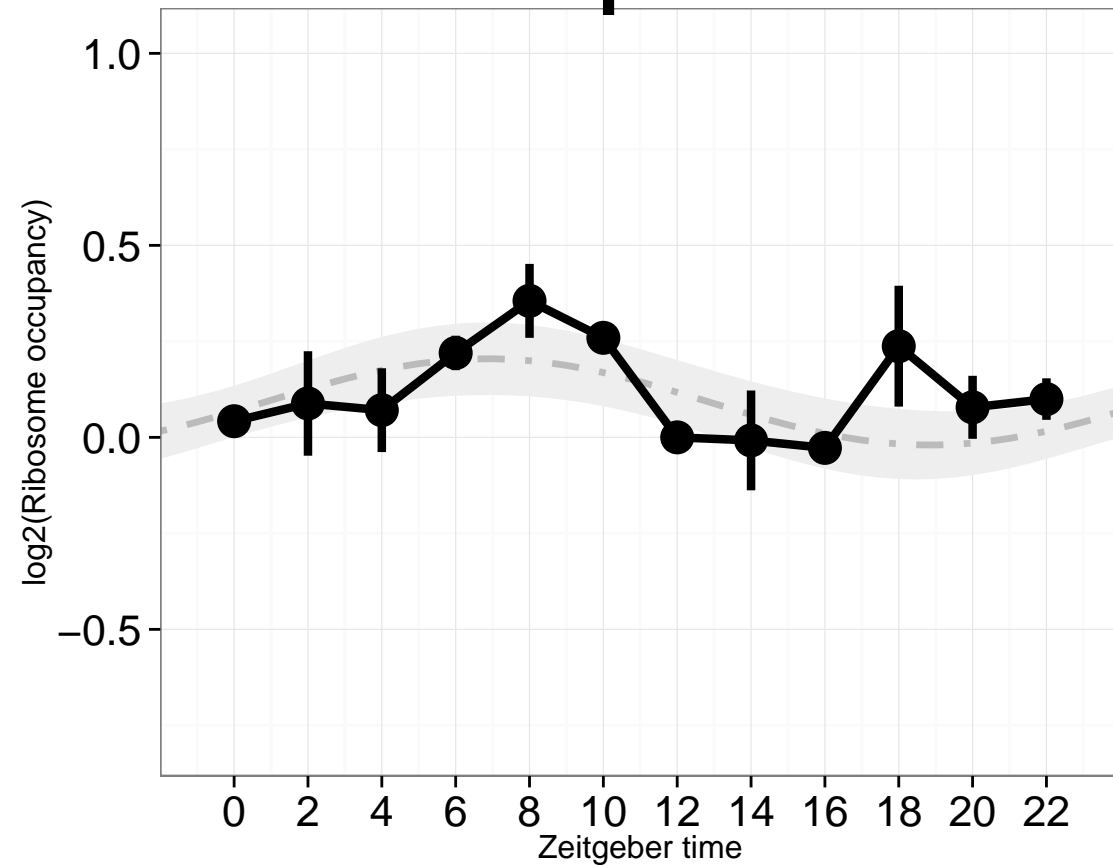

Supplement: SuppDataset_1.zip [file Mrps21_set_A.pdf › Supplemental Dataset 1/A-mRNA_nonrhyth_translation_nonrhyth/Mrps21_set_A.pdf]

## Mrps22

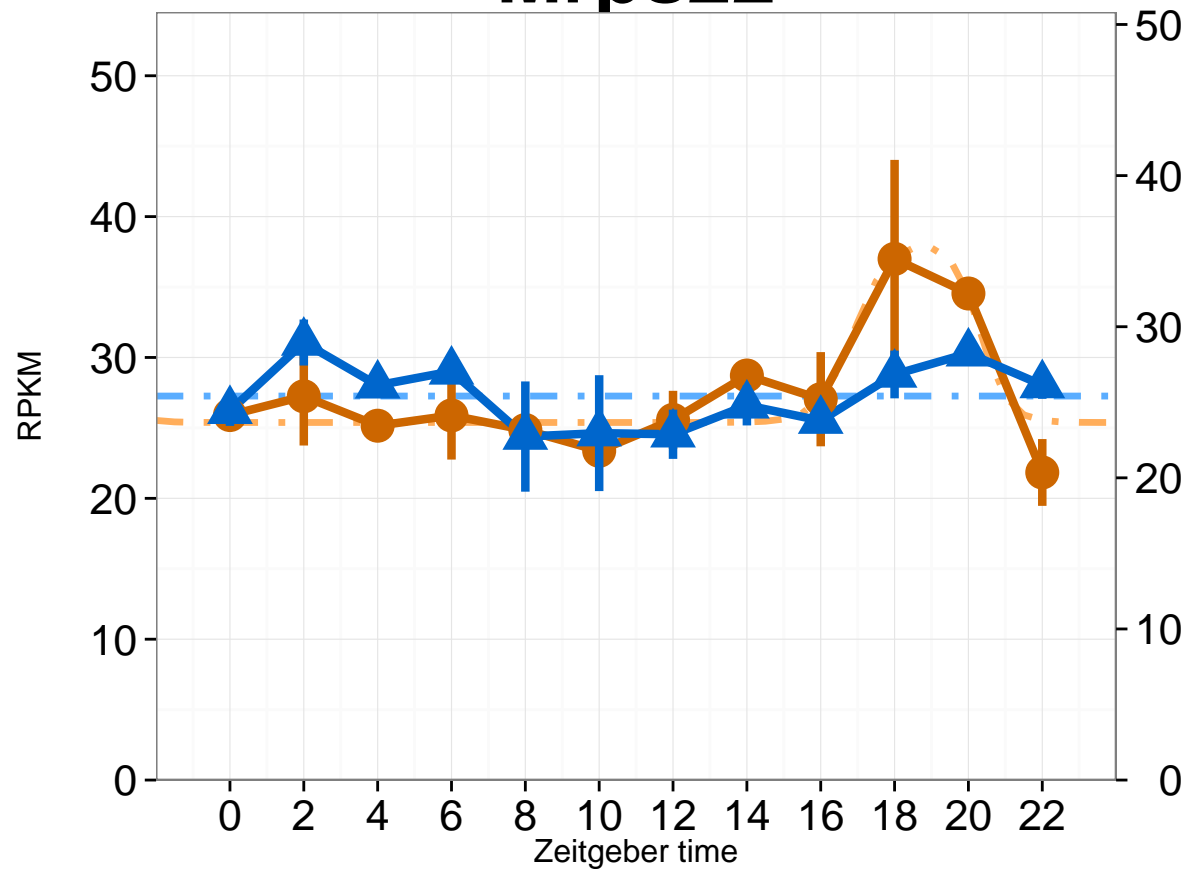

## Mrps22

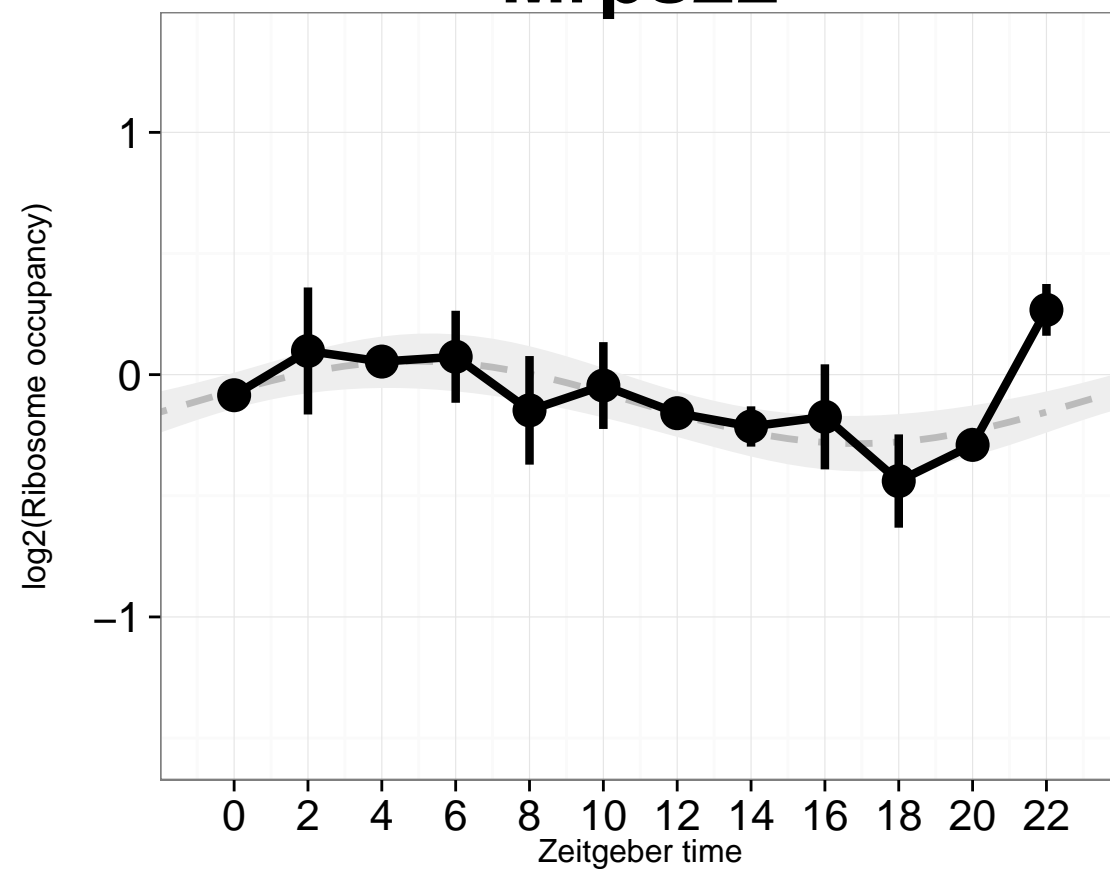

Supplement: SuppDataset_1.zip [file Mrps22_set_A.pdf › Supplemental Dataset 1/A-mRNA_nonrhyth_translation_nonrhyth/Mrps22_set_A.pdf]

## Mrps24

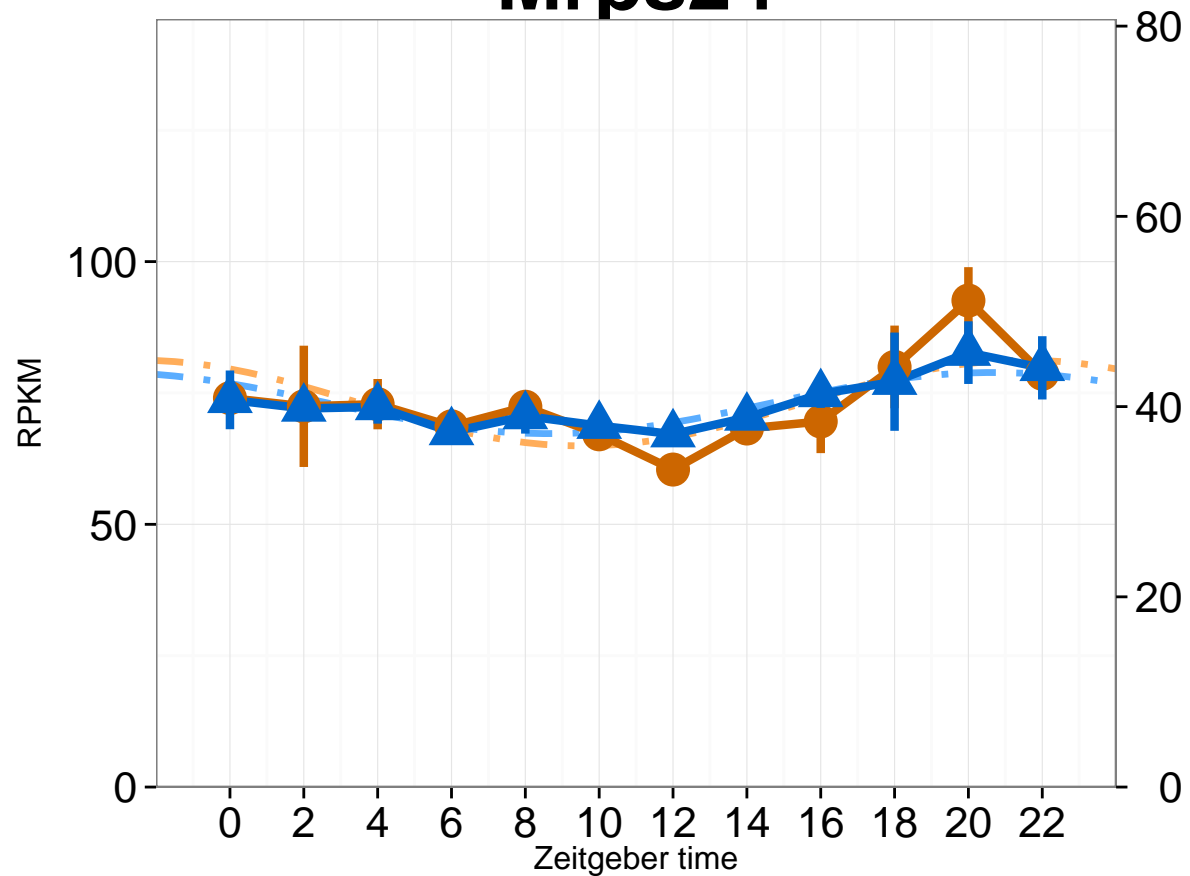

## Mrps24

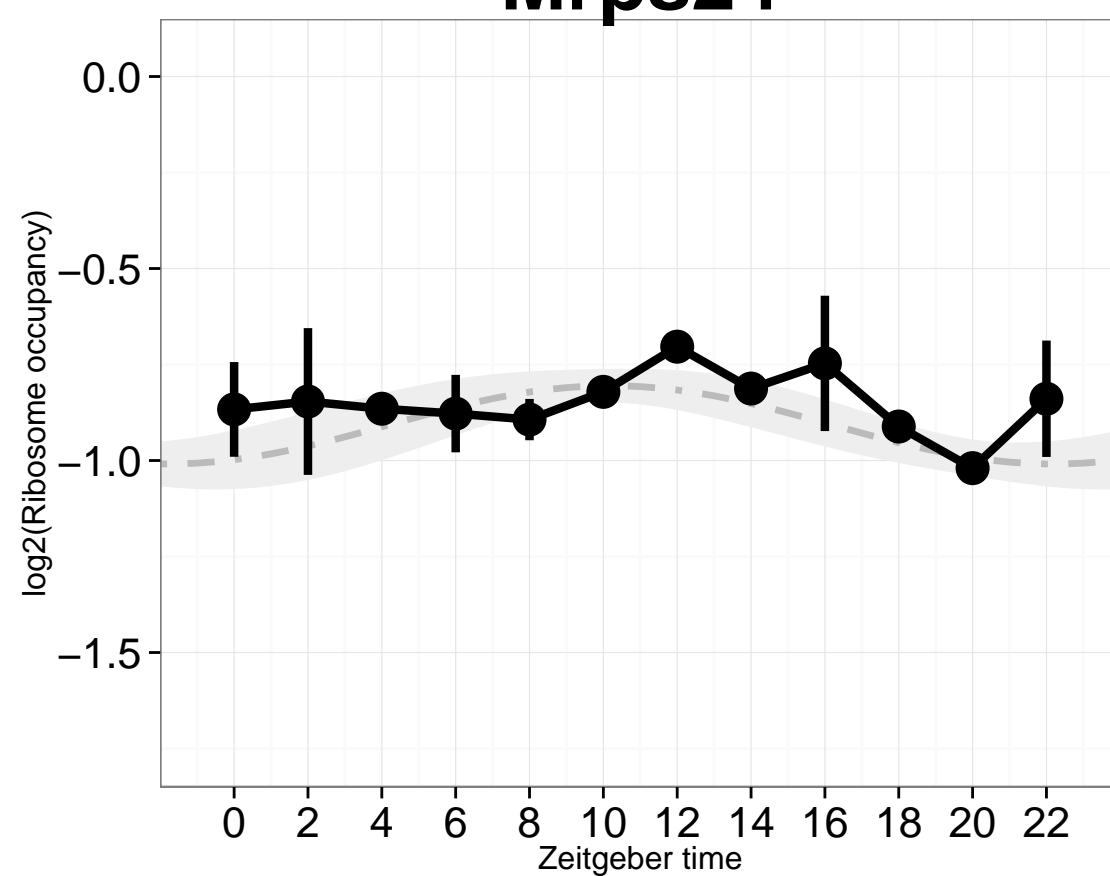

Supplement: SuppDataset_1.zip [file Mrps24_set_A.pdf › Supplemental Dataset 1/A-mRNA_nonrhyth_translation_nonrhyth/Mrps24_set_A.pdf]

# Mrps25

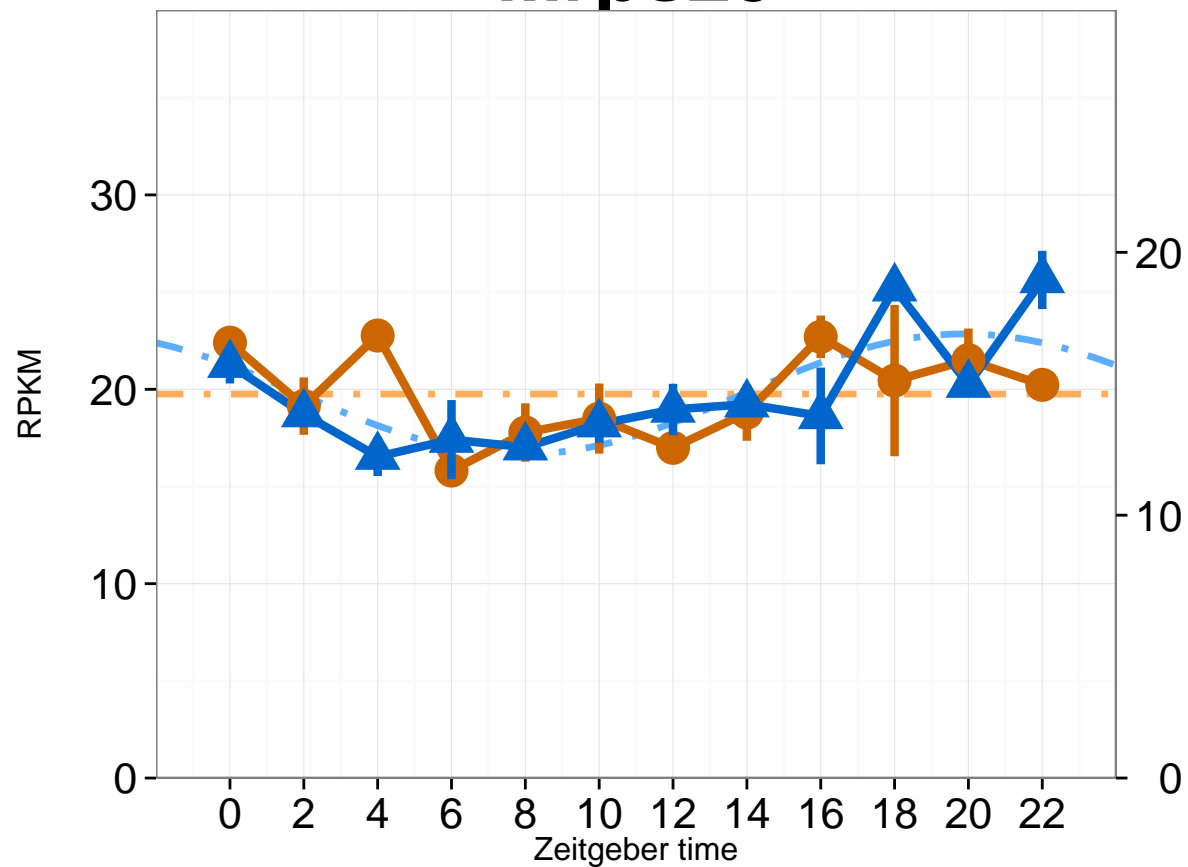

# Mrps25

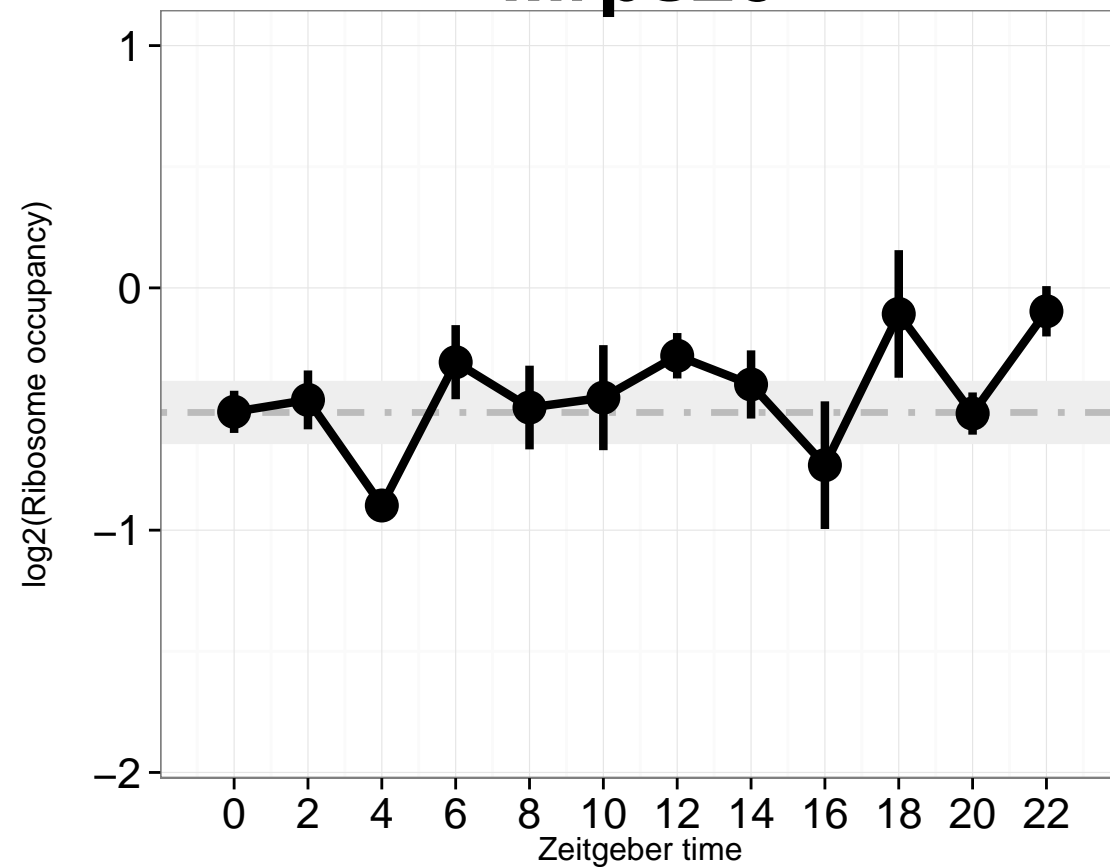

Supplement: SuppDataset_1.zip [file Mrps25_set_A.pdf › Supplemental Dataset 1/A-mRNA_nonrhyth_translation_nonrhyth/Mrps25_set_A.pdf]

# Mrps26

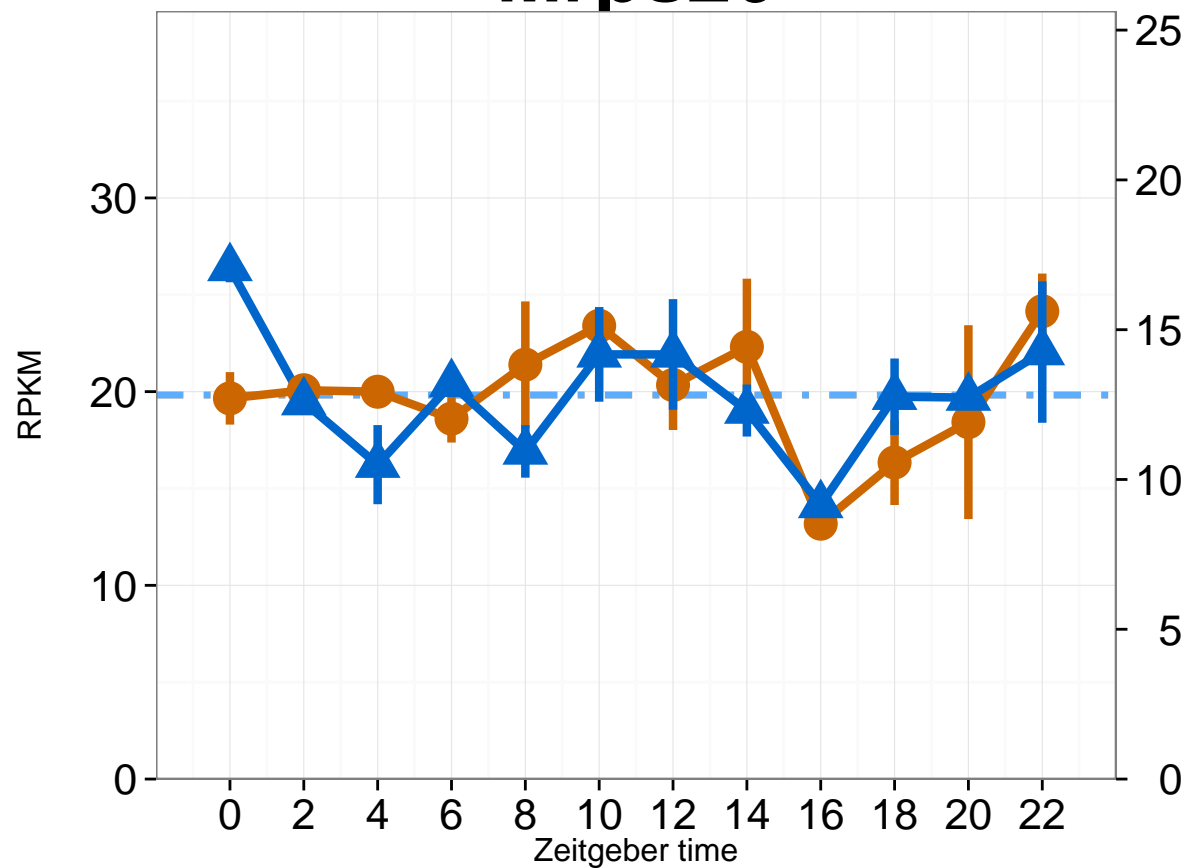

# Mrps26

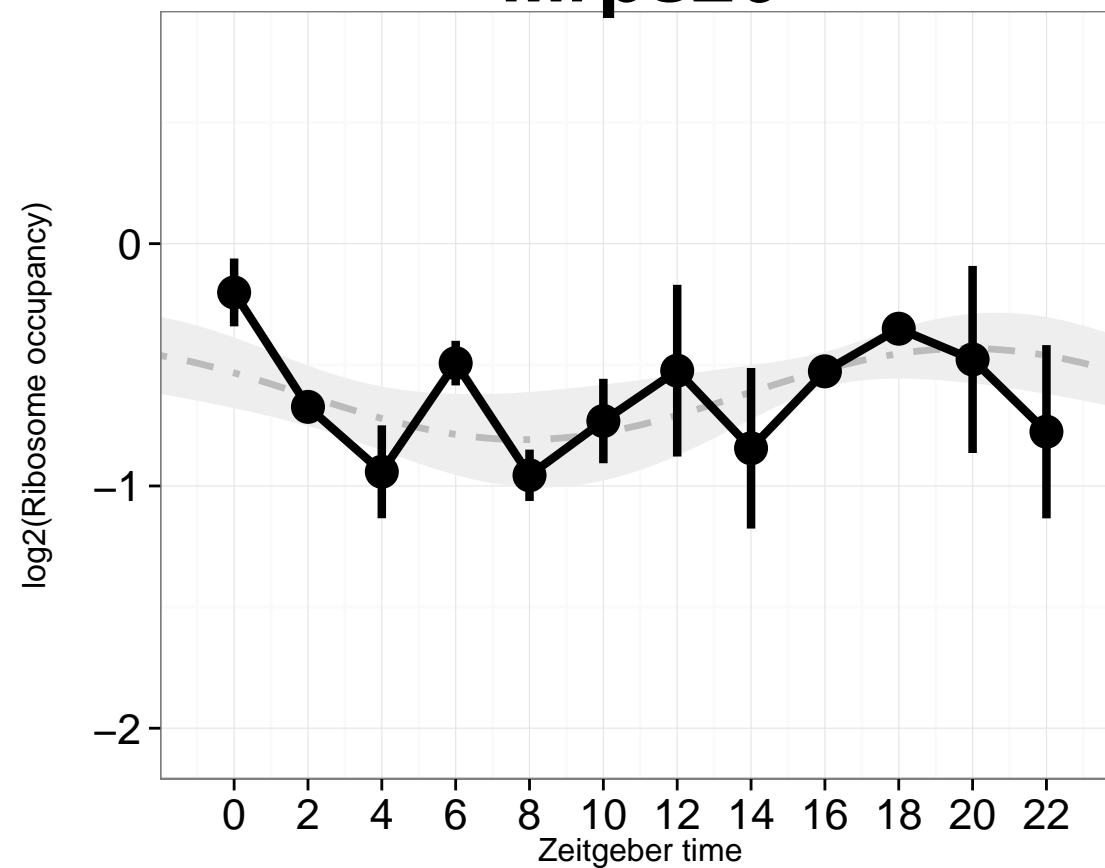

Supplement: SuppDataset_1.zip [file Mrps26_set_A.pdf › Supplemental Dataset 1/A-mRNA_nonrhyth_translation_nonrhyth/Mrps26_set_A.pdf]

# Mrps27

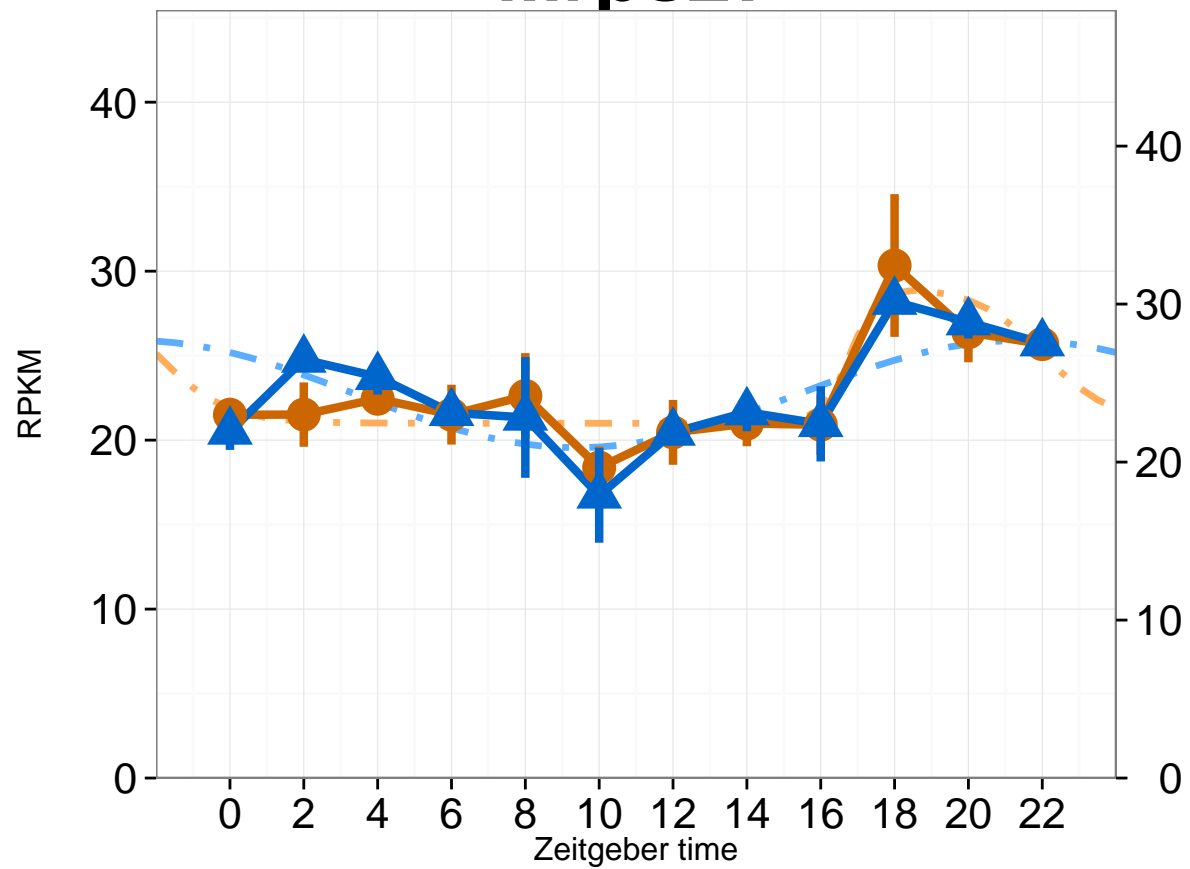

# Mrps27

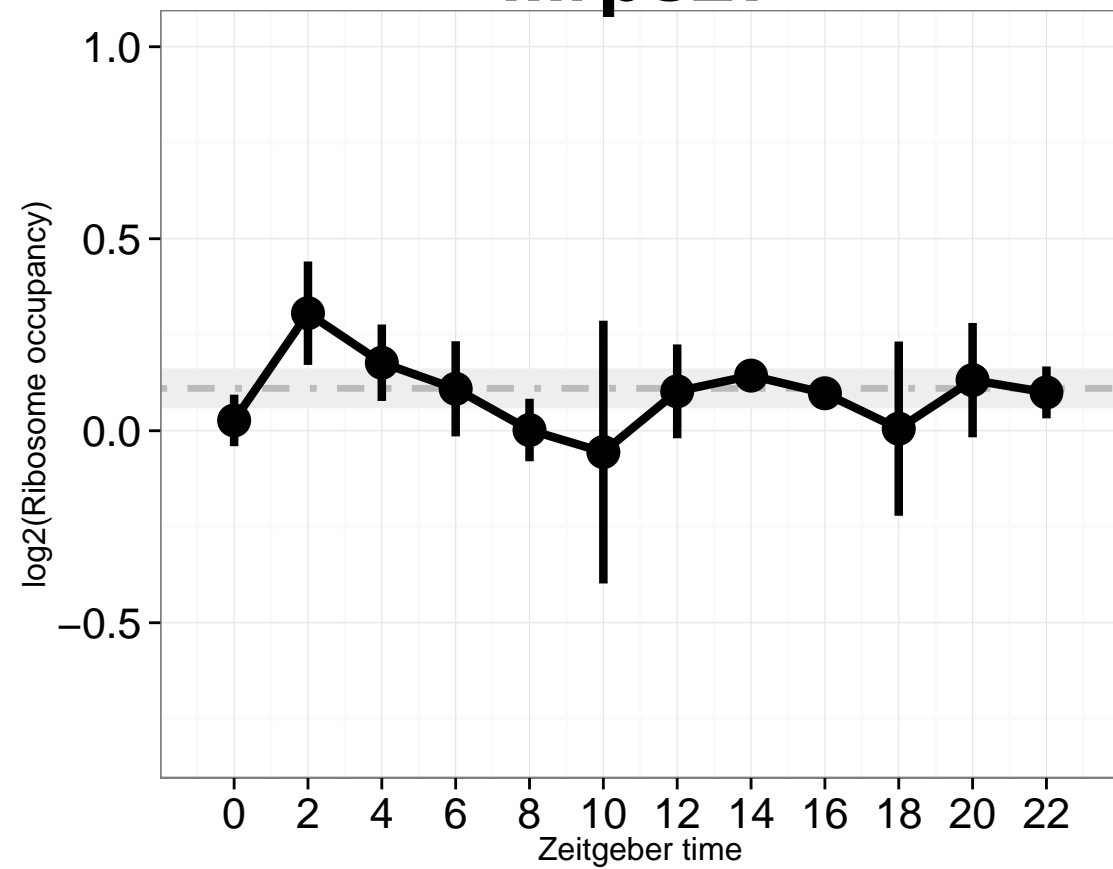

Supplement: SuppDataset_1.zip [file Mrps27_set_A.pdf › Supplemental Dataset 1/A-mRNA_nonrhyth_translation_nonrhyth/Mrps27_set_A.pdf]

# Mrps28

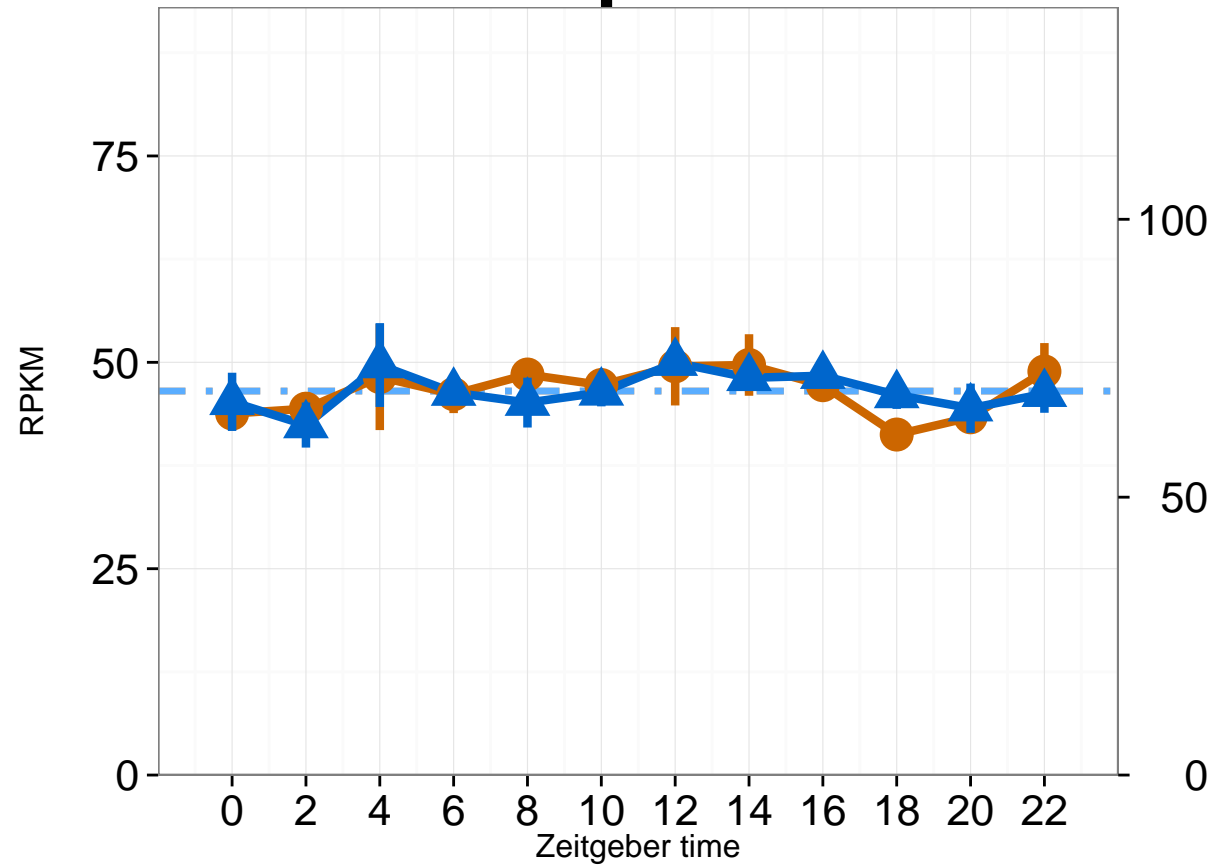

# Mrps28

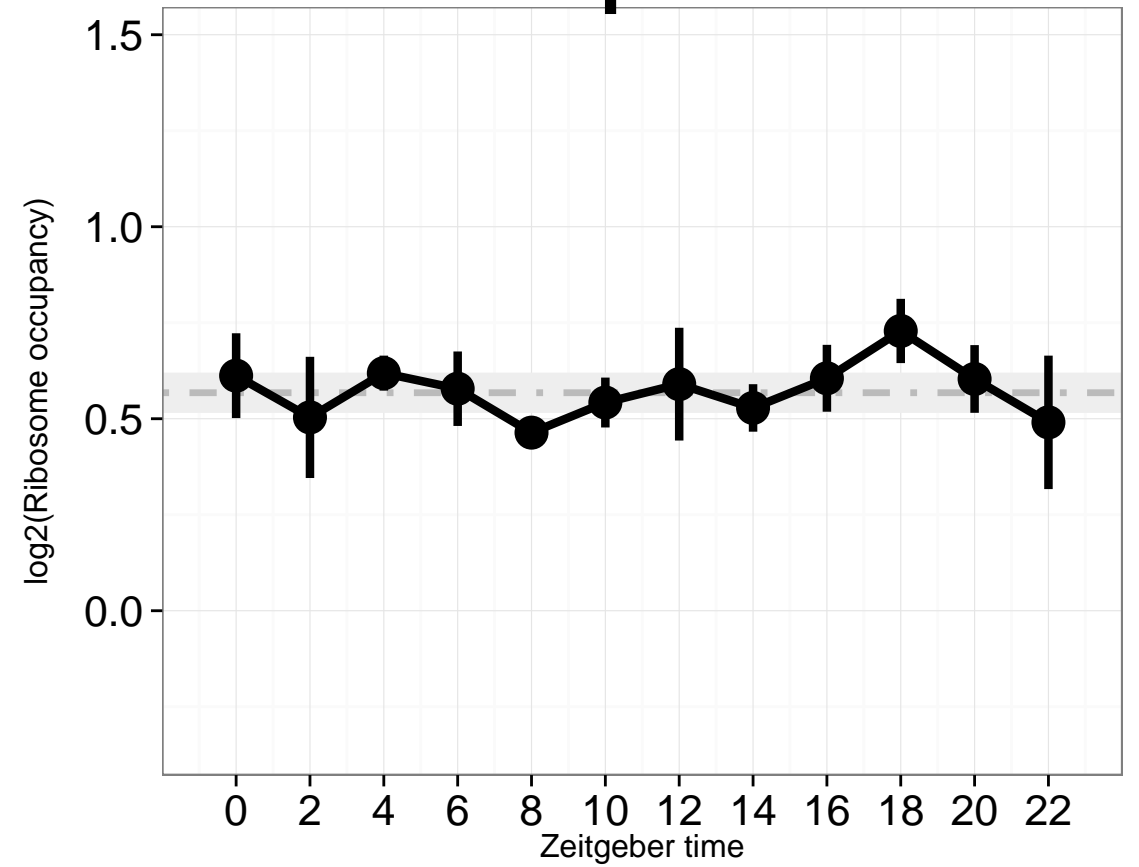

Supplement: SuppDataset_1.zip [file Mrps28_set_A.pdf › Supplemental Dataset 1/A-mRNA_nonrhyth_translation_nonrhyth/Mrps28_set_A.pdf]

## Mrps2

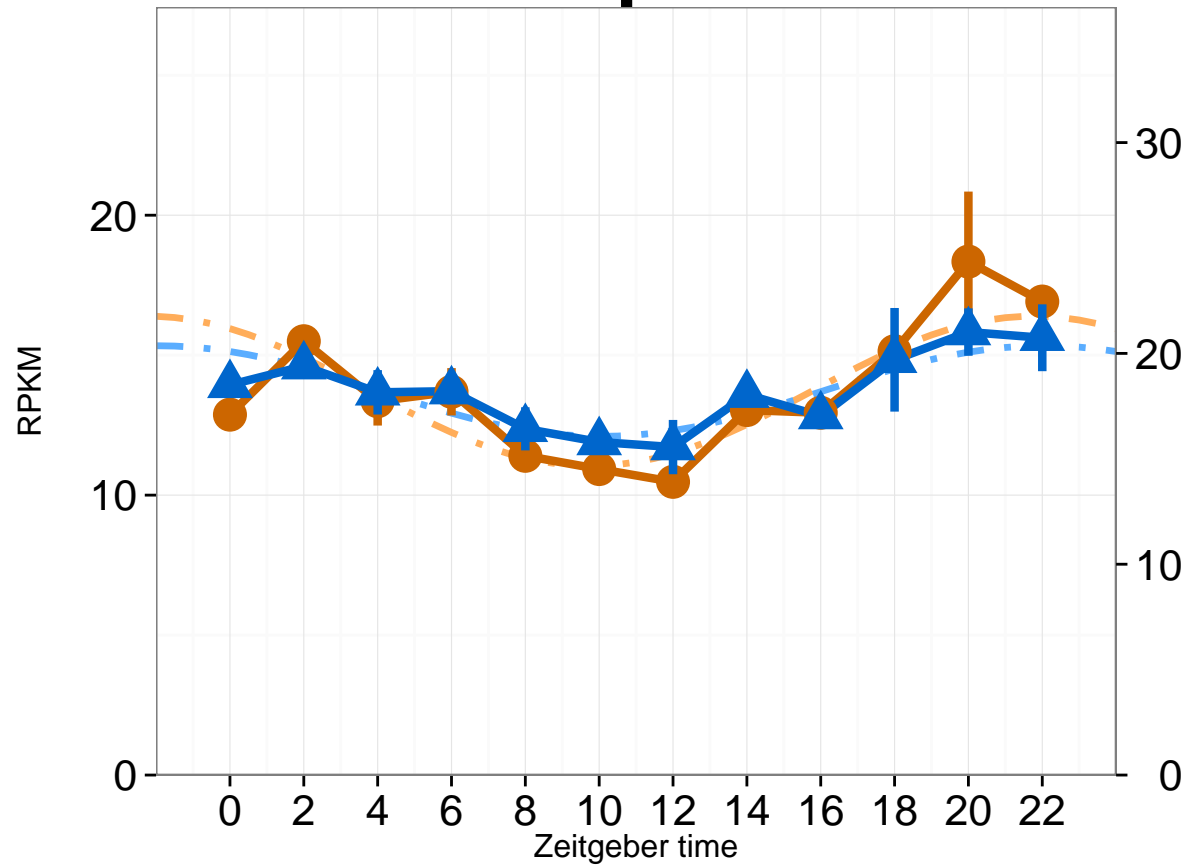

## Mrps2

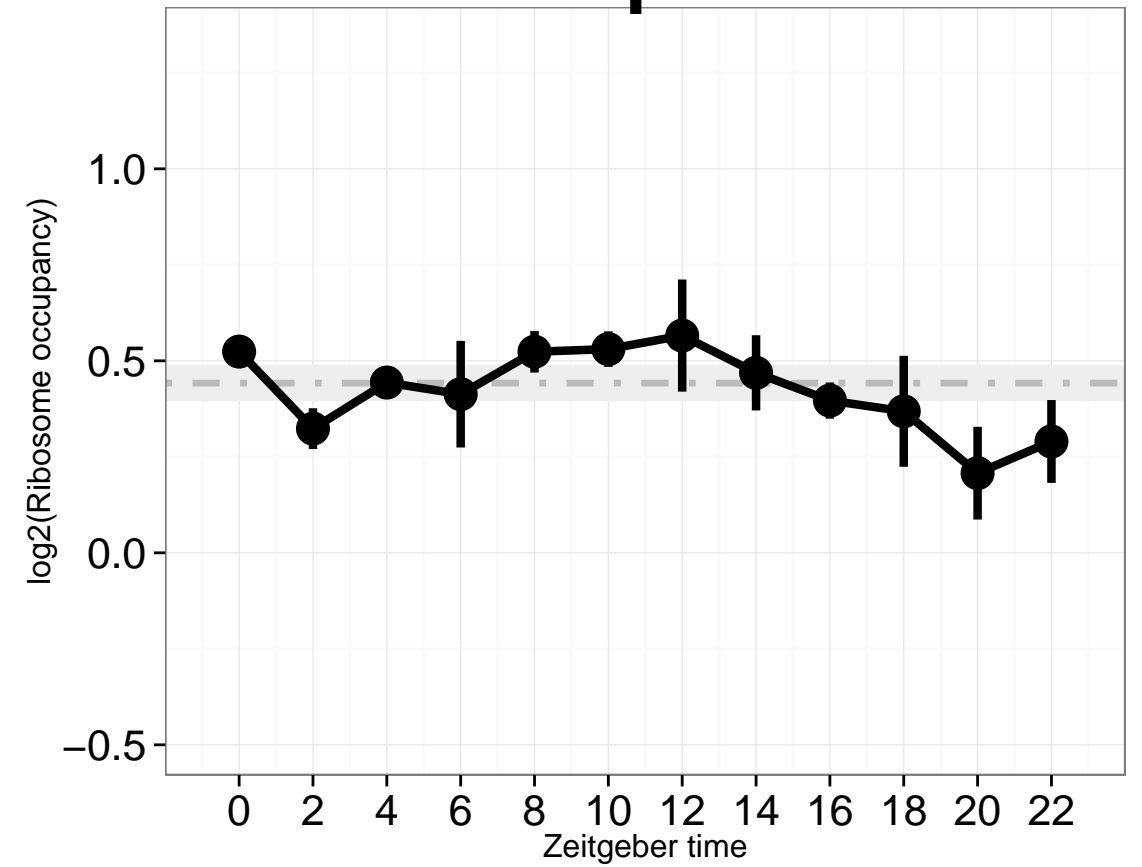

Supplement: SuppDataset_1.zip [file Mrps2_set_A.pdf › Supplemental Dataset 1/A-mRNA_nonrhyth_translation_nonrhyth/Mrps2_set_A.pdf]

## Mrps30

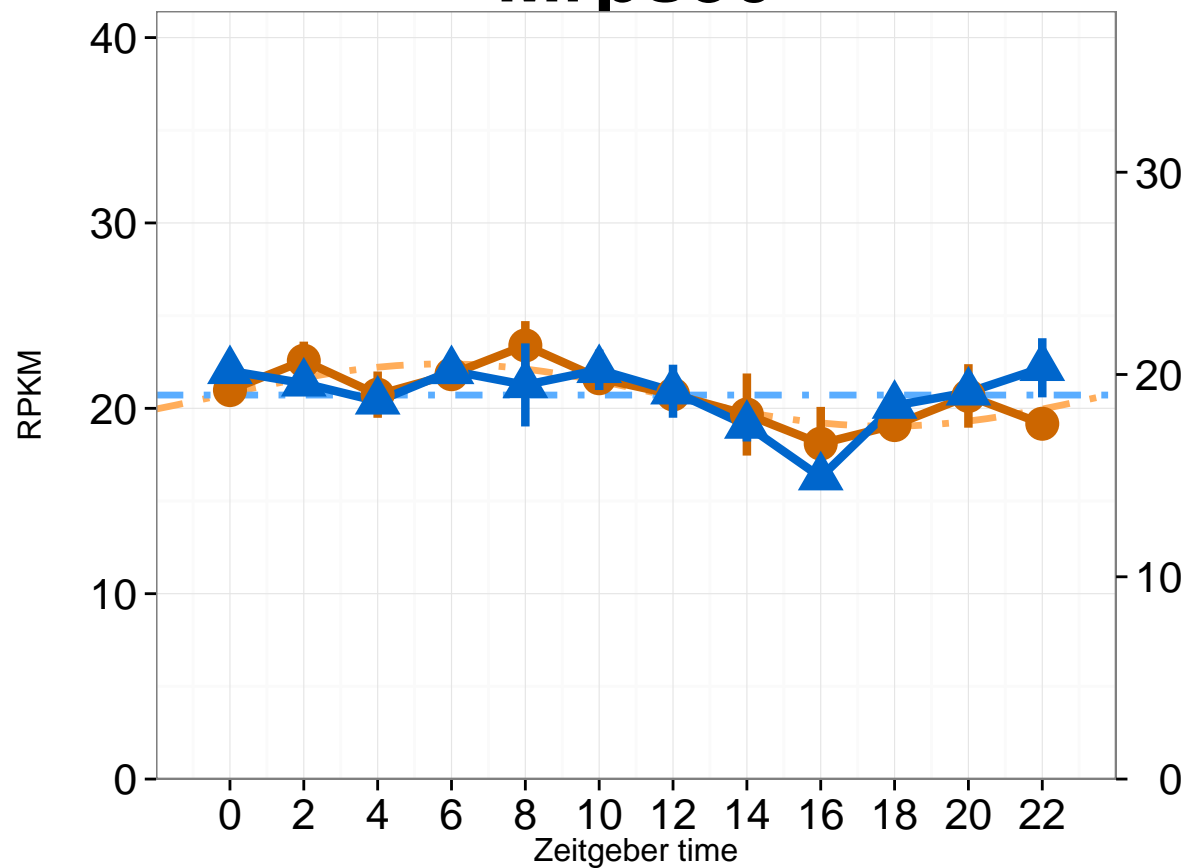

## Mrps30

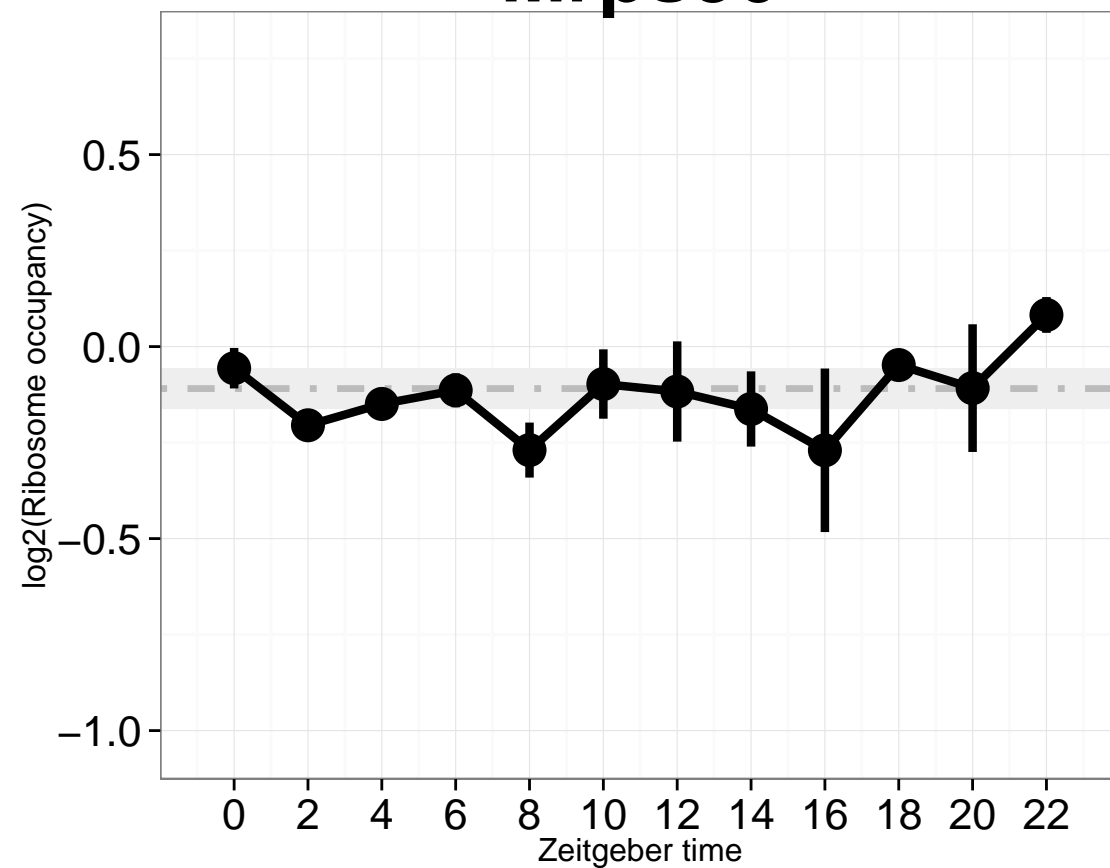

Supplement: SuppDataset_1.zip [file Mrps30_set_A.pdf › Supplemental Dataset 1/A-mRNA_nonrhyth_translation_nonrhyth/Mrps30_set_A.pdf]

# Mrps31

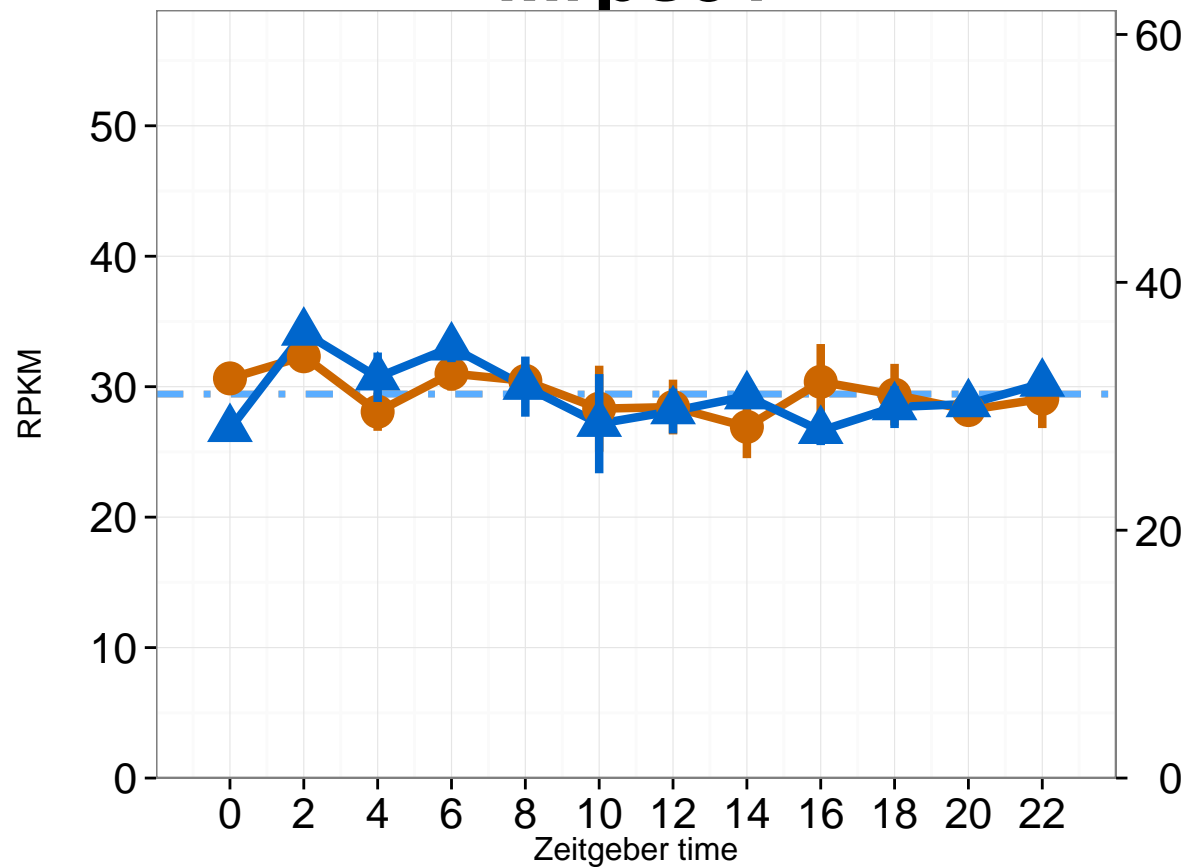

# Mrps31

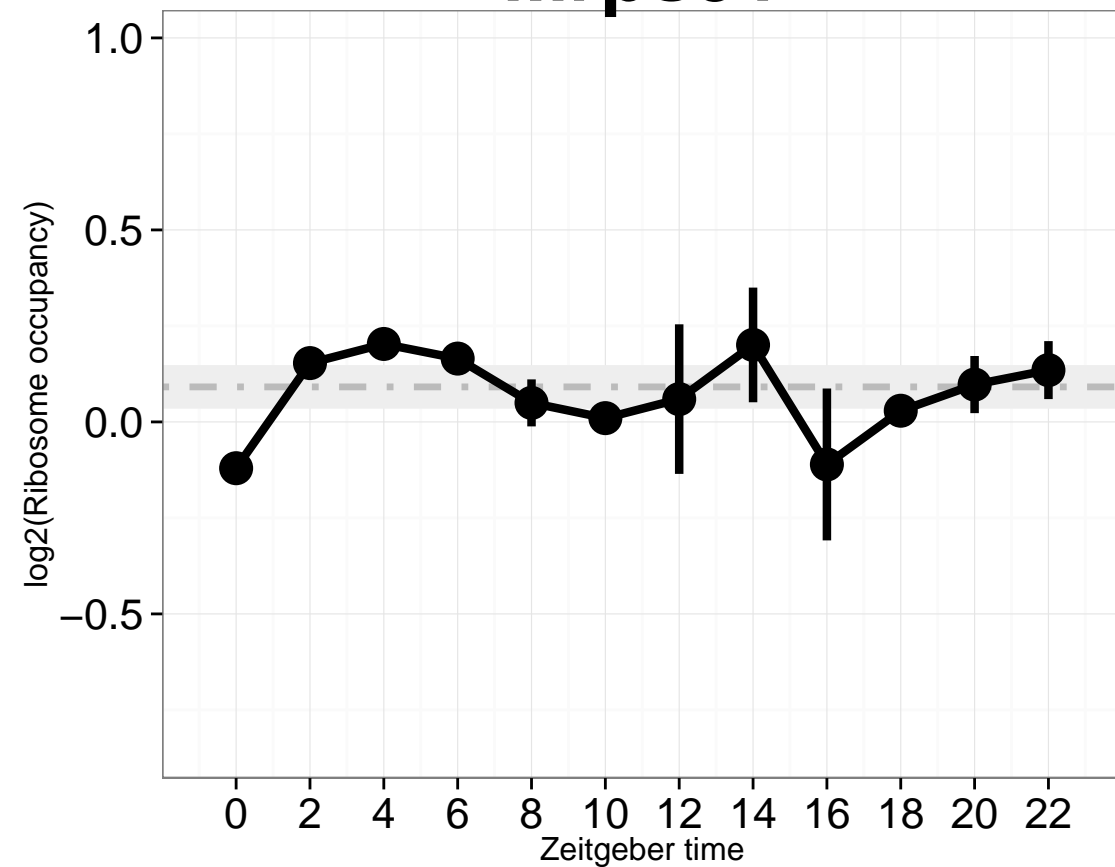

Supplement: SuppDataset_1.zip [file Mrps31_set_A.pdf › Supplemental Dataset 1/A-mRNA_nonrhyth_translation_nonrhyth/Mrps31_set_A.pdf]

# Mrps33

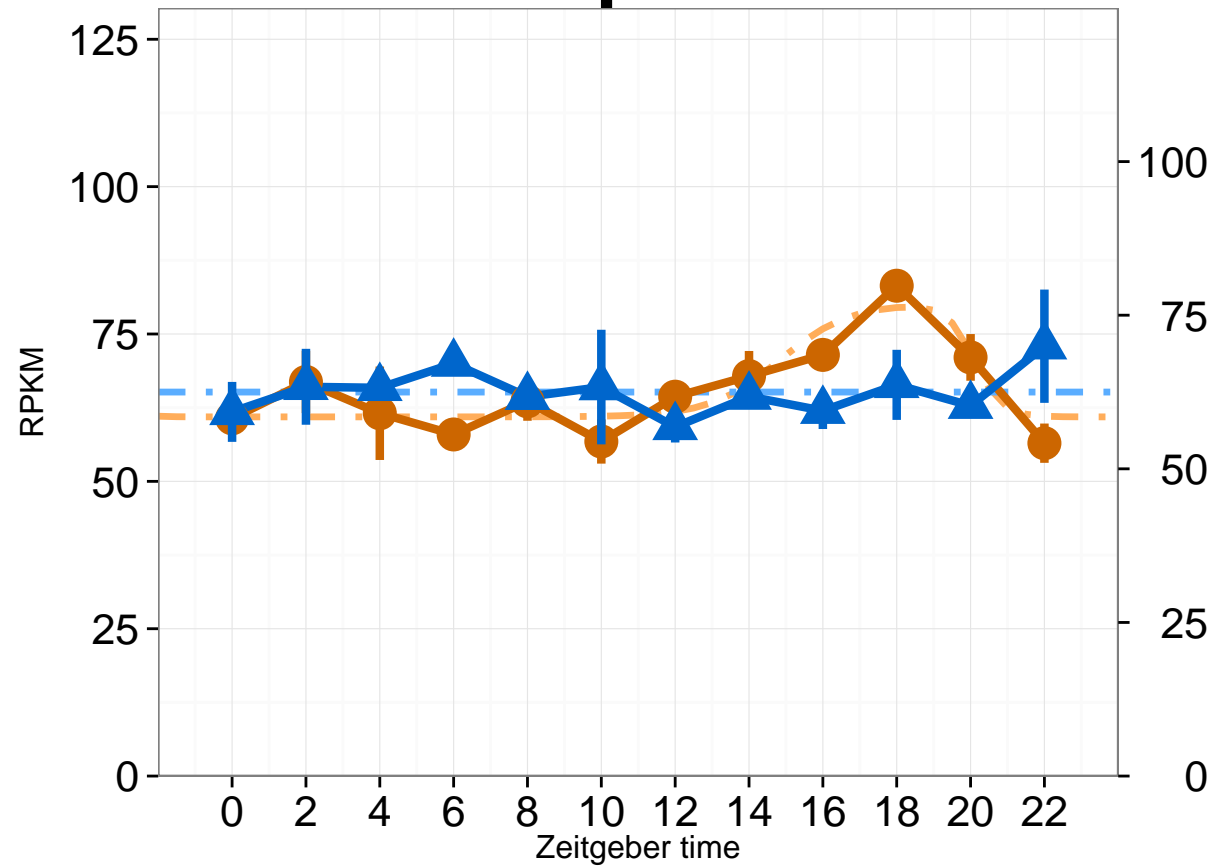

# Mrps33

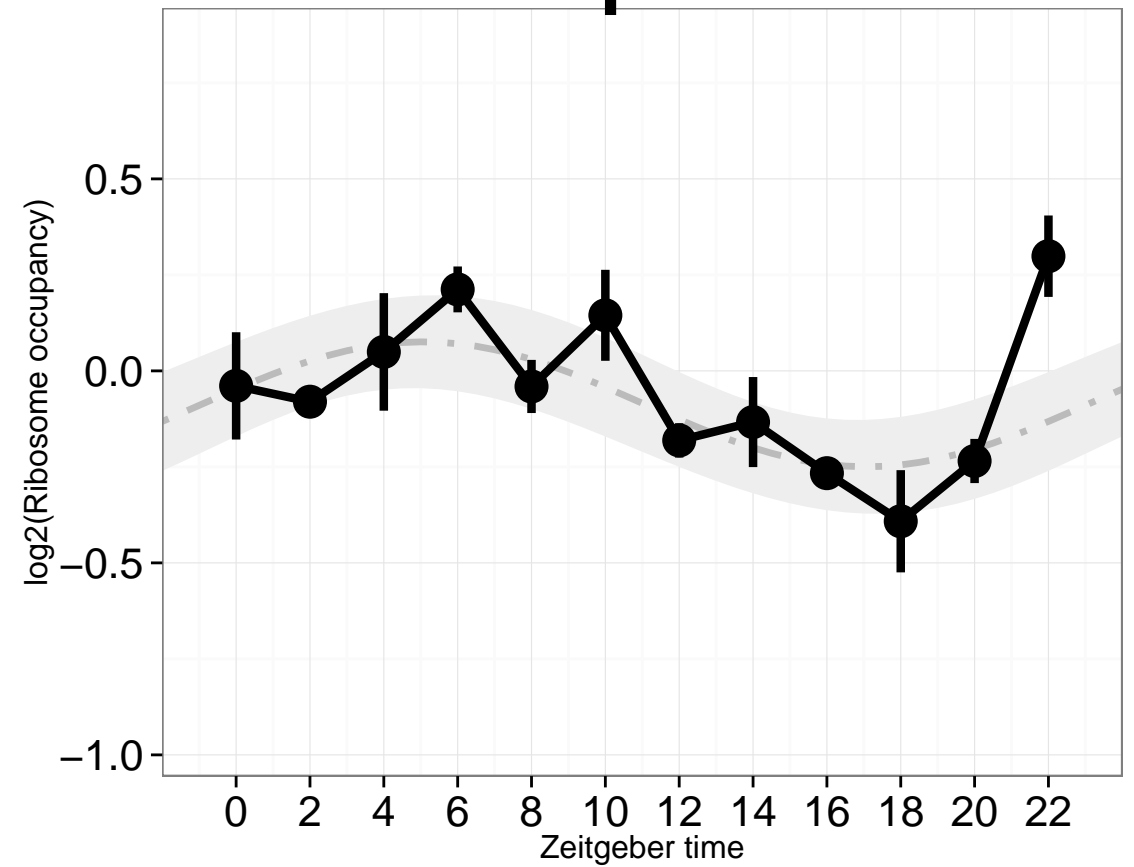

Supplement: SuppDataset_1.zip [file Mrps33_set_A.pdf › Supplemental Dataset 1/A-mRNA_nonrhyth_translation_nonrhyth/Mrps33_set_A.pdf]

# Mrps34

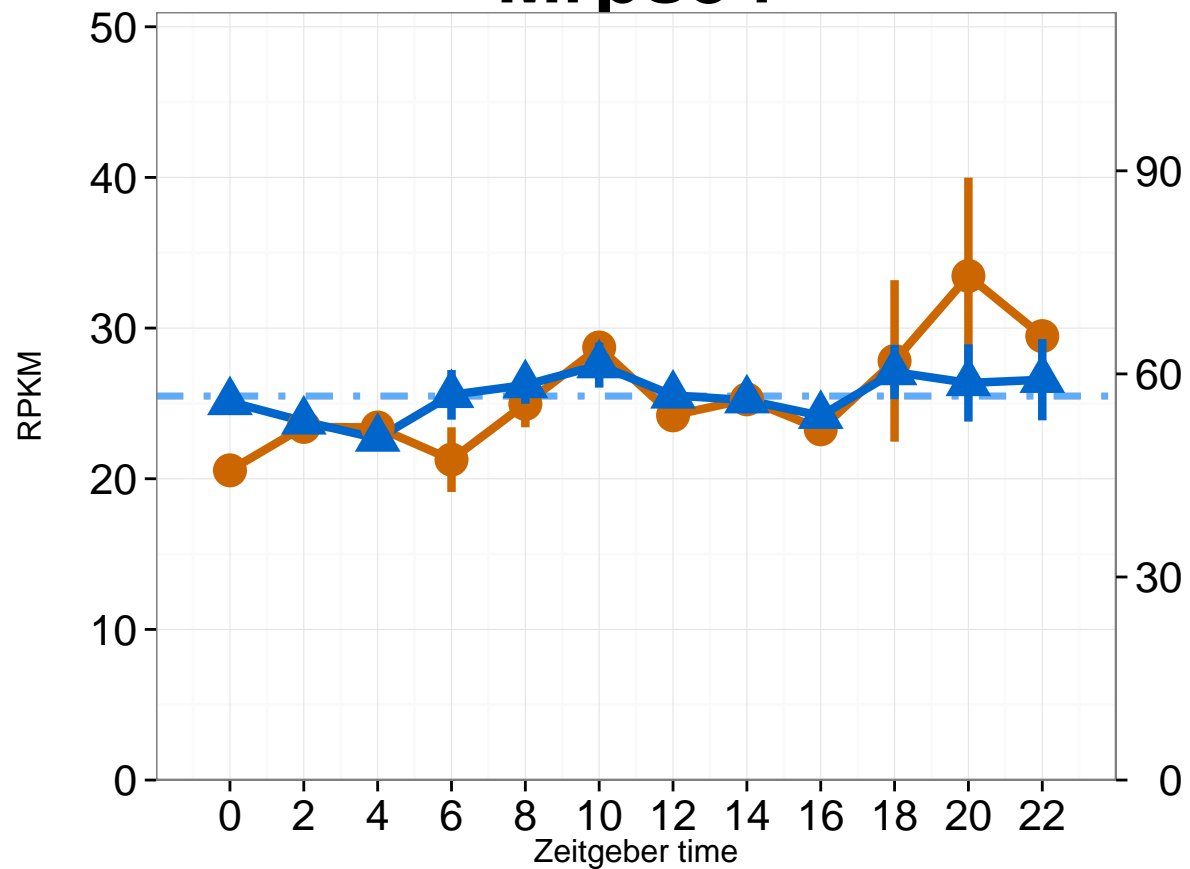

# Mrps34

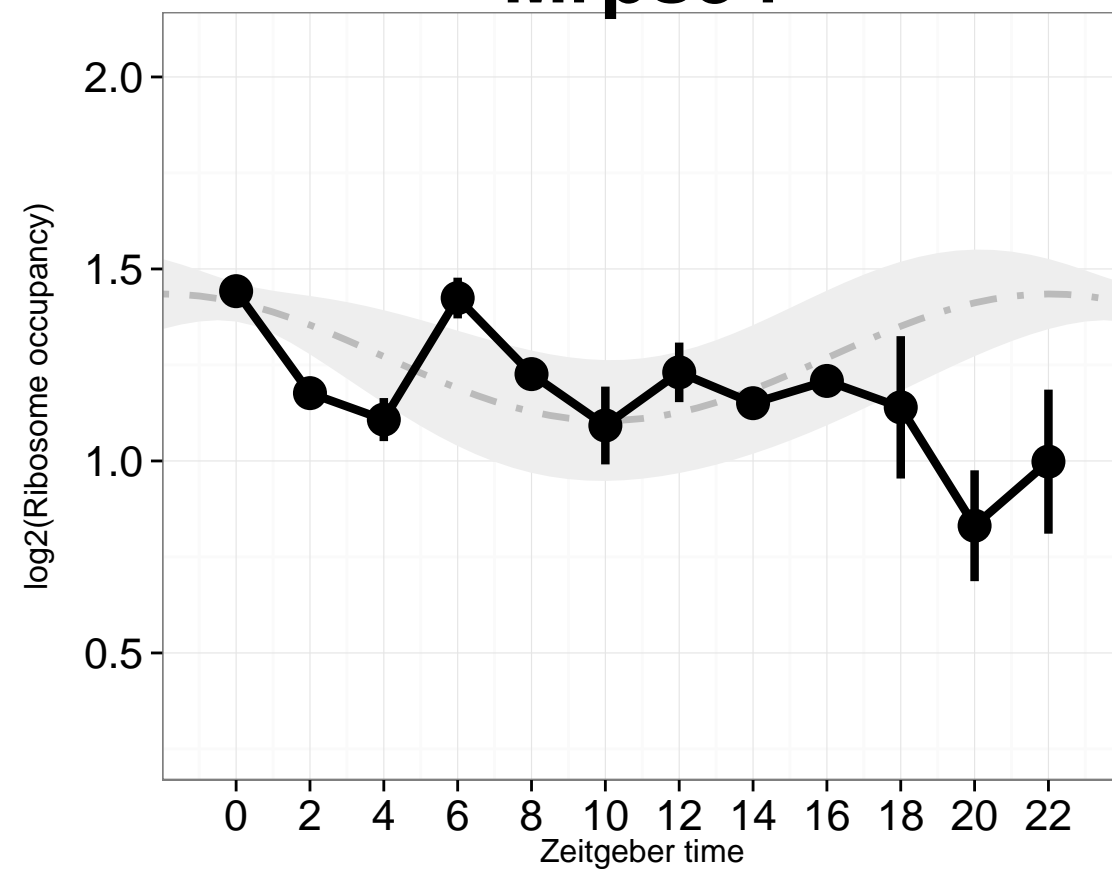

Supplement: SuppDataset_1.zip [file Mrps34_set_A.pdf › Supplemental Dataset 1/A-mRNA_nonrhyth_translation_nonrhyth/Mrps34_set_A.pdf]

## Mrps35

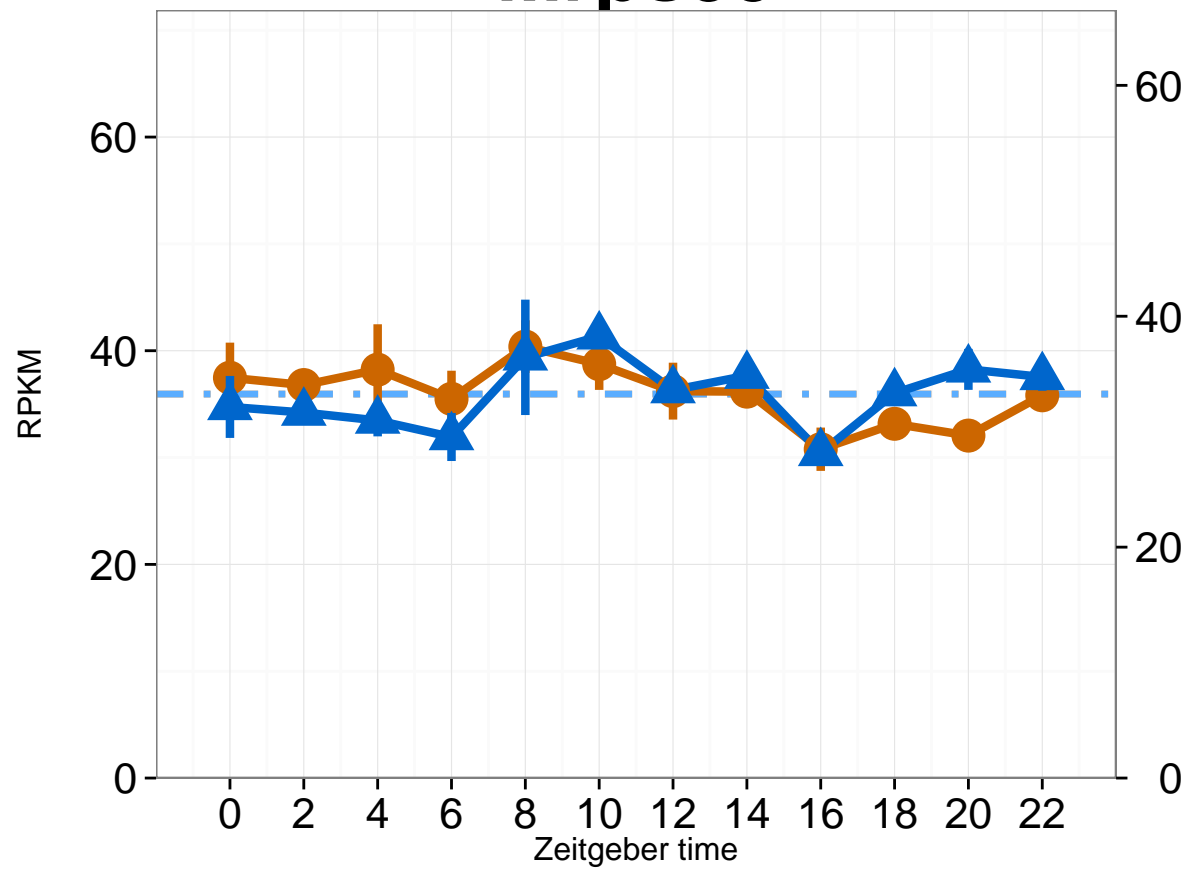

## Mrps35

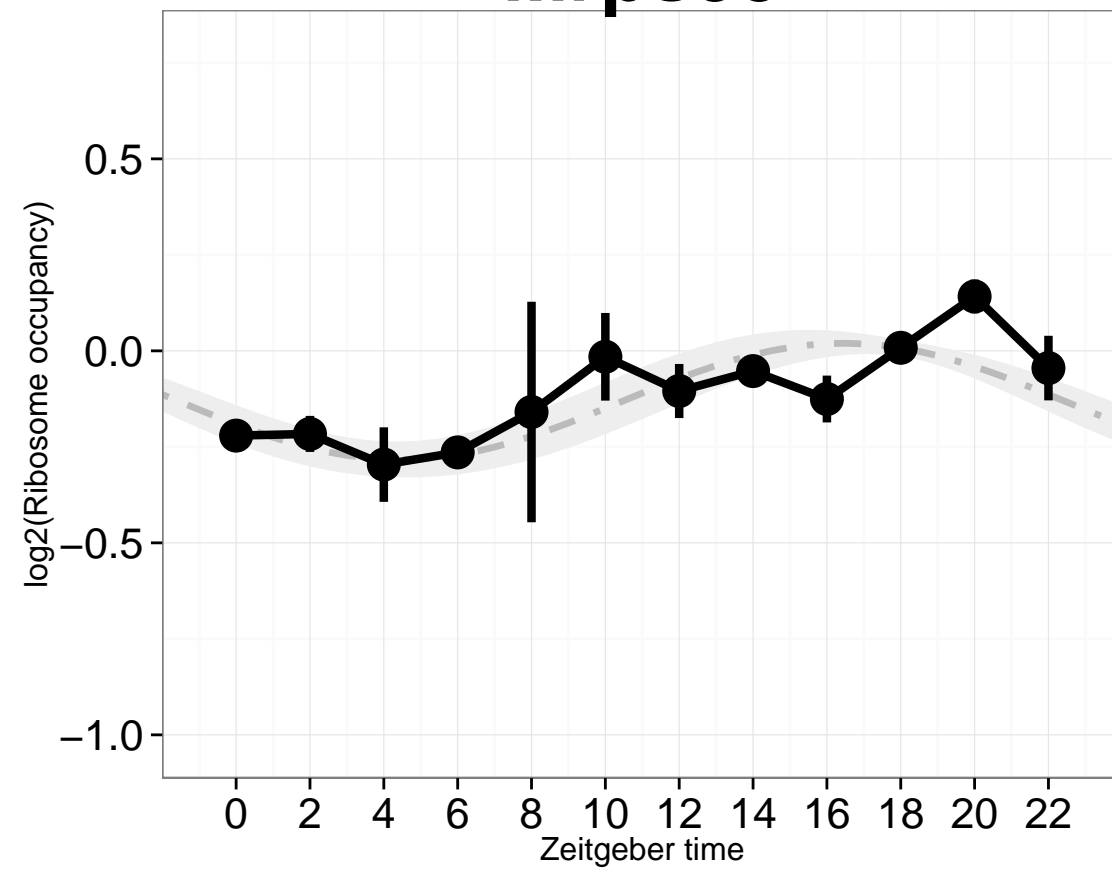

Supplement: SuppDataset_1.zip [file Mrps35_set_A.pdf › Supplemental Dataset 1/A-mRNA_nonrhyth_translation_nonrhyth/Mrps35_set_A.pdf]

## Mrps5

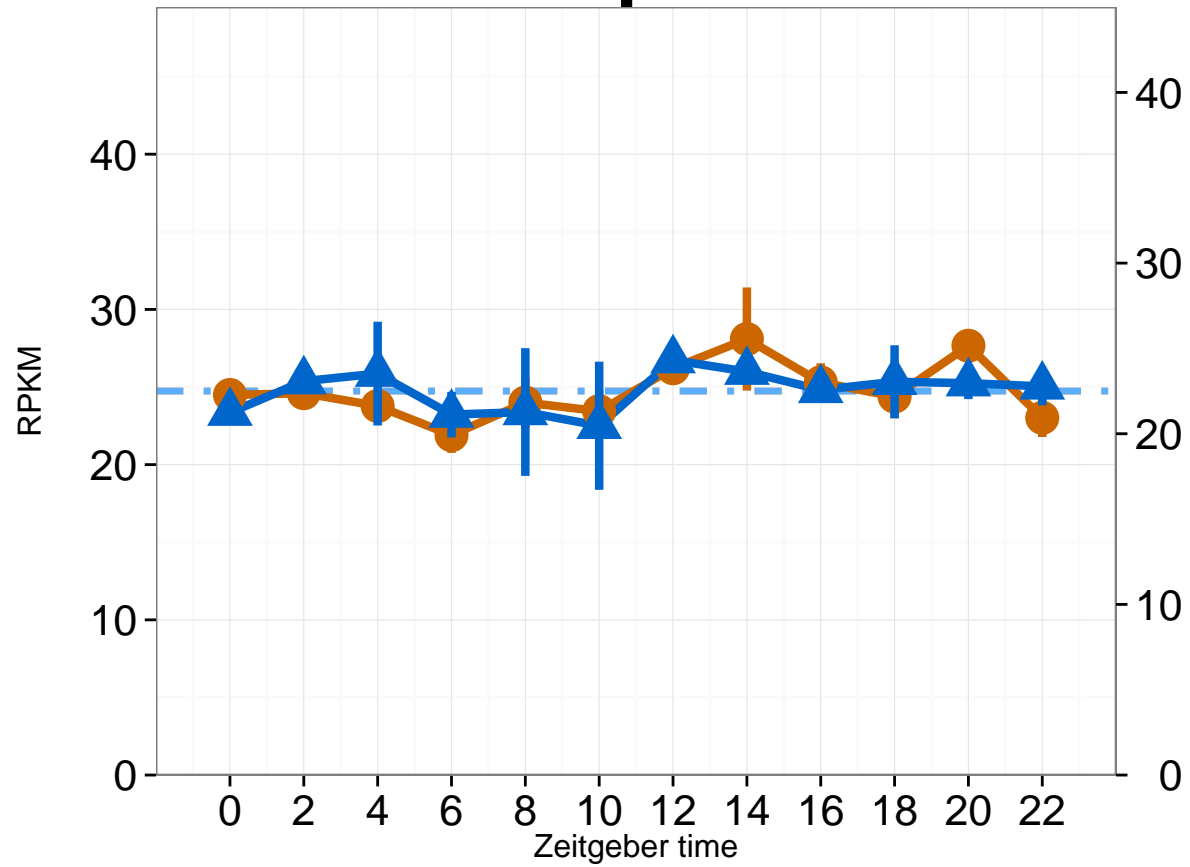

## Mrps5

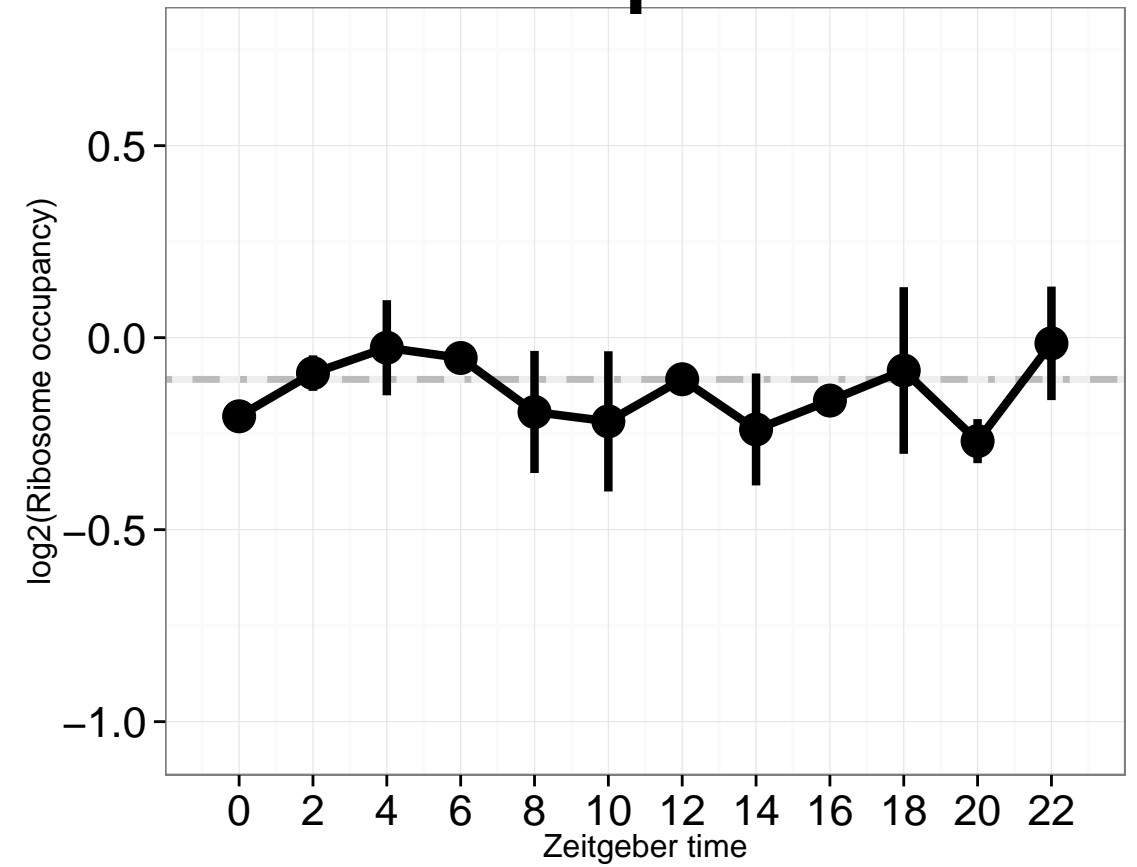

Supplement: SuppDataset_1.zip [file Mrps5_set_A.pdf › Supplemental Dataset 1/A-mRNA_nonrhyth_translation_nonrhyth/Mrps5_set_A.pdf]

# Mrps6

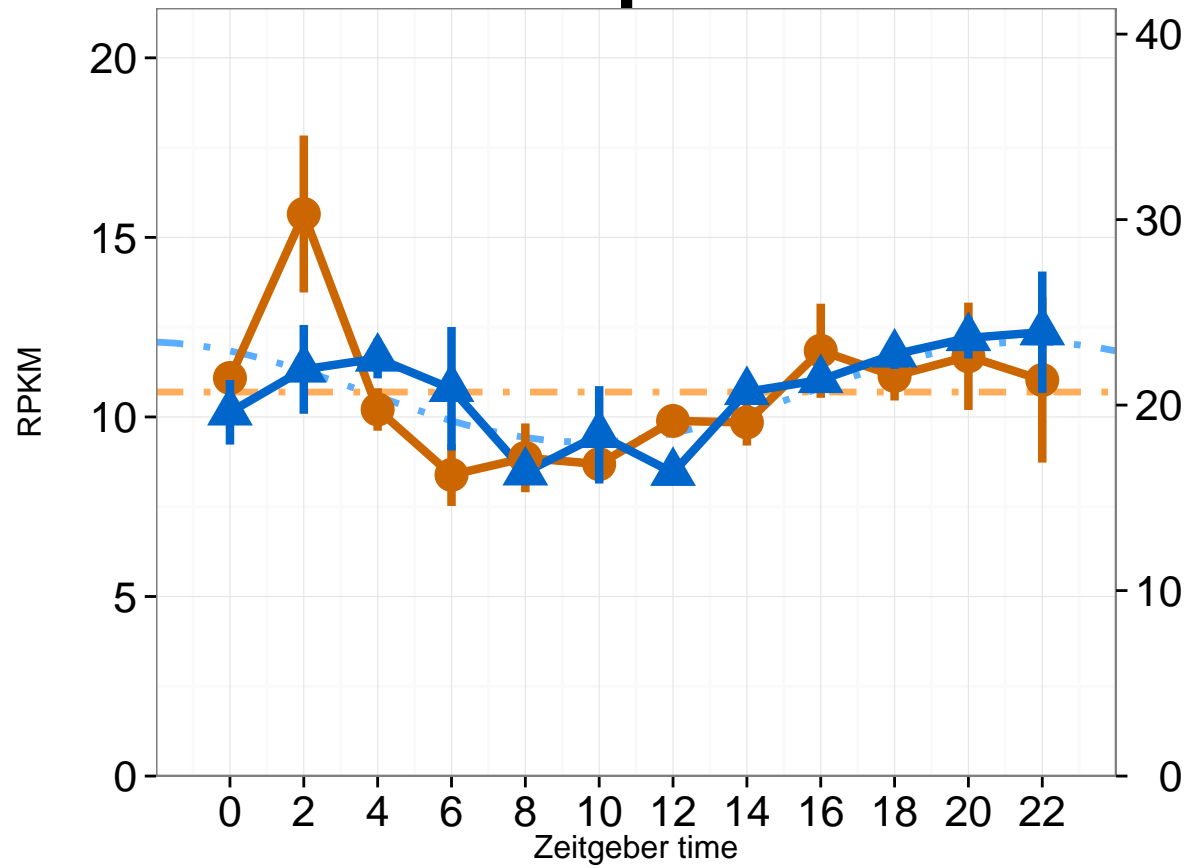

# Mrps6

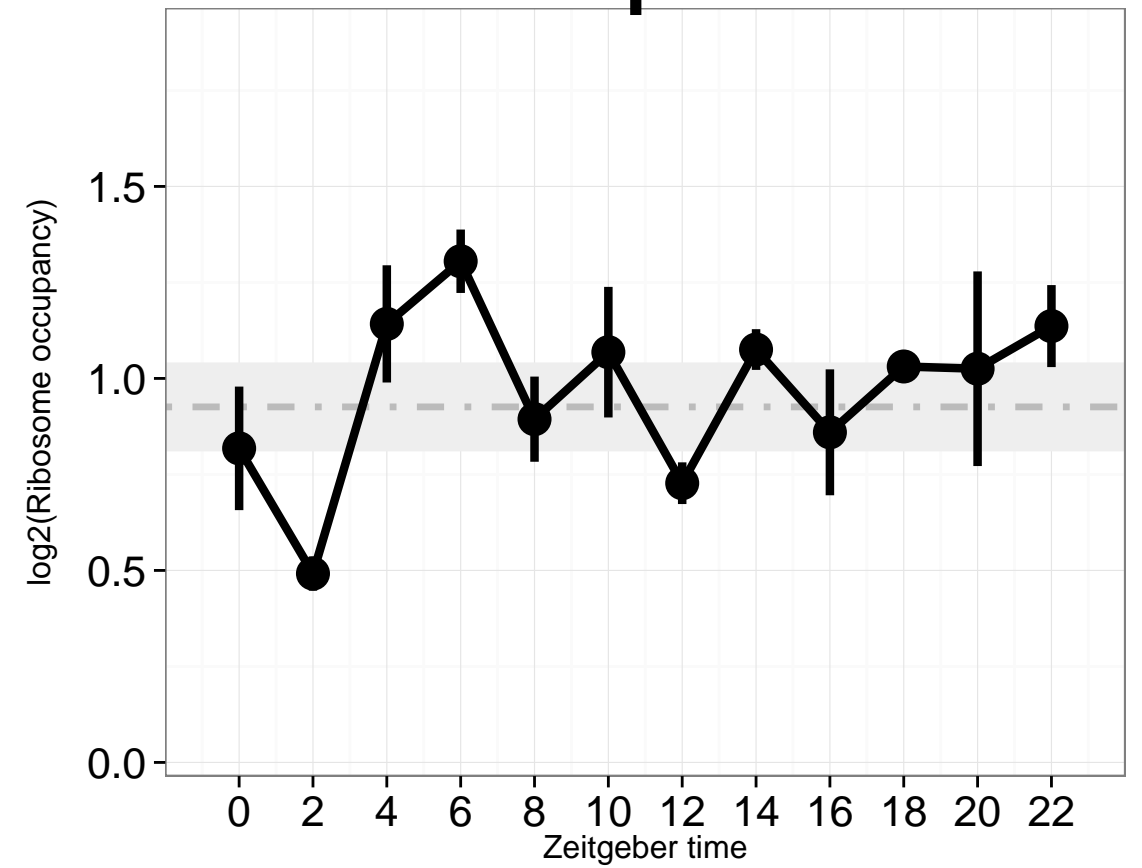

Supplement: SuppDataset_1.zip [file Mrps6_set_A.pdf › Supplemental Dataset 1/A-mRNA_nonrhyth_translation_nonrhyth/Mrps6_set_A.pdf]

## Mrps7

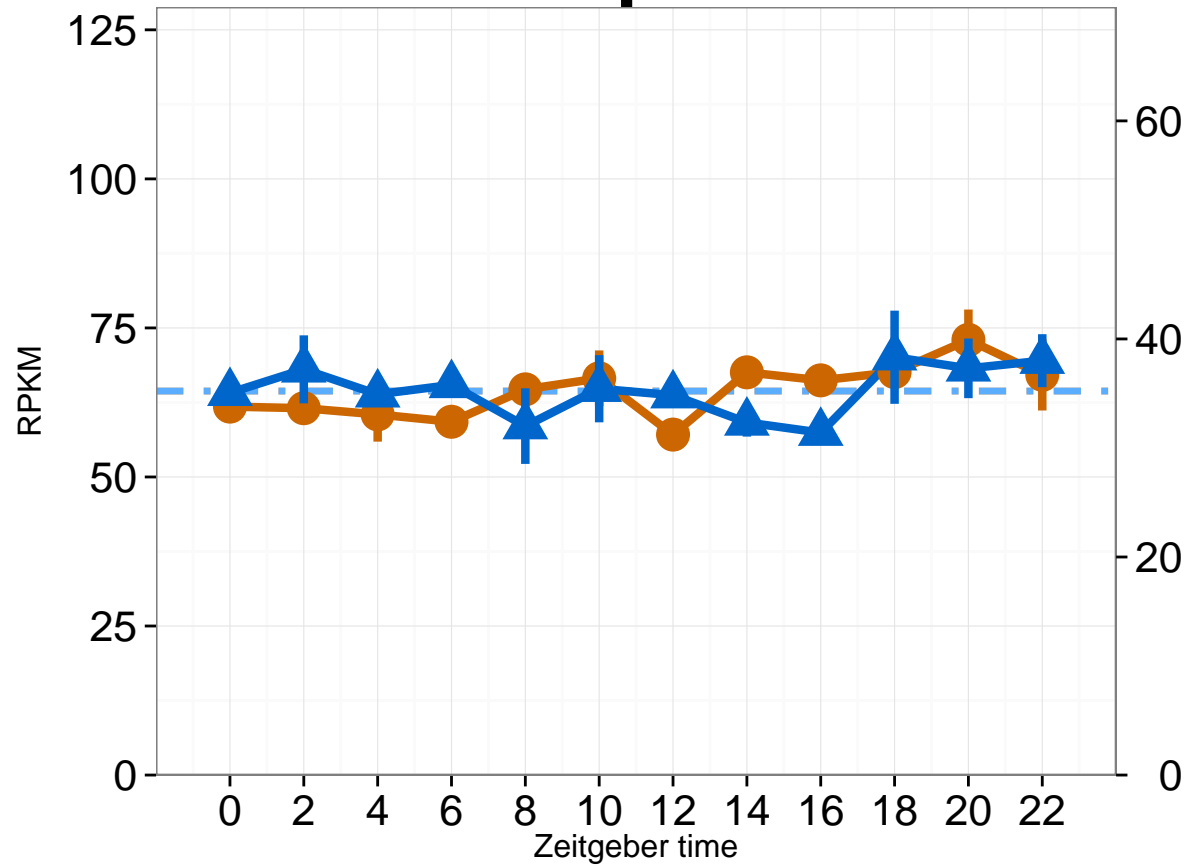

## Mrps7

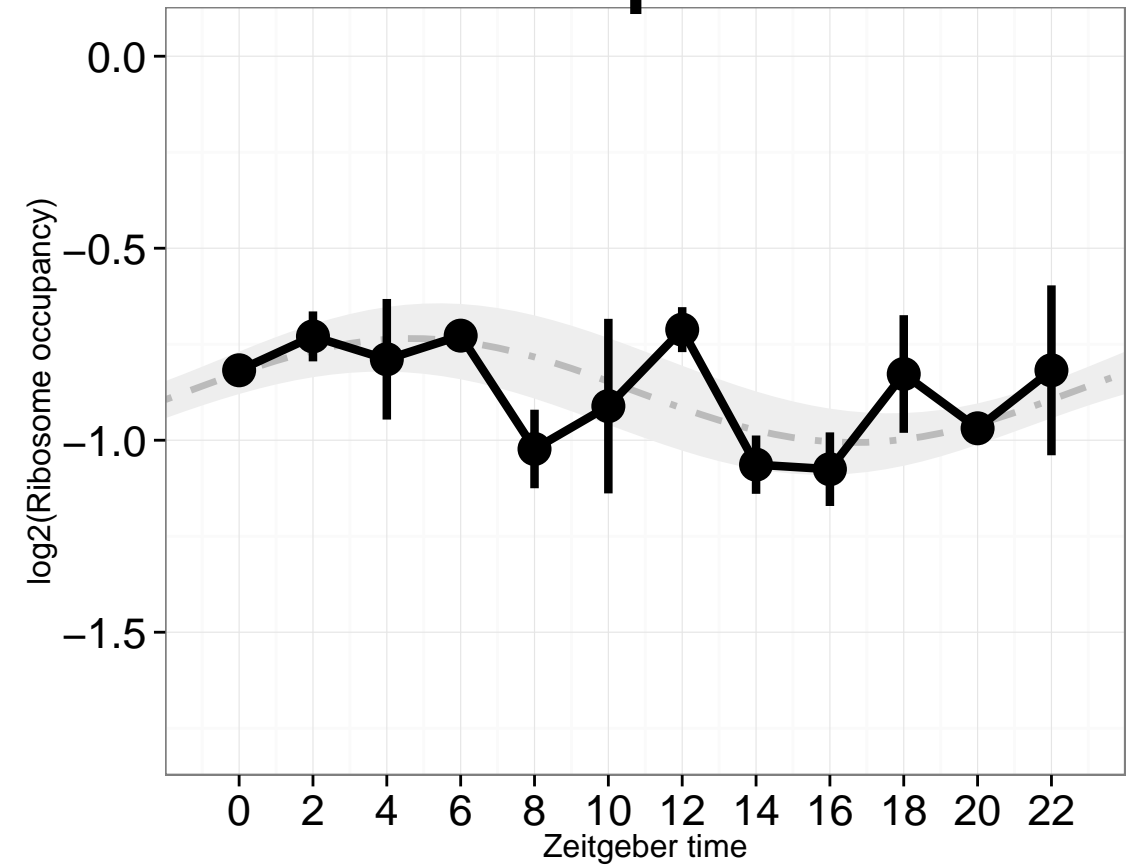

Supplement: SuppDataset_1.zip [file Mrps7_set_A.pdf › Supplemental Dataset 1/A-mRNA_nonrhyth_translation_nonrhyth/Mrps7_set_A.pdf]

# Mrps9

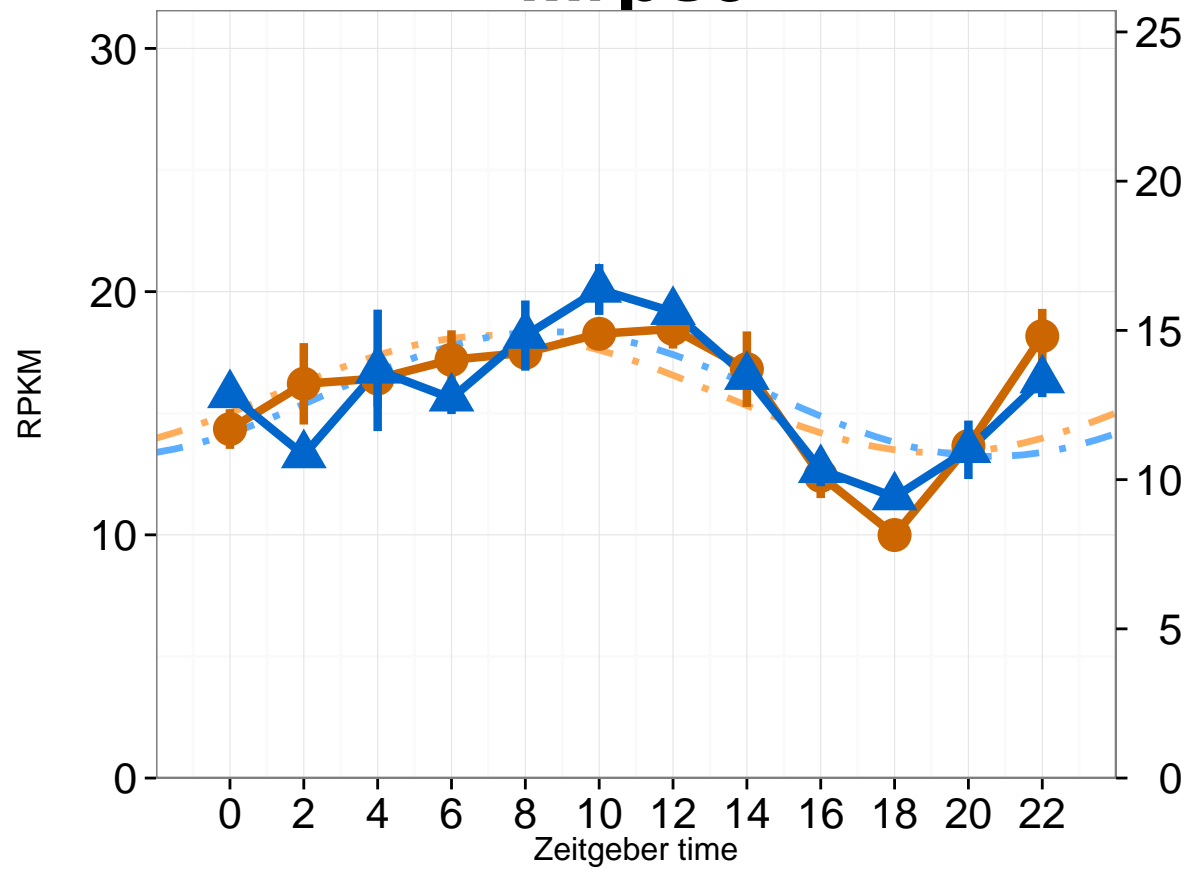

# Mrps9

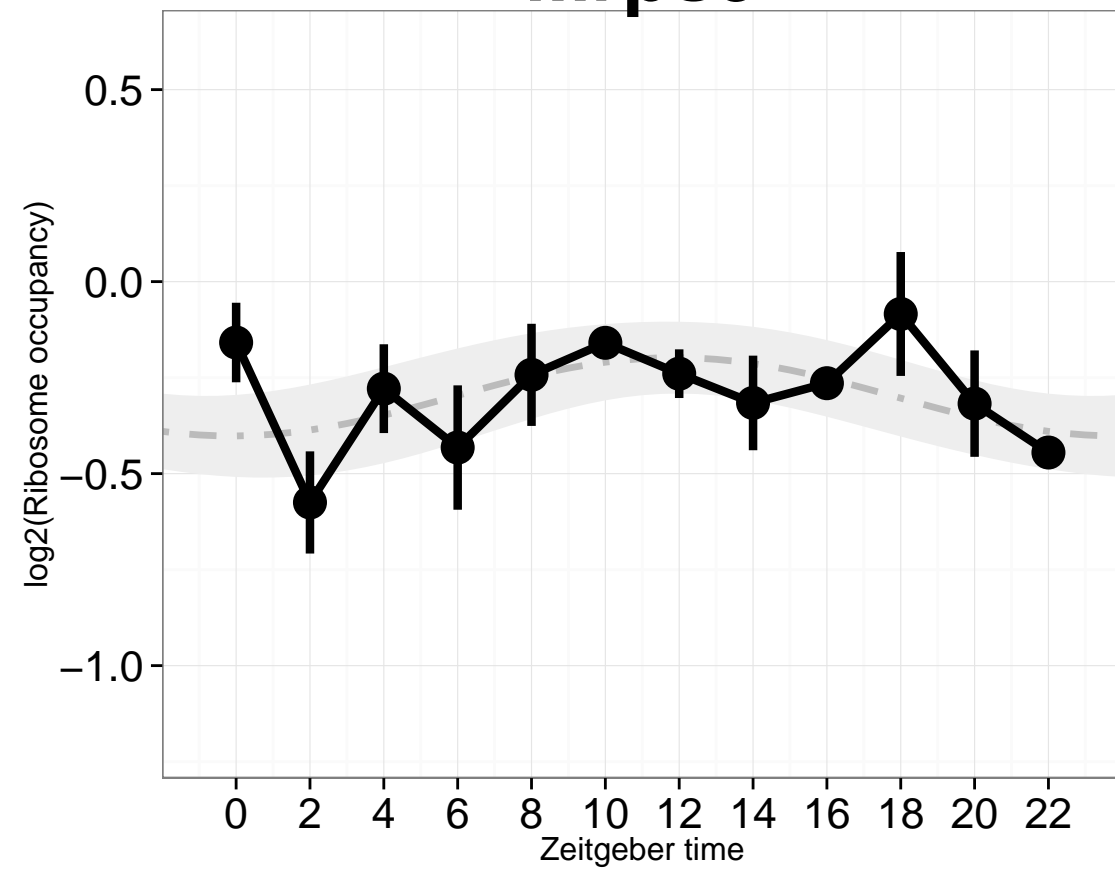

Supplement: SuppDataset_1.zip [file Mrps9_set_A.pdf › Supplemental Dataset 1/A-mRNA_nonrhyth_translation_nonrhyth/Mrps9_set_A.pdf]

## Mrrf

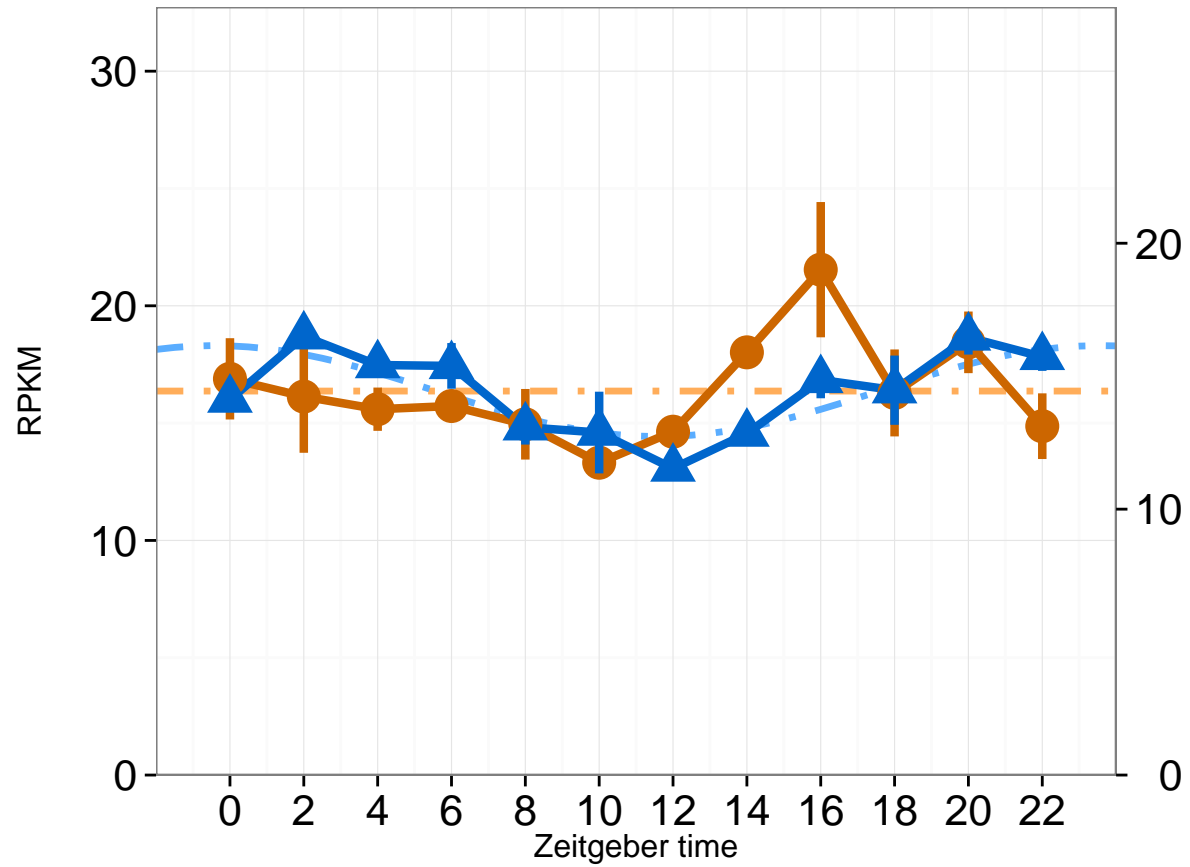

## Mrrf

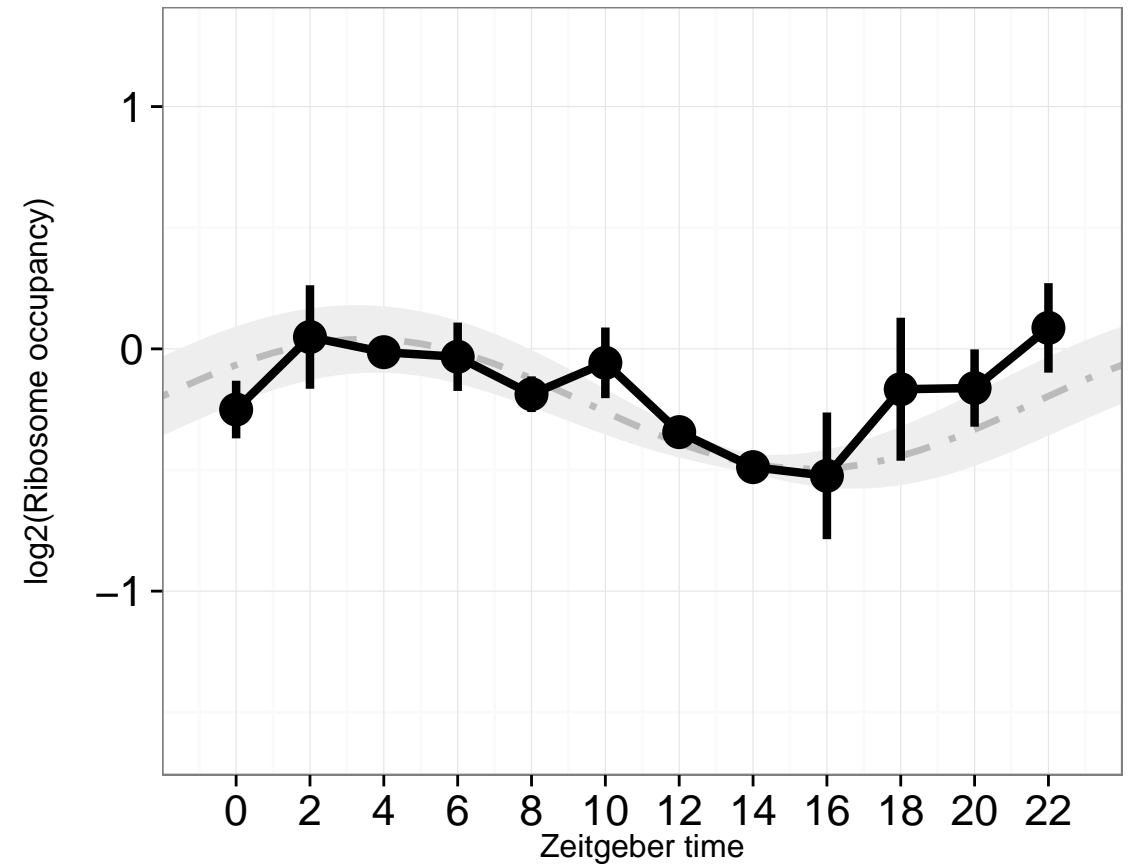

Supplement: SuppDataset_1.zip [file Mrrf_set_A.pdf › Supplemental Dataset 1/A-mRNA_nonrhyth_translation_nonrhyth/Mrrf_set_A.pdf]

# Mrs2

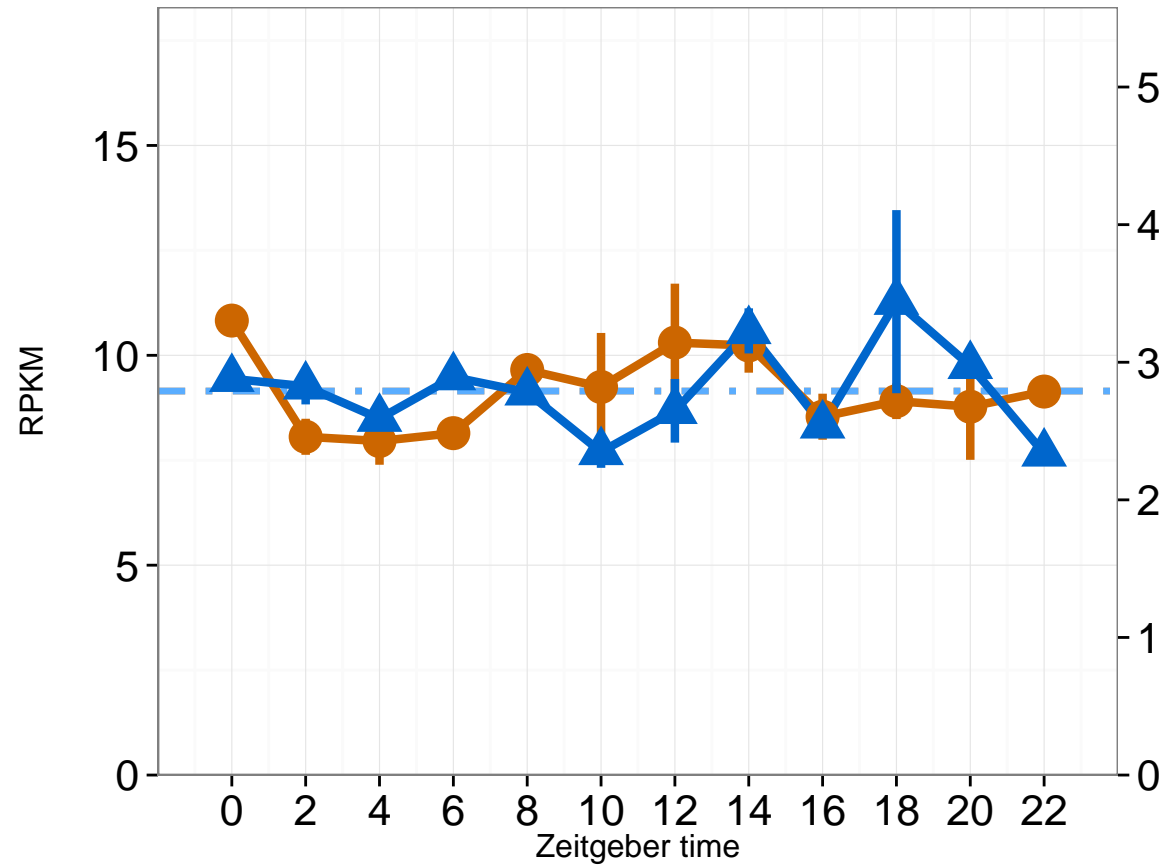

# Mrs2

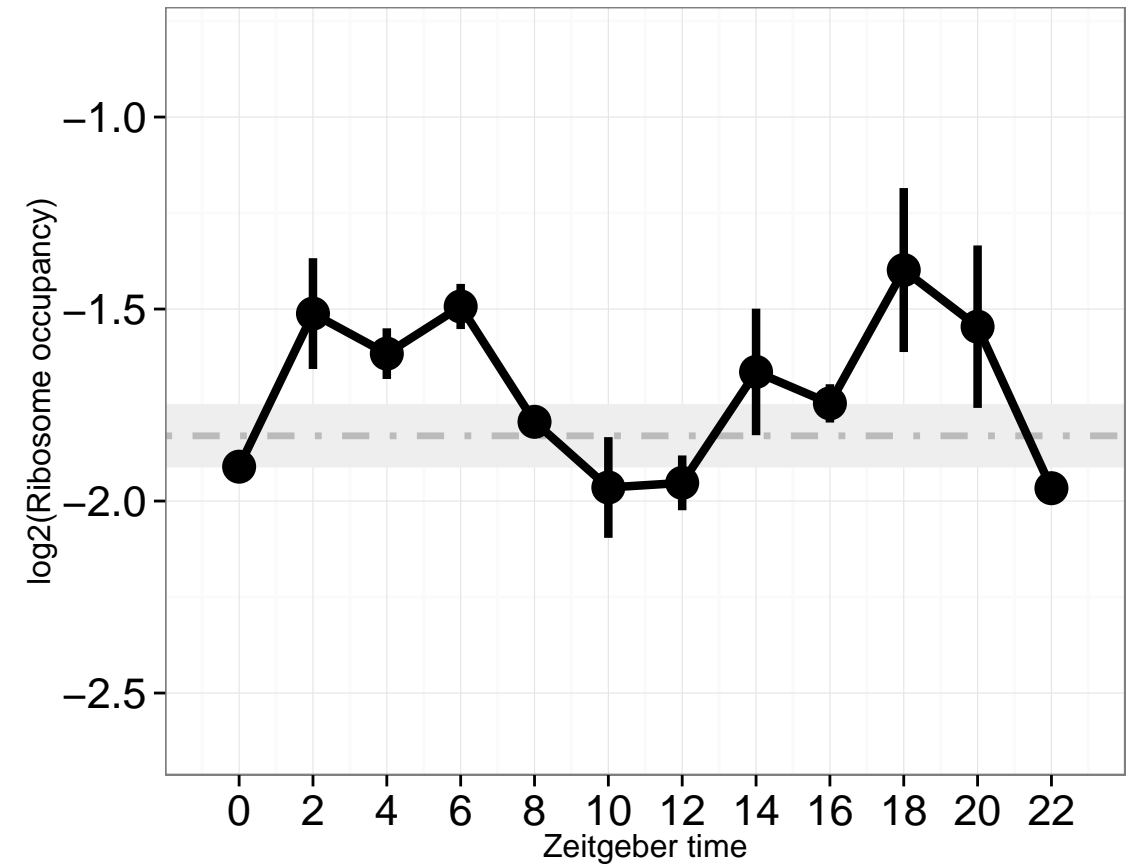

Supplement: SuppDataset_1.zip [file Mrs2_set_A.pdf › Supplemental Dataset 1/A-mRNA_nonrhyth_translation_nonrhyth/Mrs2_set_A.pdf]

**Ms4a4c TR**

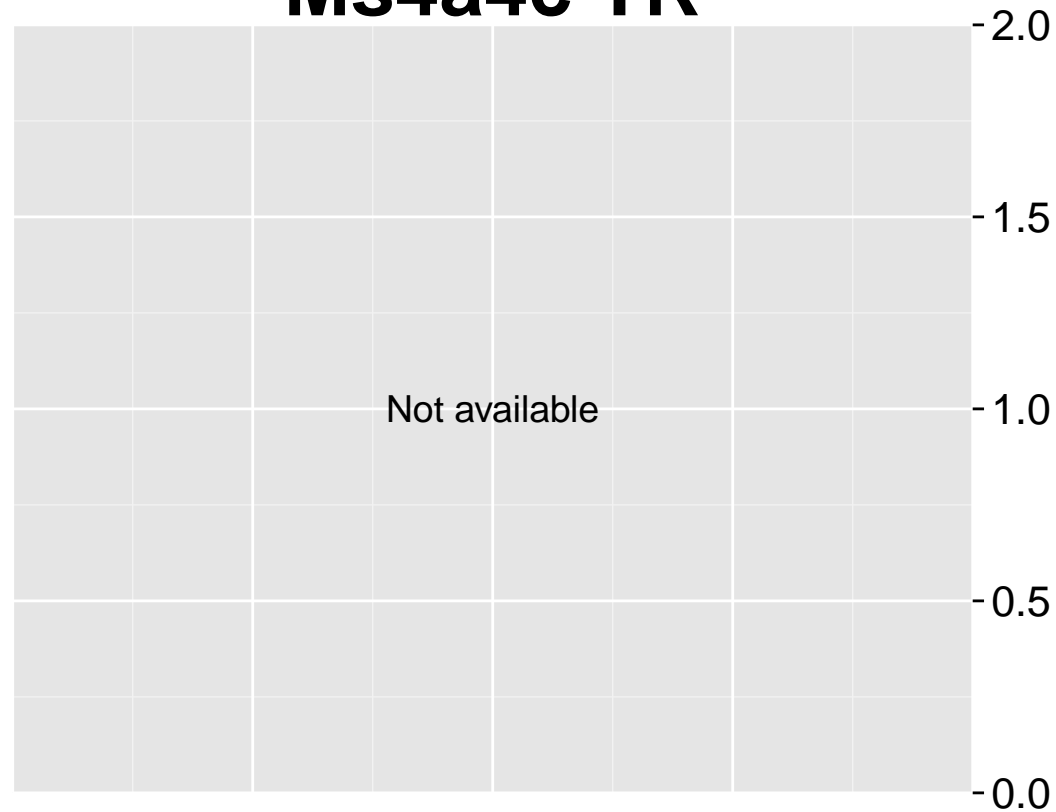

**Ms4a4c log2(Ribosome occupancy**

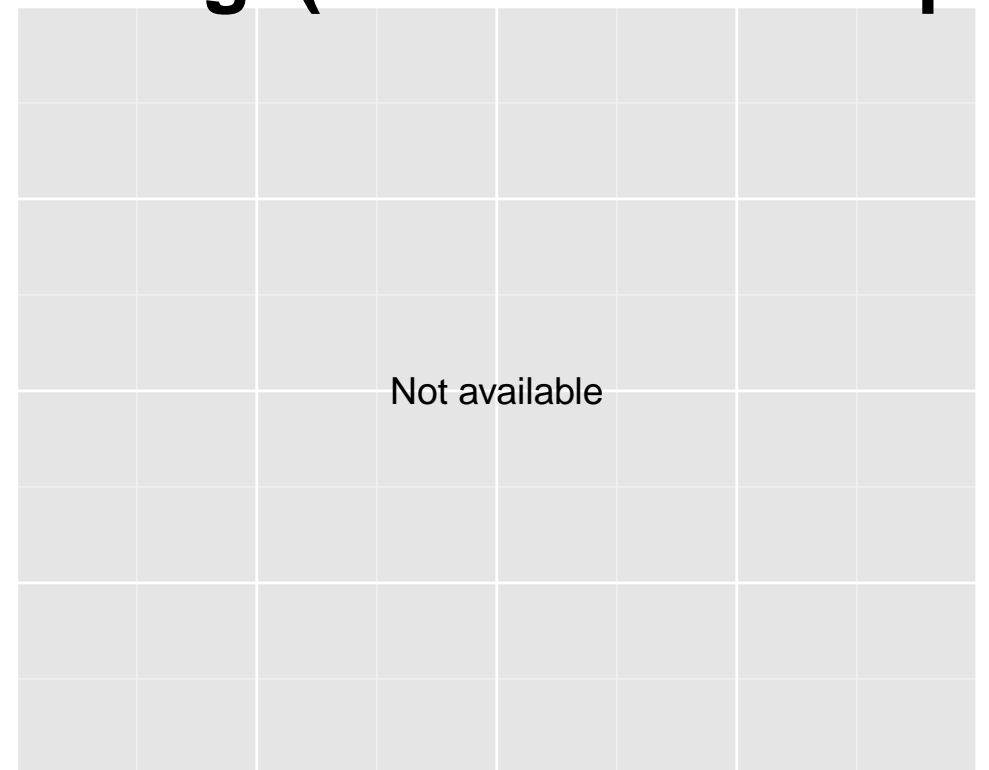

Supplement: SuppDataset_1.zip [file Ms4a4c_set_A.pdf › Supplemental Dataset 1/A-mRNA_nonrhyth_translation_nonrhyth/Ms4a4c_set_A.pdf]

# Ms4a4d

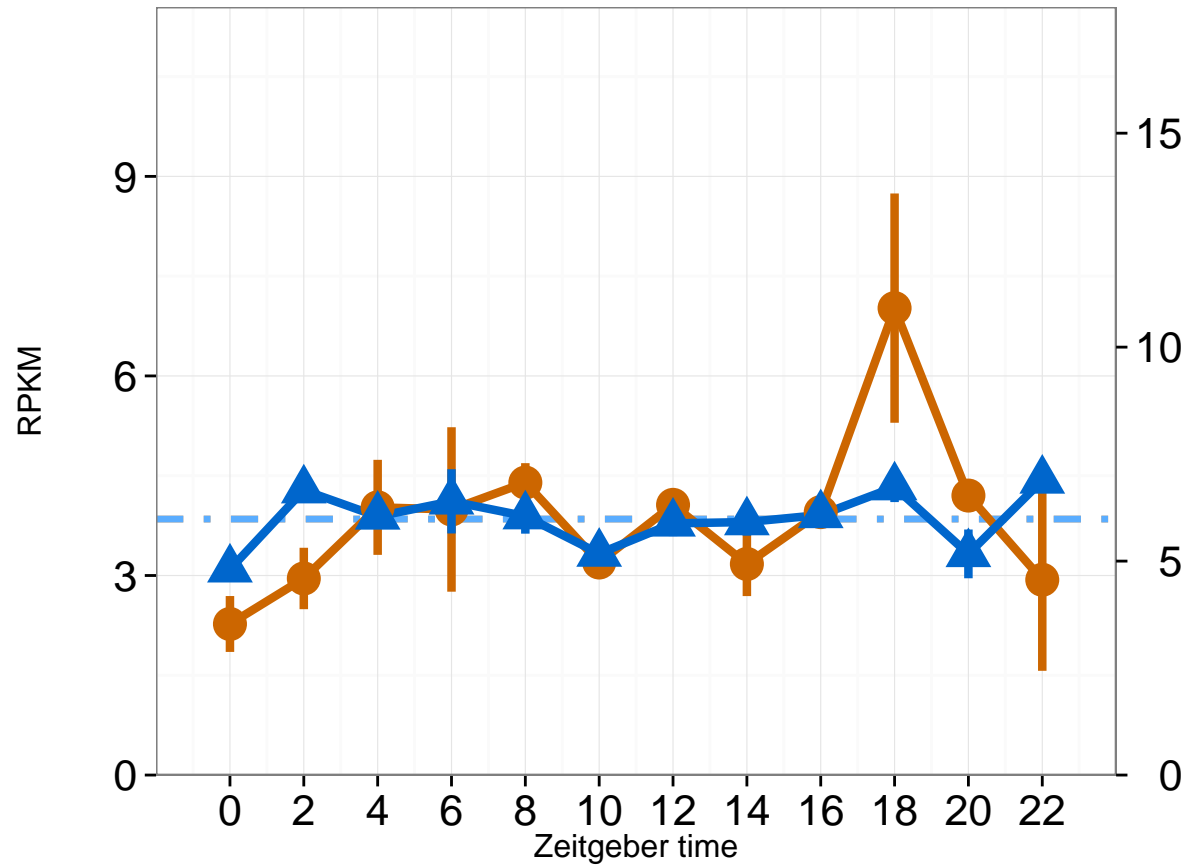

# Ms4a4d

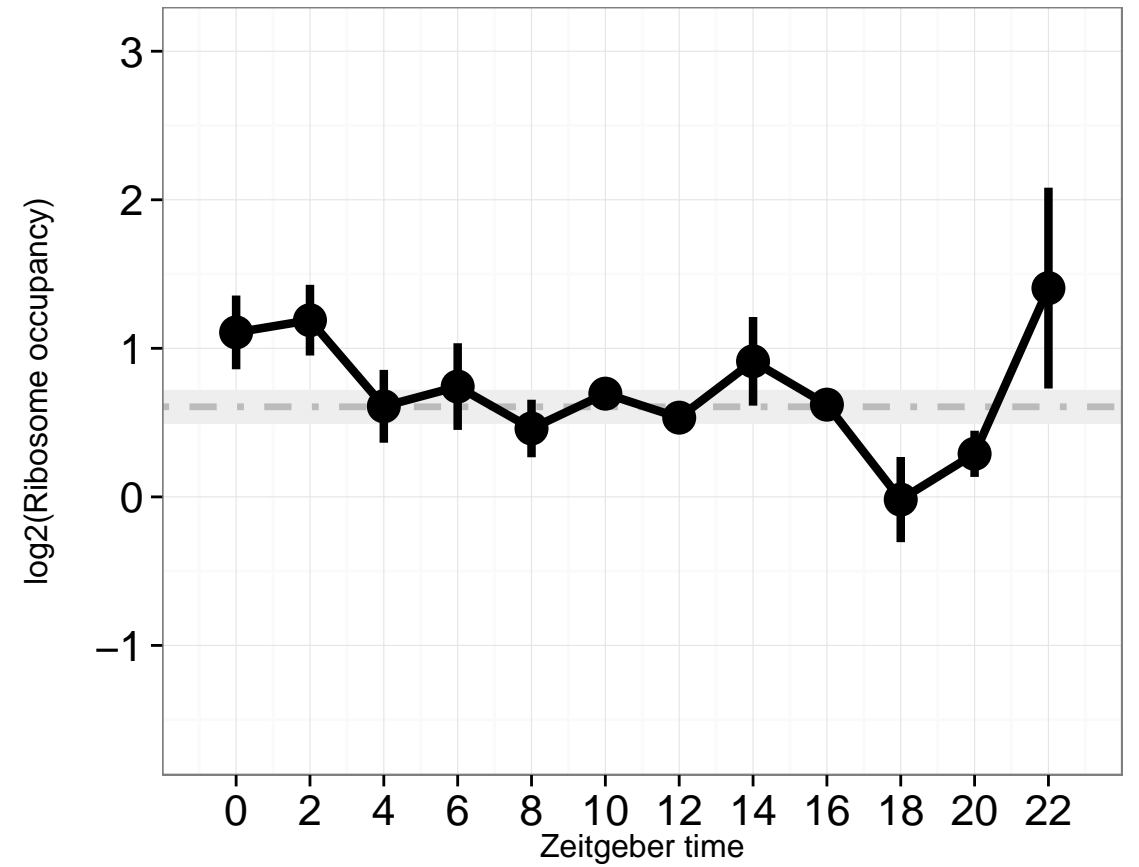

Supplement: SuppDataset_1.zip [file Ms4a4d_set_A.pdf › Supplemental Dataset 1/A-mRNA_nonrhyth_translation_nonrhyth/Ms4a4d_set_A.pdf]

# Ms4a6b

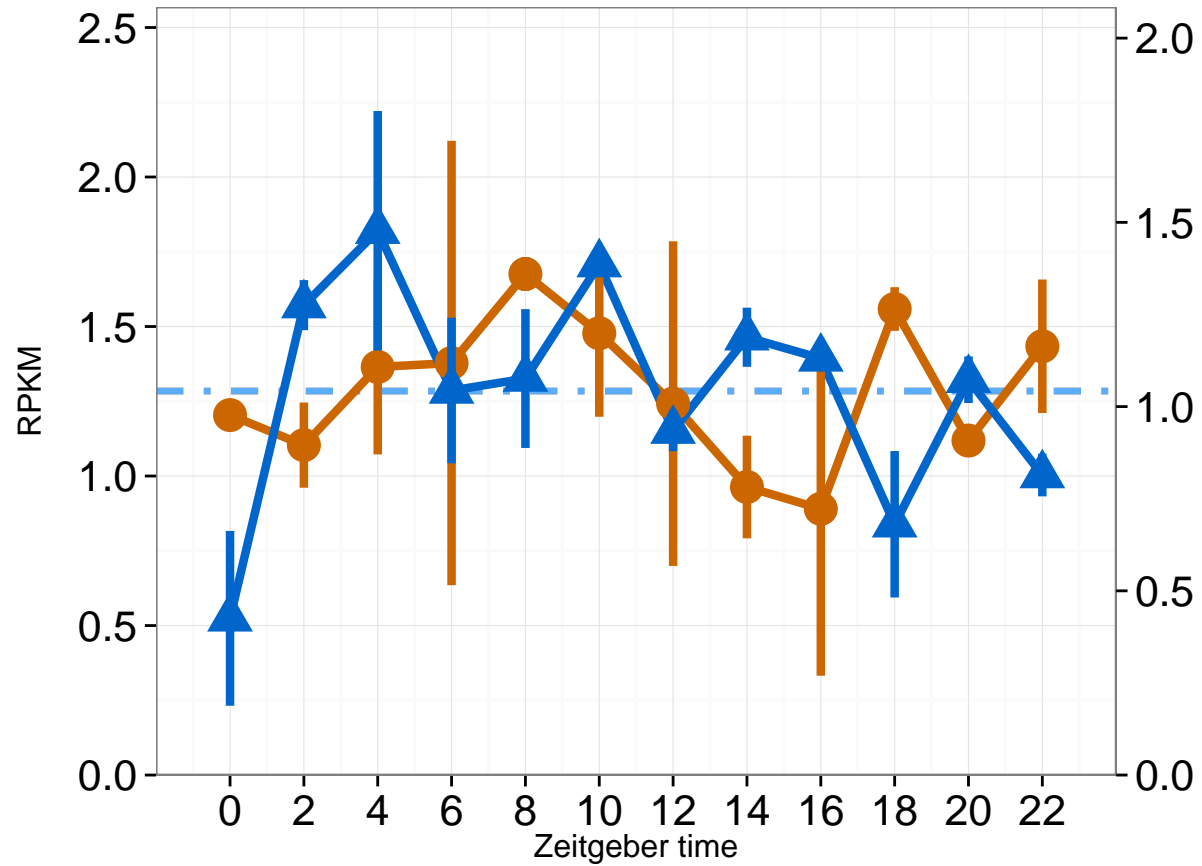

# Ms4a6b

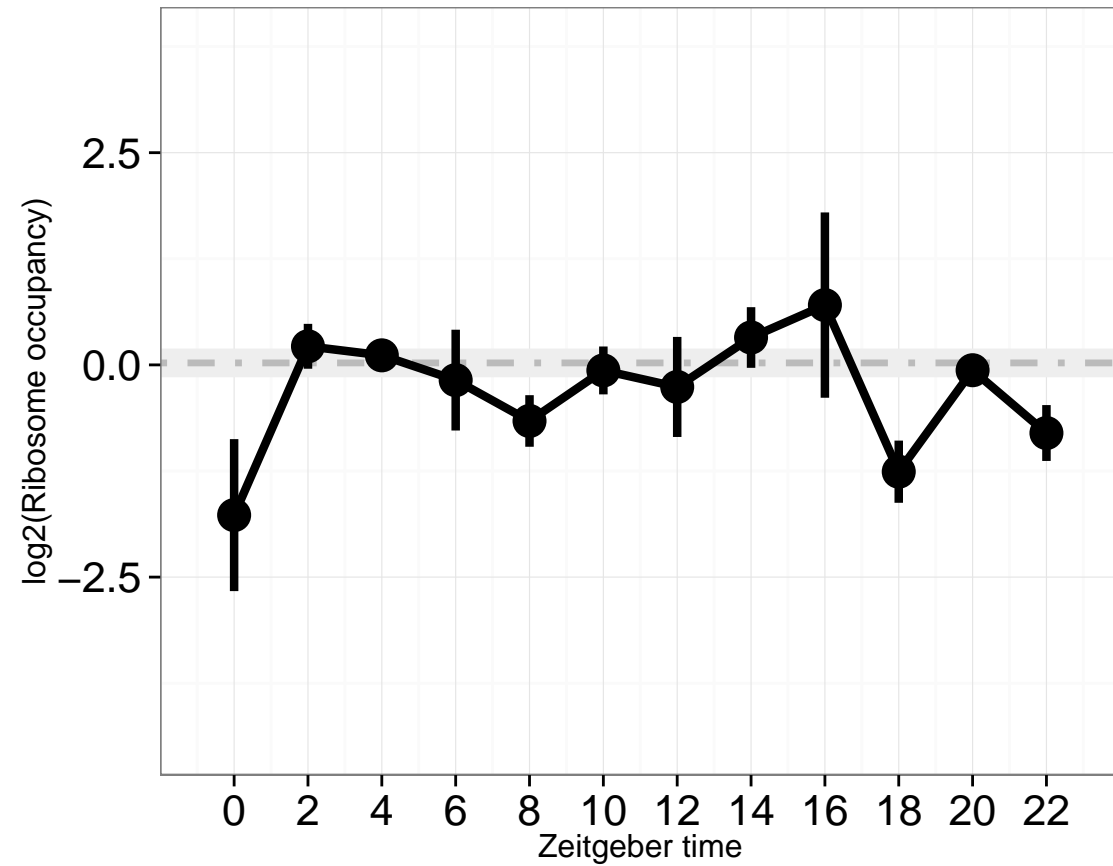

Supplement: SuppDataset_1.zip [file Ms4a6b_set_A.pdf › Supplemental Dataset 1/A-mRNA_nonrhyth_translation_nonrhyth/Ms4a6b_set_A.pdf]

# Ms4a6c

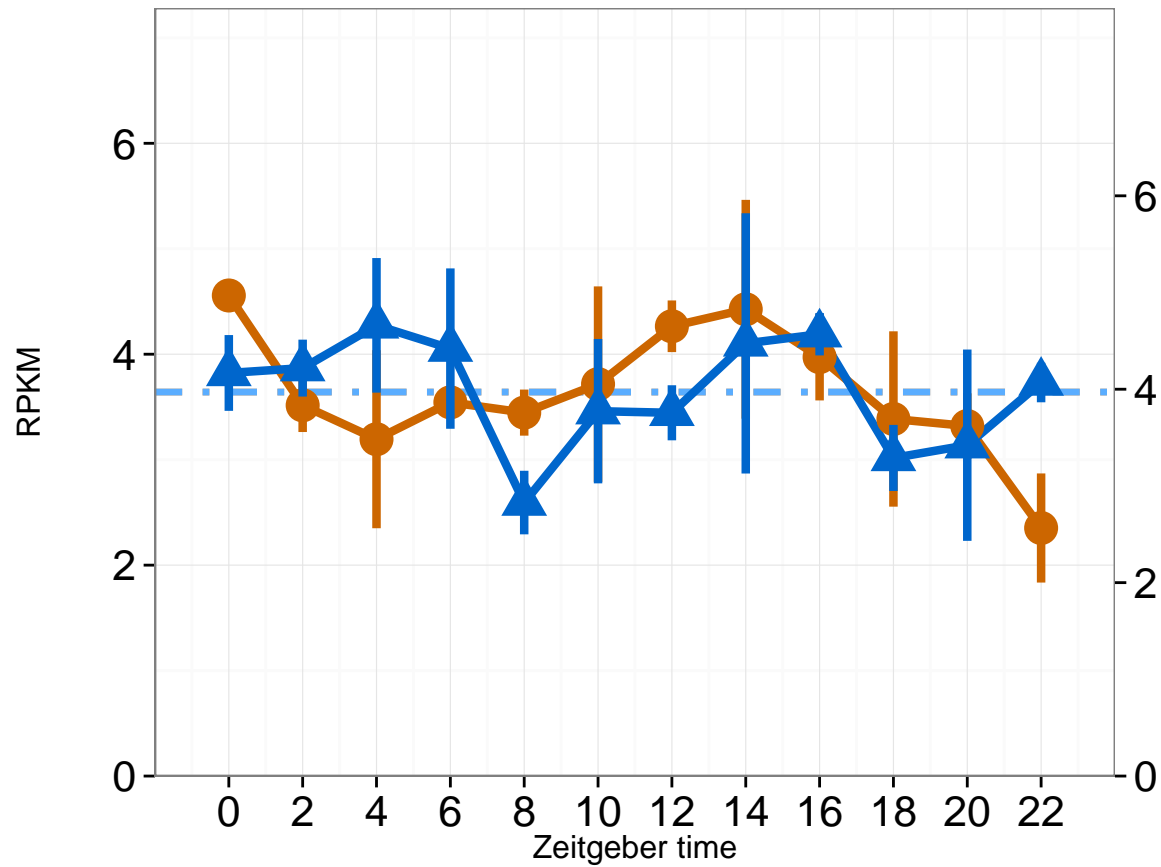

# Ms4a6c

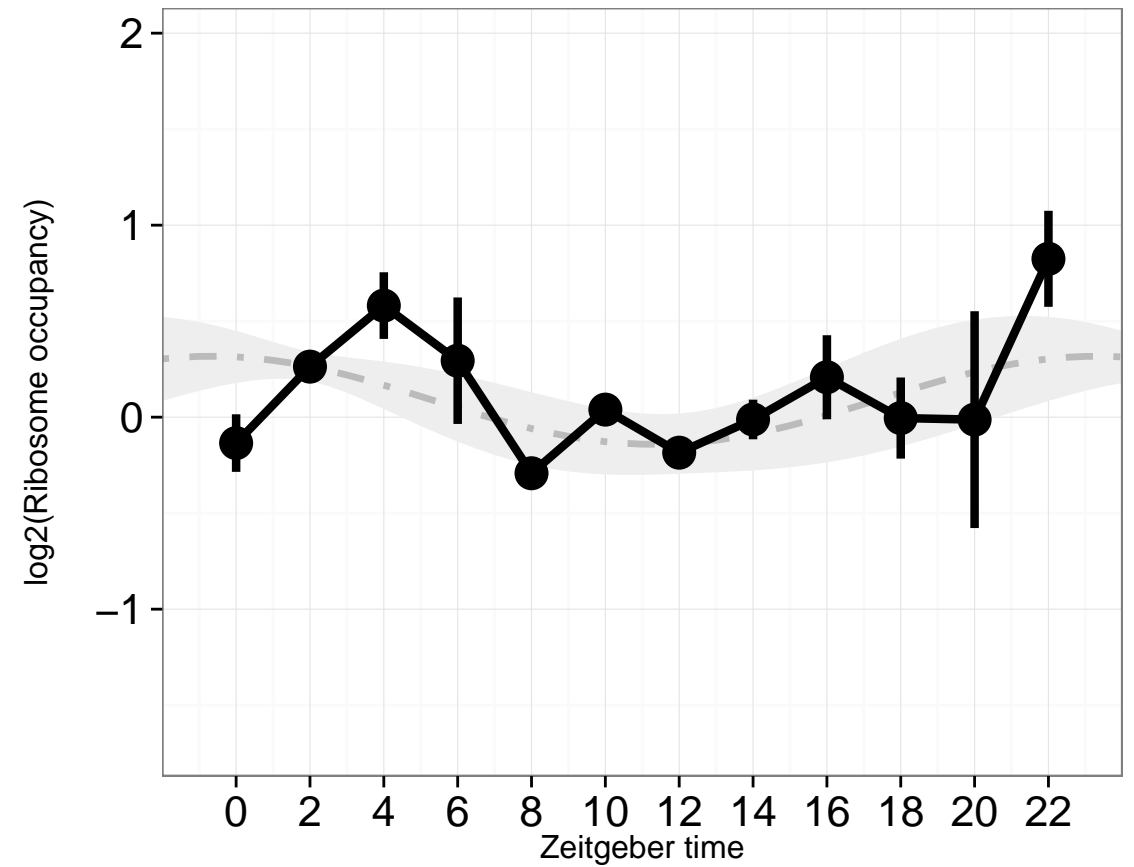

Supplement: SuppDataset_1.zip [file Ms4a6c_set_A.pdf › Supplemental Dataset 1/A-mRNA_nonrhyth_translation_nonrhyth/Ms4a6c_set_A.pdf]

# Ms4a6d

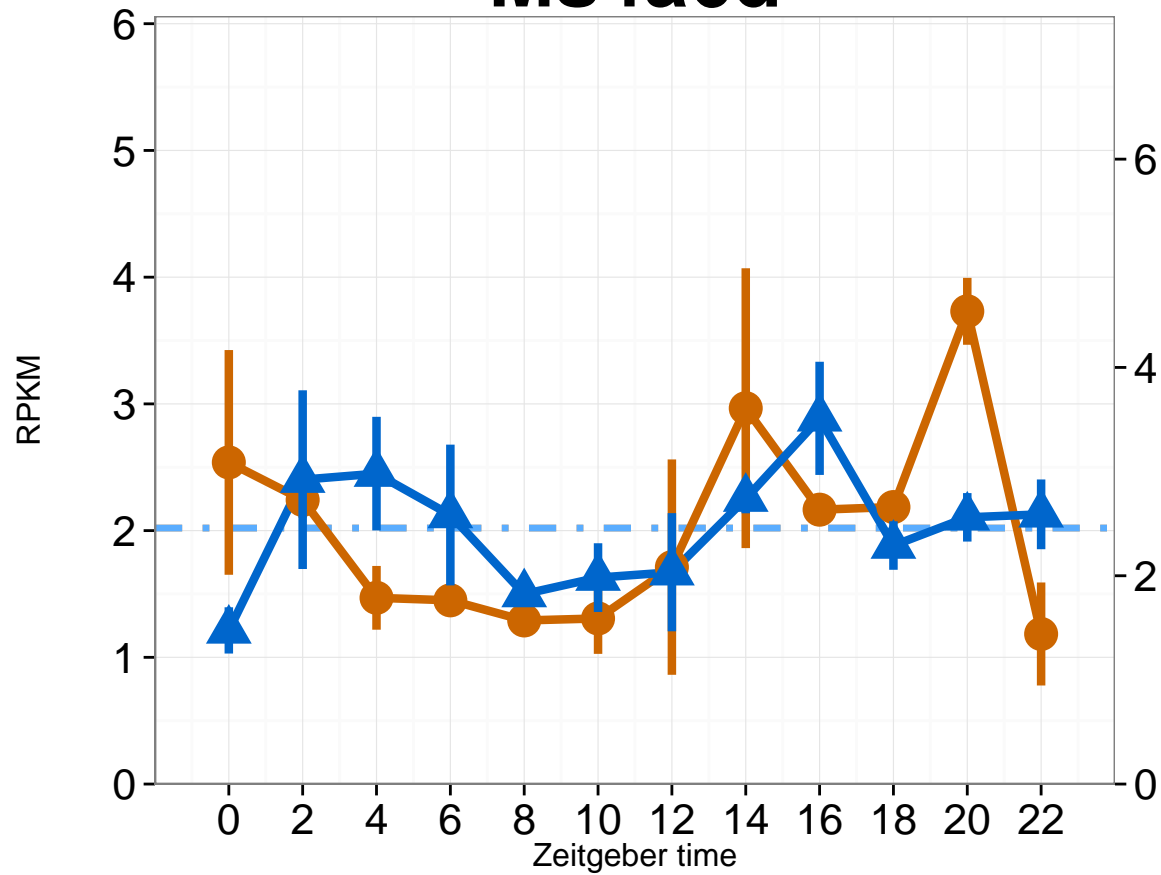

# Ms4a6d

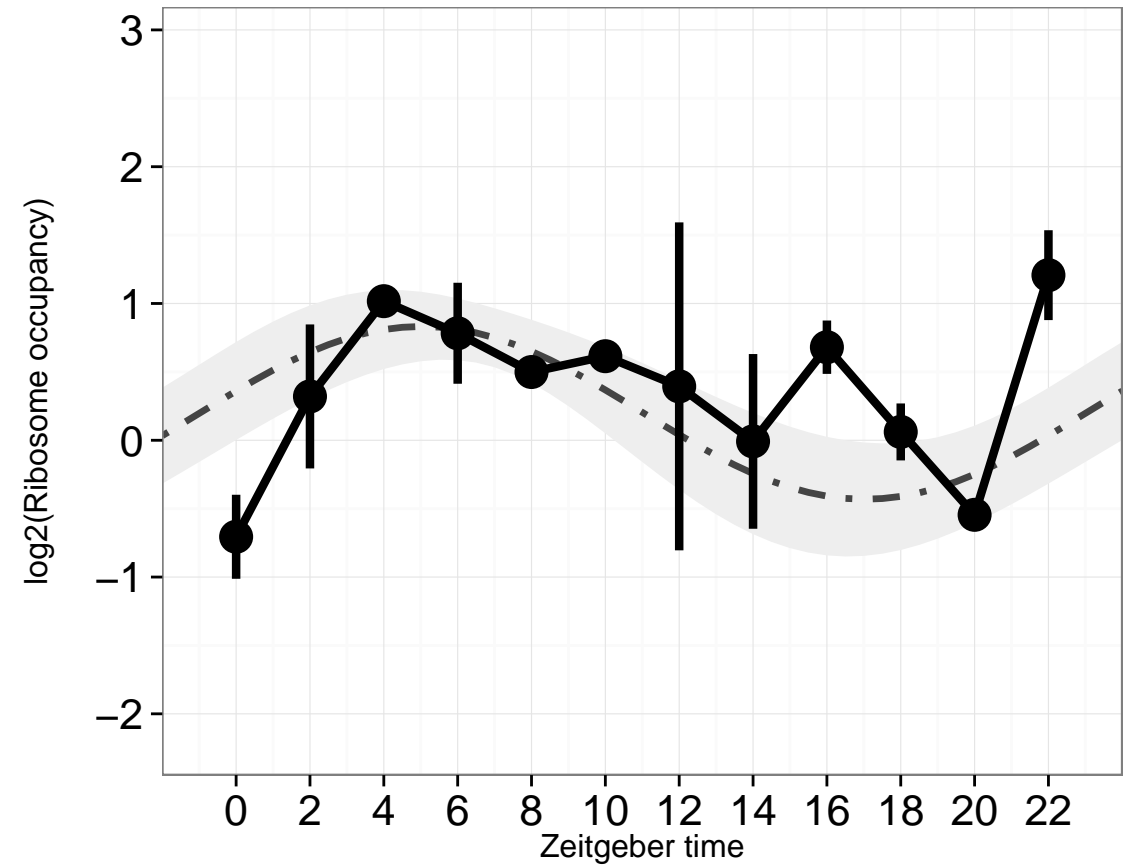

Supplement: SuppDataset_1.zip [file Ms4a6d_set_A.pdf › Supplemental Dataset 1/A-mRNA_nonrhyth_translation_nonrhyth/Ms4a6d_set_A.pdf]

**Ms4a7 TR**

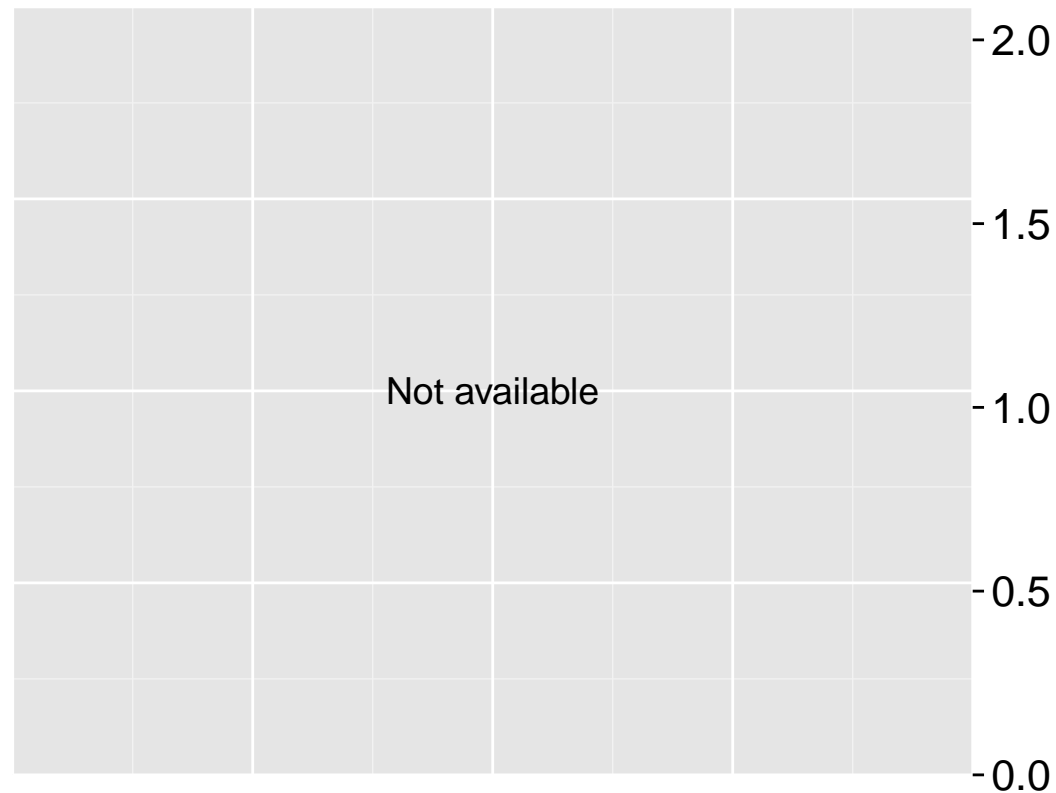

**Ms4a7 log2(Ribosome occupancy**

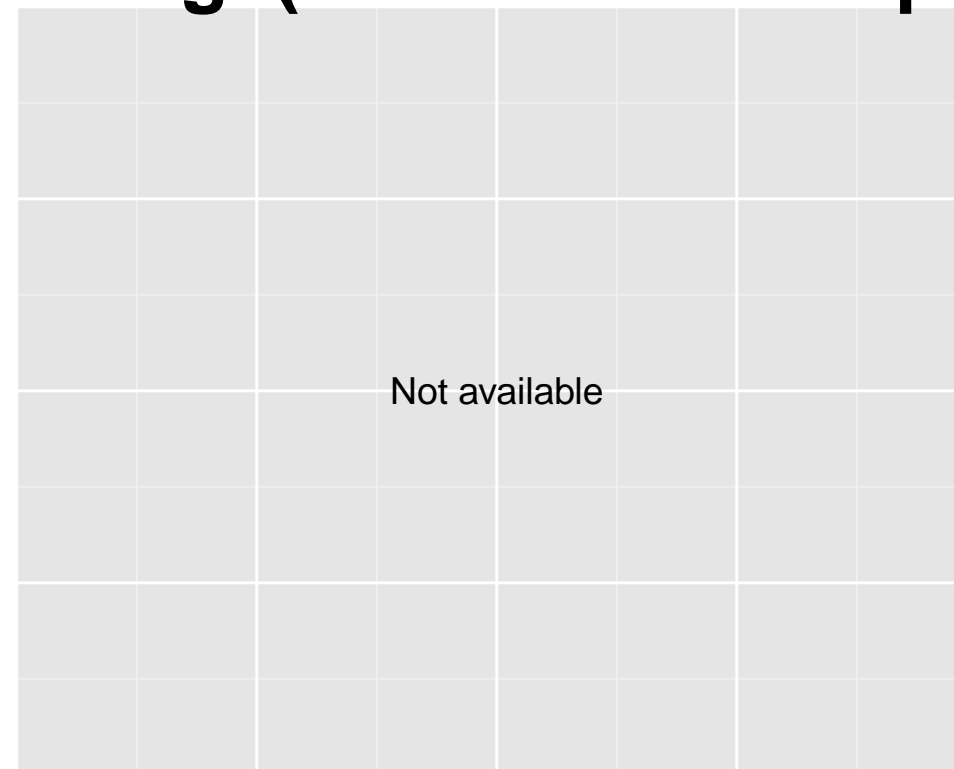

Supplement: SuppDataset_1.zip [file Ms4a7_set_A.pdf › Supplemental Dataset 1/A-mRNA_nonrhyth_translation_nonrhyth/Ms4a7_set_A.pdf]

# Msantd2

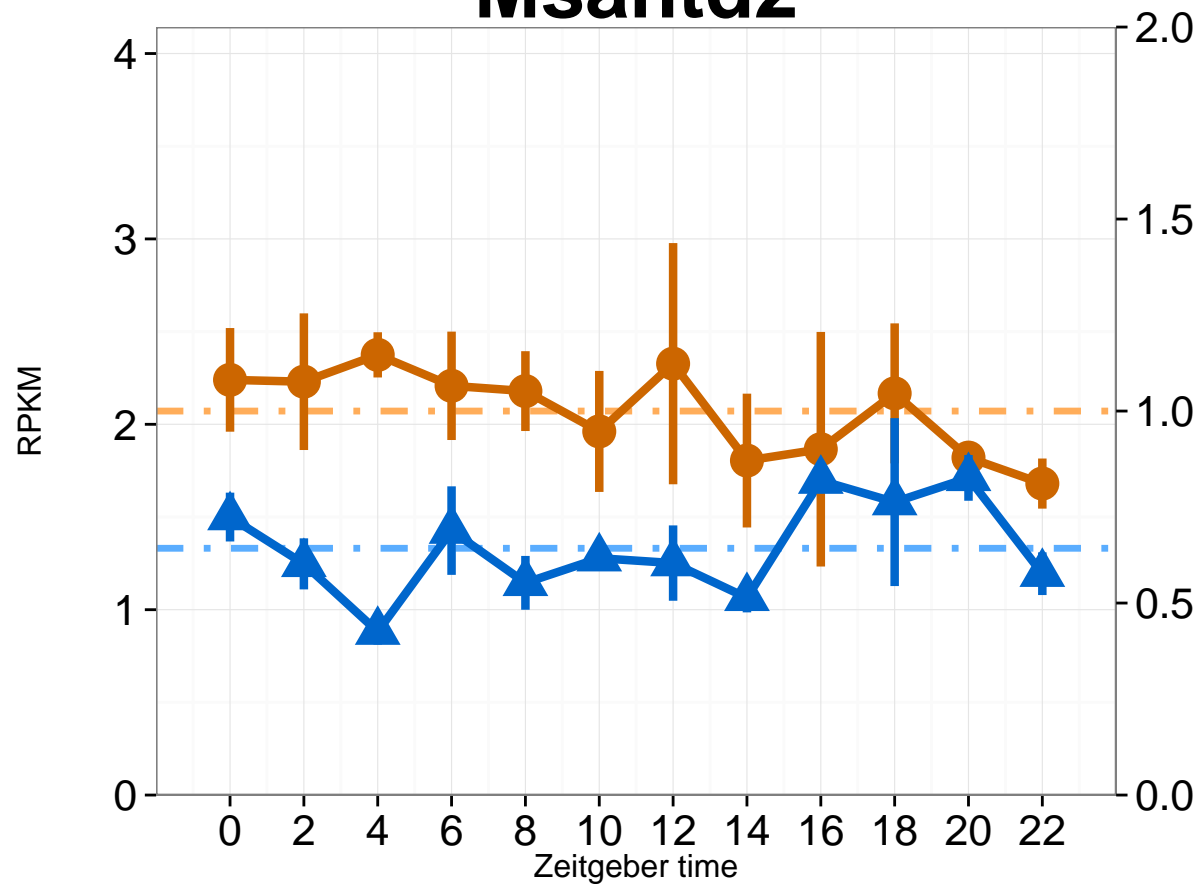

# Msantd2

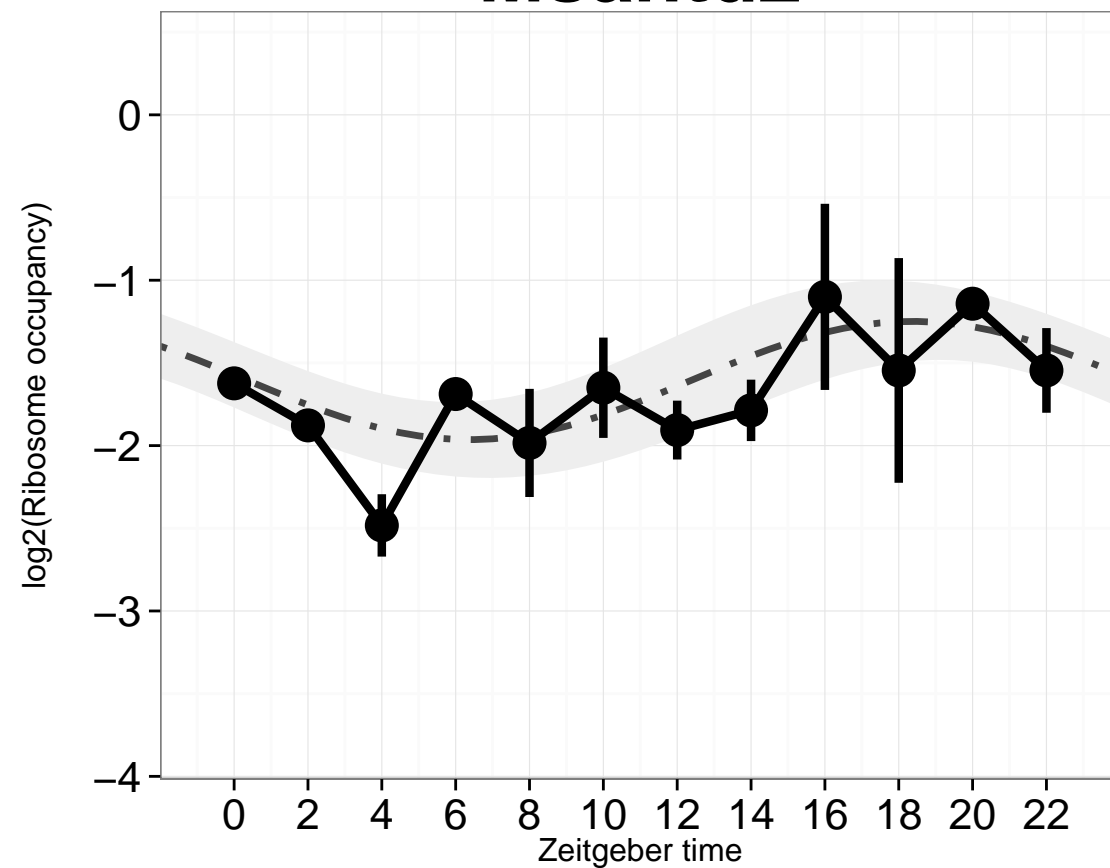

Supplement: SuppDataset_1.zip [file Msantd2_set_A.pdf › Supplemental Dataset 1/A-mRNA_nonrhyth_translation_nonrhyth/Msantd2_set_A.pdf]

## Msantd4

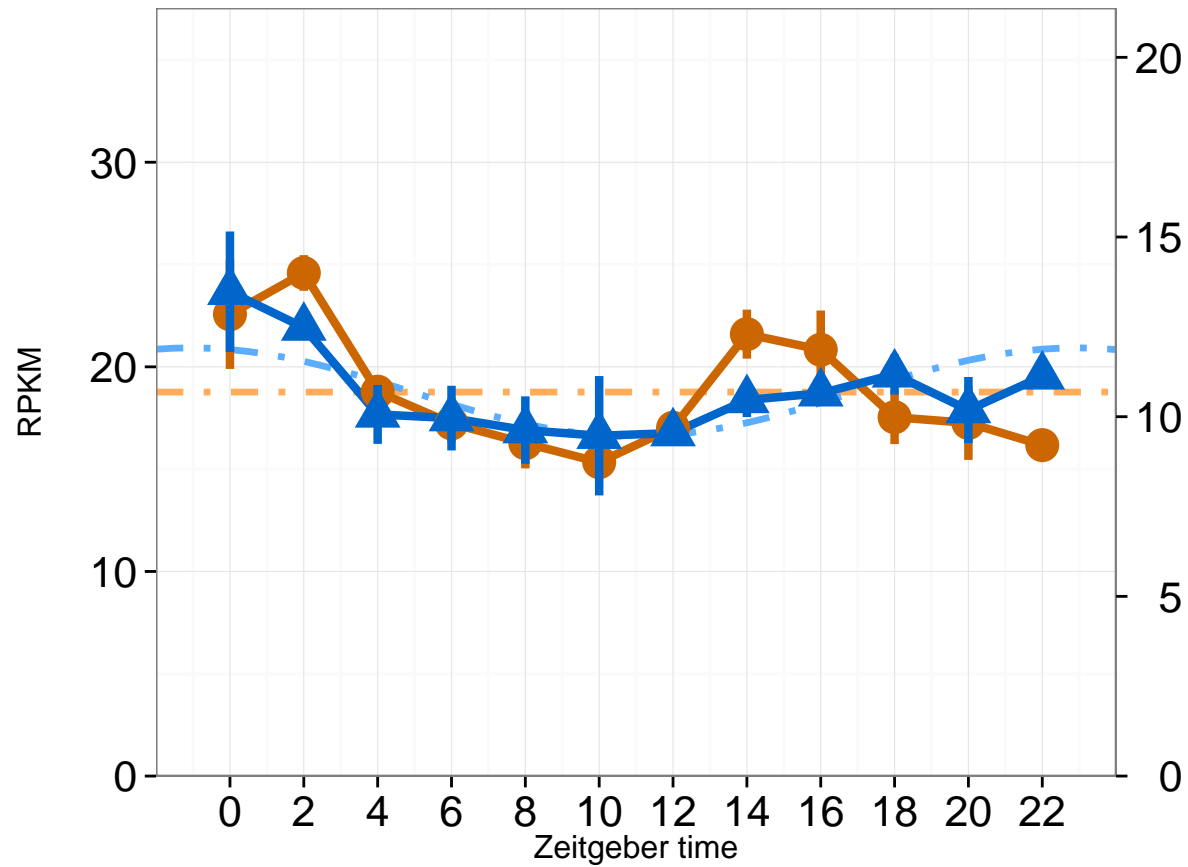

## Msantd4

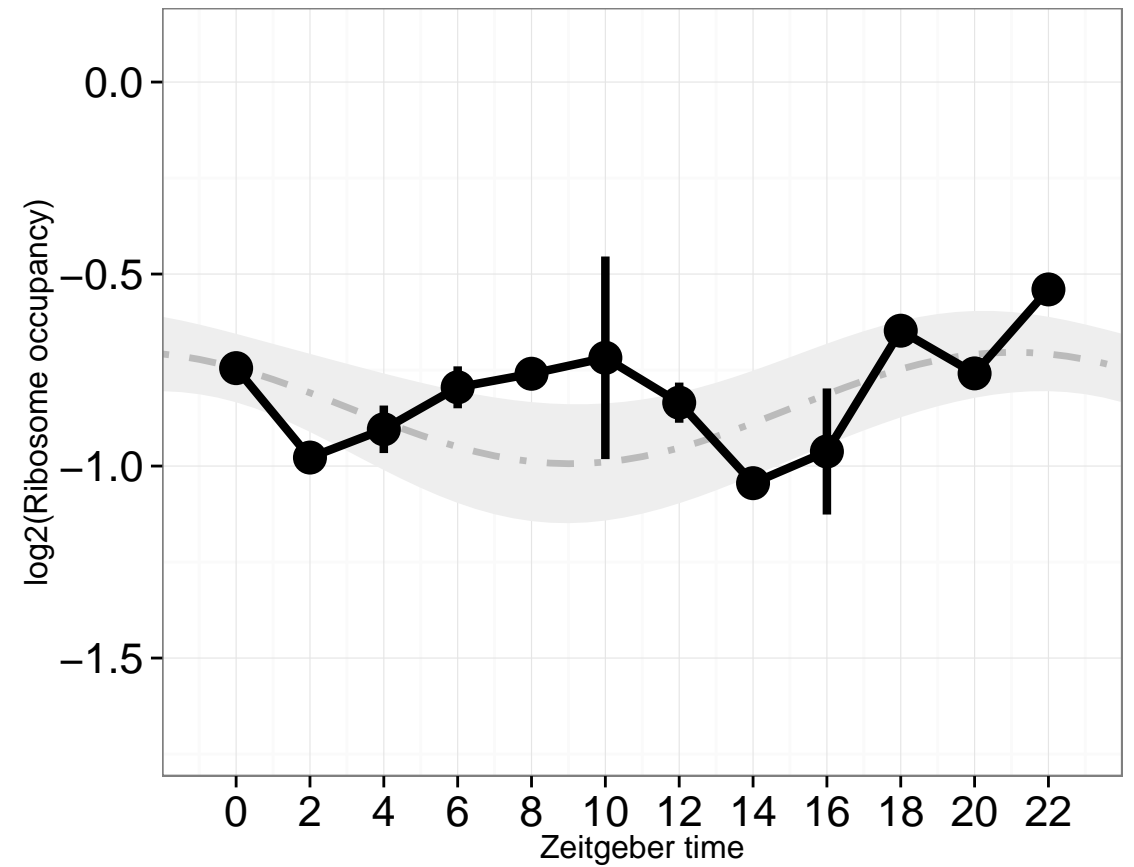

Supplement: SuppDataset_1.zip [file Msantd4_set_A.pdf › Supplemental Dataset 1/A-mRNA_nonrhyth_translation_nonrhyth/Msantd4_set_A.pdf]
