# Supplementary figures and images for: Ribosome profiling reveals the rhythmic liver translatome and circadian clock regulation by upstream open reading frames (part 46 of 113)
Source: HighWire-hosted journal article supplement (doi:10.1101/gr.195404.115), 2015-10-20

## Msh2

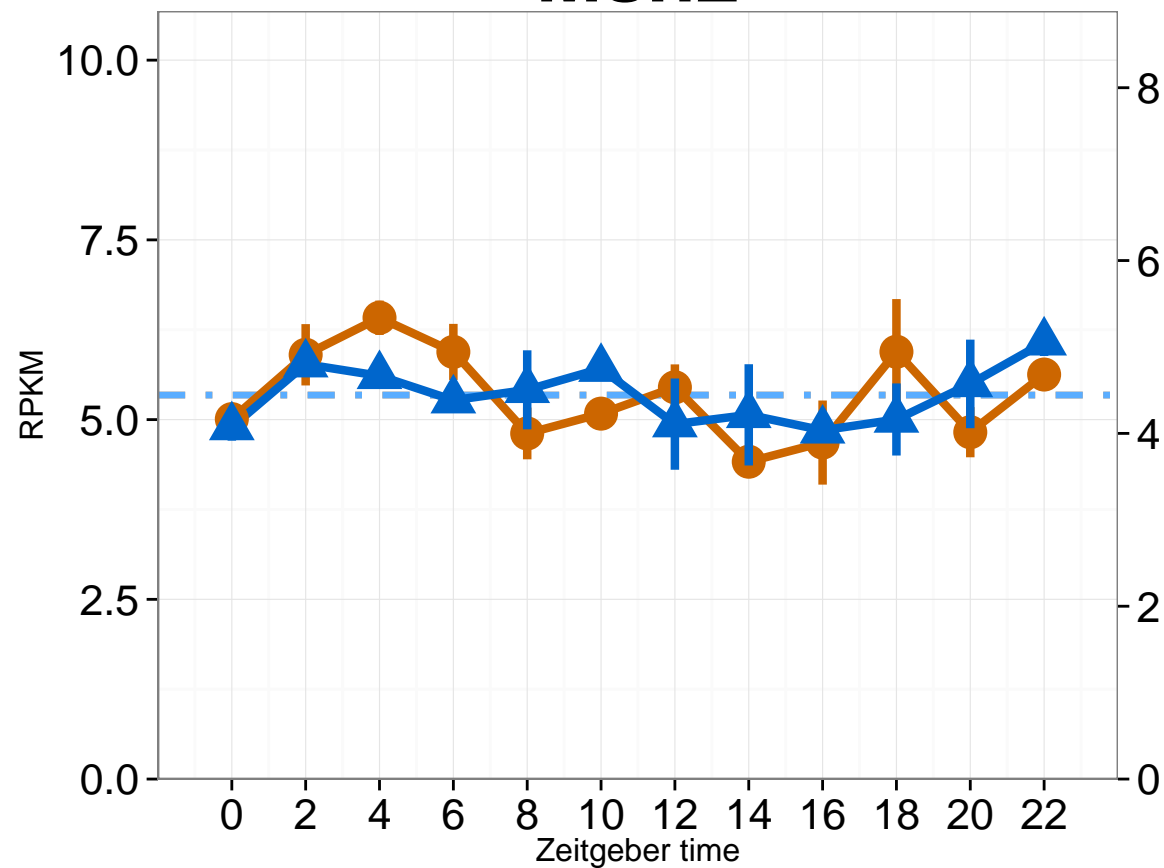

## Msh2

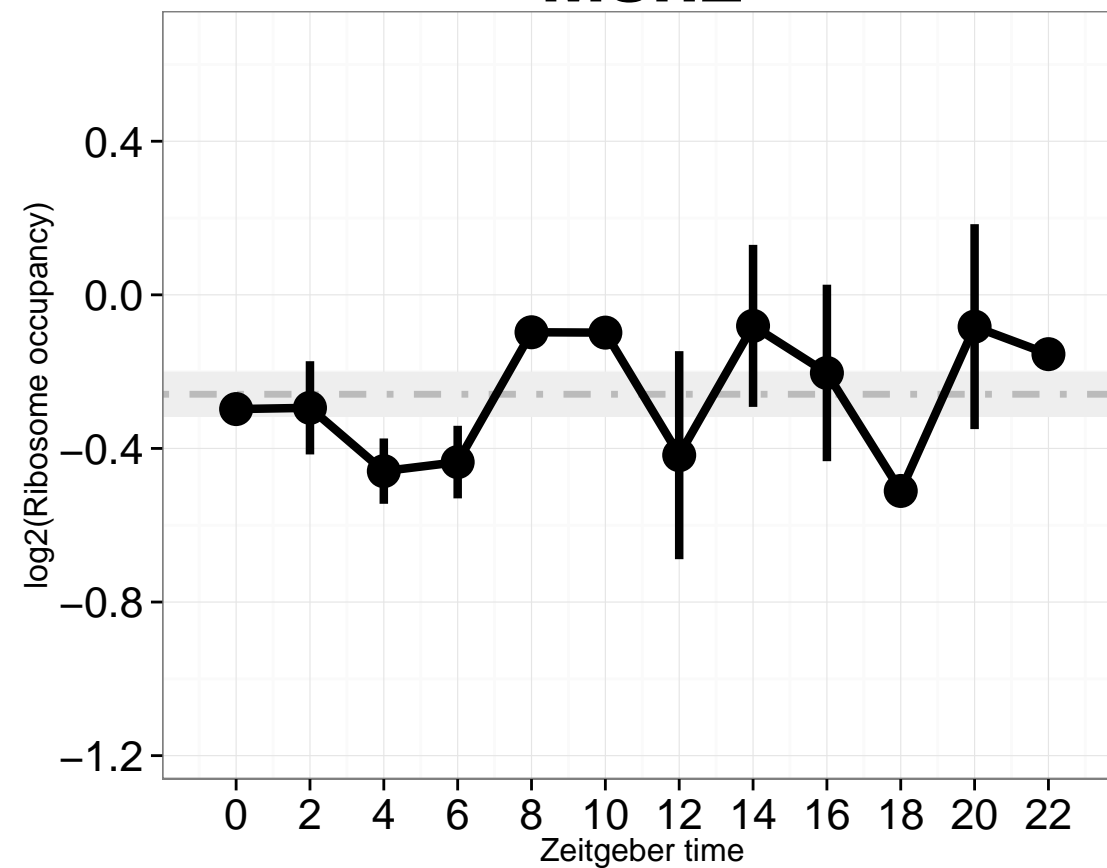

Supplement: SuppDataset_1.zip [file Msh2_set_A.pdf › Supplemental Dataset 1/A-mRNA_nonrhyth_translation_nonrhyth/Msh2_set_A.pdf]

## Msh3

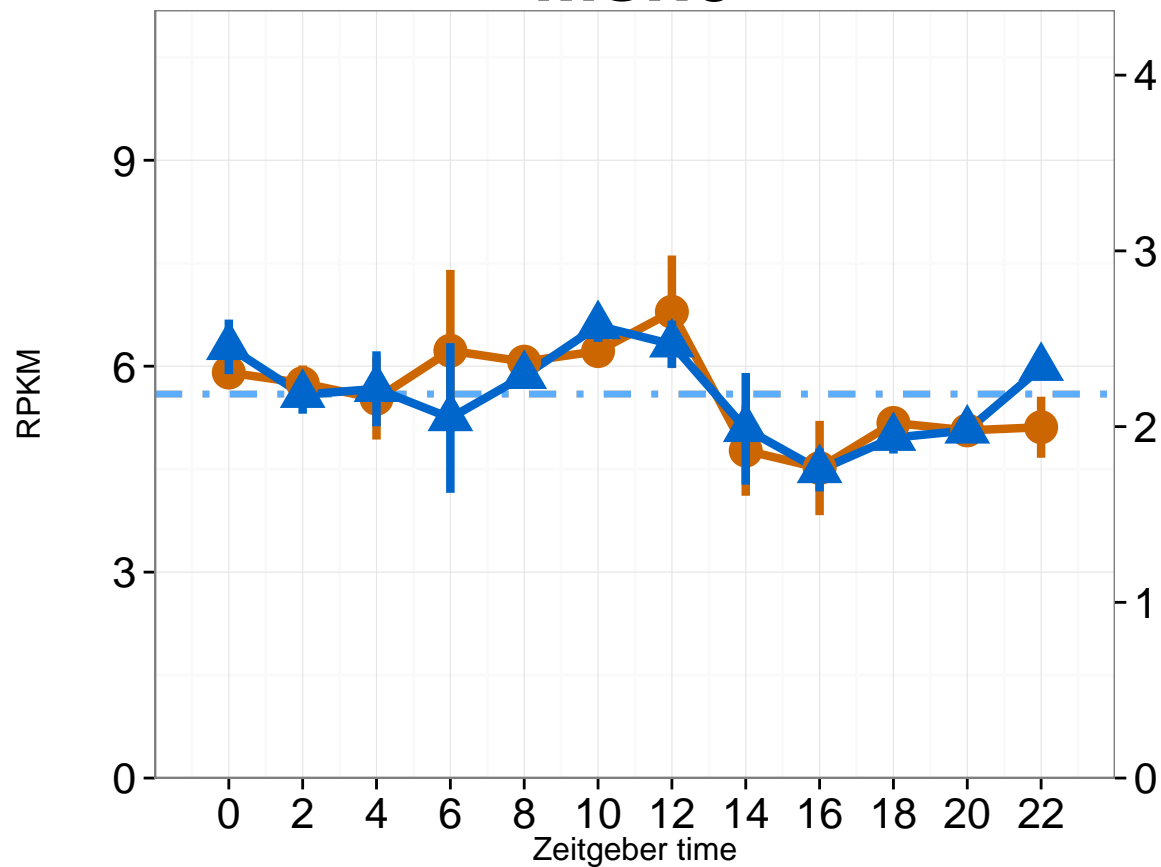

## Msh3

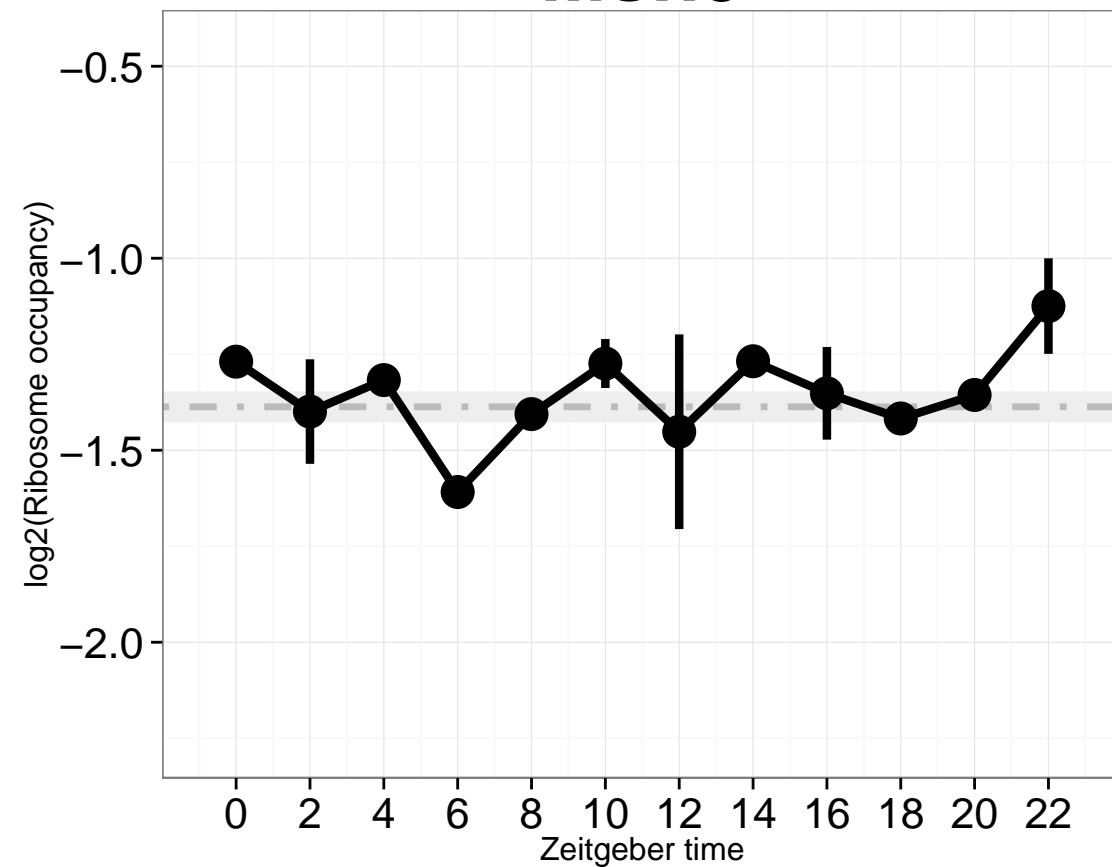

Supplement: SuppDataset_1.zip [file Msh3_set_A.pdf › Supplemental Dataset 1/A-mRNA_nonrhyth_translation_nonrhyth/Msh3_set_A.pdf]

## Msh6

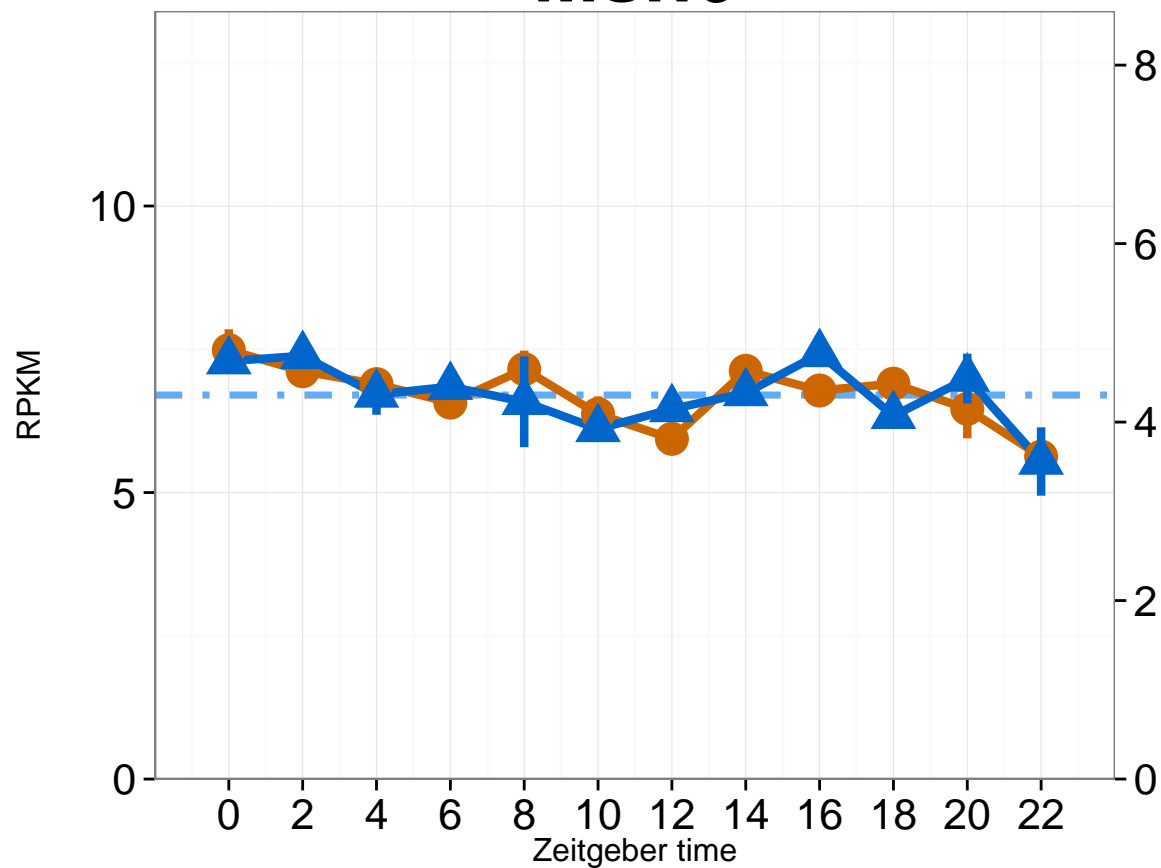

## Msh6

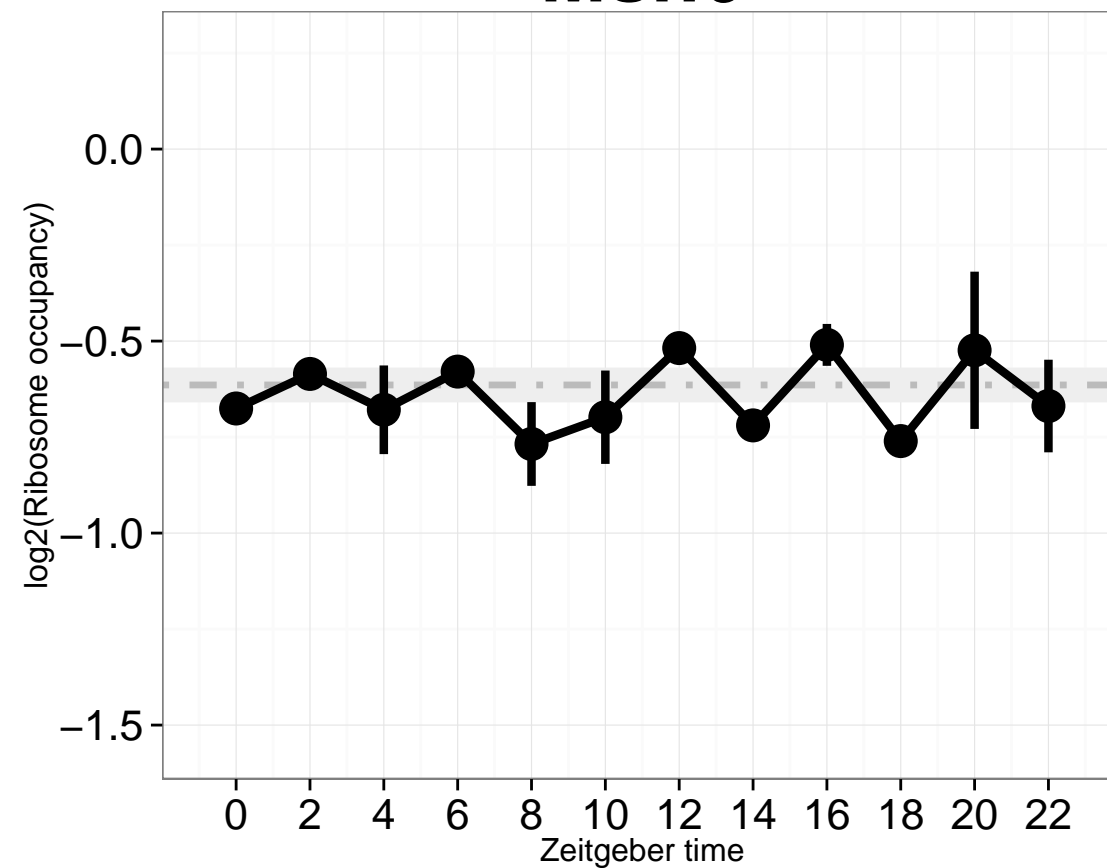

Supplement: SuppDataset_1.zip [file Msh6_set_A.pdf › Supplemental Dataset 1/A-mRNA_nonrhyth_translation_nonrhyth/Msh6_set_A.pdf]

## Msl1

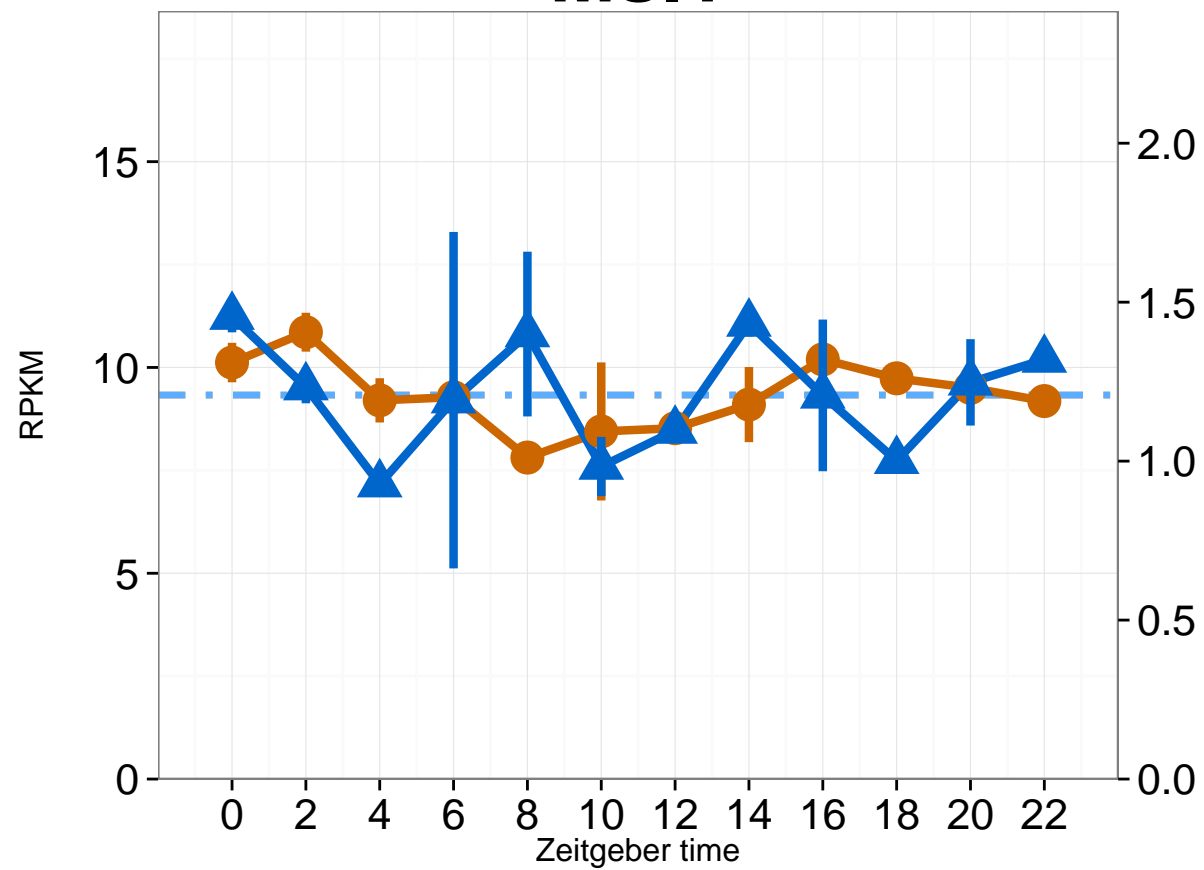

## Msl1

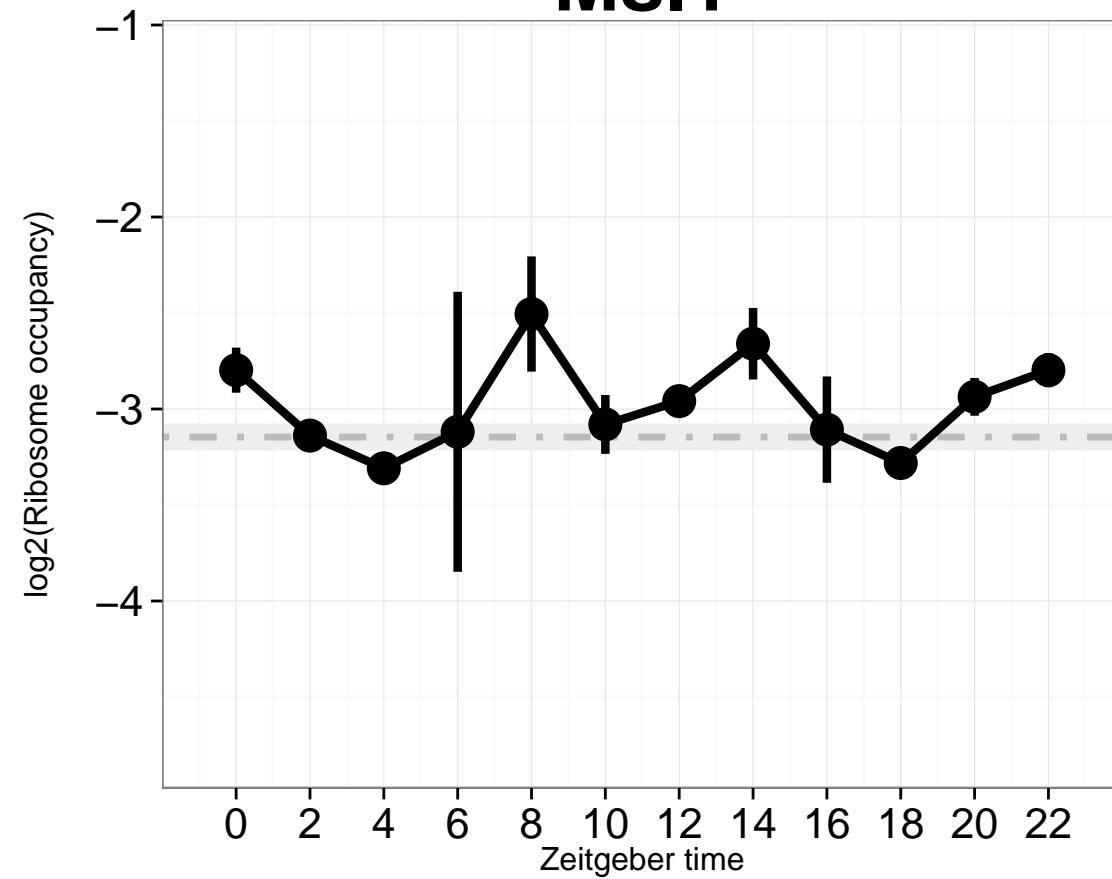

Supplement: SuppDataset_1.zip [file Msl1_set_A.pdf › Supplemental Dataset 1/A-mRNA_nonrhyth_translation_nonrhyth/Msl1_set_A.pdf]

## Msl2

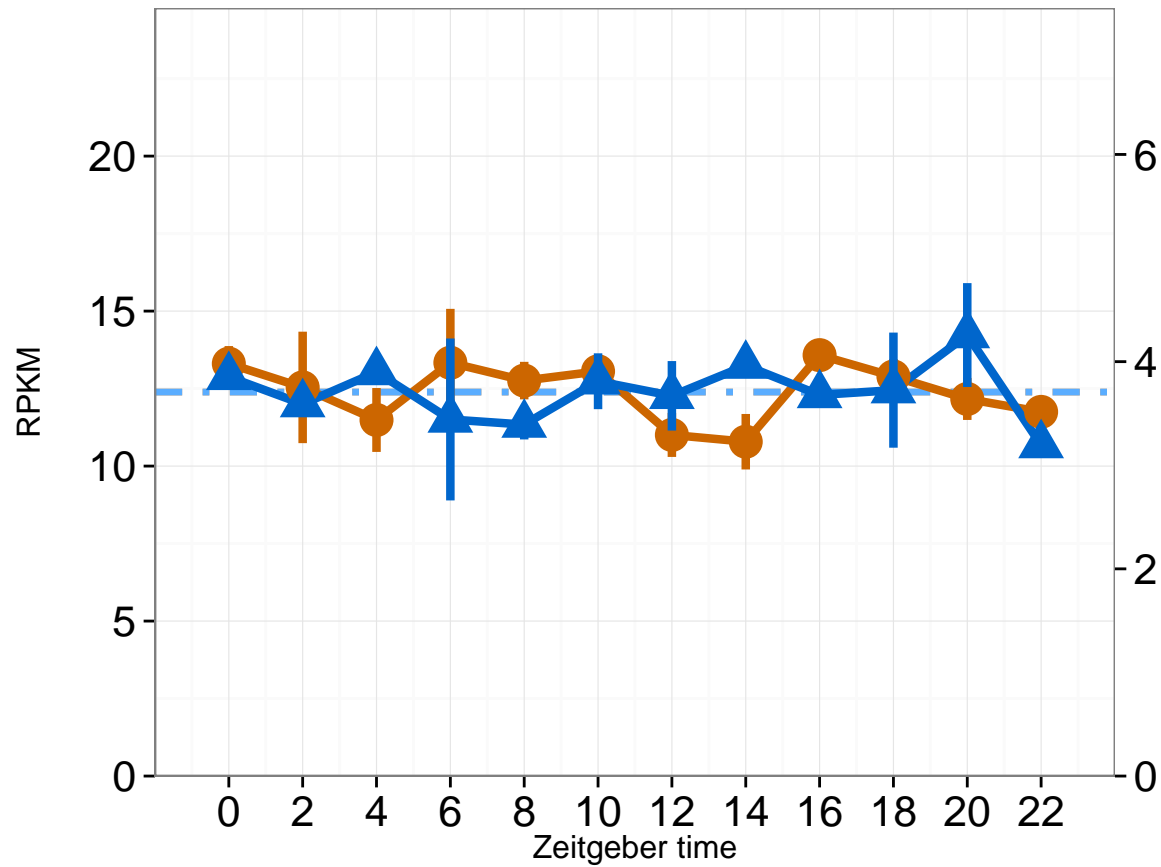

## Msl2

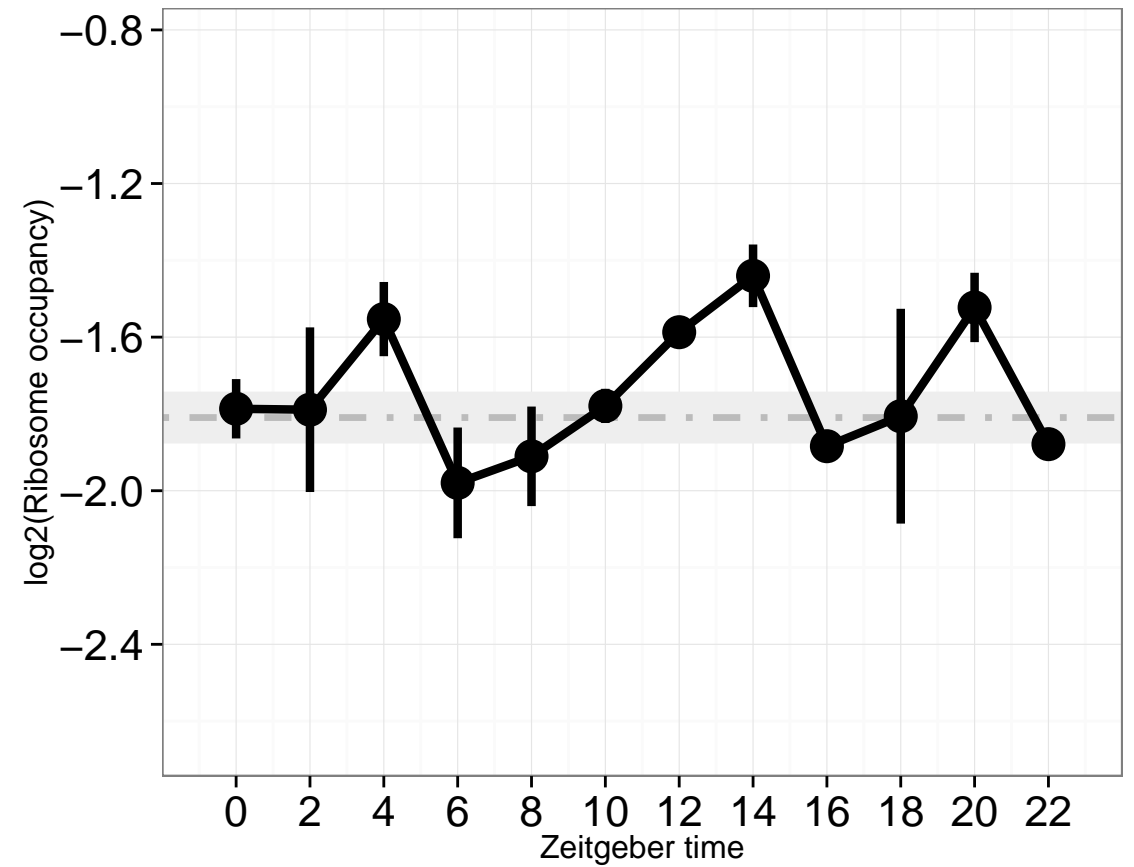

Supplement: SuppDataset_1.zip [file Msl2_set_A.pdf › Supplemental Dataset 1/A-mRNA_nonrhyth_translation_nonrhyth/Msl2_set_A.pdf]

## Msl3

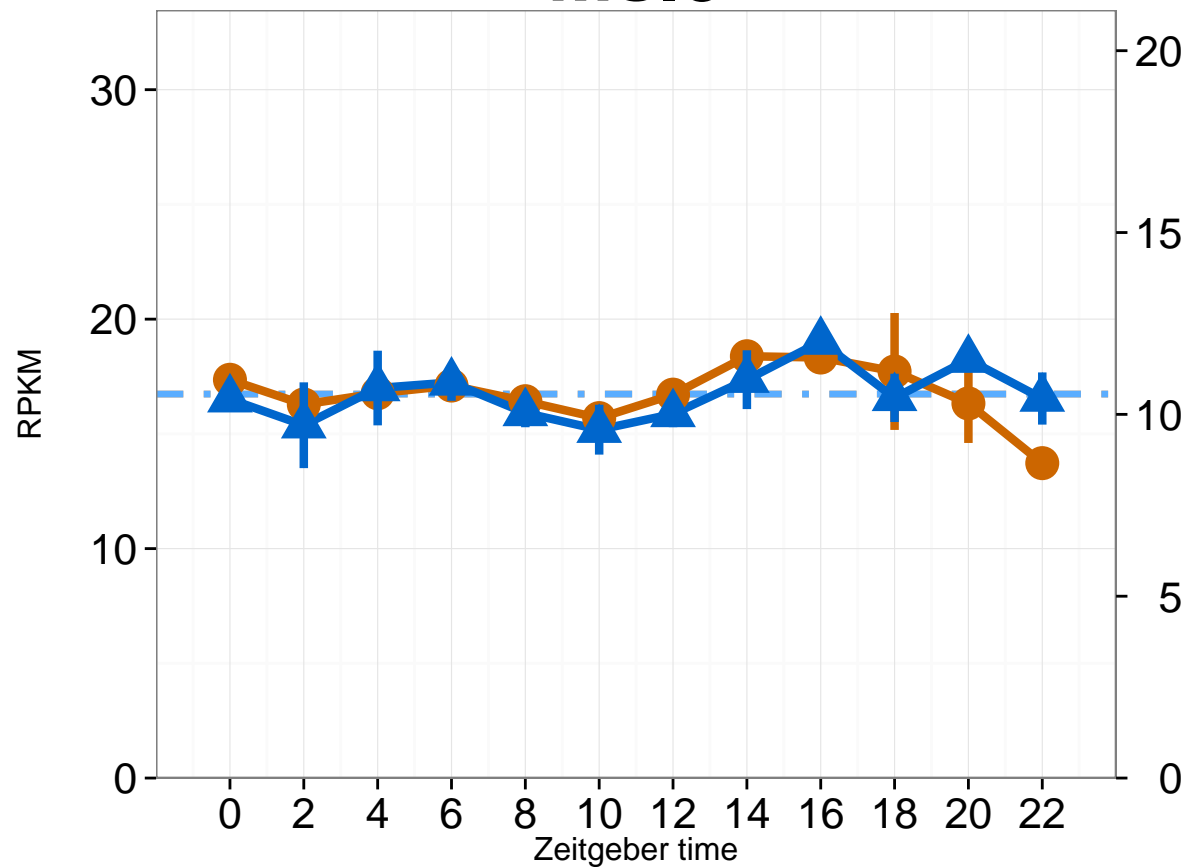

## Msl3

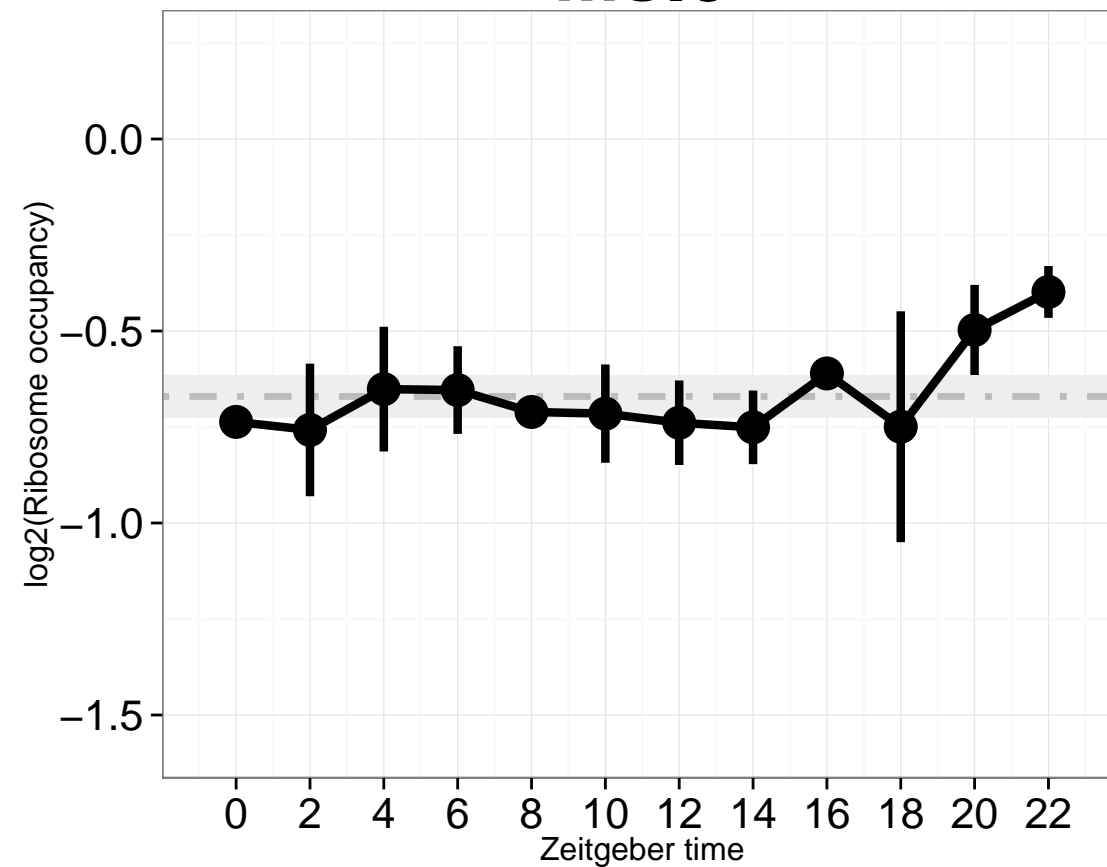

Supplement: SuppDataset_1.zip [file Msl3_set_A.pdf › Supplemental Dataset 1/A-mRNA_nonrhyth_translation_nonrhyth/Msl3_set_A.pdf]

**Msl3l2 TR**

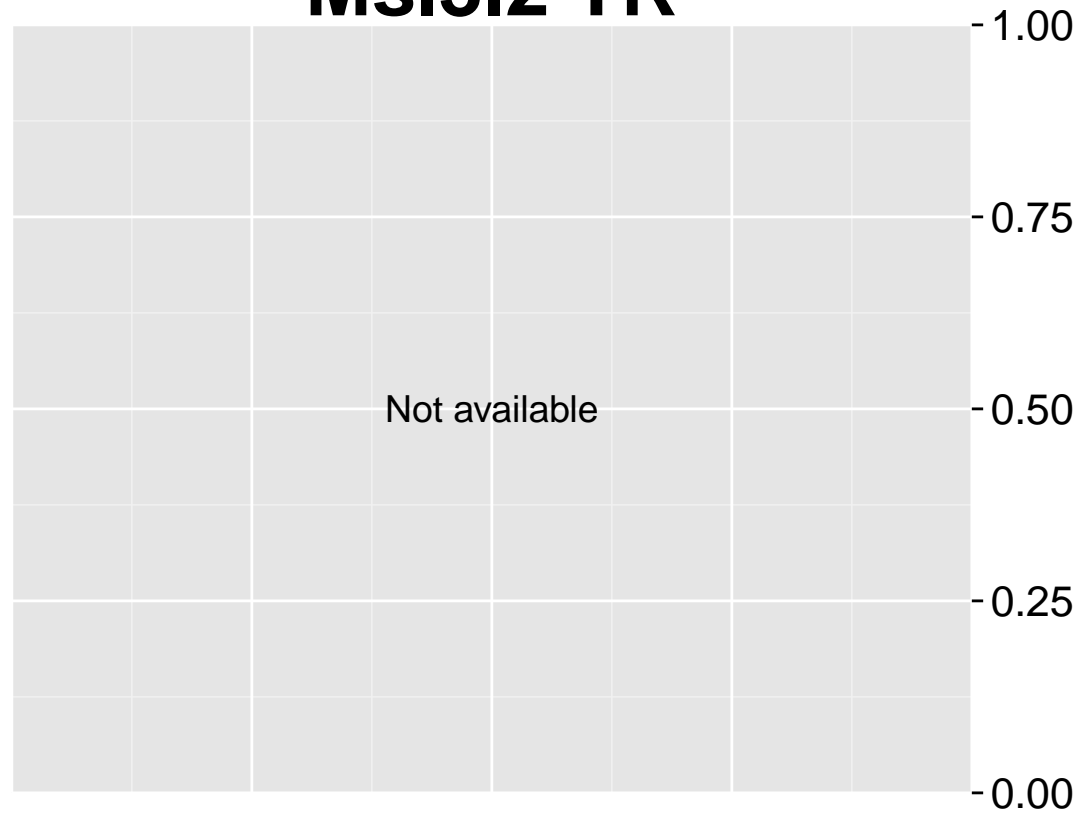

**Msl3l2 log2(Ribosome occupancy**

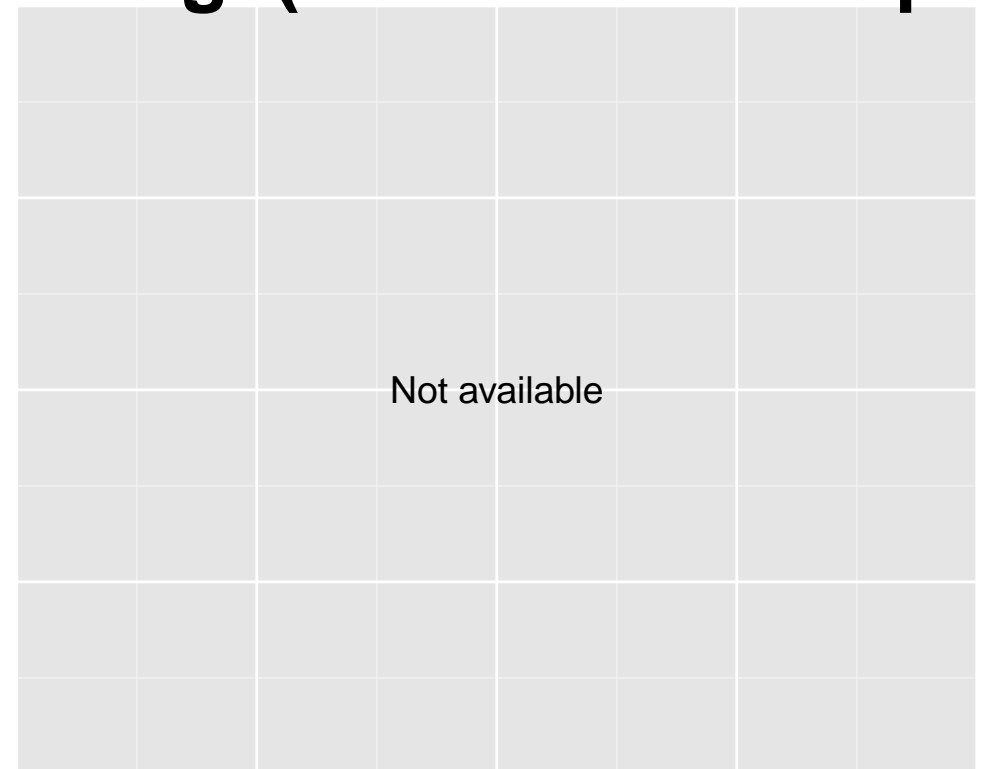

Supplement: SuppDataset_1.zip [file Msl3l2_set_A.pdf › Supplemental Dataset 1/A-mRNA_nonrhyth_translation_nonrhyth/Msl3l2_set_A.pdf]

## Msn

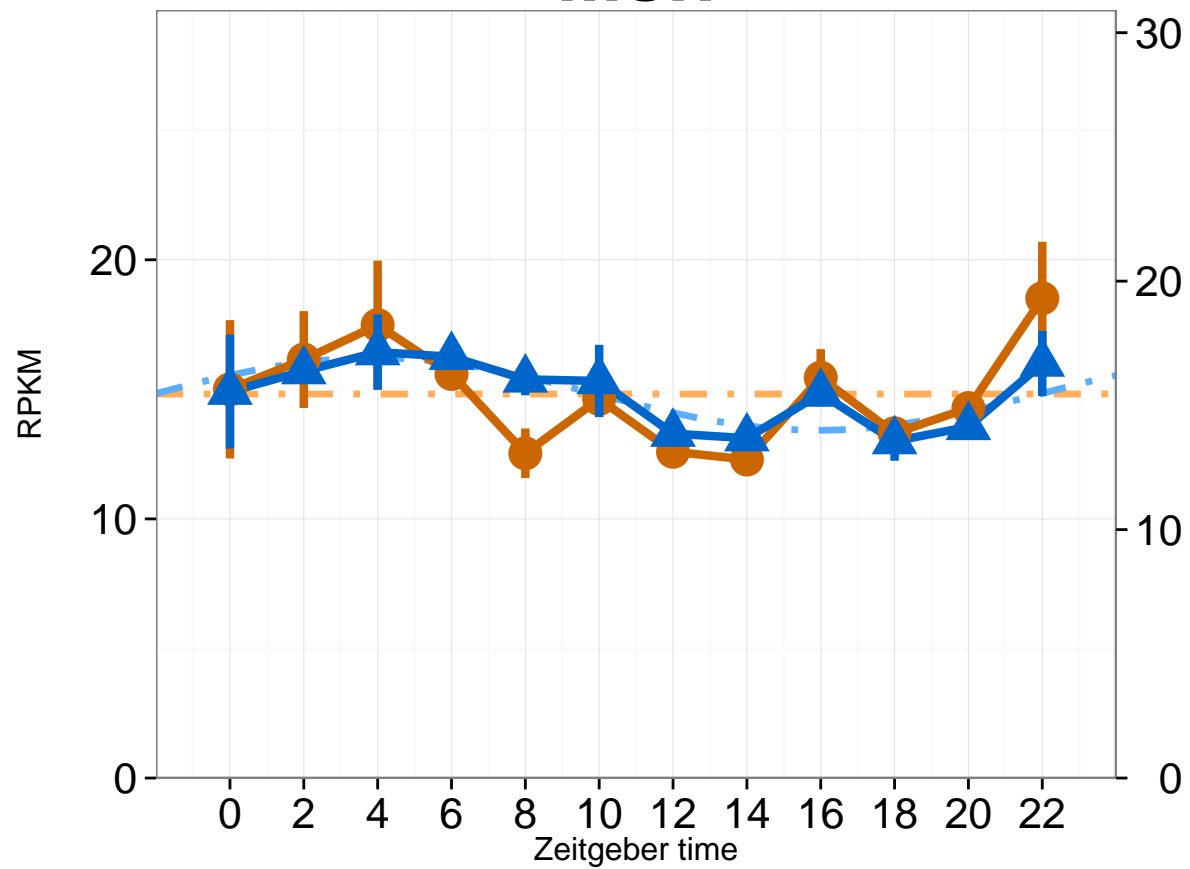

## Msn

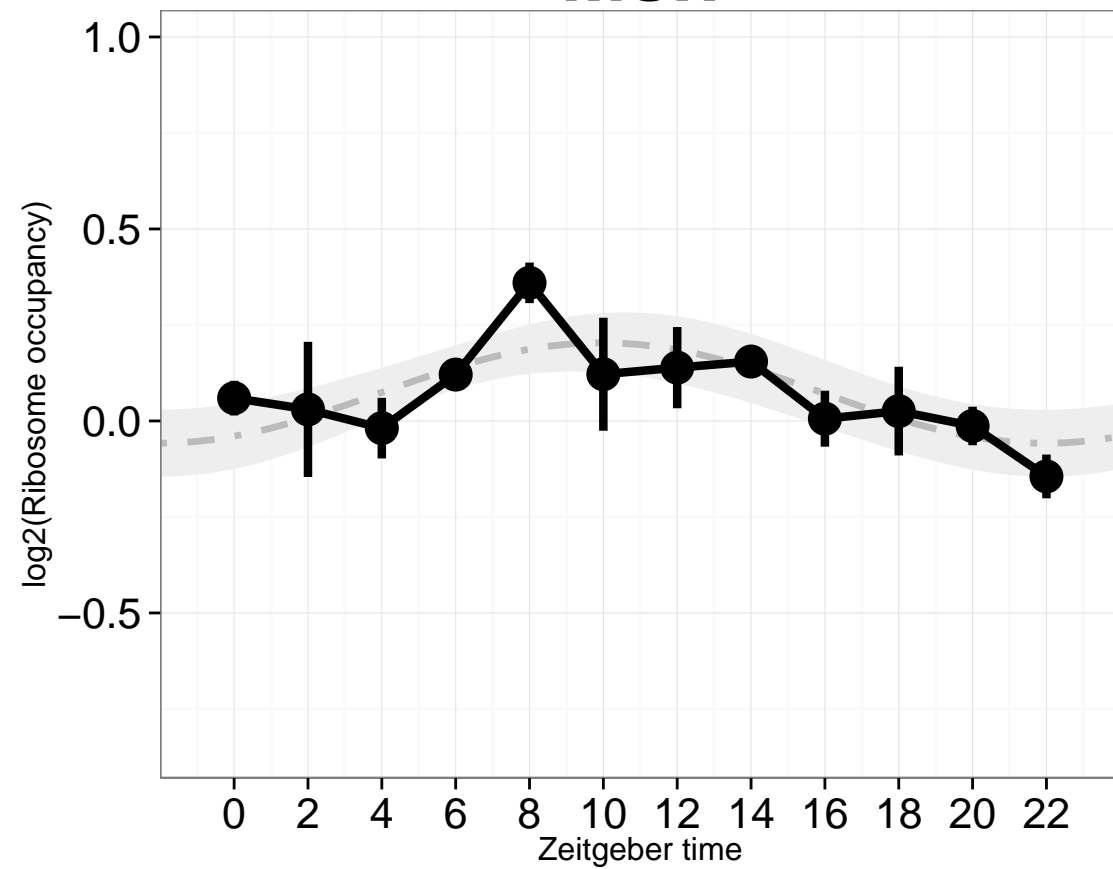

Supplement: SuppDataset_1.zip [file Msn_set_A.pdf › Supplemental Dataset 1/A-mRNA_nonrhyth_translation_nonrhyth/Msn_set_A.pdf]

# Msr1

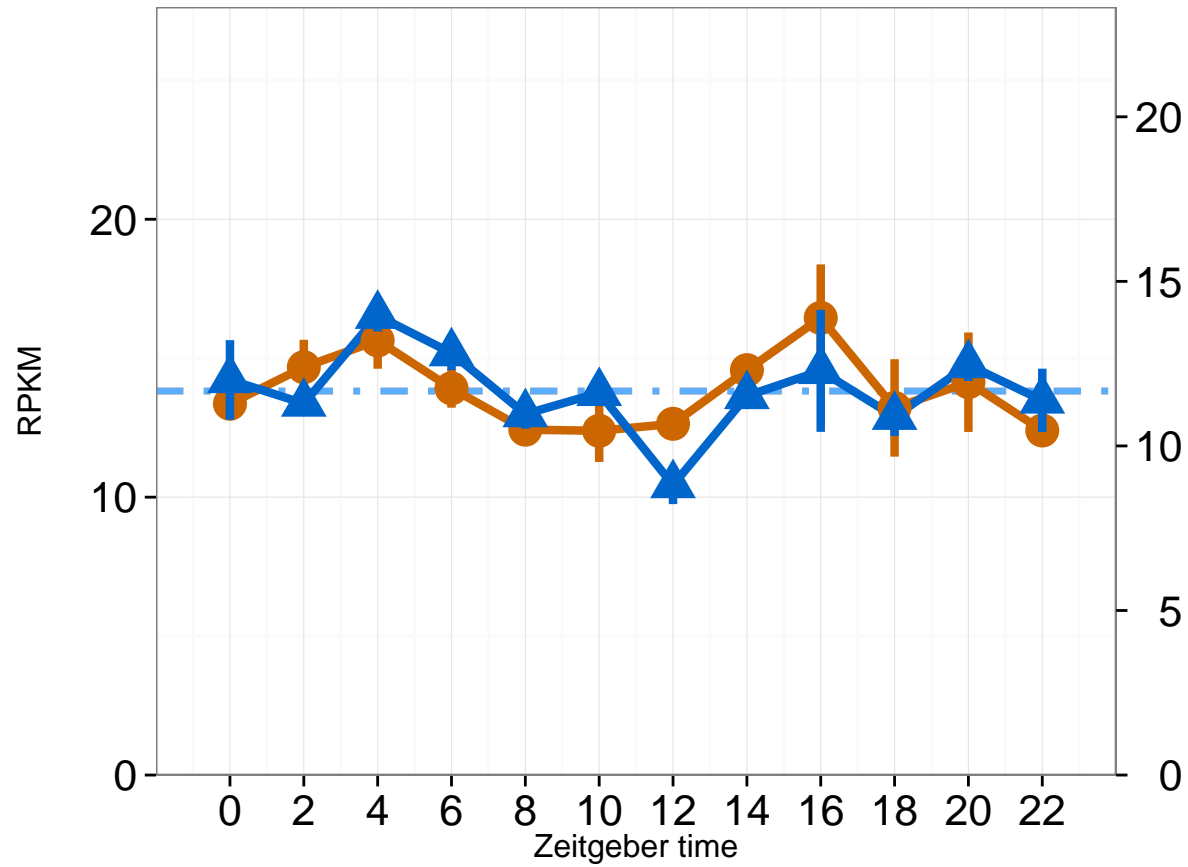

# Msr1

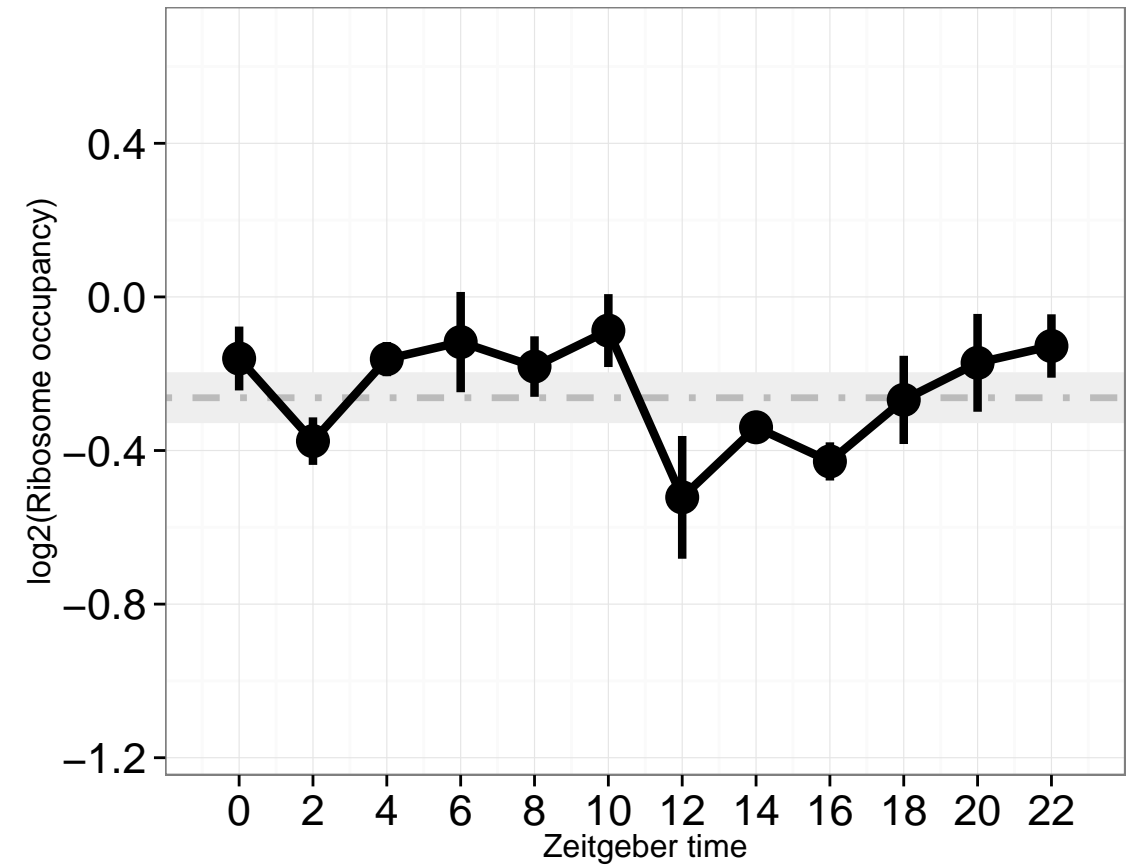

Supplement: SuppDataset_1.zip [file Msr1_set_A.pdf › Supplemental Dataset 1/A-mRNA_nonrhyth_translation_nonrhyth/Msr1_set_A.pdf]

## Msra

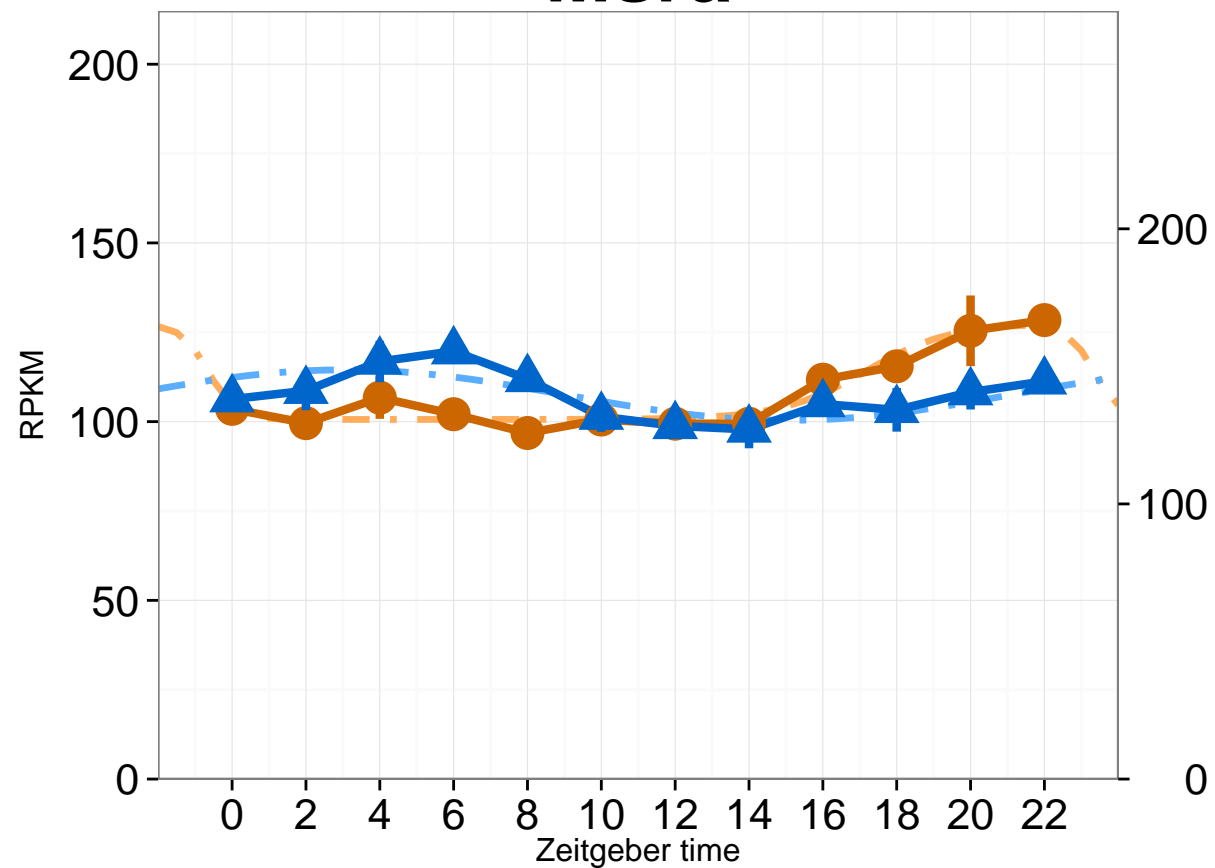

## Msra

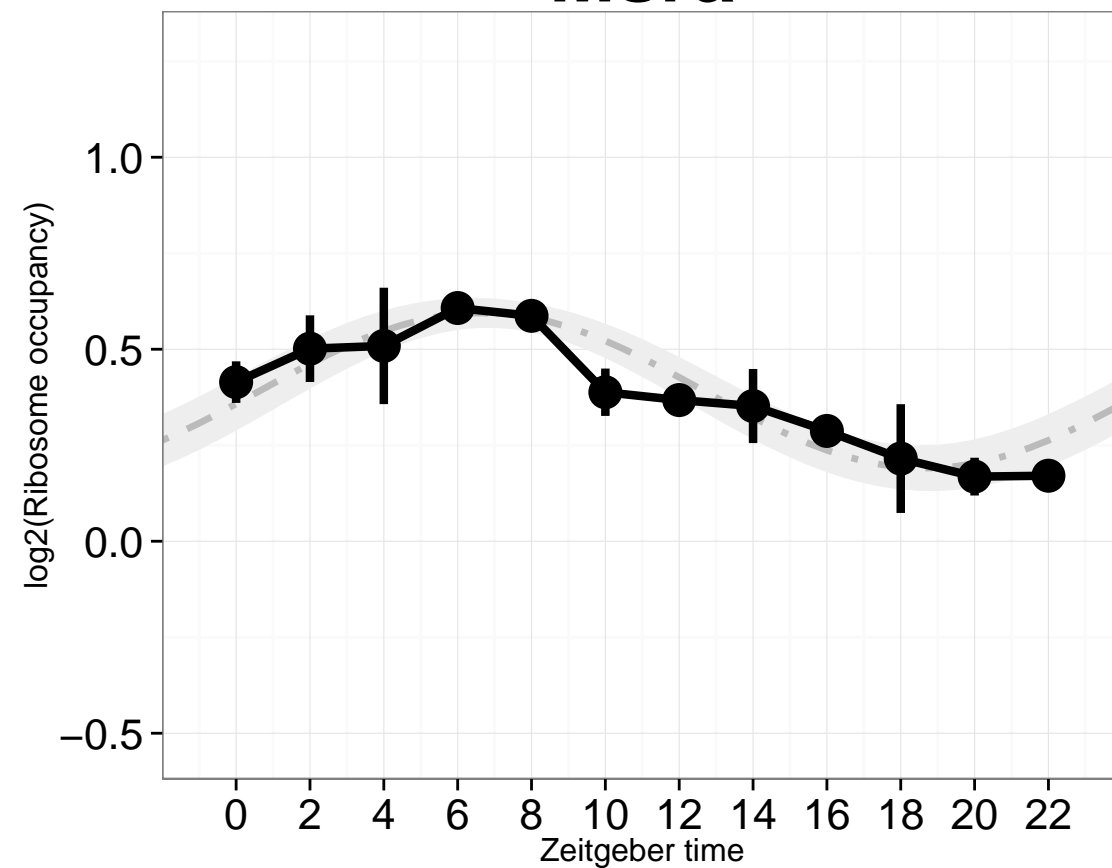

Supplement: SuppDataset_1.zip [file Msra_set_A.pdf › Supplemental Dataset 1/A-mRNA_nonrhyth_translation_nonrhyth/Msra_set_A.pdf]

# Msrb1

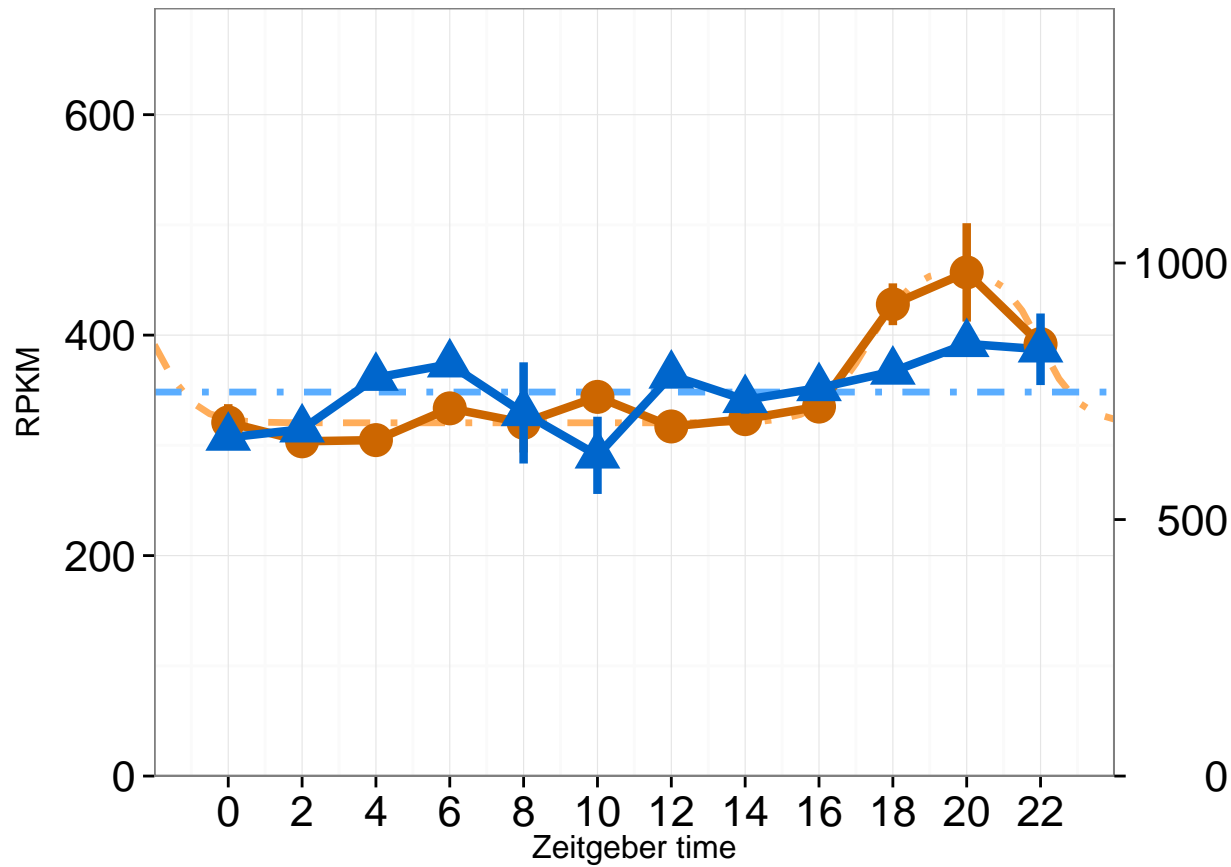

# Msrb1

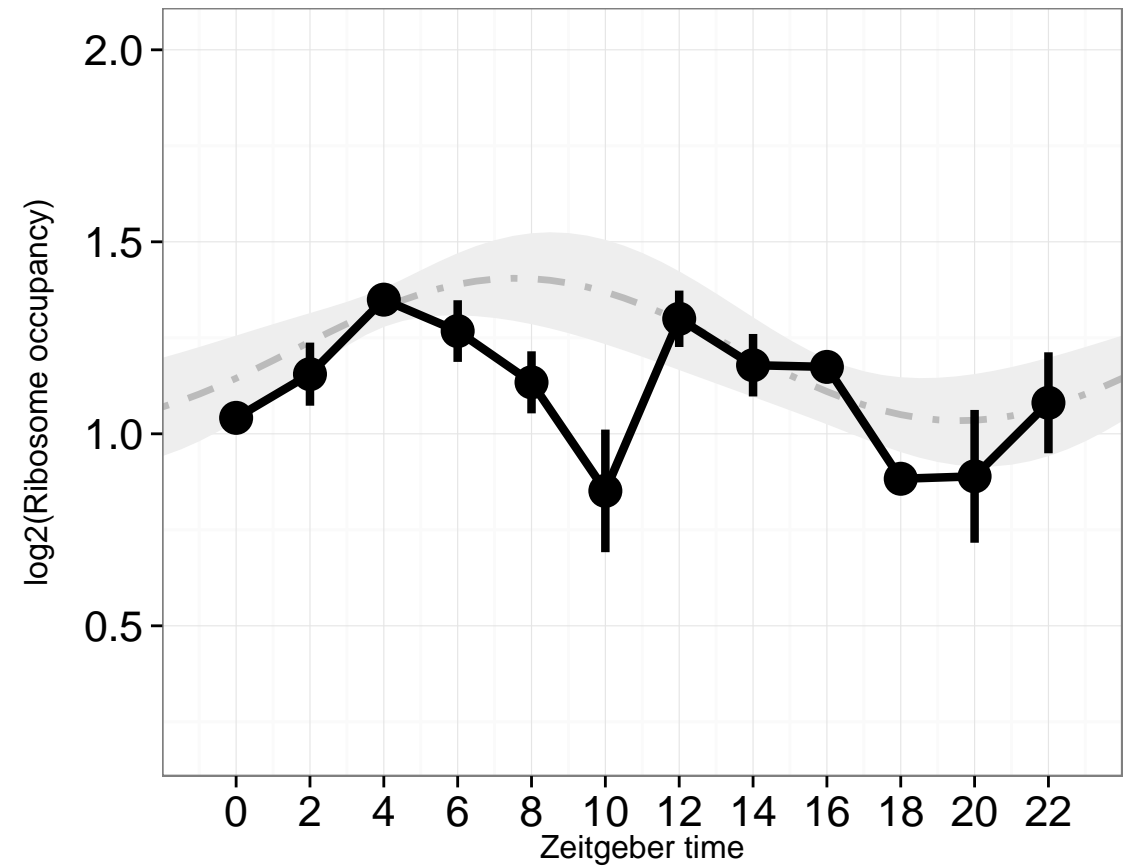

Supplement: SuppDataset_1.zip [file Msrb1_set_A.pdf › Supplemental Dataset 1/A-mRNA_nonrhyth_translation_nonrhyth/Msrb1_set_A.pdf]

# Msrb2

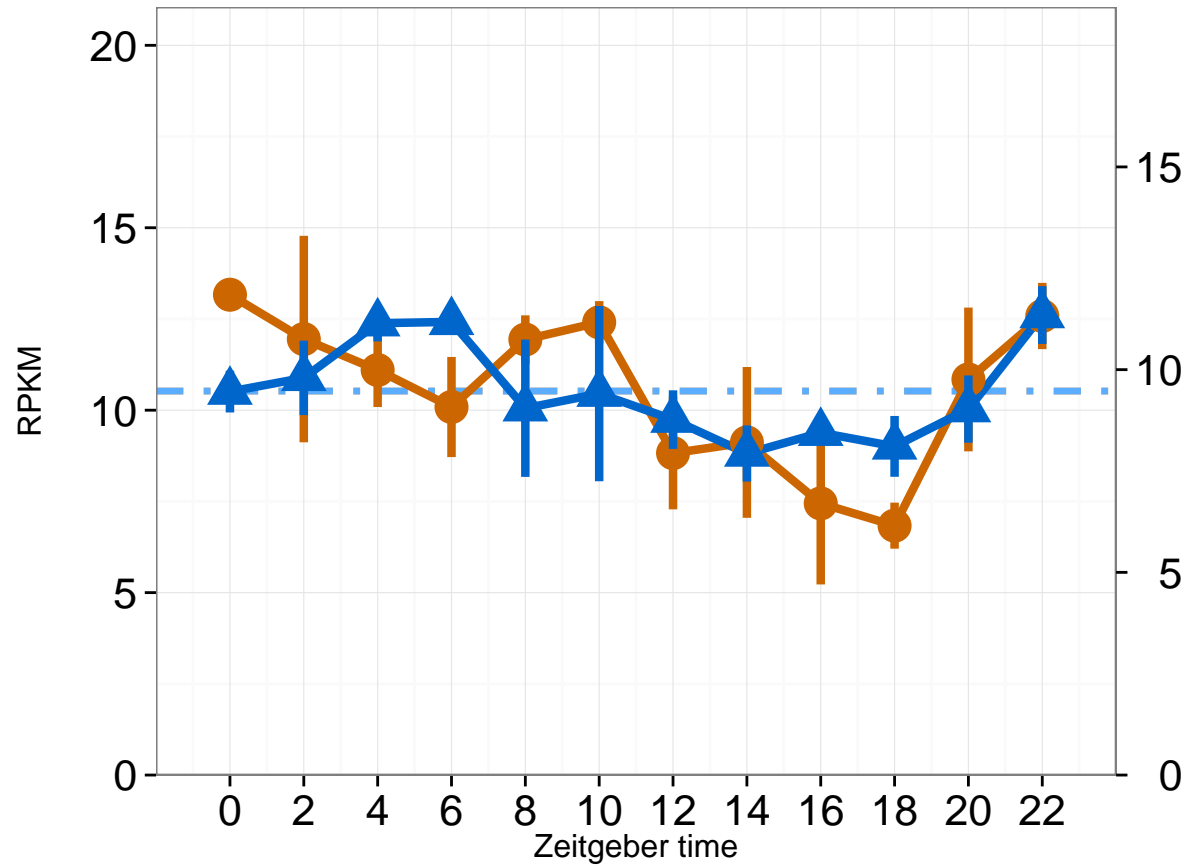

# Msrb2

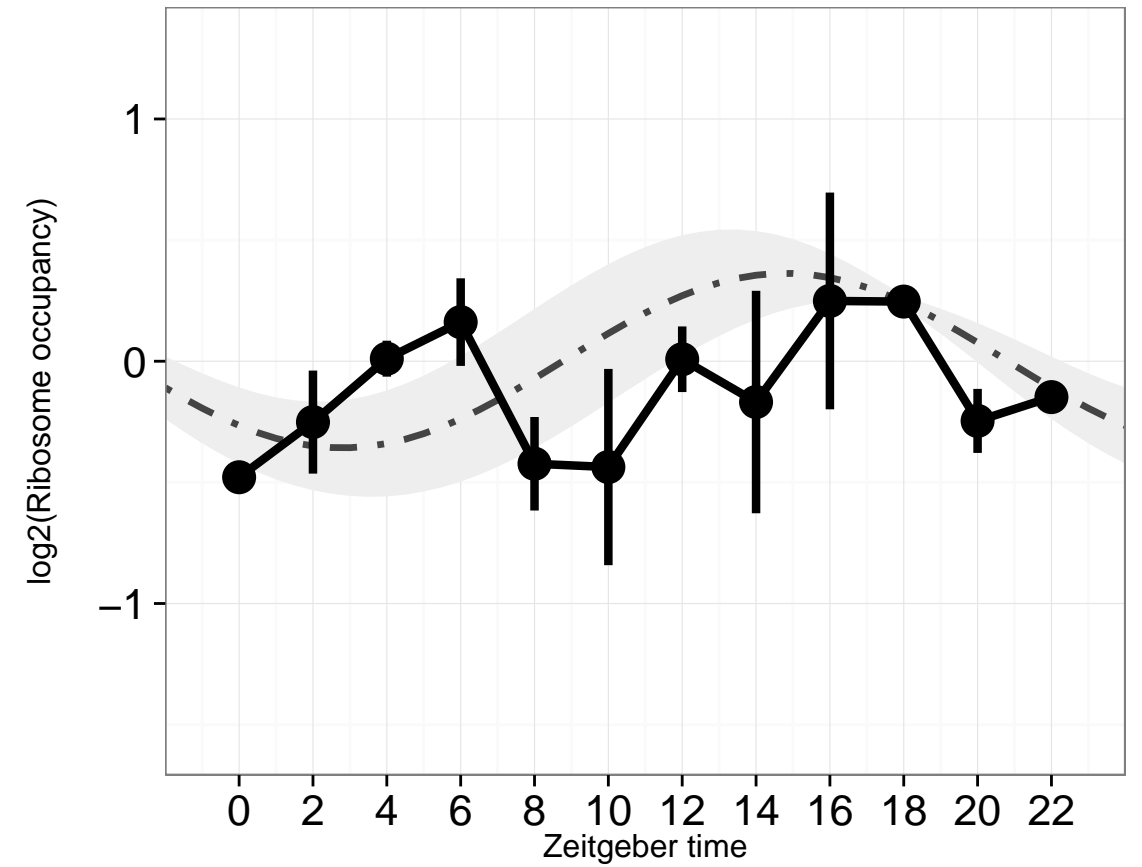

Supplement: SuppDataset_1.zip [file Msrb2_set_A.pdf › Supplemental Dataset 1/A-mRNA_nonrhyth_translation_nonrhyth/Msrb2_set_A.pdf]

# Msrb3

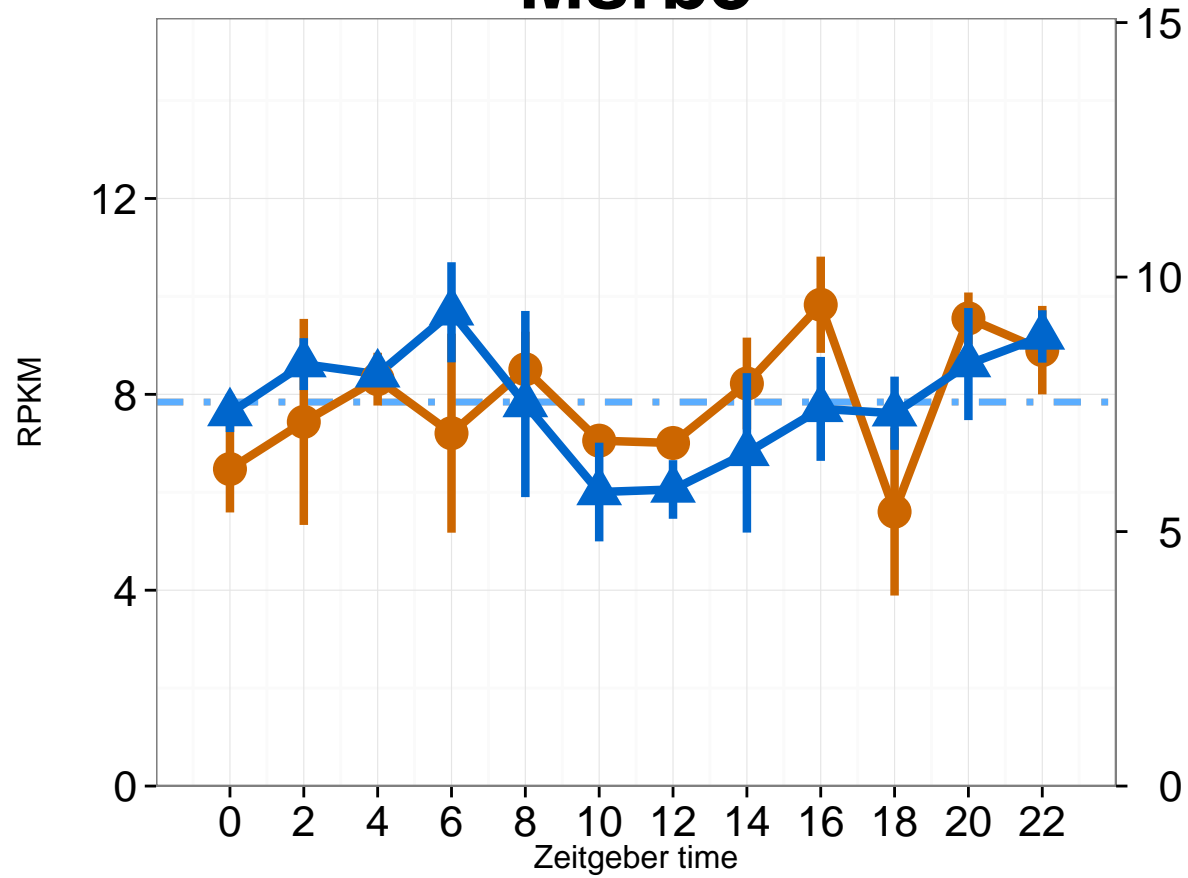

# Msrb3

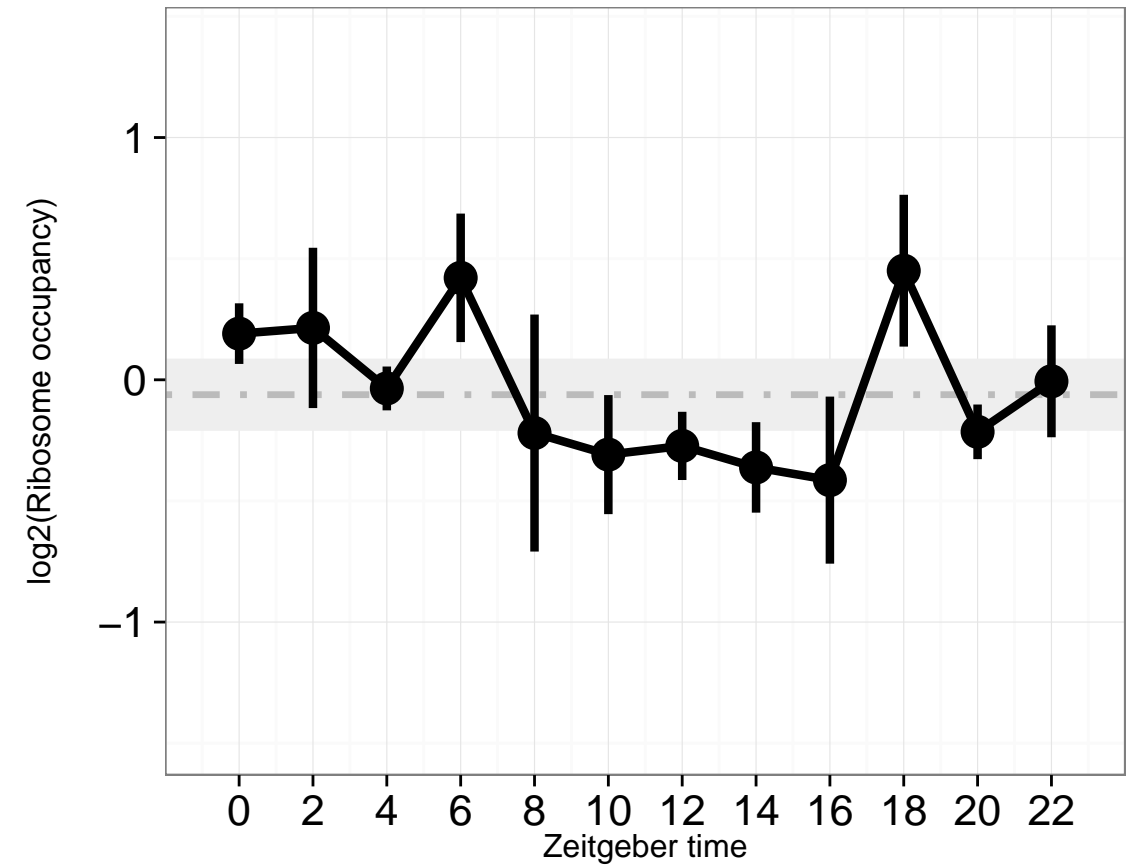

Supplement: SuppDataset_1.zip [file Msrb3_set_A.pdf › Supplemental Dataset 1/A-mRNA_nonrhyth_translation_nonrhyth/Msrb3_set_A.pdf]

## Mst1

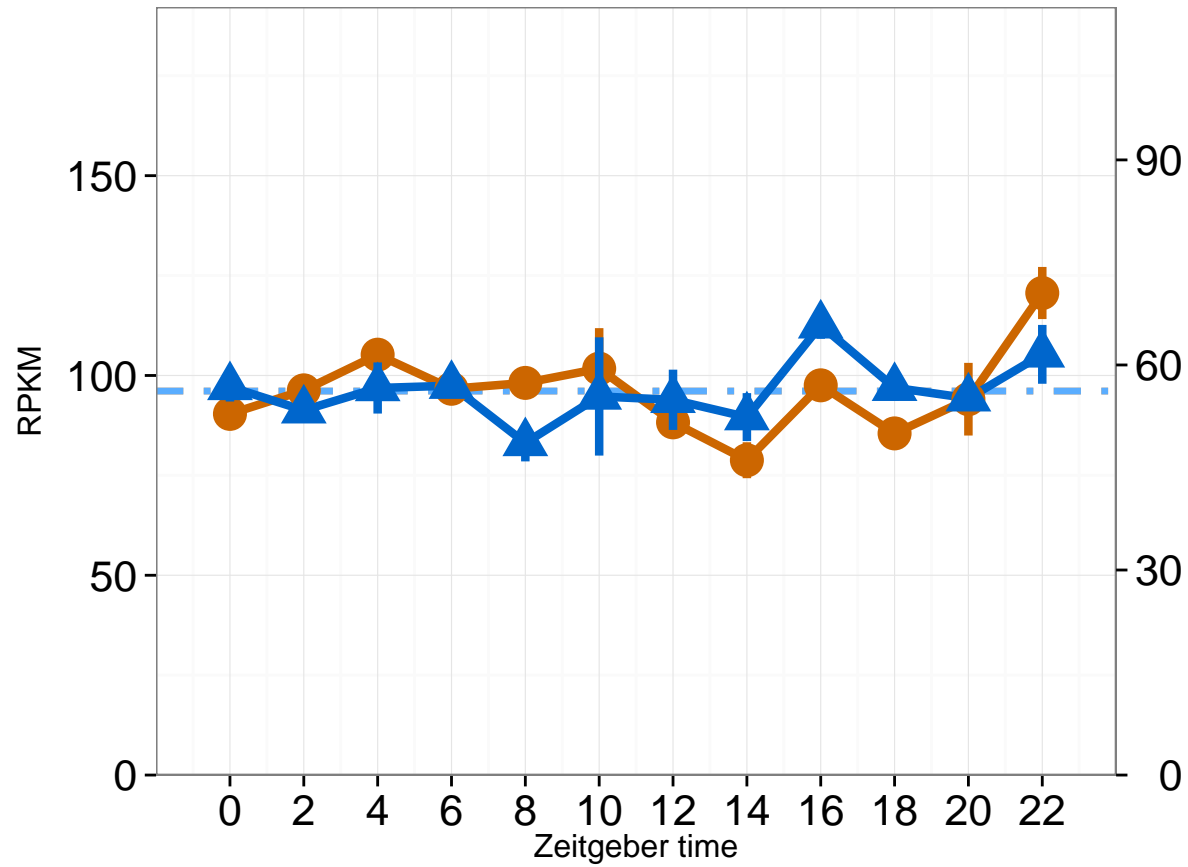

## Mst1

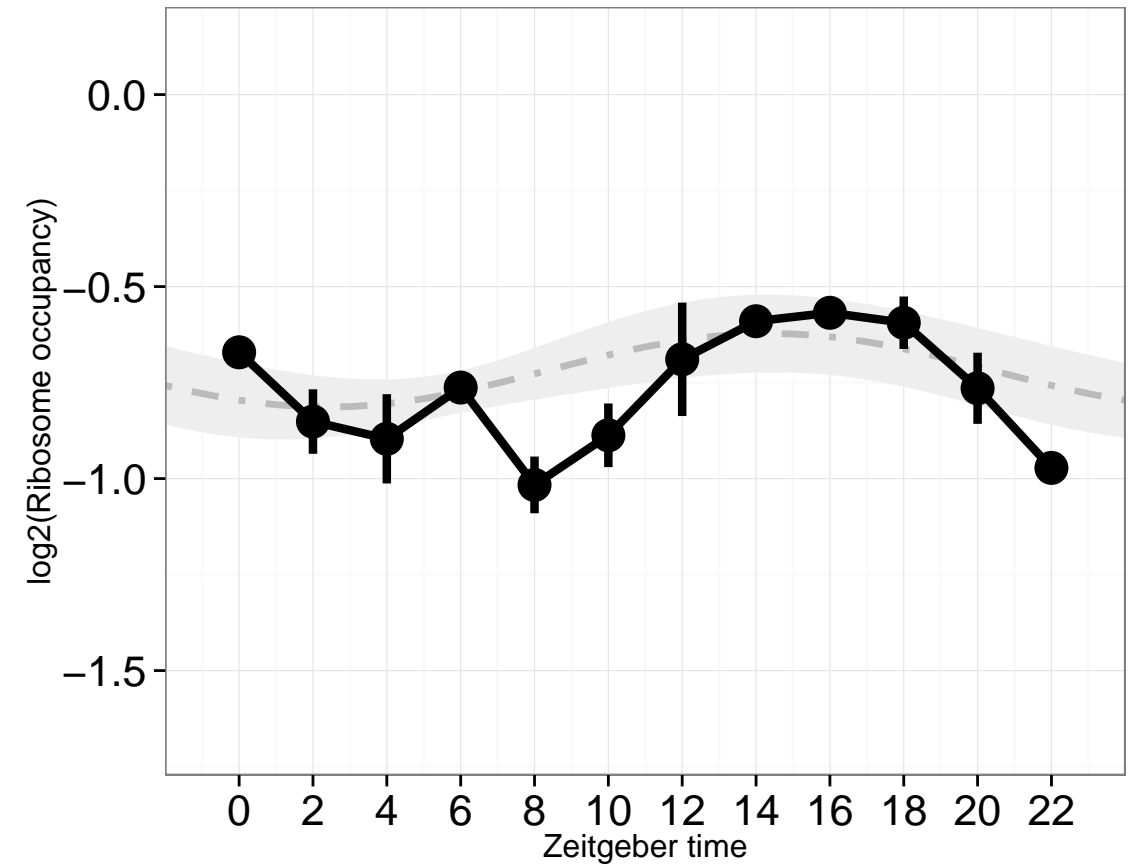

Supplement: SuppDataset_1.zip [file Mst1_set_A.pdf › Supplemental Dataset 1/A-mRNA_nonrhyth_translation_nonrhyth/Mst1_set_A.pdf]

## Msto1

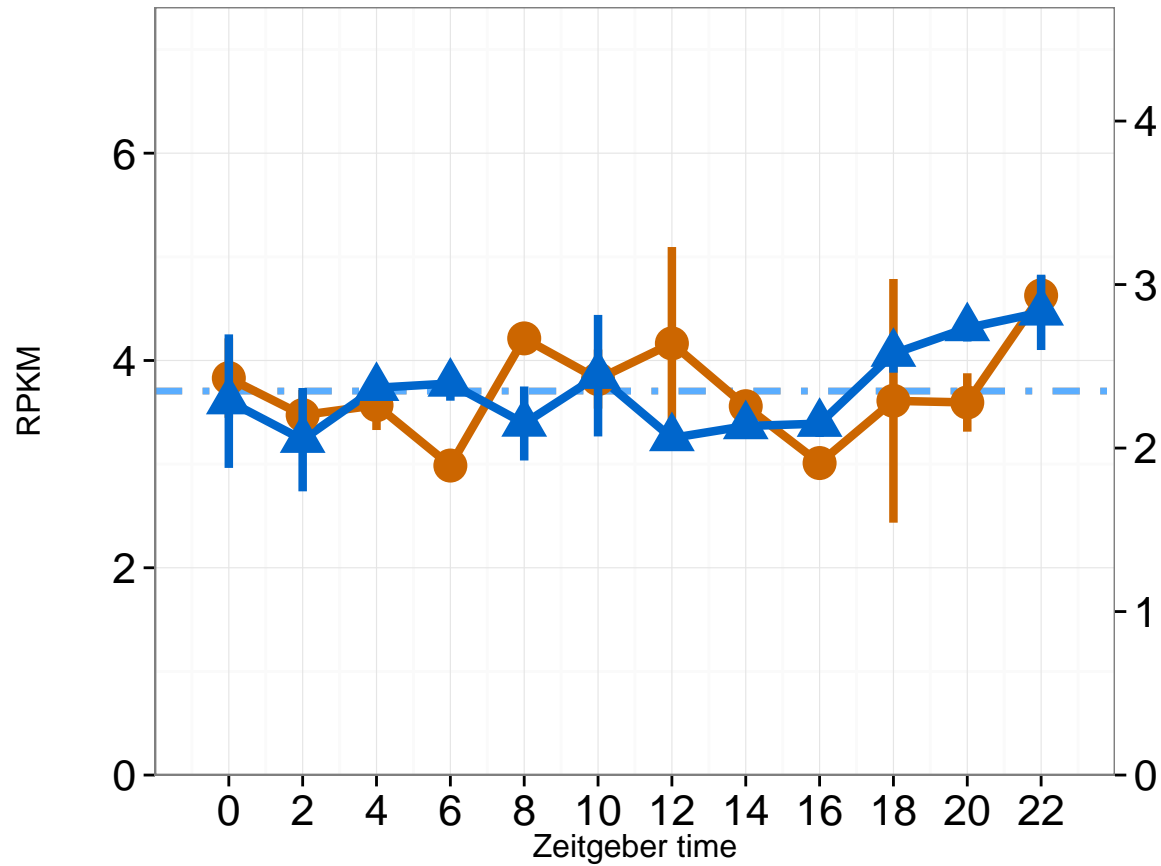

## Msto1

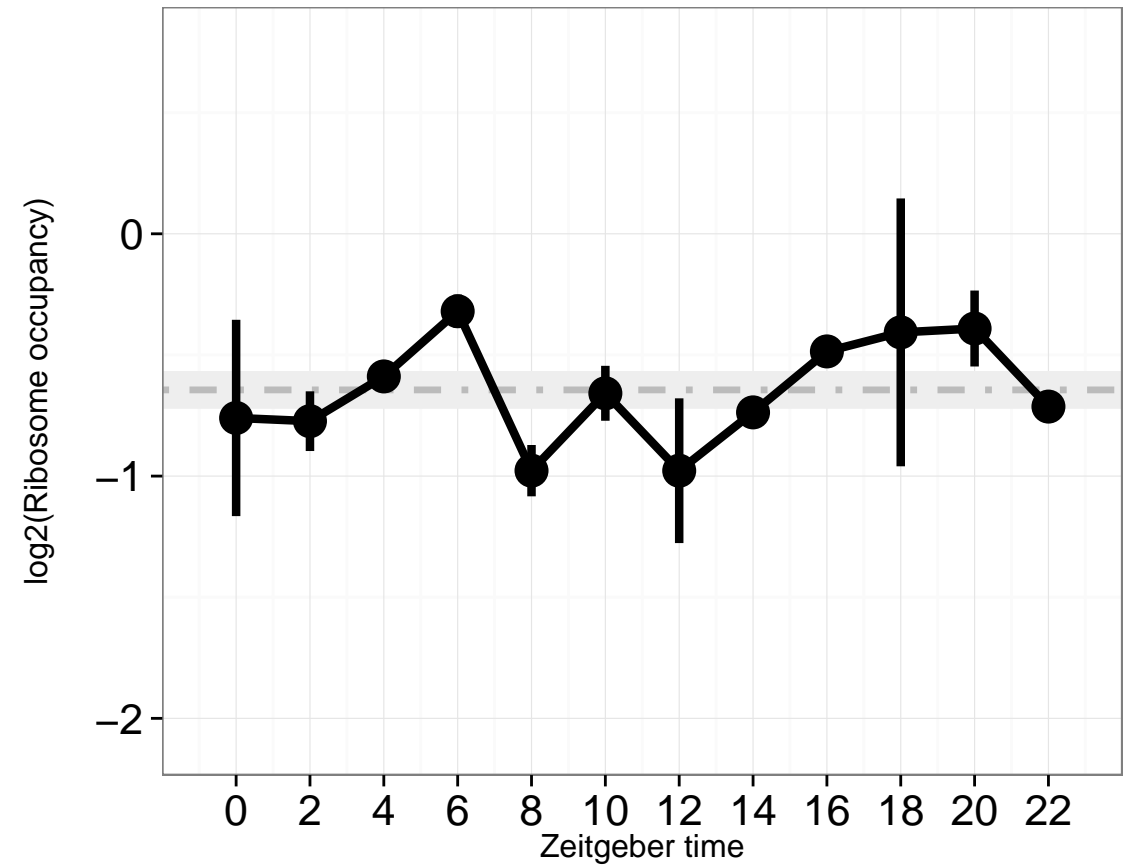

Supplement: SuppDataset_1.zip [file Msto1_set_A.pdf › Supplemental Dataset 1/A-mRNA_nonrhyth_translation_nonrhyth/Msto1_set_A.pdf]

# Mta1

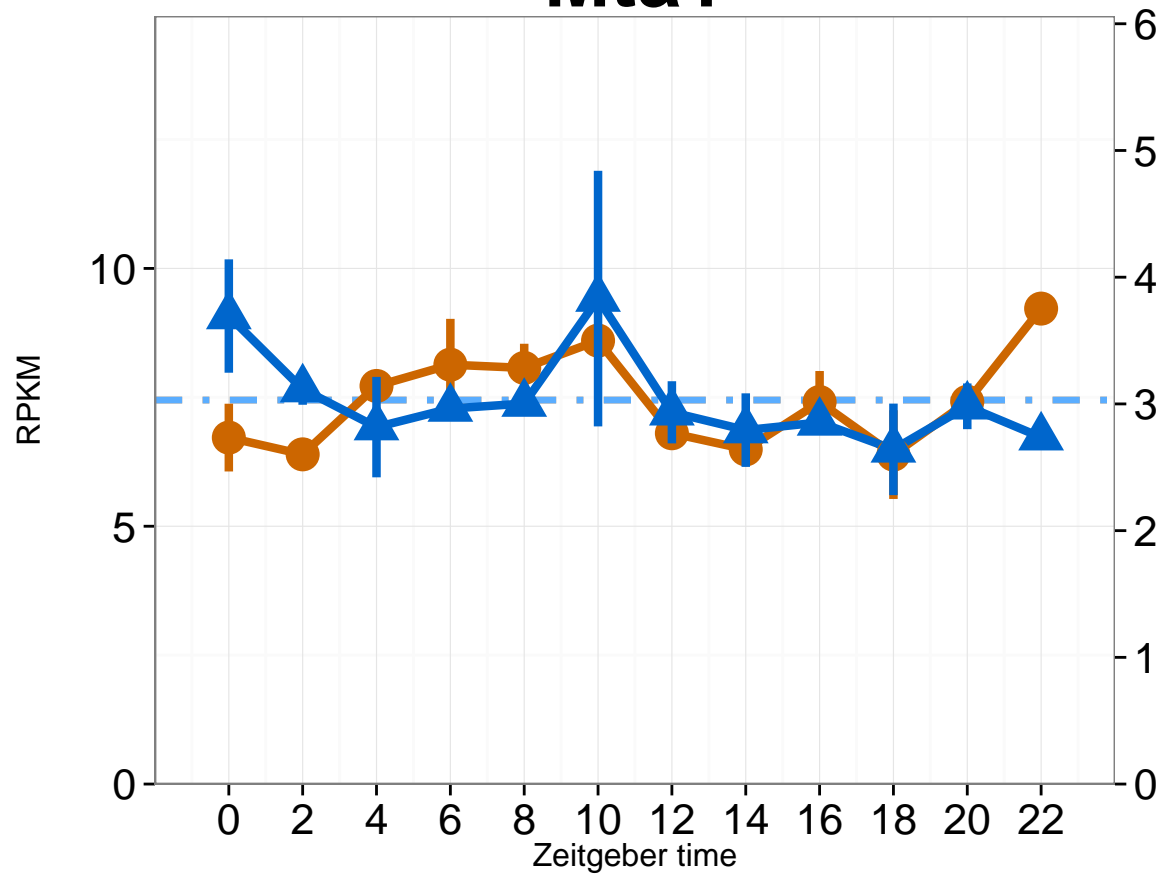

# Mta1

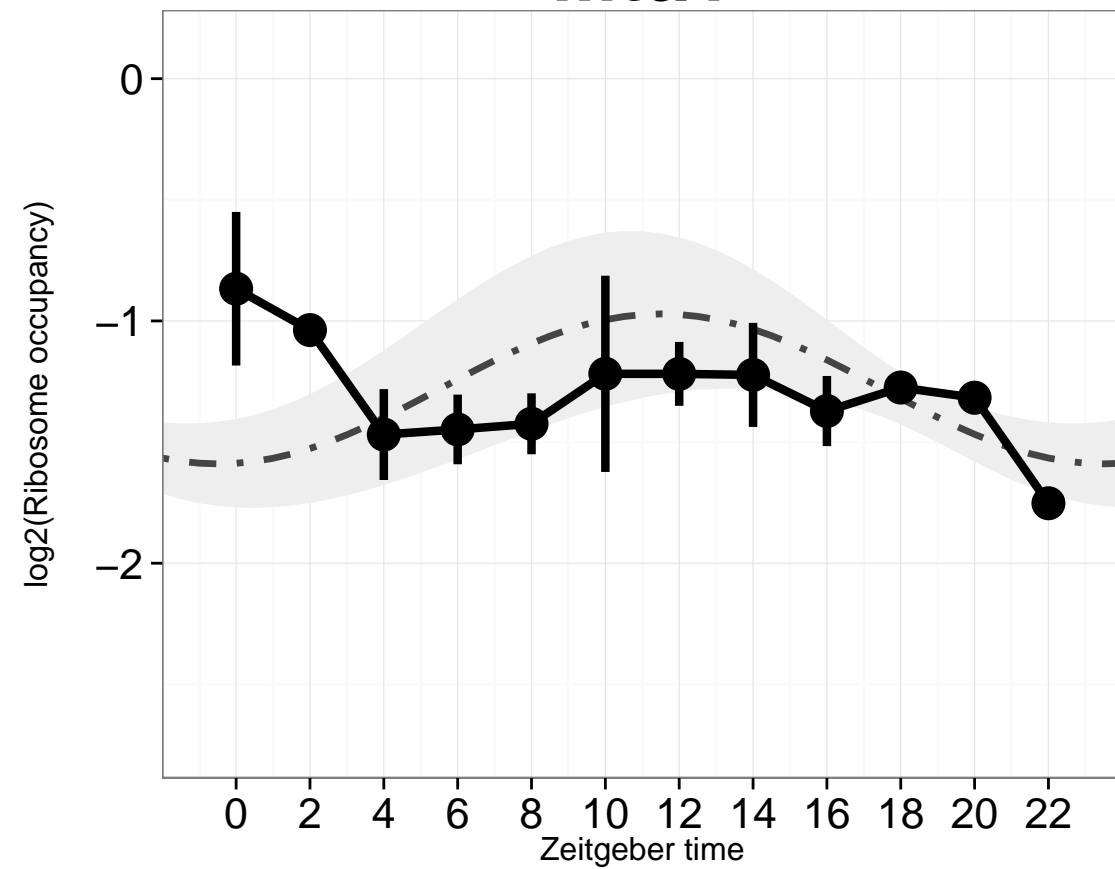

Supplement: SuppDataset_1.zip [file Mta1_set_A.pdf › Supplemental Dataset 1/A-mRNA_nonrhyth_translation_nonrhyth/Mta1_set_A.pdf]

## Mta2

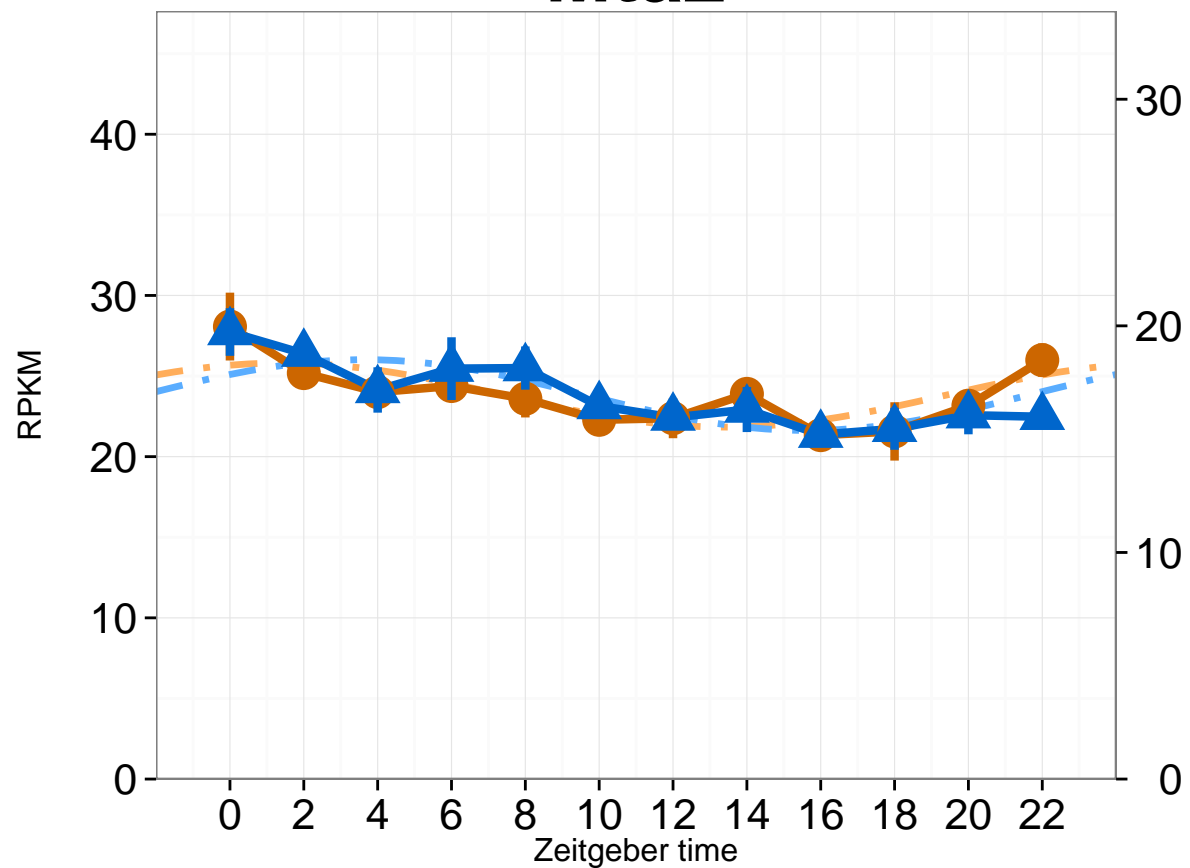

## Mta2

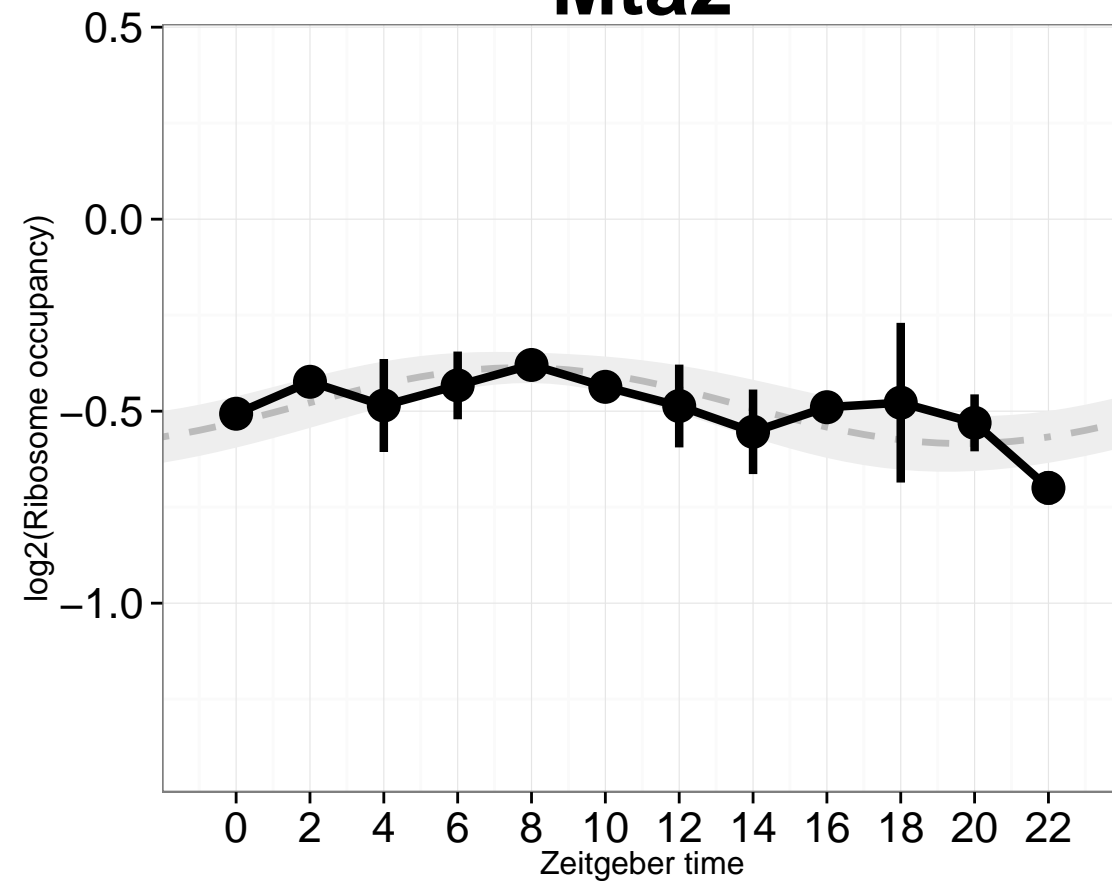

Supplement: SuppDataset_1.zip [file Mta2_set_A.pdf › Supplemental Dataset 1/A-mRNA_nonrhyth_translation_nonrhyth/Mta2_set_A.pdf]

# Mta3

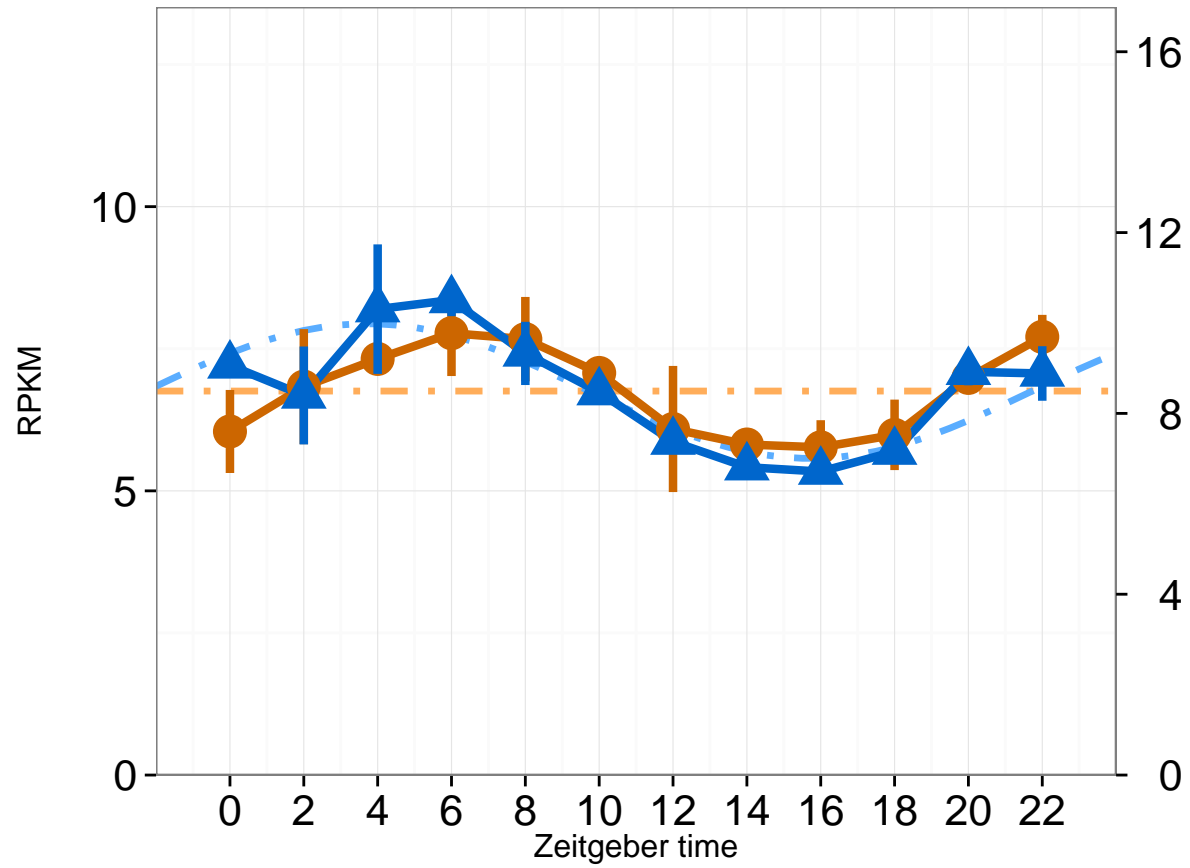

# Mta3

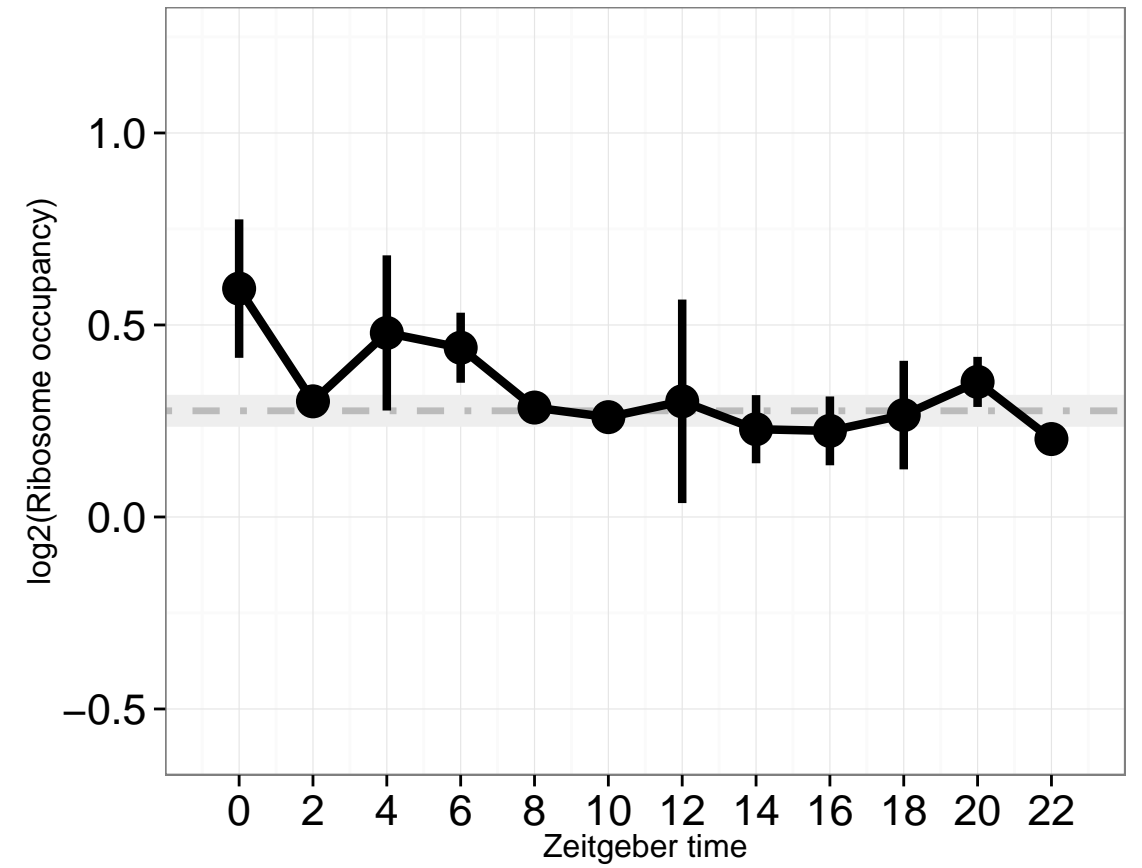

Supplement: SuppDataset_1.zip [file Mta3_set_A.pdf › Supplemental Dataset 1/A-mRNA_nonrhyth_translation_nonrhyth/Mta3_set_A.pdf]

## Mtap

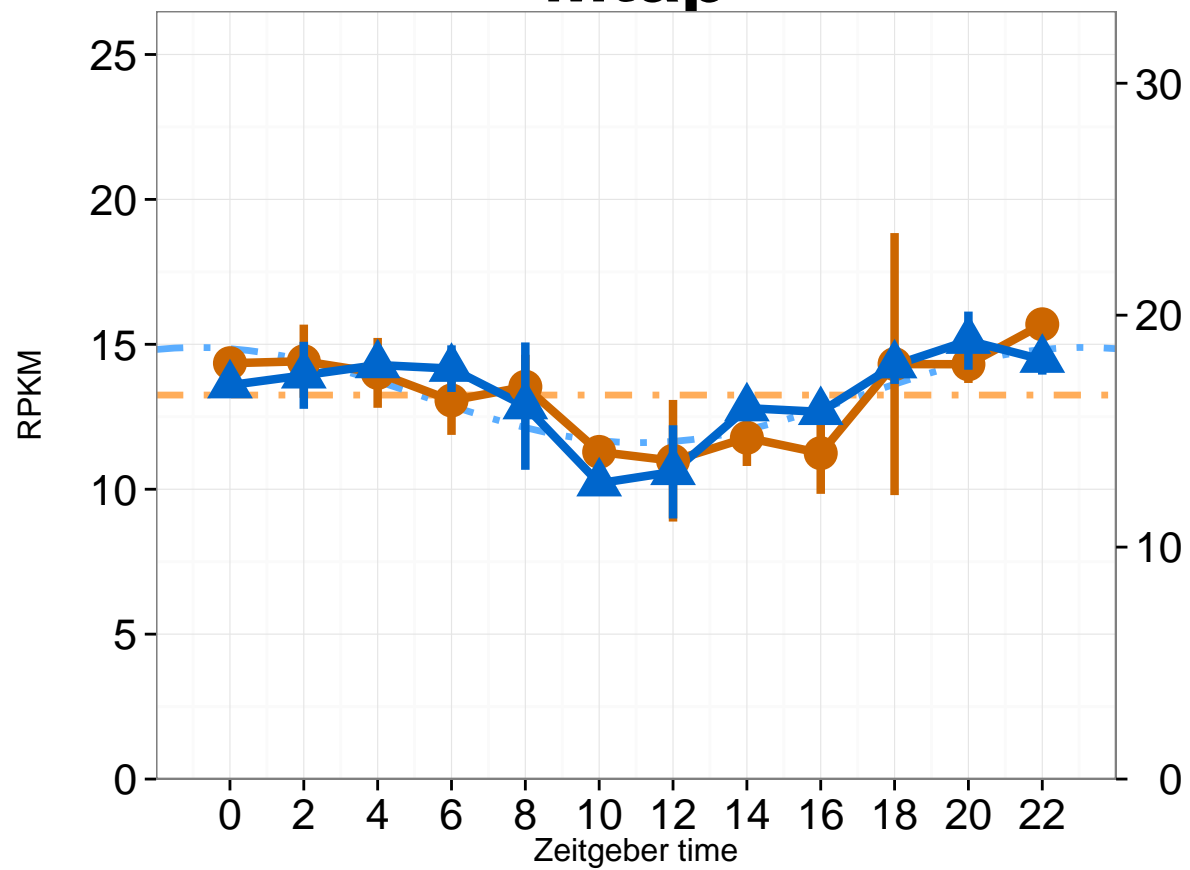

## Mtap

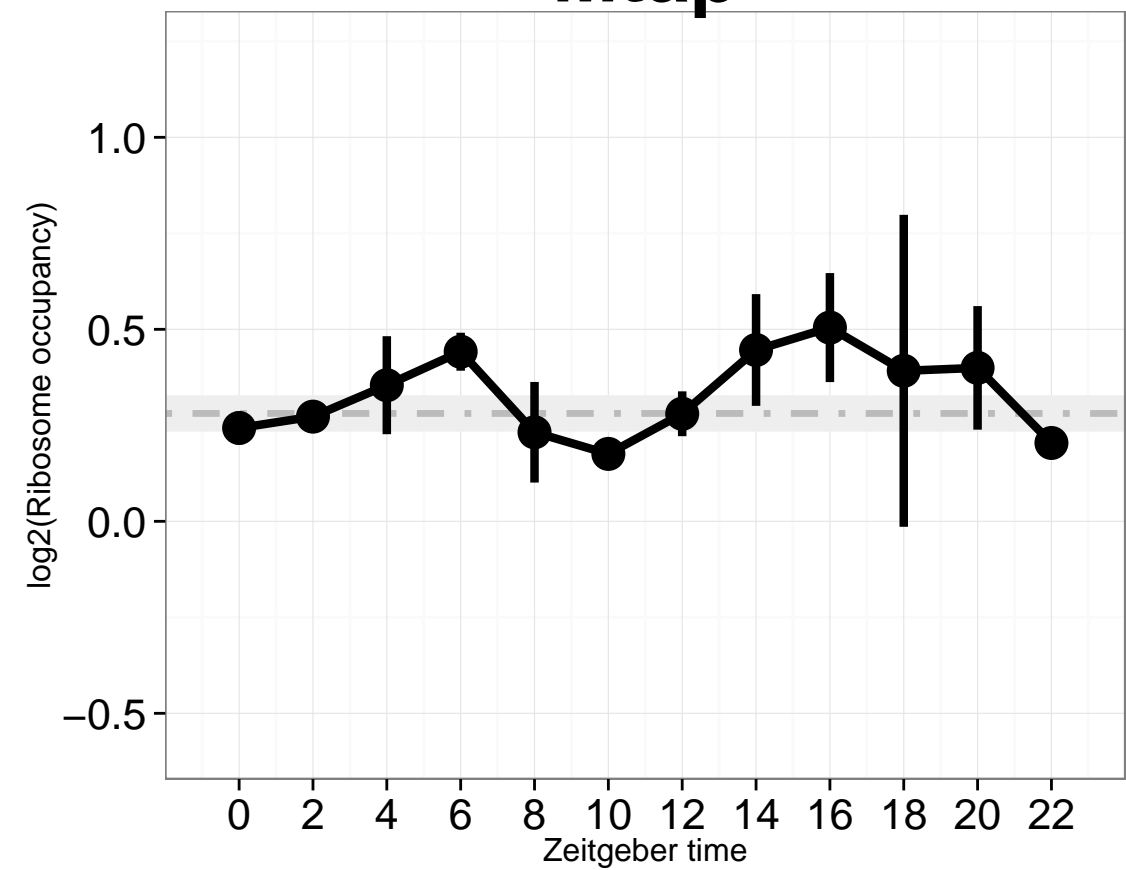

Supplement: SuppDataset_1.zip [file Mtap_set_A.pdf › Supplemental Dataset 1/A-mRNA_nonrhyth_translation_nonrhyth/Mtap_set_A.pdf]

# Mtbp

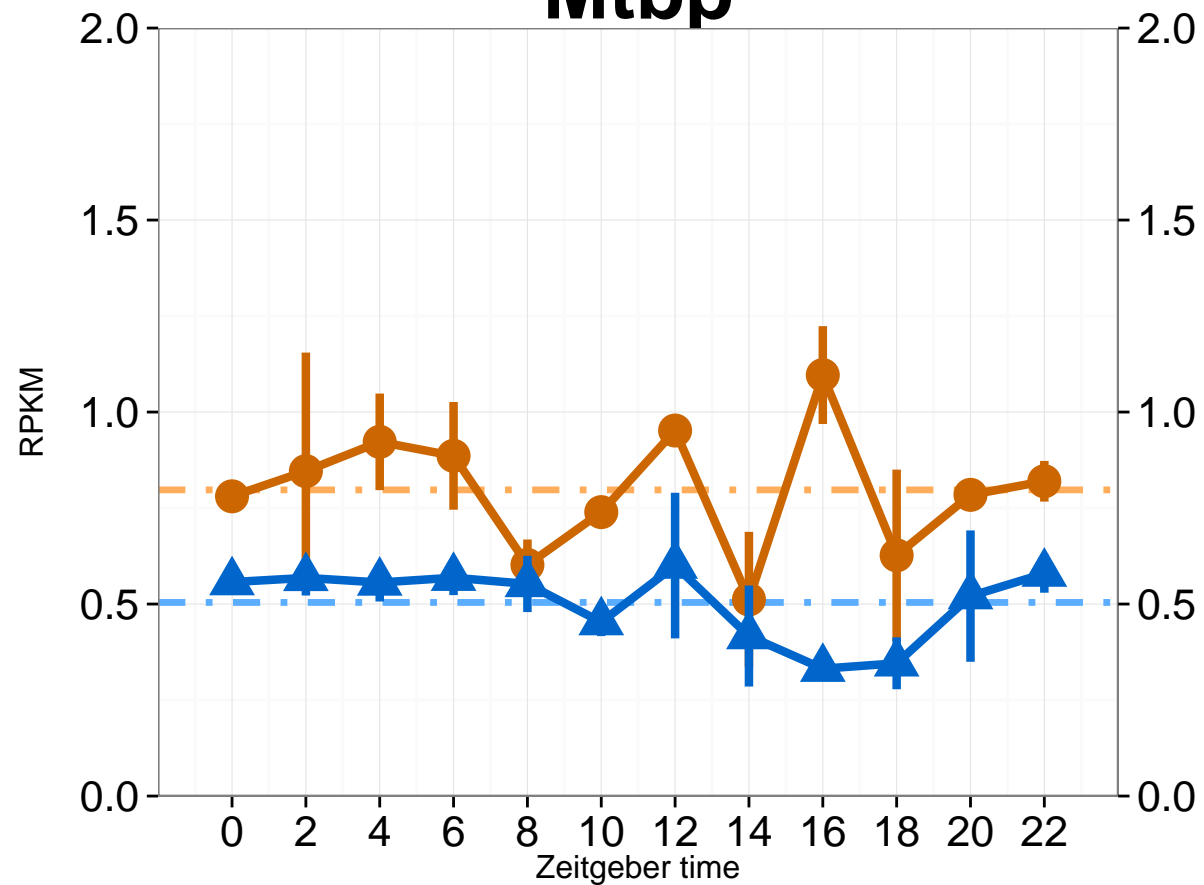

# Mtbp

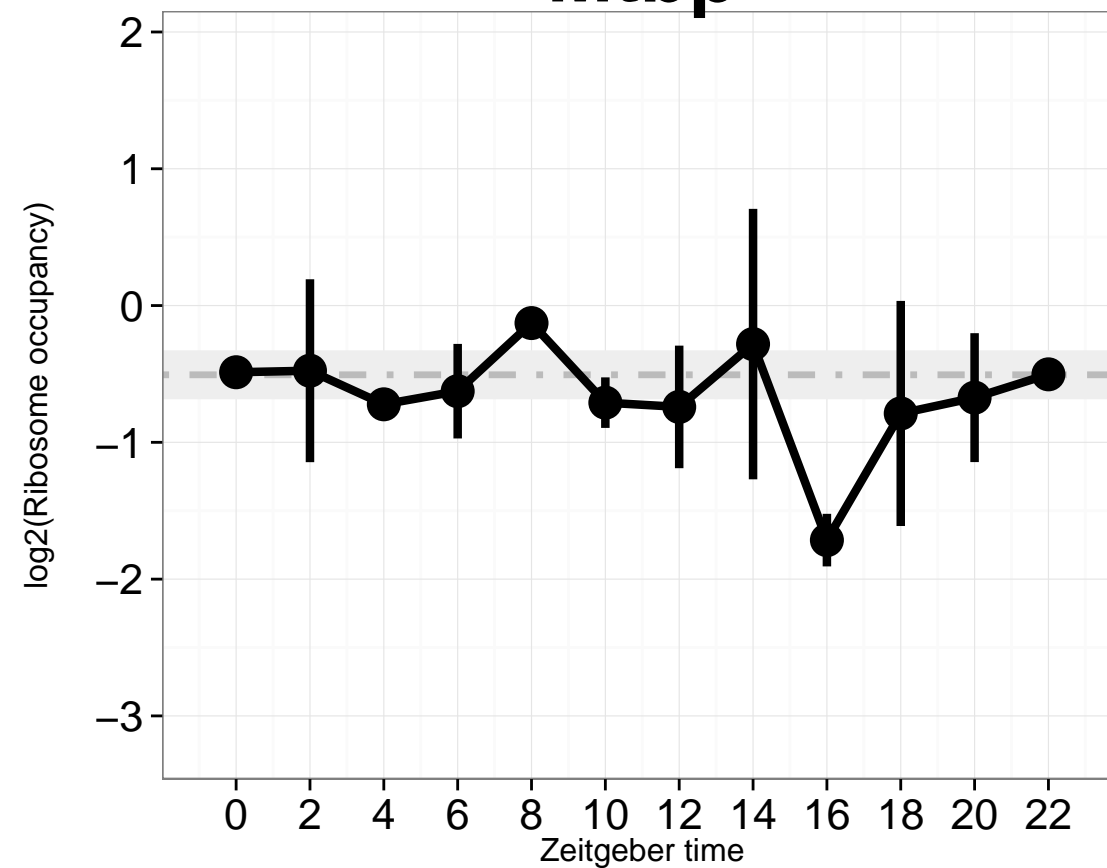

Supplement: SuppDataset_1.zip [file Mtbp_set_A.pdf › Supplemental Dataset 1/A-mRNA_nonrhyth_translation_nonrhyth/Mtbp_set_A.pdf]

# Mtch1

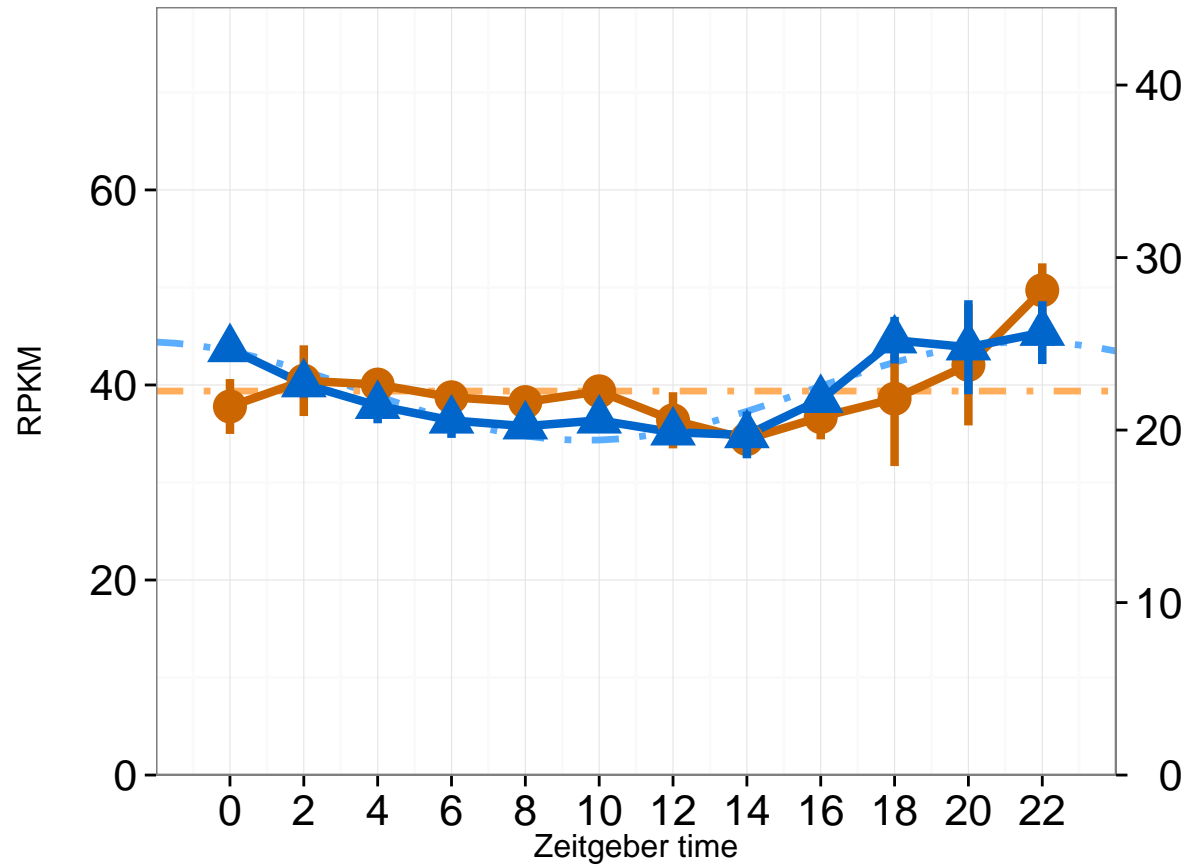

# Mtch1

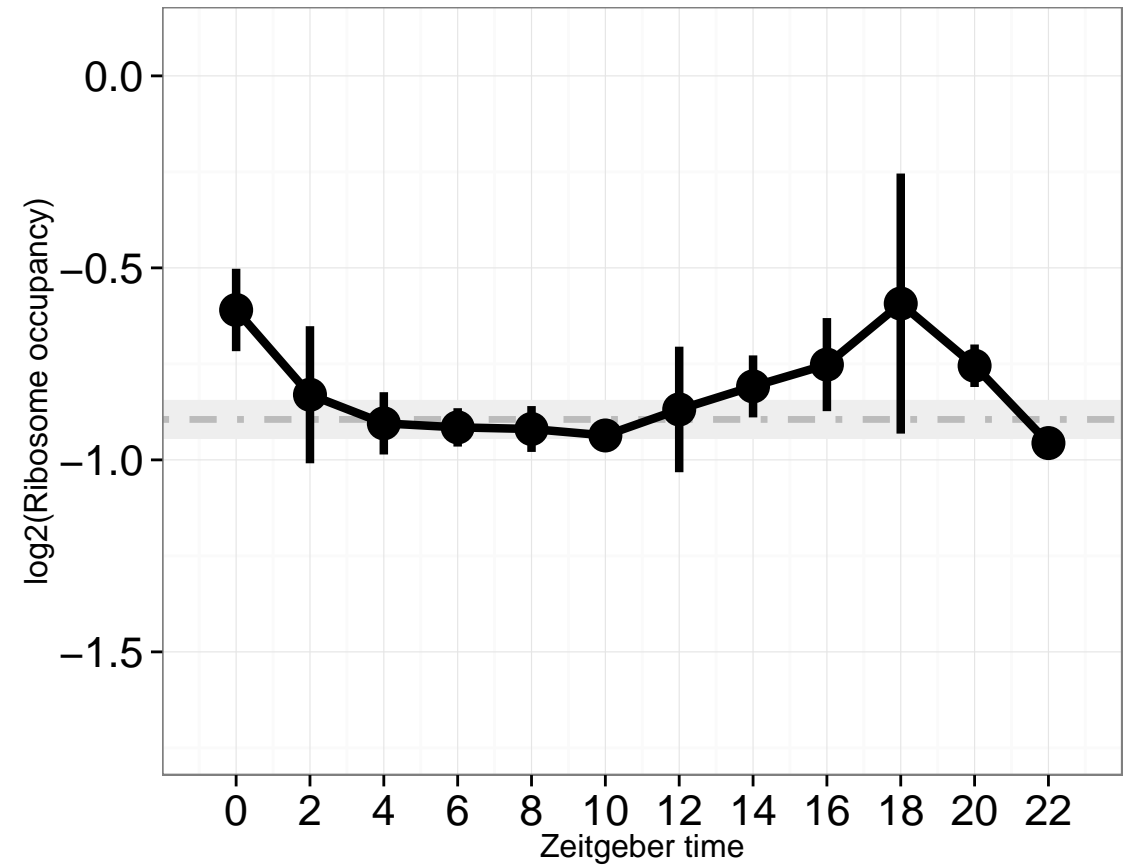

Supplement: SuppDataset_1.zip [file Mtch1_set_A.pdf › Supplemental Dataset 1/A-mRNA_nonrhyth_translation_nonrhyth/Mtch1_set_A.pdf]

## Mtch2

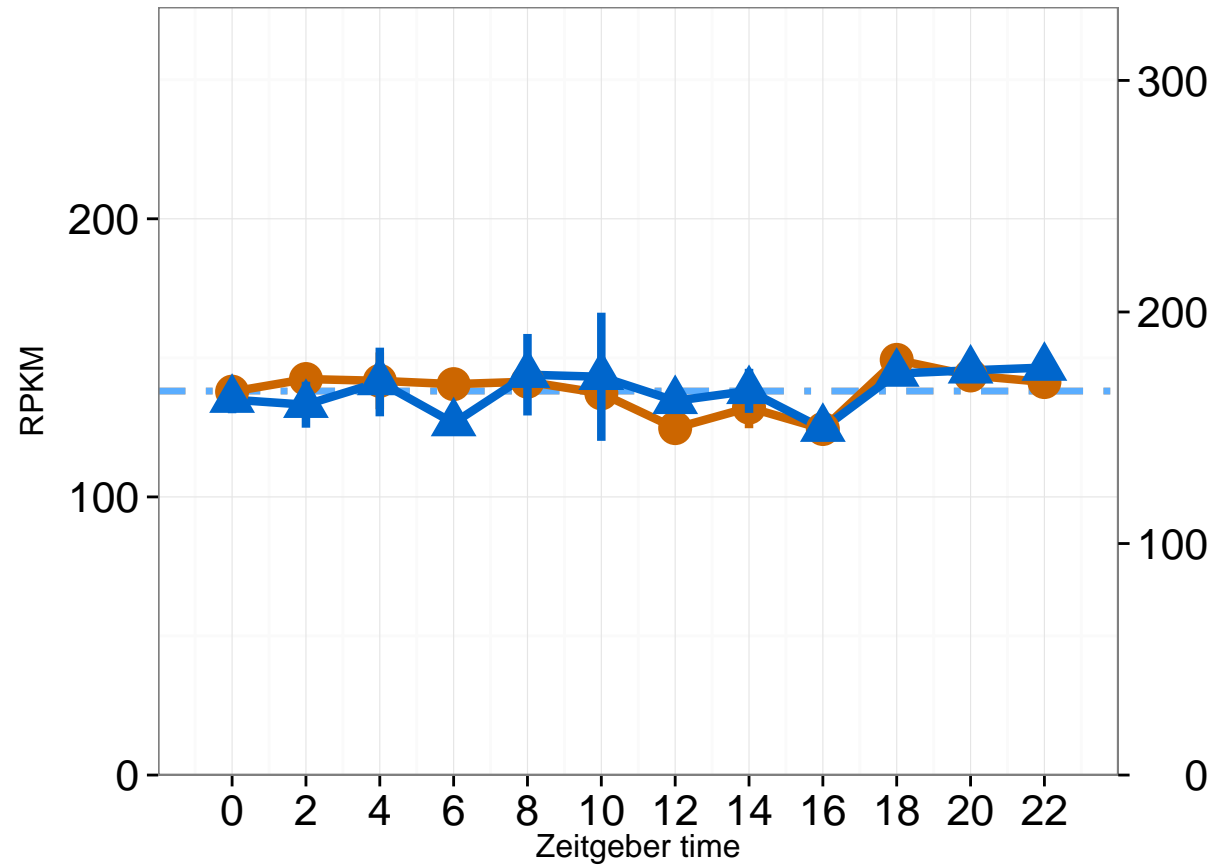

## Mtch2

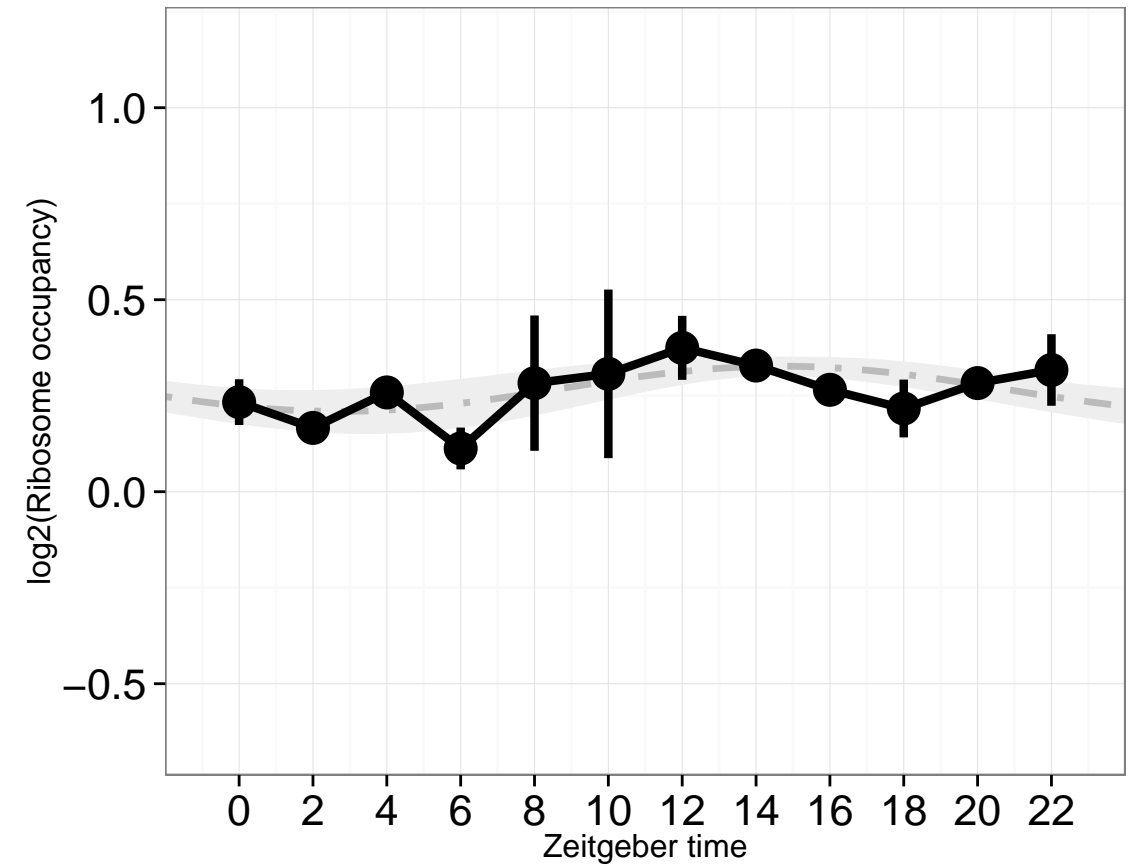

Supplement: SuppDataset_1.zip [file Mtch2_set_A.pdf › Supplemental Dataset 1/A-mRNA_nonrhyth_translation_nonrhyth/Mtch2_set_A.pdf]

# Mtcp1

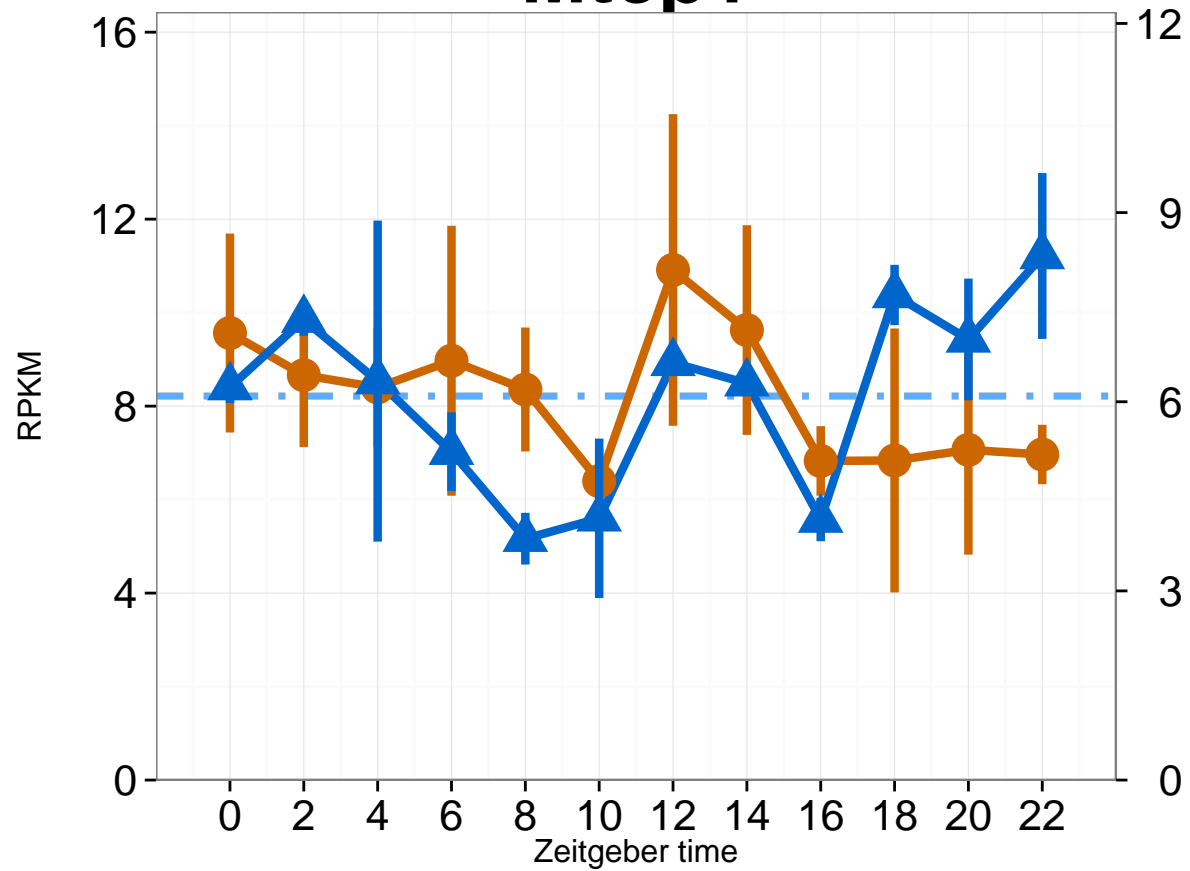

# Mtcp1

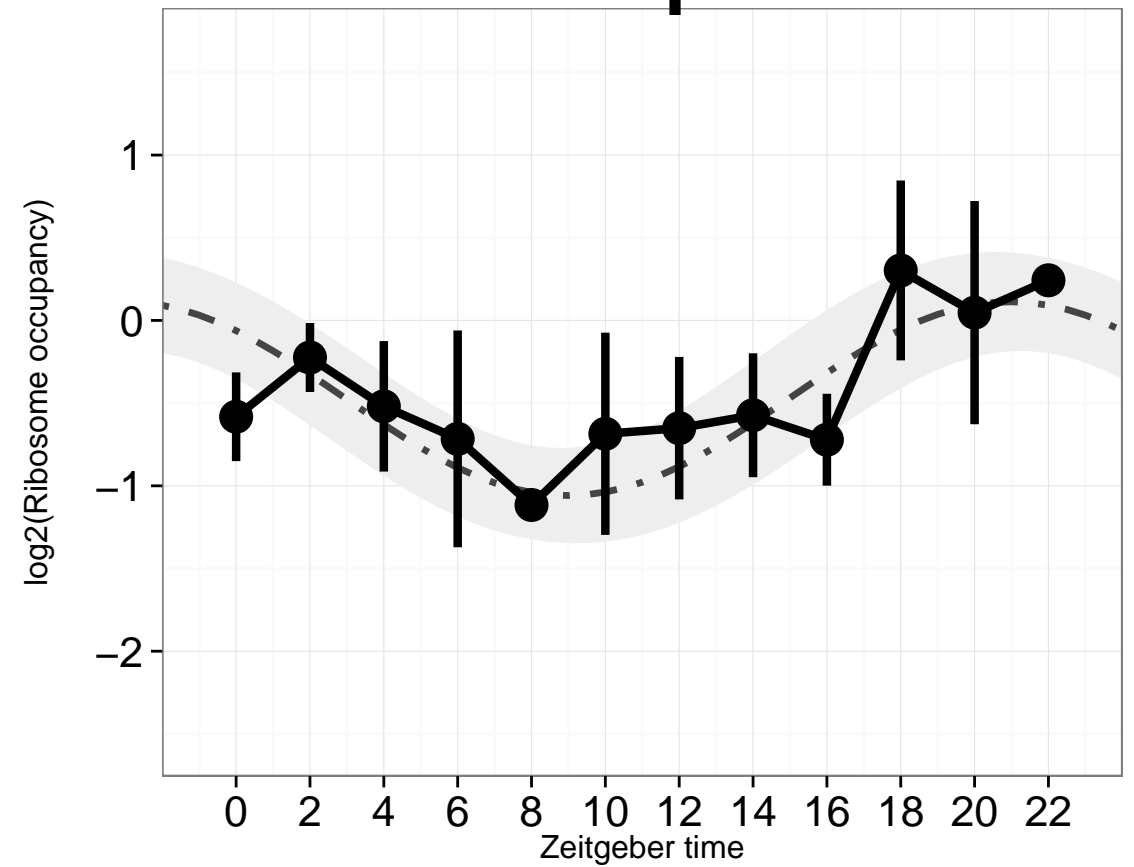

Supplement: SuppDataset_1.zip [file Mtcp1_set_A.pdf › Supplemental Dataset 1/A-mRNA_nonrhyth_translation_nonrhyth/Mtcp1_set_A.pdf]

## Mtdh

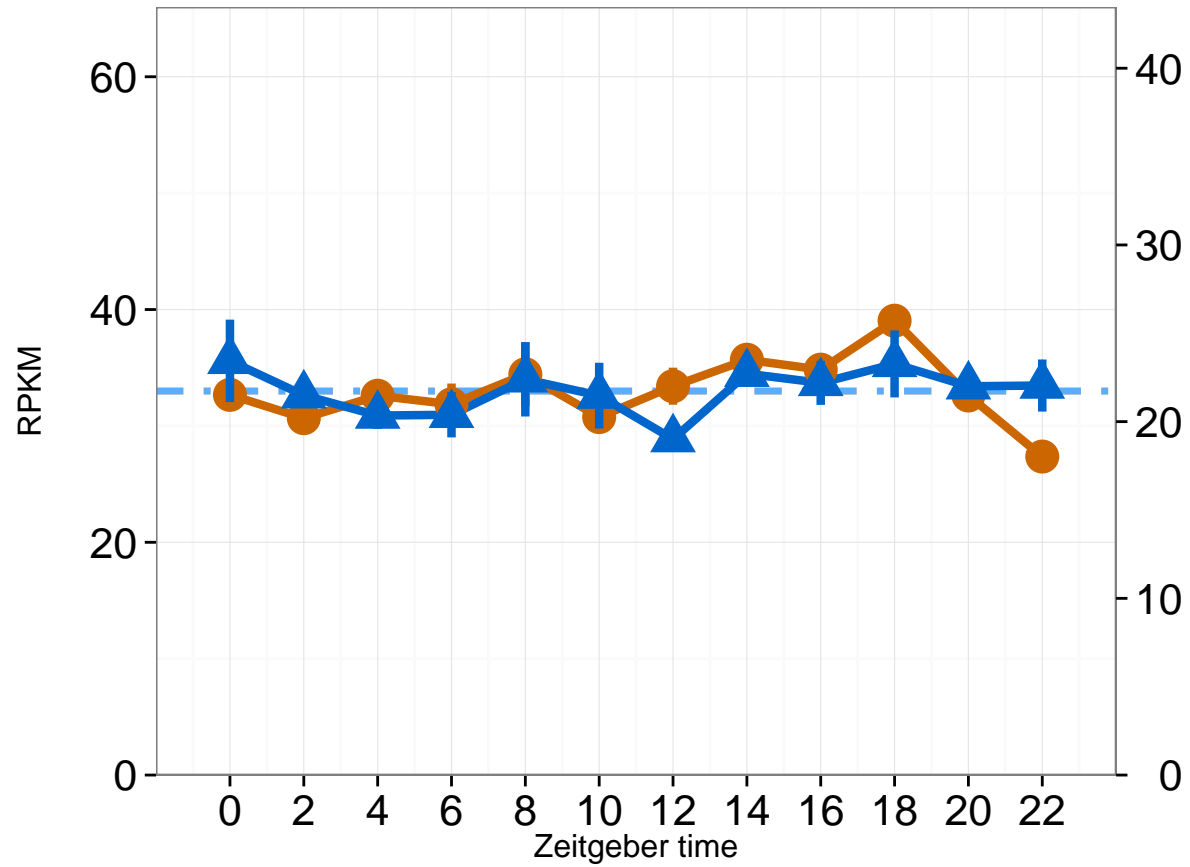

## Mtdh

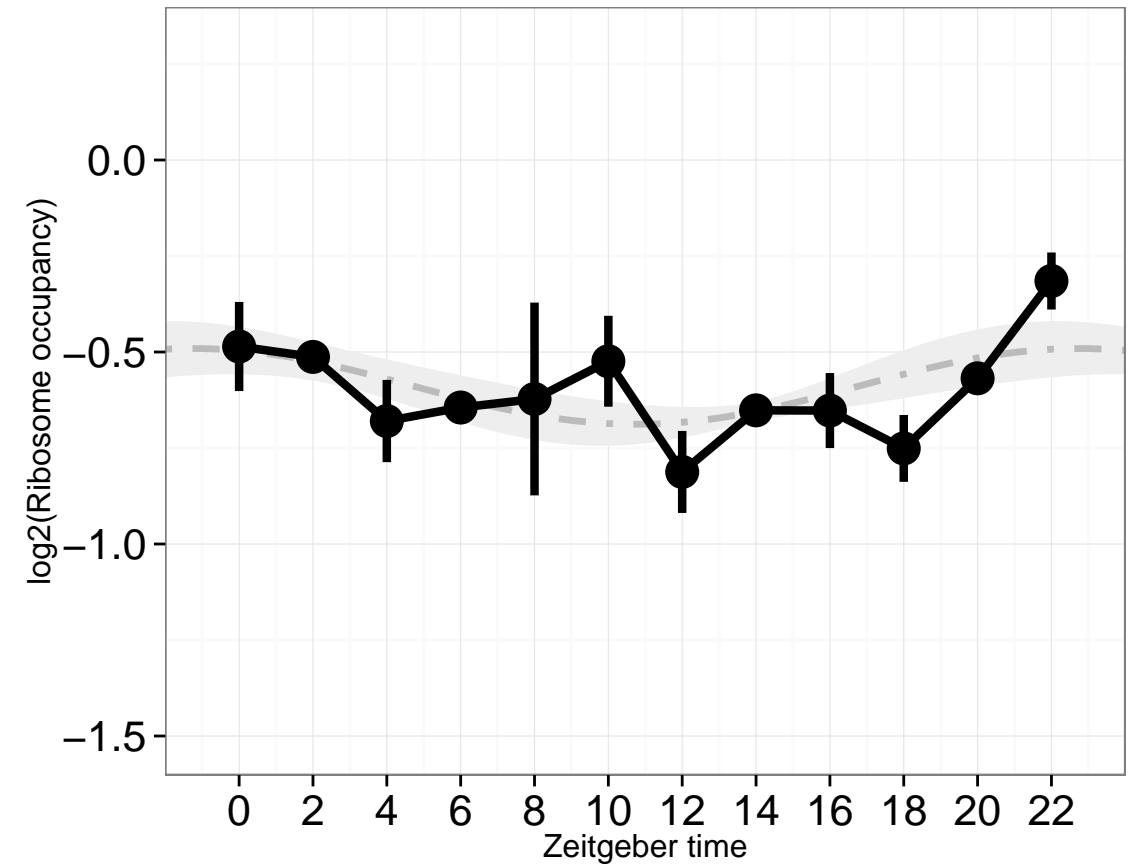

Supplement: SuppDataset_1.zip [file Mtdh_set_A.pdf › Supplemental Dataset 1/A-mRNA_nonrhyth_translation_nonrhyth/Mtdh_set_A.pdf]

## Mterf

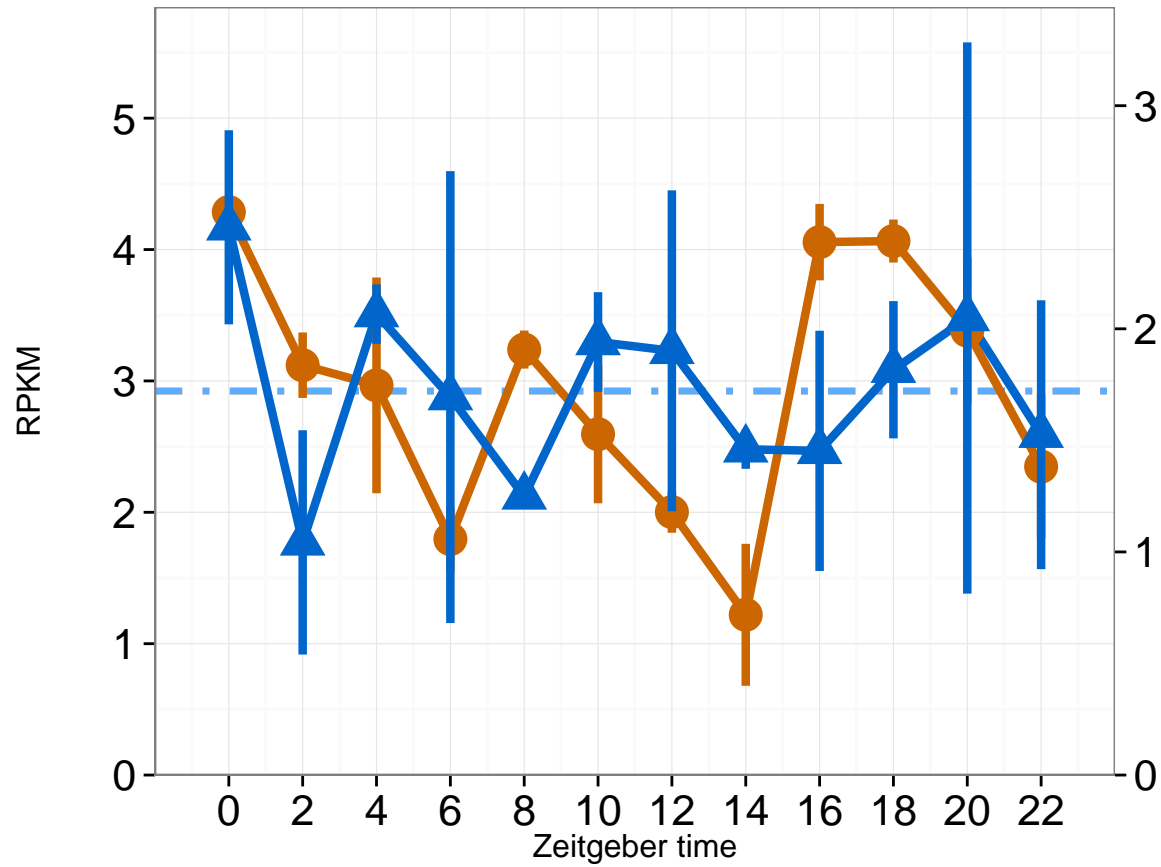

## Mterf

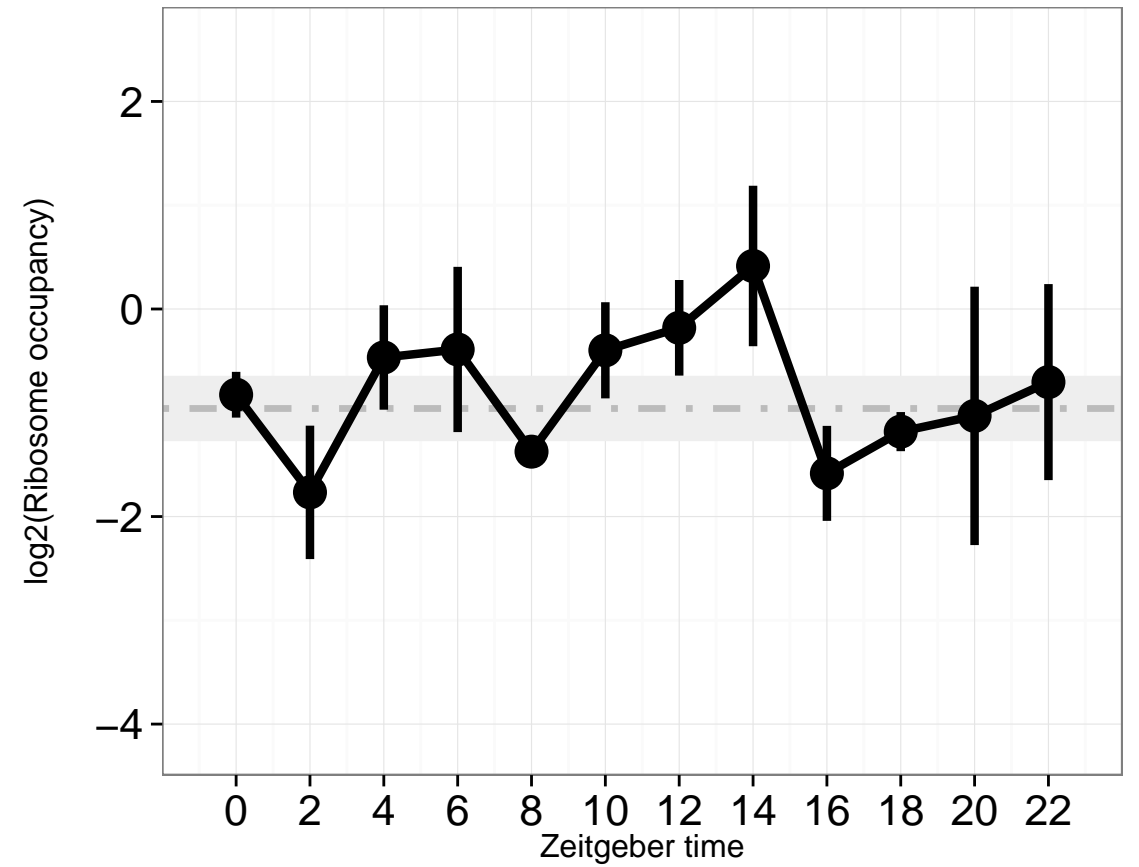

Supplement: SuppDataset_1.zip [file Mterf_set_A.pdf › Supplemental Dataset 1/A-mRNA_nonrhyth_translation_nonrhyth/Mterf_set_A.pdf]

# Mterfd1

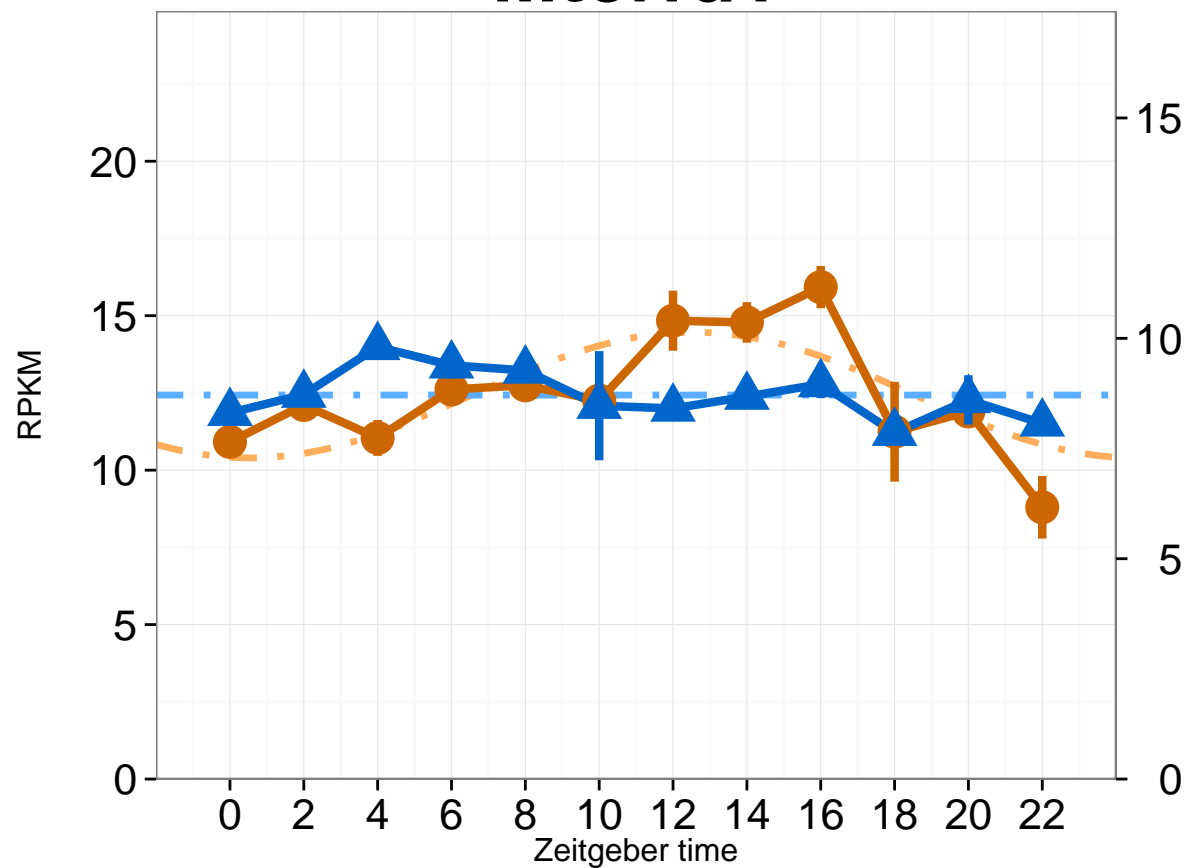

# Mterfd1

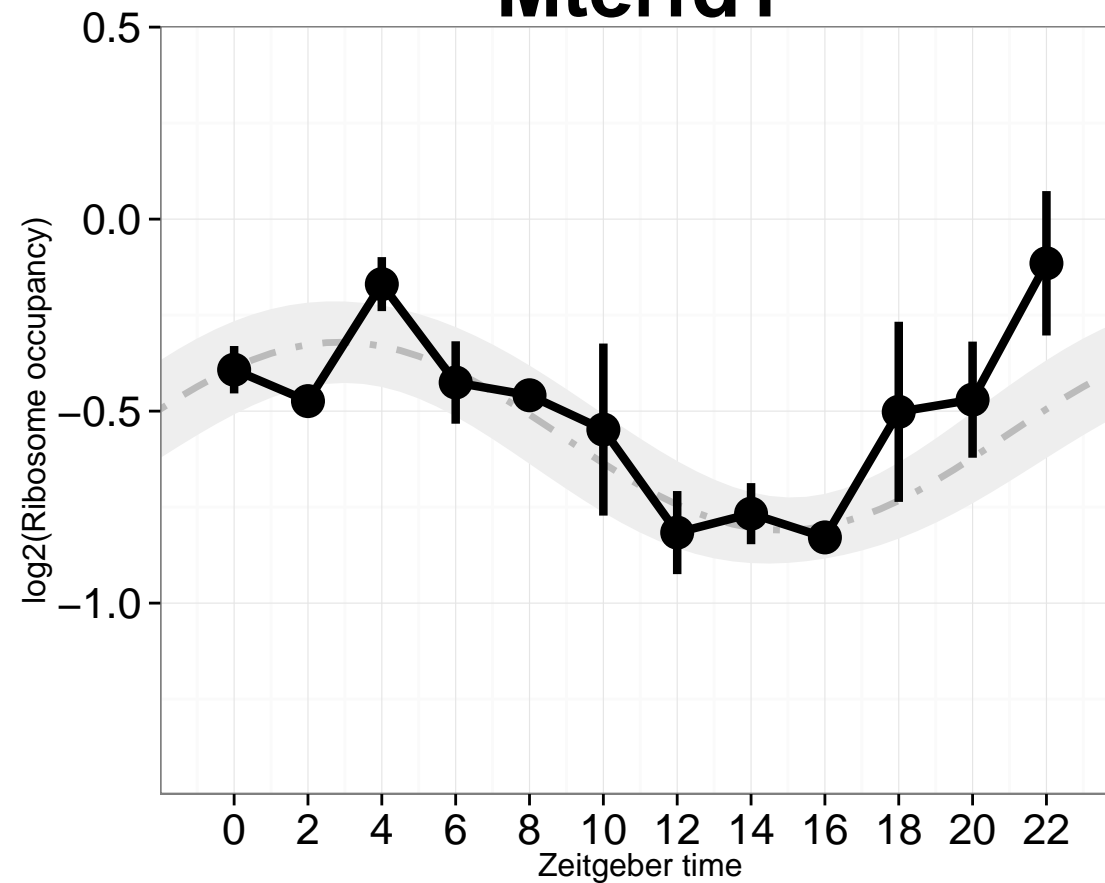

Supplement: SuppDataset_1.zip [file Mterfd1_set_A.pdf › Supplemental Dataset 1/A-mRNA_nonrhyth_translation_nonrhyth/Mterfd1_set_A.pdf]

## Mterfd2

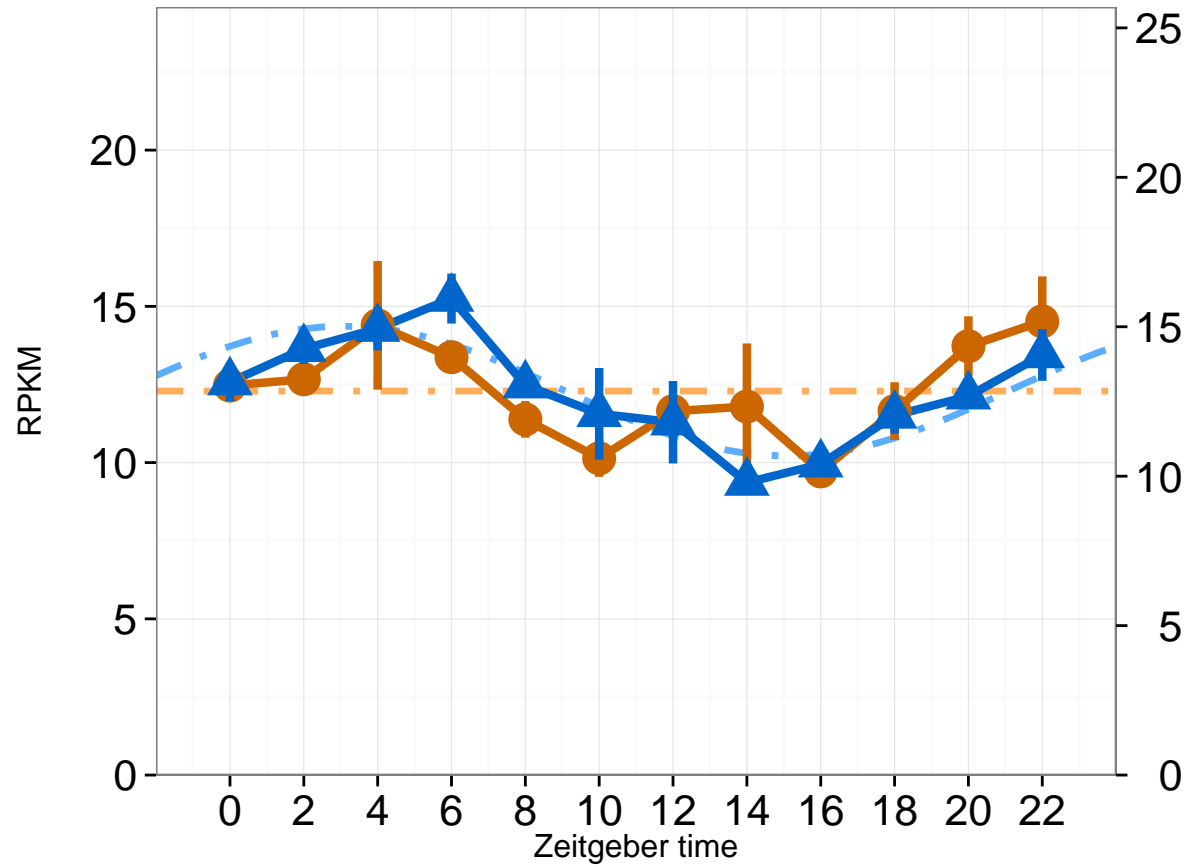

## Mterfd2

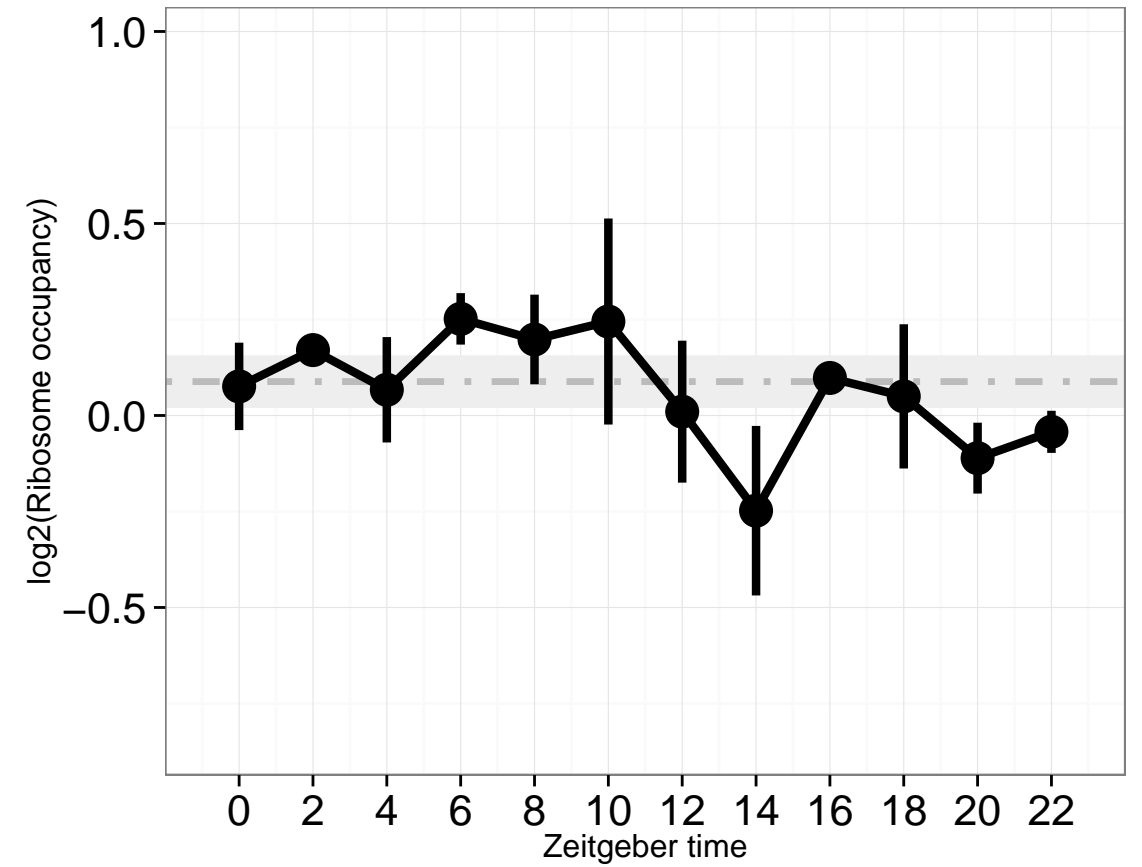

Supplement: SuppDataset_1.zip [file Mterfd2_set_A.pdf › Supplemental Dataset 1/A-mRNA_nonrhyth_translation_nonrhyth/Mterfd2_set_A.pdf]

# Mtf1

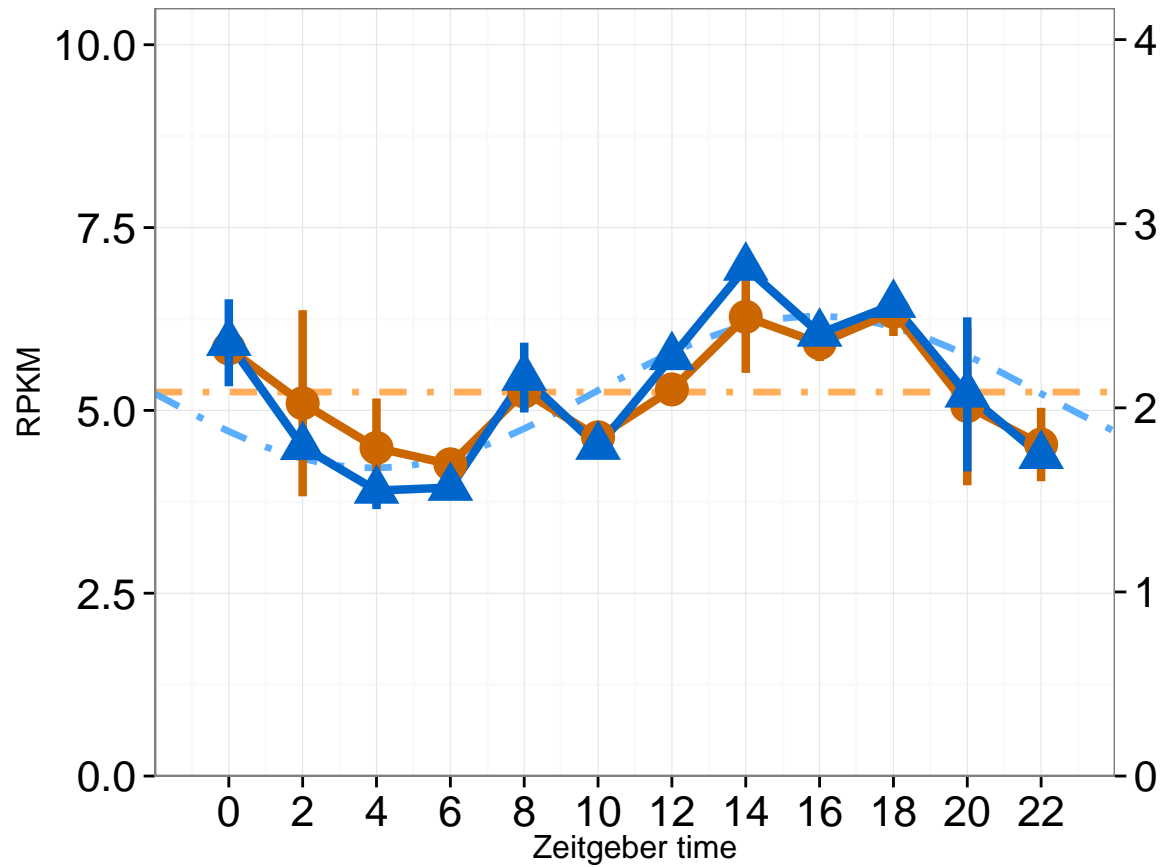

# Mtf1

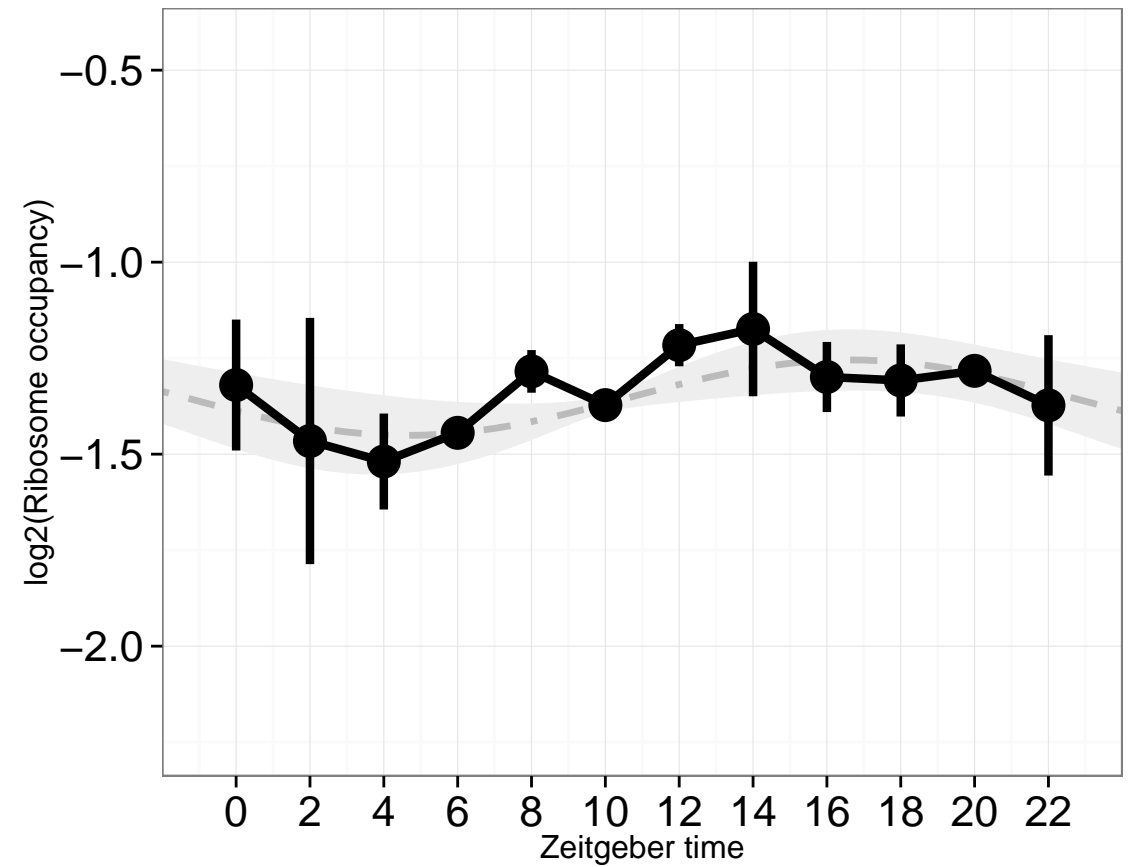

Supplement: SuppDataset_1.zip [file Mtf1_set_A.pdf › Supplemental Dataset 1/A-mRNA_nonrhyth_translation_nonrhyth/Mtf1_set_A.pdf]

# Mtf2

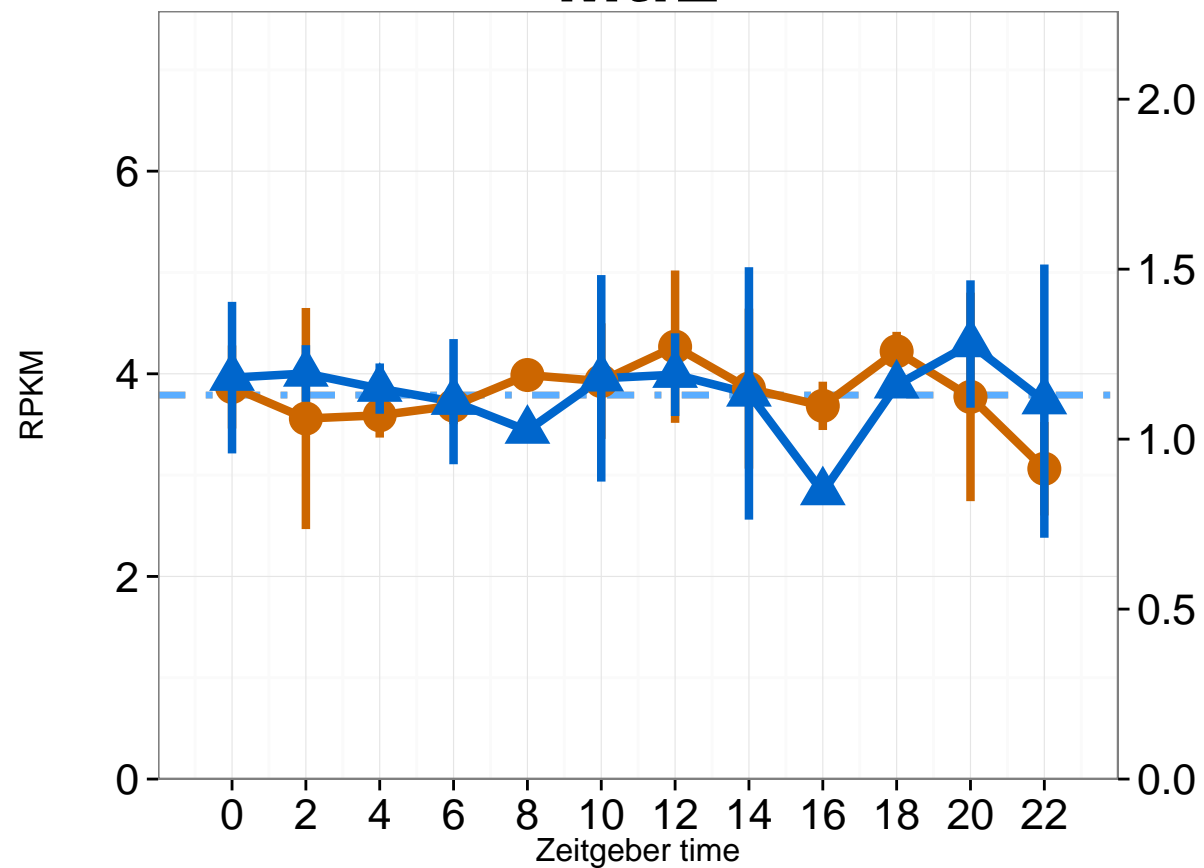

# Mtf2

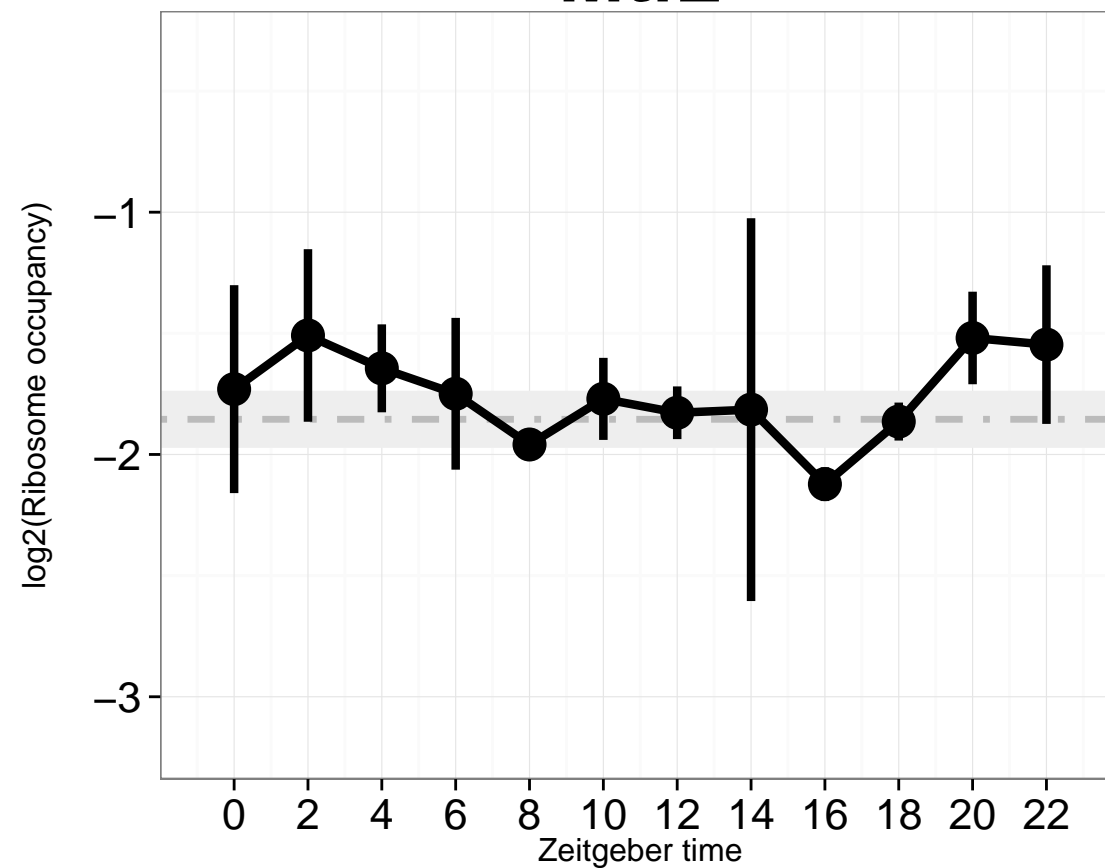

Supplement: SuppDataset_1.zip [file Mtf2_set_A.pdf › Supplemental Dataset 1/A-mRNA_nonrhyth_translation_nonrhyth/Mtf2_set_A.pdf]

## Mtfmt

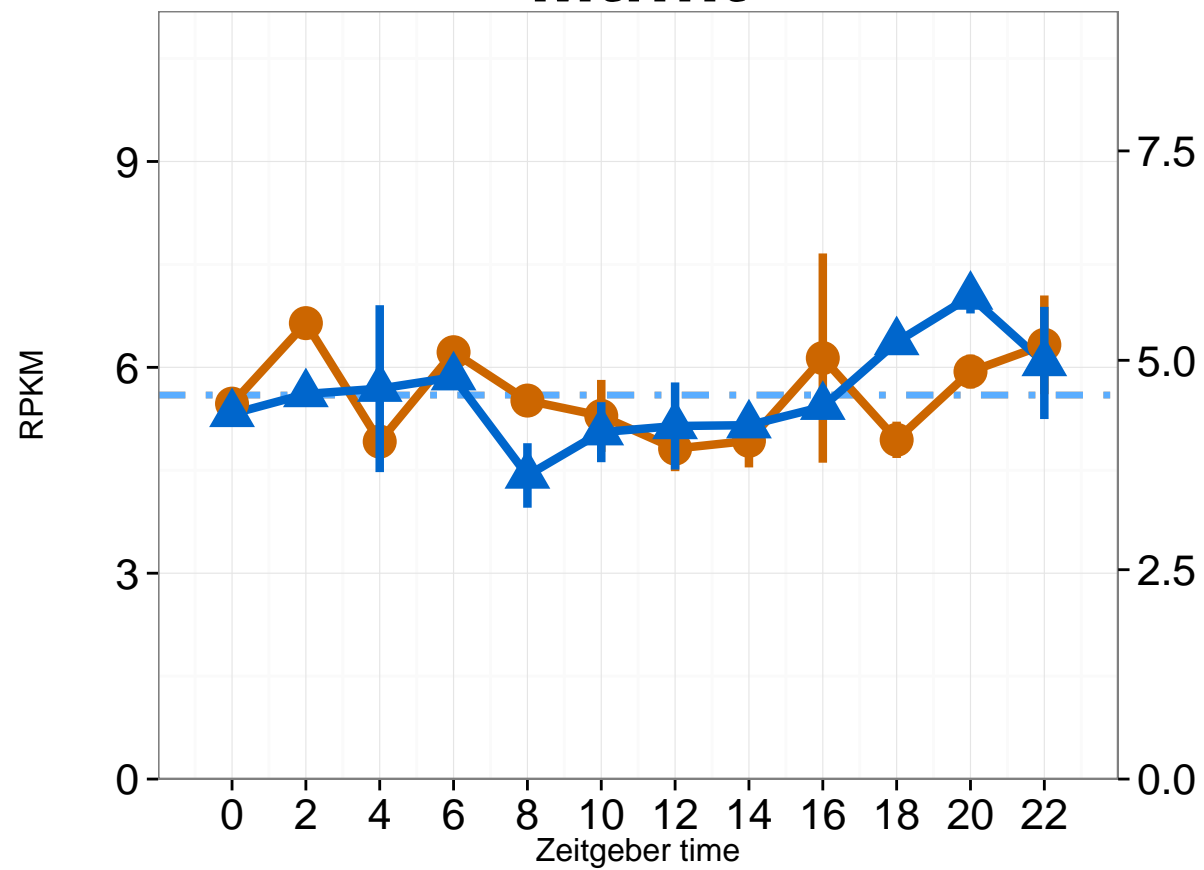

## Mtfmt

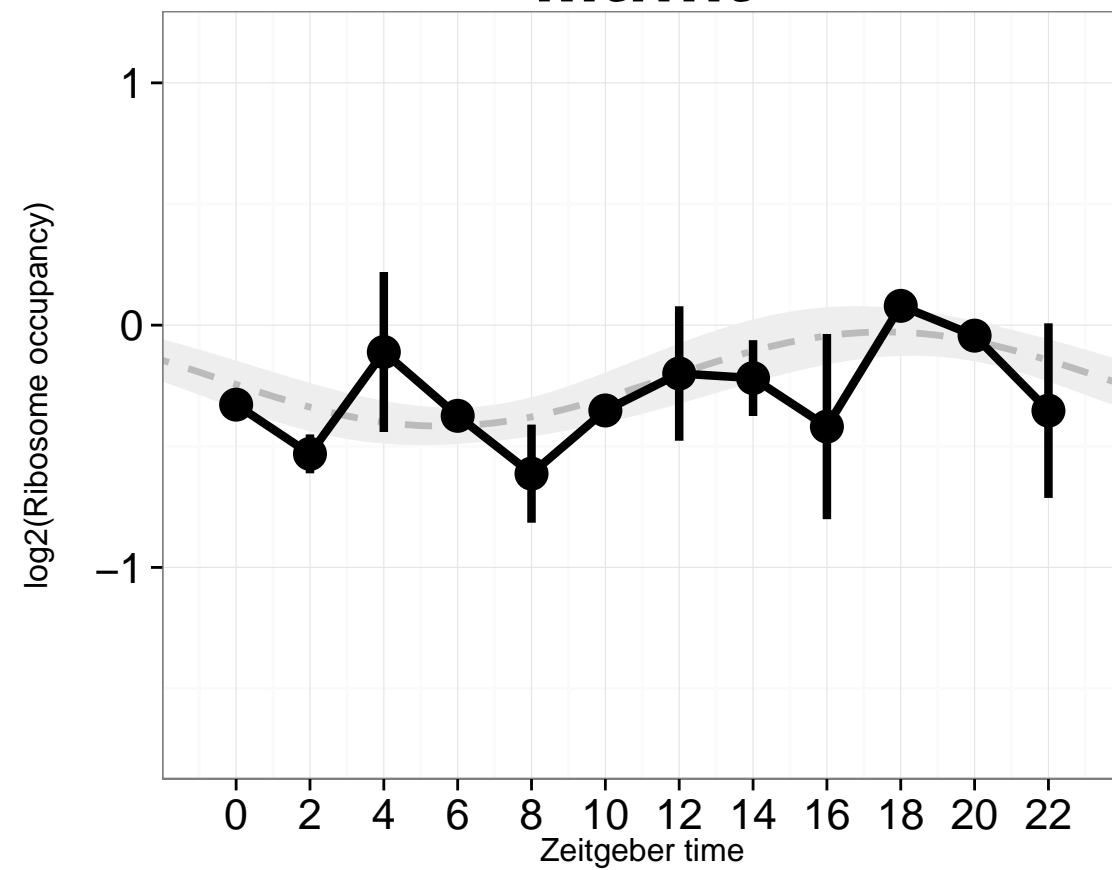

Supplement: SuppDataset_1.zip [file Mtfmt_set_A.pdf › Supplemental Dataset 1/A-mRNA_nonrhyth_translation_nonrhyth/Mtfmt_set_A.pdf]

# Mtftp1

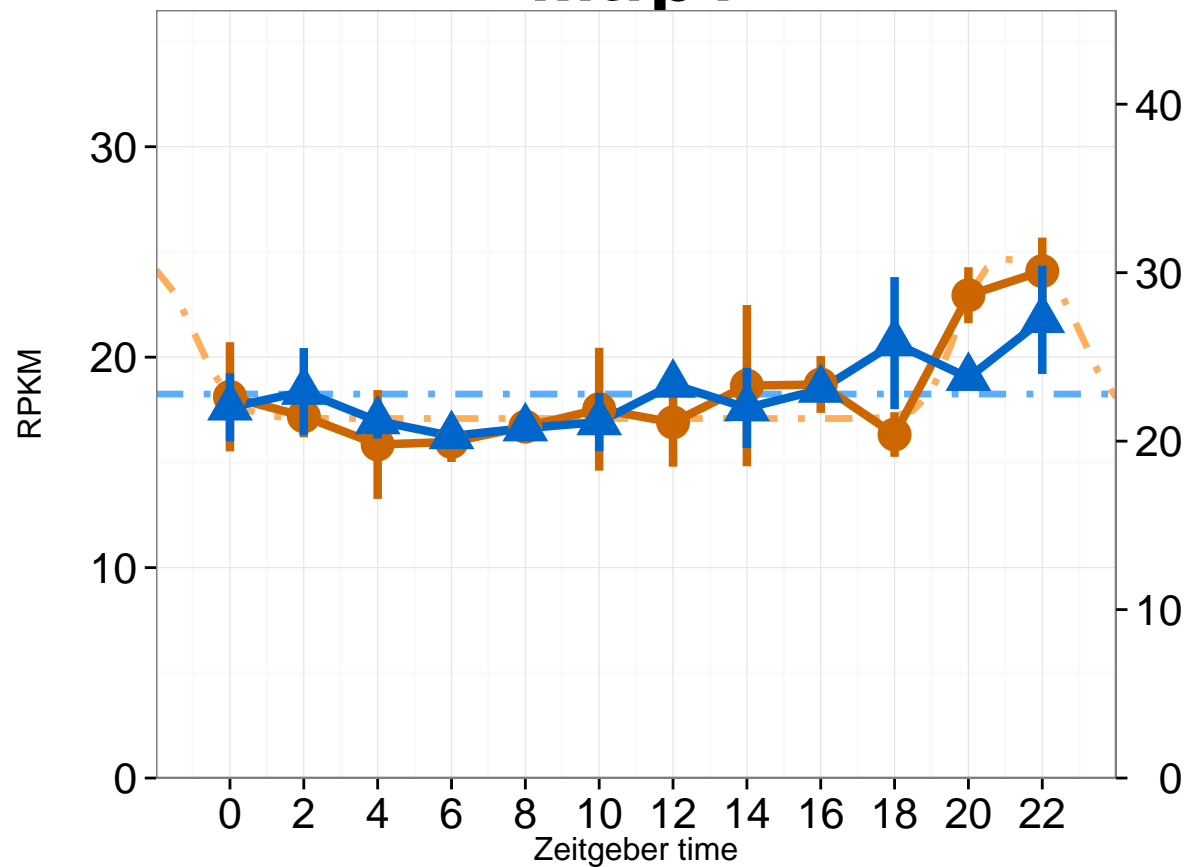

# Mtftp1

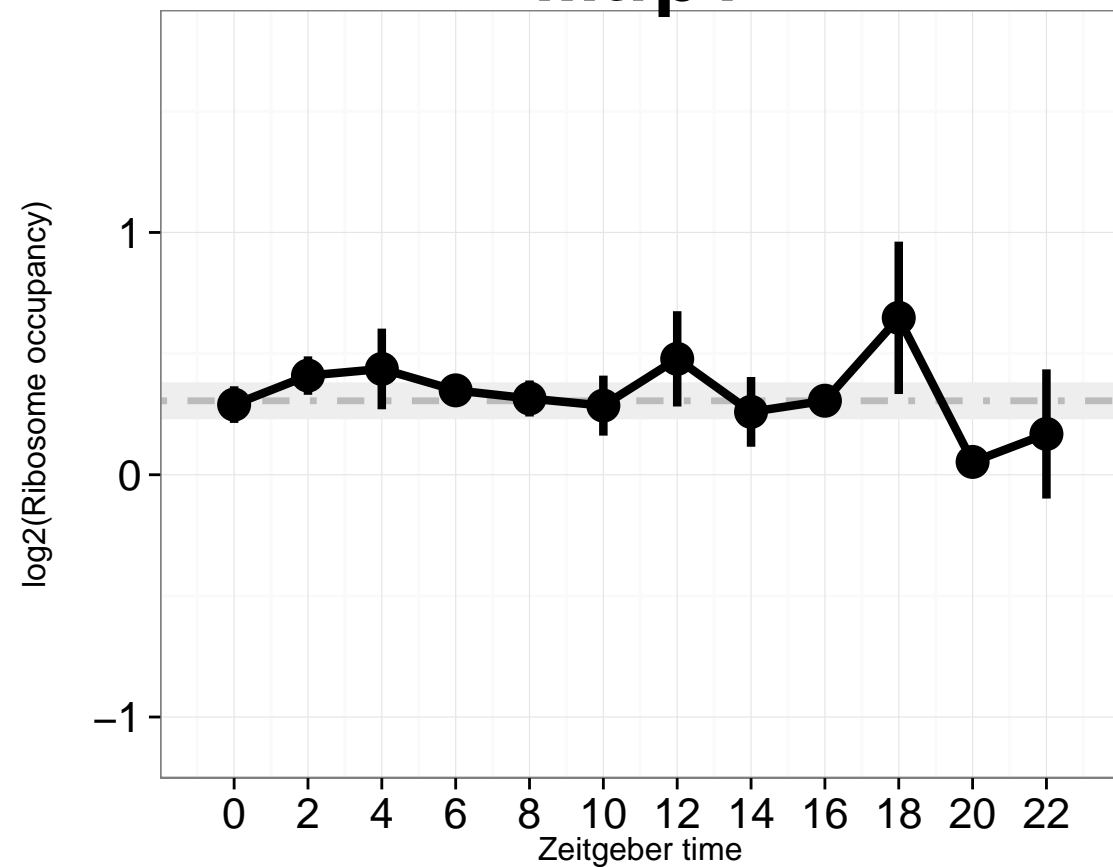

Supplement: SuppDataset_1.zip [file Mtfp1_set_A.pdf › Supplemental Dataset 1/A-mRNA_nonrhyth_translation_nonrhyth/Mtfp1_set_A.pdf]

# Mtfr1

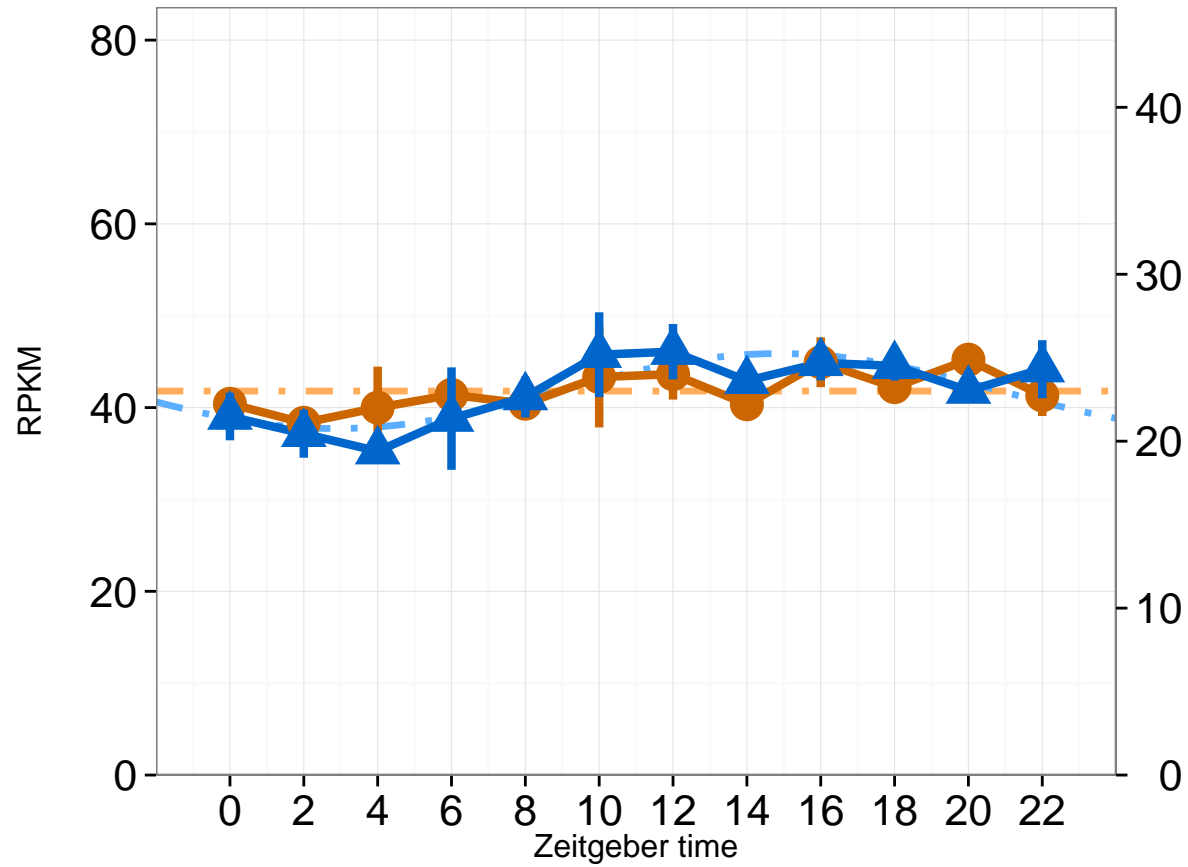

# Mtfr1

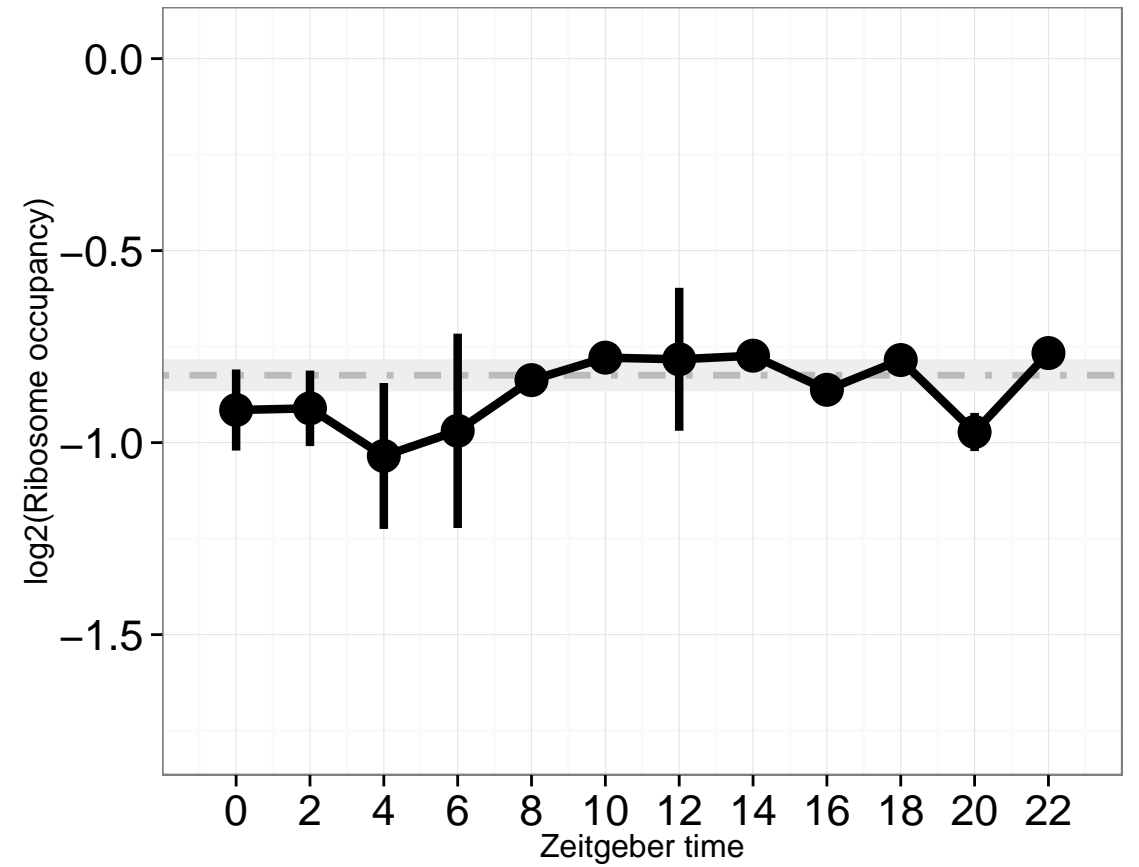

Supplement: SuppDataset_1.zip [file Mtfr1_set_A.pdf › Supplemental Dataset 1/A-mRNA_nonrhyth_translation_nonrhyth/Mtfr1_set_A.pdf]

## Mtfr1l

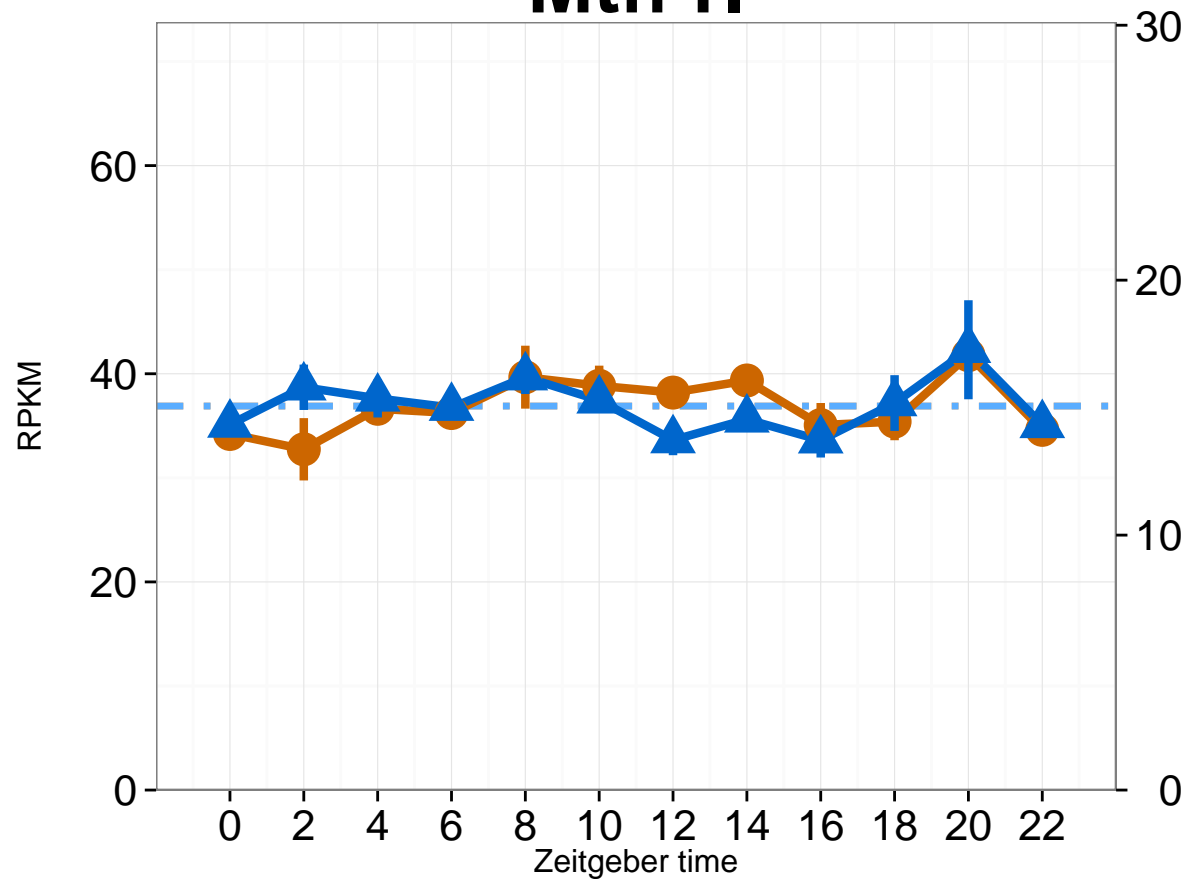

## Mtfr1l

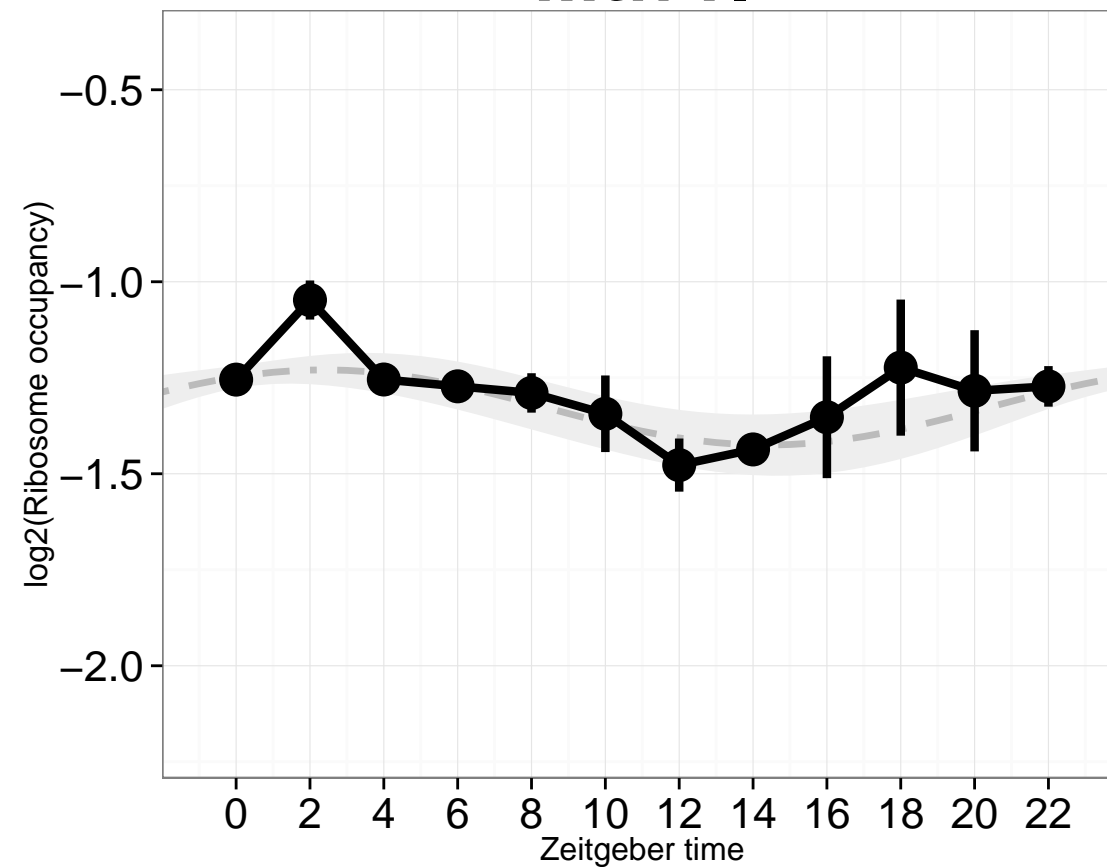

Supplement: SuppDataset_1.zip [file Mtfr1l_set_A.pdf › Supplemental Dataset 1/A-mRNA_nonrhyth_translation_nonrhyth/Mtfr1l_set_A.pdf]

## Mtg1

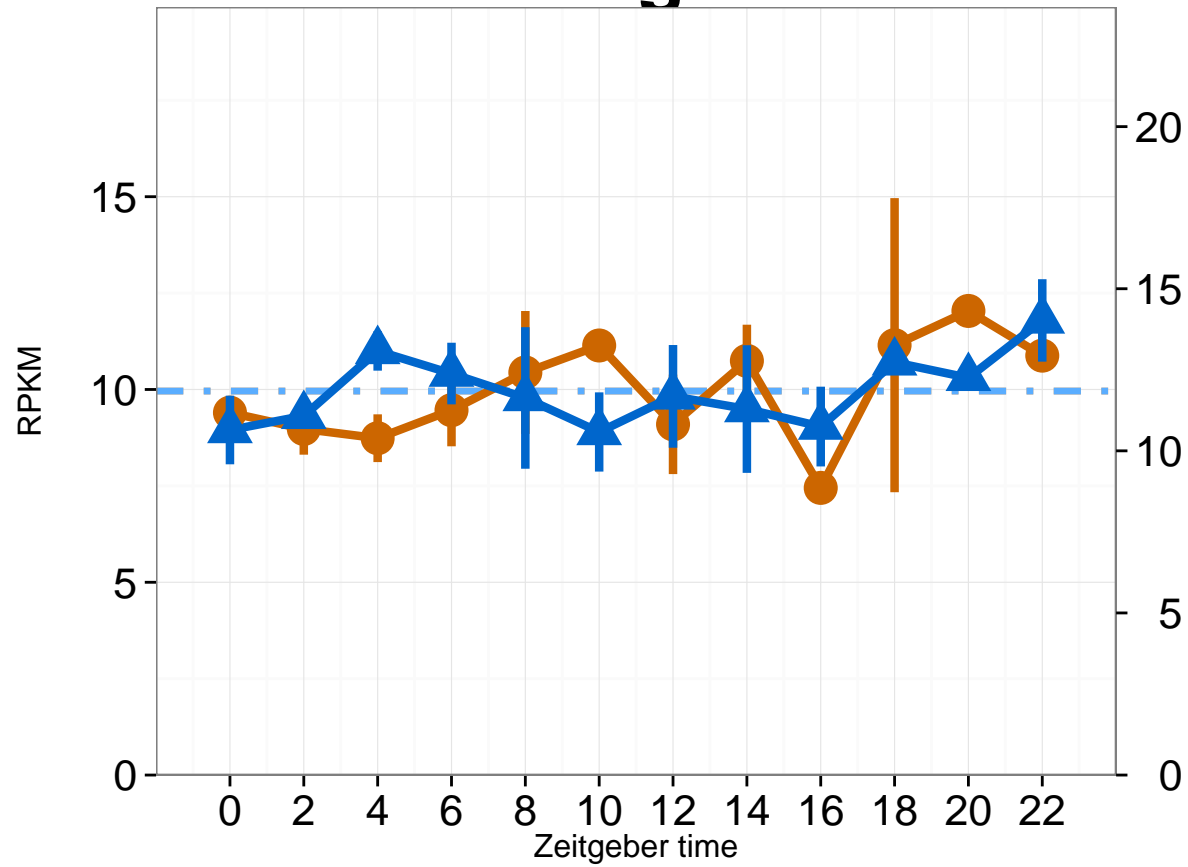

## Mtg1

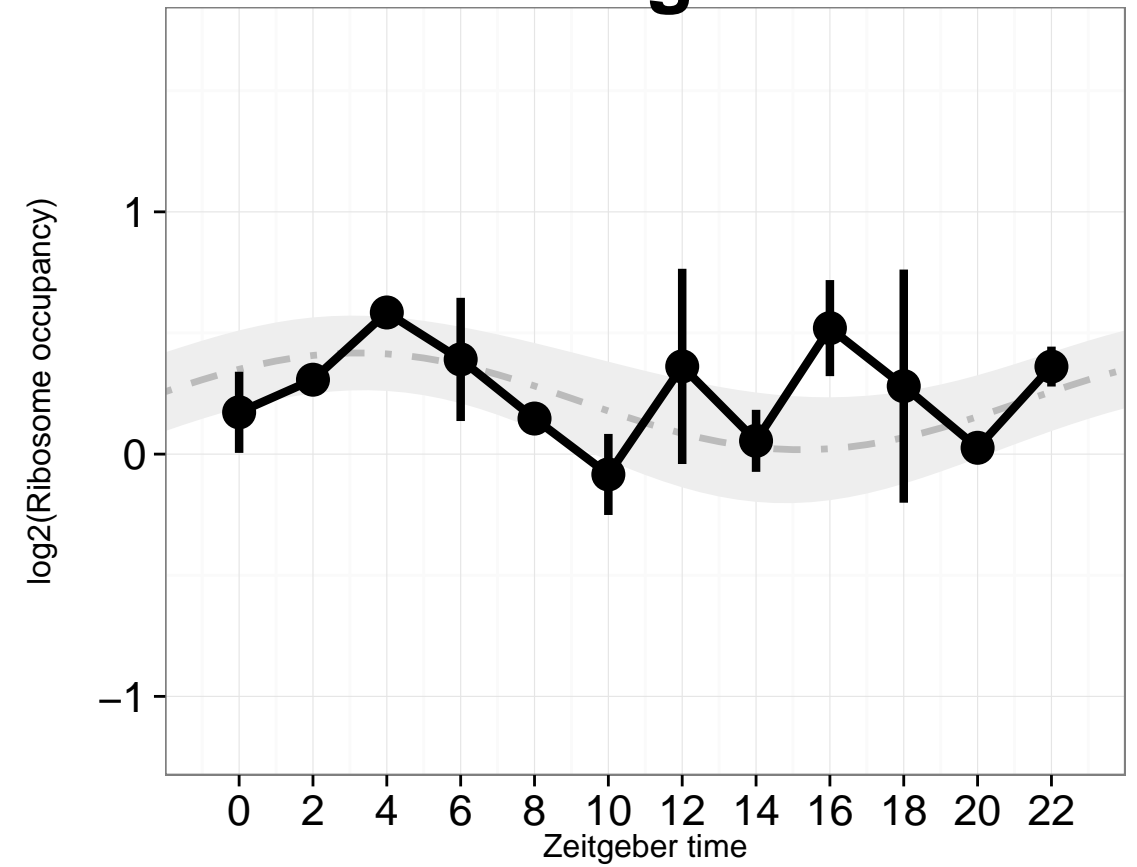

Supplement: SuppDataset_1.zip [file Mtg1_set_A.pdf › Supplemental Dataset 1/A-mRNA_nonrhyth_translation_nonrhyth/Mtg1_set_A.pdf]

## Mtg2

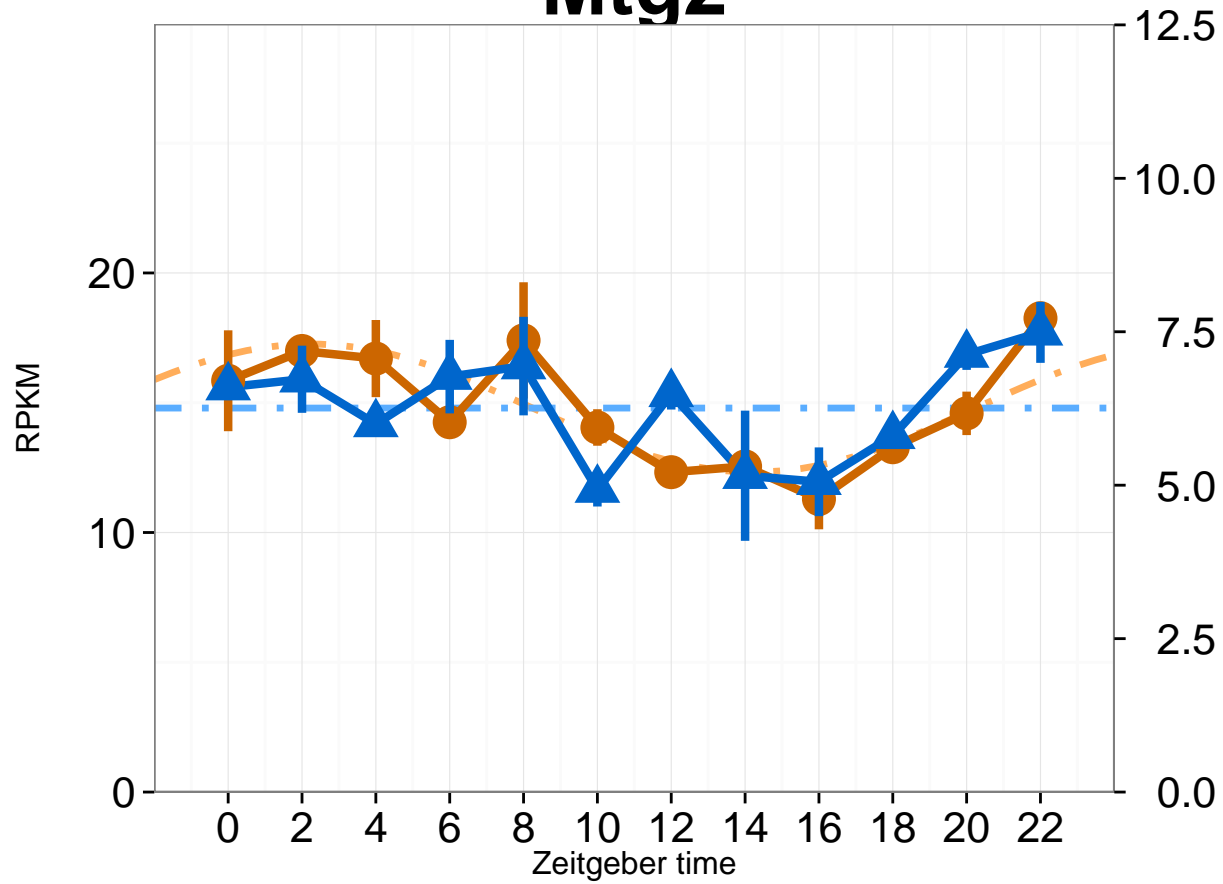

## Mtg2

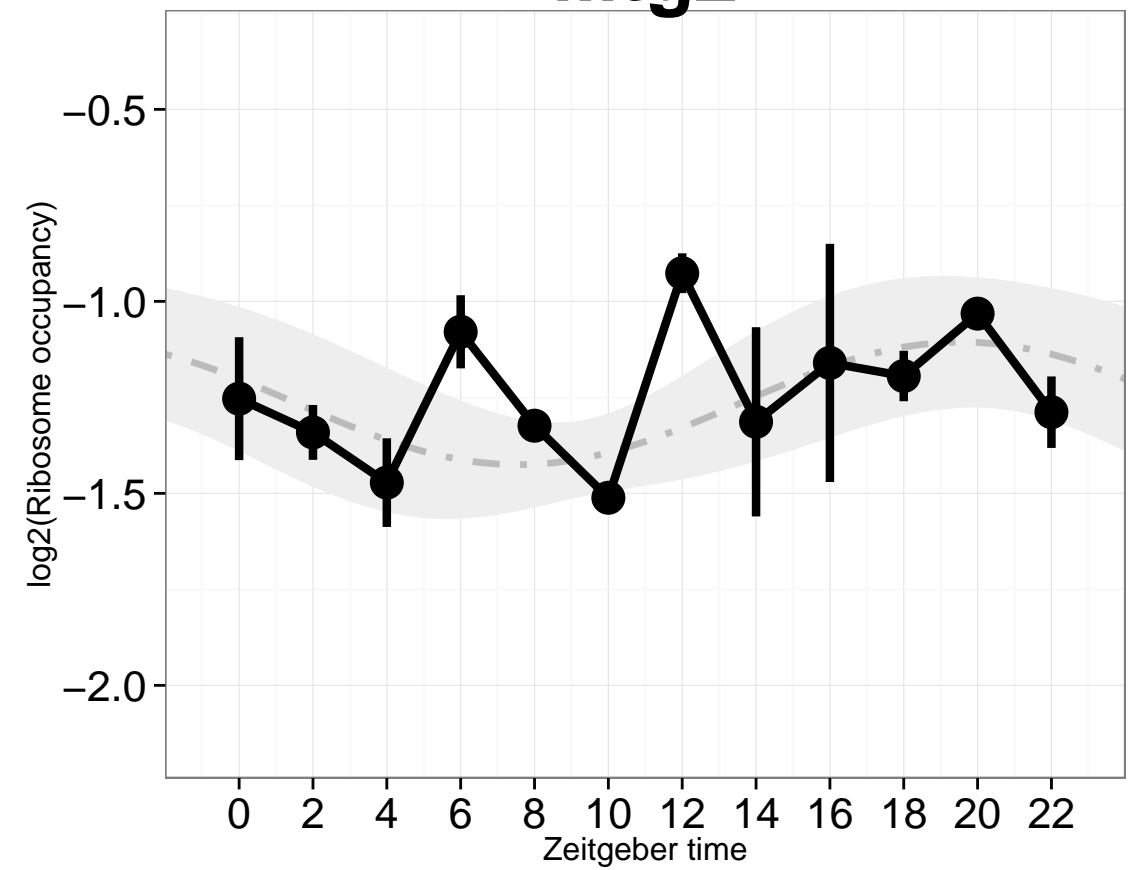

Supplement: SuppDataset_1.zip [file Mtg2_set_A.pdf › Supplemental Dataset 1/A-mRNA_nonrhyth_translation_nonrhyth/Mtg2_set_A.pdf]

## Mthfd1

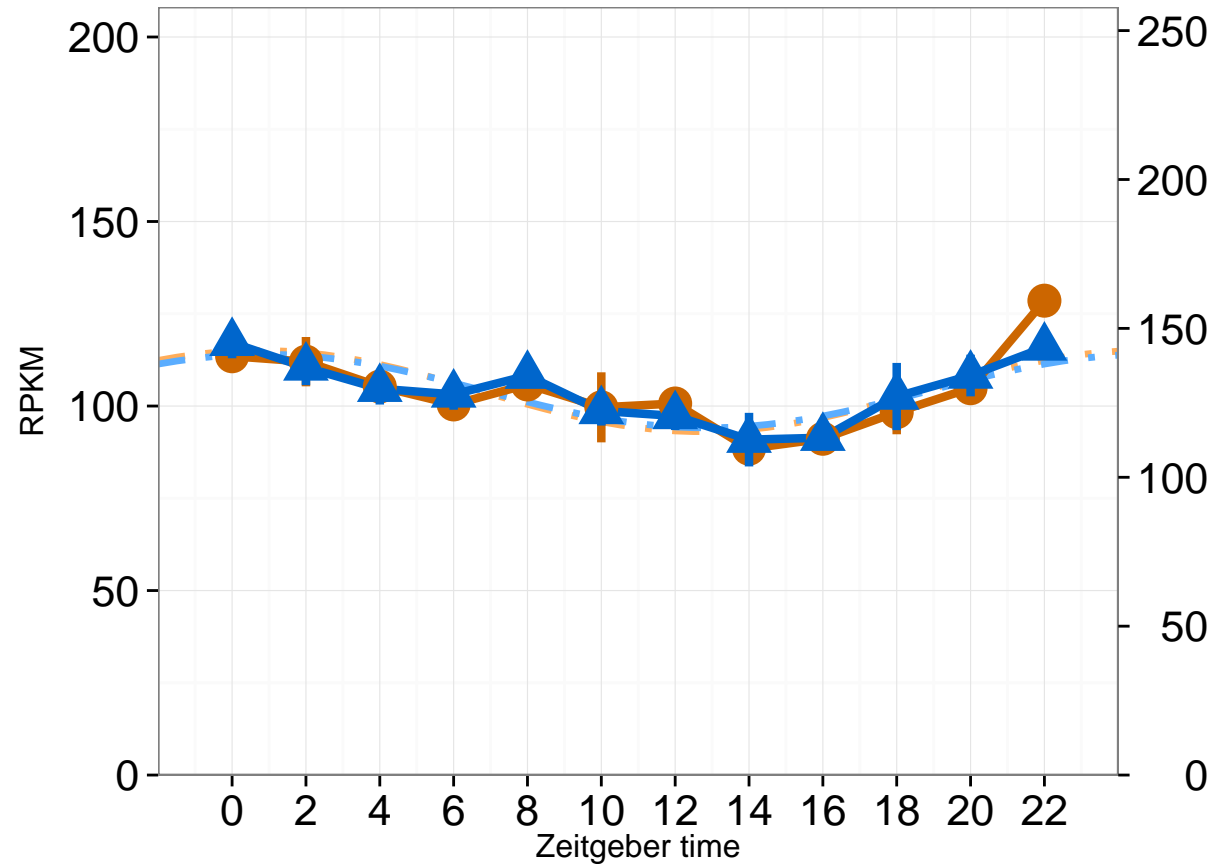

## Mthfd1

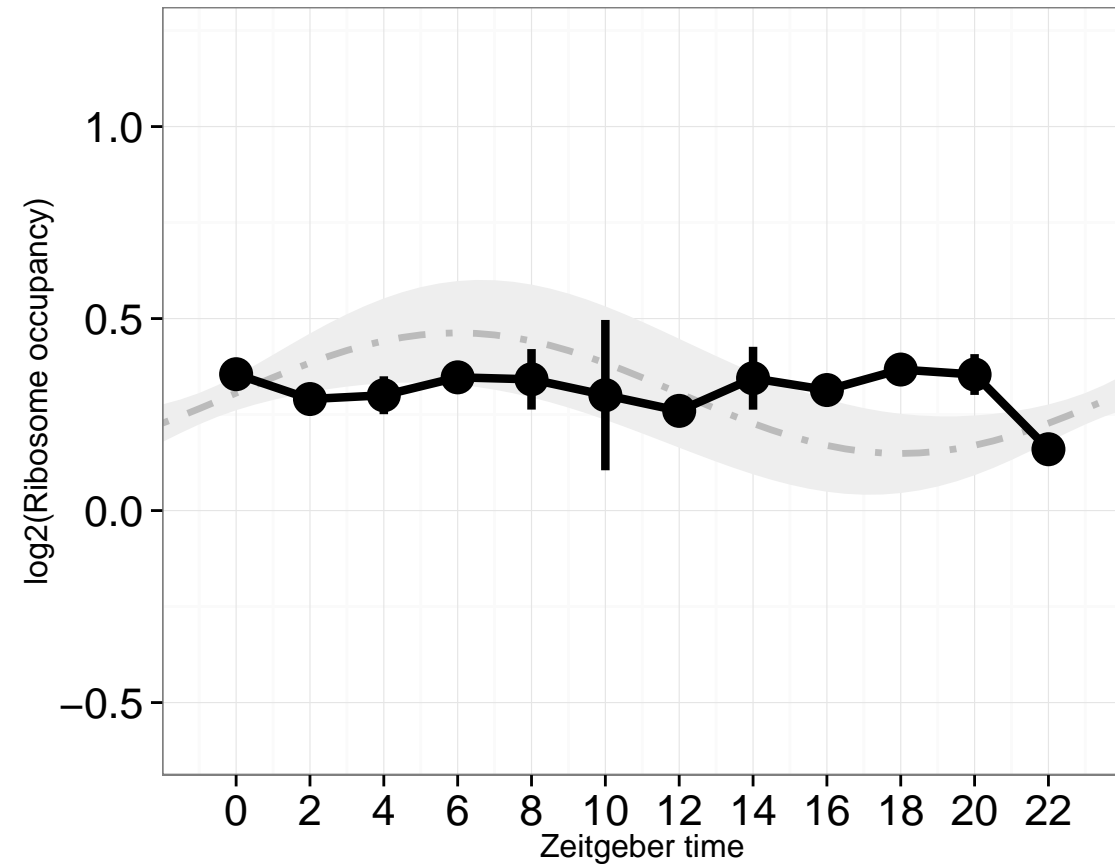

Supplement: SuppDataset_1.zip [file Mthfd1_set_A.pdf › Supplemental Dataset 1/A-mRNA_nonrhyth_translation_nonrhyth/Mthfd1_set_A.pdf]

# Mthfd2

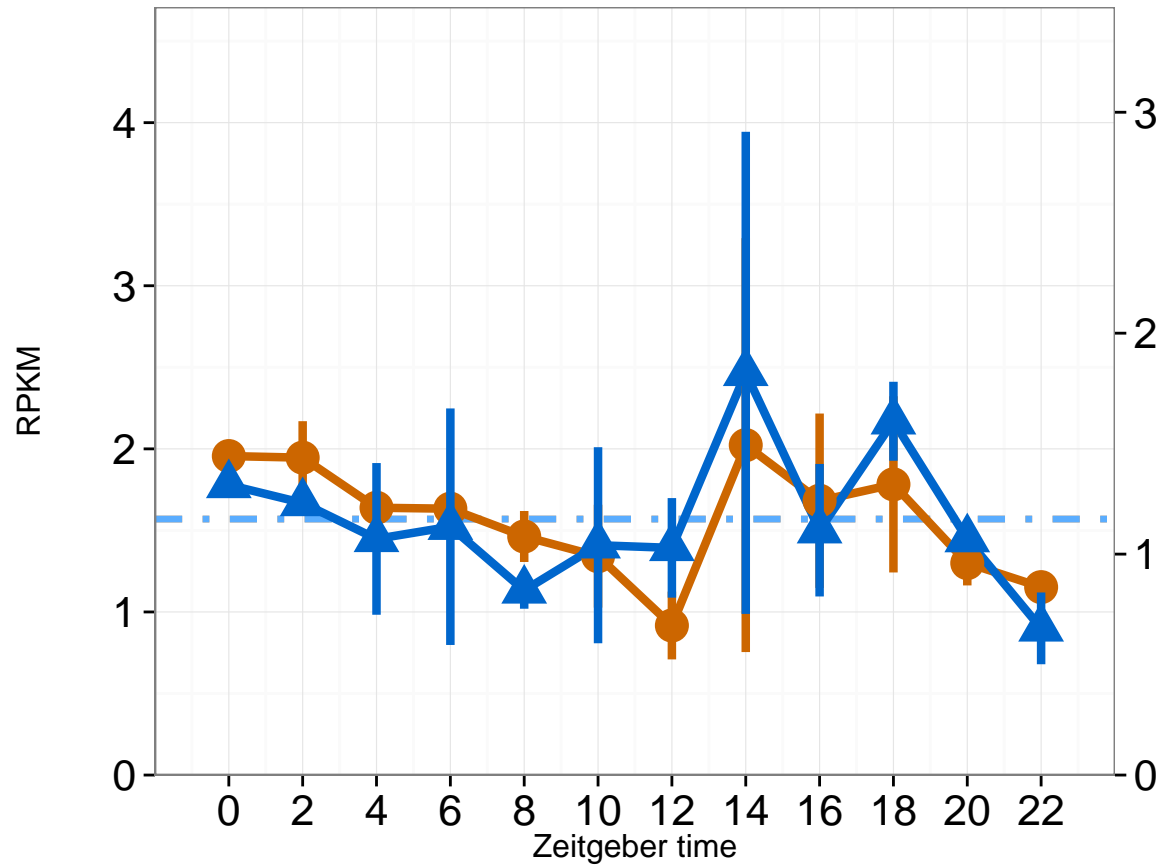

# Mthfd2

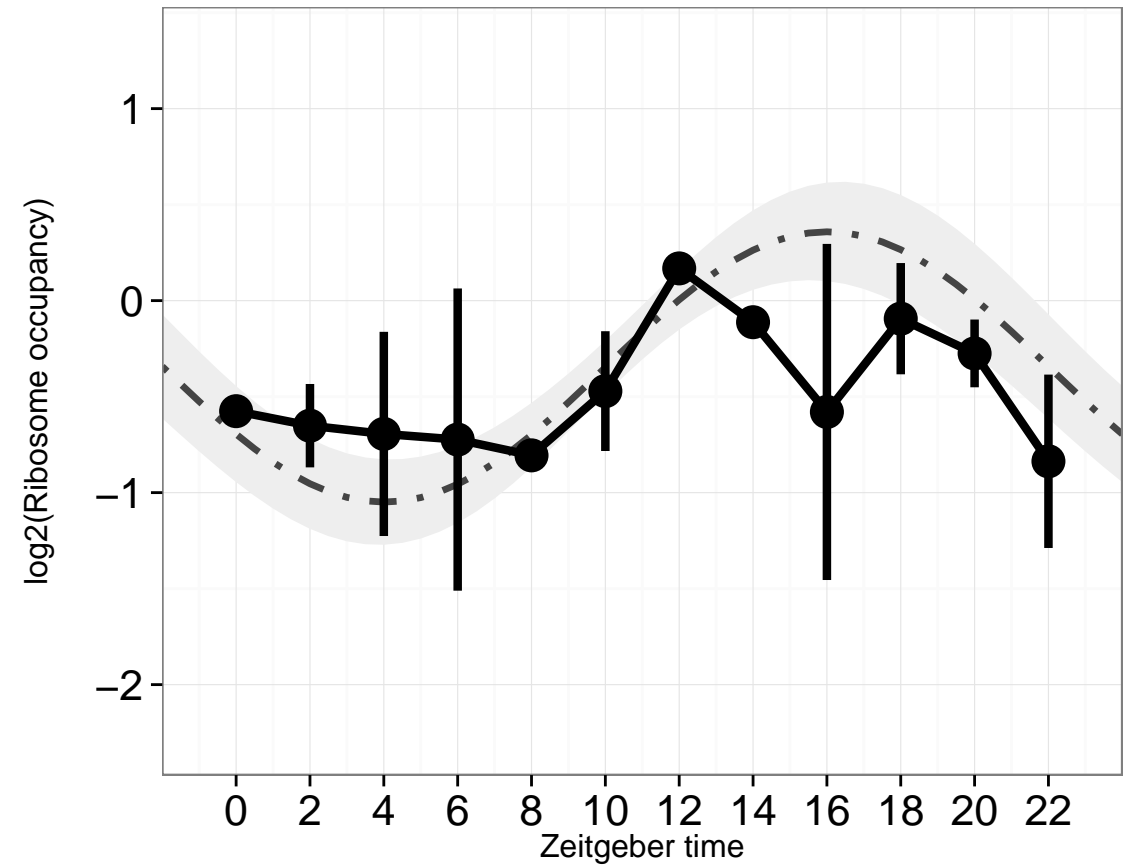

Supplement: SuppDataset_1.zip [file Mthfd2_set_A.pdf › Supplemental Dataset 1/A-mRNA_nonrhyth_translation_nonrhyth/Mthfd2_set_A.pdf]

# Mthfd2l

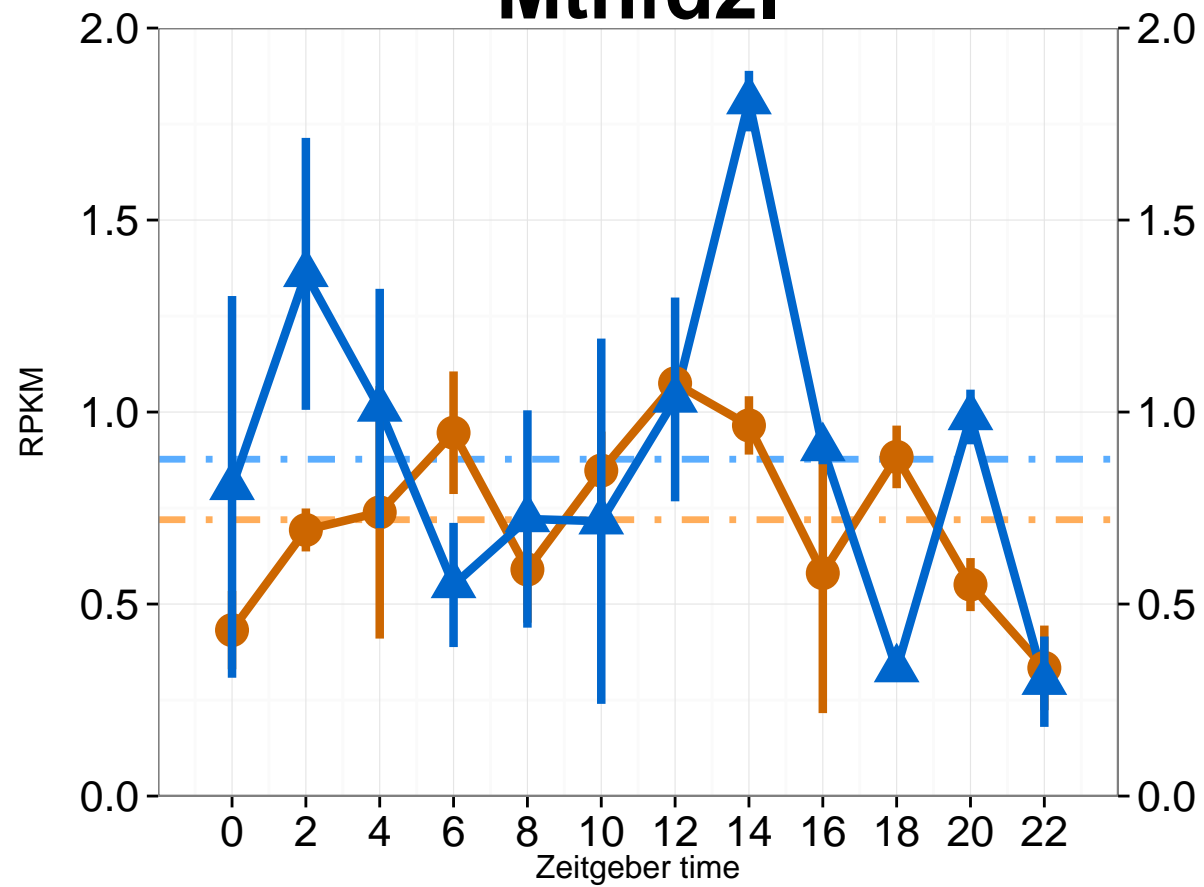

# Mthfd2l

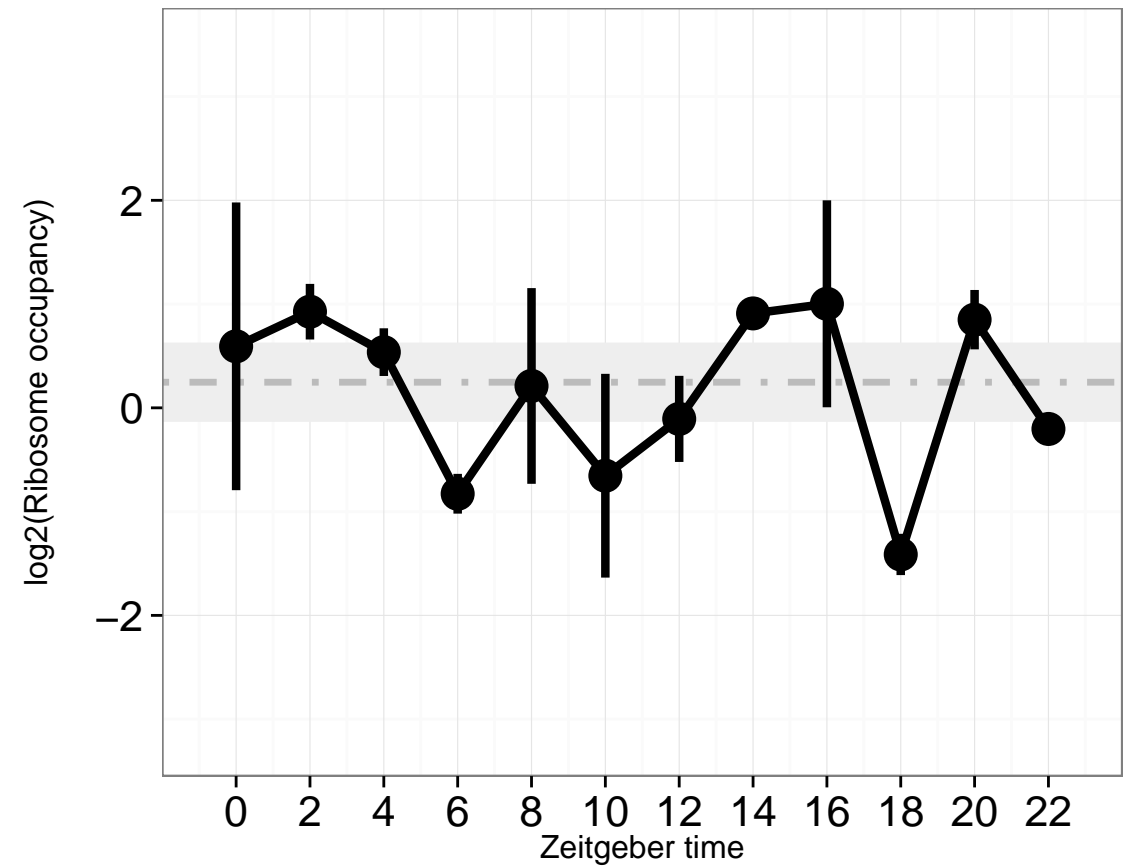

Supplement: SuppDataset_1.zip [file Mthfd2l_set_A.pdf › Supplemental Dataset 1/A-mRNA_nonrhyth_translation_nonrhyth/Mthfd2l_set_A.pdf]

# Mtif2

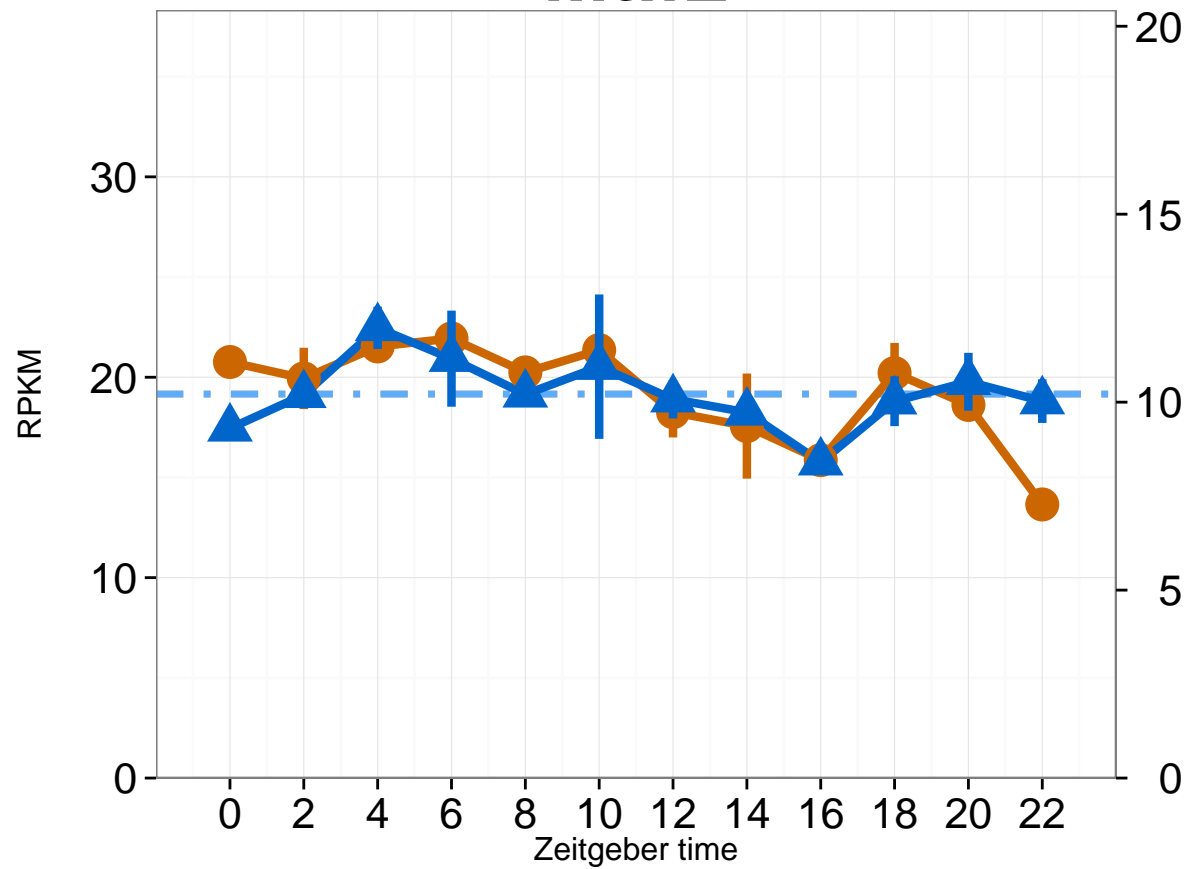

# Mtif2

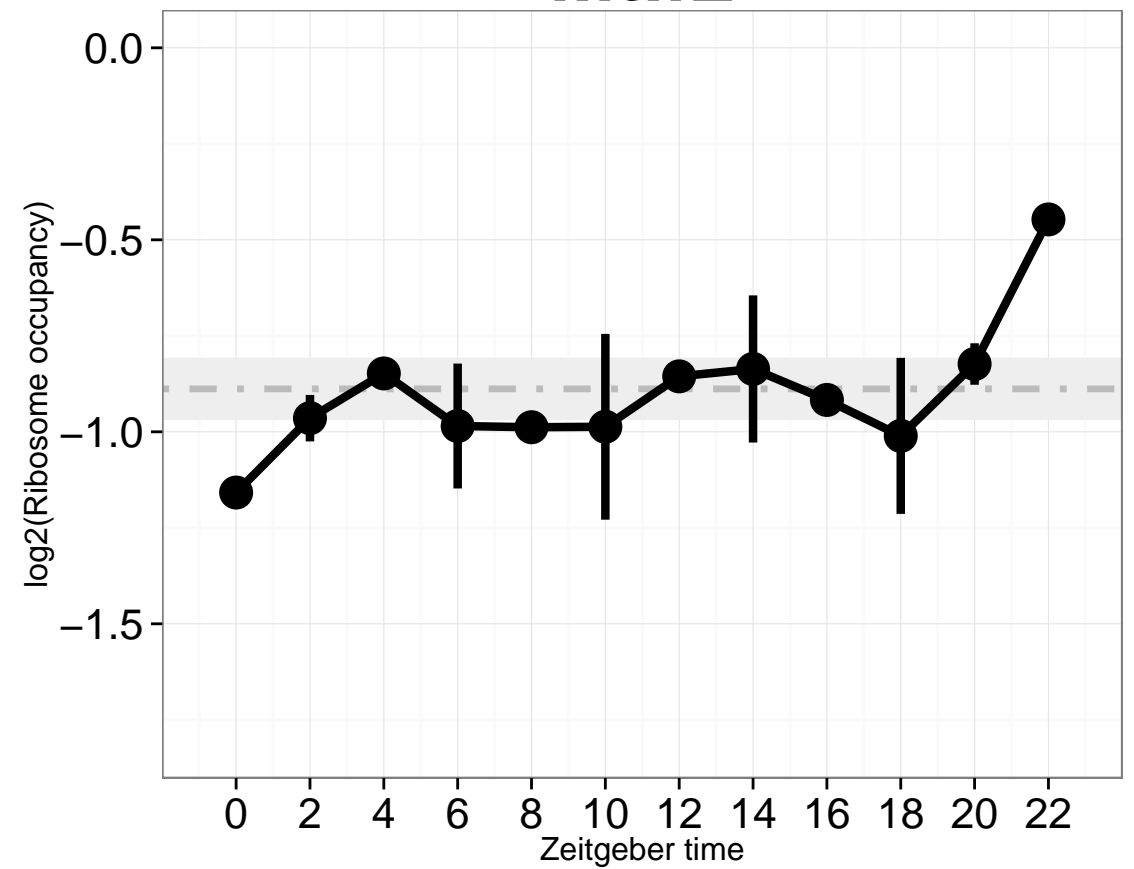

Supplement: SuppDataset_1.zip [file Mtif2_set_A.pdf › Supplemental Dataset 1/A-mRNA_nonrhyth_translation_nonrhyth/Mtif2_set_A.pdf]

## Mtif3

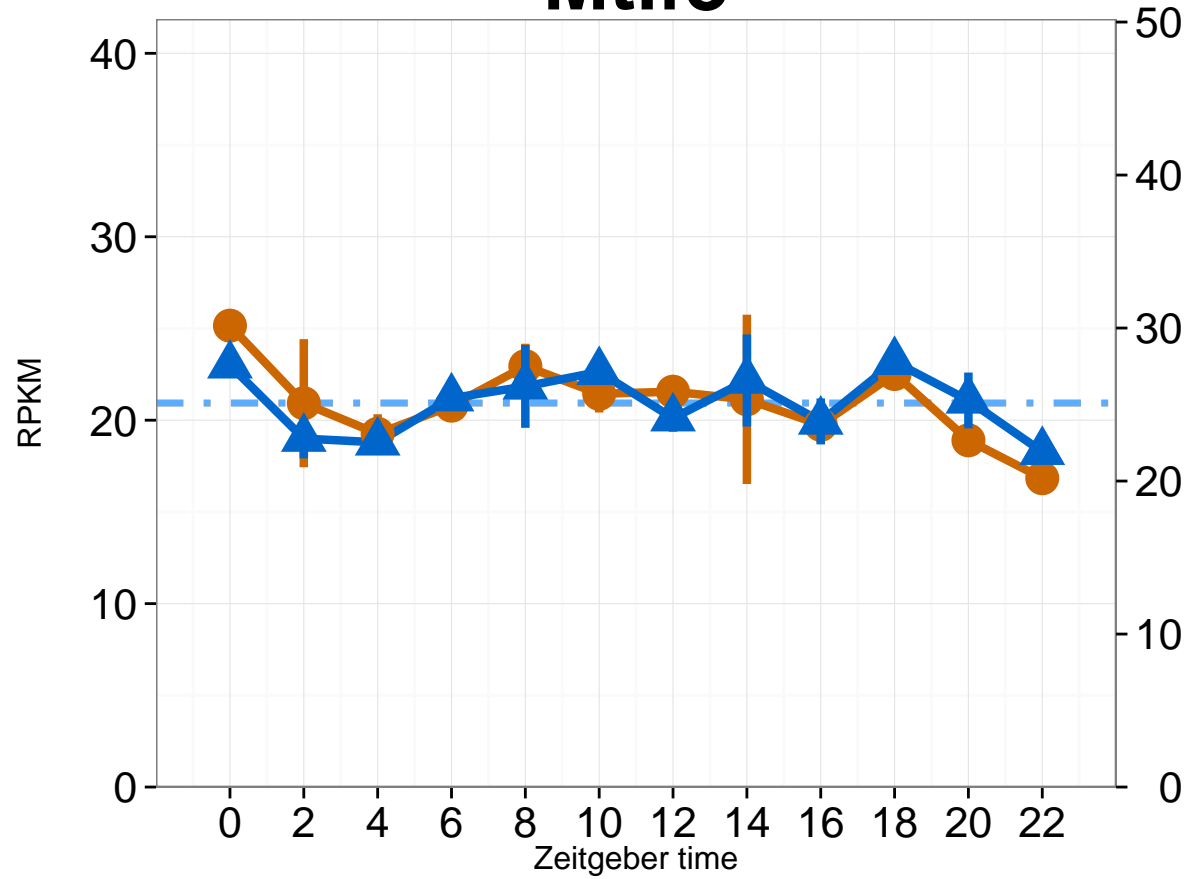

## Mtif3

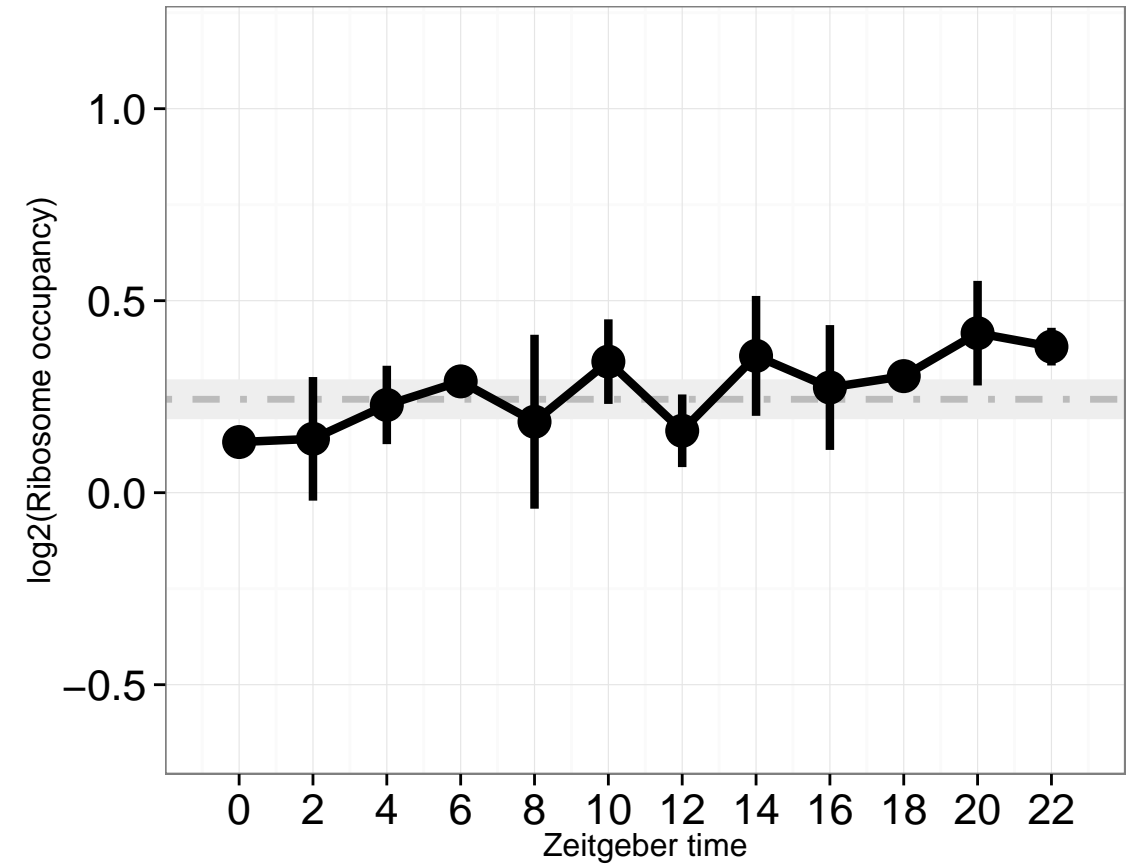

Supplement: SuppDataset_1.zip [file Mtif3_set_A.pdf › Supplemental Dataset 1/A-mRNA_nonrhyth_translation_nonrhyth/Mtif3_set_A.pdf]

# Mtmr10

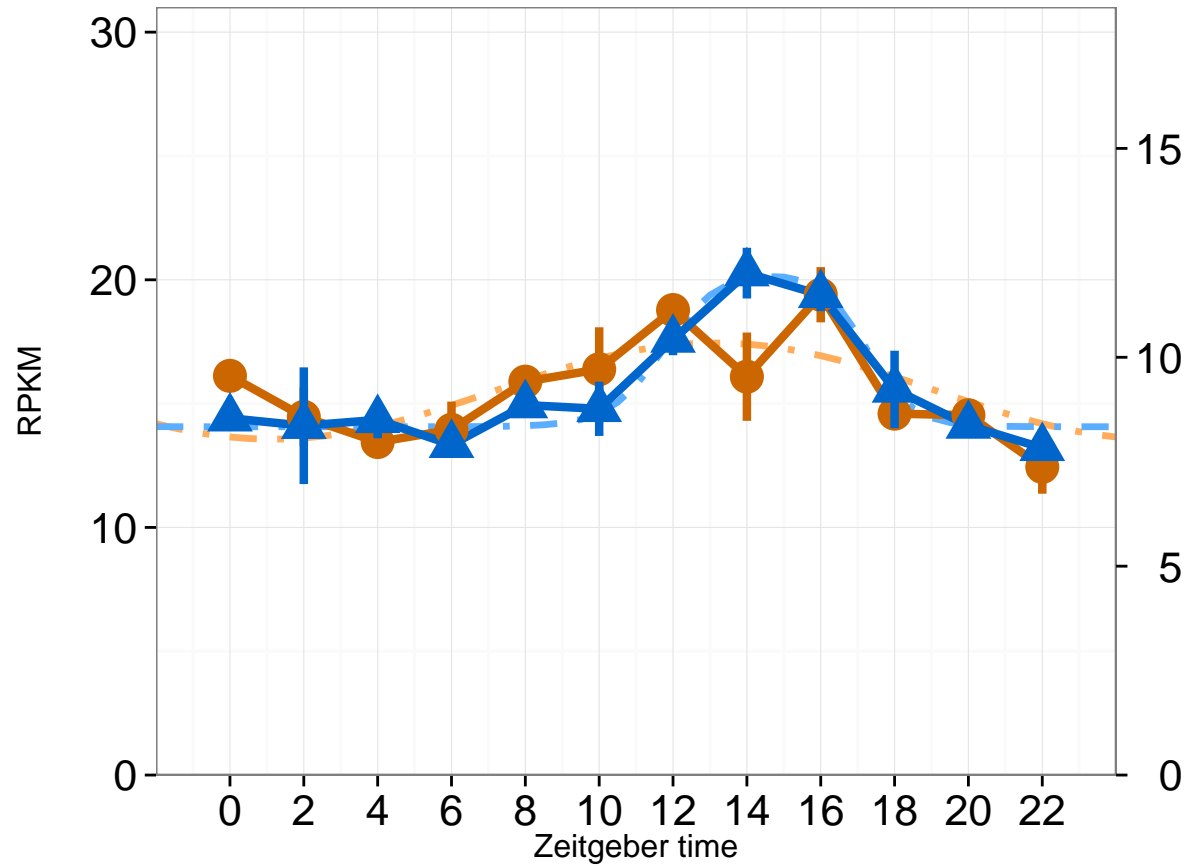

# Mtmr10

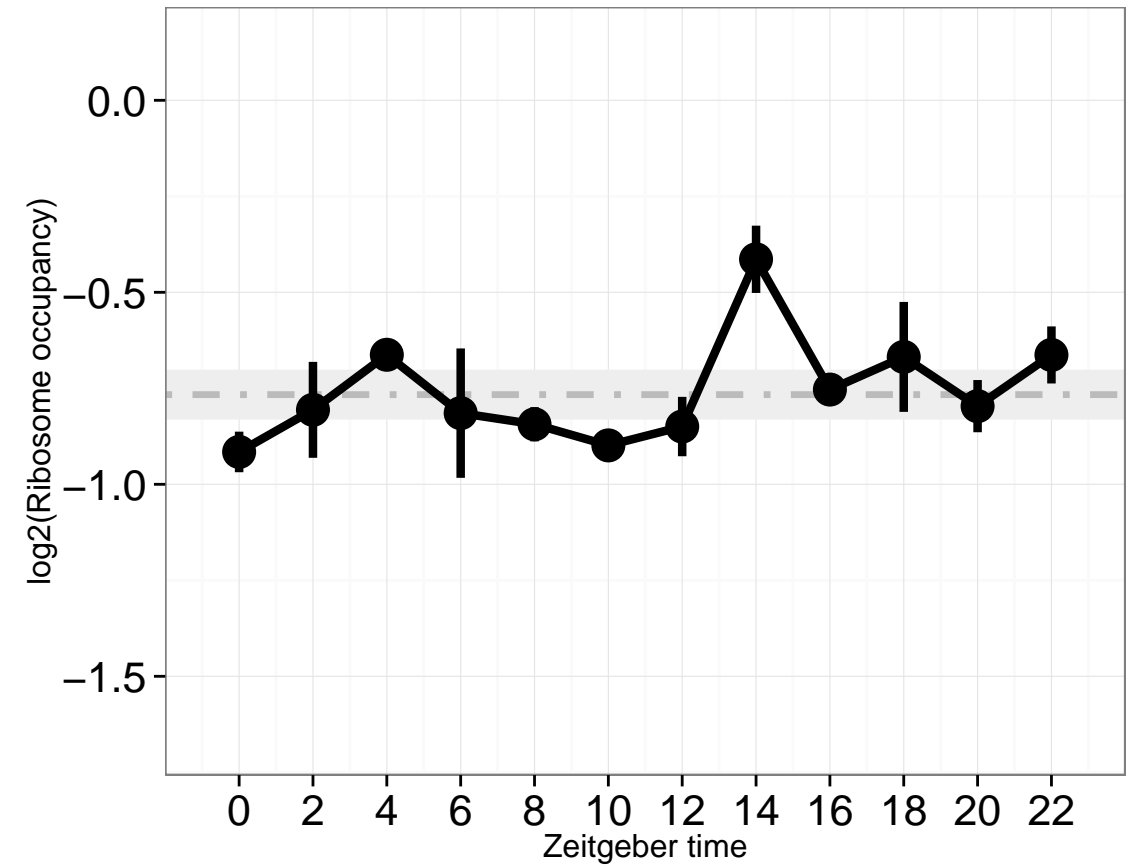

Supplement: SuppDataset_1.zip [file Mtmr10_set_A.pdf › Supplemental Dataset 1/A-mRNA_nonrhyth_translation_nonrhyth/Mtmr10_set_A.pdf]

# Mtmr12

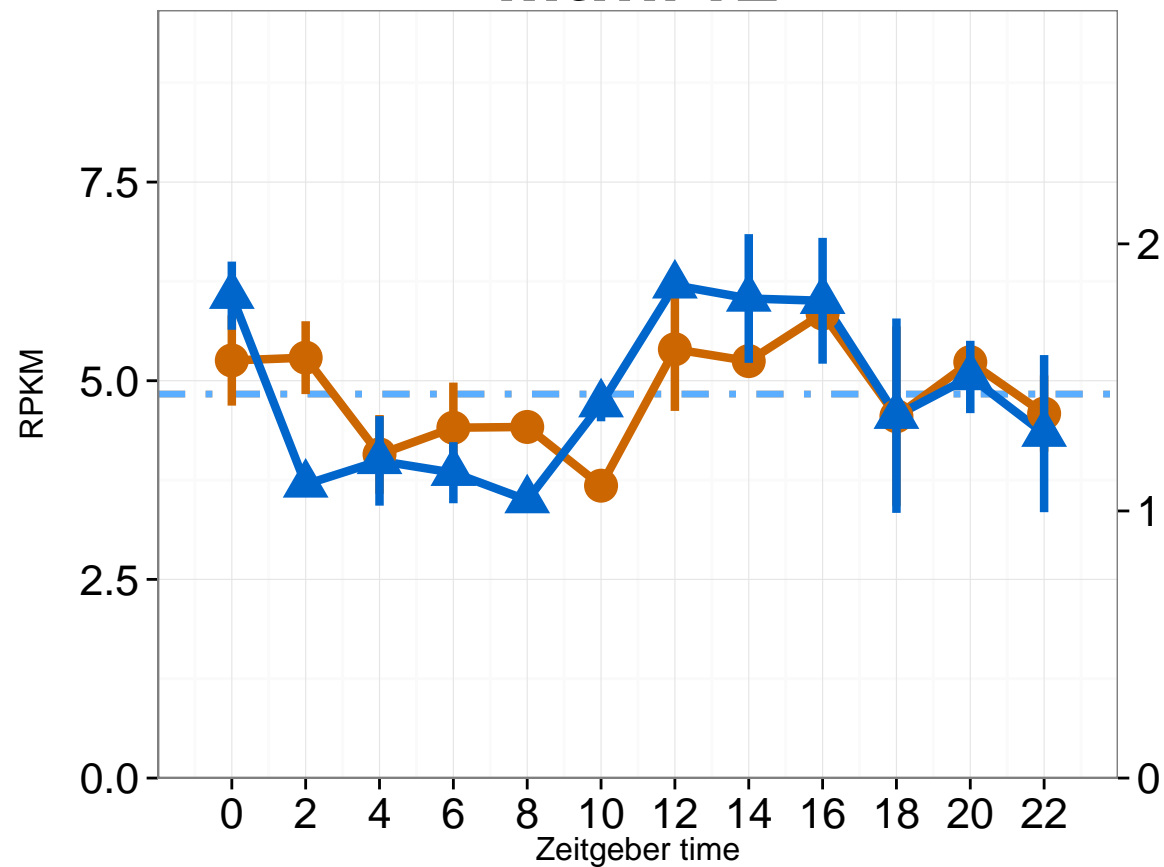

# Mtmr12

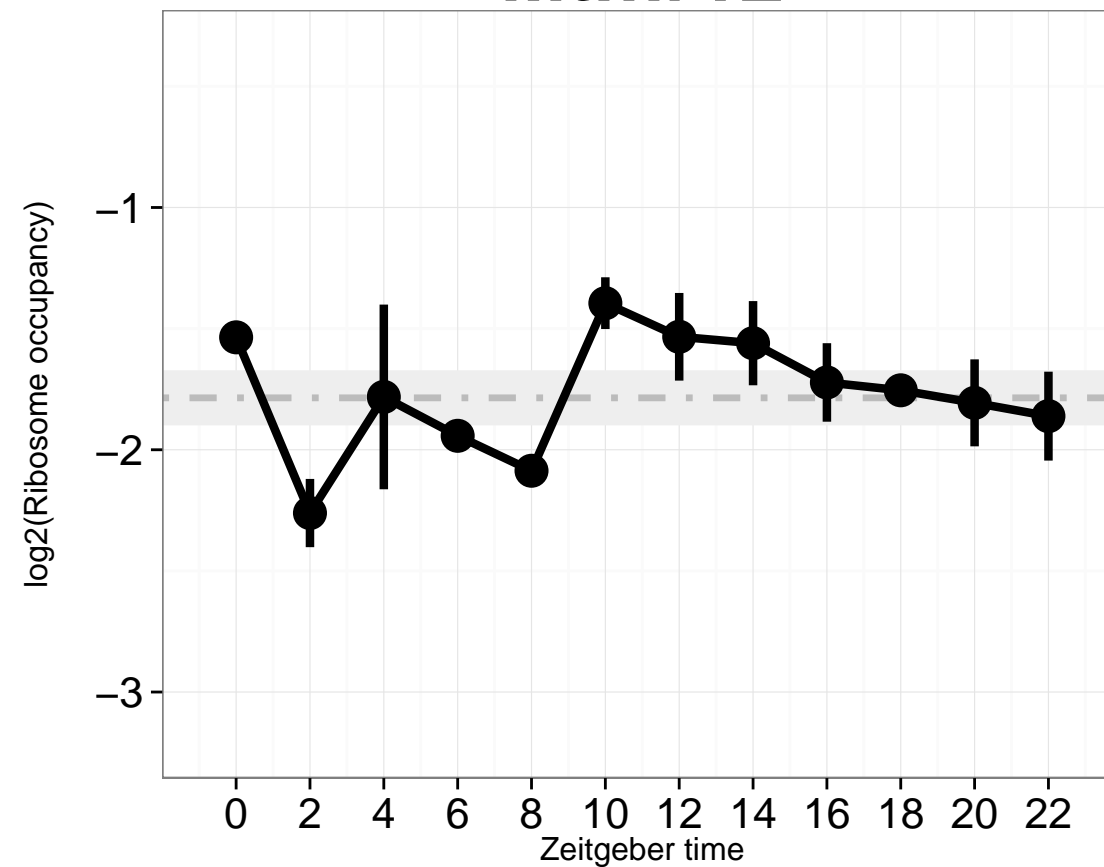

Supplement: SuppDataset_1.zip [file Mtmr12_set_A.pdf › Supplemental Dataset 1/A-mRNA_nonrhyth_translation_nonrhyth/Mtmr12_set_A.pdf]

## Mtmr14

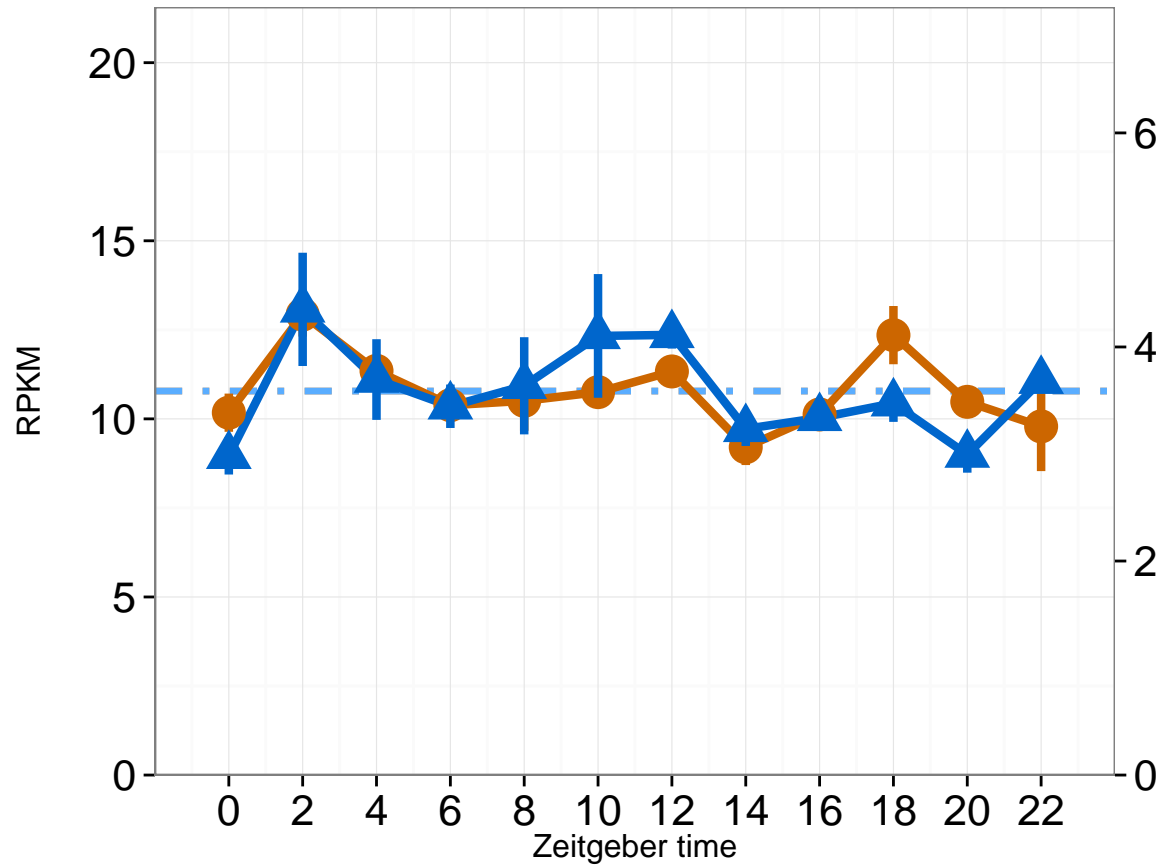

## Mtmr14

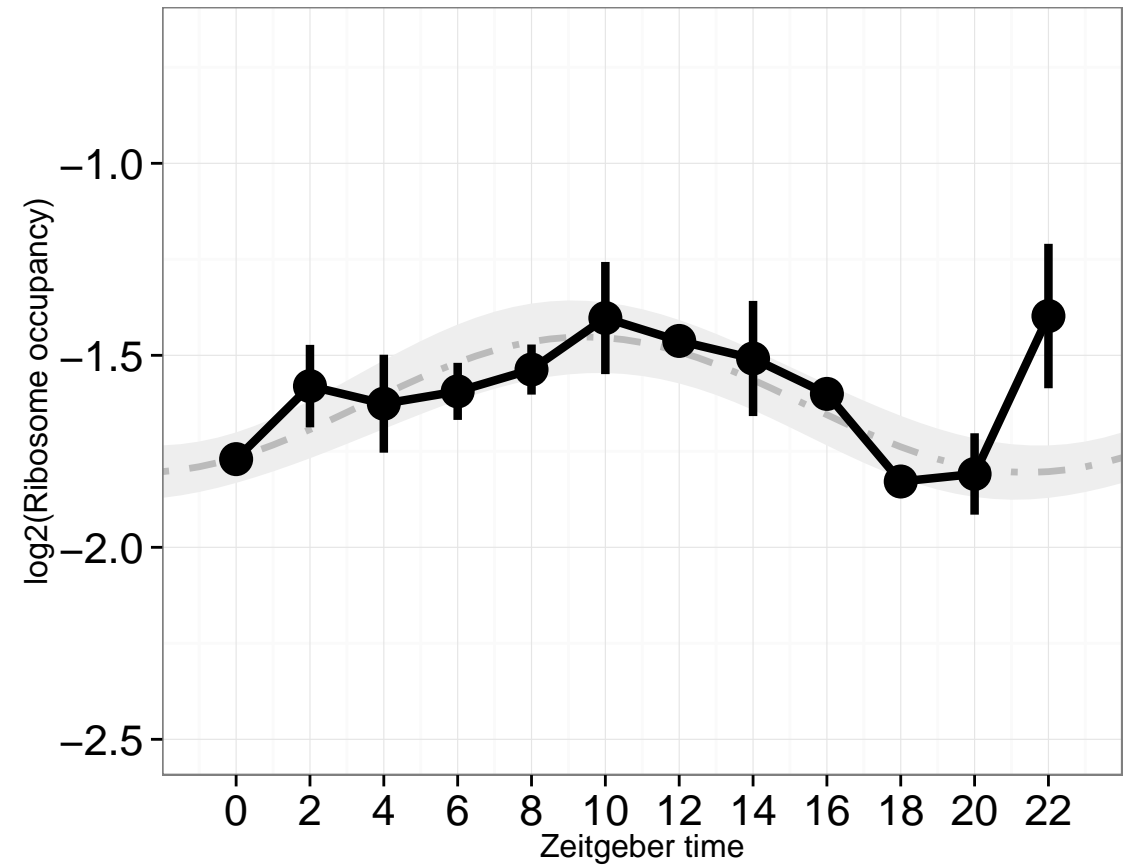

Supplement: SuppDataset_1.zip [file Mtmr14_set_A.pdf › Supplemental Dataset 1/A-mRNA_nonrhyth_translation_nonrhyth/Mtmr14_set_A.pdf]

# Mtmt1

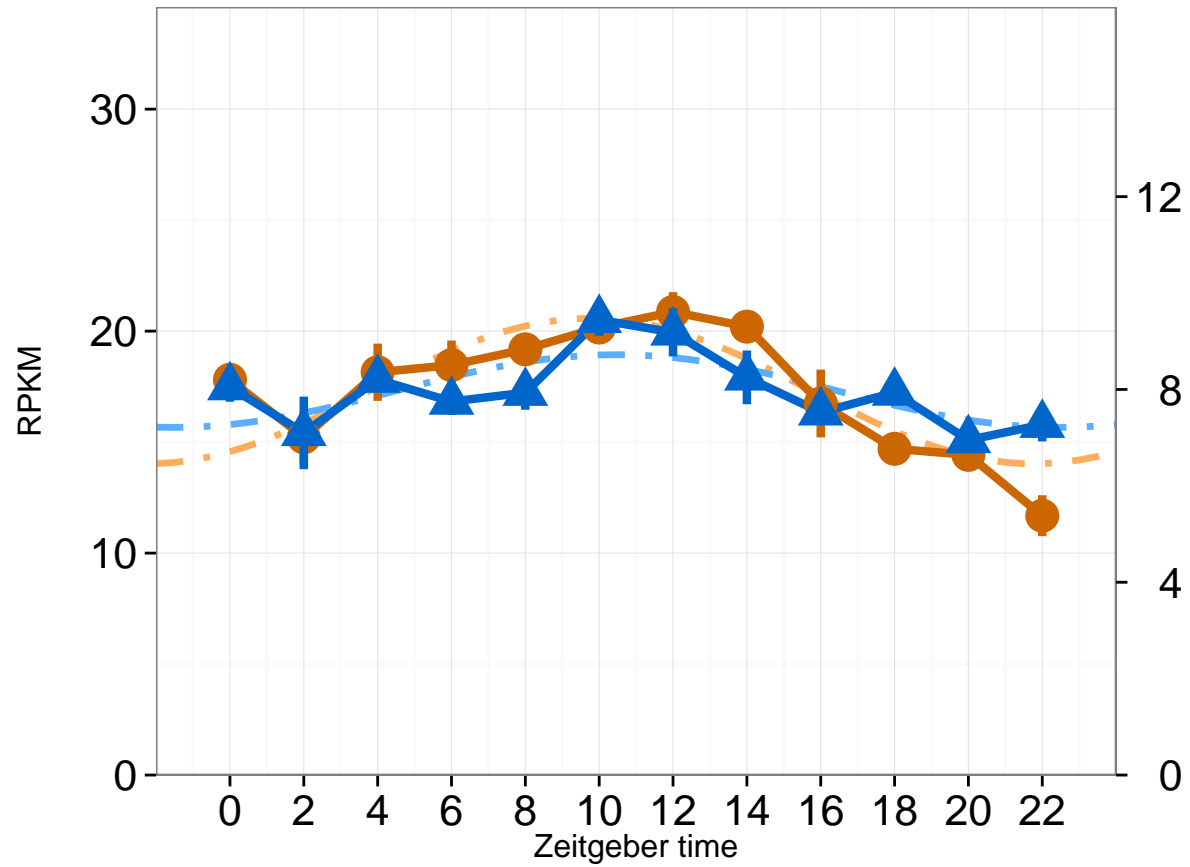

# Mtmt1

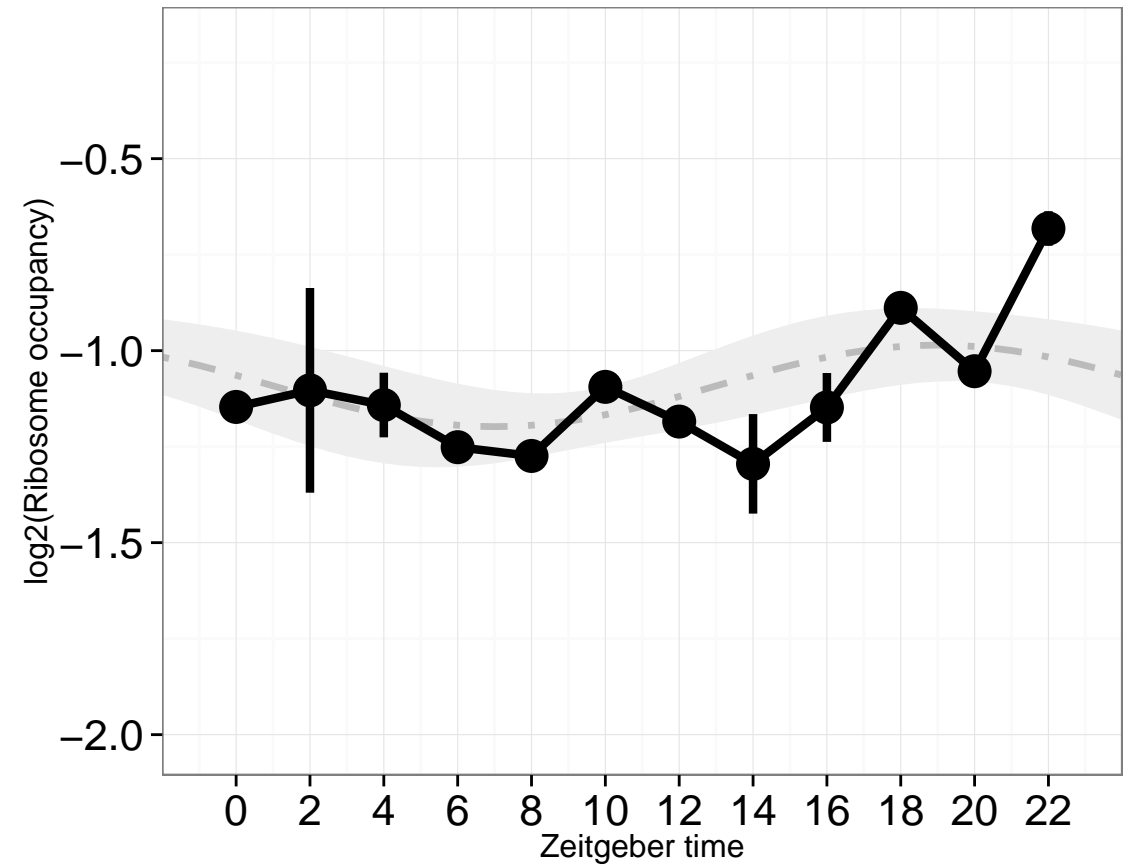

Supplement: SuppDataset_1.zip [file Mtmr1_set_A.pdf › Supplemental Dataset 1/A-mRNA_nonrhyth_translation_nonrhyth/Mtmr1_set_A.pdf]

# Mtmr2

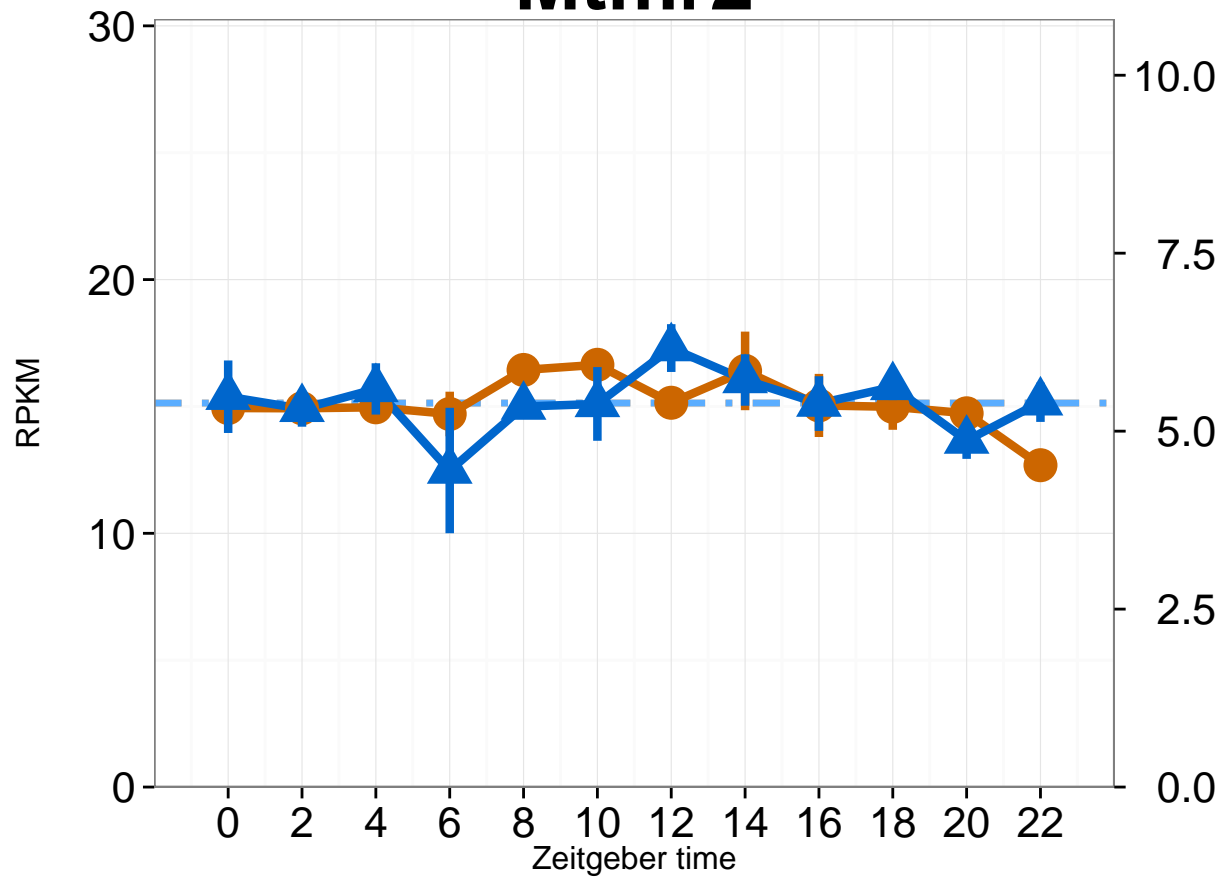

# Mtmr2

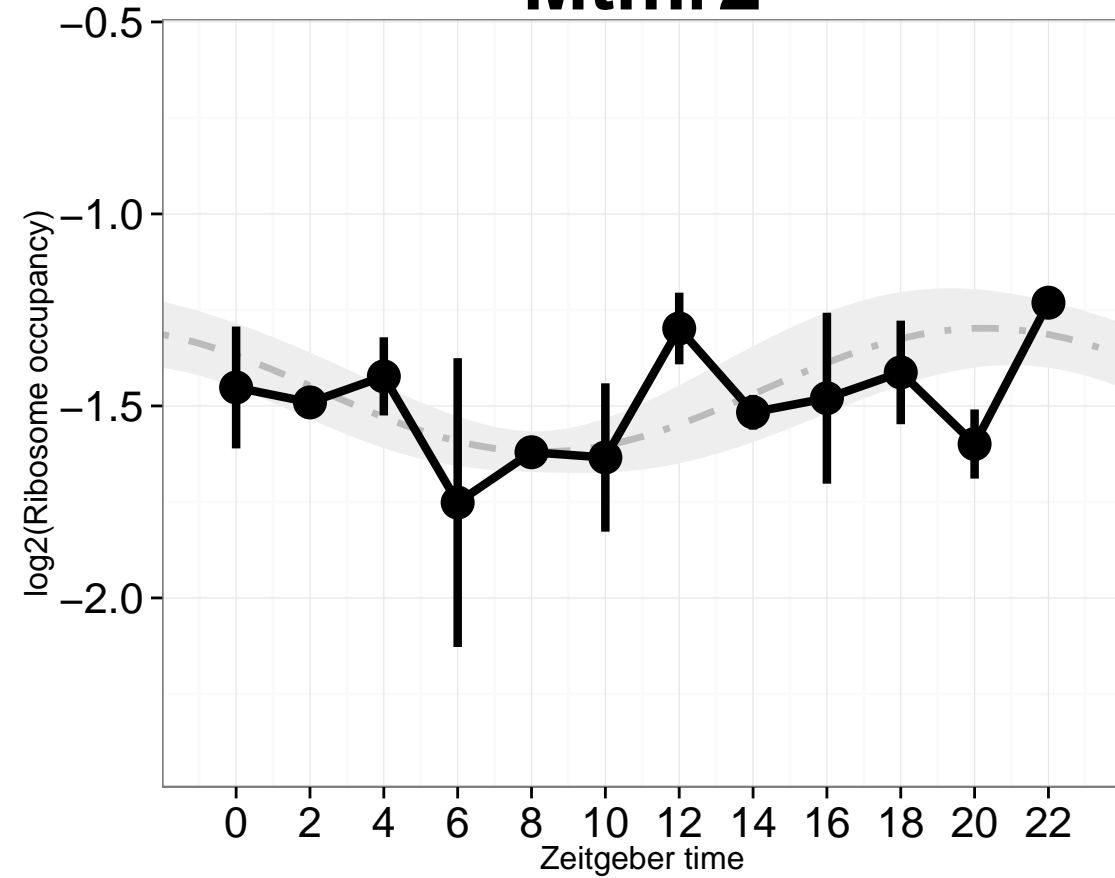

Supplement: SuppDataset_1.zip [file Mtmr2_set_A.pdf › Supplemental Dataset 1/A-mRNA_nonrhyth_translation_nonrhyth/Mtmr2_set_A.pdf]

## Mtmr3

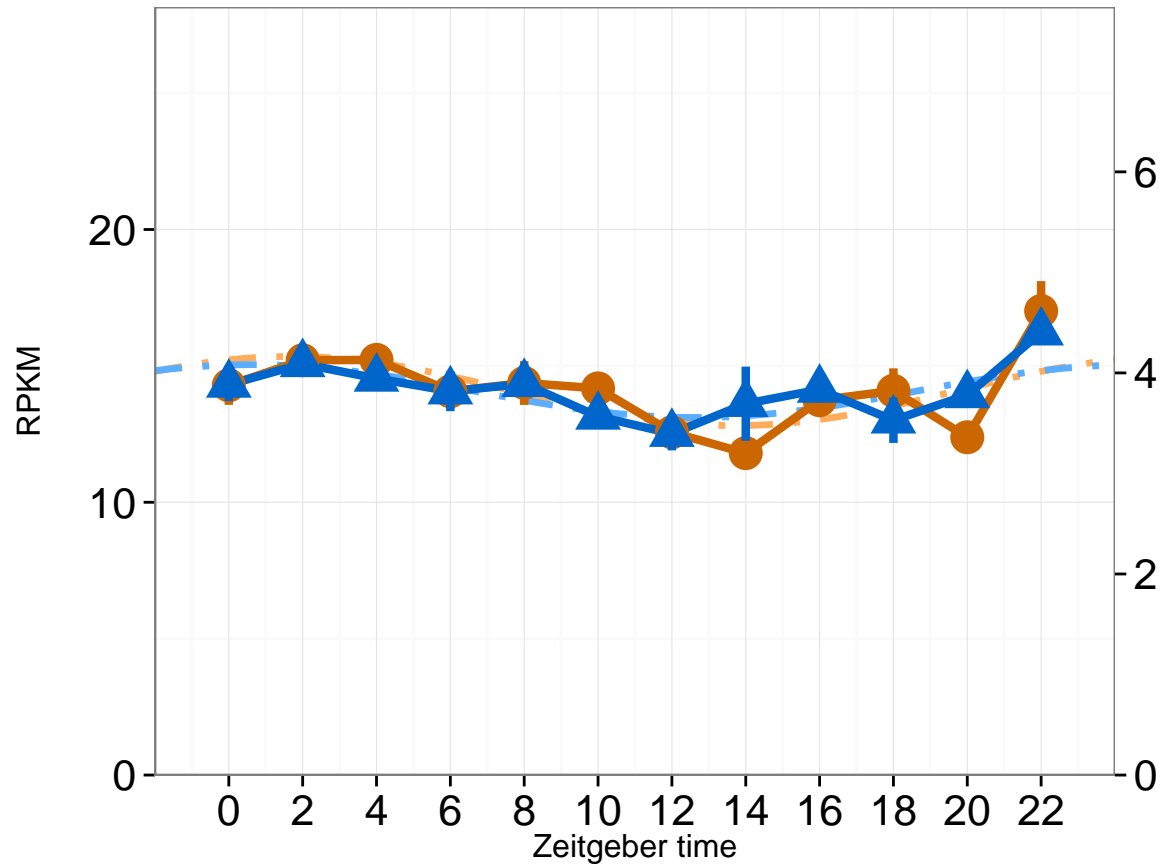

## Mtmr3

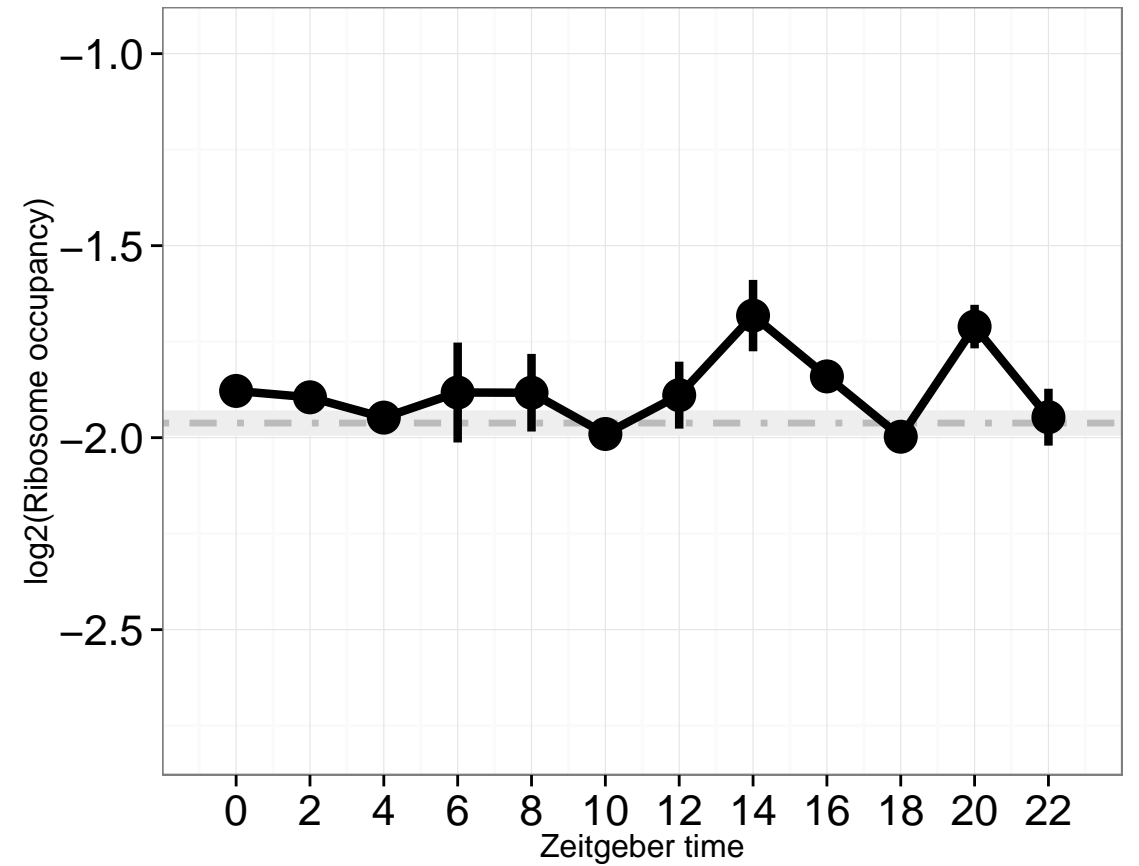

Supplement: SuppDataset_1.zip [file Mtmr3_set_A.pdf › Supplemental Dataset 1/A-mRNA_nonrhyth_translation_nonrhyth/Mtmr3_set_A.pdf]

# Mtmt4

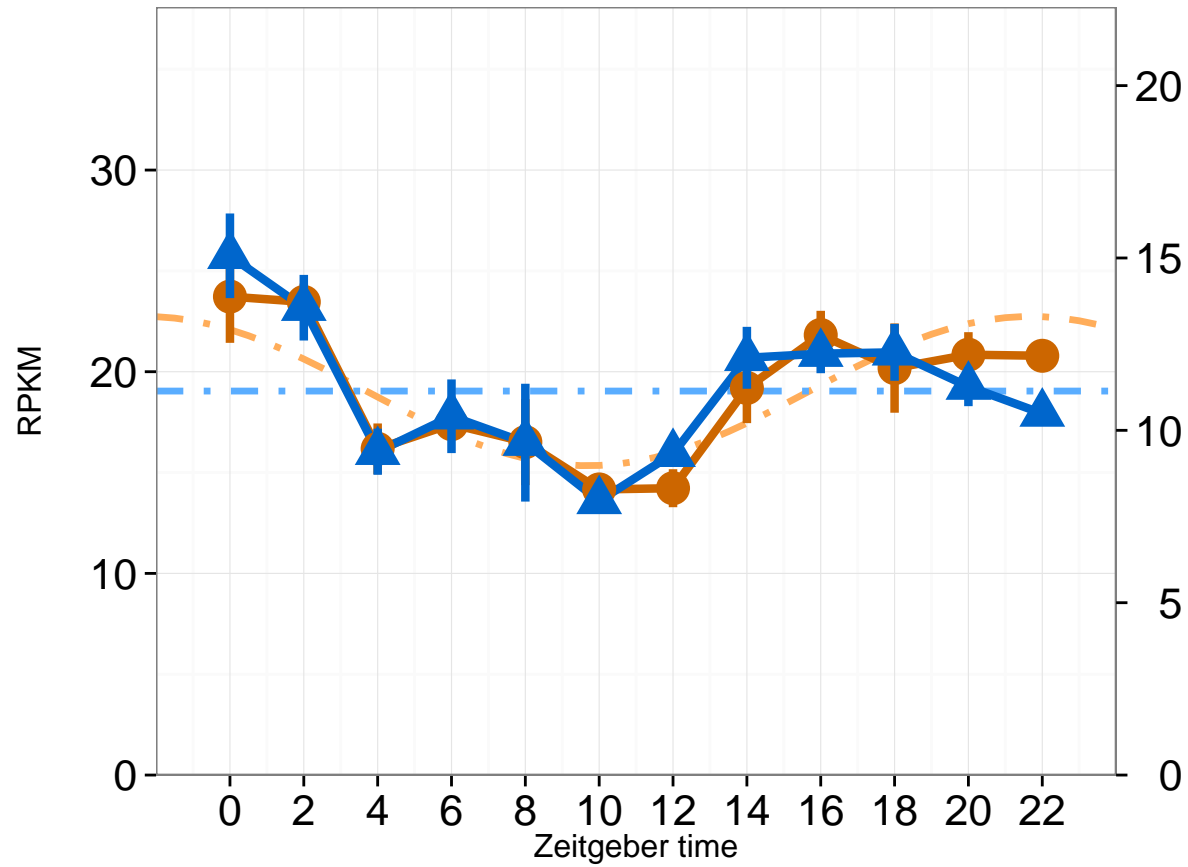

# Mtmt4

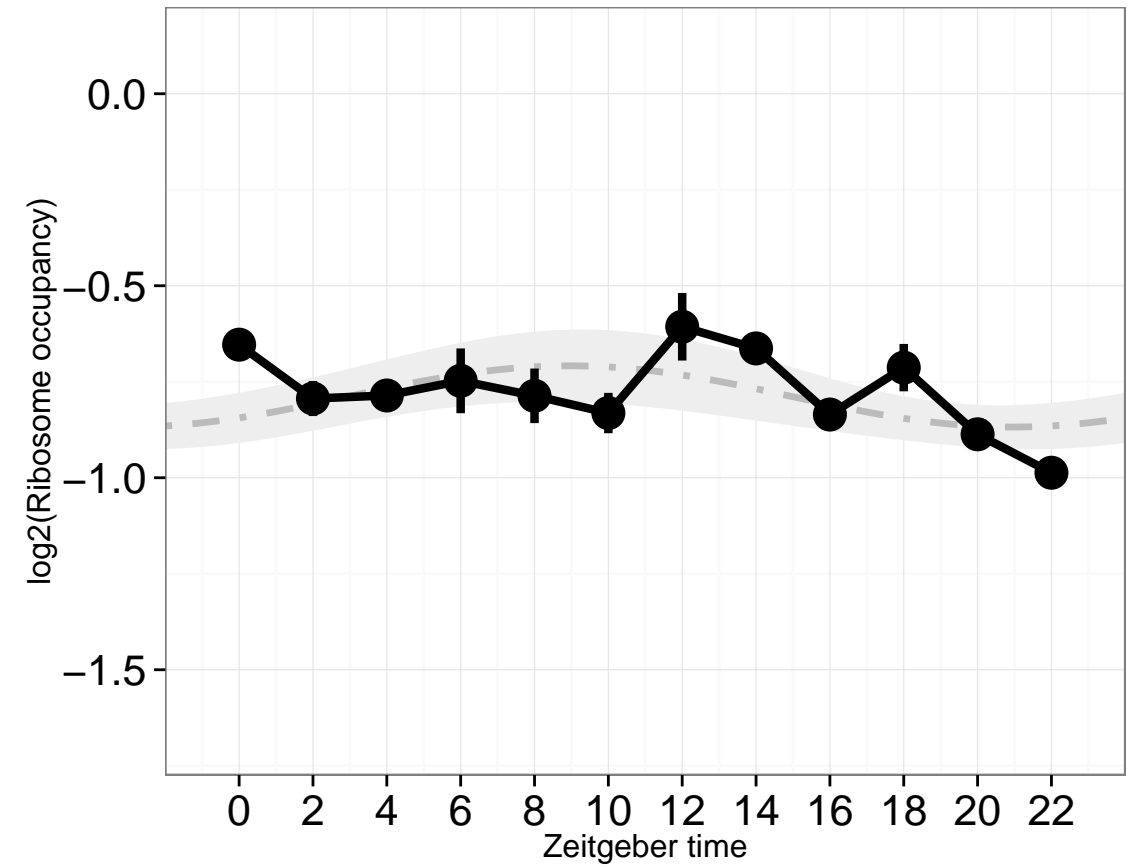

Supplement: SuppDataset_1.zip [file Mtmr4_set_A.pdf › Supplemental Dataset 1/A-mRNA_nonrhyth_translation_nonrhyth/Mtmr4_set_A.pdf]

# Mtmr6

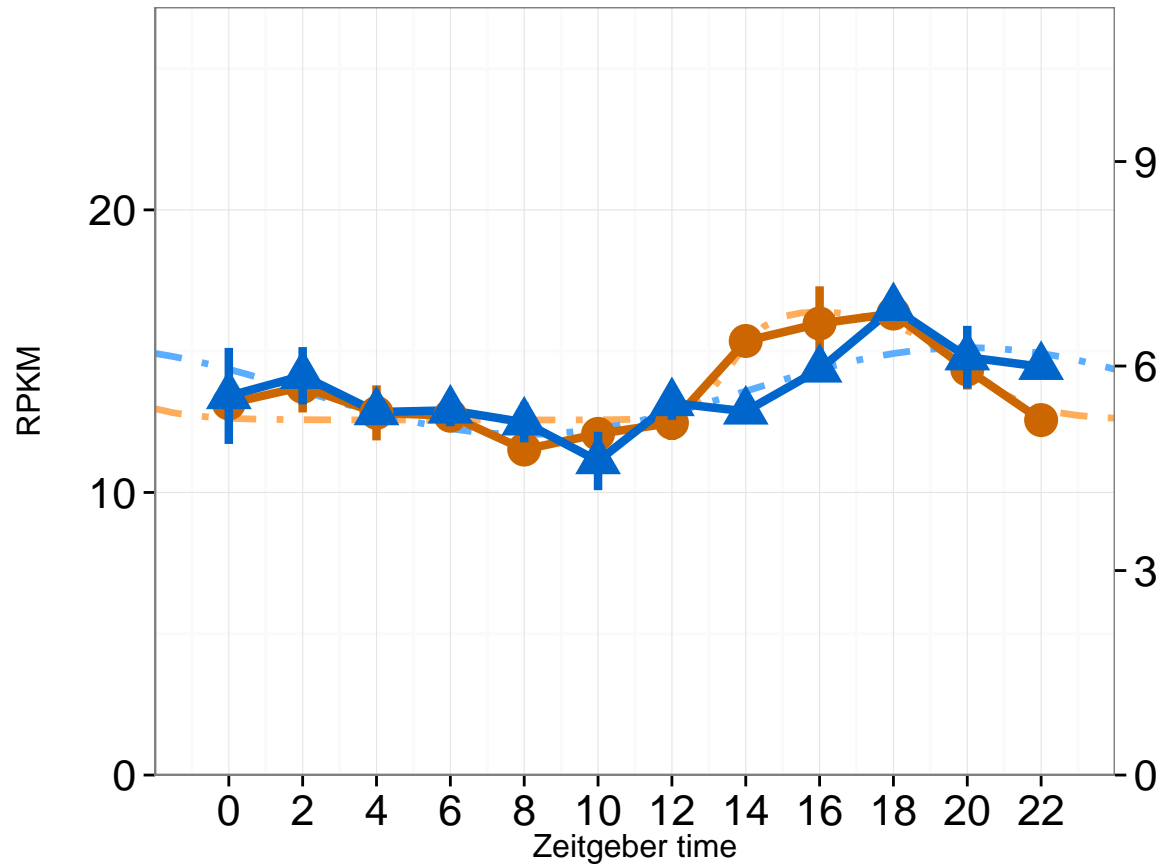

# Mtmr6

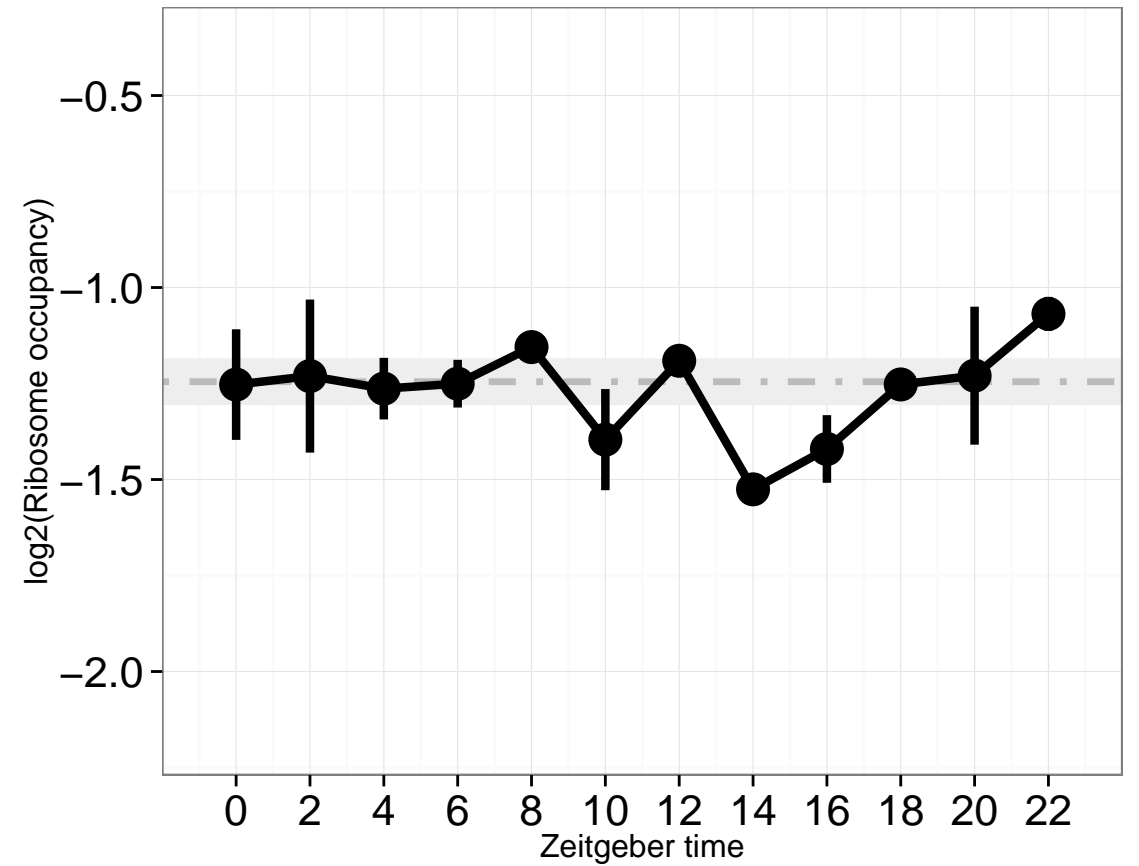

Supplement: SuppDataset_1.zip [file Mtmr6_set_A.pdf › Supplemental Dataset 1/A-mRNA_nonrhyth_translation_nonrhyth/Mtmr6_set_A.pdf]

# Mtmr7

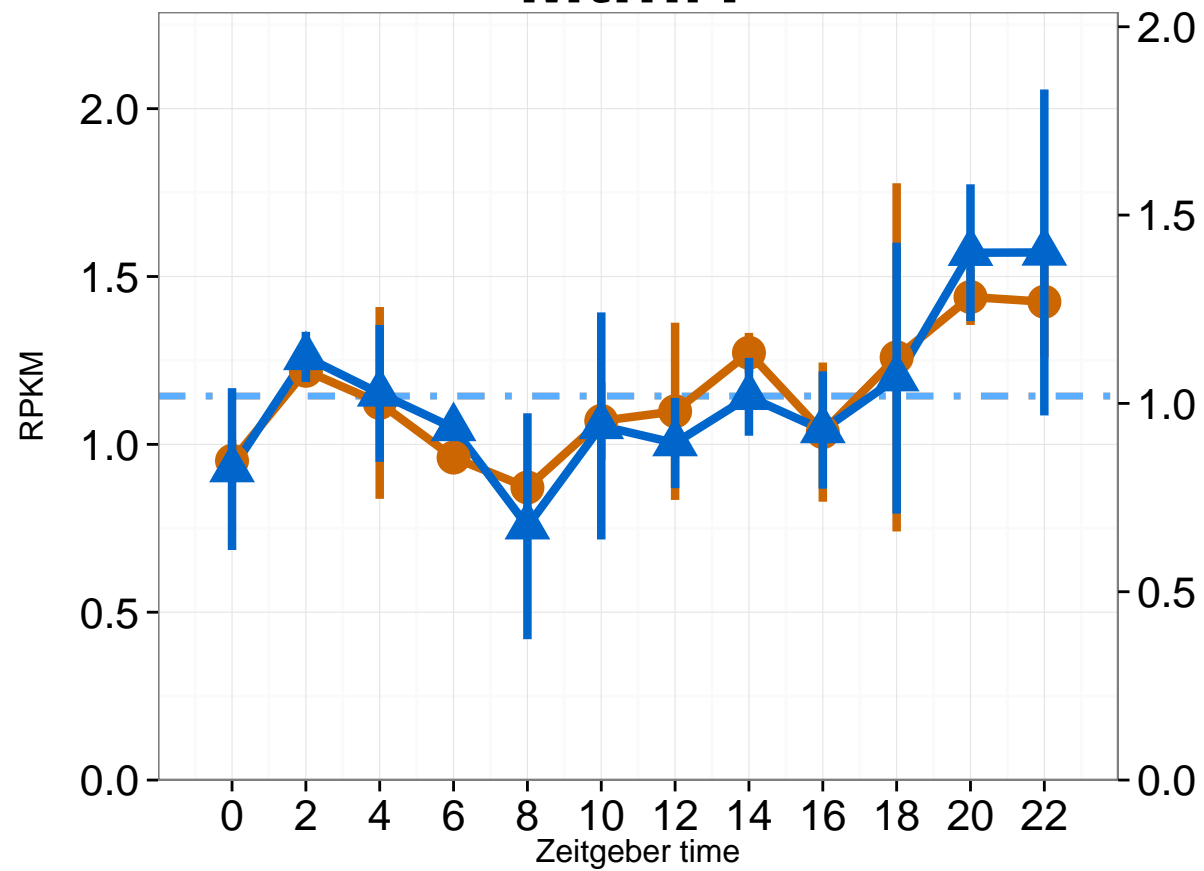

# Mtmr7

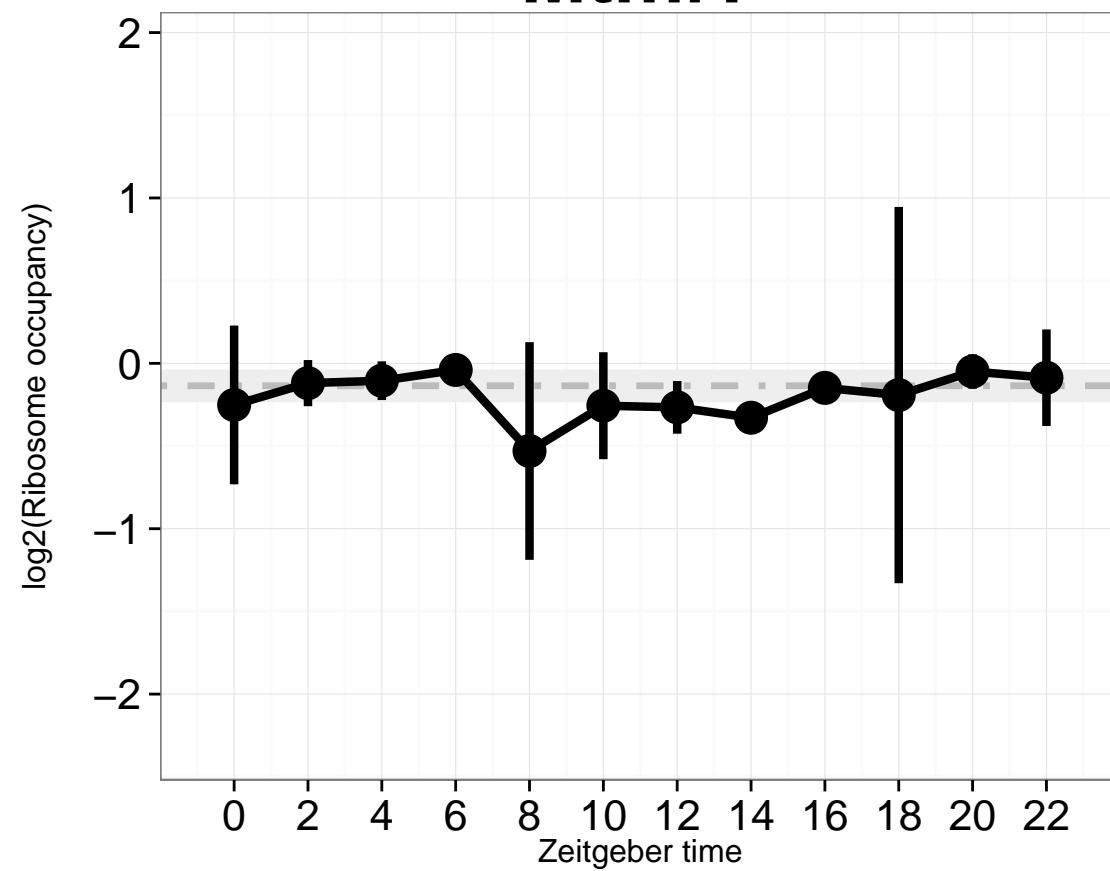

Supplement: SuppDataset_1.zip [file Mtmr7_set_A.pdf › Supplemental Dataset 1/A-mRNA_nonrhyth_translation_nonrhyth/Mtmr7_set_A.pdf]

# Mtmr9

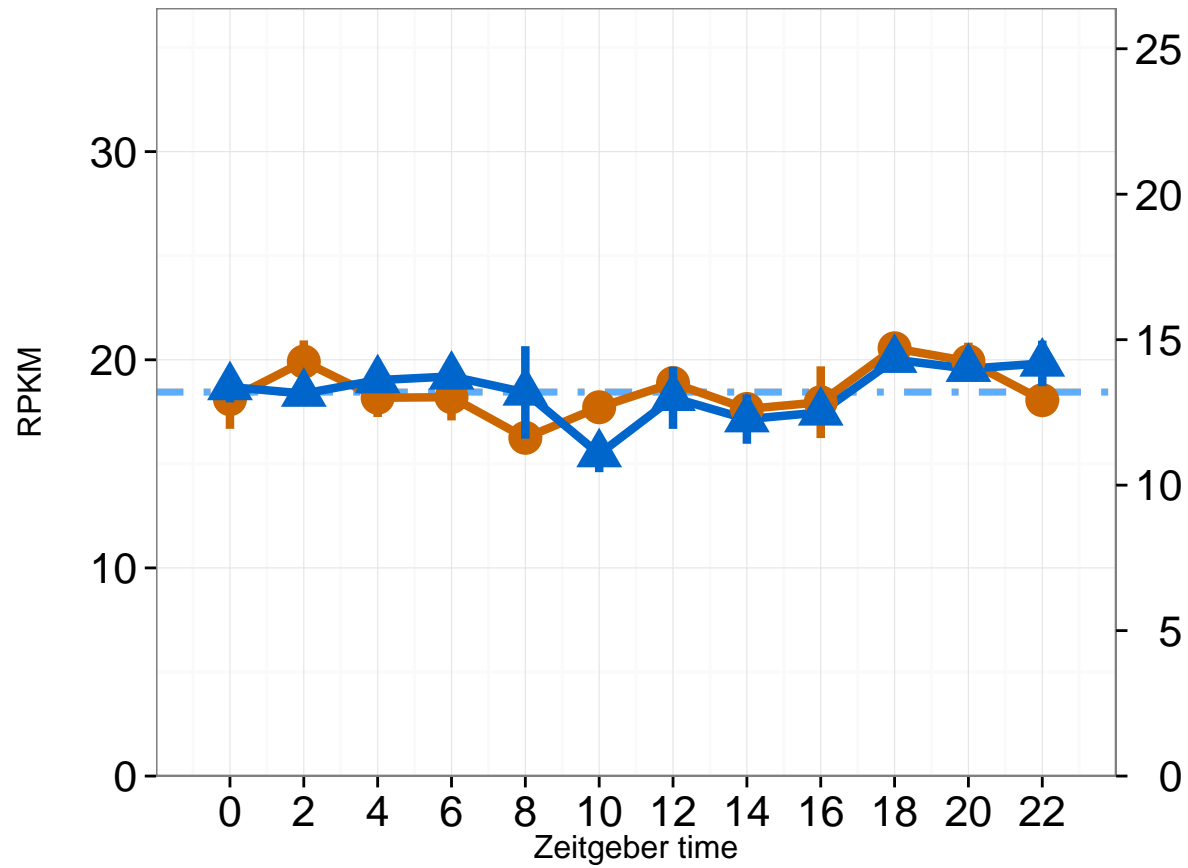

# Mtmr9

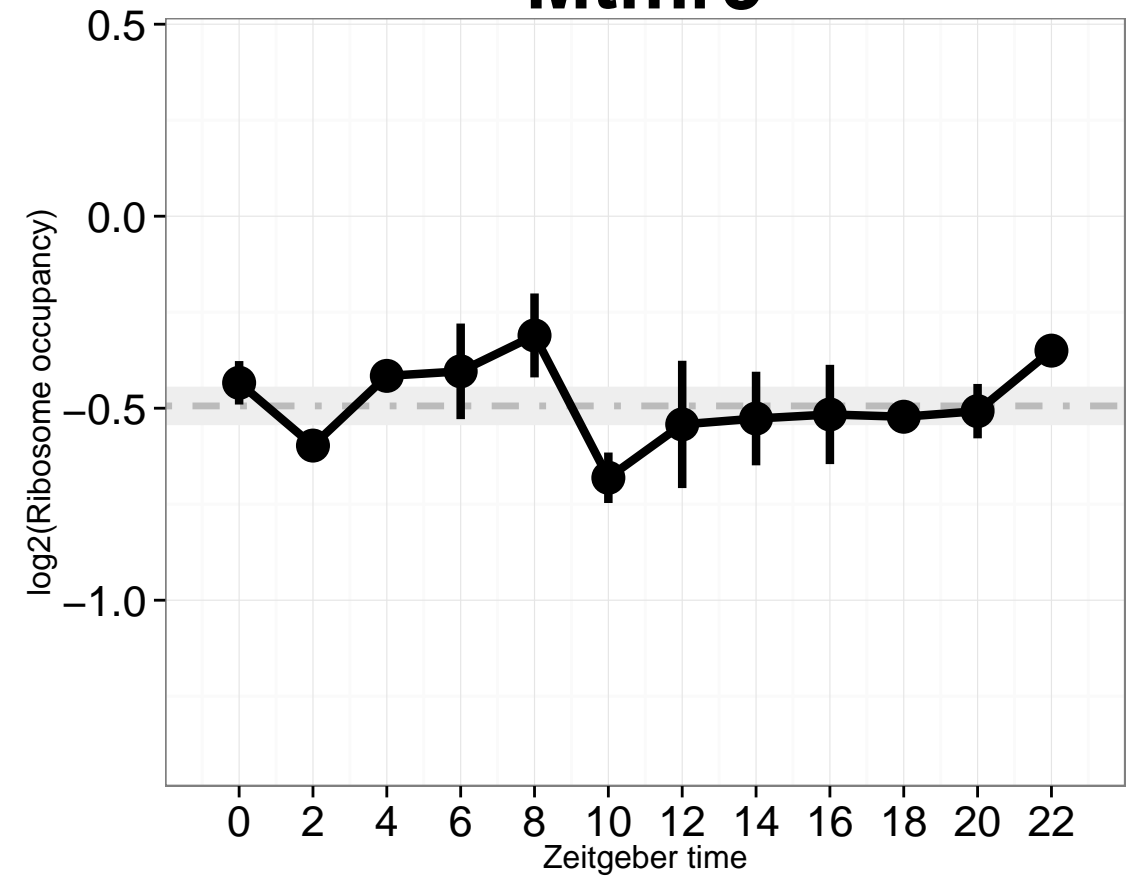

Supplement: SuppDataset_1.zip [file Mtmr9_set_A.pdf › Supplemental Dataset 1/A-mRNA_nonrhyth_translation_nonrhyth/Mtmr9_set_A.pdf]

## Mto1

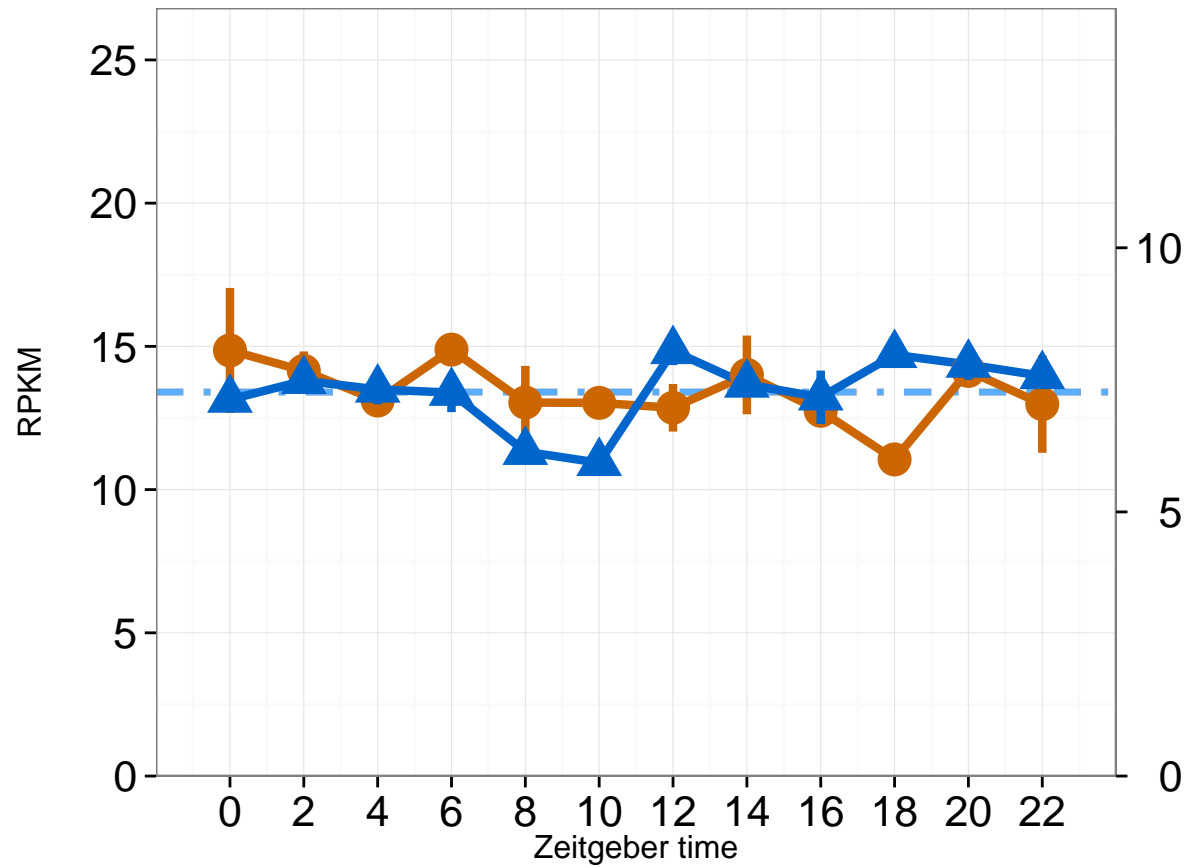

## Mto1

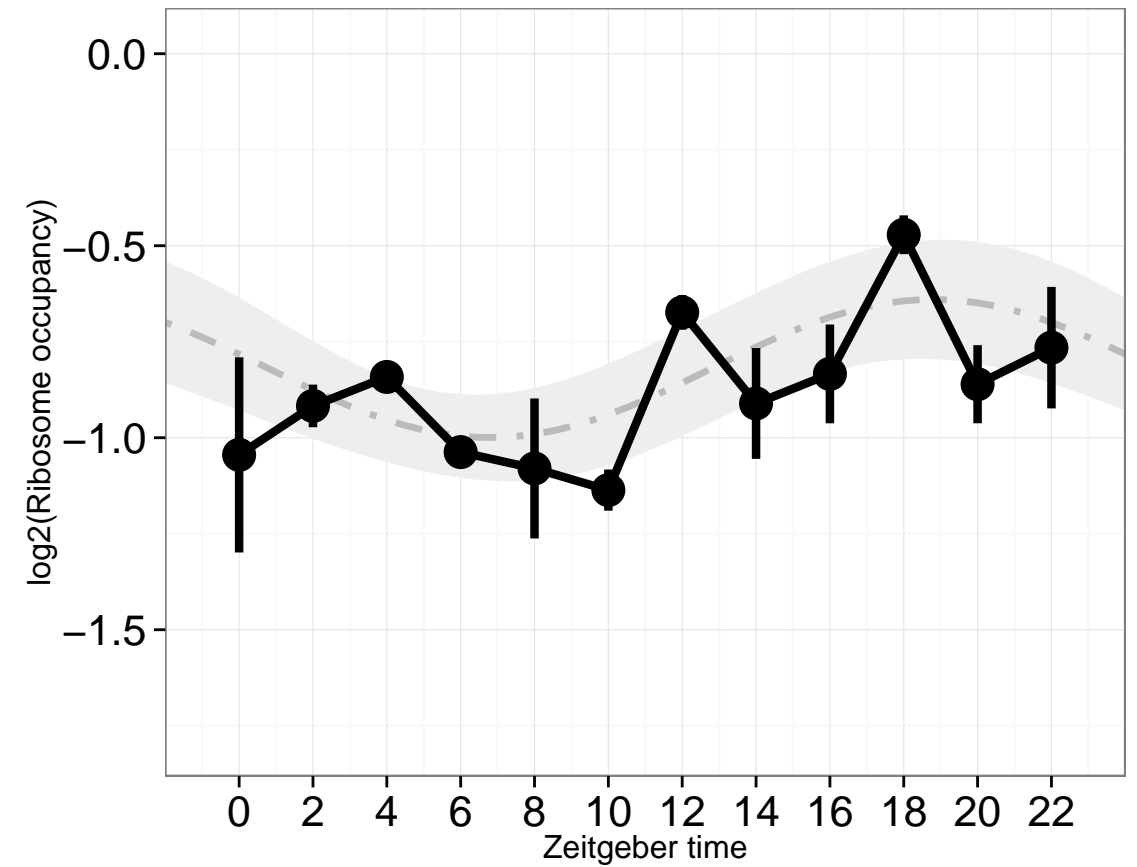

Supplement: SuppDataset_1.zip [file Mto1_set_A.pdf › Supplemental Dataset 1/A-mRNA_nonrhyth_translation_nonrhyth/Mto1_set_A.pdf]

# Mtpap

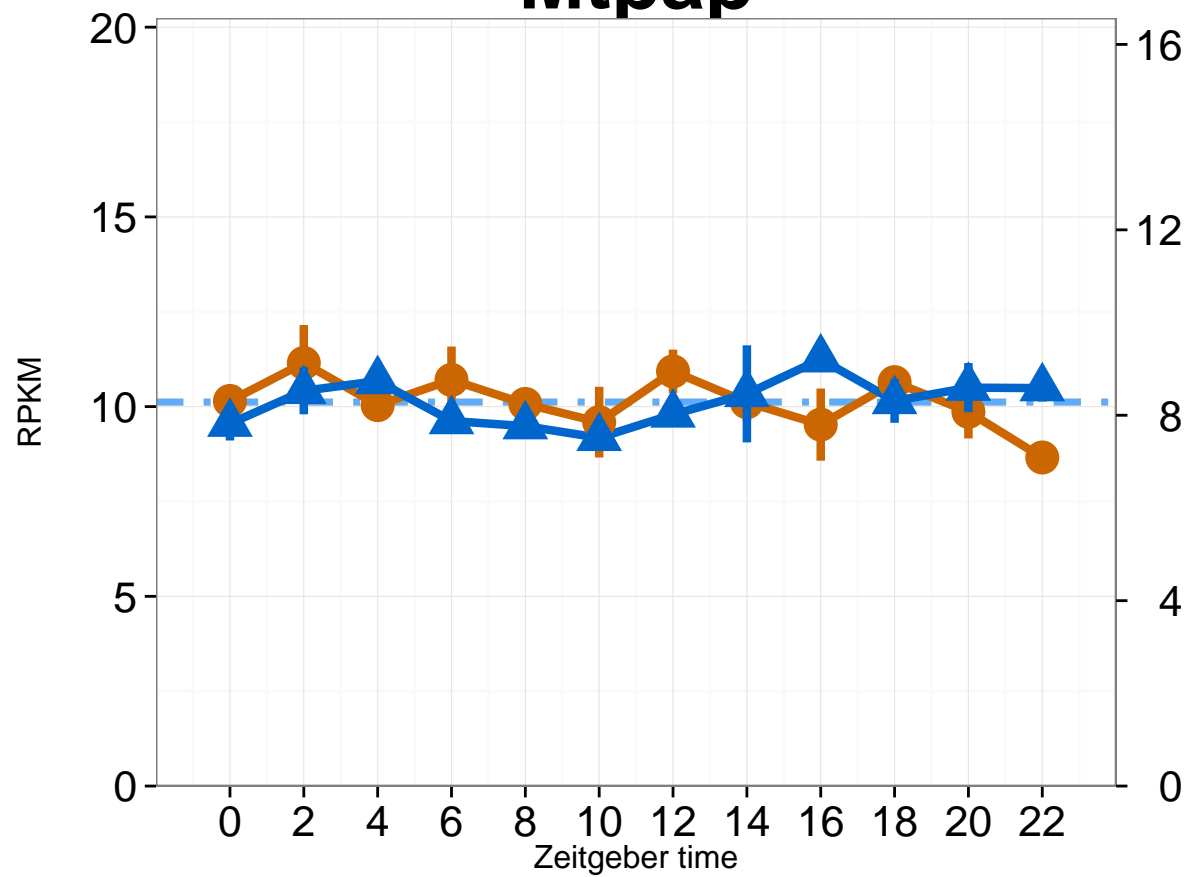

# Mtpap

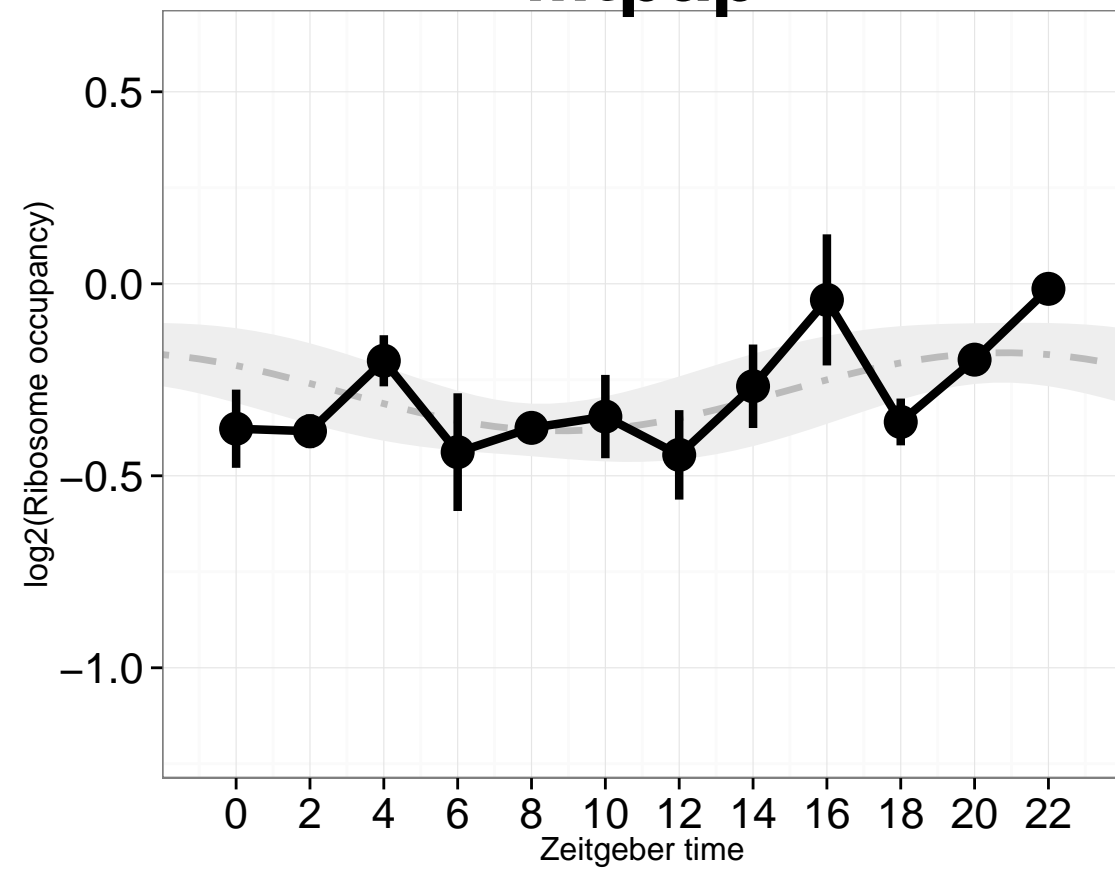

Supplement: SuppDataset_1.zip [file Mtpap_set_A.pdf › Supplemental Dataset 1/A-mRNA_nonrhyth_translation_nonrhyth/Mtpap_set_A.pdf]

## Mtpn

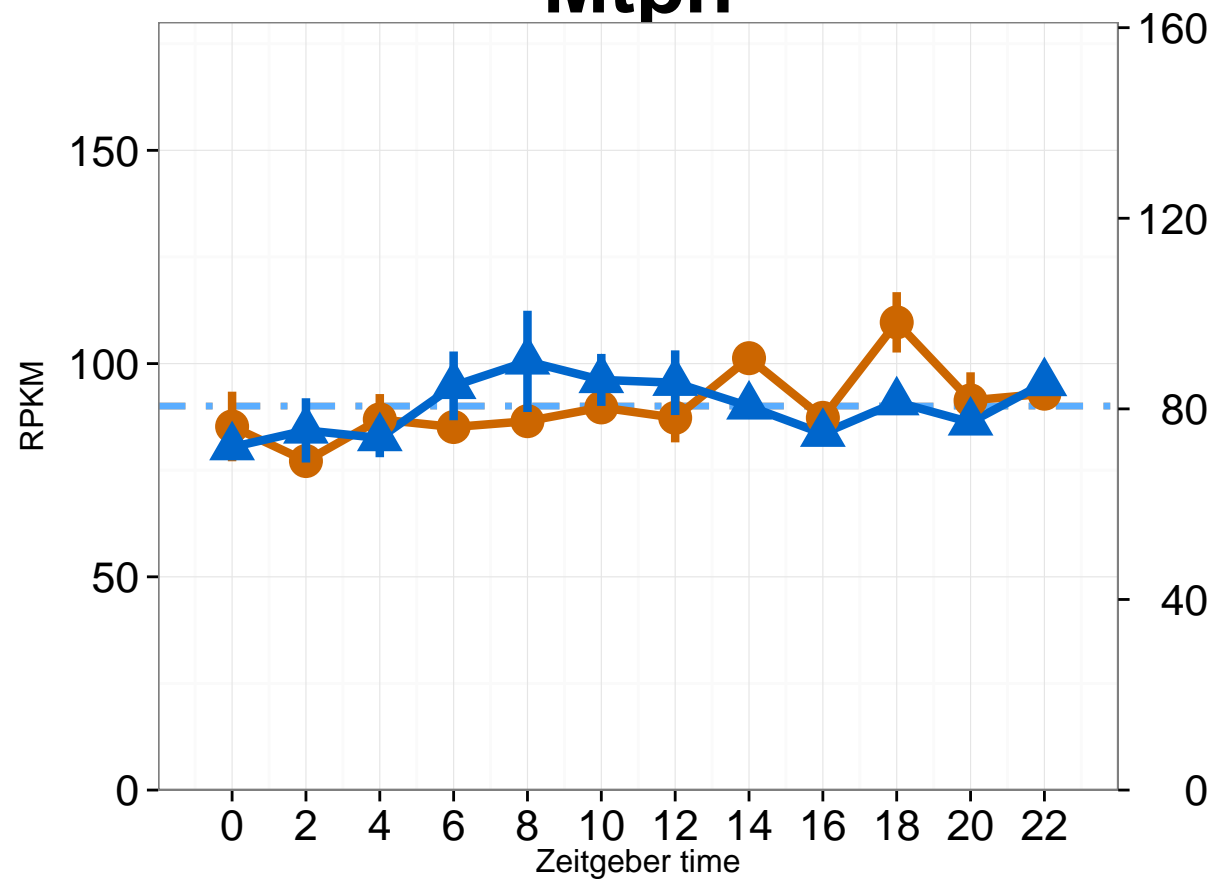

## Mtpn

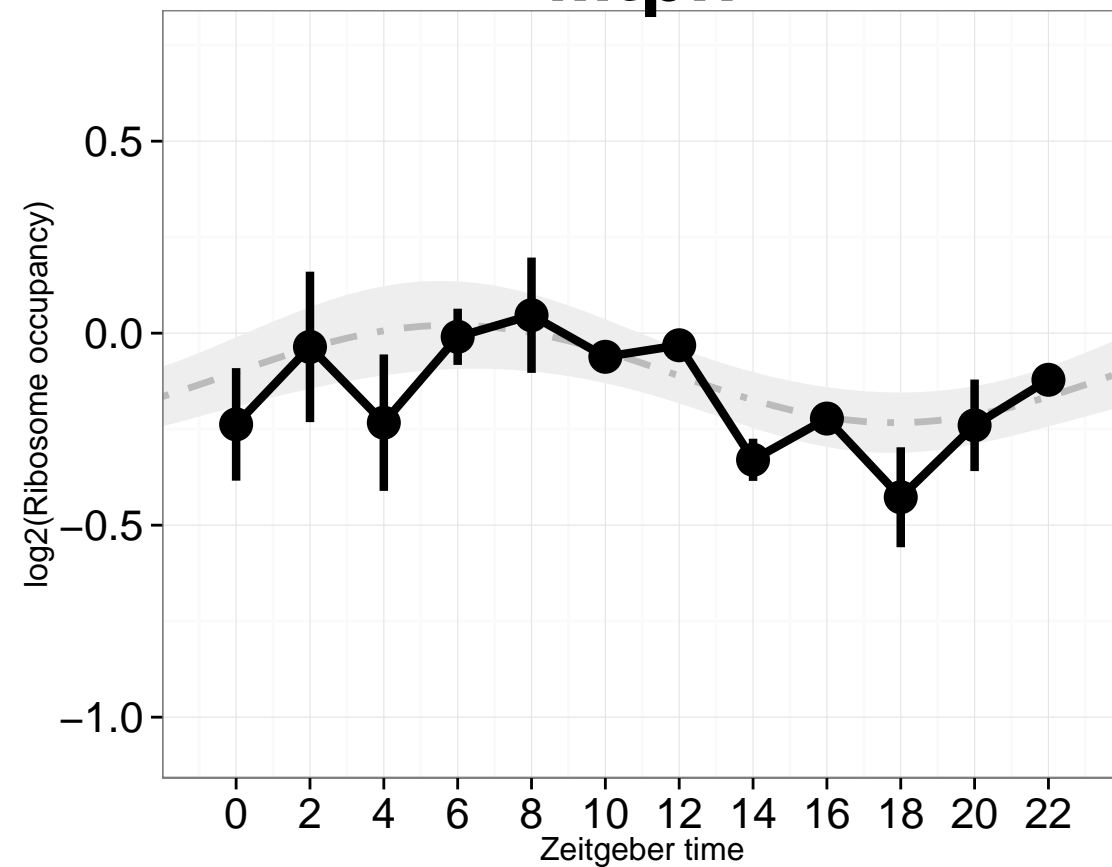

Supplement: SuppDataset_1.zip [file Mtpn_set_A.pdf › Supplemental Dataset 1/A-mRNA_nonrhyth_translation_nonrhyth/Mtpn_set_A.pdf]

## Mtr

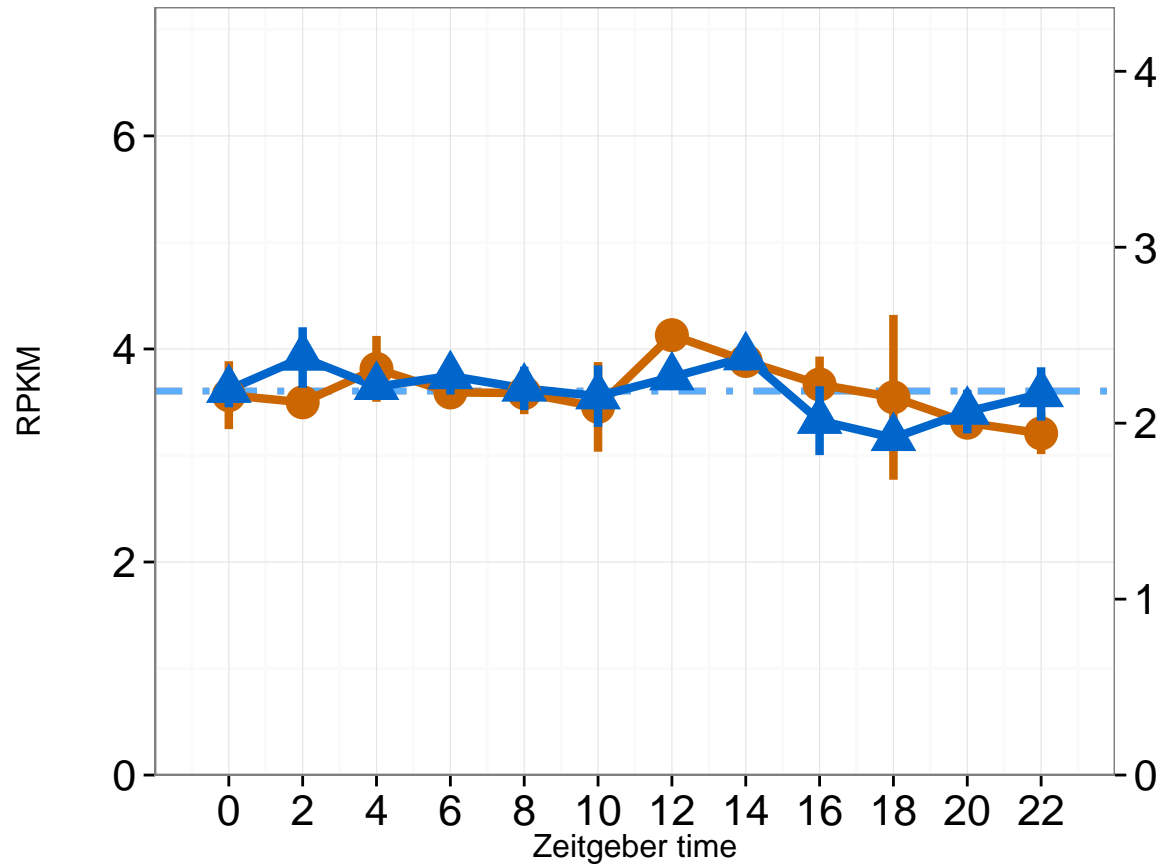

## Mtr

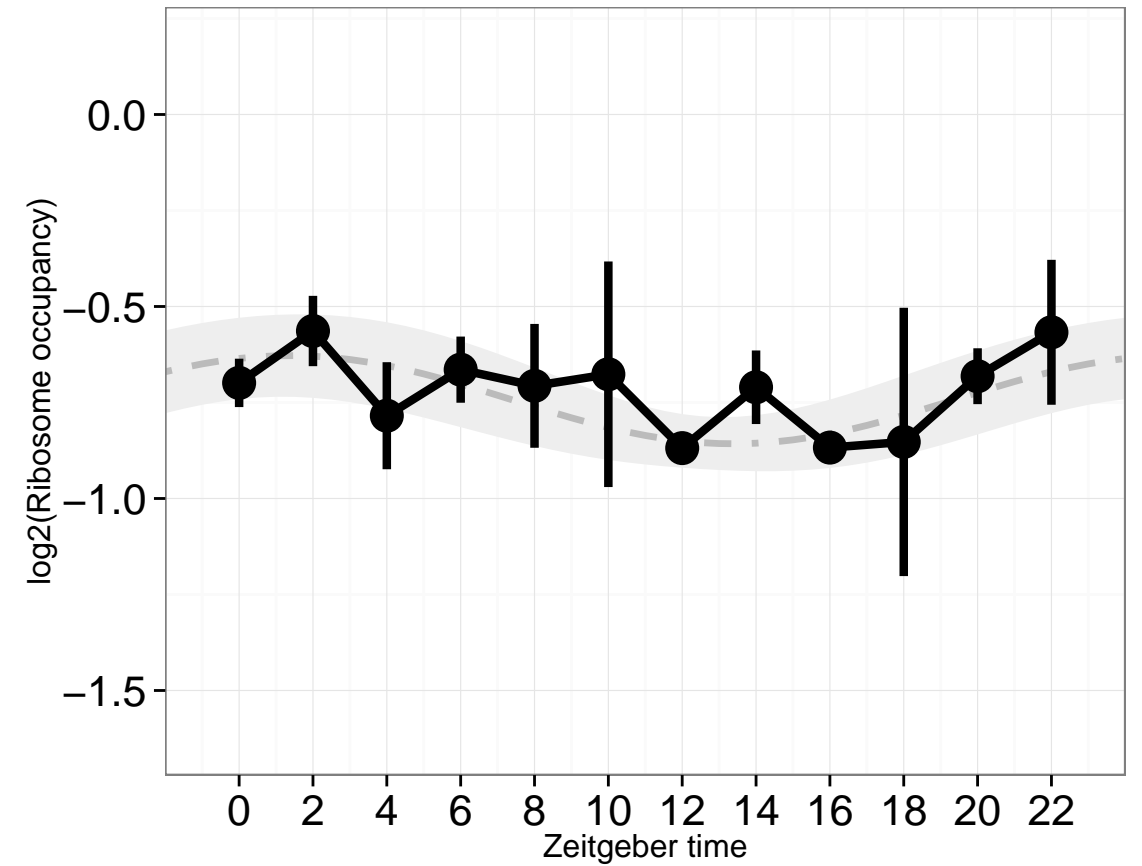

Supplement: SuppDataset_1.zip [file Mtr_set_A.pdf › Supplemental Dataset 1/A-mRNA_nonrhyth_translation_nonrhyth/Mtr_set_A.pdf]

# Mtrf1

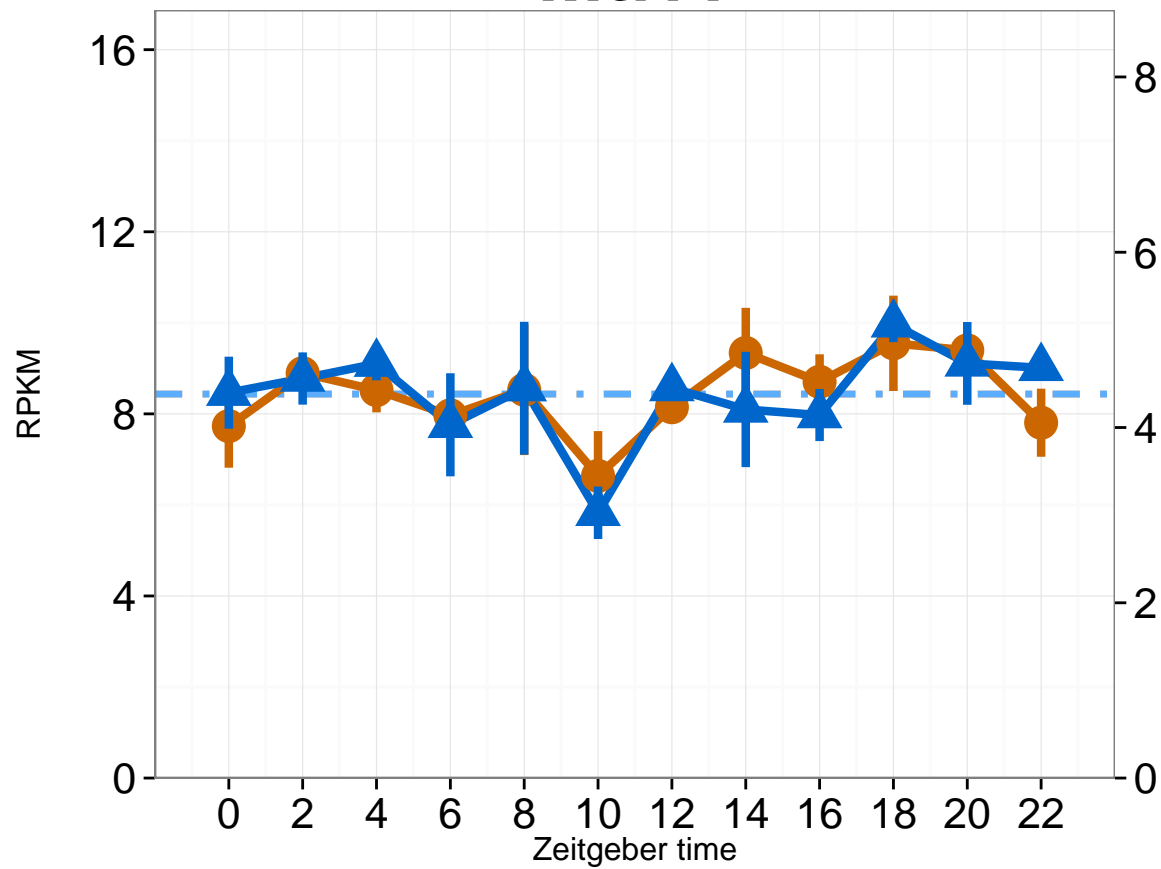

# Mtrf1

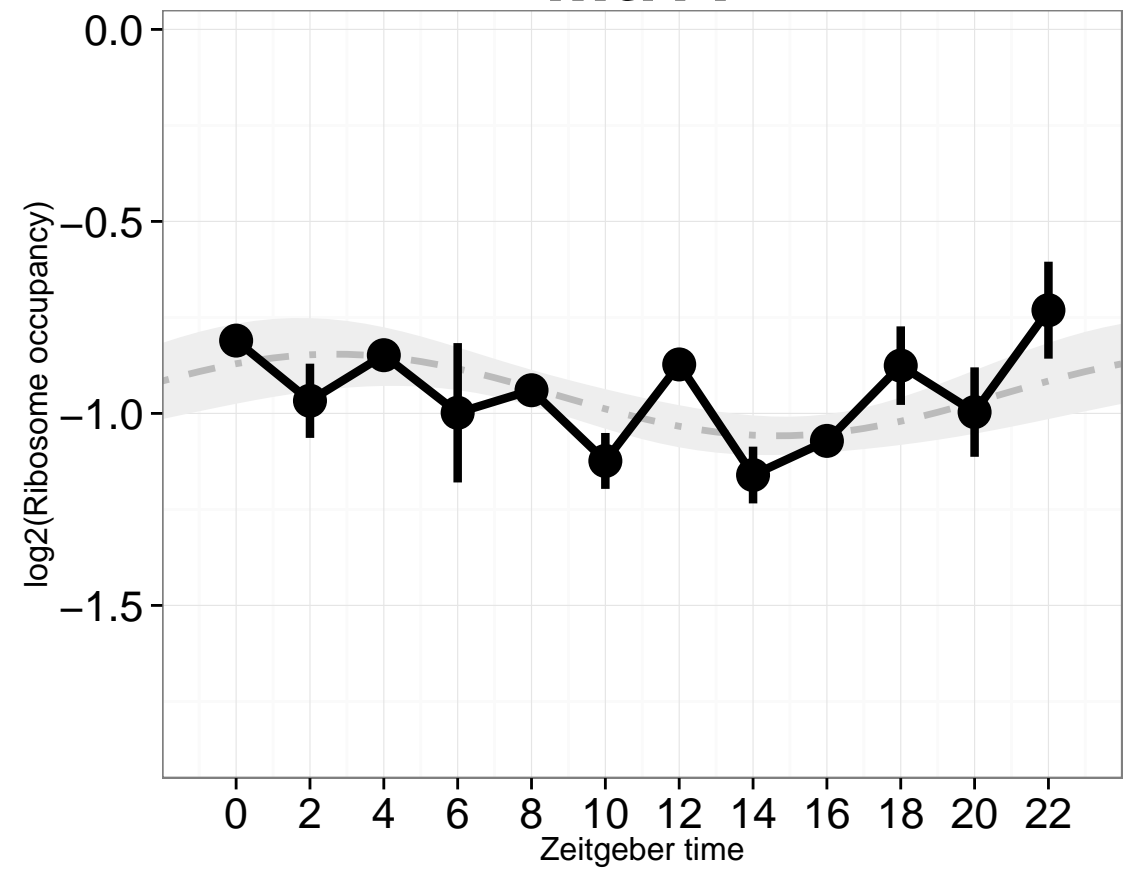

Supplement: SuppDataset_1.zip [file Mtrf1_set_A.pdf › Supplemental Dataset 1/A-mRNA_nonrhyth_translation_nonrhyth/Mtrf1_set_A.pdf]

# Mtrf1l

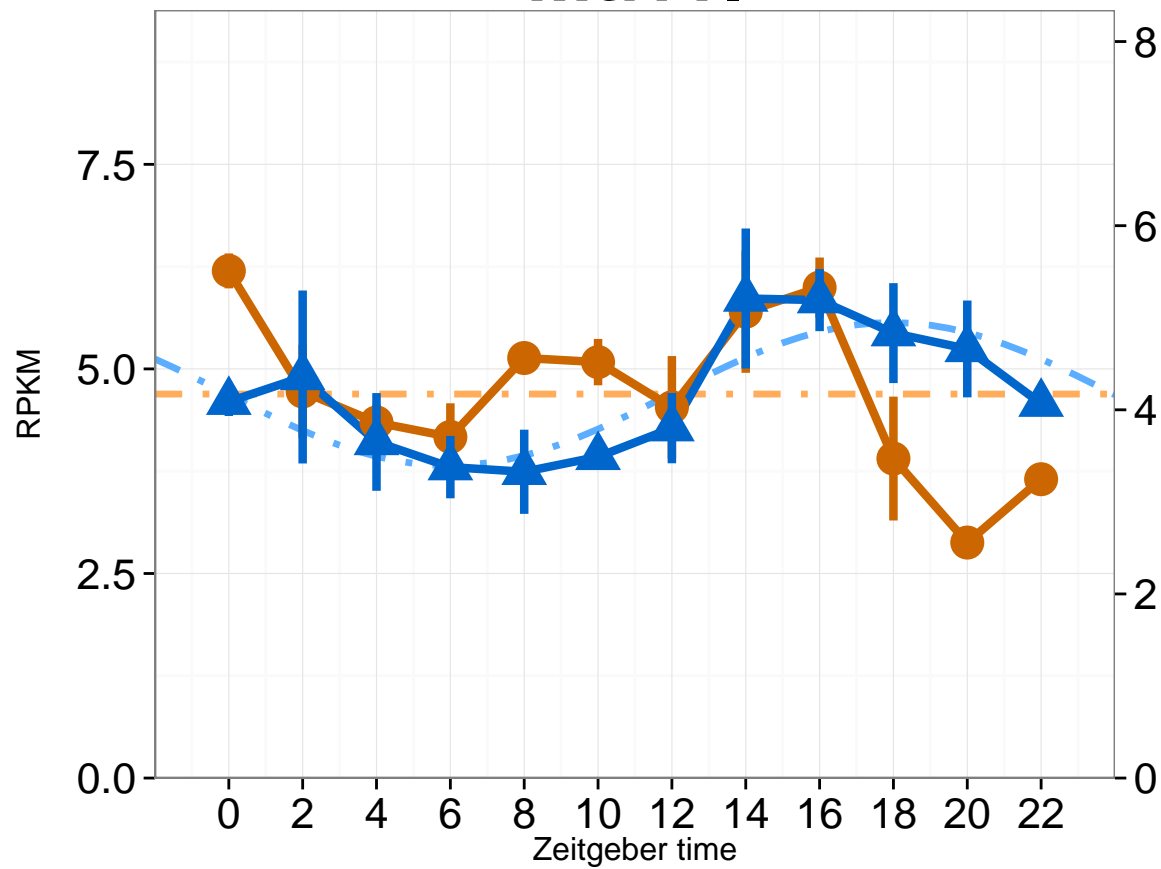

# Mtrf1l

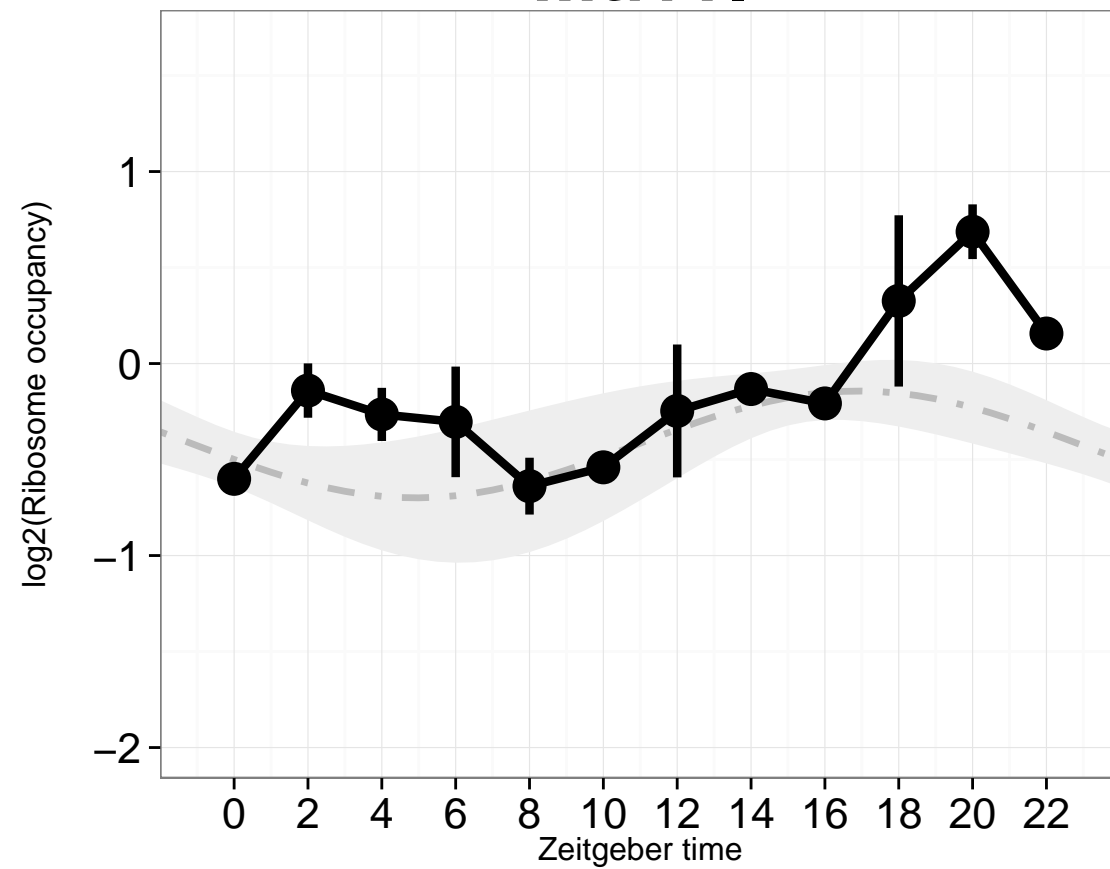

Supplement: SuppDataset_1.zip [file Mtrf1l_set_A.pdf › Supplemental Dataset 1/A-mRNA_nonrhyth_translation_nonrhyth/Mtrf1l_set_A.pdf]

# Mtss1l

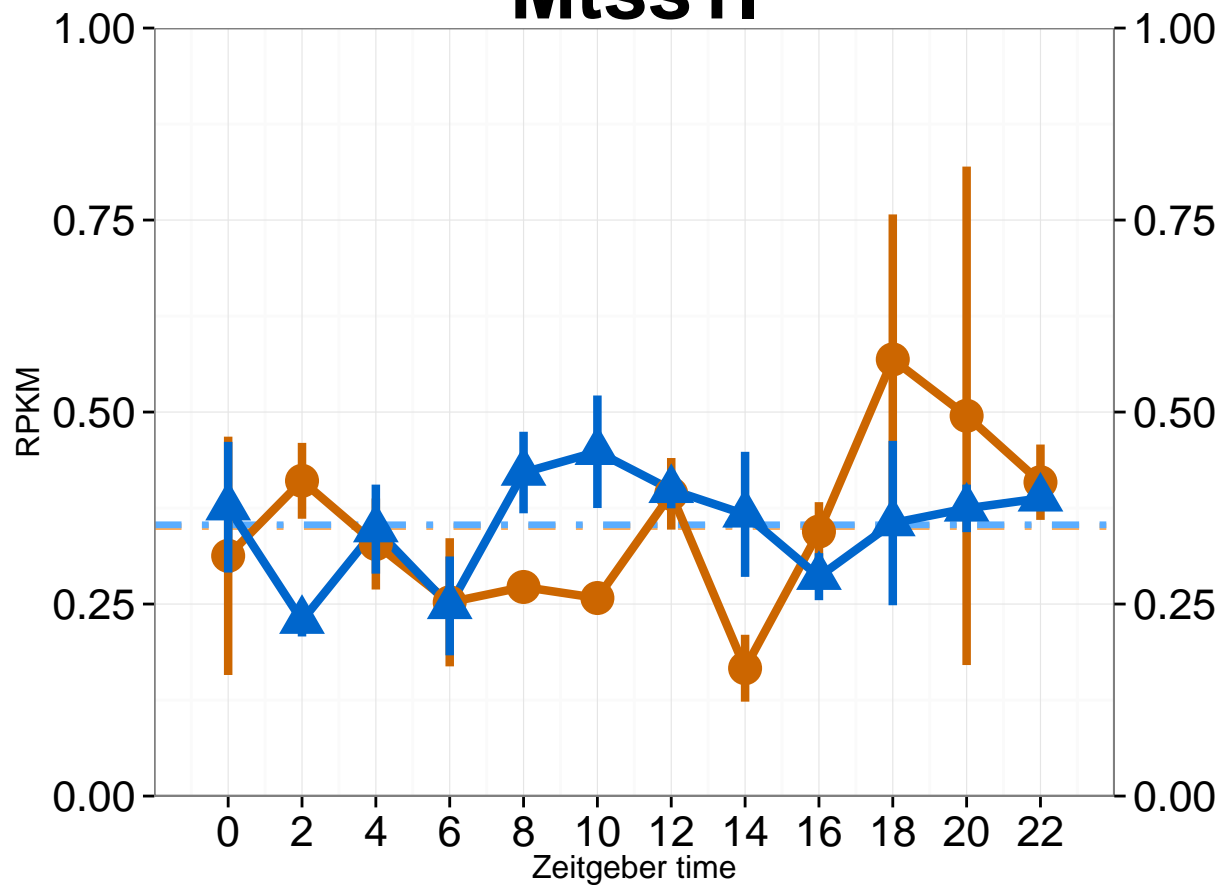

# Mtss1l

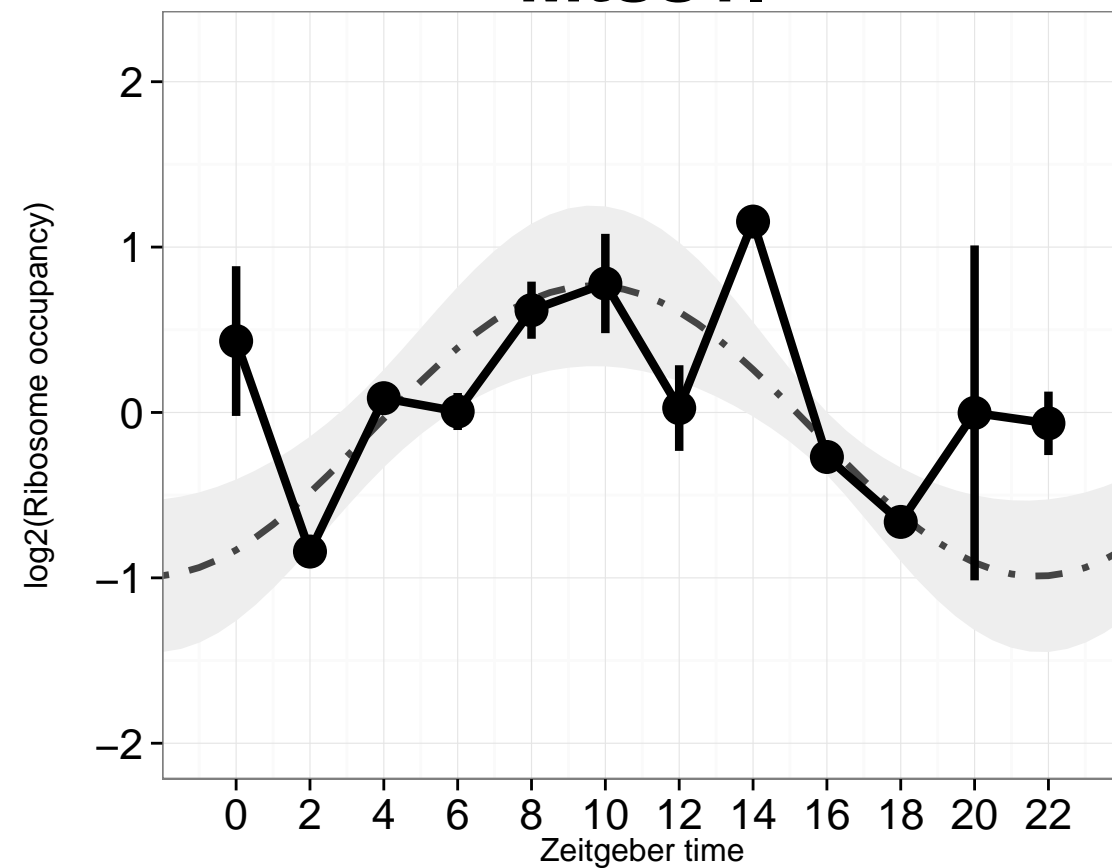

Supplement: SuppDataset_1.zip [file Mtss1l_set_A.pdf › Supplemental Dataset 1/A-mRNA_nonrhyth_translation_nonrhyth/Mtss1l_set_A.pdf]

## Mttp

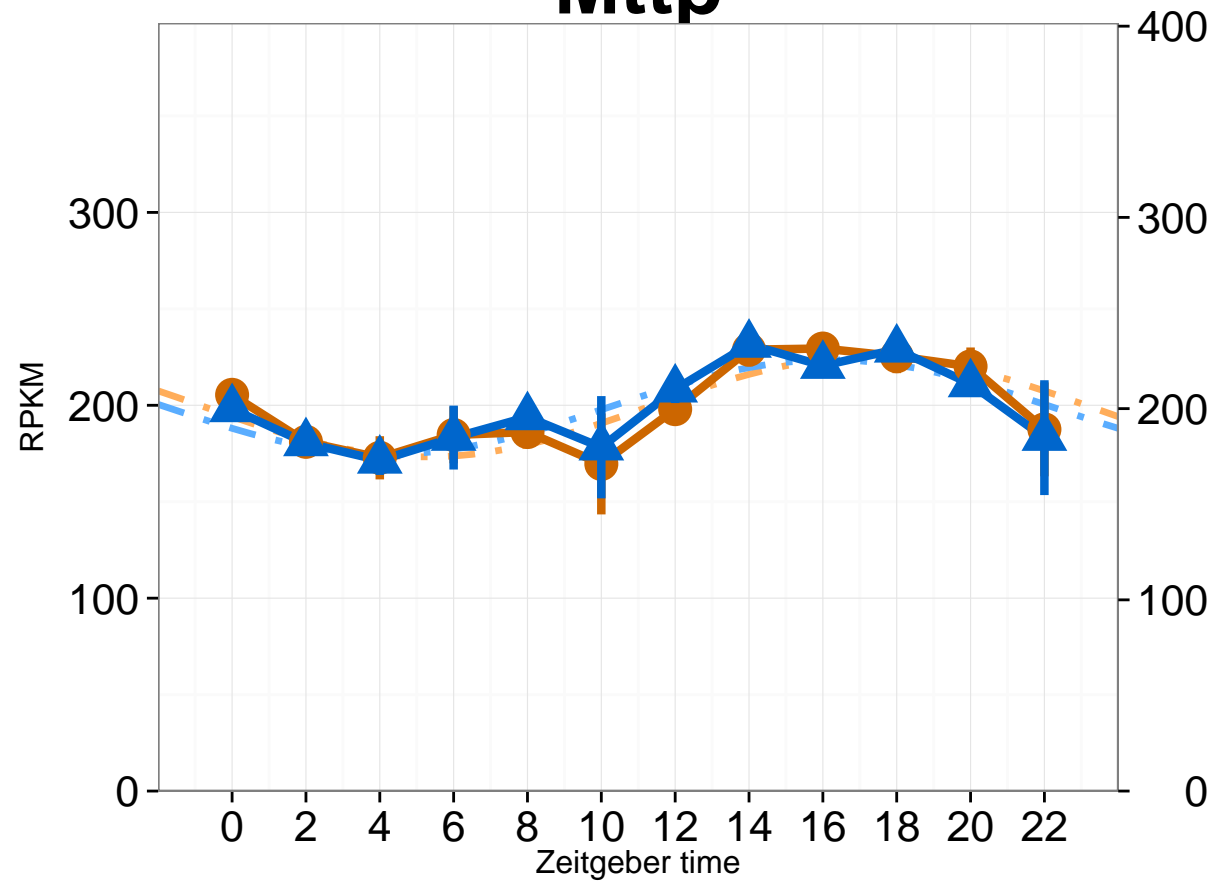

## Mttp

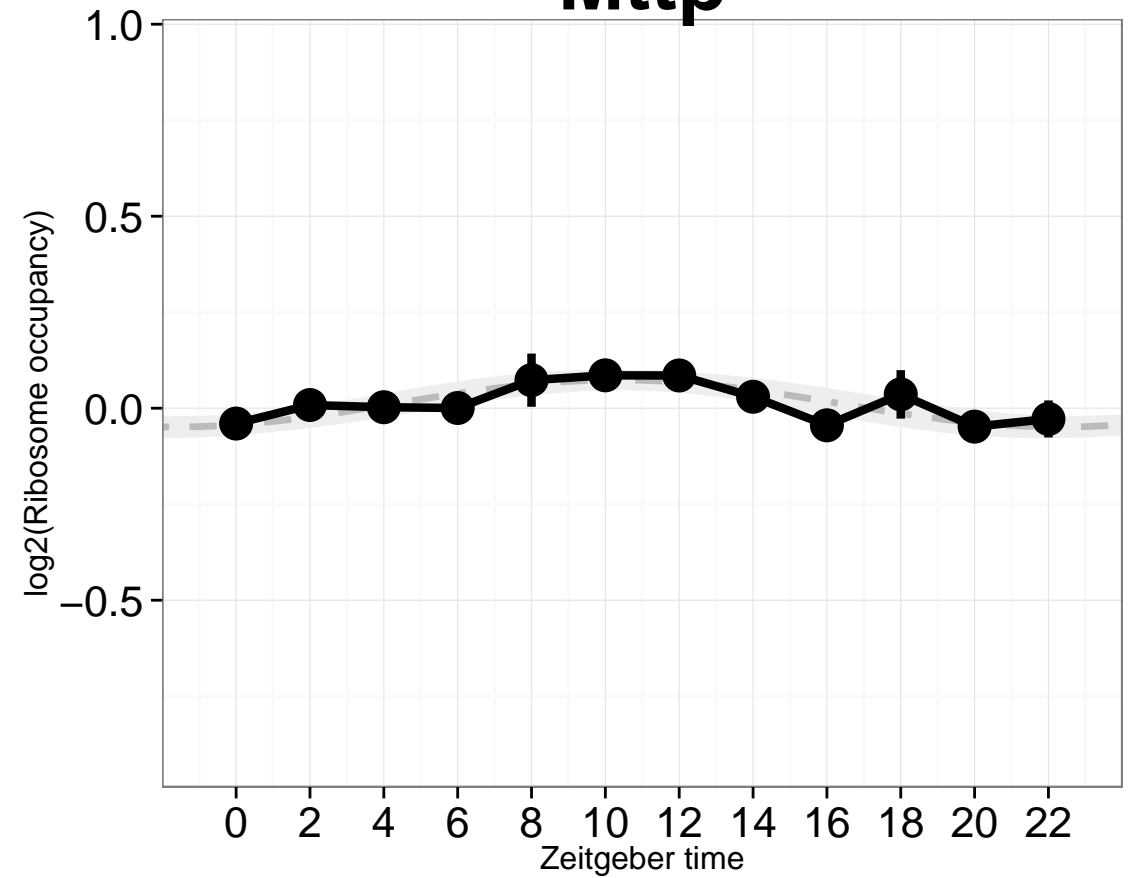

Supplement: SuppDataset_1.zip [file Mttp_set_A.pdf › Supplemental Dataset 1/A-mRNA_nonrhyth_translation_nonrhyth/Mttp_set_A.pdf]

# Mtus1

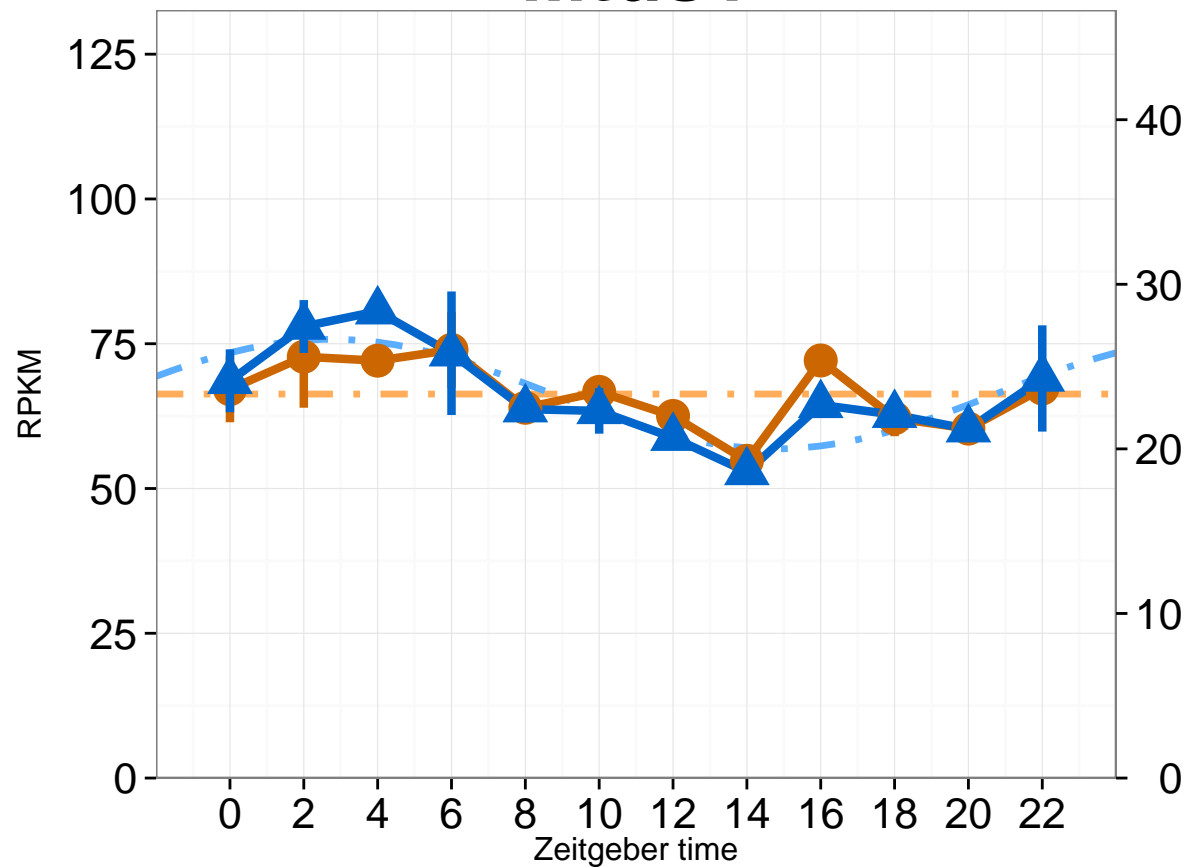

# Mtus1

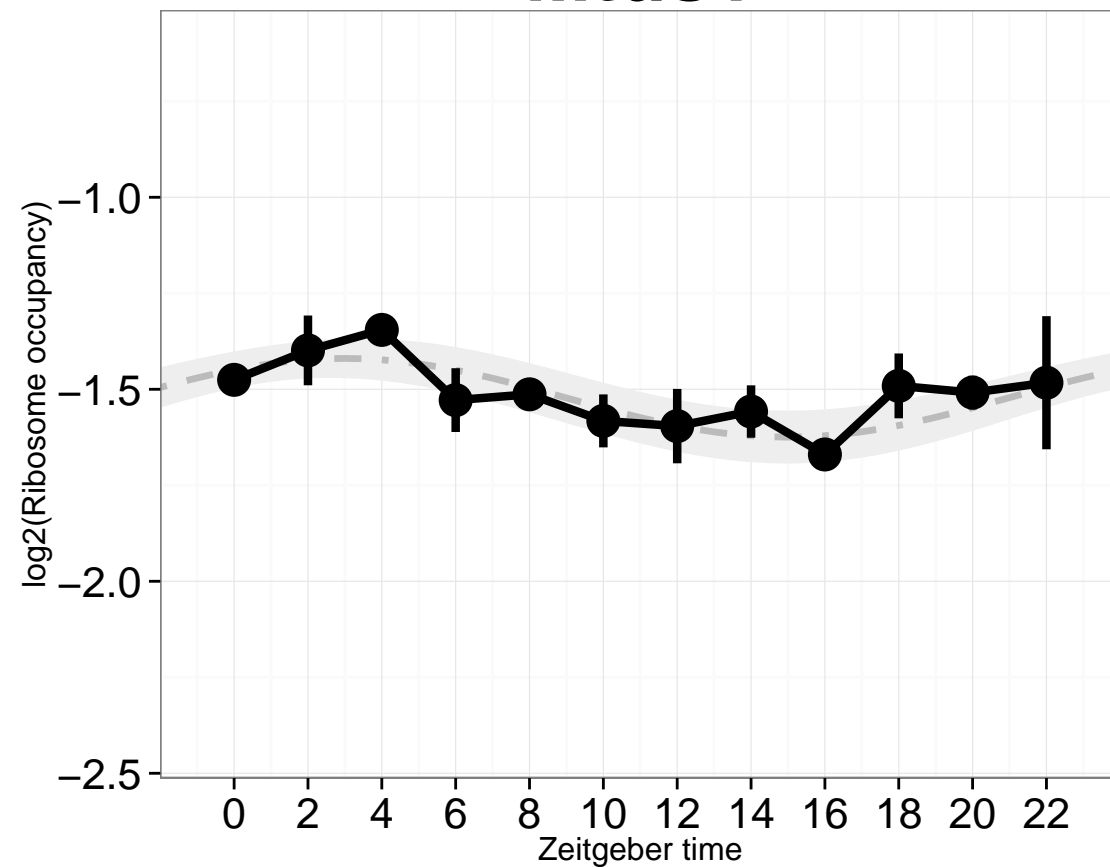

Supplement: SuppDataset_1.zip [file Mtus1_set_A.pdf › Supplemental Dataset 1/A-mRNA_nonrhyth_translation_nonrhyth/Mtus1_set_A.pdf]

**Mtus2 TR**

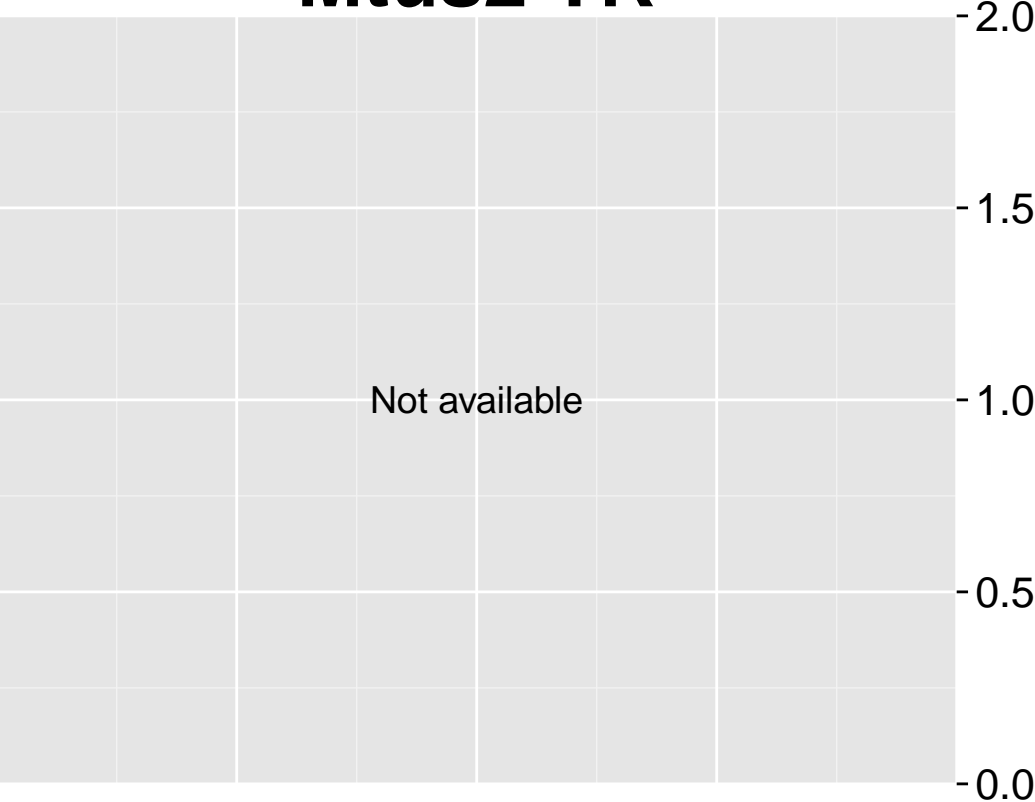

**Mtus2 log2(Ribosome occupancy**

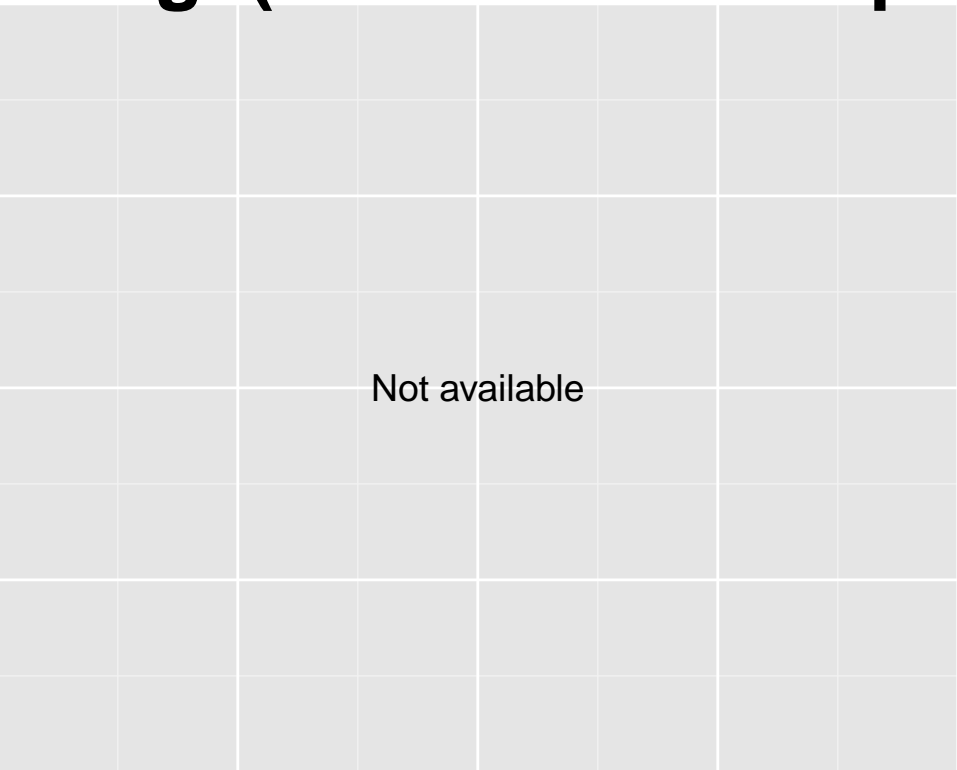

Supplement: SuppDataset_1.zip [file Mtus2_set_A.pdf › Supplemental Dataset 1/A-mRNA_nonrhyth_translation_nonrhyth/Mtus2_set_A.pdf]

# Mtx1

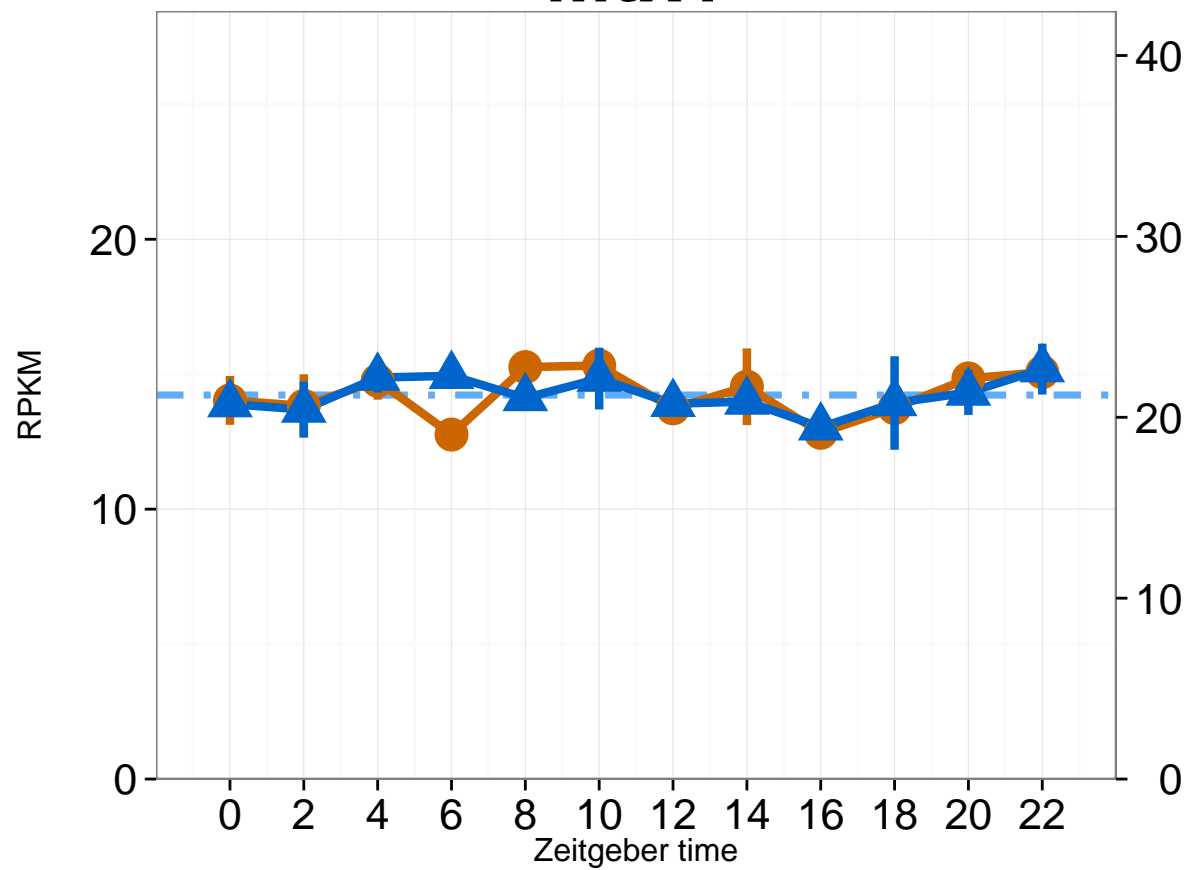

# Mtx1

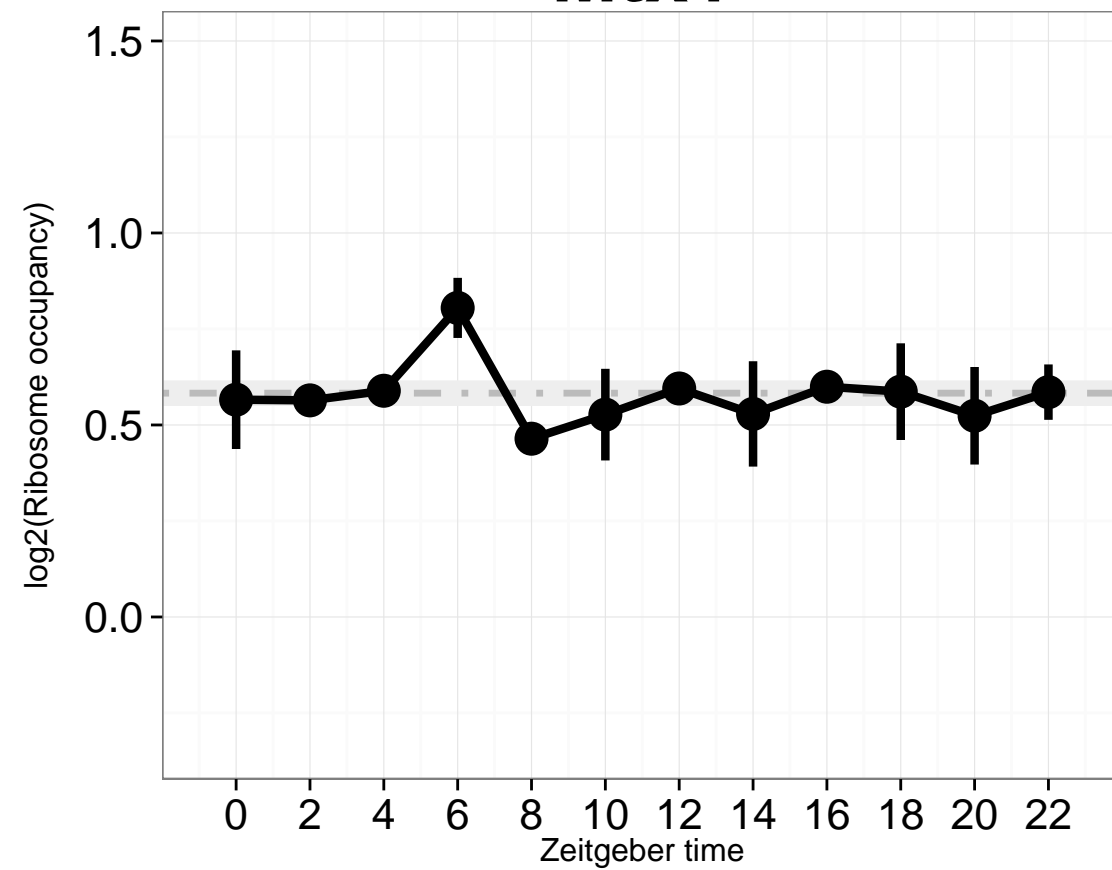

Supplement: SuppDataset_1.zip [file Mtx1_set_A.pdf › Supplemental Dataset 1/A-mRNA_nonrhyth_translation_nonrhyth/Mtx1_set_A.pdf]

# Mtx2

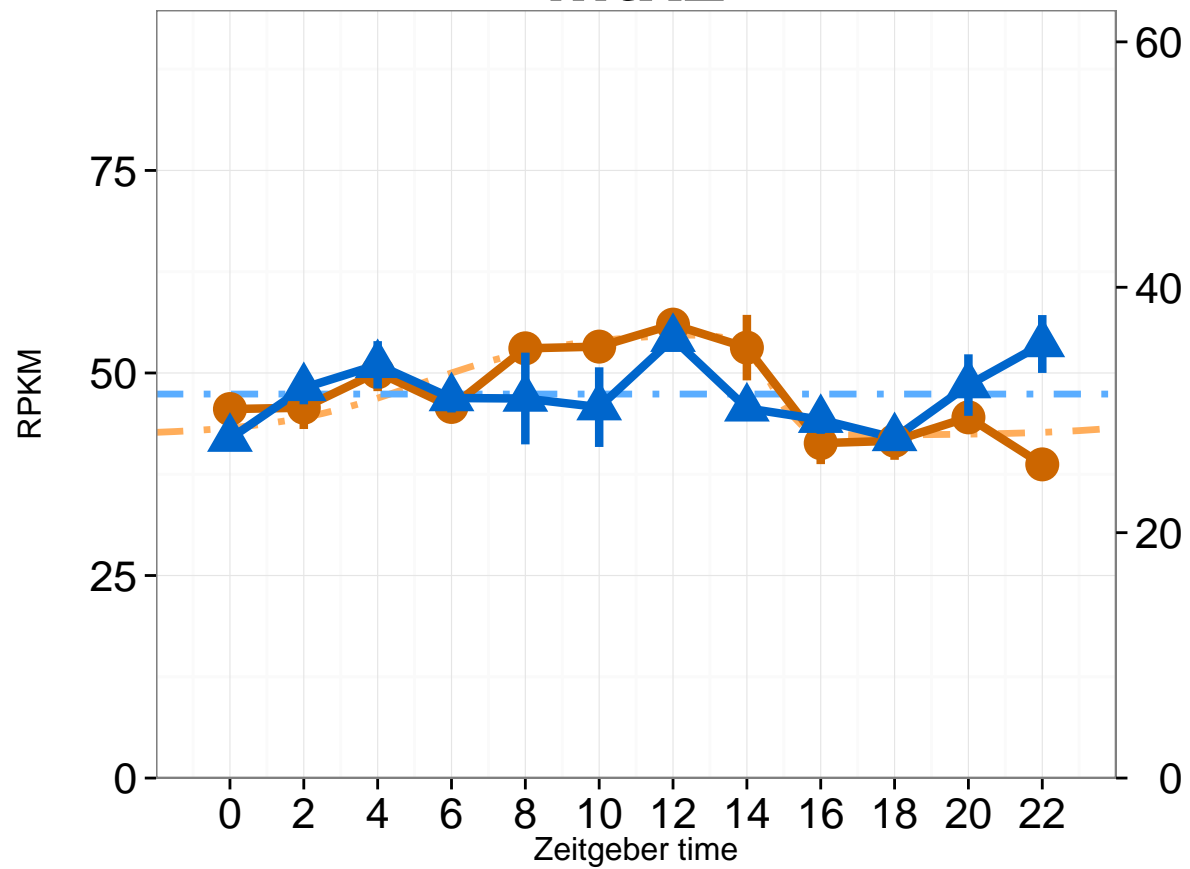

# Mtx2

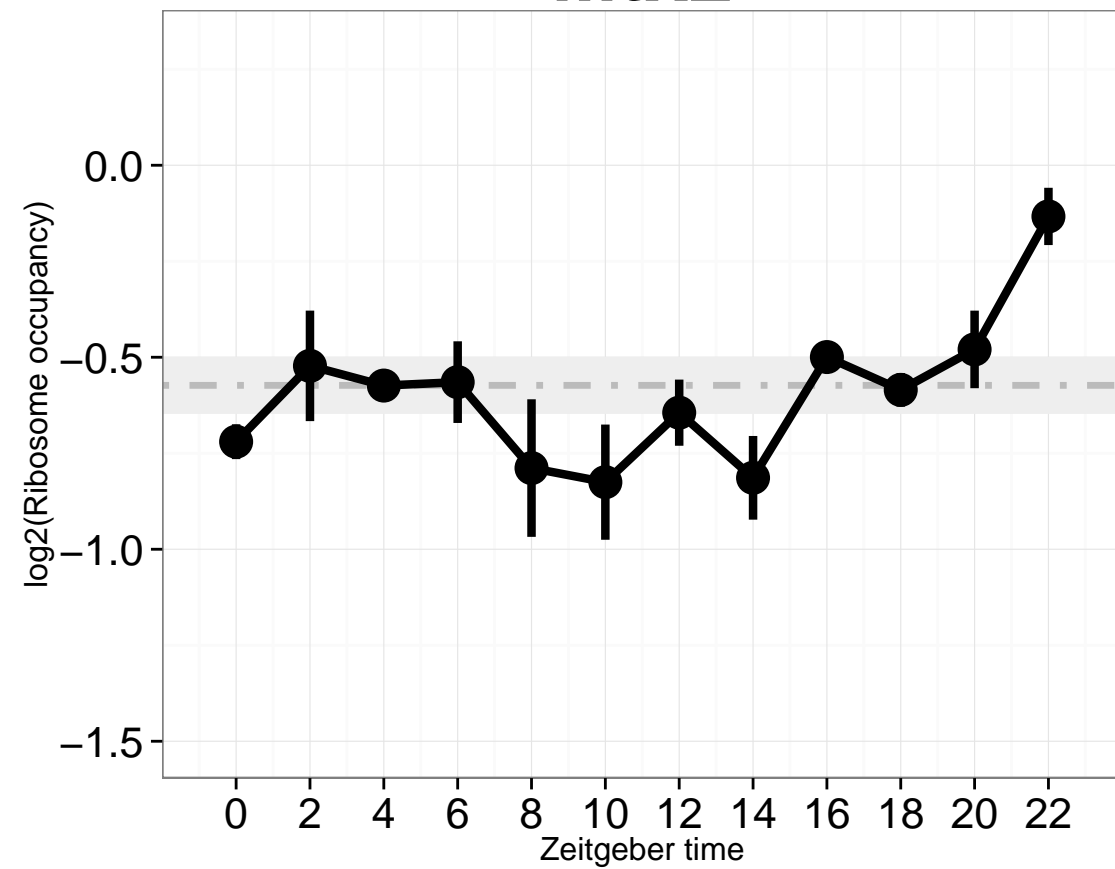

Supplement: SuppDataset_1.zip [file Mtx2_set_A.pdf › Supplemental Dataset 1/A-mRNA_nonrhyth_translation_nonrhyth/Mtx2_set_A.pdf]

# Mug1

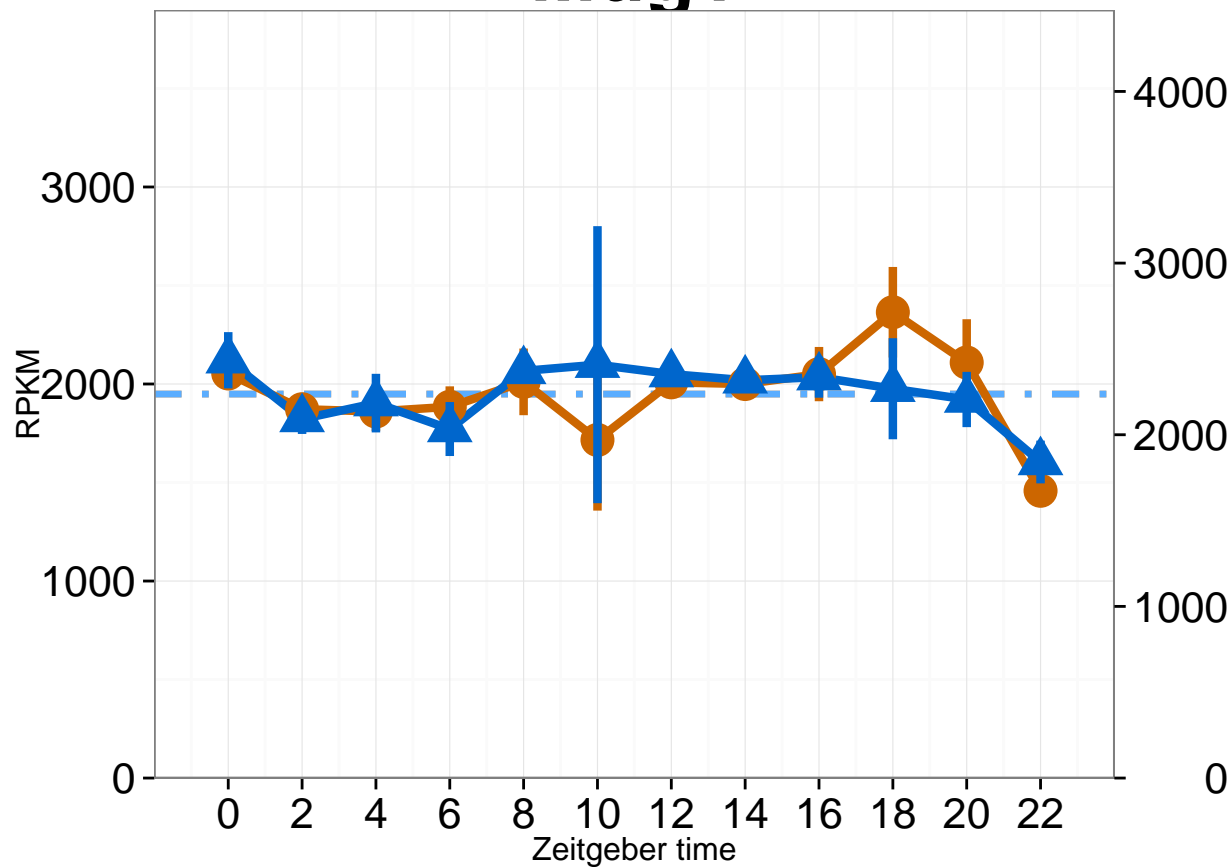

# Mug1

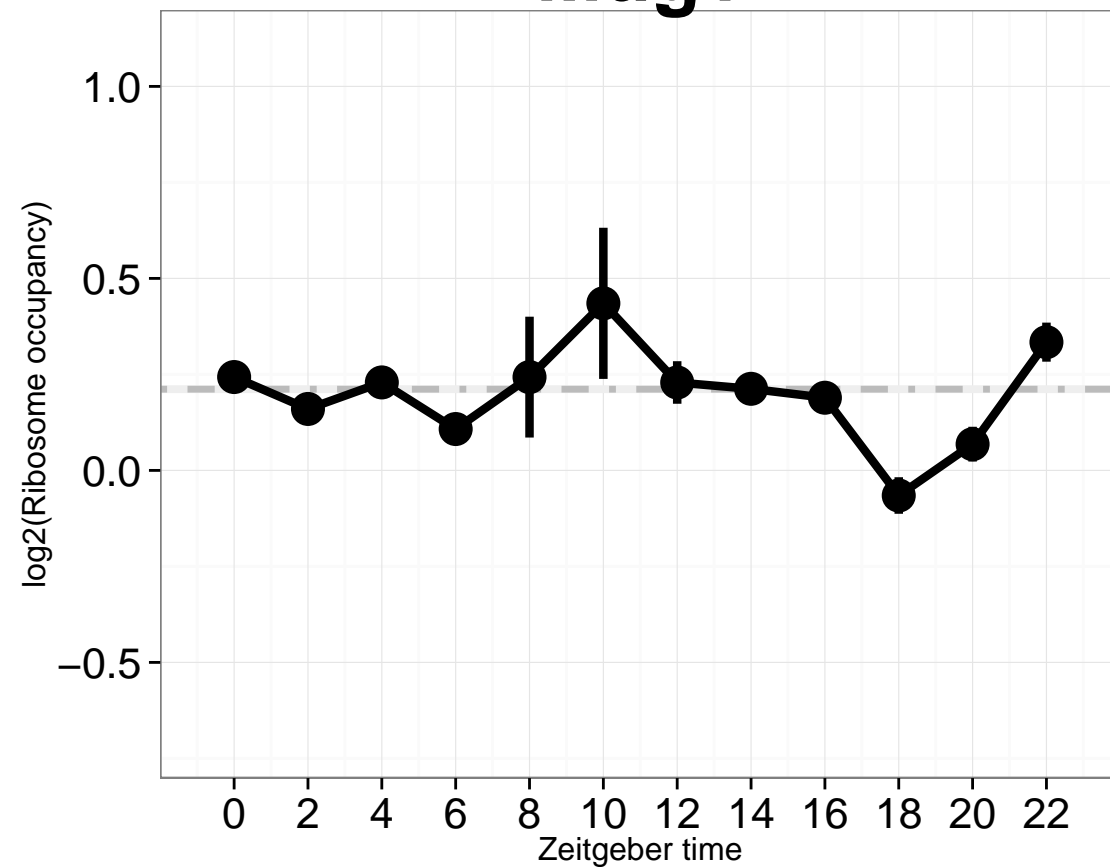

Supplement: SuppDataset_1.zip [file Mug1_set_A.pdf › Supplemental Dataset 1/A-mRNA_nonrhyth_translation_nonrhyth/Mug1_set_A.pdf]

# Mug2

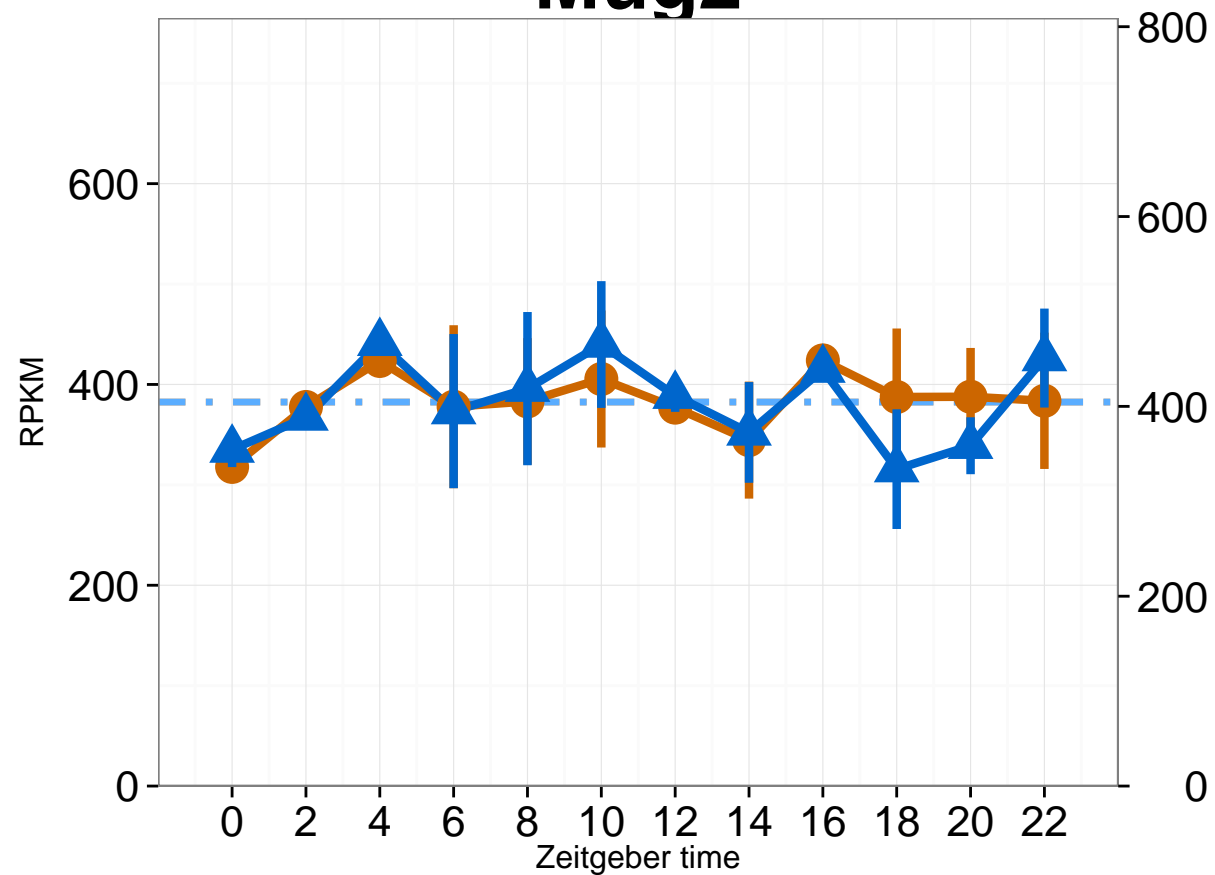

# Mug2

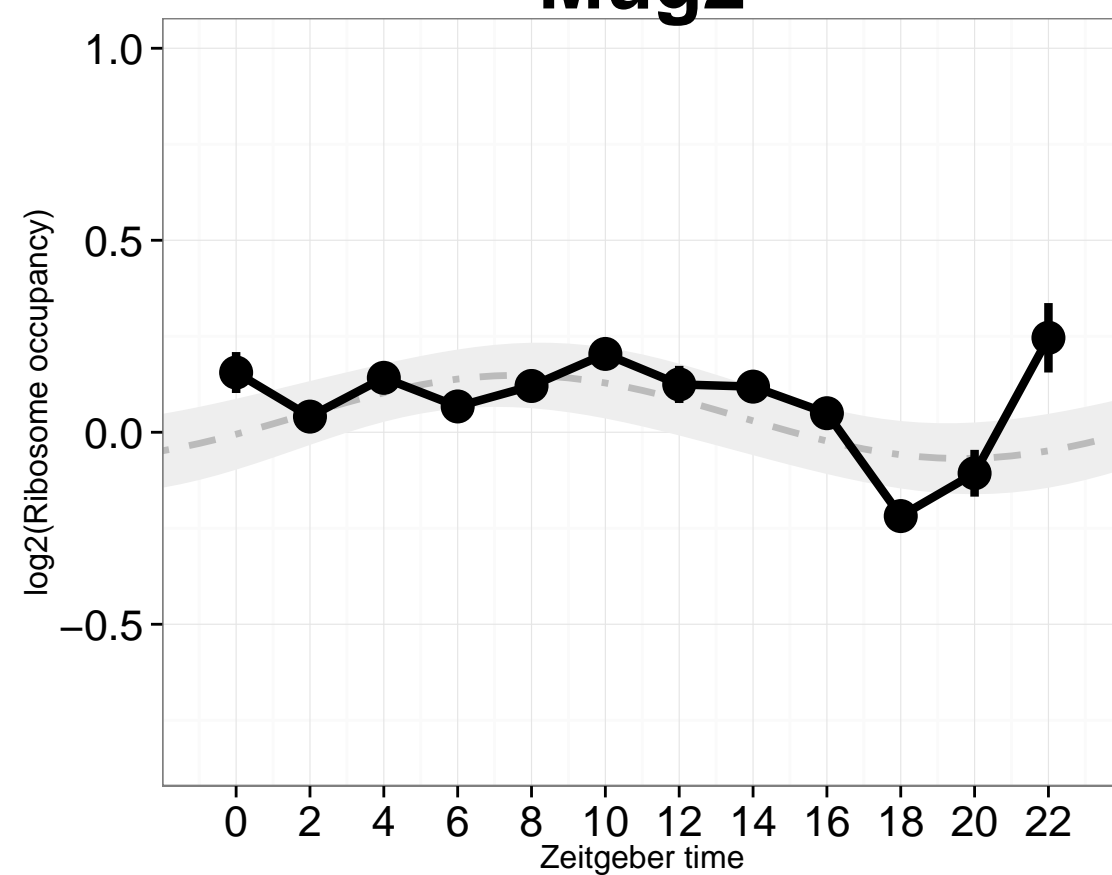

Supplement: SuppDataset_1.zip [file Mug2_set_A.pdf › Supplemental Dataset 1/A-mRNA_nonrhyth_translation_nonrhyth/Mug2_set_A.pdf]

# MuI1

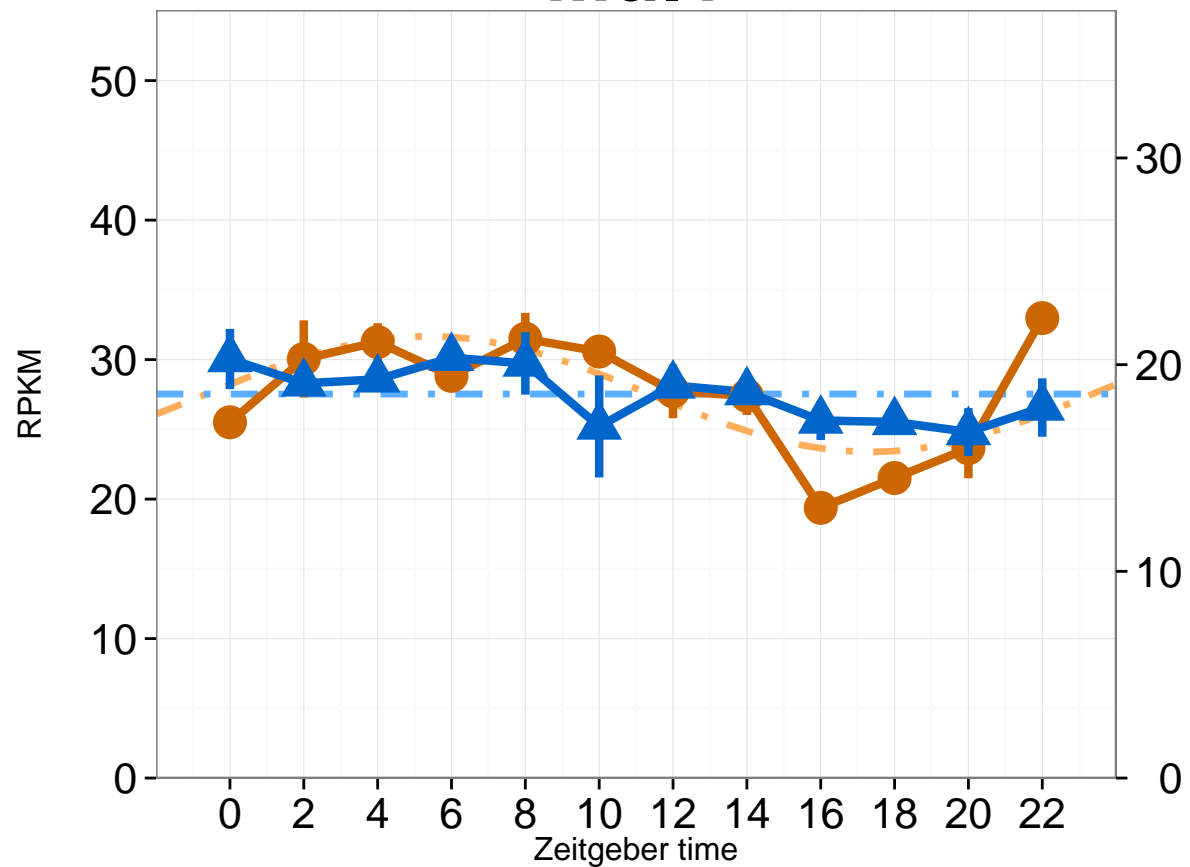

# MuI1

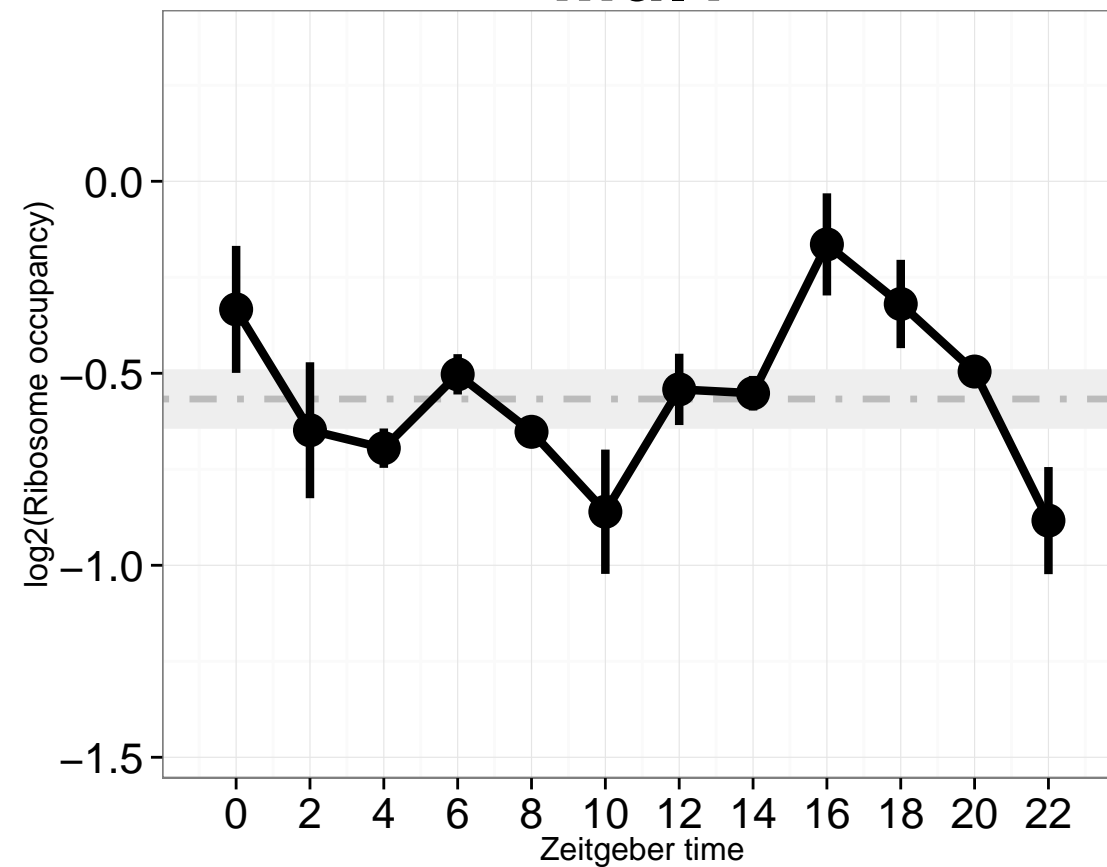

Supplement: SuppDataset_1.zip [file Mul1_set_A.pdf › Supplemental Dataset 1/A-mRNA_nonrhyth_translation_nonrhyth/Mul1_set_A.pdf]

# Mum1

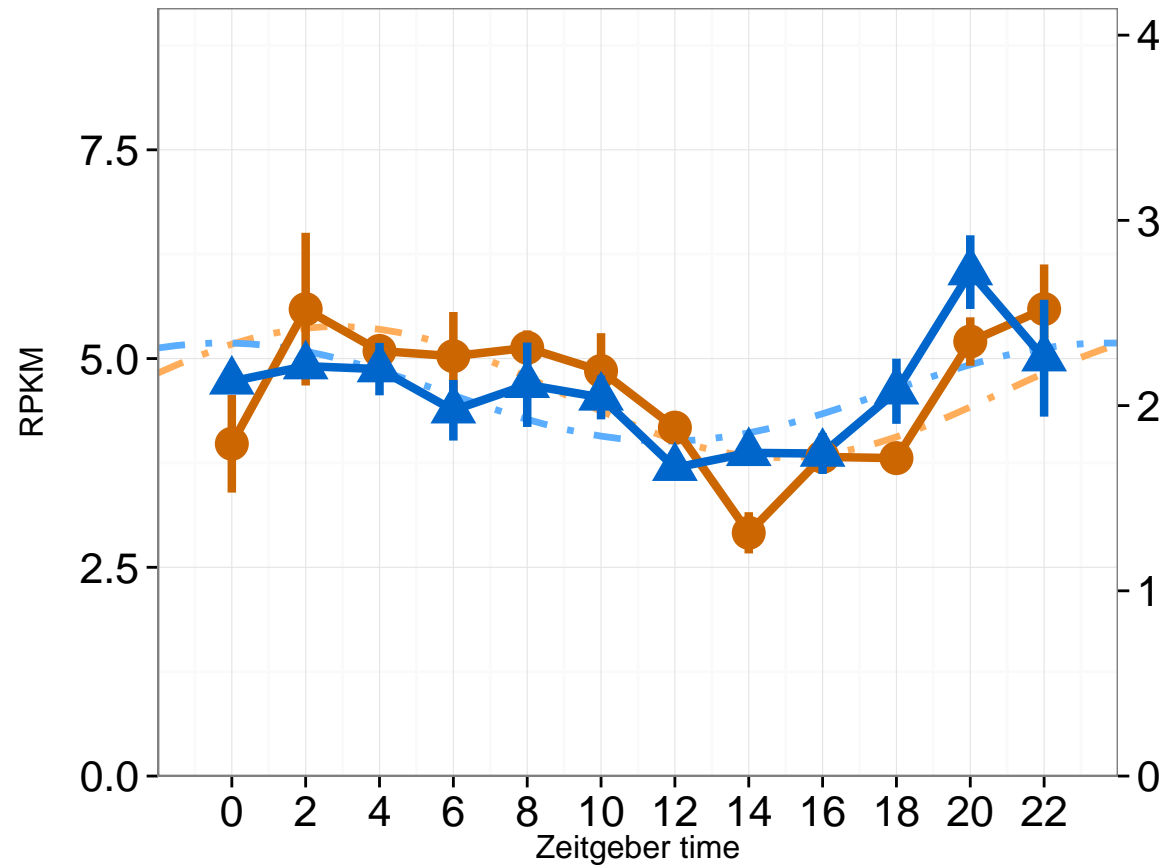

# Mum1

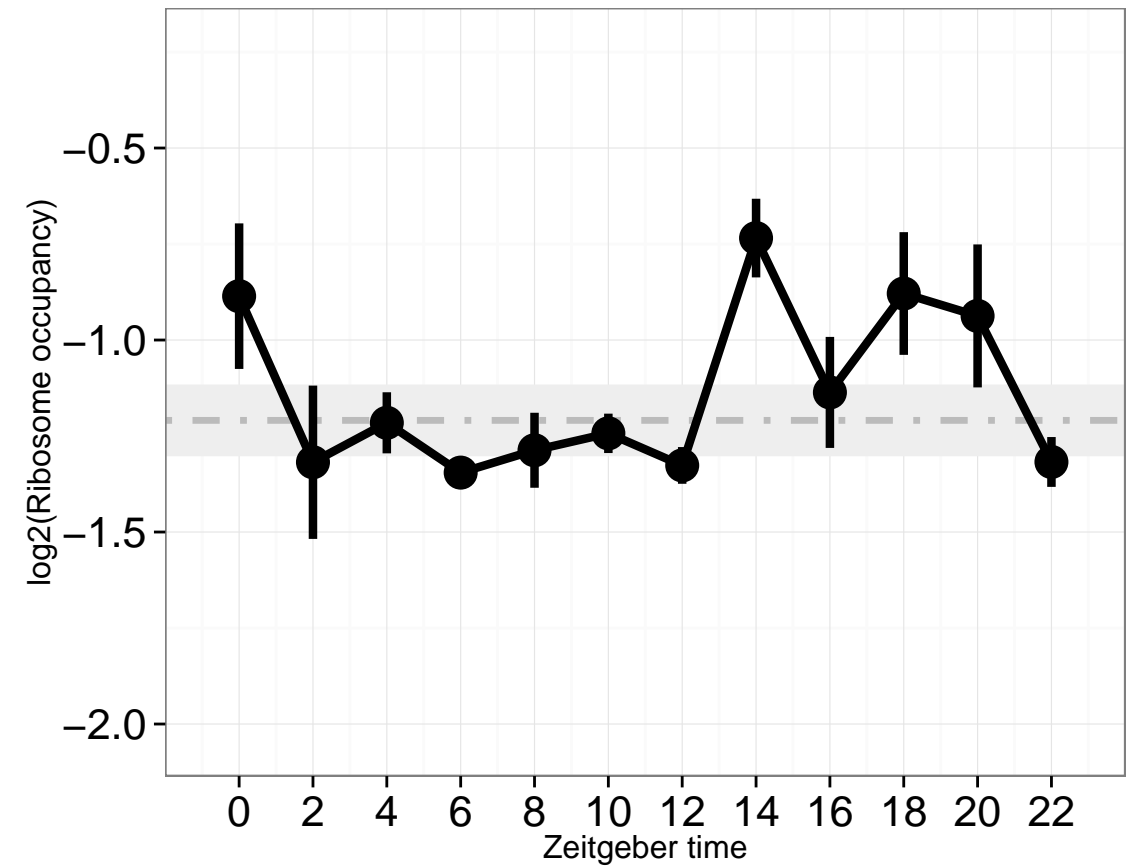

Supplement: SuppDataset_1.zip [file Mum1_set_A.pdf › Supplemental Dataset 1/A-mRNA_nonrhyth_translation_nonrhyth/Mum1_set_A.pdf]

# Mup12

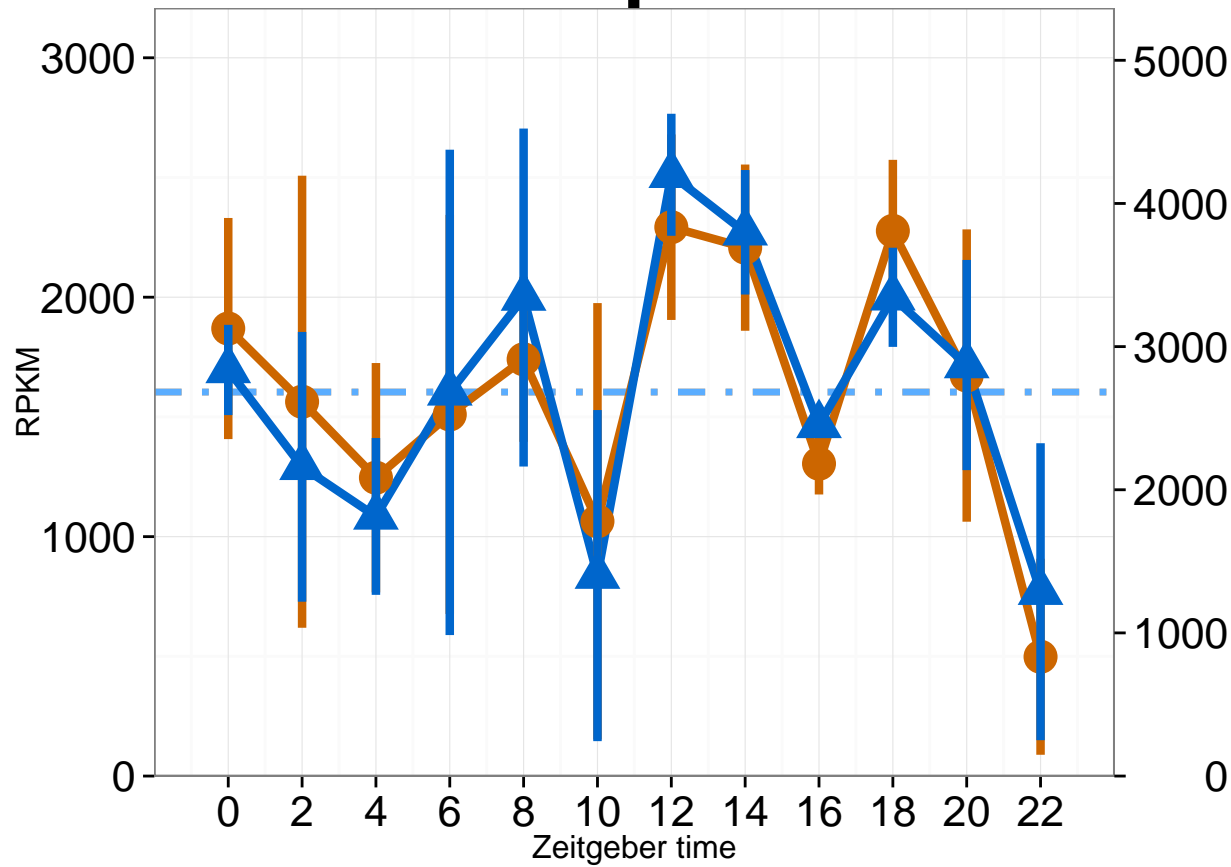

# Mup12

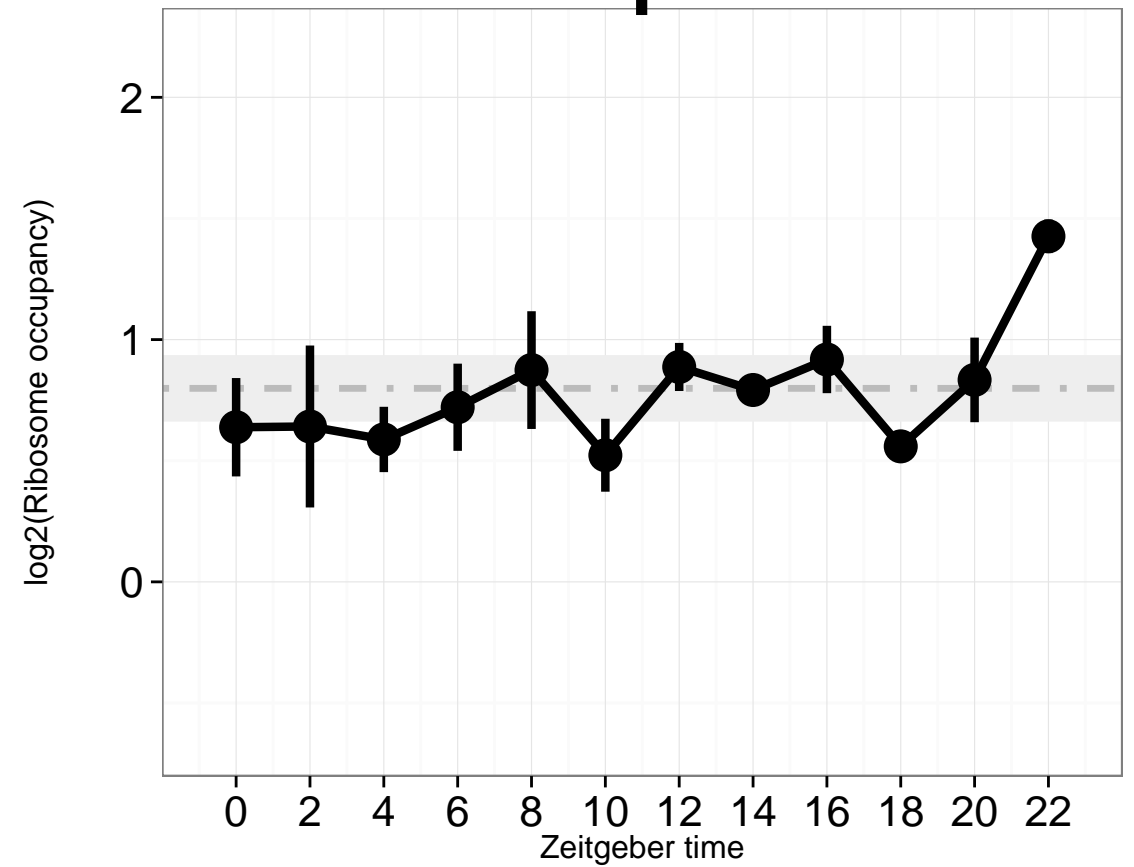

Supplement: SuppDataset_1.zip [file Mup12_set_A.pdf › Supplemental Dataset 1/A-mRNA_nonrhyth_translation_nonrhyth/Mup12_set_A.pdf]

# Mup14

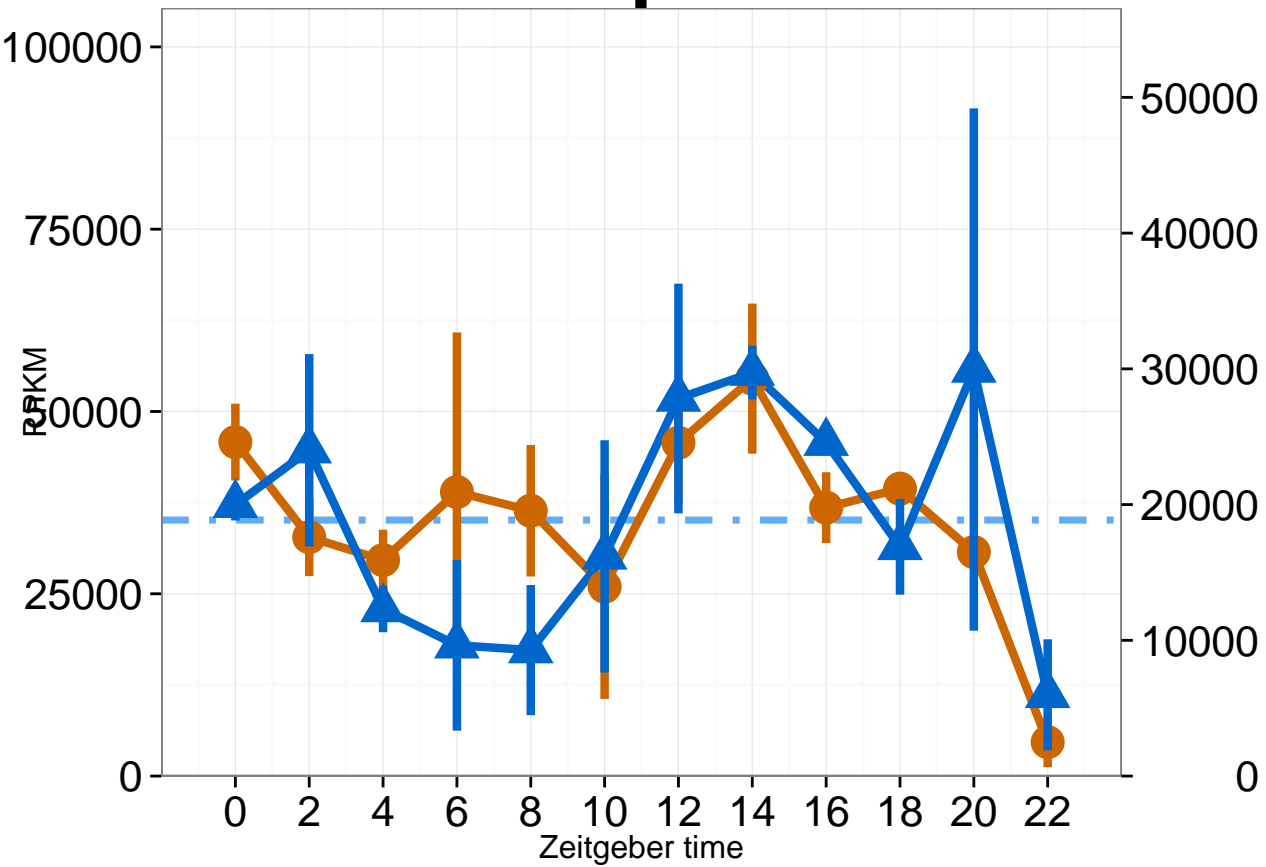

# Mup14

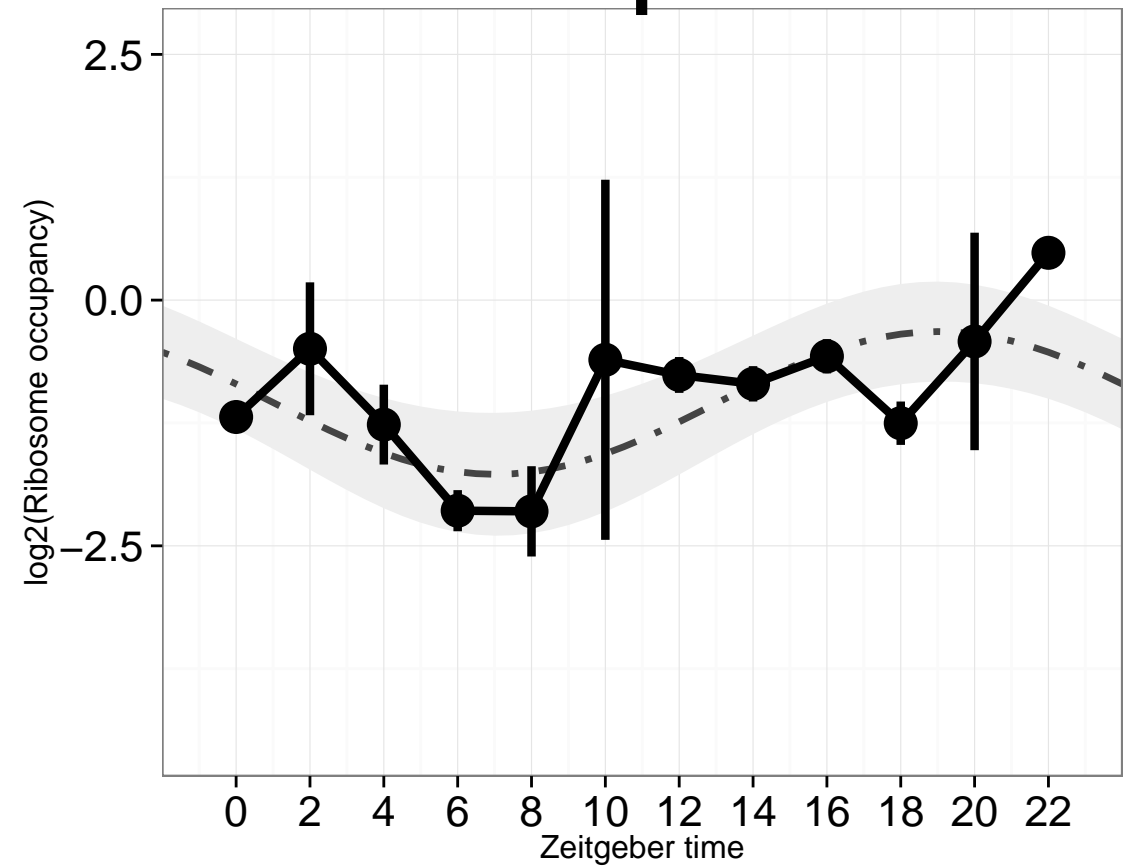

Supplement: SuppDataset_1.zip [file Mup14_set_A.pdf › Supplemental Dataset 1/A-mRNA_nonrhyth_translation_nonrhyth/Mup14_set_A.pdf]

# Mup16

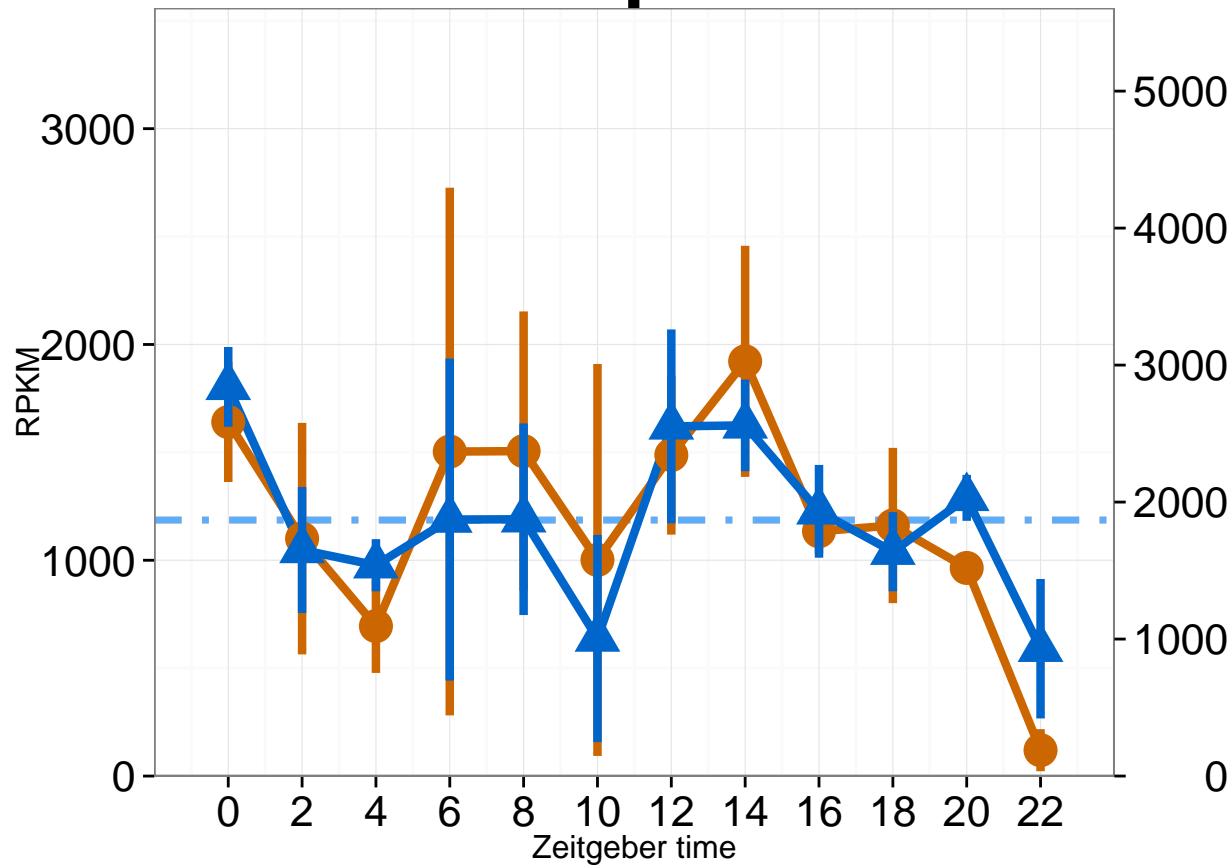

# Mup16

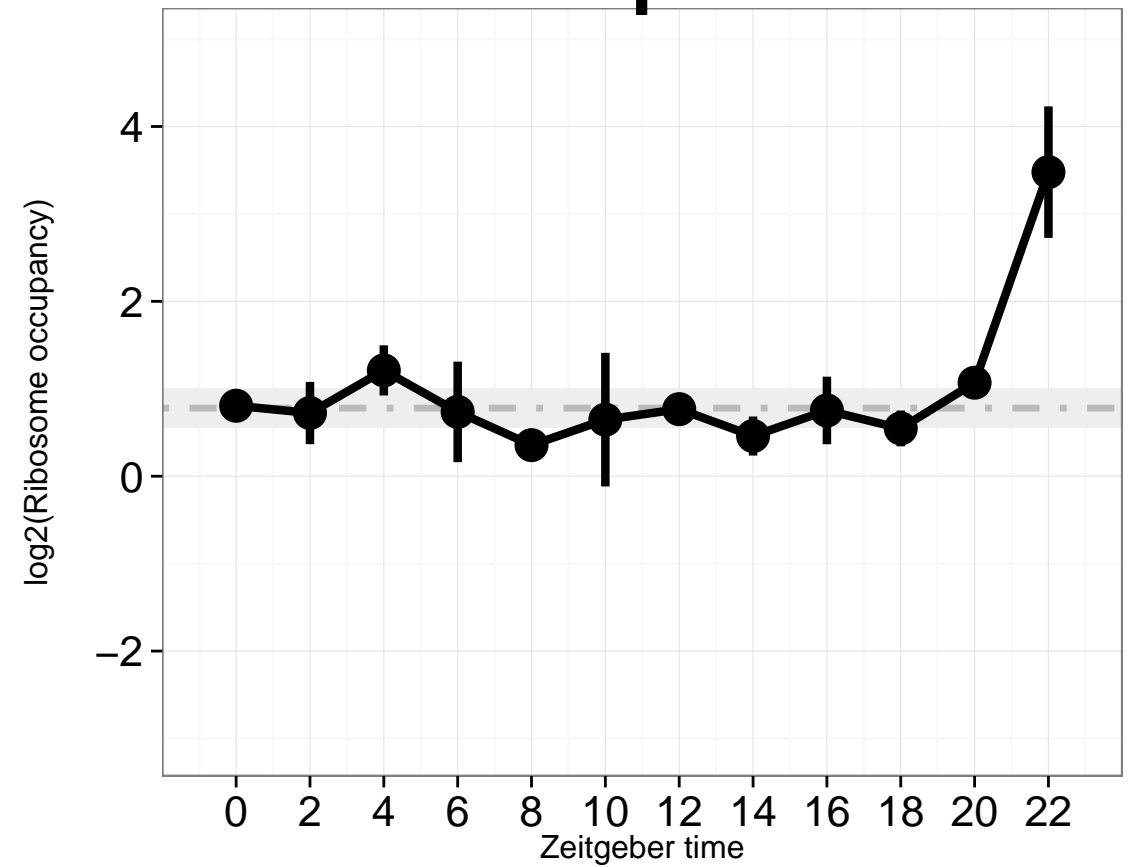

Supplement: SuppDataset_1.zip [file Mup16_set_A.pdf › Supplemental Dataset 1/A-mRNA_nonrhyth_translation_nonrhyth/Mup16_set_A.pdf]

# Mup1

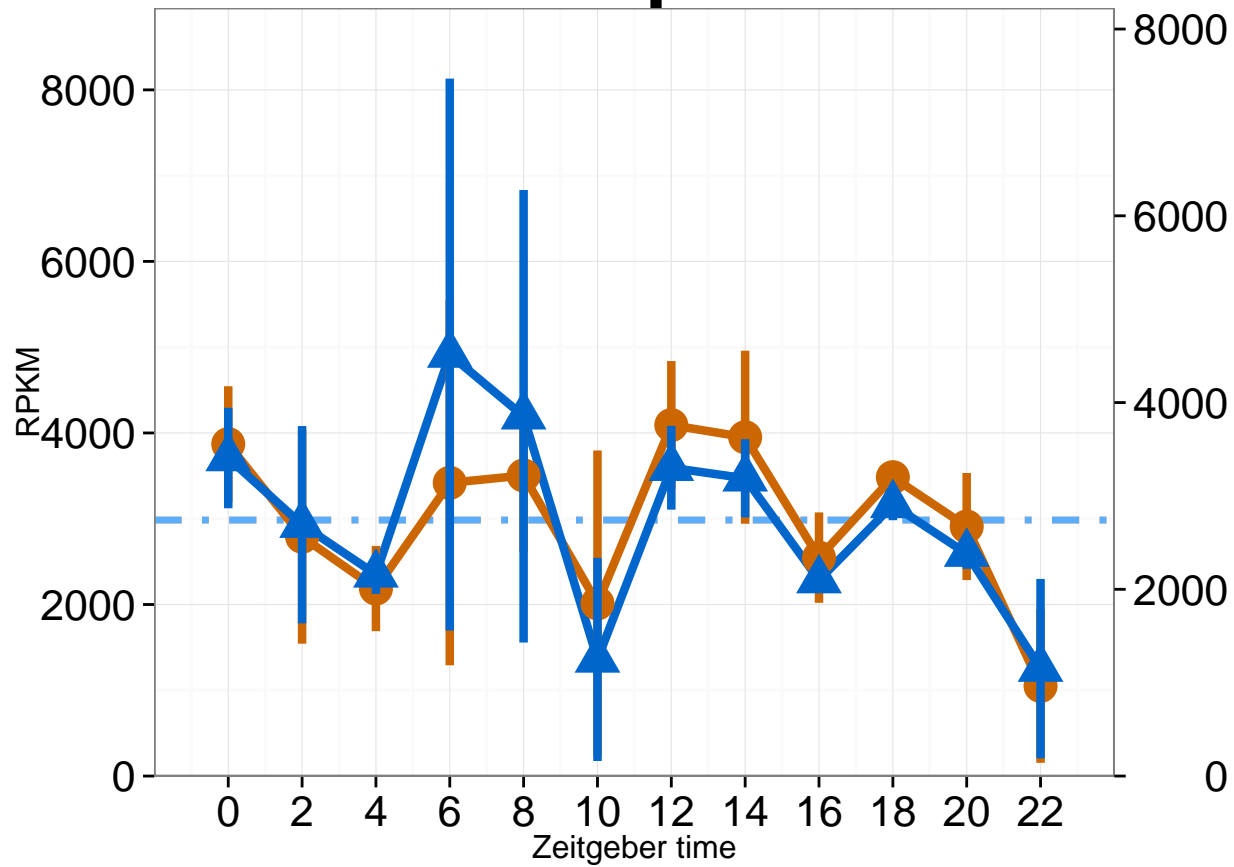

# Mup1

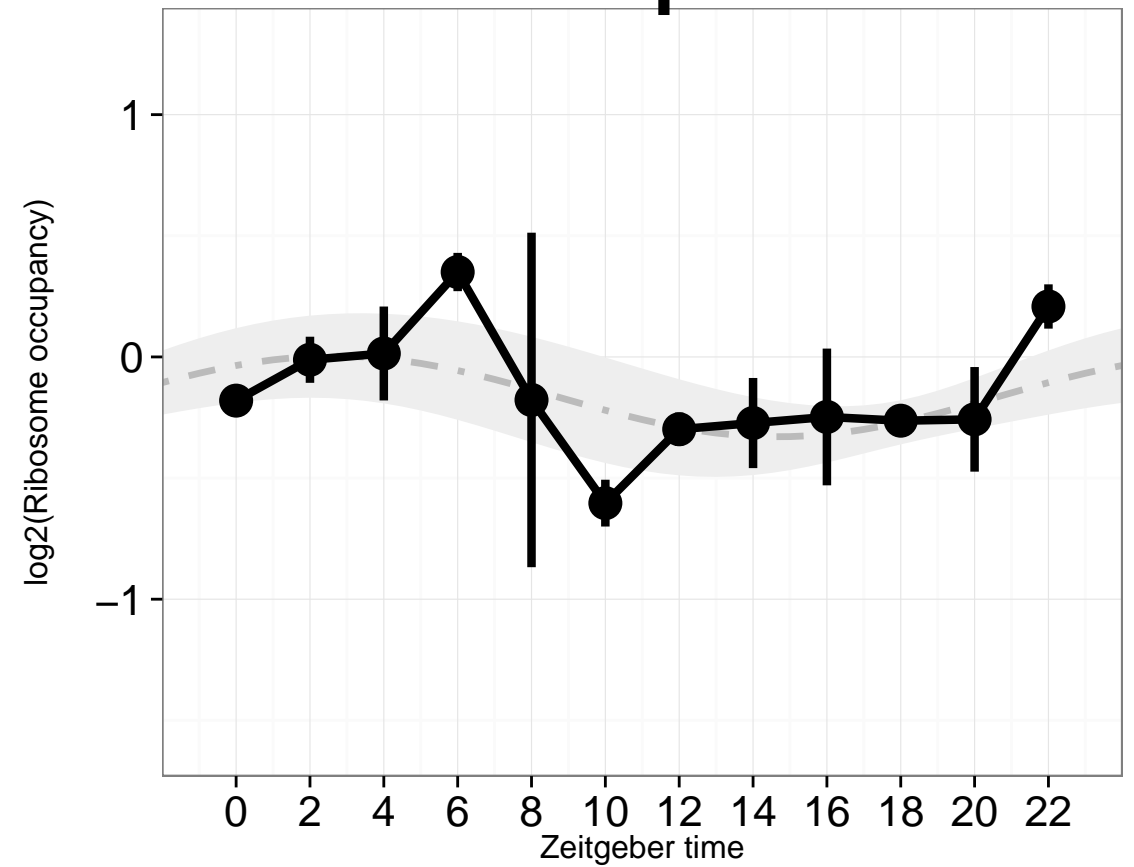

Supplement: SuppDataset_1.zip [file Mup1_set_A.pdf › Supplemental Dataset 1/A-mRNA_nonrhyth_translation_nonrhyth/Mup1_set_A.pdf]

# Mup20

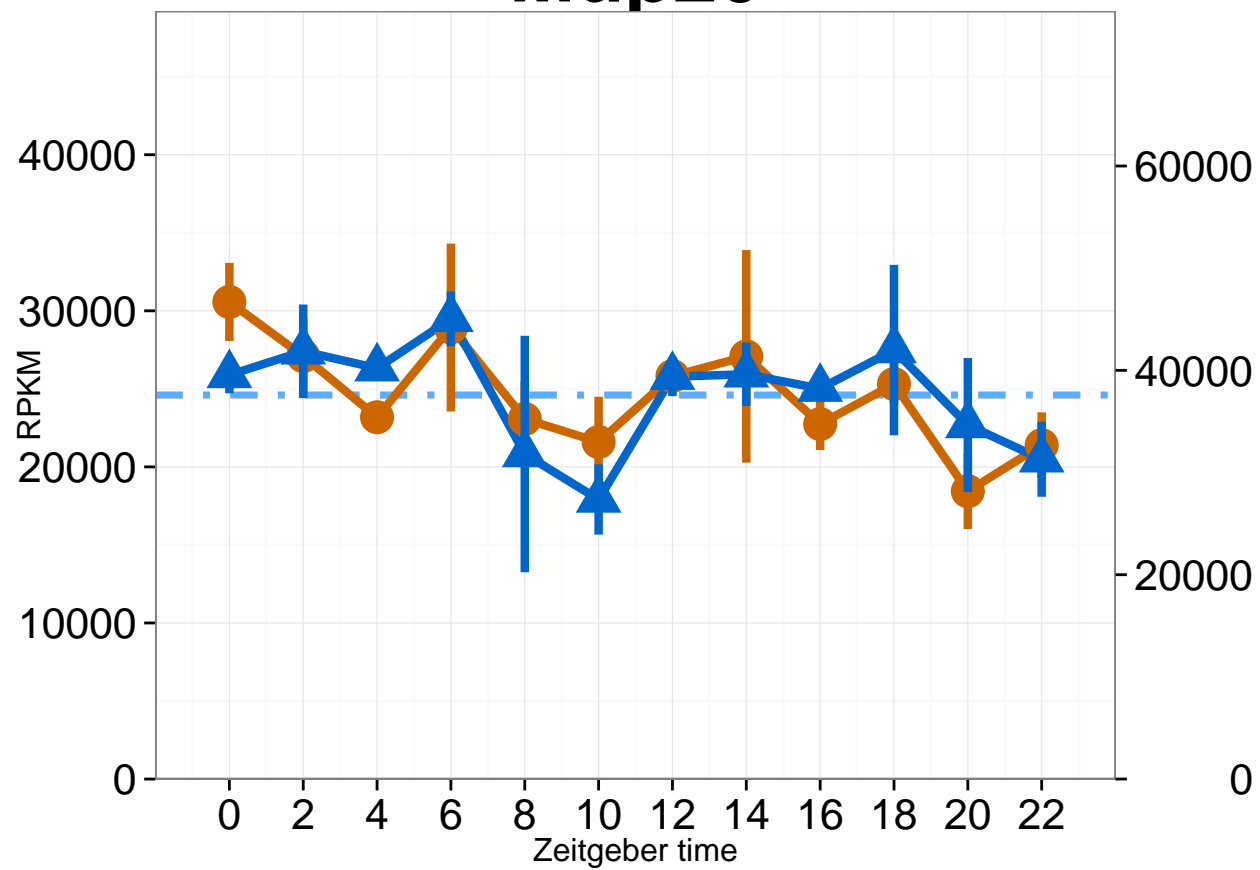

# Mup20

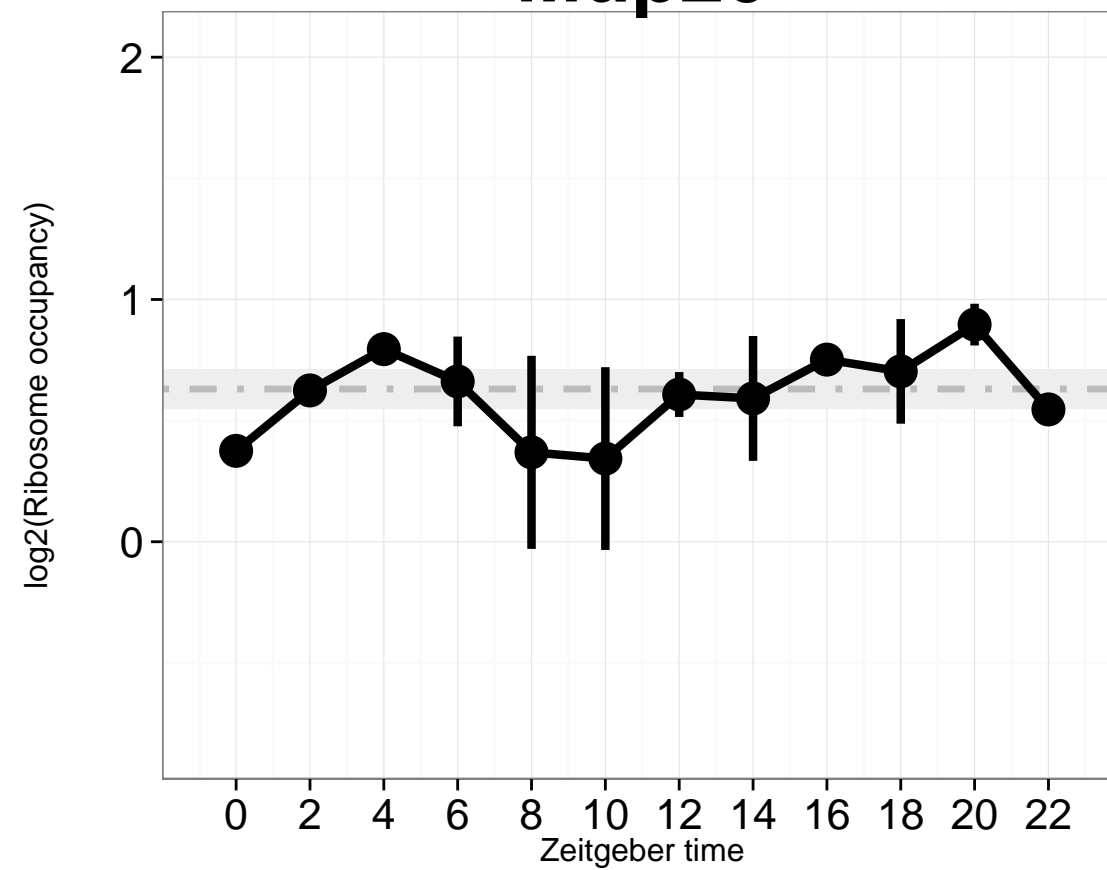

Supplement: SuppDataset_1.zip [file Mup20_set_A.pdf › Supplemental Dataset 1/A-mRNA_nonrhyth_translation_nonrhyth/Mup20_set_A.pdf]

# Mup21

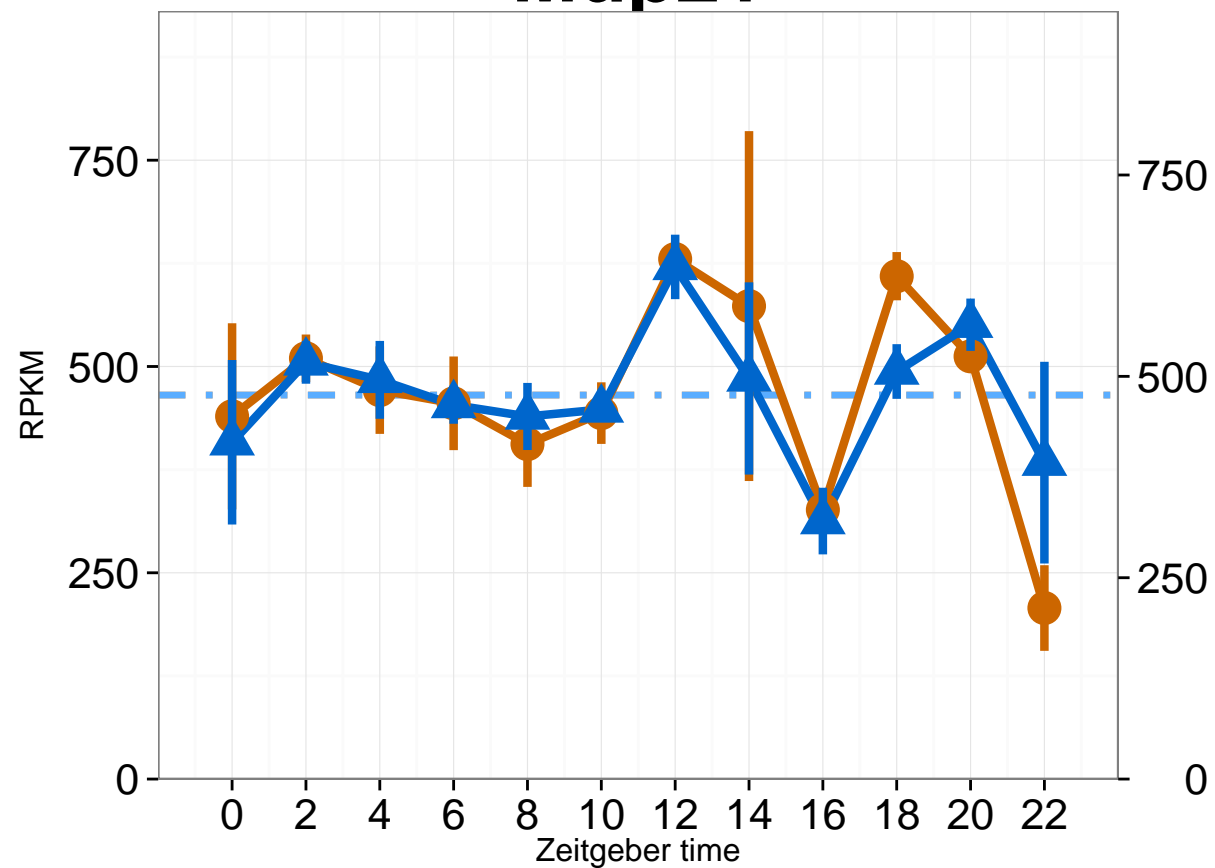

# Mup21

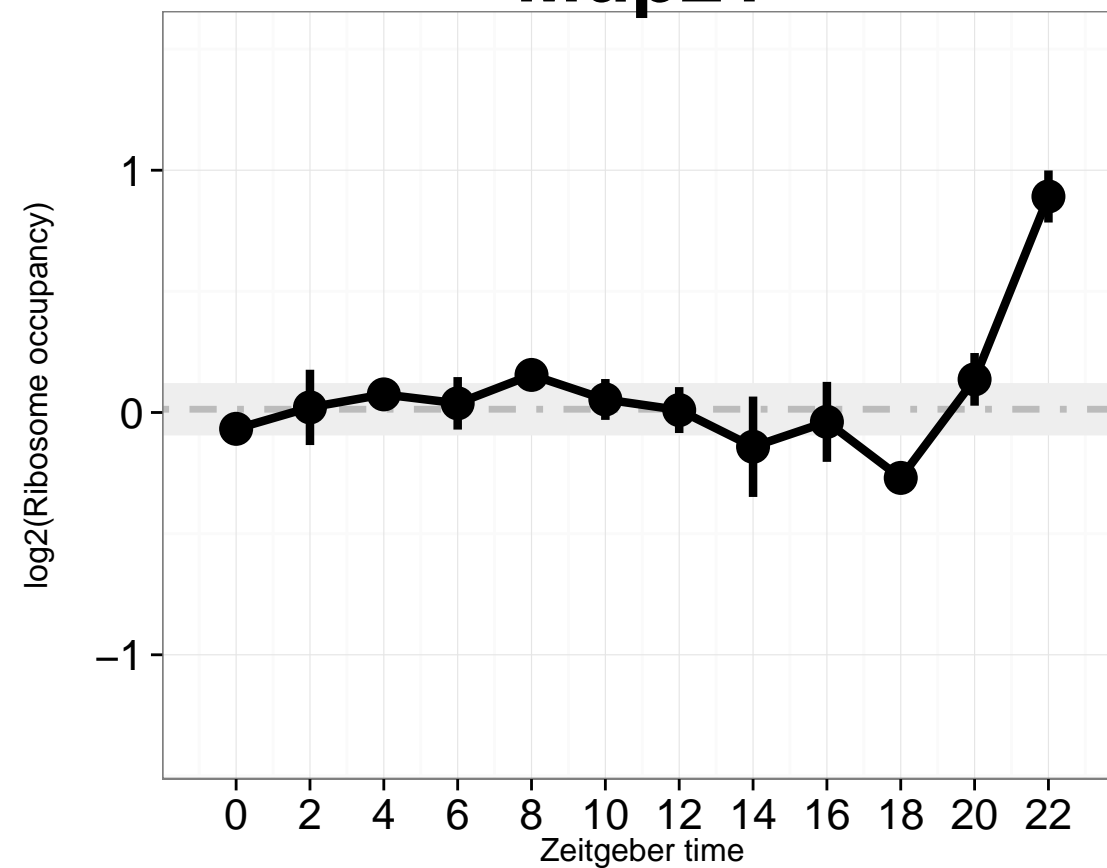

Supplement: SuppDataset_1.zip [file Mup21_set_A.pdf › Supplemental Dataset 1/A-mRNA_nonrhyth_translation_nonrhyth/Mup21_set_A.pdf]

# Mup3

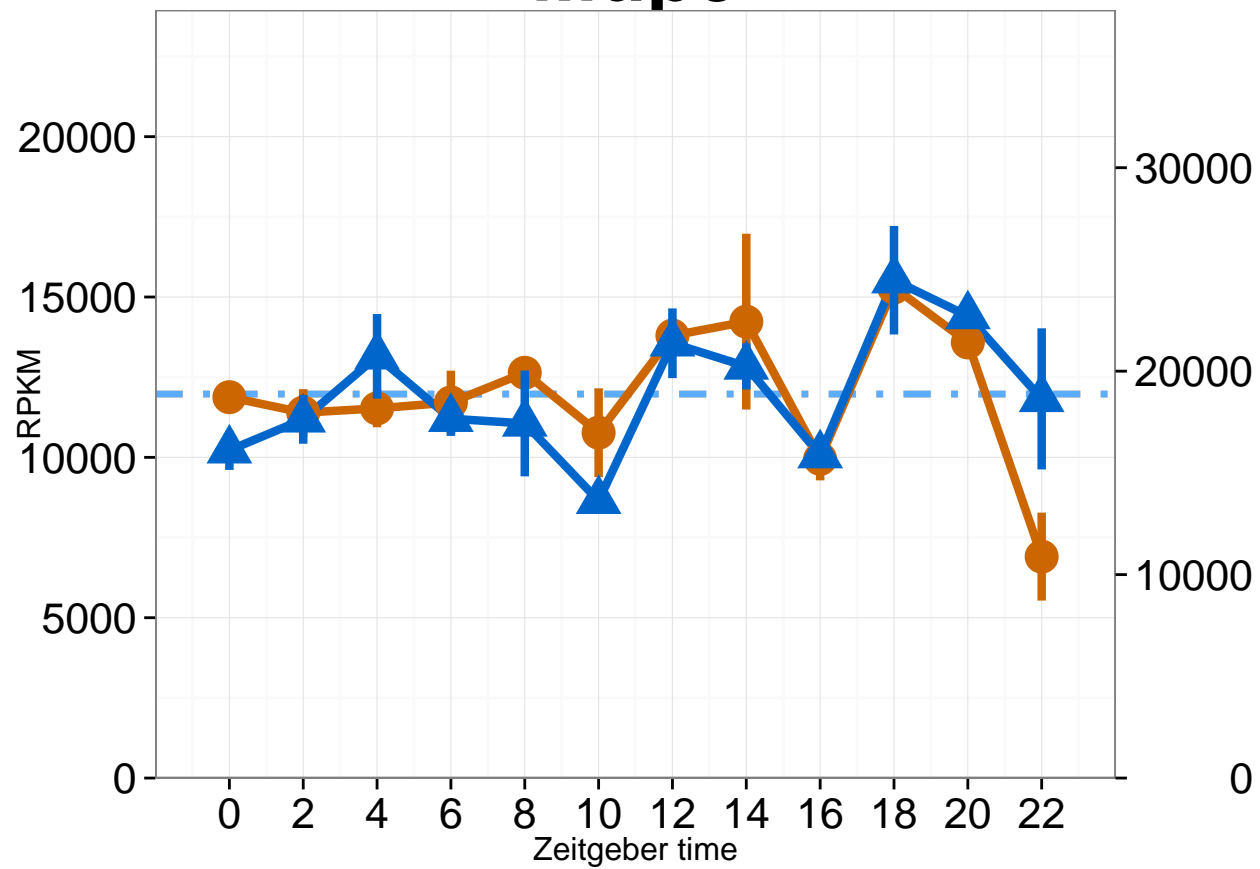

# Mup3

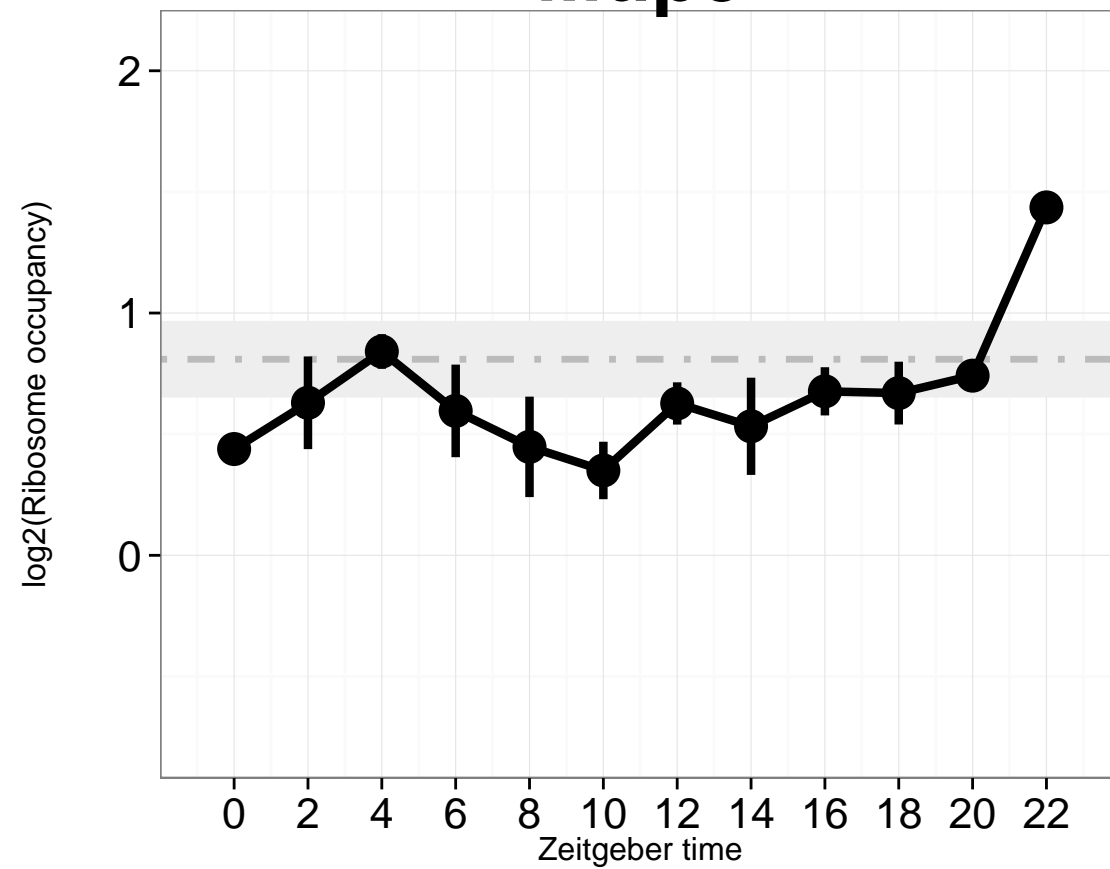

Supplement: SuppDataset_1.zip [file Mup3_set_A.pdf › Supplemental Dataset 1/A-mRNA_nonrhyth_translation_nonrhyth/Mup3_set_A.pdf]

# Mup7

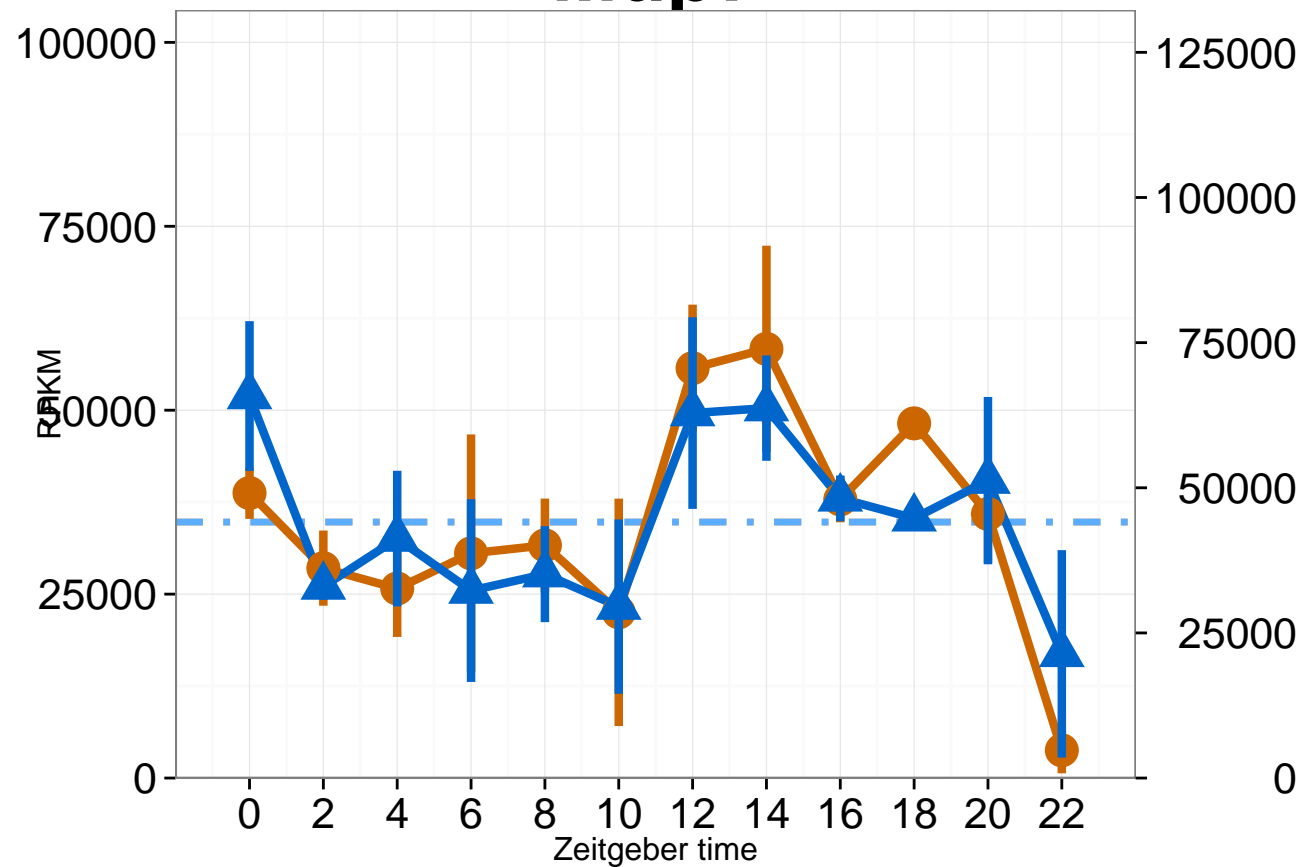

# Mup7

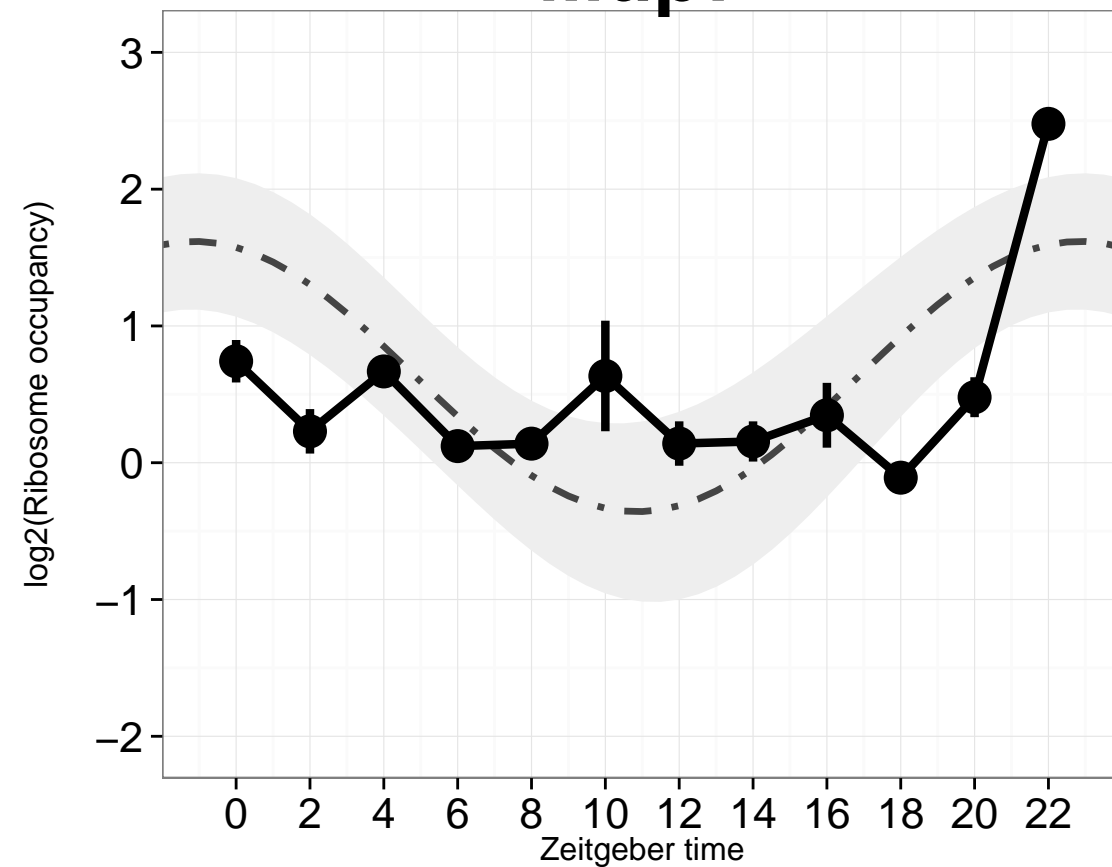

Supplement: SuppDataset_1.zip [file Mup7_set_A.pdf › Supplemental Dataset 1/A-mRNA_nonrhyth_translation_nonrhyth/Mup7_set_A.pdf]

## Mus81

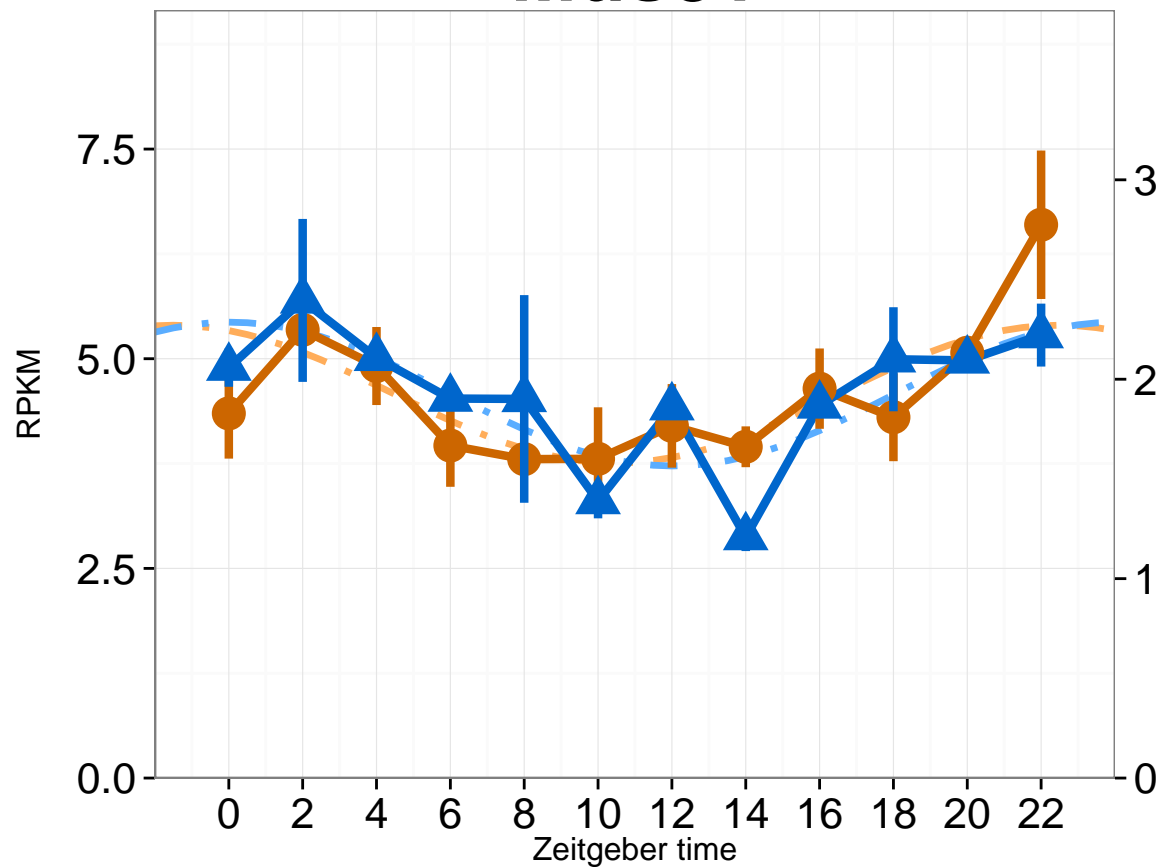

## Mus81

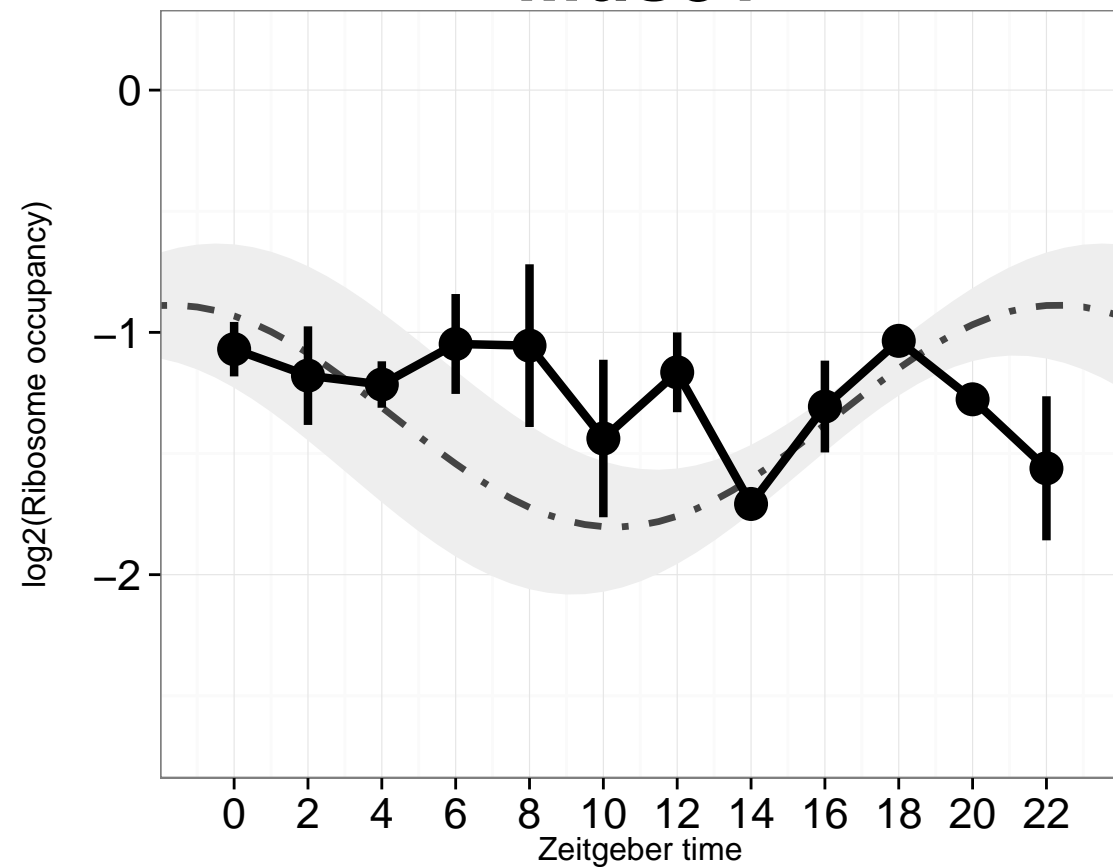

Supplement: SuppDataset_1.zip [file Mus81_set_A.pdf › Supplemental Dataset 1/A-mRNA_nonrhyth_translation_nonrhyth/Mus81_set_A.pdf]

## Mut

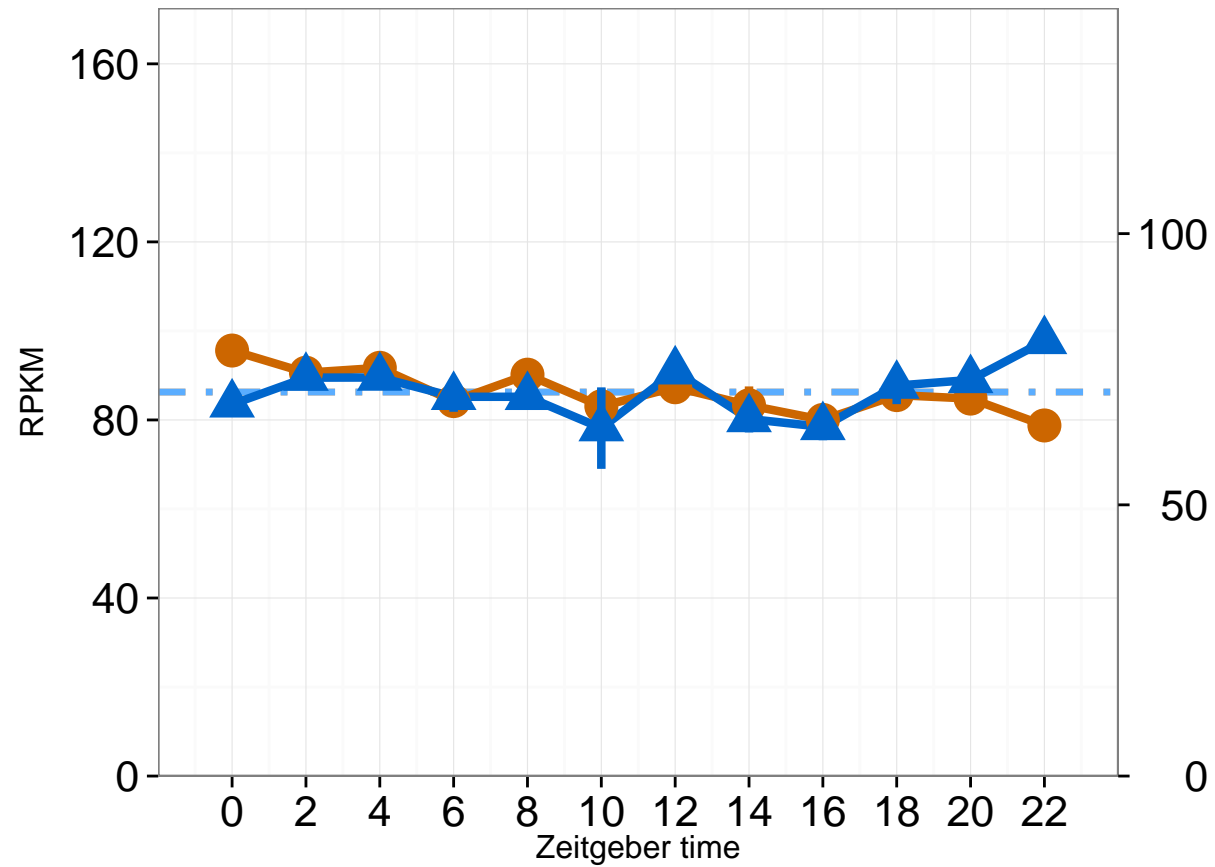

## Mut

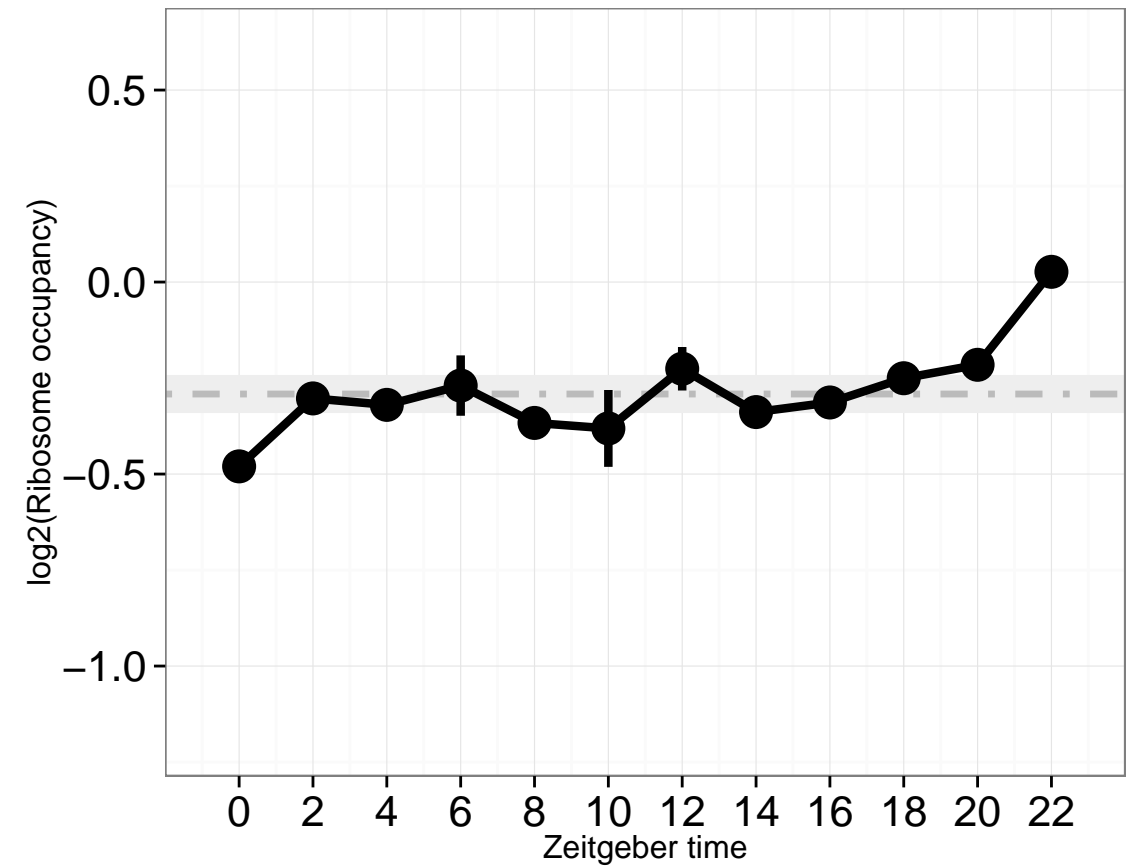

Supplement: SuppDataset_1.zip [file Mut_set_A.pdf › Supplemental Dataset 1/A-mRNA_nonrhyth_translation_nonrhyth/Mut_set_A.pdf]

# Mvb12a

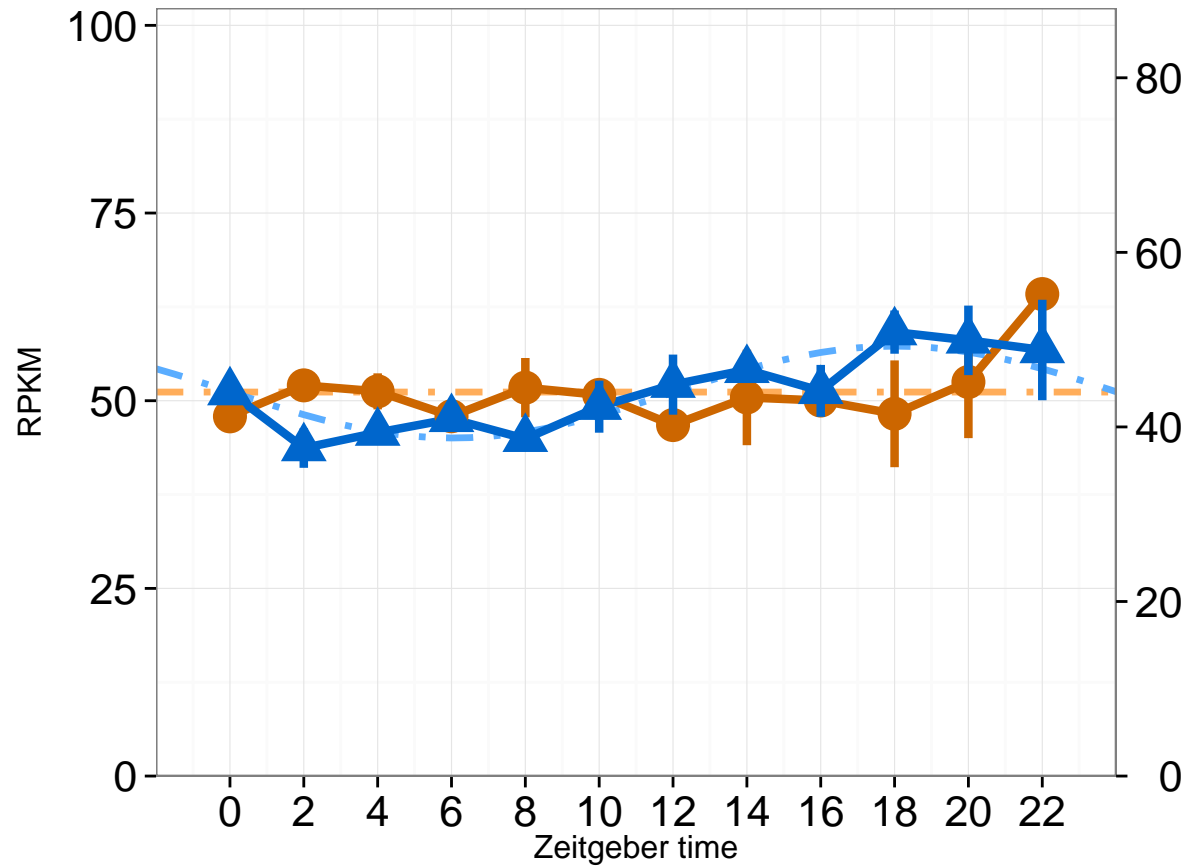

# Mvb12a

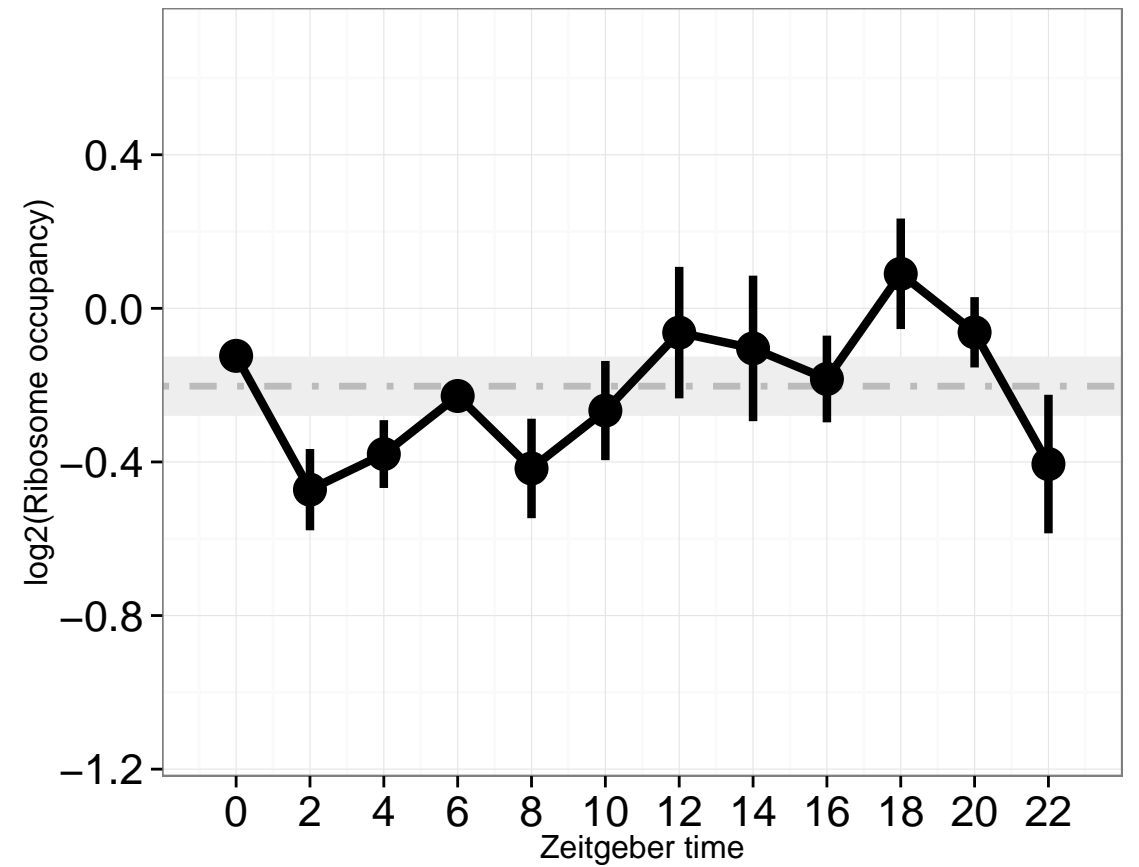

Supplement: SuppDataset_1.zip [file Mvb12a_set_A.pdf › Supplemental Dataset 1/A-mRNA_nonrhyth_translation_nonrhyth/Mvb12a_set_A.pdf]

# Mvb12b

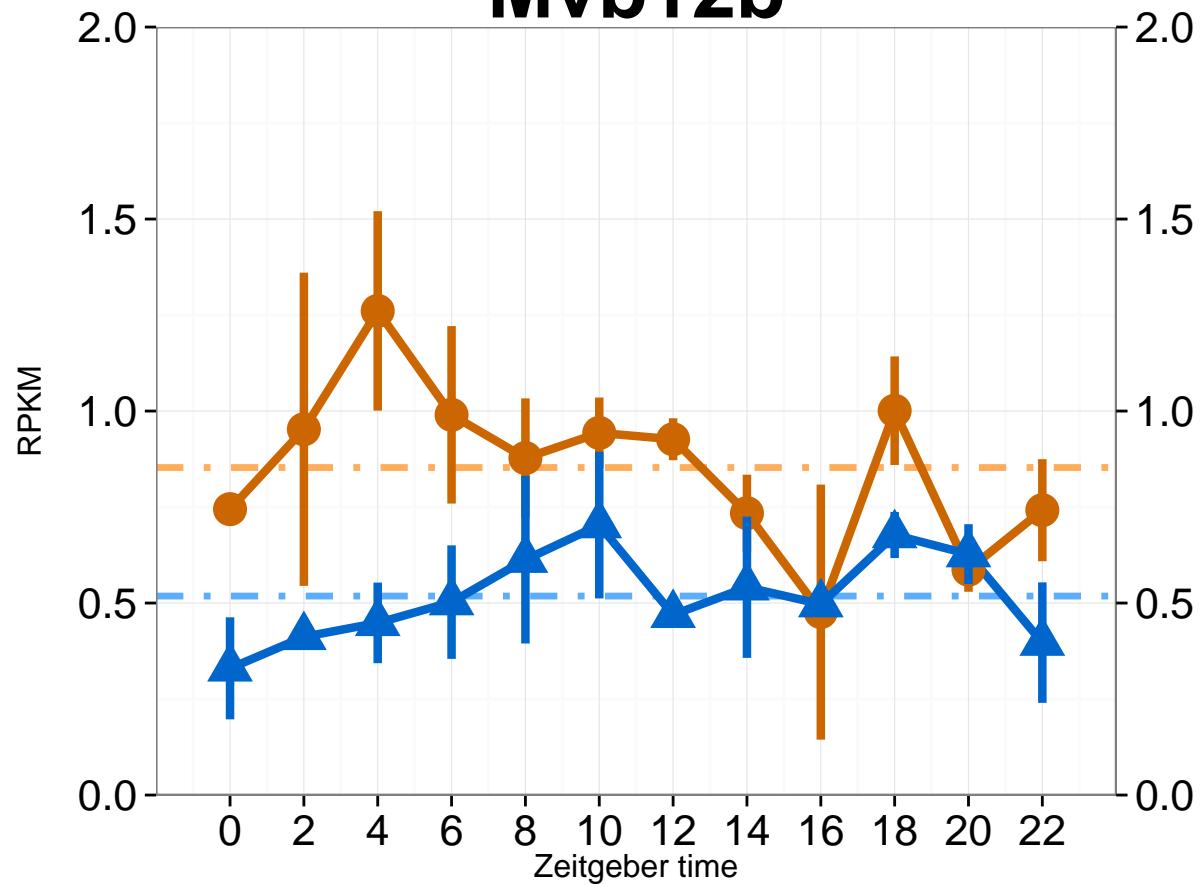

# Mvb12b

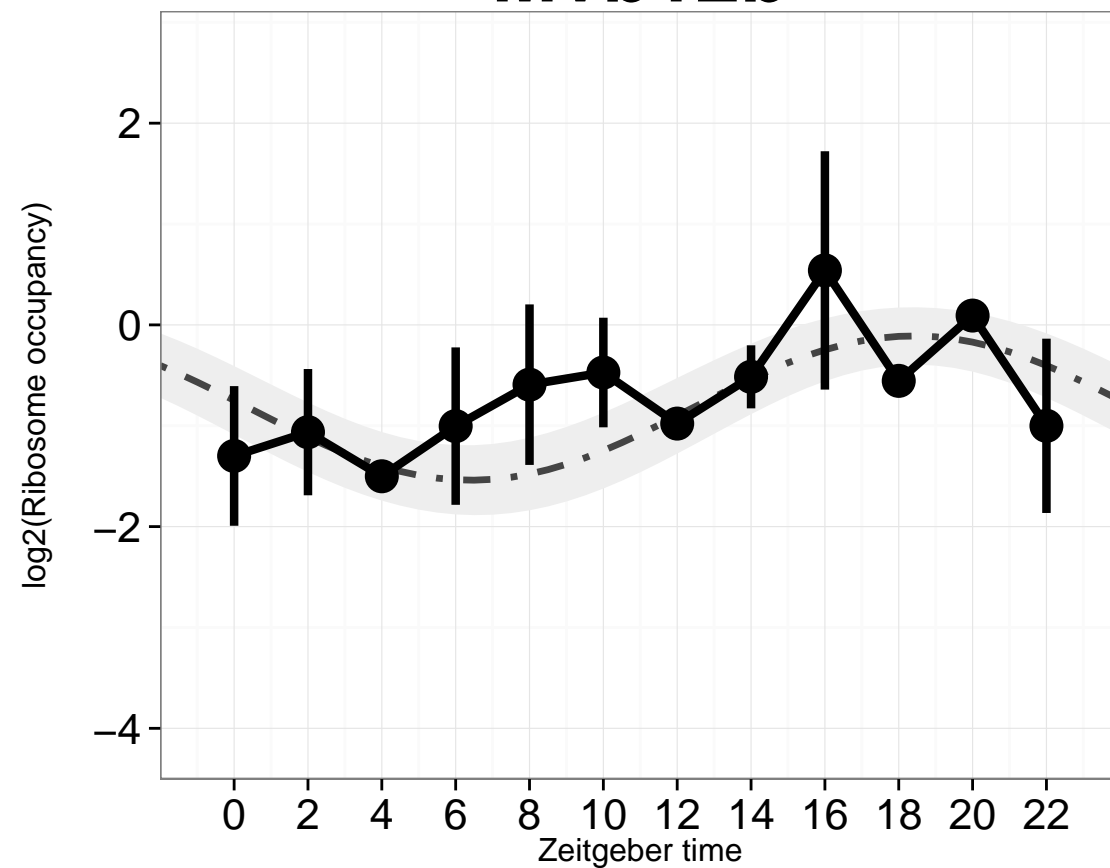

Supplement: SuppDataset_1.zip [file Mvb12b_set_A.pdf › Supplemental Dataset 1/A-mRNA_nonrhyth_translation_nonrhyth/Mvb12b_set_A.pdf]

## Mvp

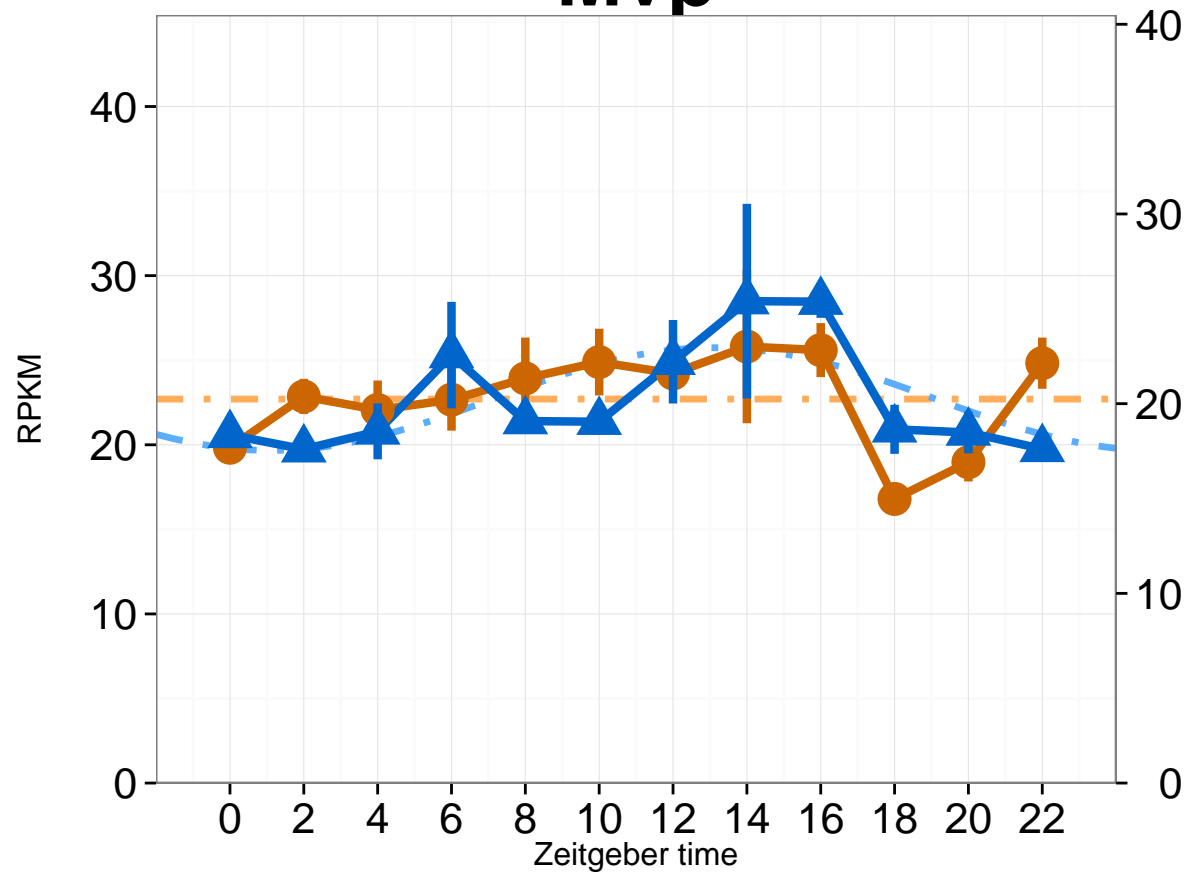

## Mvp

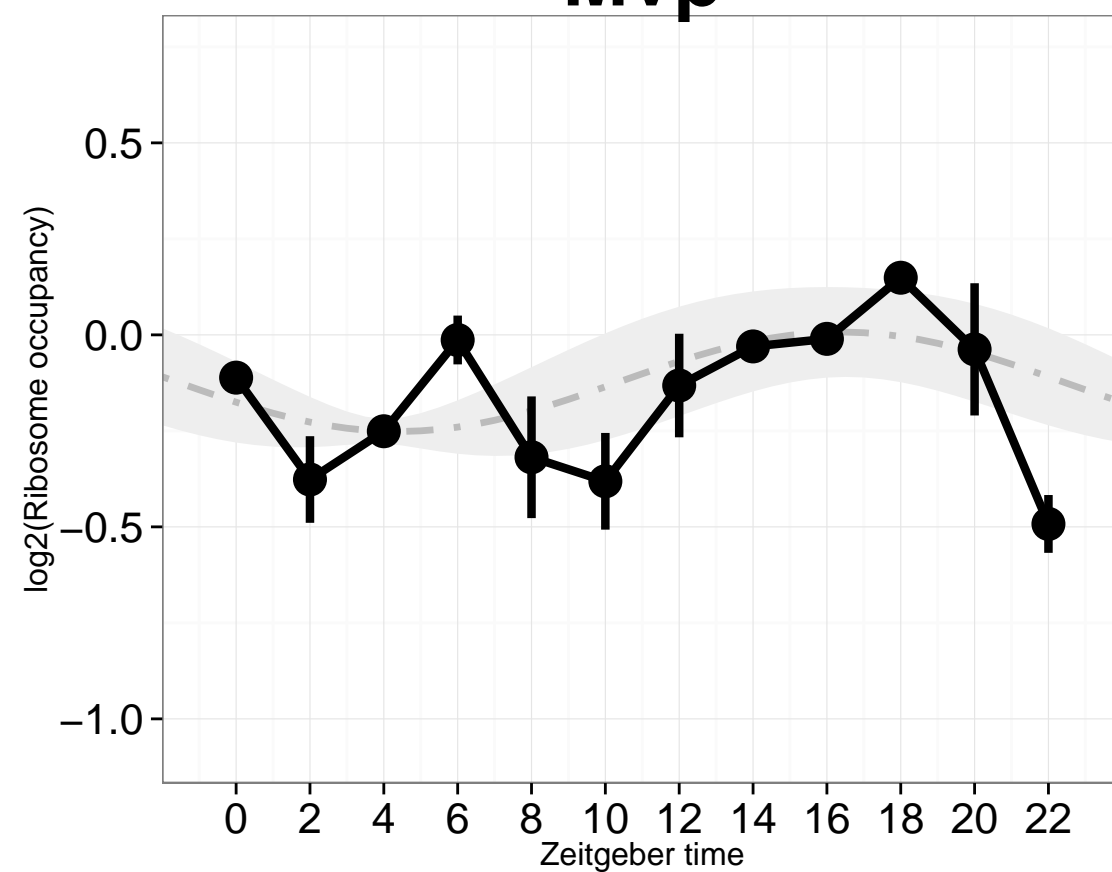

Supplement: SuppDataset_1.zip [file Mvp_set_A.pdf › Supplemental Dataset 1/A-mRNA_nonrhyth_translation_nonrhyth/Mvp_set_A.pdf]

## Mxd1

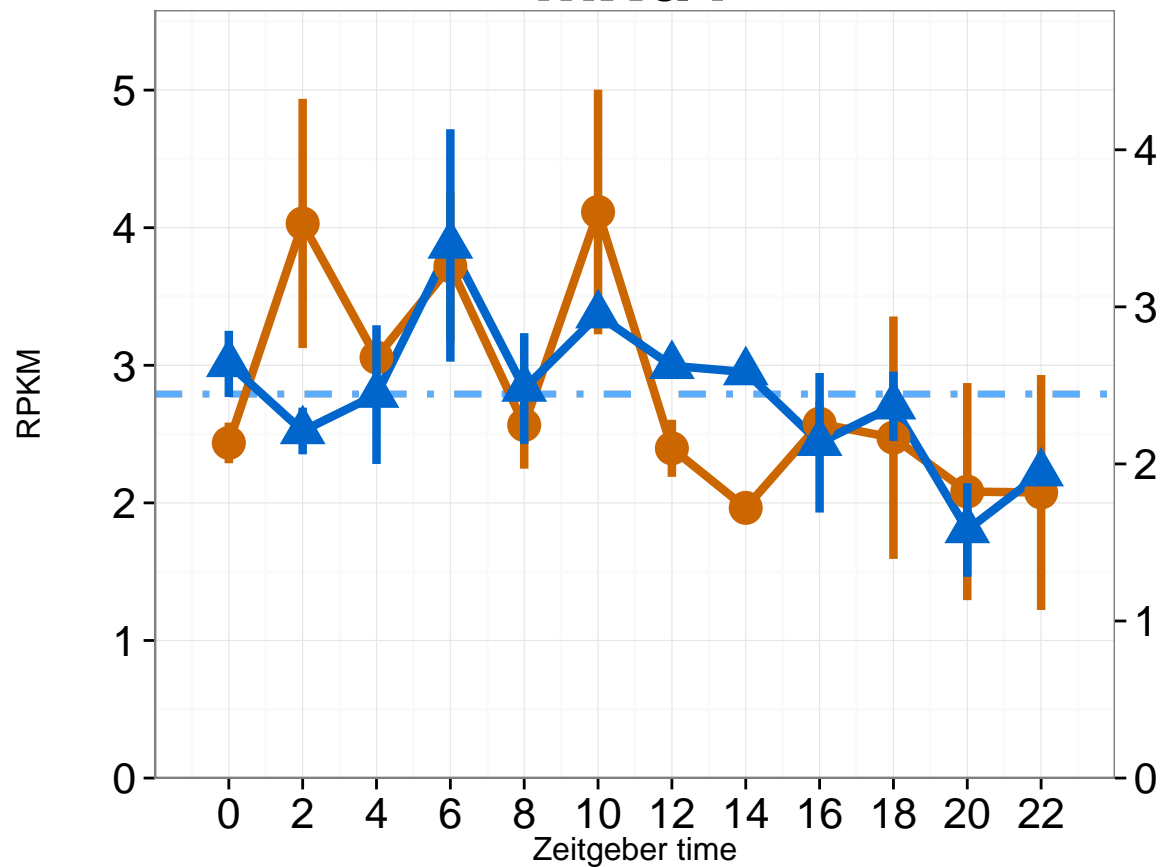

## Mxd1

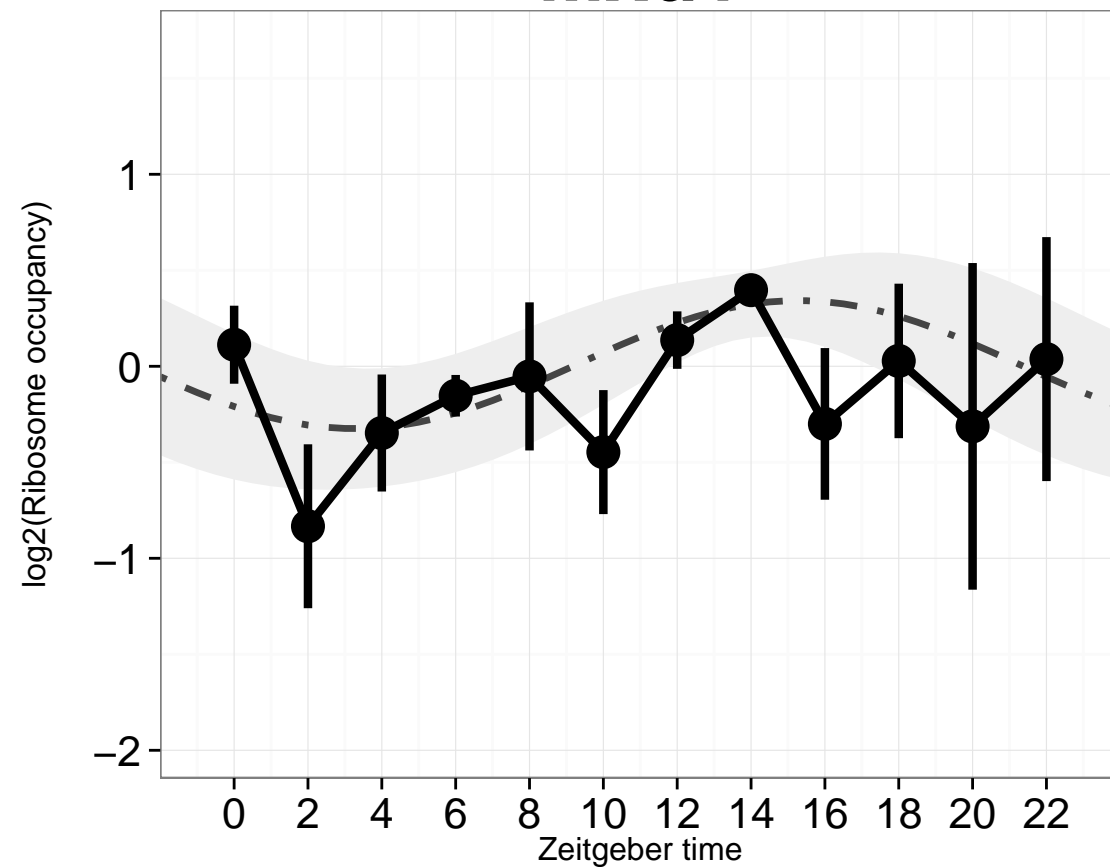

Supplement: SuppDataset_1.zip [file Mxd1_set_A.pdf › Supplemental Dataset 1/A-mRNA_nonrhyth_translation_nonrhyth/Mxd1_set_A.pdf]

## Mxd4

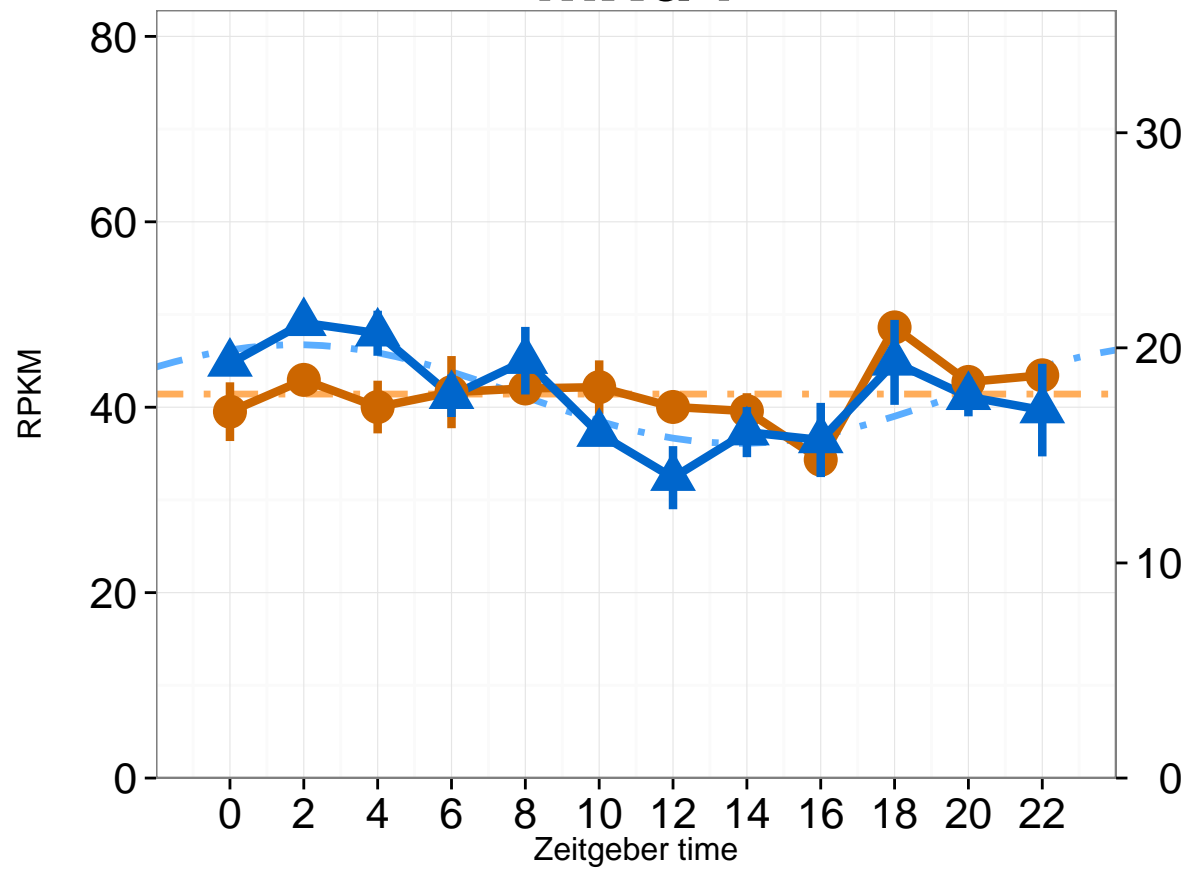

## Mxd4

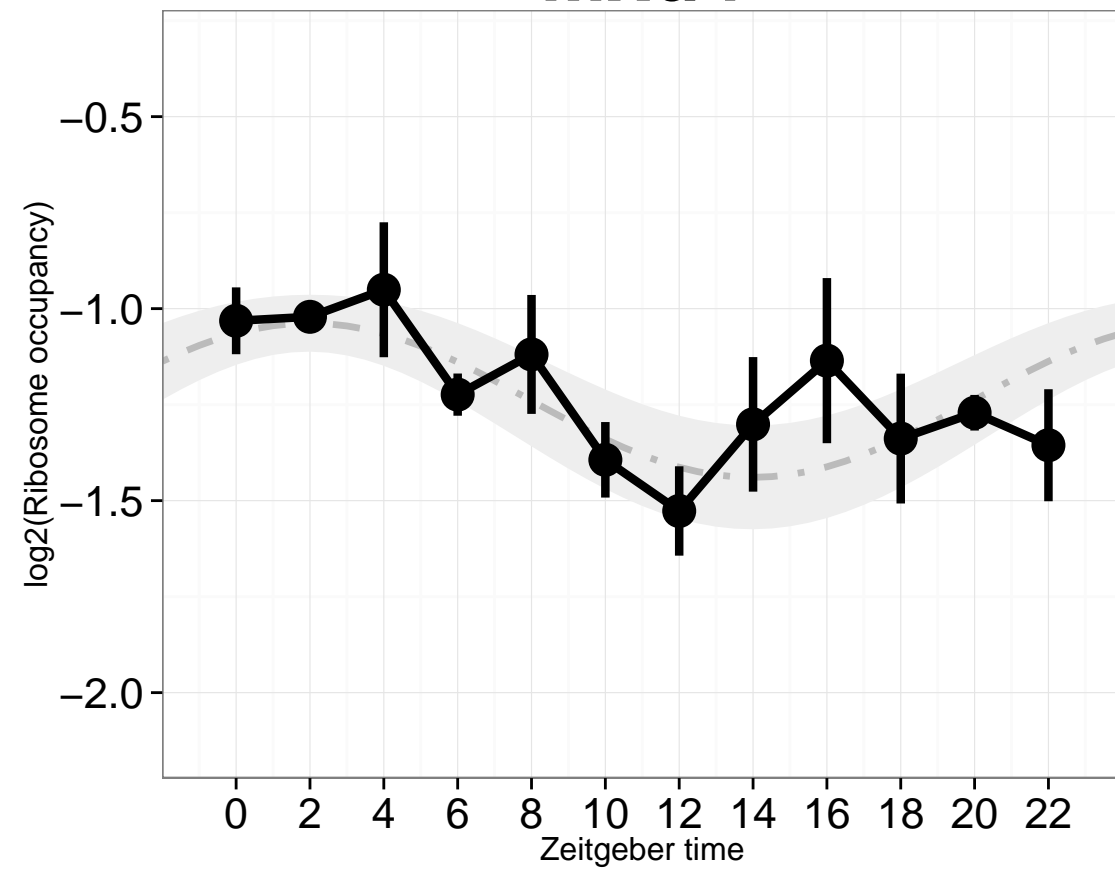

Supplement: SuppDataset_1.zip [file Mxd4_set_A.pdf › Supplemental Dataset 1/A-mRNA_nonrhyth_translation_nonrhyth/Mxd4_set_A.pdf]

# Mxra7

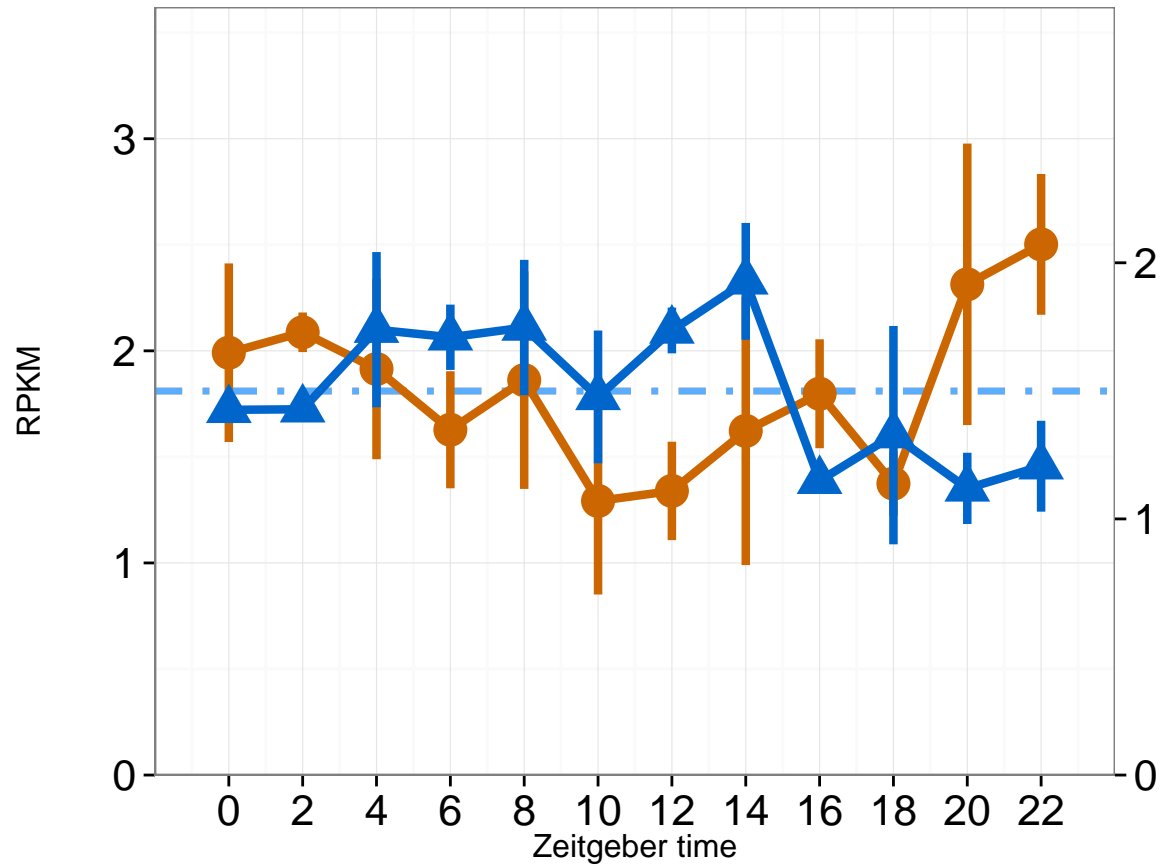

# Mxra7

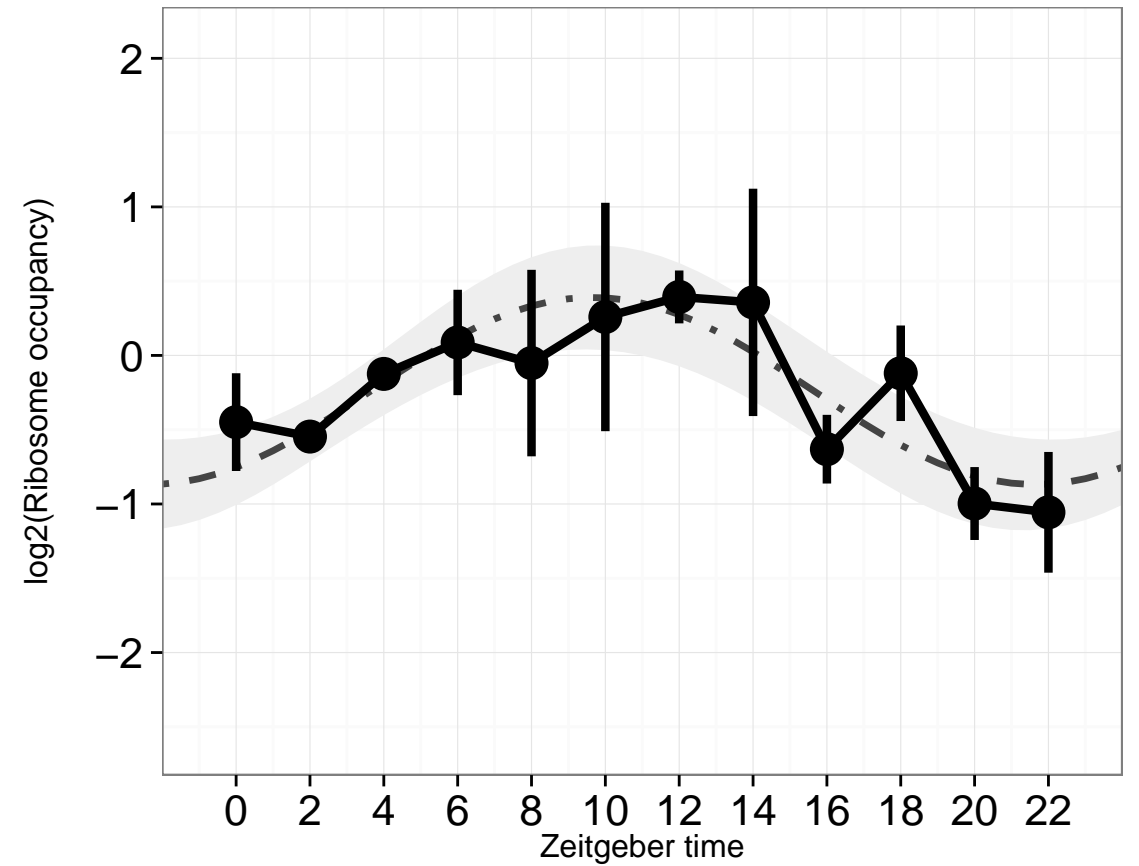

Supplement: SuppDataset_1.zip [file Mxra7_set_A.pdf › Supplemental Dataset 1/A-mRNA_nonrhyth_translation_nonrhyth/Mxra7_set_A.pdf]

# Mxra8

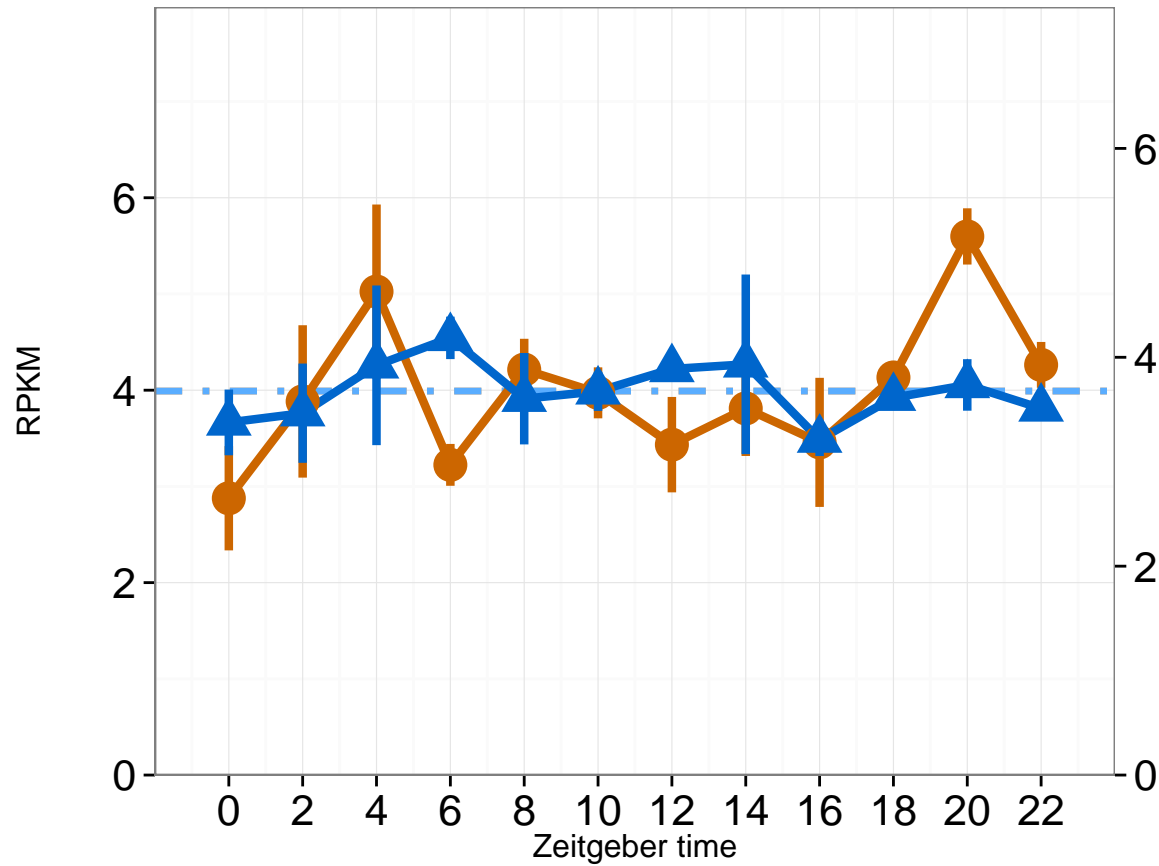

# Mxra8

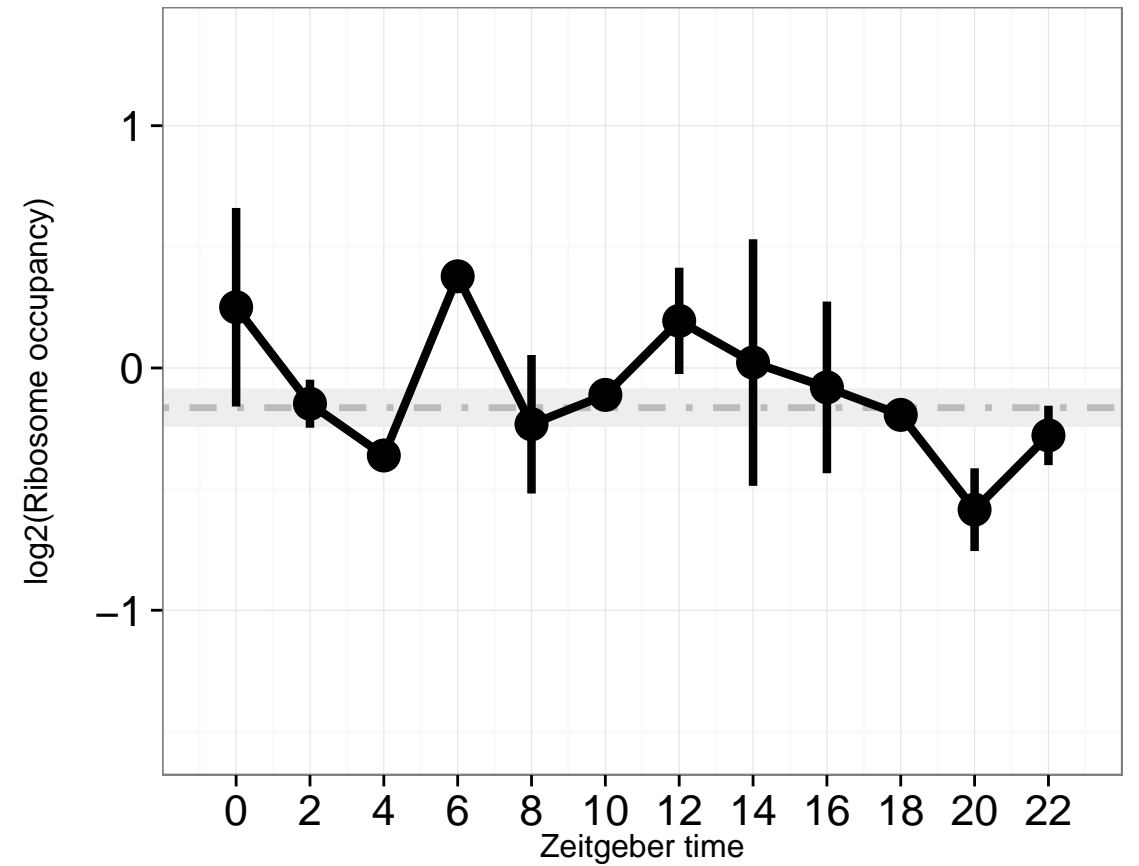

Supplement: SuppDataset_1.zip [file Mxra8_set_A.pdf › Supplemental Dataset 1/A-mRNA_nonrhyth_translation_nonrhyth/Mxra8_set_A.pdf]

# Mybbp1a

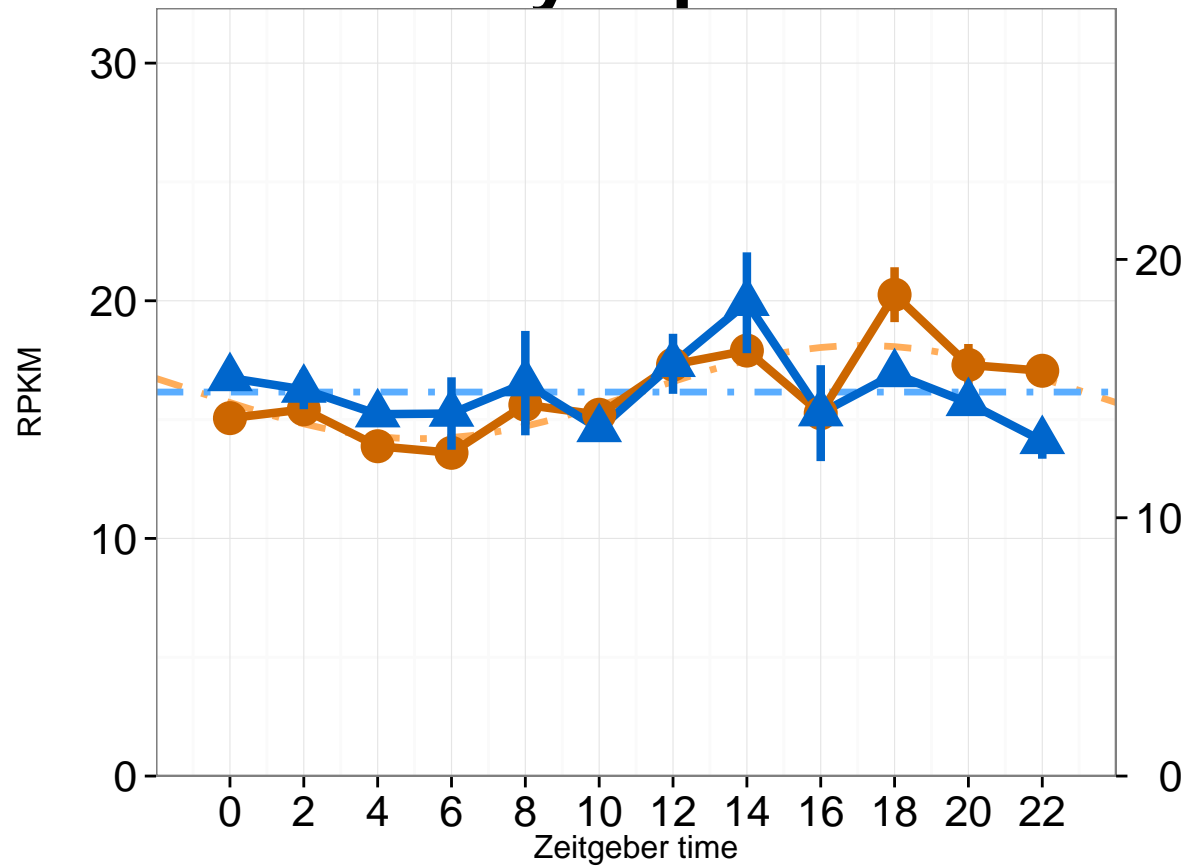

# Mybbp1a

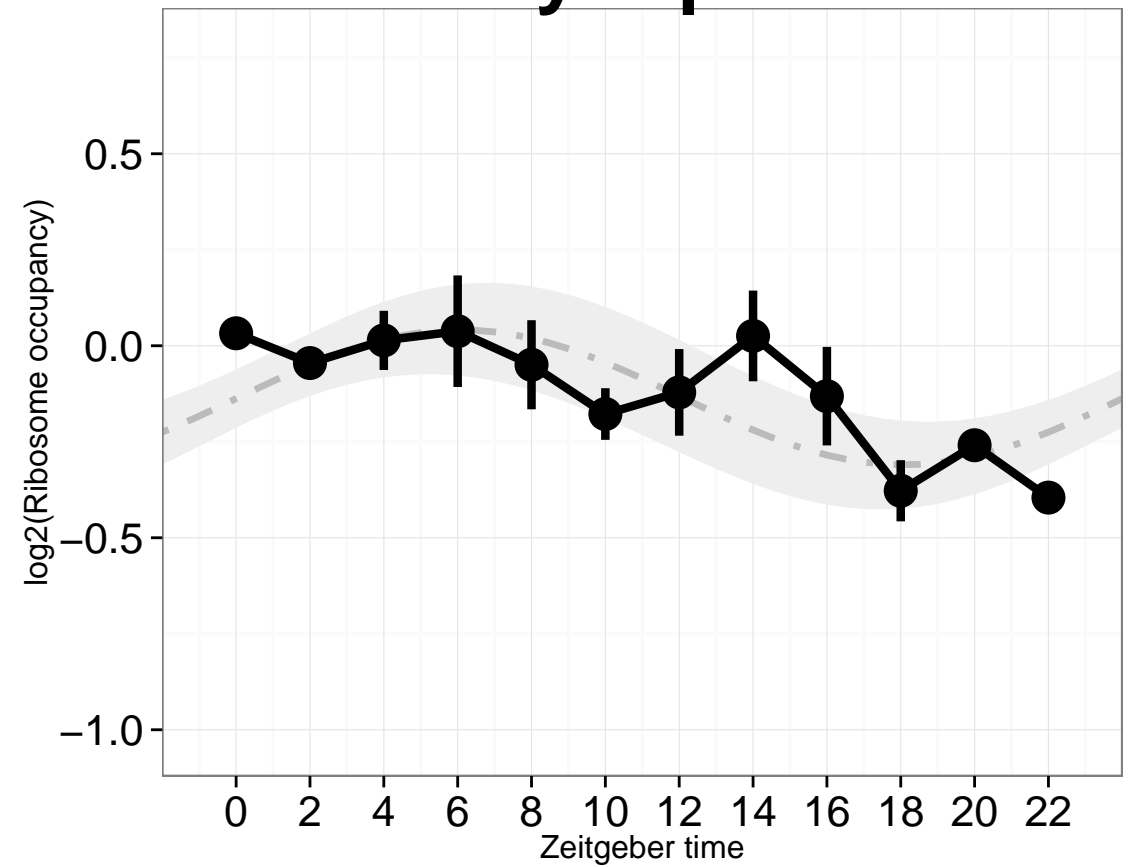

Supplement: SuppDataset_1.zip [file Mybbp1a_set_A.pdf › Supplemental Dataset 1/A-mRNA_nonrhyth_translation_nonrhyth/Mybbp1a_set_A.pdf]

## Myc

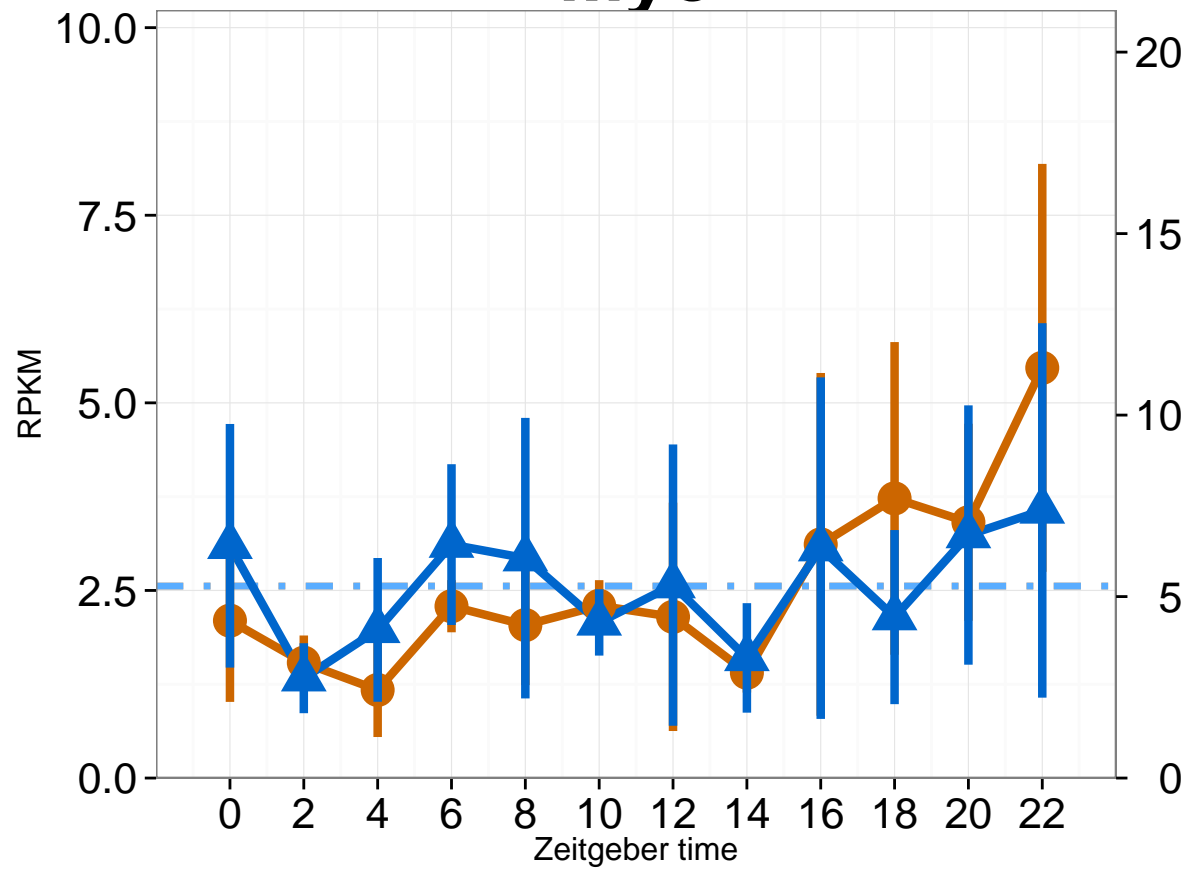

## Myc

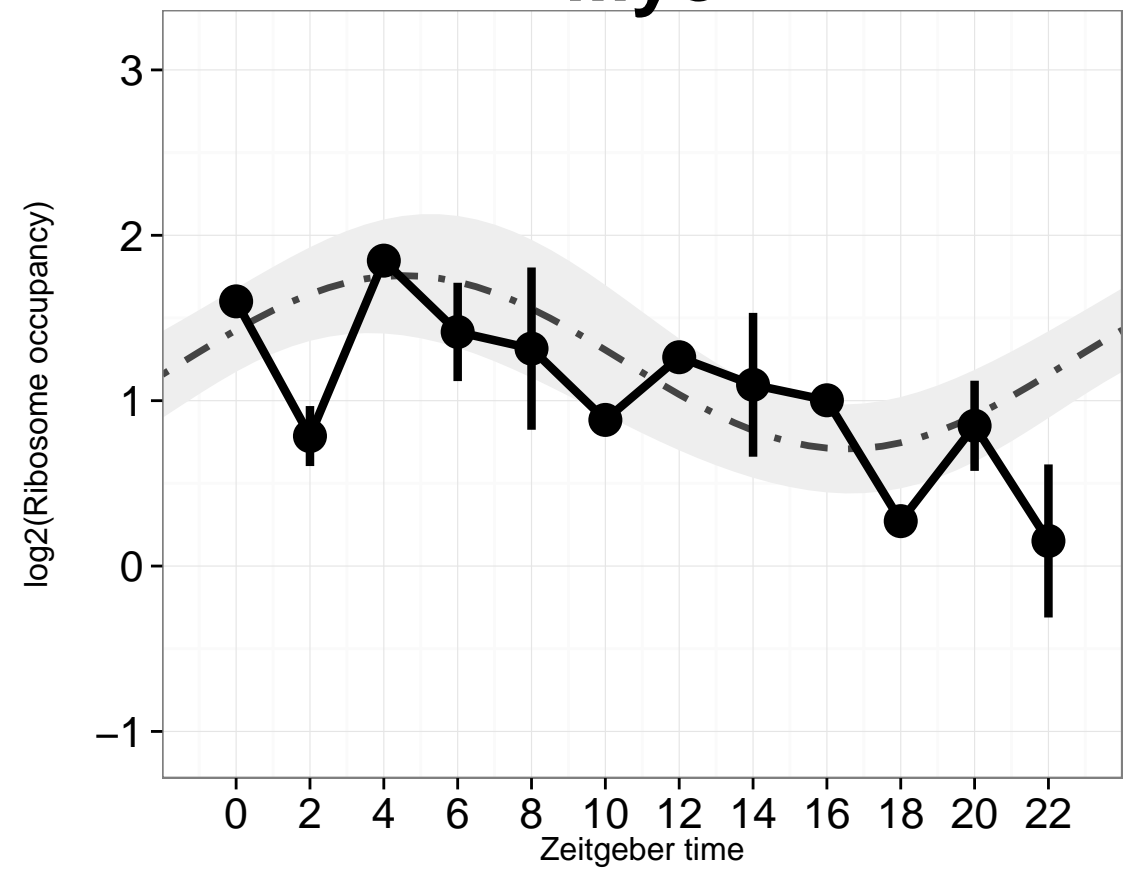

Supplement: SuppDataset_1.zip [file Myc_set_A.pdf › Supplemental Dataset 1/A-mRNA_nonrhyth_translation_nonrhyth/Myc_set_A.pdf]

# Mycbp2

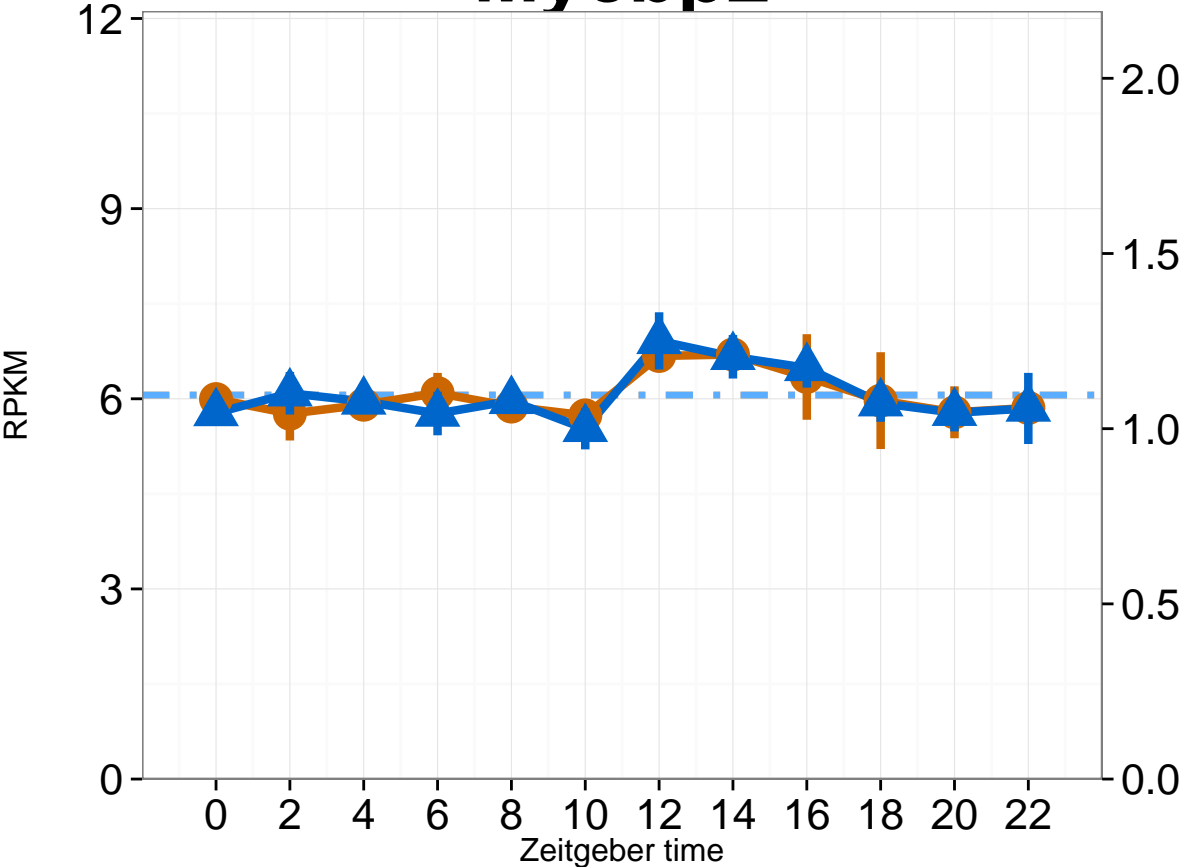

# Mycbp2

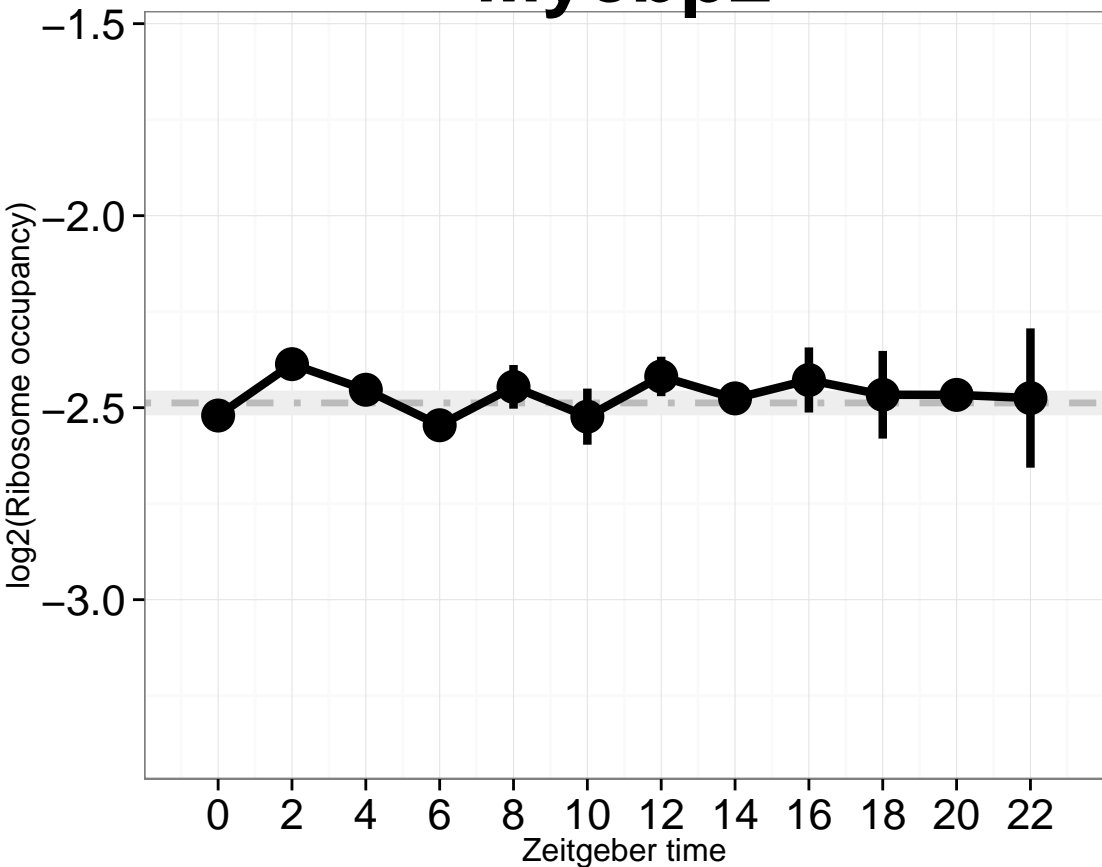

Supplement: SuppDataset_1.zip [file Mycbp2_set_A.pdf › Supplemental Dataset 1/A-mRNA_nonrhyth_translation_nonrhyth/Mycbp2_set_A.pdf]

## Mycl

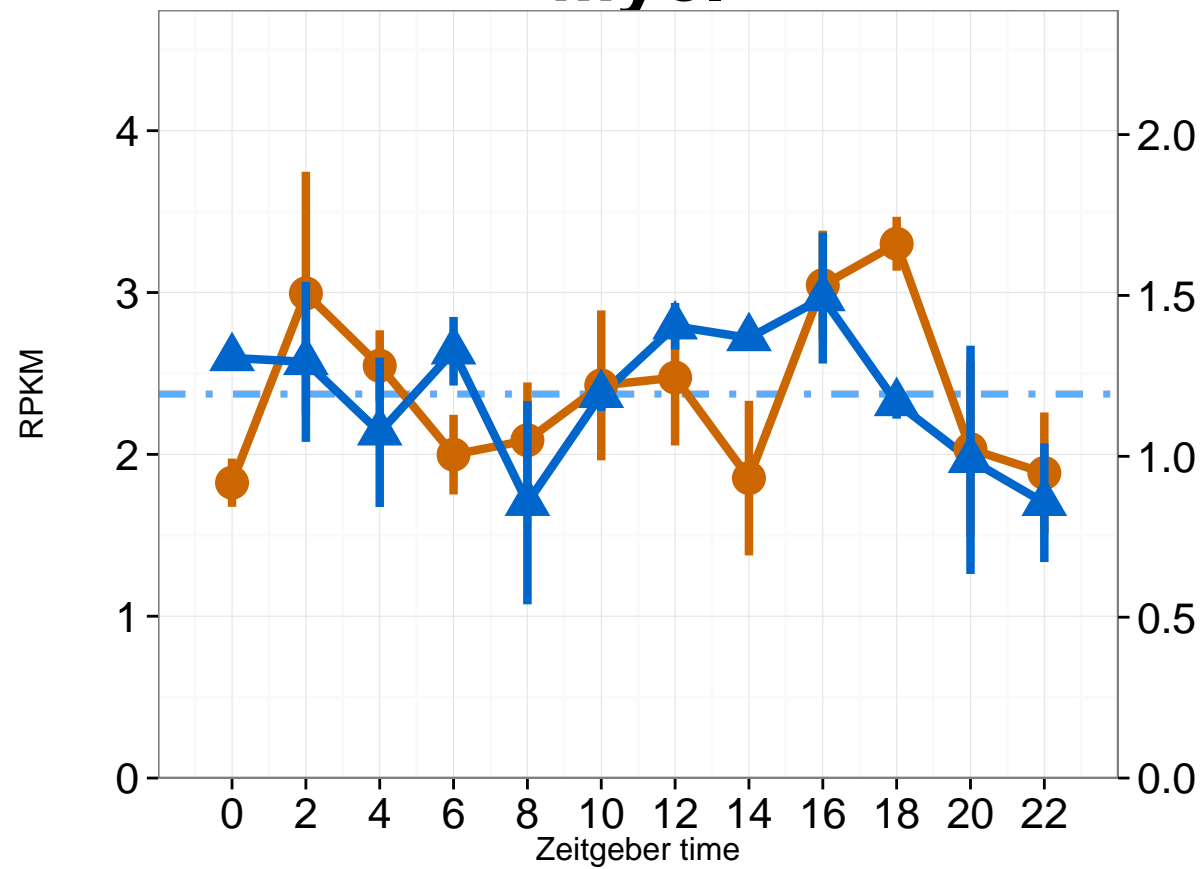

## Mycl

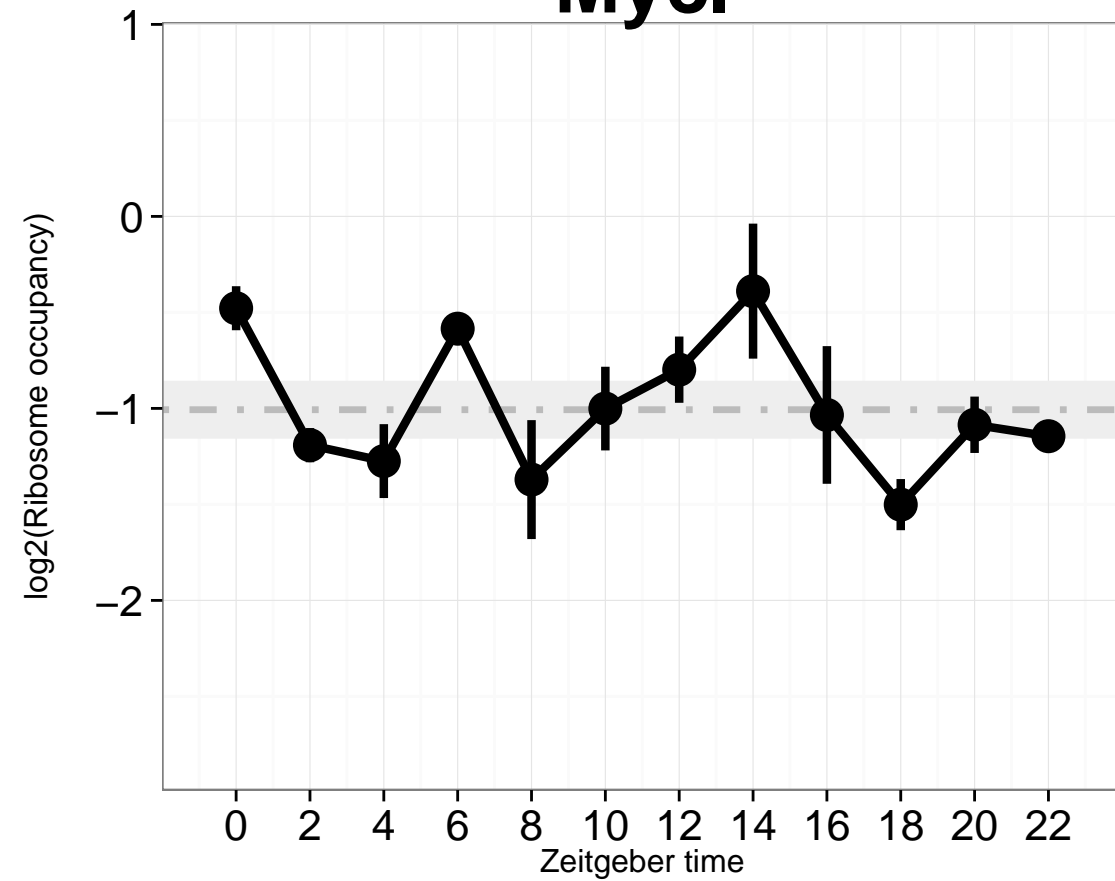

Supplement: SuppDataset_1.zip [file Mycl_set_A.pdf › Supplemental Dataset 1/A-mRNA_nonrhyth_translation_nonrhyth/Mycl_set_A.pdf]

## Mycn TR

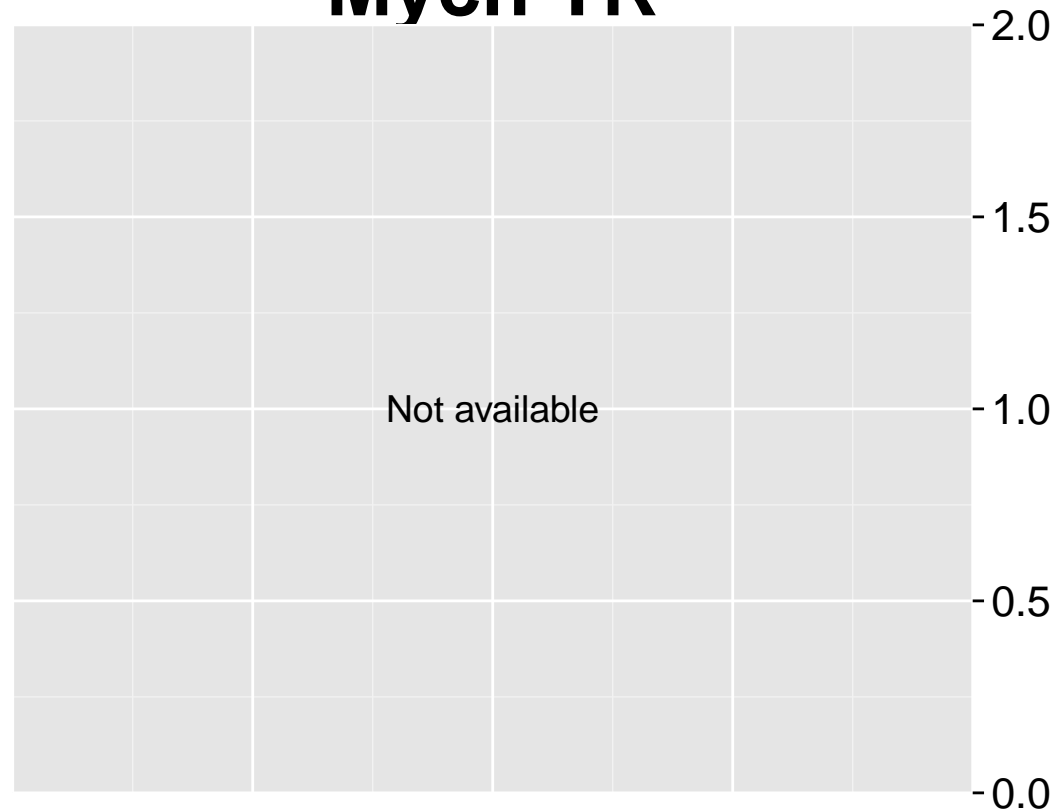

## Mycn log2(Ribosome occupancy)

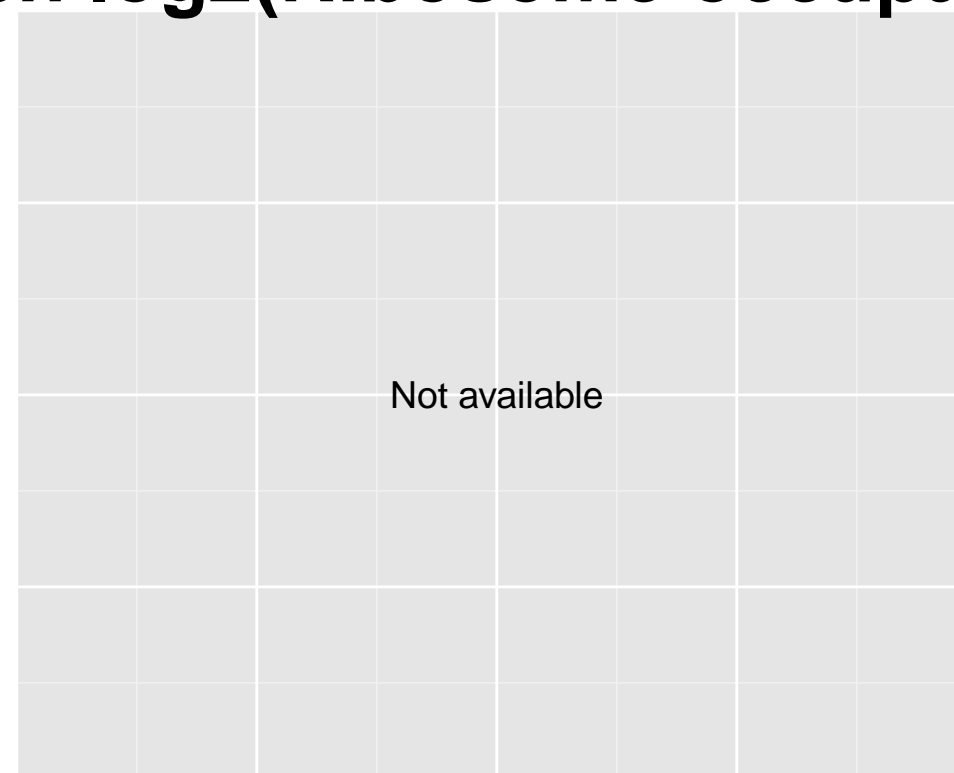

Supplement: SuppDataset_1.zip [file Mycn_set_A.pdf › Supplemental Dataset 1/A-mRNA_nonrhyth_translation_nonrhyth/Mycn_set_A.pdf]

# Myct1

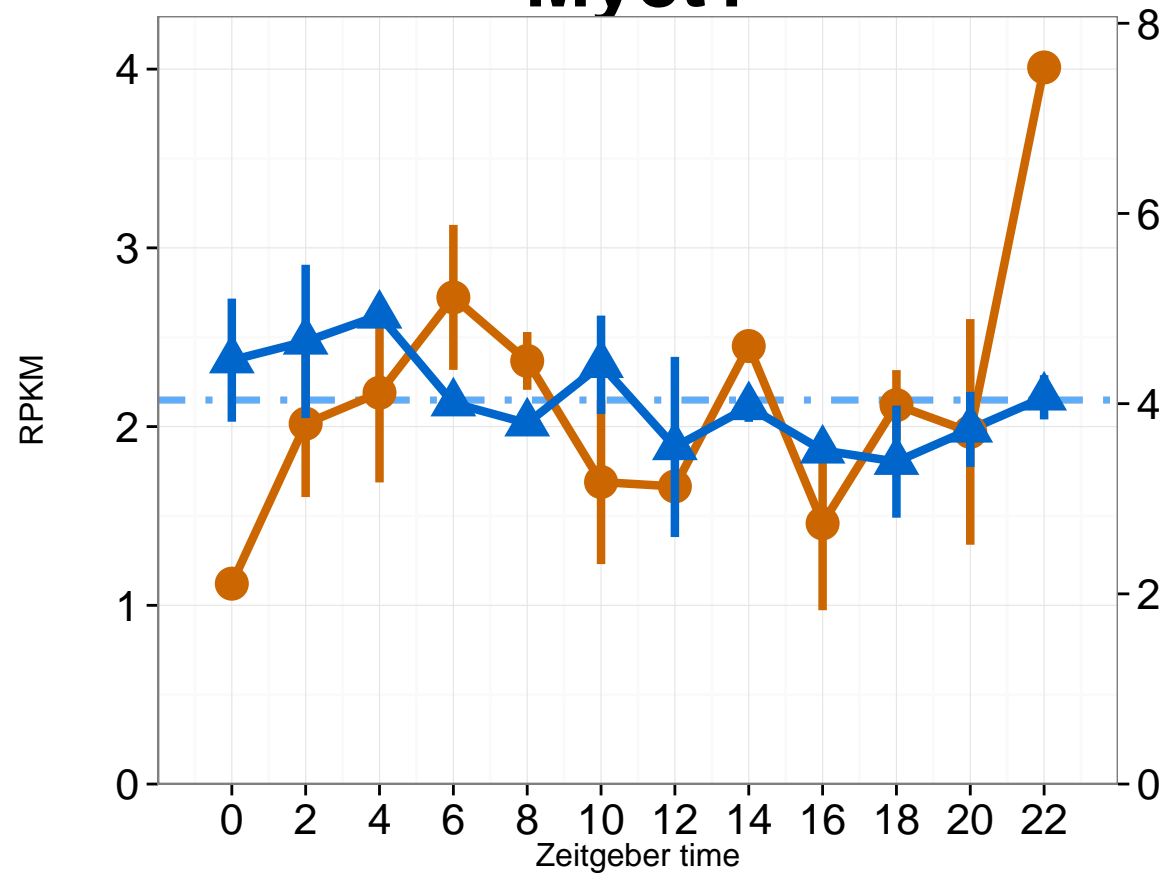

# Myct1

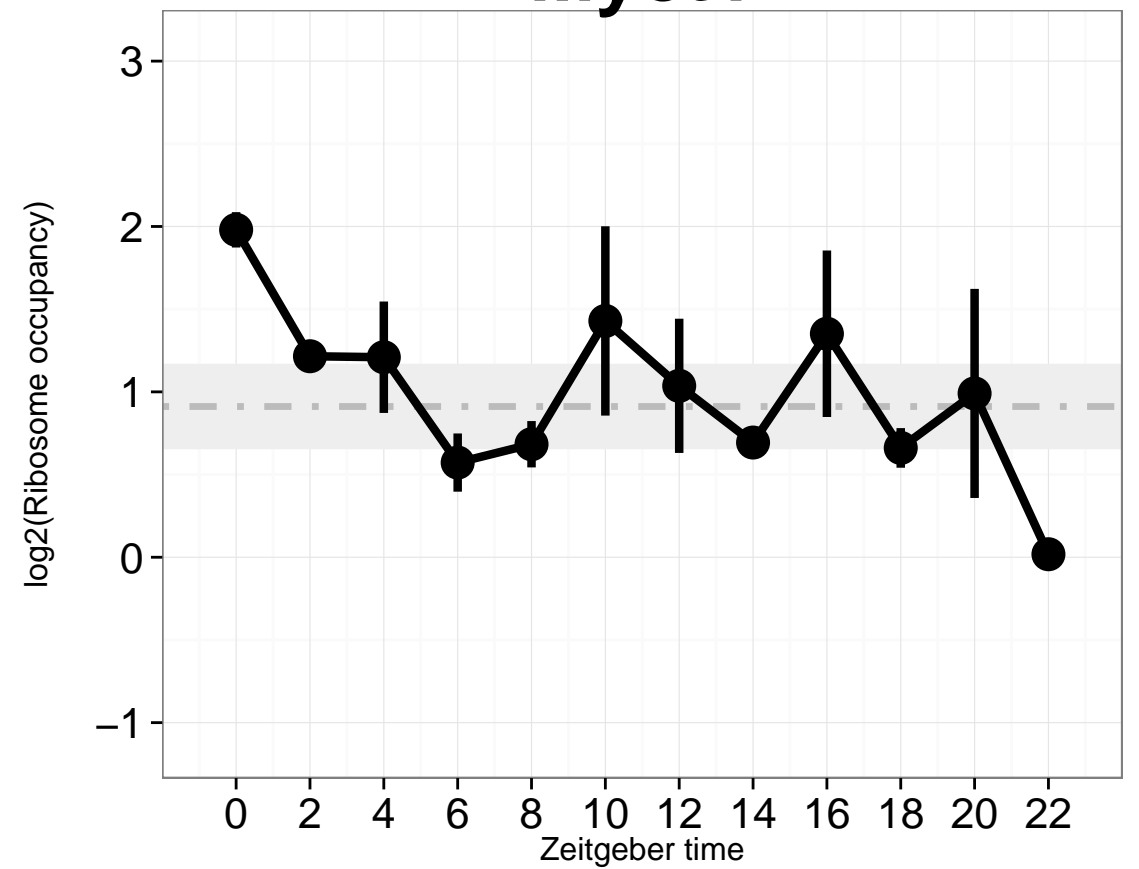

Supplement: SuppDataset_1.zip [file Myct1_set_A.pdf › Supplemental Dataset 1/A-mRNA_nonrhyth_translation_nonrhyth/Myct1_set_A.pdf]

## Myd88

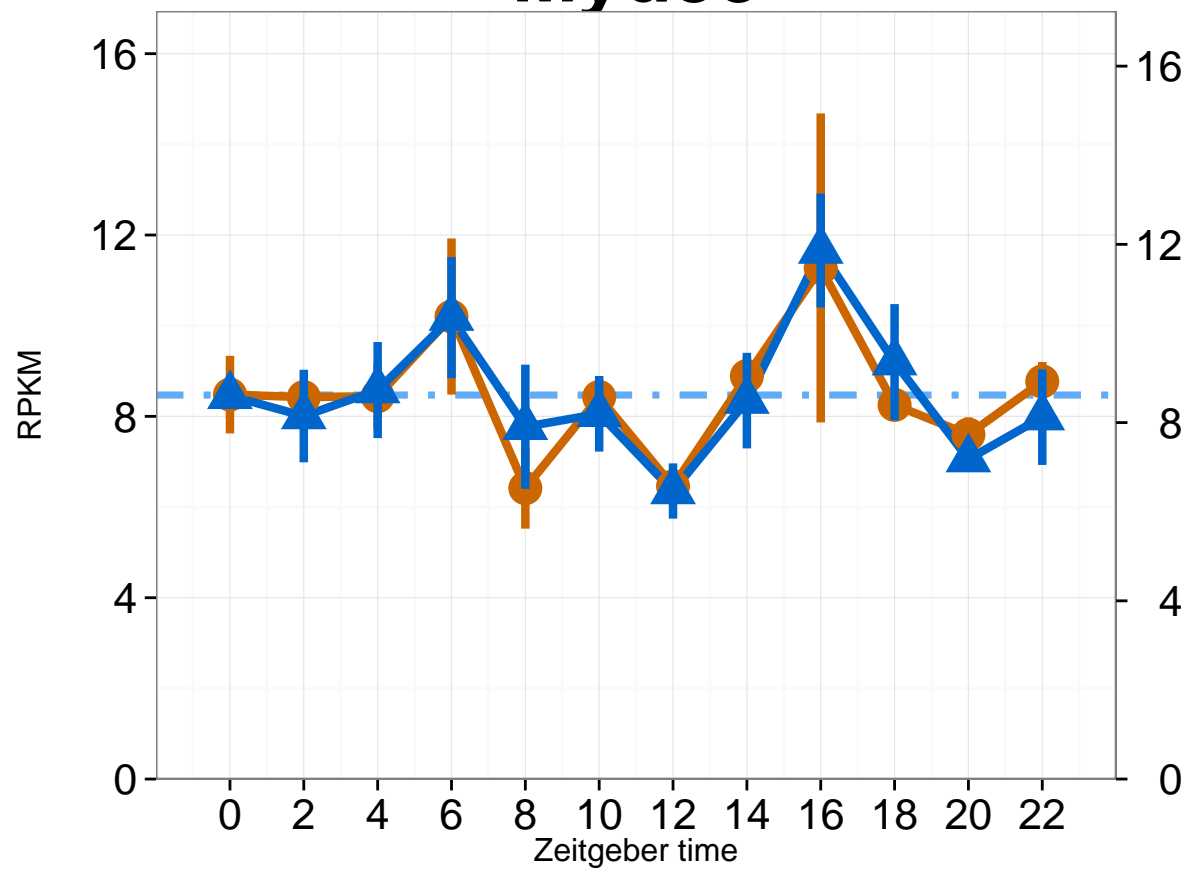

## Myd88

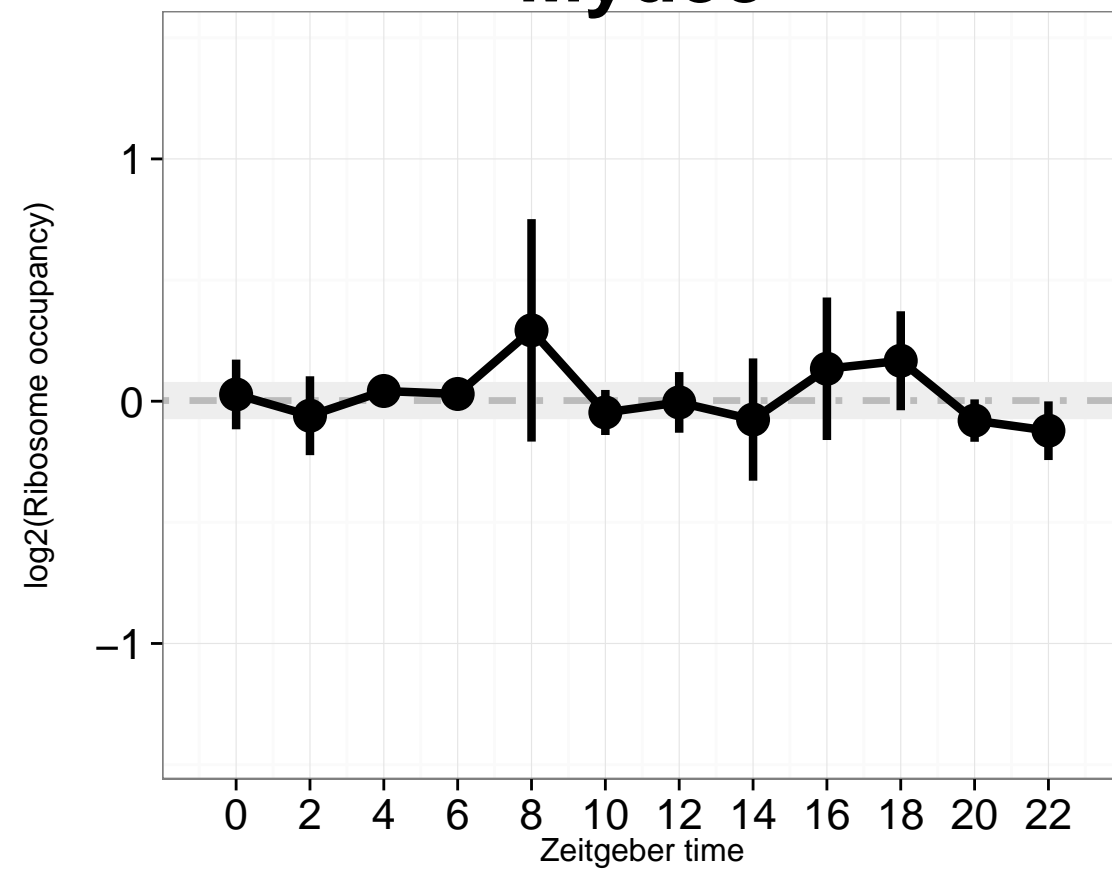

Supplement: SuppDataset_1.zip [file Myd88_set_A.pdf › Supplemental Dataset 1/A-mRNA_nonrhyth_translation_nonrhyth/Myd88_set_A.pdf]

## Myef2

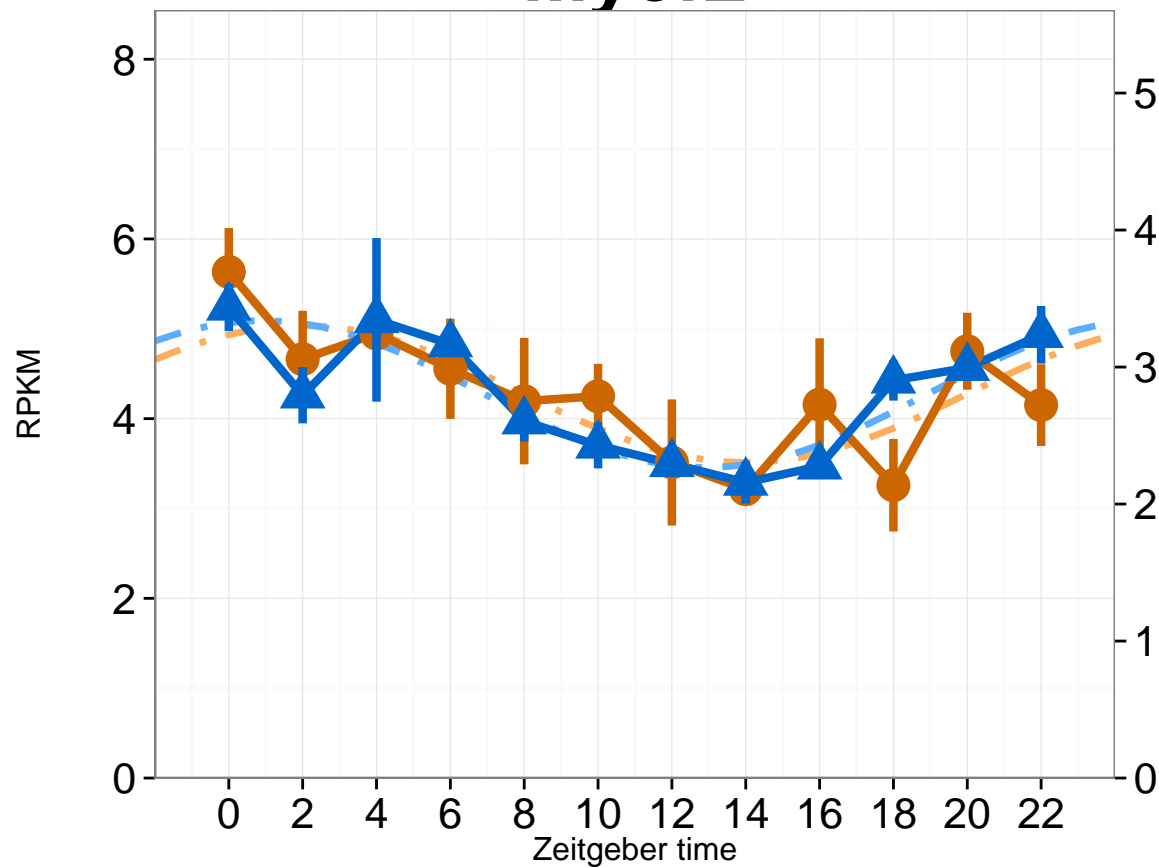

## Myef2

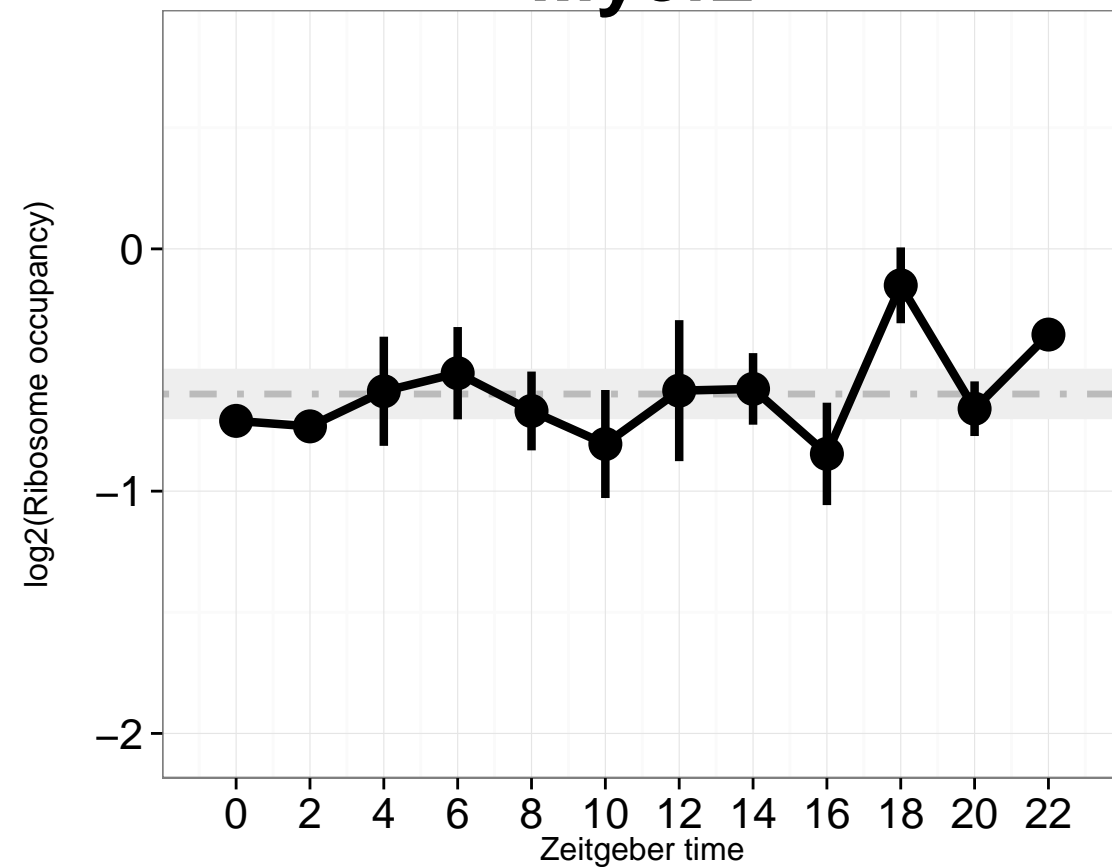

Supplement: SuppDataset_1.zip [file Myef2_set_A.pdf › Supplemental Dataset 1/A-mRNA_nonrhyth_translation_nonrhyth/Myef2_set_A.pdf]

## Myg1

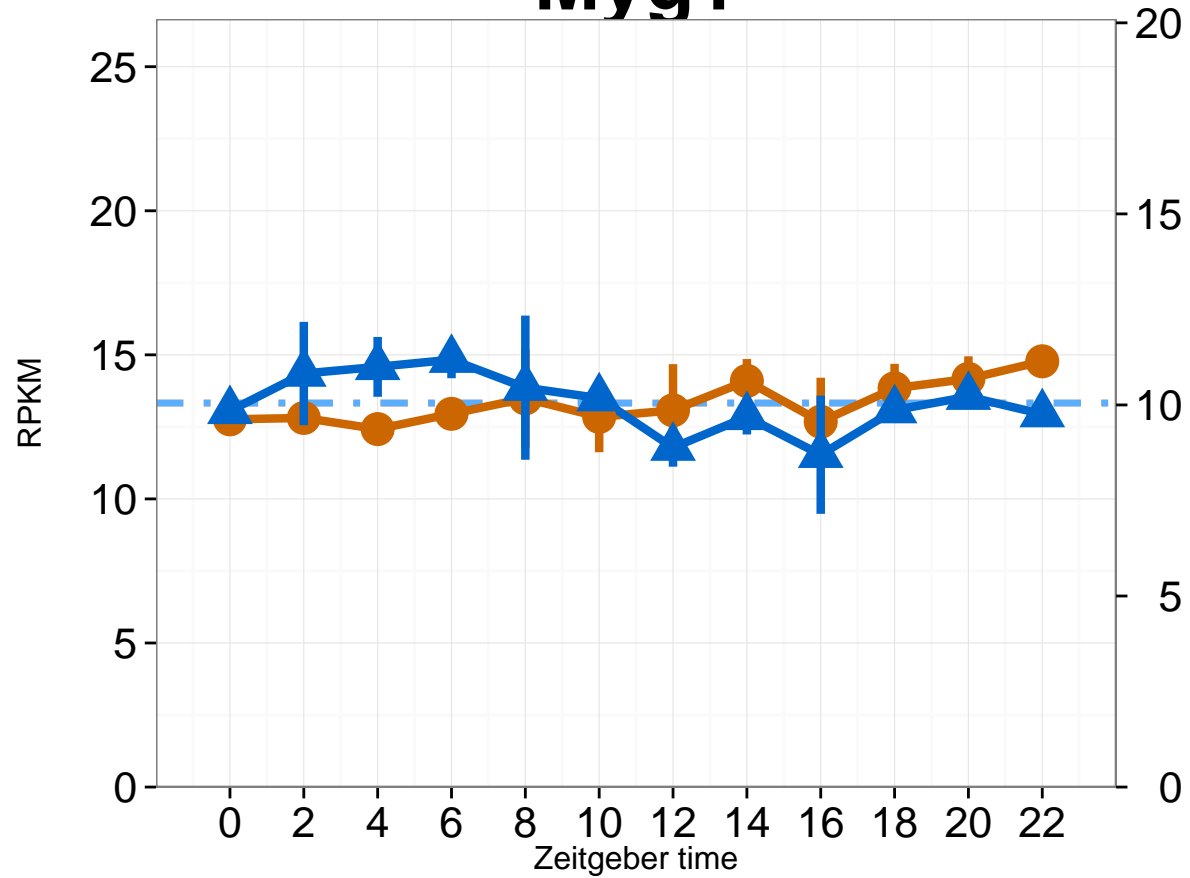

## Myg1

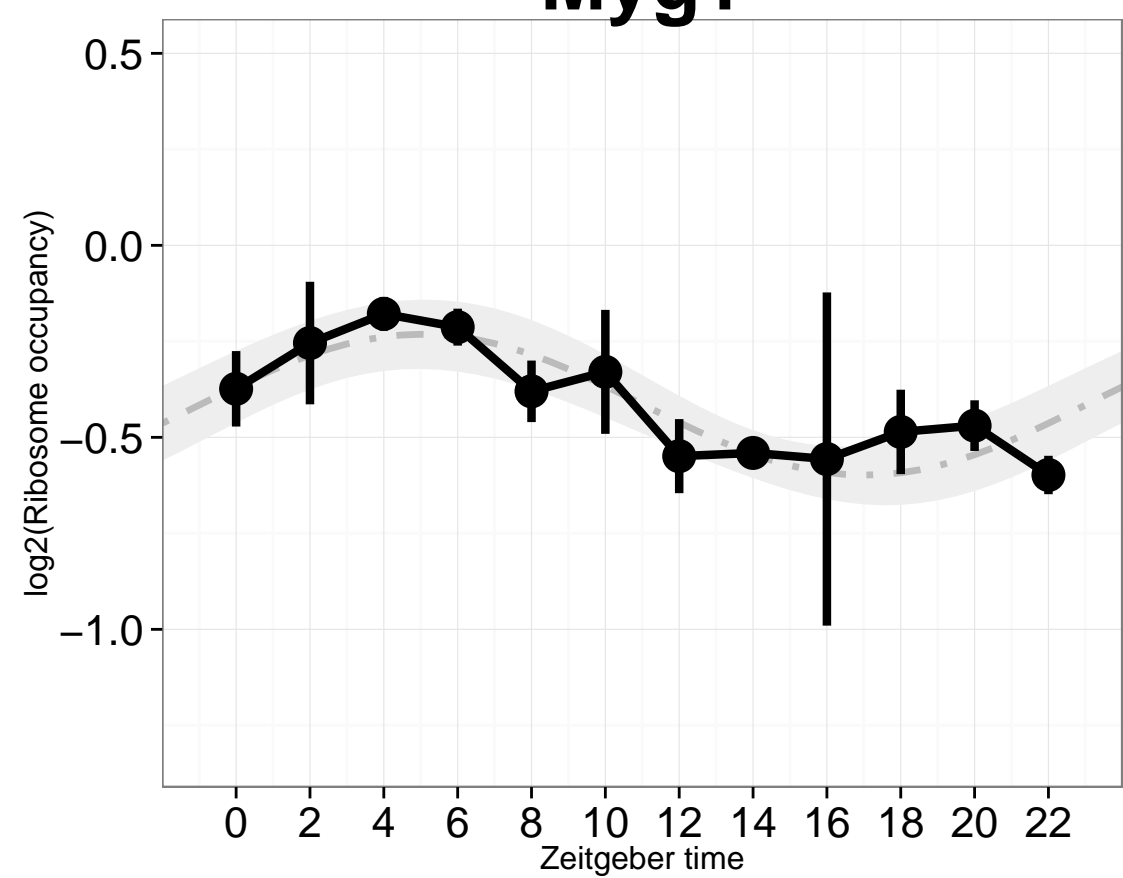

Supplement: SuppDataset_1.zip [file Myg1_set_A.pdf › Supplemental Dataset 1/A-mRNA_nonrhyth_translation_nonrhyth/Myg1_set_A.pdf]

# Myh10

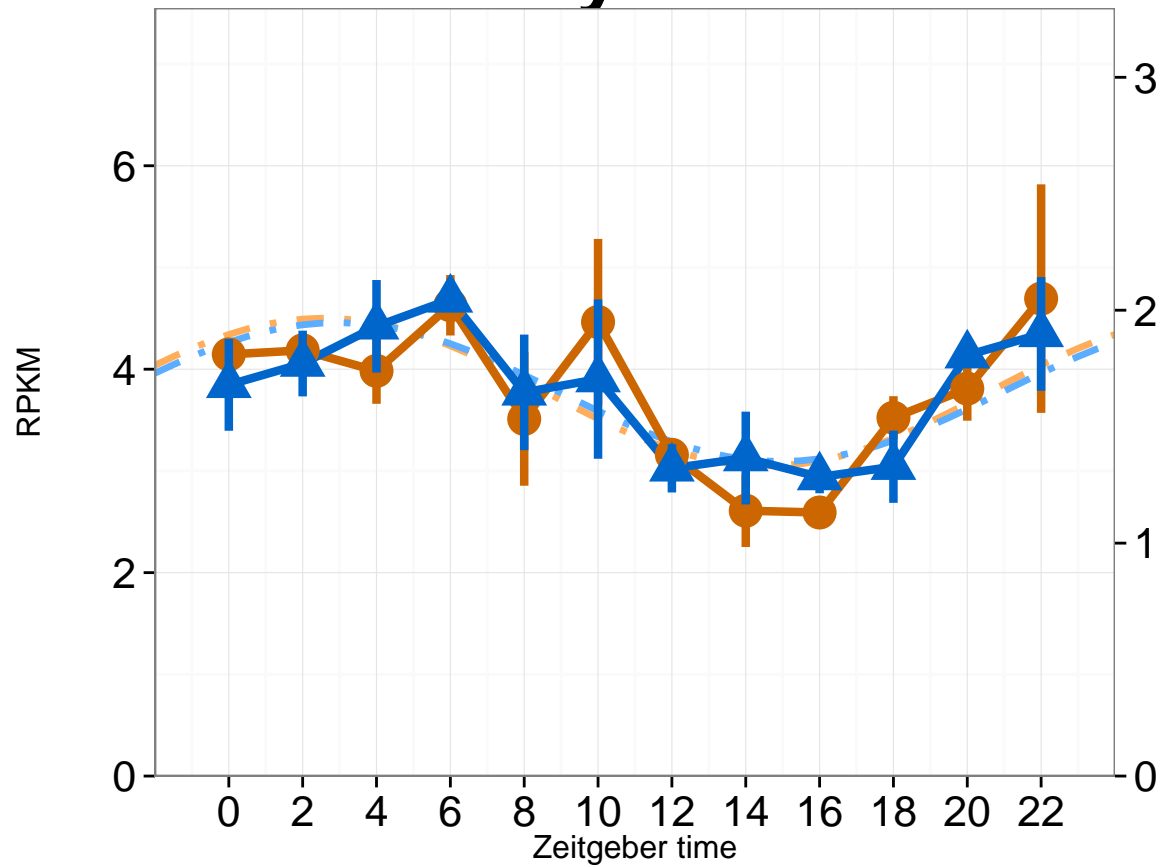

# Myh10

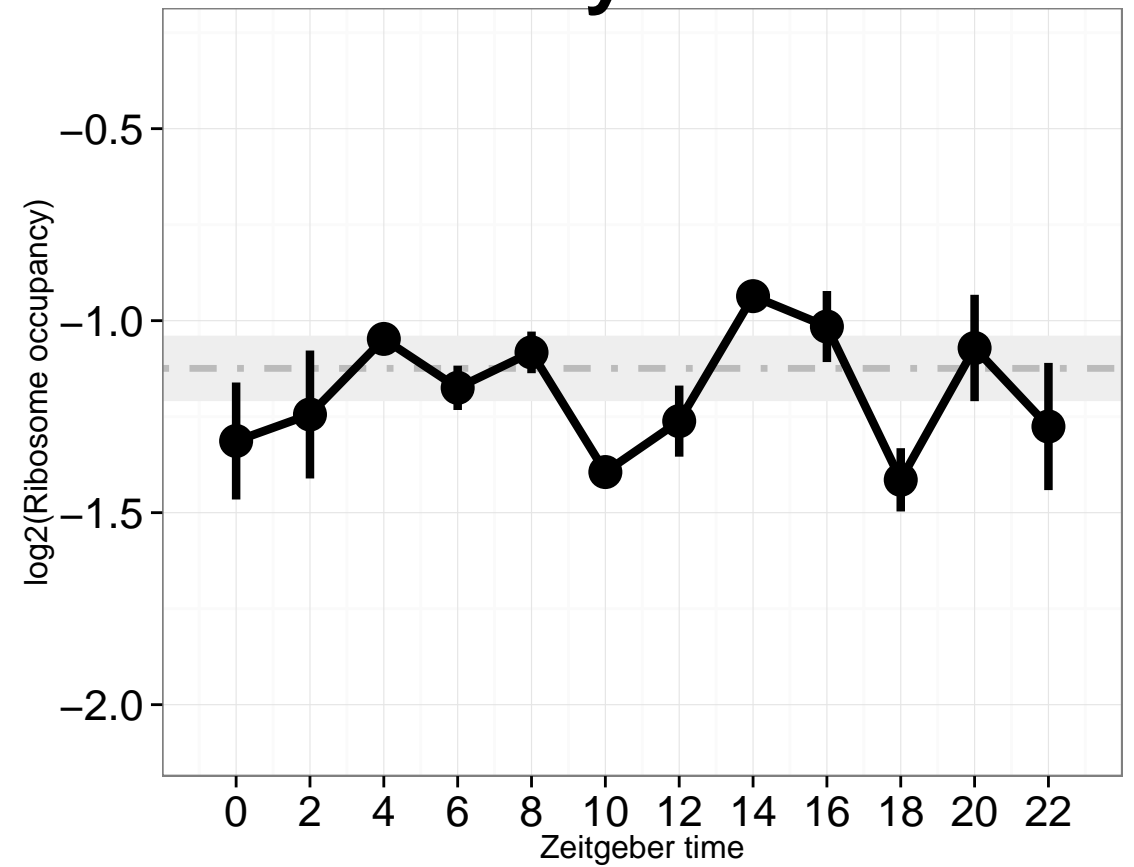

Supplement: SuppDataset_1.zip [file Myh10_set_A.pdf › Supplemental Dataset 1/A-mRNA_nonrhyth_translation_nonrhyth/Myh10_set_A.pdf]

# Myh11

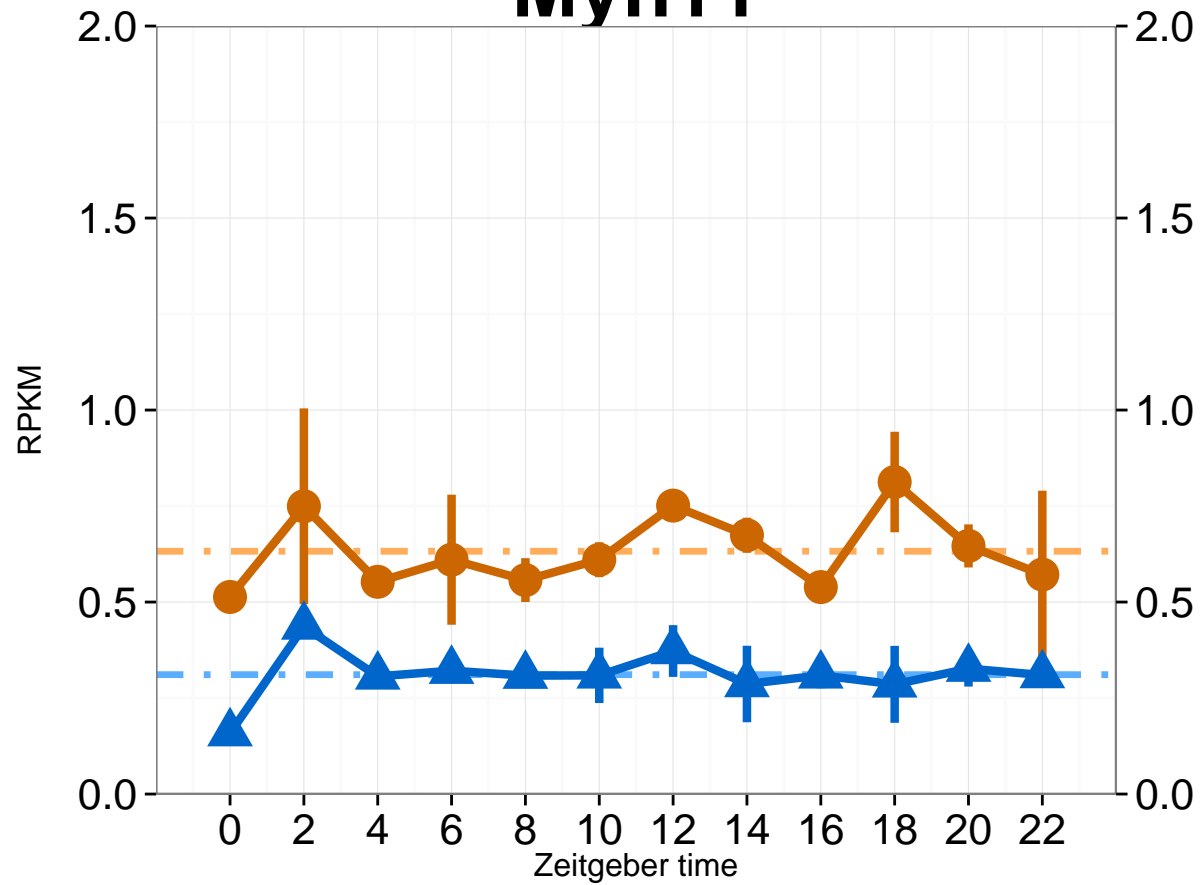

# Myh11

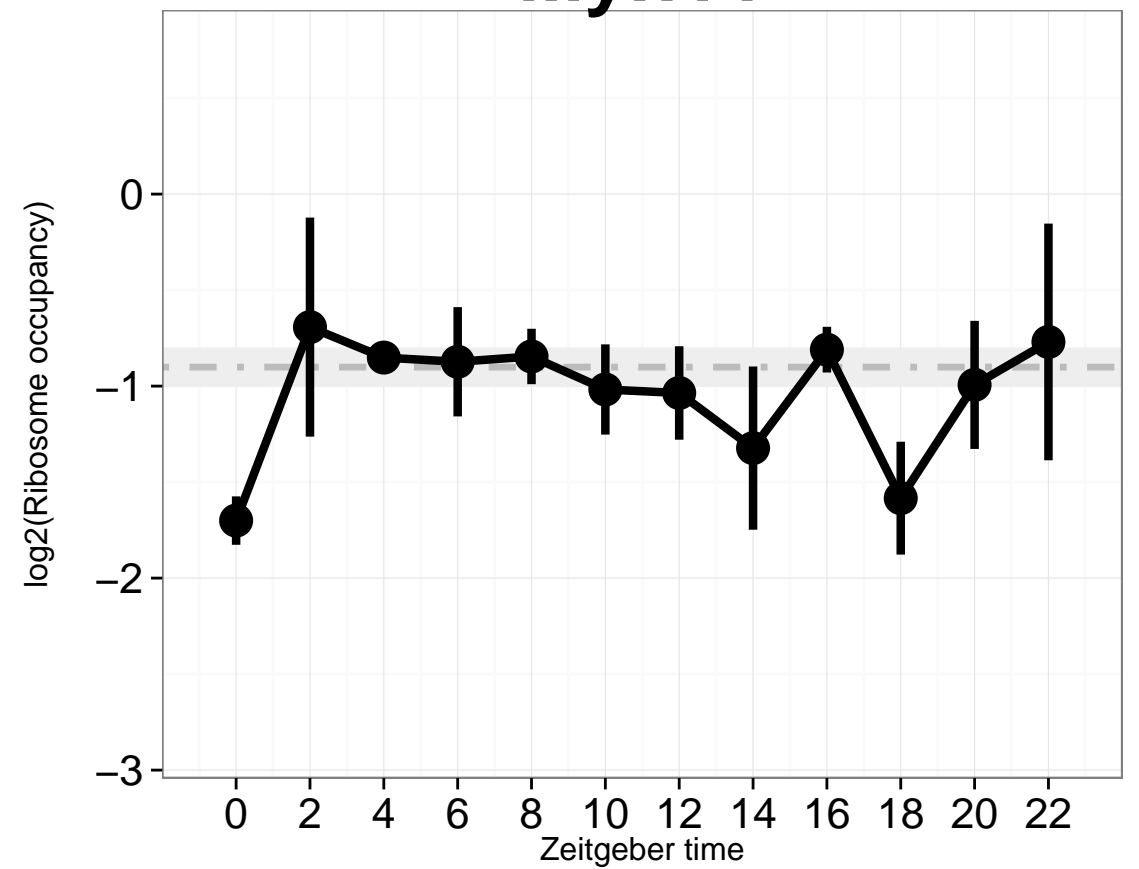

Supplement: SuppDataset_1.zip [file Myh11_set_A.pdf › Supplemental Dataset 1/A-mRNA_nonrhyth_translation_nonrhyth/Myh11_set_A.pdf]

# Myh9

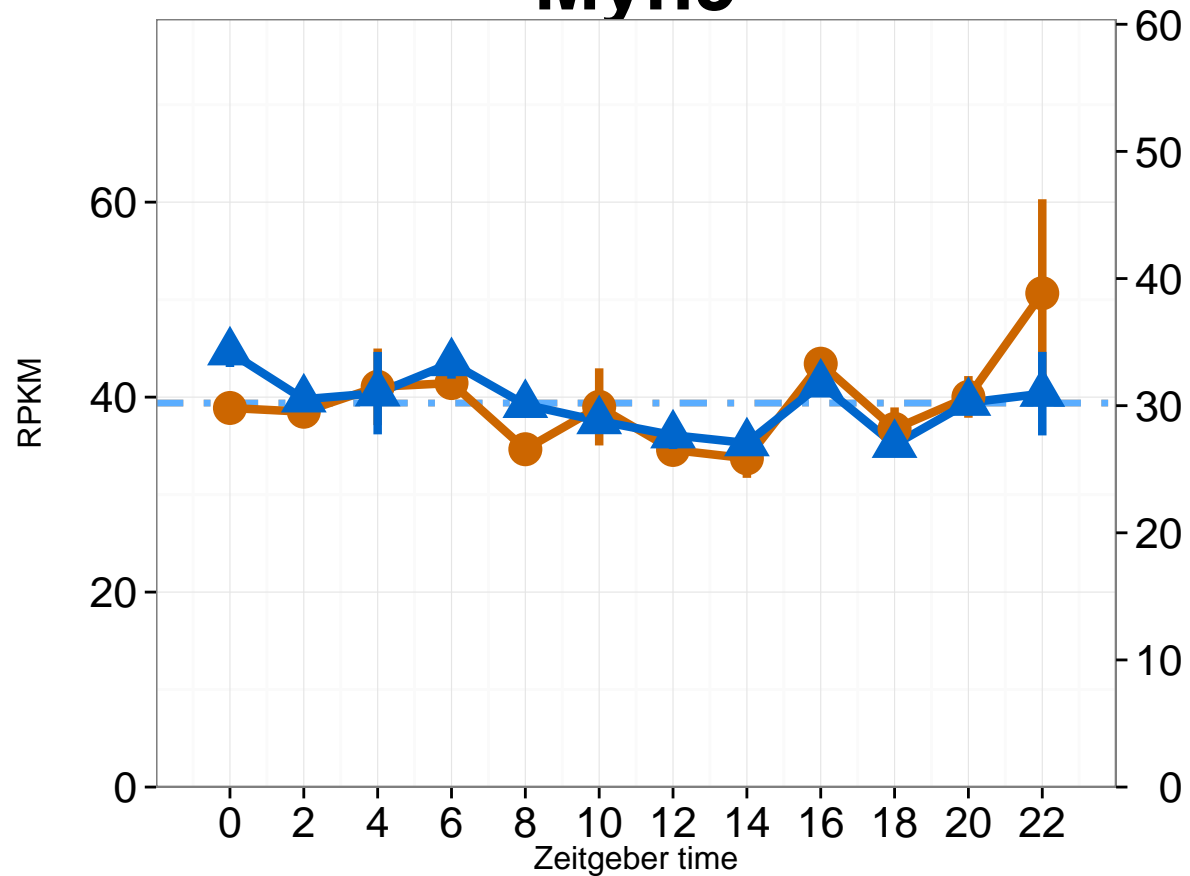

# Myh9

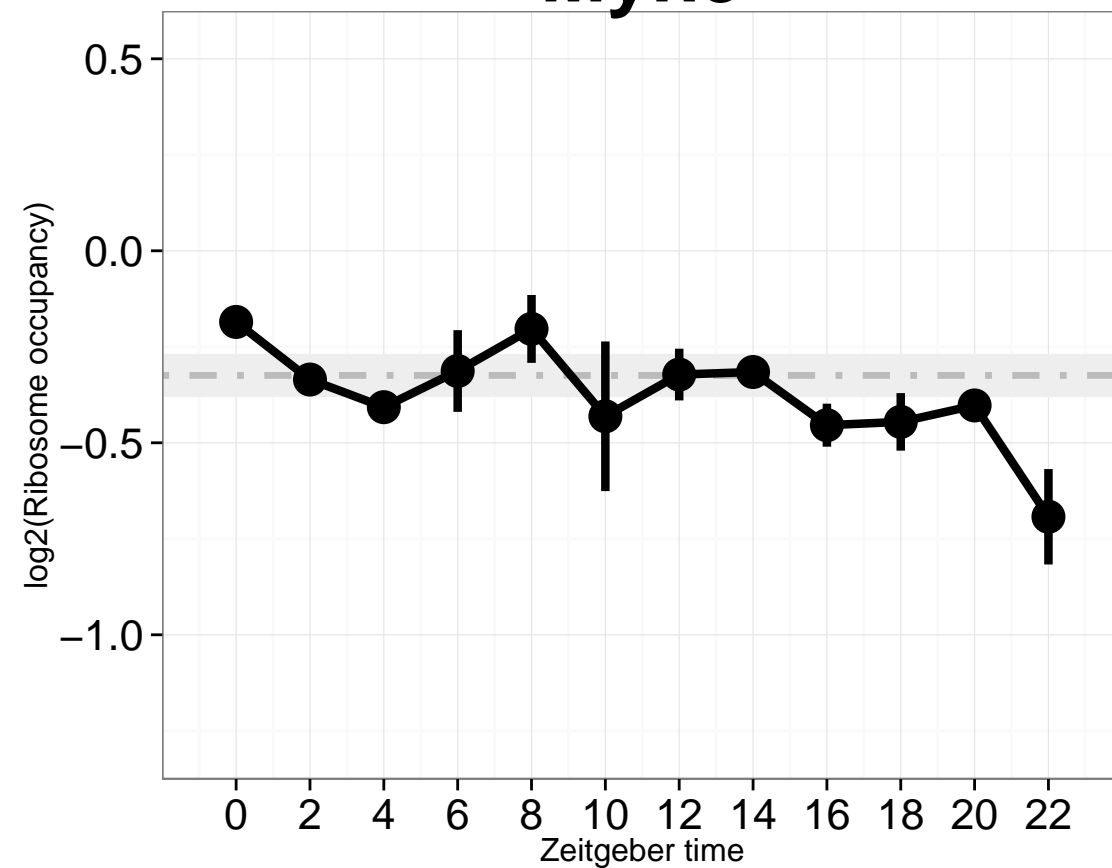

Supplement: SuppDataset_1.zip [file Myh9_set_A.pdf › Supplemental Dataset 1/A-mRNA_nonrhyth_translation_nonrhyth/Myh9_set_A.pdf]

# Myl12a

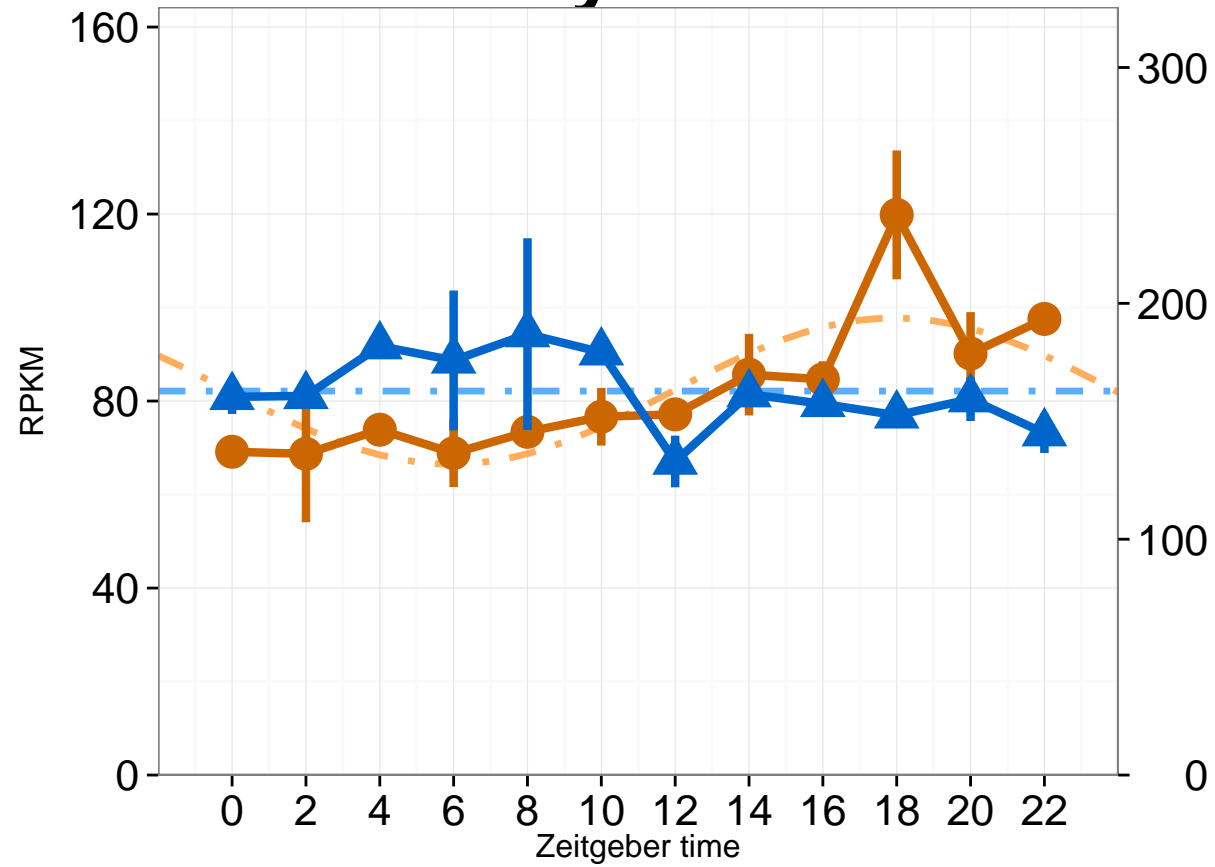

# Myl12a

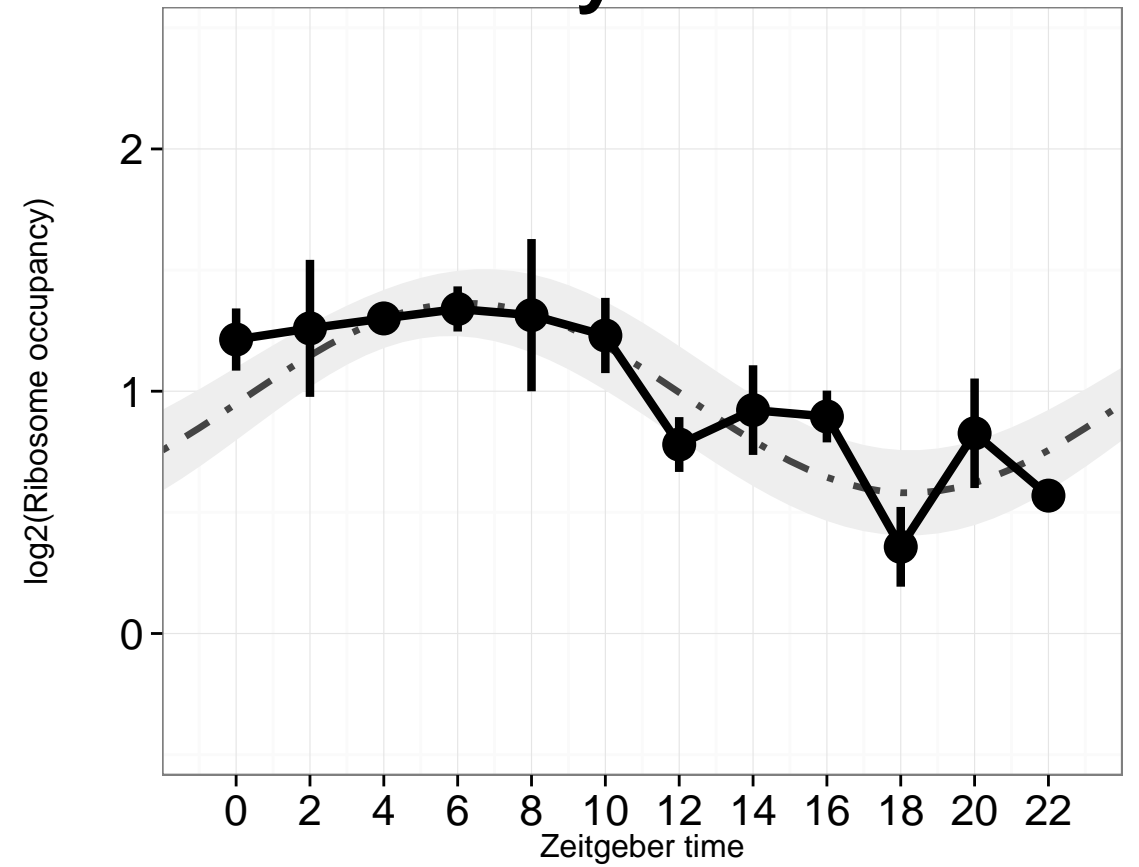

Supplement: SuppDataset_1.zip [file Myl12a_set_A.pdf › Supplemental Dataset 1/A-mRNA_nonrhyth_translation_nonrhyth/Myl12a_set_A.pdf]

## MyI12b

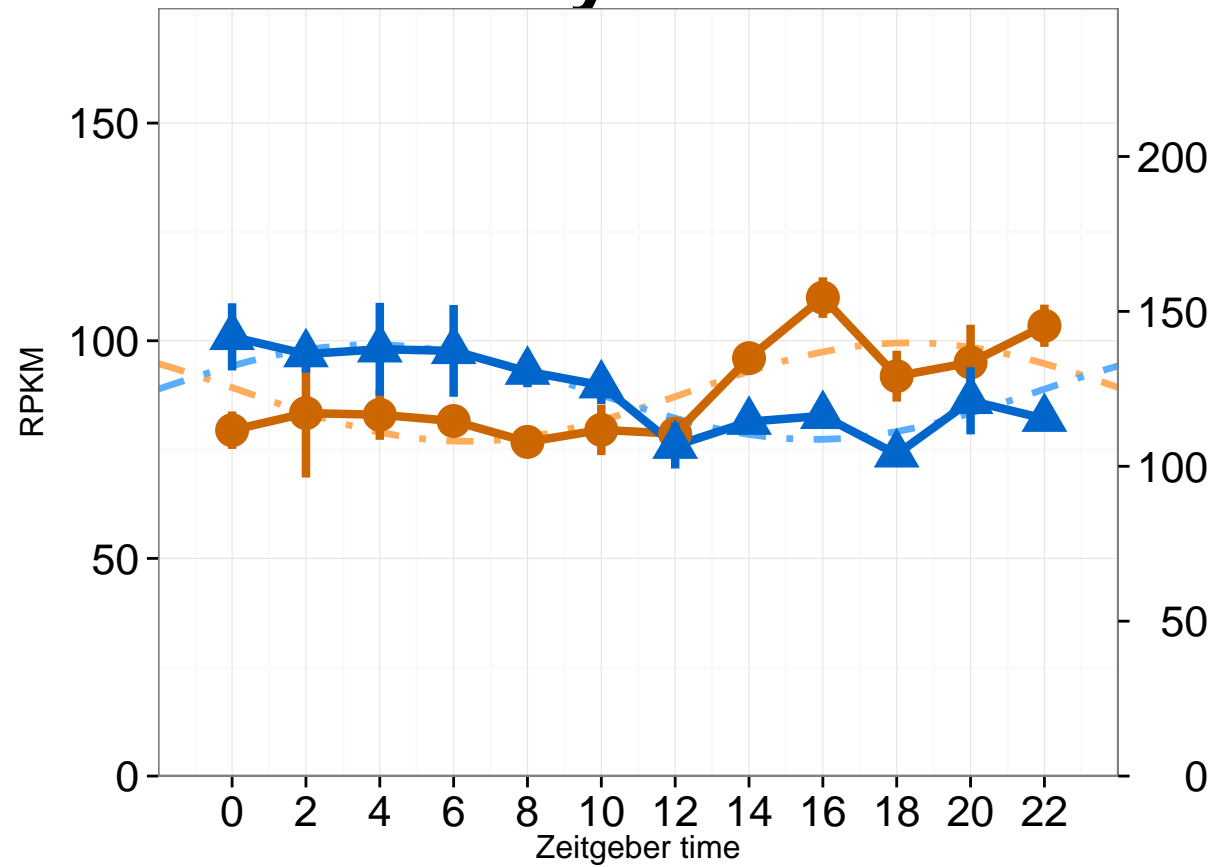

## MyI12b

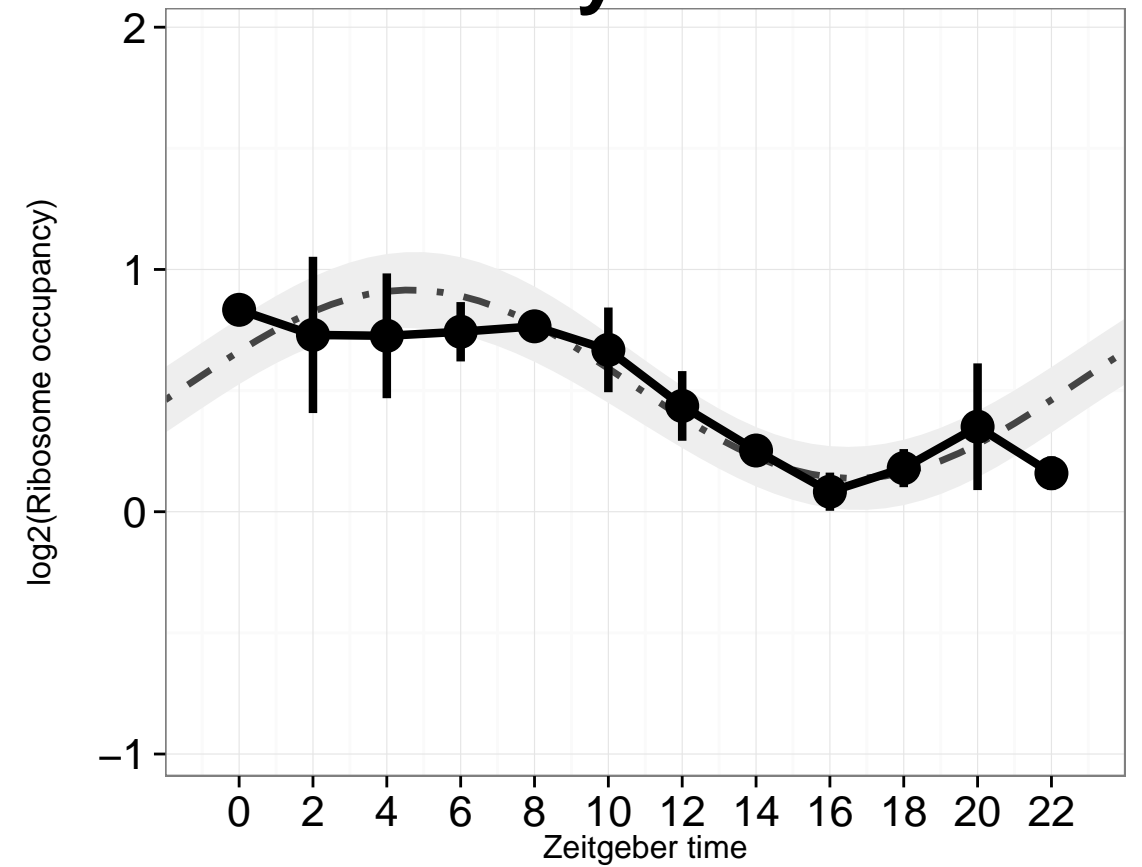

Supplement: SuppDataset_1.zip [file Myl12b_set_A.pdf › Supplemental Dataset 1/A-mRNA_nonrhyth_translation_nonrhyth/Myl12b_set_A.pdf]

## Myl6

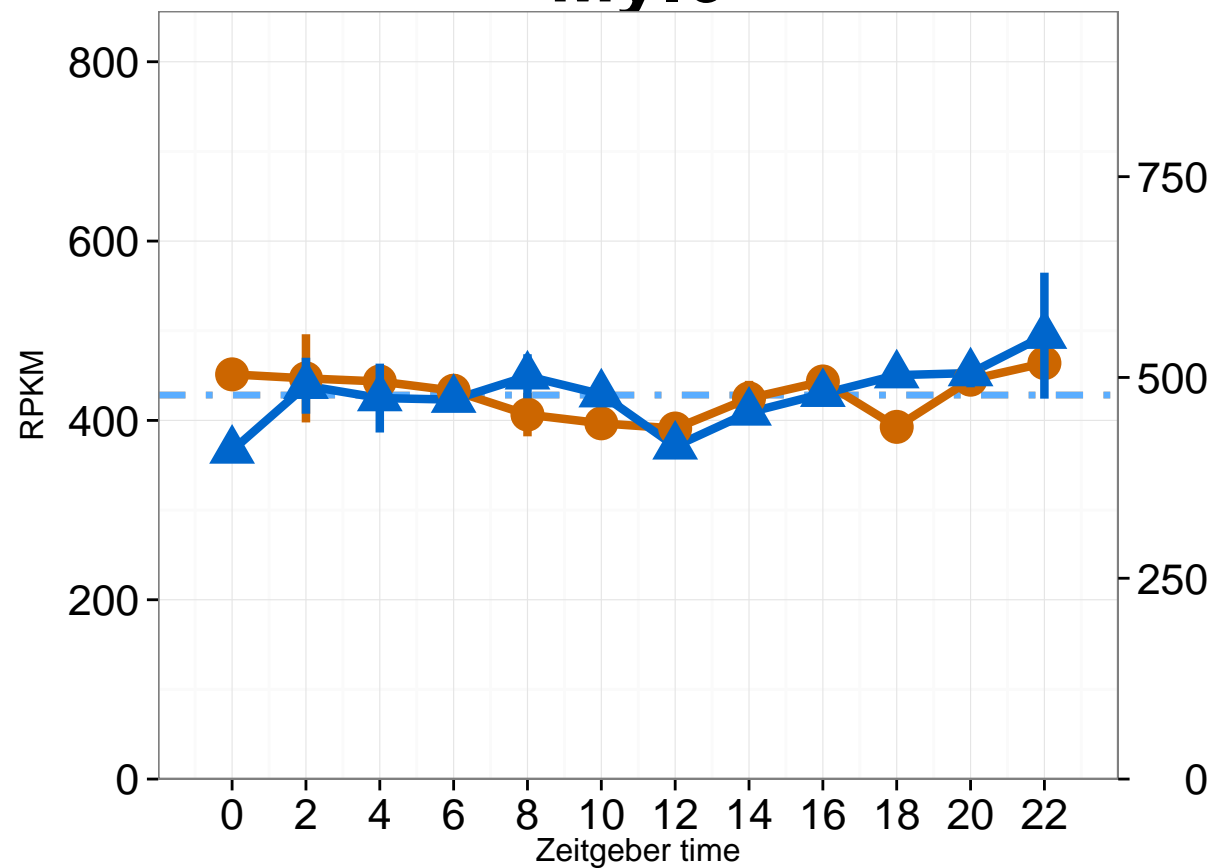

## Myl6

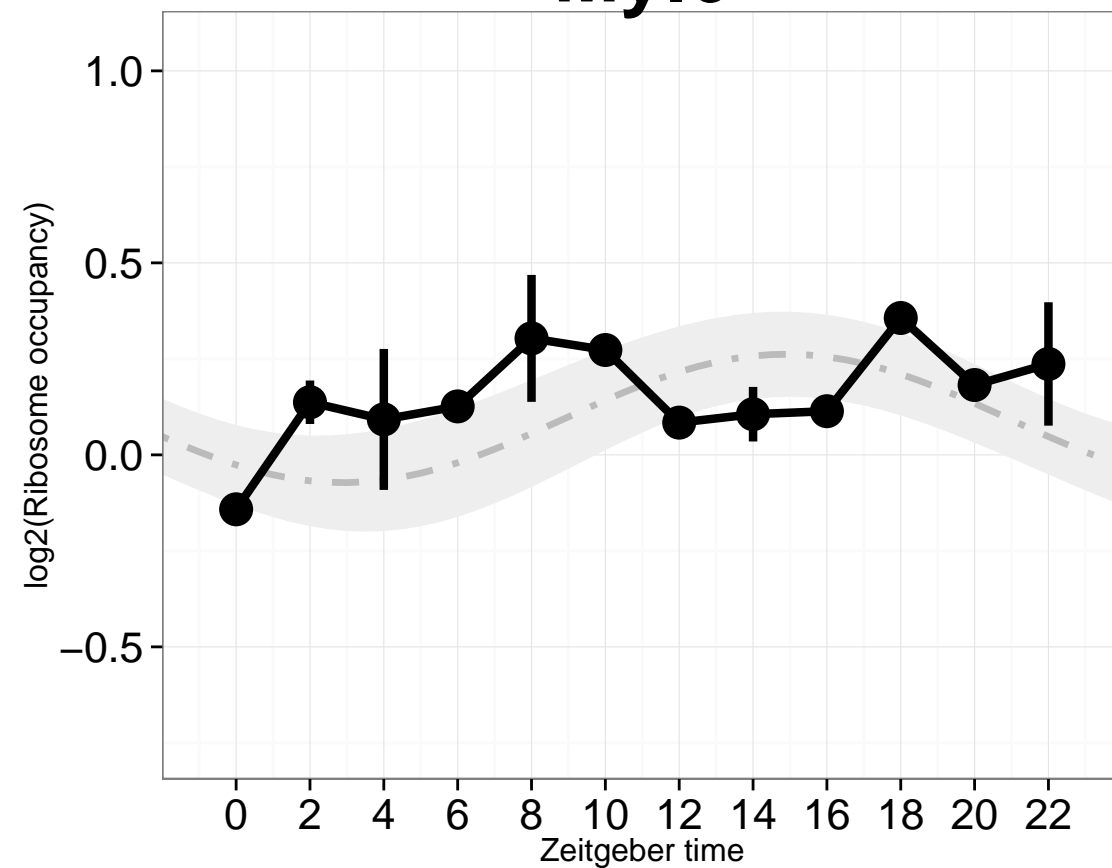

Supplement: SuppDataset_1.zip [file Myl6_set_A.pdf › Supplemental Dataset 1/A-mRNA_nonrhyth_translation_nonrhyth/Myl6_set_A.pdf]

## Myliip

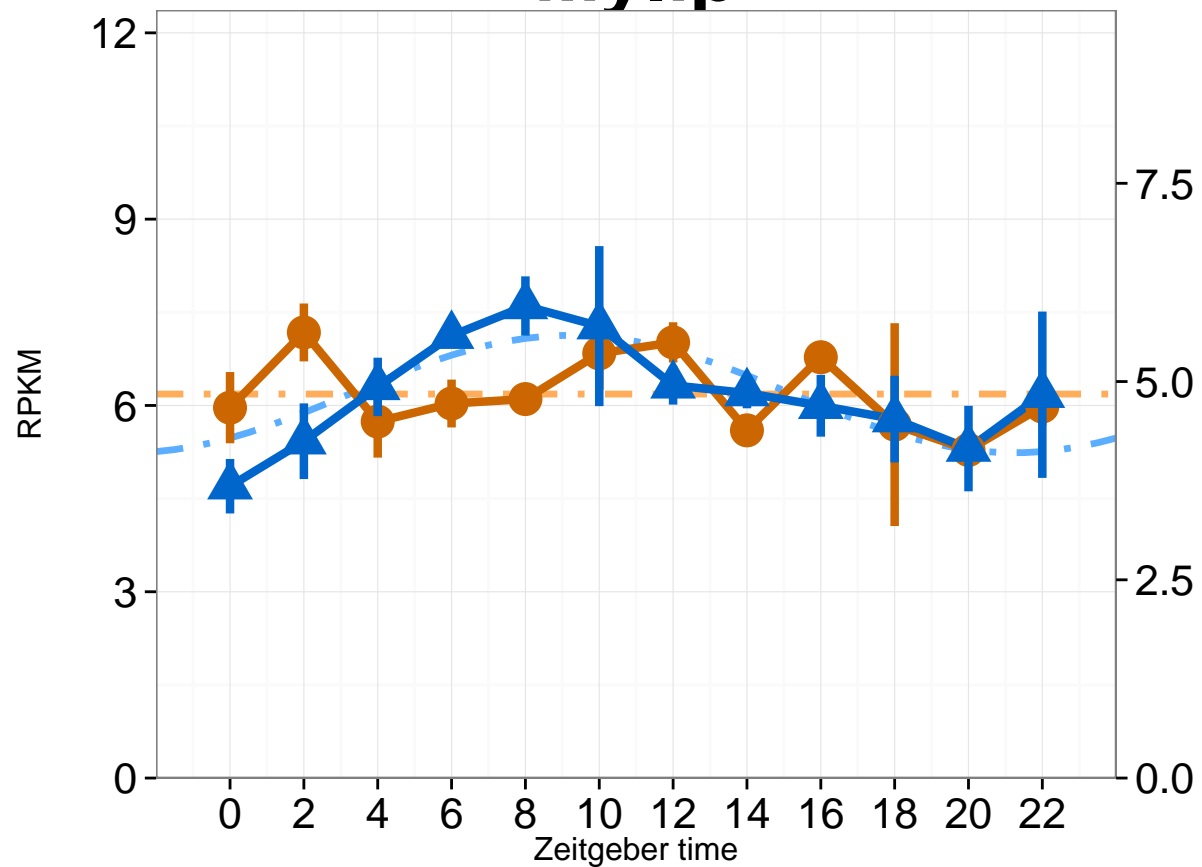

## Myliip

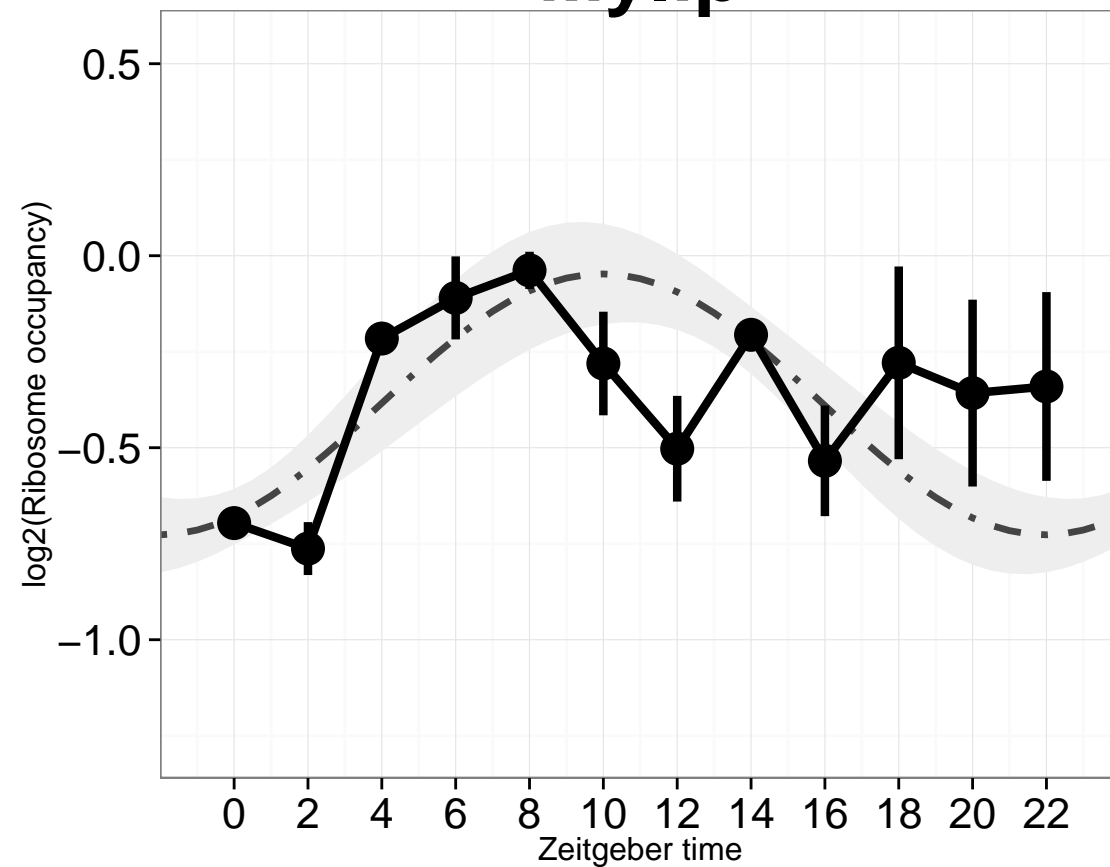

Supplement: SuppDataset_1.zip [file Mylip_set_A.pdf › Supplemental Dataset 1/A-mRNA_nonrhyth_translation_nonrhyth/Mylip_set_A.pdf]

# Mylk

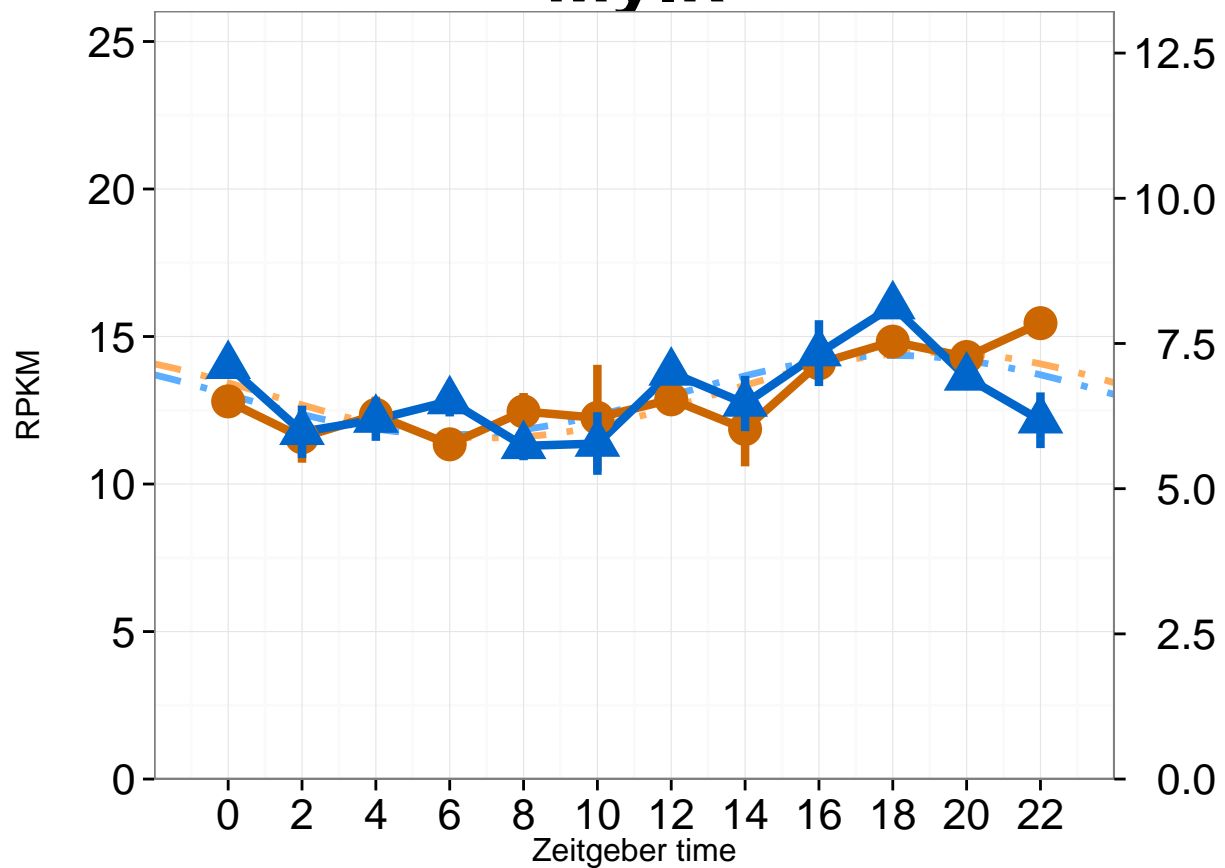

# Mylk

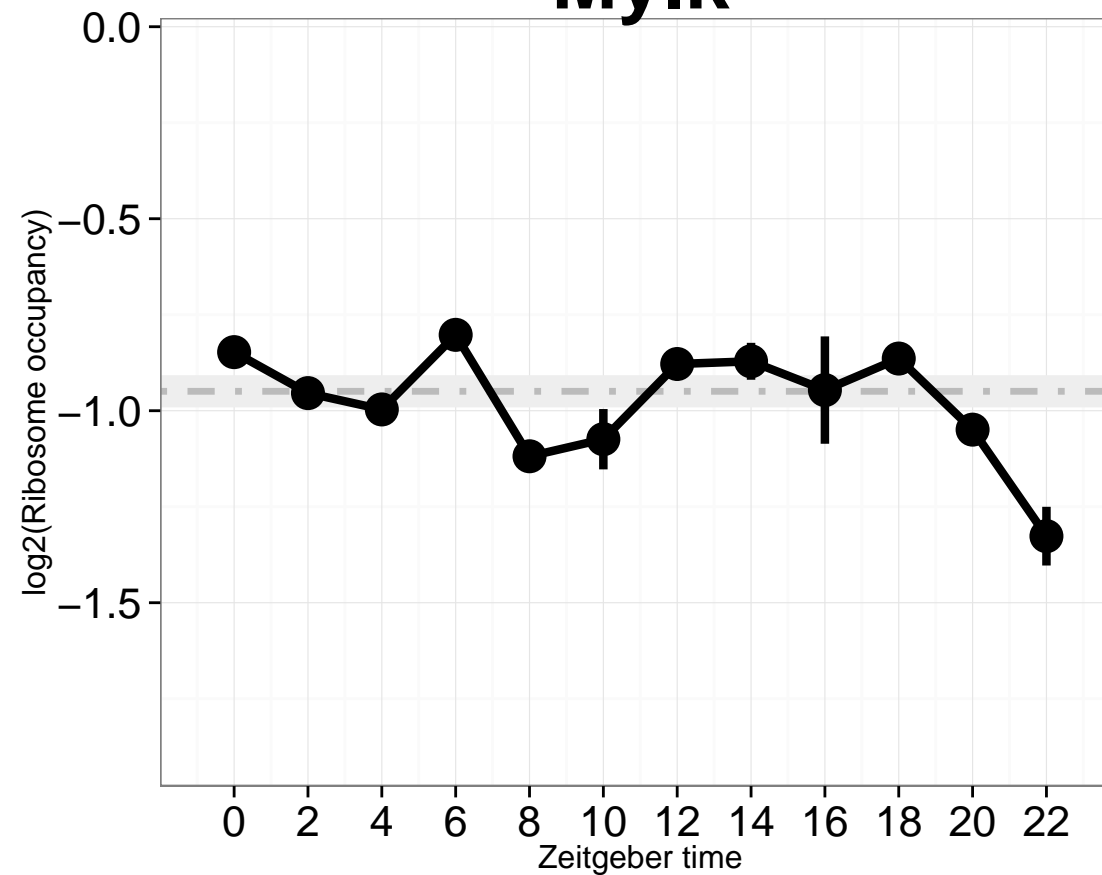

Supplement: SuppDataset_1.zip [file Mylk_set_A.pdf › Supplemental Dataset 1/A-mRNA_nonrhyth_translation_nonrhyth/Mylk_set_A.pdf]
