# Supplementary figures and images for: Ribosome profiling reveals the rhythmic liver translatome and circadian clock regulation by upstream open reading frames (part 47 of 113)
Source: HighWire-hosted journal article supplement (doi:10.1101/gr.195404.115), 2015-10-20

## Mynn

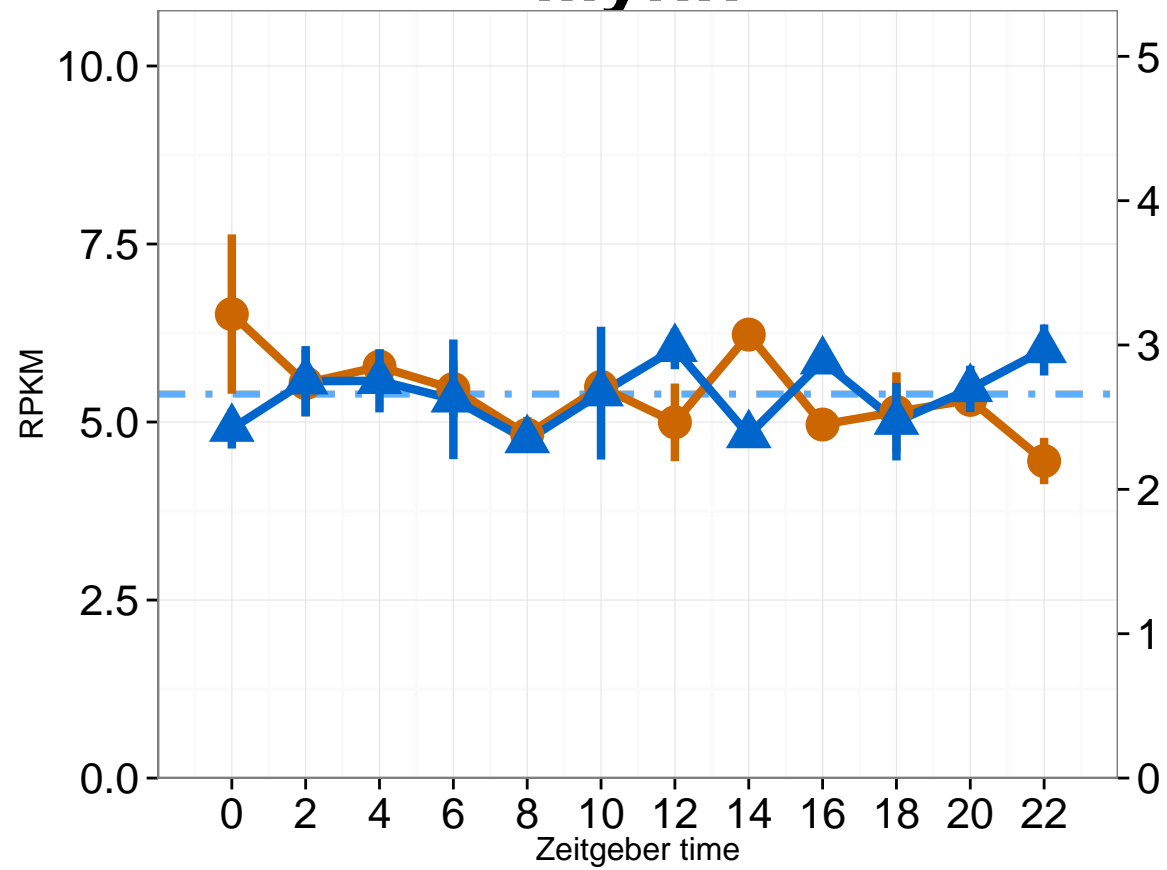

## Mynn

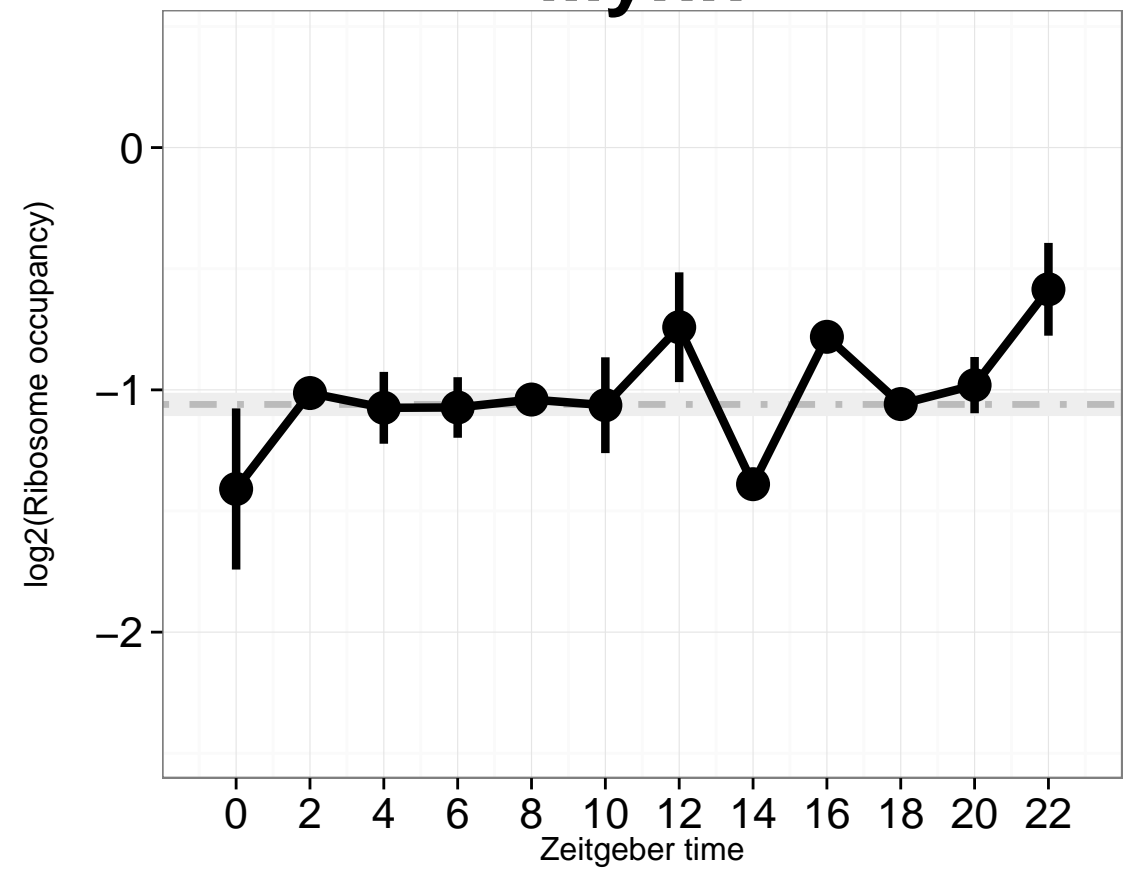

Supplement: SuppDataset_1.zip [file Mynn_set_A.pdf › Supplemental Dataset 1/A-mRNA_nonrhyth_translation_nonrhyth/Mynn_set_A.pdf]

## Myo10

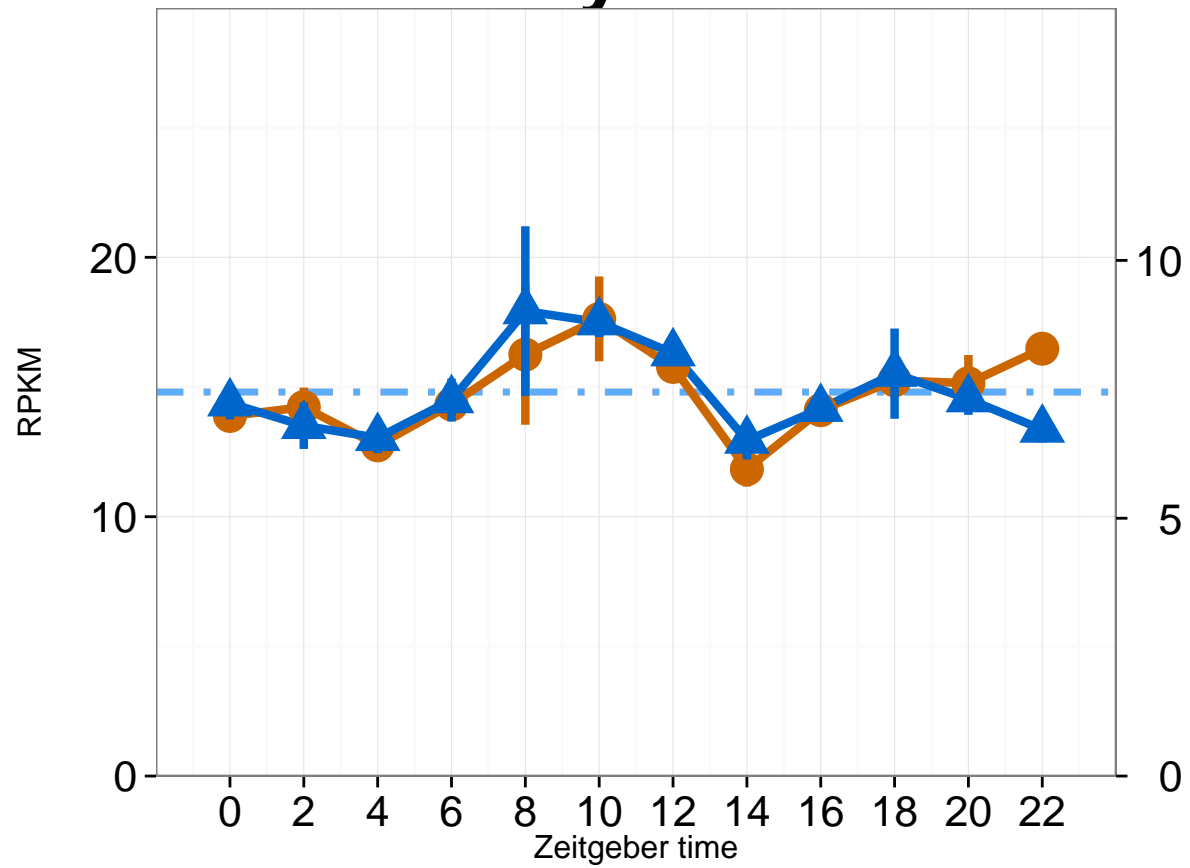

## Myo10

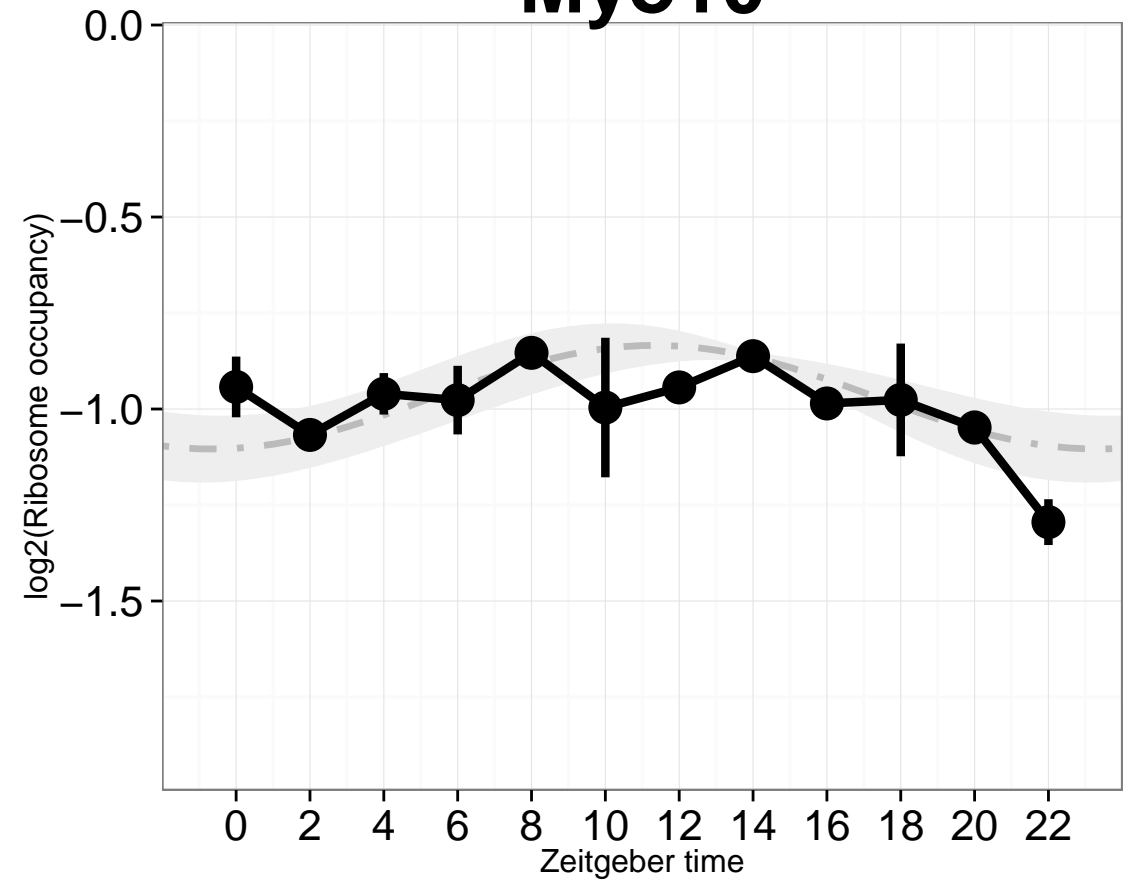

Supplement: SuppDataset_1.zip [file Myo10_set_A.pdf › Supplemental Dataset 1/A-mRNA_nonrhyth_translation_nonrhyth/Myo10_set_A.pdf]

# Myo18a

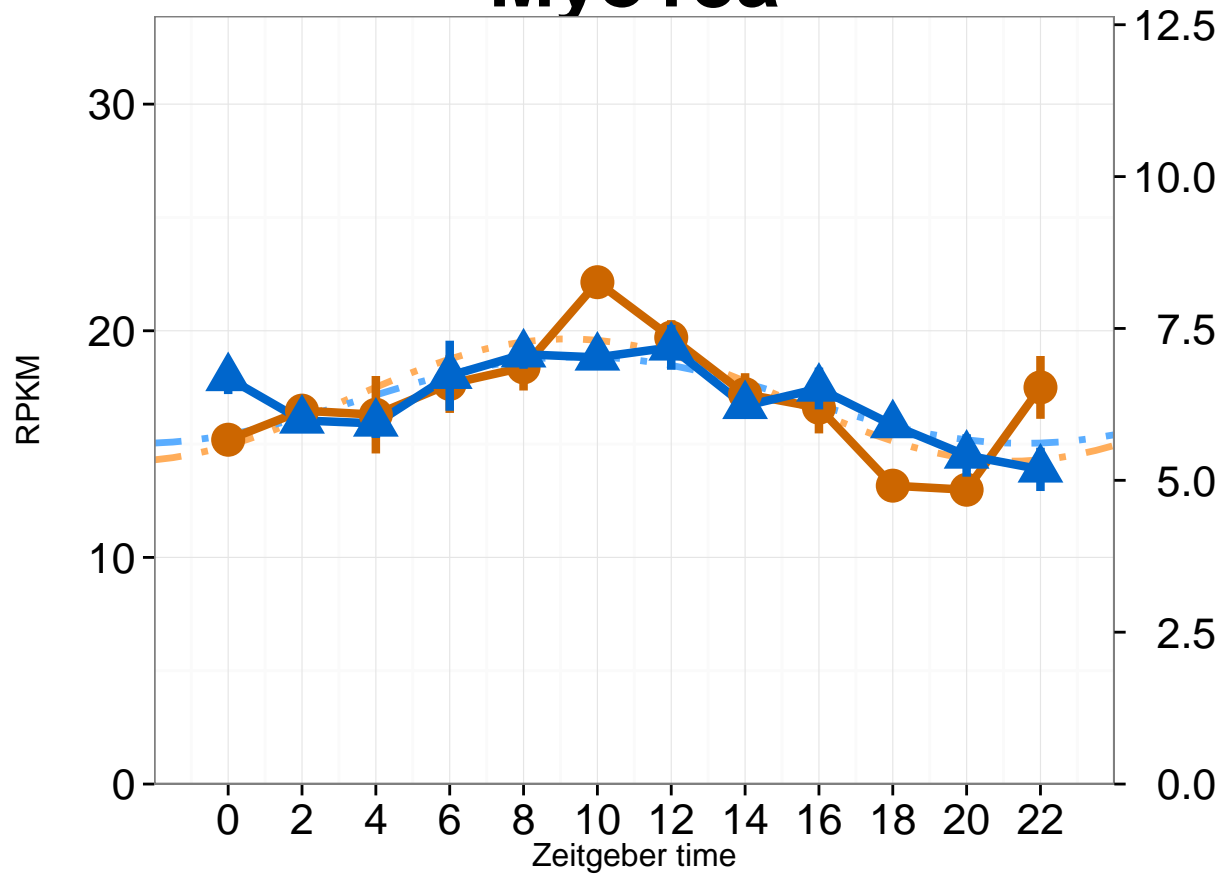

# Myo18a

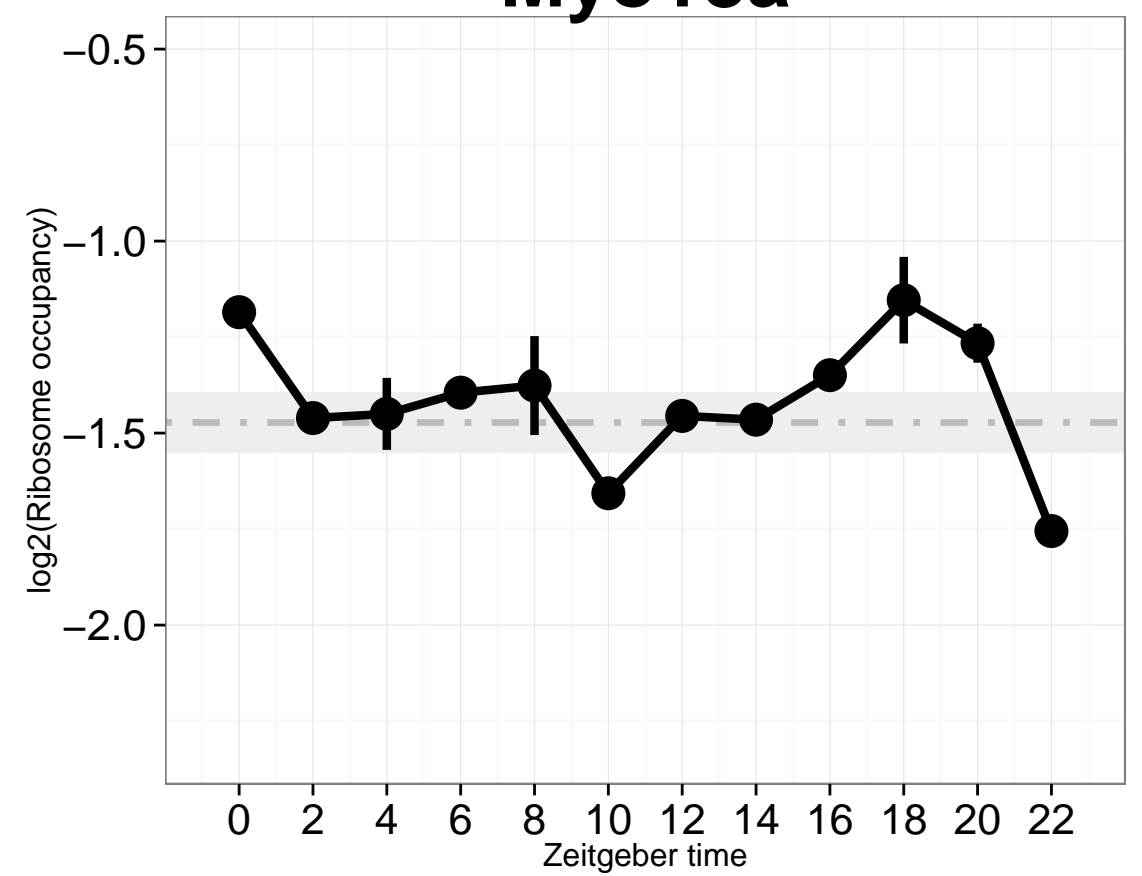

Supplement: SuppDataset_1.zip [file Myo18a_set_A.pdf › Supplemental Dataset 1/A-mRNA_nonrhyth_translation_nonrhyth/Myo18a_set_A.pdf]

# Myo1b

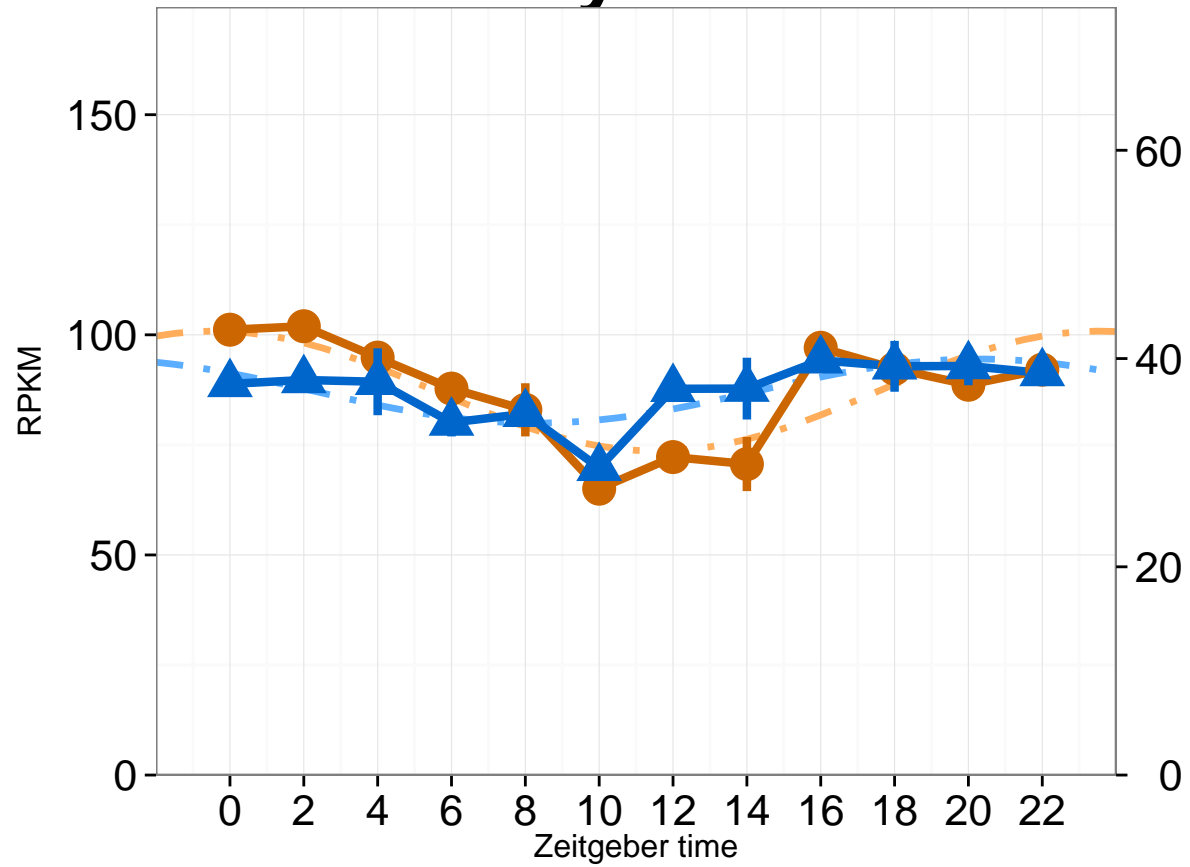

# Myo1b

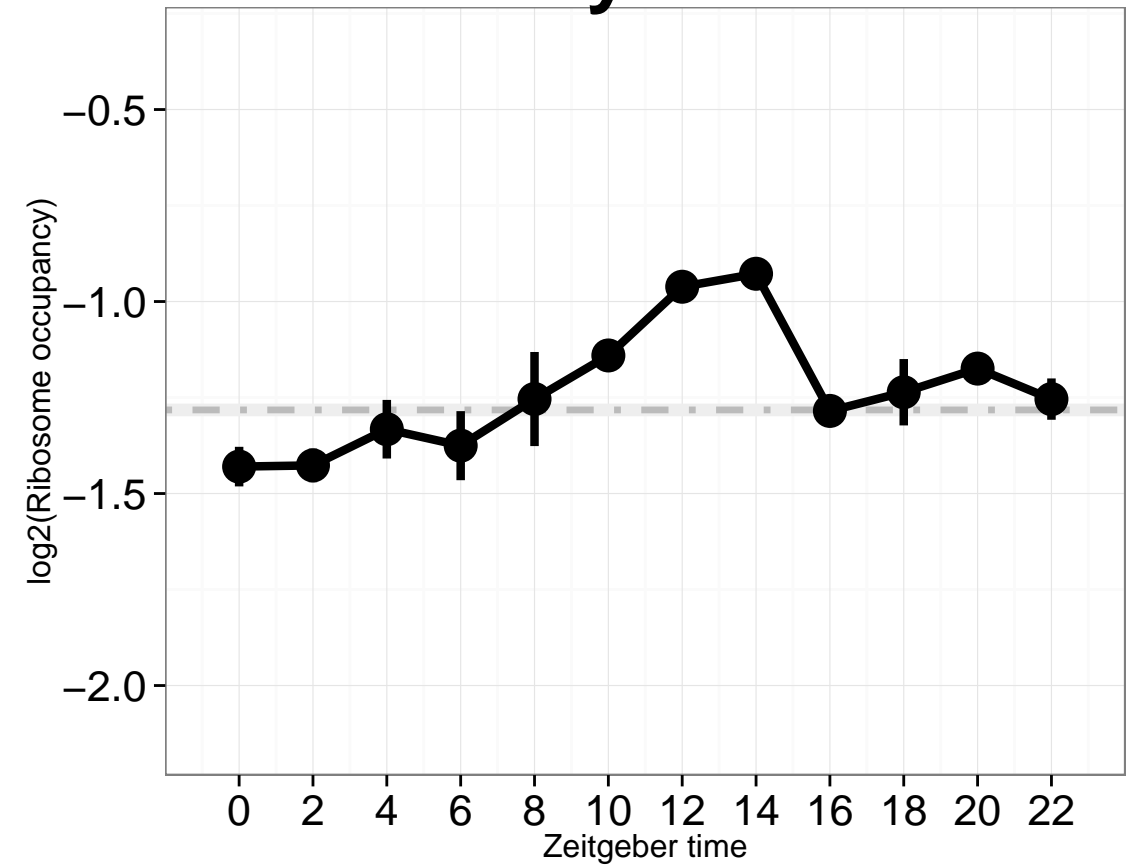

Supplement: SuppDataset_1.zip [file Myo1b_set_A.pdf › Supplemental Dataset 1/A-mRNA_nonrhyth_translation_nonrhyth/Myo1b_set_A.pdf]

## Myo1c

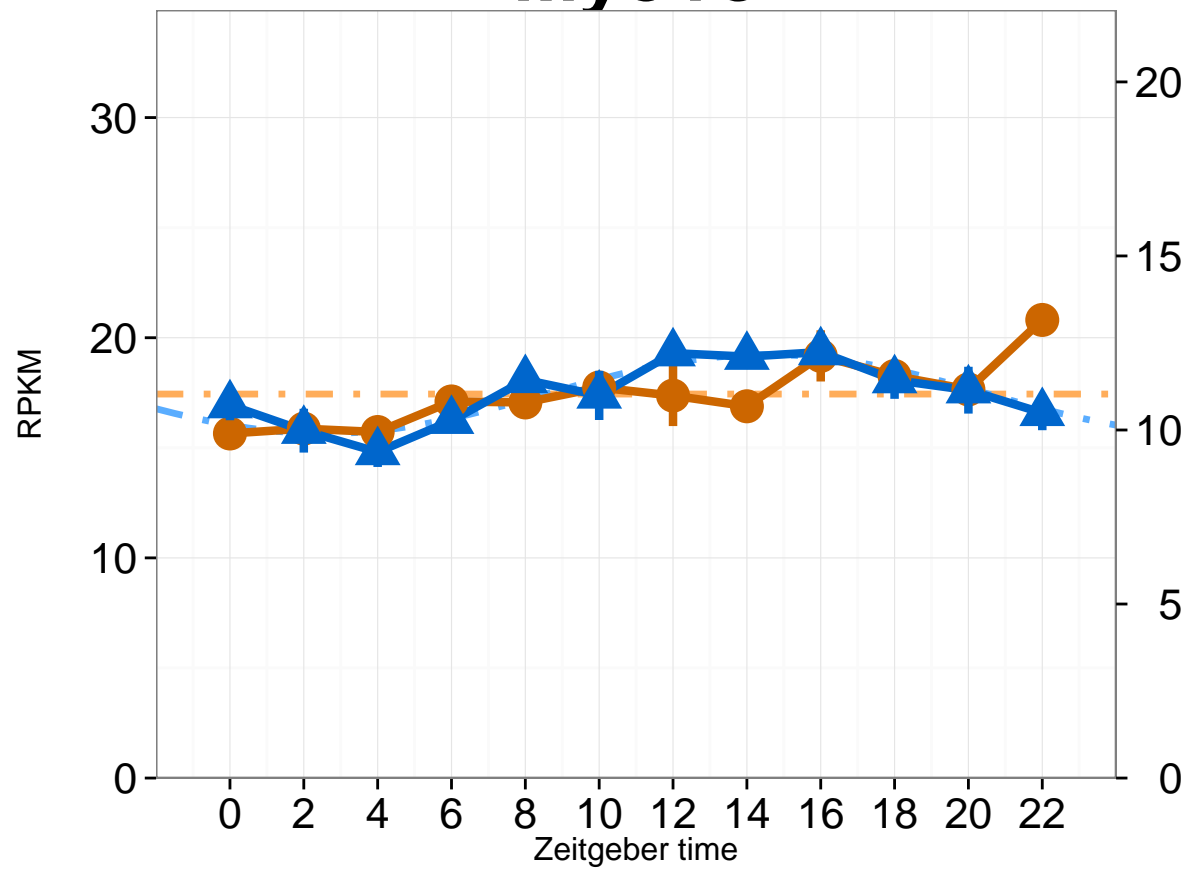

## Myo1c

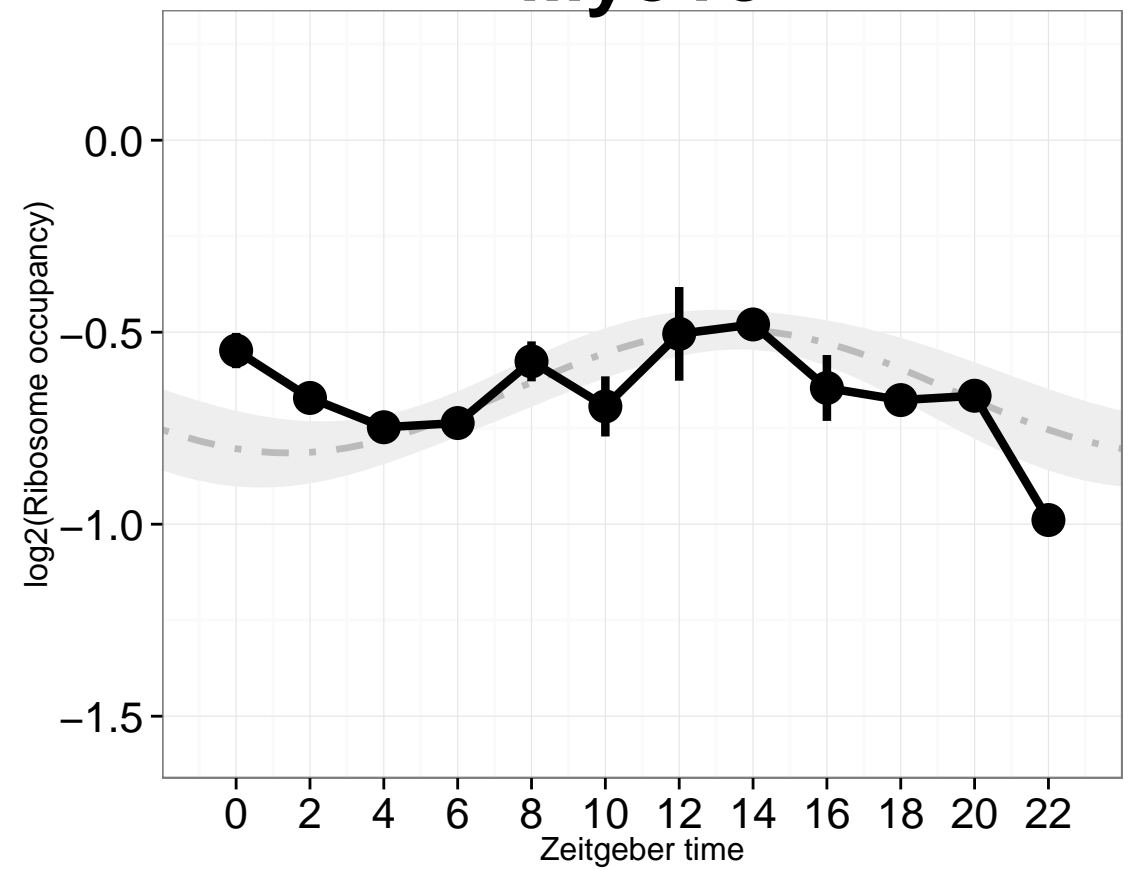

Supplement: SuppDataset_1.zip [file Myo1c_set_A.pdf › Supplemental Dataset 1/A-mRNA_nonrhyth_translation_nonrhyth/Myo1c_set_A.pdf]

# Myo1d

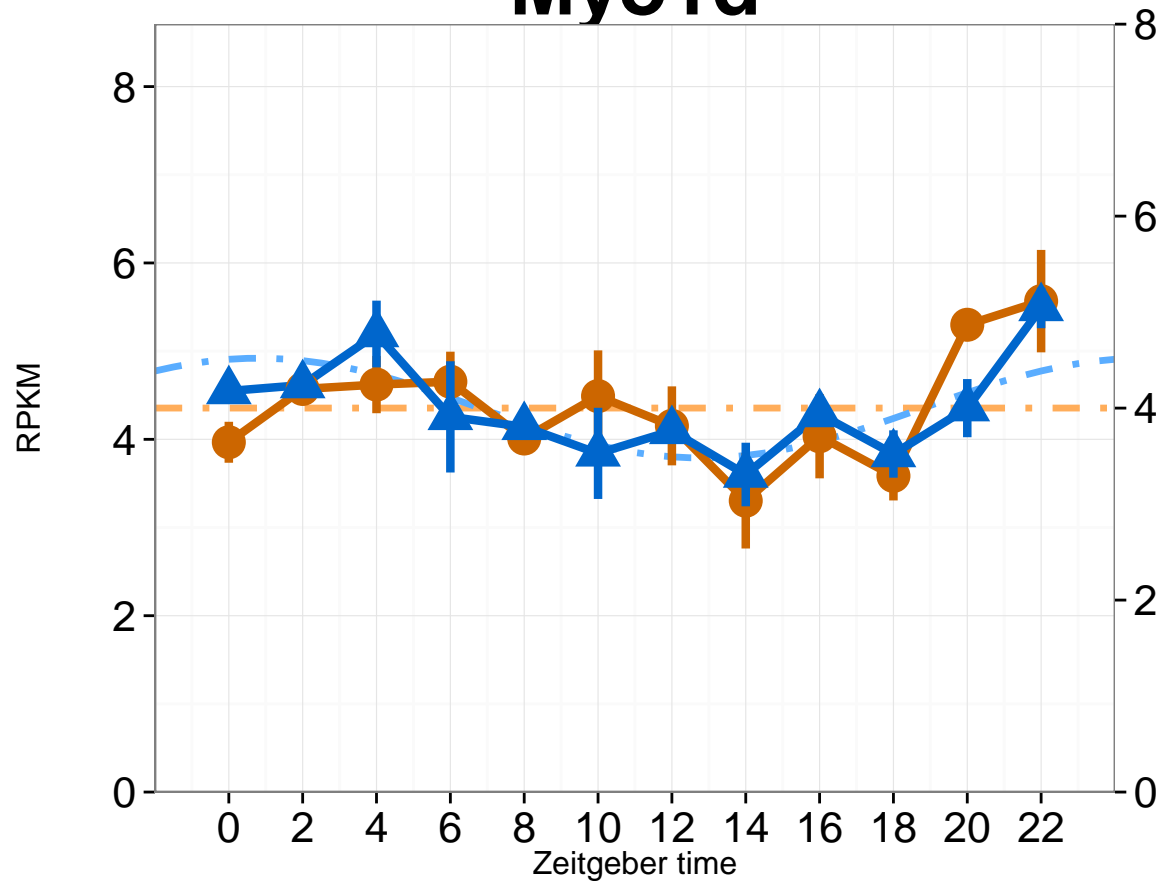

# Myo1d

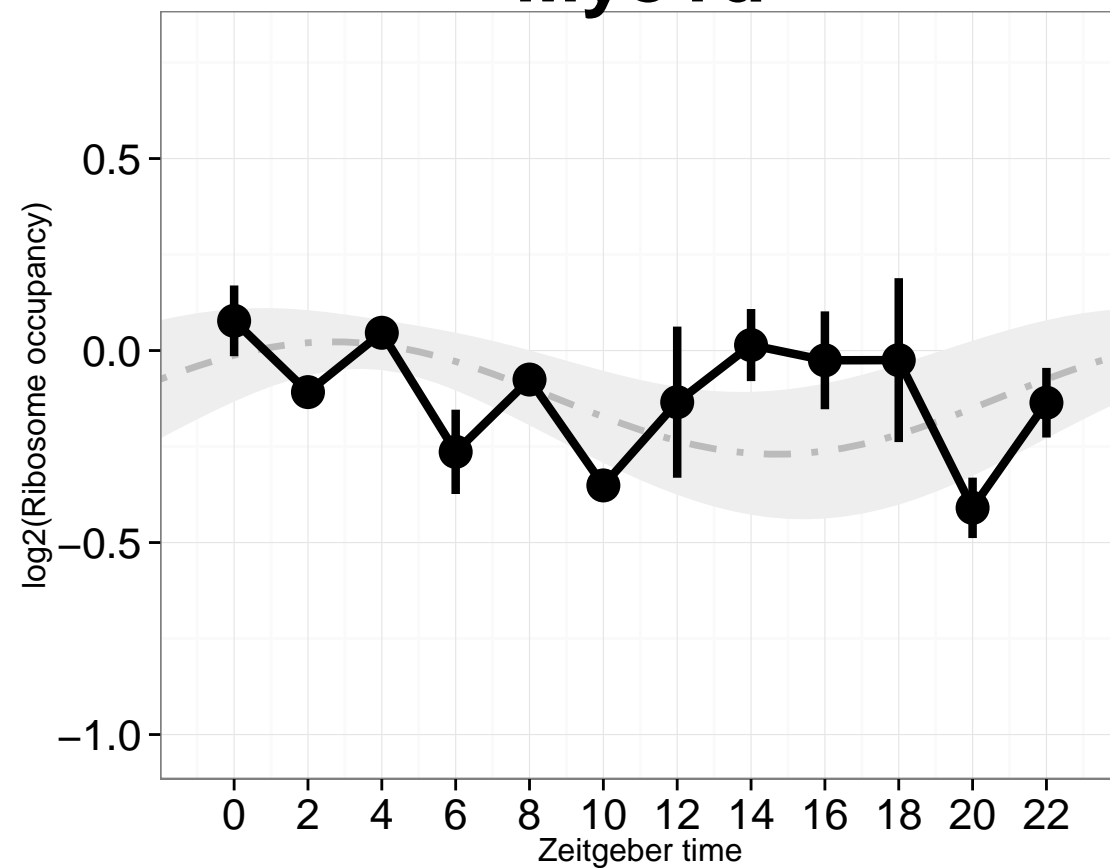

Supplement: SuppDataset_1.zip [file Myo1d_set_A.pdf › Supplemental Dataset 1/A-mRNA_nonrhyth_translation_nonrhyth/Myo1d_set_A.pdf]

## Myo1e

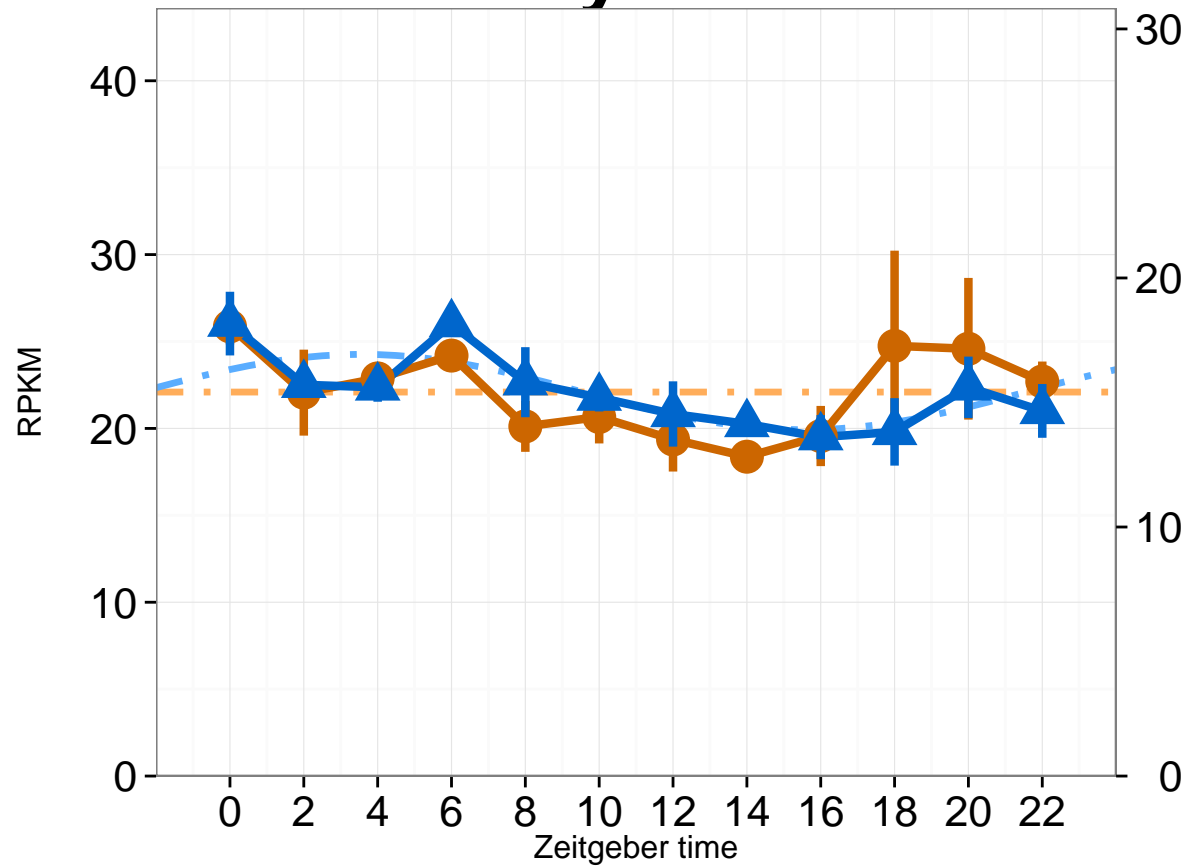

## Myo1e

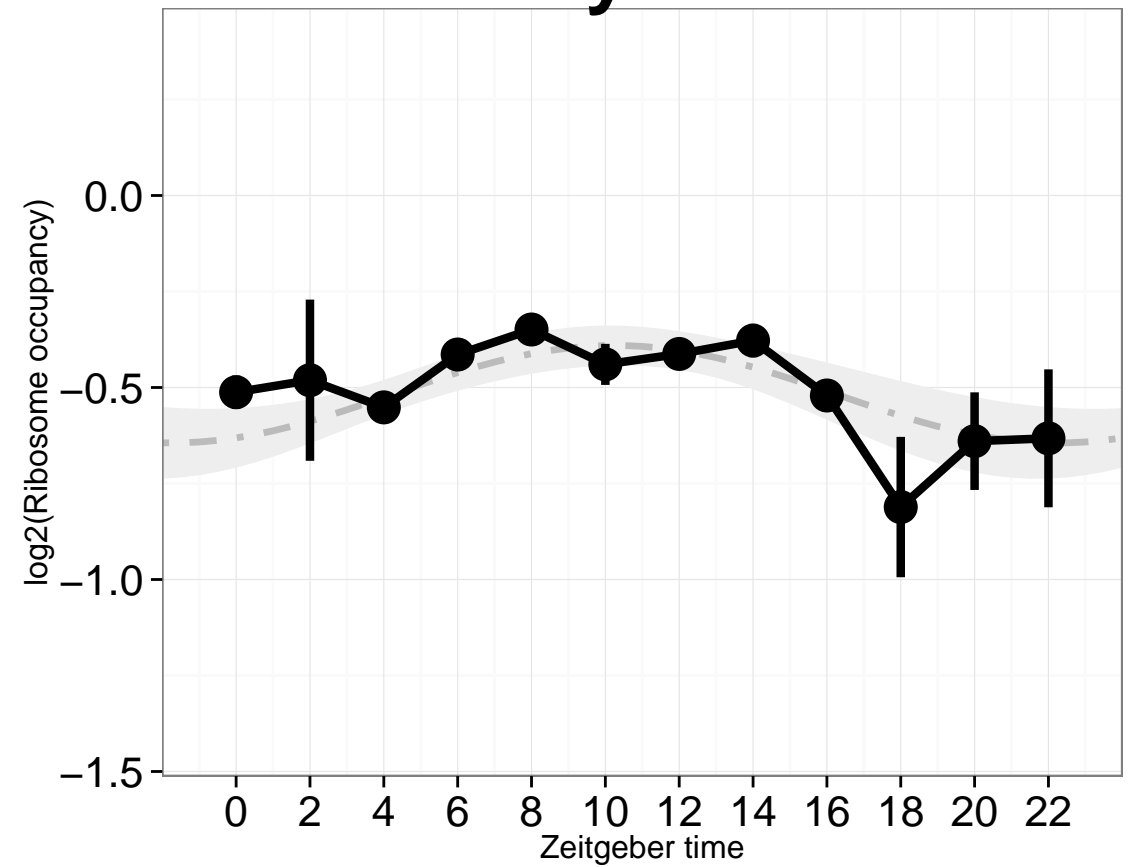

Supplement: SuppDataset_1.zip [file Myo1e_set_A.pdf › Supplemental Dataset 1/A-mRNA_nonrhyth_translation_nonrhyth/Myo1e_set_A.pdf]

## Myo1f

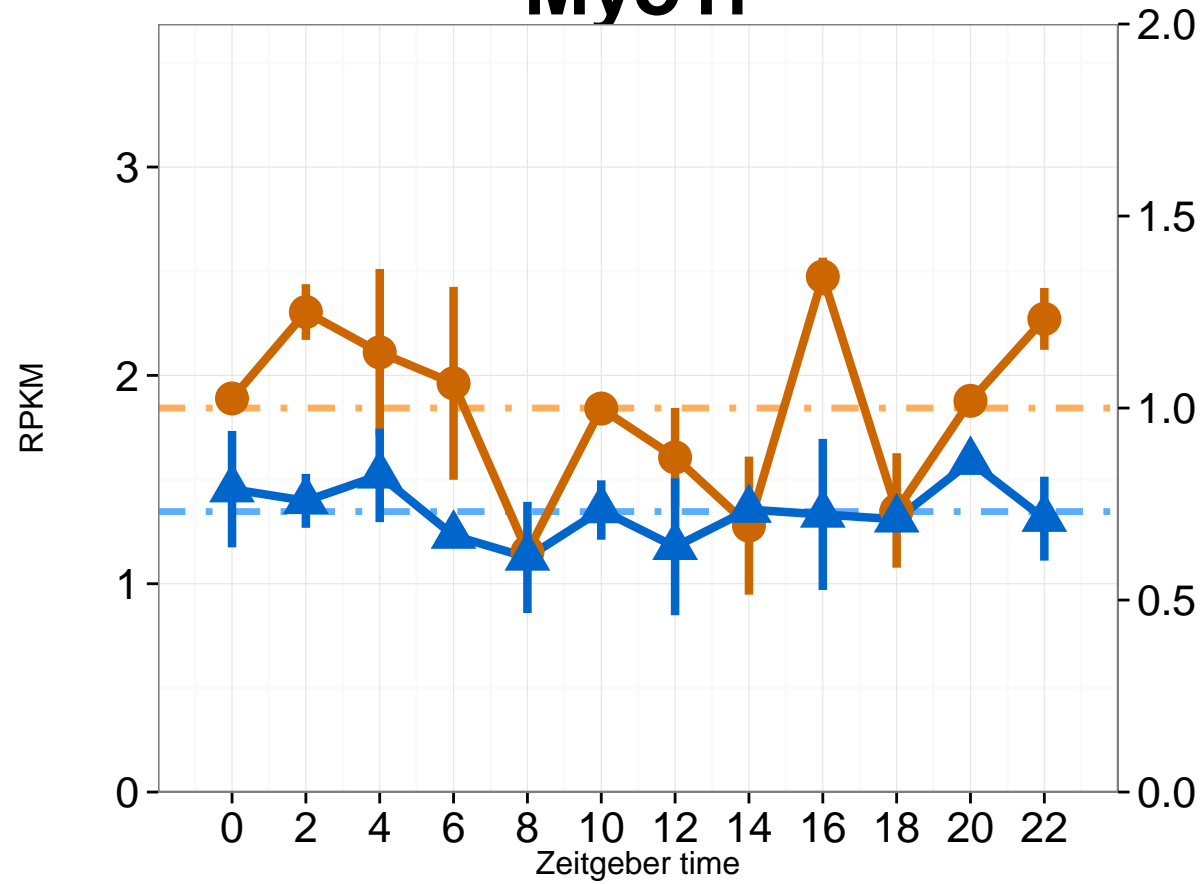

## Myo1f

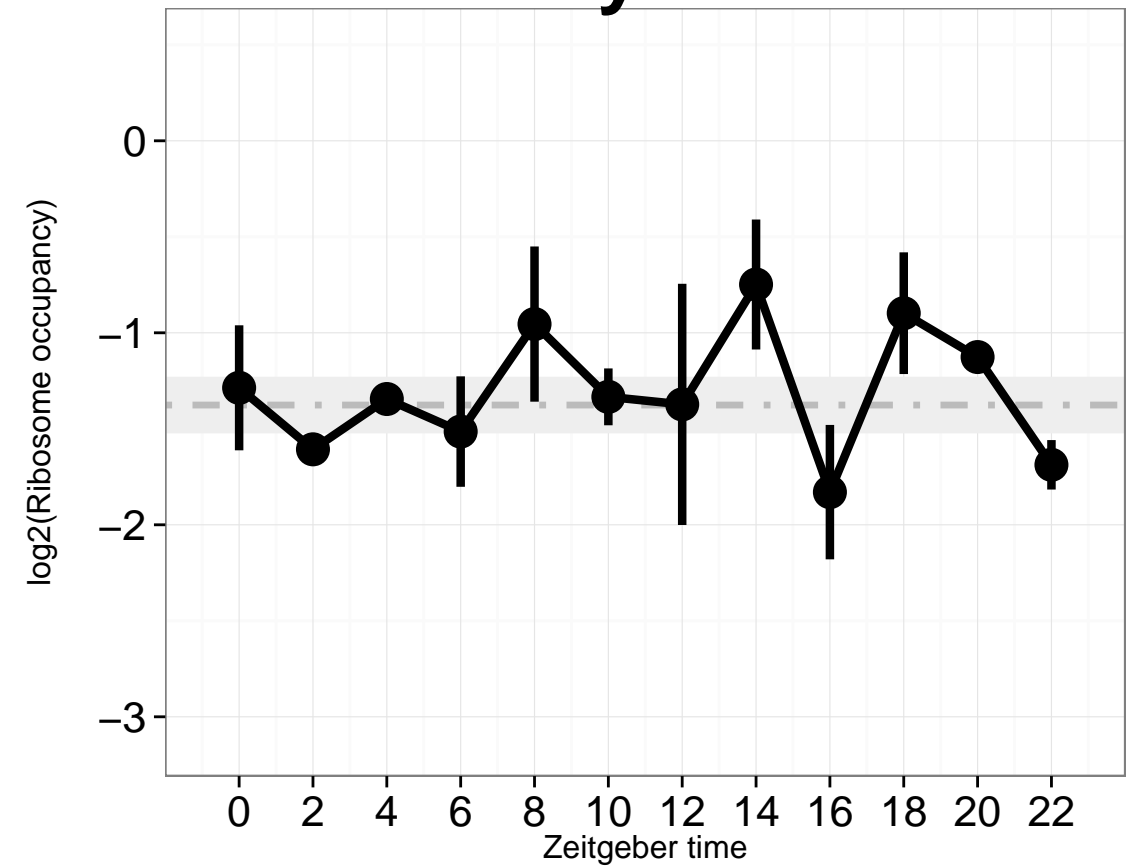

Supplement: SuppDataset_1.zip [file Myo1f_set_A.pdf › Supplemental Dataset 1/A-mRNA_nonrhyth_translation_nonrhyth/Myo1f_set_A.pdf]

# Myo1g

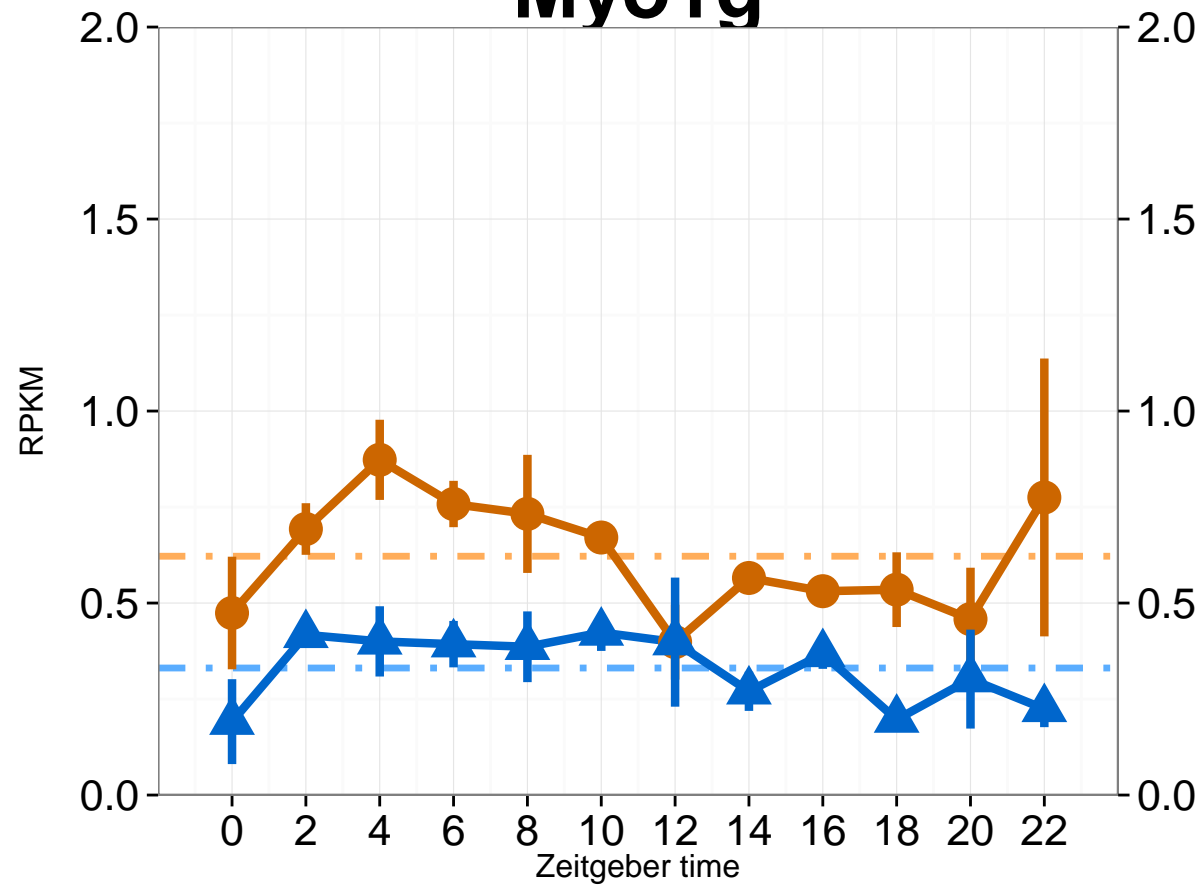

# Myo1g

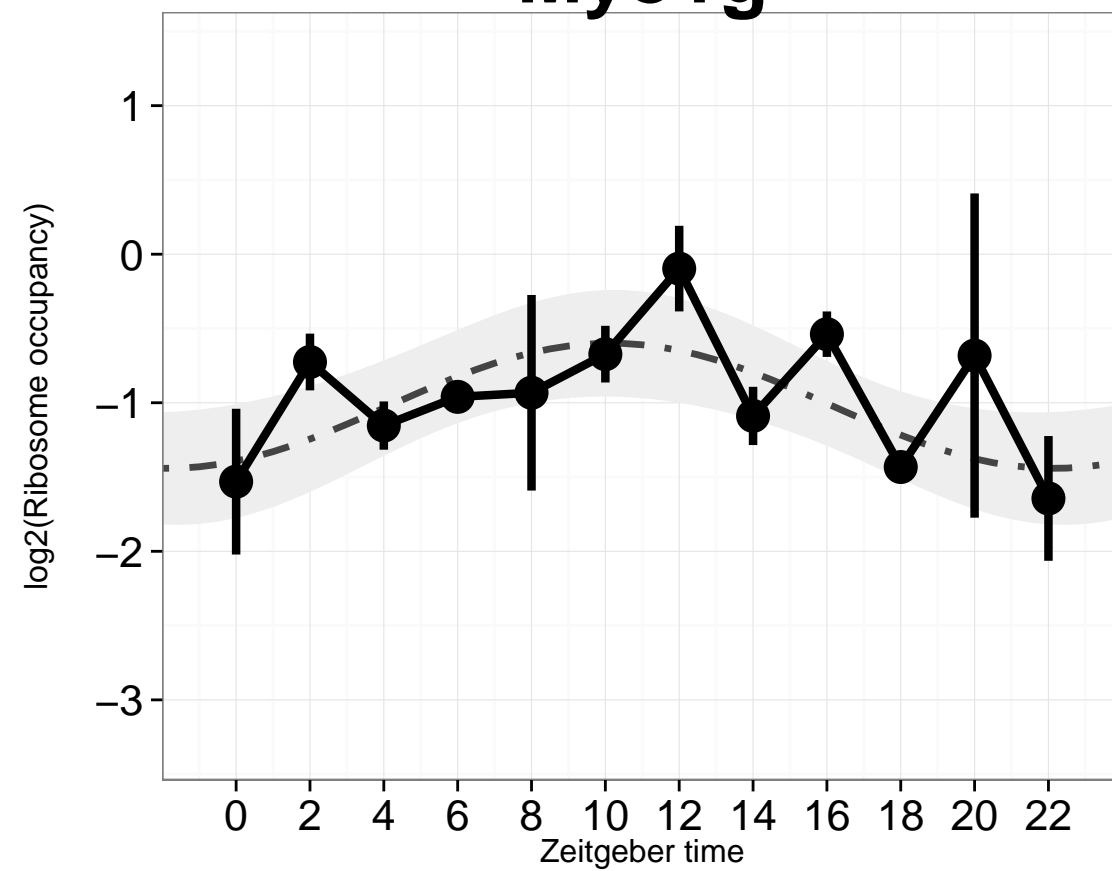

Supplement: SuppDataset_1.zip [file Myo1g_set_A.pdf › Supplemental Dataset 1/A-mRNA_nonrhyth_translation_nonrhyth/Myo1g_set_A.pdf]

# Myo5b

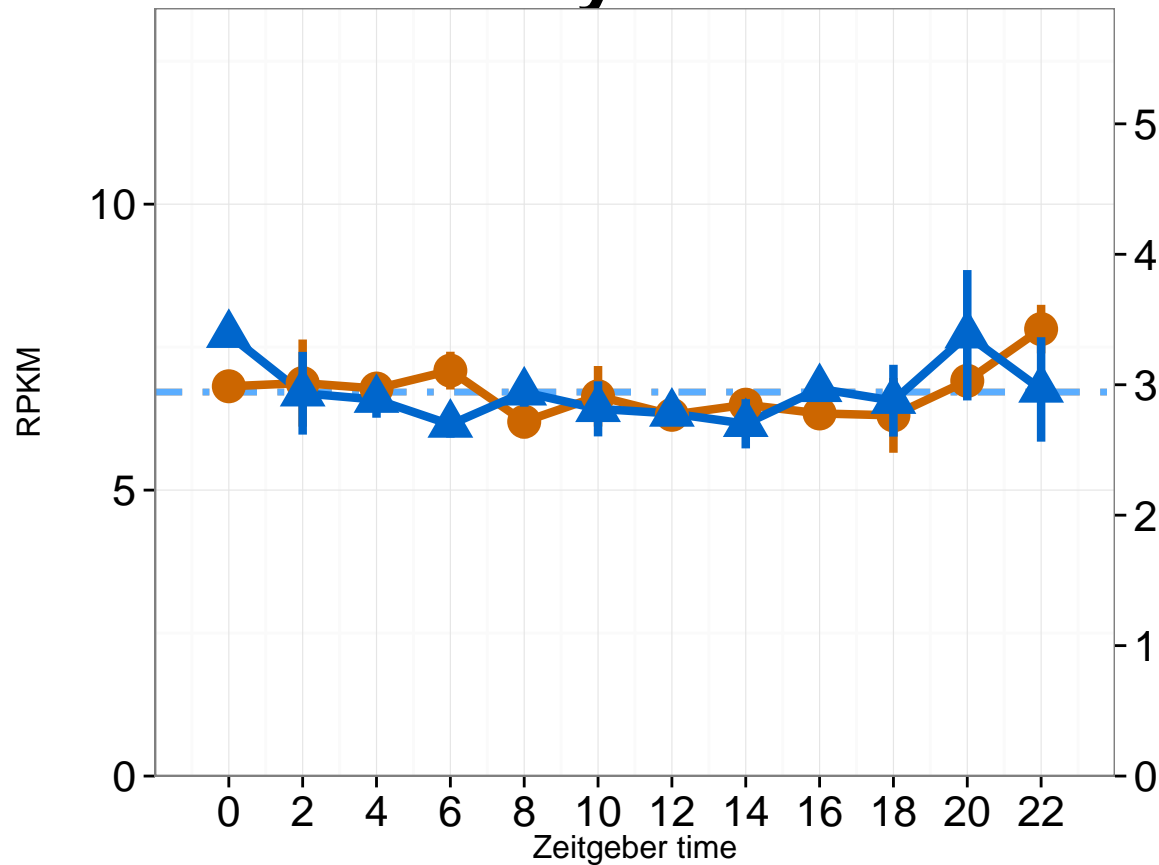

# Myo5b

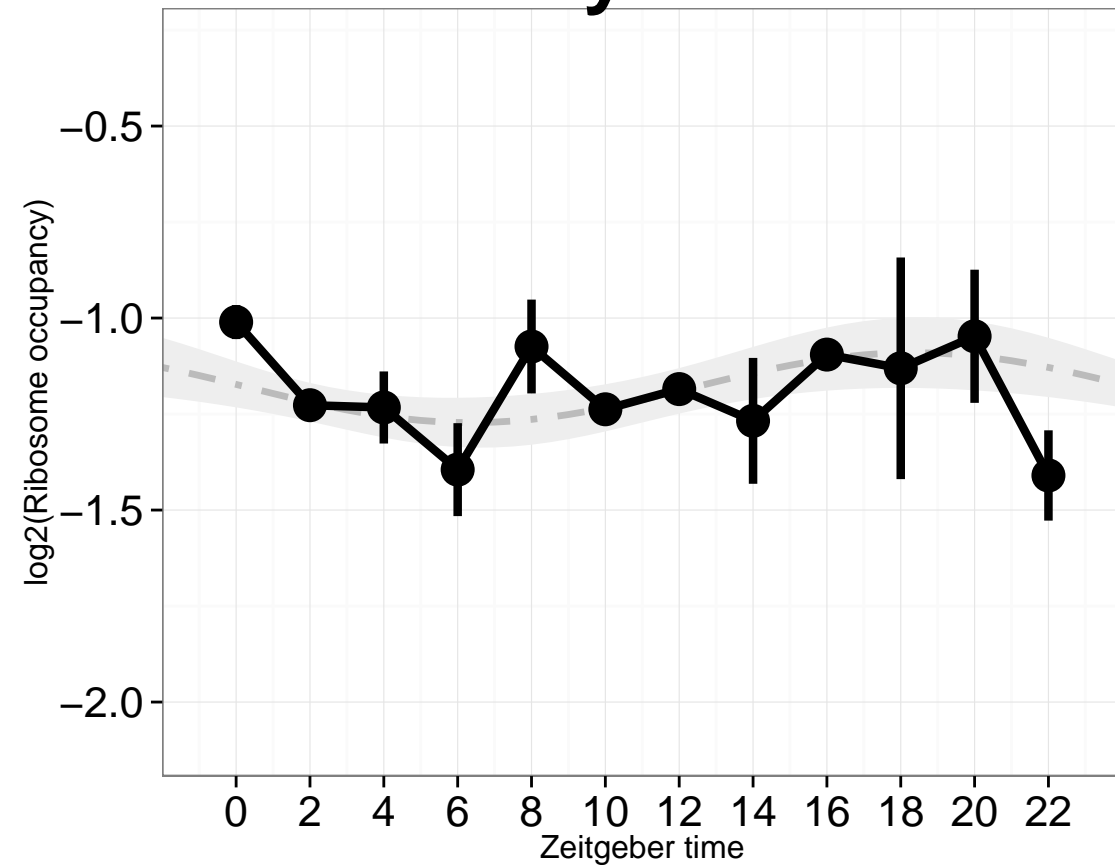

Supplement: SuppDataset_1.zip [file Myo5b_set_A.pdf › Supplemental Dataset 1/A-mRNA_nonrhyth_translation_nonrhyth/Myo5b_set_A.pdf]

# Myo6

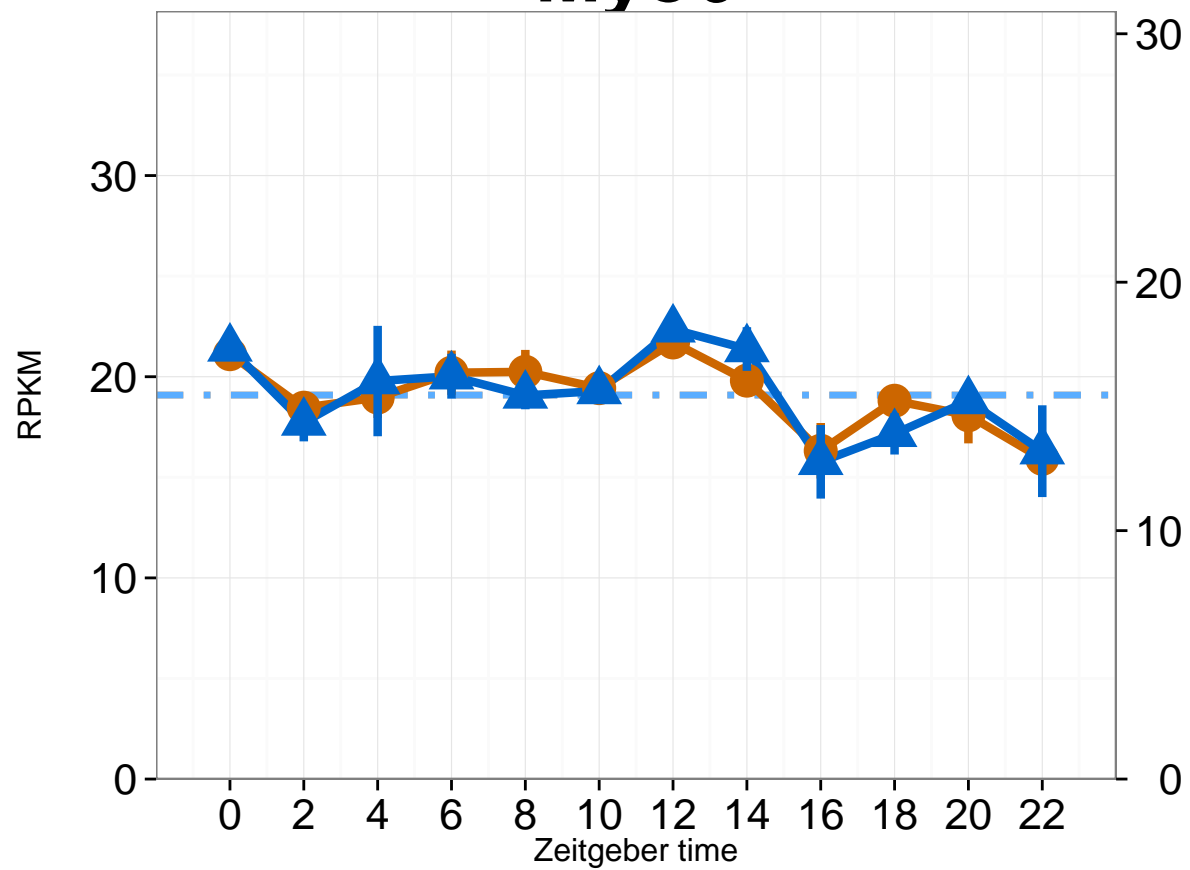

# Myo6

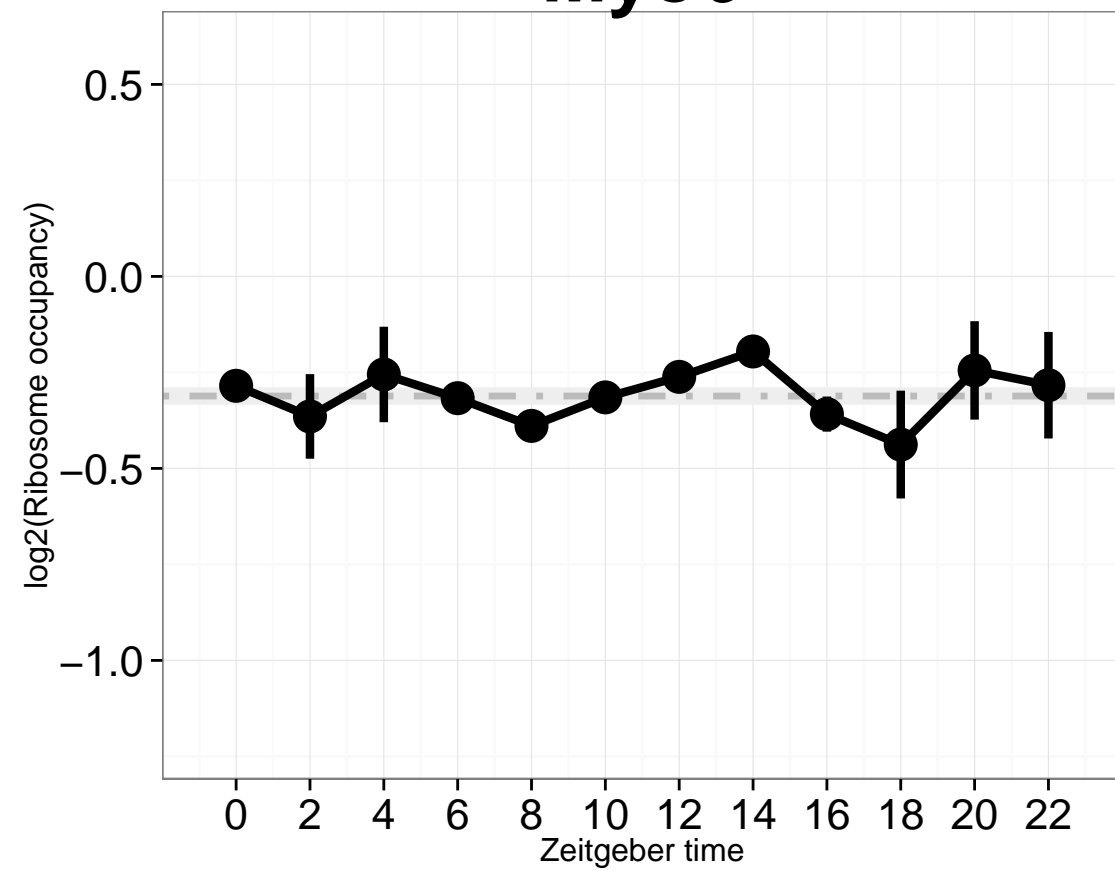

Supplement: SuppDataset_1.zip [file Myo6_set_A.pdf › Supplemental Dataset 1/A-mRNA_nonrhyth_translation_nonrhyth/Myo6_set_A.pdf]

# Myo7a

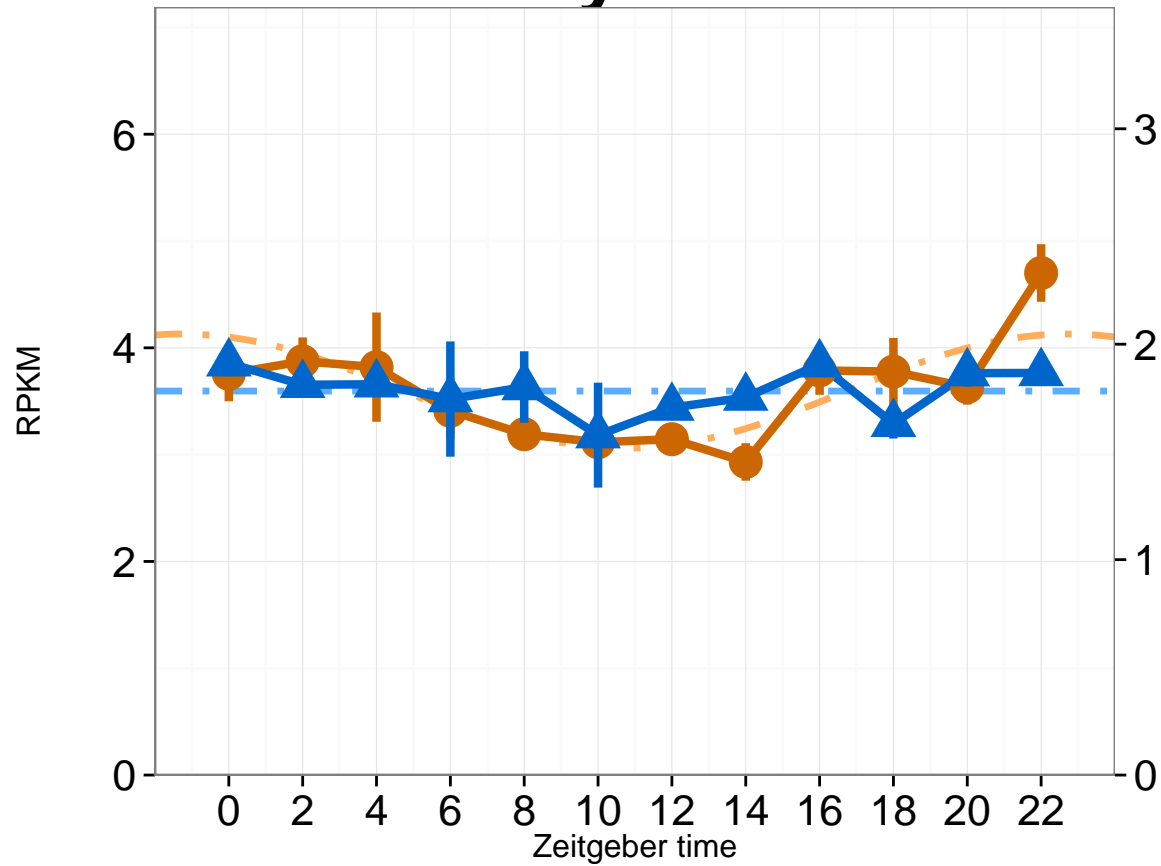

# Myo7a

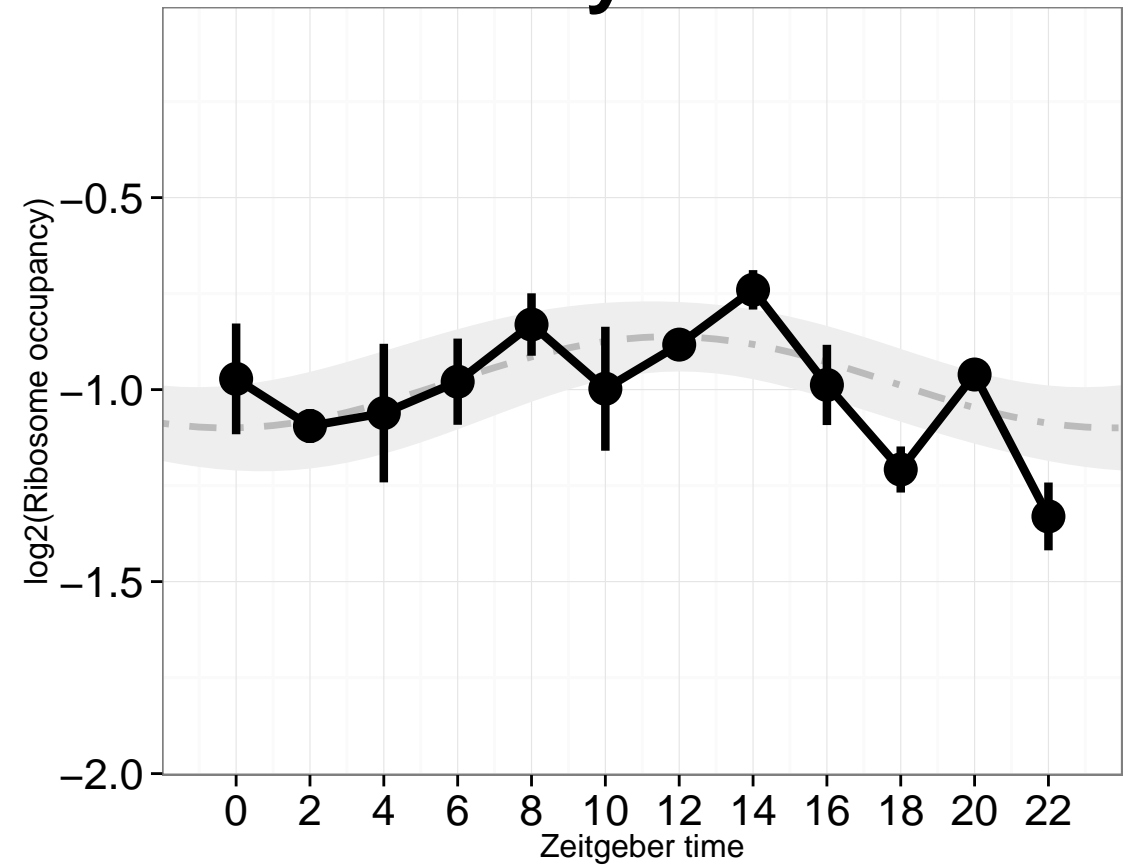

Supplement: SuppDataset_1.zip [file Myo7a_set_A.pdf › Supplemental Dataset 1/A-mRNA_nonrhyth_translation_nonrhyth/Myo7a_set_A.pdf]

# Myo9a

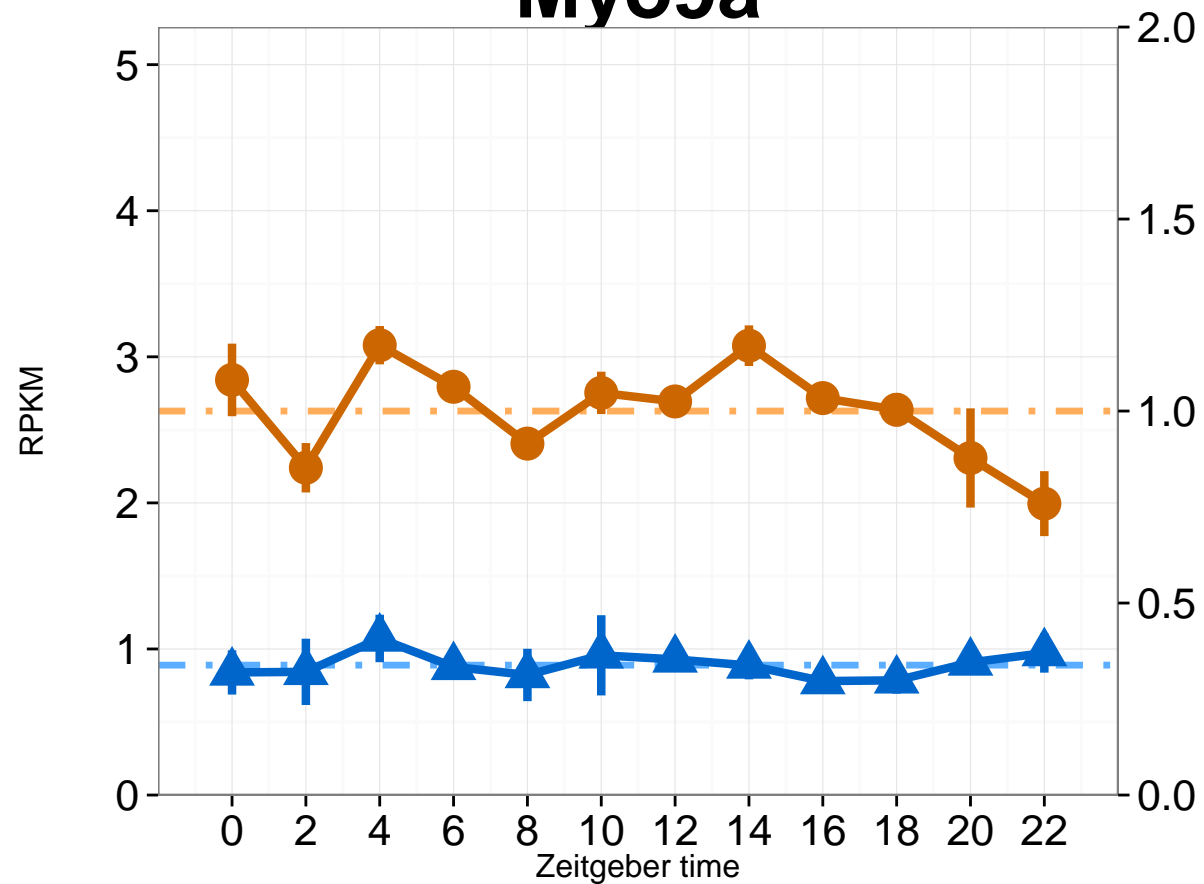

# Myo9a

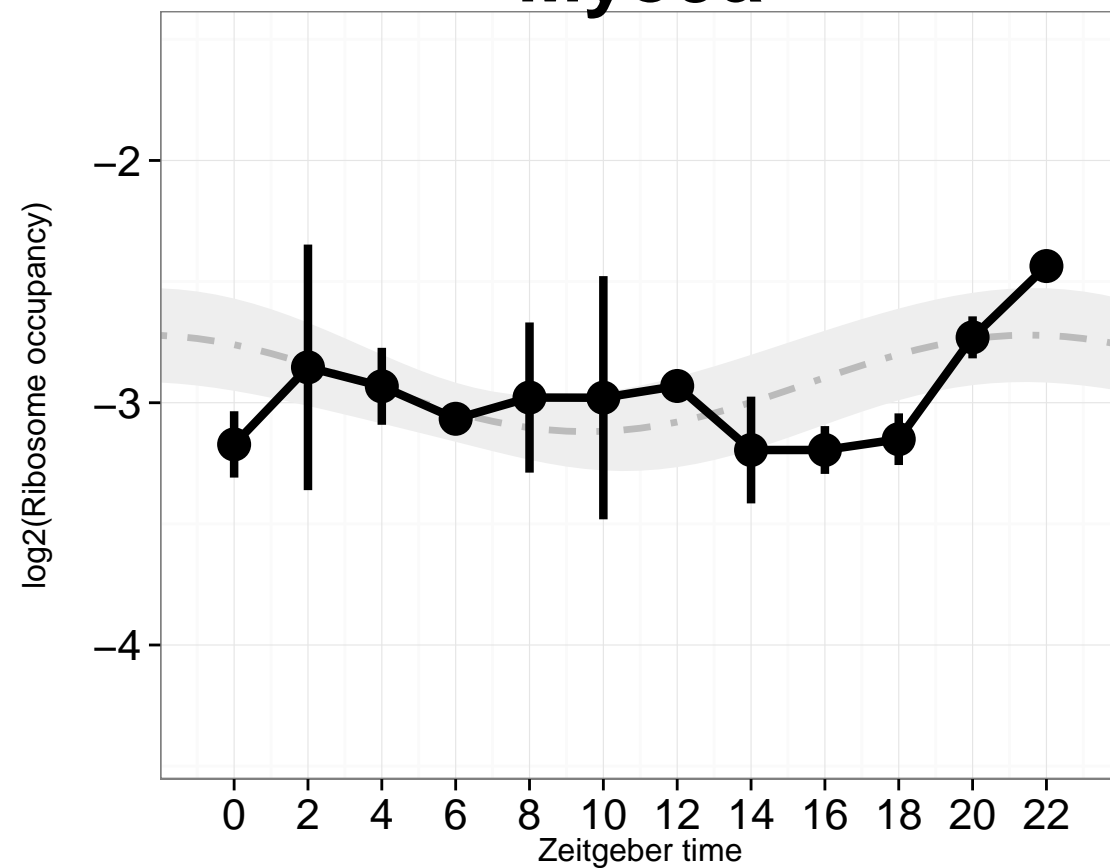

Supplement: SuppDataset_1.zip [file Myo9a_set_A.pdf › Supplemental Dataset 1/A-mRNA_nonrhyth_translation_nonrhyth/Myo9a_set_A.pdf]

# Myo9b

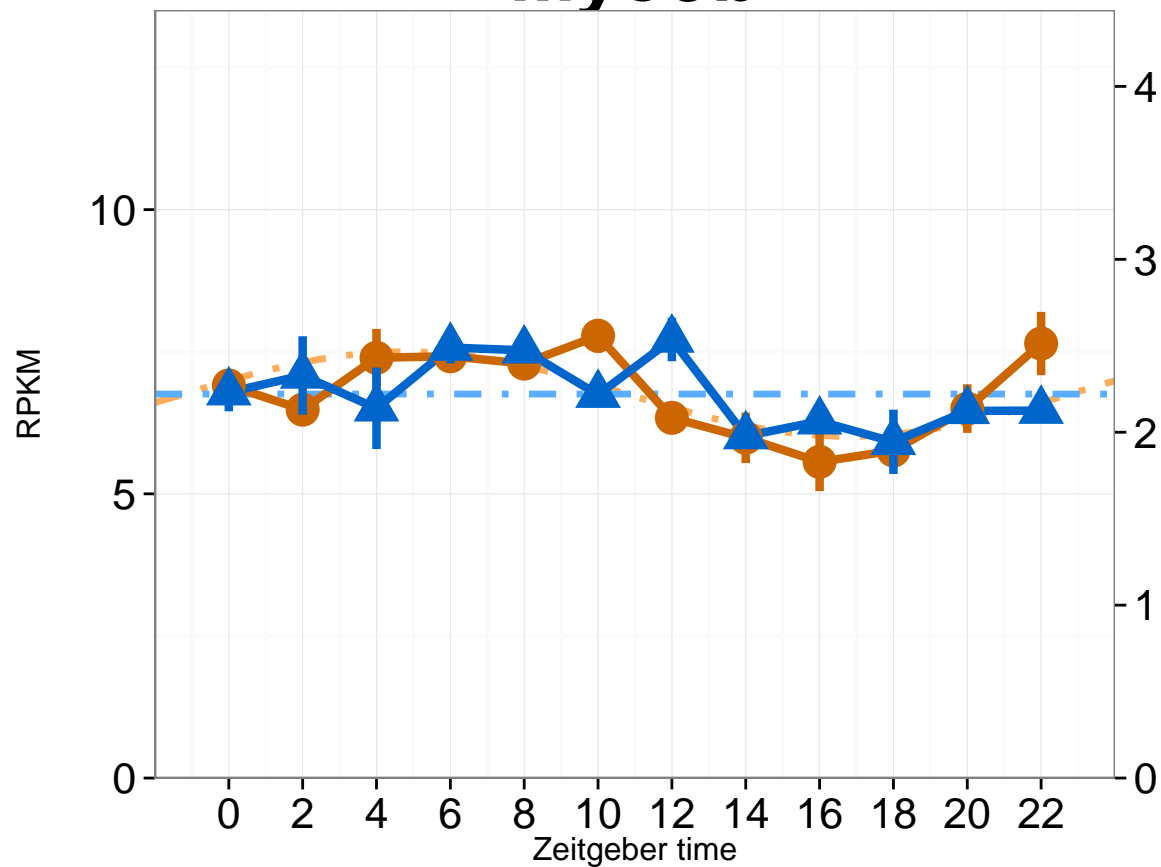

# Myo9b

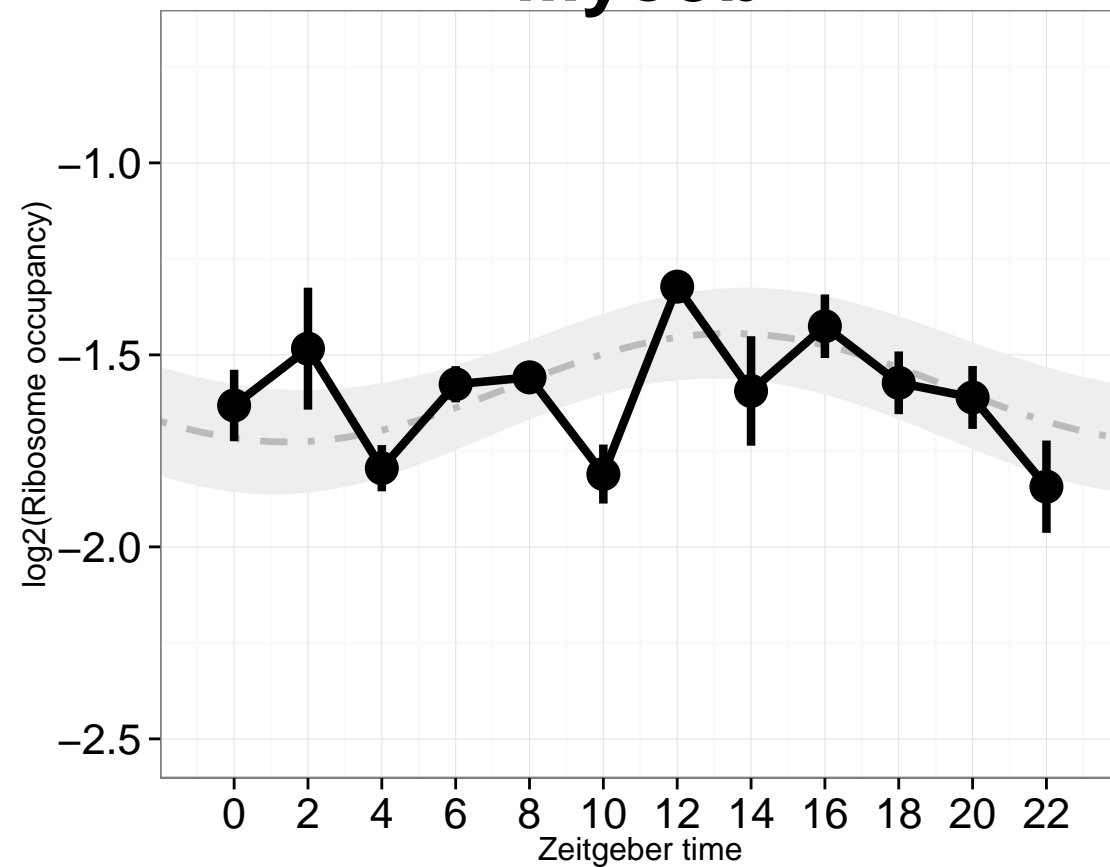

Supplement: SuppDataset_1.zip [file Myo9b_set_A.pdf › Supplemental Dataset 1/A-mRNA_nonrhyth_translation_nonrhyth/Myo9b_set_A.pdf]

## Myof

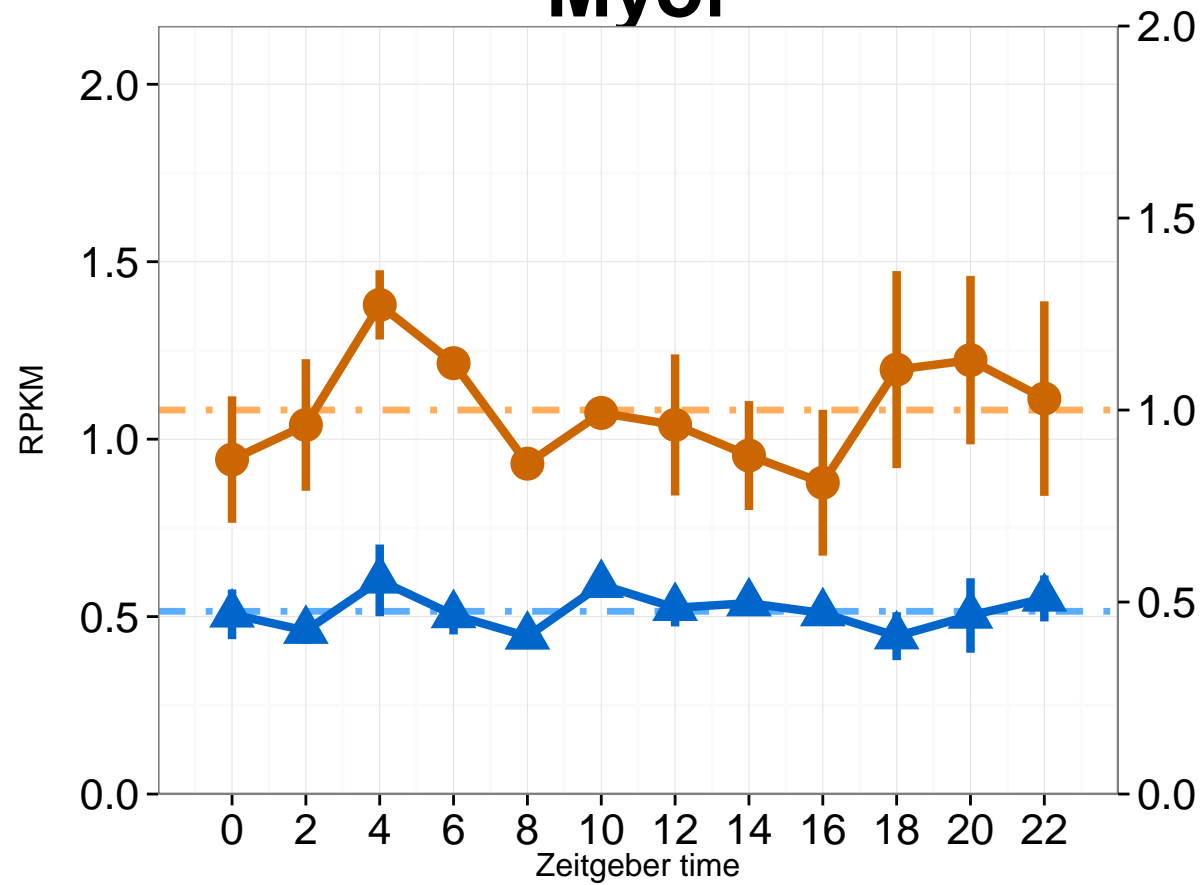

## Myof

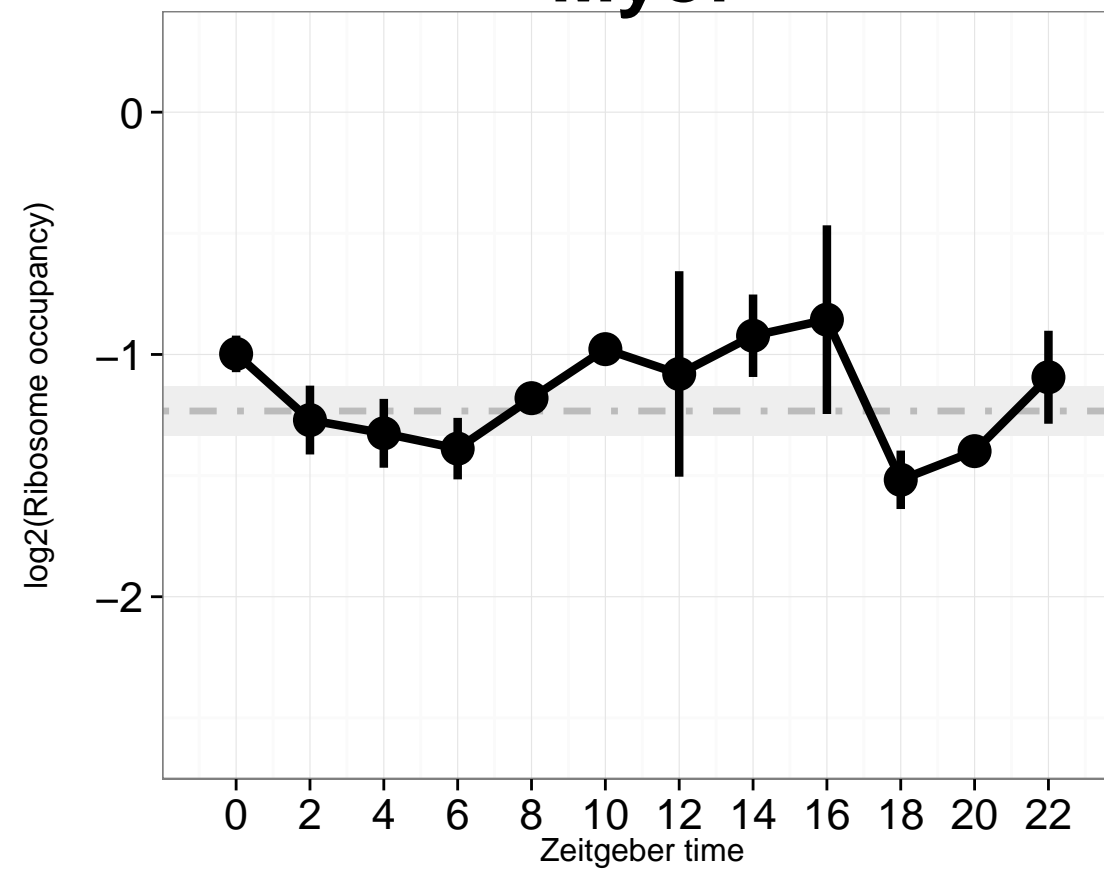

Supplement: SuppDataset_1.zip [file Myof_set_A.pdf › Supplemental Dataset 1/A-mRNA_nonrhyth_translation_nonrhyth/Myof_set_A.pdf]

## Myom1

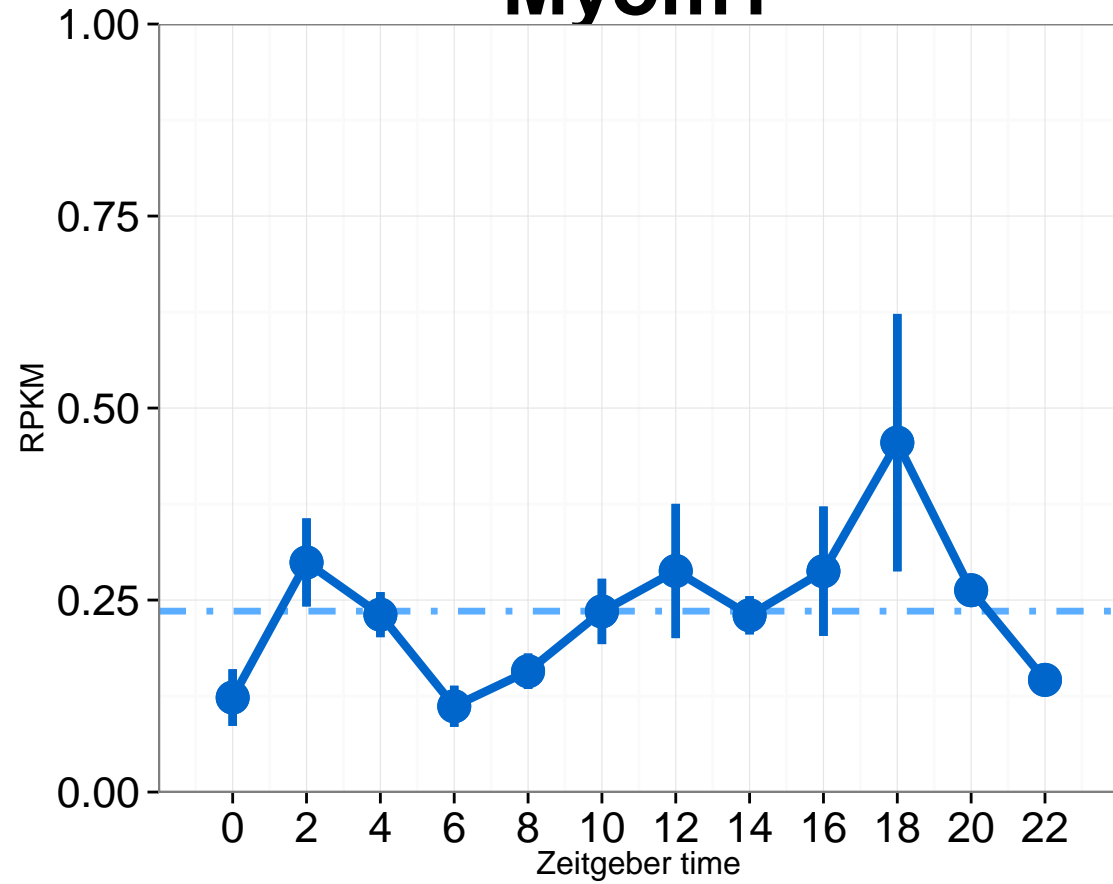

## Myom1 log2(Ribosome occupancy

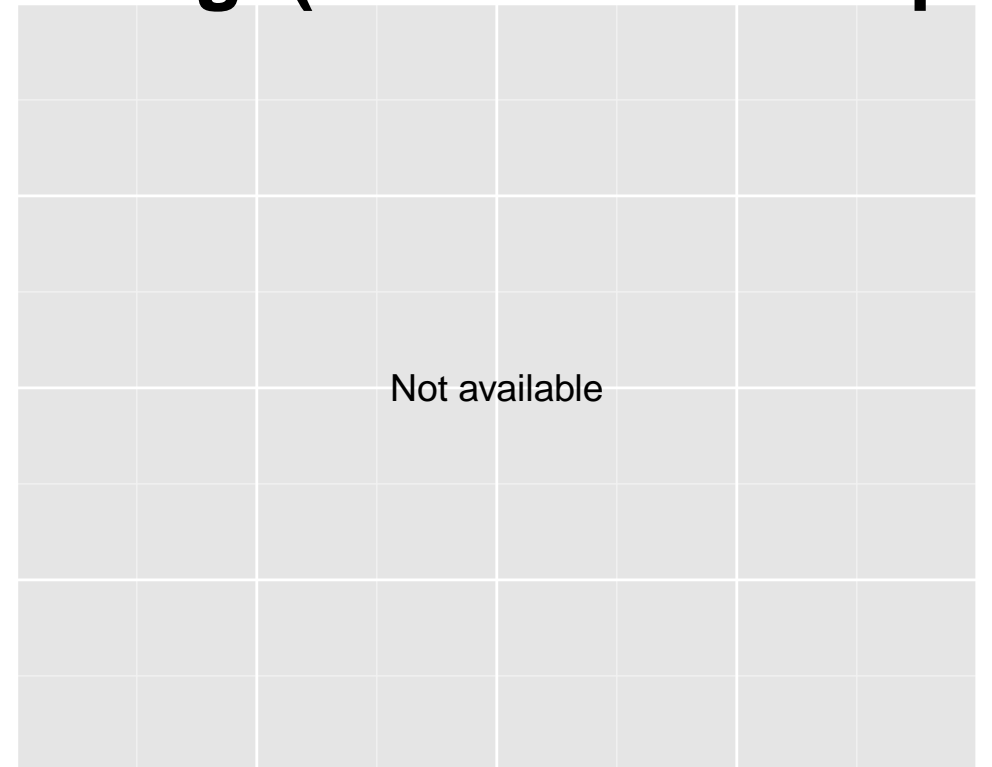

Supplement: SuppDataset_1.zip [file Myom1_set_A.pdf › Supplemental Dataset 1/A-mRNA_nonrhyth_translation_nonrhyth/Myom1_set_A.pdf]

## Myrf

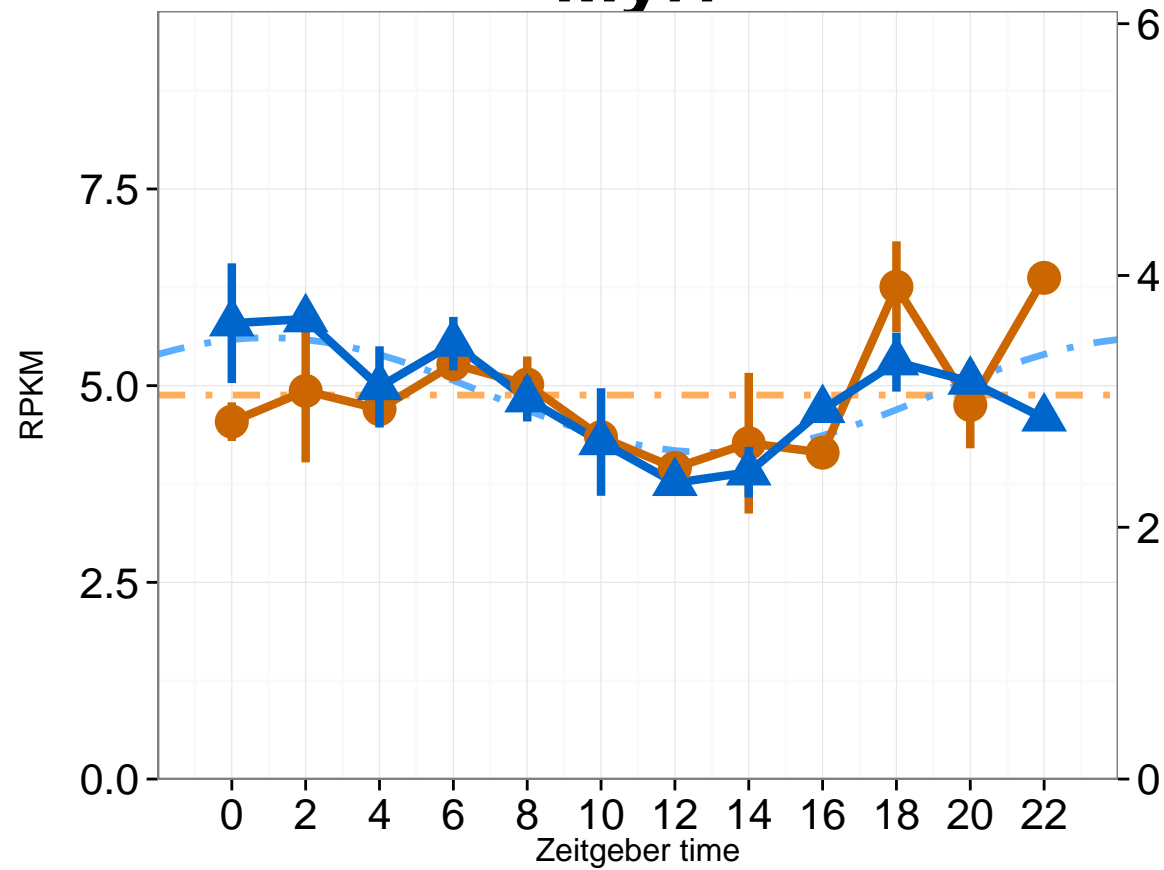

## Myrf

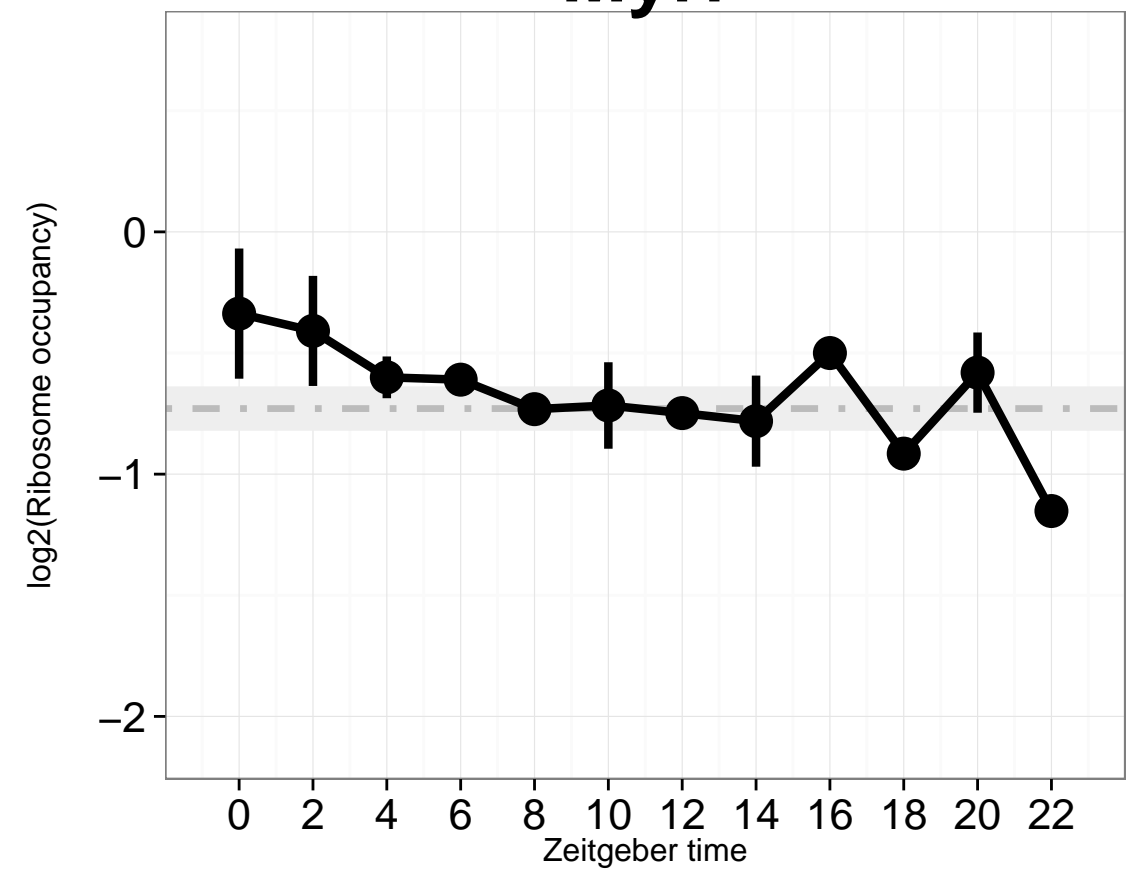

Supplement: SuppDataset_1.zip [file Myrf_set_A.pdf › Supplemental Dataset 1/A-mRNA_nonrhyth_translation_nonrhyth/Myrf_set_A.pdf]

# Mysm1

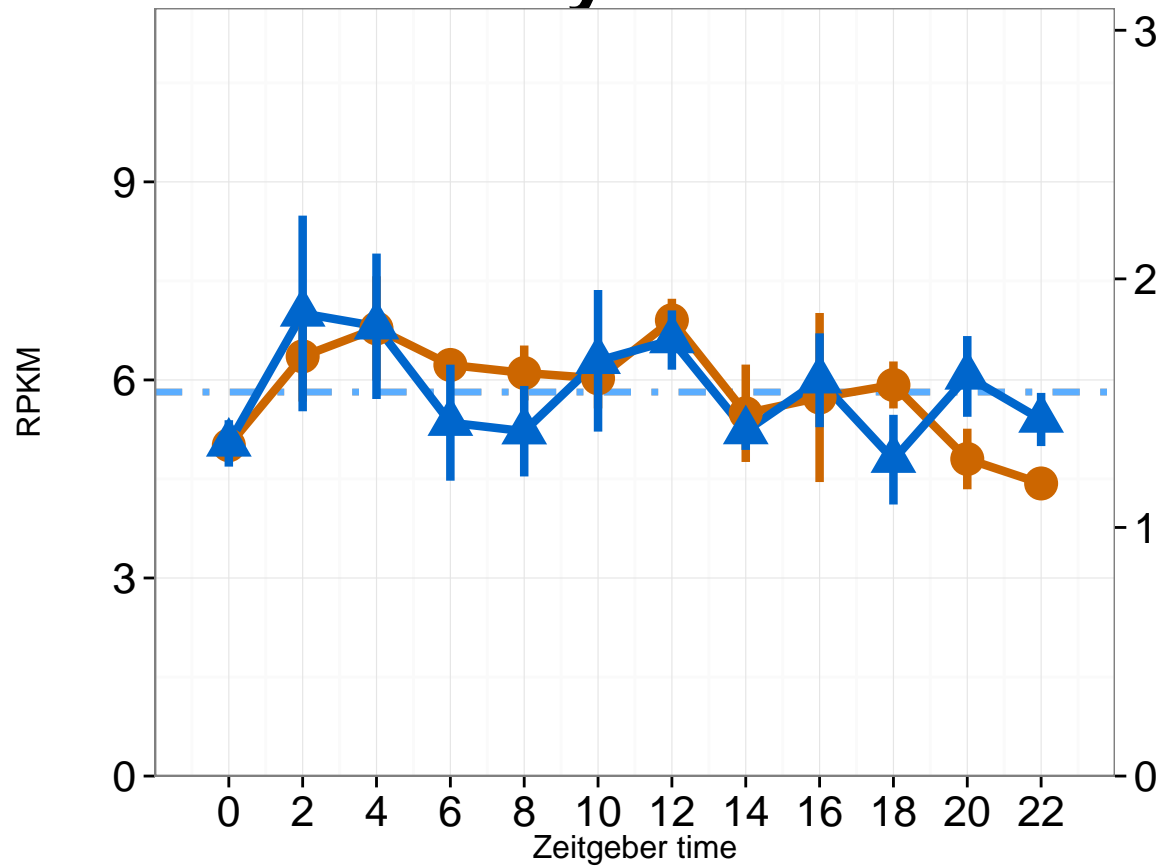

# Mysm1

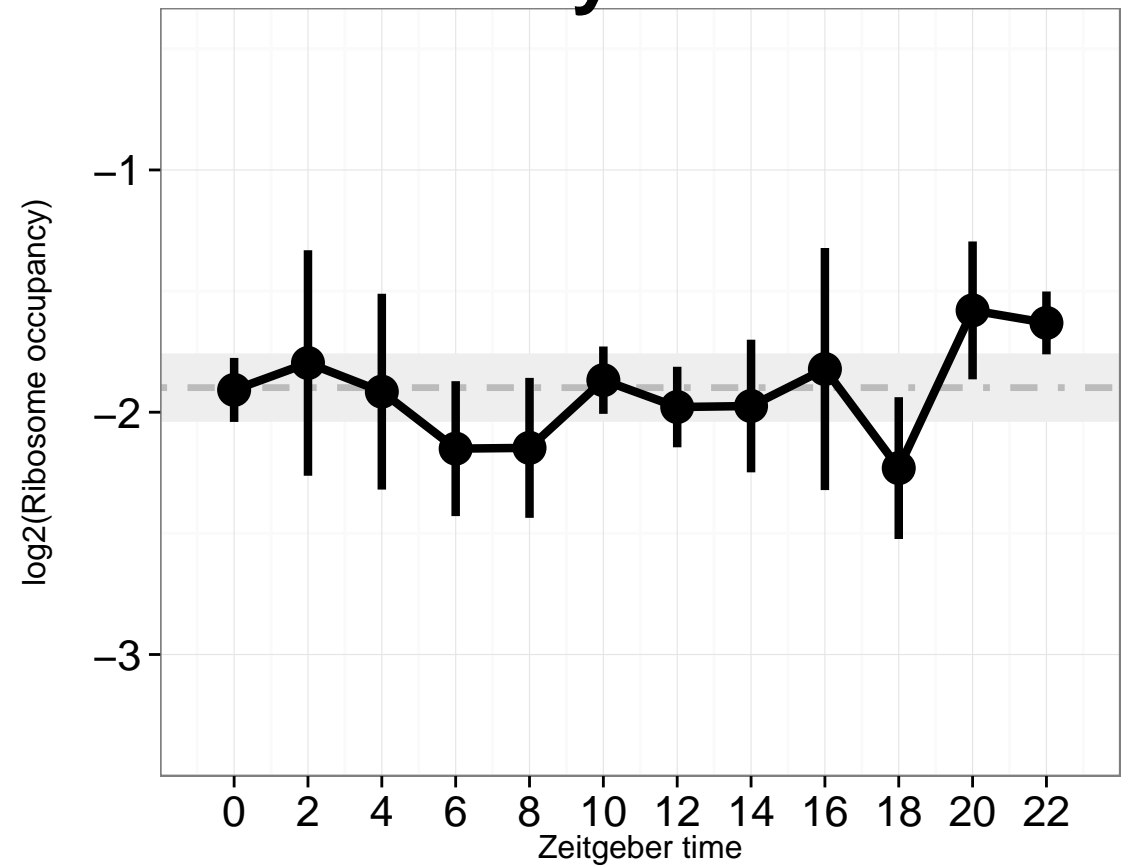

Supplement: SuppDataset_1.zip [file Mysm1_set_A.pdf › Supplemental Dataset 1/A-mRNA_nonrhyth_translation_nonrhyth/Mysm1_set_A.pdf]

## Myzap

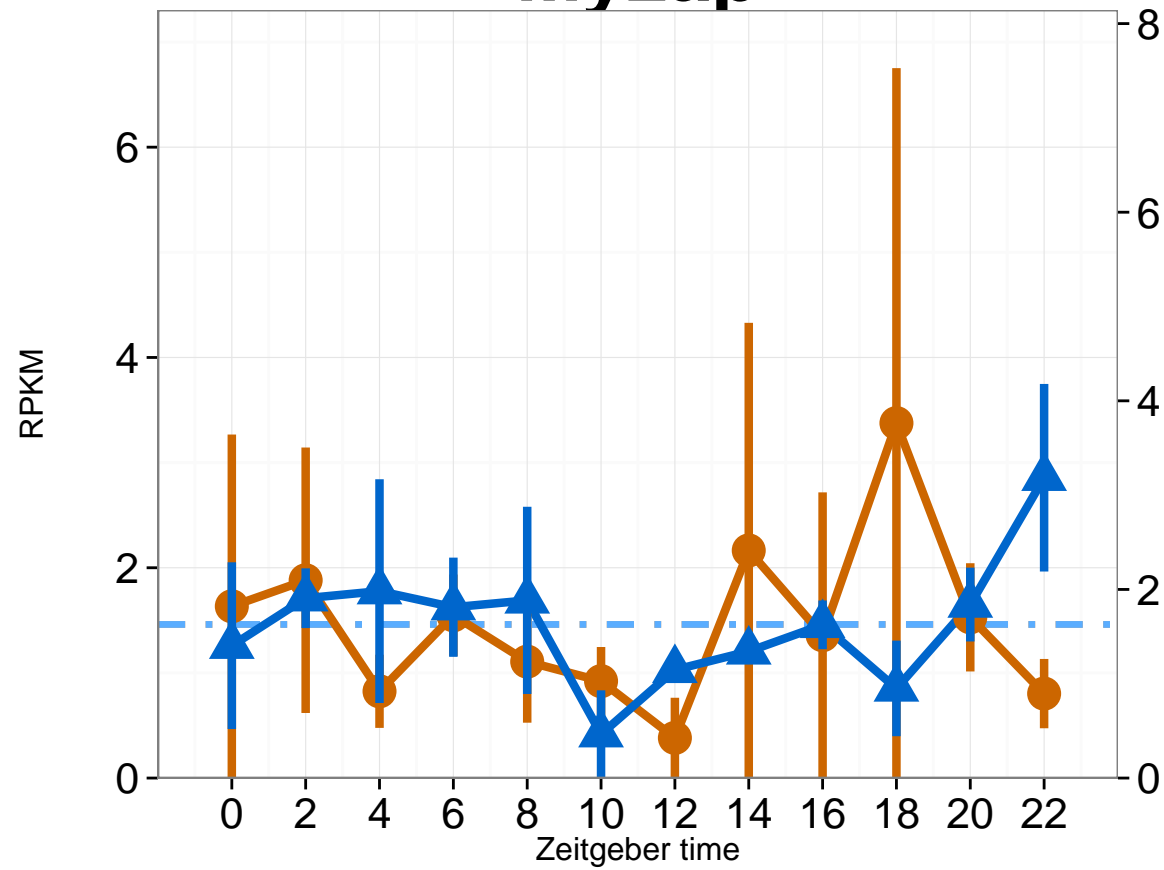

## Myzap

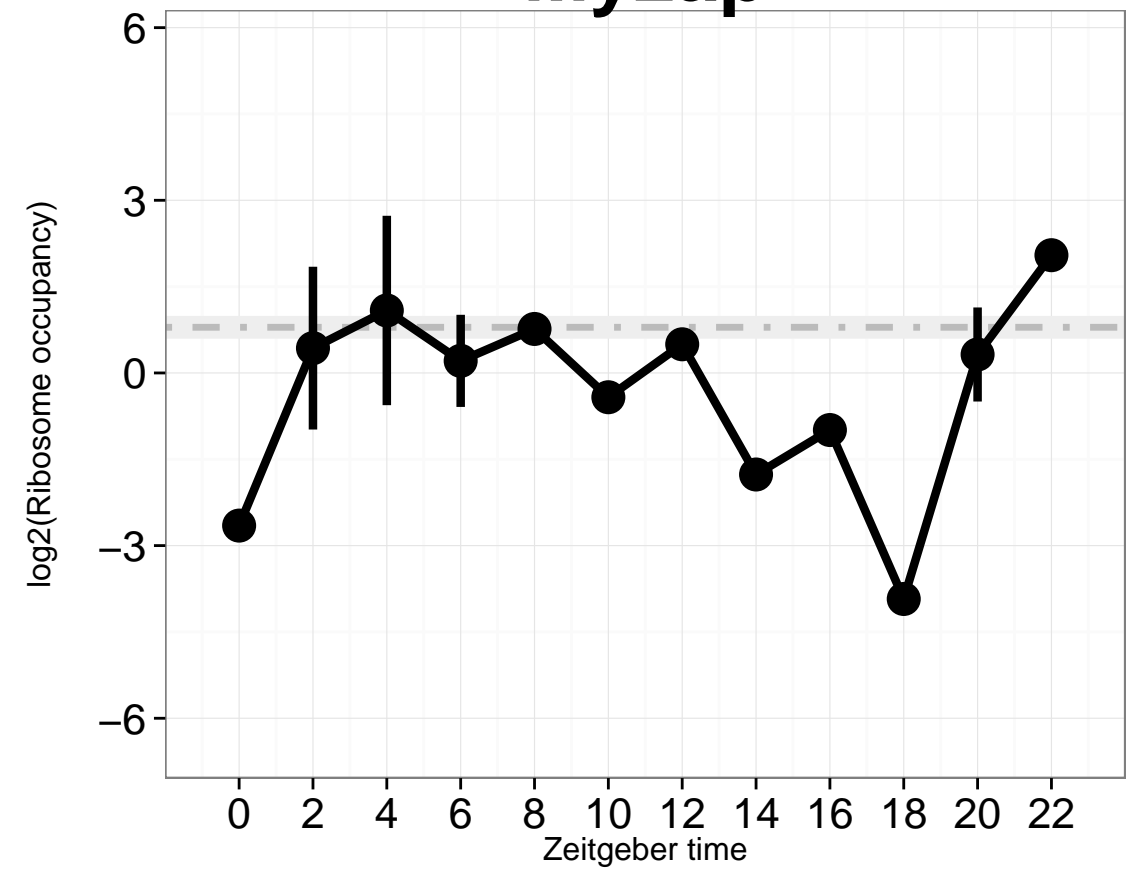

Supplement: SuppDataset_1.zip [file Myzap_set_A.pdf › Supplemental Dataset 1/A-mRNA_nonrhyth_translation_nonrhyth/Myzap_set_A.pdf]

## Mzt2

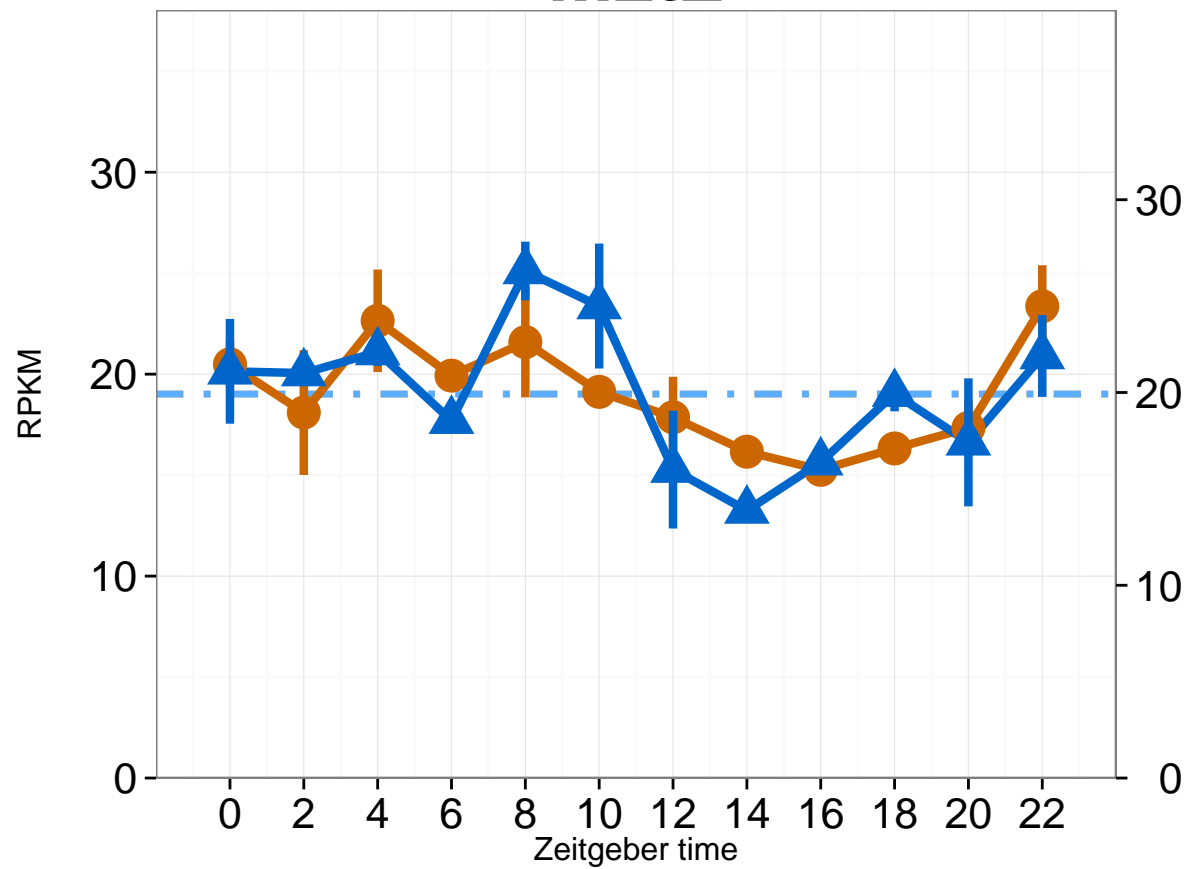

## Mzt2

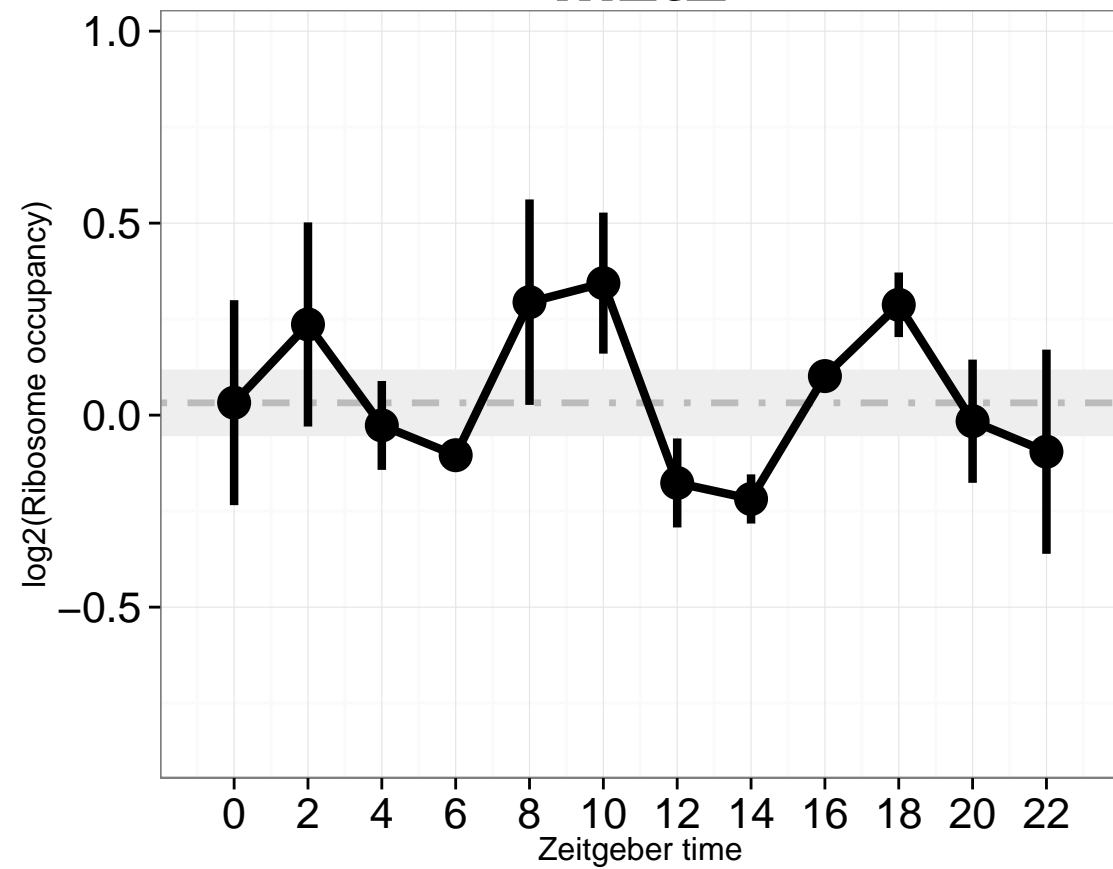

Supplement: SuppDataset_1.zip [file Mzt2_set_A.pdf › Supplemental Dataset 1/A-mRNA_nonrhyth_translation_nonrhyth/Mzt2_set_A.pdf]

# N4bp1

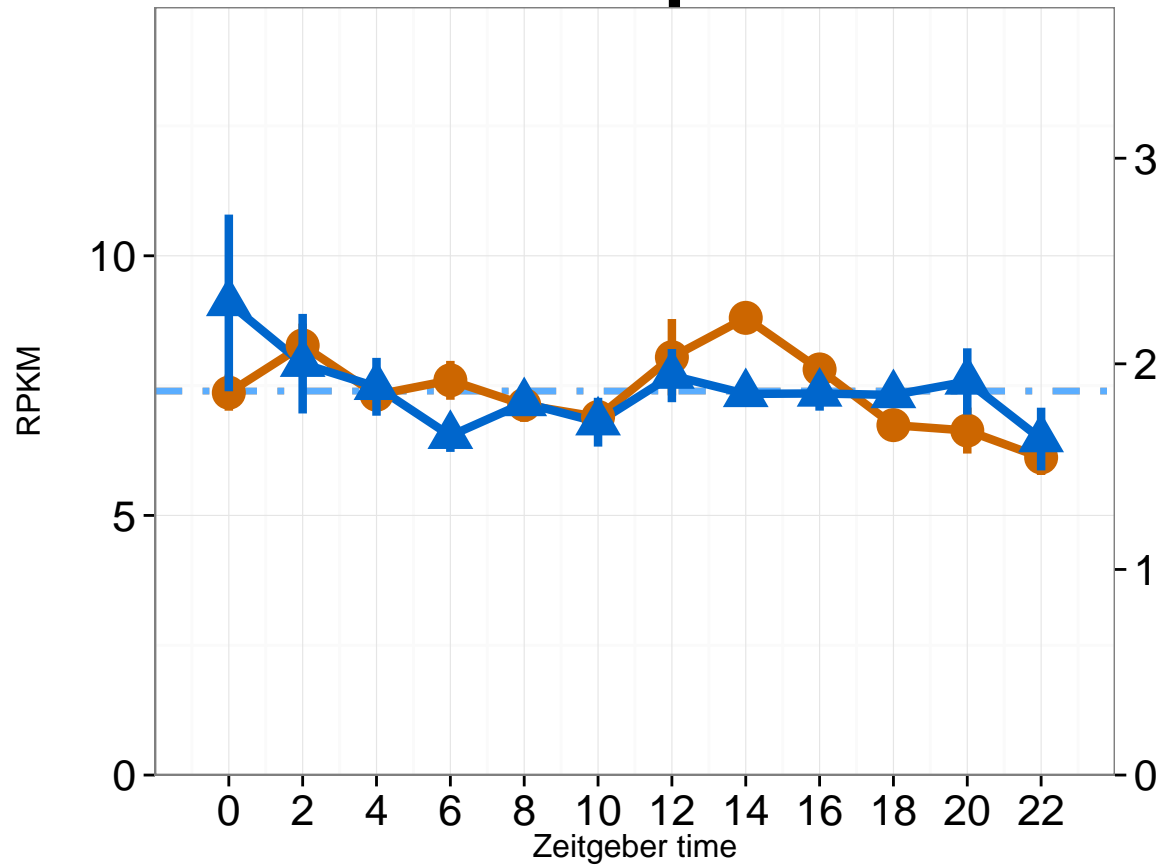

# N4bp1

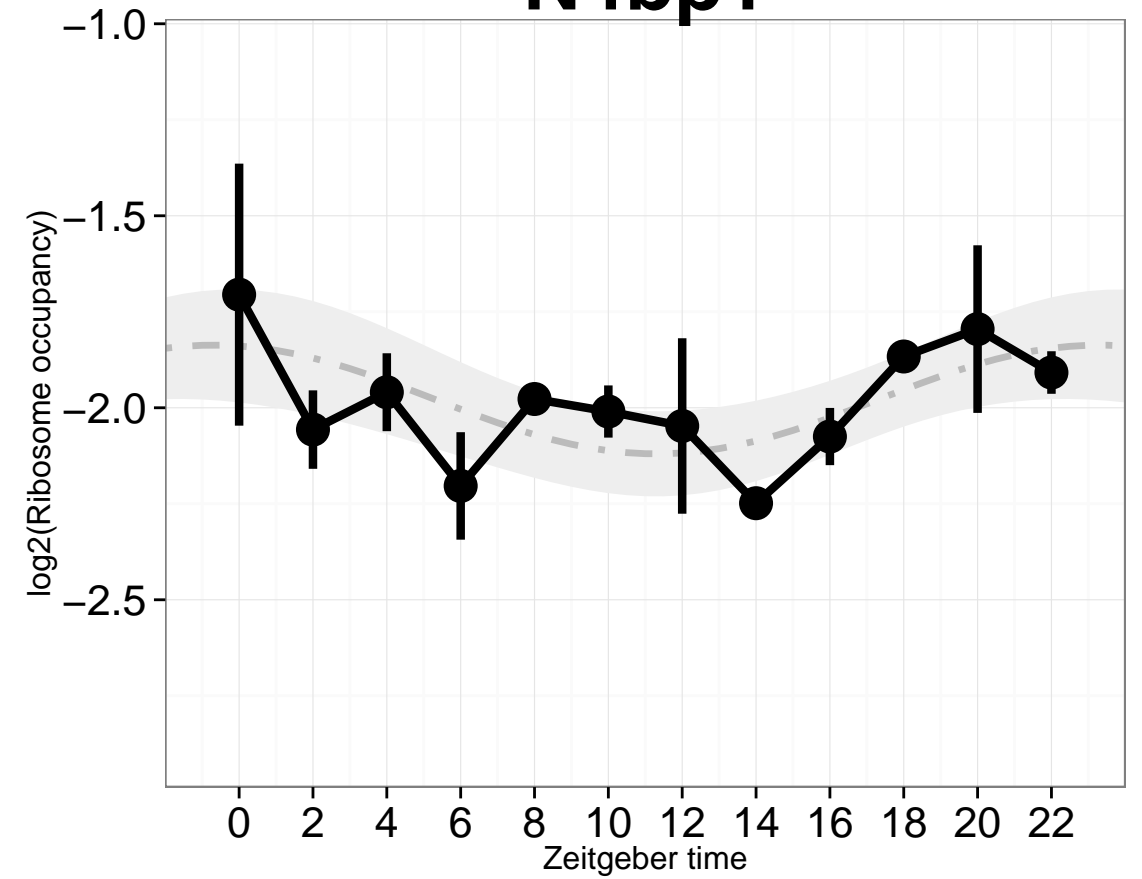

Supplement: SuppDataset_1.zip [file N4bp1_set_A.pdf › Supplemental Dataset 1/A-mRNA_nonrhyth_translation_nonrhyth/N4bp1_set_A.pdf]

# N4bp2

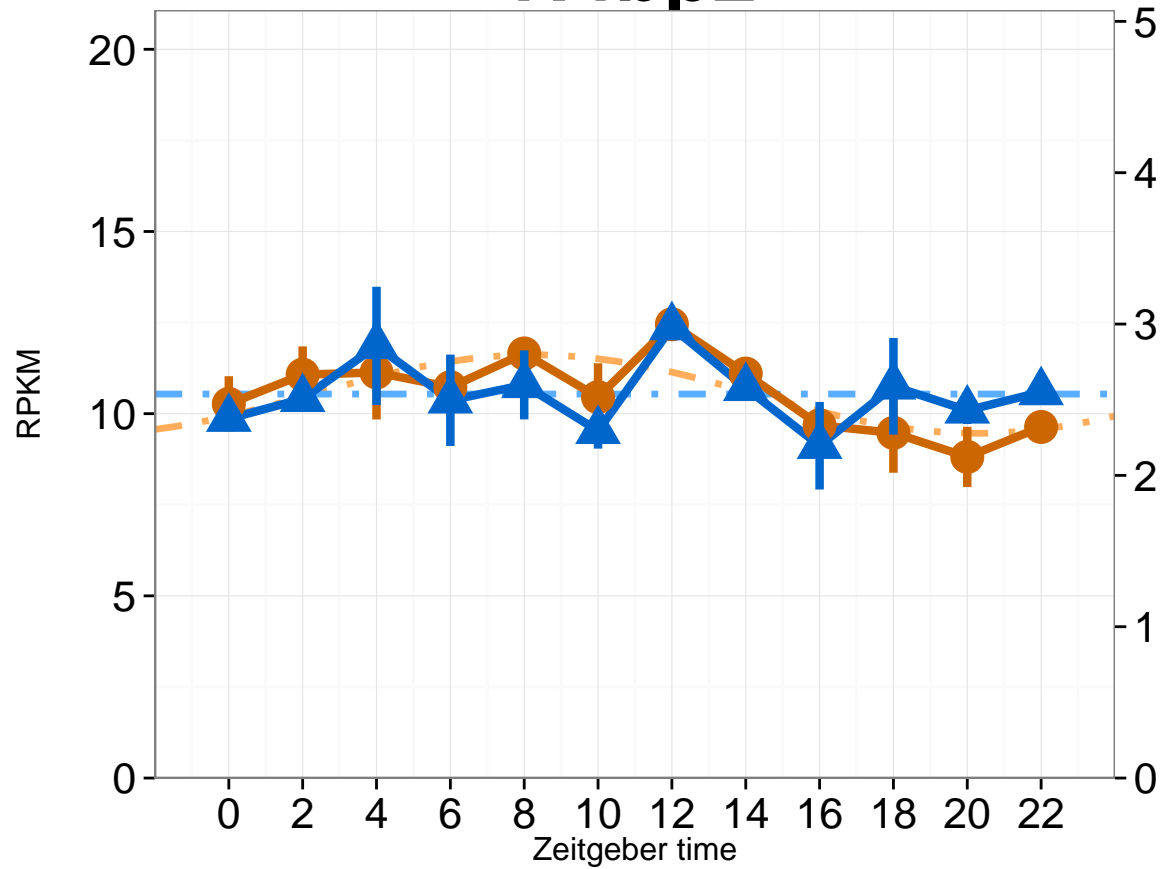

# N4bp2

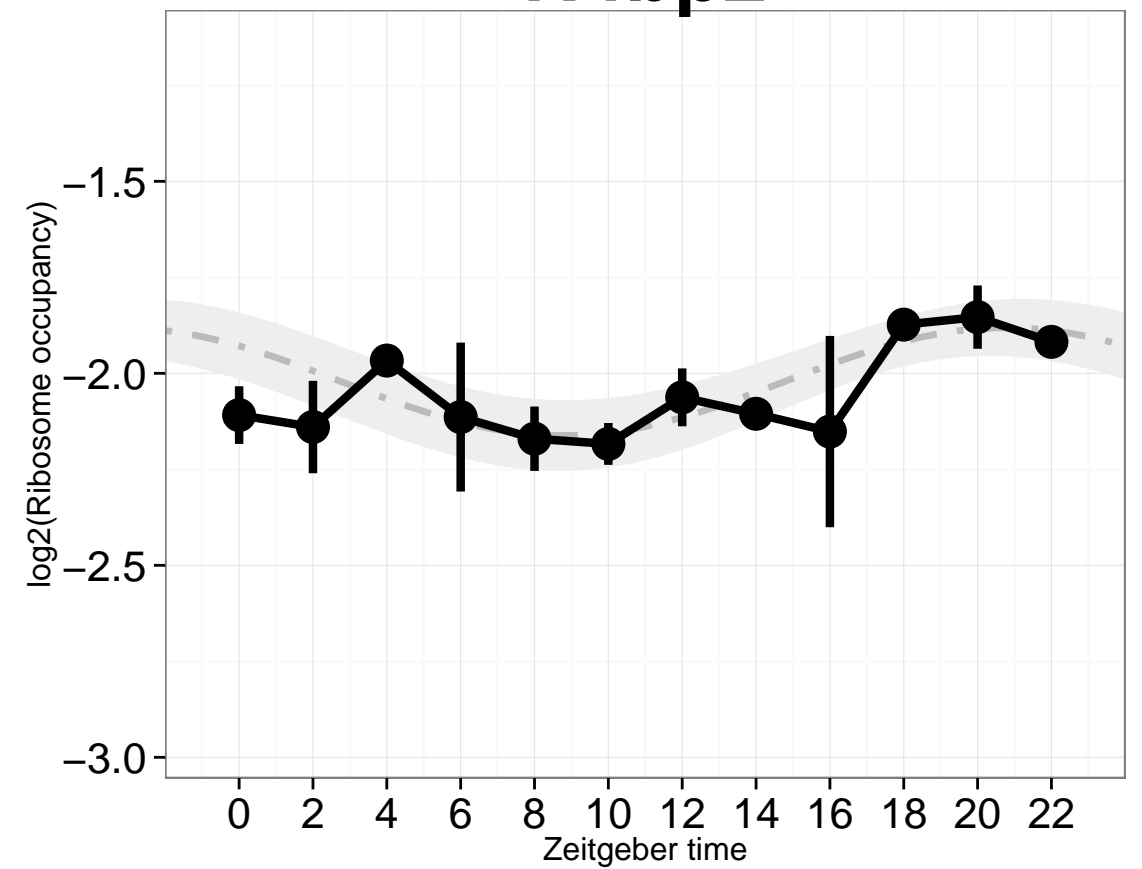

Supplement: SuppDataset_1.zip [file N4bp2_set_A.pdf › Supplemental Dataset 1/A-mRNA_nonrhyth_translation_nonrhyth/N4bp2_set_A.pdf]

# N4bp2l2

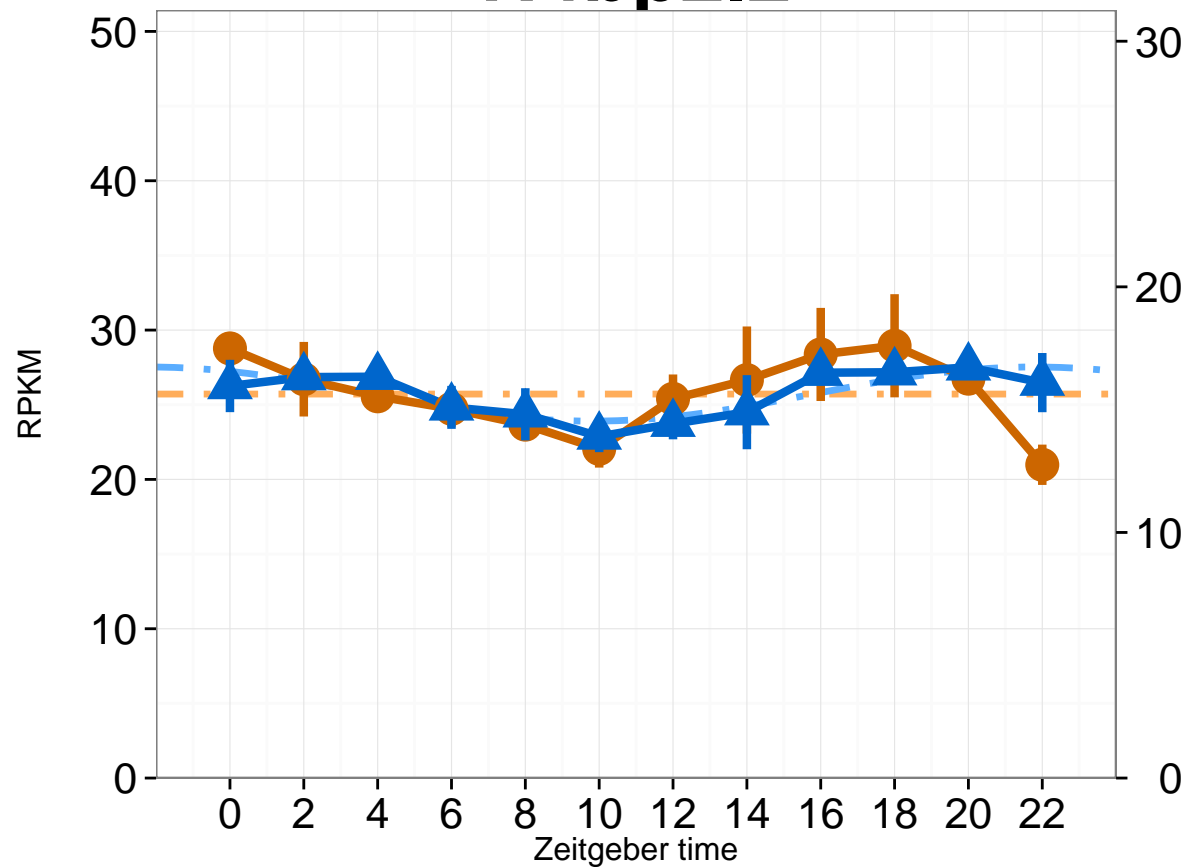

# N4bp2l2

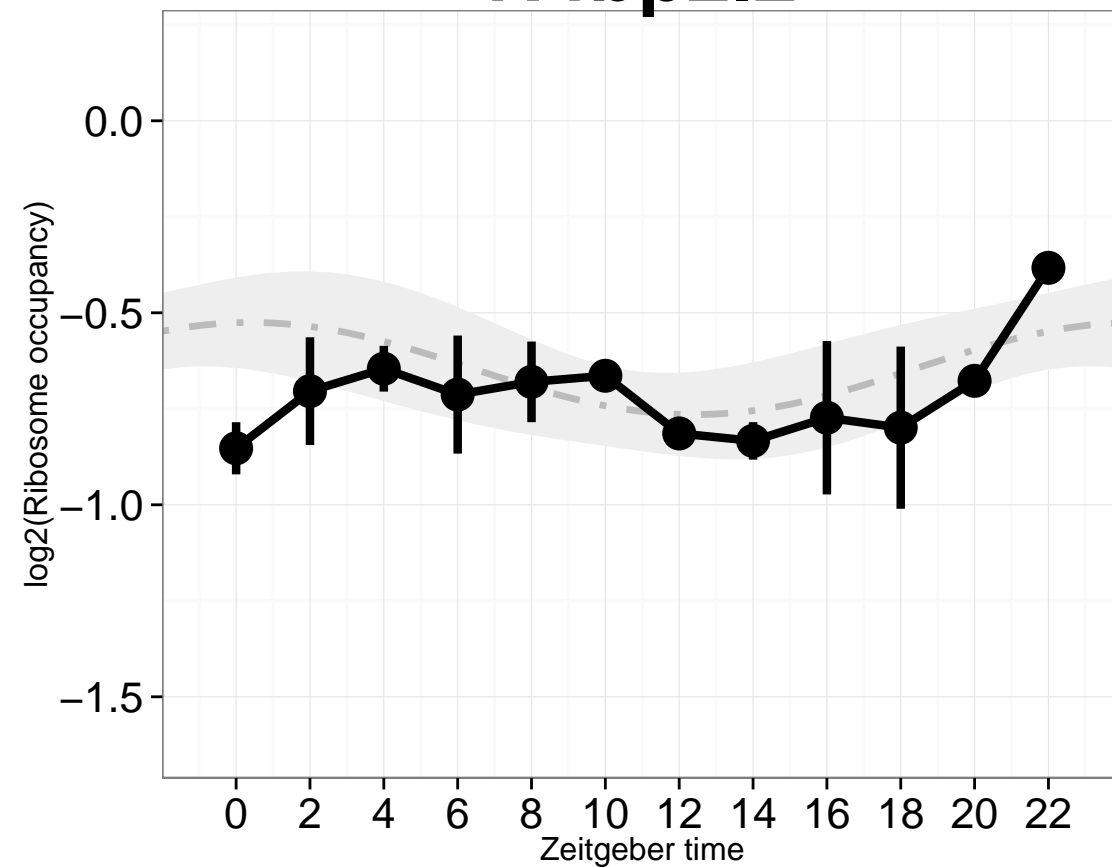

Supplement: SuppDataset_1.zip [file N4bp2l2_set_A.pdf › Supplemental Dataset 1/A-mRNA_nonrhyth_translation_nonrhyth/N4bp2l2_set_A.pdf]

## Naa10

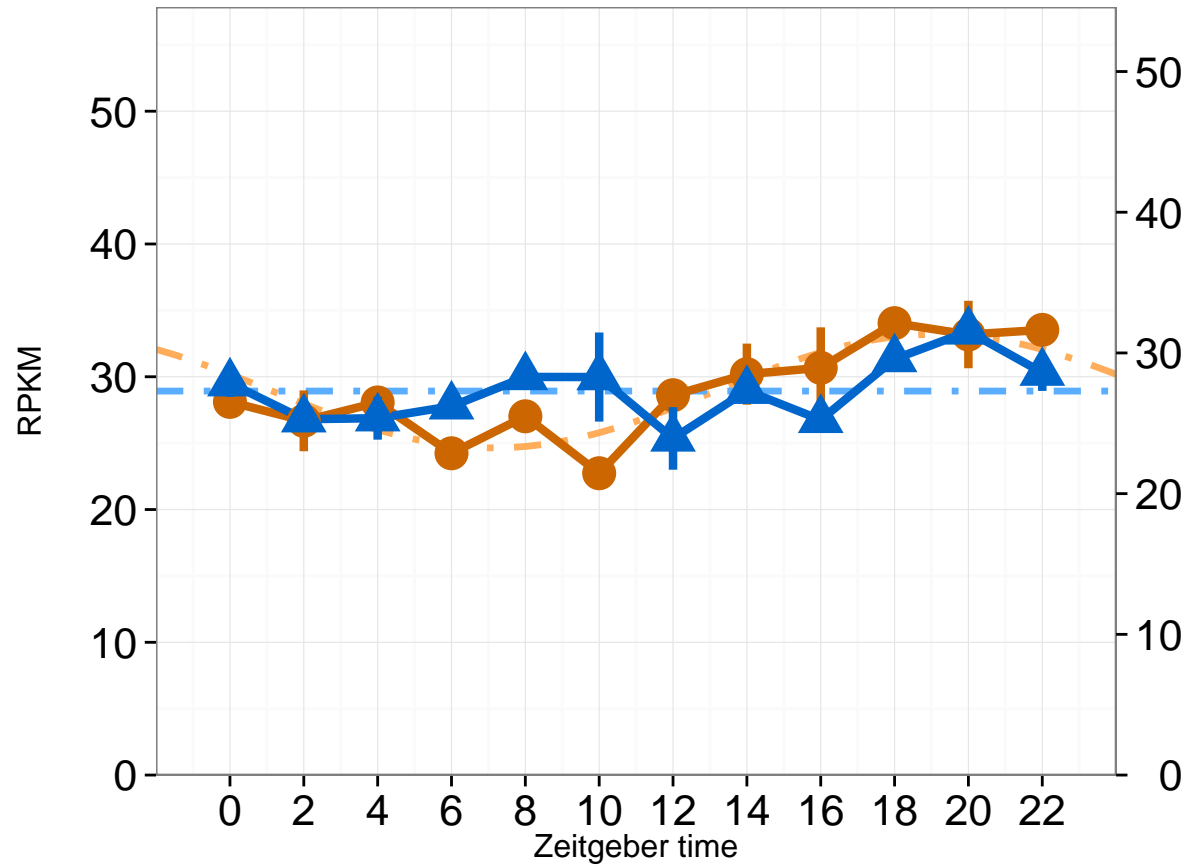

## Naa10

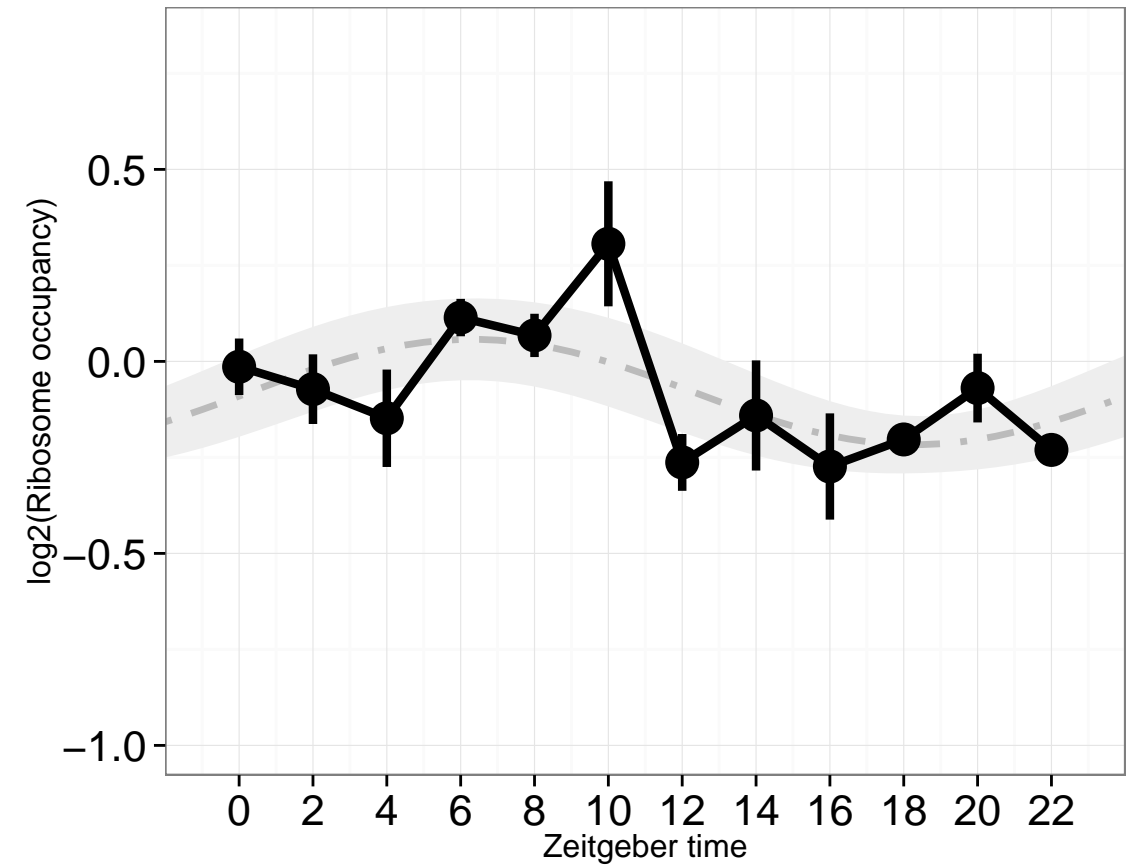

Supplement: SuppDataset_1.zip [file Naa10_set_A.pdf › Supplemental Dataset 1/A-mRNA_nonrhyth_translation_nonrhyth/Naa10_set_A.pdf]

## Naa15

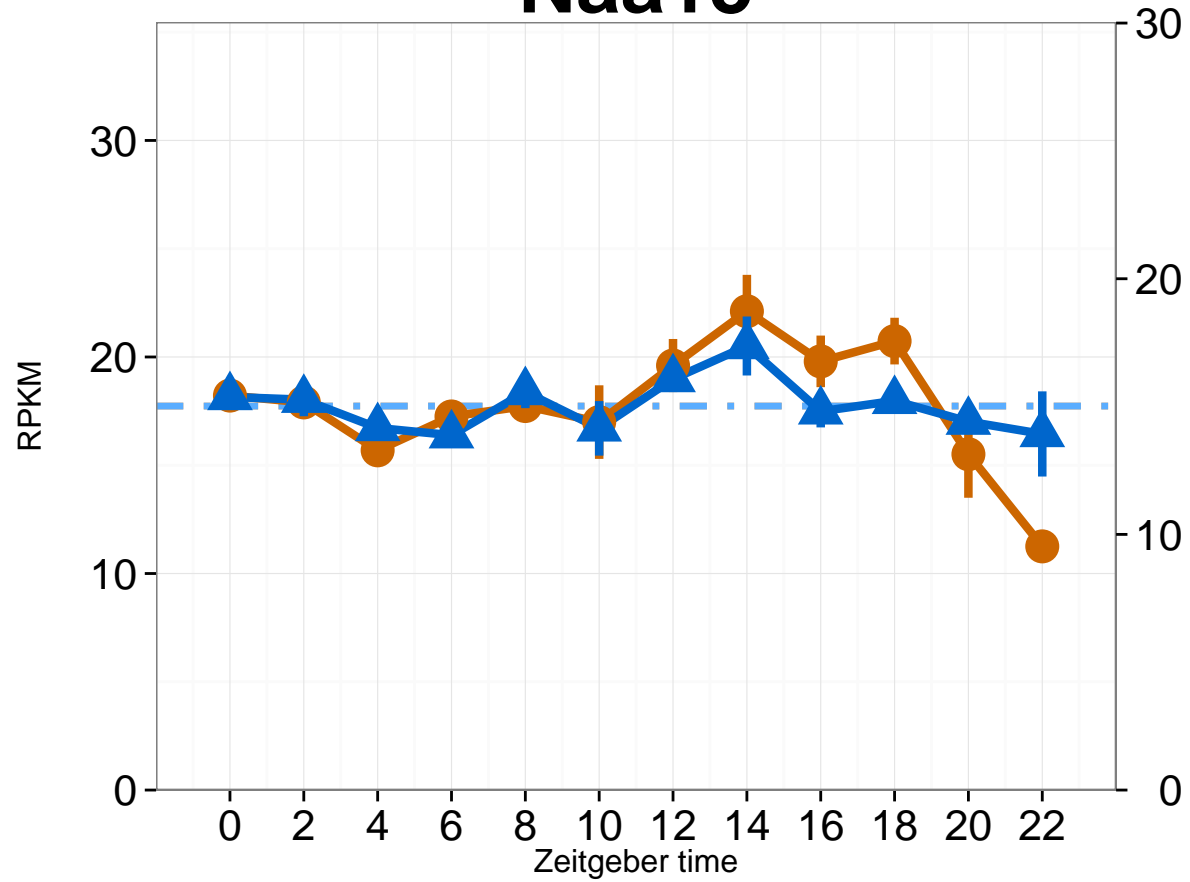

## Naa15

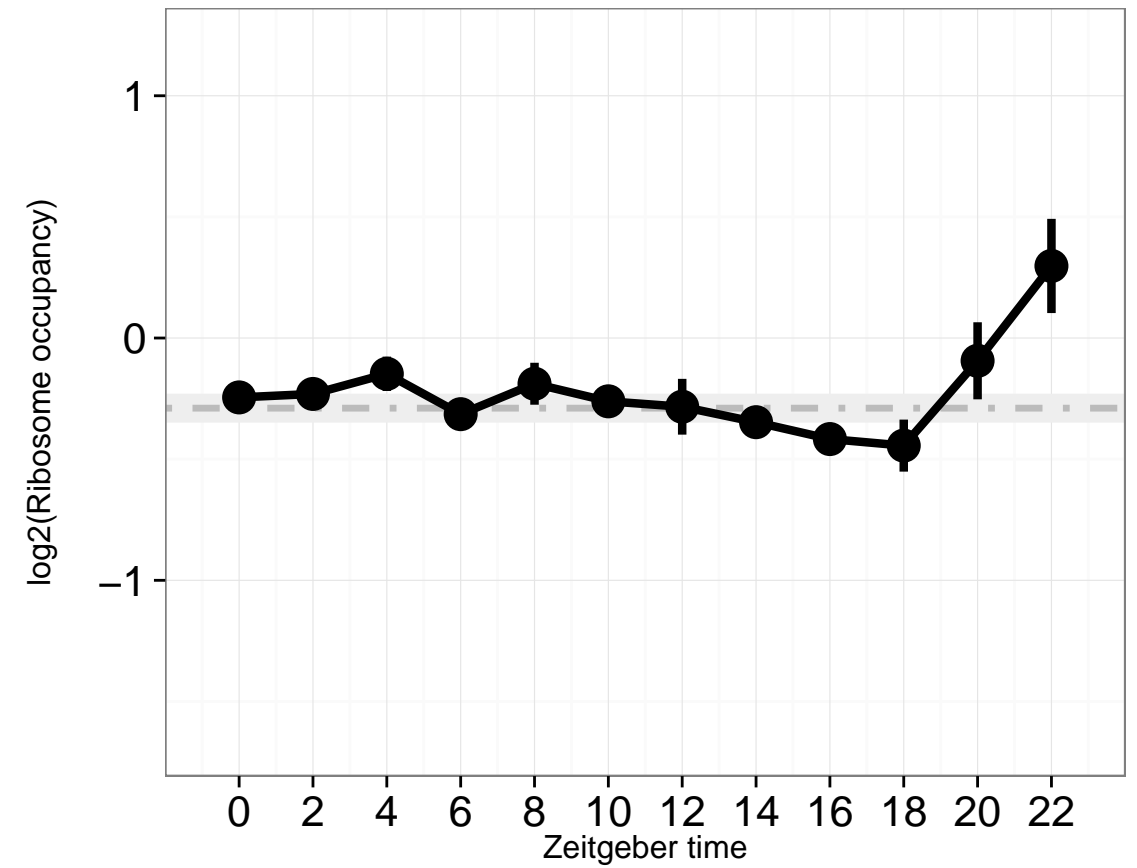

Supplement: SuppDataset_1.zip [file Naa15_set_A.pdf › Supplemental Dataset 1/A-mRNA_nonrhyth_translation_nonrhyth/Naa15_set_A.pdf]

## Naa20

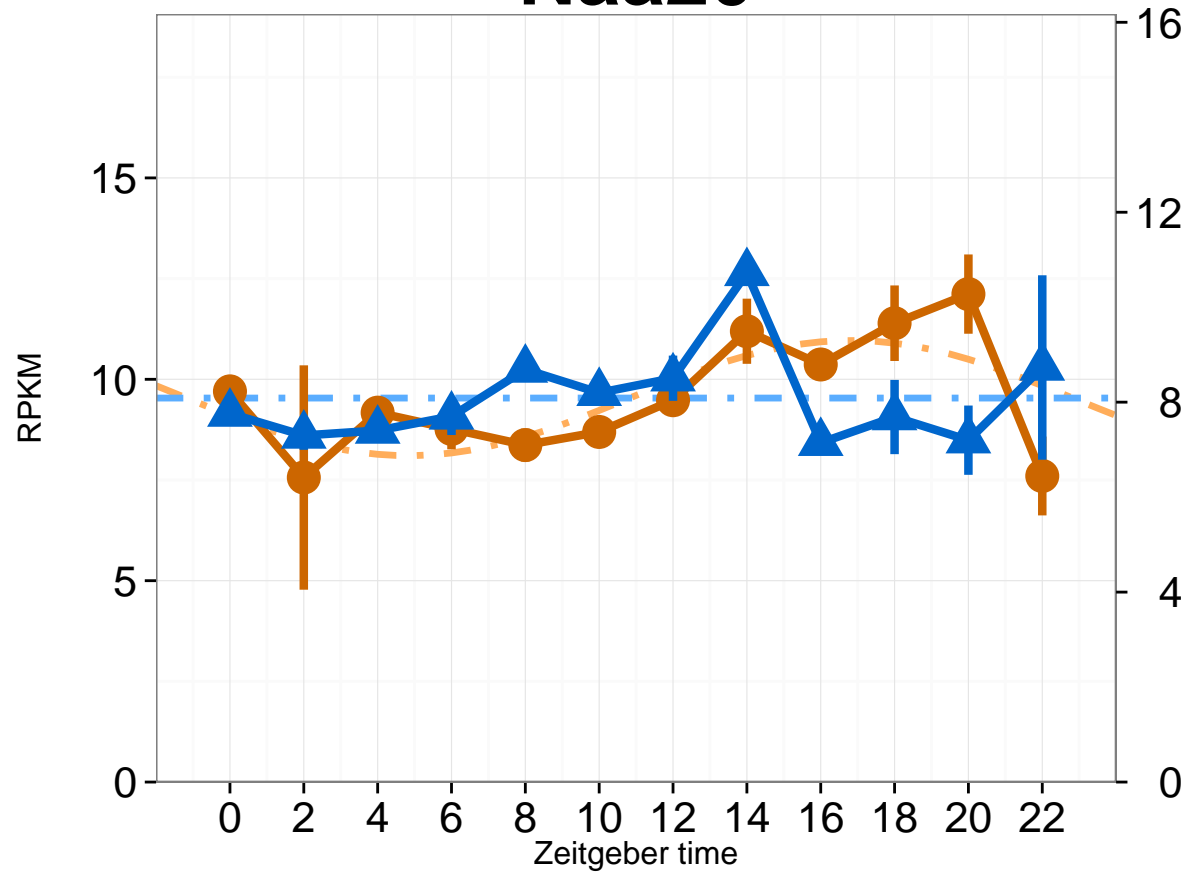

## Naa20

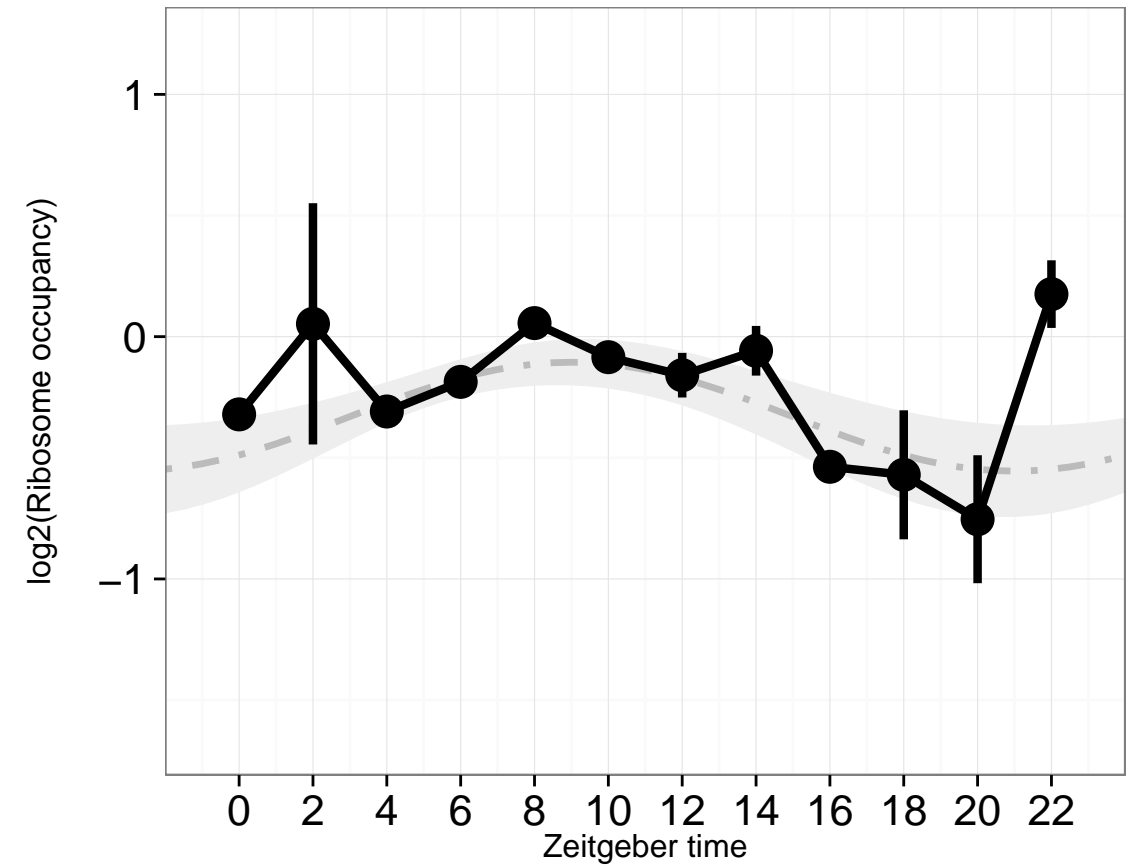

Supplement: SuppDataset_1.zip [file Naa20_set_A.pdf › Supplemental Dataset 1/A-mRNA_nonrhyth_translation_nonrhyth/Naa20_set_A.pdf]

## Naa25

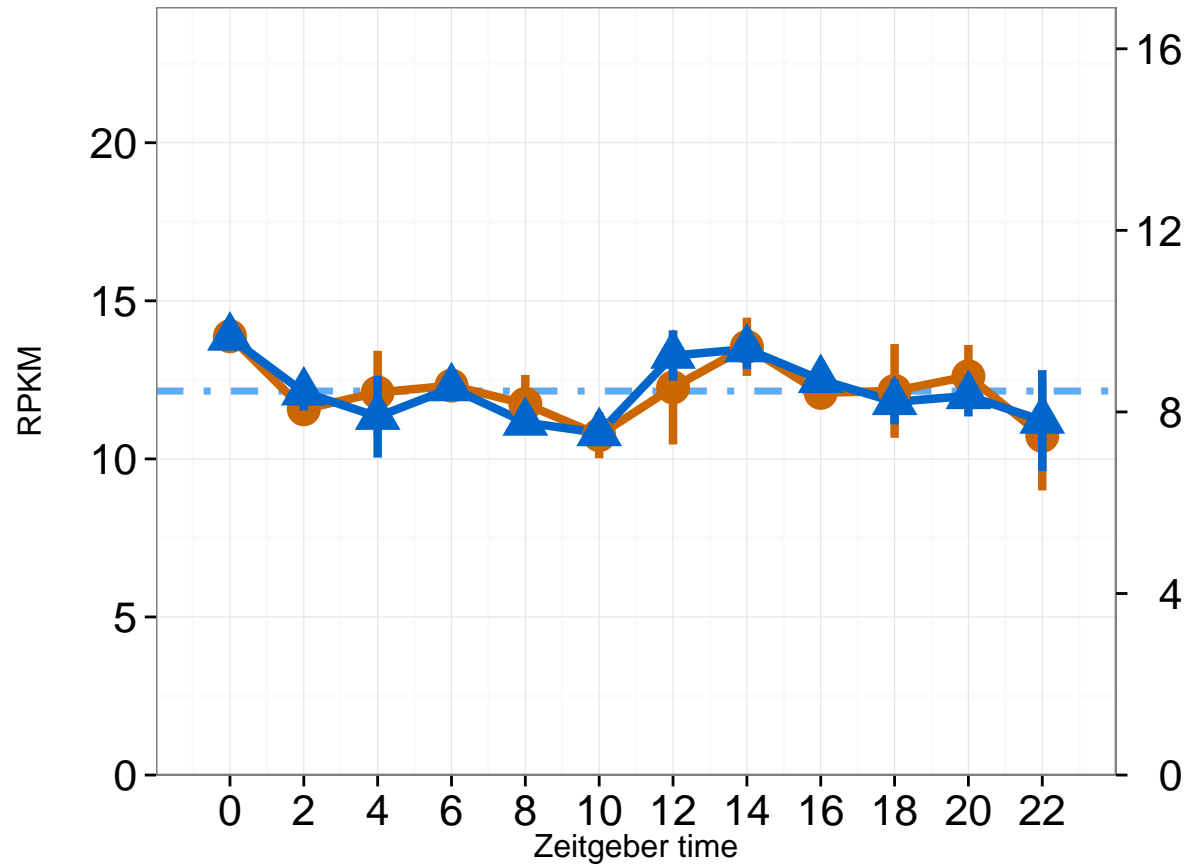

## Naa25

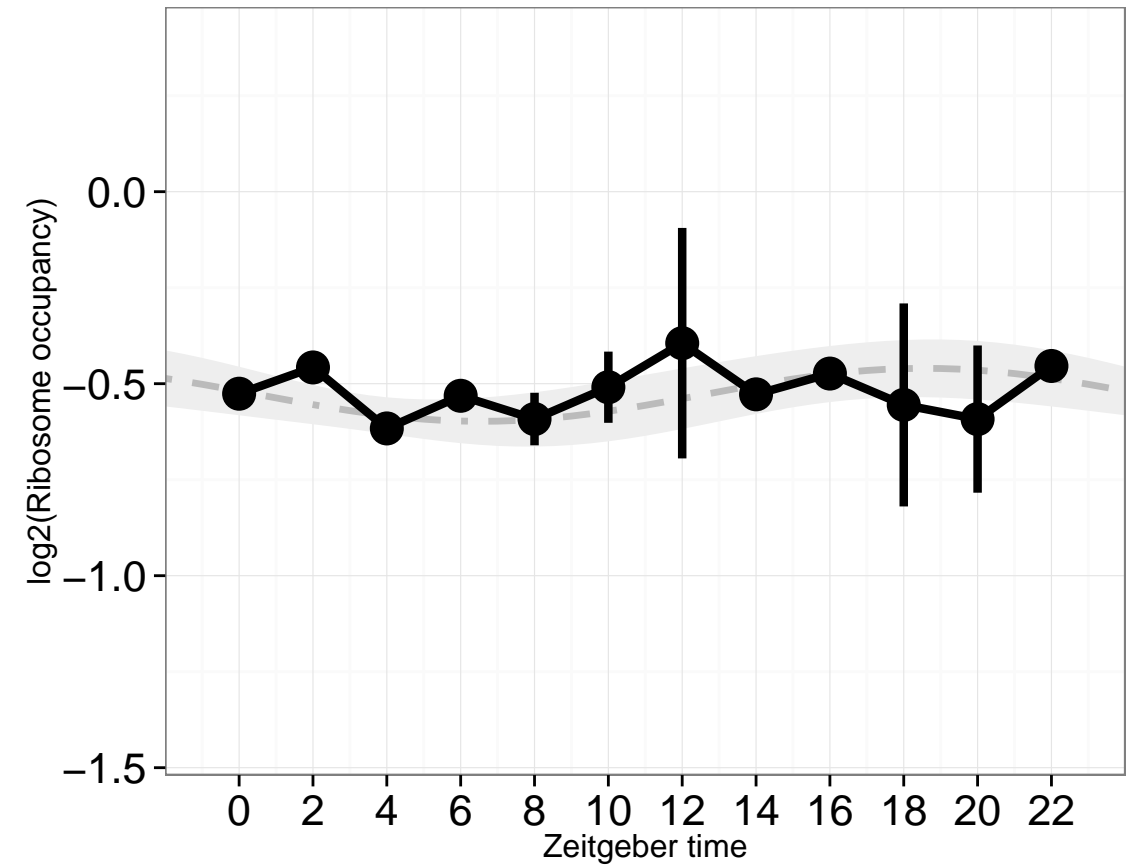

Supplement: SuppDataset_1.zip [file Naa25_set_A.pdf › Supplemental Dataset 1/A-mRNA_nonrhyth_translation_nonrhyth/Naa25_set_A.pdf]

## Naa30

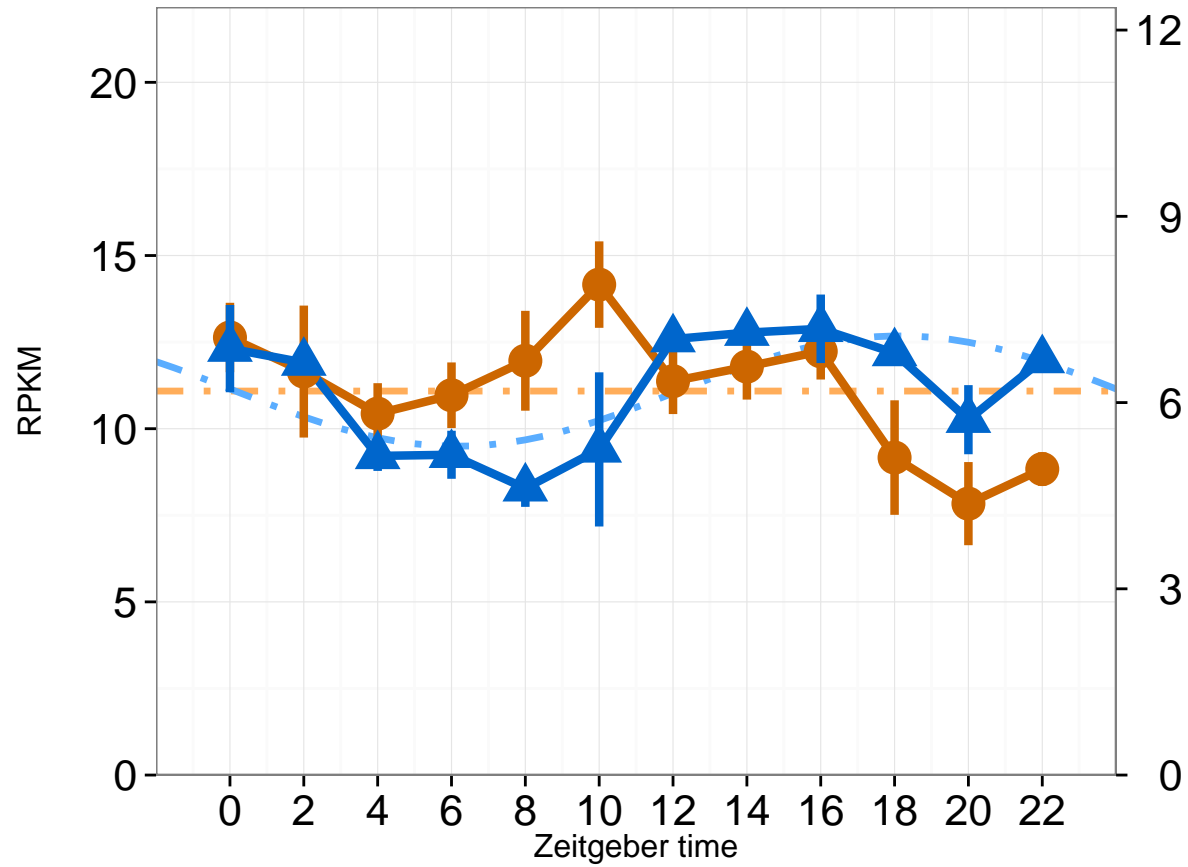

## Naa30

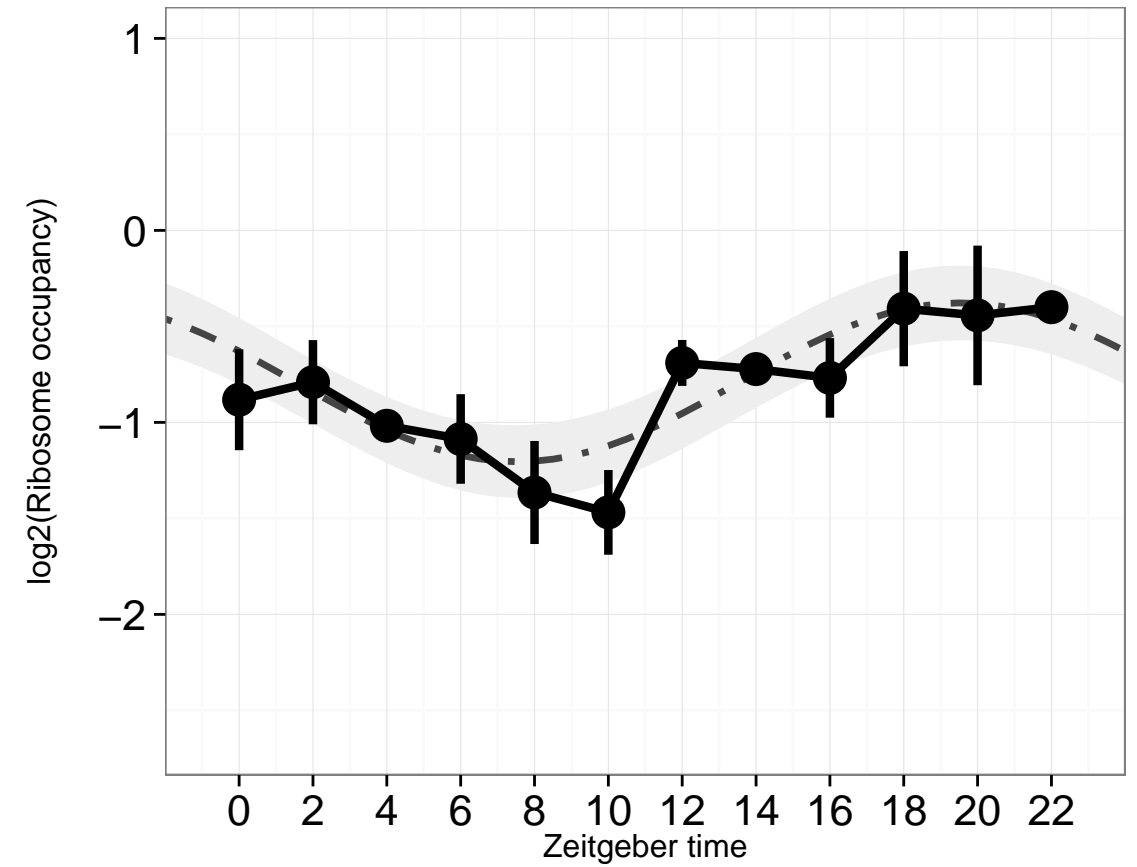

Supplement: SuppDataset_1.zip [file Naa30_set_A.pdf › Supplemental Dataset 1/A-mRNA_nonrhyth_translation_nonrhyth/Naa30_set_A.pdf]

## Naa35

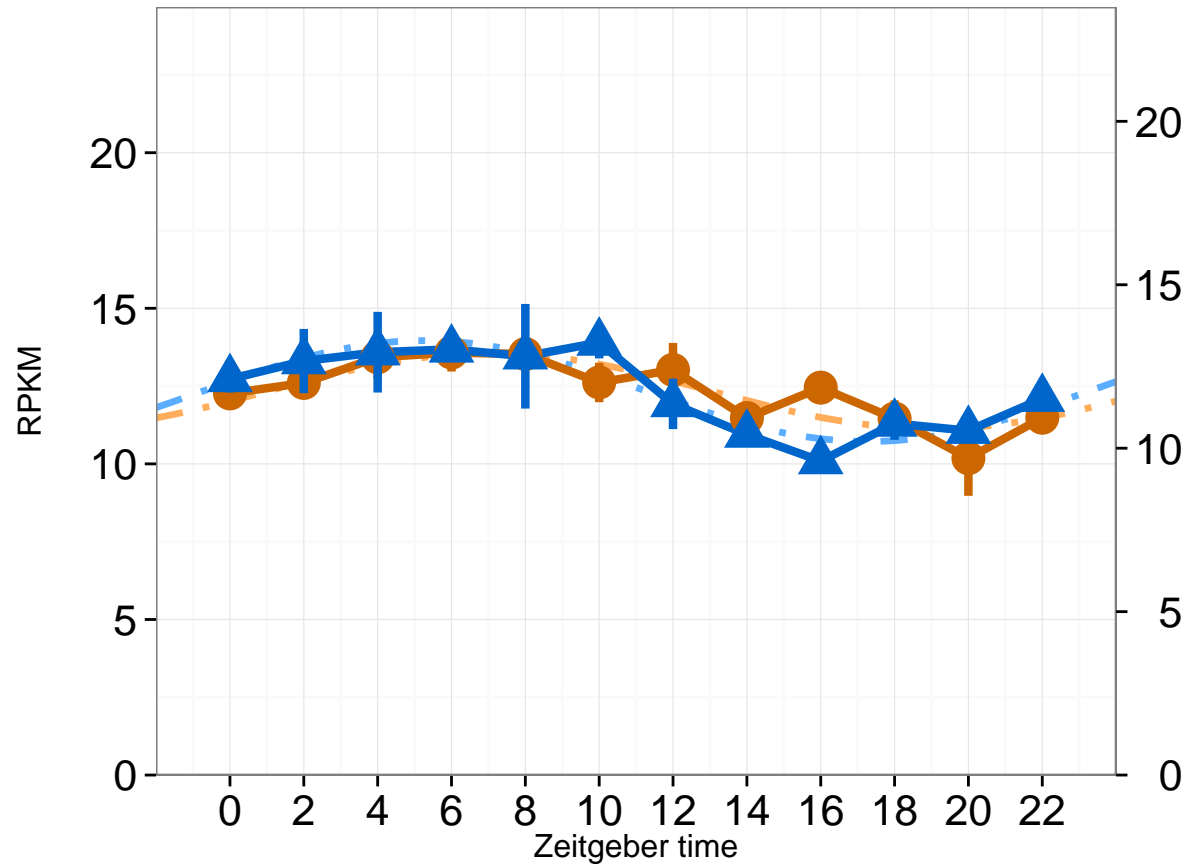

## Naa35

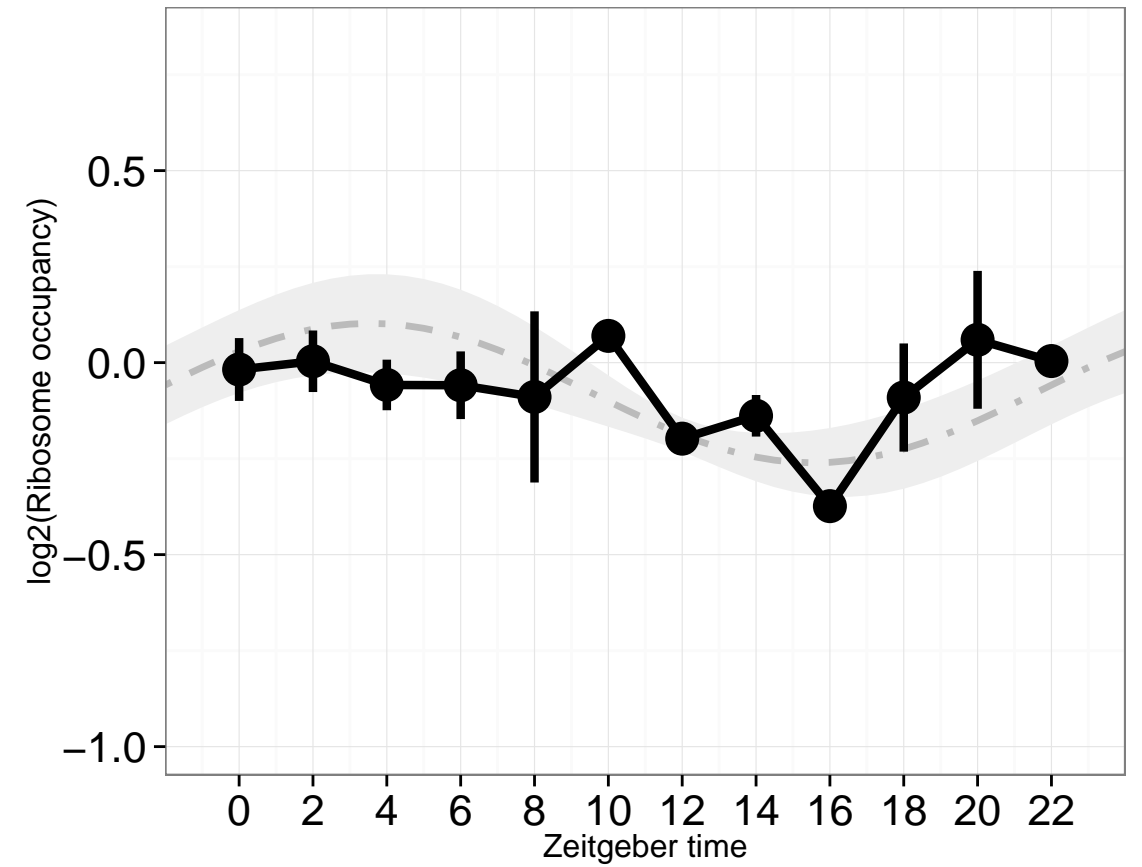

Supplement: SuppDataset_1.zip [file Naa35_set_A.pdf › Supplemental Dataset 1/A-mRNA_nonrhyth_translation_nonrhyth/Naa35_set_A.pdf]

## Naa40

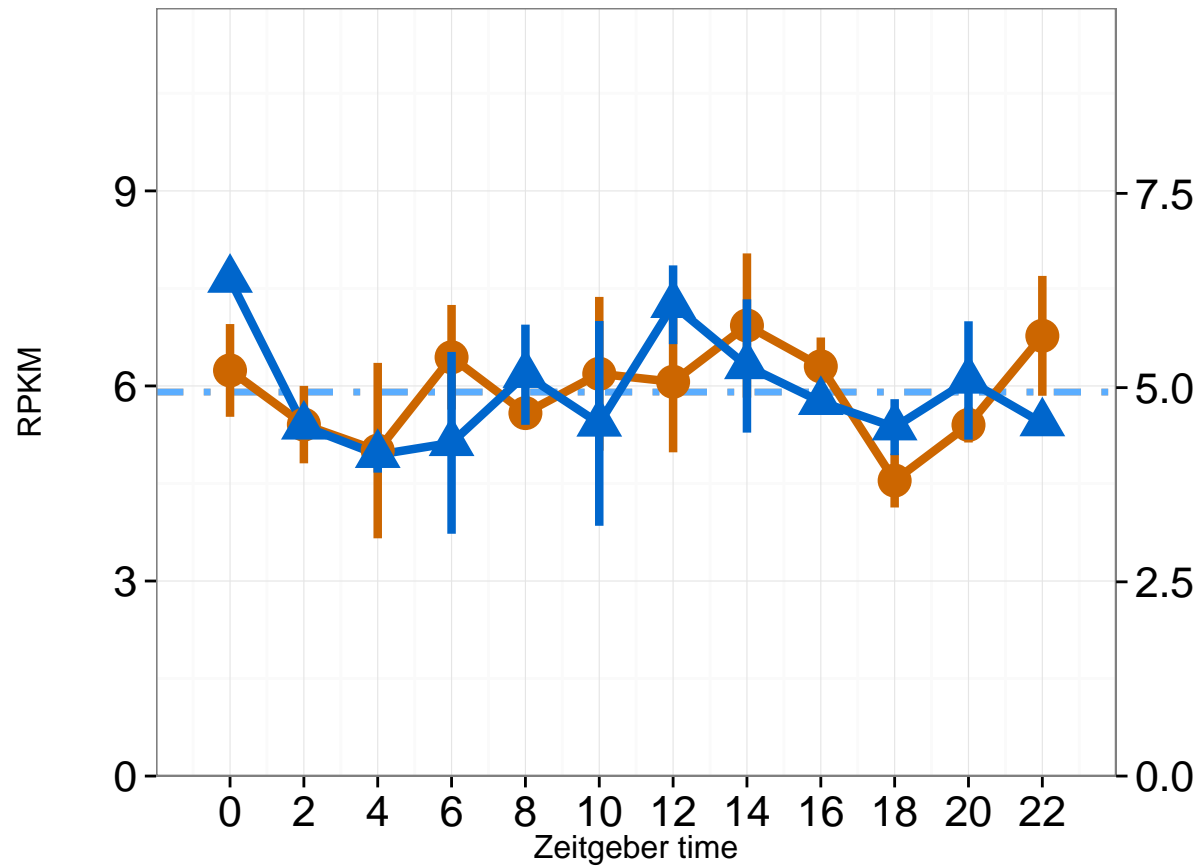

## Naa40

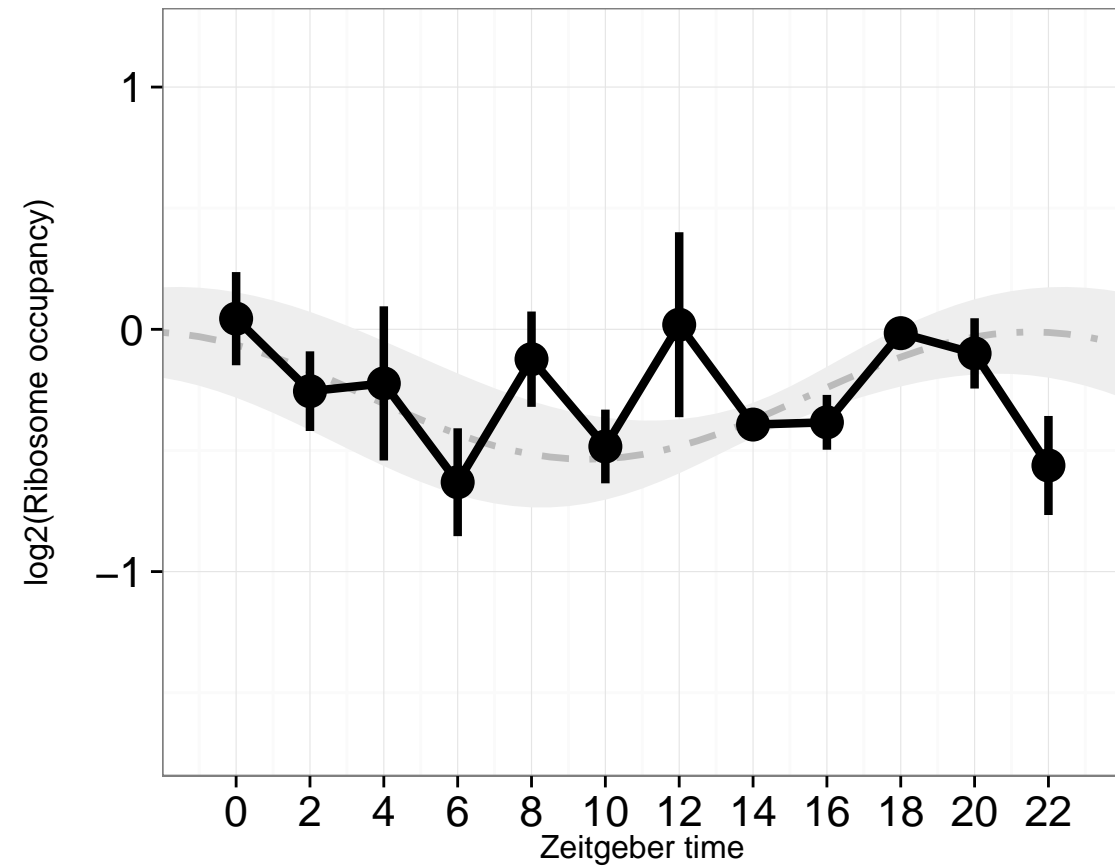

Supplement: SuppDataset_1.zip [file Naa40_set_A.pdf › Supplemental Dataset 1/A-mRNA_nonrhyth_translation_nonrhyth/Naa40_set_A.pdf]

## Naalad2

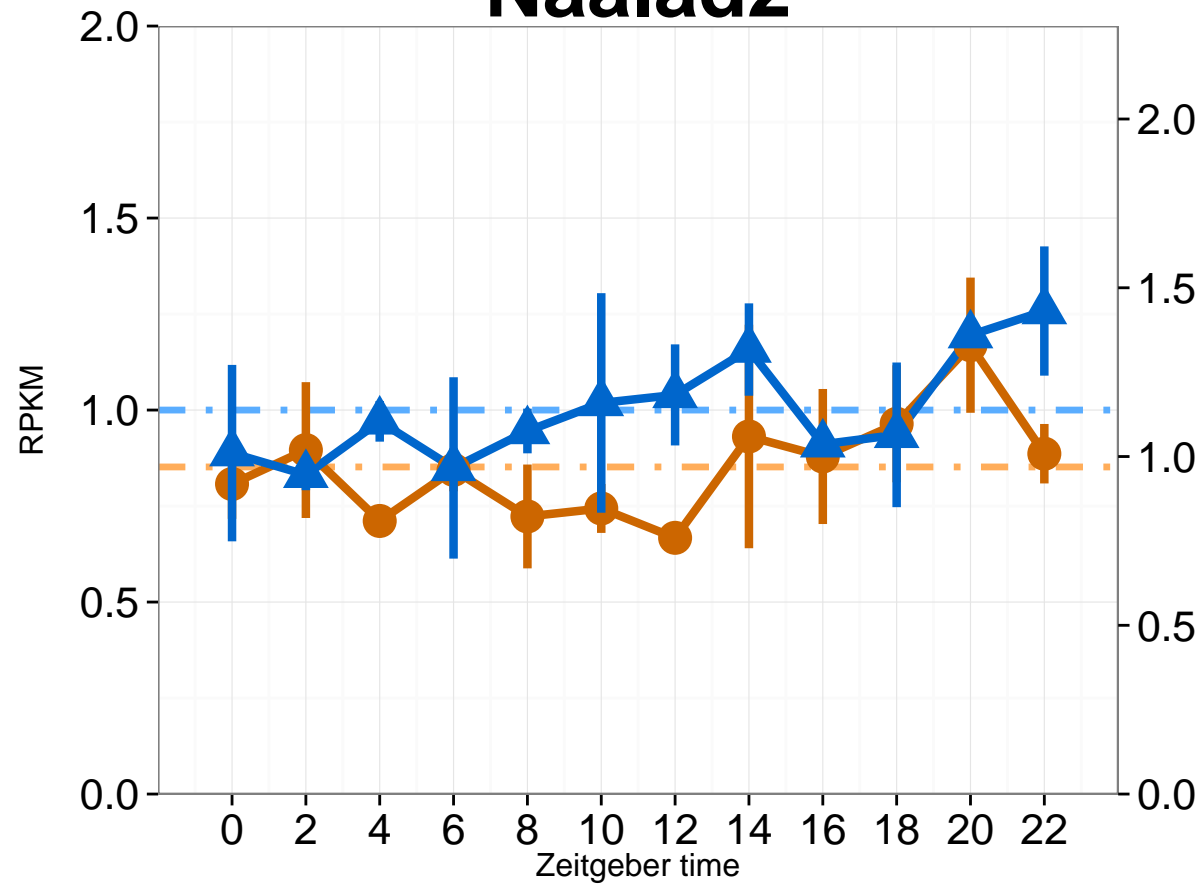

## Naalad2

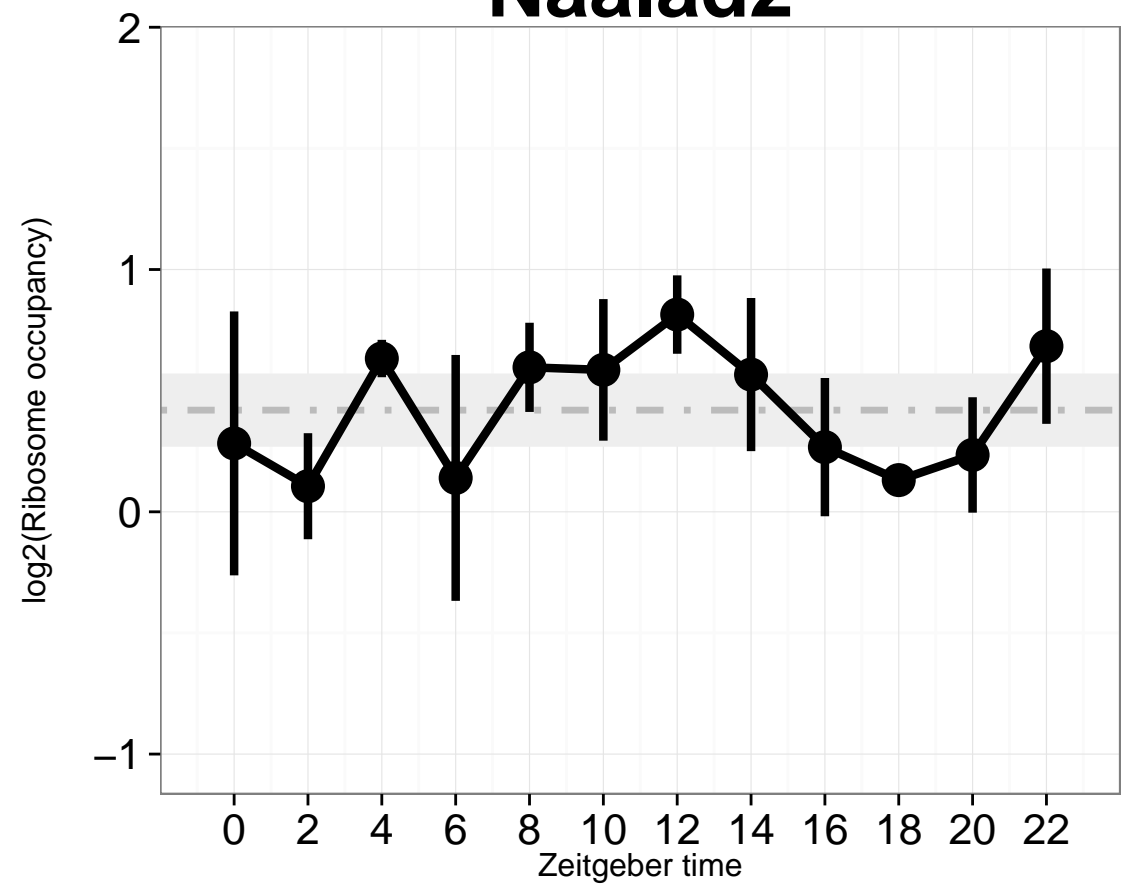

Supplement: SuppDataset_1.zip [file Naalad2_set_A.pdf › Supplemental Dataset 1/A-mRNA_nonrhyth_translation_nonrhyth/Naalad2_set_A.pdf]

# Nab1

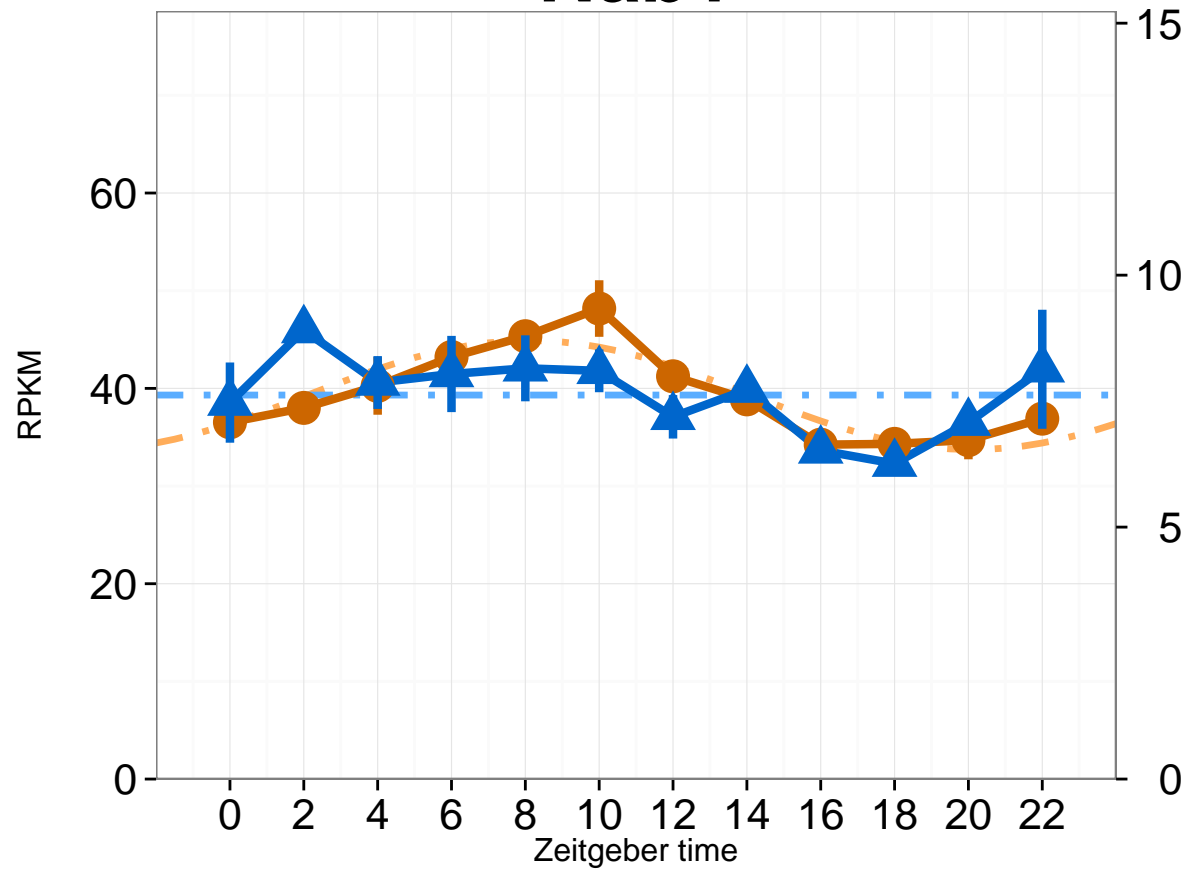

# Nab1

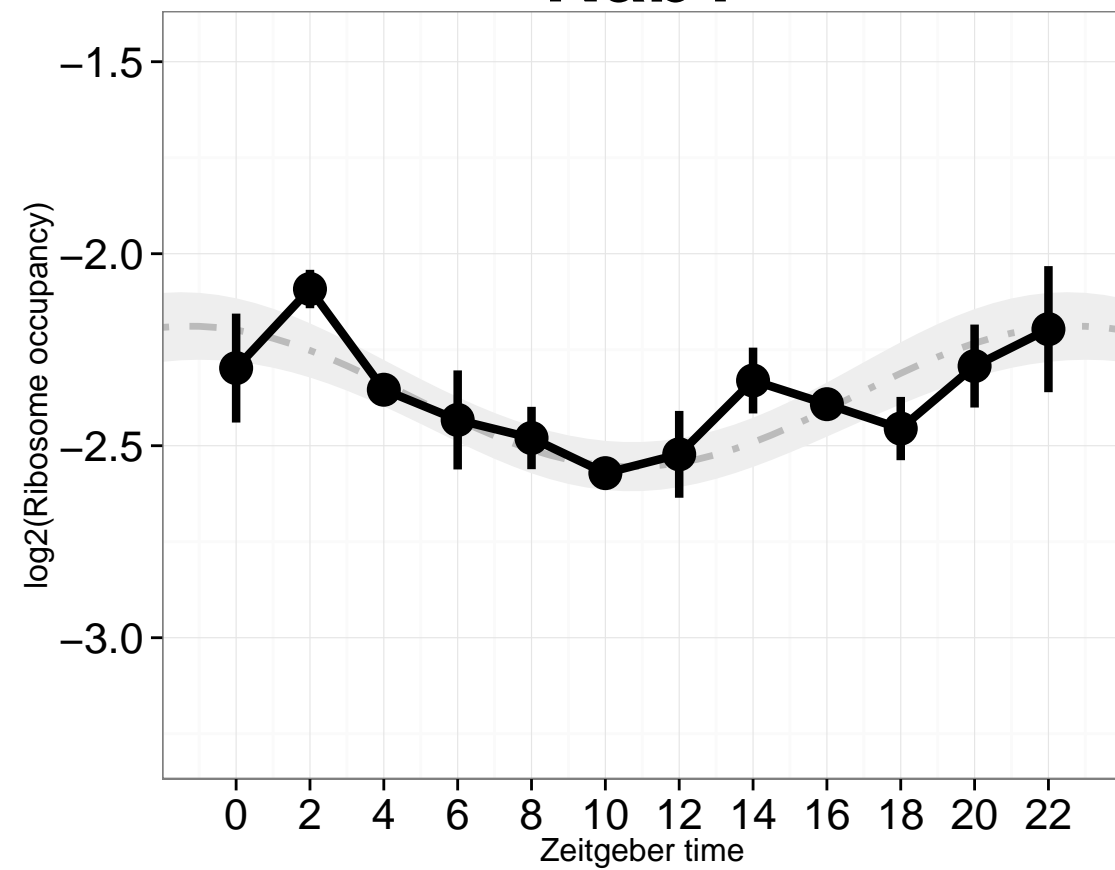

Supplement: SuppDataset_1.zip [file Nab1_set_A.pdf › Supplemental Dataset 1/A-mRNA_nonrhyth_translation_nonrhyth/Nab1_set_A.pdf]

## Nabp2

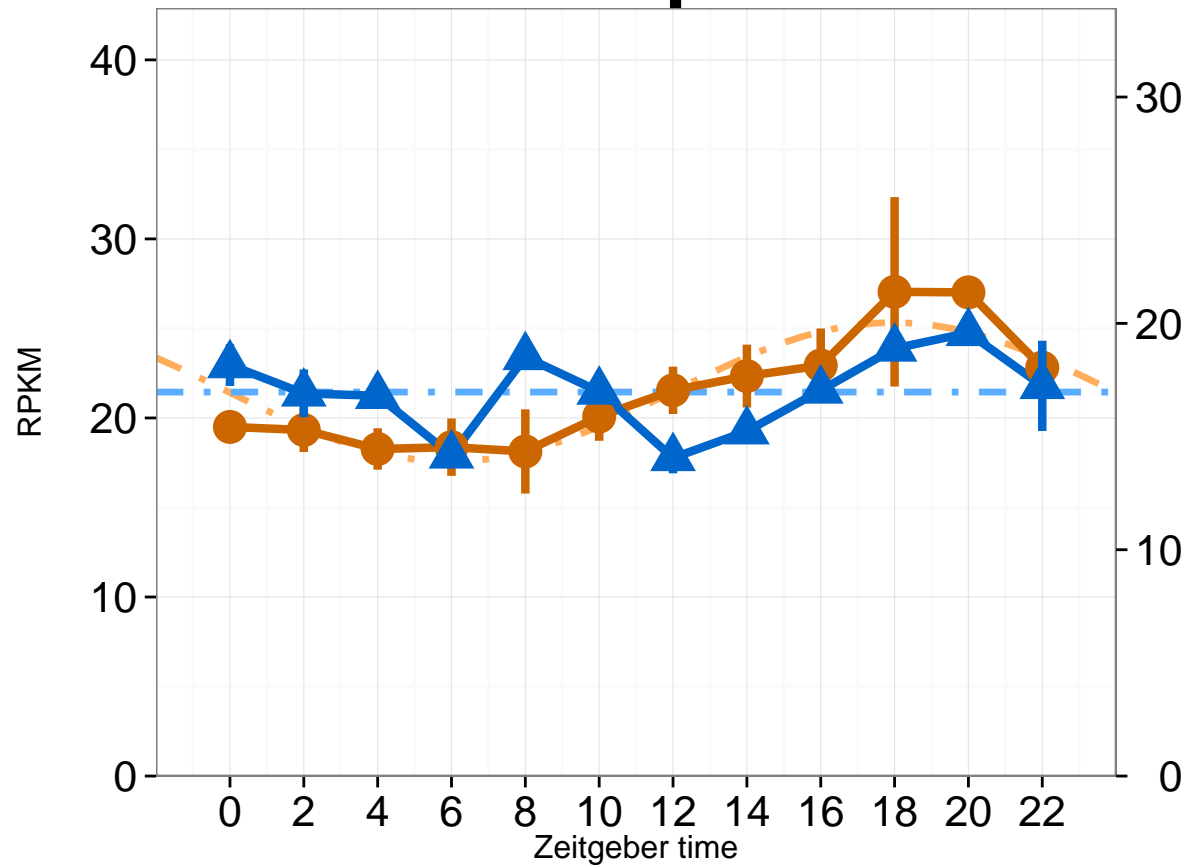

## Nabp2

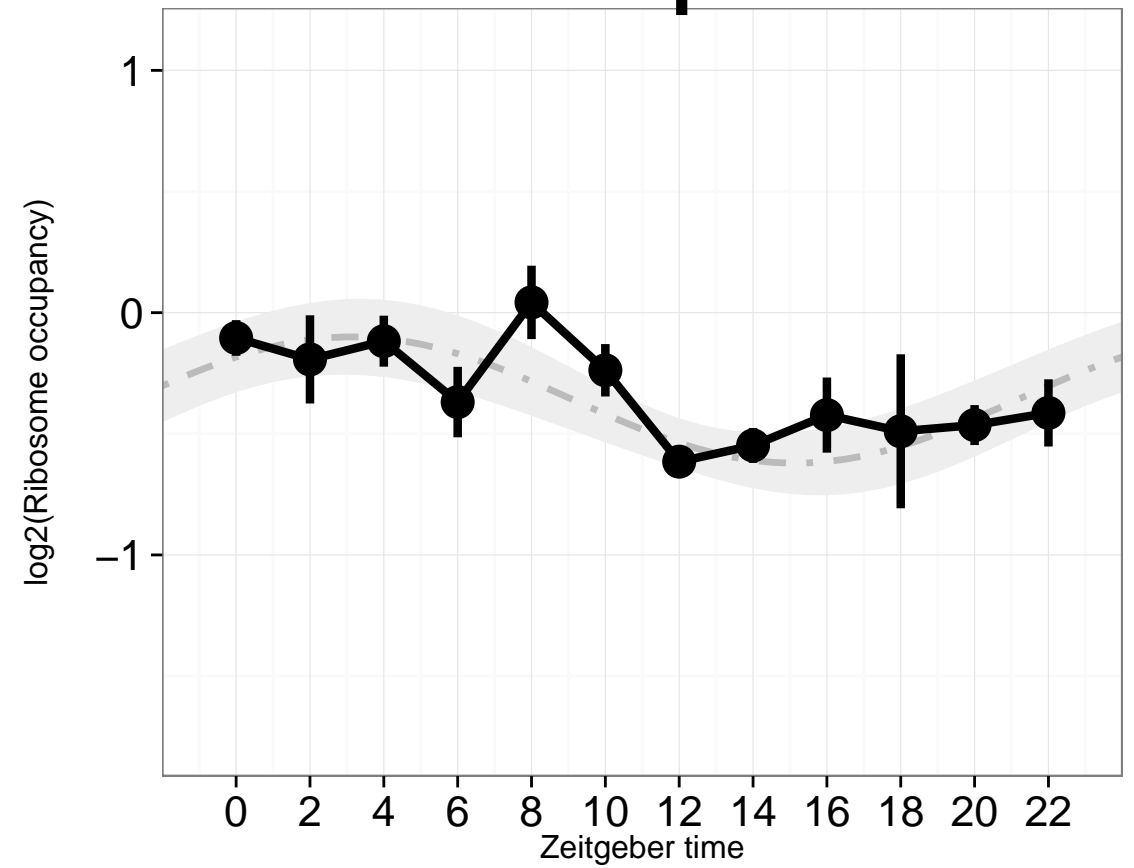

Supplement: SuppDataset_1.zip [file Nabp2_set_A.pdf › Supplemental Dataset 1/A-mRNA_nonrhyth_translation_nonrhyth/Nabp2_set_A.pdf]

# Nacc1

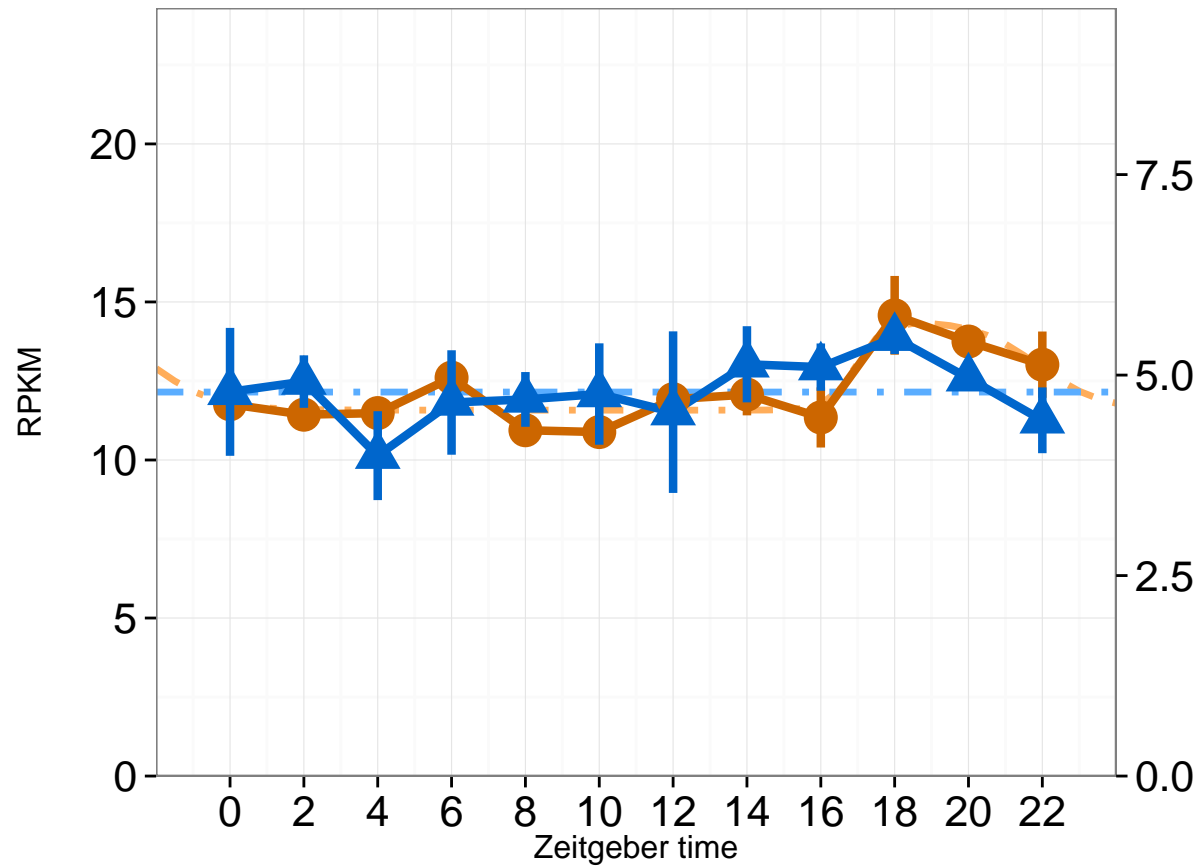

# Nacc1

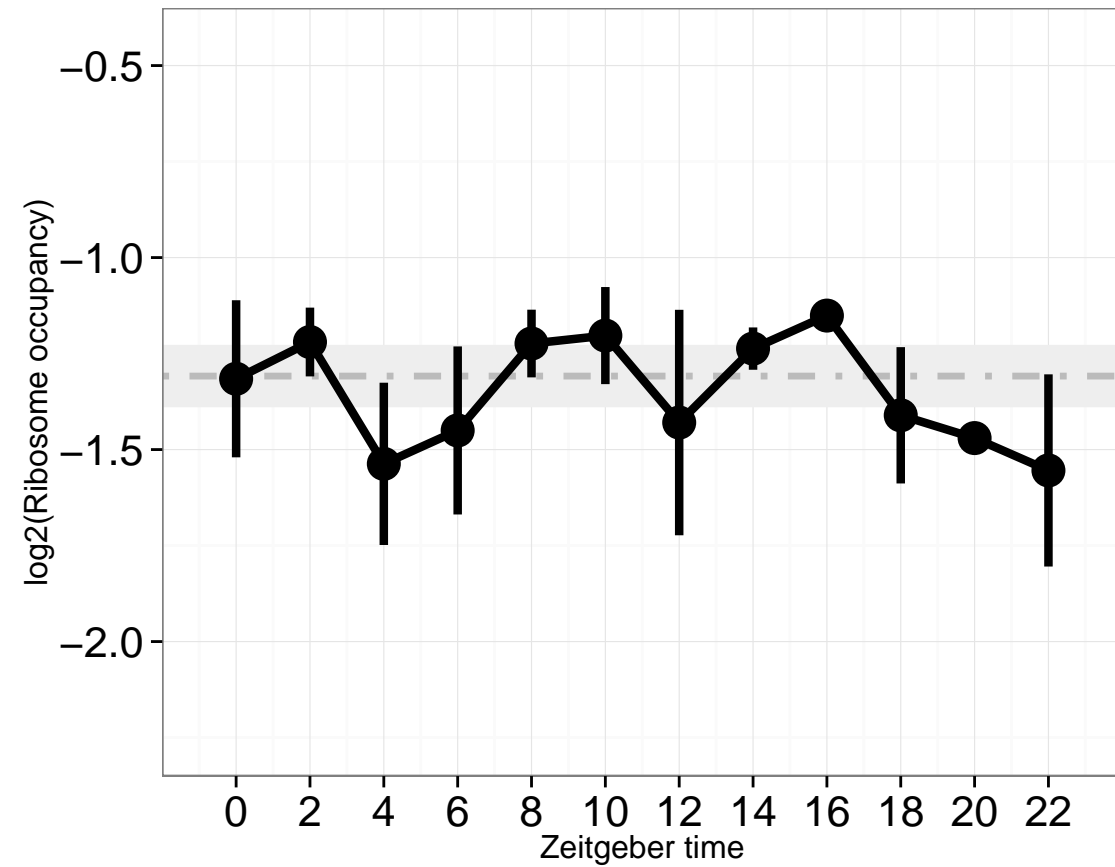

Supplement: SuppDataset_1.zip [file Nacc1_set_A.pdf › Supplemental Dataset 1/A-mRNA_nonrhyth_translation_nonrhyth/Nacc1_set_A.pdf]

## Nacc2

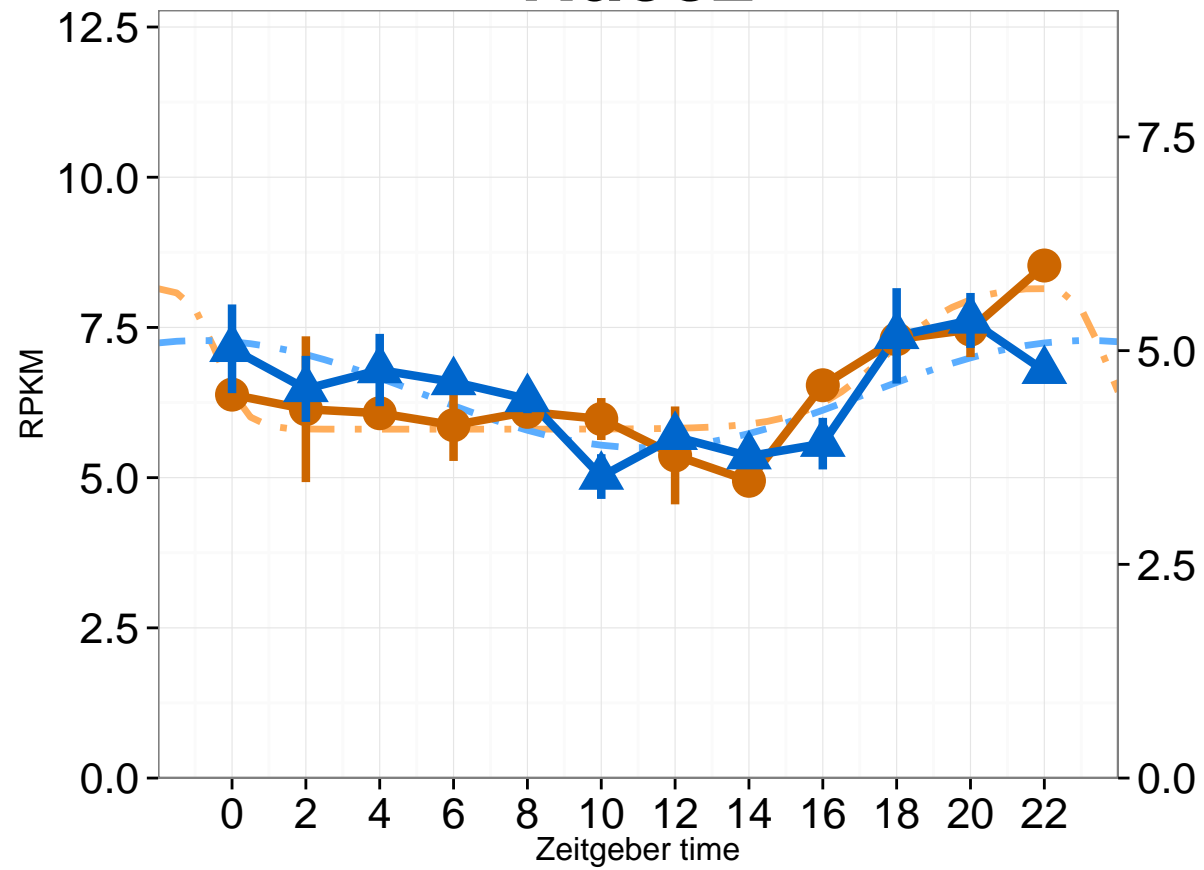

## Nacc2

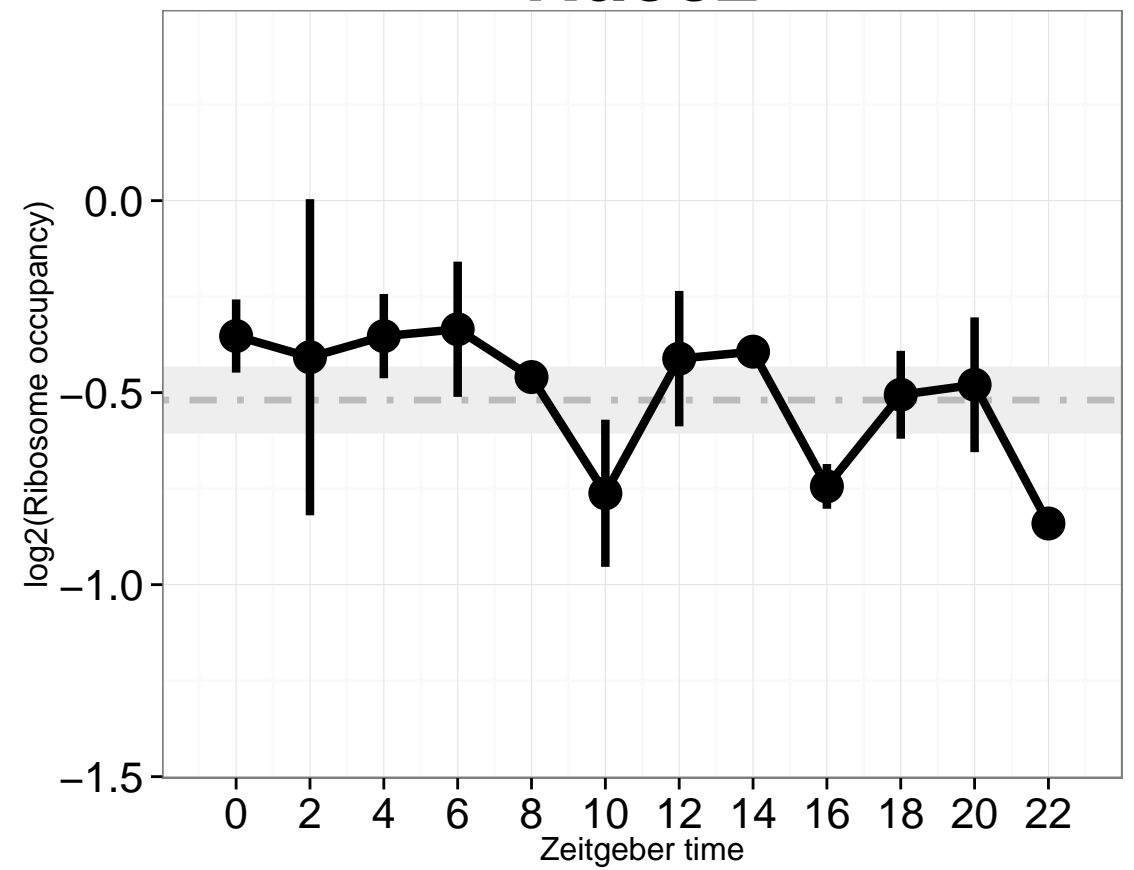

Supplement: SuppDataset_1.zip [file Nacc2_set_A.pdf › Supplemental Dataset 1/A-mRNA_nonrhyth_translation_nonrhyth/Nacc2_set_A.pdf]

# Nadk2

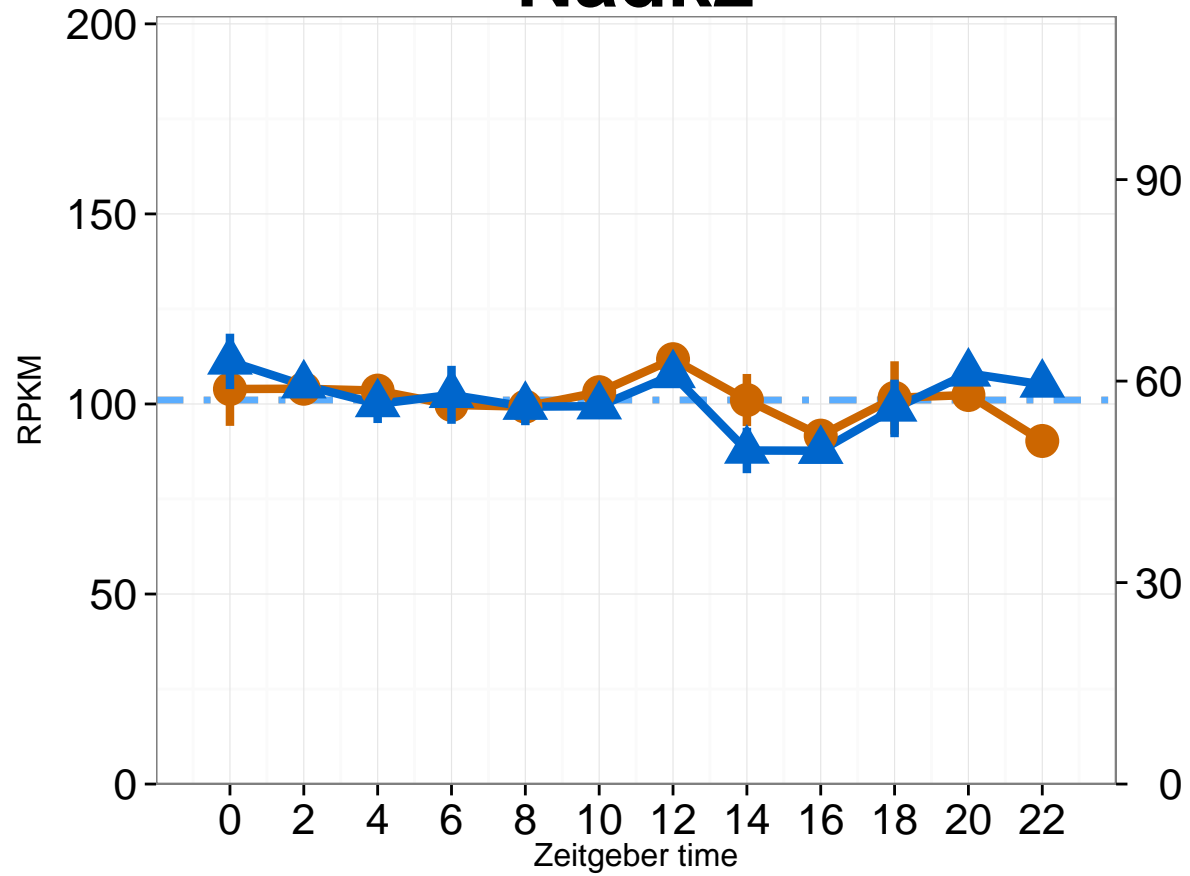

# Nadk2

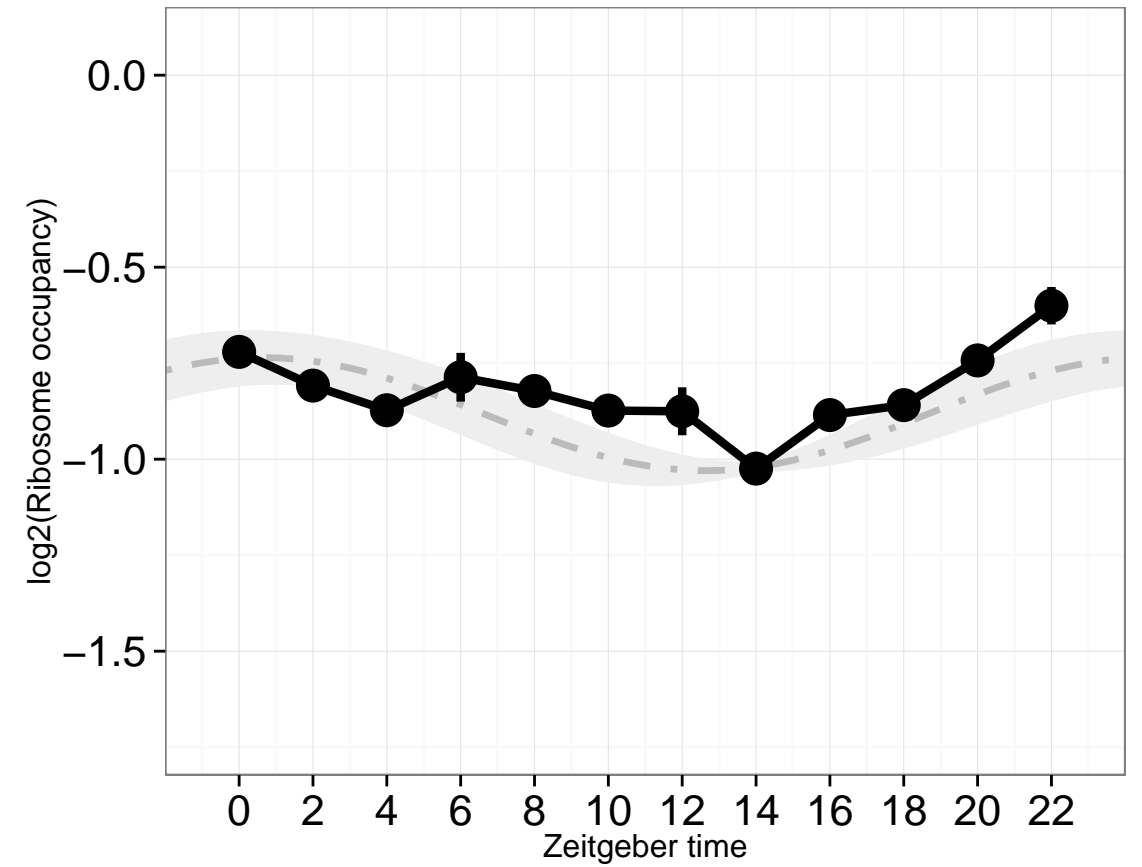

Supplement: SuppDataset_1.zip [file Nadk2_set_A.pdf › Supplemental Dataset 1/A-mRNA_nonrhyth_translation_nonrhyth/Nadk2_set_A.pdf]

## Nadk

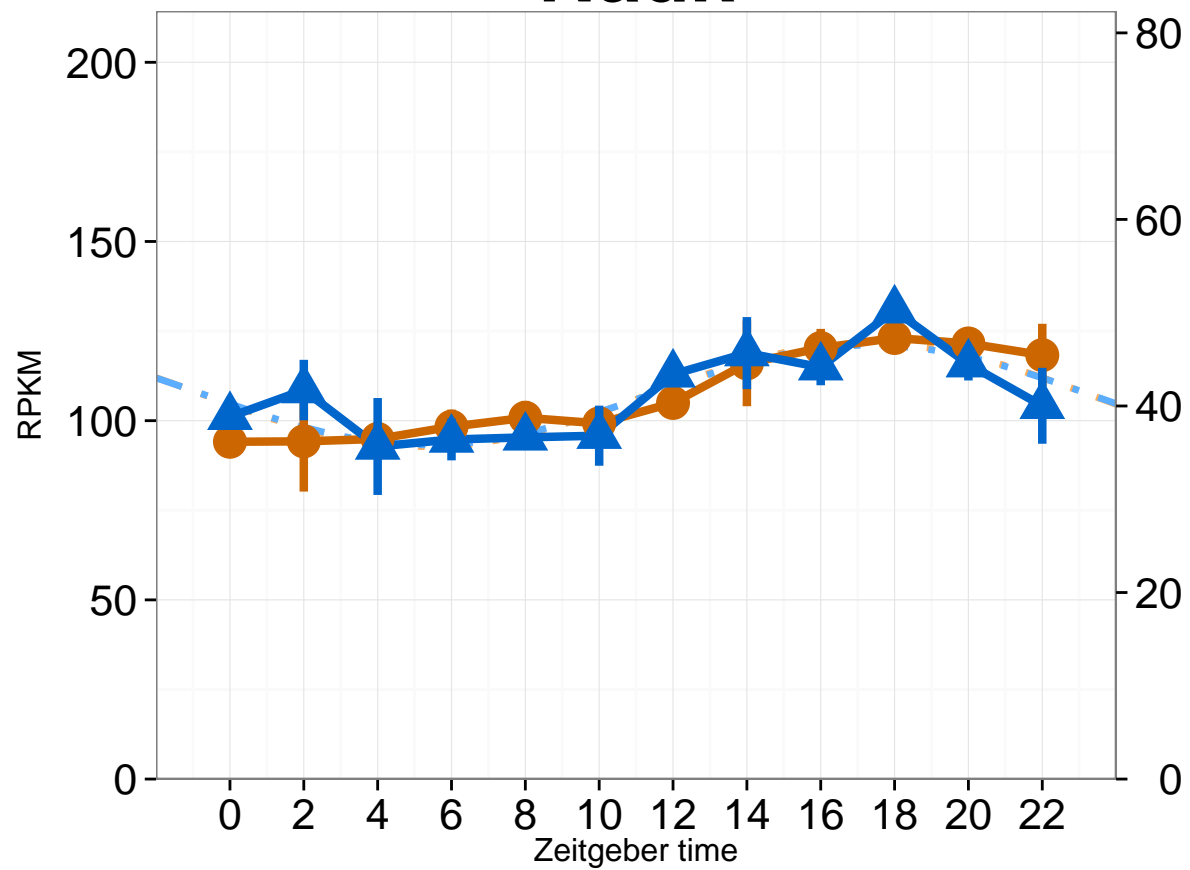

## Nadk

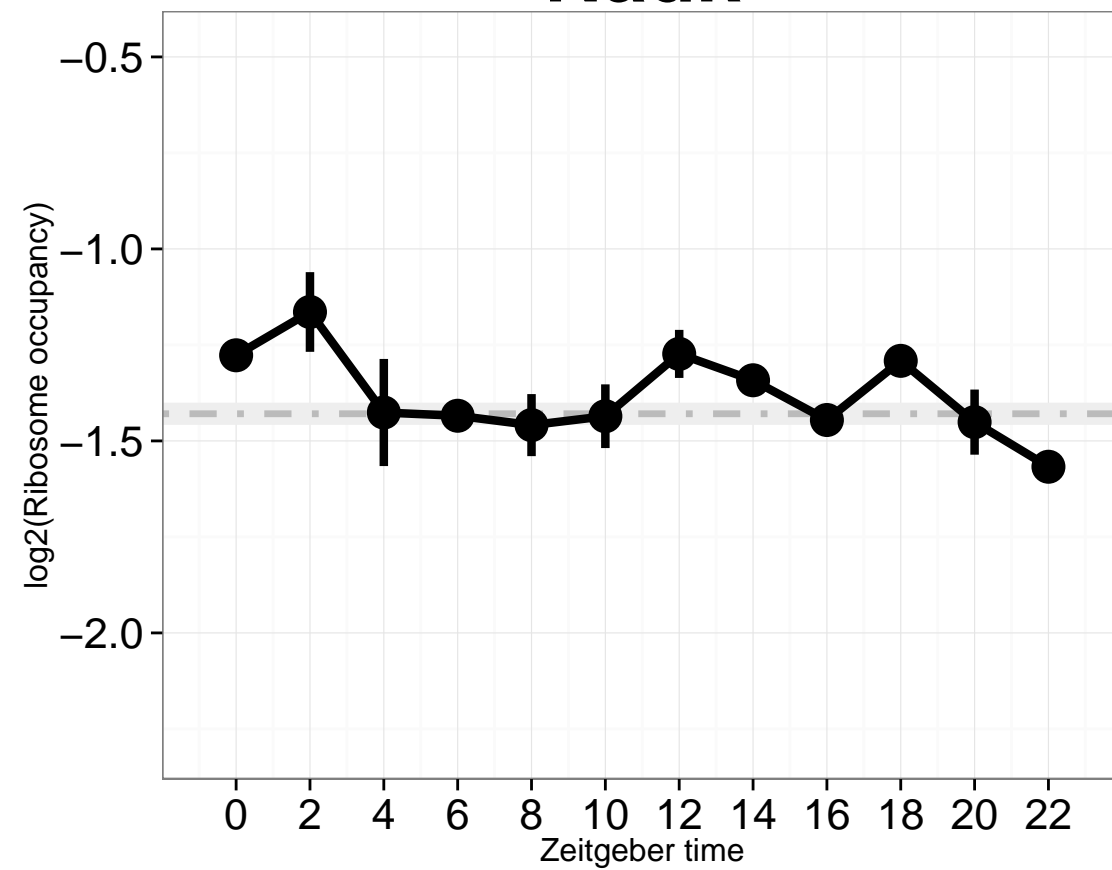

Supplement: SuppDataset_1.zip [file Nadk_set_A.pdf › Supplemental Dataset 1/A-mRNA_nonrhyth_translation_nonrhyth/Nadk_set_A.pdf]

# Nadsyn1

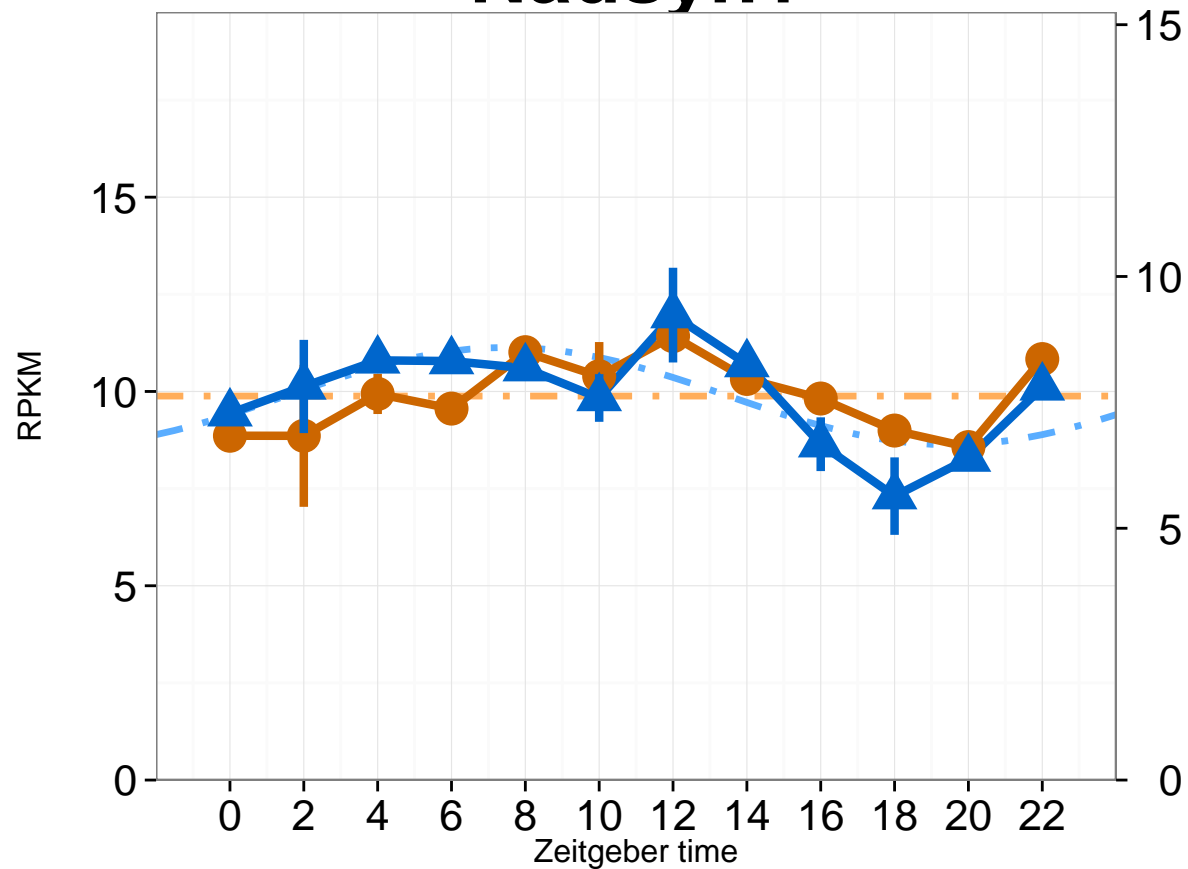

# Nadsyn1

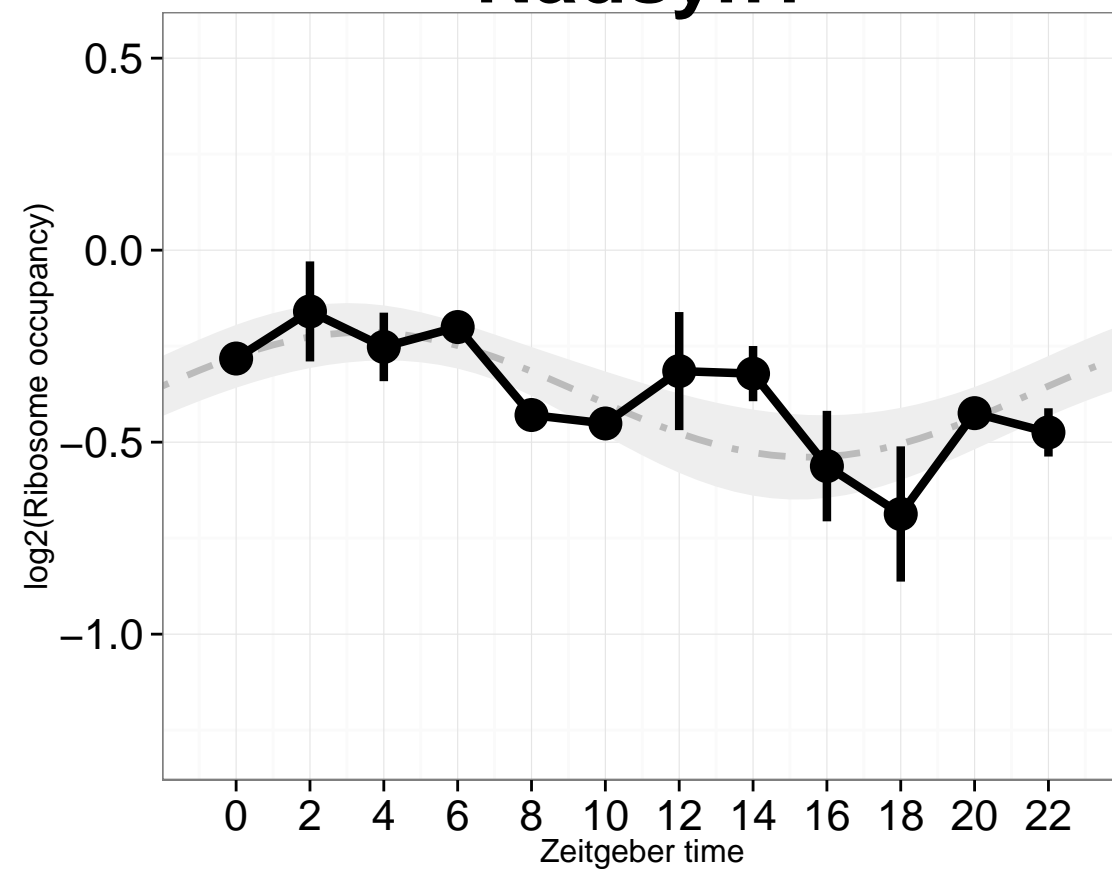

Supplement: SuppDataset_1.zip [file Nadsyn1_set_A.pdf › Supplemental Dataset 1/A-mRNA_nonrhyth_translation_nonrhyth/Nadsyn1_set_A.pdf]

## Nae1

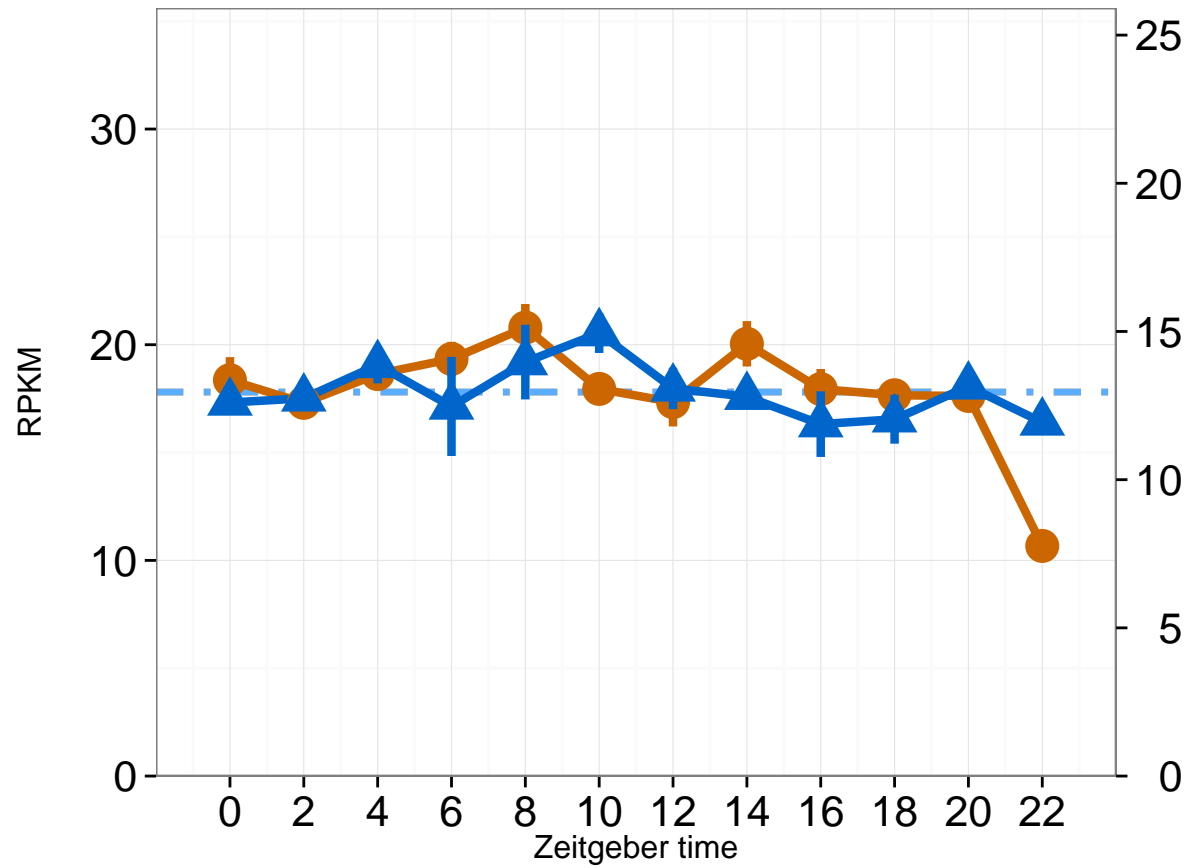

## Nae1

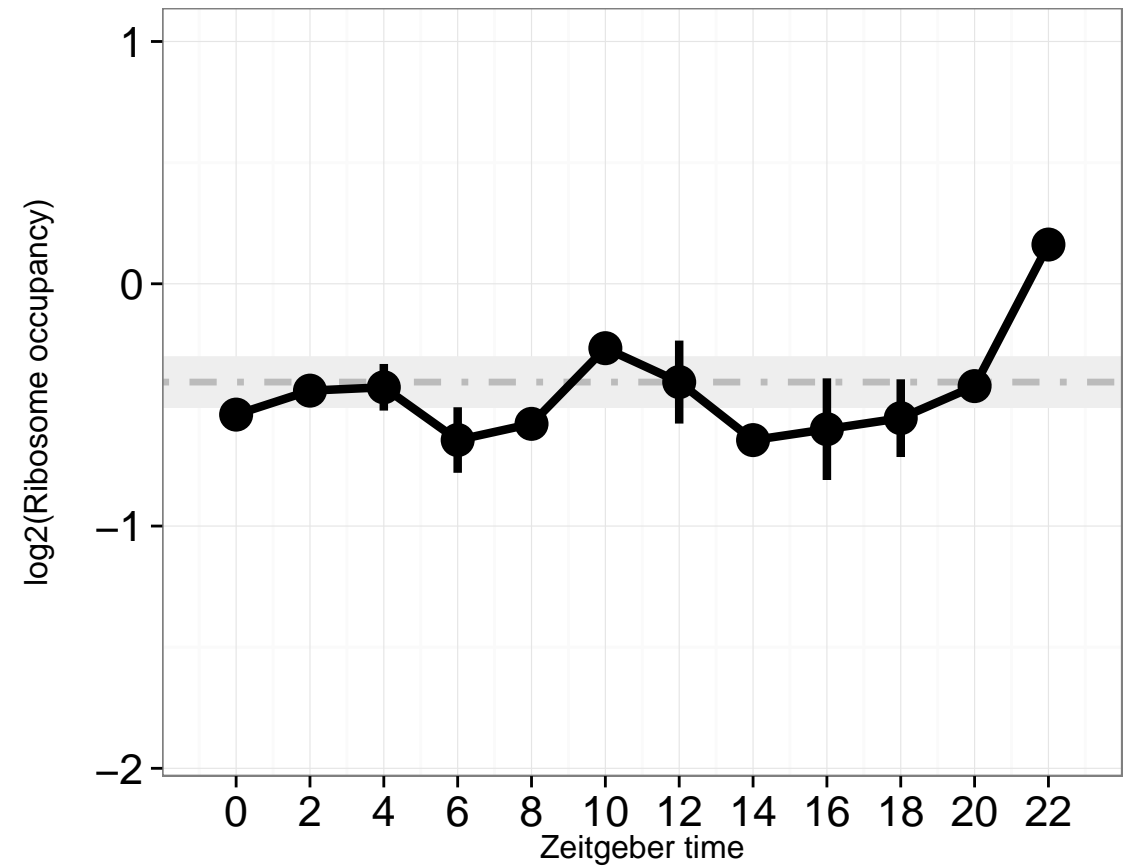

Supplement: SuppDataset_1.zip [file Nae1_set_A.pdf › Supplemental Dataset 1/A-mRNA_nonrhyth_translation_nonrhyth/Nae1_set_A.pdf]

## Naf1

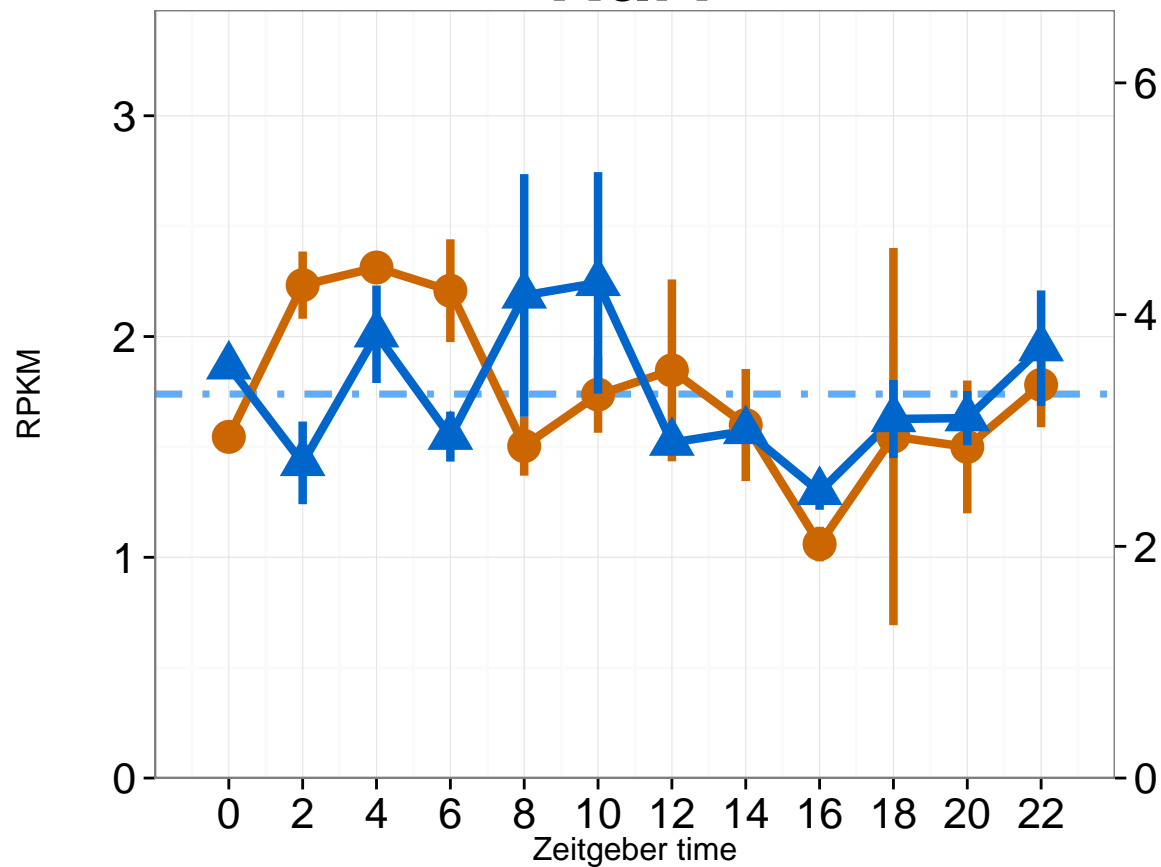

## Naf1

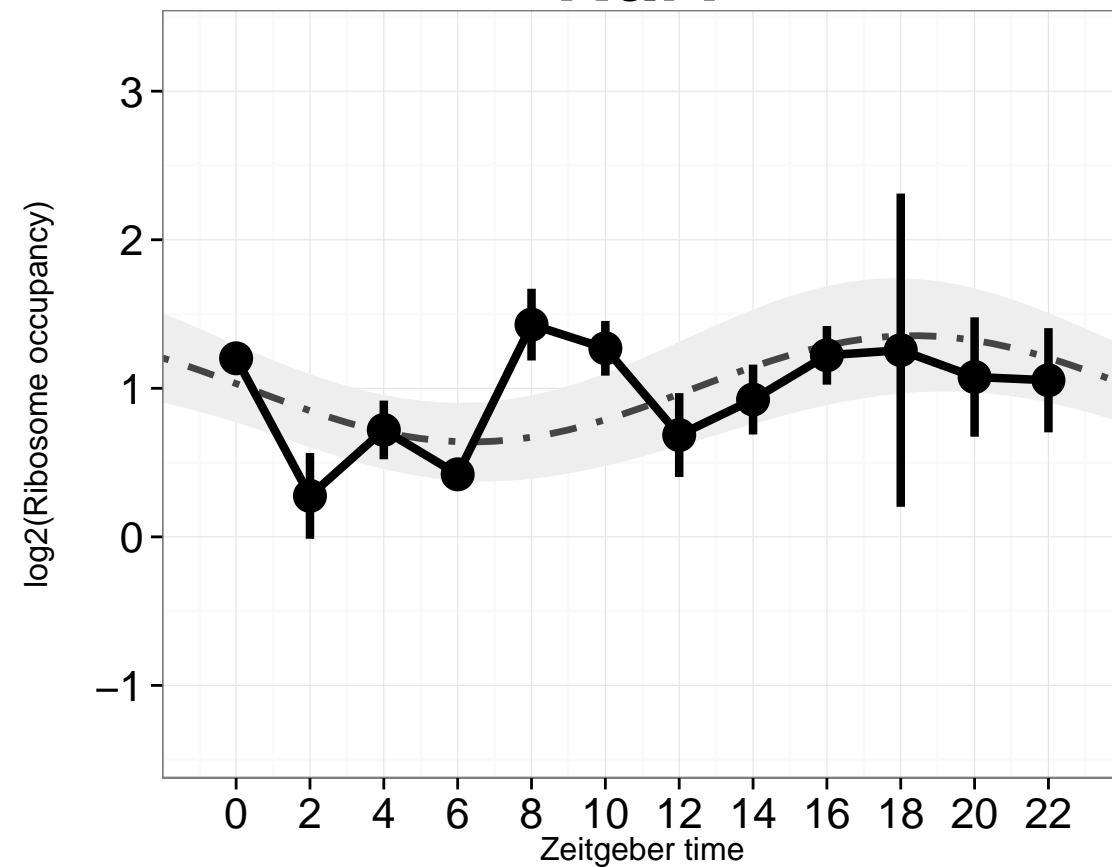

Supplement: SuppDataset_1.zip [file Naf1_set_A.pdf › Supplemental Dataset 1/A-mRNA_nonrhyth_translation_nonrhyth/Naf1_set_A.pdf]

## Nagk

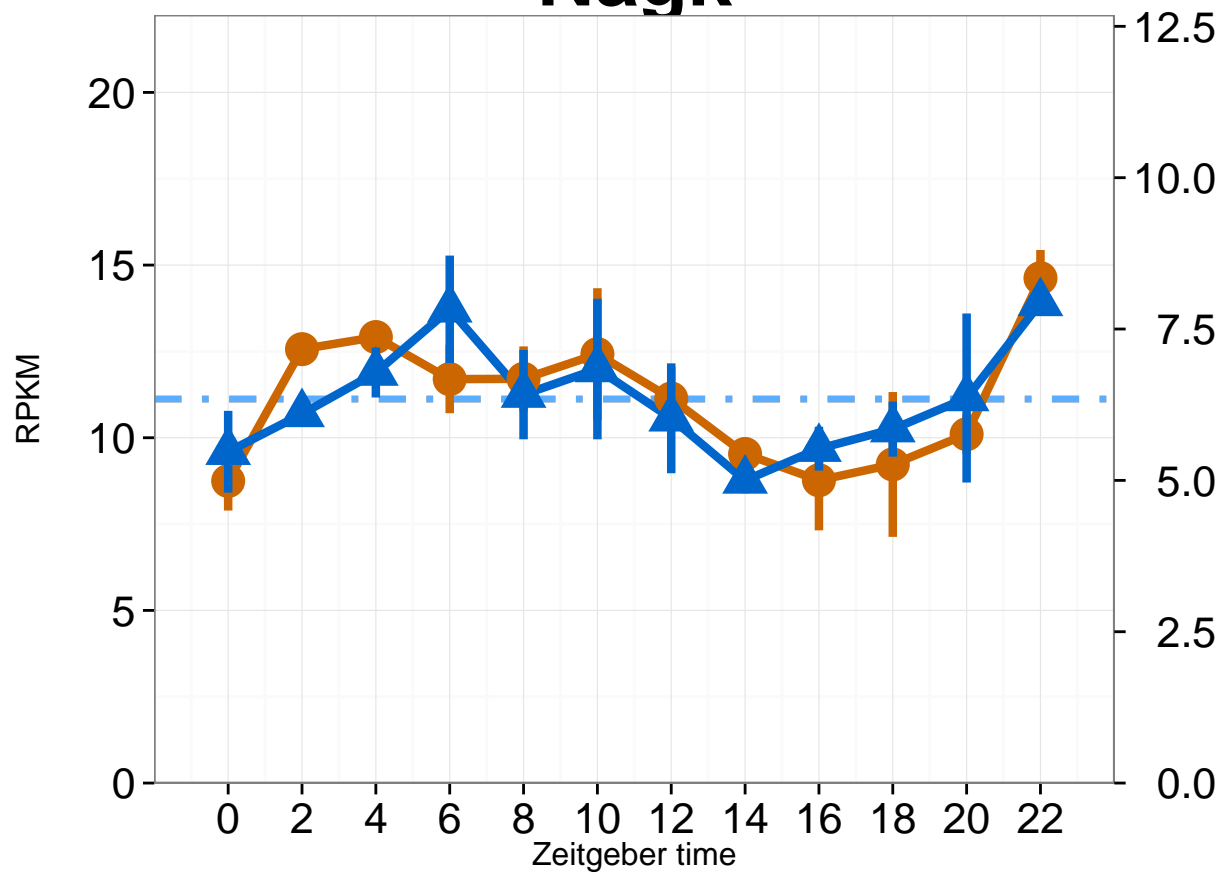

## Nagk

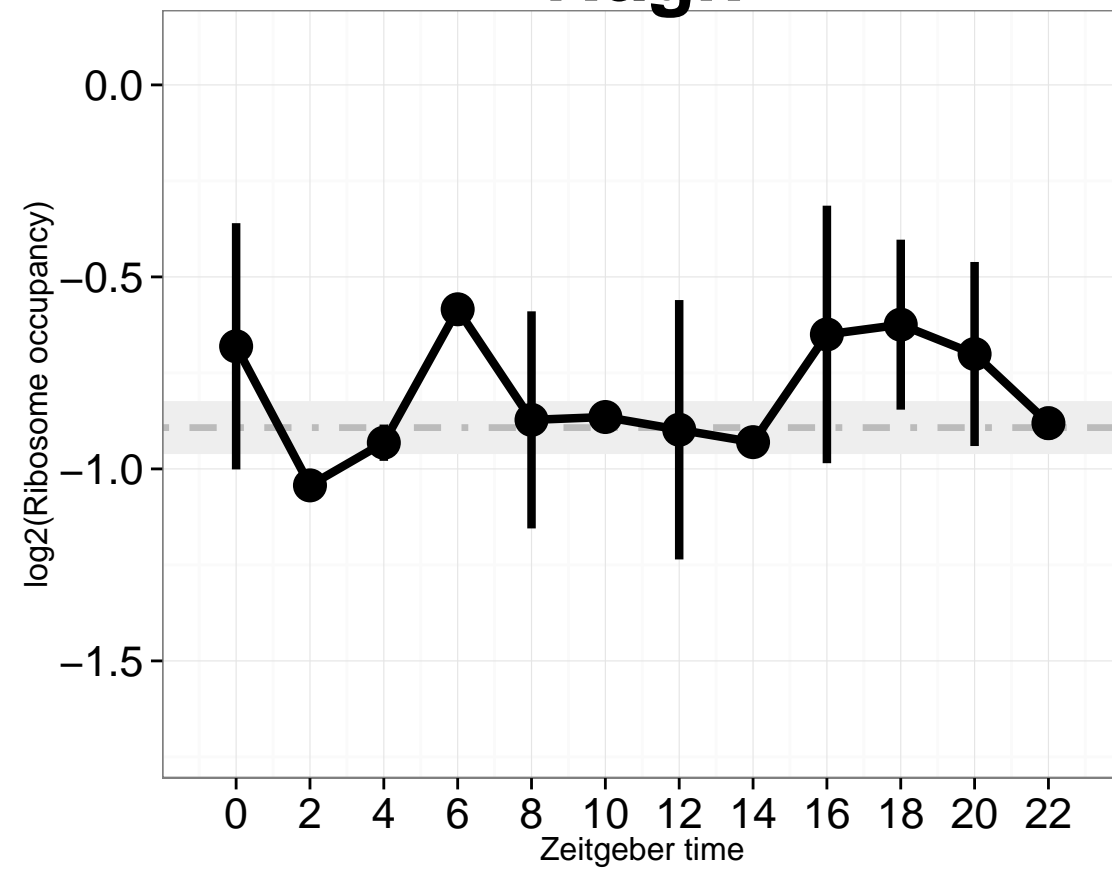

Supplement: SuppDataset_1.zip [file Nagk_set_A.pdf › Supplemental Dataset 1/A-mRNA_nonrhyth_translation_nonrhyth/Nagk_set_A.pdf]

## Naglu

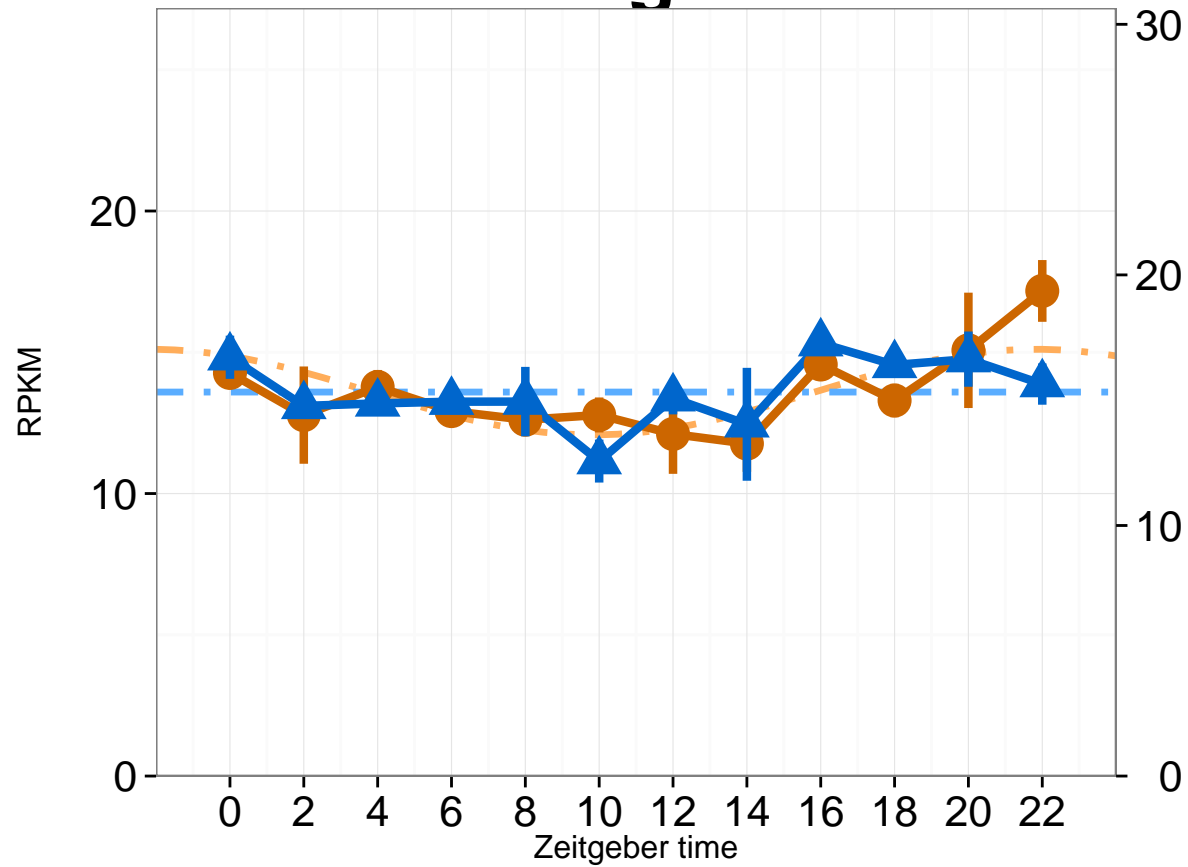

## Naglu

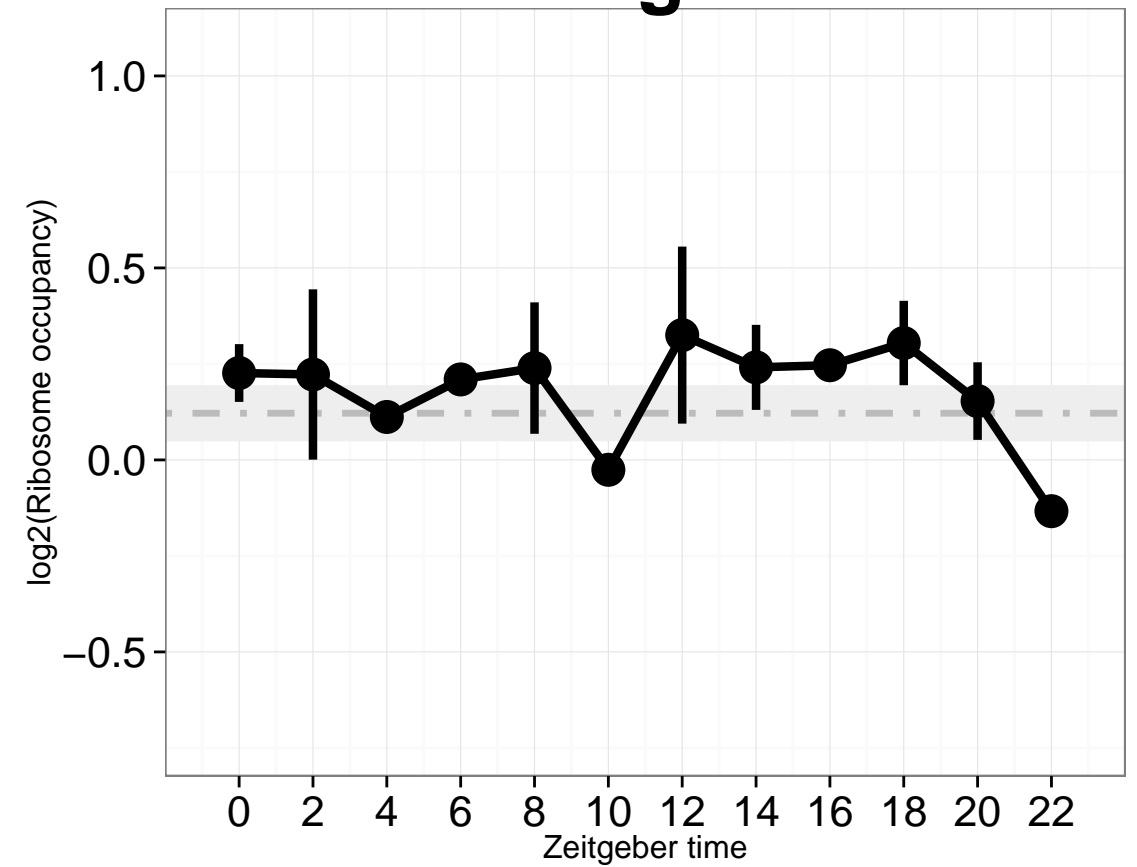

Supplement: SuppDataset_1.zip [file Naglu_set_A.pdf › Supplemental Dataset 1/A-mRNA_nonrhyth_translation_nonrhyth/Naglu_set_A.pdf]

## Nagpa

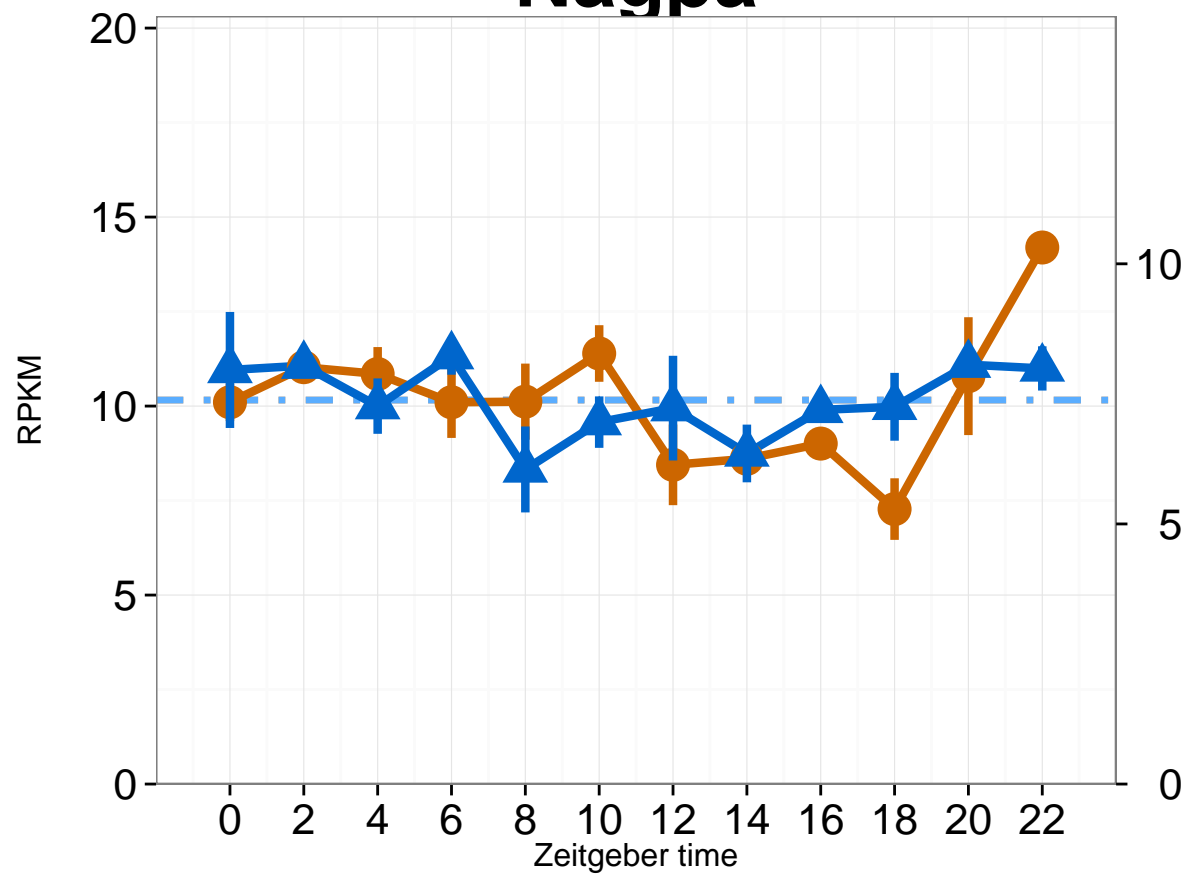

## Nagpa

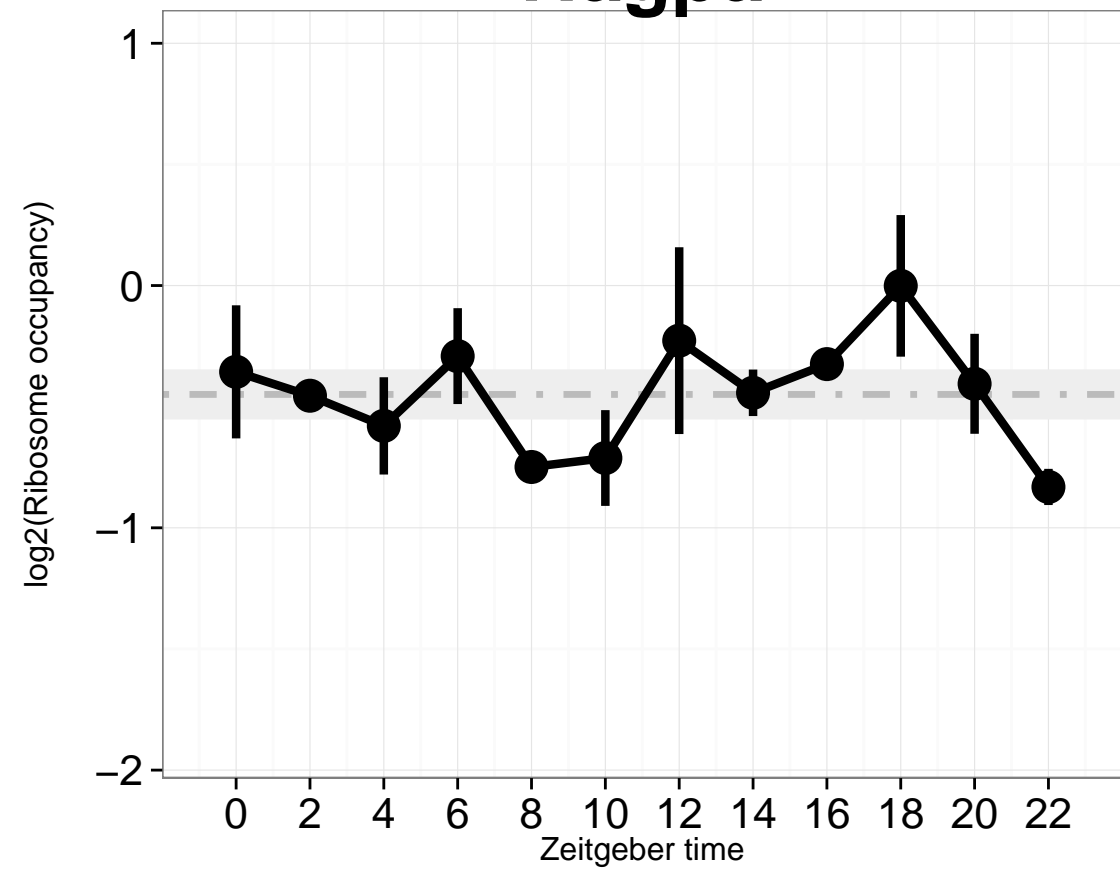

Supplement: SuppDataset_1.zip [file Nagpa_set_A.pdf › Supplemental Dataset 1/A-mRNA_nonrhyth_translation_nonrhyth/Nagpa_set_A.pdf]

## Naif1

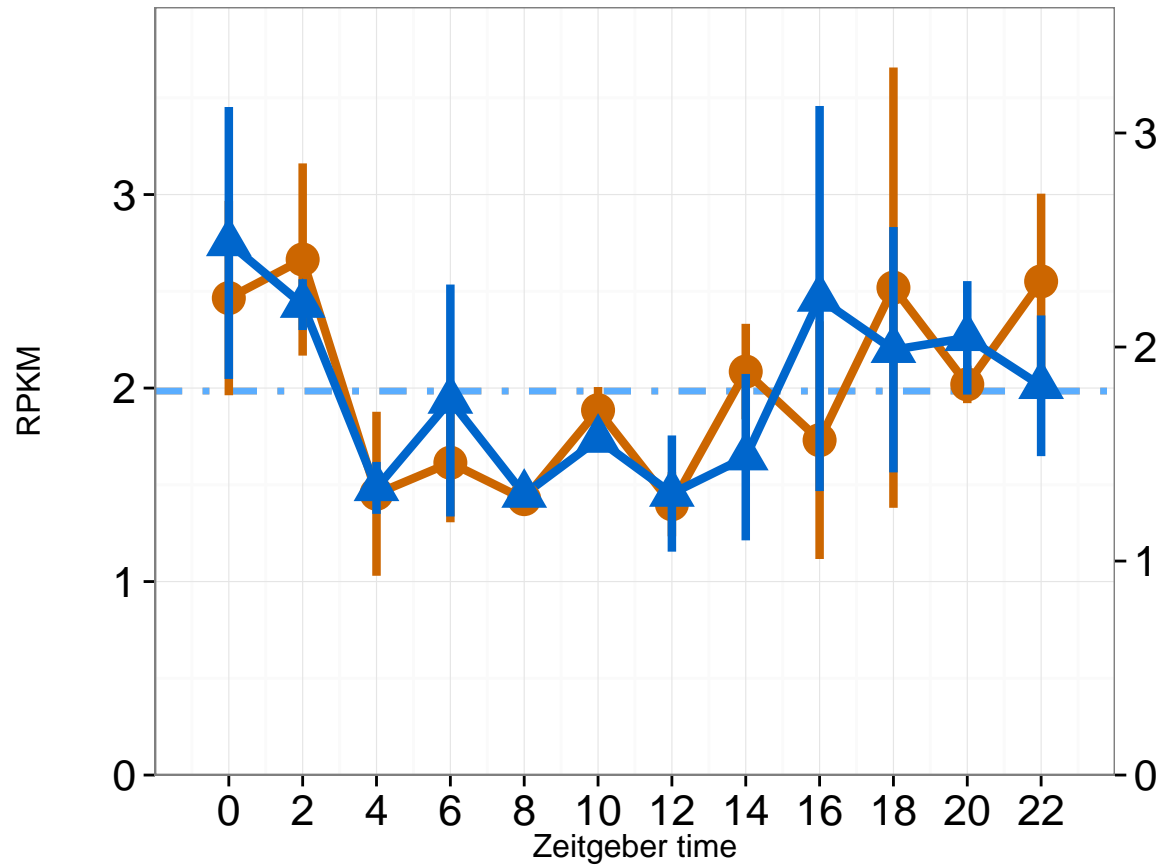

## Naif1

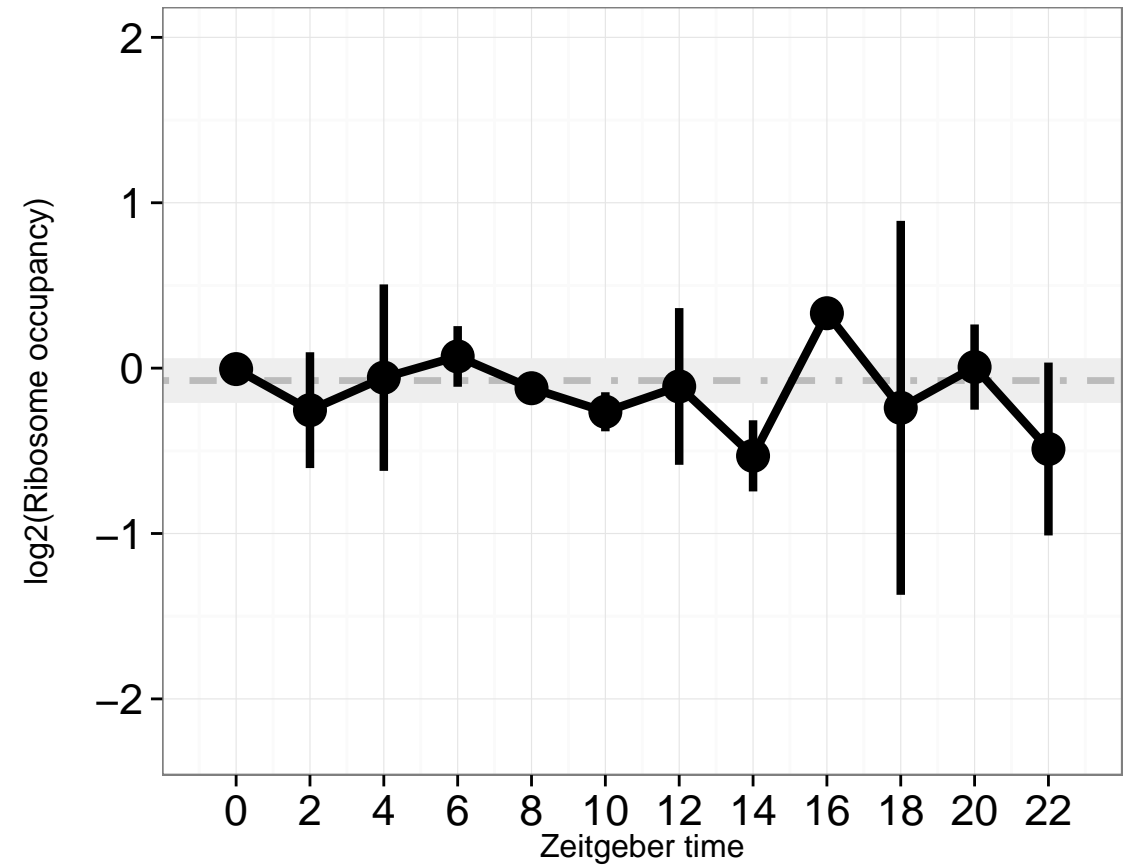

Supplement: SuppDataset_1.zip [file Naif1_set_A.pdf › Supplemental Dataset 1/A-mRNA_nonrhyth_translation_nonrhyth/Naif1_set_A.pdf]

## Naip2

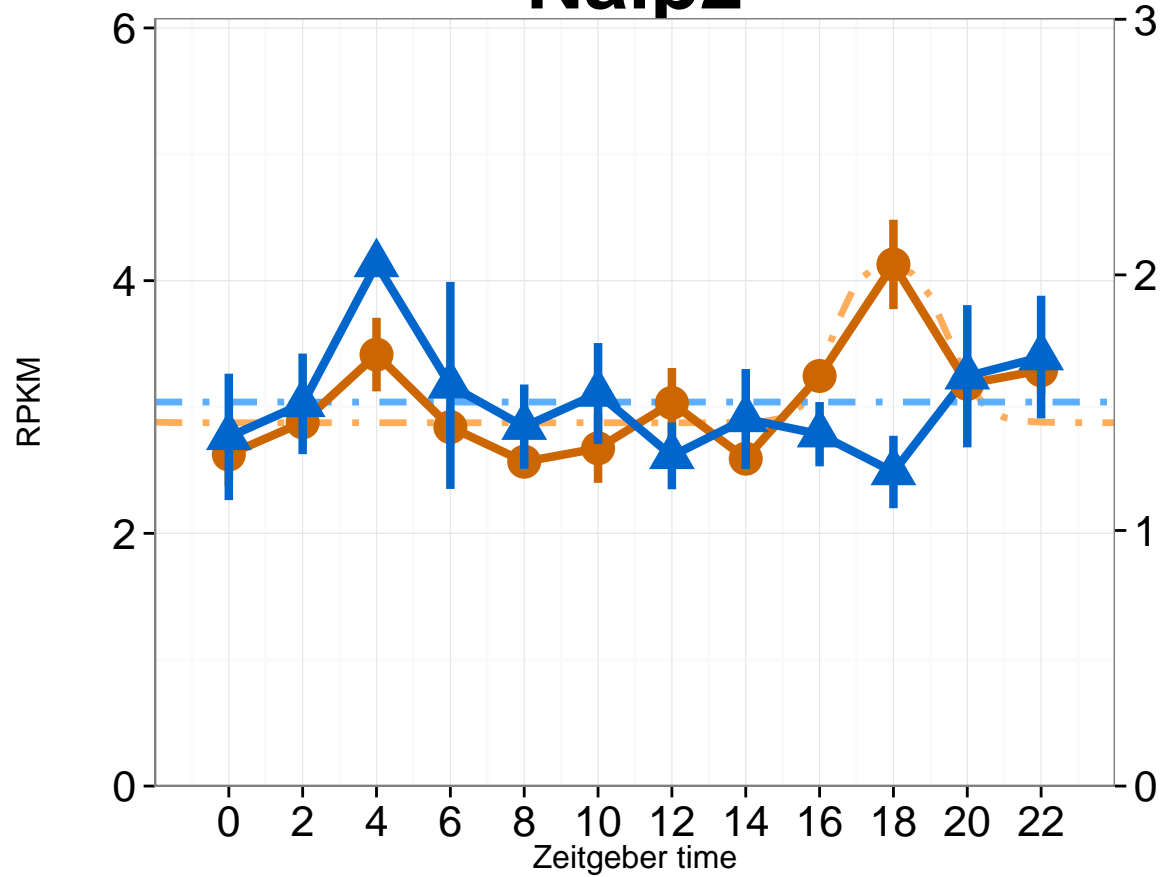

## Naip2

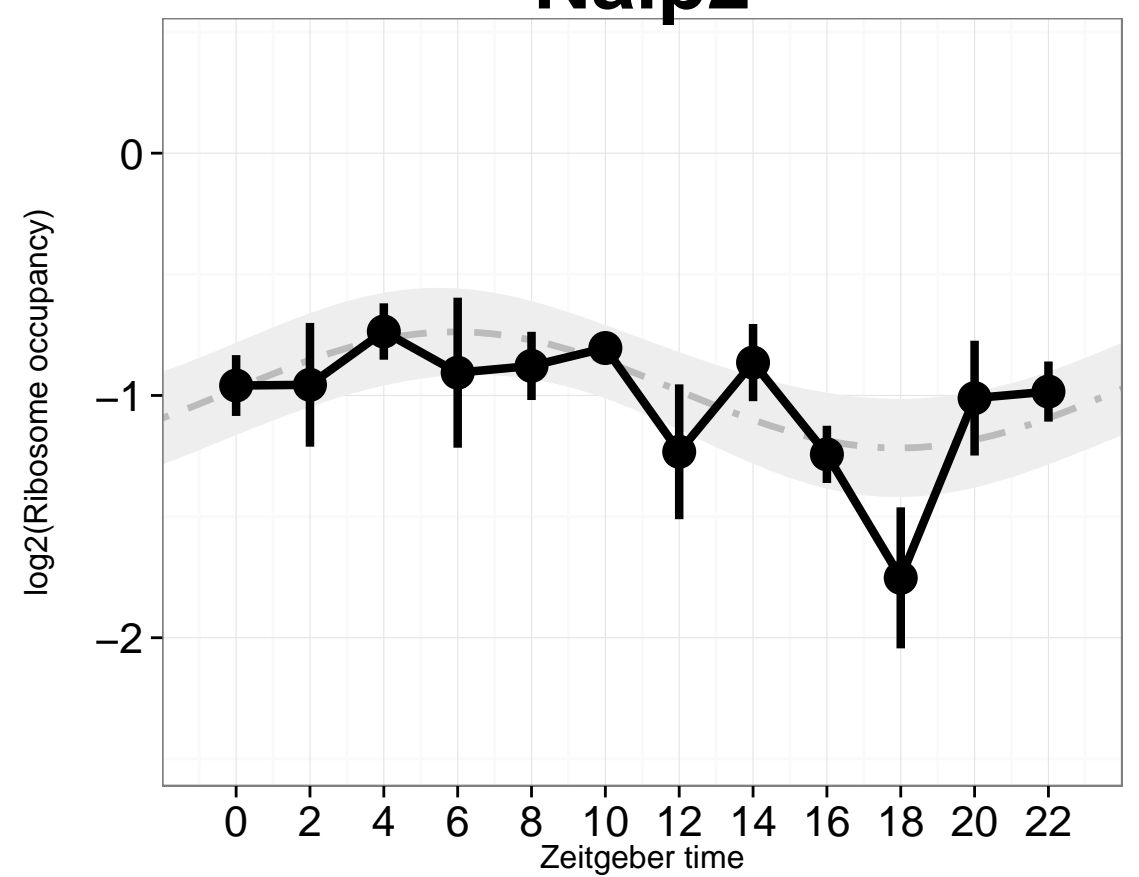

Supplement: SuppDataset_1.zip [file Naip2_set_A.pdf › Supplemental Dataset 1/A-mRNA_nonrhyth_translation_nonrhyth/Naip2_set_A.pdf]

## Naip5

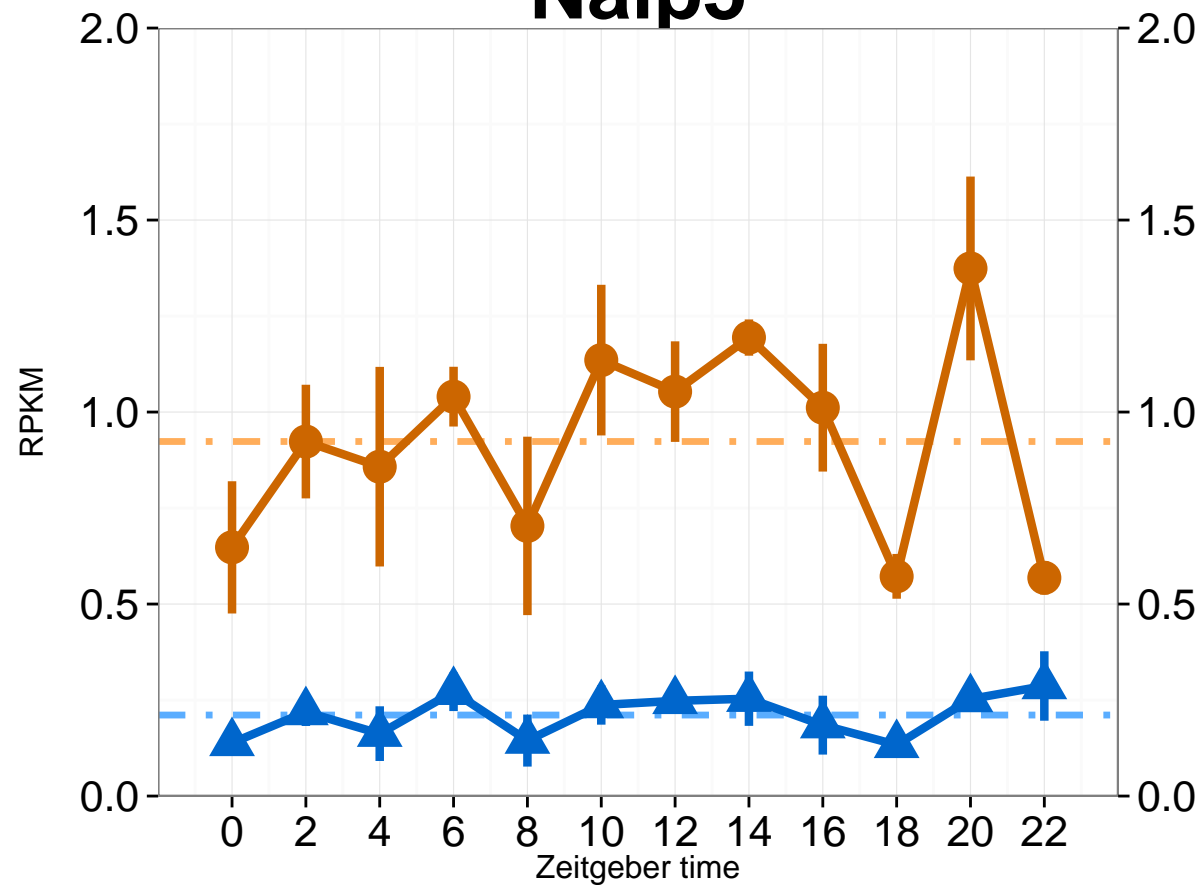

## Naip5

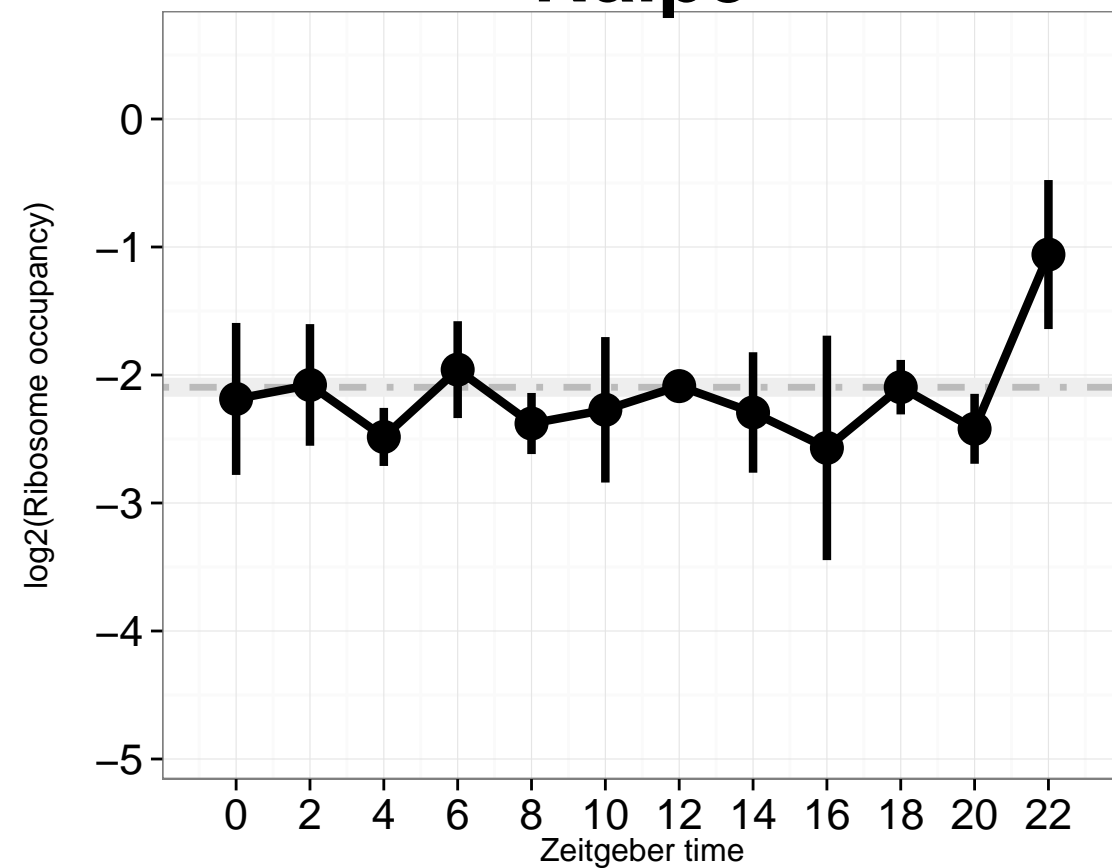

Supplement: SuppDataset_1.zip [file Naip5_set_A.pdf › Supplemental Dataset 1/A-mRNA_nonrhyth_translation_nonrhyth/Naip5_set_A.pdf]

## Naip6

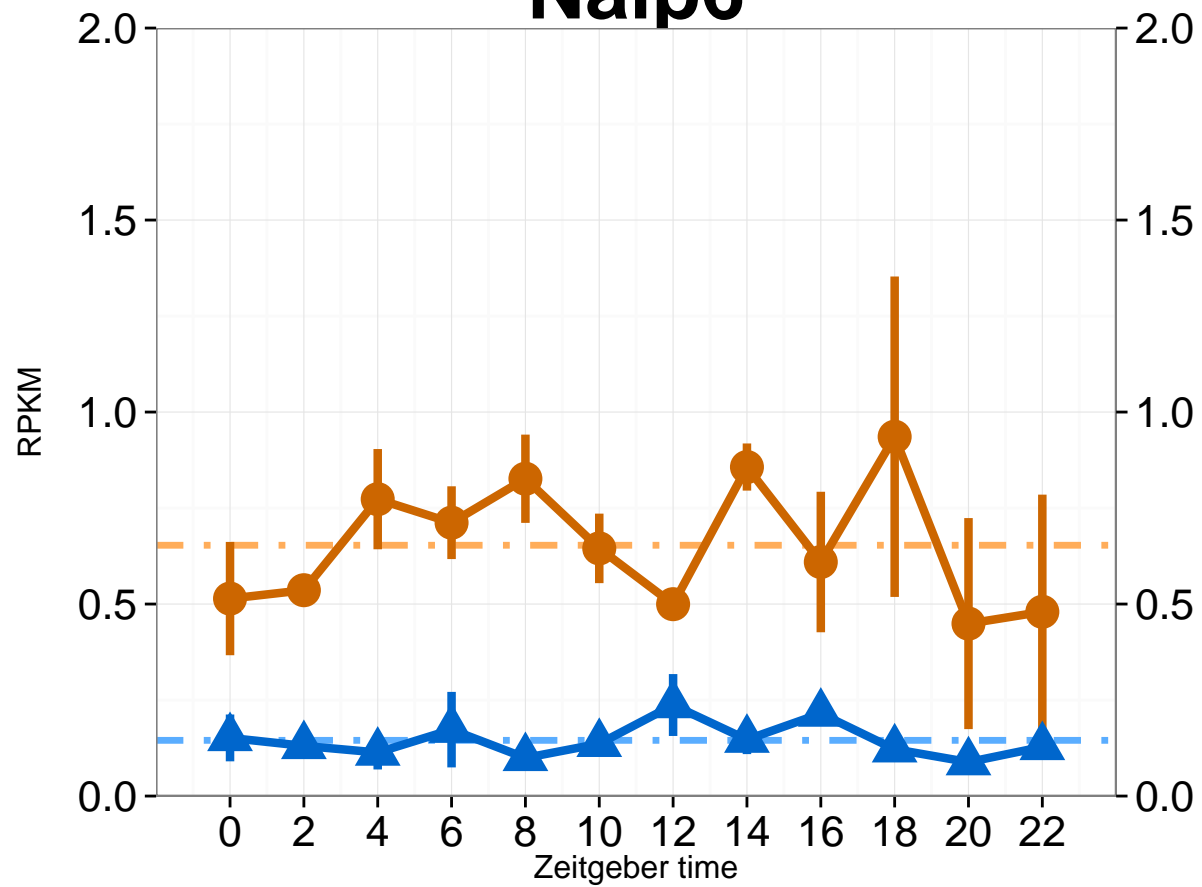

## Naip6

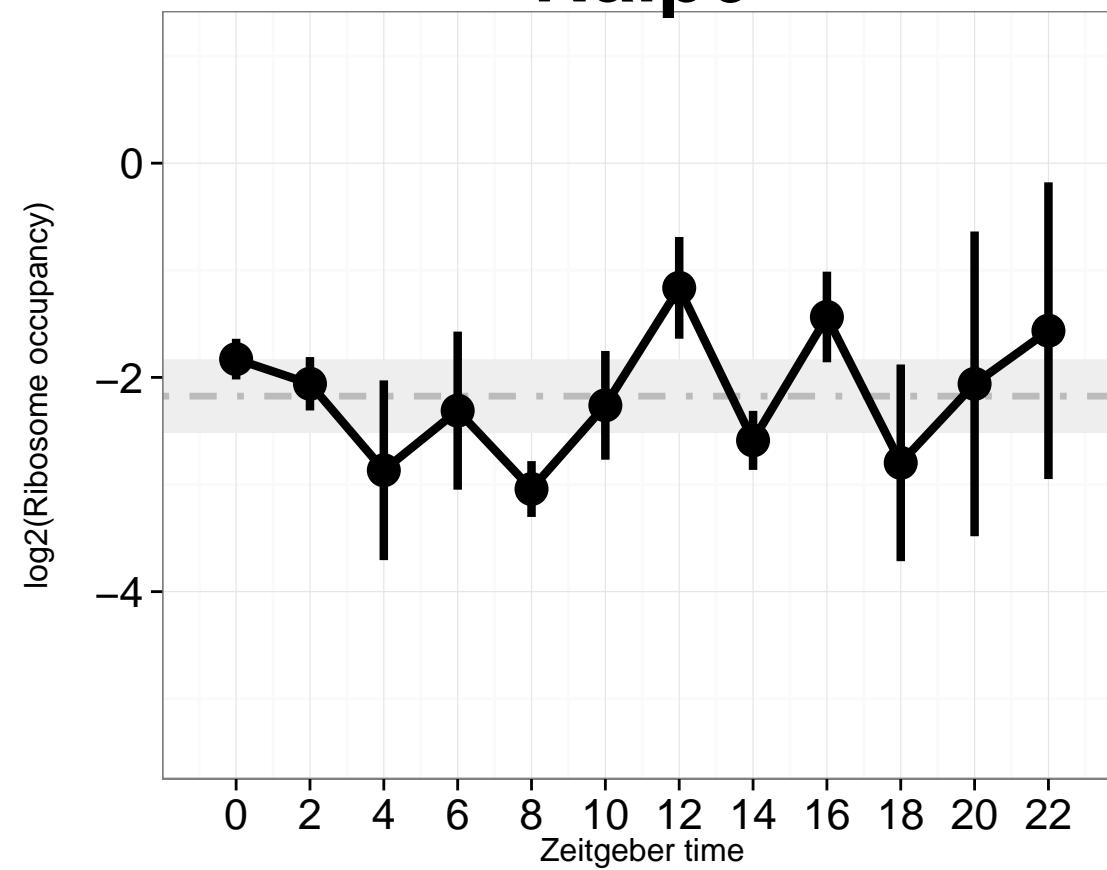

Supplement: SuppDataset_1.zip [file Naip6_set_A.pdf › Supplemental Dataset 1/A-mRNA_nonrhyth_translation_nonrhyth/Naip6_set_A.pdf]

Nans

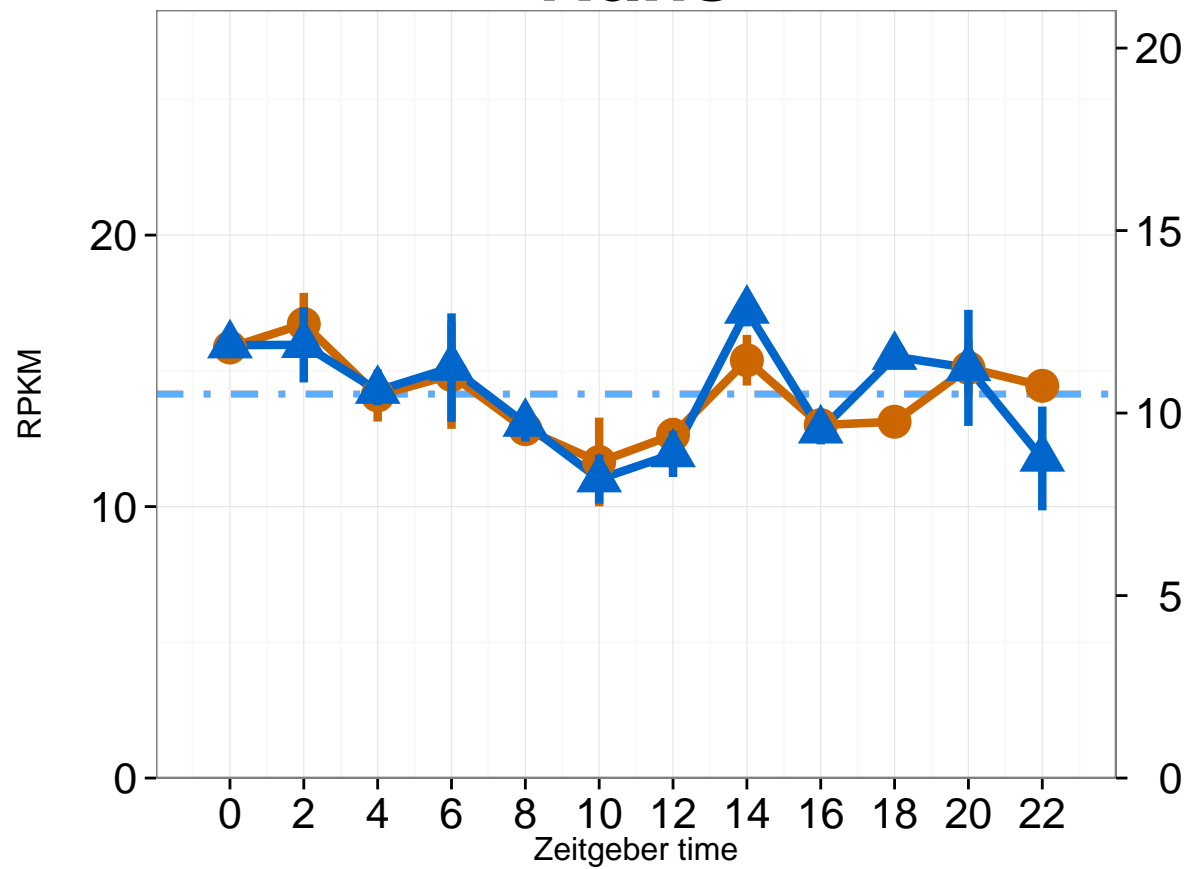

Nans

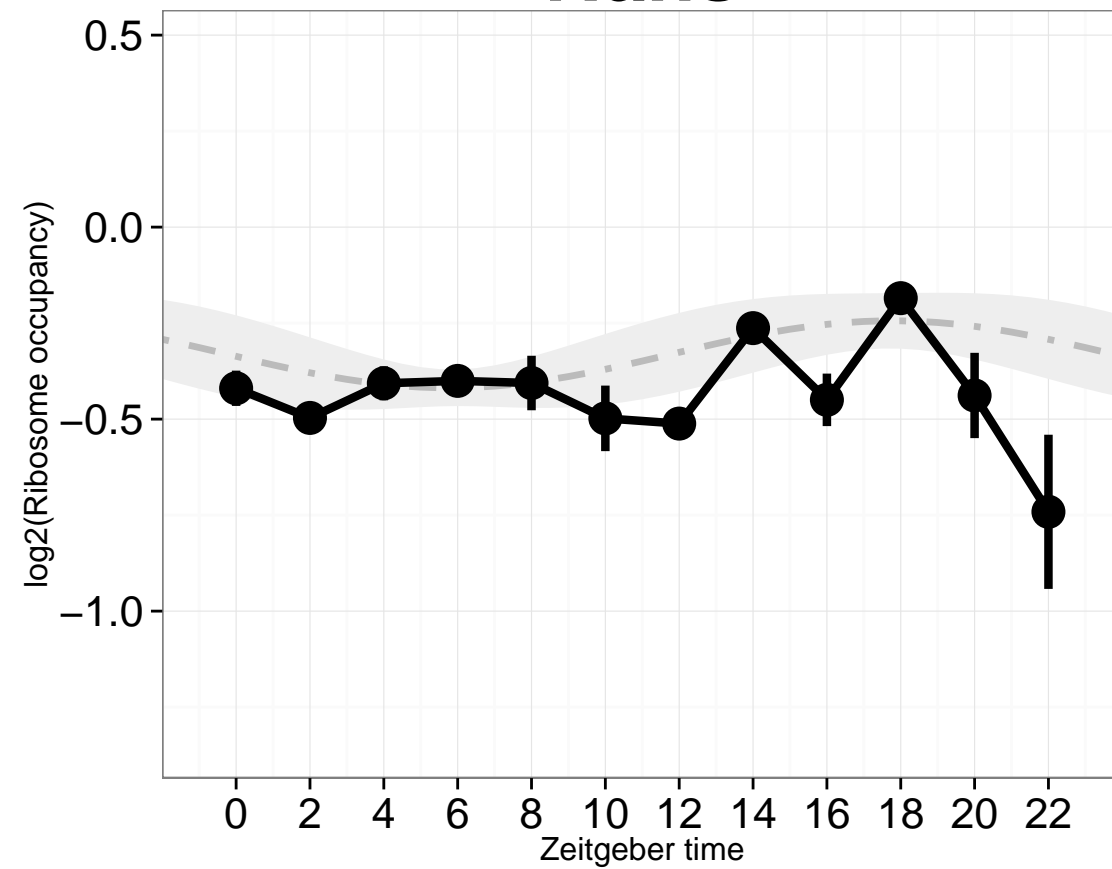

Supplement: SuppDataset_1.zip [file Nans_set_A.pdf › Supplemental Dataset 1/A-mRNA_nonrhyth_translation_nonrhyth/Nans_set_A.pdf]

# Nap1l1

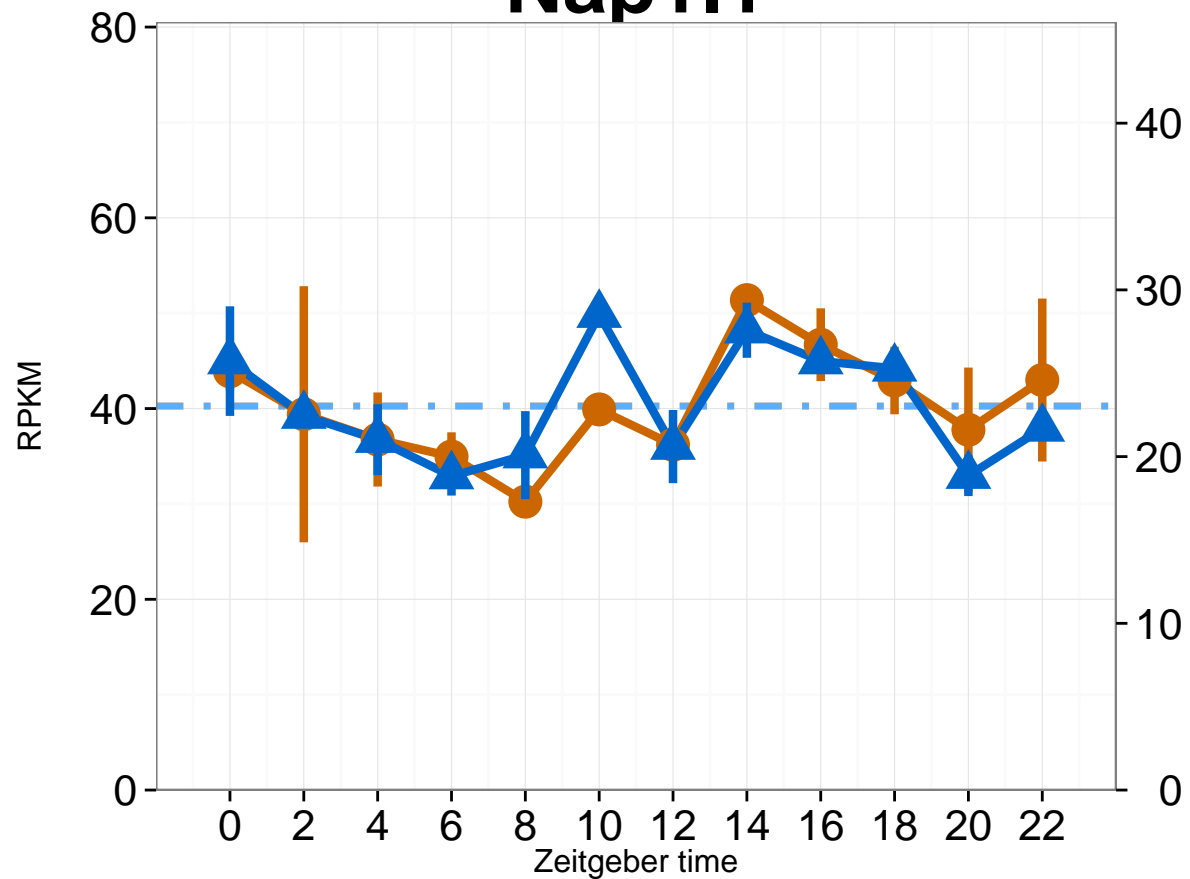

# Nap1l1

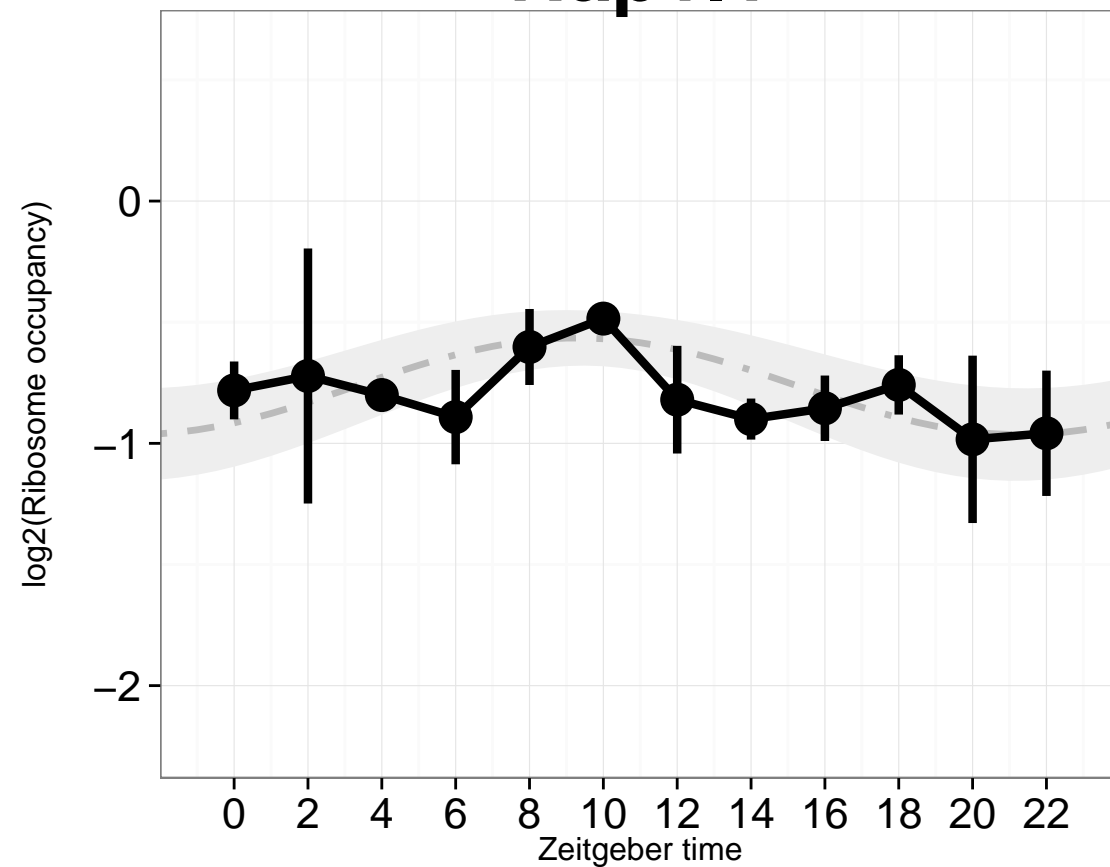

Supplement: SuppDataset_1.zip [file Nap1l1_set_A.pdf › Supplemental Dataset 1/A-mRNA_nonrhyth_translation_nonrhyth/Nap1l1_set_A.pdf]

## Nap1I4

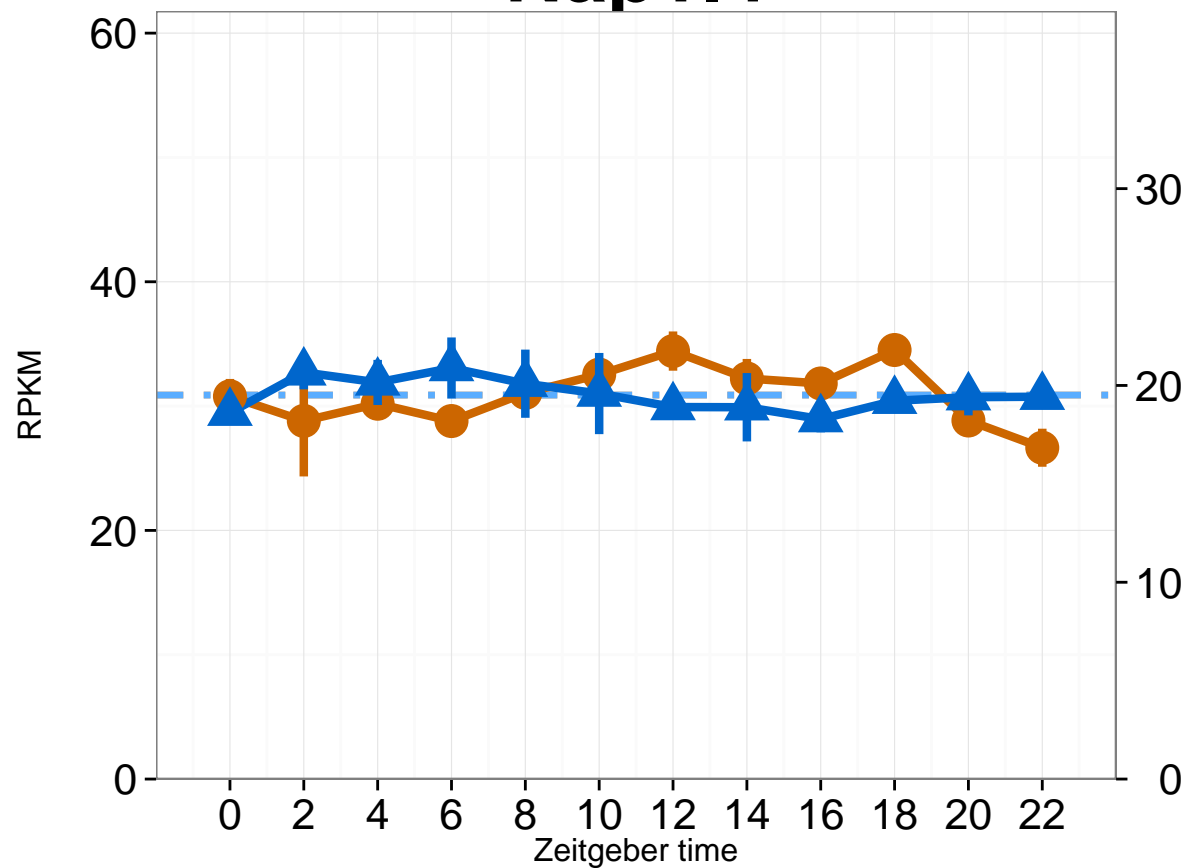

## Nap1I4

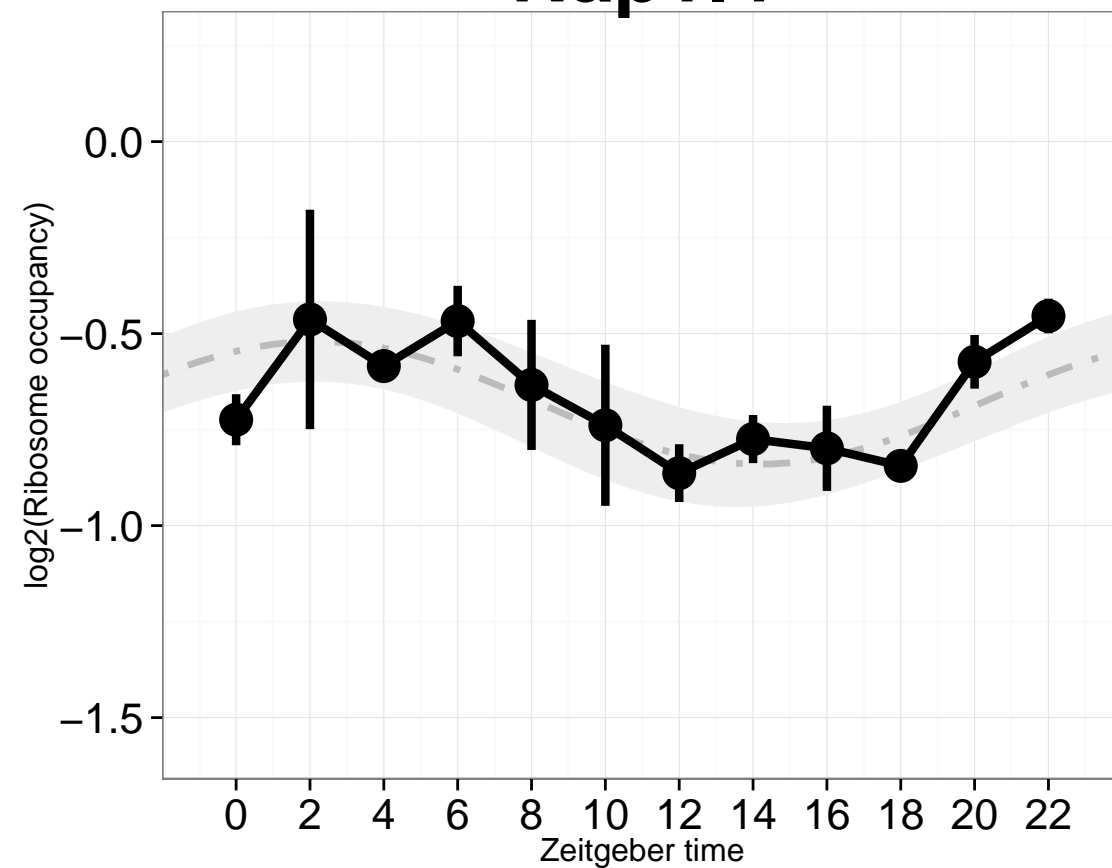

Supplement: SuppDataset_1.zip [file Nap1l4_set_A.pdf › Supplemental Dataset 1/A-mRNA_nonrhyth_translation_nonrhyth/Nap1l4_set_A.pdf]

## Napa

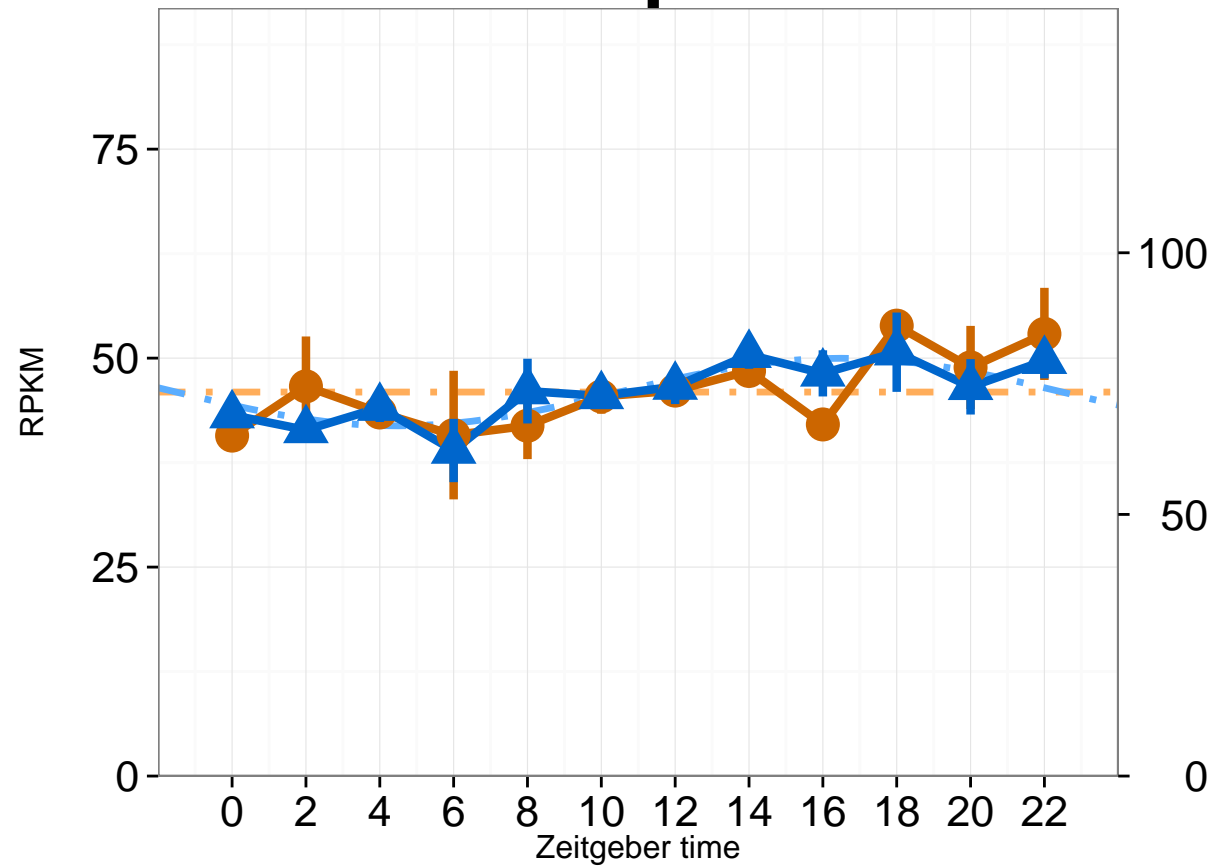

## Napa

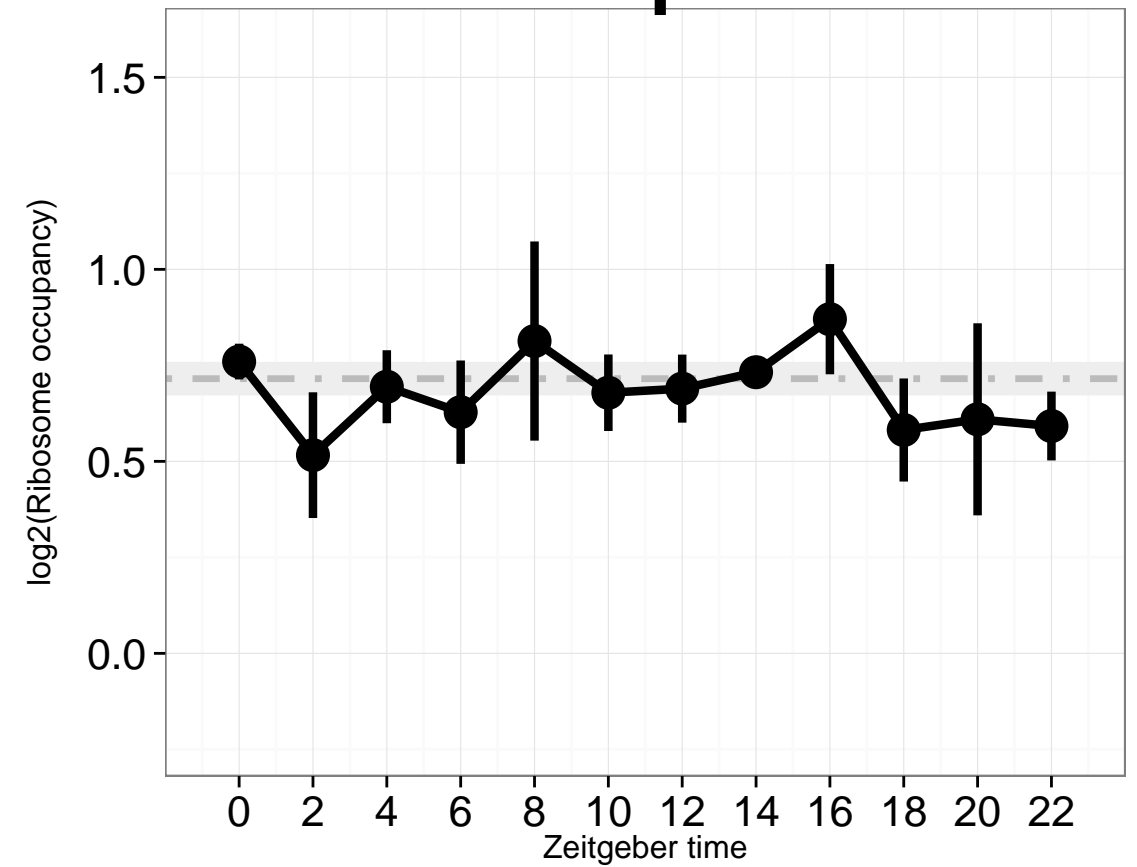

Supplement: SuppDataset_1.zip [file Napa_set_A.pdf › Supplemental Dataset 1/A-mRNA_nonrhyth_translation_nonrhyth/Napa_set_A.pdf]

## Napg

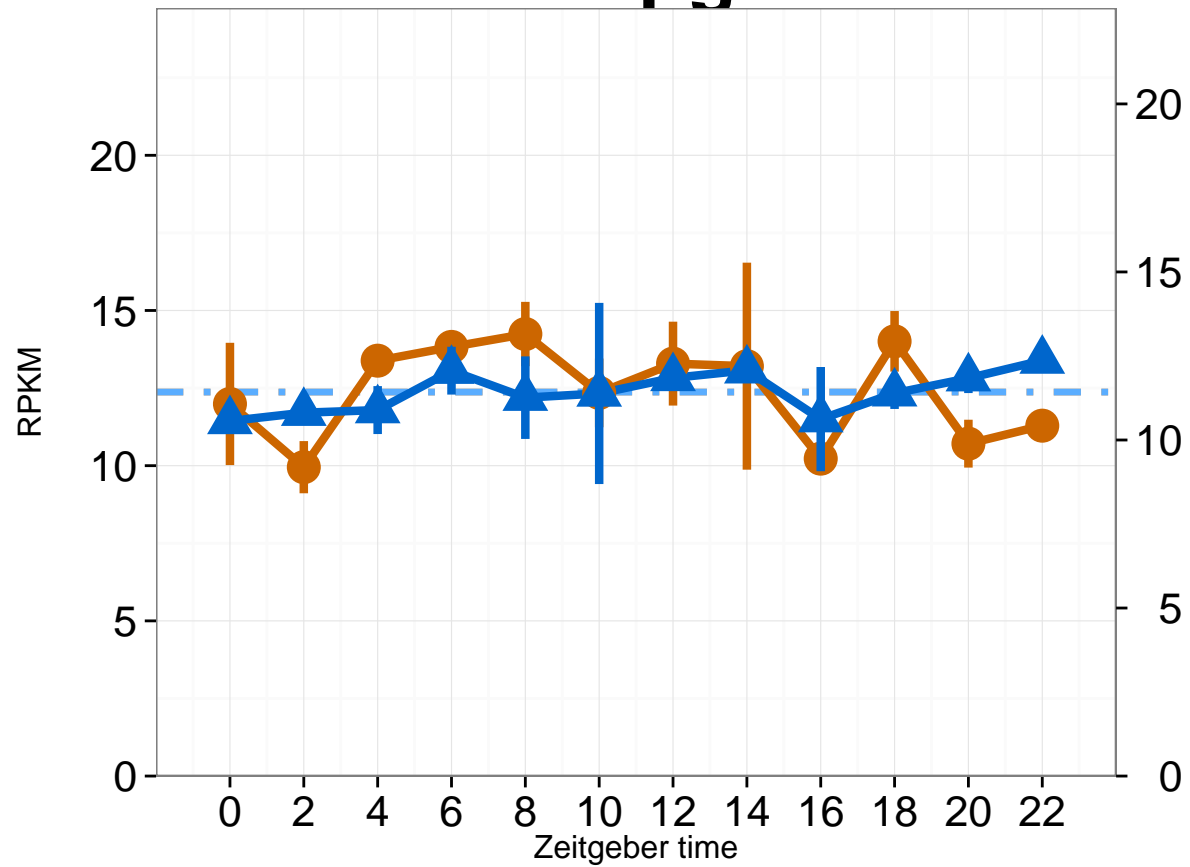

## Napg

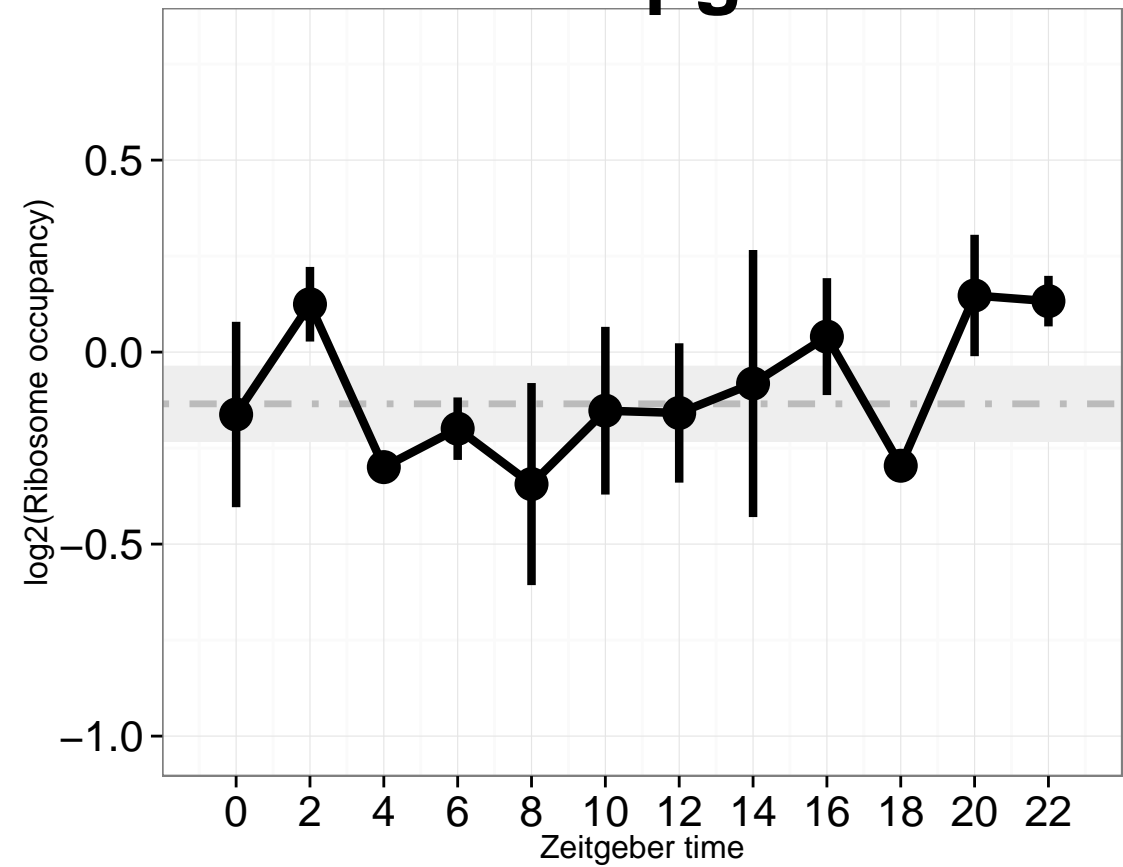

Supplement: SuppDataset_1.zip [file Napg_set_A.pdf › Supplemental Dataset 1/A-mRNA_nonrhyth_translation_nonrhyth/Napg_set_A.pdf]

# Naprt1

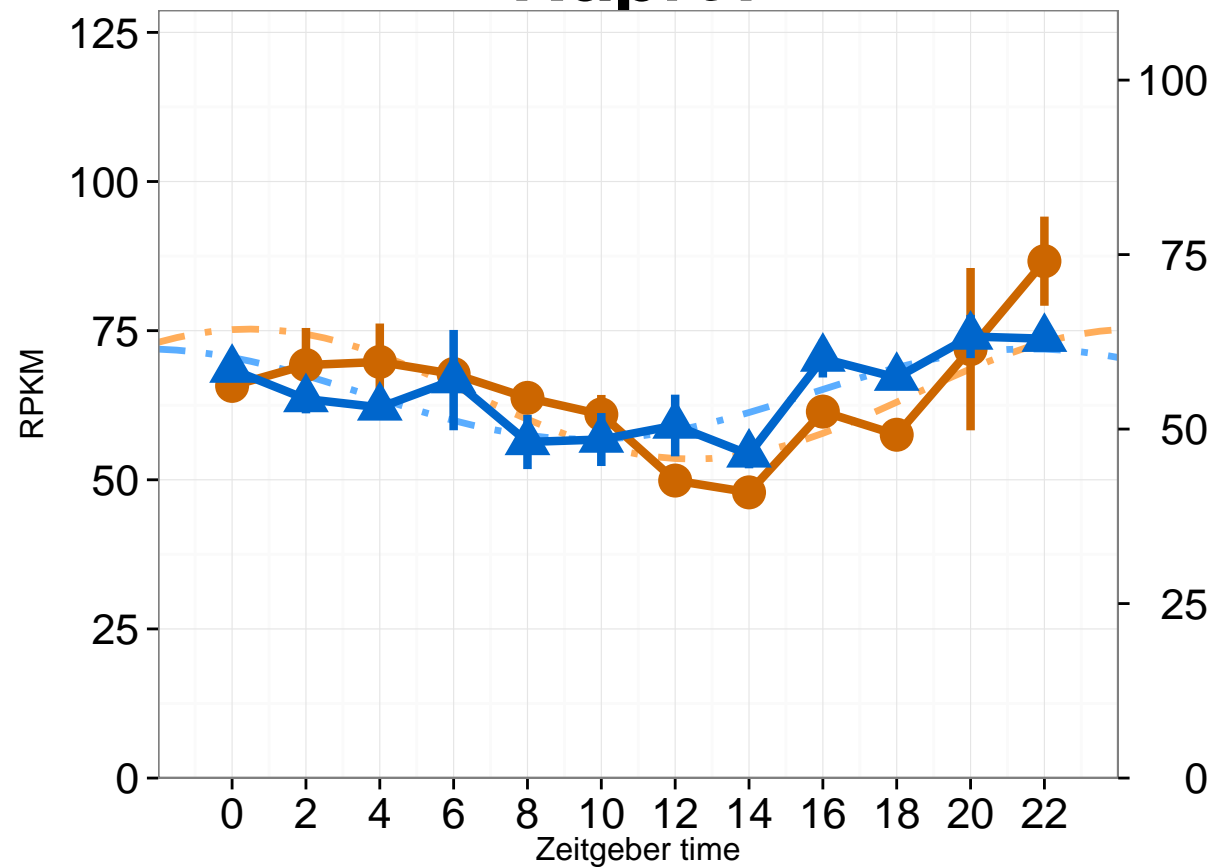

# Naprt1

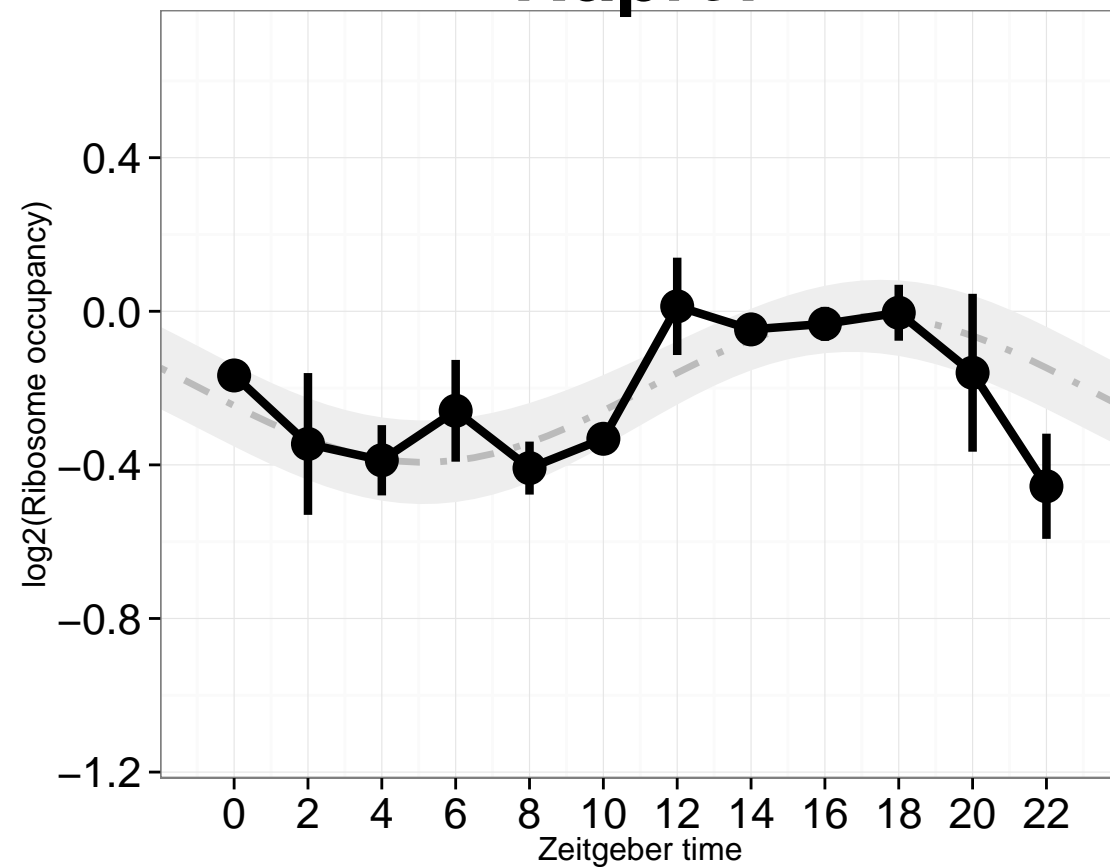

Supplement: SuppDataset_1.zip [file Naprt1_set_A.pdf › Supplemental Dataset 1/A-mRNA_nonrhyth_translation_nonrhyth/Naprt1_set_A.pdf]

**Napsa TR**

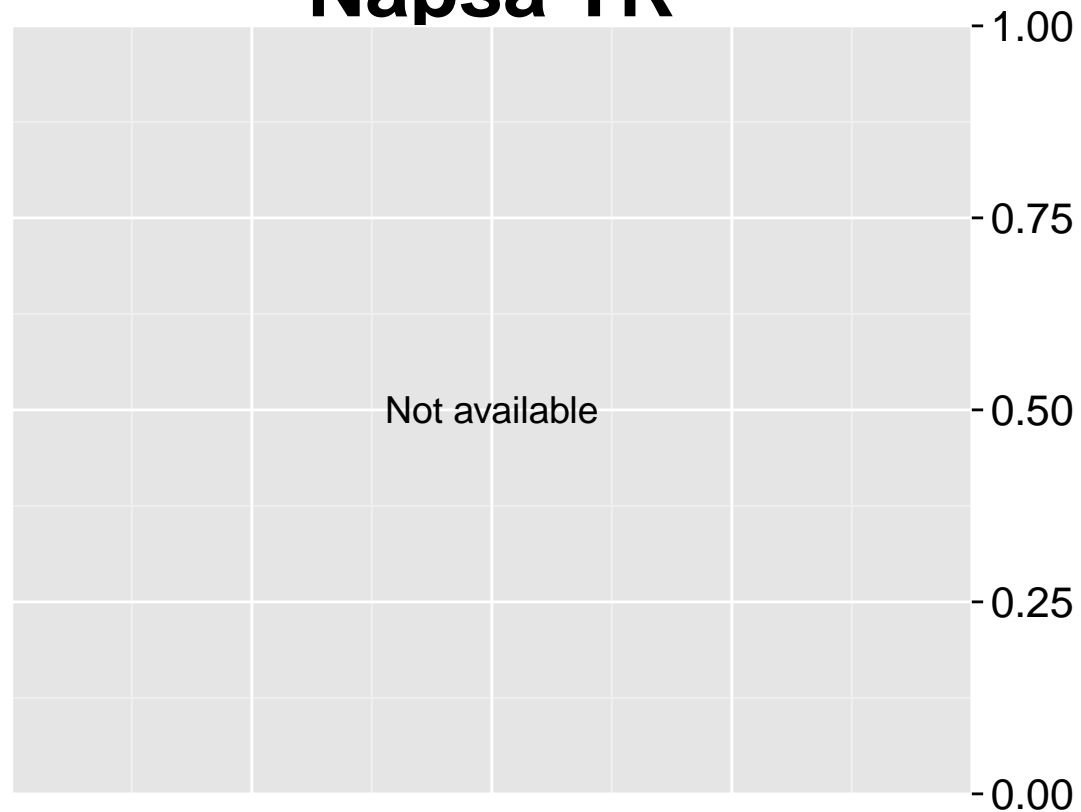

**Napsa log2(Ribosome occupancy**

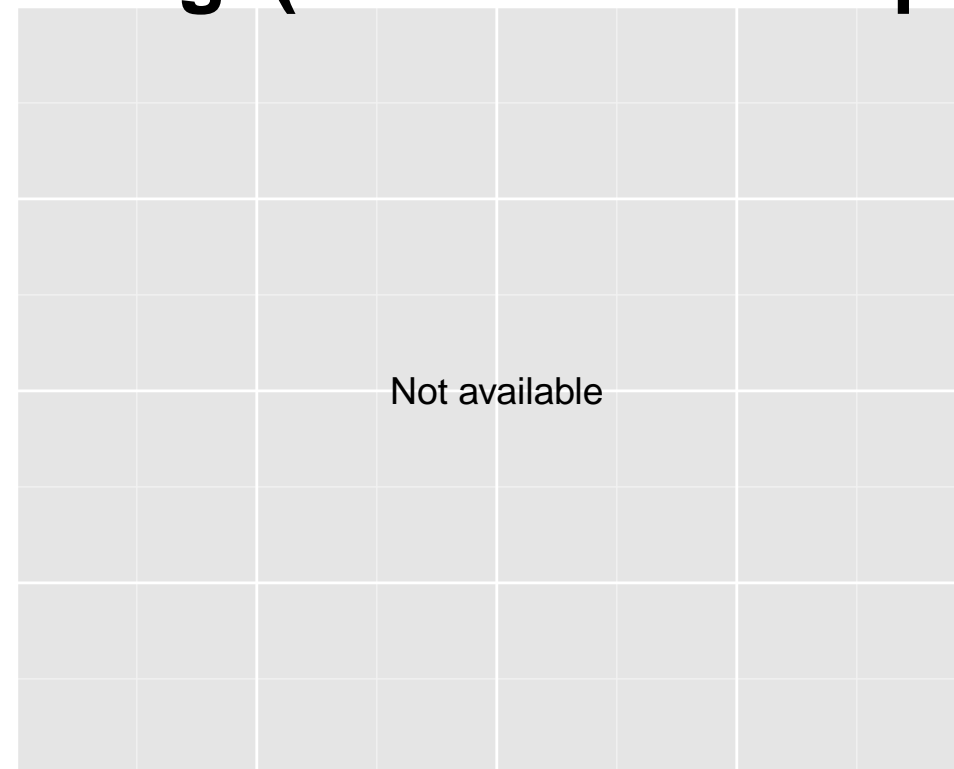

Supplement: SuppDataset_1.zip [file Napsa_set_A.pdf › Supplemental Dataset 1/A-mRNA_nonrhyth_translation_nonrhyth/Napsa_set_A.pdf]

## Narfl

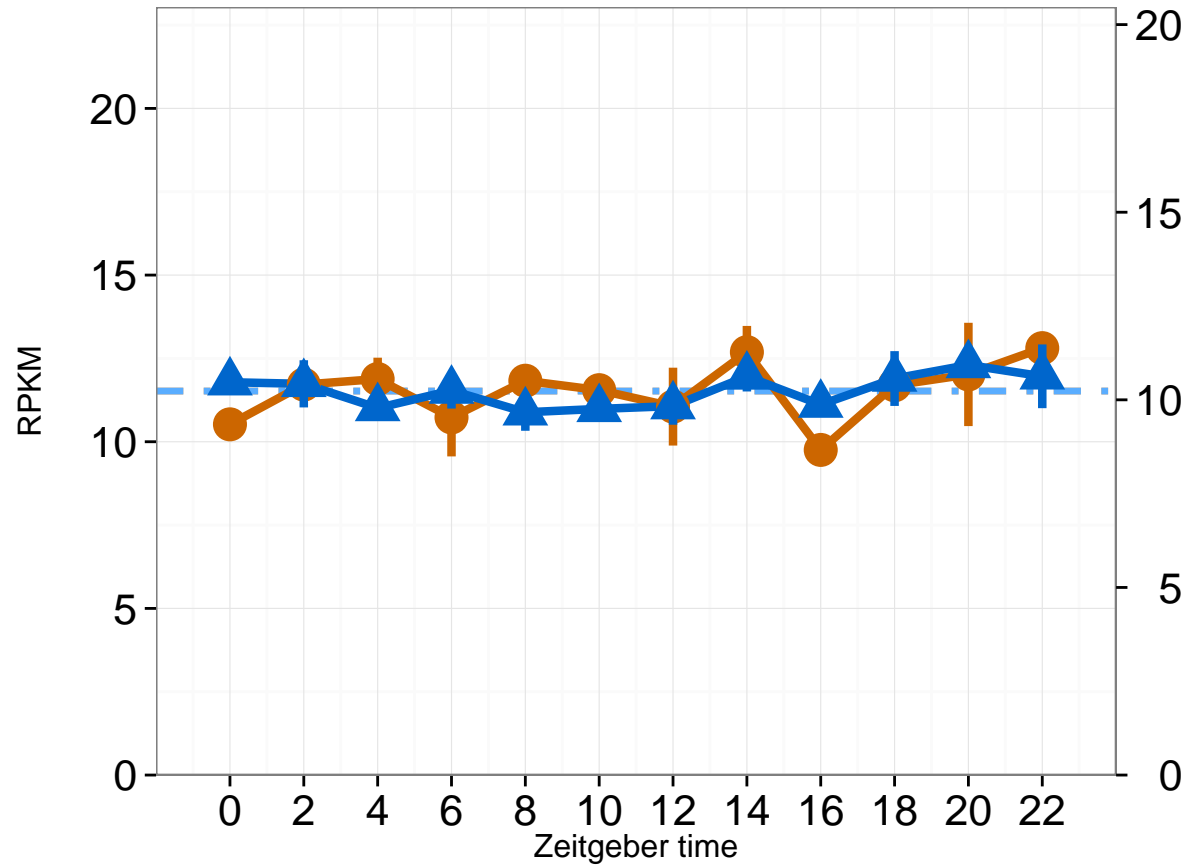

## Narfl

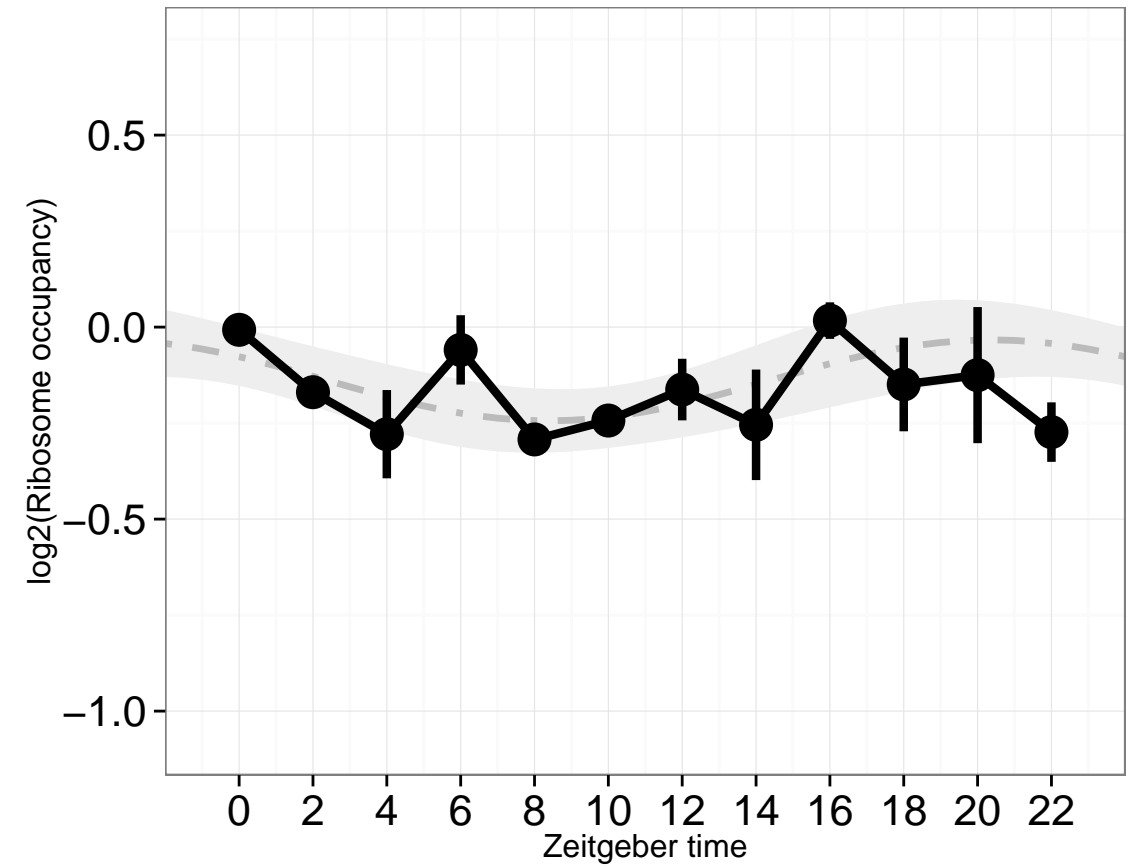

Supplement: SuppDataset_1.zip [file Narfl_set_A.pdf › Supplemental Dataset 1/A-mRNA_nonrhyth_translation_nonrhyth/Narfl_set_A.pdf]

## Narg2

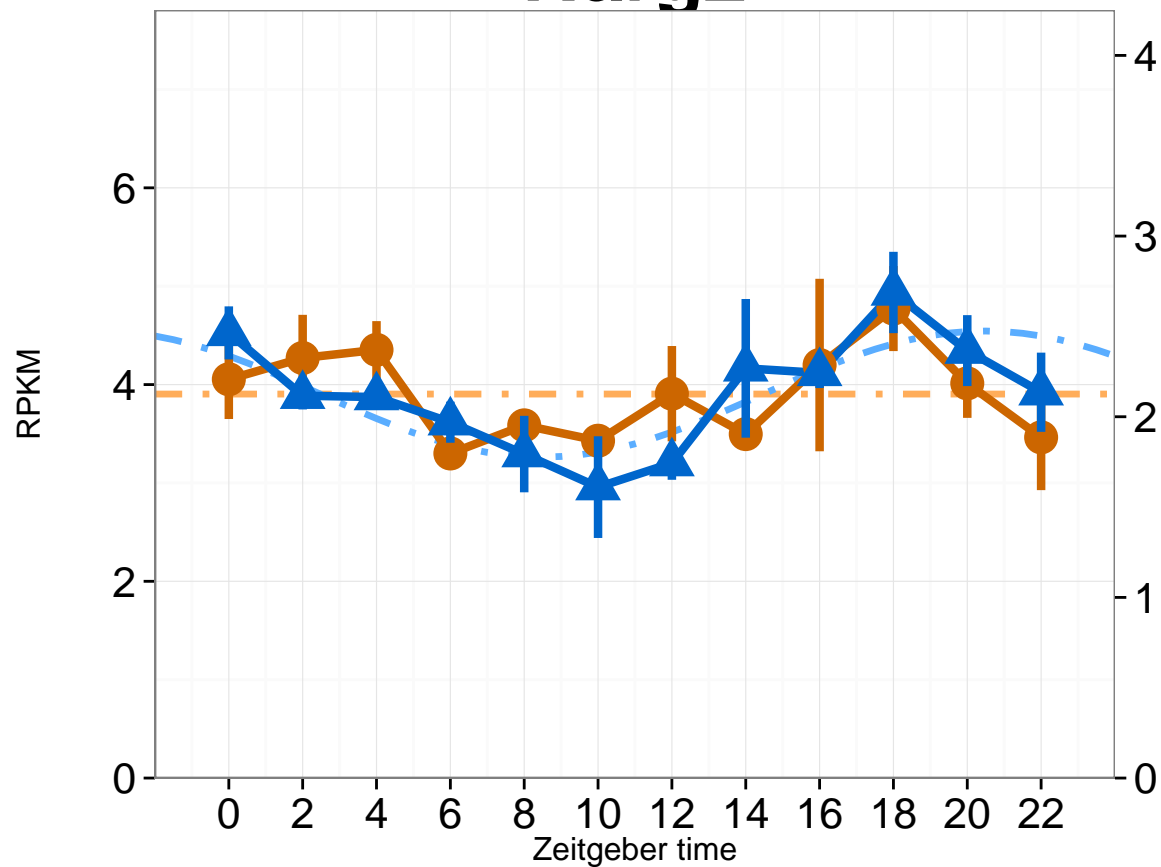

## Narg2

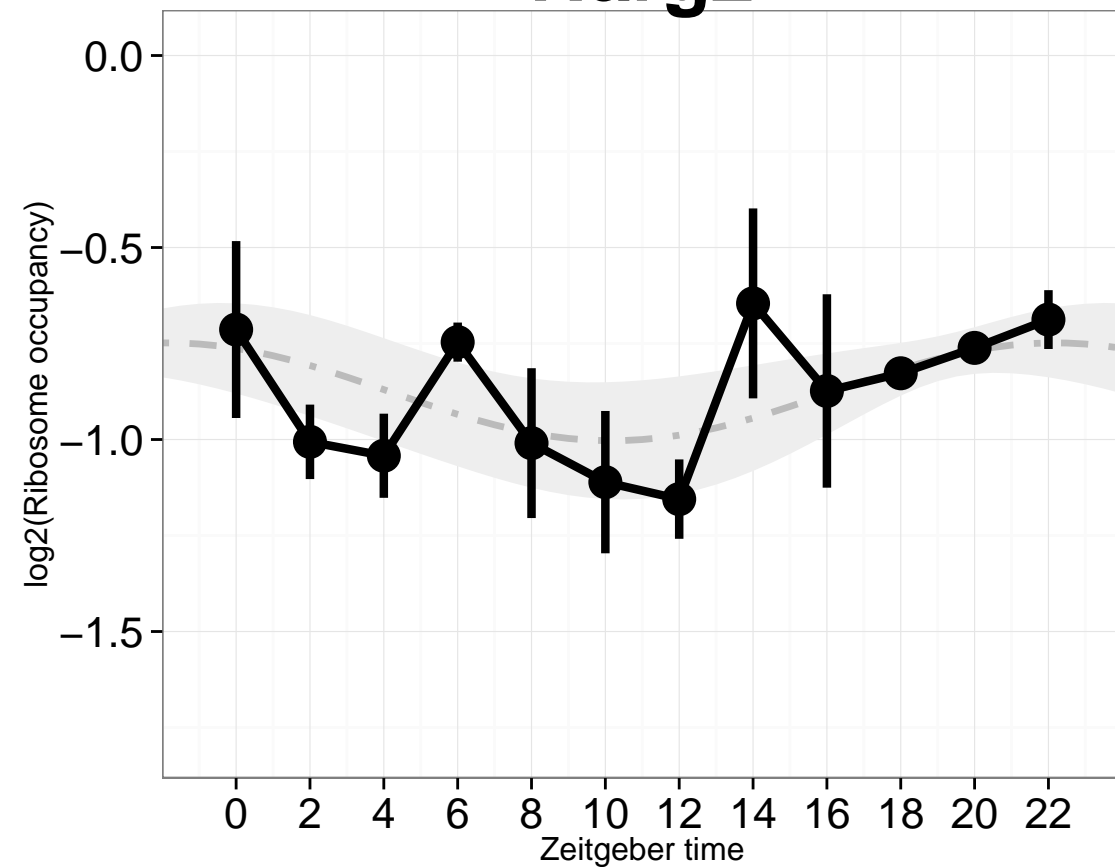

Supplement: SuppDataset_1.zip [file Narg2_set_A.pdf › Supplemental Dataset 1/A-mRNA_nonrhyth_translation_nonrhyth/Narg2_set_A.pdf]

## Nars2

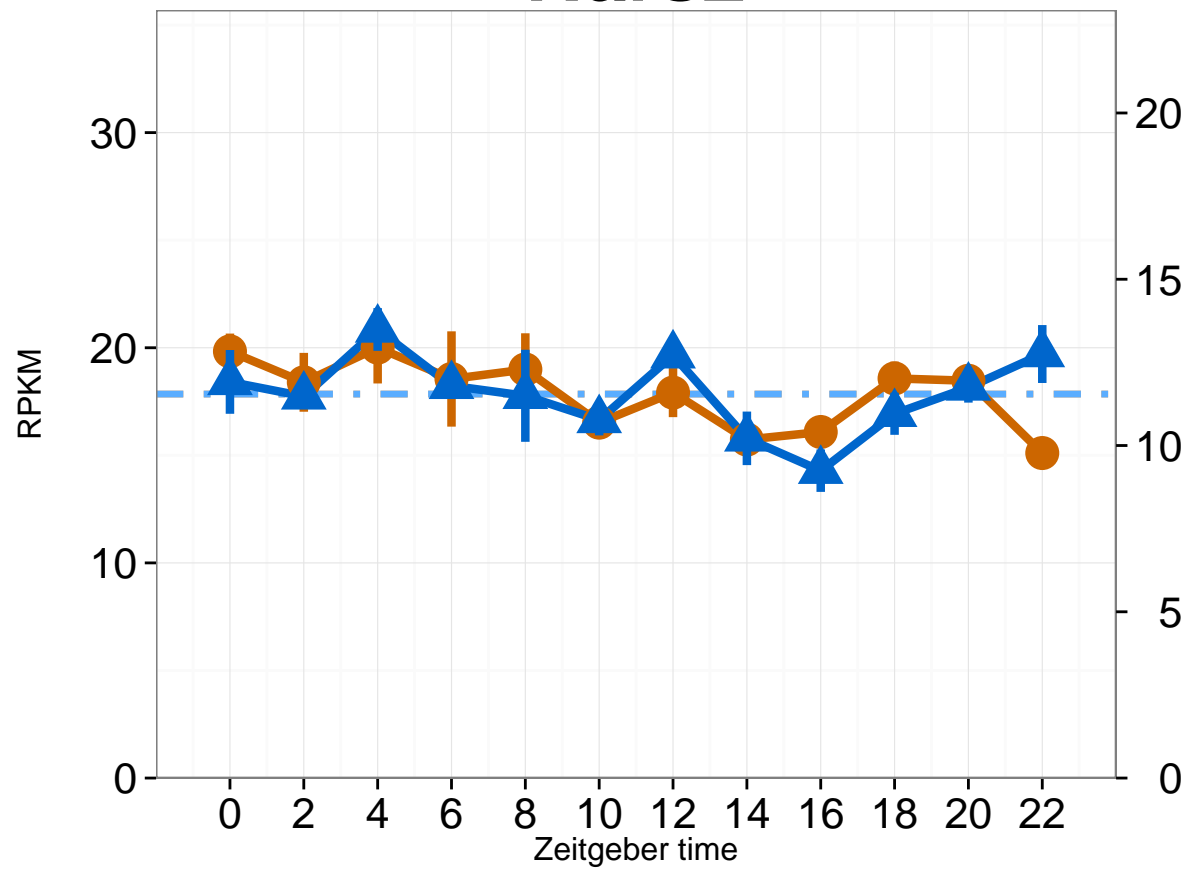

## Nars2

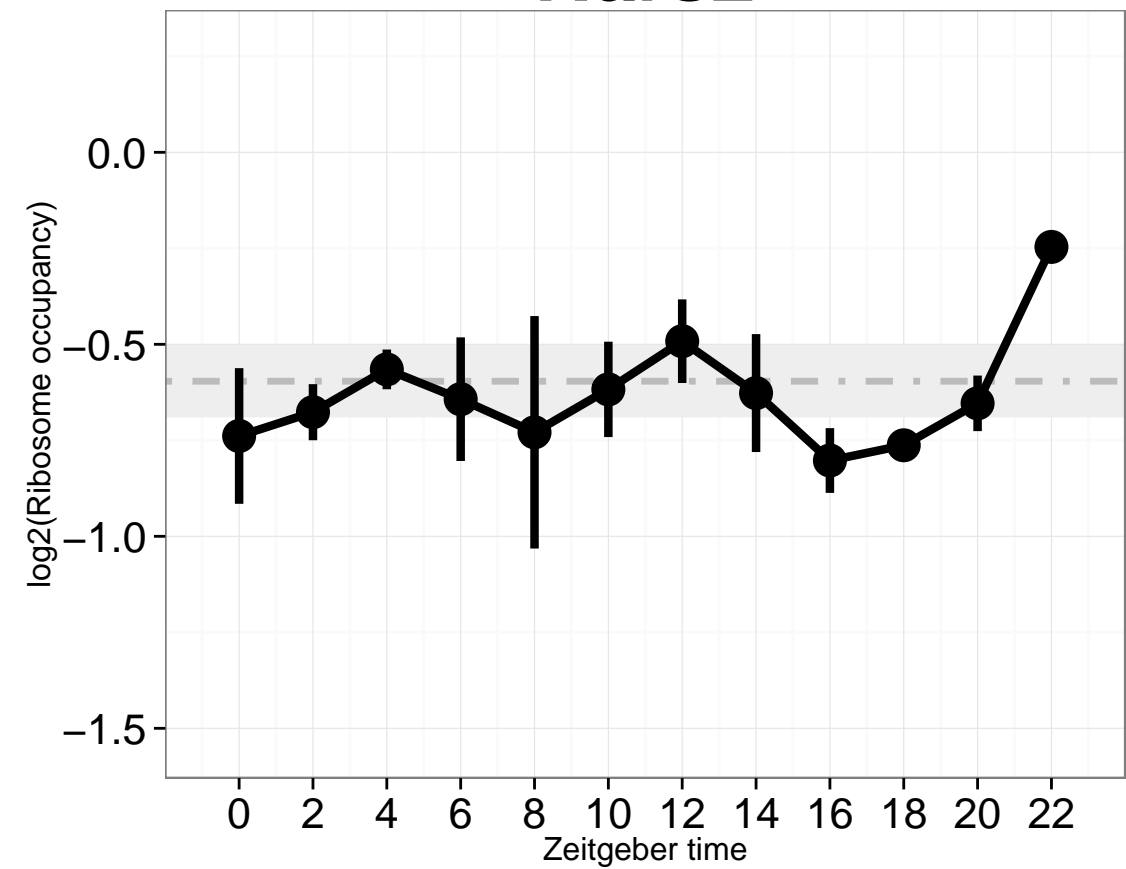

Supplement: SuppDataset_1.zip [file Nars2_set_A.pdf › Supplemental Dataset 1/A-mRNA_nonrhyth_translation_nonrhyth/Nars2_set_A.pdf]

## Nars

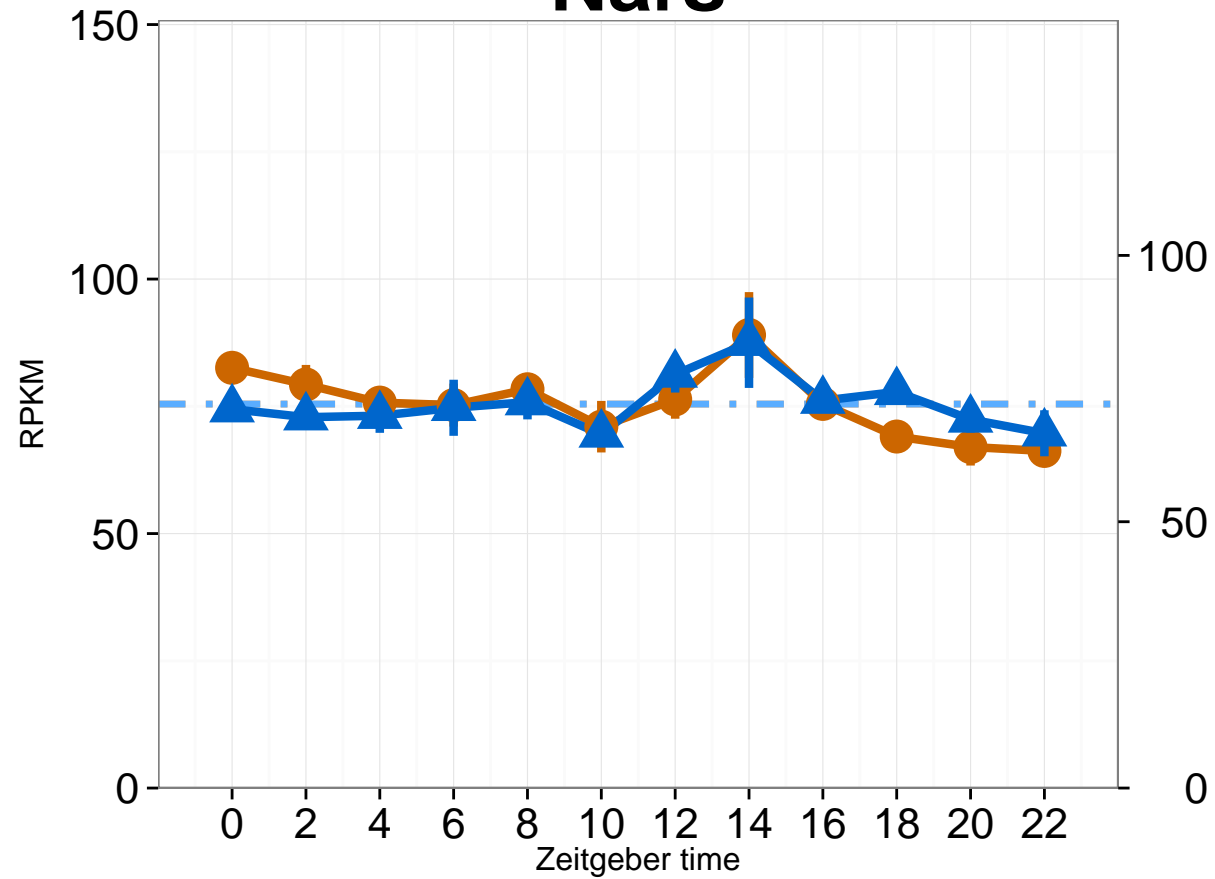

## Nars

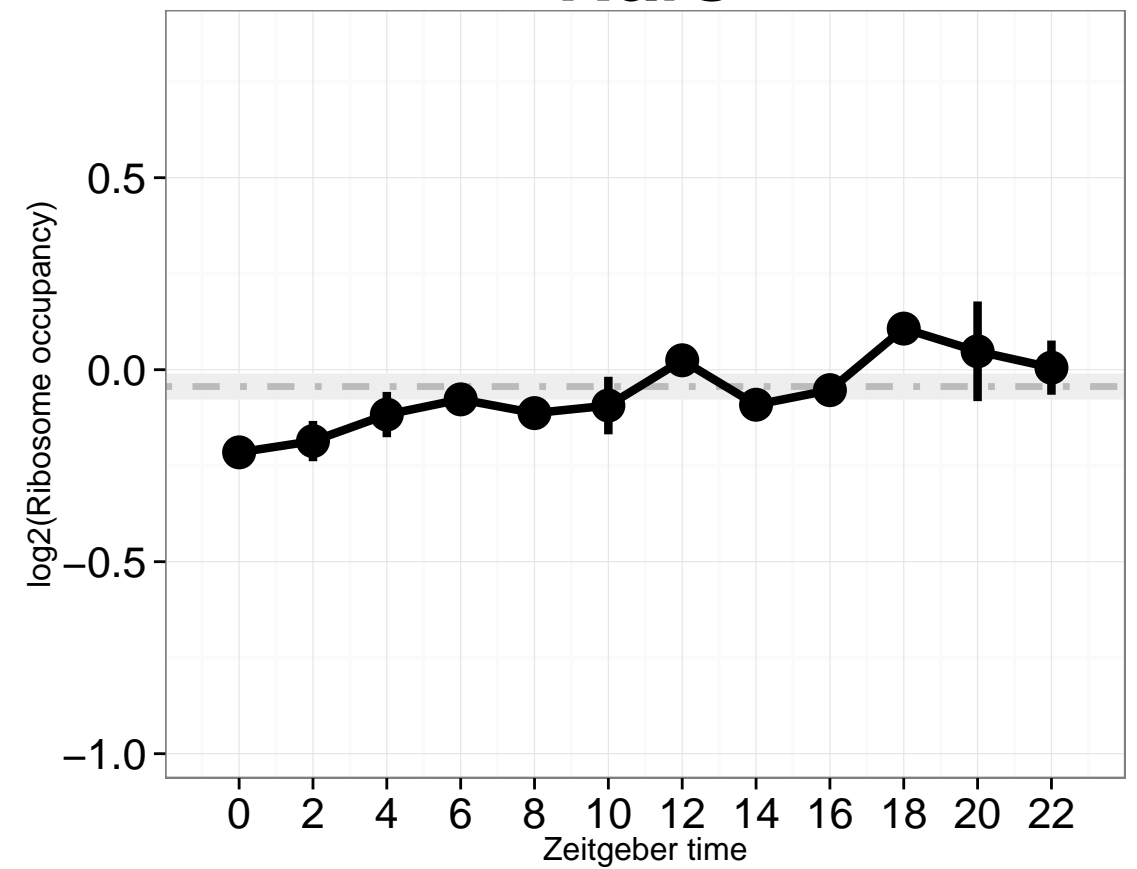

Supplement: SuppDataset_1.zip [file Nars_set_A.pdf › Supplemental Dataset 1/A-mRNA_nonrhyth_translation_nonrhyth/Nars_set_A.pdf]

# Nat10

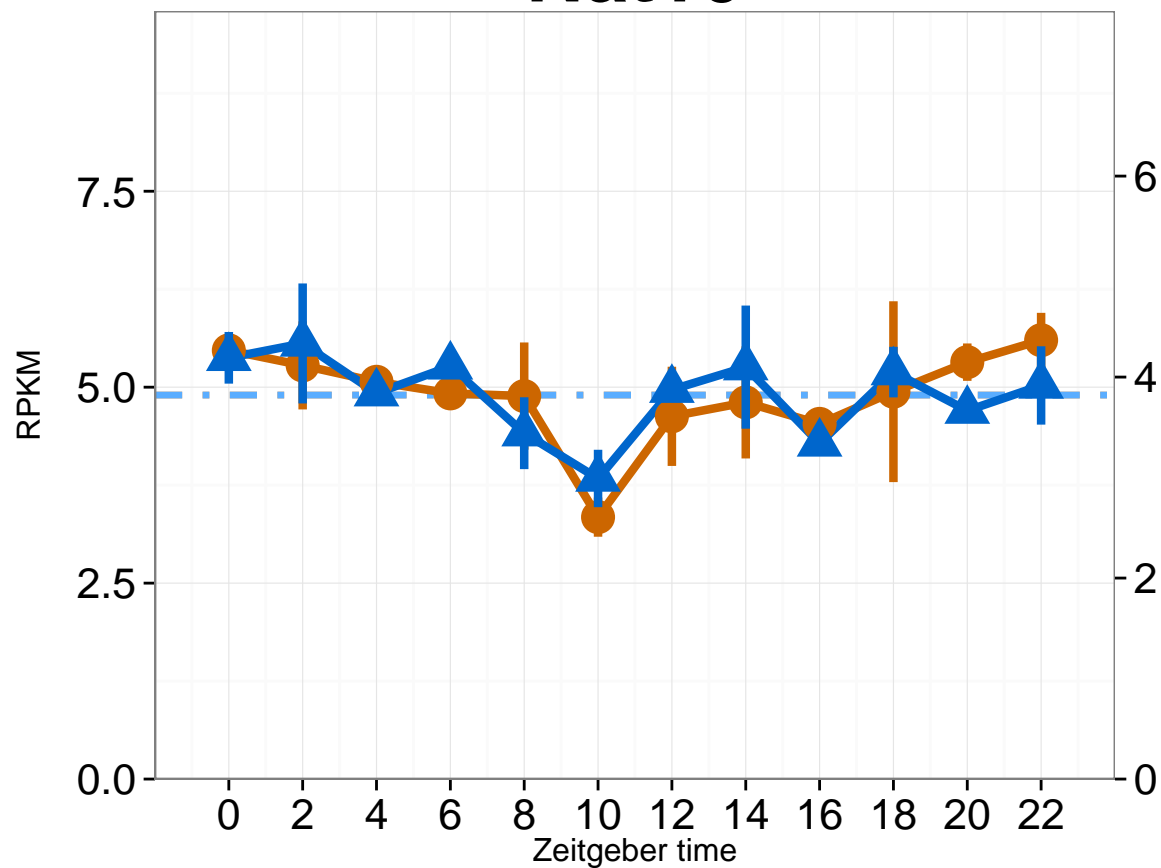

# Nat10

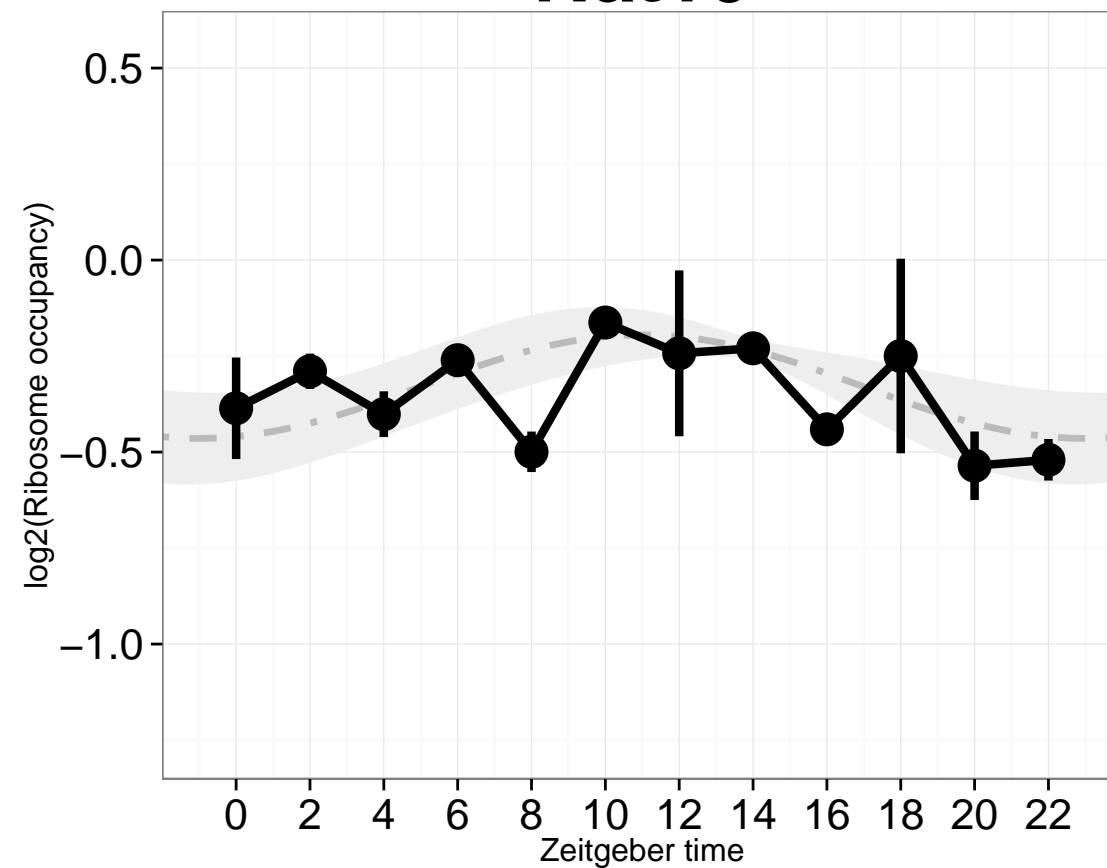

Supplement: SuppDataset_1.zip [file Nat10_set_A.pdf › Supplemental Dataset 1/A-mRNA_nonrhyth_translation_nonrhyth/Nat10_set_A.pdf]

## Nat1

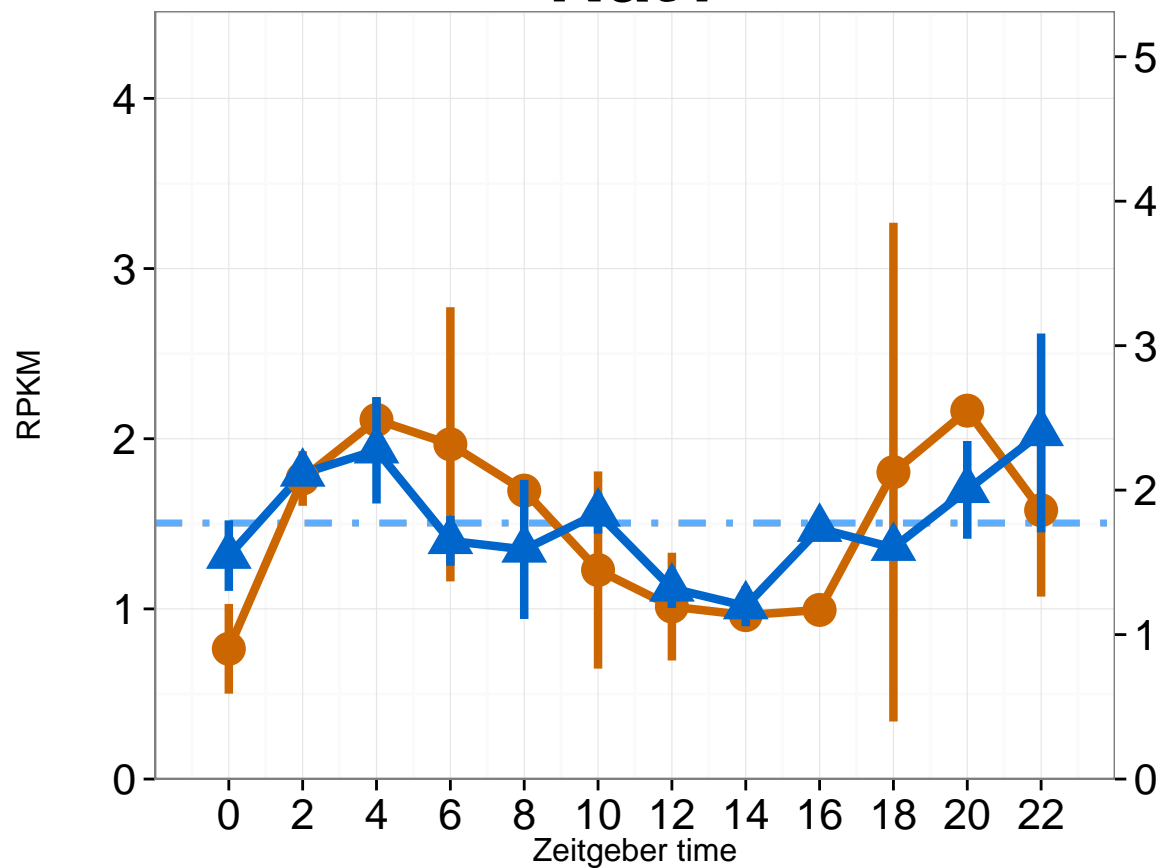

## Nat1

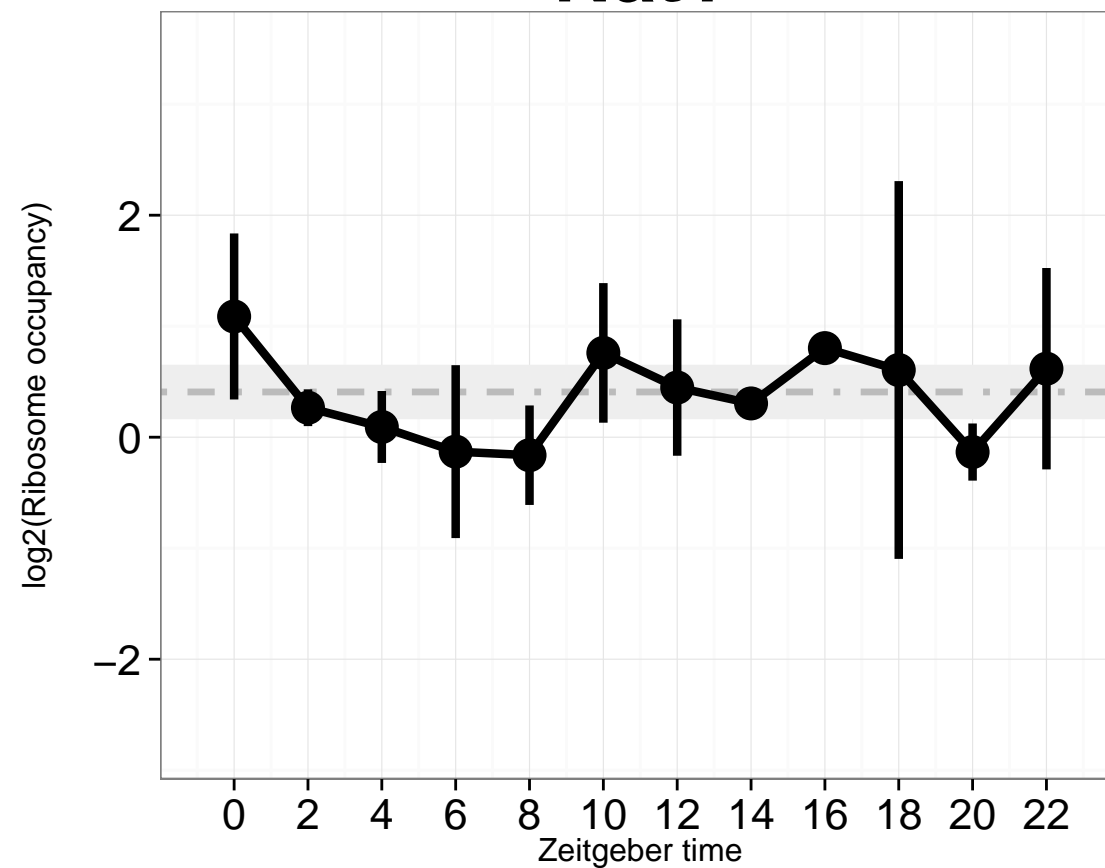

Supplement: SuppDataset_1.zip [file Nat1_set_A.pdf › Supplemental Dataset 1/A-mRNA_nonrhyth_translation_nonrhyth/Nat1_set_A.pdf]

## Nat2

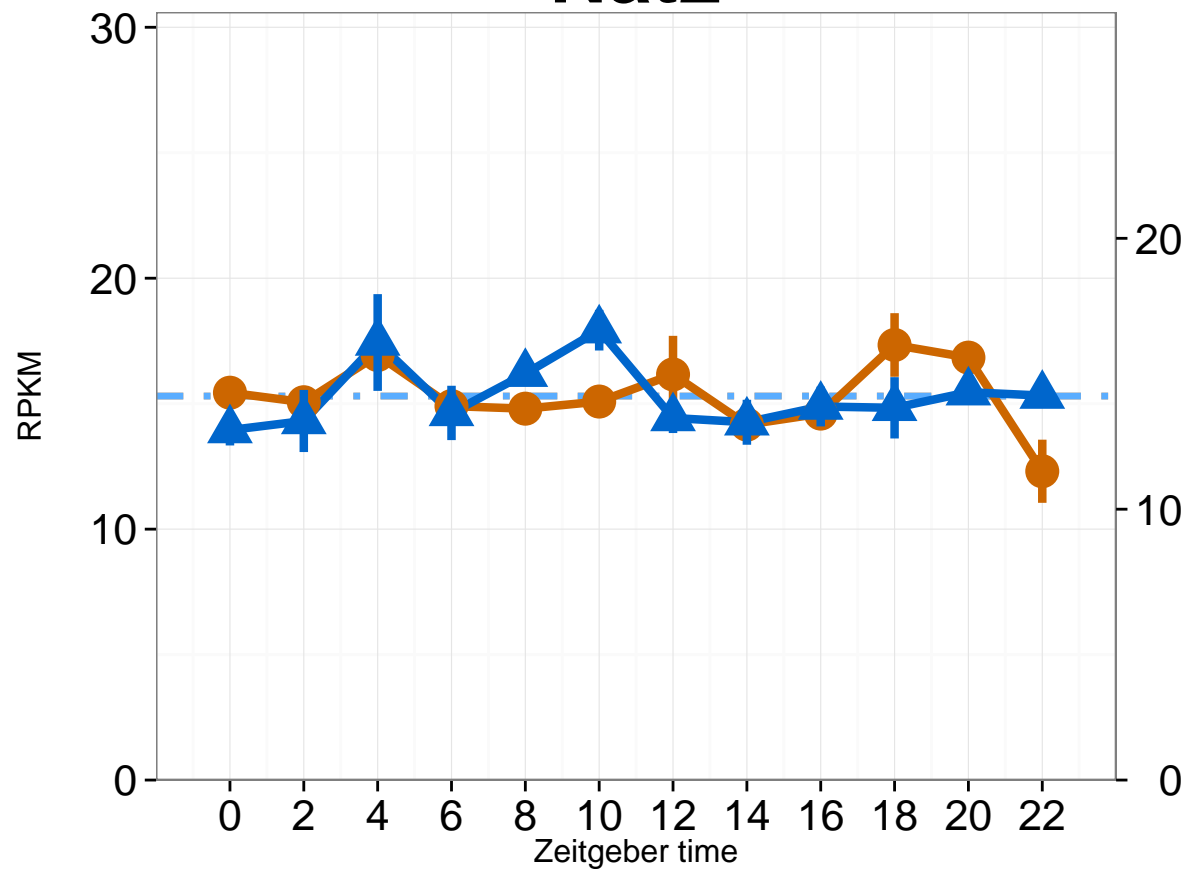

## Nat2

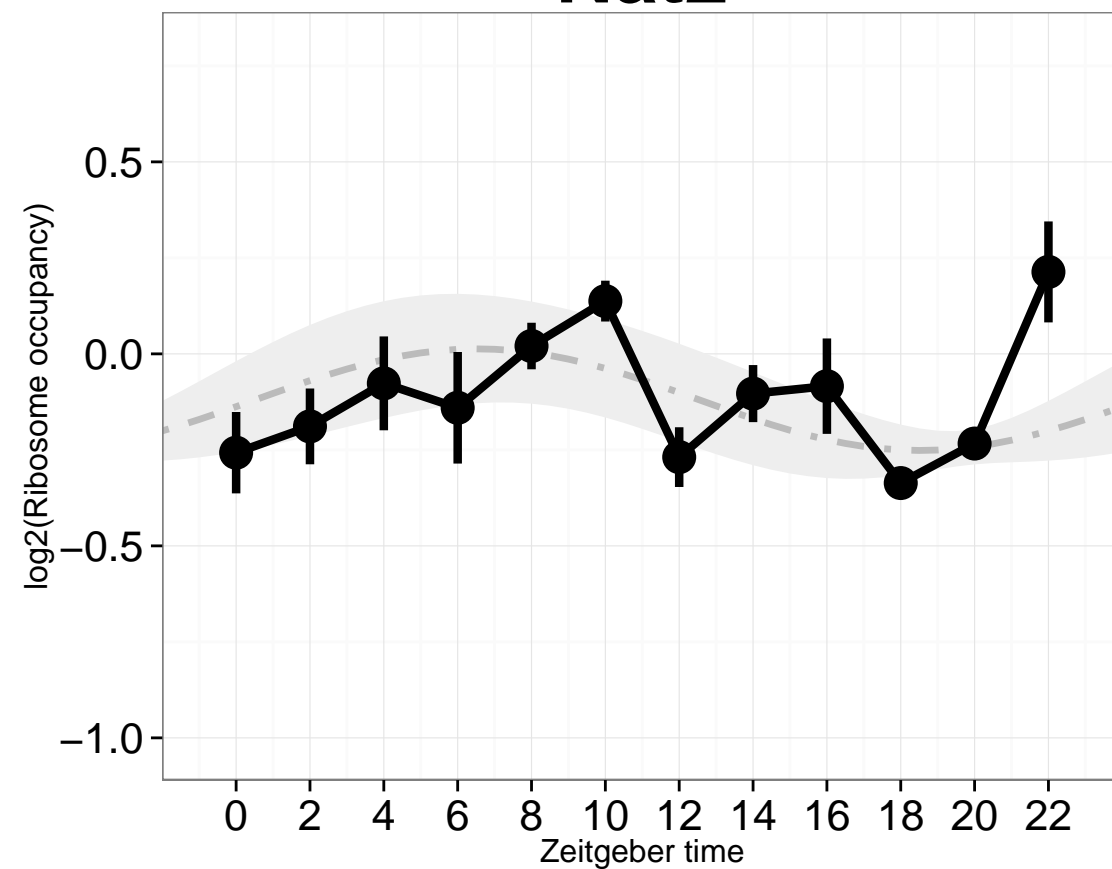

Supplement: SuppDataset_1.zip [file Nat2_set_A.pdf › Supplemental Dataset 1/A-mRNA_nonrhyth_translation_nonrhyth/Nat2_set_A.pdf]

## Nat9

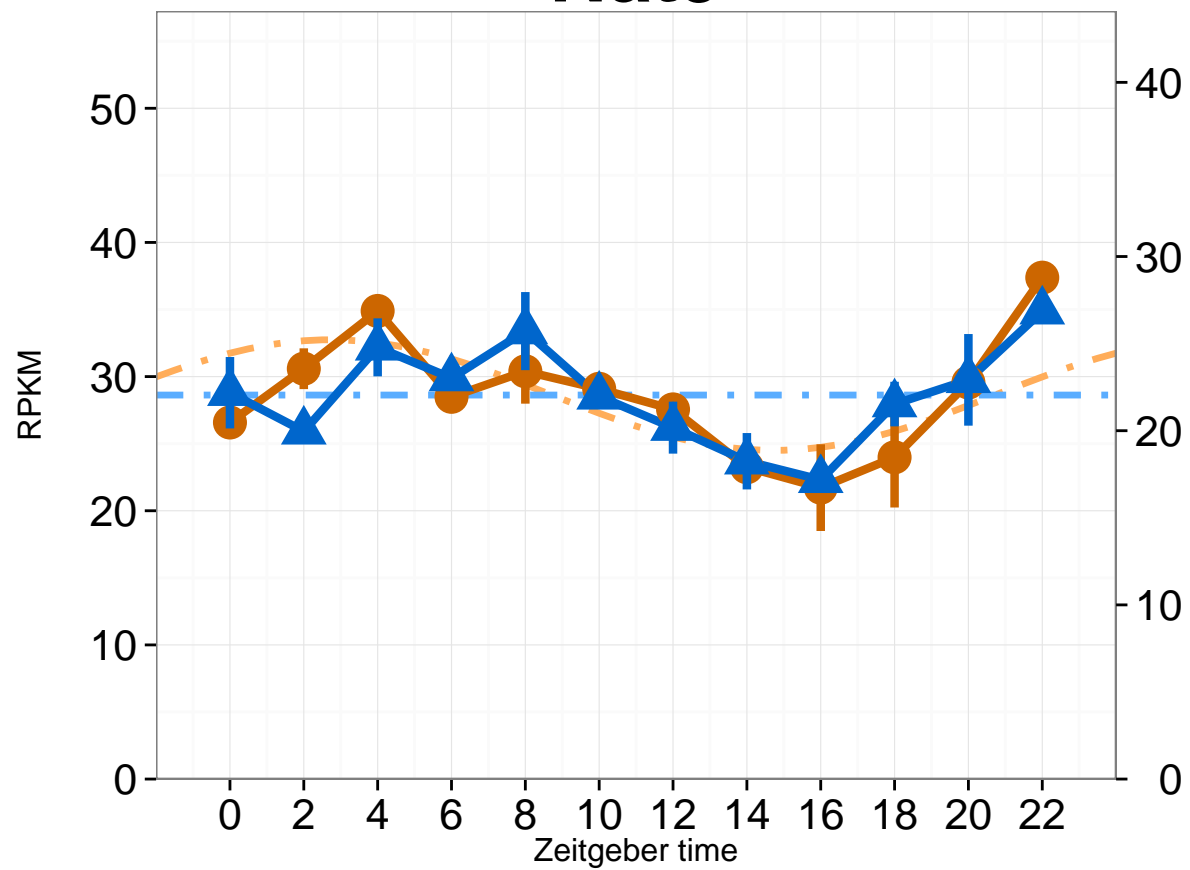

## Nat9

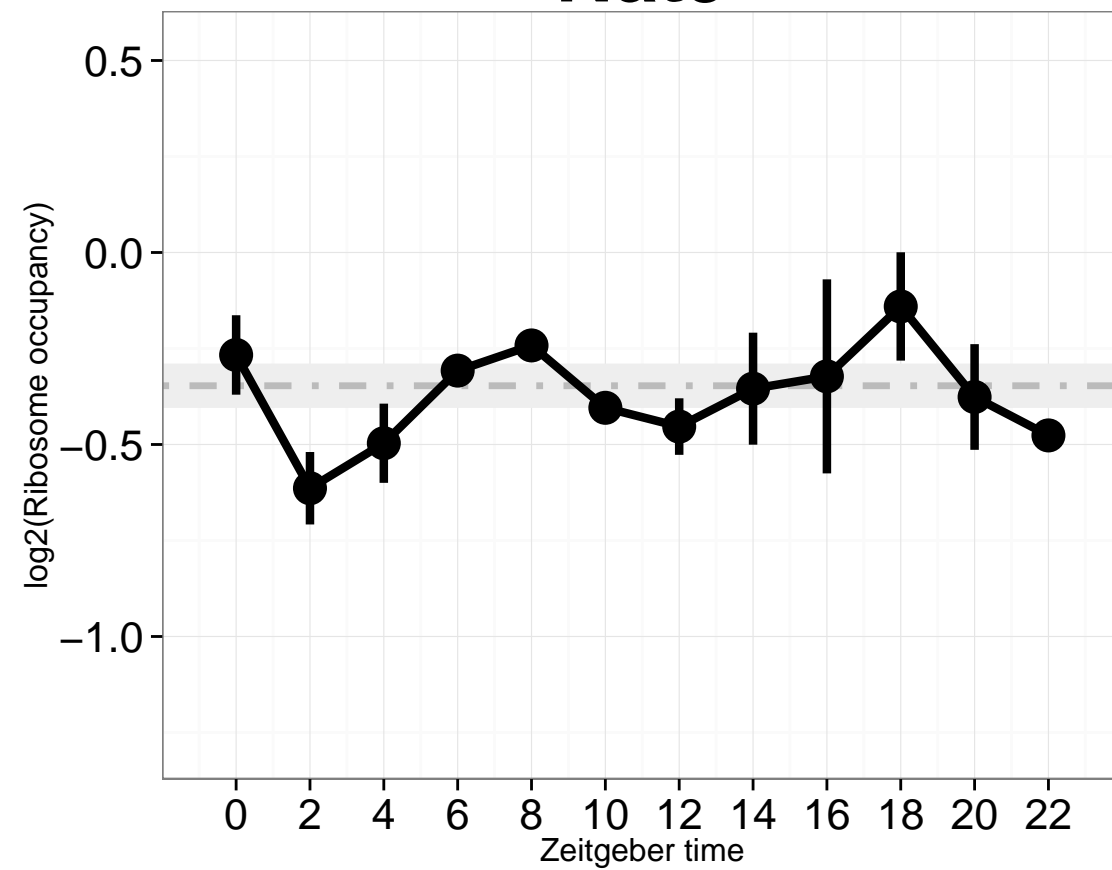

Supplement: SuppDataset_1.zip [file Nat9_set_A.pdf › Supplemental Dataset 1/A-mRNA_nonrhyth_translation_nonrhyth/Nat9_set_A.pdf]

## Nav1

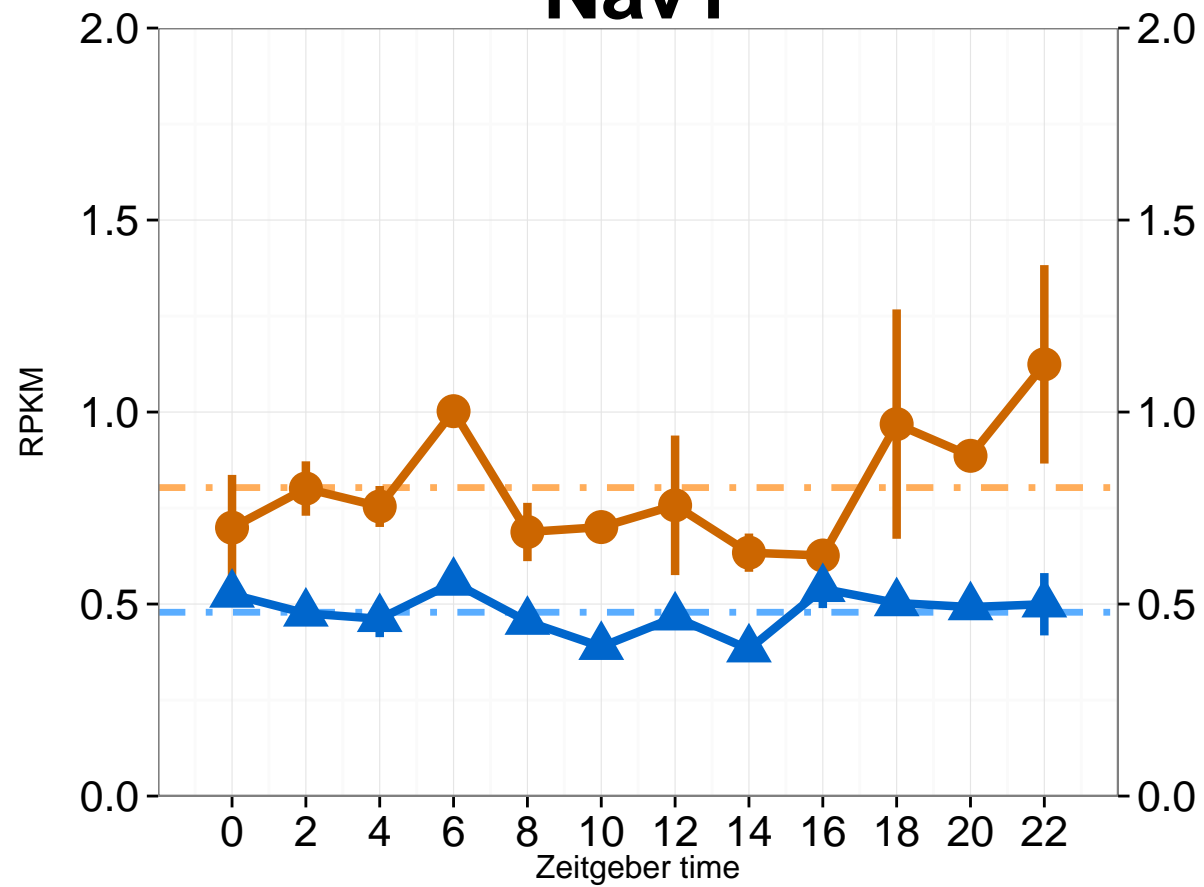

## Nav1

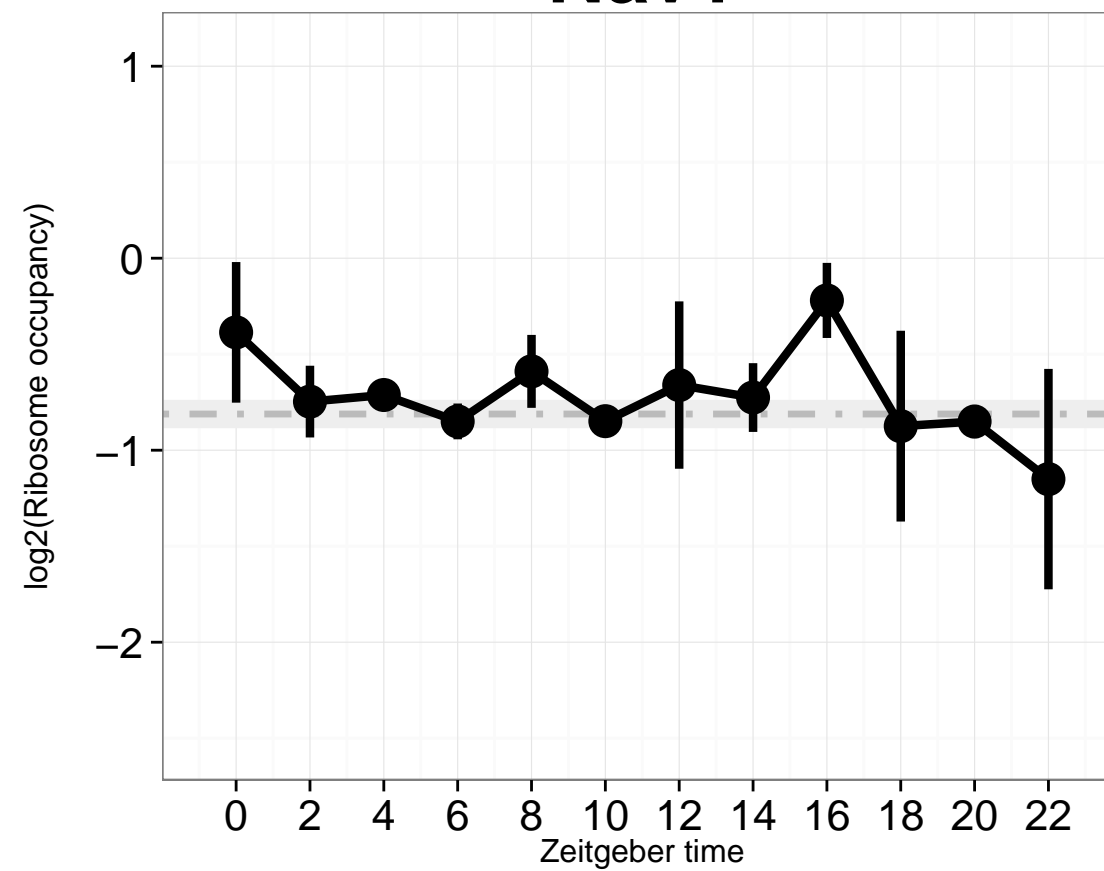

Supplement: SuppDataset_1.zip [file Nav1_set_A.pdf › Supplemental Dataset 1/A-mRNA_nonrhyth_translation_nonrhyth/Nav1_set_A.pdf]

## Nav2

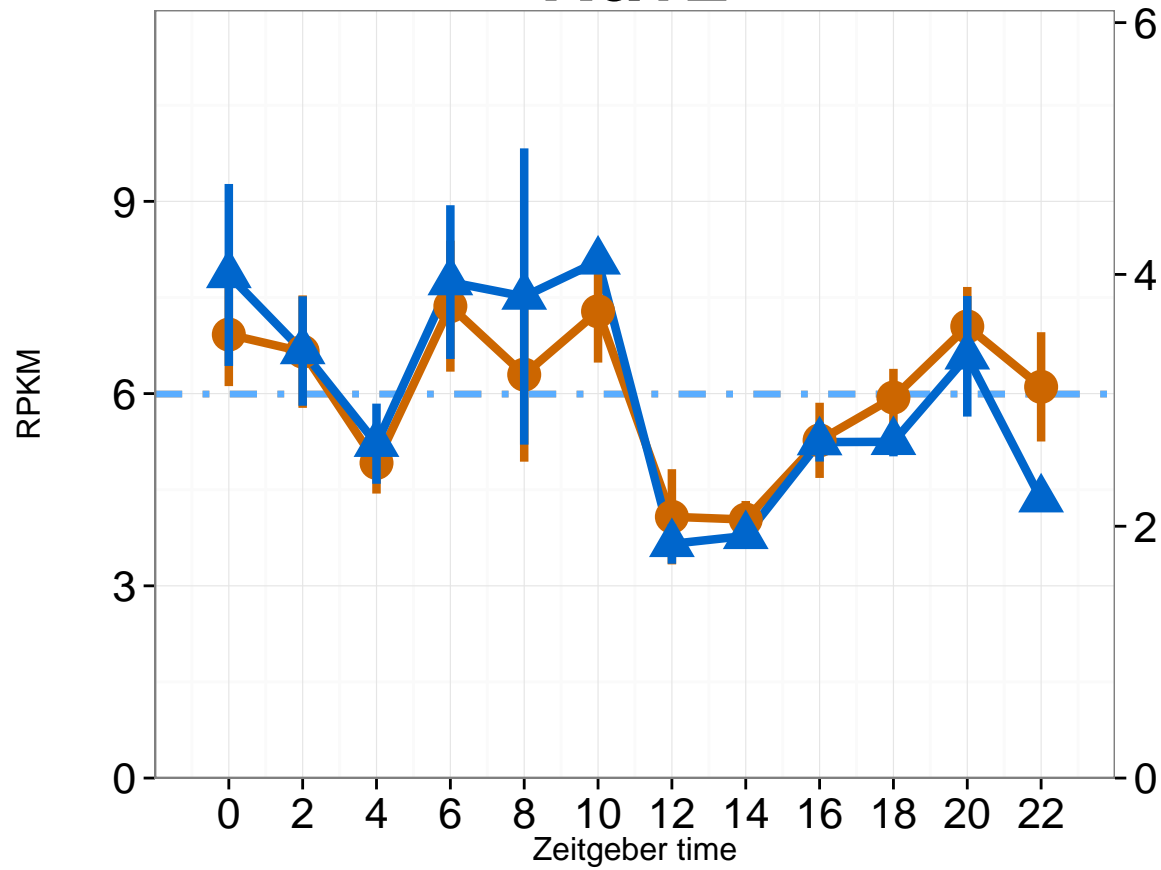

## Nav2

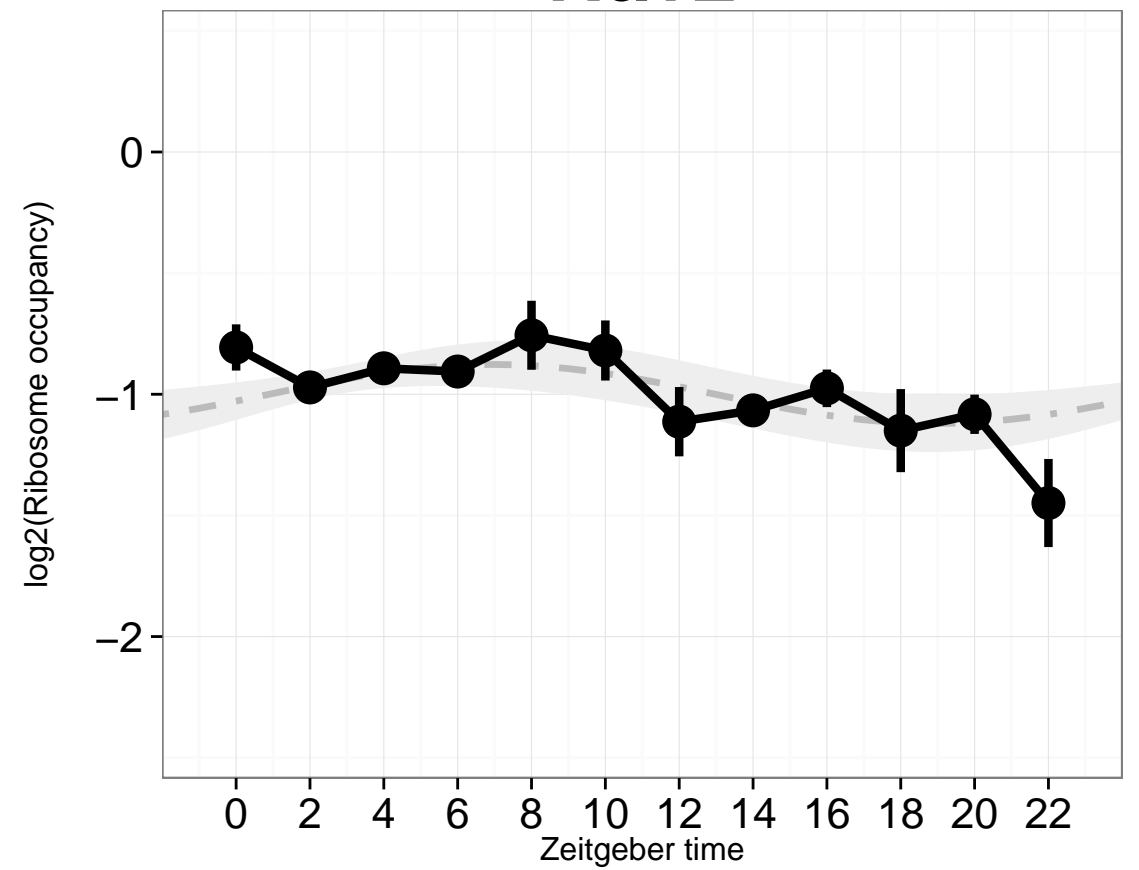

Supplement: SuppDataset_1.zip [file Nav2_set_A.pdf › Supplemental Dataset 1/A-mRNA_nonrhyth_translation_nonrhyth/Nav2_set_A.pdf]

## Nbas

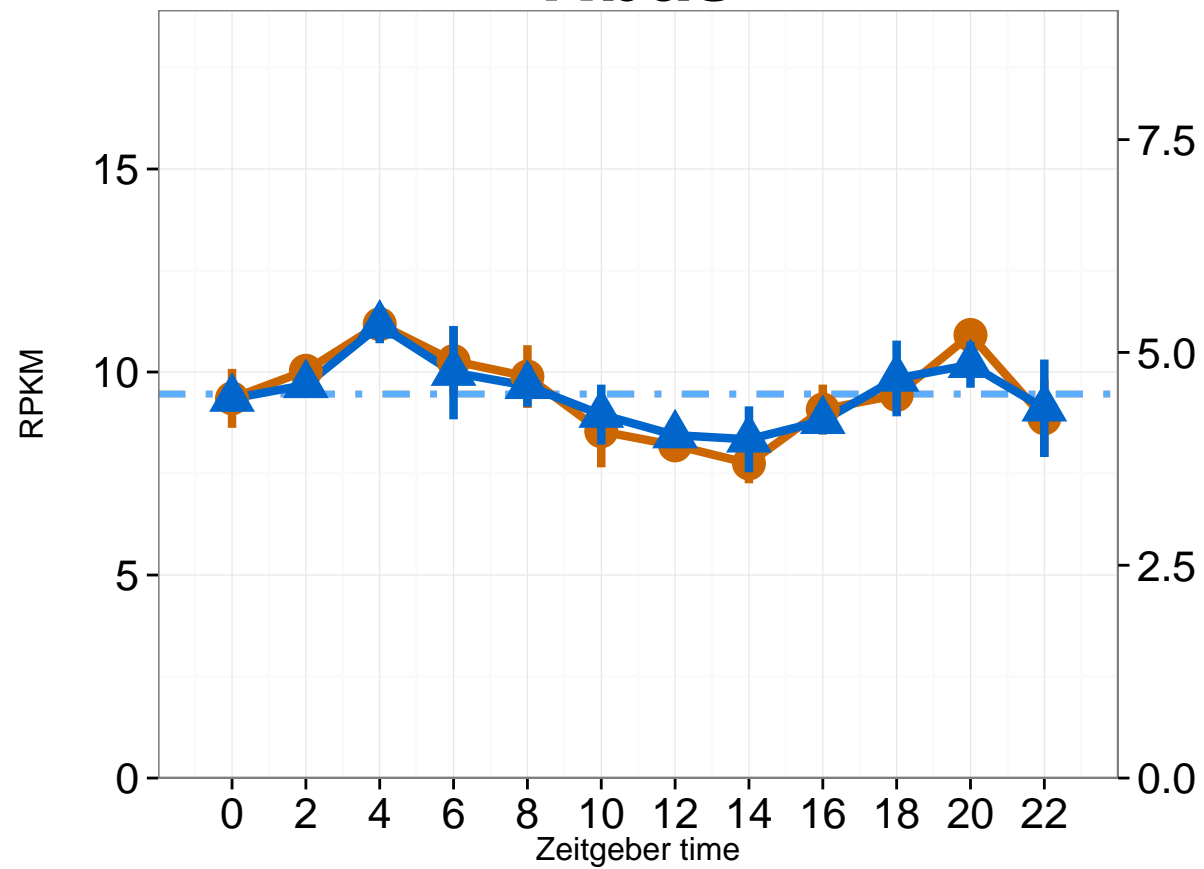

## Nbas

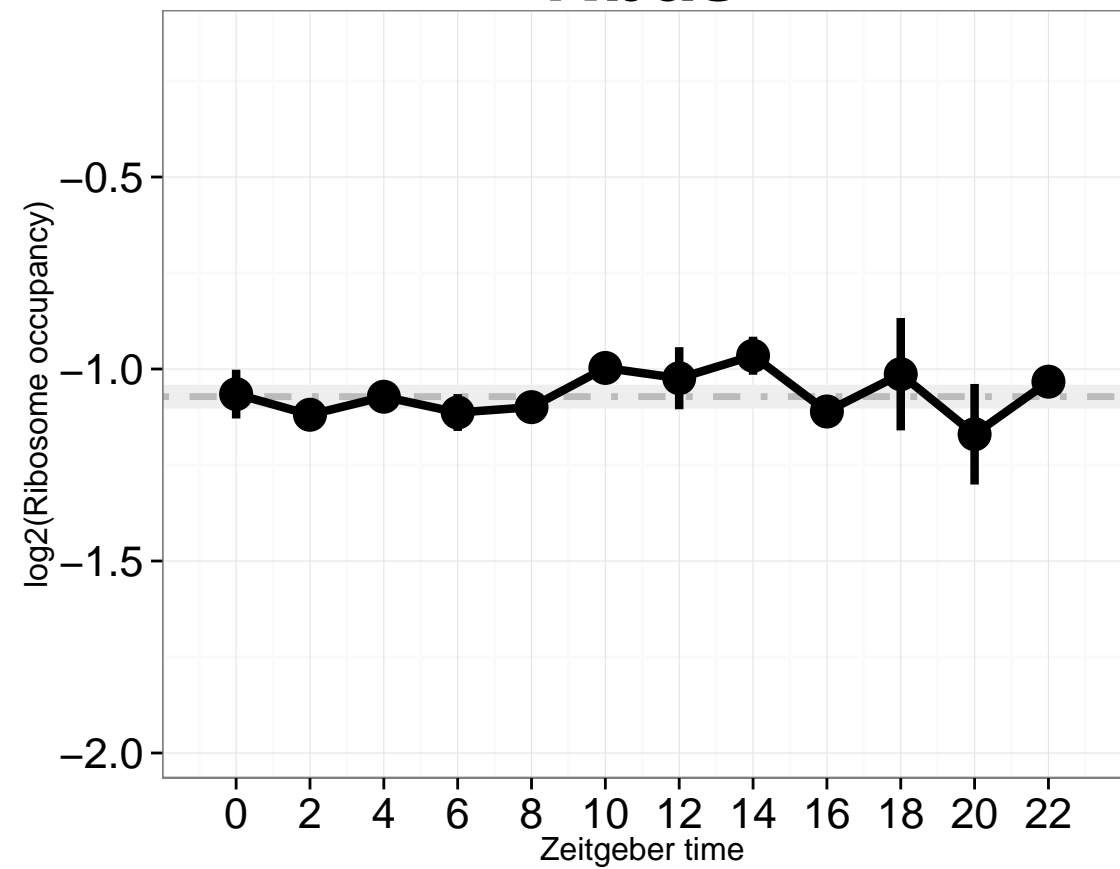

Supplement: SuppDataset_1.zip [file Nbas_set_A.pdf › Supplemental Dataset 1/A-mRNA_nonrhyth_translation_nonrhyth/Nbas_set_A.pdf]

## Nbea

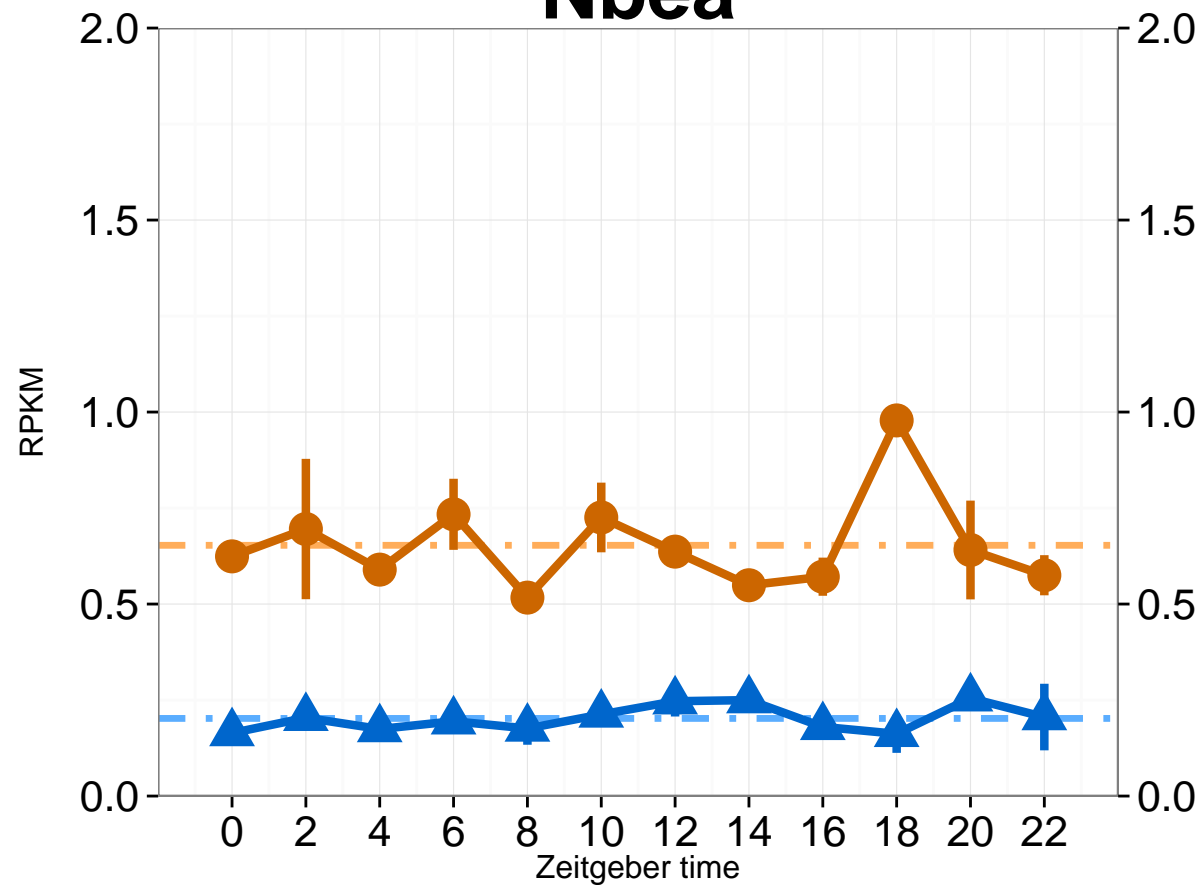

## Nbea

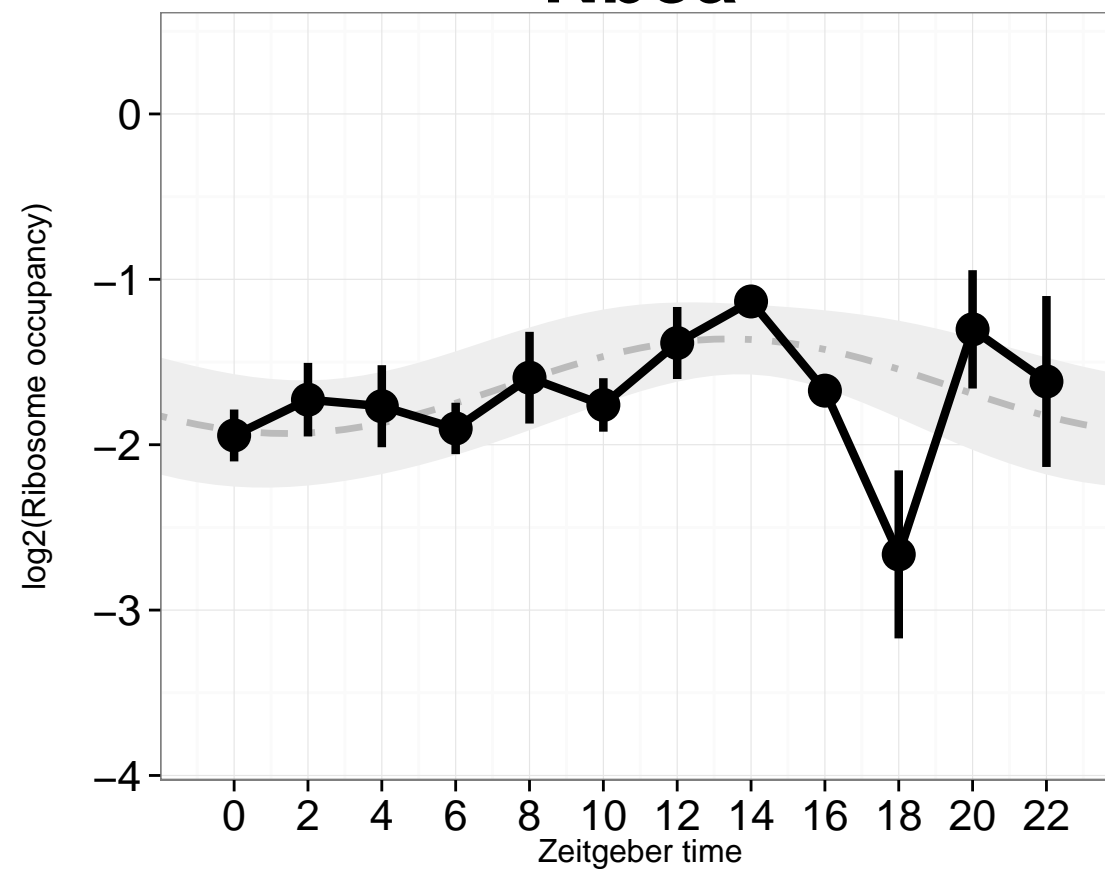

Supplement: SuppDataset_1.zip [file Nbea_set_A.pdf › Supplemental Dataset 1/A-mRNA_nonrhyth_translation_nonrhyth/Nbea_set_A.pdf]

# Nbeal1

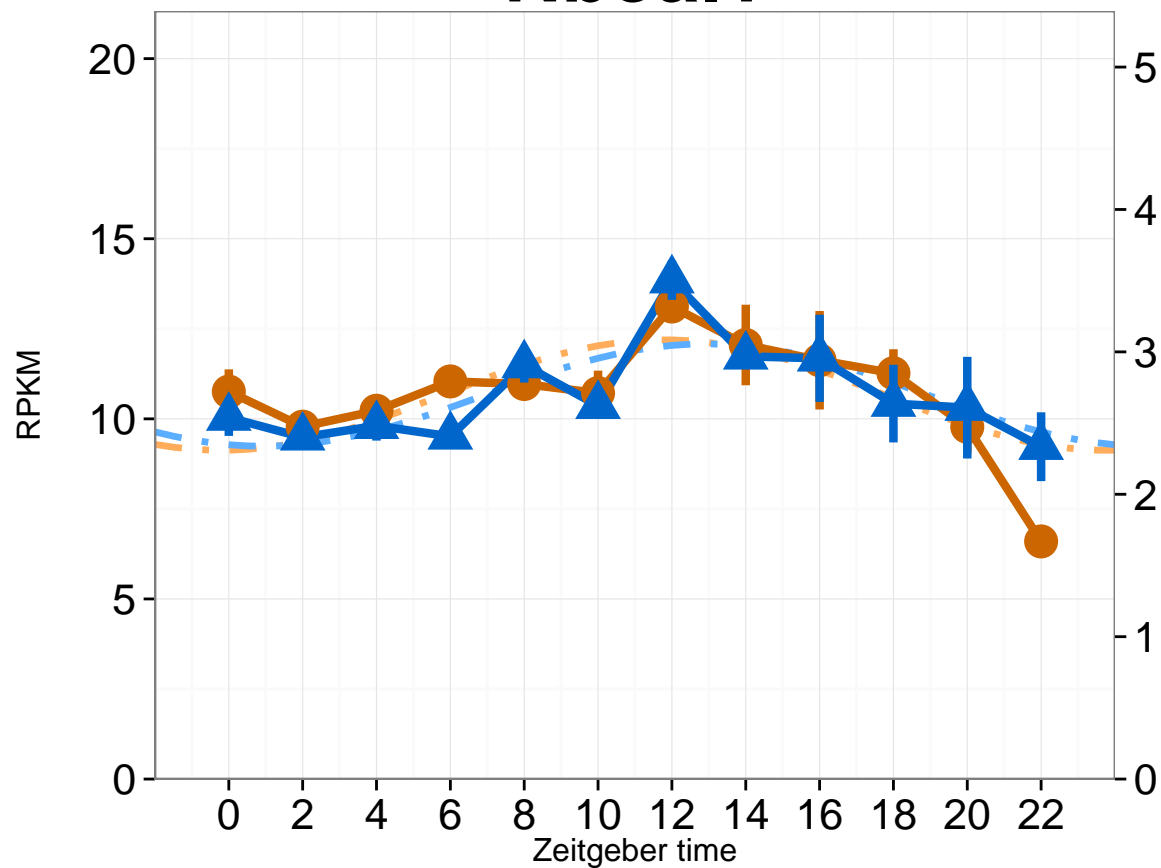

# Nbeal1

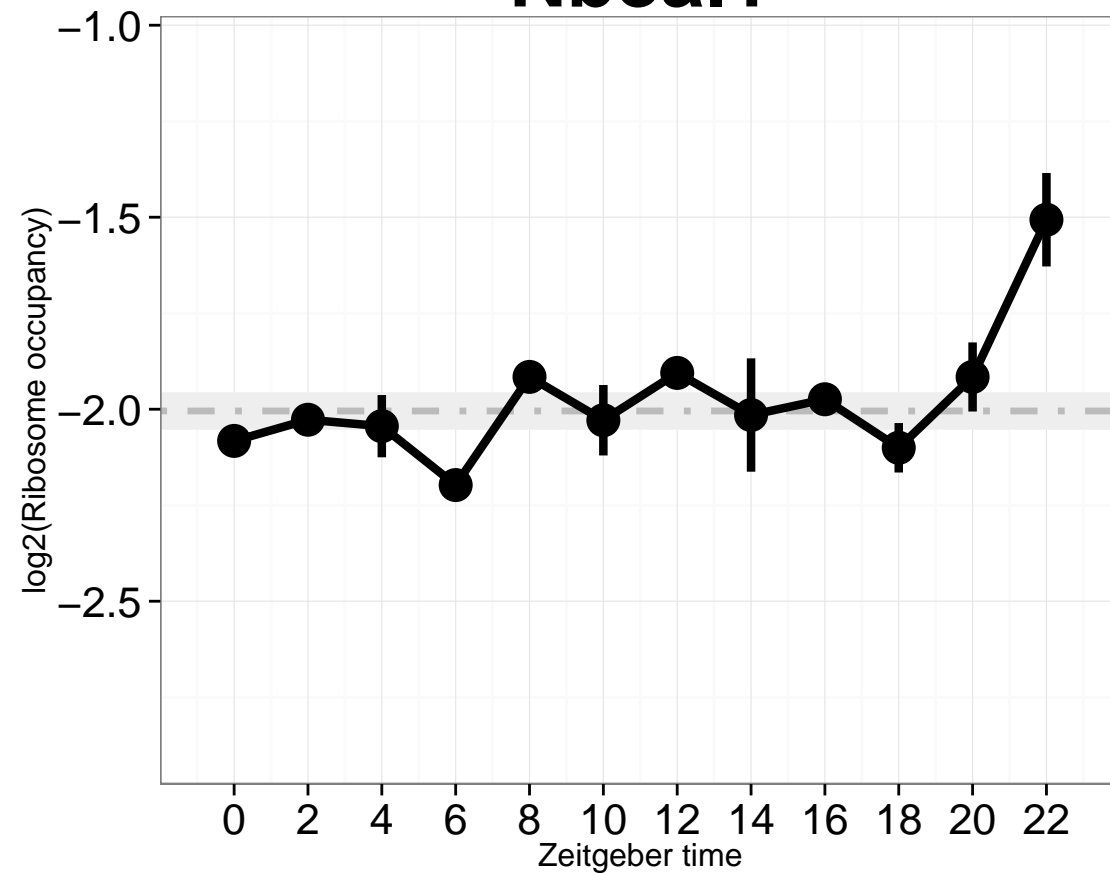

Supplement: SuppDataset_1.zip [file Nbeal1_set_A.pdf › Supplemental Dataset 1/A-mRNA_nonrhyth_translation_nonrhyth/Nbeal1_set_A.pdf]

## Nbn

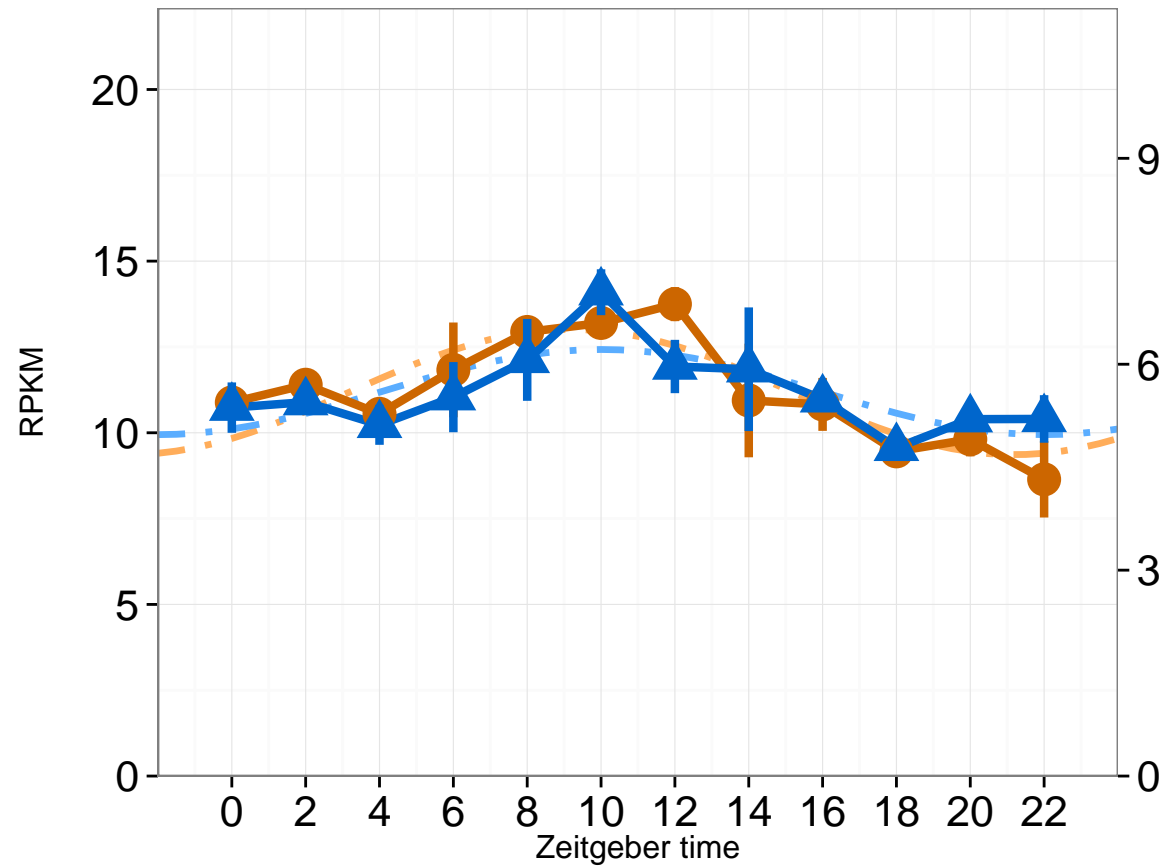

## Nbn

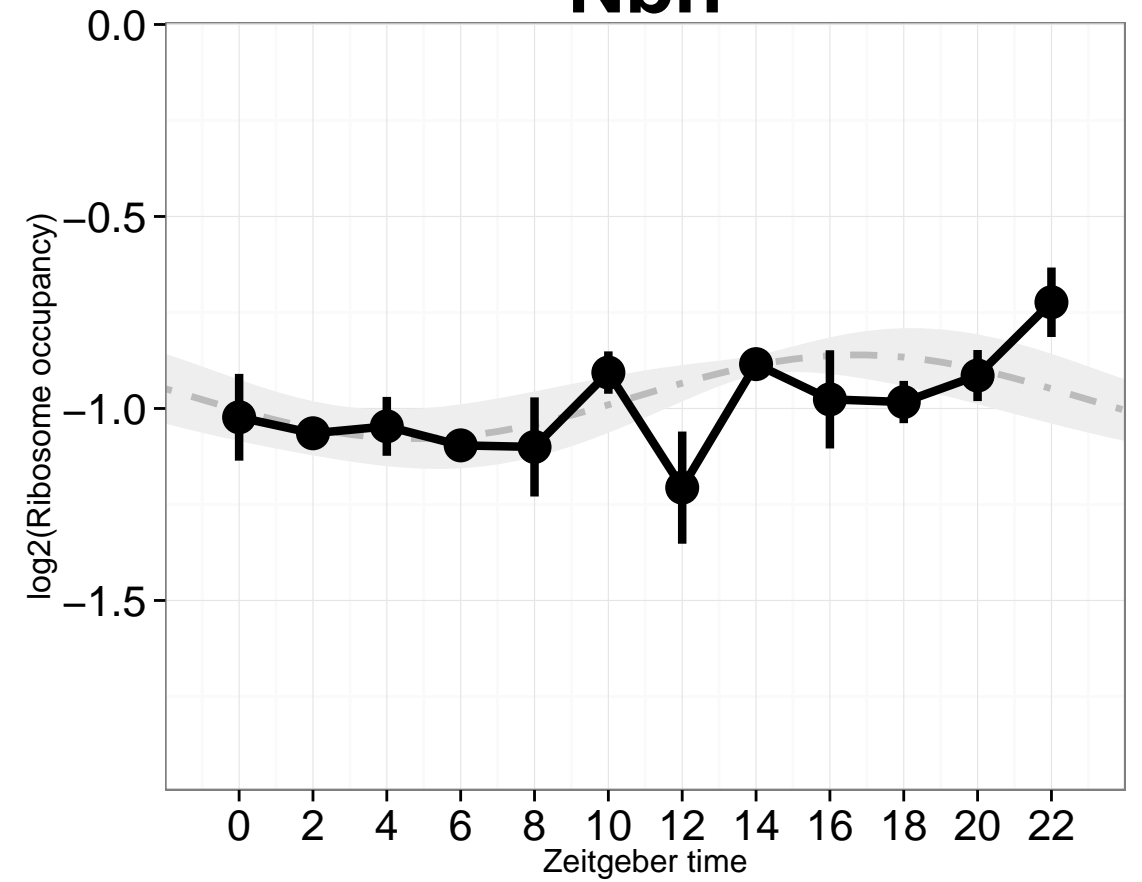

Supplement: SuppDataset_1.zip [file Nbn_set_A.pdf › Supplemental Dataset 1/A-mRNA_nonrhyth_translation_nonrhyth/Nbn_set_A.pdf]

## Nbr1

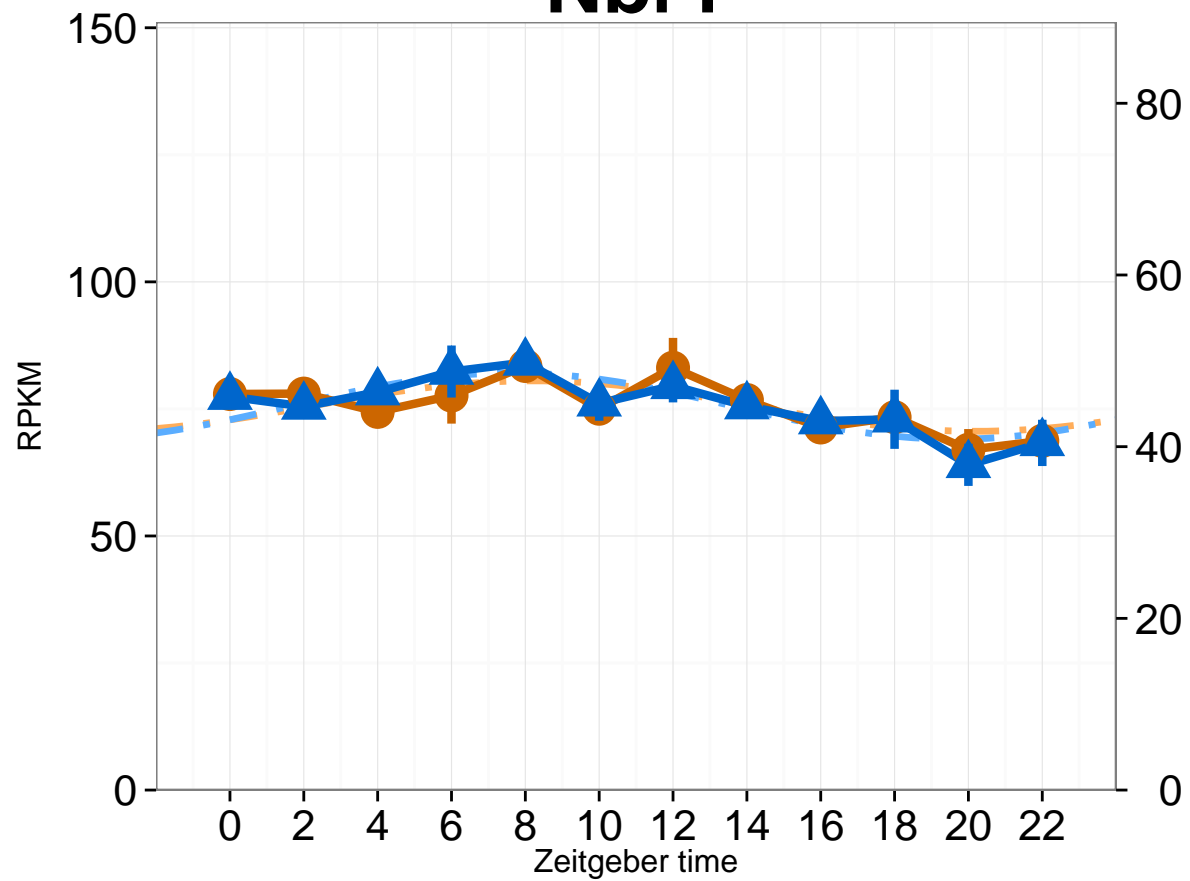

## Nbr1

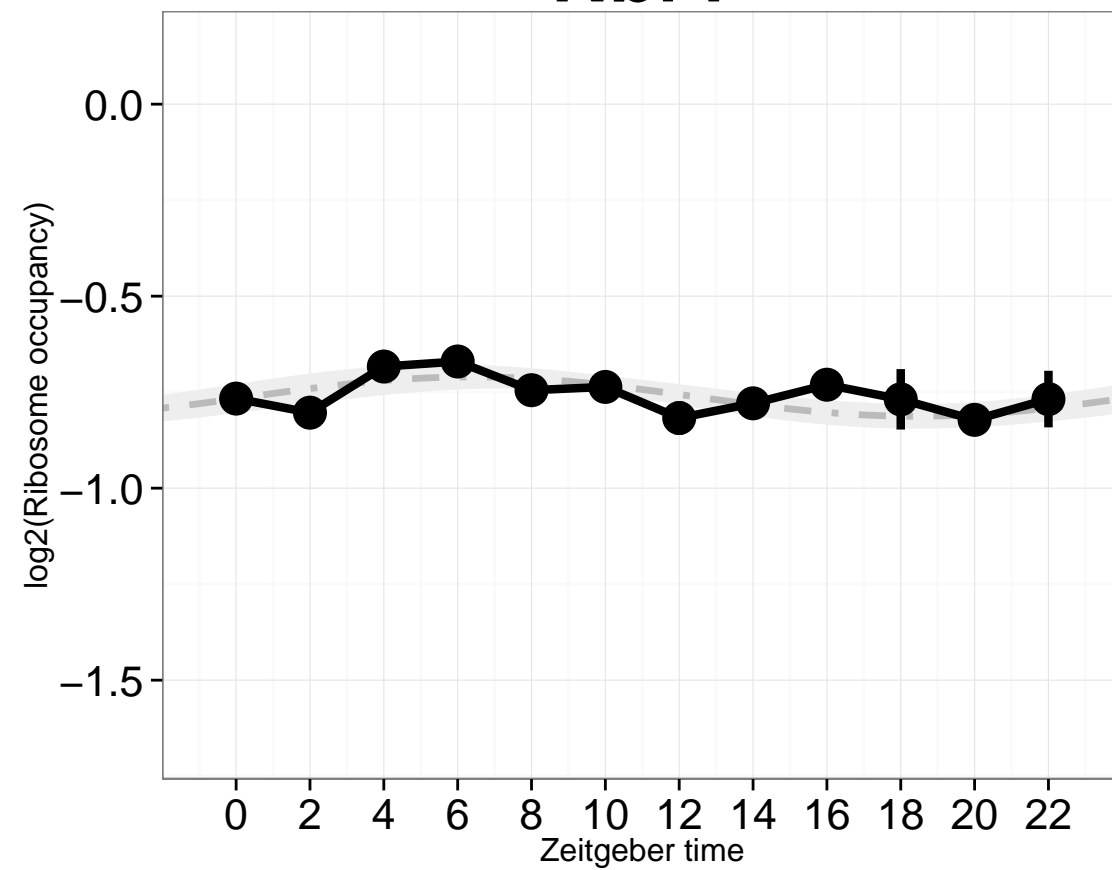

Supplement: SuppDataset_1.zip [file Nbr1_set_A.pdf › Supplemental Dataset 1/A-mRNA_nonrhyth_translation_nonrhyth/Nbr1_set_A.pdf]

## Ncam2

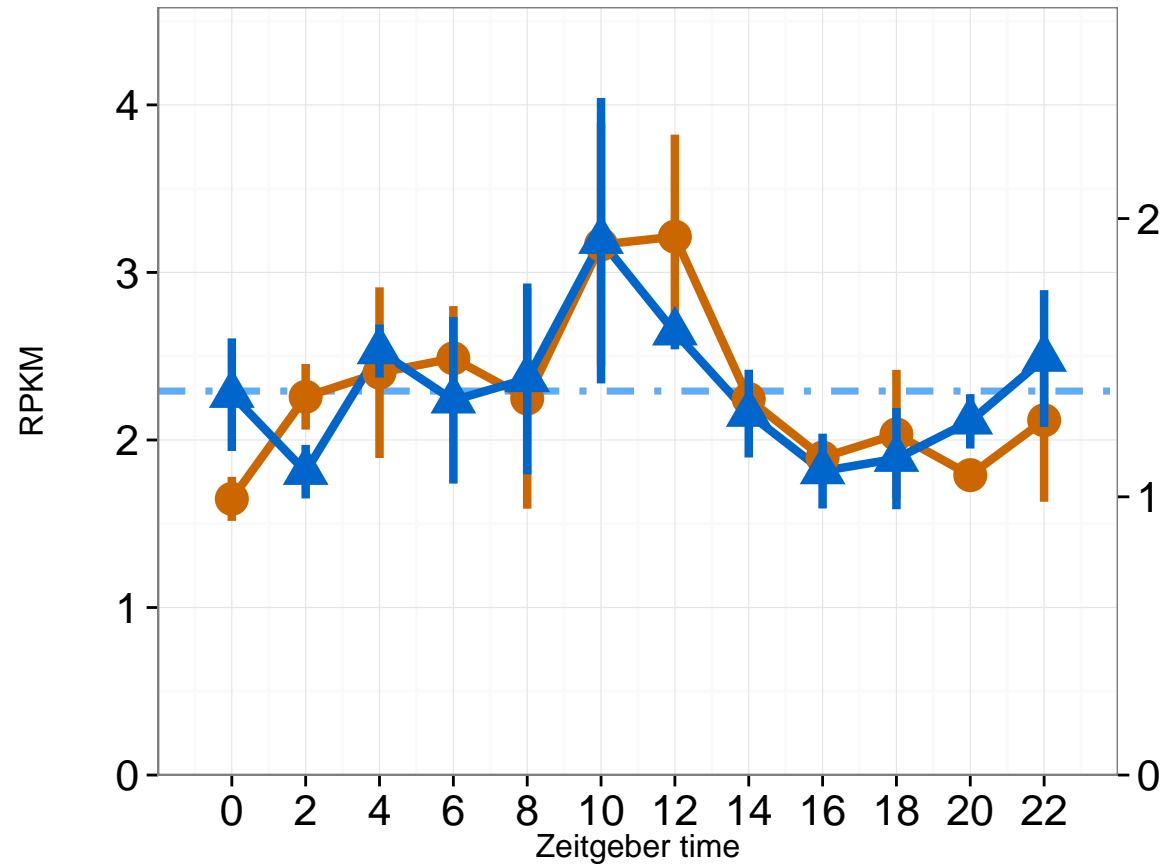

## Ncam2

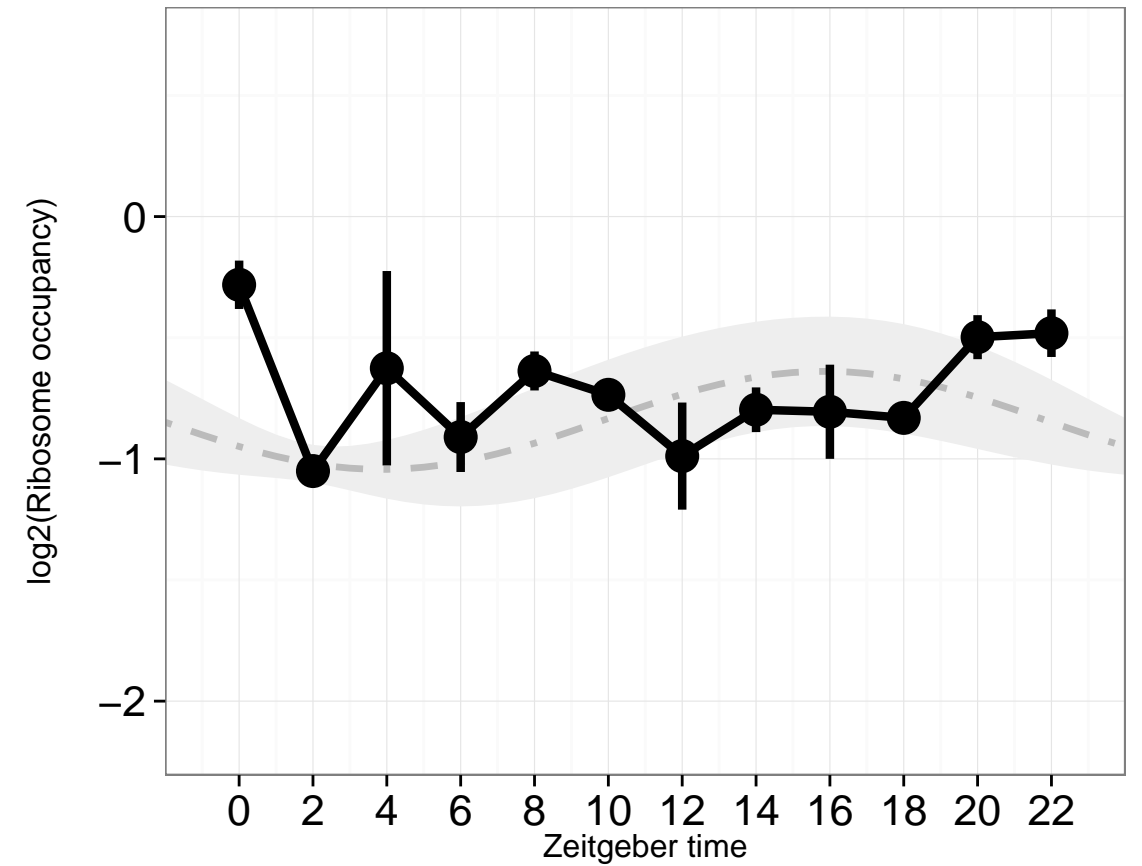

Supplement: SuppDataset_1.zip [file Ncam2_set_A.pdf › Supplemental Dataset 1/A-mRNA_nonrhyth_translation_nonrhyth/Ncam2_set_A.pdf]

## Ncapd2

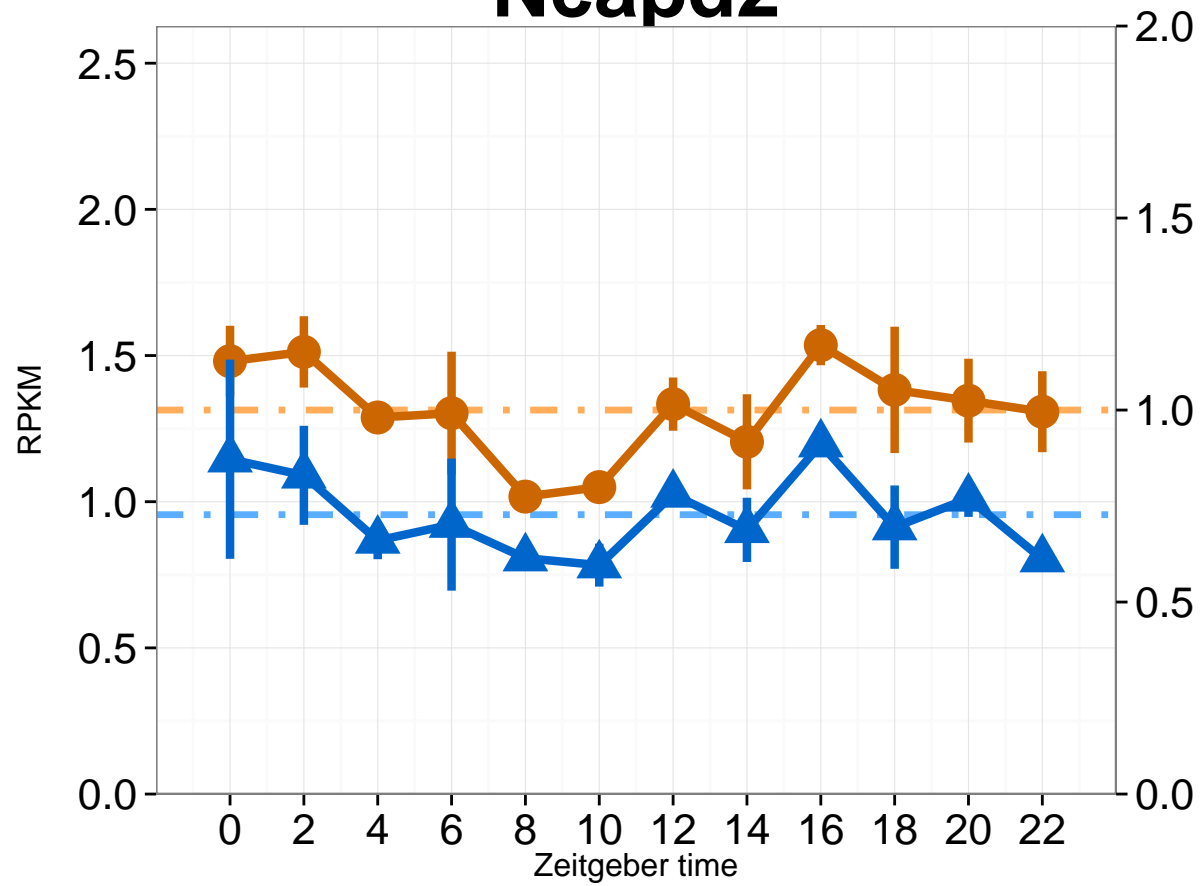

## Ncapd2

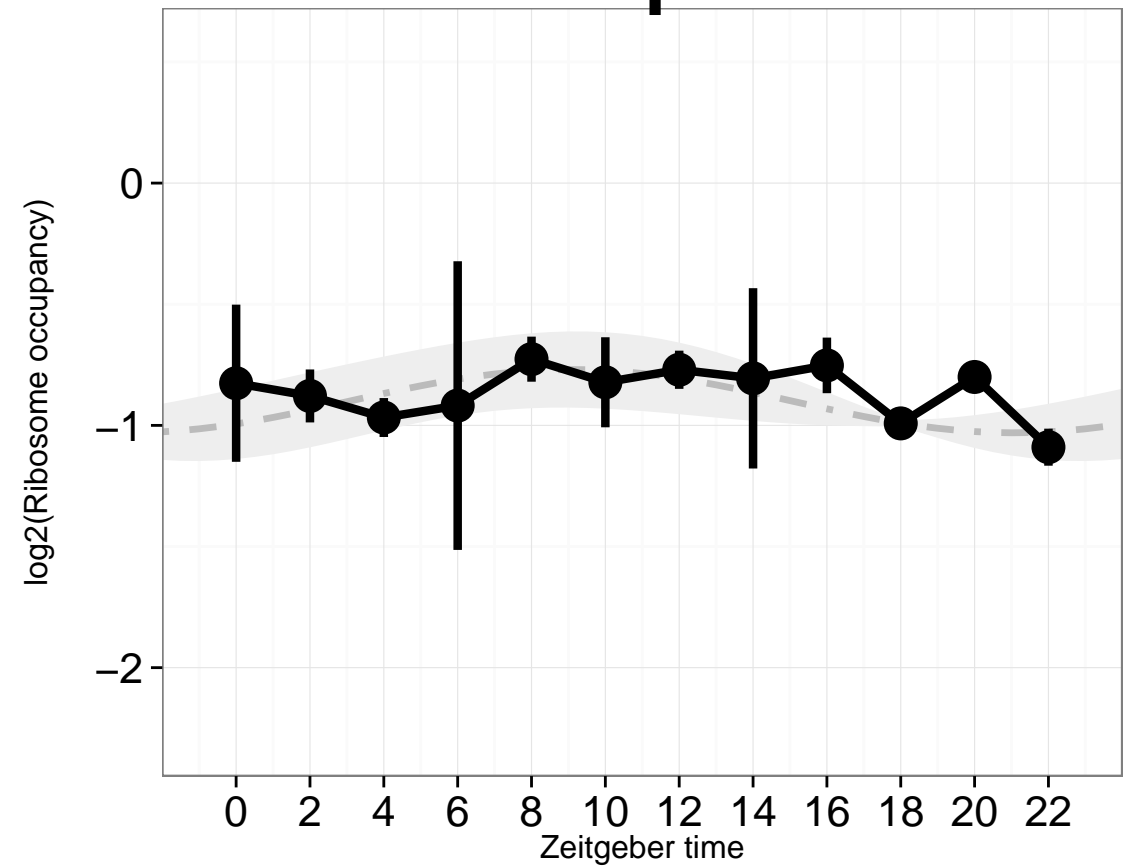

Supplement: SuppDataset_1.zip [file Ncapd2_set_A.pdf › Supplemental Dataset 1/A-mRNA_nonrhyth_translation_nonrhyth/Ncapd2_set_A.pdf]

## Ncapd3

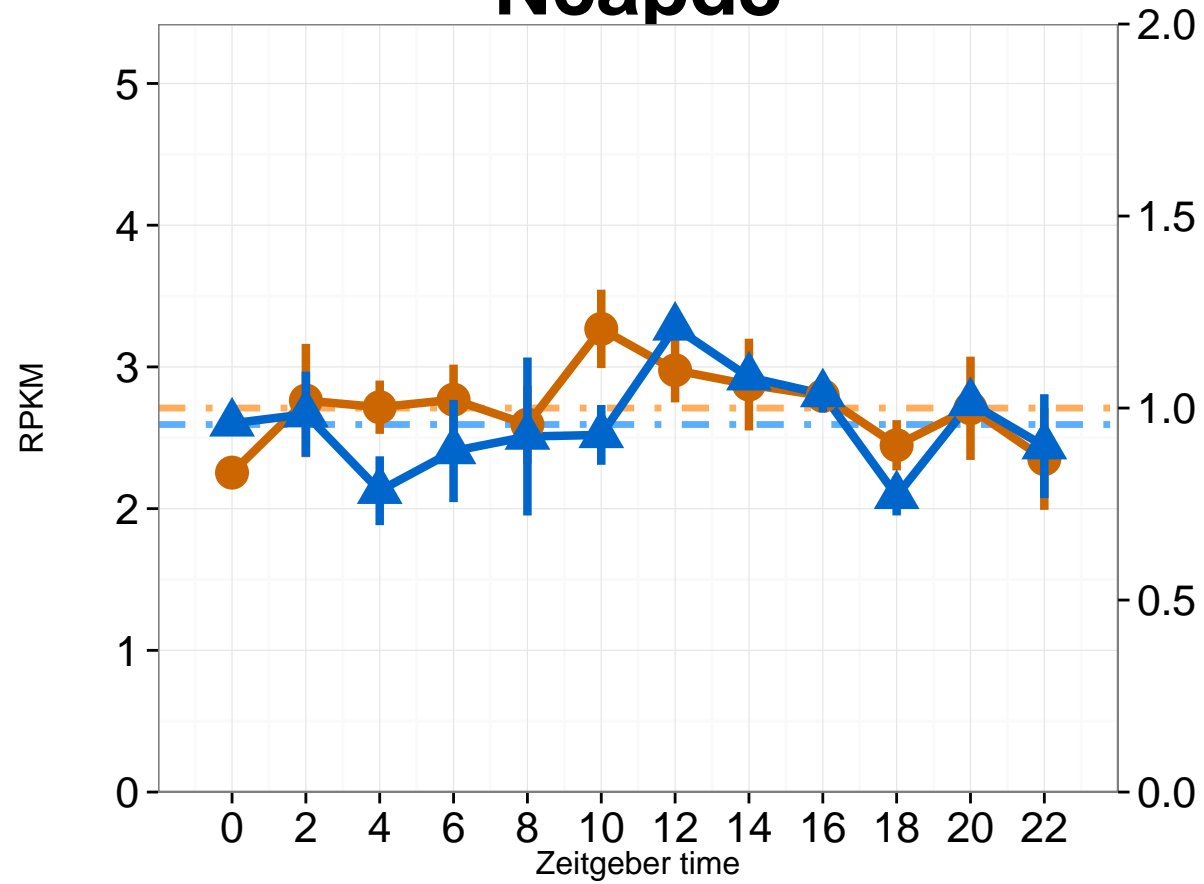

## Ncapd3

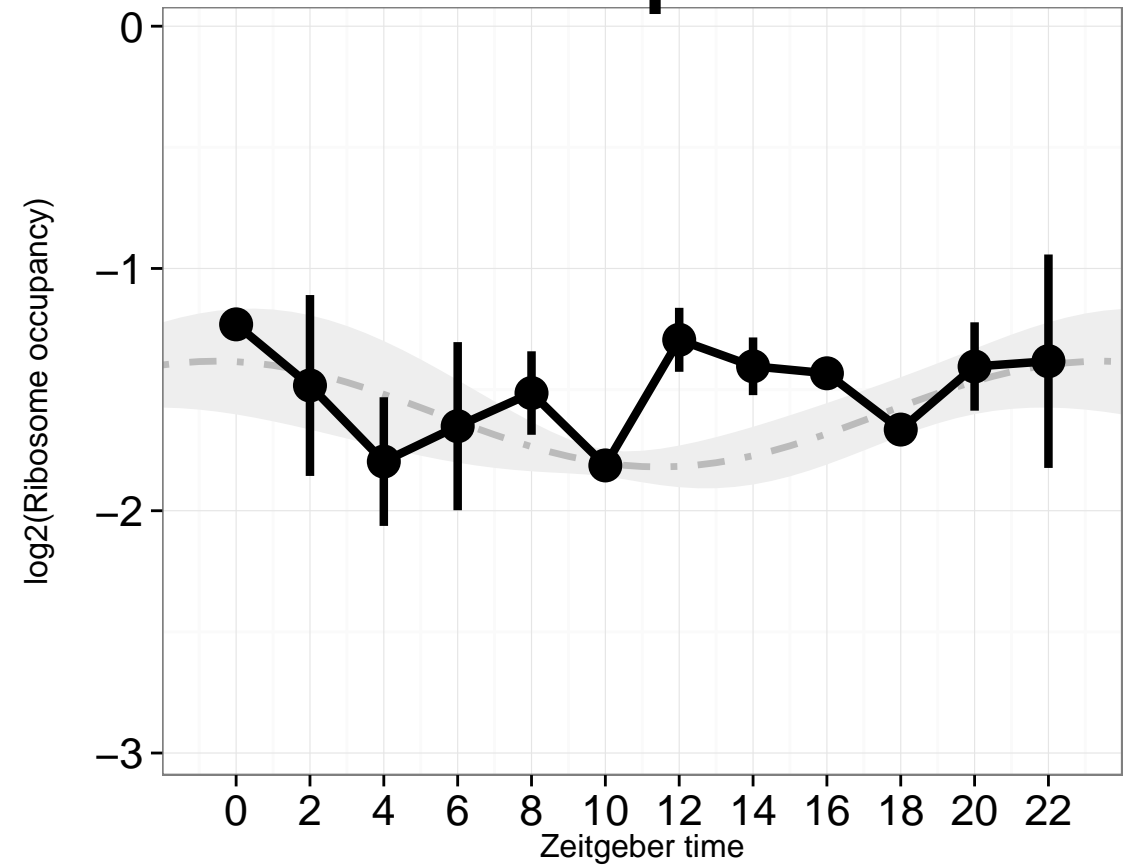

Supplement: SuppDataset_1.zip [file Ncapd3_set_A.pdf › Supplemental Dataset 1/A-mRNA_nonrhyth_translation_nonrhyth/Ncapd3_set_A.pdf]

# Ncapg2

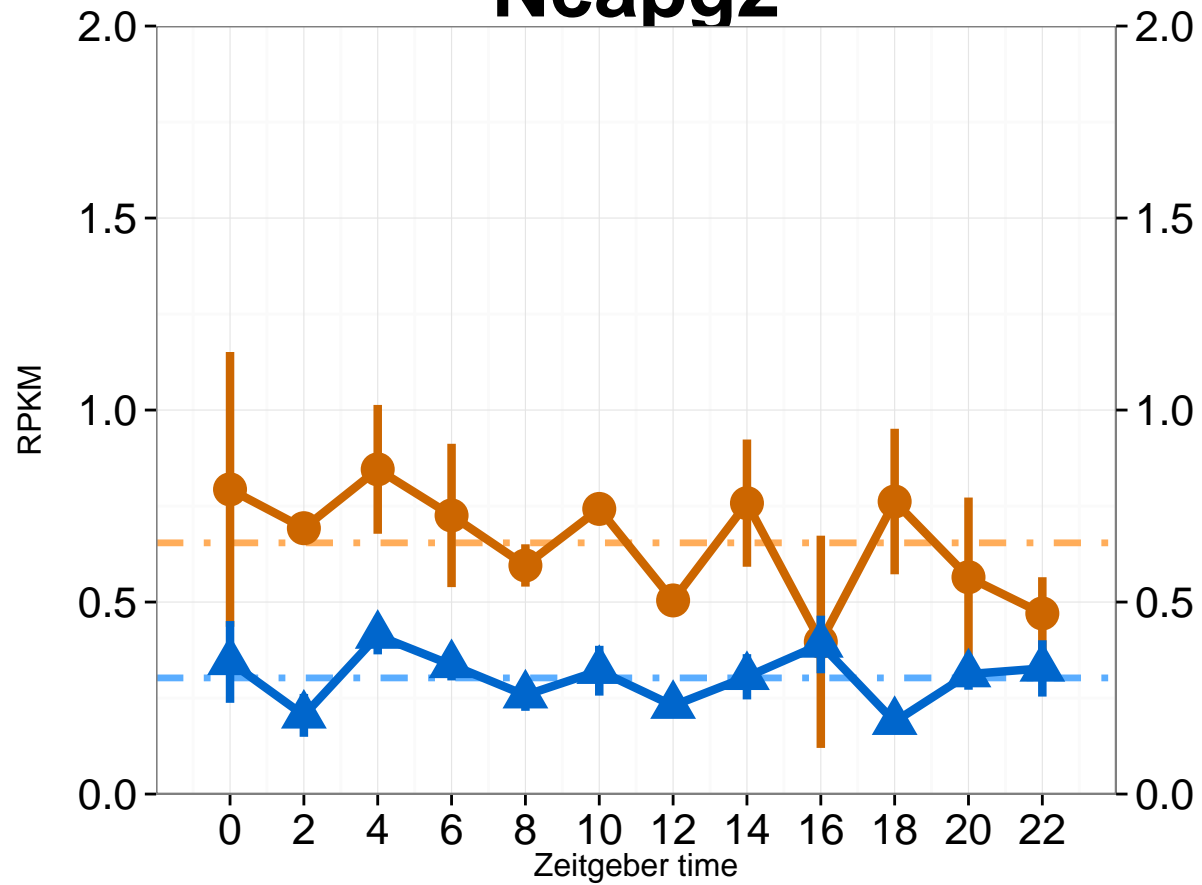

# Ncapg2

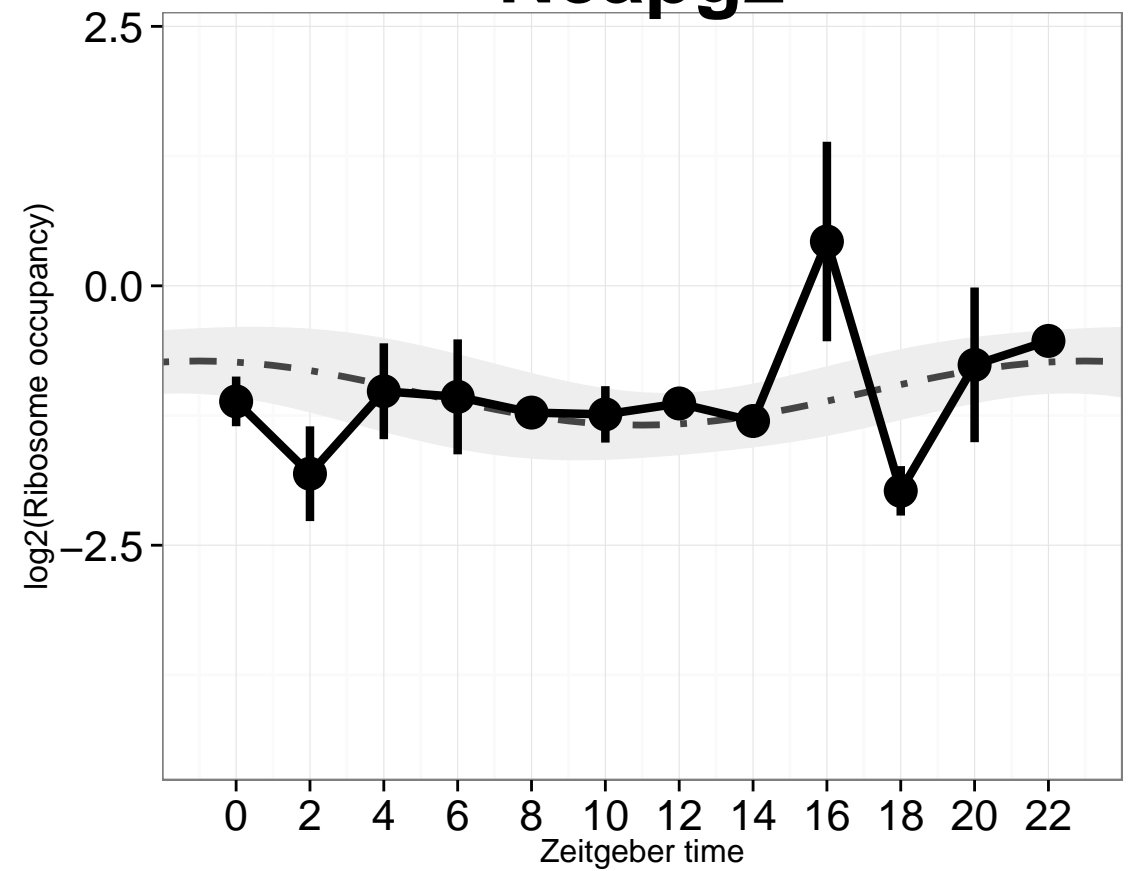

Supplement: SuppDataset_1.zip [file Ncapg2_set_A.pdf › Supplemental Dataset 1/A-mRNA_nonrhyth_translation_nonrhyth/Ncapg2_set_A.pdf]

## Ncaph2

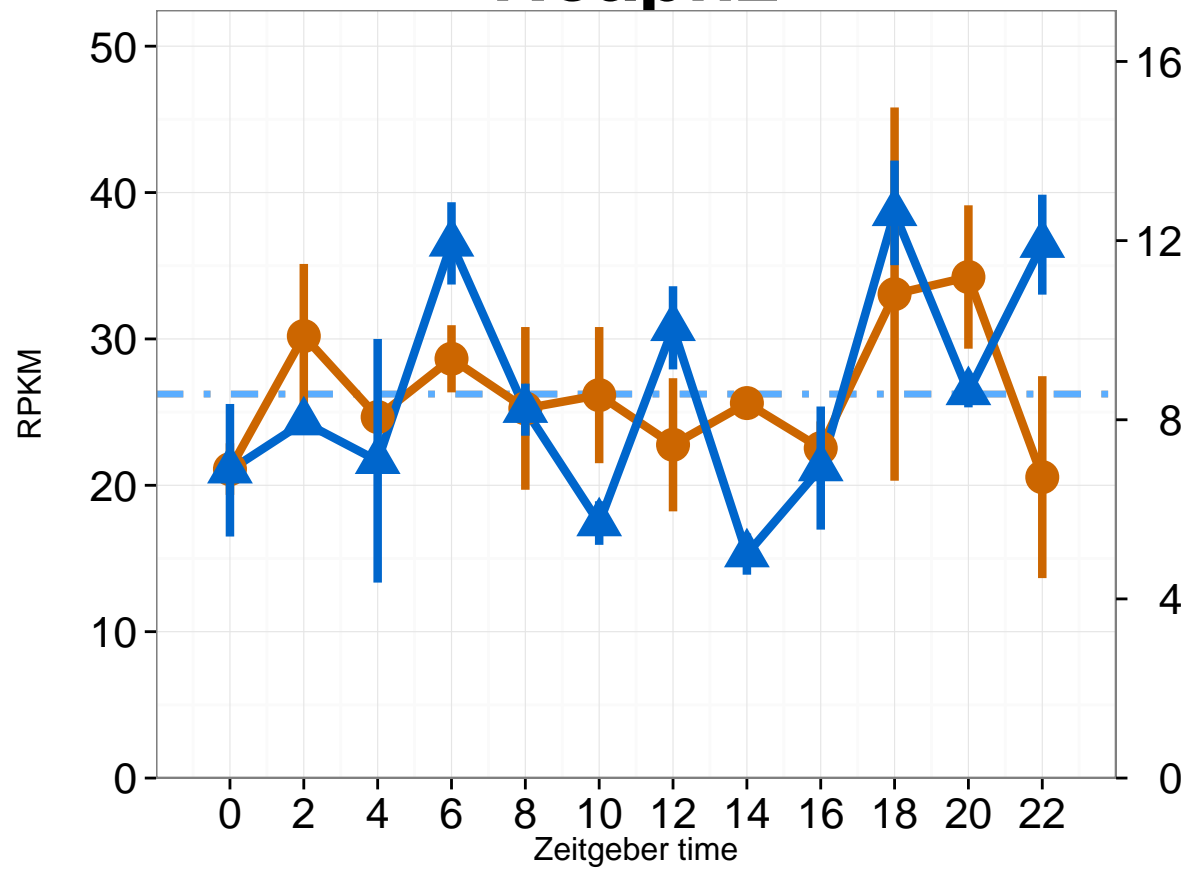

## Ncaph2

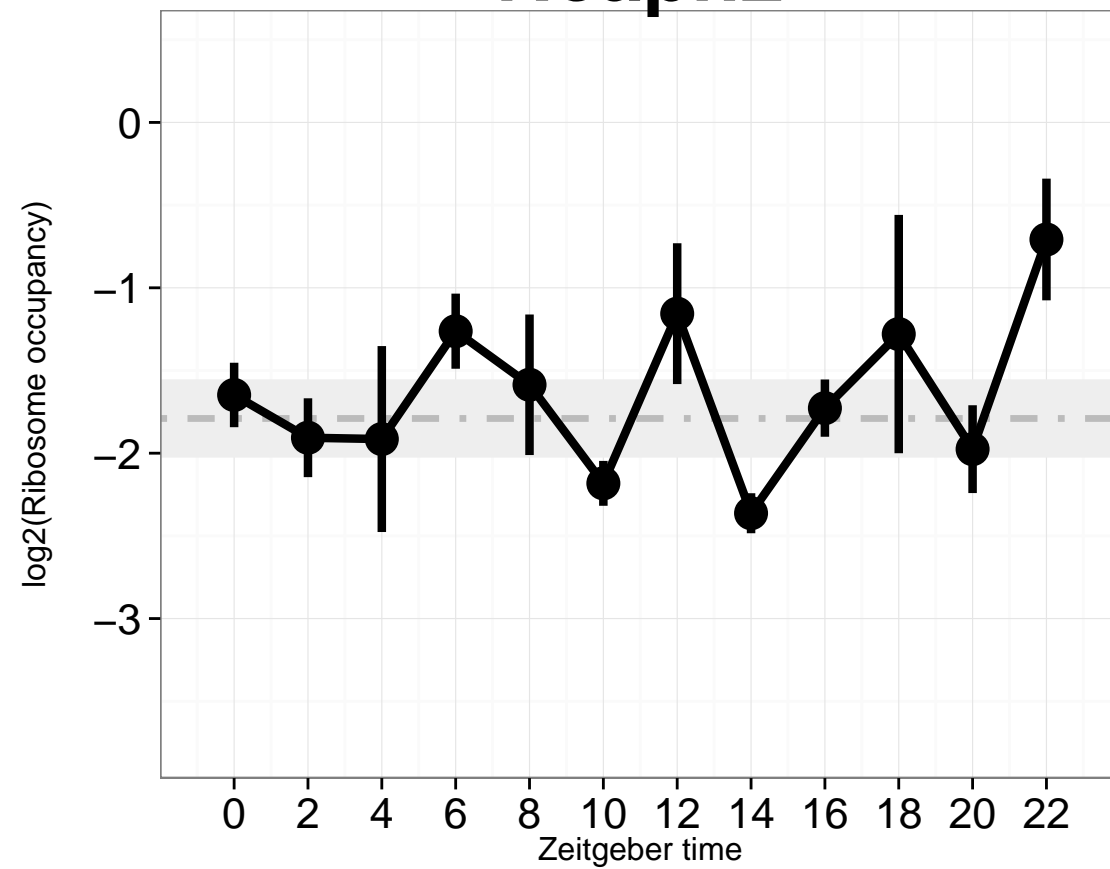

Supplement: SuppDataset_1.zip [file Ncaph2_set_A.pdf › Supplemental Dataset 1/A-mRNA_nonrhyth_translation_nonrhyth/Ncaph2_set_A.pdf]

## Ncaph

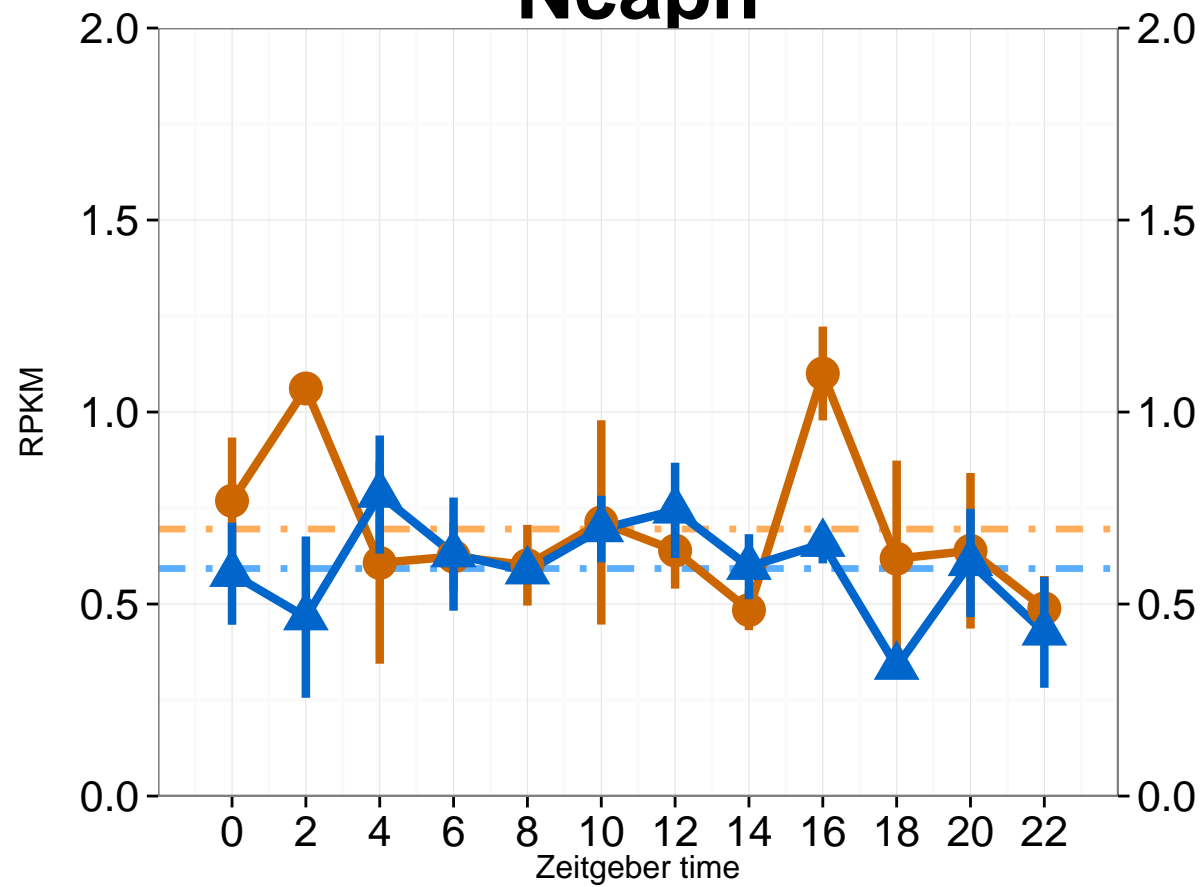

## Ncaph

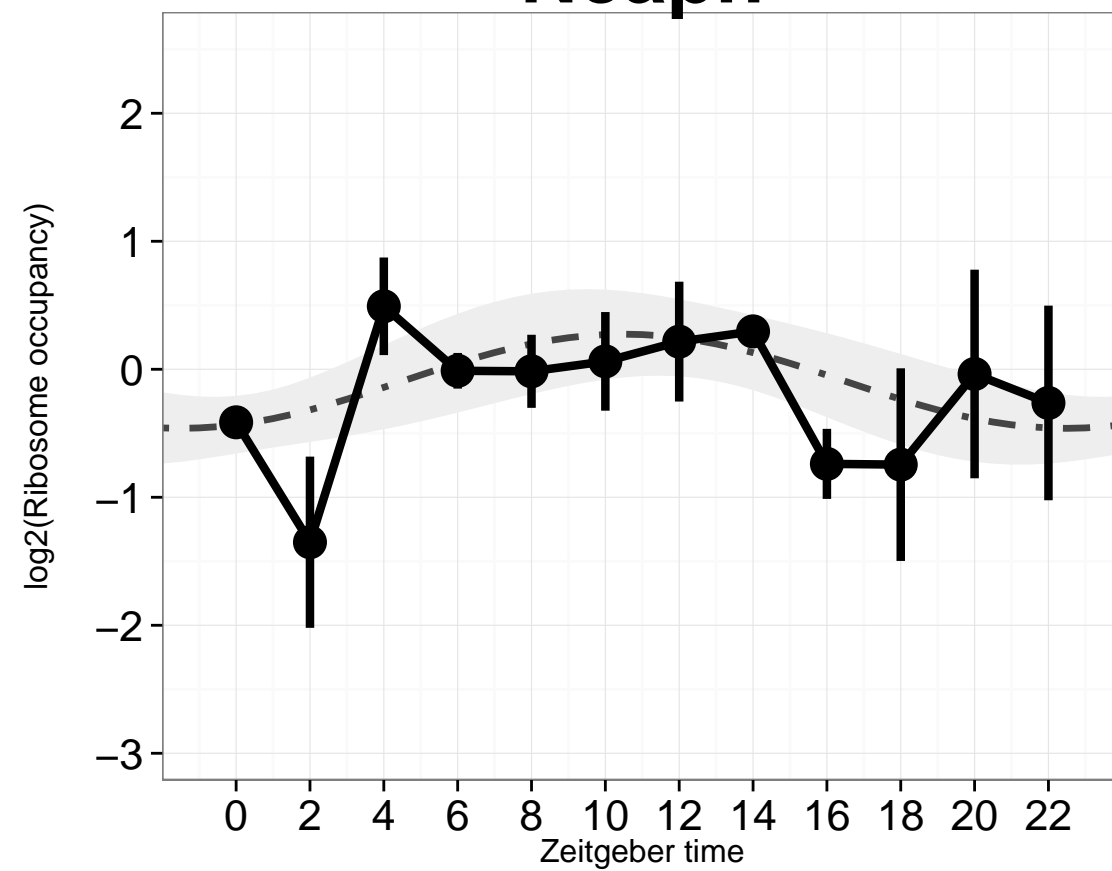

Supplement: SuppDataset_1.zip [file Ncaph_set_A.pdf › Supplemental Dataset 1/A-mRNA_nonrhyth_translation_nonrhyth/Ncaph_set_A.pdf]

## Ncbp1

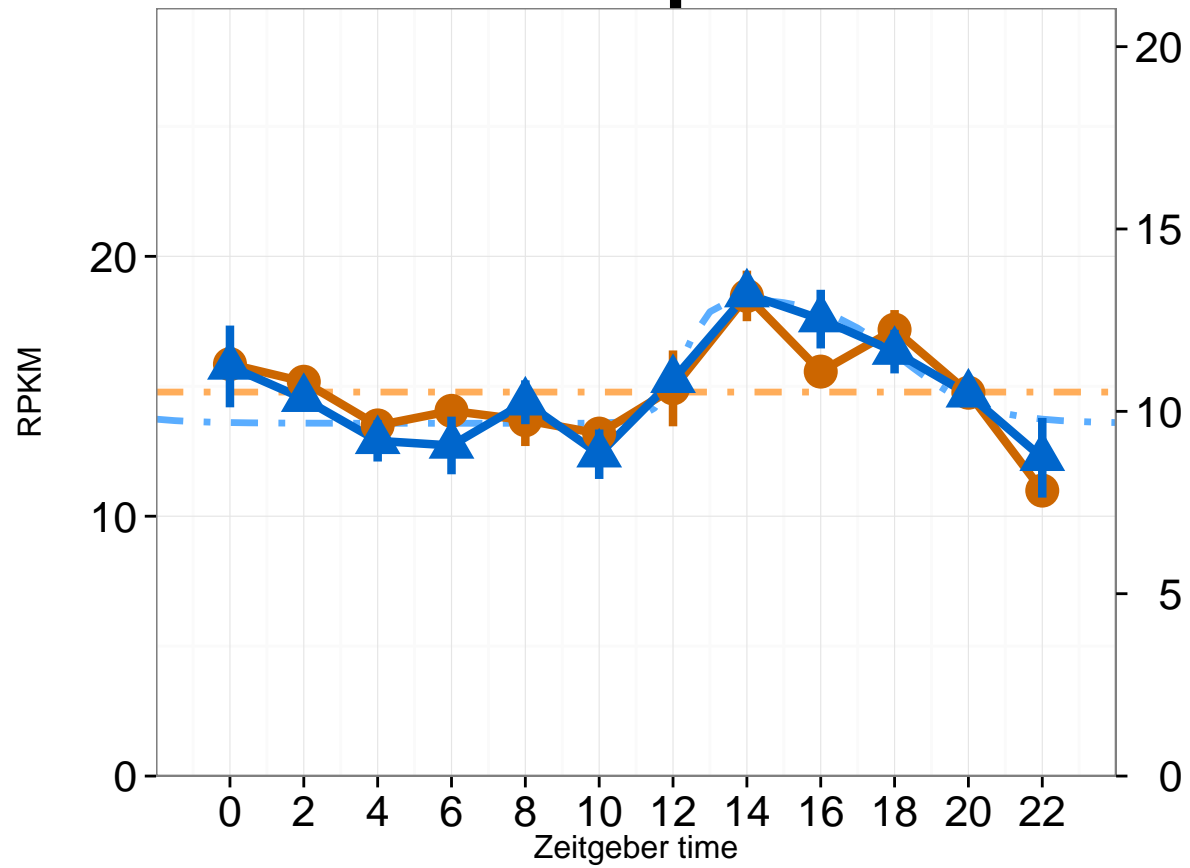

## Ncbp1

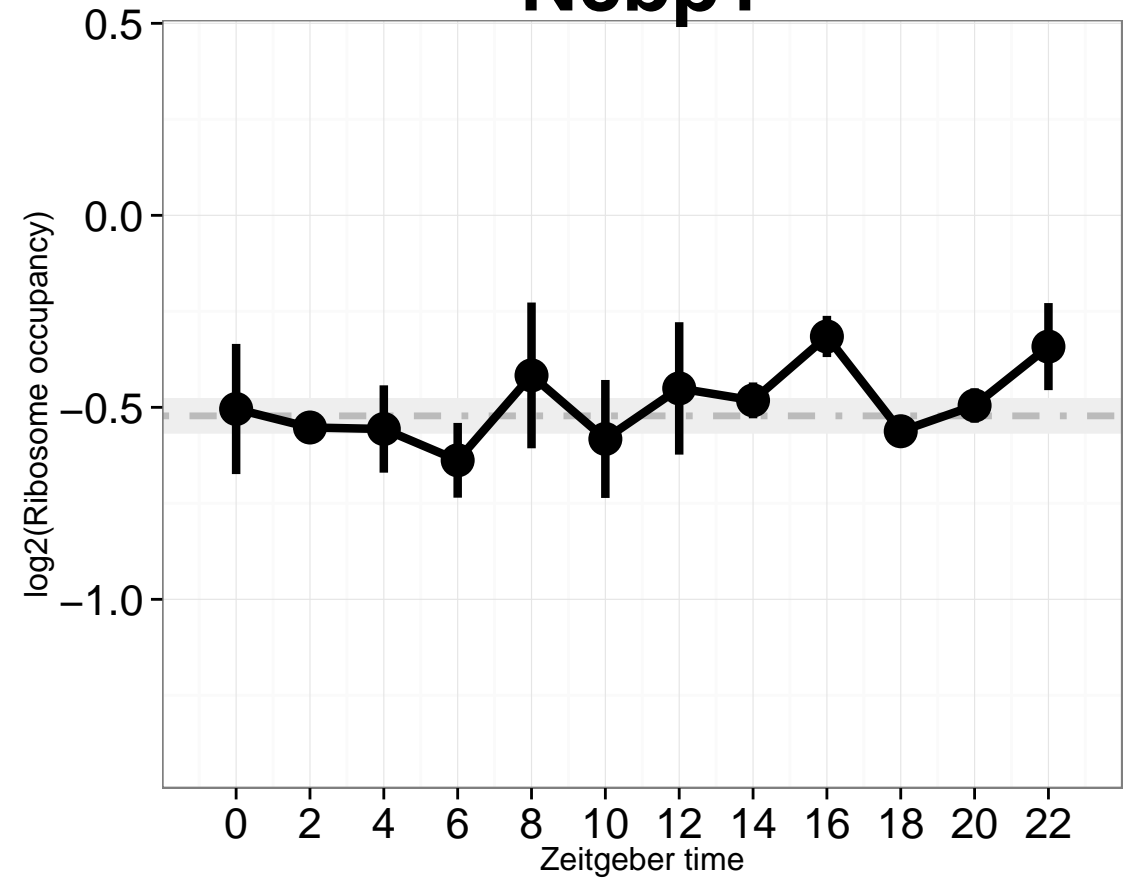

Supplement: SuppDataset_1.zip [file Ncbp1_set_A.pdf › Supplemental Dataset 1/A-mRNA_nonrhyth_translation_nonrhyth/Ncbp1_set_A.pdf]

## Ncbp2

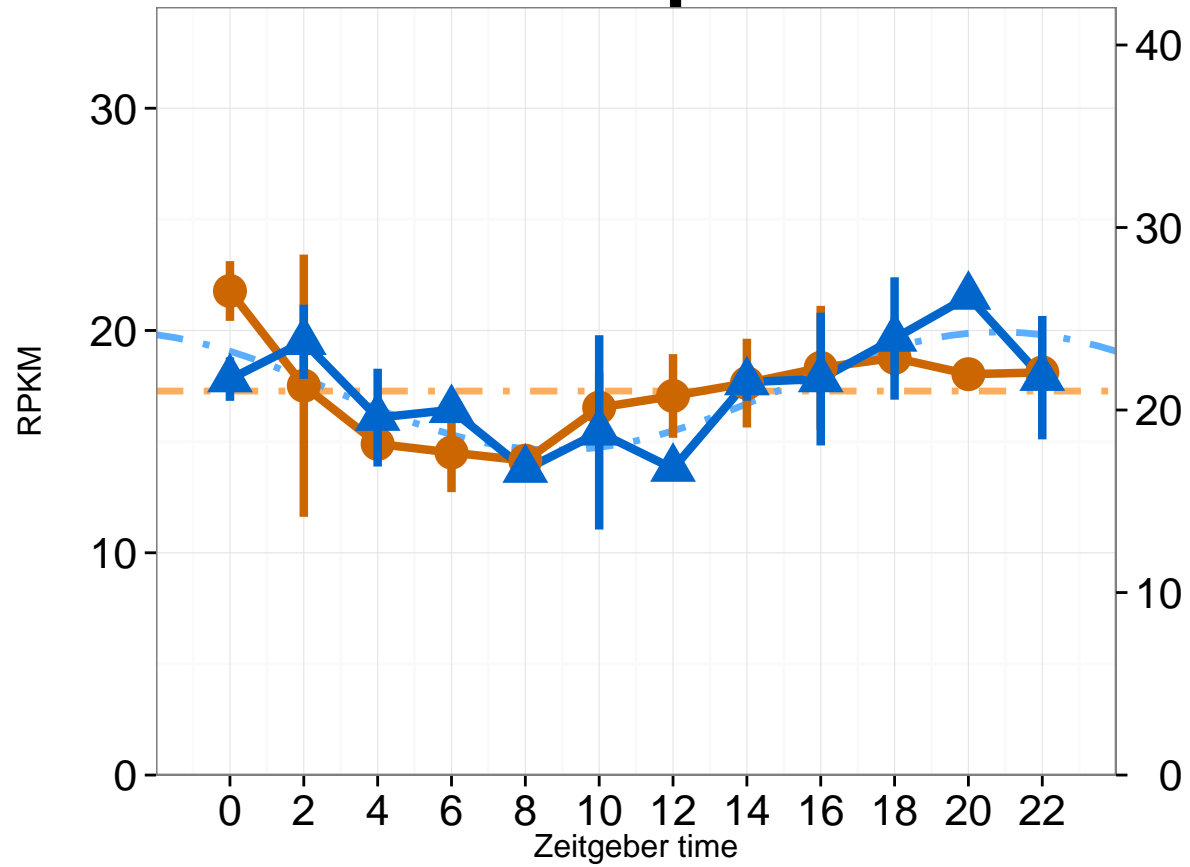

## Ncbp2

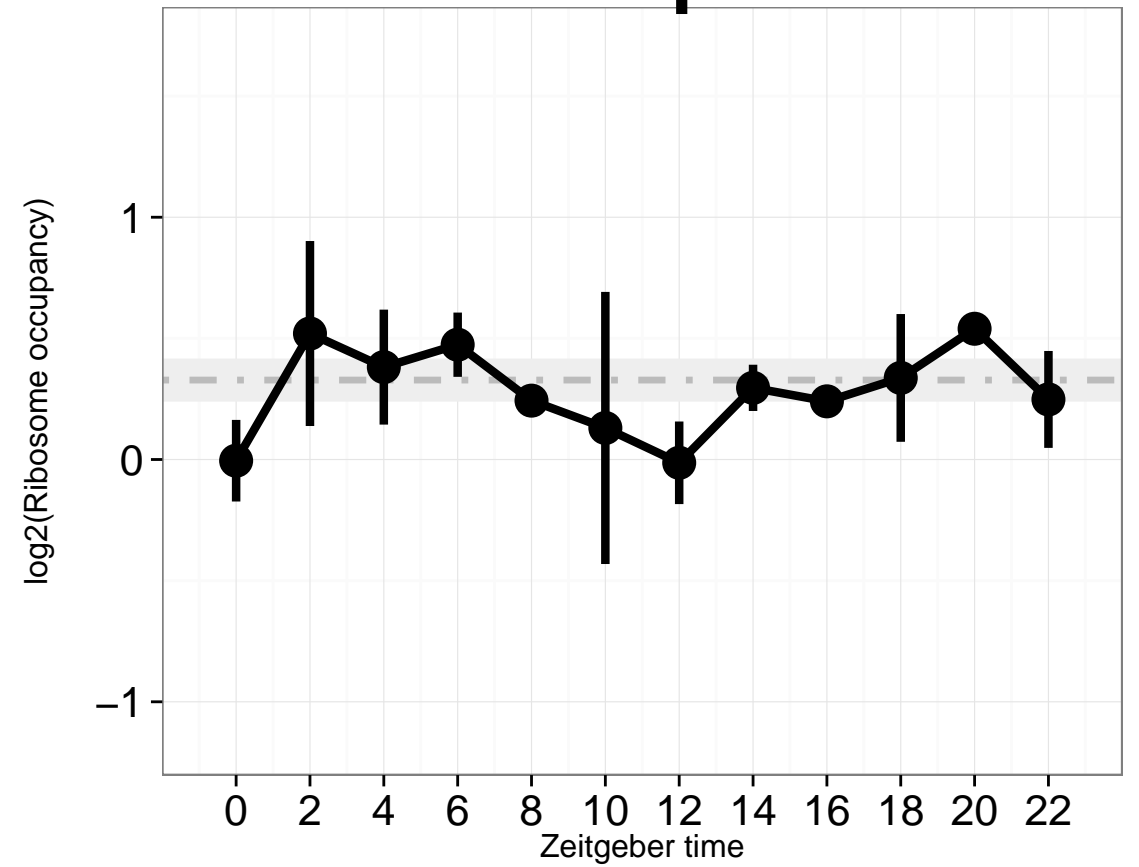

Supplement: SuppDataset_1.zip [file Ncbp2_set_A.pdf › Supplemental Dataset 1/A-mRNA_nonrhyth_translation_nonrhyth/Ncbp2_set_A.pdf]

## Ncdn

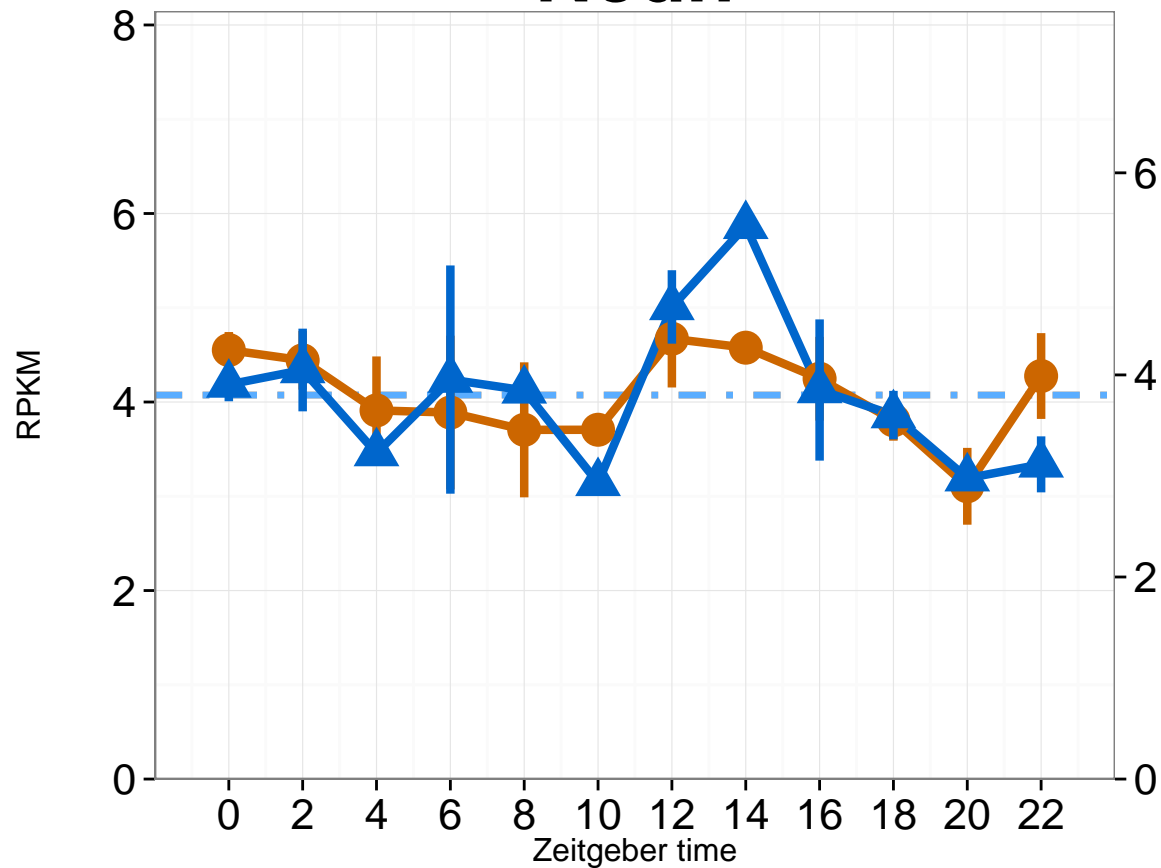

## Ncdn

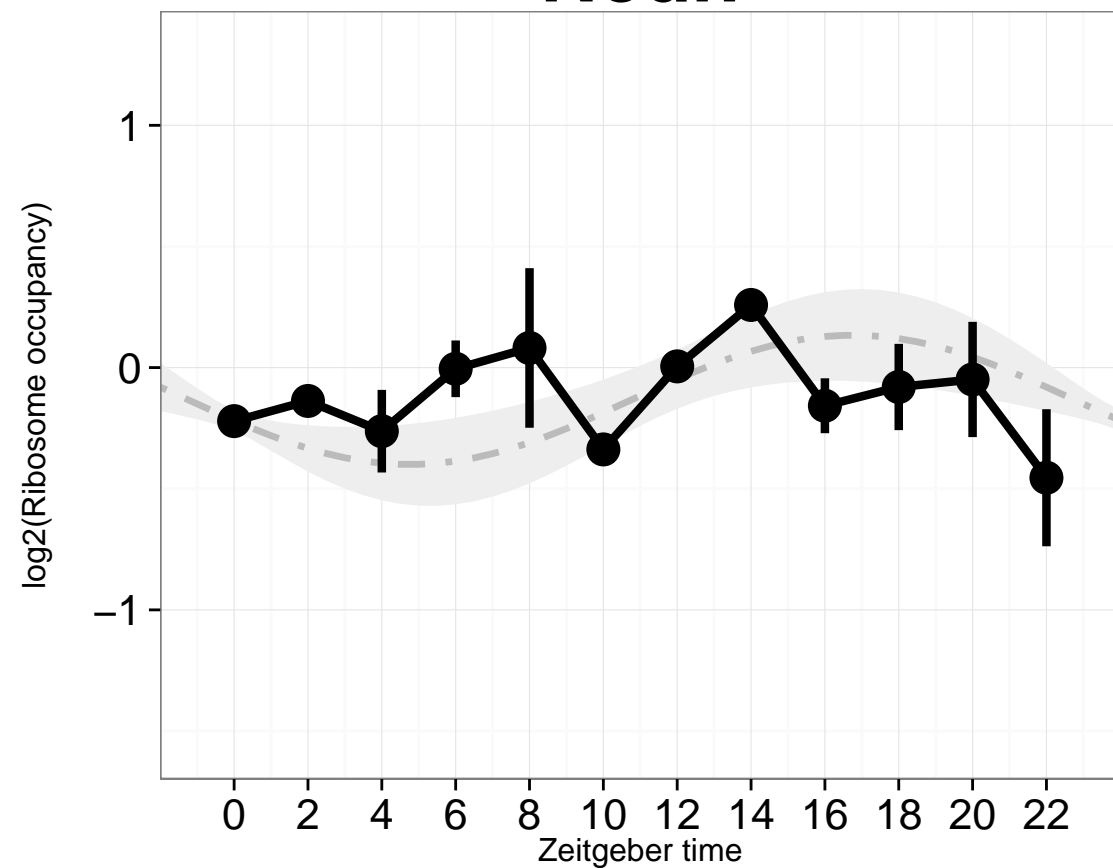

Supplement: SuppDataset_1.zip [file Ncdn_set_A.pdf › Supplemental Dataset 1/A-mRNA_nonrhyth_translation_nonrhyth/Ncdn_set_A.pdf]

## Nceh1

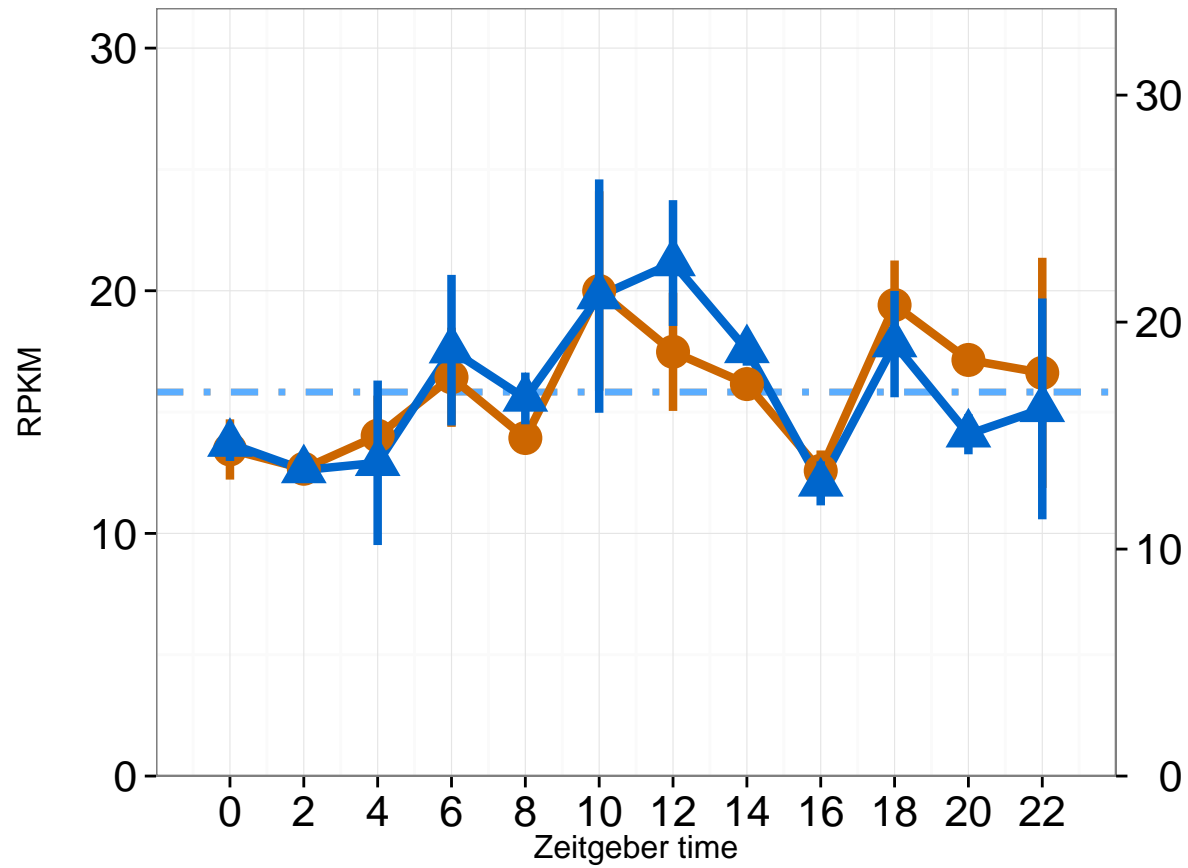

## Nceh1

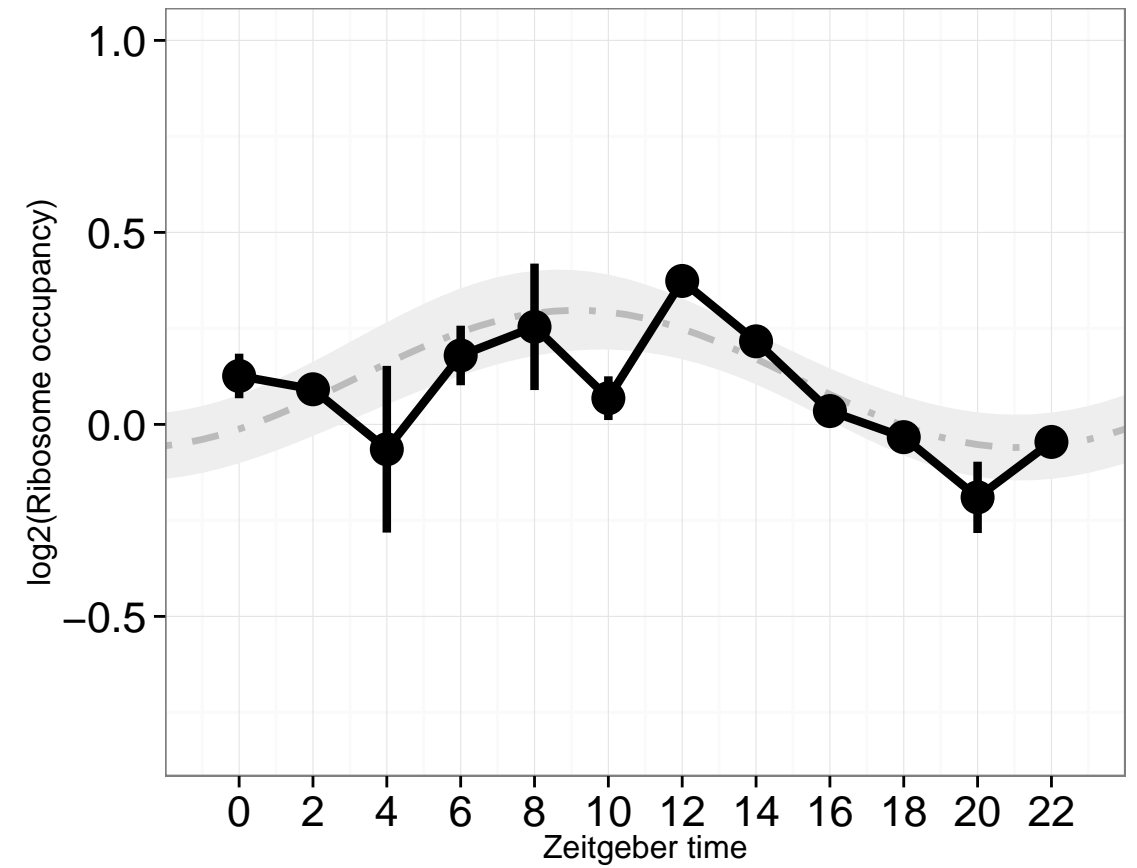

Supplement: SuppDataset_1.zip [file Nceh1_set_A.pdf › Supplemental Dataset 1/A-mRNA_nonrhyth_translation_nonrhyth/Nceh1_set_A.pdf]

## Ncf1

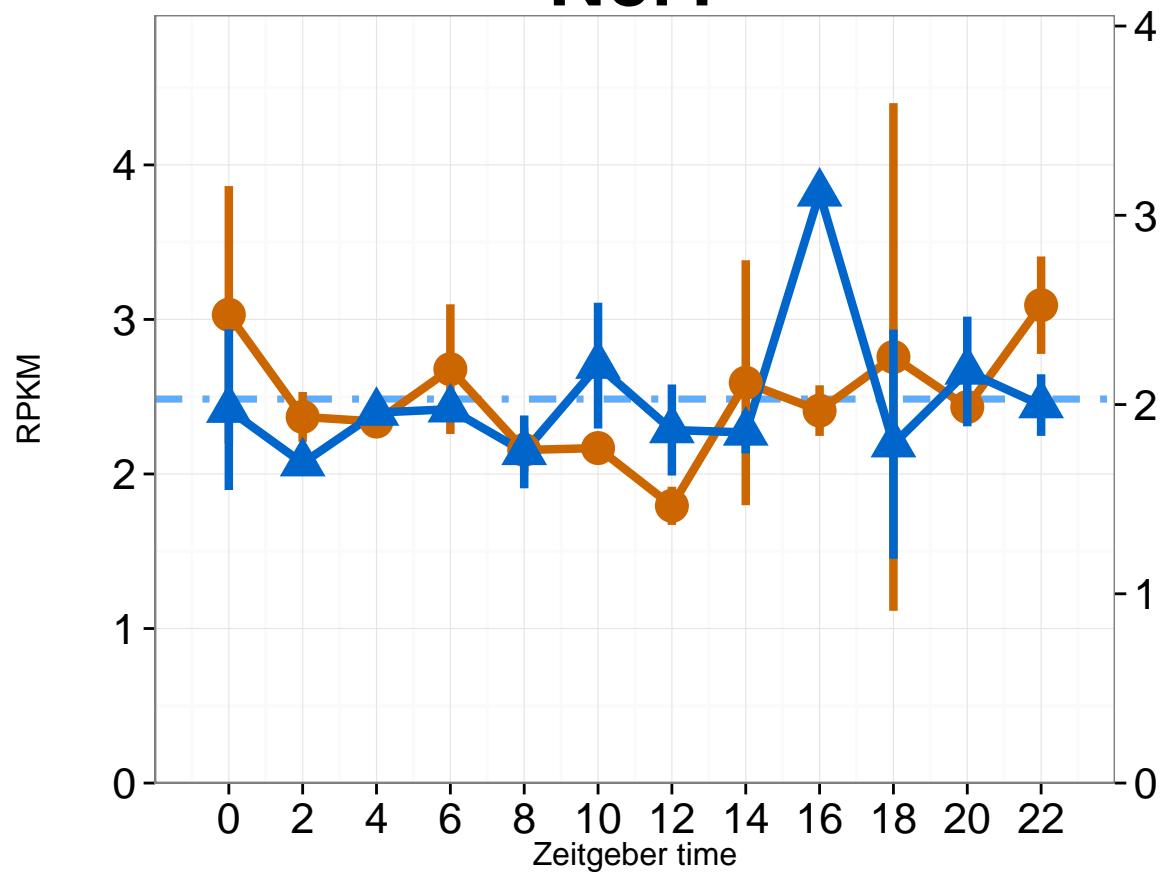

## Ncf1

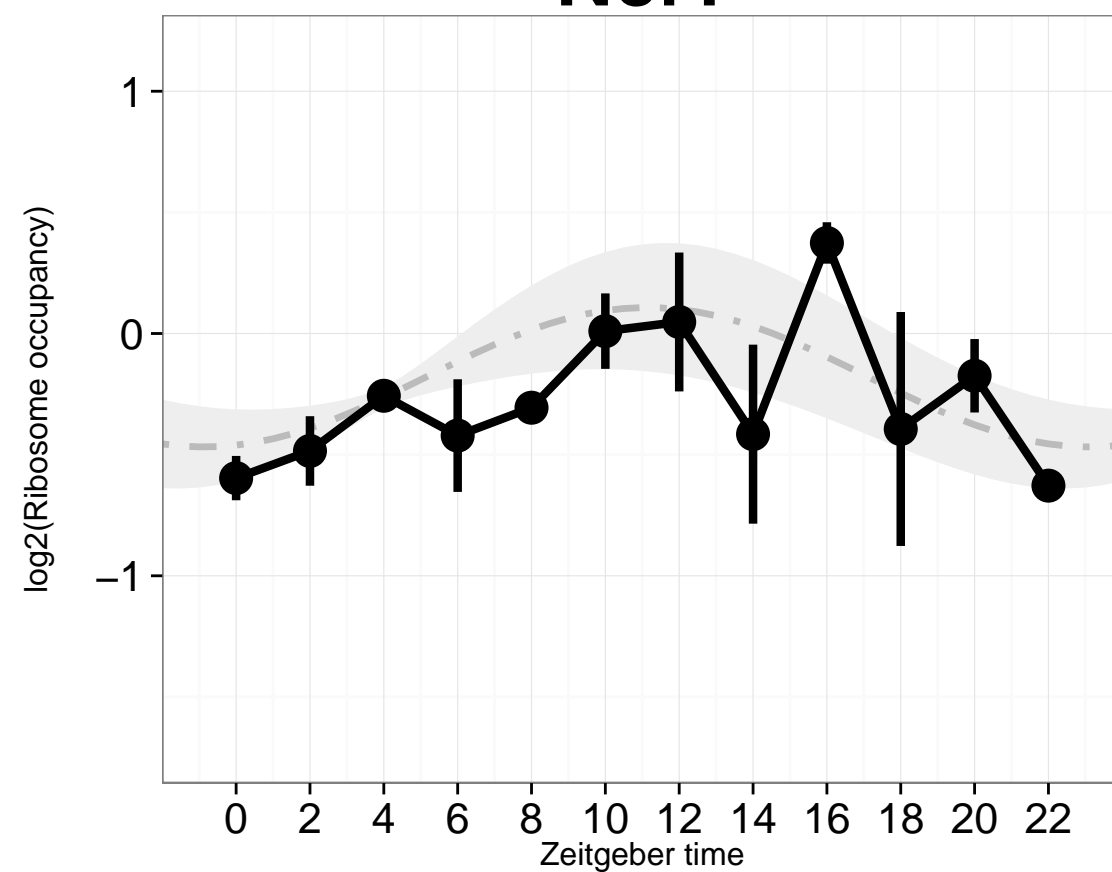

Supplement: SuppDataset_1.zip [file Ncf1_set_A.pdf › Supplemental Dataset 1/A-mRNA_nonrhyth_translation_nonrhyth/Ncf1_set_A.pdf]

## Nck1

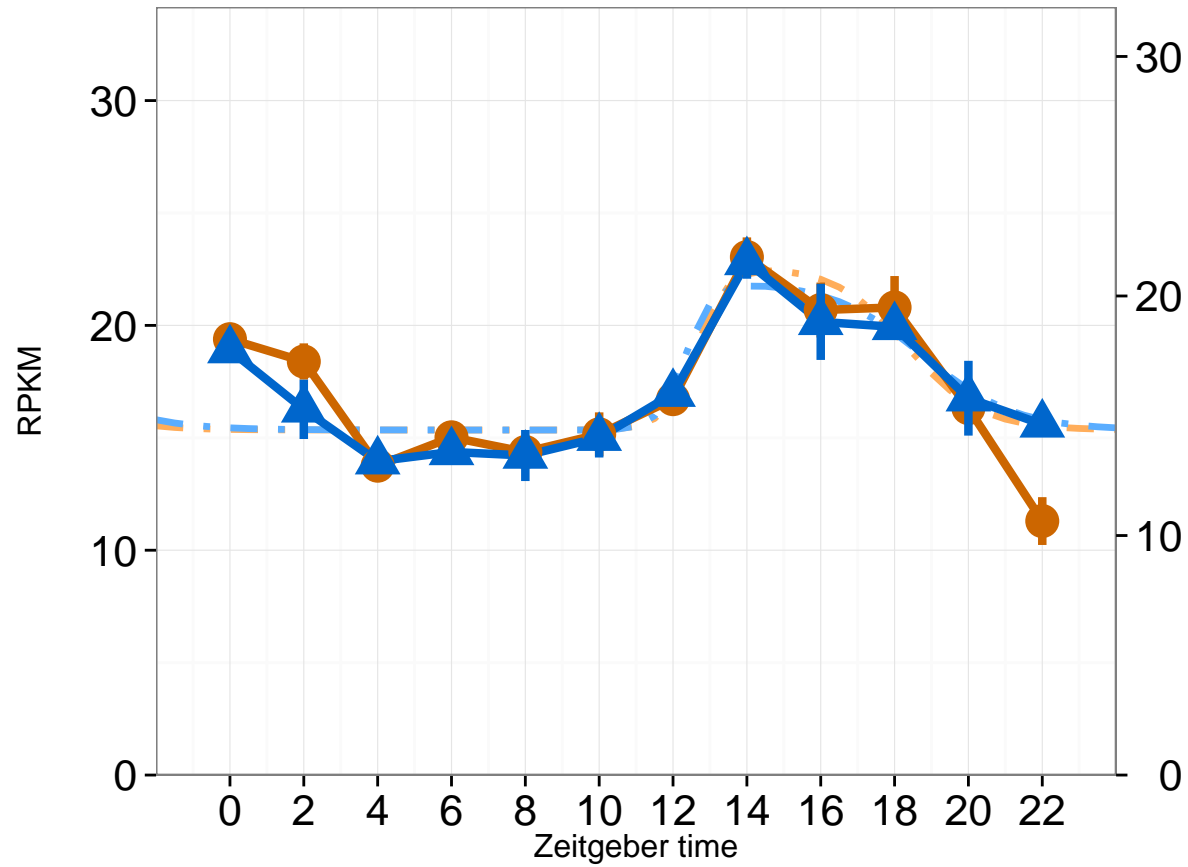

## Nck1

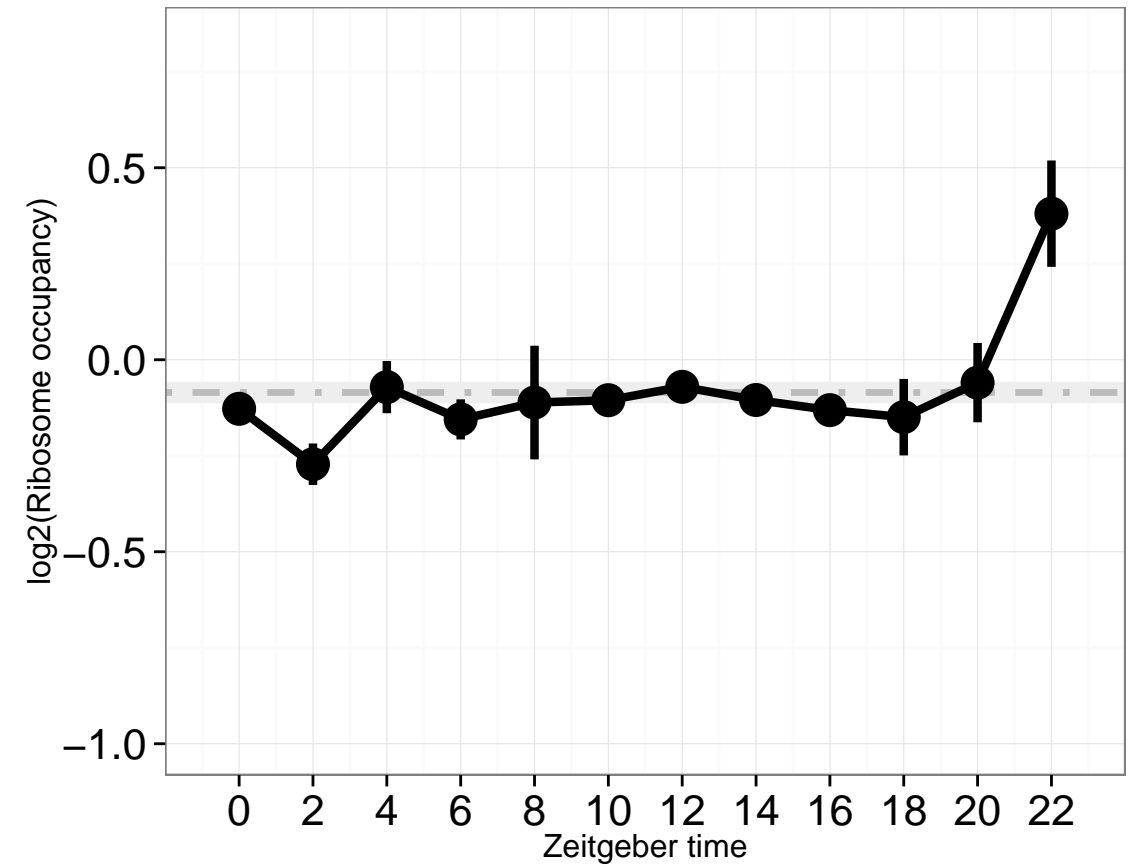

Supplement: SuppDataset_1.zip [file Nck1_set_A.pdf › Supplemental Dataset 1/A-mRNA_nonrhyth_translation_nonrhyth/Nck1_set_A.pdf]

## Nck2

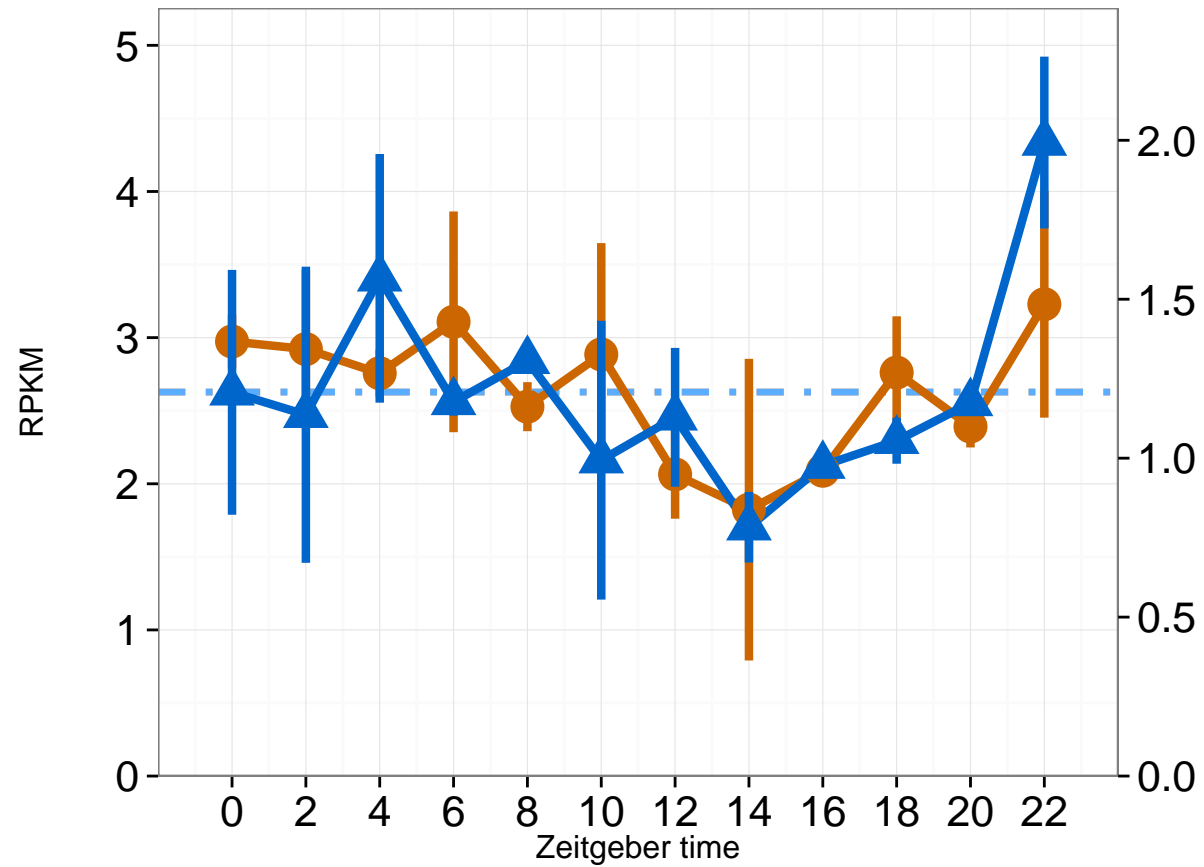

## Nck2

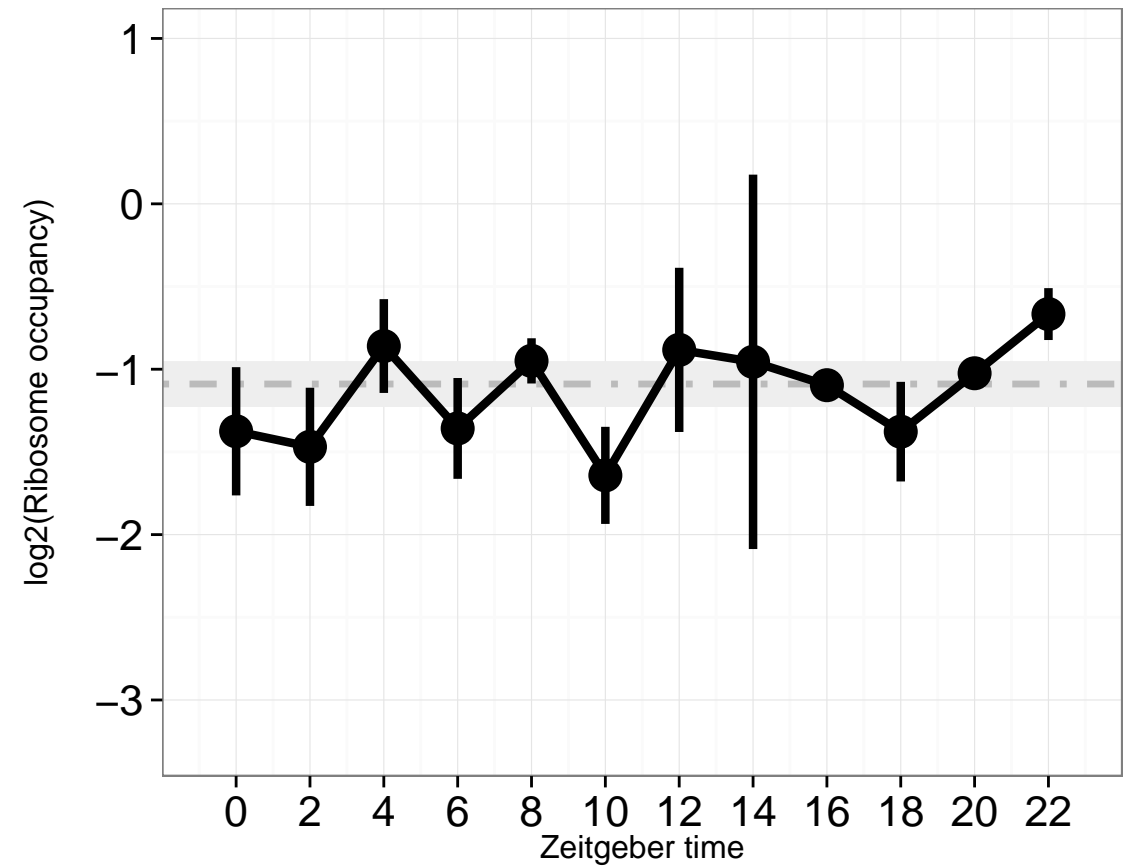

Supplement: SuppDataset_1.zip [file Nck2_set_A.pdf › Supplemental Dataset 1/A-mRNA_nonrhyth_translation_nonrhyth/Nck2_set_A.pdf]

# Nckap1

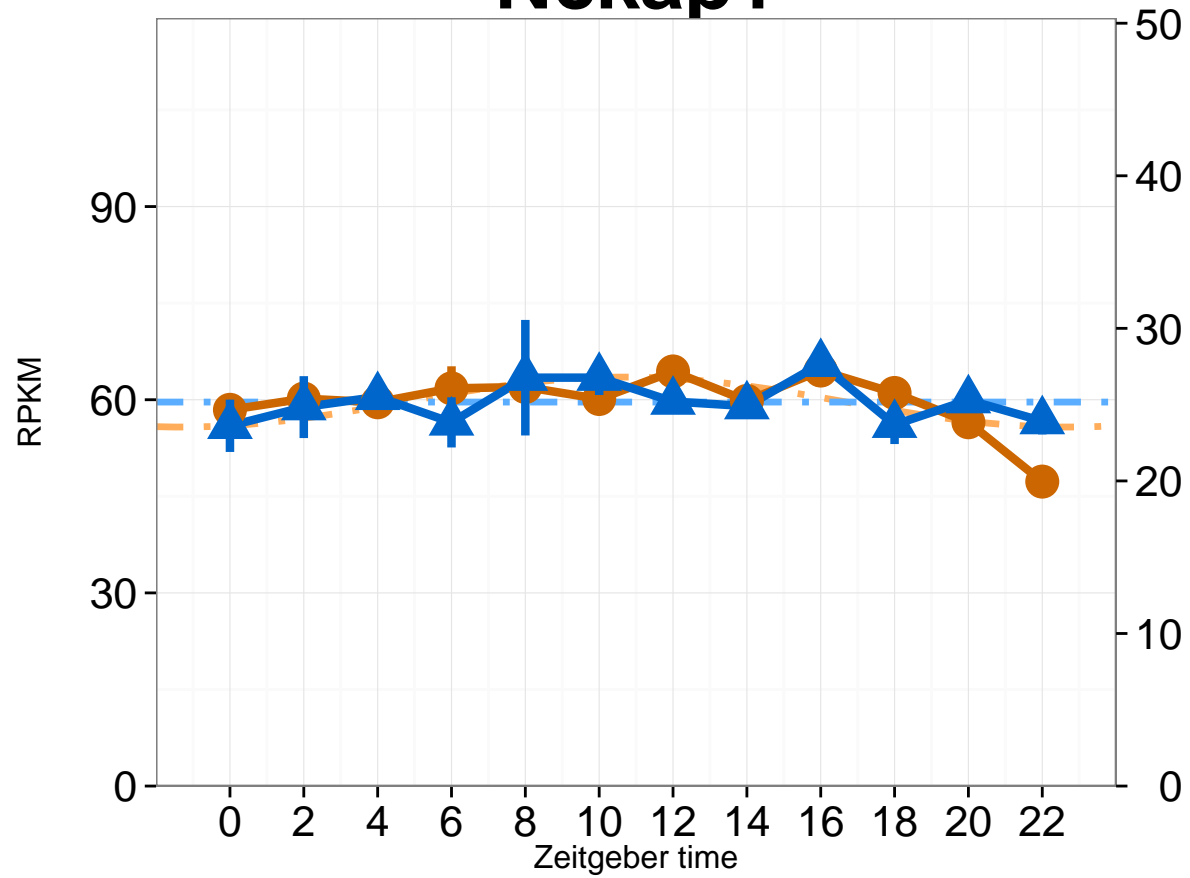

# Nckap1

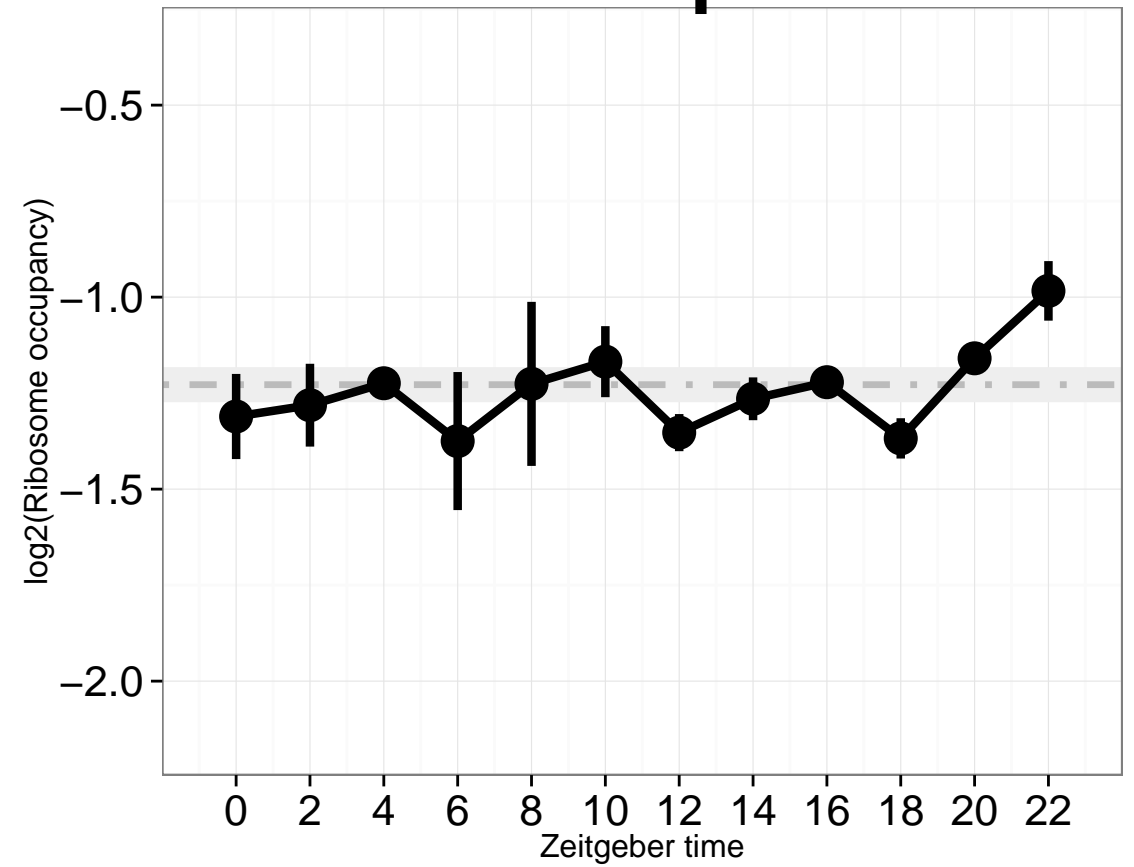

Supplement: SuppDataset_1.zip [file Nckap1_set_A.pdf › Supplemental Dataset 1/A-mRNA_nonrhyth_translation_nonrhyth/Nckap1_set_A.pdf]

## Nckap1l

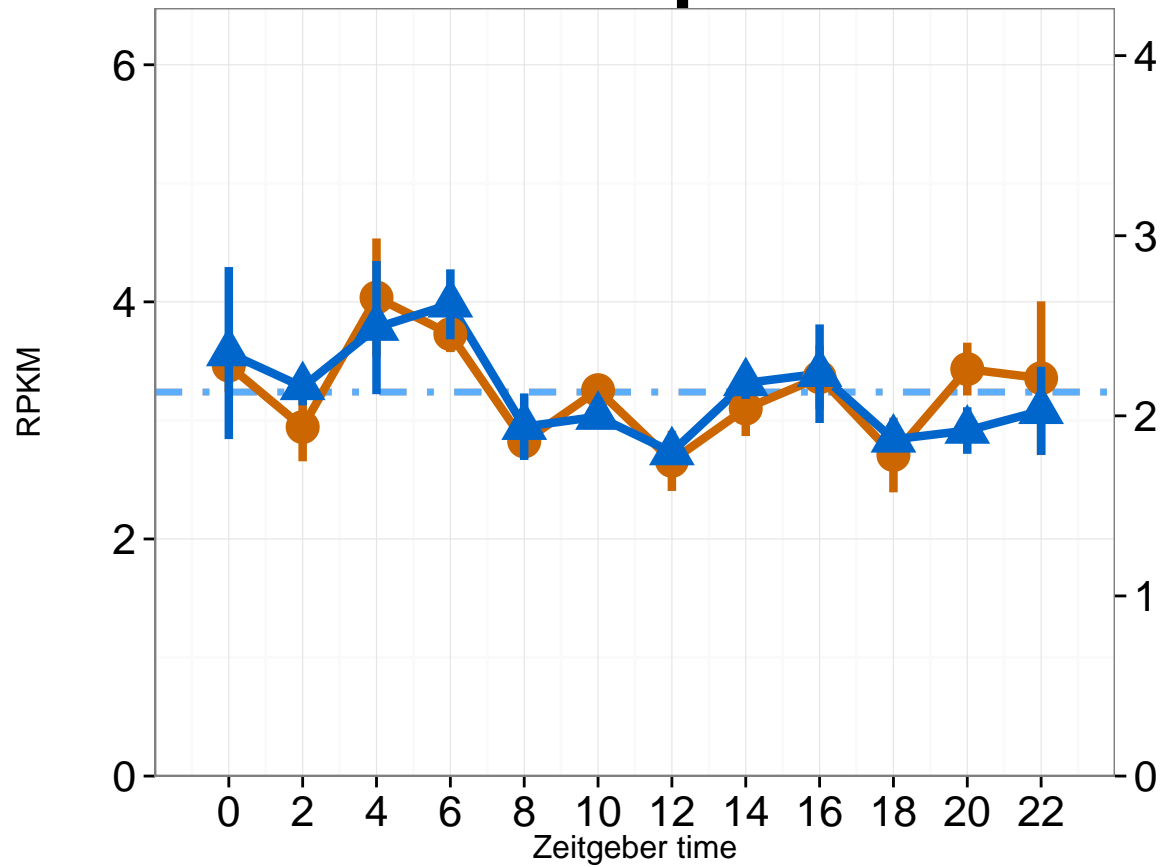

## Nckap1l

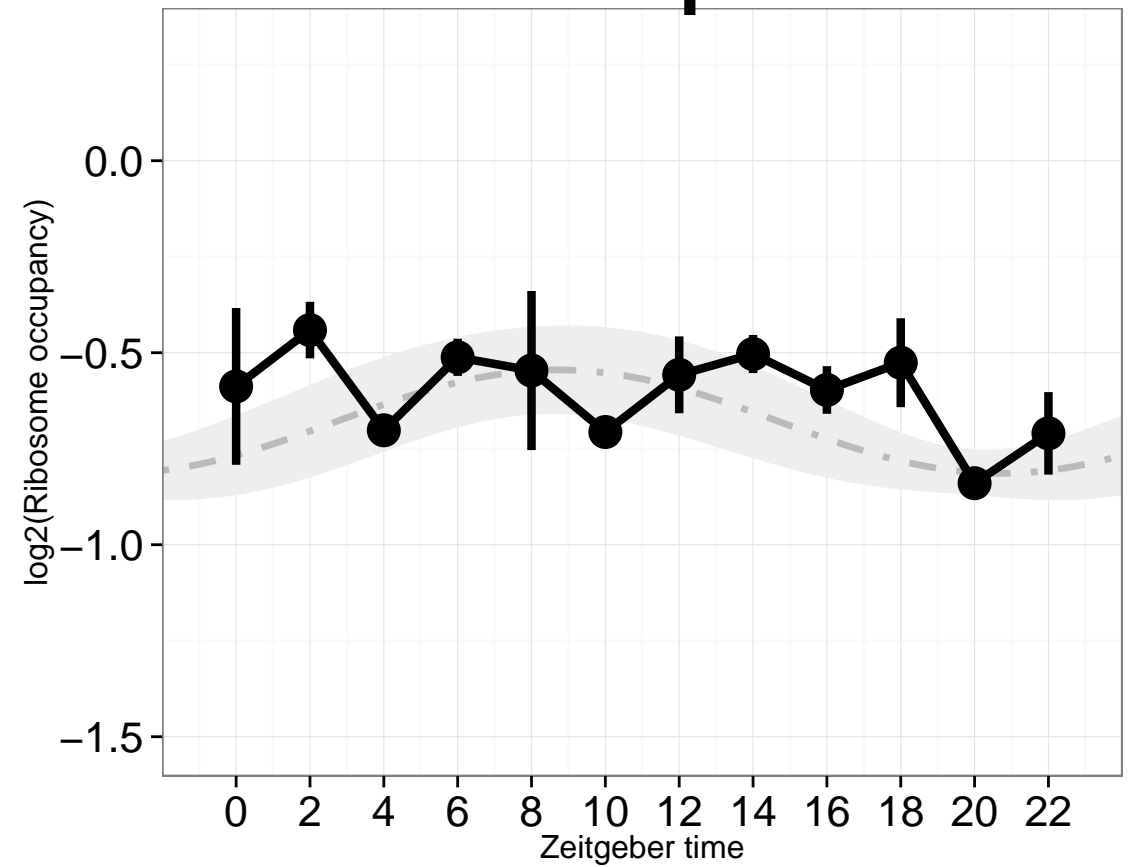

Supplement: SuppDataset_1.zip [file Nckap1l_set_A.pdf › Supplemental Dataset 1/A-mRNA_nonrhyth_translation_nonrhyth/Nckap1l_set_A.pdf]

## Nckipsd

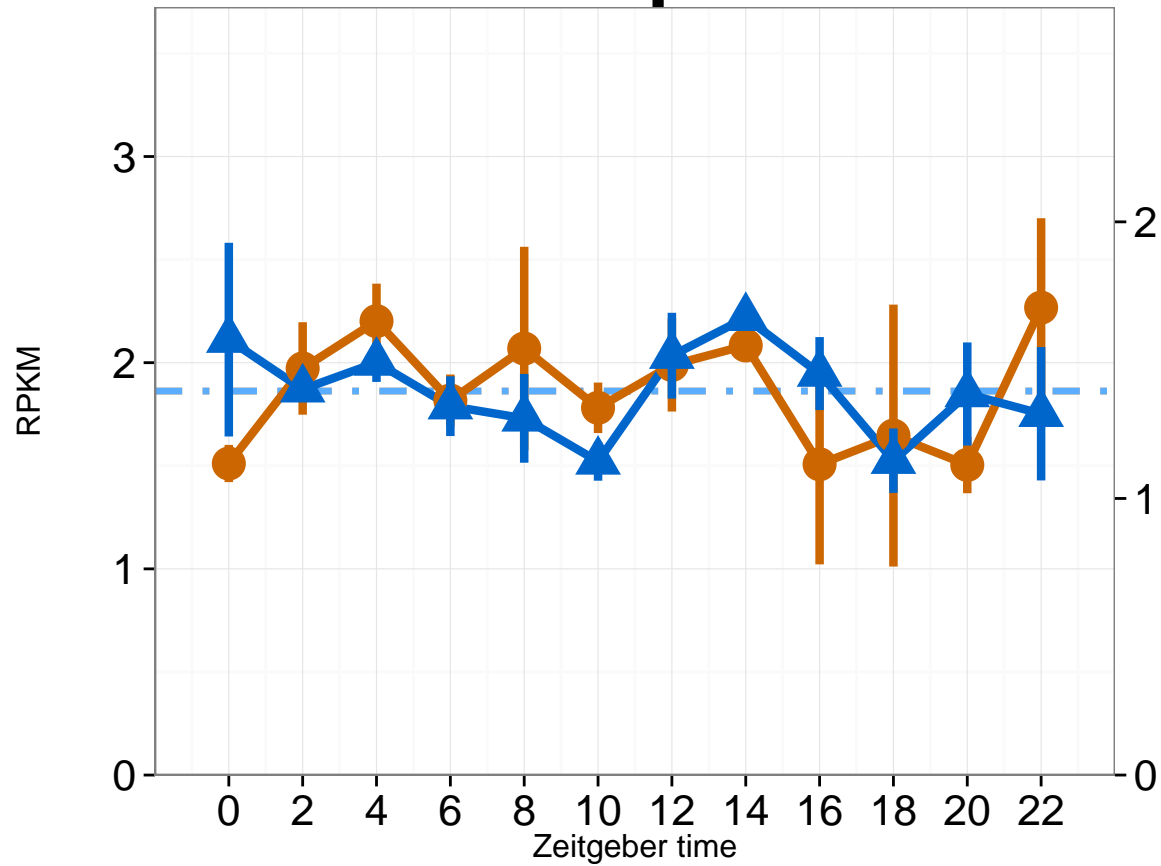

## Nckipsd

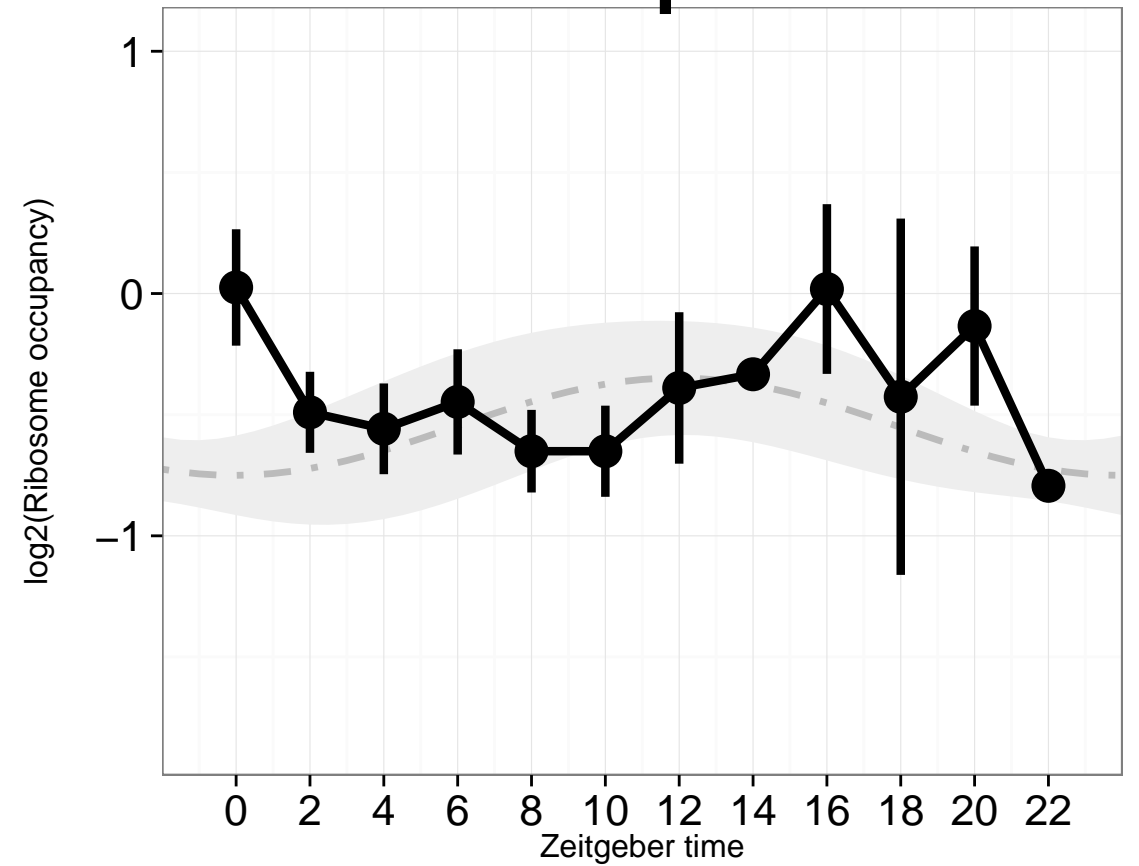

Supplement: SuppDataset_1.zip [file Nckipsd_set_A.pdf › Supplemental Dataset 1/A-mRNA_nonrhyth_translation_nonrhyth/Nckipsd_set_A.pdf]

## Ncln

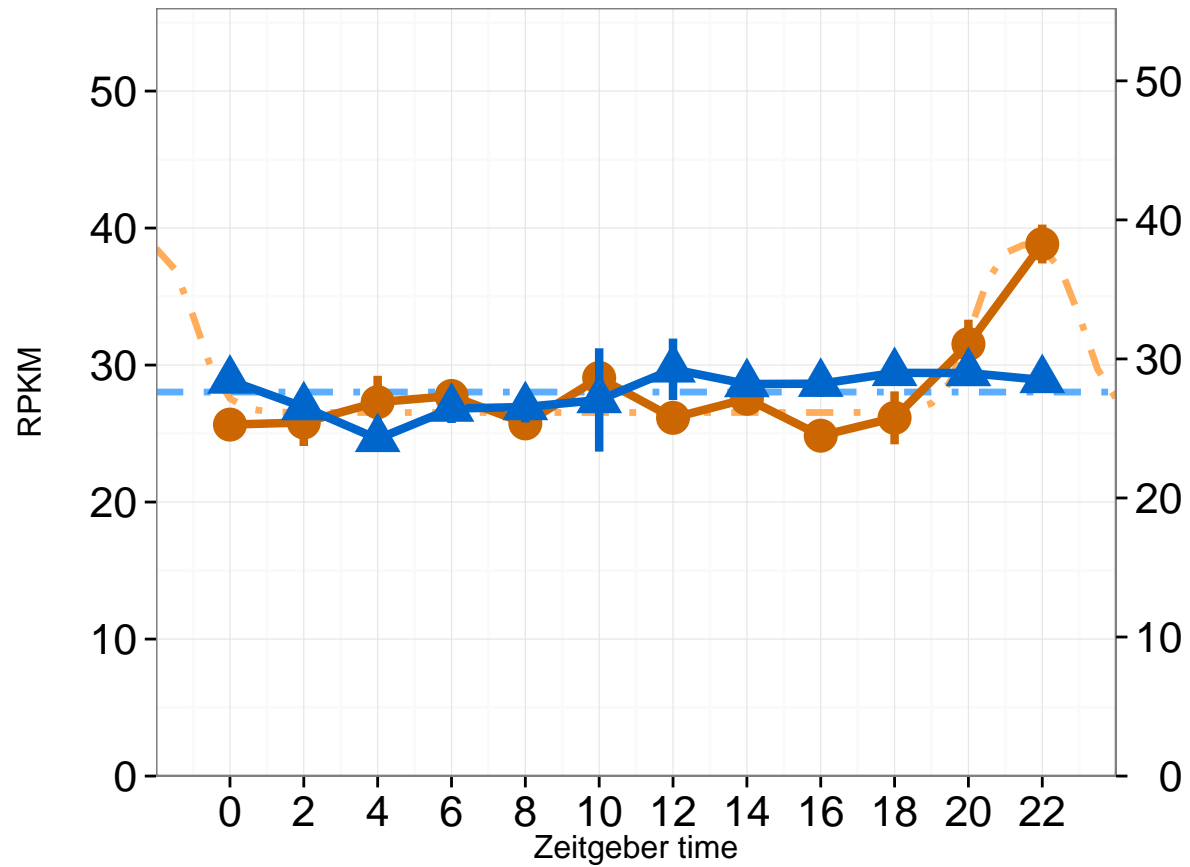

## Ncln

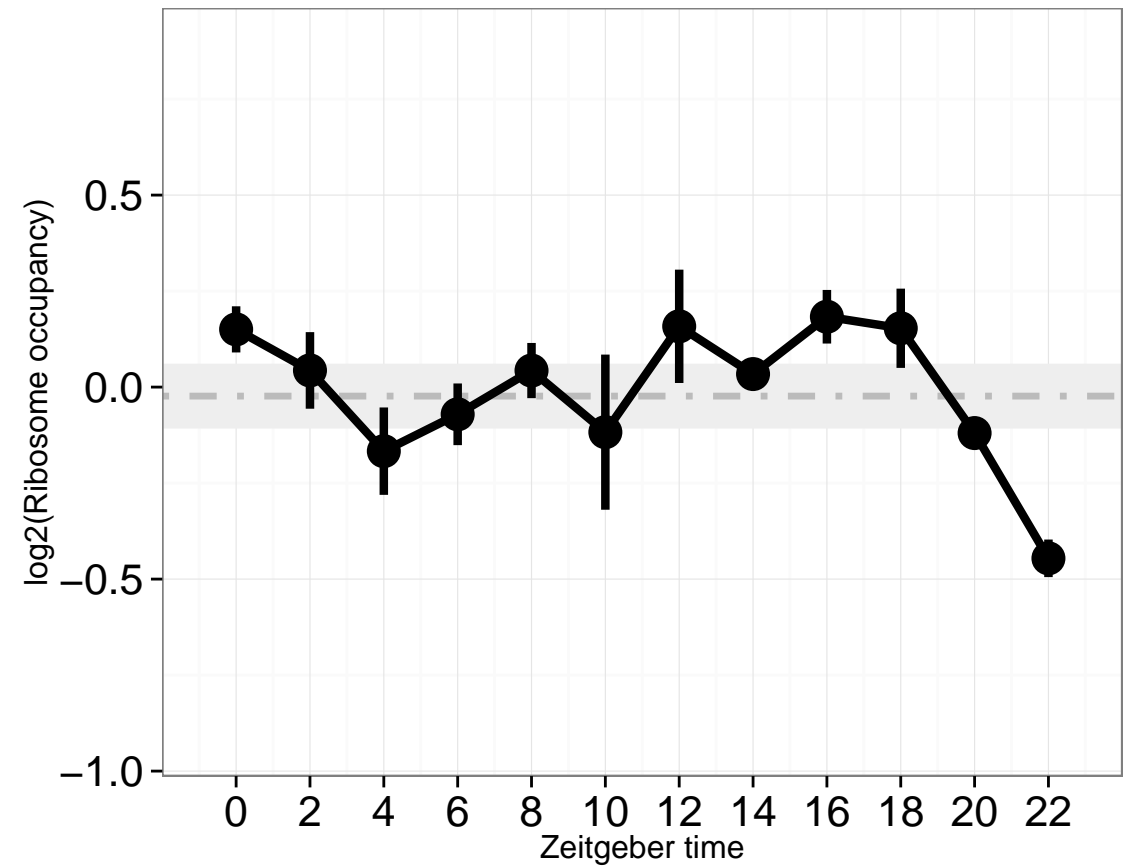

Supplement: SuppDataset_1.zip [file Ncln_set_A.pdf › Supplemental Dataset 1/A-mRNA_nonrhyth_translation_nonrhyth/Ncln_set_A.pdf]

# Ncoa1

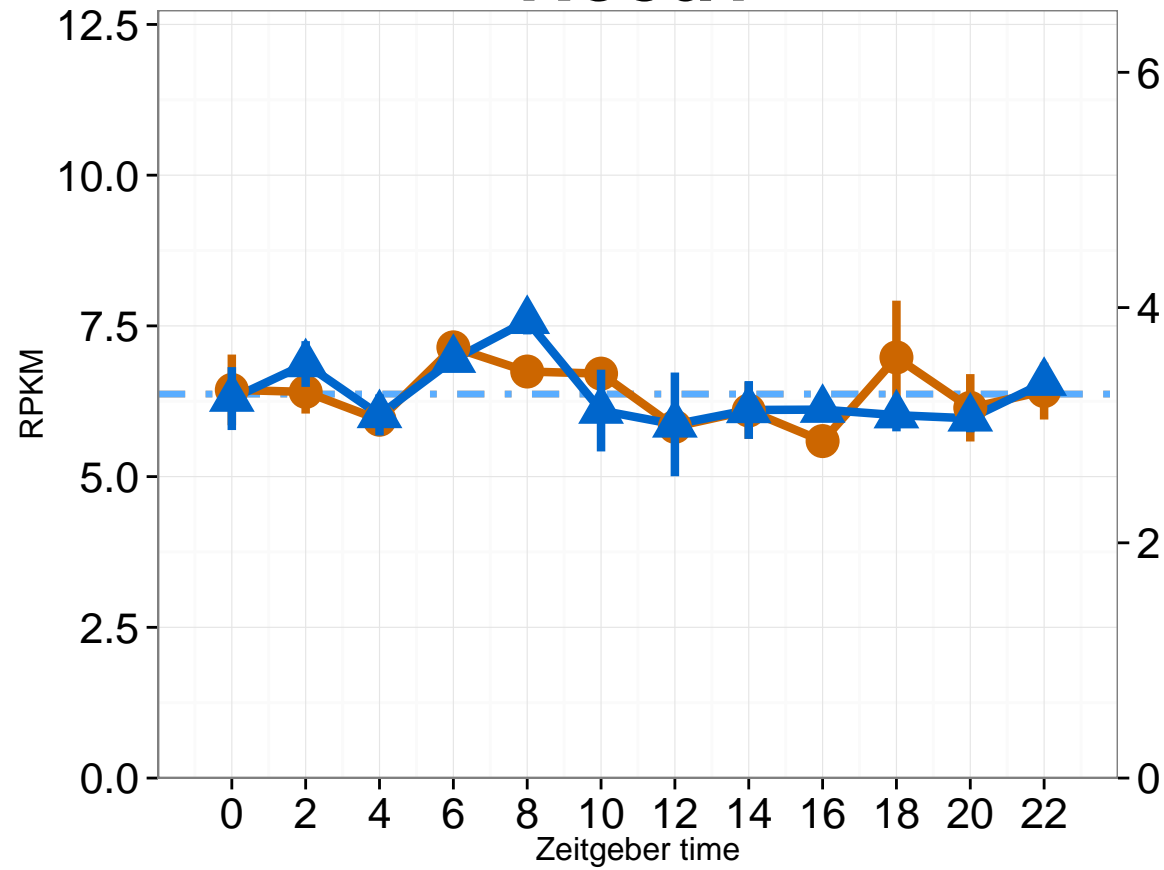

# Ncoa1

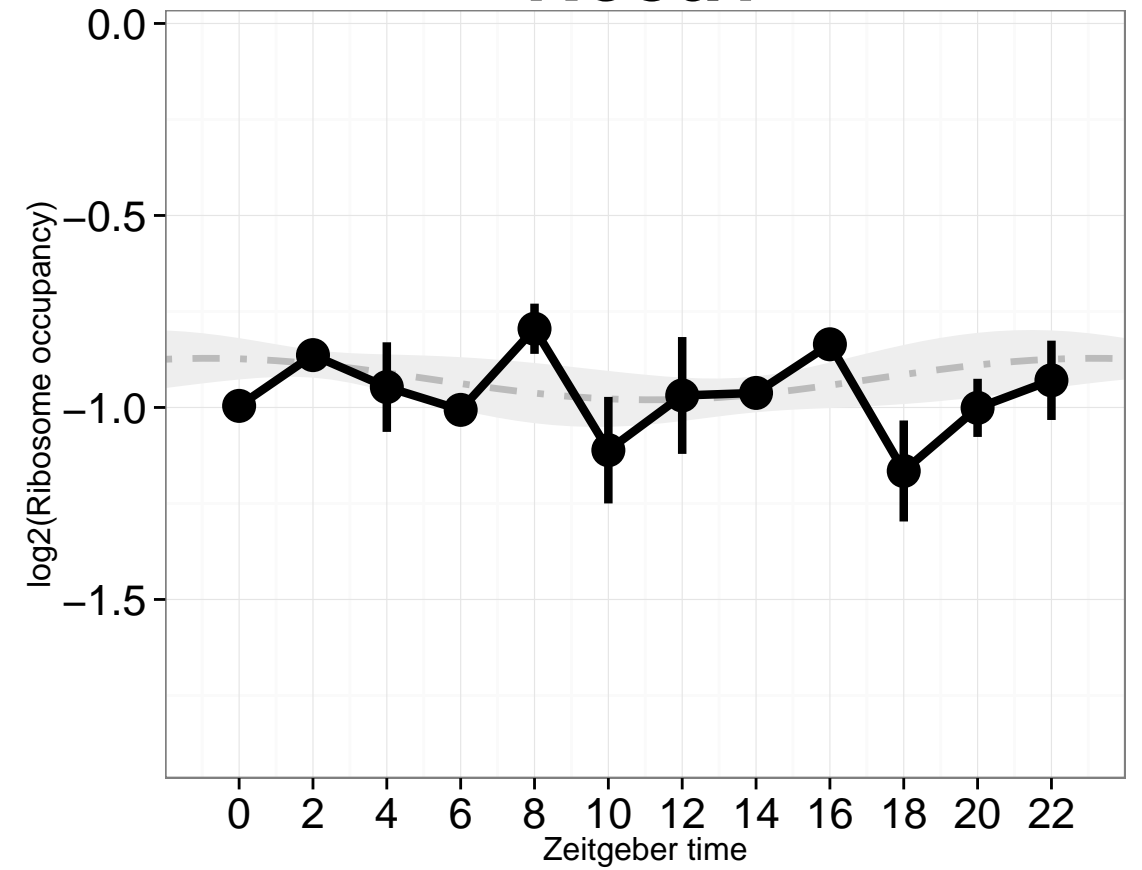

Supplement: SuppDataset_1.zip [file Ncoa1_set_A.pdf › Supplemental Dataset 1/A-mRNA_nonrhyth_translation_nonrhyth/Ncoa1_set_A.pdf]

## Ncoa2

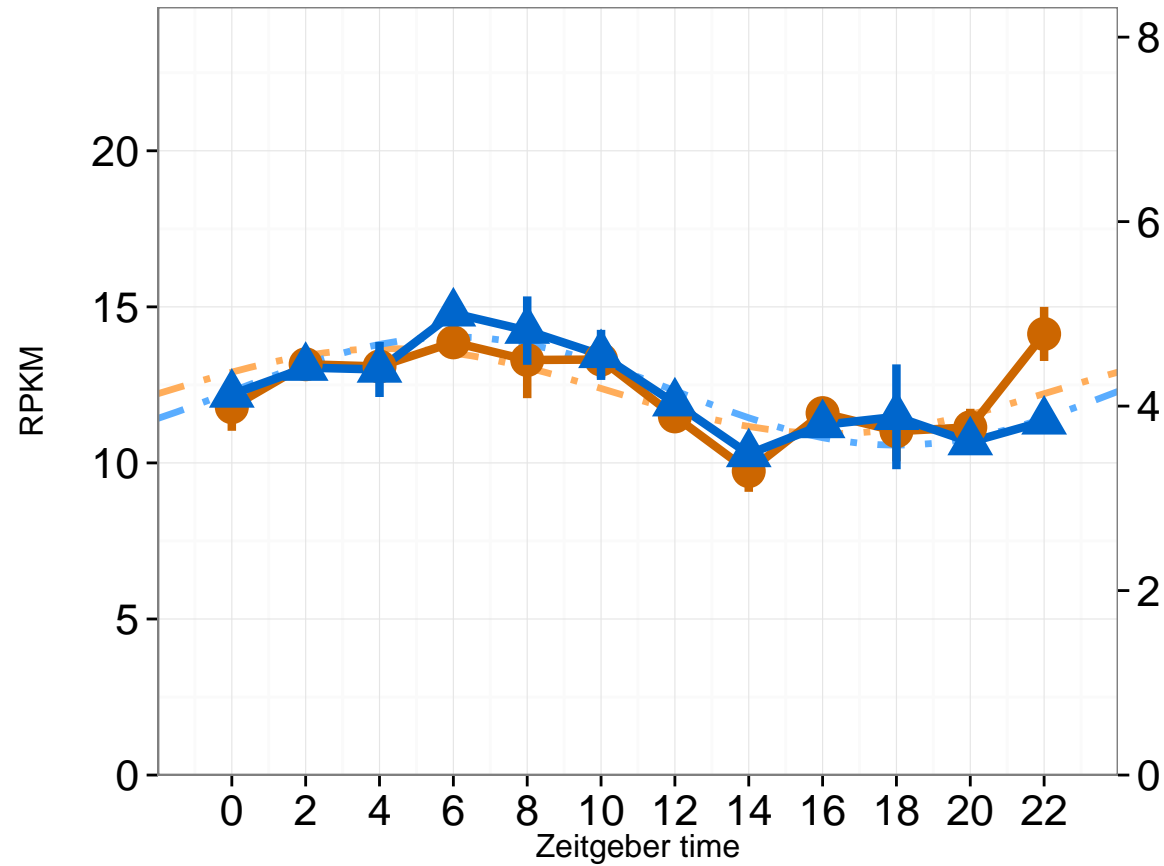

## Ncoa2

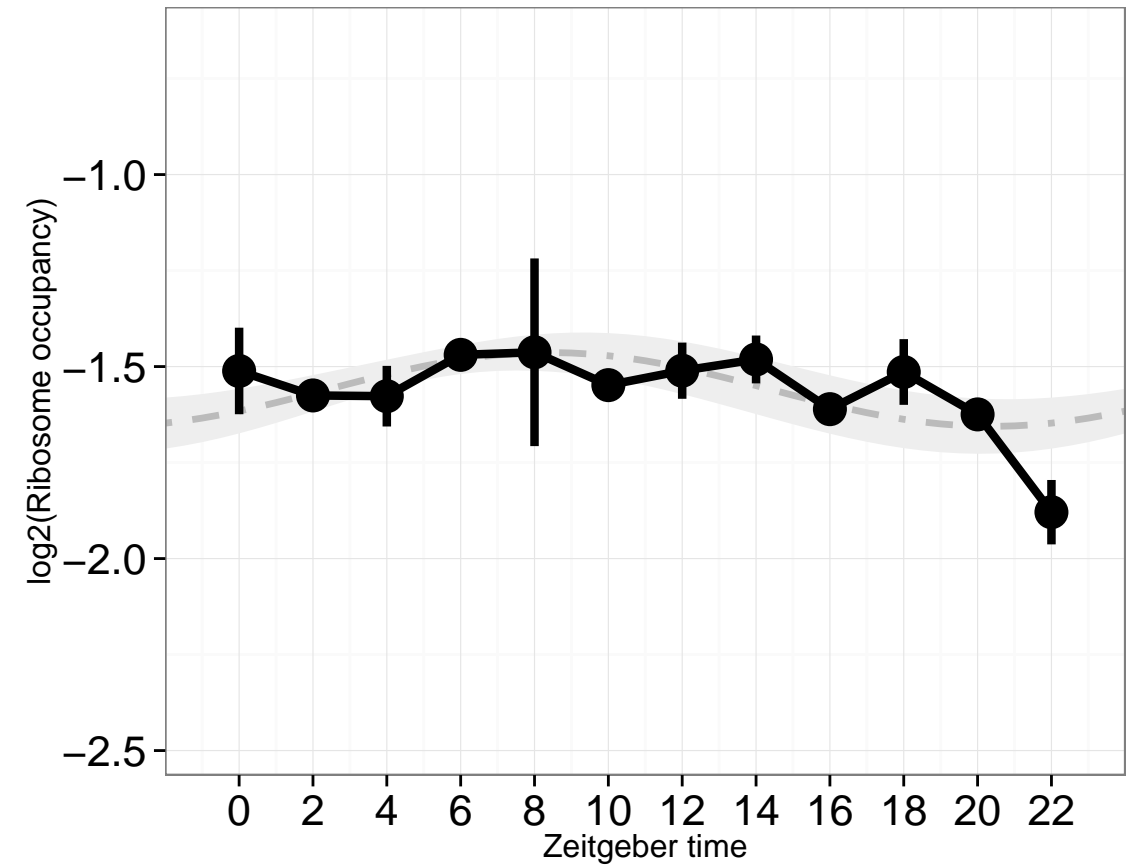

Supplement: SuppDataset_1.zip [file Ncoa2_set_A.pdf › Supplemental Dataset 1/A-mRNA_nonrhyth_translation_nonrhyth/Ncoa2_set_A.pdf]

## Ncoa3

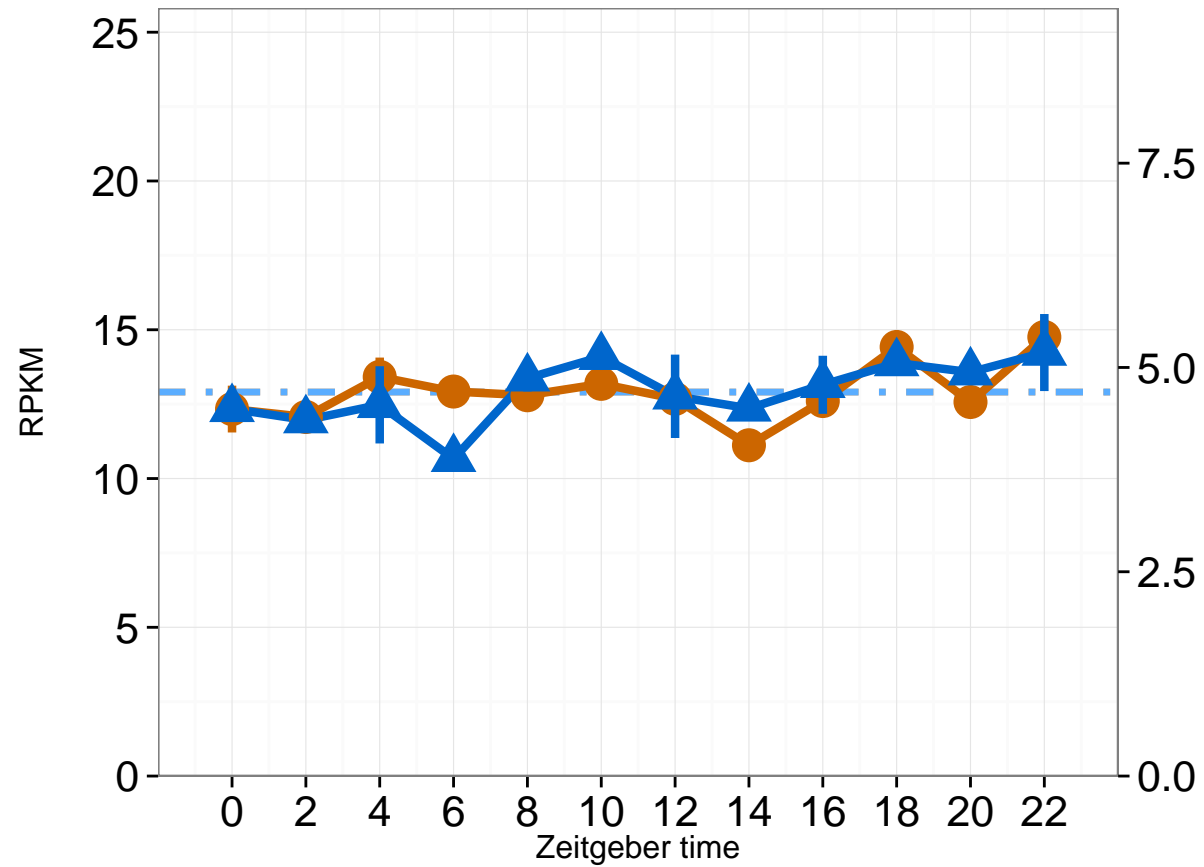

## Ncoa3

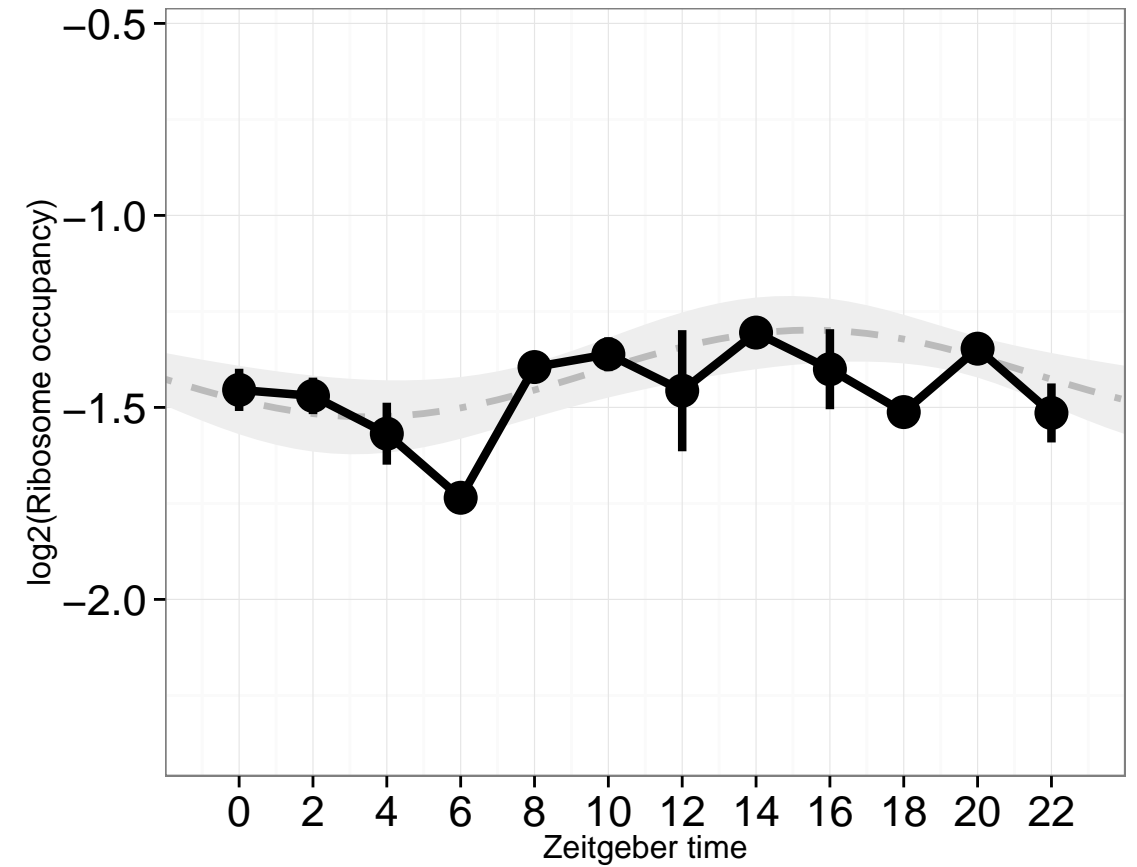

Supplement: SuppDataset_1.zip [file Ncoa3_set_A.pdf › Supplemental Dataset 1/A-mRNA_nonrhyth_translation_nonrhyth/Ncoa3_set_A.pdf]

## Ncoa4

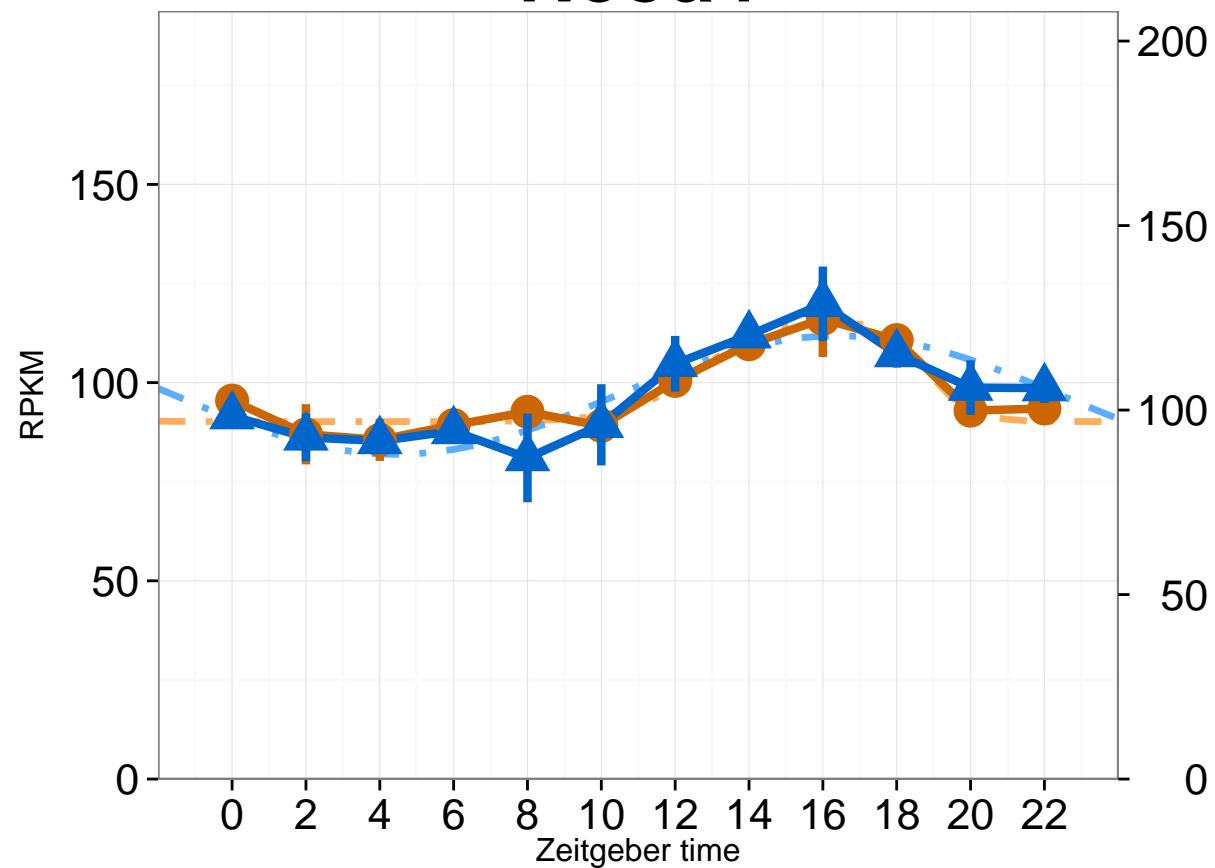

## Ncoa4

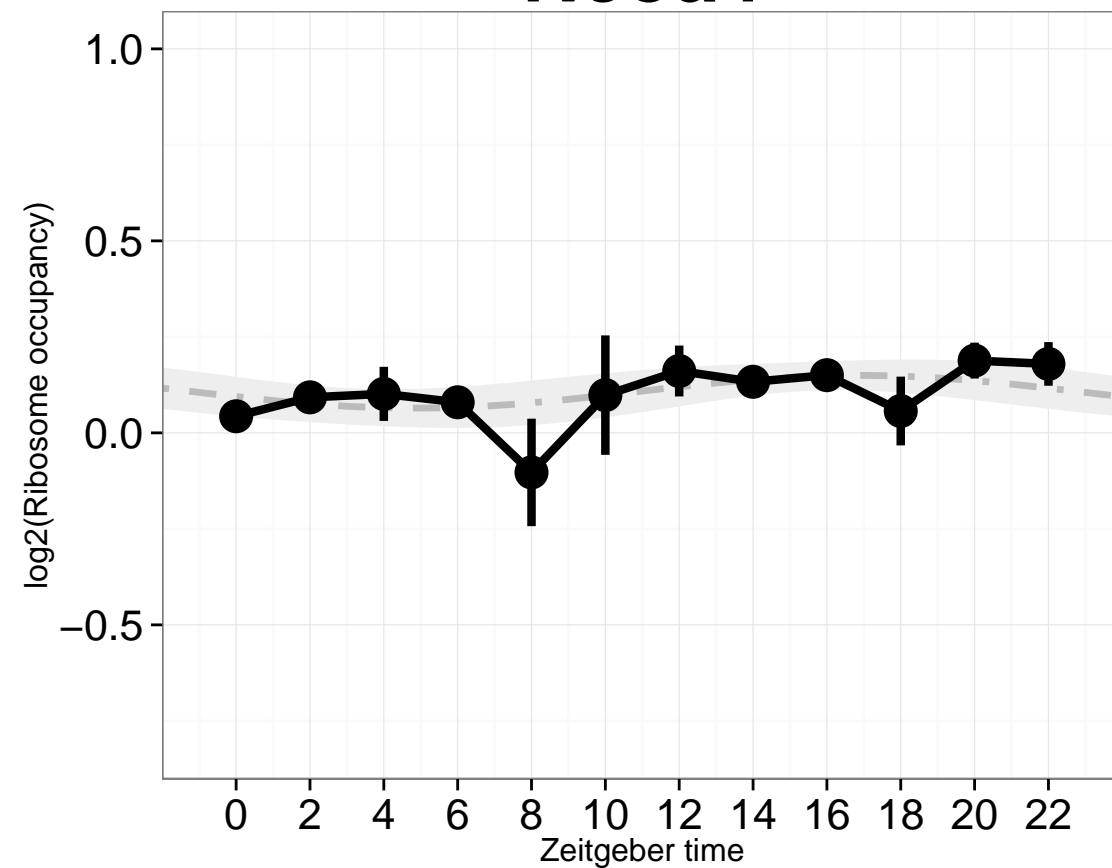

Supplement: SuppDataset_1.zip [file Ncoa4_set_A.pdf › Supplemental Dataset 1/A-mRNA_nonrhyth_translation_nonrhyth/Ncoa4_set_A.pdf]

# Ncoa6

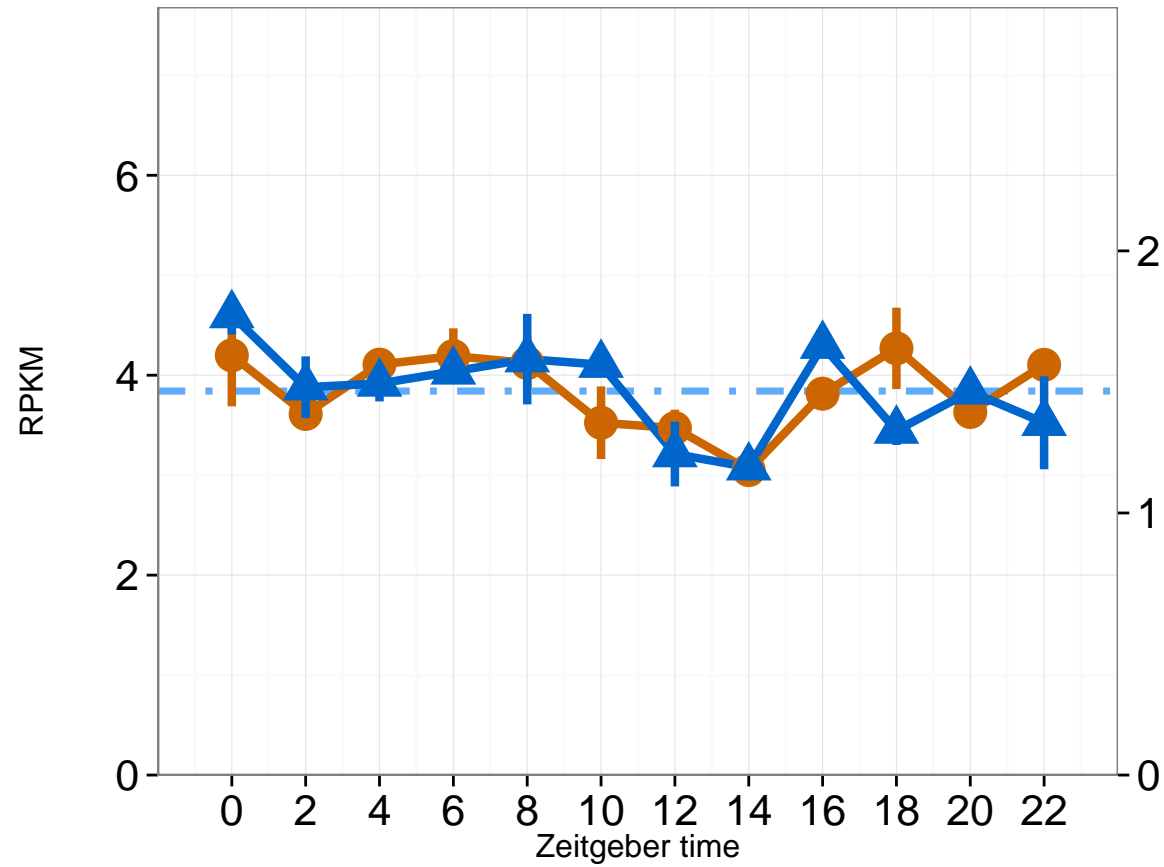

# Ncoa6

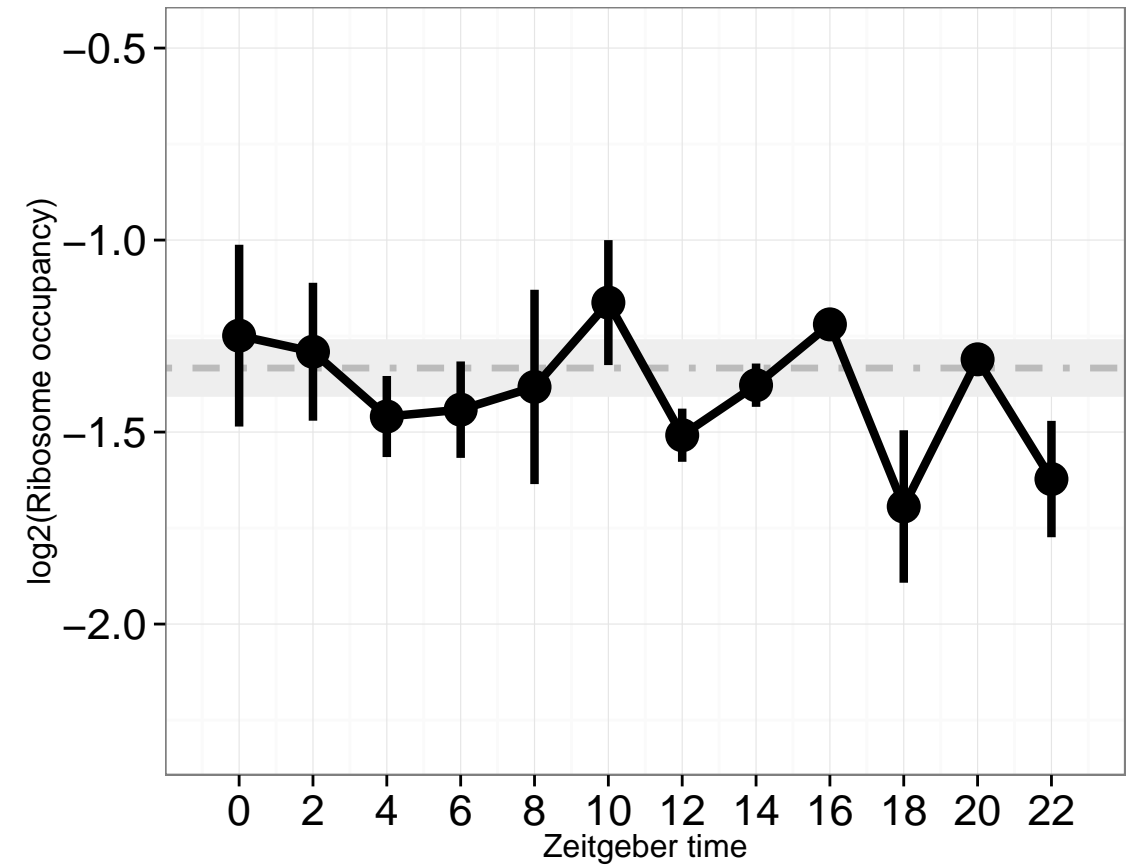

Supplement: SuppDataset_1.zip [file Ncoa6_set_A.pdf › Supplemental Dataset 1/A-mRNA_nonrhyth_translation_nonrhyth/Ncoa6_set_A.pdf]

# Ncoa7

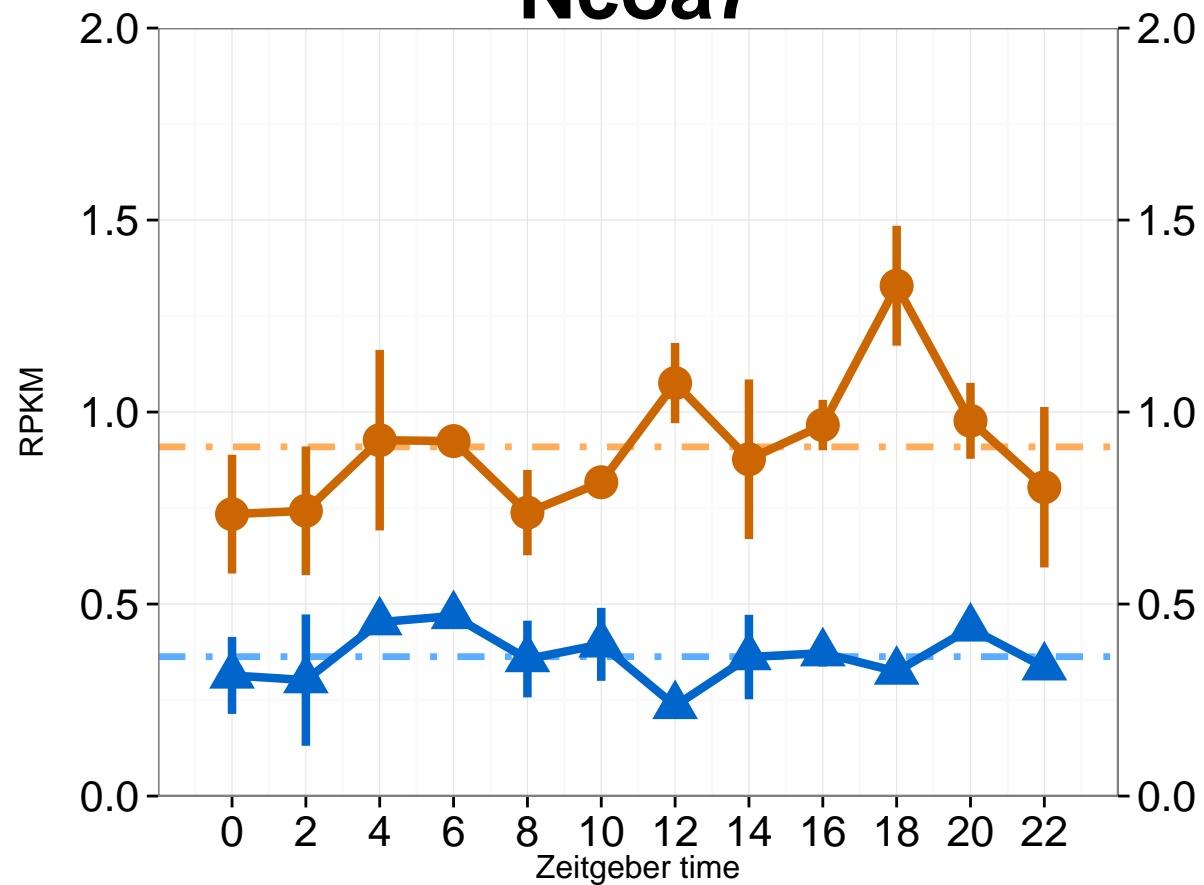

# Ncoa7

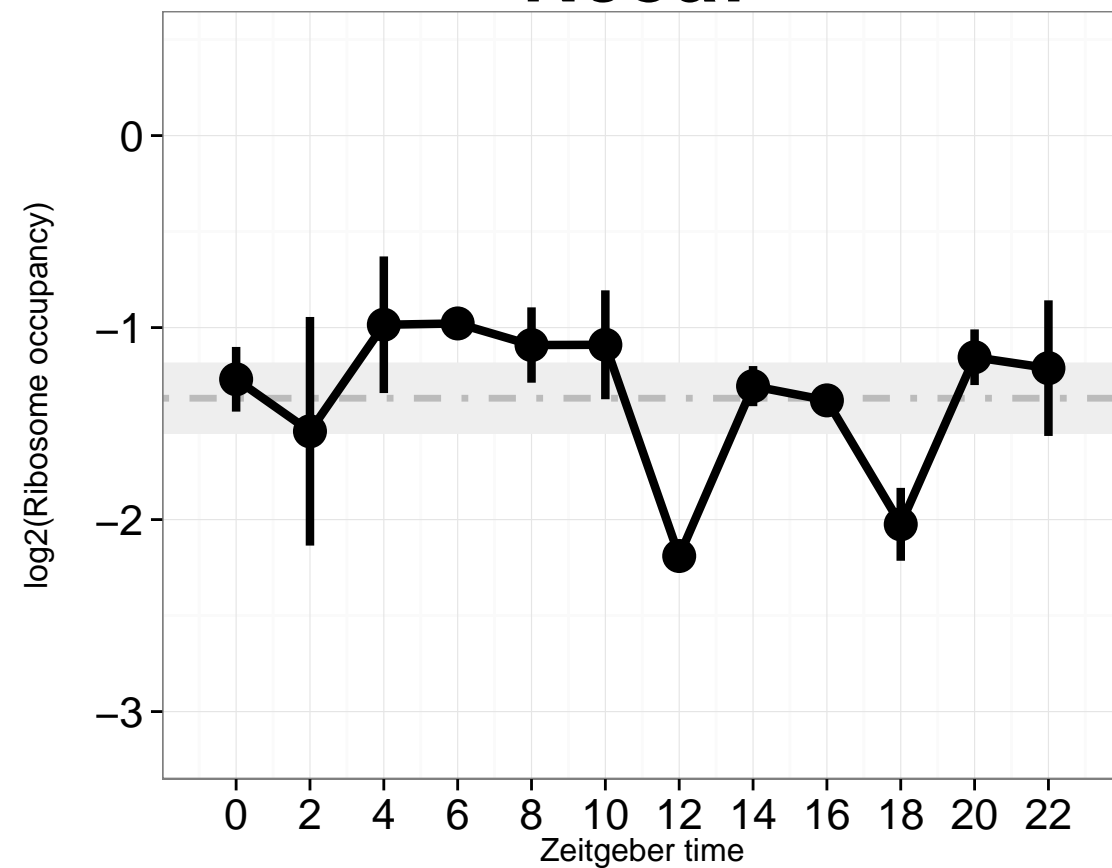

Supplement: SuppDataset_1.zip [file Ncoa7_set_A.pdf › Supplemental Dataset 1/A-mRNA_nonrhyth_translation_nonrhyth/Ncoa7_set_A.pdf]

## Ncor1

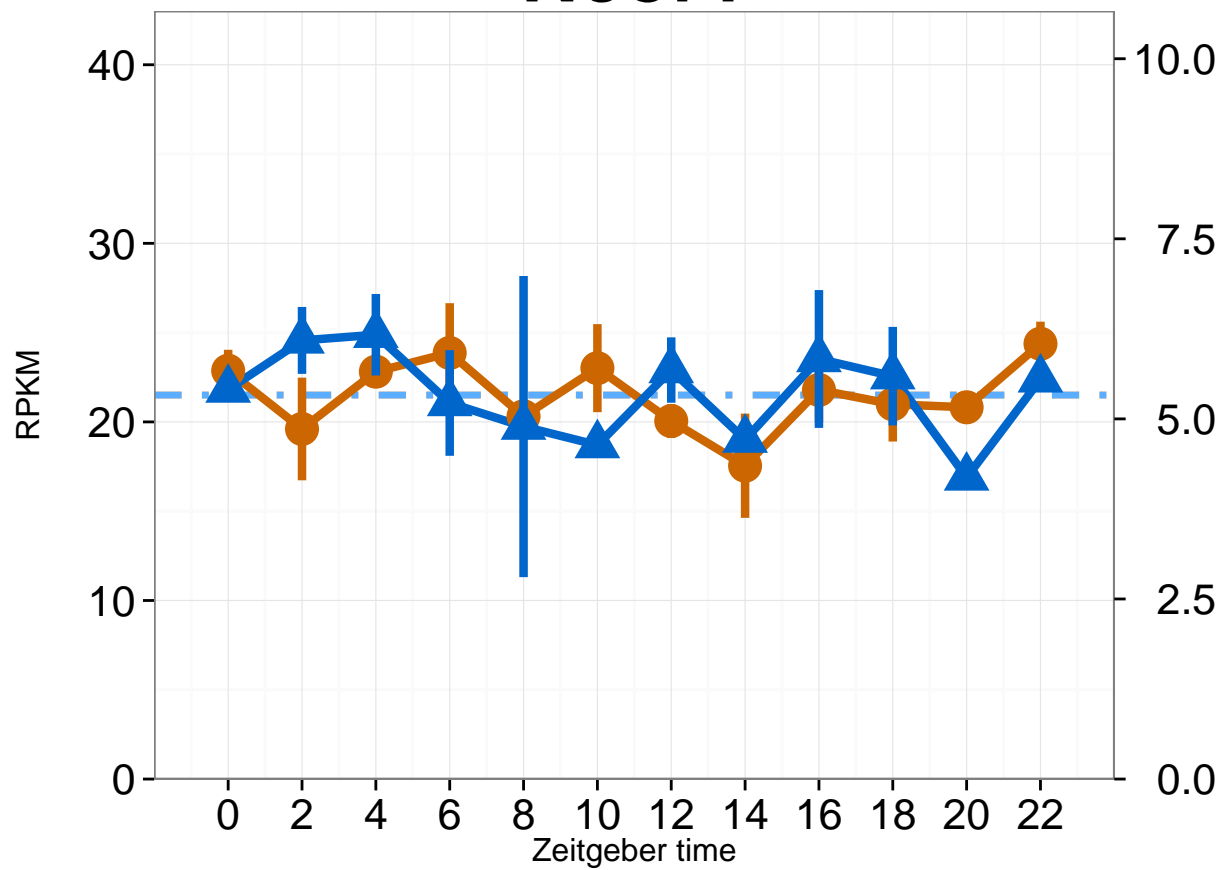

## Ncor1

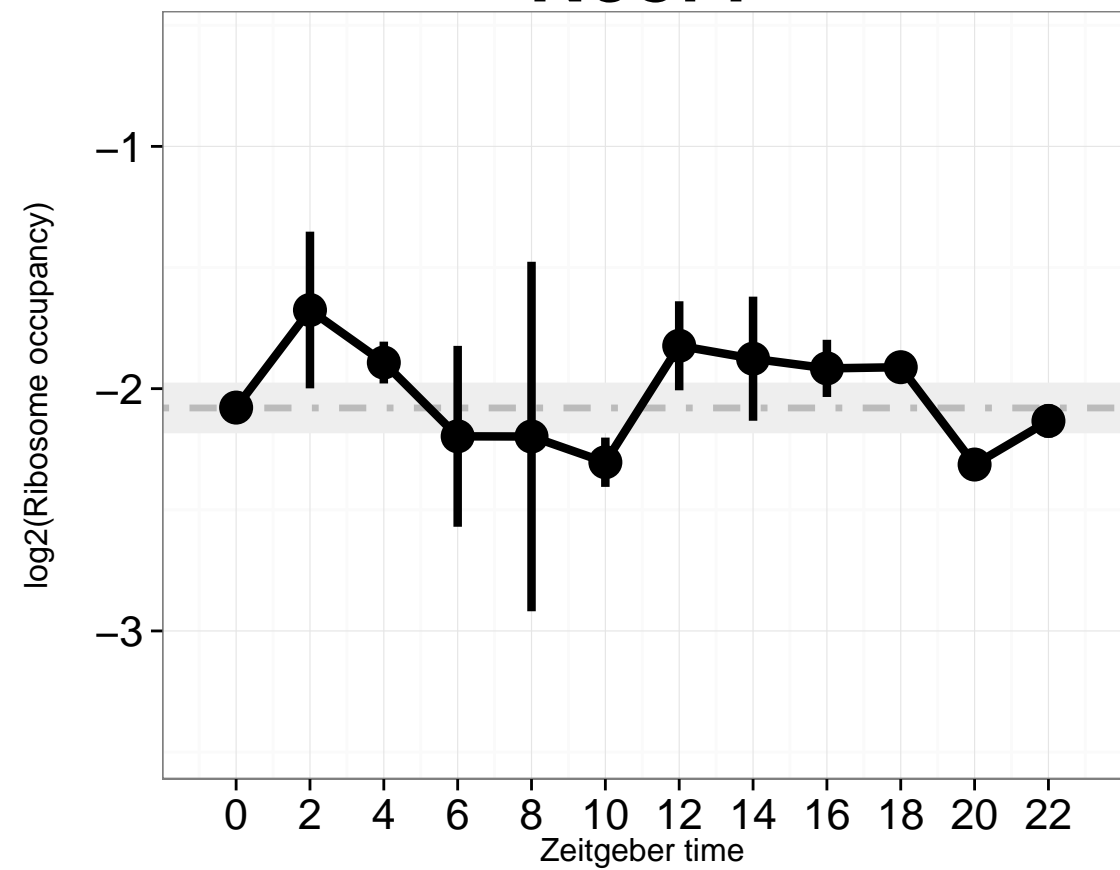

Supplement: SuppDataset_1.zip [file Ncor1_set_A.pdf › Supplemental Dataset 1/A-mRNA_nonrhyth_translation_nonrhyth/Ncor1_set_A.pdf]

## Ncor2

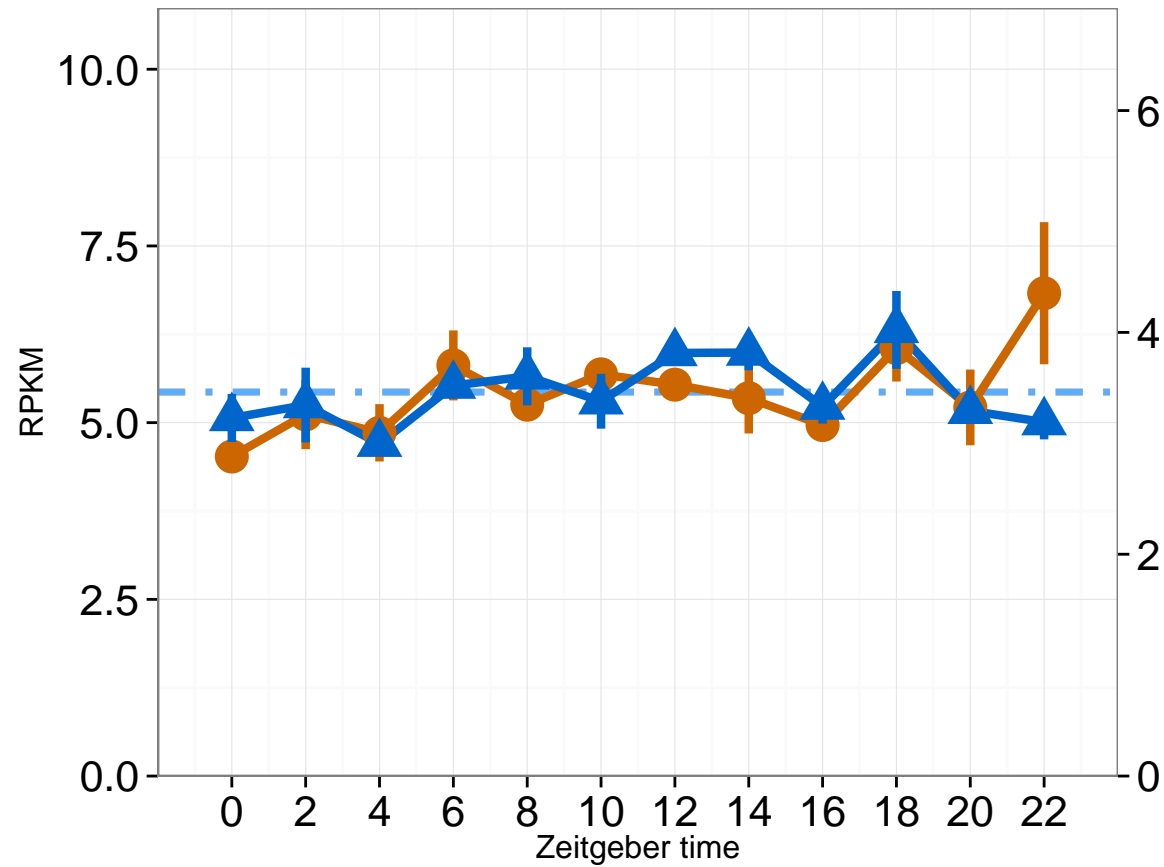

## Ncor2

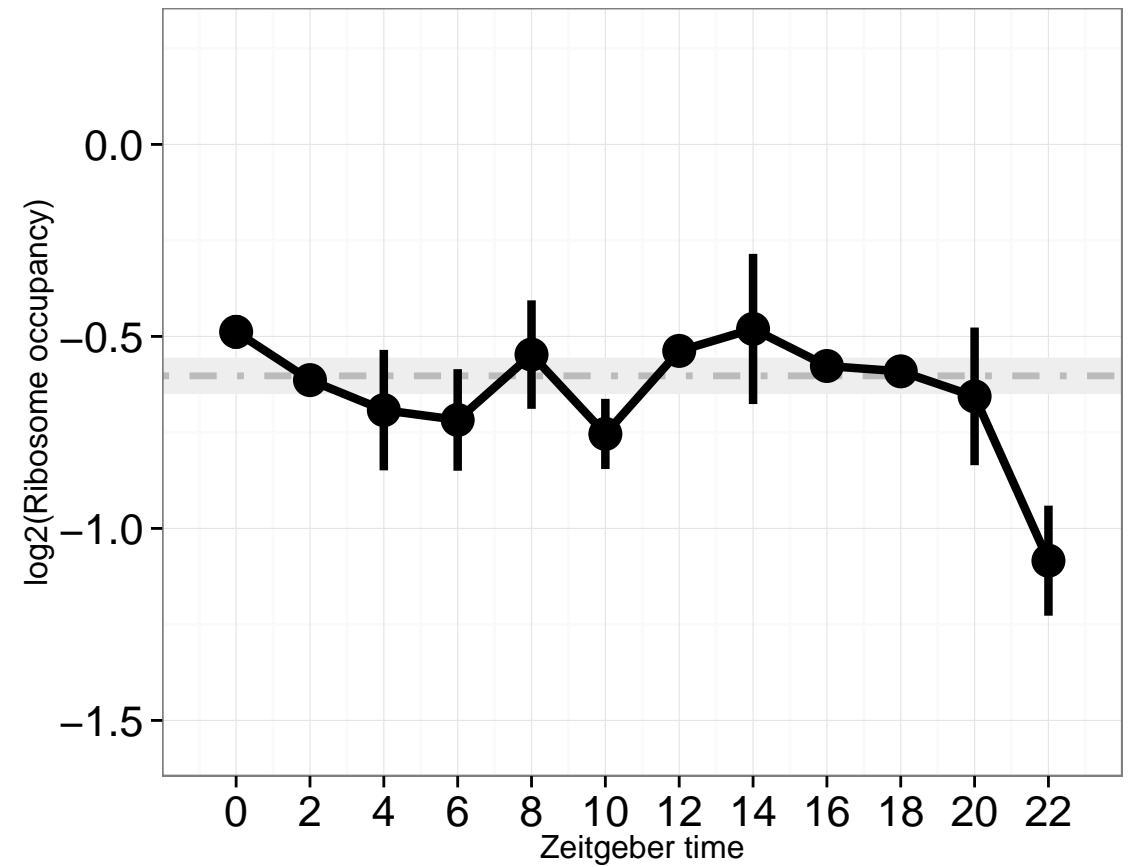

Supplement: SuppDataset_1.zip [file Ncor2_set_A.pdf › Supplemental Dataset 1/A-mRNA_nonrhyth_translation_nonrhyth/Ncor2_set_A.pdf]

## Ncstn

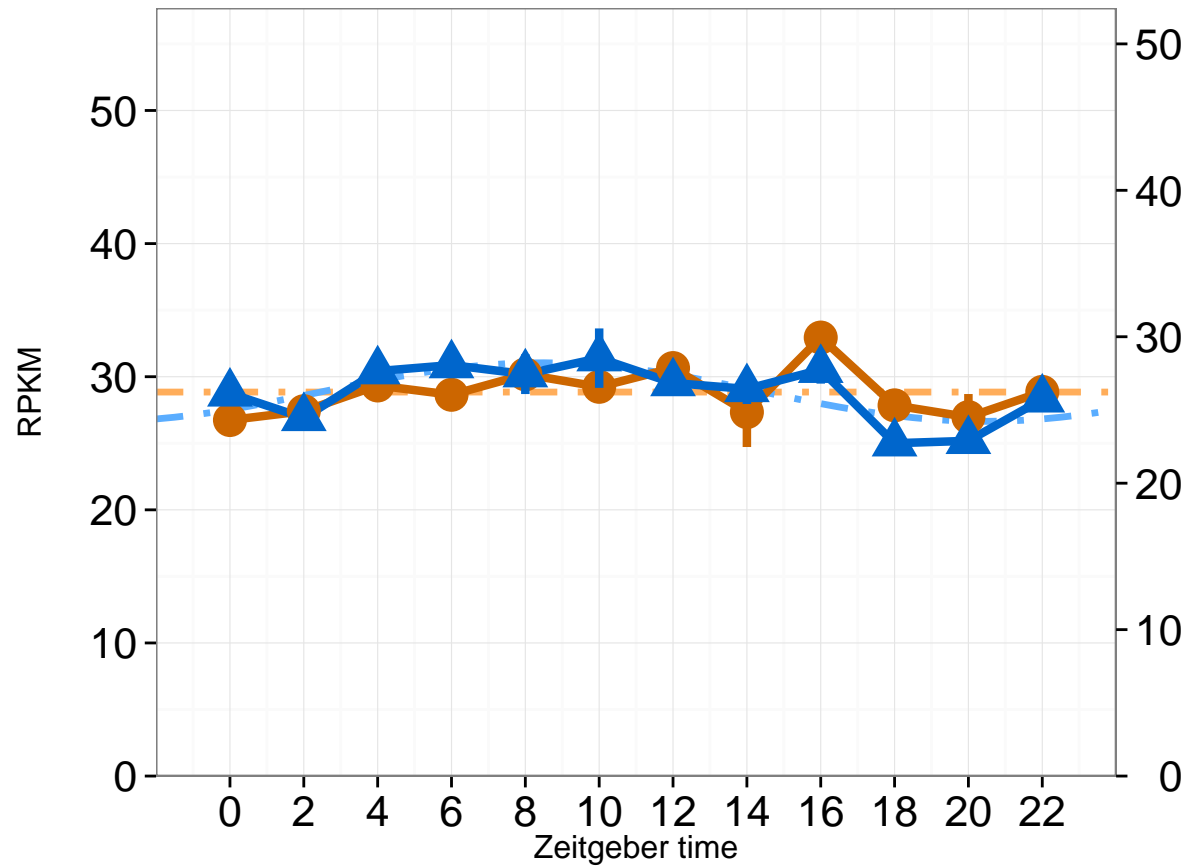

## Ncstn

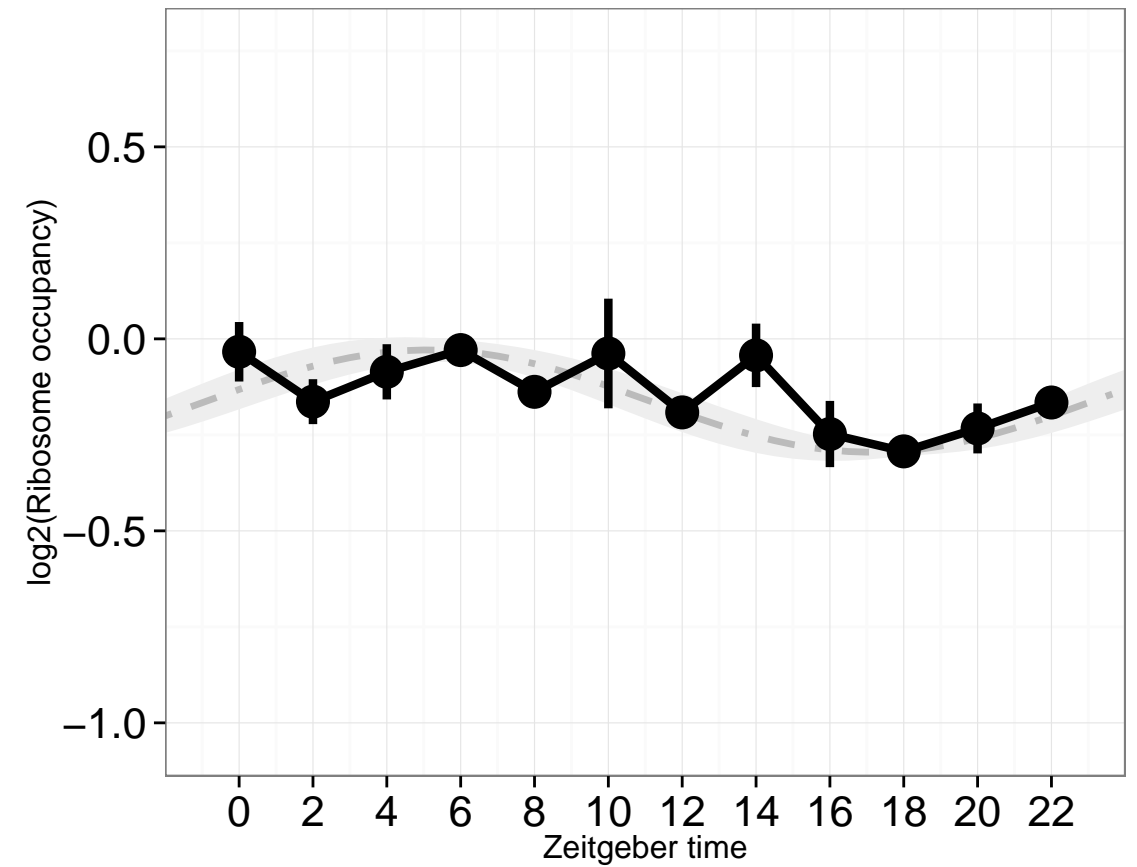

Supplement: SuppDataset_1.zip [file Ncstn_set_A.pdf › Supplemental Dataset 1/A-mRNA_nonrhyth_translation_nonrhyth/Ncstn_set_A.pdf]

## Ndc1

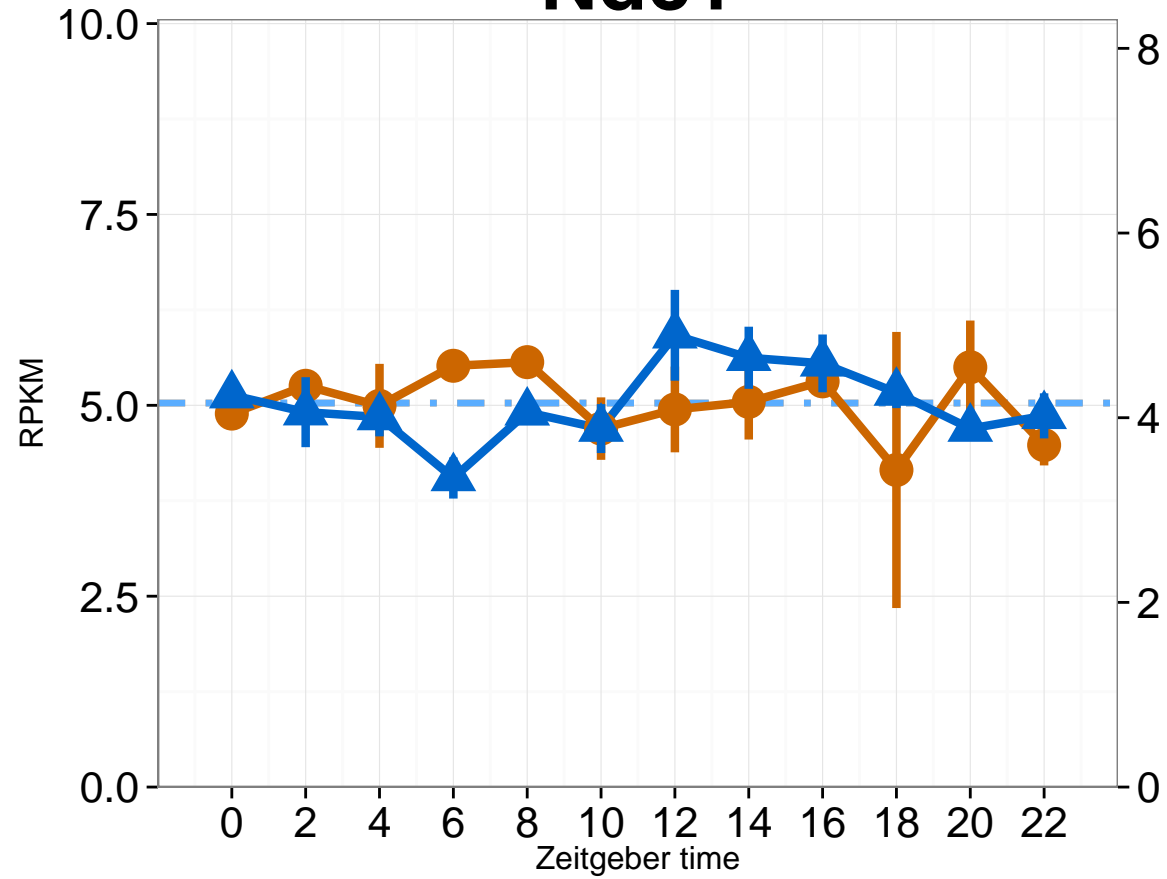

## Ndc1

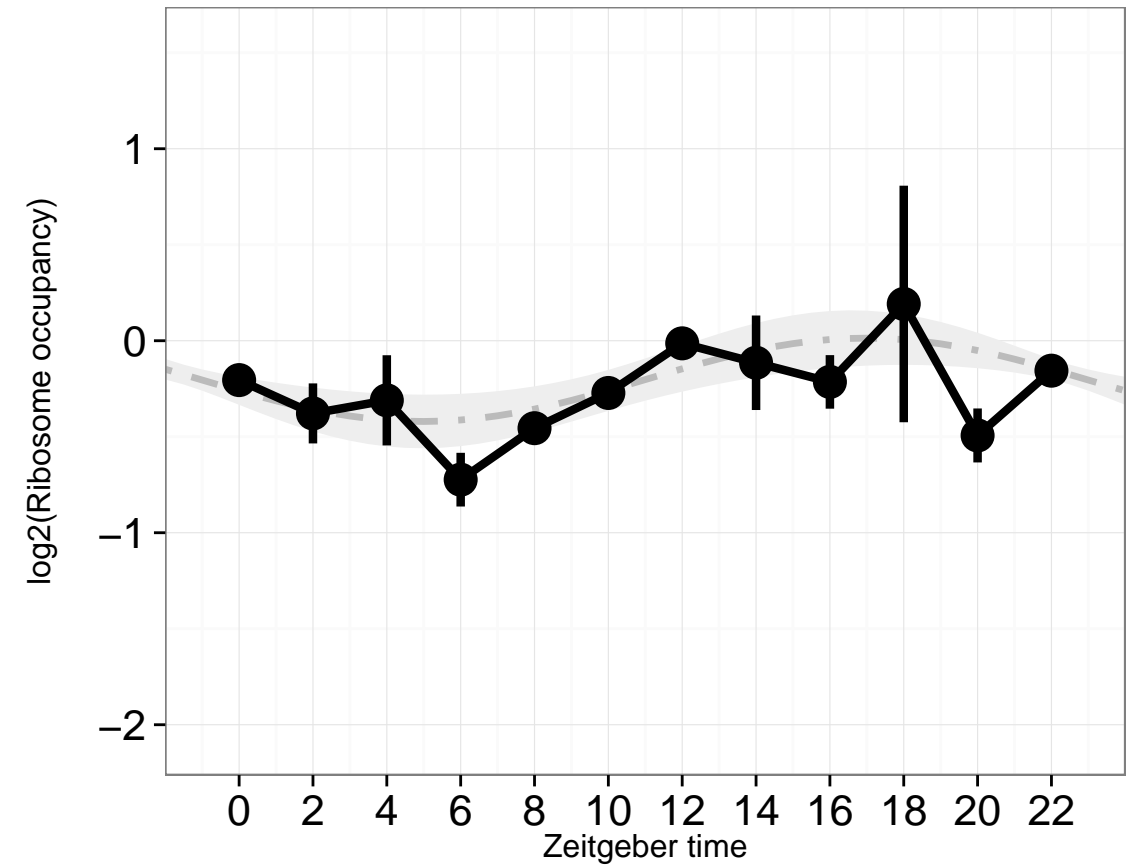

Supplement: SuppDataset_1.zip [file Ndc1_set_A.pdf › Supplemental Dataset 1/A-mRNA_nonrhyth_translation_nonrhyth/Ndc1_set_A.pdf]

# Nde1

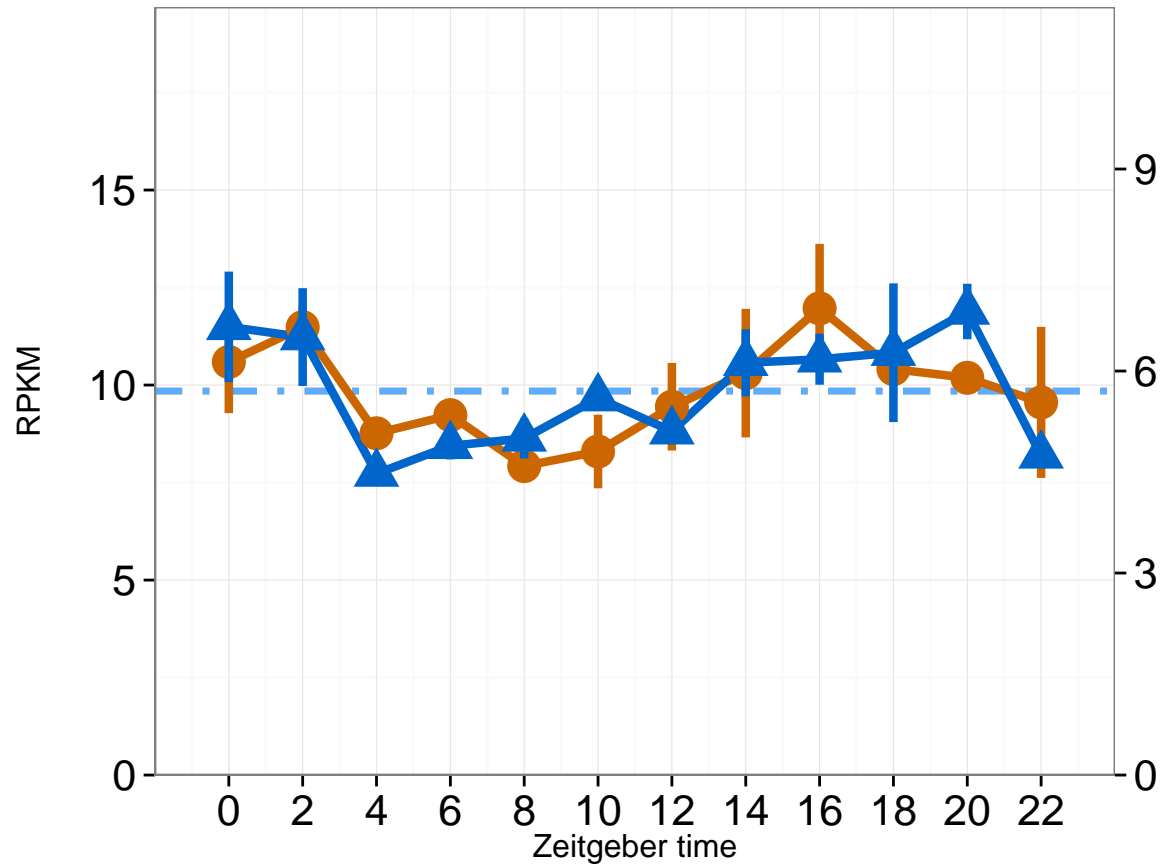

# Nde1

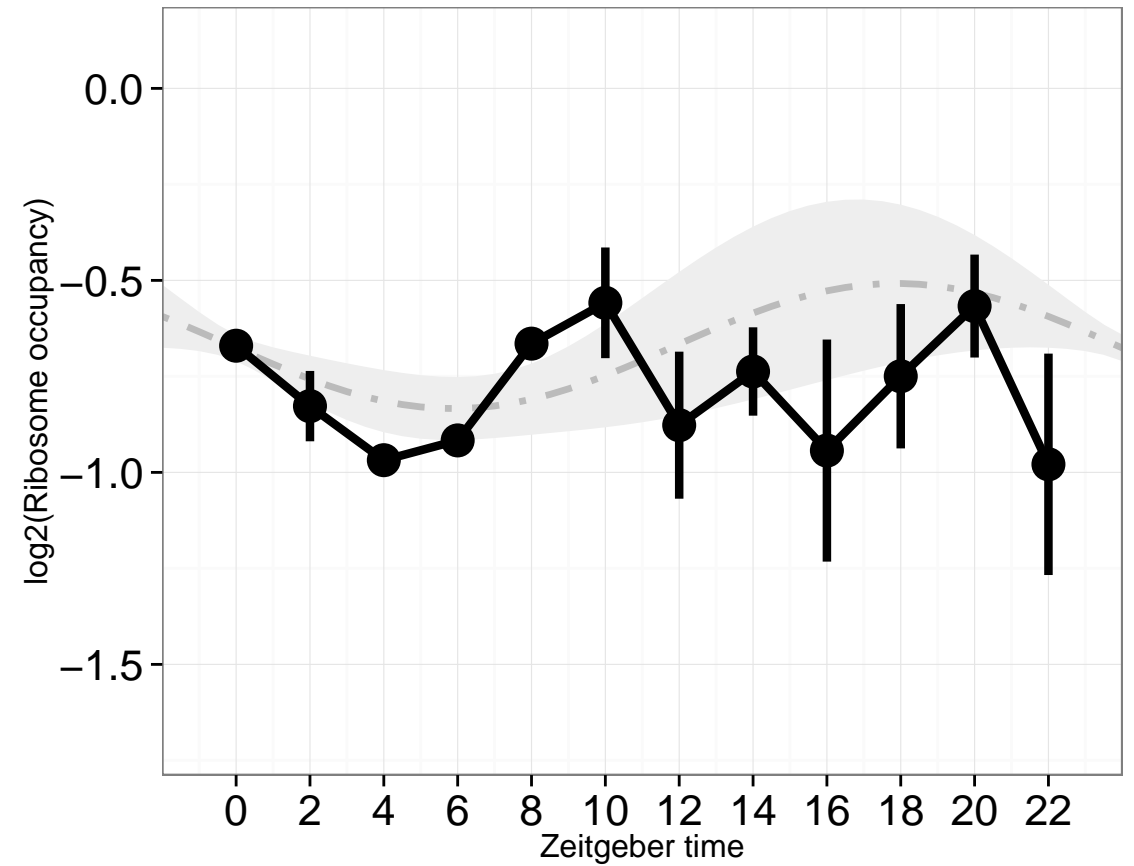

Supplement: SuppDataset_1.zip [file Nde1_set_A.pdf › Supplemental Dataset 1/A-mRNA_nonrhyth_translation_nonrhyth/Nde1_set_A.pdf]

## Ndfip1

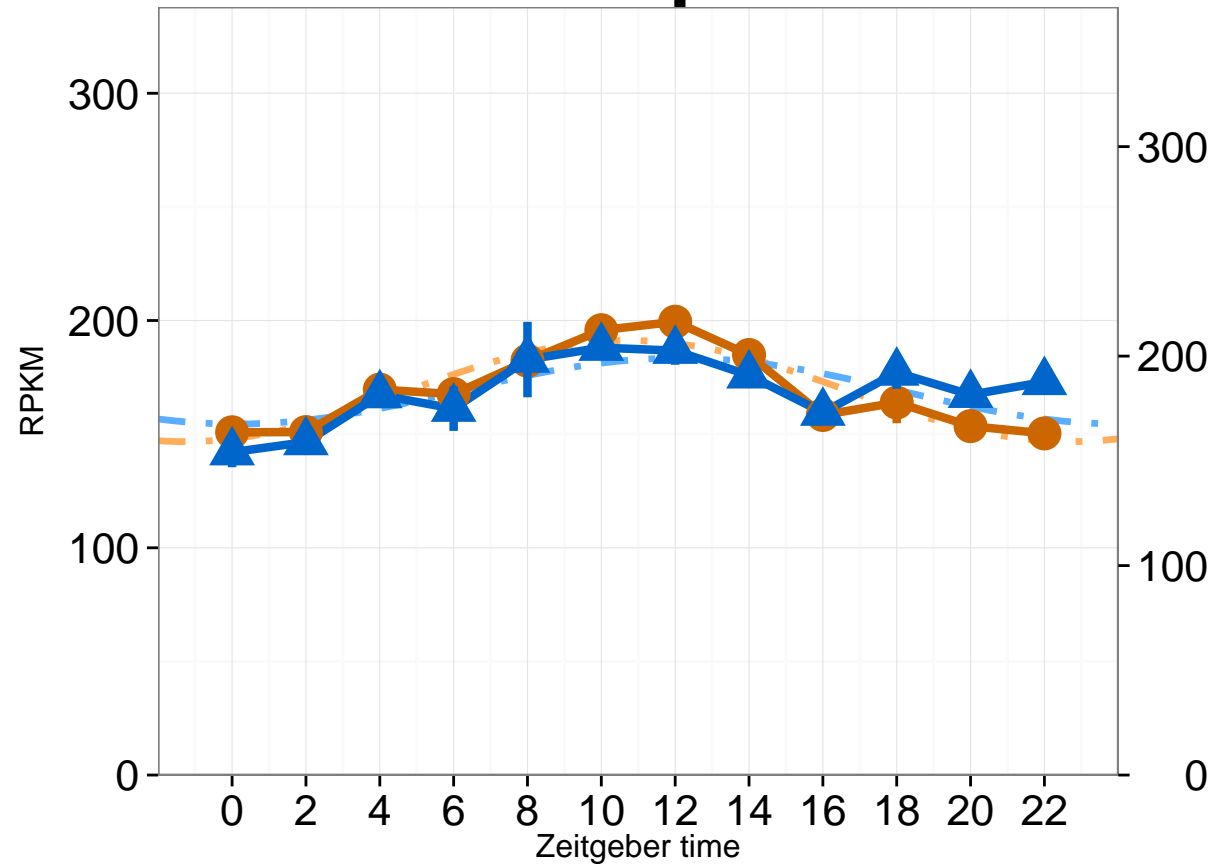

## Ndfip1

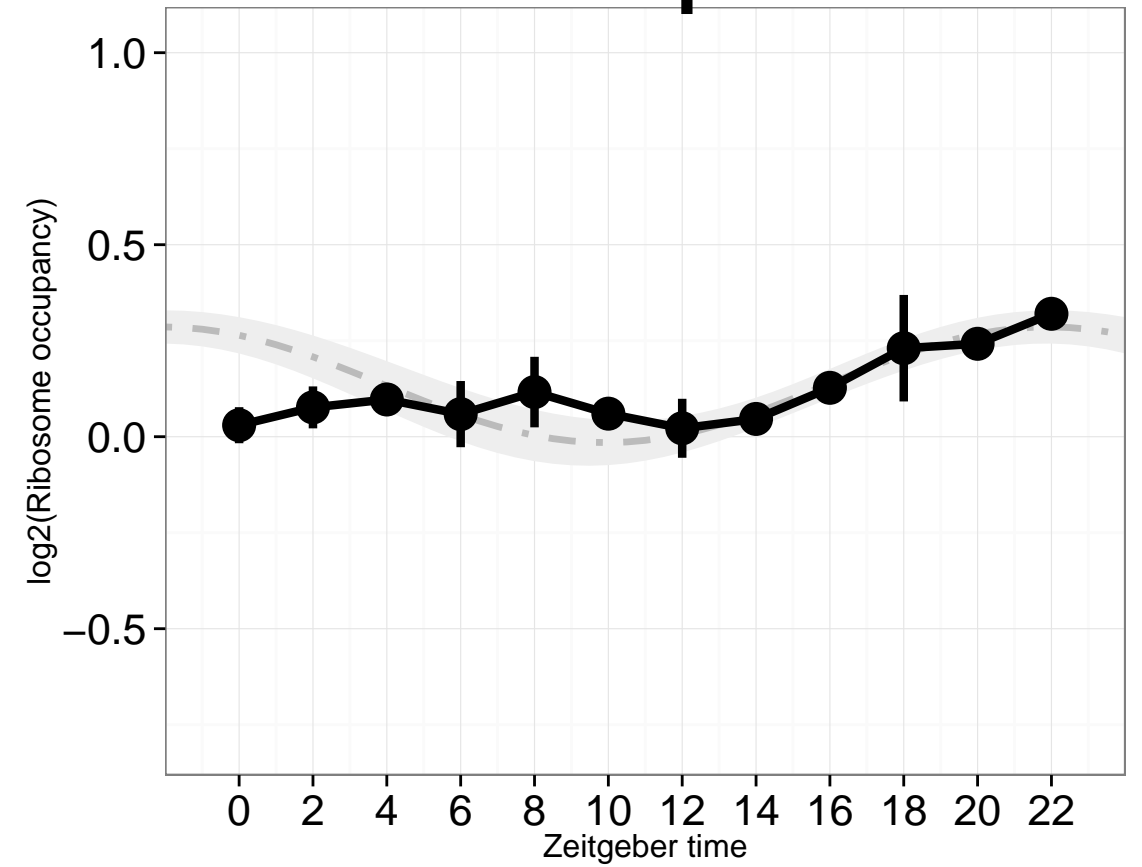

Supplement: SuppDataset_1.zip [file Ndfip1_set_A.pdf › Supplemental Dataset 1/A-mRNA_nonrhyth_translation_nonrhyth/Ndfip1_set_A.pdf]

## Ndfip2

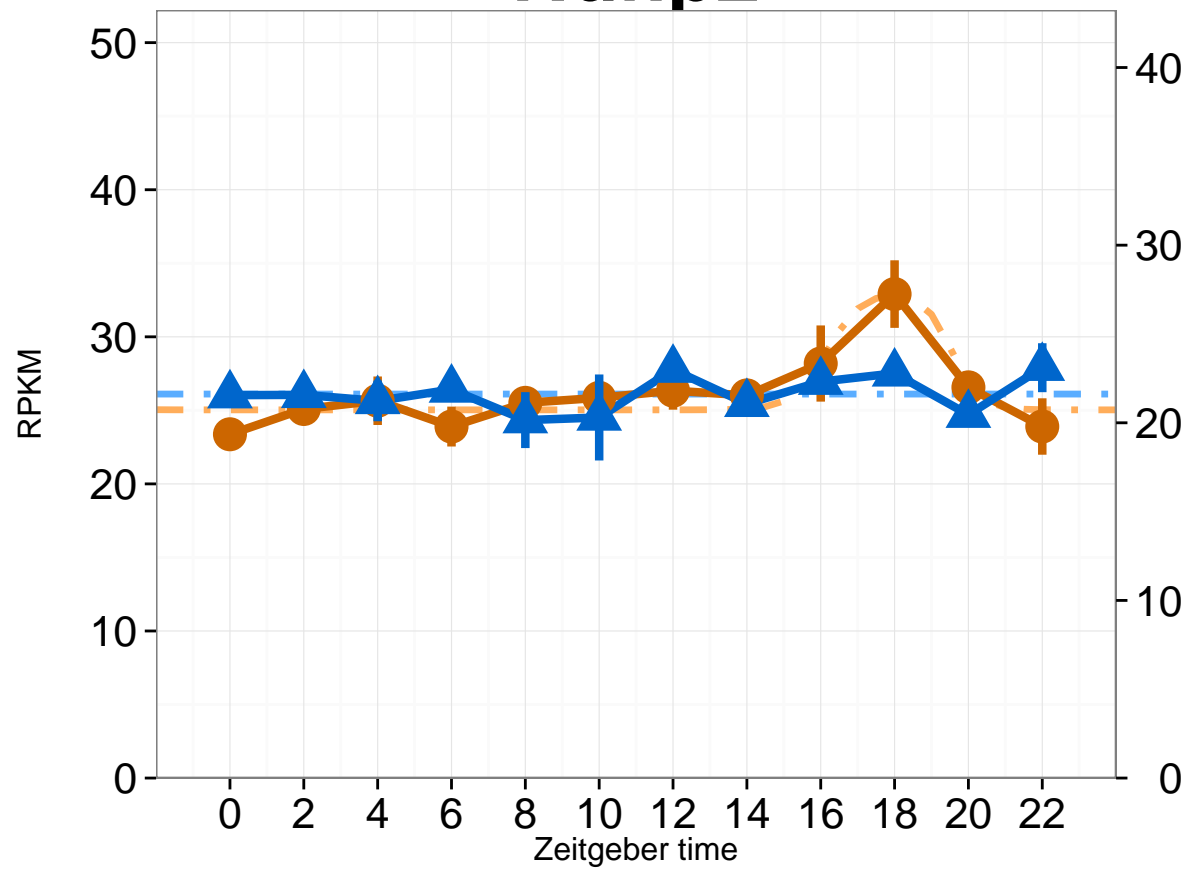

## Ndfip2

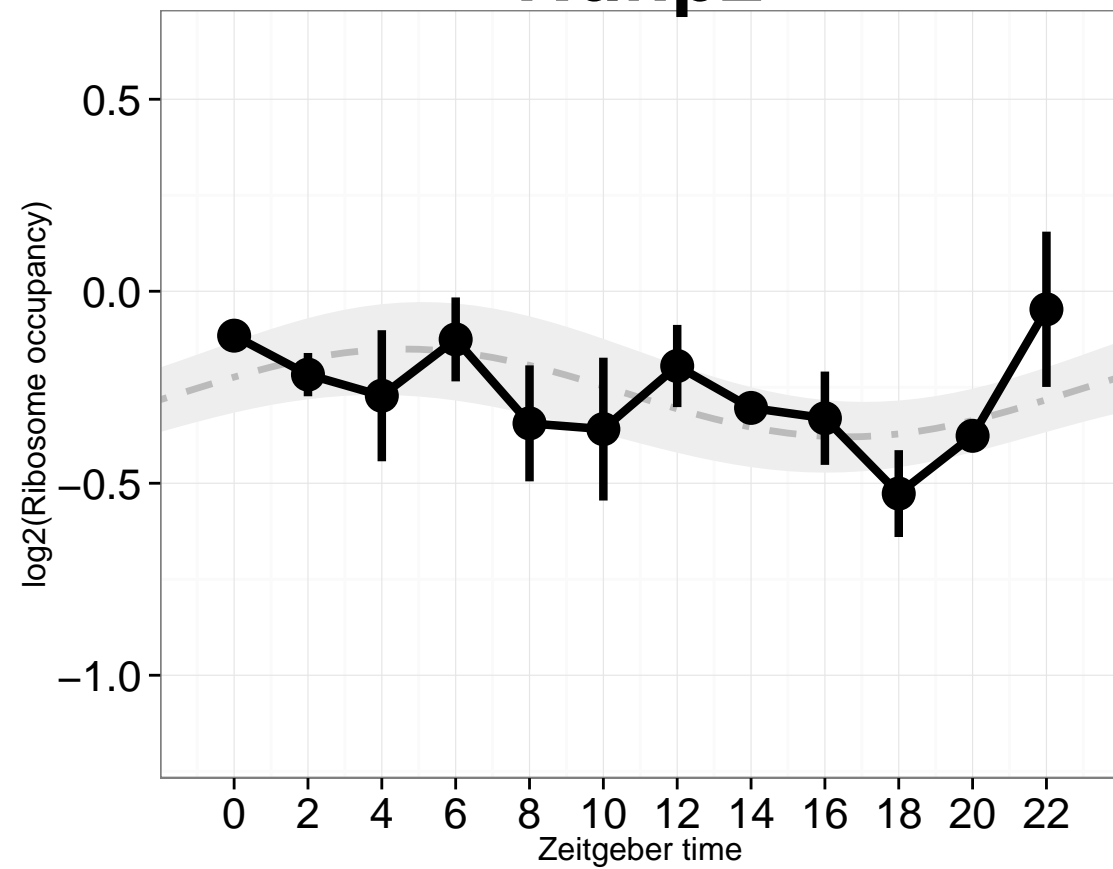

Supplement: SuppDataset_1.zip [file Ndfip2_set_A.pdf › Supplemental Dataset 1/A-mRNA_nonrhyth_translation_nonrhyth/Ndfip2_set_A.pdf]

## Ndn

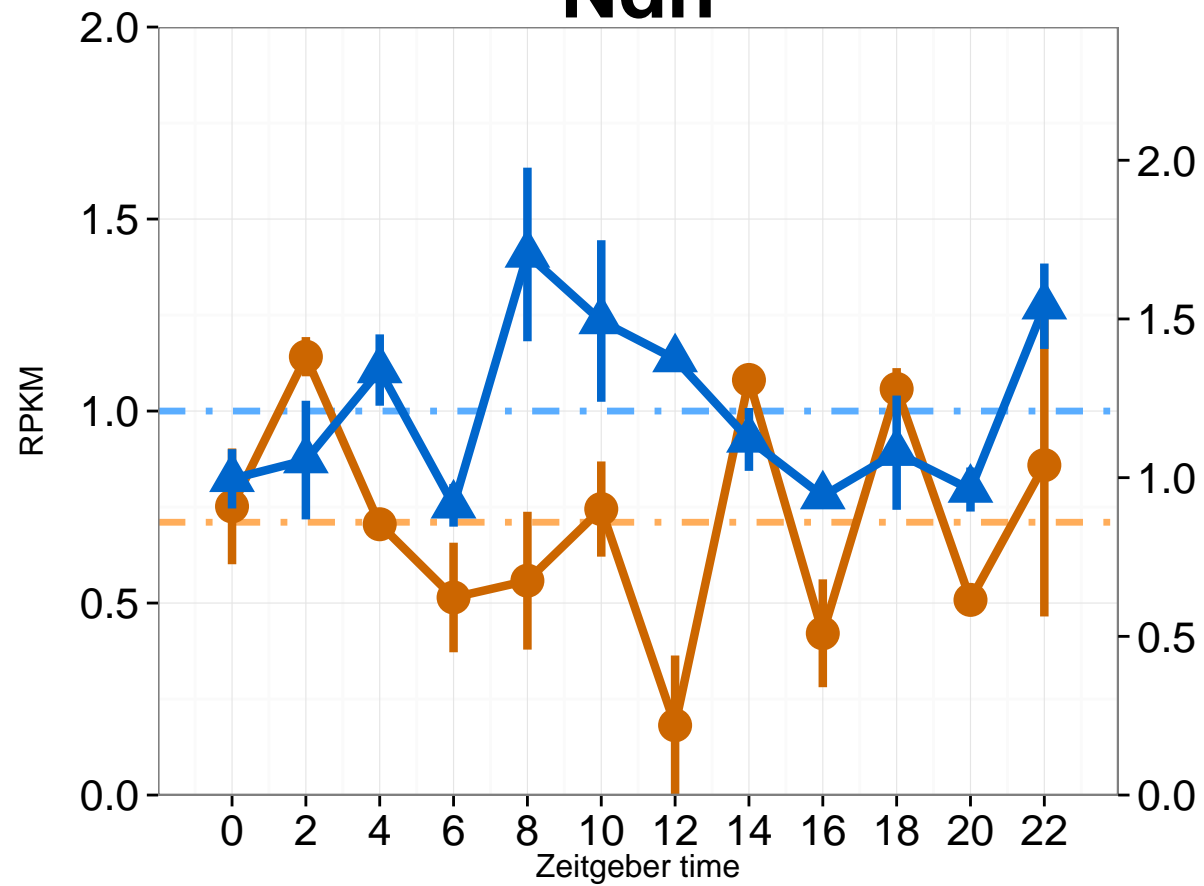

## Ndn

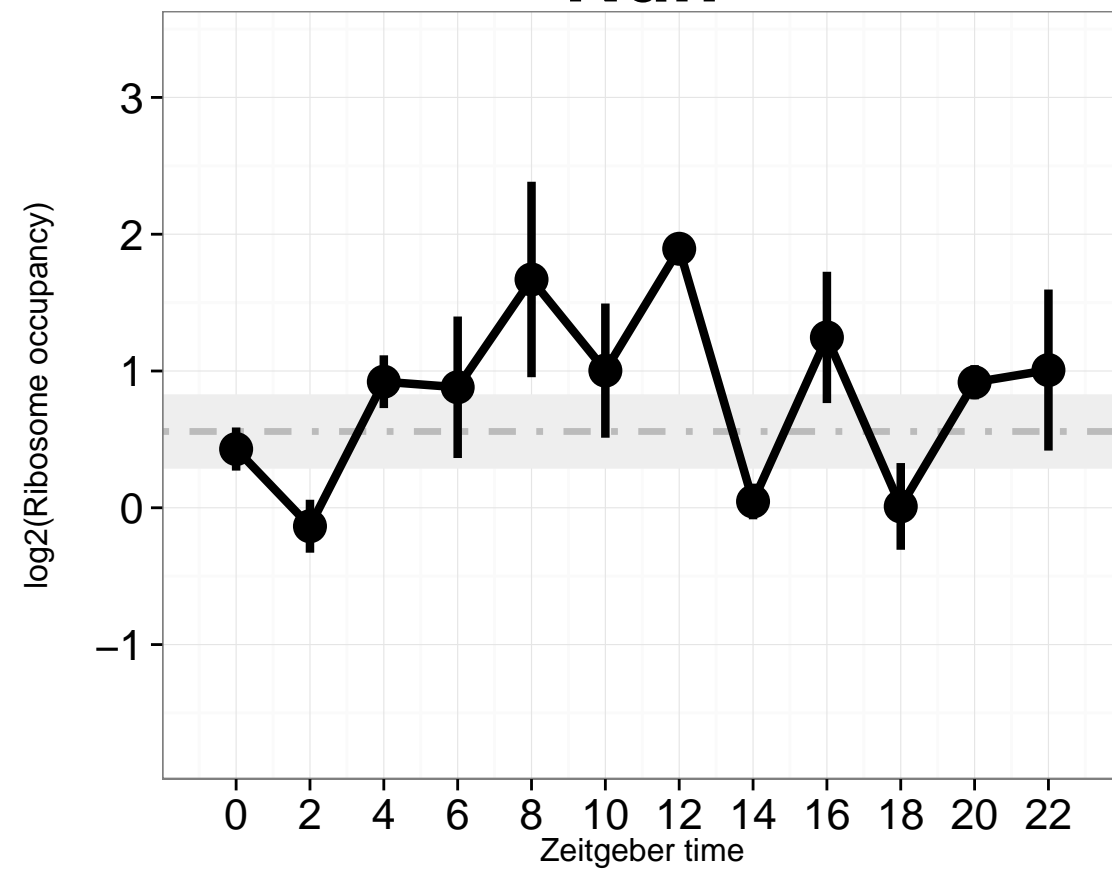

Supplement: SuppDataset_1.zip [file Ndn_set_A.pdf › Supplemental Dataset 1/A-mRNA_nonrhyth_translation_nonrhyth/Ndn_set_A.pdf]
