# Supplementary figures and images for: Ribosome profiling reveals the rhythmic liver translatome and circadian clock regulation by upstream open reading frames (part 48 of 113)
Source: HighWire-hosted journal article supplement (doi:10.1101/gr.195404.115), 2015-10-20

## Ndor1

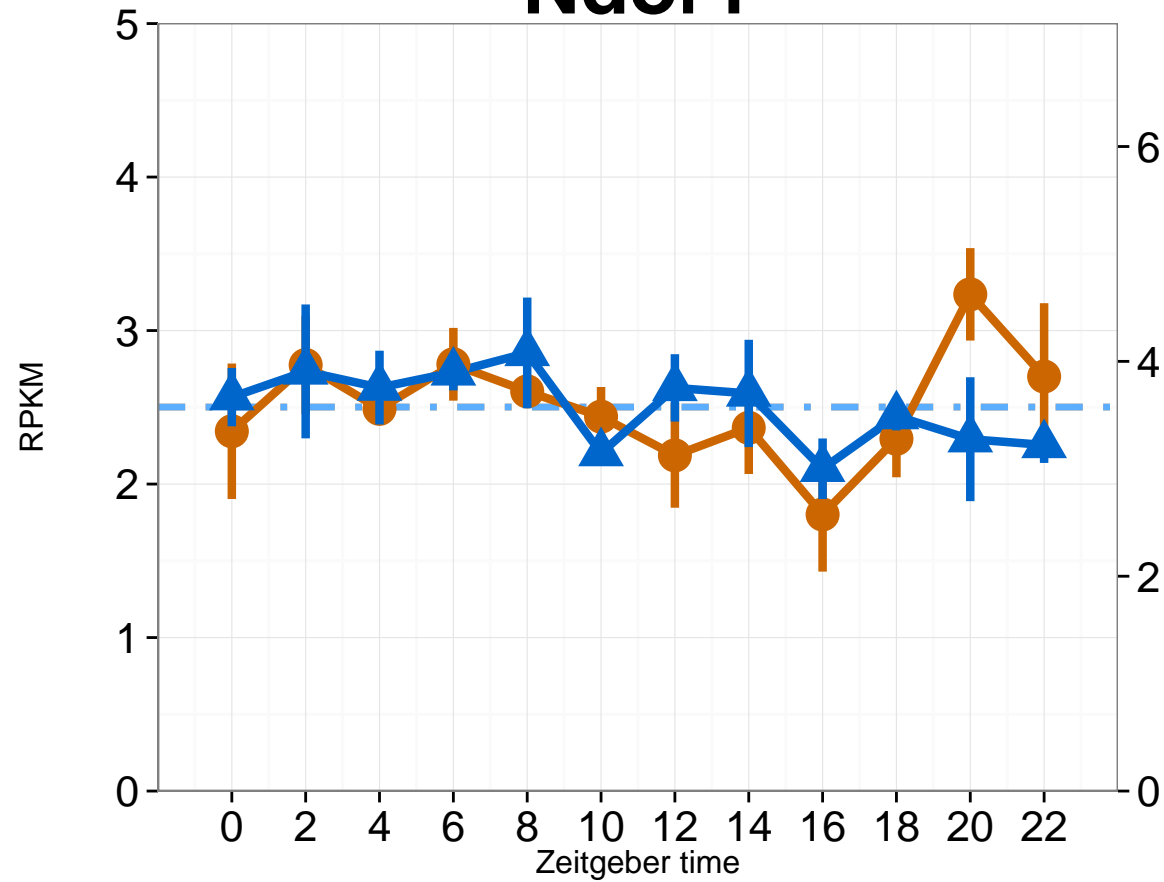

## Ndor1

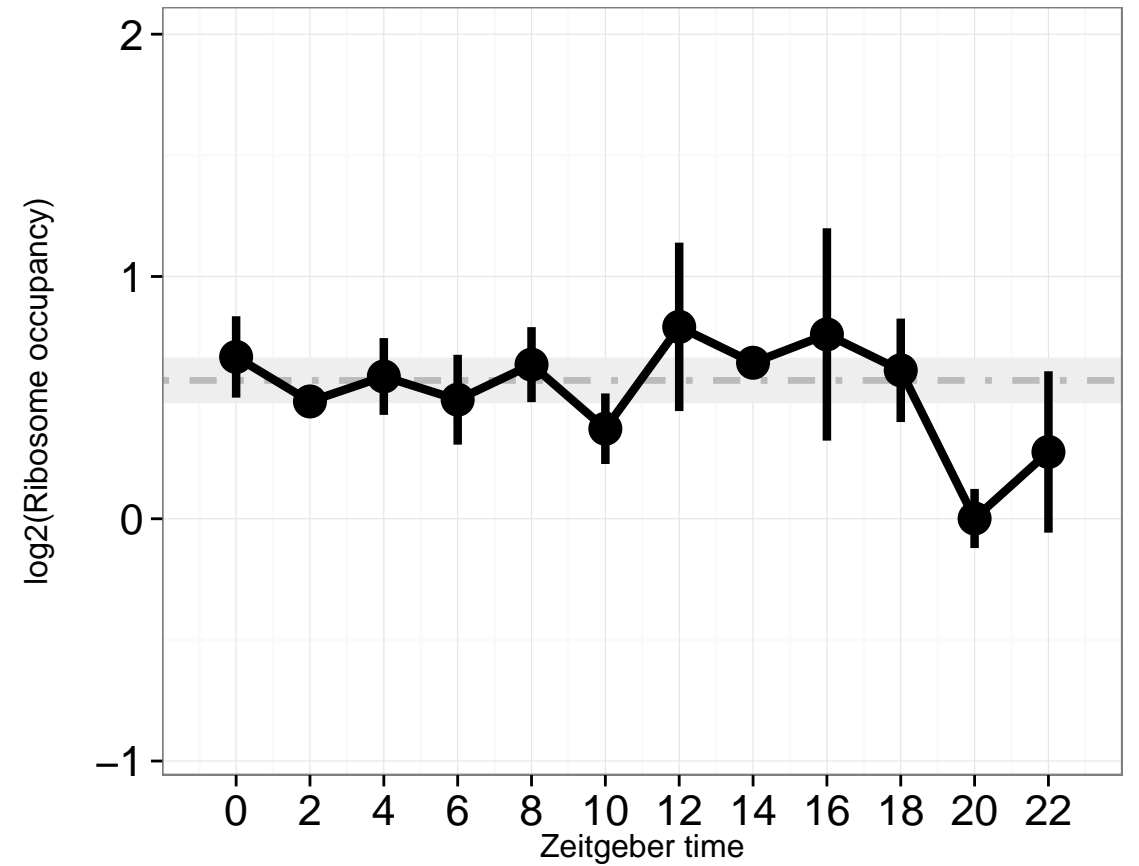

Supplement: SuppDataset_1.zip [file Ndor1_set_A.pdf › Supplemental Dataset 1/A-mRNA_nonrhyth_translation_nonrhyth/Ndor1_set_A.pdf]

## Ndrp2

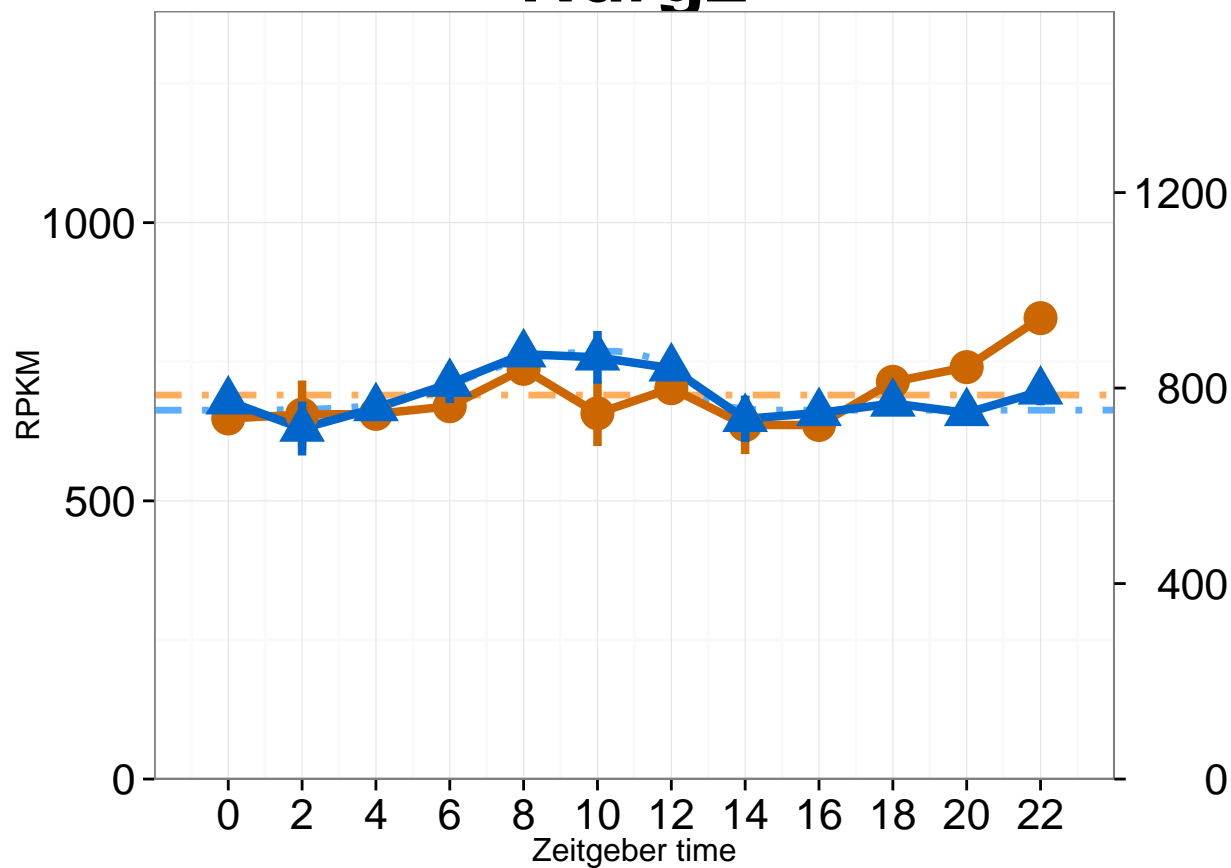

## Ndrp2

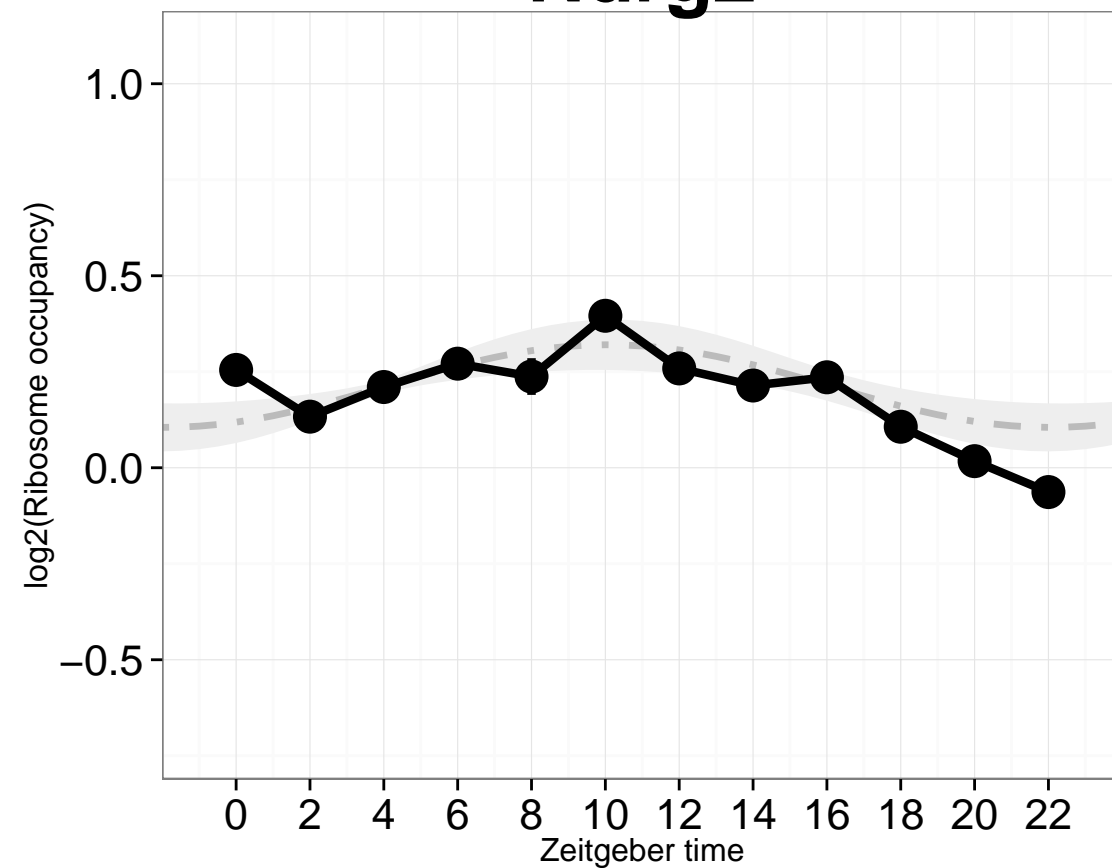

Supplement: SuppDataset_1.zip [file Ndrg2_set_A.pdf › Supplemental Dataset 1/A-mRNA_nonrhyth_translation_nonrhyth/Ndrg2_set_A.pdf]

## Ndrq3

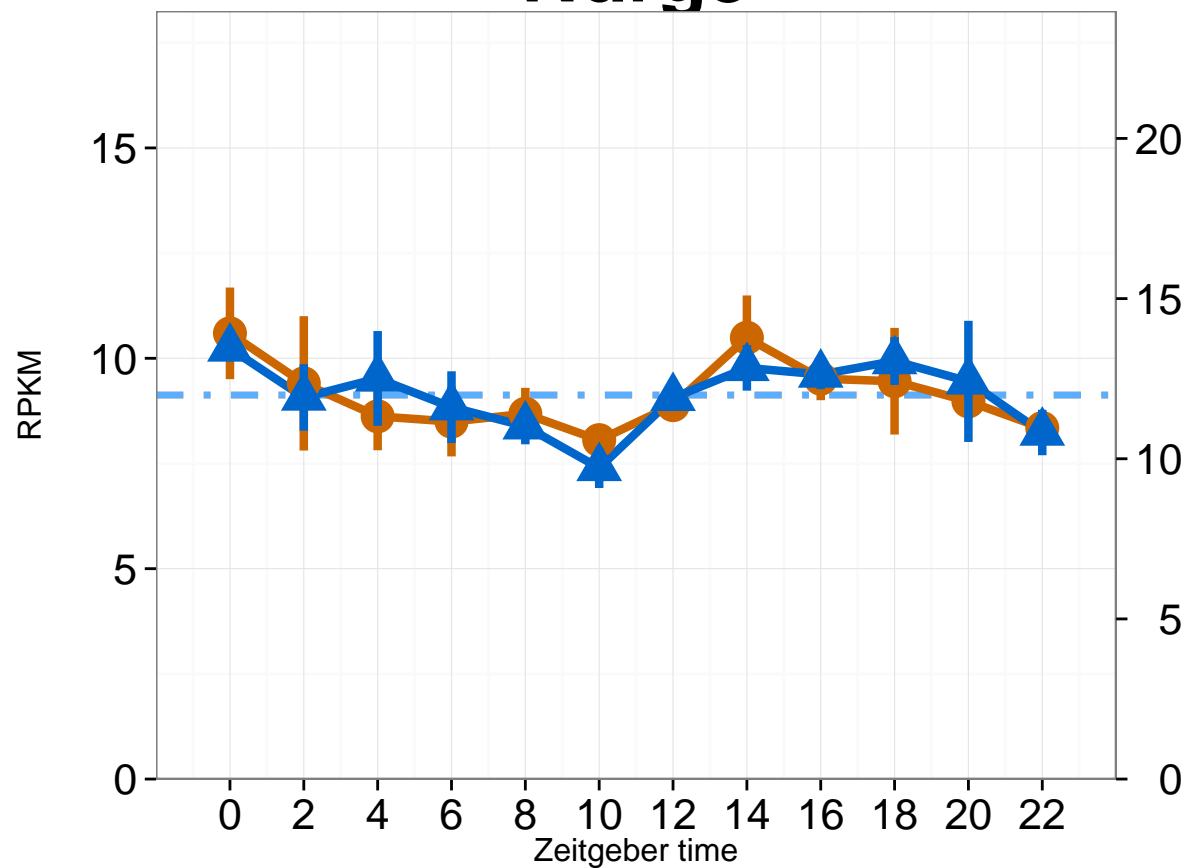

## Ndrq3

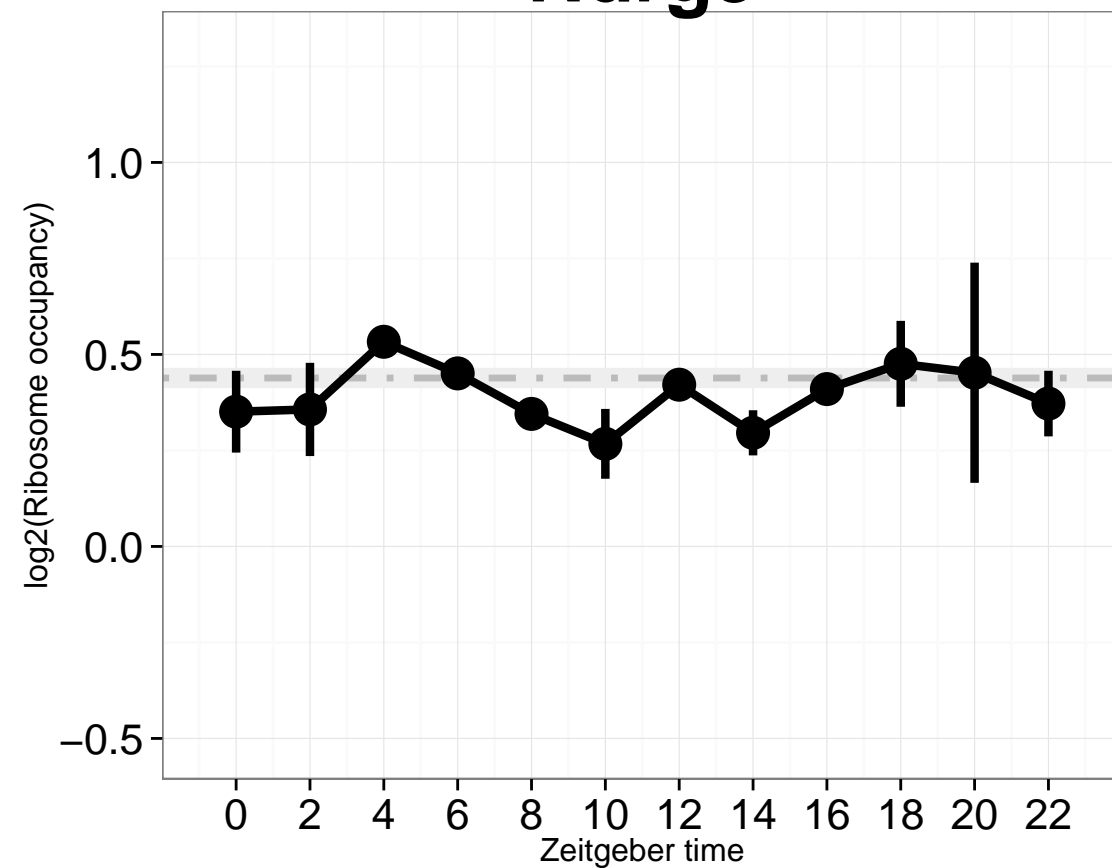

Supplement: SuppDataset_1.zip [file Ndrg3_set_A.pdf › Supplemental Dataset 1/A-mRNA_nonrhyth_translation_nonrhyth/Ndrg3_set_A.pdf]

# Ndst1

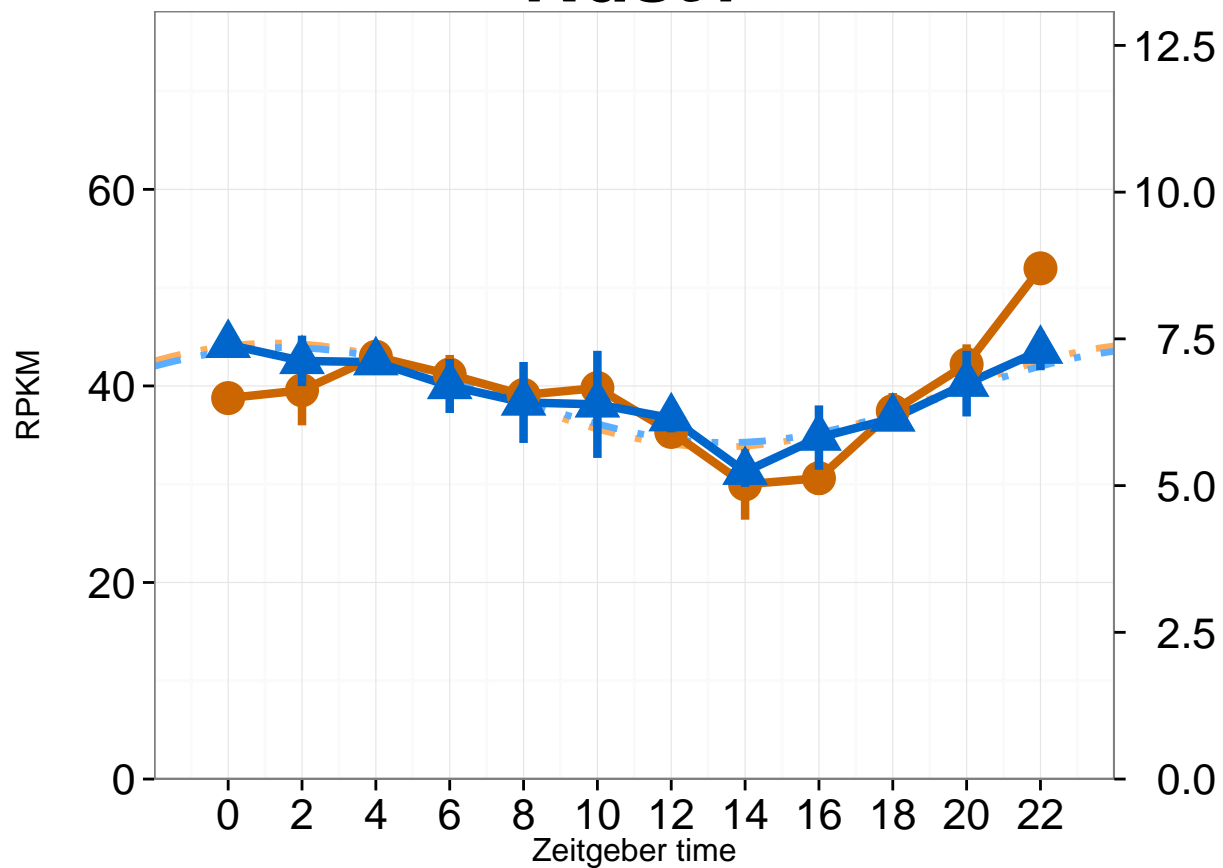

# Ndst1

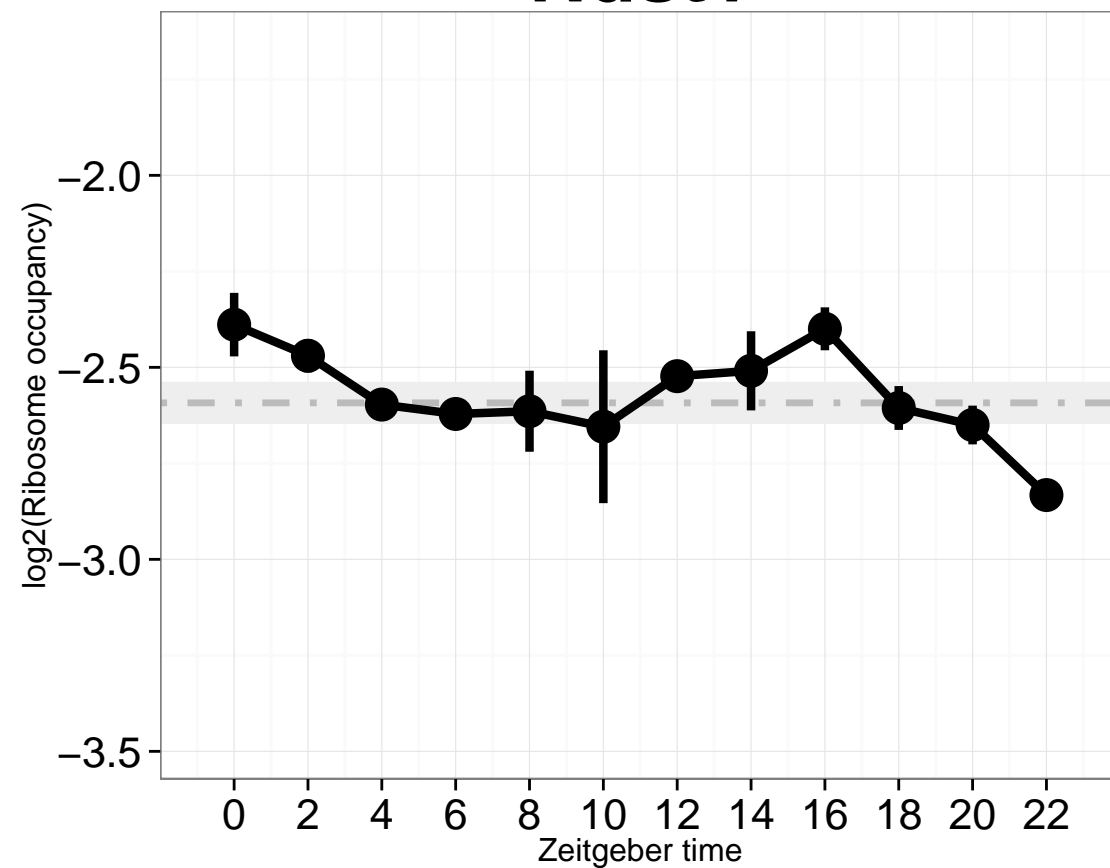

Supplement: SuppDataset_1.zip [file Ndst1_set_A.pdf › Supplemental Dataset 1/A-mRNA_nonrhyth_translation_nonrhyth/Ndst1_set_A.pdf]

# Ndst2

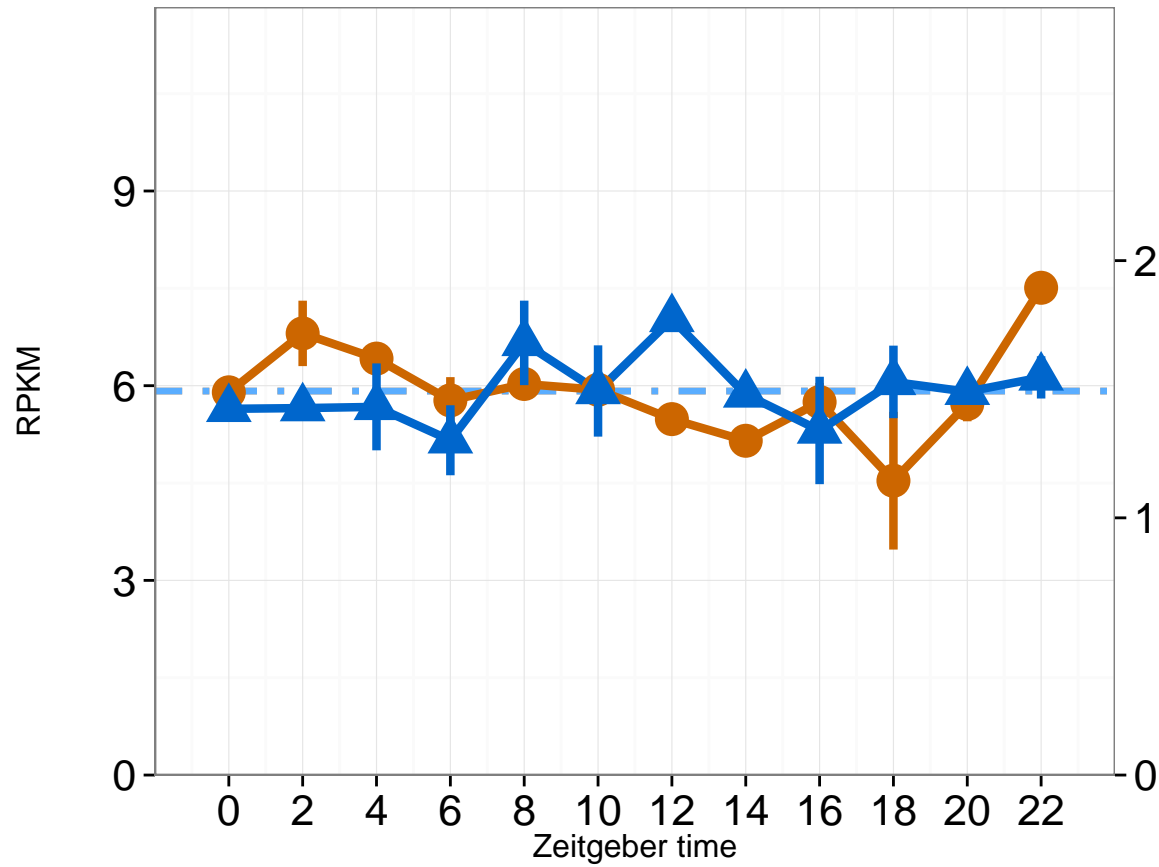

# Ndst2

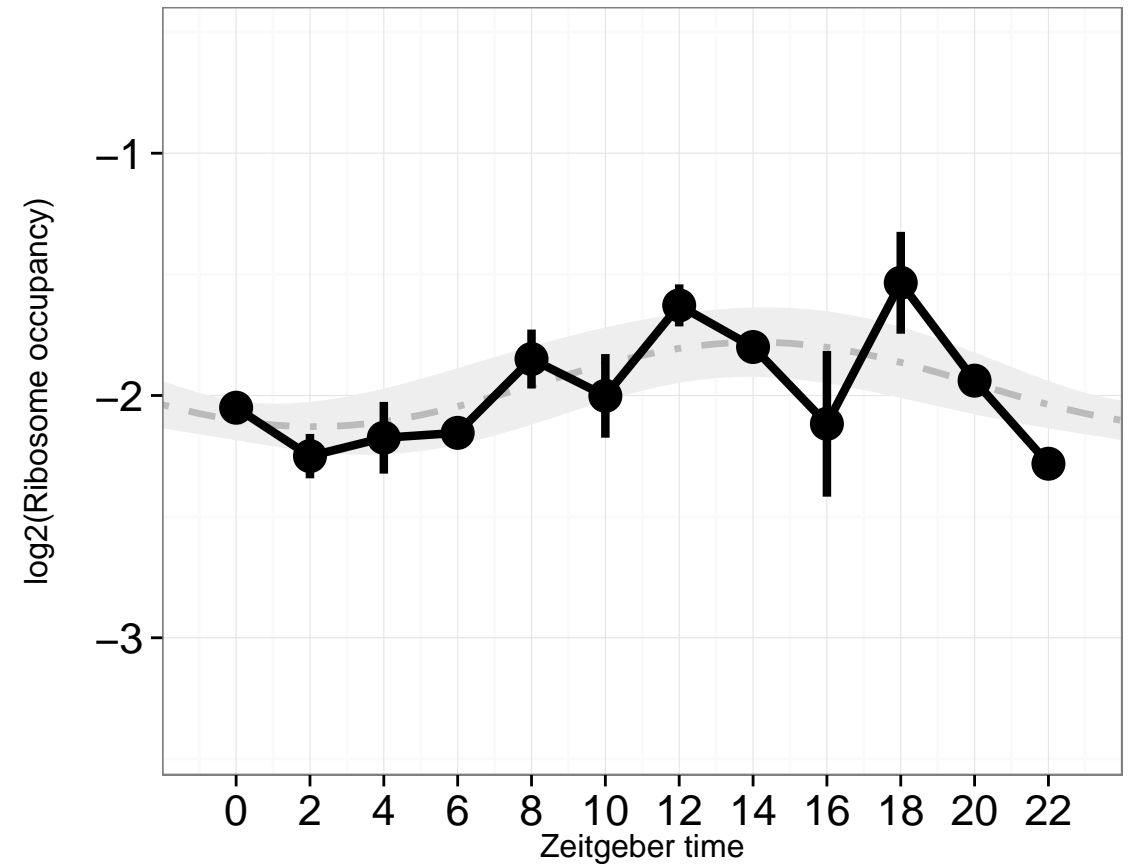

Supplement: SuppDataset_1.zip [file Ndst2_set_A.pdf › Supplemental Dataset 1/A-mRNA_nonrhyth_translation_nonrhyth/Ndst2_set_A.pdf]

## Ndufa10

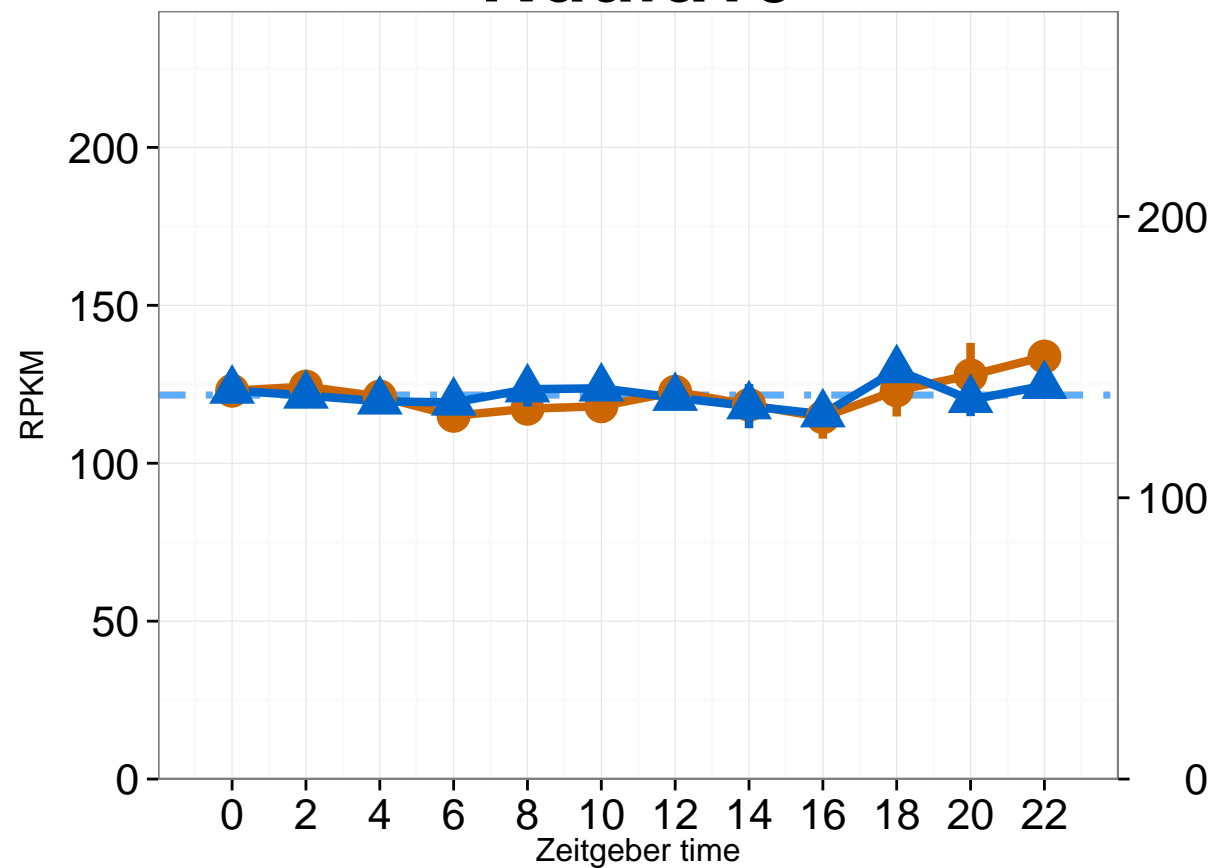

## Ndufa10

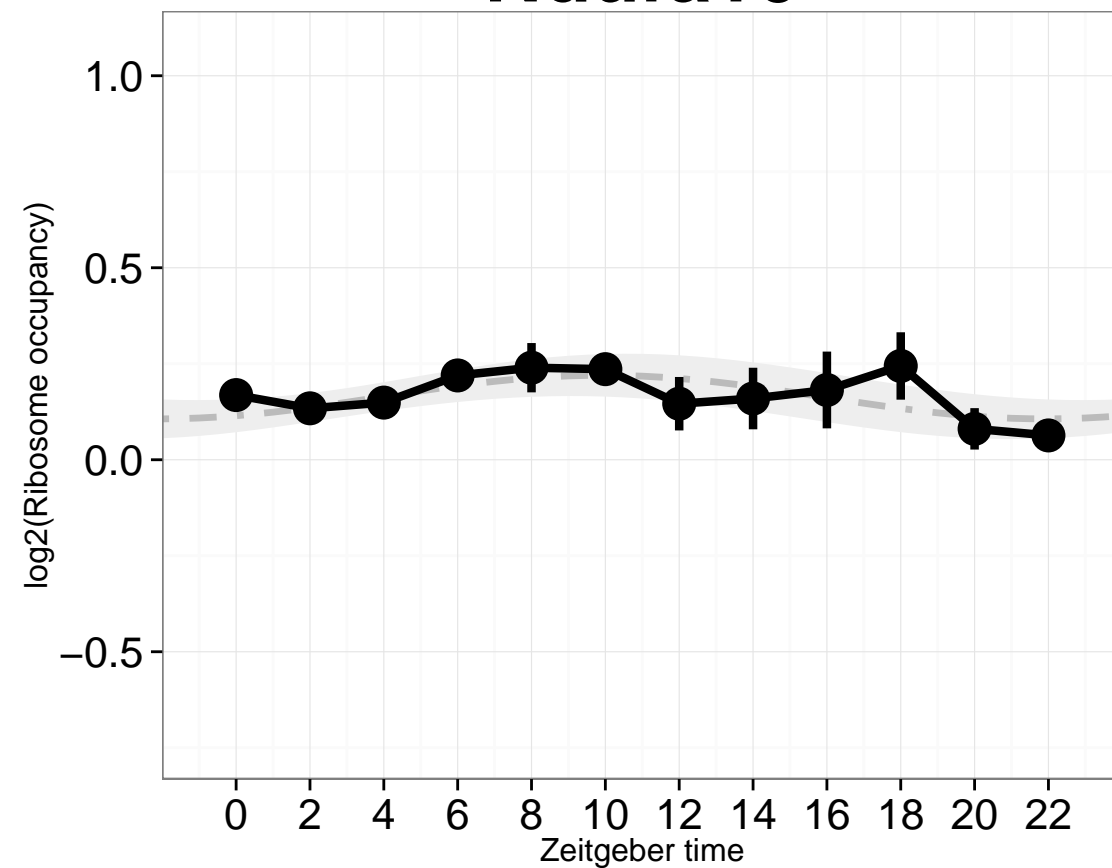

Supplement: SuppDataset_1.zip [file Ndufa10_set_A.pdf › Supplemental Dataset 1/A-mRNA_nonrhyth_translation_nonrhyth/Ndufa10_set_A.pdf]

# Ndufa11

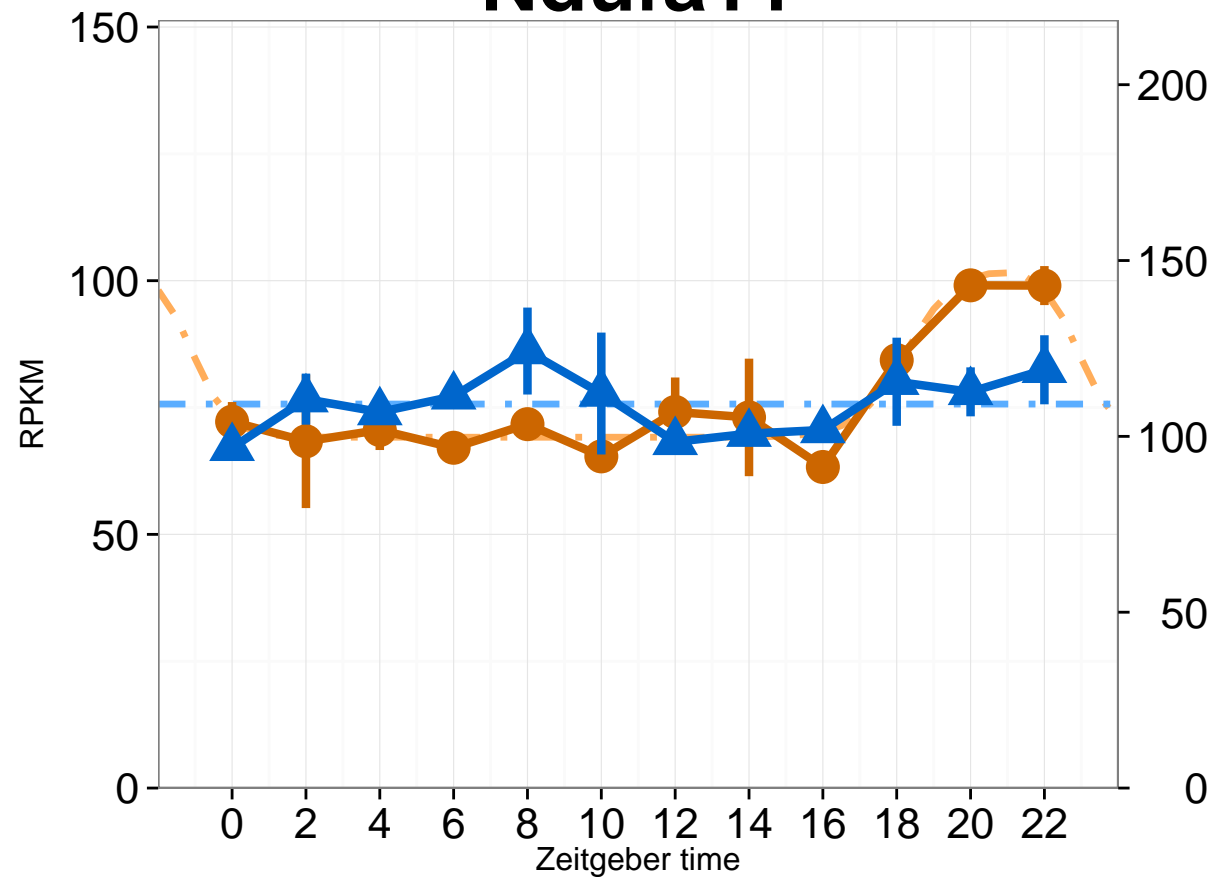

# Ndufa11

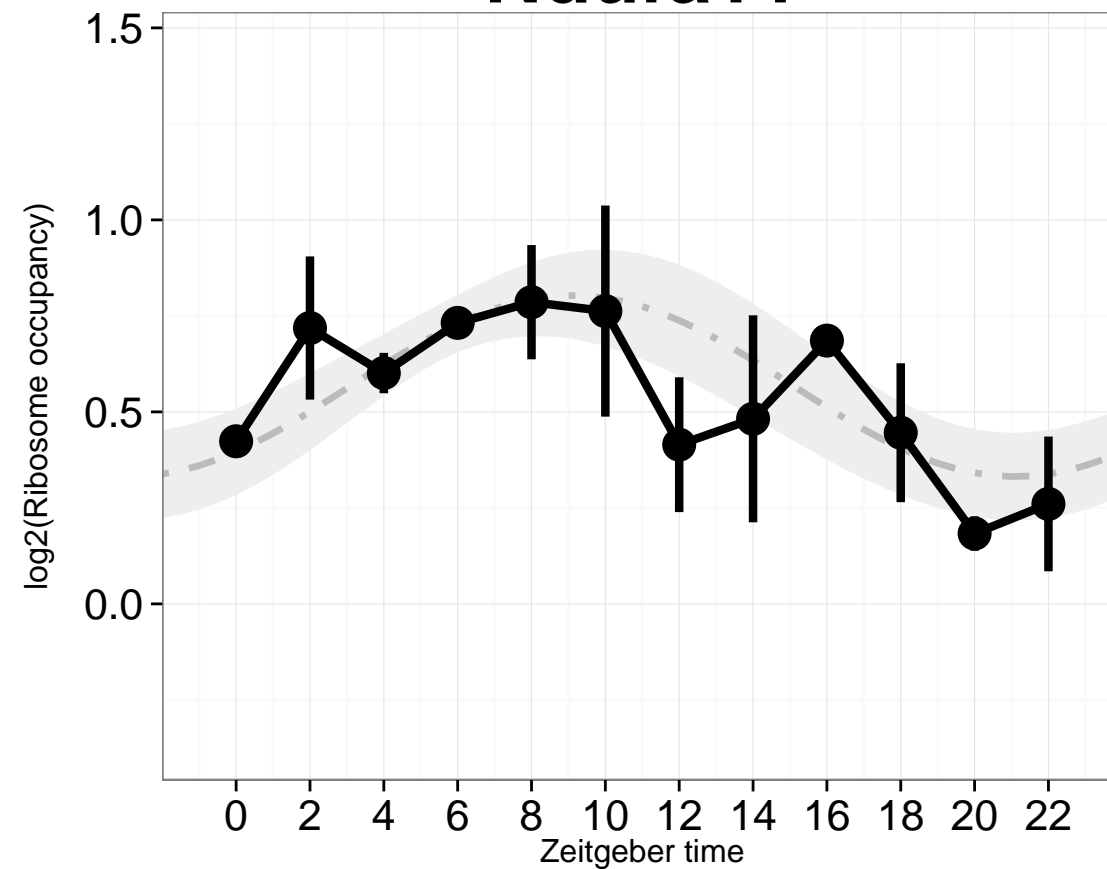

Supplement: SuppDataset_1.zip [file Ndufa11_set_A.pdf › Supplemental Dataset 1/A-mRNA_nonrhyth_translation_nonrhyth/Ndufa11_set_A.pdf]

## Ndufa12

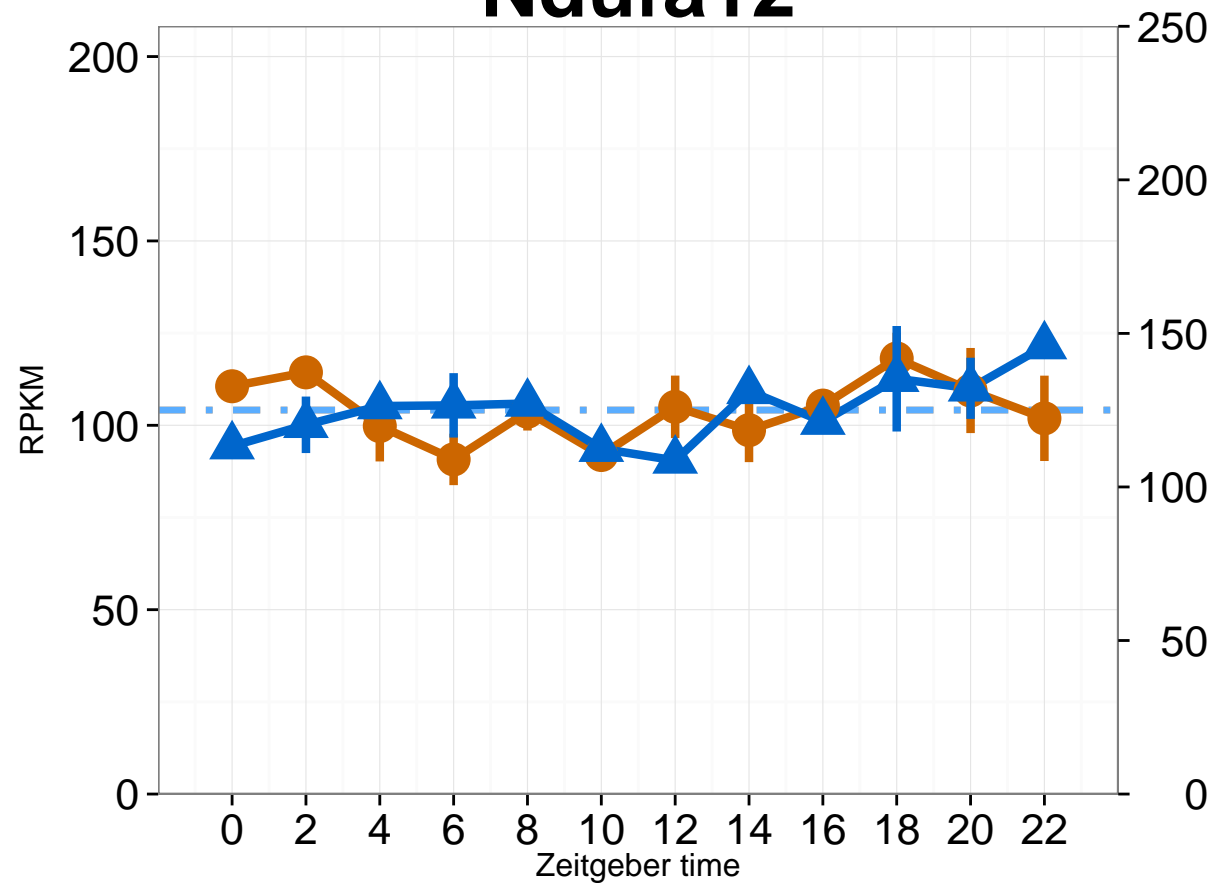

## Ndufa12

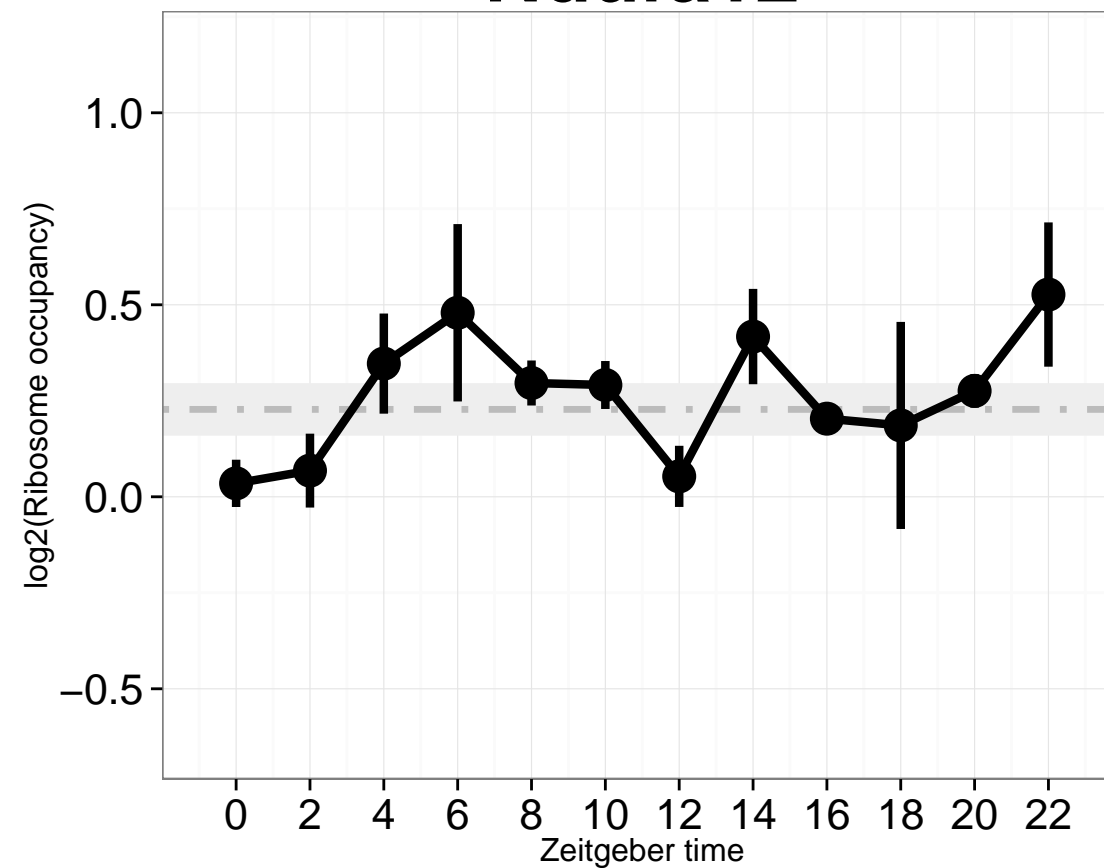

Supplement: SuppDataset_1.zip [file Ndufa12_set_A.pdf › Supplemental Dataset 1/A-mRNA_nonrhyth_translation_nonrhyth/Ndufa12_set_A.pdf]

## Ndufa13

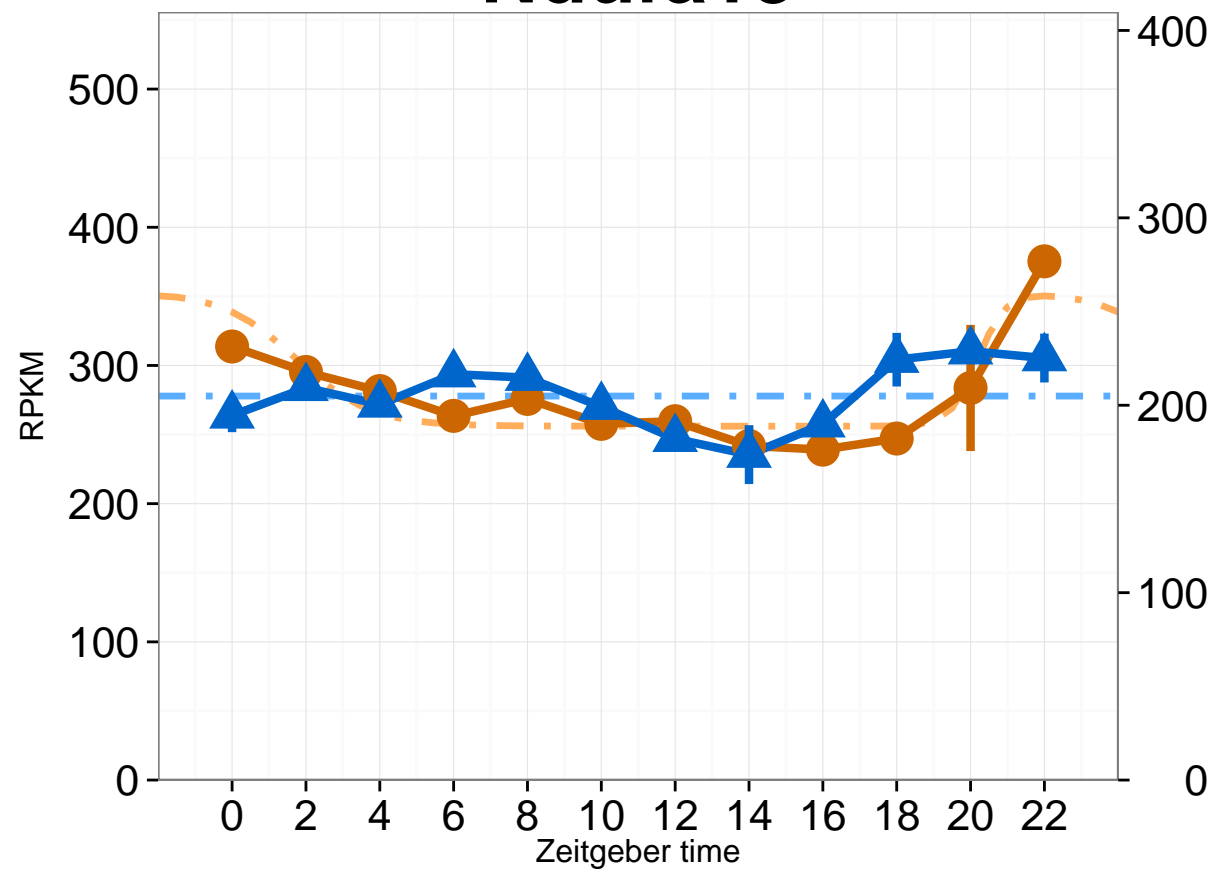

## Ndufa13

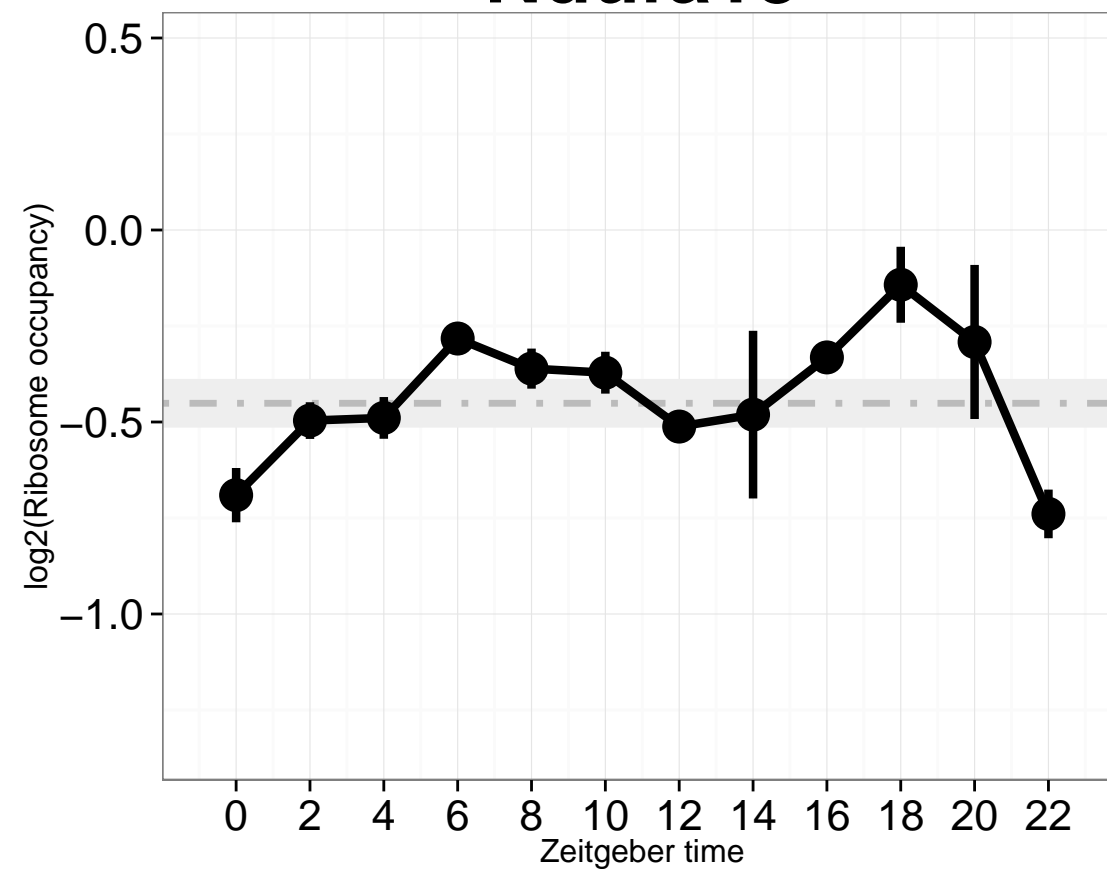

Supplement: SuppDataset_1.zip [file Ndufa13_set_A.pdf › Supplemental Dataset 1/A-mRNA_nonrhyth_translation_nonrhyth/Ndufa13_set_A.pdf]

# Ndufa1

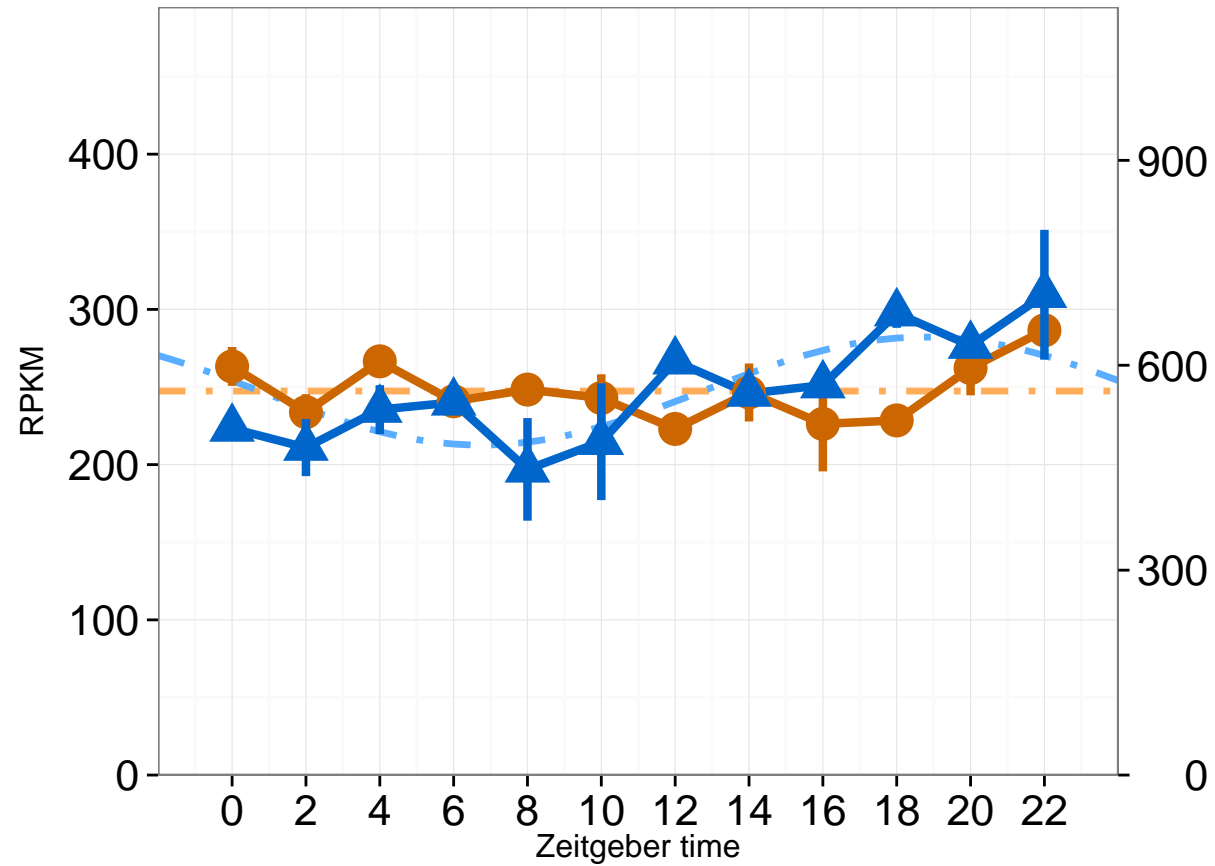

# Ndufa1

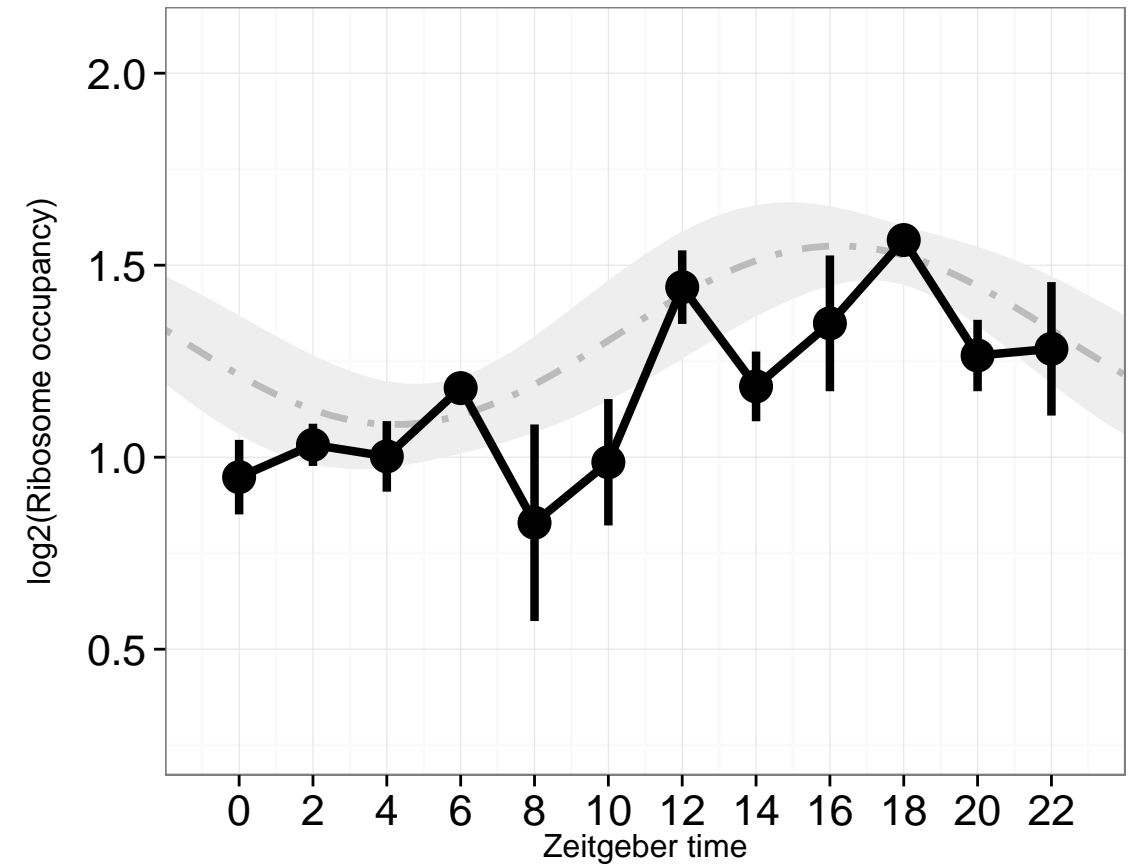

Supplement: SuppDataset_1.zip [file Ndufa1_set_A.pdf › Supplemental Dataset 1/A-mRNA_nonrhyth_translation_nonrhyth/Ndufa1_set_A.pdf]

## Ndufa2

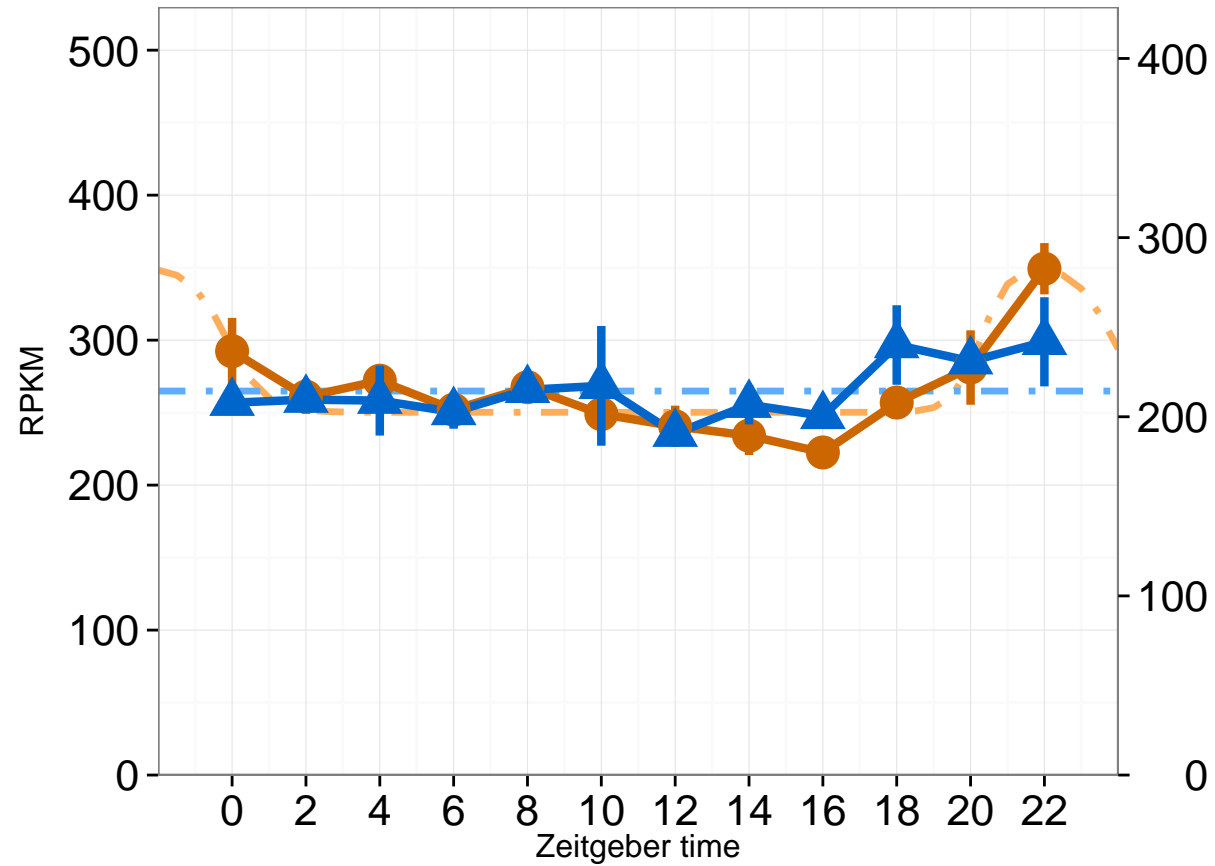

## Ndufa2

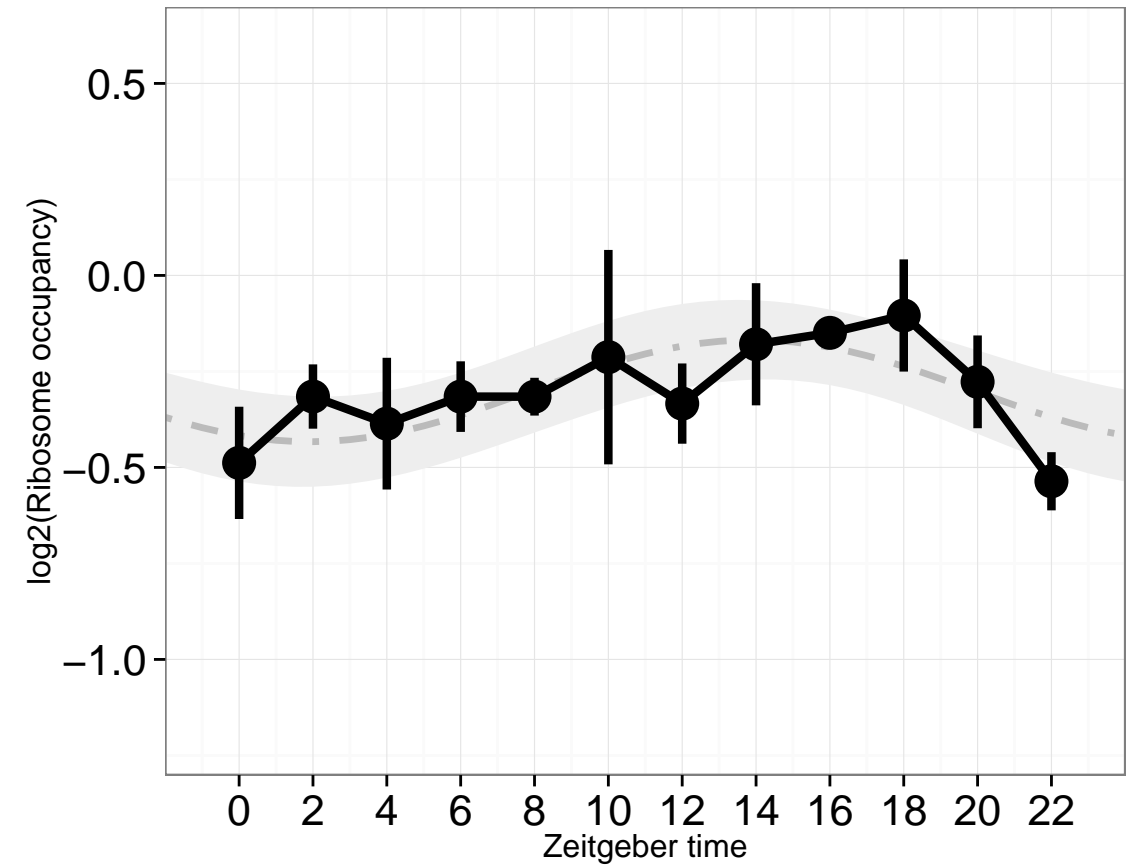

Supplement: SuppDataset_1.zip [file Ndufa2_set_A.pdf › Supplemental Dataset 1/A-mRNA_nonrhyth_translation_nonrhyth/Ndufa2_set_A.pdf]

# Ndufa3

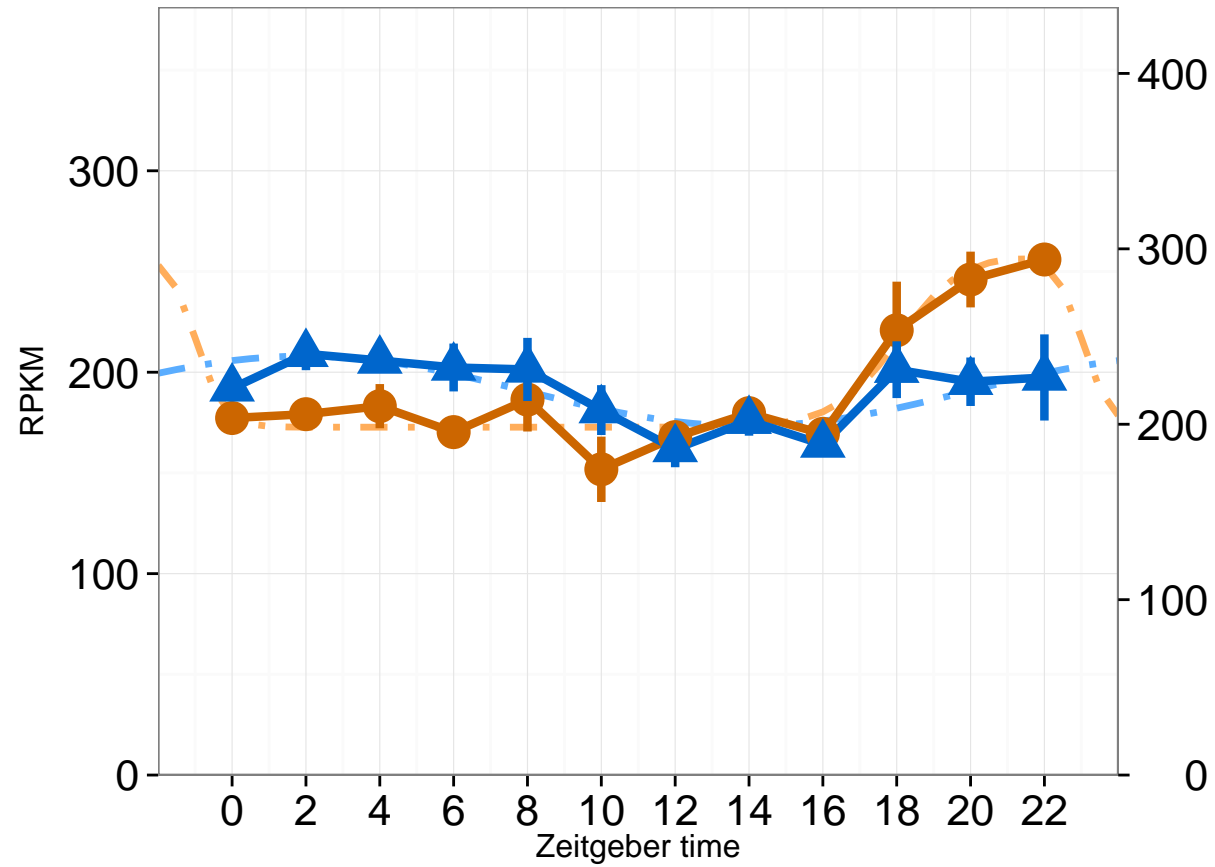

# Ndufa3

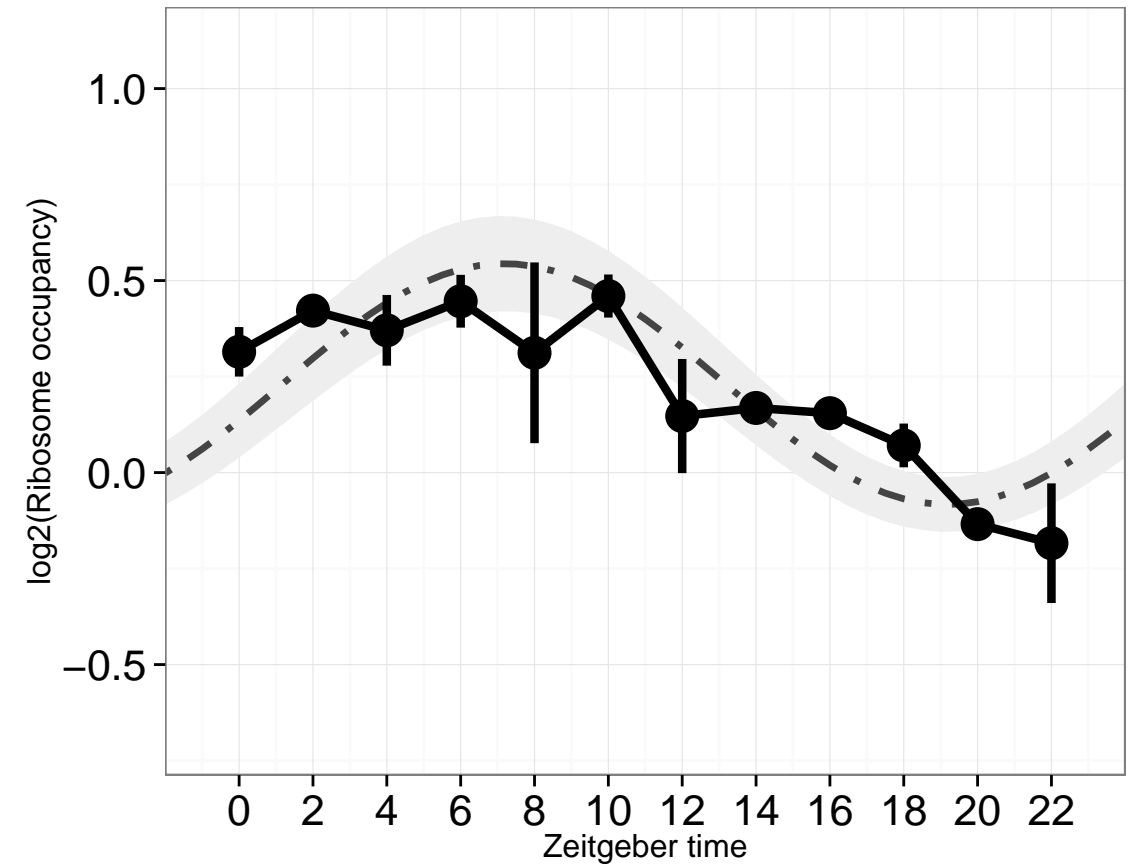

Supplement: SuppDataset_1.zip [file Ndufa3_set_A.pdf › Supplemental Dataset 1/A-mRNA_nonrhyth_translation_nonrhyth/Ndufa3_set_A.pdf]

# Ndufa4

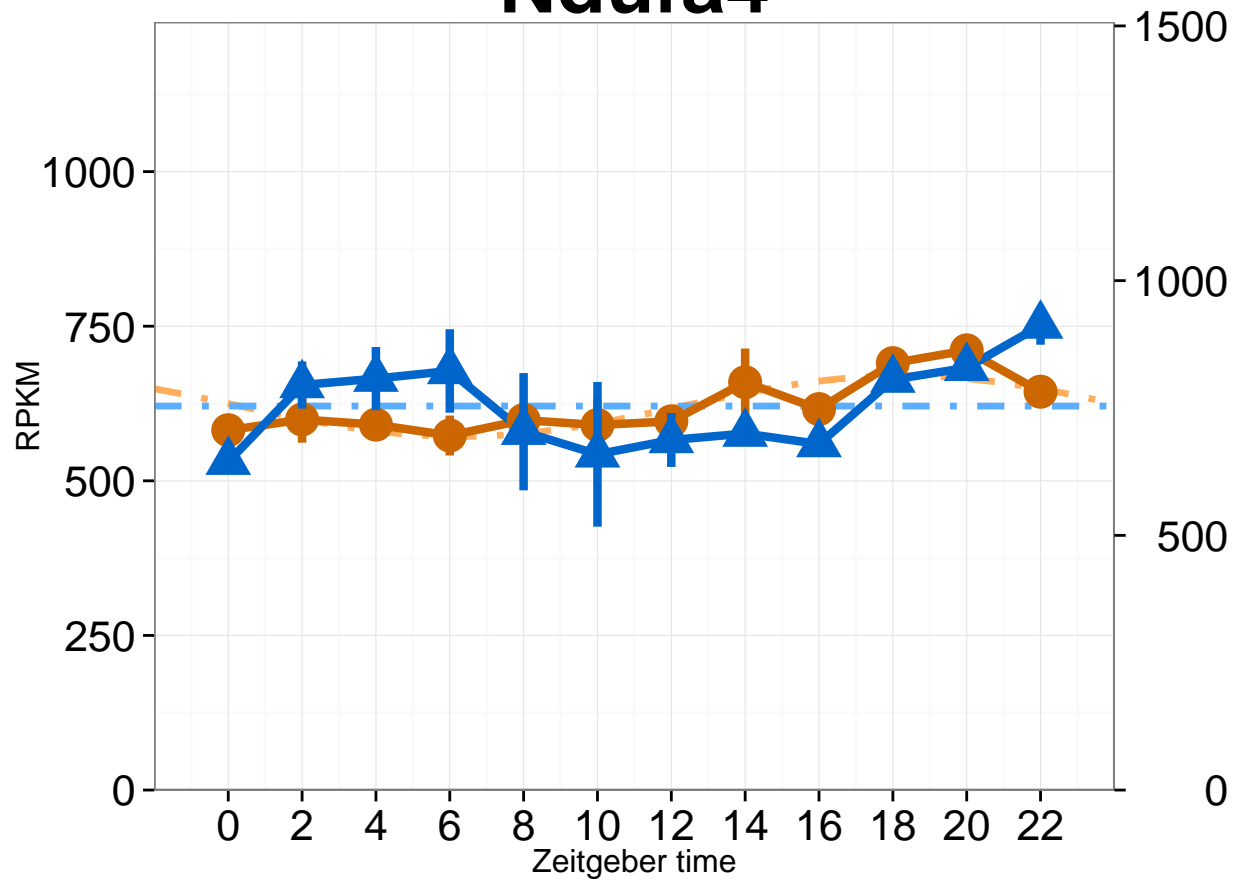

# Ndufa4

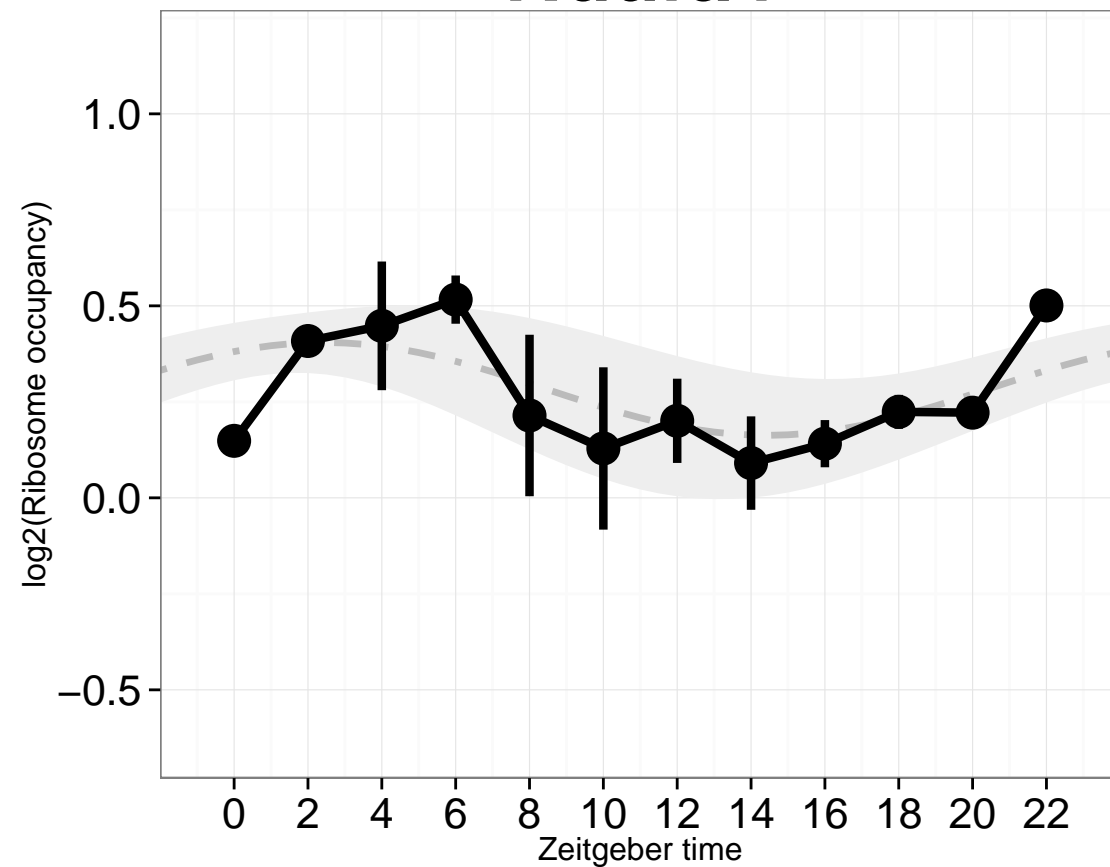

Supplement: SuppDataset_1.zip [file Ndufa4_set_A.pdf › Supplemental Dataset 1/A-mRNA_nonrhyth_translation_nonrhyth/Ndufa4_set_A.pdf]

# Ndufa5

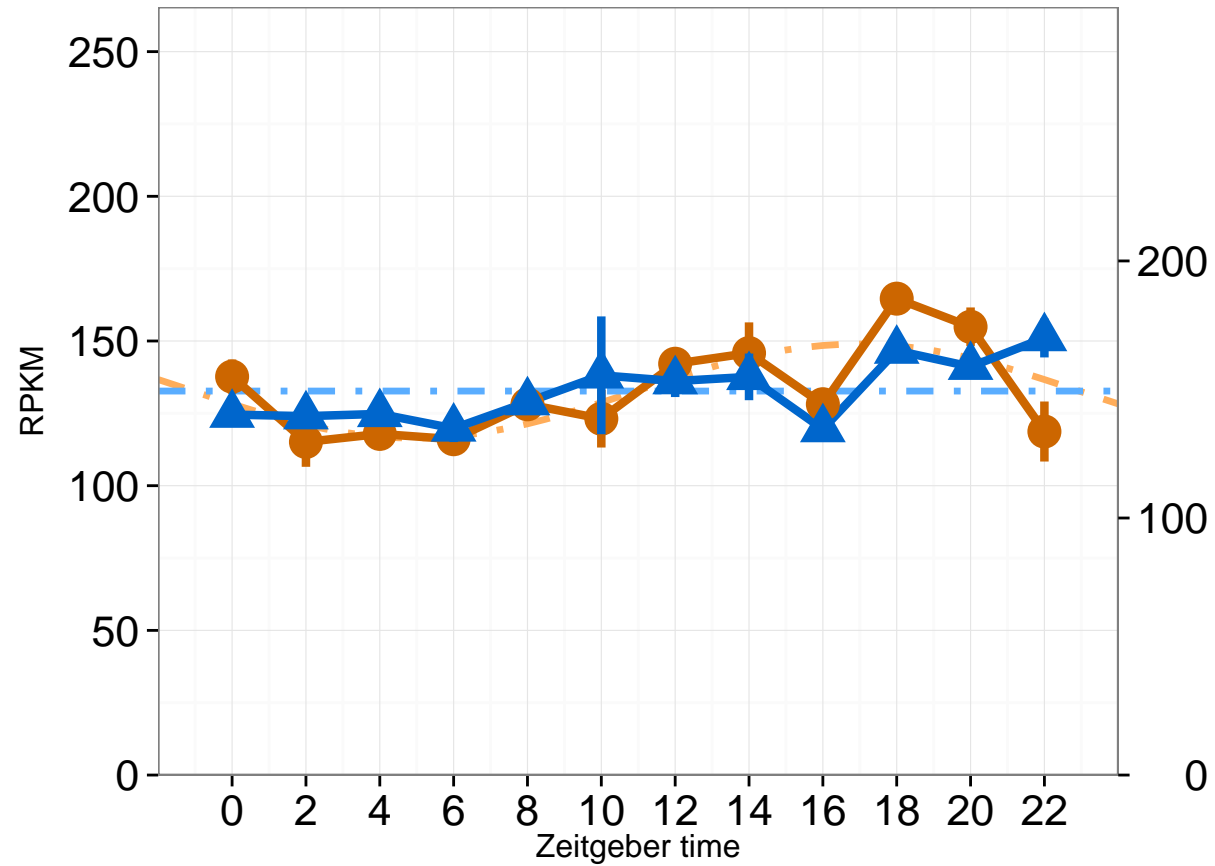

# Ndufa5

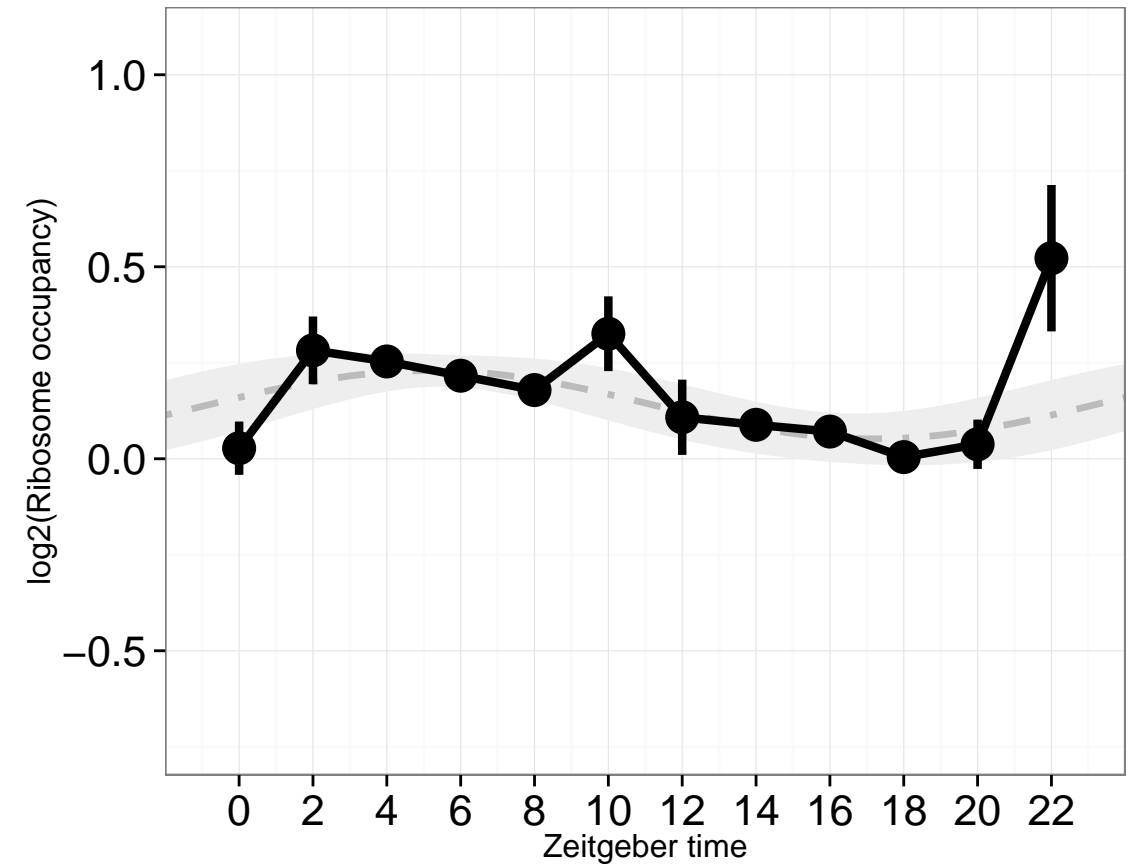

Supplement: SuppDataset_1.zip [file Ndufa5_set_A.pdf › Supplemental Dataset 1/A-mRNA_nonrhyth_translation_nonrhyth/Ndufa5_set_A.pdf]

# Ndufa6

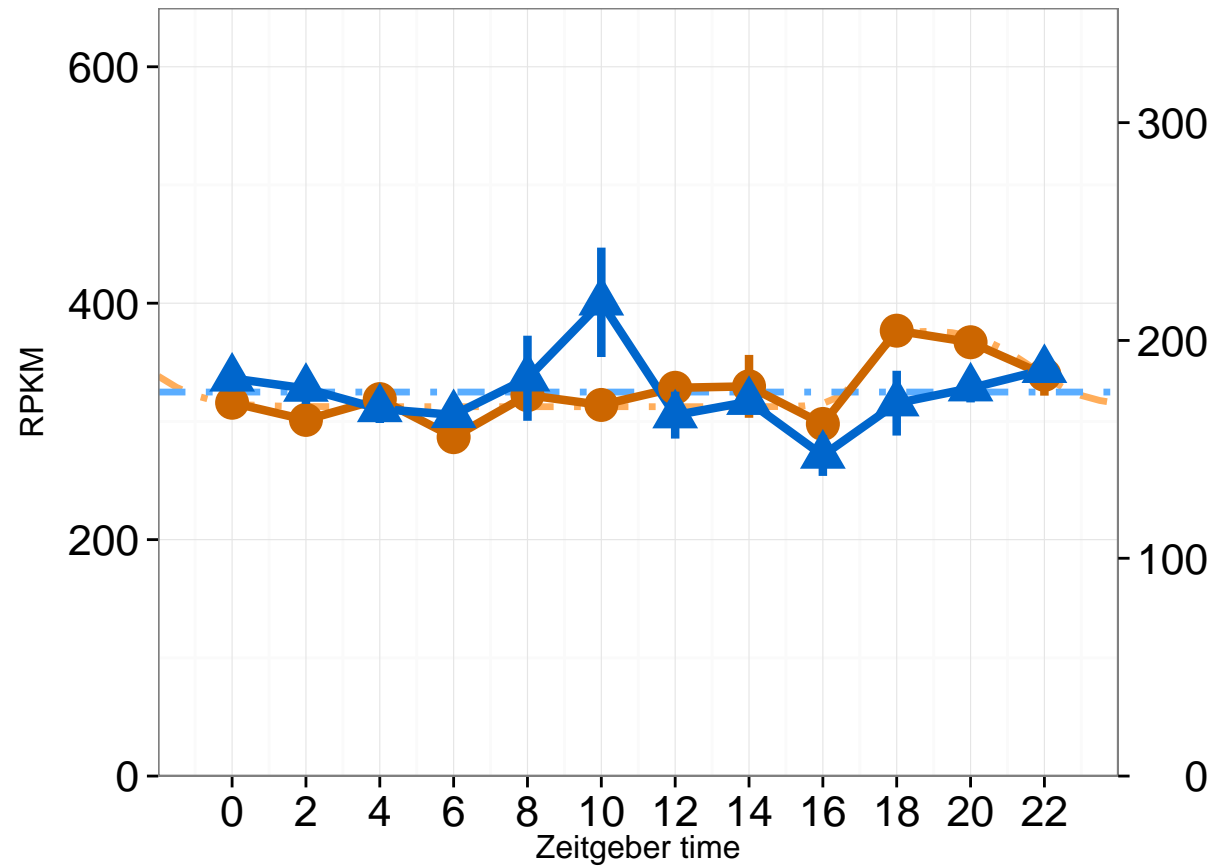

# Ndufa6

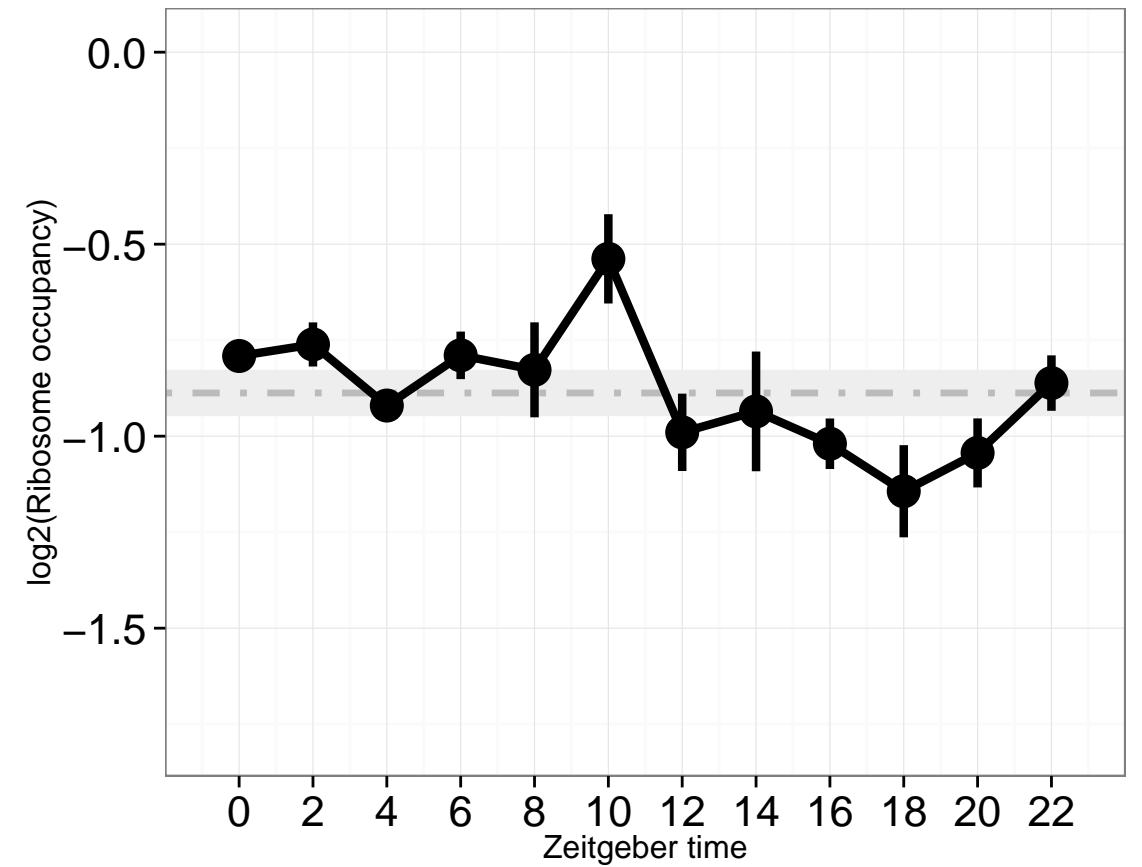

Supplement: SuppDataset_1.zip [file Ndufa6_set_A.pdf › Supplemental Dataset 1/A-mRNA_nonrhyth_translation_nonrhyth/Ndufa6_set_A.pdf]

# Ndufa8

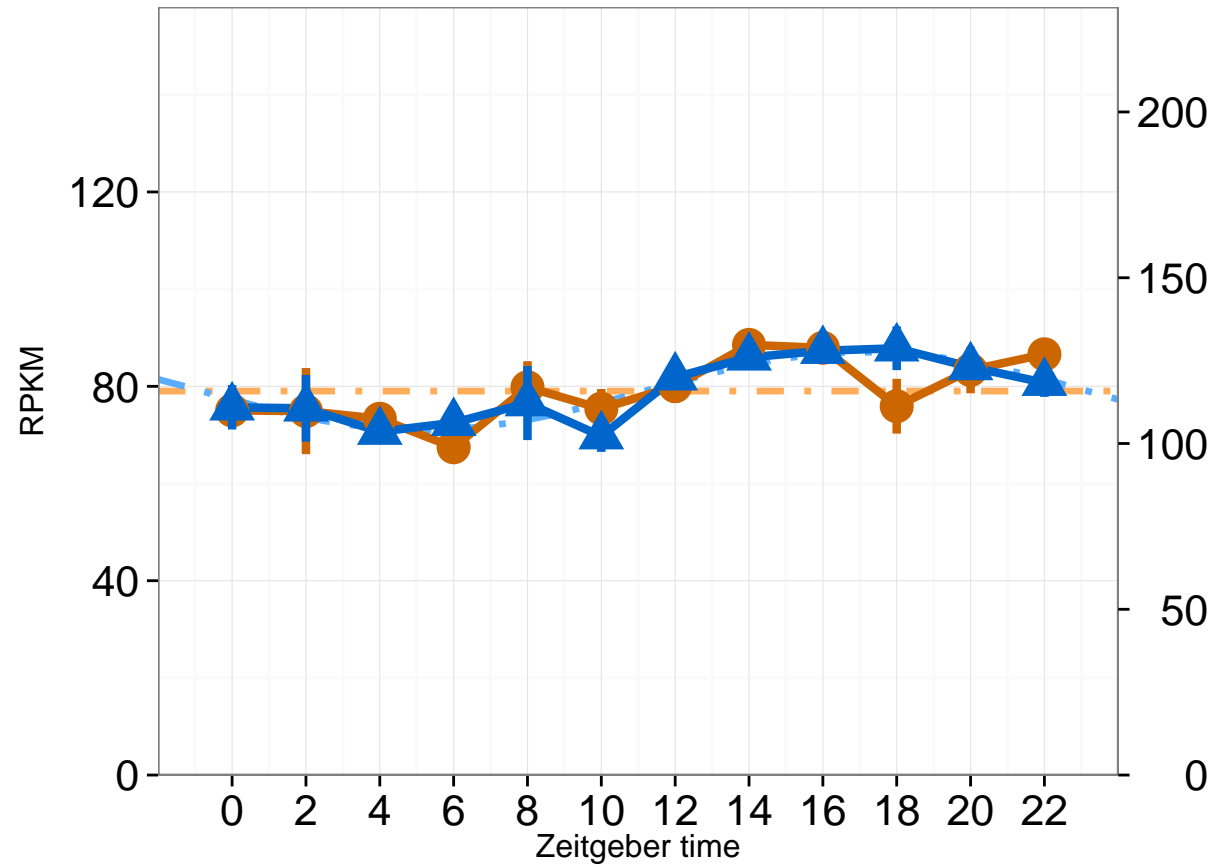

# Ndufa8

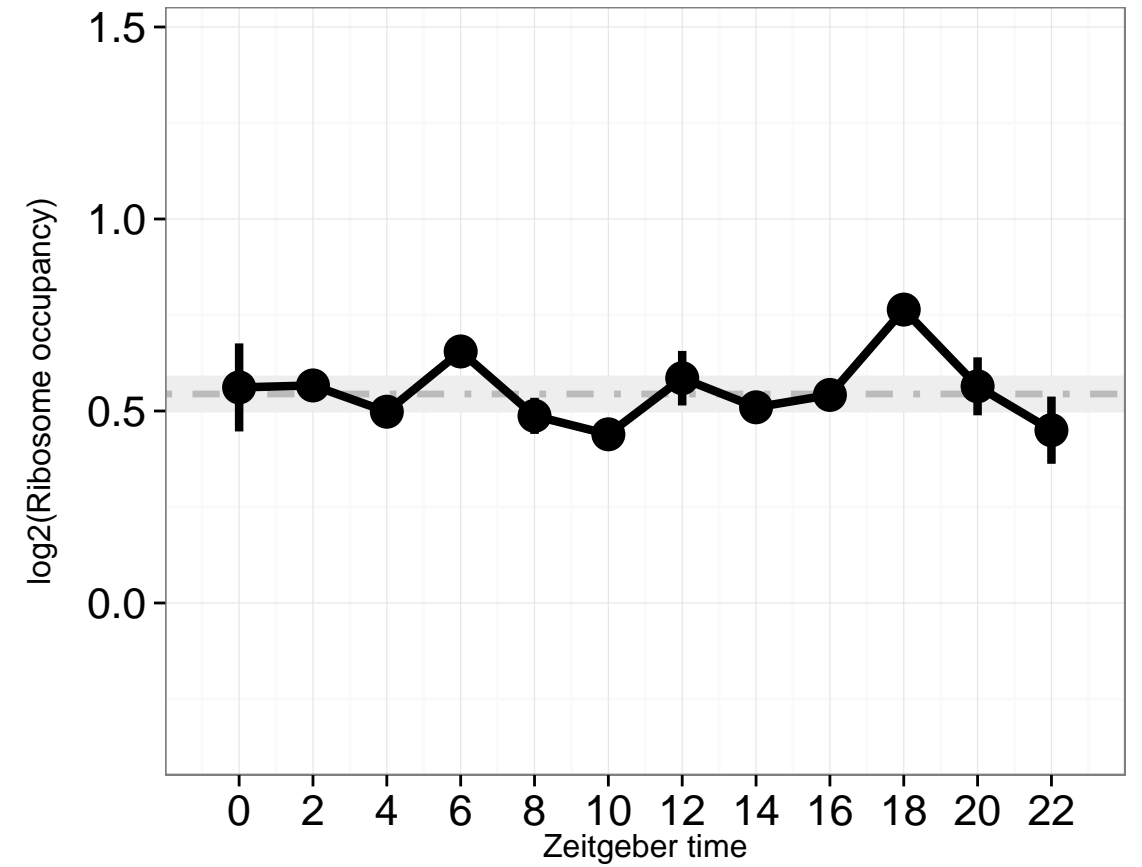

Supplement: SuppDataset_1.zip [file Ndufa8_set_A.pdf › Supplemental Dataset 1/A-mRNA_nonrhyth_translation_nonrhyth/Ndufa8_set_A.pdf]

## Ndufa9

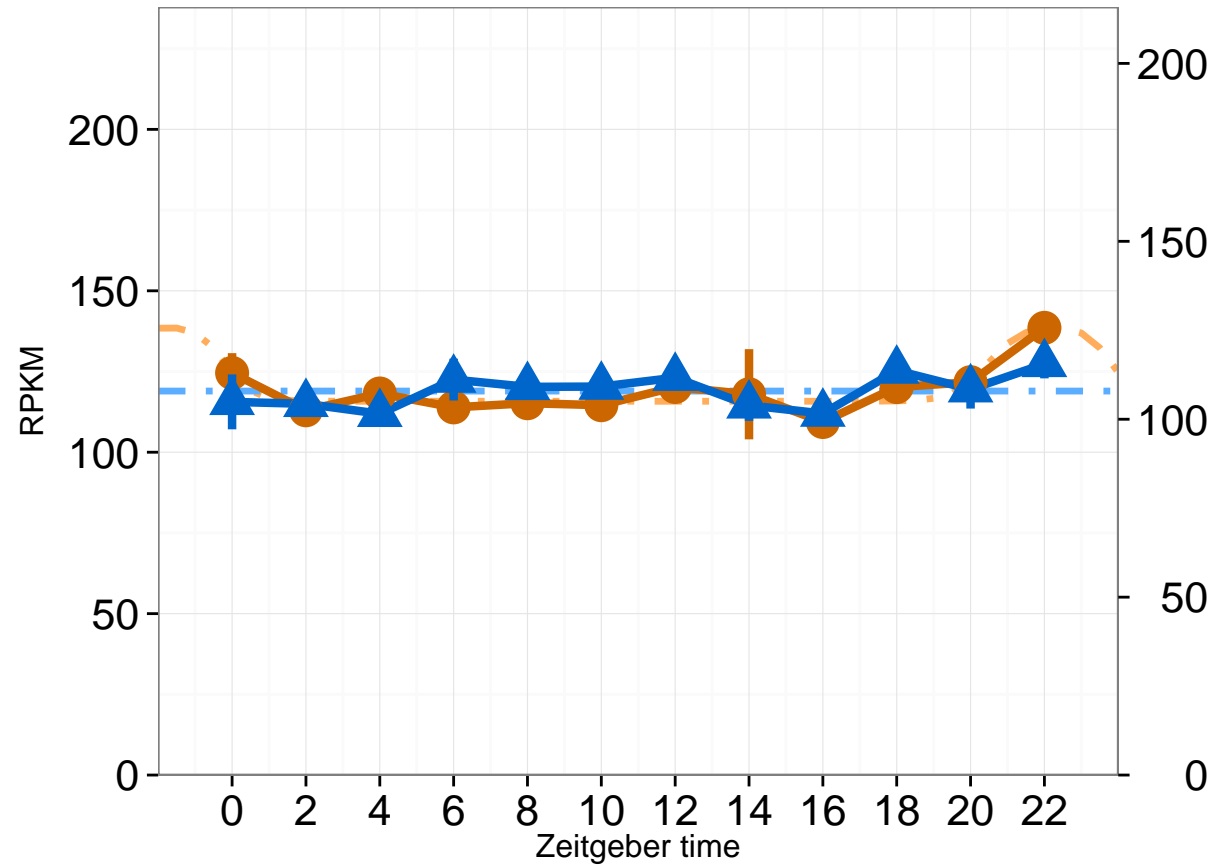

## Ndufa9

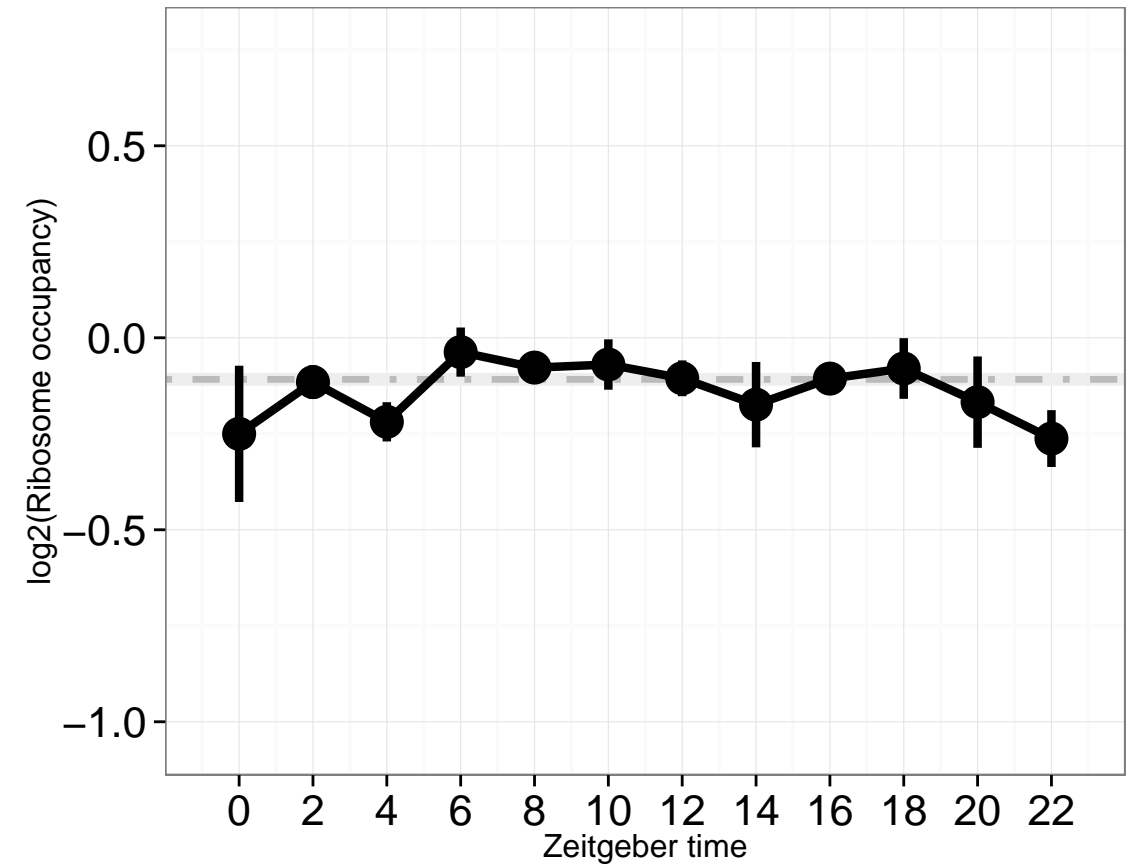

Supplement: SuppDataset_1.zip [file Ndufa9_set_A.pdf › Supplemental Dataset 1/A-mRNA_nonrhyth_translation_nonrhyth/Ndufa9_set_A.pdf]

# Ndufab1

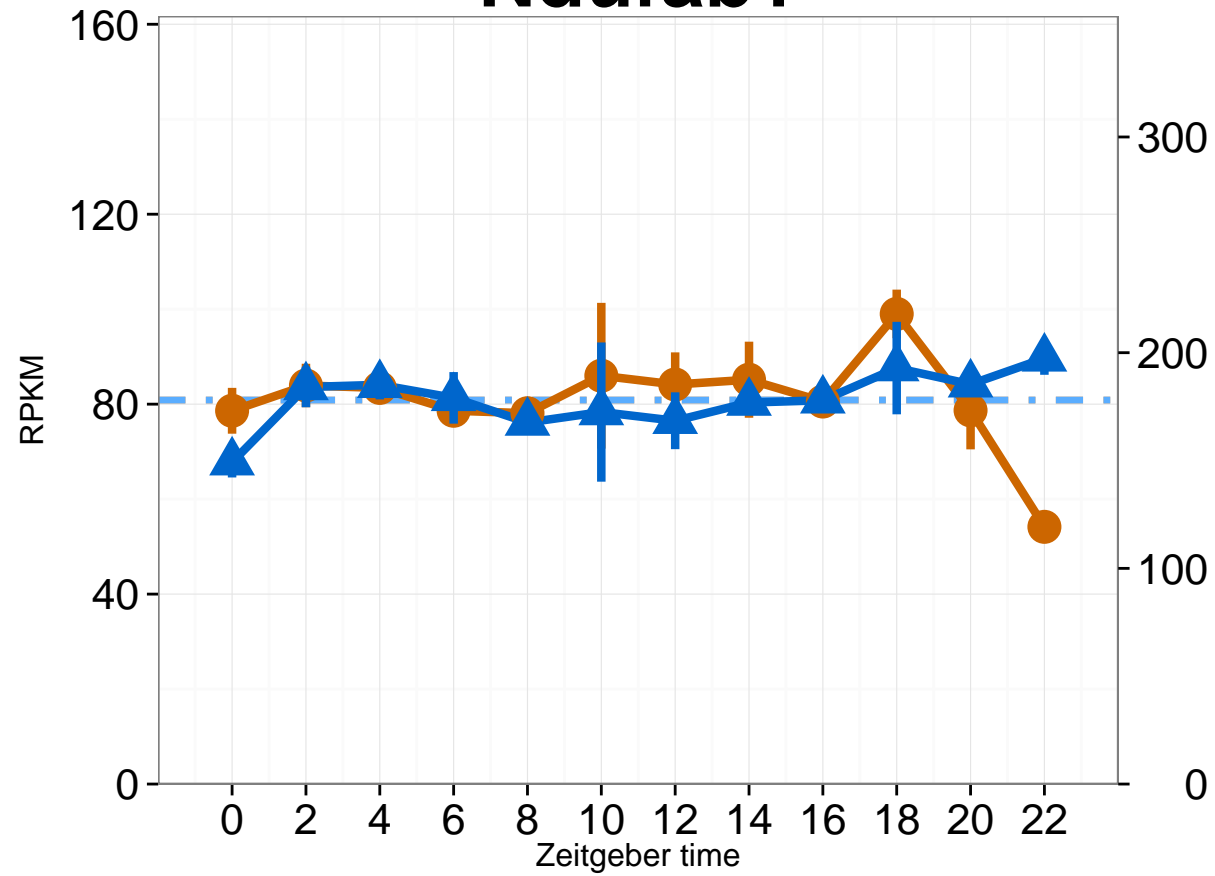

# Ndufab1

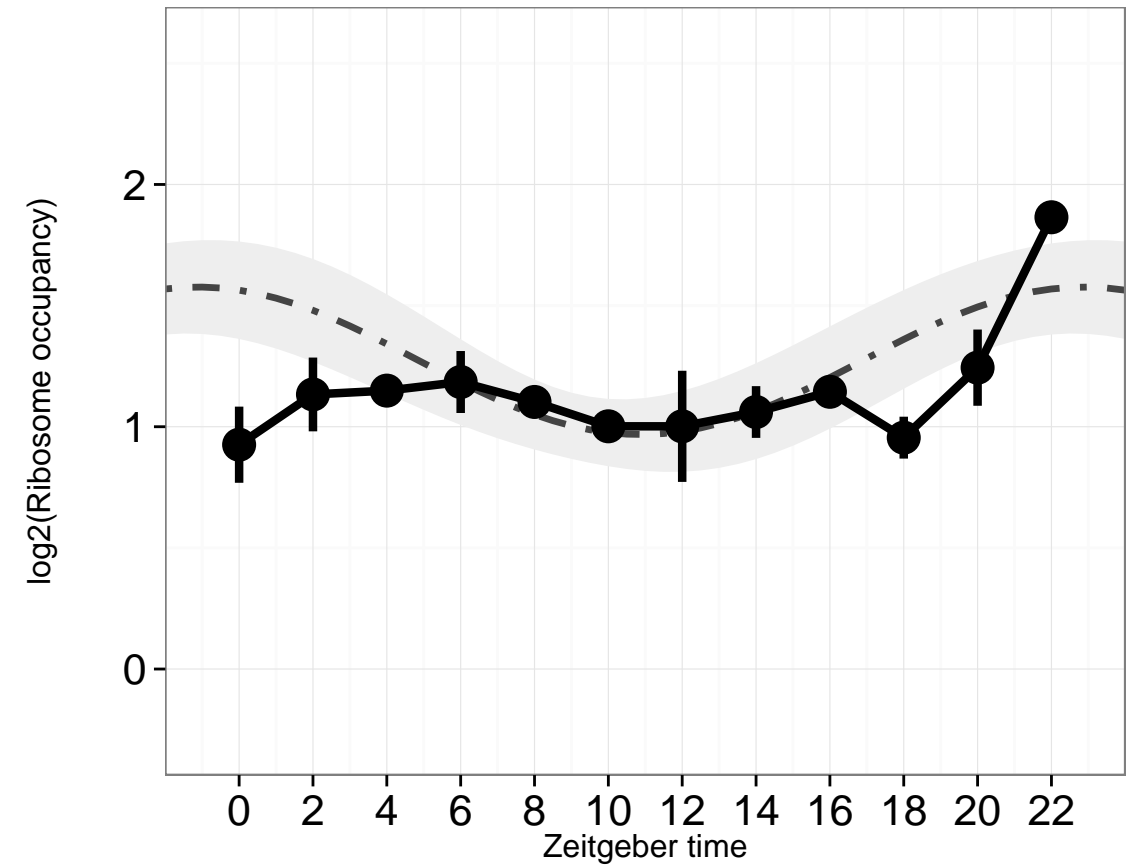

Supplement: SuppDataset_1.zip [file Ndufab1_set_A.pdf › Supplemental Dataset 1/A-mRNA_nonrhyth_translation_nonrhyth/Ndufab1_set_A.pdf]

# Ndutfaf1

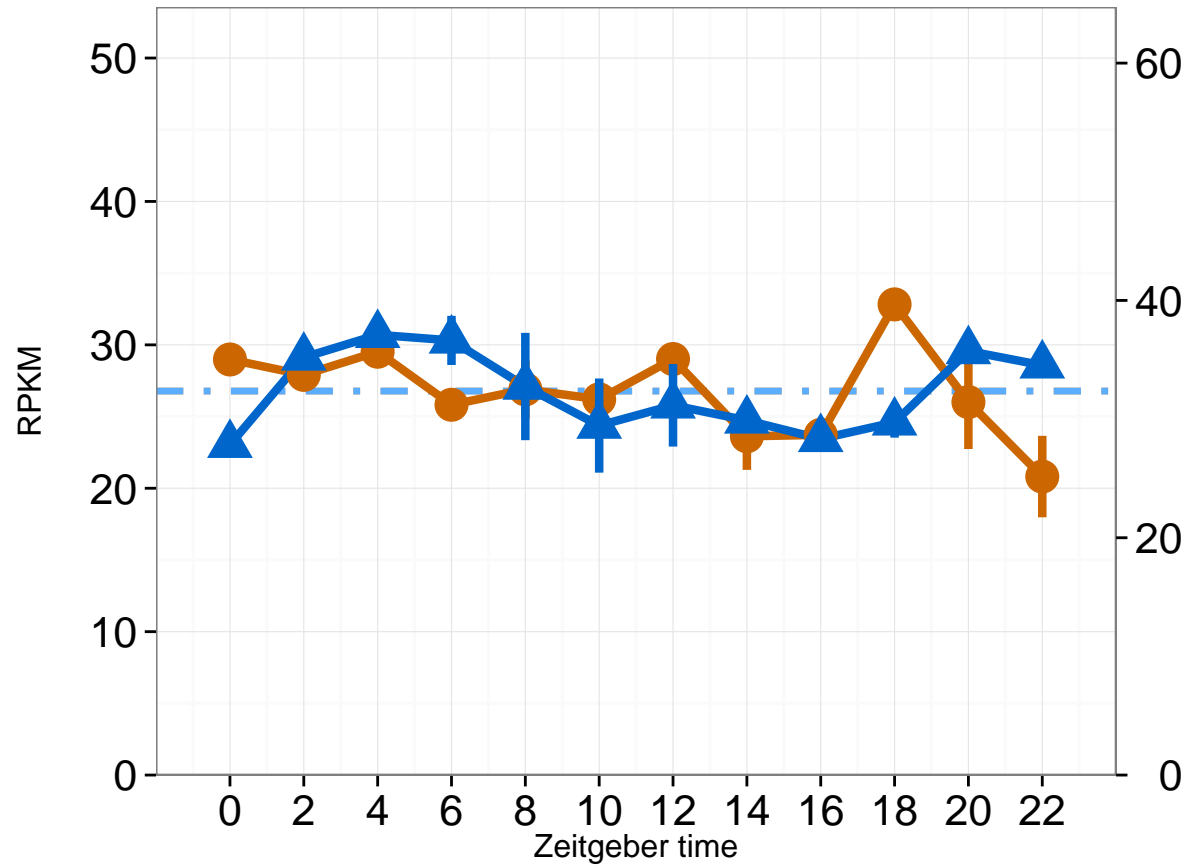

# Ndutfaf1

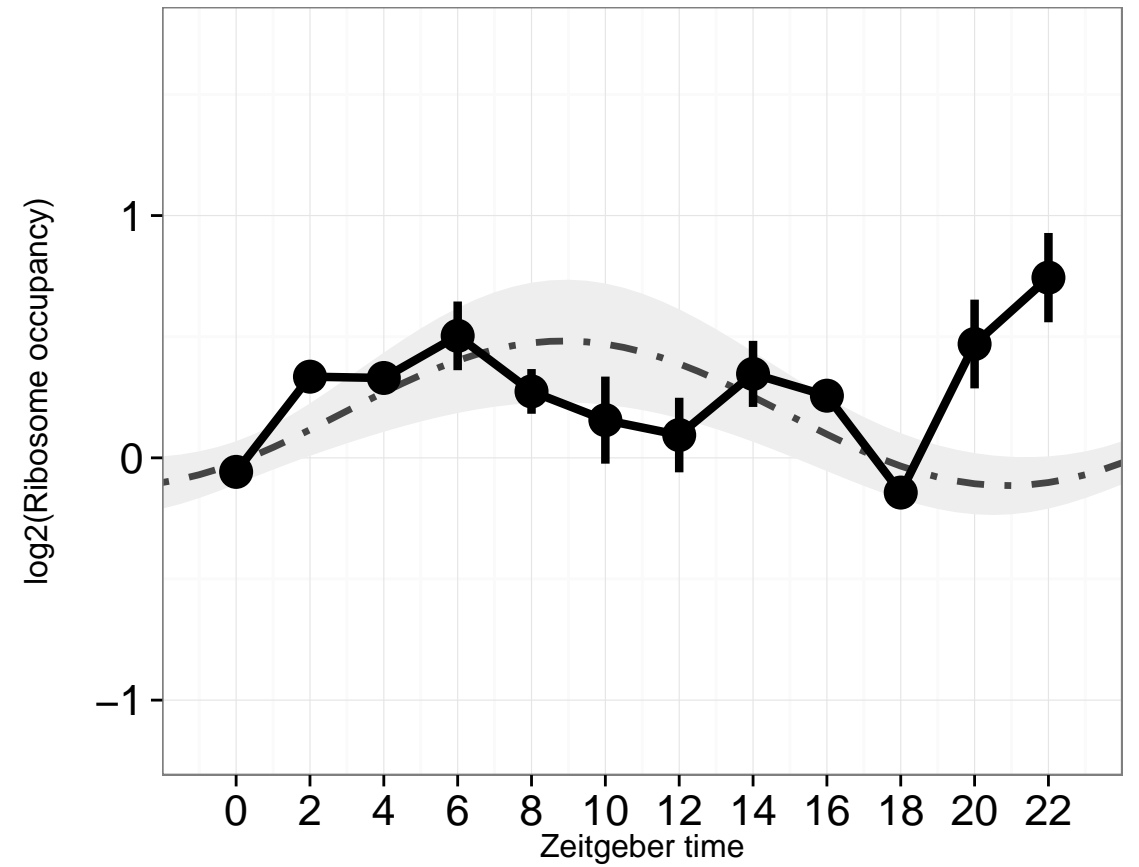

Supplement: SuppDataset_1.zip [file Ndufaf1_set_A.pdf › Supplemental Dataset 1/A-mRNA_nonrhyth_translation_nonrhyth/Ndufaf1_set_A.pdf]

# Ndutfaf2

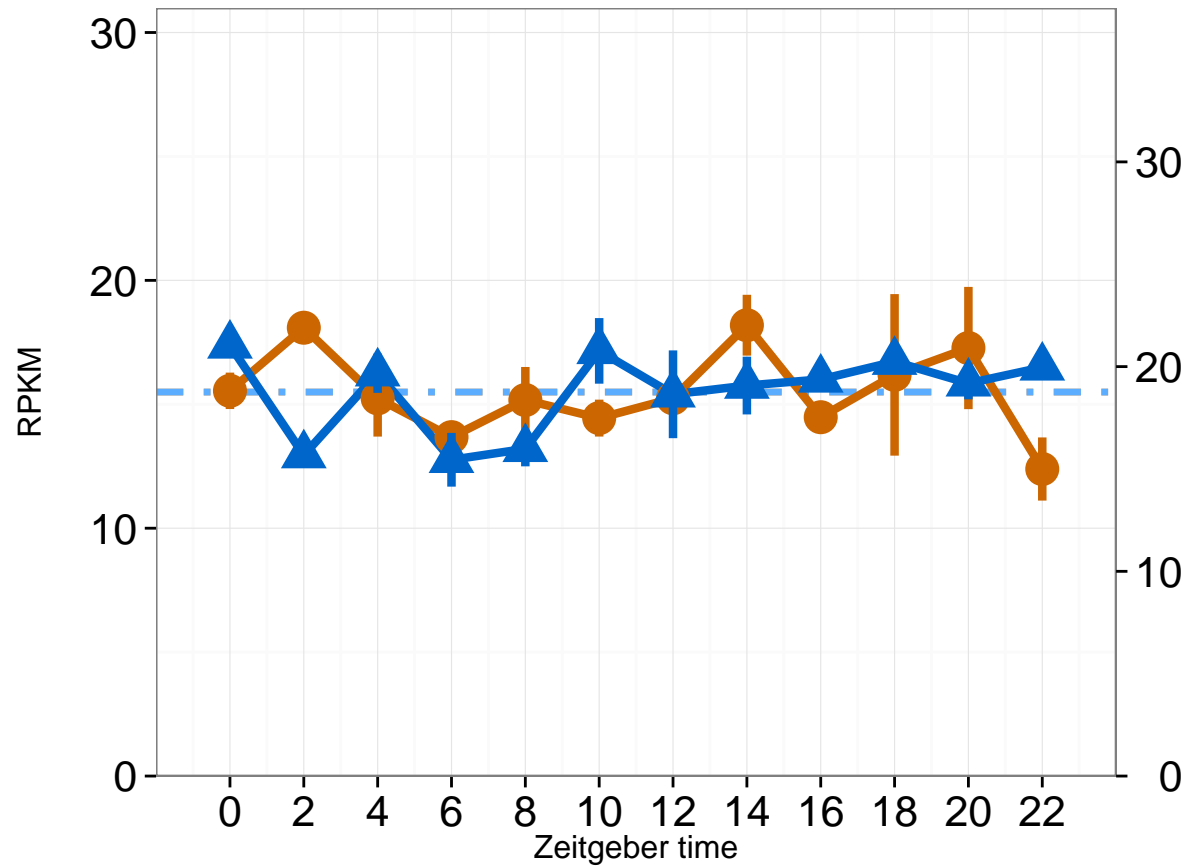

# Ndutfaf2

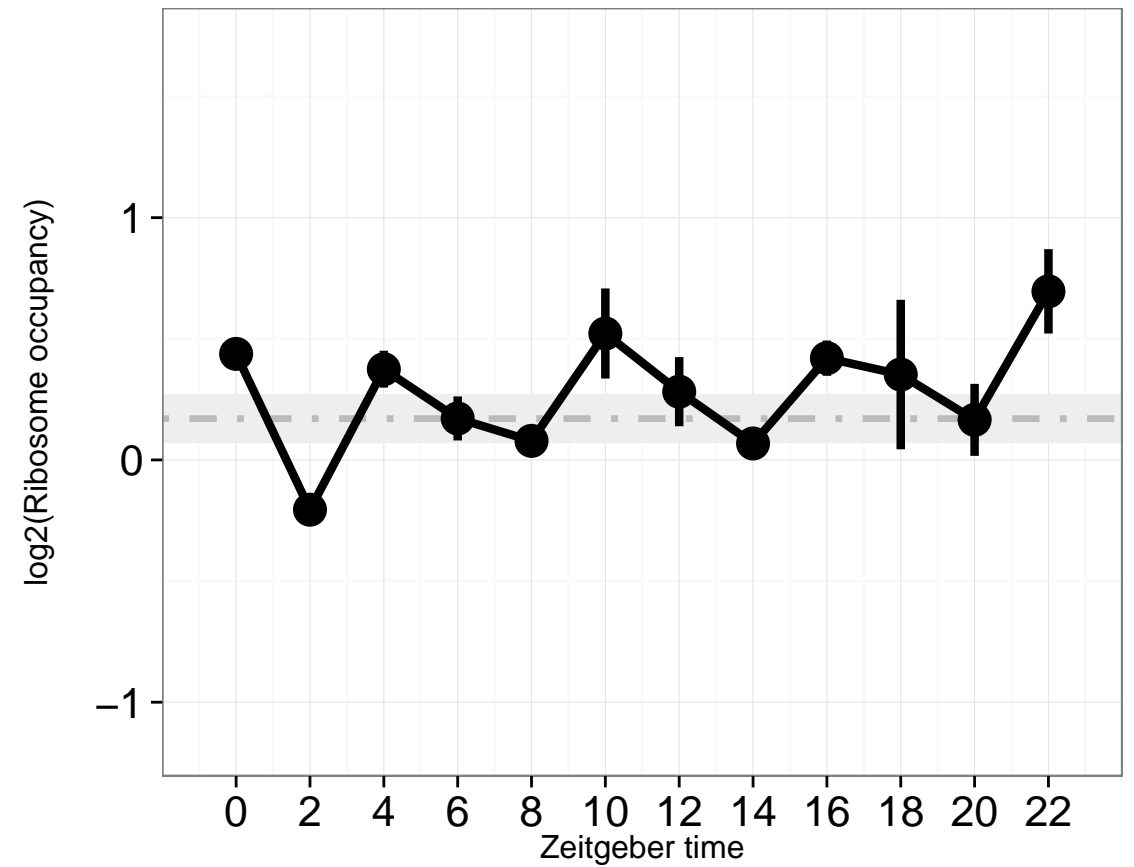

Supplement: SuppDataset_1.zip [file Ndufaf2_set_A.pdf › Supplemental Dataset 1/A-mRNA_nonrhyth_translation_nonrhyth/Ndufaf2_set_A.pdf]

# Ndufaf3

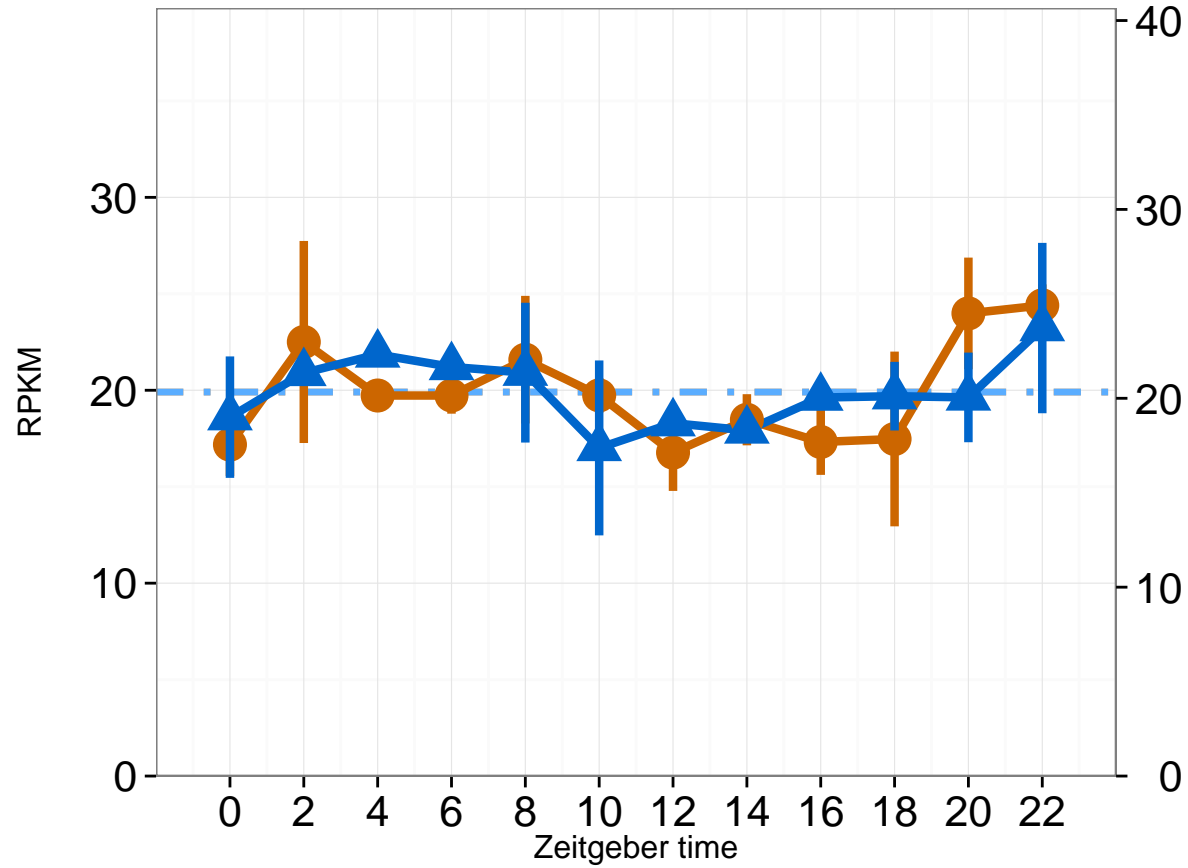

# Ndufaf3

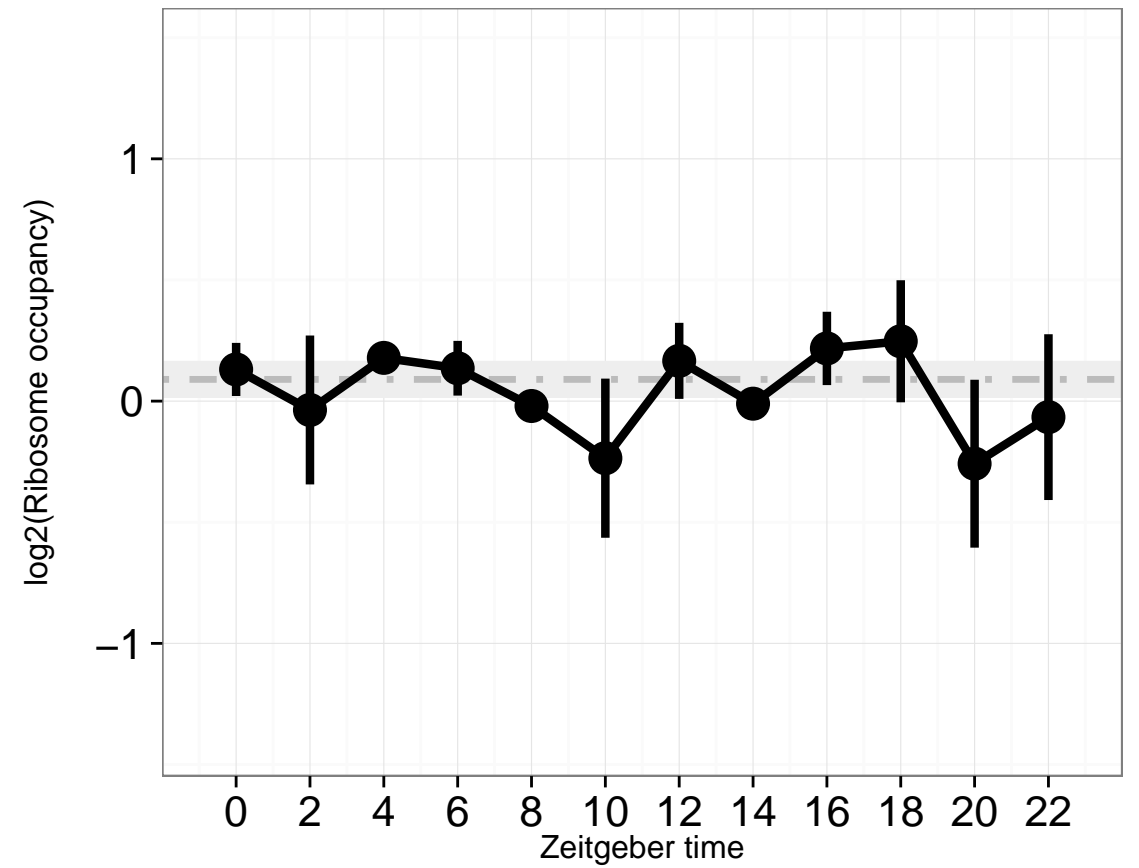

Supplement: SuppDataset_1.zip [file Ndufaf3_set_A.pdf › Supplemental Dataset 1/A-mRNA_nonrhyth_translation_nonrhyth/Ndufaf3_set_A.pdf]

## Ndufaf5

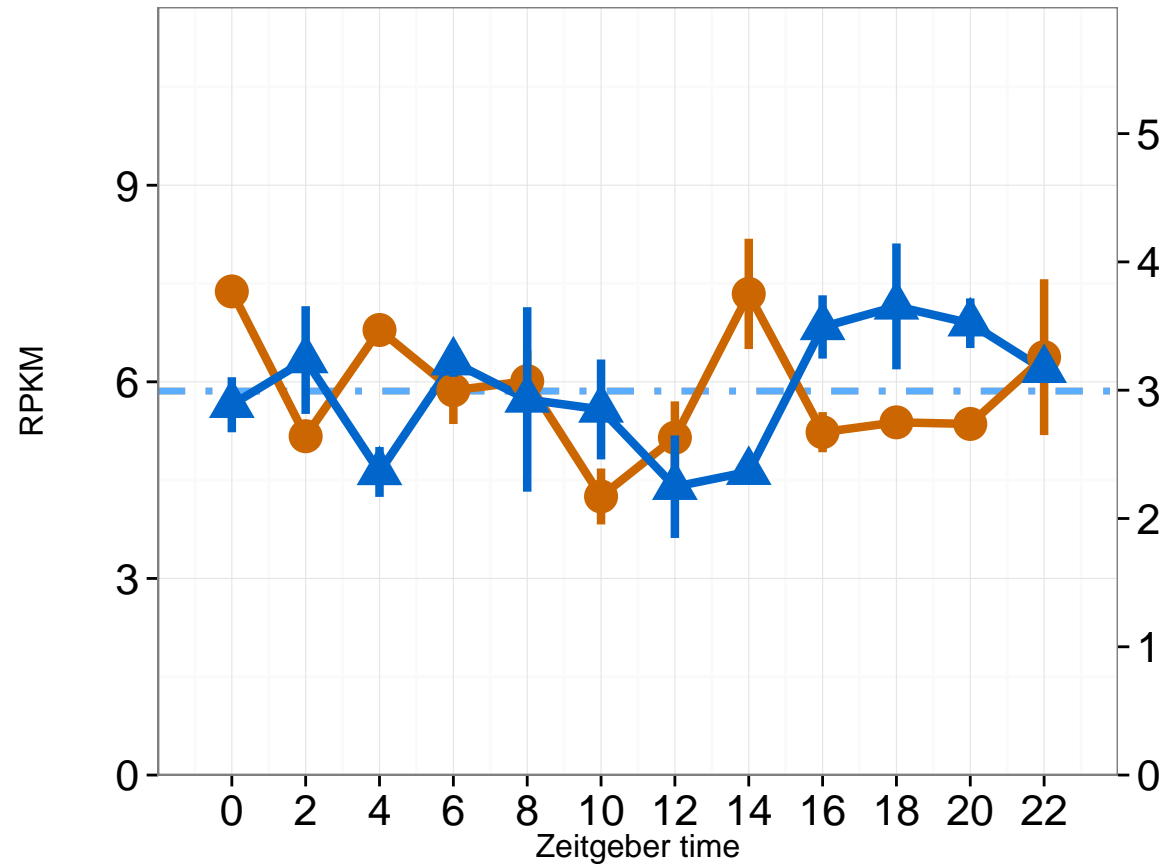

## Ndufaf5

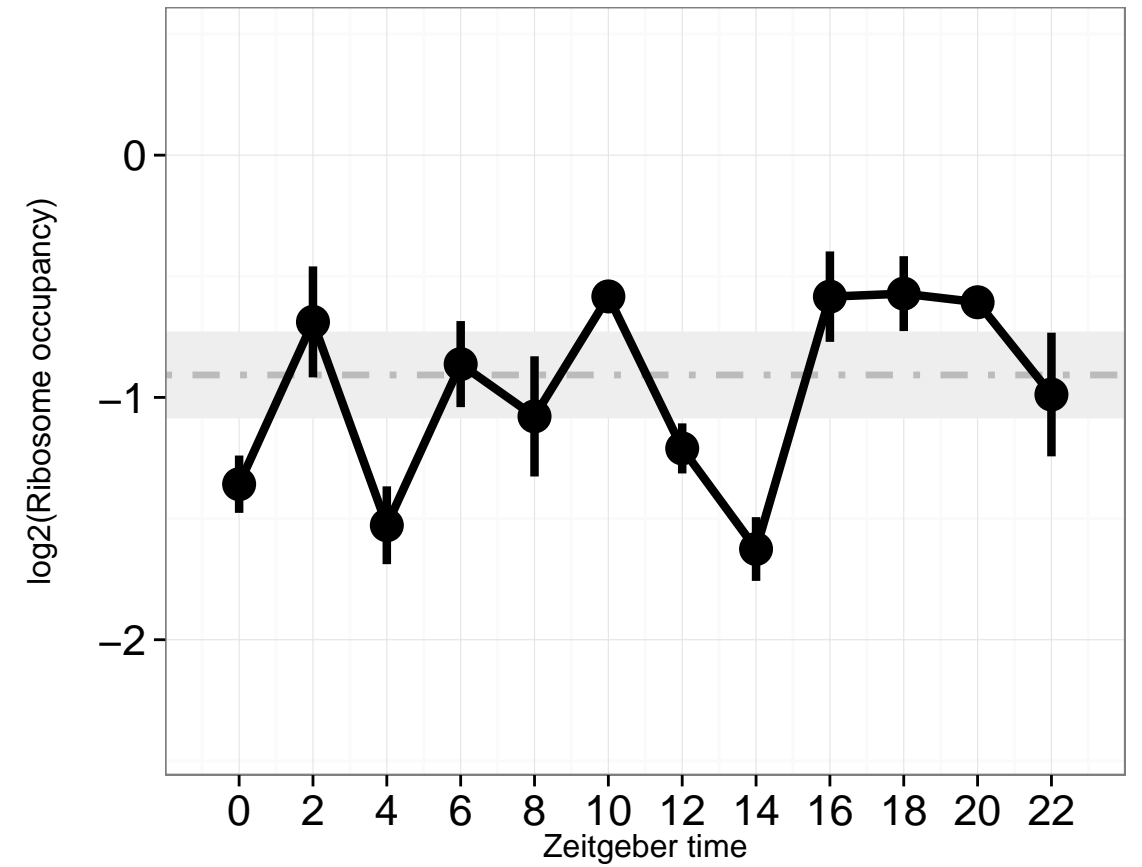

Supplement: SuppDataset_1.zip [file Ndufaf5_set_A.pdf › Supplemental Dataset 1/A-mRNA_nonrhyth_translation_nonrhyth/Ndufaf5_set_A.pdf]

# Ndutfaf6

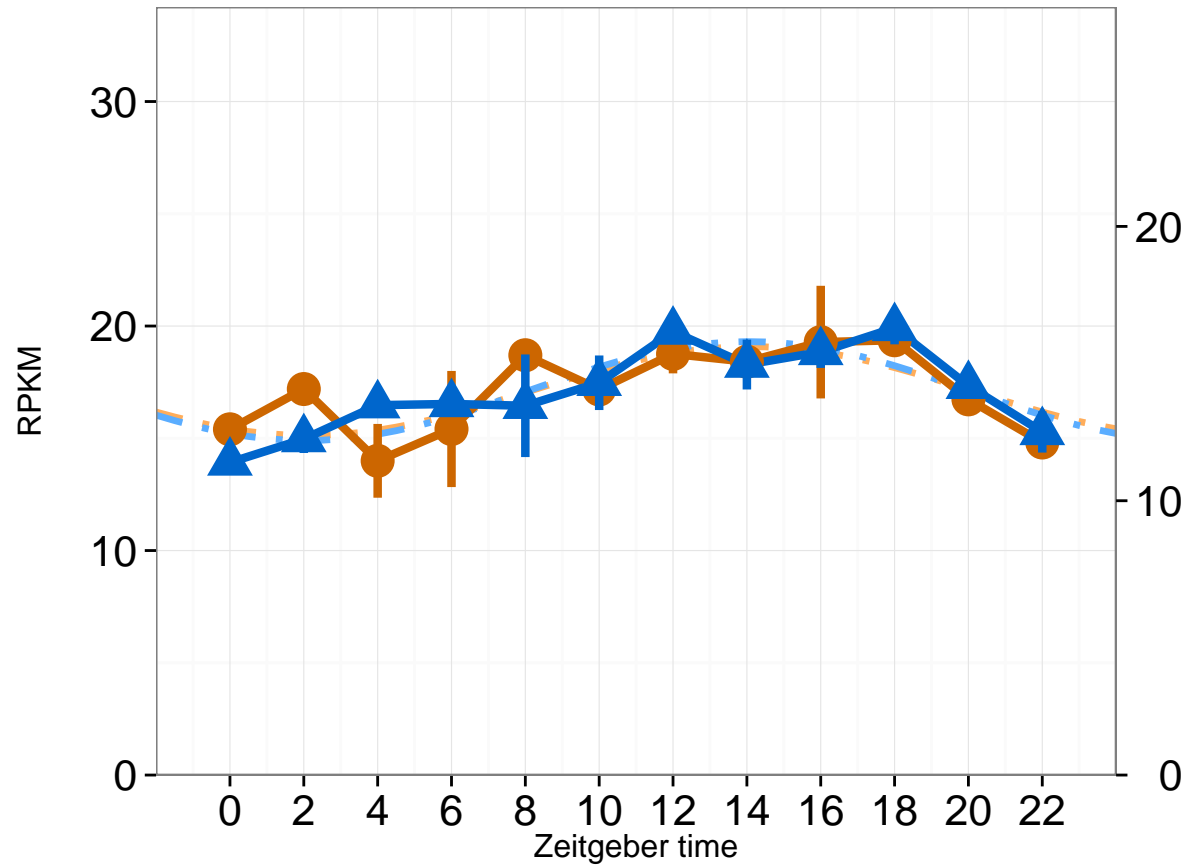

# Ndutfaf6

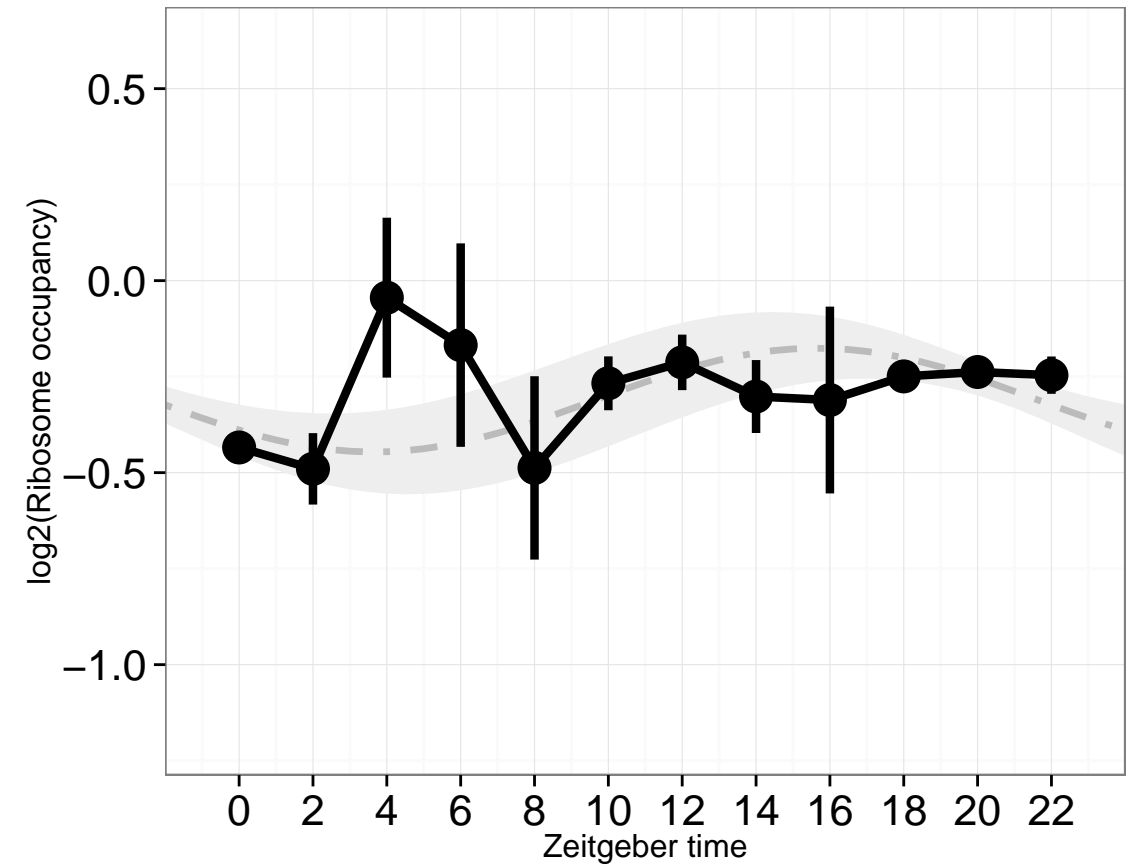

Supplement: SuppDataset_1.zip [file Ndufaf6_set_A.pdf › Supplemental Dataset 1/A-mRNA_nonrhyth_translation_nonrhyth/Ndufaf6_set_A.pdf]

## Ndufaf7

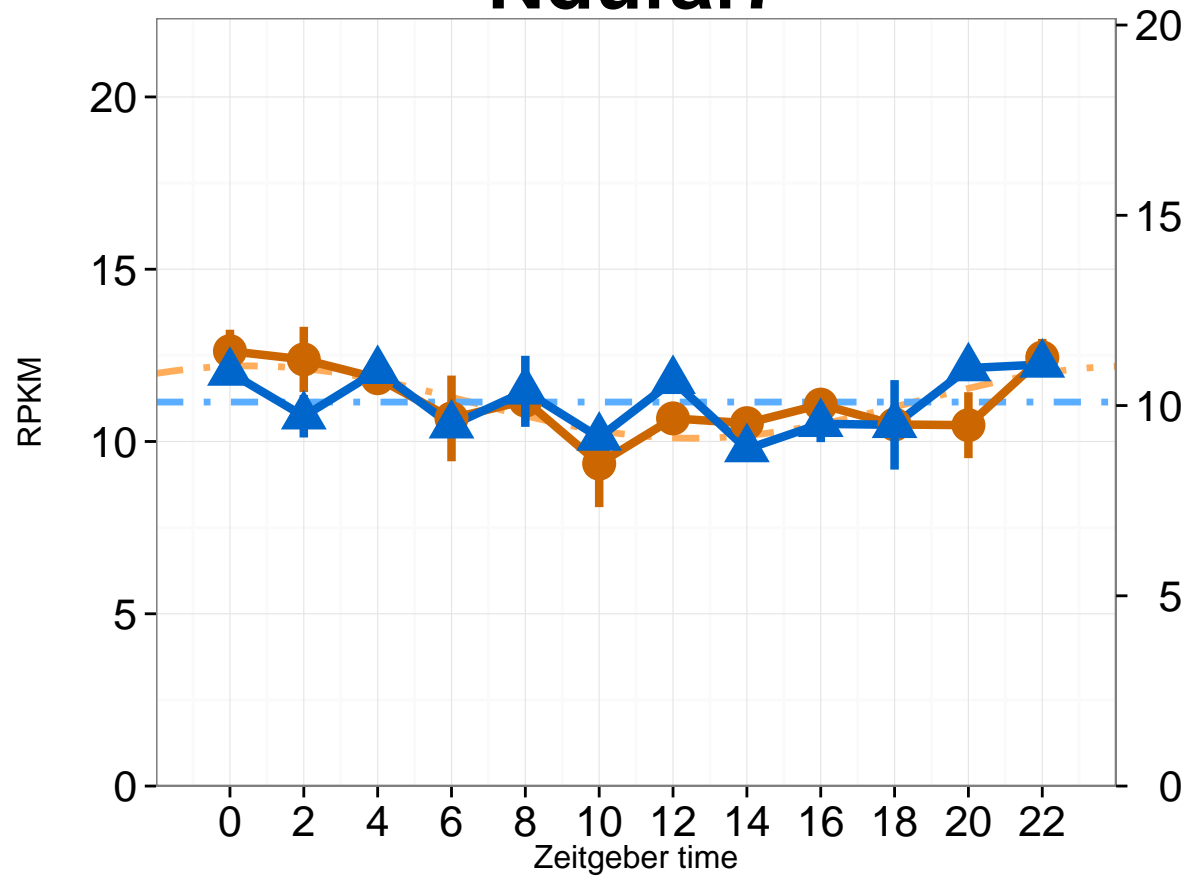

## Ndufaf7

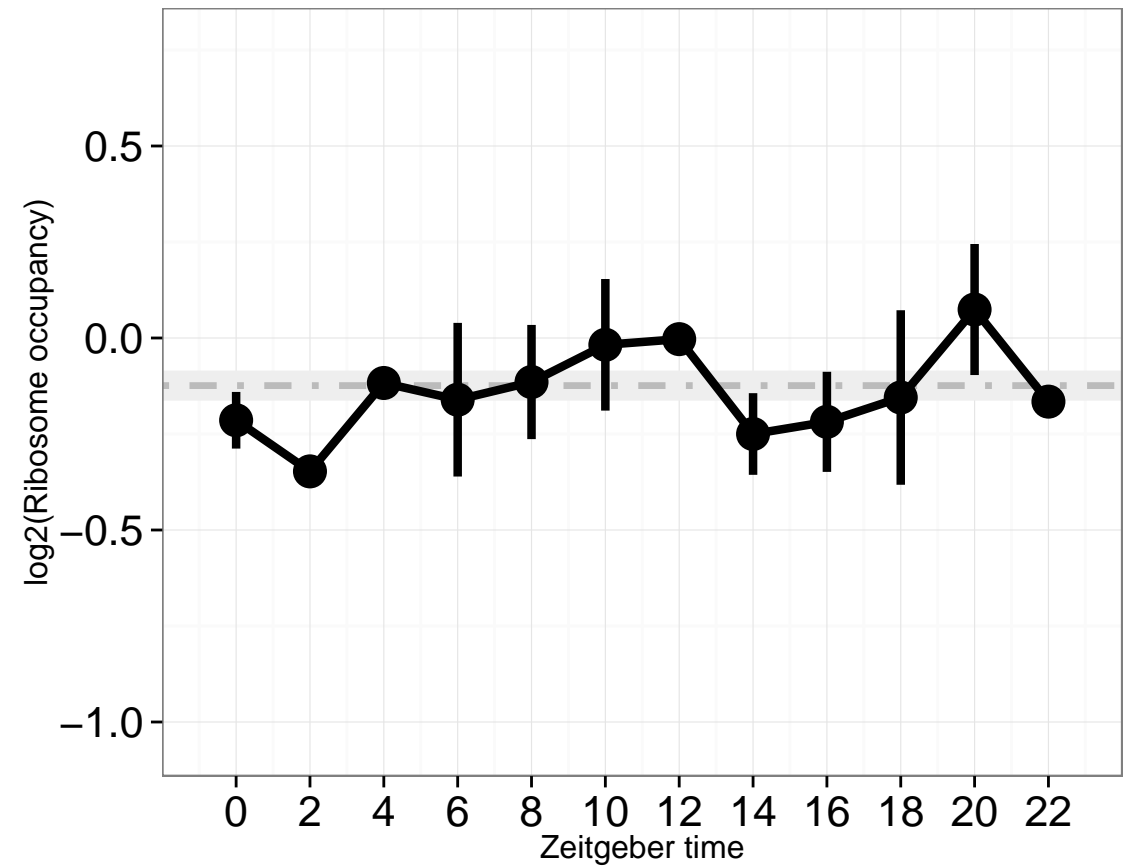

Supplement: SuppDataset_1.zip [file Ndufaf7_set_A.pdf › Supplemental Dataset 1/A-mRNA_nonrhyth_translation_nonrhyth/Ndufaf7_set_A.pdf]

# Ndufb10

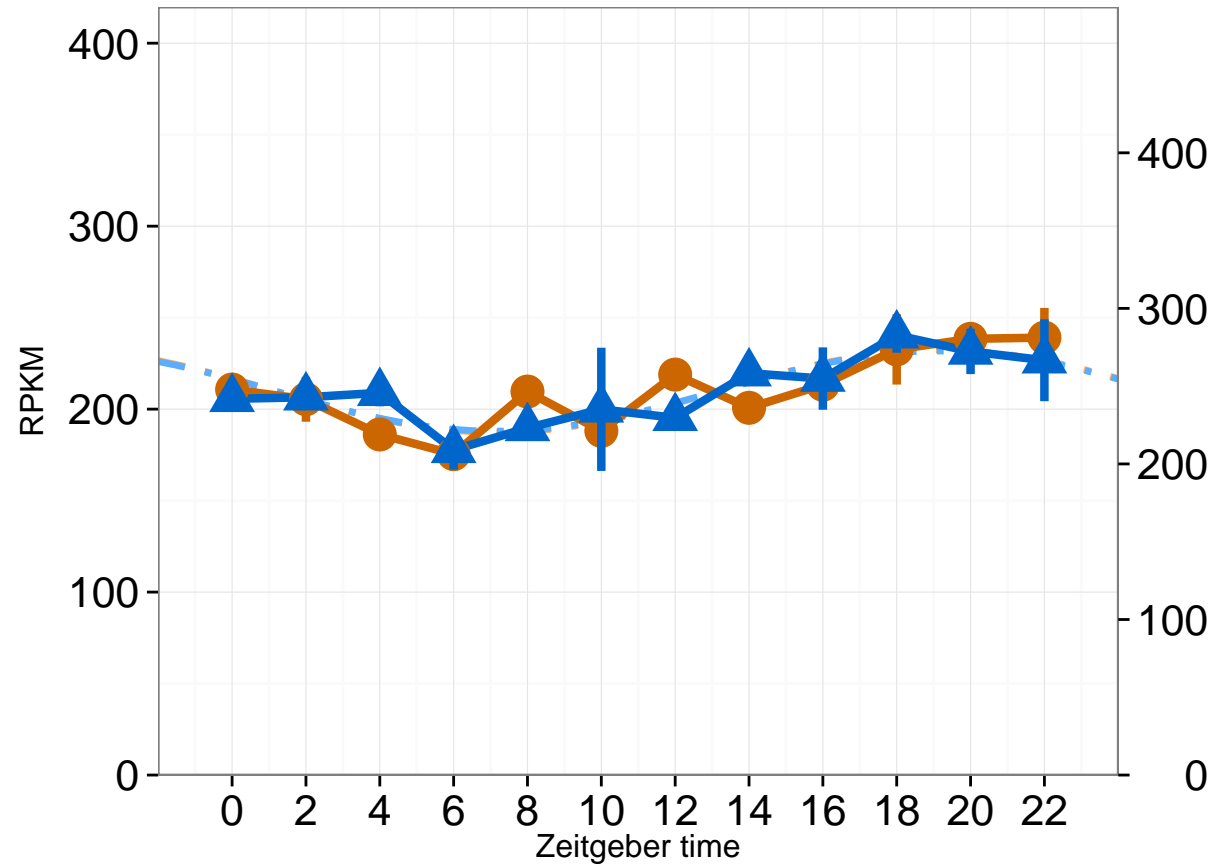

# Ndufb10

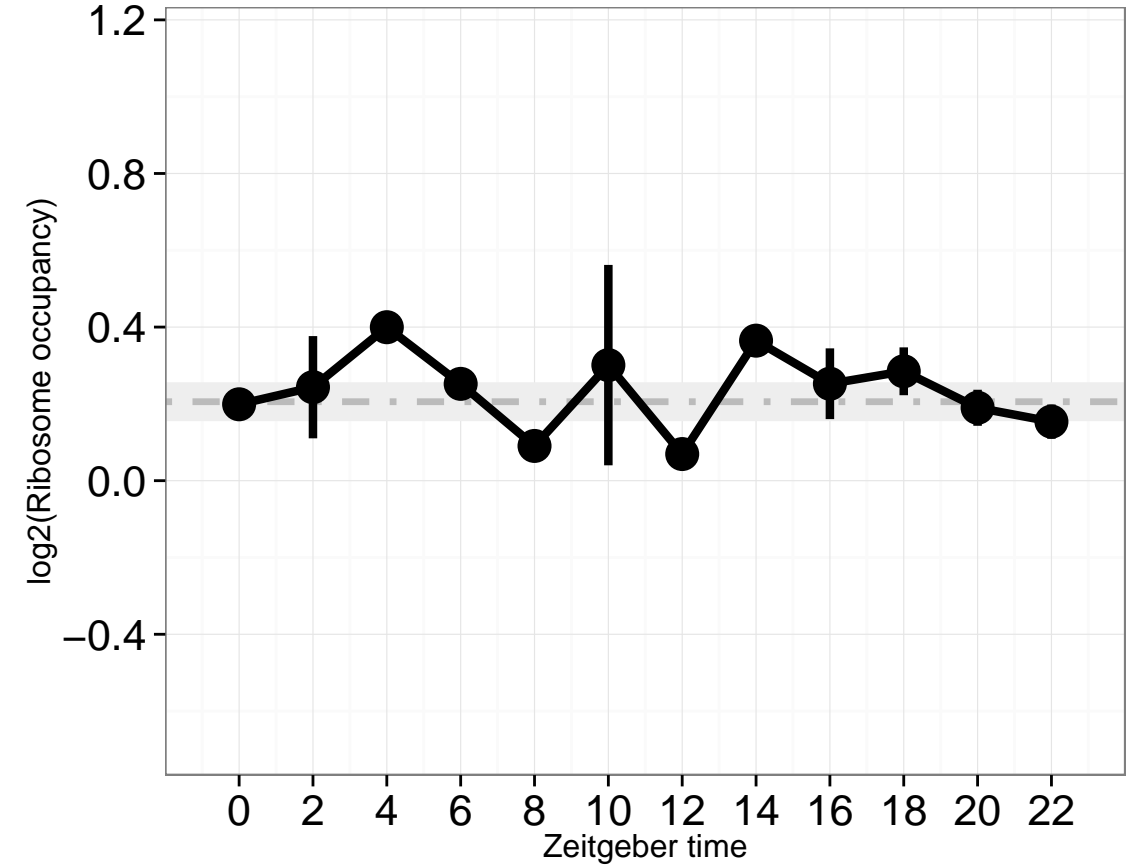

Supplement: SuppDataset_1.zip [file Ndufb10_set_A.pdf › Supplemental Dataset 1/A-mRNA_nonrhyth_translation_nonrhyth/Ndufb10_set_A.pdf]

# Ndufb11

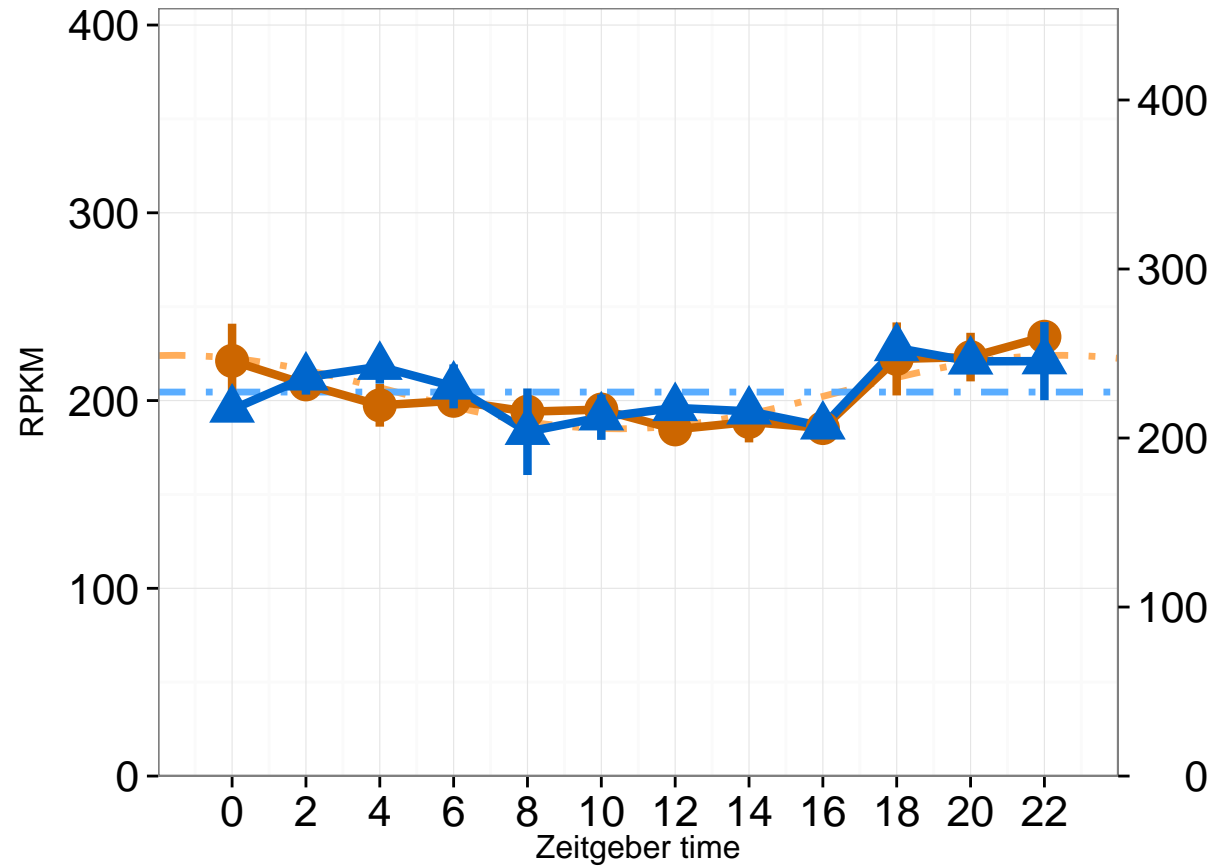

# Ndufb11

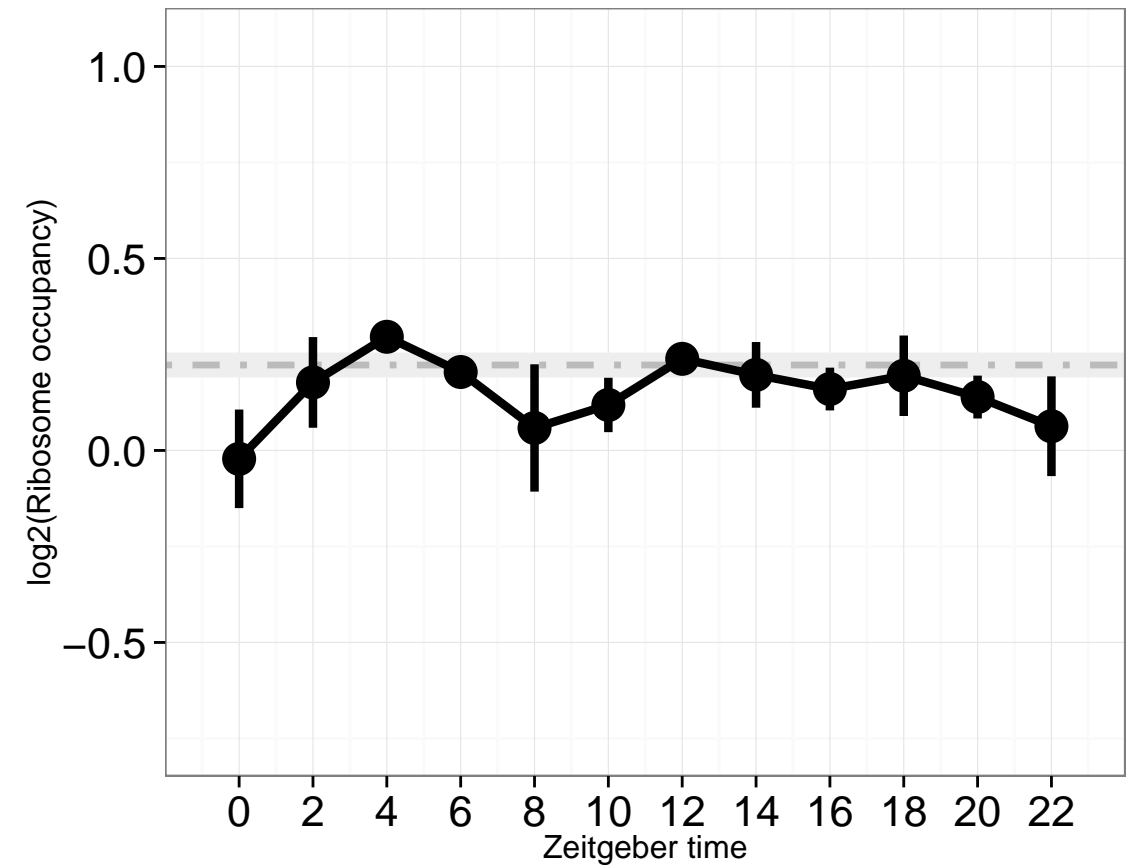

Supplement: SuppDataset_1.zip [file Ndufb11_set_A.pdf › Supplemental Dataset 1/A-mRNA_nonrhyth_translation_nonrhyth/Ndufb11_set_A.pdf]

## Ndufb2

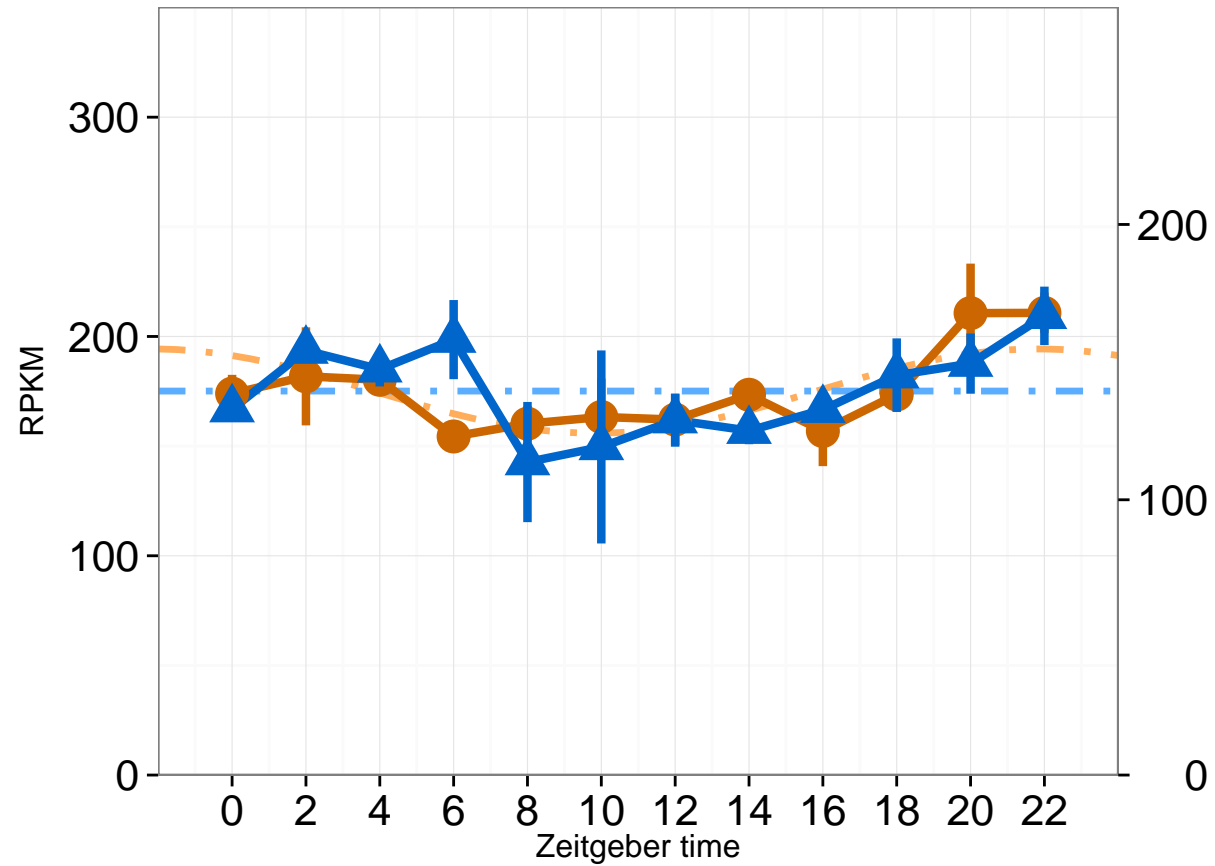

## Ndufb2

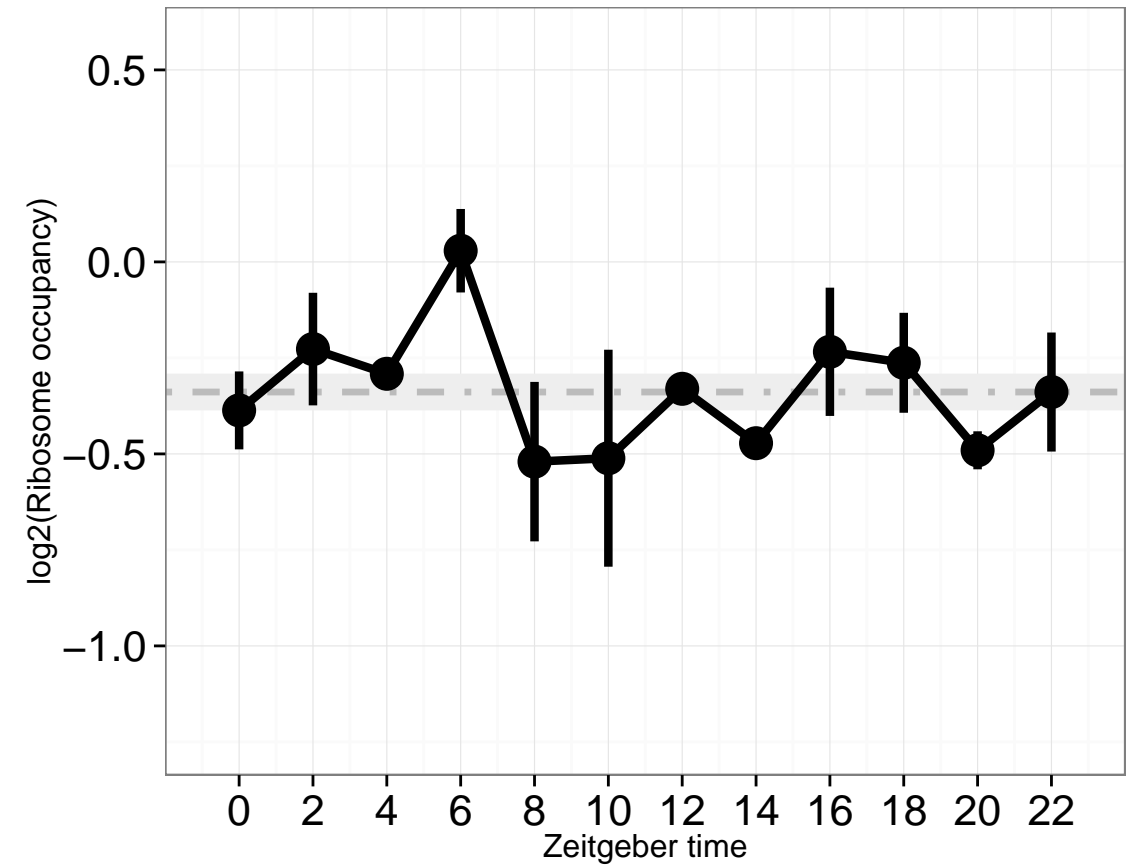

Supplement: SuppDataset_1.zip [file Ndufb2_set_A.pdf › Supplemental Dataset 1/A-mRNA_nonrhyth_translation_nonrhyth/Ndufb2_set_A.pdf]

## Ndufb3

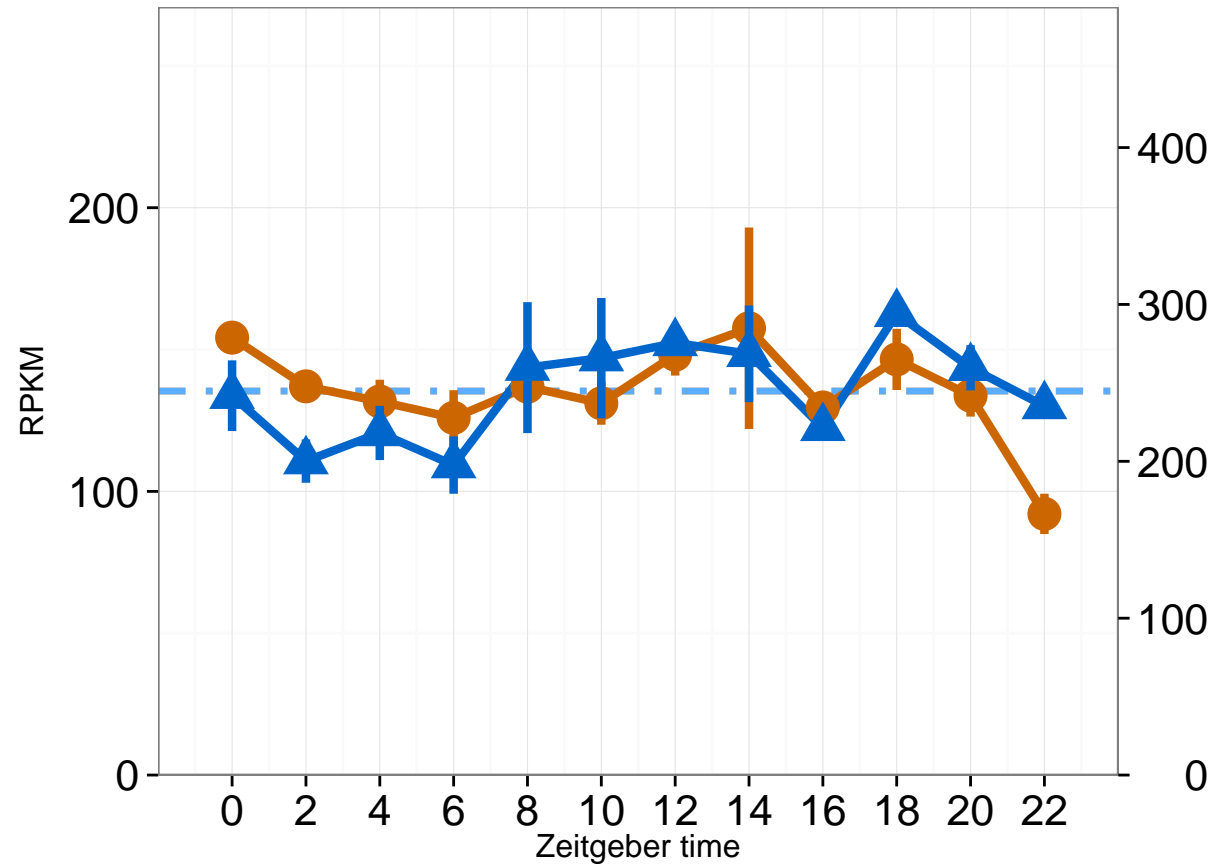

## Ndufb3

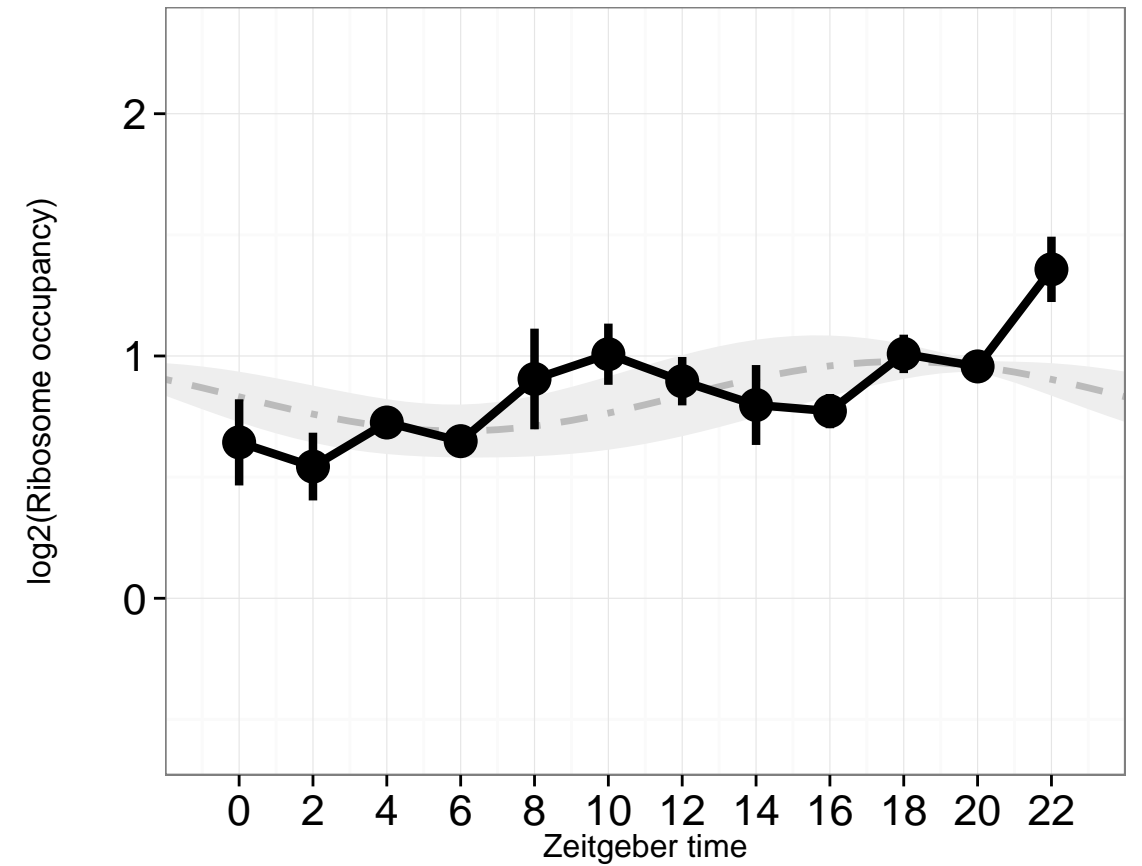

Supplement: SuppDataset_1.zip [file Ndufb3_set_A.pdf › Supplemental Dataset 1/A-mRNA_nonrhyth_translation_nonrhyth/Ndufb3_set_A.pdf]

## Ndufb4

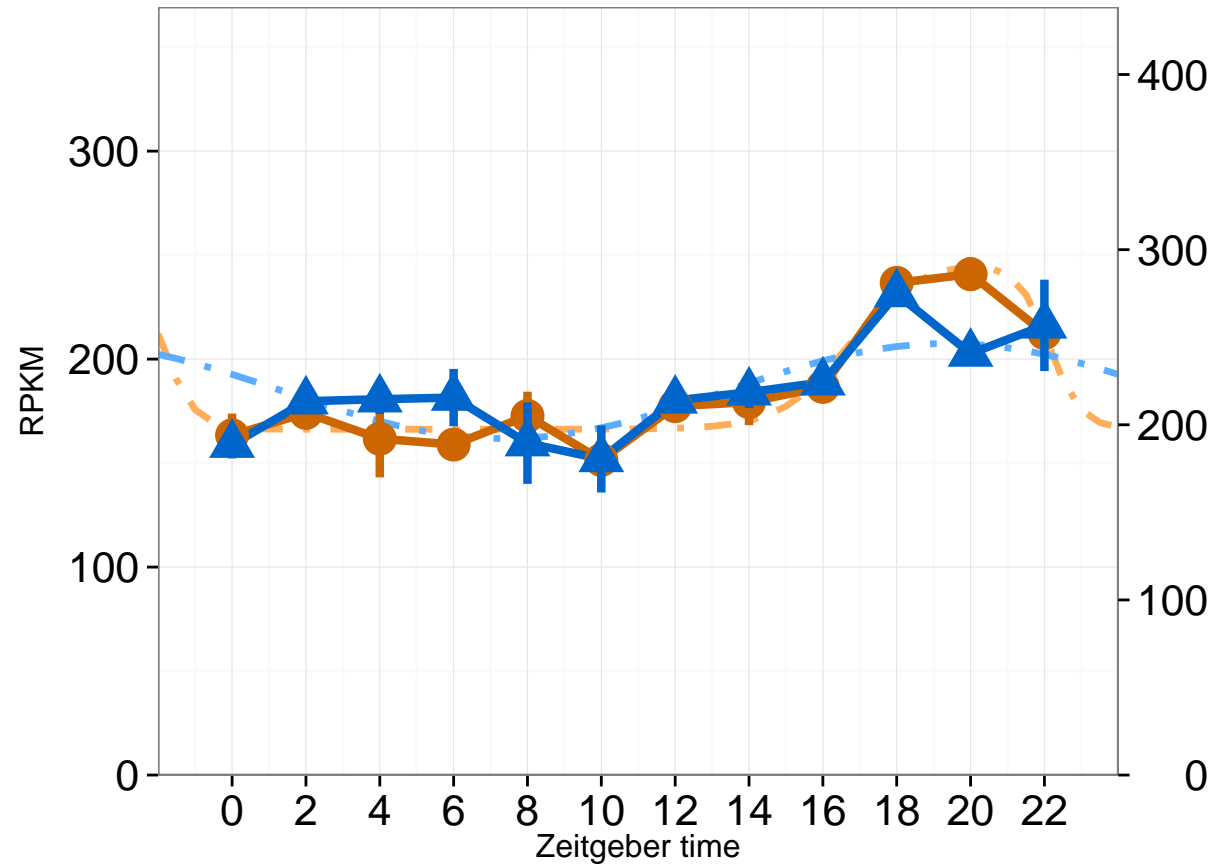

## Ndufb4

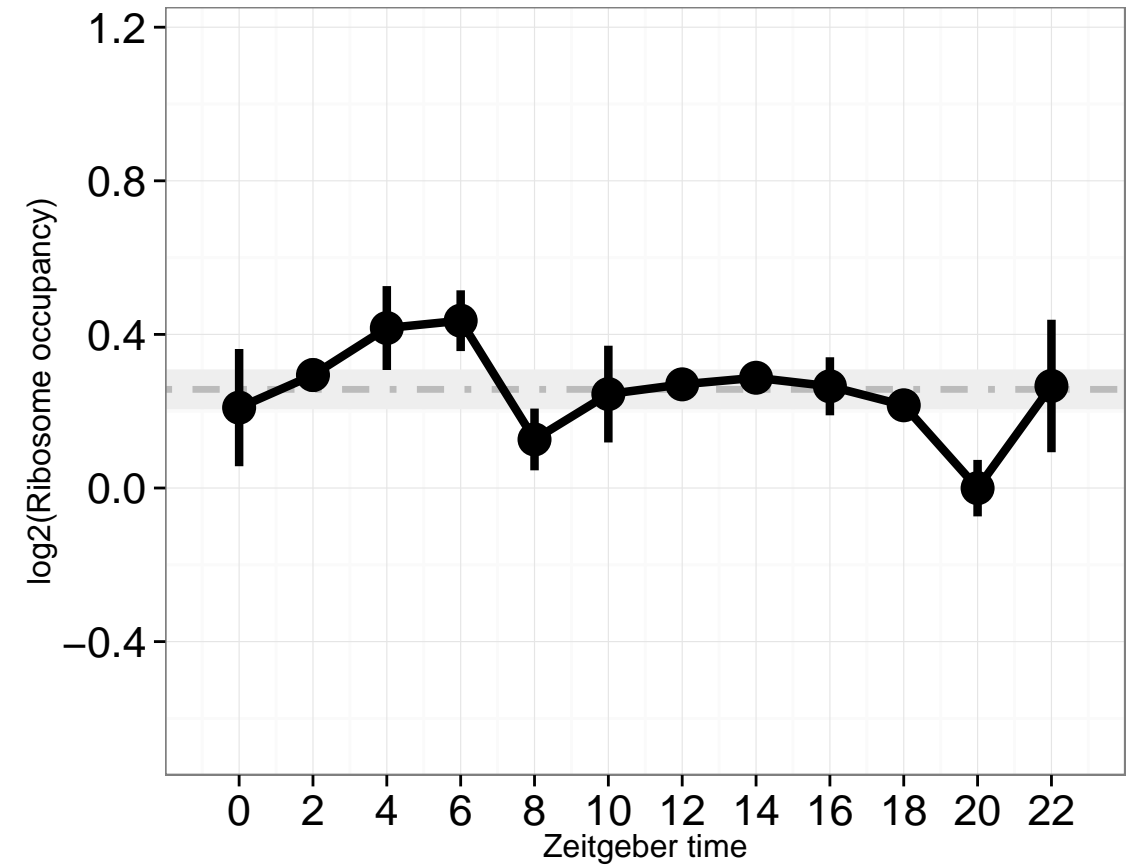

Supplement: SuppDataset_1.zip [file Ndufb4_set_A.pdf › Supplemental Dataset 1/A-mRNA_nonrhyth_translation_nonrhyth/Ndufb4_set_A.pdf]

# Ndufb5

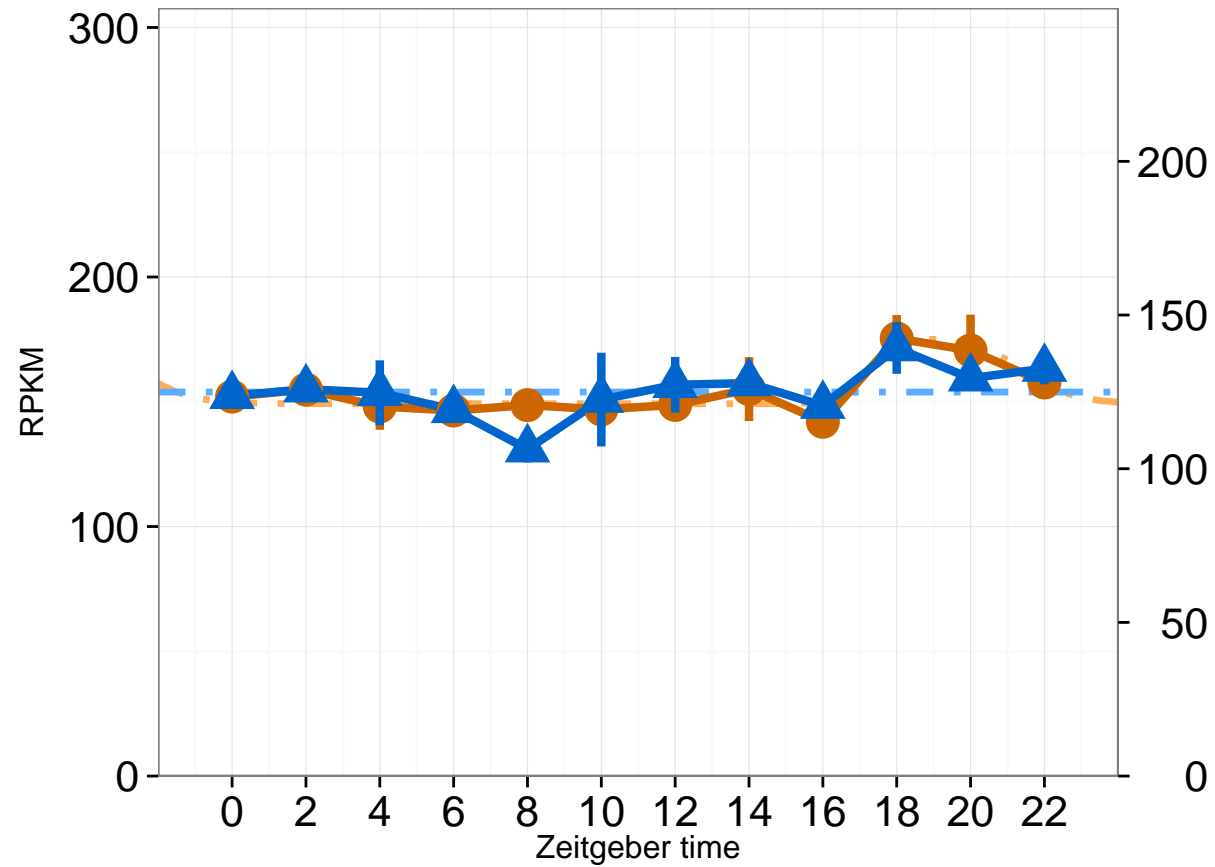

# Ndufb5

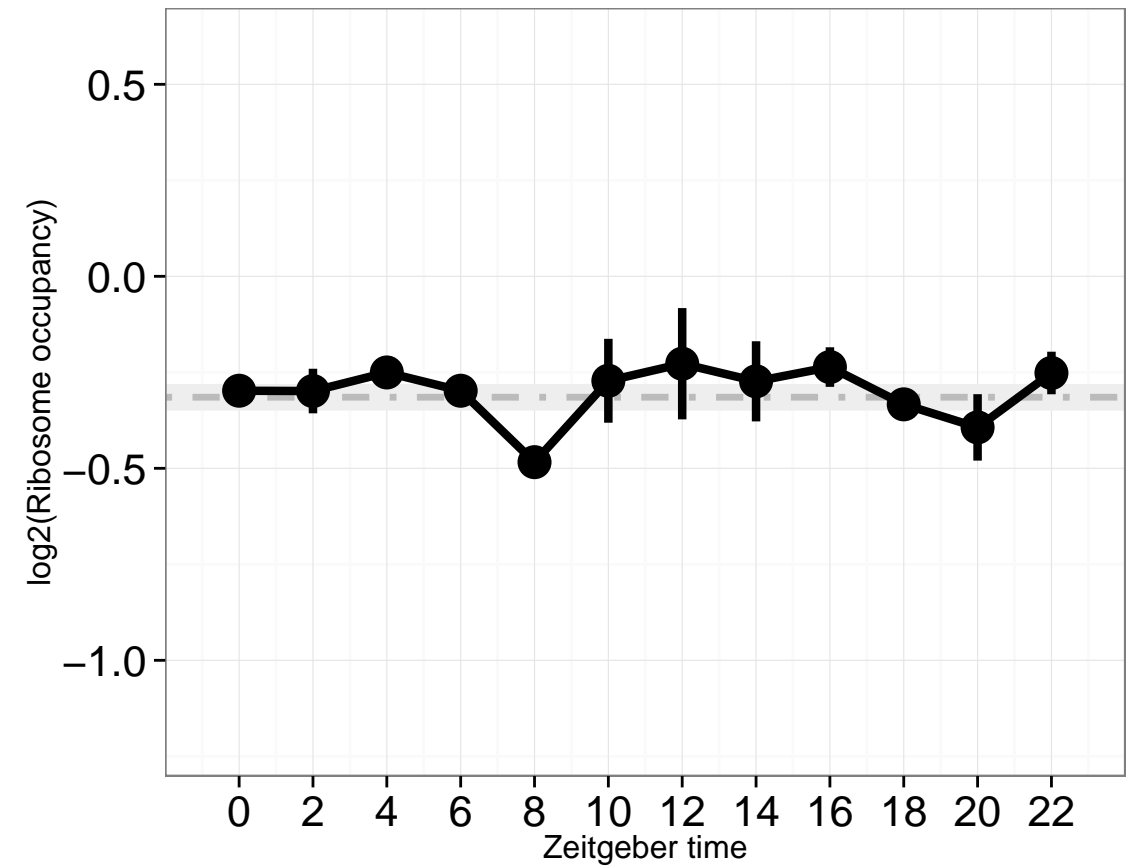

Supplement: SuppDataset_1.zip [file Ndufb5_set_A.pdf › Supplemental Dataset 1/A-mRNA_nonrhyth_translation_nonrhyth/Ndufb5_set_A.pdf]

# Ndufb6

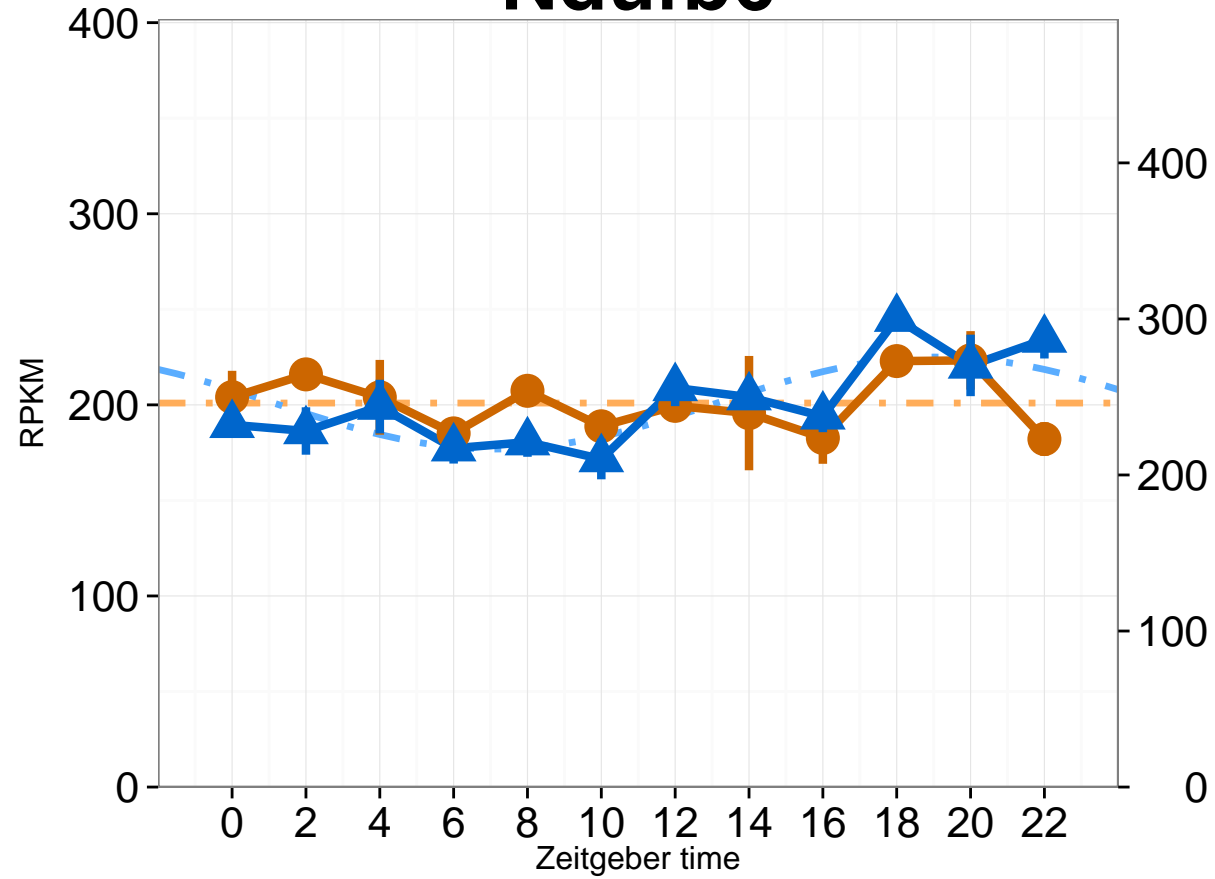

# Ndufb6

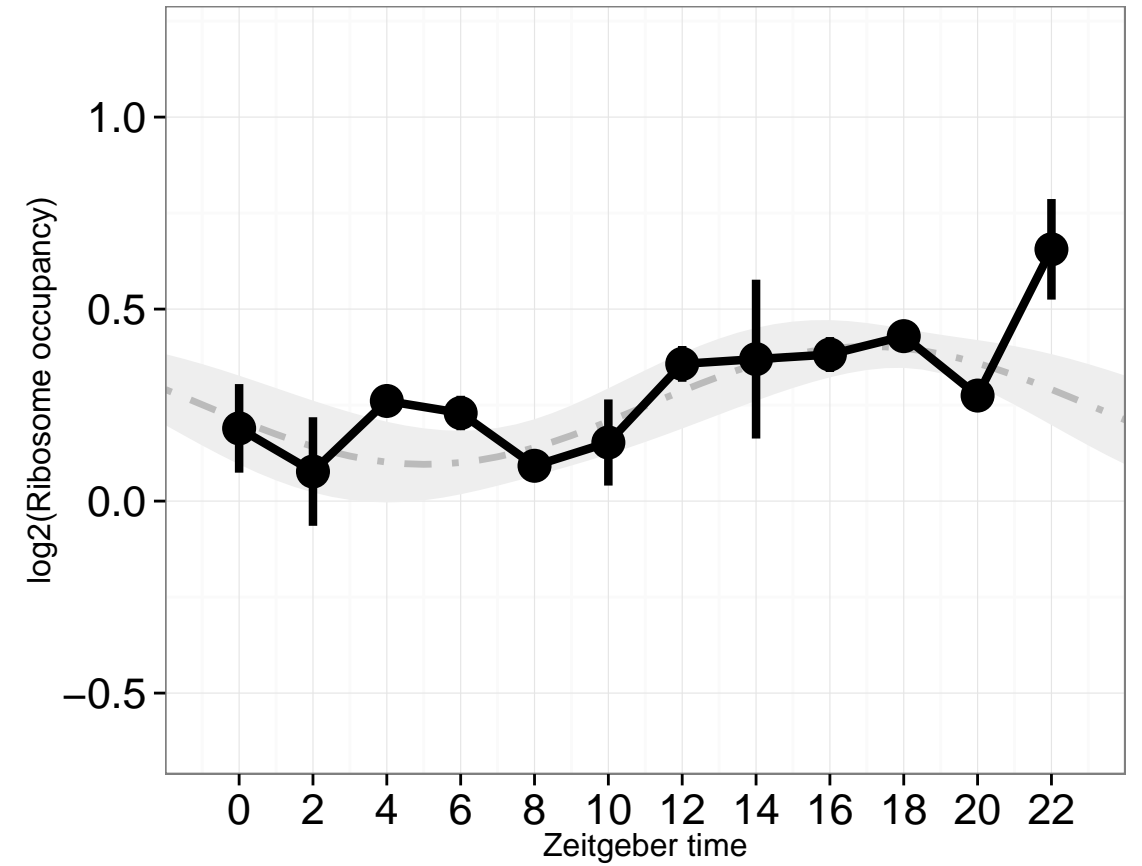

Supplement: SuppDataset_1.zip [file Ndufb6_set_A.pdf › Supplemental Dataset 1/A-mRNA_nonrhyth_translation_nonrhyth/Ndufb6_set_A.pdf]

# Ndufb8

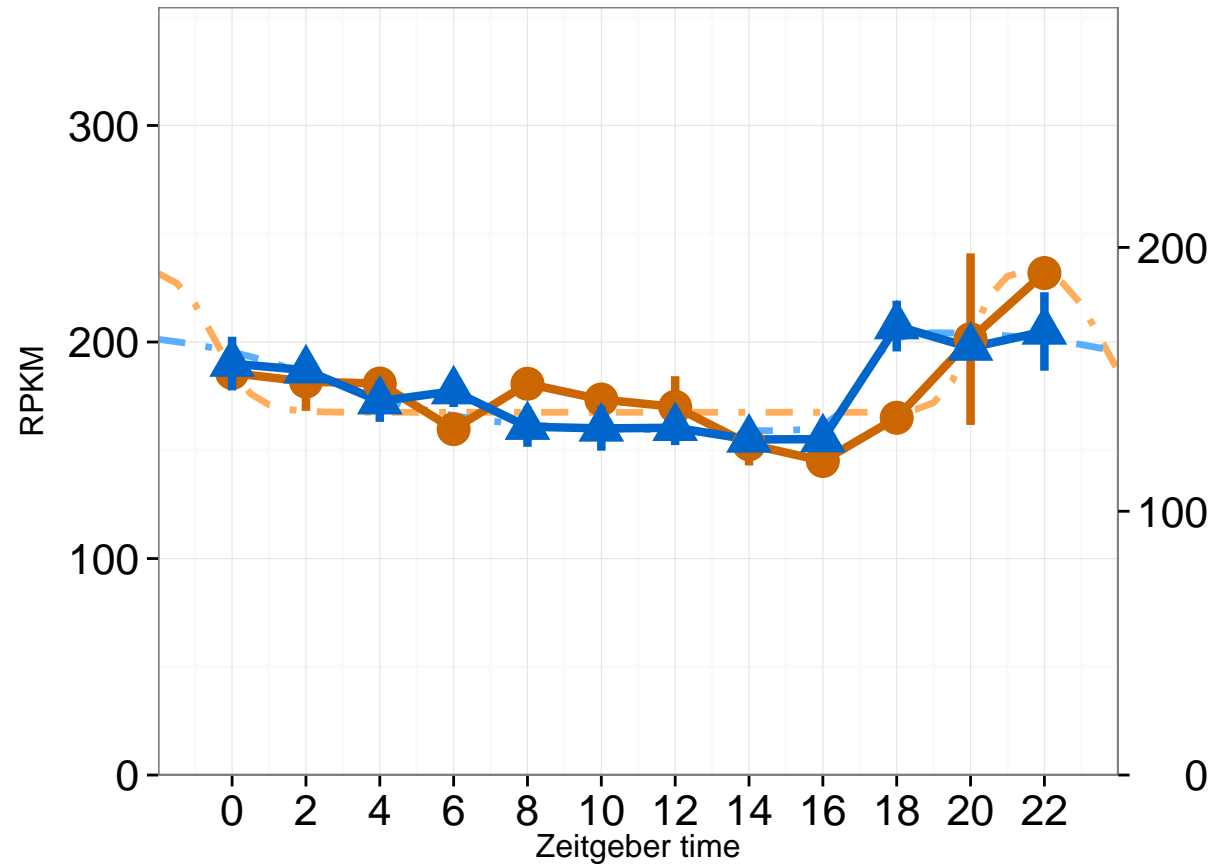

# Ndufb8

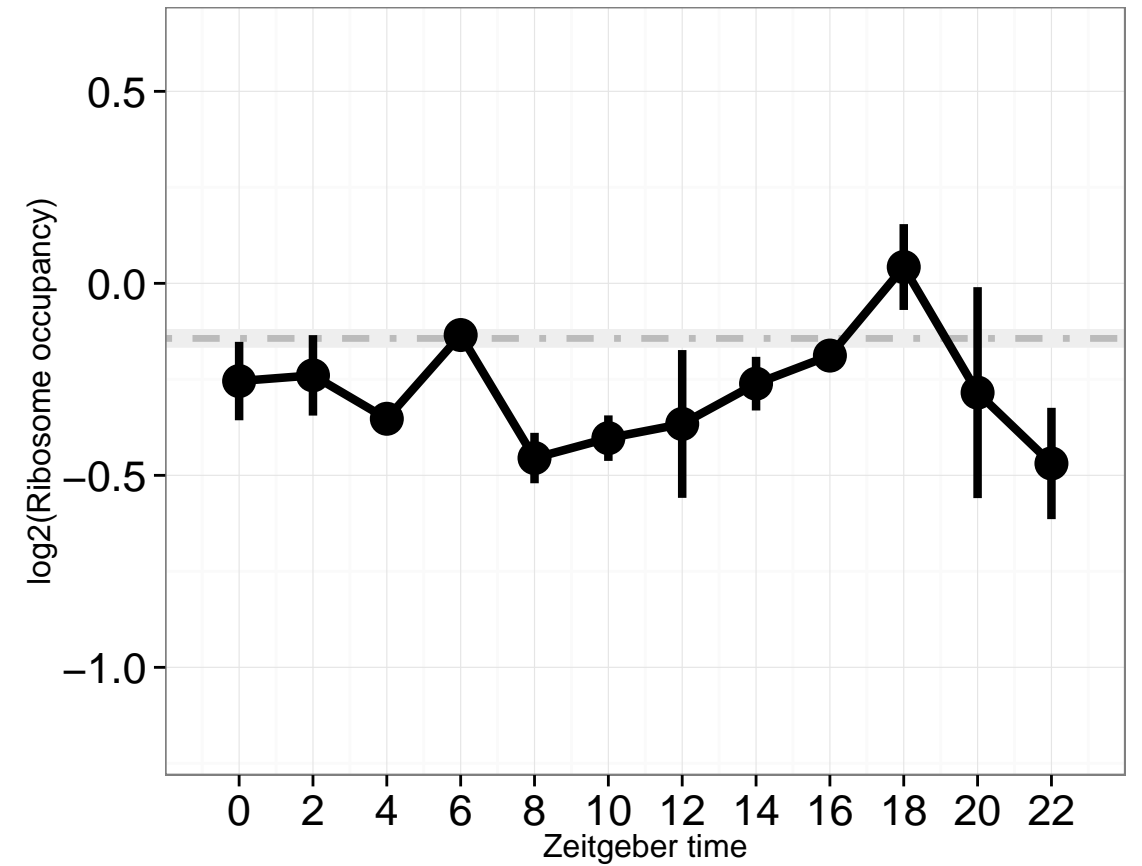

Supplement: SuppDataset_1.zip [file Ndufb8_set_A.pdf › Supplemental Dataset 1/A-mRNA_nonrhyth_translation_nonrhyth/Ndufb8_set_A.pdf]

## Ndufb9

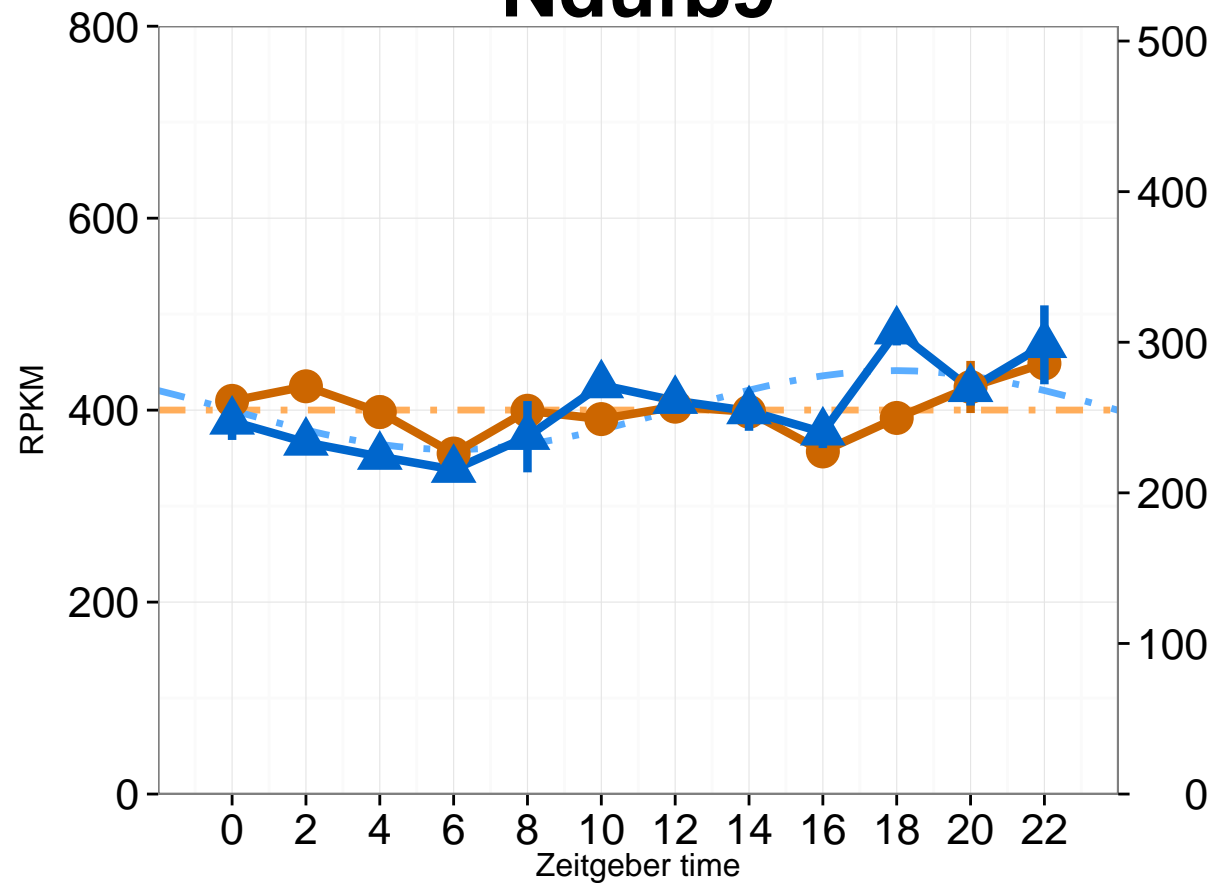

## Ndufb9

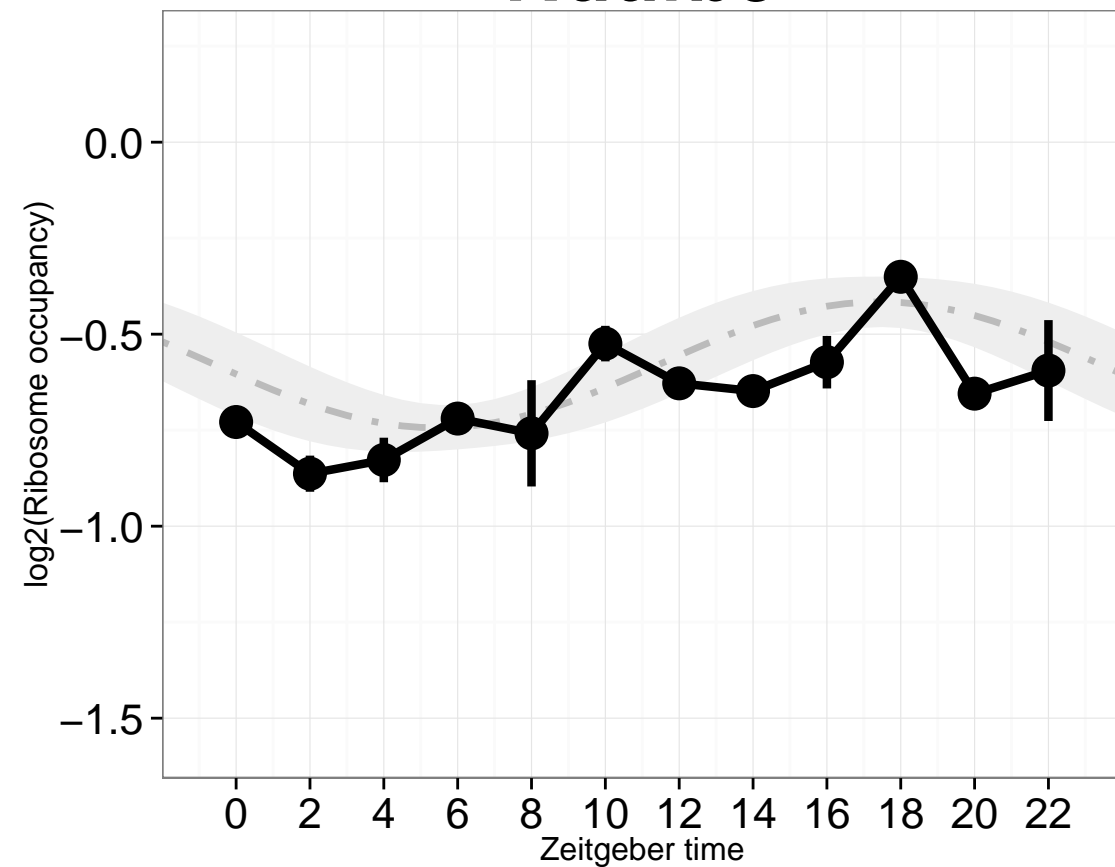

Supplement: SuppDataset_1.zip [file Ndufb9_set_A.pdf › Supplemental Dataset 1/A-mRNA_nonrhyth_translation_nonrhyth/Ndufb9_set_A.pdf]

## Ndufc1

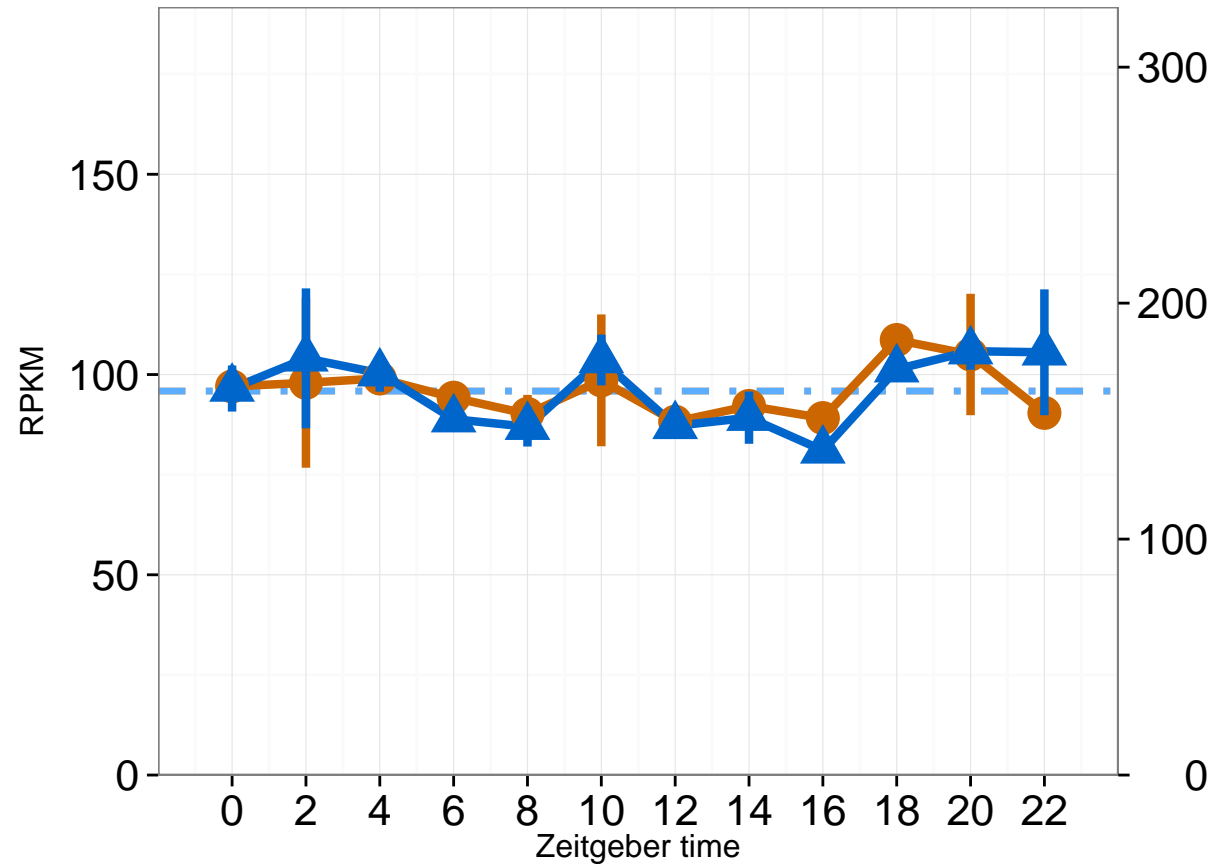

## Ndufc1

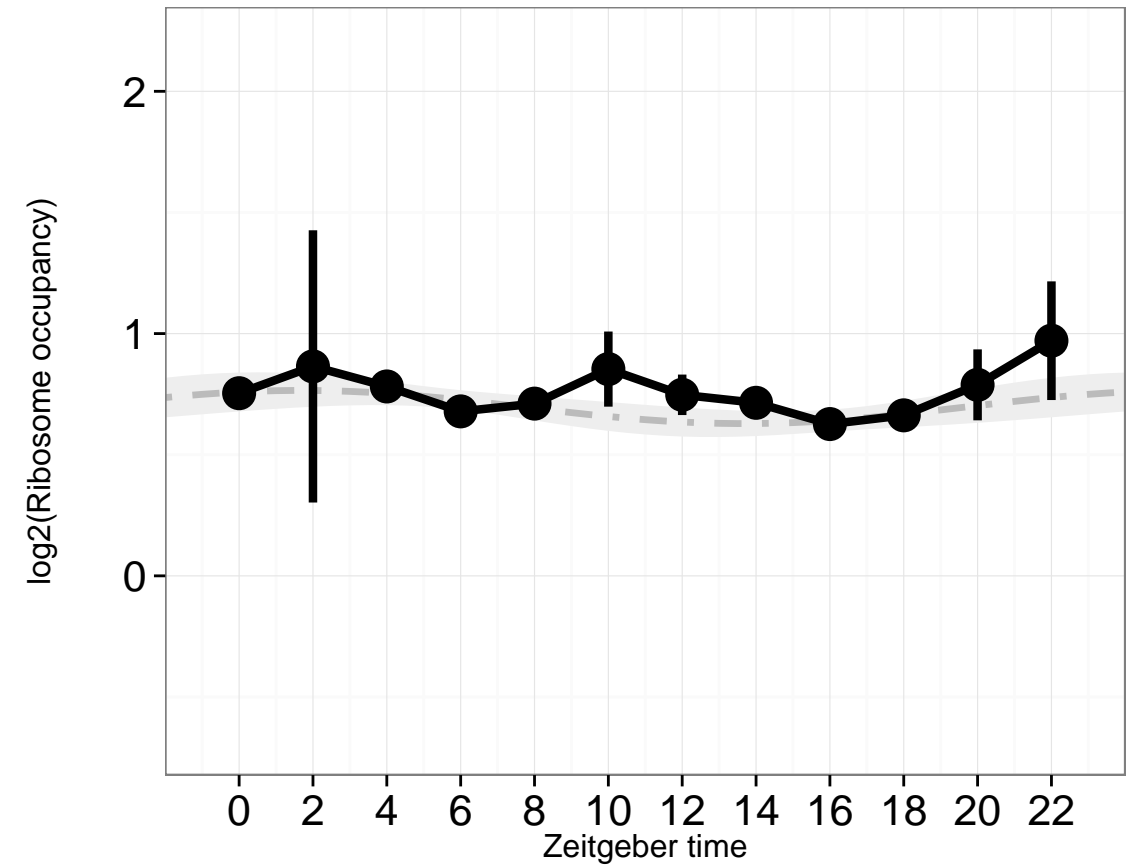

Supplement: SuppDataset_1.zip [file Ndufc1_set_A.pdf › Supplemental Dataset 1/A-mRNA_nonrhyth_translation_nonrhyth/Ndufc1_set_A.pdf]

# Ndufc2

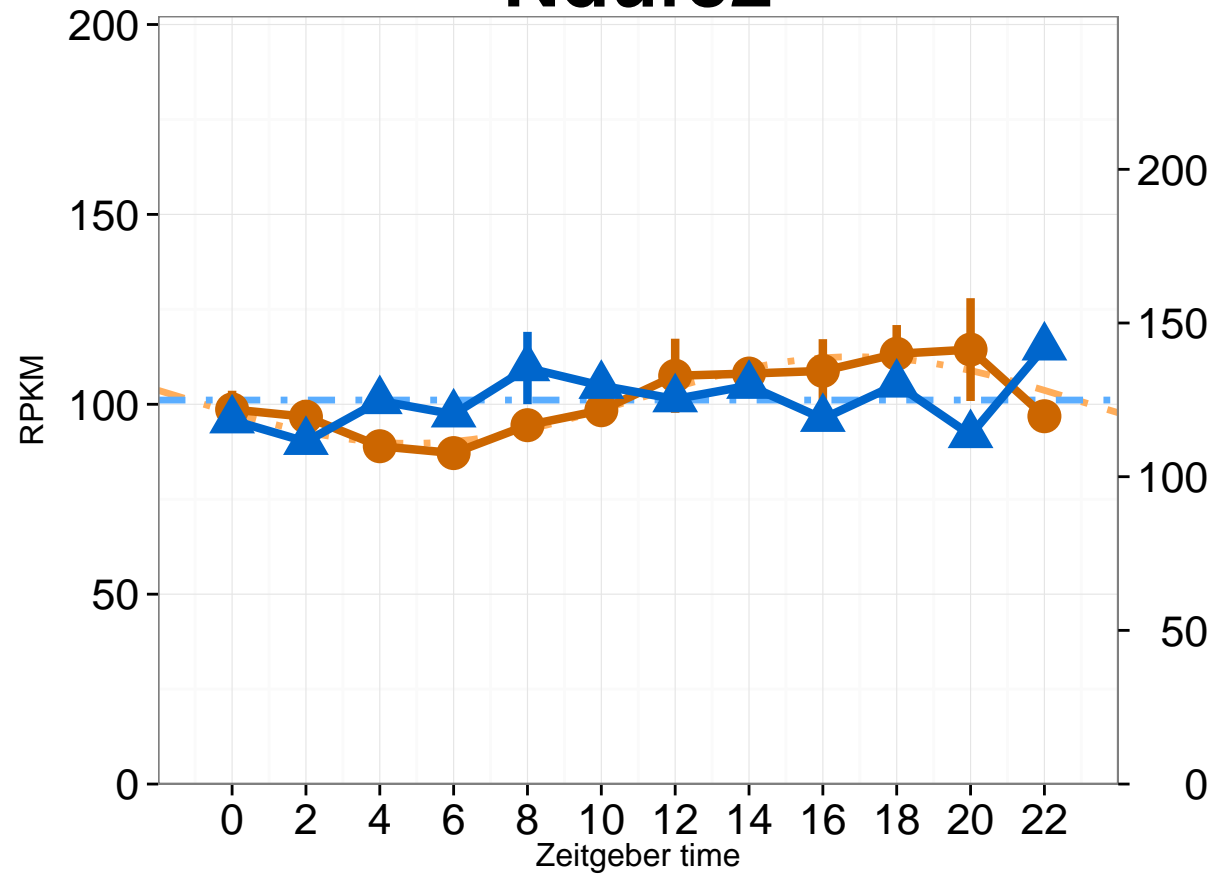

# Ndufc2

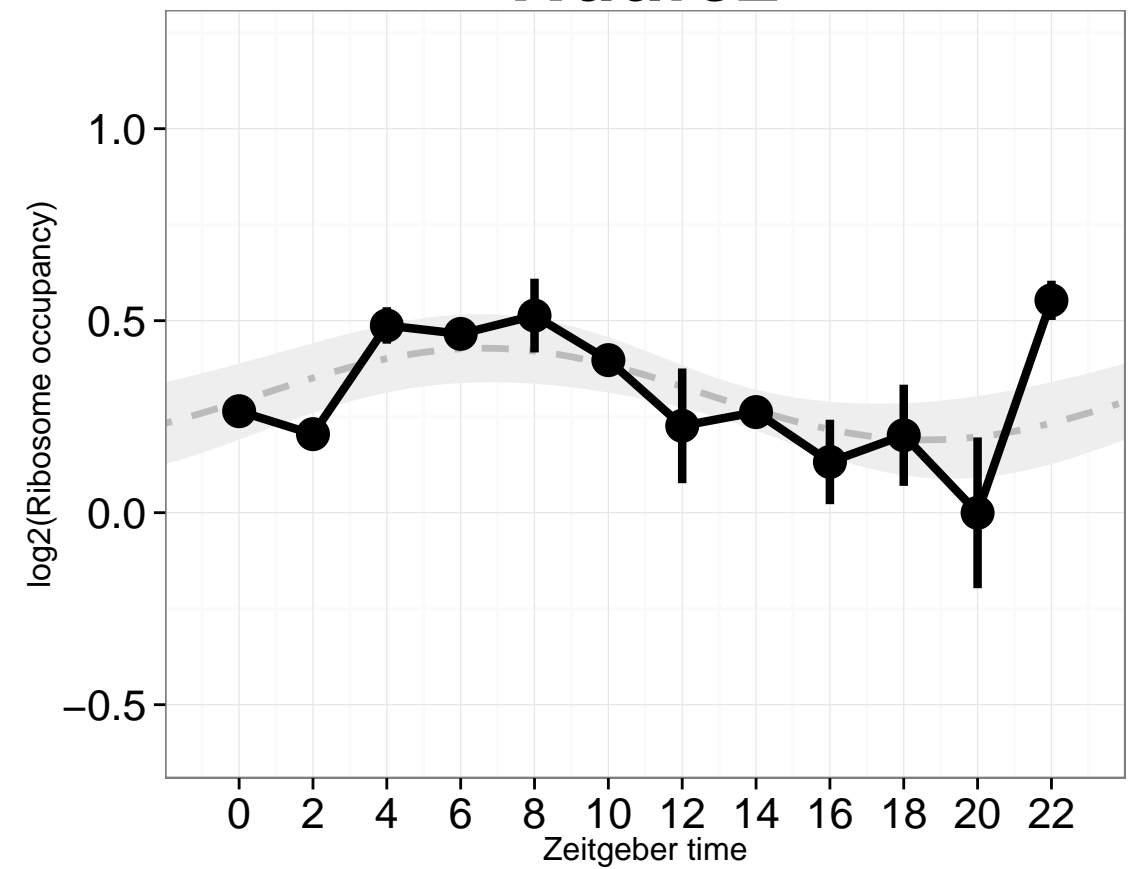

Supplement: SuppDataset_1.zip [file Ndufc2_set_A.pdf › Supplemental Dataset 1/A-mRNA_nonrhyth_translation_nonrhyth/Ndufc2_set_A.pdf]

## Ndufs1

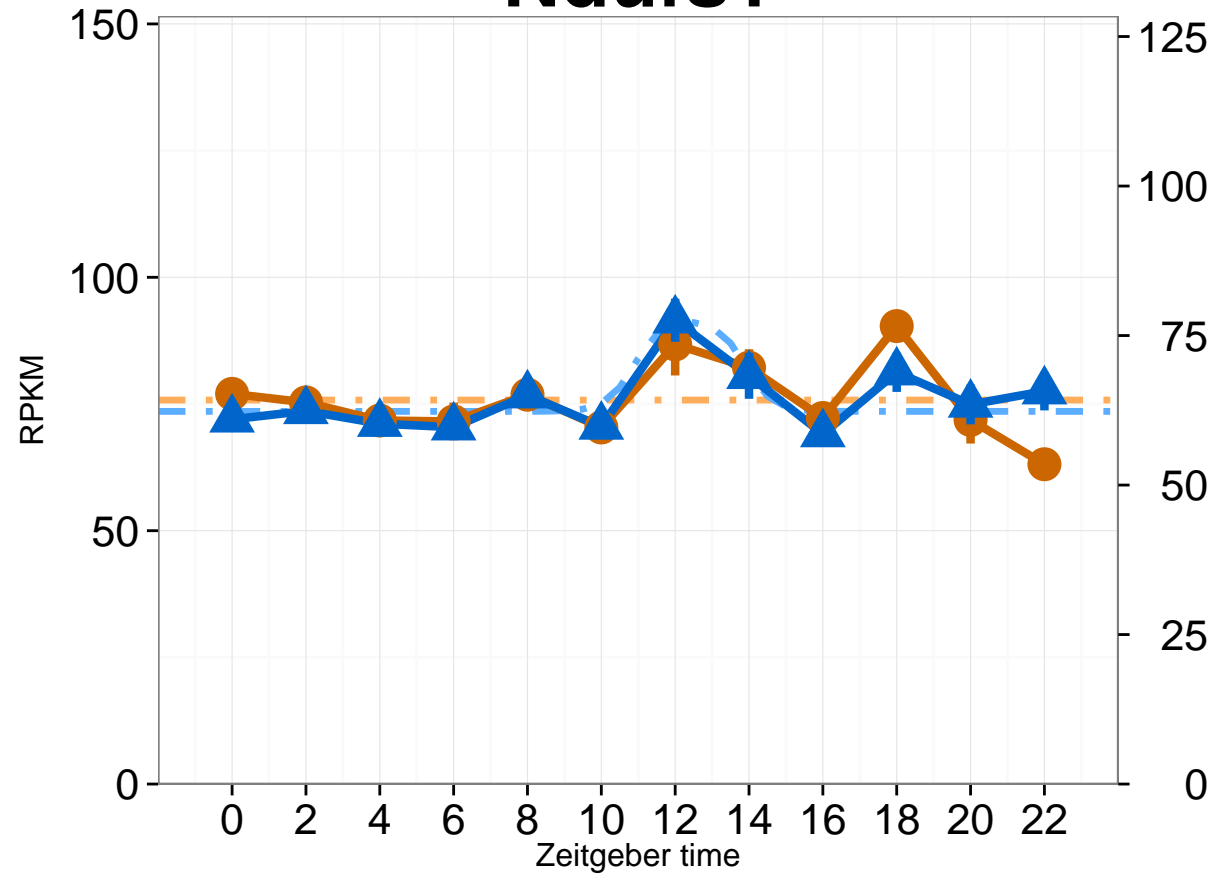

## Ndufs1

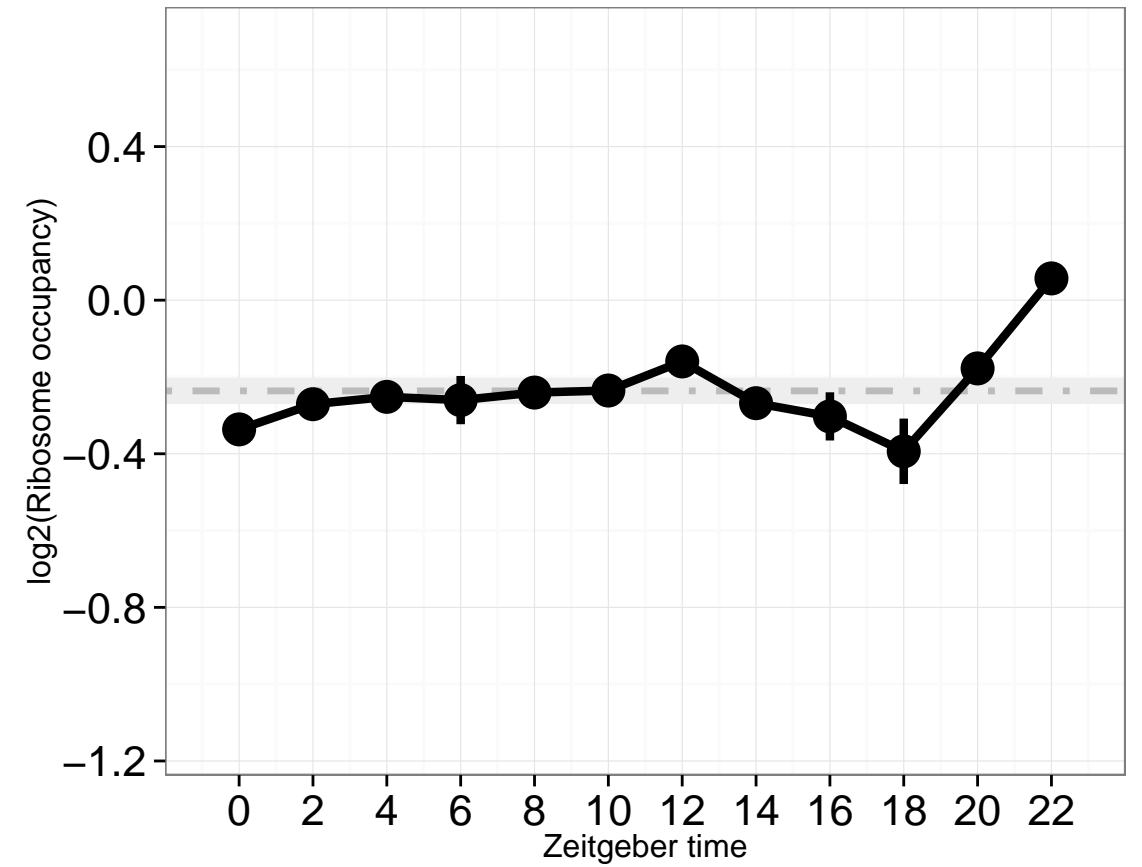

Supplement: SuppDataset_1.zip [file Ndufs1_set_A.pdf › Supplemental Dataset 1/A-mRNA_nonrhyth_translation_nonrhyth/Ndufs1_set_A.pdf]

## Ndufs2

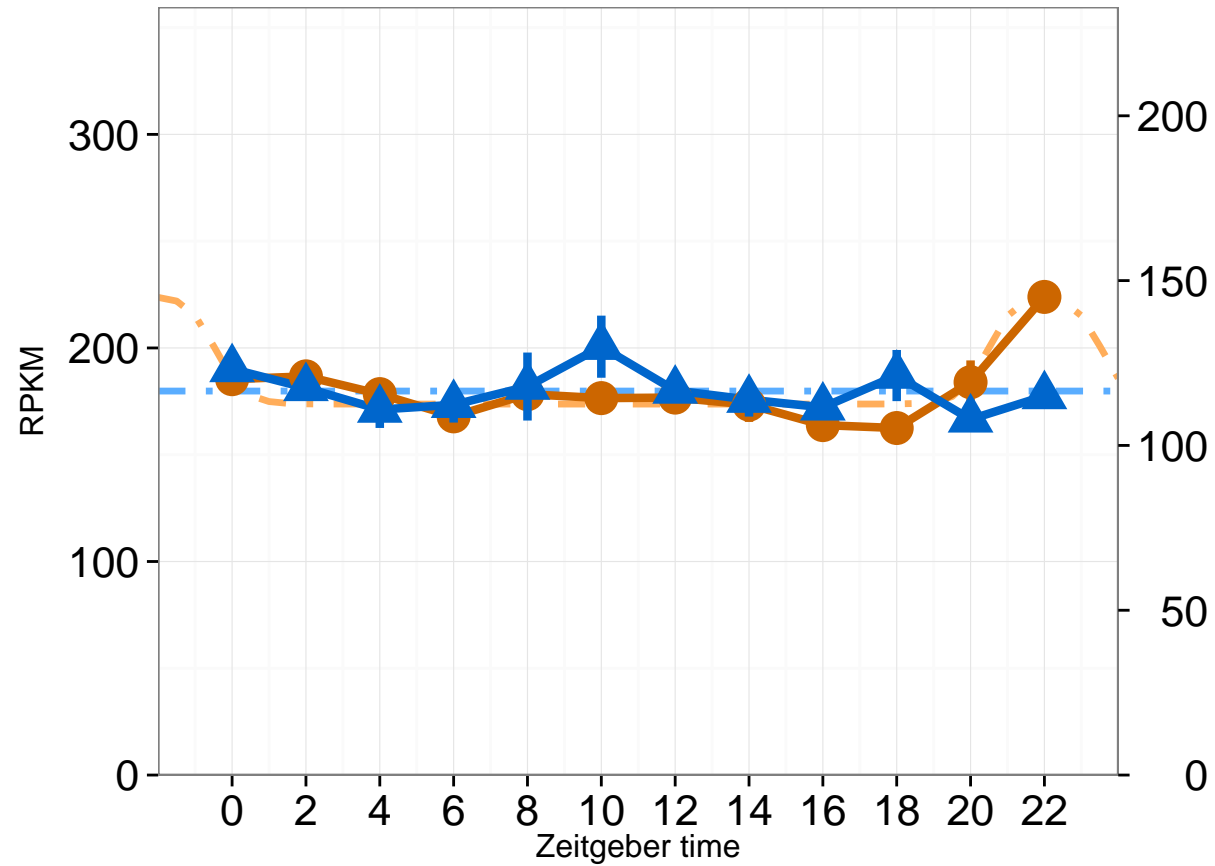

## Ndufs2

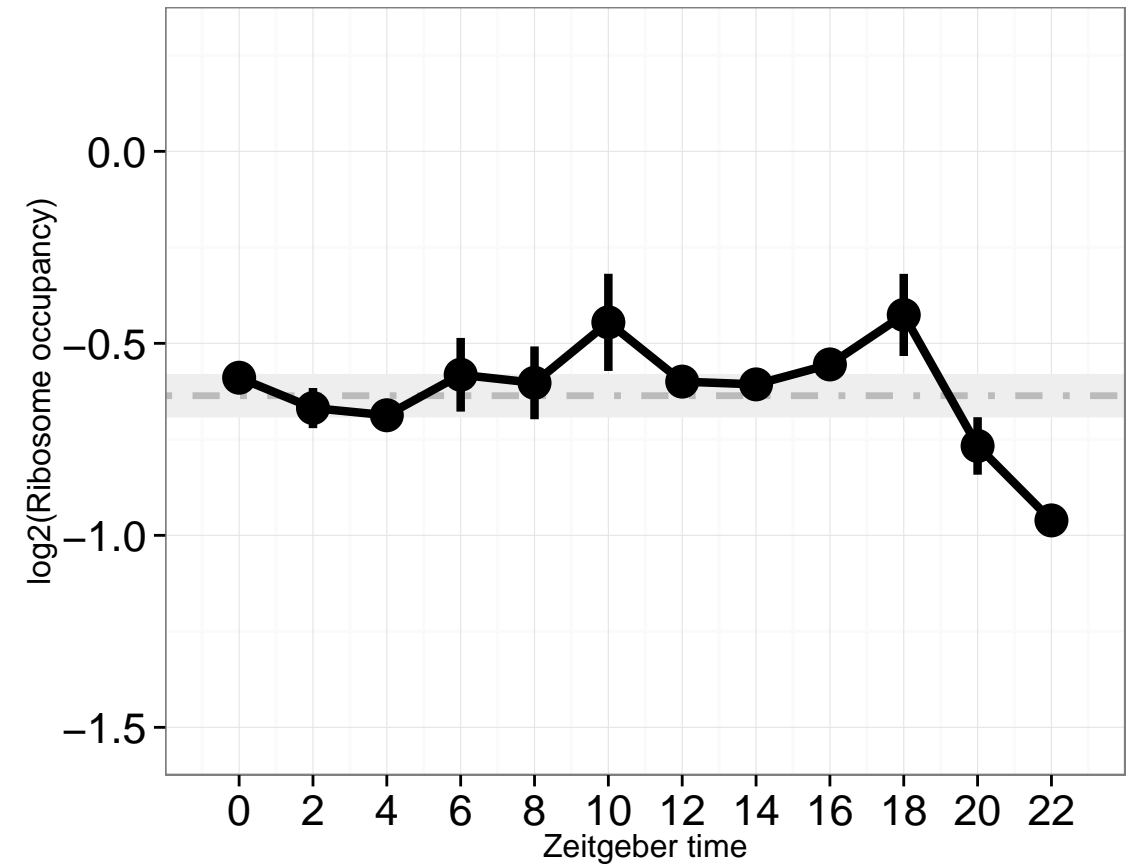

Supplement: SuppDataset_1.zip [file Ndufs2_set_A.pdf › Supplemental Dataset 1/A-mRNA_nonrhyth_translation_nonrhyth/Ndufs2_set_A.pdf]

## Ndufs3

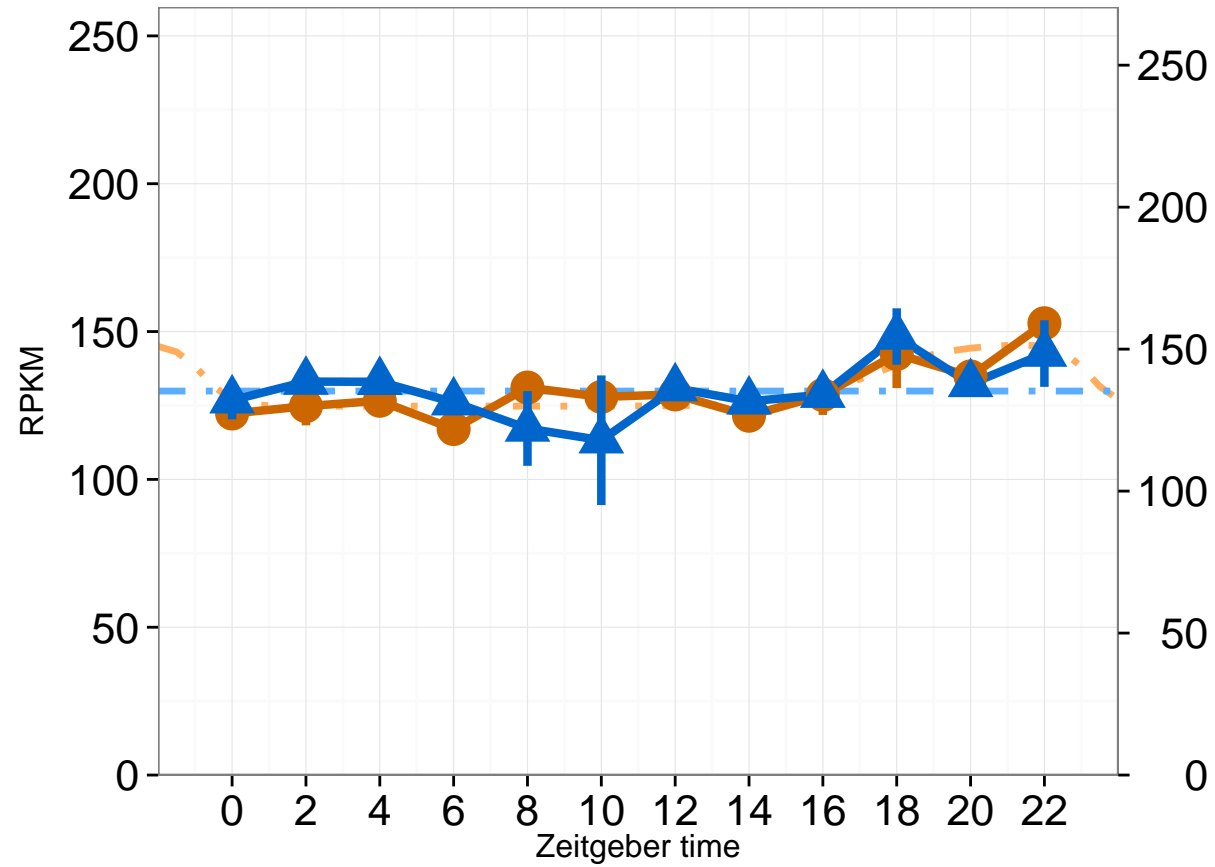

## Ndufs3

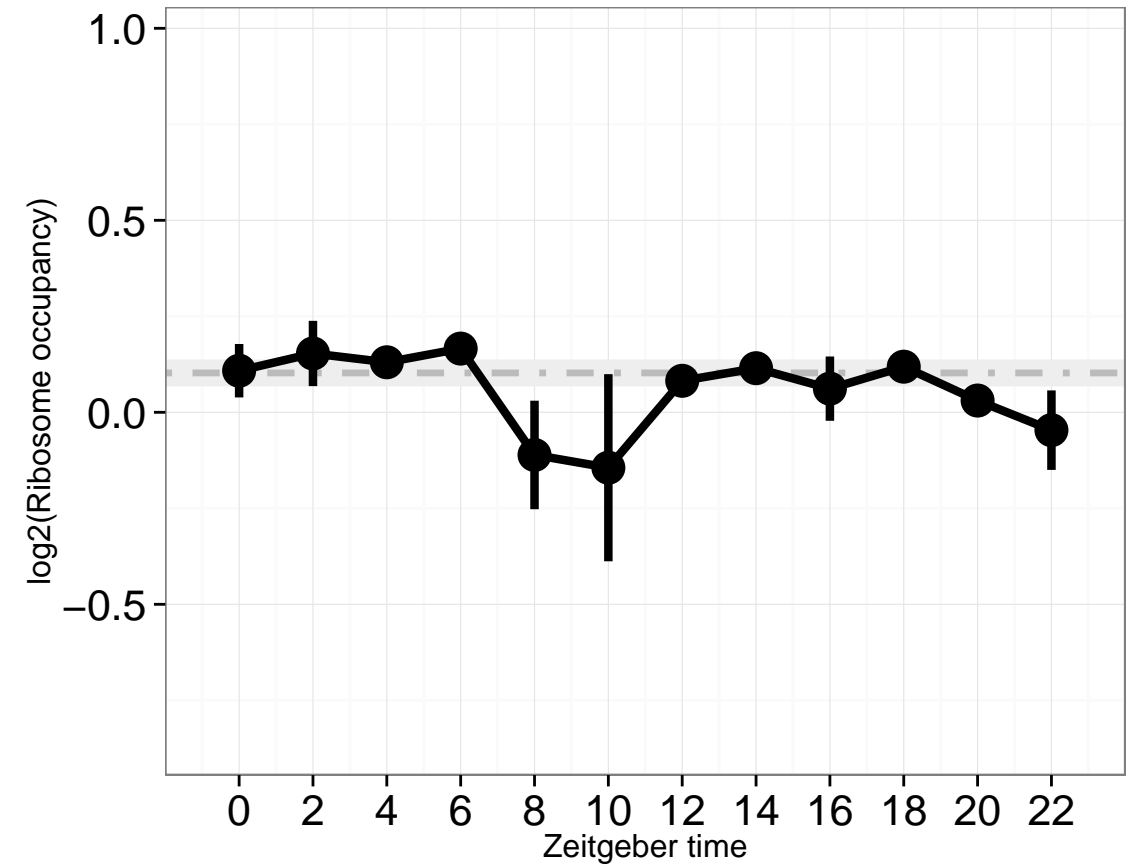

Supplement: SuppDataset_1.zip [file Ndufs3_set_A.pdf › Supplemental Dataset 1/A-mRNA_nonrhyth_translation_nonrhyth/Ndufs3_set_A.pdf]

## Ndufs4

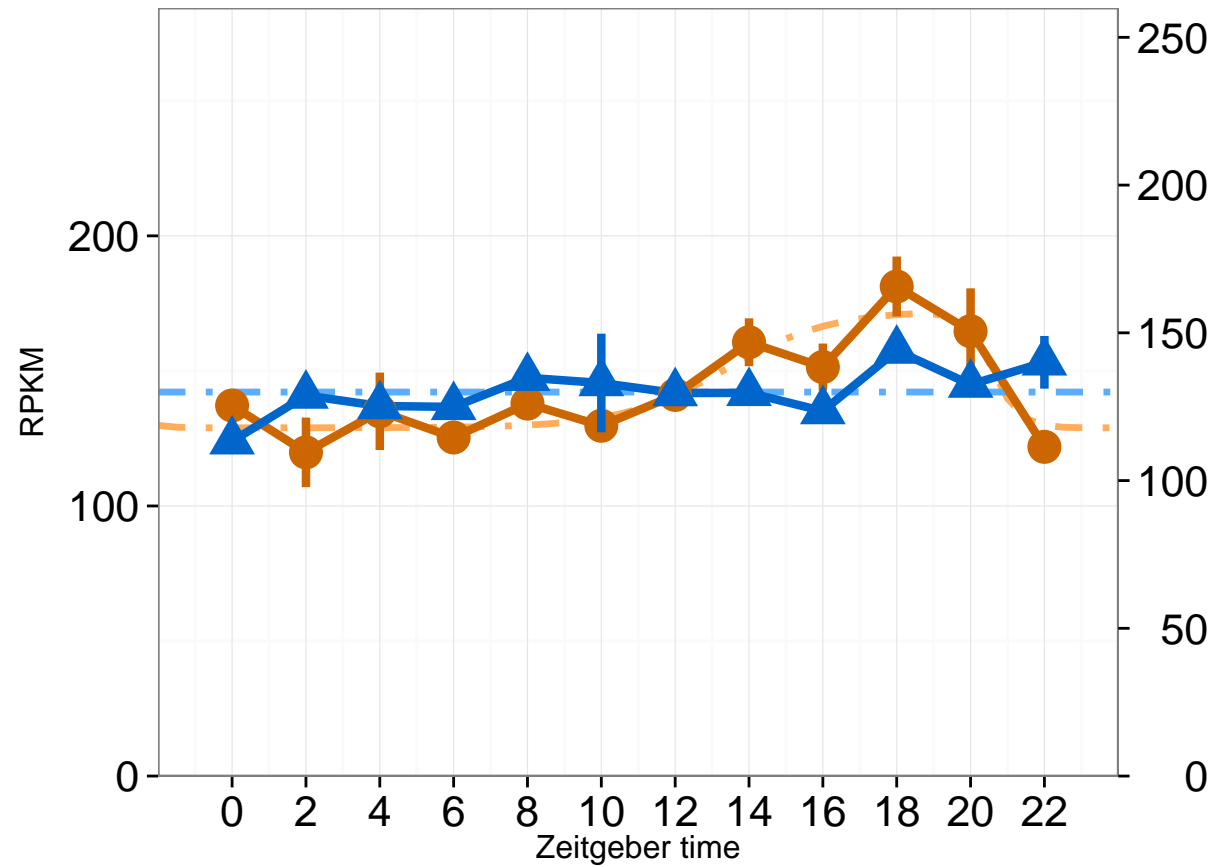

## Ndufs4

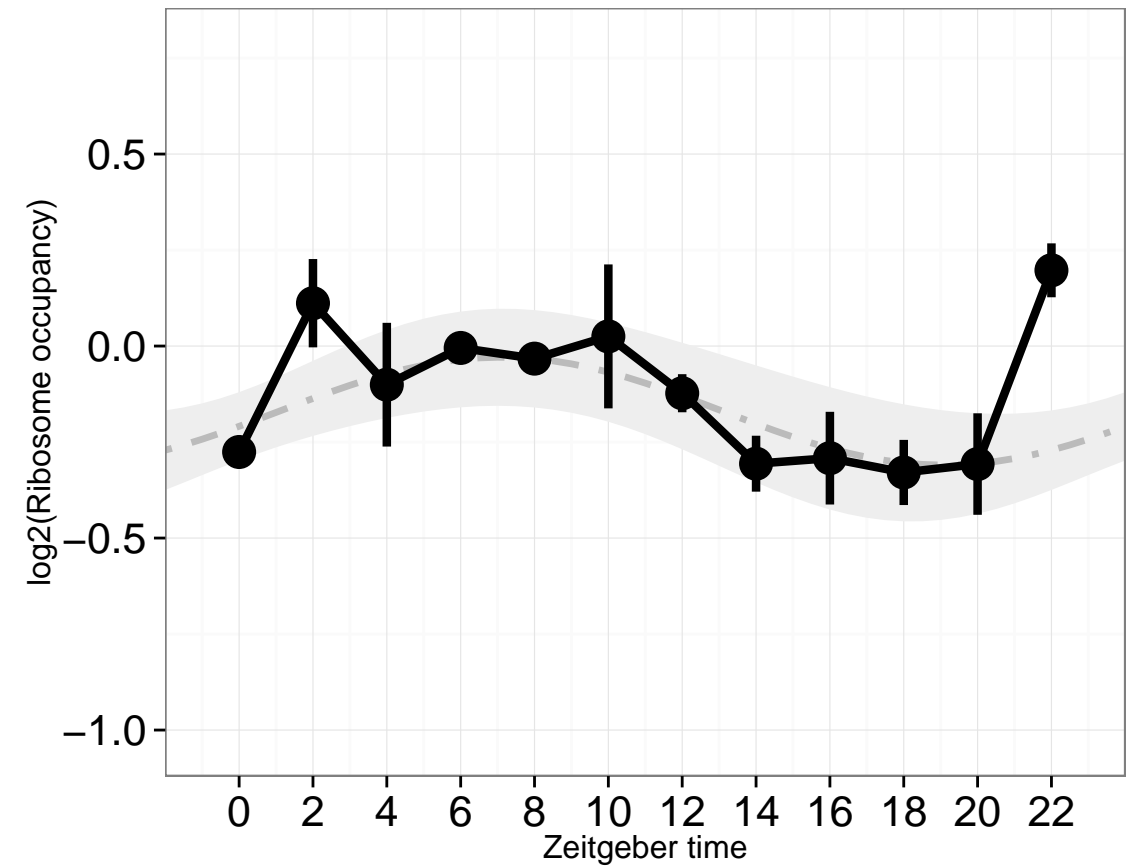

Supplement: SuppDataset_1.zip [file Ndufs4_set_A.pdf › Supplemental Dataset 1/A-mRNA_nonrhyth_translation_nonrhyth/Ndufs4_set_A.pdf]

## Ndufs5

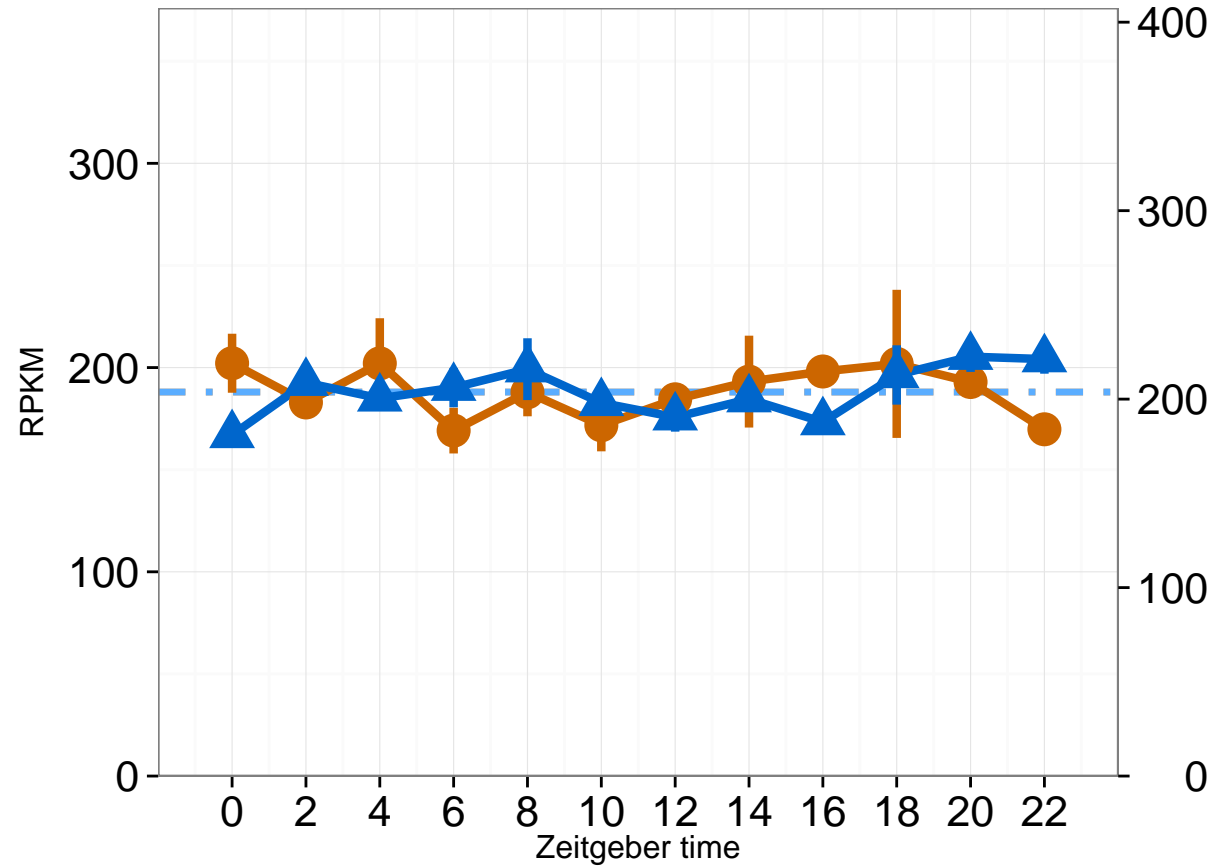

## Ndufs5

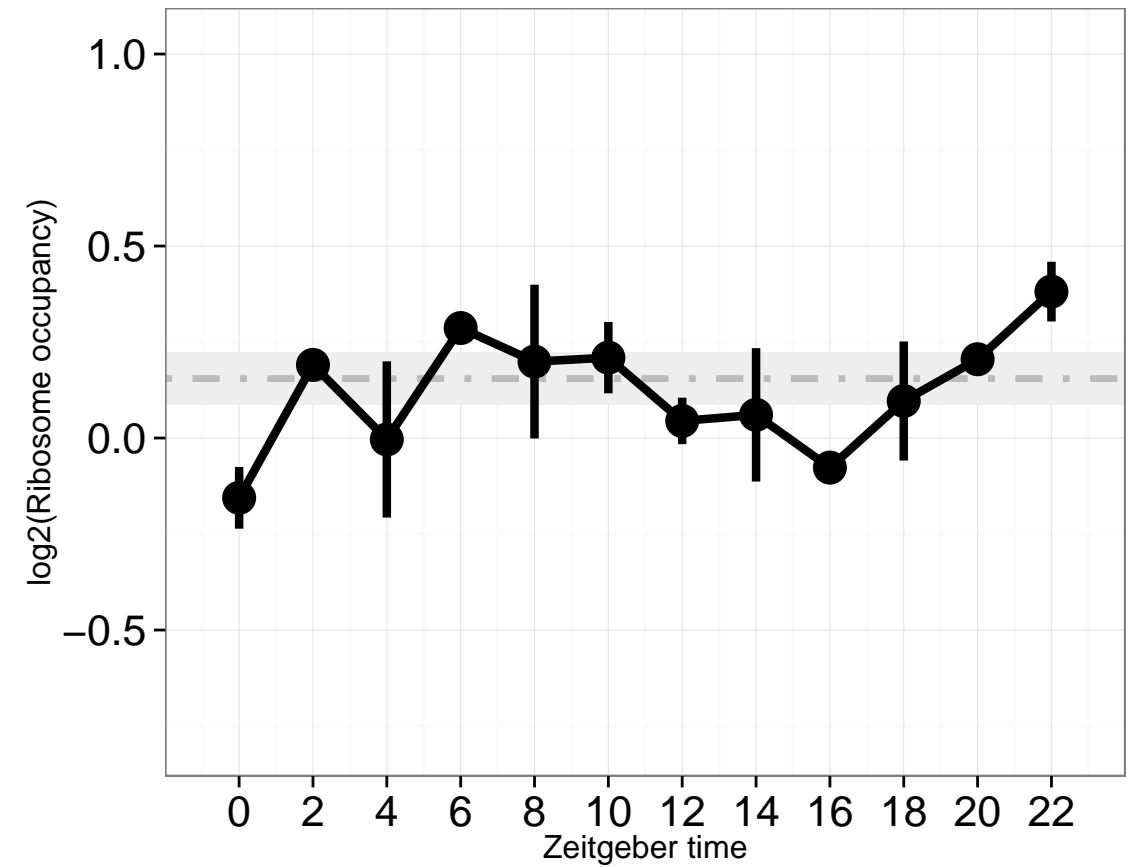

Supplement: SuppDataset_1.zip [file Ndufs5_set_A.pdf › Supplemental Dataset 1/A-mRNA_nonrhyth_translation_nonrhyth/Ndufs5_set_A.pdf]

# Ndufs6

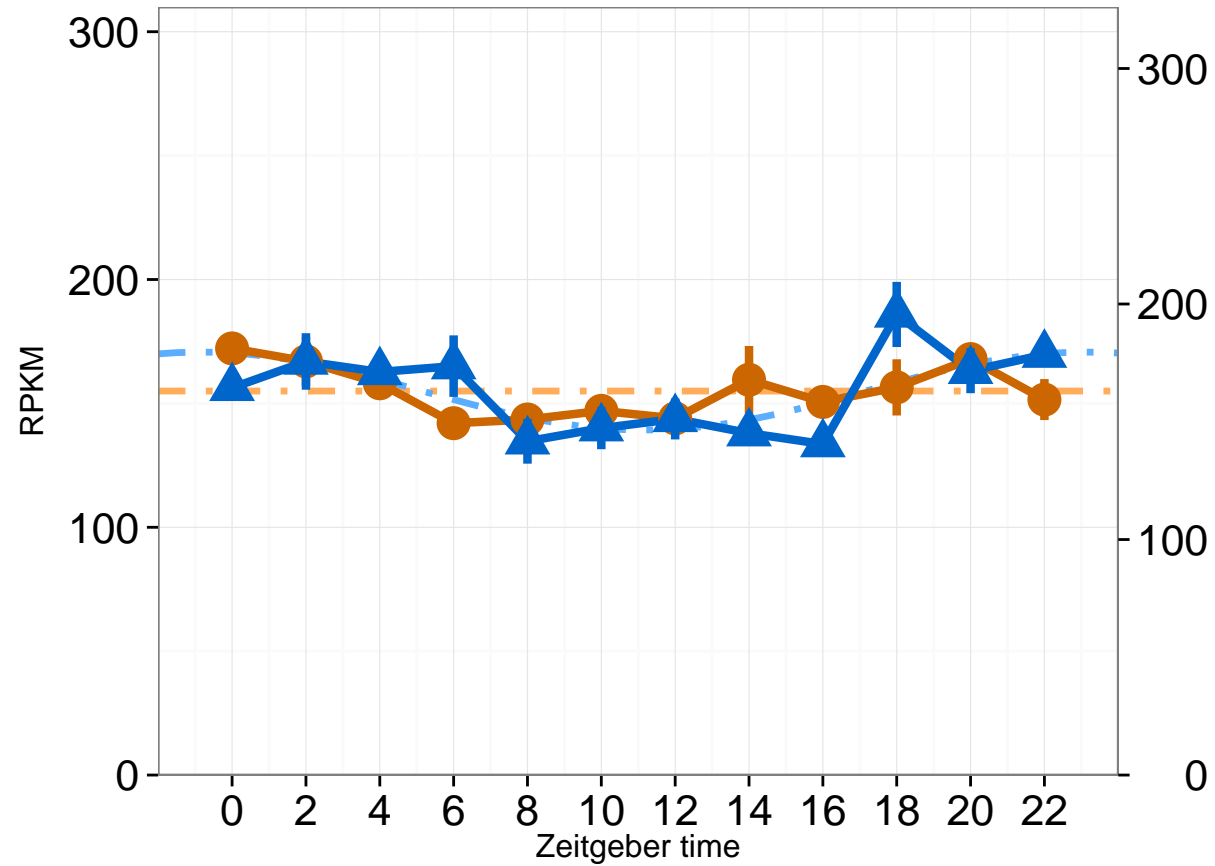

# Ndufs6

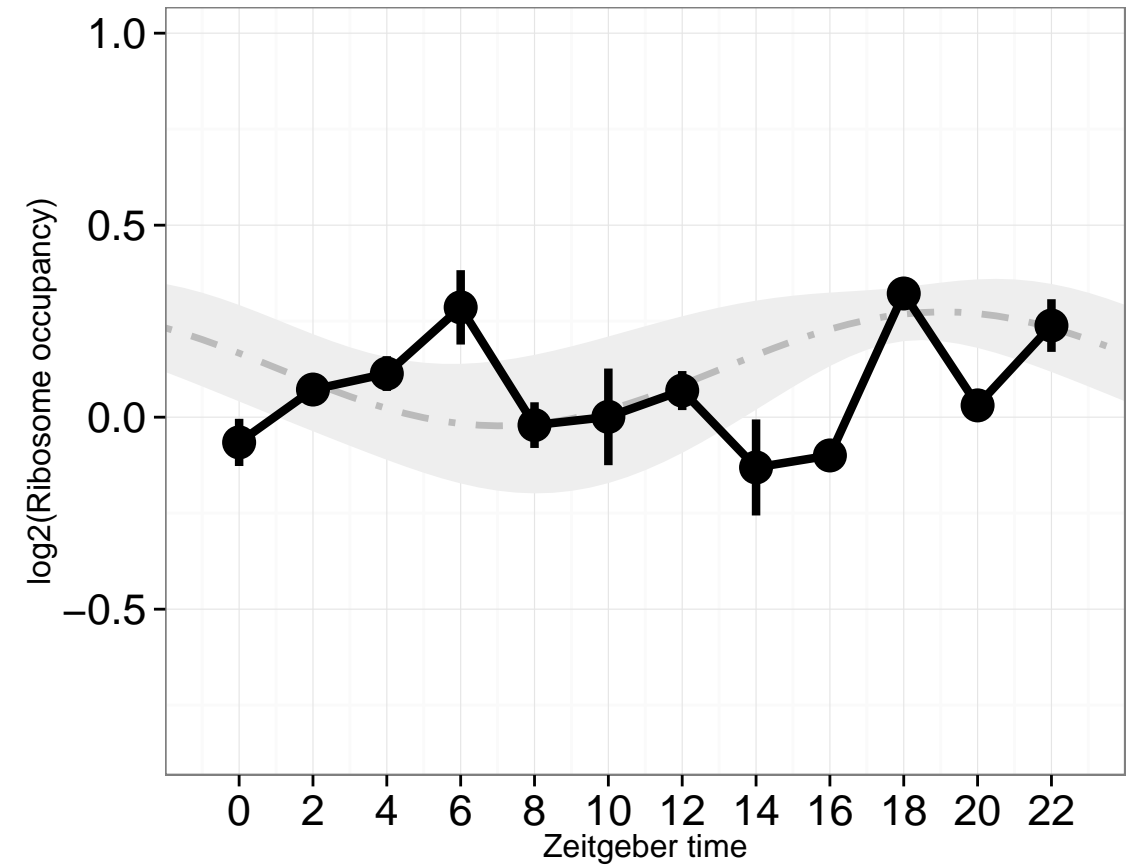

Supplement: SuppDataset_1.zip [file Ndufs6_set_A.pdf › Supplemental Dataset 1/A-mRNA_nonrhyth_translation_nonrhyth/Ndufs6_set_A.pdf]

## Ndufs8

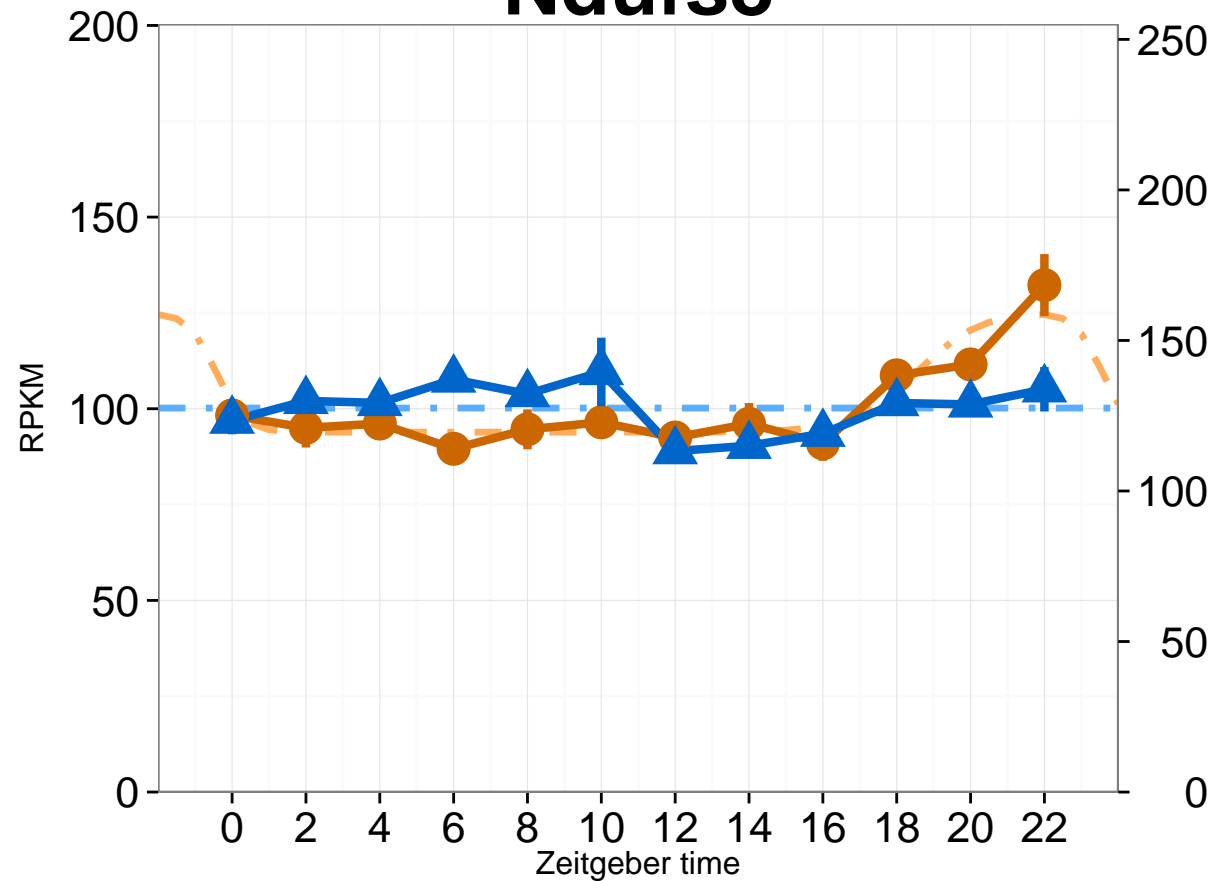

## Ndufs8

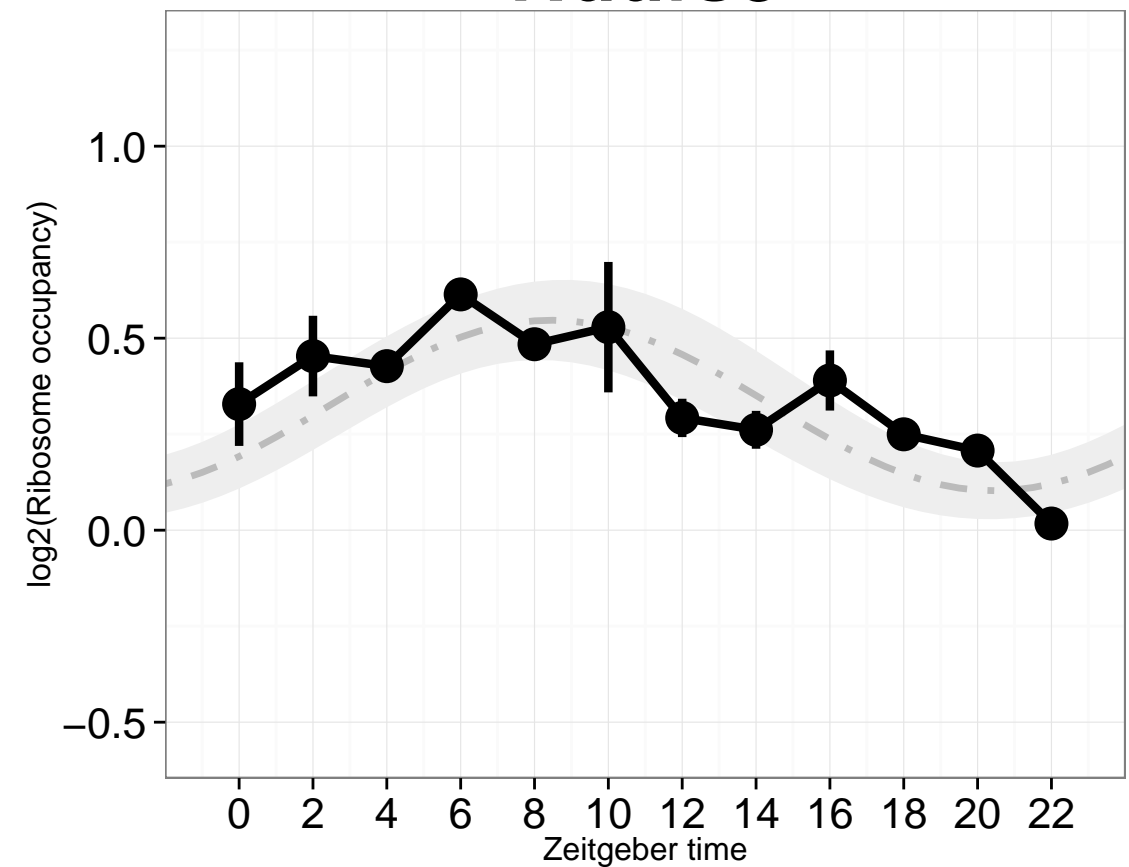

Supplement: SuppDataset_1.zip [file Ndufs8_set_A.pdf › Supplemental Dataset 1/A-mRNA_nonrhyth_translation_nonrhyth/Ndufs8_set_A.pdf]

# Ndufv1

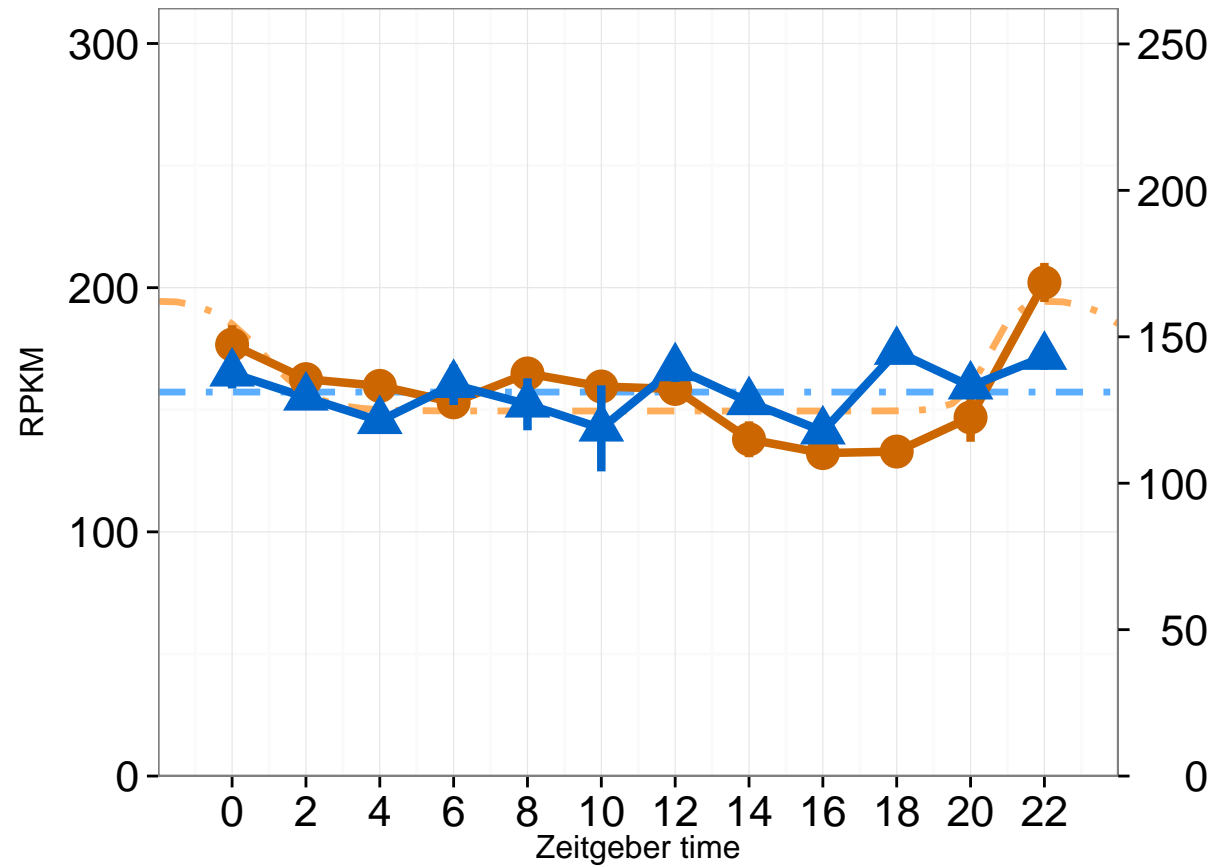

# Ndufv1

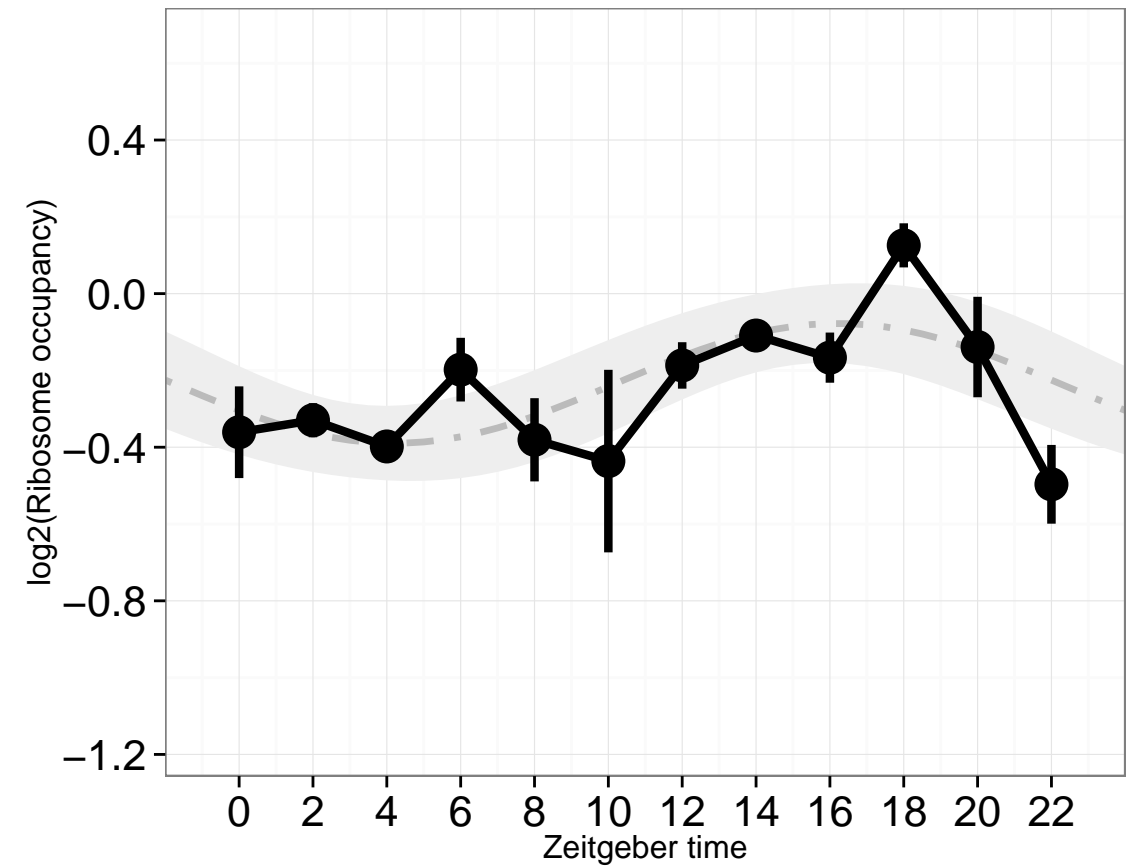

Supplement: SuppDataset_1.zip [file Ndufv1_set_A.pdf › Supplemental Dataset 1/A-mRNA_nonrhyth_translation_nonrhyth/Ndufv1_set_A.pdf]

## Ndufv2

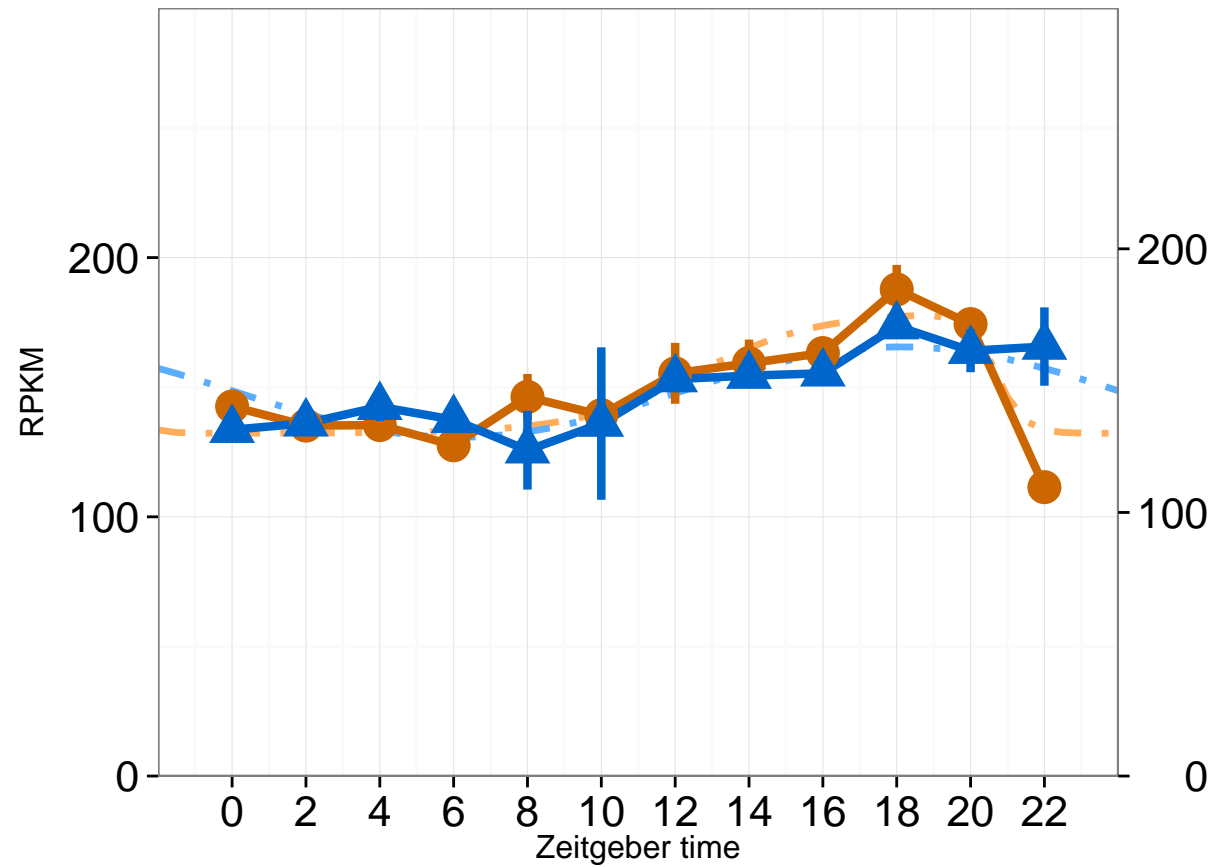

## Ndufv2

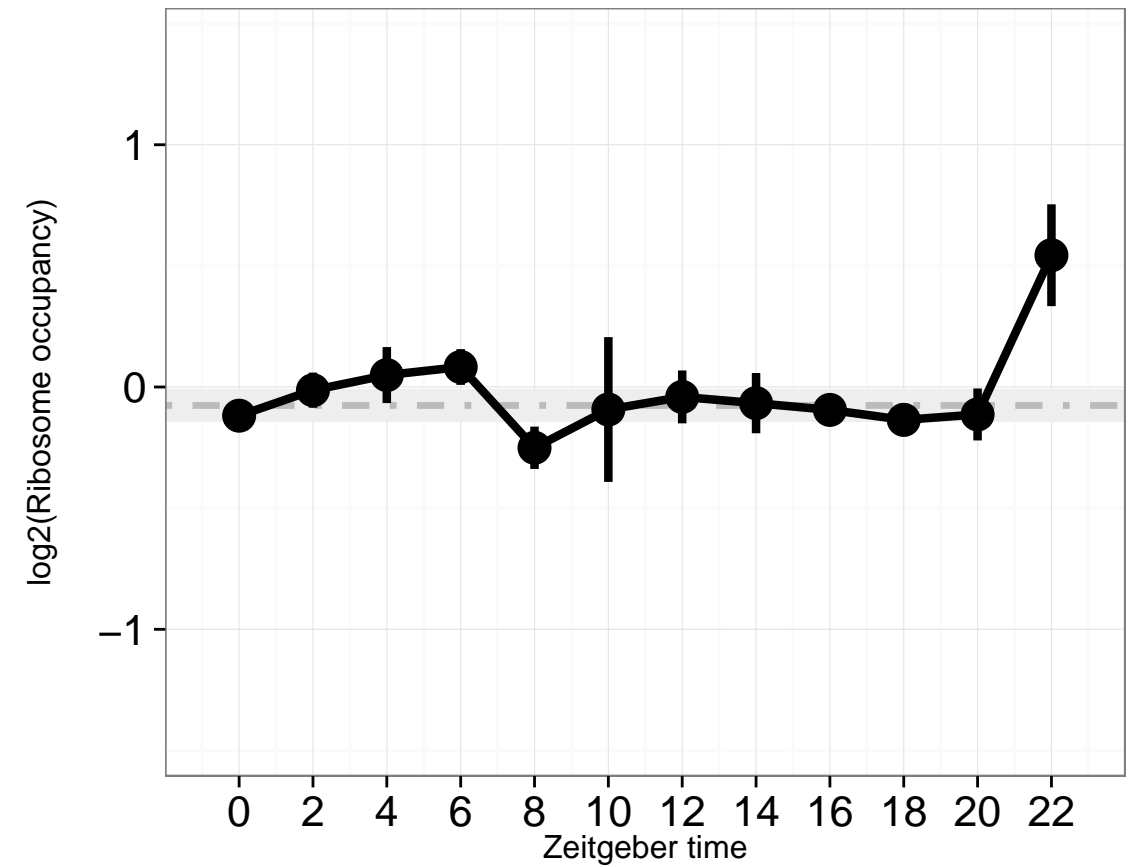

Supplement: SuppDataset_1.zip [file Ndufv2_set_A.pdf › Supplemental Dataset 1/A-mRNA_nonrhyth_translation_nonrhyth/Ndufv2_set_A.pdf]

# Ndufv3

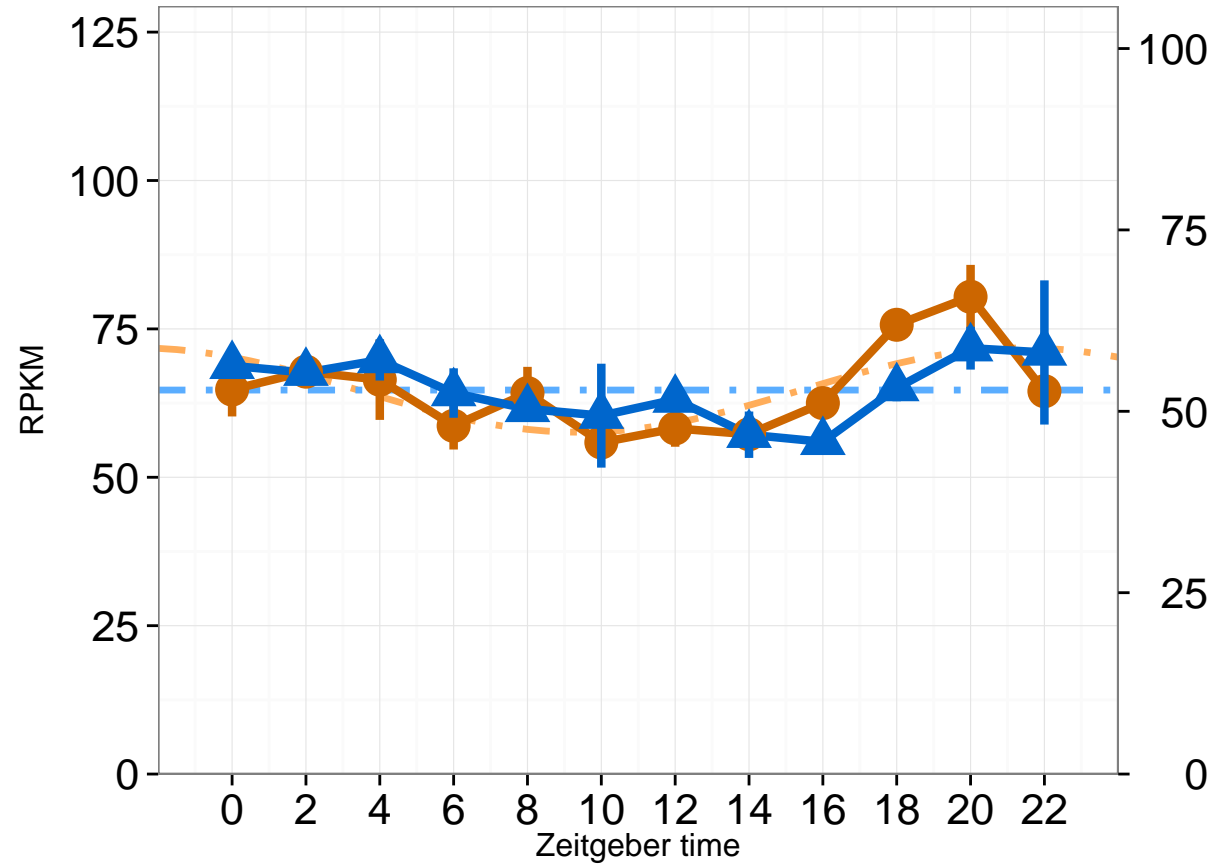

# Ndufv3

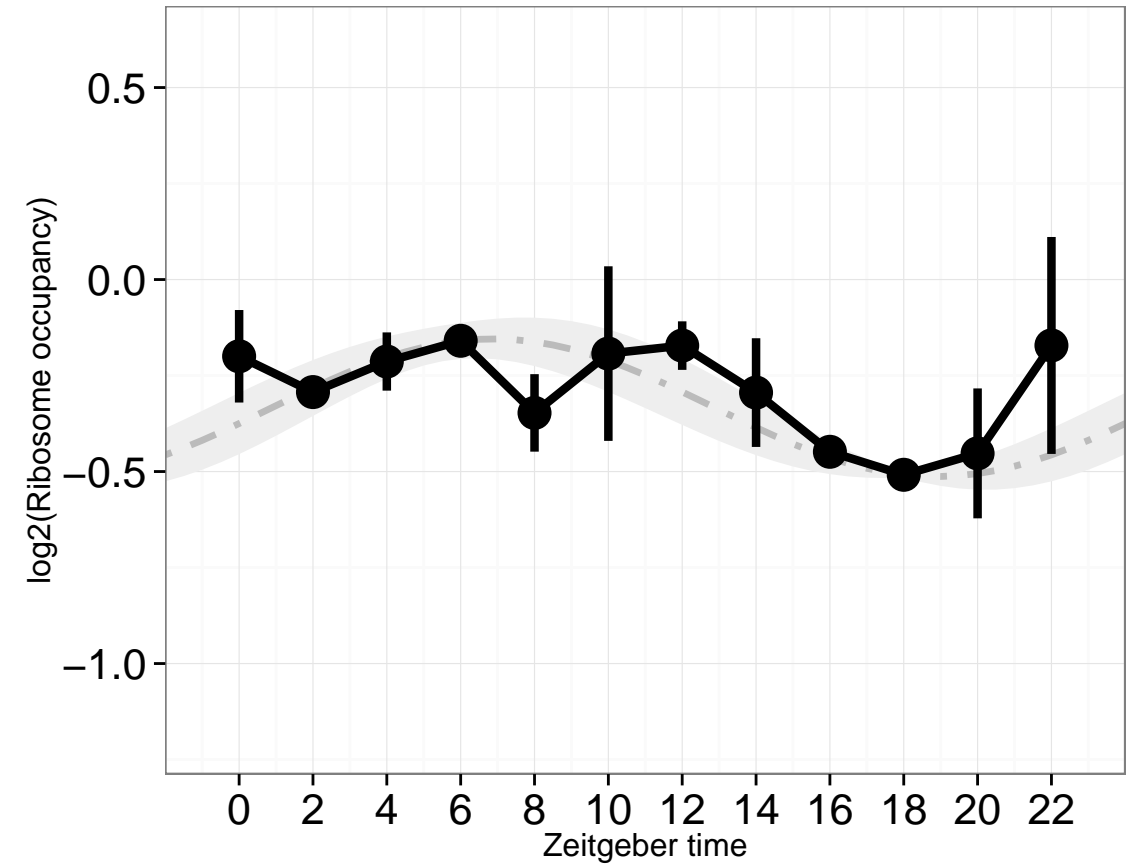

Supplement: SuppDataset_1.zip [file Ndufv3_set_A.pdf › Supplemental Dataset 1/A-mRNA_nonrhyth_translation_nonrhyth/Ndufv3_set_A.pdf]

## Neb

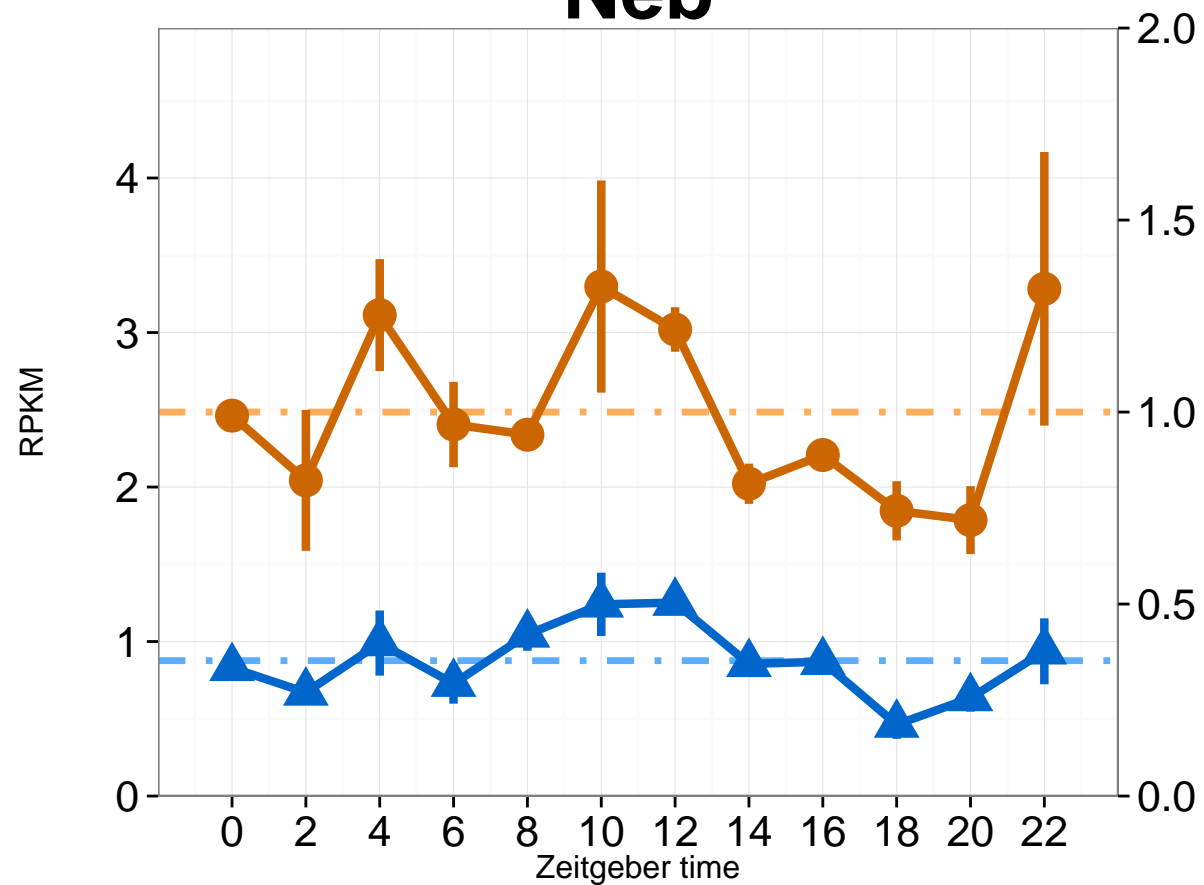

## Neb

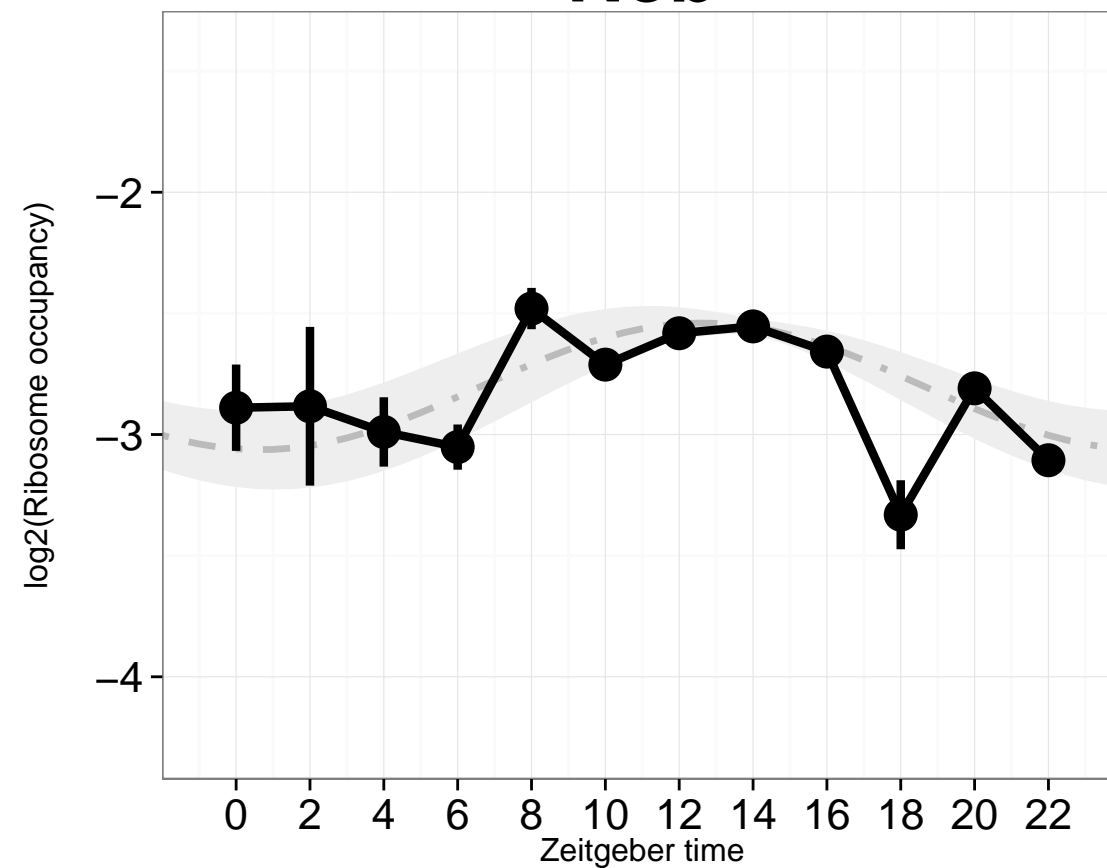

Supplement: SuppDataset_1.zip [file Neb_set_A.pdf › Supplemental Dataset 1/A-mRNA_nonrhyth_translation_nonrhyth/Neb_set_A.pdf]

## Necab1

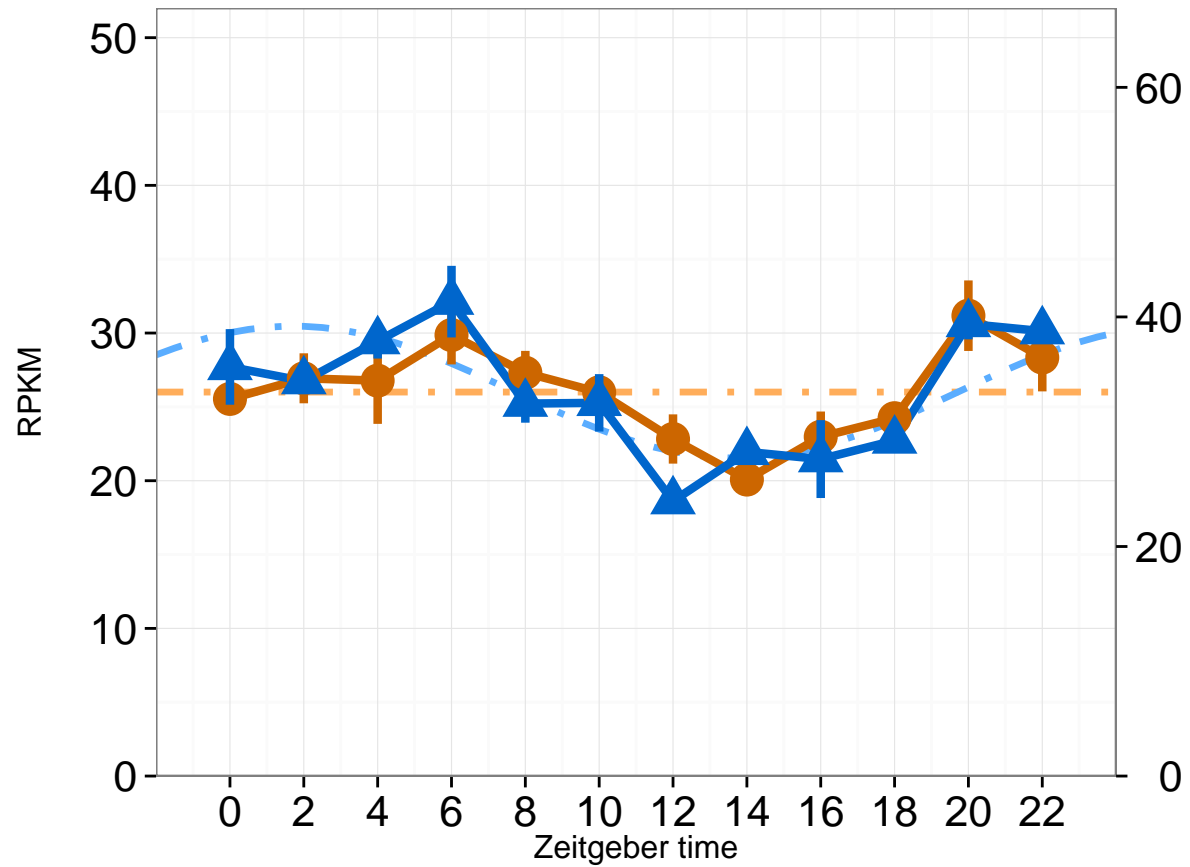

## Necab1

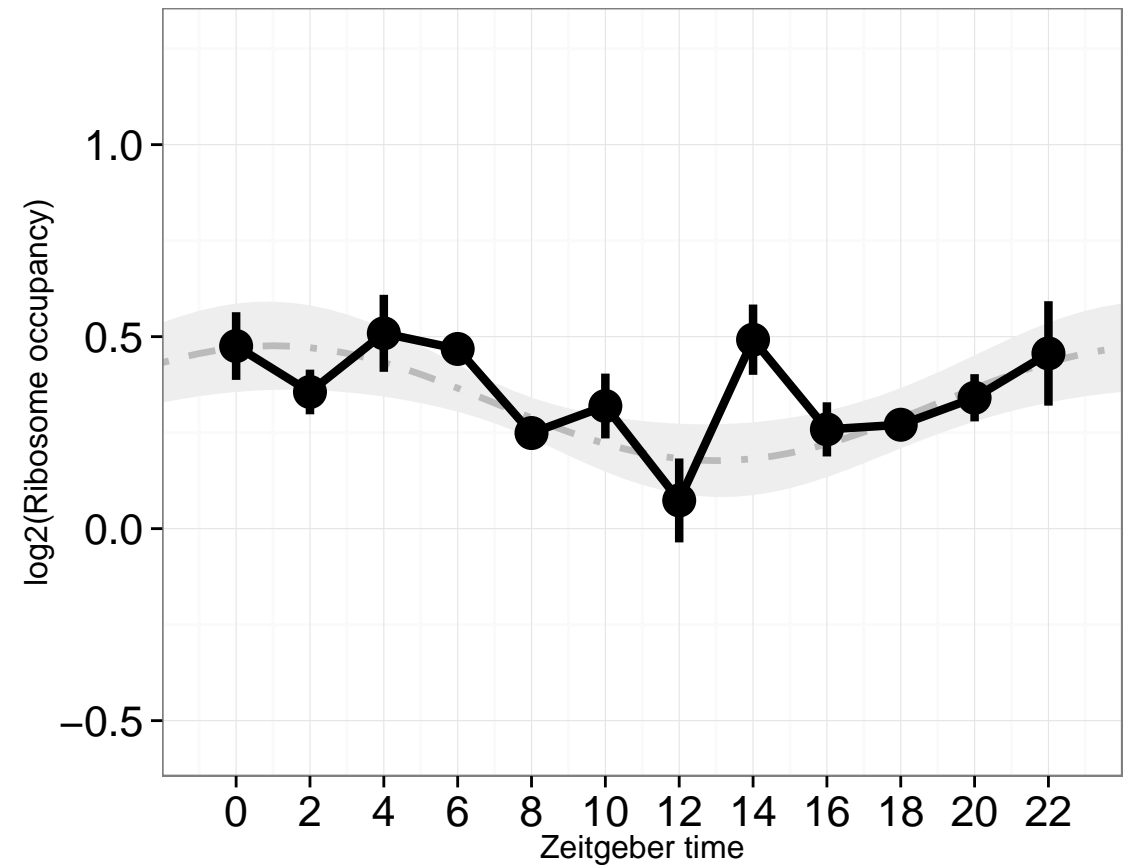

Supplement: SuppDataset_1.zip [file Necab1_set_A.pdf › Supplemental Dataset 1/A-mRNA_nonrhyth_translation_nonrhyth/Necab1_set_A.pdf]

## Necap1

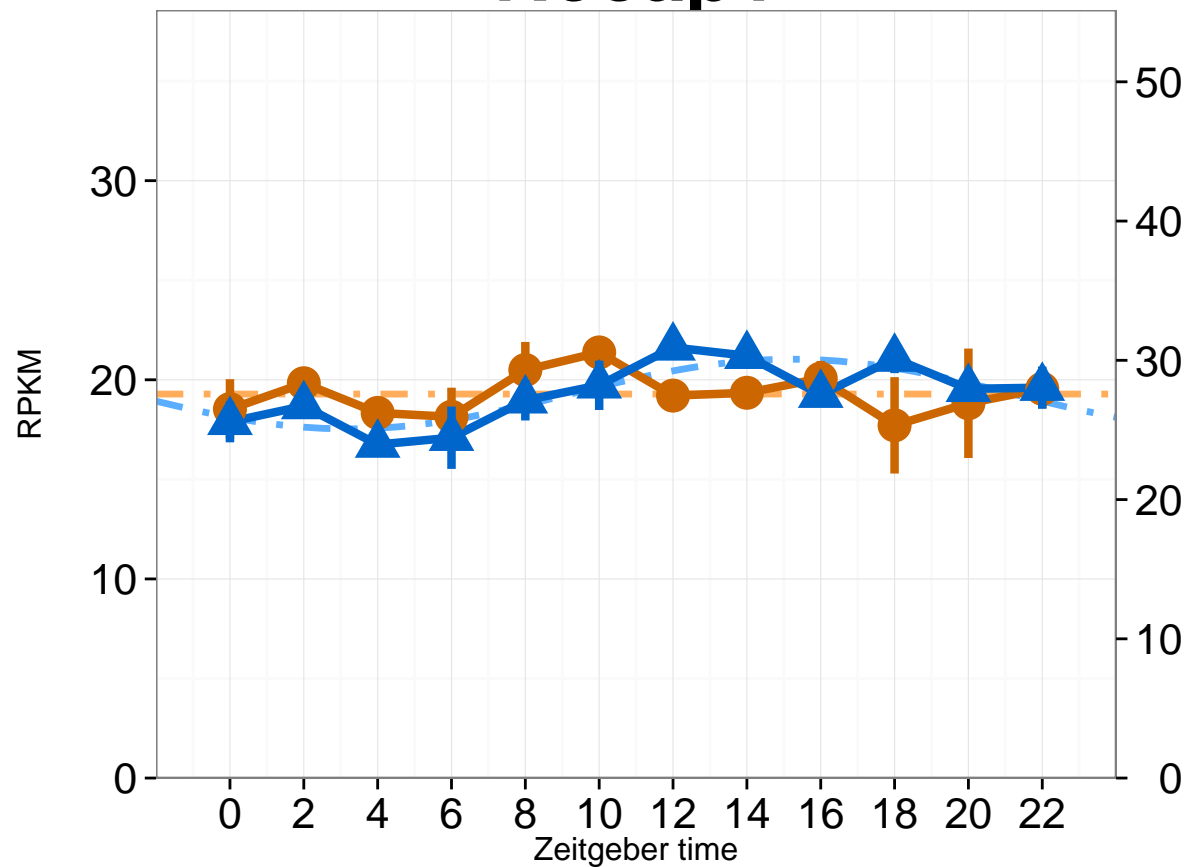

## Necap1

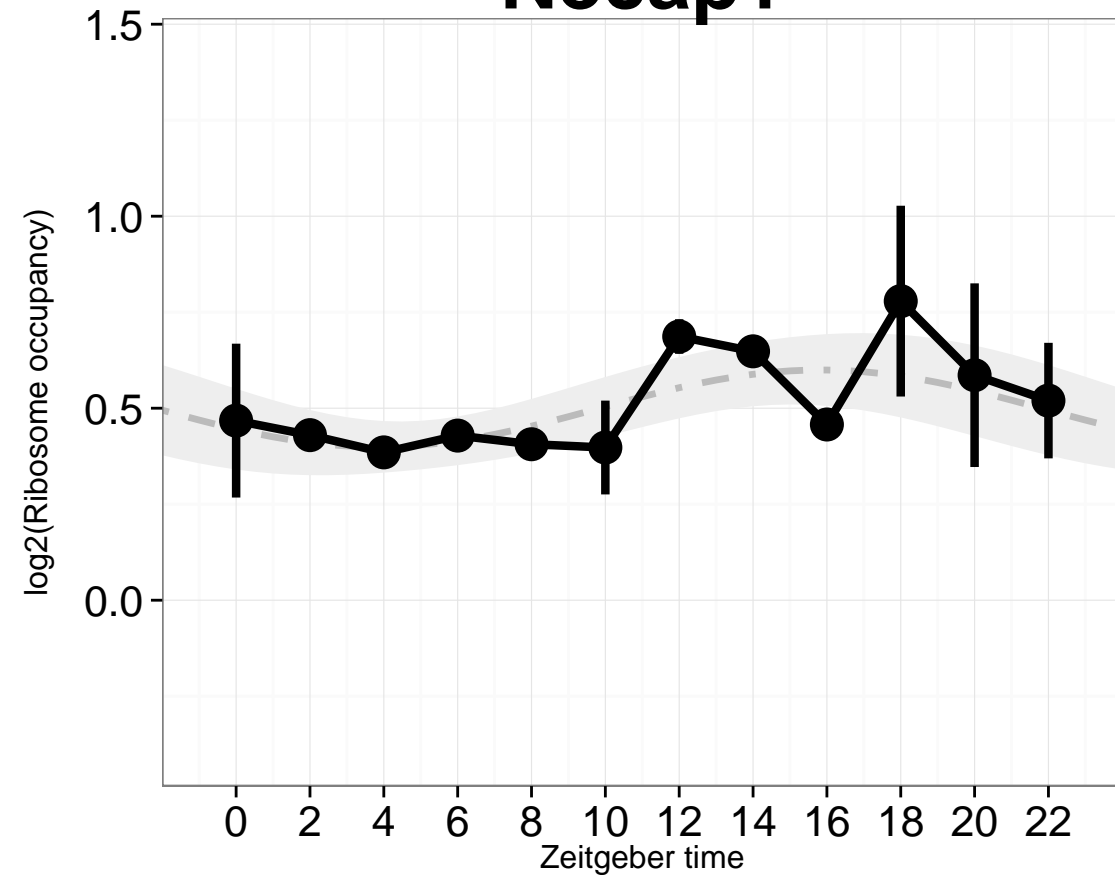

Supplement: SuppDataset_1.zip [file Necap1_set_A.pdf › Supplemental Dataset 1/A-mRNA_nonrhyth_translation_nonrhyth/Necap1_set_A.pdf]

## Necap2

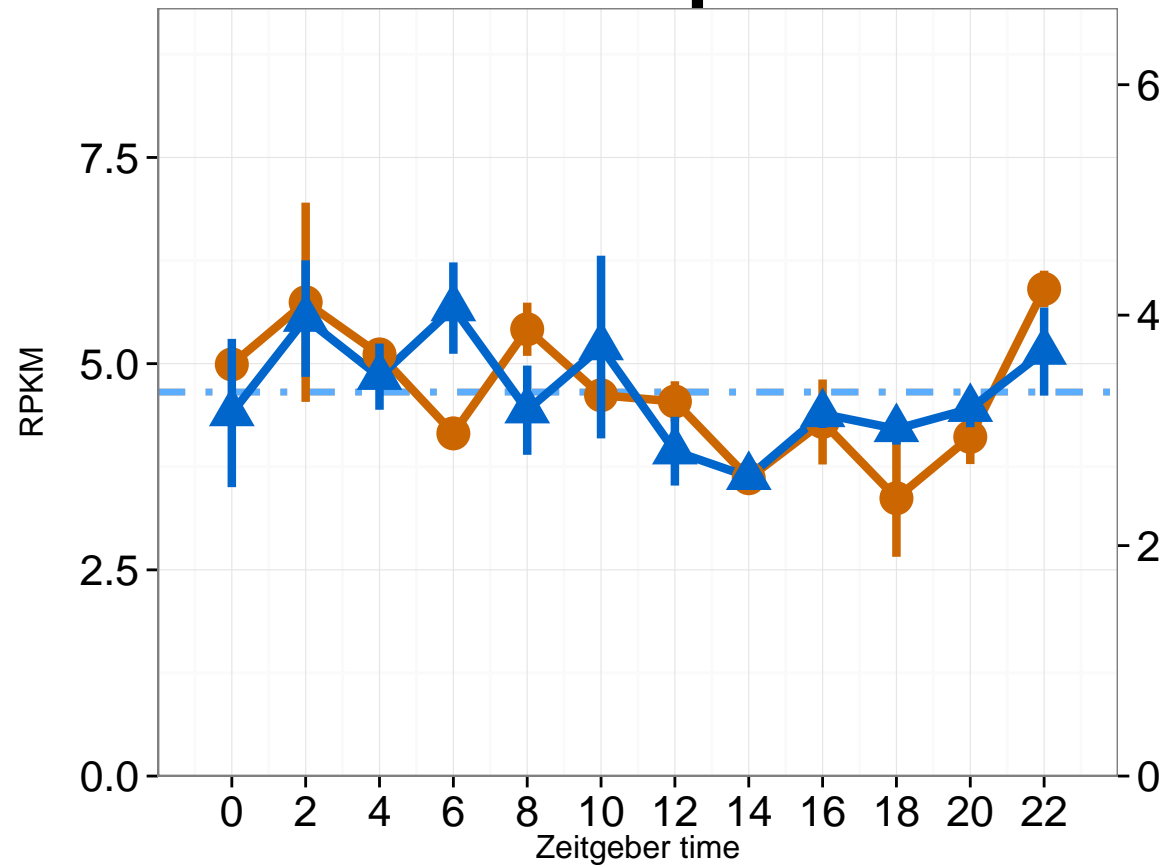

## Necap2

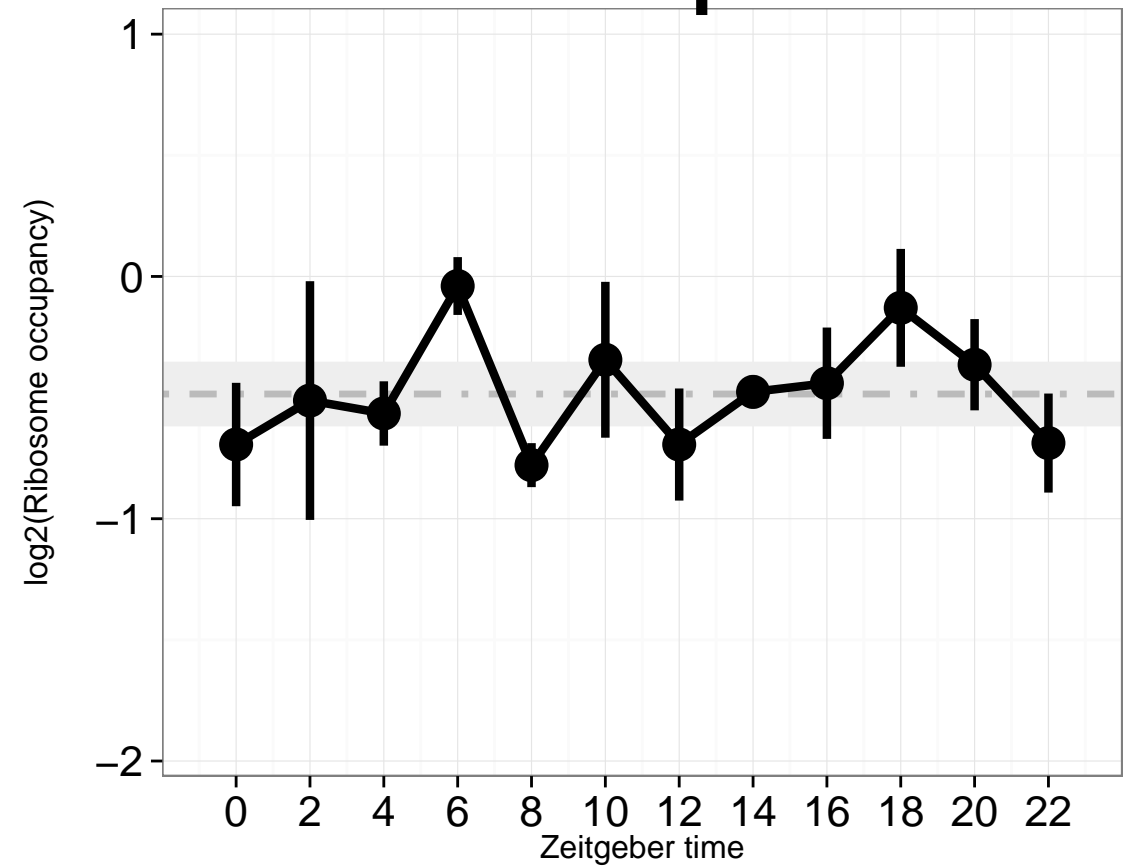

Supplement: SuppDataset_1.zip [file Necap2_set_A.pdf › Supplemental Dataset 1/A-mRNA_nonrhyth_translation_nonrhyth/Necap2_set_A.pdf]

## Nedd1

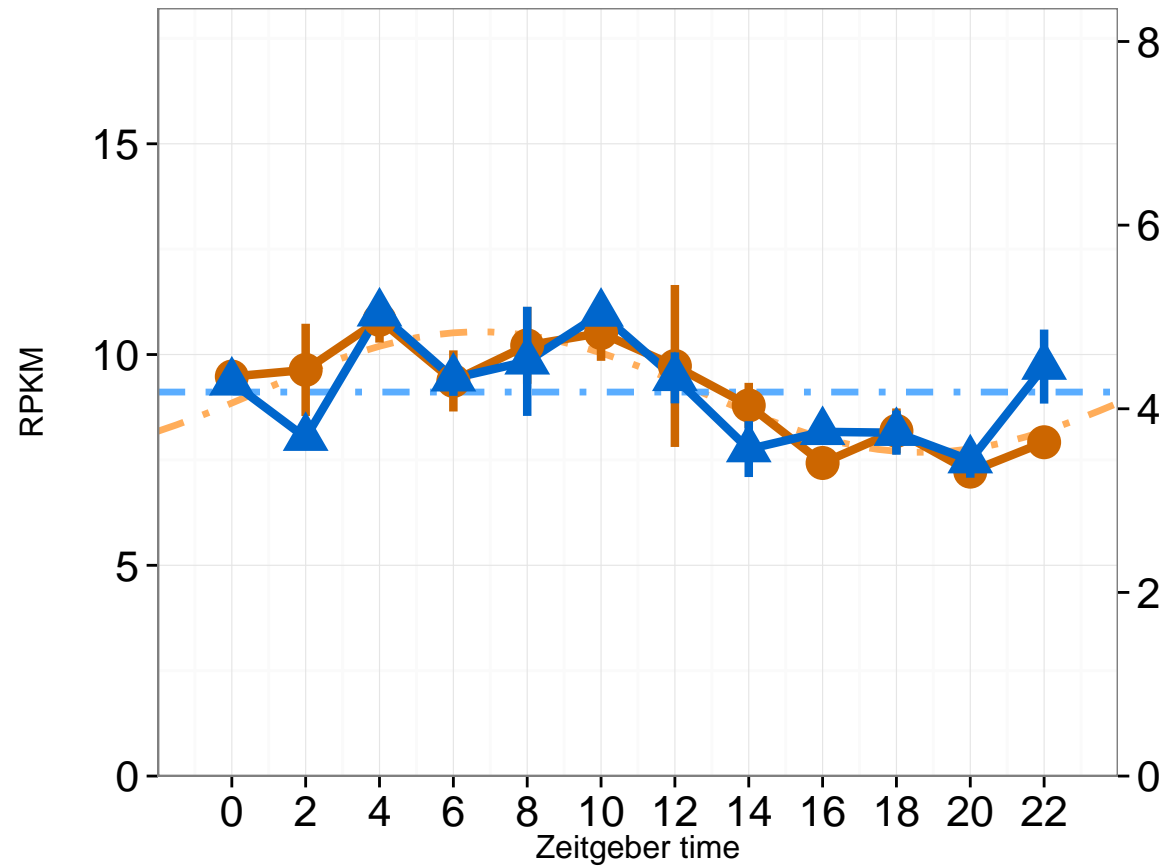

## Nedd1

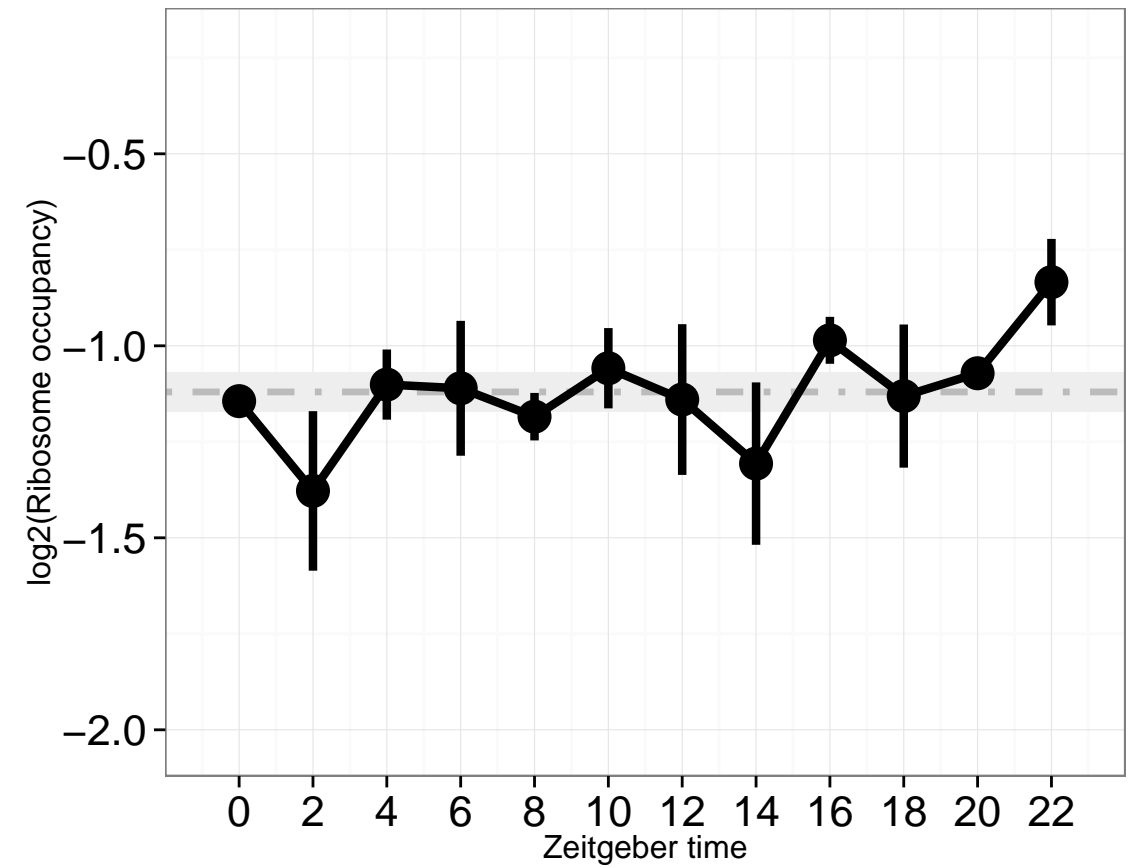

Supplement: SuppDataset_1.zip [file Nedd1_set_A.pdf › Supplemental Dataset 1/A-mRNA_nonrhyth_translation_nonrhyth/Nedd1_set_A.pdf]

## Nedd4

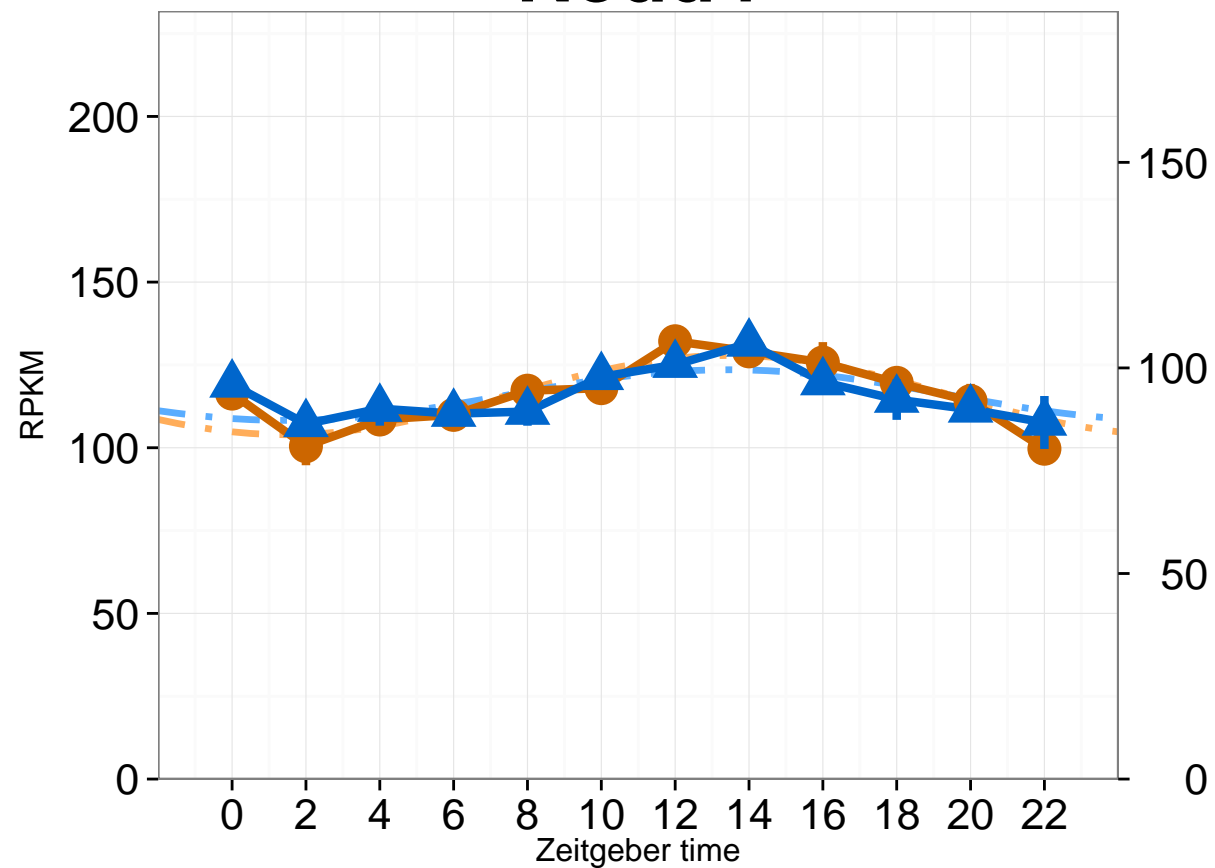

## Nedd4

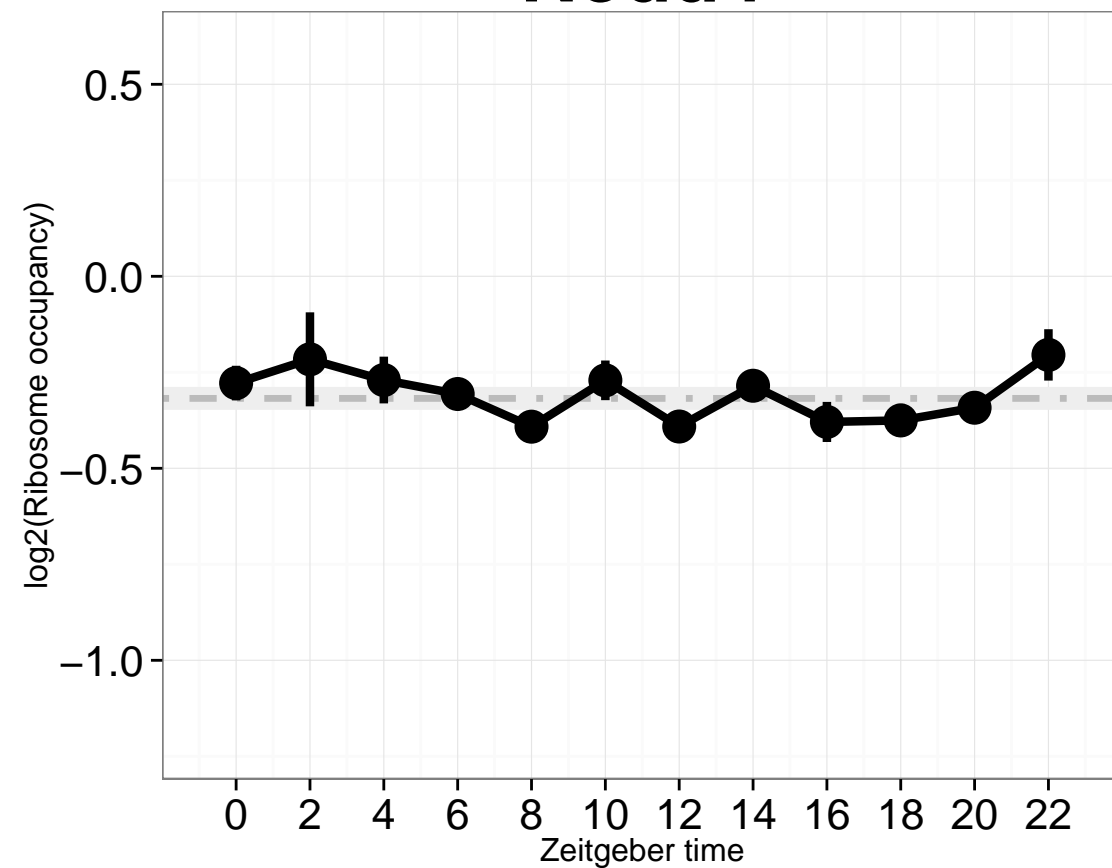

Supplement: SuppDataset_1.zip [file Nedd4_set_A.pdf › Supplemental Dataset 1/A-mRNA_nonrhyth_translation_nonrhyth/Nedd4_set_A.pdf]

## Nedd8

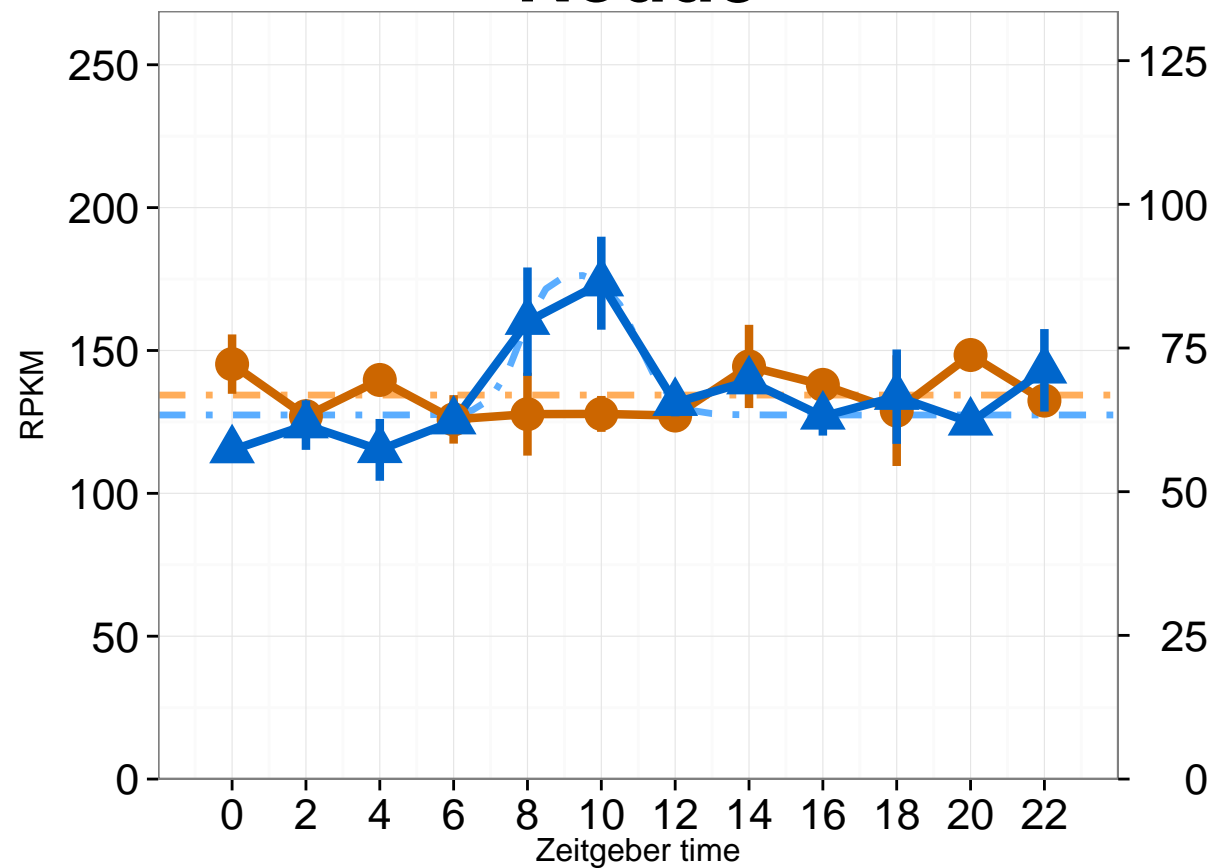

## Nedd8

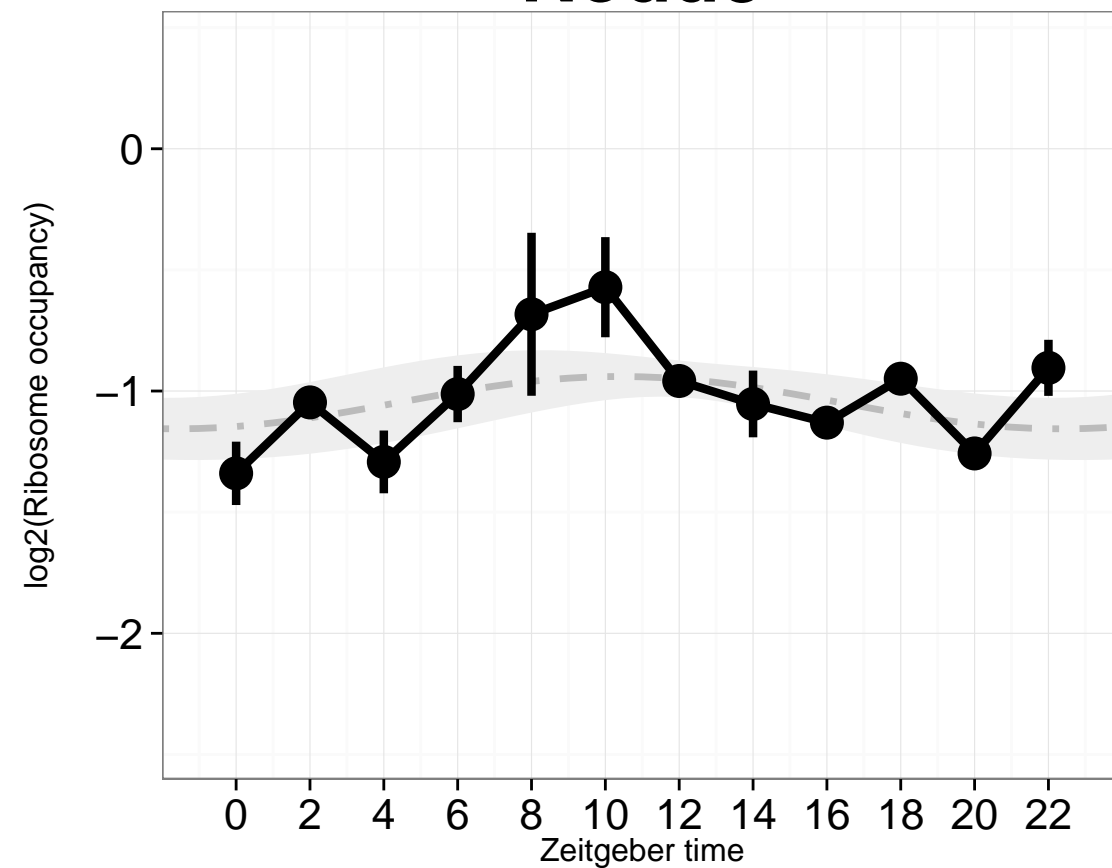

Supplement: SuppDataset_1.zip [file Nedd8_set_A.pdf › Supplemental Dataset 1/A-mRNA_nonrhyth_translation_nonrhyth/Nedd8_set_A.pdf]

# Nedd9

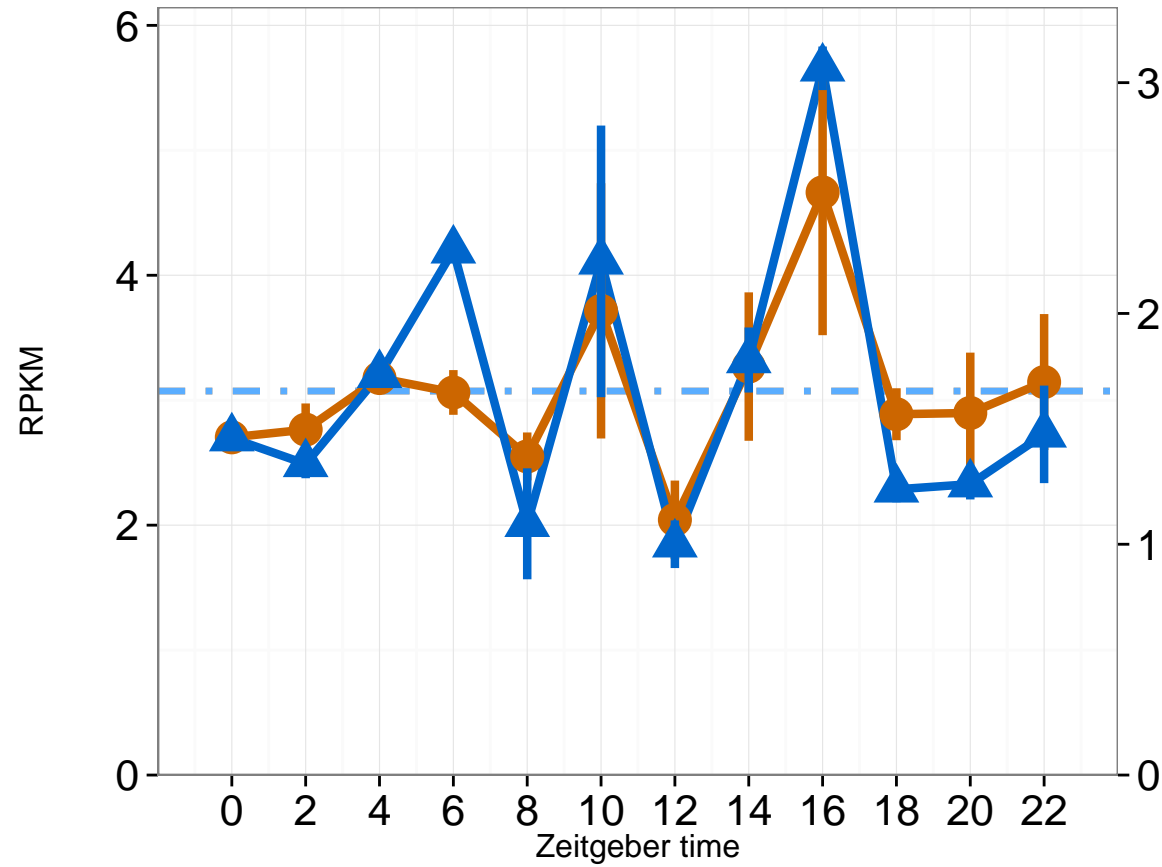

# Nedd9

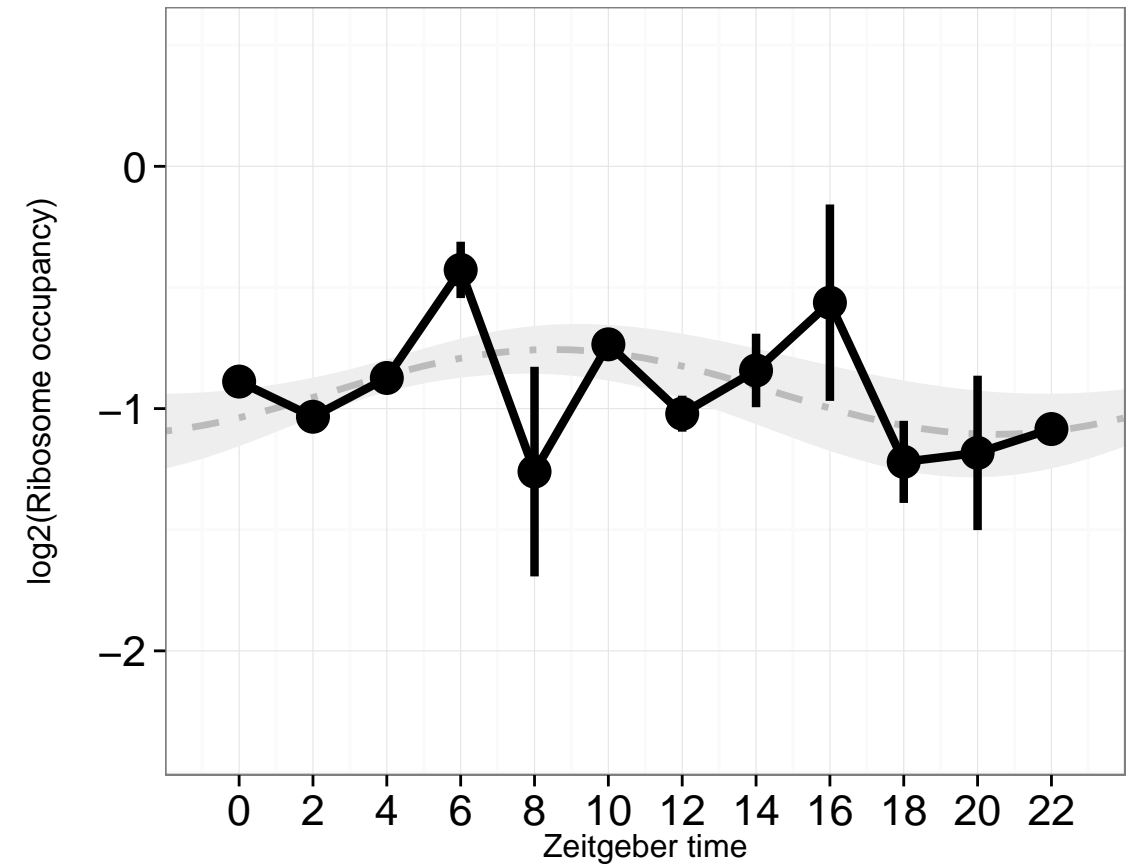

Supplement: SuppDataset_1.zip [file Nedd9_set_A.pdf › Supplemental Dataset 1/A-mRNA_nonrhyth_translation_nonrhyth/Nedd9_set_A.pdf]

## Nek1

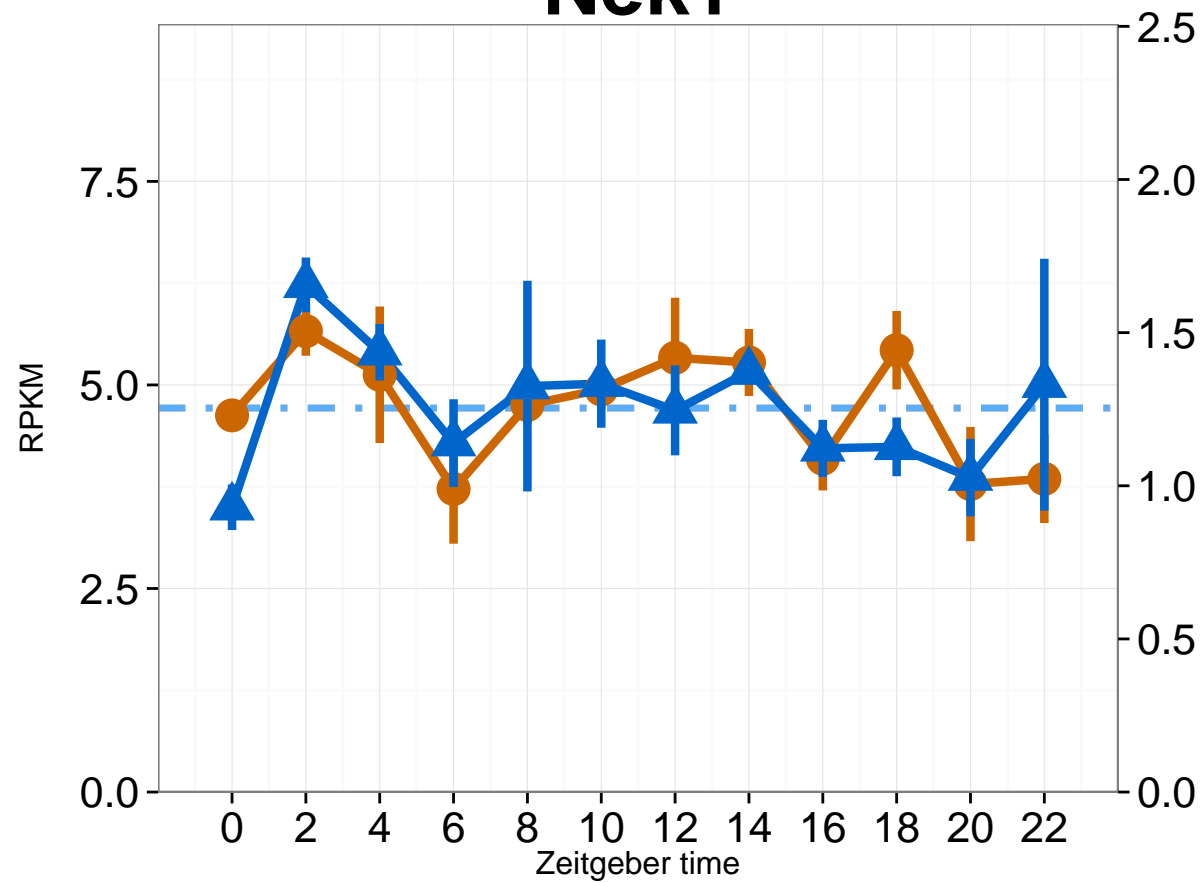

## Nek1

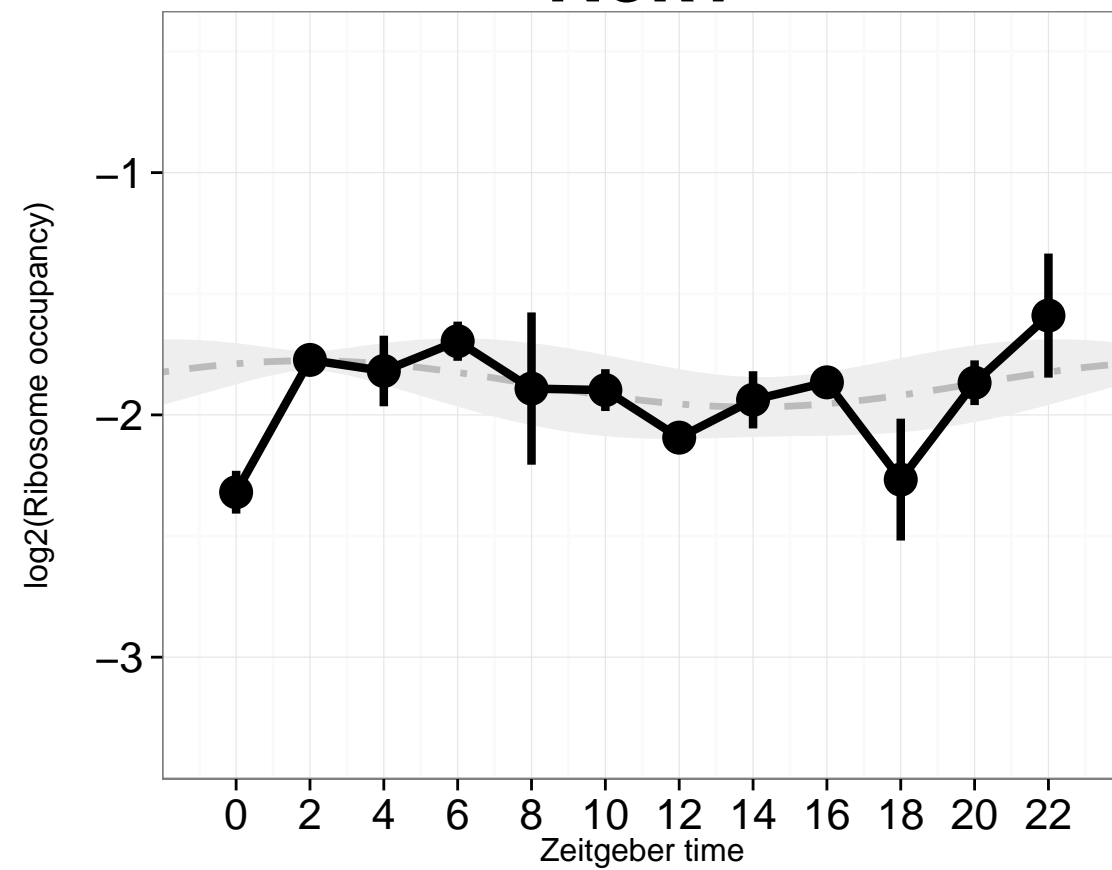

Supplement: SuppDataset_1.zip [file Nek1_set_A.pdf › Supplemental Dataset 1/A-mRNA_nonrhyth_translation_nonrhyth/Nek1_set_A.pdf]

## Nek3

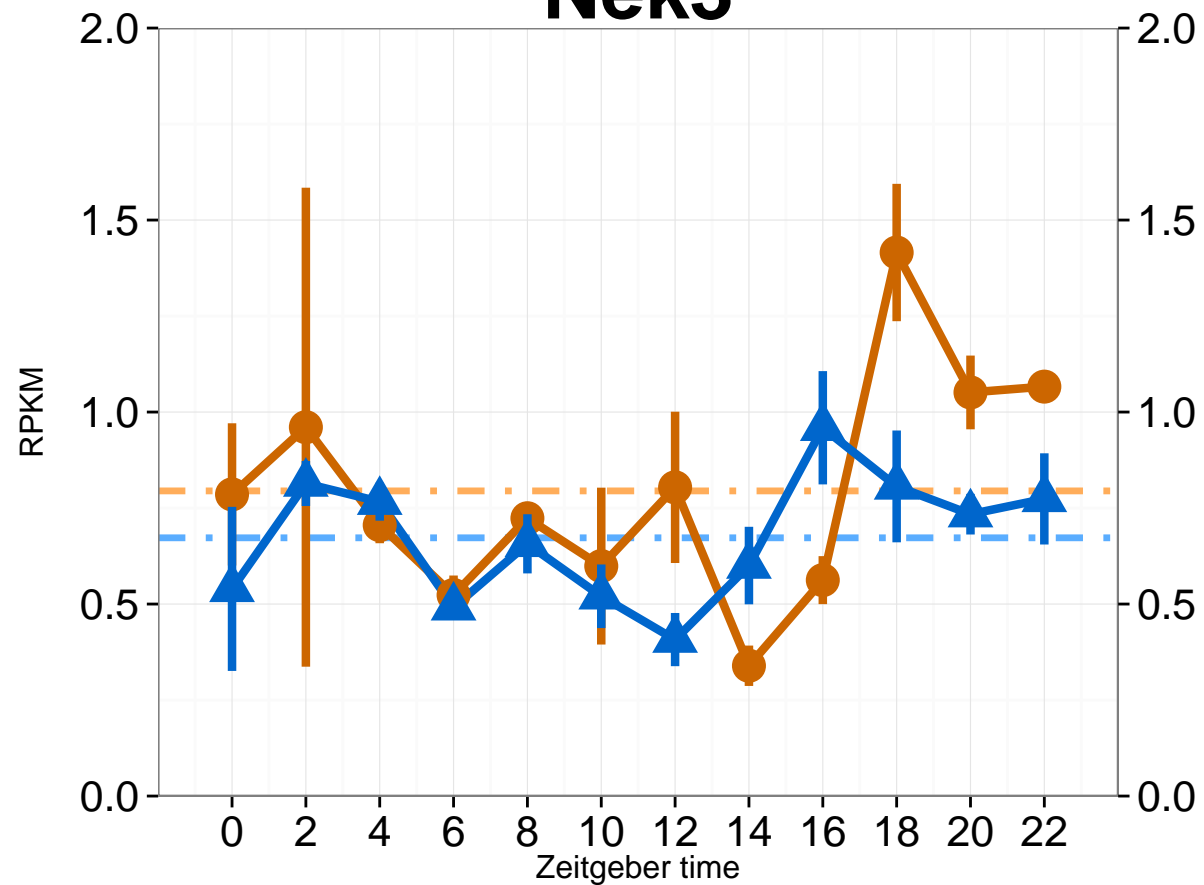

## Nek3

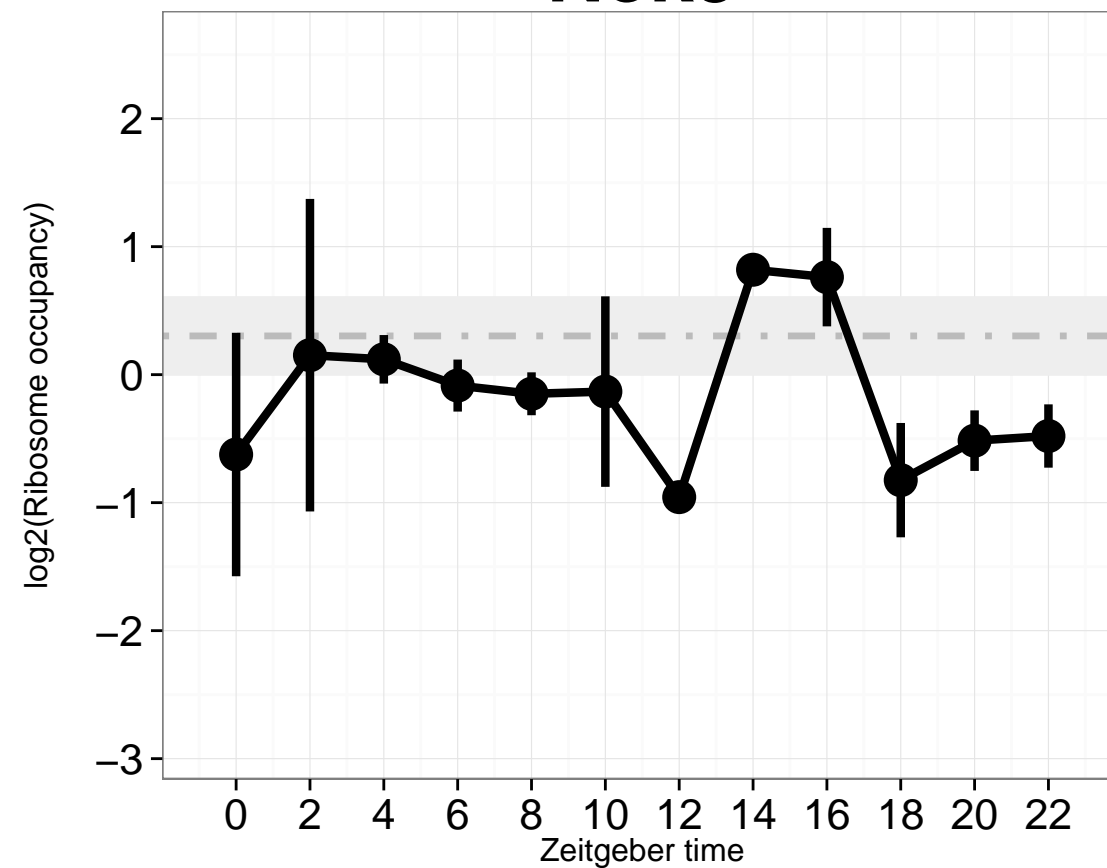

Supplement: SuppDataset_1.zip [file Nek3_set_A.pdf › Supplemental Dataset 1/A-mRNA_nonrhyth_translation_nonrhyth/Nek3_set_A.pdf]

# Nek6

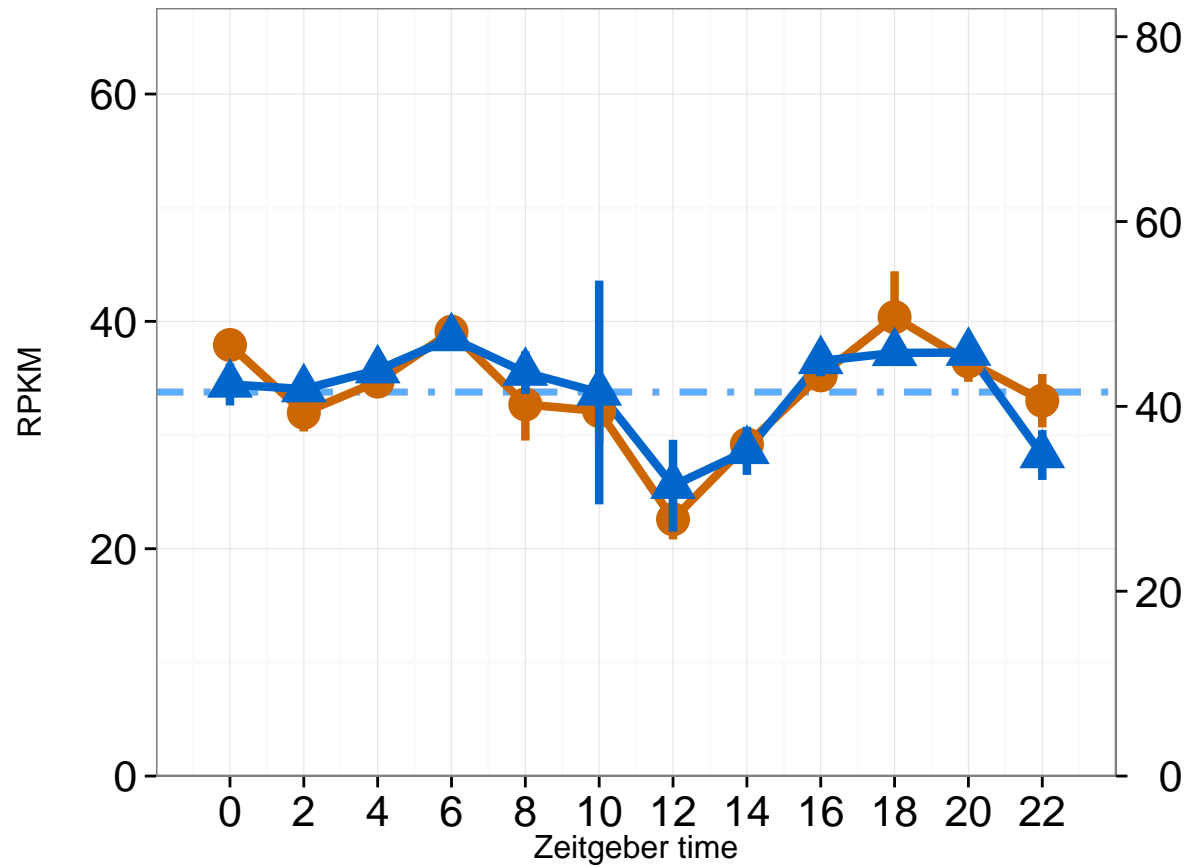

# Nek6

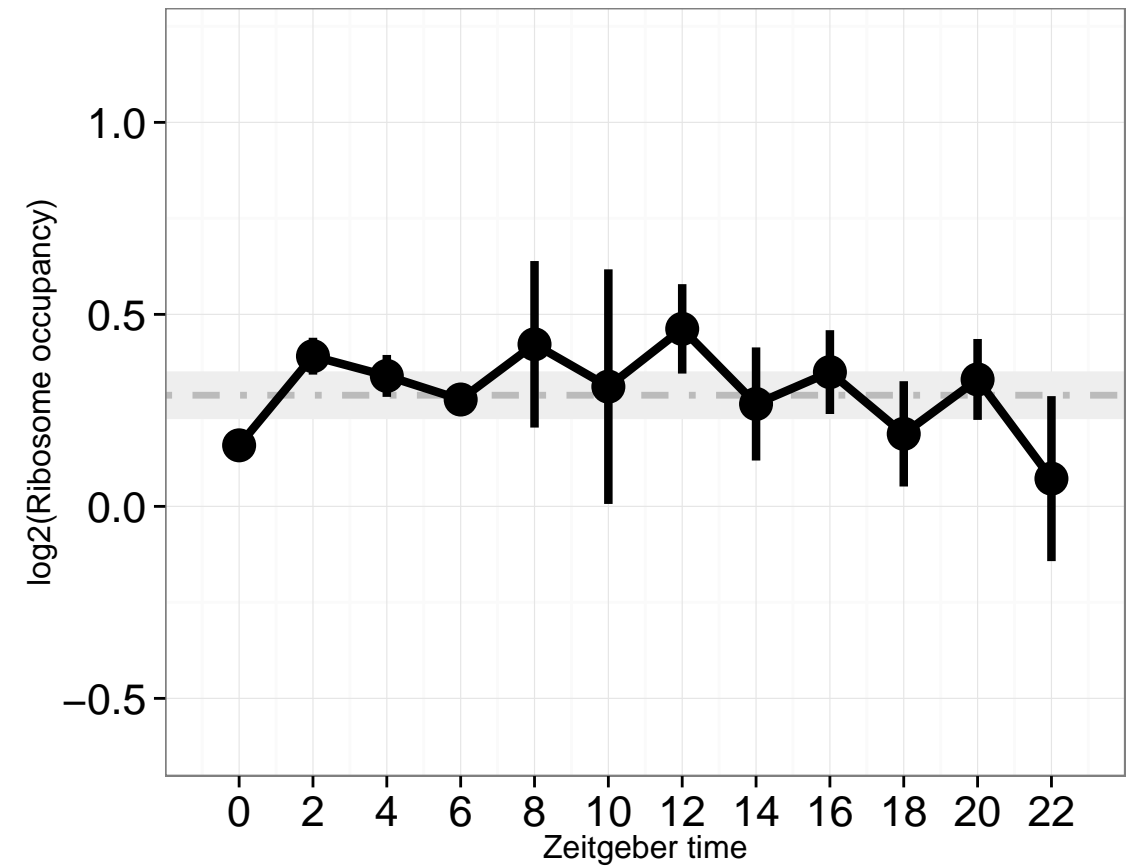

Supplement: SuppDataset_1.zip [file Nek6_set_A.pdf › Supplemental Dataset 1/A-mRNA_nonrhyth_translation_nonrhyth/Nek6_set_A.pdf]

## Nek7

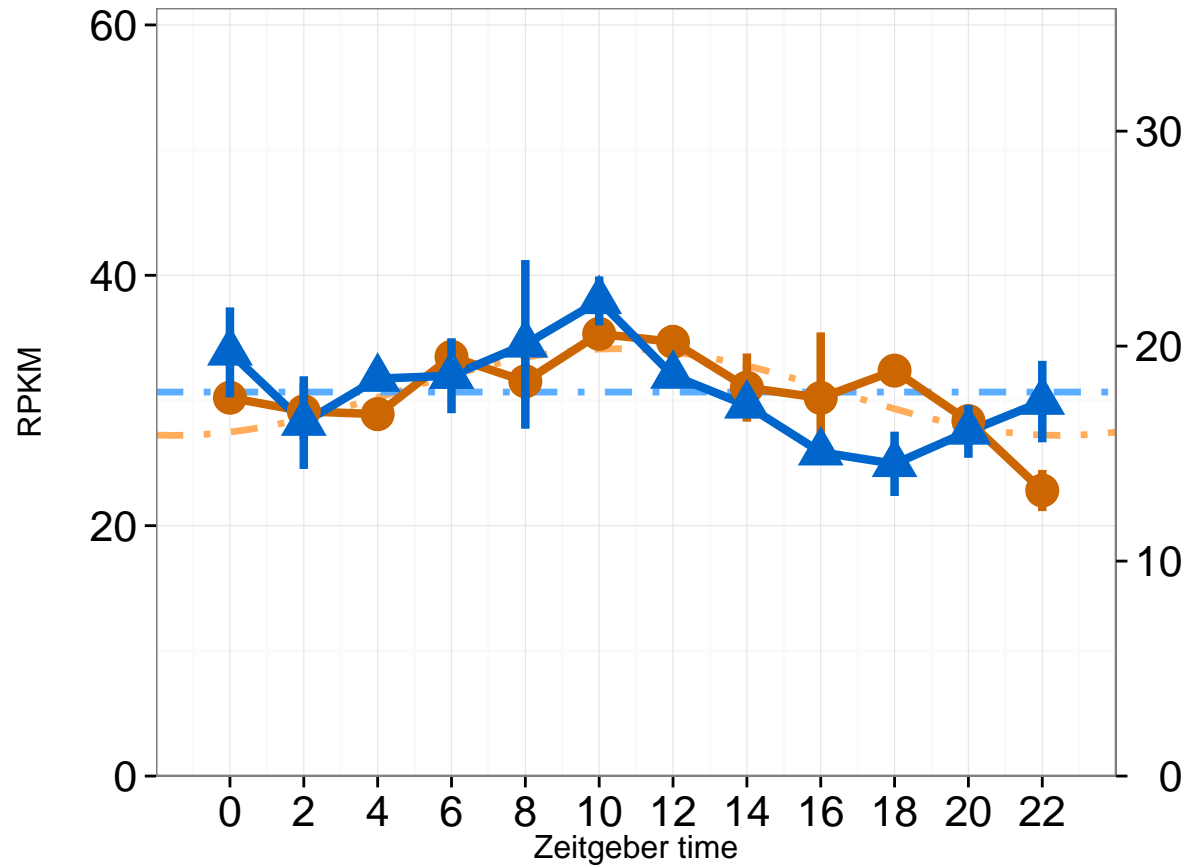

## Nek7

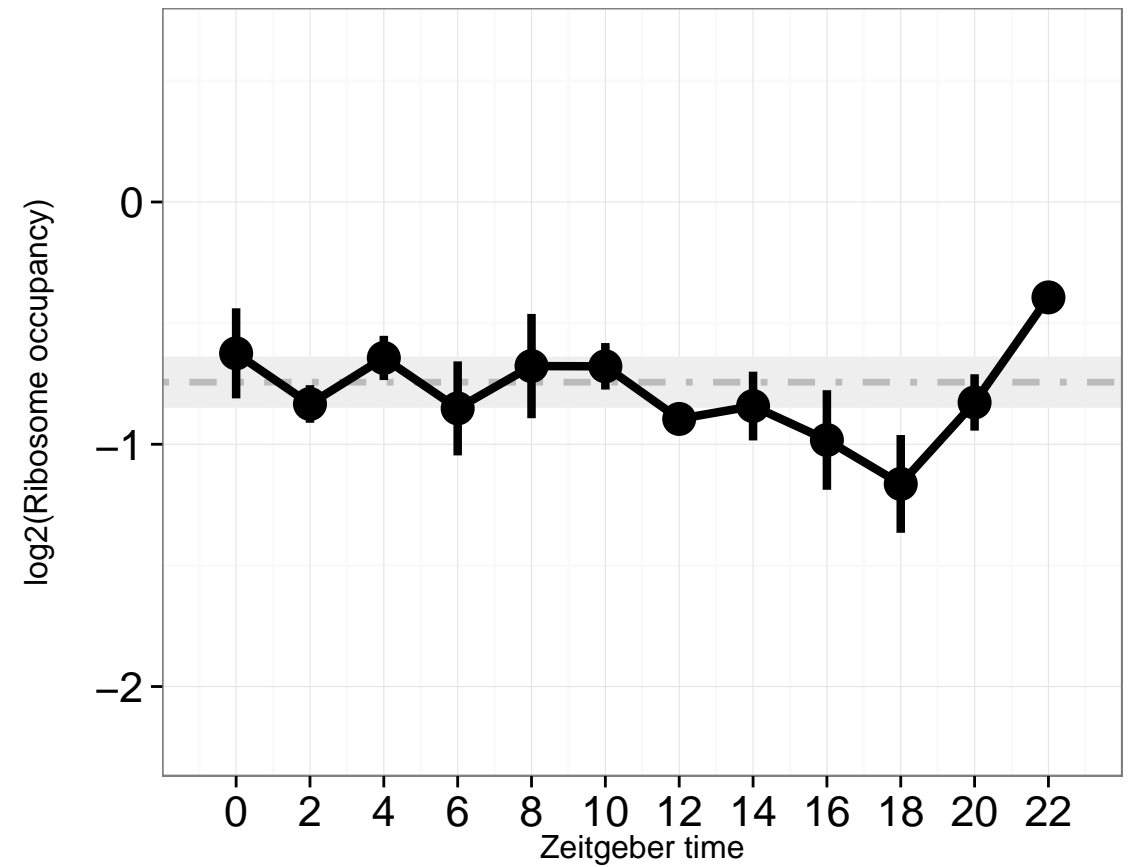

Supplement: SuppDataset_1.zip [file Nek7_set_A.pdf › Supplemental Dataset 1/A-mRNA_nonrhyth_translation_nonrhyth/Nek7_set_A.pdf]

## Nek8

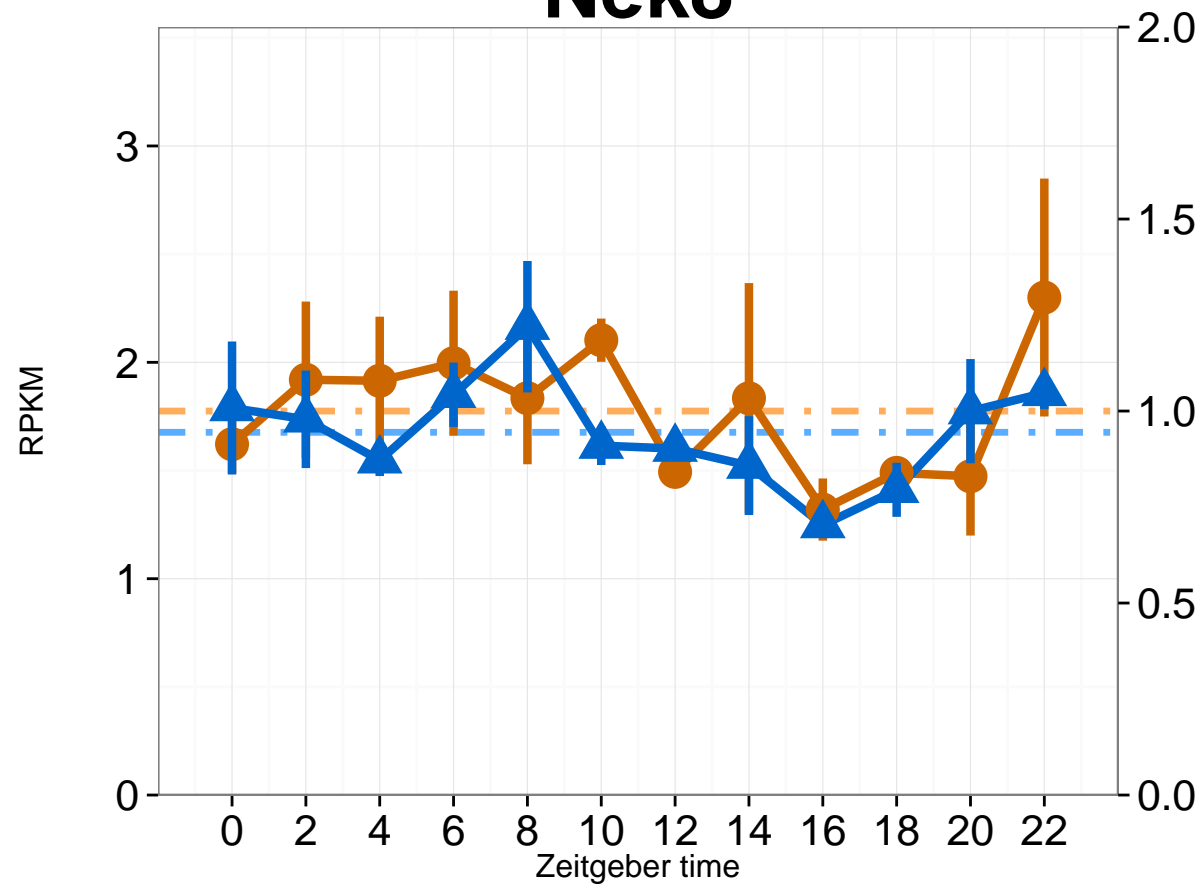

## Nek8

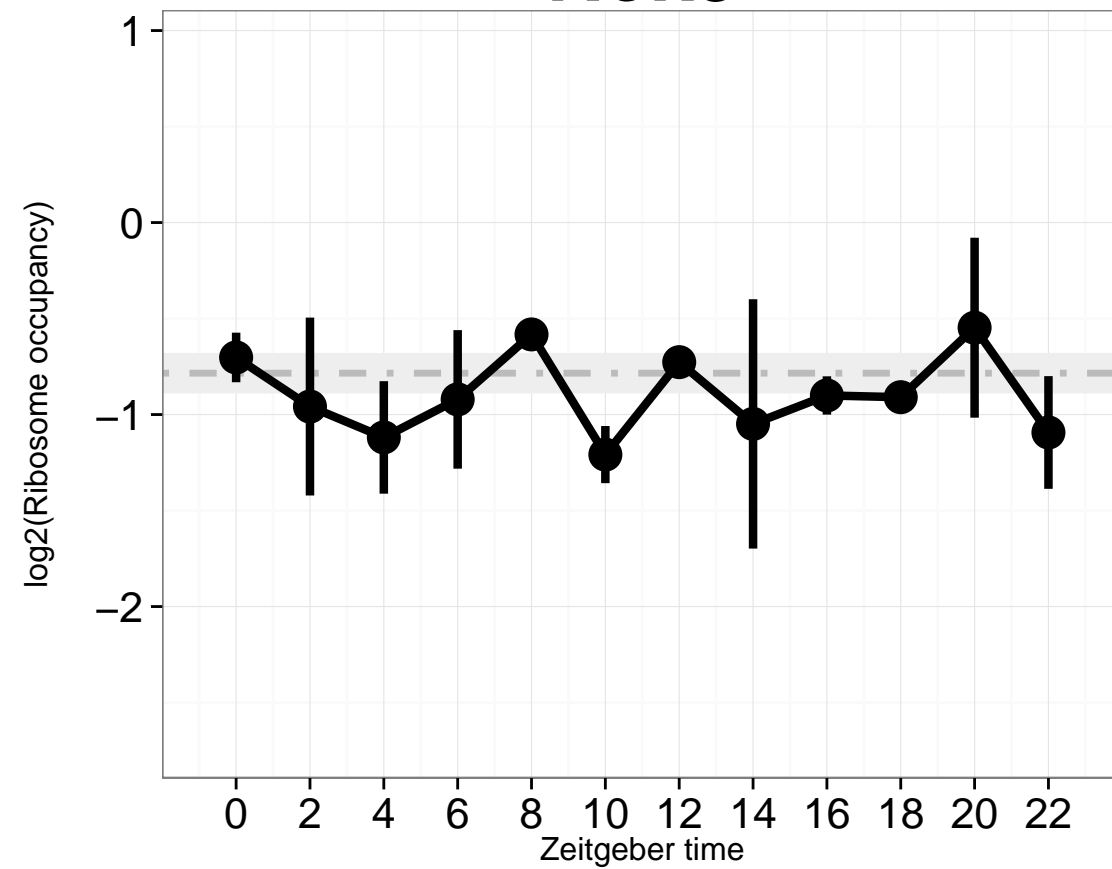

Supplement: SuppDataset_1.zip [file Nek8_set_A.pdf › Supplemental Dataset 1/A-mRNA_nonrhyth_translation_nonrhyth/Nek8_set_A.pdf]

## Nek9

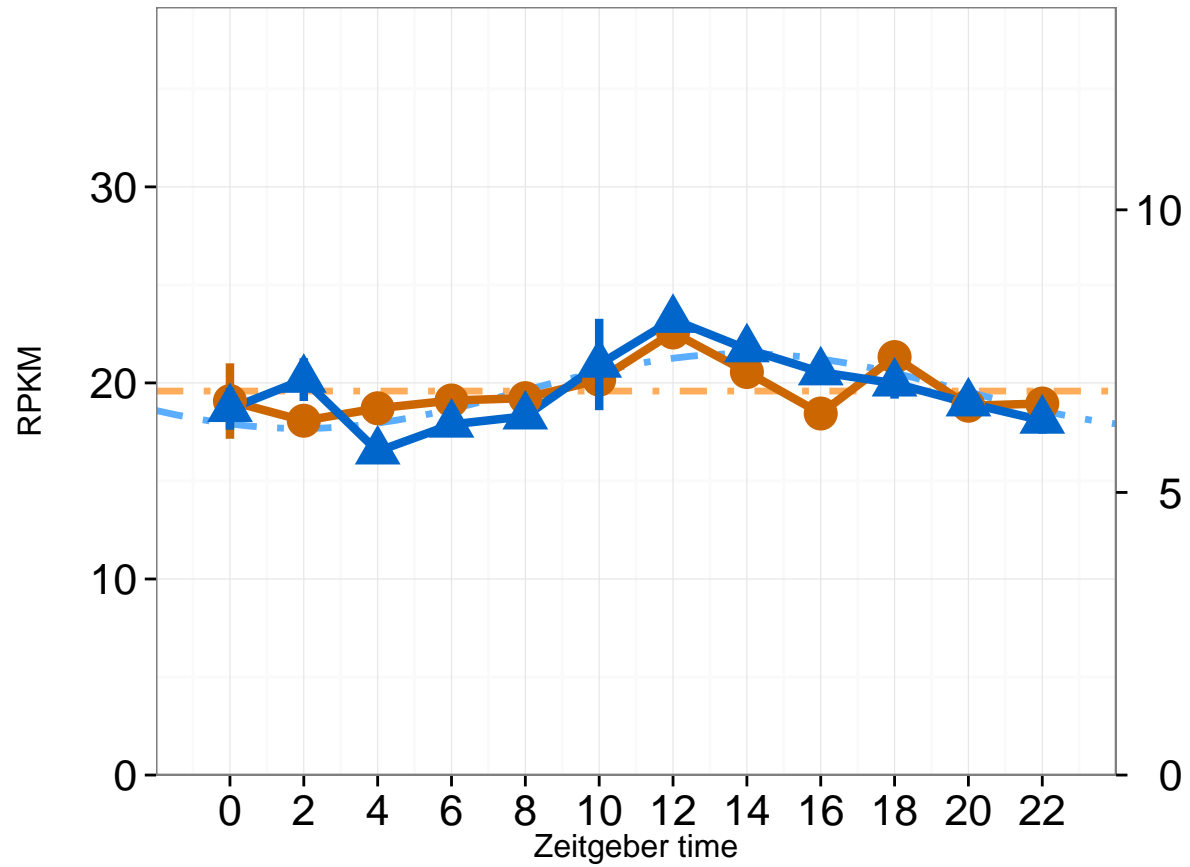

## Nek9

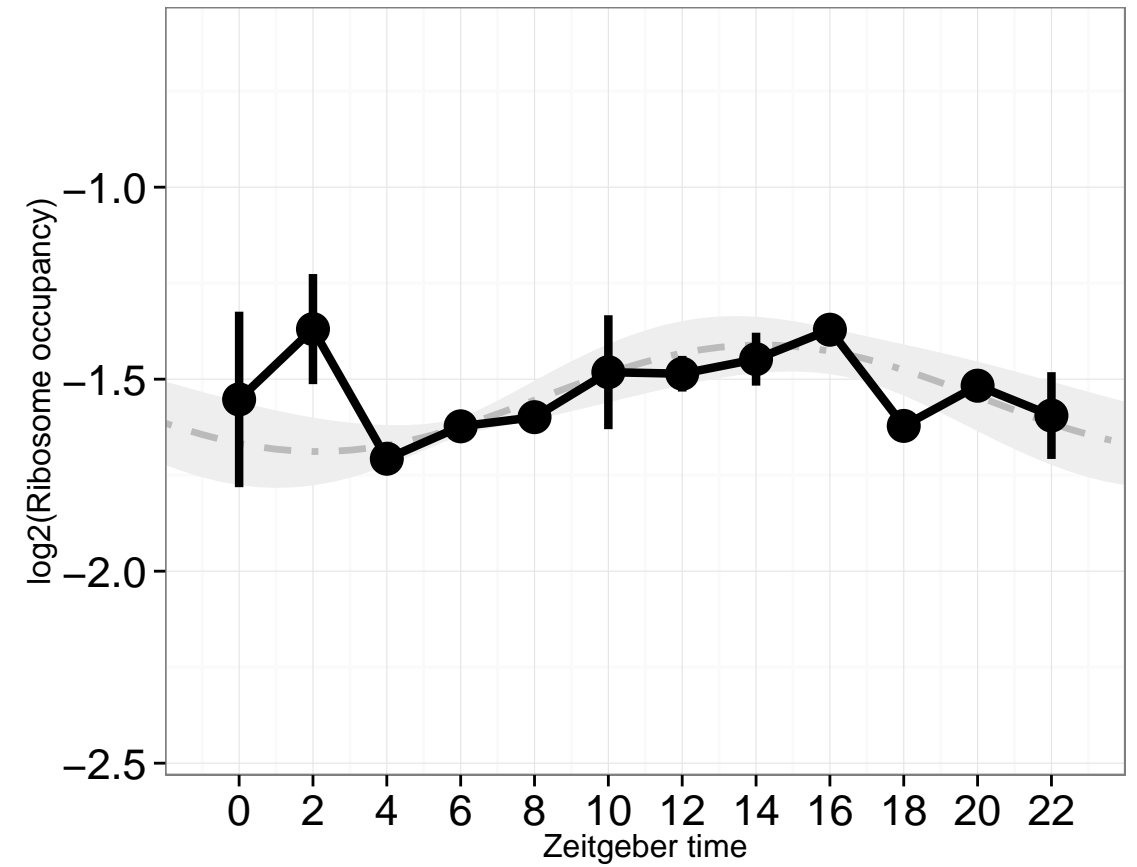

Supplement: SuppDataset_1.zip [file Nek9_set_A.pdf › Supplemental Dataset 1/A-mRNA_nonrhyth_translation_nonrhyth/Nek9_set_A.pdf]

## Nelfb

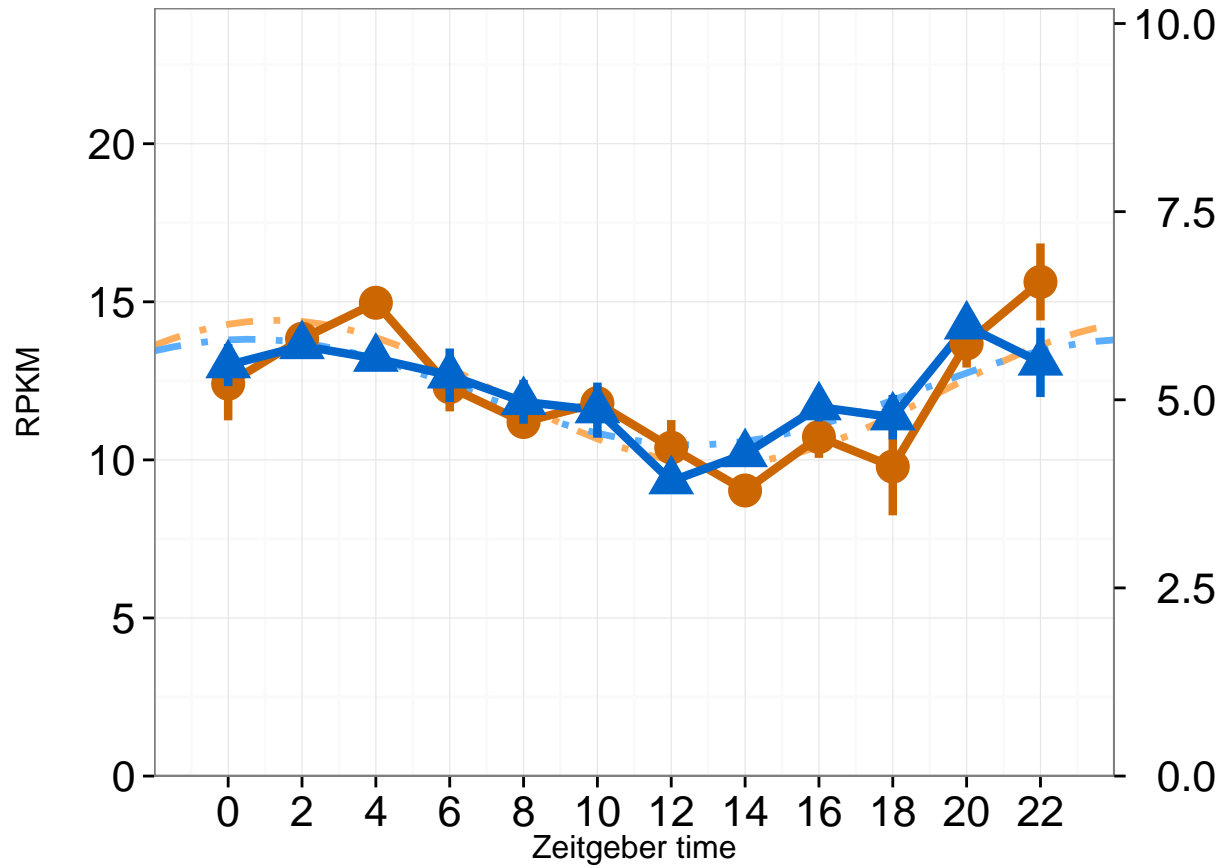

## Nelfb

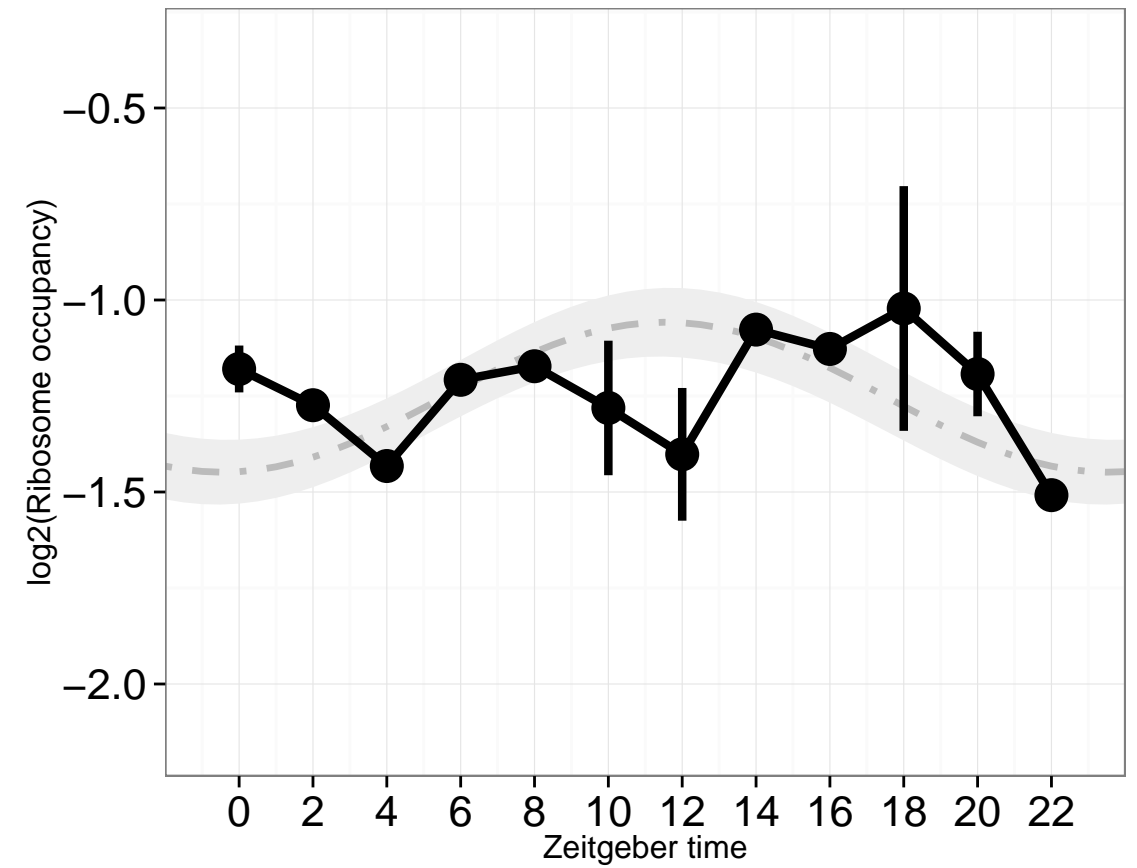

Supplement: SuppDataset_1.zip [file Nelfb_set_A.pdf › Supplemental Dataset 1/A-mRNA_nonrhyth_translation_nonrhyth/Nelfb_set_A.pdf]

## Nelfcd

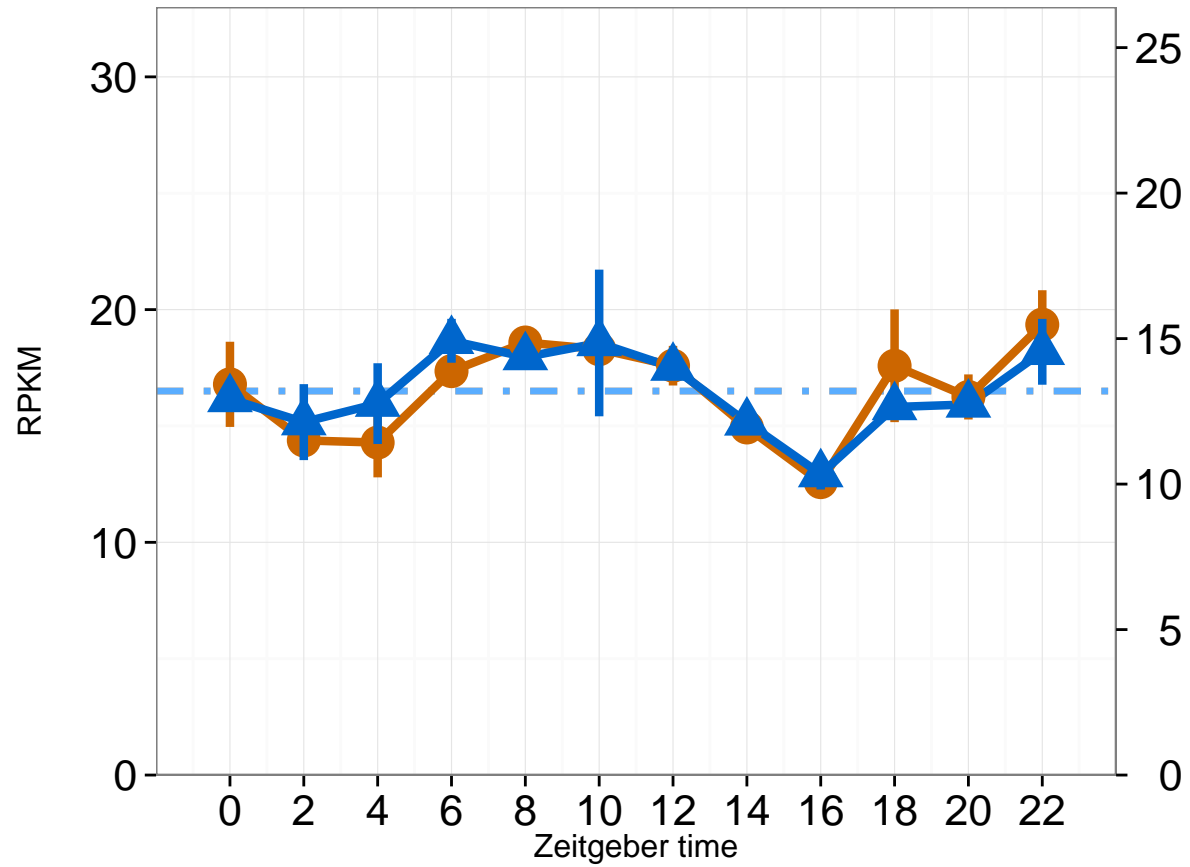

## Nelfcd

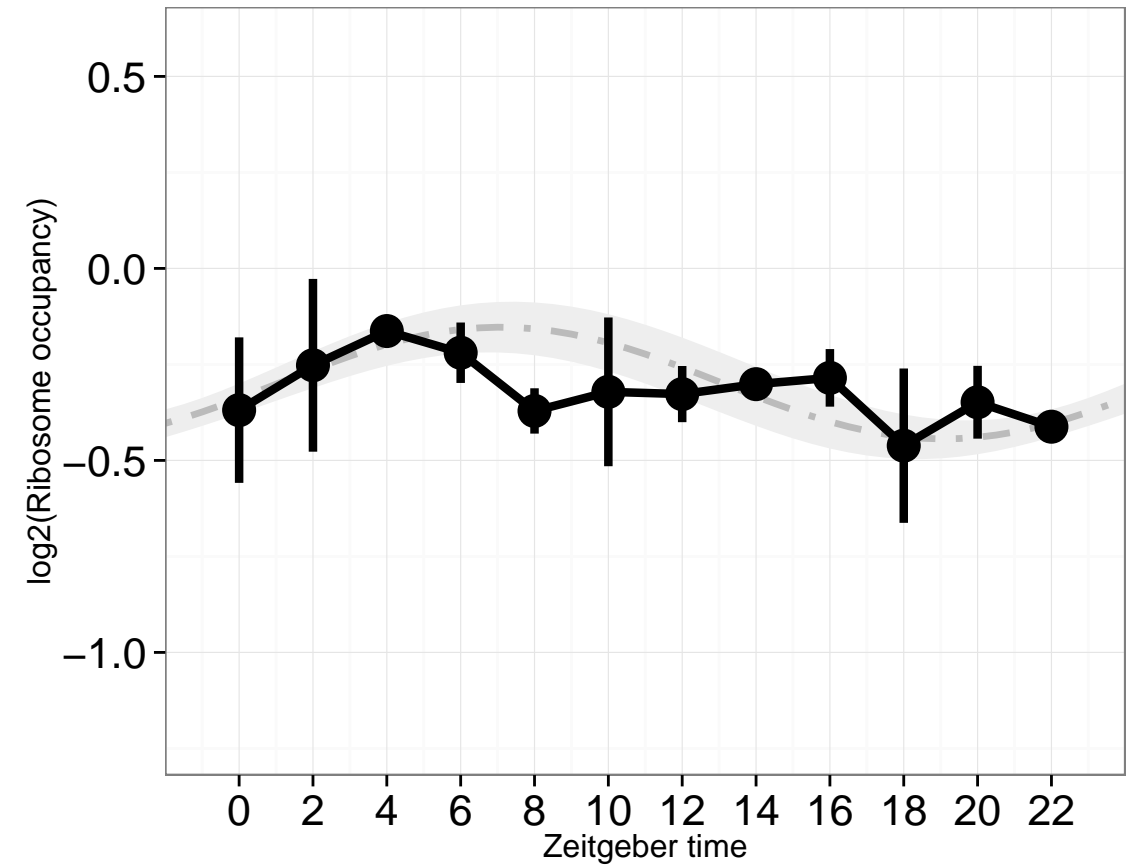

Supplement: SuppDataset_1.zip [file Nelfcd_set_A.pdf › Supplemental Dataset 1/A-mRNA_nonrhyth_translation_nonrhyth/Nelfcd_set_A.pdf]

## Nelfe

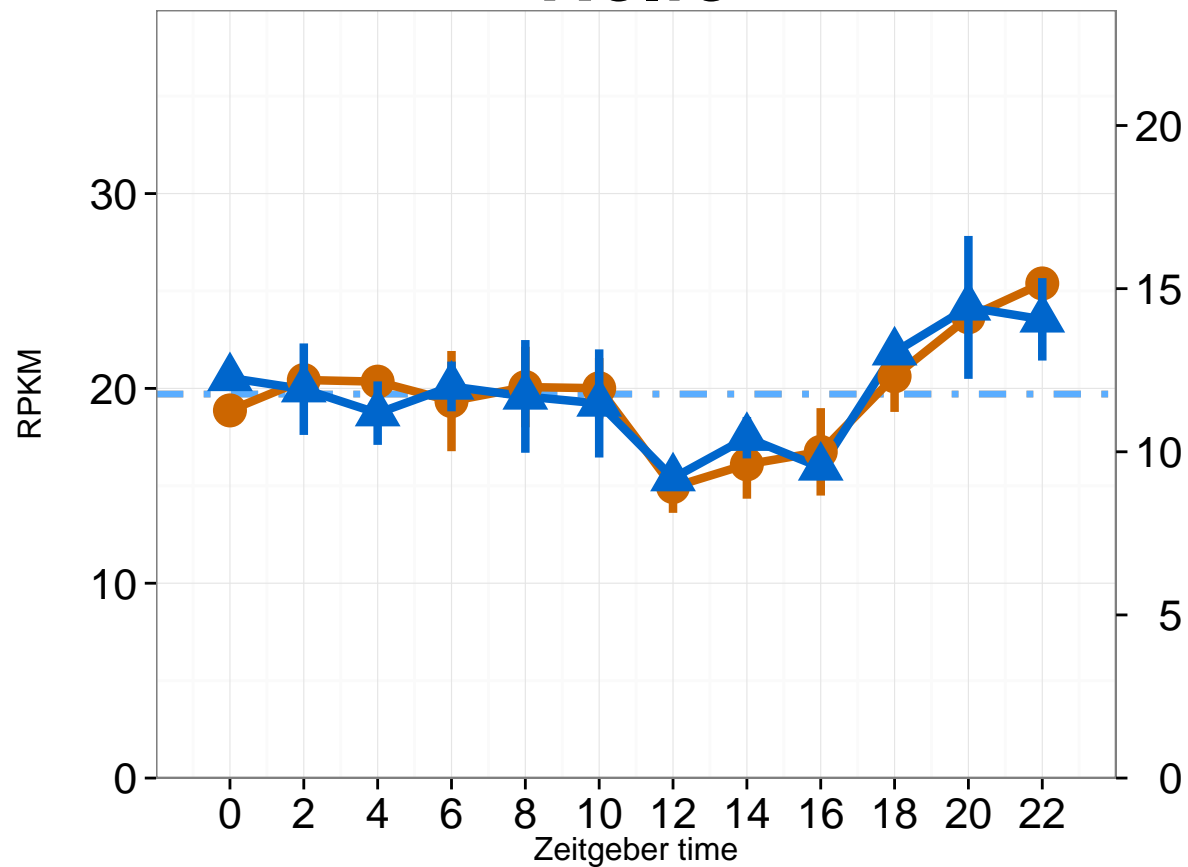

## Nelfe

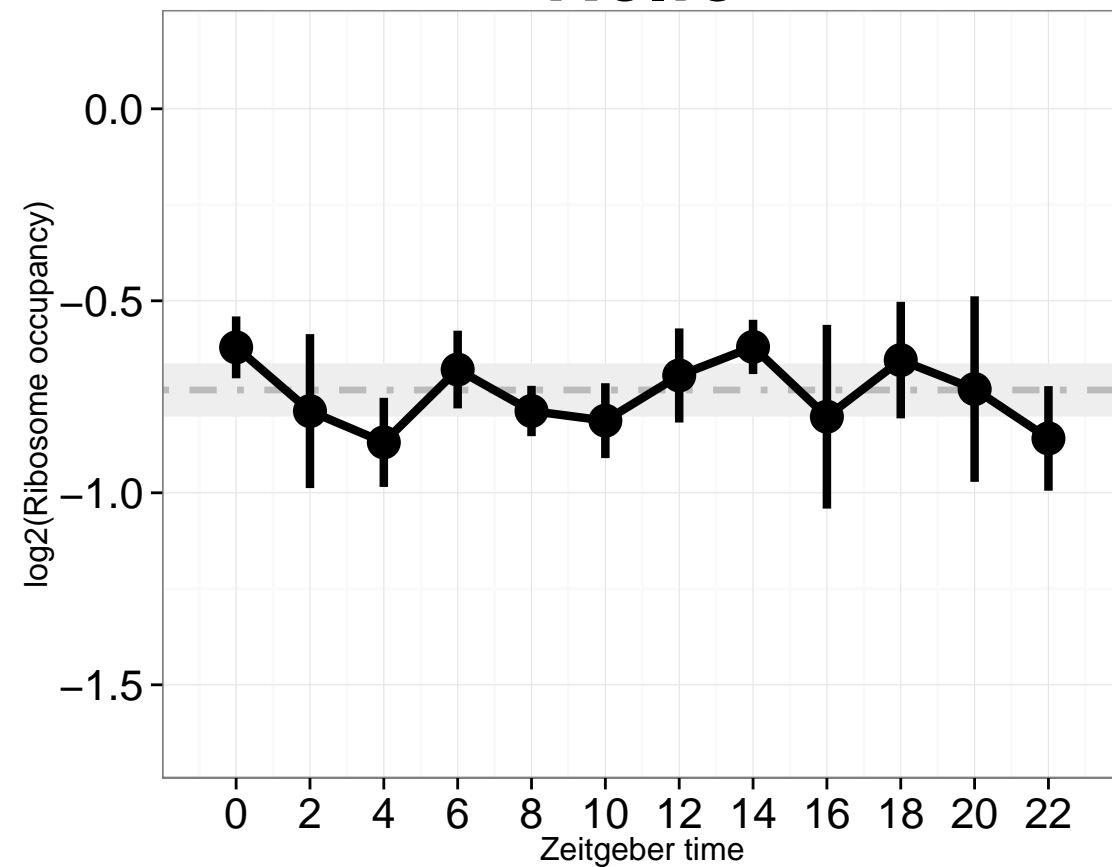

Supplement: SuppDataset_1.zip [file Nelfe_set_A.pdf › Supplemental Dataset 1/A-mRNA_nonrhyth_translation_nonrhyth/Nelfe_set_A.pdf]

## Nemf

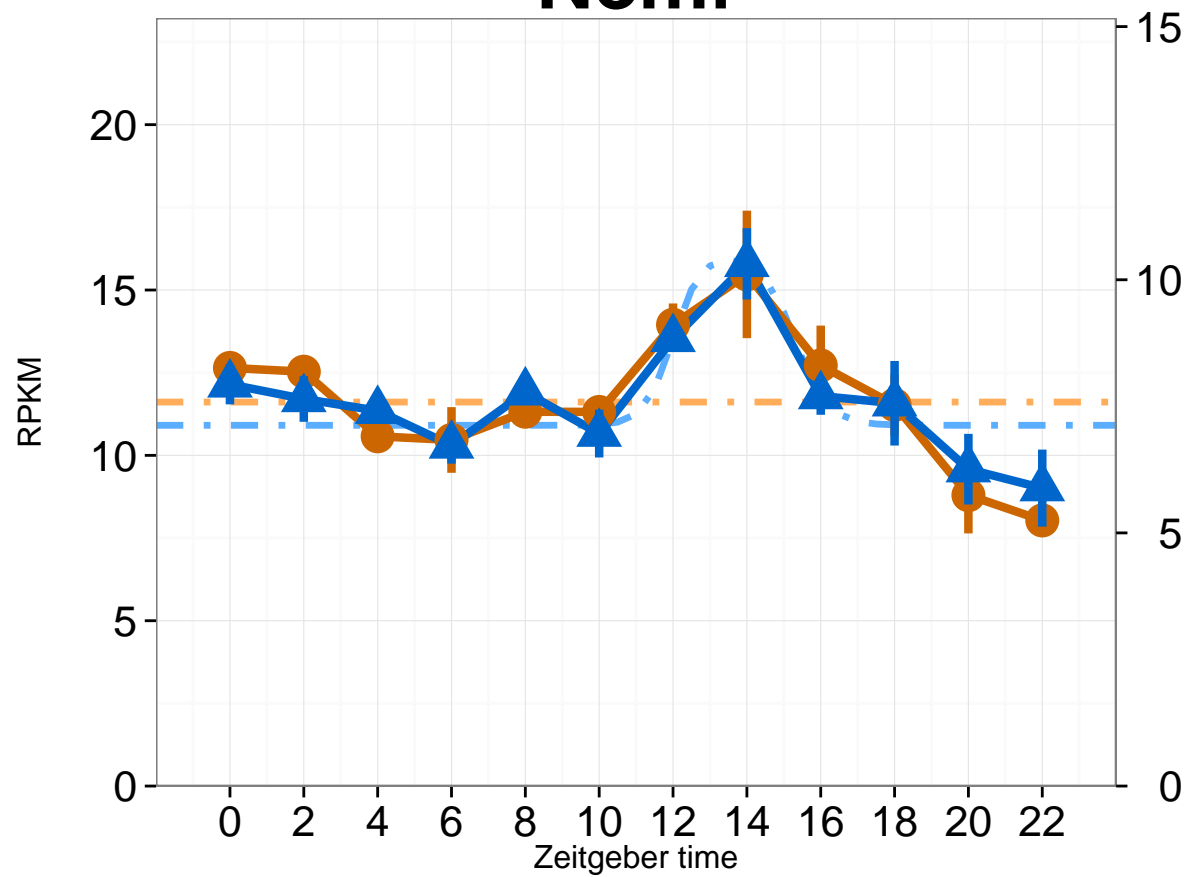

## Nemf

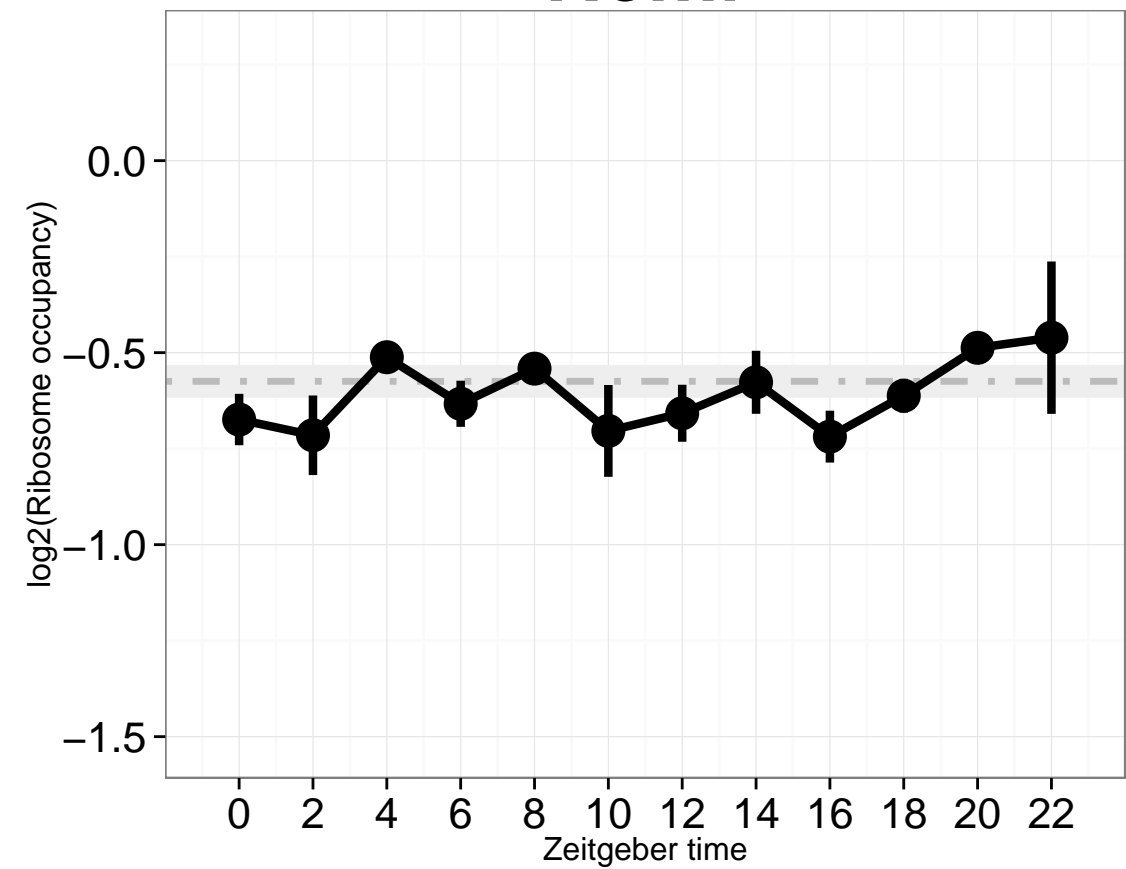

Supplement: SuppDataset_1.zip [file Nemf_set_A.pdf › Supplemental Dataset 1/A-mRNA_nonrhyth_translation_nonrhyth/Nemf_set_A.pdf]

## Nenf

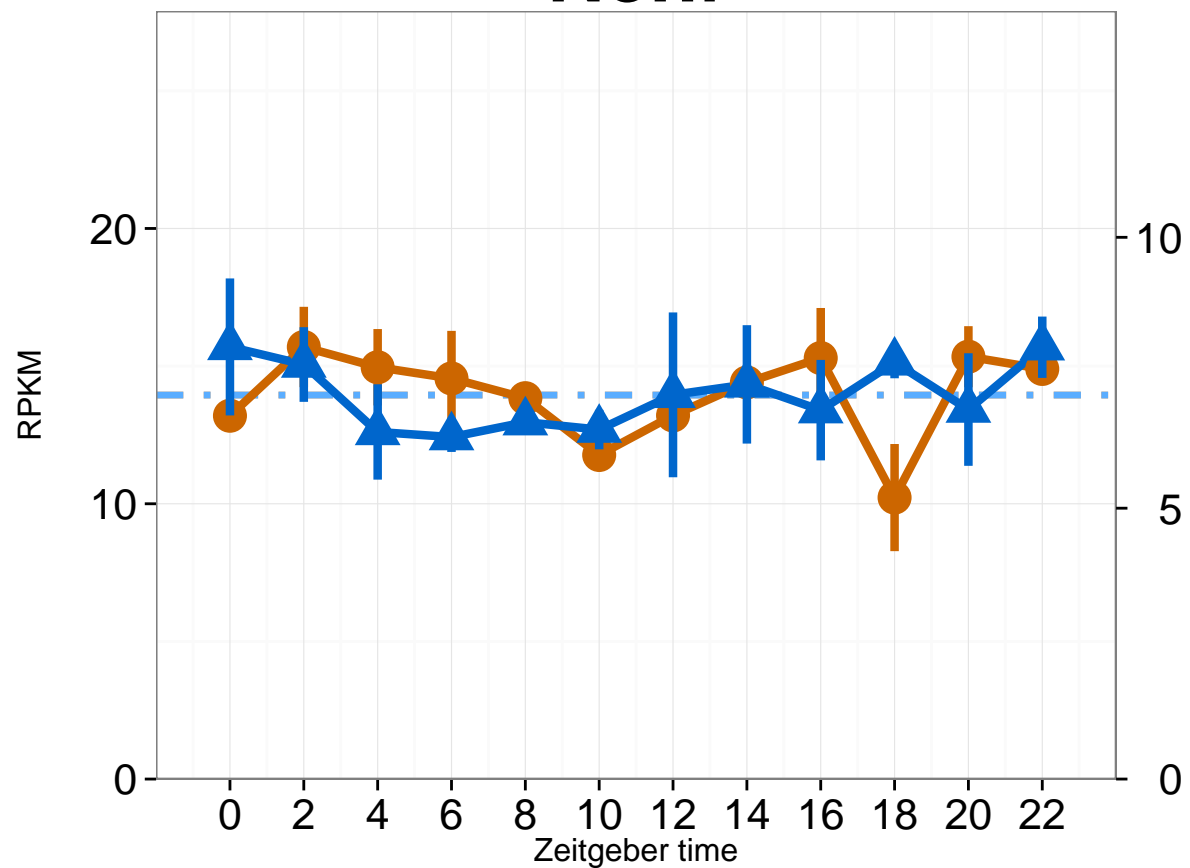

## Nenf

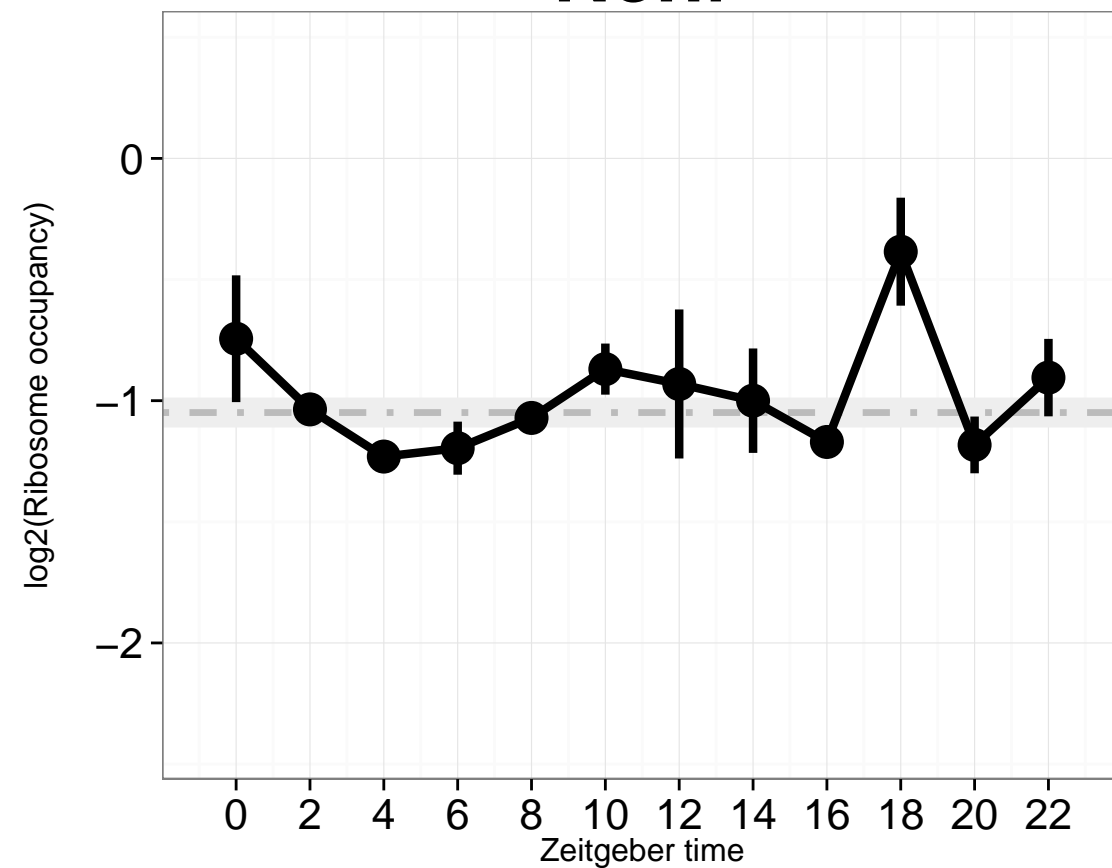

Supplement: SuppDataset_1.zip [file Nenf_set_A.pdf › Supplemental Dataset 1/A-mRNA_nonrhyth_translation_nonrhyth/Nenf_set_A.pdf]

## Neo1

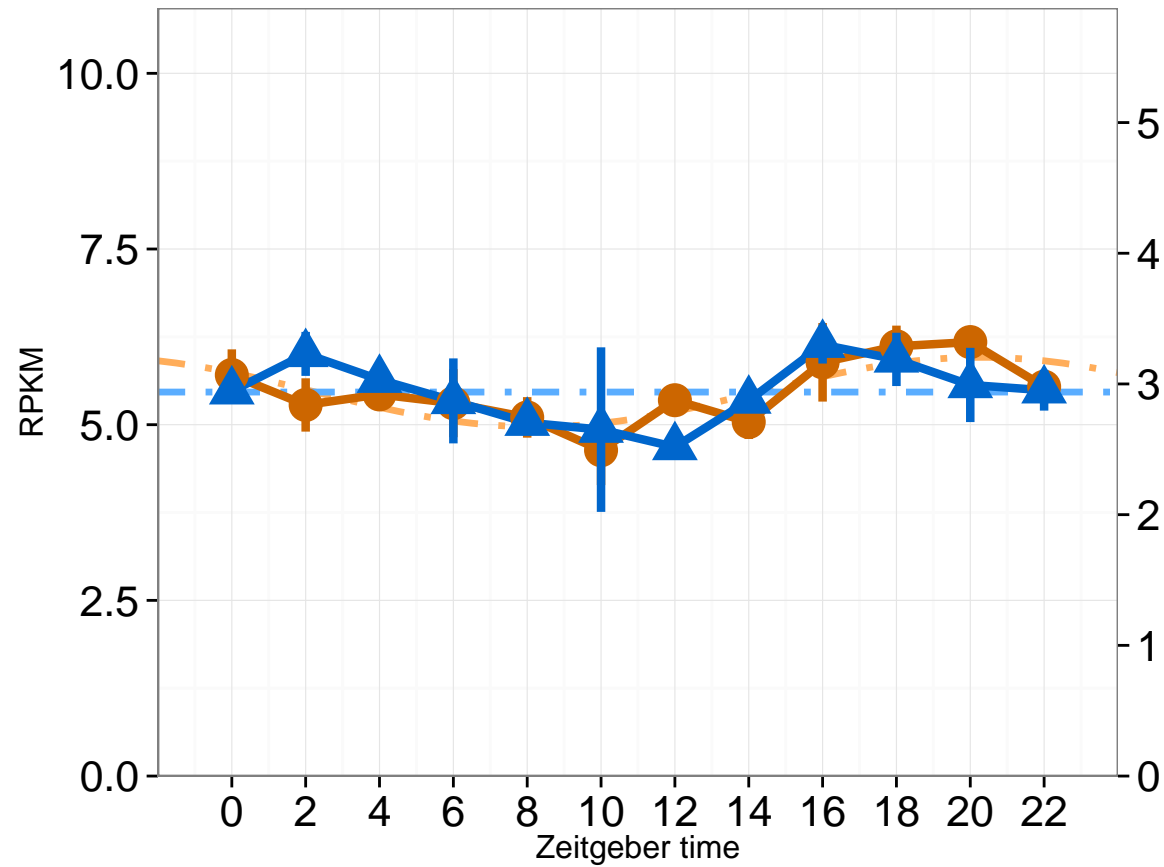

## Neo1

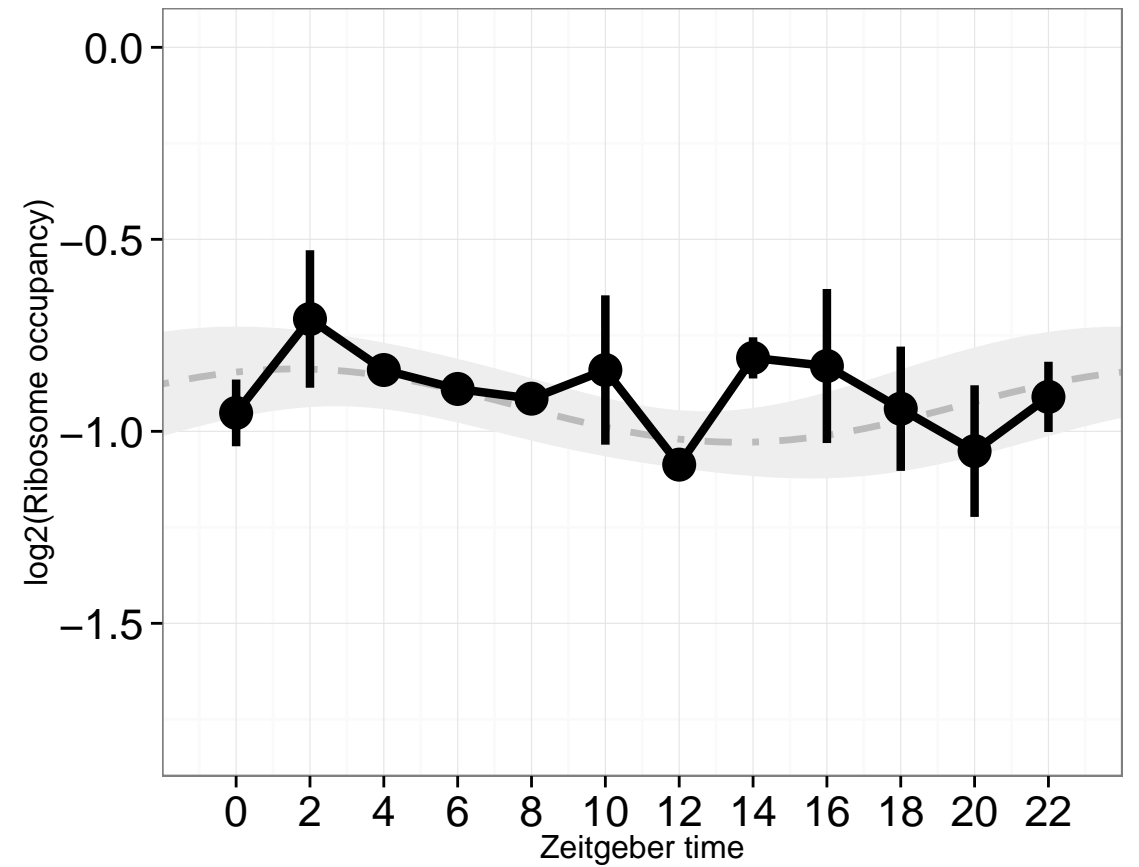

Supplement: SuppDataset_1.zip [file Neo1_set_A.pdf › Supplemental Dataset 1/A-mRNA_nonrhyth_translation_nonrhyth/Neo1_set_A.pdf]

# Neu1

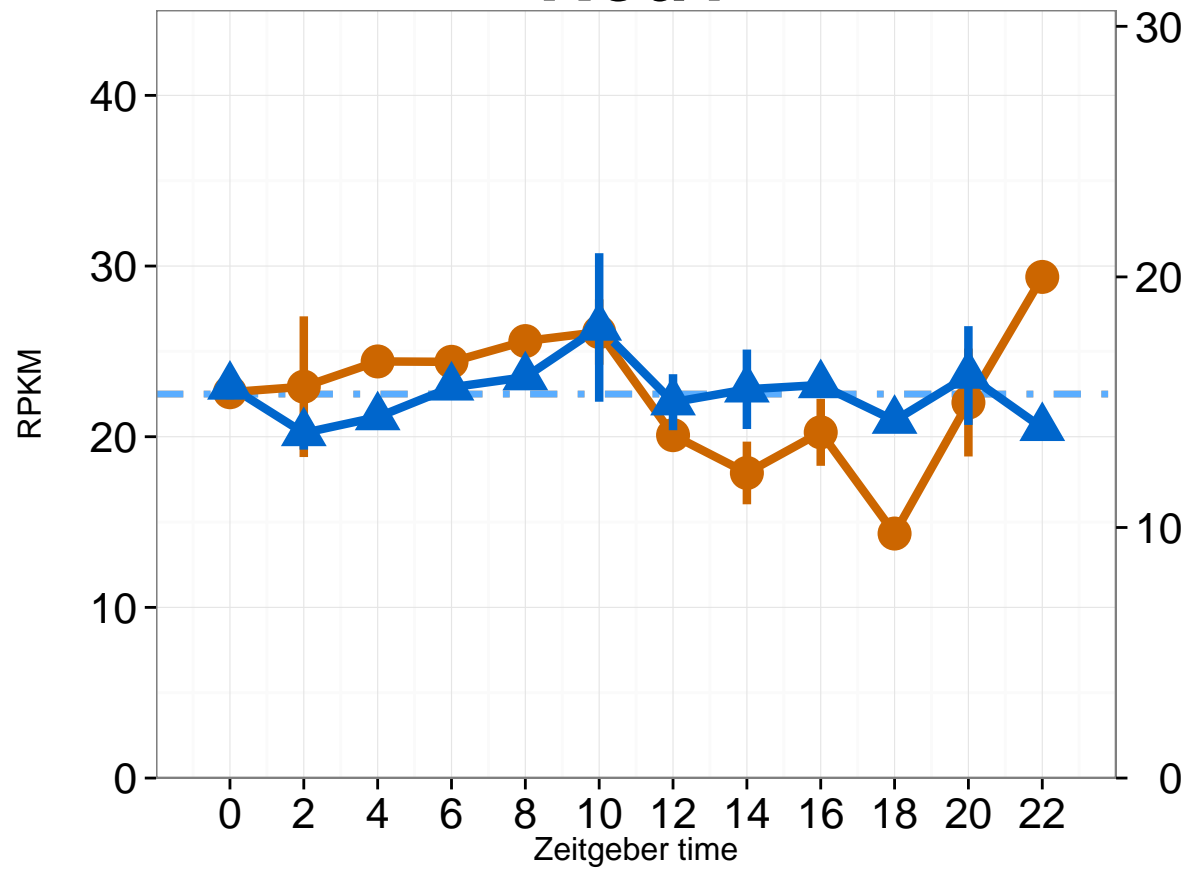

# Neu1

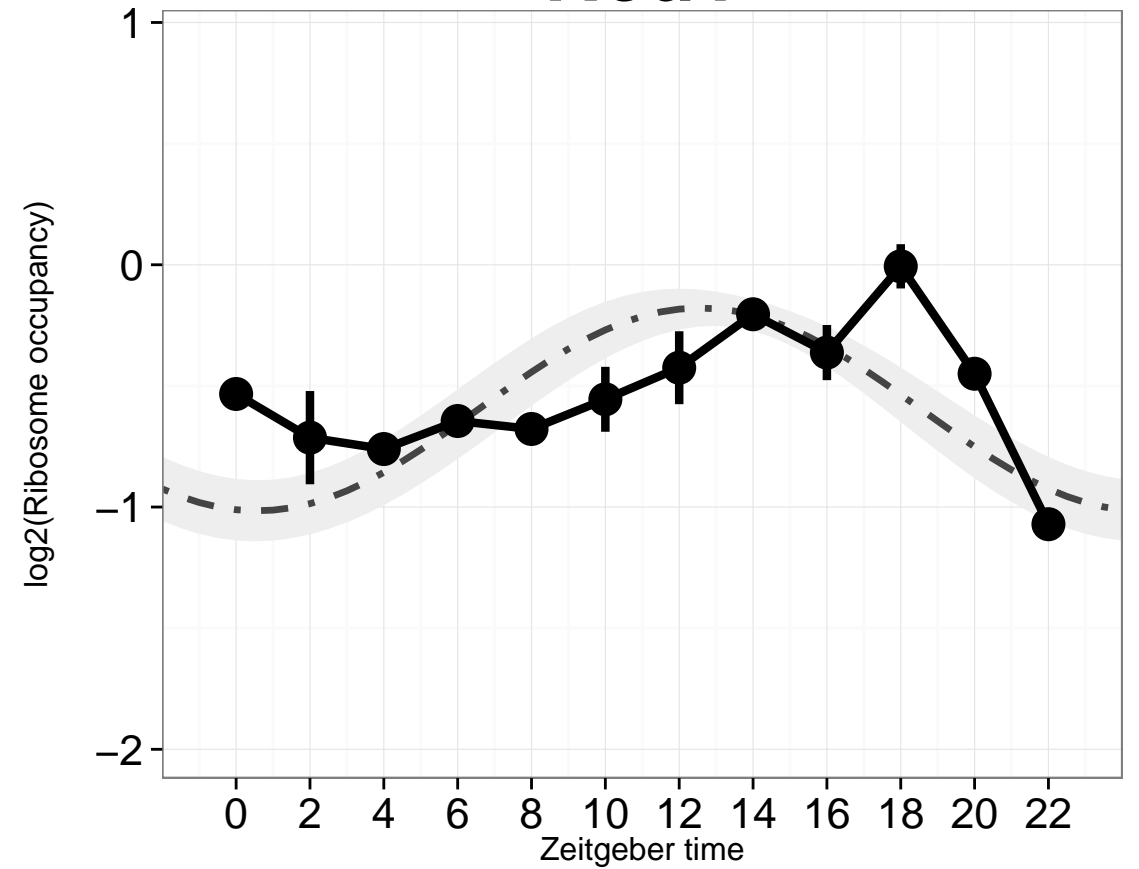

Supplement: SuppDataset_1.zip [file Neu1_set_A.pdf › Supplemental Dataset 1/A-mRNA_nonrhyth_translation_nonrhyth/Neu1_set_A.pdf]

# Neurl2

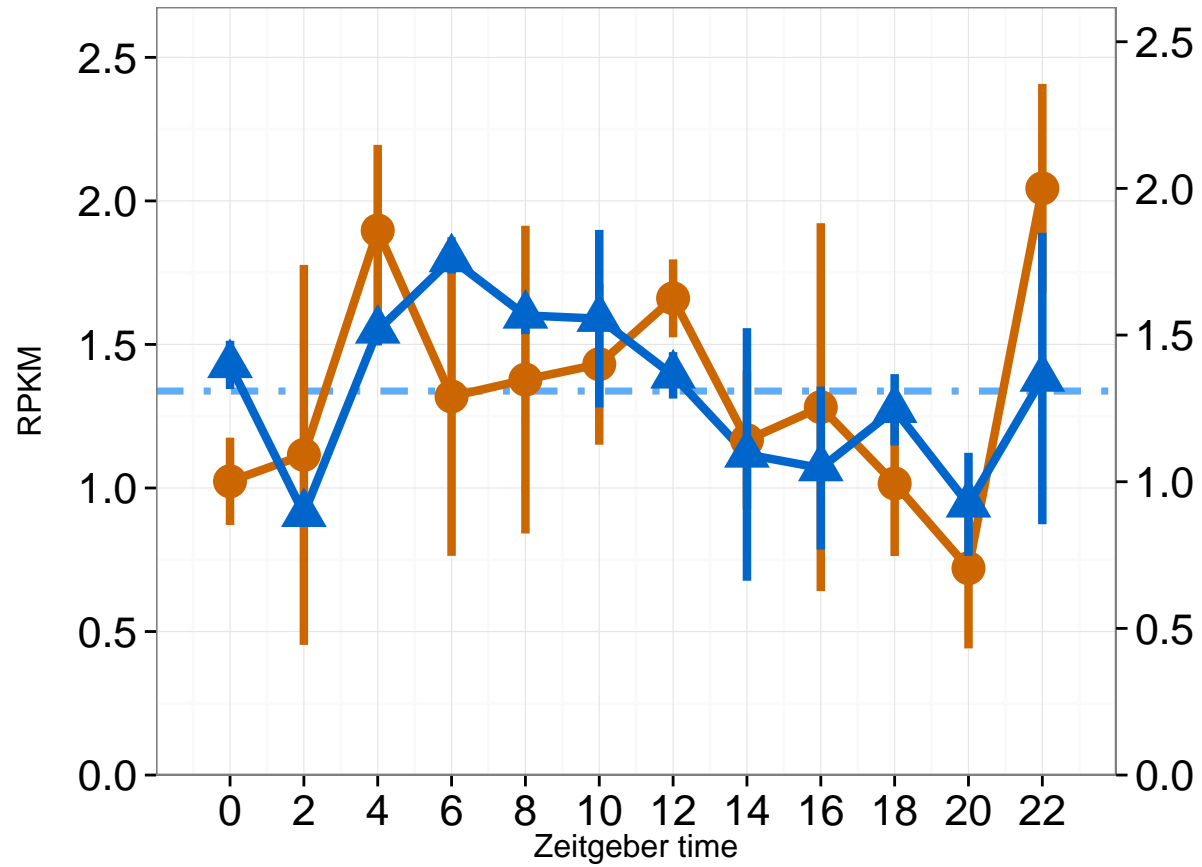

# Neurl2

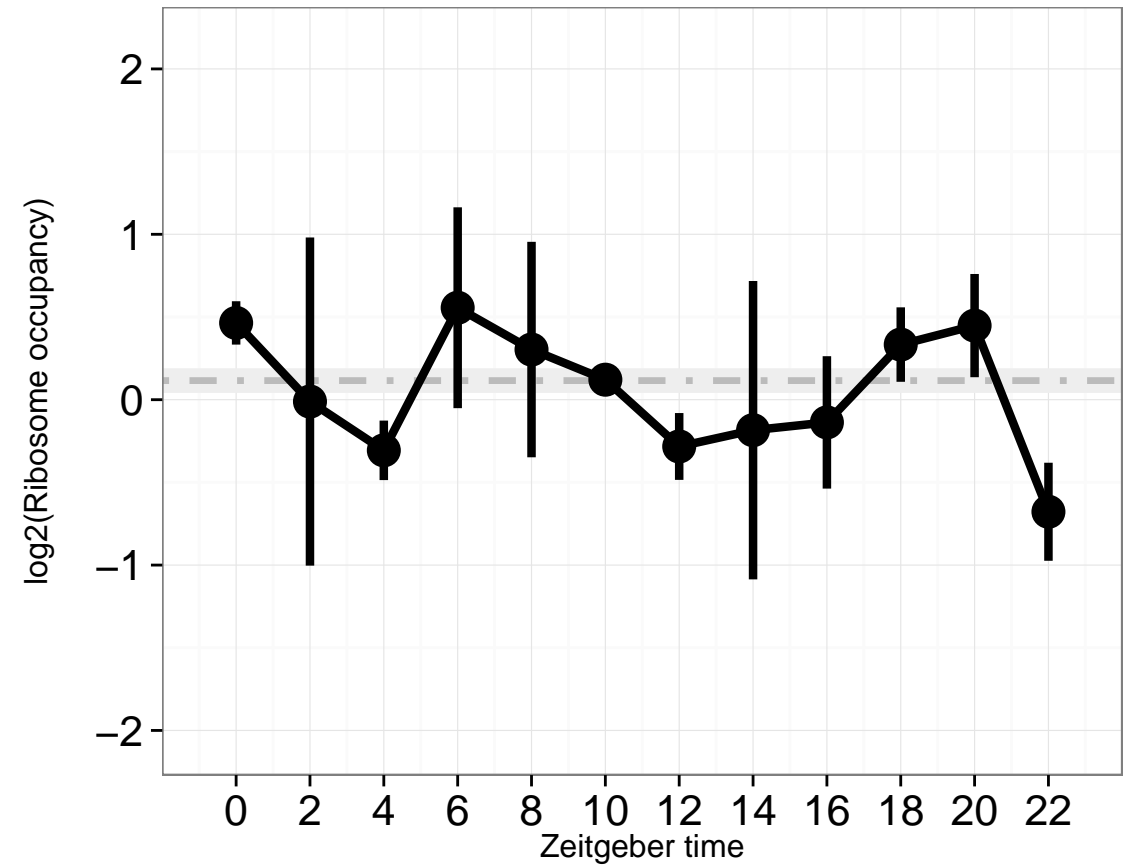

Supplement: SuppDataset_1.zip [file Neurl2_set_A.pdf › Supplemental Dataset 1/A-mRNA_nonrhyth_translation_nonrhyth/Neurl2_set_A.pdf]

## Neurl3

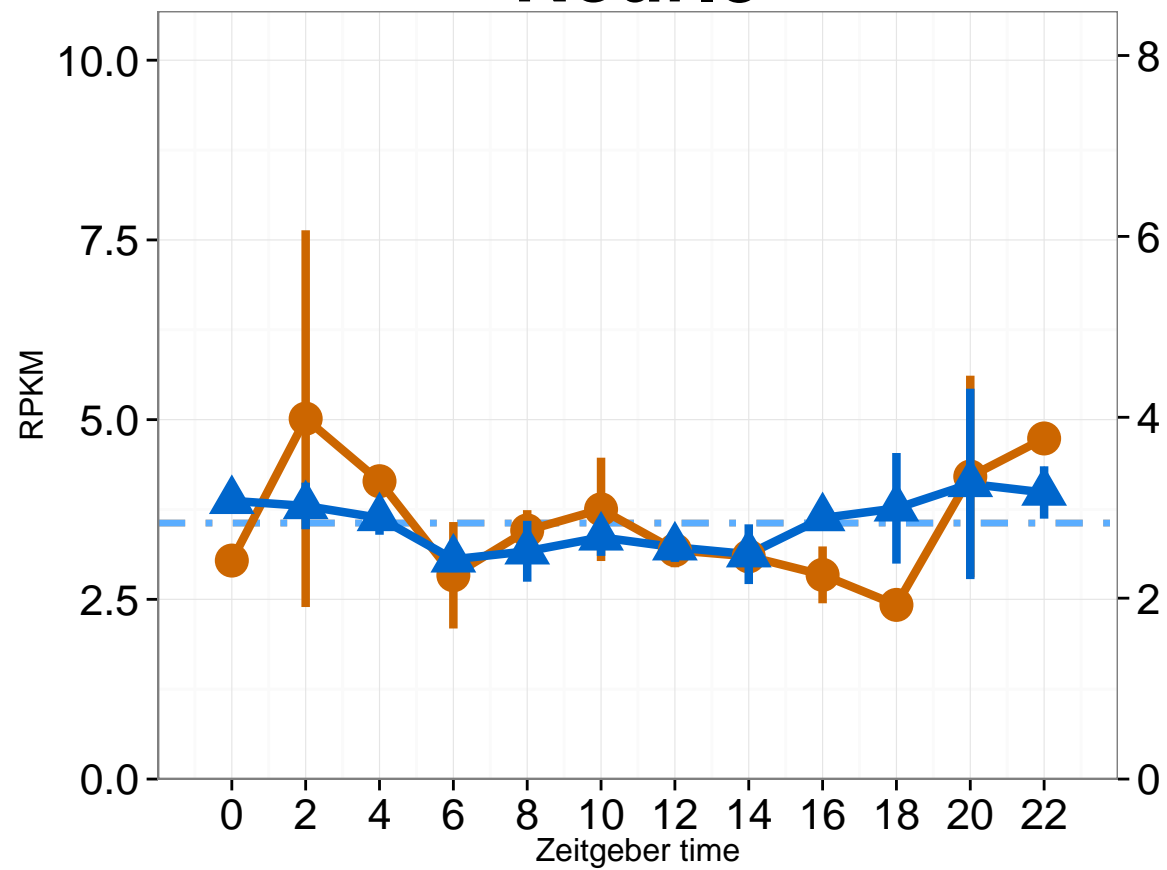

## Neurl3

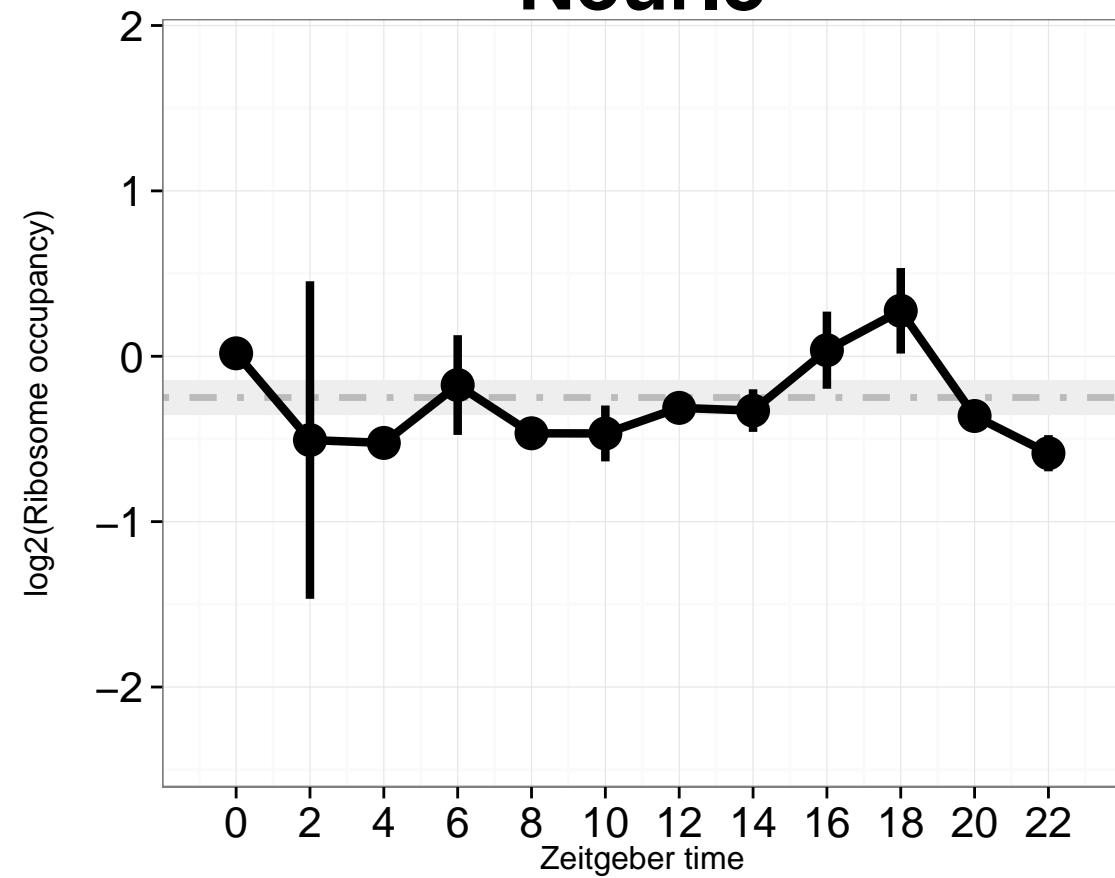

Supplement: SuppDataset_1.zip [file Neurl3_set_A.pdf › Supplemental Dataset 1/A-mRNA_nonrhyth_translation_nonrhyth/Neurl3_set_A.pdf]

## Neurl4

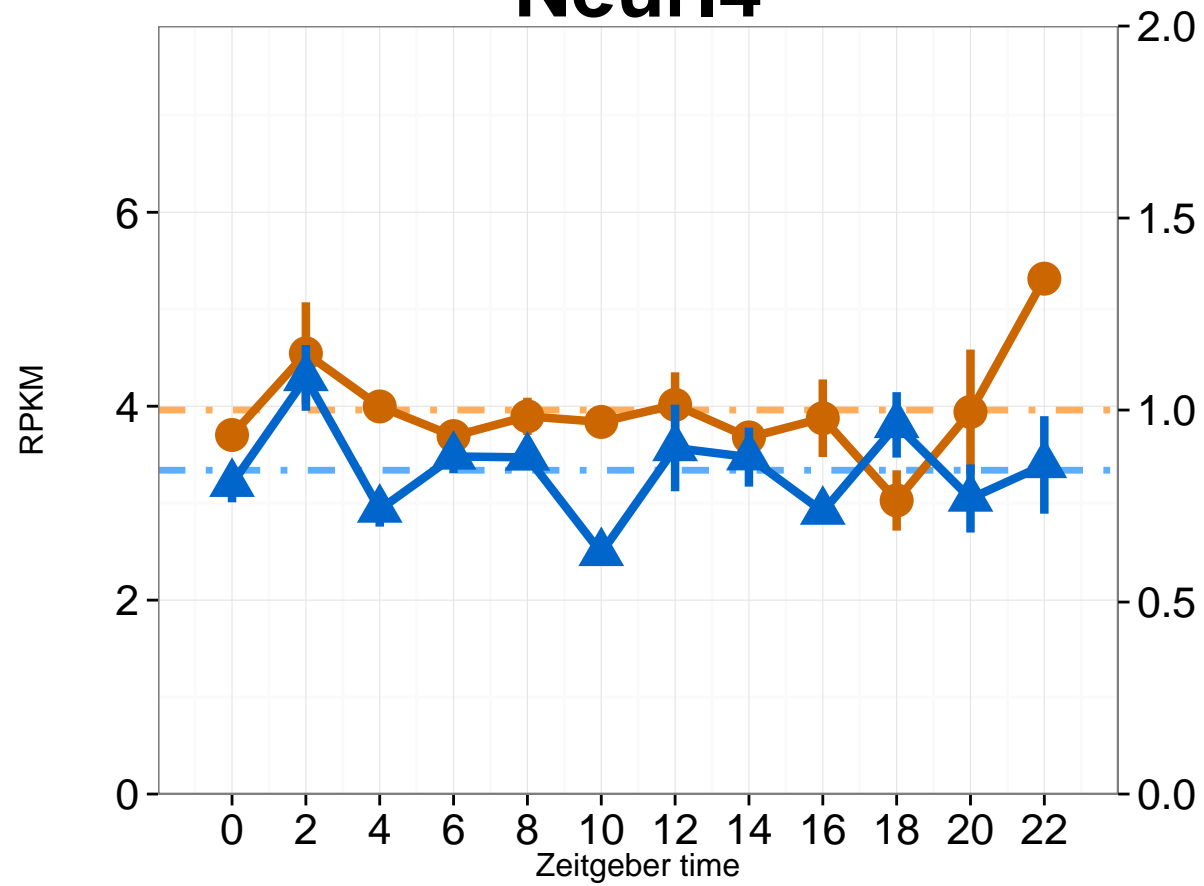

## Neurl4

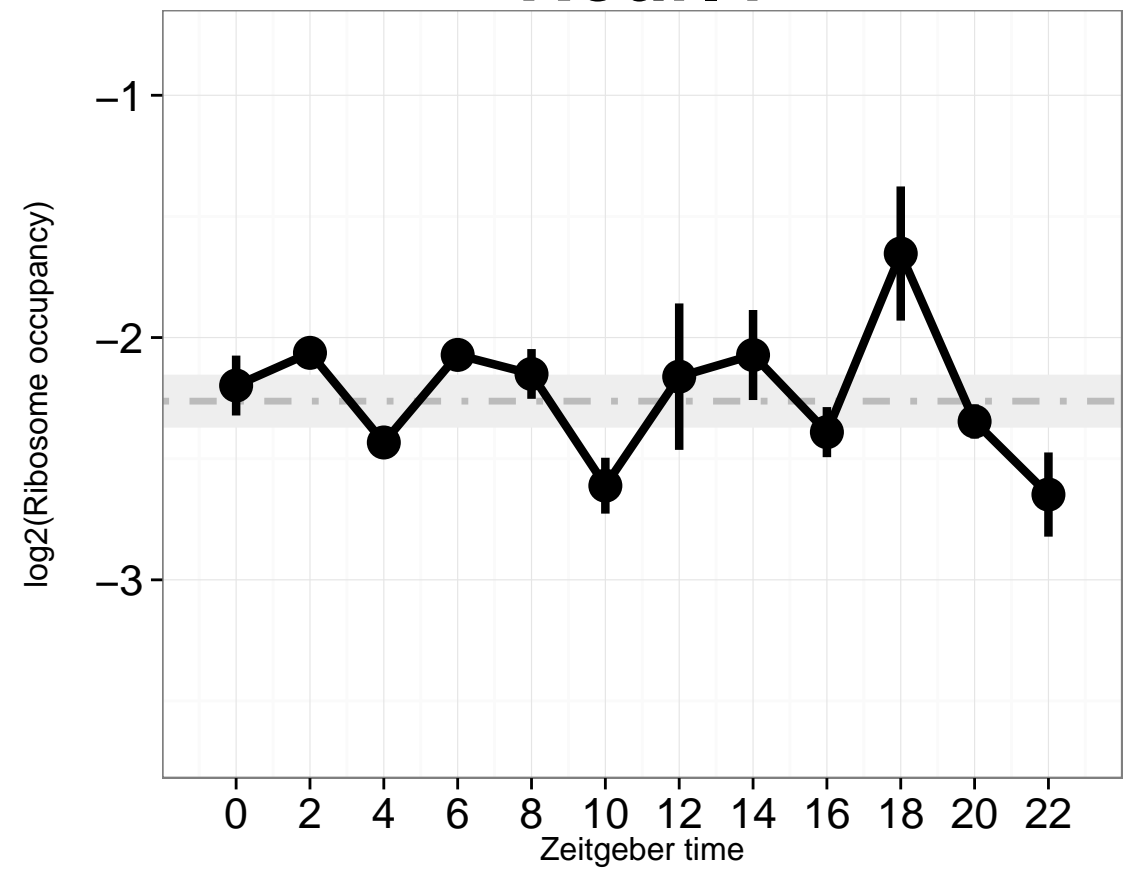

Supplement: SuppDataset_1.zip [file Neurl4_set_A.pdf › Supplemental Dataset 1/A-mRNA_nonrhyth_translation_nonrhyth/Neurl4_set_A.pdf]

## Nf1

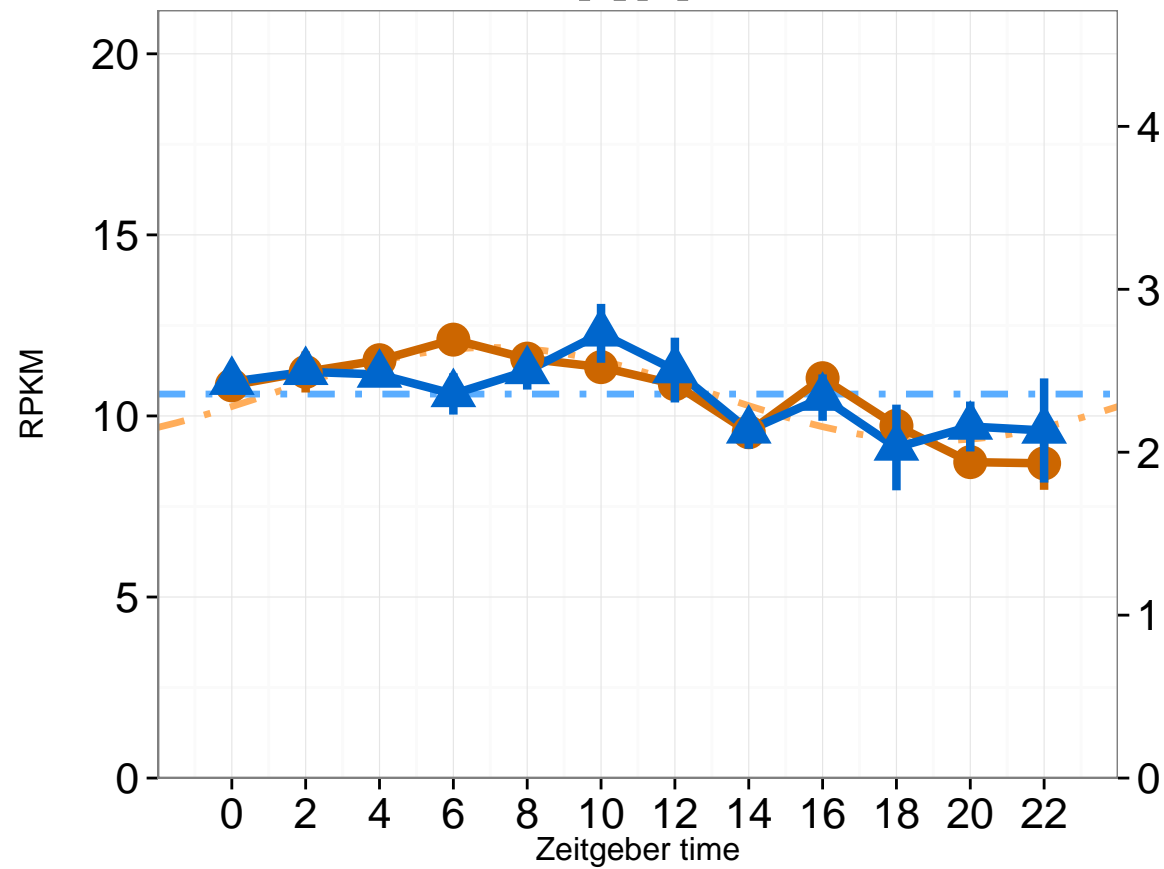

## Nf1

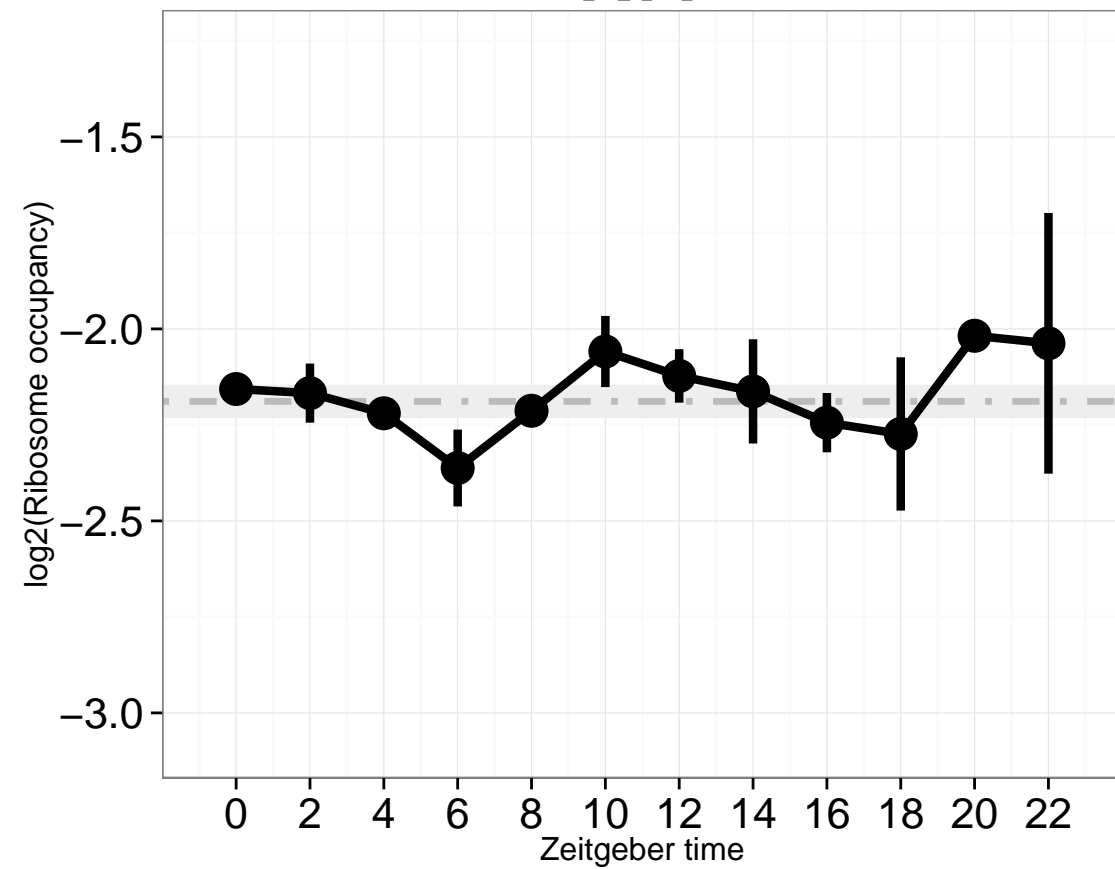

Supplement: SuppDataset_1.zip [file Nf1_set_A.pdf › Supplemental Dataset 1/A-mRNA_nonrhyth_translation_nonrhyth/Nf1_set_A.pdf]

## Nf2

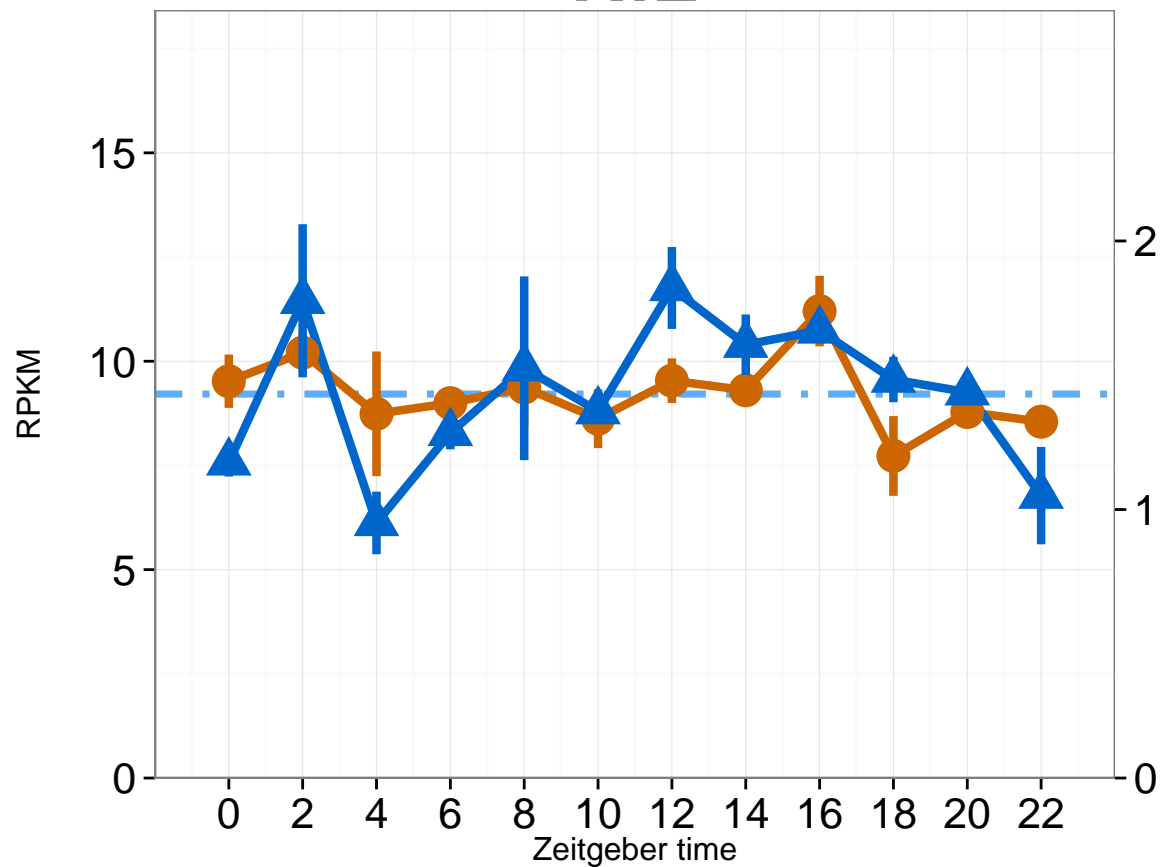

## Nf2

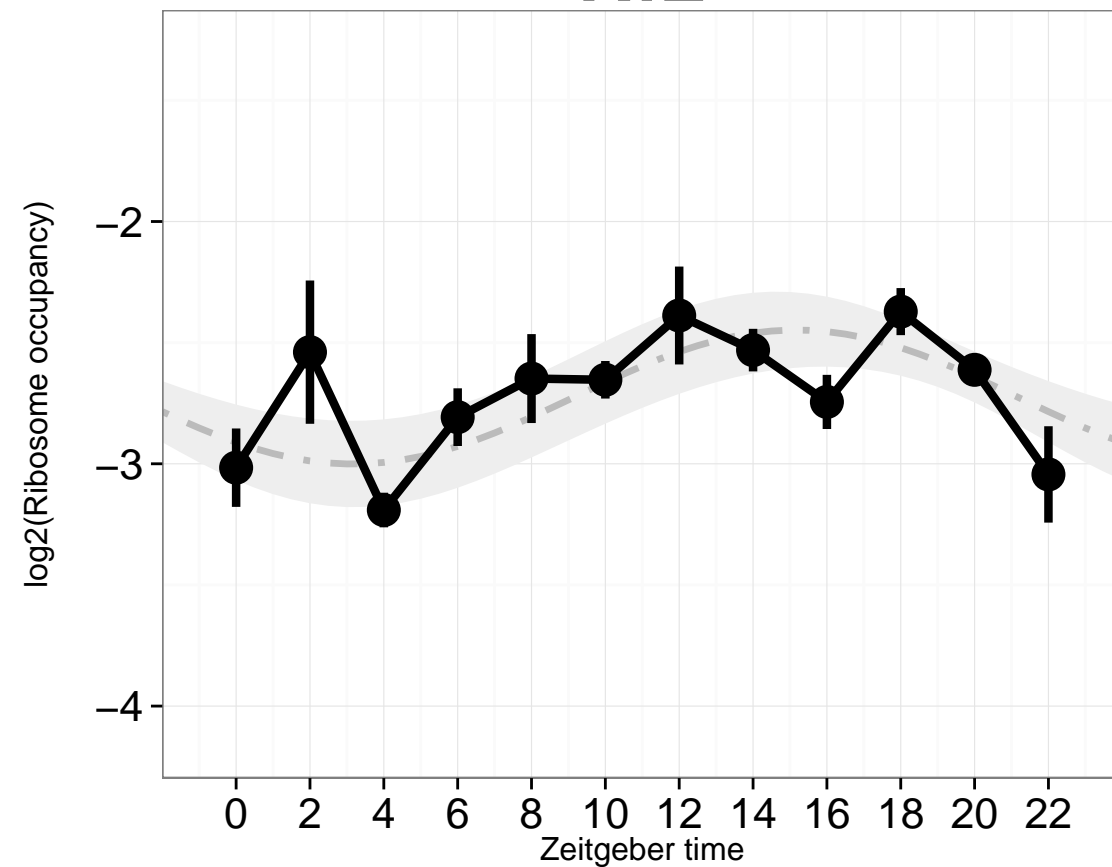

Supplement: SuppDataset_1.zip [file Nf2_set_A.pdf › Supplemental Dataset 1/A-mRNA_nonrhyth_translation_nonrhyth/Nf2_set_A.pdf]

## Nfat5

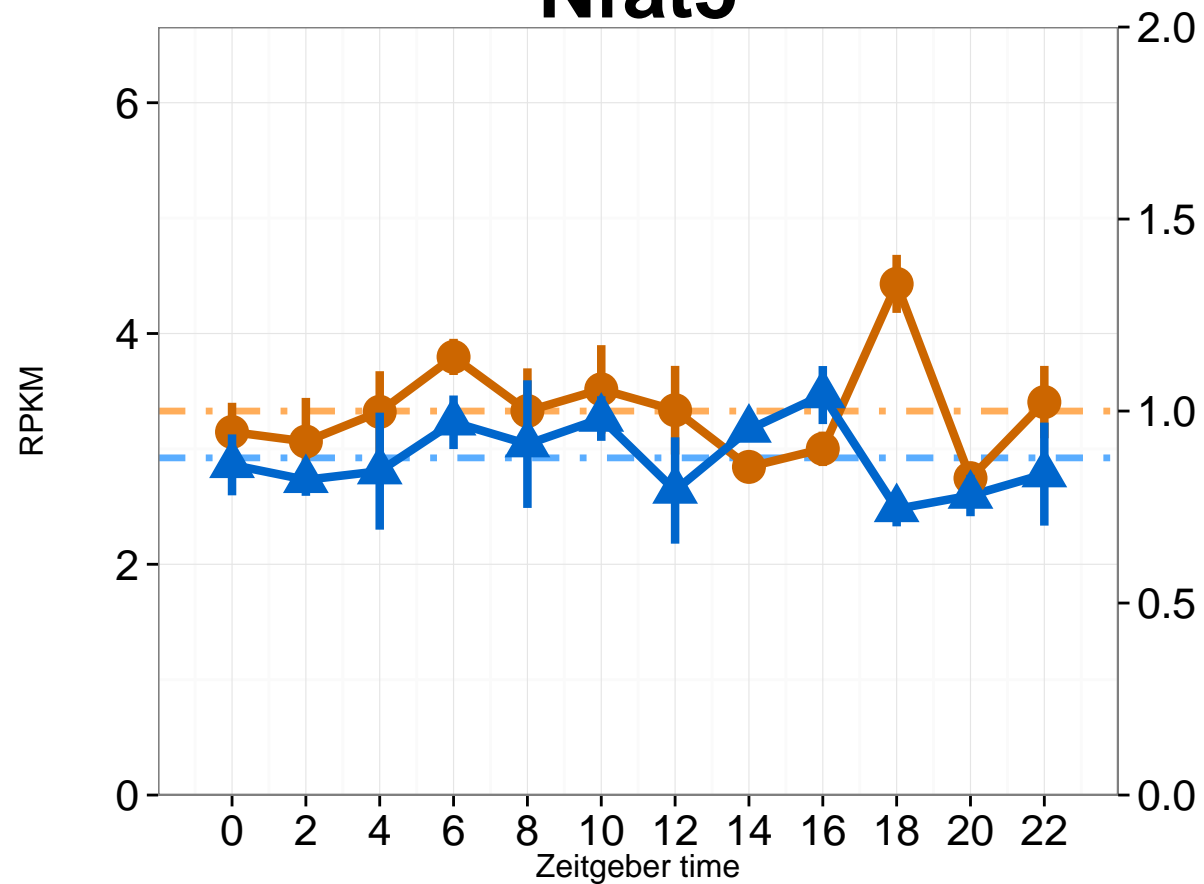

## Nfat5

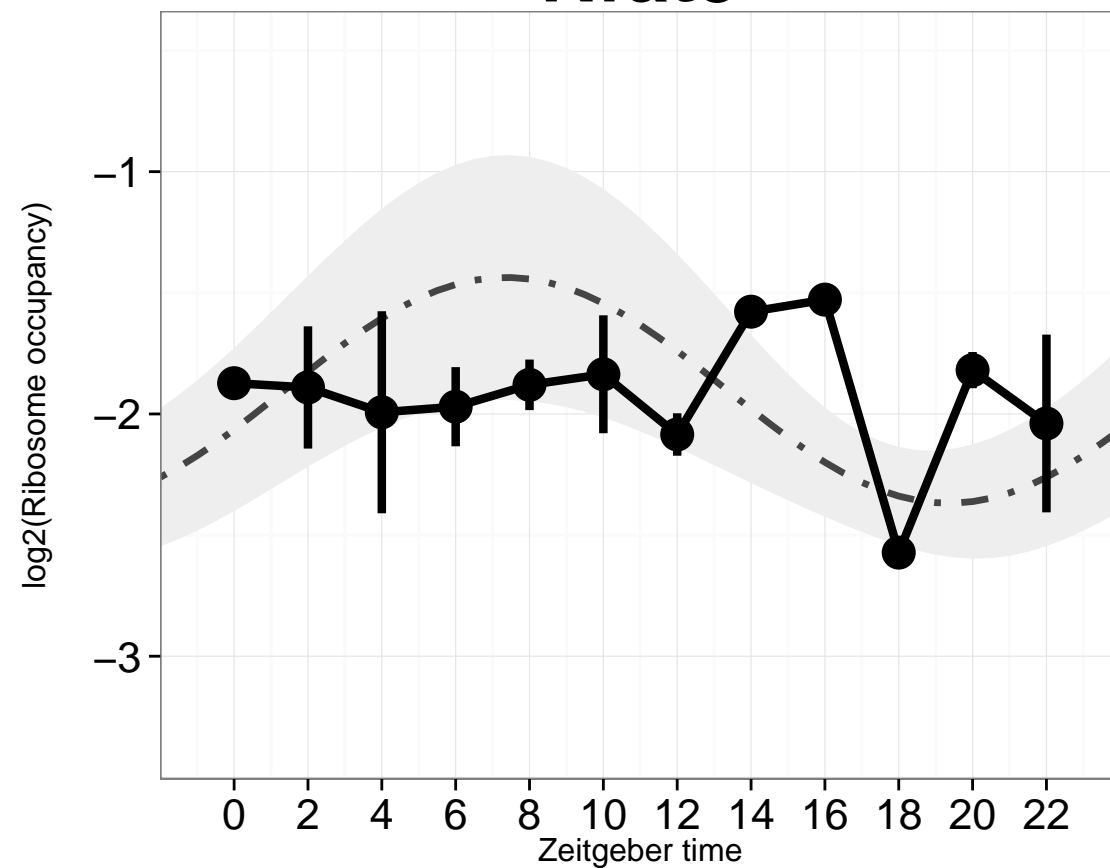

Supplement: SuppDataset_1.zip [file Nfat5_set_A.pdf › Supplemental Dataset 1/A-mRNA_nonrhyth_translation_nonrhyth/Nfat5_set_A.pdf]

# Nfatc1

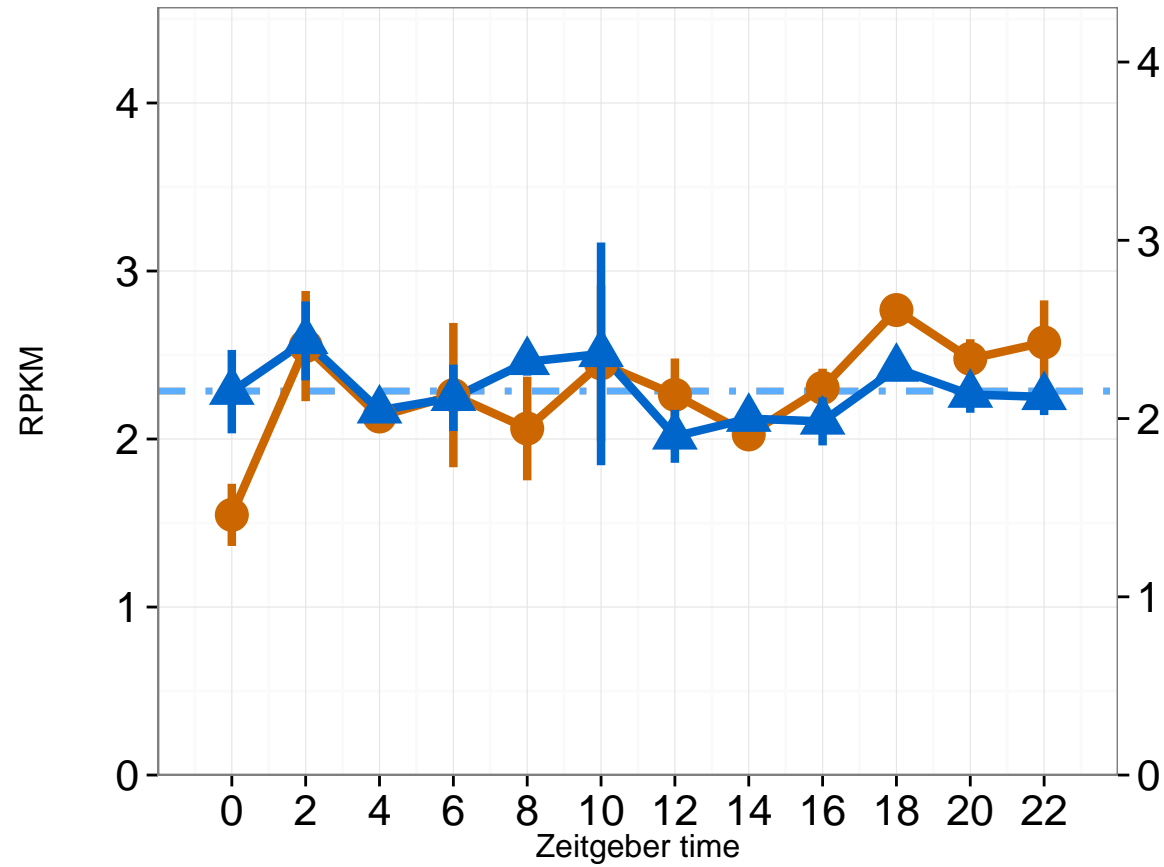

# Nfatc1

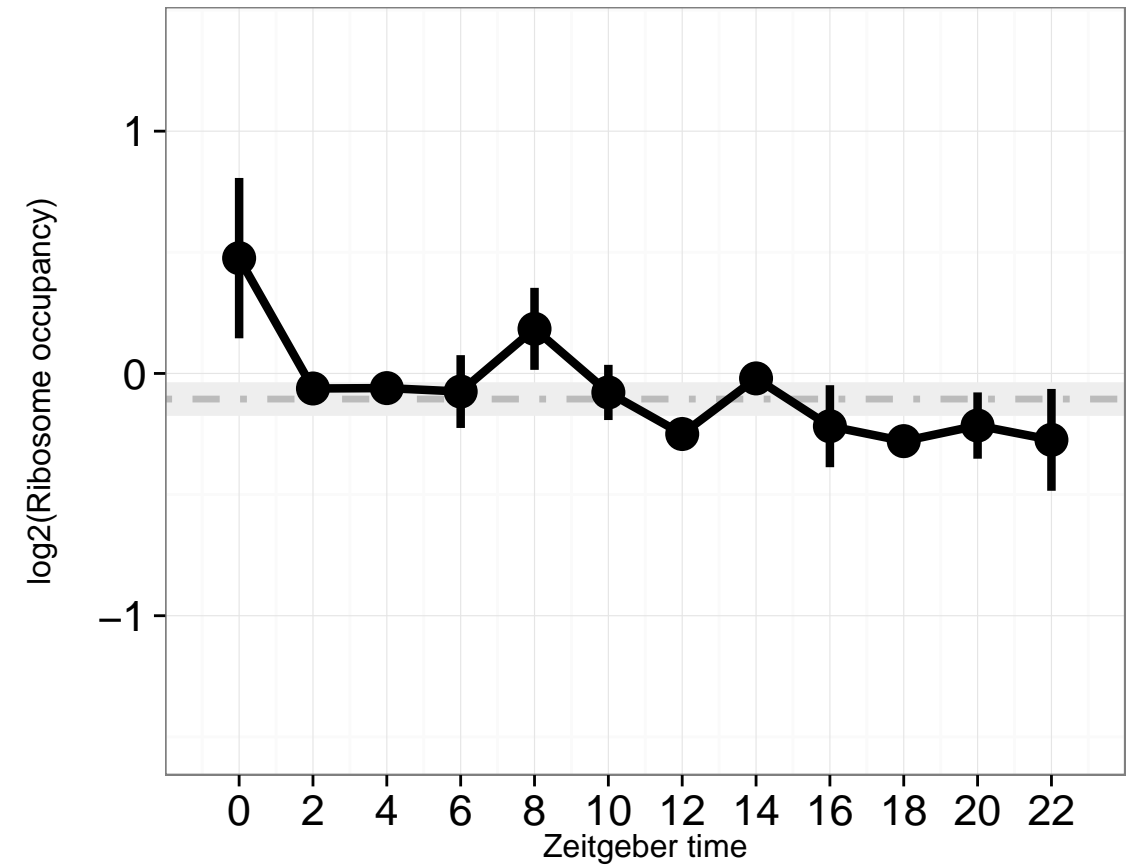

Supplement: SuppDataset_1.zip [file Nfatc1_set_A.pdf › Supplemental Dataset 1/A-mRNA_nonrhyth_translation_nonrhyth/Nfatc1_set_A.pdf]

# Nfatc2ip

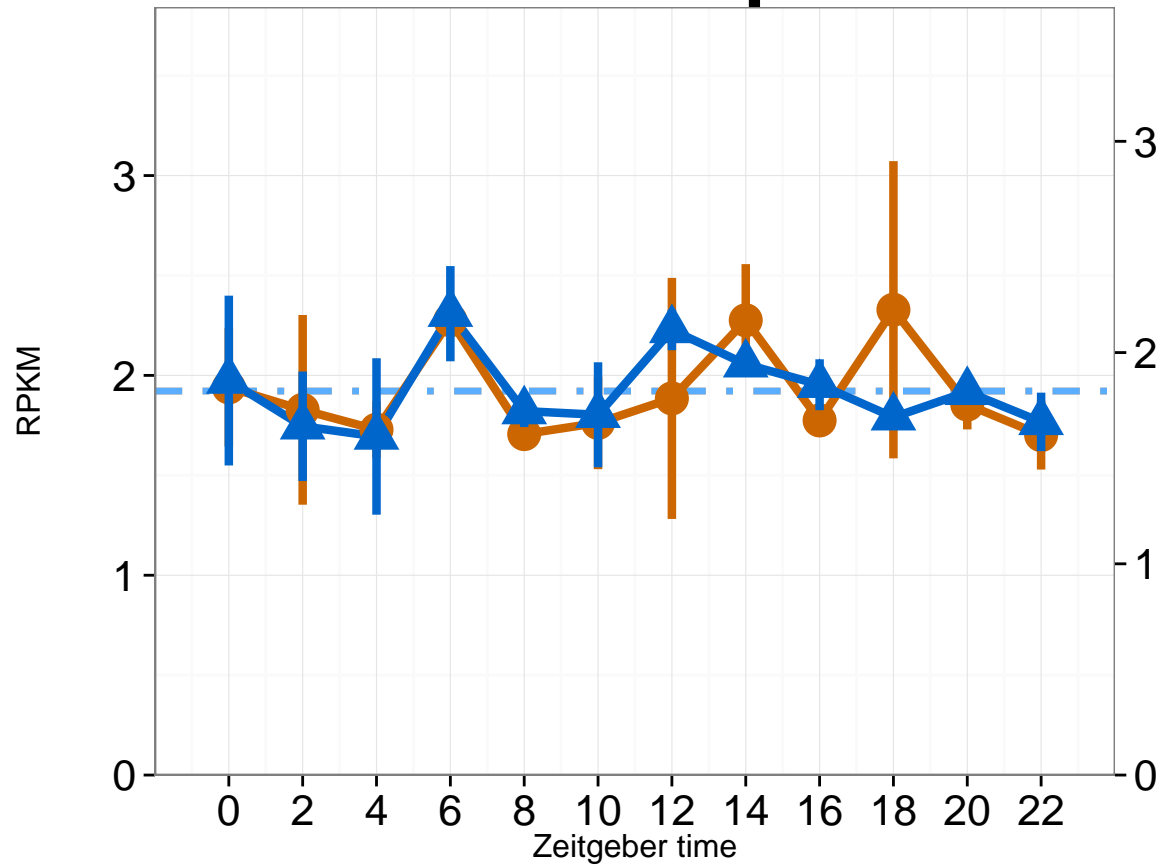

# Nfatc2ip

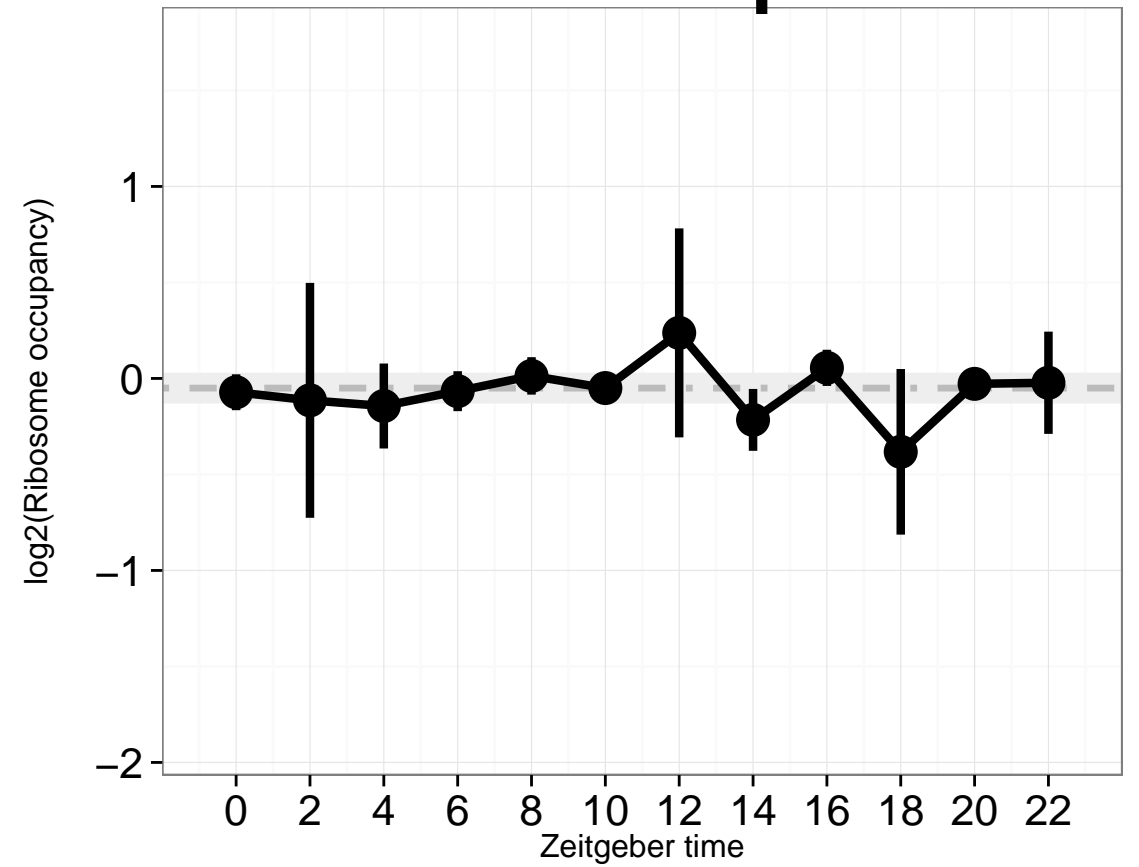

Supplement: SuppDataset_1.zip [file Nfatc2ip_set_A.pdf › Supplemental Dataset 1/A-mRNA_nonrhyth_translation_nonrhyth/Nfatc2ip_set_A.pdf]

## Nfatc3

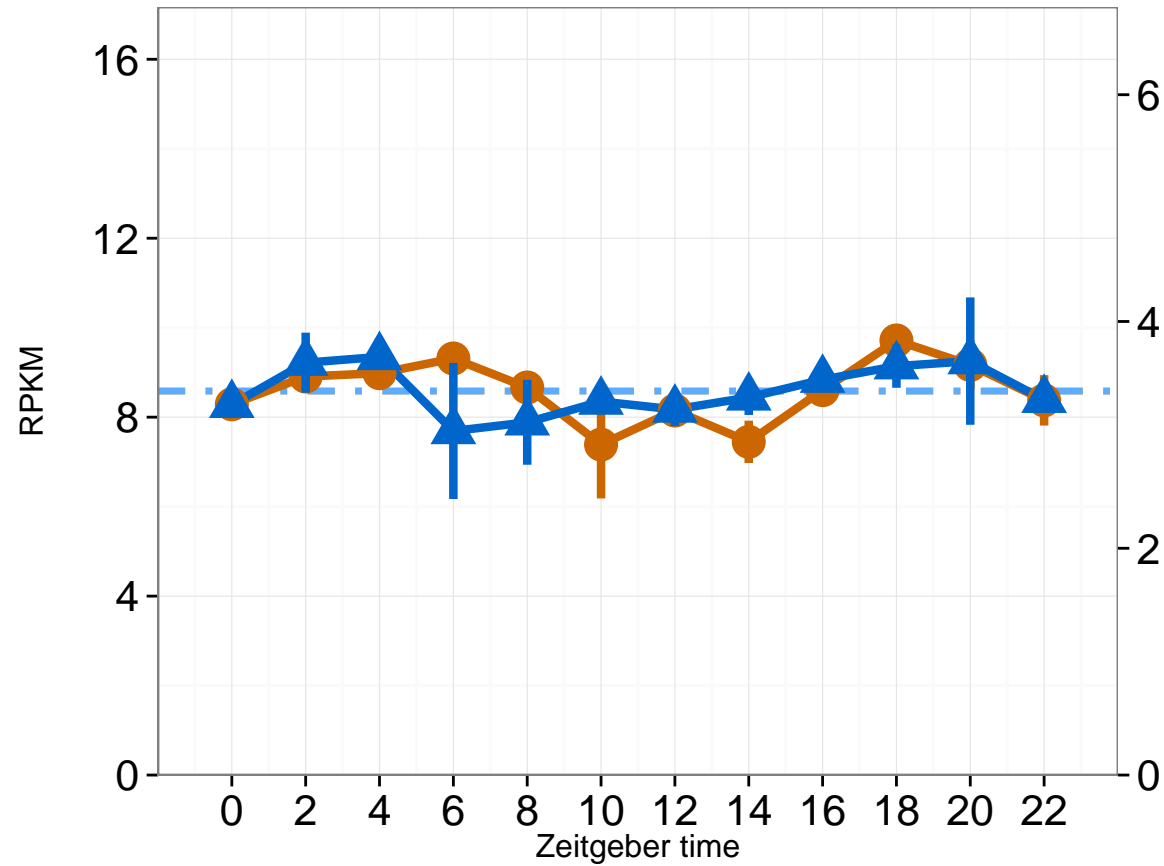

## Nfatc3

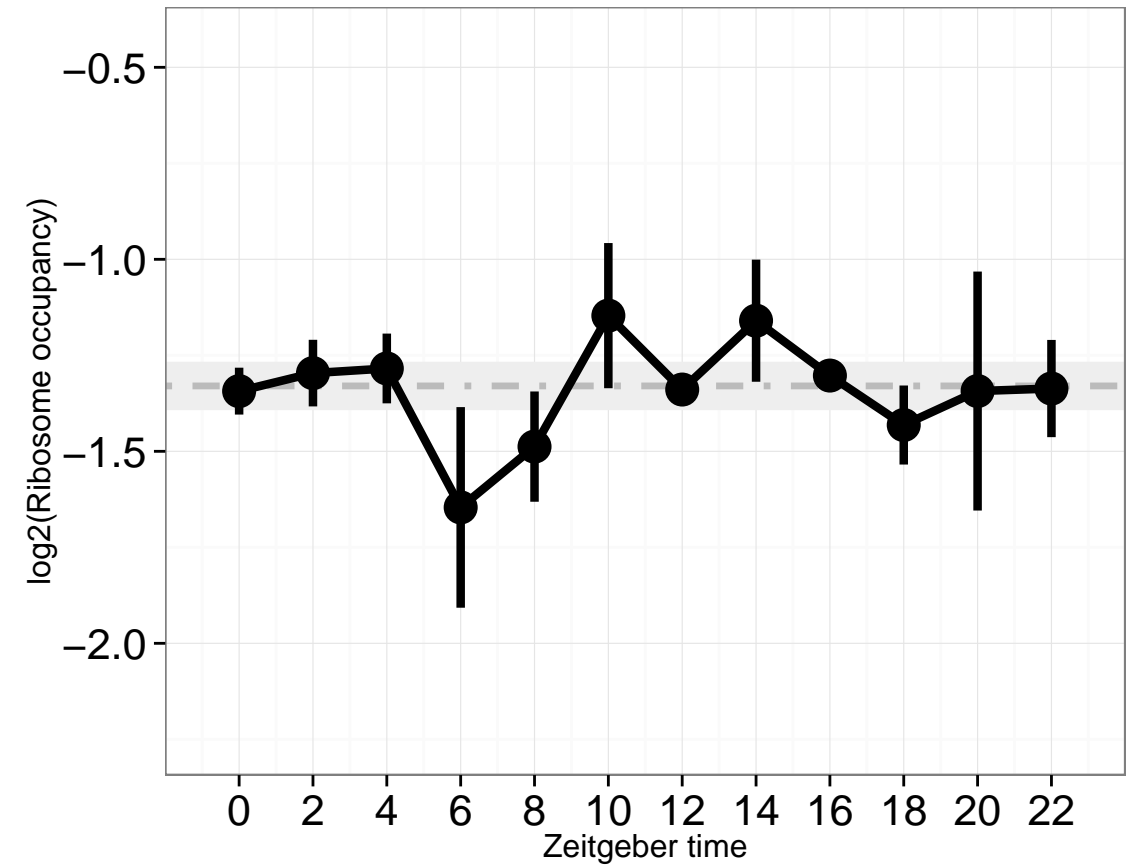

Supplement: SuppDataset_1.zip [file Nfatc3_set_A.pdf › Supplemental Dataset 1/A-mRNA_nonrhyth_translation_nonrhyth/Nfatc3_set_A.pdf]

## Nfe2

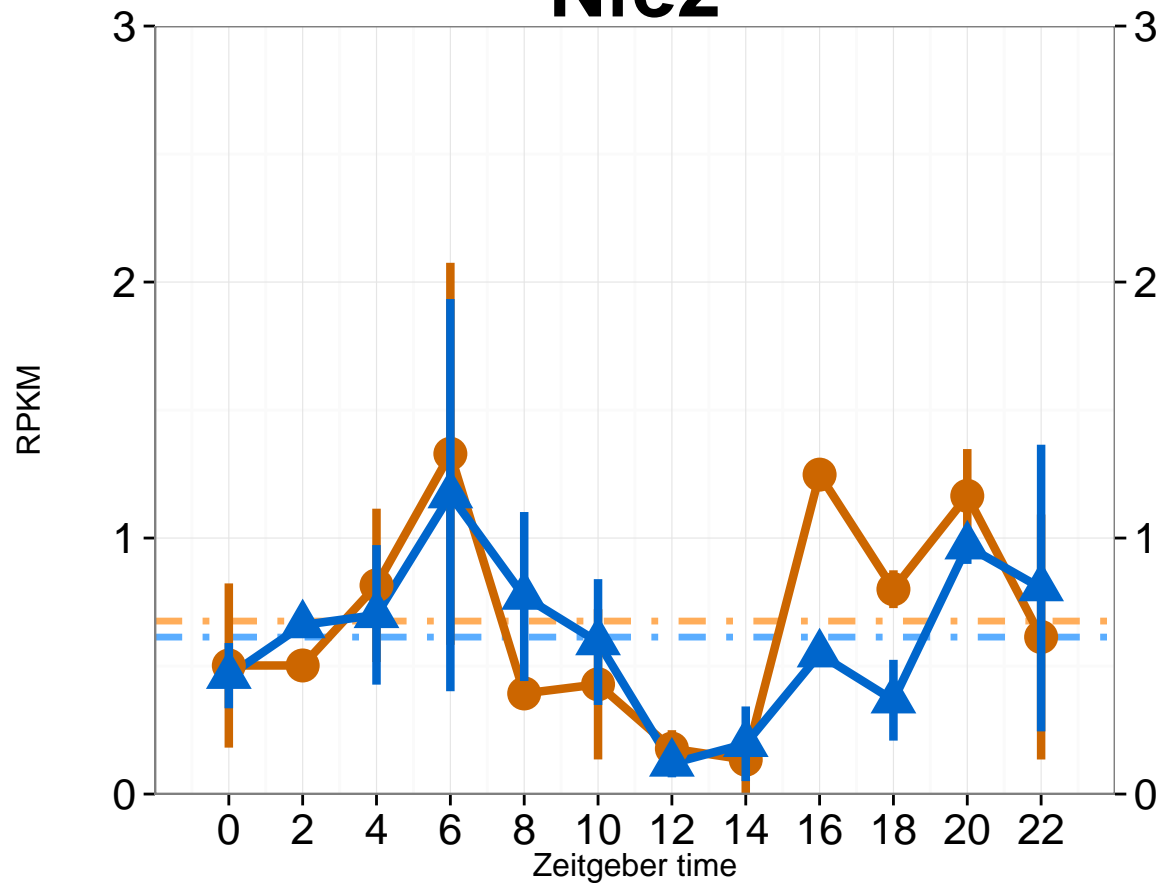

## Nfe2

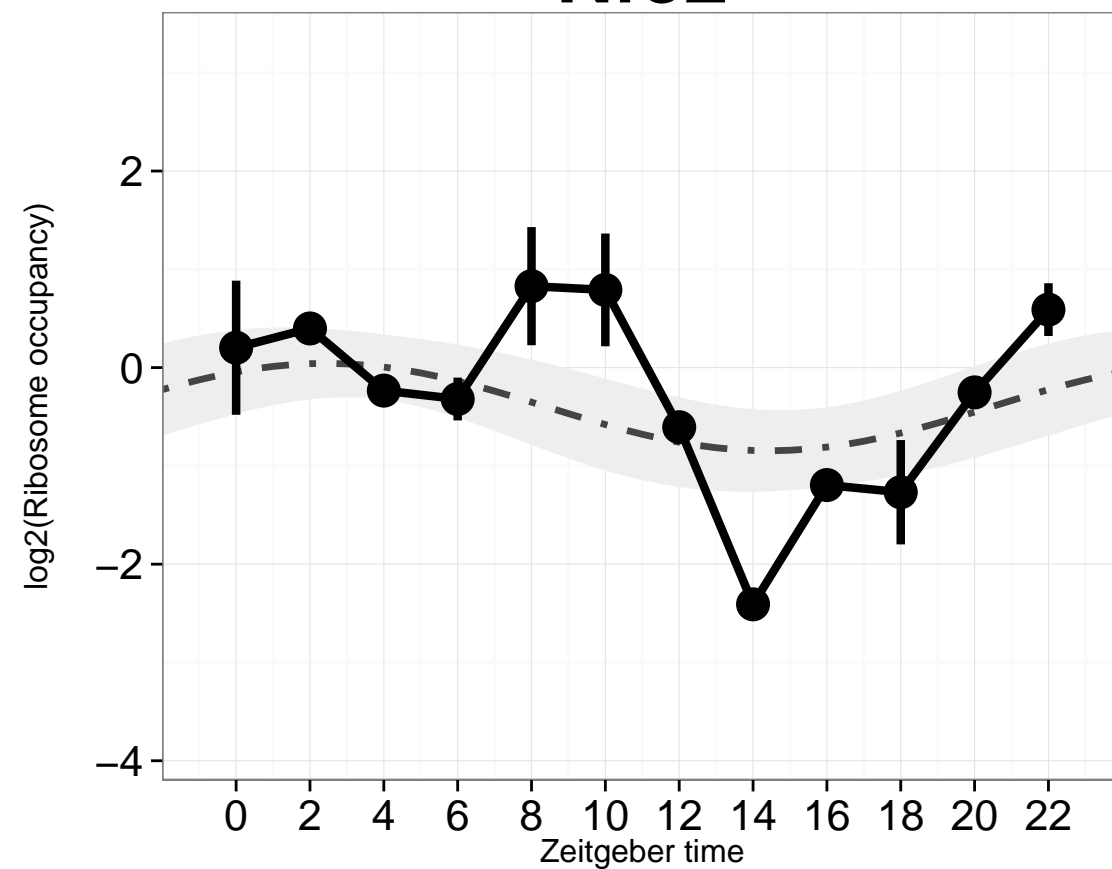

Supplement: SuppDataset_1.zip [file Nfe2_set_A.pdf › Supplemental Dataset 1/A-mRNA_nonrhyth_translation_nonrhyth/Nfe2_set_A.pdf]

## Nfe2l1

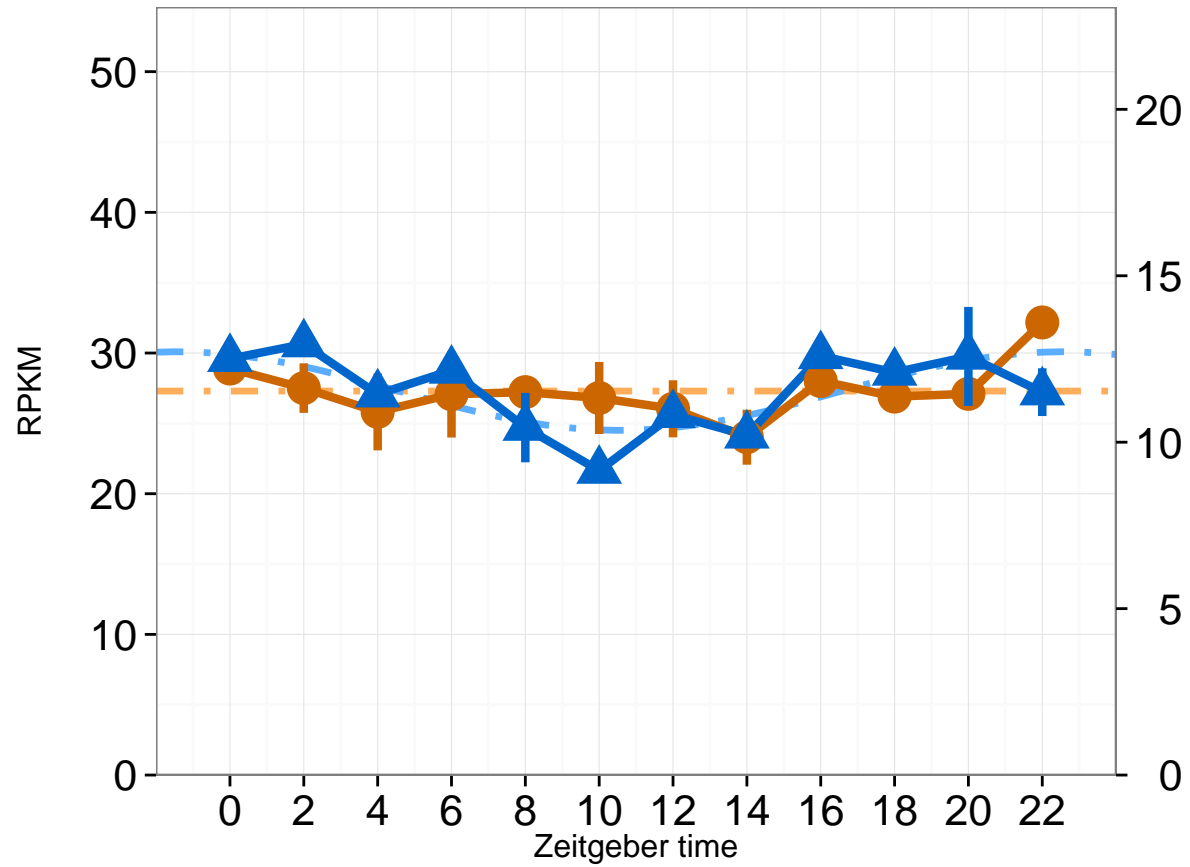

## Nfe2l1

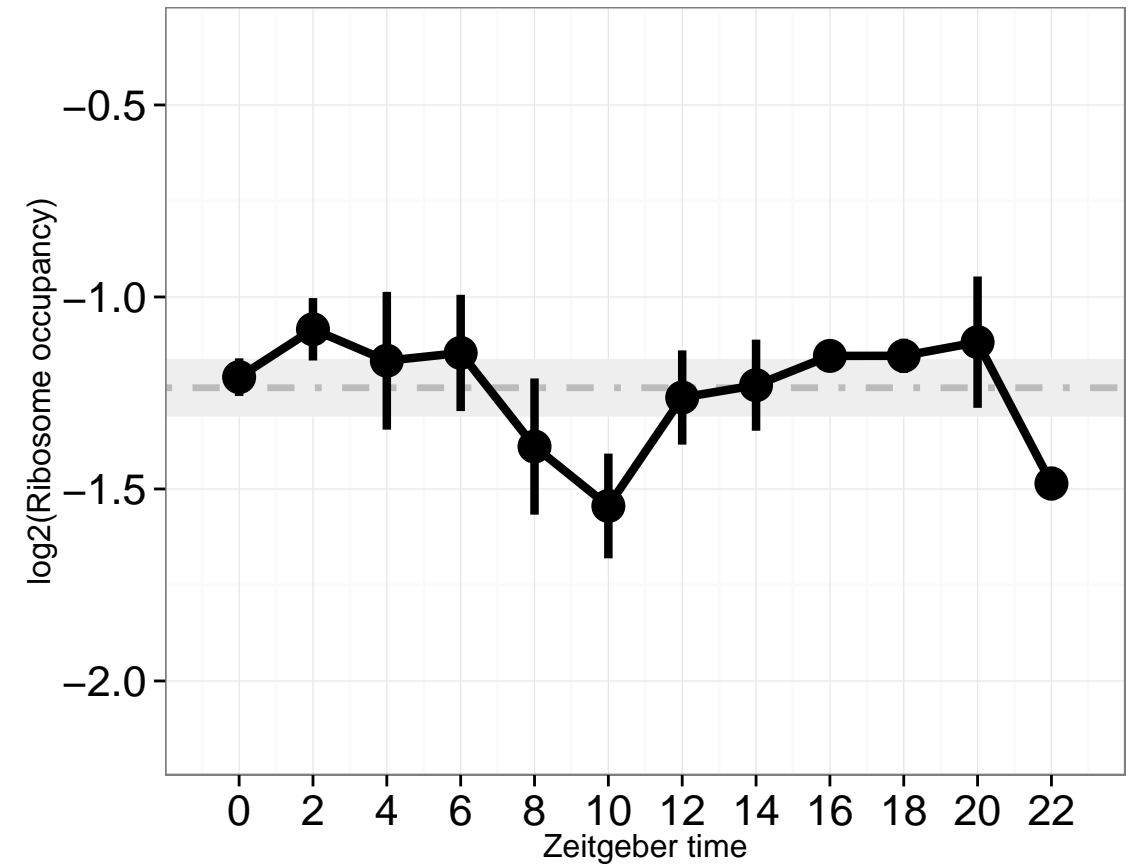

Supplement: SuppDataset_1.zip [file Nfe2l1_set_A.pdf › Supplemental Dataset 1/A-mRNA_nonrhyth_translation_nonrhyth/Nfe2l1_set_A.pdf]

## Nfe2l2

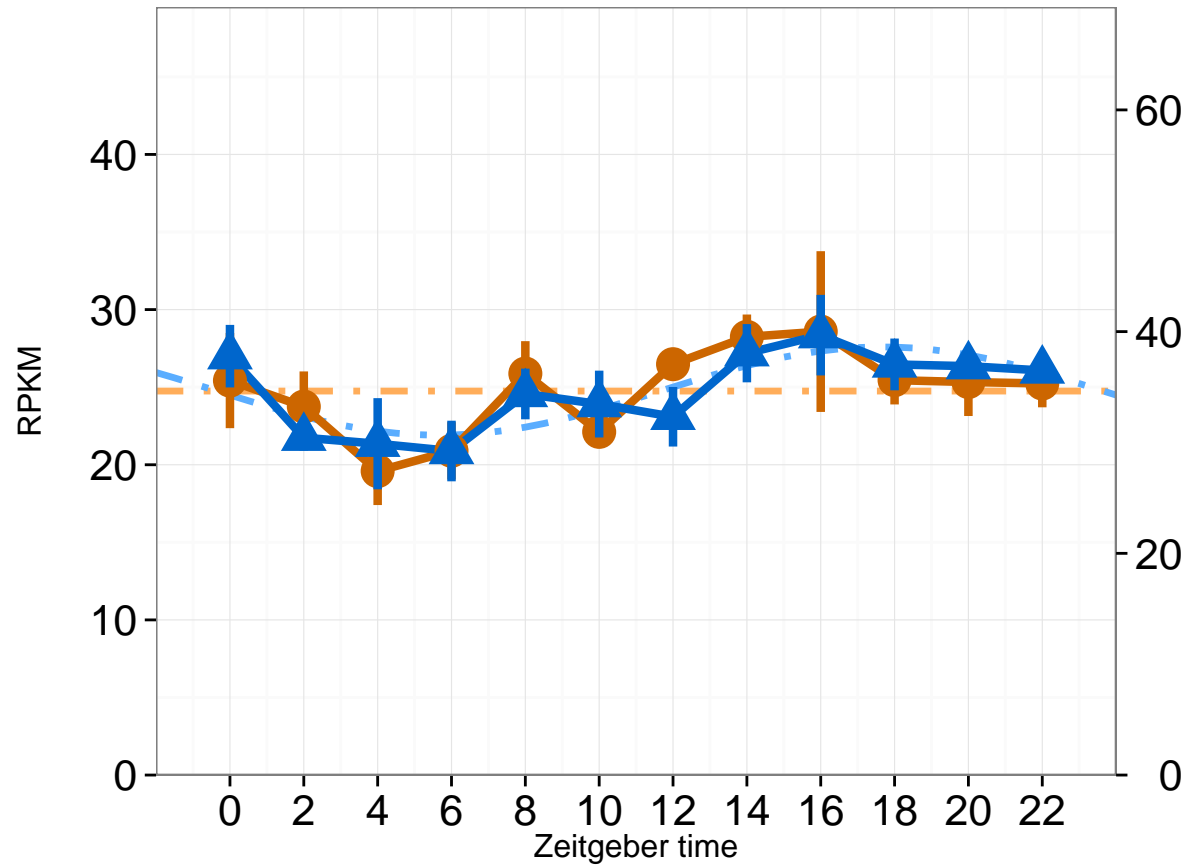

## Nfe2l2

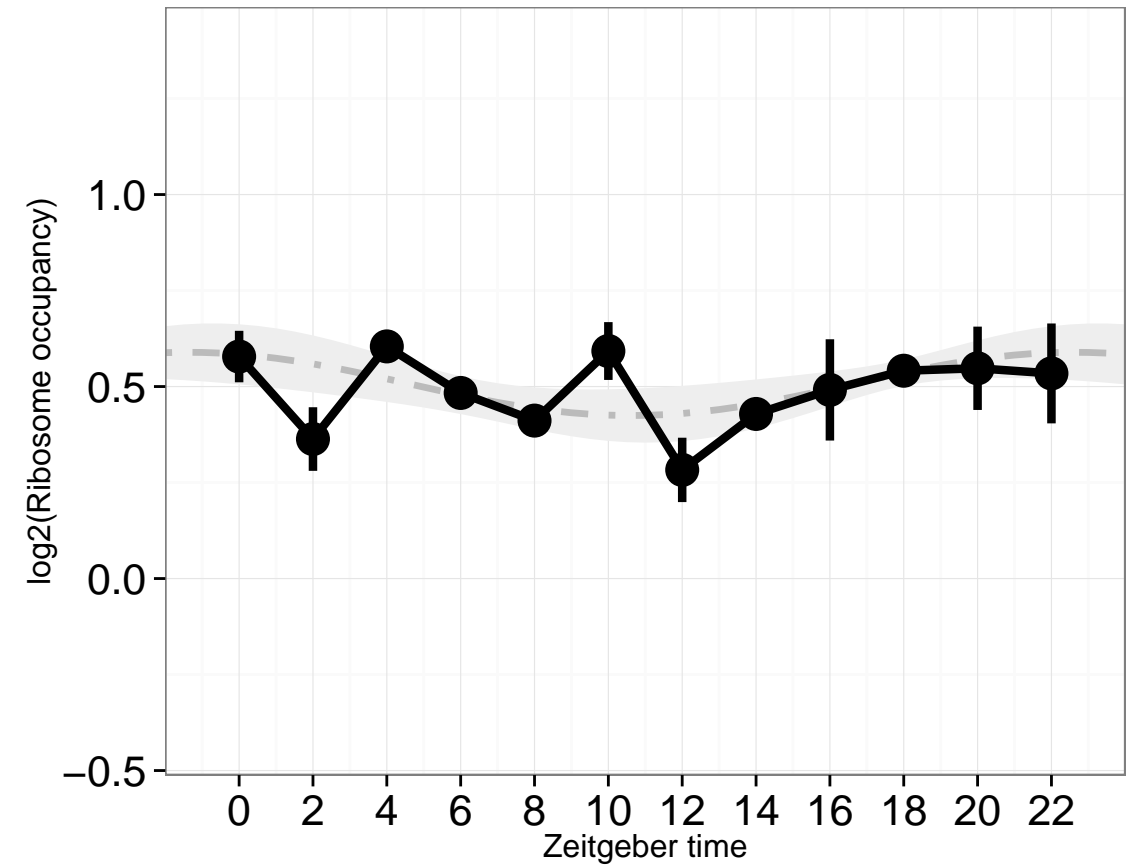

Supplement: SuppDataset_1.zip [file Nfe2l2_set_A.pdf › Supplemental Dataset 1/A-mRNA_nonrhyth_translation_nonrhyth/Nfe2l2_set_A.pdf]

## Nfia

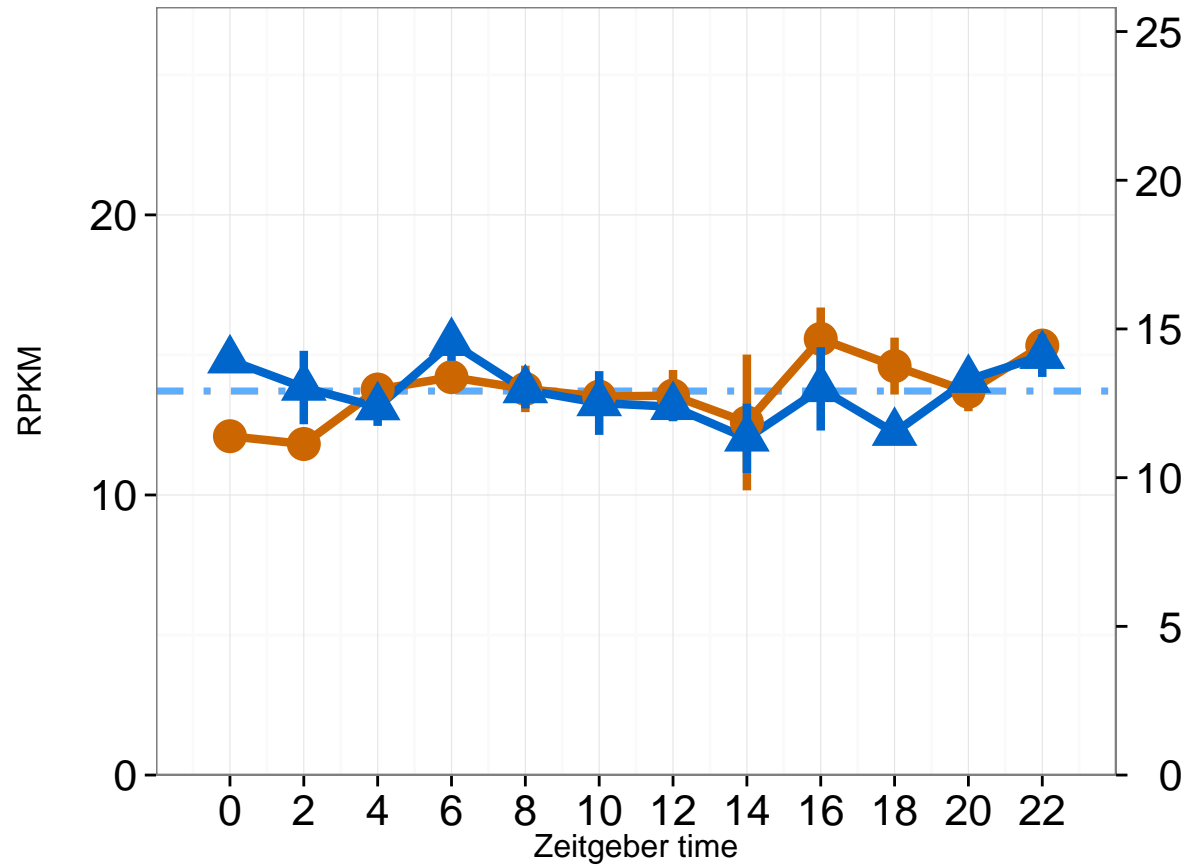

## Nfia

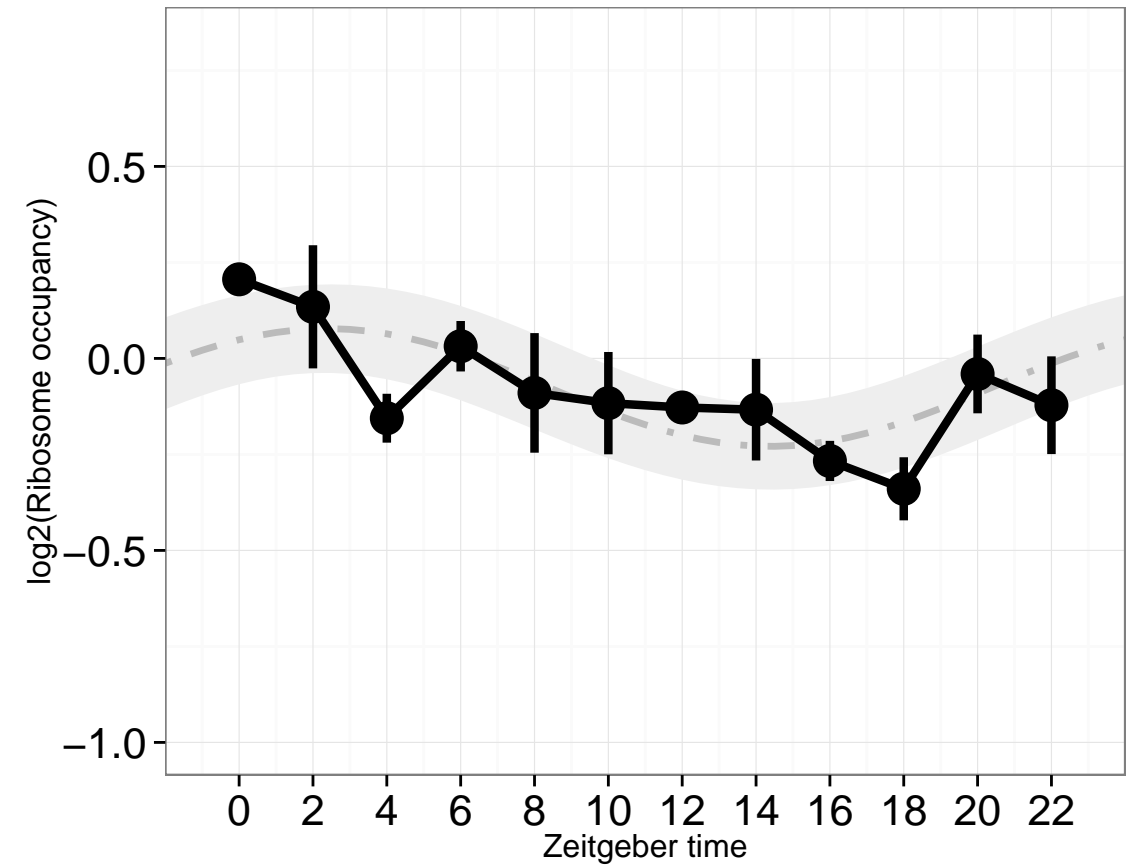

Supplement: SuppDataset_1.zip [file Nfia_set_A.pdf › Supplemental Dataset 1/A-mRNA_nonrhyth_translation_nonrhyth/Nfia_set_A.pdf]

## Nfib

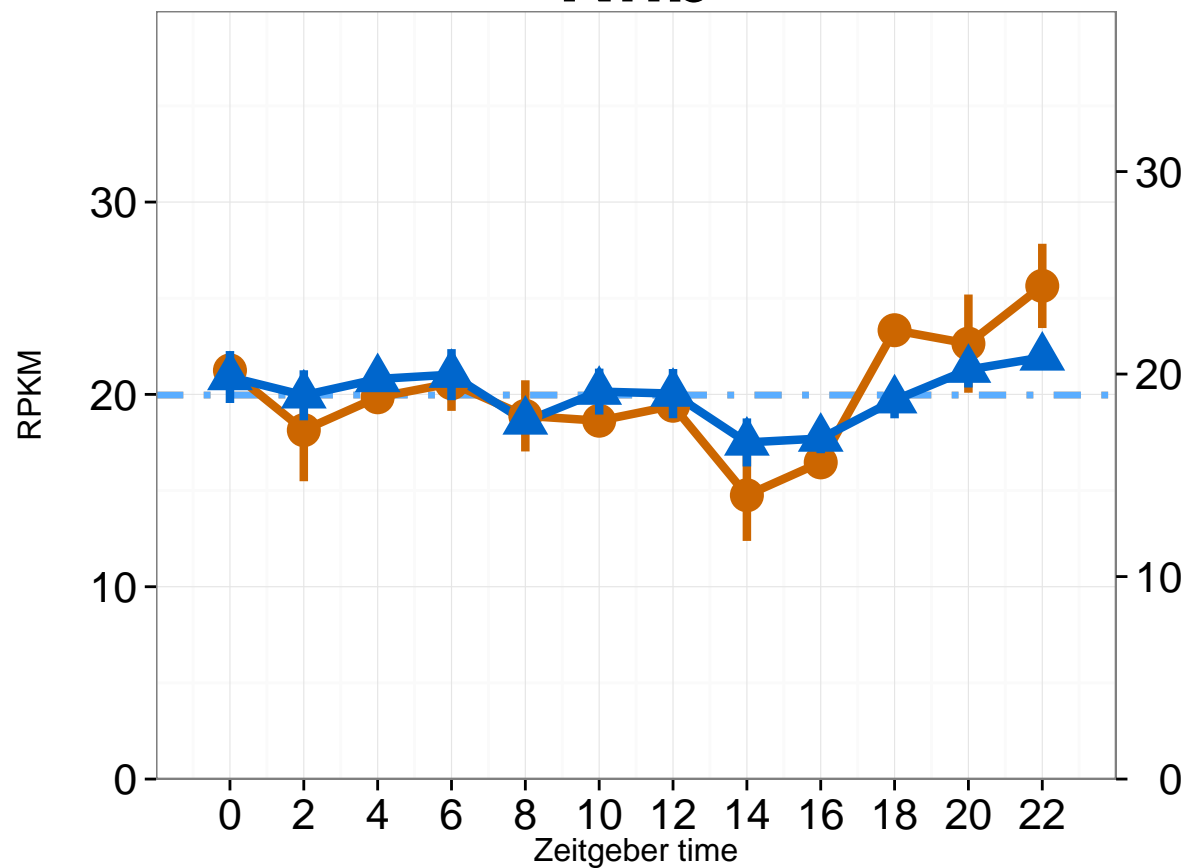

## Nfib

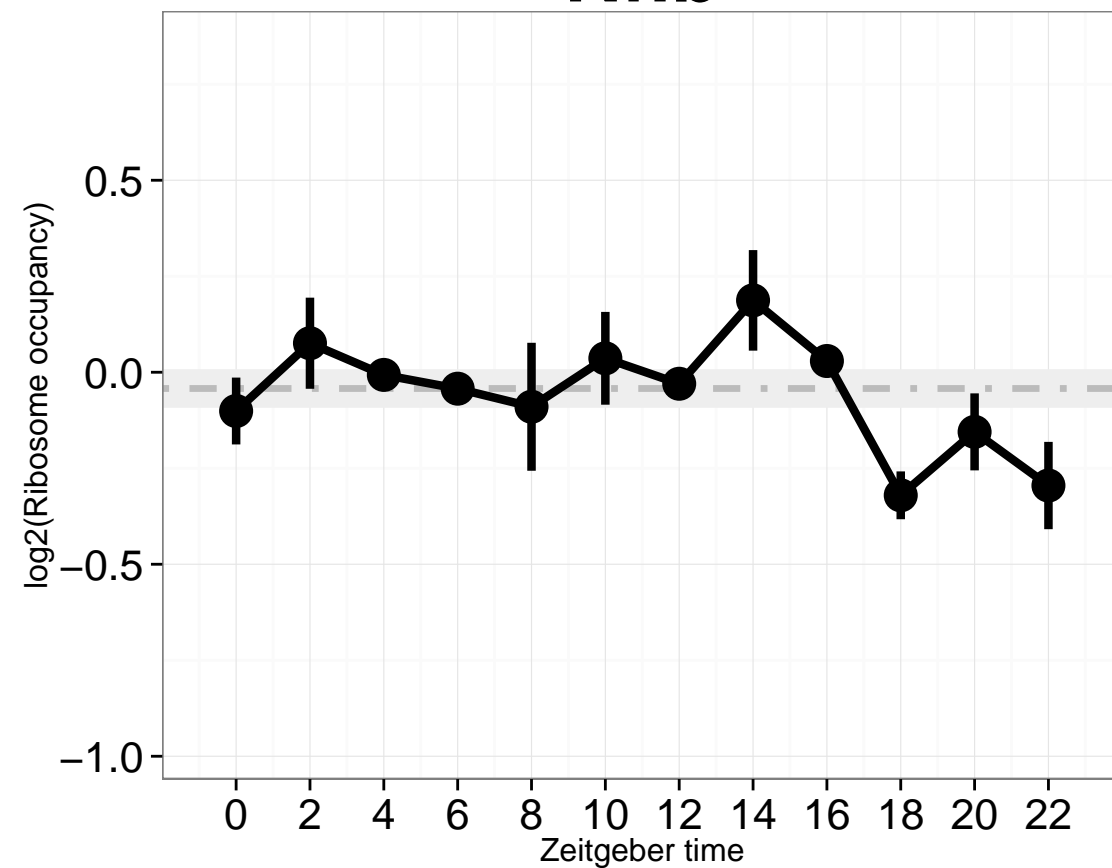

Supplement: SuppDataset_1.zip [file Nfib_set_A.pdf › Supplemental Dataset 1/A-mRNA_nonrhyth_translation_nonrhyth/Nfib_set_A.pdf]

## Nfix

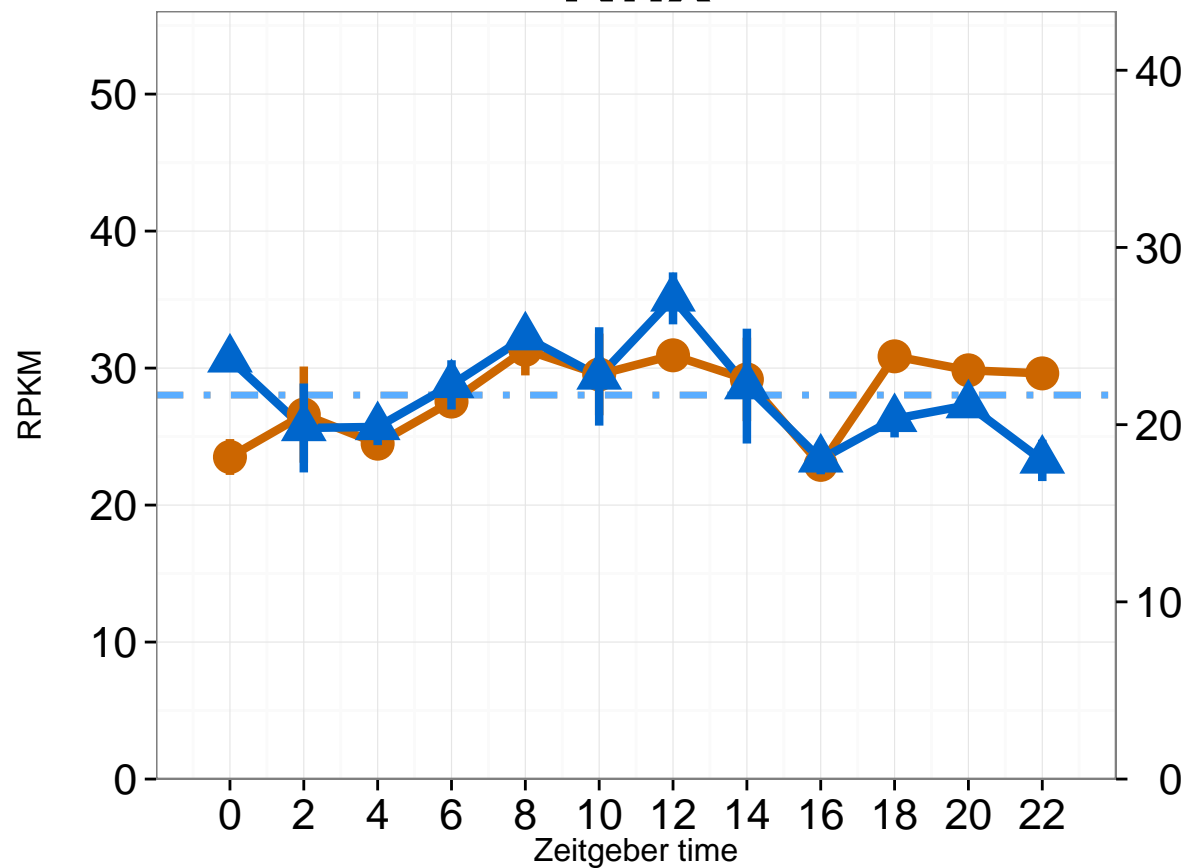

## Nfix

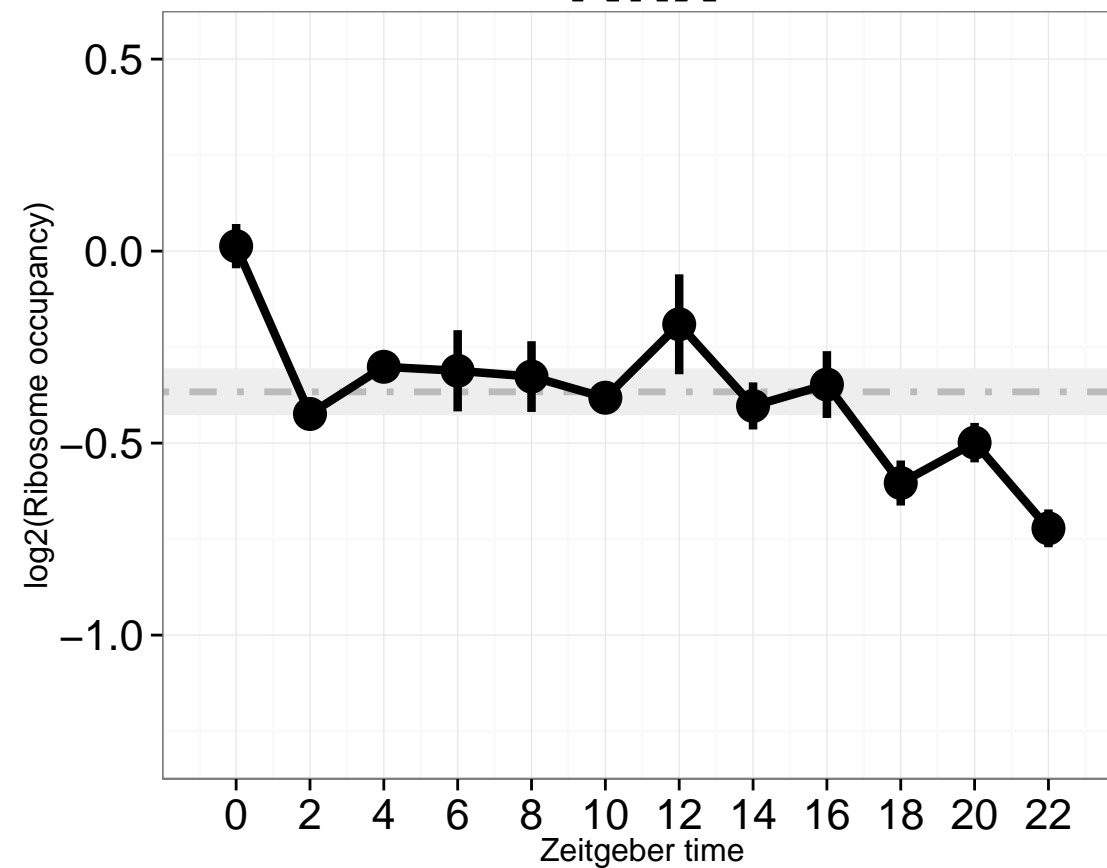

Supplement: SuppDataset_1.zip [file Nfix_set_A.pdf › Supplemental Dataset 1/A-mRNA_nonrhyth_translation_nonrhyth/Nfix_set_A.pdf]

## Nfkb1

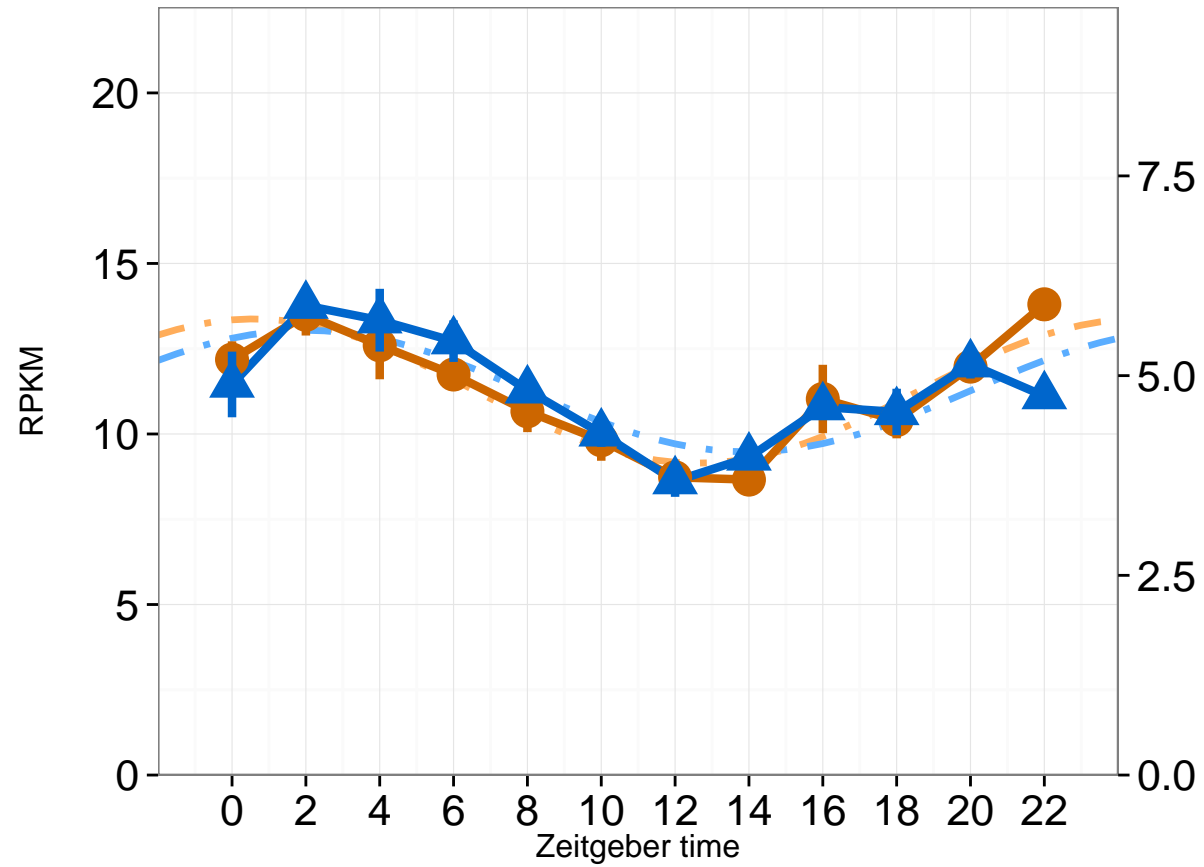

## Nfkb1

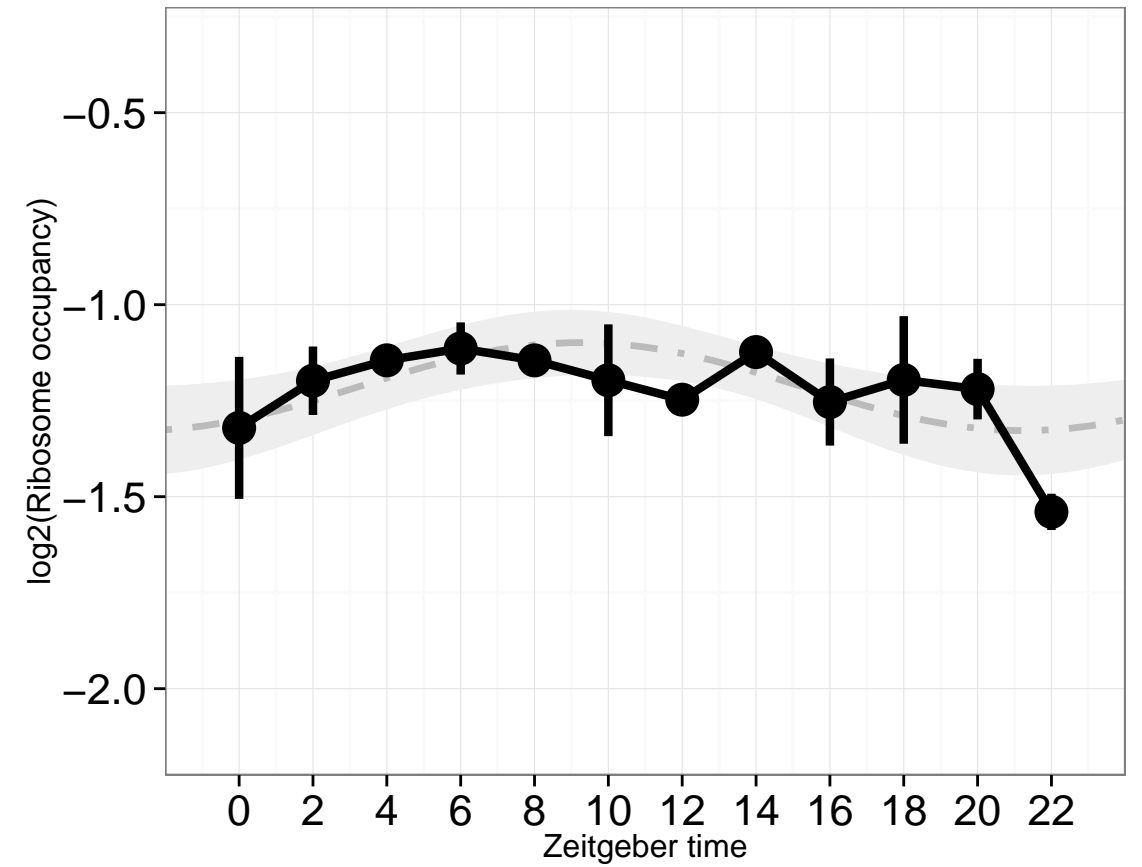

Supplement: SuppDataset_1.zip [file Nfkb1_set_A.pdf › Supplemental Dataset 1/A-mRNA_nonrhyth_translation_nonrhyth/Nfkb1_set_A.pdf]

# Nfkbia

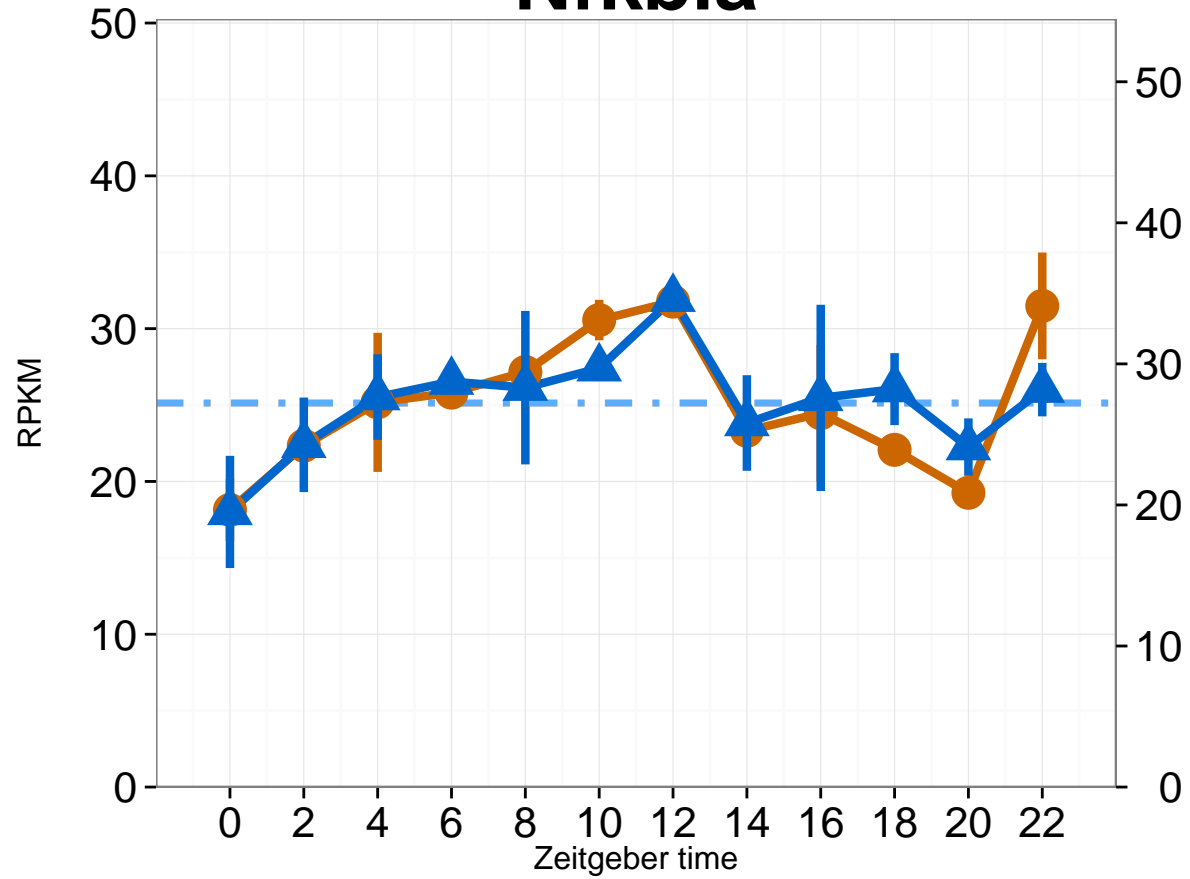

# Nfkbia

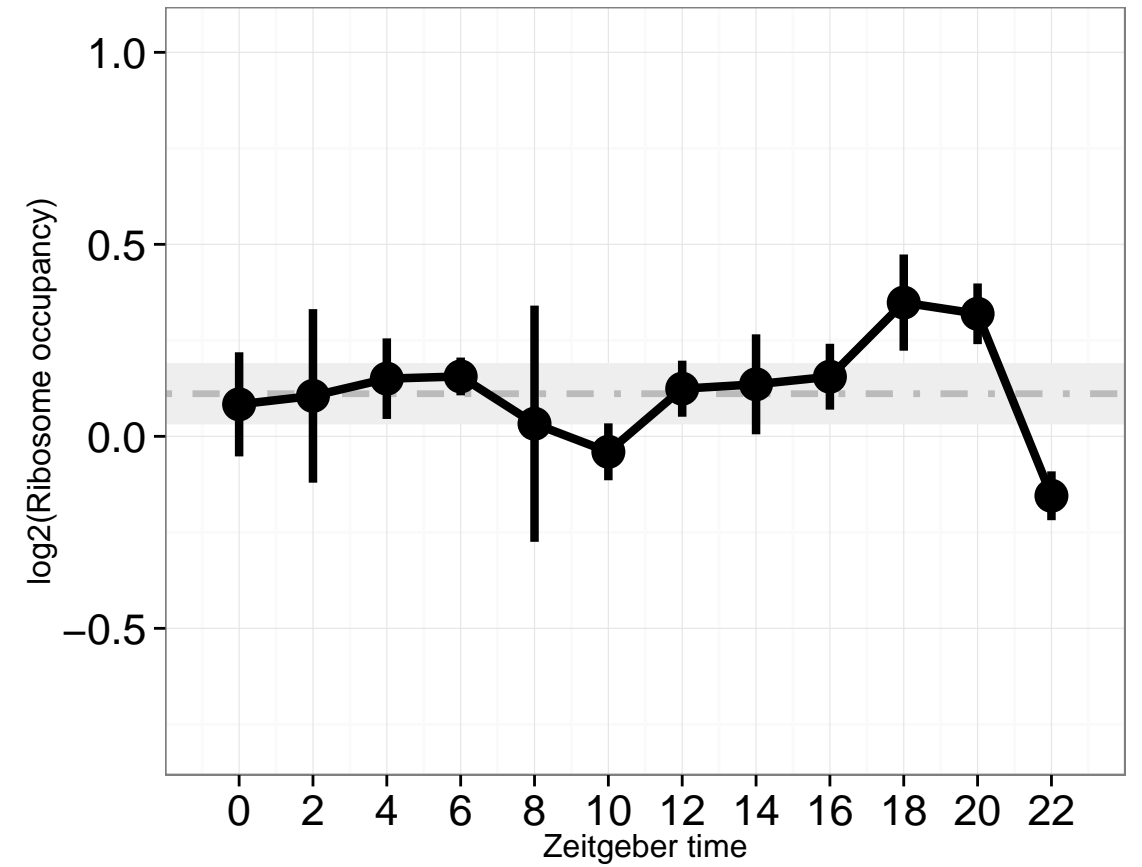

Supplement: SuppDataset_1.zip [file Nfkbia_set_A.pdf › Supplemental Dataset 1/A-mRNA_nonrhyth_translation_nonrhyth/Nfkbia_set_A.pdf]

## Nfrkb

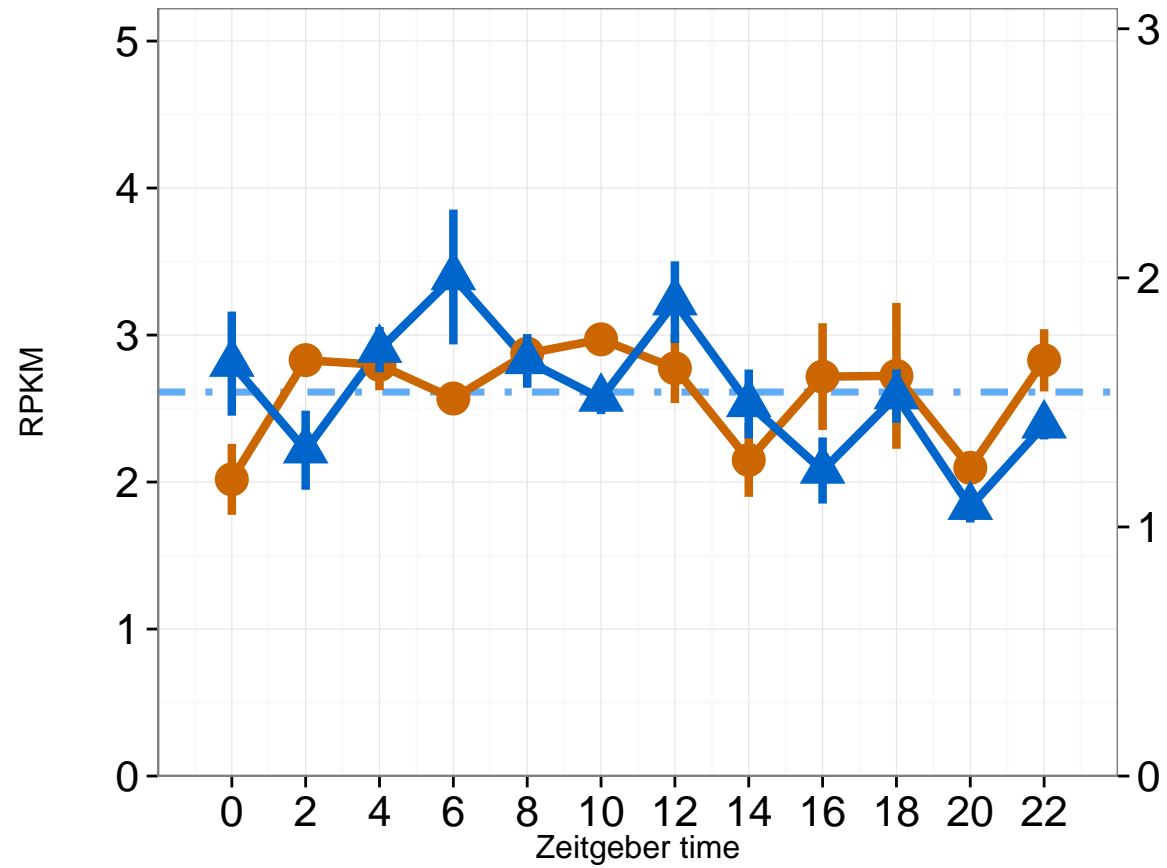

## Nfrkb

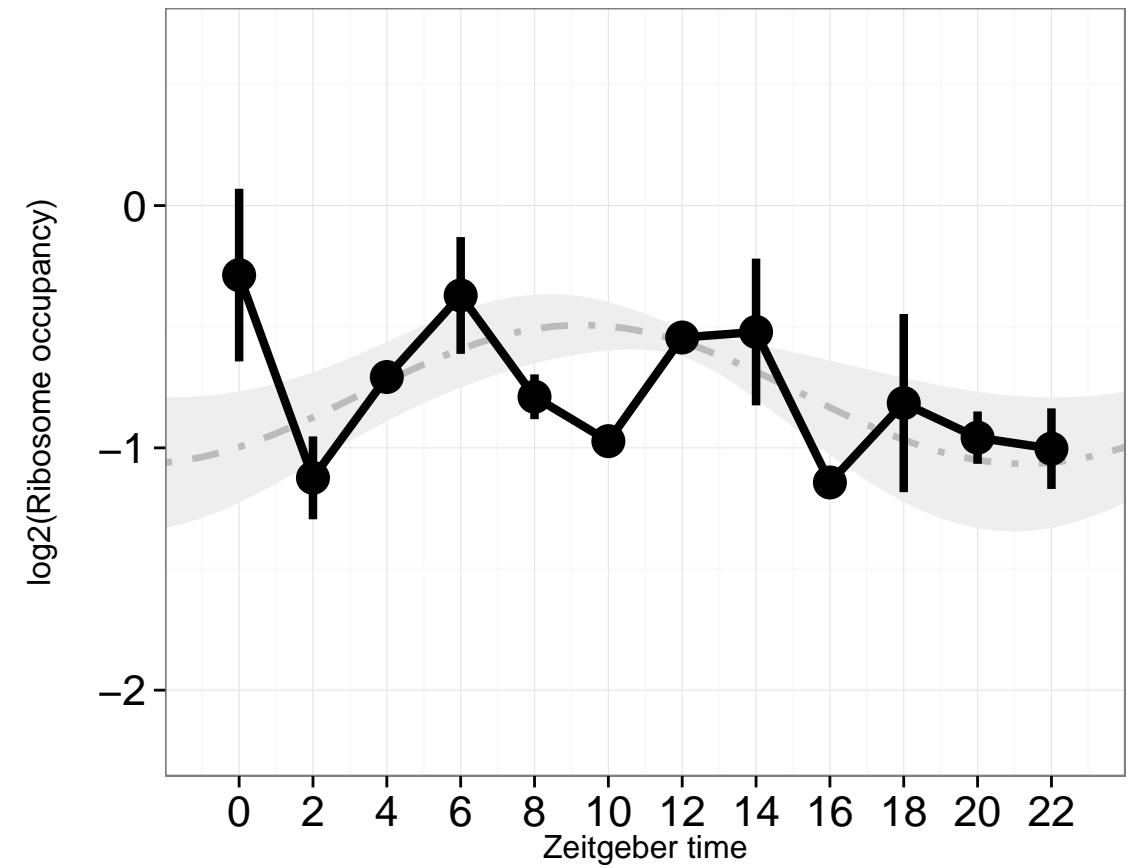

Supplement: SuppDataset_1.zip [file Nfrkb_set_A.pdf › Supplemental Dataset 1/A-mRNA_nonrhyth_translation_nonrhyth/Nfrkb_set_A.pdf]

## Nfs1

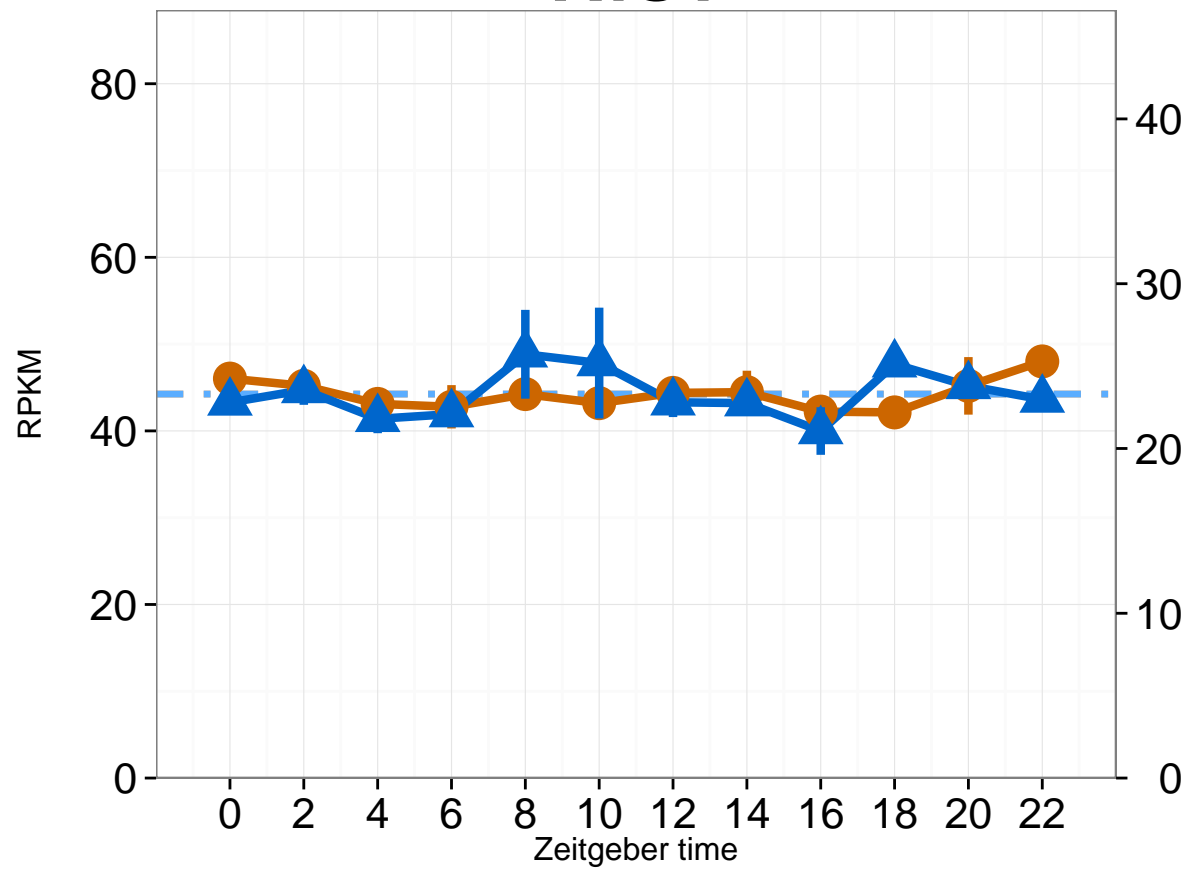

## Nfs1

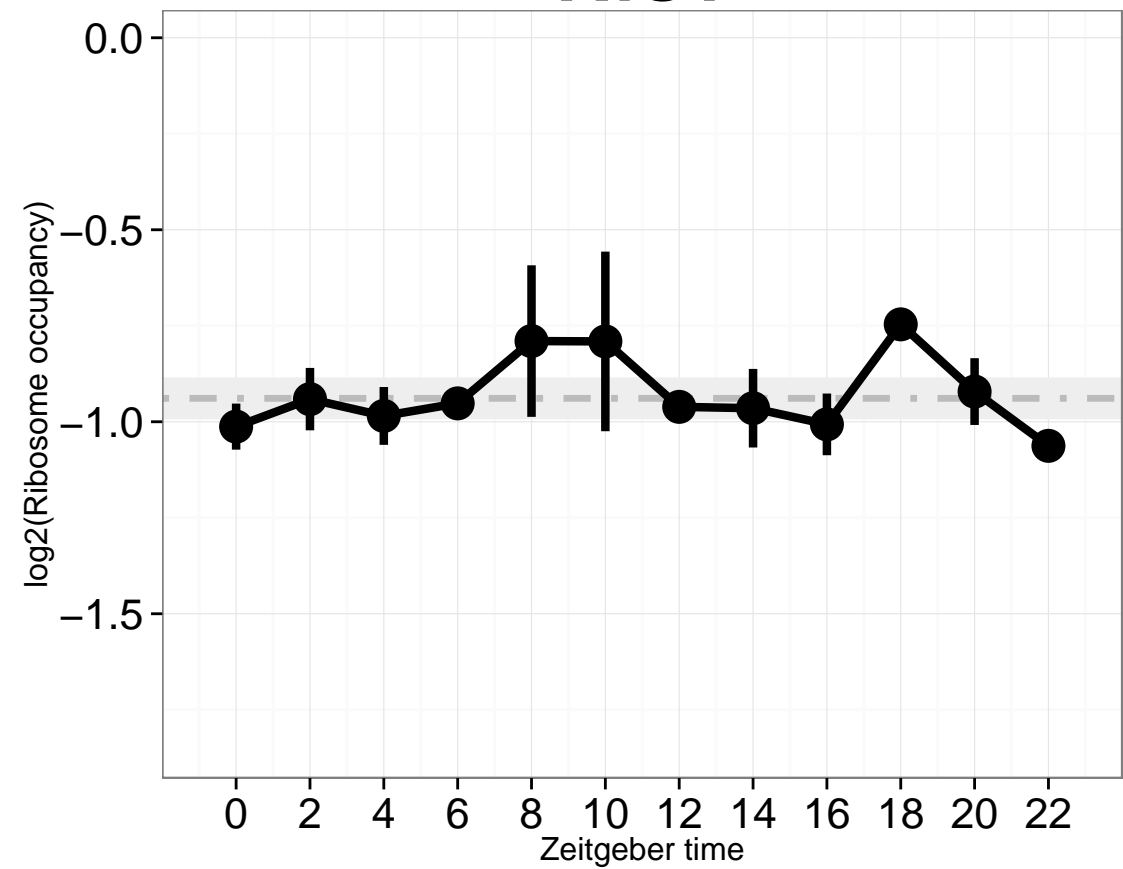

Supplement: SuppDataset_1.zip [file Nfs1_set_A.pdf › Supplemental Dataset 1/A-mRNA_nonrhyth_translation_nonrhyth/Nfs1_set_A.pdf]

## Nfu1

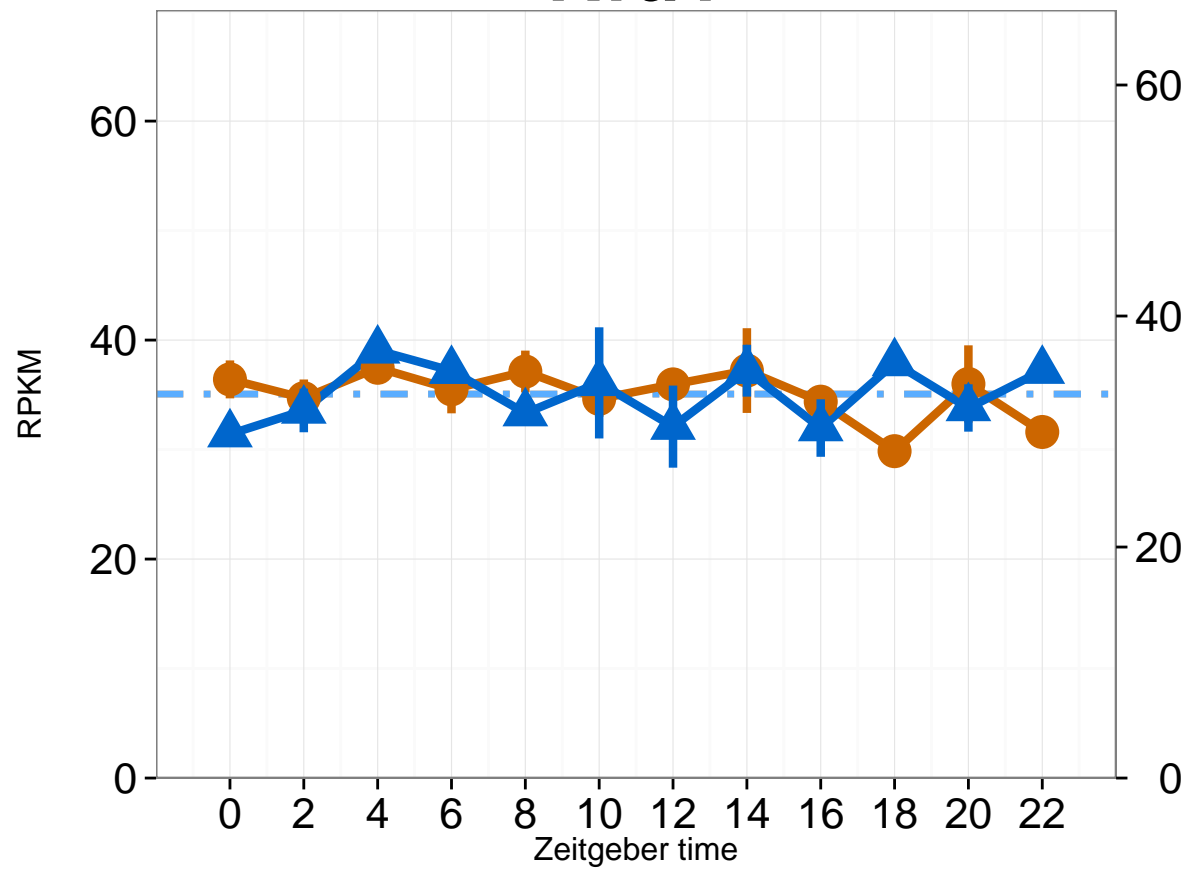

## Nfu1

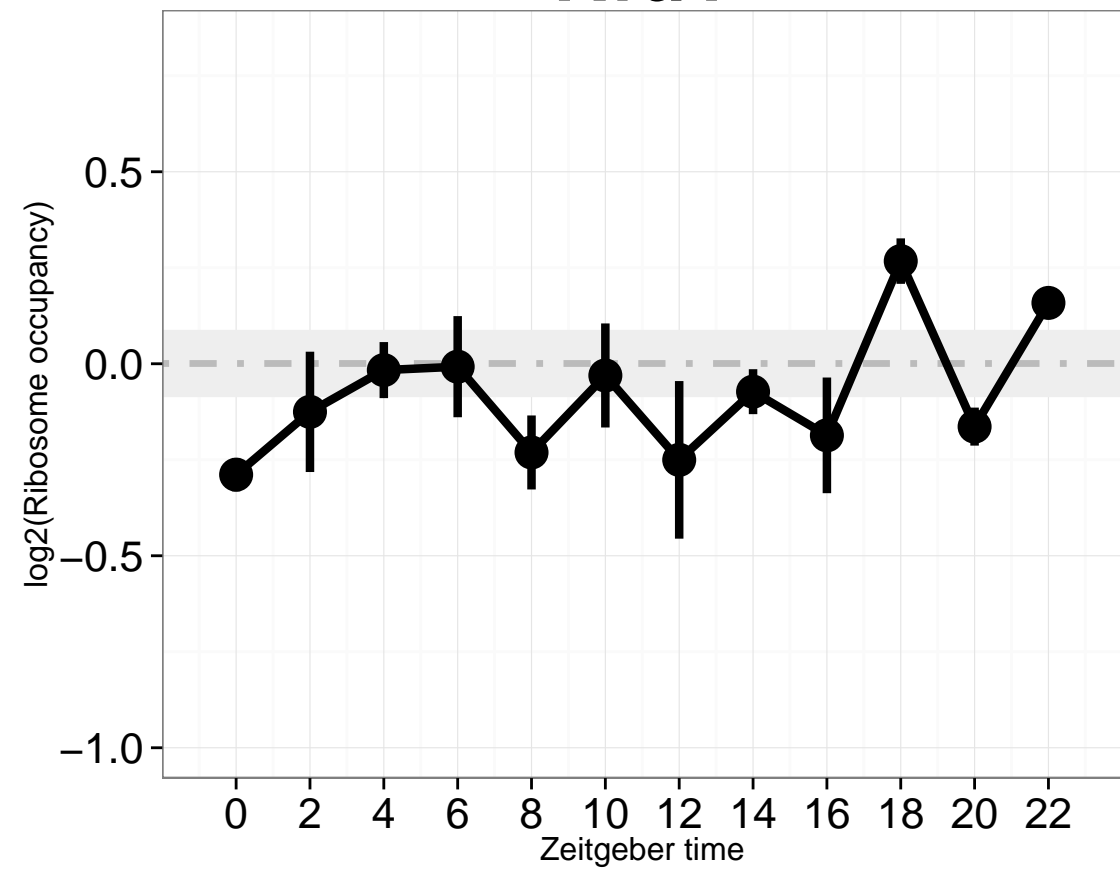

Supplement: SuppDataset_1.zip [file Nfu1_set_A.pdf › Supplemental Dataset 1/A-mRNA_nonrhyth_translation_nonrhyth/Nfu1_set_A.pdf]

## Nfya

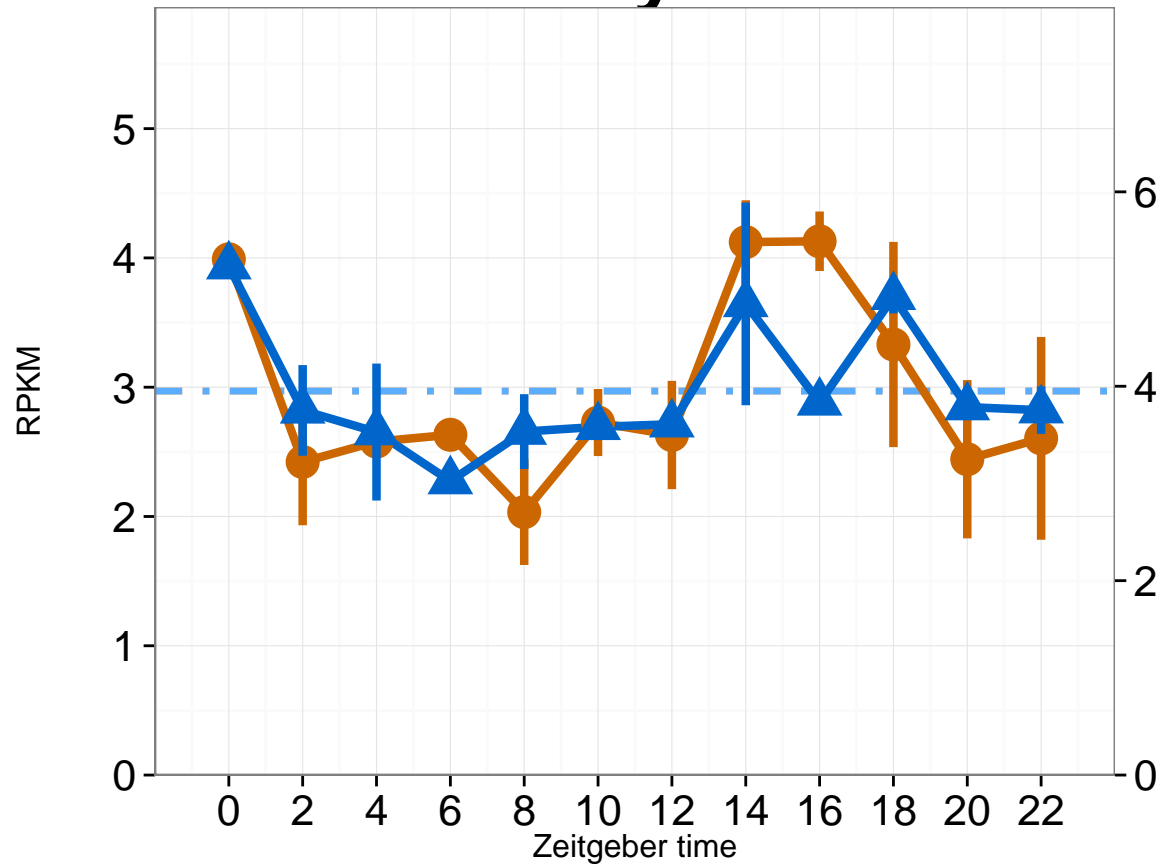

## Nfya

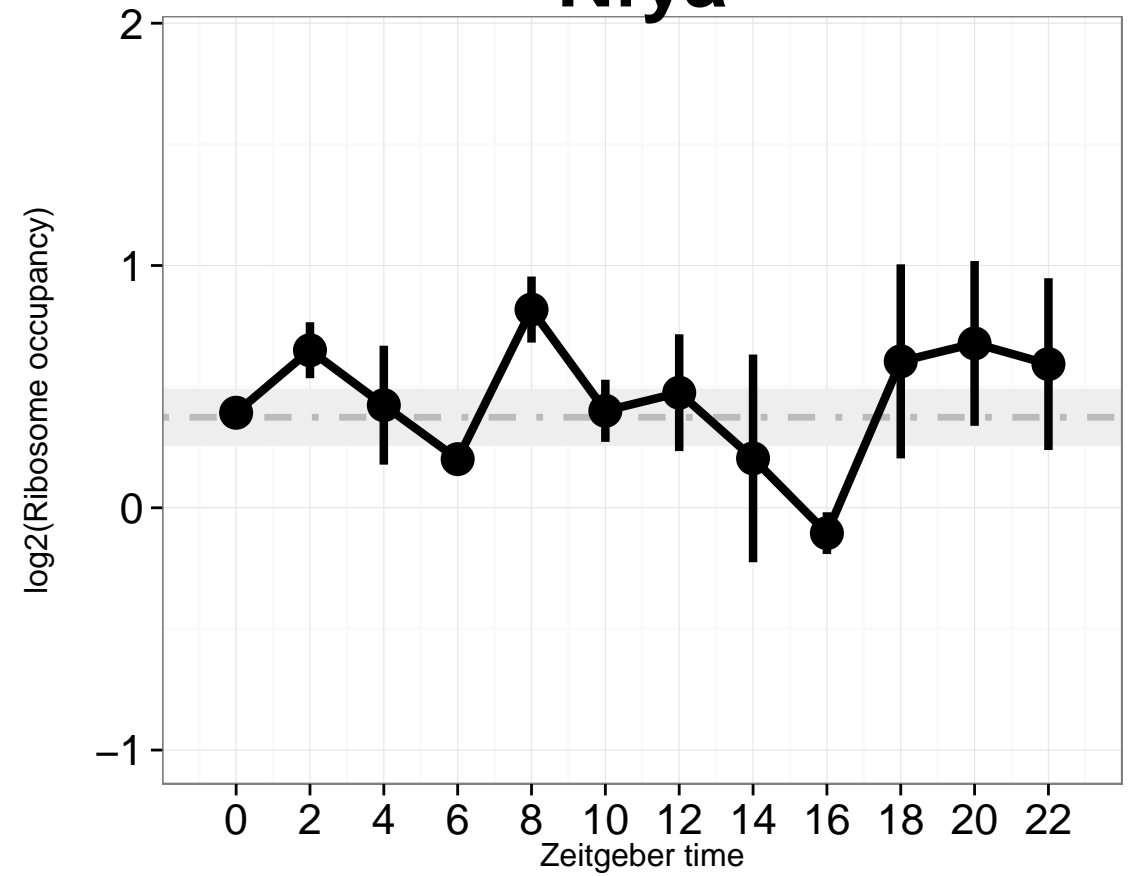

Supplement: SuppDataset_1.zip [file Nfya_set_A.pdf › Supplemental Dataset 1/A-mRNA_nonrhyth_translation_nonrhyth/Nfya_set_A.pdf]

## Nfyb

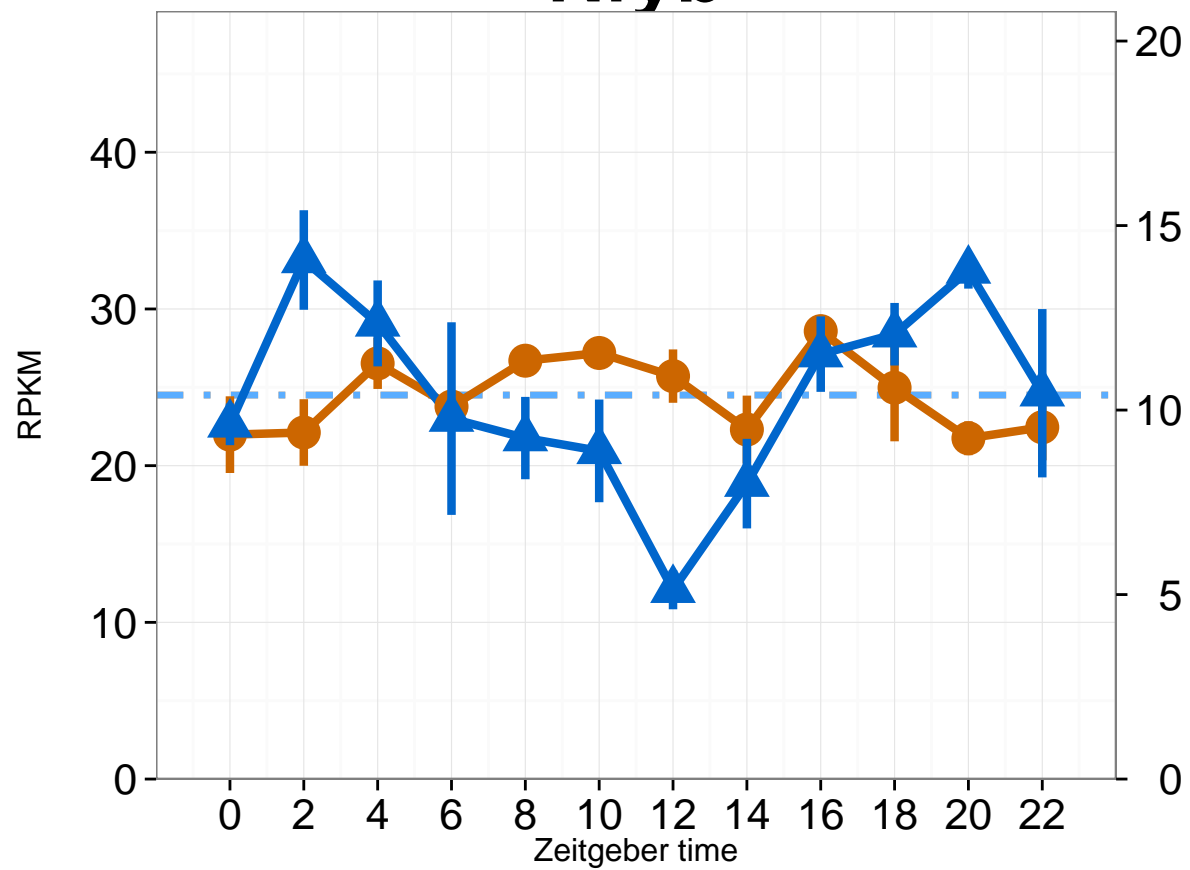

## Nfyb

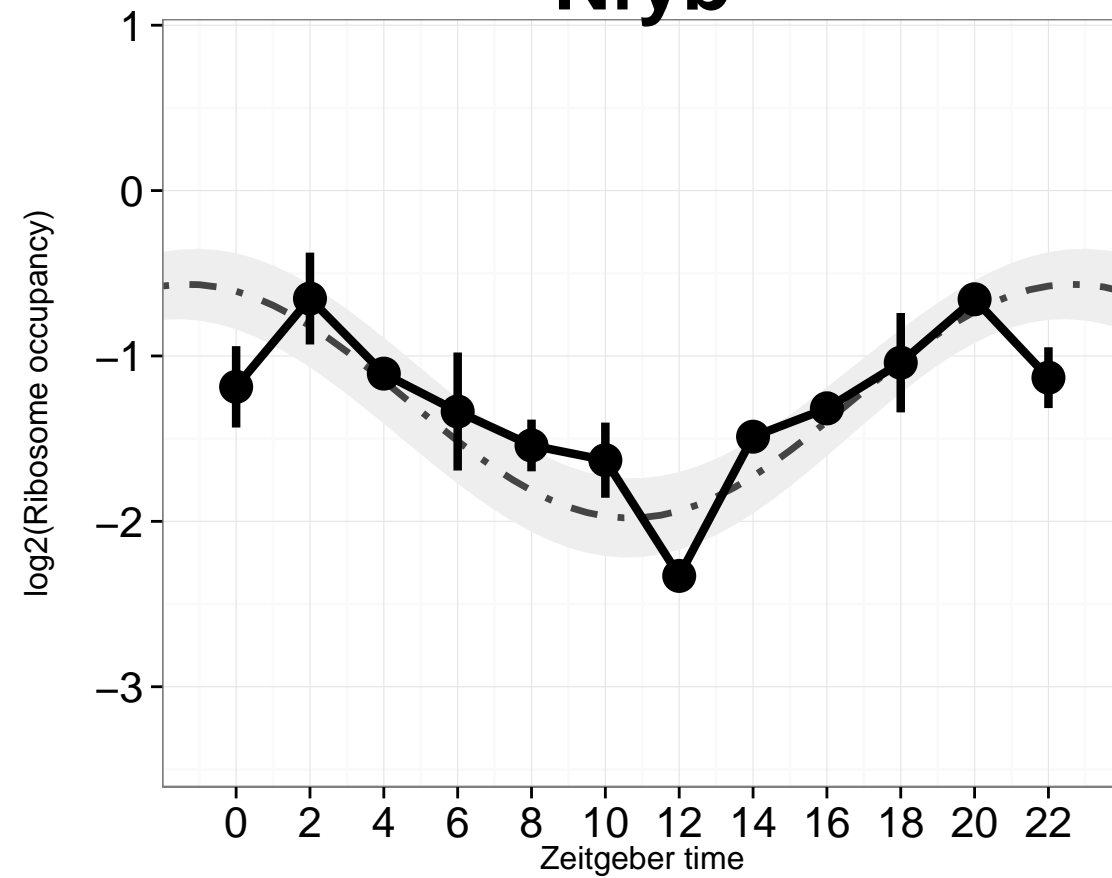

Supplement: SuppDataset_1.zip [file Nfyb_set_A.pdf › Supplemental Dataset 1/A-mRNA_nonrhyth_translation_nonrhyth/Nfyb_set_A.pdf]

## Nfyc

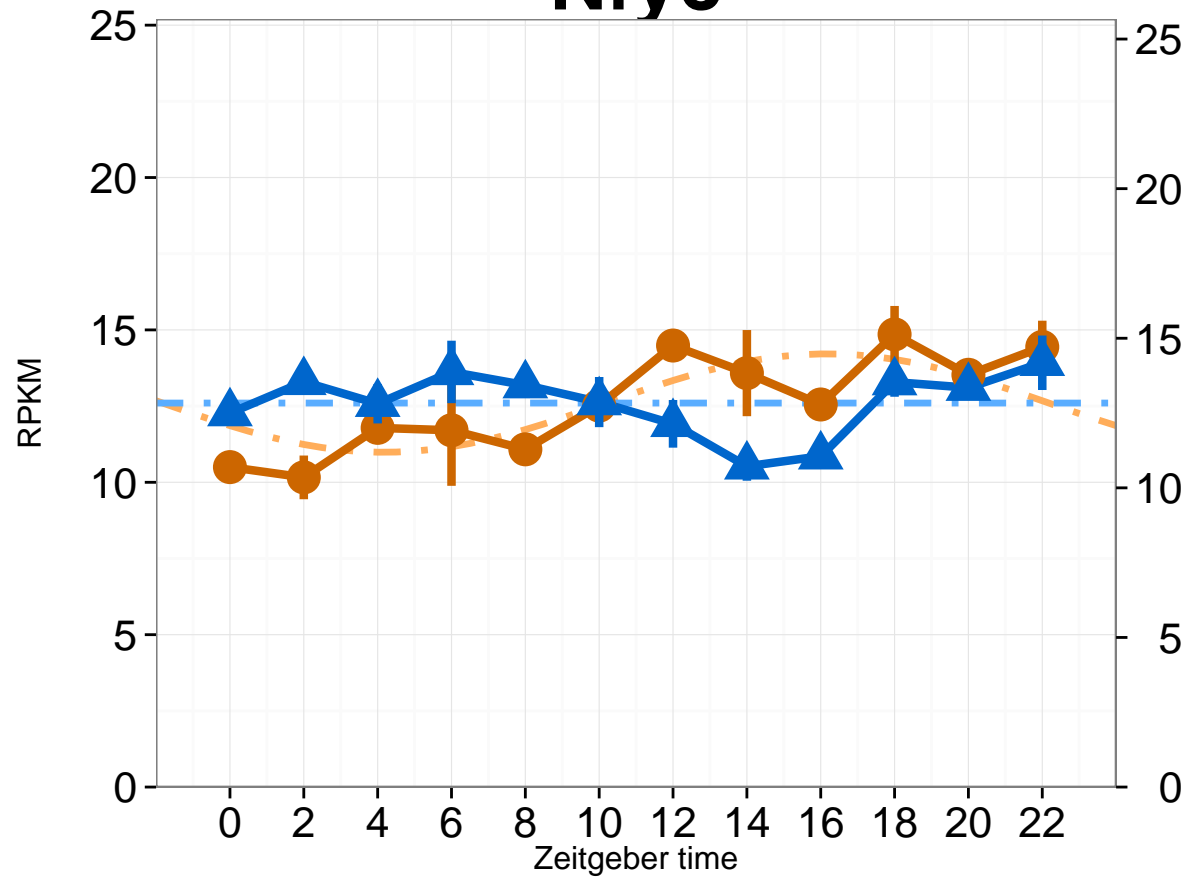

## Nfyc

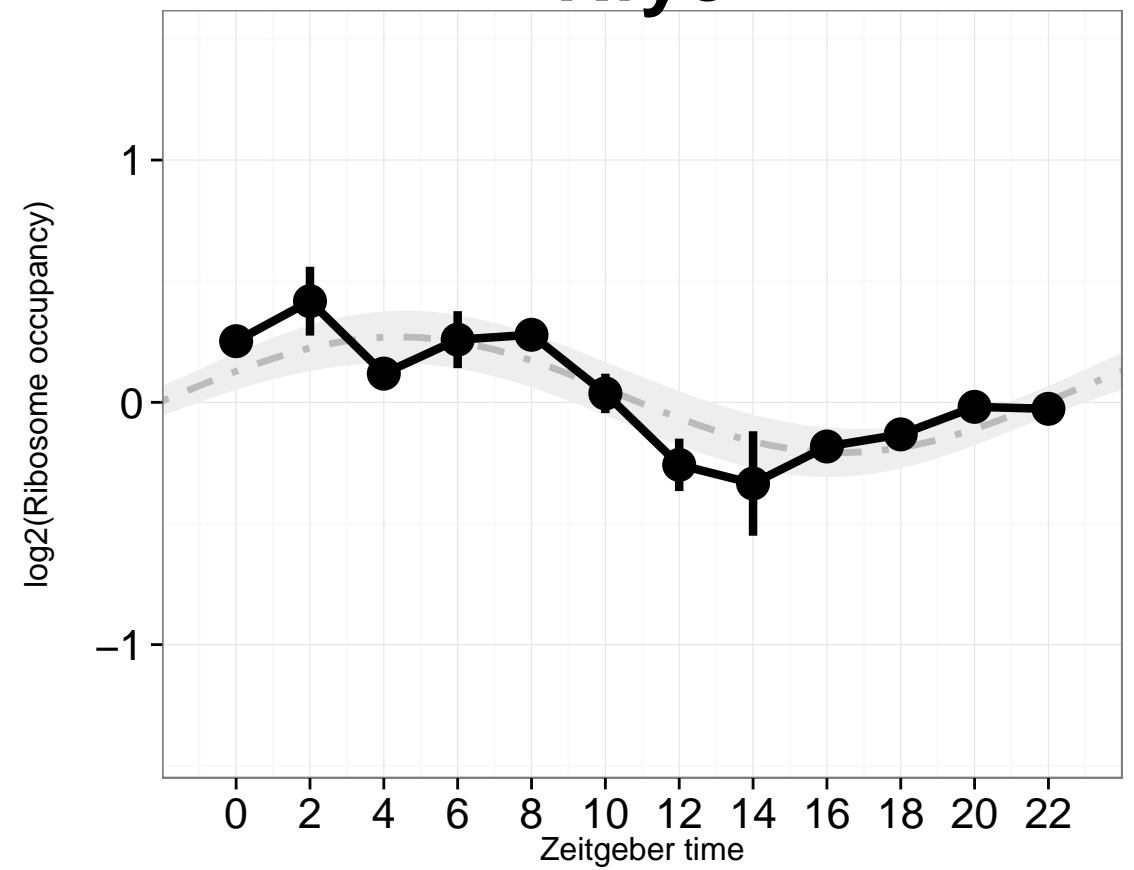

Supplement: SuppDataset_1.zip [file Nfyc_set_A.pdf › Supplemental Dataset 1/A-mRNA_nonrhyth_translation_nonrhyth/Nfyc_set_A.pdf]

## Ngdn

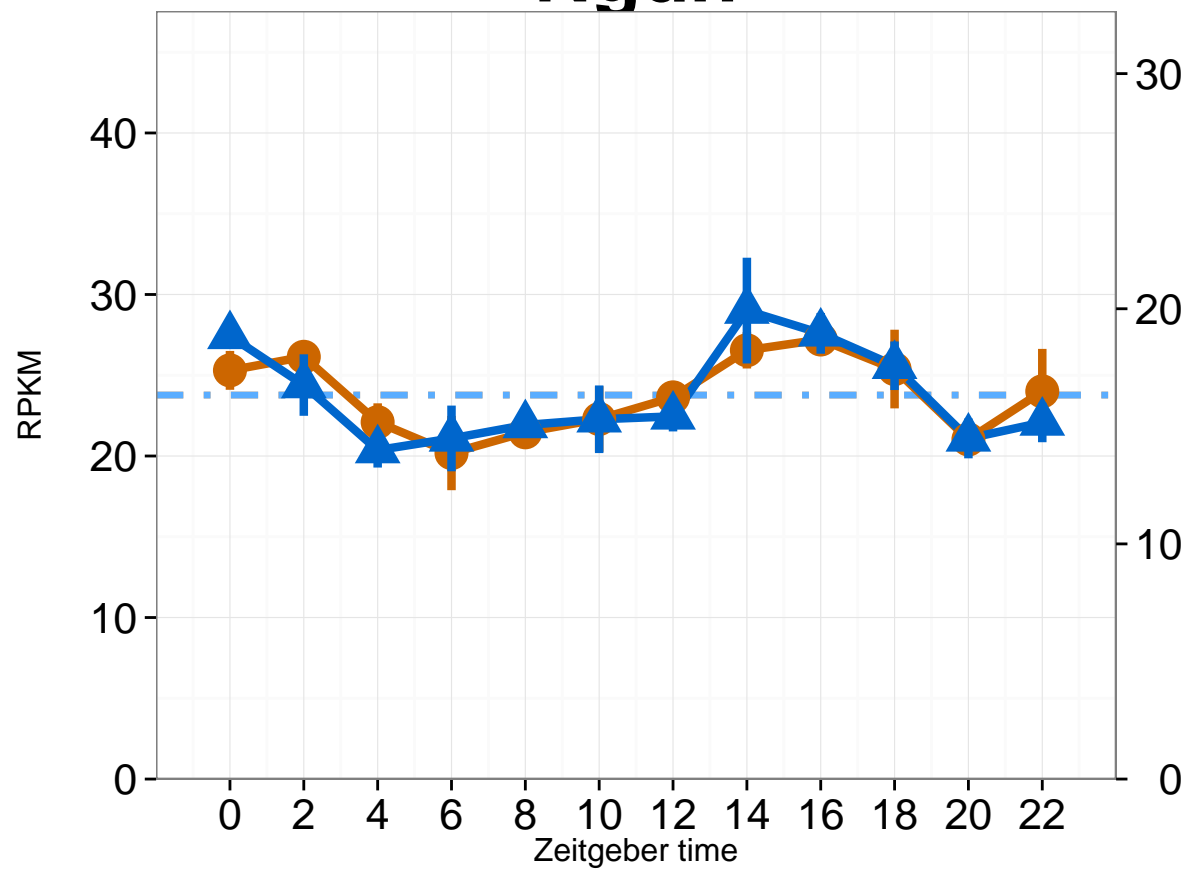

## Ngdn

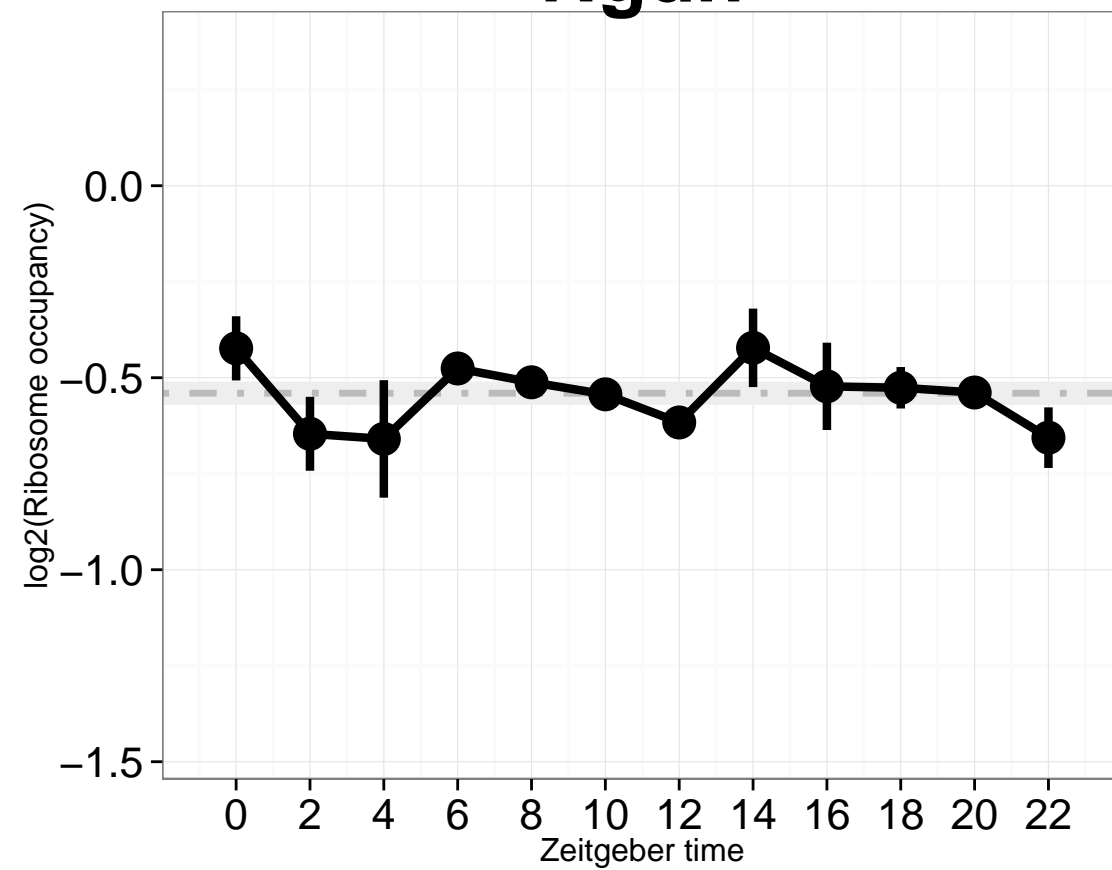

Supplement: SuppDataset_1.zip [file Ngdn_set_A.pdf › Supplemental Dataset 1/A-mRNA_nonrhyth_translation_nonrhyth/Ngdn_set_A.pdf]

## Ngf

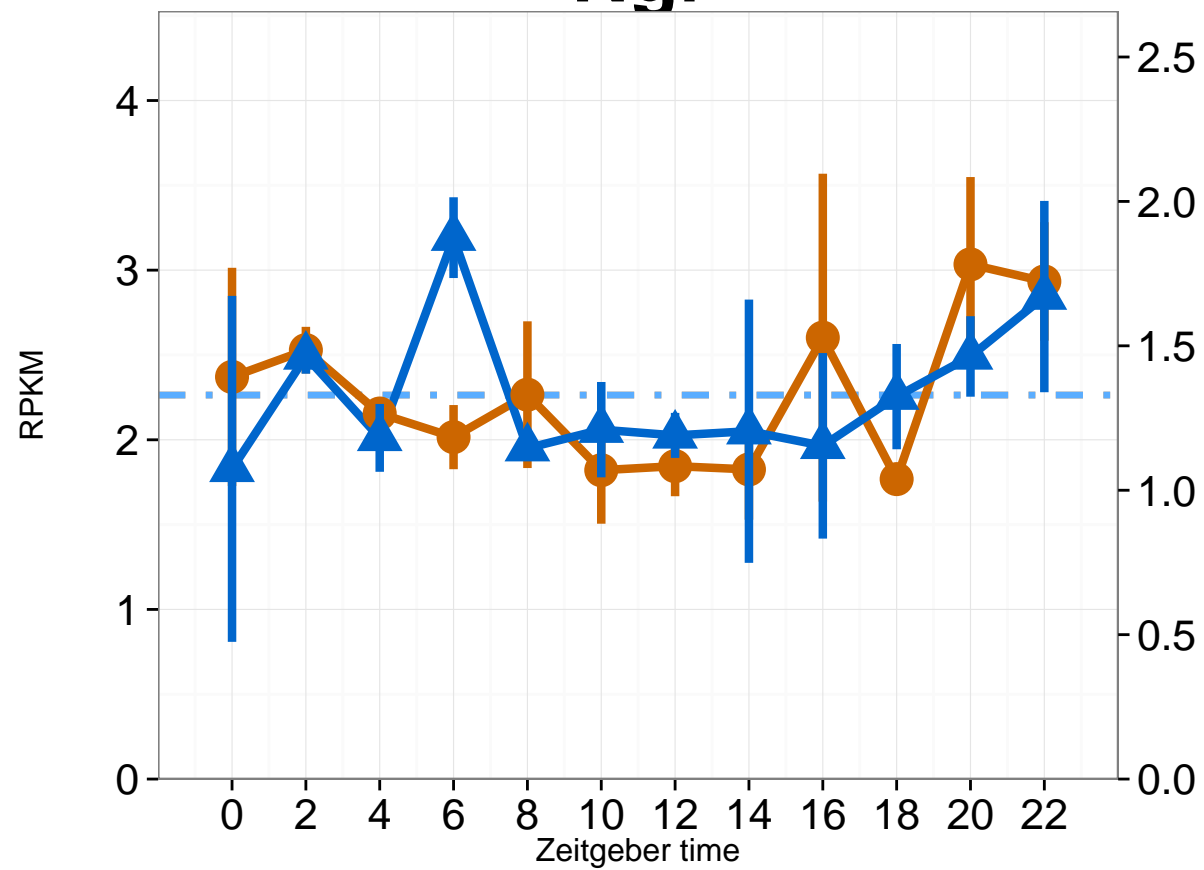

## Ngf

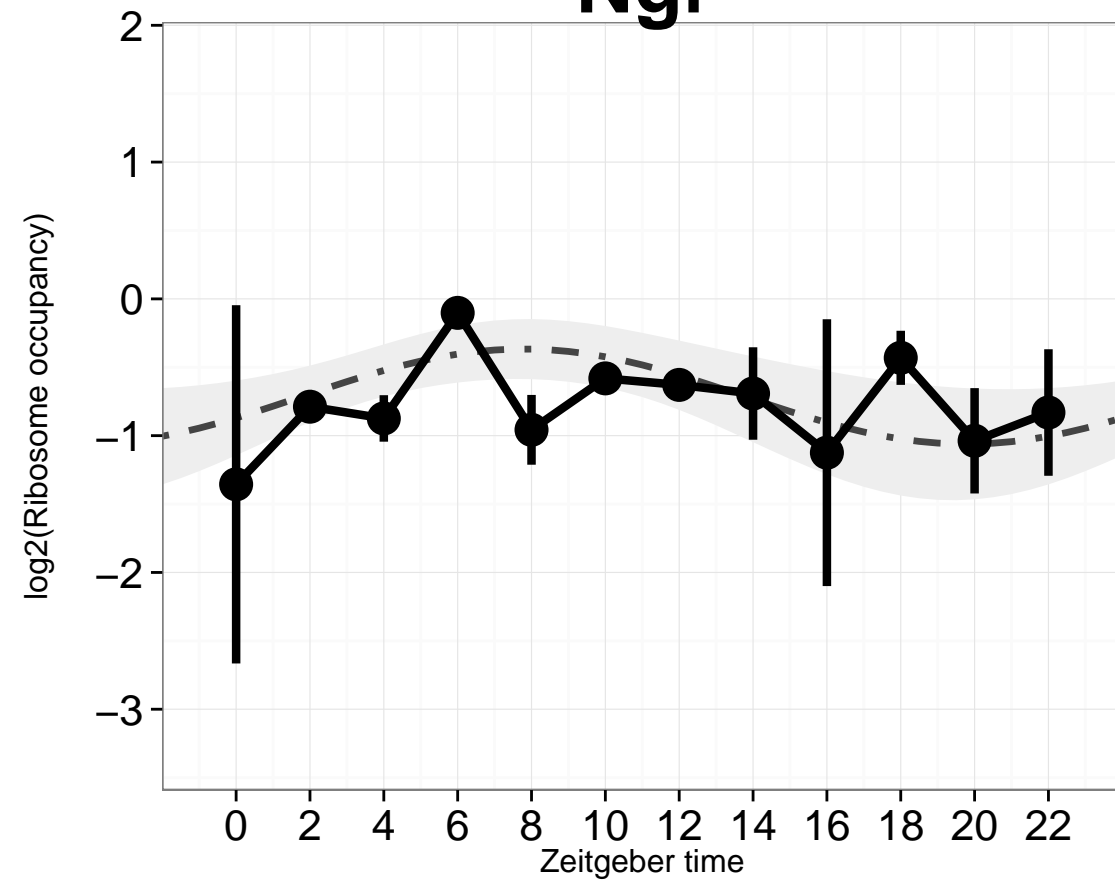

Supplement: SuppDataset_1.zip [file Ngf_set_A.pdf › Supplemental Dataset 1/A-mRNA_nonrhyth_translation_nonrhyth/Ngf_set_A.pdf]

**Ngfrap1 TR**

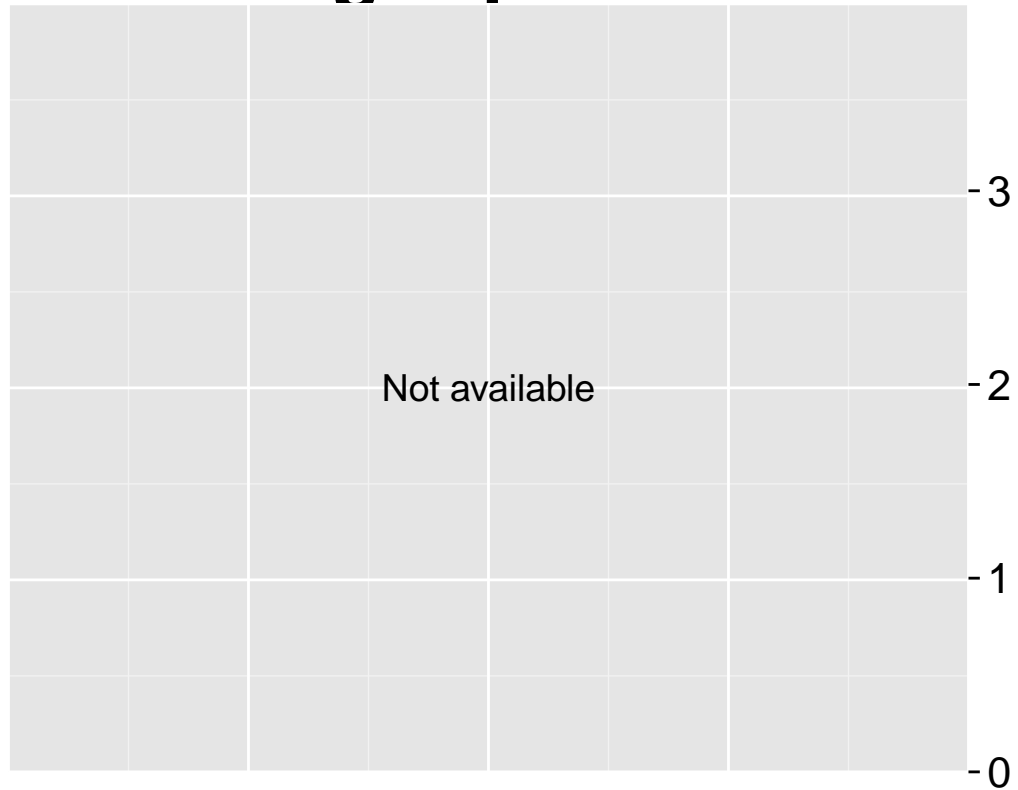

**Ngfrap1 log2(Ribosome occupancy**

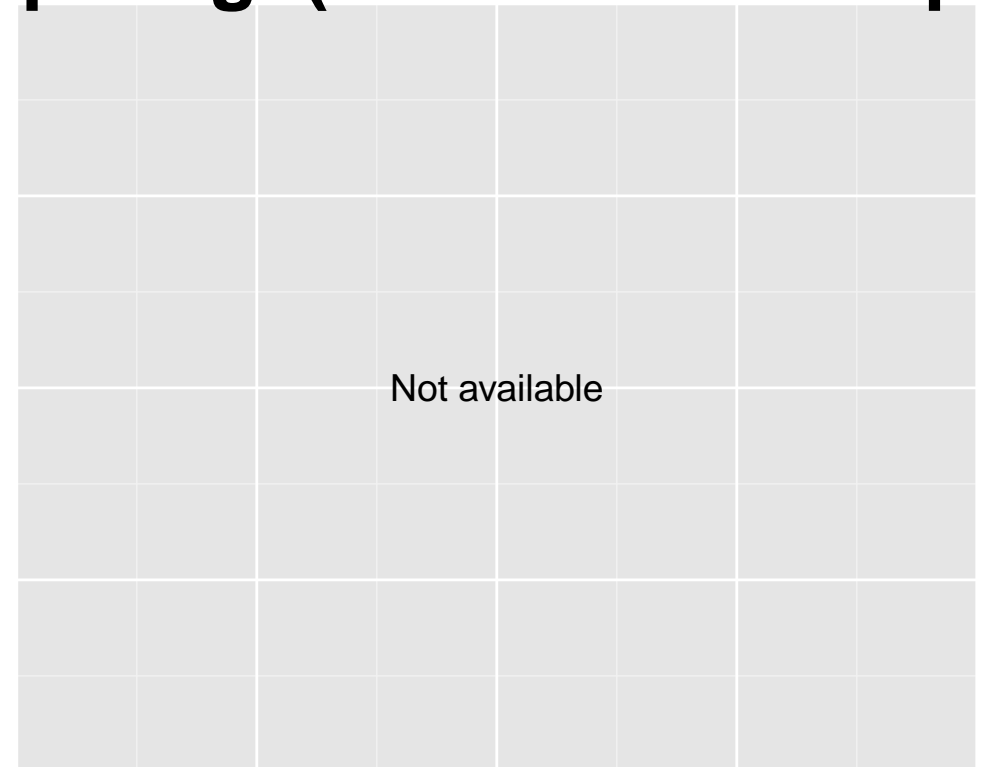

Supplement: SuppDataset_1.zip [file Ngfrap1_set_A.pdf › Supplemental Dataset 1/A-mRNA_nonrhyth_translation_nonrhyth/Ngfrap1_set_A.pdf]

# Ngly1

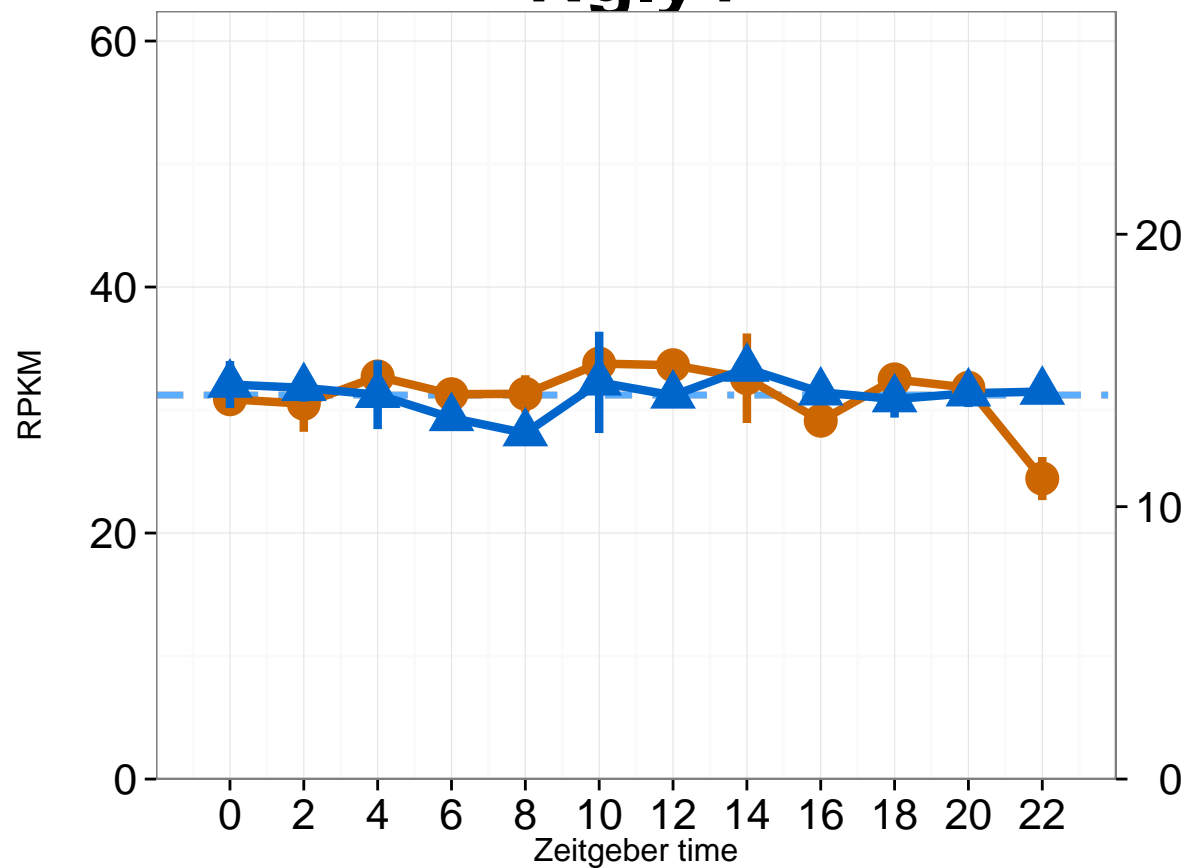

# Ngly1

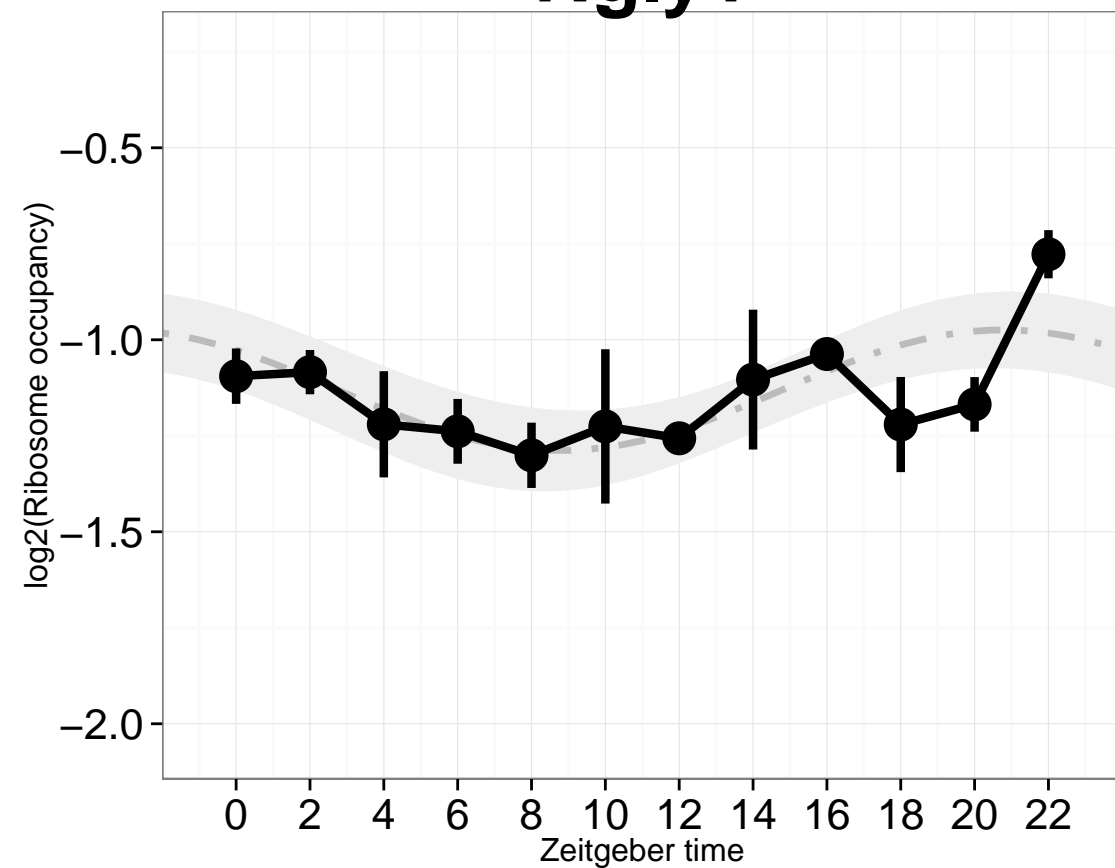

Supplement: SuppDataset_1.zip [file Ngly1_set_A.pdf › Supplemental Dataset 1/A-mRNA_nonrhyth_translation_nonrhyth/Ngly1_set_A.pdf]

## Ngrn

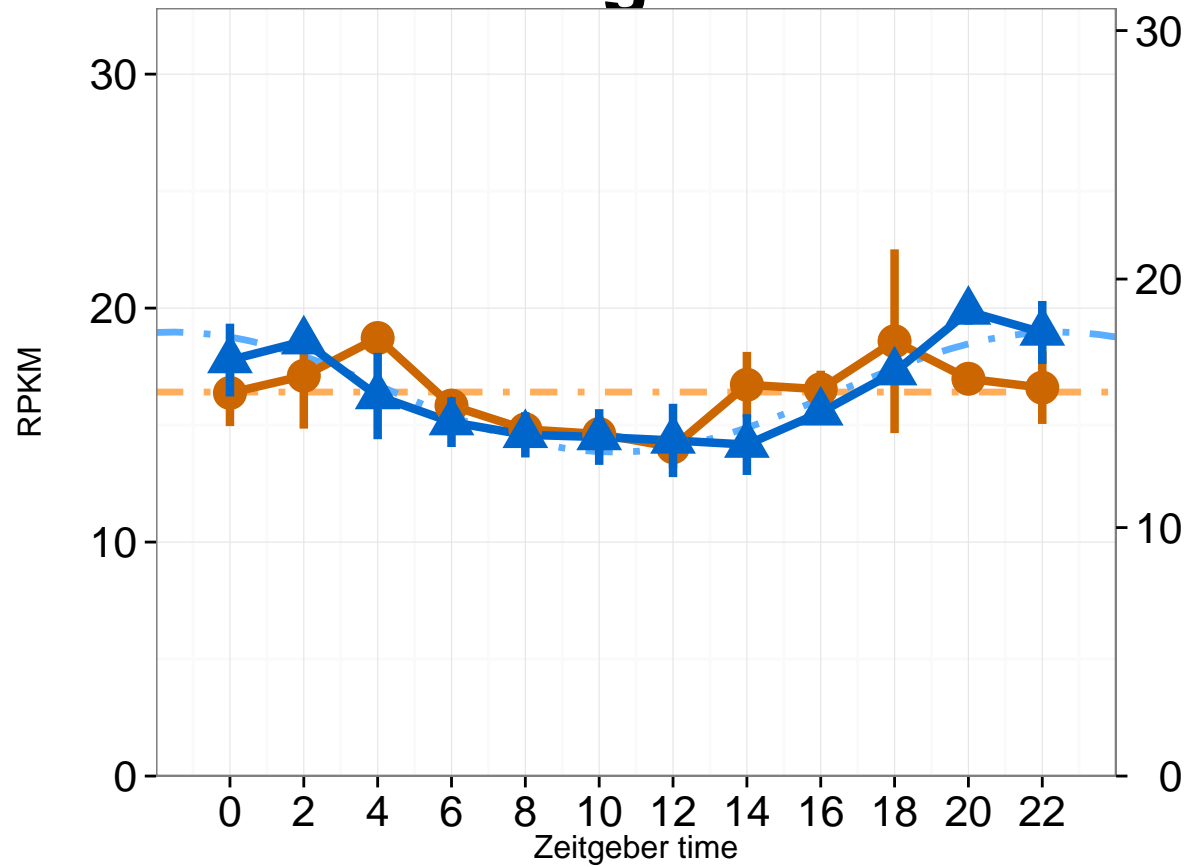

## Ngrn

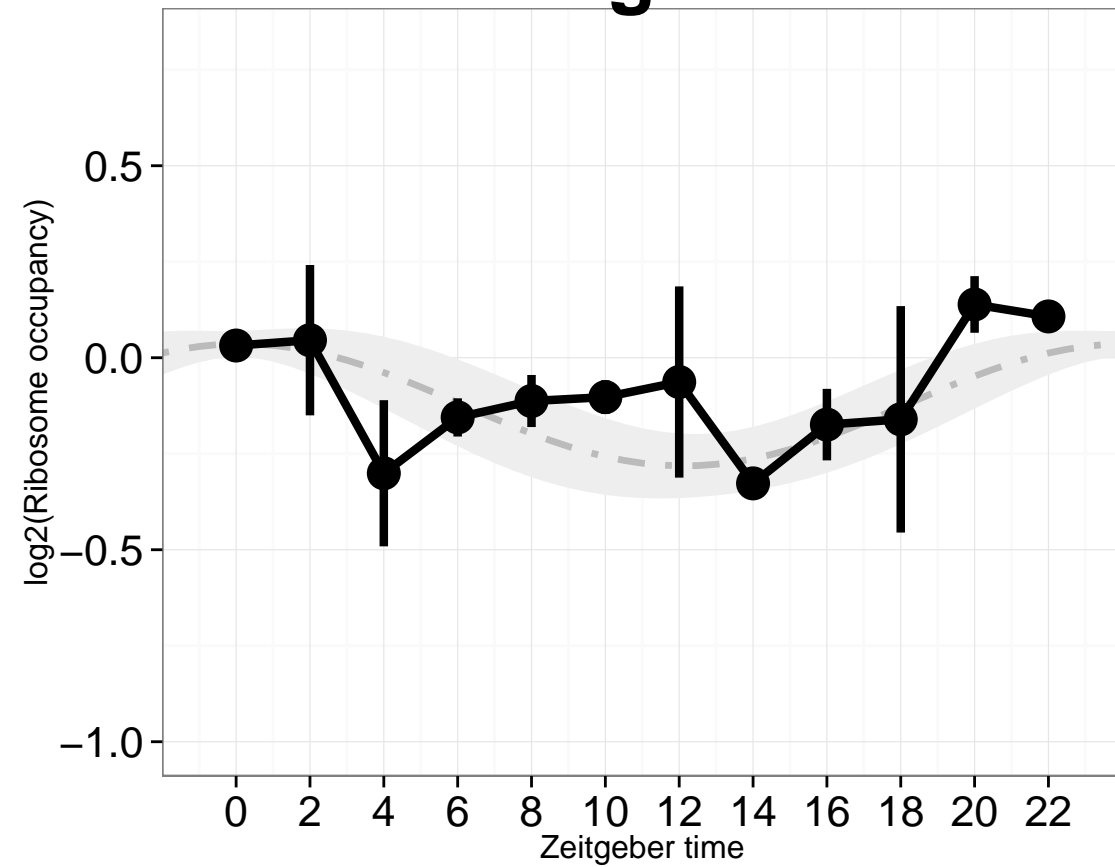

Supplement: SuppDataset_1.zip [file Ngrn_set_A.pdf › Supplemental Dataset 1/A-mRNA_nonrhyth_translation_nonrhyth/Ngrn_set_A.pdf]

## Nhlrc3

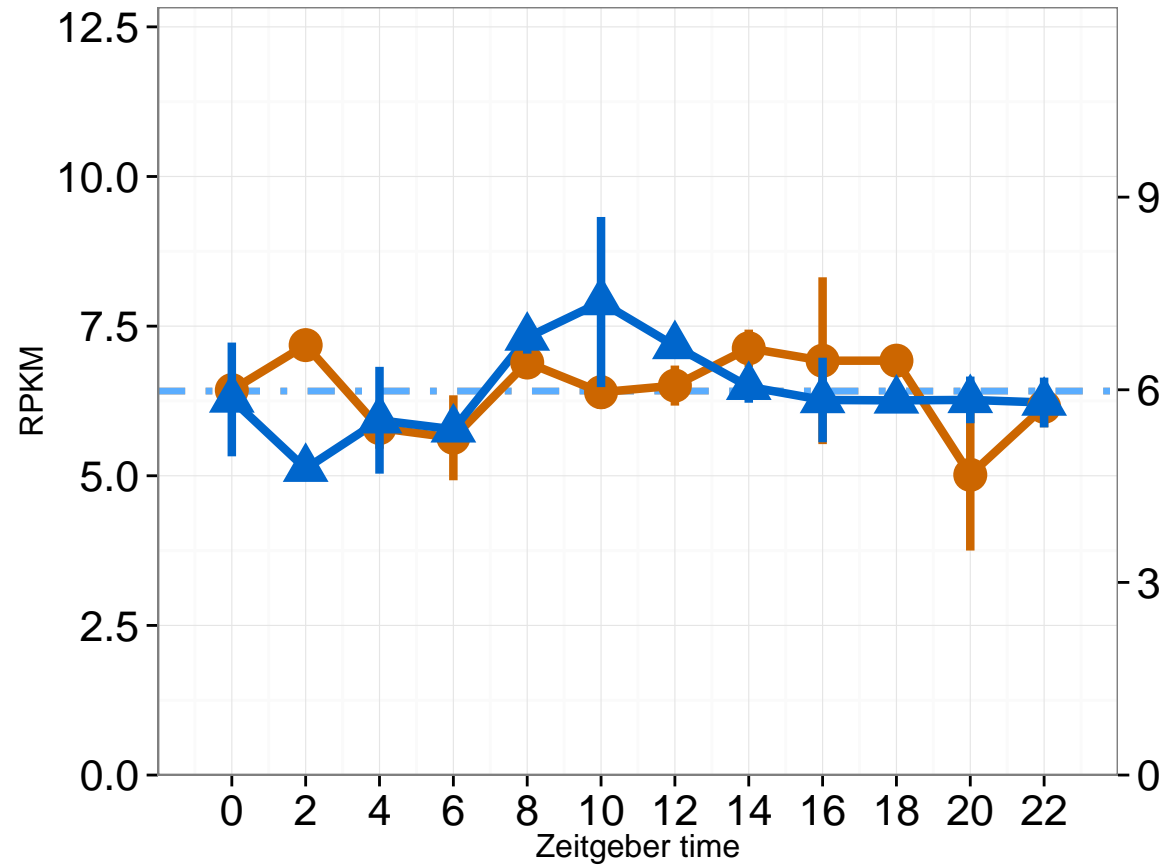

## Nhlrc3

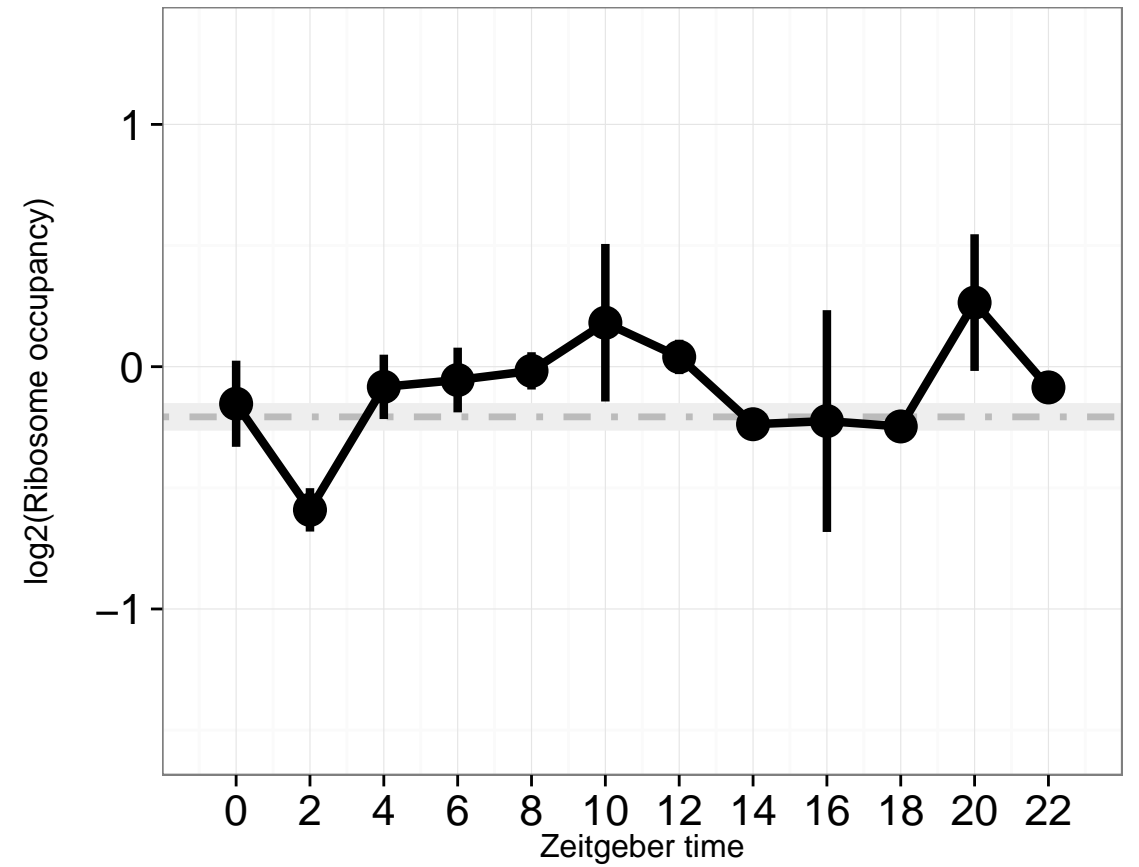

Supplement: SuppDataset_1.zip [file Nhlrc3_set_A.pdf › Supplemental Dataset 1/A-mRNA_nonrhyth_translation_nonrhyth/Nhlrc3_set_A.pdf]

## Nhp2

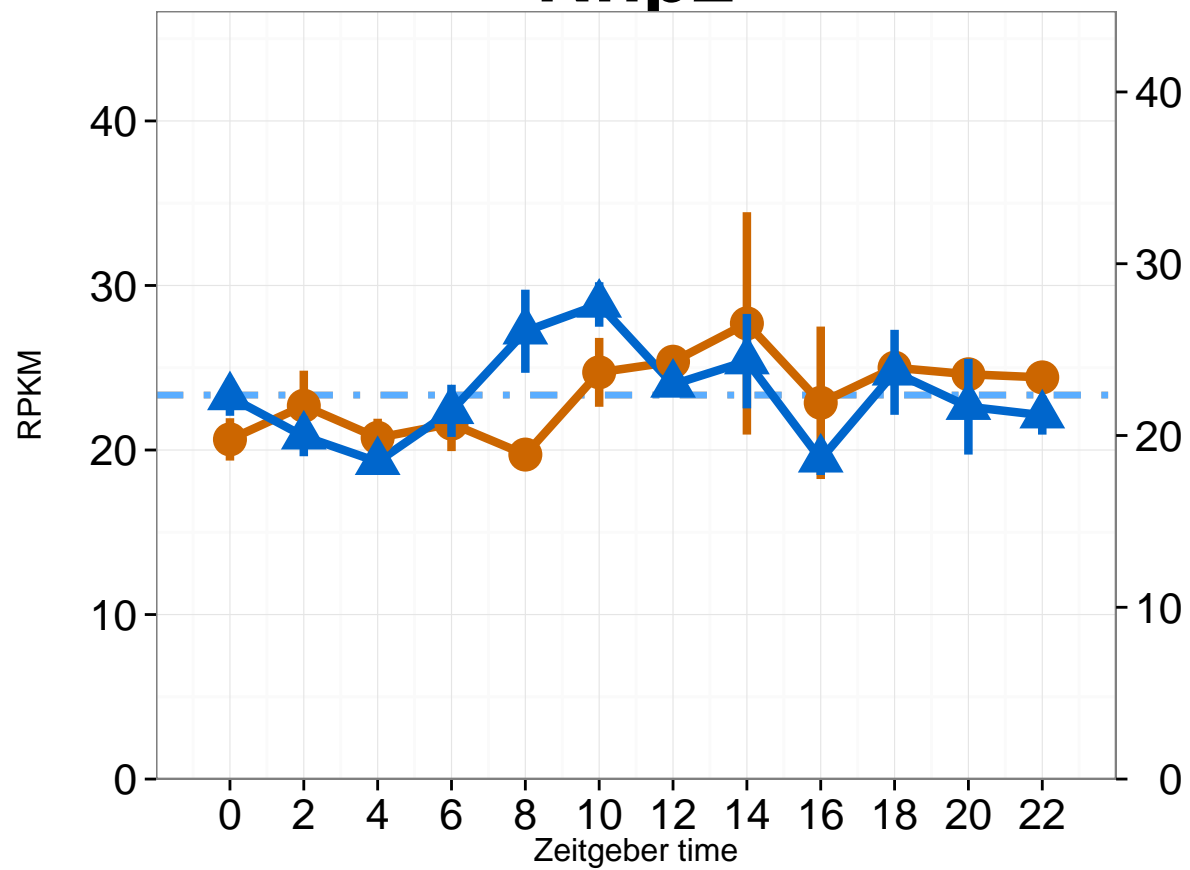

## Nhp2

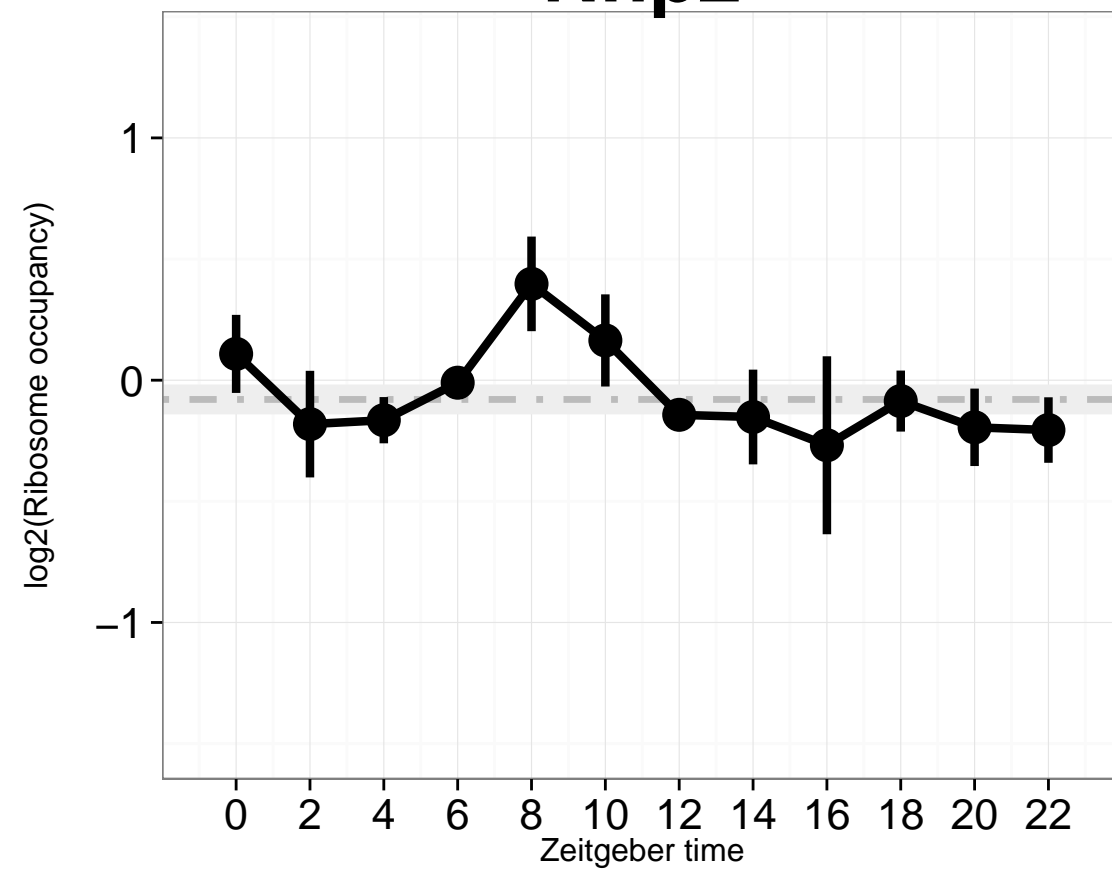

Supplement: SuppDataset_1.zip [file Nhp2_set_A.pdf › Supplemental Dataset 1/A-mRNA_nonrhyth_translation_nonrhyth/Nhp2_set_A.pdf]

## Nhp2l1

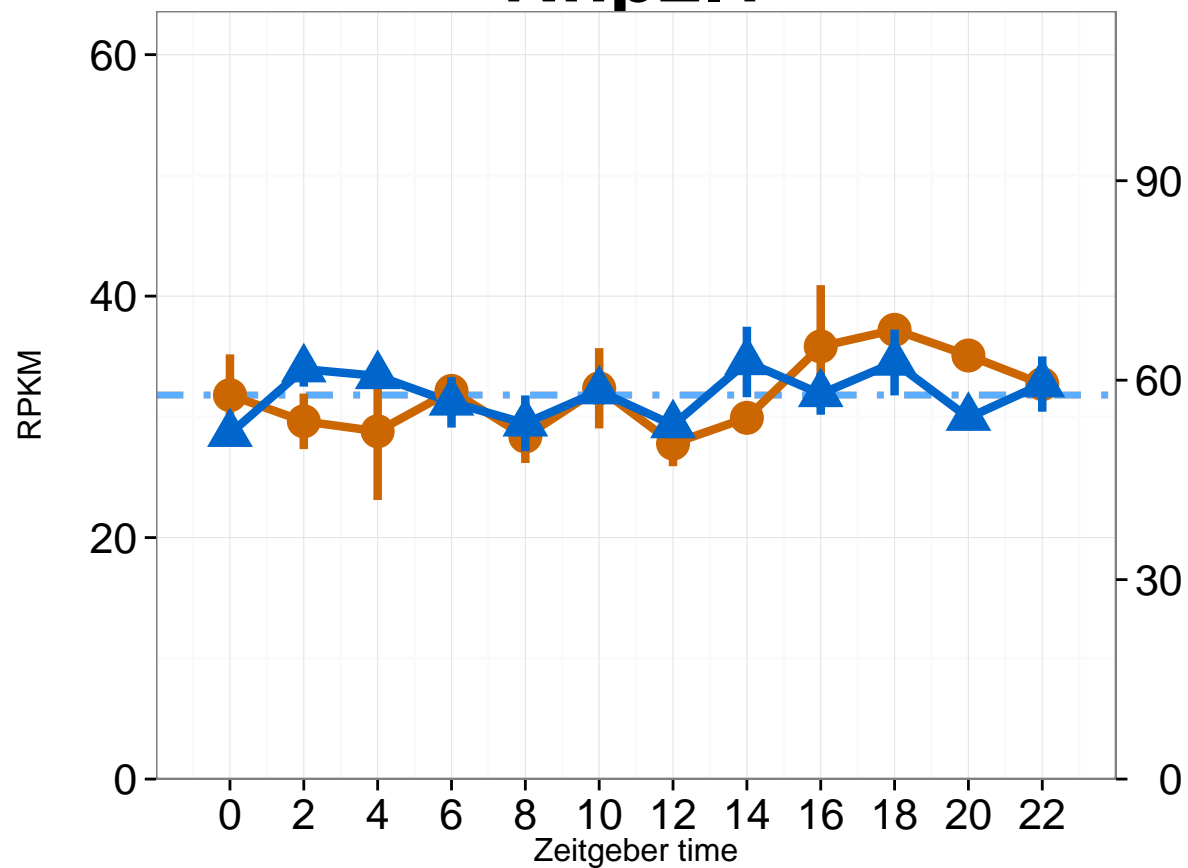

## Nhp2l1

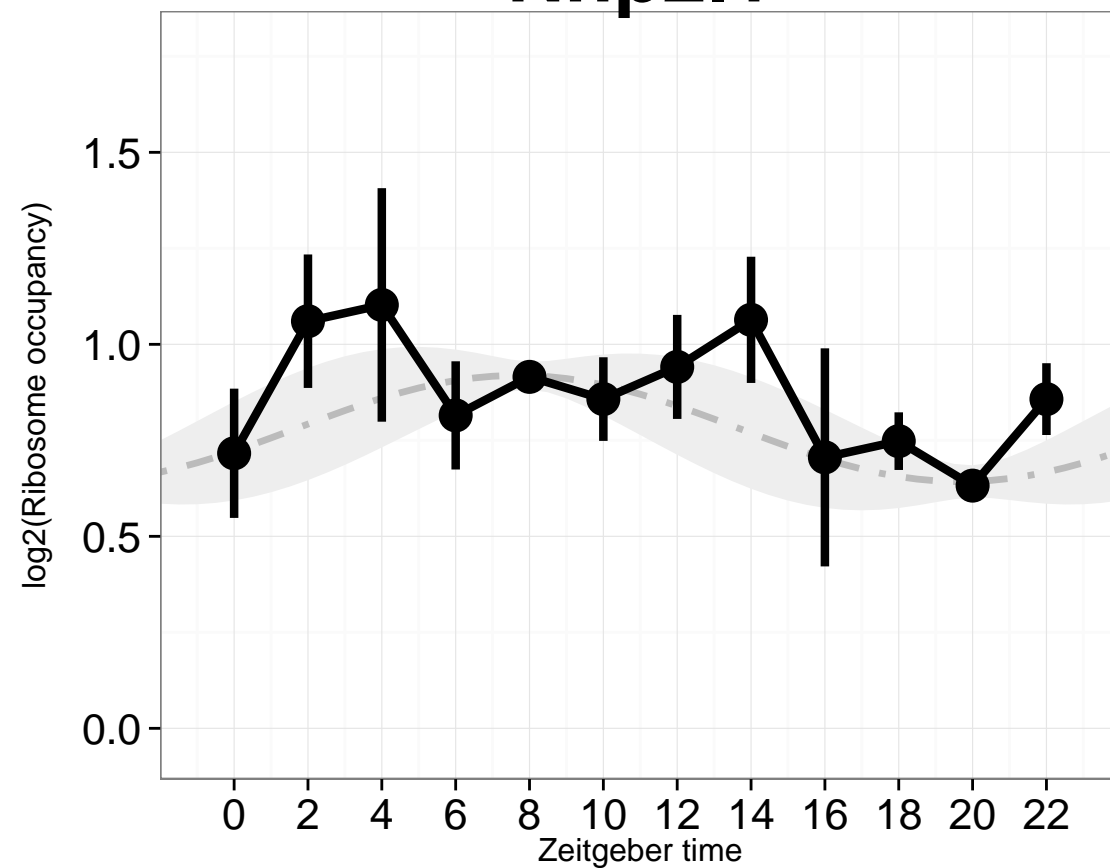

Supplement: SuppDataset_1.zip [file Nhp2l1_set_A.pdf › Supplemental Dataset 1/A-mRNA_nonrhyth_translation_nonrhyth/Nhp2l1_set_A.pdf]

## Nid1

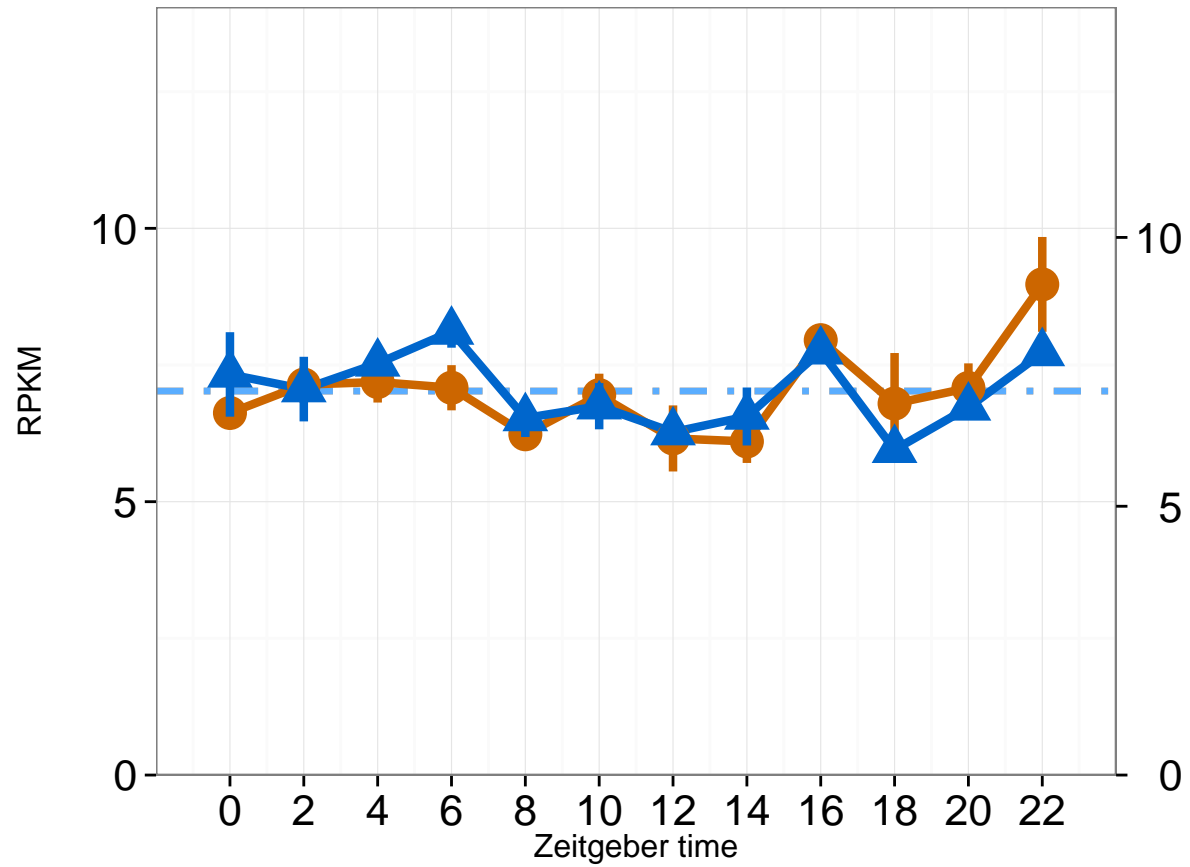

## Nid1

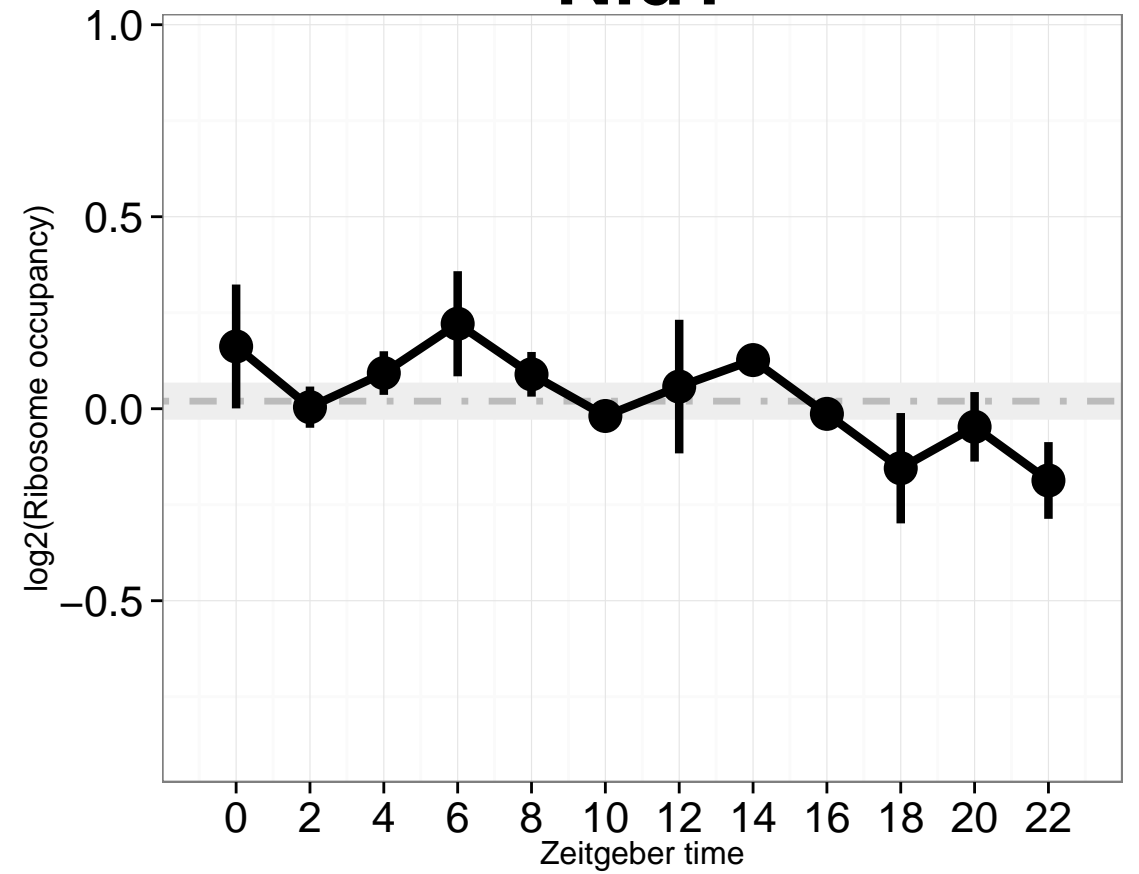

Supplement: SuppDataset_1.zip [file Nid1_set_A.pdf › Supplemental Dataset 1/A-mRNA_nonrhyth_translation_nonrhyth/Nid1_set_A.pdf]

## Nif3I1

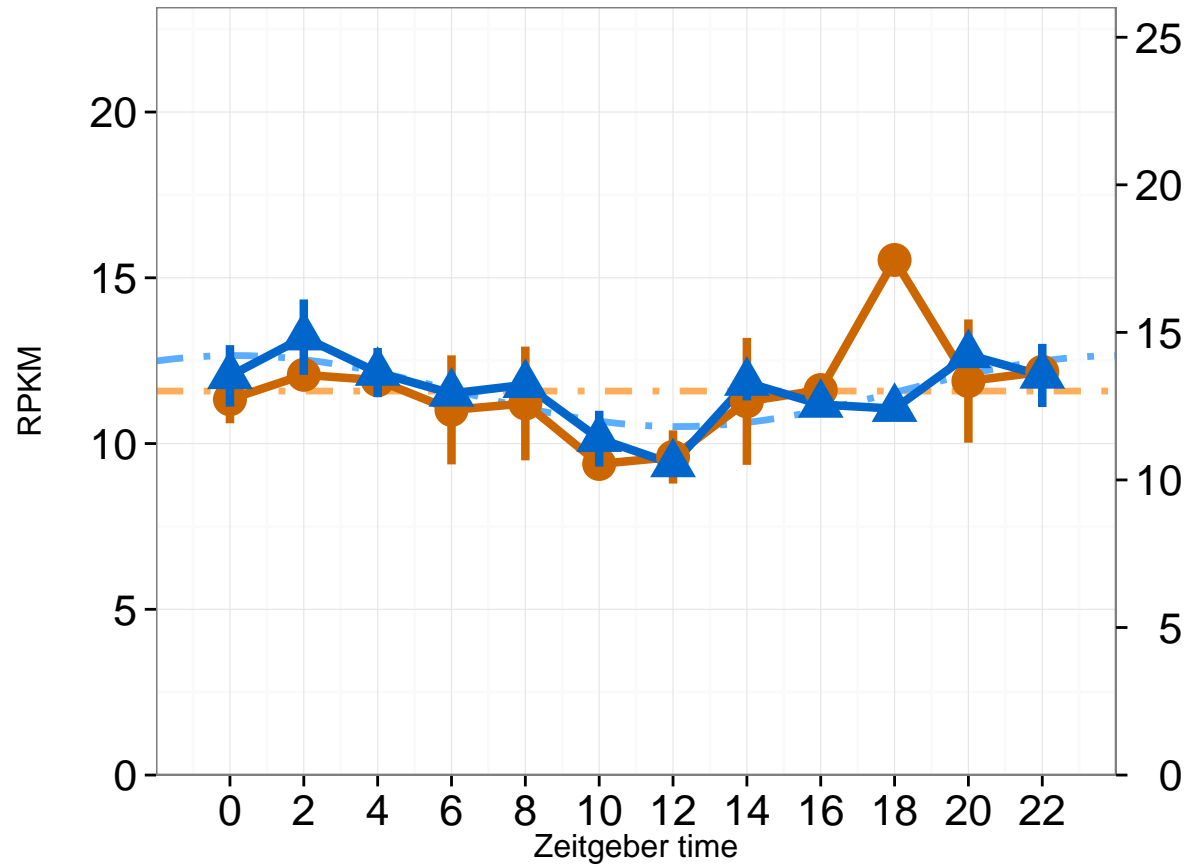

## Nif3I1

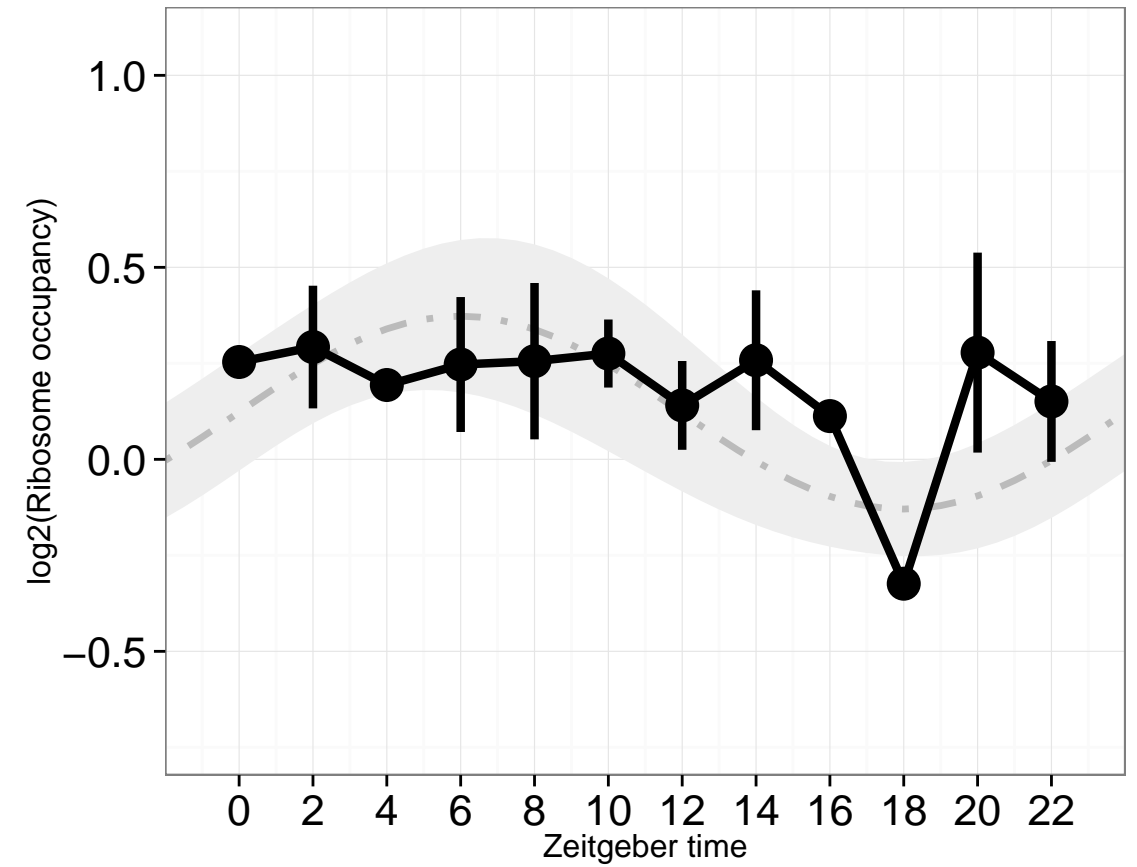

Supplement: SuppDataset_1.zip [file Nif3l1_set_A.pdf › Supplemental Dataset 1/A-mRNA_nonrhyth_translation_nonrhyth/Nif3l1_set_A.pdf]

## Nim1

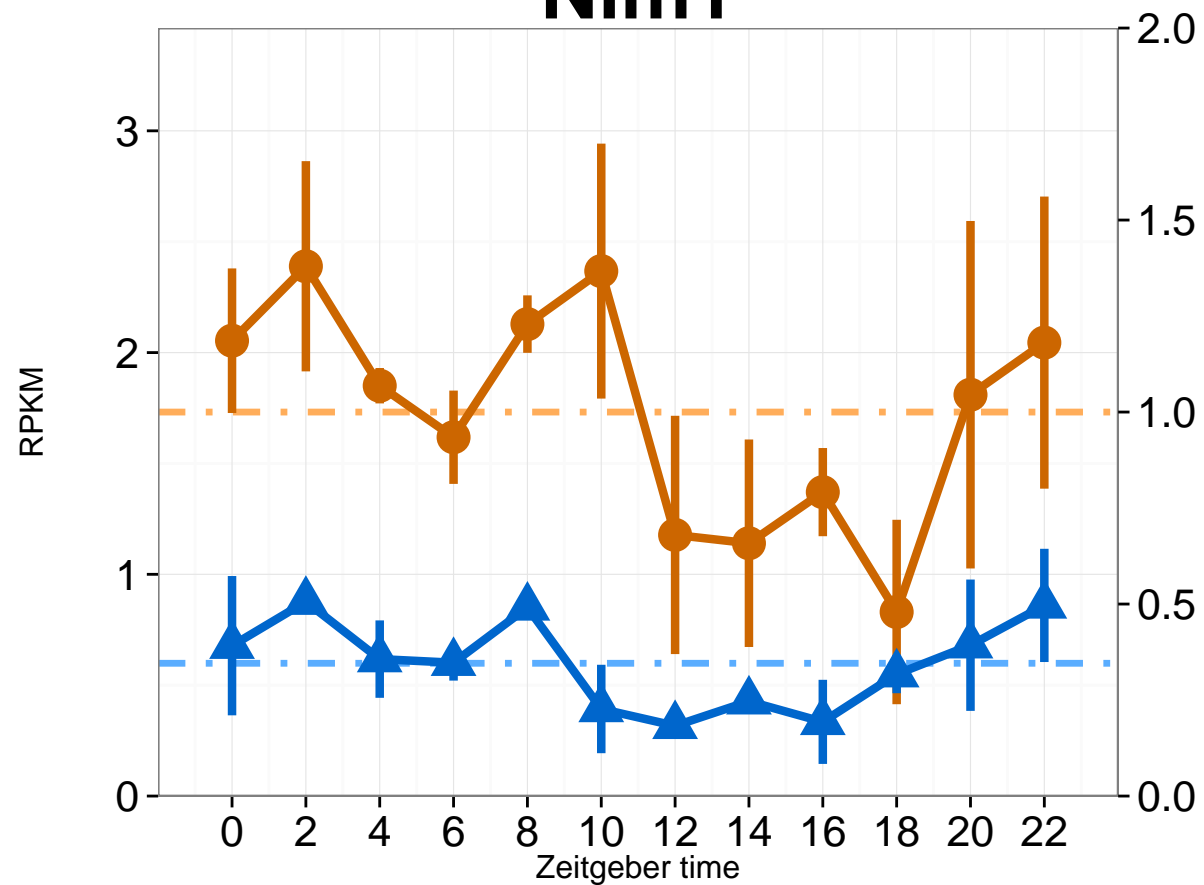

## Nim1

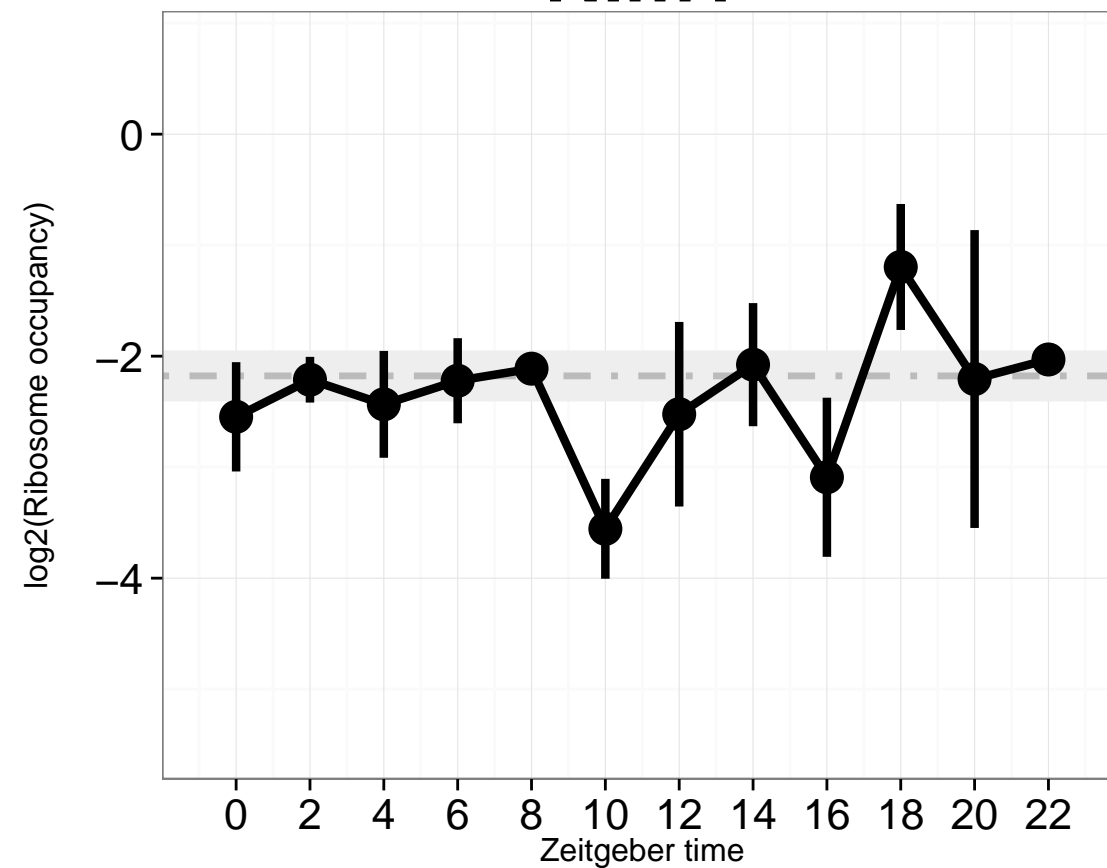

Supplement: SuppDataset_1.zip [file Nim1_set_A.pdf › Supplemental Dataset 1/A-mRNA_nonrhyth_translation_nonrhyth/Nim1_set_A.pdf]
