# Supplementary figures and images for: Ribosome profiling reveals the rhythmic liver translatome and circadian clock regulation by upstream open reading frames (part 49 of 113)
Source: HighWire-hosted journal article supplement (doi:10.1101/gr.195404.115), 2015-10-20

## Nin

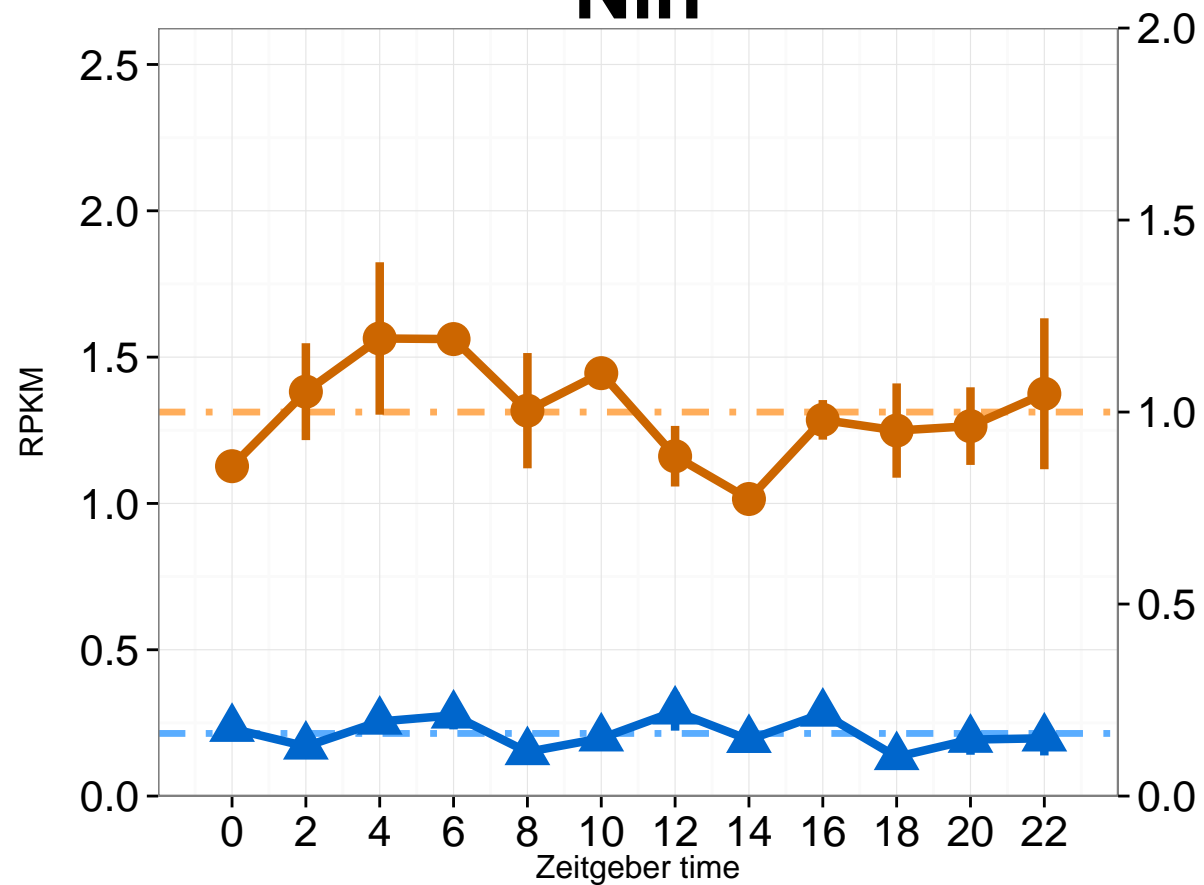

## Nin

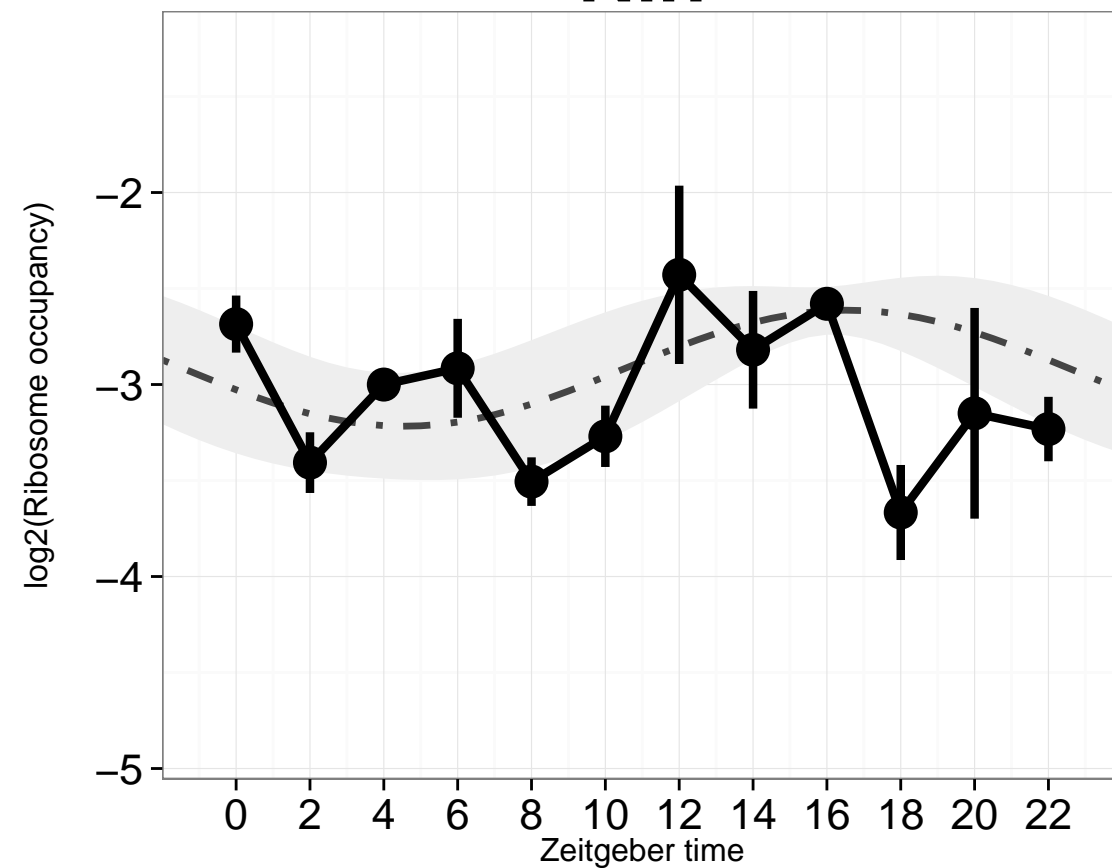

Supplement: SuppDataset_1.zip [file Nin_set_A.pdf › Supplemental Dataset 1/A-mRNA_nonrhyth_translation_nonrhyth/Nin_set_A.pdf]

## Nip7

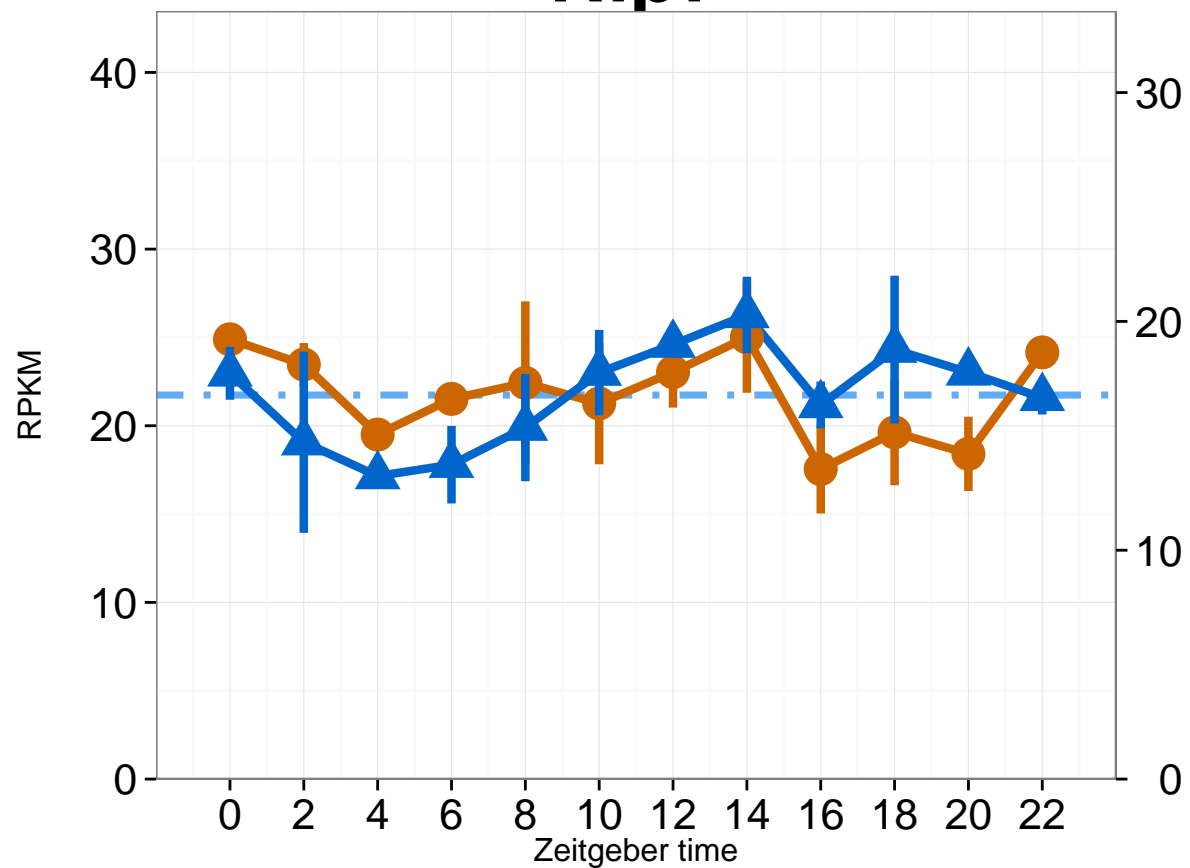

## Nip7

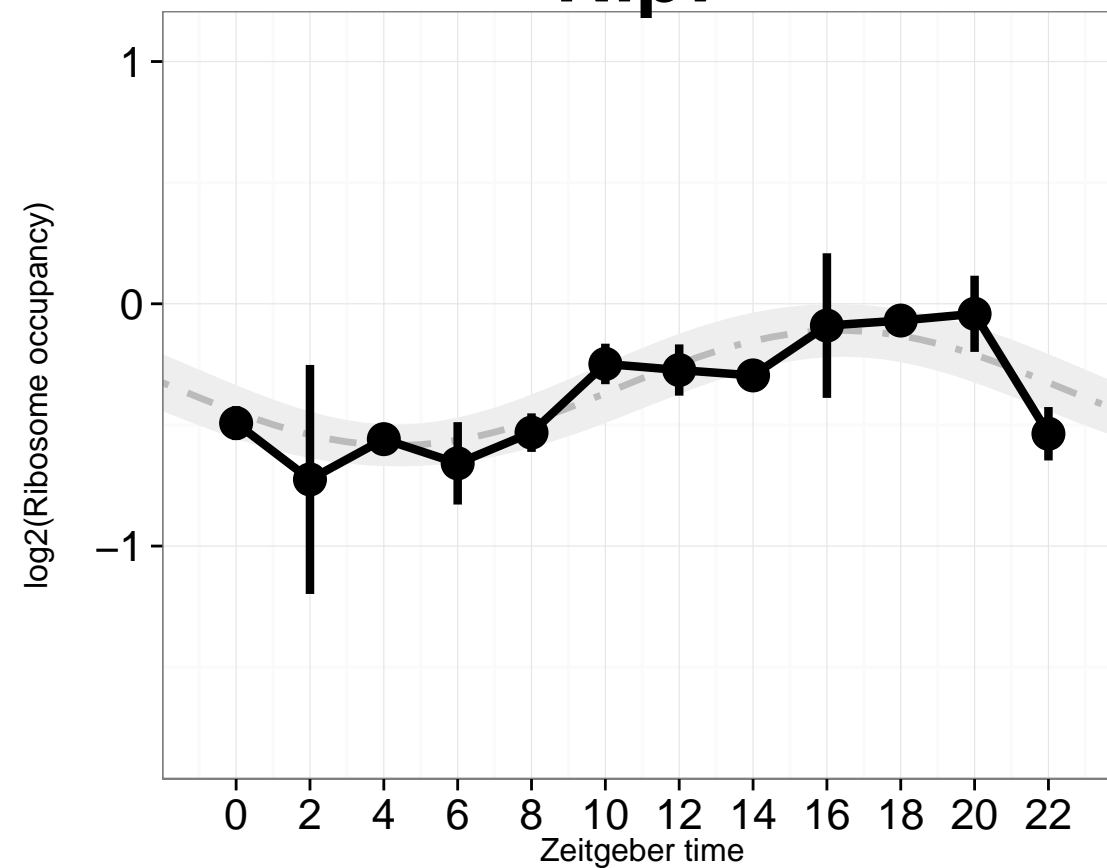

Supplement: SuppDataset_1.zip [file Nip7_set_A.pdf › Supplemental Dataset 1/A-mRNA_nonrhyth_translation_nonrhyth/Nip7_set_A.pdf]

## Nipa2

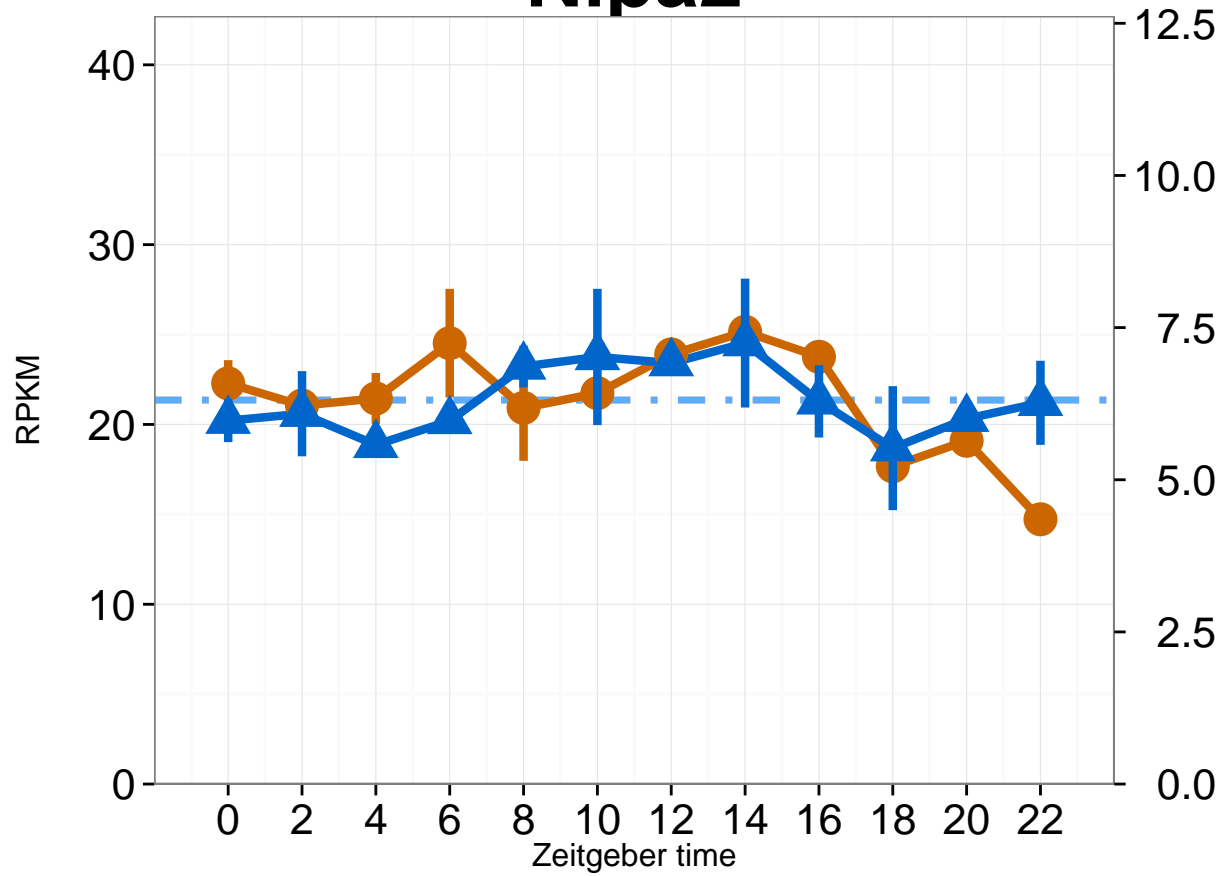

## Nipa2

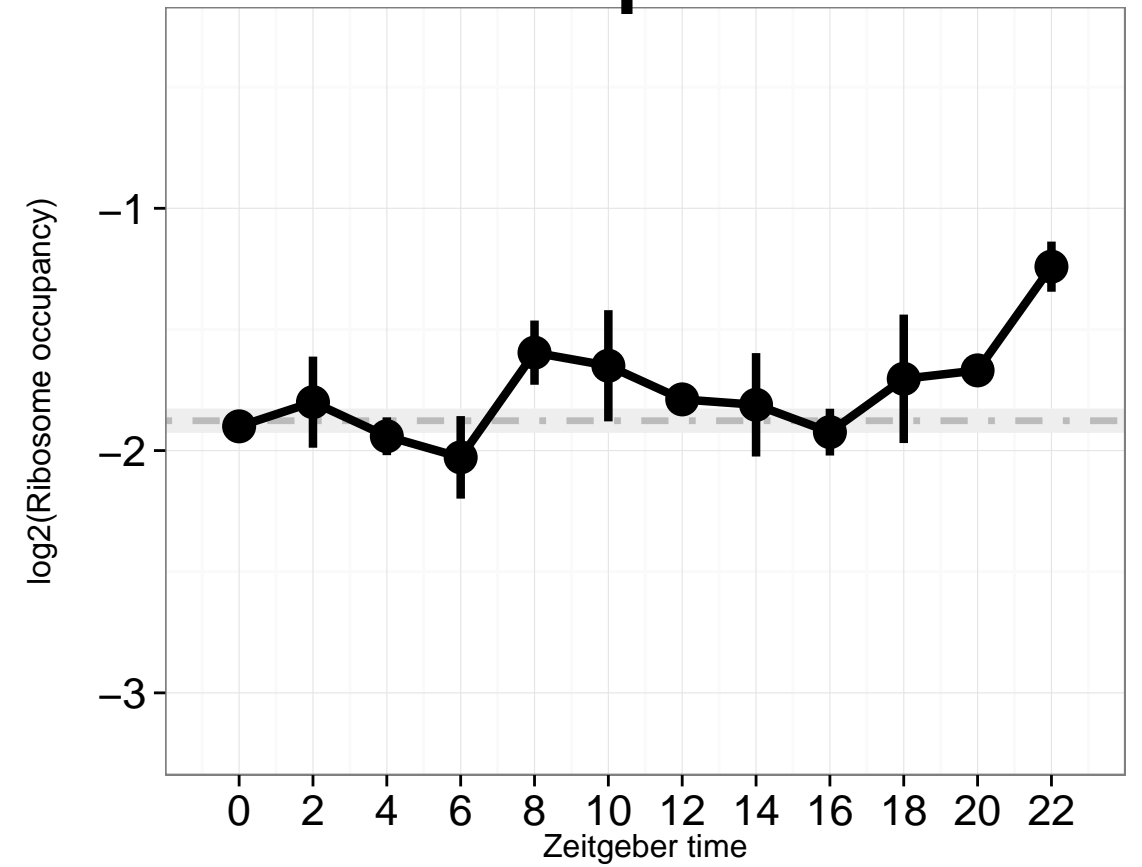

Supplement: SuppDataset_1.zip [file Nipa2_set_A.pdf › Supplemental Dataset 1/A-mRNA_nonrhyth_translation_nonrhyth/Nipa2_set_A.pdf]

# Nipal1

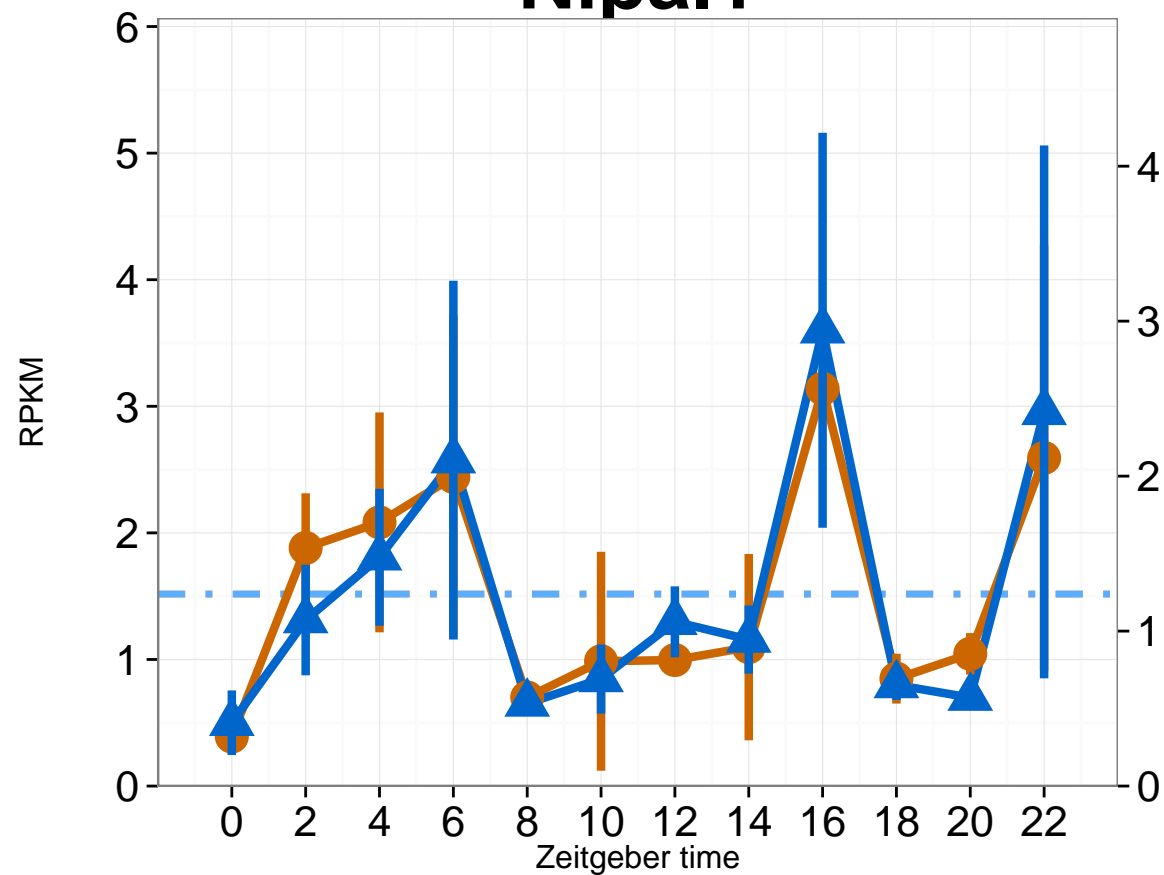

# Nipal1

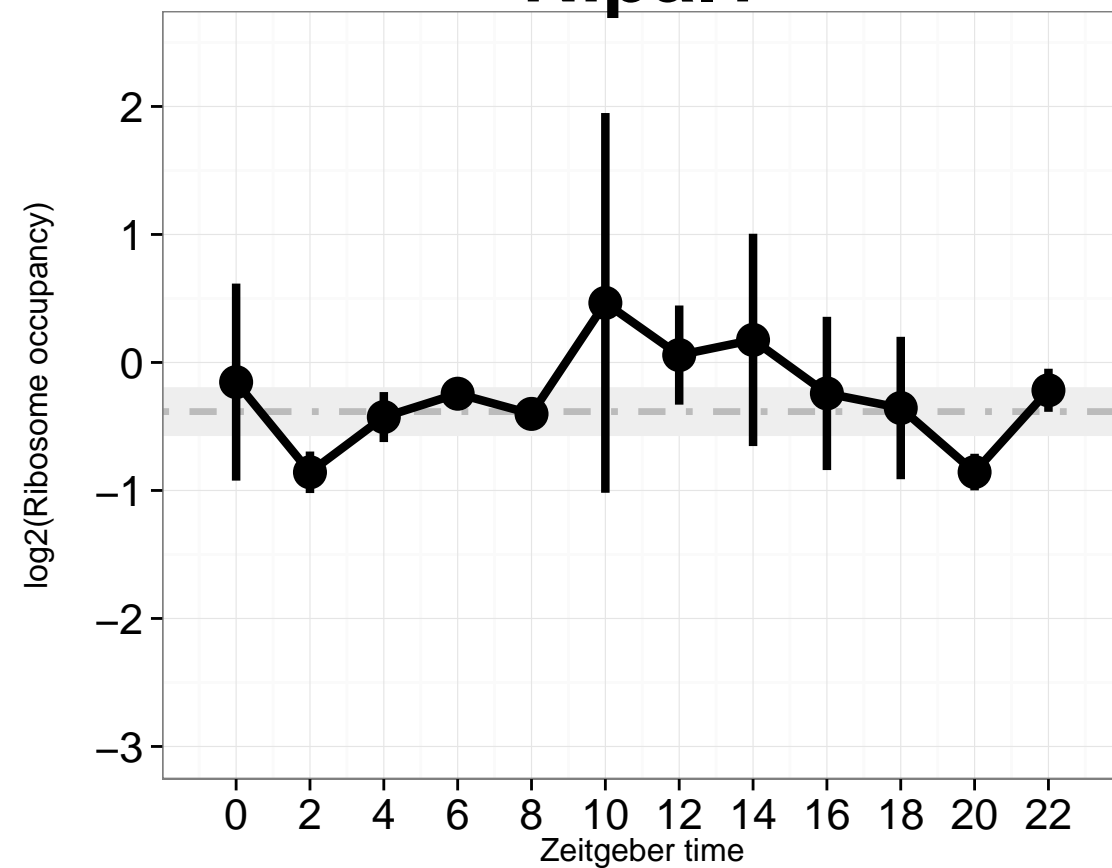

Supplement: SuppDataset_1.zip [file Nipal1_set_A.pdf › Supplemental Dataset 1/A-mRNA_nonrhyth_translation_nonrhyth/Nipal1_set_A.pdf]

## Nipbl

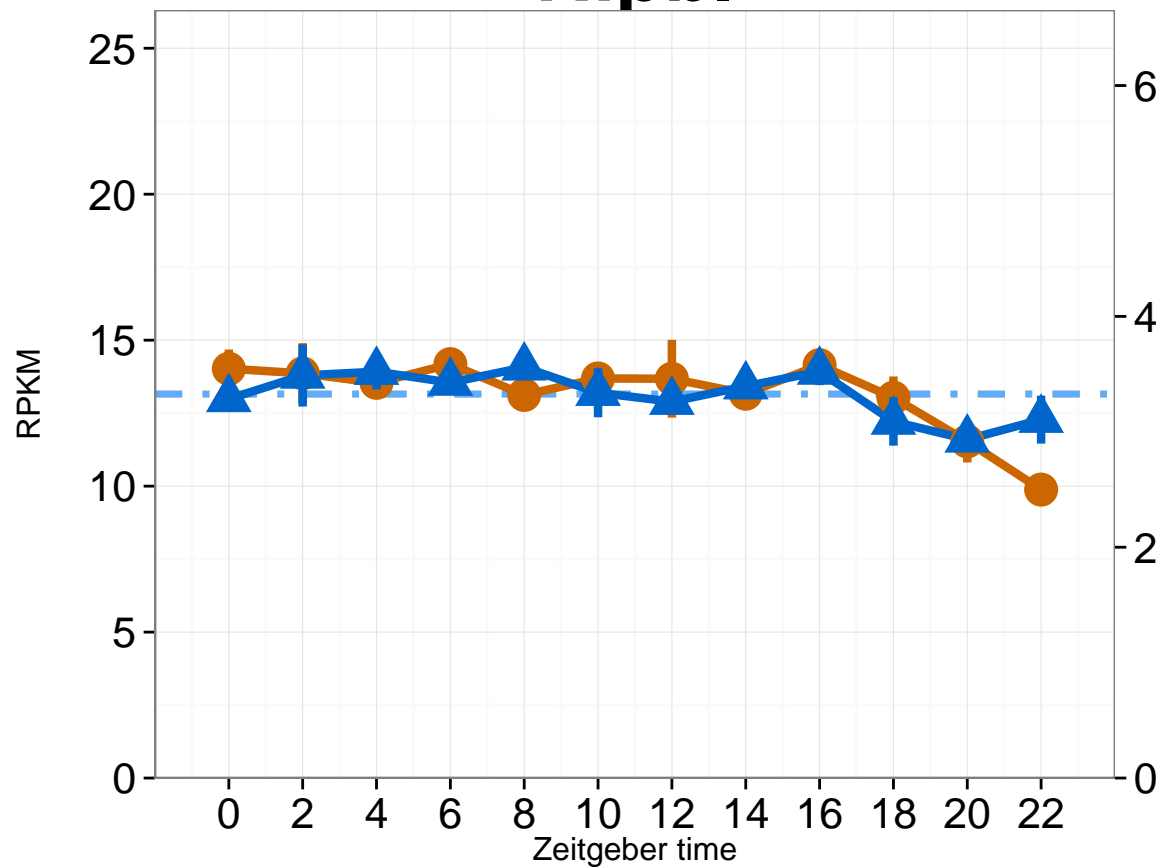

## Nipbl

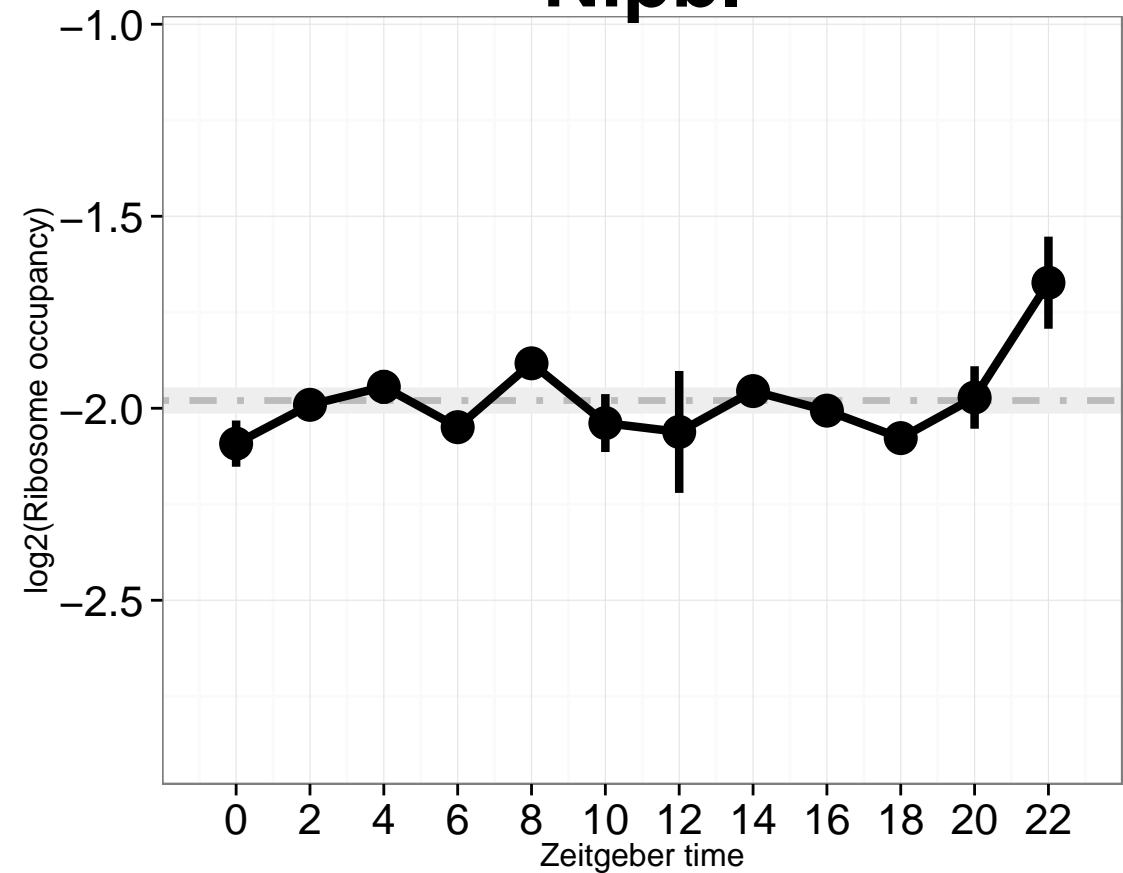

Supplement: SuppDataset_1.zip [file Nipbl_set_A.pdf › Supplemental Dataset 1/A-mRNA_nonrhyth_translation_nonrhyth/Nipbl_set_A.pdf]

# Nipsnap1

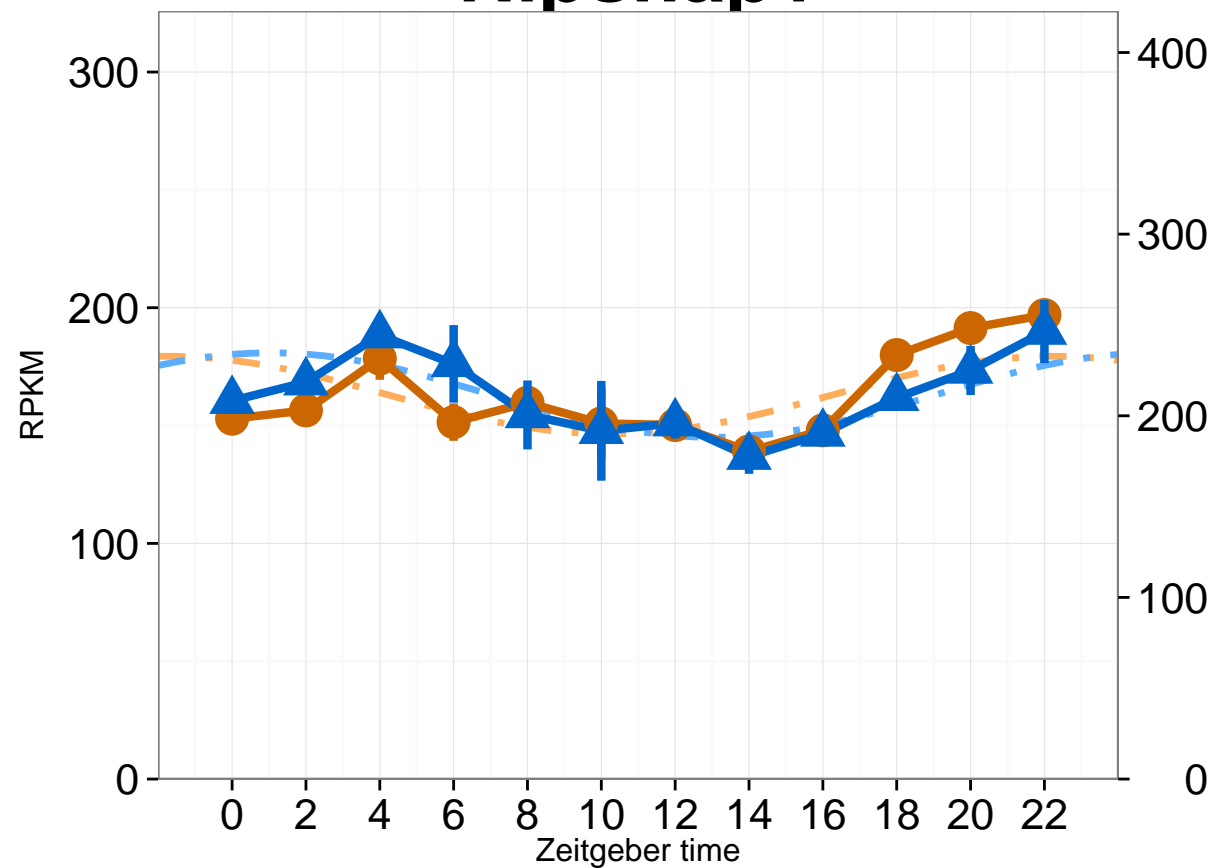

# Nipsnap1

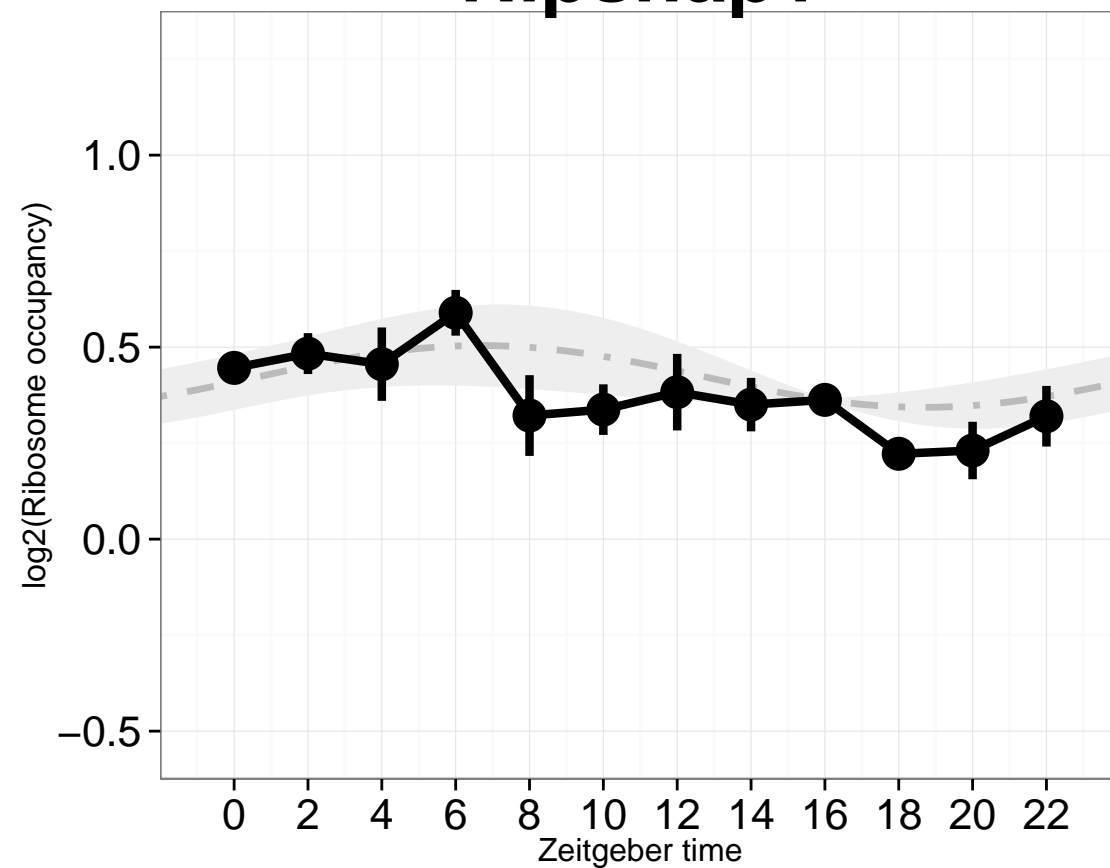

Supplement: SuppDataset_1.zip [file Nipsnap1_set_A.pdf › Supplemental Dataset 1/A-mRNA_nonrhyth_translation_nonrhyth/Nipsnap1_set_A.pdf]

# Nipsnap3b

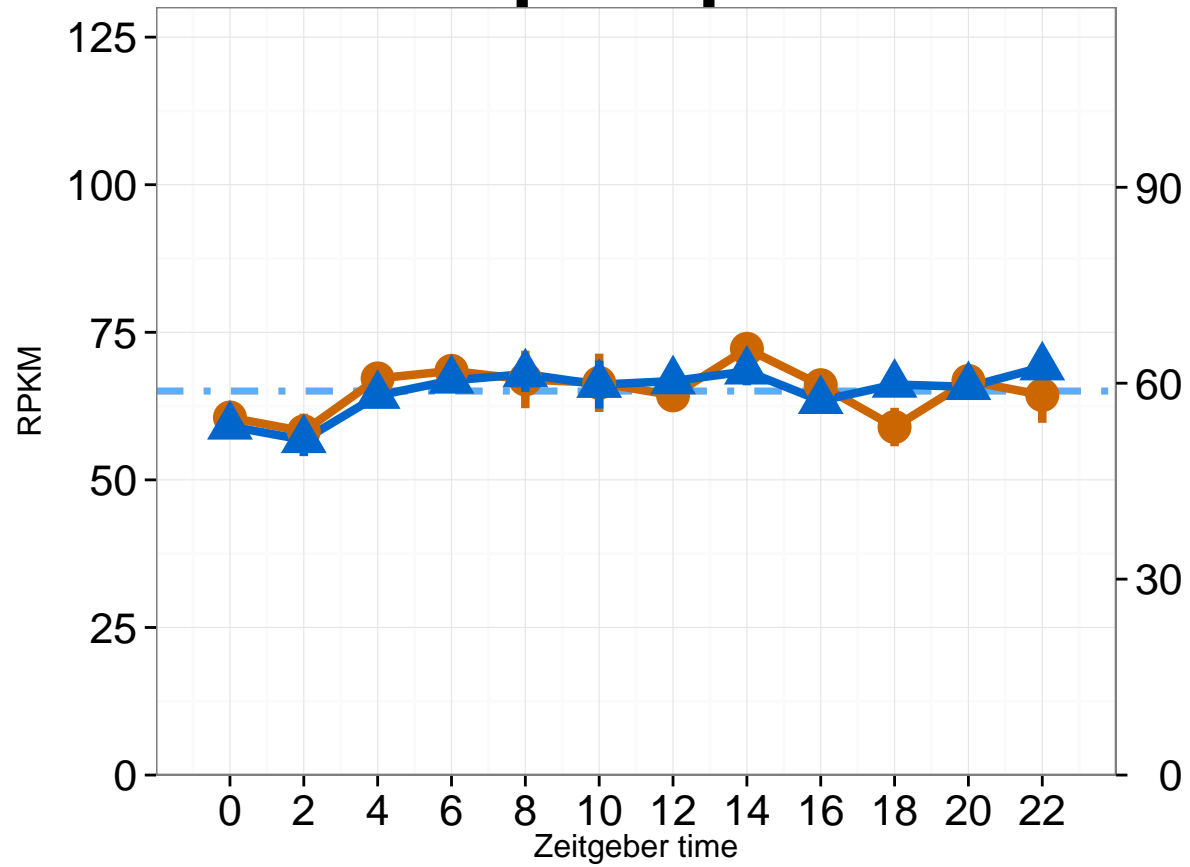

# Nipsnap3b

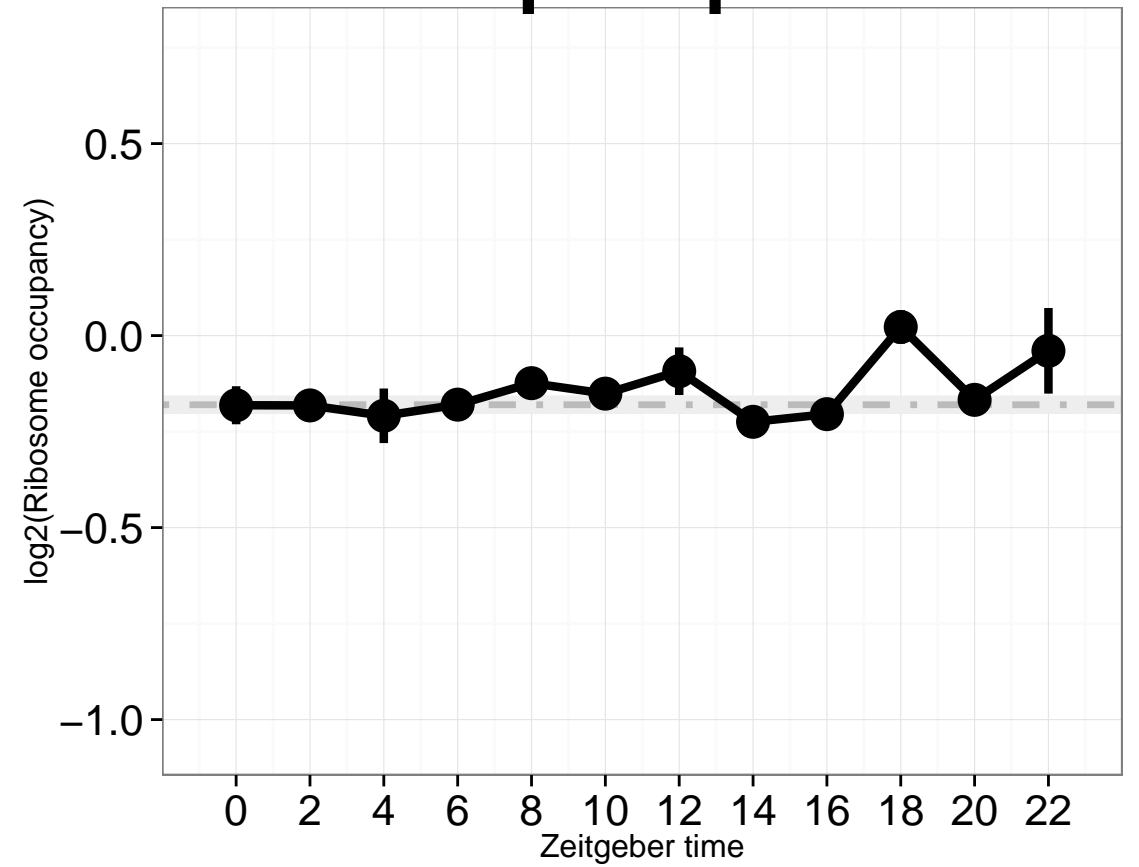

Supplement: SuppDataset_1.zip [file Nipsnap3b_set_A.pdf › Supplemental Dataset 1/A-mRNA_nonrhyth_translation_nonrhyth/Nipsnap3b_set_A.pdf]

## Nisch

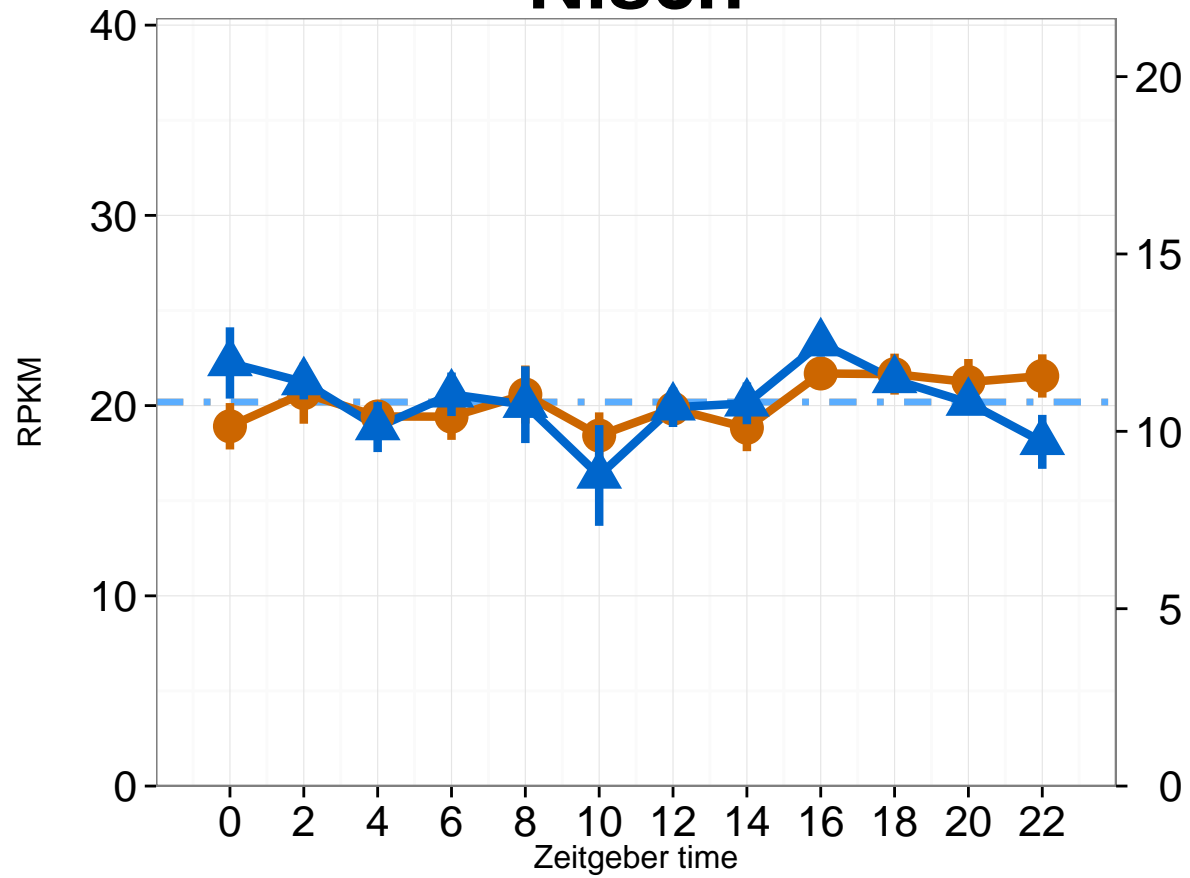

## Nisch

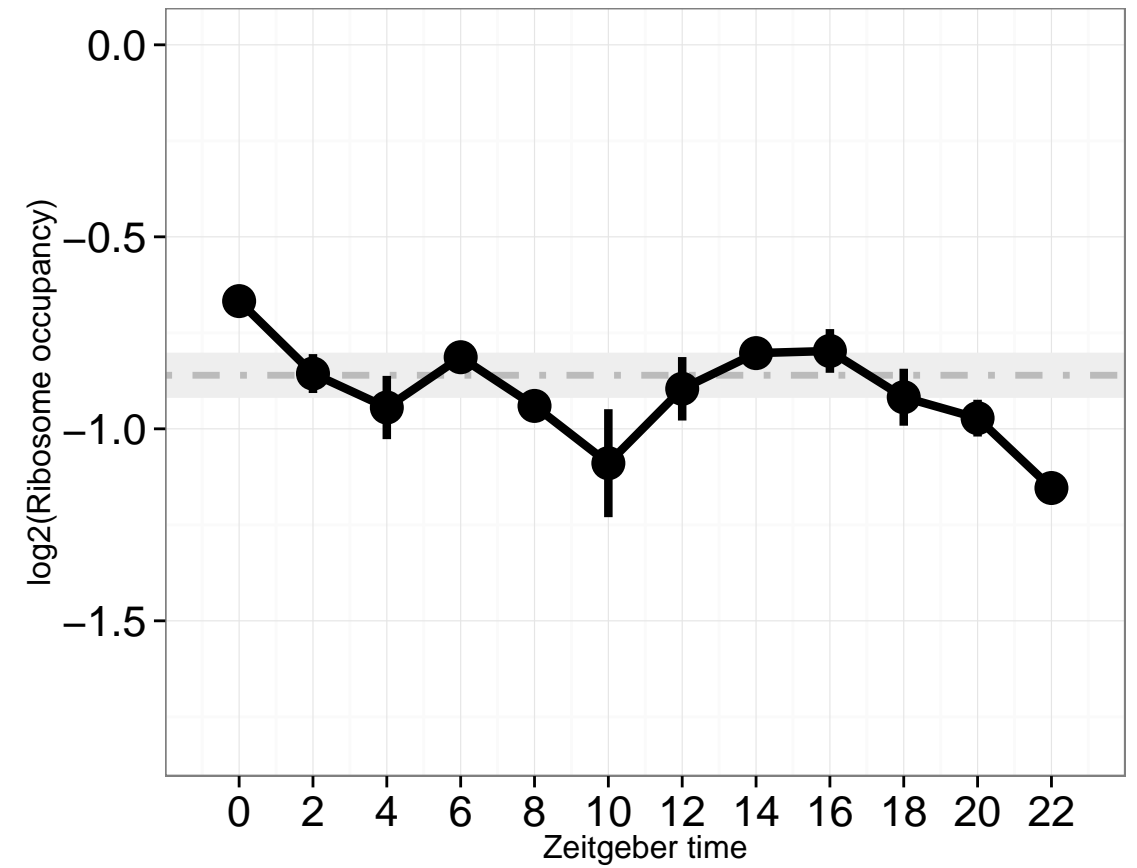

Supplement: SuppDataset_1.zip [file Nisch_set_A.pdf › Supplemental Dataset 1/A-mRNA_nonrhyth_translation_nonrhyth/Nisch_set_A.pdf]

## Nit1

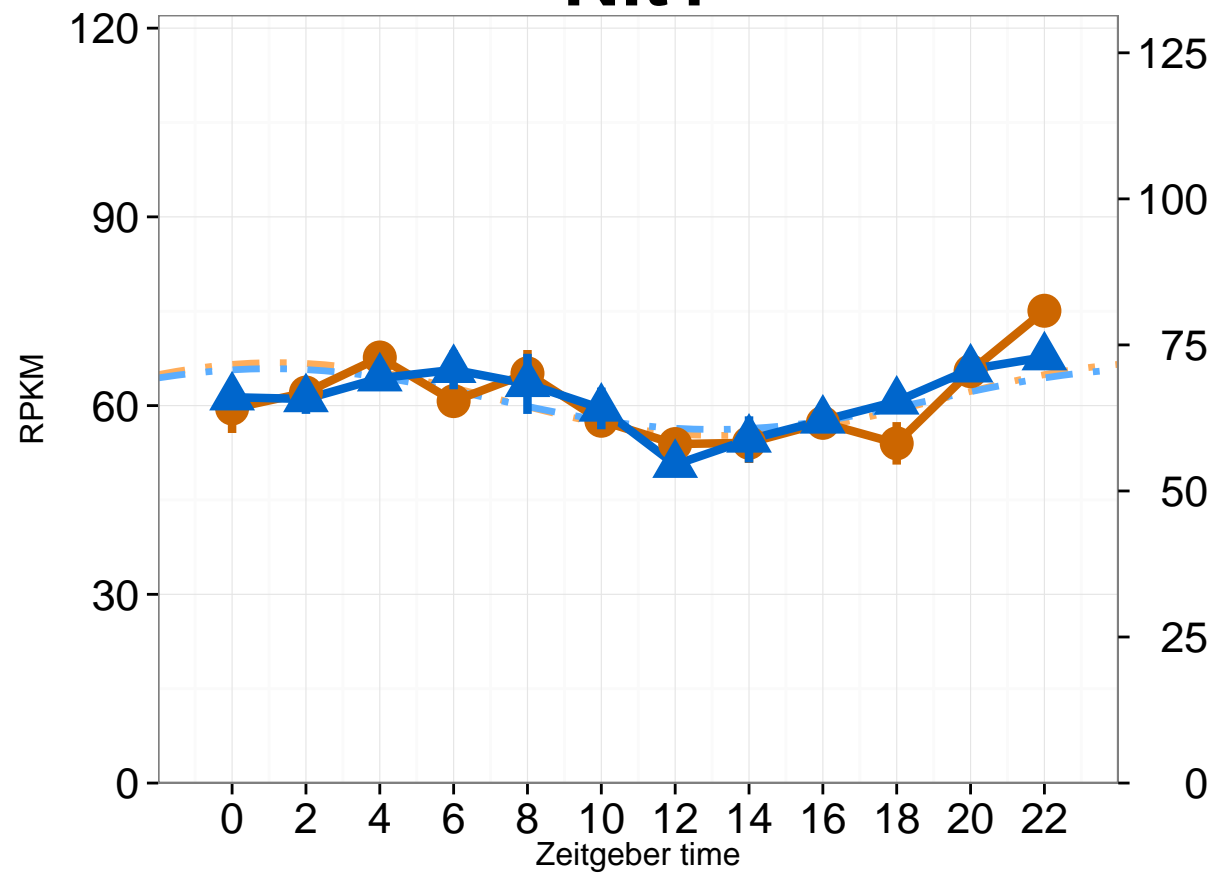

## Nit1

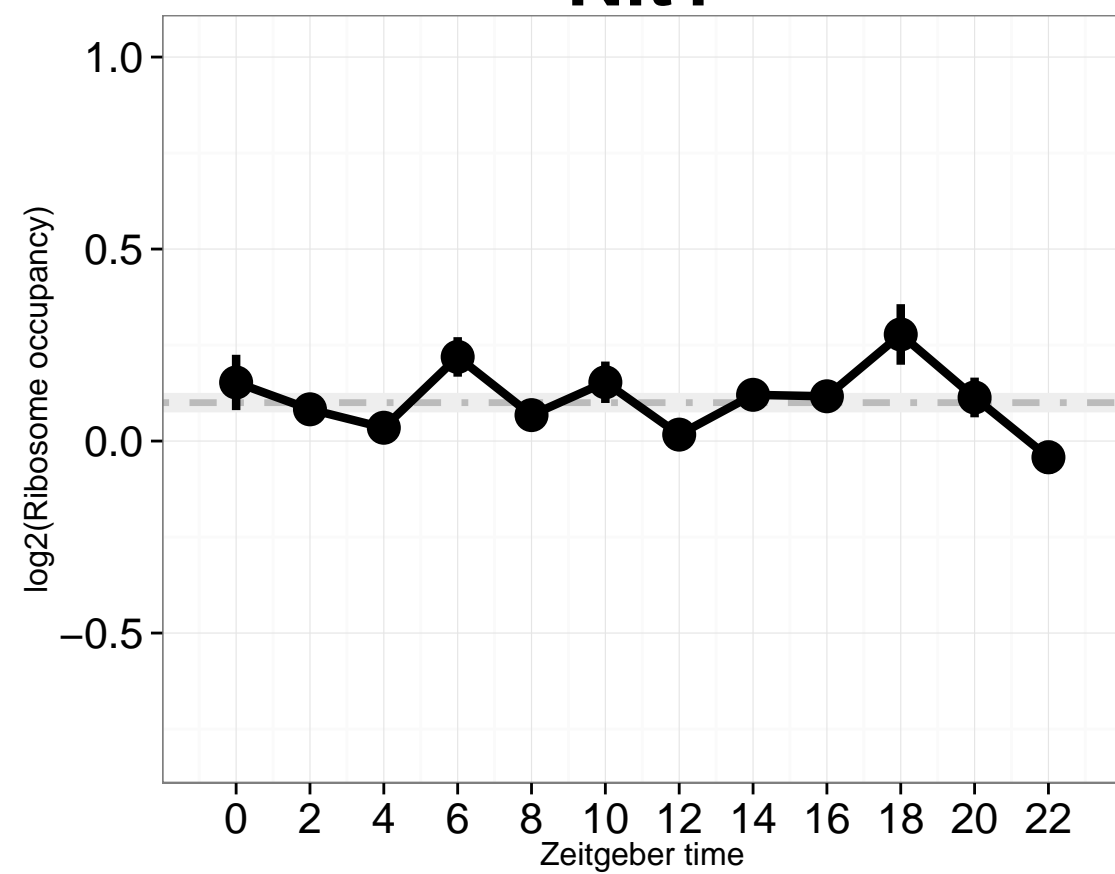

Supplement: SuppDataset_1.zip [file Nit1_set_A.pdf › Supplemental Dataset 1/A-mRNA_nonrhyth_translation_nonrhyth/Nit1_set_A.pdf]

## Nit2

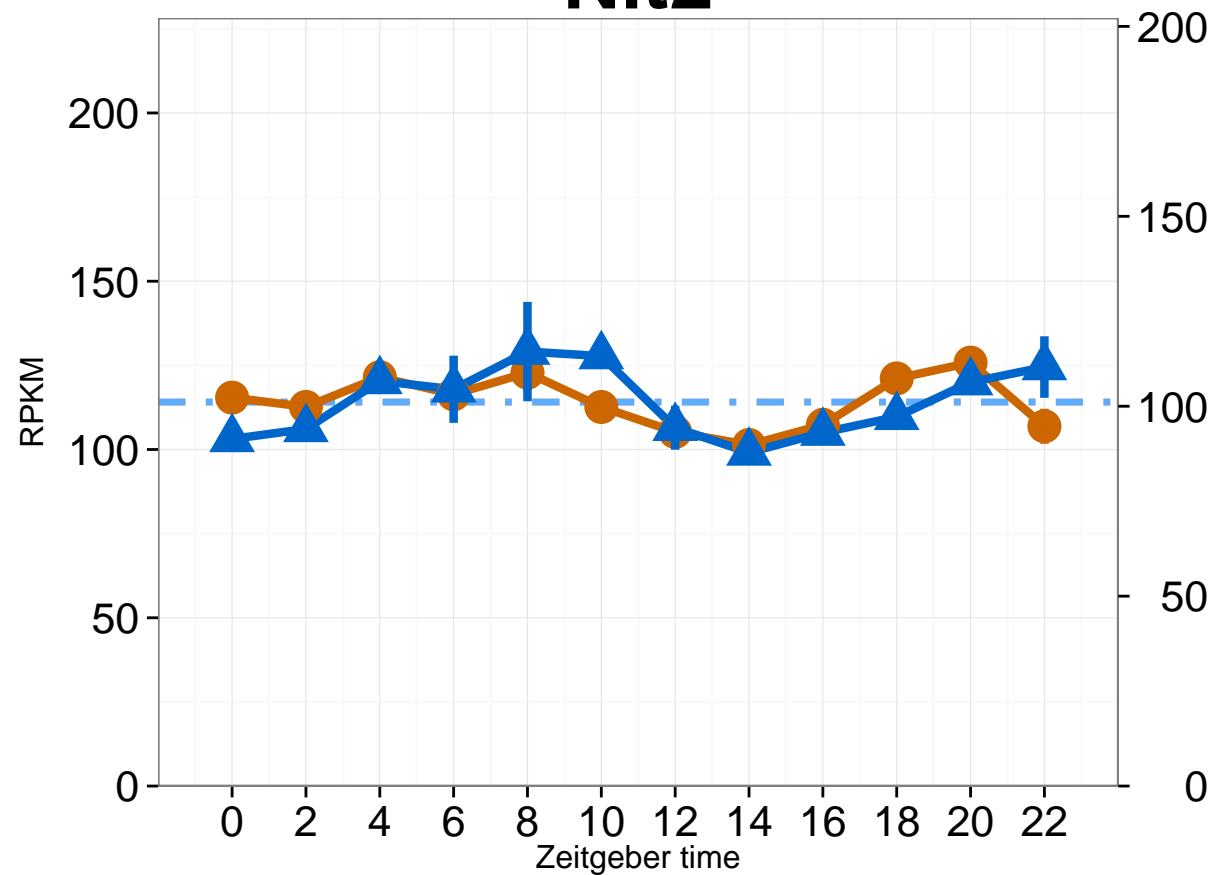

## Nit2

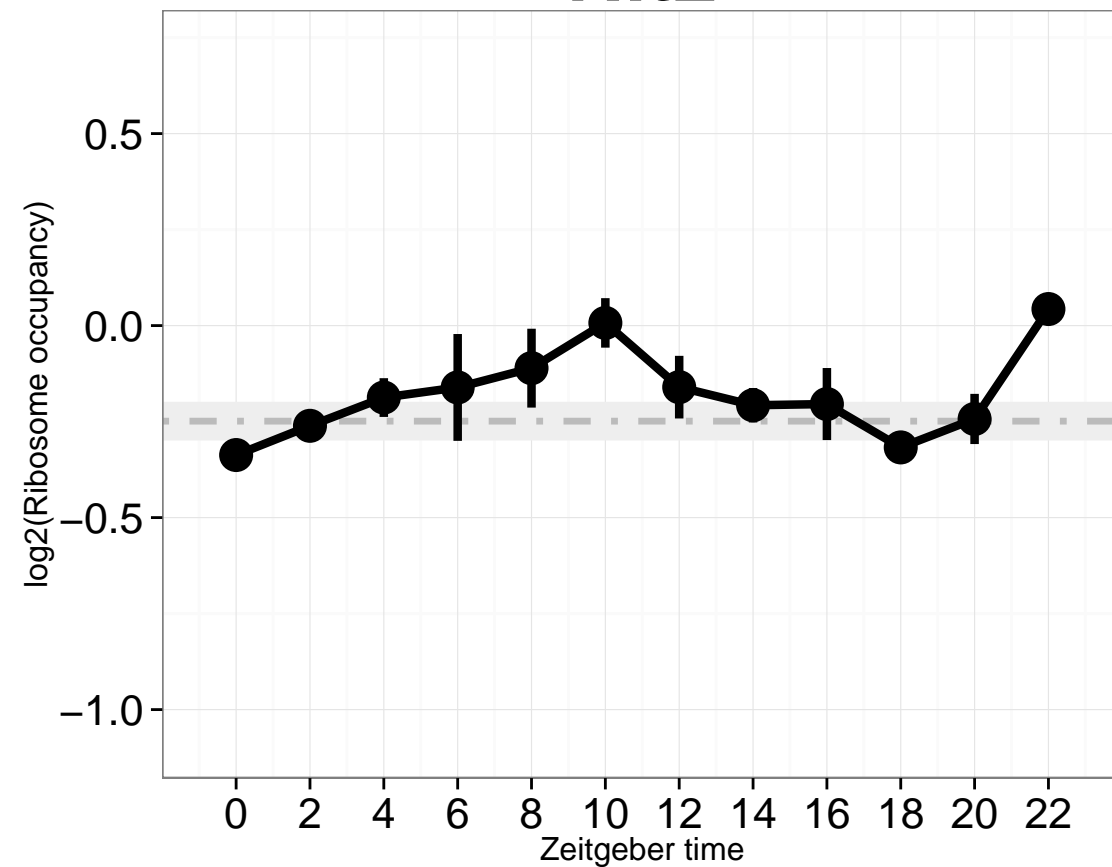

Supplement: SuppDataset_1.zip [file Nit2_set_A.pdf › Supplemental Dataset 1/A-mRNA_nonrhyth_translation_nonrhyth/Nit2_set_A.pdf]

## Nkap

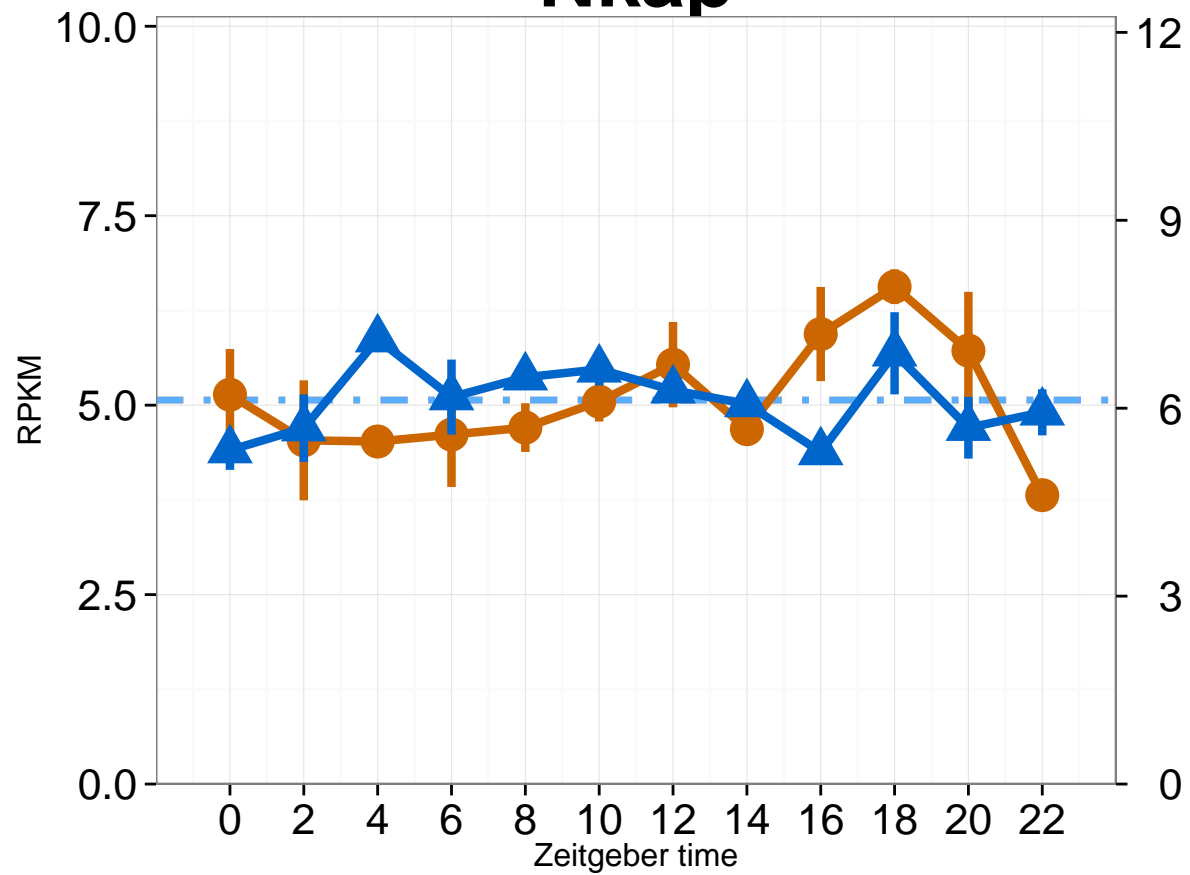

## Nkap

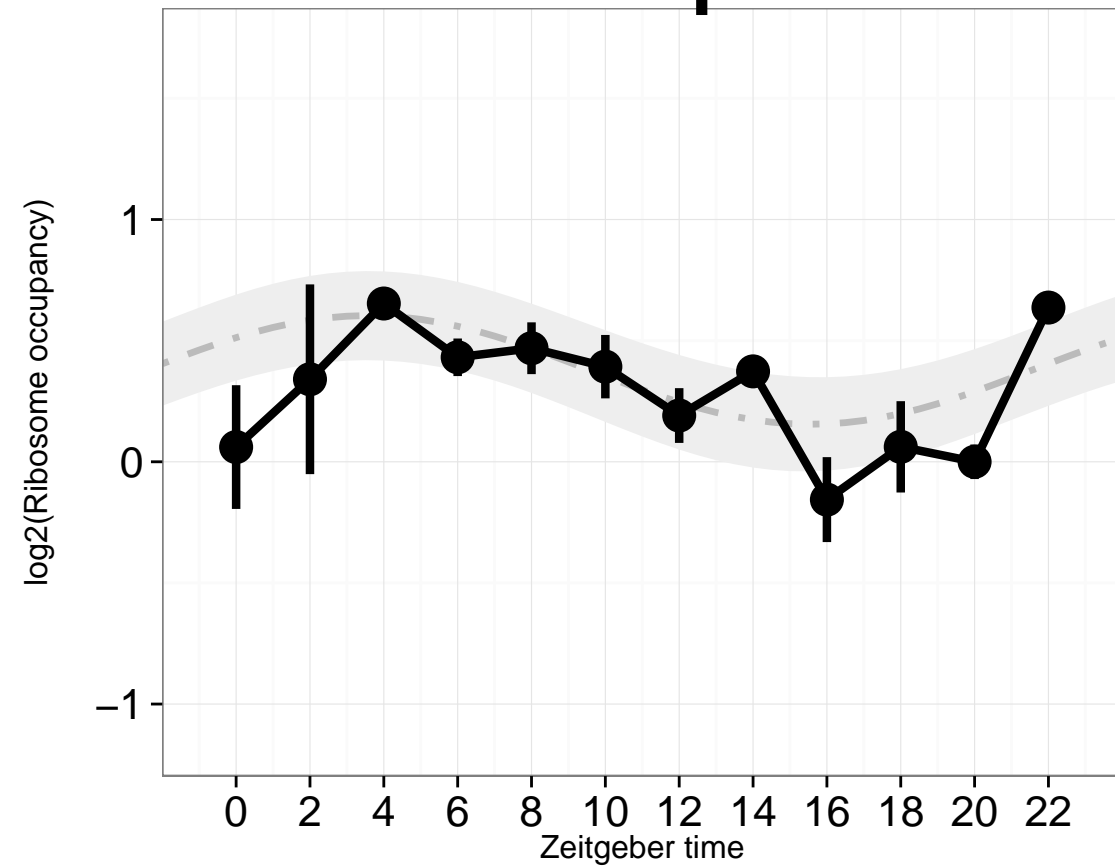

Supplement: SuppDataset_1.zip [file Nkap_set_A.pdf › Supplemental Dataset 1/A-mRNA_nonrhyth_translation_nonrhyth/Nkap_set_A.pdf]

## Nkd1

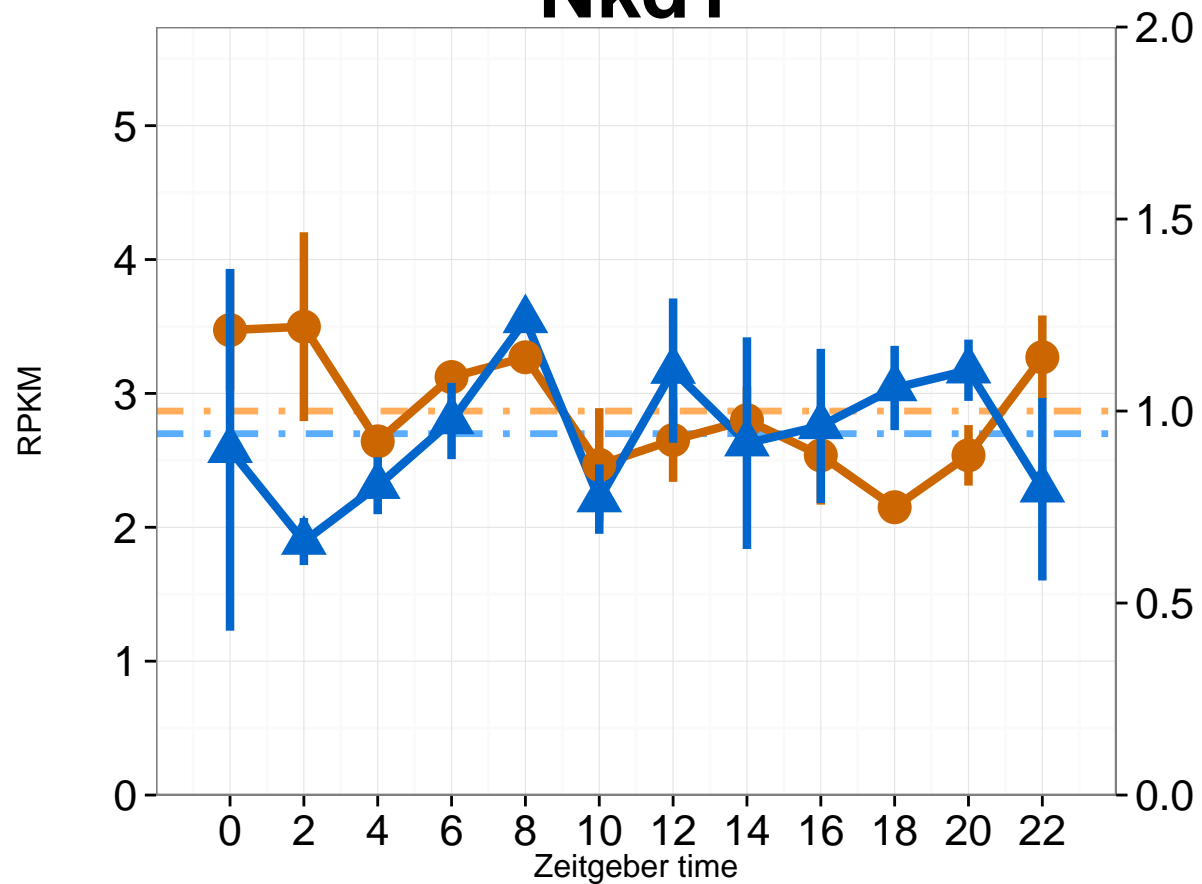

## Nkd1

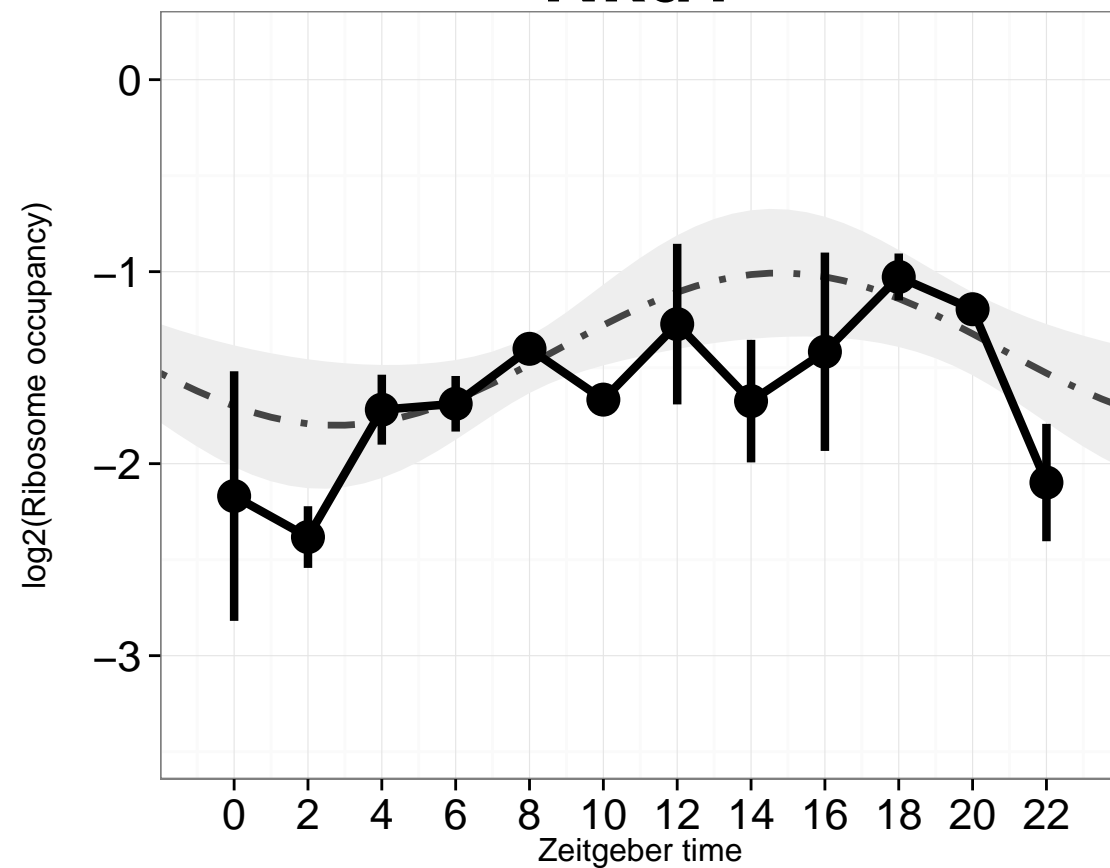

Supplement: SuppDataset_1.zip [file Nkd1_set_A.pdf › Supplemental Dataset 1/A-mRNA_nonrhyth_translation_nonrhyth/Nkd1_set_A.pdf]

## Nkiras1

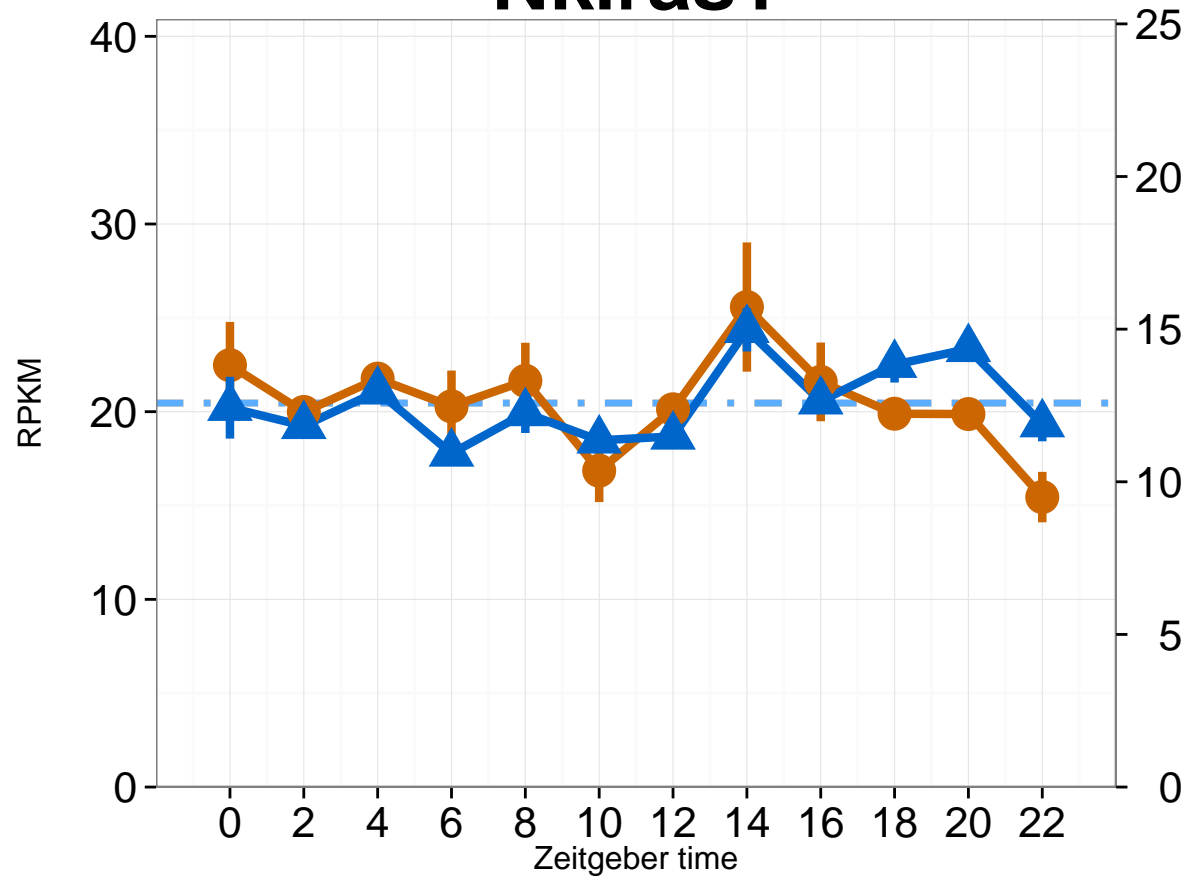

## Nkiras1

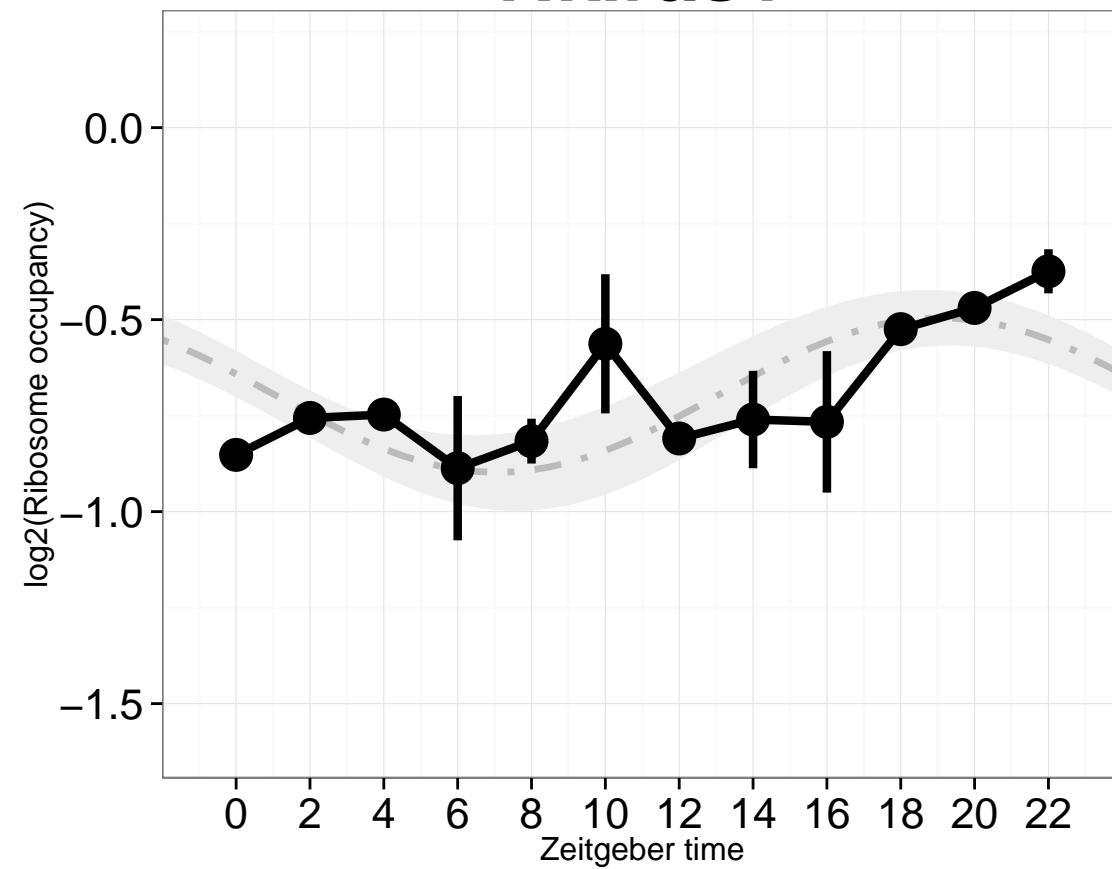

Supplement: SuppDataset_1.zip [file Nkiras1_set_A.pdf › Supplemental Dataset 1/A-mRNA_nonrhyth_translation_nonrhyth/Nkiras1_set_A.pdf]

## Nkrf

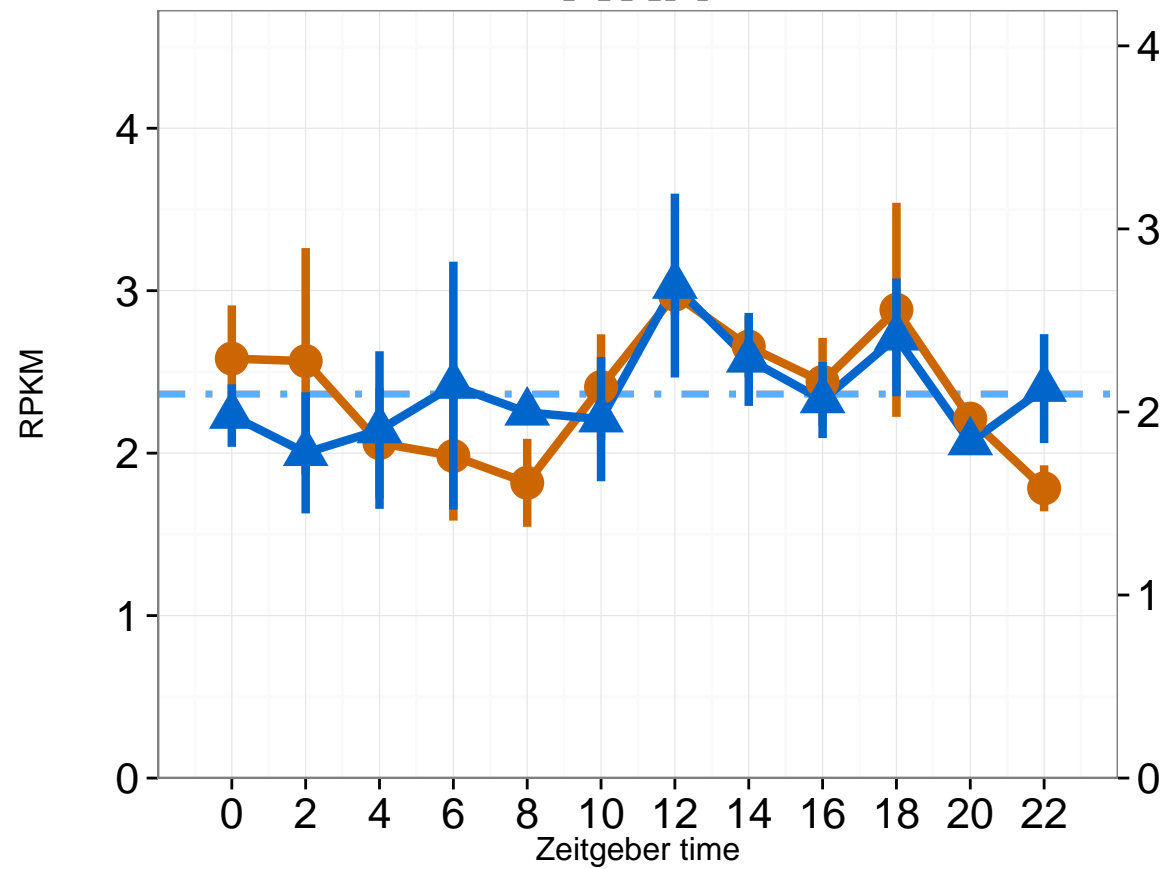

## Nkrf

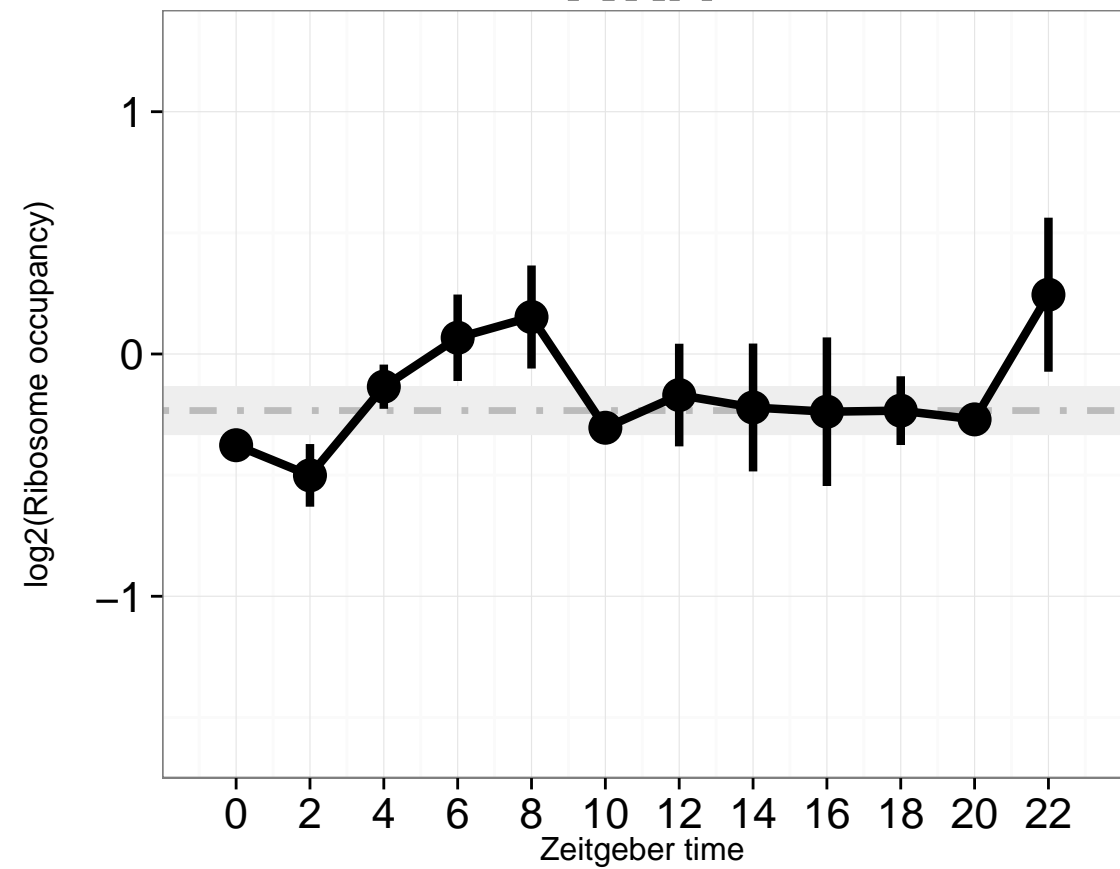

Supplement: SuppDataset_1.zip [file Nkrf_set_A.pdf › Supplemental Dataset 1/A-mRNA_nonrhyth_translation_nonrhyth/Nkrf_set_A.pdf]

## Nktr

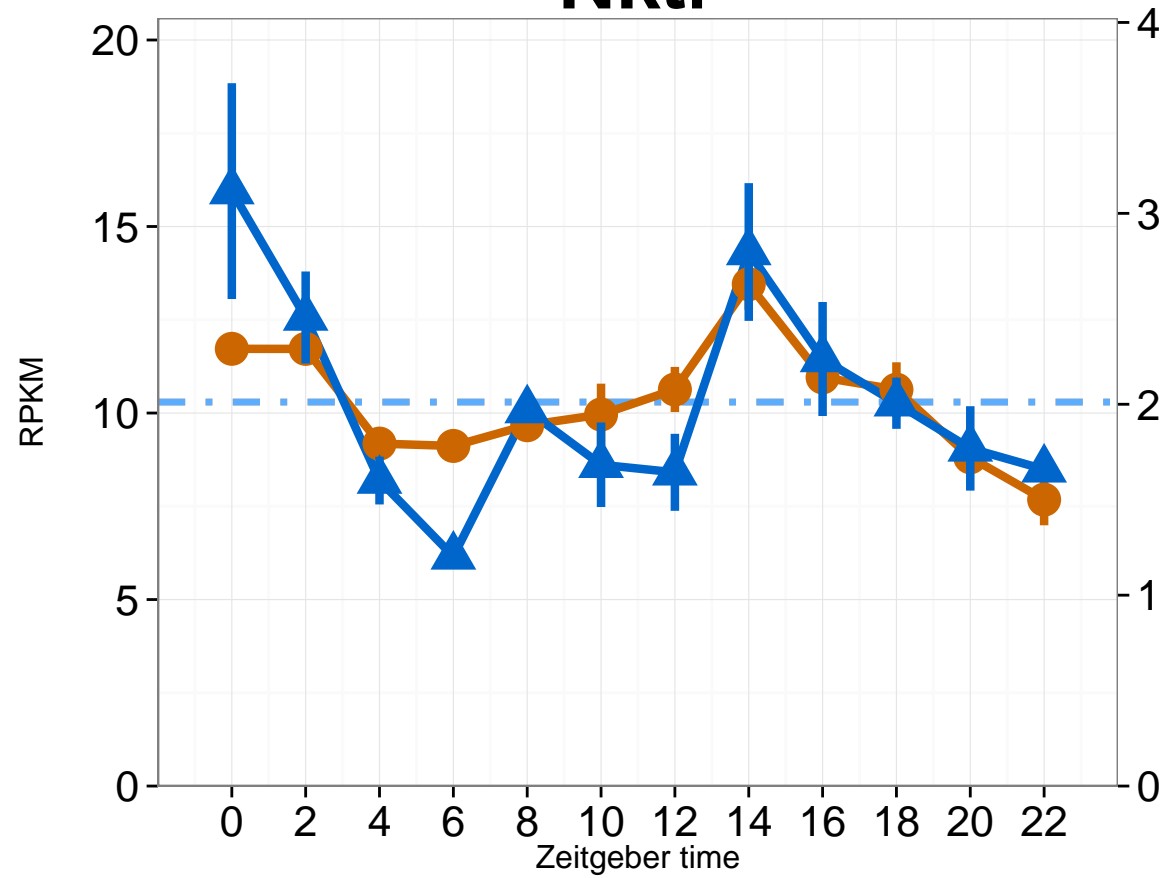

## Nktr

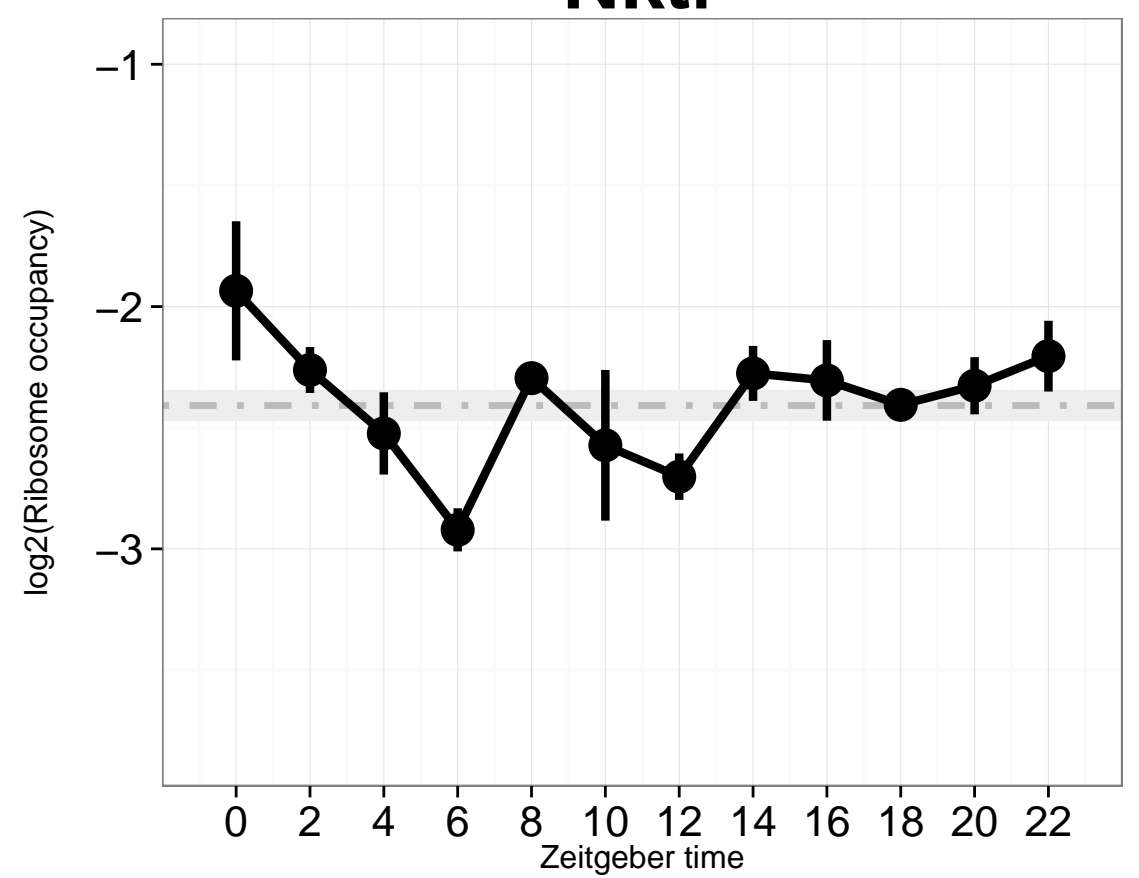

Supplement: SuppDataset_1.zip [file Nktr_set_A.pdf › Supplemental Dataset 1/A-mRNA_nonrhyth_translation_nonrhyth/Nktr_set_A.pdf]

# Nle1

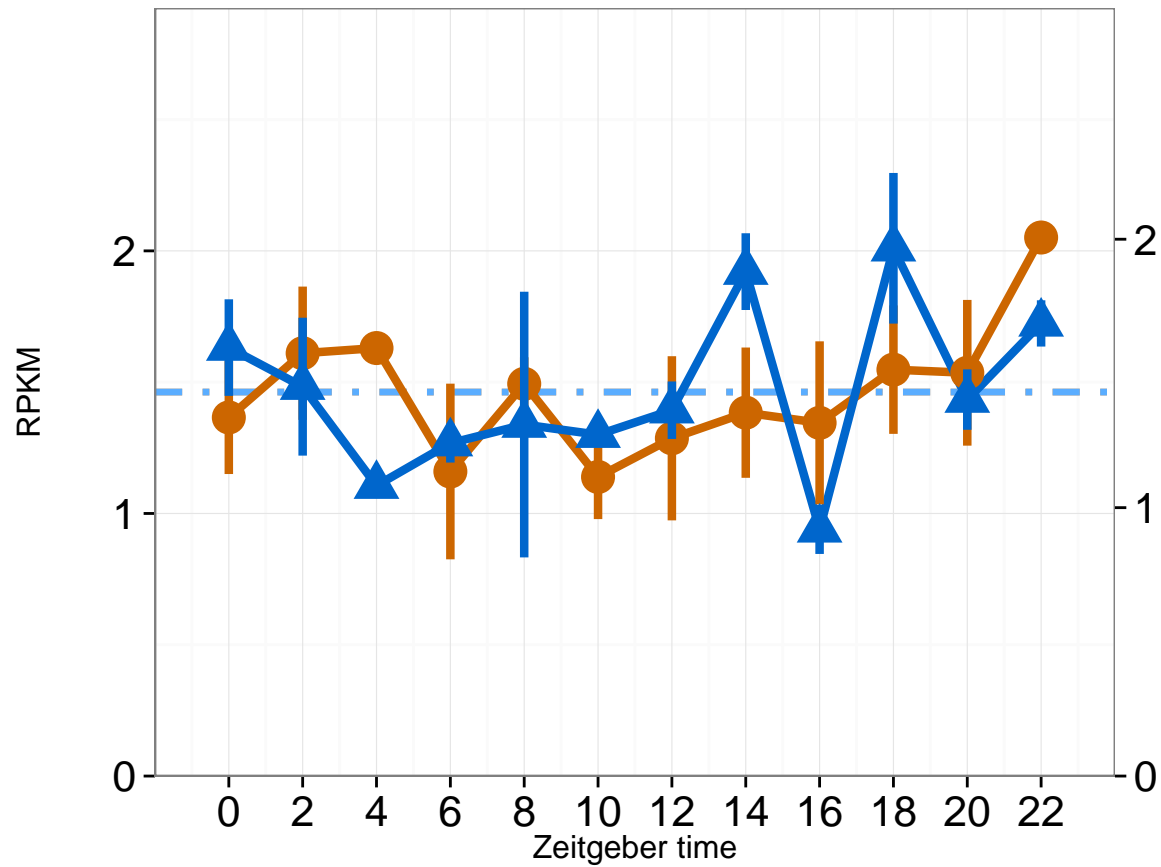

# Nle1

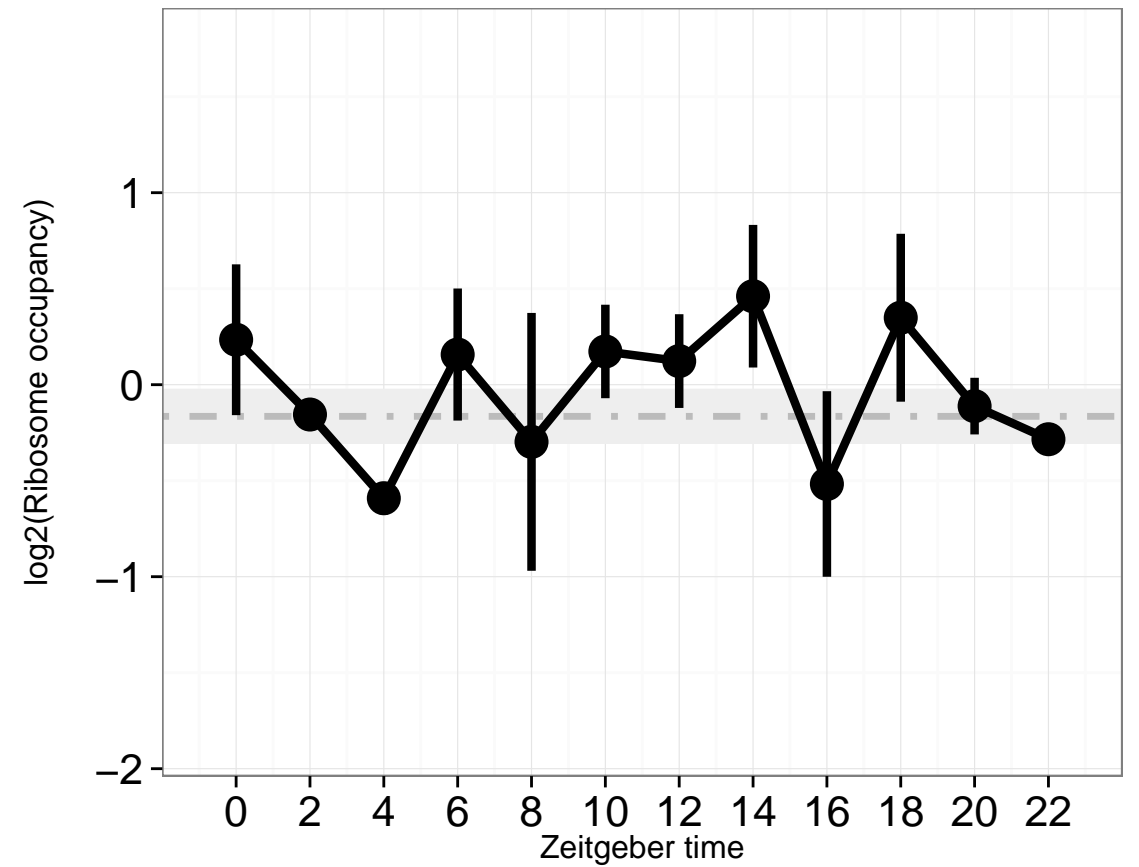

Supplement: SuppDataset_1.zip [file Nle1_set_A.pdf › Supplemental Dataset 1/A-mRNA_nonrhyth_translation_nonrhyth/Nle1_set_A.pdf]

## Nlgn2

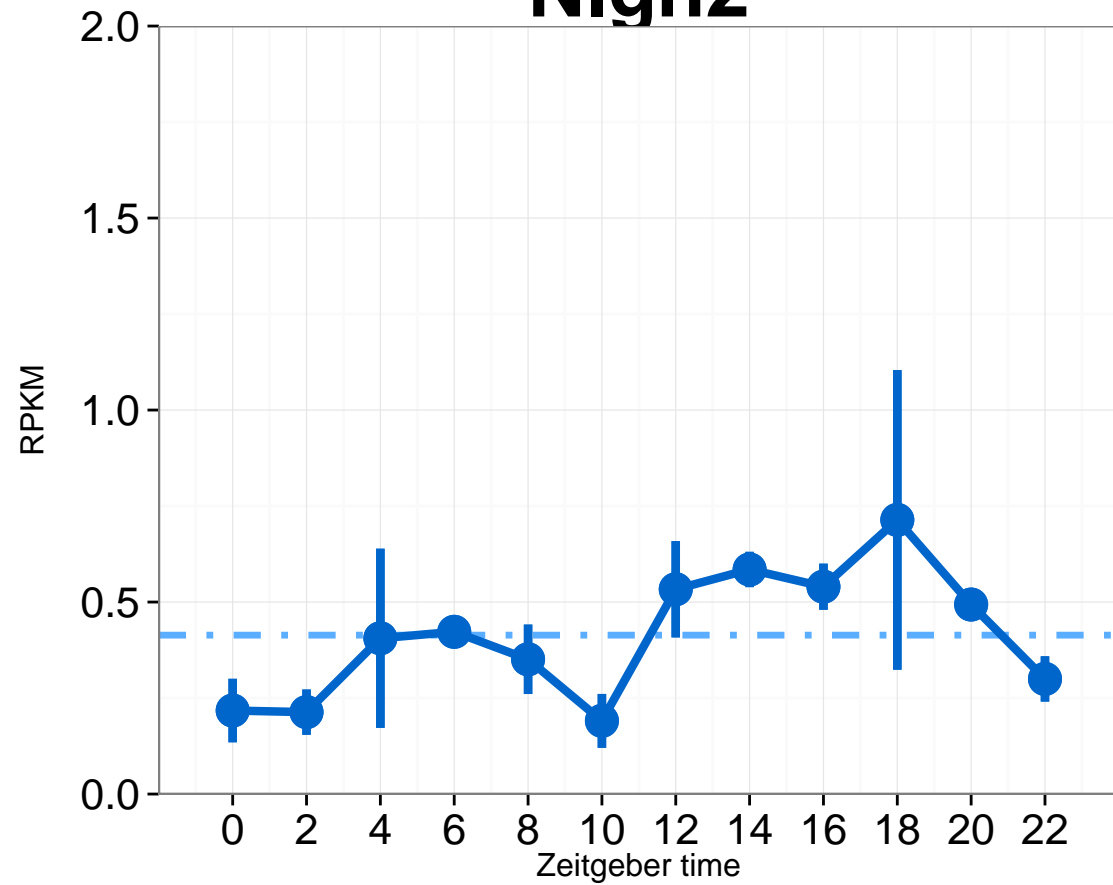

## Nlgn2 log2(Ribosome occupancy

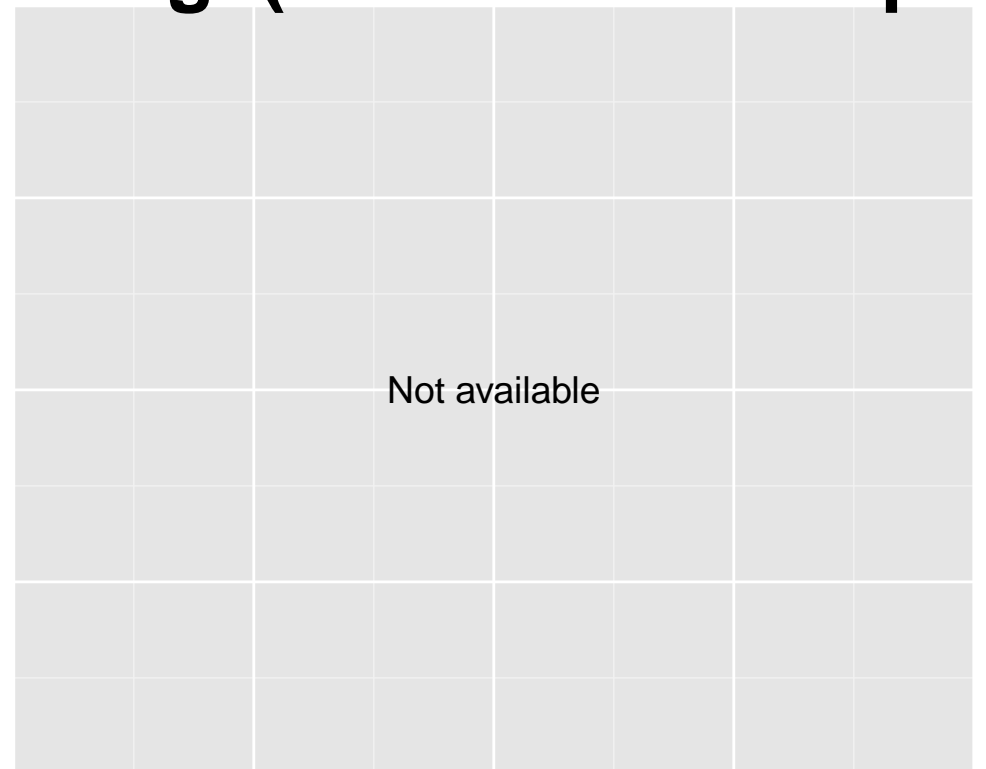

Supplement: SuppDataset_1.zip [file Nlgn2_set_A.pdf › Supplemental Dataset 1/A-mRNA_nonrhyth_translation_nonrhyth/Nlgn2_set_A.pdf]

## Nik

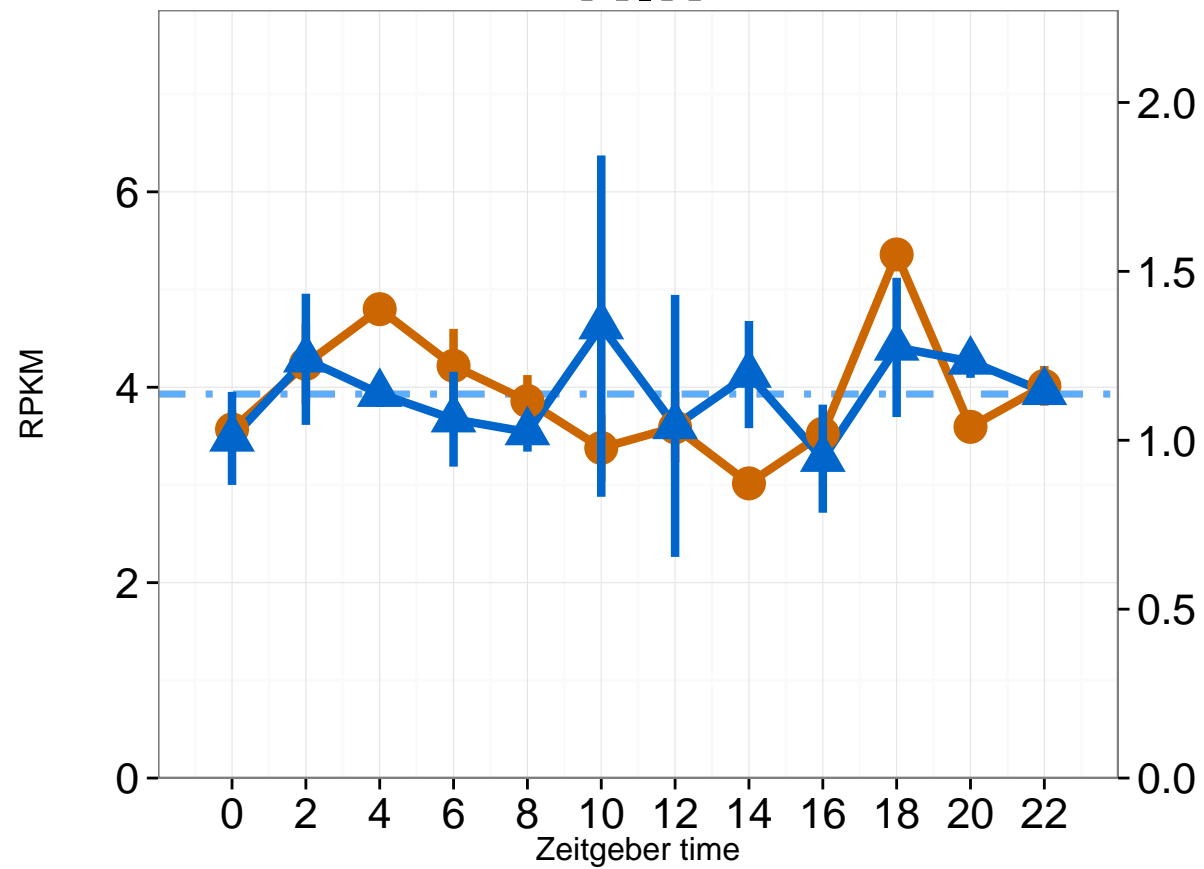

## Nik

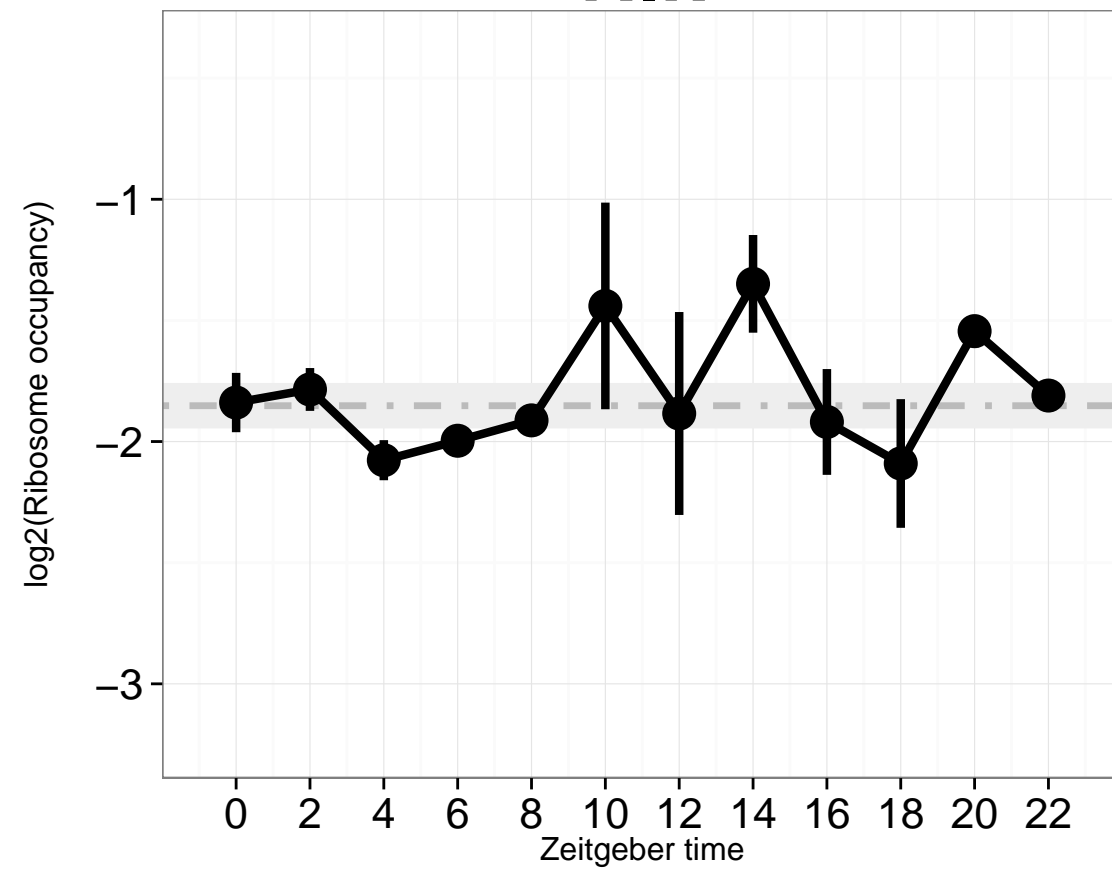

Supplement: SuppDataset_1.zip [file Nlk_set_A.pdf › Supplemental Dataset 1/A-mRNA_nonrhyth_translation_nonrhyth/Nlk_set_A.pdf]

# NIn

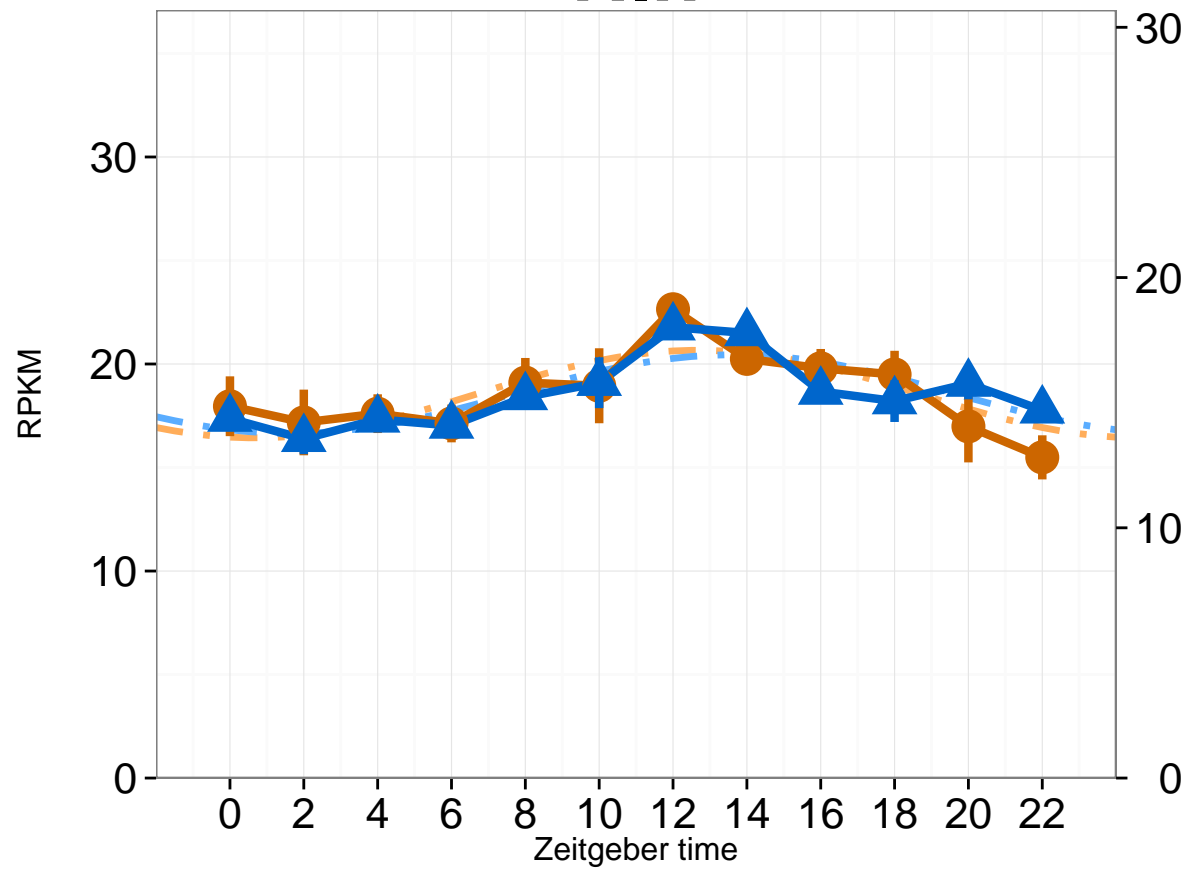

# NIn

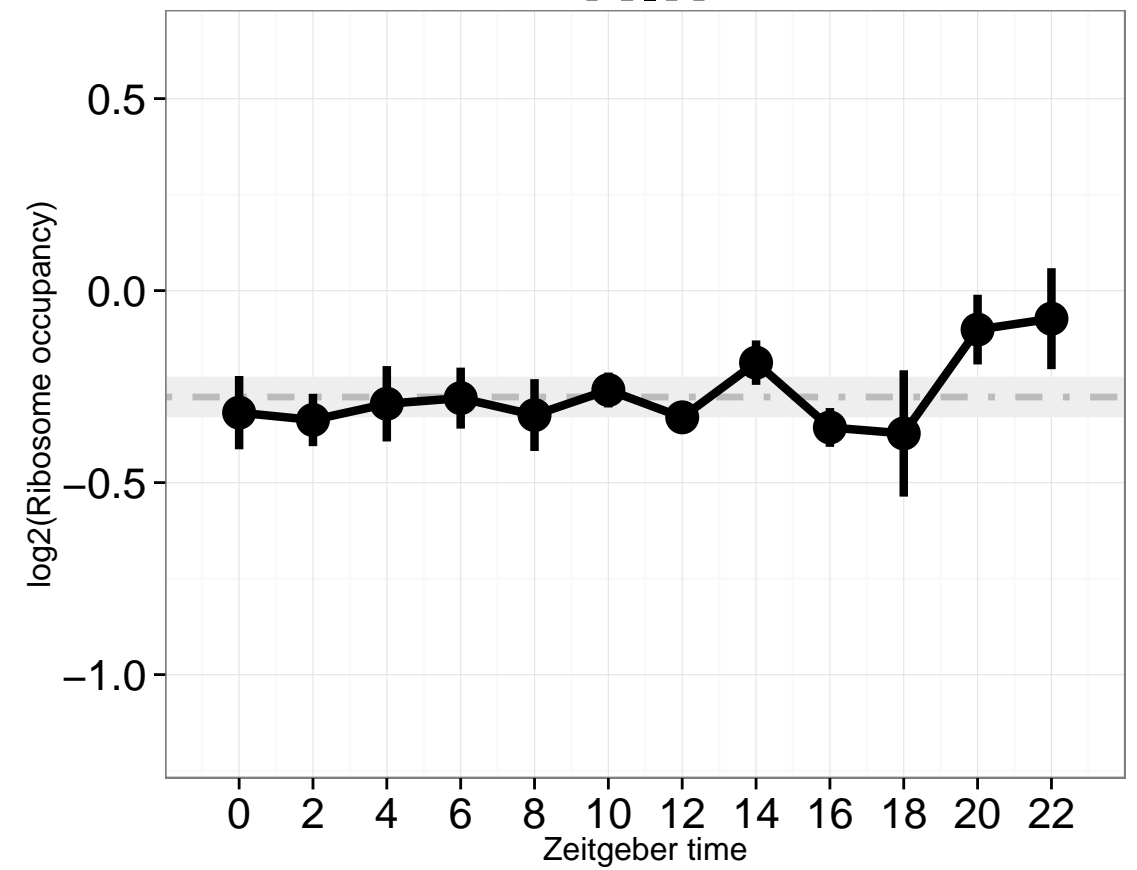

Supplement: SuppDataset_1.zip [file Nln_set_A.pdf › Supplemental Dataset 1/A-mRNA_nonrhyth_translation_nonrhyth/Nln_set_A.pdf]

## Nlrc4

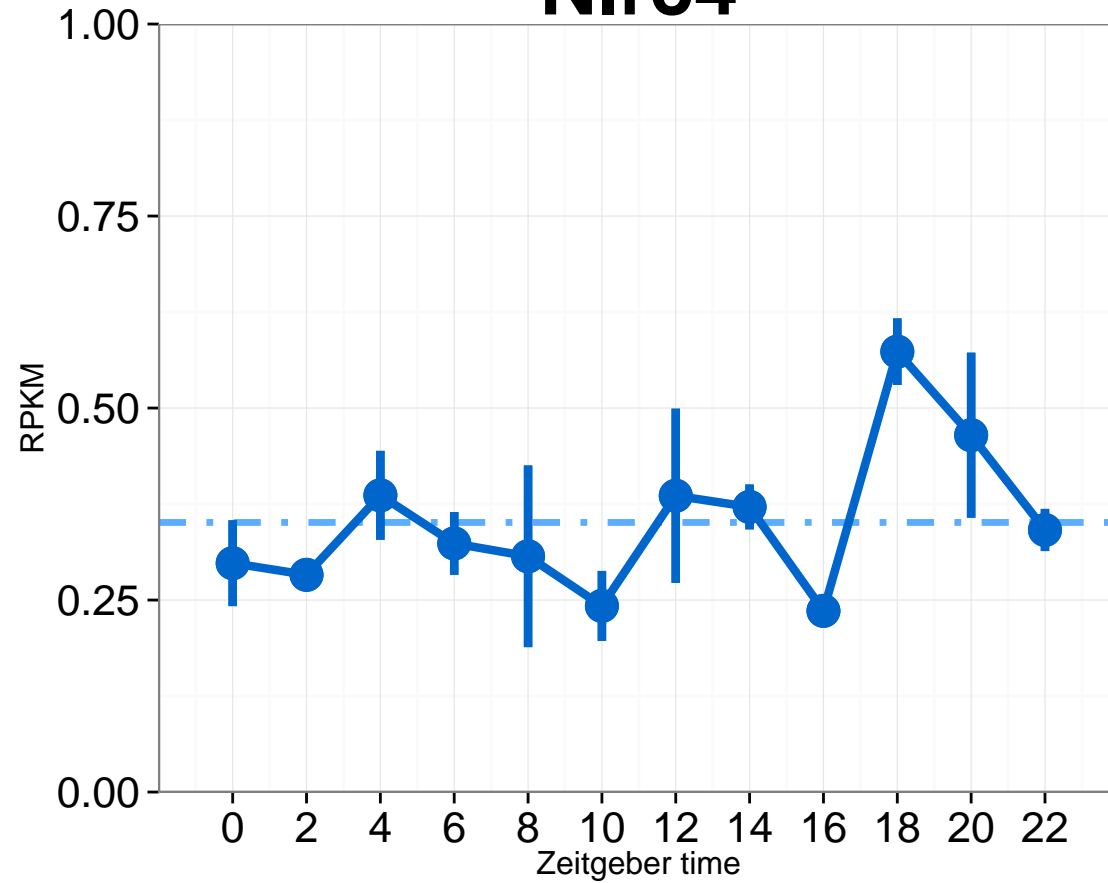

## Nlrc4 log2(Ribosome occupancy)

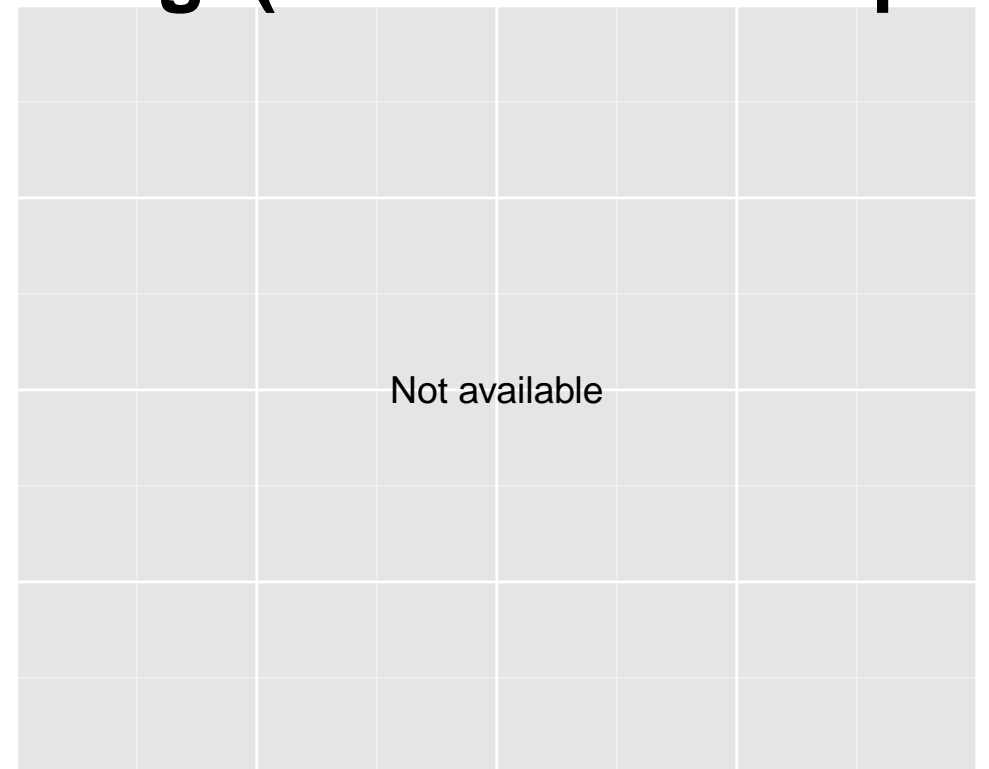

Supplement: SuppDataset_1.zip [file Nlrc4_set_A.pdf › Supplemental Dataset 1/A-mRNA_nonrhyth_translation_nonrhyth/Nlrc4_set_A.pdf]

## Nlrc5

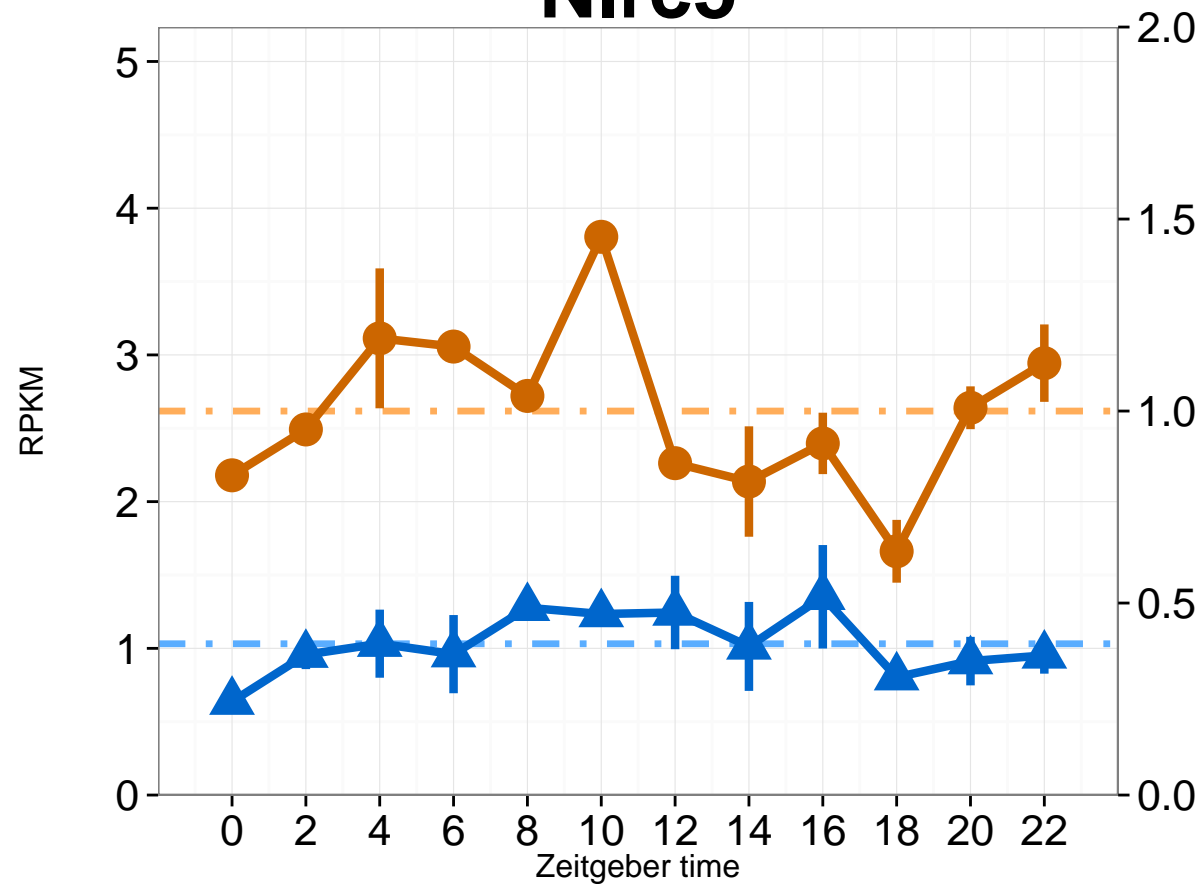

## Nlrc5

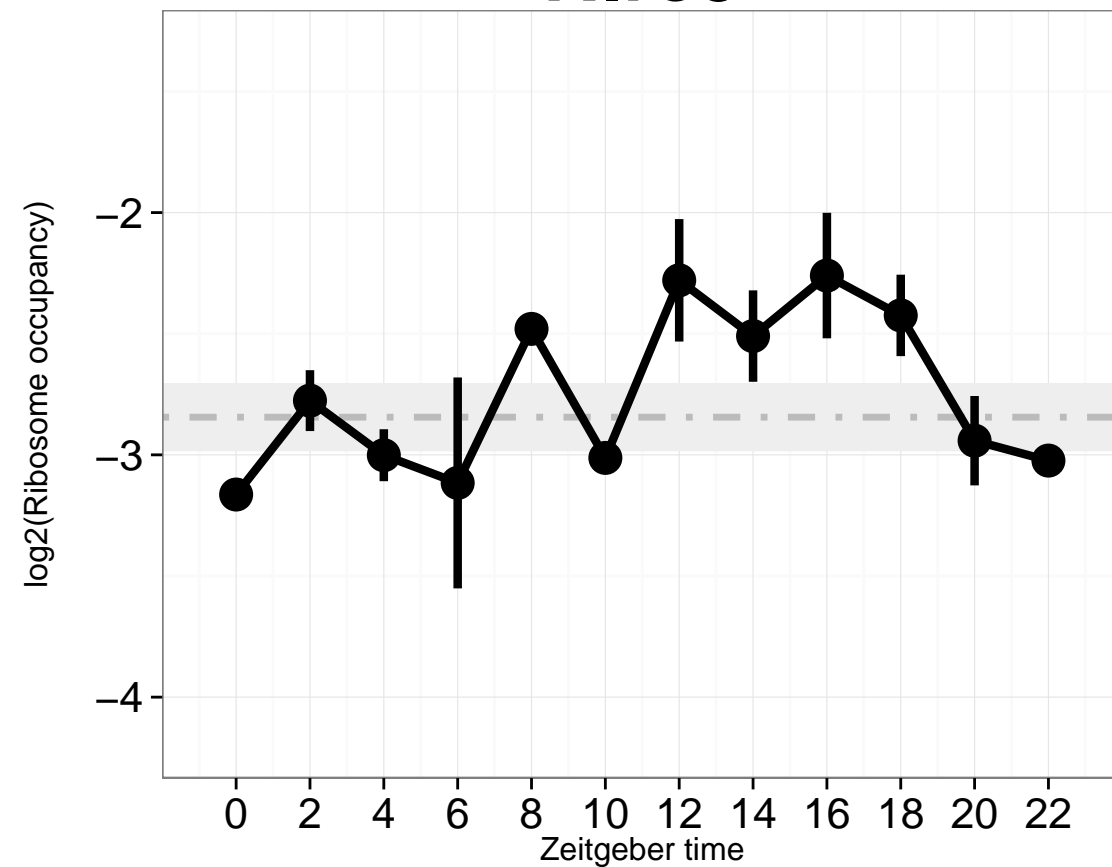

Supplement: SuppDataset_1.zip [file Nlrc5_set_A.pdf › Supplemental Dataset 1/A-mRNA_nonrhyth_translation_nonrhyth/Nlrc5_set_A.pdf]

## Nlrp3

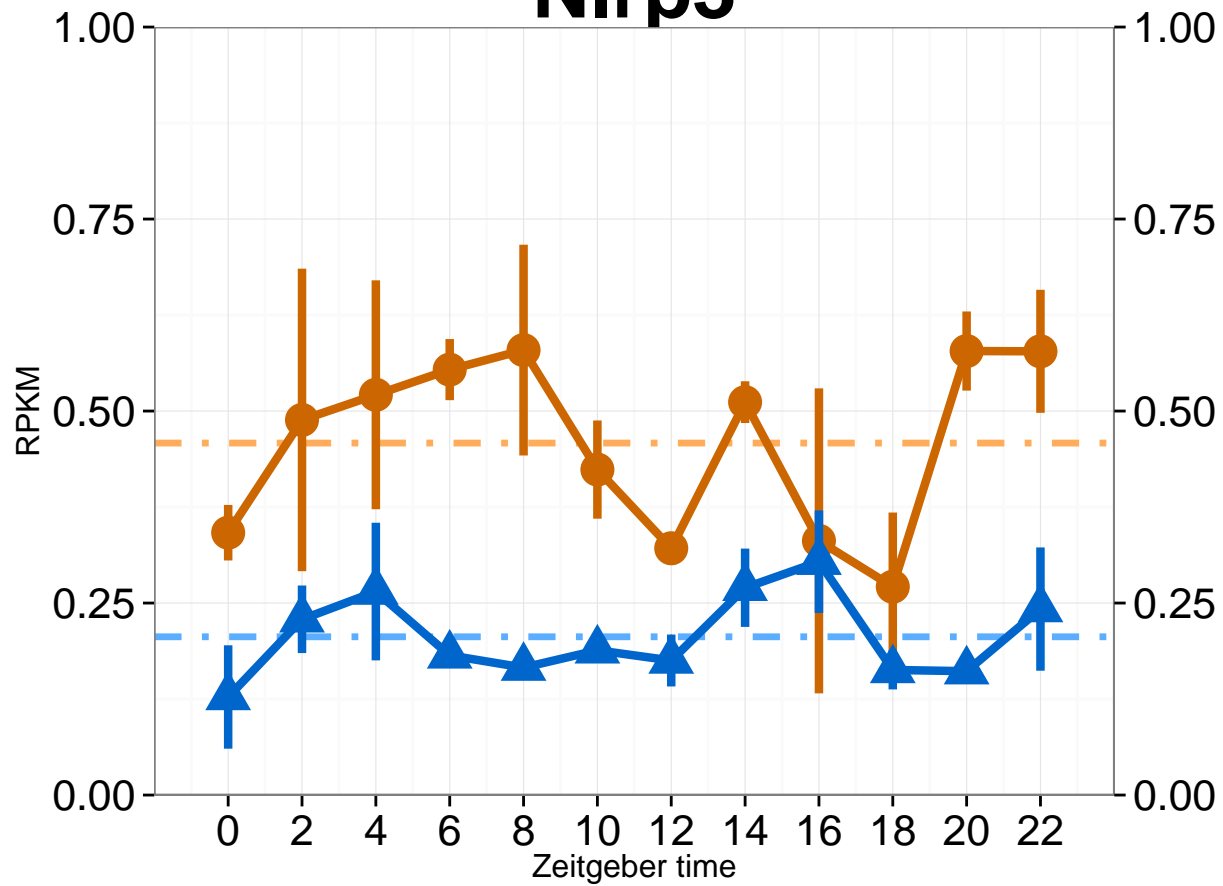

## Nlrp3

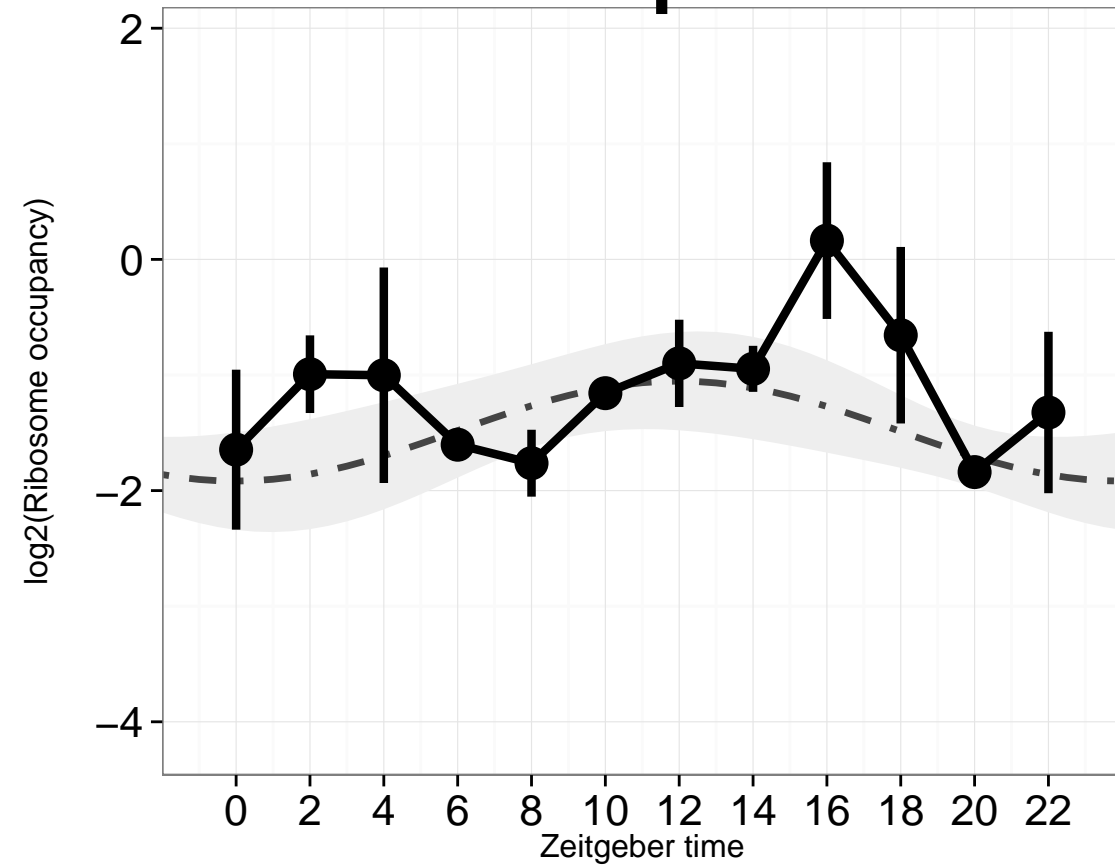

Supplement: SuppDataset_1.zip [file Nlrp3_set_A.pdf › Supplemental Dataset 1/A-mRNA_nonrhyth_translation_nonrhyth/Nlrp3_set_A.pdf]

# Nlrp6

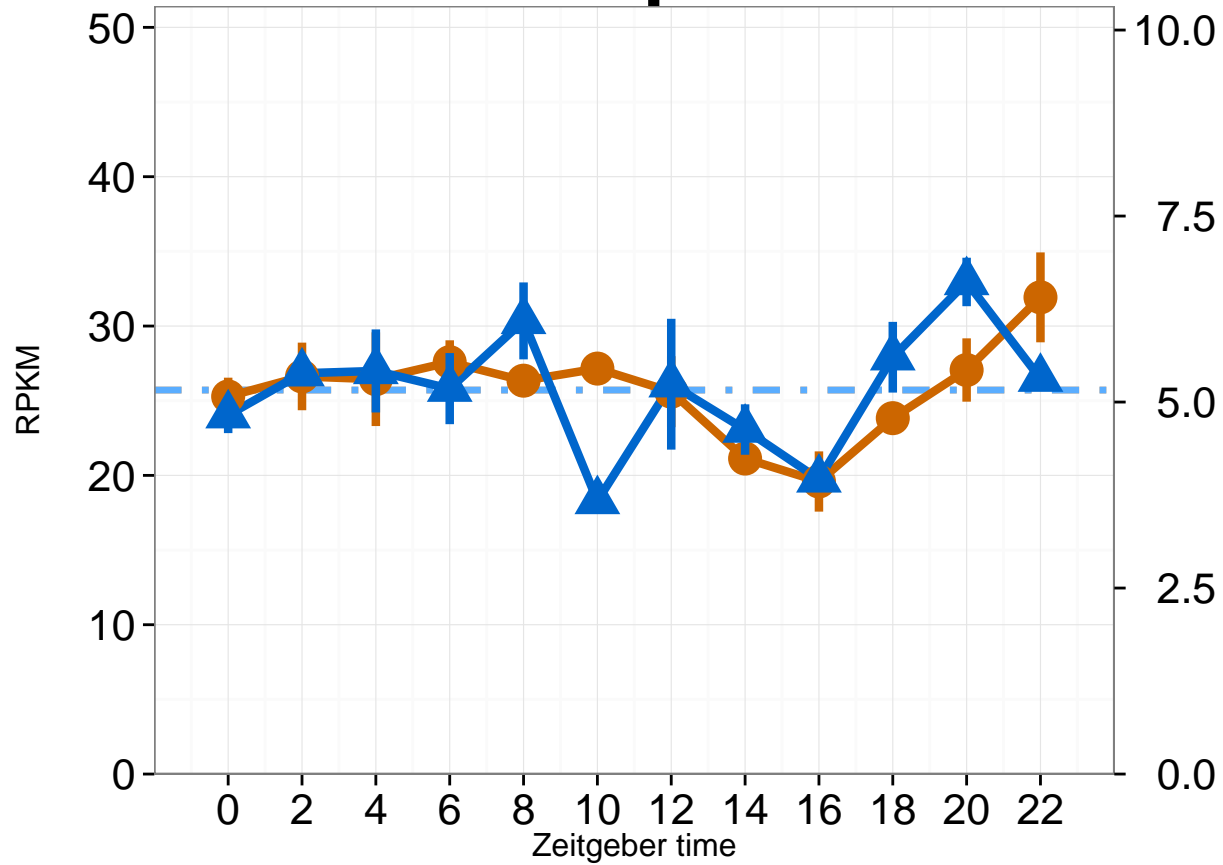

# Nlrp6

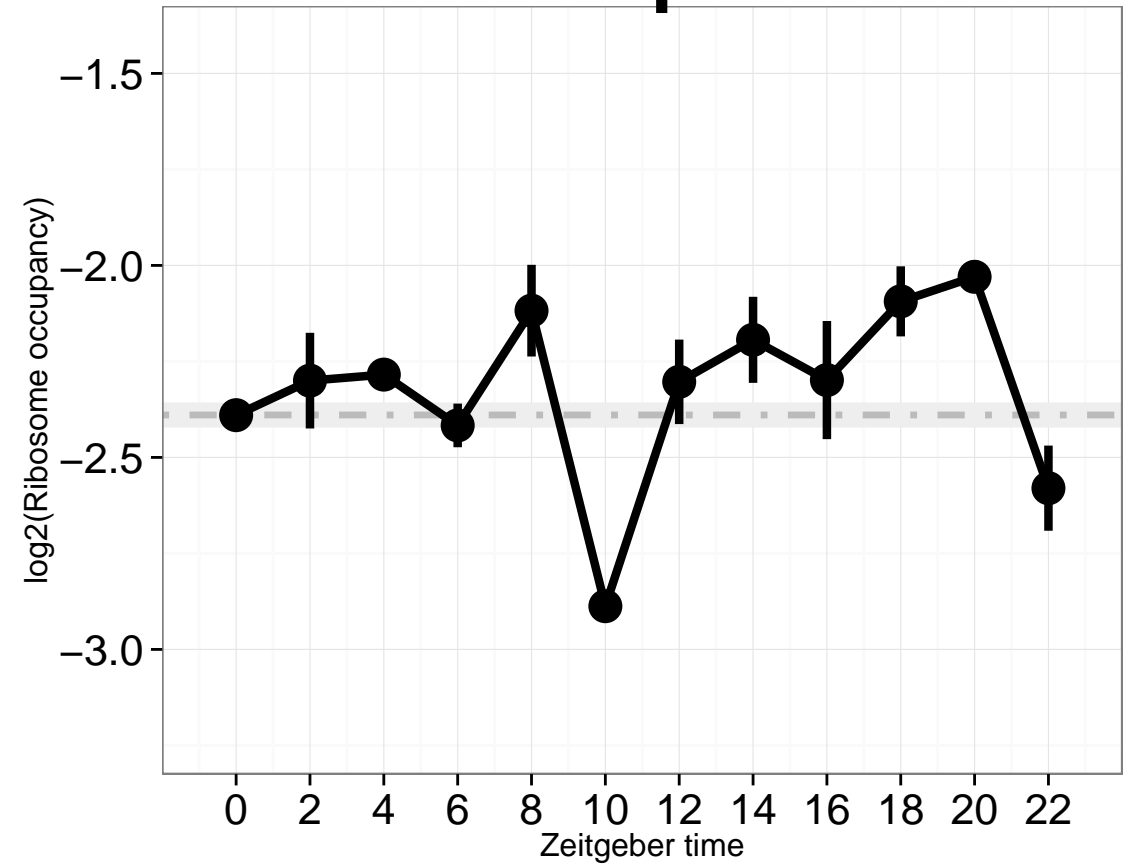

Supplement: SuppDataset_1.zip [file Nlrp6_set_A.pdf › Supplemental Dataset 1/A-mRNA_nonrhyth_translation_nonrhyth/Nlrp6_set_A.pdf]

## Nlrx1

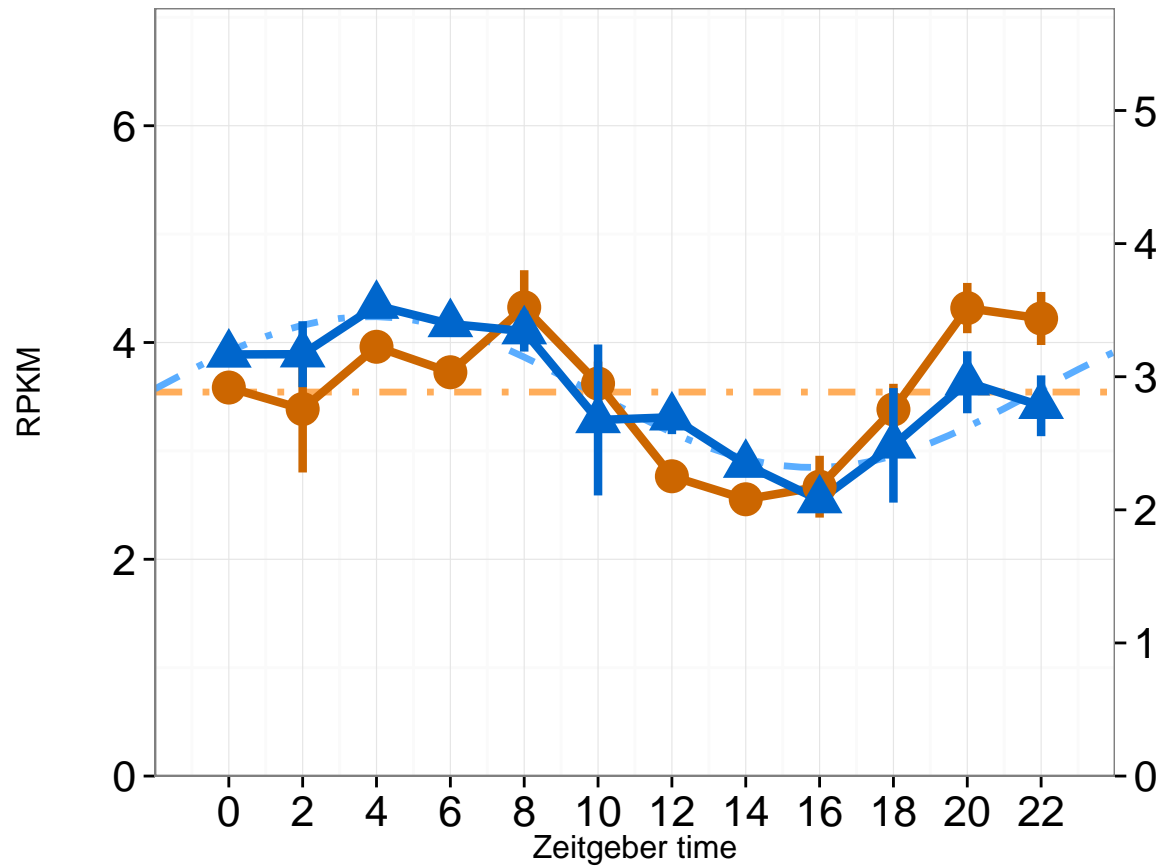

## Nlrx1

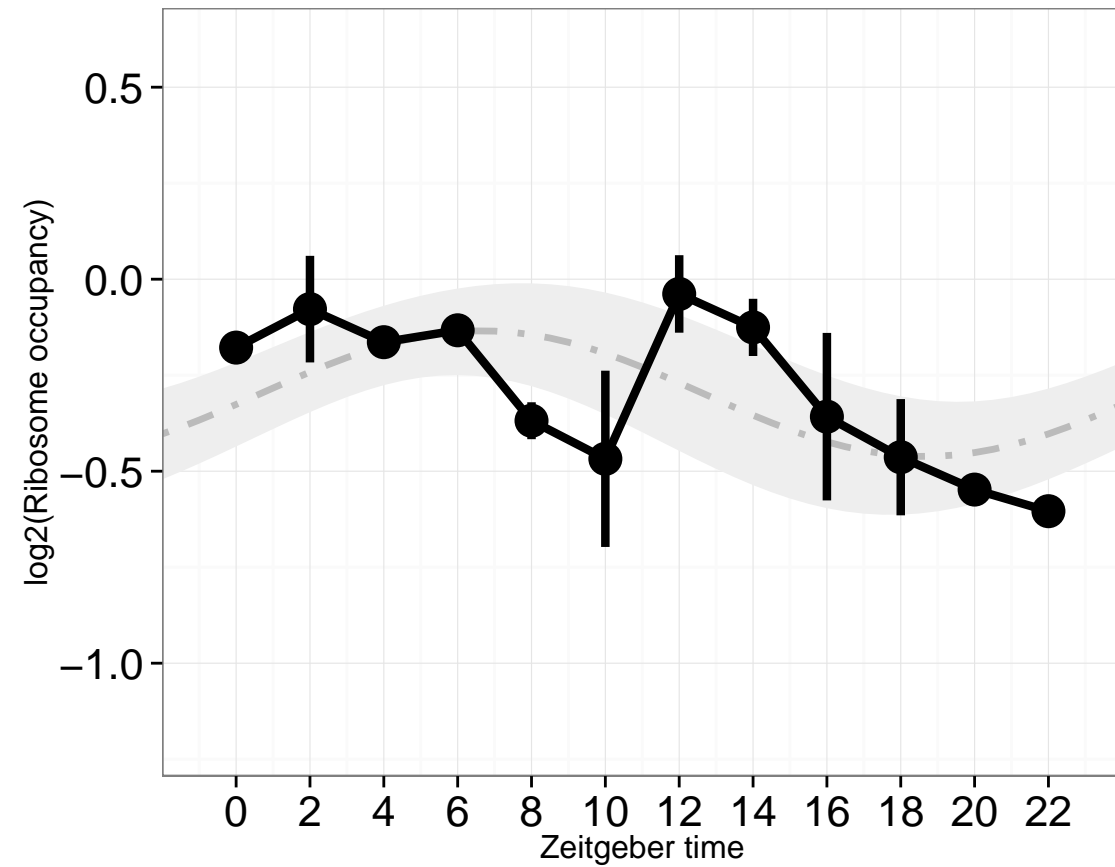

Supplement: SuppDataset_1.zip [file Nlrx1_set_A.pdf › Supplemental Dataset 1/A-mRNA_nonrhyth_translation_nonrhyth/Nlrx1_set_A.pdf]

## Nmd3

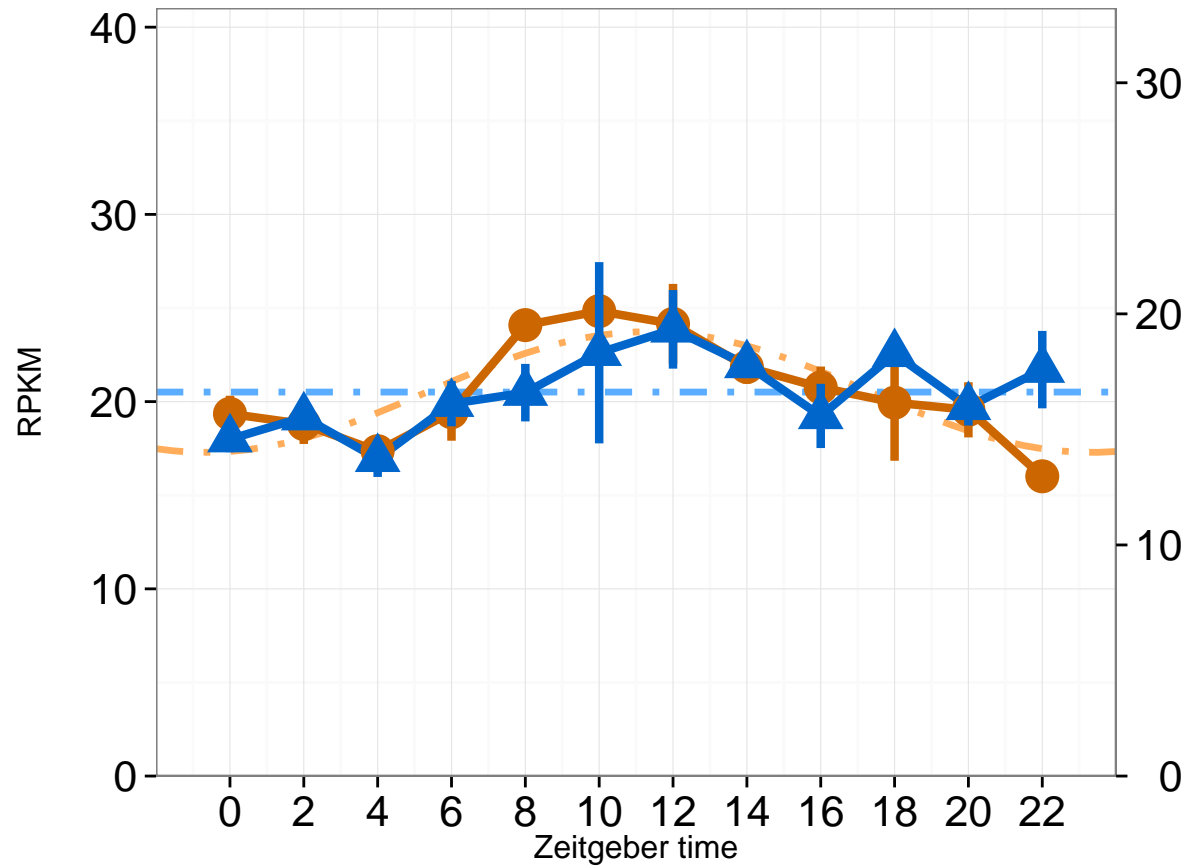

## Nmd3

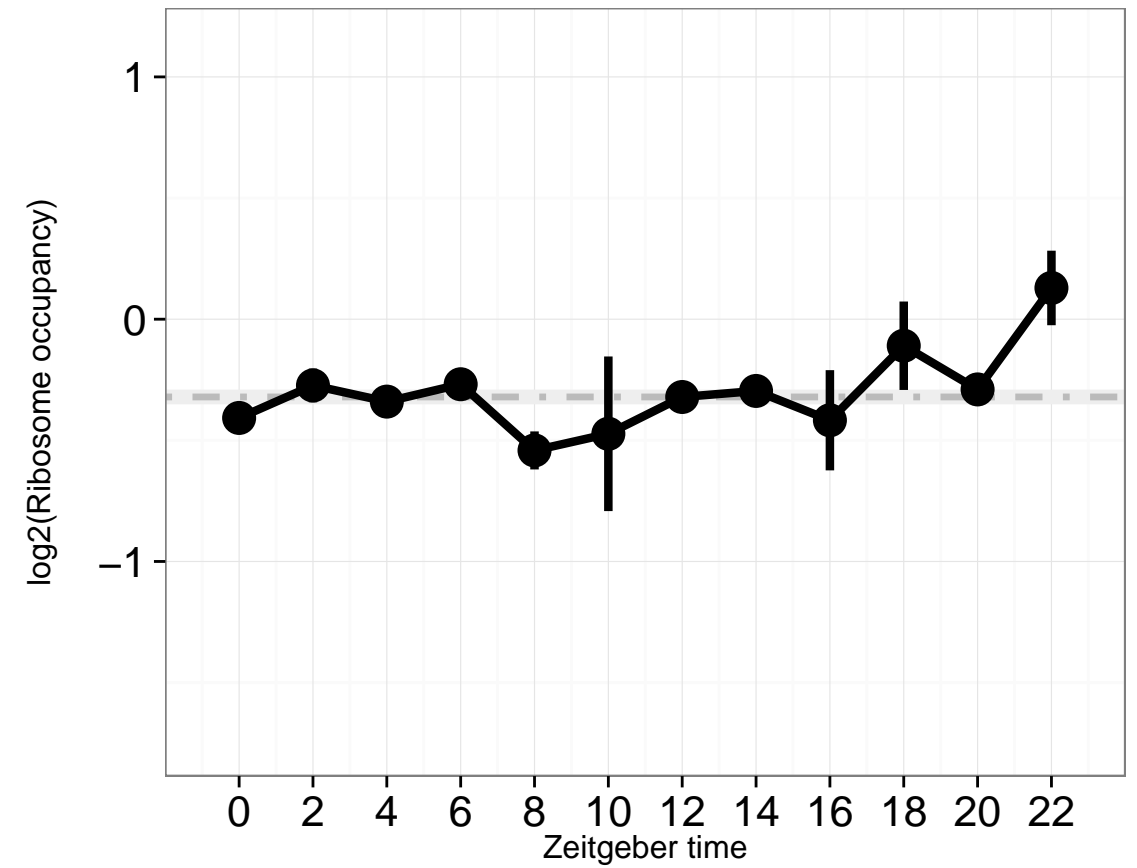

Supplement: SuppDataset_1.zip [file Nmd3_set_A.pdf › Supplemental Dataset 1/A-mRNA_nonrhyth_translation_nonrhyth/Nmd3_set_A.pdf]

## Nme1

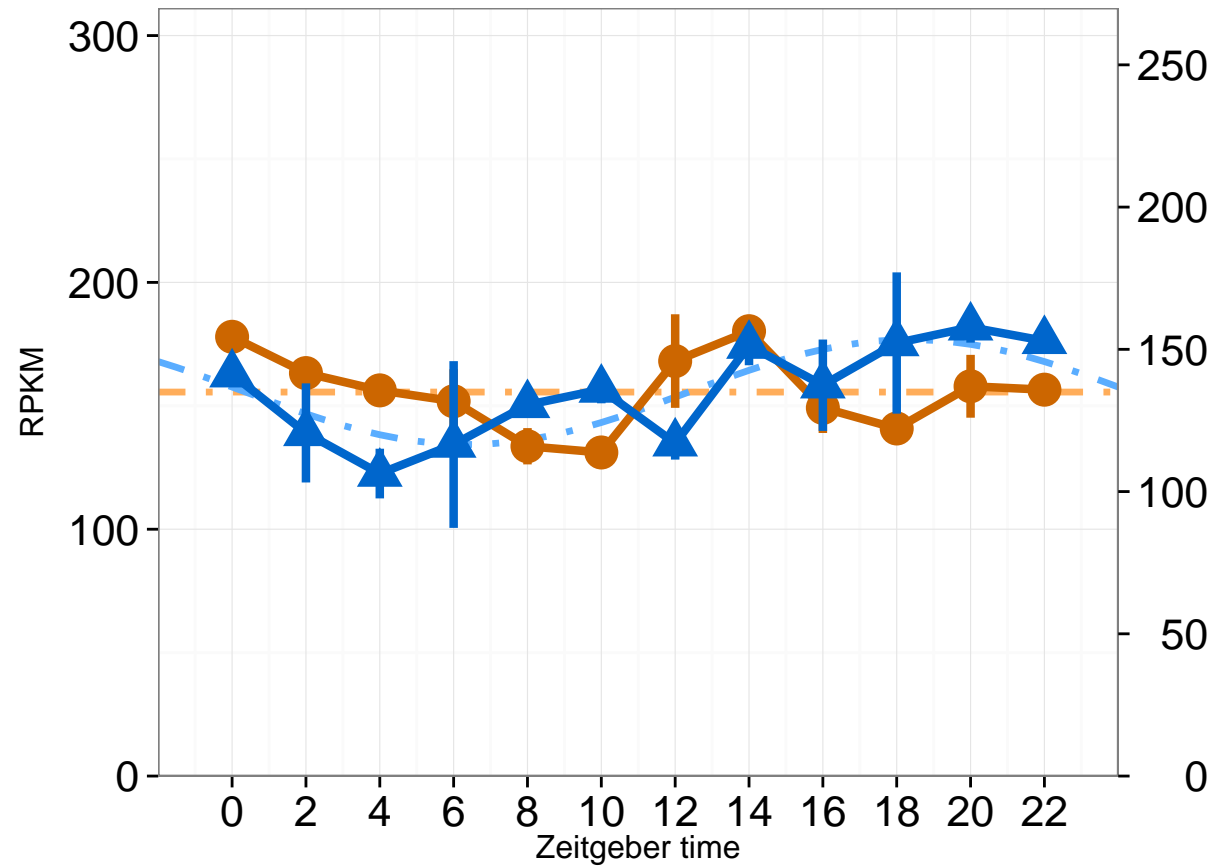

## Nme1

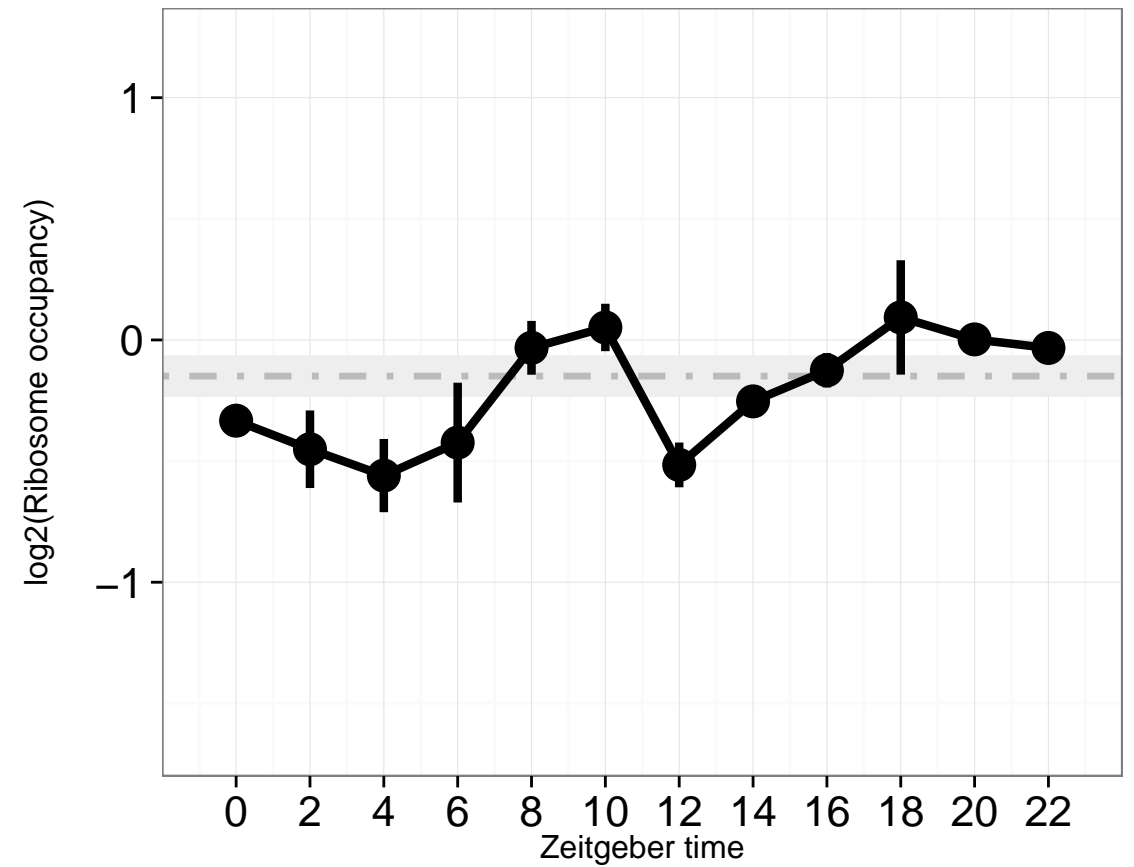

Supplement: SuppDataset_1.zip [file Nme1_set_A.pdf › Supplemental Dataset 1/A-mRNA_nonrhyth_translation_nonrhyth/Nme1_set_A.pdf]

## Nme2

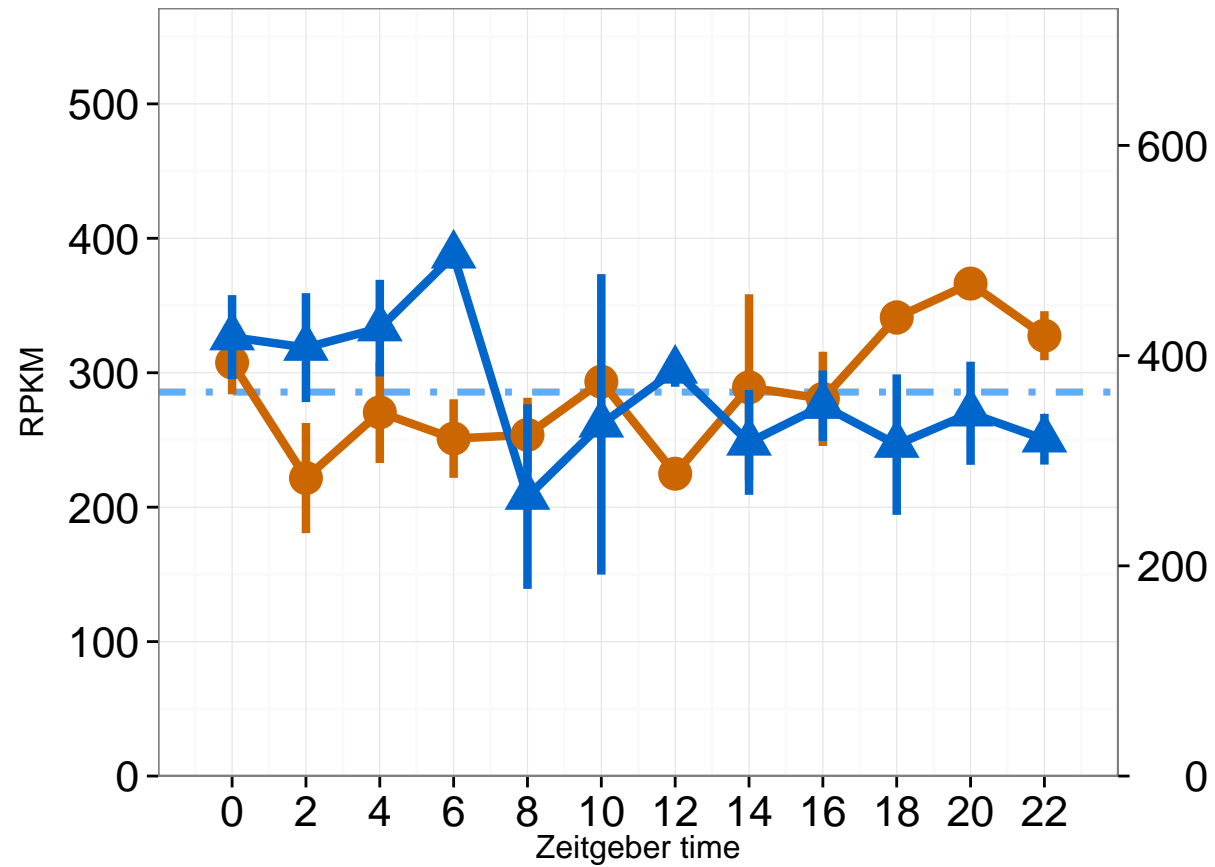

## Nme2

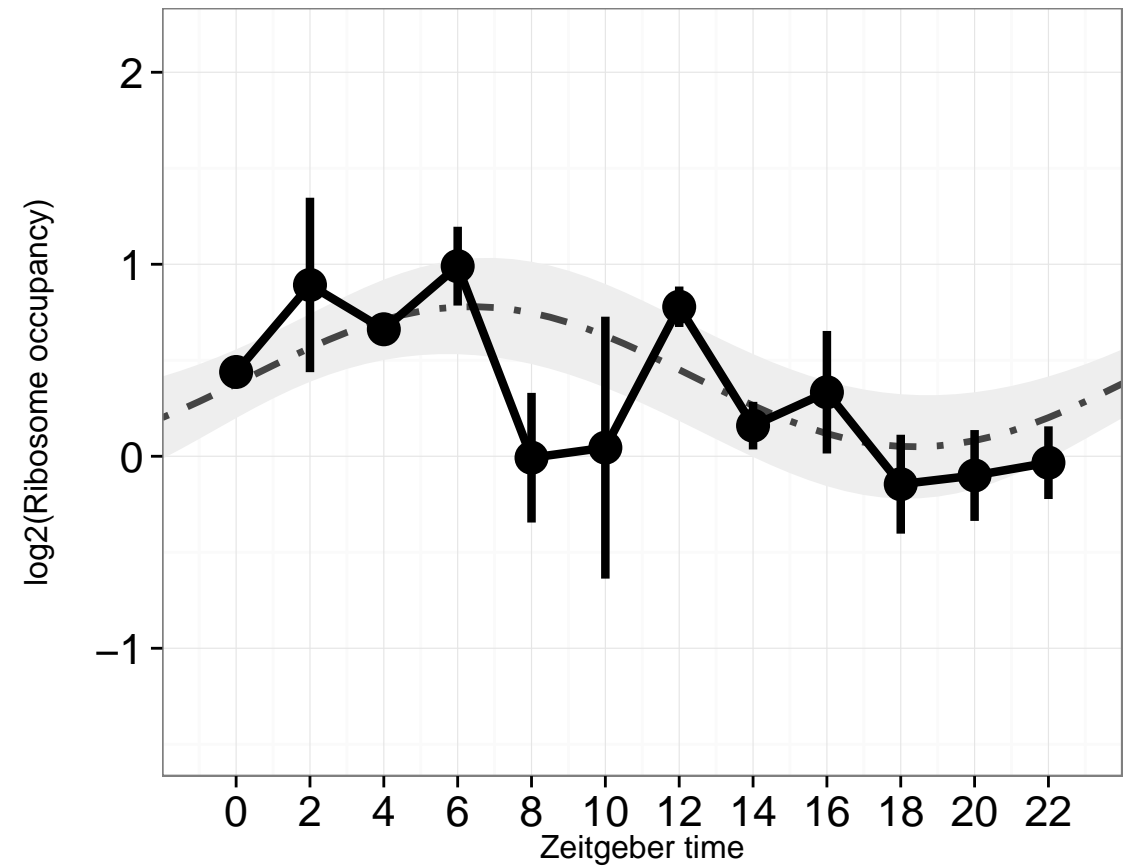

Supplement: SuppDataset_1.zip [file Nme2_set_A.pdf › Supplemental Dataset 1/A-mRNA_nonrhyth_translation_nonrhyth/Nme2_set_A.pdf]

## Nme3

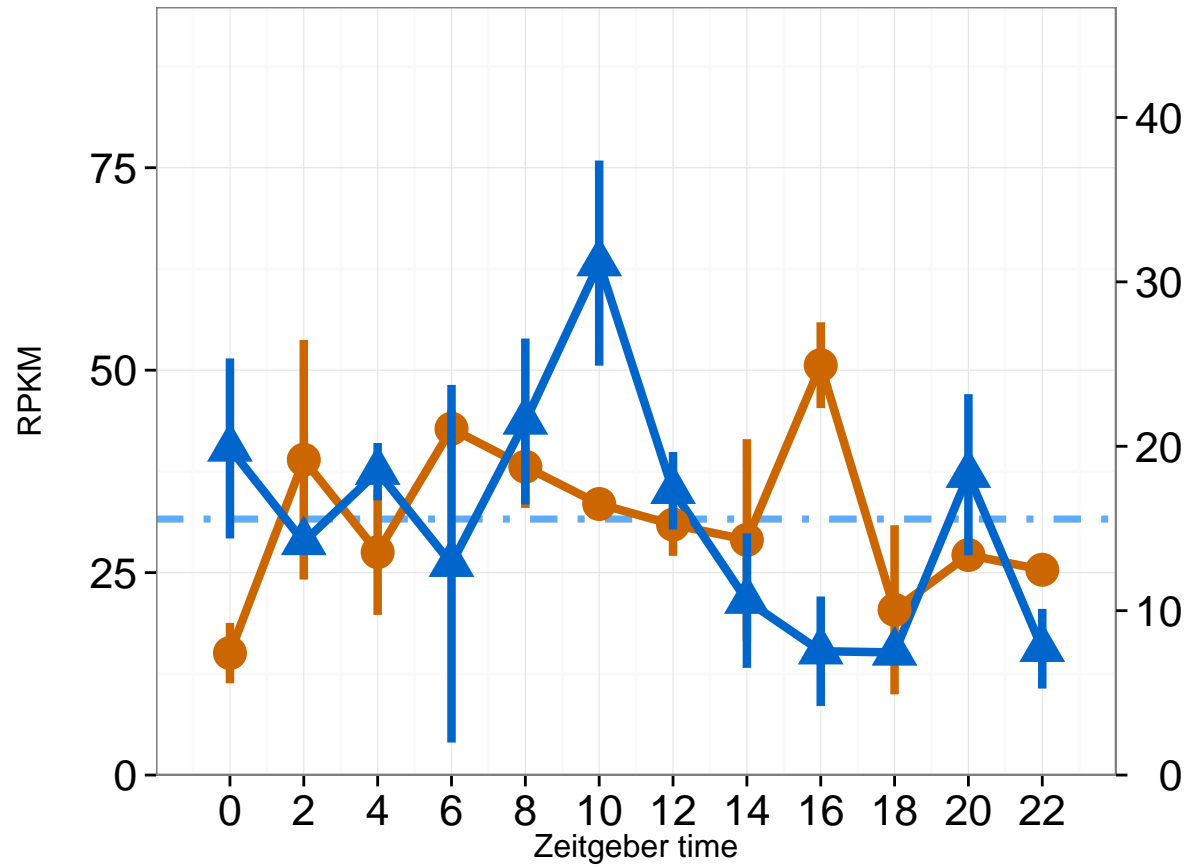

## Nme3

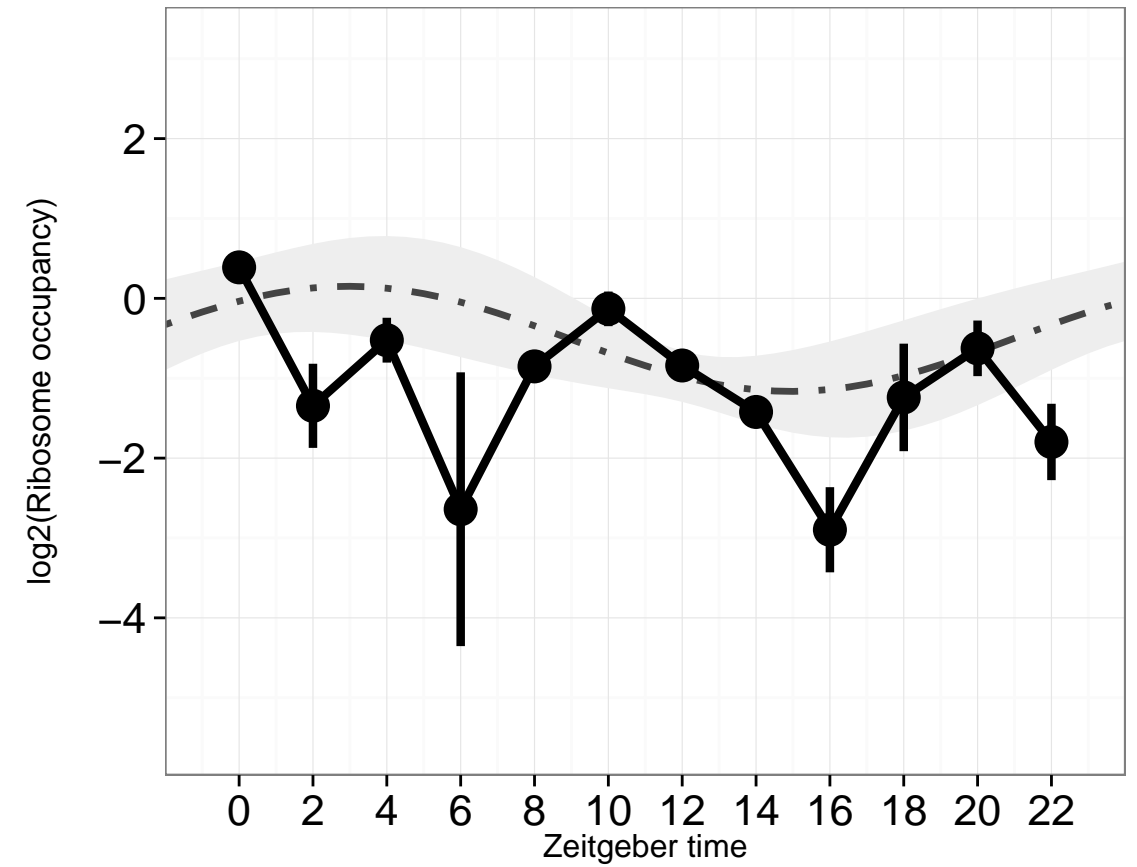

Supplement: SuppDataset_1.zip [file Nme3_set_A.pdf › Supplemental Dataset 1/A-mRNA_nonrhyth_translation_nonrhyth/Nme3_set_A.pdf]

## Nme6

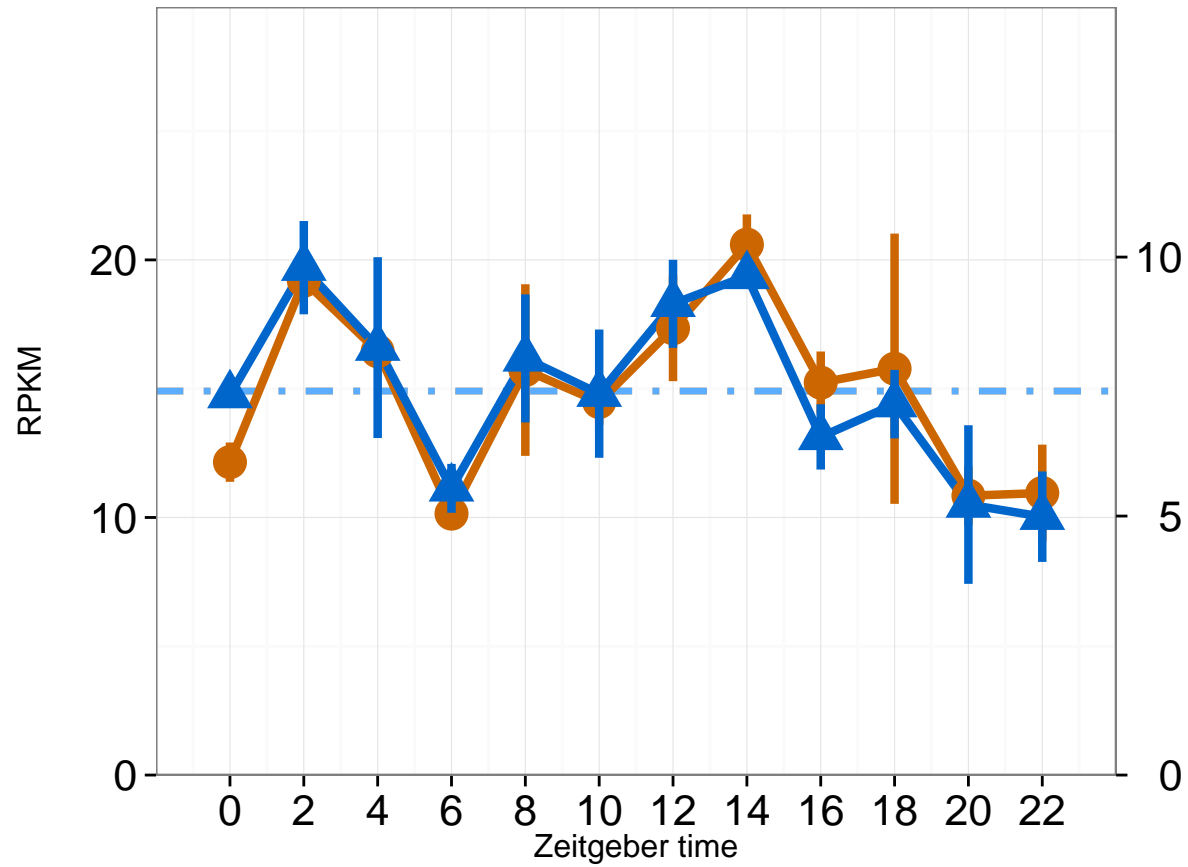

## Nme6

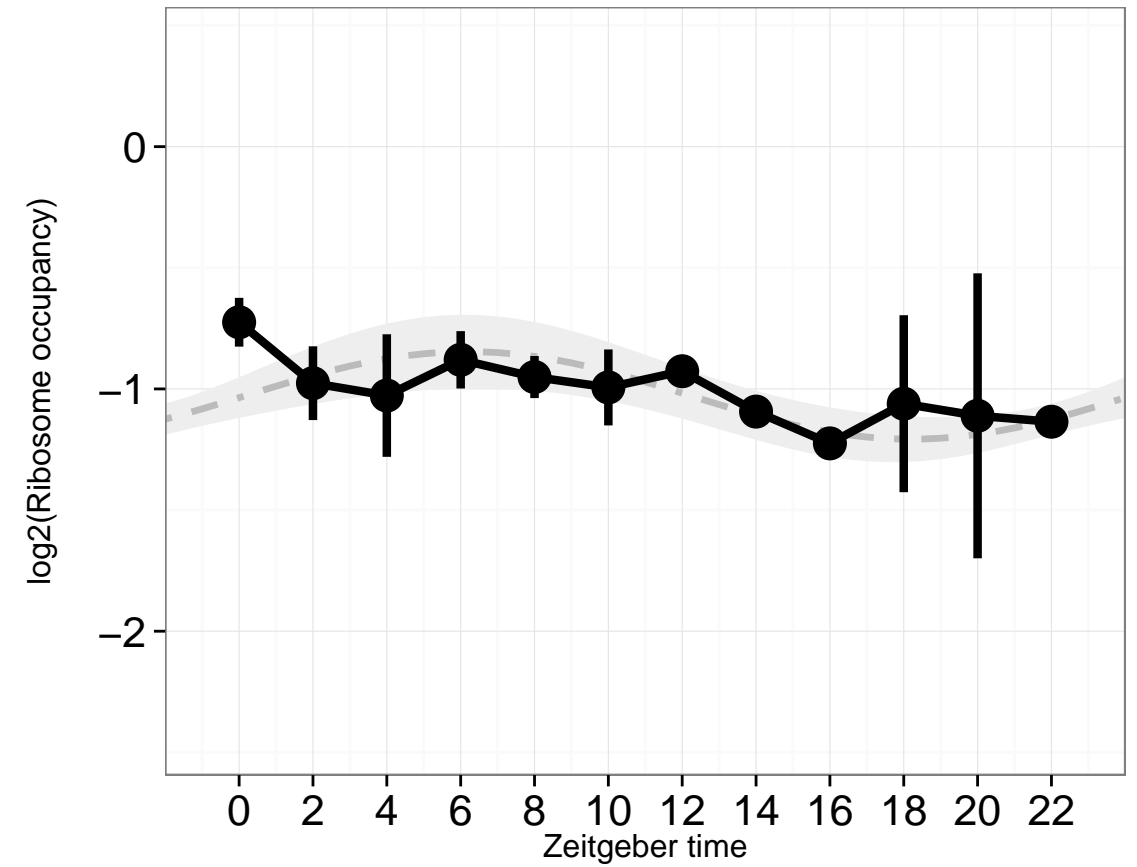

Supplement: SuppDataset_1.zip [file Nme6_set_A.pdf › Supplemental Dataset 1/A-mRNA_nonrhyth_translation_nonrhyth/Nme6_set_A.pdf]

# Nme7

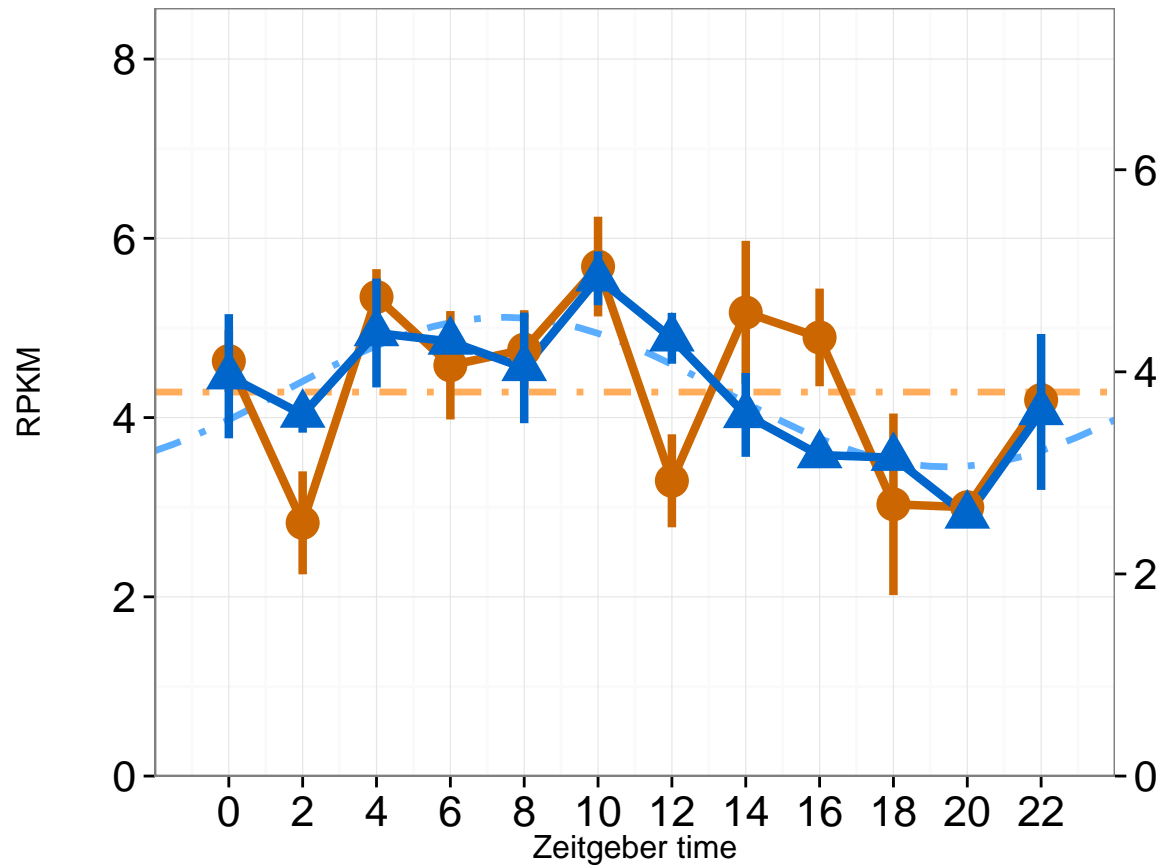

# Nme7

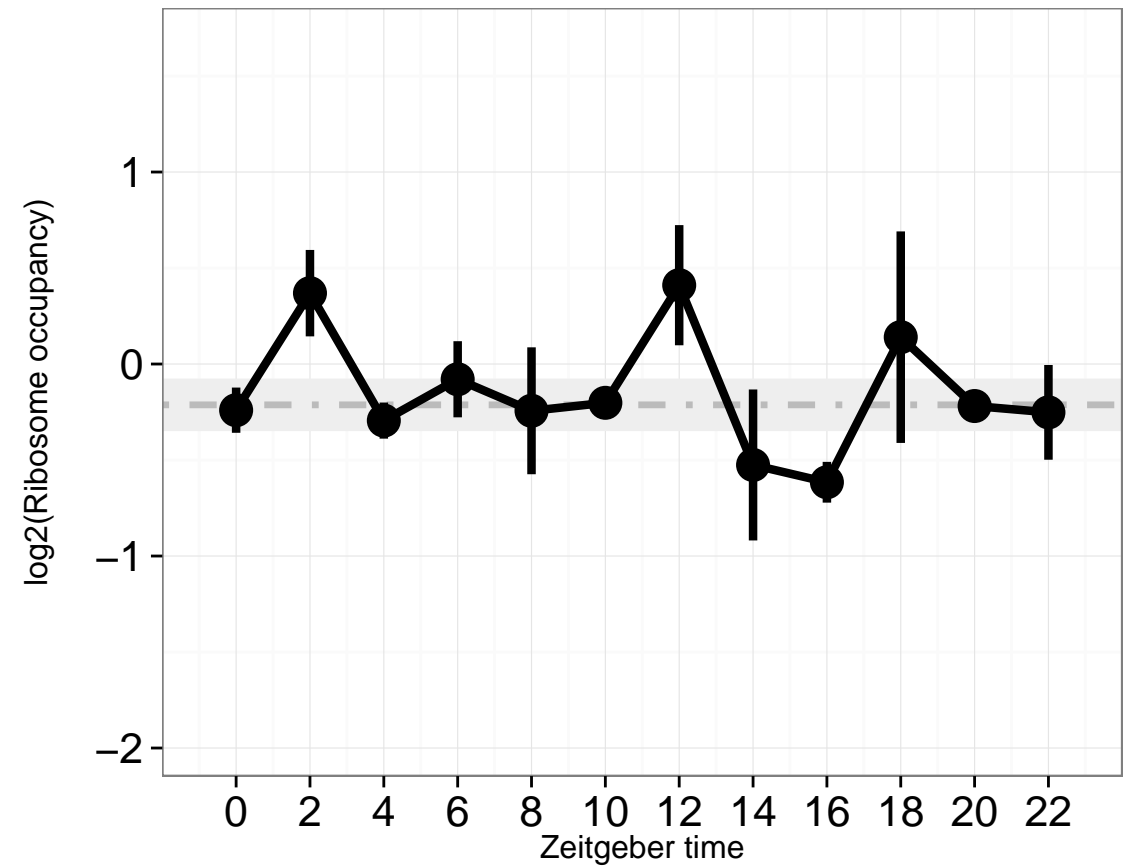

Supplement: SuppDataset_1.zip [file Nme7_set_A.pdf › Supplemental Dataset 1/A-mRNA_nonrhyth_translation_nonrhyth/Nme7_set_A.pdf]

## Nmi

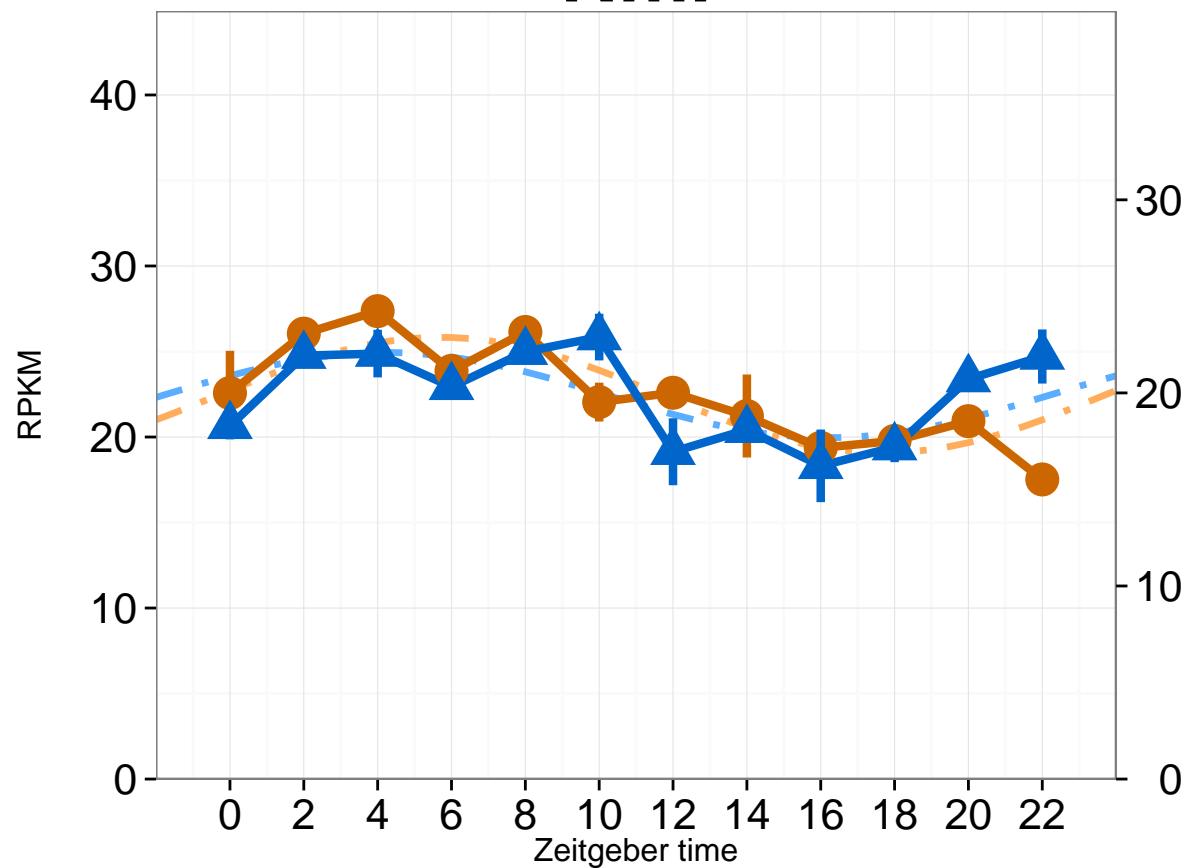

## Nmi

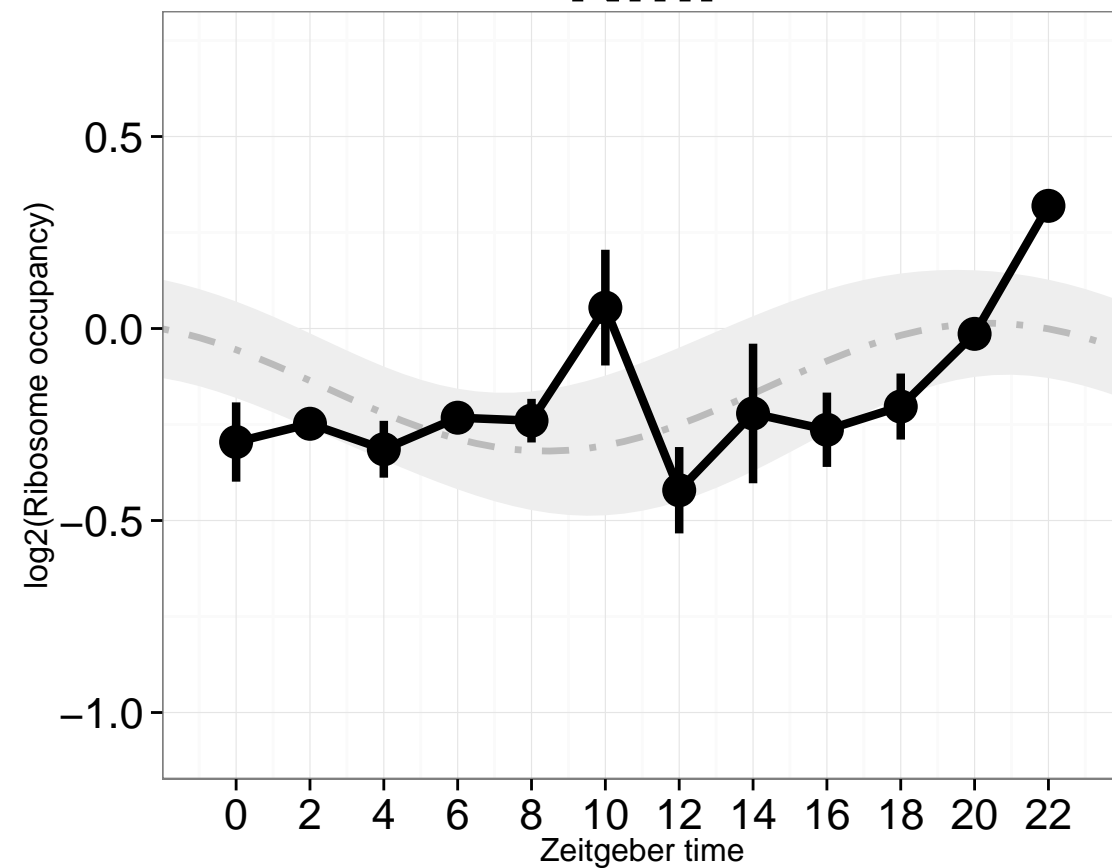

Supplement: SuppDataset_1.zip [file Nmi_set_A.pdf › Supplemental Dataset 1/A-mRNA_nonrhyth_translation_nonrhyth/Nmi_set_A.pdf]

# Nmnat1

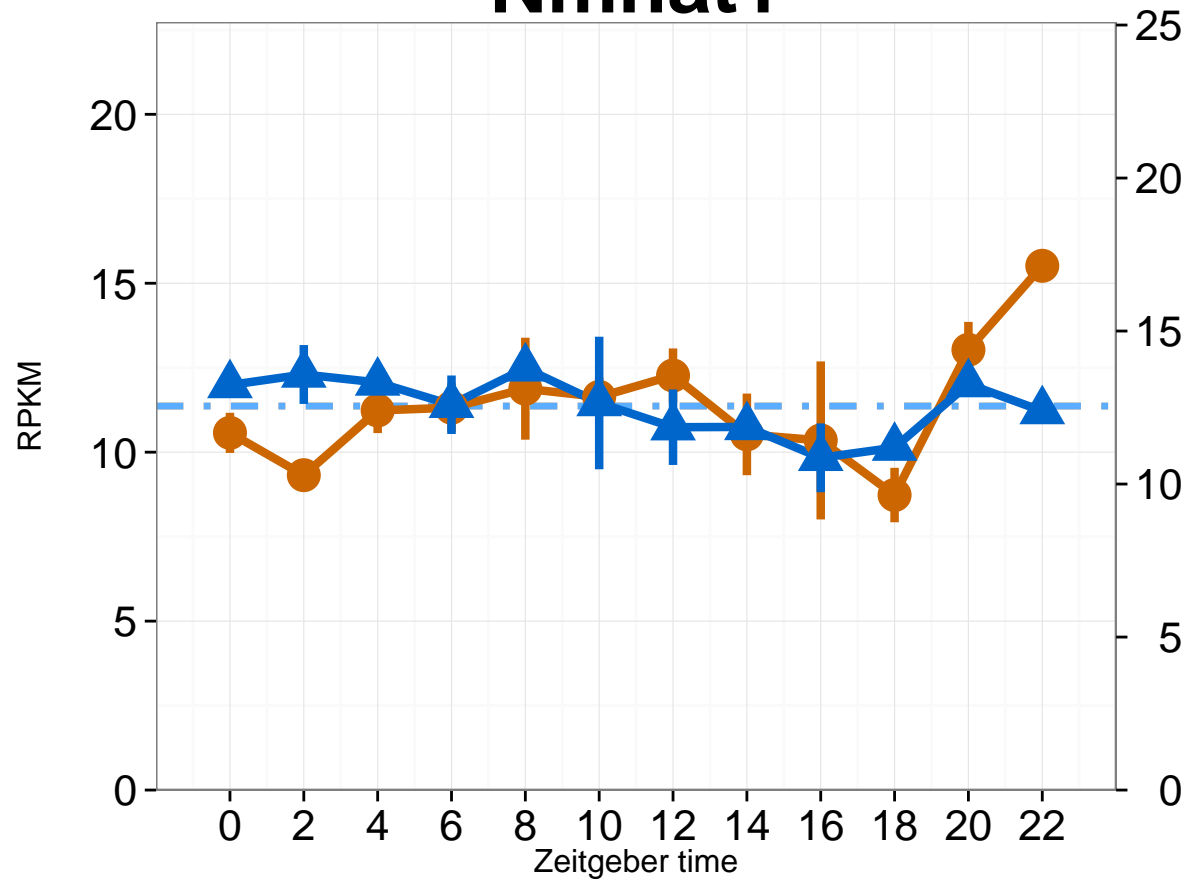

# Nmnat1

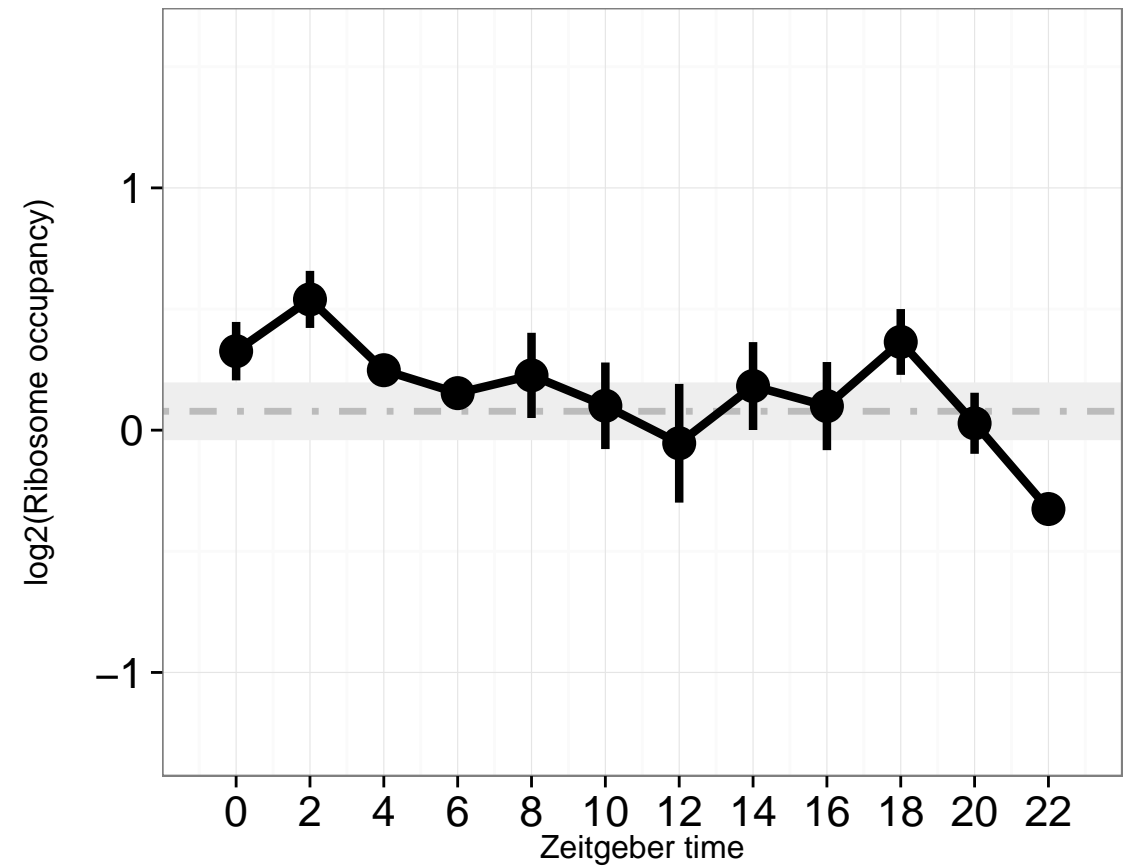

Supplement: SuppDataset_1.zip [file Nmnat1_set_A.pdf › Supplemental Dataset 1/A-mRNA_nonrhyth_translation_nonrhyth/Nmnat1_set_A.pdf]

## Nmral1

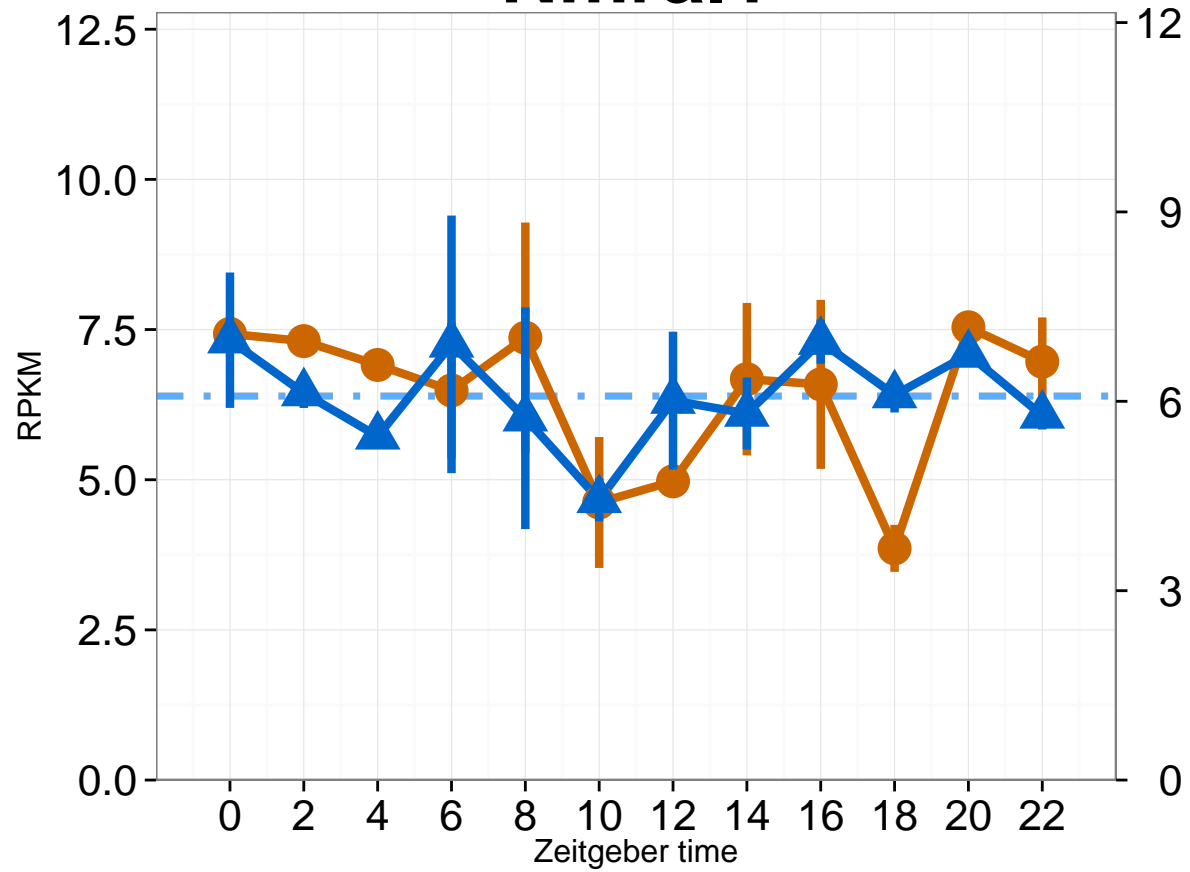

## Nmral1

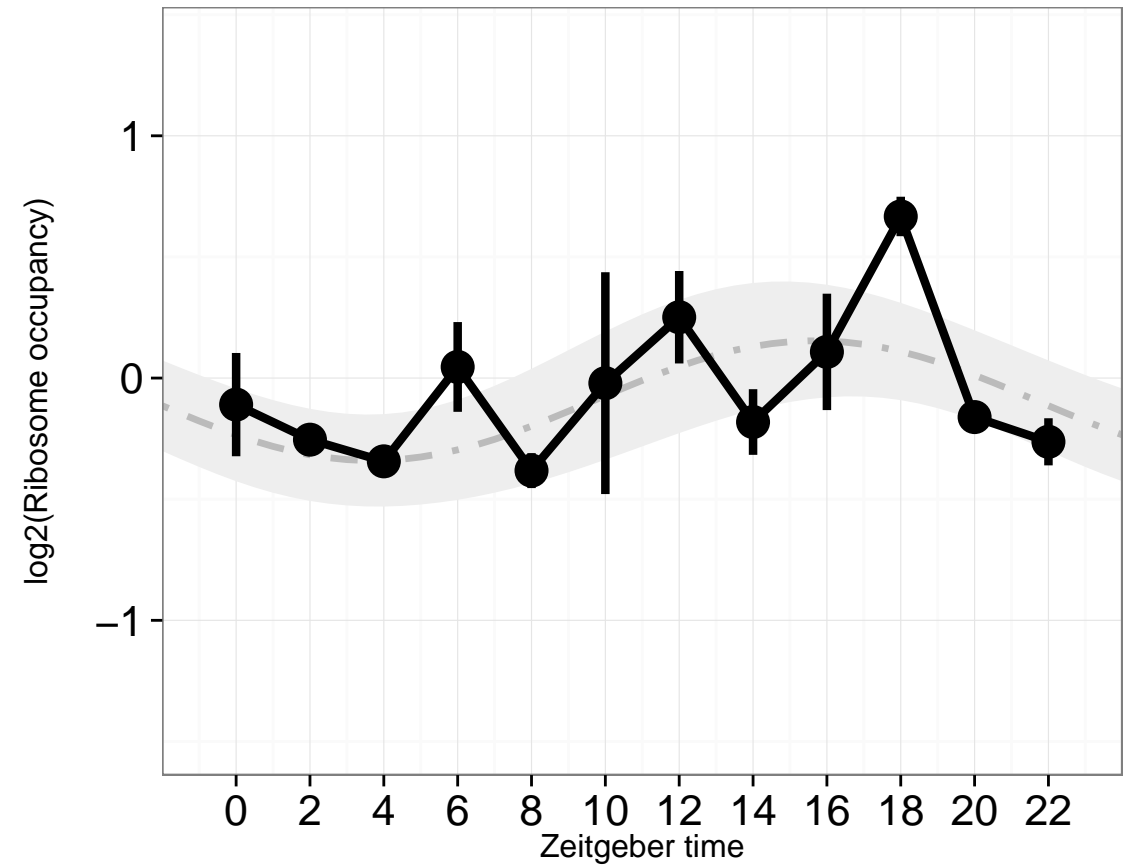

Supplement: SuppDataset_1.zip [file Nmral1_set_A.pdf › Supplemental Dataset 1/A-mRNA_nonrhyth_translation_nonrhyth/Nmral1_set_A.pdf]

## Nmt1

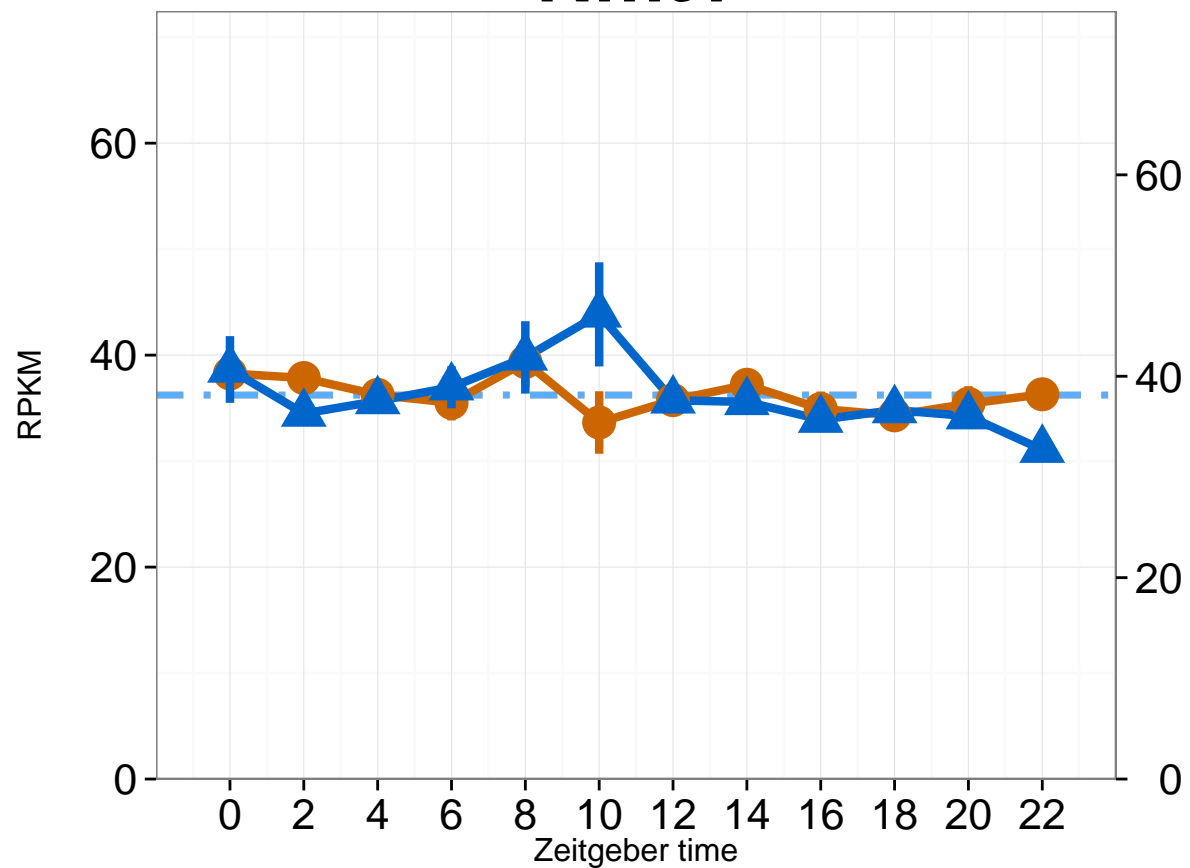

## Nmt1

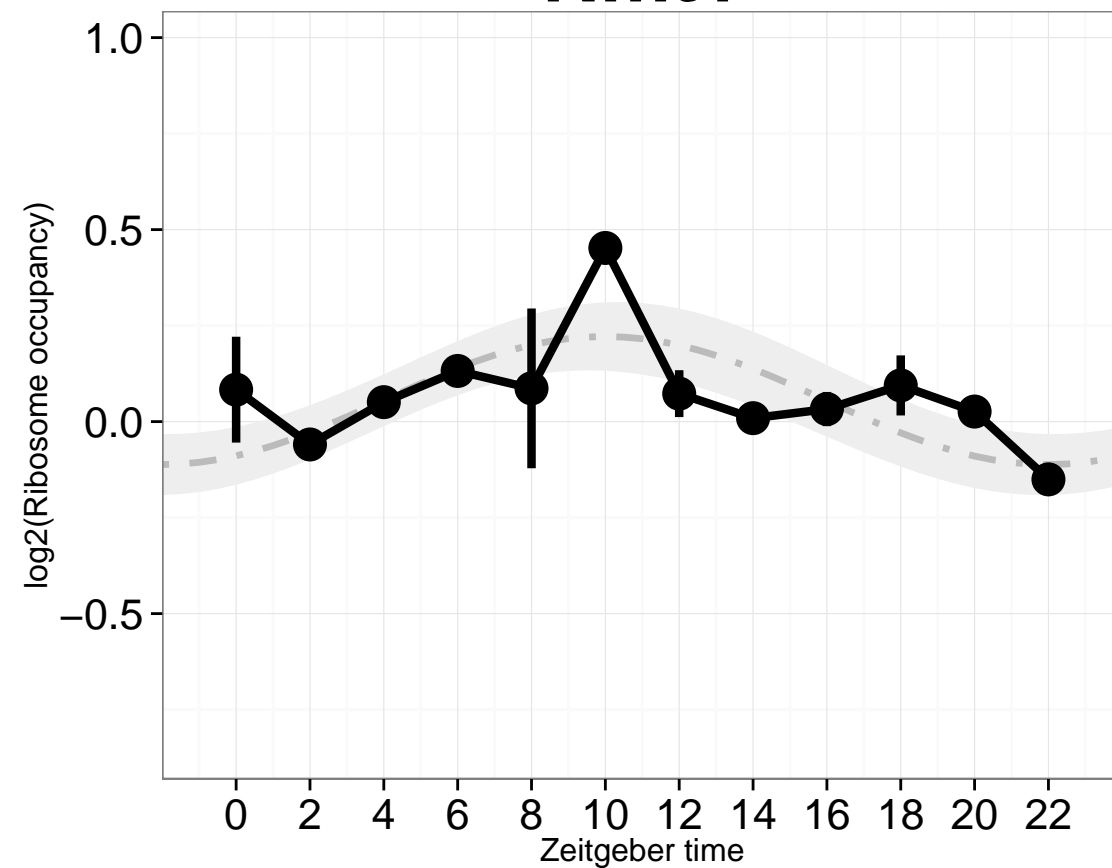

Supplement: SuppDataset_1.zip [file Nmt1_set_A.pdf › Supplemental Dataset 1/A-mRNA_nonrhyth_translation_nonrhyth/Nmt1_set_A.pdf]

## Nmt2

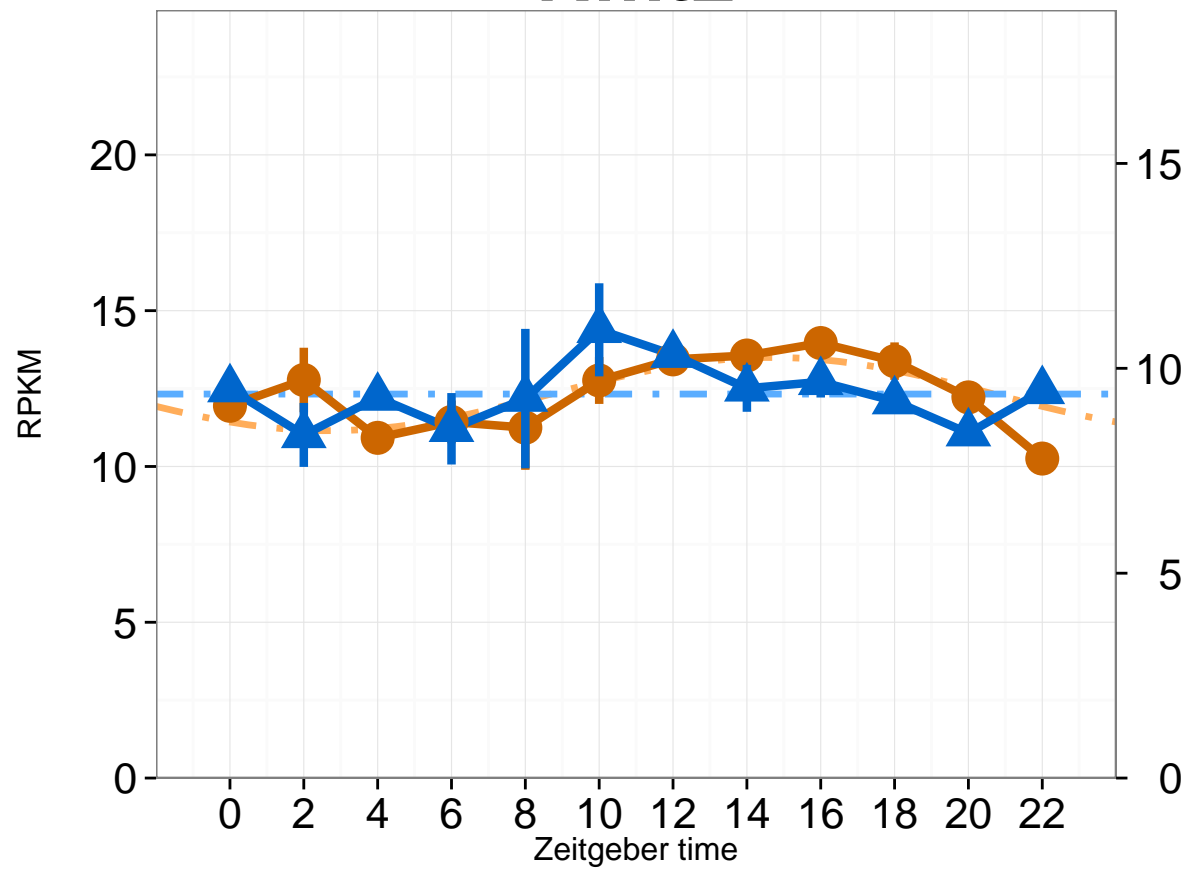

## Nmt2

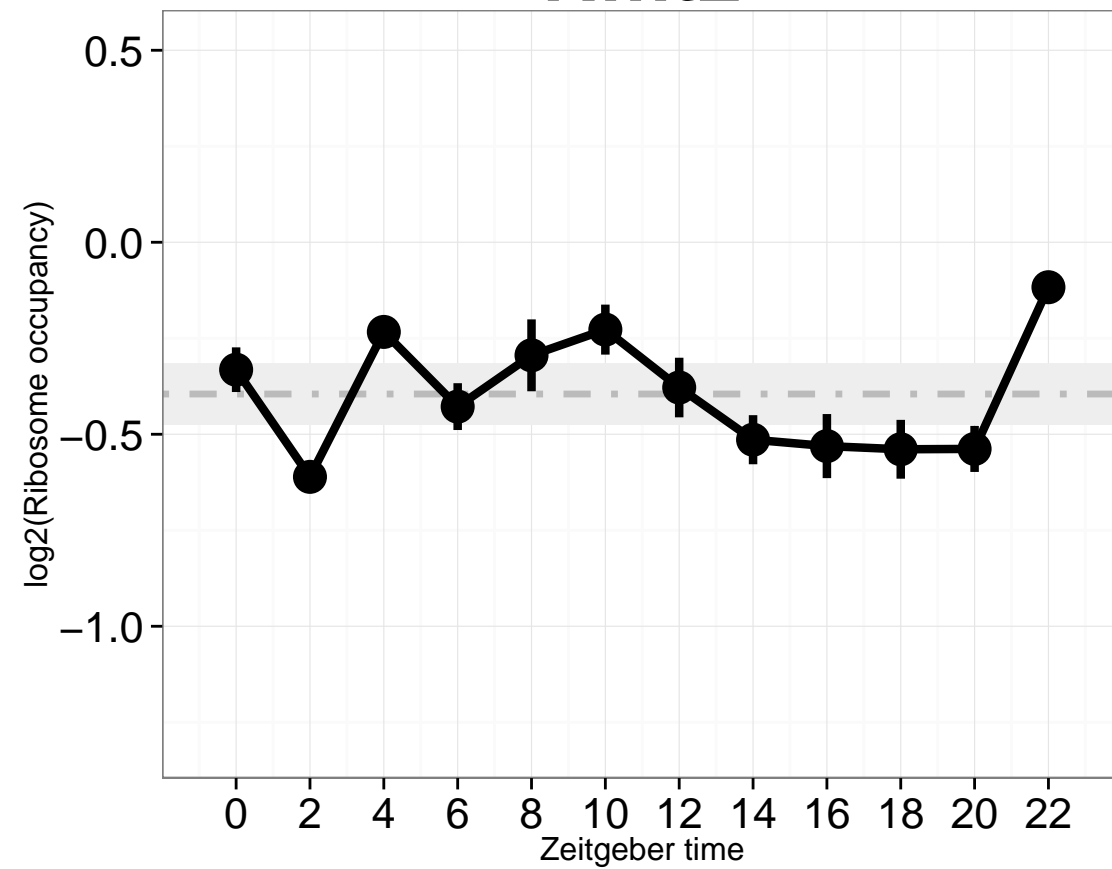

Supplement: SuppDataset_1.zip [file Nmt2_set_A.pdf › Supplemental Dataset 1/A-mRNA_nonrhyth_translation_nonrhyth/Nmt2_set_A.pdf]

## Noa1

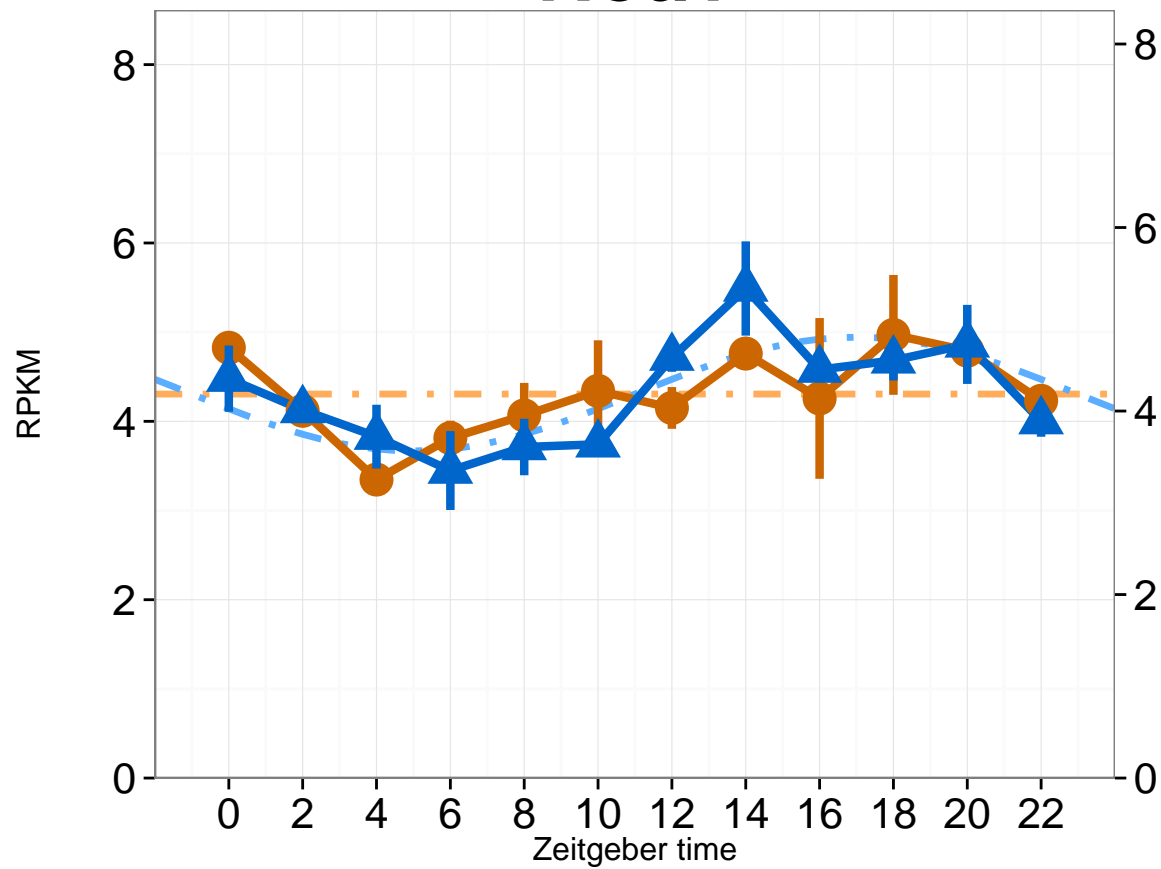

## Noa1

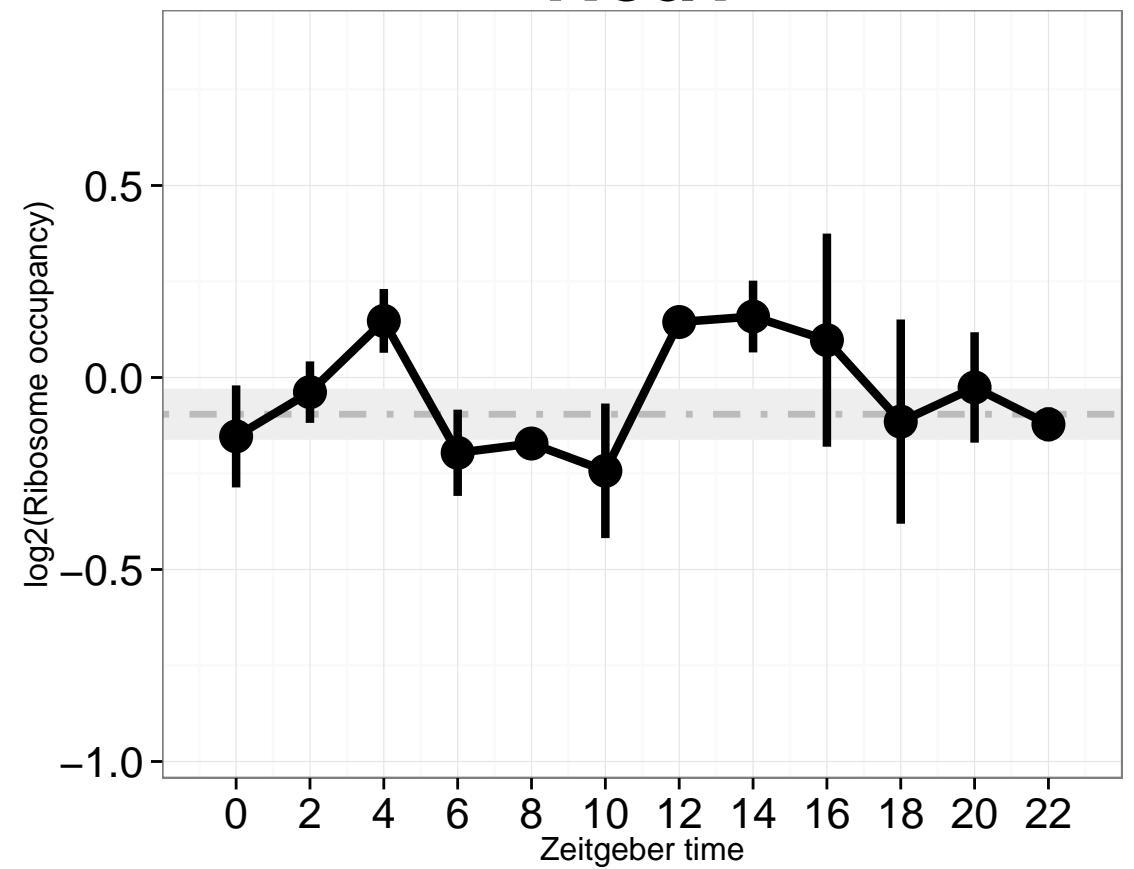

Supplement: SuppDataset_1.zip [file Noa1_set_A.pdf › Supplemental Dataset 1/A-mRNA_nonrhyth_translation_nonrhyth/Noa1_set_A.pdf]

## Nob1

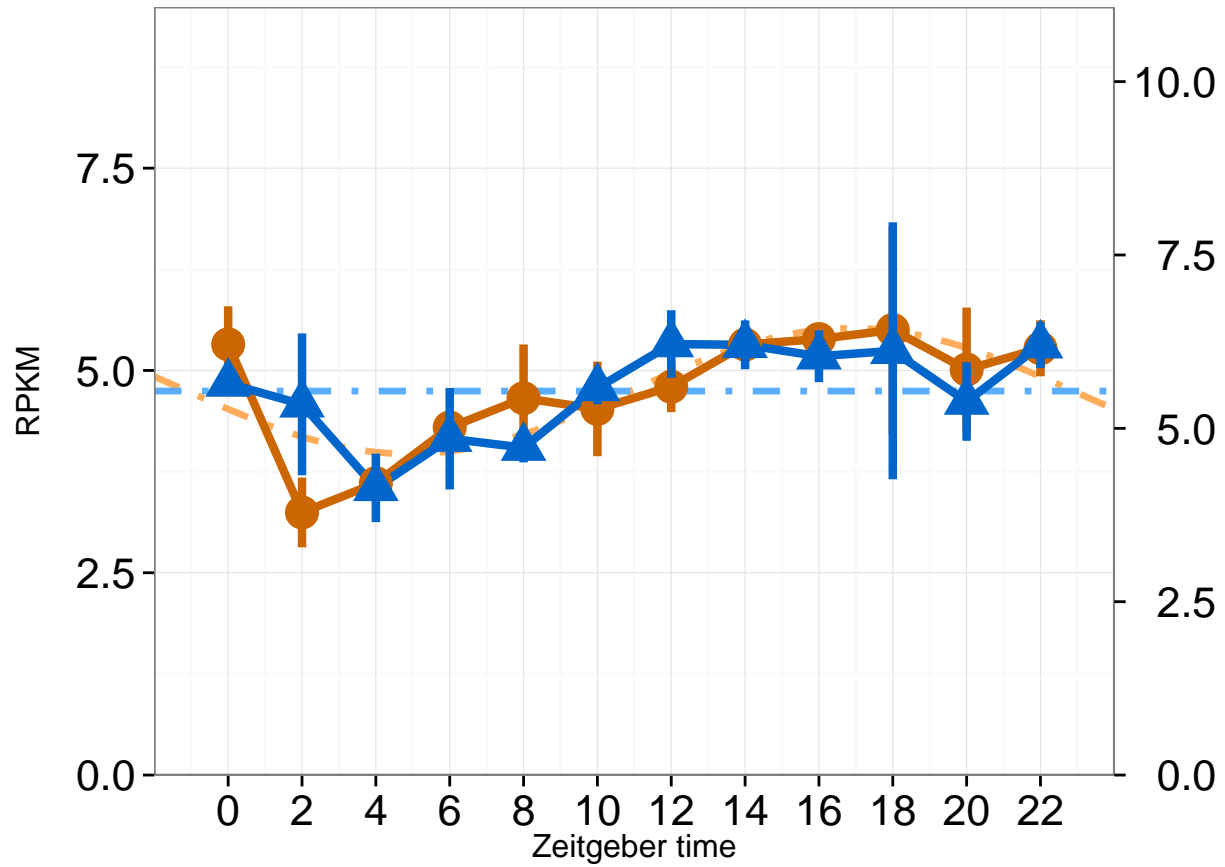

## Nob1

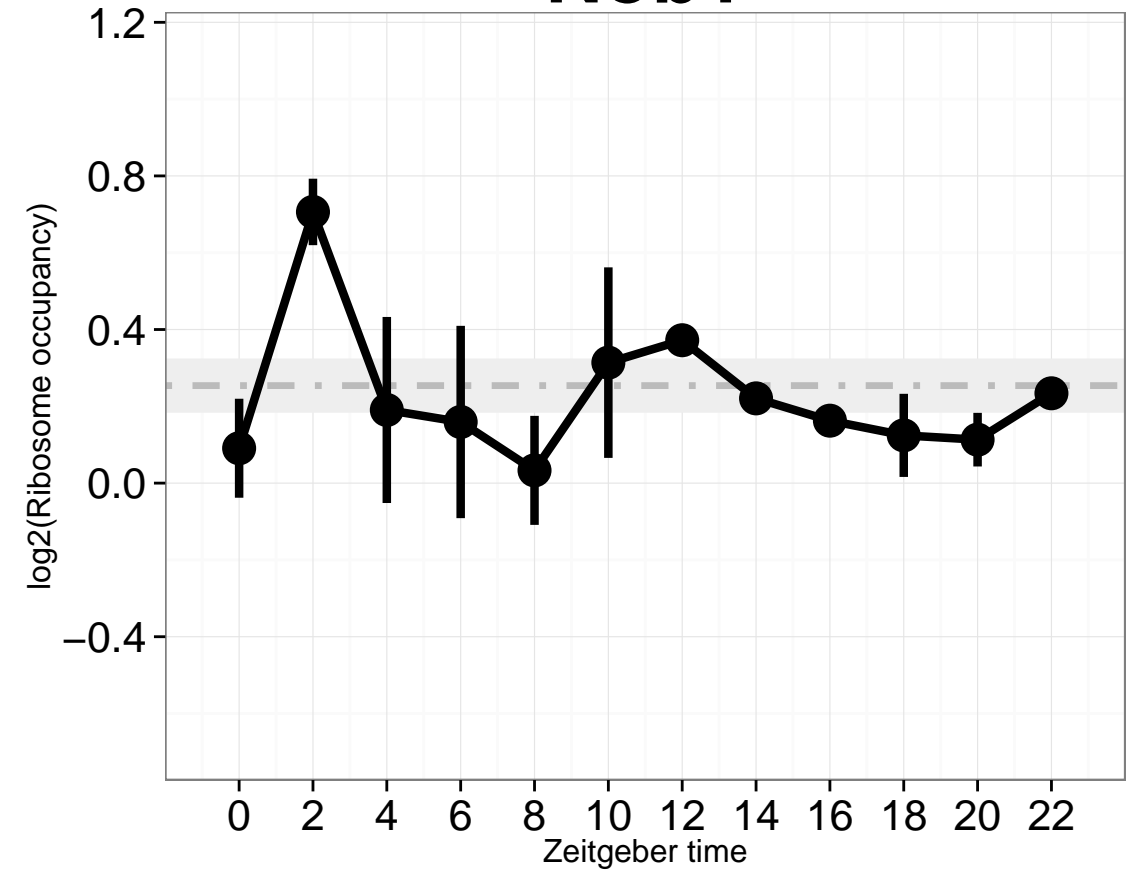

Supplement: SuppDataset_1.zip [file Nob1_set_A.pdf › Supplemental Dataset 1/A-mRNA_nonrhyth_translation_nonrhyth/Nob1_set_A.pdf]

## Noc2l

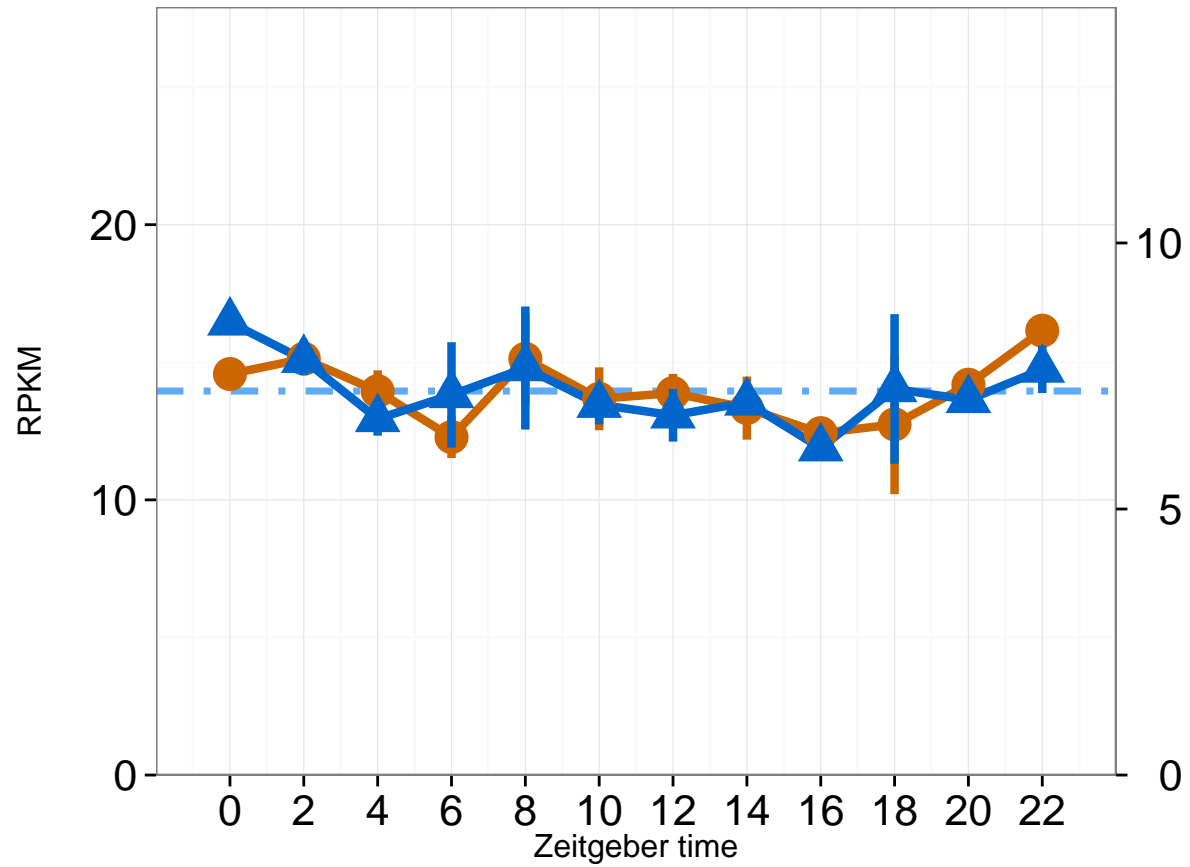

## Noc2l

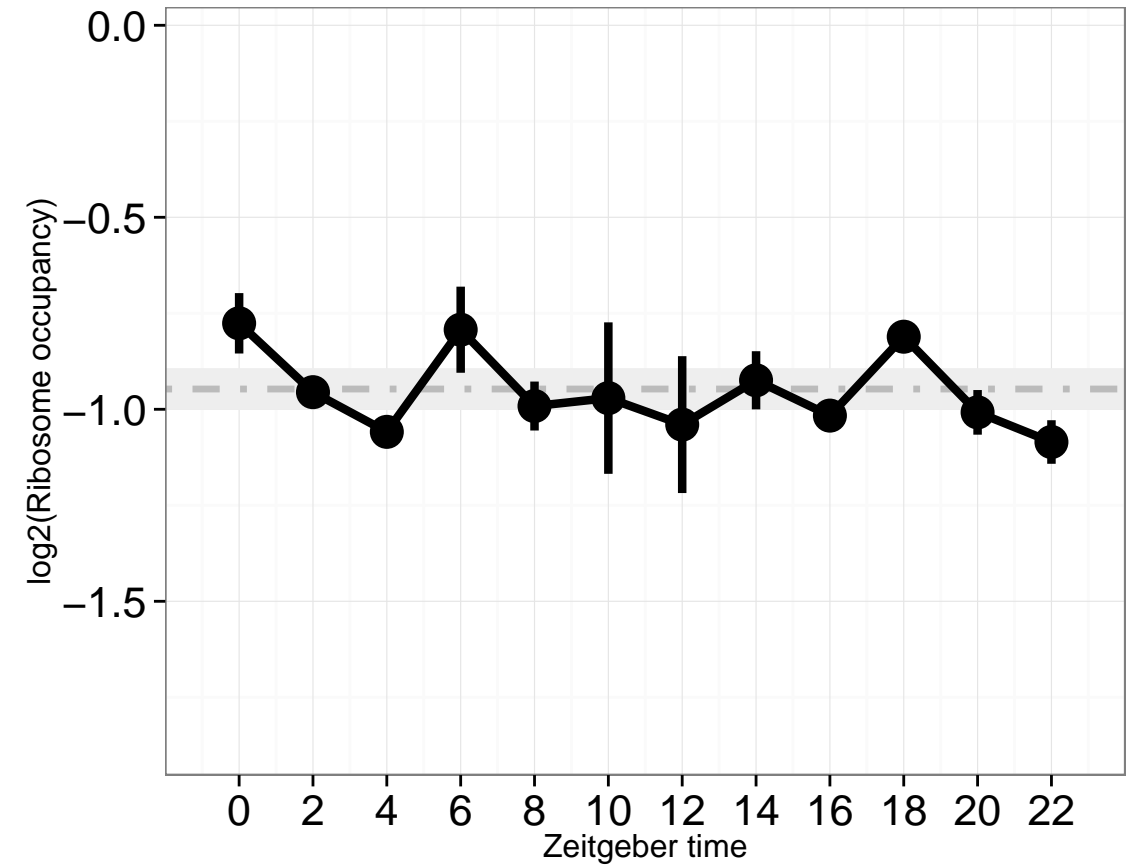

Supplement: SuppDataset_1.zip [file Noc2l_set_A.pdf › Supplemental Dataset 1/A-mRNA_nonrhyth_translation_nonrhyth/Noc2l_set_A.pdf]

## Noc3l

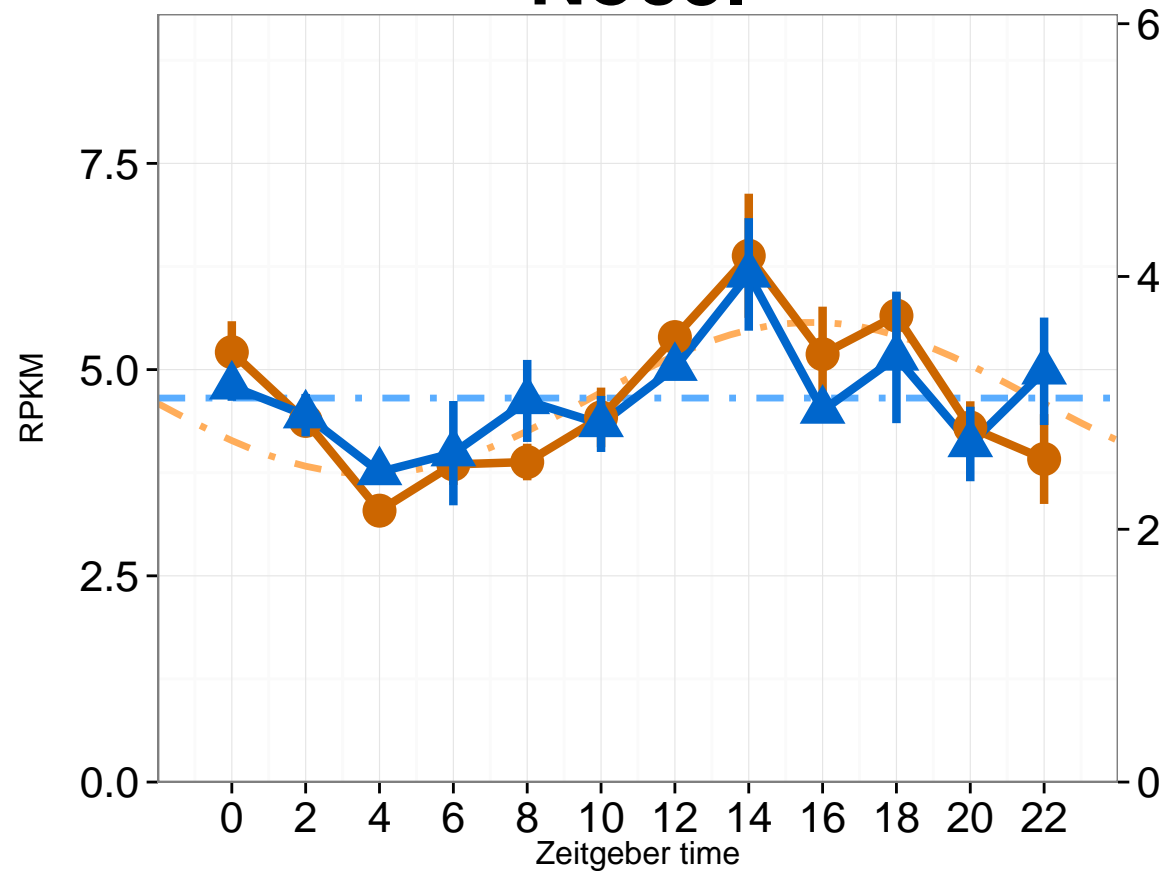

## Noc3l

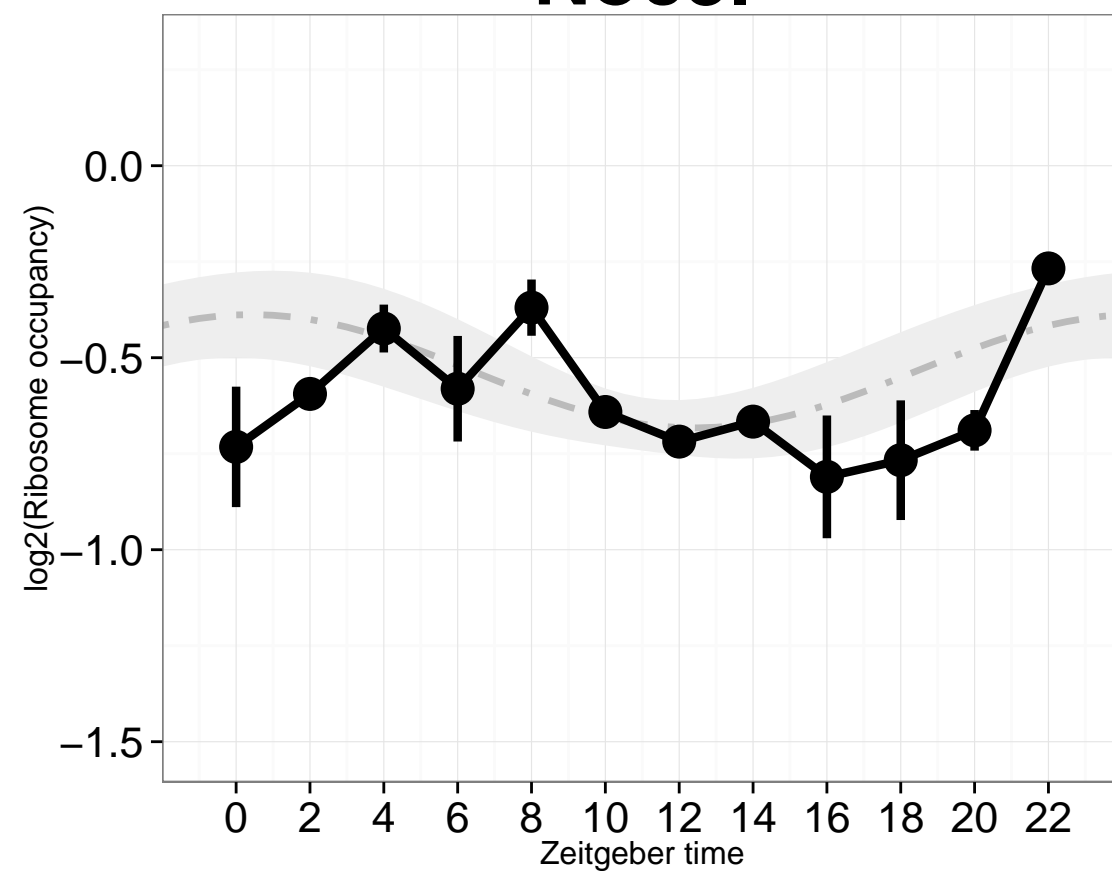

Supplement: SuppDataset_1.zip [file Noc3l_set_A.pdf › Supplemental Dataset 1/A-mRNA_nonrhyth_translation_nonrhyth/Noc3l_set_A.pdf]

## Noc4I

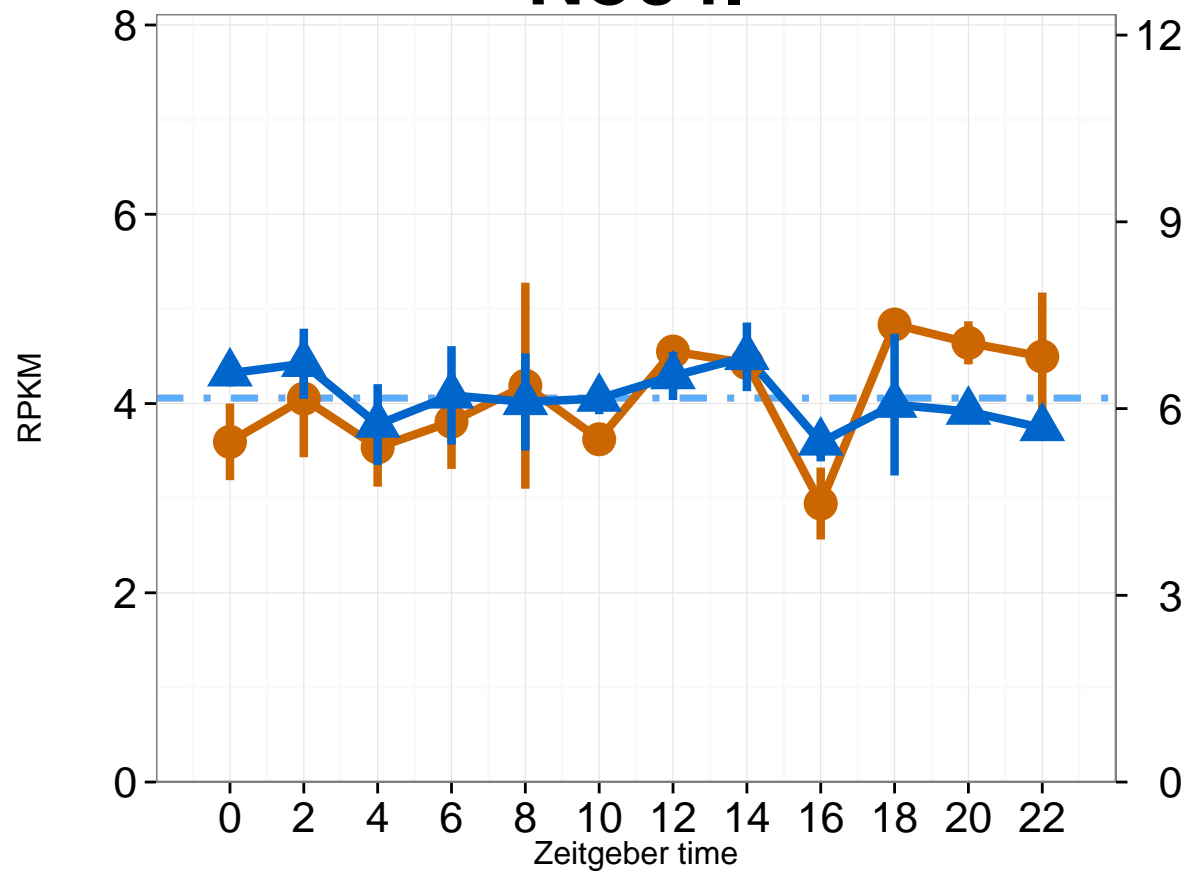

## Noc4I

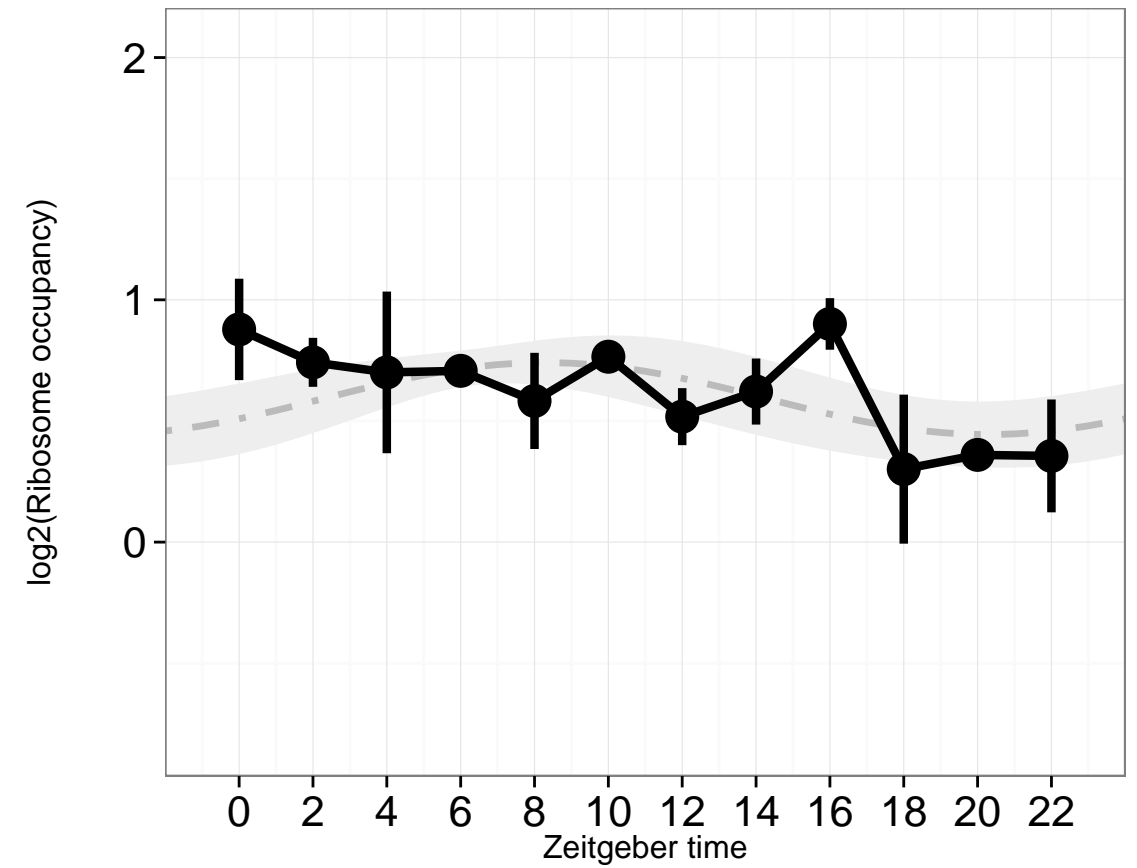

Supplement: SuppDataset_1.zip [file Noc4l_set_A.pdf › Supplemental Dataset 1/A-mRNA_nonrhyth_translation_nonrhyth/Noc4l_set_A.pdf]

# Nod1

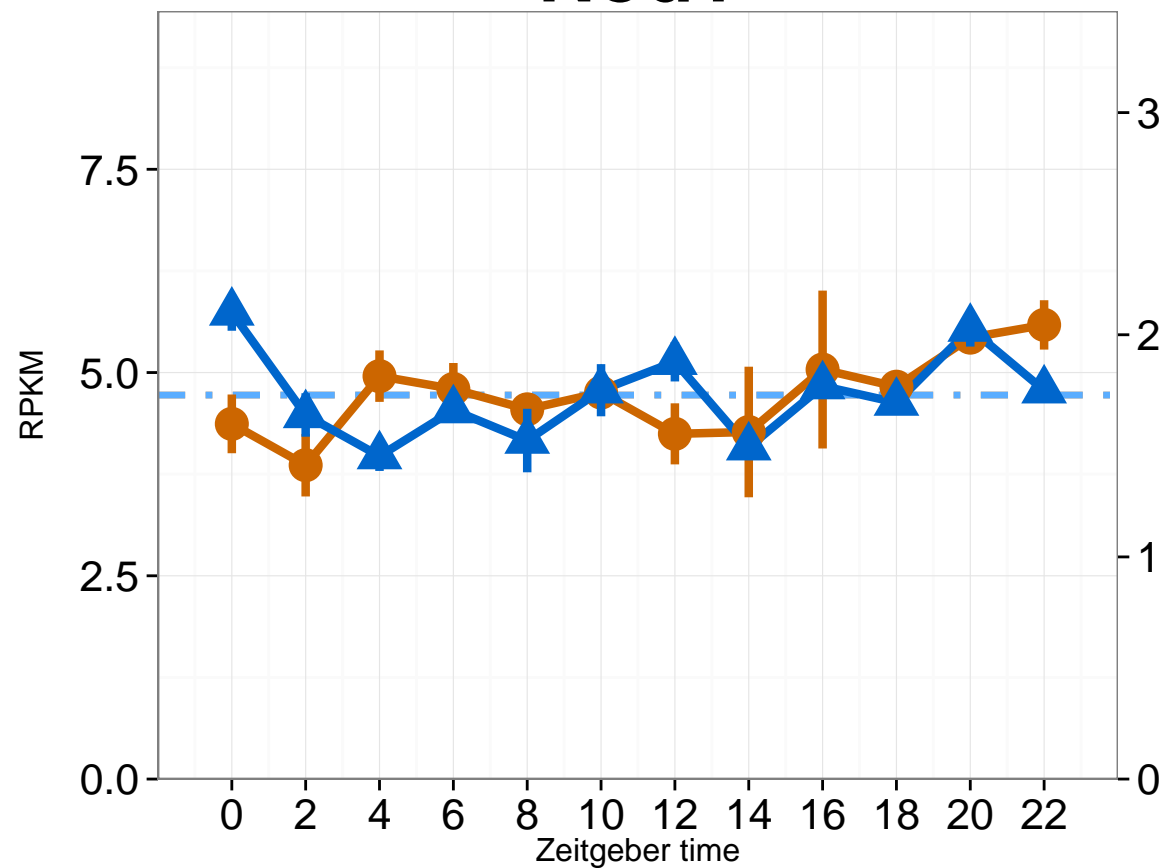

# Nod1

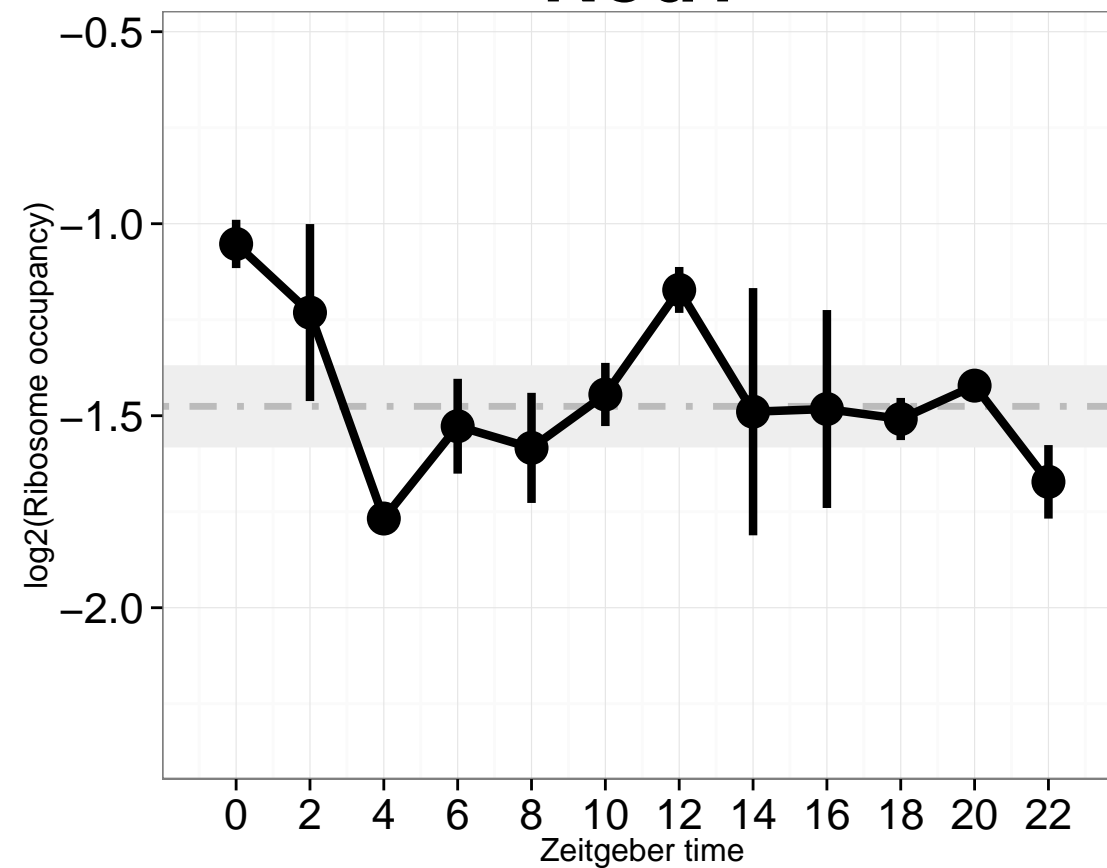

Supplement: SuppDataset_1.zip [file Nod1_set_A.pdf › Supplemental Dataset 1/A-mRNA_nonrhyth_translation_nonrhyth/Nod1_set_A.pdf]

## NoI11

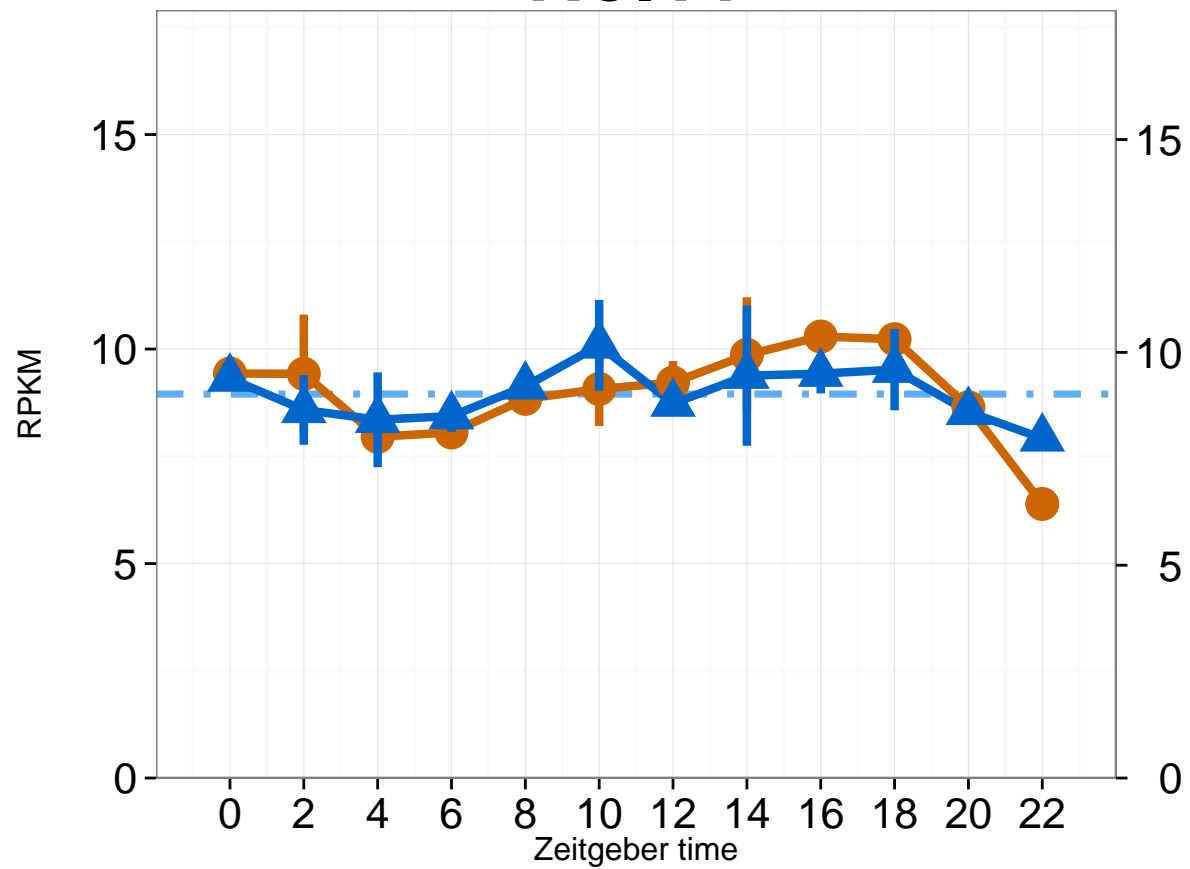

## NoI11

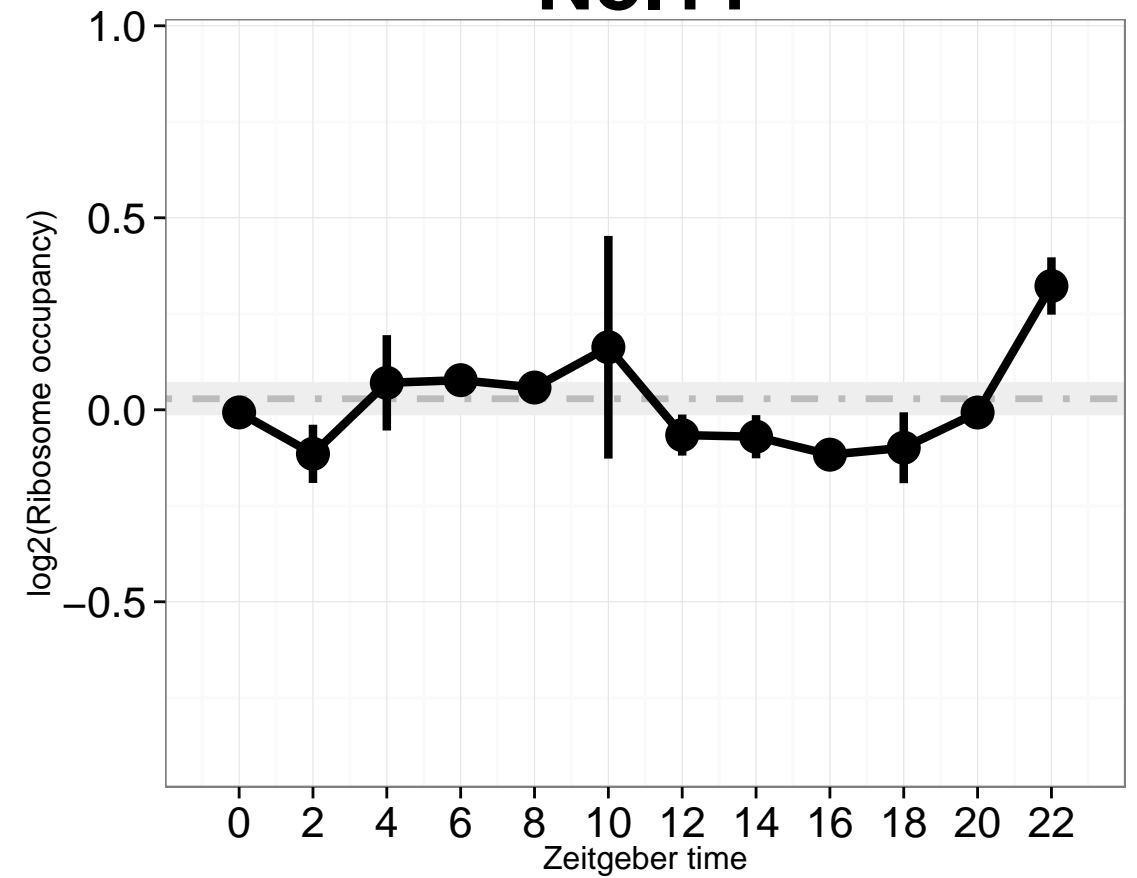

Supplement: SuppDataset_1.zip [file Nol11_set_A.pdf › Supplemental Dataset 1/A-mRNA_nonrhyth_translation_nonrhyth/Nol11_set_A.pdf]

## Nol6

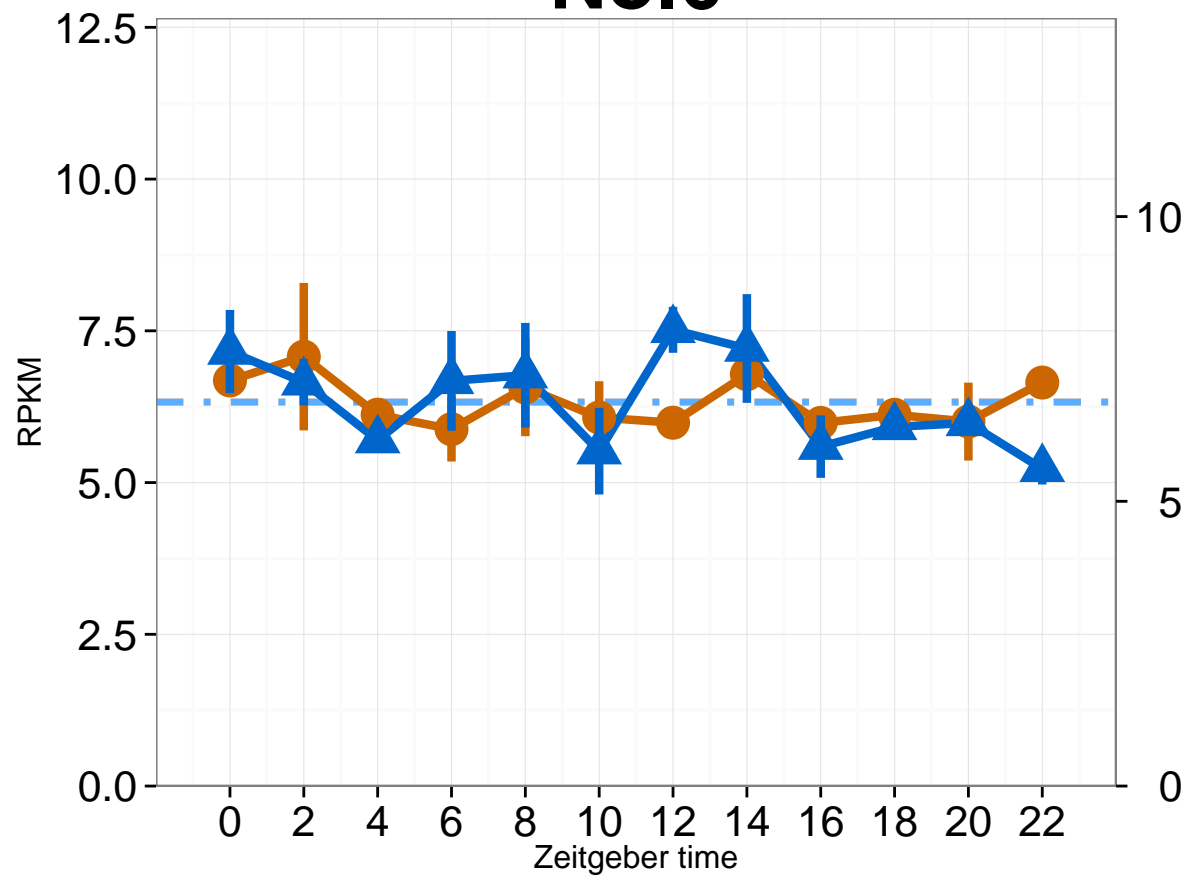

## Nol6

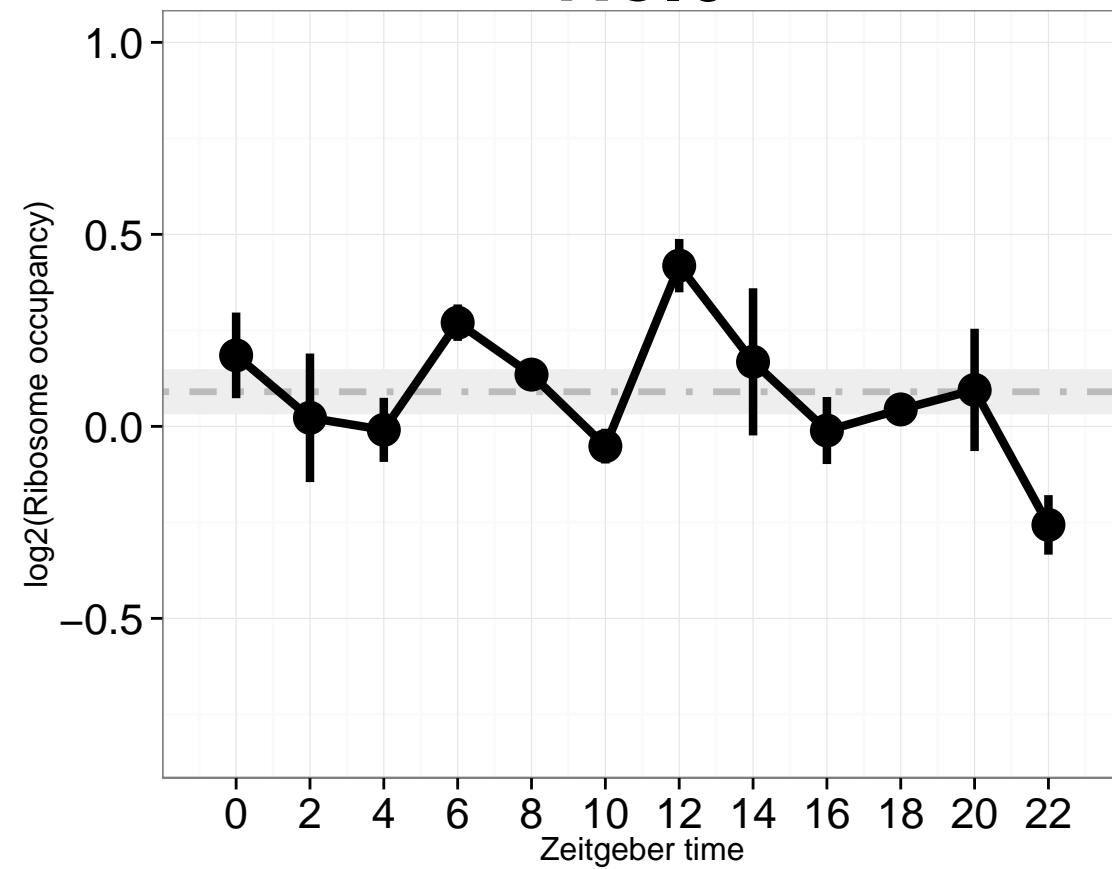

Supplement: SuppDataset_1.zip [file Nol6_set_A.pdf › Supplemental Dataset 1/A-mRNA_nonrhyth_translation_nonrhyth/Nol6_set_A.pdf]

## NoI7

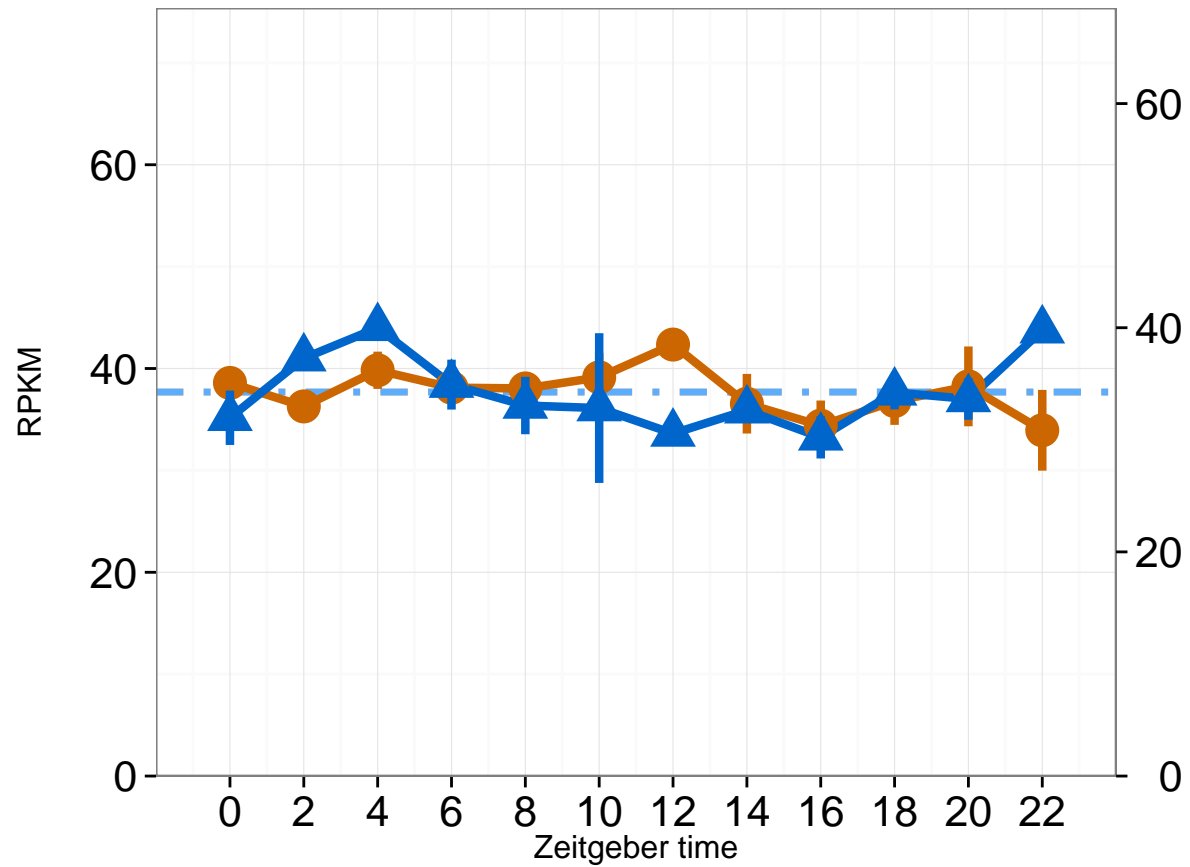

## NoI7

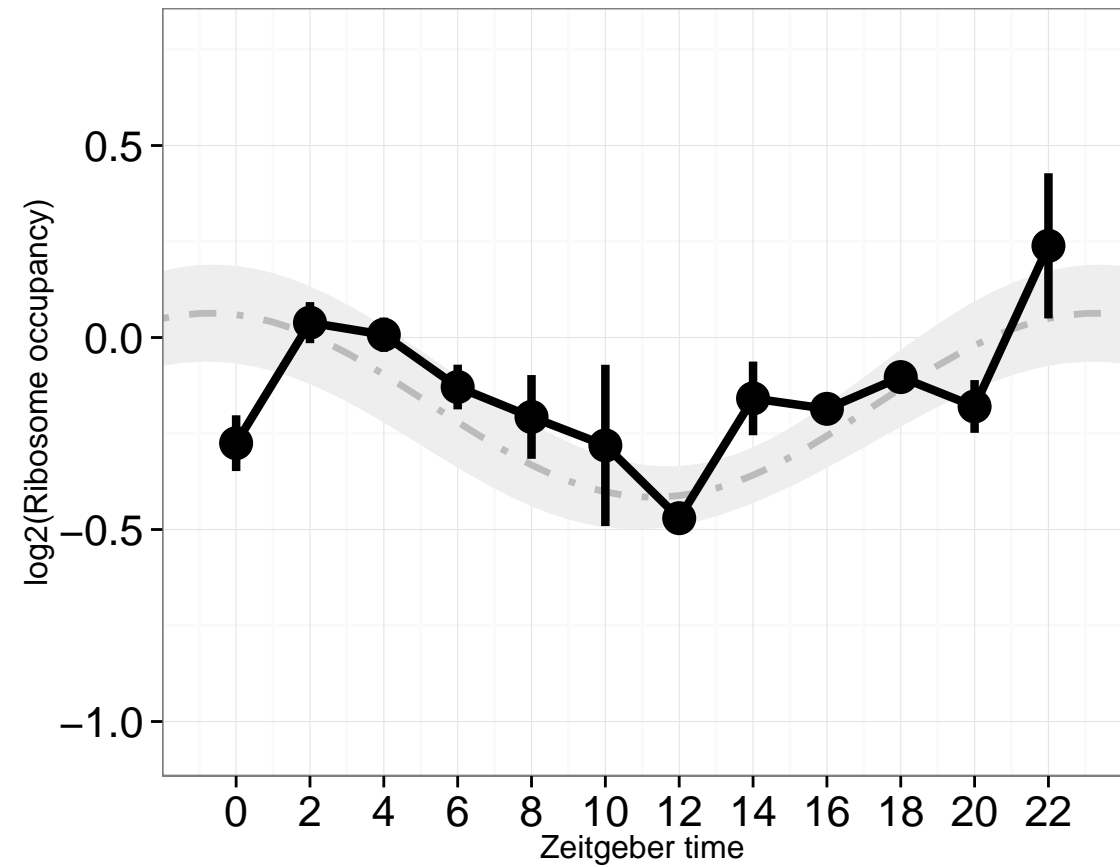

Supplement: SuppDataset_1.zip [file Nol7_set_A.pdf › Supplemental Dataset 1/A-mRNA_nonrhyth_translation_nonrhyth/Nol7_set_A.pdf]

## NoI9

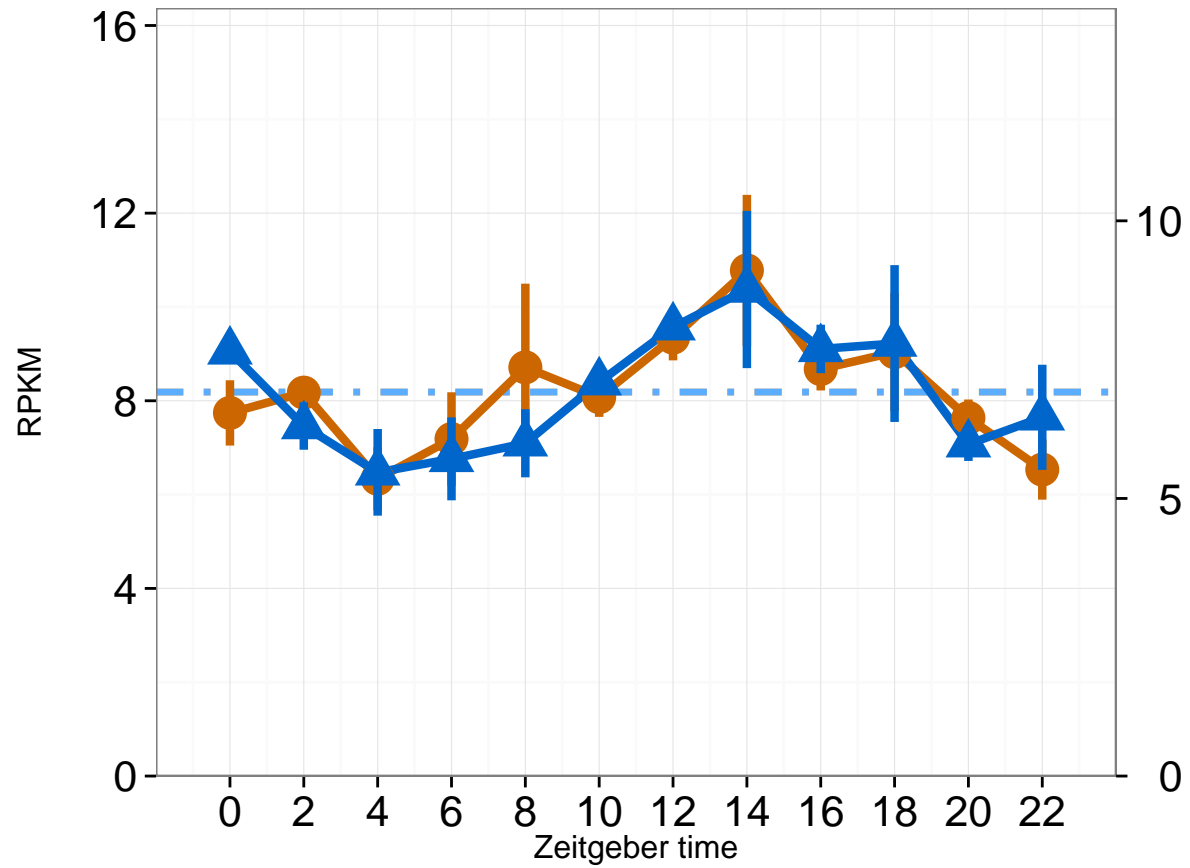

## NoI9

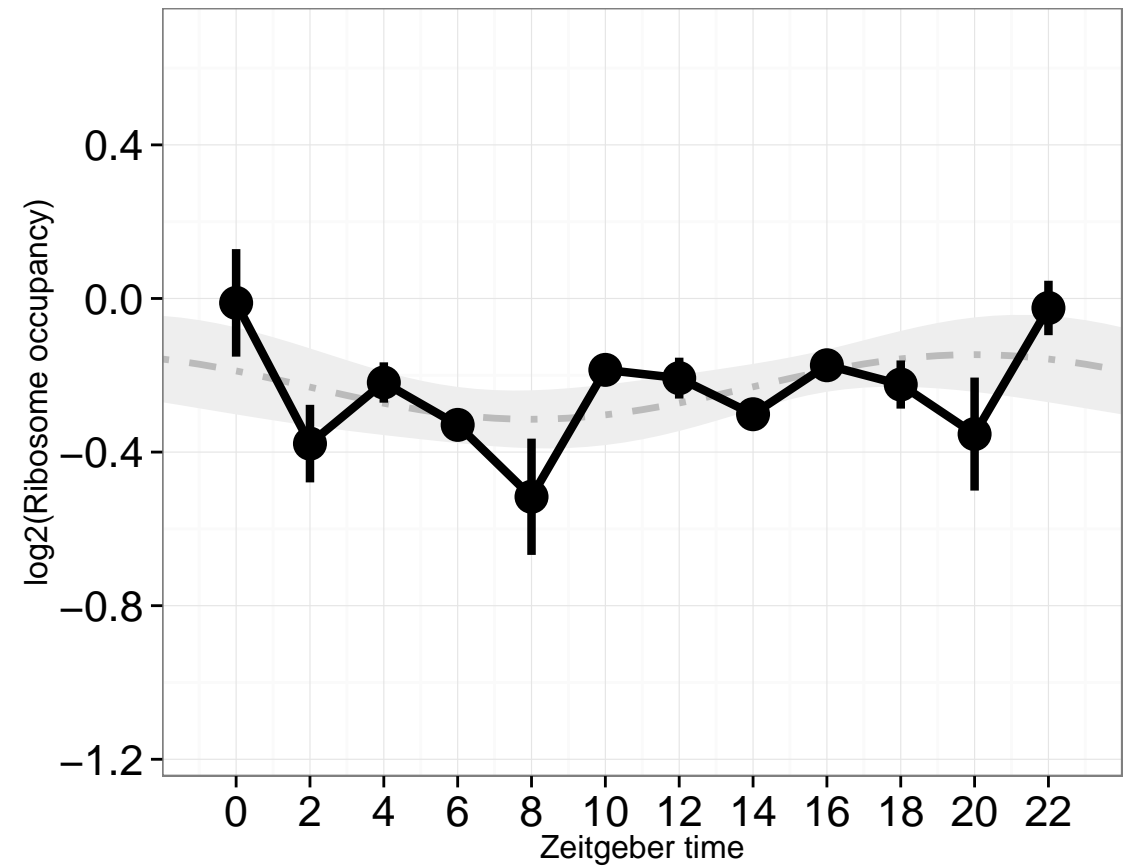

Supplement: SuppDataset_1.zip [file Nol9_set_A.pdf › Supplemental Dataset 1/A-mRNA_nonrhyth_translation_nonrhyth/Nol9_set_A.pdf]

# Nom1

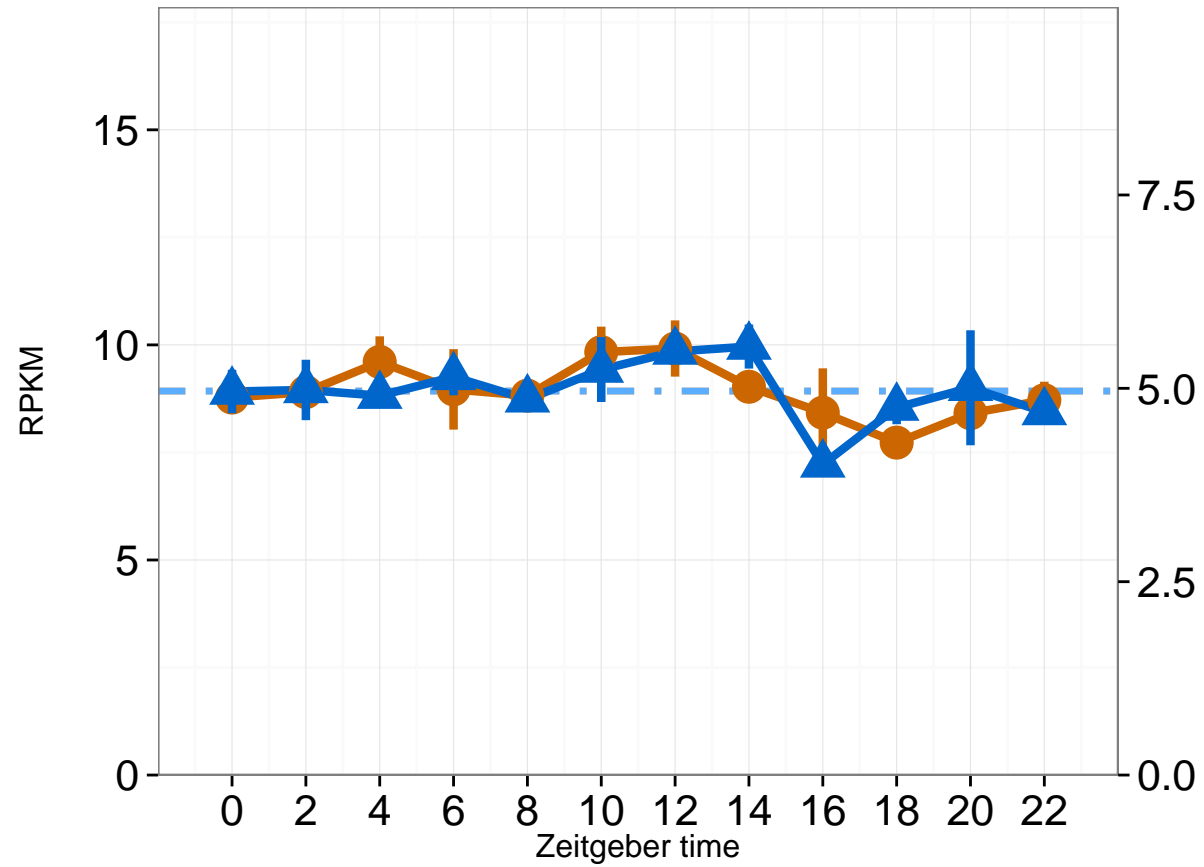

# Nom1

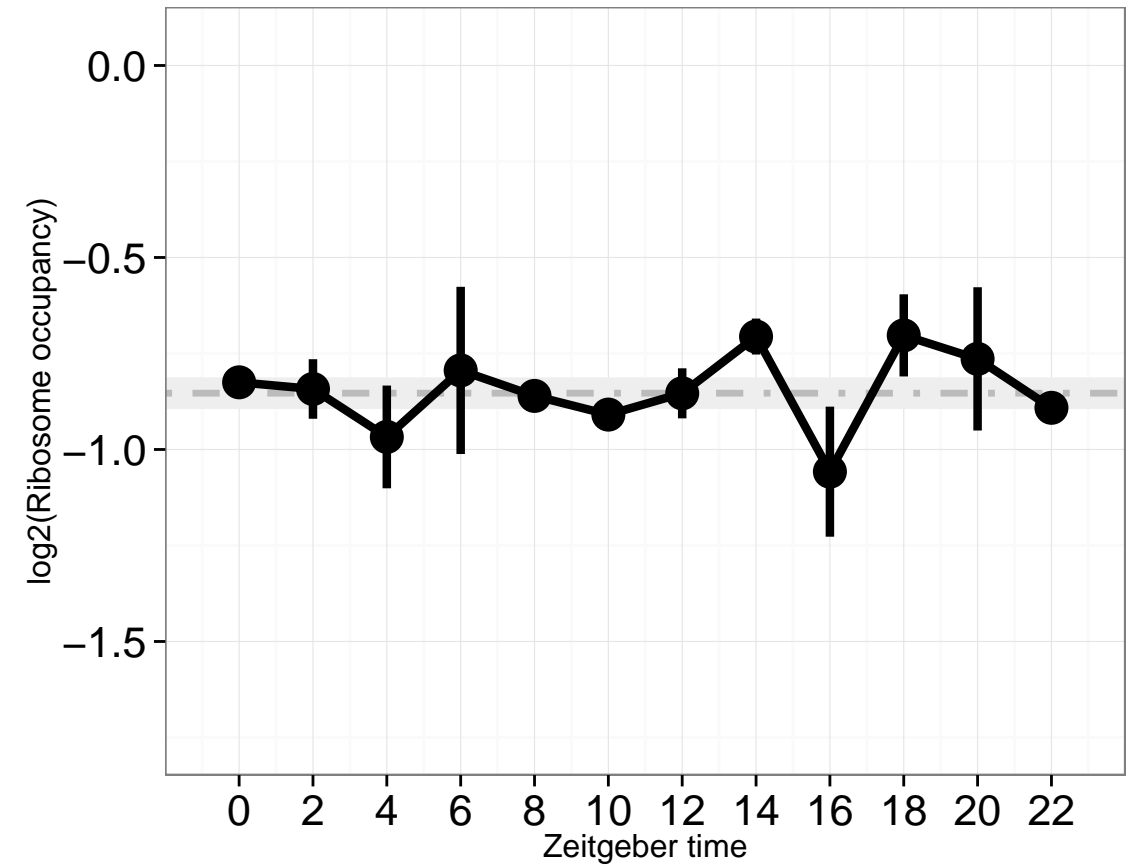

Supplement: SuppDataset_1.zip [file Nom1_set_A.pdf › Supplemental Dataset 1/A-mRNA_nonrhyth_translation_nonrhyth/Nom1_set_A.pdf]

## Nomo1

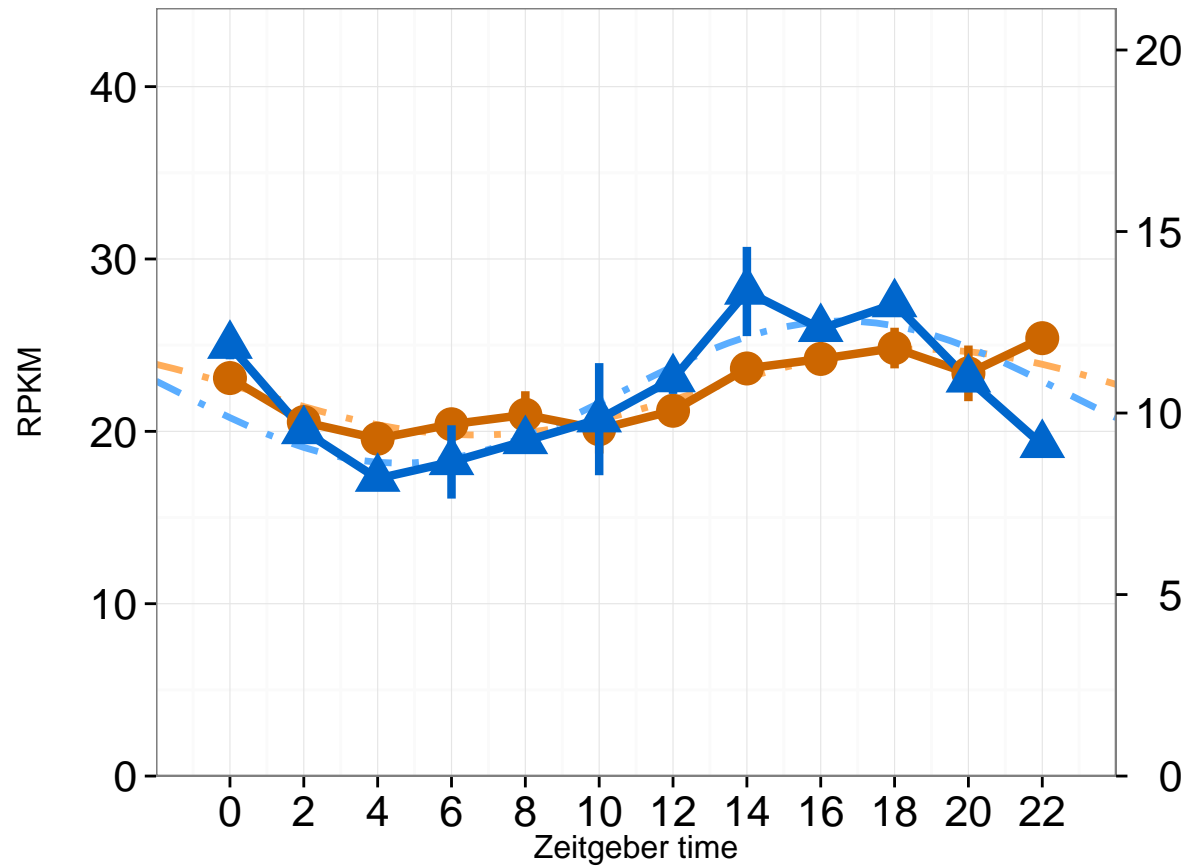

## Nomo1

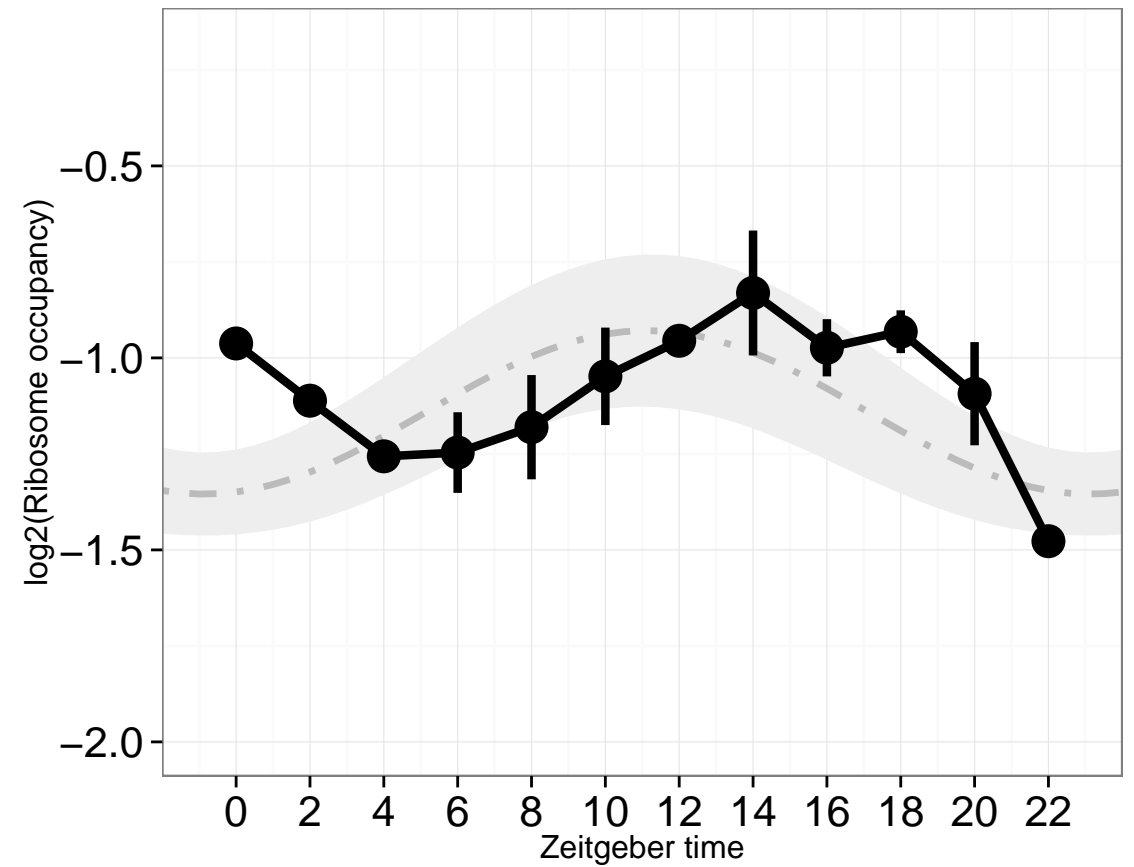

Supplement: SuppDataset_1.zip [file Nomo1_set_A.pdf › Supplemental Dataset 1/A-mRNA_nonrhyth_translation_nonrhyth/Nomo1_set_A.pdf]

## Nono

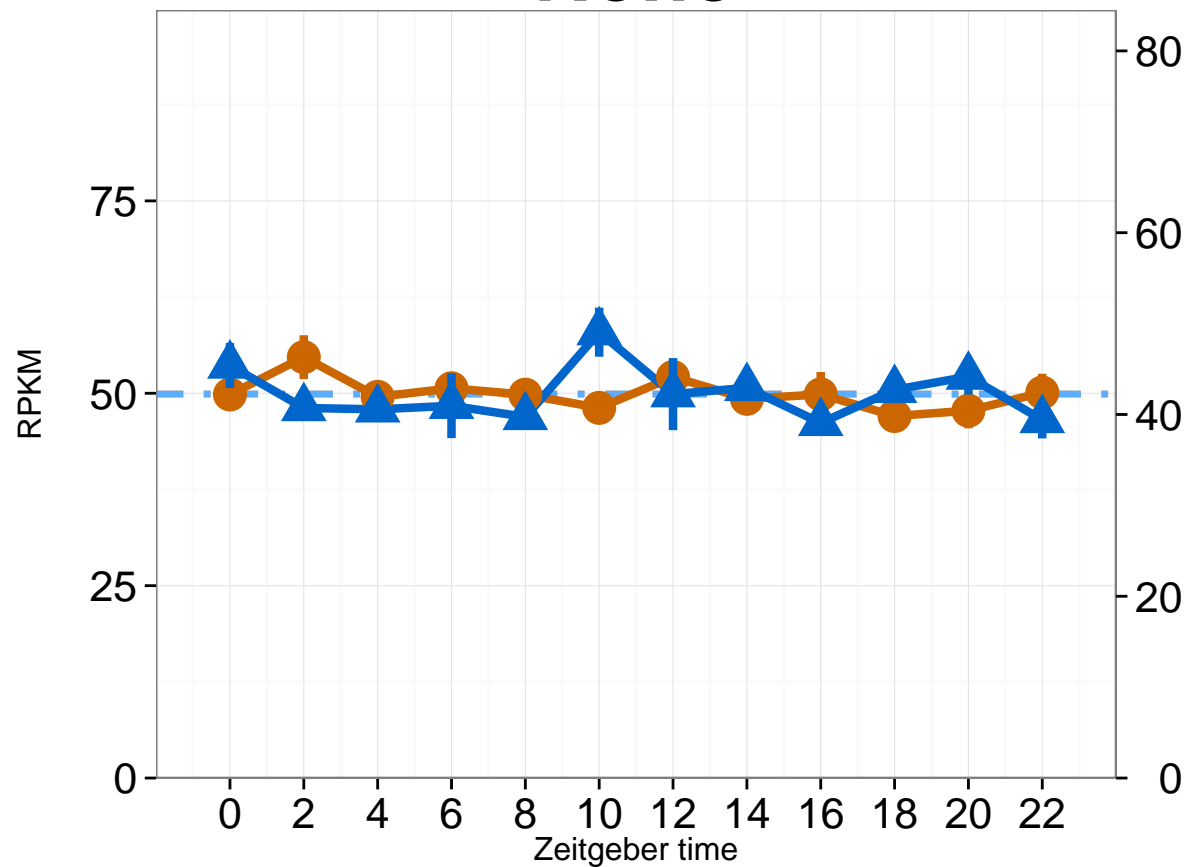

## Nono

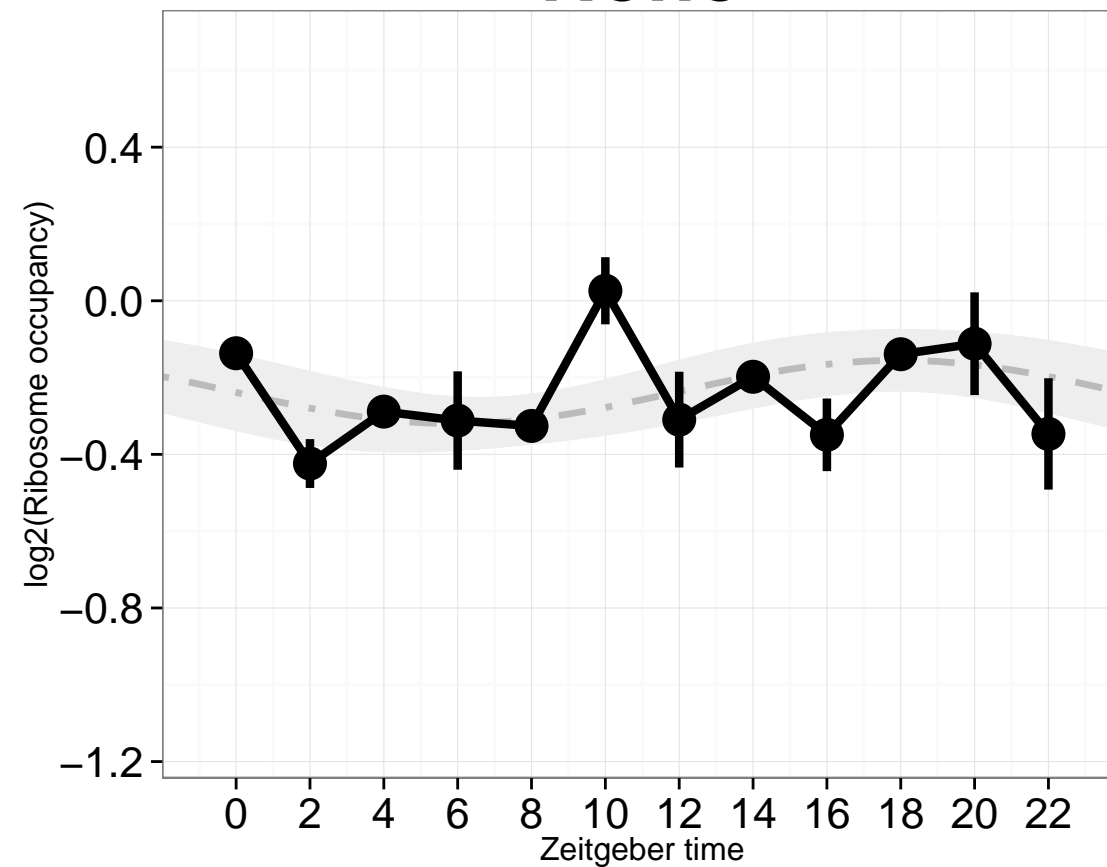

Supplement: SuppDataset_1.zip [file Nono_set_A.pdf › Supplemental Dataset 1/A-mRNA_nonrhyth_translation_nonrhyth/Nono_set_A.pdf]

## Nop14

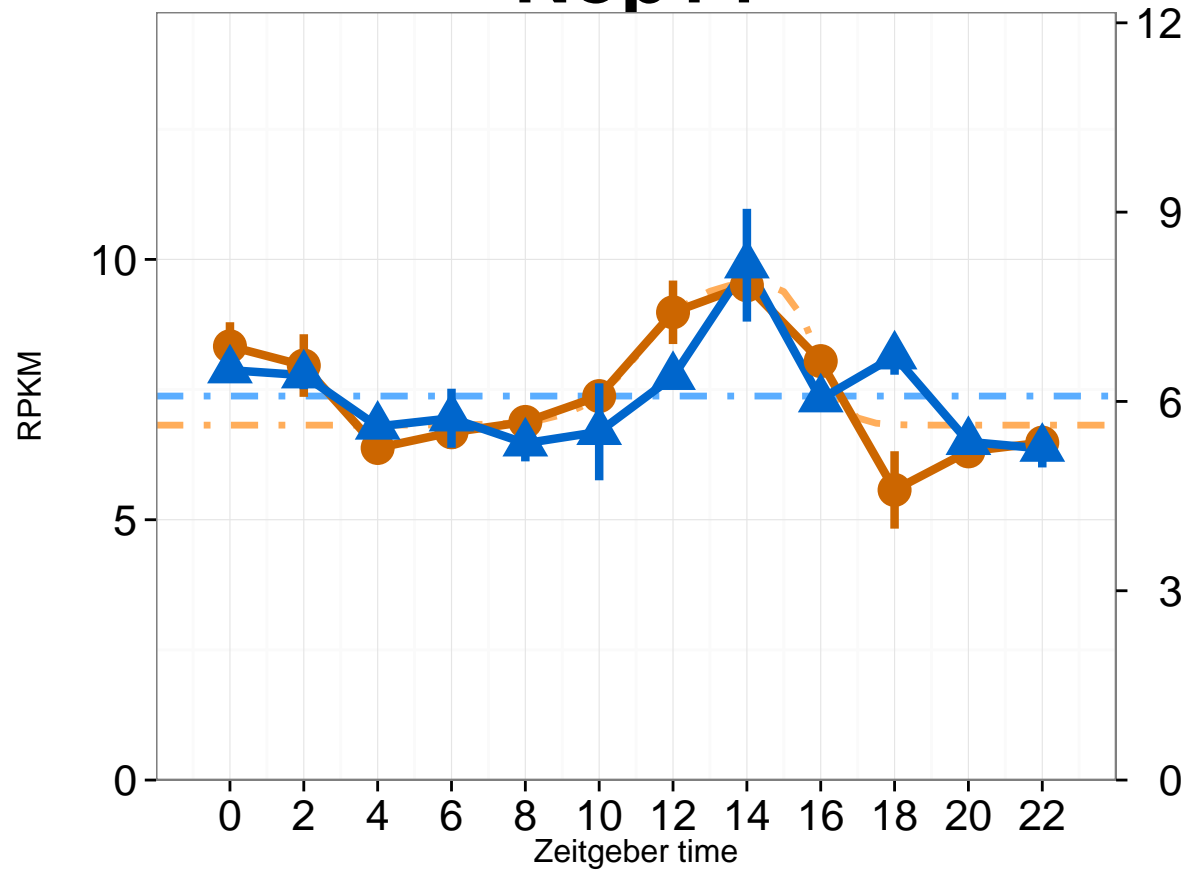

## Nop14

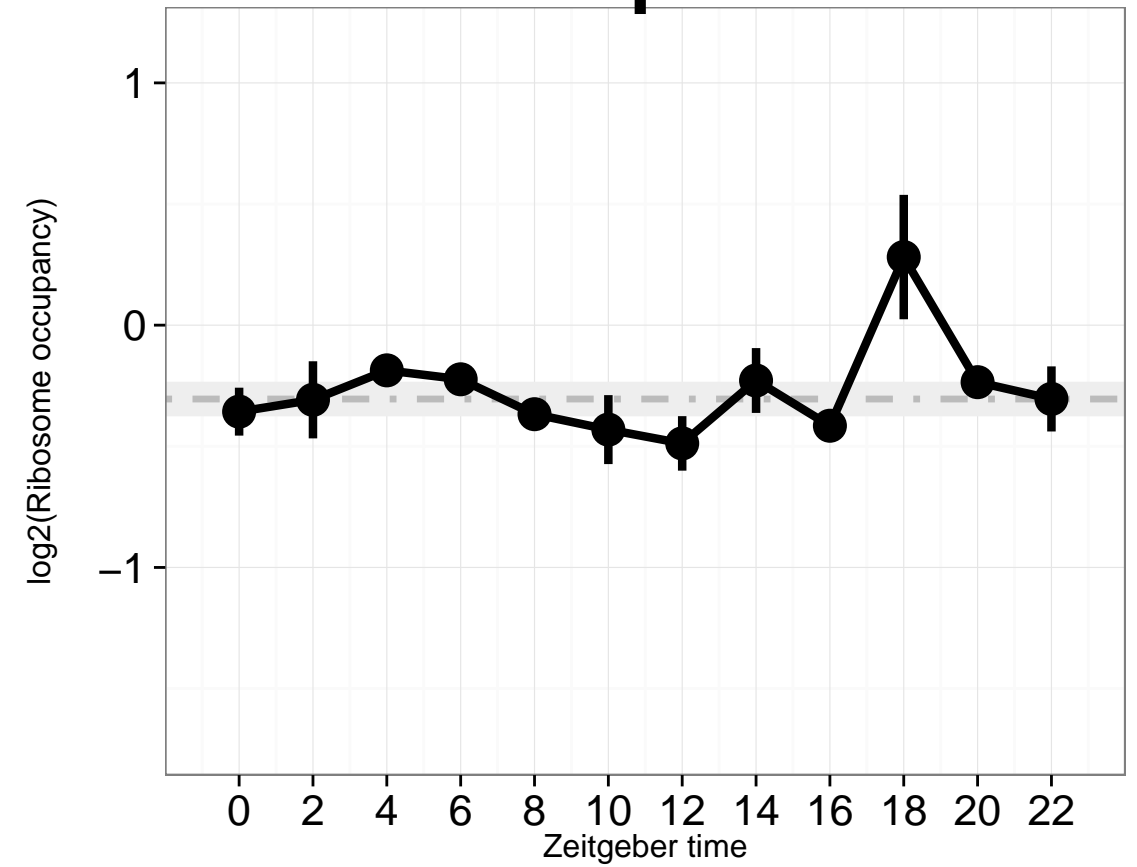

Supplement: SuppDataset_1.zip [file Nop14_set_A.pdf › Supplemental Dataset 1/A-mRNA_nonrhyth_translation_nonrhyth/Nop14_set_A.pdf]

## Nop58

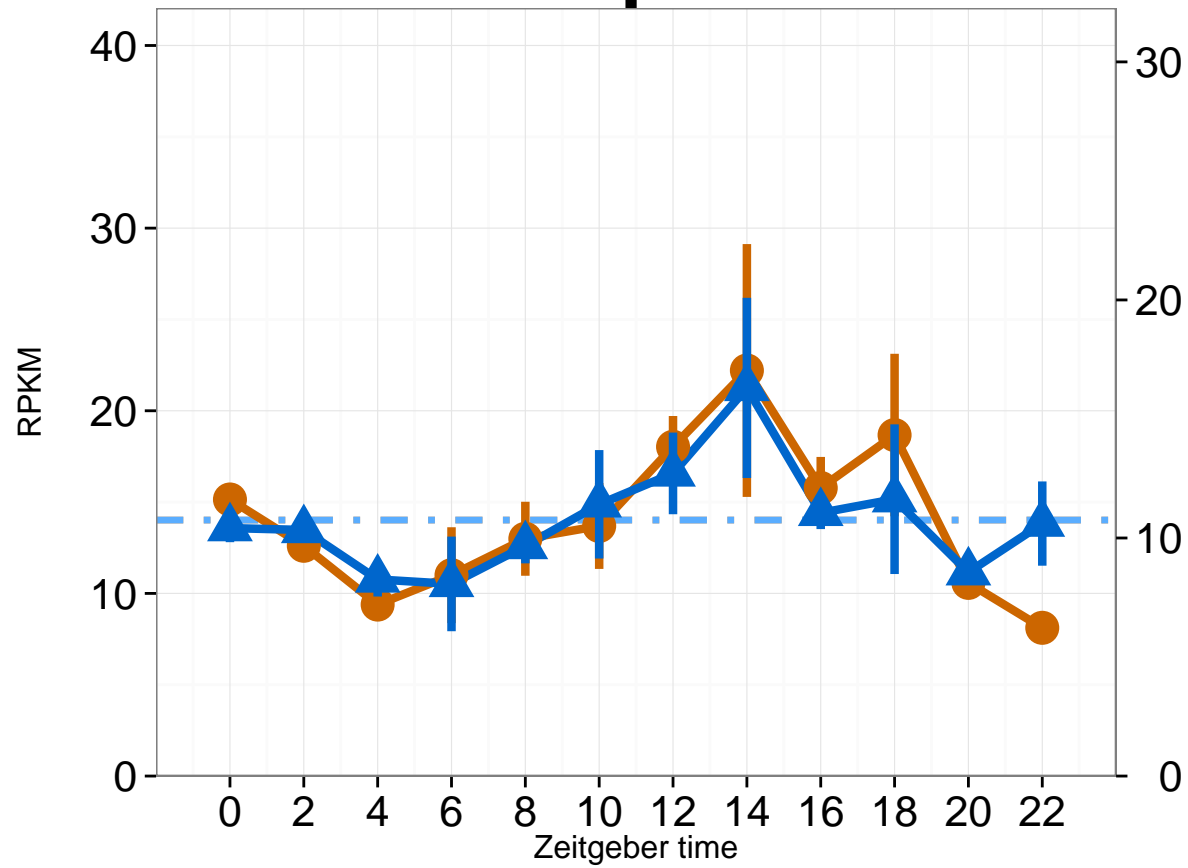

## Nop58

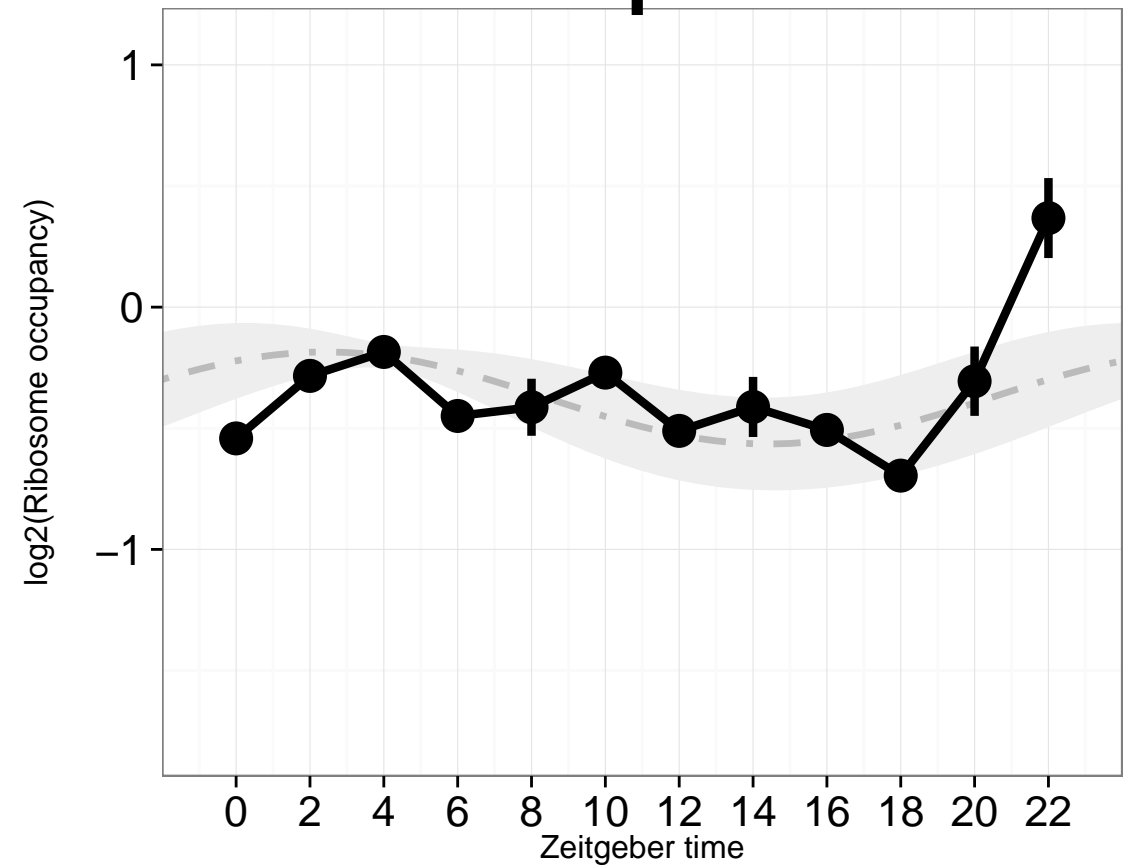

Supplement: SuppDataset_1.zip [file Nop58_set_A.pdf › Supplemental Dataset 1/A-mRNA_nonrhyth_translation_nonrhyth/Nop58_set_A.pdf]

## Nop9

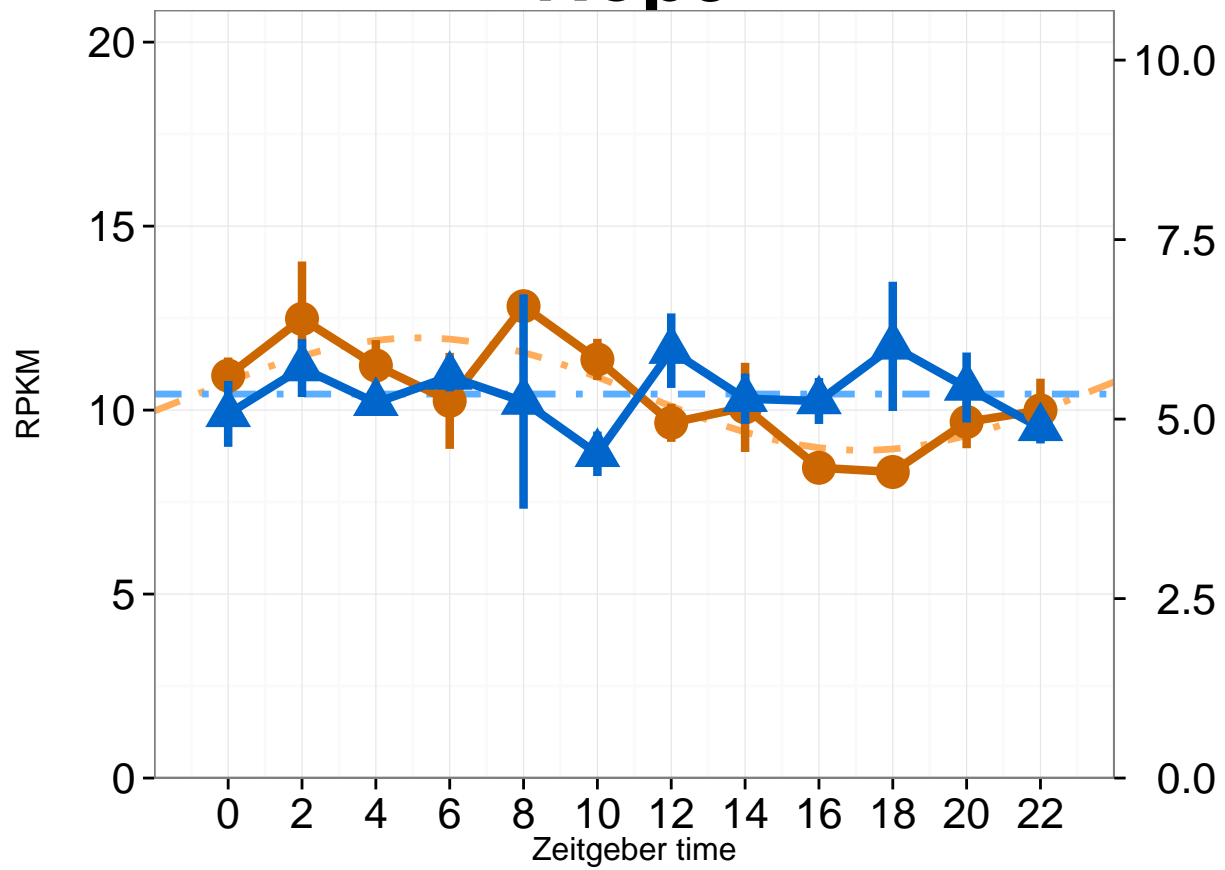

## Nop9

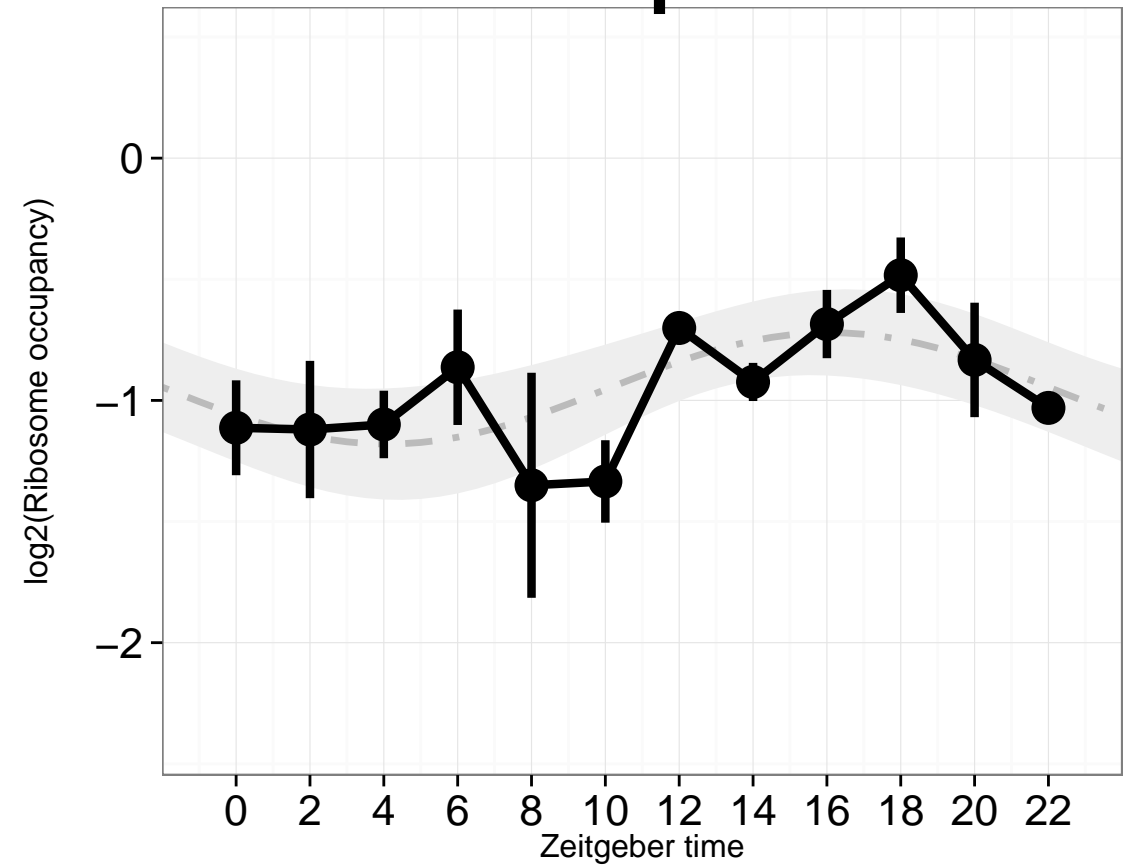

Supplement: SuppDataset_1.zip [file Nop9_set_A.pdf › Supplemental Dataset 1/A-mRNA_nonrhyth_translation_nonrhyth/Nop9_set_A.pdf]

## Nos3

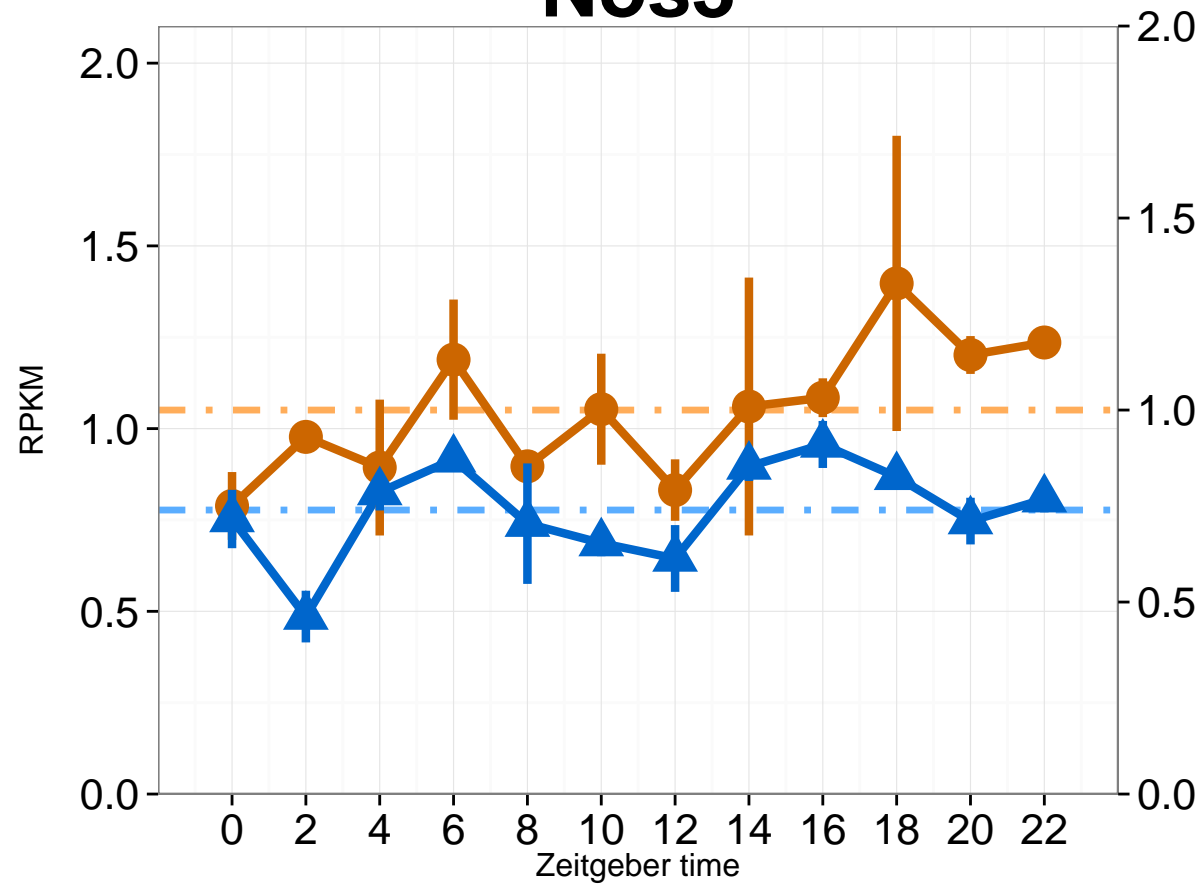

## Nos3

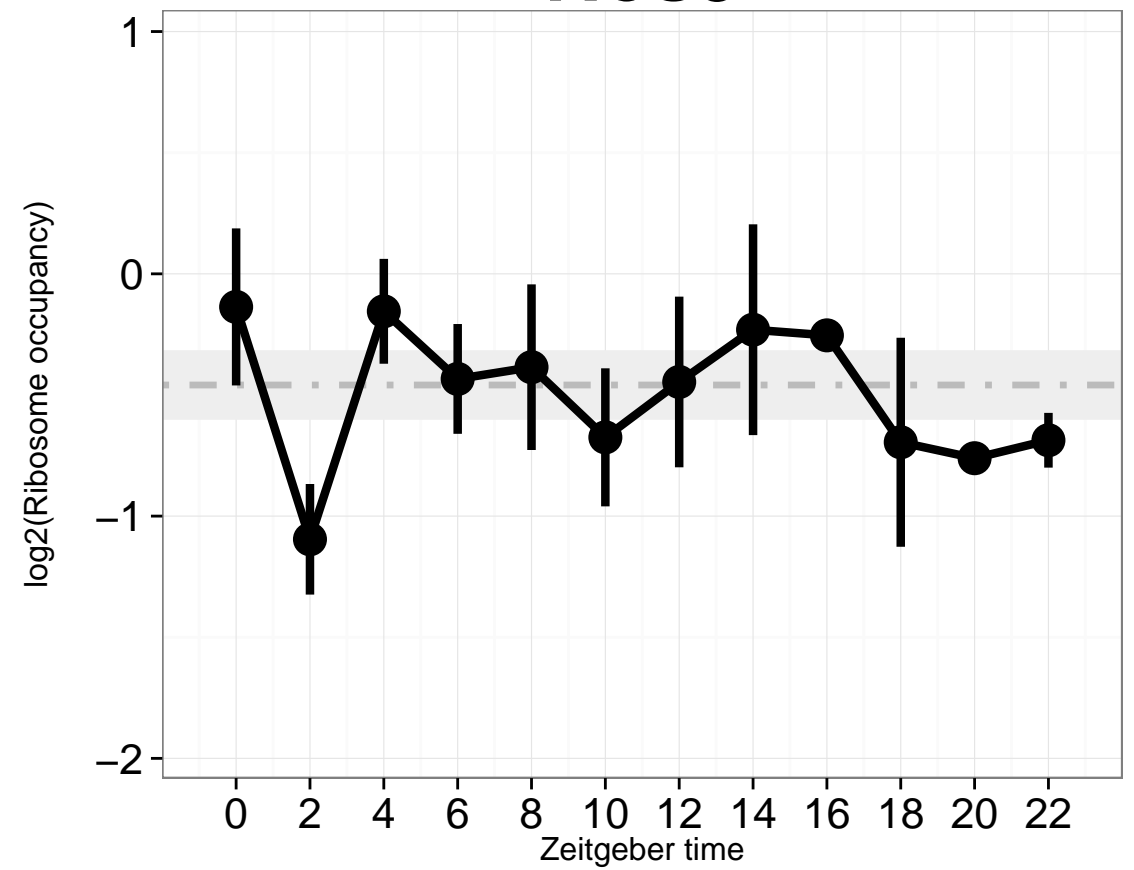

Supplement: SuppDataset_1.zip [file Nos3_set_A.pdf › Supplemental Dataset 1/A-mRNA_nonrhyth_translation_nonrhyth/Nos3_set_A.pdf]

## Nostrin

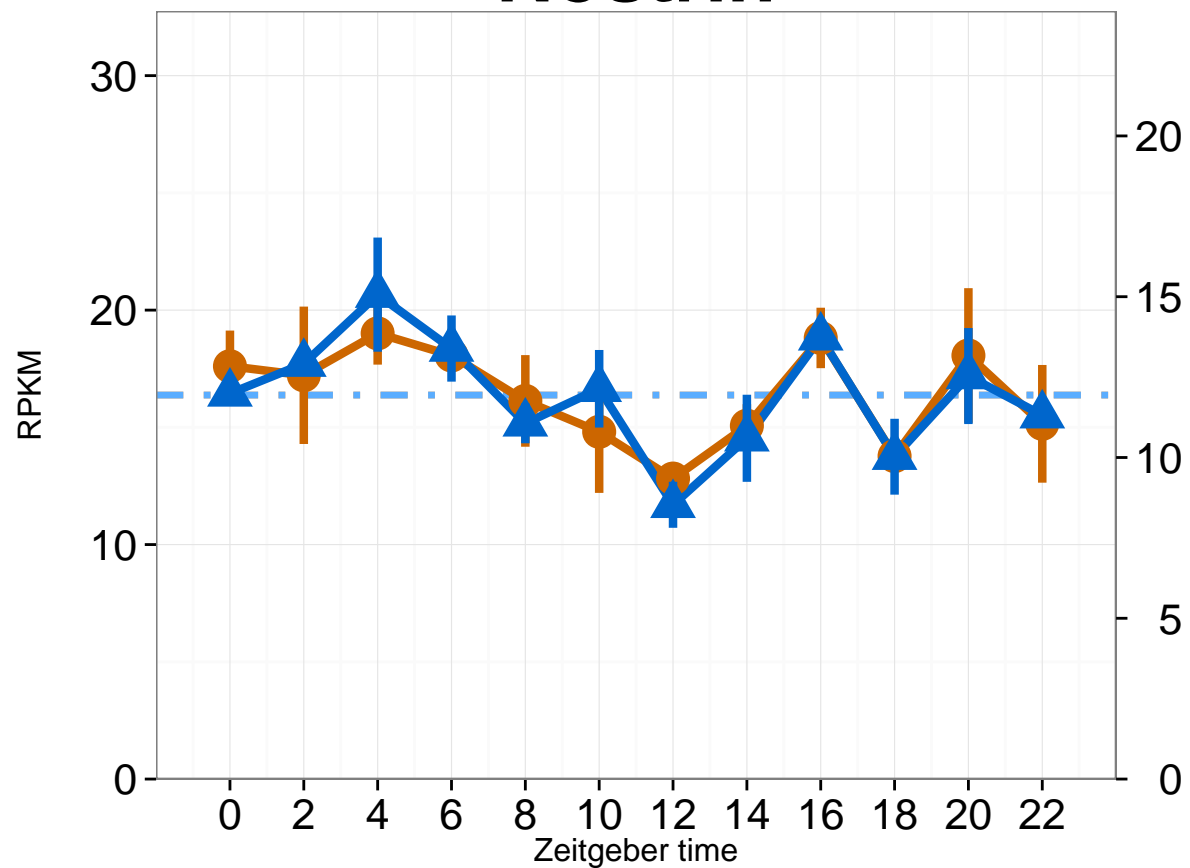

## Nostrin

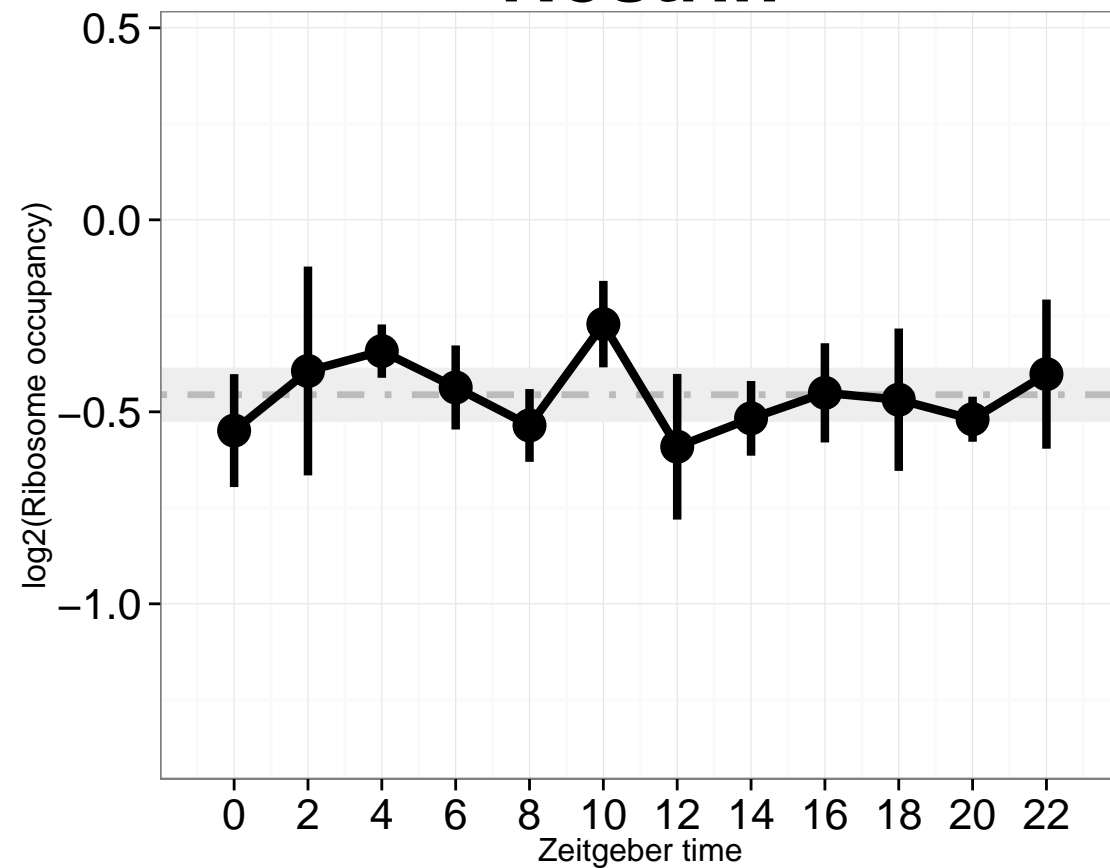

Supplement: SuppDataset_1.zip [file Nostrin_set_A.pdf › Supplemental Dataset 1/A-mRNA_nonrhyth_translation_nonrhyth/Nostrin_set_A.pdf]

## Notch2

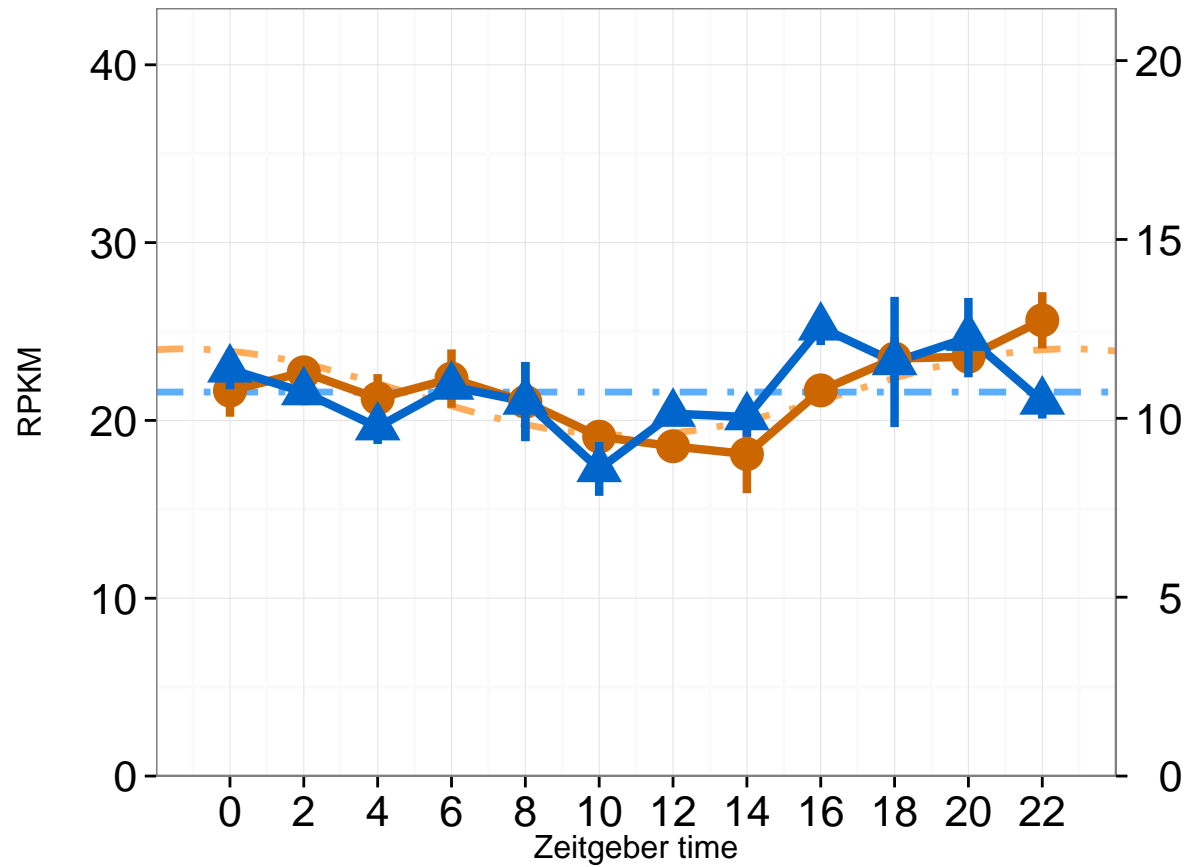

## Notch2

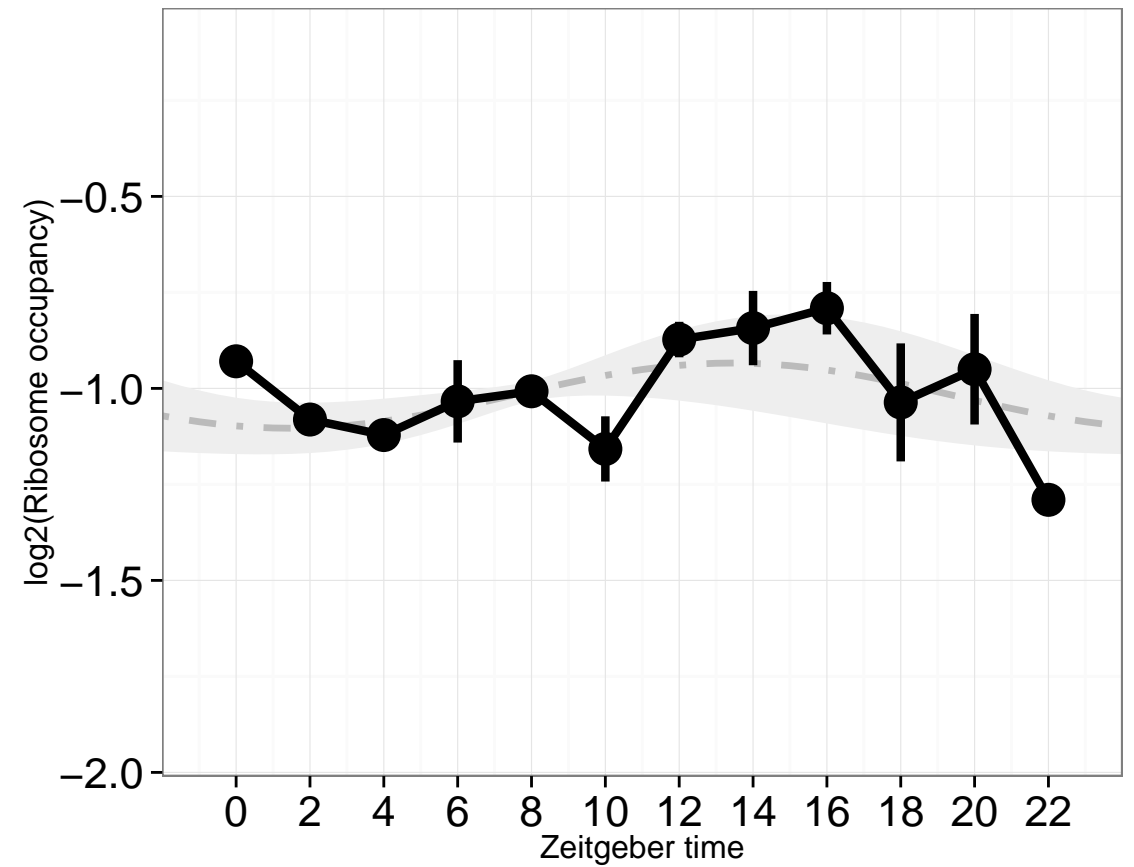

Supplement: SuppDataset_1.zip [file Notch2_set_A.pdf › Supplemental Dataset 1/A-mRNA_nonrhyth_translation_nonrhyth/Notch2_set_A.pdf]

## Notch3

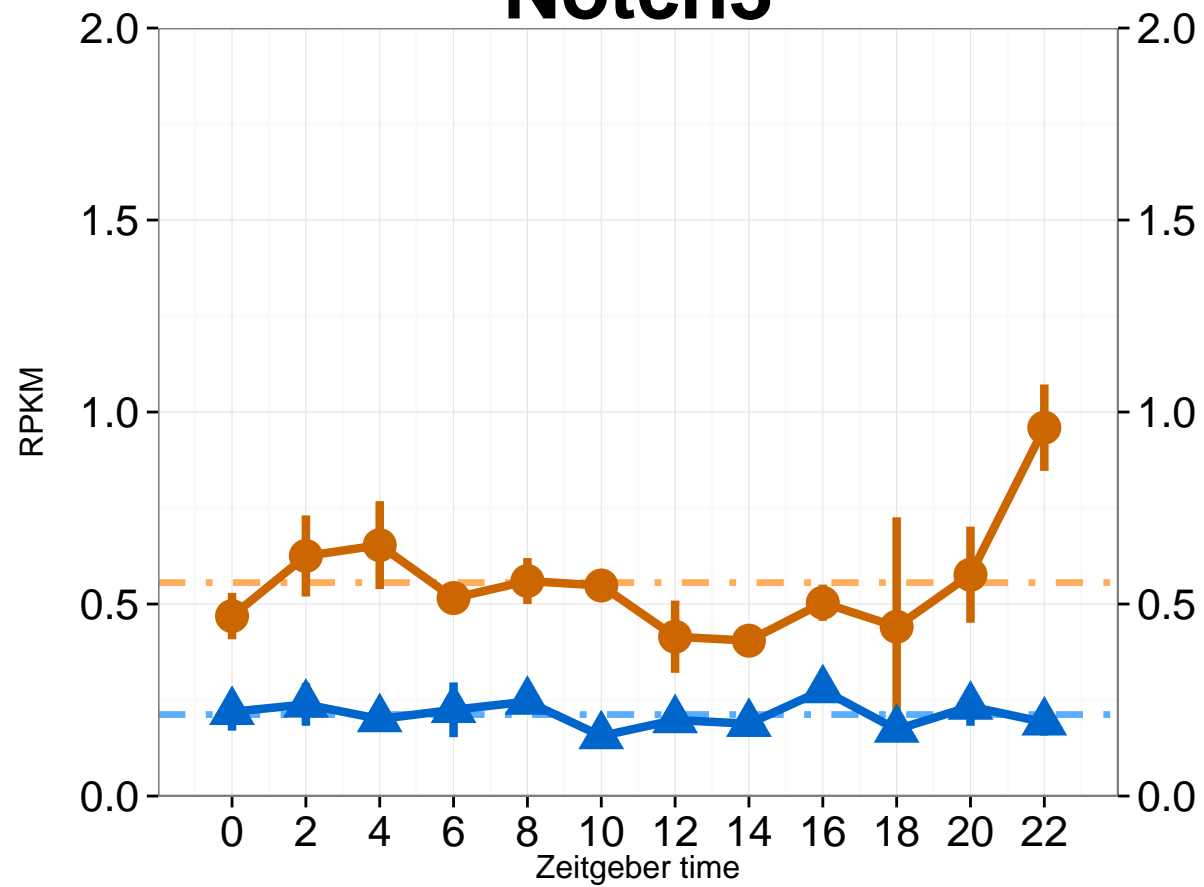

## Notch3

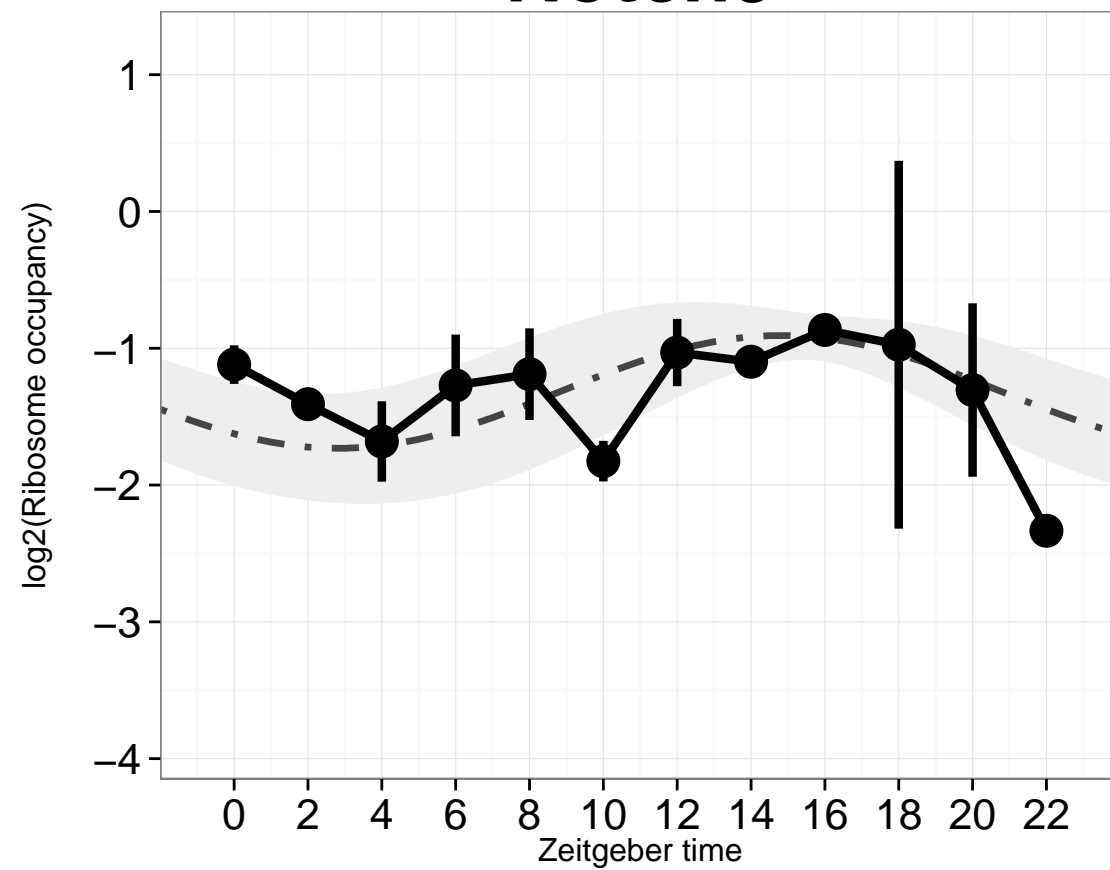

Supplement: SuppDataset_1.zip [file Notch3_set_A.pdf › Supplemental Dataset 1/A-mRNA_nonrhyth_translation_nonrhyth/Notch3_set_A.pdf]

## Notch4

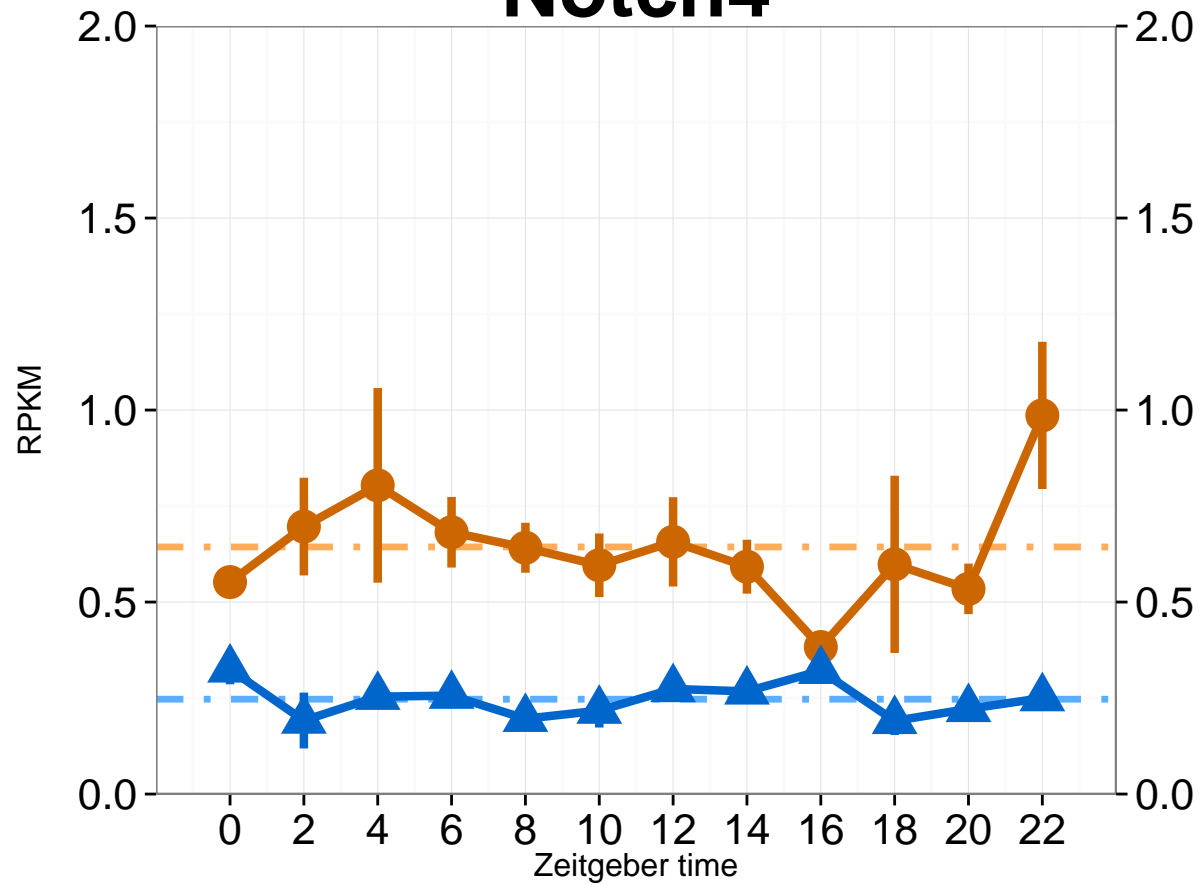

## Notch4

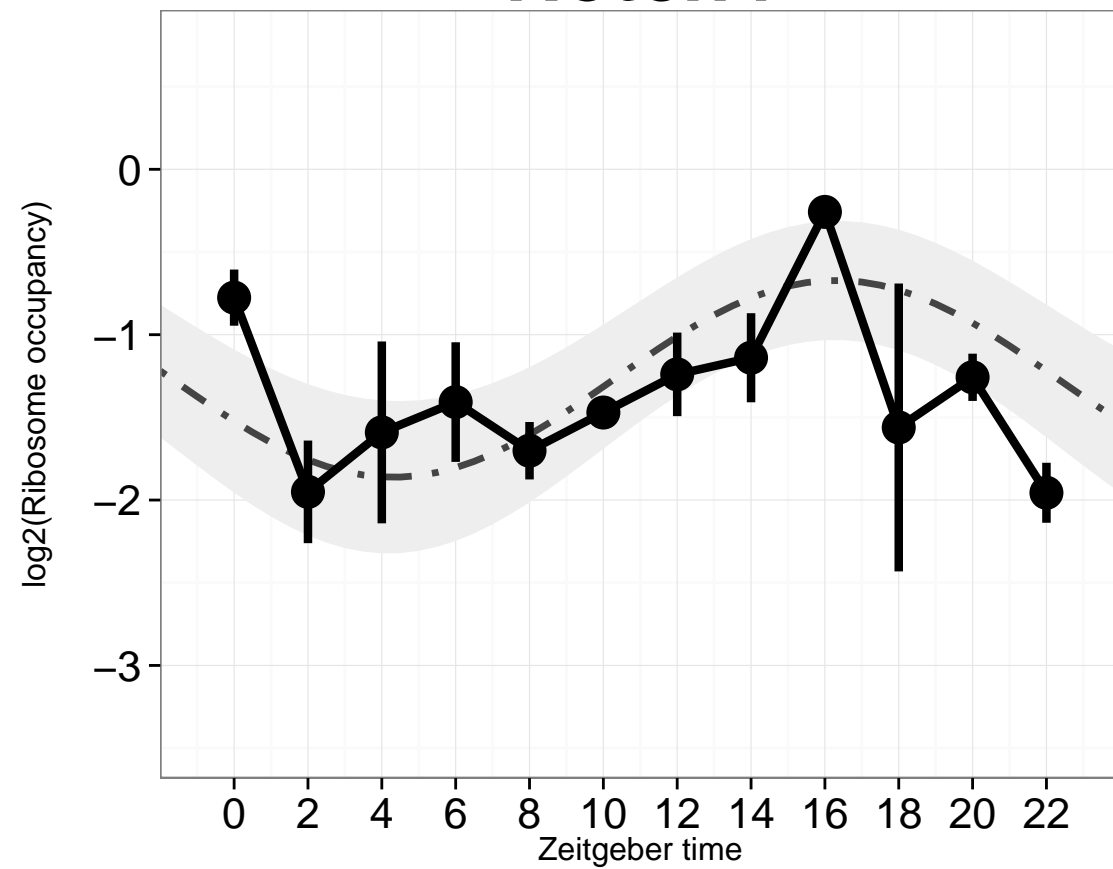

Supplement: SuppDataset_1.zip [file Notch4_set_A.pdf › Supplemental Dataset 1/A-mRNA_nonrhyth_translation_nonrhyth/Notch4_set_A.pdf]

## Notum

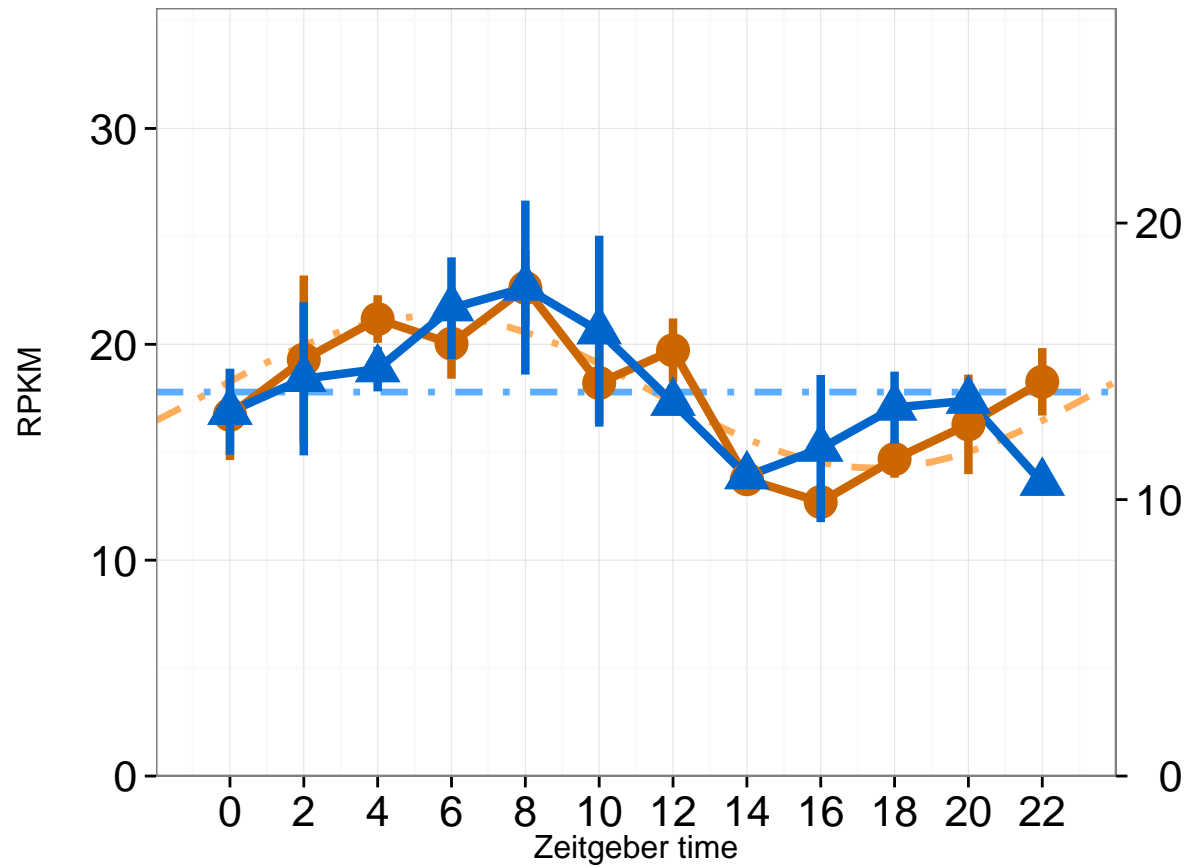

## Notum

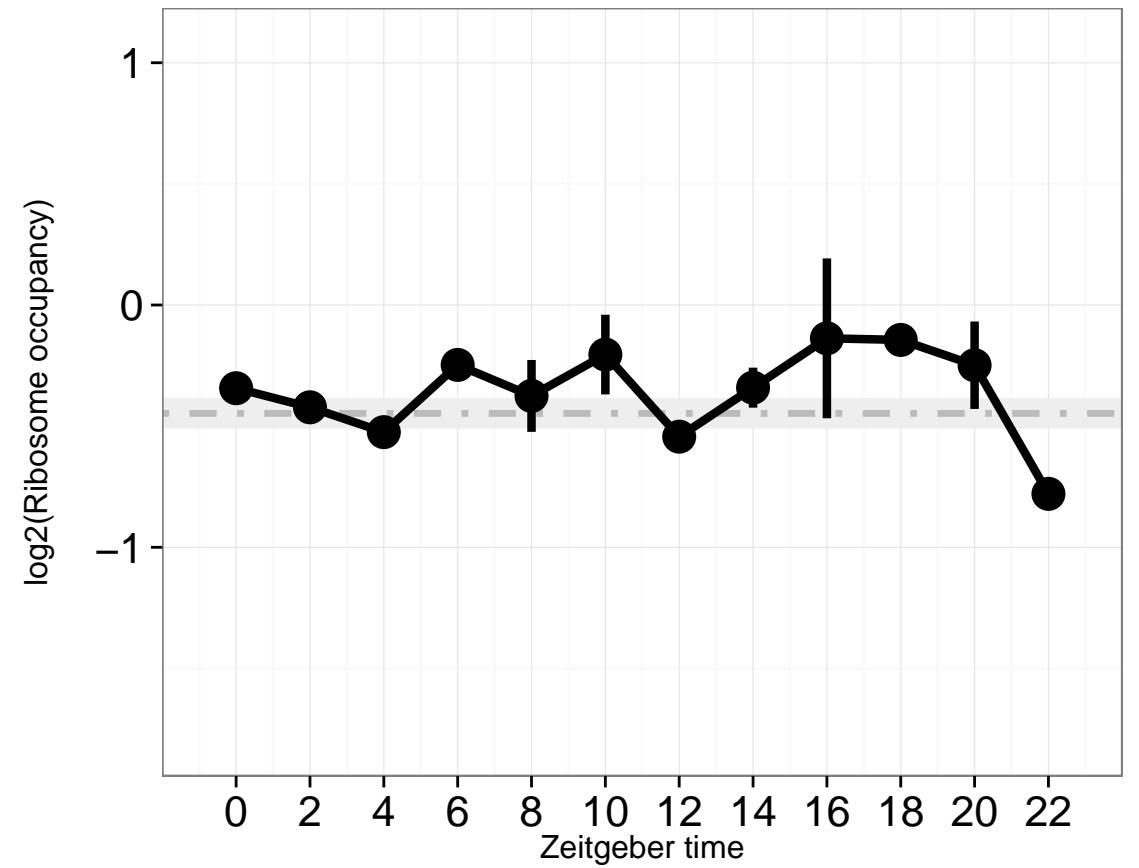

Supplement: SuppDataset_1.zip [file Notum_set_A.pdf › Supplemental Dataset 1/A-mRNA_nonrhyth_translation_nonrhyth/Notum_set_A.pdf]

## Npat

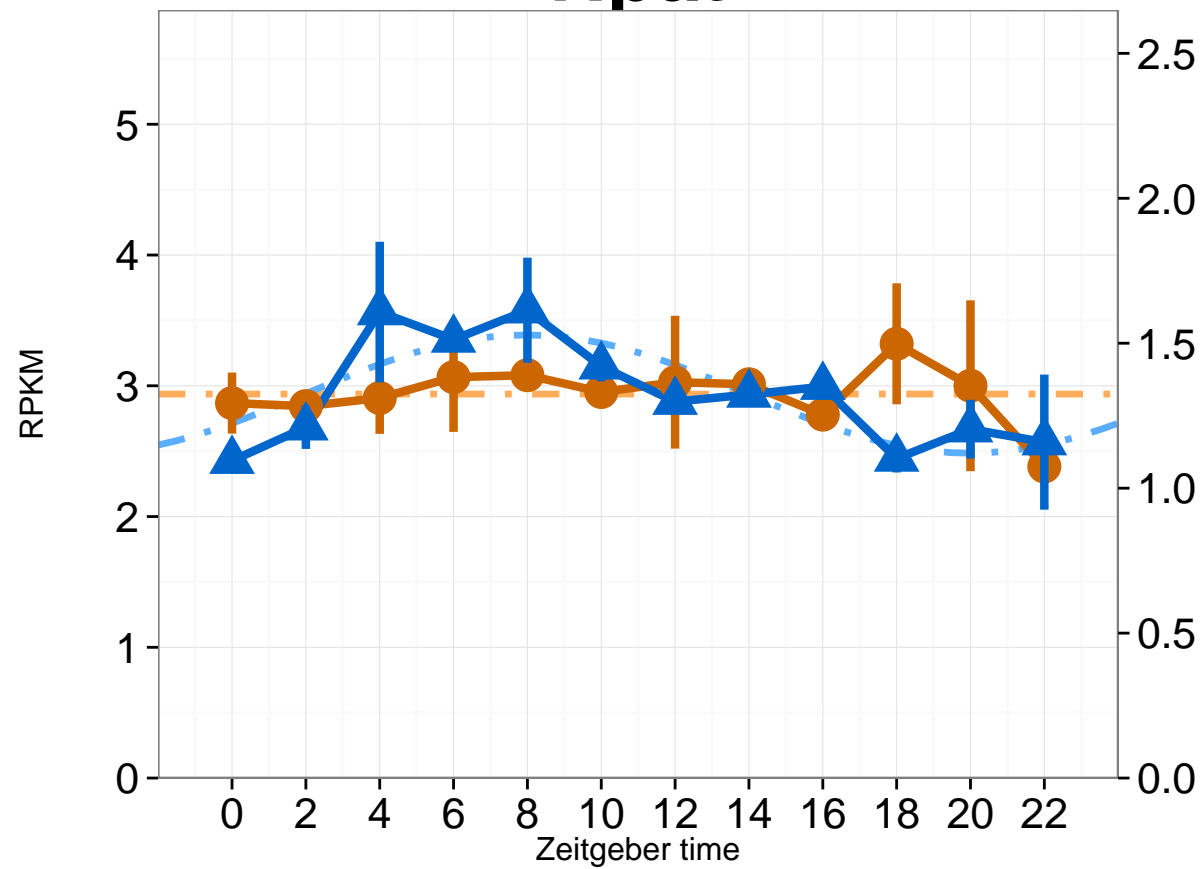

## Npat

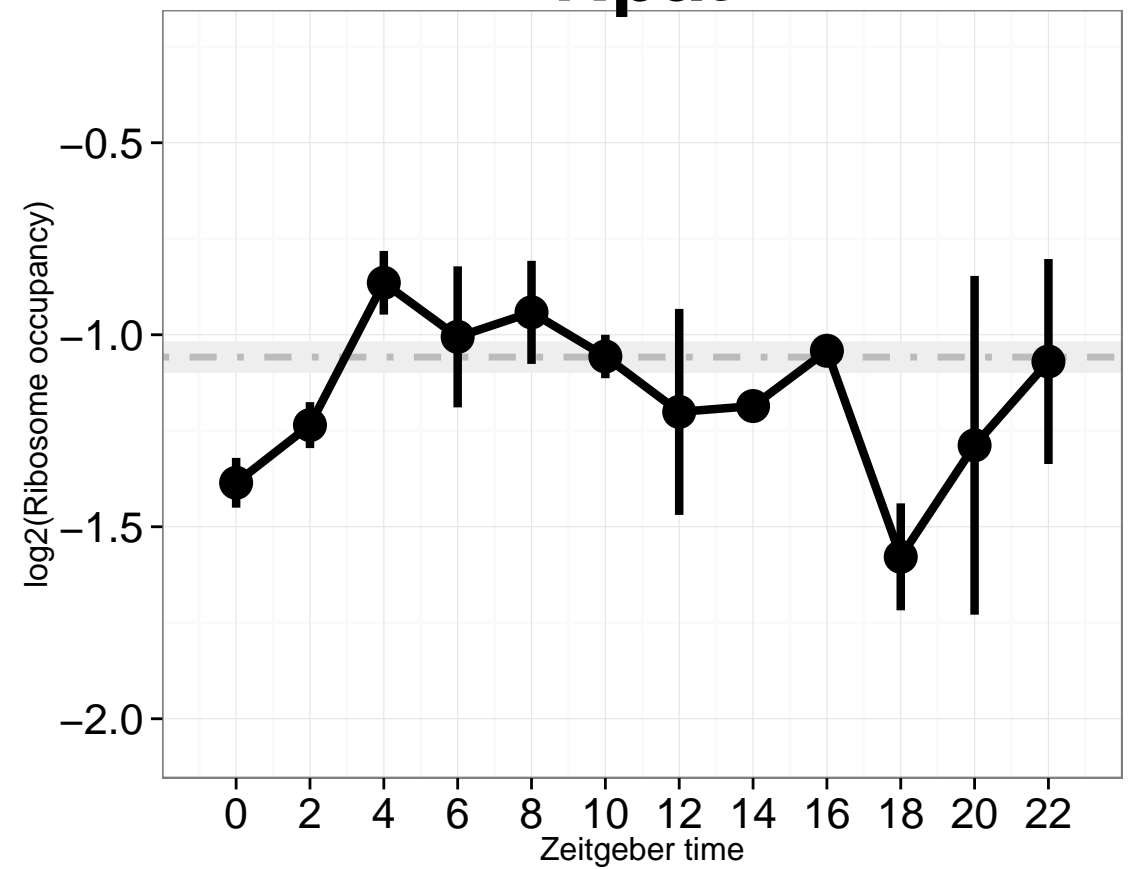

Supplement: SuppDataset_1.zip [file Npat_set_A.pdf › Supplemental Dataset 1/A-mRNA_nonrhyth_translation_nonrhyth/Npat_set_A.pdf]

## Npc2

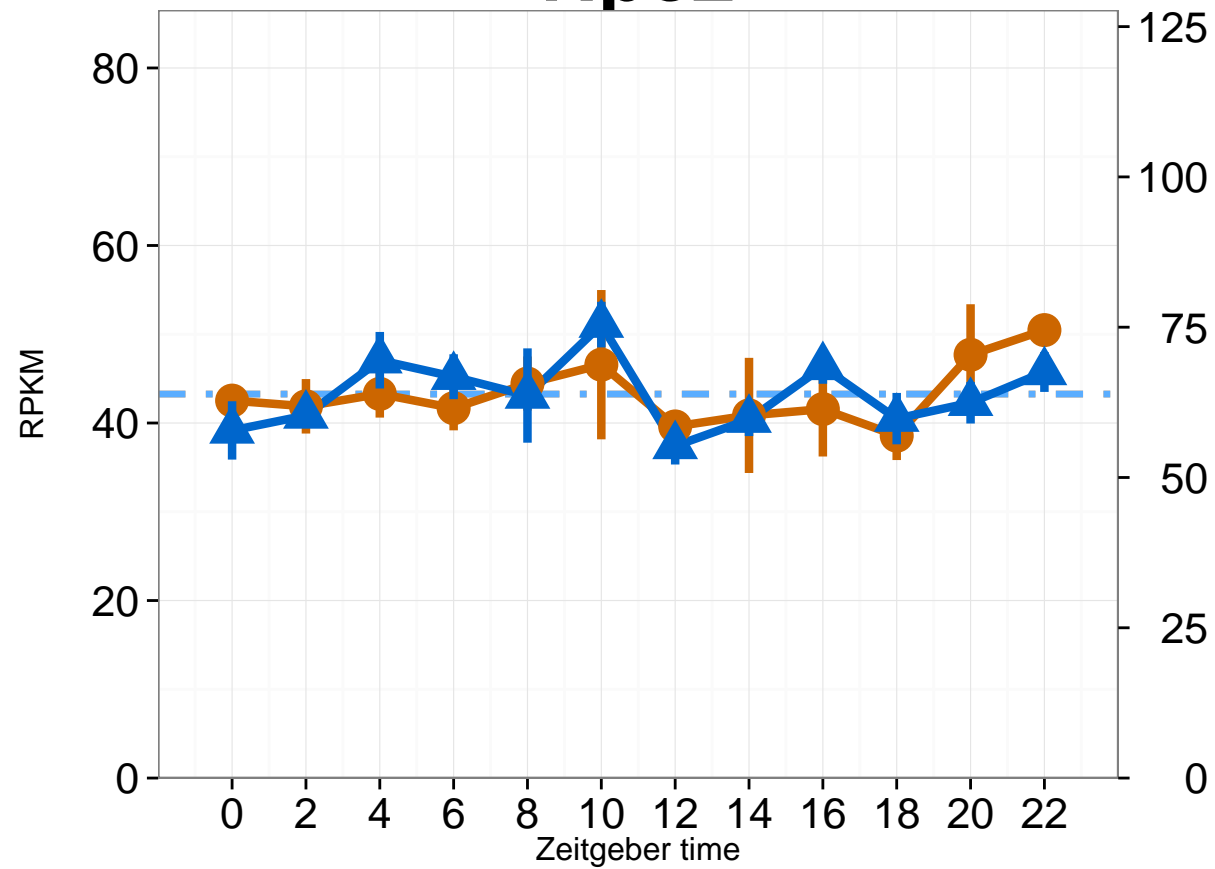

## Npc2

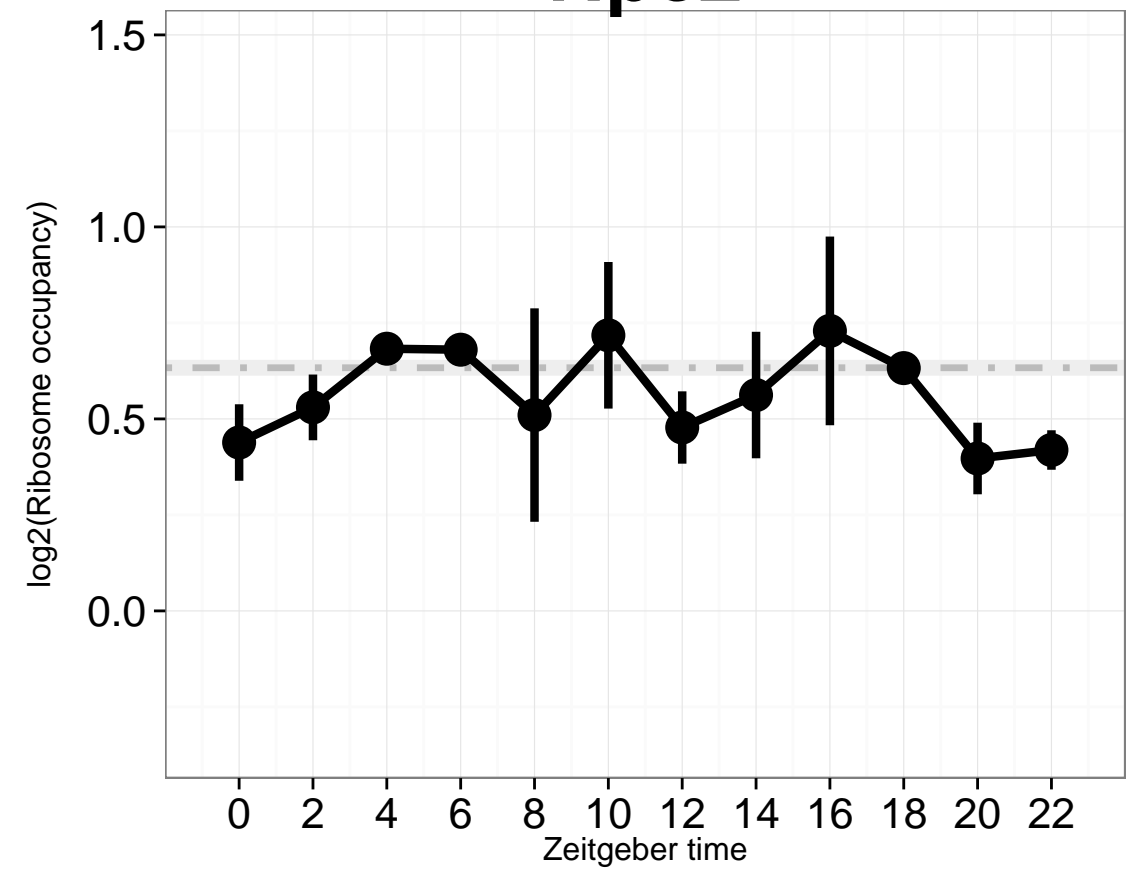

Supplement: SuppDataset_1.zip [file Npc2_set_A.pdf › Supplemental Dataset 1/A-mRNA_nonrhyth_translation_nonrhyth/Npc2_set_A.pdf]

# Npdc1

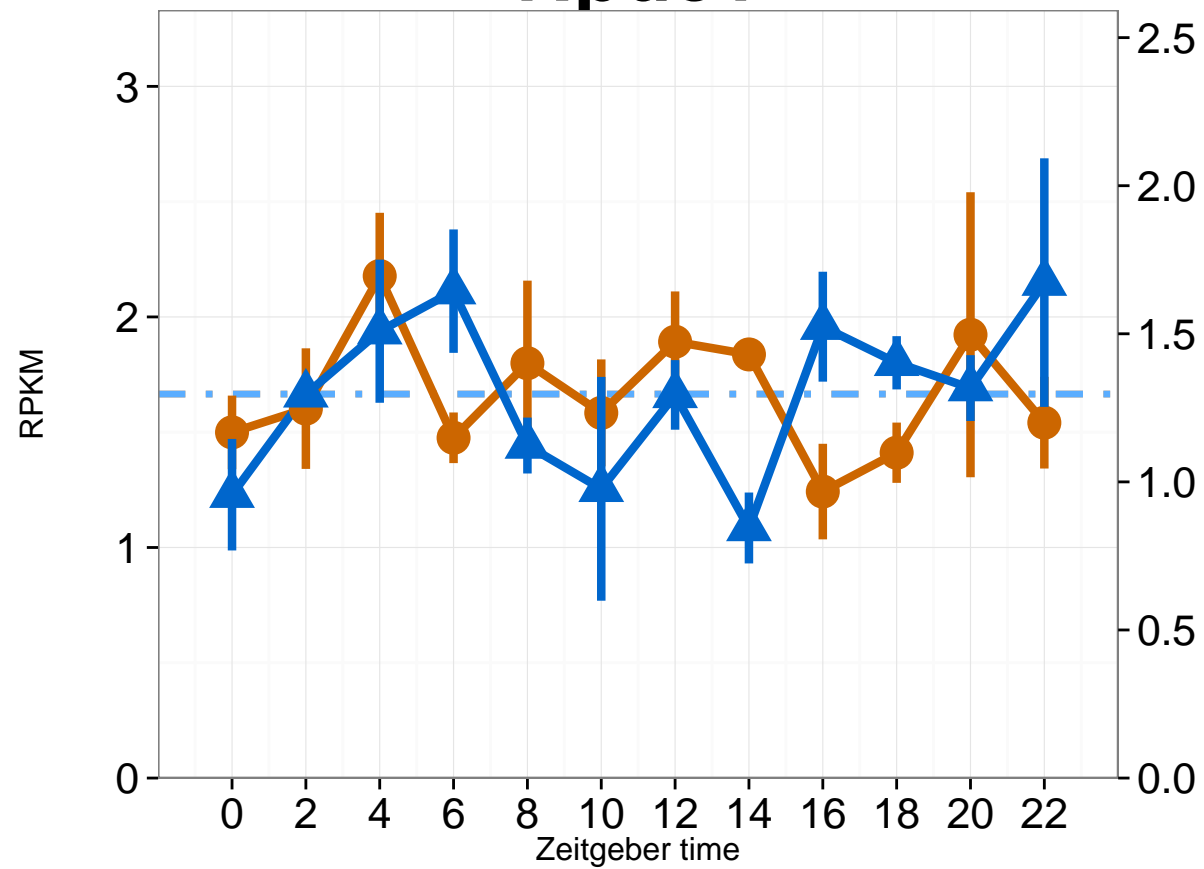

# Npdc1

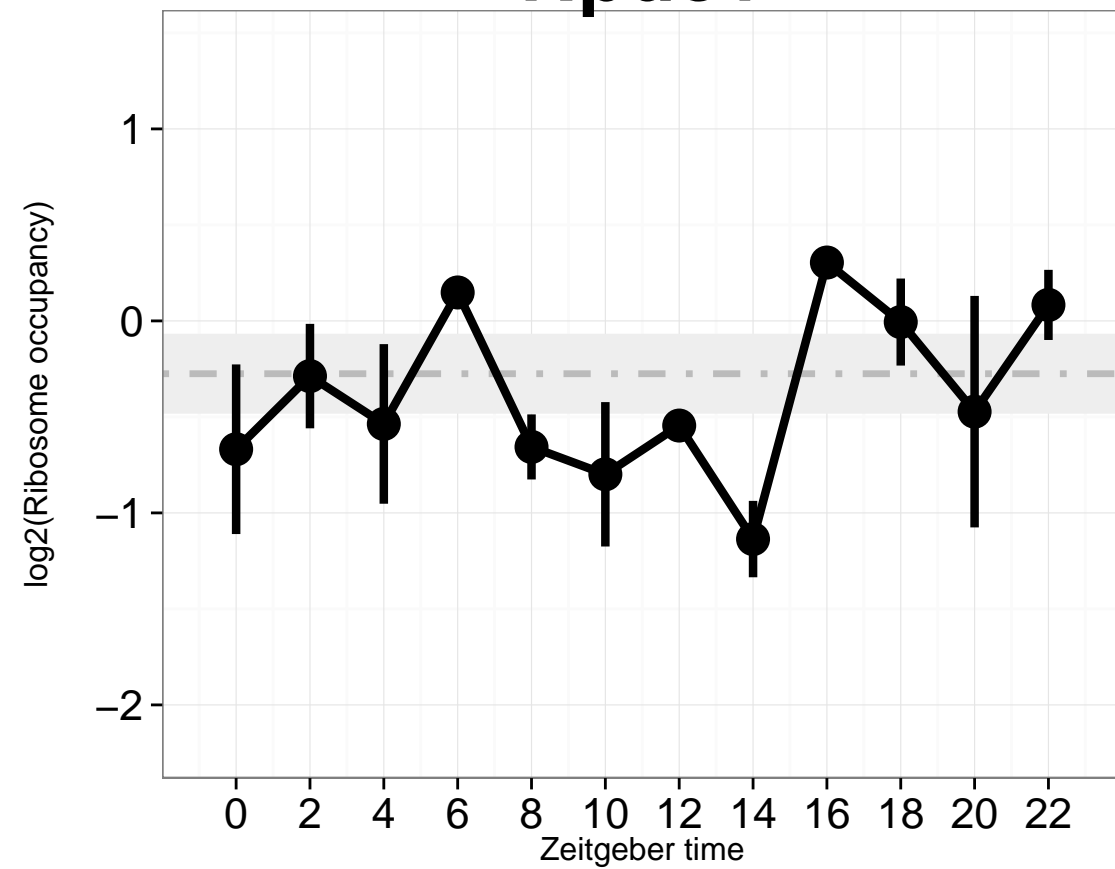

Supplement: SuppDataset_1.zip [file Npdc1_set_A.pdf › Supplemental Dataset 1/A-mRNA_nonrhyth_translation_nonrhyth/Npdc1_set_A.pdf]

# Npepl1

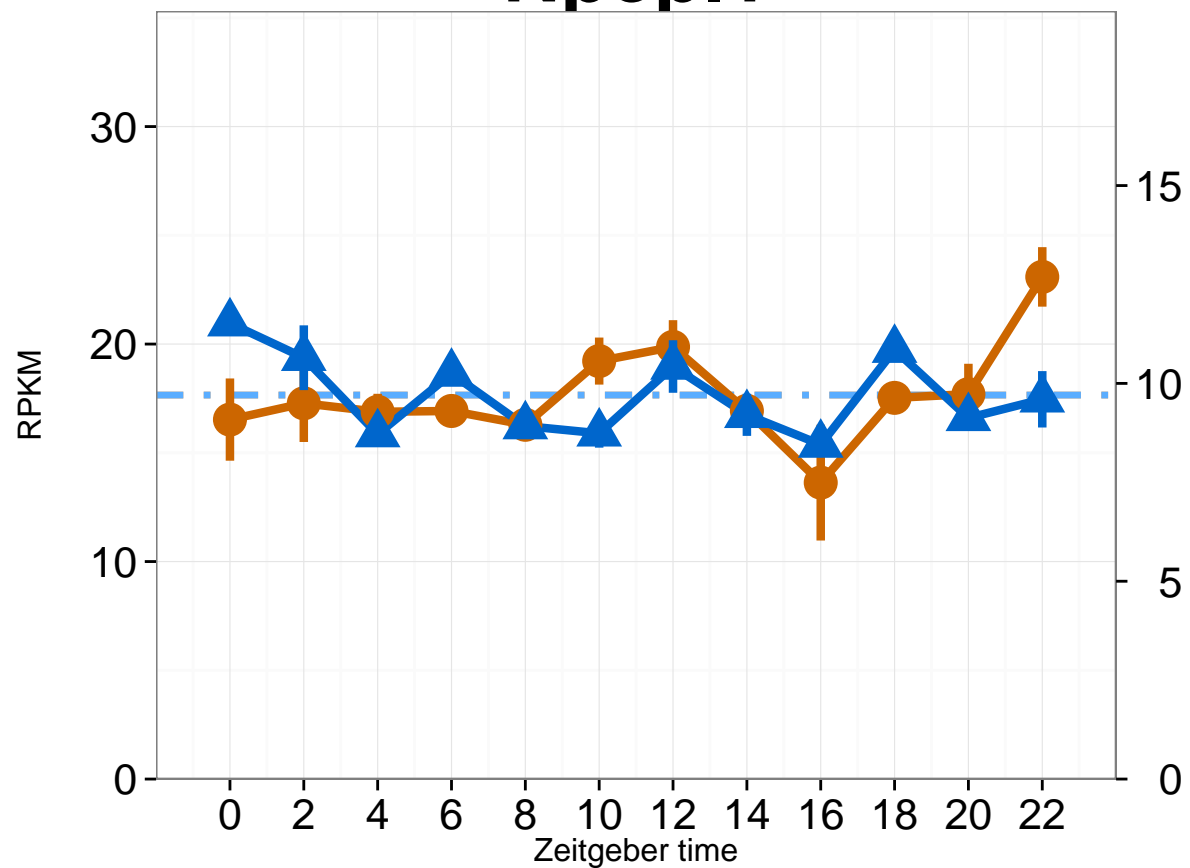

# Npepl1

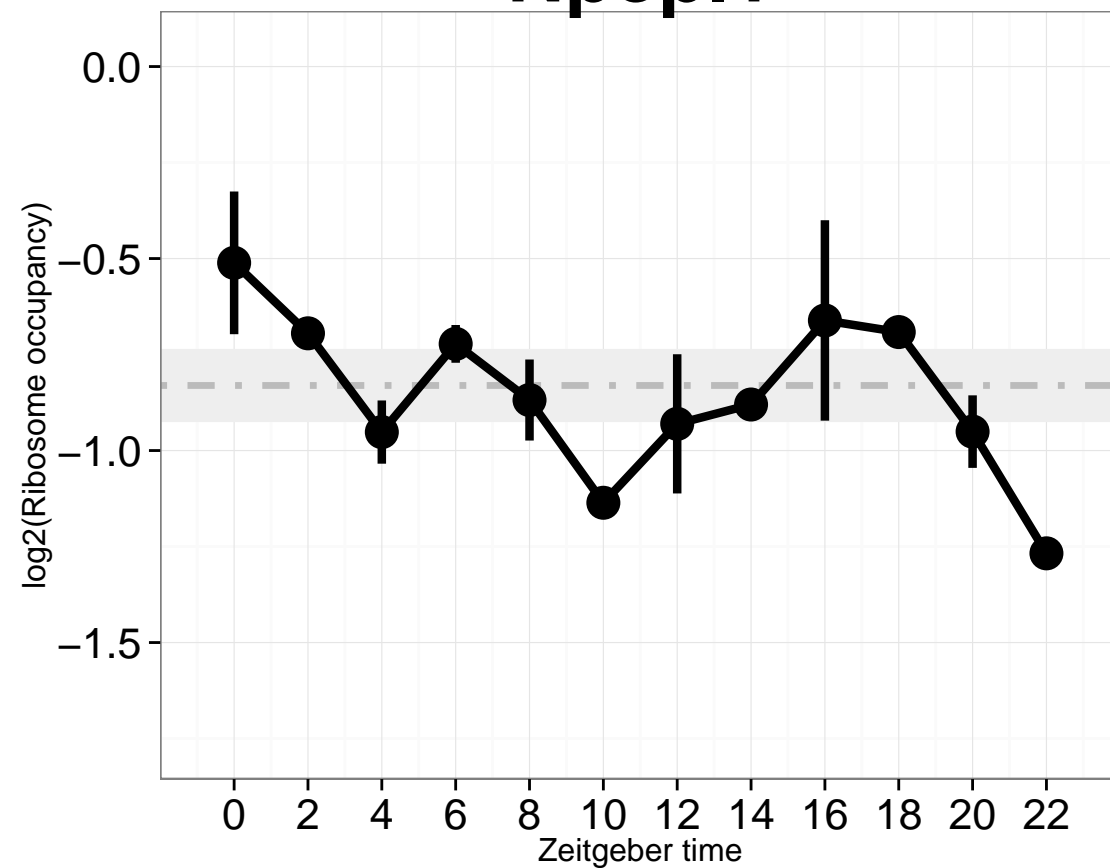

Supplement: SuppDataset_1.zip [file Npepl1_set_A.pdf › Supplemental Dataset 1/A-mRNA_nonrhyth_translation_nonrhyth/Npepl1_set_A.pdf]

## Npepps

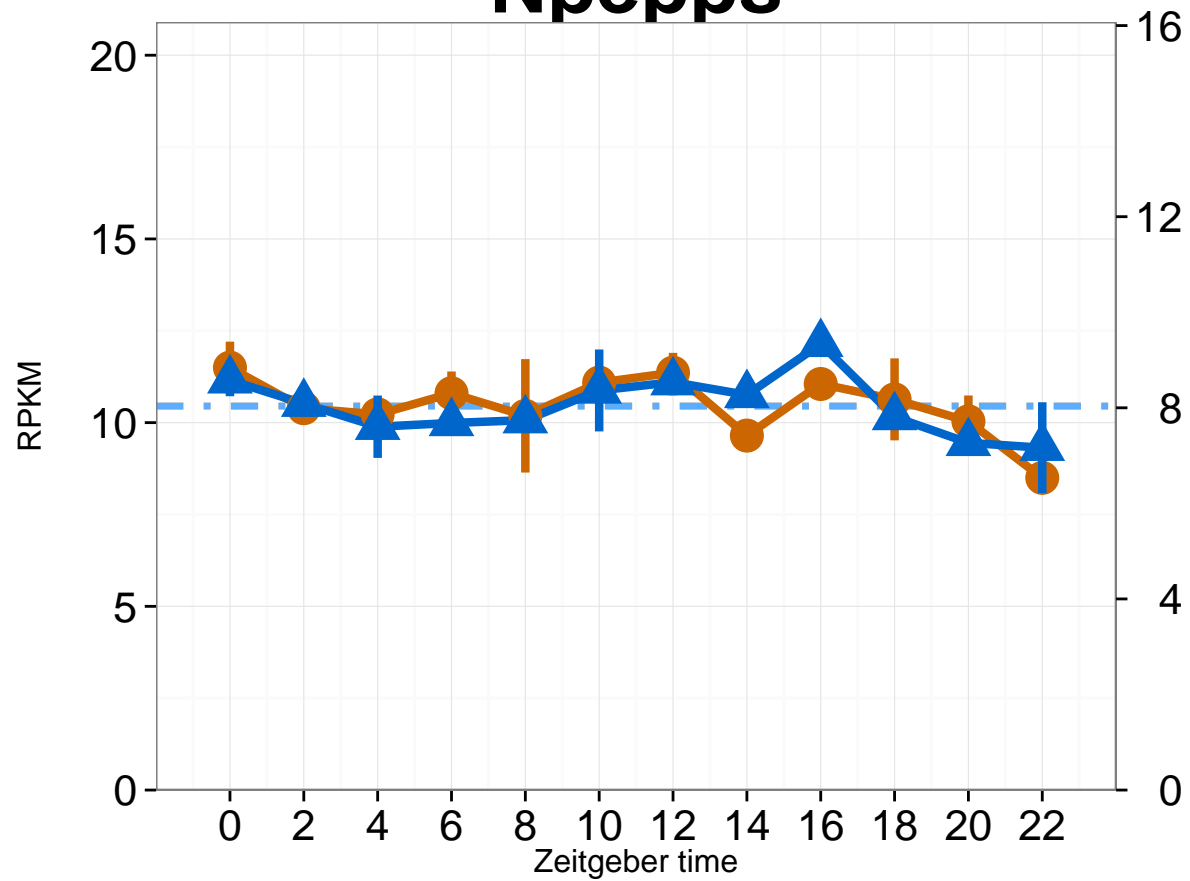

## Npepps

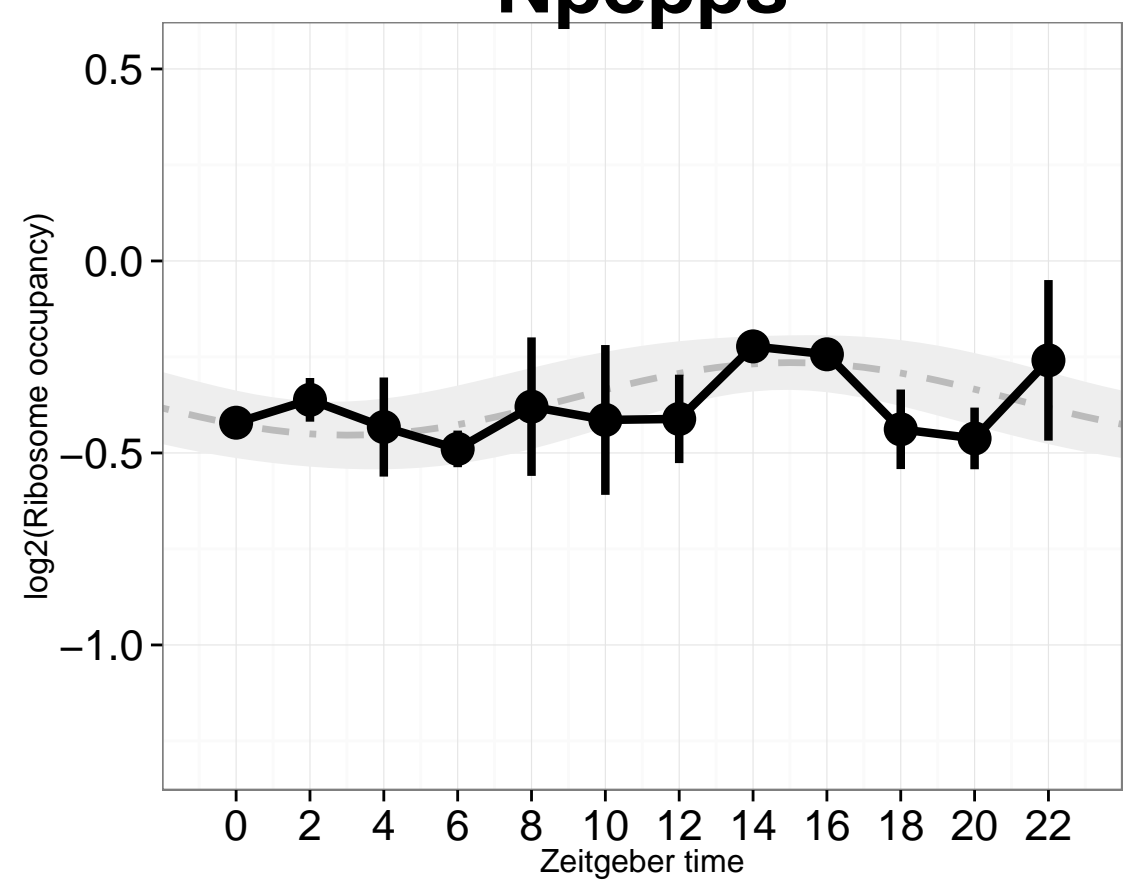

Supplement: SuppDataset_1.zip [file Npepps_set_A.pdf › Supplemental Dataset 1/A-mRNA_nonrhyth_translation_nonrhyth/Npepps_set_A.pdf]

## Nphp1

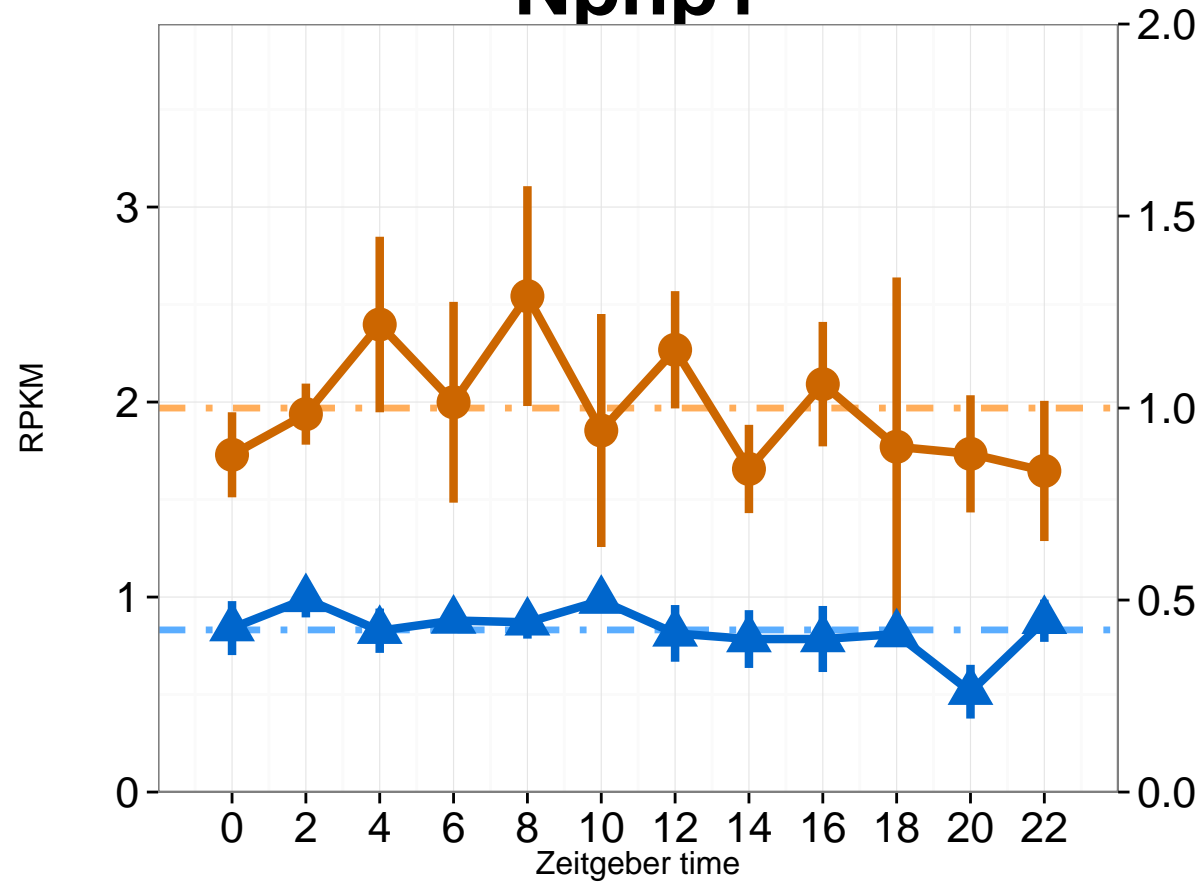

## Nphp1

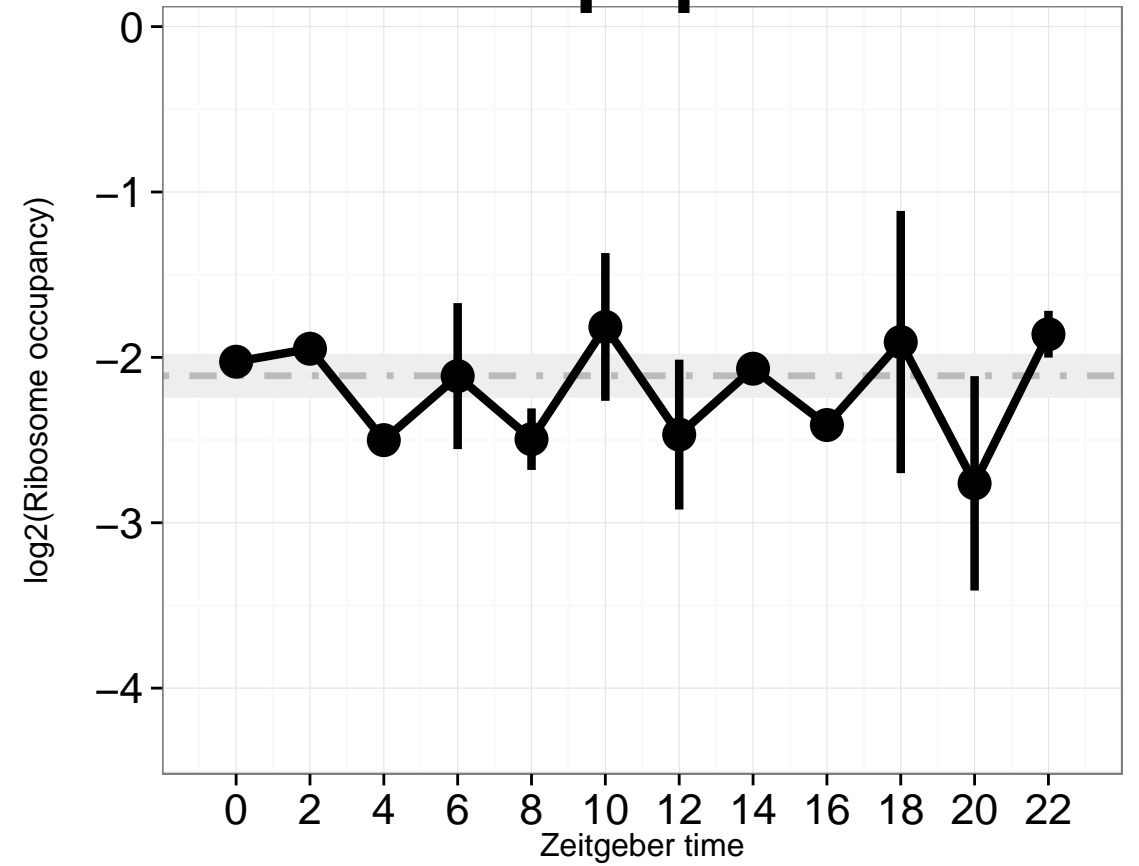

Supplement: SuppDataset_1.zip [file Nphp1_set_A.pdf › Supplemental Dataset 1/A-mRNA_nonrhyth_translation_nonrhyth/Nphp1_set_A.pdf]

## Nphp3

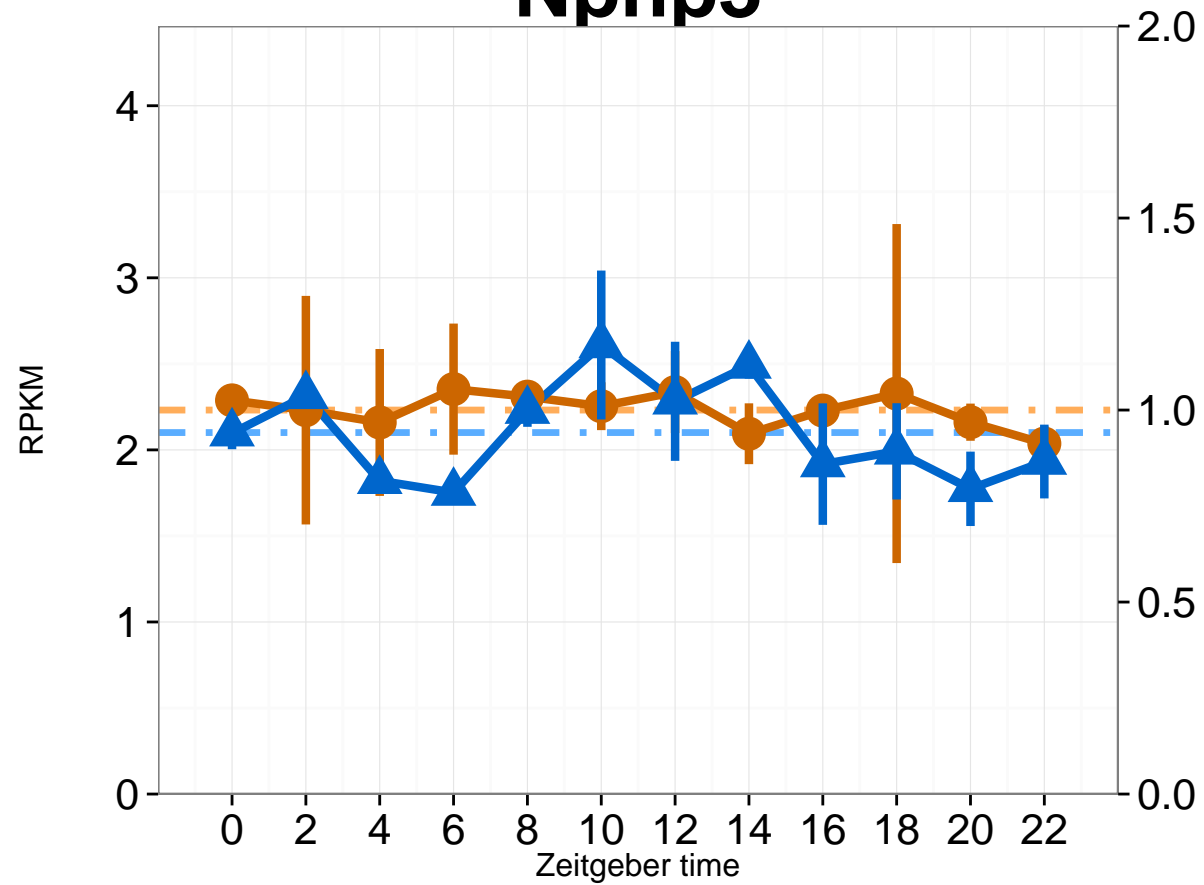

## Nphp3

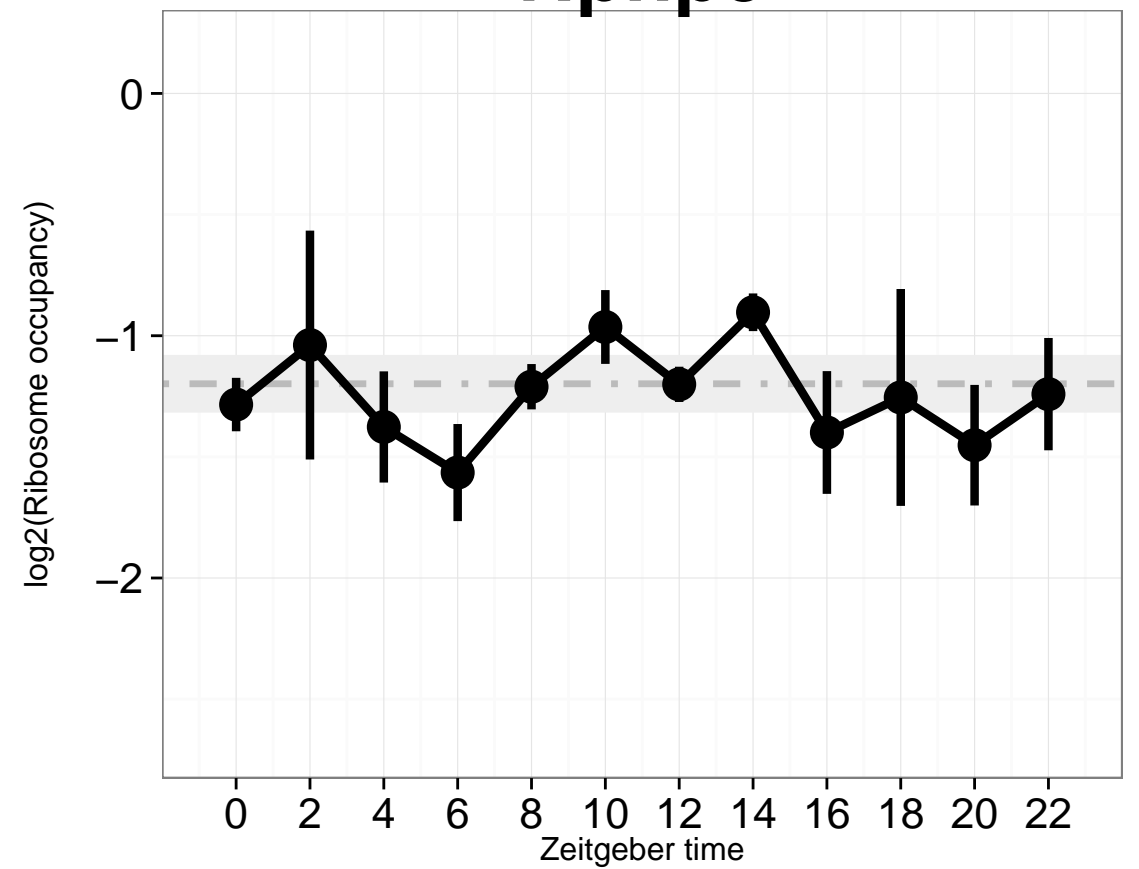

Supplement: SuppDataset_1.zip [file Nphp3_set_A.pdf › Supplemental Dataset 1/A-mRNA_nonrhyth_translation_nonrhyth/Nphp3_set_A.pdf]

# Npl

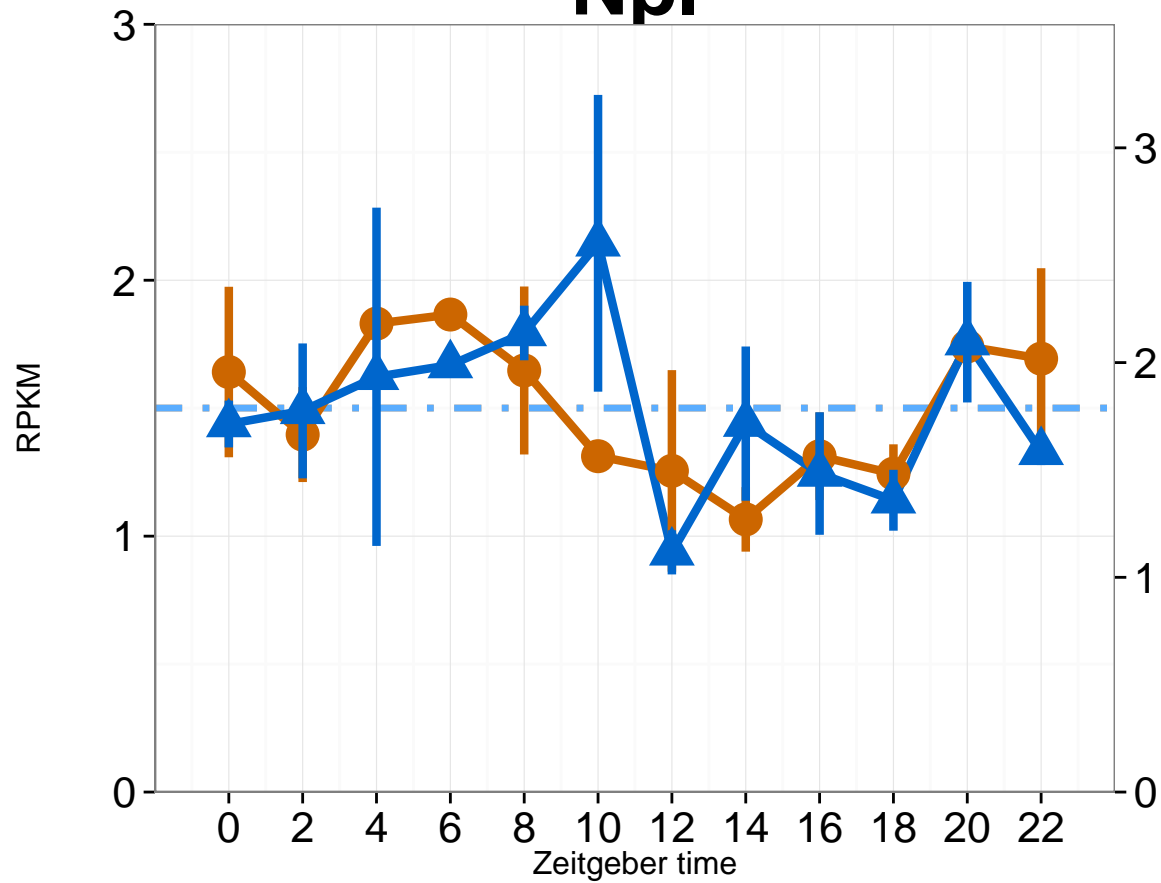

# Npl

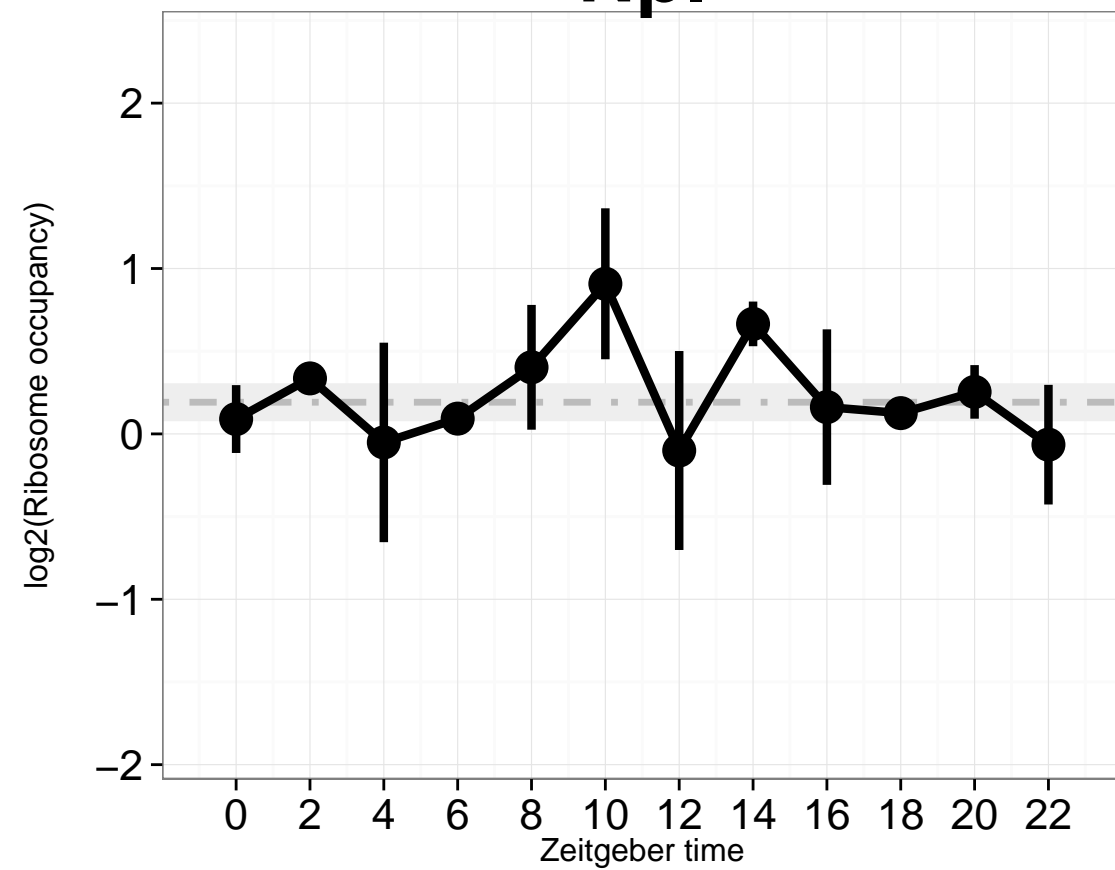

Supplement: SuppDataset_1.zip [file Npl_set_A.pdf › Supplemental Dataset 1/A-mRNA_nonrhyth_translation_nonrhyth/Npl_set_A.pdf]

## Nploc4

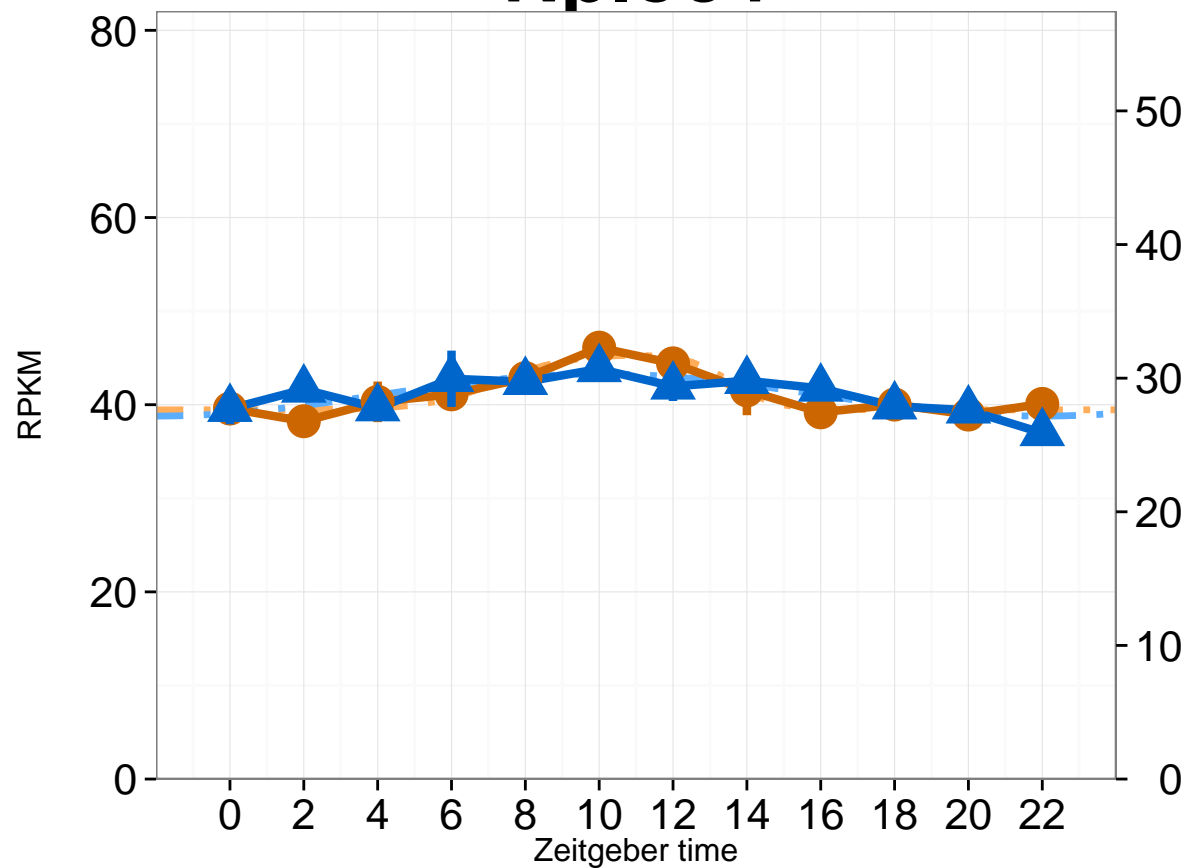

## Nploc4

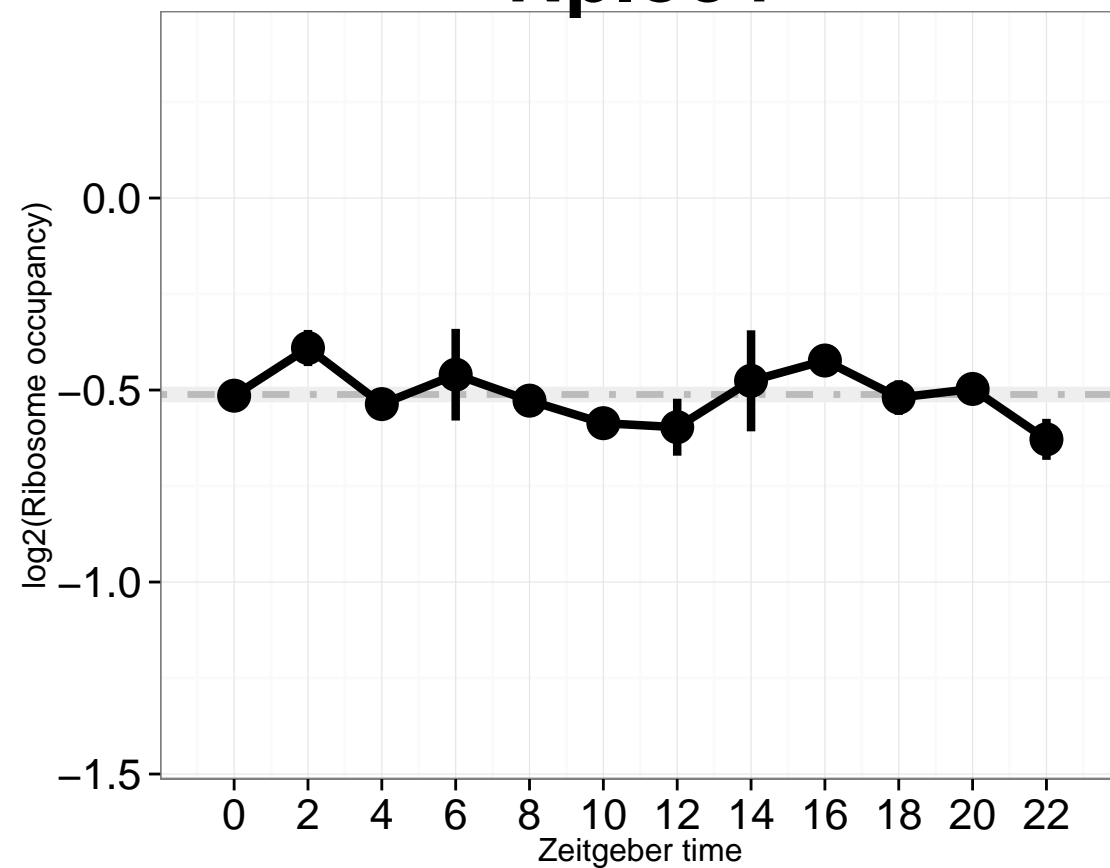

Supplement: SuppDataset_1.zip [file Nploc4_set_A.pdf › Supplemental Dataset 1/A-mRNA_nonrhyth_translation_nonrhyth/Nploc4_set_A.pdf]

## Npm3

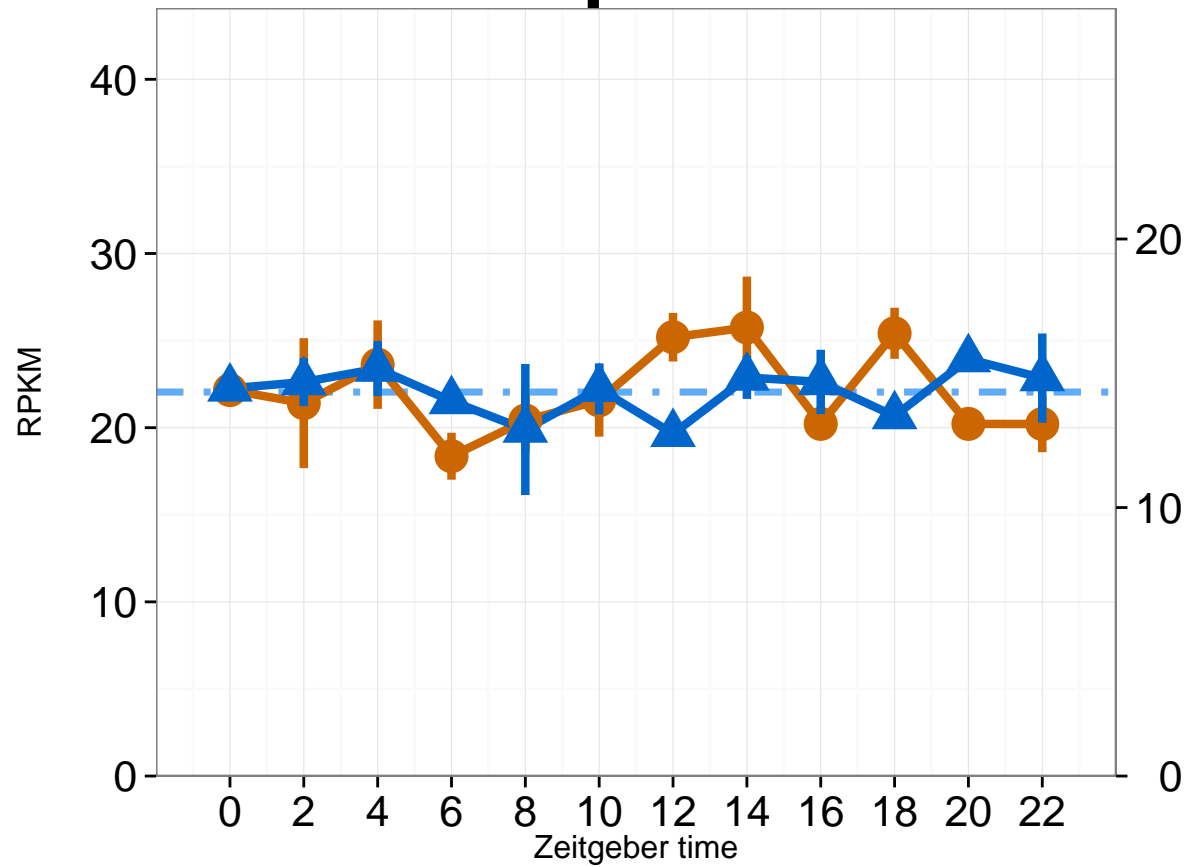

## Npm3

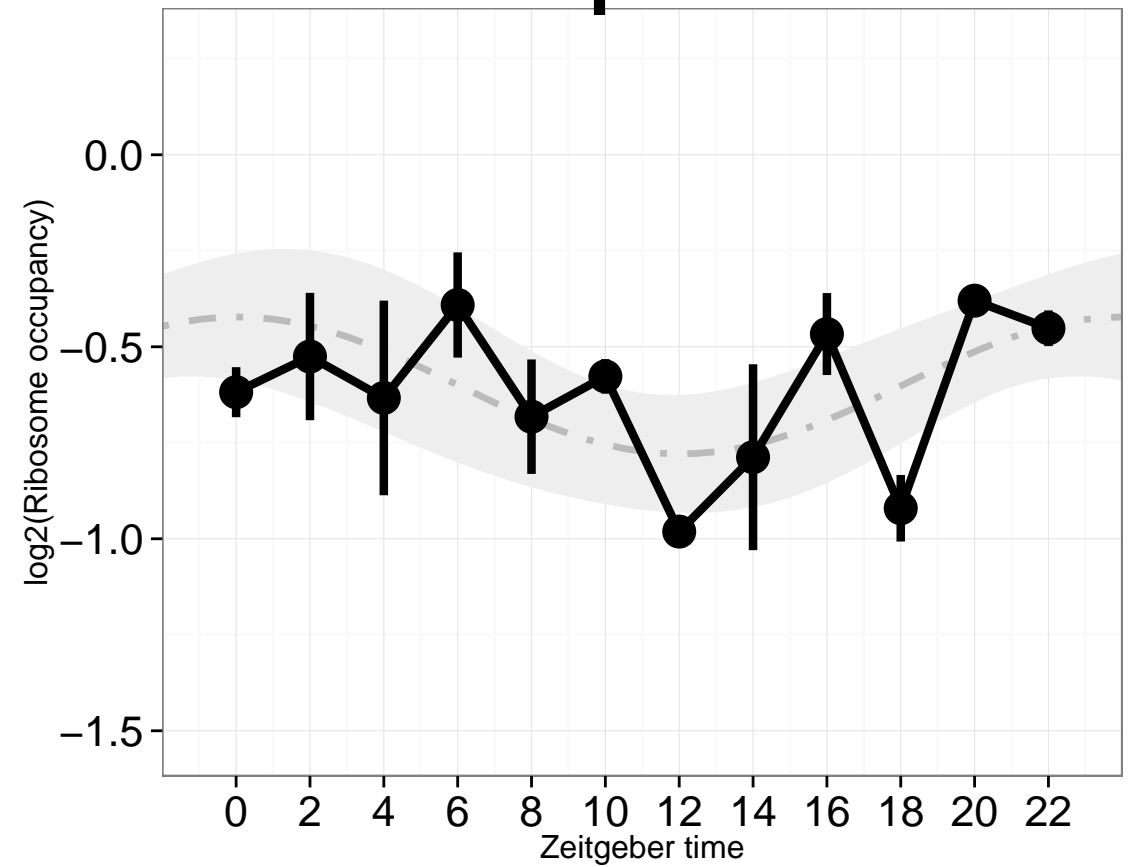

Supplement: SuppDataset_1.zip [file Npm3_set_A.pdf › Supplemental Dataset 1/A-mRNA_nonrhyth_translation_nonrhyth/Npm3_set_A.pdf]

## Npr1

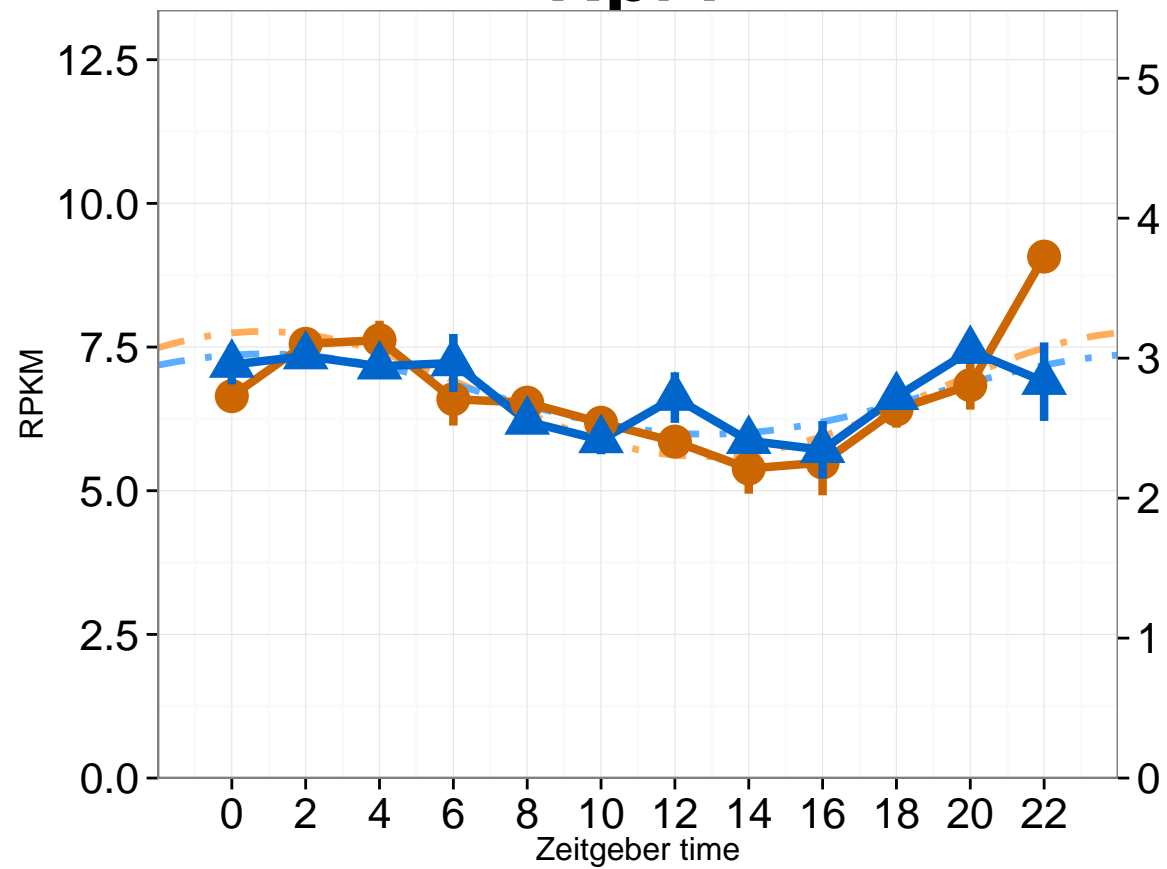

## Npr1

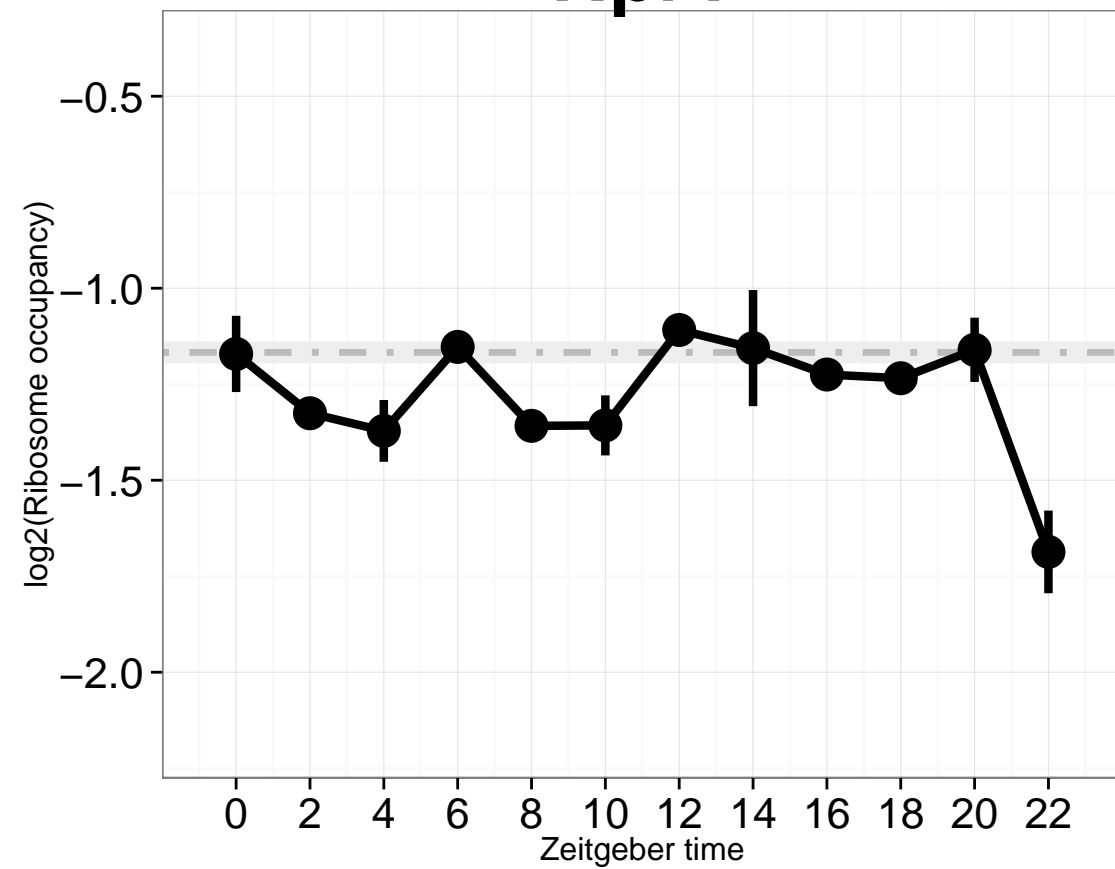

Supplement: SuppDataset_1.zip [file Npr1_set_A.pdf › Supplemental Dataset 1/A-mRNA_nonrhyth_translation_nonrhyth/Npr1_set_A.pdf]

## Nprl2

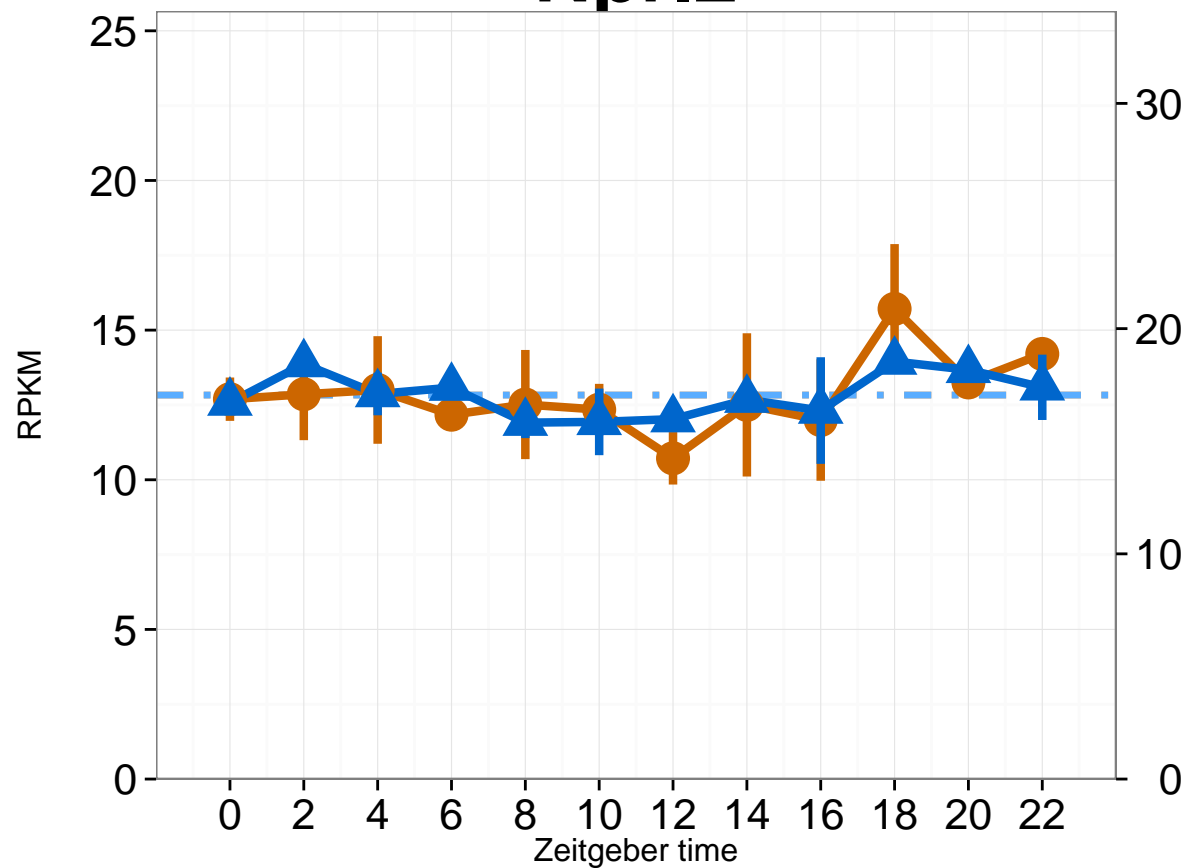

## Nprl2

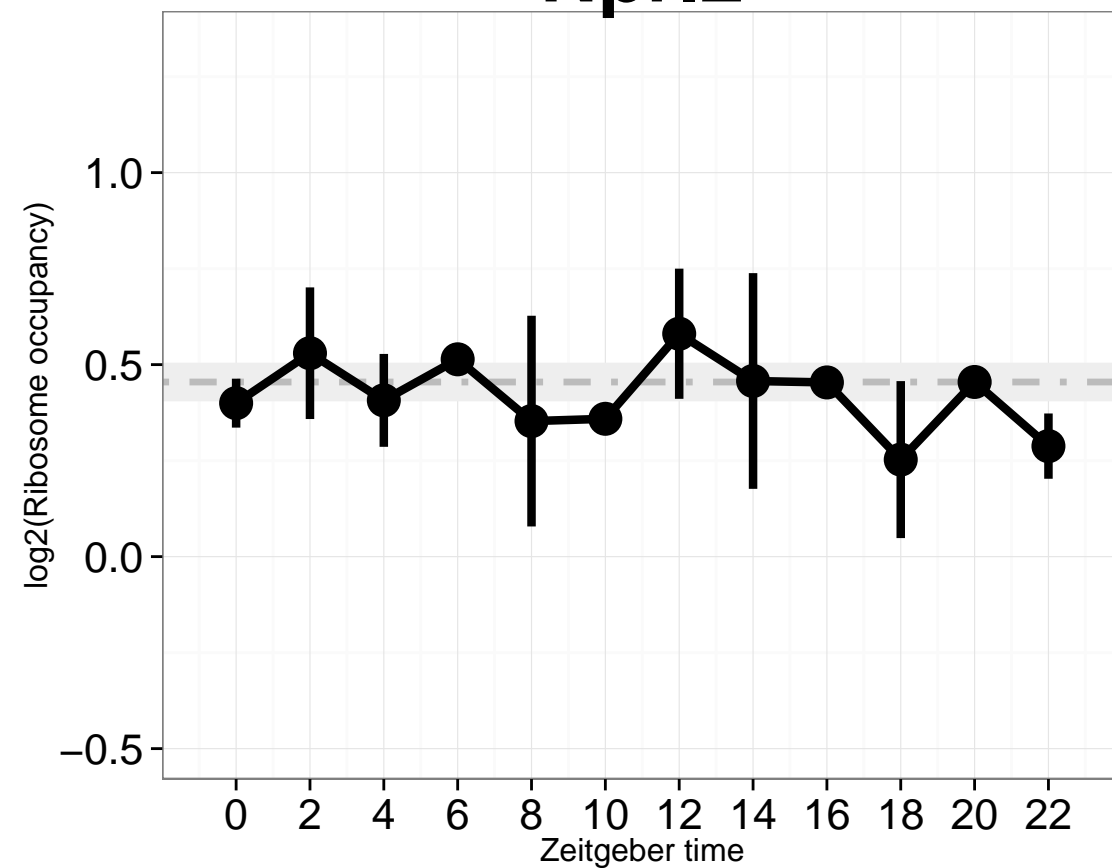

Supplement: SuppDataset_1.zip [file Nprl2_set_A.pdf › Supplemental Dataset 1/A-mRNA_nonrhyth_translation_nonrhyth/Nprl2_set_A.pdf]

## Nprl3

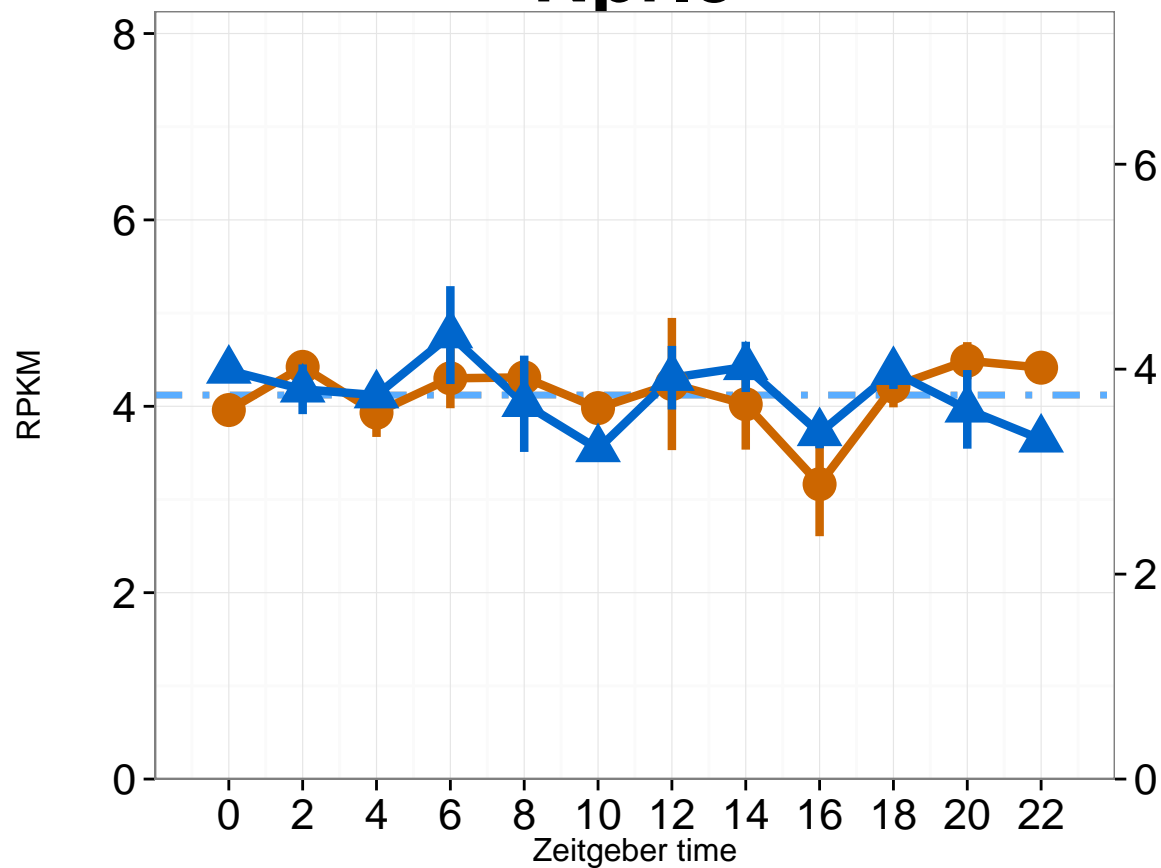

## Nprl3

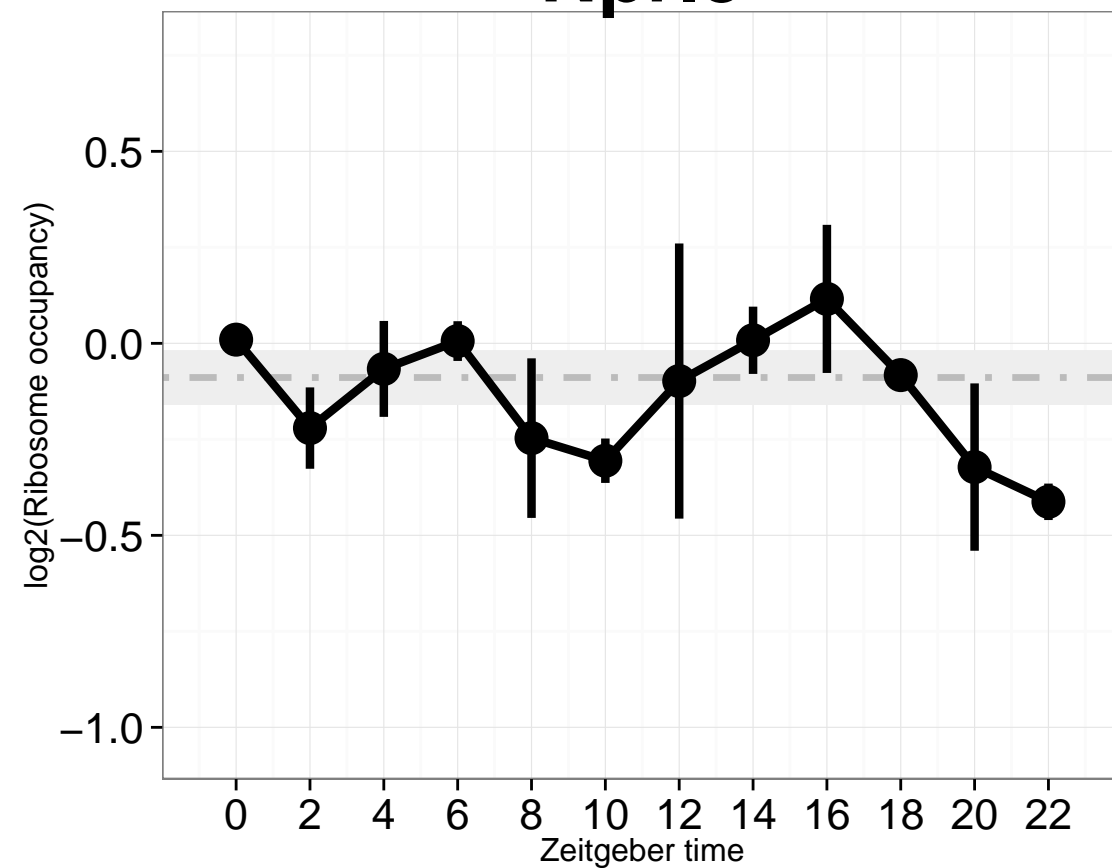

Supplement: SuppDataset_1.zip [file Nprl3_set_A.pdf › Supplemental Dataset 1/A-mRNA_nonrhyth_translation_nonrhyth/Nprl3_set_A.pdf]

## Nptn

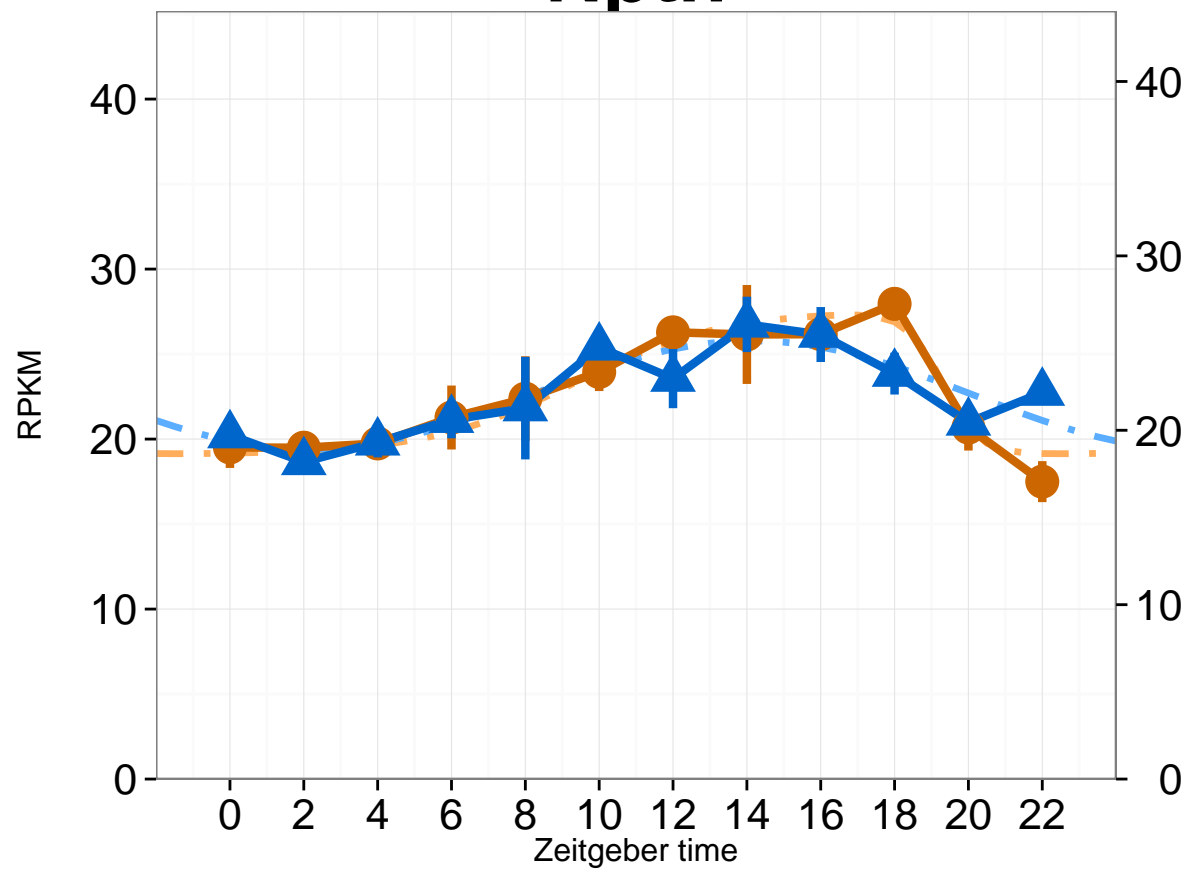

## Nptn

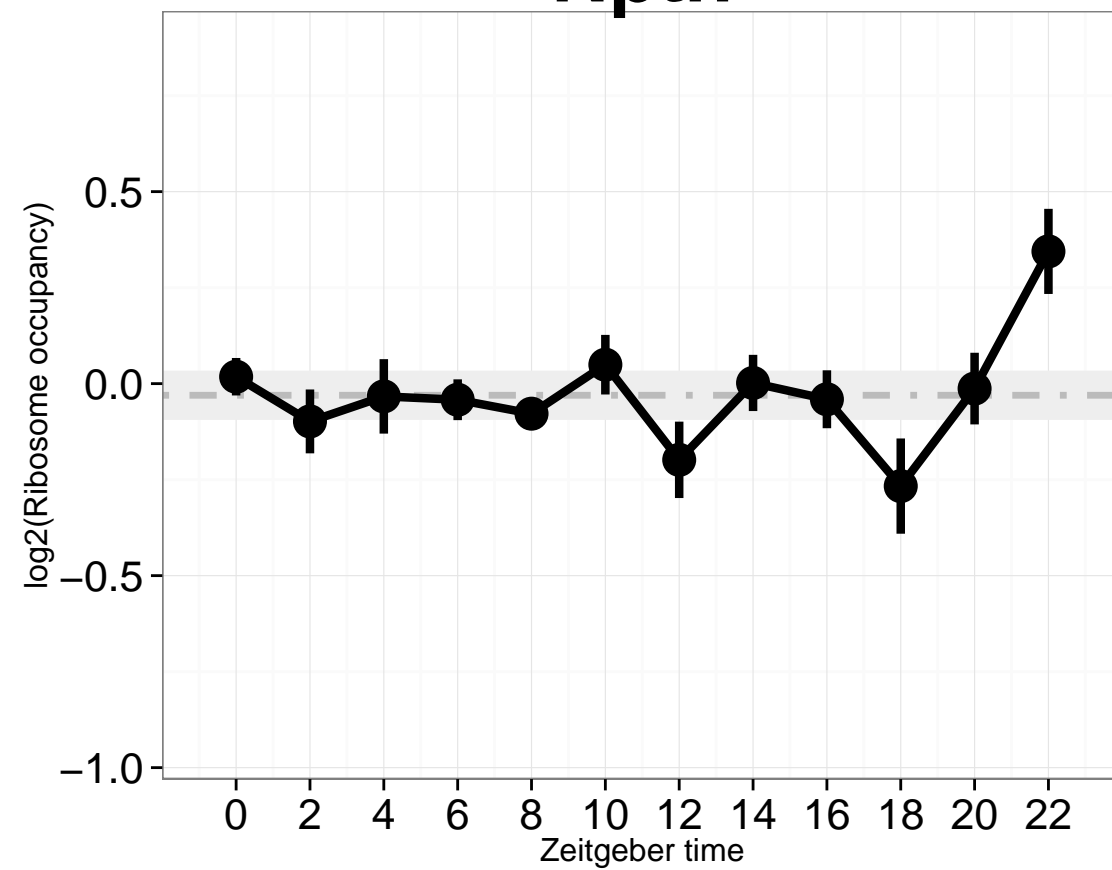

Supplement: SuppDataset_1.zip [file Nptn_set_A.pdf › Supplemental Dataset 1/A-mRNA_nonrhyth_translation_nonrhyth/Nptn_set_A.pdf]

## Nqo1

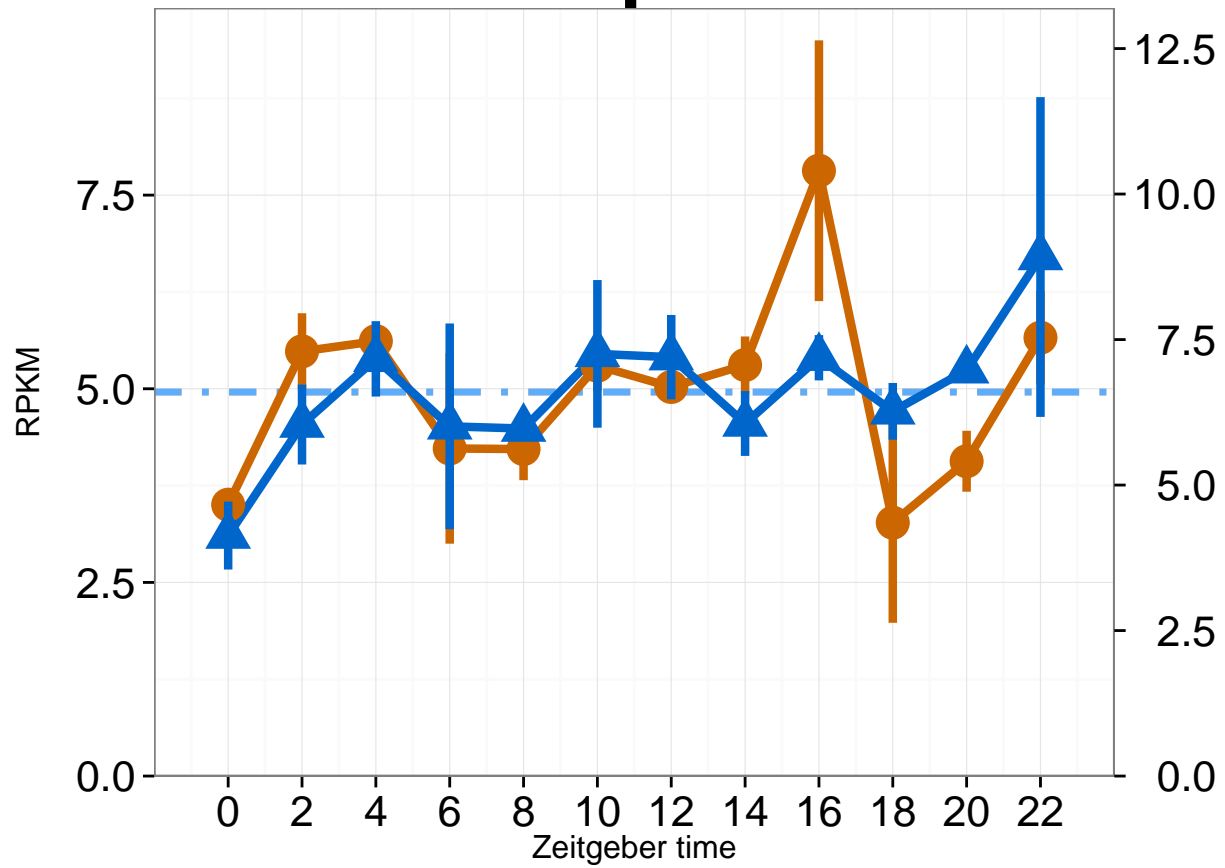

## Nqo1

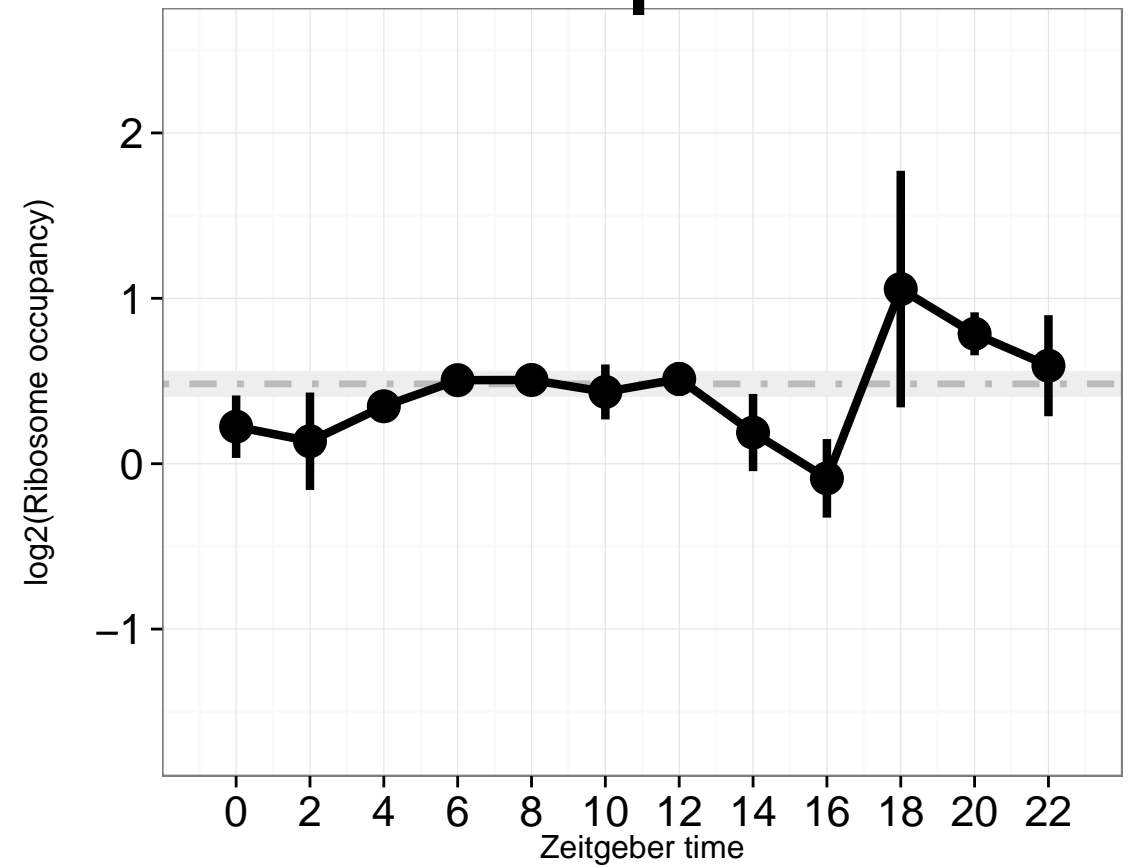

Supplement: SuppDataset_1.zip [file Nqo1_set_A.pdf › Supplemental Dataset 1/A-mRNA_nonrhyth_translation_nonrhyth/Nqo1_set_A.pdf]

## Nqo2

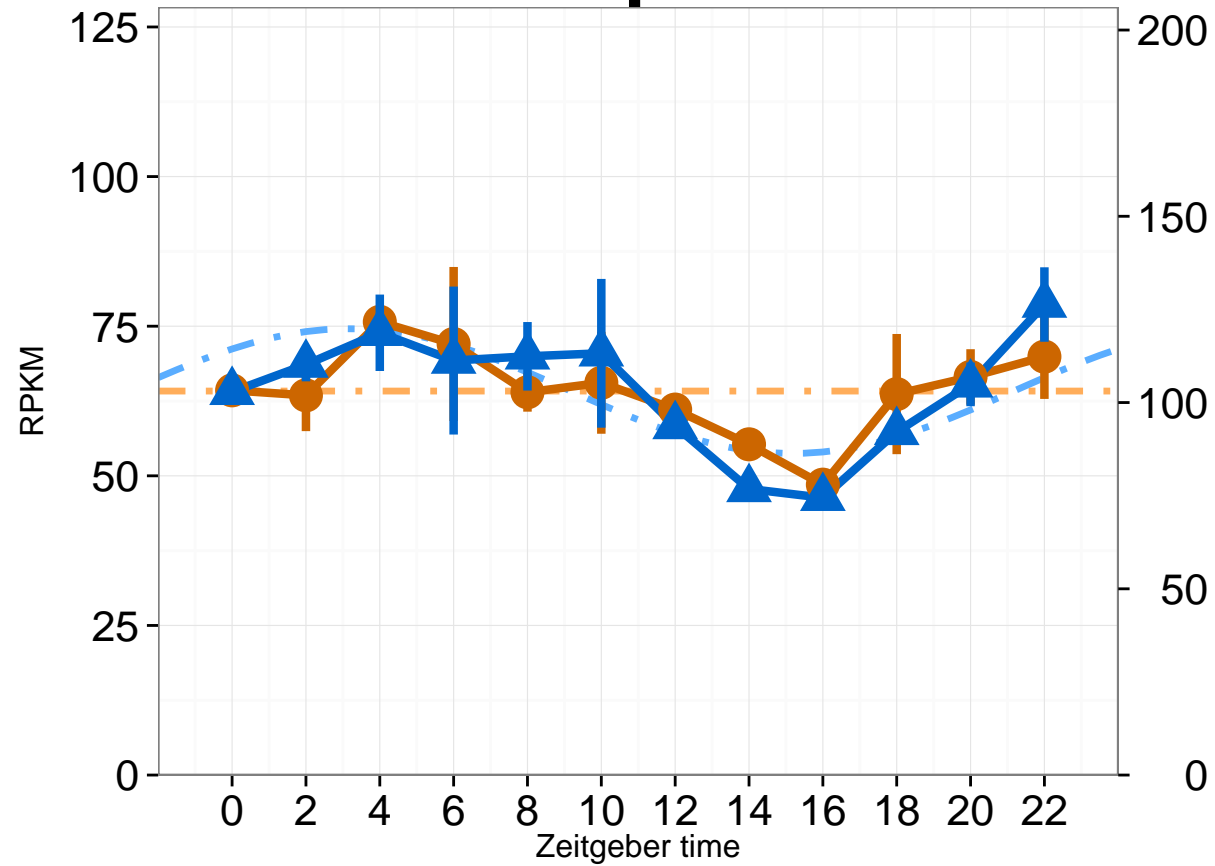

## Nqo2

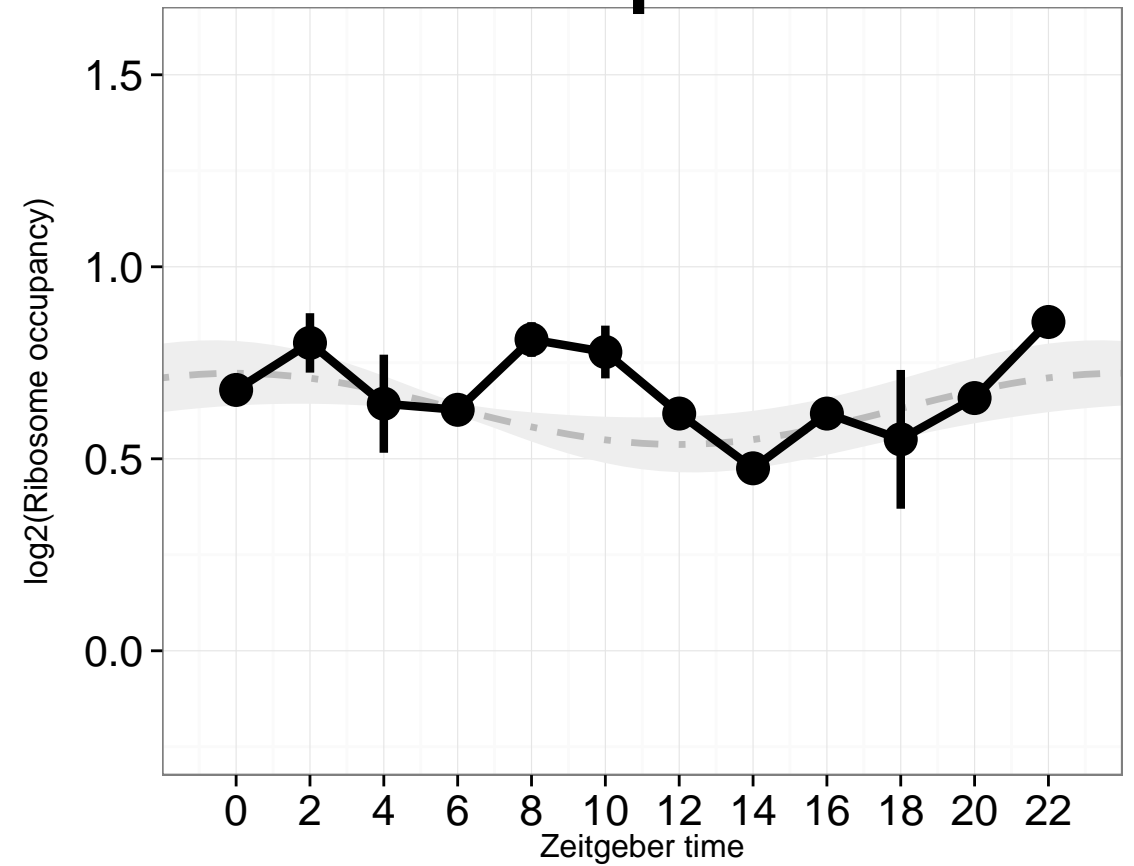

Supplement: SuppDataset_1.zip [file Nqo2_set_A.pdf › Supplemental Dataset 1/A-mRNA_nonrhyth_translation_nonrhyth/Nqo2_set_A.pdf]

# Nr1h2

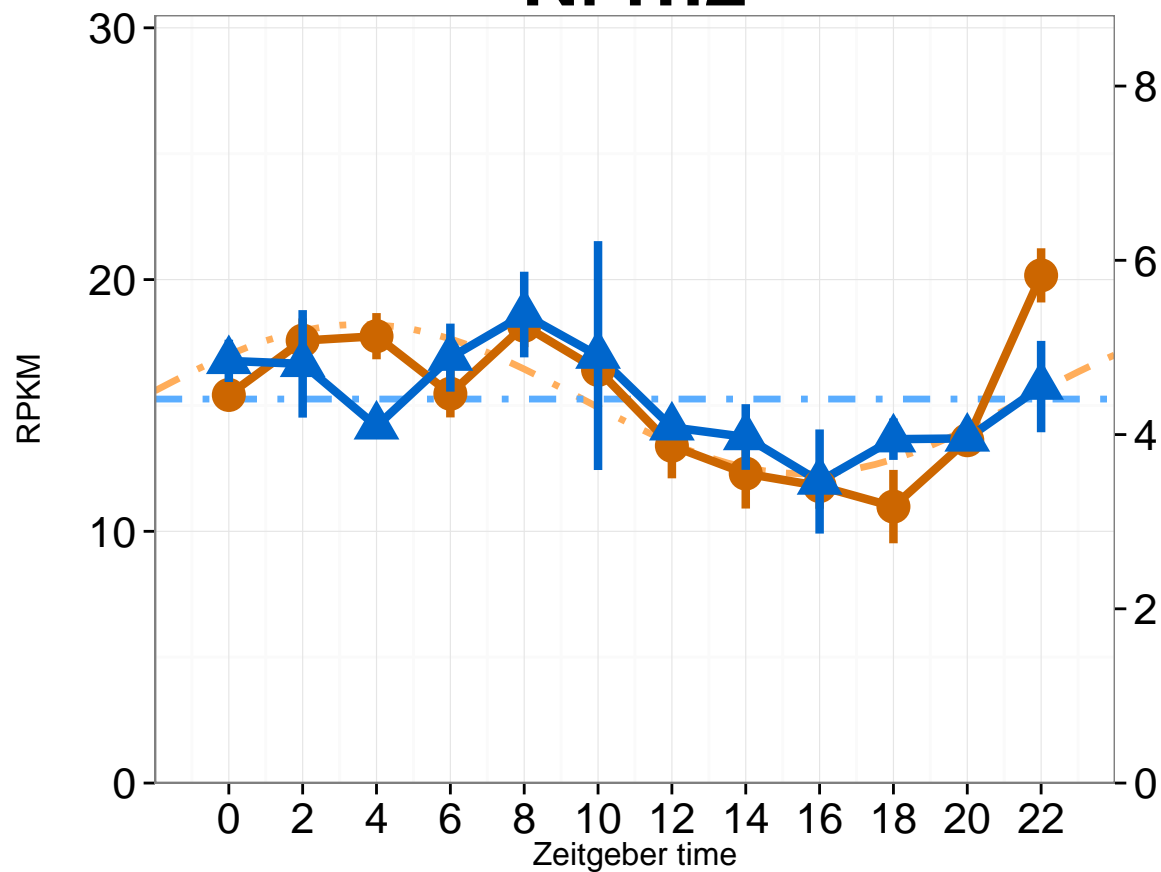

# Nr1h2

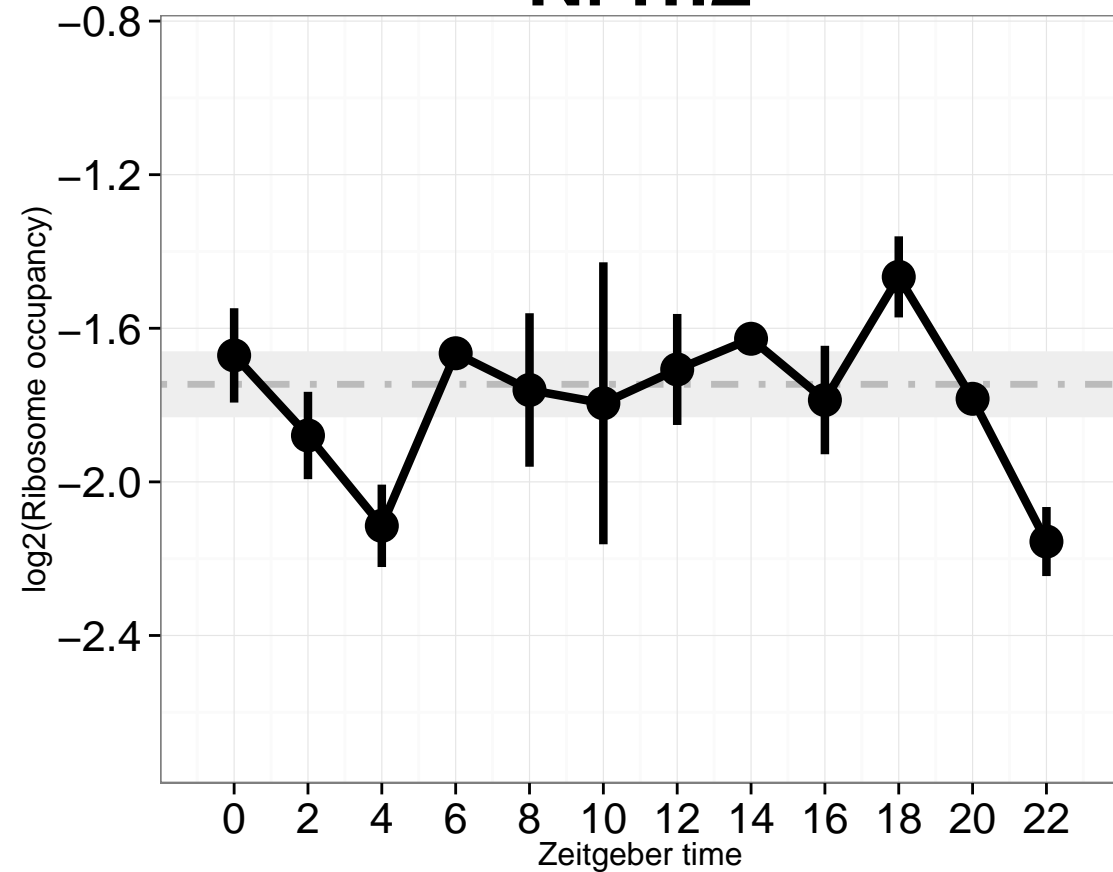

Supplement: SuppDataset_1.zip [file Nr1h2_set_A.pdf › Supplemental Dataset 1/A-mRNA_nonrhyth_translation_nonrhyth/Nr1h2_set_A.pdf]

# Nr1h3

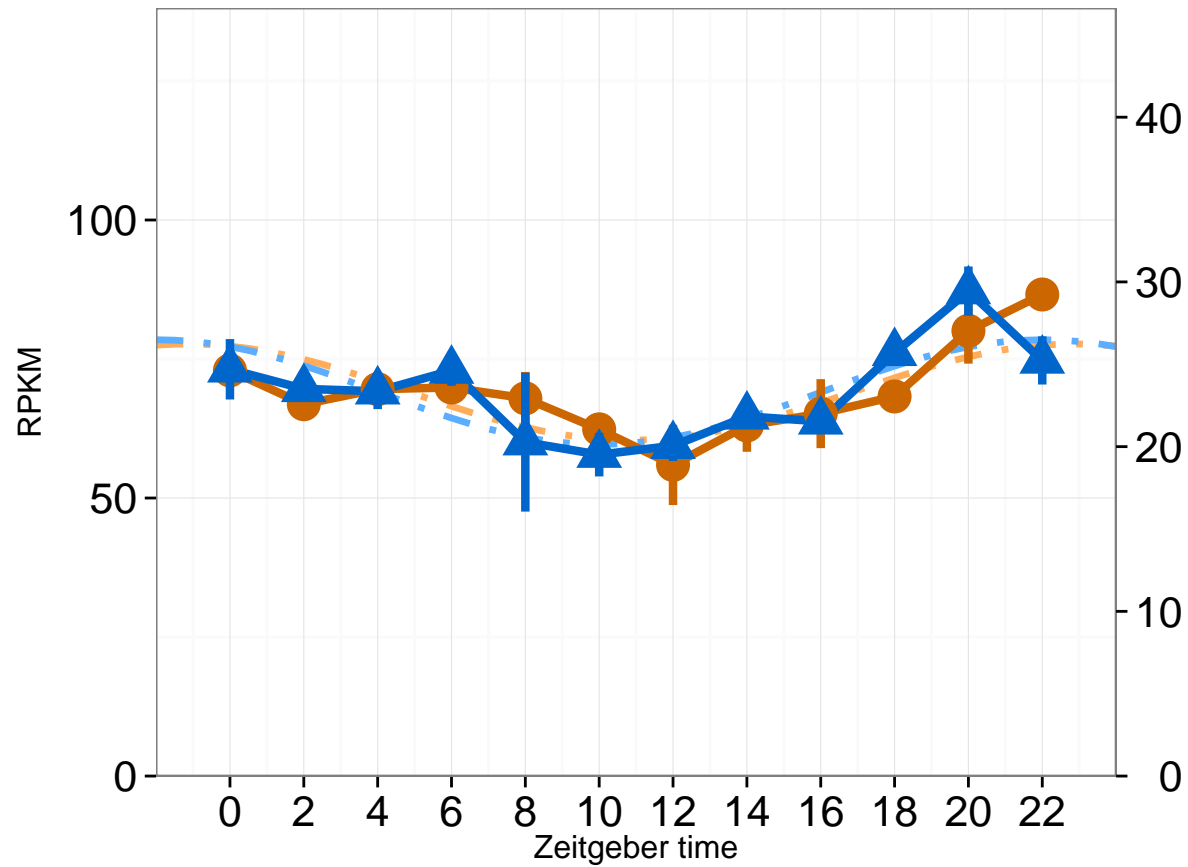

# Nr1h3

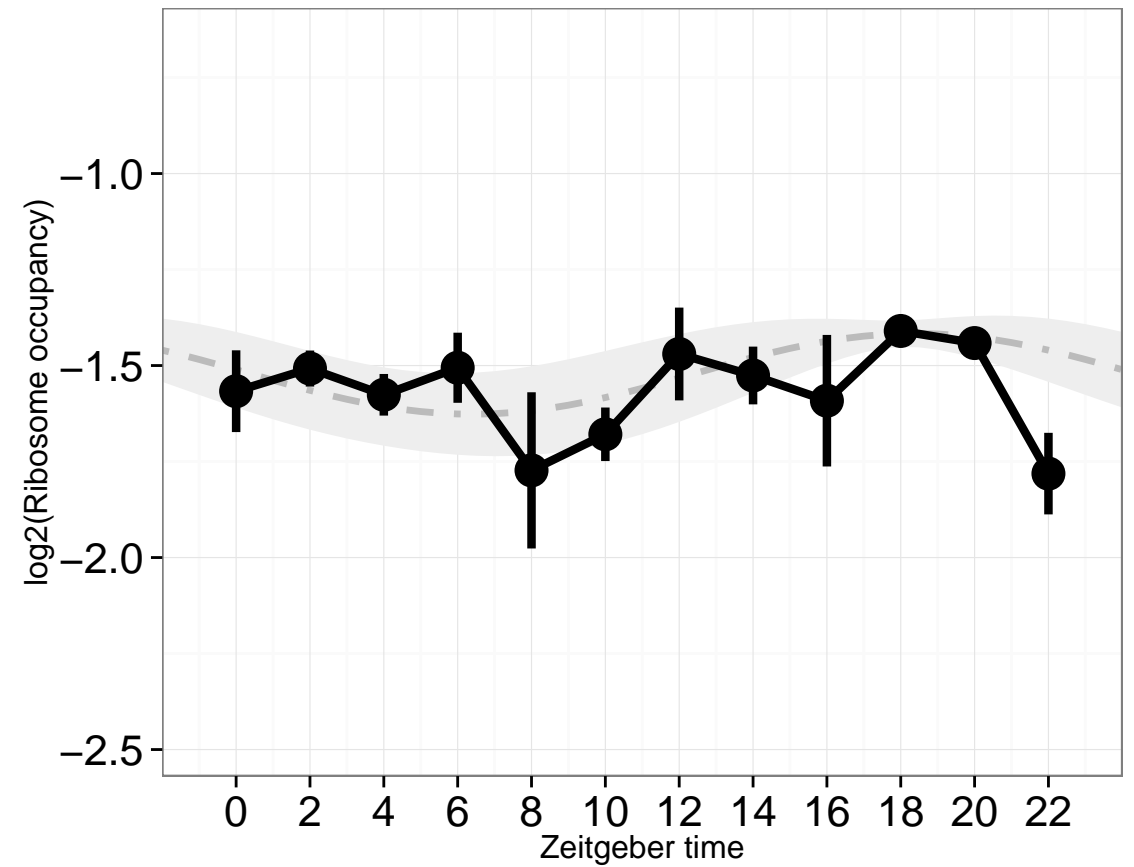

Supplement: SuppDataset_1.zip [file Nr1h3_set_A.pdf › Supplemental Dataset 1/A-mRNA_nonrhyth_translation_nonrhyth/Nr1h3_set_A.pdf]

## Nr1i2

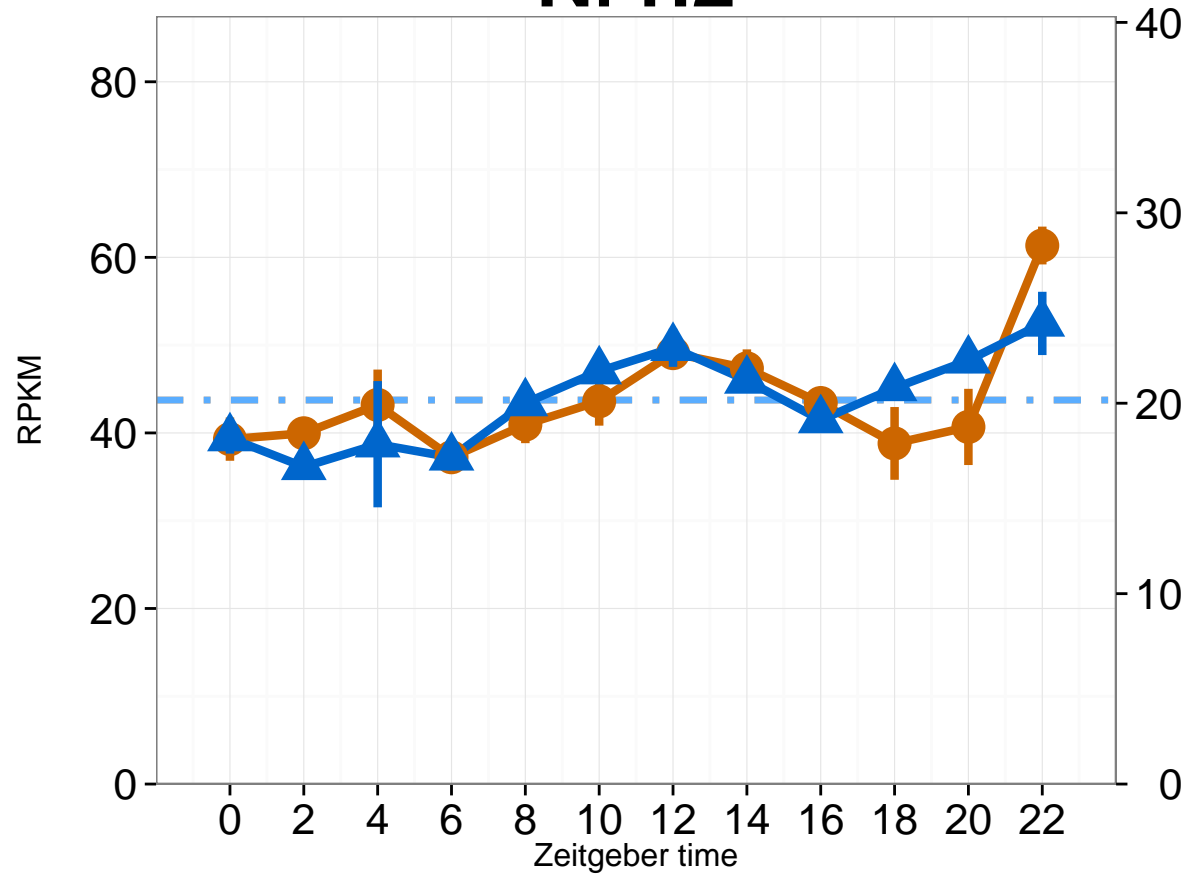

## Nr1i2

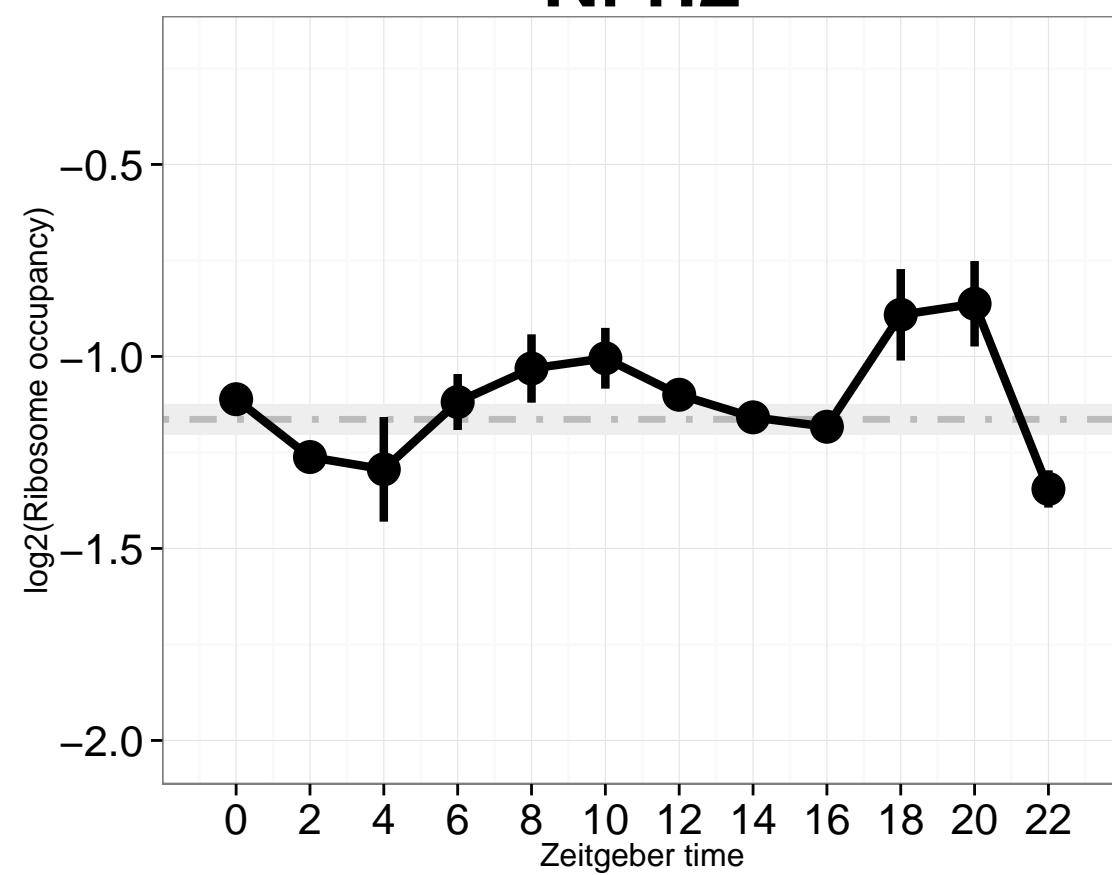

Supplement: SuppDataset_1.zip [file Nr1i2_set_A.pdf › Supplemental Dataset 1/A-mRNA_nonrhyth_translation_nonrhyth/Nr1i2_set_A.pdf]

# Nr2c1

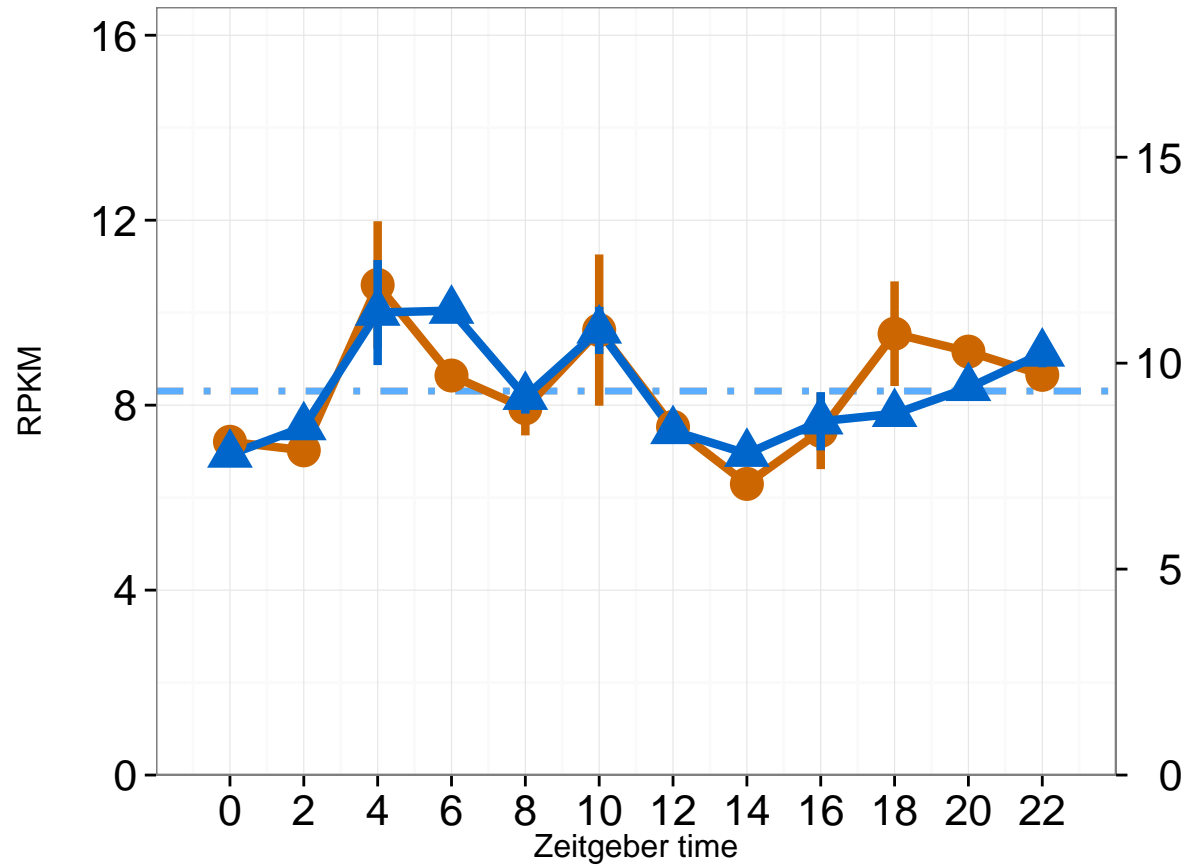

# Nr2c1

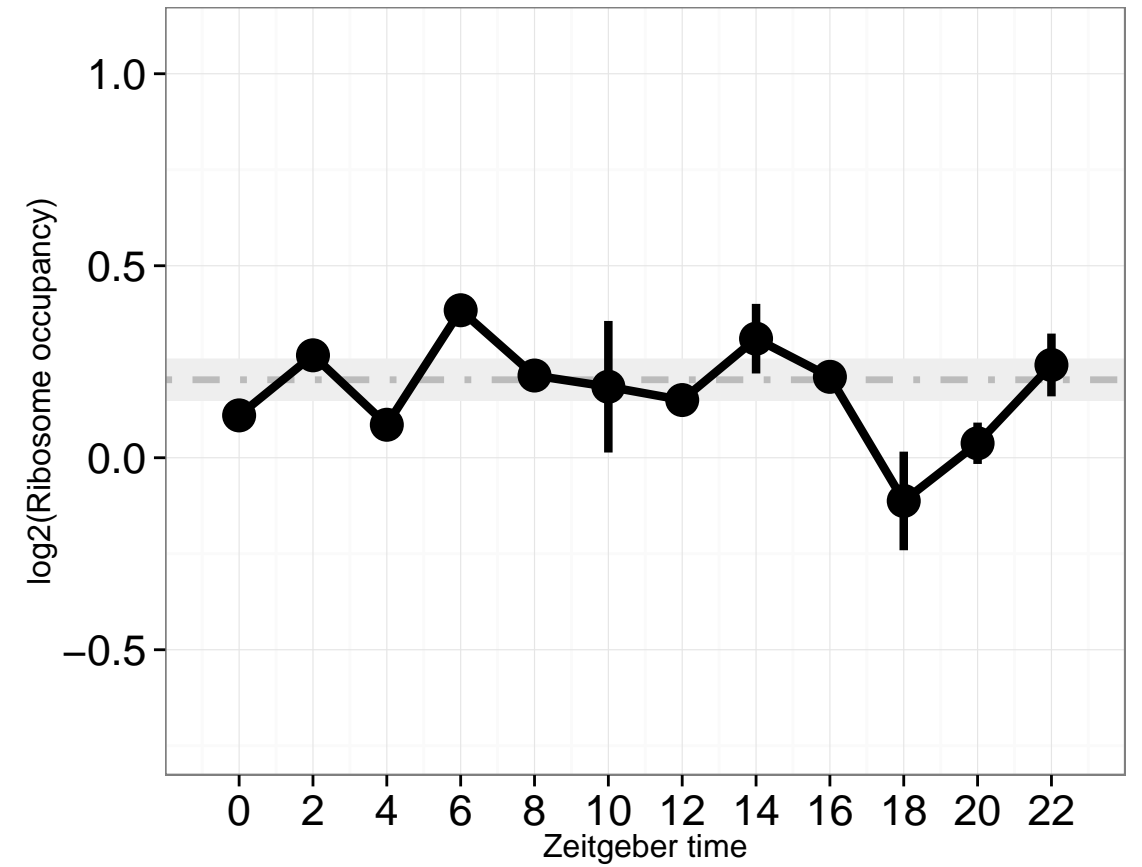

Supplement: SuppDataset_1.zip [file Nr2c1_set_A.pdf › Supplemental Dataset 1/A-mRNA_nonrhyth_translation_nonrhyth/Nr2c1_set_A.pdf]

# Nr2c2

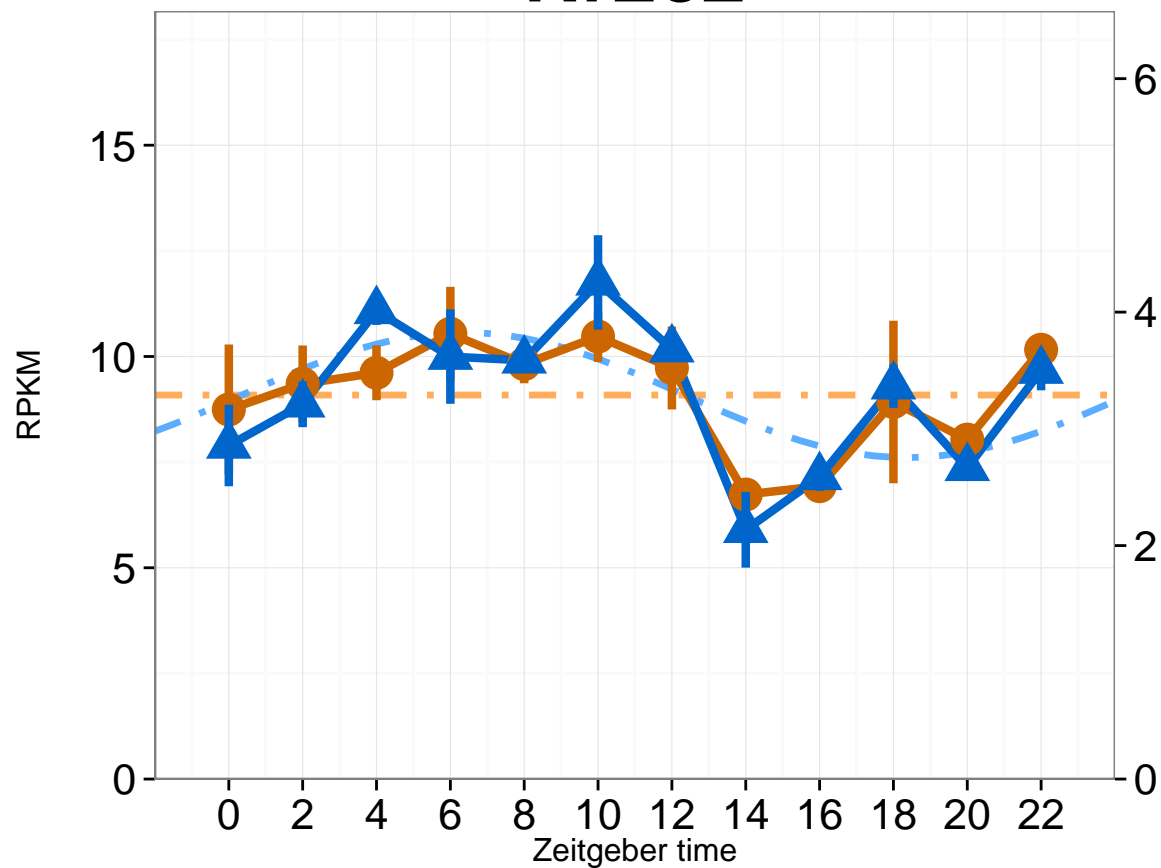

# Nr2c2

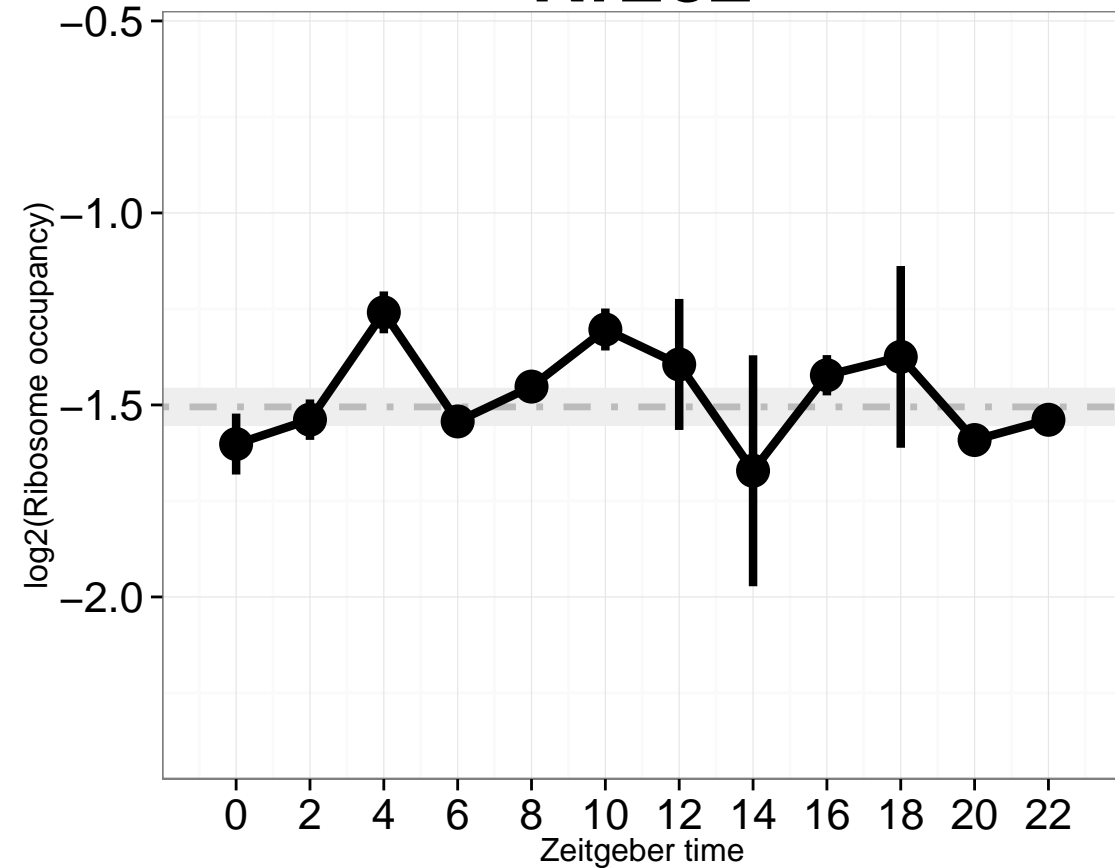

Supplement: SuppDataset_1.zip [file Nr2c2_set_A.pdf › Supplemental Dataset 1/A-mRNA_nonrhyth_translation_nonrhyth/Nr2c2_set_A.pdf]

# Nr2c2ap

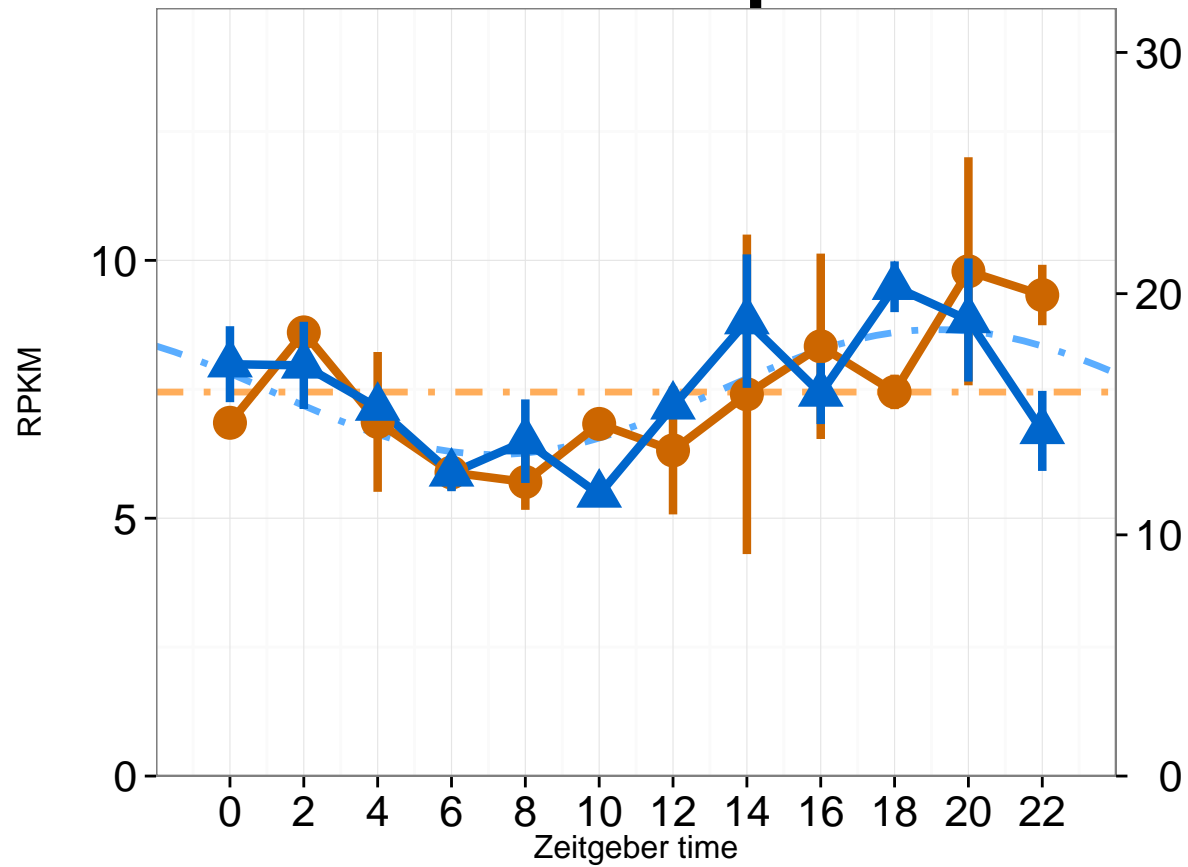

# Nr2c2ap

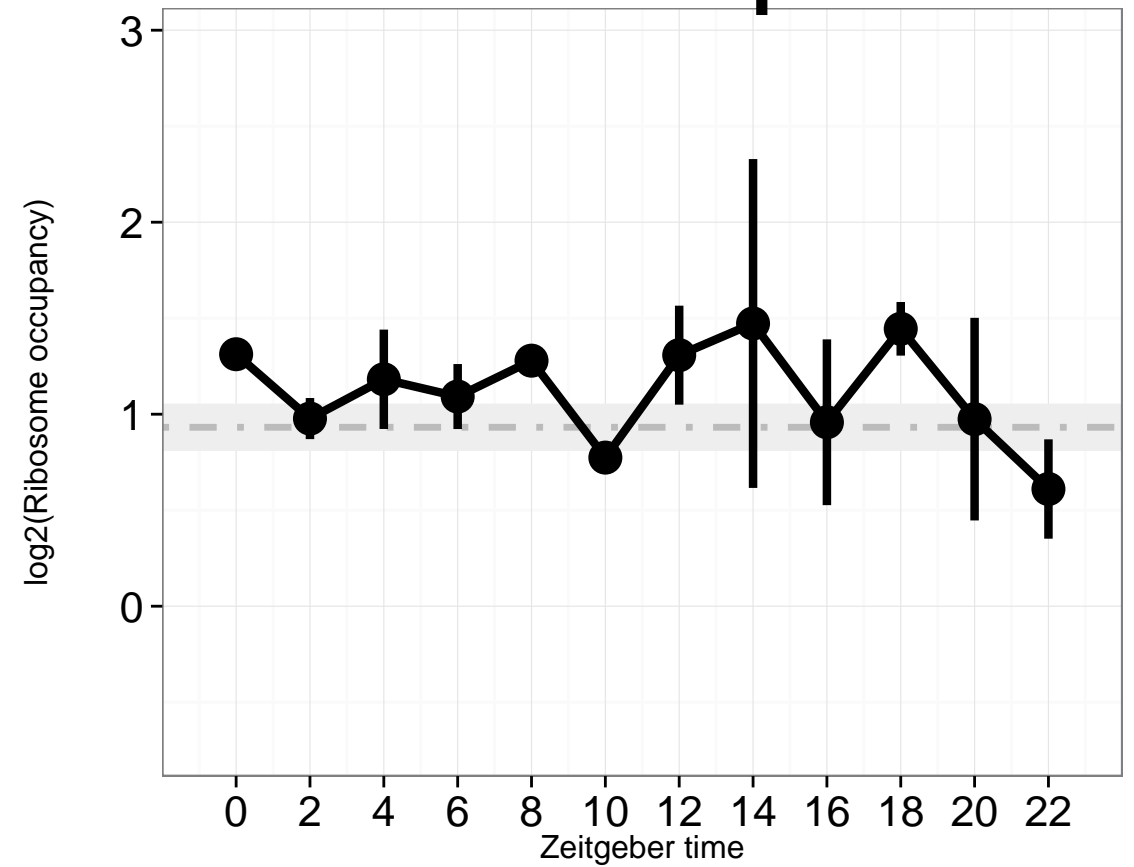

Supplement: SuppDataset_1.zip [file Nr2c2ap_set_A.pdf › Supplemental Dataset 1/A-mRNA_nonrhyth_translation_nonrhyth/Nr2c2ap_set_A.pdf]

## Nr3c1

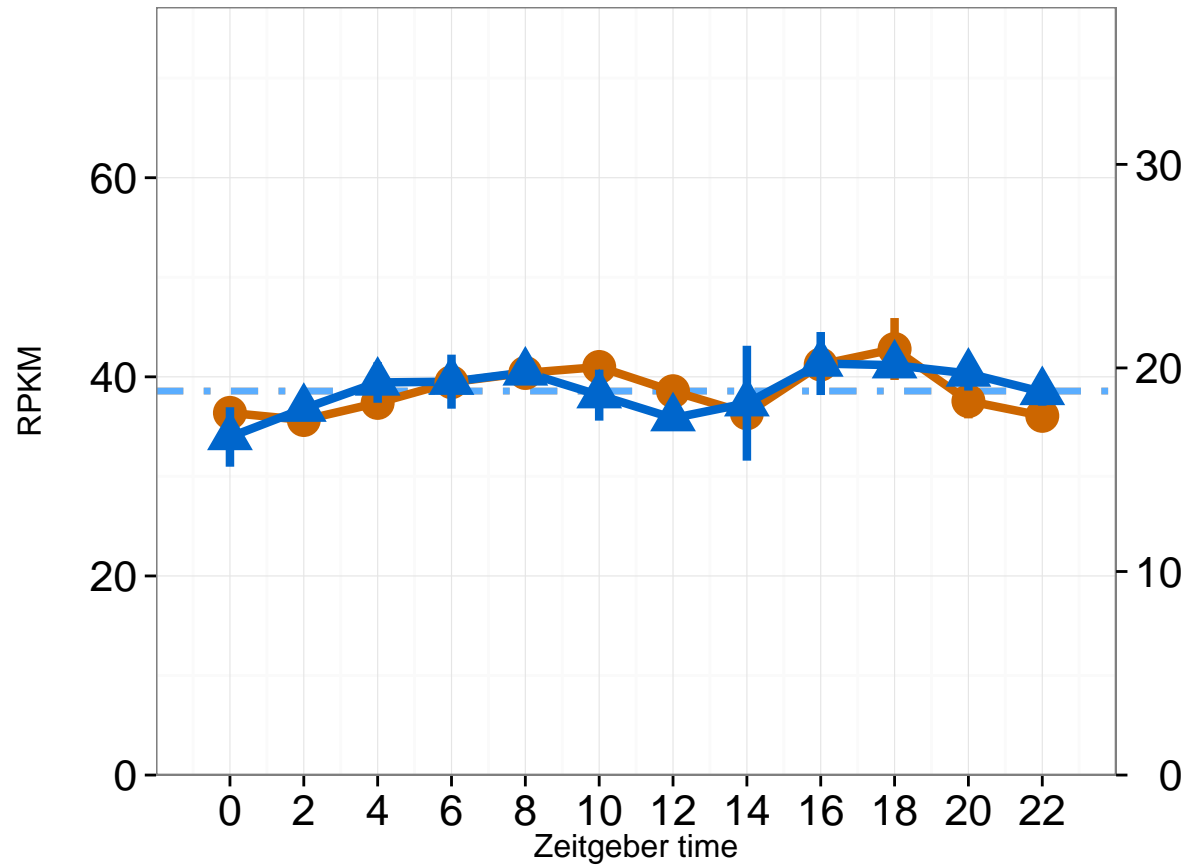

## Nr3c1

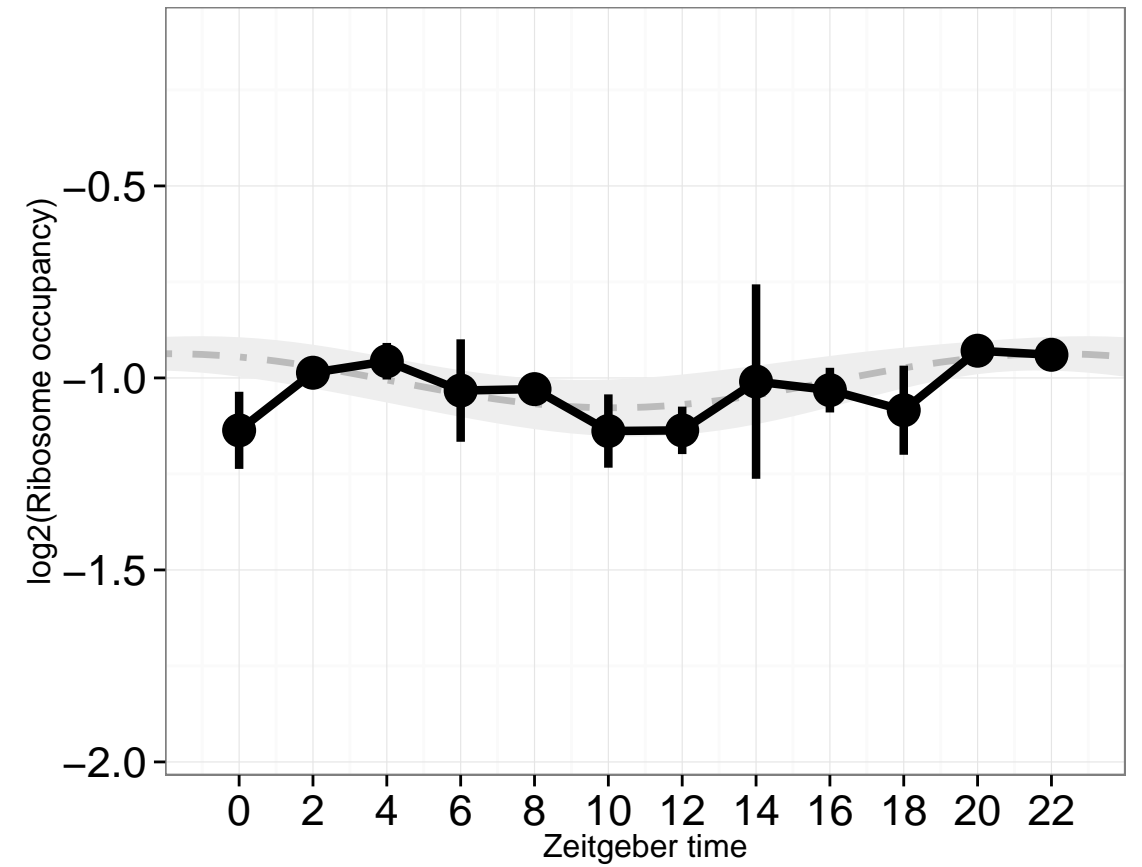

Supplement: SuppDataset_1.zip [file Nr3c1_set_A.pdf › Supplemental Dataset 1/A-mRNA_nonrhyth_translation_nonrhyth/Nr3c1_set_A.pdf]

# Nr4a1

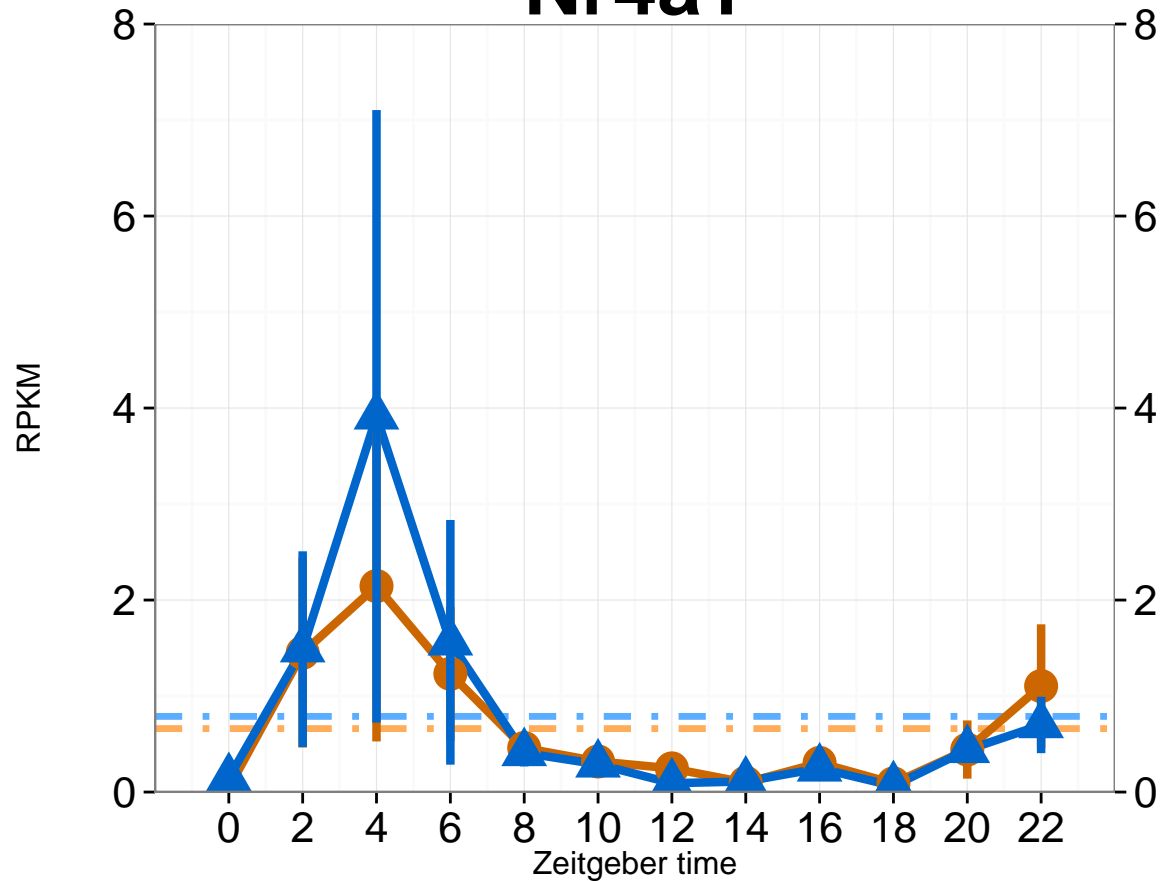

# Nr4a1

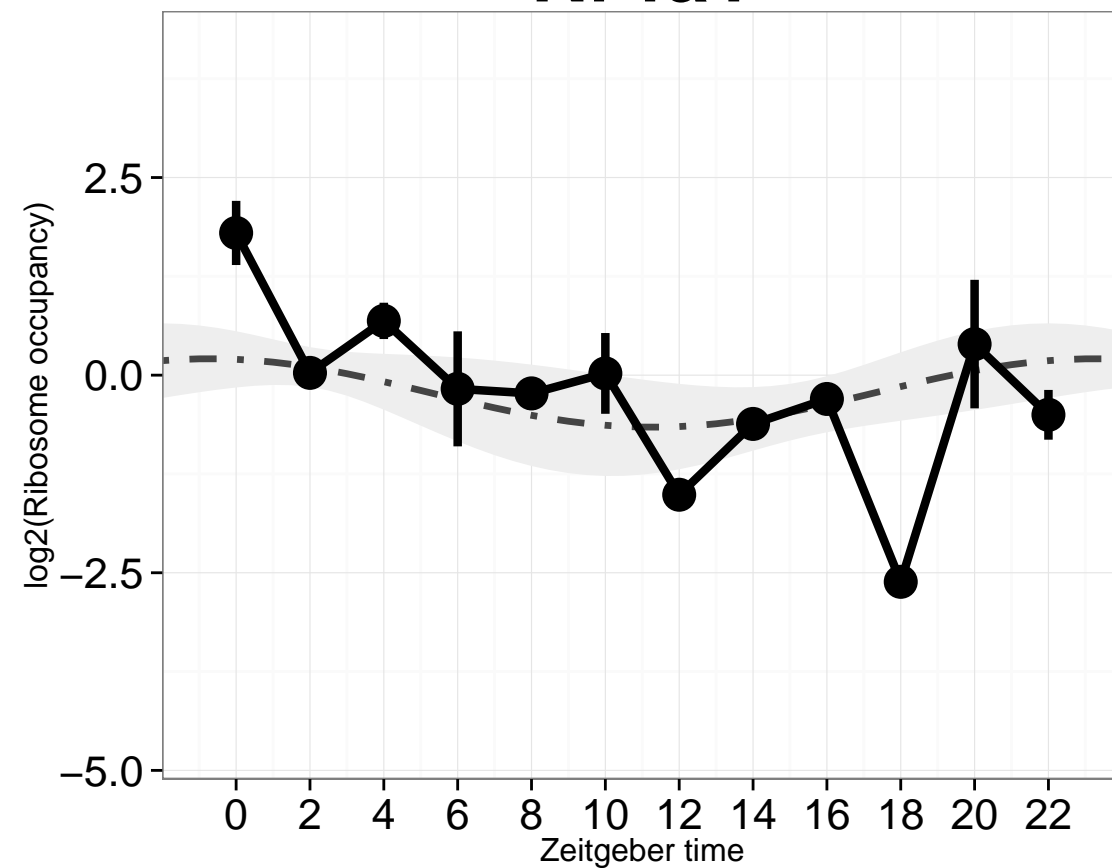

Supplement: SuppDataset_1.zip [file Nr4a1_set_A.pdf › Supplemental Dataset 1/A-mRNA_nonrhyth_translation_nonrhyth/Nr4a1_set_A.pdf]

## Nr5a2

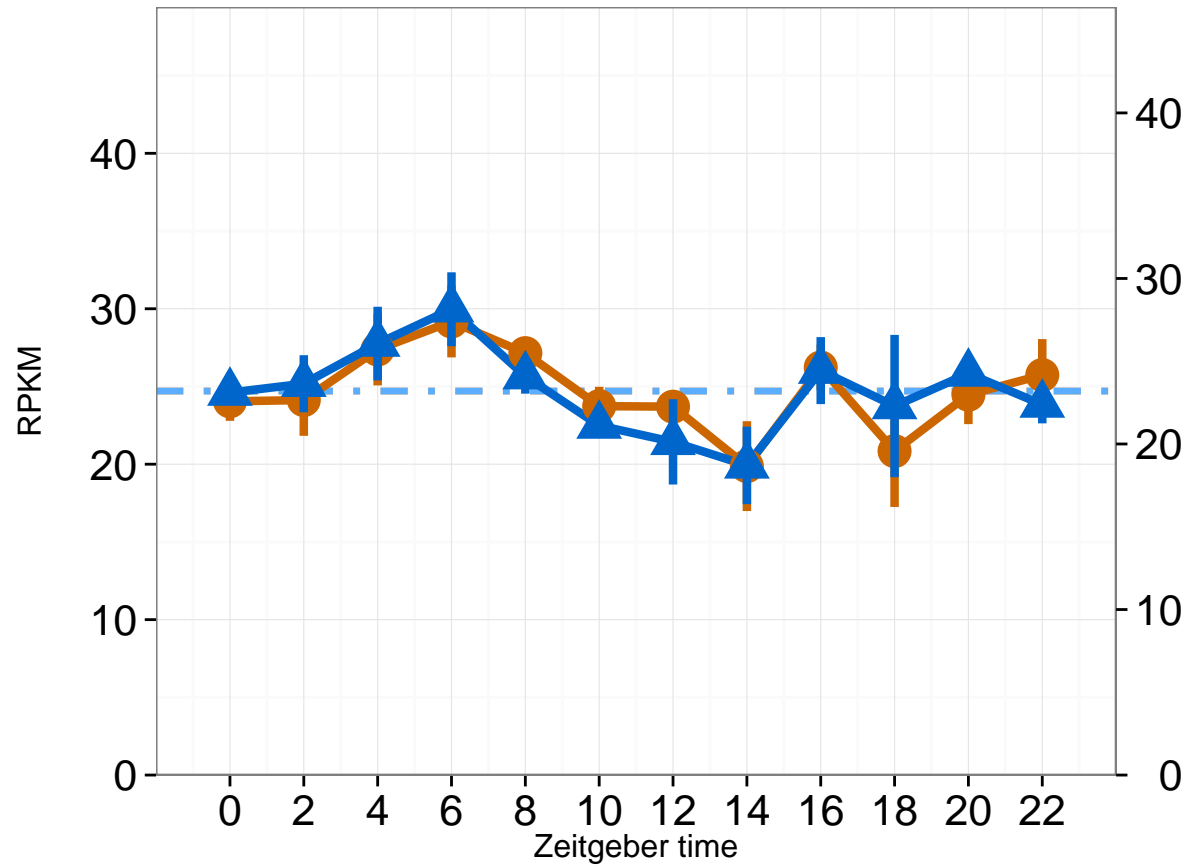

## Nr5a2

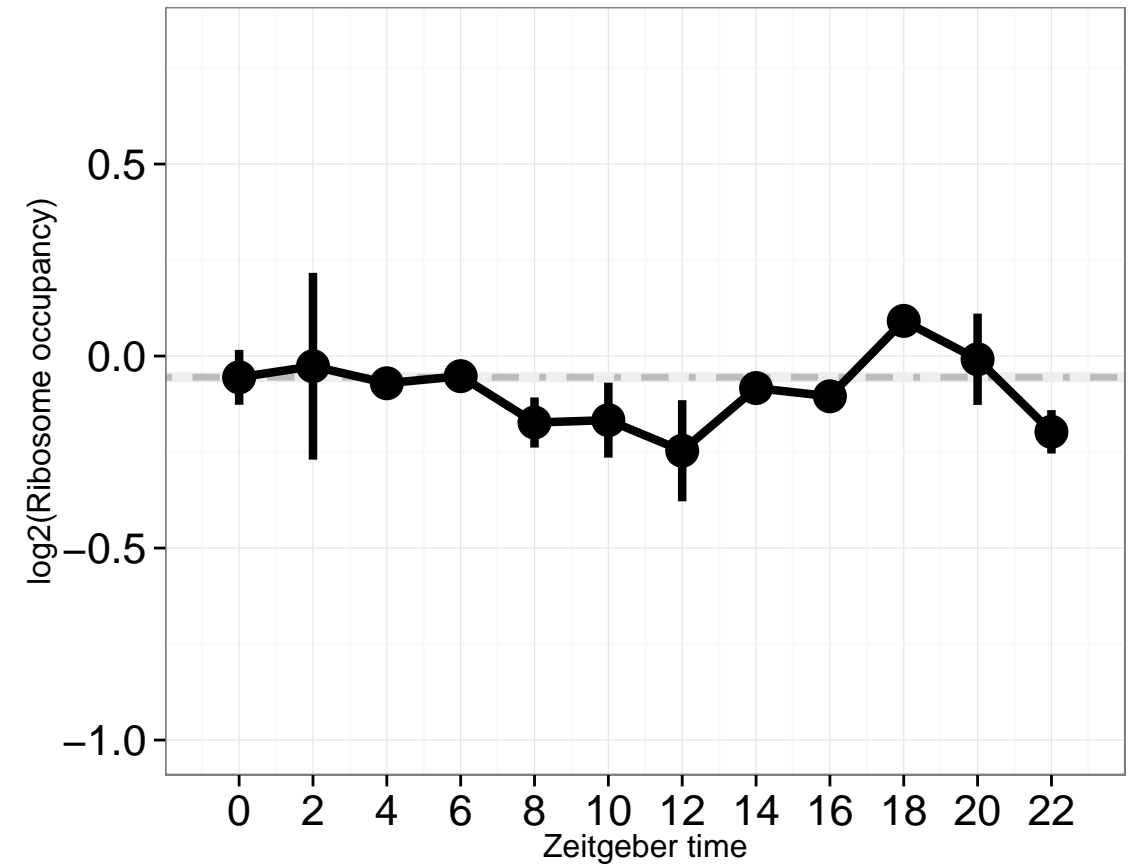

Supplement: SuppDataset_1.zip [file Nr5a2_set_A.pdf › Supplemental Dataset 1/A-mRNA_nonrhyth_translation_nonrhyth/Nr5a2_set_A.pdf]

## Nr6a1

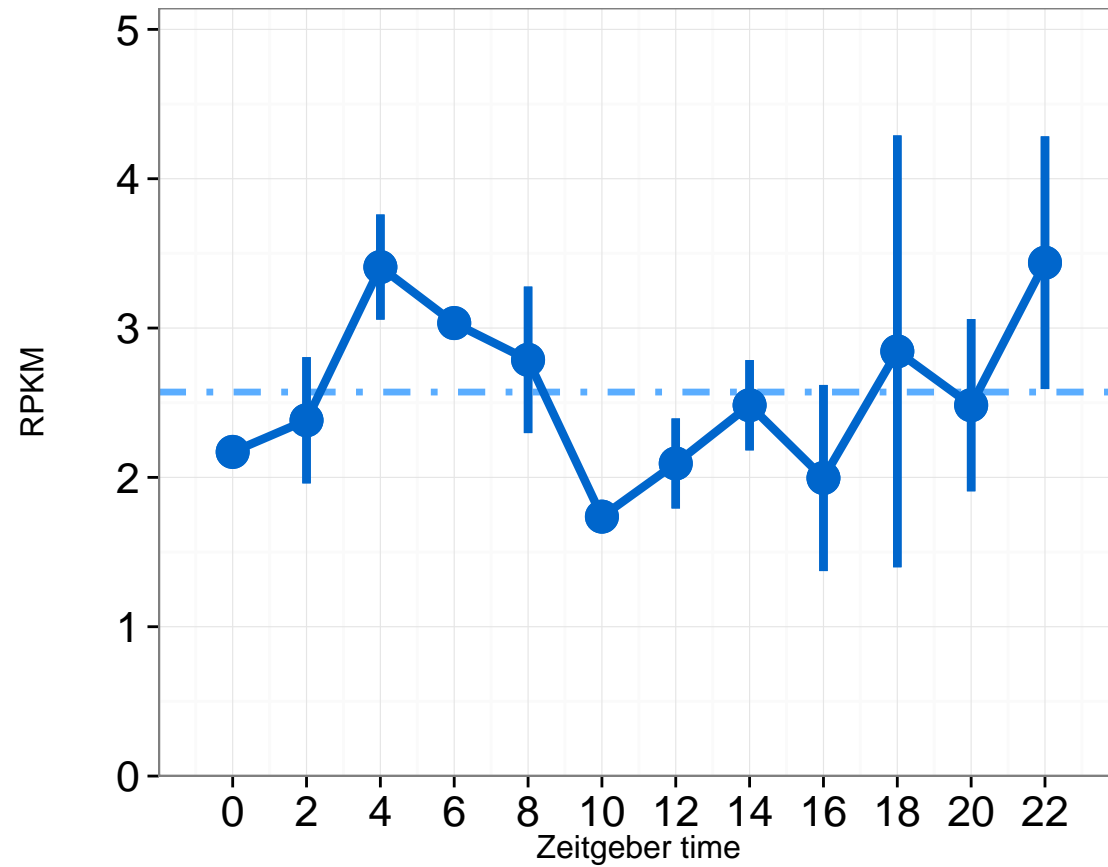

## Nr6a1 log2(Ribosome occupancy

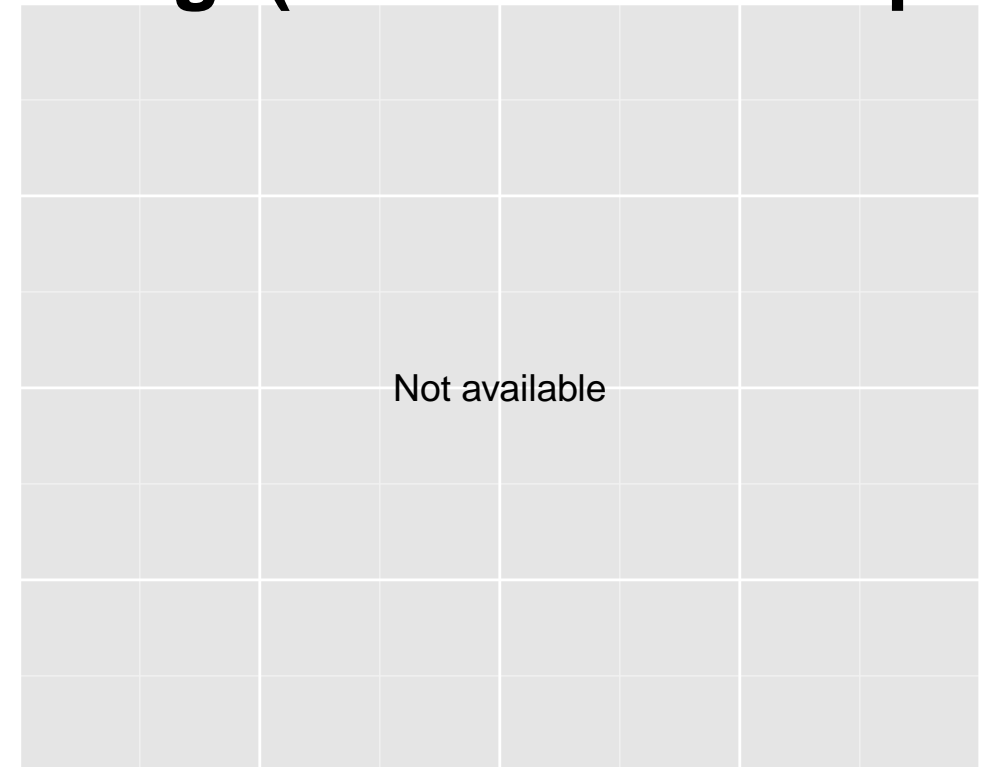

Supplement: SuppDataset_1.zip [file Nr6a1_set_A.pdf › Supplemental Dataset 1/A-mRNA_nonrhyth_translation_nonrhyth/Nr6a1_set_A.pdf]

## Nras

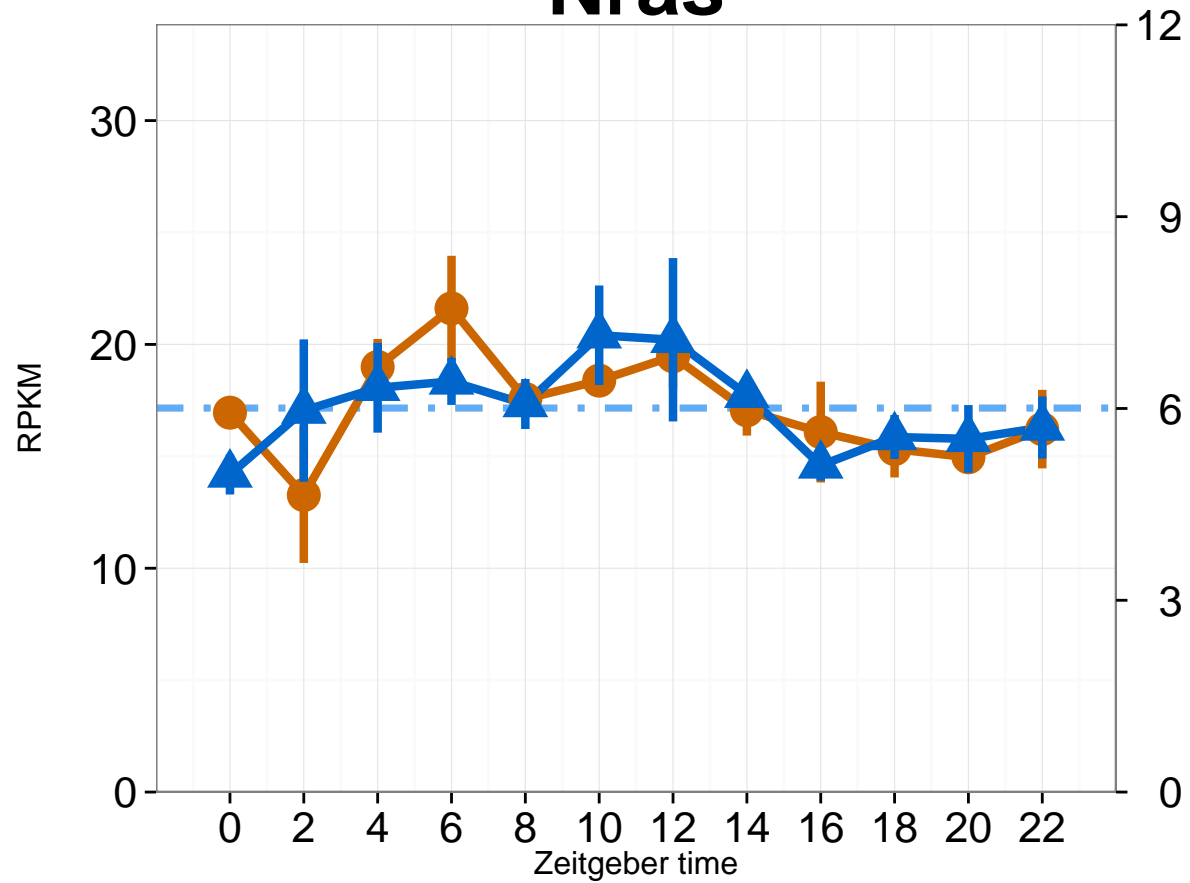

## Nras

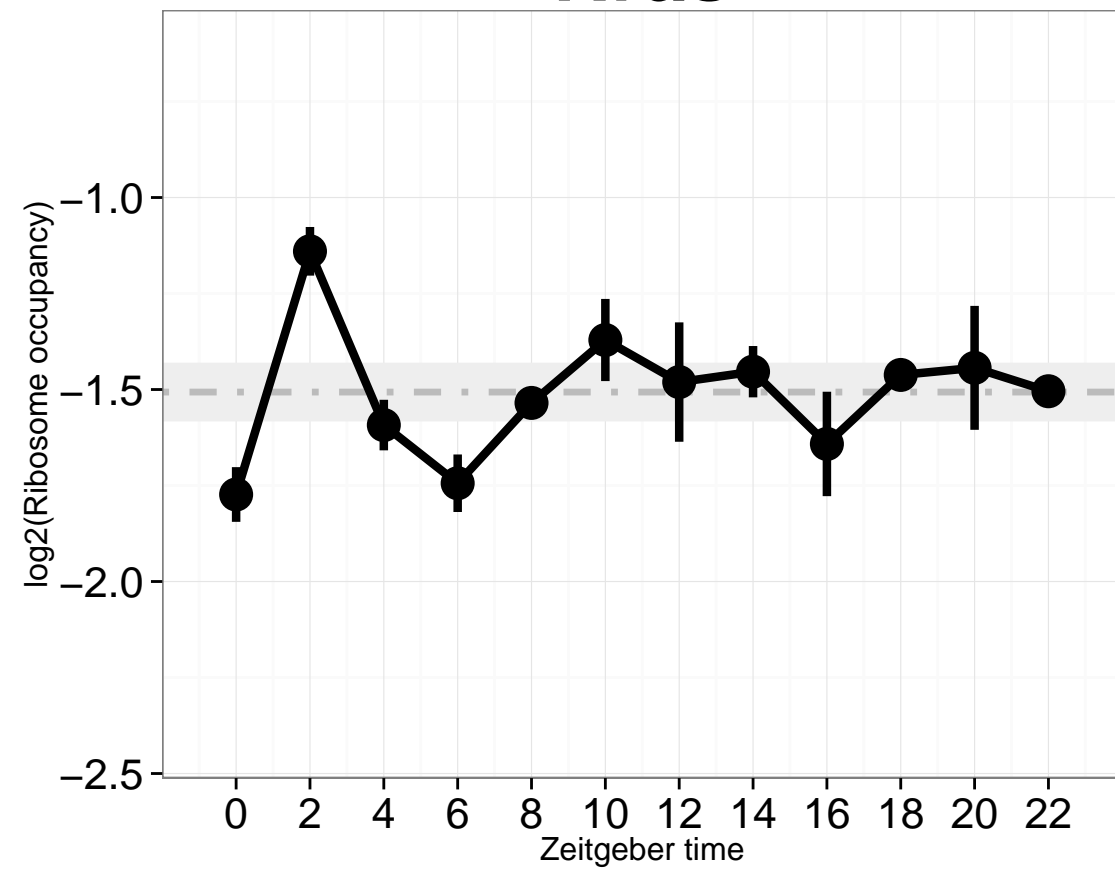

Supplement: SuppDataset_1.zip [file Nras_set_A.pdf › Supplemental Dataset 1/A-mRNA_nonrhyth_translation_nonrhyth/Nras_set_A.pdf]

## Nrbf2

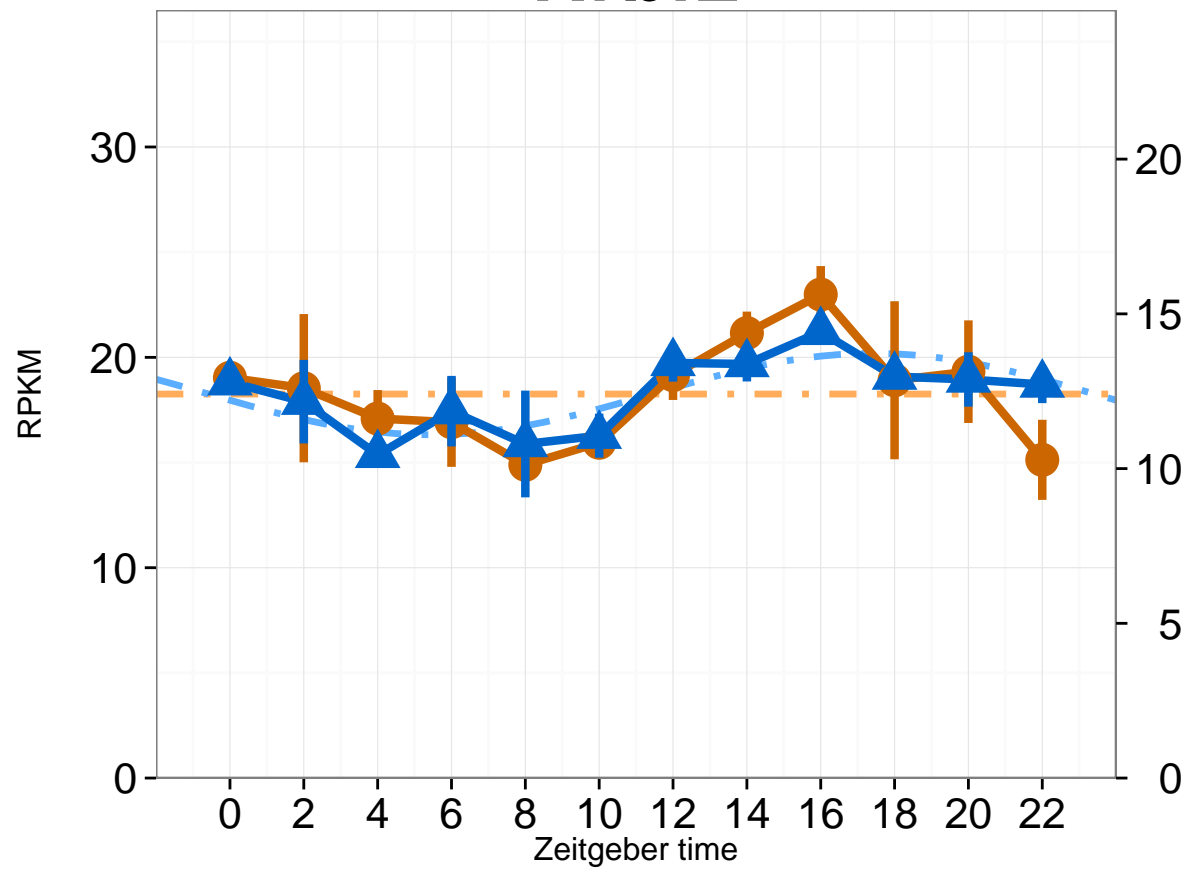

## Nrbf2

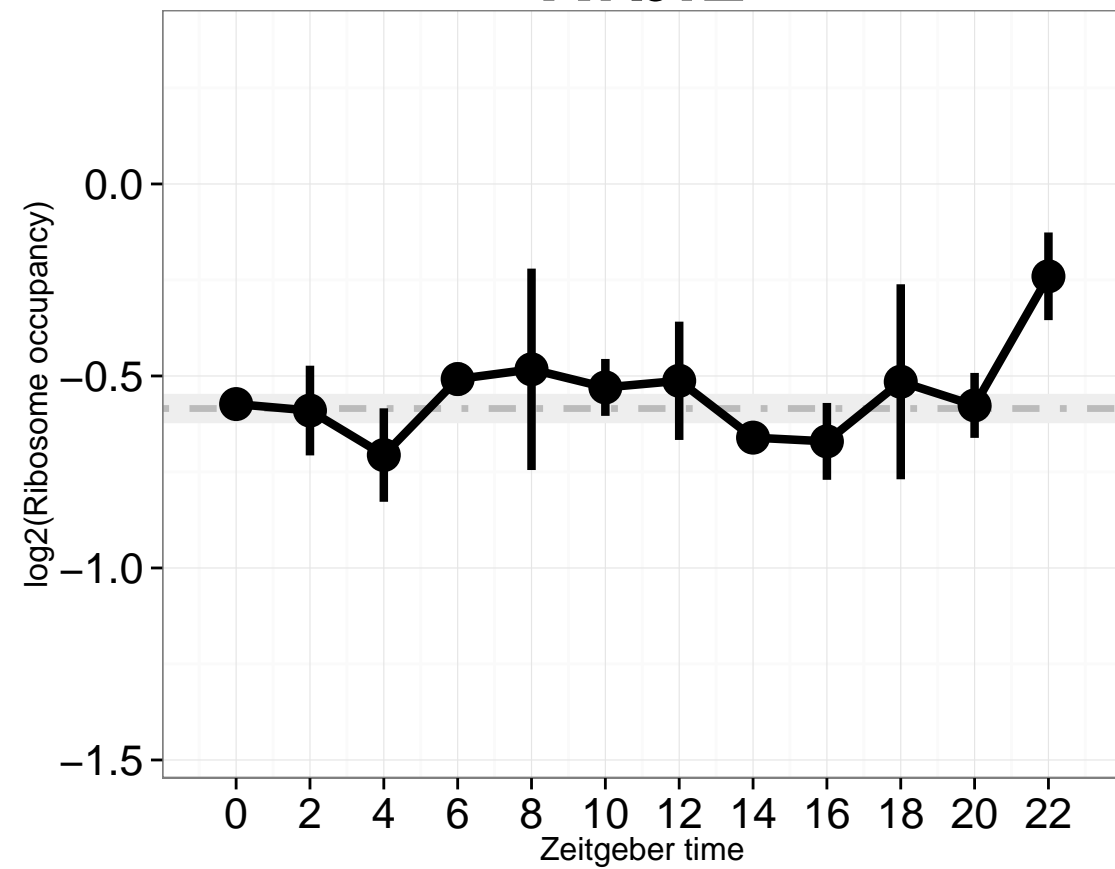

Supplement: SuppDataset_1.zip [file Nrbf2_set_A.pdf › Supplemental Dataset 1/A-mRNA_nonrhyth_translation_nonrhyth/Nrbf2_set_A.pdf]

## Nrbp1

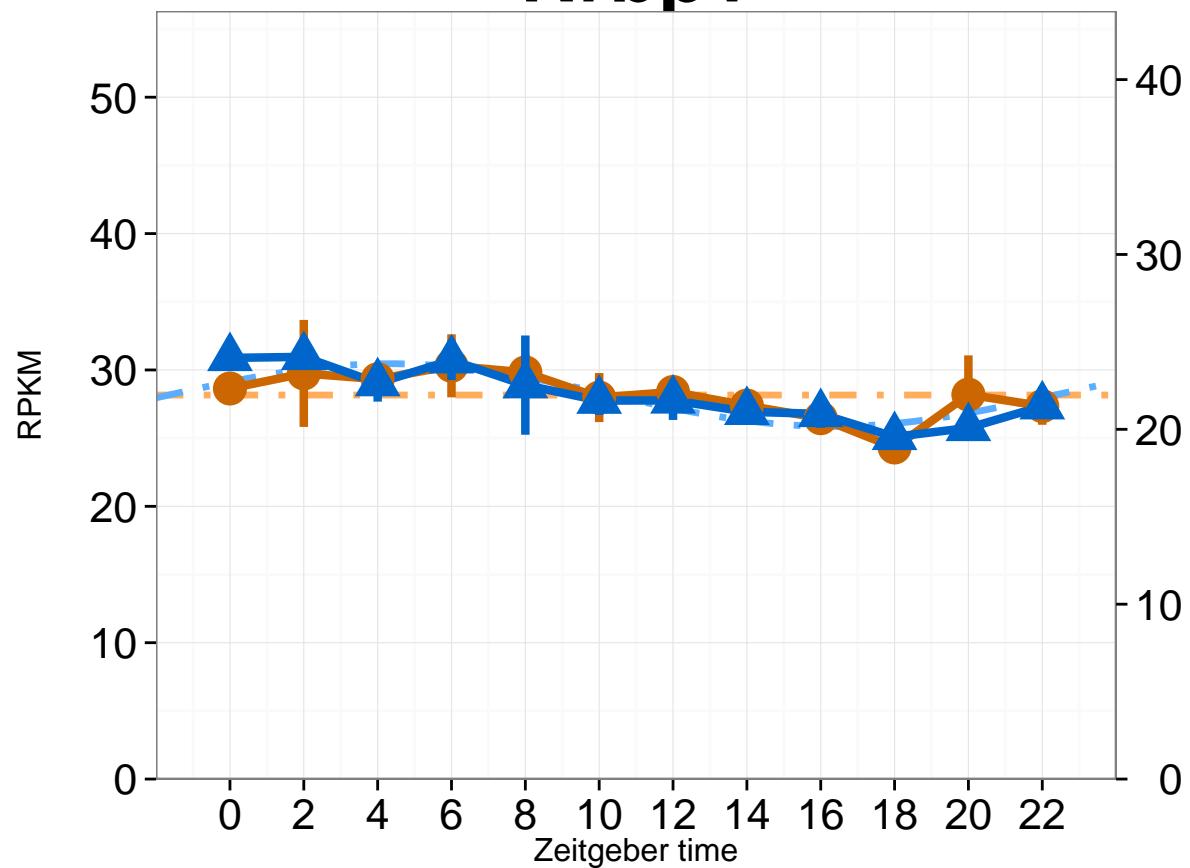

## Nrbp1

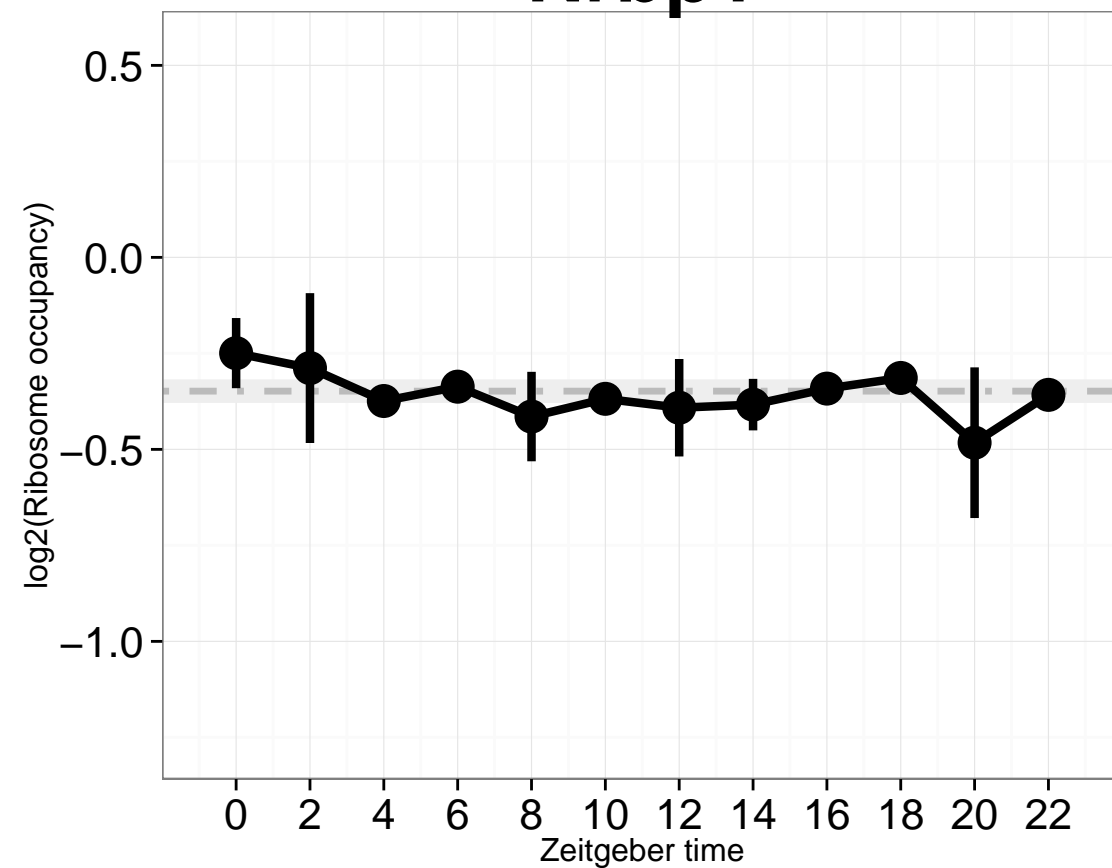

Supplement: SuppDataset_1.zip [file Nrbp1_set_A.pdf › Supplemental Dataset 1/A-mRNA_nonrhyth_translation_nonrhyth/Nrbp1_set_A.pdf]

## Nrd1

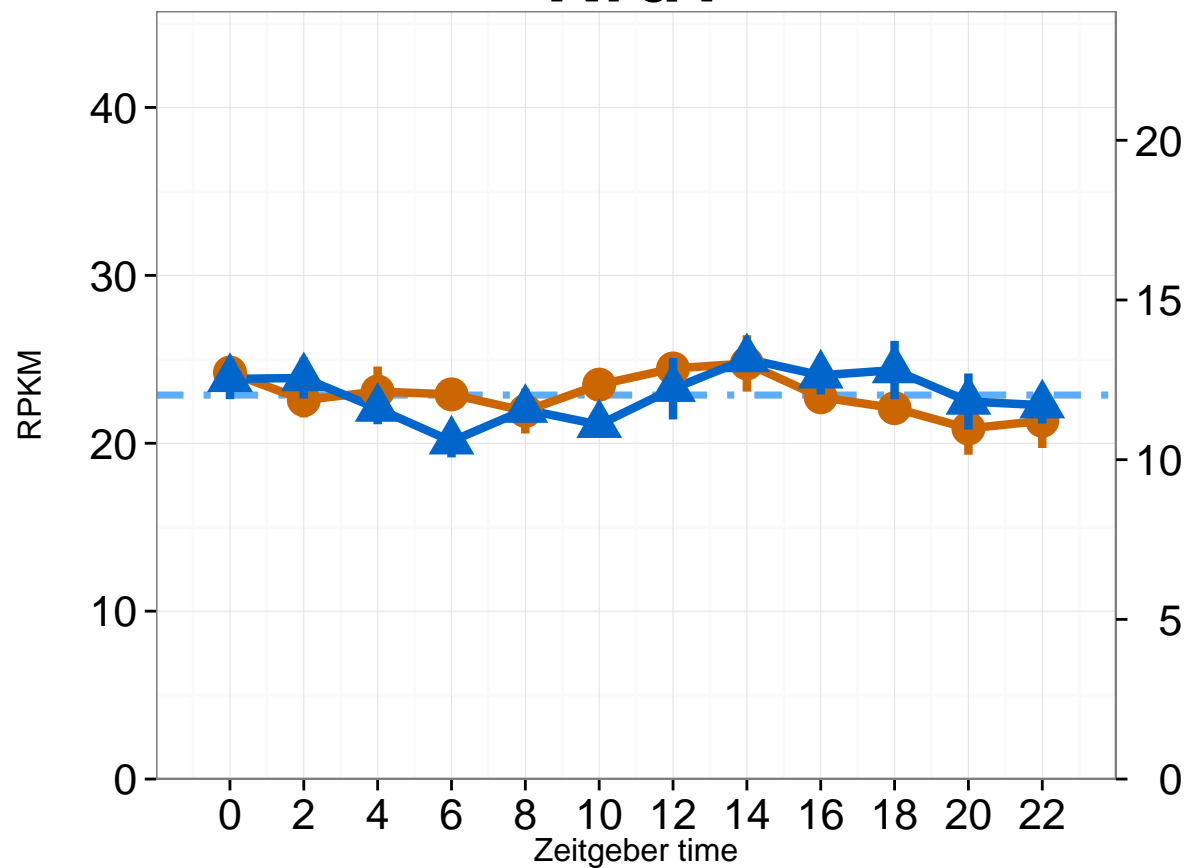

## Nrd1

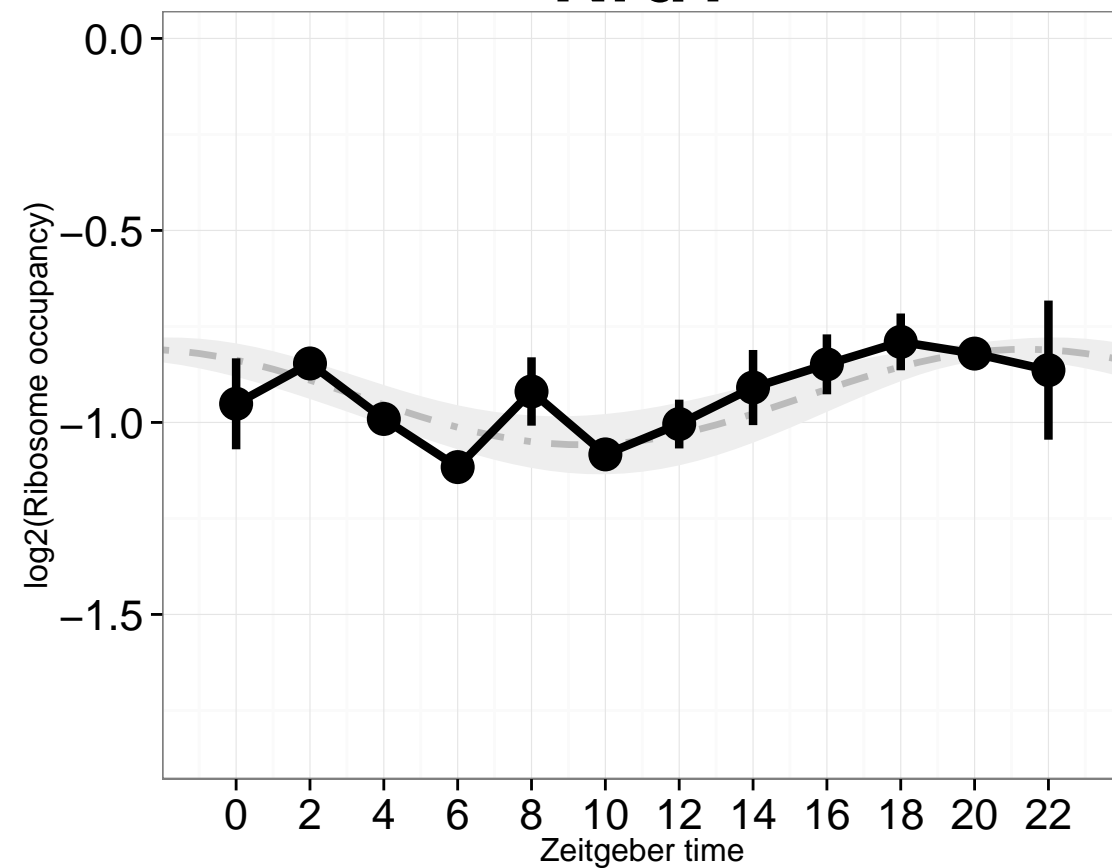

Supplement: SuppDataset_1.zip [file Nrd1_set_A.pdf › Supplemental Dataset 1/A-mRNA_nonrhyth_translation_nonrhyth/Nrd1_set_A.pdf]

## Nrde2

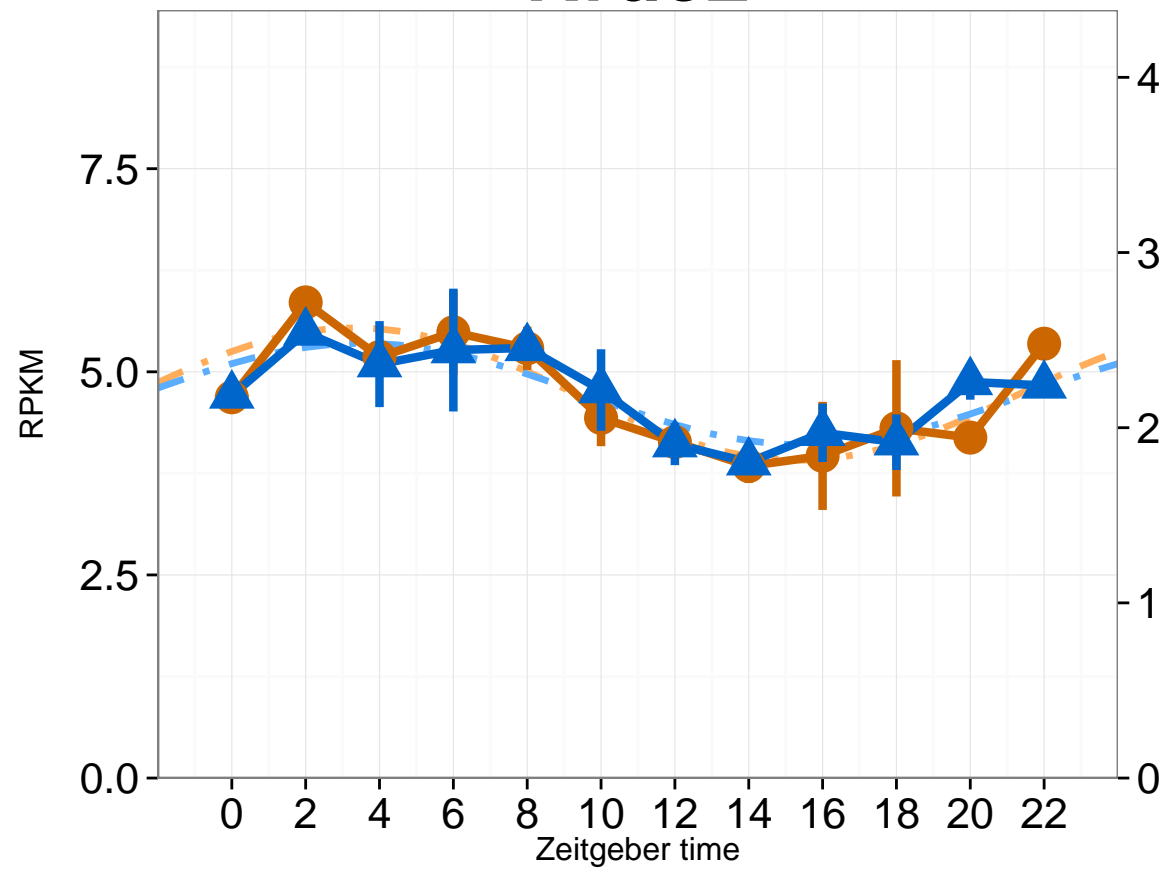

## Nrde2

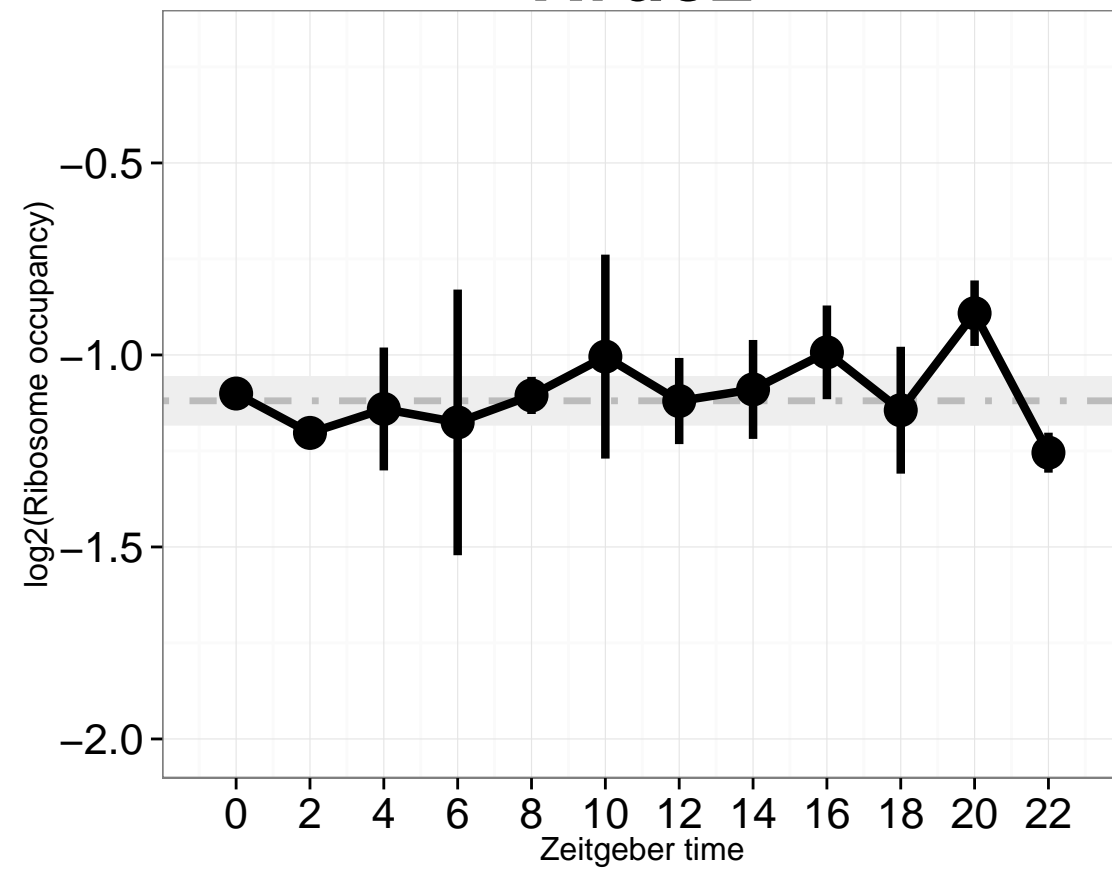

Supplement: SuppDataset_1.zip [file Nrde2_set_A.pdf › Supplemental Dataset 1/A-mRNA_nonrhyth_translation_nonrhyth/Nrde2_set_A.pdf]

## Nrf1

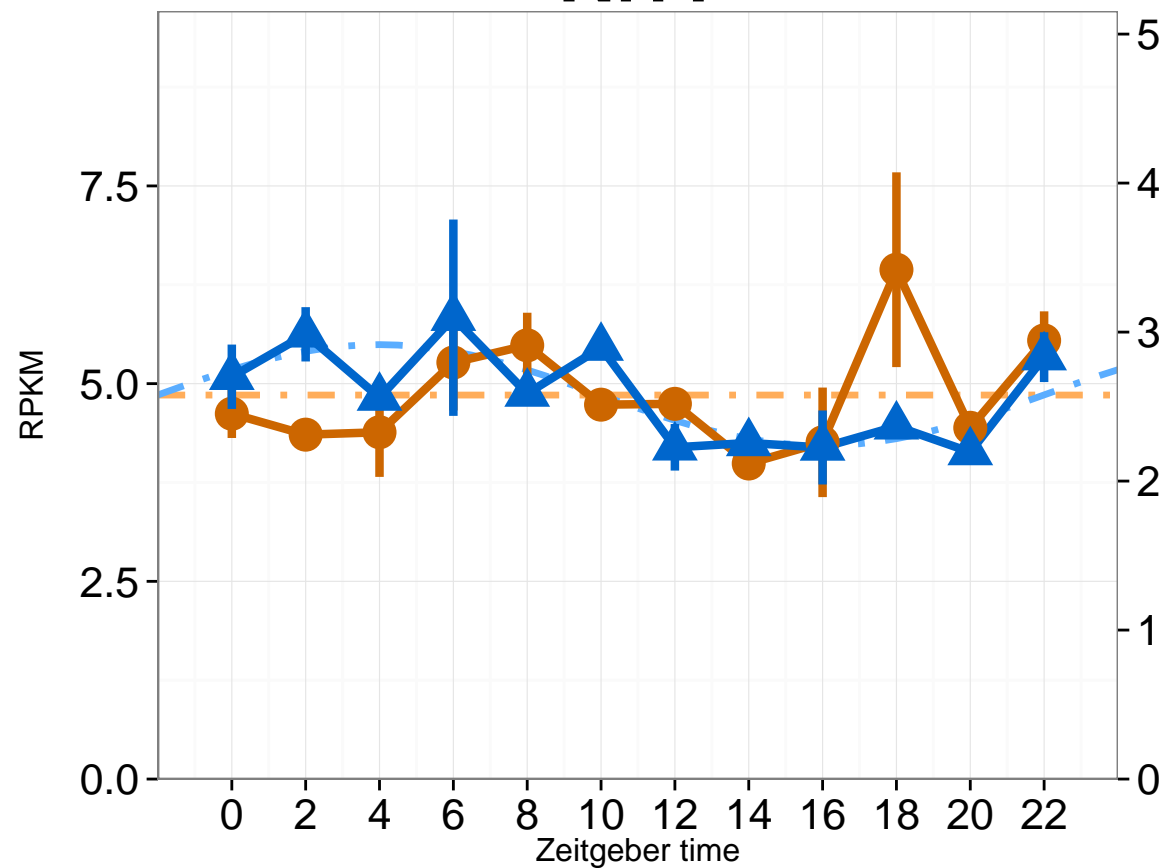

## Nrf1

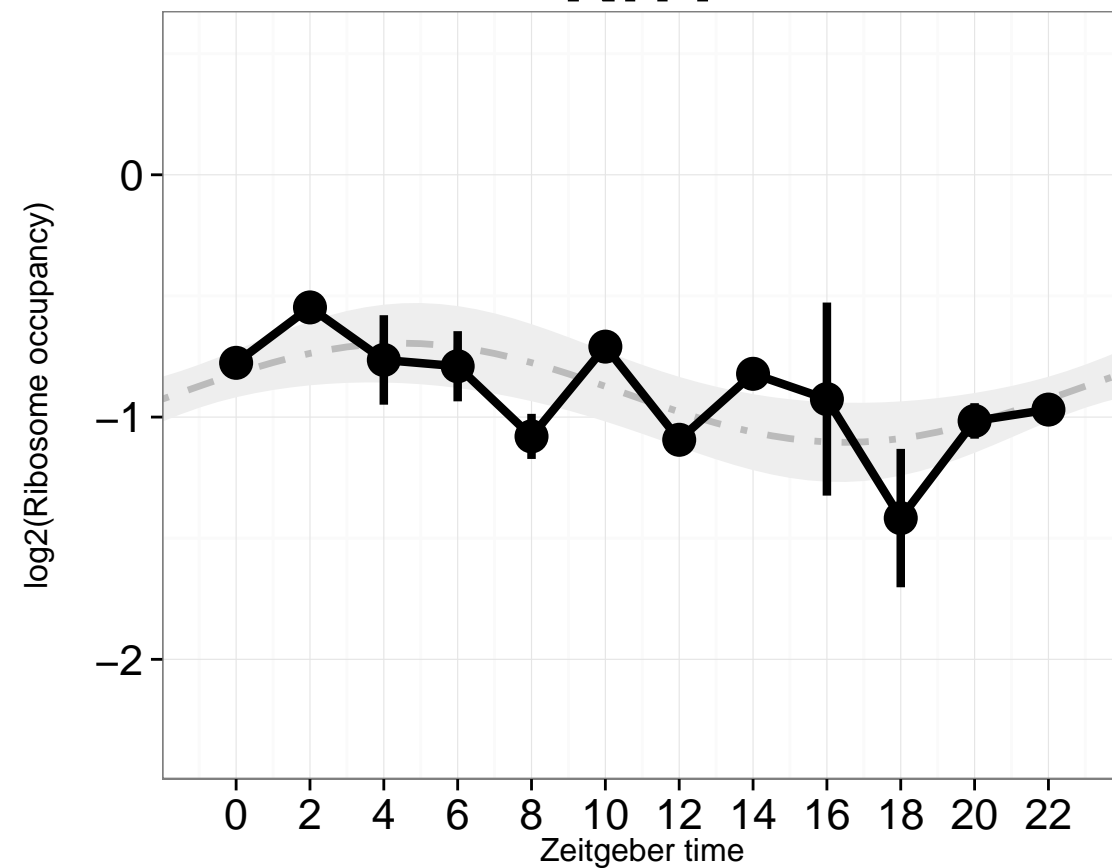

Supplement: SuppDataset_1.zip [file Nrf1_set_A.pdf › Supplemental Dataset 1/A-mRNA_nonrhyth_translation_nonrhyth/Nrf1_set_A.pdf]

**Nrm TR**

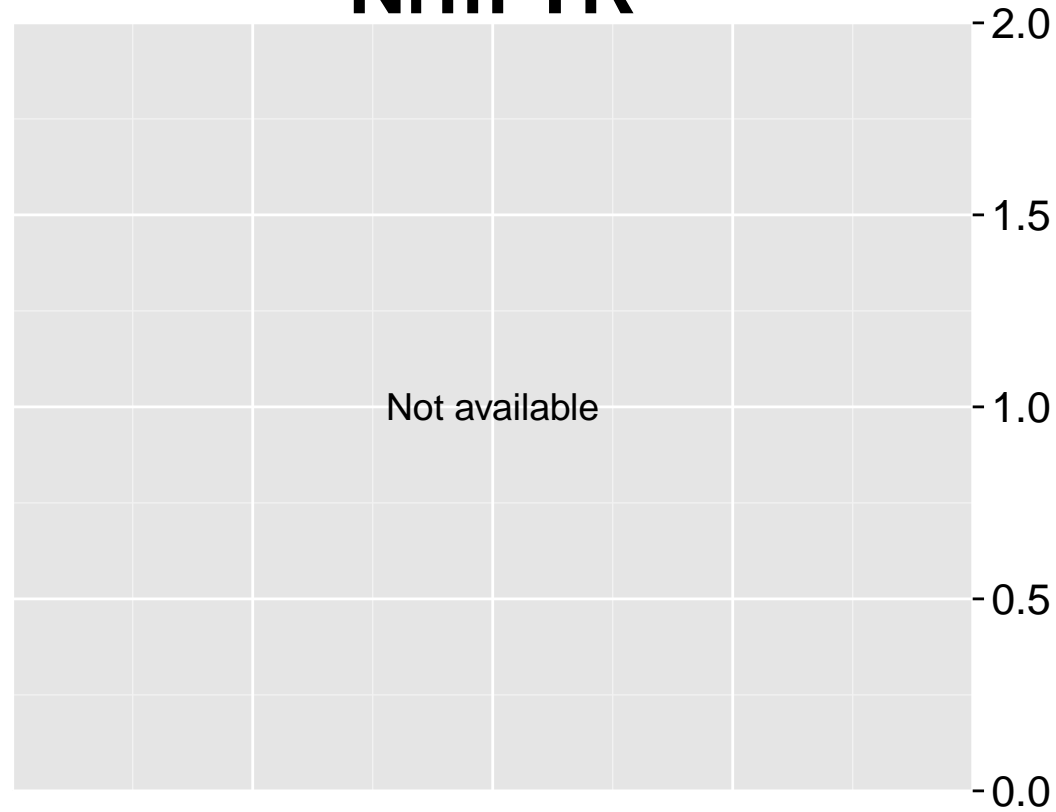

**Nrm log2(Ribosome occupancy)**

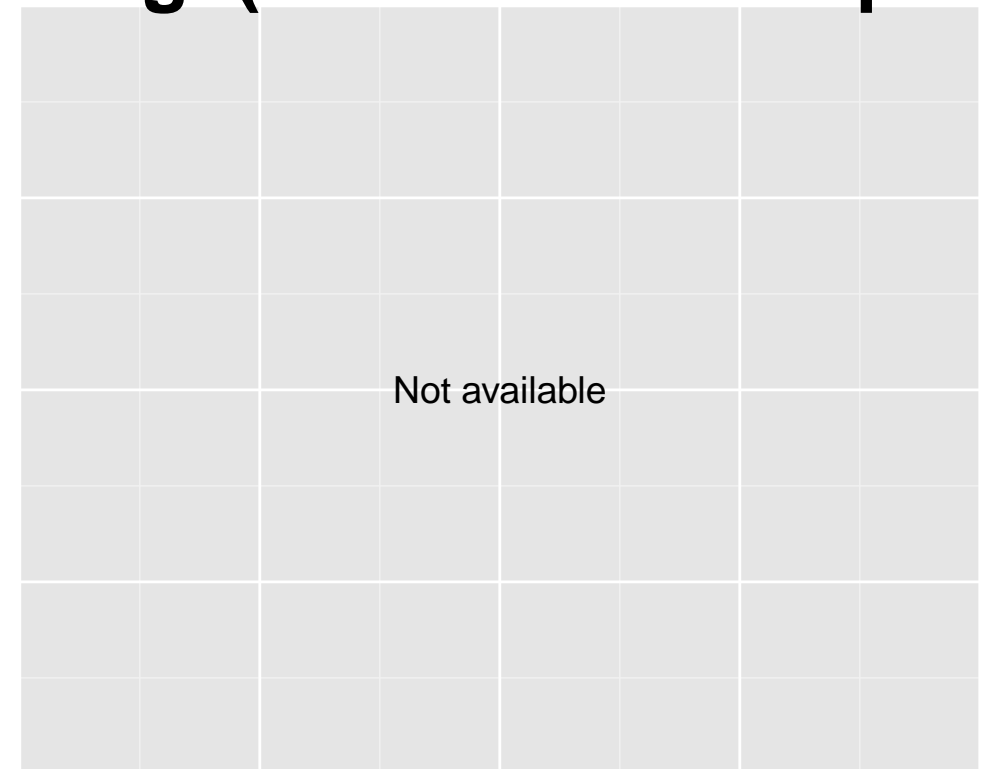

Supplement: SuppDataset_1.zip [file Nrm_set_A.pdf › Supplemental Dataset 1/A-mRNA_nonrhyth_translation_nonrhyth/Nrm_set_A.pdf]

# Nrn1

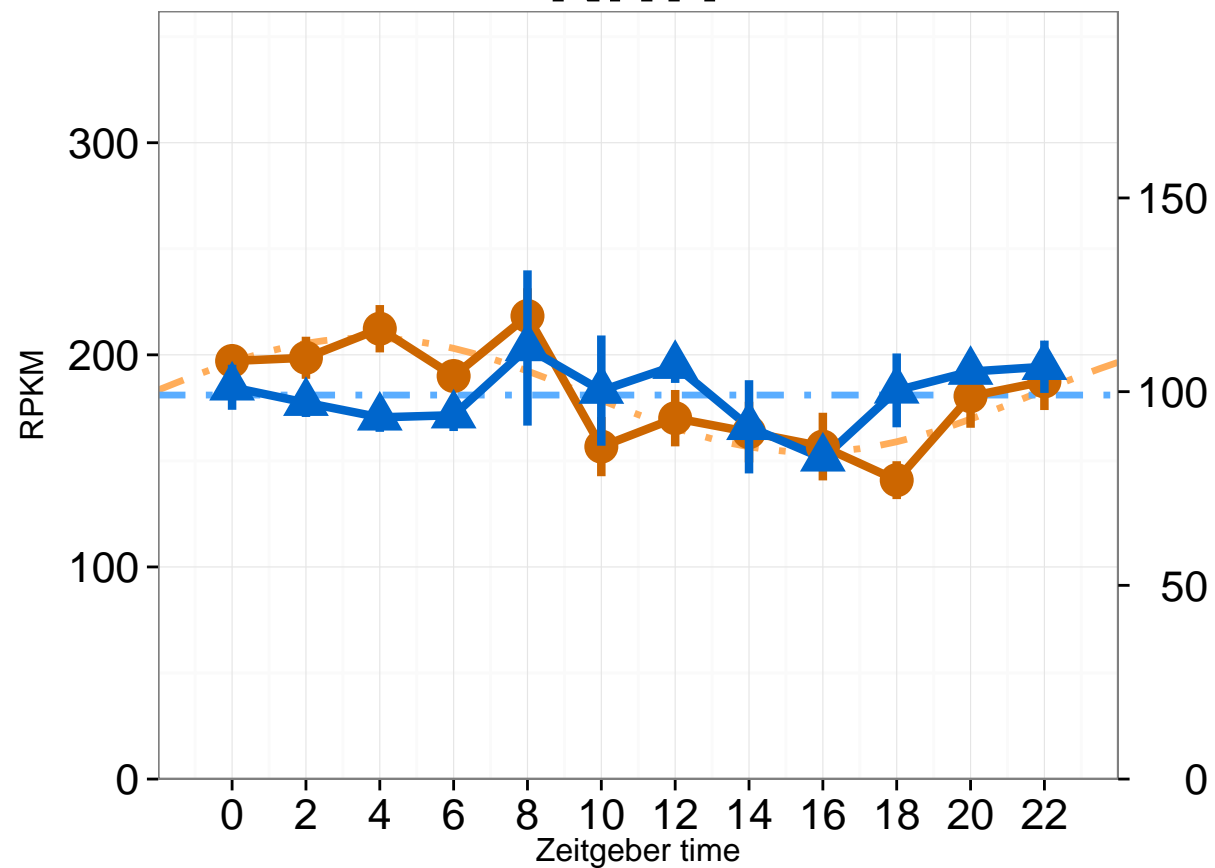

# Nrn1

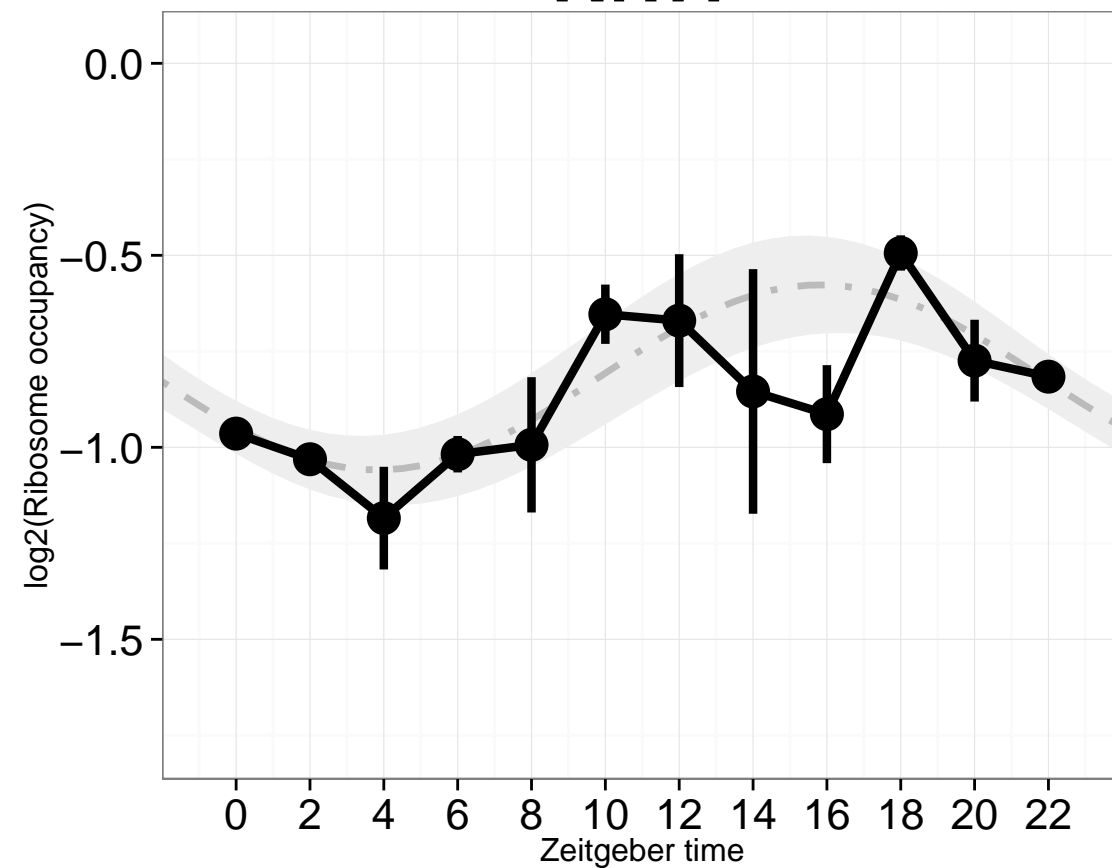

Supplement: SuppDataset_1.zip [file Nrn1_set_A.pdf › Supplemental Dataset 1/A-mRNA_nonrhyth_translation_nonrhyth/Nrn1_set_A.pdf]

# Nrp1

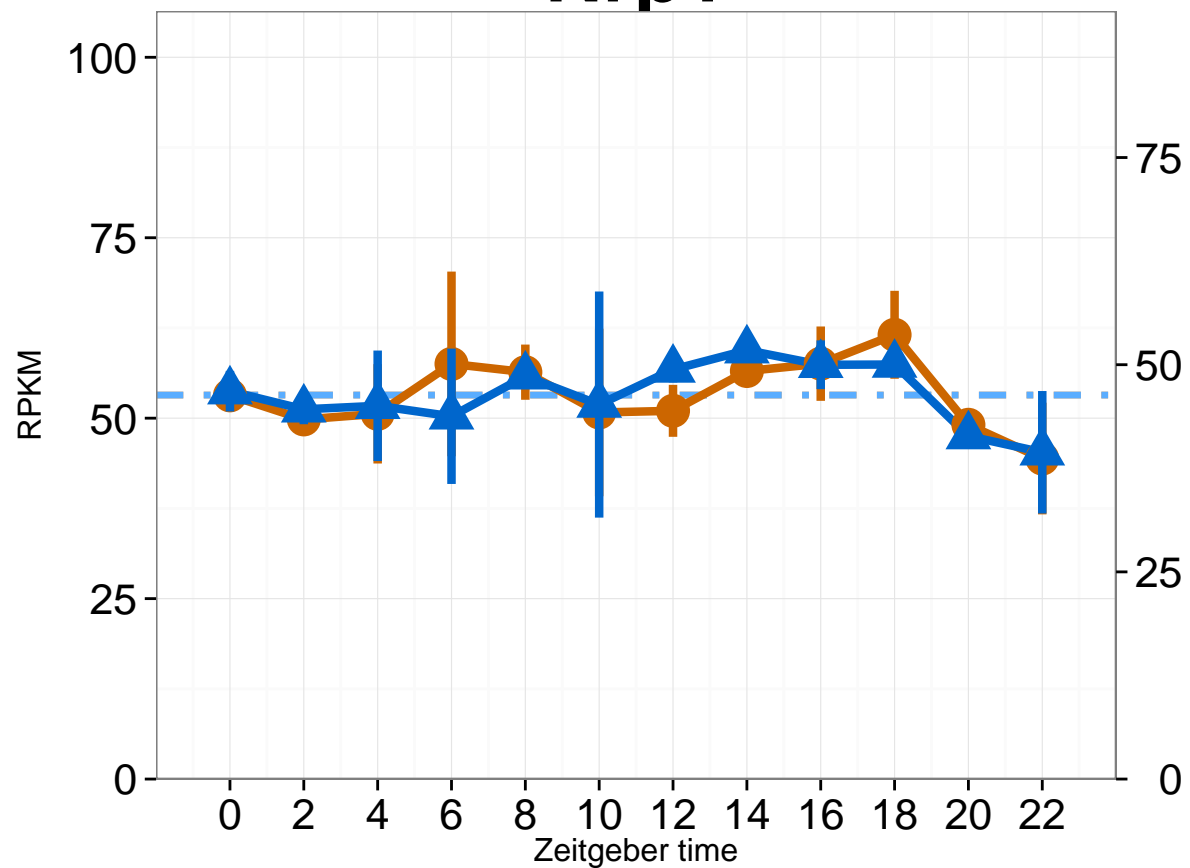

# Nrp1

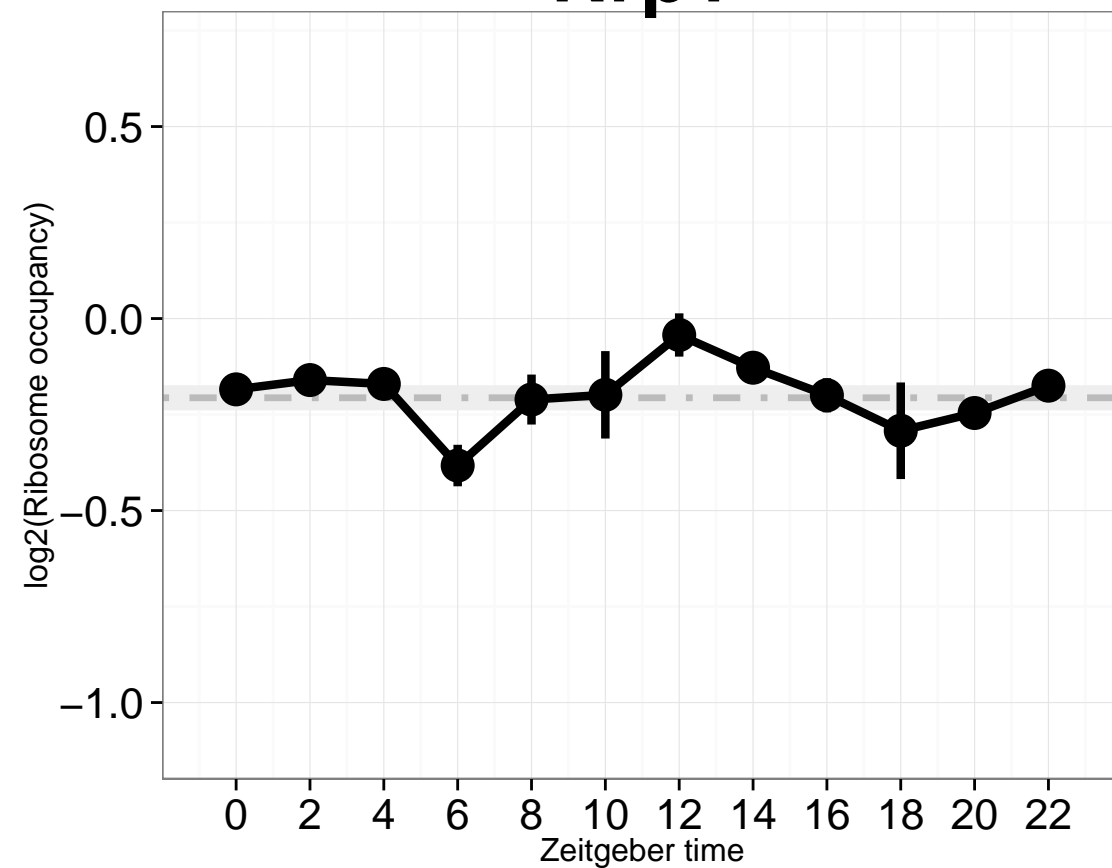

Supplement: SuppDataset_1.zip [file Nrp1_set_A.pdf › Supplemental Dataset 1/A-mRNA_nonrhyth_translation_nonrhyth/Nrp1_set_A.pdf]

# Nrp2

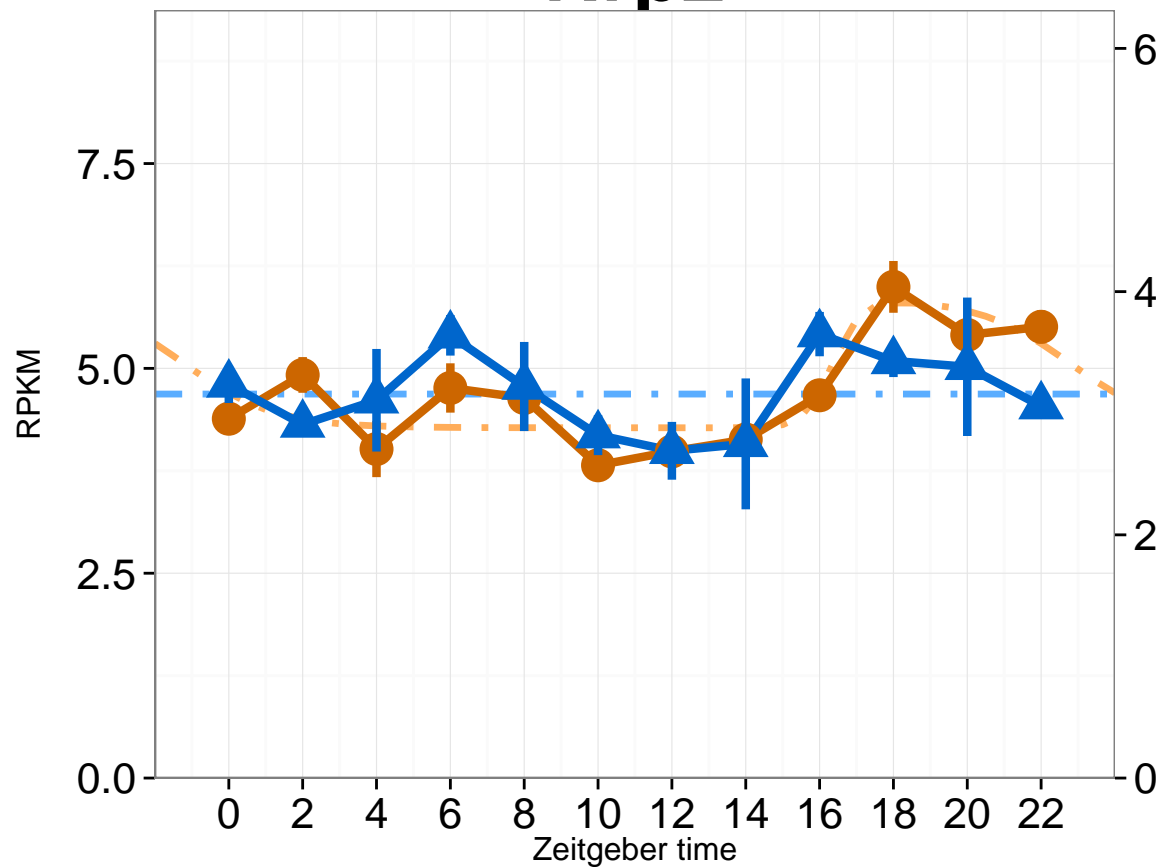

# Nrp2

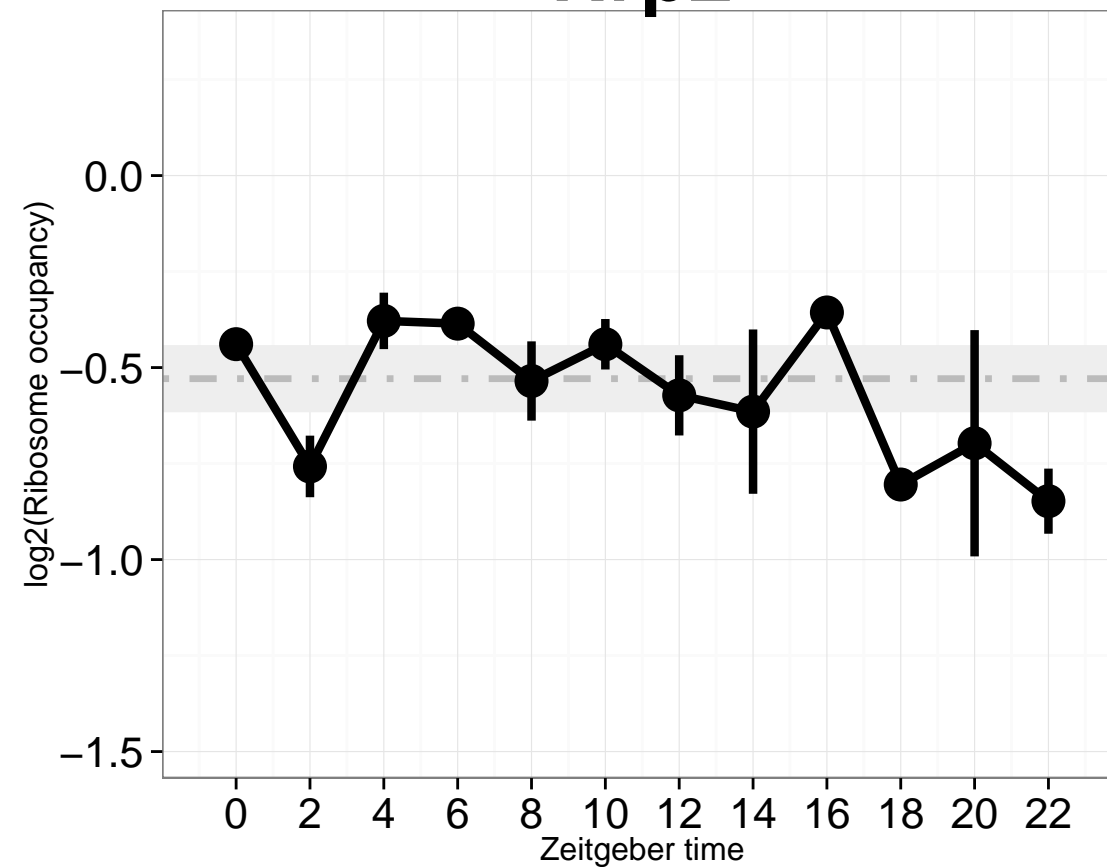

Supplement: SuppDataset_1.zip [file Nrp2_set_A.pdf › Supplemental Dataset 1/A-mRNA_nonrhyth_translation_nonrhyth/Nrp2_set_A.pdf]

## Nrros

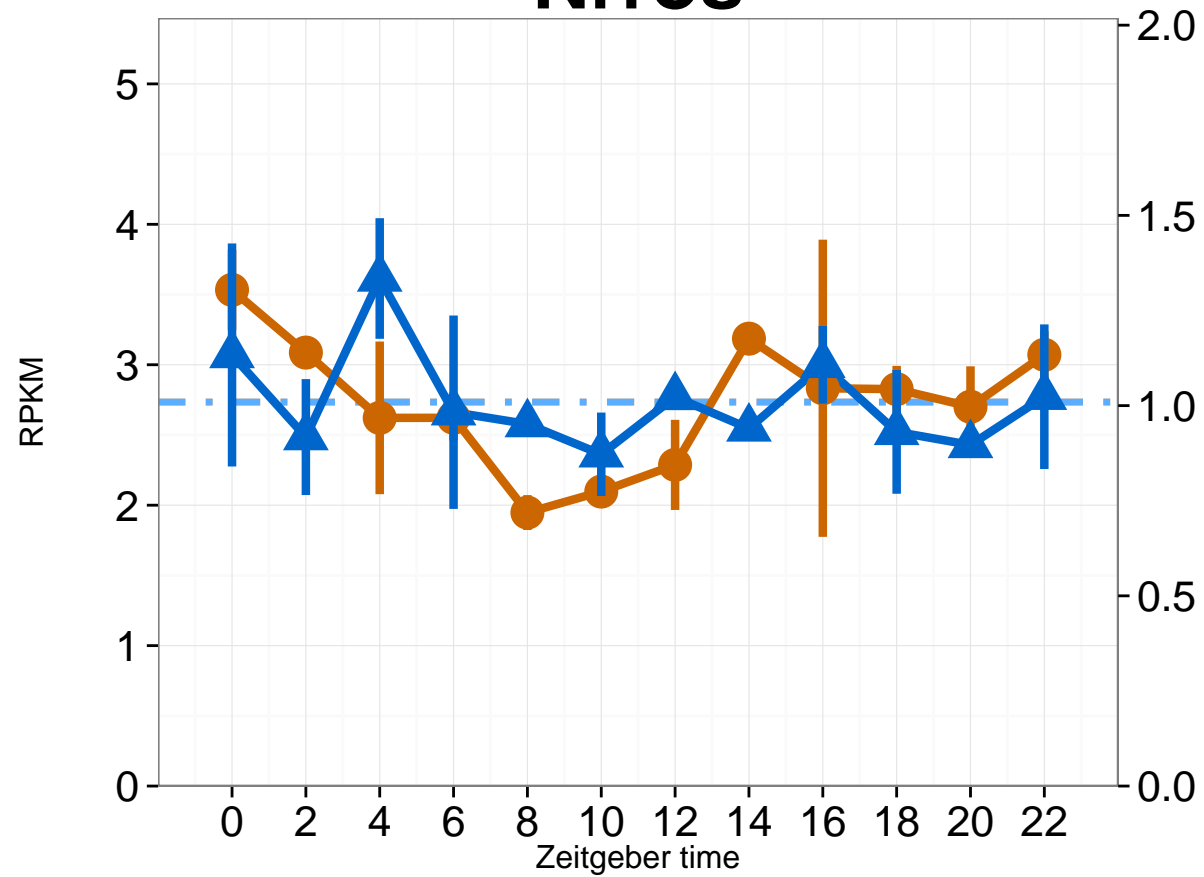

## Nrros

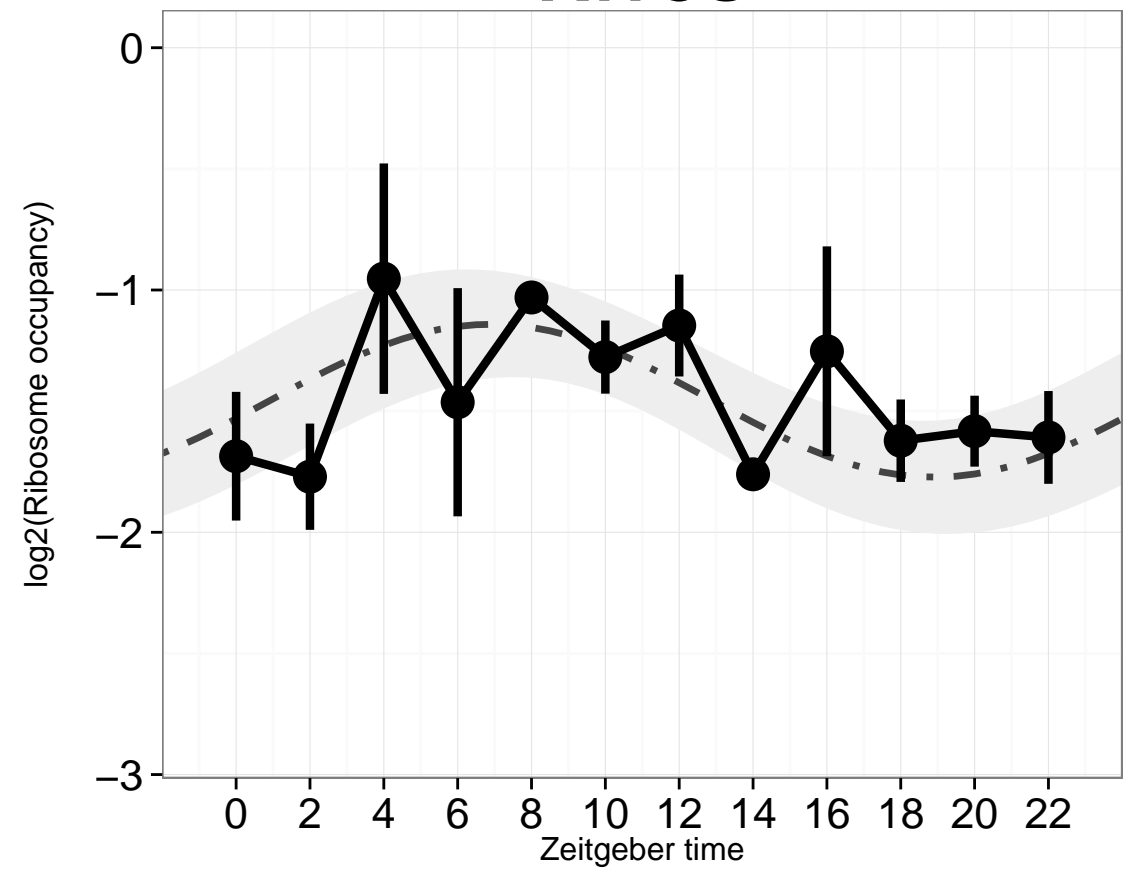

Supplement: SuppDataset_1.zip [file Nrros_set_A.pdf › Supplemental Dataset 1/A-mRNA_nonrhyth_translation_nonrhyth/Nrros_set_A.pdf]

# Nrxn1

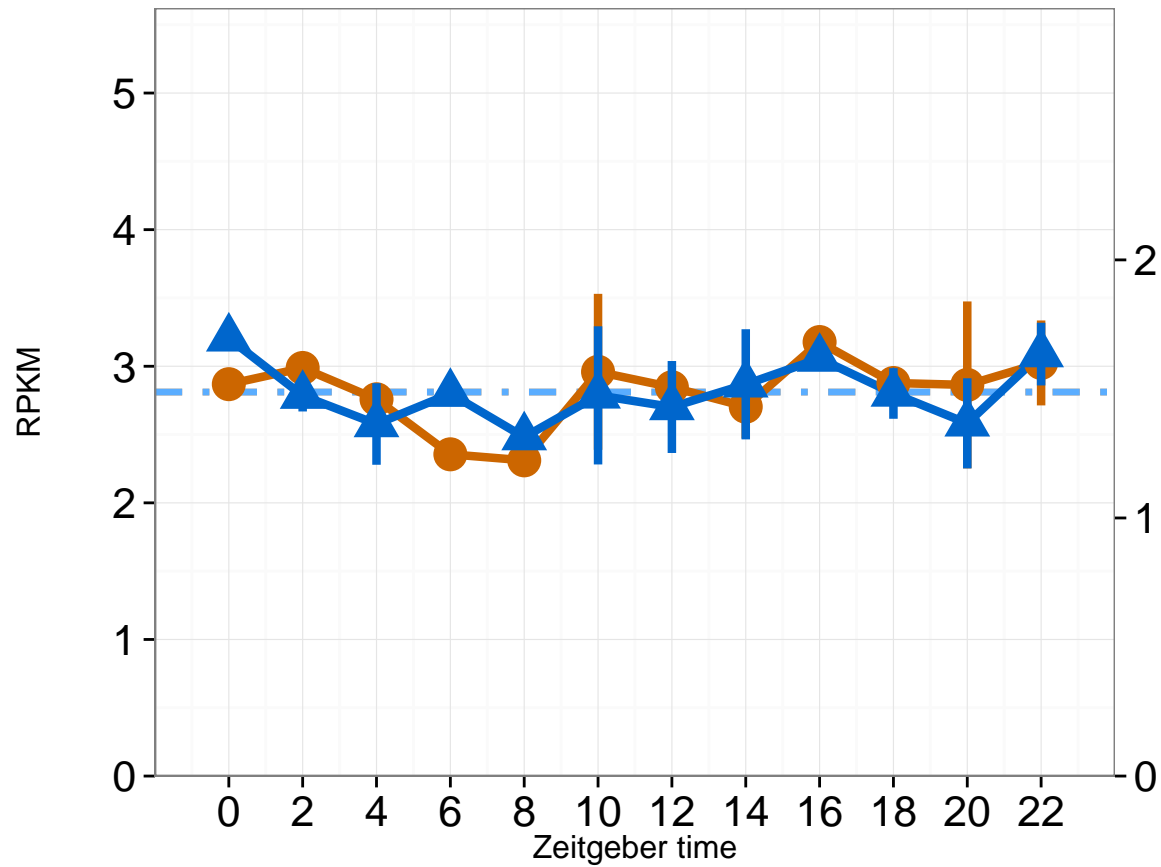

# Nrxn1

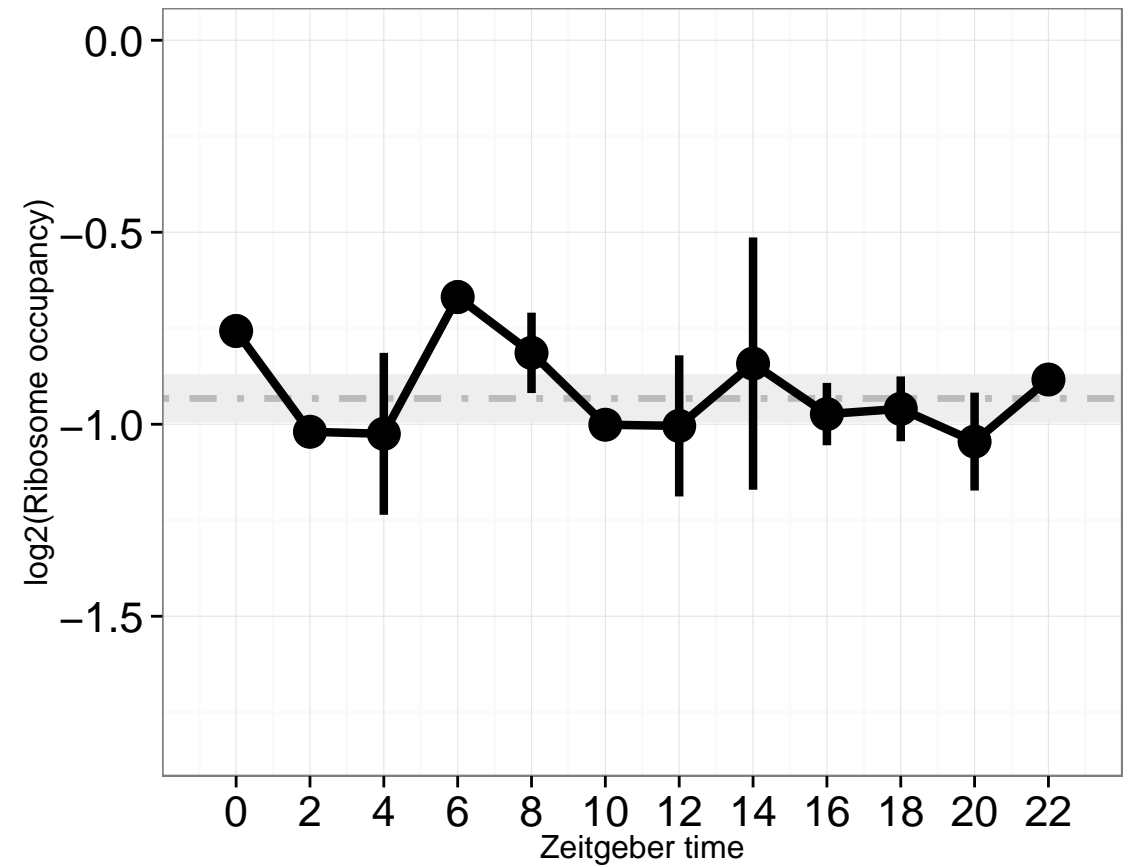

Supplement: SuppDataset_1.zip [file Nrxn1_set_A.pdf › Supplemental Dataset 1/A-mRNA_nonrhyth_translation_nonrhyth/Nrxn1_set_A.pdf]

## Nsa2

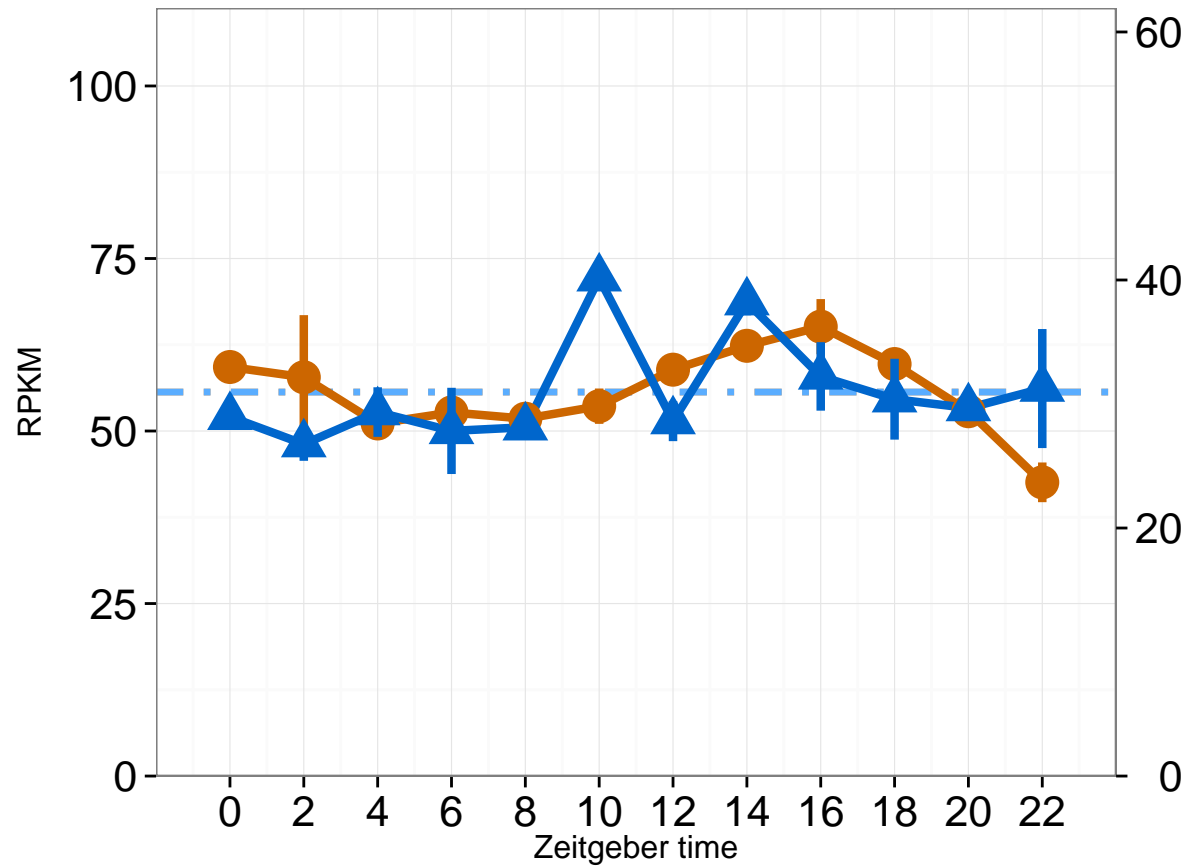

## Nsa2

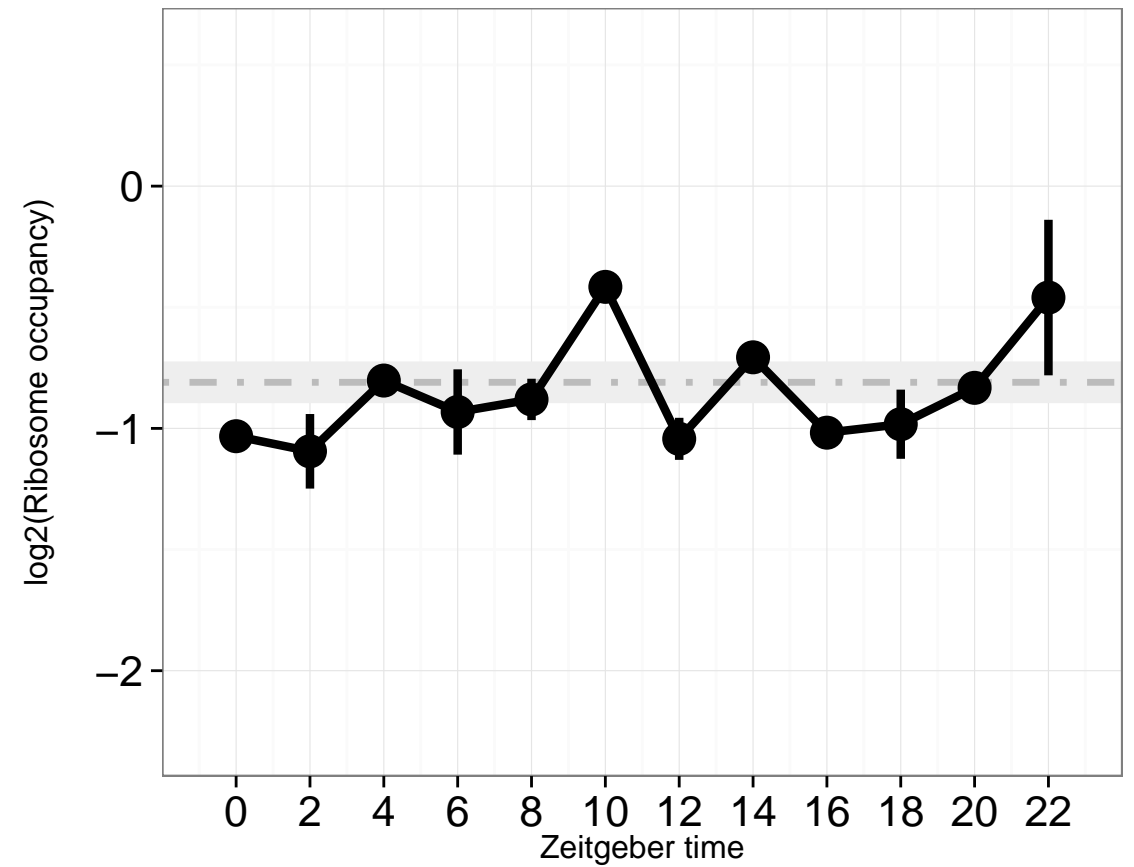

Supplement: SuppDataset_1.zip [file Nsa2_set_A.pdf › Supplemental Dataset 1/A-mRNA_nonrhyth_translation_nonrhyth/Nsa2_set_A.pdf]

## Nsd1

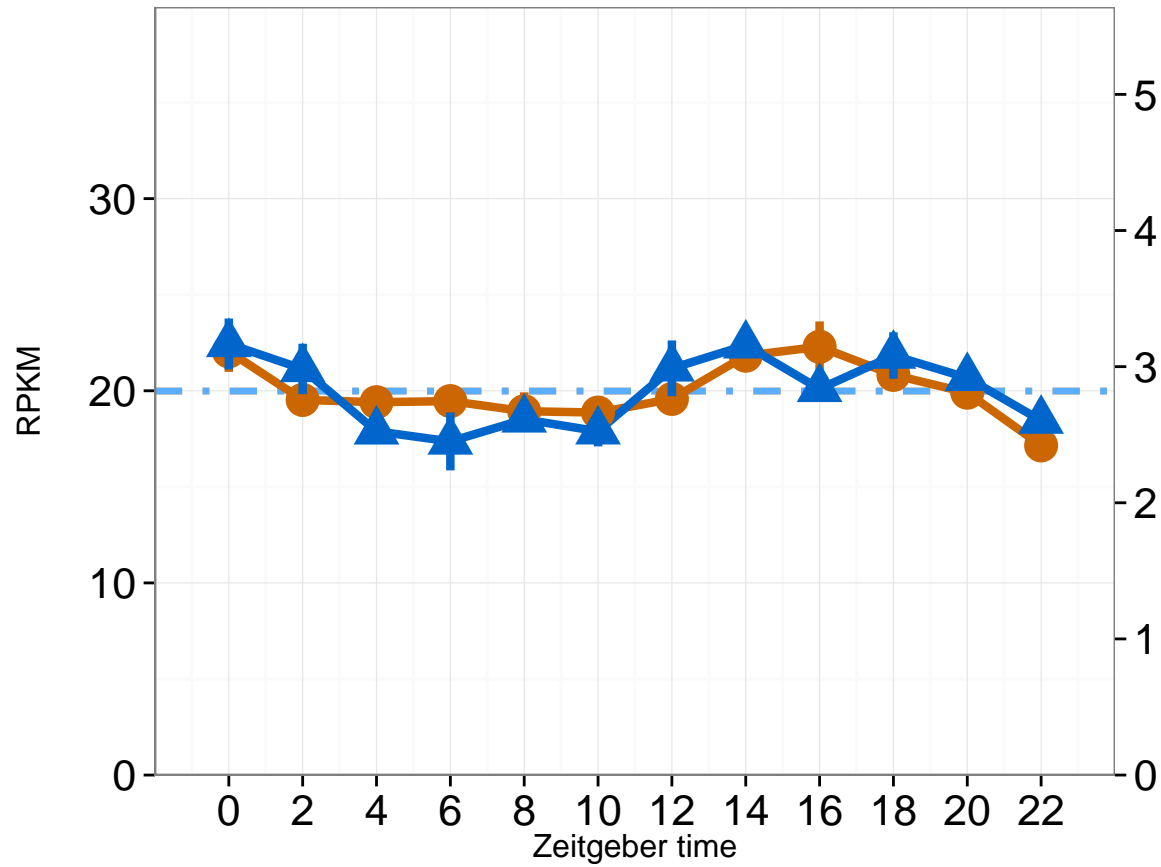

## Nsd1

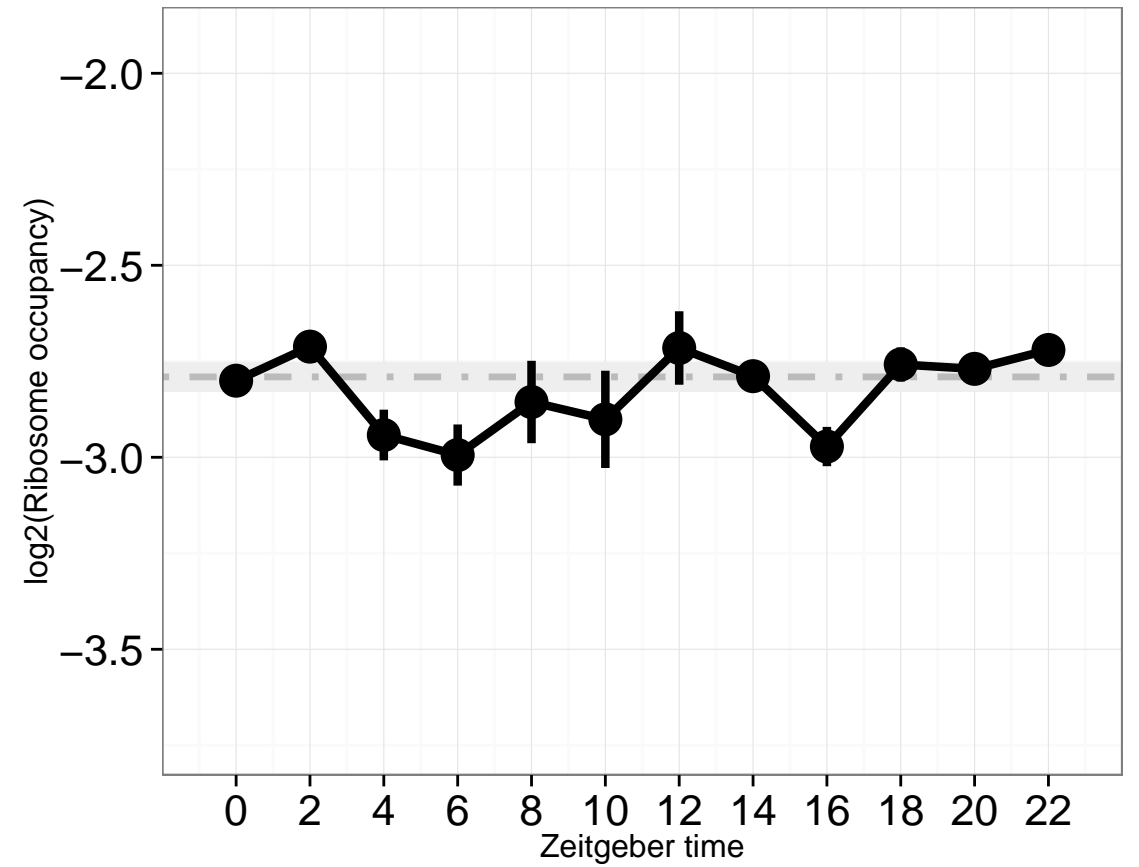

Supplement: SuppDataset_1.zip [file Nsd1_set_A.pdf › Supplemental Dataset 1/A-mRNA_nonrhyth_translation_nonrhyth/Nsd1_set_A.pdf]

## Nsdhl

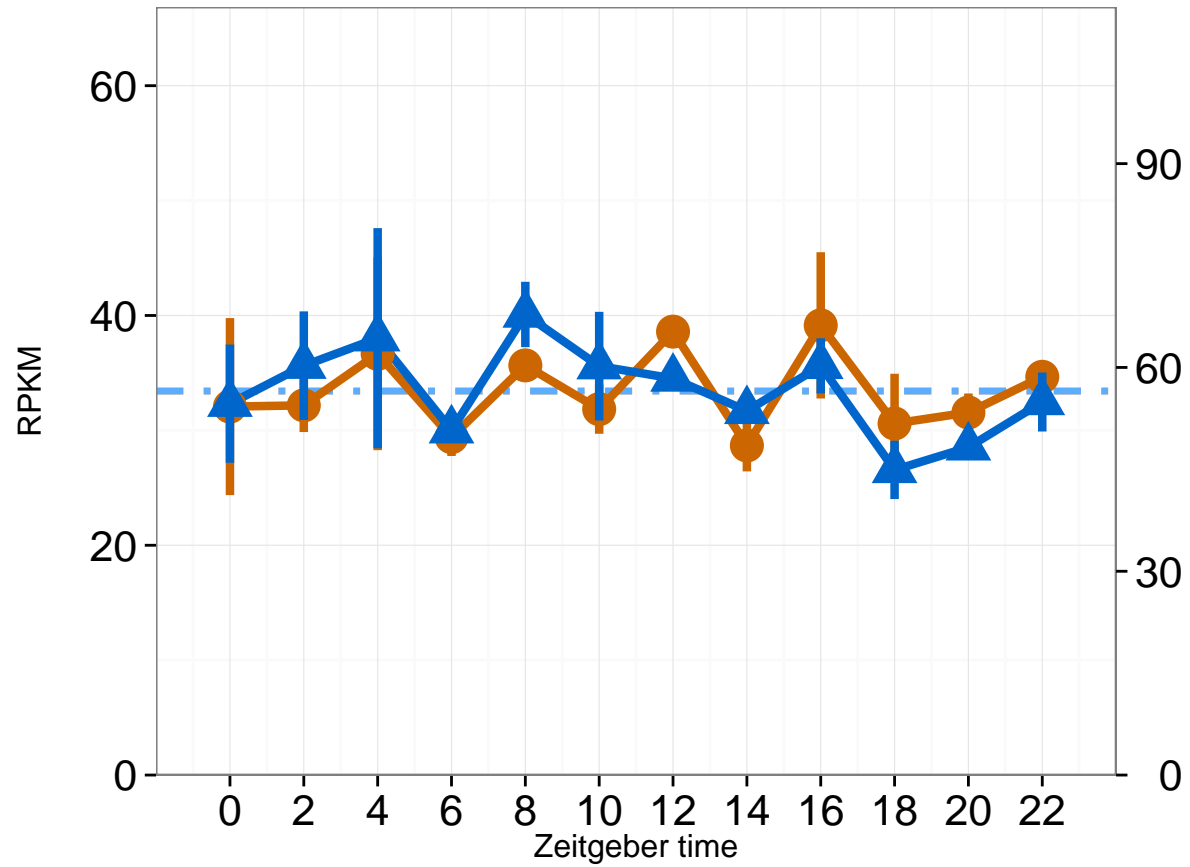

## Nsdhl

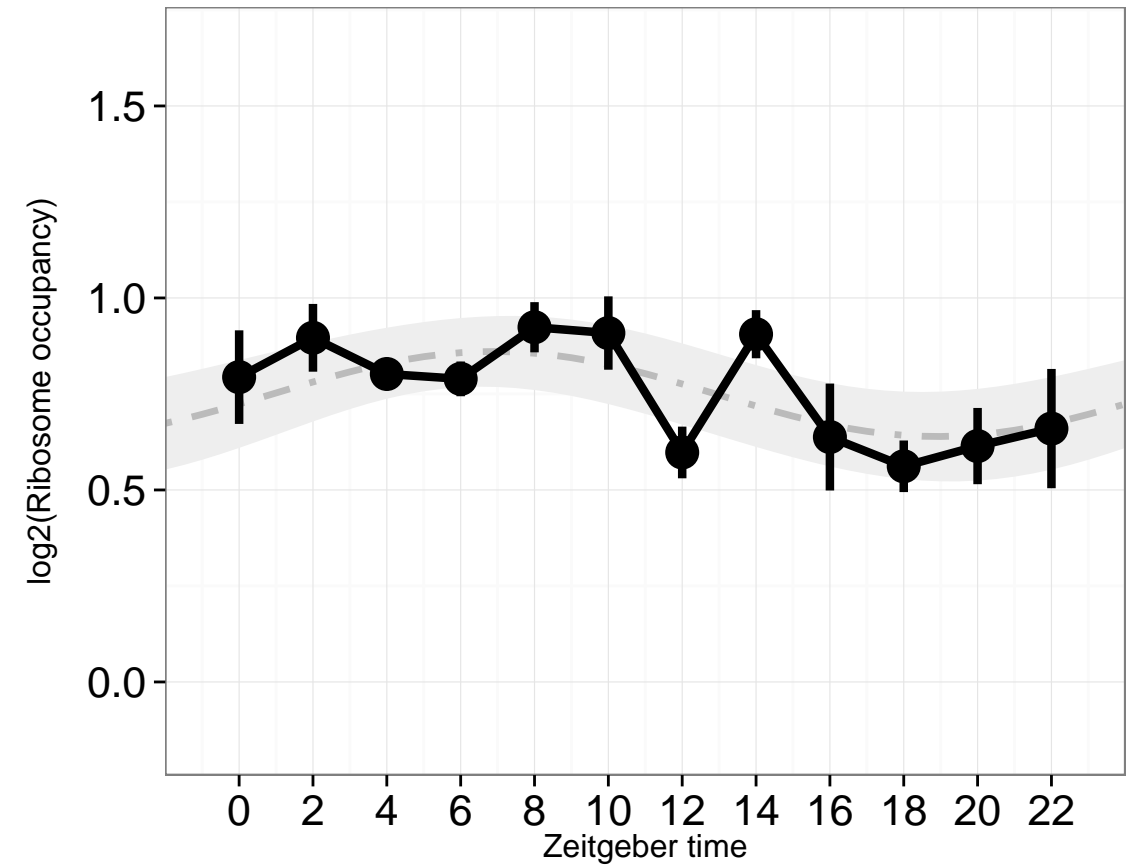

Supplement: SuppDataset_1.zip [file Nsdhl_set_A.pdf › Supplemental Dataset 1/A-mRNA_nonrhyth_translation_nonrhyth/Nsdhl_set_A.pdf]

## Nsf

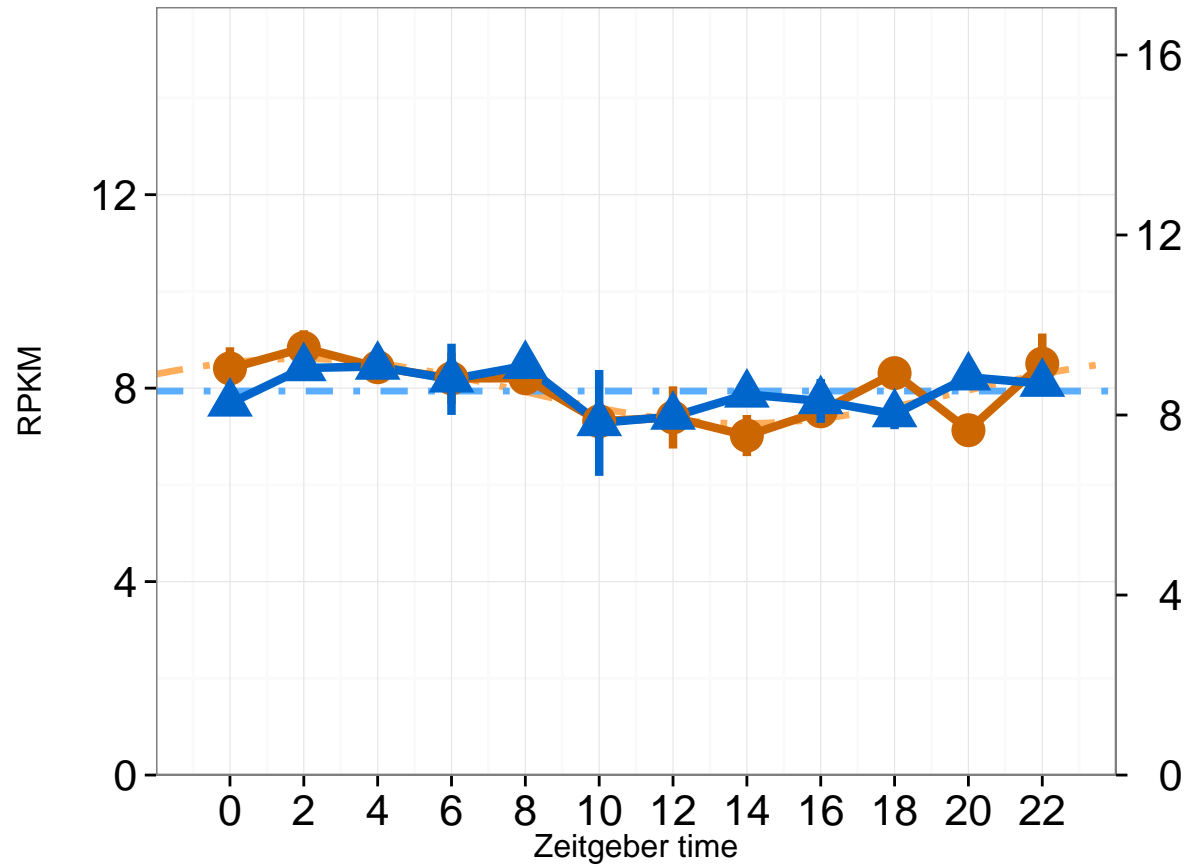

## Nsf

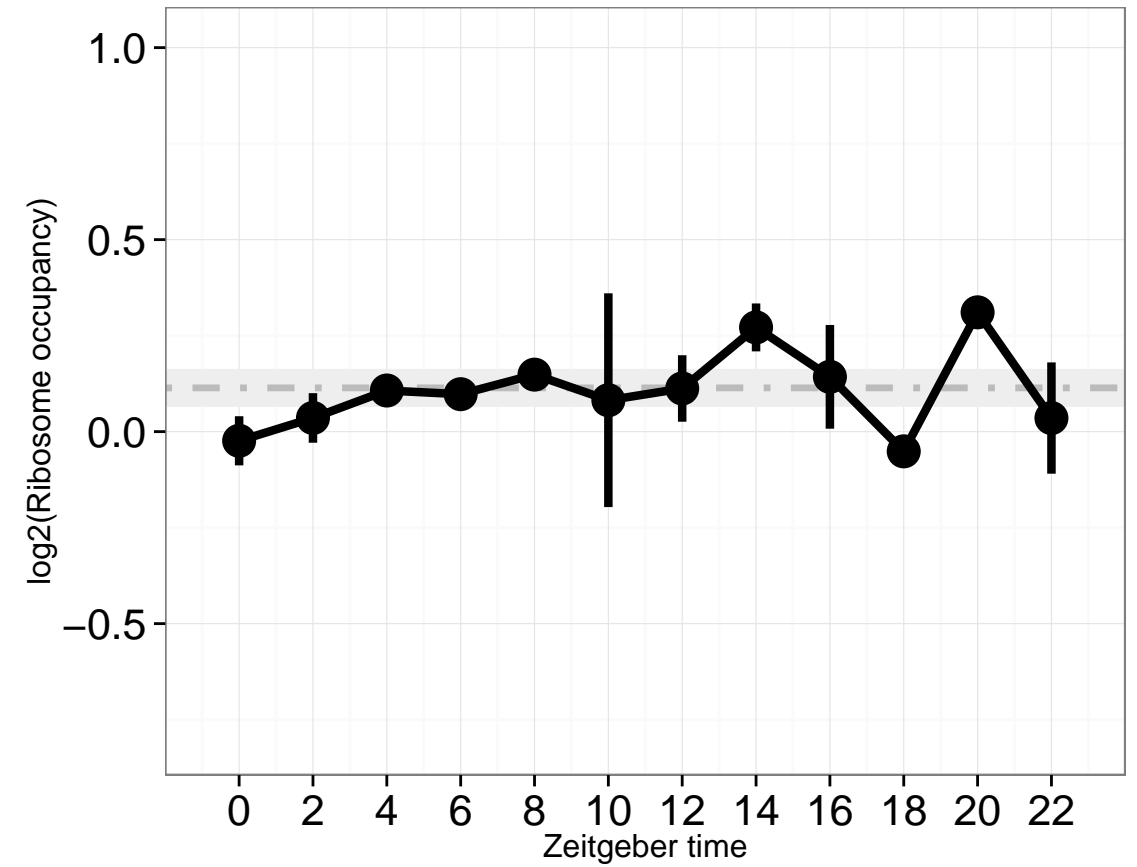

Supplement: SuppDataset_1.zip [file Nsf_set_A.pdf › Supplemental Dataset 1/A-mRNA_nonrhyth_translation_nonrhyth/Nsf_set_A.pdf]

## Nsfl1c

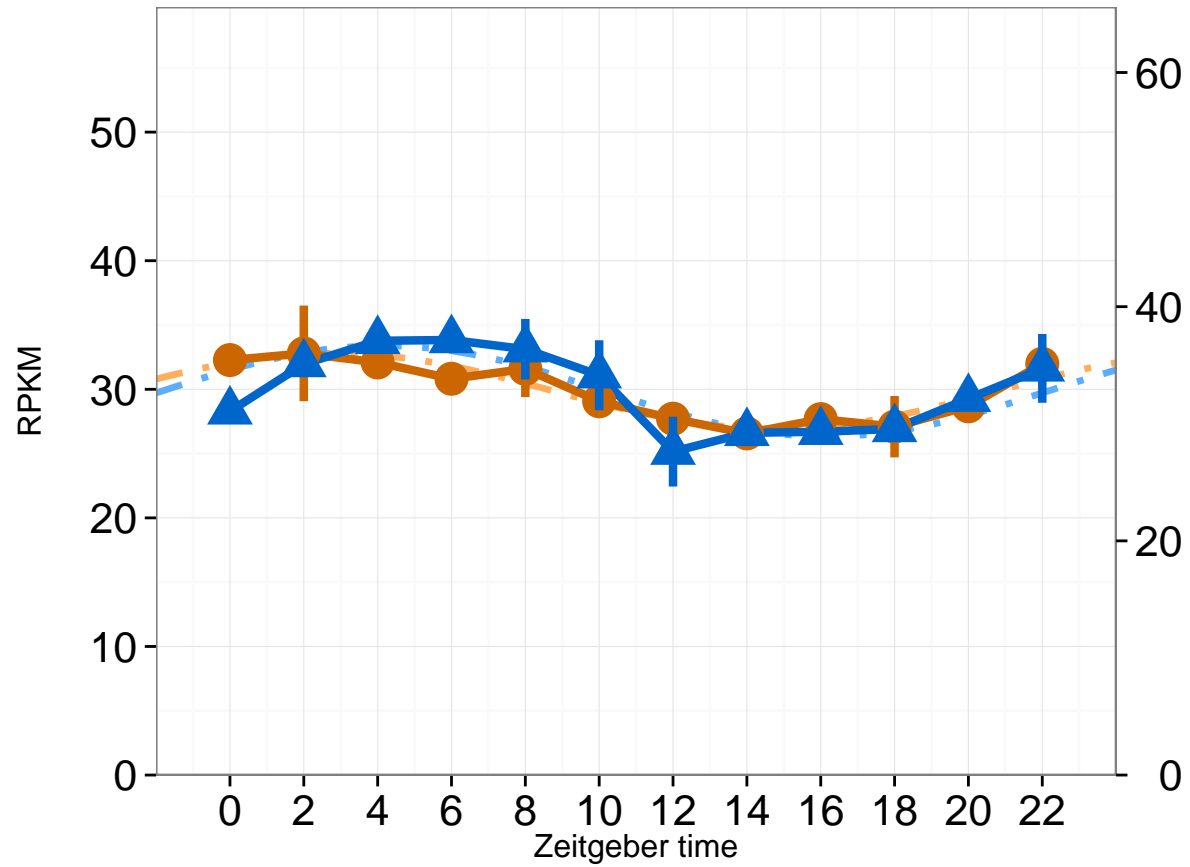

## Nsfl1c

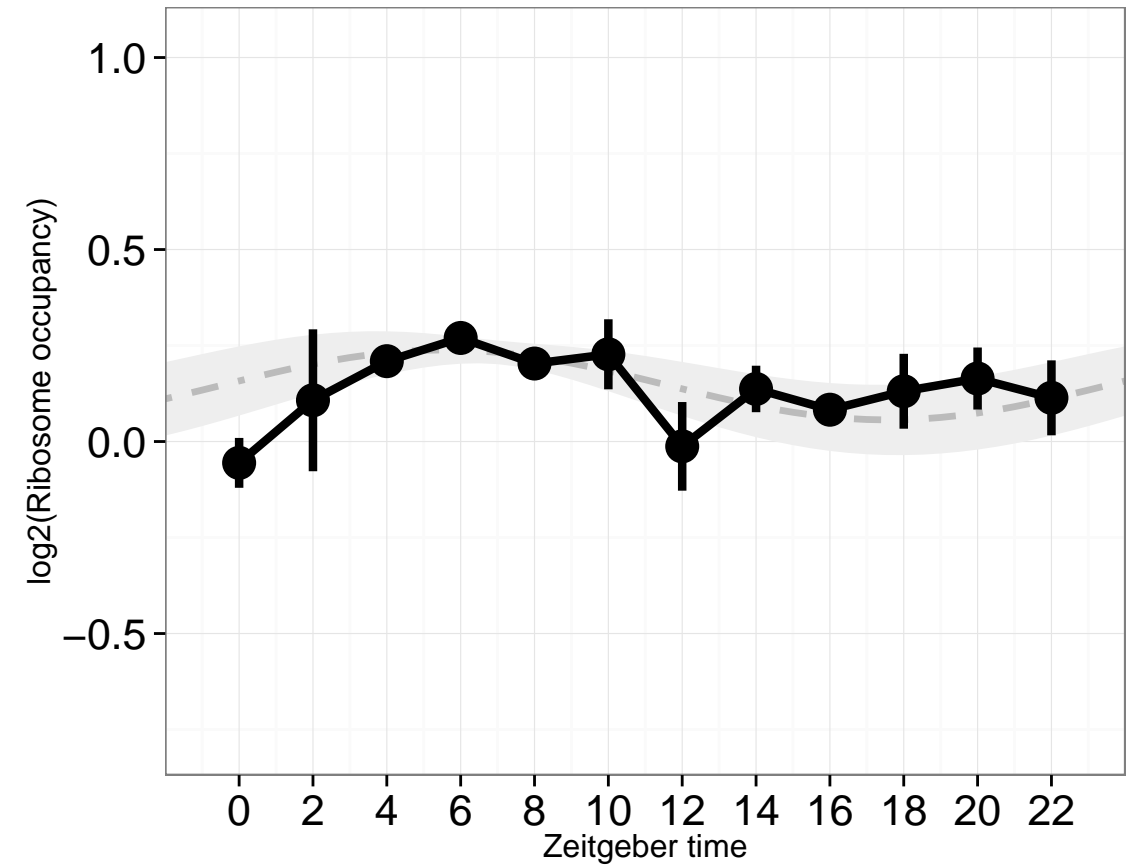

Supplement: SuppDataset_1.zip [file Nsfl1c_set_A.pdf › Supplemental Dataset 1/A-mRNA_nonrhyth_translation_nonrhyth/Nsfl1c_set_A.pdf]
