# Supplementary figures and images for: Ribosome profiling reveals the rhythmic liver translatome and circadian clock regulation by upstream open reading frames (part 50 of 113)
Source: HighWire-hosted journal article supplement (doi:10.1101/gr.195404.115), 2015-10-20

**Nsg1 TR**

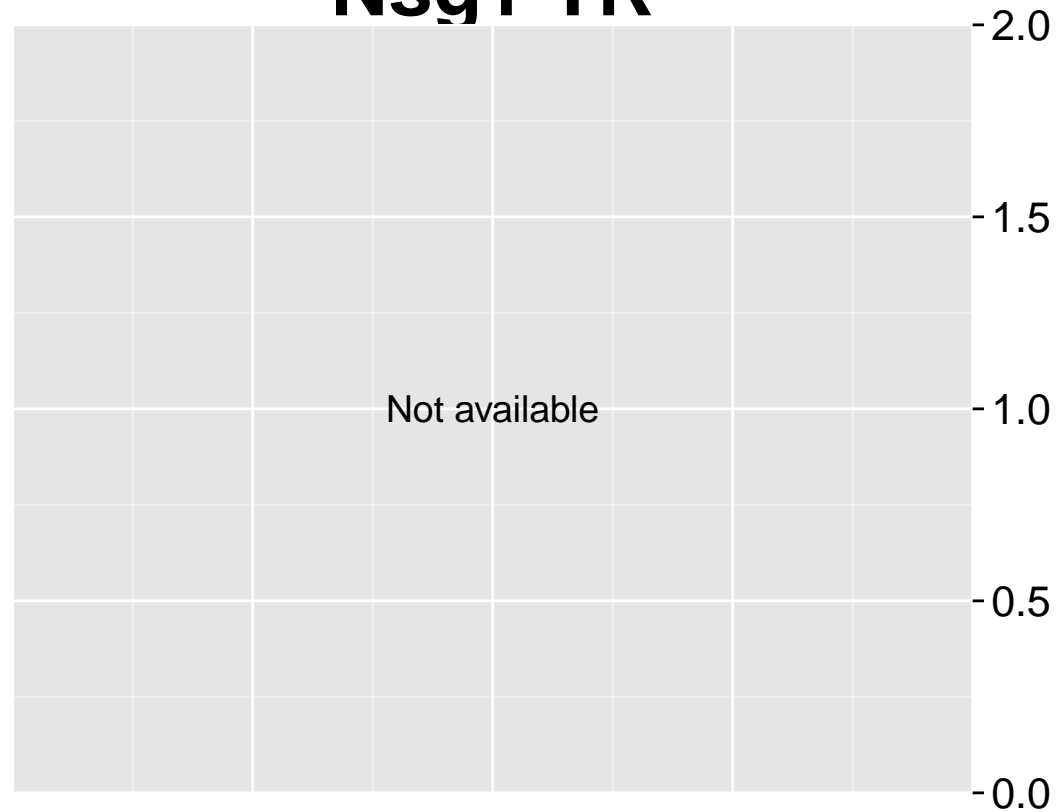

**Nsg1 log2(Ribosome occupancy)**

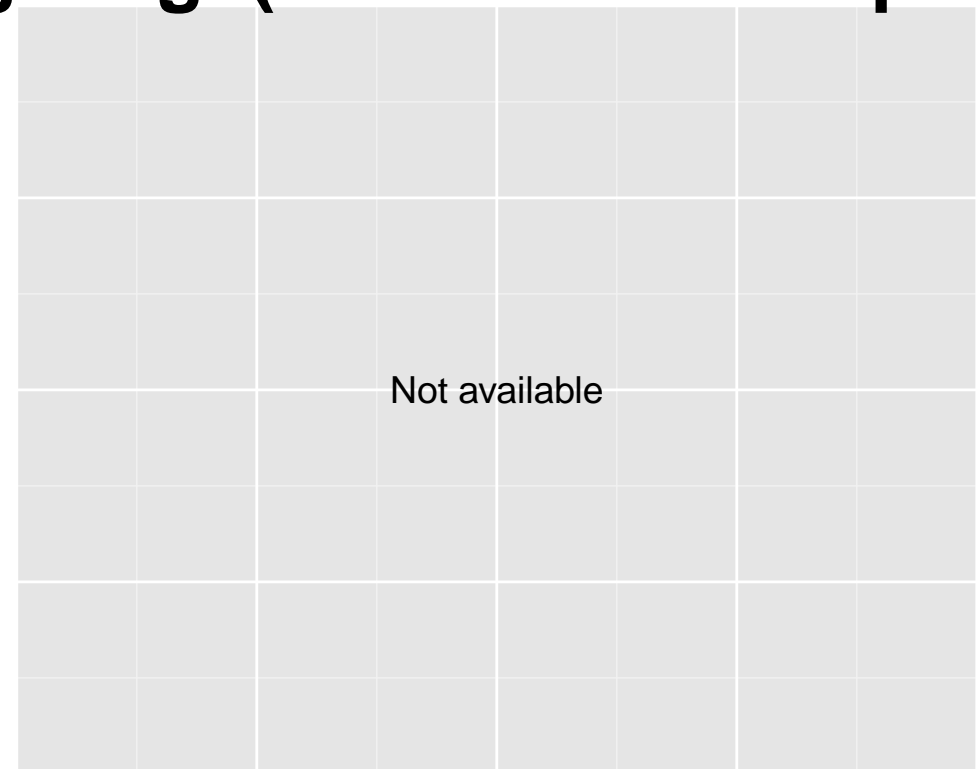

Supplement: SuppDataset_1.zip [file Nsg1_set_A.pdf › Supplemental Dataset 1/A-mRNA_nonrhyth_translation_nonrhyth/Nsg1_set_A.pdf]

## Nsmaf

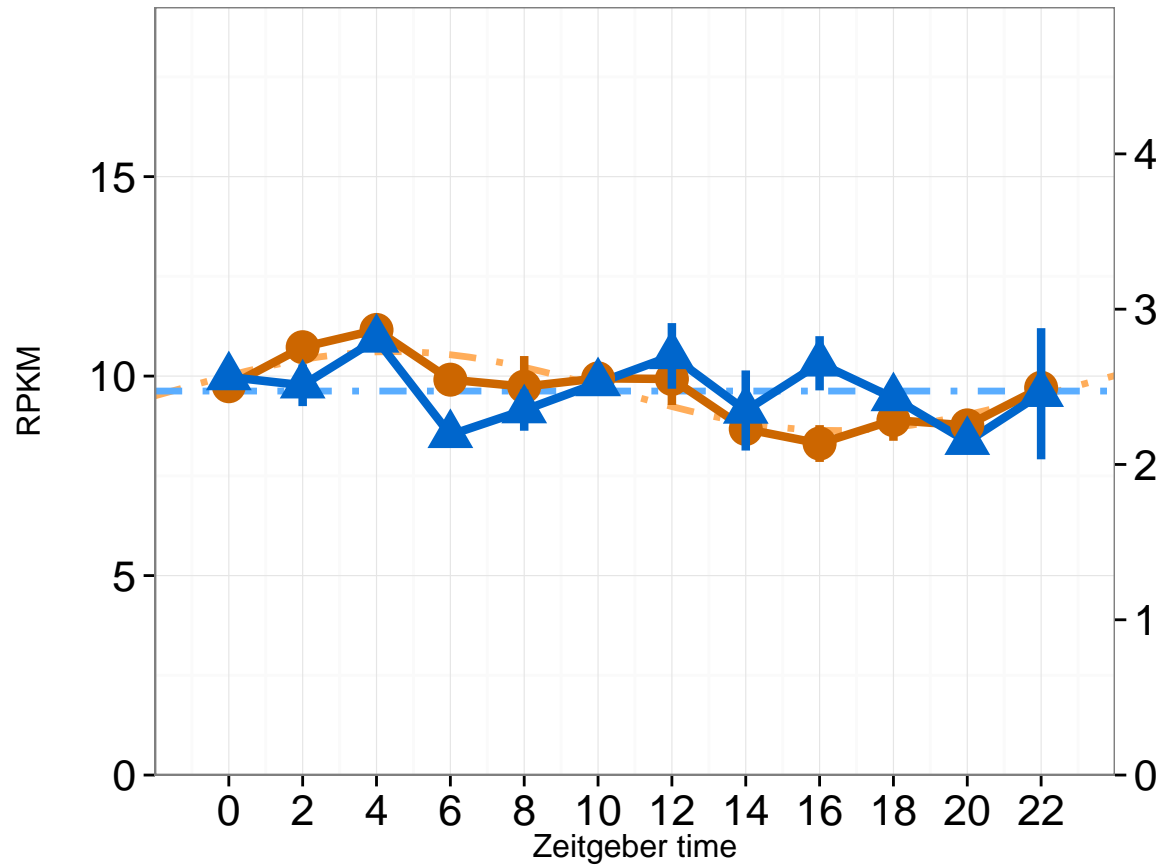

## Nsmaf

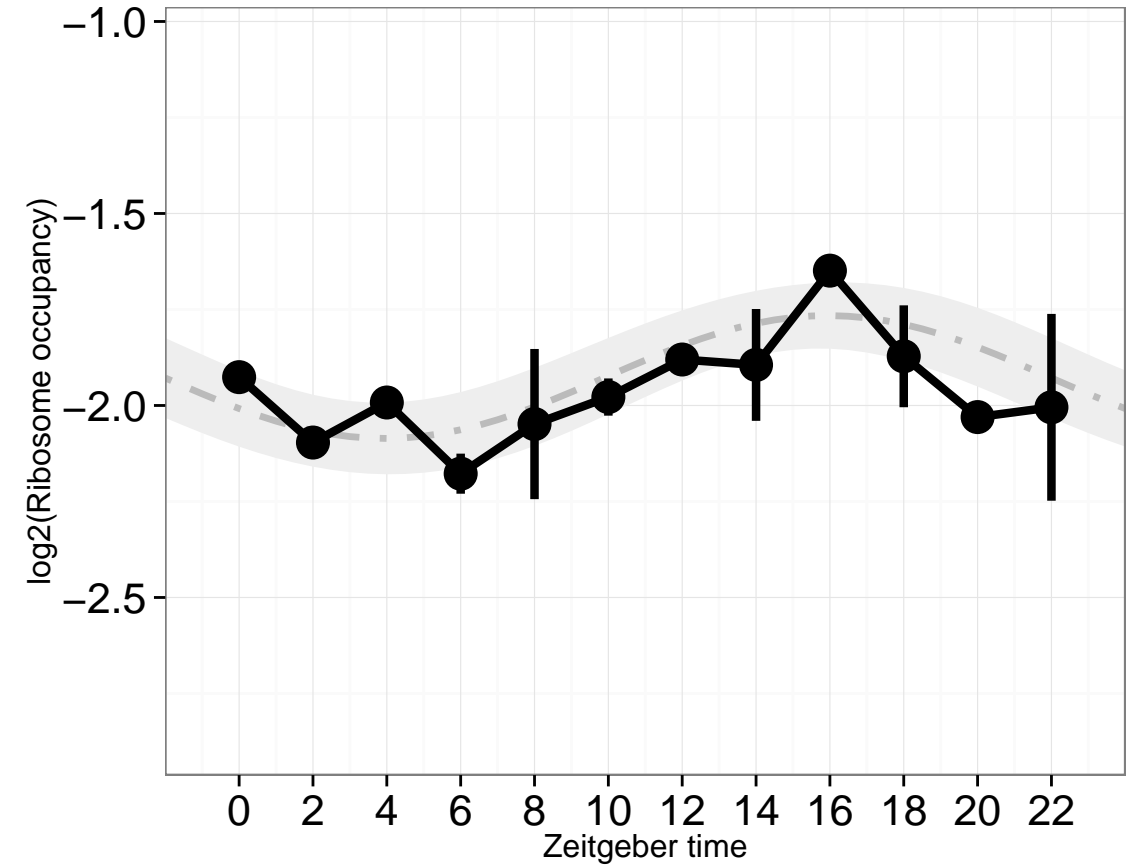

Supplement: SuppDataset_1.zip [file Nsmaf_set_A.pdf › Supplemental Dataset 1/A-mRNA_nonrhyth_translation_nonrhyth/Nsmaf_set_A.pdf]

# Nsmce1

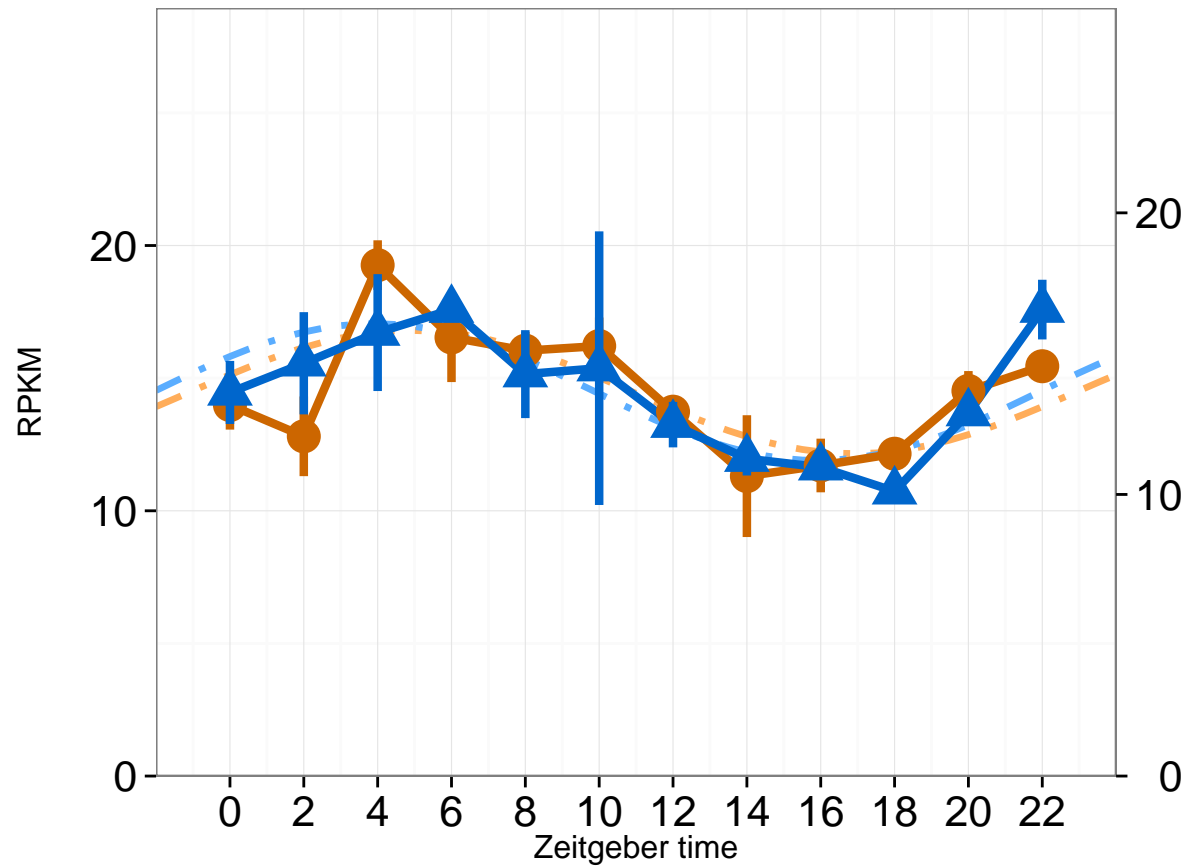

# Nsmce1

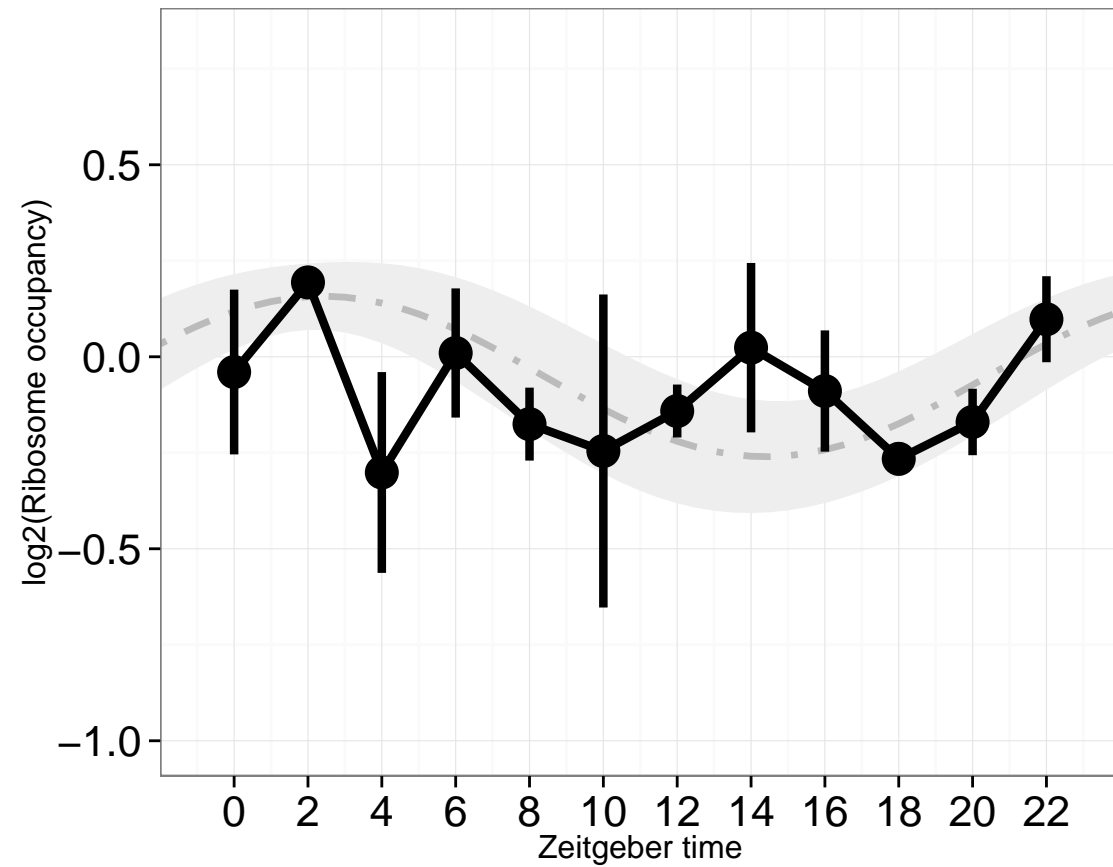

Supplement: SuppDataset_1.zip [file Nsmce1_set_A.pdf › Supplemental Dataset 1/A-mRNA_nonrhyth_translation_nonrhyth/Nsmce1_set_A.pdf]

## Nsmce4a

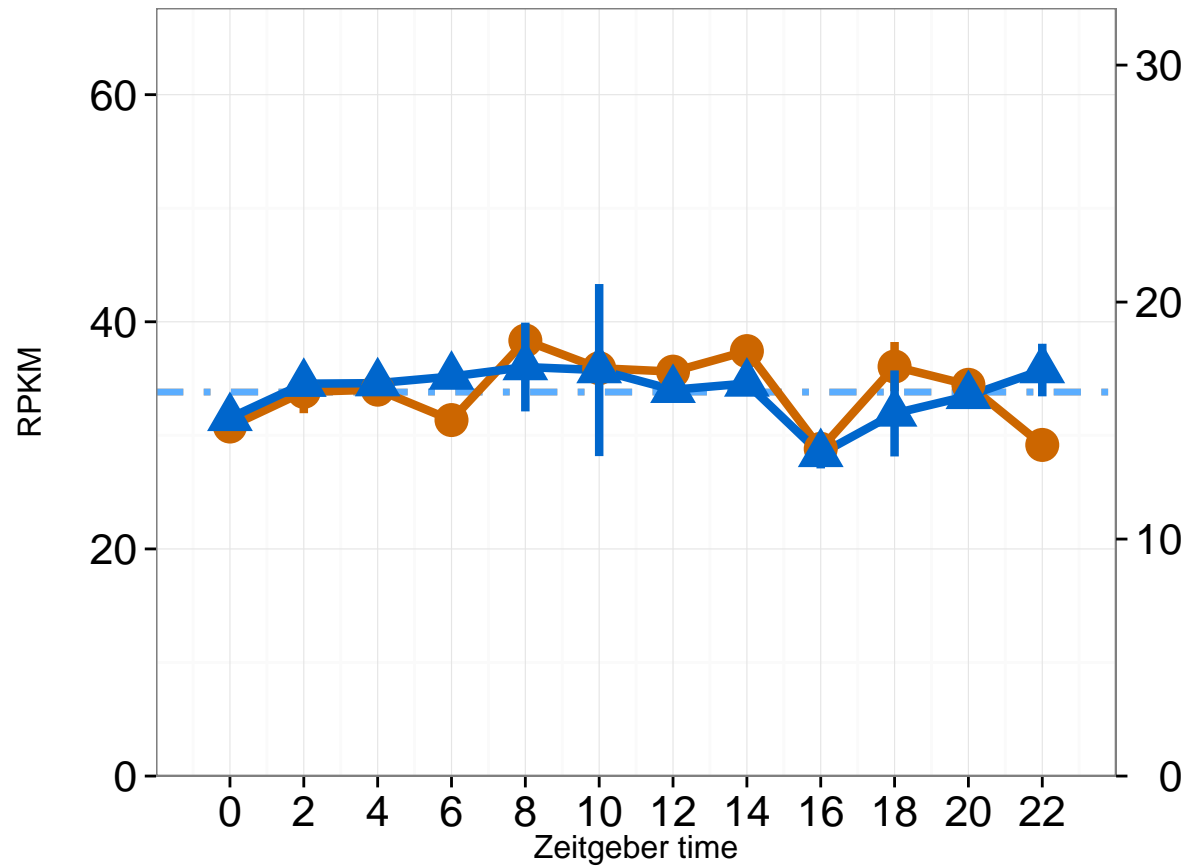

## Nsmce4a

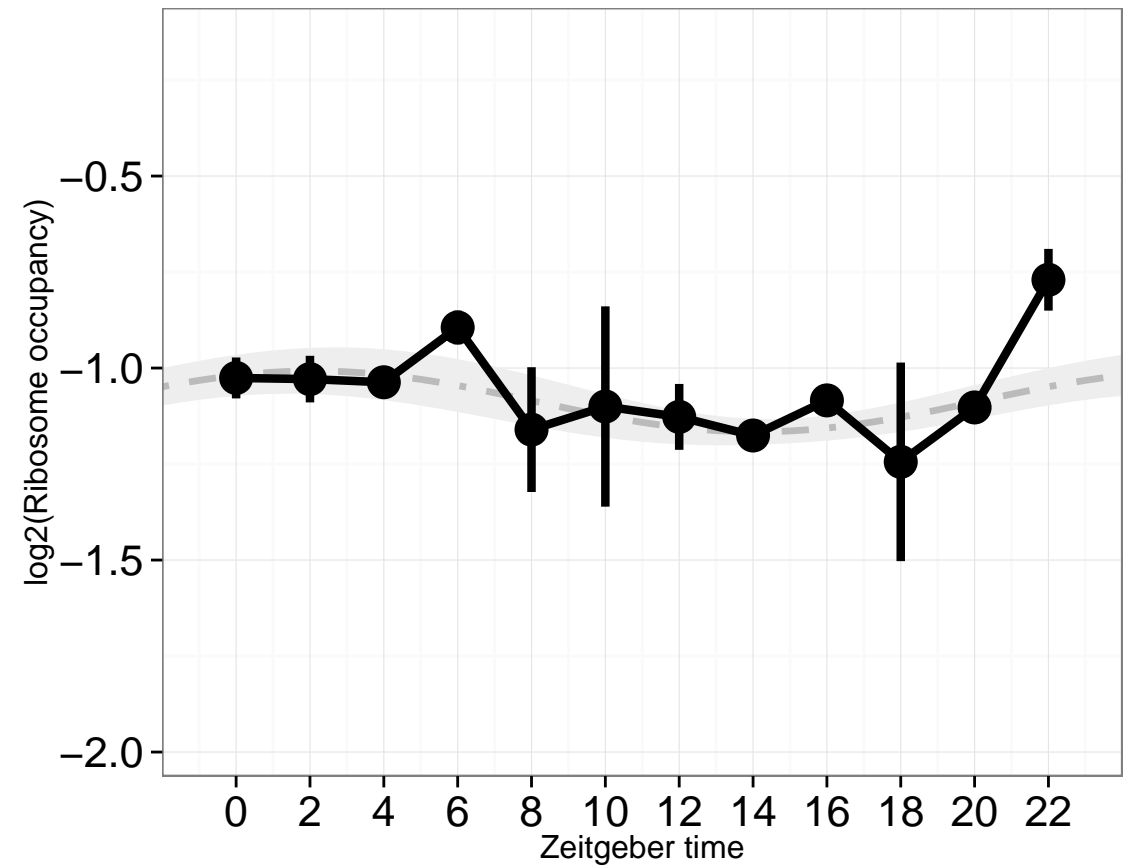

Supplement: SuppDataset_1.zip [file Nsmce4a_set_A.pdf › Supplemental Dataset 1/A-mRNA_nonrhyth_translation_nonrhyth/Nsmce4a_set_A.pdf]

# Nsmf

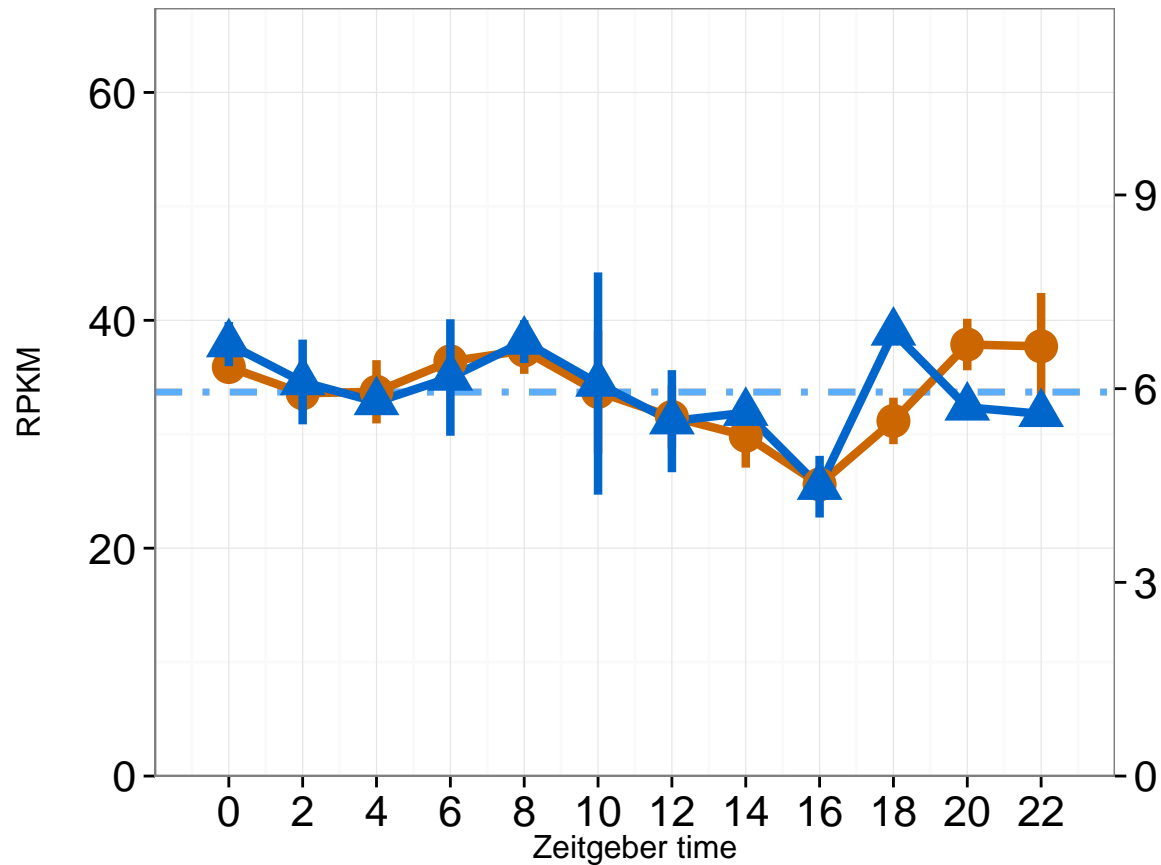

# Nsmf

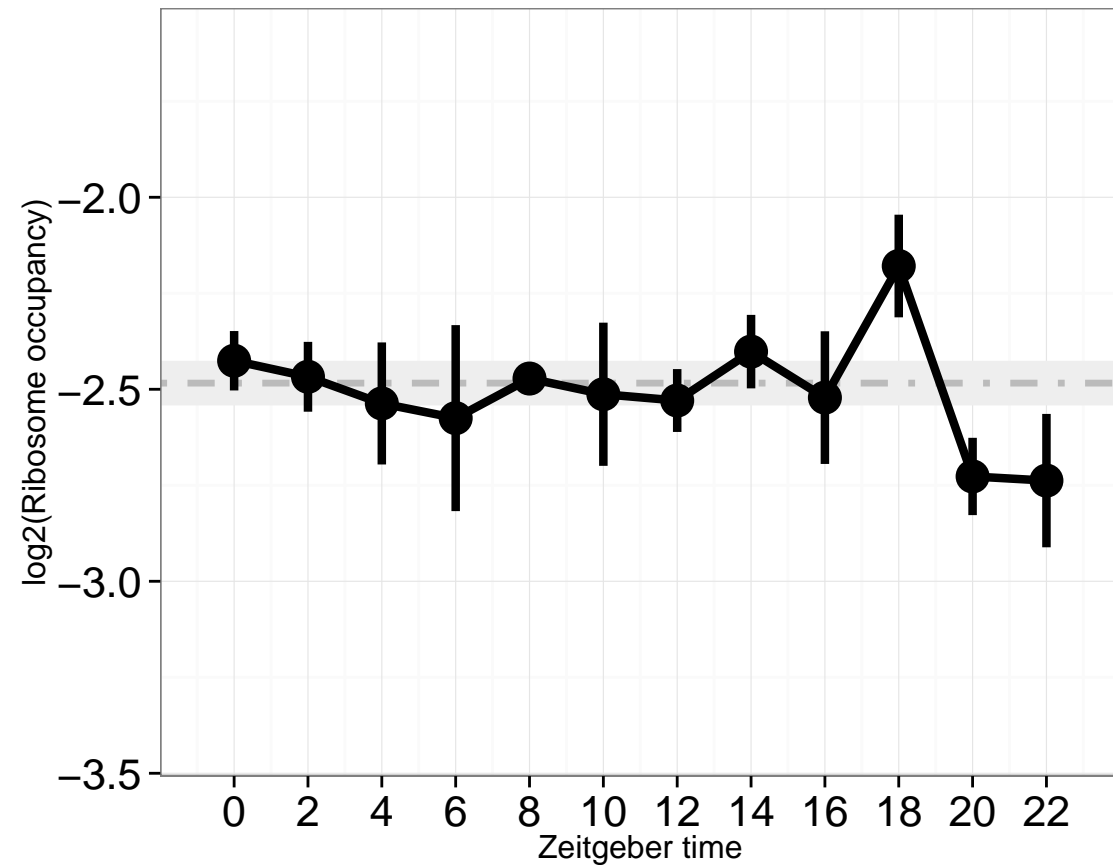

Supplement: SuppDataset_1.zip [file Nsmf_set_A.pdf › Supplemental Dataset 1/A-mRNA_nonrhyth_translation_nonrhyth/Nsmf_set_A.pdf]

## Nsun2

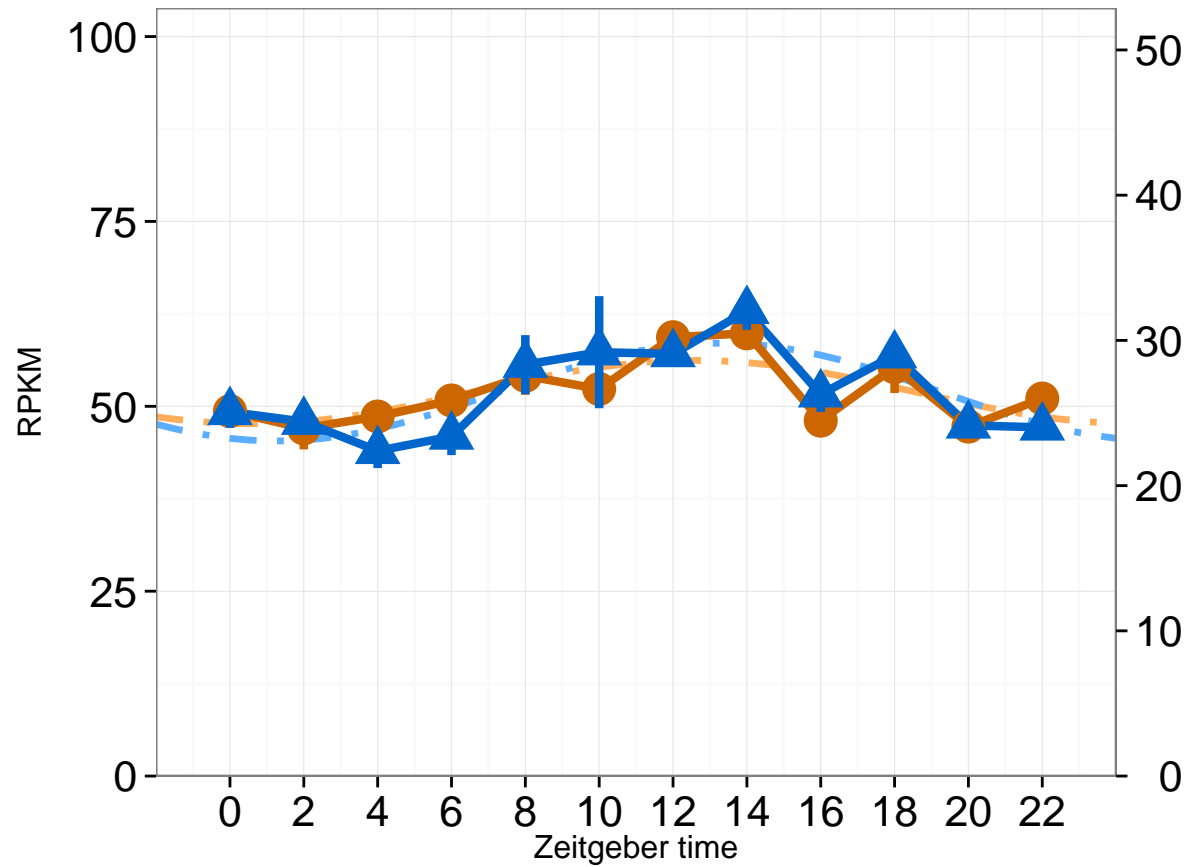

## Nsun2

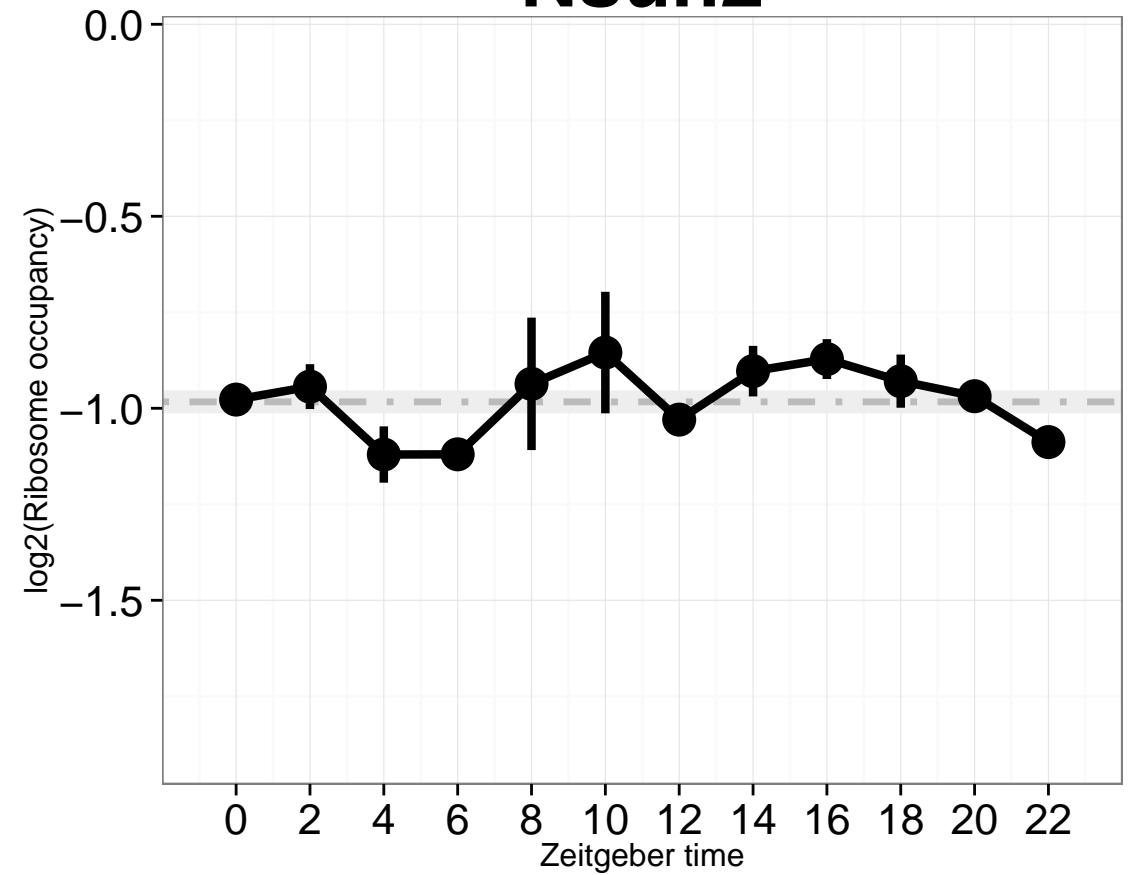

Supplement: SuppDataset_1.zip [file Nsun2_set_A.pdf › Supplemental Dataset 1/A-mRNA_nonrhyth_translation_nonrhyth/Nsun2_set_A.pdf]

## Nsun3

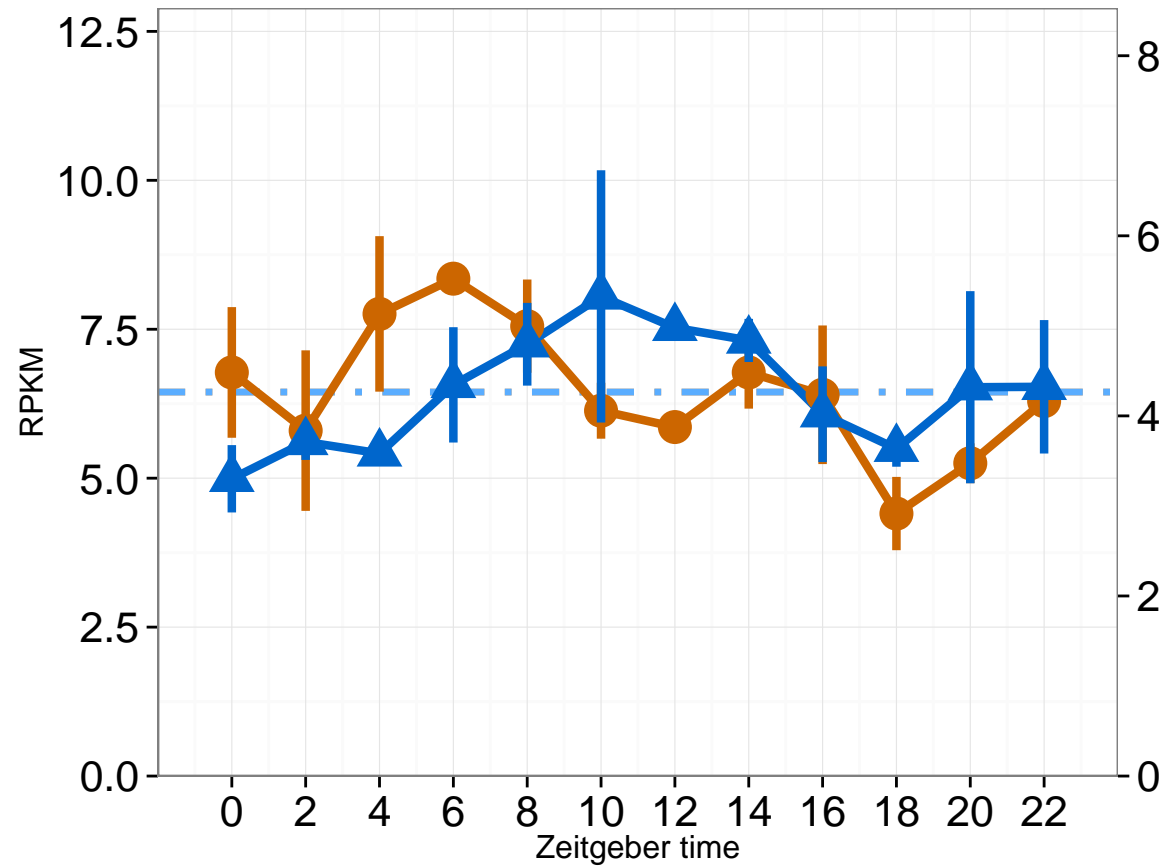

## Nsun3

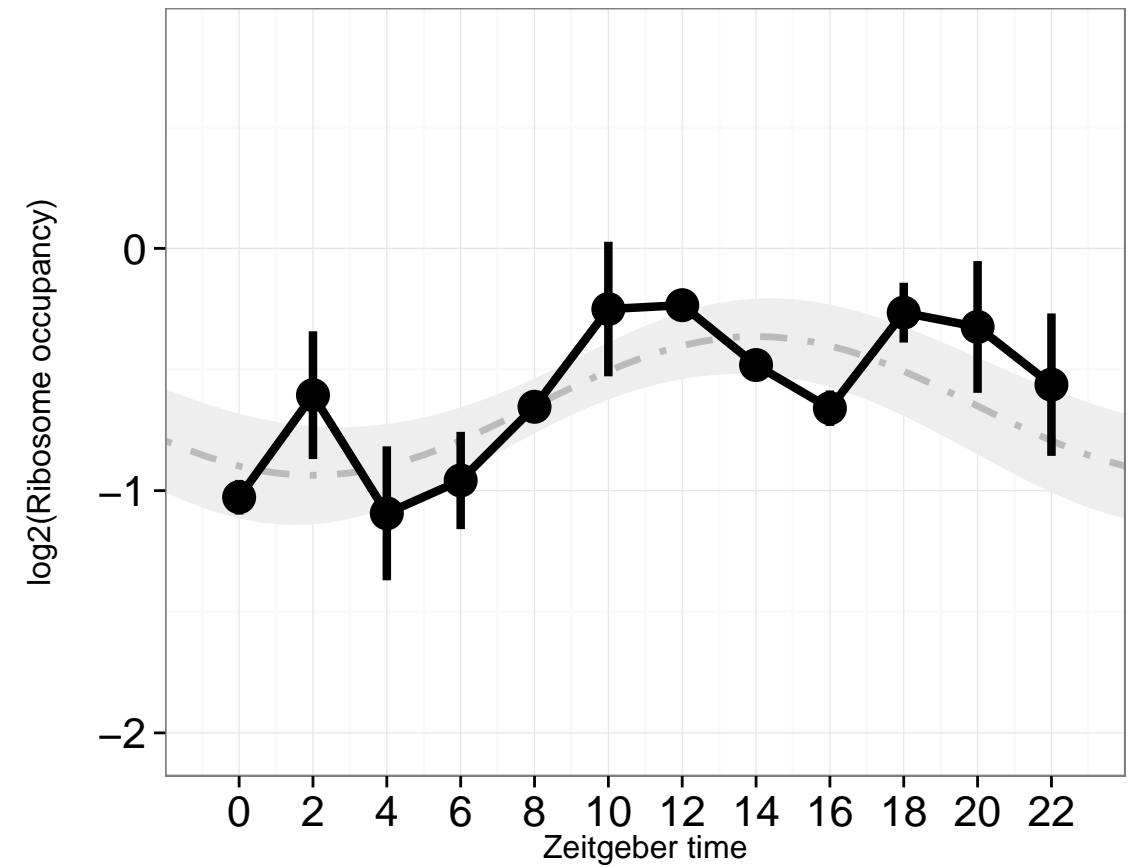

Supplement: SuppDataset_1.zip [file Nsun3_set_A.pdf › Supplemental Dataset 1/A-mRNA_nonrhyth_translation_nonrhyth/Nsun3_set_A.pdf]

## Nsun4

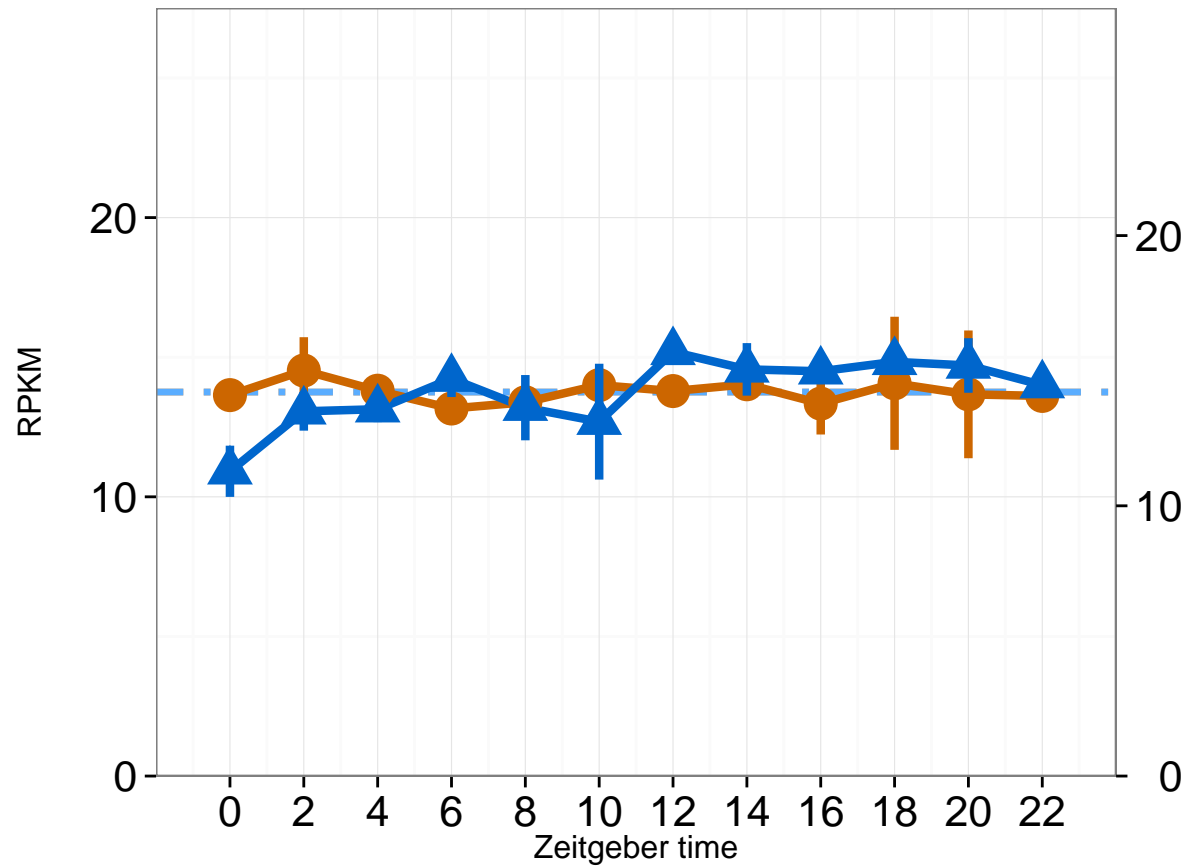

## Nsun4

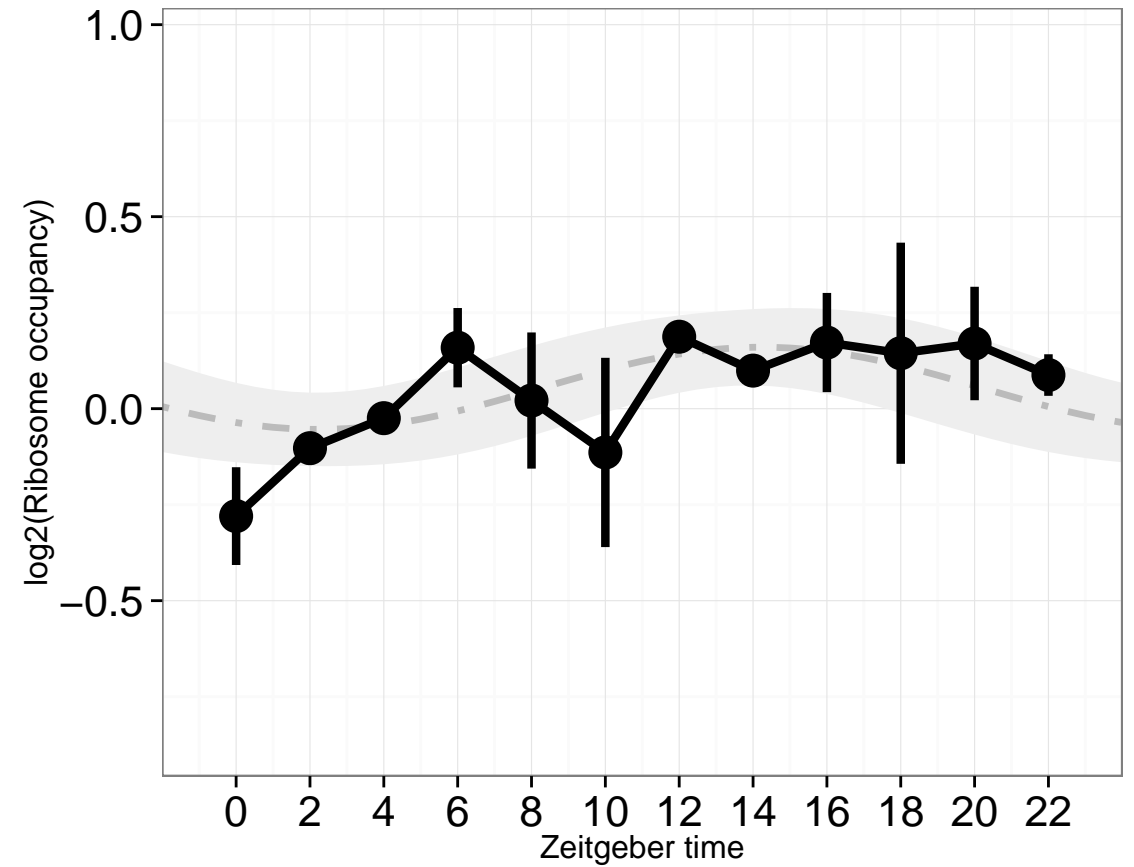

Supplement: SuppDataset_1.zip [file Nsun4_set_A.pdf › Supplemental Dataset 1/A-mRNA_nonrhyth_translation_nonrhyth/Nsun4_set_A.pdf]

# Nsun5

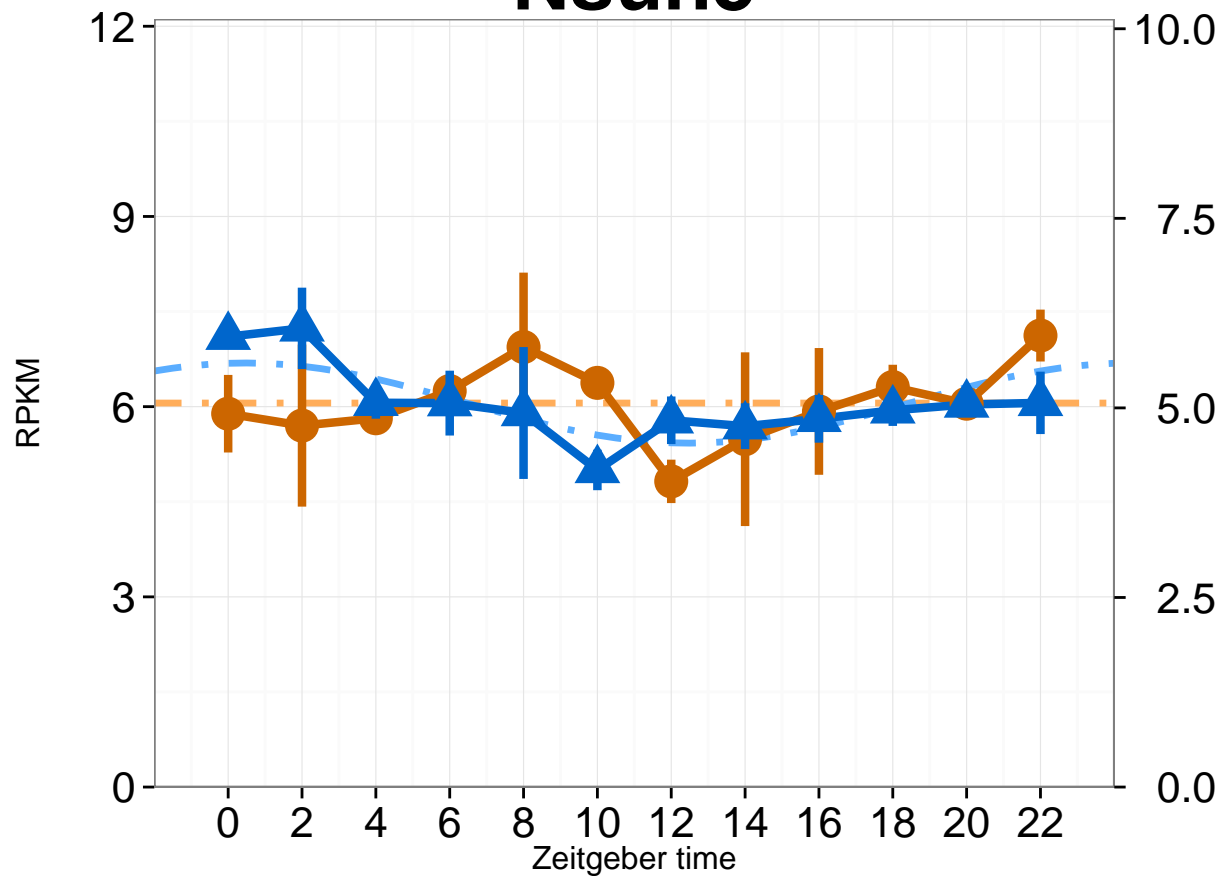

# Nsun5

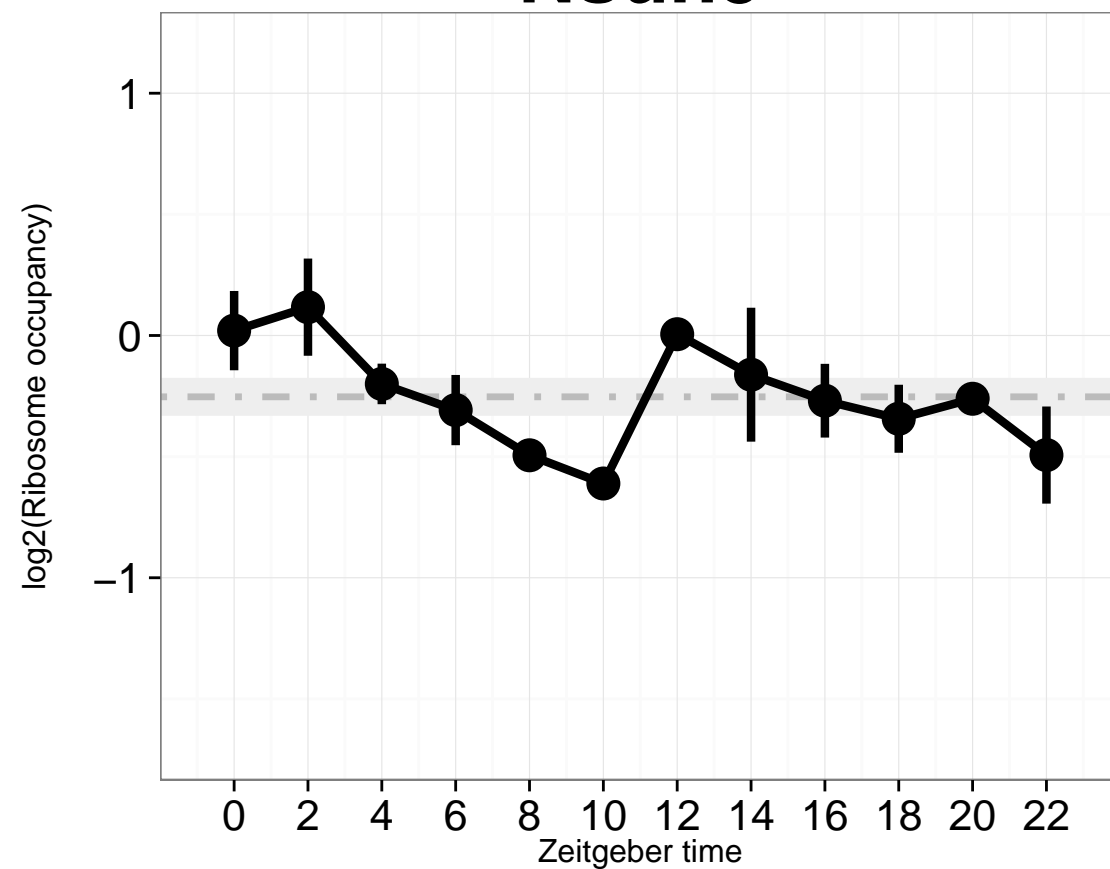

Supplement: SuppDataset_1.zip [file Nsun5_set_A.pdf › Supplemental Dataset 1/A-mRNA_nonrhyth_translation_nonrhyth/Nsun5_set_A.pdf]

# Nsun6

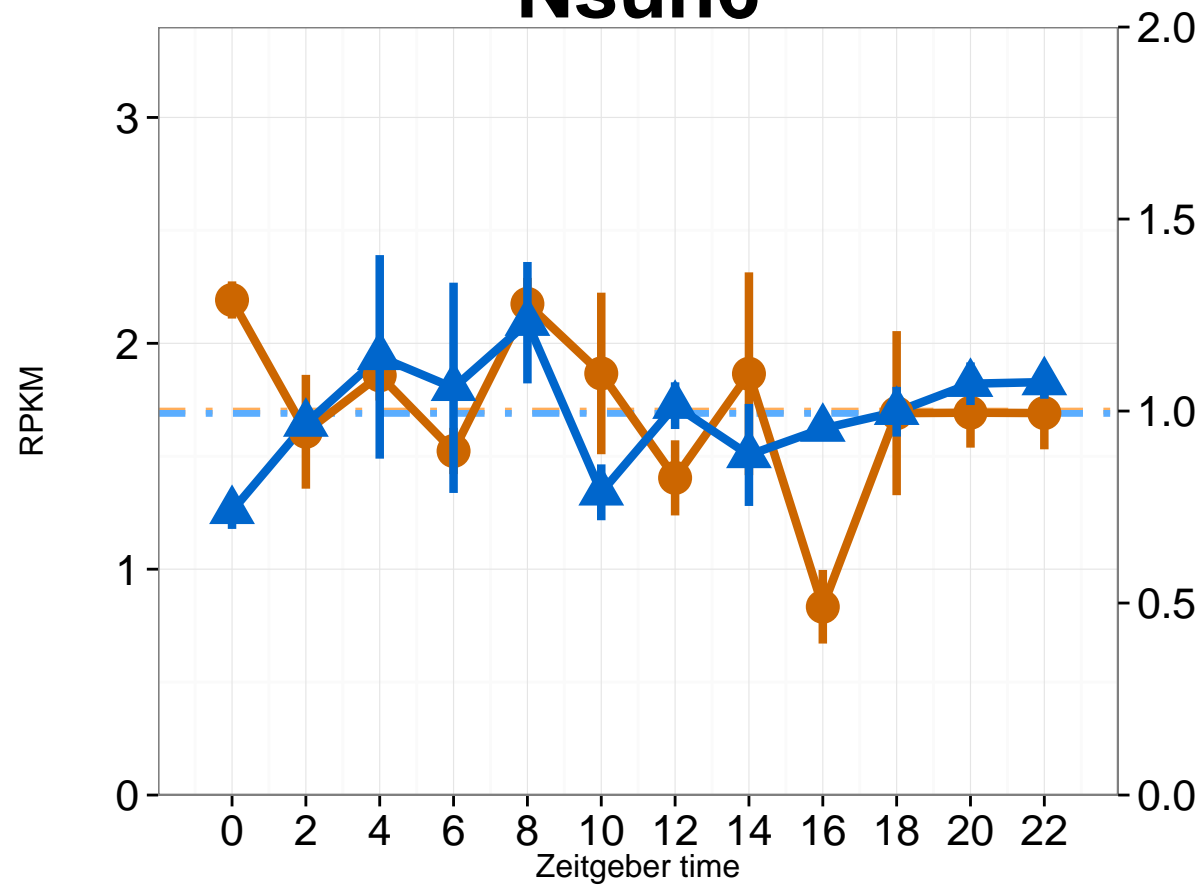

# Nsun6

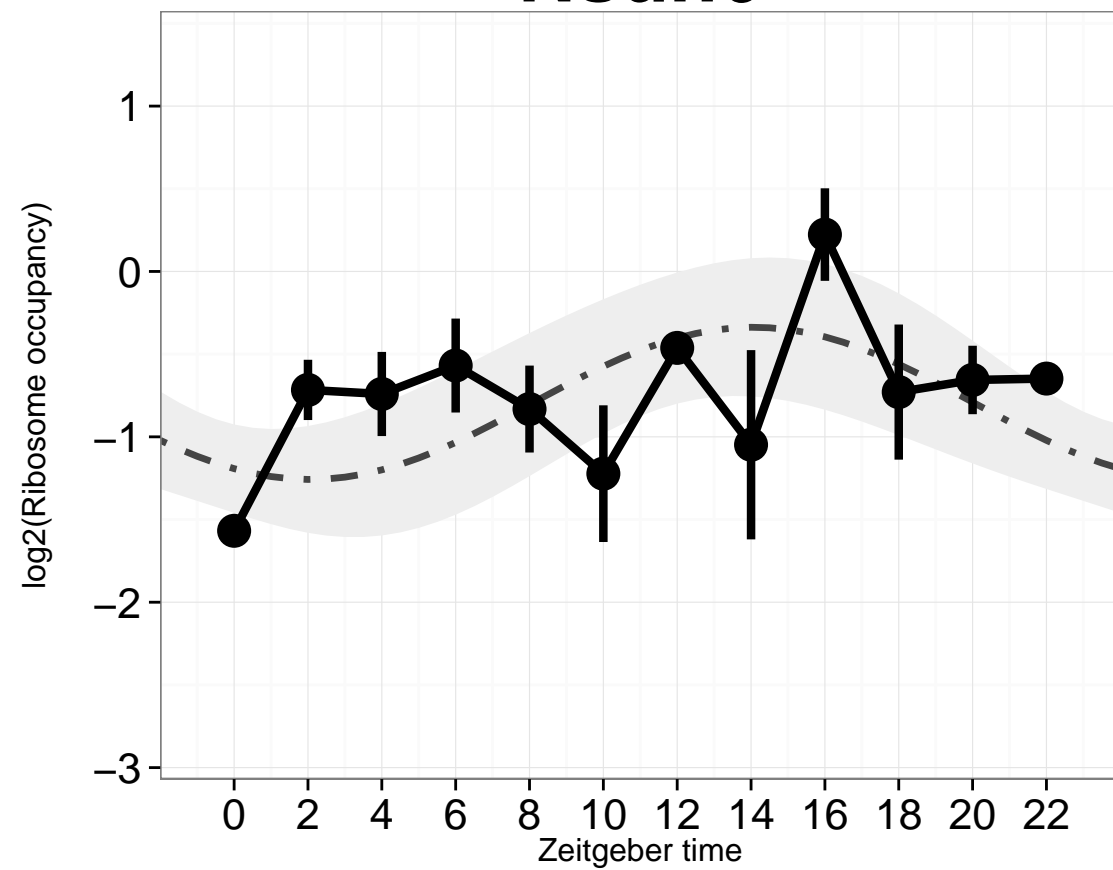

Supplement: SuppDataset_1.zip [file Nsun6_set_A.pdf › Supplemental Dataset 1/A-mRNA_nonrhyth_translation_nonrhyth/Nsun6_set_A.pdf]

# Nt5c2

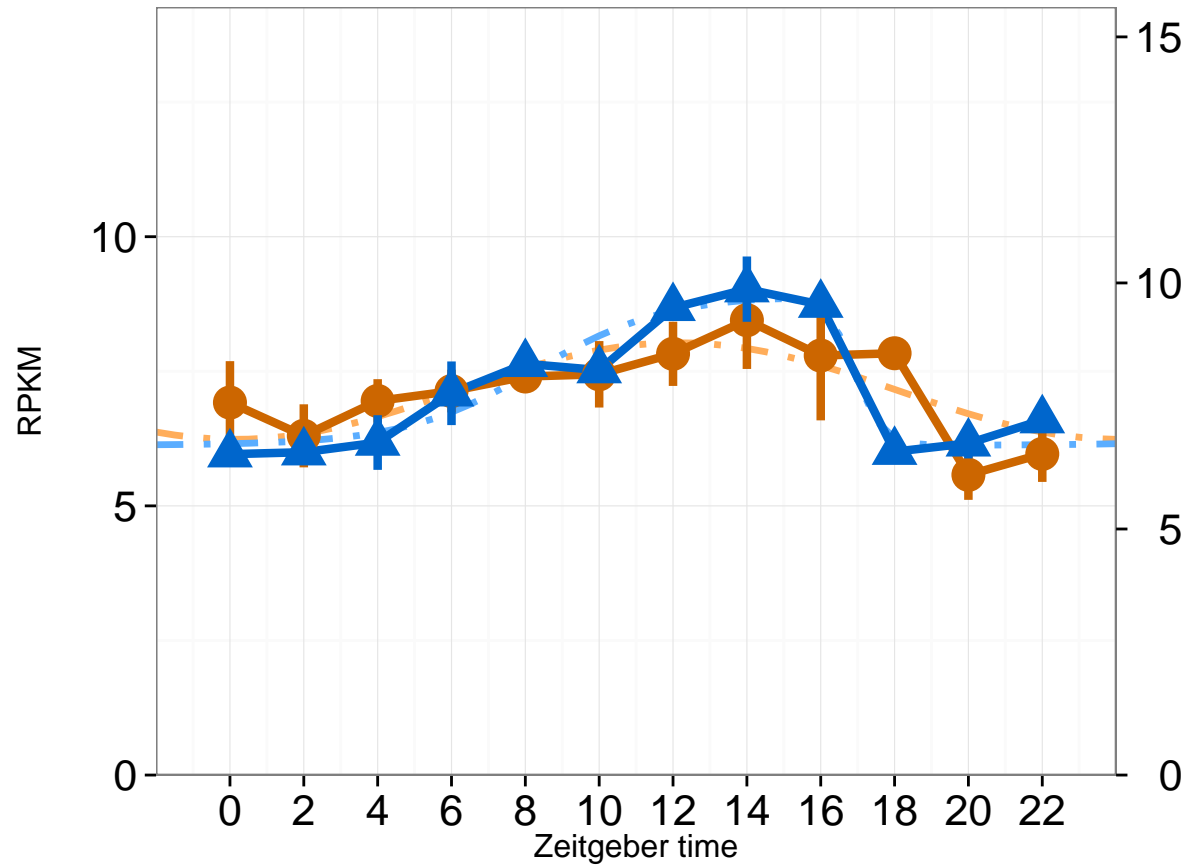

# Nt5c2

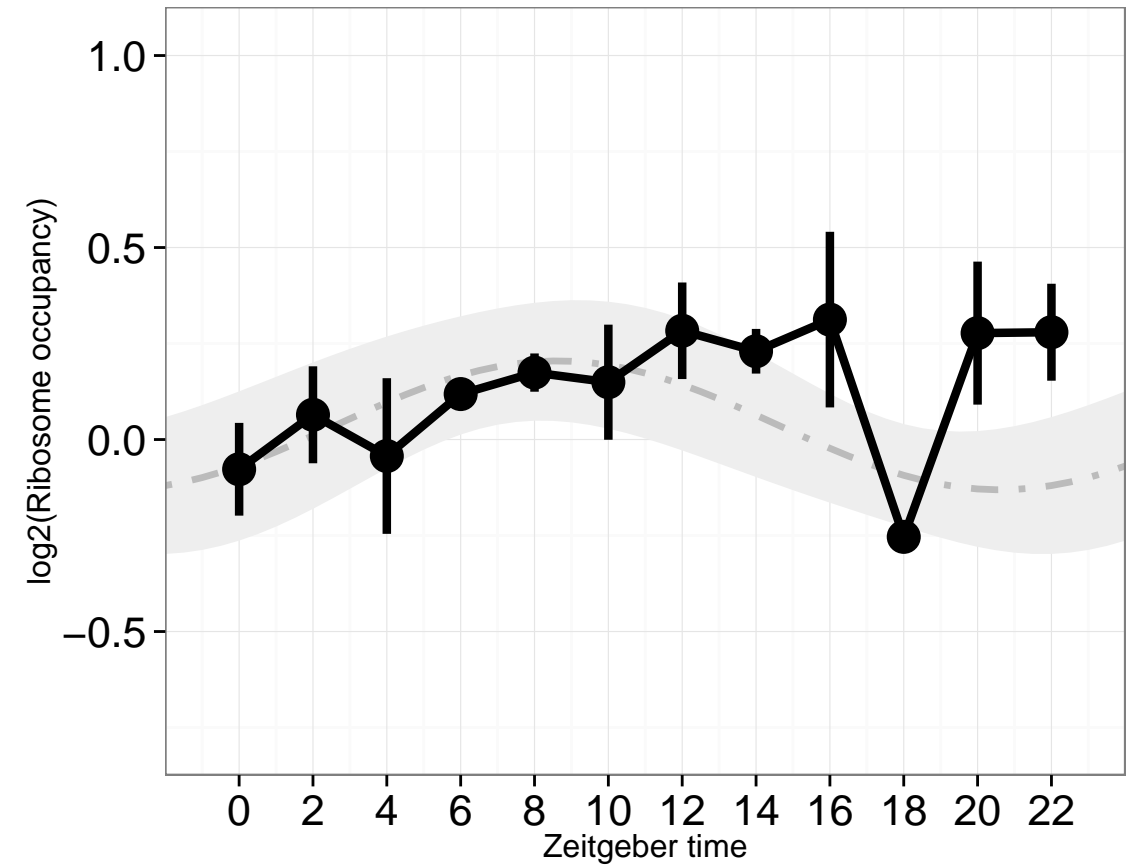

Supplement: SuppDataset_1.zip [file Nt5c2_set_A.pdf › Supplemental Dataset 1/A-mRNA_nonrhyth_translation_nonrhyth/Nt5c2_set_A.pdf]

# Nt5c3

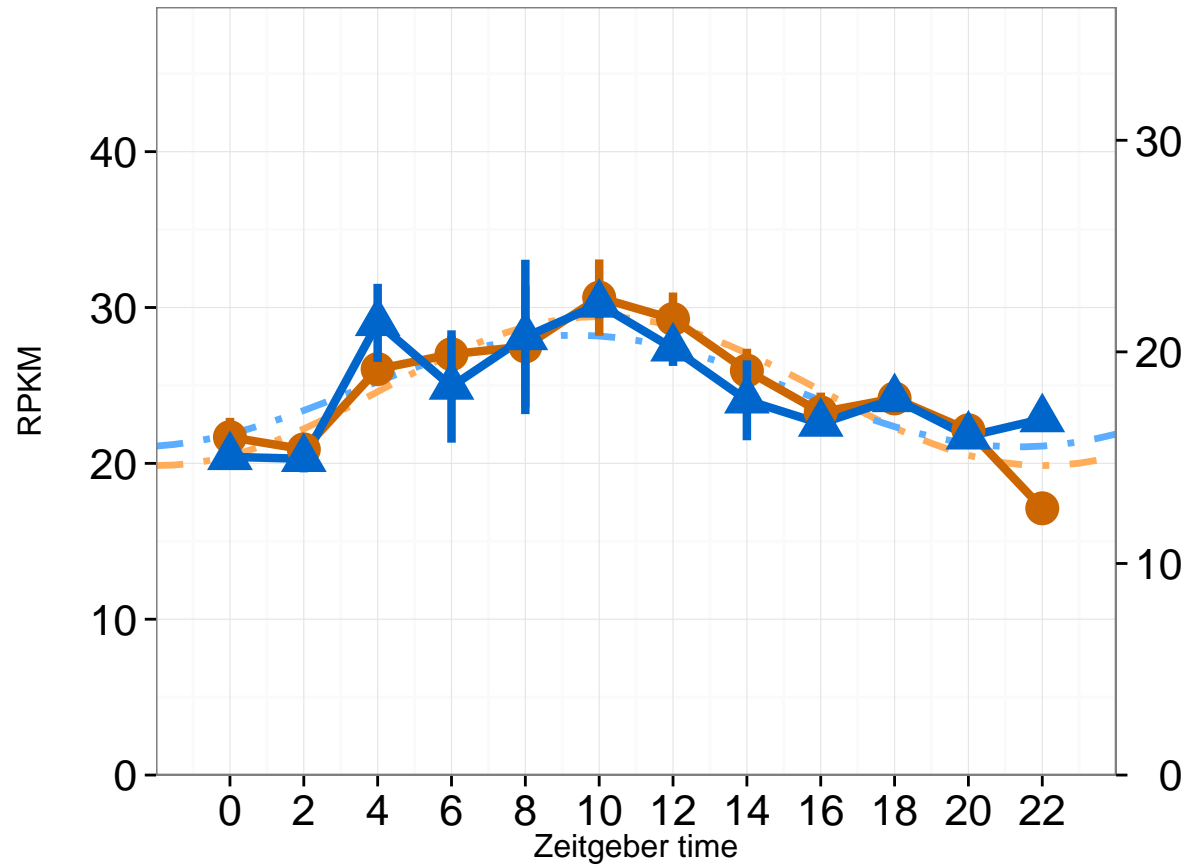

# Nt5c3

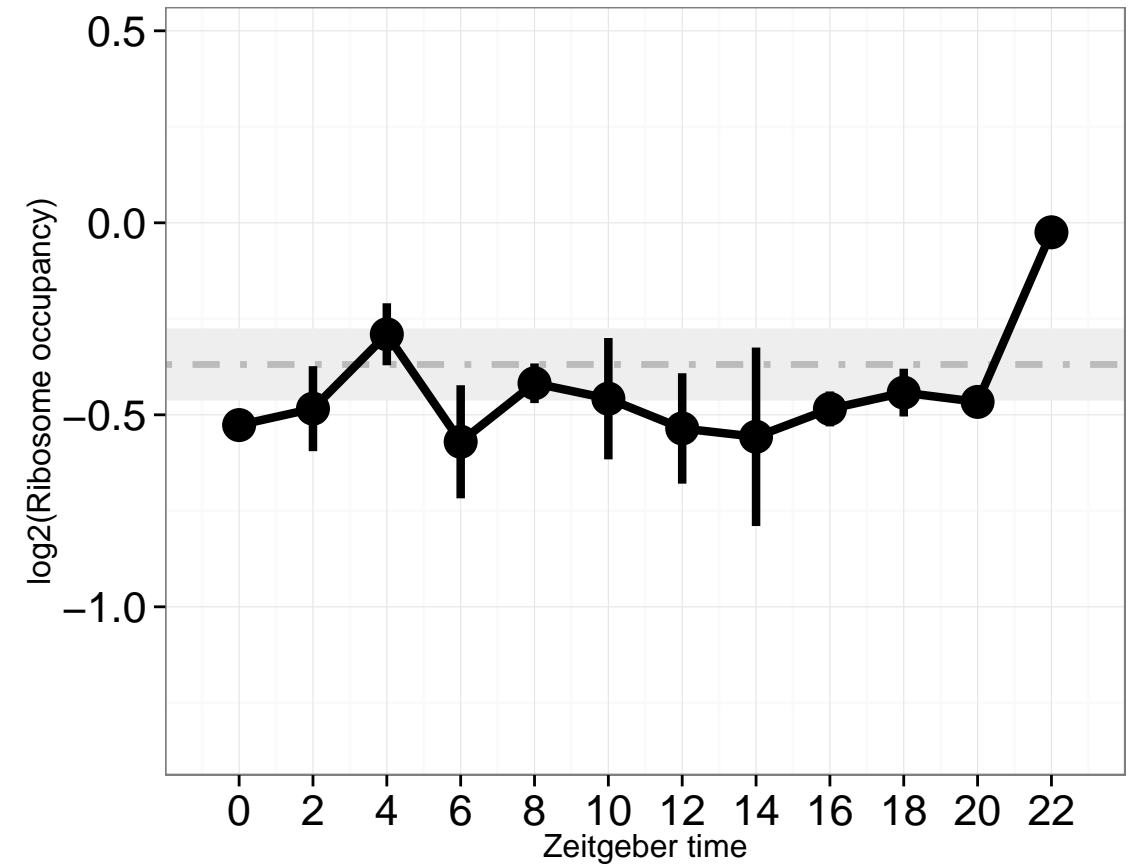

Supplement: SuppDataset_1.zip [file Nt5c3_set_A.pdf › Supplemental Dataset 1/A-mRNA_nonrhyth_translation_nonrhyth/Nt5c3_set_A.pdf]

# Nt5c3b

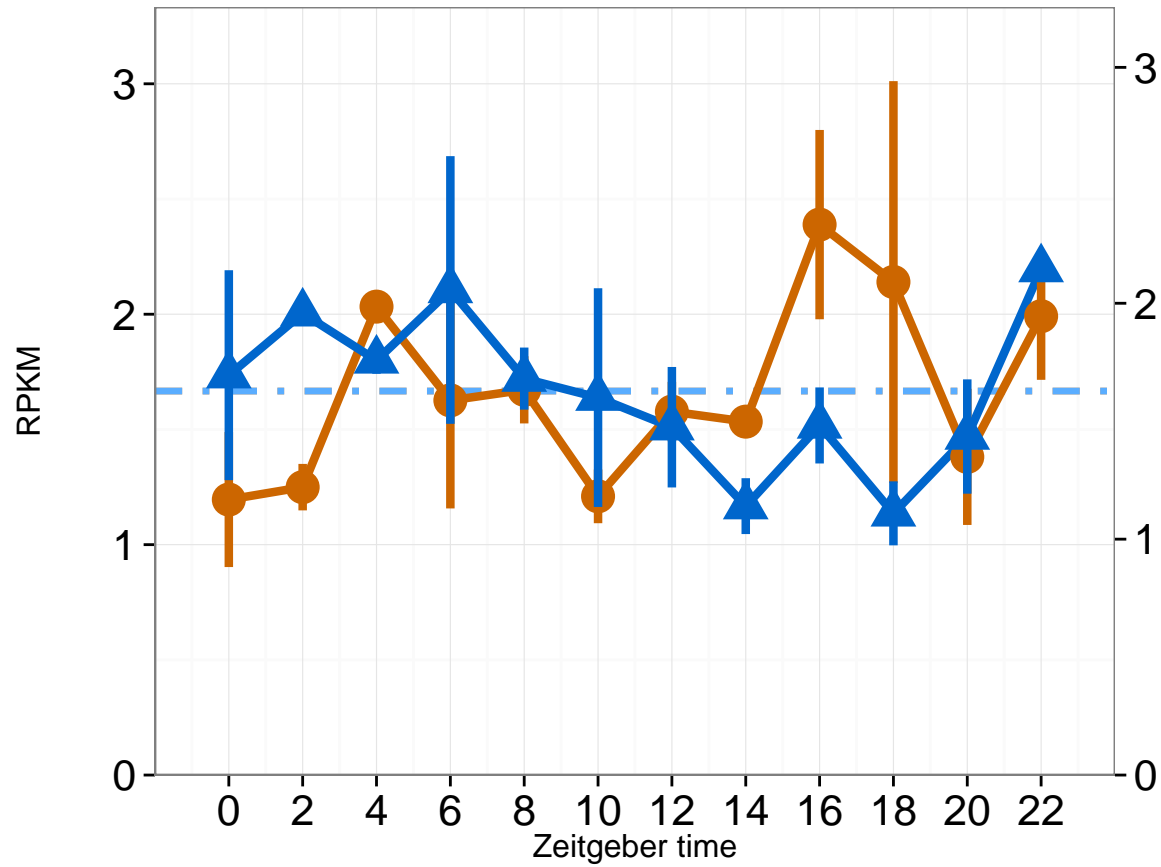

# Nt5c3b

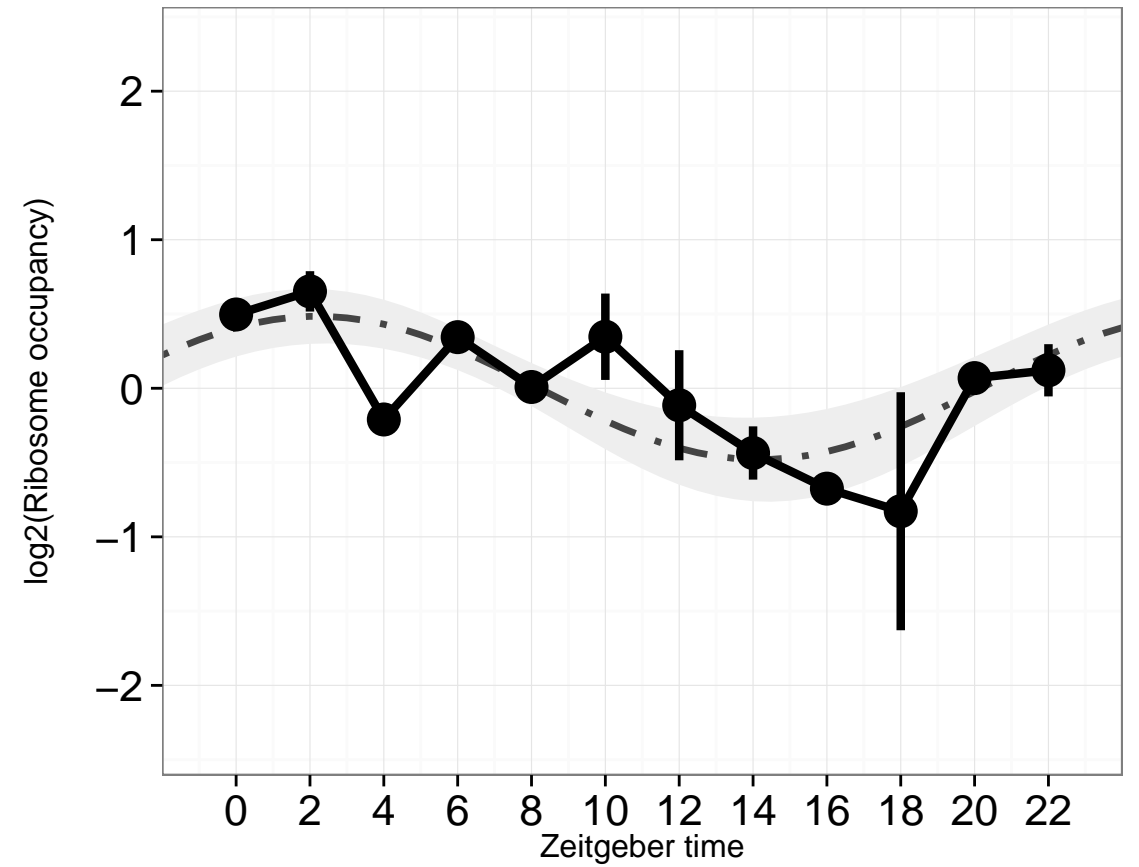

Supplement: SuppDataset_1.zip [file Nt5c3b_set_A.pdf › Supplemental Dataset 1/A-mRNA_nonrhyth_translation_nonrhyth/Nt5c3b_set_A.pdf]

## Nt5c

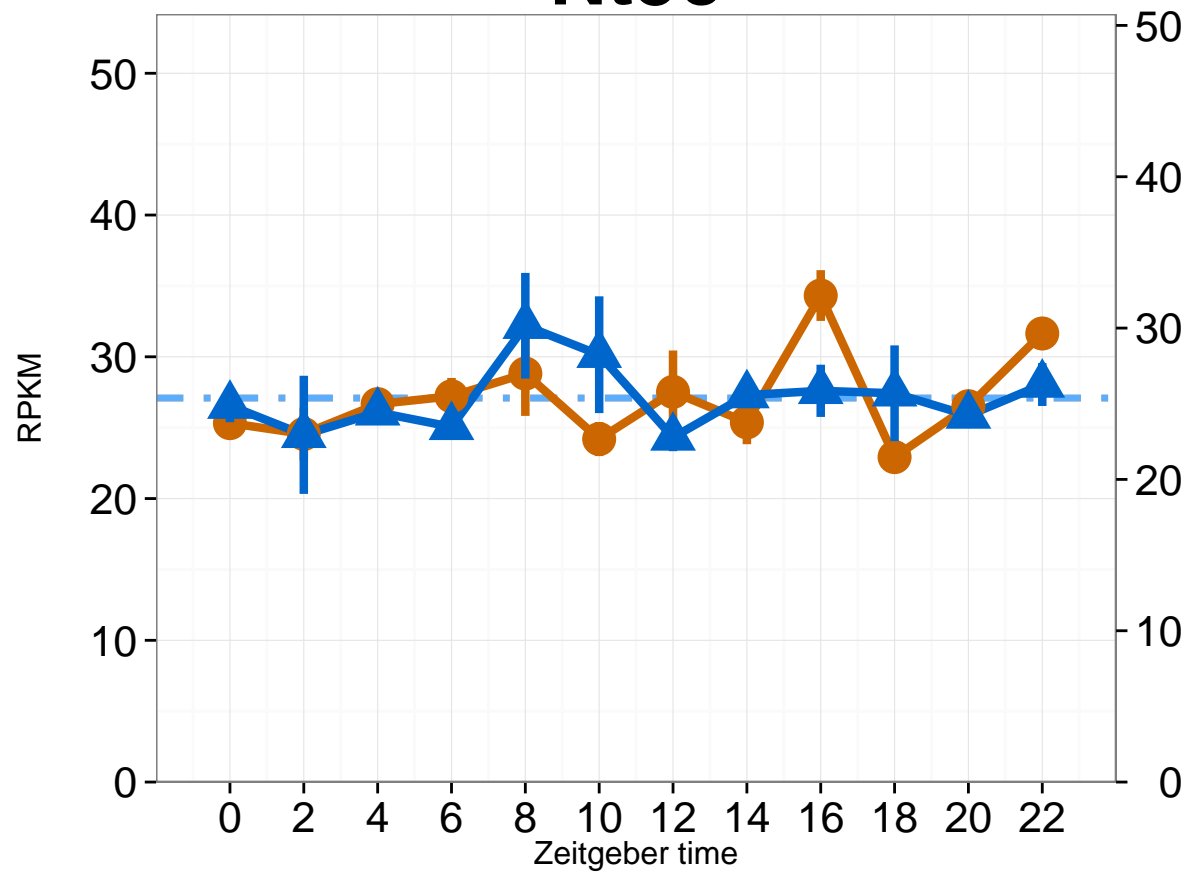

## Nt5c

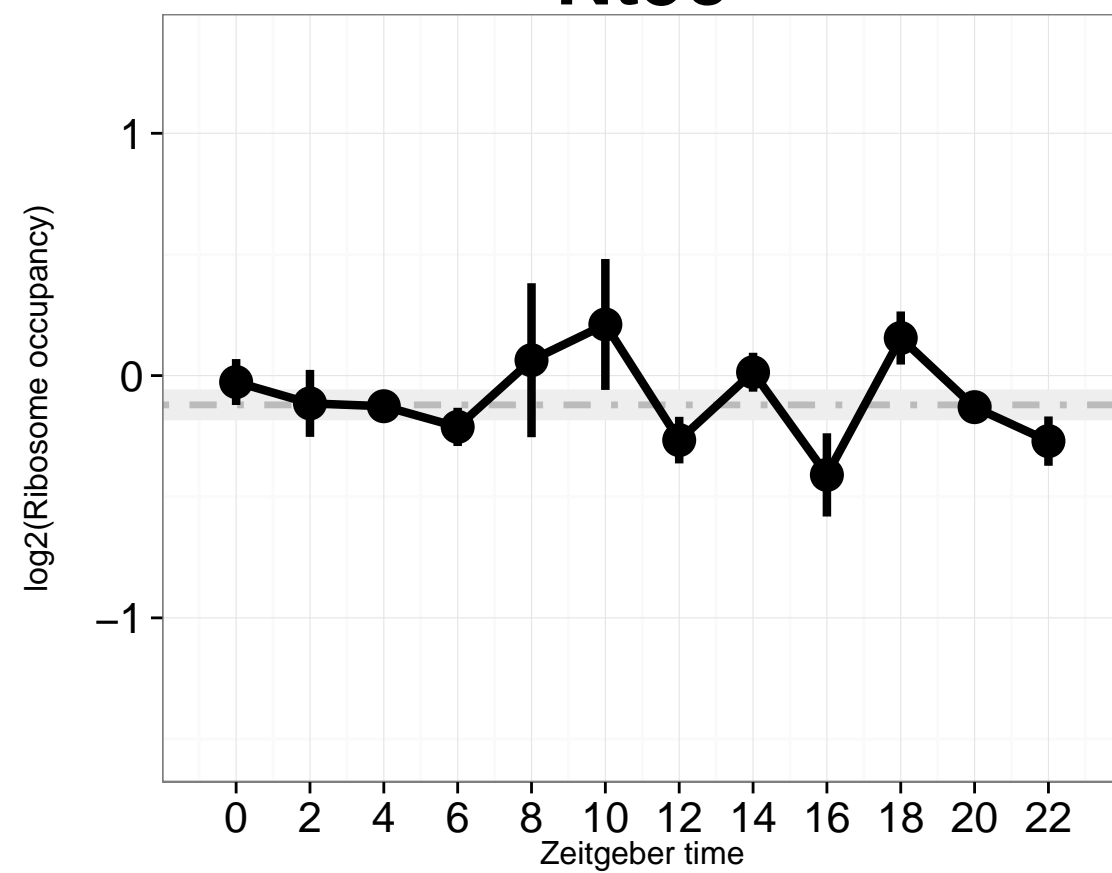

Supplement: SuppDataset_1.zip [file Nt5c_set_A.pdf › Supplemental Dataset 1/A-mRNA_nonrhyth_translation_nonrhyth/Nt5c_set_A.pdf]

# Nt5dc1

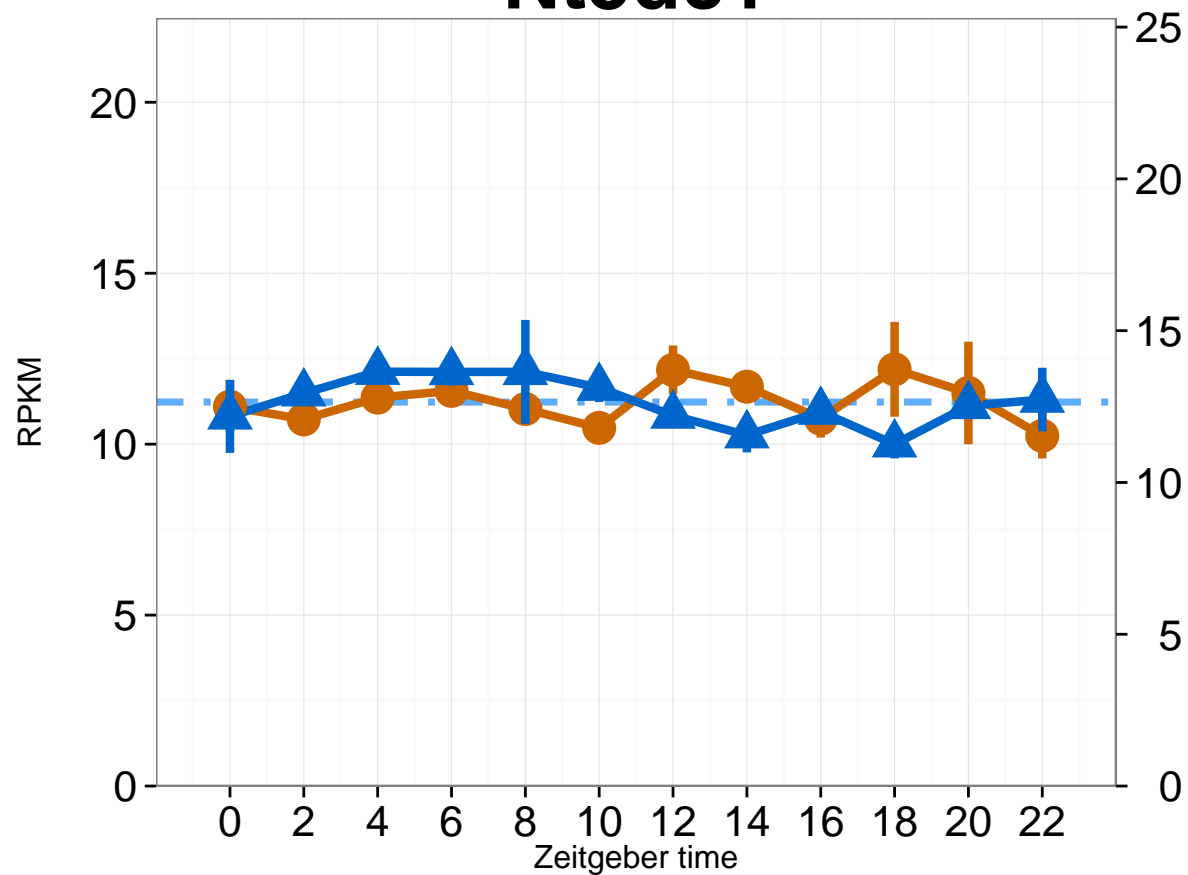

# Nt5dc1

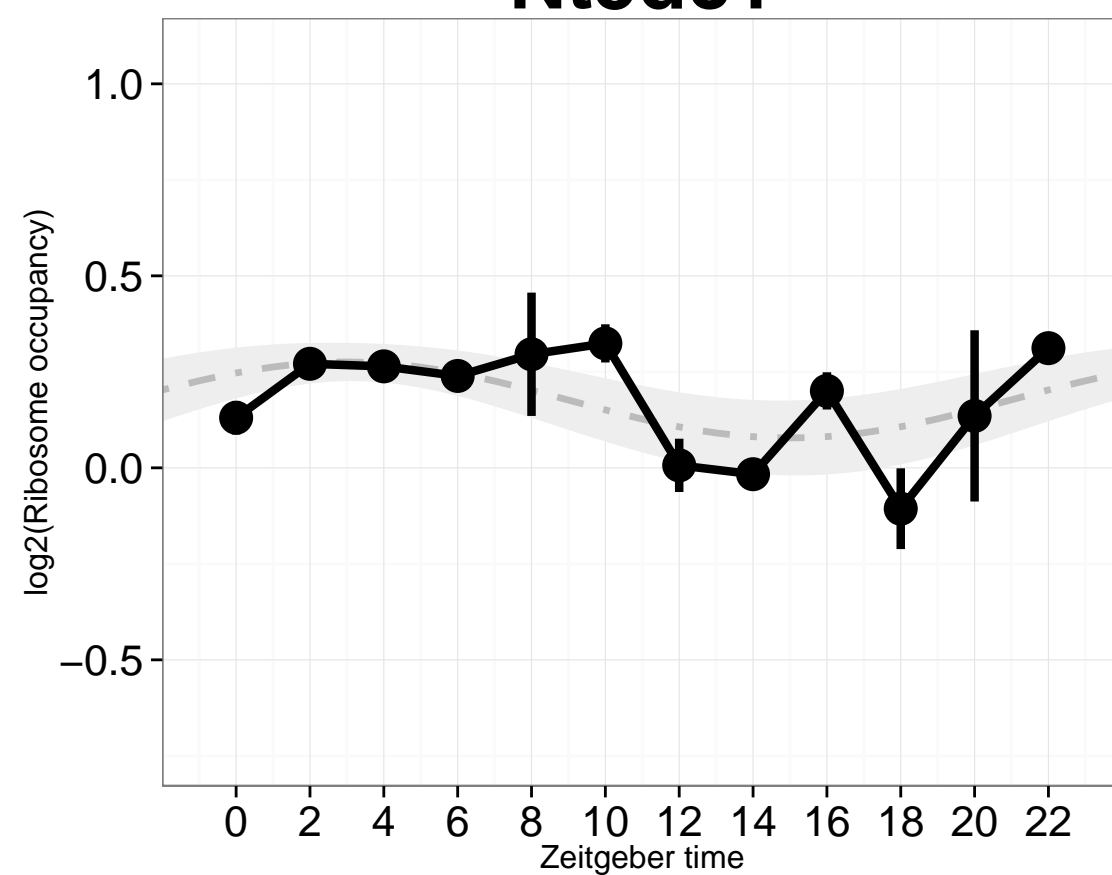

Supplement: SuppDataset_1.zip [file Nt5dc1_set_A.pdf › Supplemental Dataset 1/A-mRNA_nonrhyth_translation_nonrhyth/Nt5dc1_set_A.pdf]

# Nt5dc2

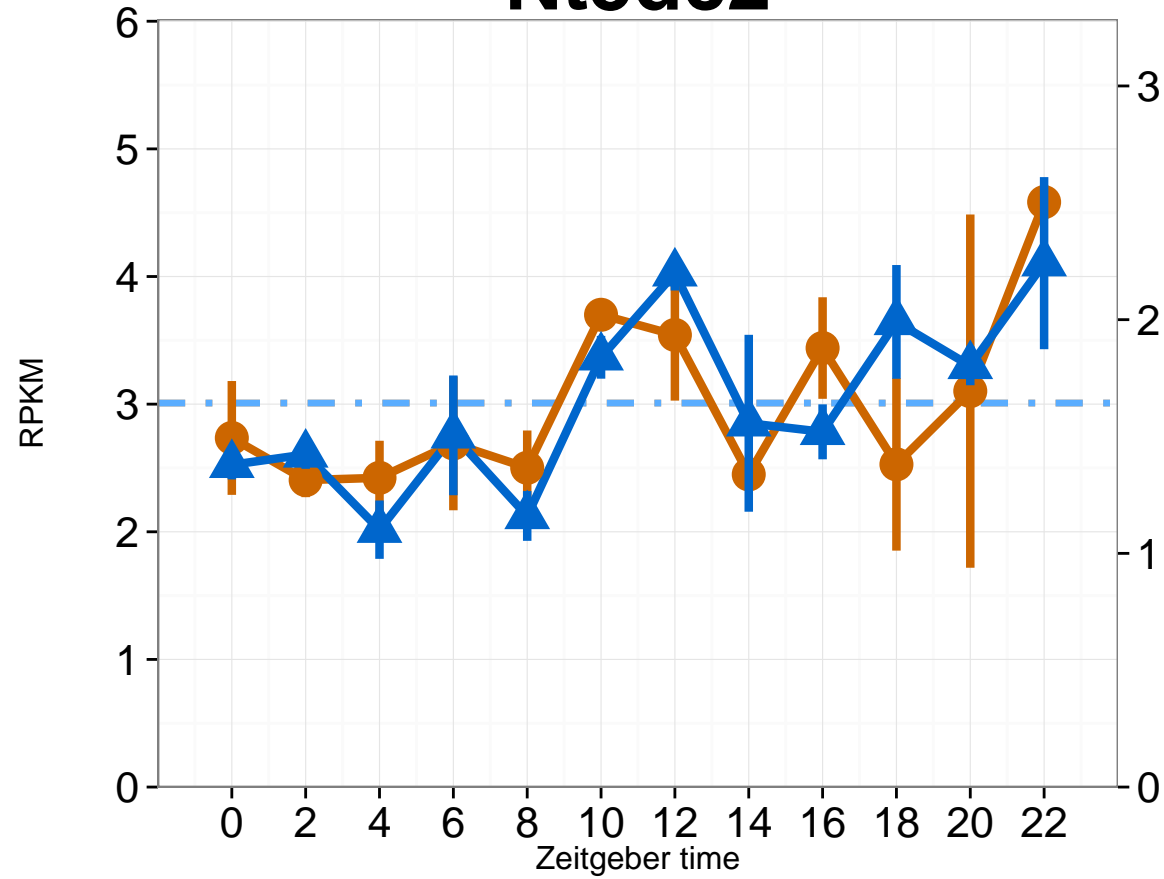

# Nt5dc2

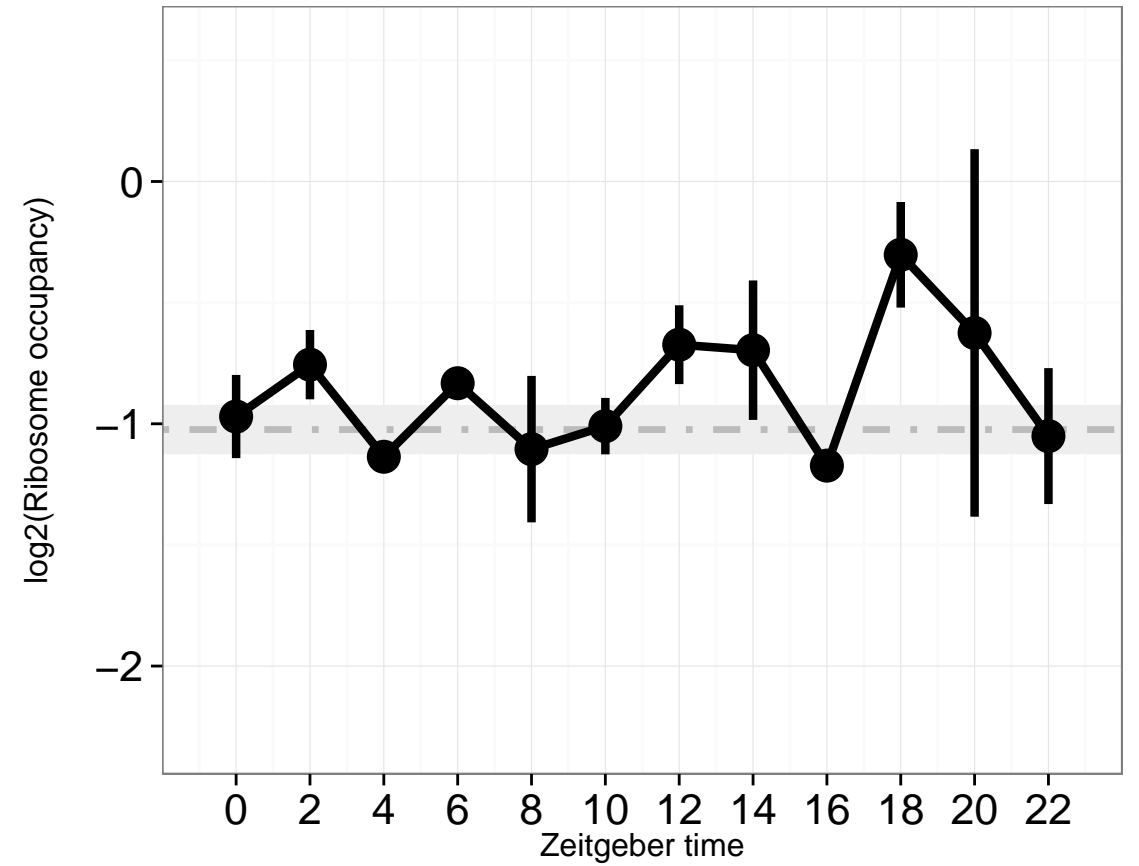

Supplement: SuppDataset_1.zip [file Nt5dc2_set_A.pdf › Supplemental Dataset 1/A-mRNA_nonrhyth_translation_nonrhyth/Nt5dc2_set_A.pdf]

# Nt5dc3

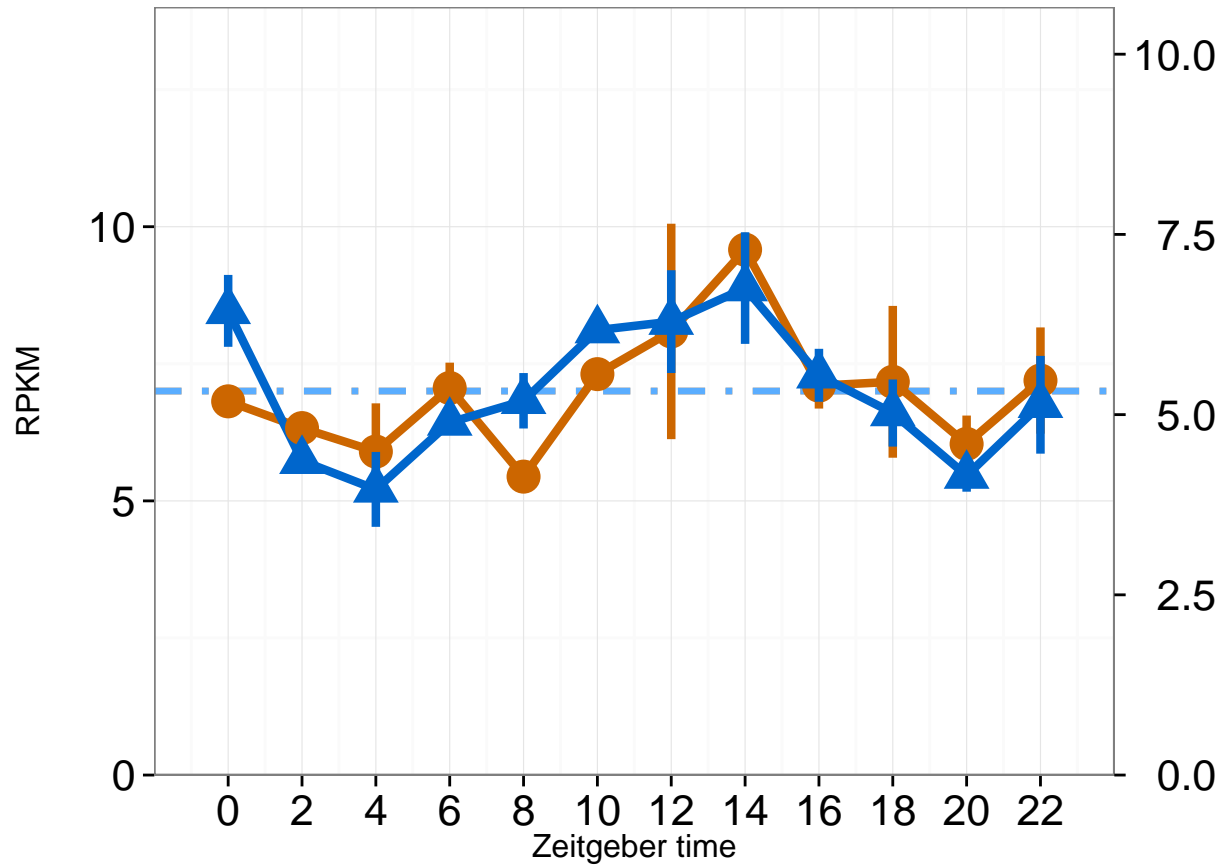

# Nt5dc3

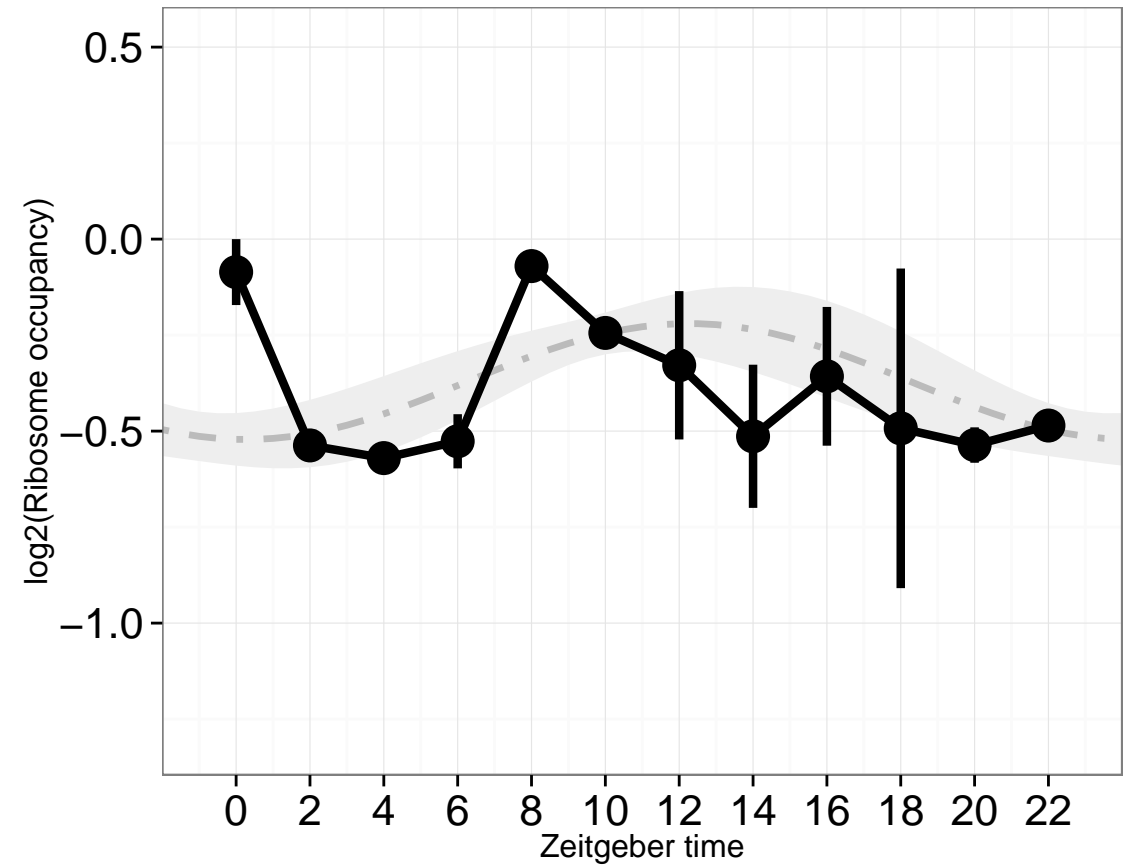

Supplement: SuppDataset_1.zip [file Nt5dc3_set_A.pdf › Supplemental Dataset 1/A-mRNA_nonrhyth_translation_nonrhyth/Nt5dc3_set_A.pdf]

## Ntan1

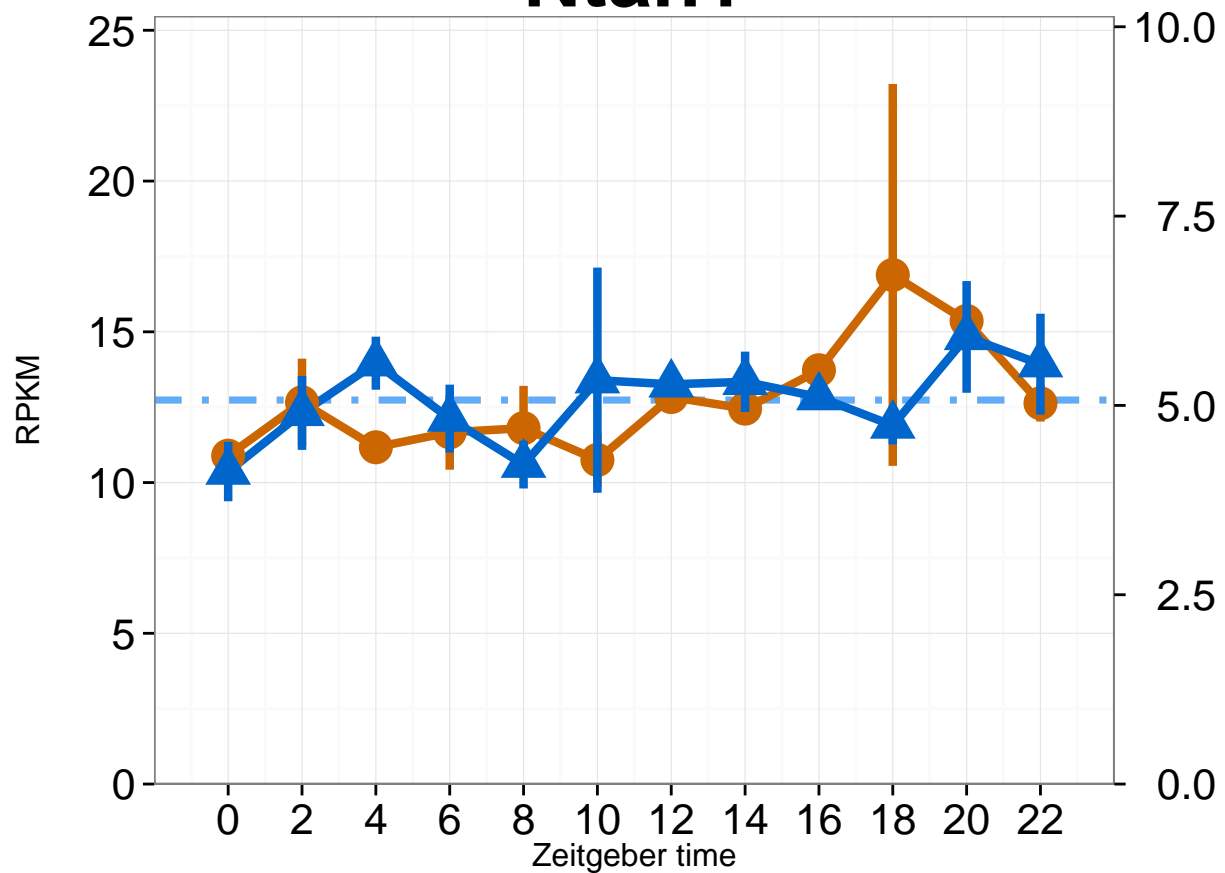

## Ntan1

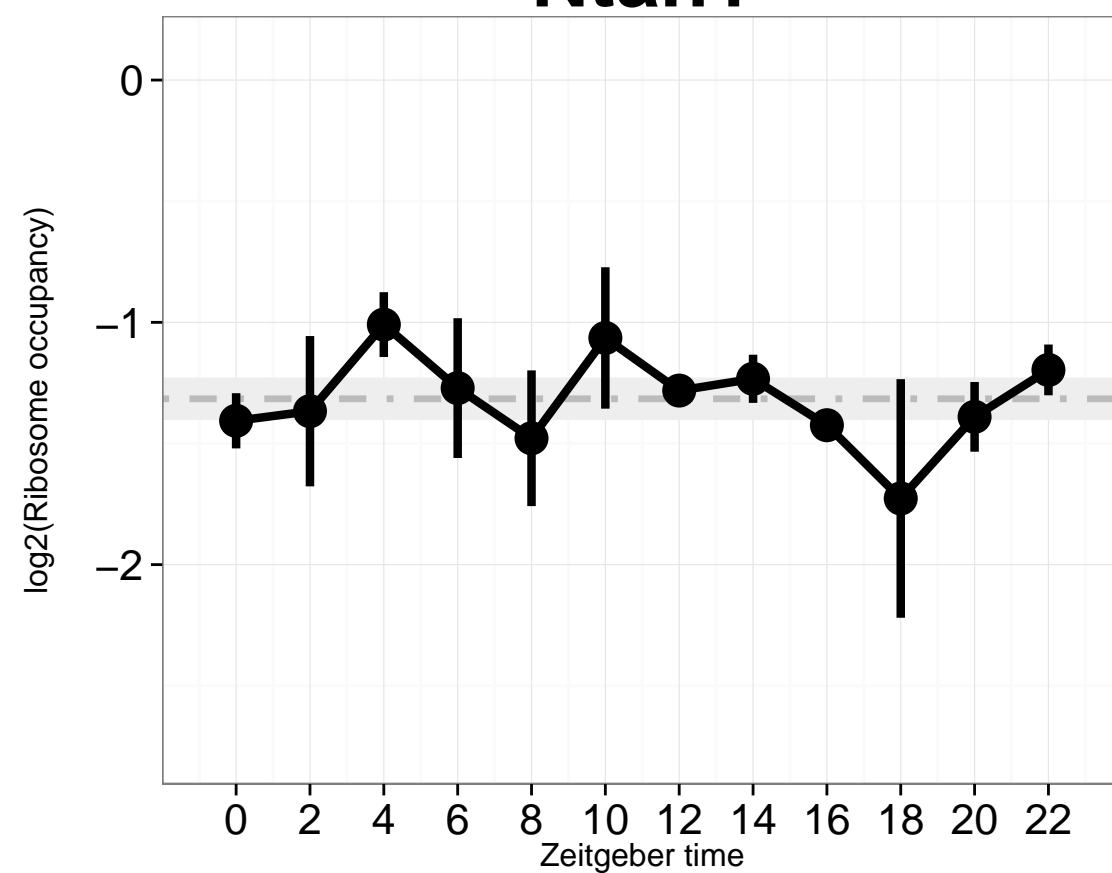

Supplement: SuppDataset_1.zip [file Ntan1_set_A.pdf › Supplemental Dataset 1/A-mRNA_nonrhyth_translation_nonrhyth/Ntan1_set_A.pdf]

# Ntmt1

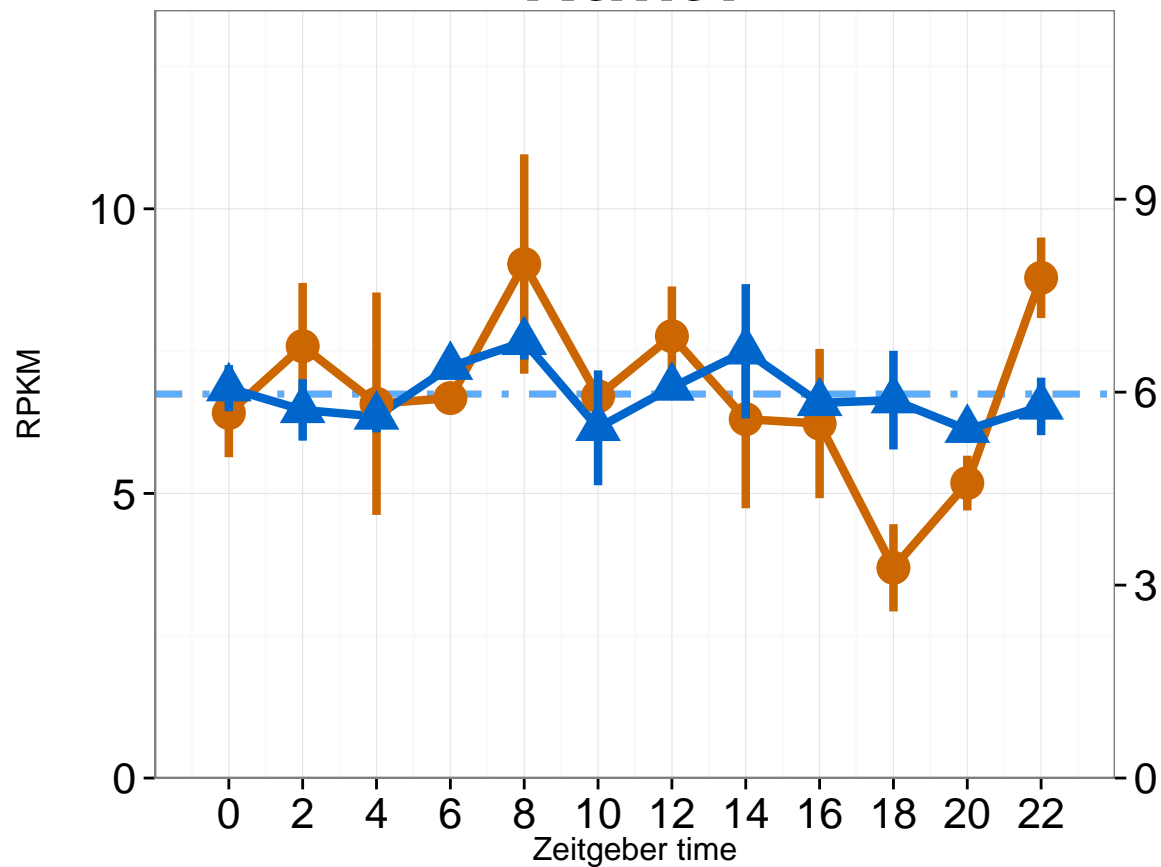

# Ntmt1

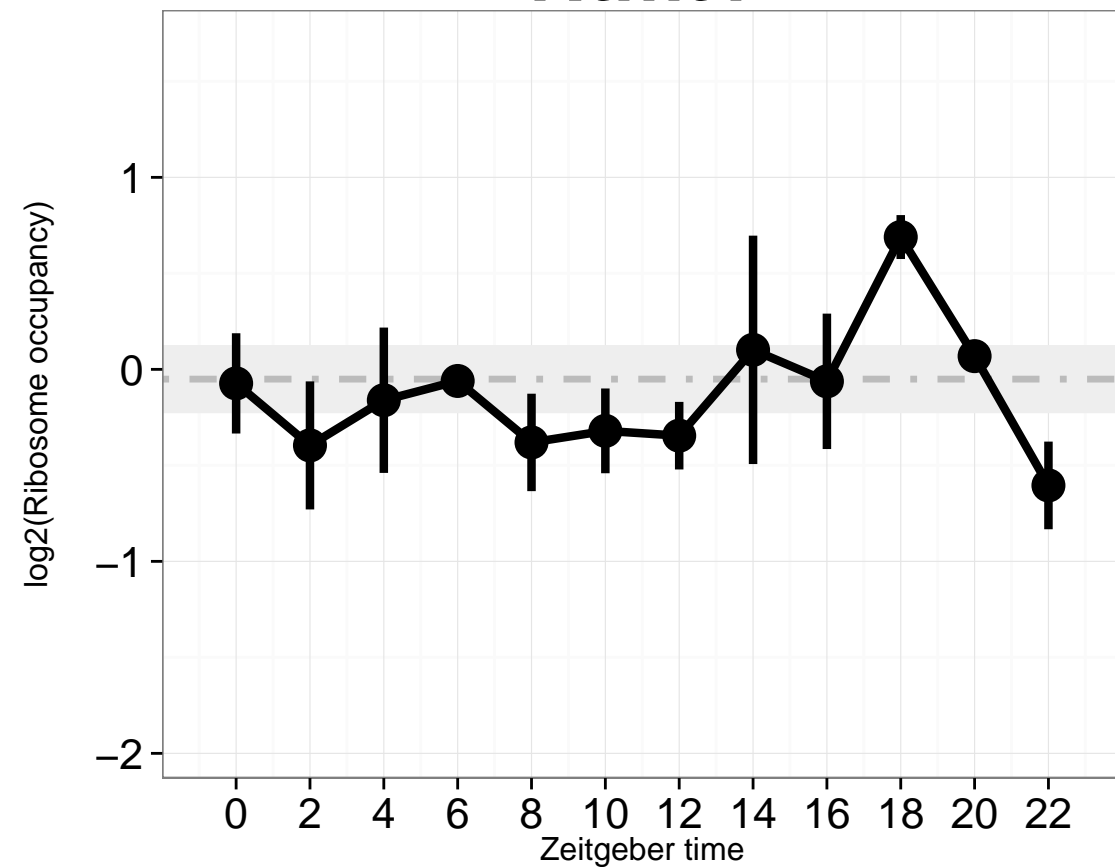

Supplement: SuppDataset_1.zip [file Ntmt1_set_A.pdf › Supplemental Dataset 1/A-mRNA_nonrhyth_translation_nonrhyth/Ntmt1_set_A.pdf]

# Ntn1

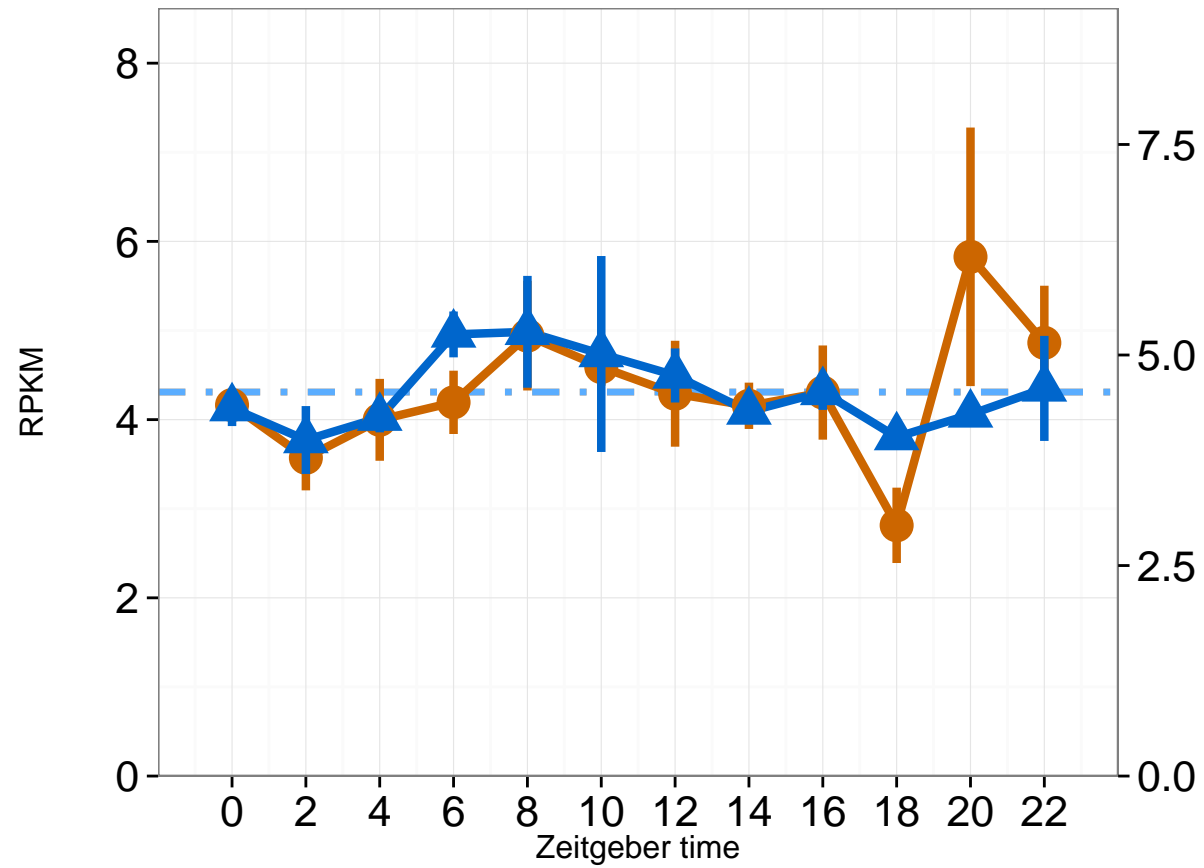

# Ntn1

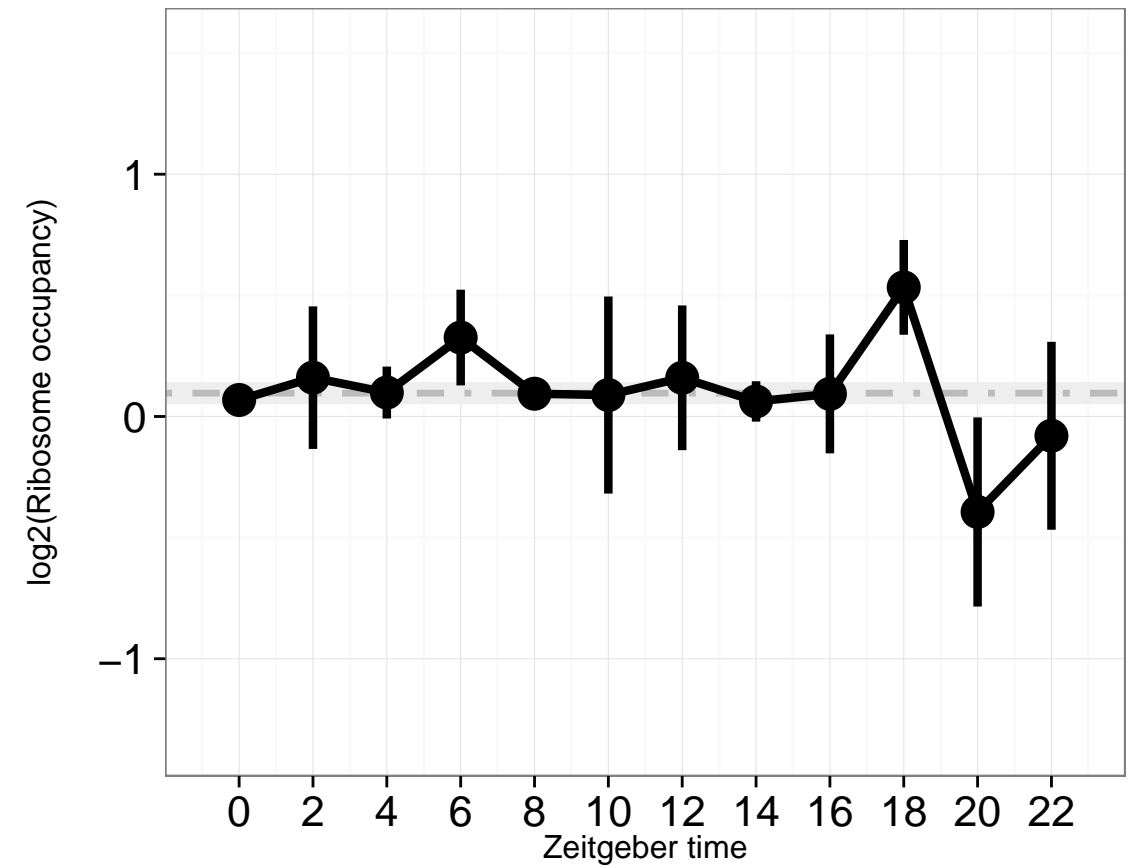

Supplement: SuppDataset_1.zip [file Ntn1_set_A.pdf › Supplemental Dataset 1/A-mRNA_nonrhyth_translation_nonrhyth/Ntn1_set_A.pdf]

## Ntng2

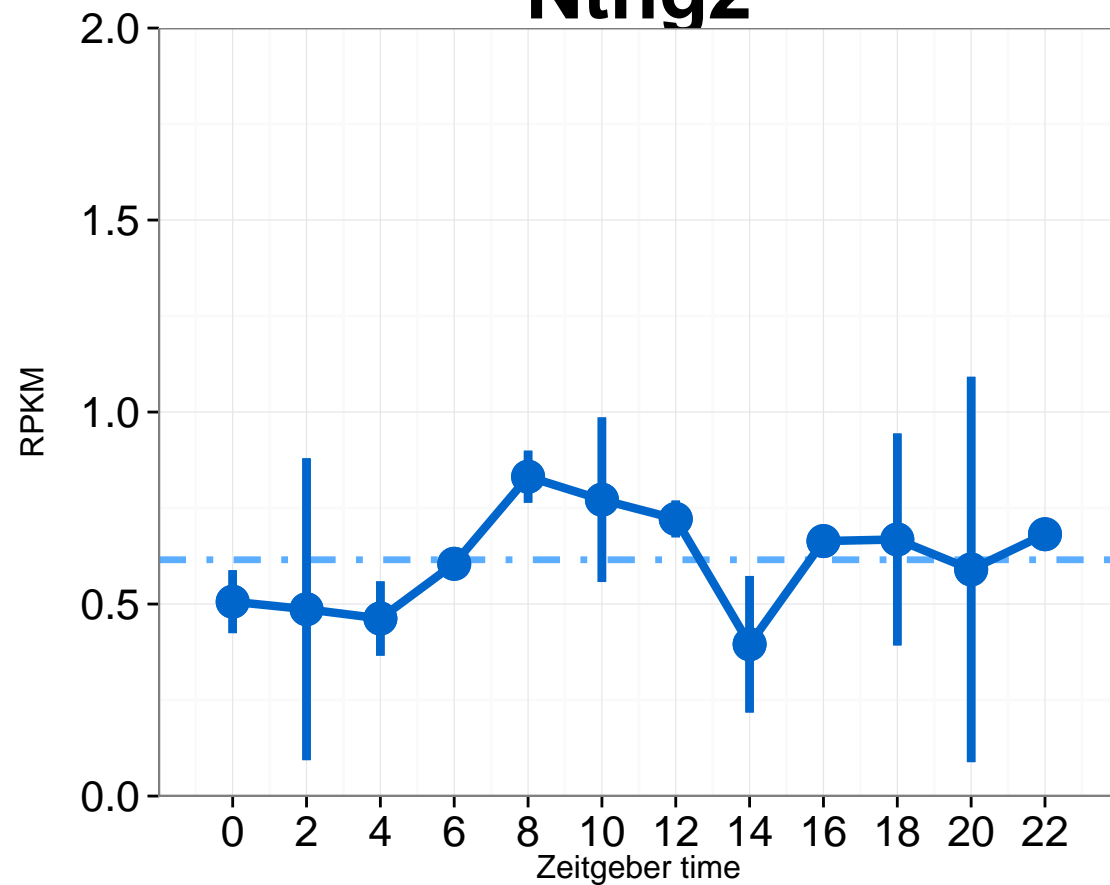

## Ntng2 log2(Ribosome occupancy

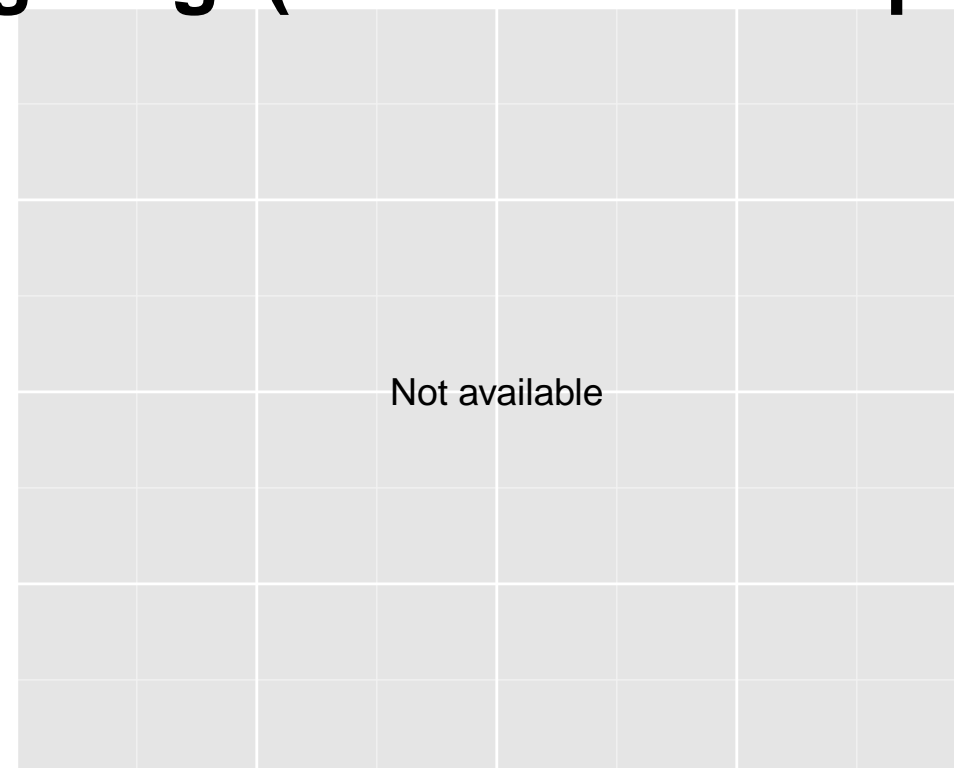

Supplement: SuppDataset_1.zip [file Ntng2_set_A.pdf › Supplemental Dataset 1/A-mRNA_nonrhyth_translation_nonrhyth/Ntng2_set_A.pdf]

# Ntrk2

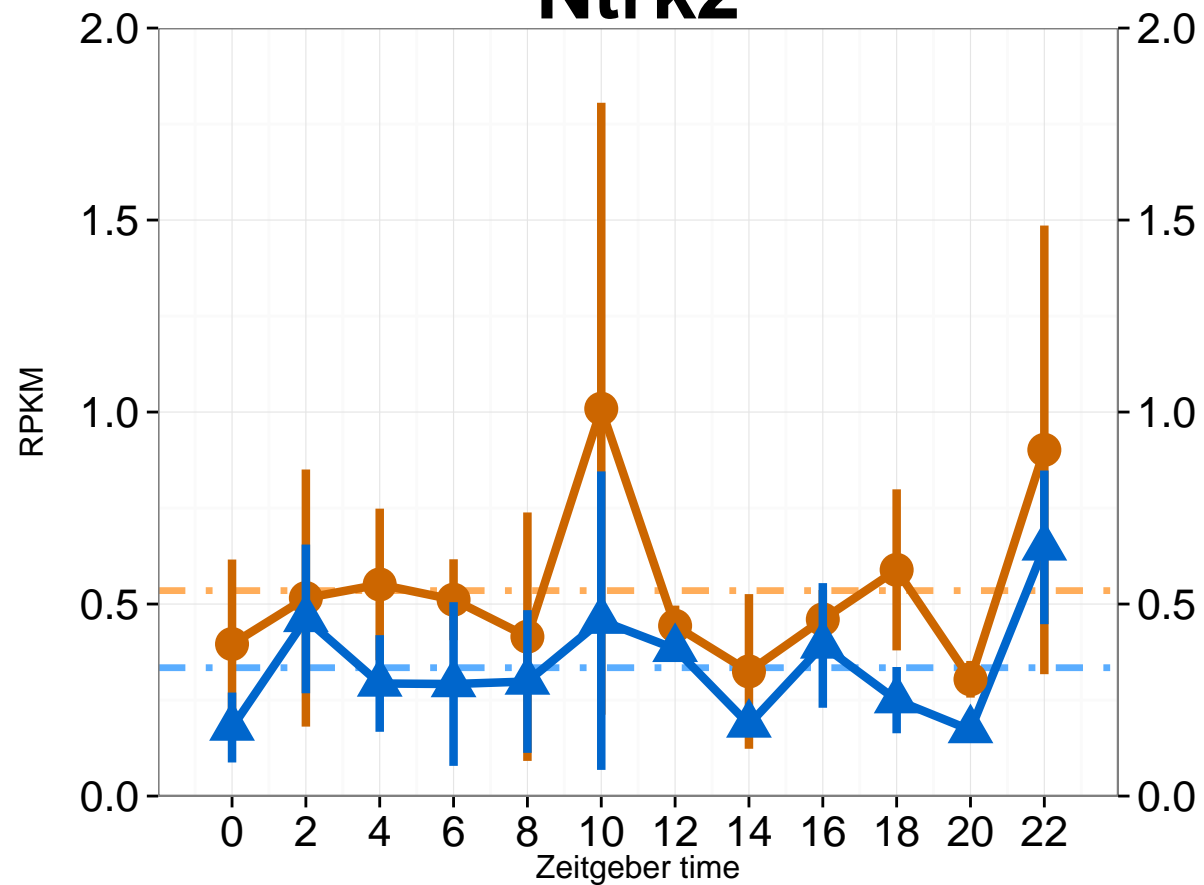

# Ntrk2

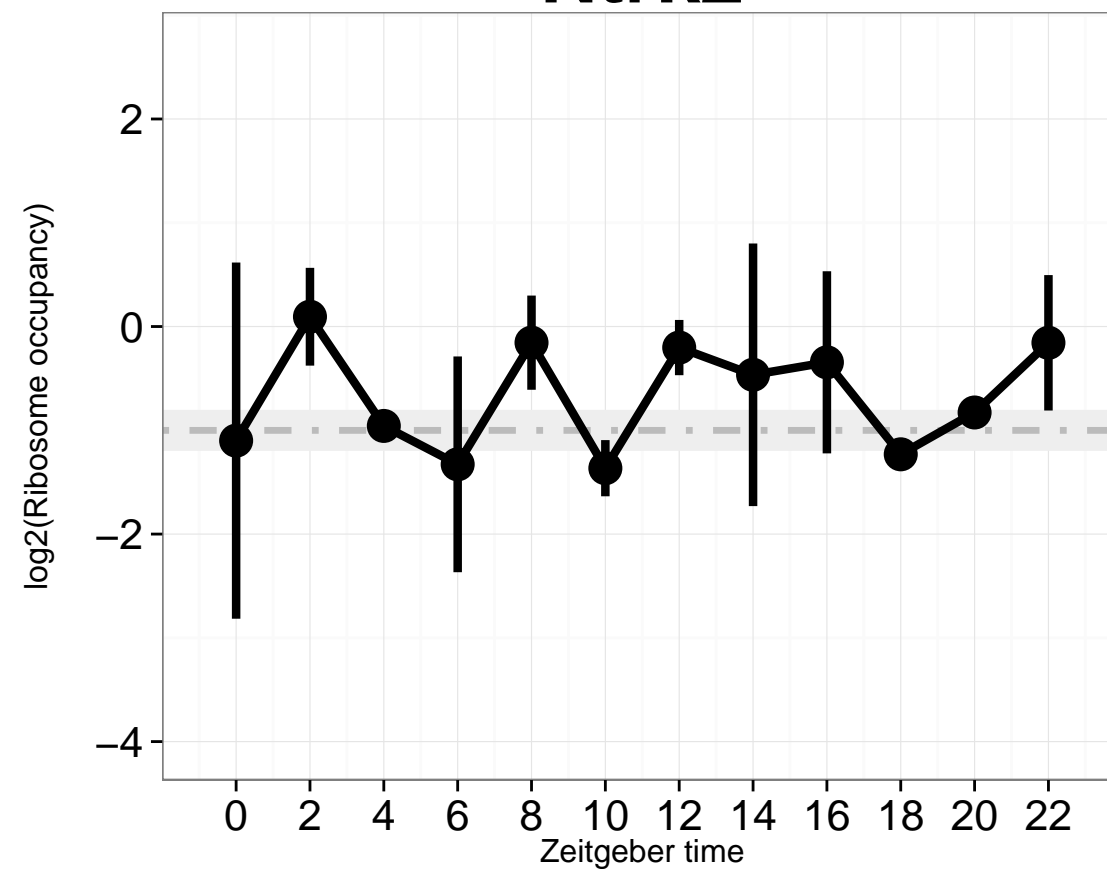

Supplement: SuppDataset_1.zip [file Ntrk2_set_A.pdf › Supplemental Dataset 1/A-mRNA_nonrhyth_translation_nonrhyth/Ntrk2_set_A.pdf]

## Nuak2

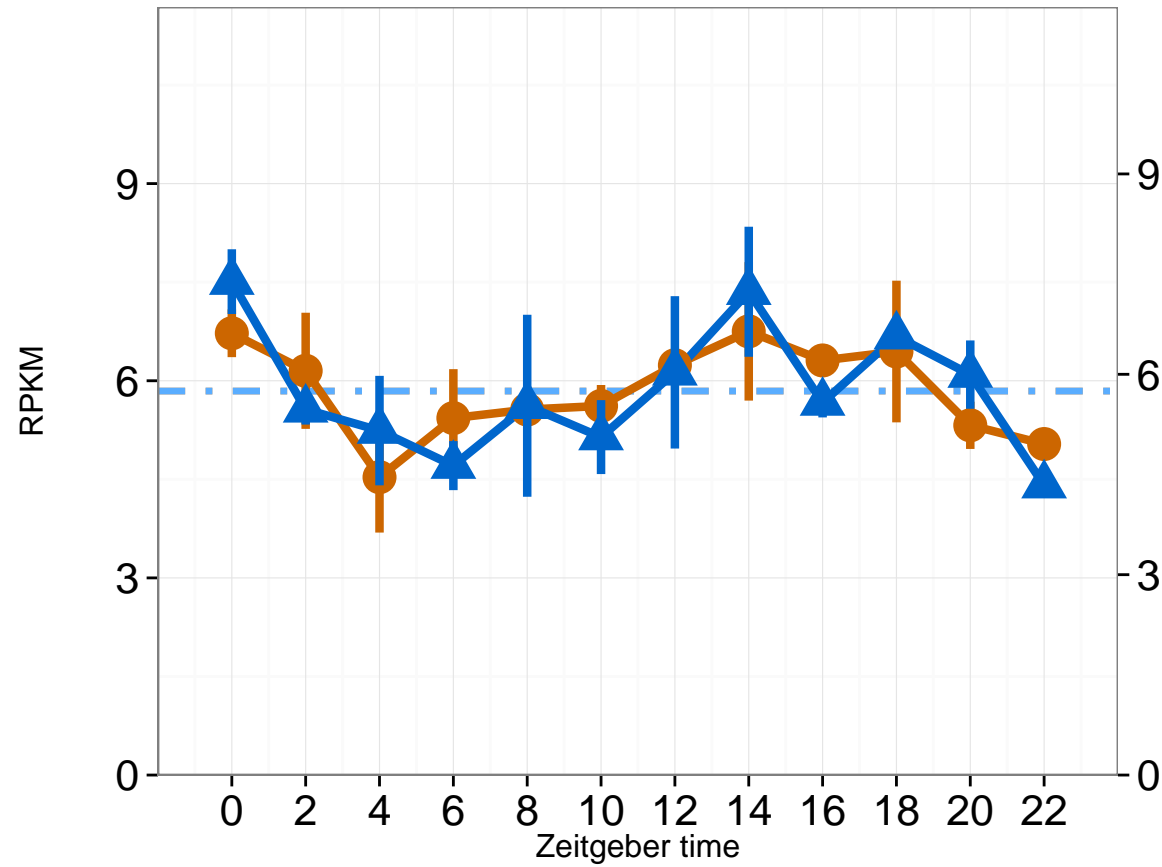

## Nuak2

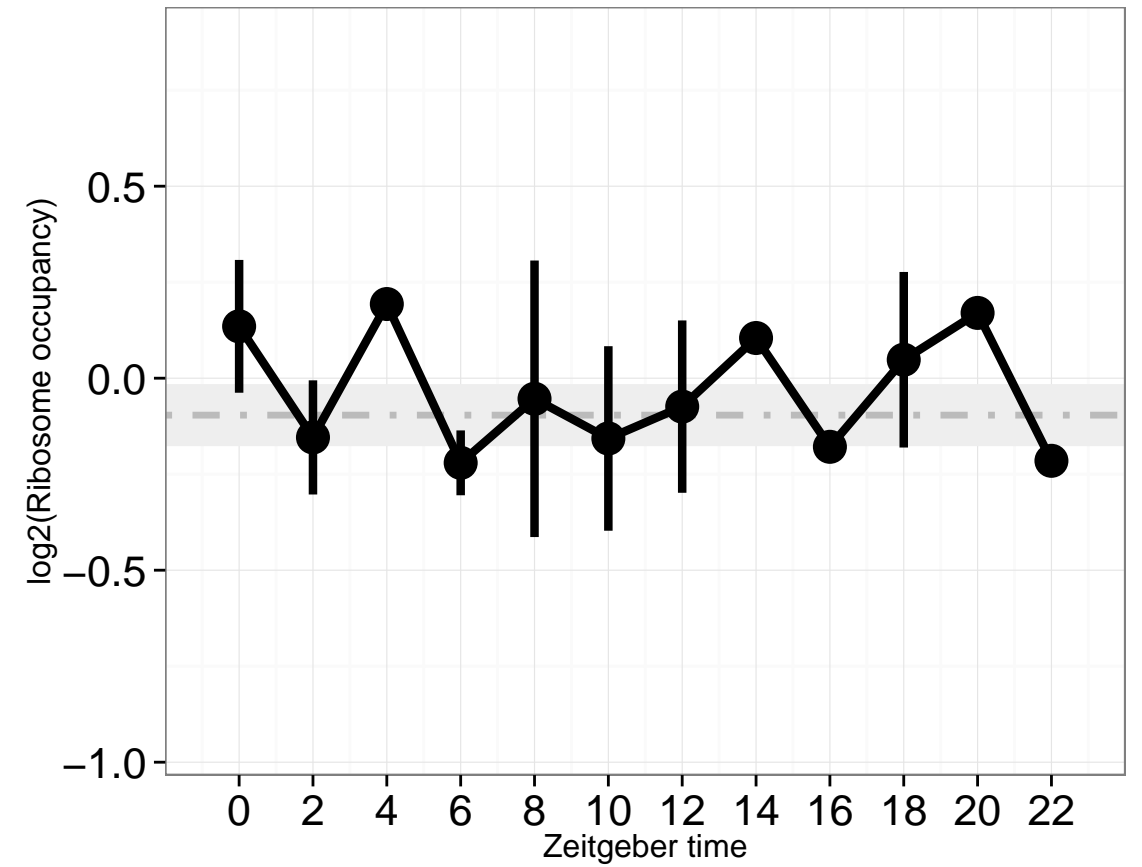

Supplement: SuppDataset_1.zip [file Nuak2_set_A.pdf › Supplemental Dataset 1/A-mRNA_nonrhyth_translation_nonrhyth/Nuak2_set_A.pdf]

## Nub1

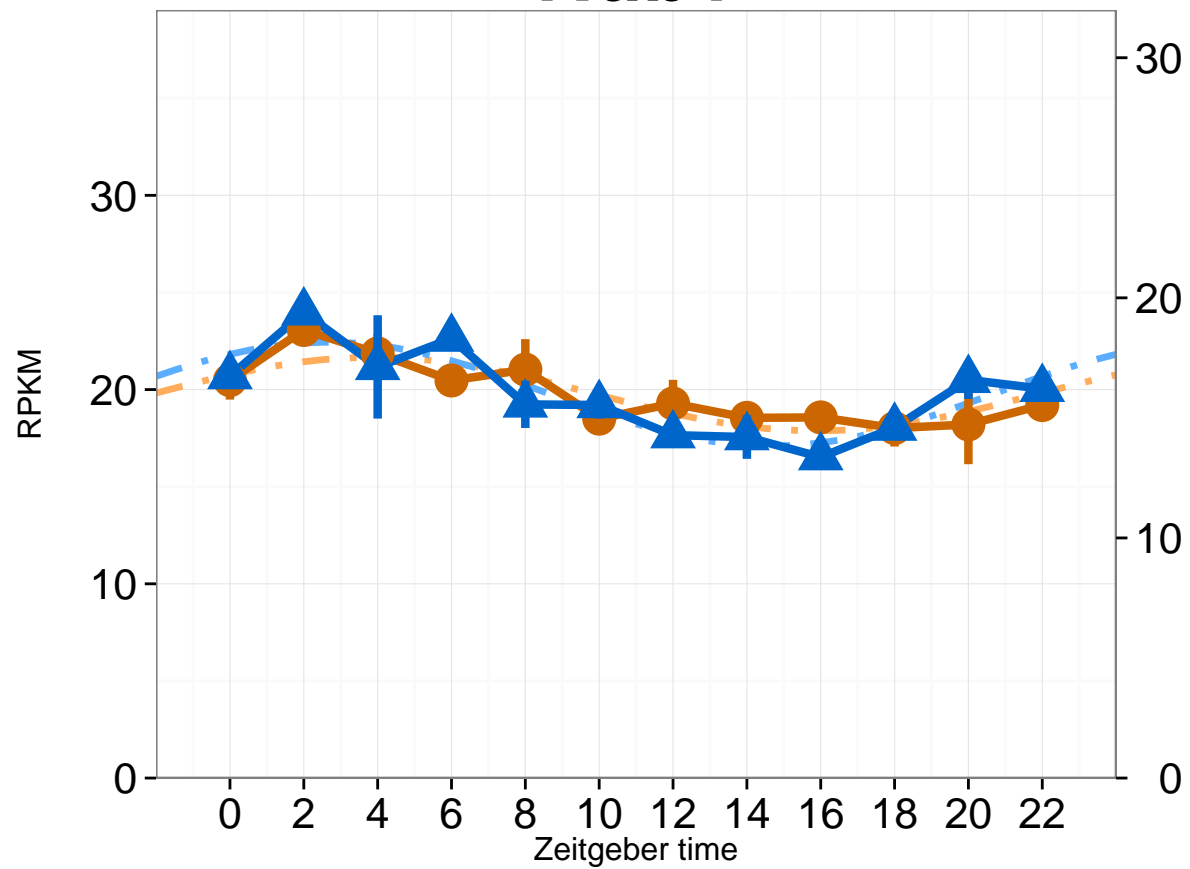

## Nub1

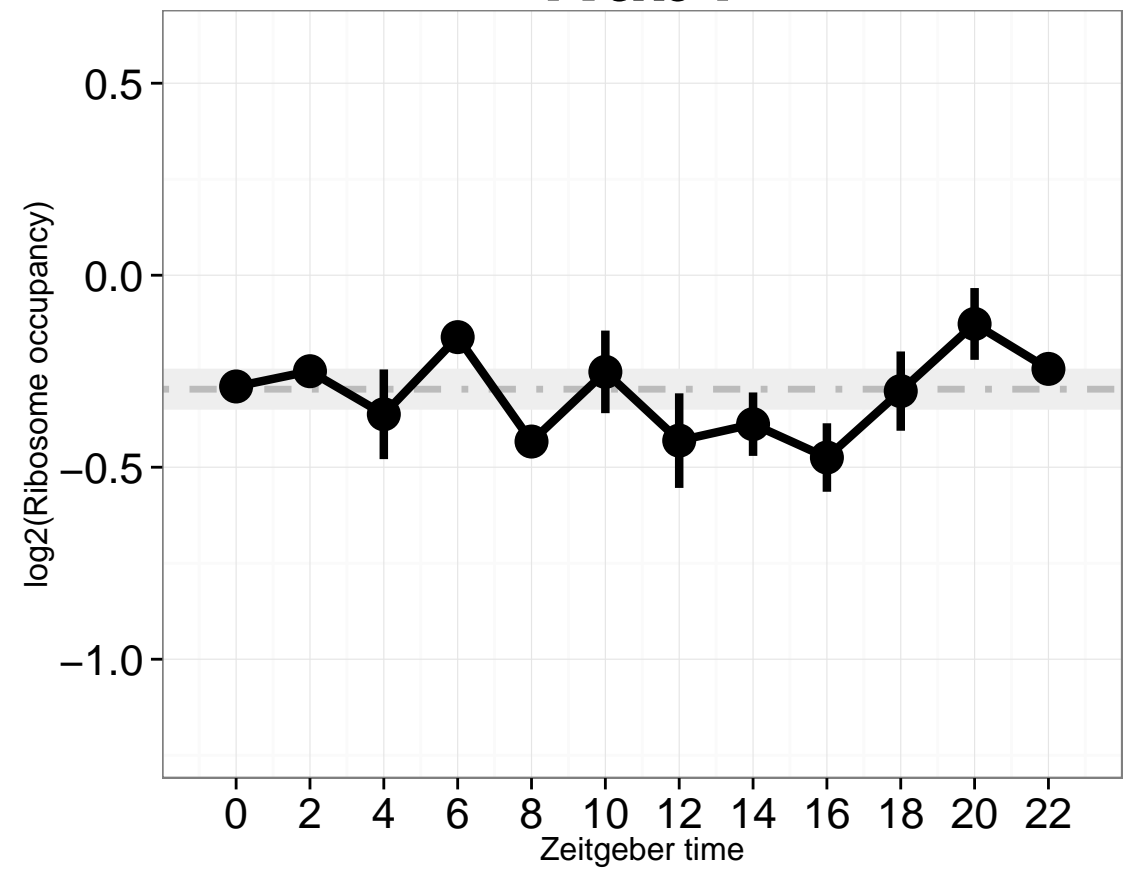

Supplement: SuppDataset_1.zip [file Nub1_set_A.pdf › Supplemental Dataset 1/A-mRNA_nonrhyth_translation_nonrhyth/Nub1_set_A.pdf]

## Nubp1

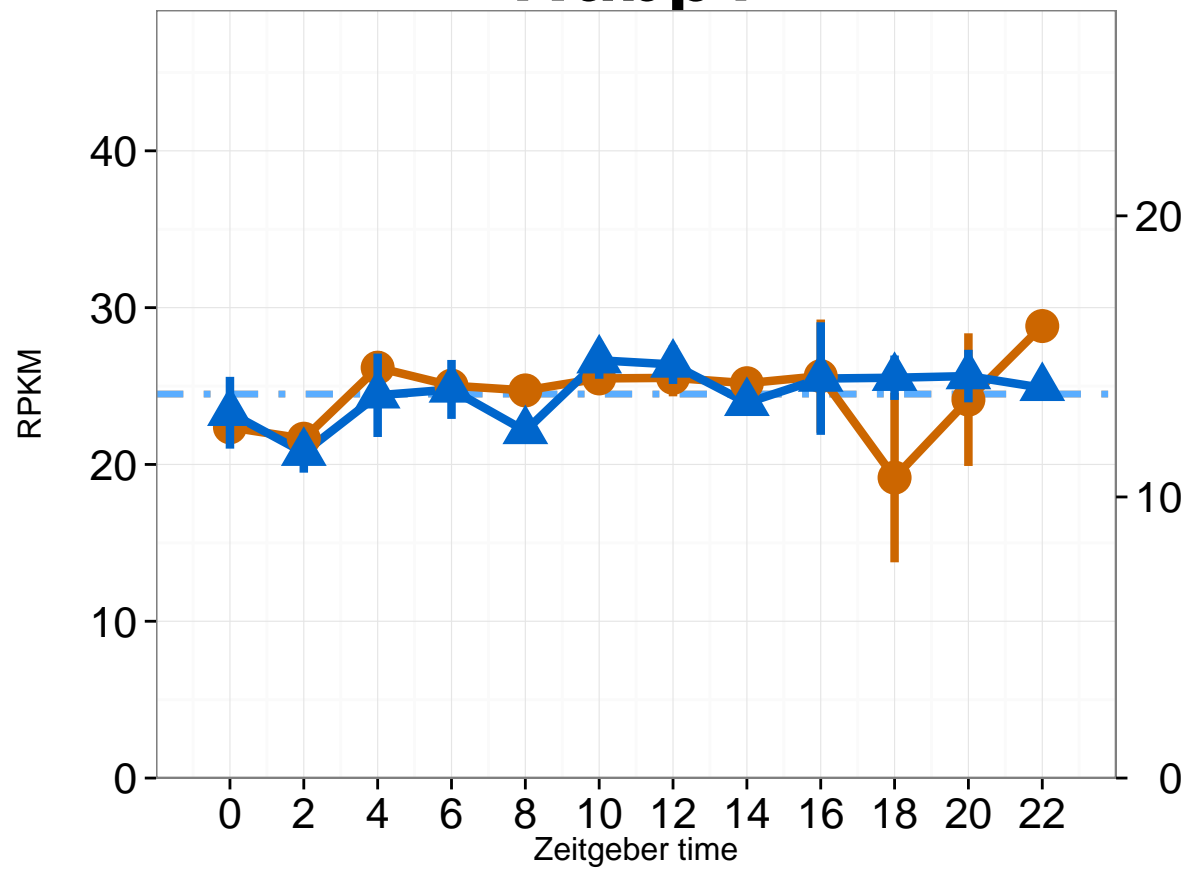

## Nubp1

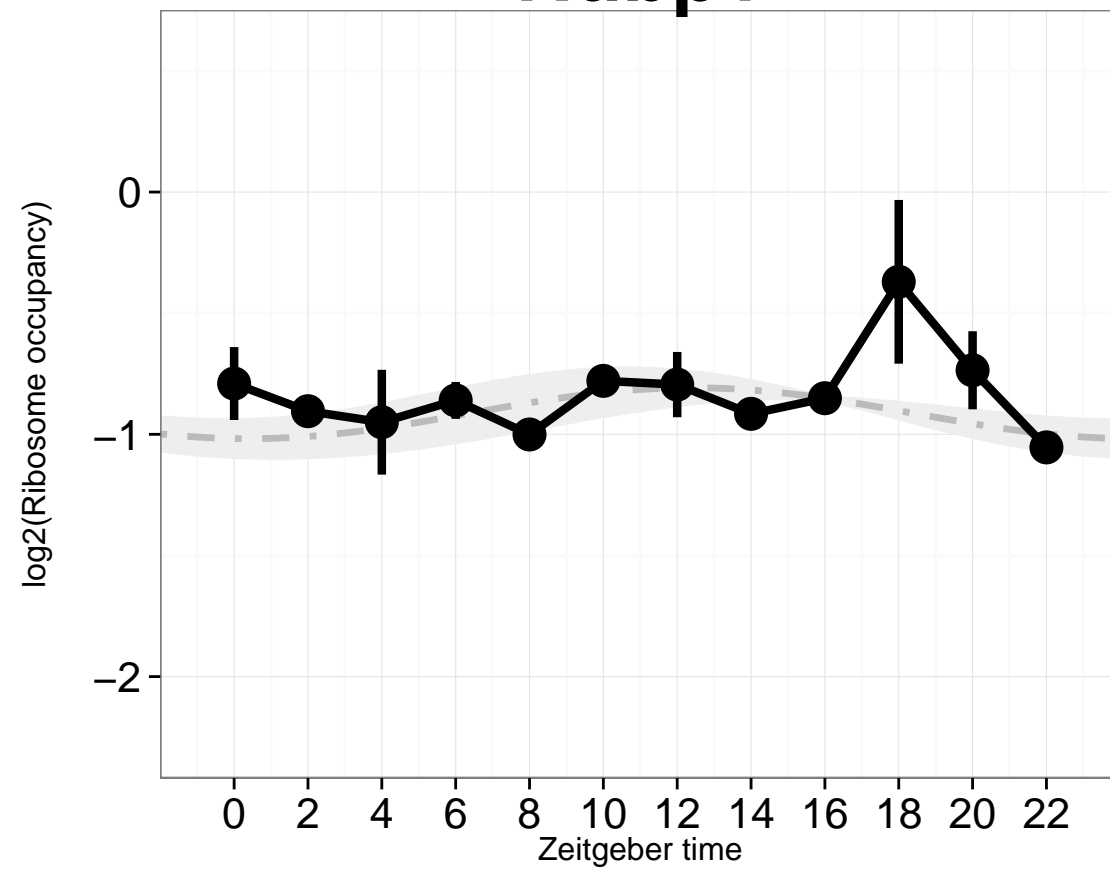

Supplement: SuppDataset_1.zip [file Nubp1_set_A.pdf › Supplemental Dataset 1/A-mRNA_nonrhyth_translation_nonrhyth/Nubp1_set_A.pdf]

## Nubp2

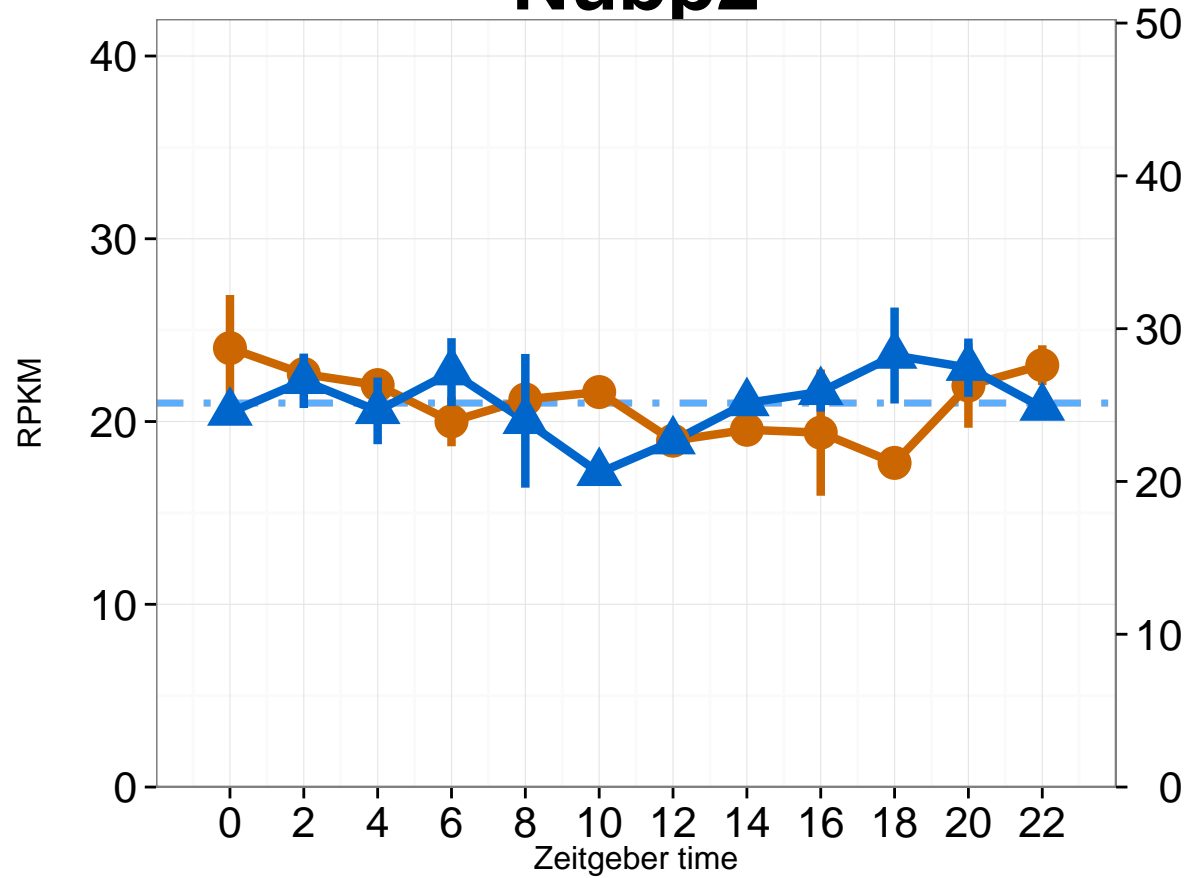

## Nubp2

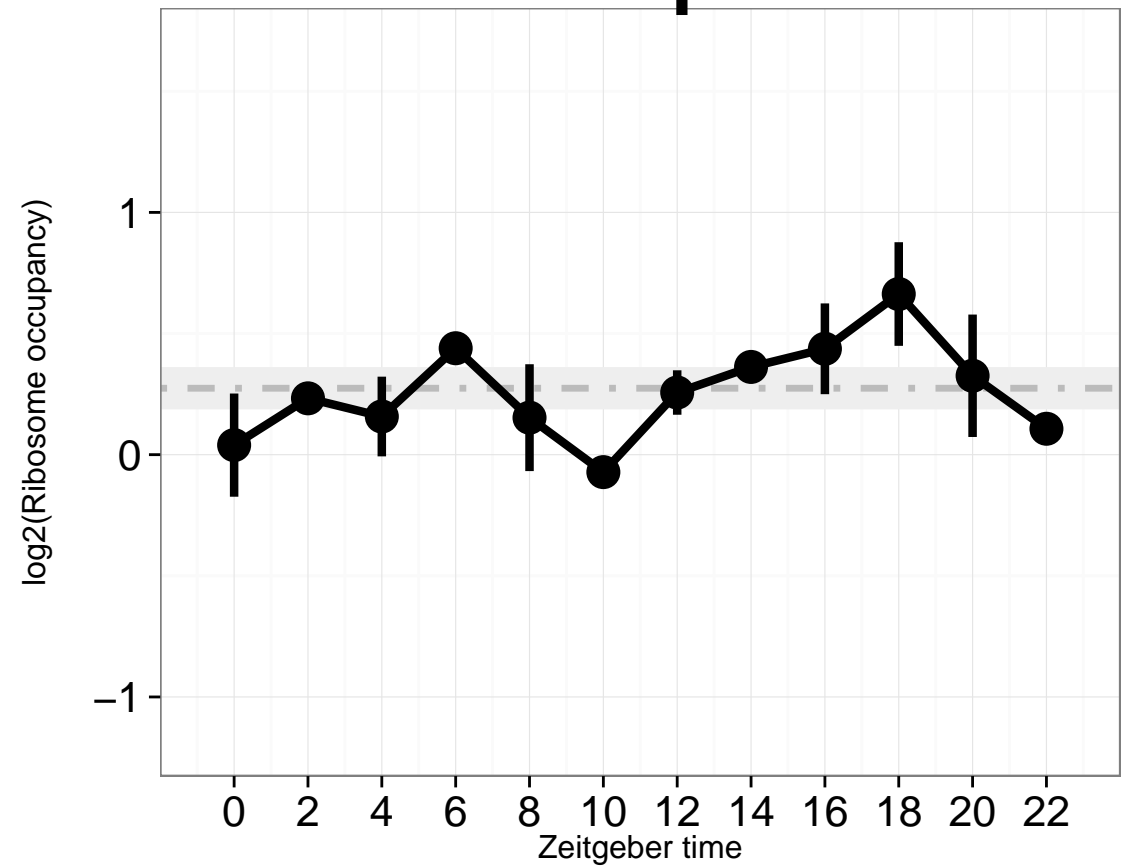

Supplement: SuppDataset_1.zip [file Nubp2_set_A.pdf › Supplemental Dataset 1/A-mRNA_nonrhyth_translation_nonrhyth/Nubp2_set_A.pdf]

## Nubpl

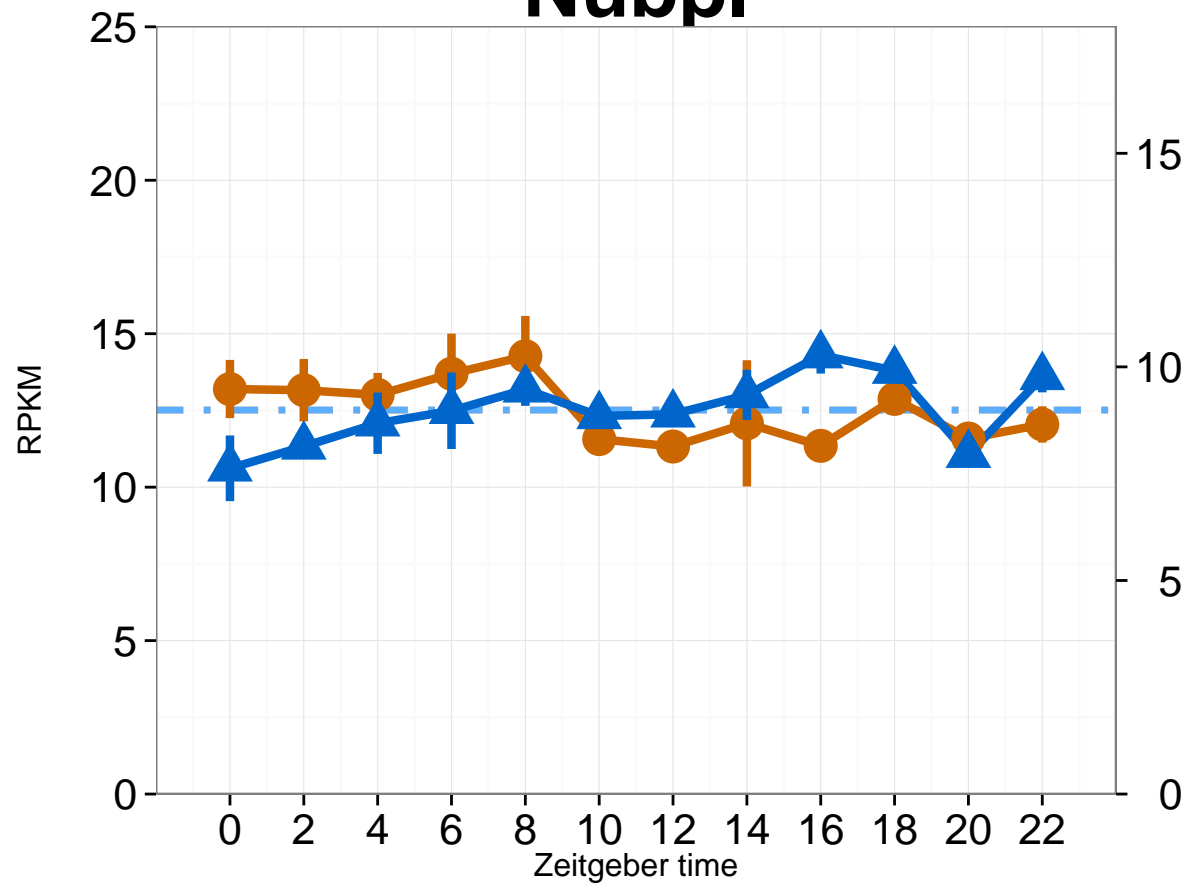

## Nubpl

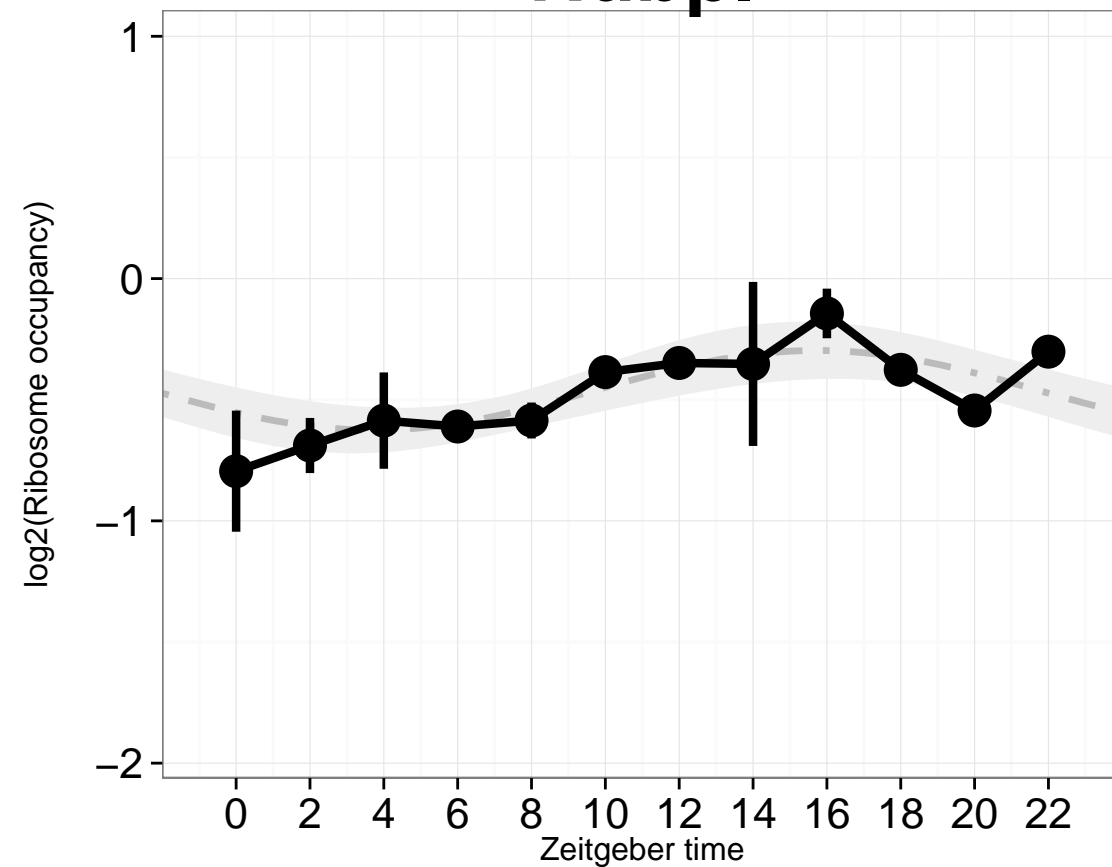

Supplement: SuppDataset_1.zip [file Nubpl_set_A.pdf › Supplemental Dataset 1/A-mRNA_nonrhyth_translation_nonrhyth/Nubpl_set_A.pdf]

# Nucb1

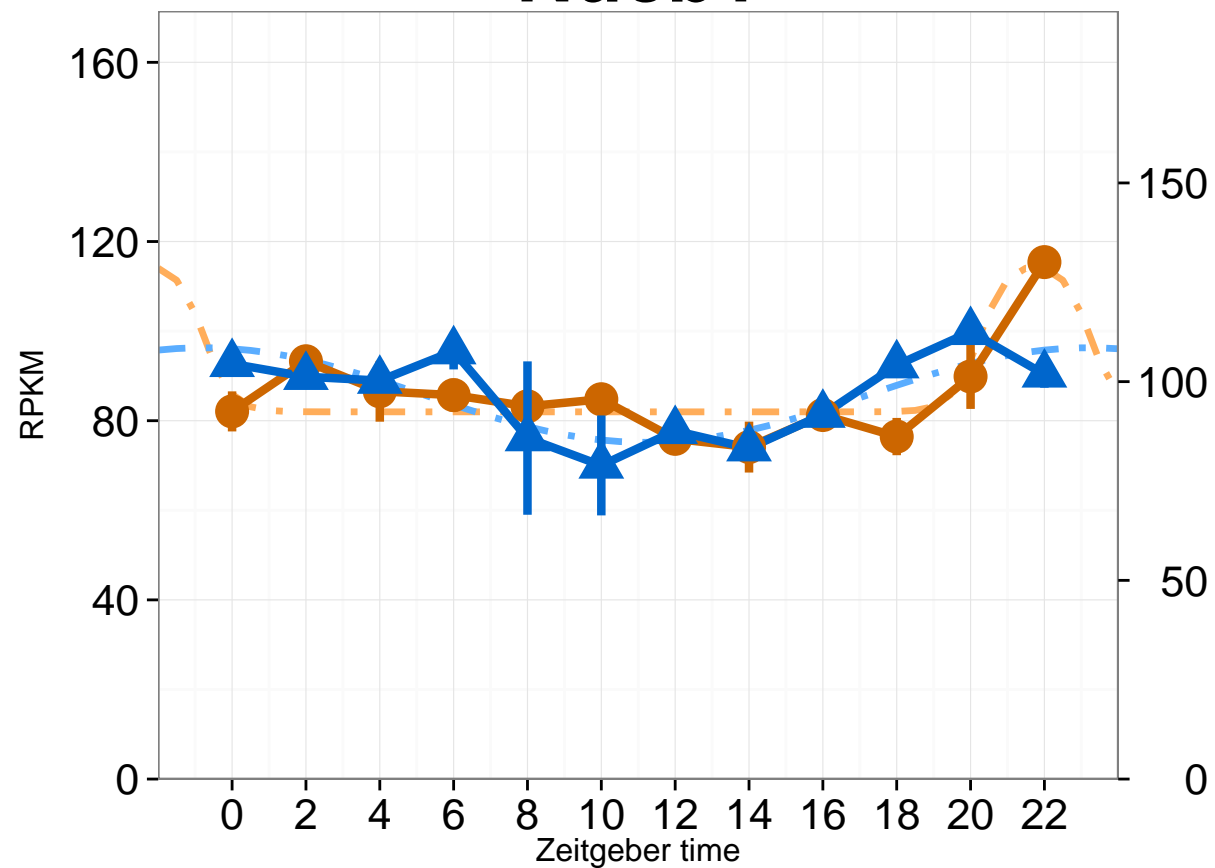

# Nucb1

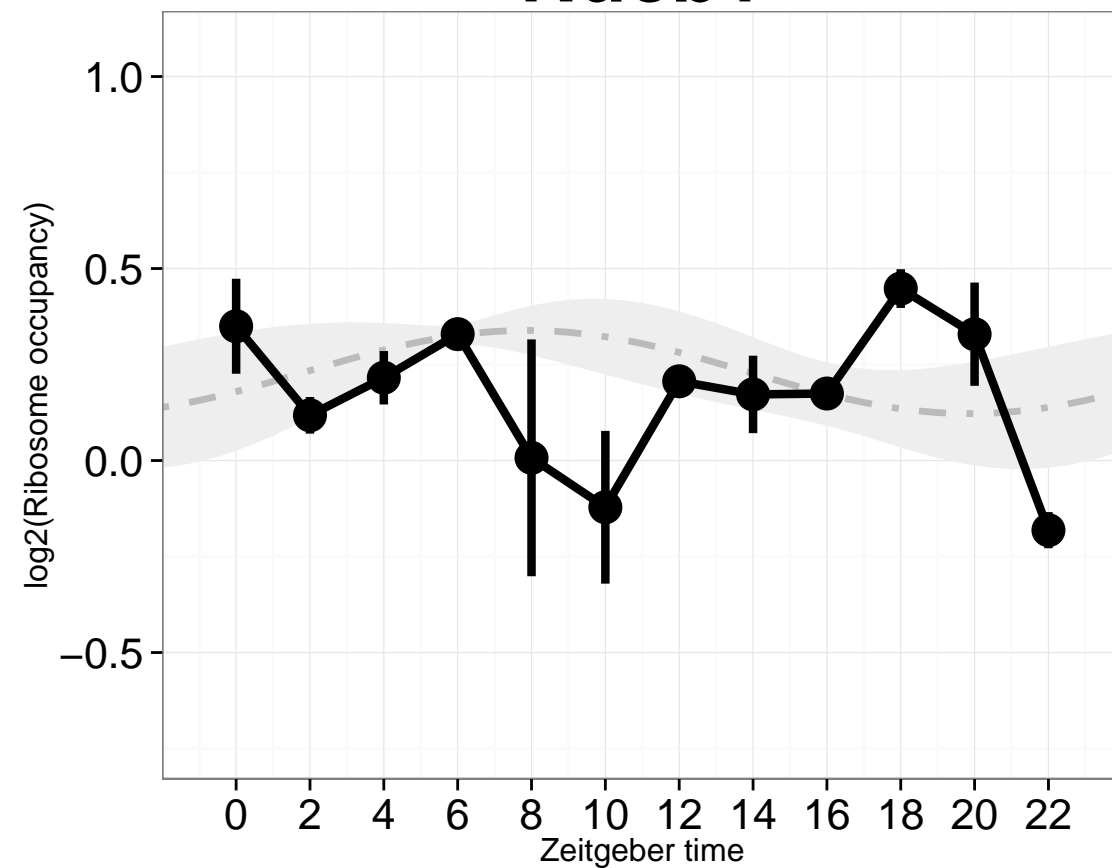

Supplement: SuppDataset_1.zip [file Nucb1_set_A.pdf › Supplemental Dataset 1/A-mRNA_nonrhyth_translation_nonrhyth/Nucb1_set_A.pdf]

## Nucb2

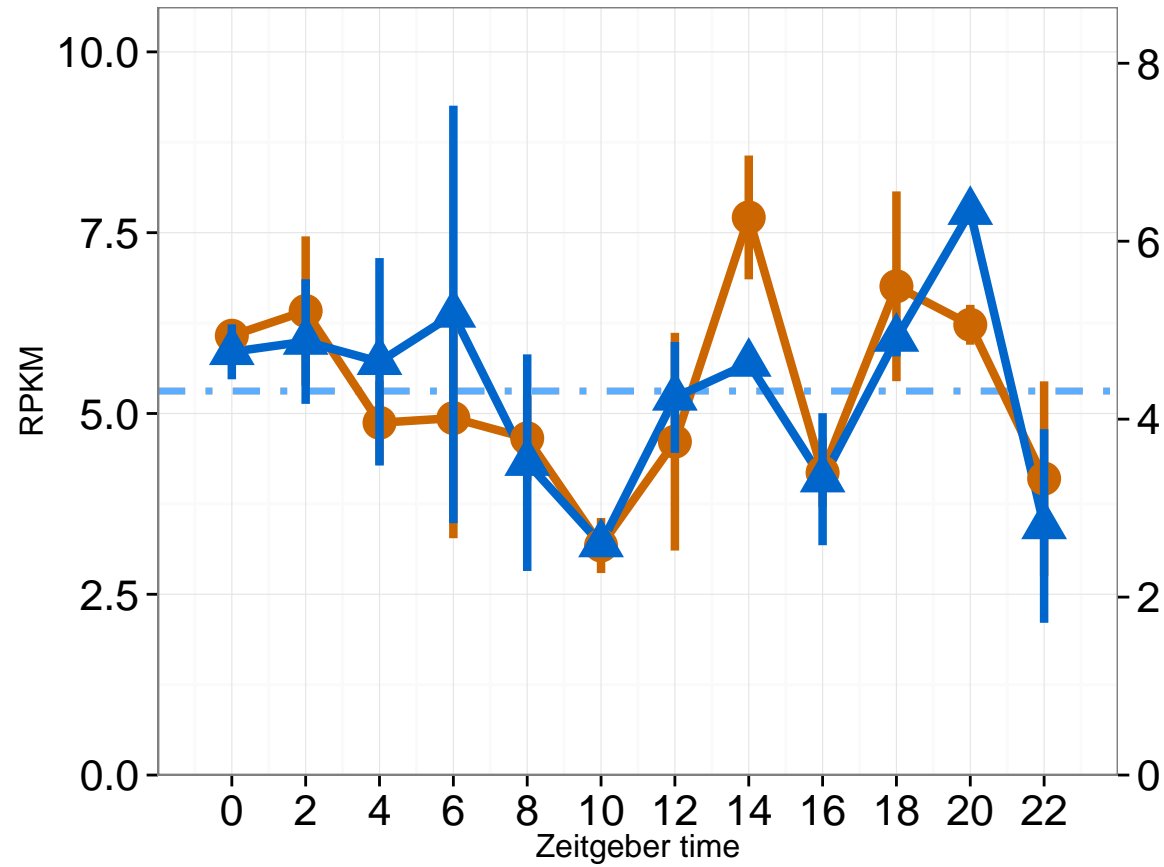

## Nucb2

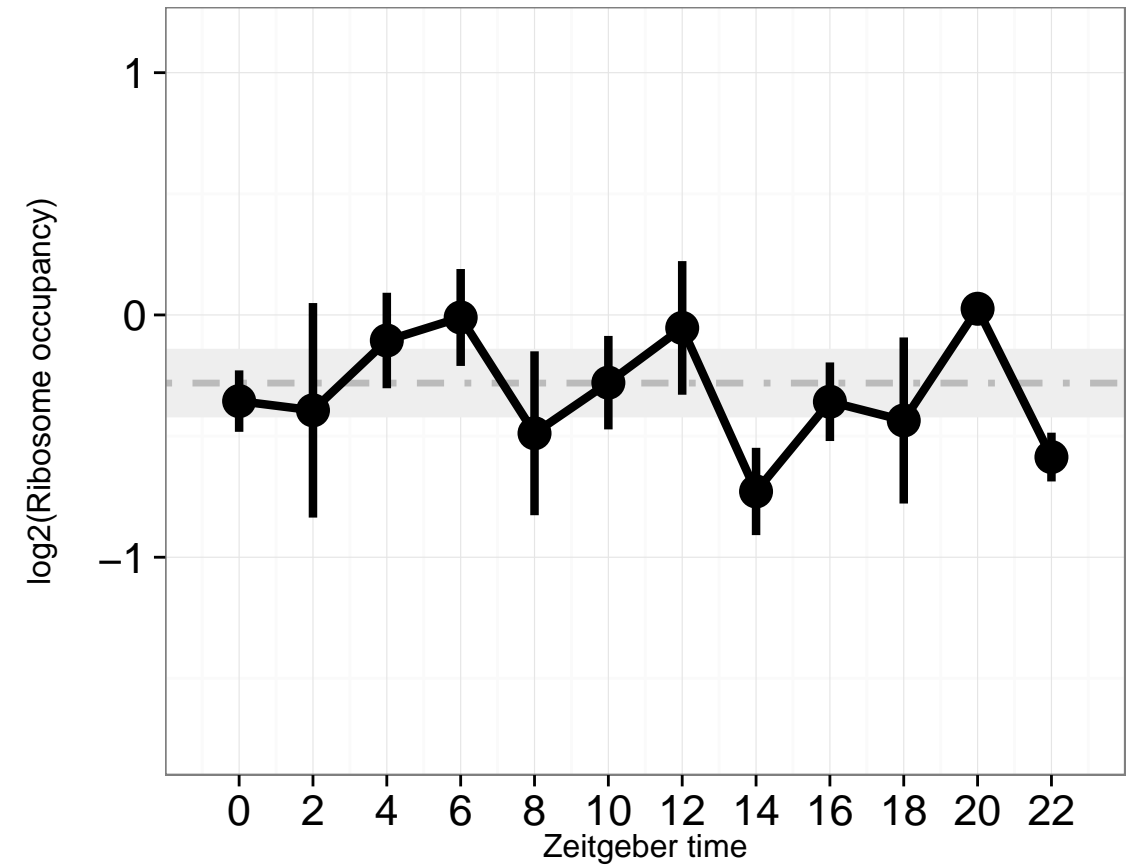

Supplement: SuppDataset_1.zip [file Nucb2_set_A.pdf › Supplemental Dataset 1/A-mRNA_nonrhyth_translation_nonrhyth/Nucb2_set_A.pdf]

# Nudc

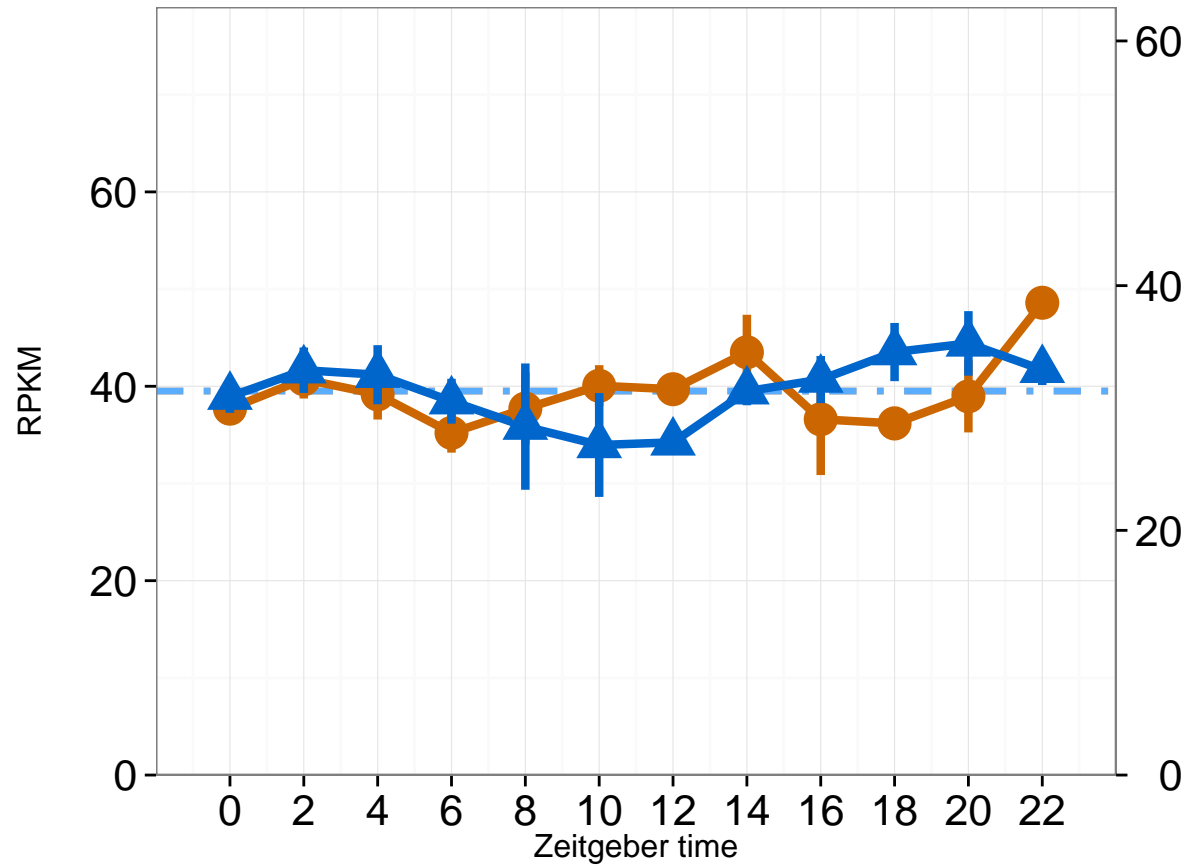

# Nudc

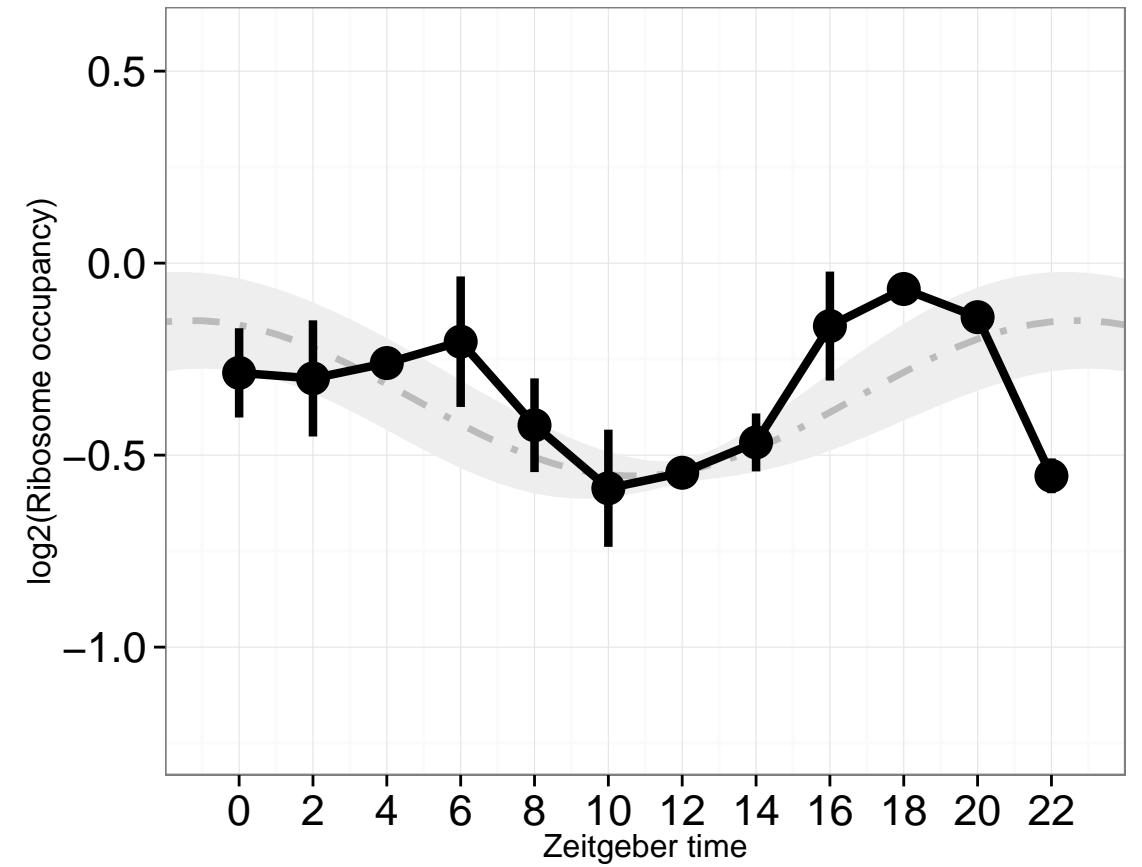

Supplement: SuppDataset_1.zip [file Nudc_set_A.pdf › Supplemental Dataset 1/A-mRNA_nonrhyth_translation_nonrhyth/Nudc_set_A.pdf]

## Nudcd1

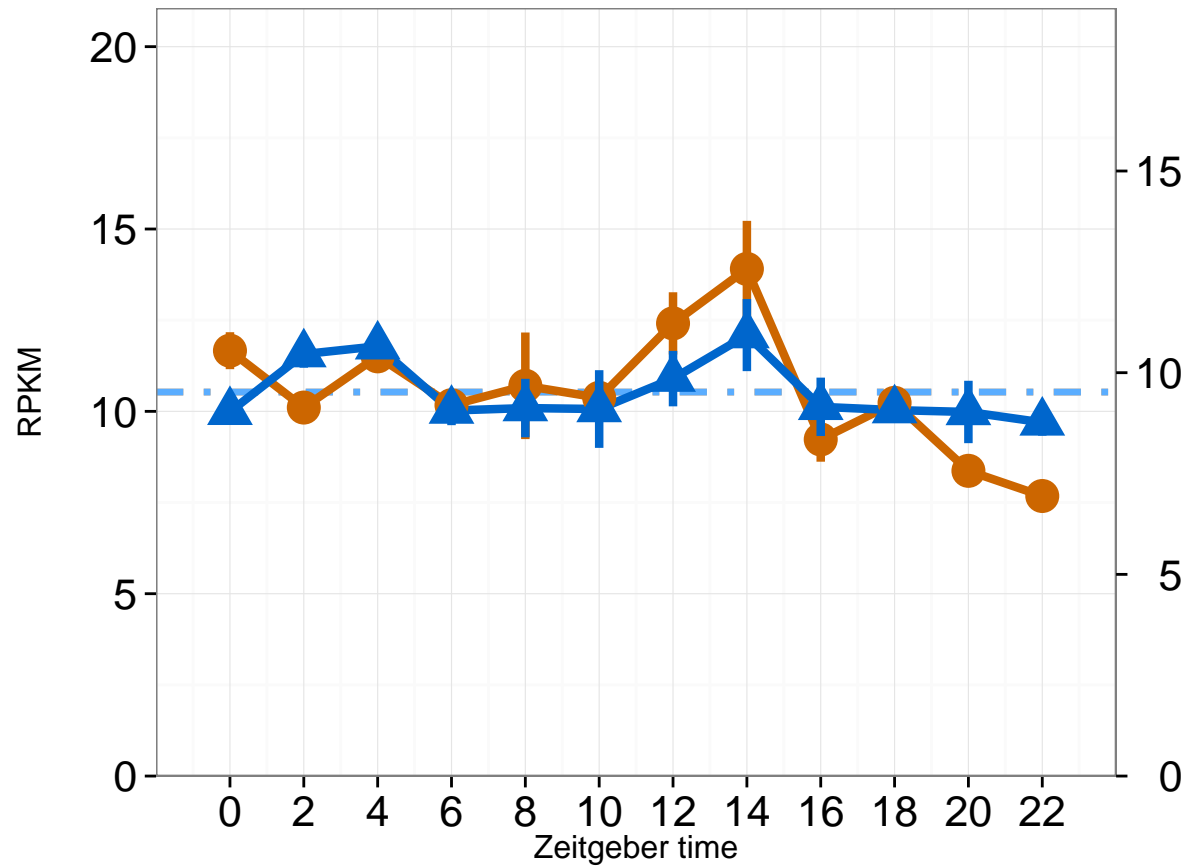

## Nudcd1

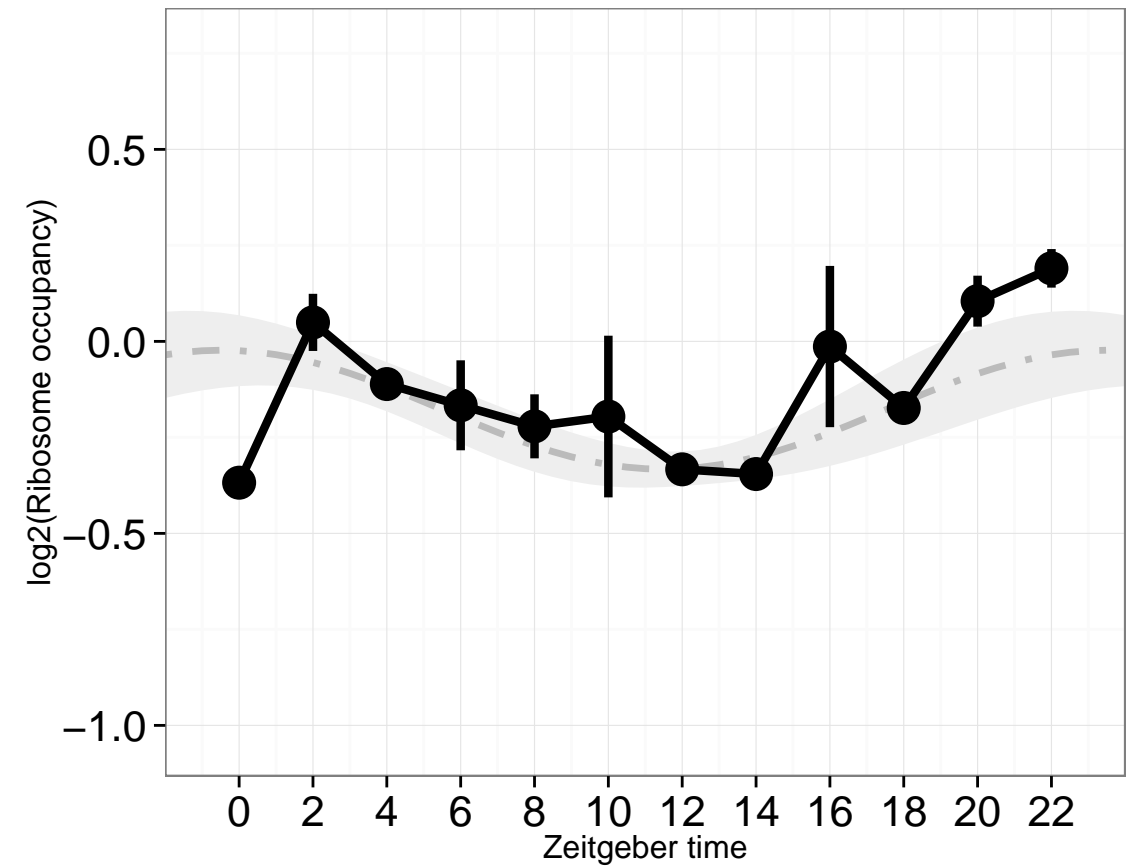

Supplement: SuppDataset_1.zip [file Nudcd1_set_A.pdf › Supplemental Dataset 1/A-mRNA_nonrhyth_translation_nonrhyth/Nudcd1_set_A.pdf]

## Nudcd2

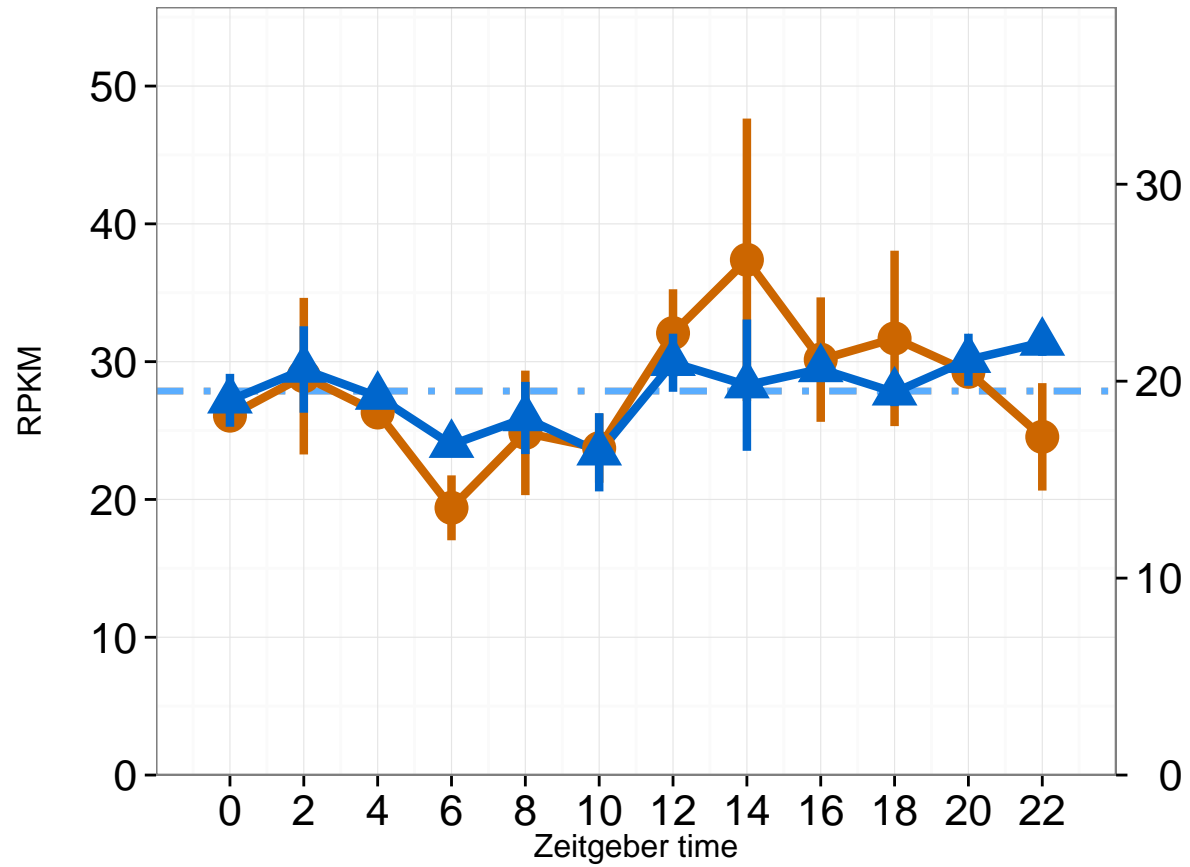

## Nudcd2

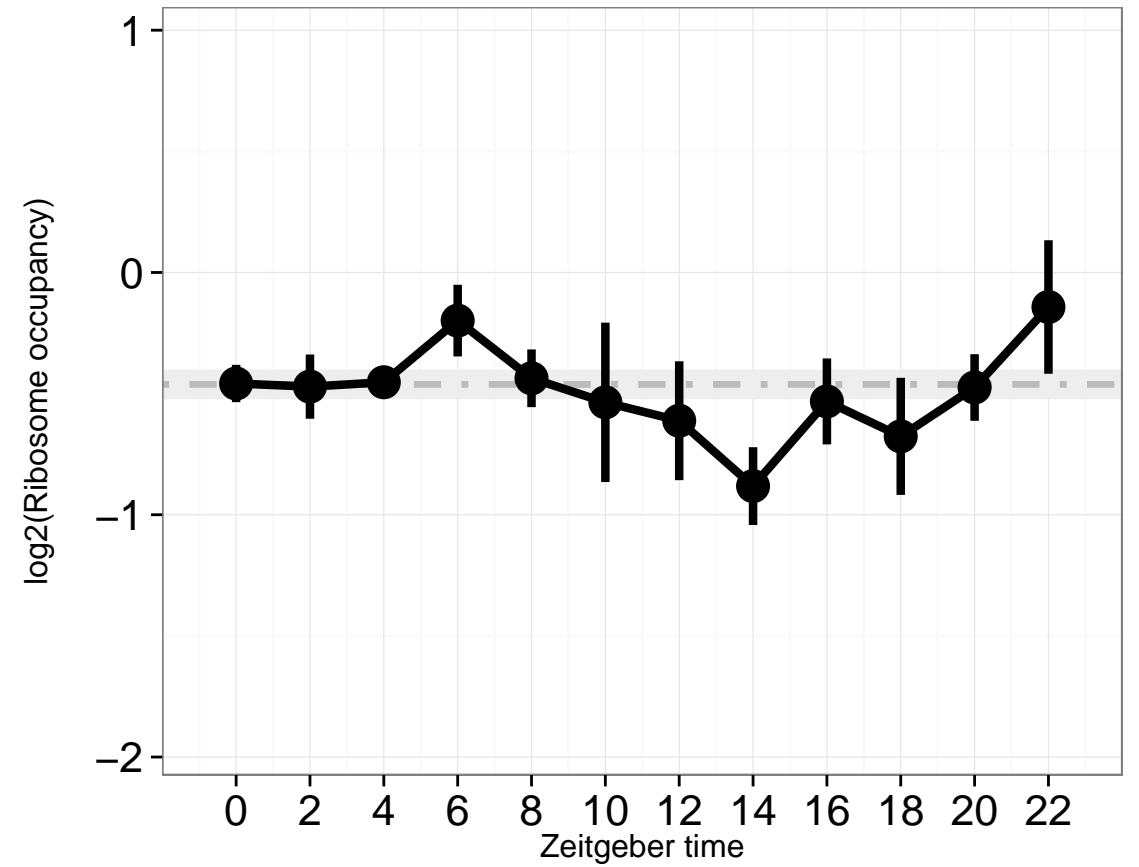

Supplement: SuppDataset_1.zip [file Nudcd2_set_A.pdf › Supplemental Dataset 1/A-mRNA_nonrhyth_translation_nonrhyth/Nudcd2_set_A.pdf]

## Nudcd3

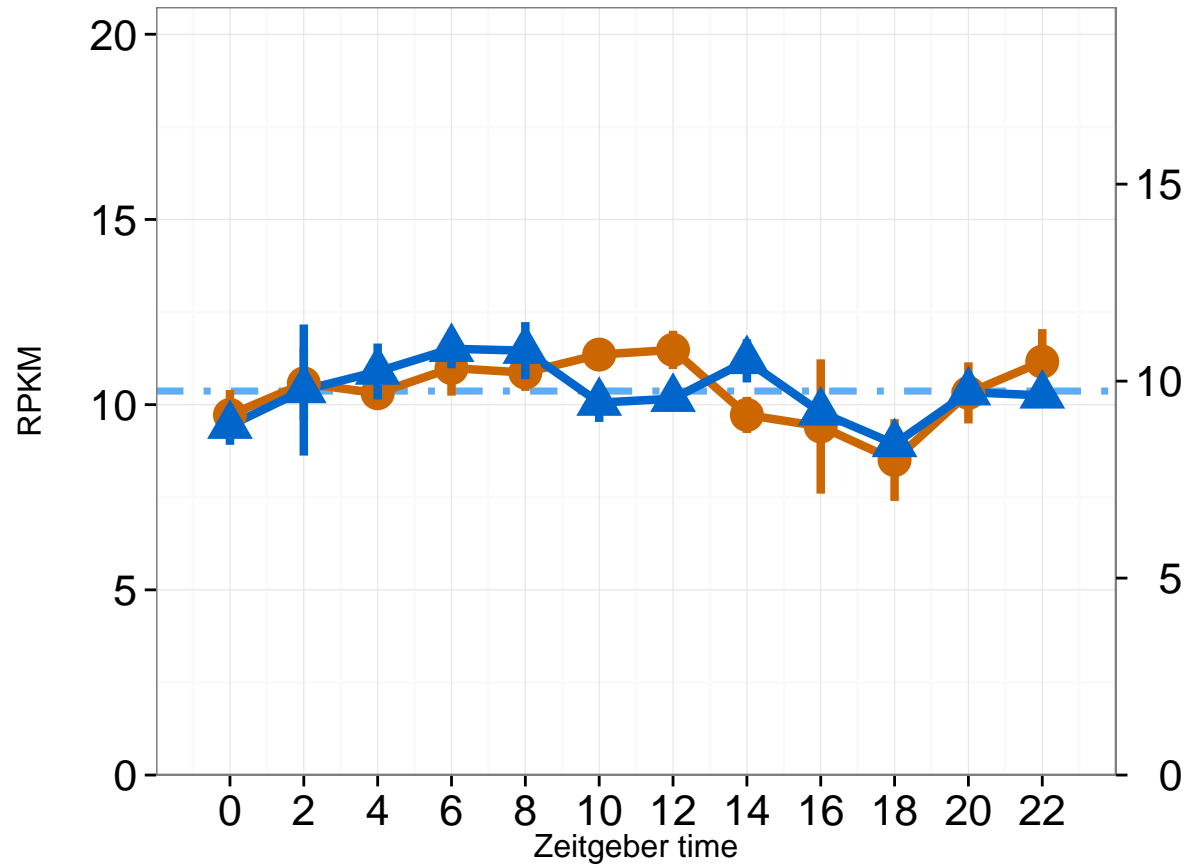

## Nudcd3

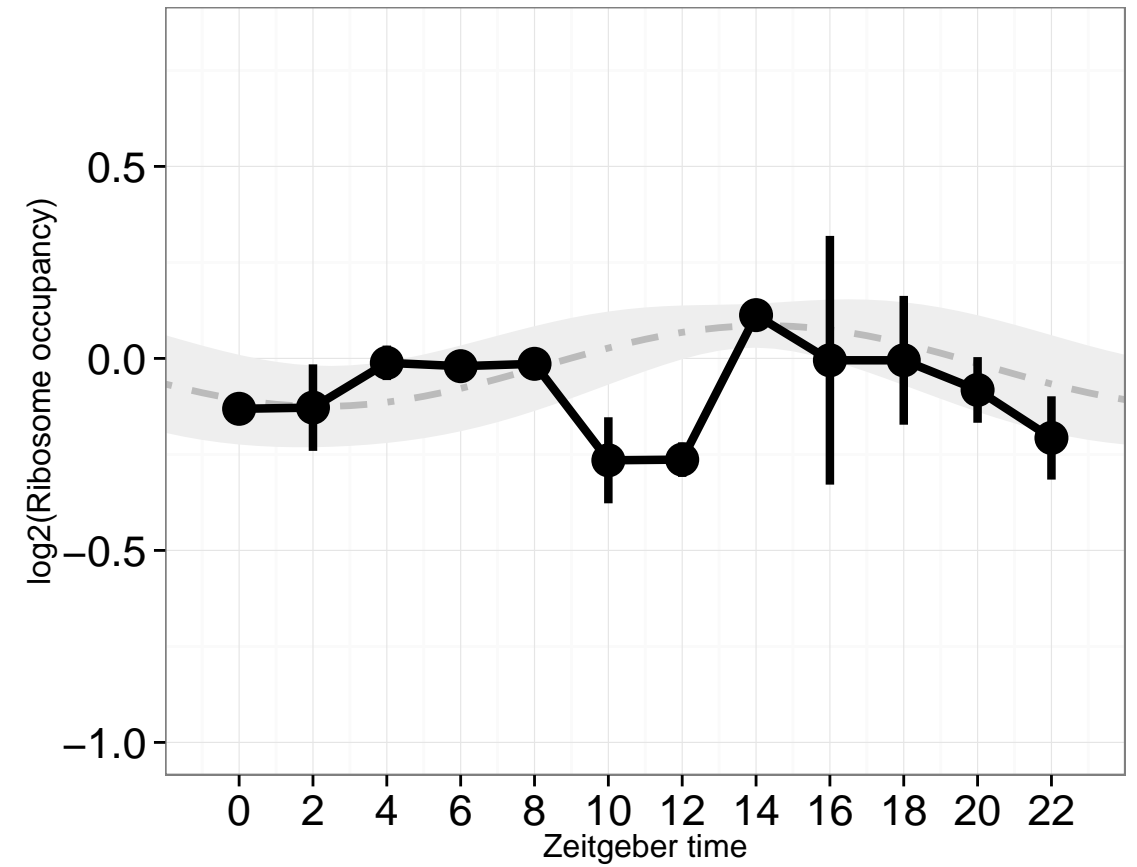

Supplement: SuppDataset_1.zip [file Nudcd3_set_A.pdf › Supplemental Dataset 1/A-mRNA_nonrhyth_translation_nonrhyth/Nudcd3_set_A.pdf]

## Nudt12

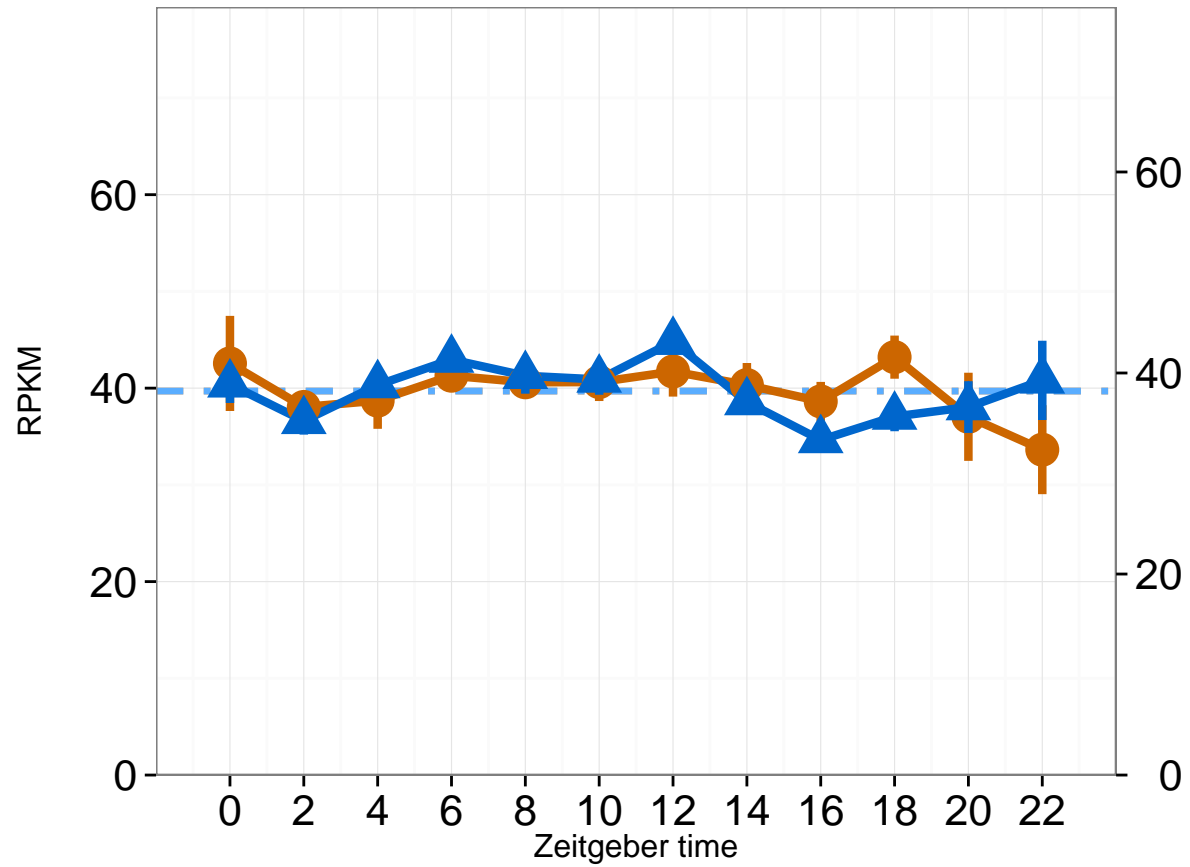

## Nudt12

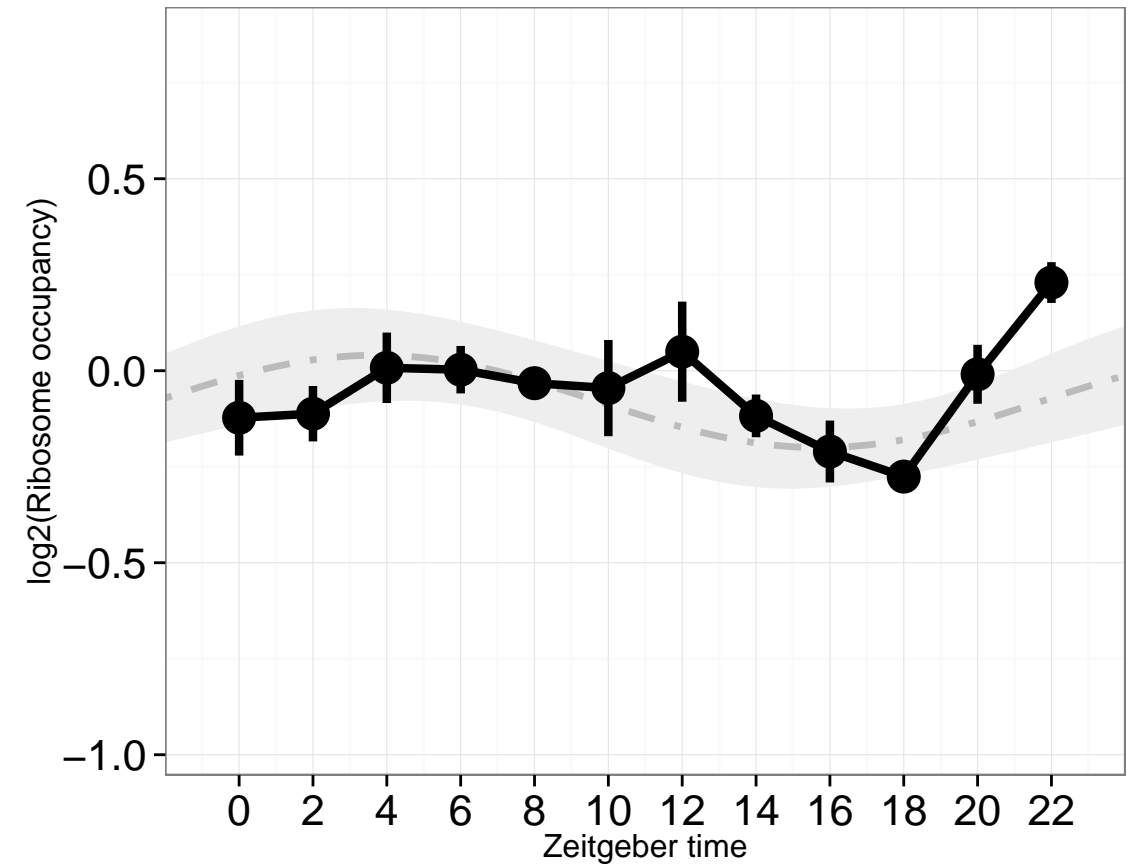

Supplement: SuppDataset_1.zip [file Nudt12_set_A.pdf › Supplemental Dataset 1/A-mRNA_nonrhyth_translation_nonrhyth/Nudt12_set_A.pdf]

# Nudt13

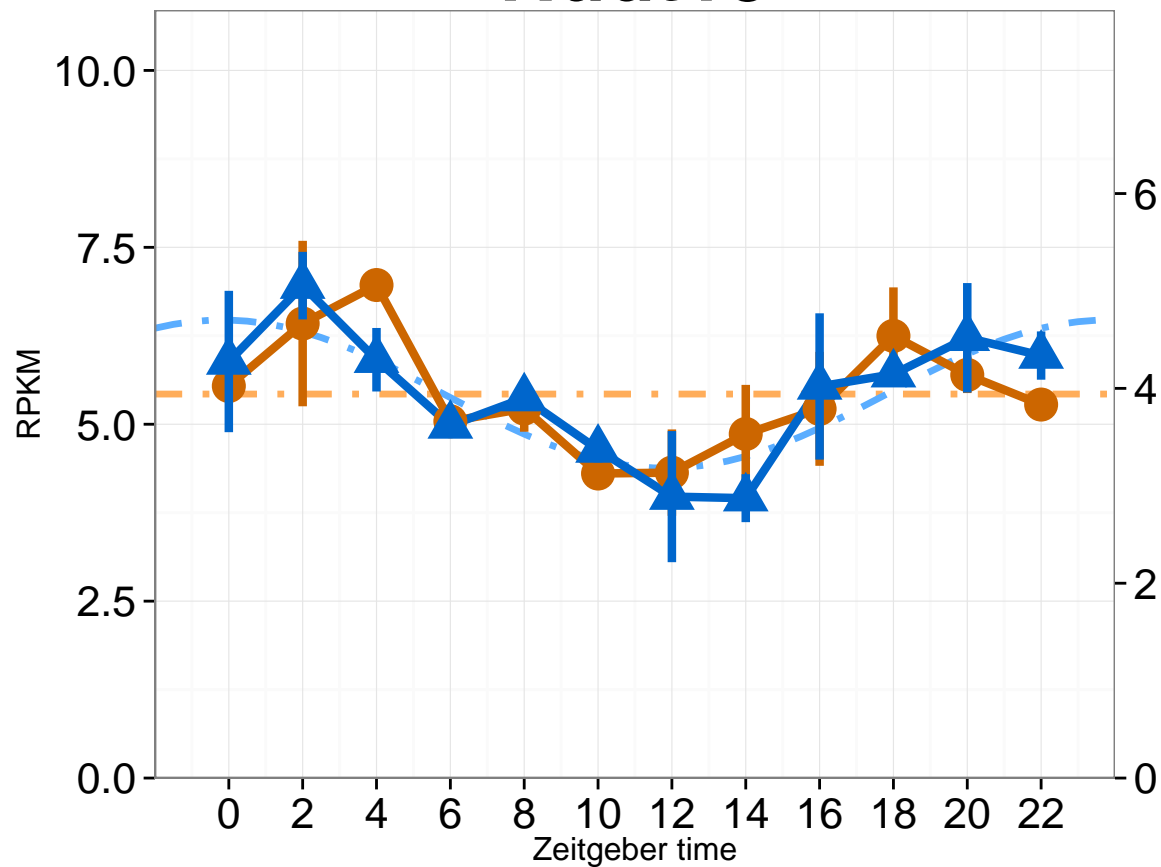

# Nudt13

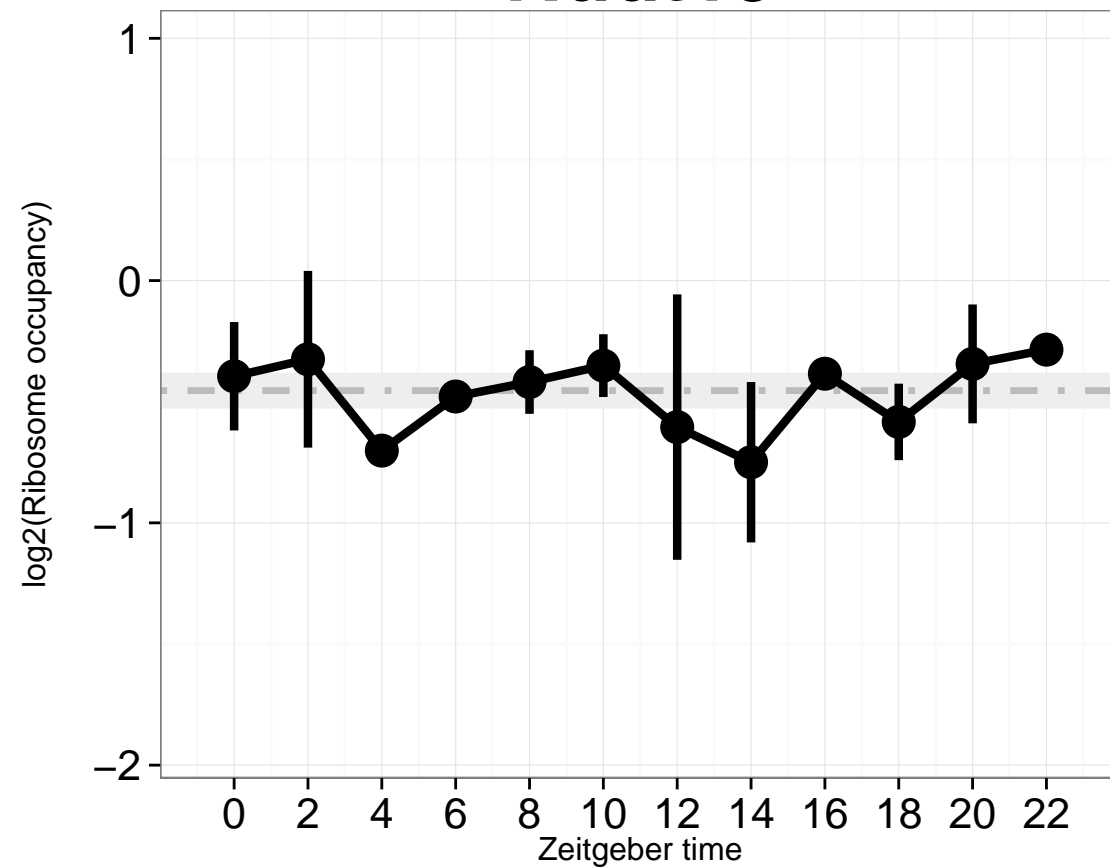

Supplement: SuppDataset_1.zip [file Nudt13_set_A.pdf › Supplemental Dataset 1/A-mRNA_nonrhyth_translation_nonrhyth/Nudt13_set_A.pdf]

## Nudt14

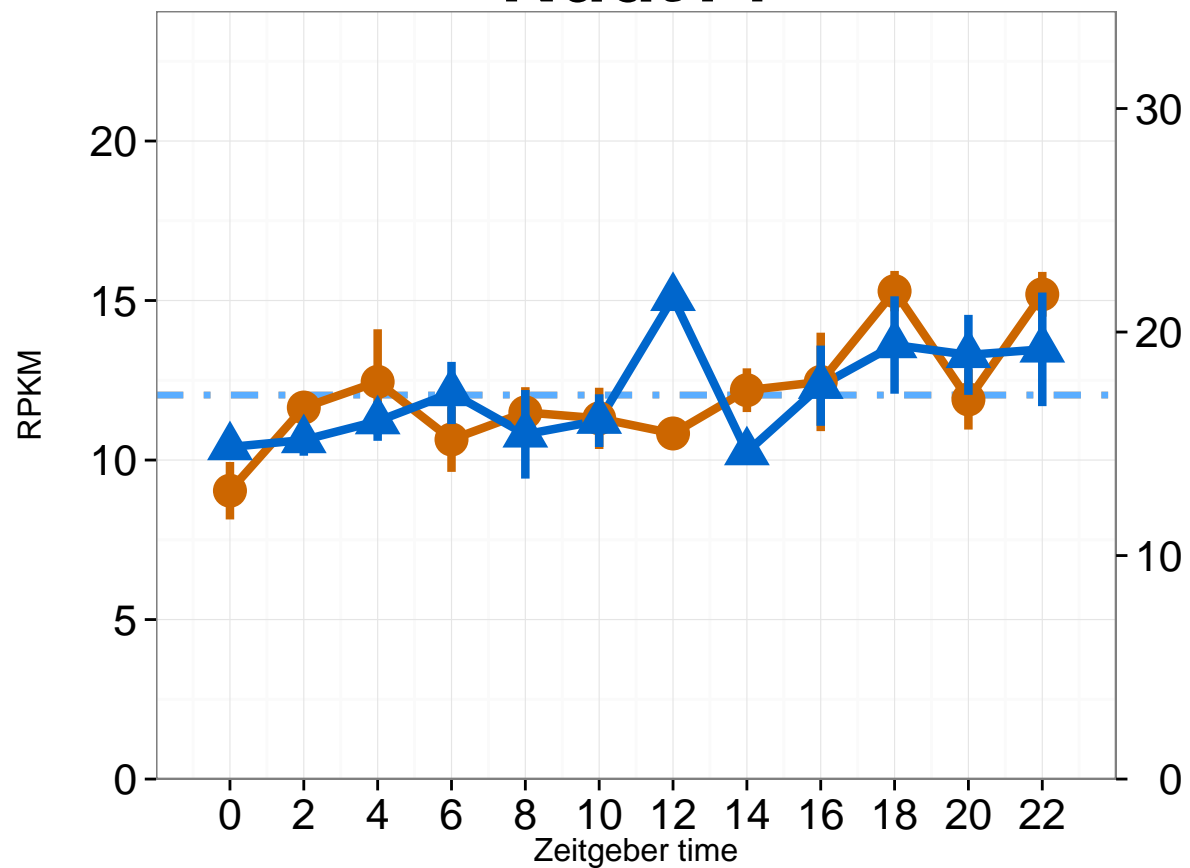

## Nudt14

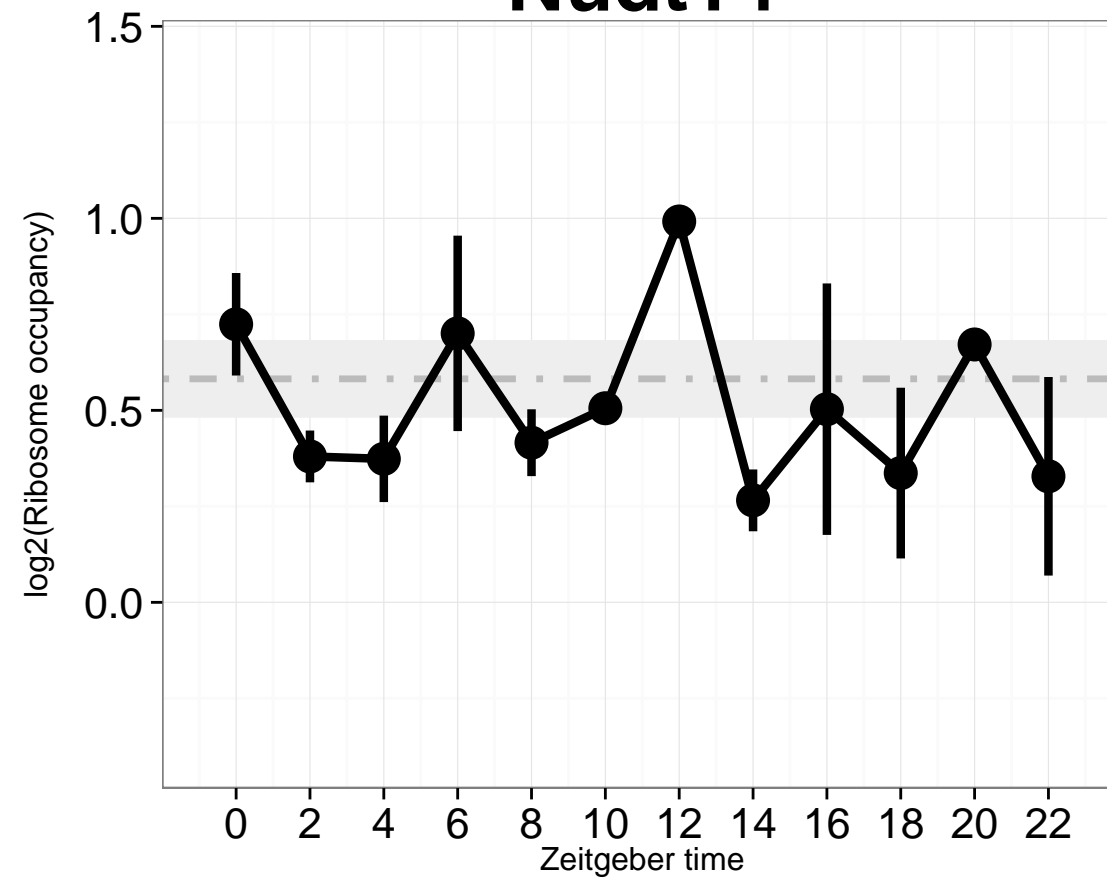

Supplement: SuppDataset_1.zip [file Nudt14_set_A.pdf › Supplemental Dataset 1/A-mRNA_nonrhyth_translation_nonrhyth/Nudt14_set_A.pdf]

# Nudt15

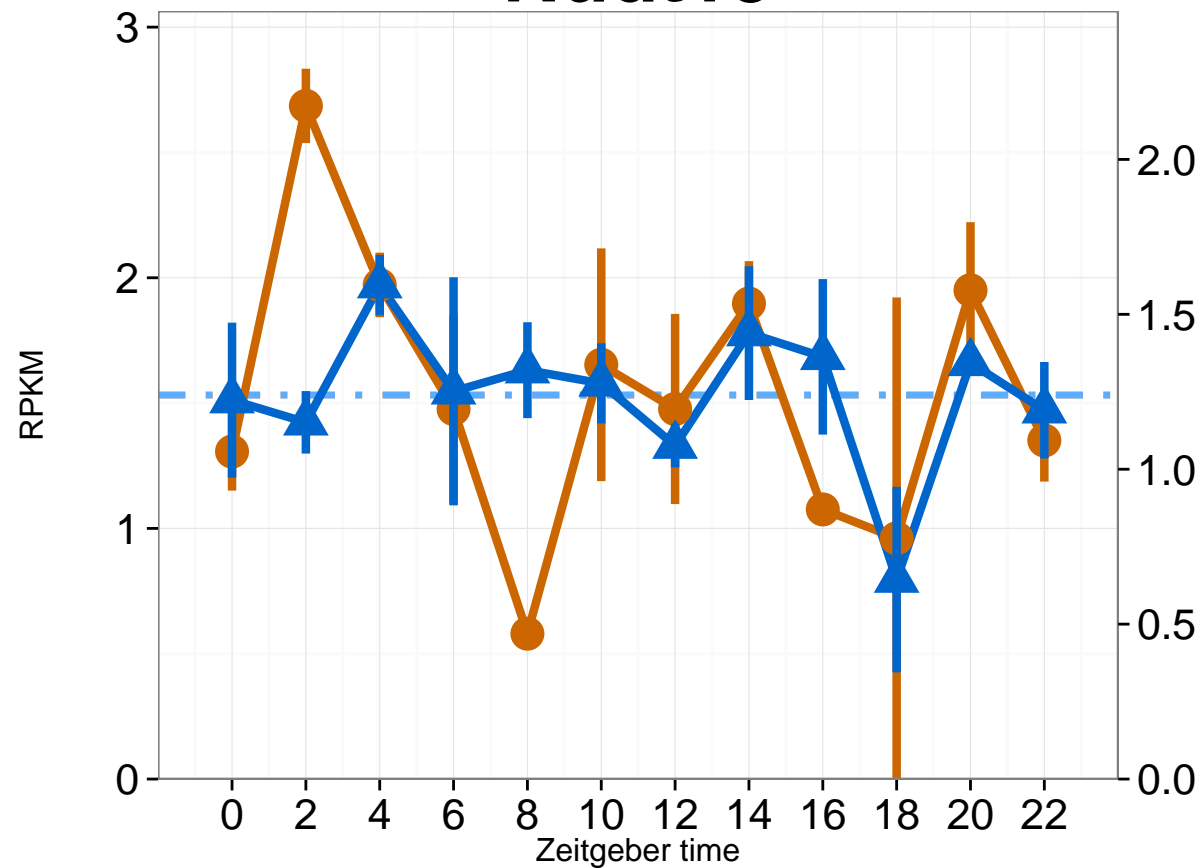

# Nudt15

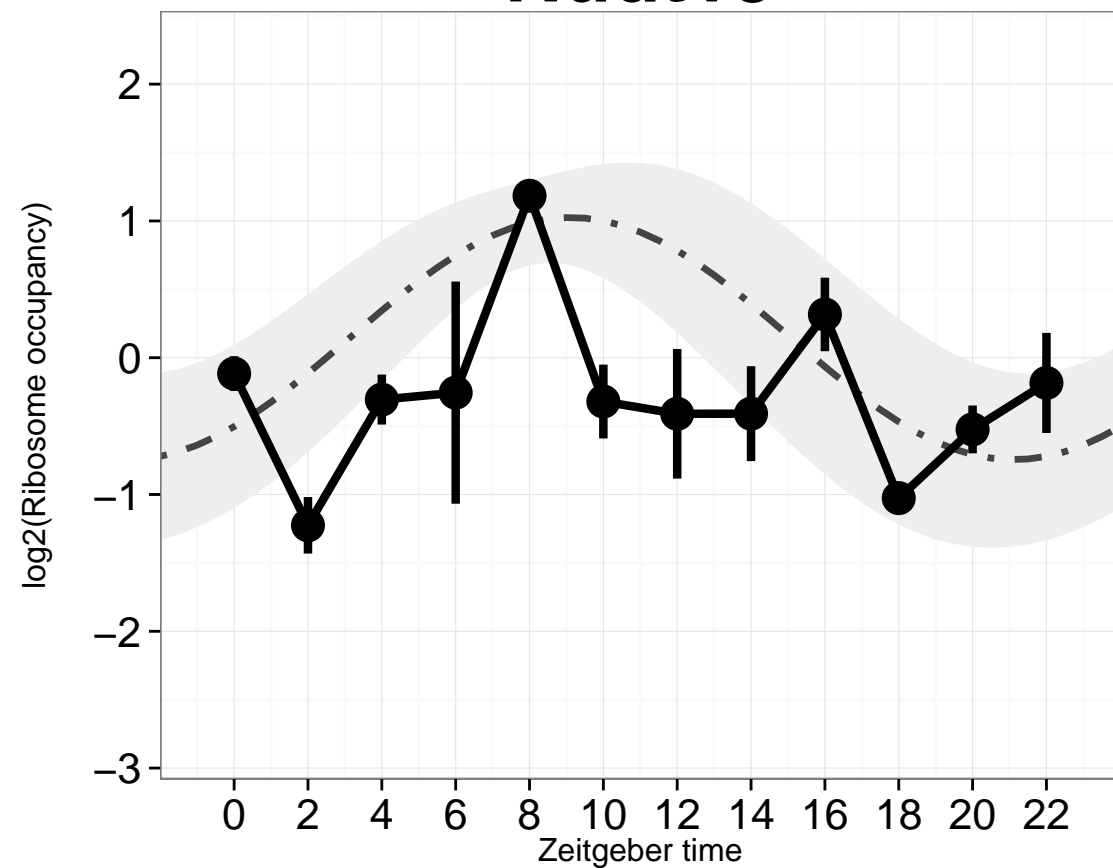

Supplement: SuppDataset_1.zip [file Nudt15_set_A.pdf › Supplemental Dataset 1/A-mRNA_nonrhyth_translation_nonrhyth/Nudt15_set_A.pdf]

## Nudt16l1

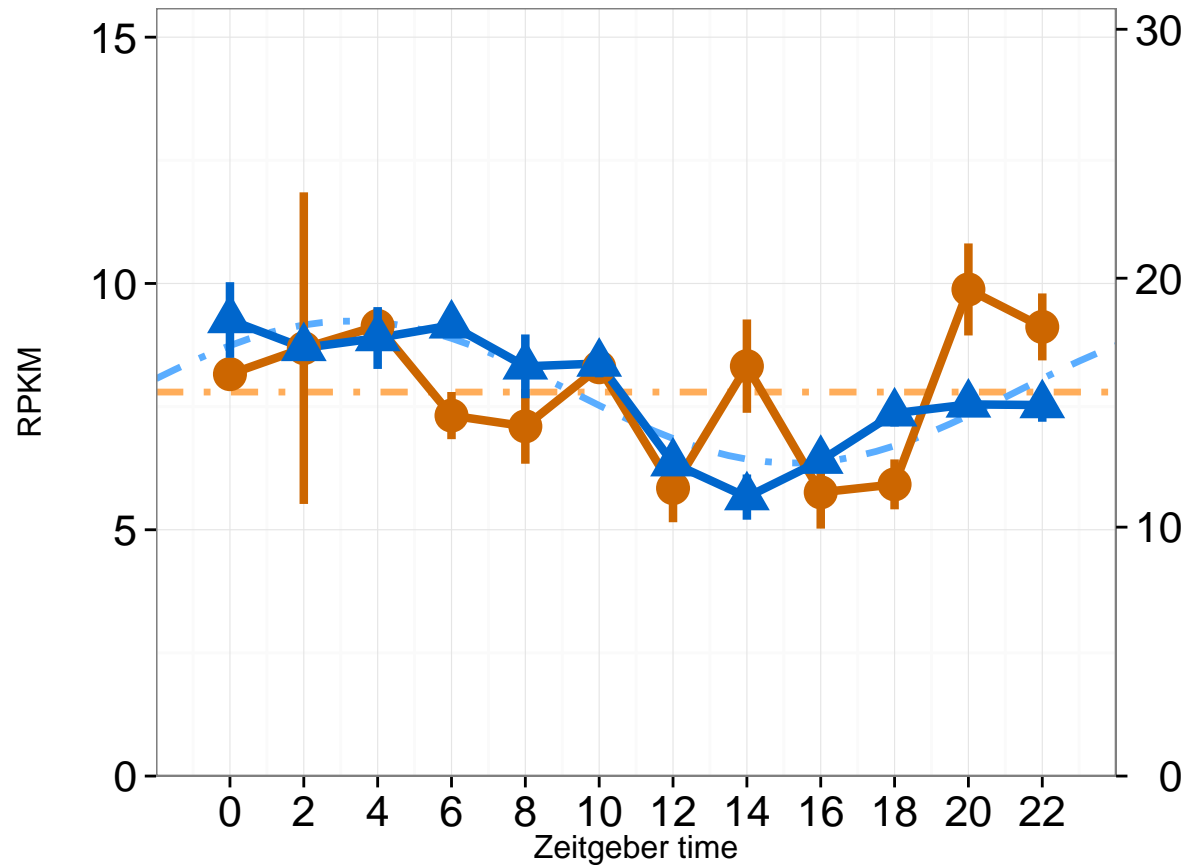

## Nudt16l1

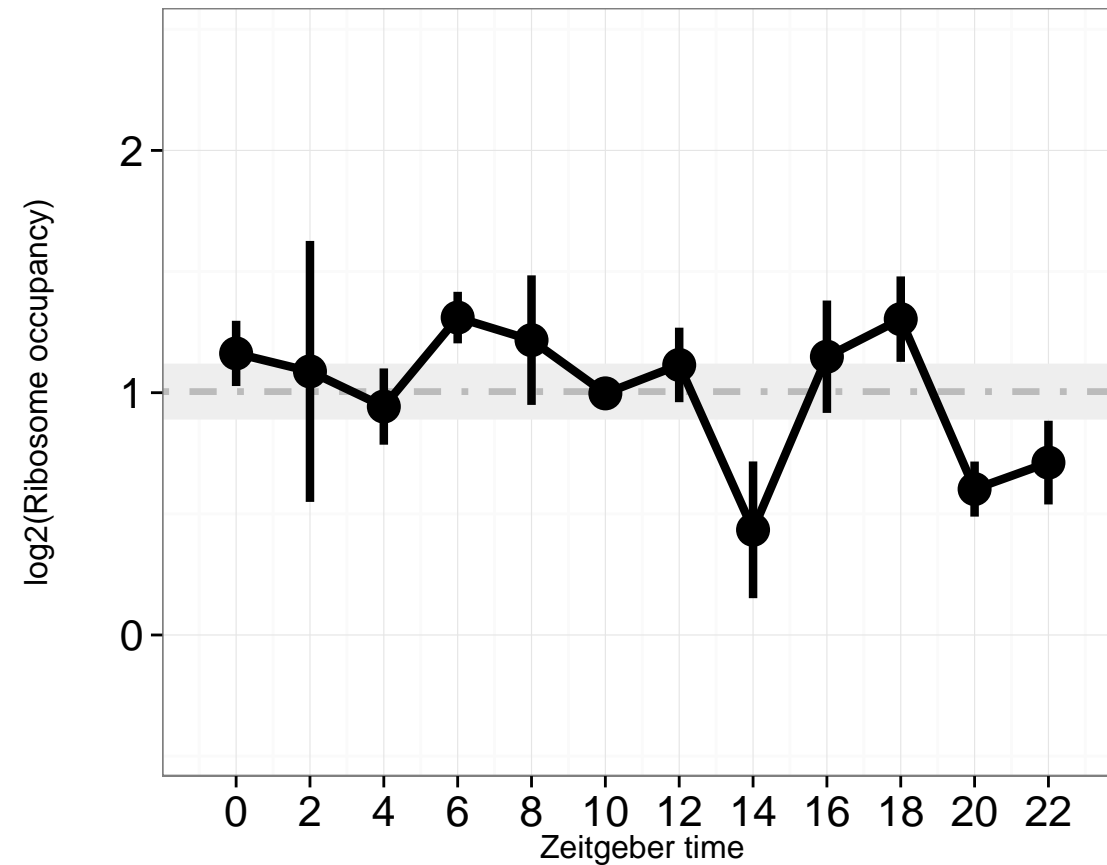

Supplement: SuppDataset_1.zip [file Nudt16l1_set_A.pdf › Supplemental Dataset 1/A-mRNA_nonrhyth_translation_nonrhyth/Nudt16l1_set_A.pdf]

# Nudt19

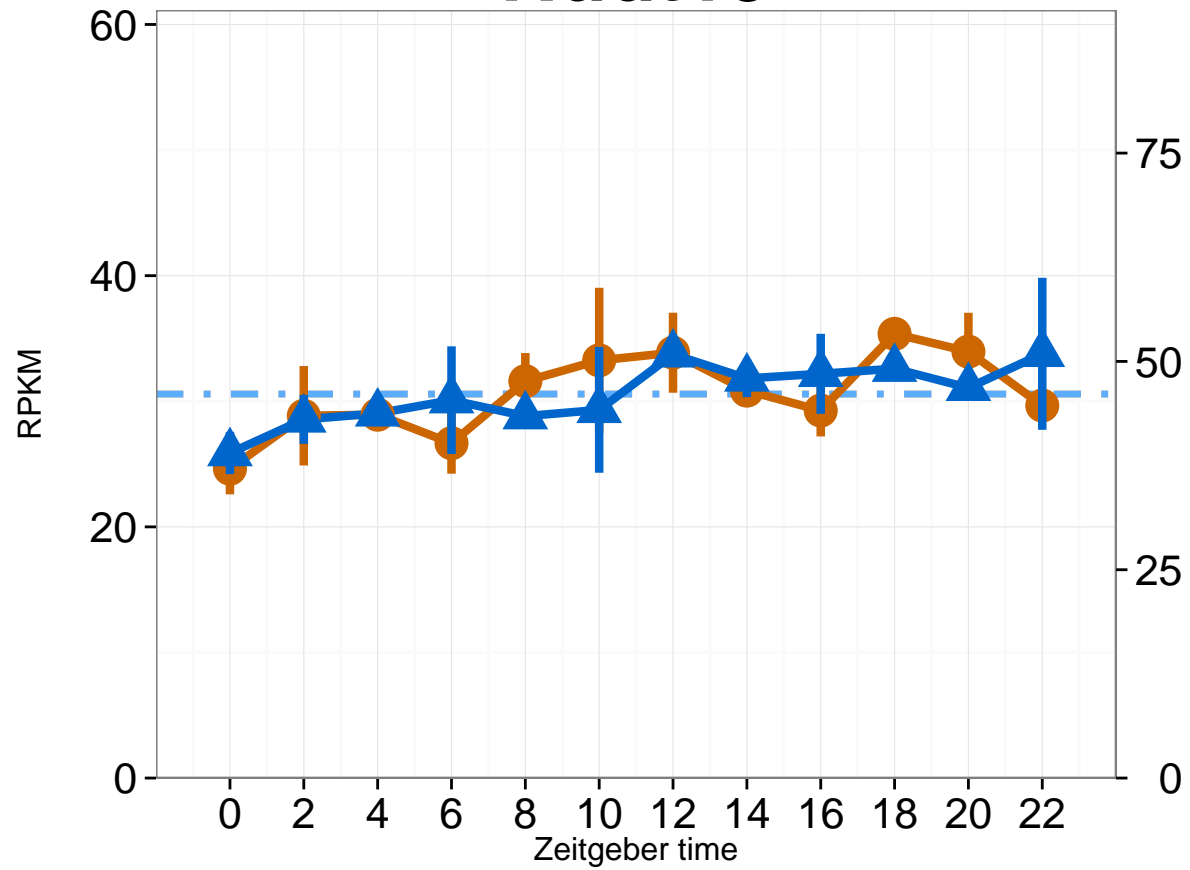

# Nudt19

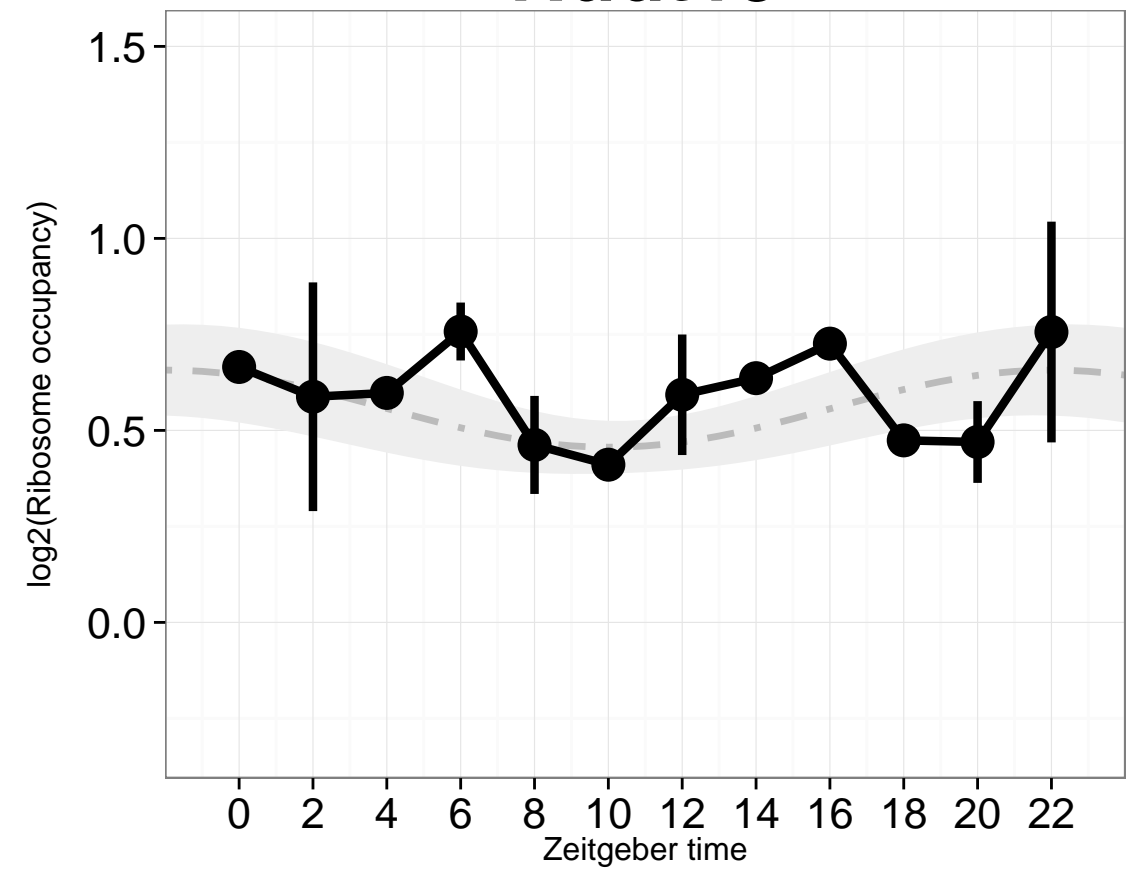

Supplement: SuppDataset_1.zip [file Nudt19_set_A.pdf › Supplemental Dataset 1/A-mRNA_nonrhyth_translation_nonrhyth/Nudt19_set_A.pdf]

## Nudt21

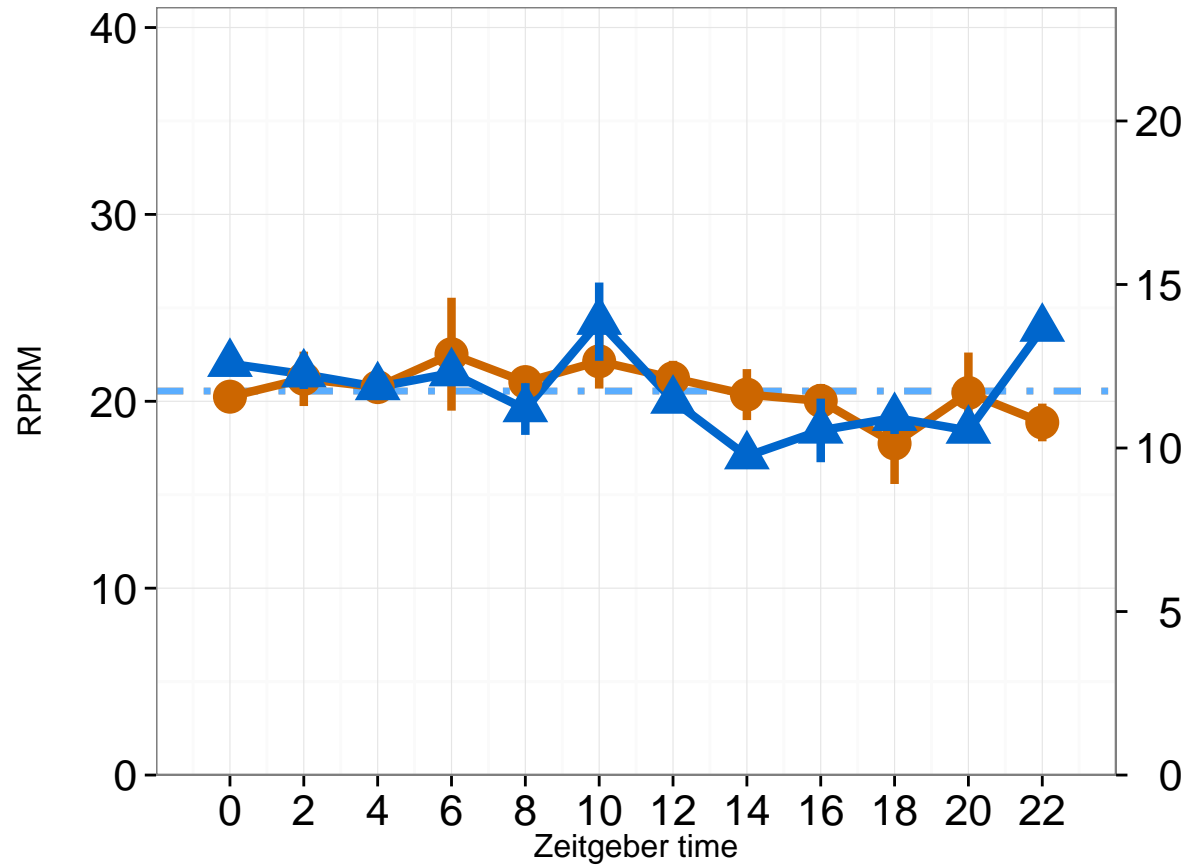

## Nudt21

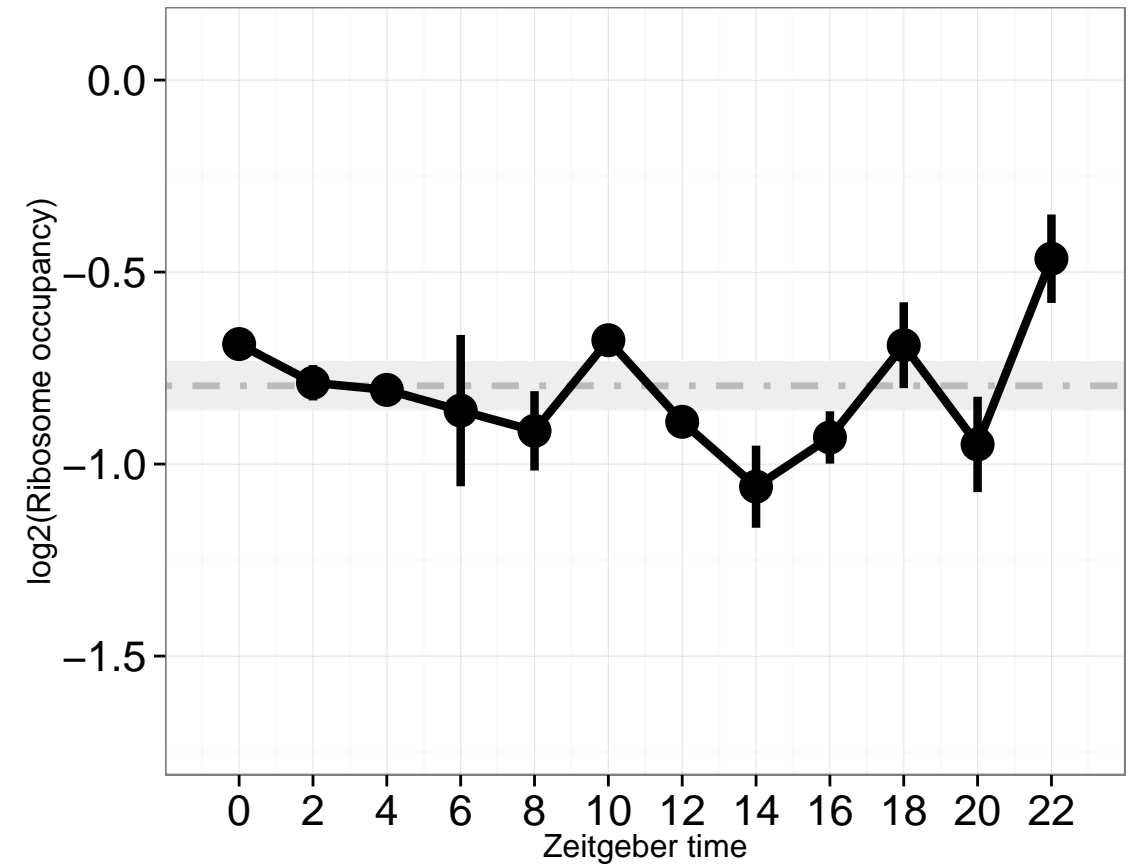

Supplement: SuppDataset_1.zip [file Nudt21_set_A.pdf › Supplemental Dataset 1/A-mRNA_nonrhyth_translation_nonrhyth/Nudt21_set_A.pdf]

## Nudt22

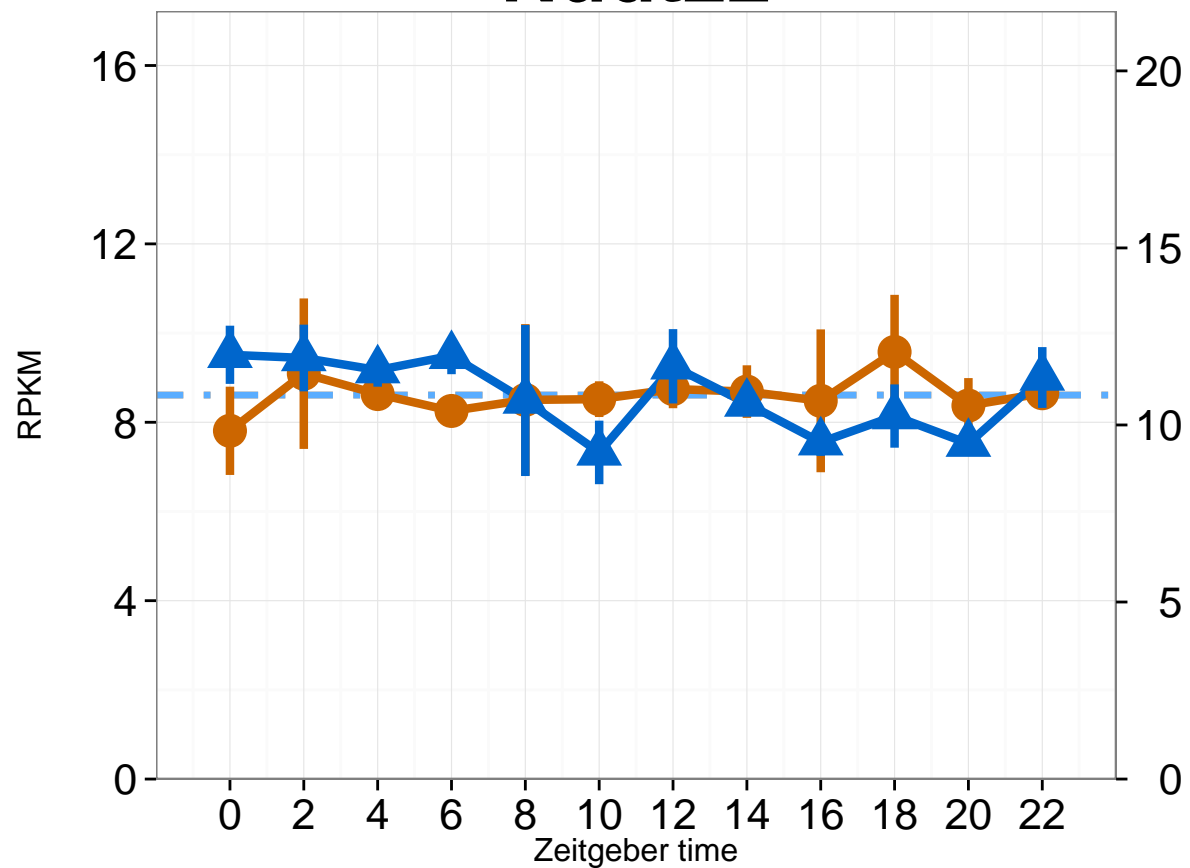

## Nudt22

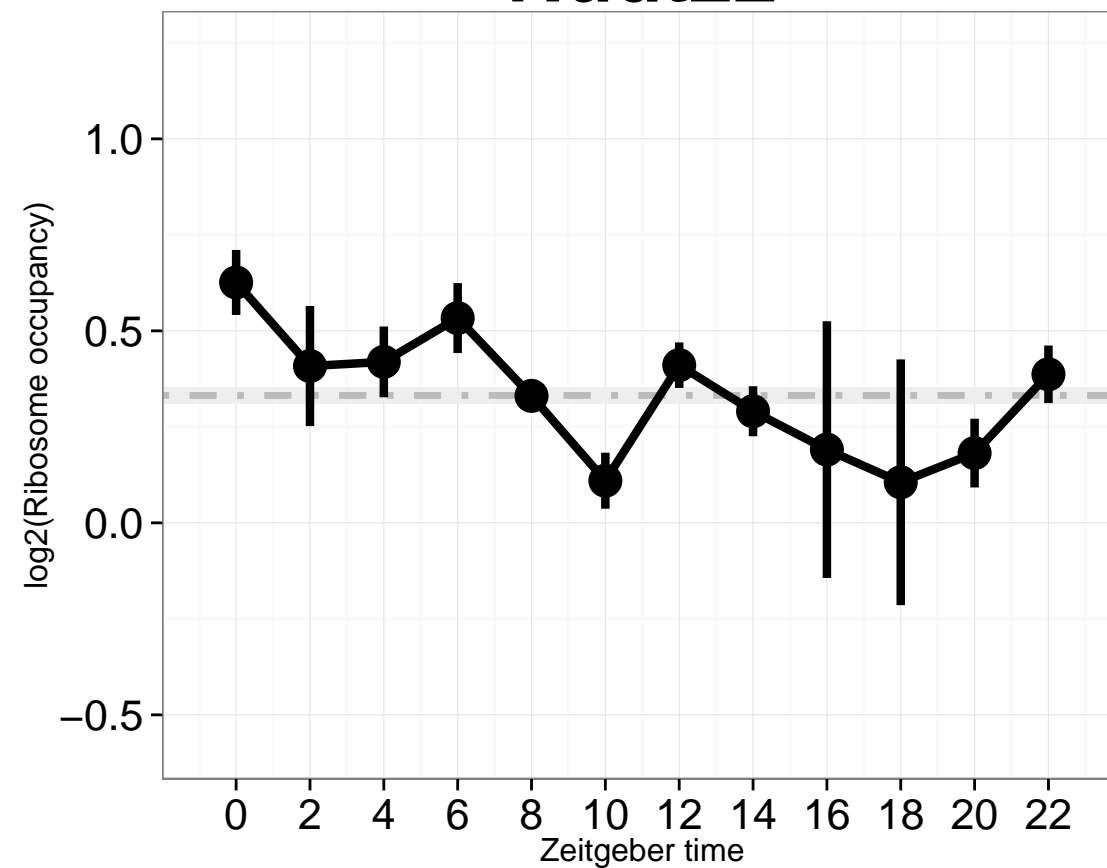

Supplement: SuppDataset_1.zip [file Nudt22_set_A.pdf › Supplemental Dataset 1/A-mRNA_nonrhyth_translation_nonrhyth/Nudt22_set_A.pdf]

## Nudt2

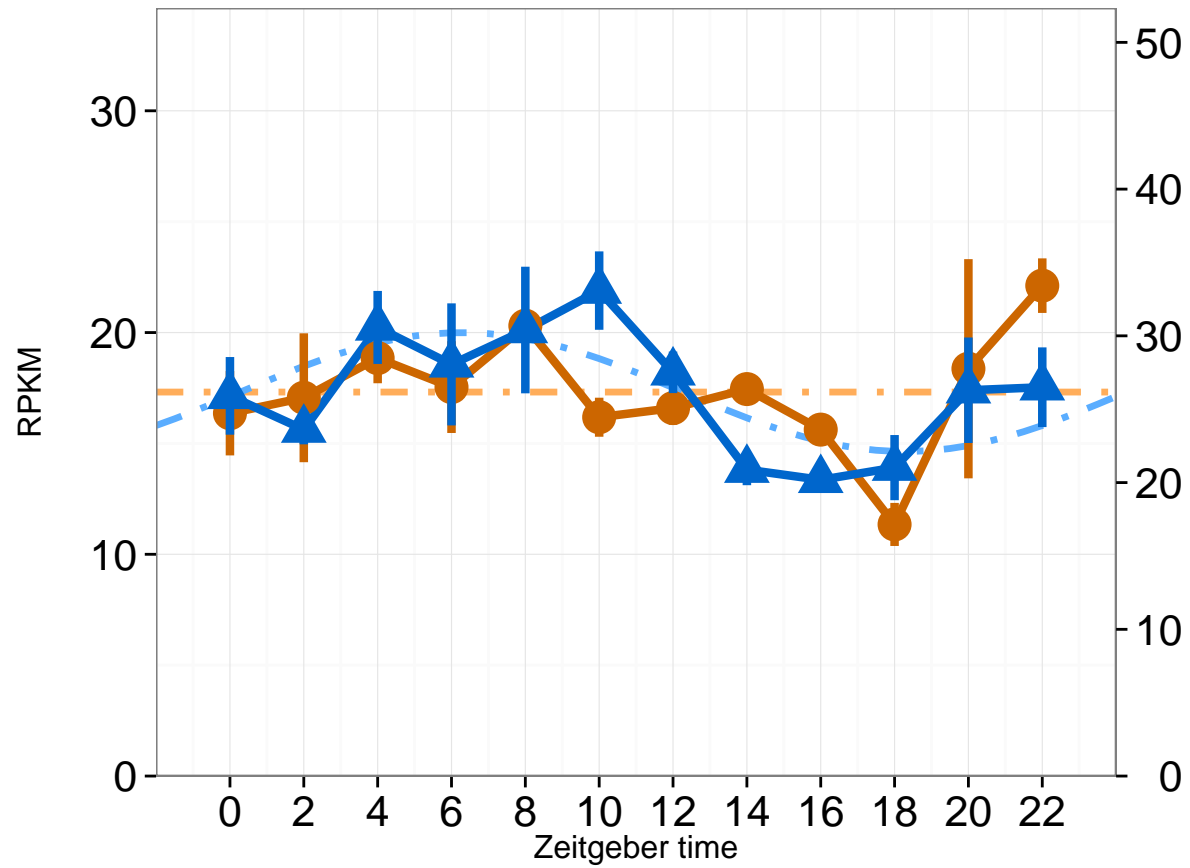

## Nudt2

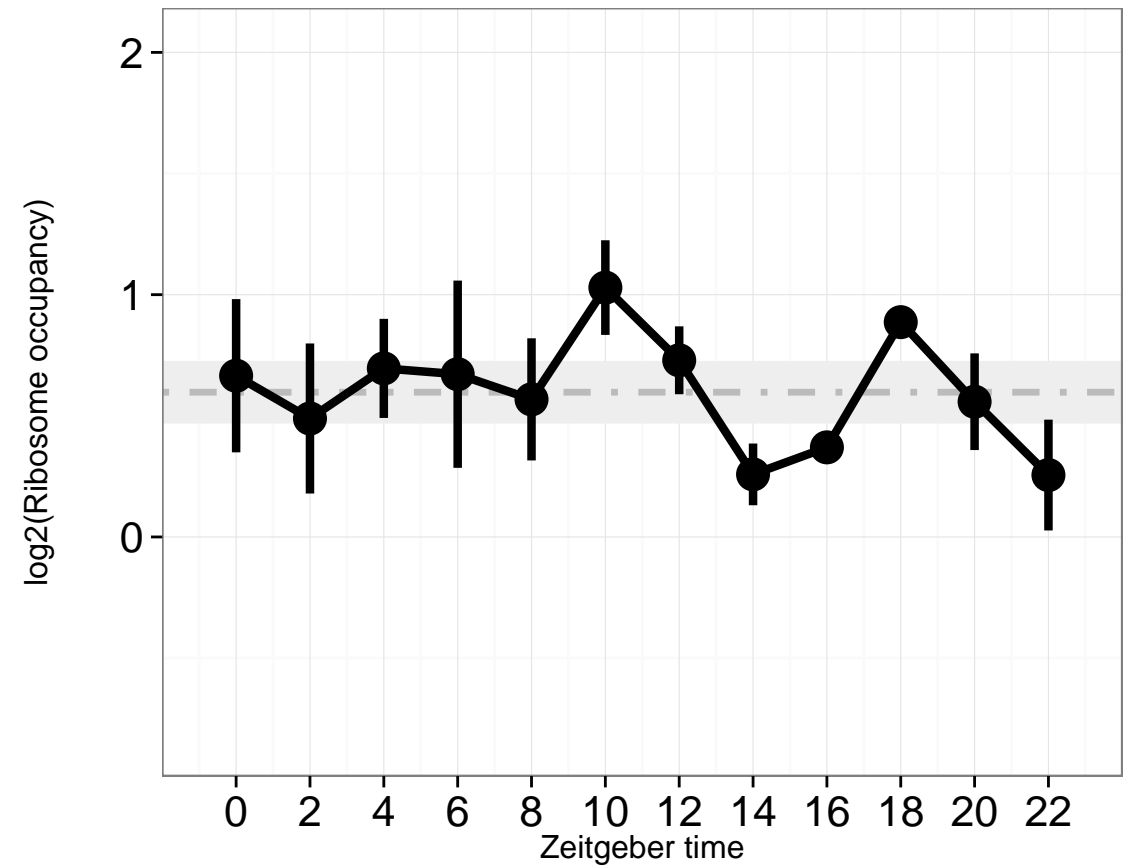

Supplement: SuppDataset_1.zip [file Nudt2_set_A.pdf › Supplemental Dataset 1/A-mRNA_nonrhyth_translation_nonrhyth/Nudt2_set_A.pdf]

## Nudt3

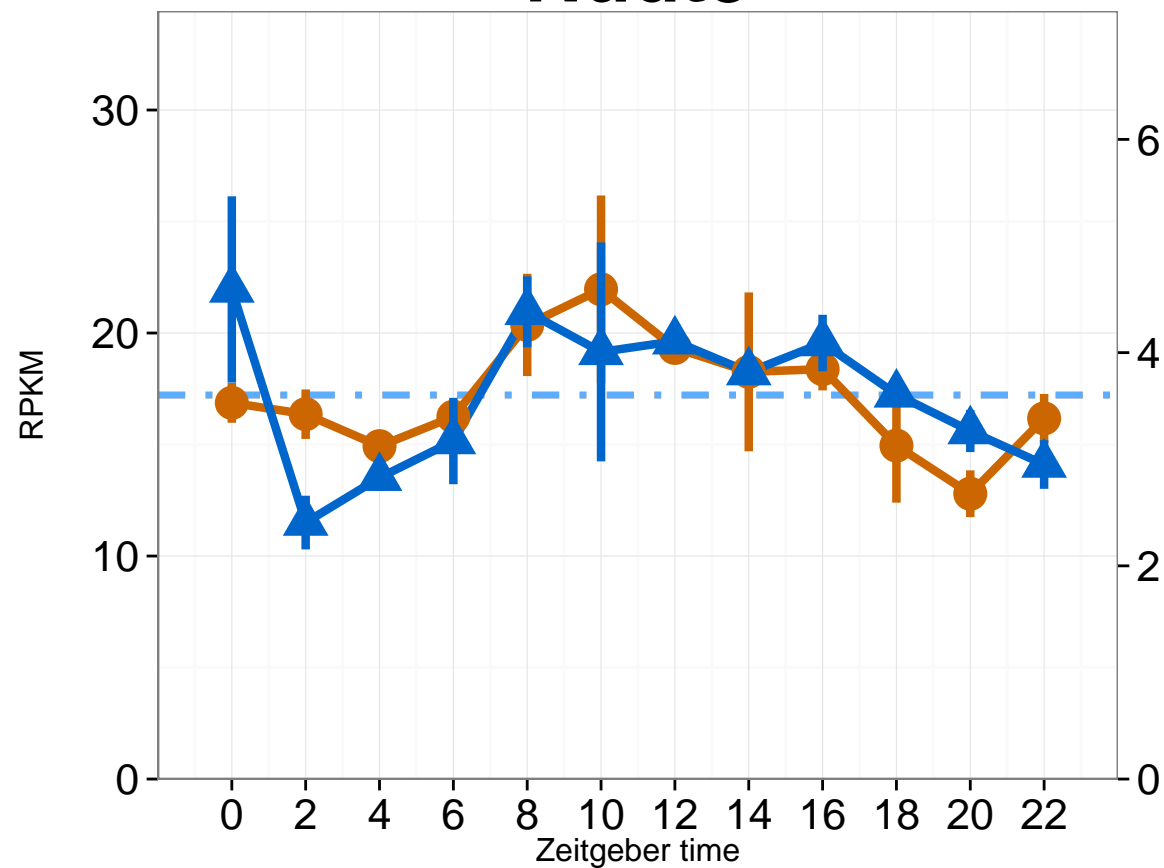

## Nudt3

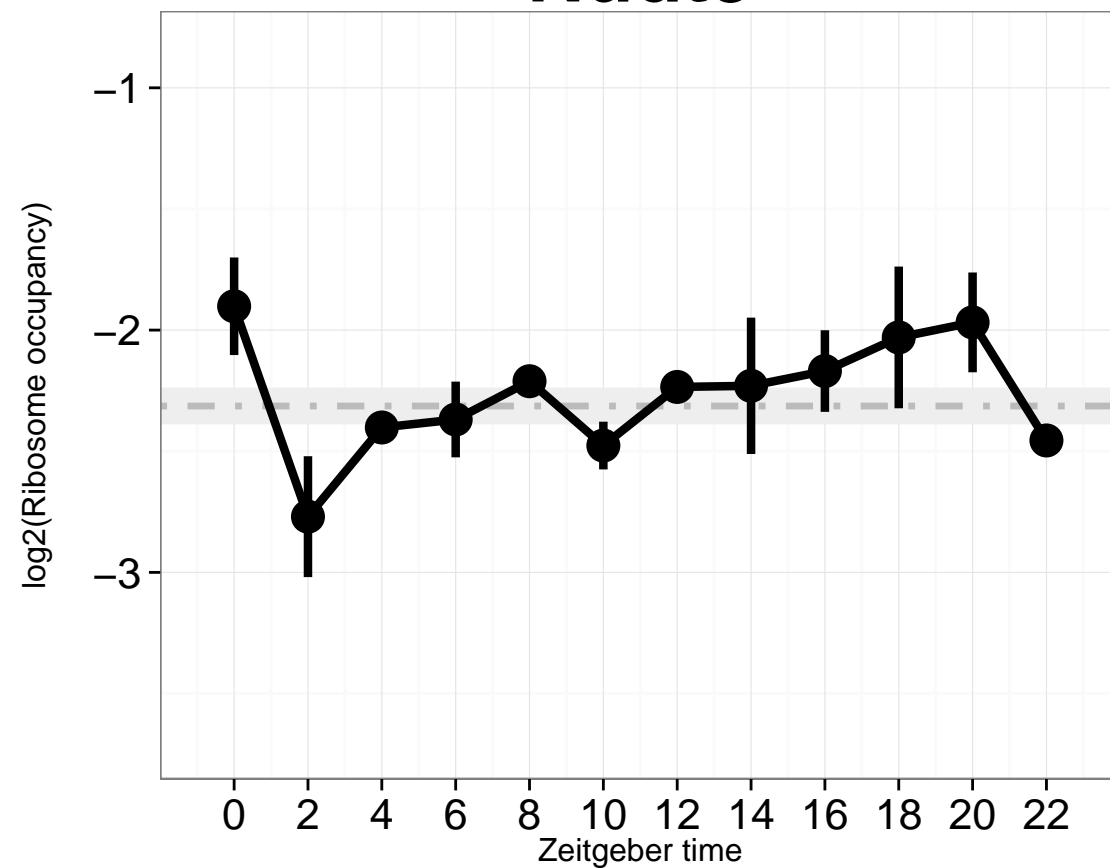

Supplement: SuppDataset_1.zip [file Nudt3_set_A.pdf › Supplemental Dataset 1/A-mRNA_nonrhyth_translation_nonrhyth/Nudt3_set_A.pdf]

## Nudt4

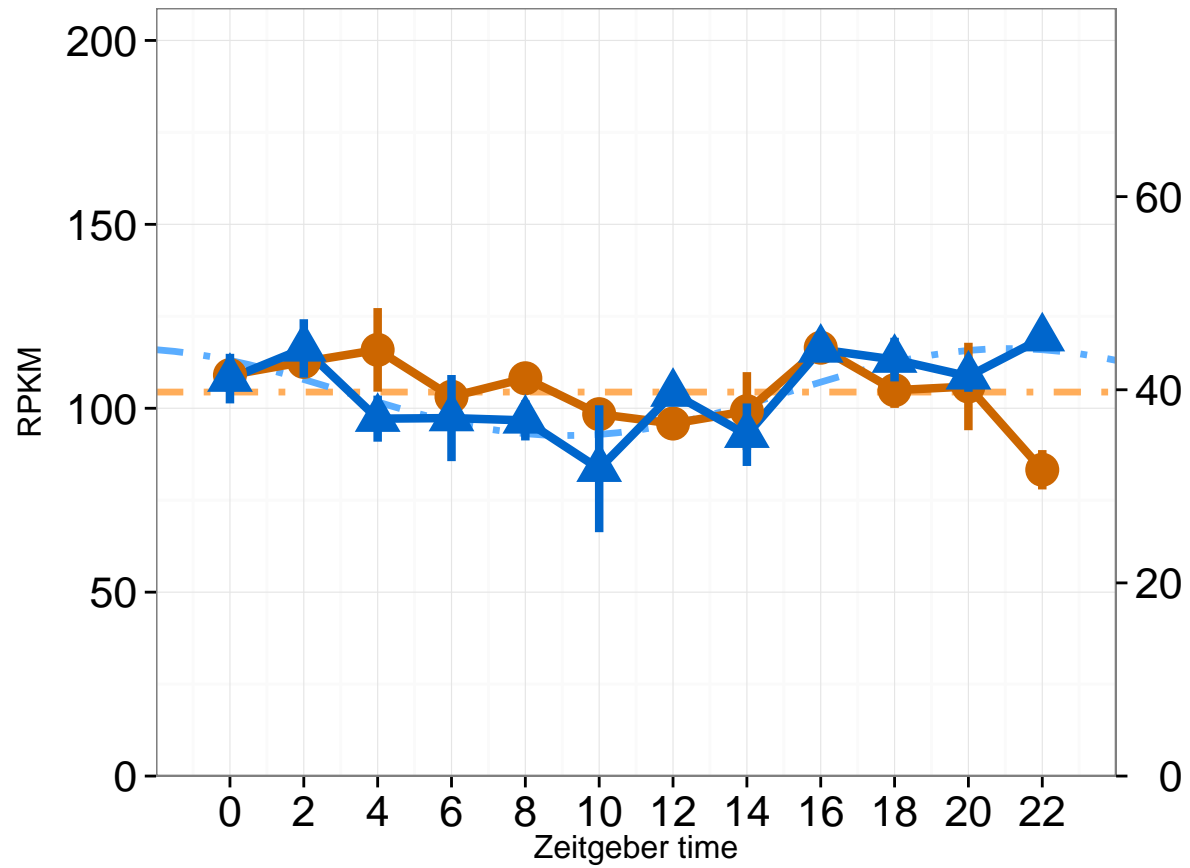

## Nudt4

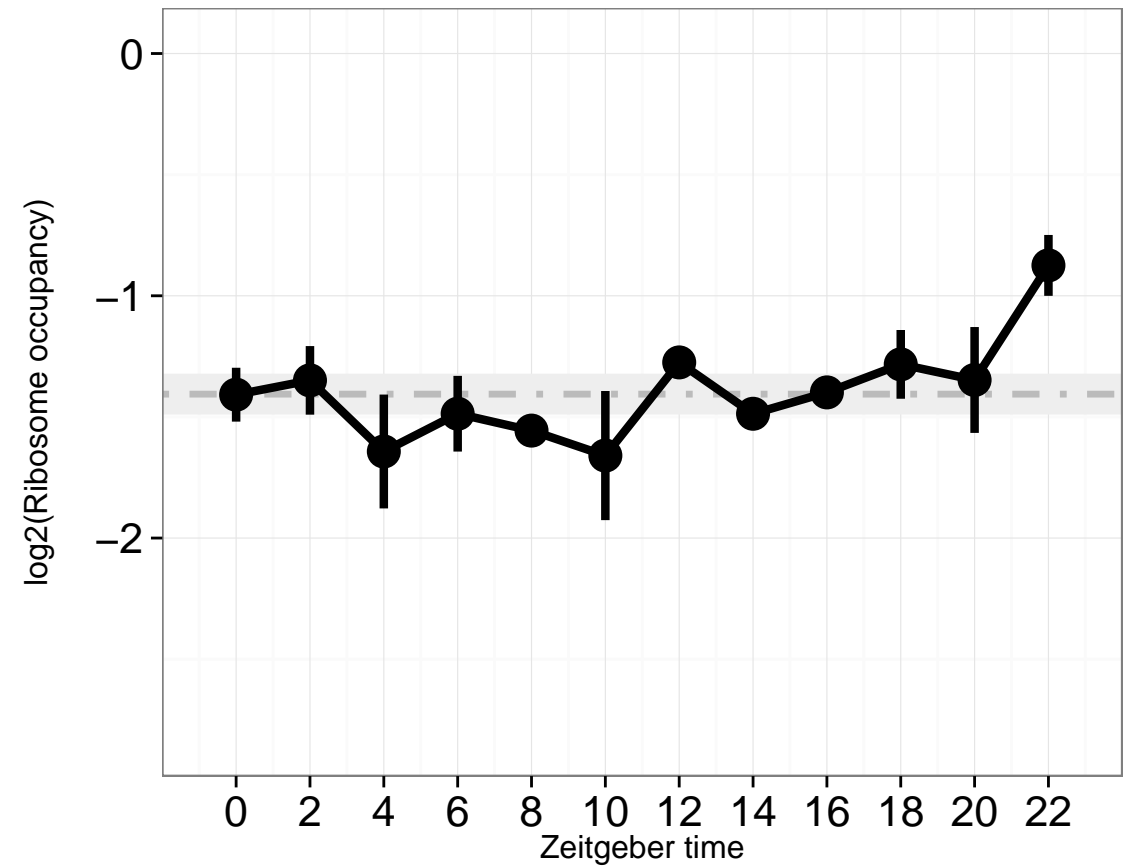

Supplement: SuppDataset_1.zip [file Nudt4_set_A.pdf › Supplemental Dataset 1/A-mRNA_nonrhyth_translation_nonrhyth/Nudt4_set_A.pdf]

## Nudt5

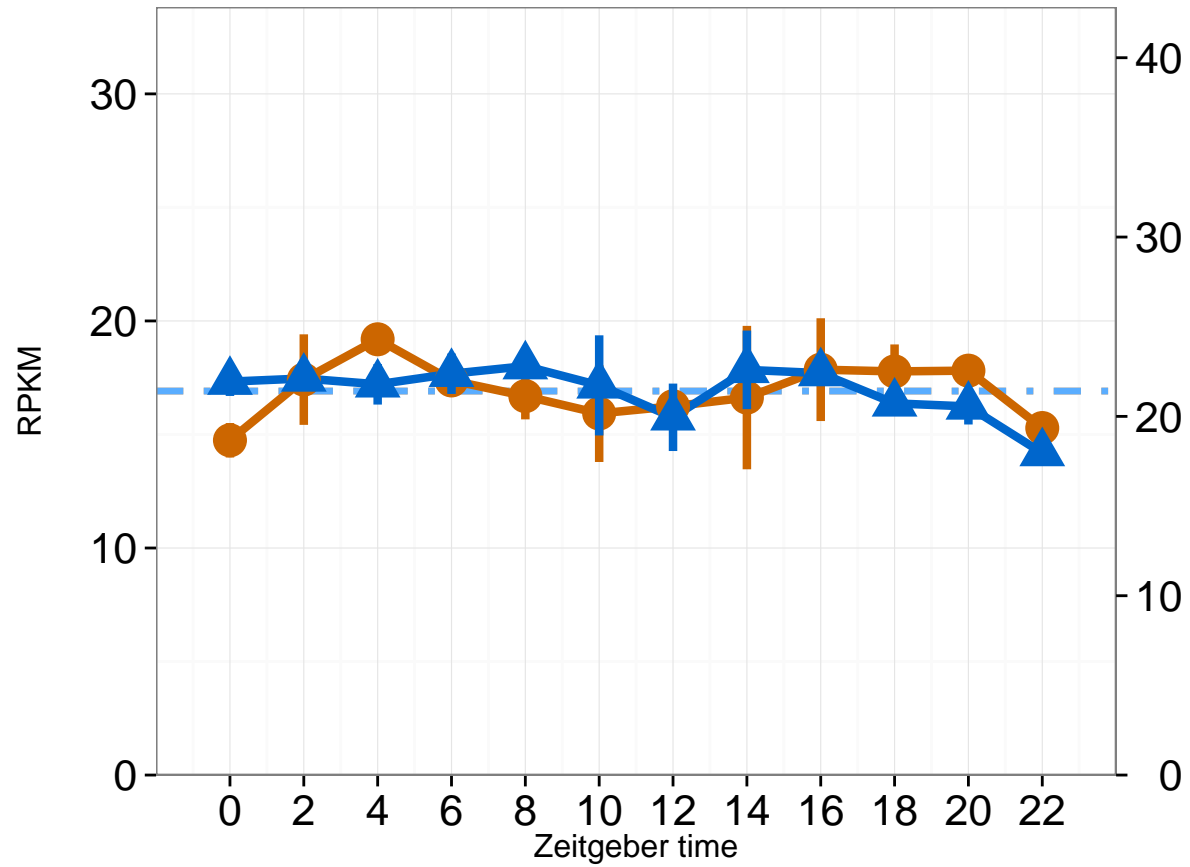

## Nudt5

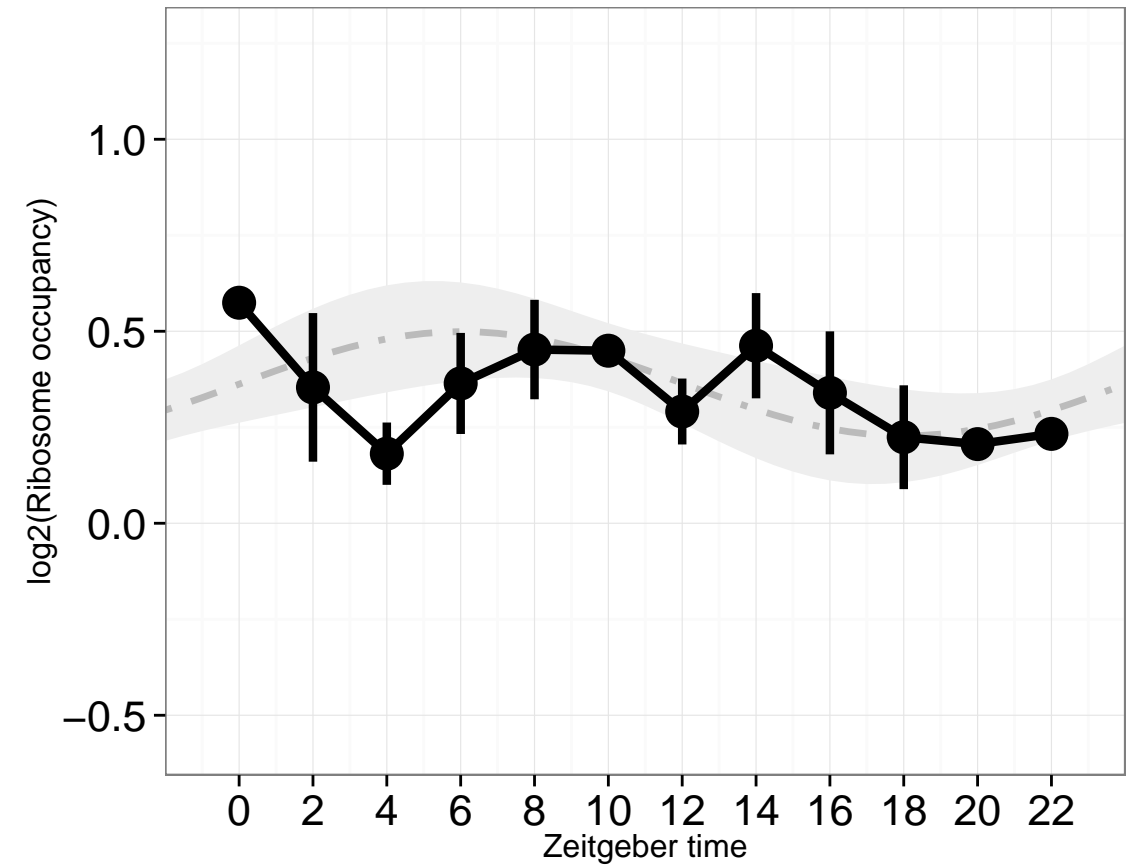

Supplement: SuppDataset_1.zip [file Nudt5_set_A.pdf › Supplemental Dataset 1/A-mRNA_nonrhyth_translation_nonrhyth/Nudt5_set_A.pdf]

# Nudt6

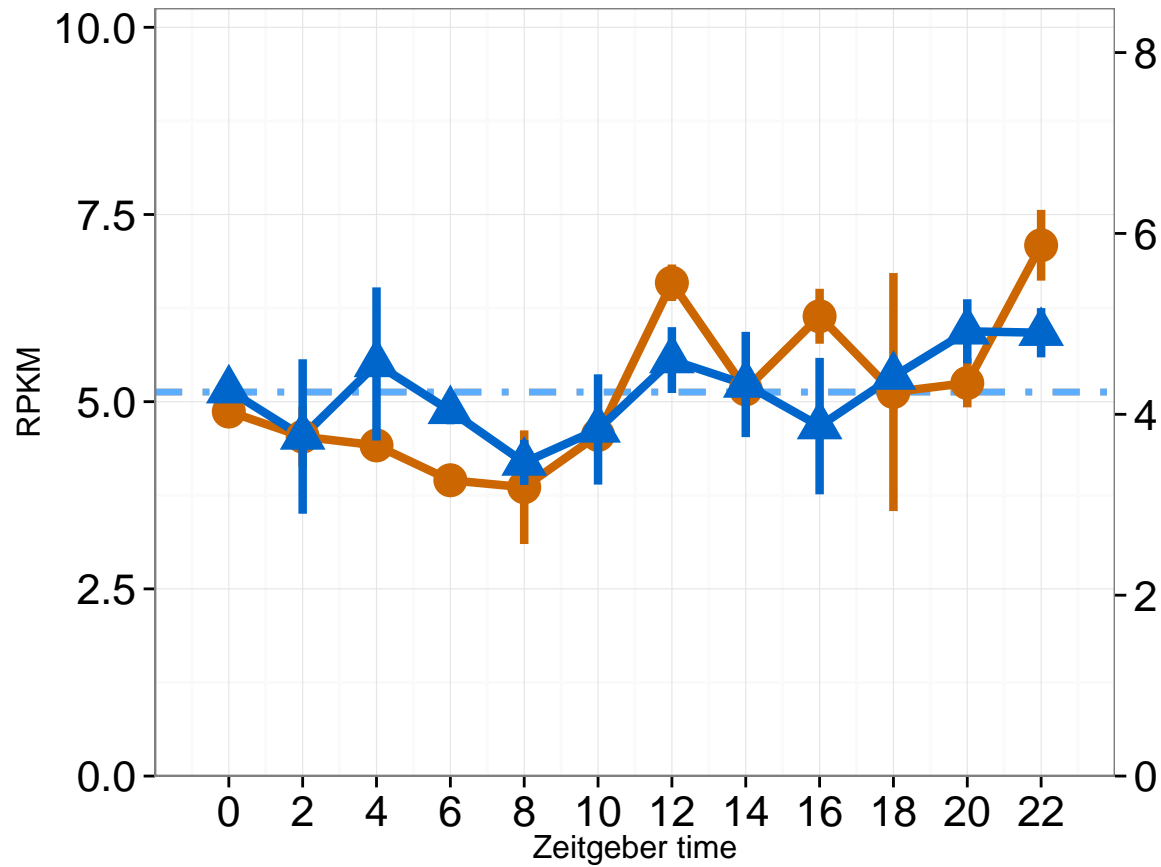

# Nudt6

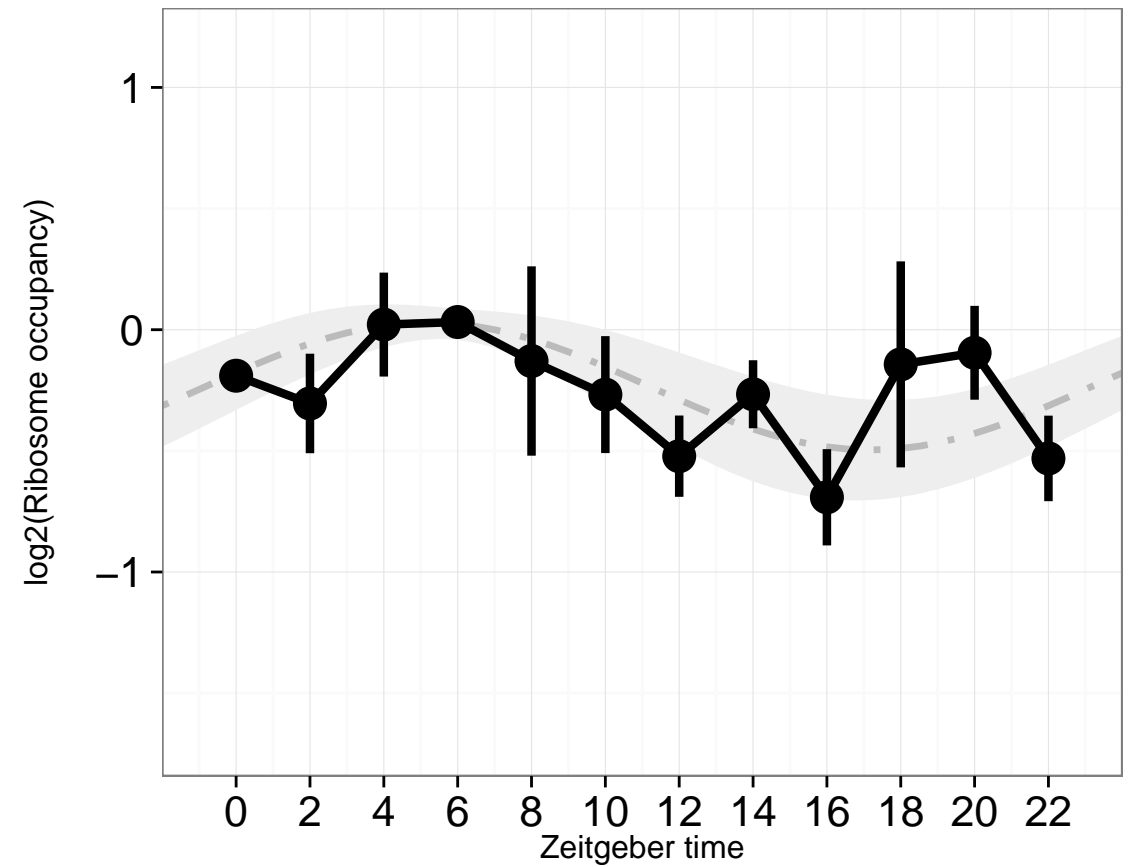

Supplement: SuppDataset_1.zip [file Nudt6_set_A.pdf › Supplemental Dataset 1/A-mRNA_nonrhyth_translation_nonrhyth/Nudt6_set_A.pdf]

## Nudt7

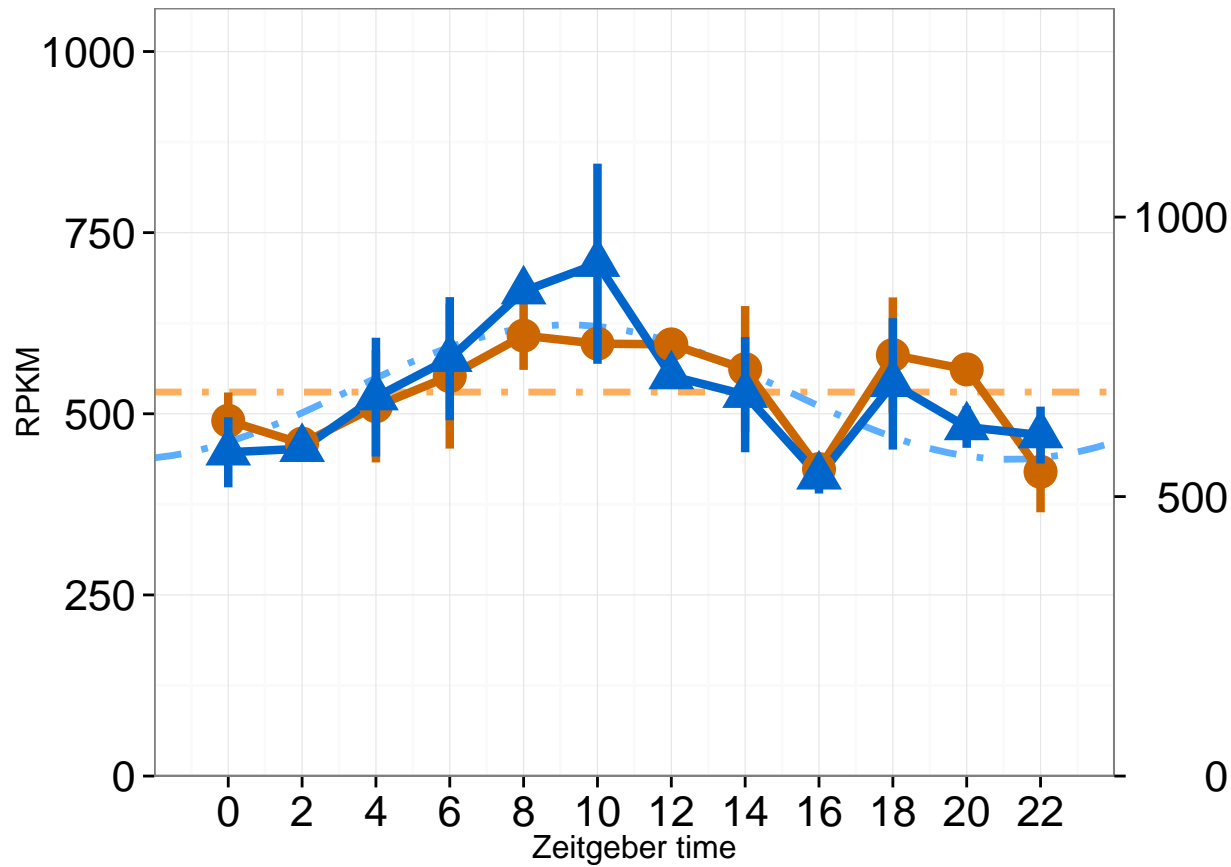

## Nudt7

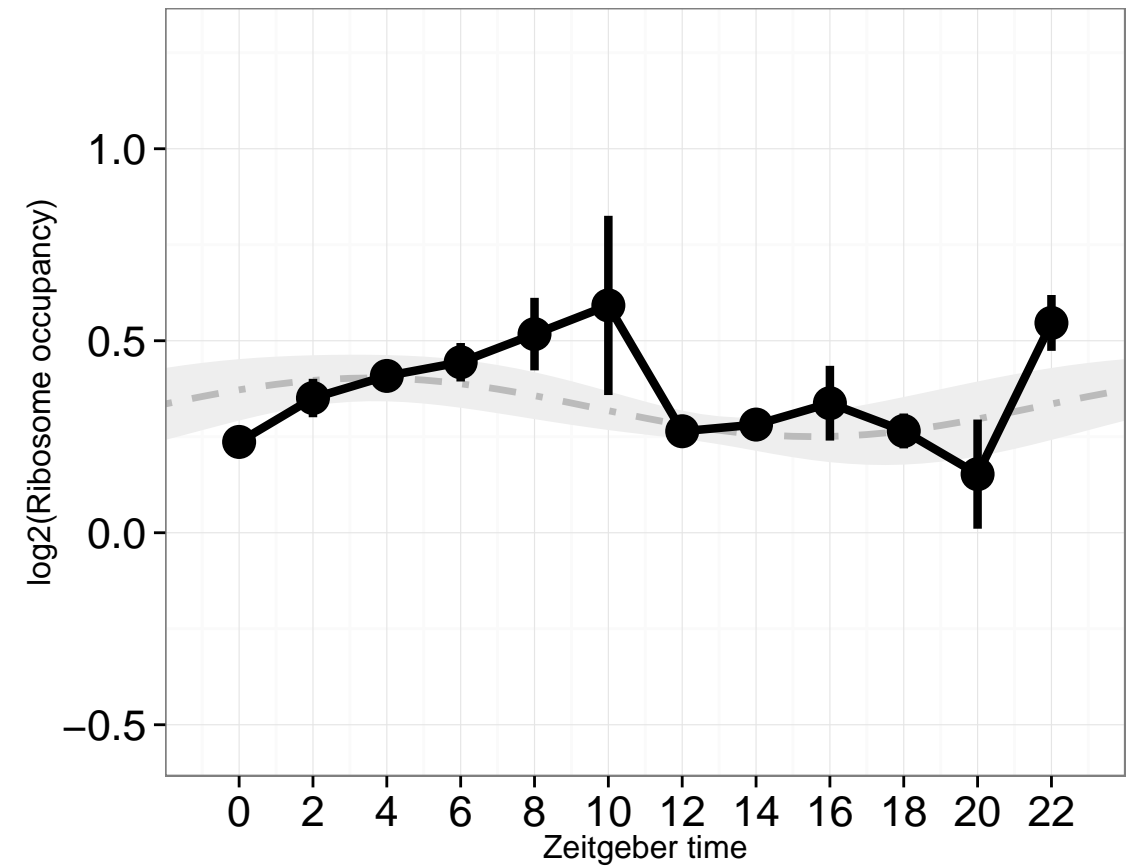

Supplement: SuppDataset_1.zip [file Nudt7_set_A.pdf › Supplemental Dataset 1/A-mRNA_nonrhyth_translation_nonrhyth/Nudt7_set_A.pdf]

## Nudt9

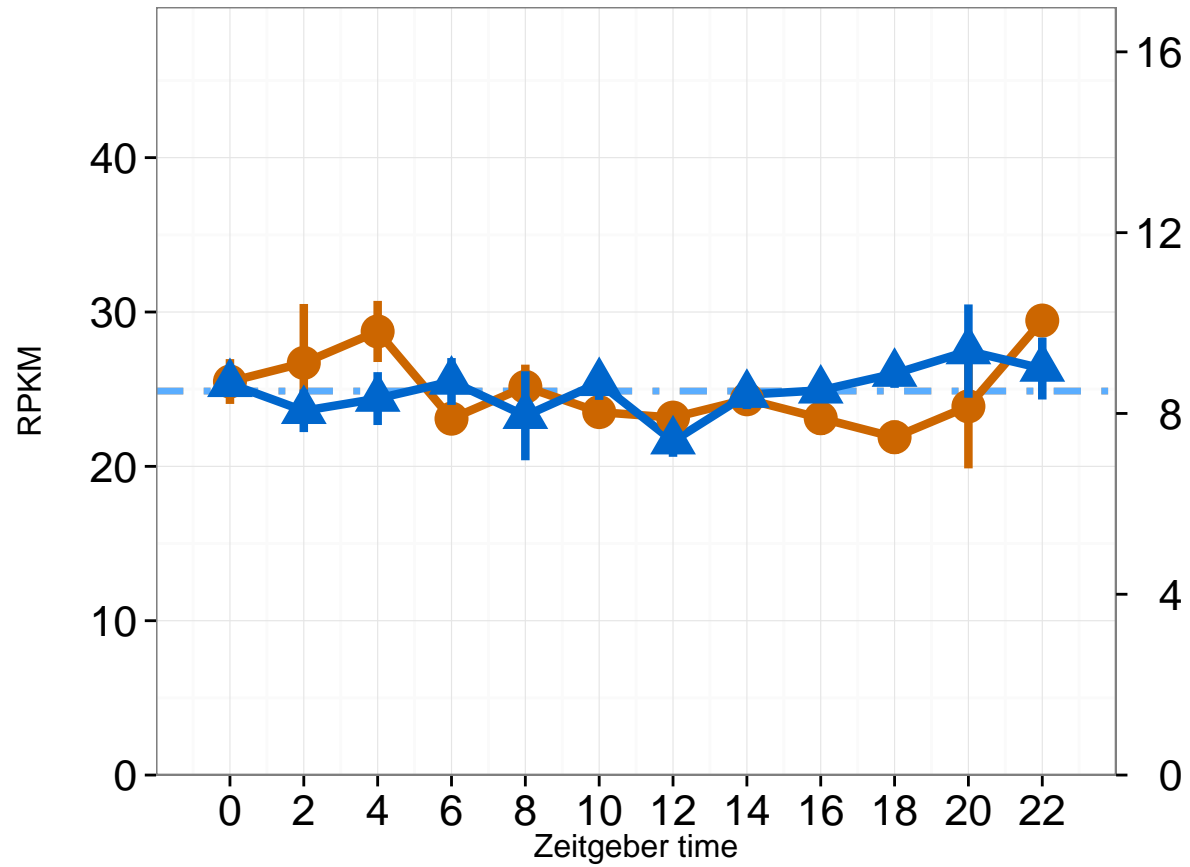

## Nudt9

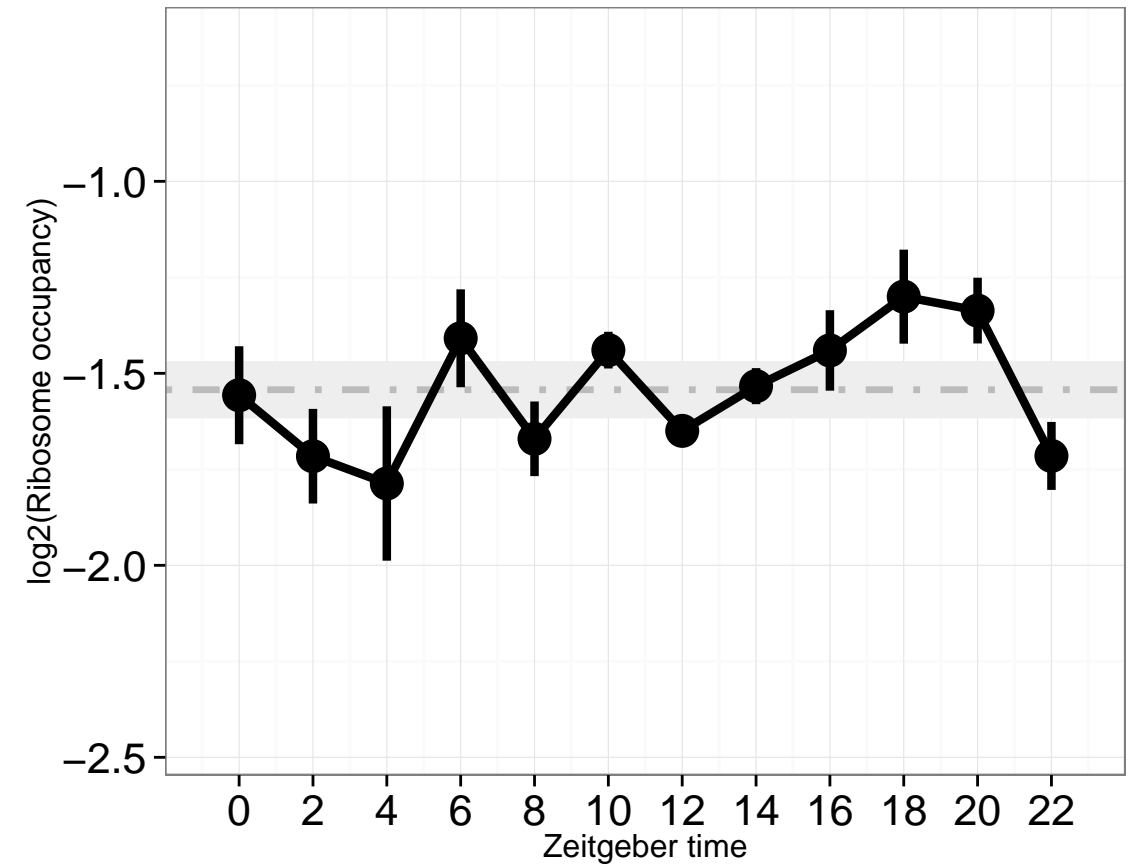

Supplement: SuppDataset_1.zip [file Nudt9_set_A.pdf › Supplemental Dataset 1/A-mRNA_nonrhyth_translation_nonrhyth/Nudt9_set_A.pdf]

## Nufip1

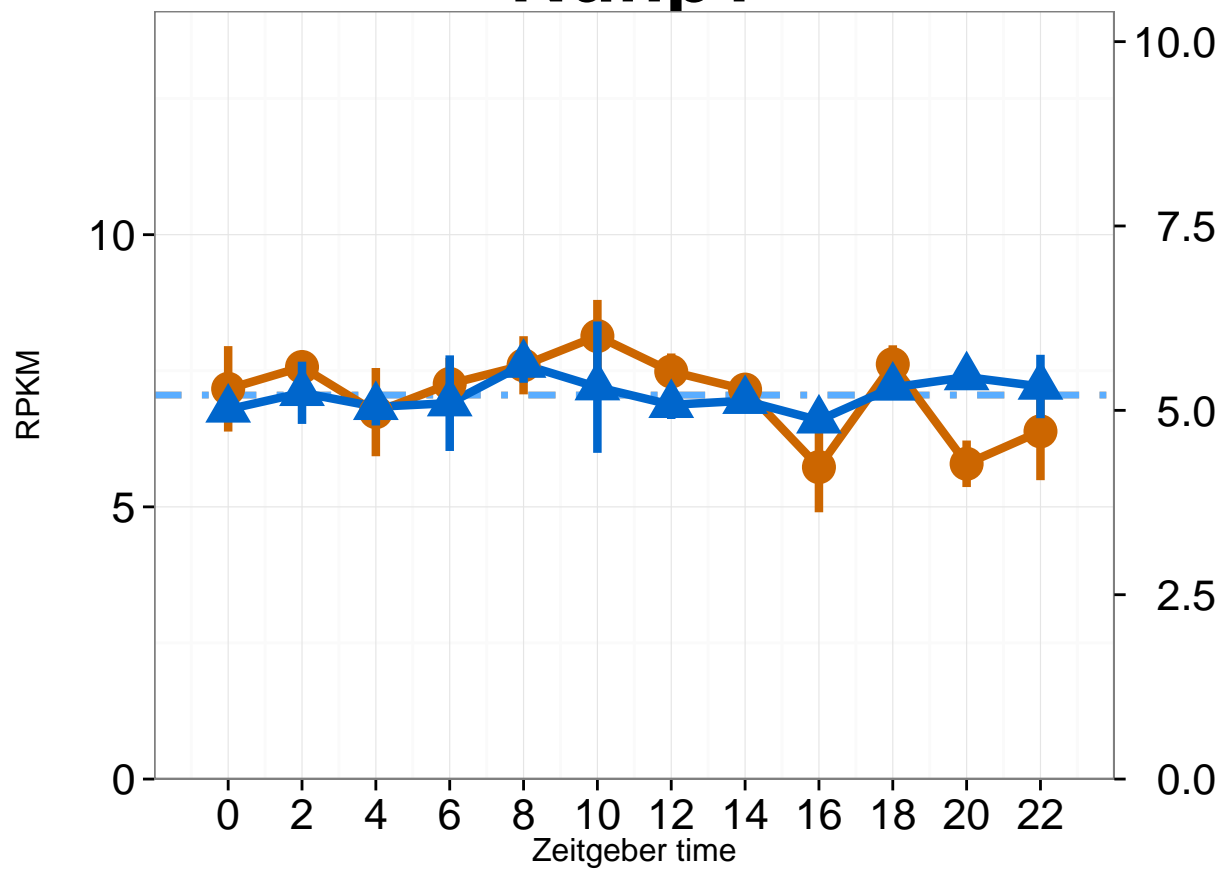

## Nufip1

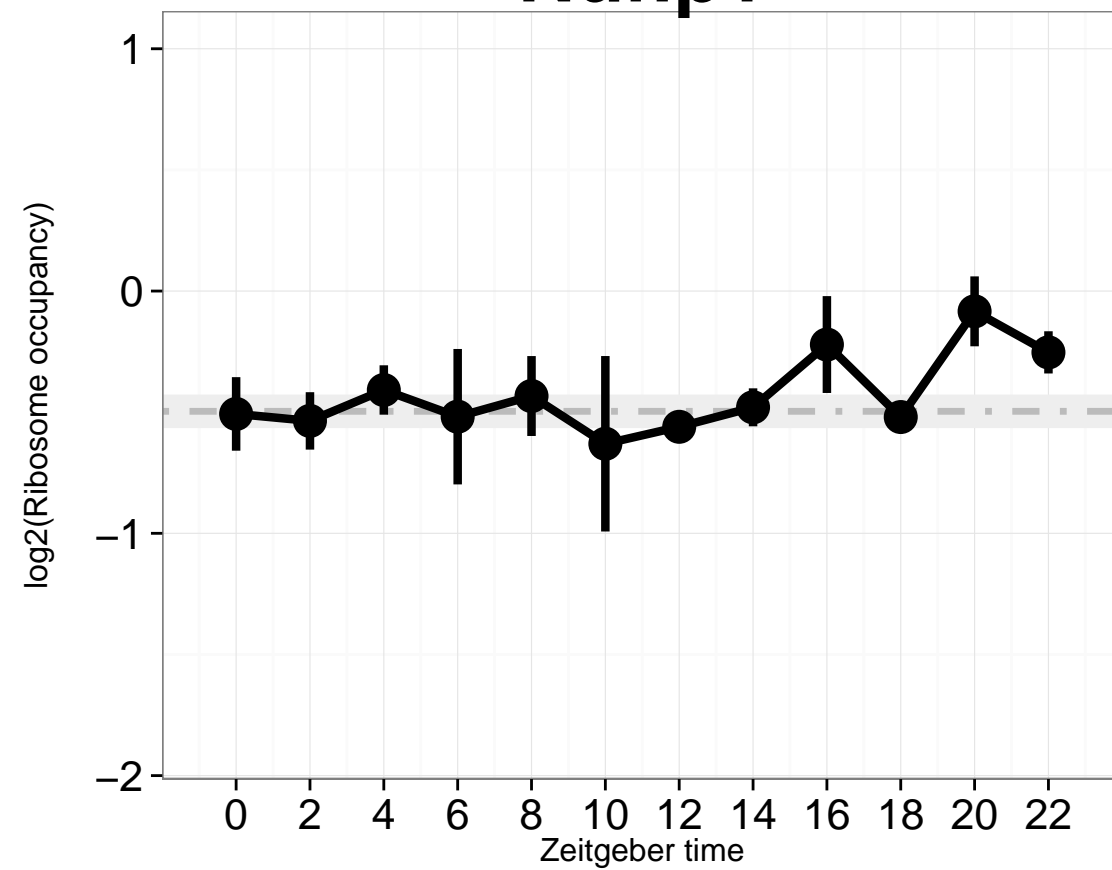

Supplement: SuppDataset_1.zip [file Nufip1_set_A.pdf › Supplemental Dataset 1/A-mRNA_nonrhyth_translation_nonrhyth/Nufip1_set_A.pdf]

## Nufip2

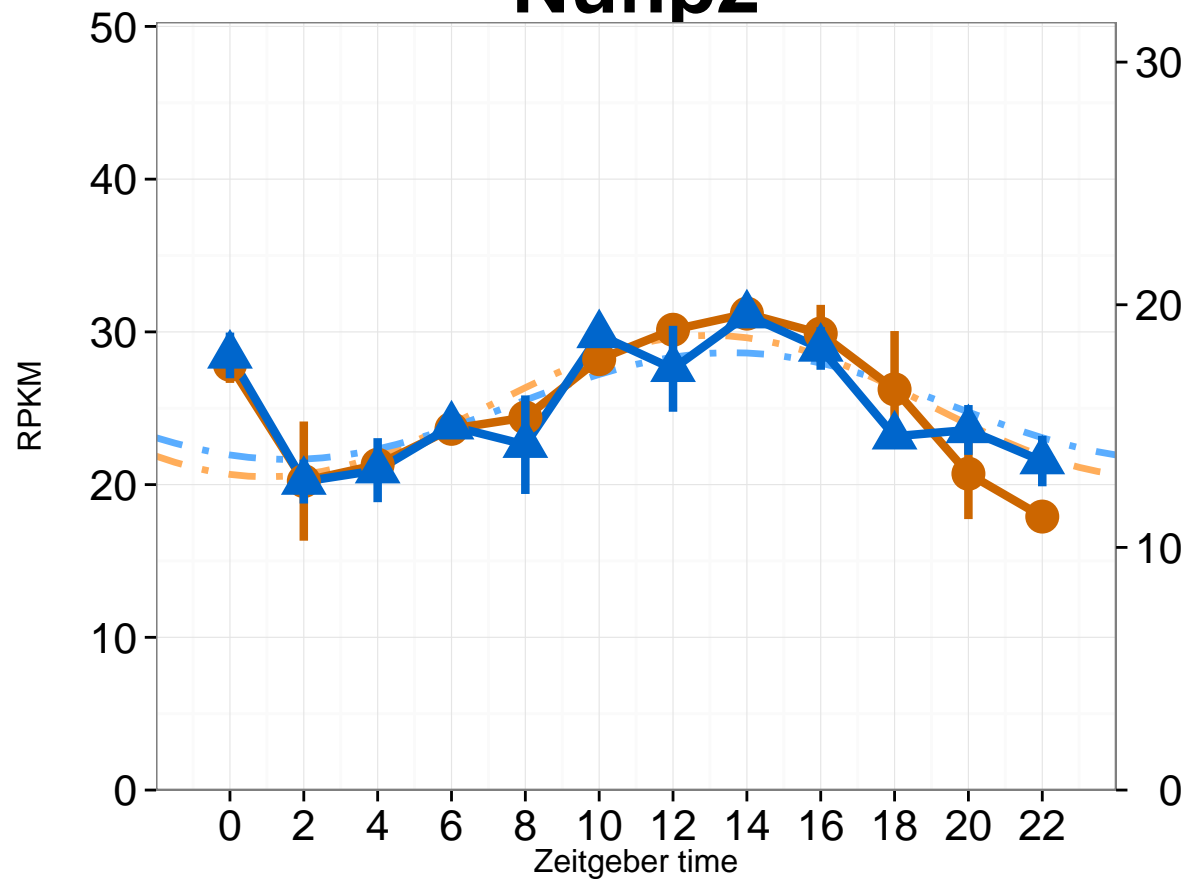

## Nufip2

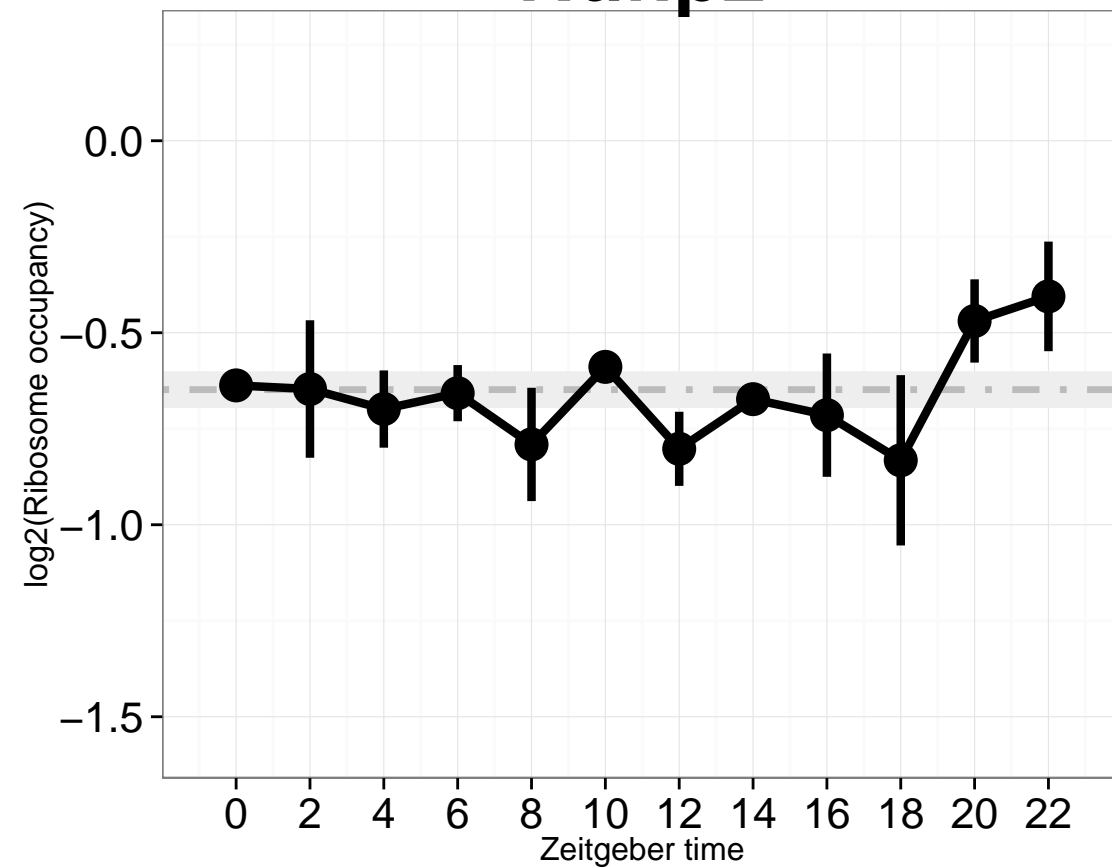

Supplement: SuppDataset_1.zip [file Nufip2_set_A.pdf › Supplemental Dataset 1/A-mRNA_nonrhyth_translation_nonrhyth/Nufip2_set_A.pdf]

# Numa1

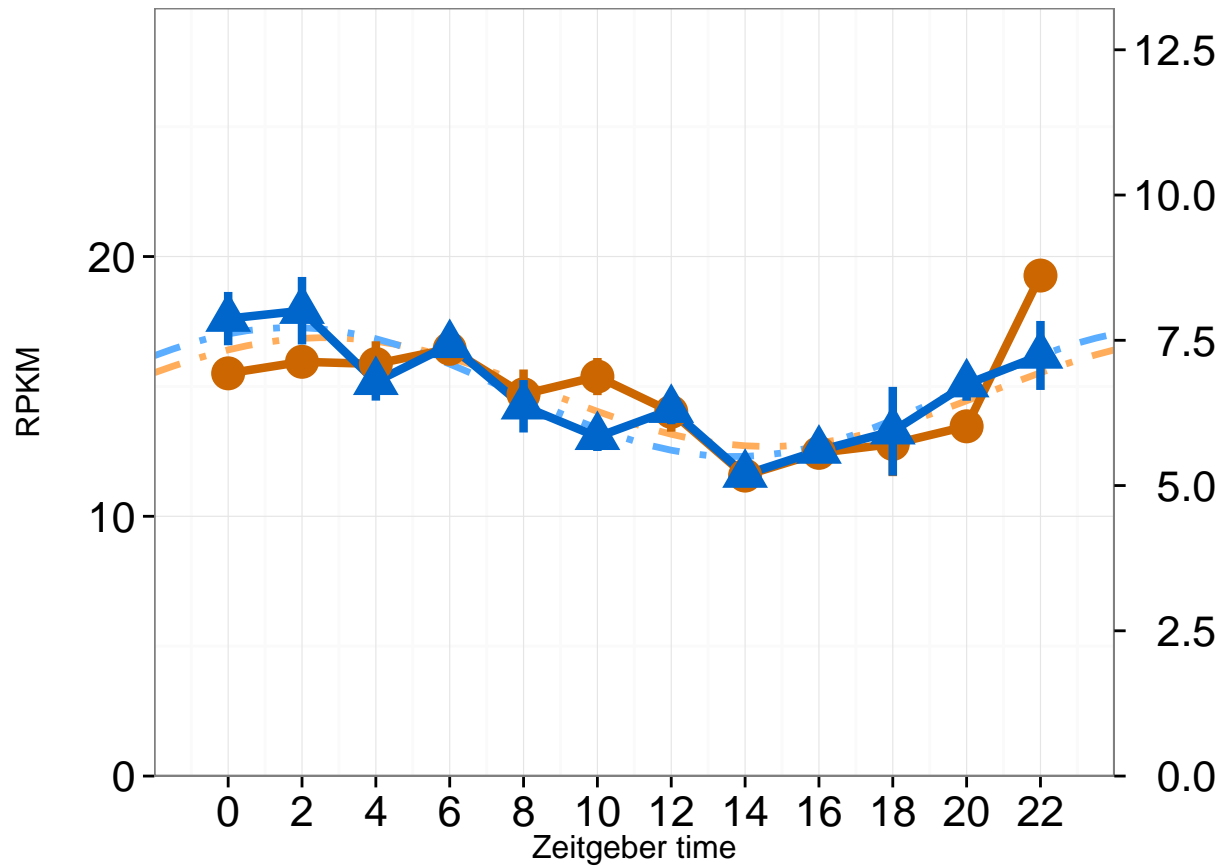

# Numa1

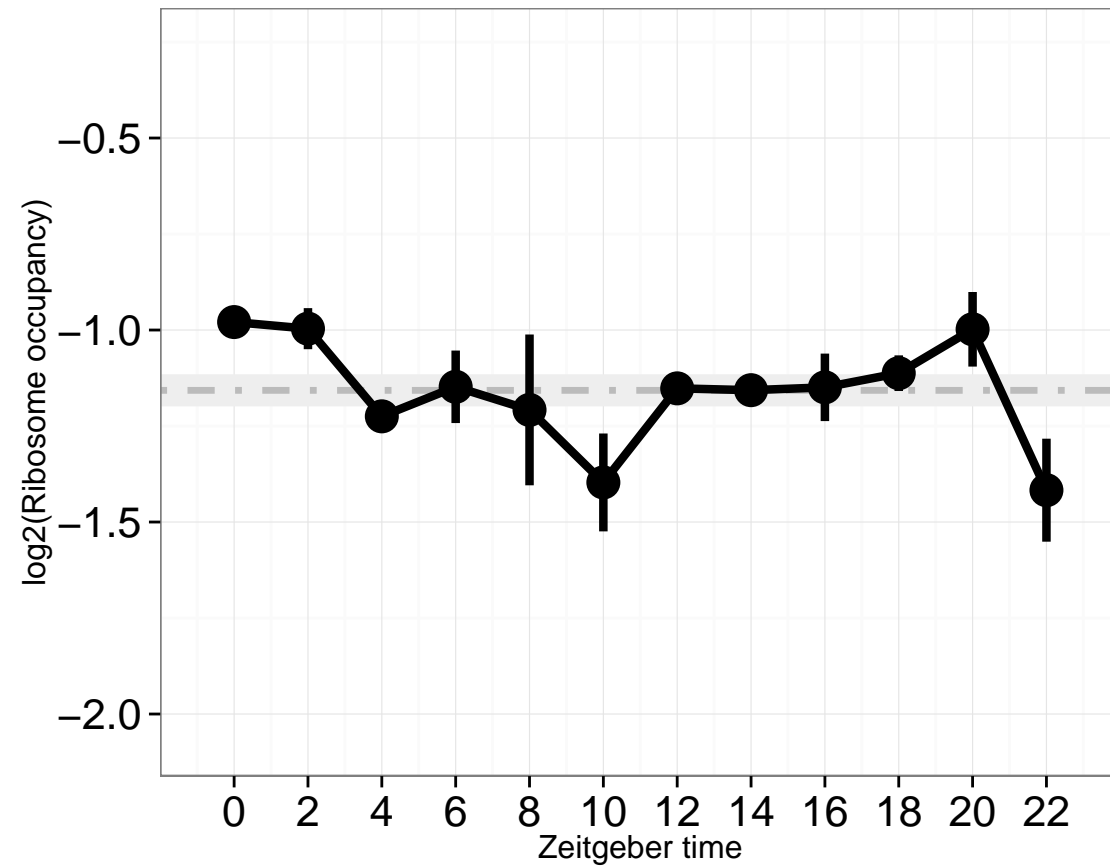

Supplement: SuppDataset_1.zip [file Numa1_set_A.pdf › Supplemental Dataset 1/A-mRNA_nonrhyth_translation_nonrhyth/Numa1_set_A.pdf]

## Numb

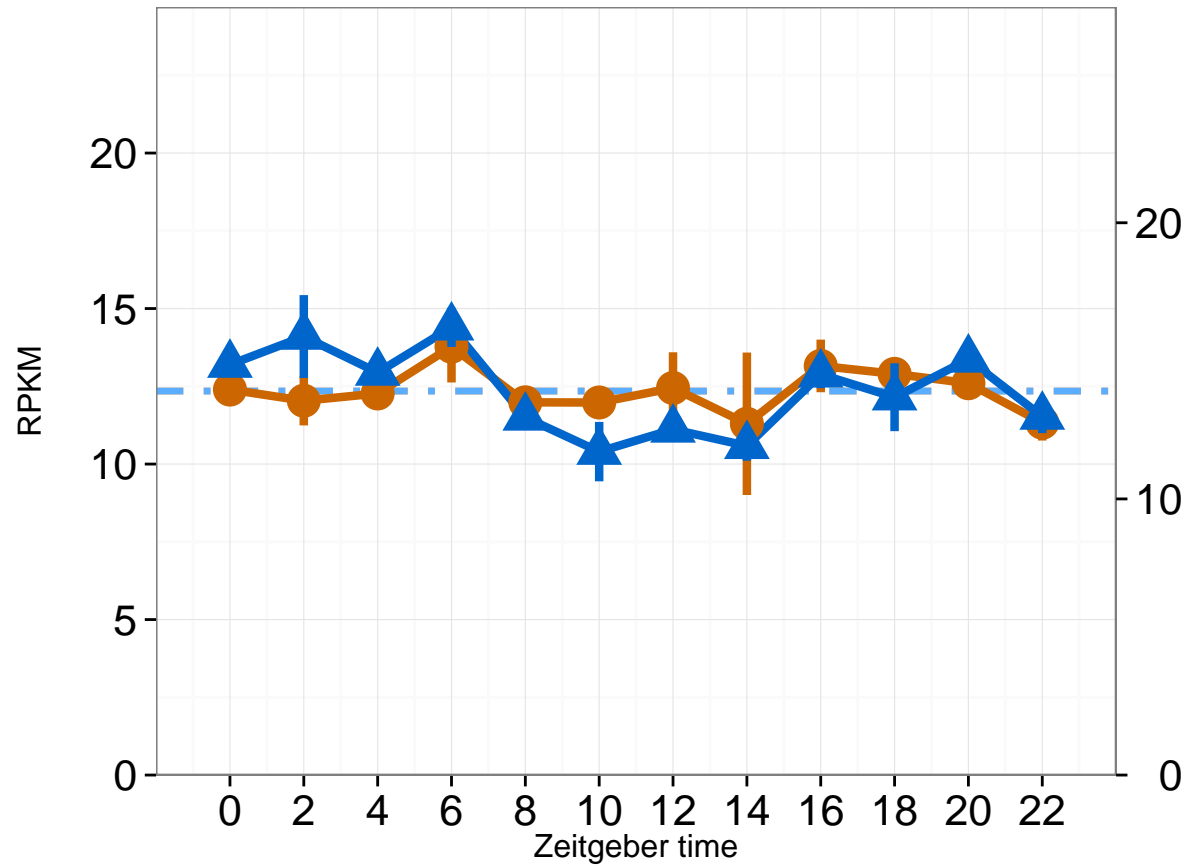

## Numb

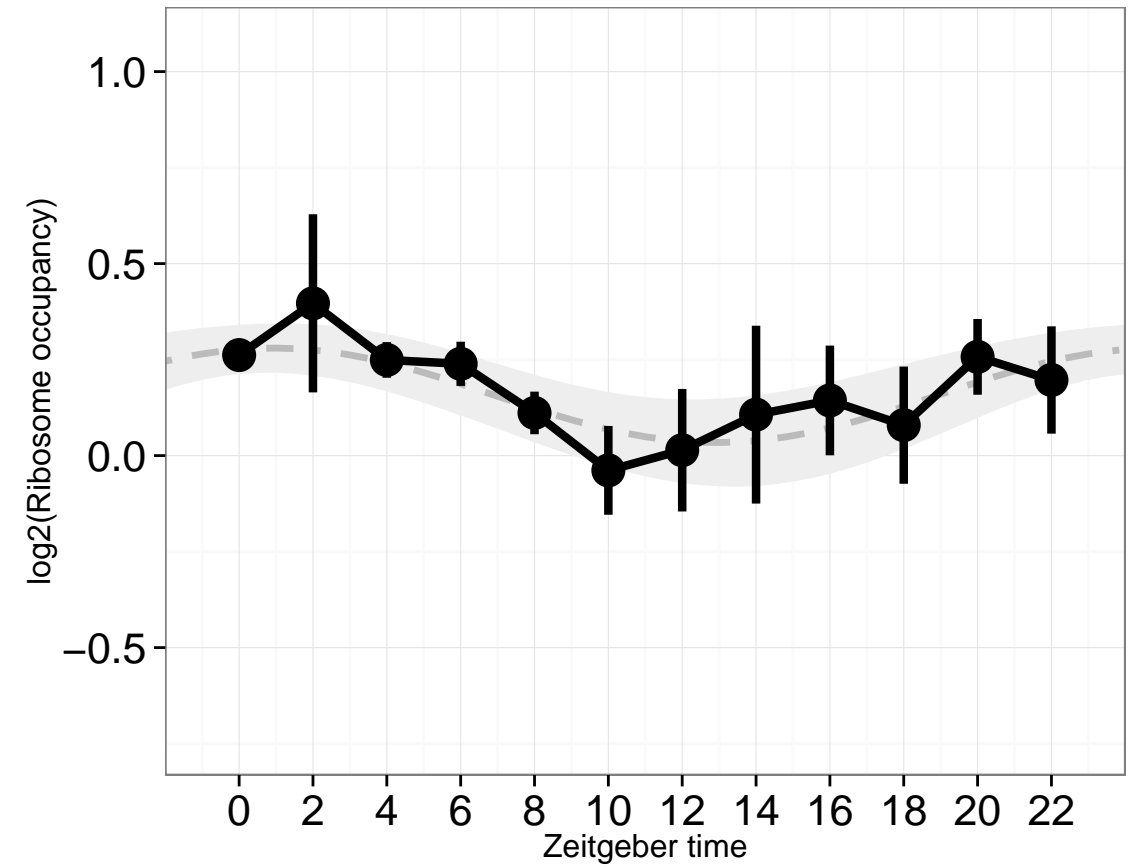

Supplement: SuppDataset_1.zip [file Numb_set_A.pdf › Supplemental Dataset 1/A-mRNA_nonrhyth_translation_nonrhyth/Numb_set_A.pdf]

# Nup107

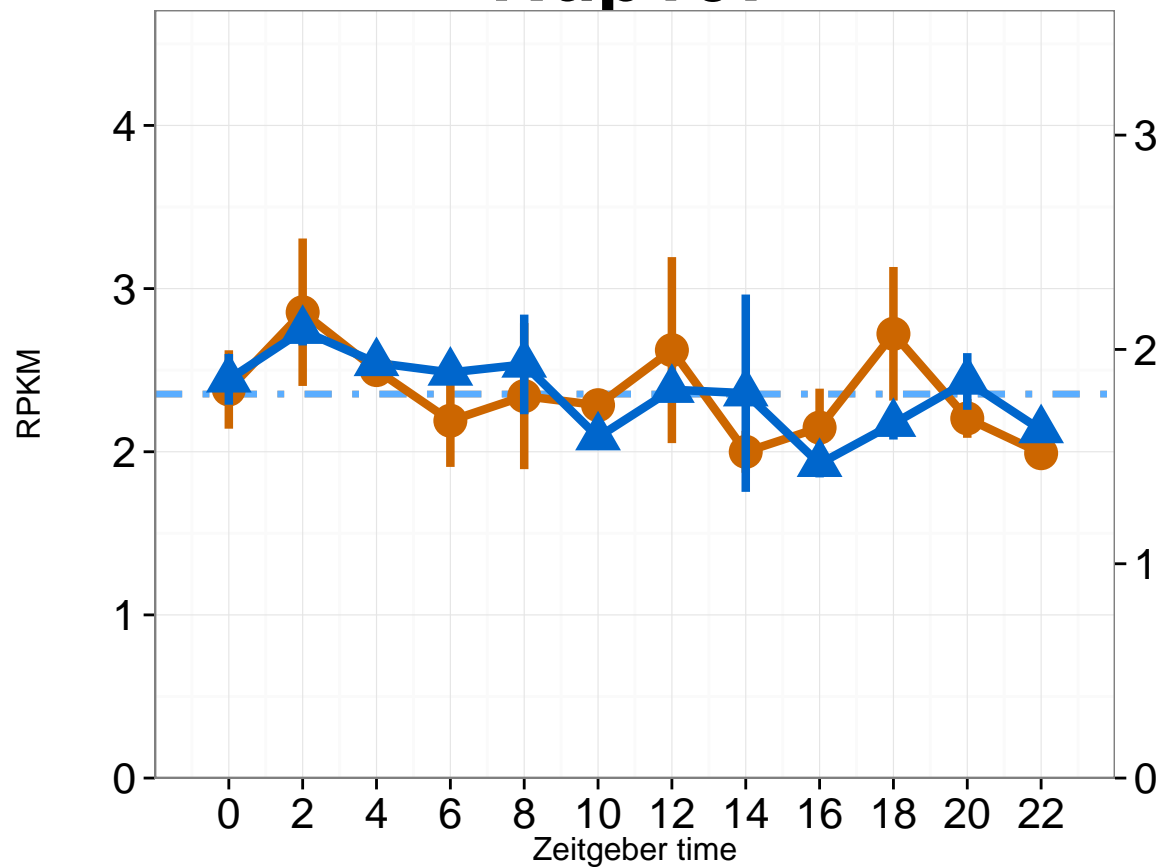

# Nup107

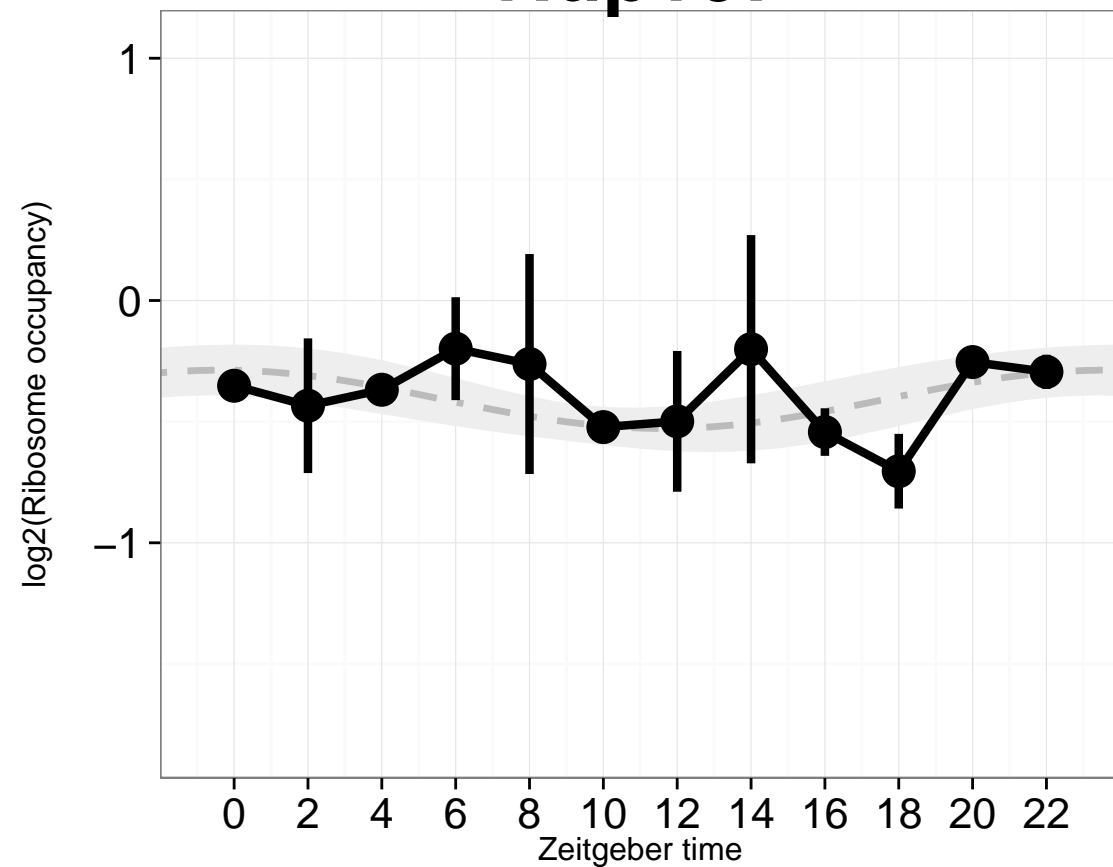

Supplement: SuppDataset_1.zip [file Nup107_set_A.pdf › Supplemental Dataset 1/A-mRNA_nonrhyth_translation_nonrhyth/Nup107_set_A.pdf]

# Nup153

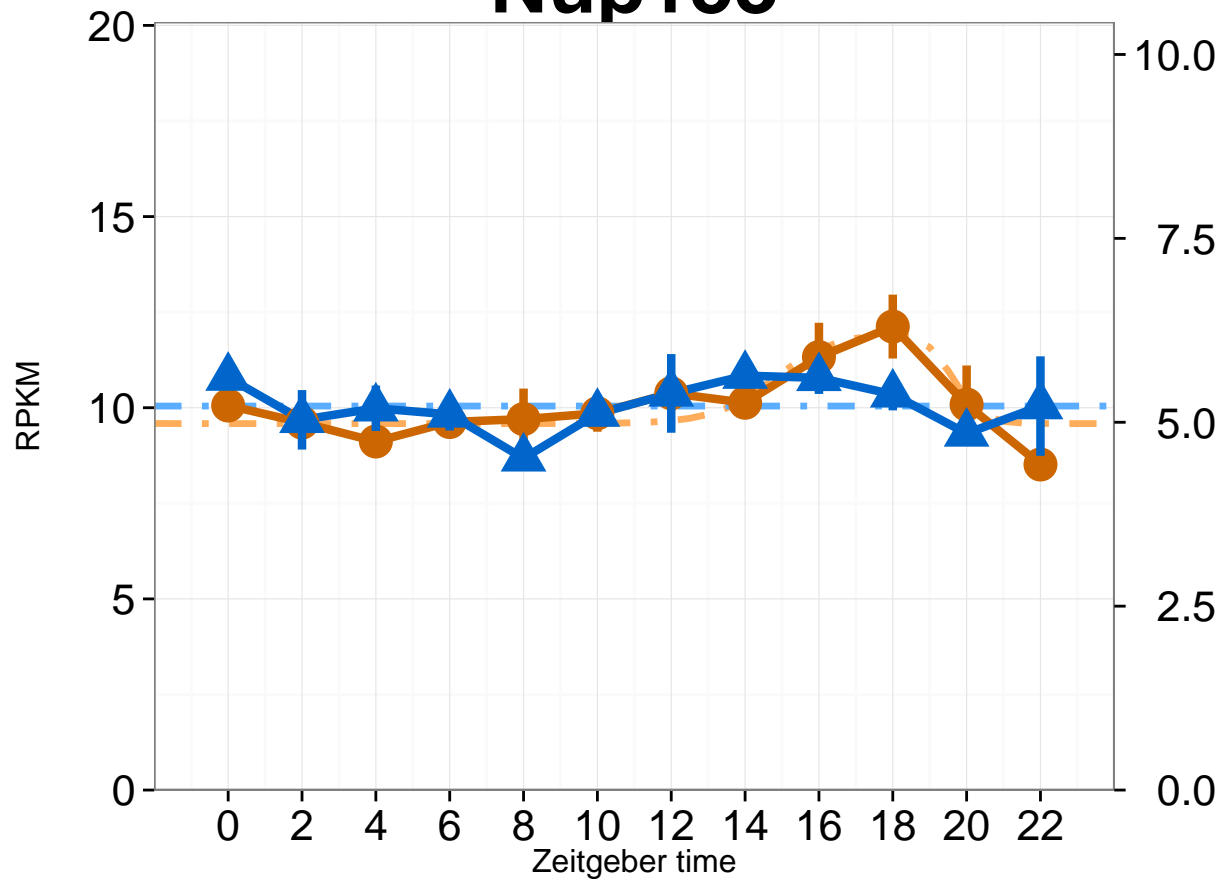

# Nup153

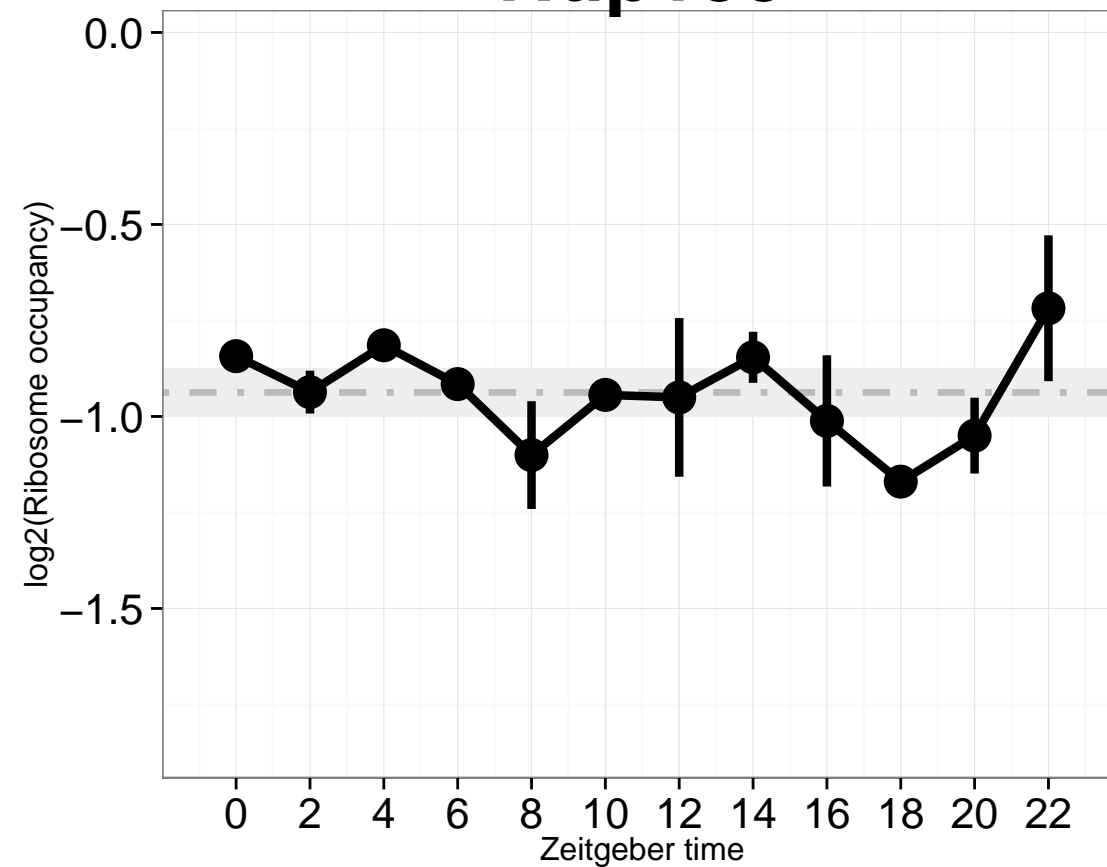

Supplement: SuppDataset_1.zip [file Nup153_set_A.pdf › Supplemental Dataset 1/A-mRNA_nonrhyth_translation_nonrhyth/Nup153_set_A.pdf]

## Nup155

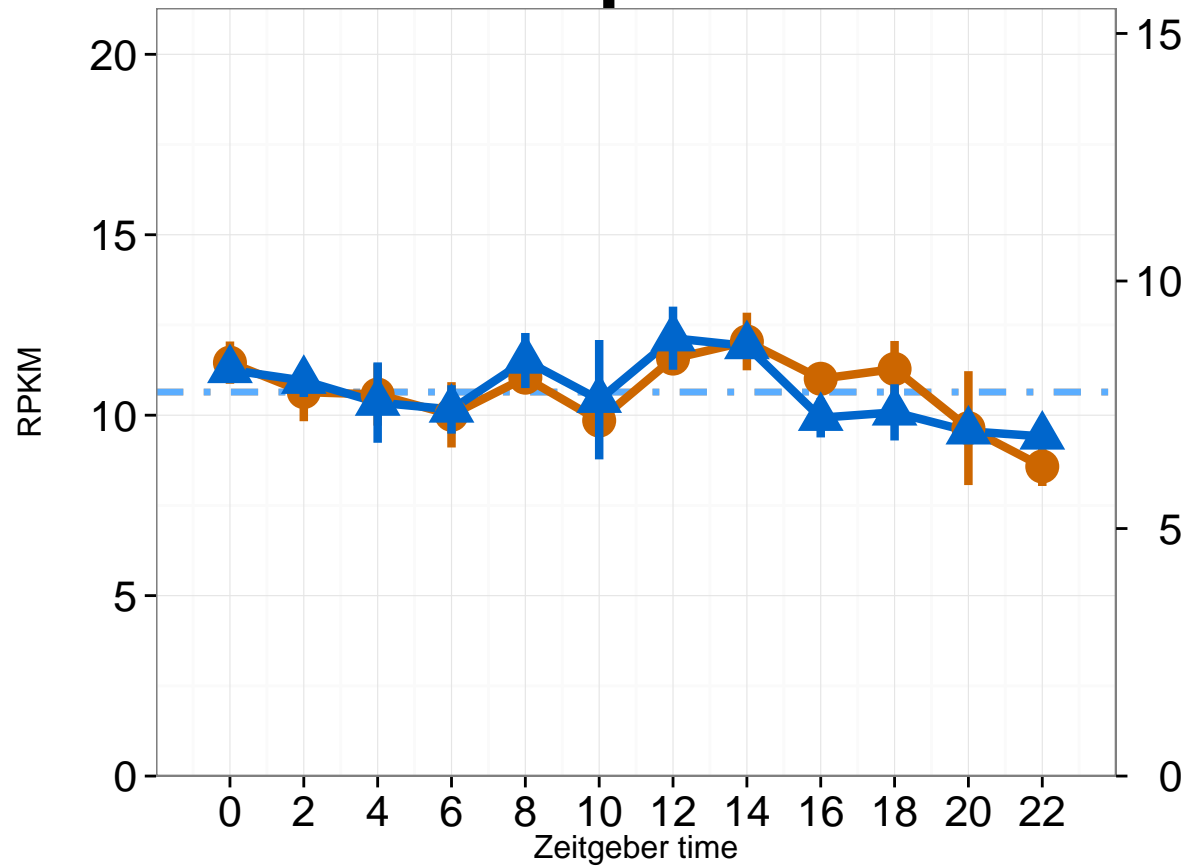

## Nup155

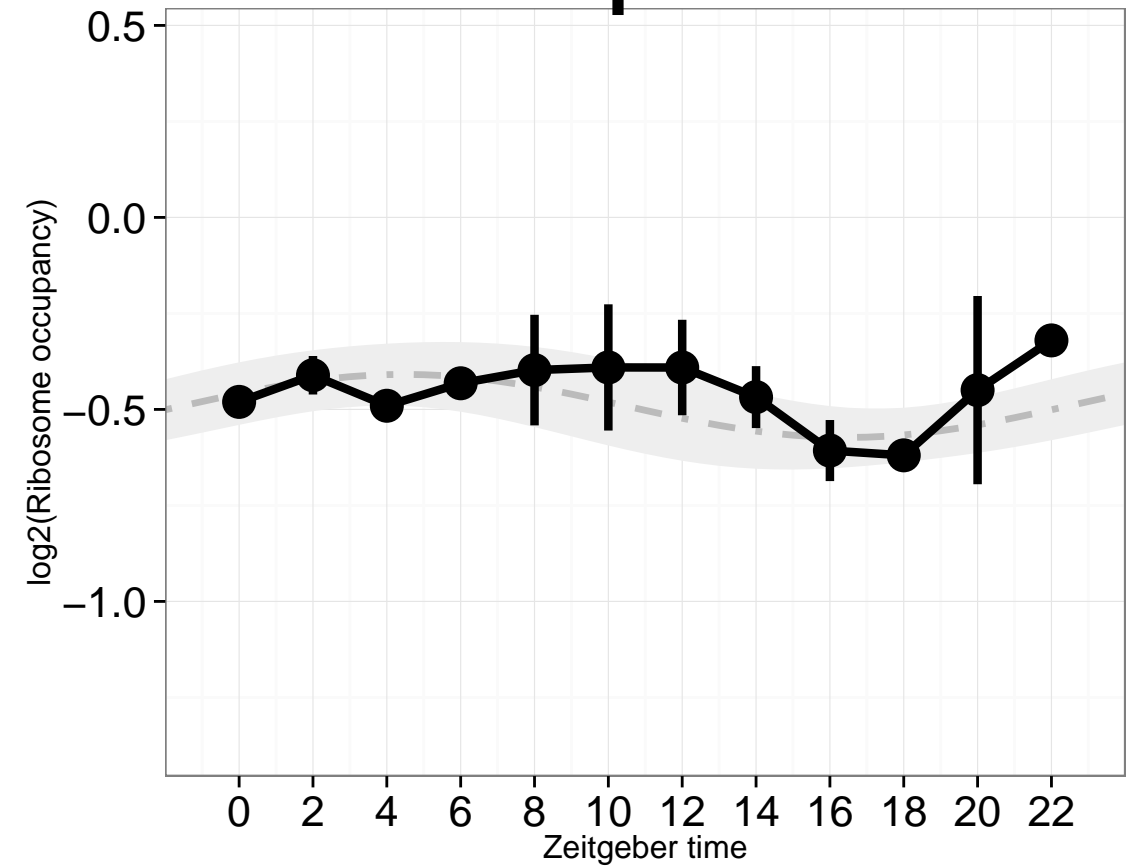

Supplement: SuppDataset_1.zip [file Nup155_set_A.pdf › Supplemental Dataset 1/A-mRNA_nonrhyth_translation_nonrhyth/Nup155_set_A.pdf]

## Nup160

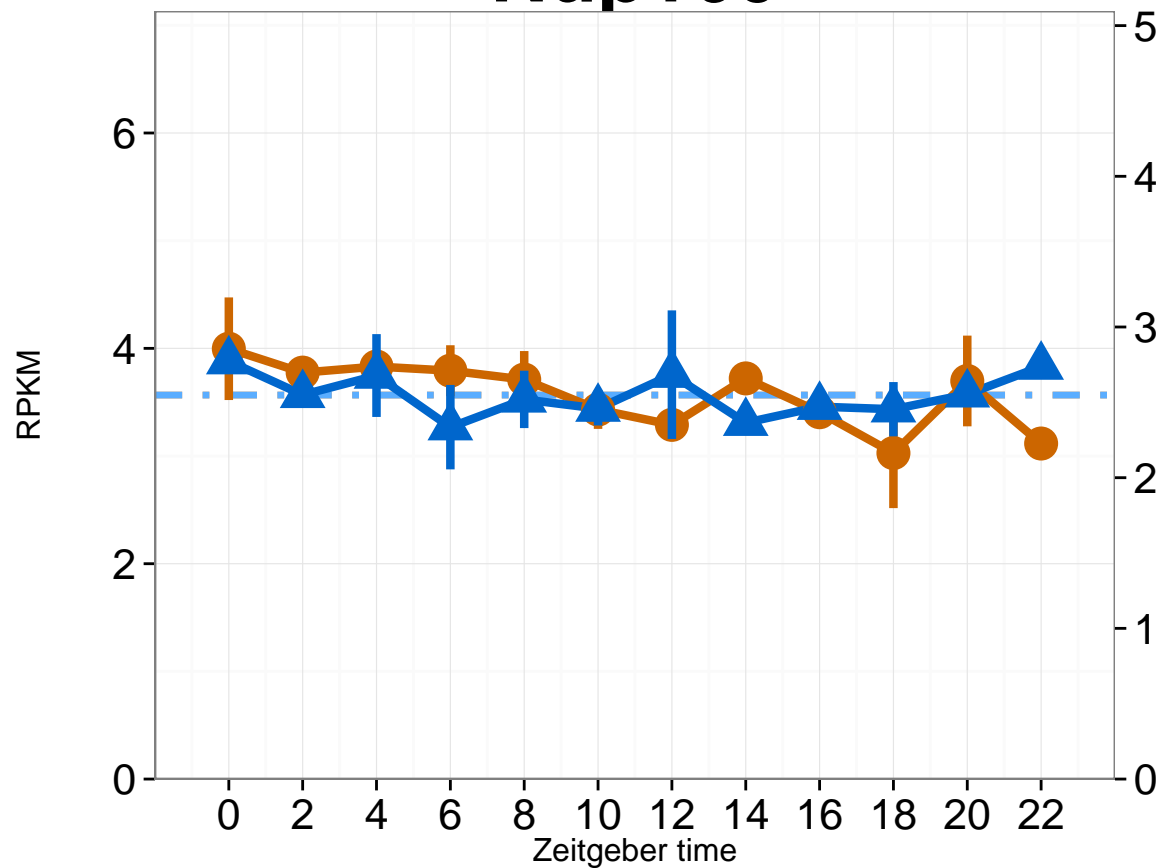

## Nup160

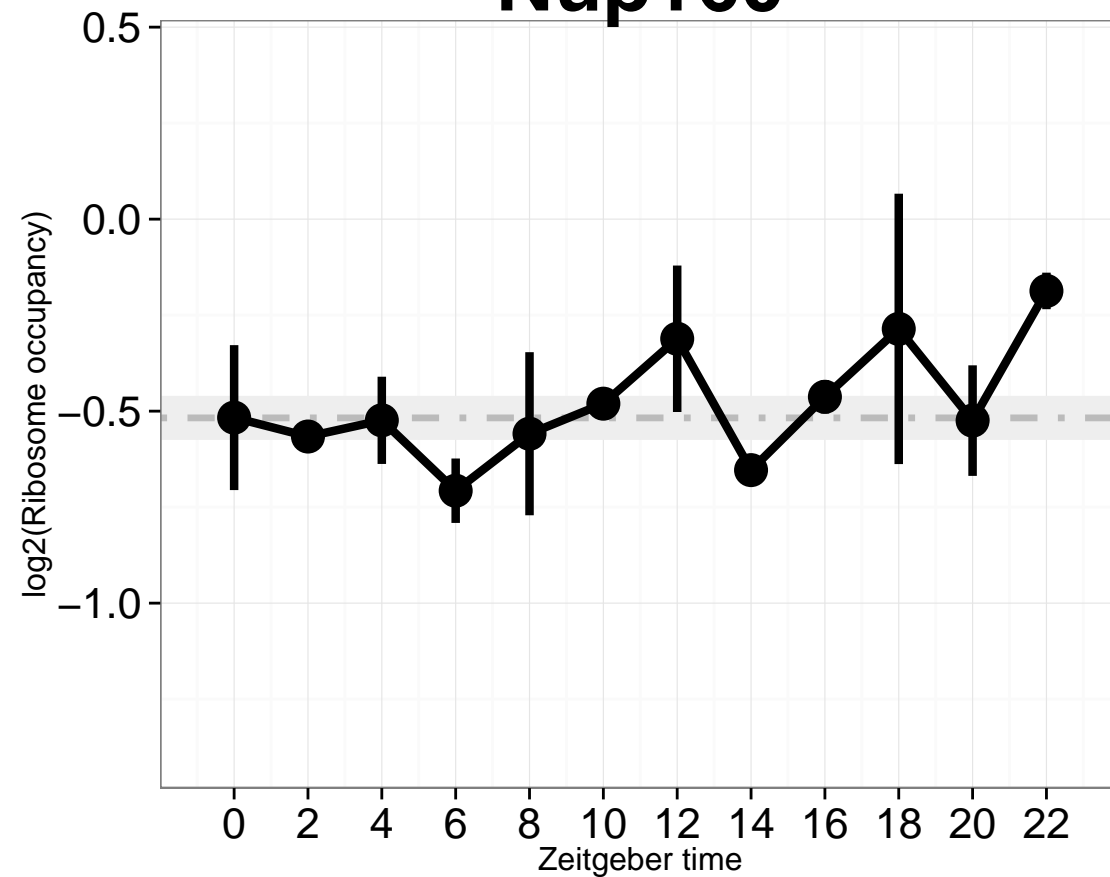

Supplement: SuppDataset_1.zip [file Nup160_set_A.pdf › Supplemental Dataset 1/A-mRNA_nonrhyth_translation_nonrhyth/Nup160_set_A.pdf]

# Nup188

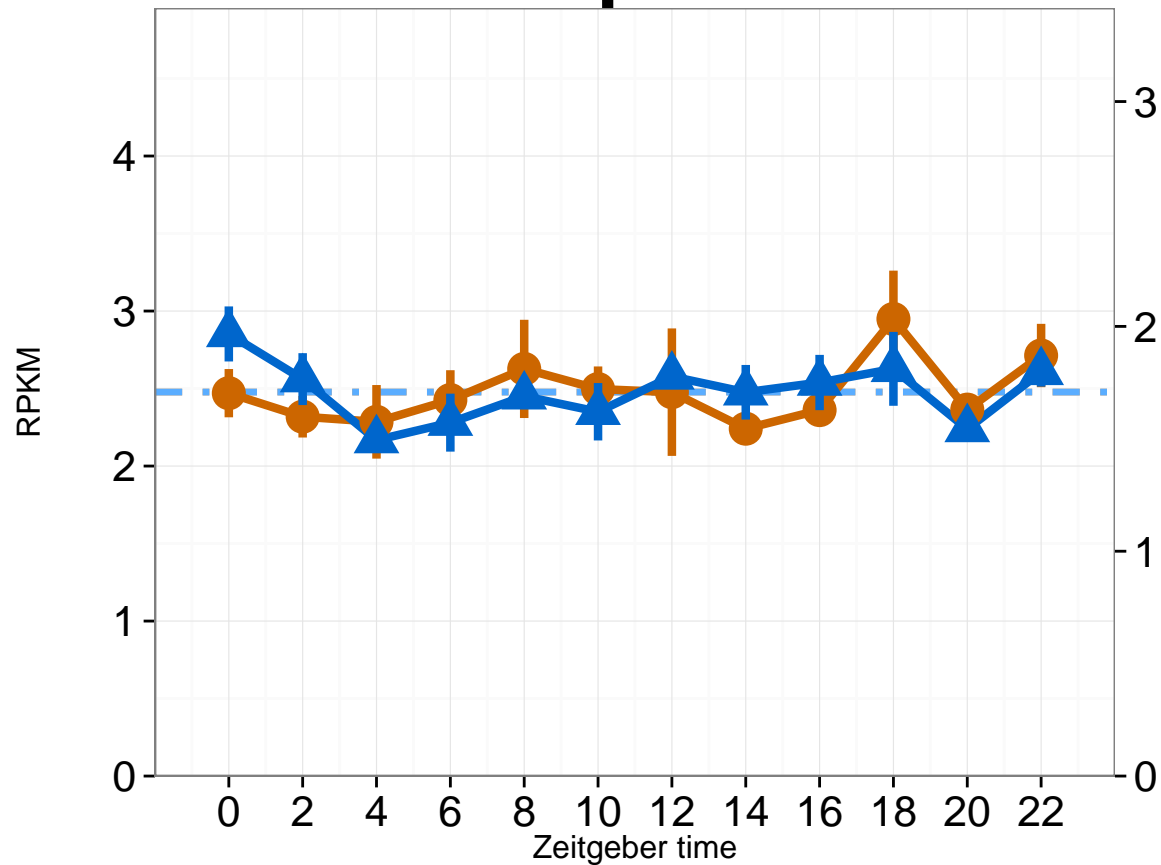

# Nup188

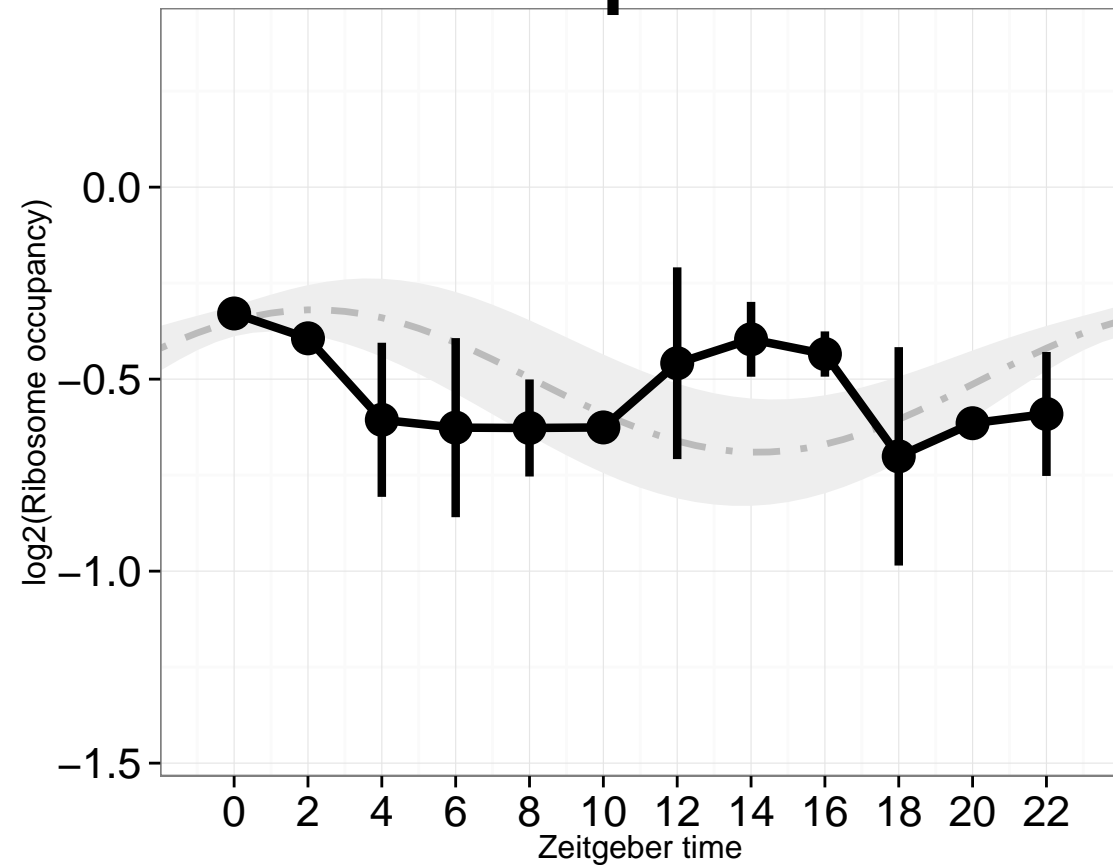

Supplement: SuppDataset_1.zip [file Nup188_set_A.pdf › Supplemental Dataset 1/A-mRNA_nonrhyth_translation_nonrhyth/Nup188_set_A.pdf]

## Nup205

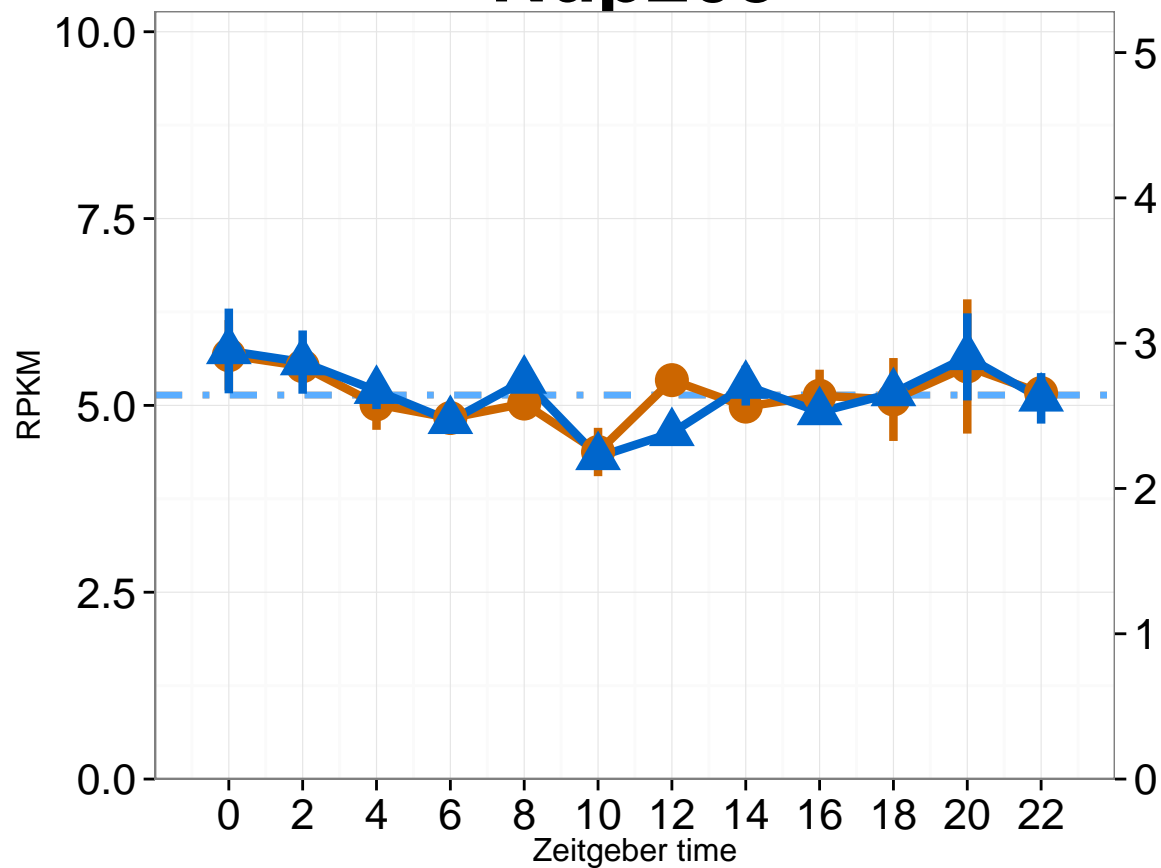

## Nup205

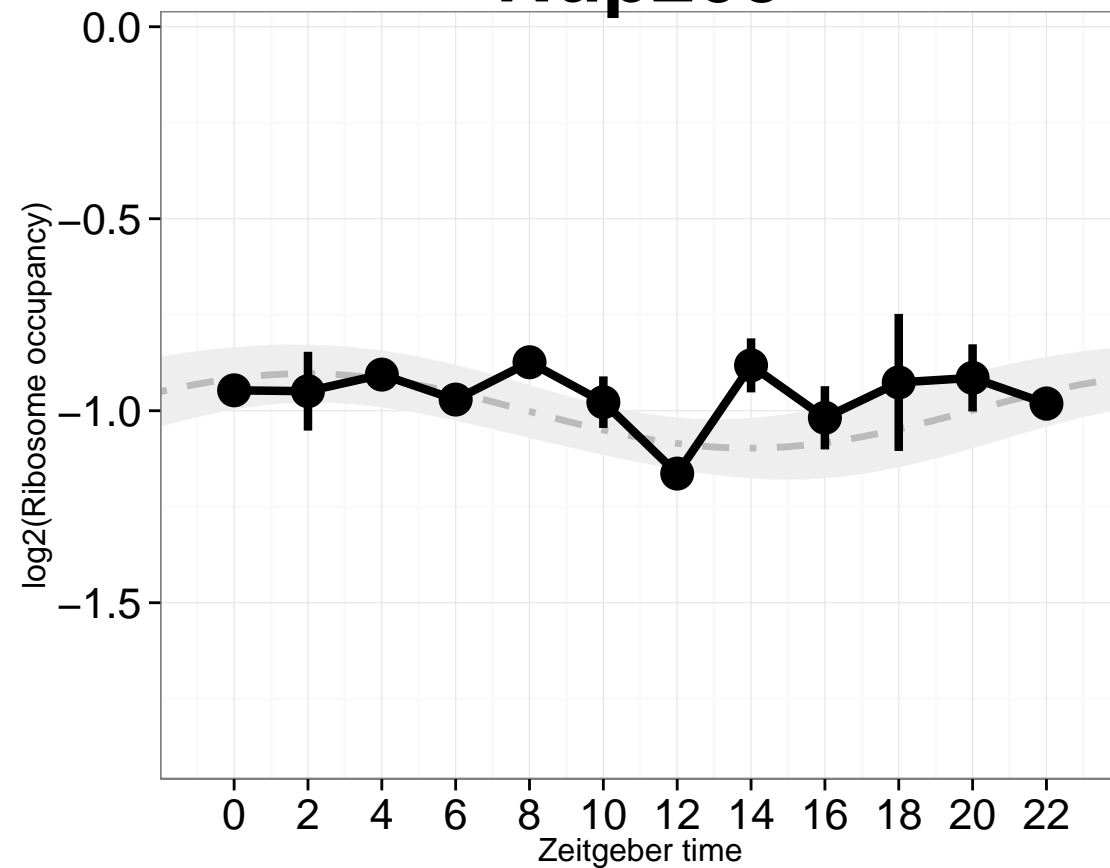

Supplement: SuppDataset_1.zip [file Nup205_set_A.pdf › Supplemental Dataset 1/A-mRNA_nonrhyth_translation_nonrhyth/Nup205_set_A.pdf]

# Nup210

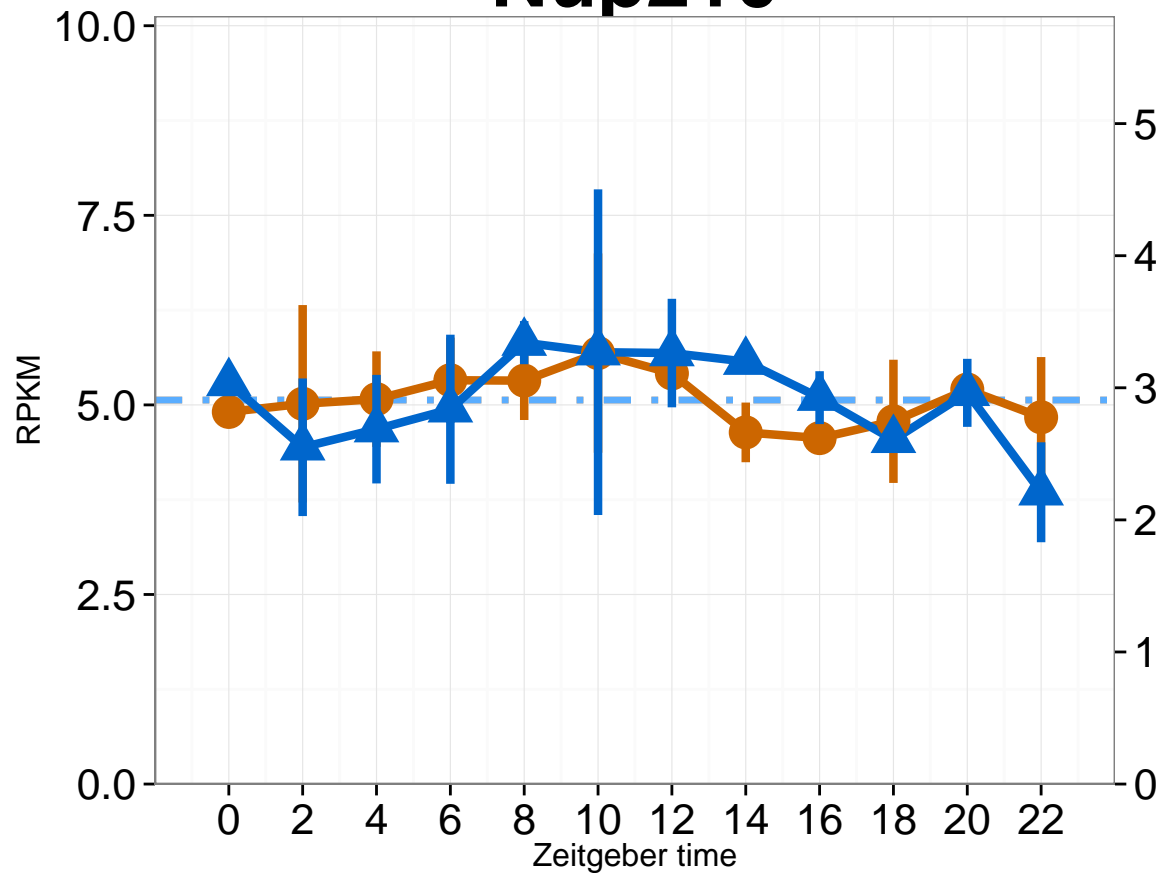

# Nup210

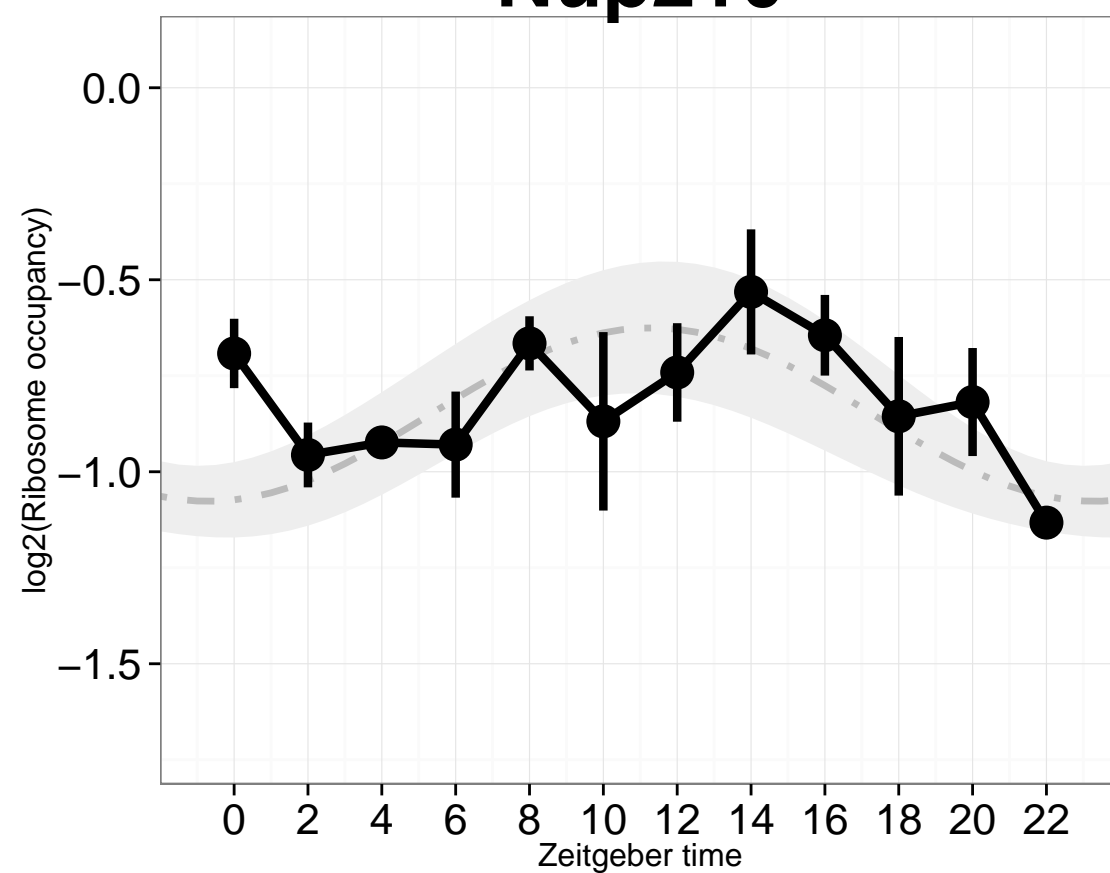

Supplement: SuppDataset_1.zip [file Nup210_set_A.pdf › Supplemental Dataset 1/A-mRNA_nonrhyth_translation_nonrhyth/Nup210_set_A.pdf]

## Nup214

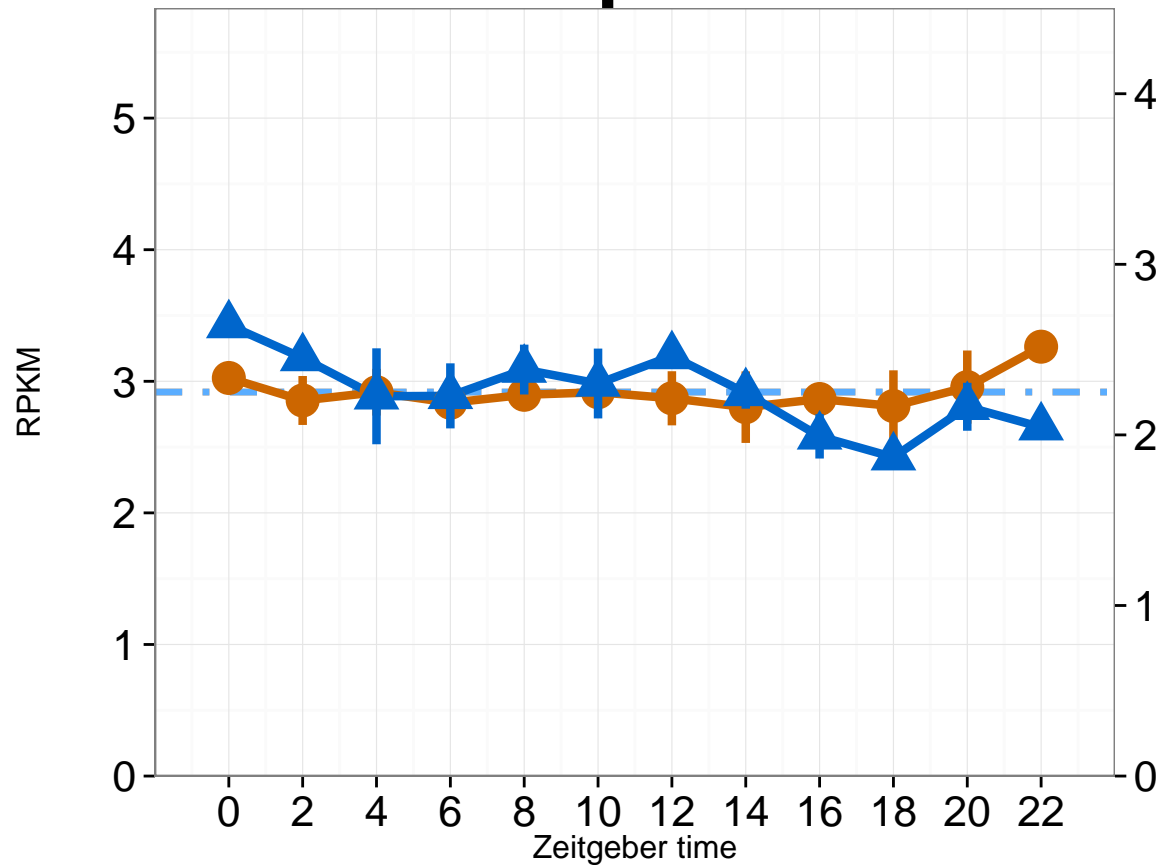

## Nup214

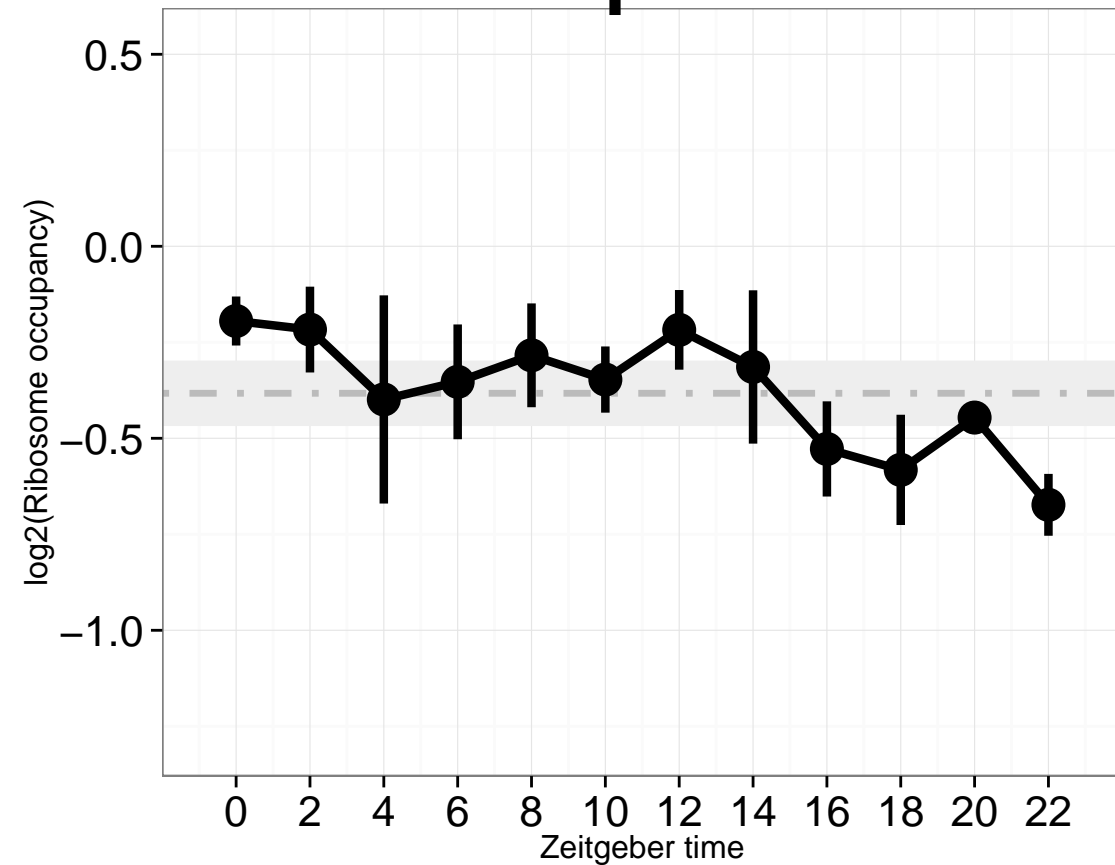

Supplement: SuppDataset_1.zip [file Nup214_set_A.pdf › Supplemental Dataset 1/A-mRNA_nonrhyth_translation_nonrhyth/Nup214_set_A.pdf]

## Nup37

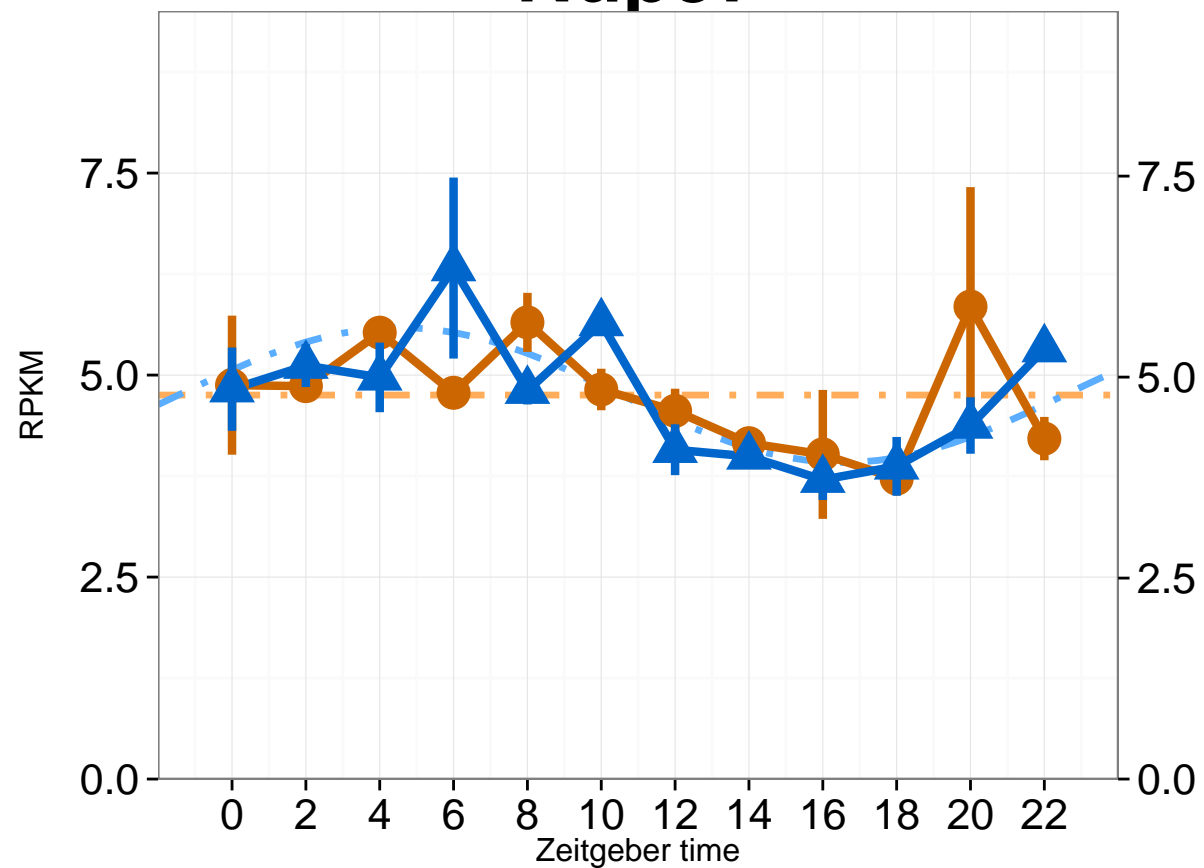

## Nup37

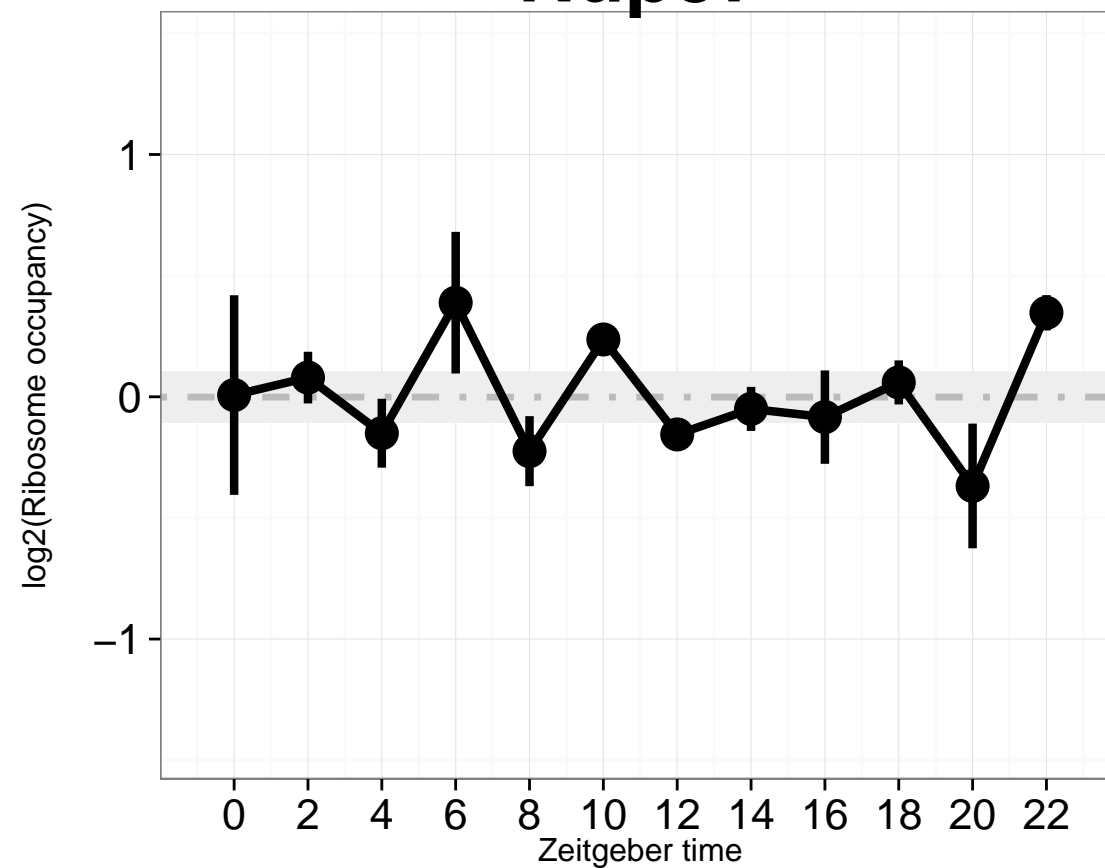

Supplement: SuppDataset_1.zip [file Nup37_set_A.pdf › Supplemental Dataset 1/A-mRNA_nonrhyth_translation_nonrhyth/Nup37_set_A.pdf]

# Nup43

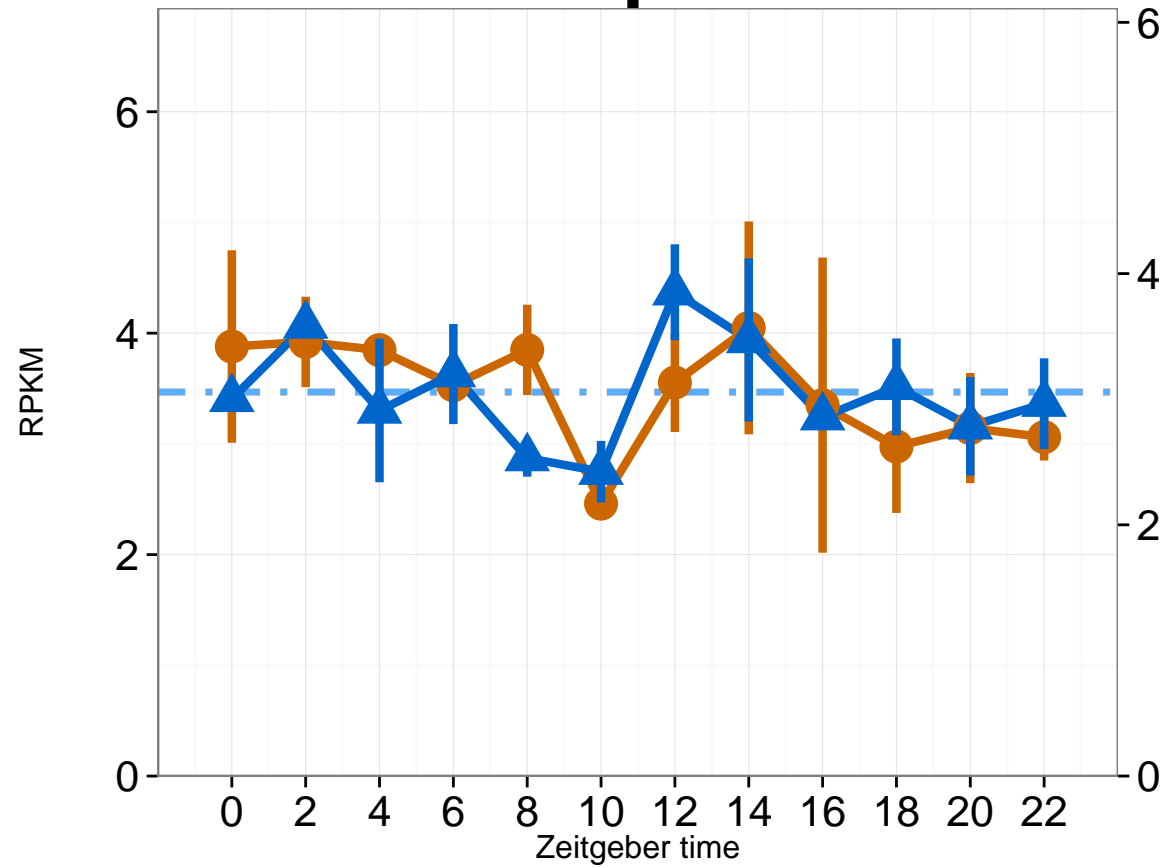

# Nup43

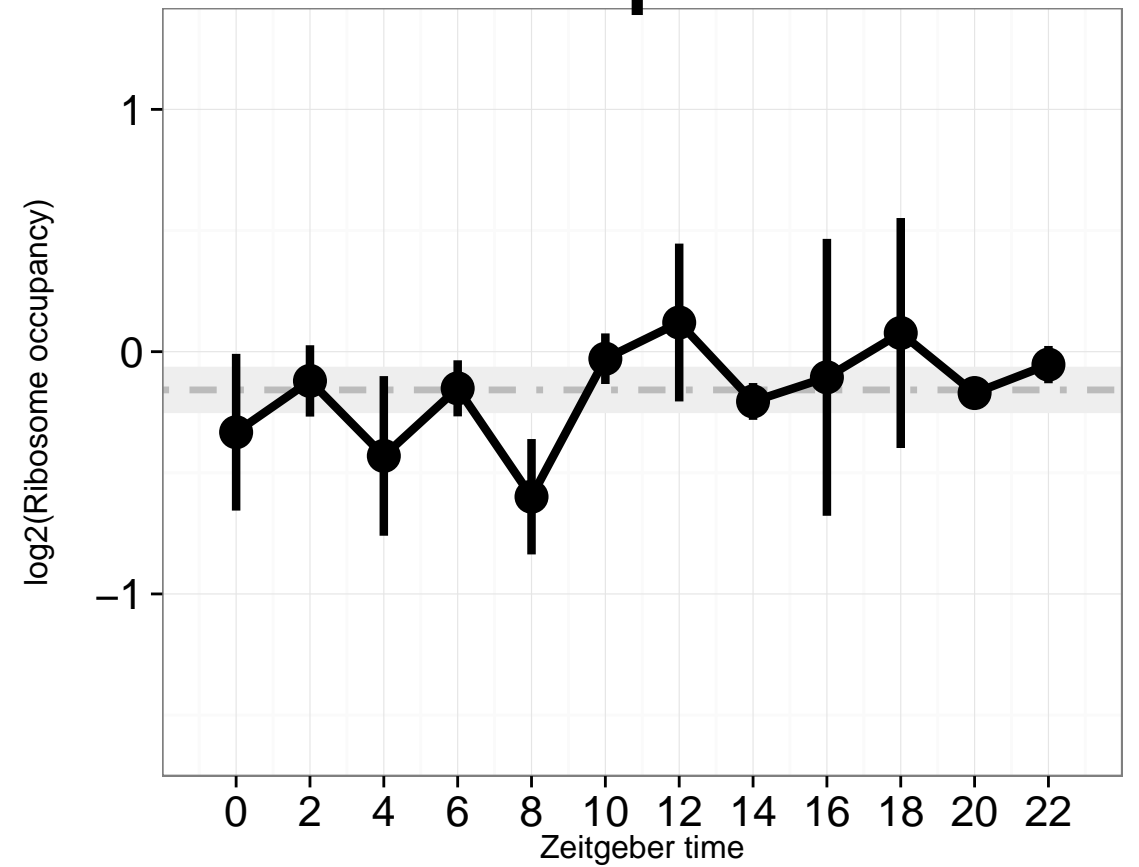

Supplement: SuppDataset_1.zip [file Nup43_set_A.pdf › Supplemental Dataset 1/A-mRNA_nonrhyth_translation_nonrhyth/Nup43_set_A.pdf]

## Nup50

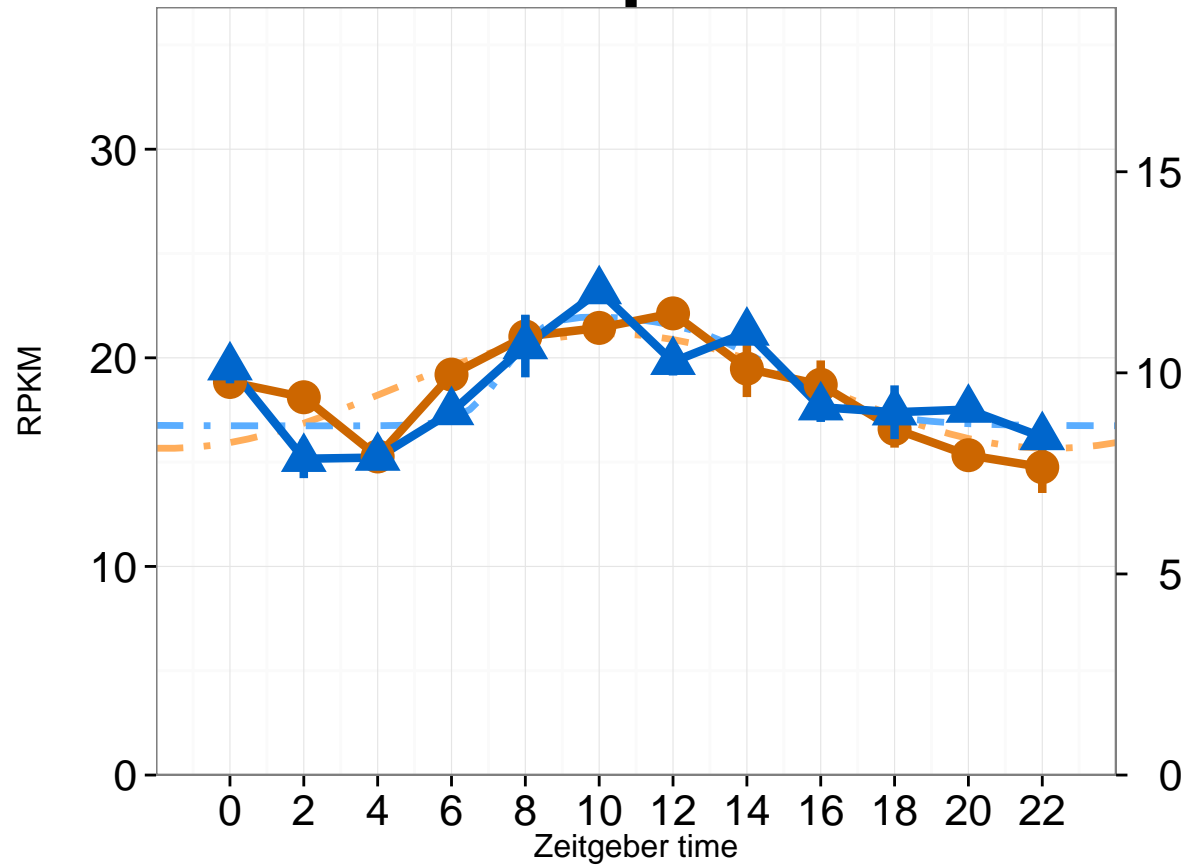

## Nup50

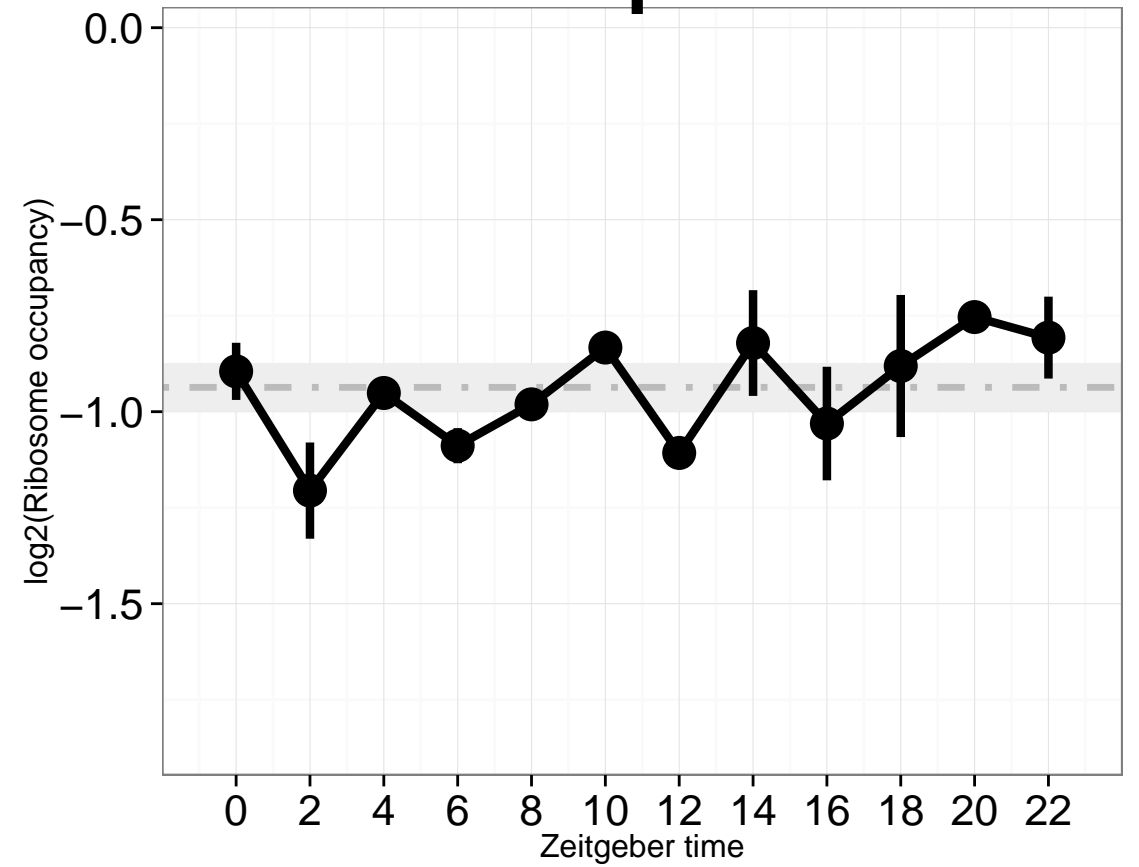

Supplement: SuppDataset_1.zip [file Nup50_set_A.pdf › Supplemental Dataset 1/A-mRNA_nonrhyth_translation_nonrhyth/Nup50_set_A.pdf]

## Nup54

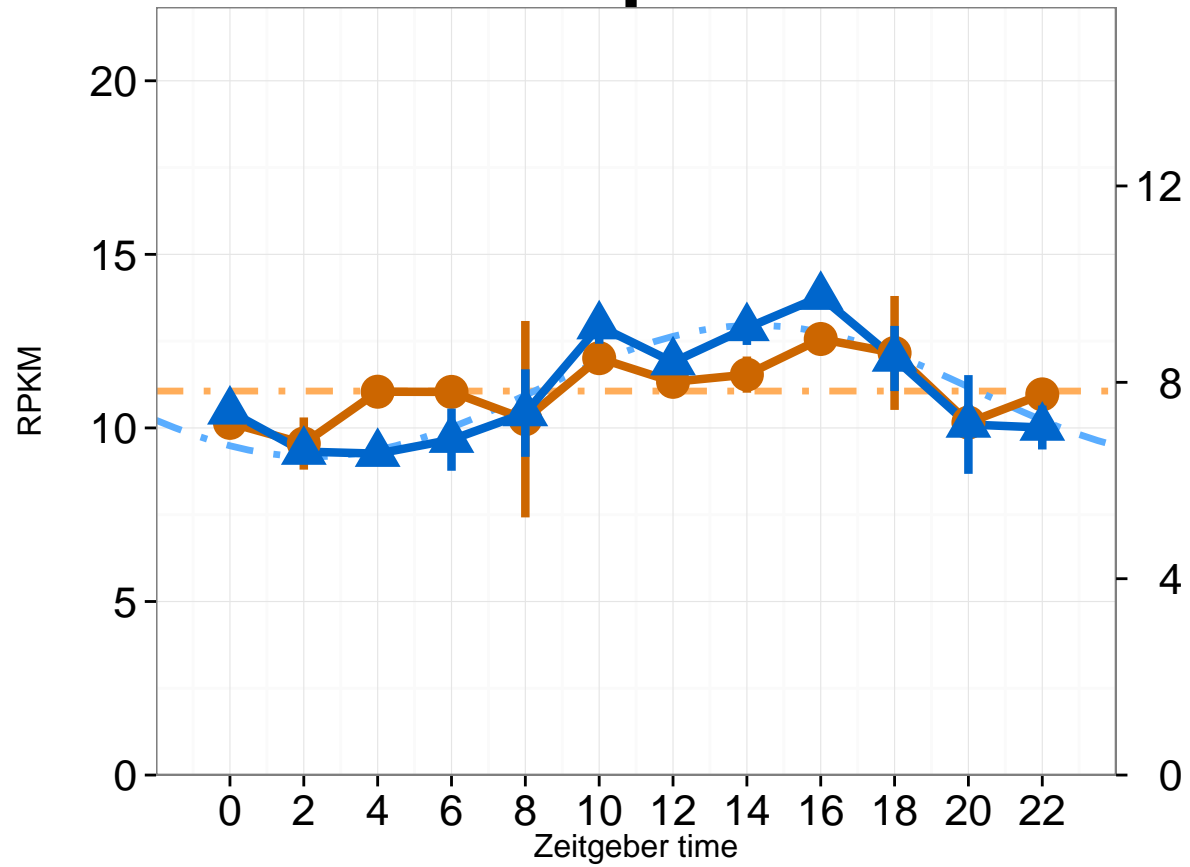

## Nup54

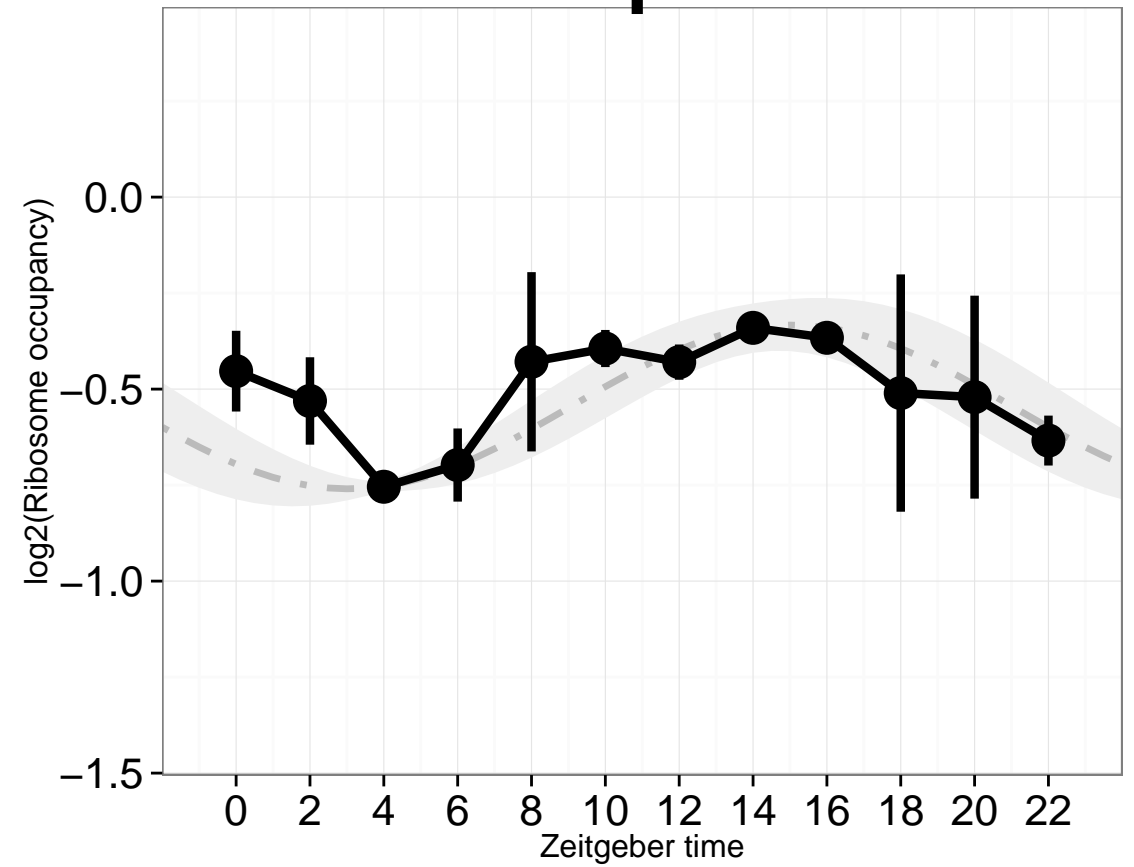

Supplement: SuppDataset_1.zip [file Nup54_set_A.pdf › Supplemental Dataset 1/A-mRNA_nonrhyth_translation_nonrhyth/Nup54_set_A.pdf]

## Nup85

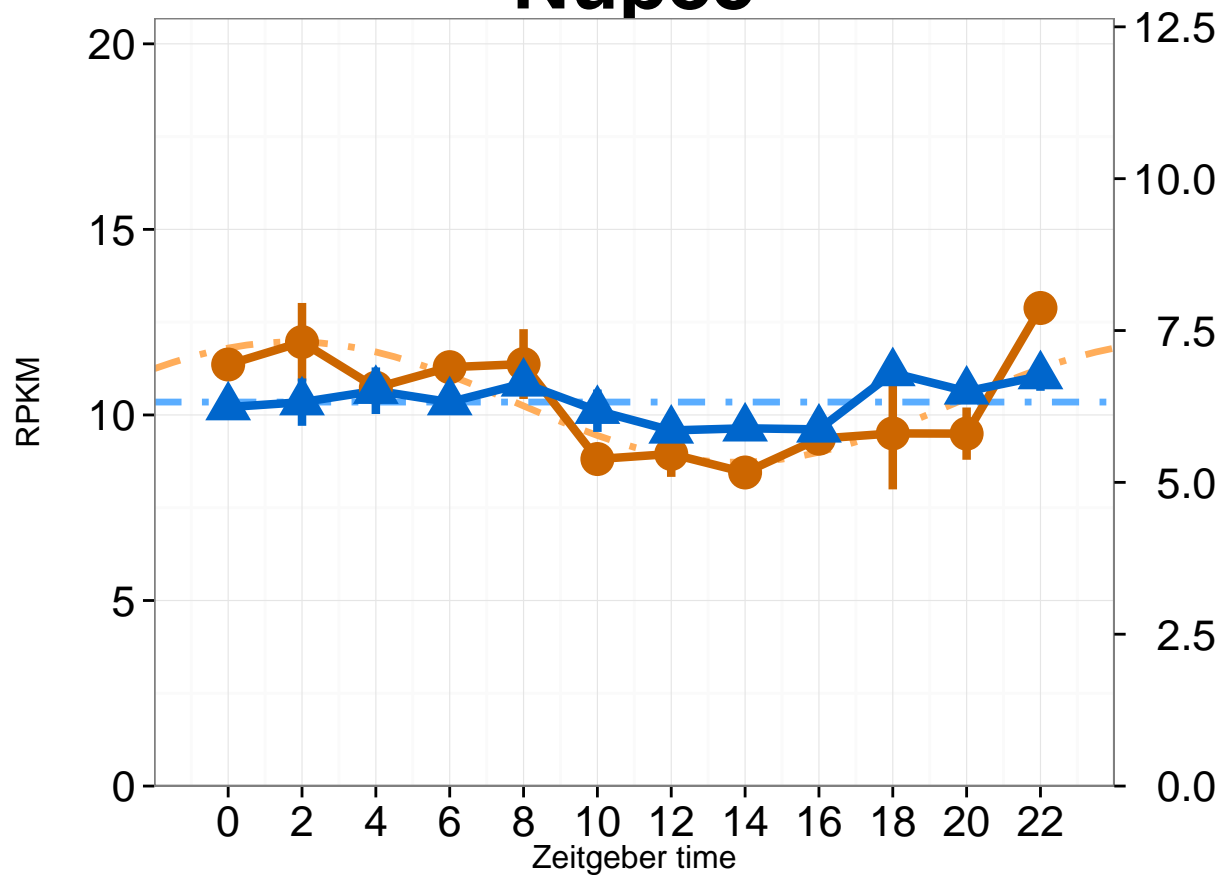

## Nup85

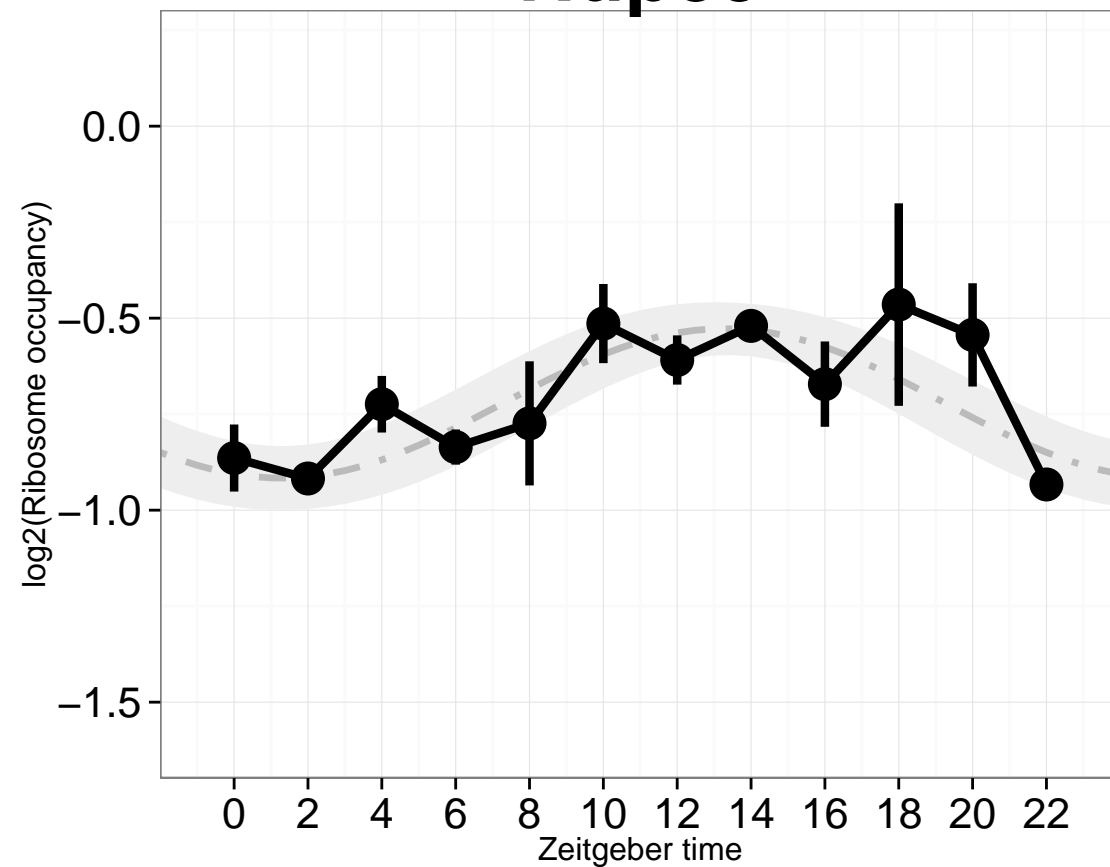

Supplement: SuppDataset_1.zip [file Nup85_set_A.pdf › Supplemental Dataset 1/A-mRNA_nonrhyth_translation_nonrhyth/Nup85_set_A.pdf]

## Nup88

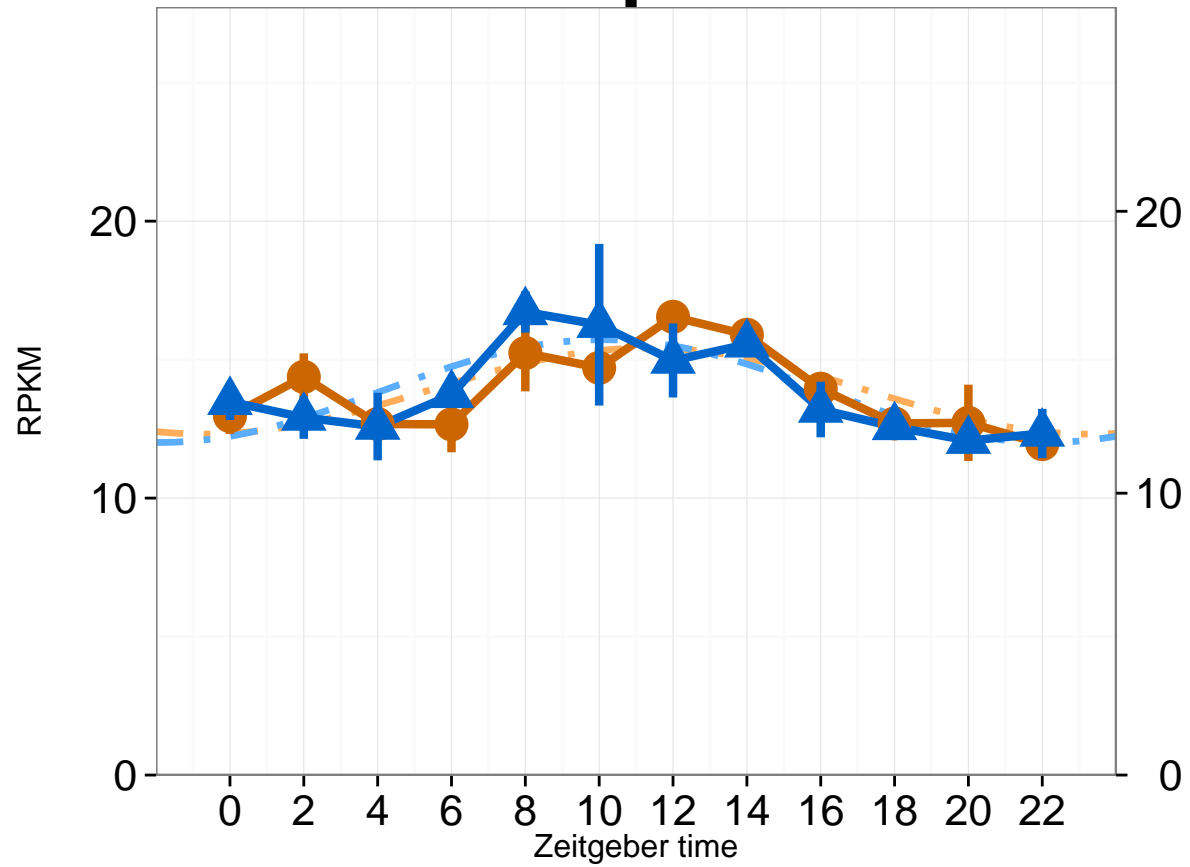

## Nup88

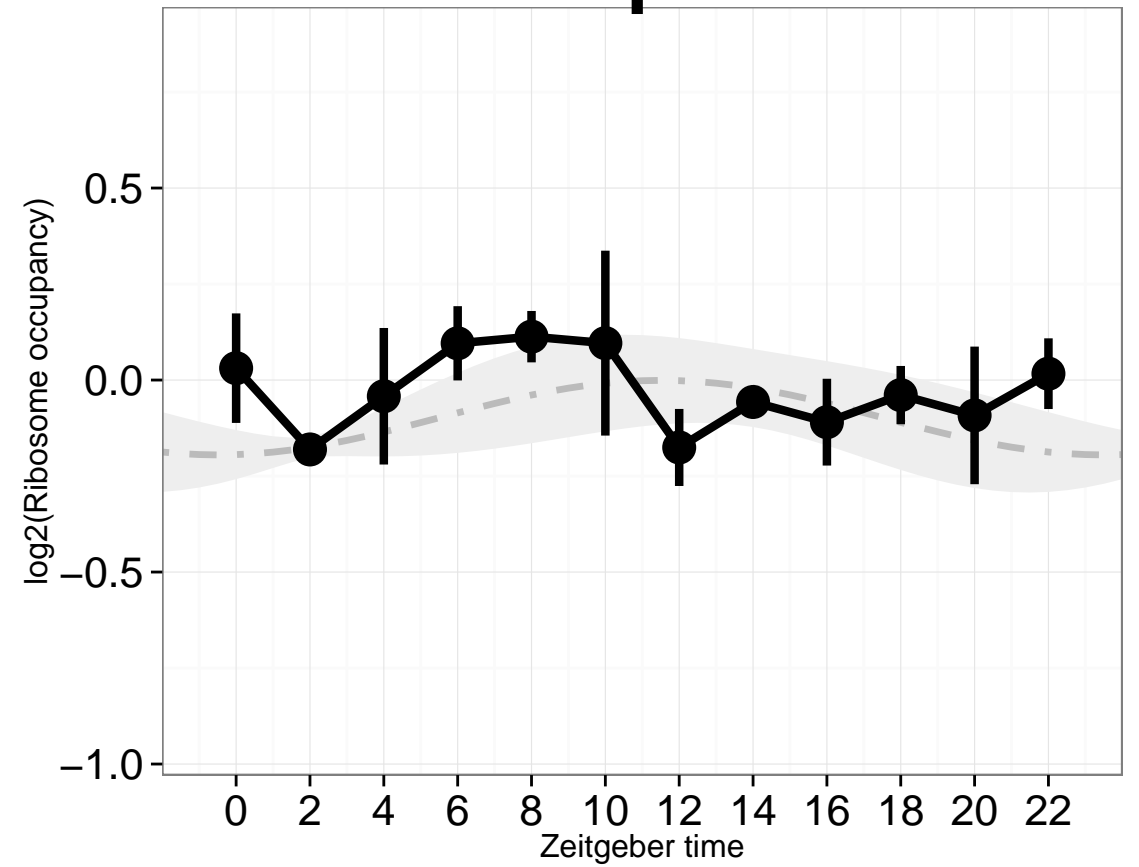

Supplement: SuppDataset_1.zip [file Nup88_set_A.pdf › Supplemental Dataset 1/A-mRNA_nonrhyth_translation_nonrhyth/Nup88_set_A.pdf]

## Nup93

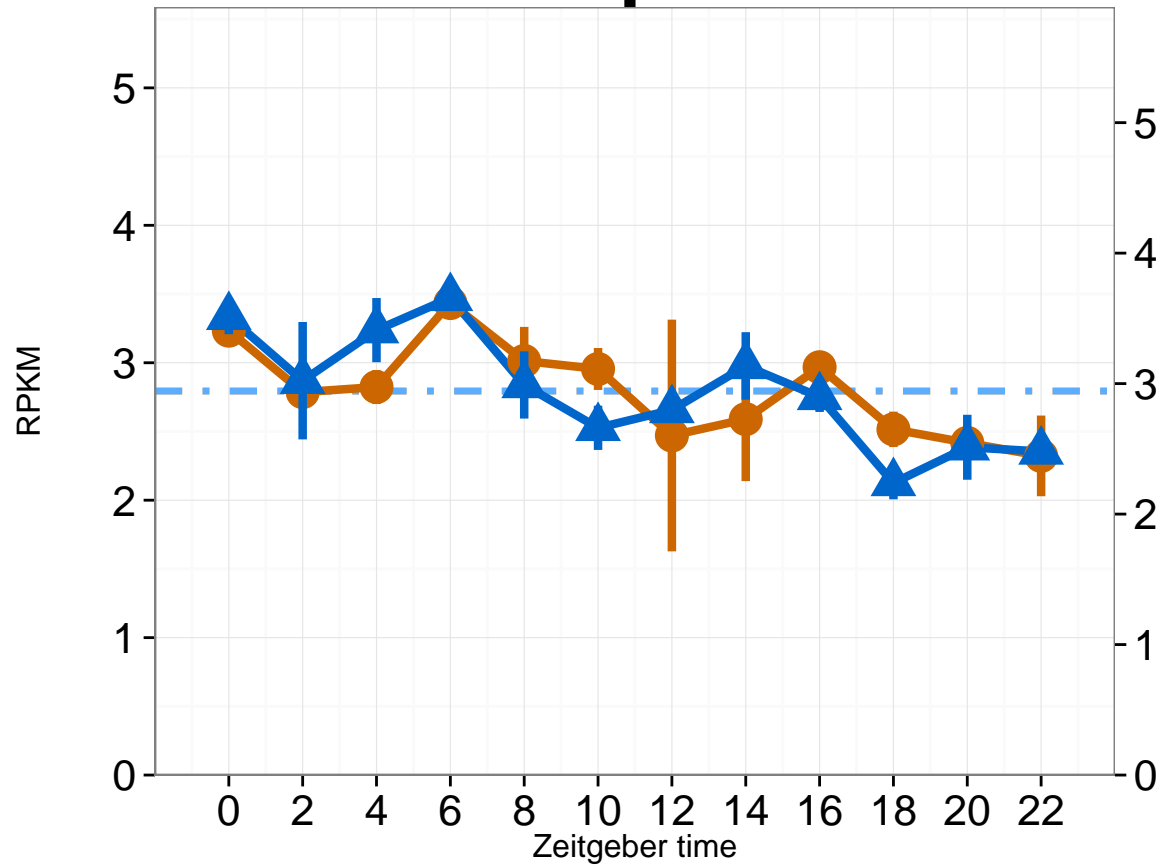

## Nup93

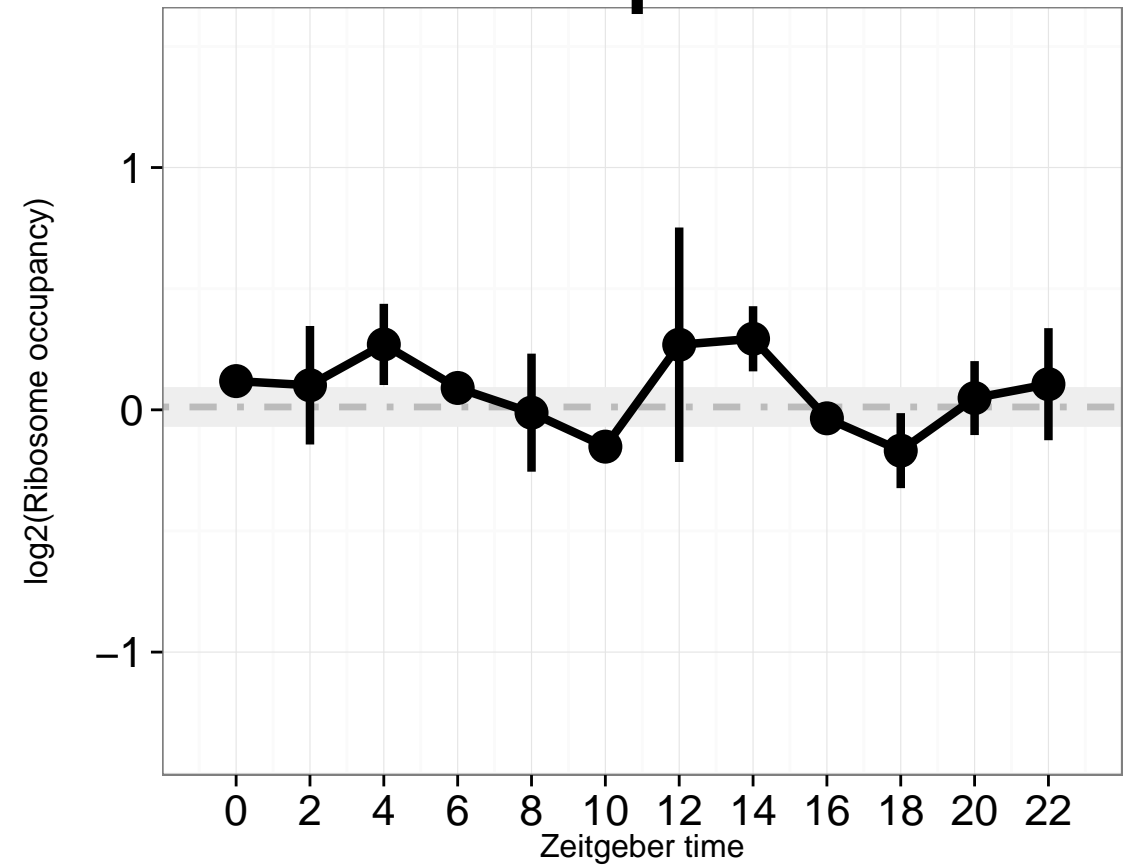

Supplement: SuppDataset_1.zip [file Nup93_set_A.pdf › Supplemental Dataset 1/A-mRNA_nonrhyth_translation_nonrhyth/Nup93_set_A.pdf]

## Nup98

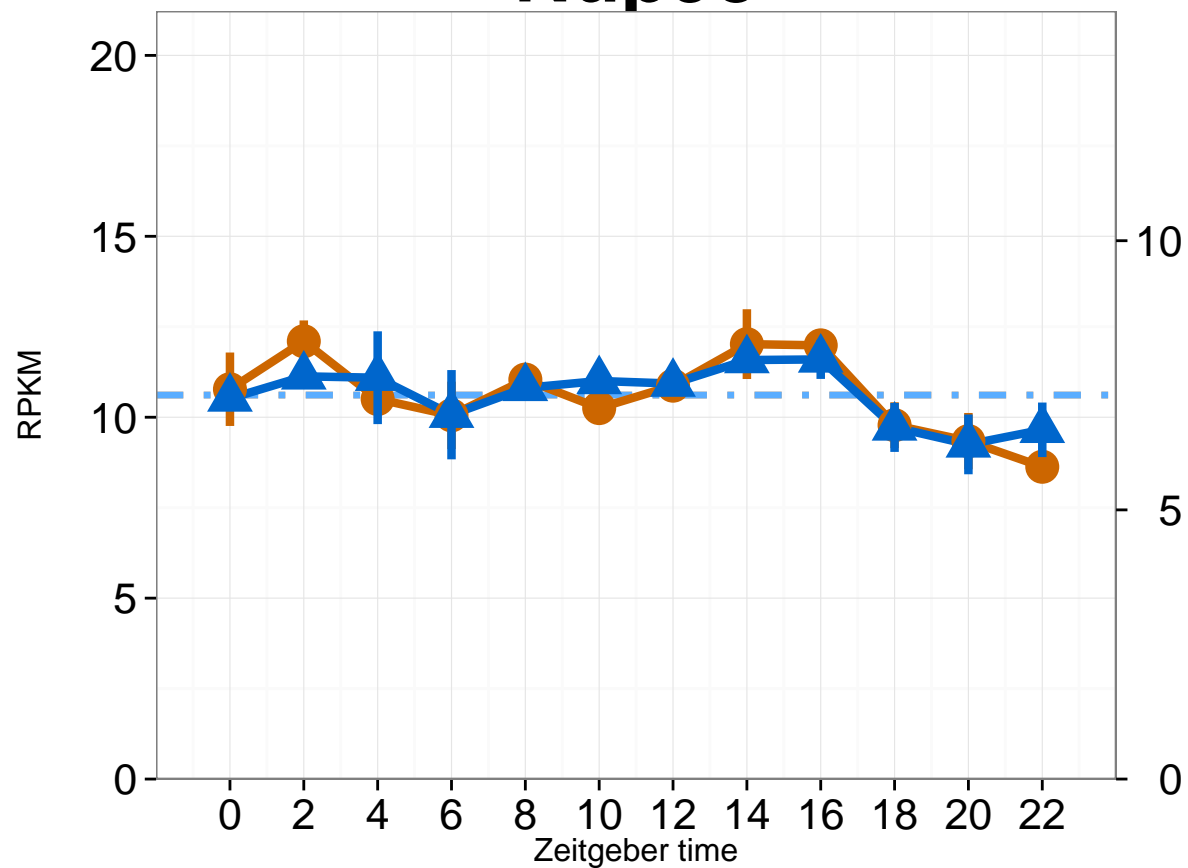

## Nup98

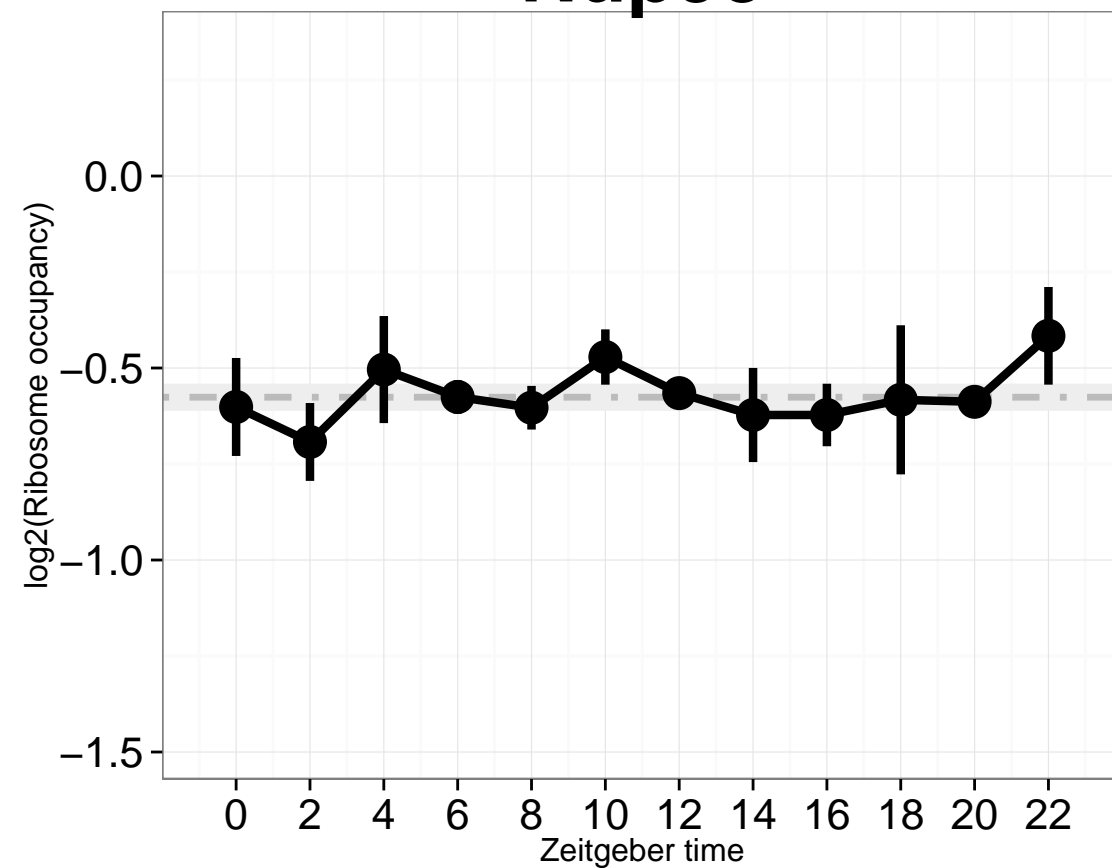

Supplement: SuppDataset_1.zip [file Nup98_set_A.pdf › Supplemental Dataset 1/A-mRNA_nonrhyth_translation_nonrhyth/Nup98_set_A.pdf]

# Nupl1

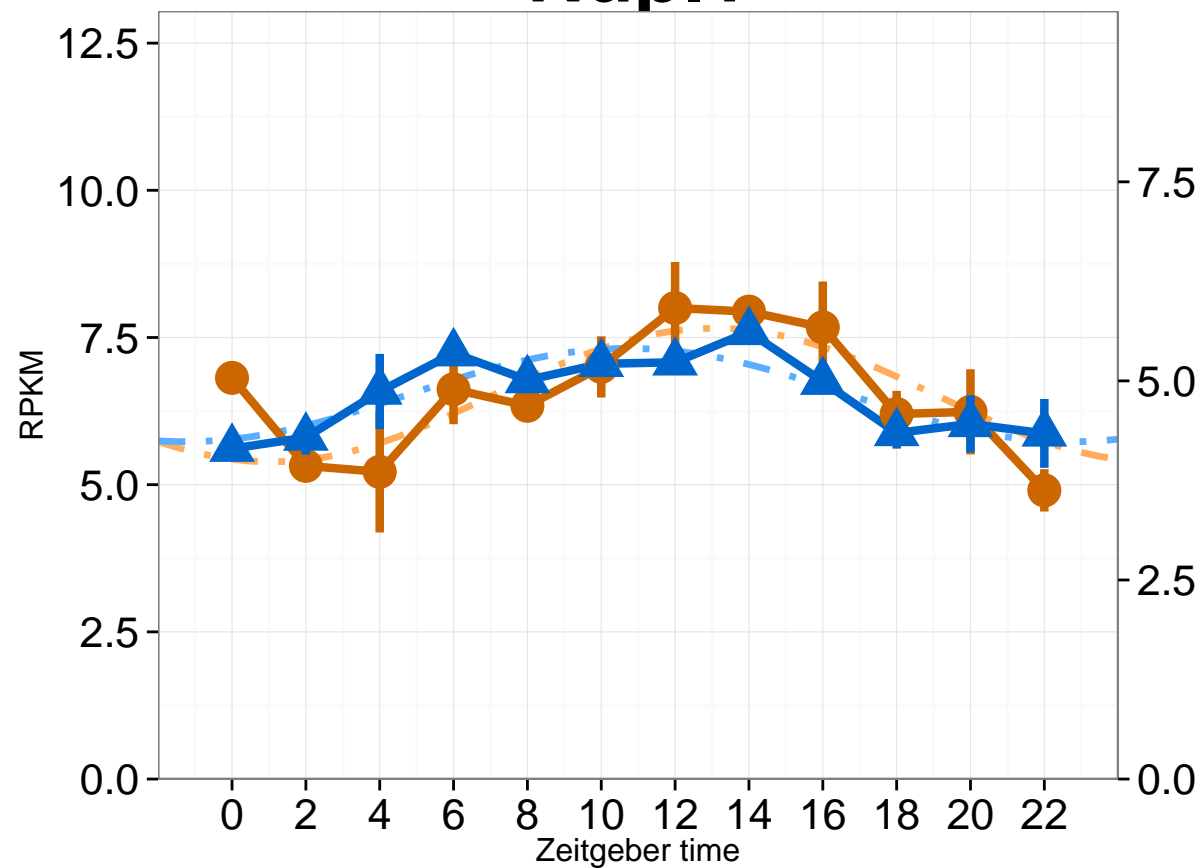

# Nupl1

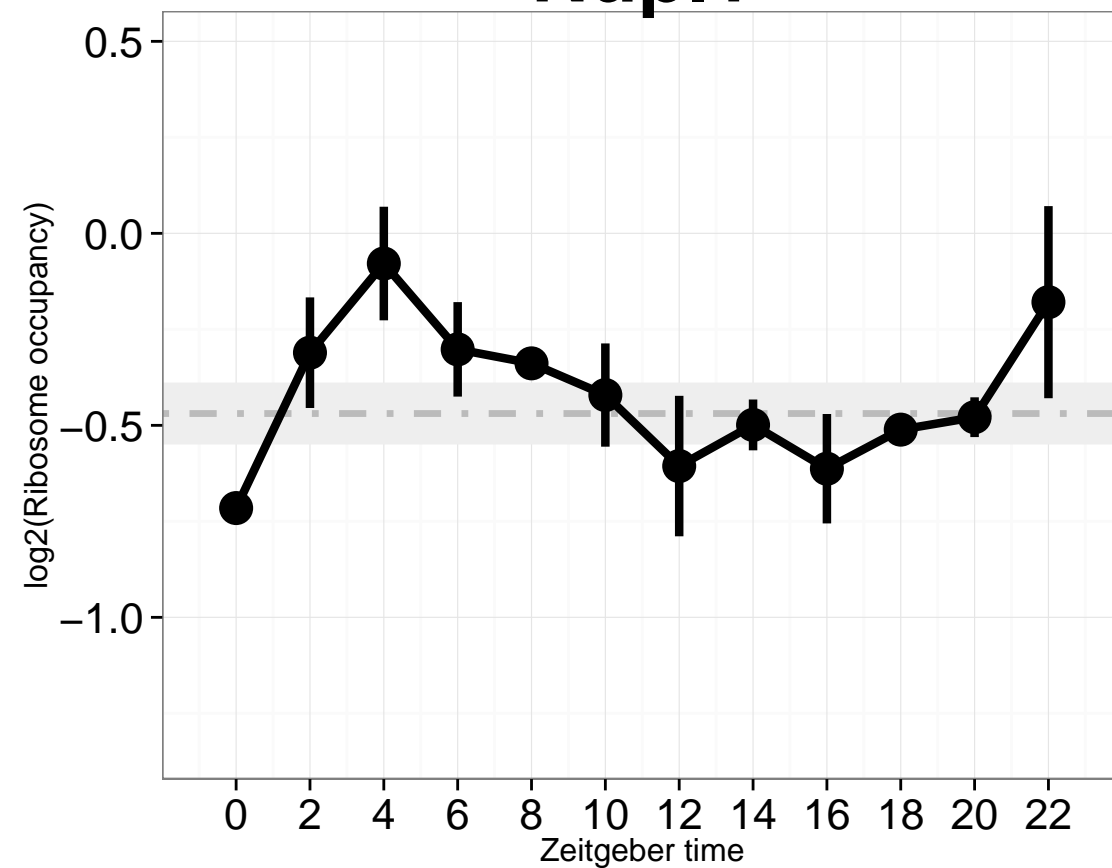

Supplement: SuppDataset_1.zip [file Nupl1_set_A.pdf › Supplemental Dataset 1/A-mRNA_nonrhyth_translation_nonrhyth/Nupl1_set_A.pdf]

# Nupl2

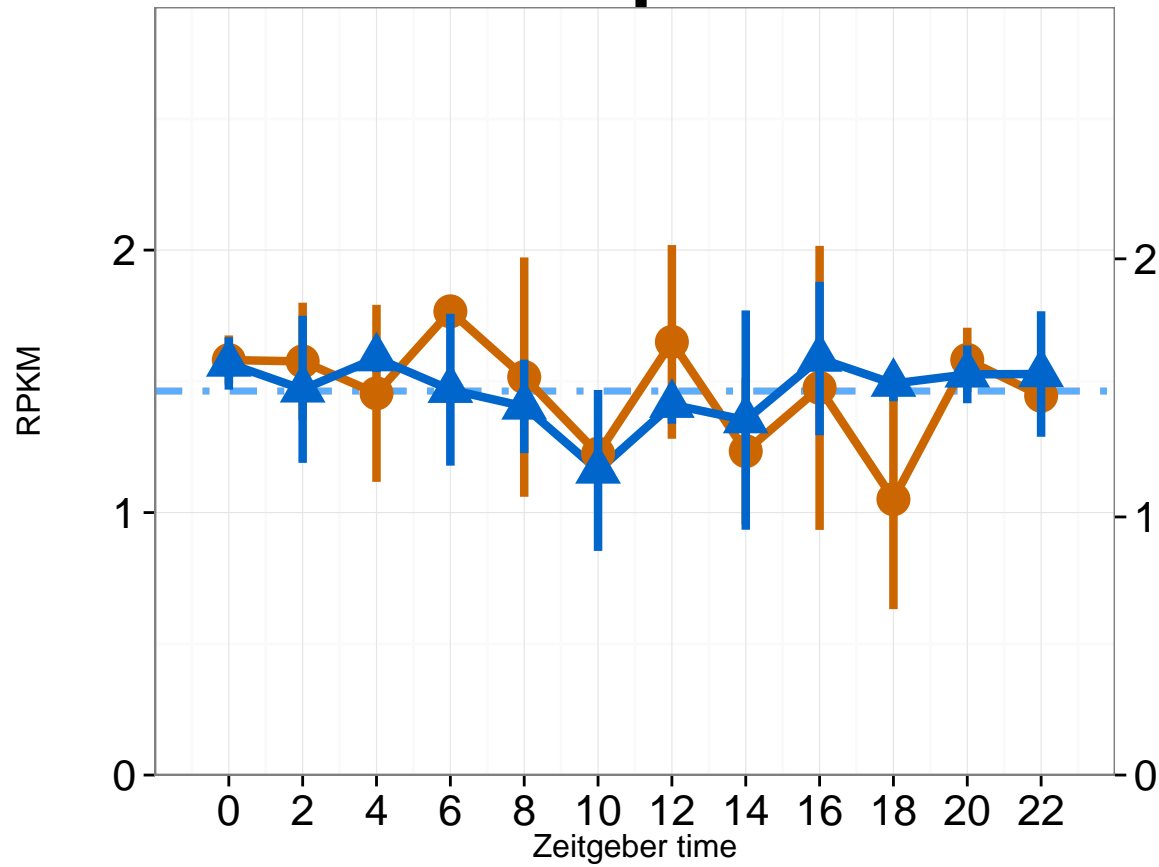

# Nupl2

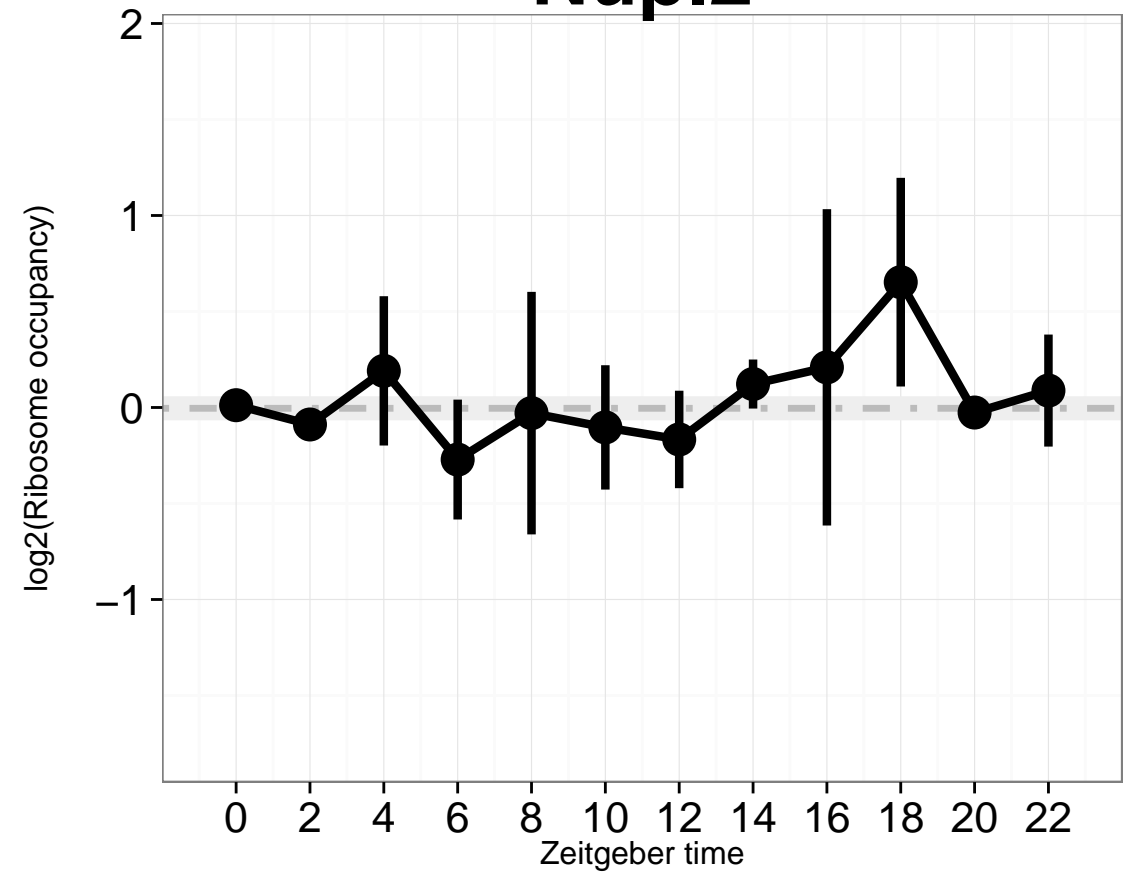

Supplement: SuppDataset_1.zip [file Nupl2_set_A.pdf › Supplemental Dataset 1/A-mRNA_nonrhyth_translation_nonrhyth/Nupl2_set_A.pdf]

# Nus1

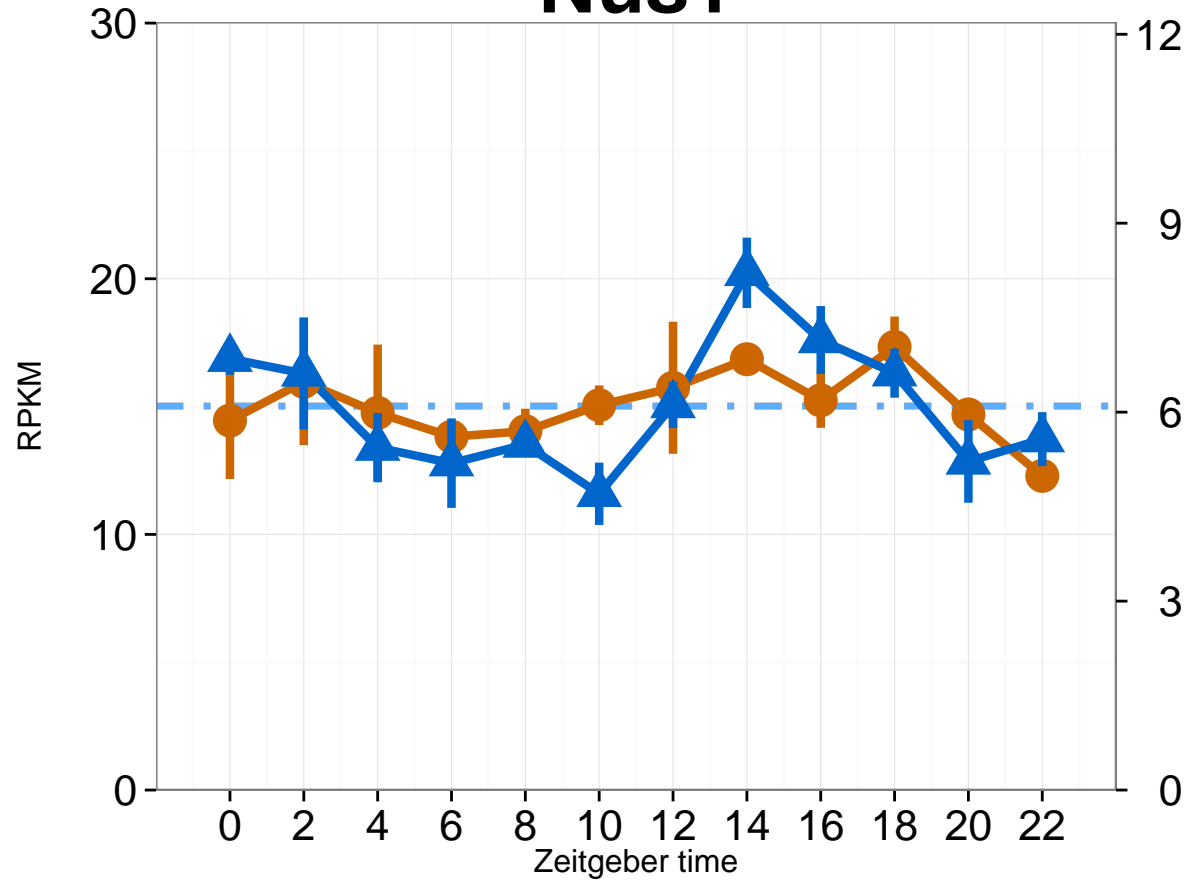

# Nus1

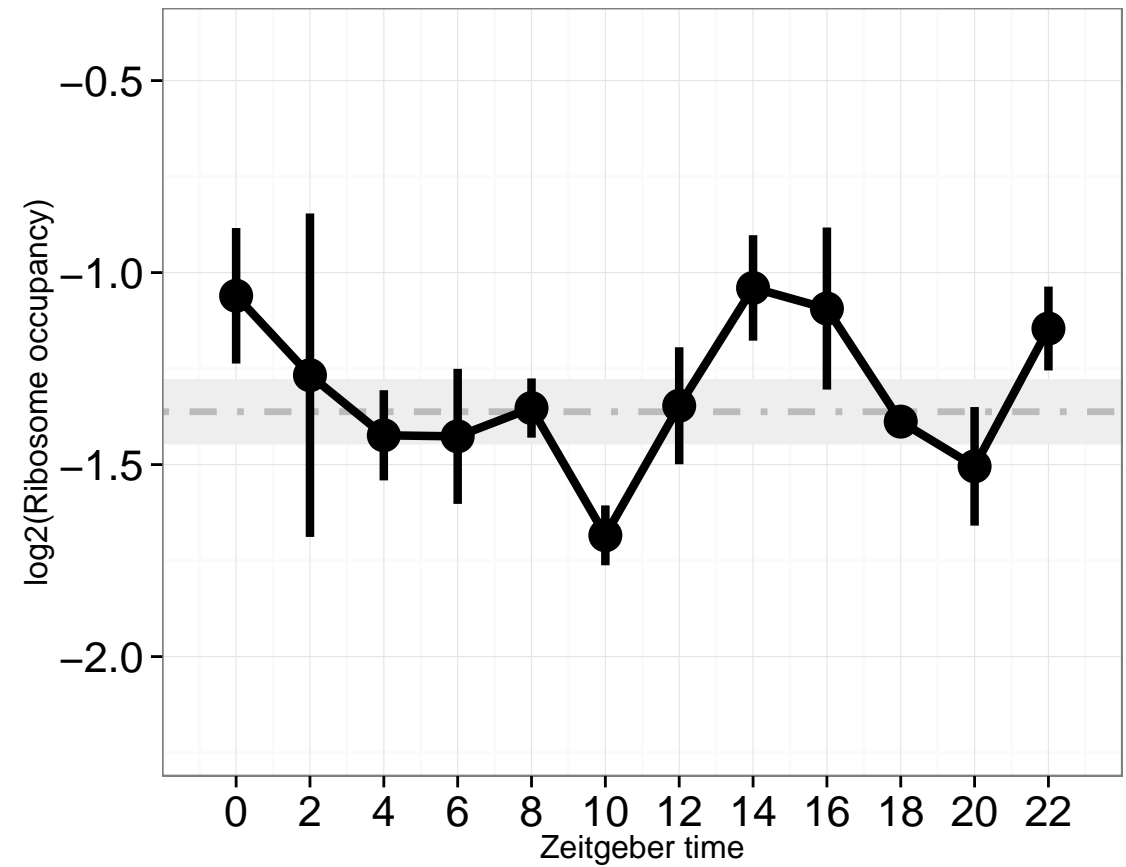

Supplement: SuppDataset_1.zip [file Nus1_set_A.pdf › Supplemental Dataset 1/A-mRNA_nonrhyth_translation_nonrhyth/Nus1_set_A.pdf]

## Nutf2

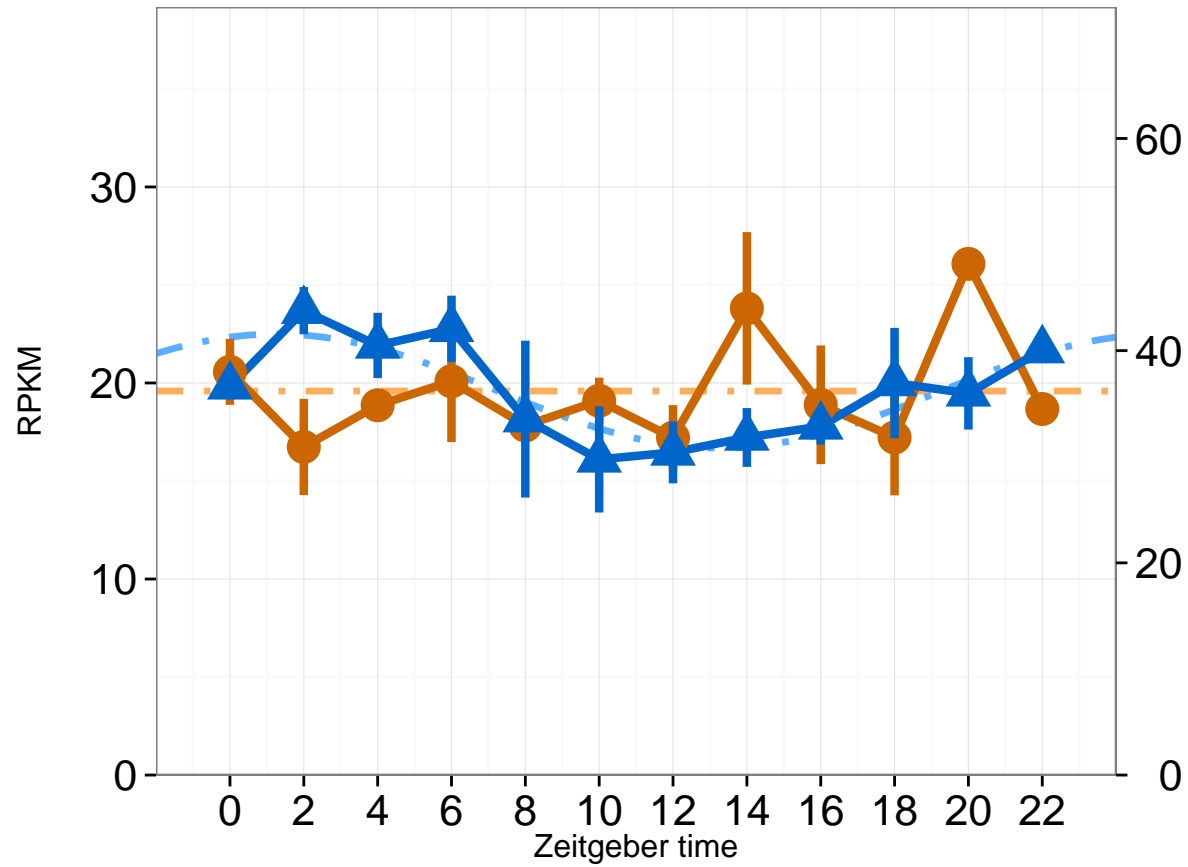

## Nutf2

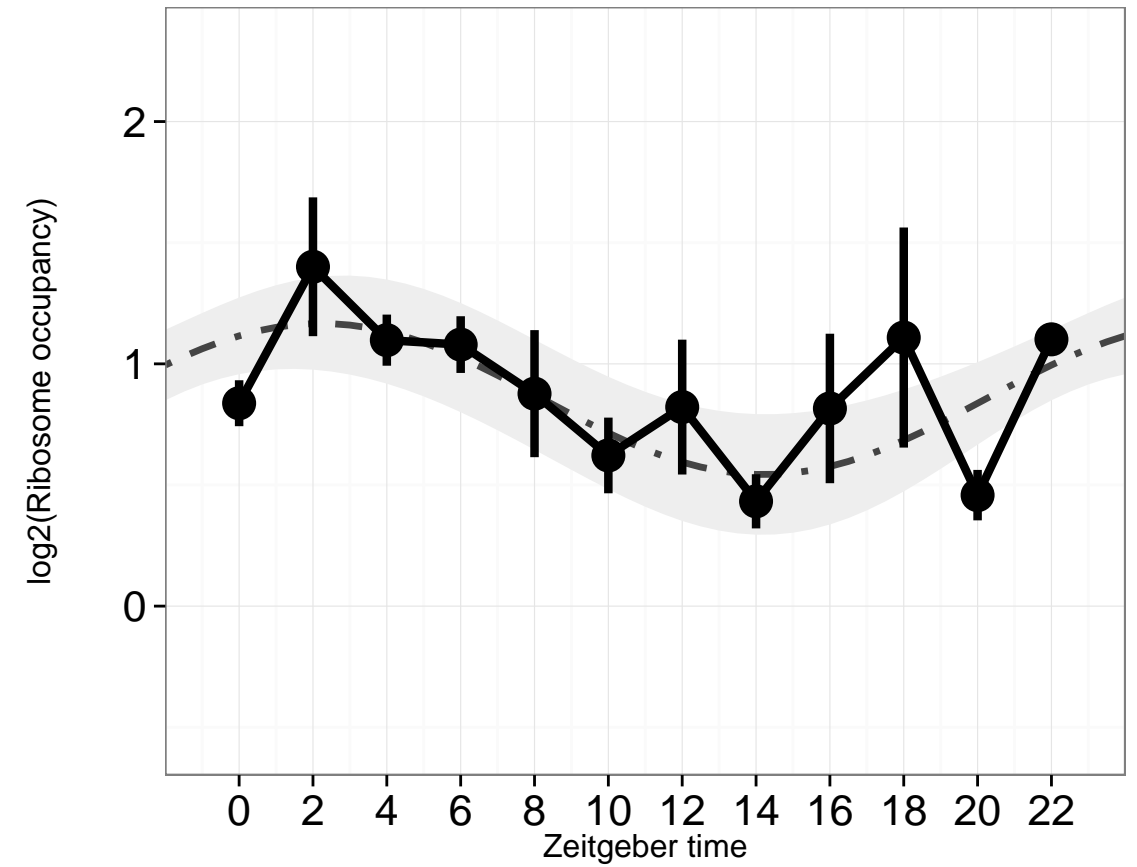

Supplement: SuppDataset_1.zip [file Nutf2_set_A.pdf › Supplemental Dataset 1/A-mRNA_nonrhyth_translation_nonrhyth/Nutf2_set_A.pdf]

## NvI

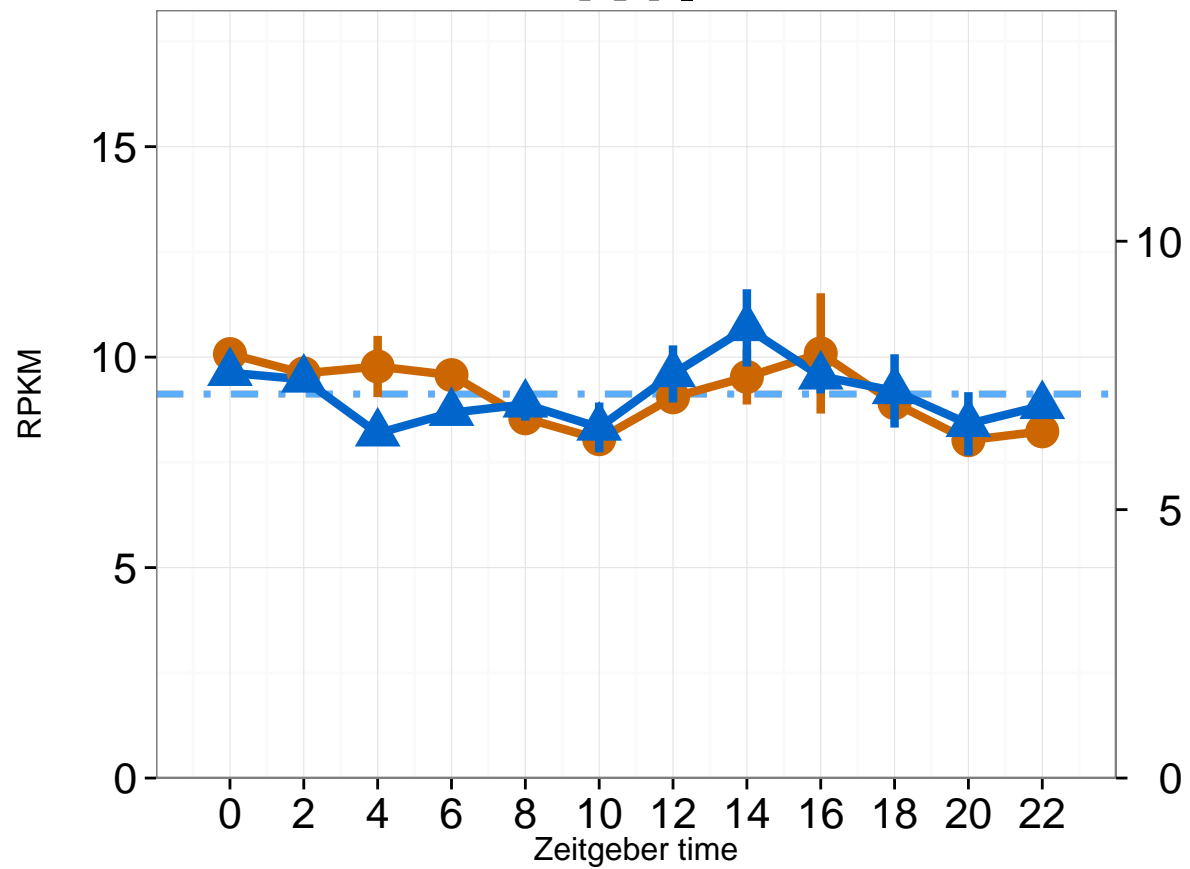

## NvI

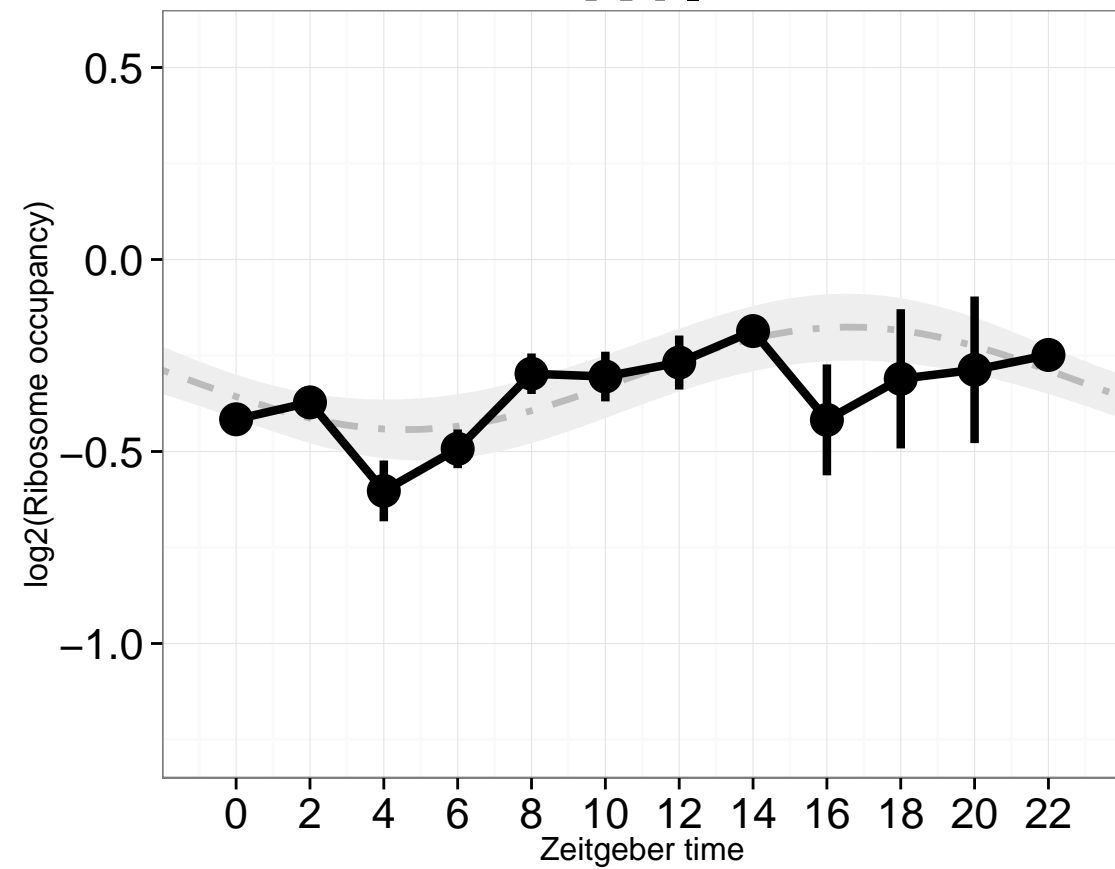

Supplement: SuppDataset_1.zip [file Nvl_set_A.pdf › Supplemental Dataset 1/A-mRNA_nonrhyth_translation_nonrhyth/Nvl_set_A.pdf]

## Nxf1

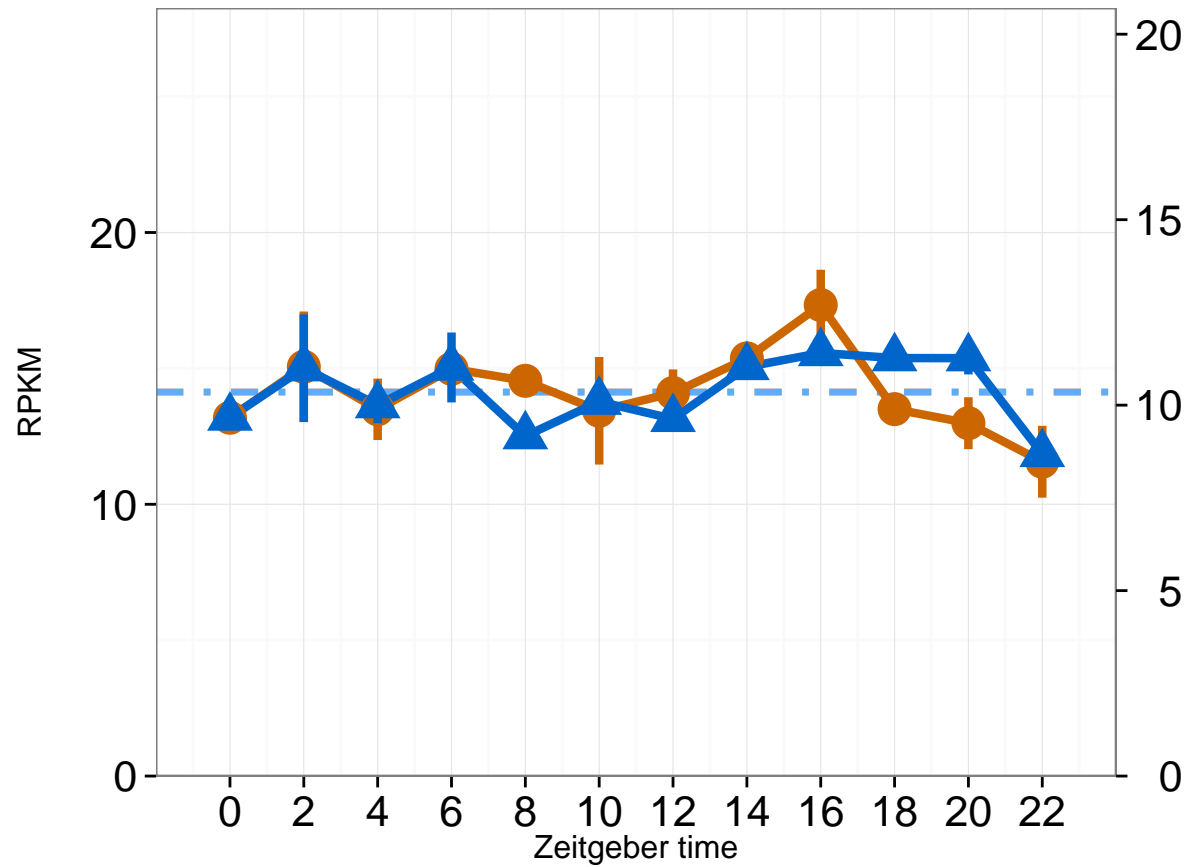

## Nxf1

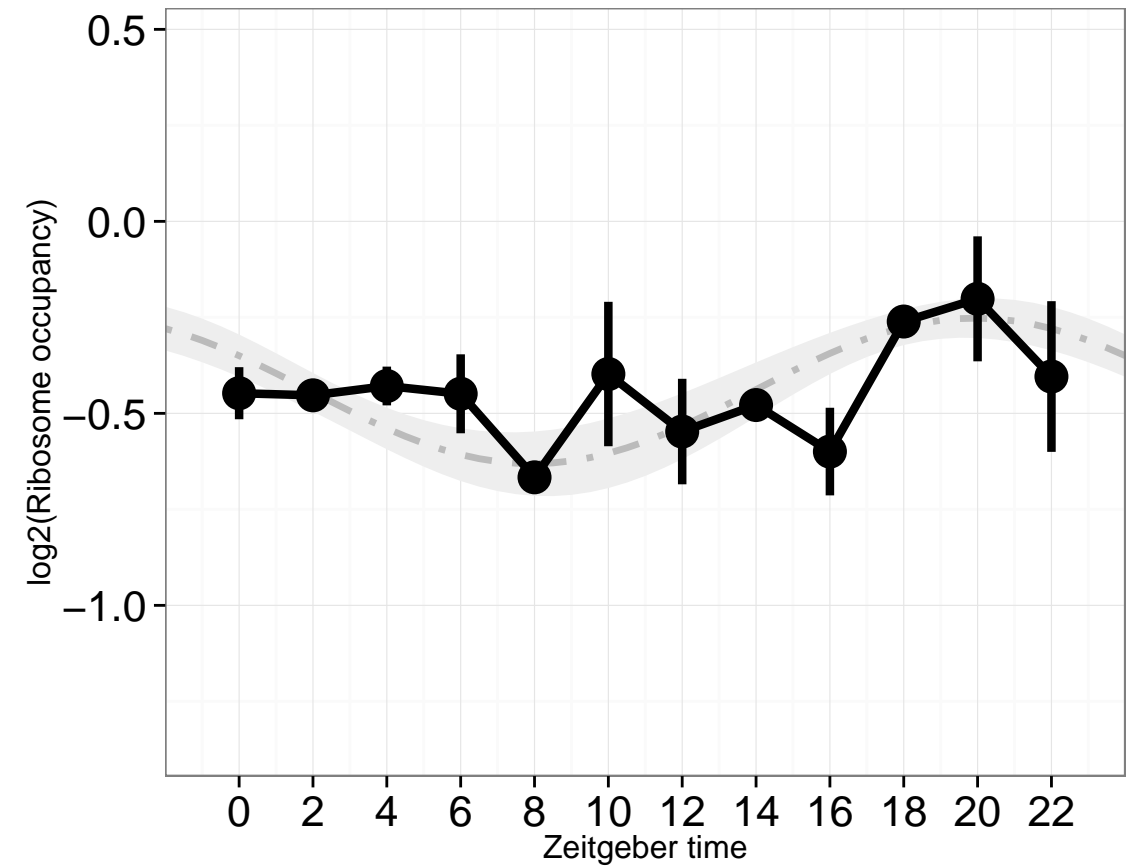

Supplement: SuppDataset_1.zip [file Nxf1_set_A.pdf › Supplemental Dataset 1/A-mRNA_nonrhyth_translation_nonrhyth/Nxf1_set_A.pdf]

## Nxpe2

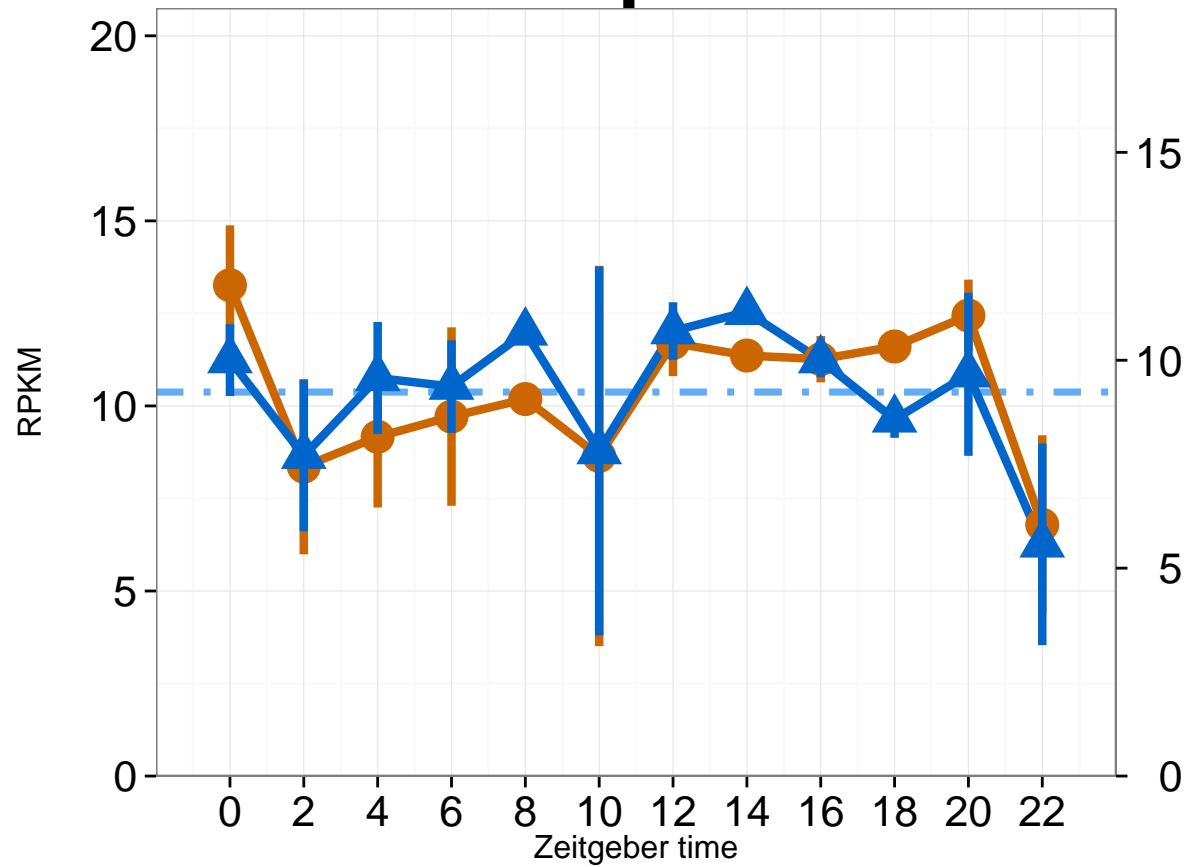

## Nxpe2

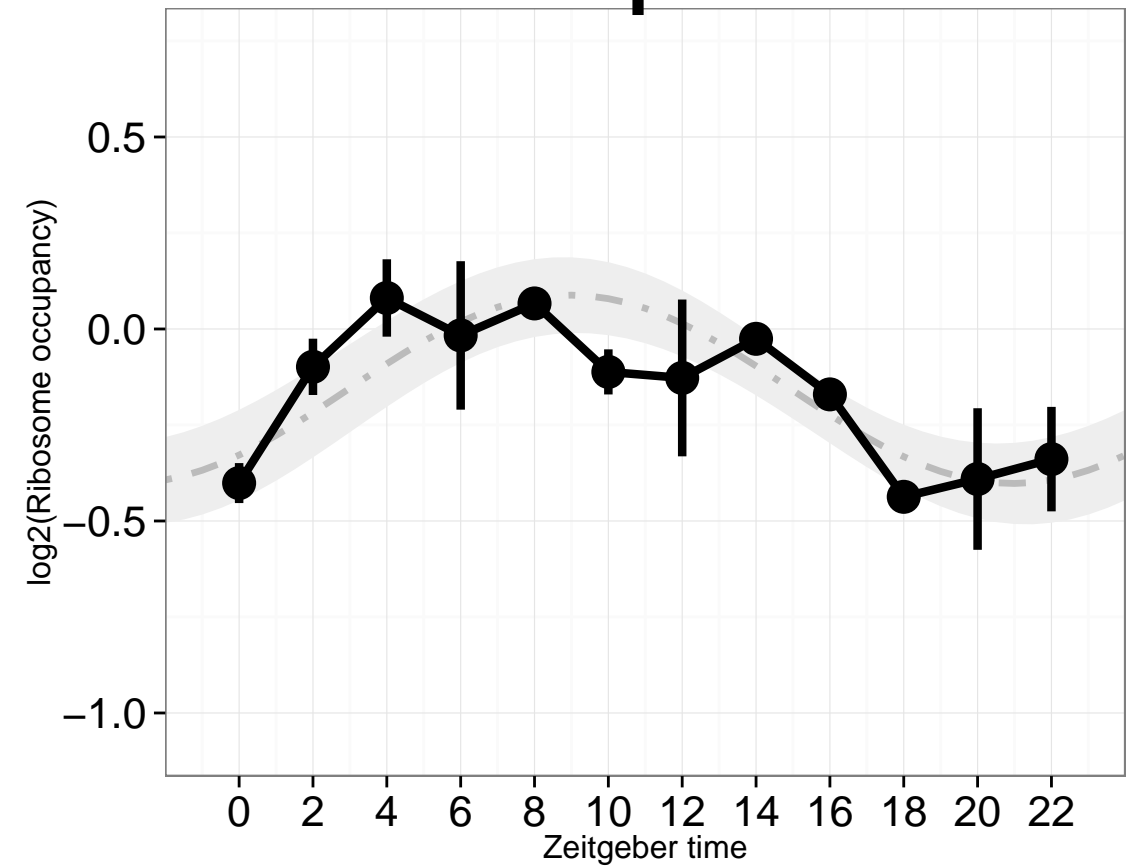

Supplement: SuppDataset_1.zip [file Nxpe2_set_A.pdf › Supplemental Dataset 1/A-mRNA_nonrhyth_translation_nonrhyth/Nxpe2_set_A.pdf]

# Nxpe4

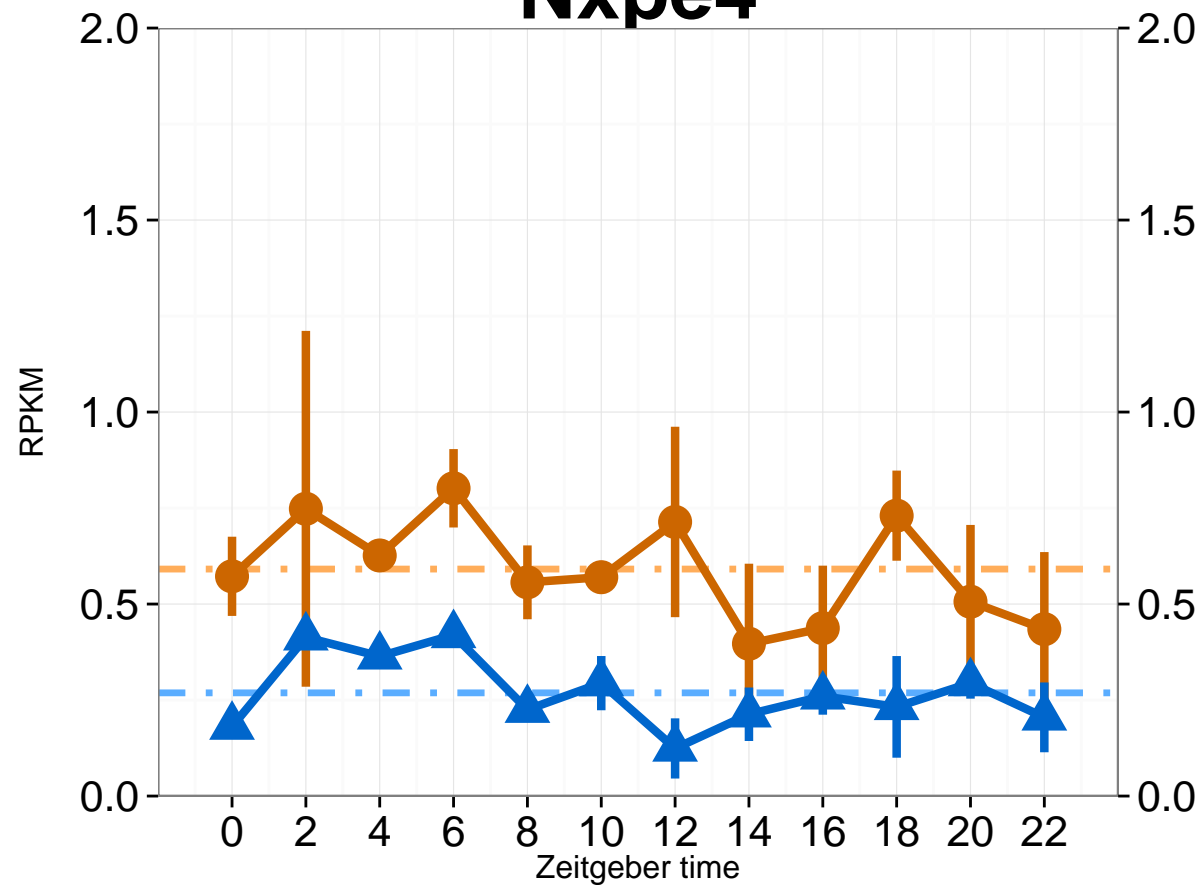

# Nxpe4

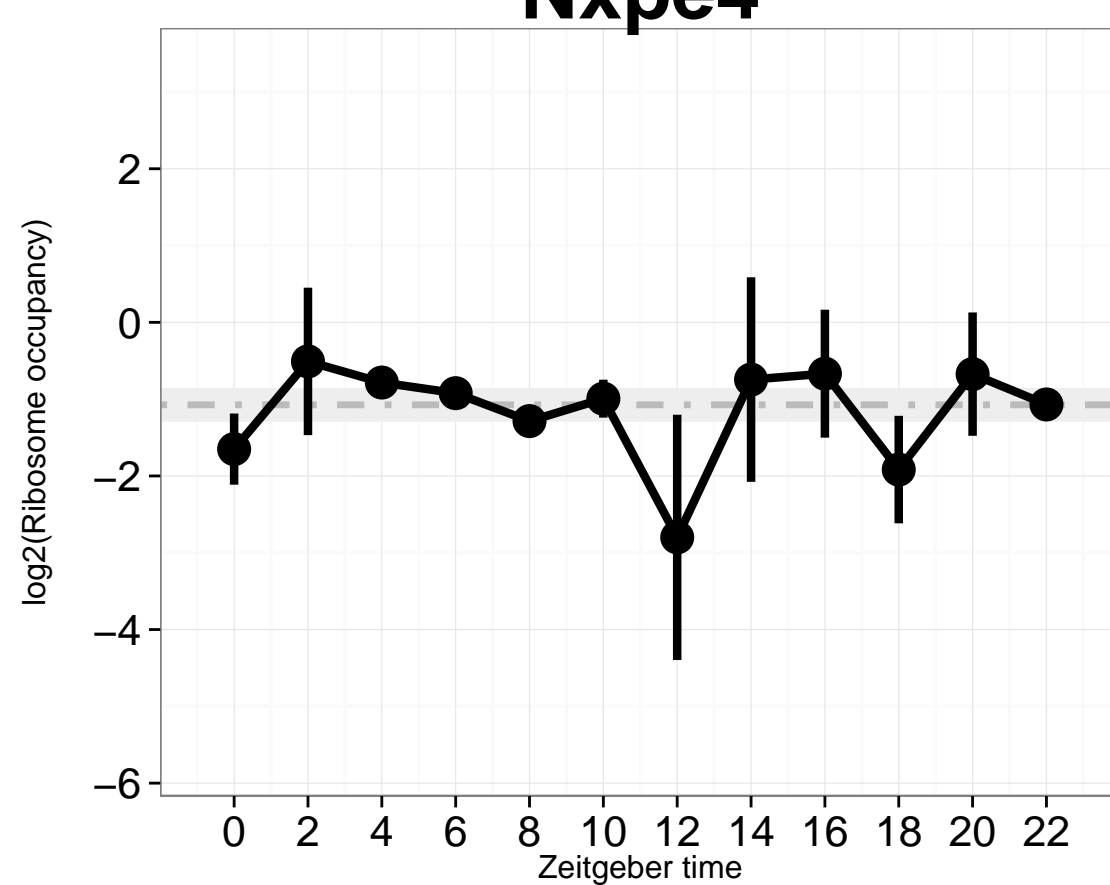

Supplement: SuppDataset_1.zip [file Nxpe4_set_A.pdf › Supplemental Dataset 1/A-mRNA_nonrhyth_translation_nonrhyth/Nxpe4_set_A.pdf]

## Nxt1

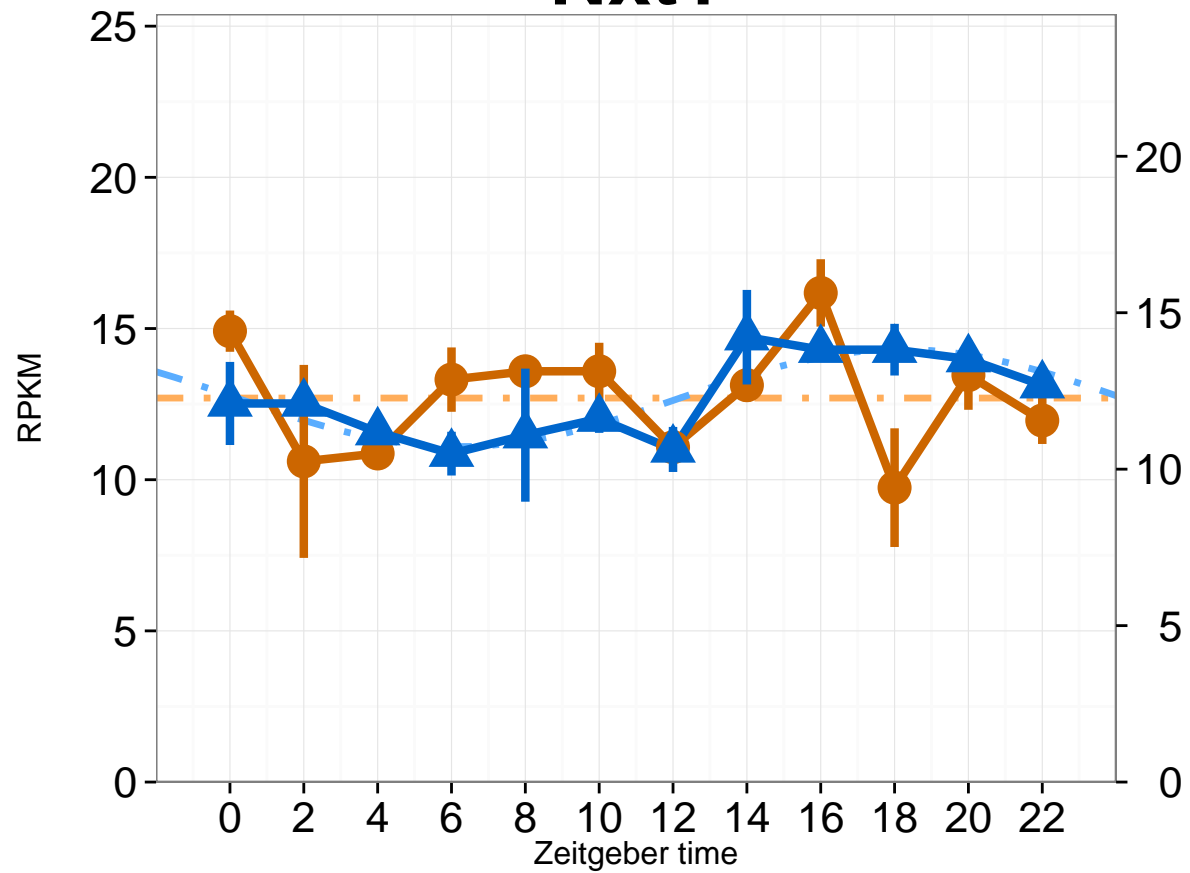

## Nxt1

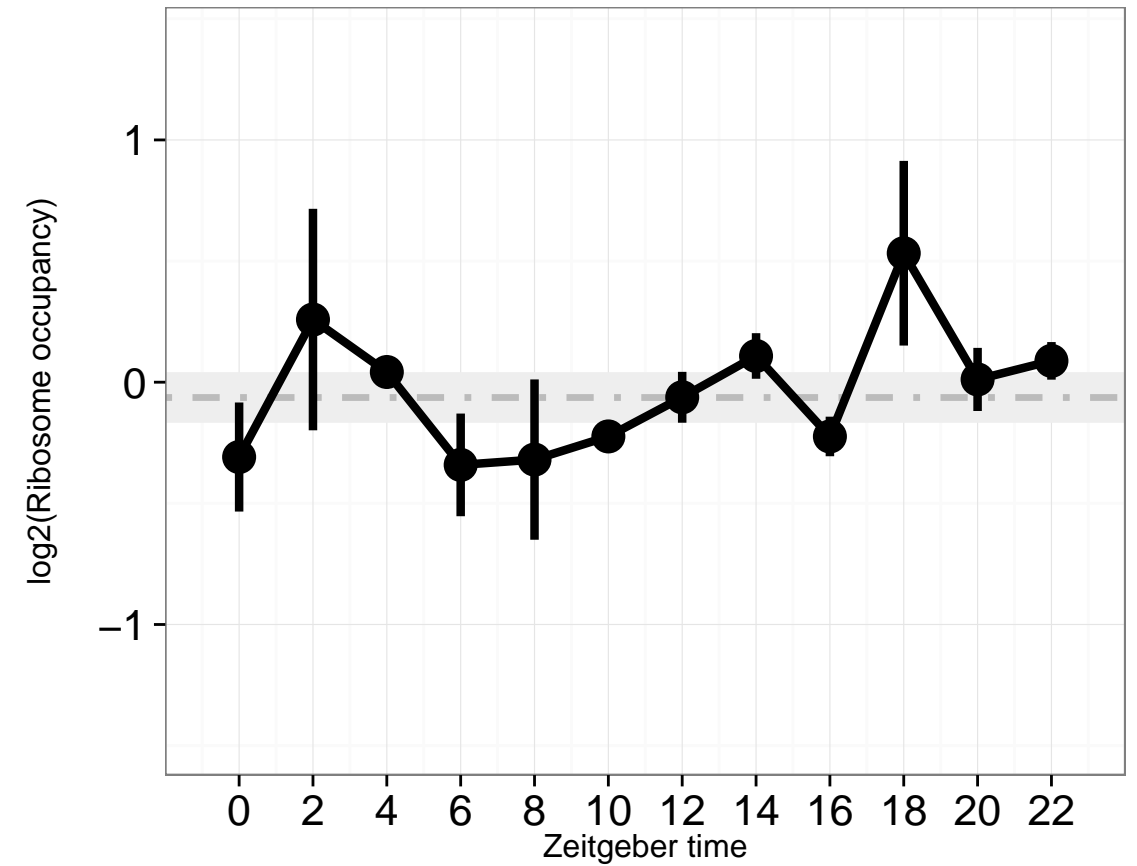

Supplement: SuppDataset_1.zip [file Nxt1_set_A.pdf › Supplemental Dataset 1/A-mRNA_nonrhyth_translation_nonrhyth/Nxt1_set_A.pdf]

## Nynrin

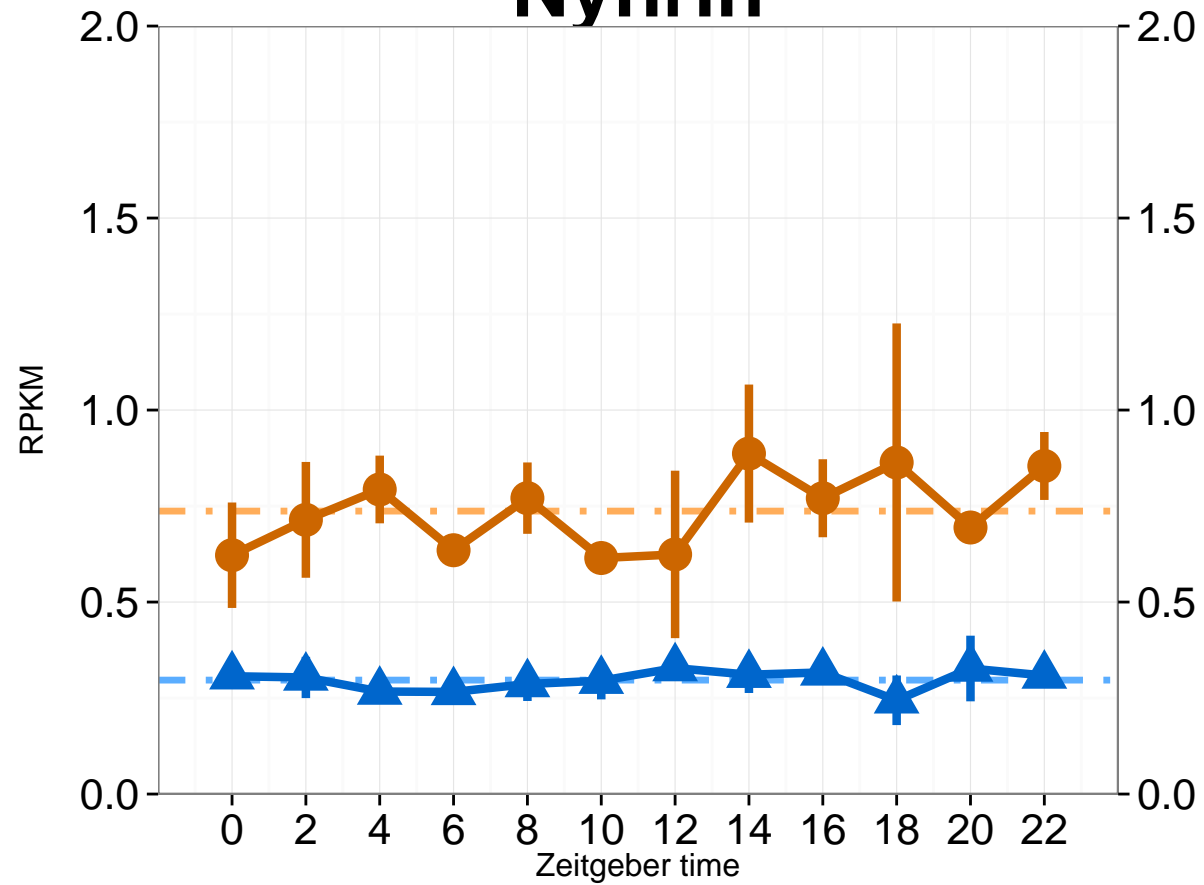

## Nynrin

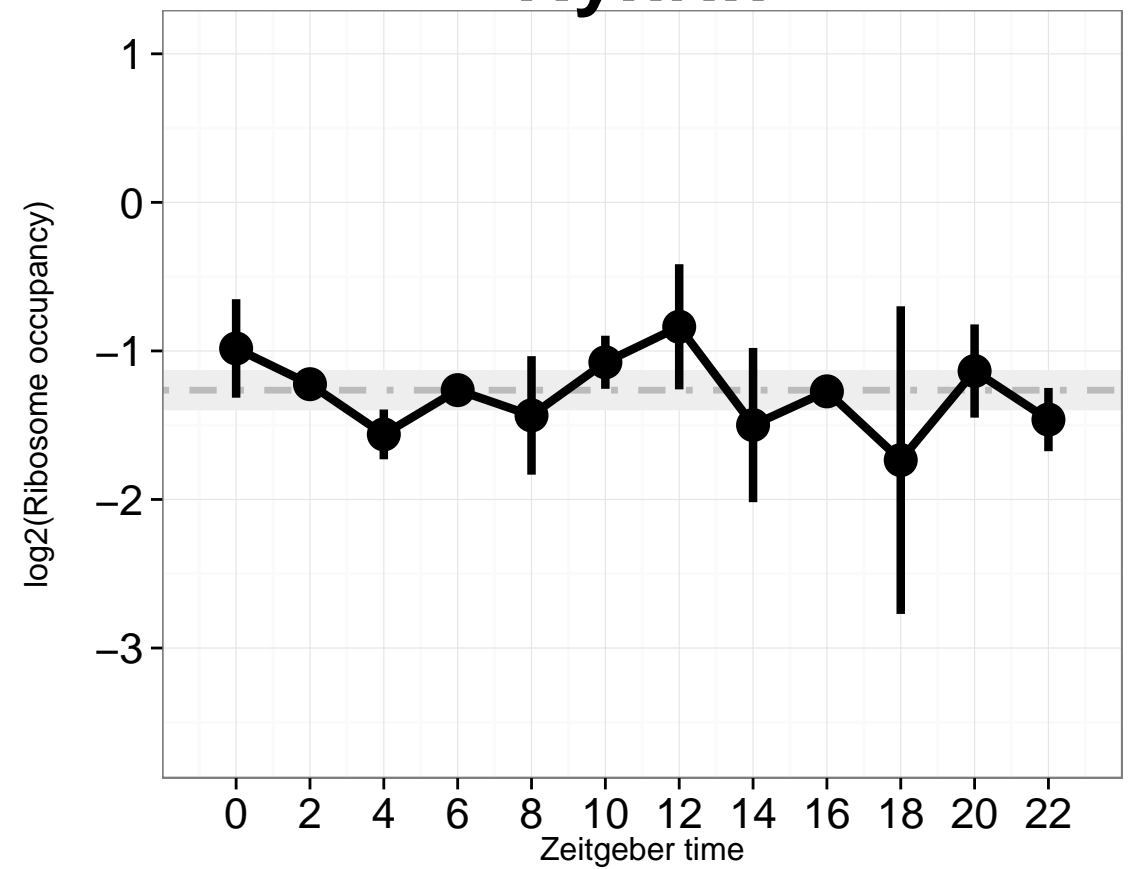

Supplement: SuppDataset_1.zip [file Nynrin_set_A.pdf › Supplemental Dataset 1/A-mRNA_nonrhyth_translation_nonrhyth/Nynrin_set_A.pdf]

## Oaf

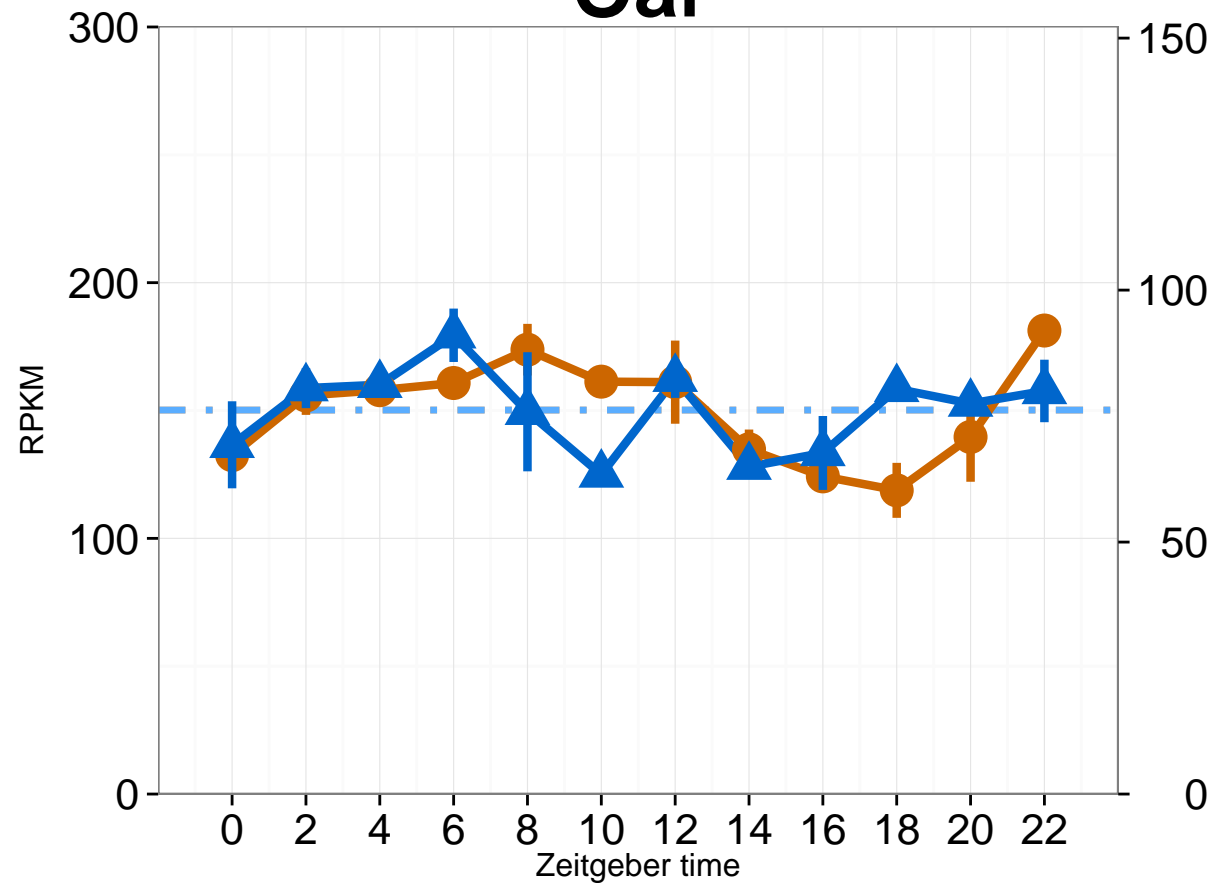

## Oaf

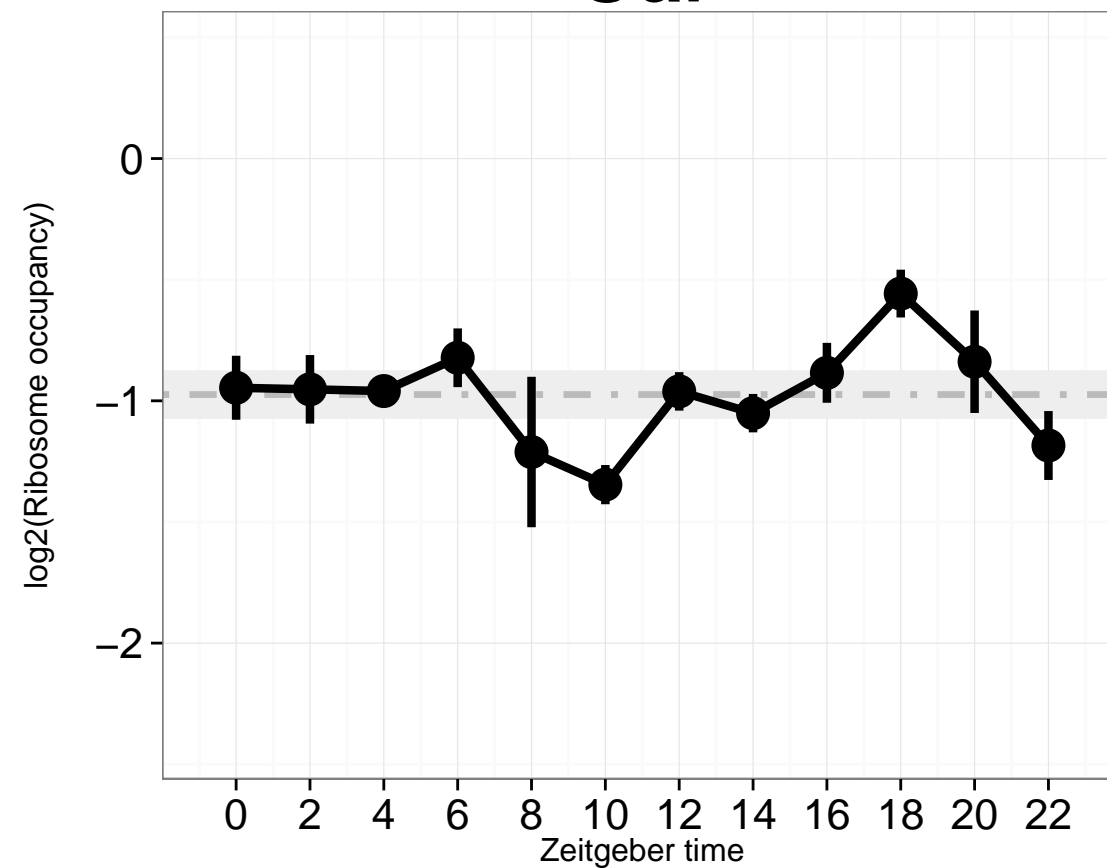

Supplement: SuppDataset_1.zip [file Oaf_set_A.pdf › Supplemental Dataset 1/A-mRNA_nonrhyth_translation_nonrhyth/Oaf_set_A.pdf]

# Oard1

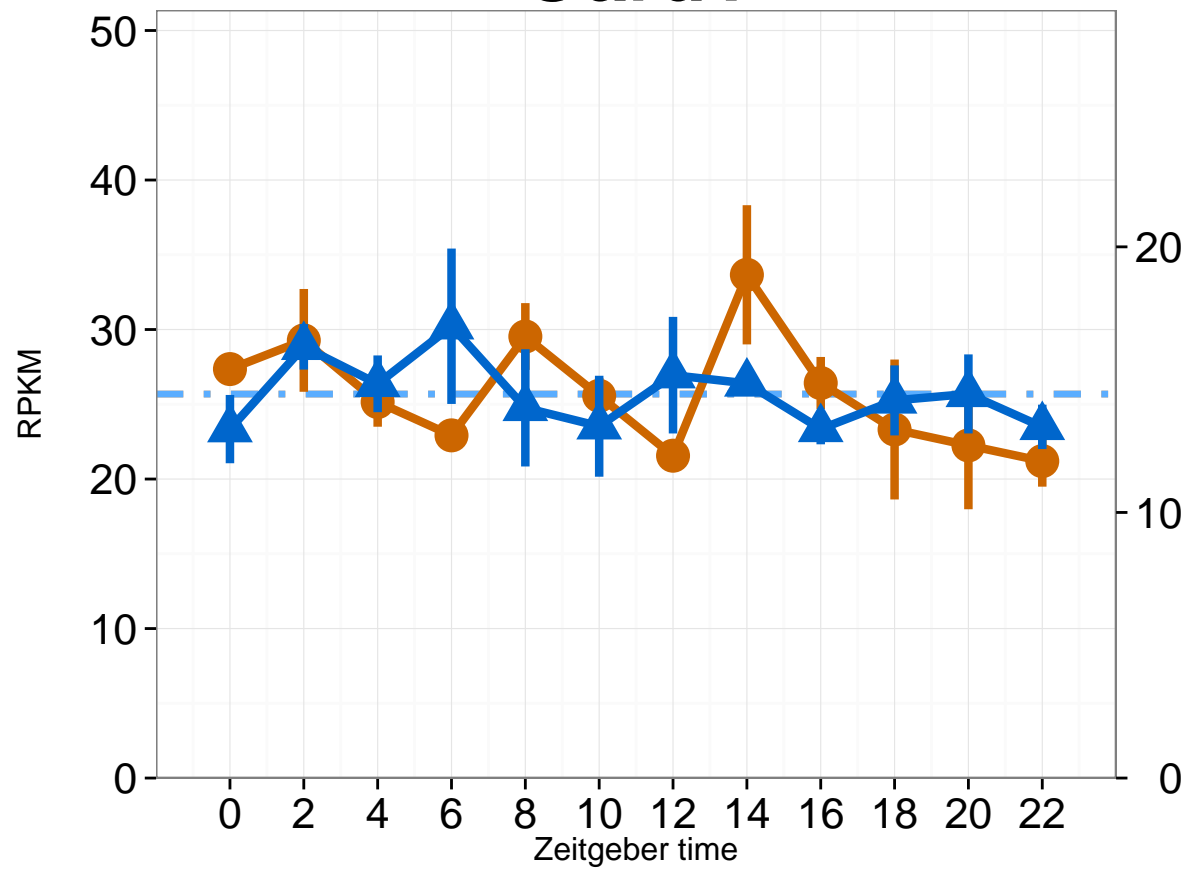

# Oard1

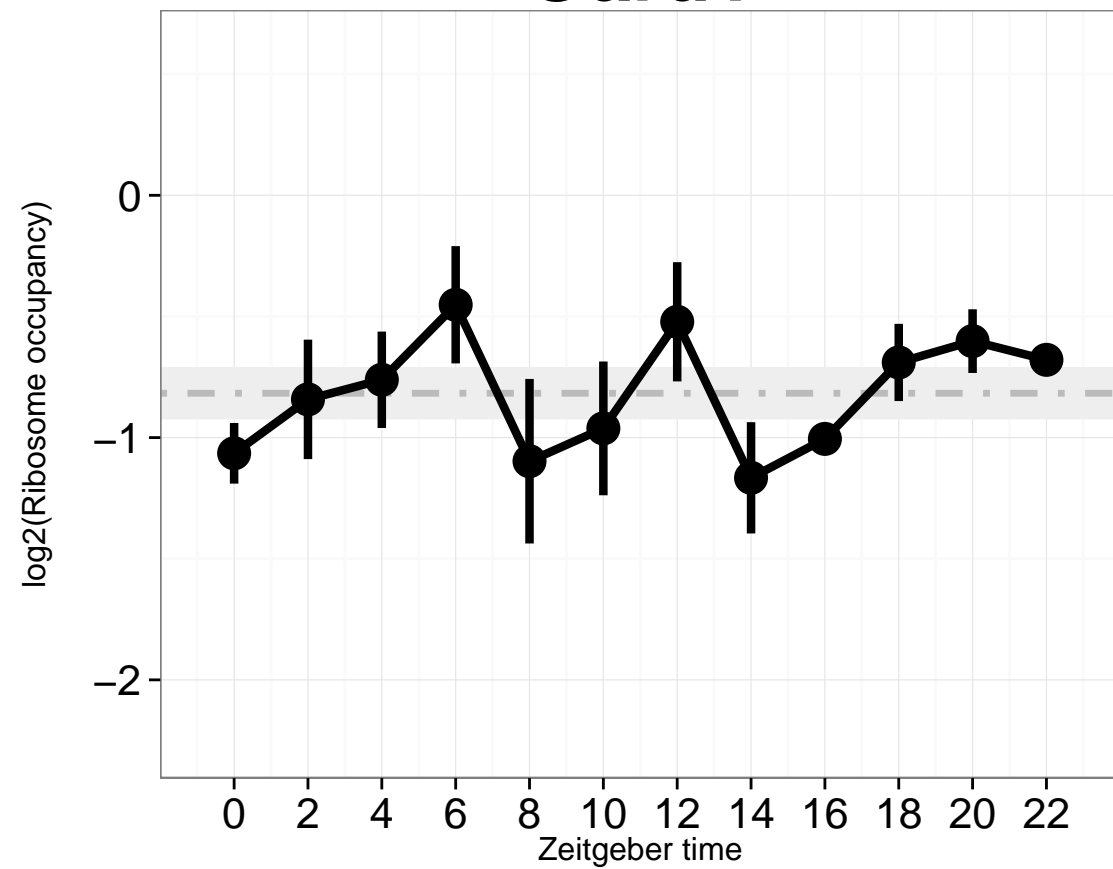

Supplement: SuppDataset_1.zip [file Oard1_set_A.pdf › Supplemental Dataset 1/A-mRNA_nonrhyth_translation_nonrhyth/Oard1_set_A.pdf]

## Oas1c

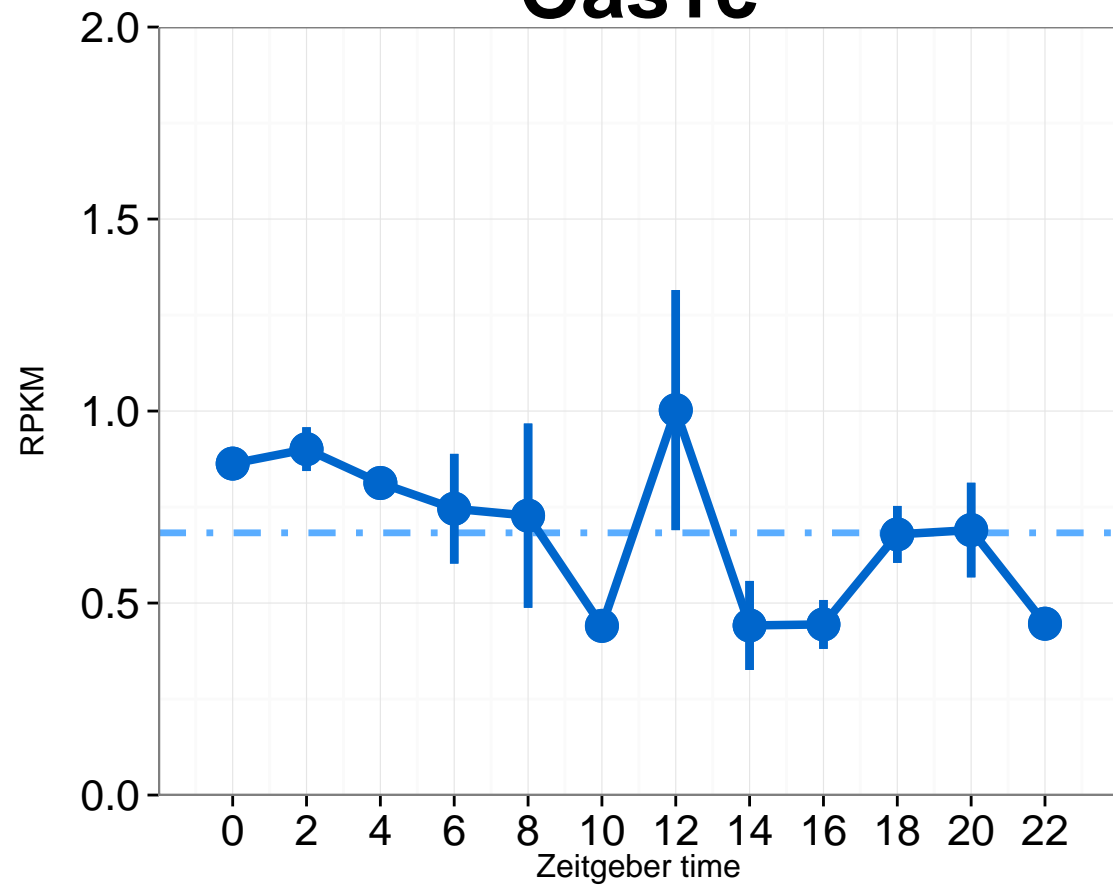

## Oas1c log2(Ribosome occupancy

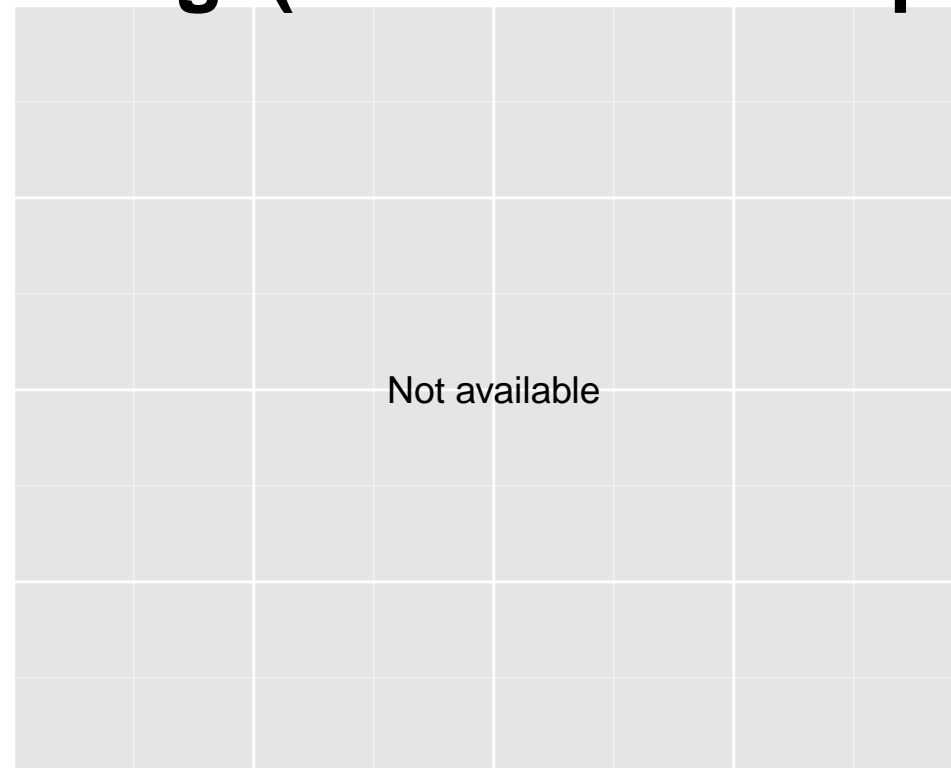

Supplement: SuppDataset_1.zip [file Oas1c_set_A.pdf › Supplemental Dataset 1/A-mRNA_nonrhyth_translation_nonrhyth/Oas1c_set_A.pdf]

## Oas2

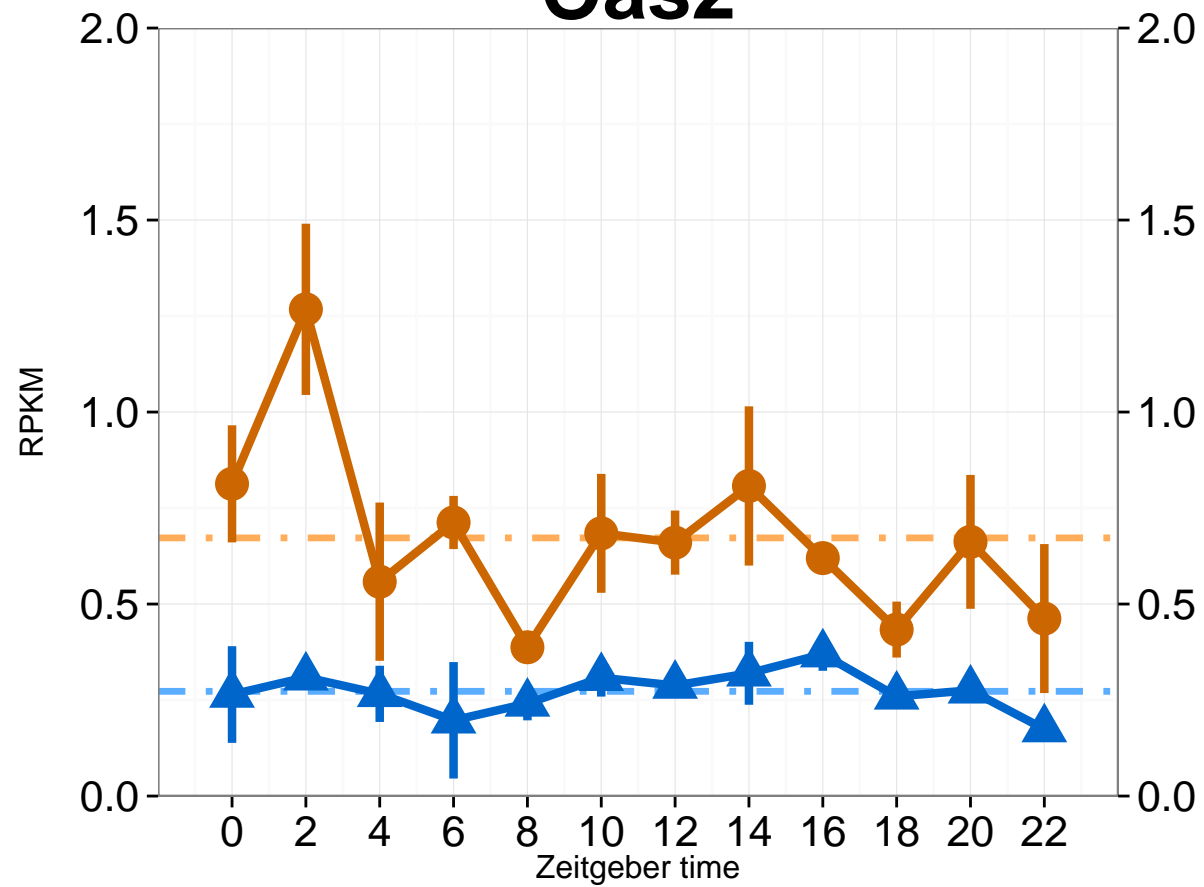

## Oas2

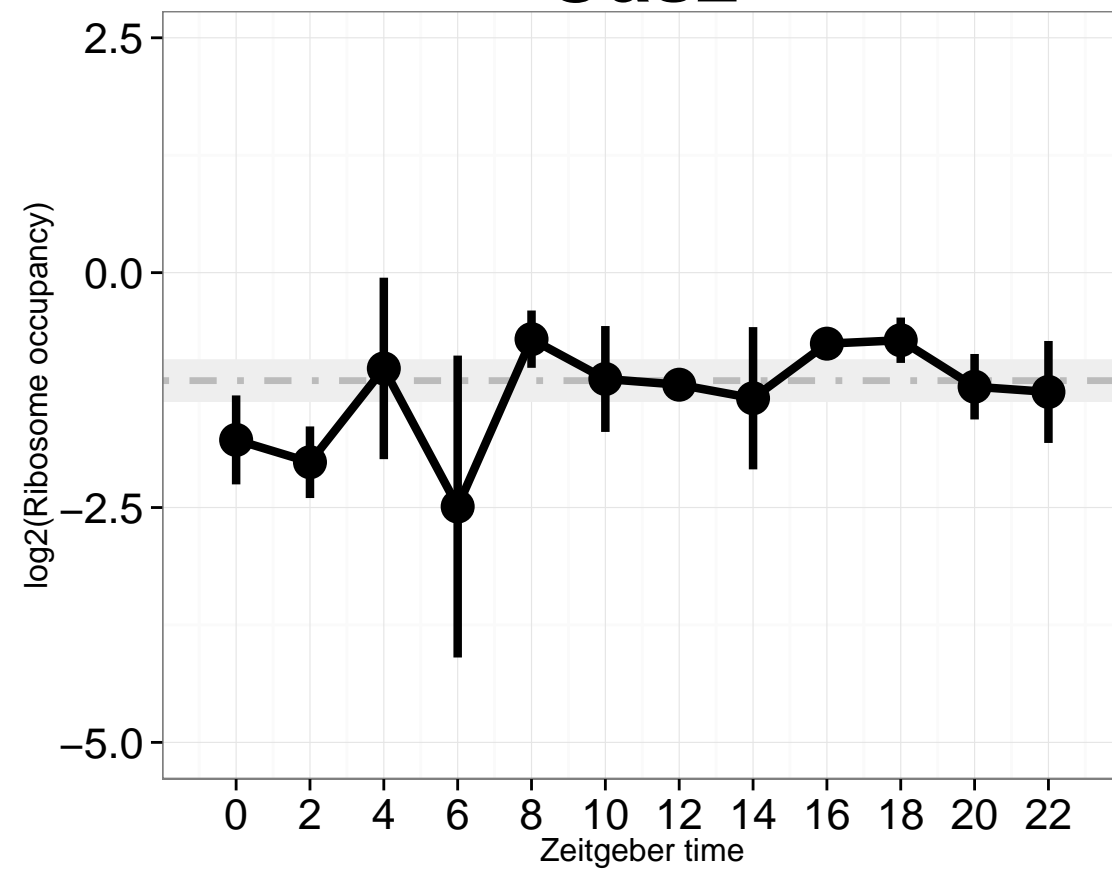

Supplement: SuppDataset_1.zip [file Oas2_set_A.pdf › Supplemental Dataset 1/A-mRNA_nonrhyth_translation_nonrhyth/Oas2_set_A.pdf]

## Oas3

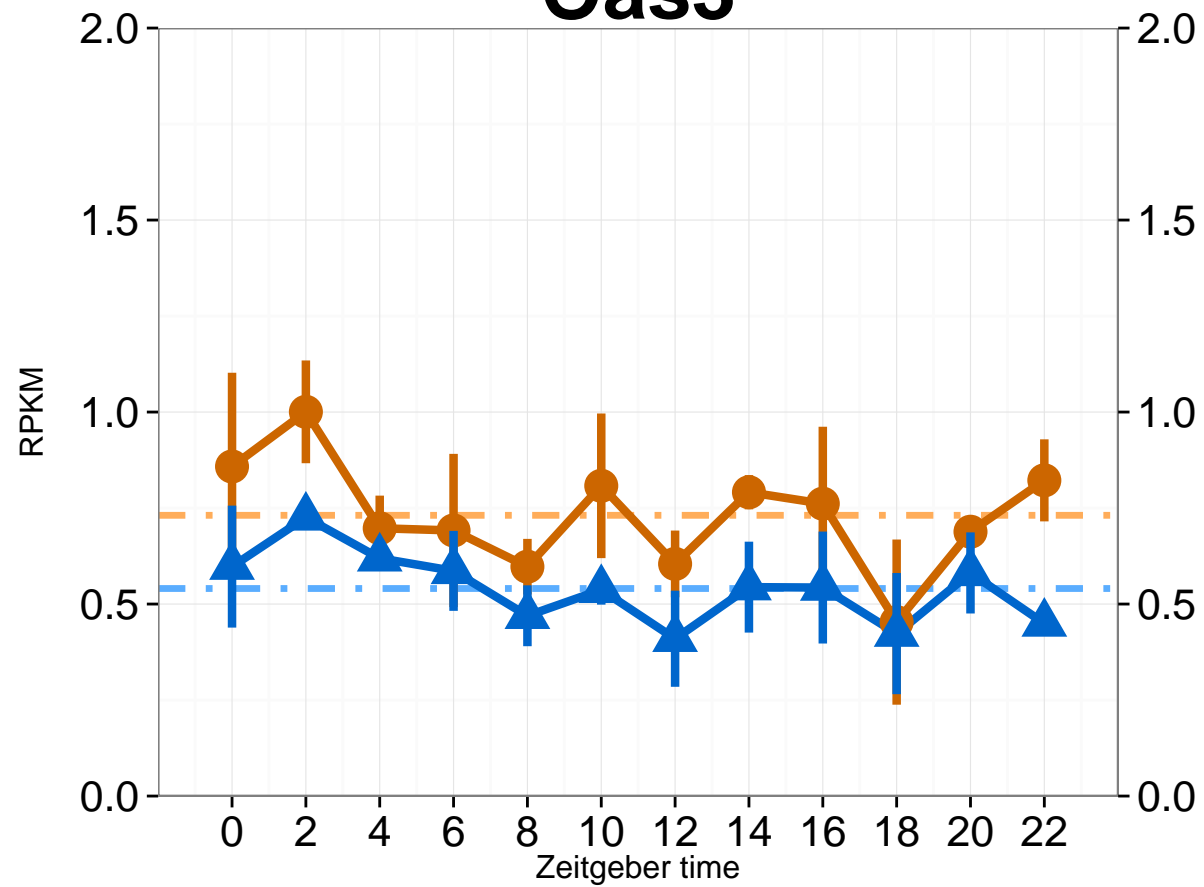

## Oas3

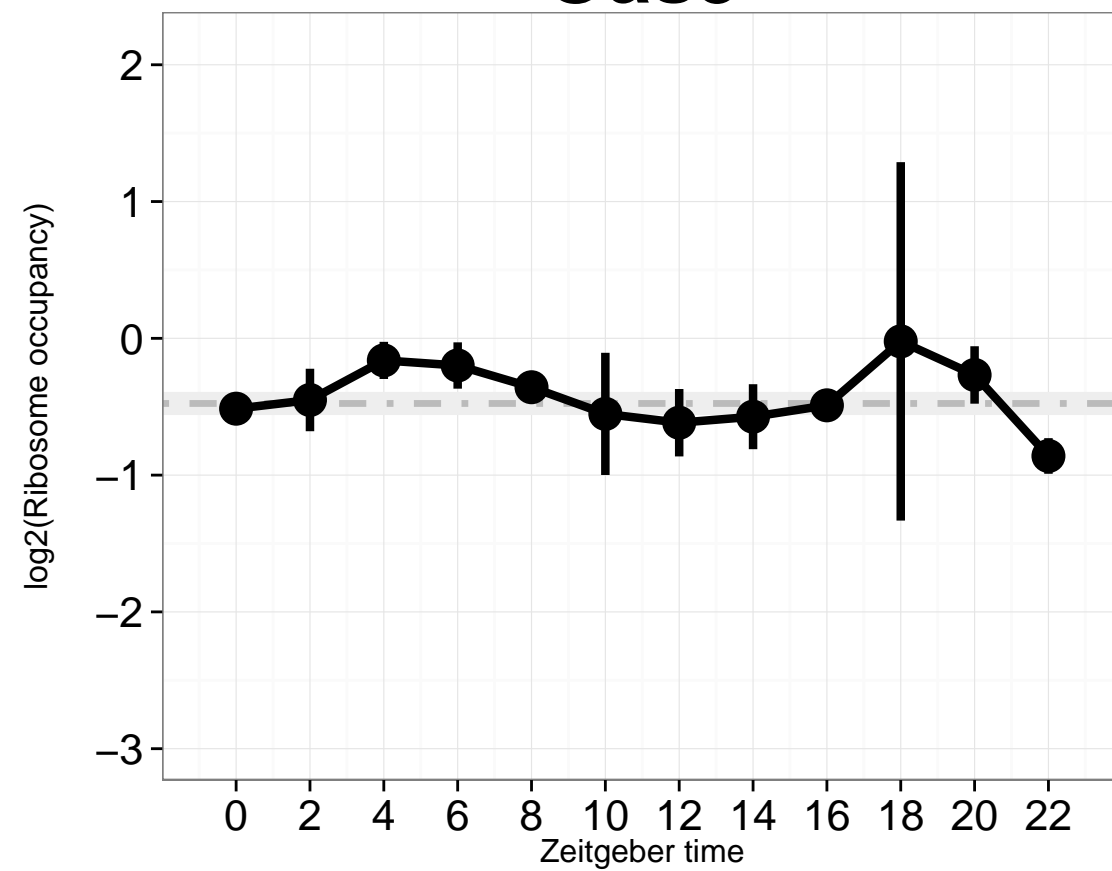

Supplement: SuppDataset_1.zip [file Oas3_set_A.pdf › Supplemental Dataset 1/A-mRNA_nonrhyth_translation_nonrhyth/Oas3_set_A.pdf]

## Oat

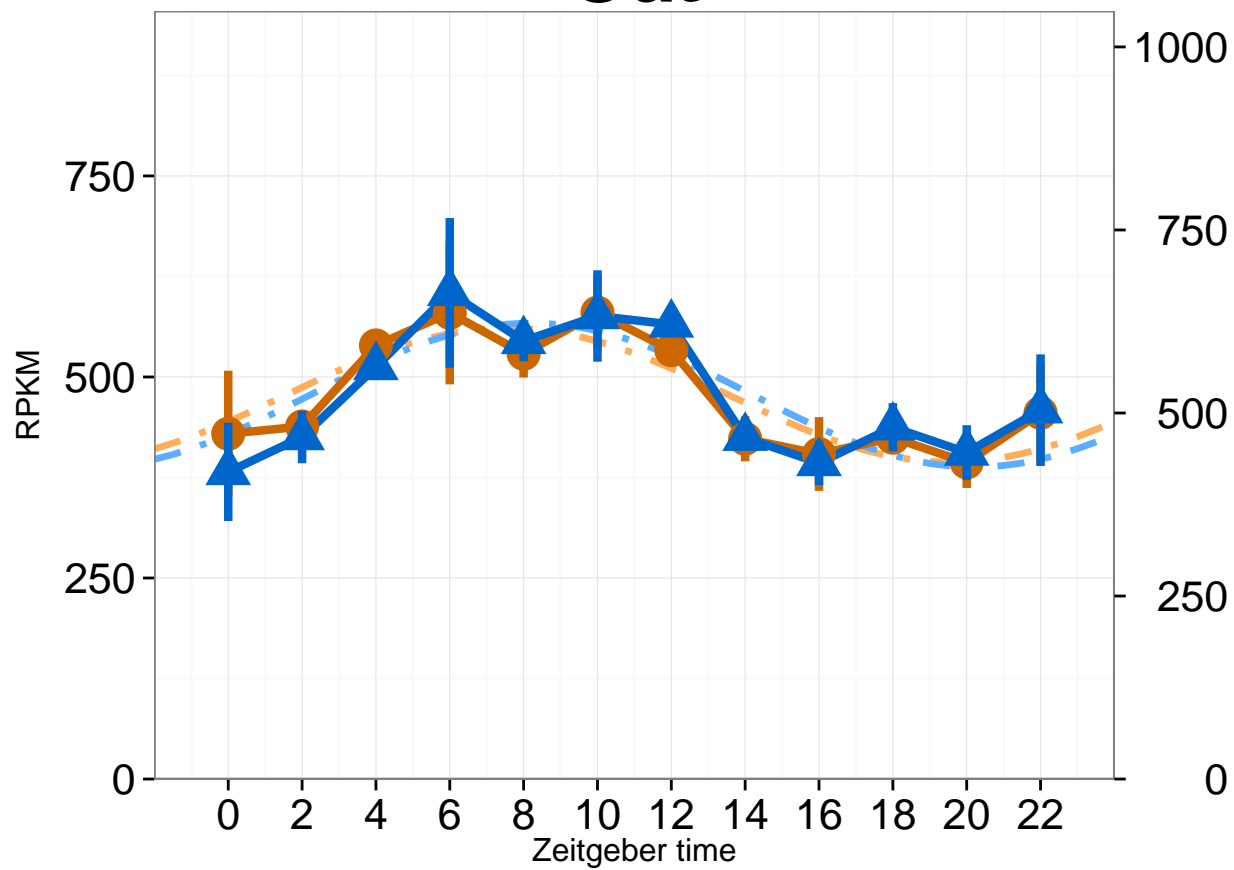

## Oat

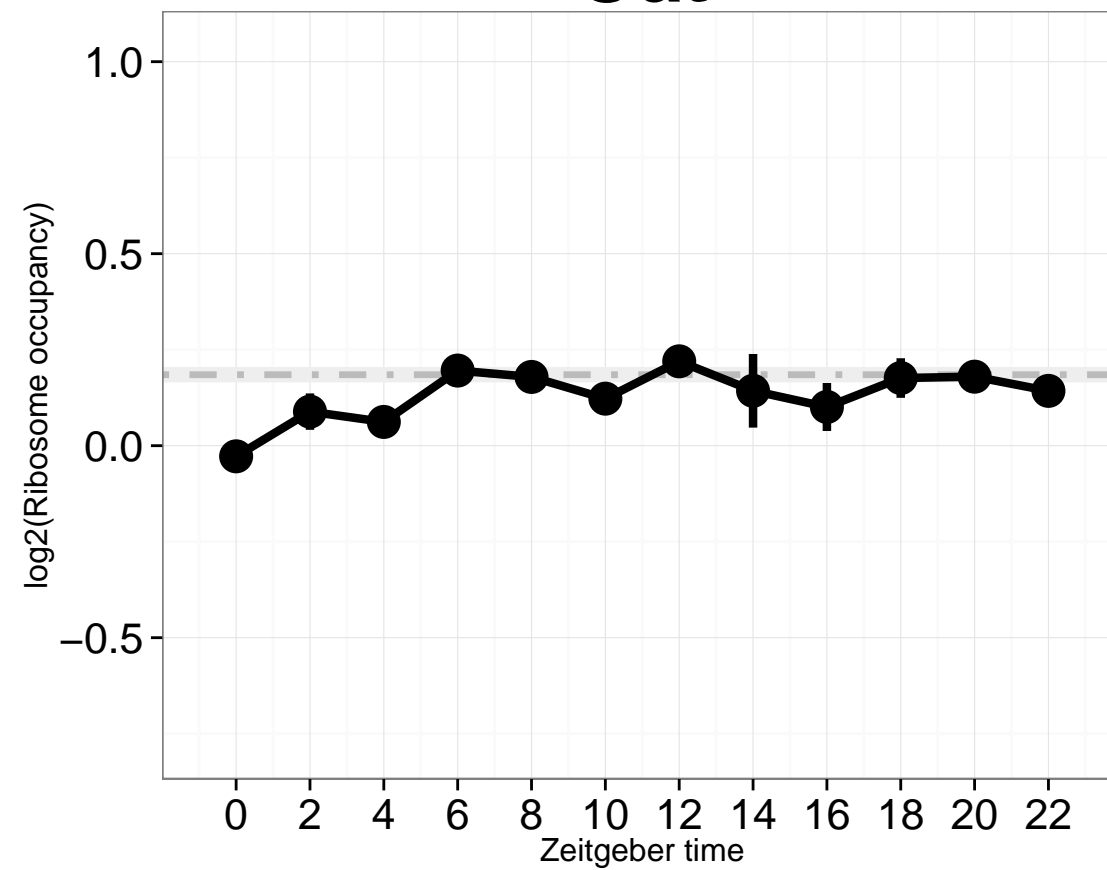

Supplement: SuppDataset_1.zip [file Oat_set_A.pdf › Supplemental Dataset 1/A-mRNA_nonrhyth_translation_nonrhyth/Oat_set_A.pdf]

## Oaz1

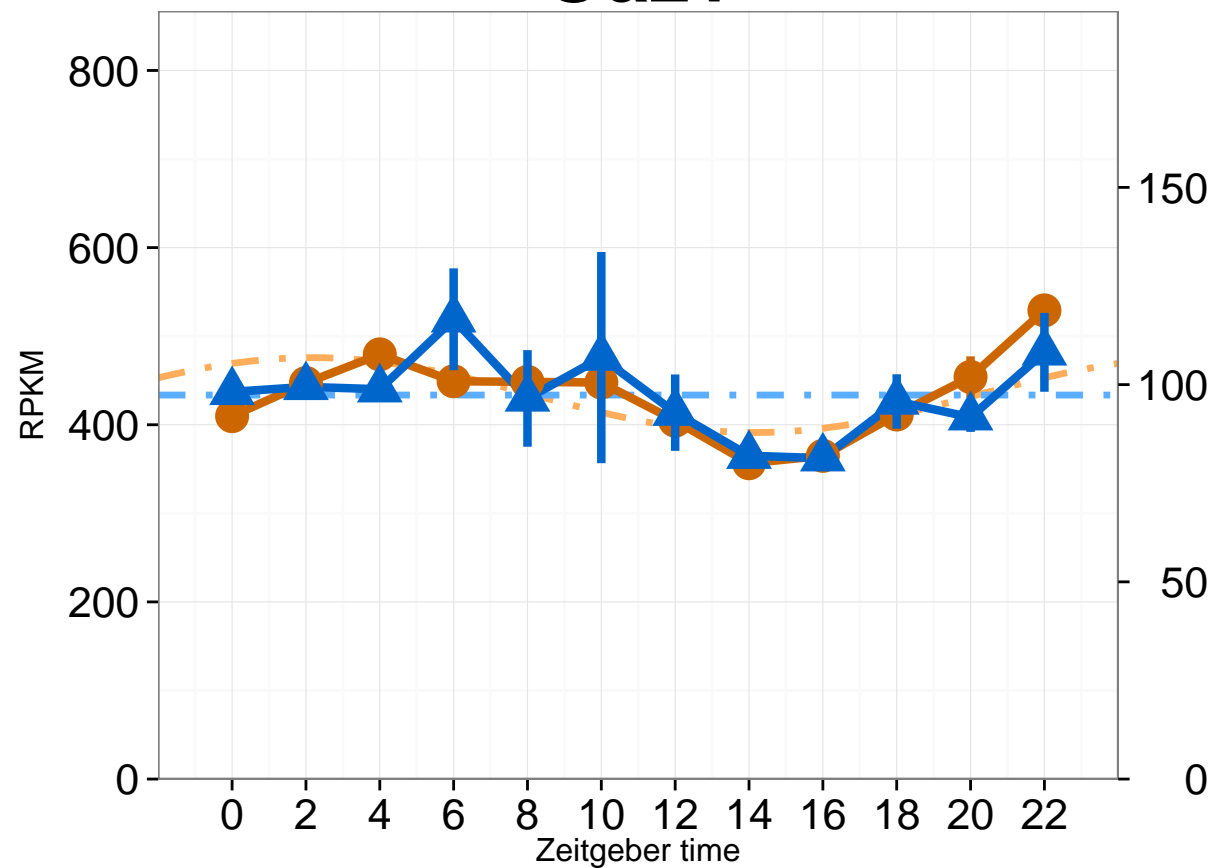

## Oaz1

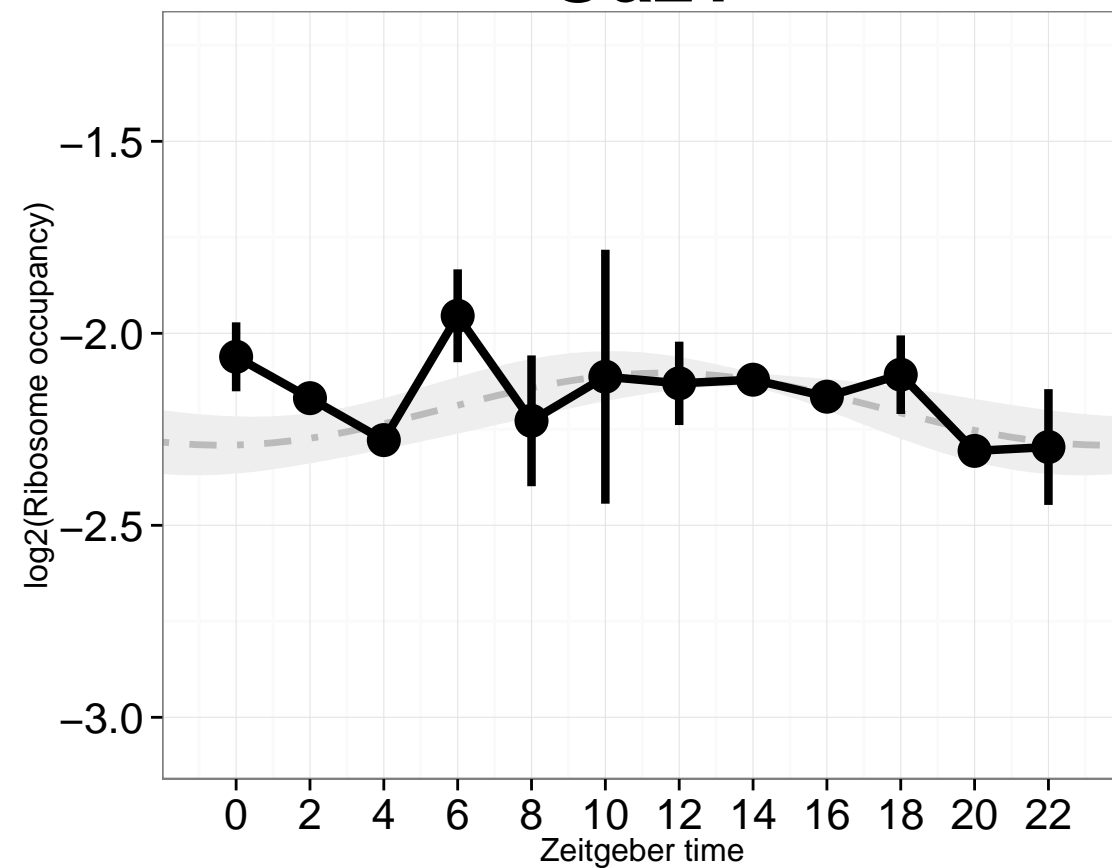

Supplement: SuppDataset_1.zip [file Oaz1_set_A.pdf › Supplemental Dataset 1/A-mRNA_nonrhyth_translation_nonrhyth/Oaz1_set_A.pdf]

## Oaz2

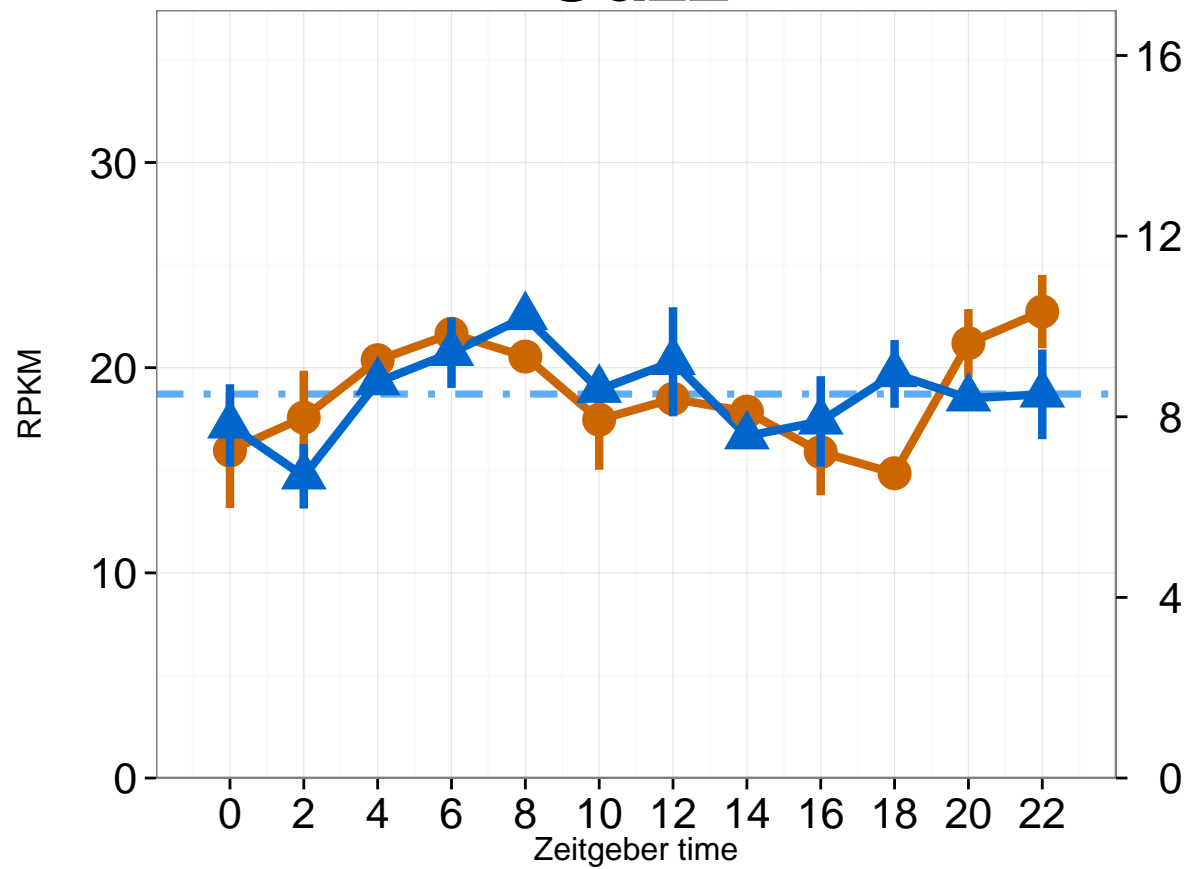

## Oaz2

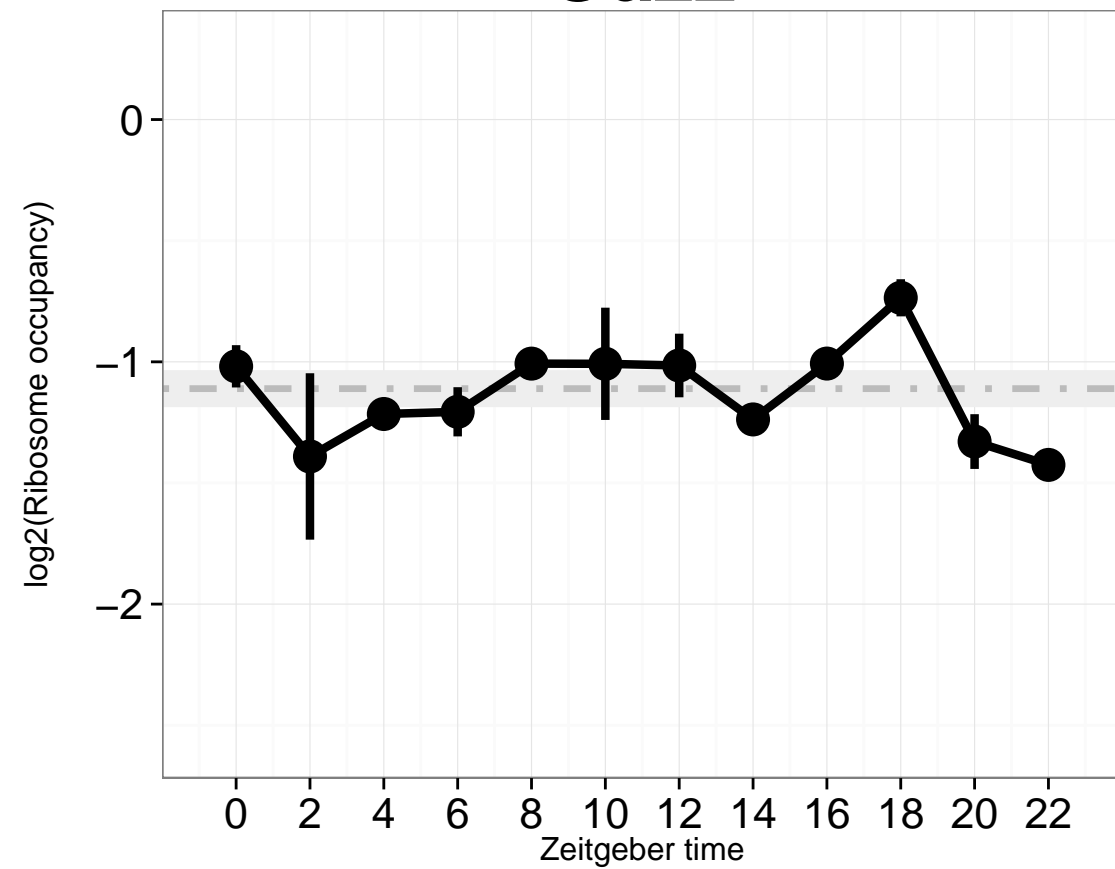

Supplement: SuppDataset_1.zip [file Oaz2_set_A.pdf › Supplemental Dataset 1/A-mRNA_nonrhyth_translation_nonrhyth/Oaz2_set_A.pdf]

# Obp2a

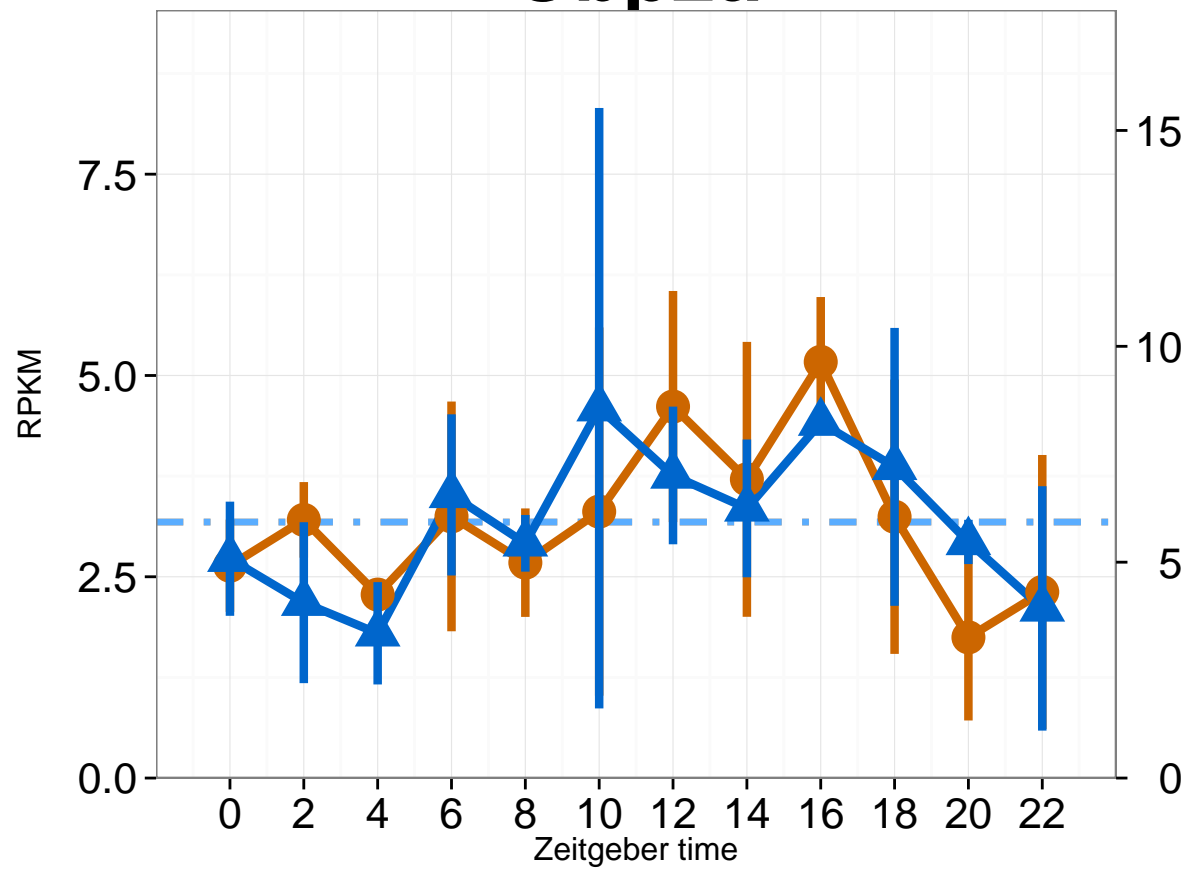

# Obp2a

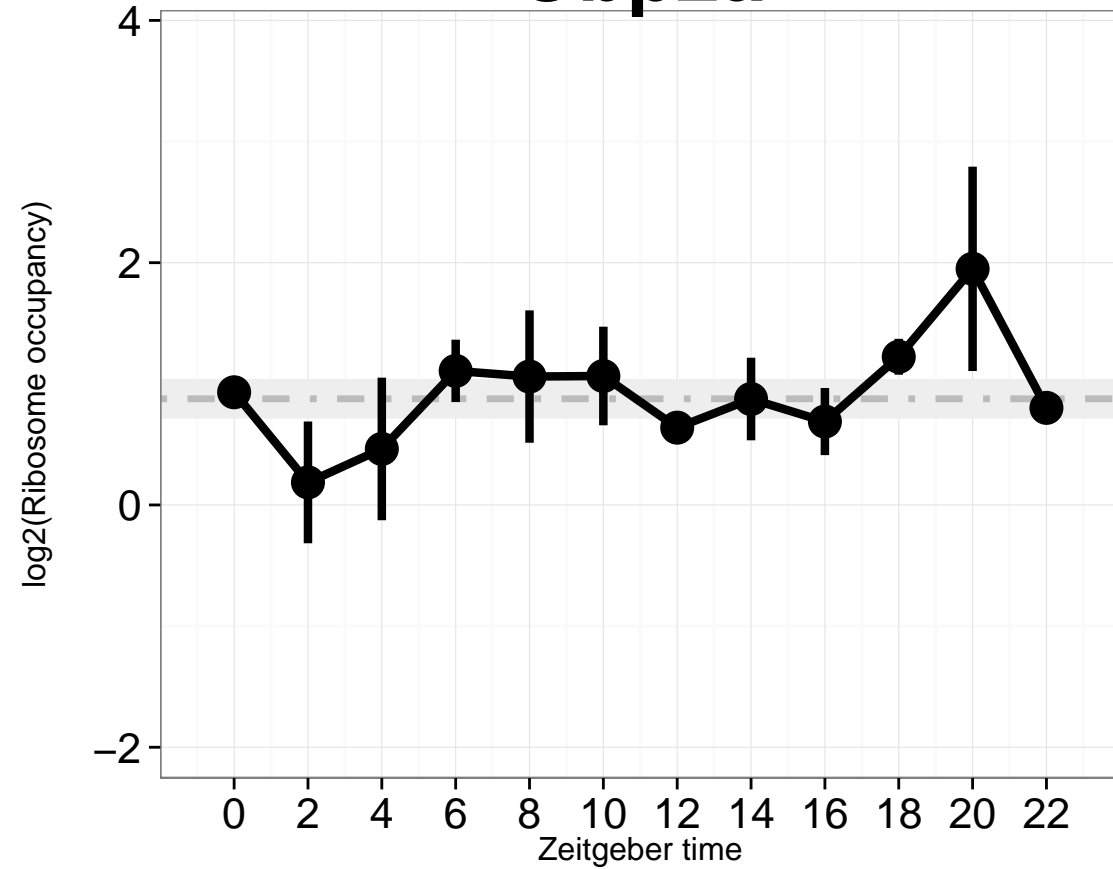

Supplement: SuppDataset_1.zip [file Obp2a_set_A.pdf › Supplemental Dataset 1/A-mRNA_nonrhyth_translation_nonrhyth/Obp2a_set_A.pdf]

# Ocel1

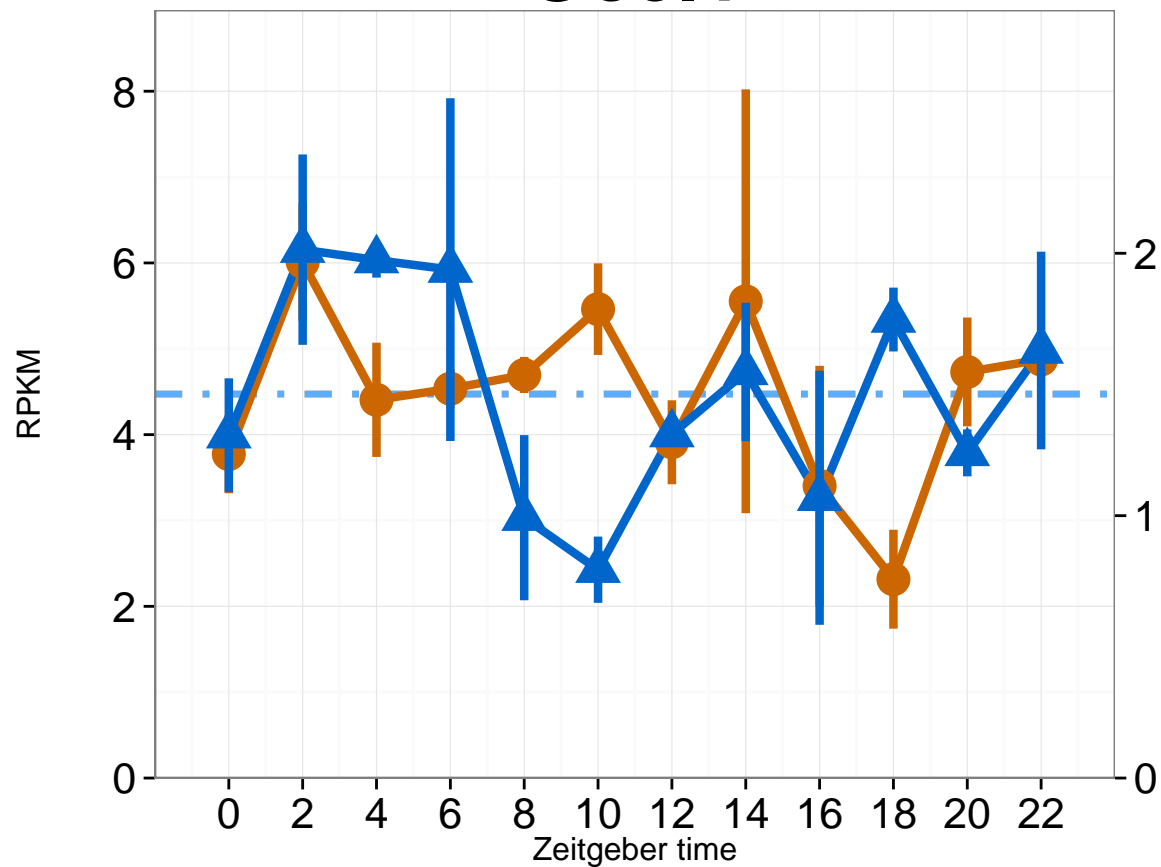

# Ocel1

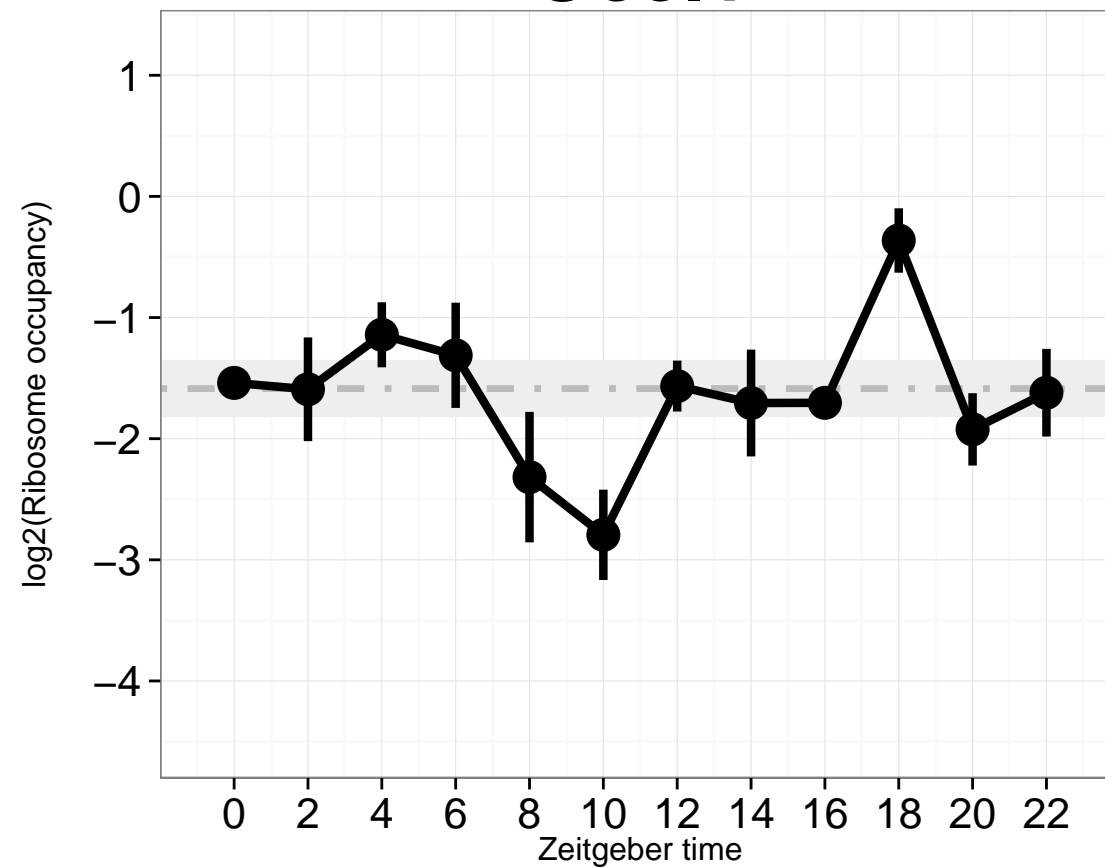

Supplement: SuppDataset_1.zip [file Ocel1_set_A.pdf › Supplemental Dataset 1/A-mRNA_nonrhyth_translation_nonrhyth/Ocel1_set_A.pdf]

# Ociad1

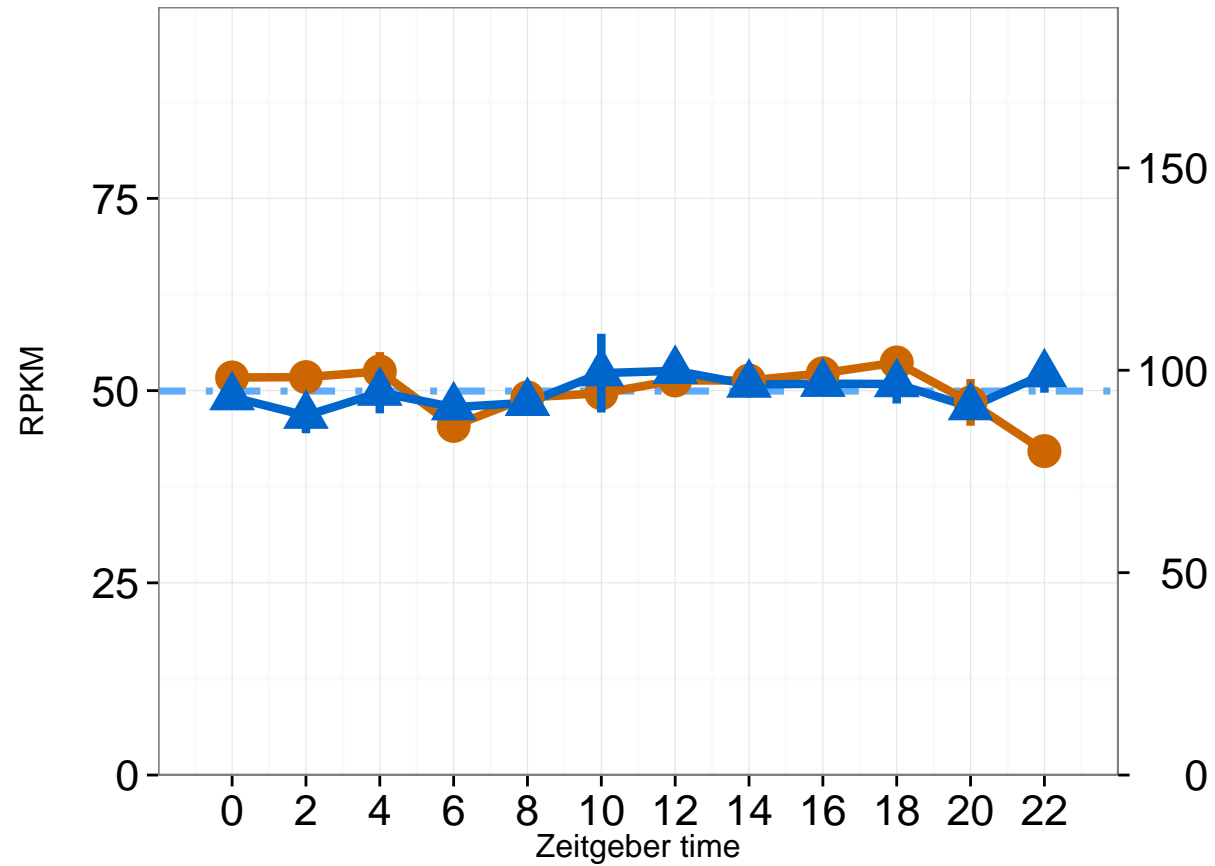

# Ociad1

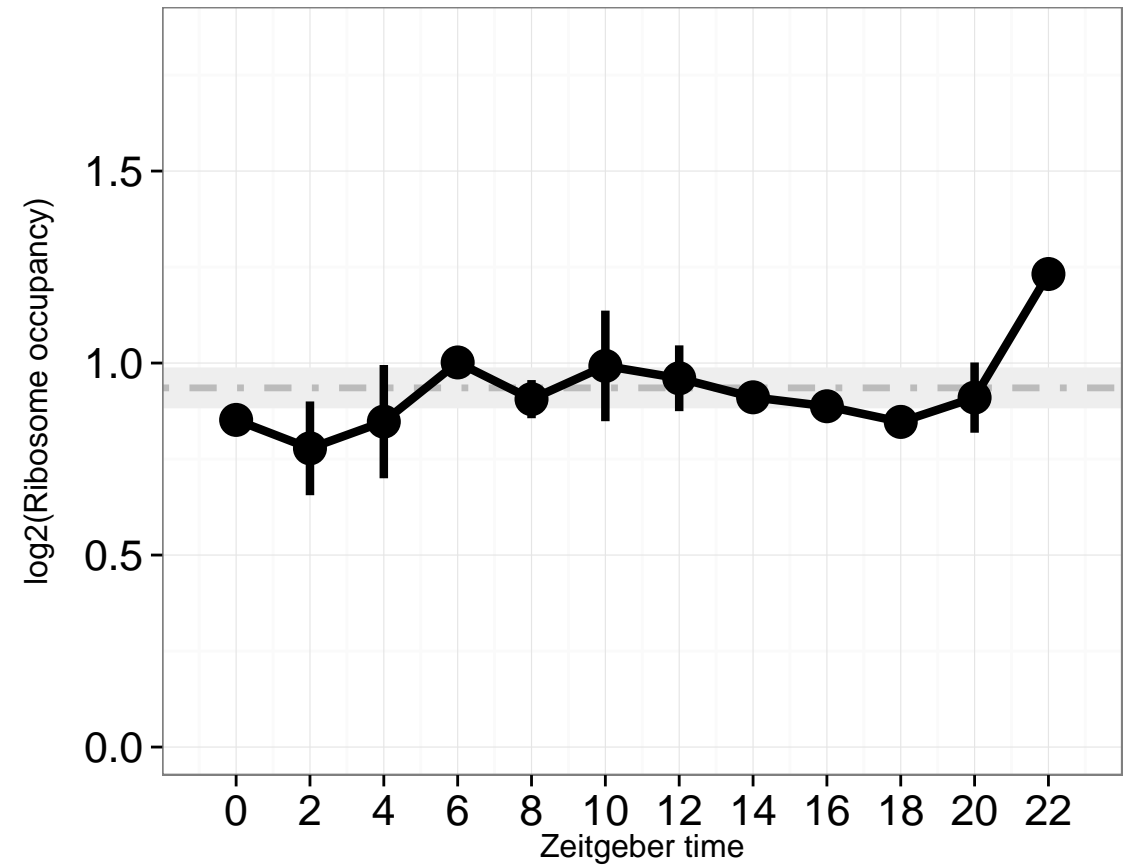

Supplement: SuppDataset_1.zip [file Ociad1_set_A.pdf › Supplemental Dataset 1/A-mRNA_nonrhyth_translation_nonrhyth/Ociad1_set_A.pdf]

## Ociad2

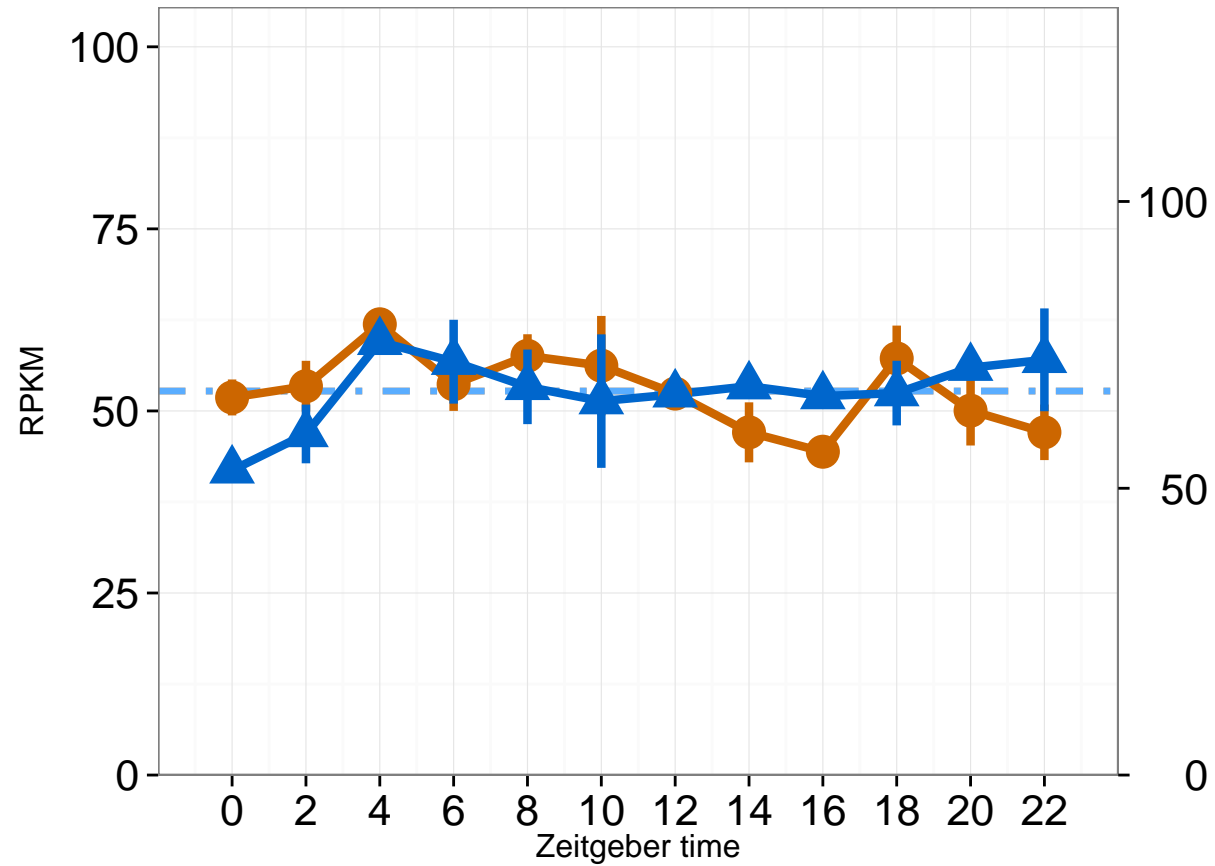

## Ociad2

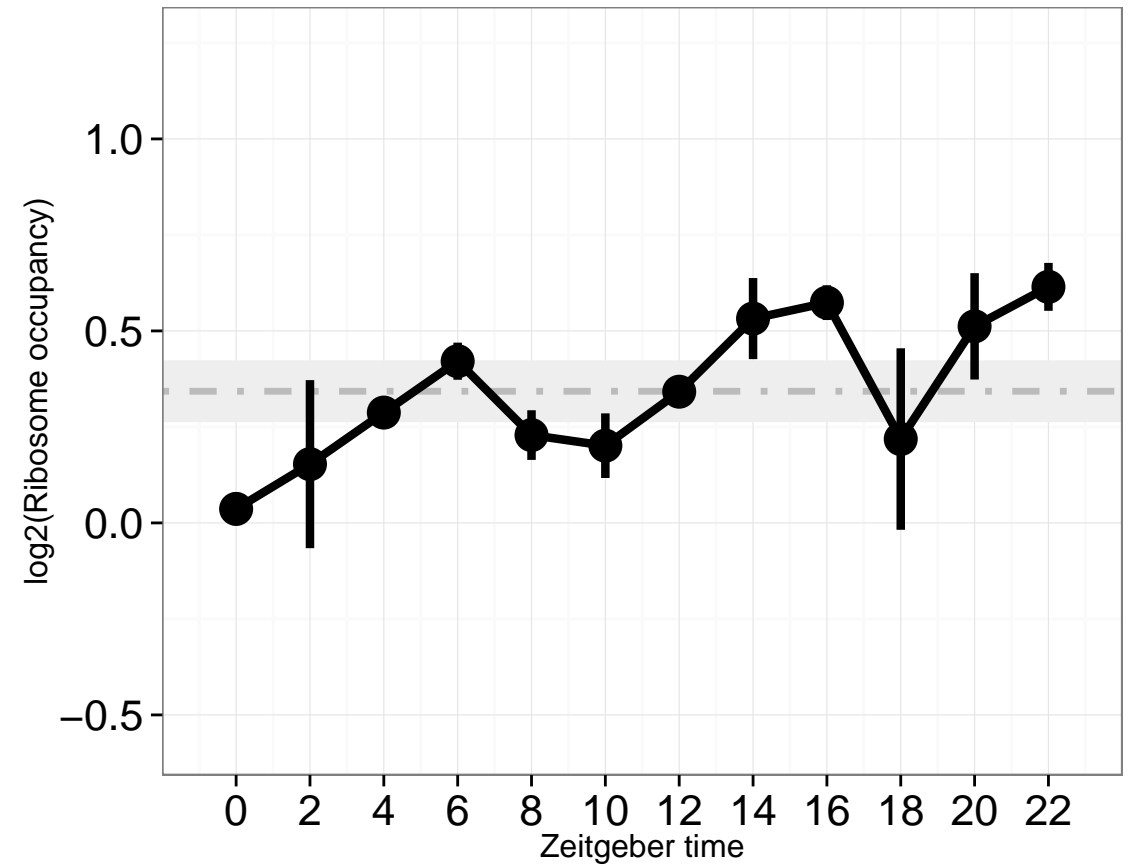

Supplement: SuppDataset_1.zip [file Ociad2_set_A.pdf › Supplemental Dataset 1/A-mRNA_nonrhyth_translation_nonrhyth/Ociad2_set_A.pdf]

## Ocr1

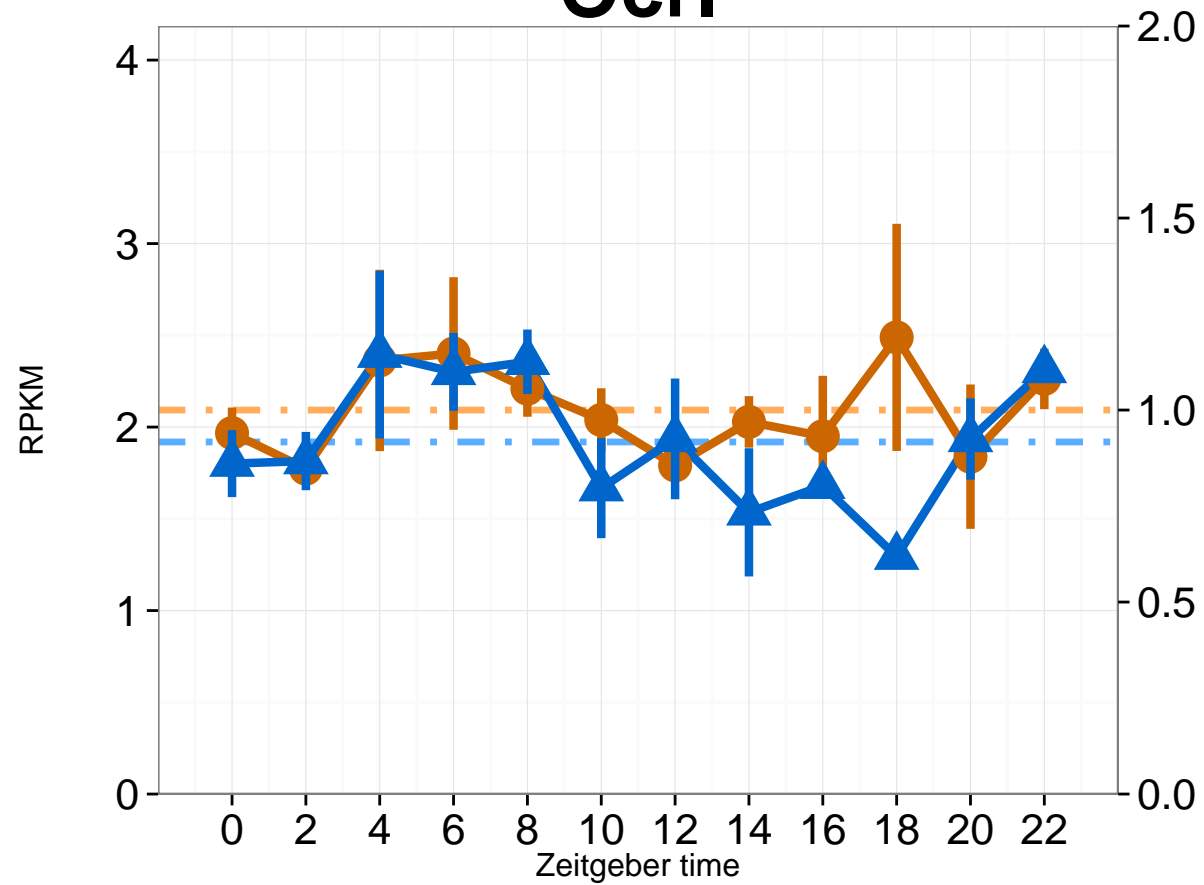

## Ocr1

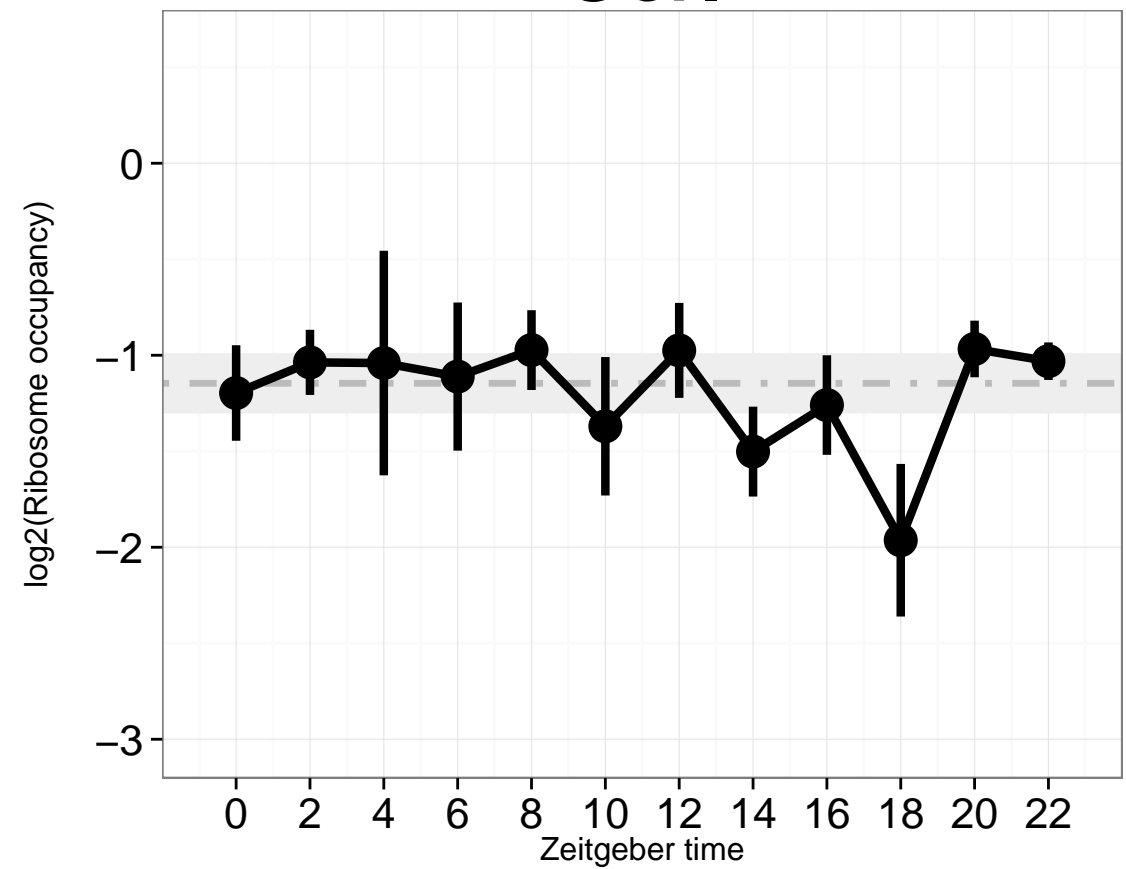

Supplement: SuppDataset_1.zip [file Ocrl_set_A.pdf › Supplemental Dataset 1/A-mRNA_nonrhyth_translation_nonrhyth/Ocrl_set_A.pdf]

**Ocstamp TR**

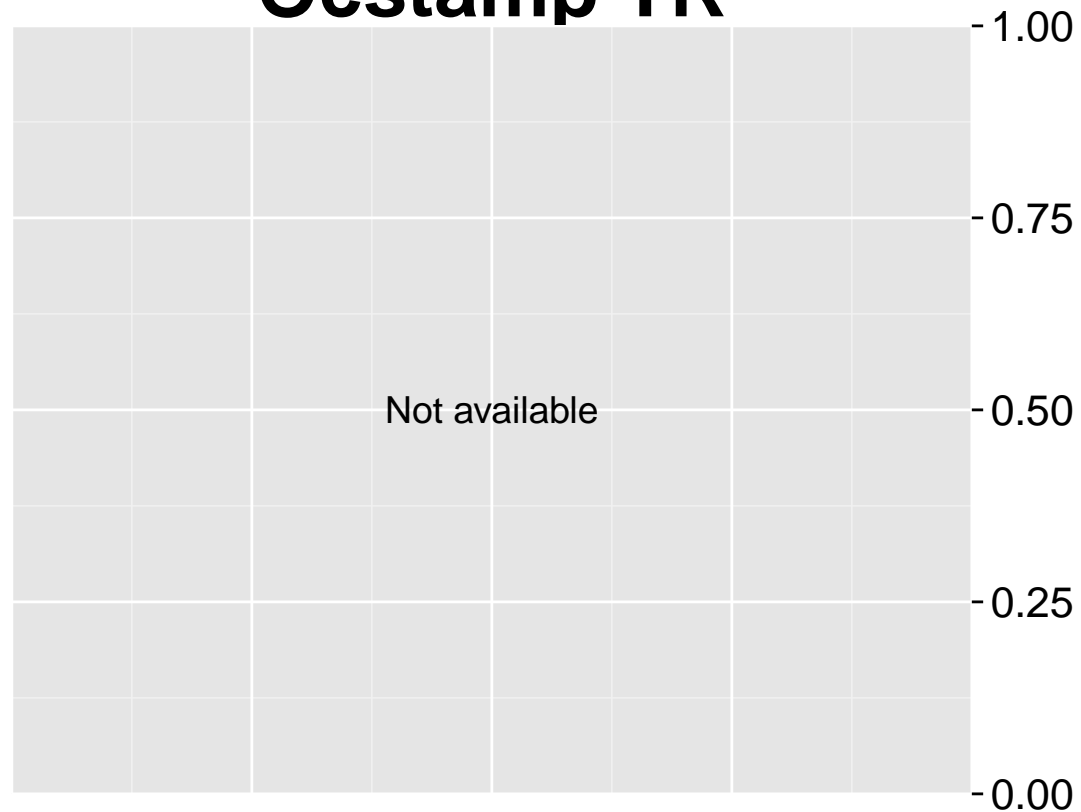

**Ocstamp  $\log_2$ (Ribosome occupancy)**

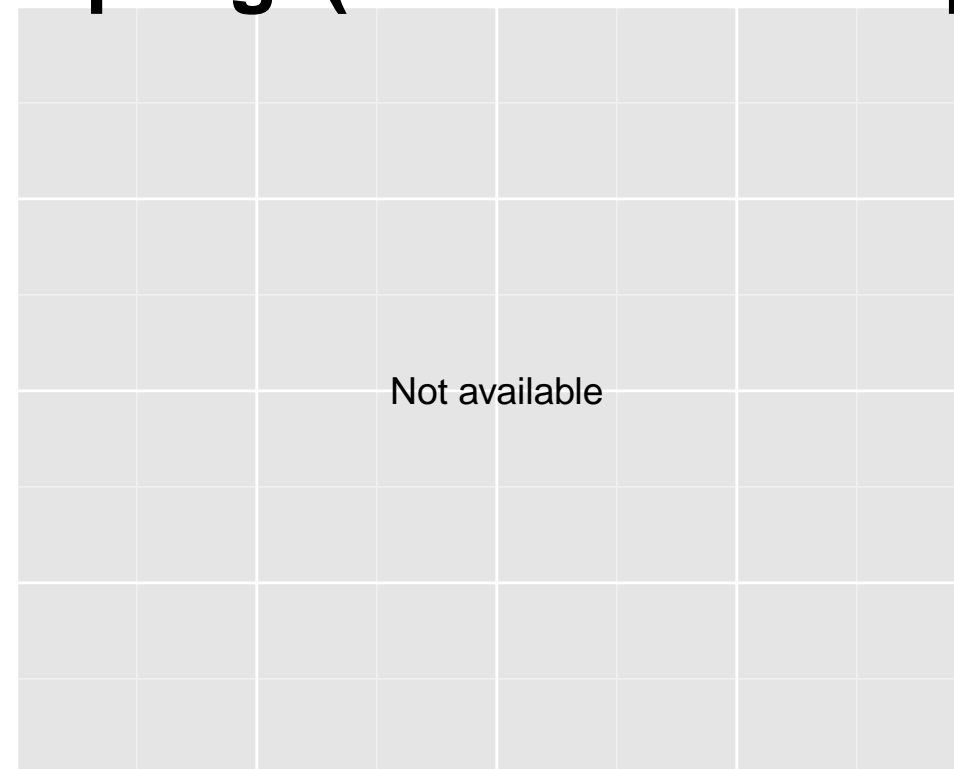

Supplement: SuppDataset_1.zip [file Ocstamp_set_A.pdf › Supplemental Dataset 1/A-mRNA_nonrhyth_translation_nonrhyth/Ocstamp_set_A.pdf]

## Odf2

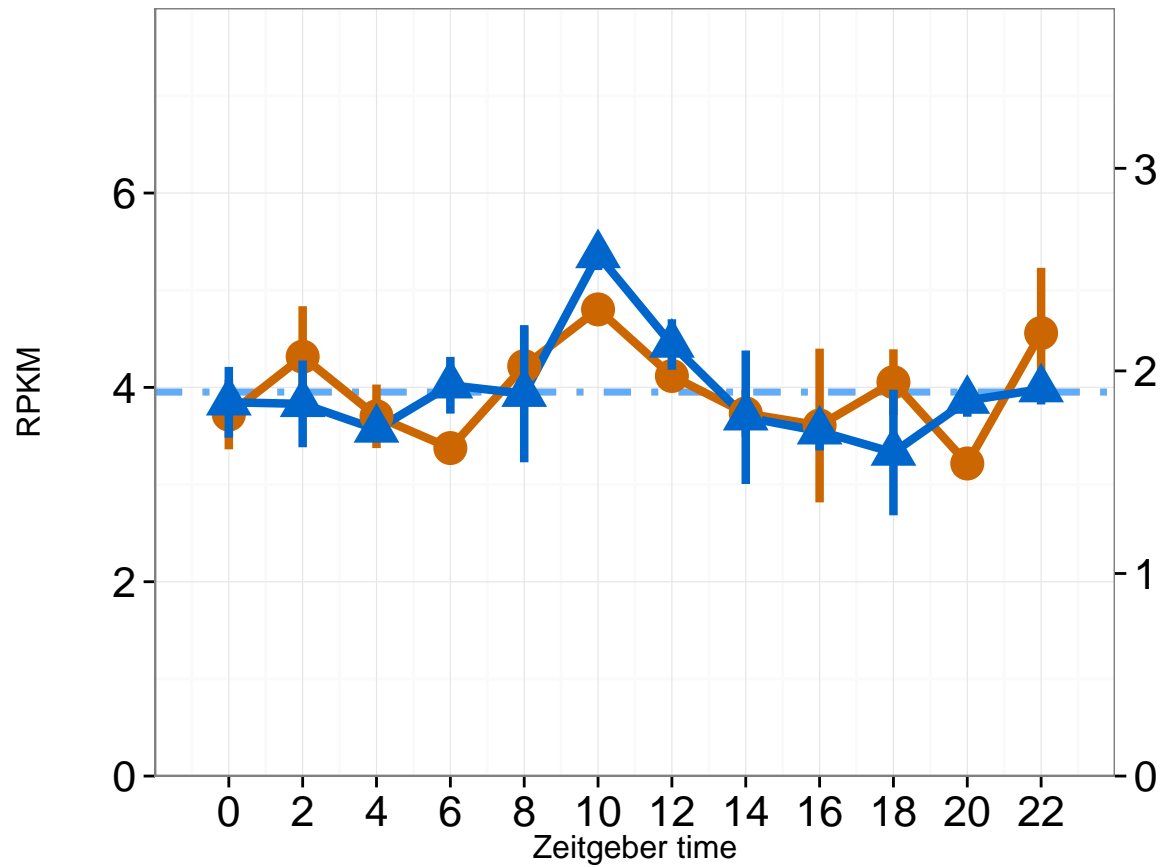

## Odf2

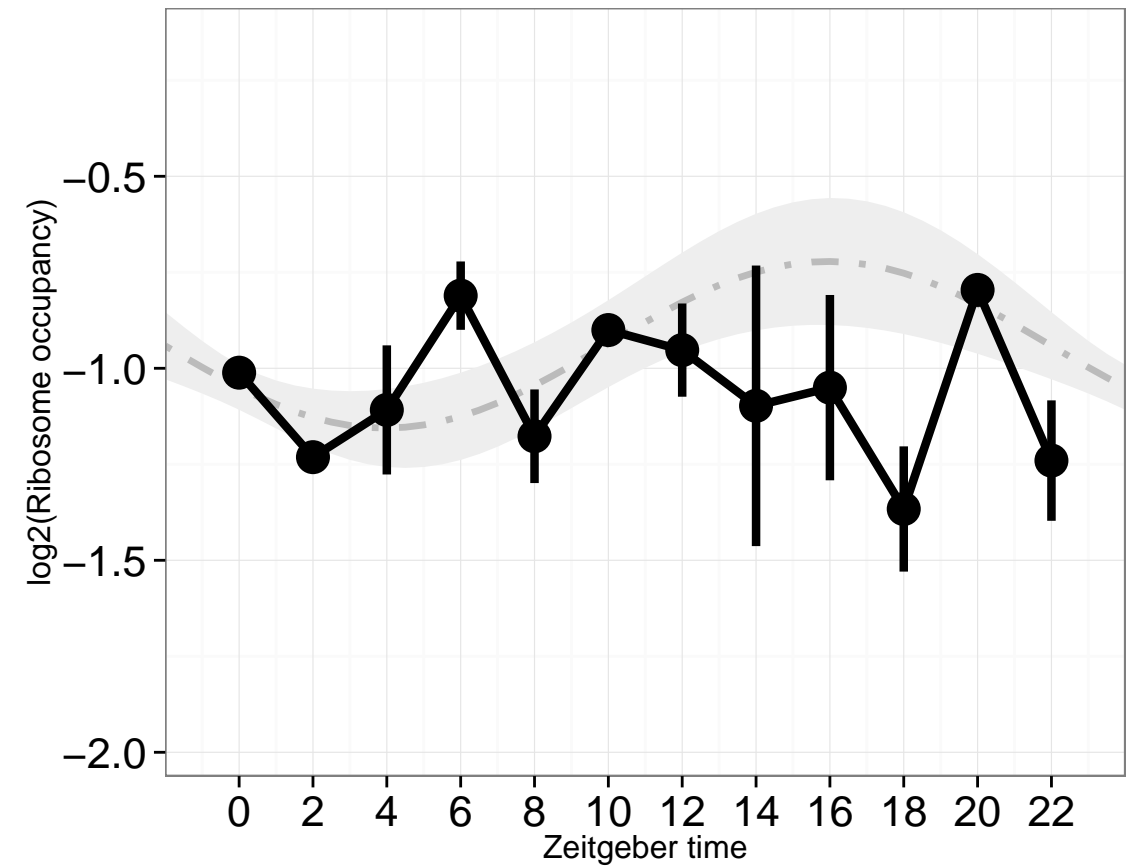

Supplement: SuppDataset_1.zip [file Odf2_set_A.pdf › Supplemental Dataset 1/A-mRNA_nonrhyth_translation_nonrhyth/Odf2_set_A.pdf]

# Odf2l

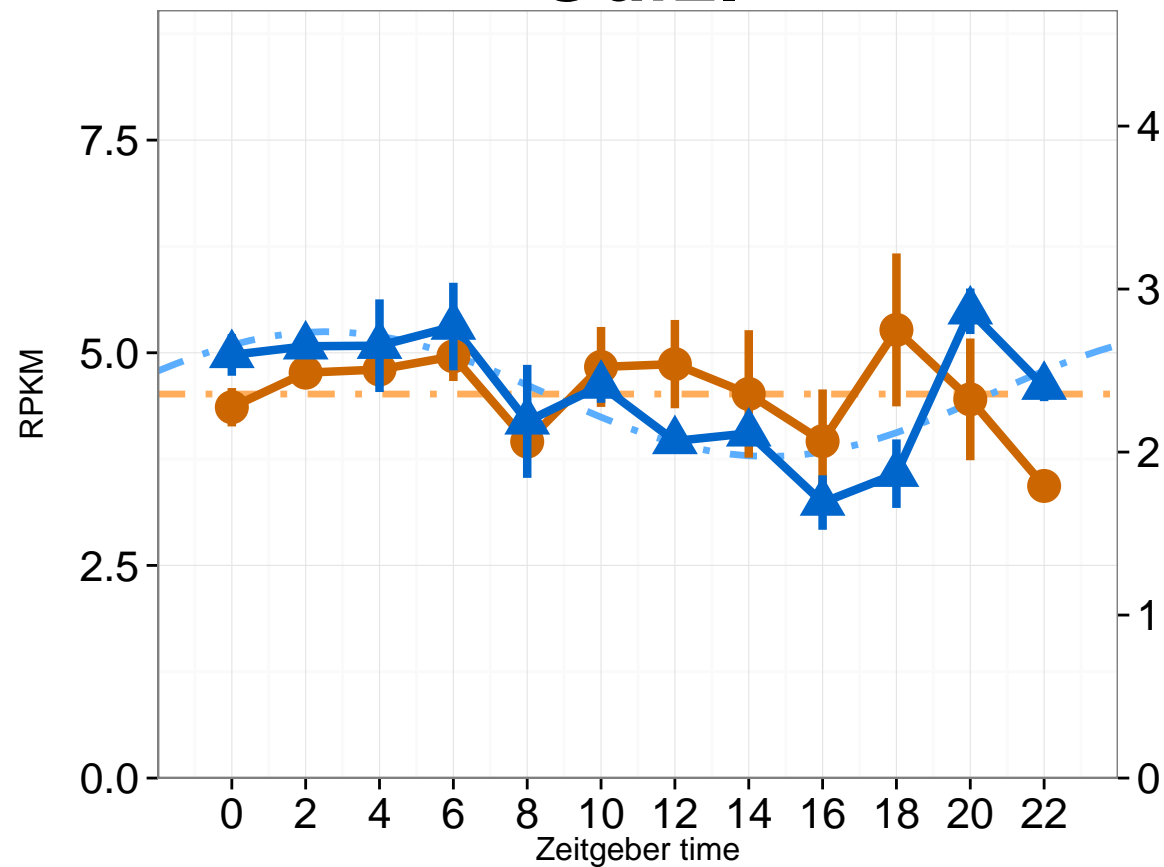

# Odf2l

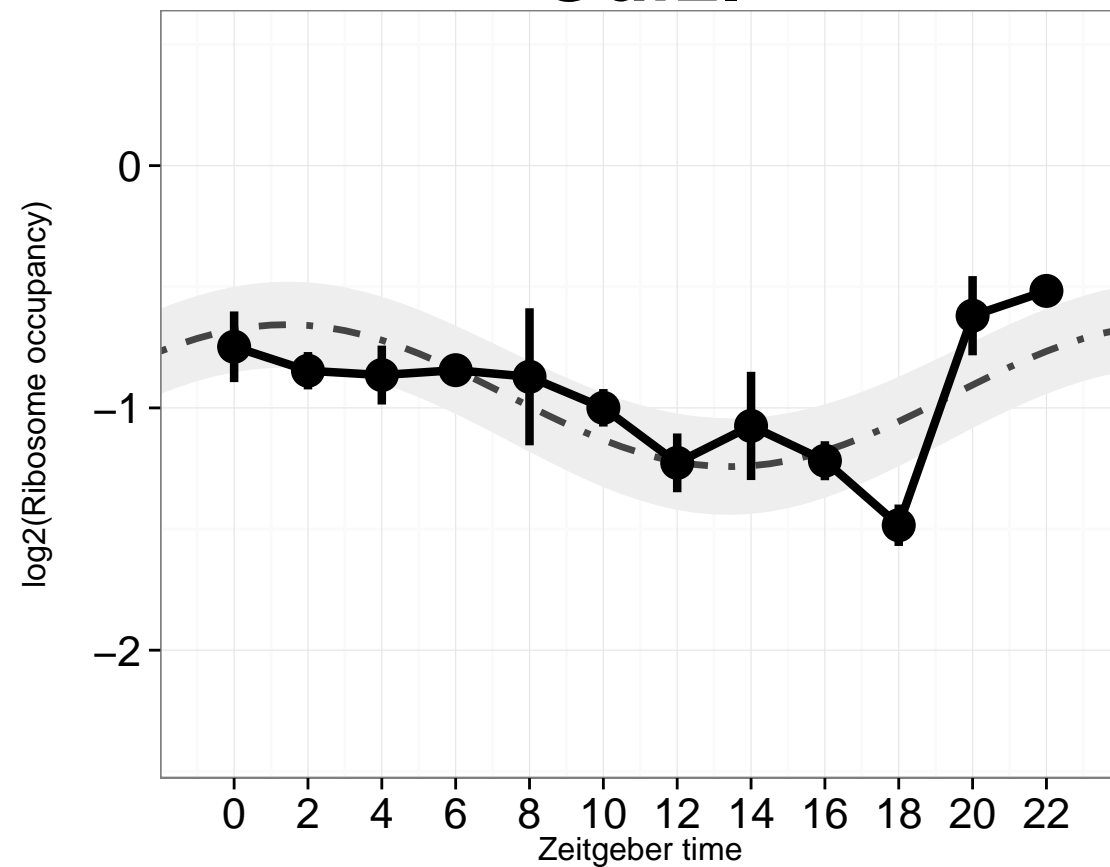

Supplement: SuppDataset_1.zip [file Odf2l_set_A.pdf › Supplemental Dataset 1/A-mRNA_nonrhyth_translation_nonrhyth/Odf2l_set_A.pdf]

# Ofd1

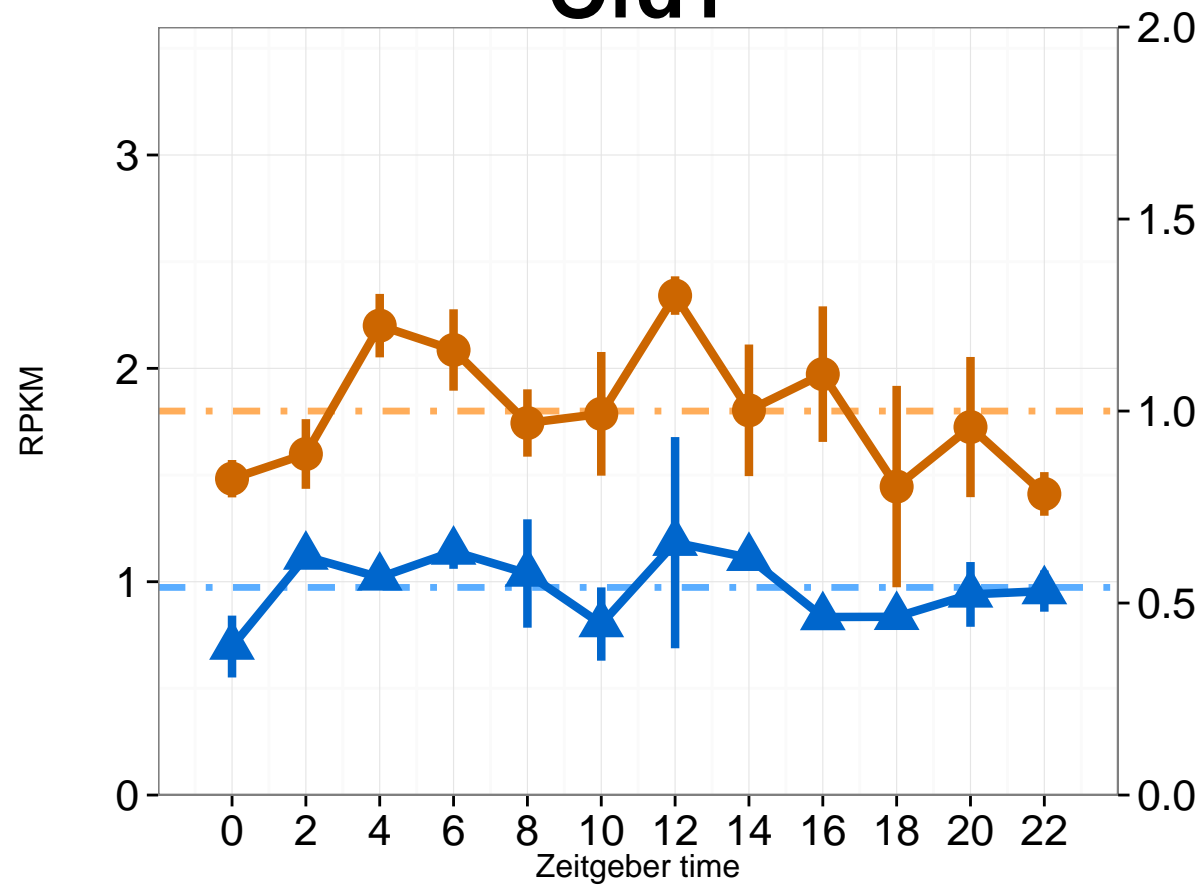

# Ofd1

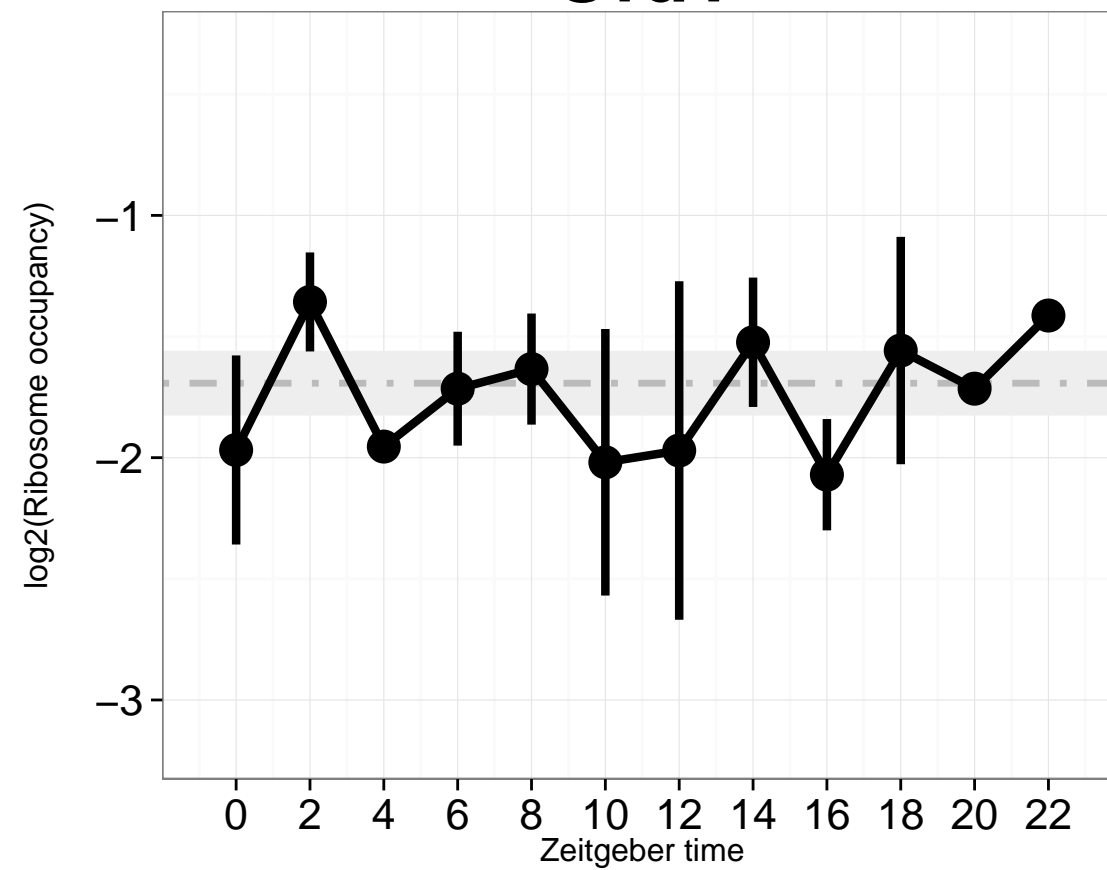

Supplement: SuppDataset_1.zip [file Ofd1_set_A.pdf › Supplemental Dataset 1/A-mRNA_nonrhyth_translation_nonrhyth/Ofd1_set_A.pdf]

## Ogdh

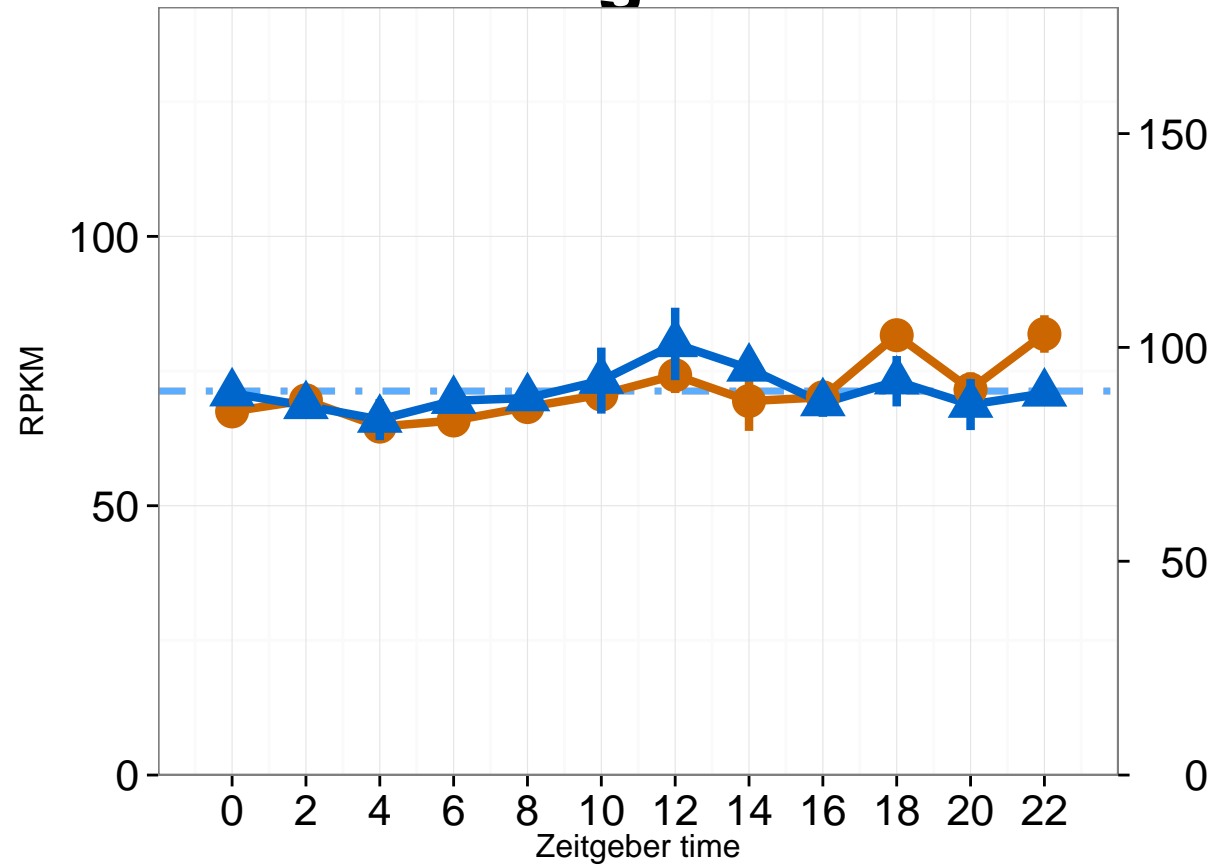

## Ogdh

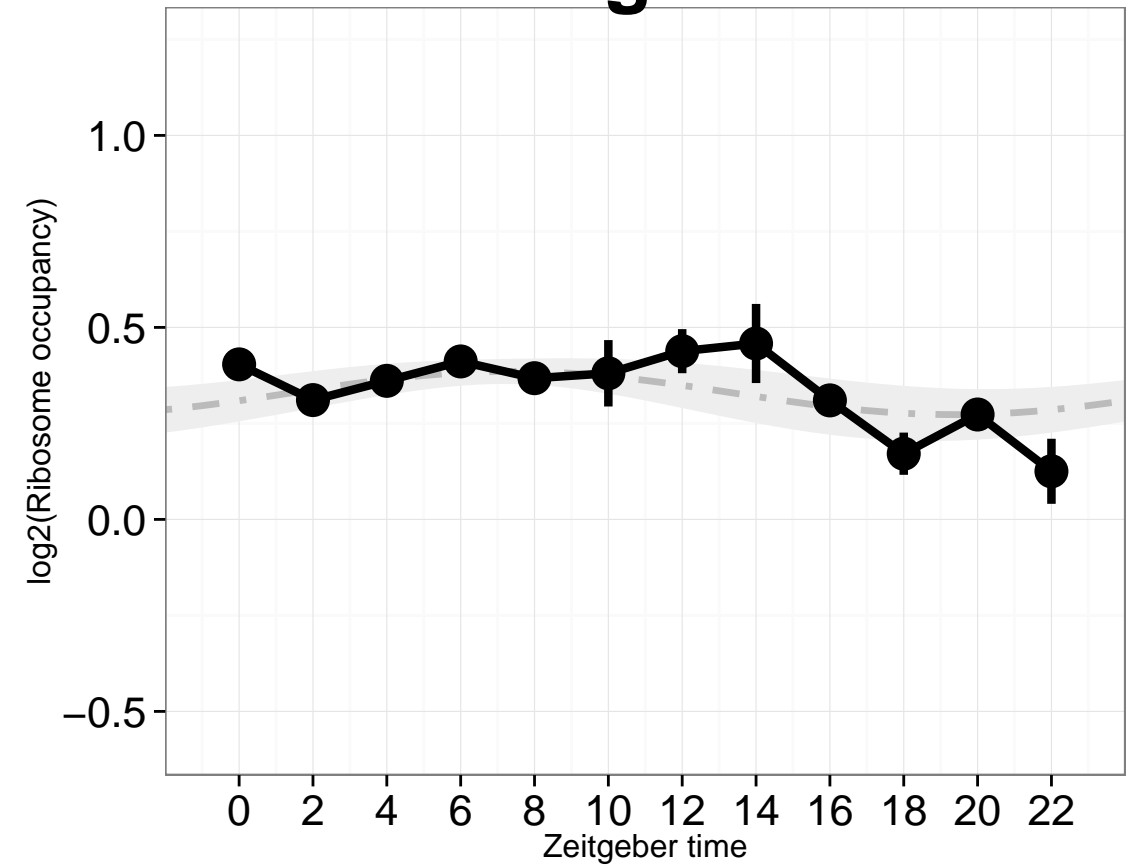

Supplement: SuppDataset_1.zip [file Ogdh_set_A.pdf › Supplemental Dataset 1/A-mRNA_nonrhyth_translation_nonrhyth/Ogdh_set_A.pdf]

## Ogfod1

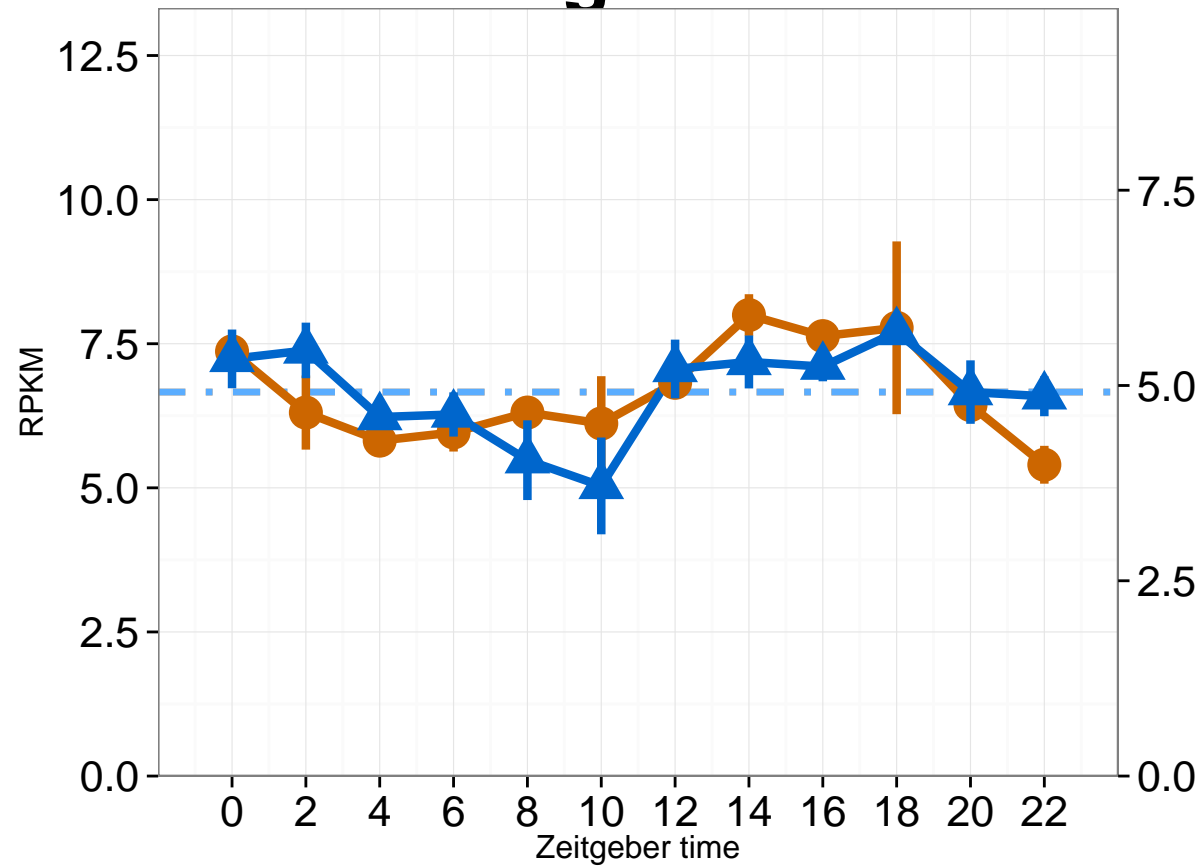

## Ogfod1

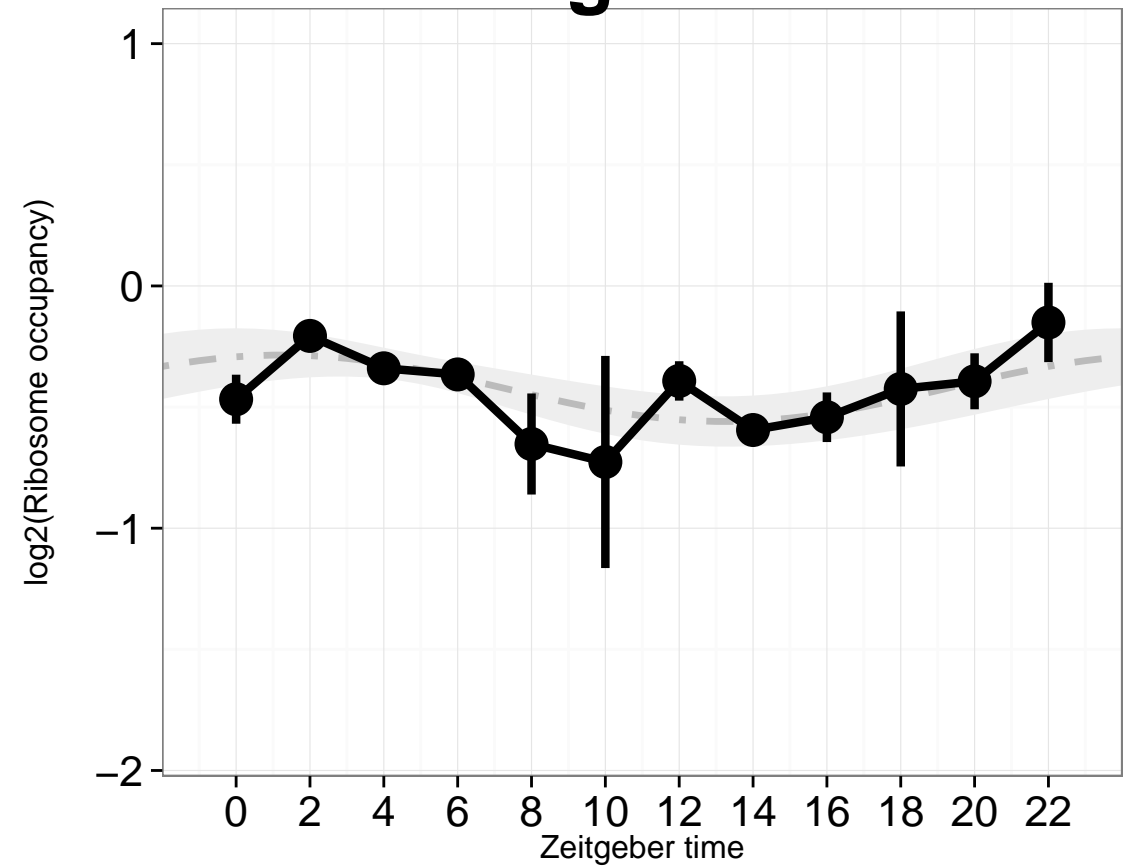

Supplement: SuppDataset_1.zip [file Ogfod1_set_A.pdf › Supplemental Dataset 1/A-mRNA_nonrhyth_translation_nonrhyth/Ogfod1_set_A.pdf]

# Ogfod2

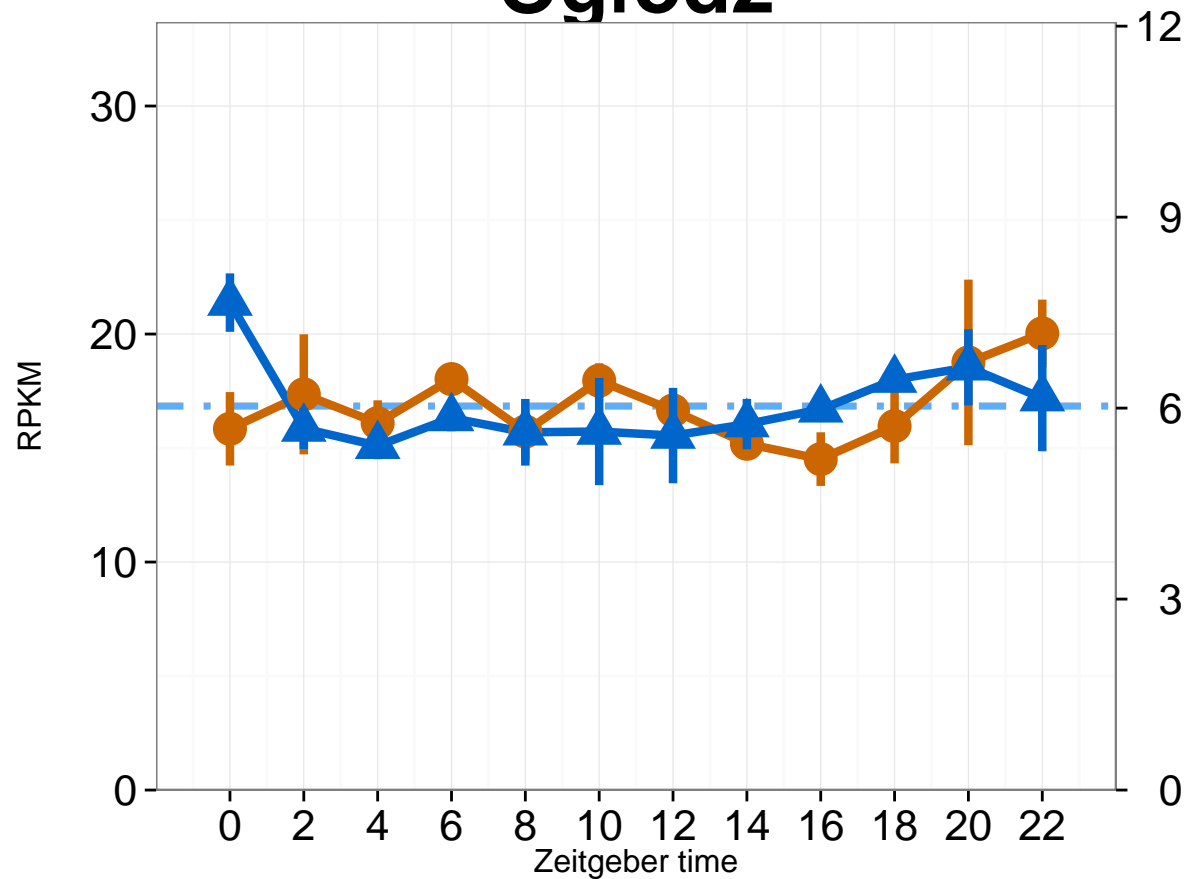

# Ogfod2

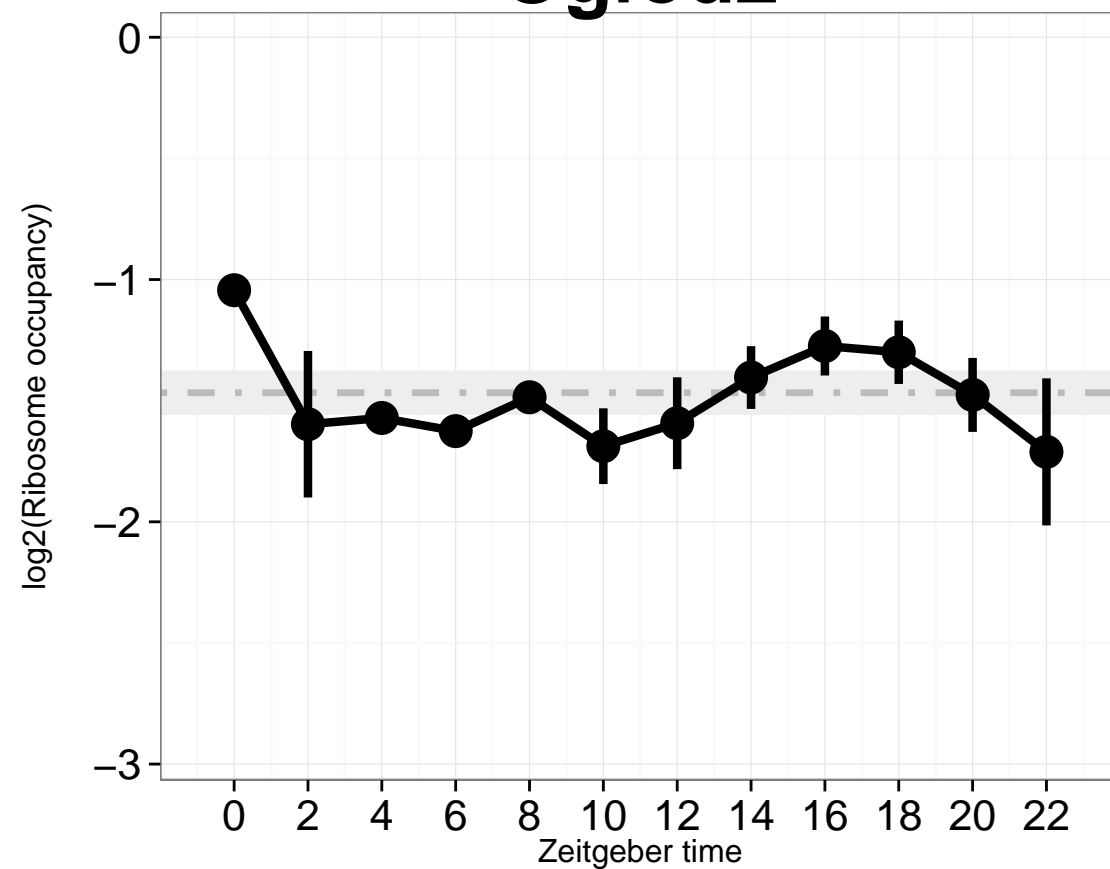

Supplement: SuppDataset_1.zip [file Ogfod2_set_A.pdf › Supplemental Dataset 1/A-mRNA_nonrhyth_translation_nonrhyth/Ogfod2_set_A.pdf]

# Ogfod3

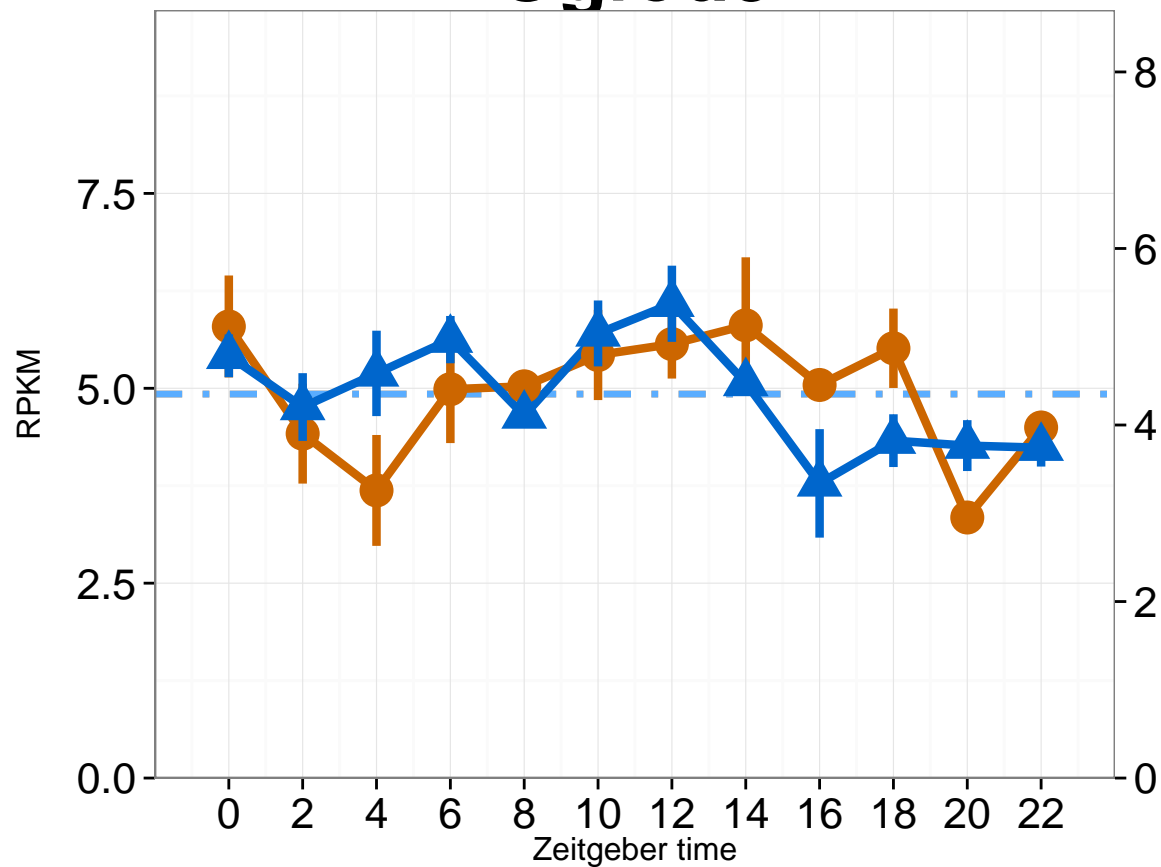

# Ogfod3

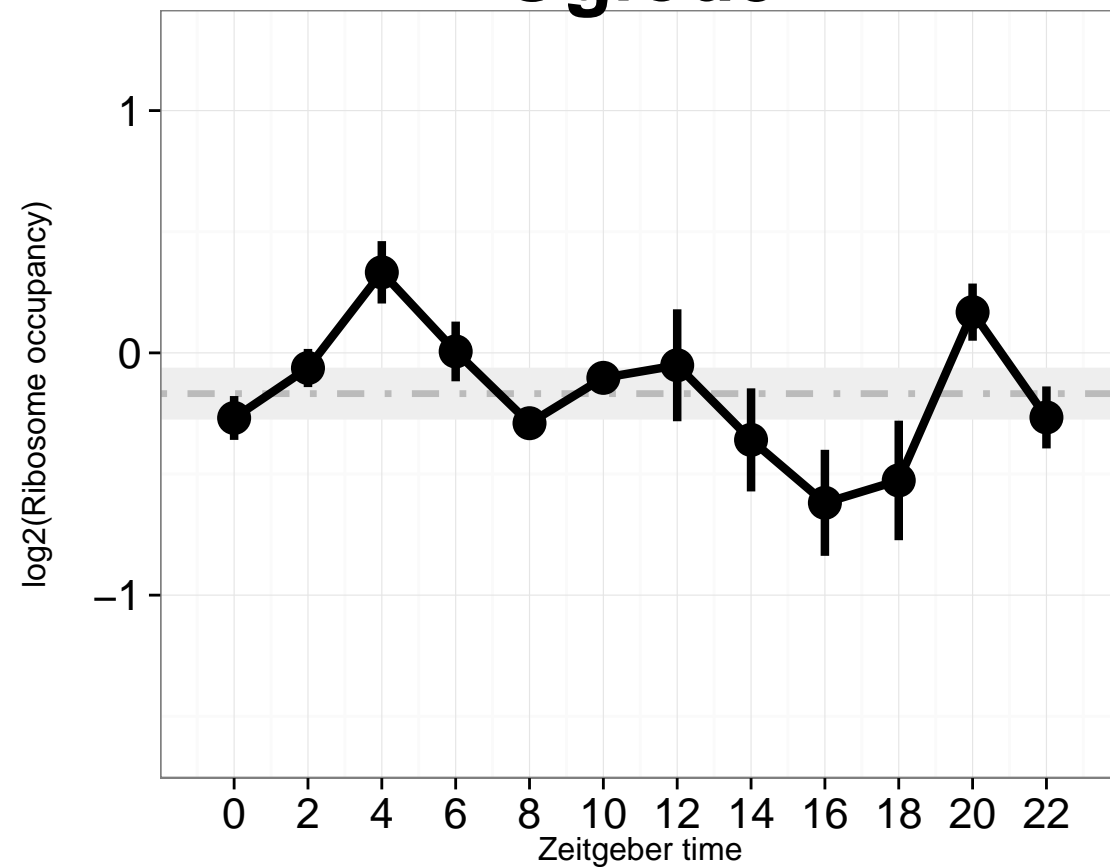

Supplement: SuppDataset_1.zip [file Ogfod3_set_A.pdf › Supplemental Dataset 1/A-mRNA_nonrhyth_translation_nonrhyth/Ogfod3_set_A.pdf]

# Ogfr

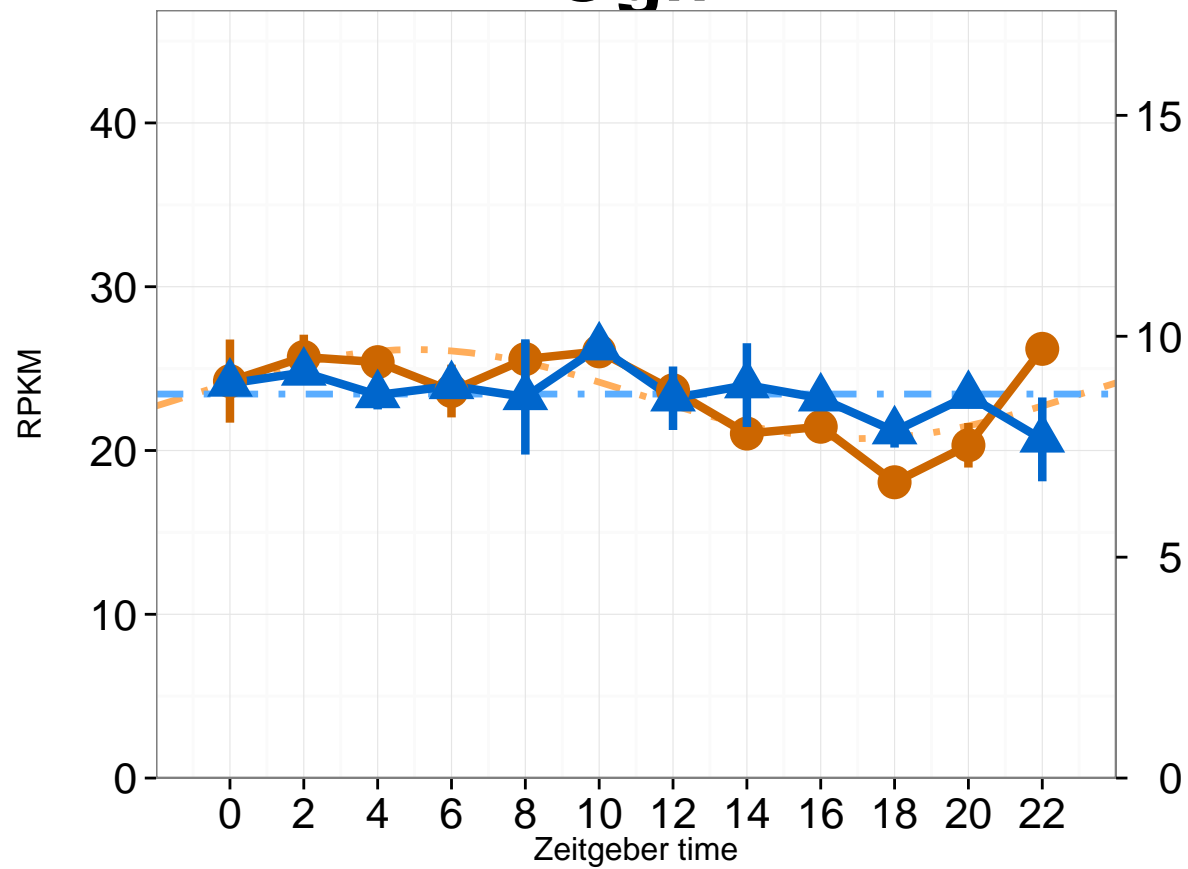

# Ogfr

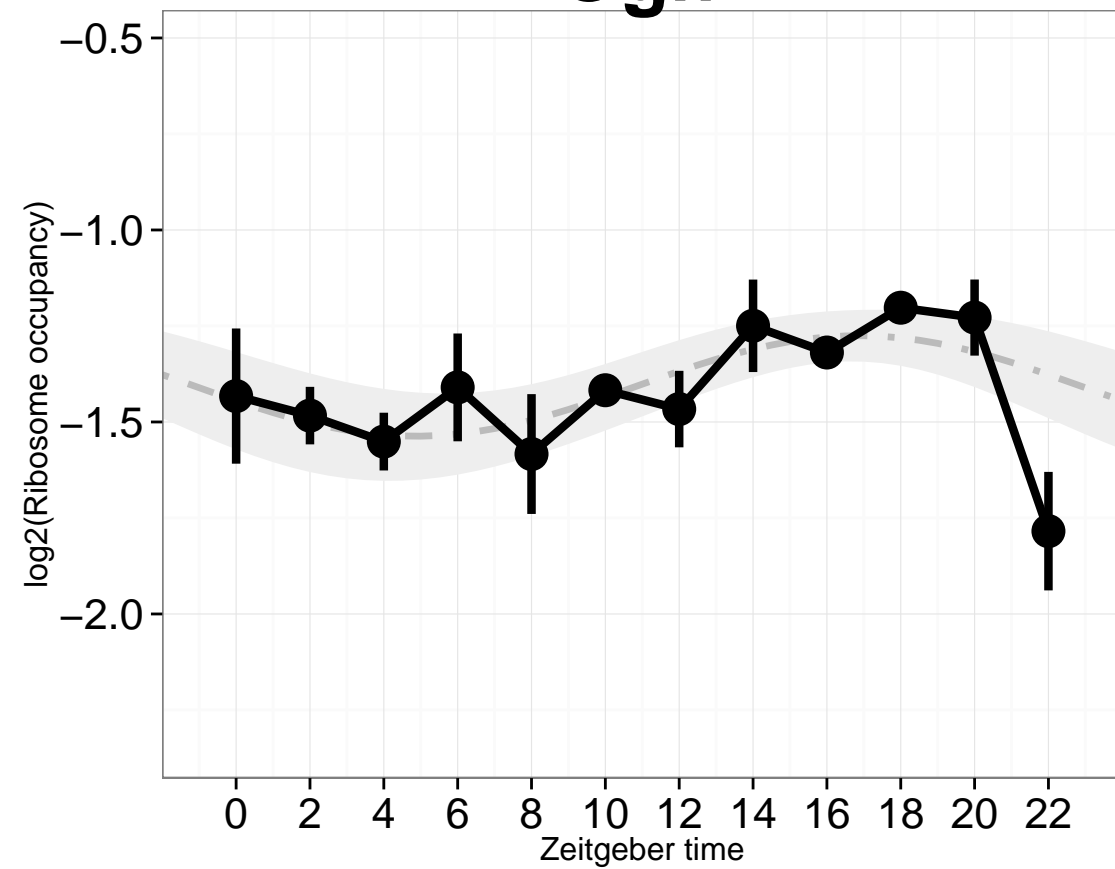

Supplement: SuppDataset_1.zip [file Ogfr_set_A.pdf › Supplemental Dataset 1/A-mRNA_nonrhyth_translation_nonrhyth/Ogfr_set_A.pdf]
