# Supplementary figures and images for: Ribosome profiling reveals the rhythmic liver translatome and circadian clock regulation by upstream open reading frames (part 92 of 113)
Source: HighWire-hosted journal article supplement (doi:10.1101/gr.195404.115), 2015-10-20

## Oasl2

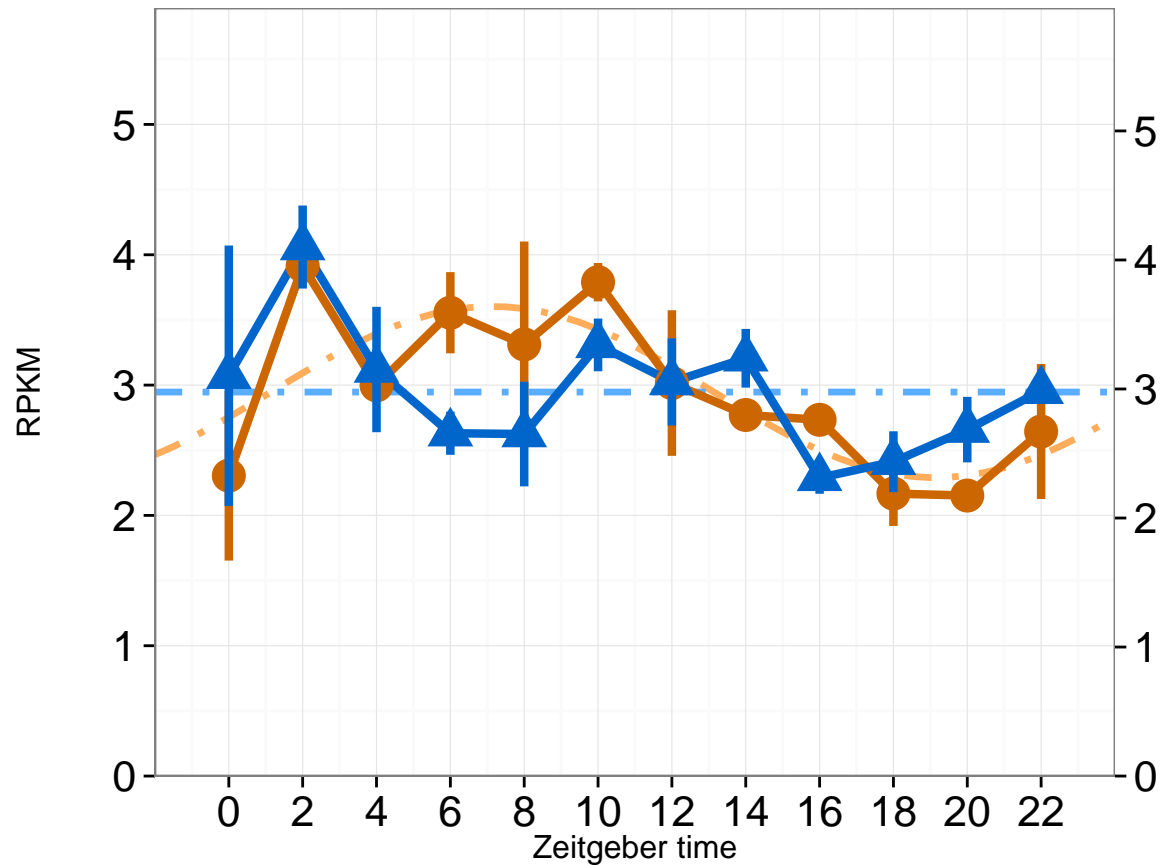

## Oasl2

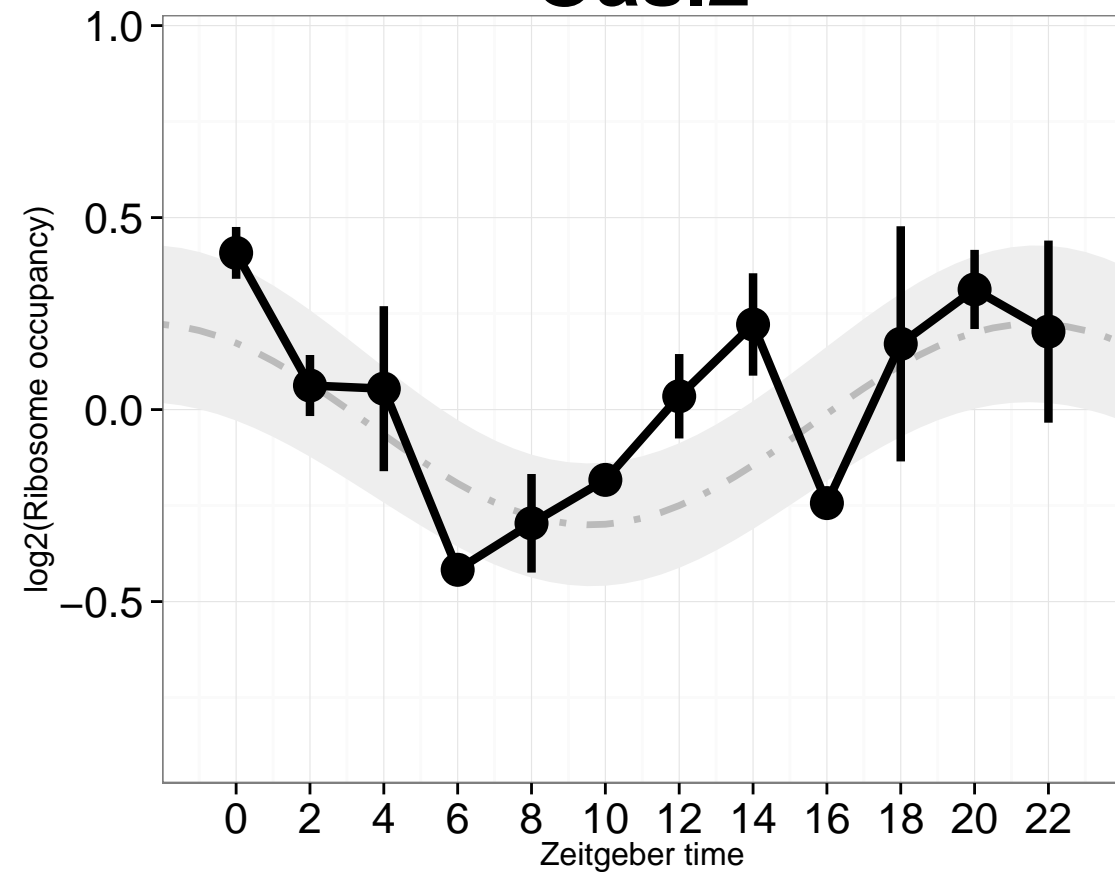

Supplement: SuppDataset_1.zip [file Oasl2_set_B.pdf › Supplemental Dataset 1/B-mRNA_rhythm_translation_nonrhyth/Oasl2_set_B.pdf]

# Ogn

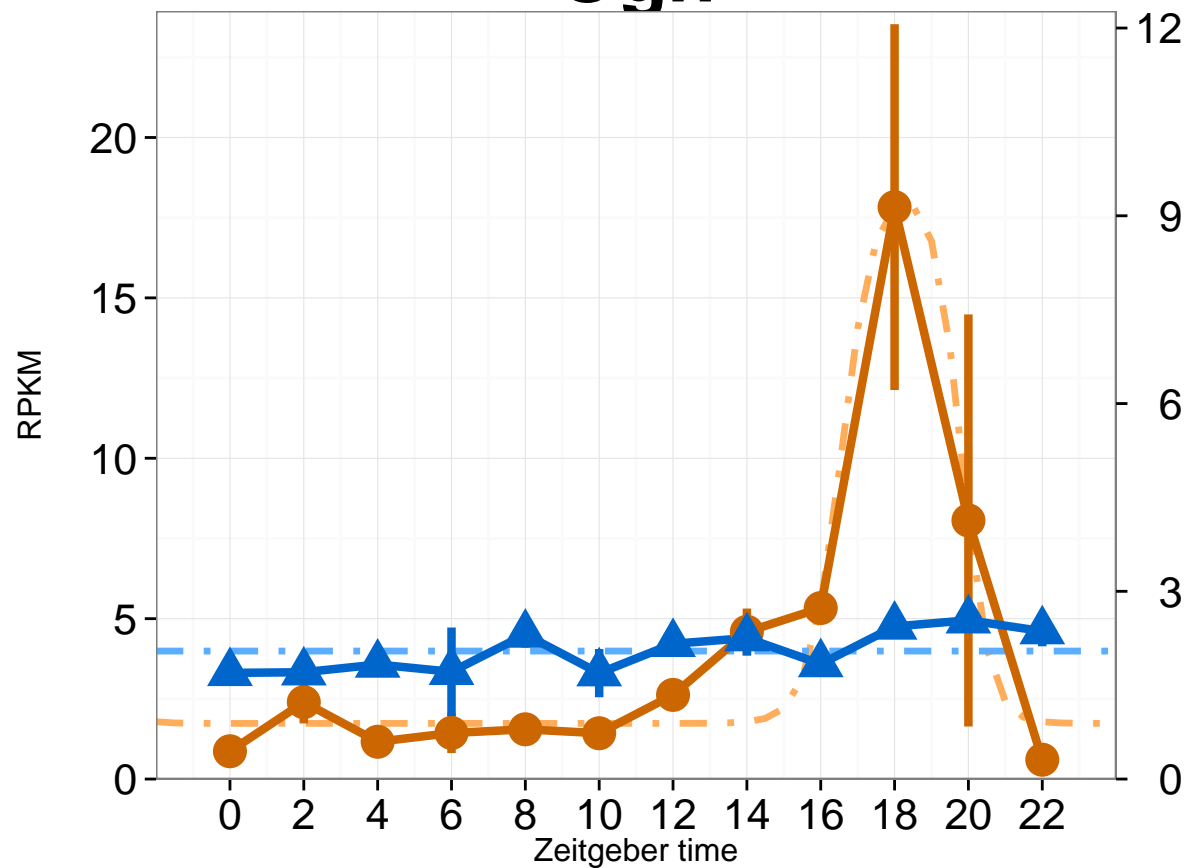

# Ogn

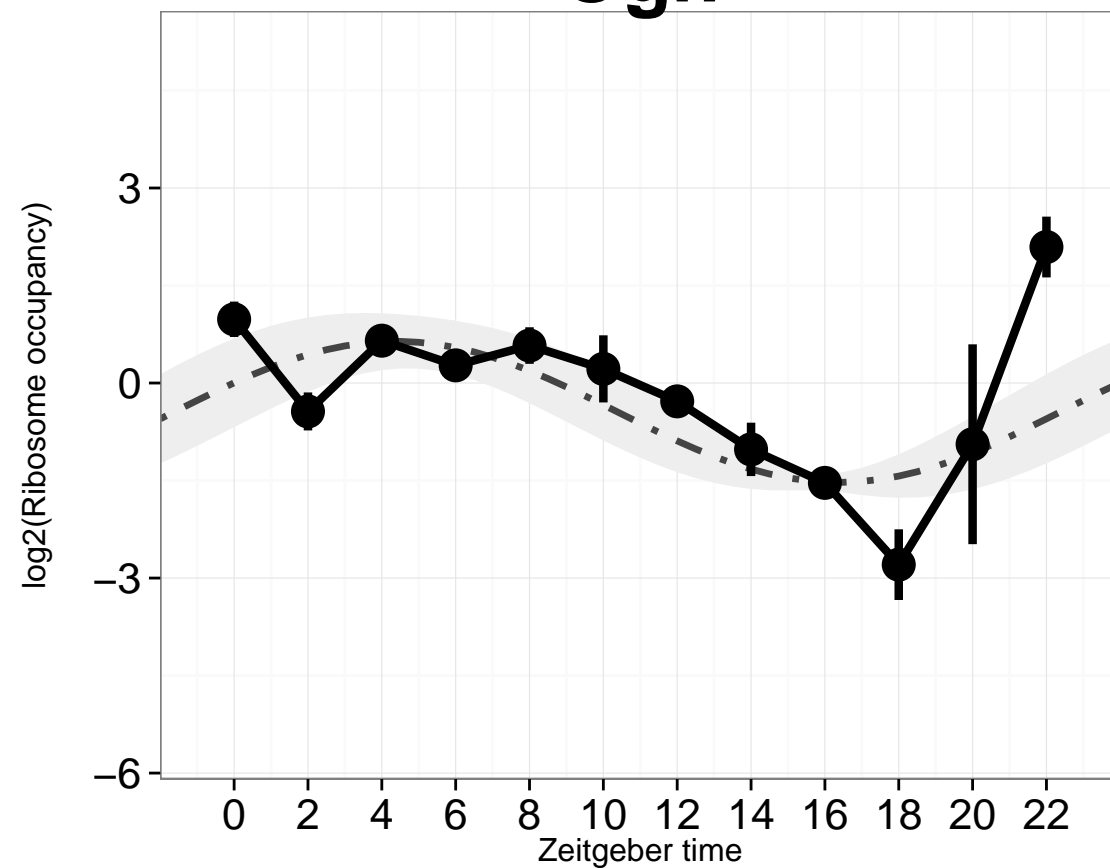

Supplement: SuppDataset_1.zip [file Ogn_set_B.pdf › Supplemental Dataset 1/B-mRNA_rhythm_translation_nonrhyth/Ogn_set_B.pdf]

## Oit3

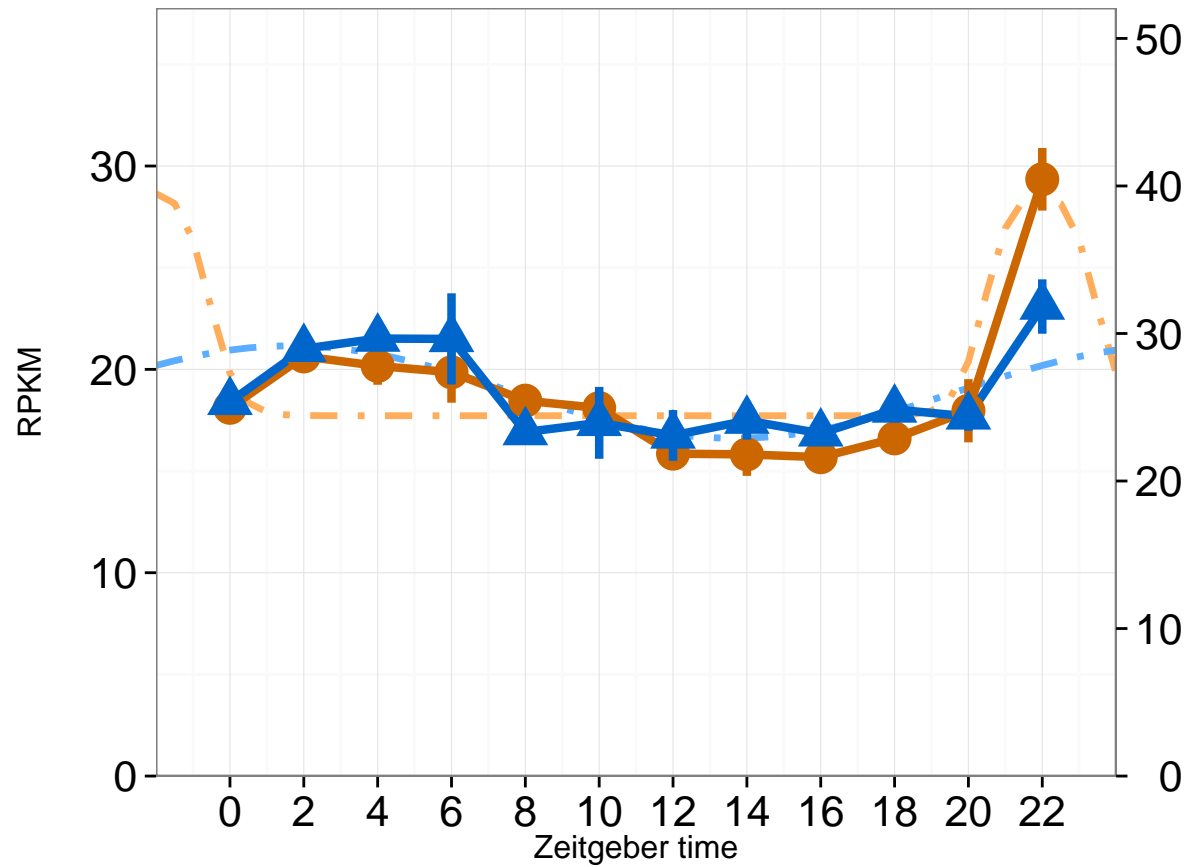

## Oit3

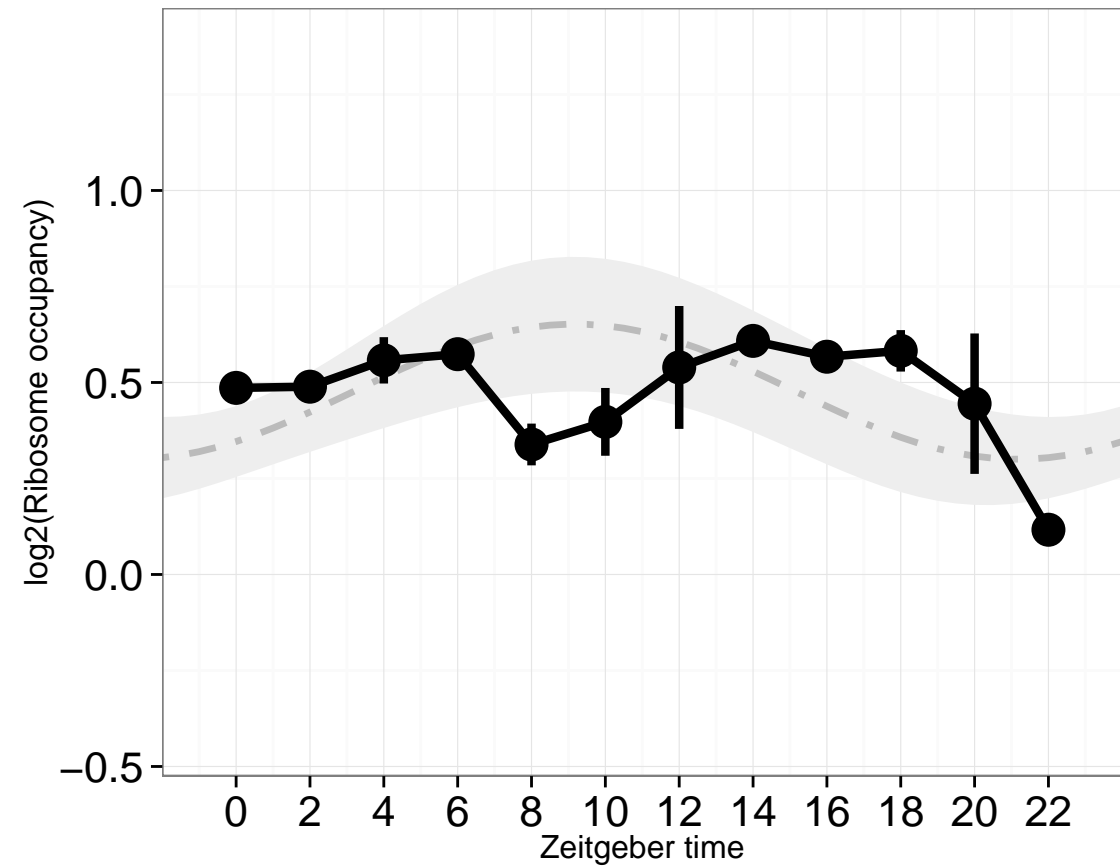

Supplement: SuppDataset_1.zip [file Oit3_set_B.pdf › Supplemental Dataset 1/B-mRNA_rhythm_translation_nonrhyth/Oit3_set_B.pdf]

## Olfr1034

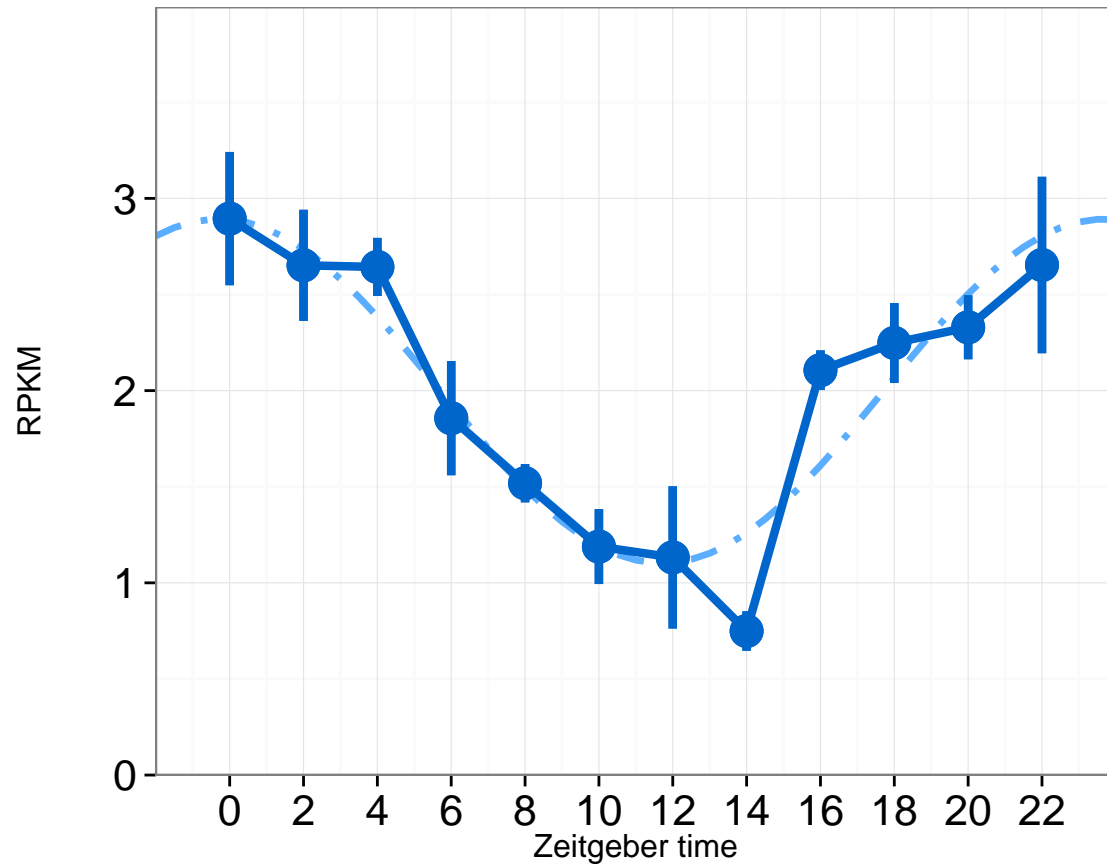

## Olfr1034 log2(Ribosome occupanc

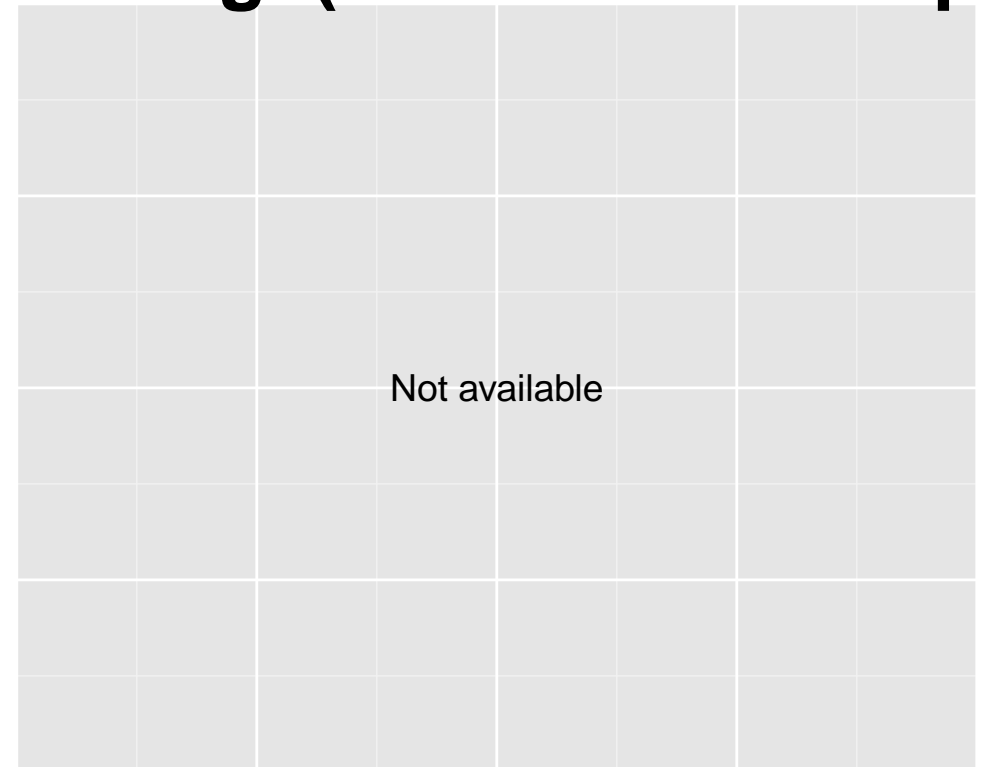

Supplement: SuppDataset_1.zip [file Olfr1034_set_B.pdf › Supplemental Dataset 1/B-mRNA_rhythm_translation_nonrhyth/Olfr1034_set_B.pdf]

## Omd

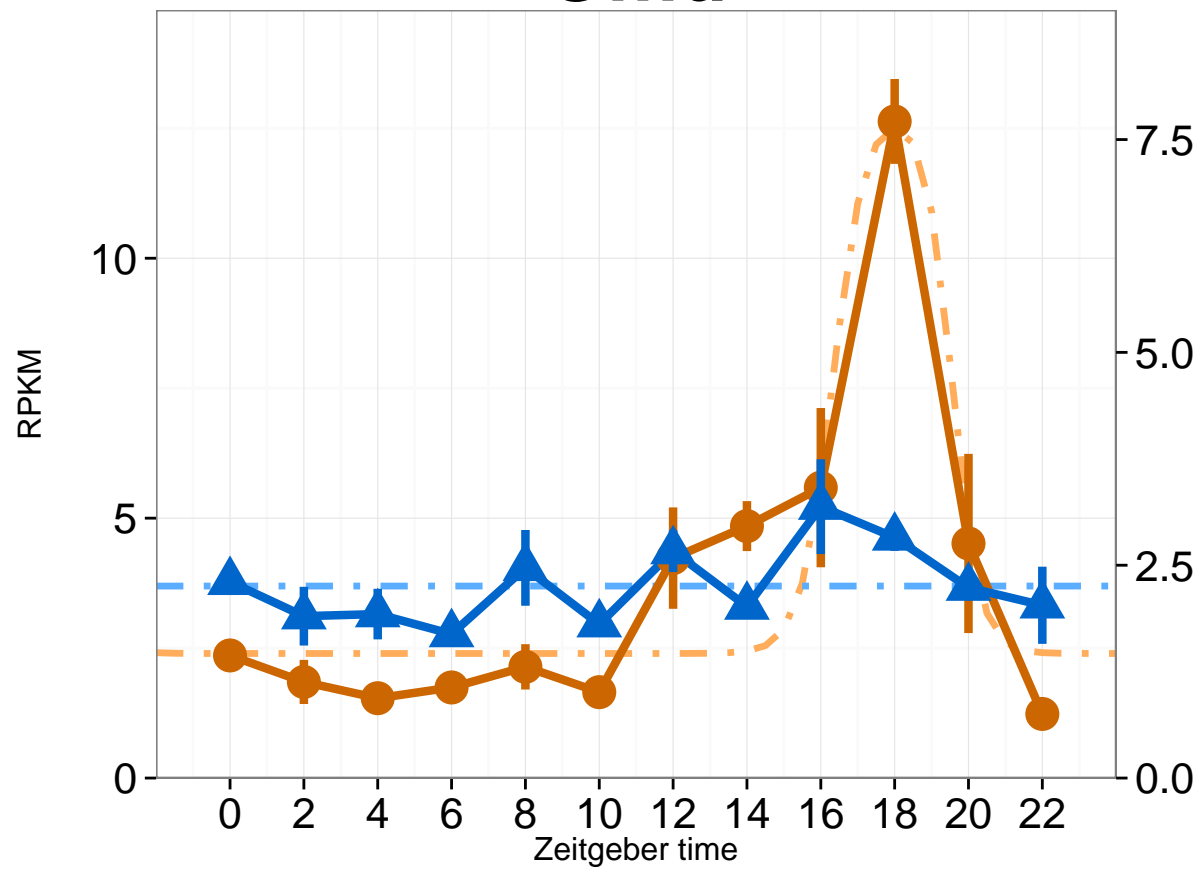

## Omd

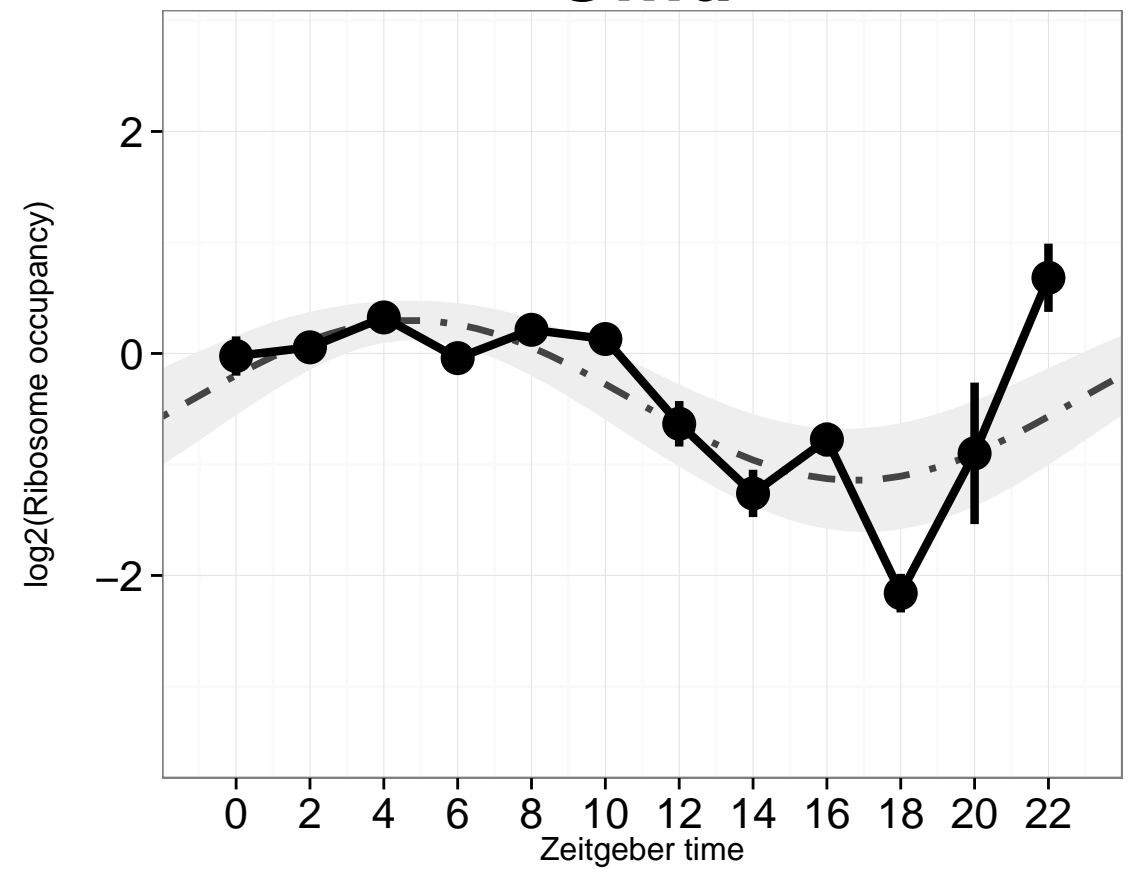

Supplement: SuppDataset_1.zip [file Omd_set_B.pdf › Supplemental Dataset 1/B-mRNA_rhythm_translation_nonrhyth/Omd_set_B.pdf]

## Ormdl2

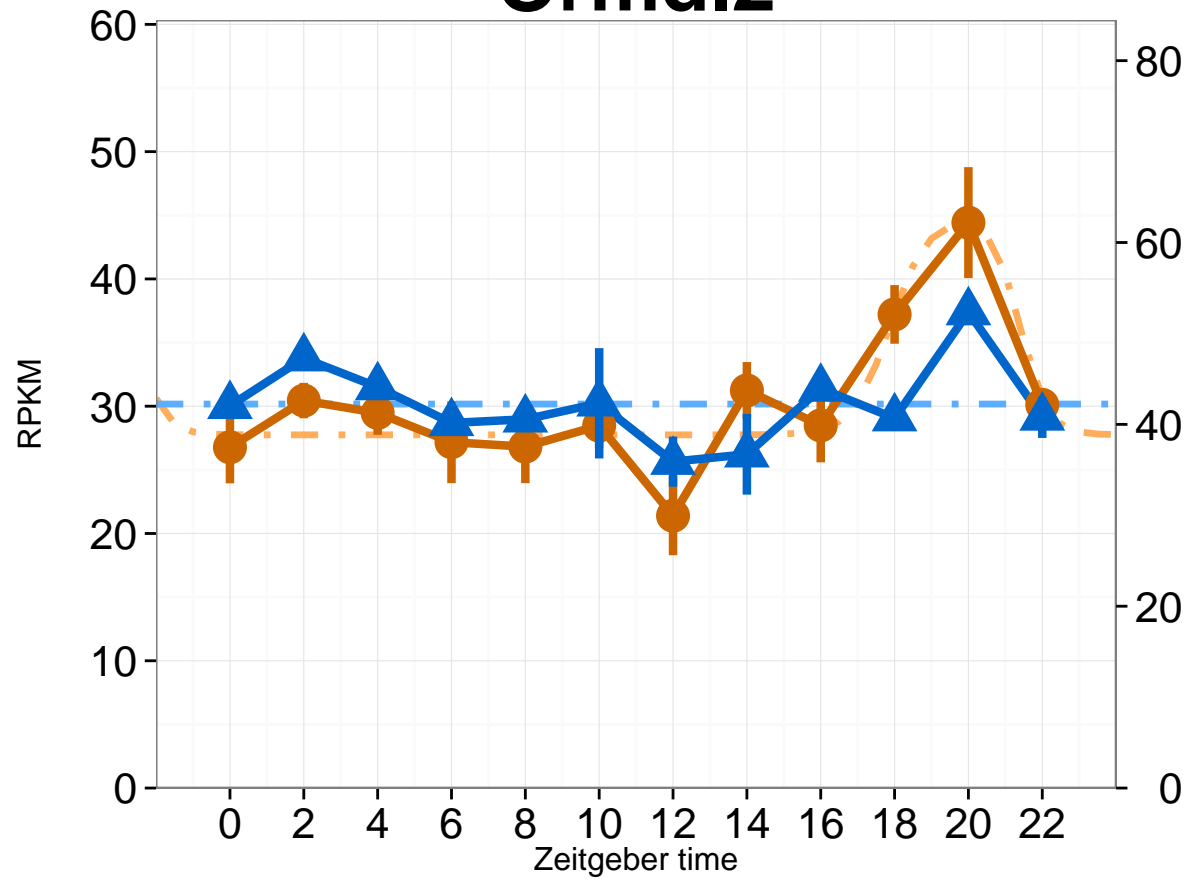

## Ormdl2

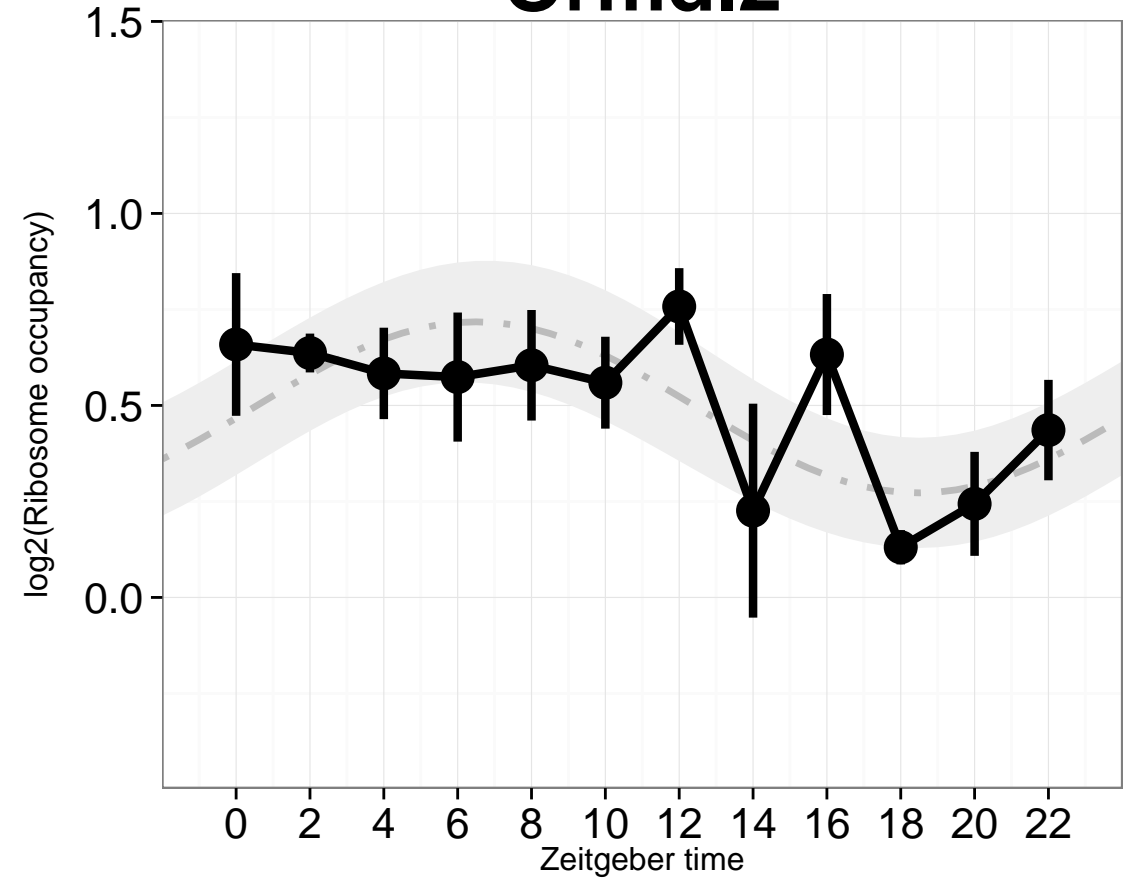

Supplement: SuppDataset_1.zip [file Ormdl2_set_B.pdf › Supplemental Dataset 1/B-mRNA_rhythm_translation_nonrhyth/Ormdl2_set_B.pdf]

## Ost4

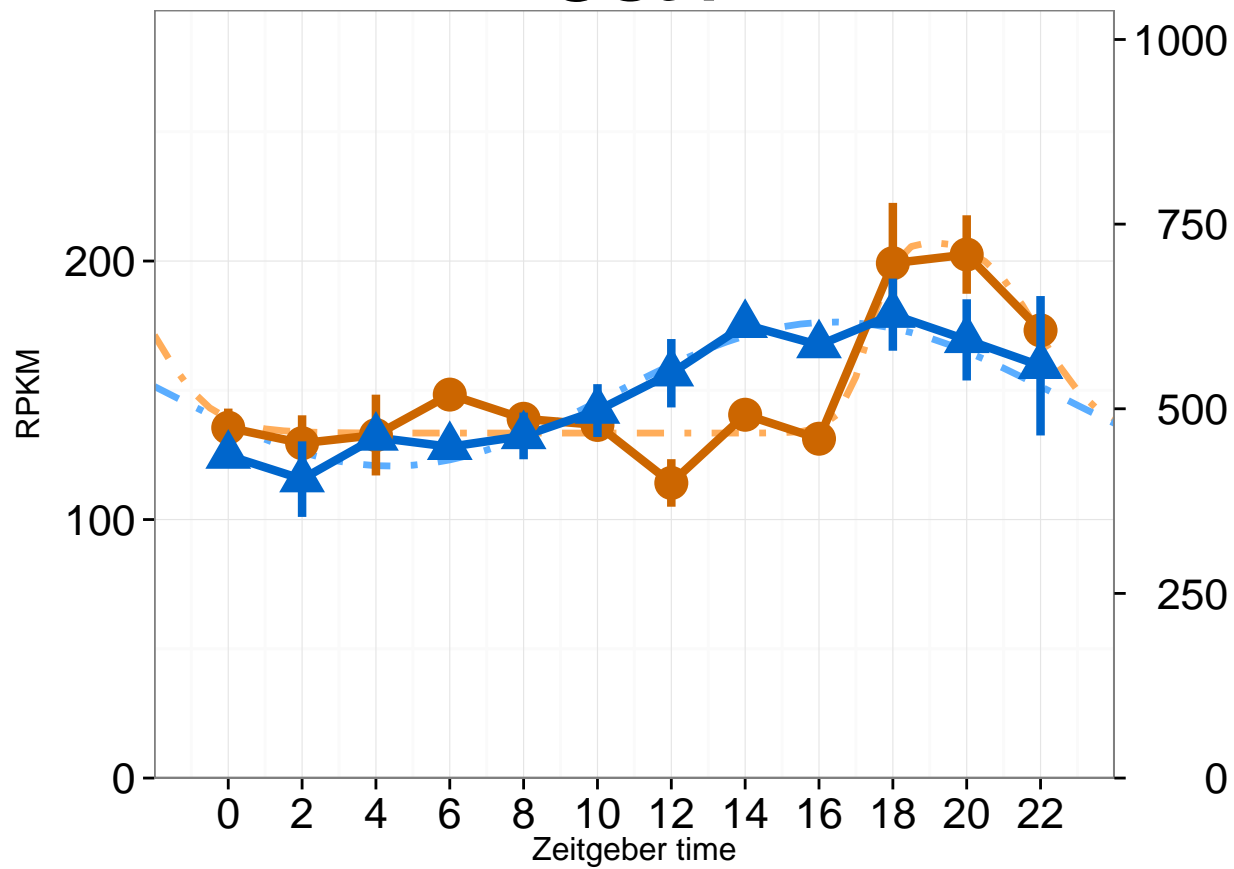

## Ost4

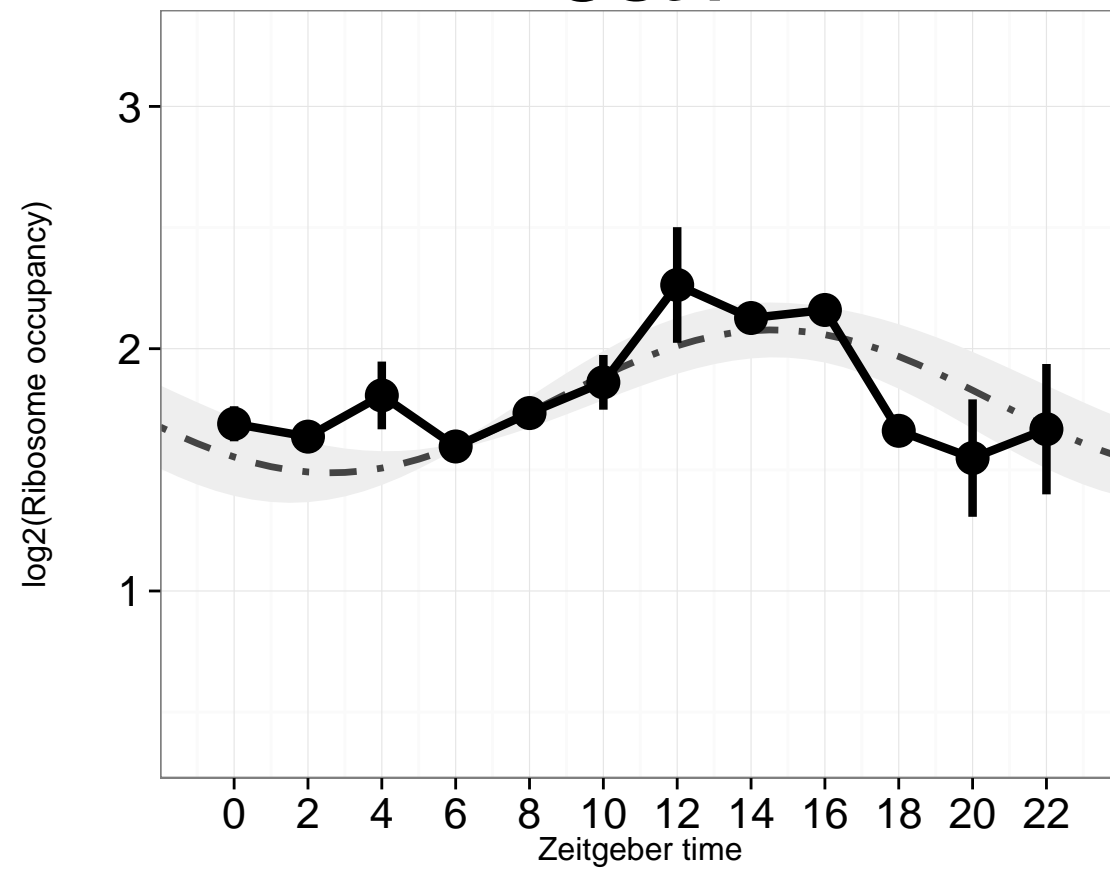

Supplement: SuppDataset_1.zip [file Ost4_set_B.pdf › Supplemental Dataset 1/B-mRNA_rhythm_translation_nonrhyth/Ost4_set_B.pdf]

## Ostc

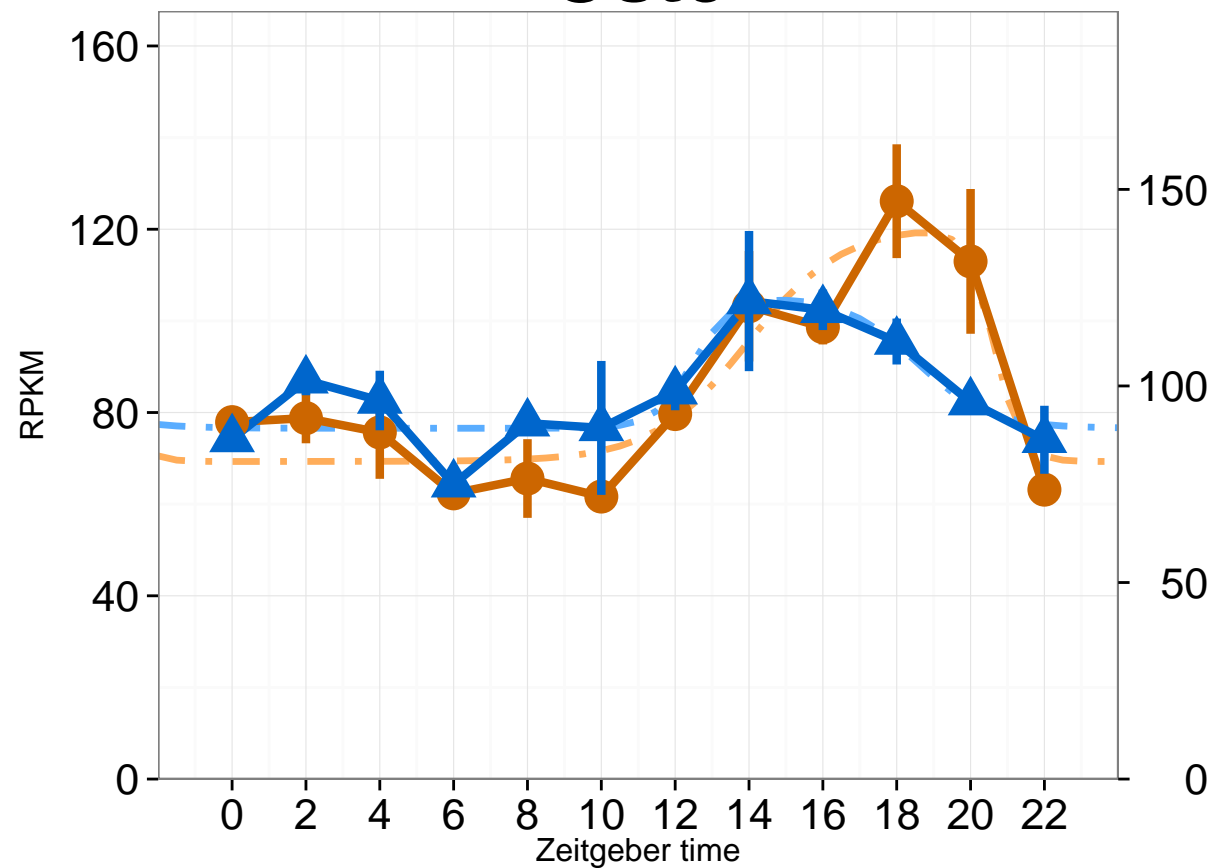

## Ostc

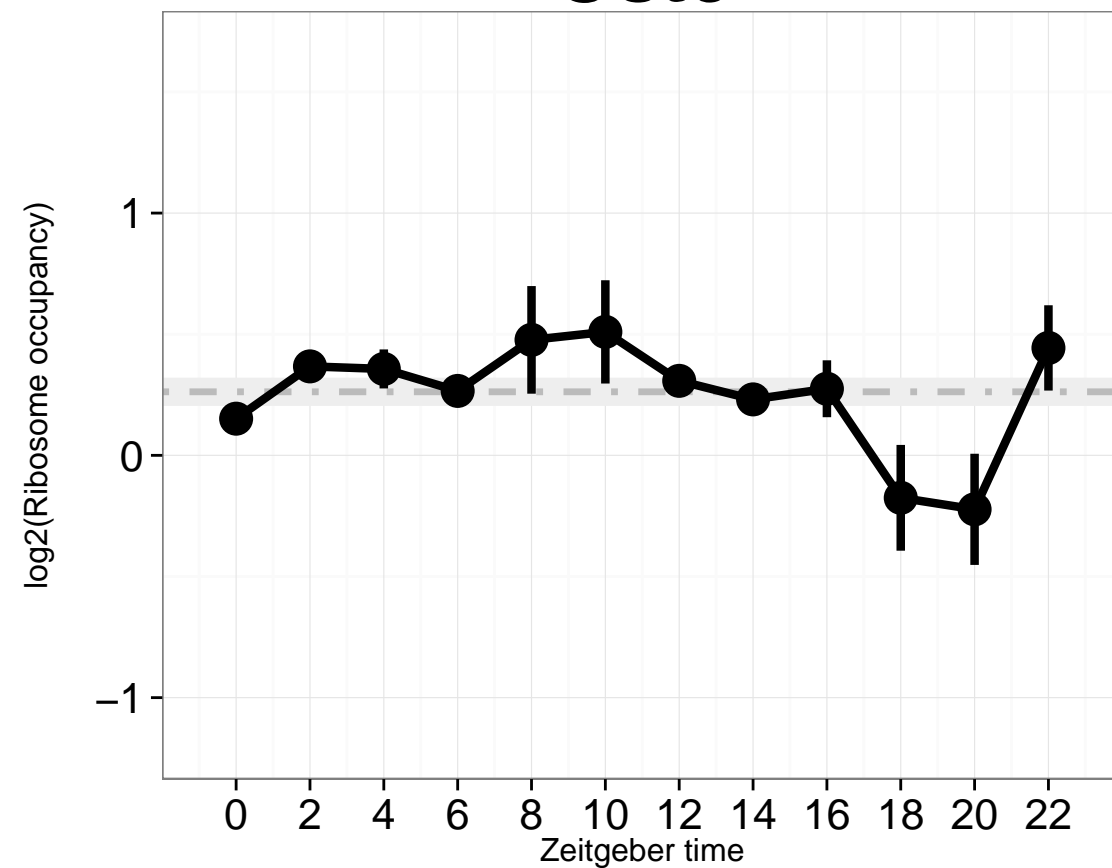

Supplement: SuppDataset_1.zip [file Ostc_set_B.pdf › Supplemental Dataset 1/B-mRNA_rhythm_translation_nonrhyth/Ostc_set_B.pdf]

# P2ry12

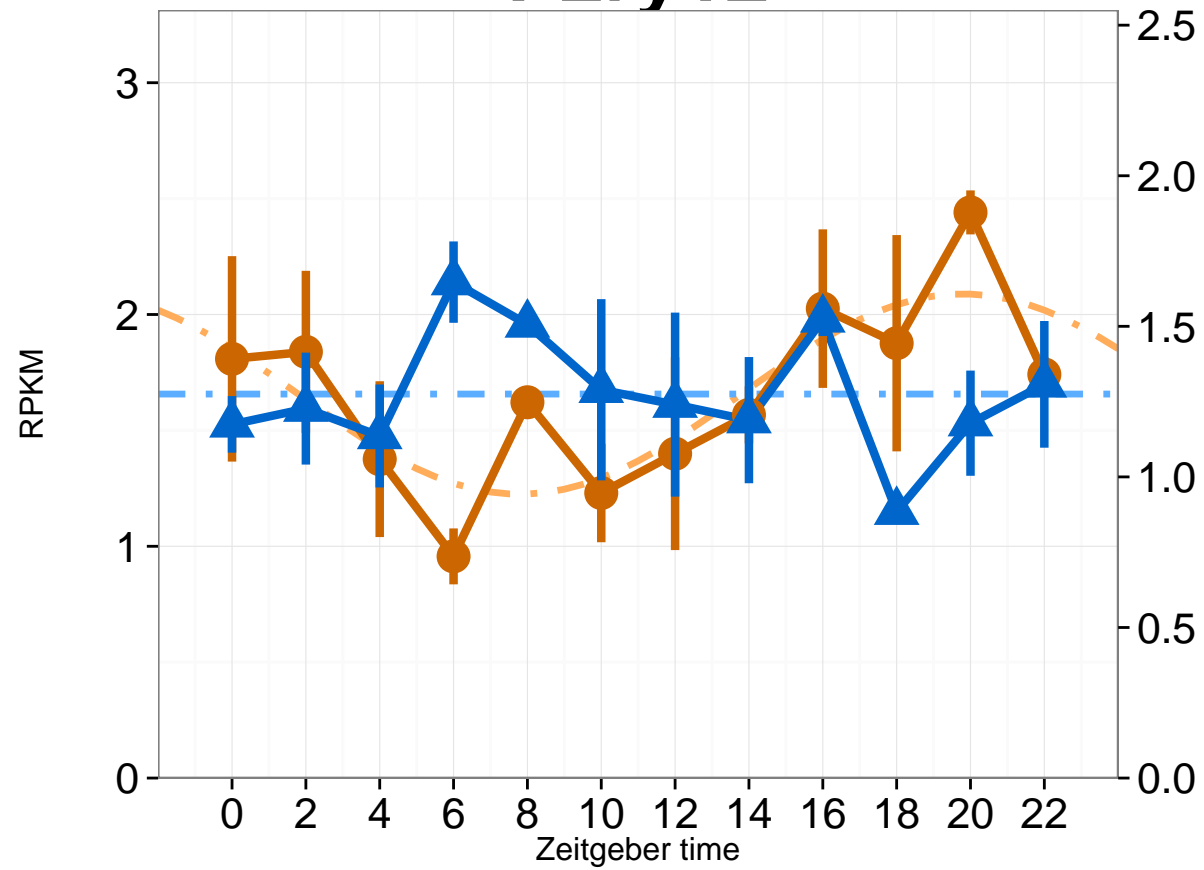

# P2ry12

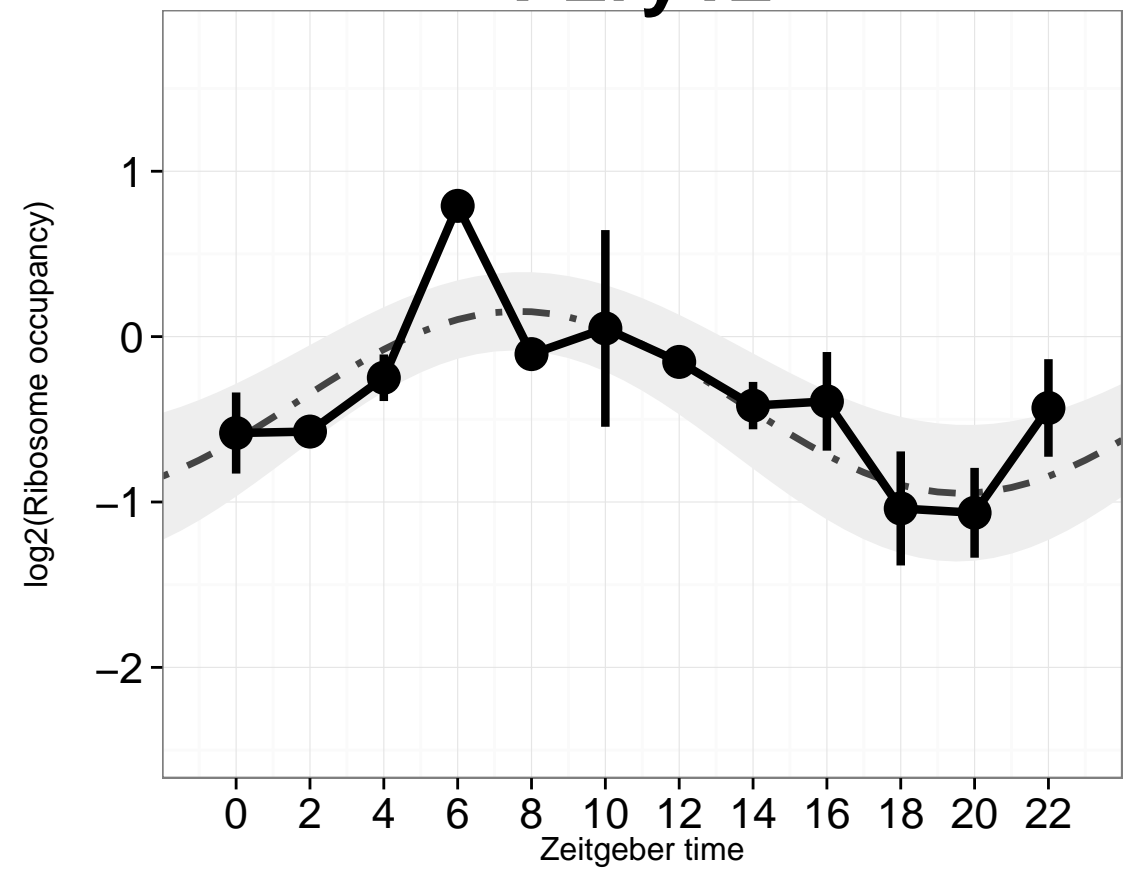

Supplement: SuppDataset_1.zip [file P2ry12_set_B.pdf › Supplemental Dataset 1/B-mRNA_rhythm_translation_nonrhyth/P2ry12_set_B.pdf]

# P2ry13

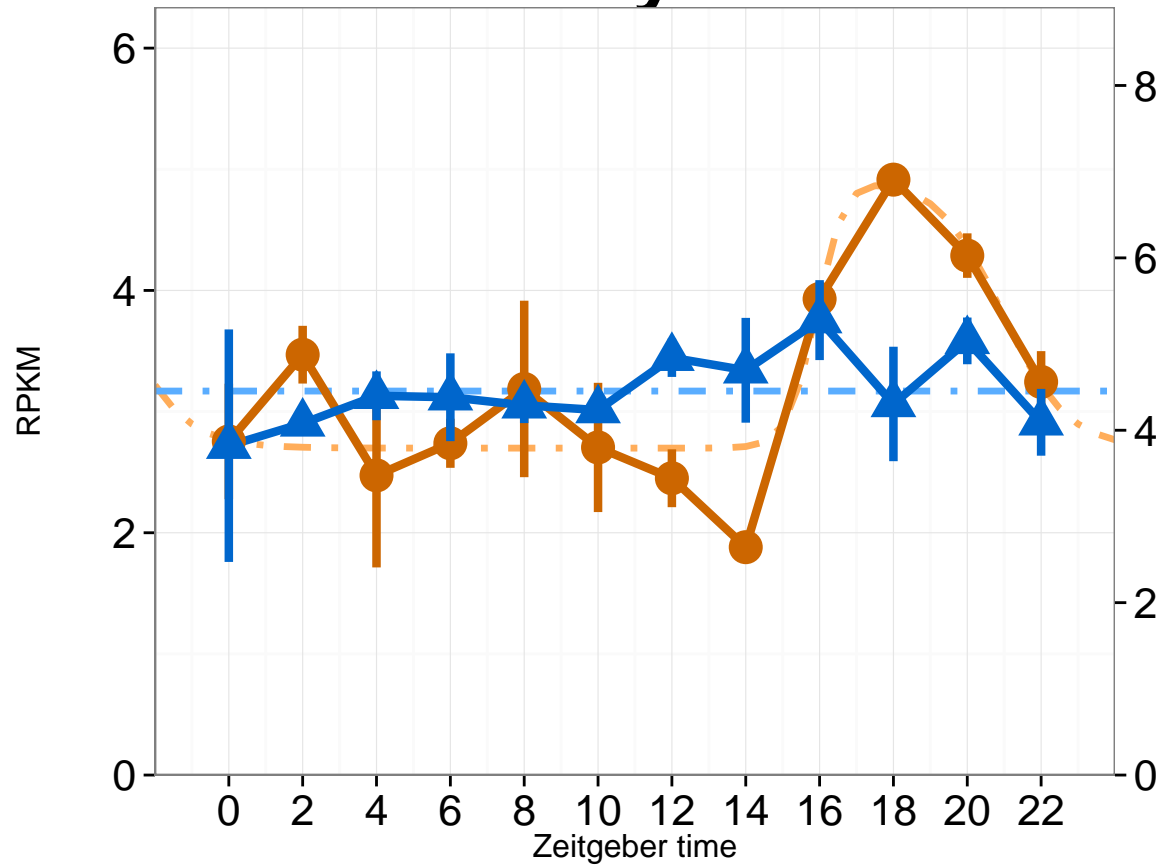

# P2ry13

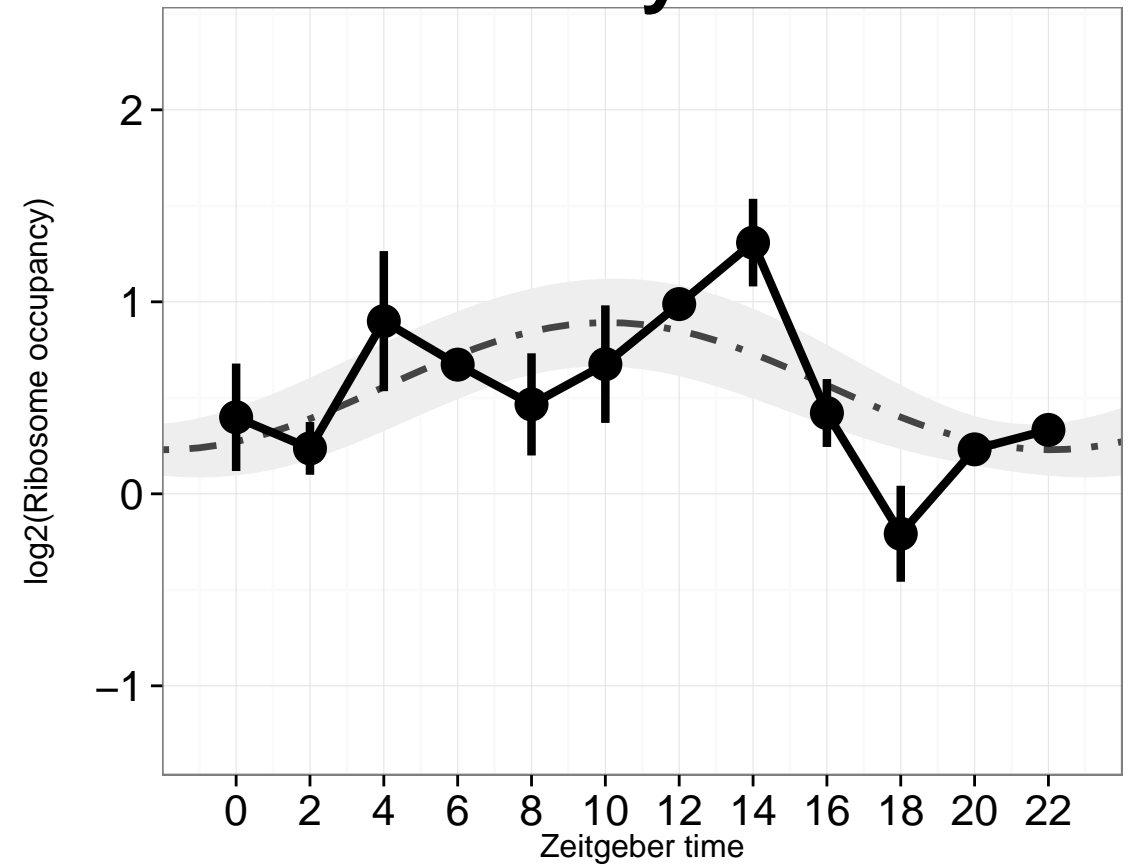

Supplement: SuppDataset_1.zip [file P2ry13_set_B.pdf › Supplemental Dataset 1/B-mRNA_rhythm_translation_nonrhyth/P2ry13_set_B.pdf]

## Palid1

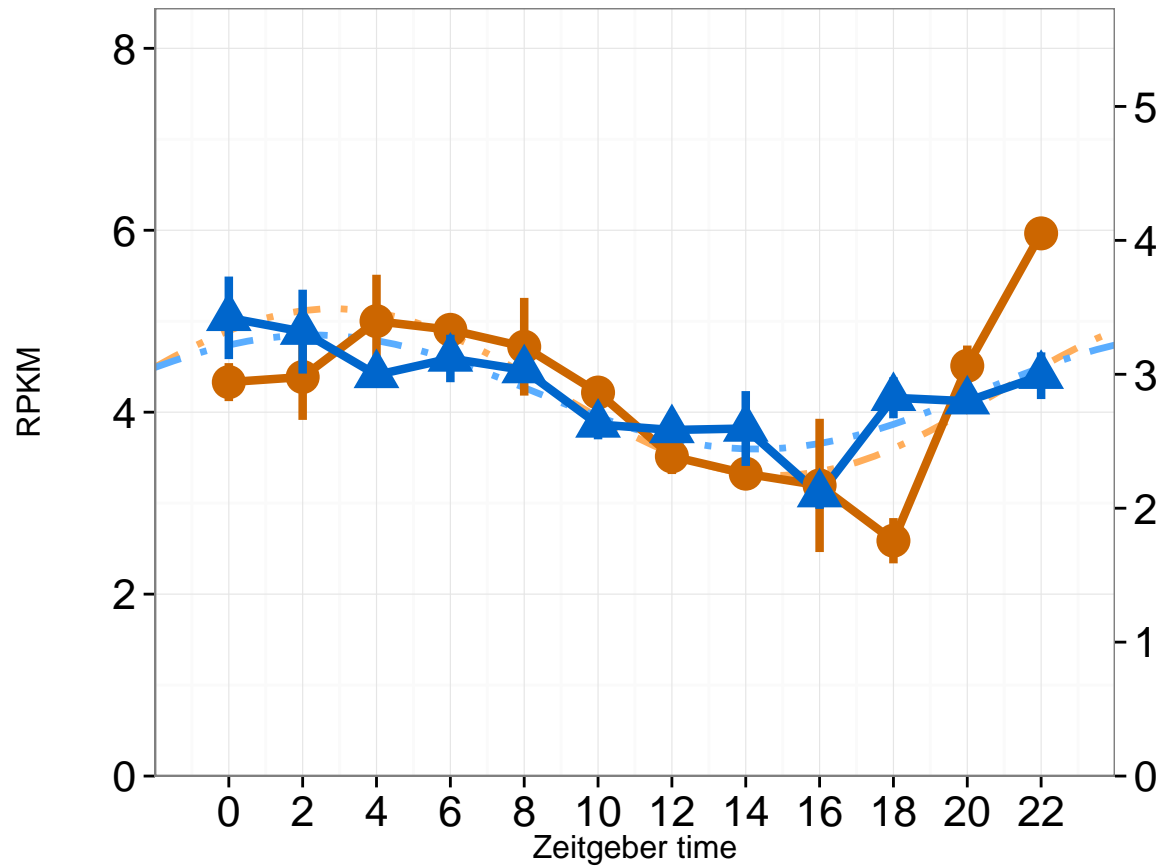

## Palid1

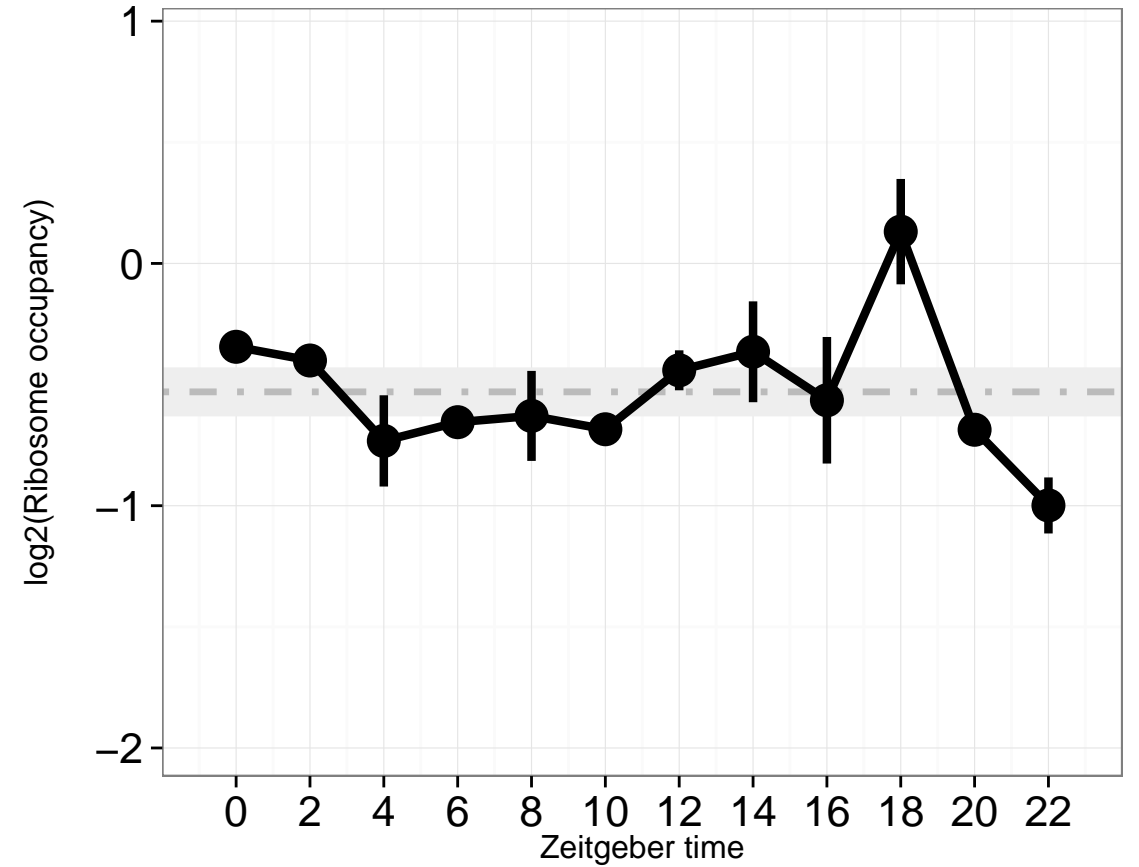

Supplement: SuppDataset_1.zip [file Pald1_set_B.pdf › Supplemental Dataset 1/B-mRNA_rhythm_translation_nonrhyth/Pald1_set_B.pdf]

# Pamr1

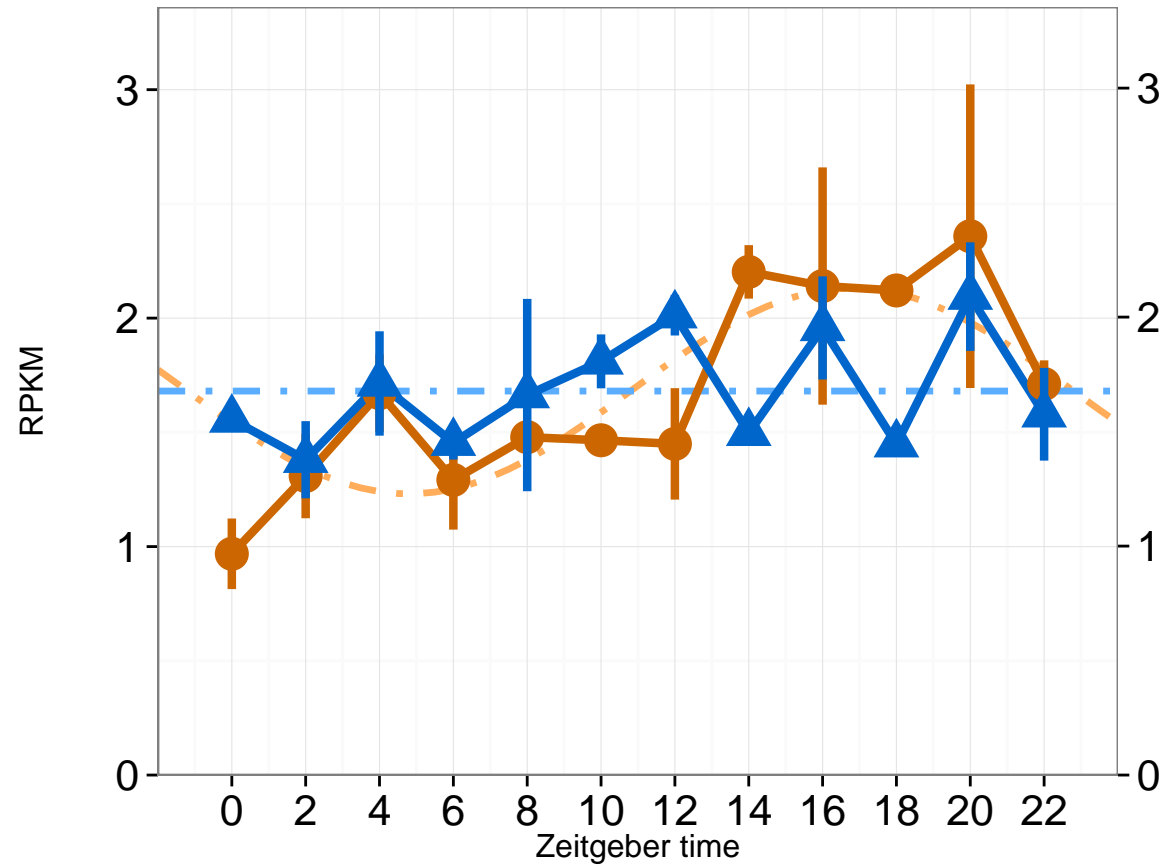

# Pamr1

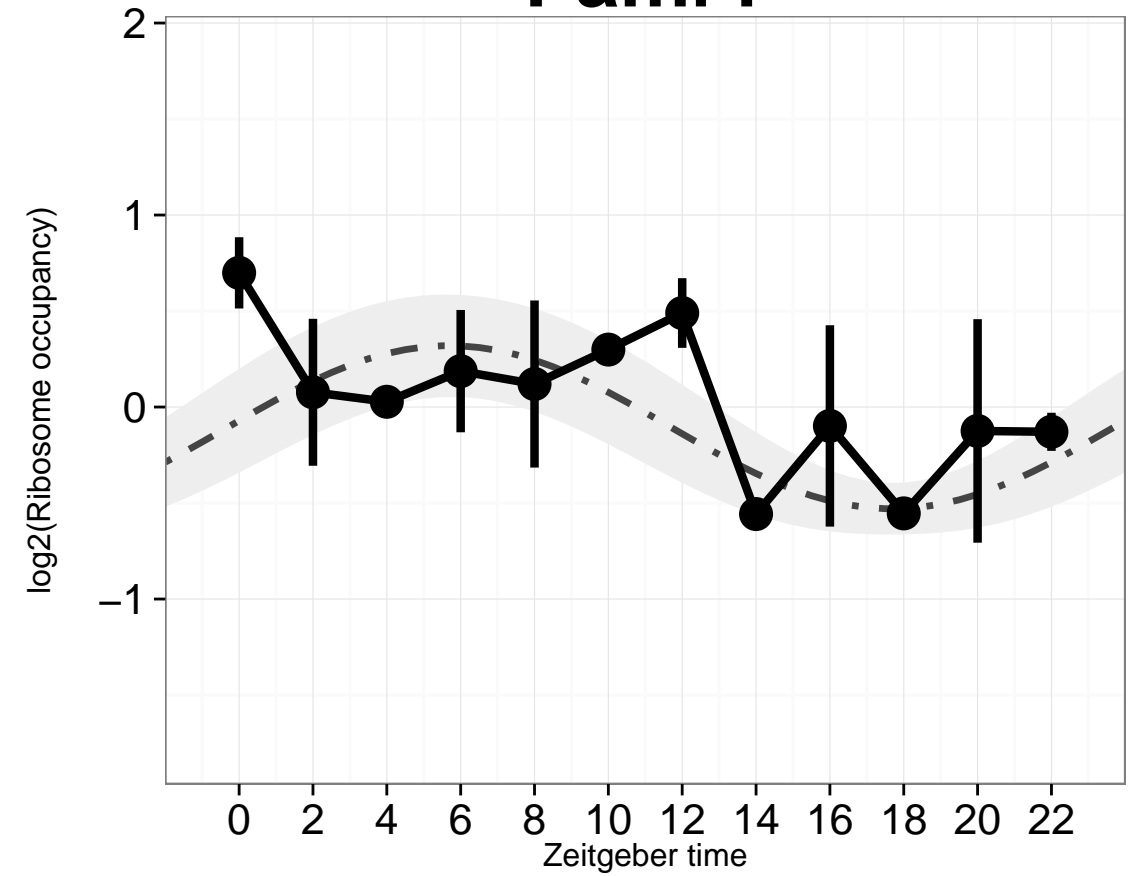

Supplement: SuppDataset_1.zip [file Pamr1_set_B.pdf › Supplemental Dataset 1/B-mRNA_rhythm_translation_nonrhyth/Pamr1_set_B.pdf]

# Pard6a

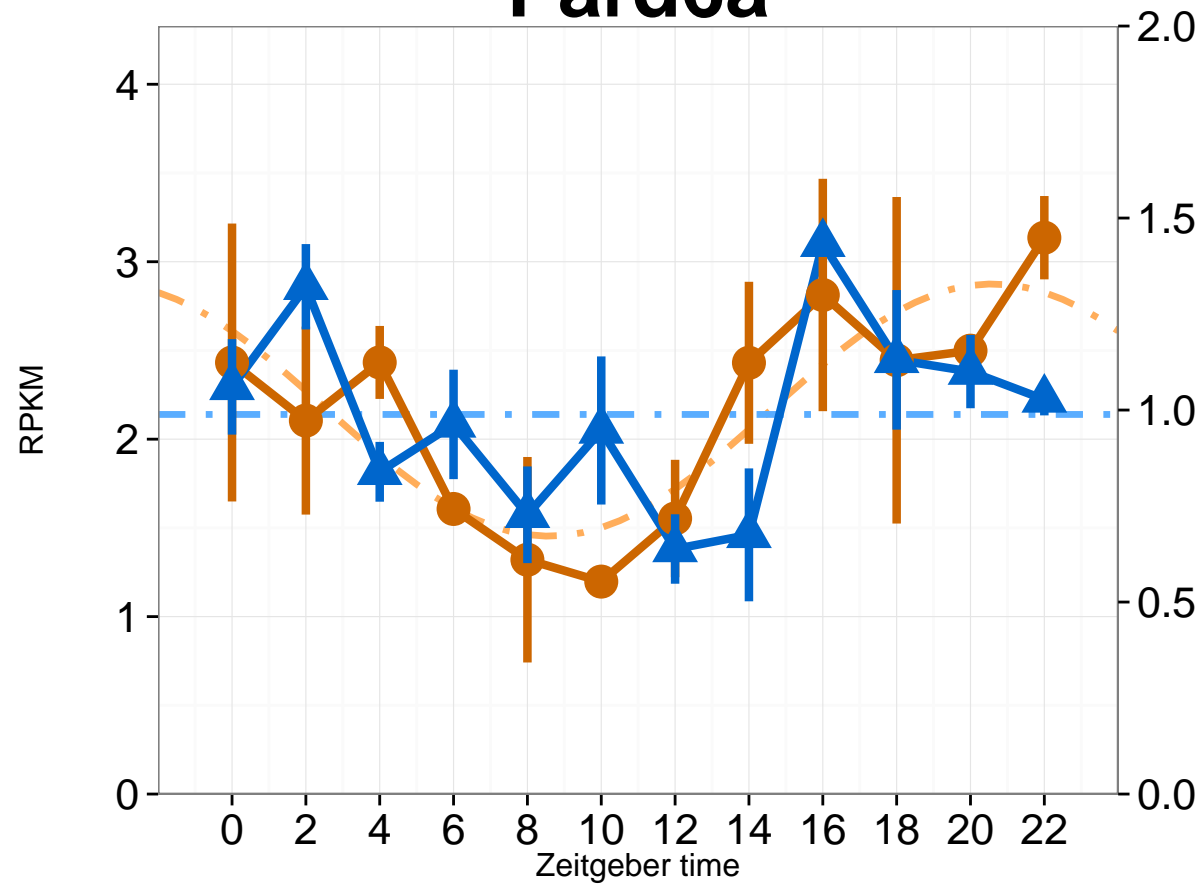

# Pard6a

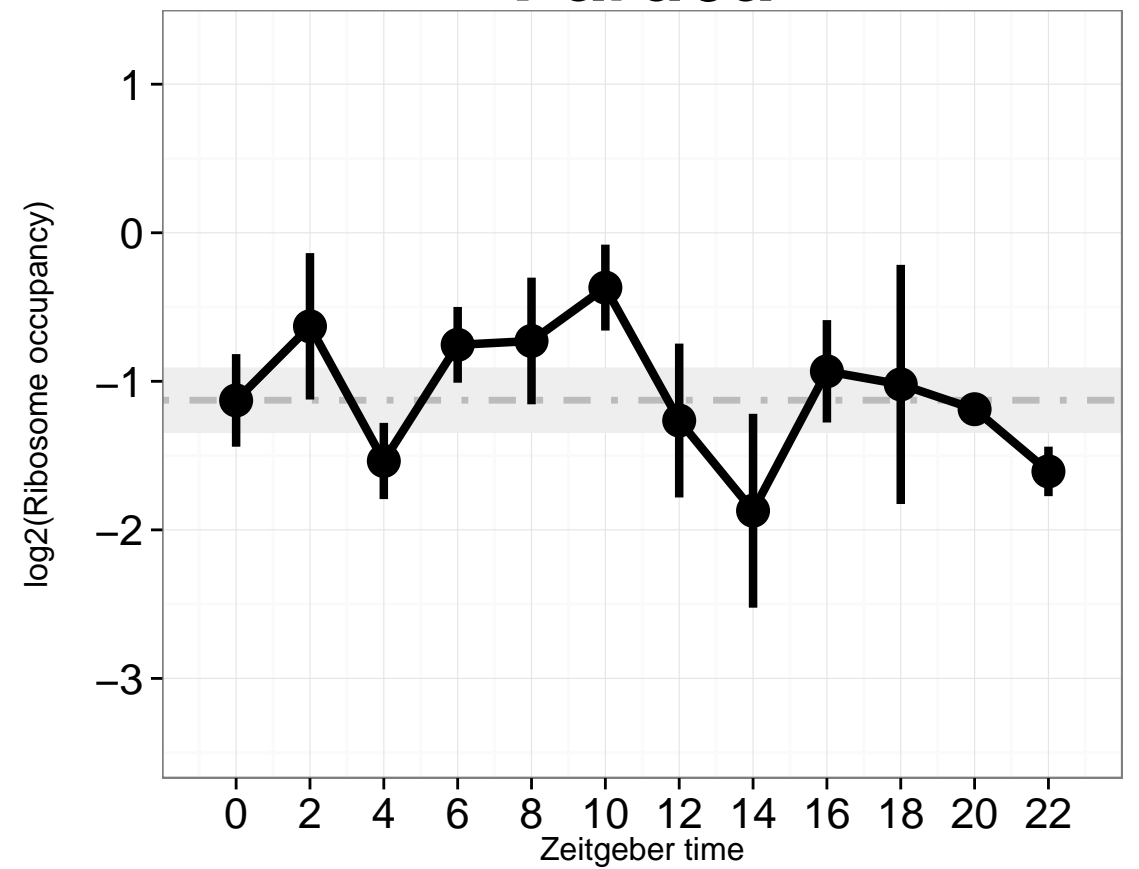

Supplement: SuppDataset_1.zip [file Pard6a_set_B.pdf › Supplemental Dataset 1/B-mRNA_rhythm_translation_nonrhyth/Pard6a_set_B.pdf]

## Parp10

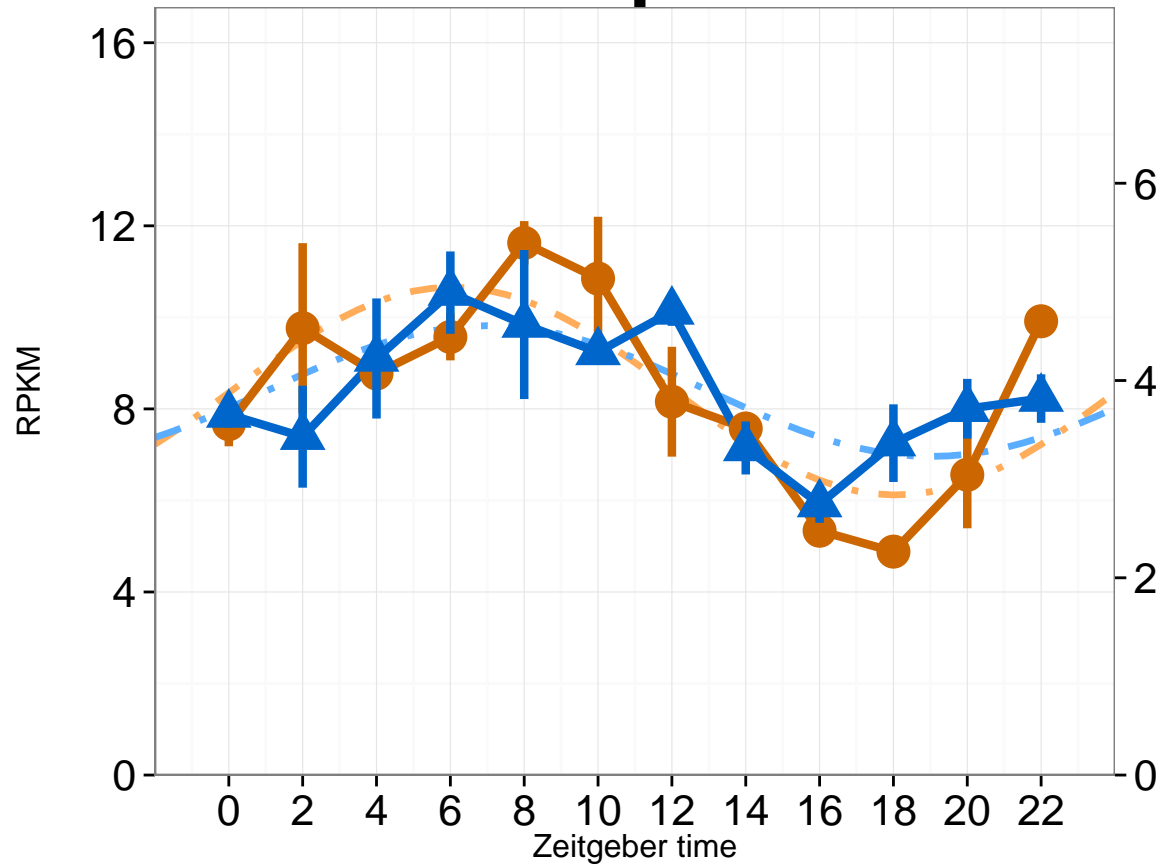

## Parp10

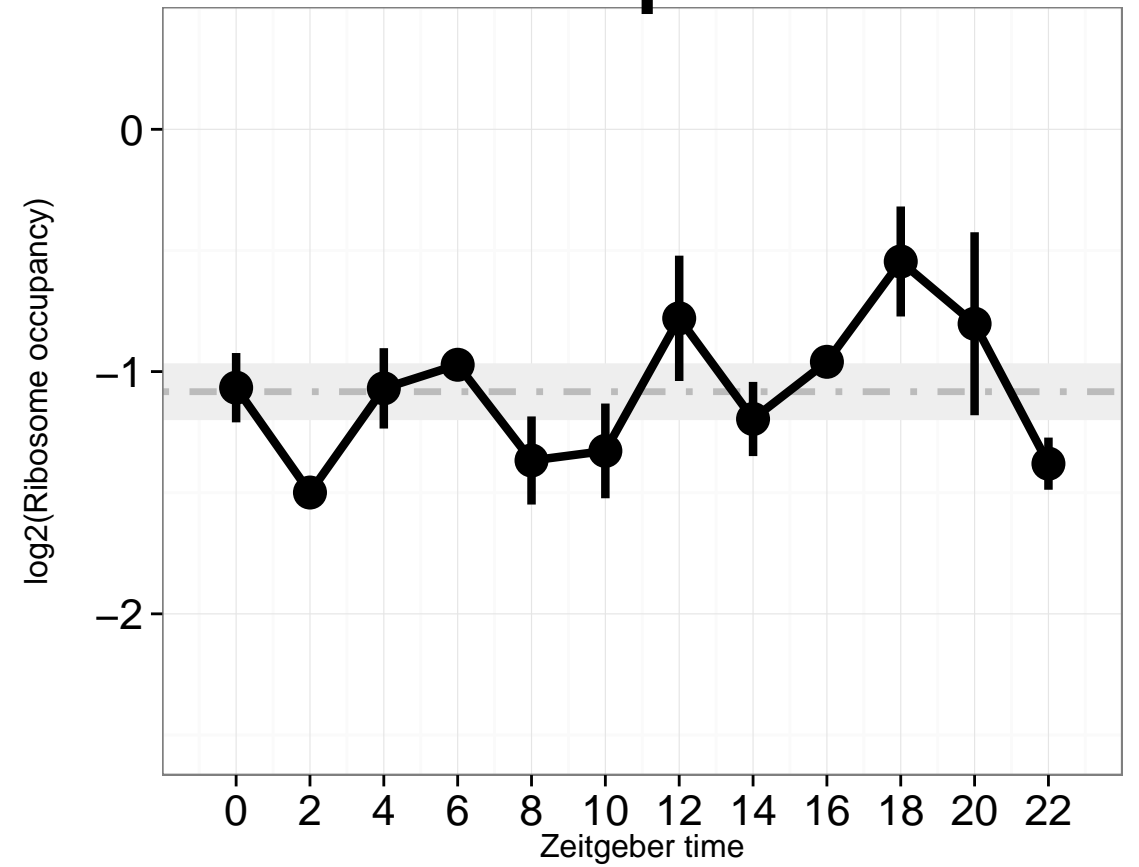

Supplement: SuppDataset_1.zip [file Parp10_set_B.pdf › Supplemental Dataset 1/B-mRNA_rhythm_translation_nonrhyth/Parp10_set_B.pdf]

# Pcbd1

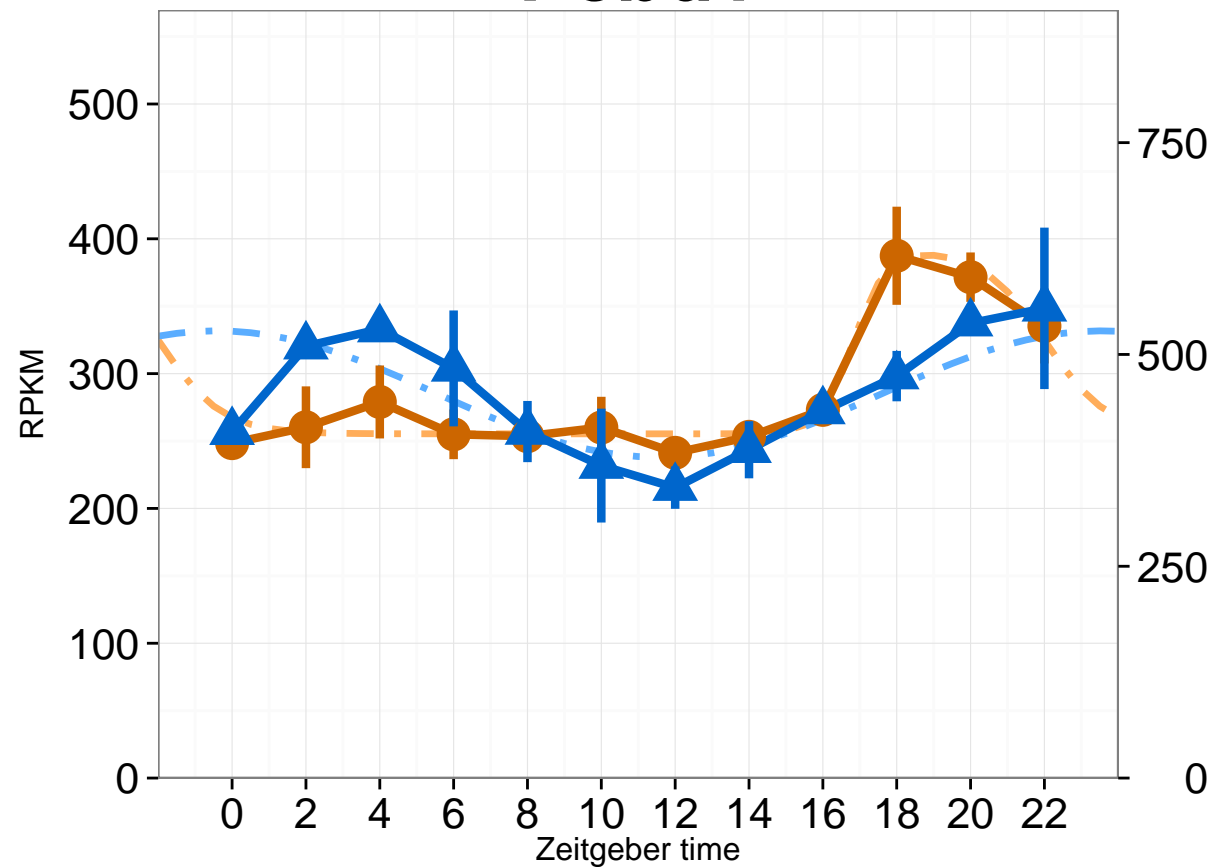

# Pcbd1

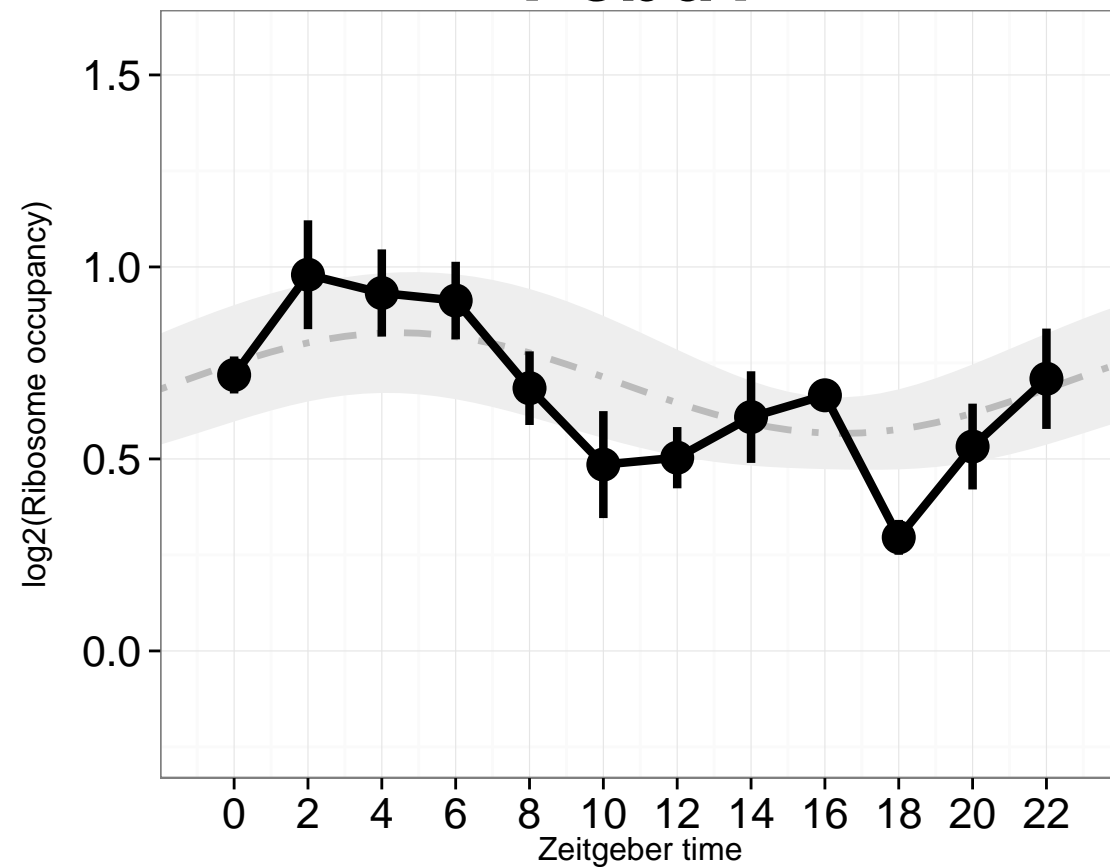

Supplement: SuppDataset_1.zip [file Pcbd1_set_B.pdf › Supplemental Dataset 1/B-mRNA_rhythm_translation_nonrhyth/Pcbd1_set_B.pdf]

# Pcdh7

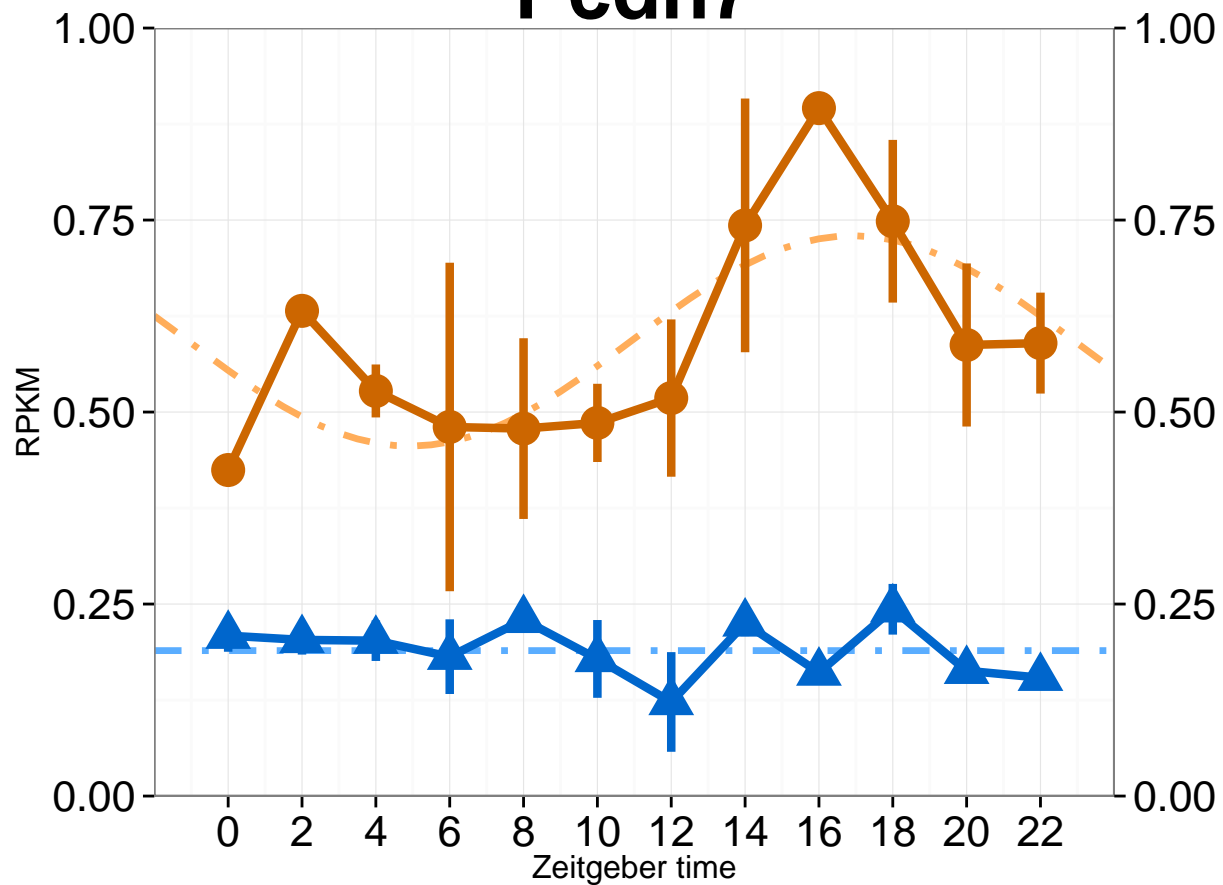

# Pcdh7

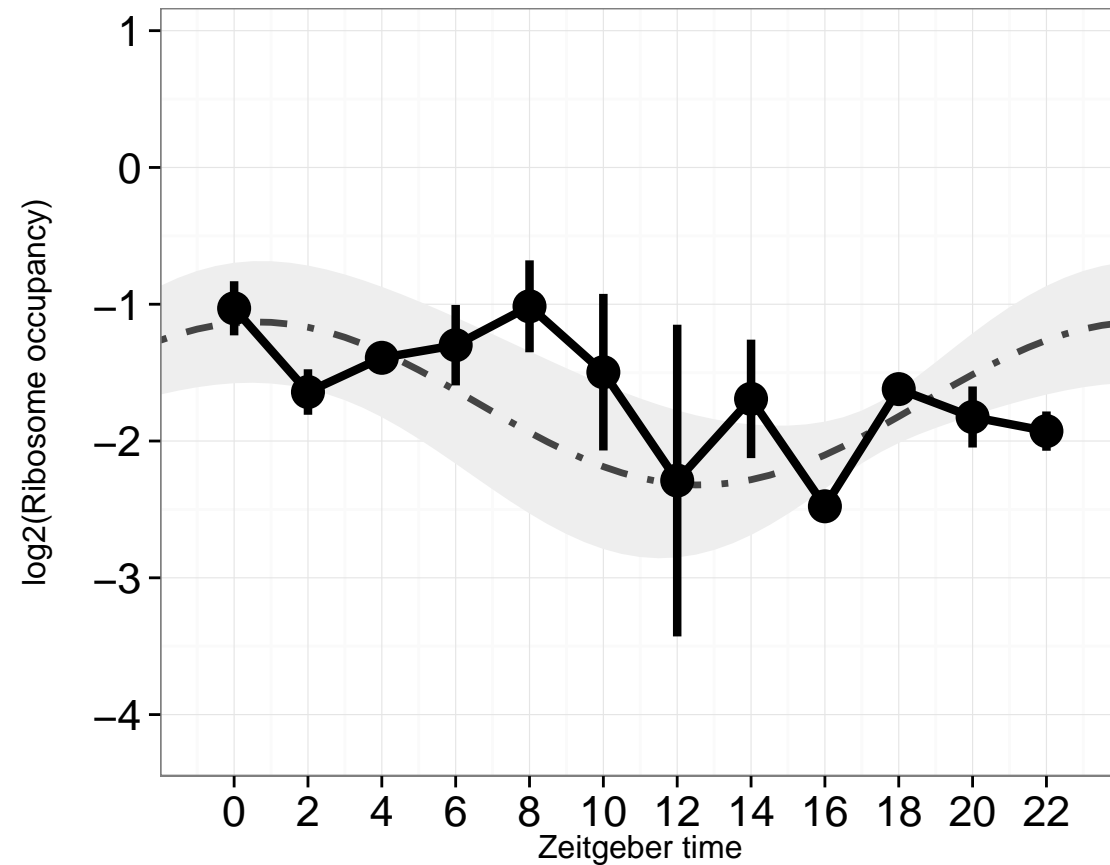

Supplement: SuppDataset_1.zip [file Pcdh7_set_B.pdf › Supplemental Dataset 1/B-mRNA_rhythm_translation_nonrhyth/Pcdh7_set_B.pdf]

# Pcgf5

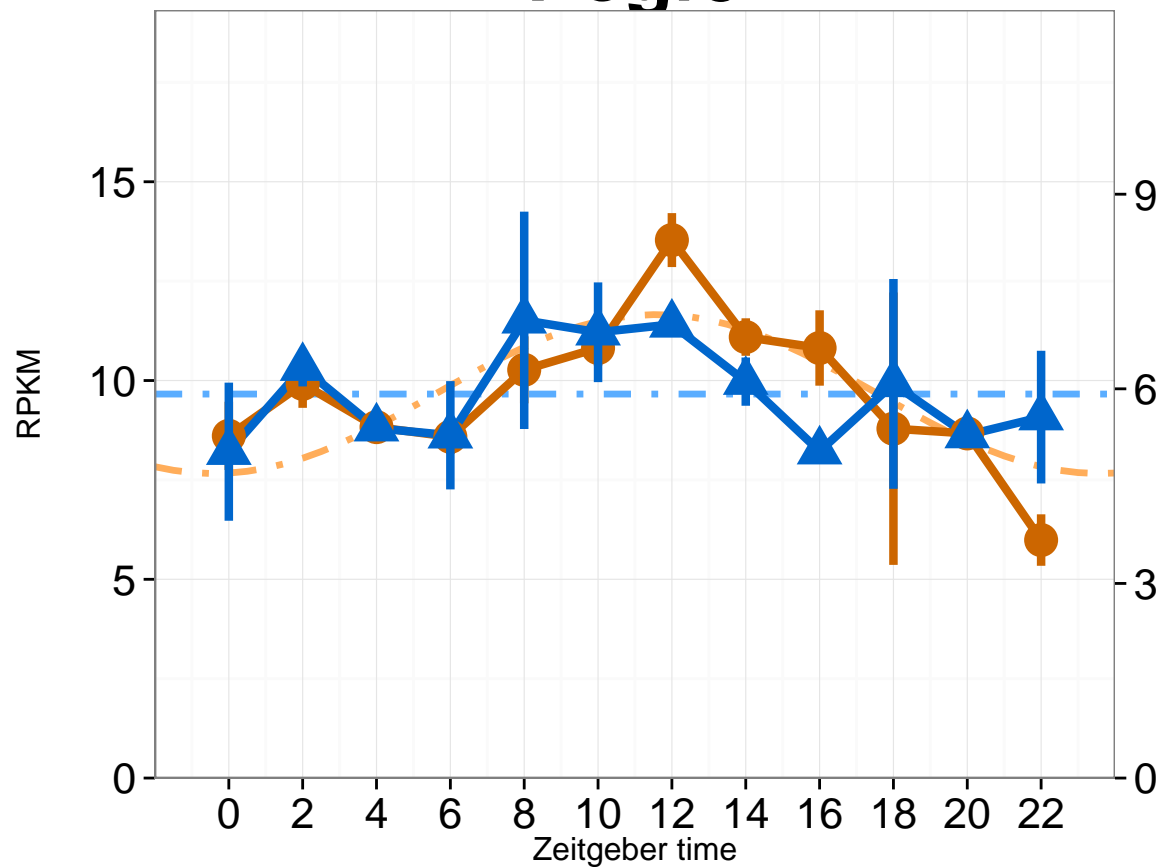

# Pcgf5

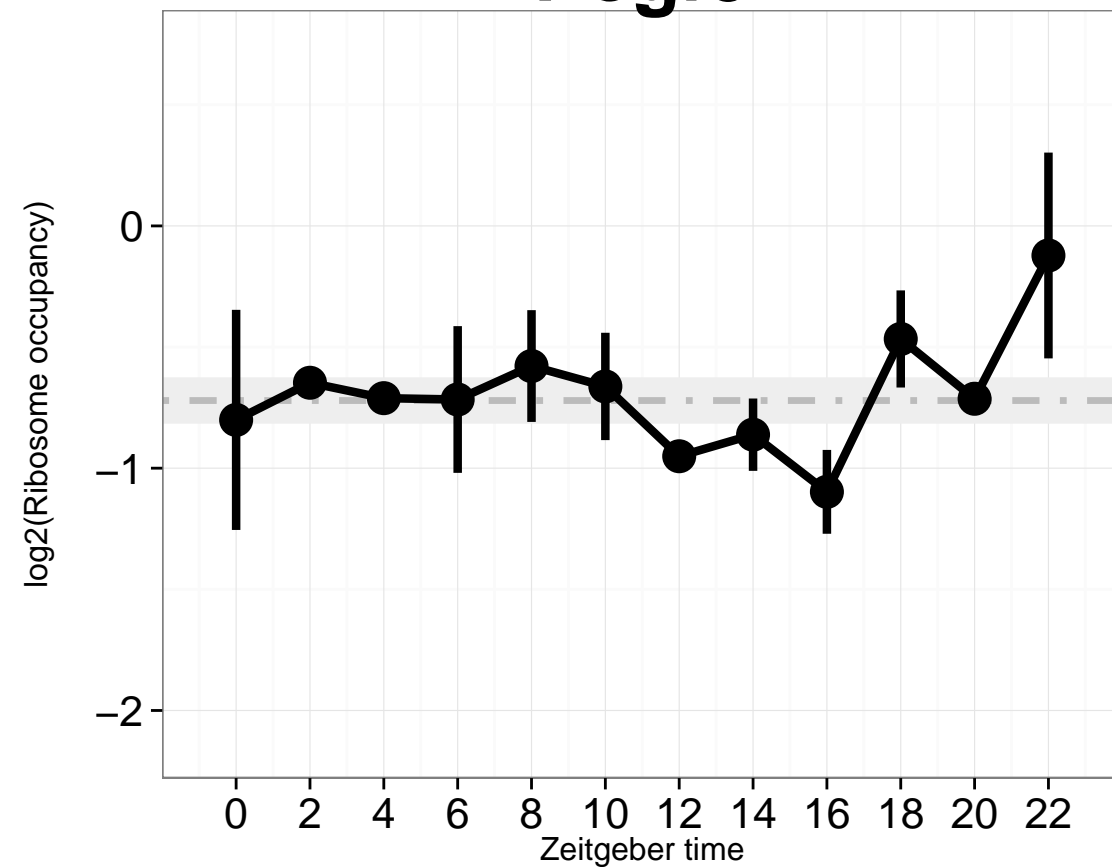

Supplement: SuppDataset_1.zip [file Pcgf5_set_B.pdf › Supplemental Dataset 1/B-mRNA_rhythm_translation_nonrhyth/Pcgf5_set_B.pdf]

## Pcif1

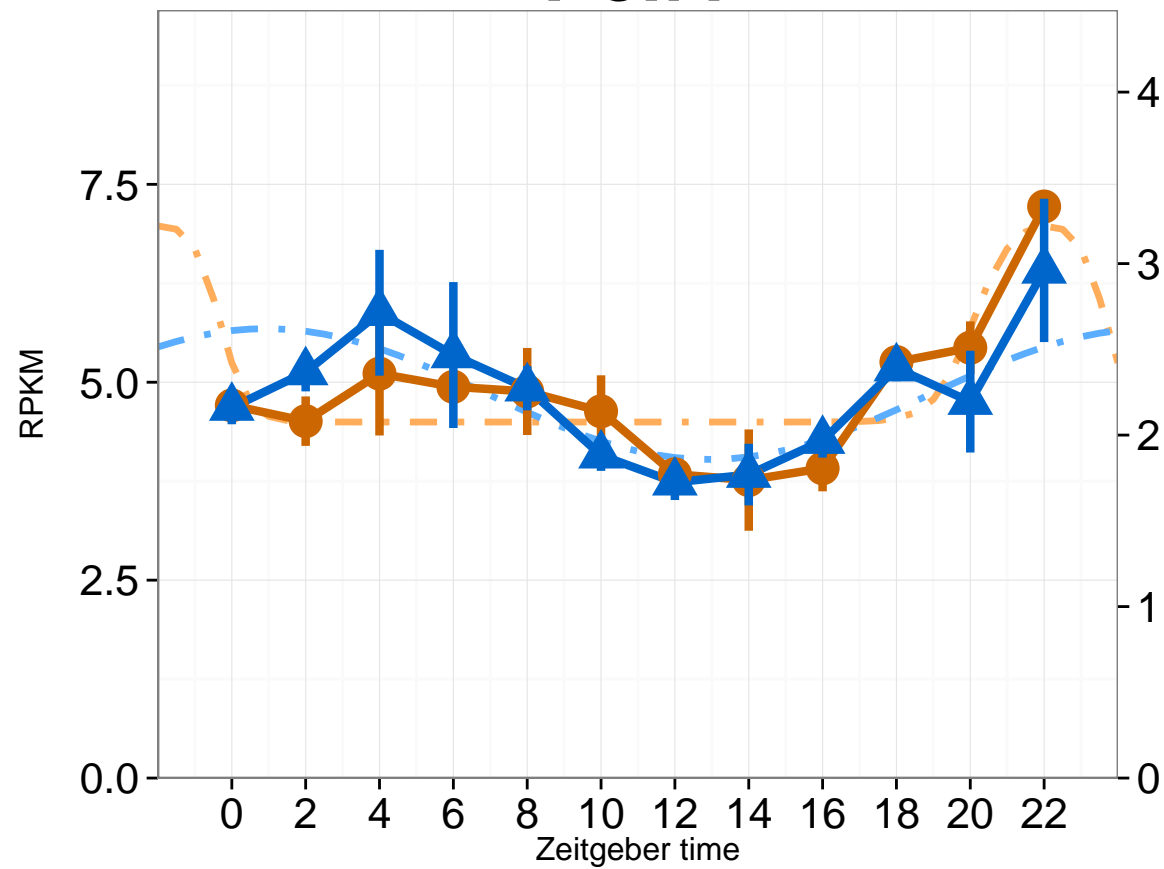

## Pcif1

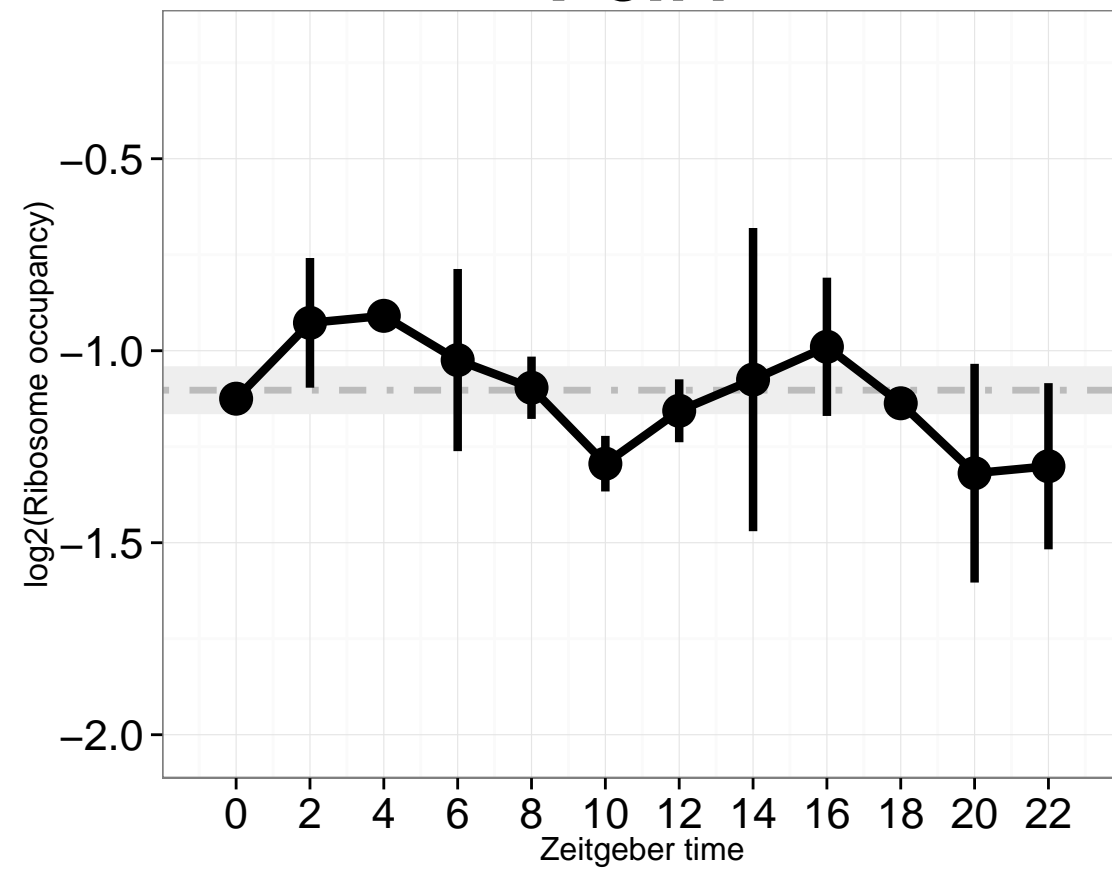

Supplement: SuppDataset_1.zip [file Pcif1_set_B.pdf › Supplemental Dataset 1/B-mRNA_rhythm_translation_nonrhyth/Pcif1_set_B.pdf]

## Pdcd2l

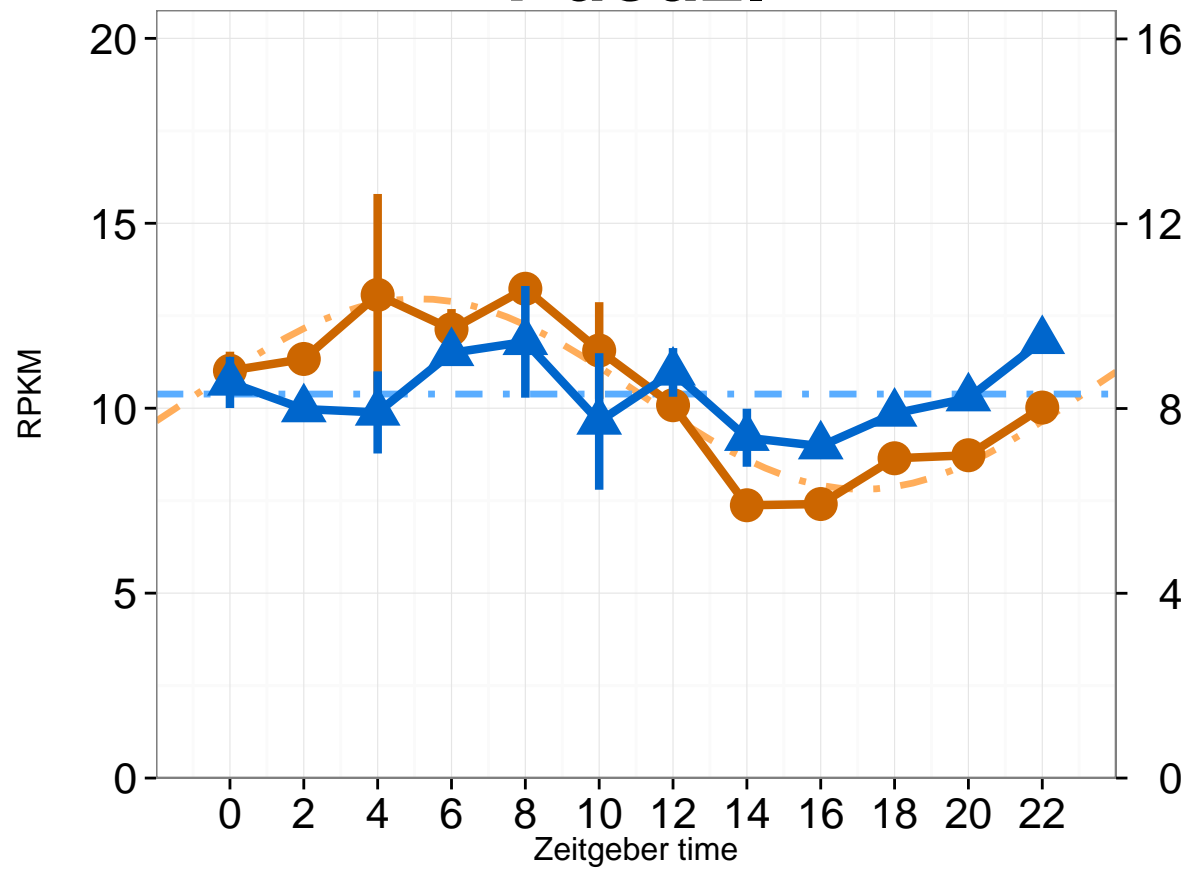

## Pdcd2l

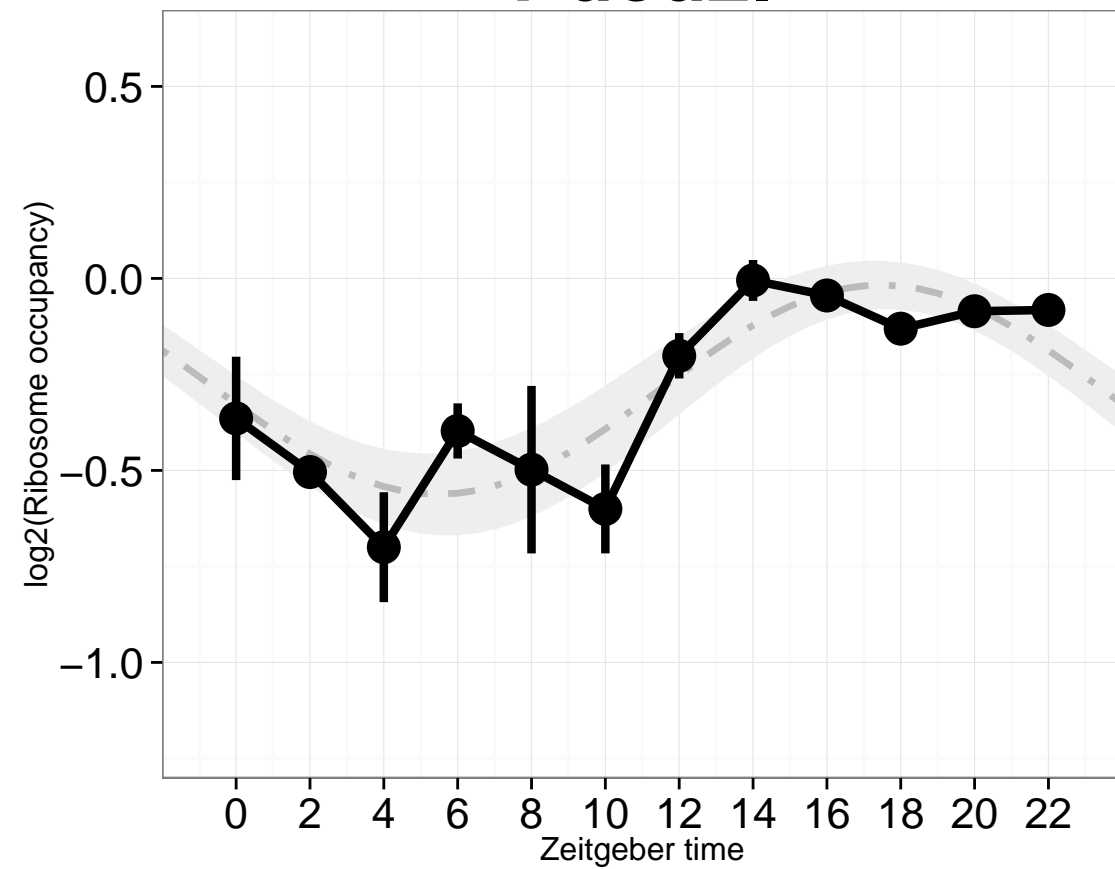

Supplement: SuppDataset_1.zip [file Pdcd2l_set_B.pdf › Supplemental Dataset 1/B-mRNA_rhythm_translation_nonrhyth/Pdcd2l_set_B.pdf]

## Pdcd4

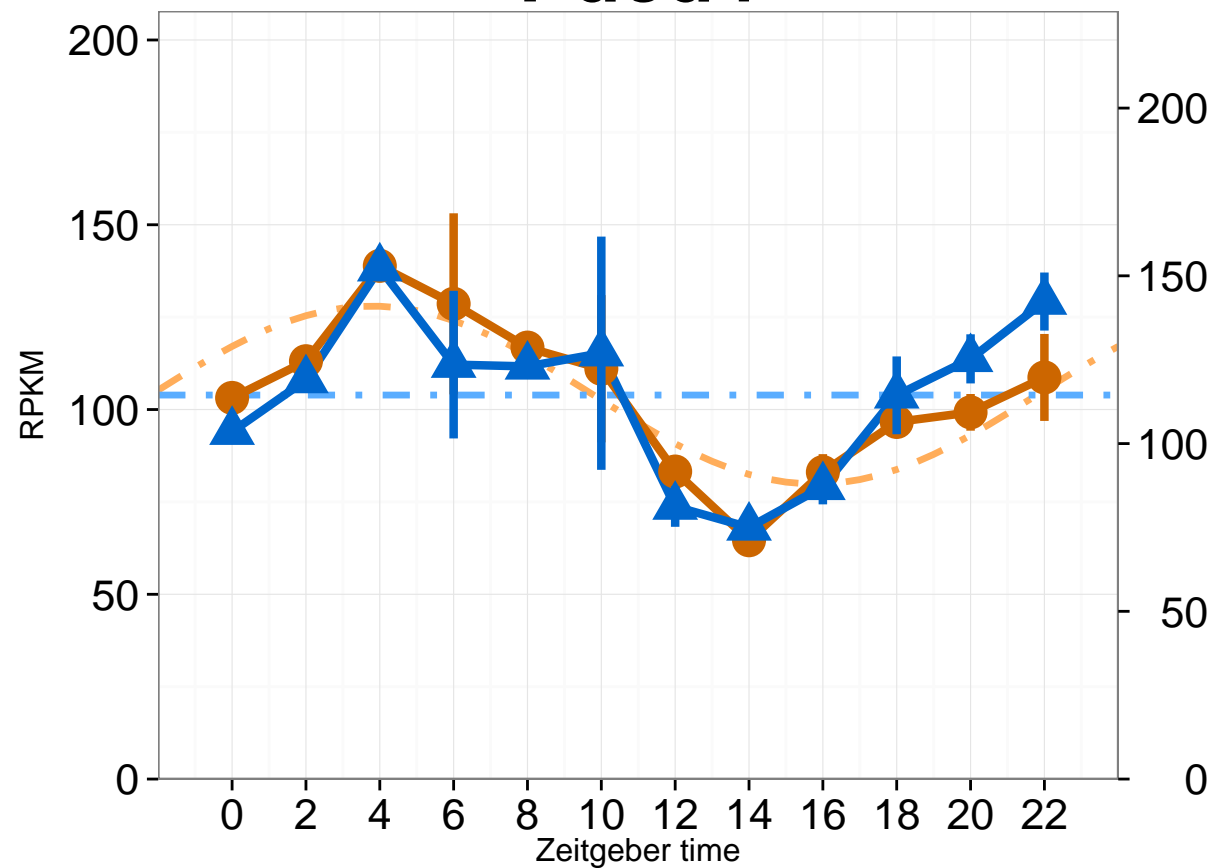

## Pdcd4

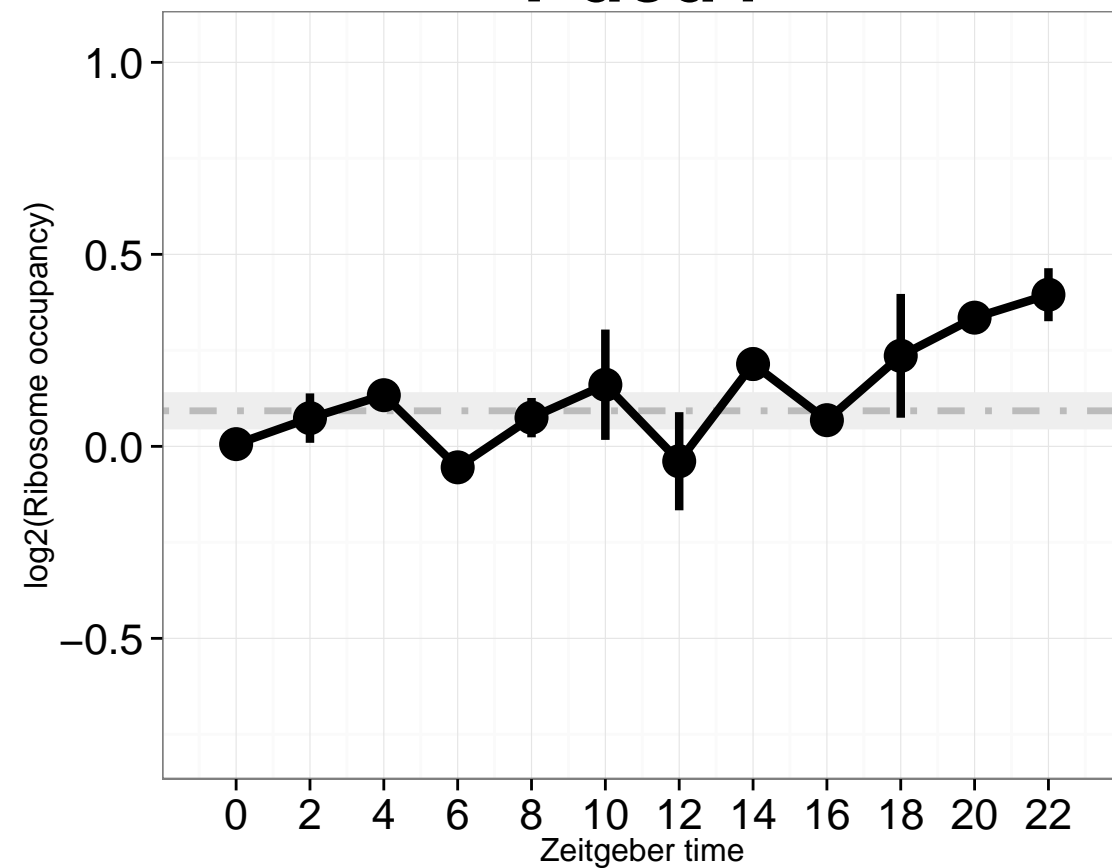

Supplement: SuppDataset_1.zip [file Pdcd4_set_B.pdf › Supplemental Dataset 1/B-mRNA_rhythm_translation_nonrhyth/Pdcd4_set_B.pdf]

# Pde2a

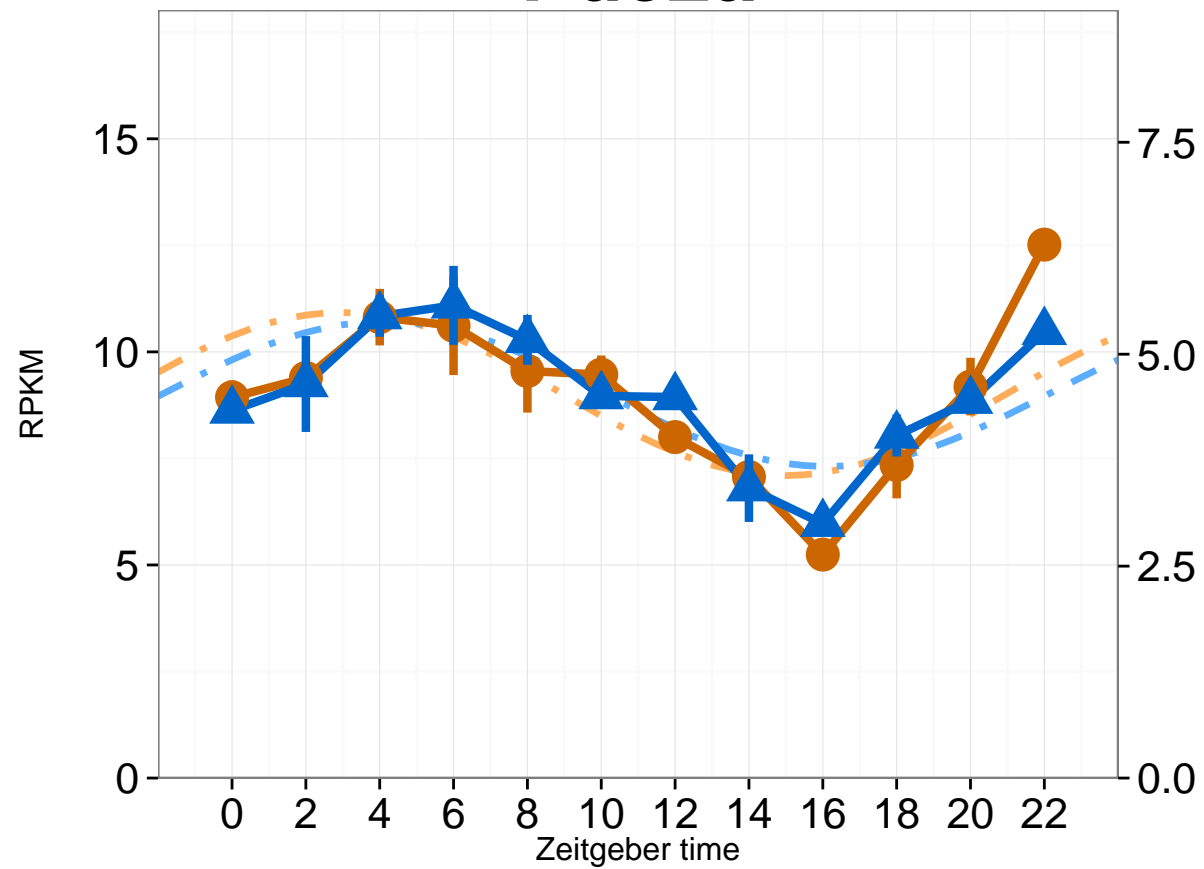

# Pde2a

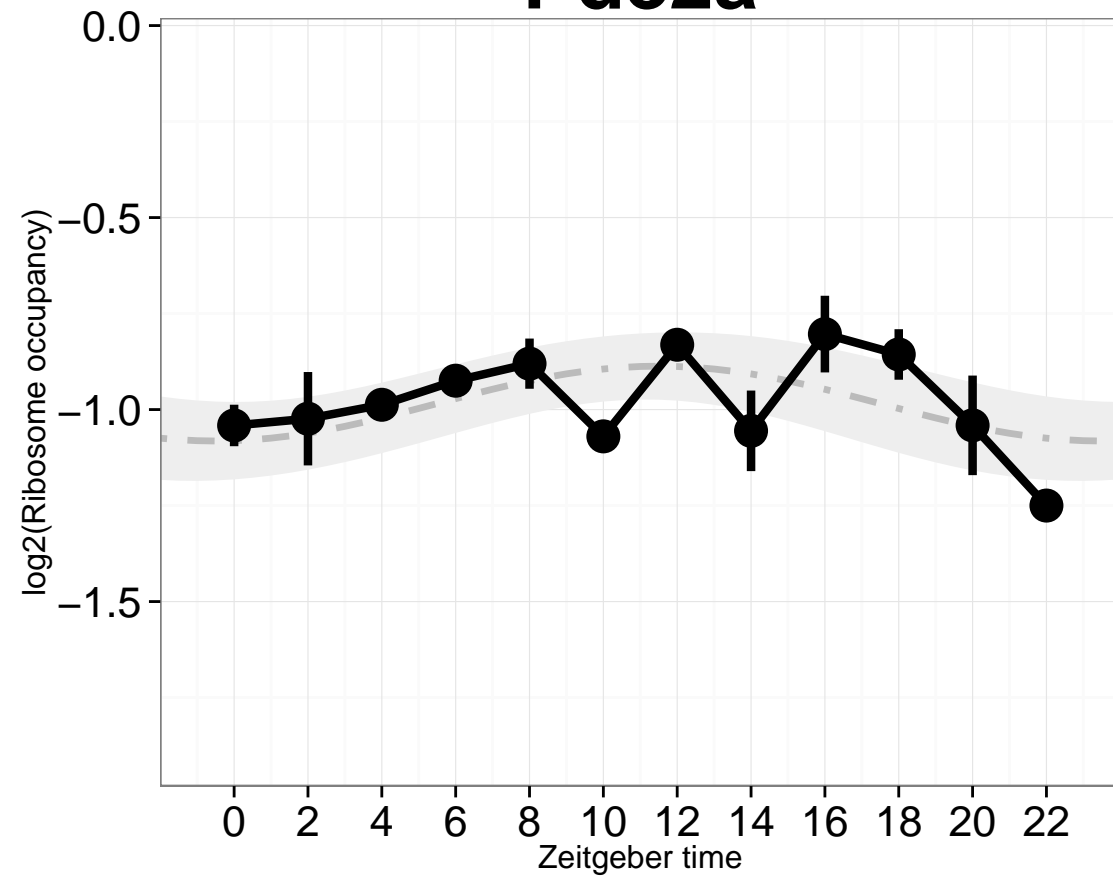

Supplement: SuppDataset_1.zip [file Pde2a_set_B.pdf › Supplemental Dataset 1/B-mRNA_rhythm_translation_nonrhyth/Pde2a_set_B.pdf]

# Pde4a

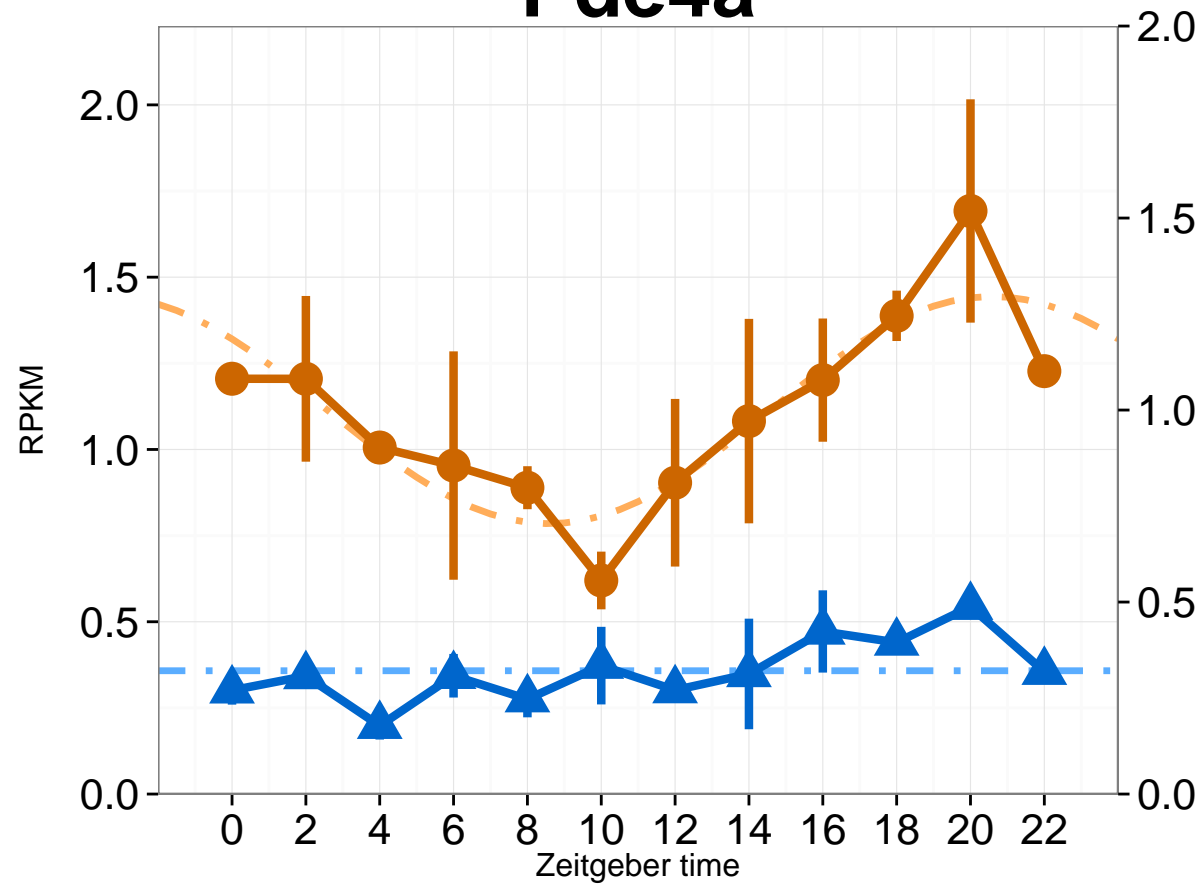

# Pde4a

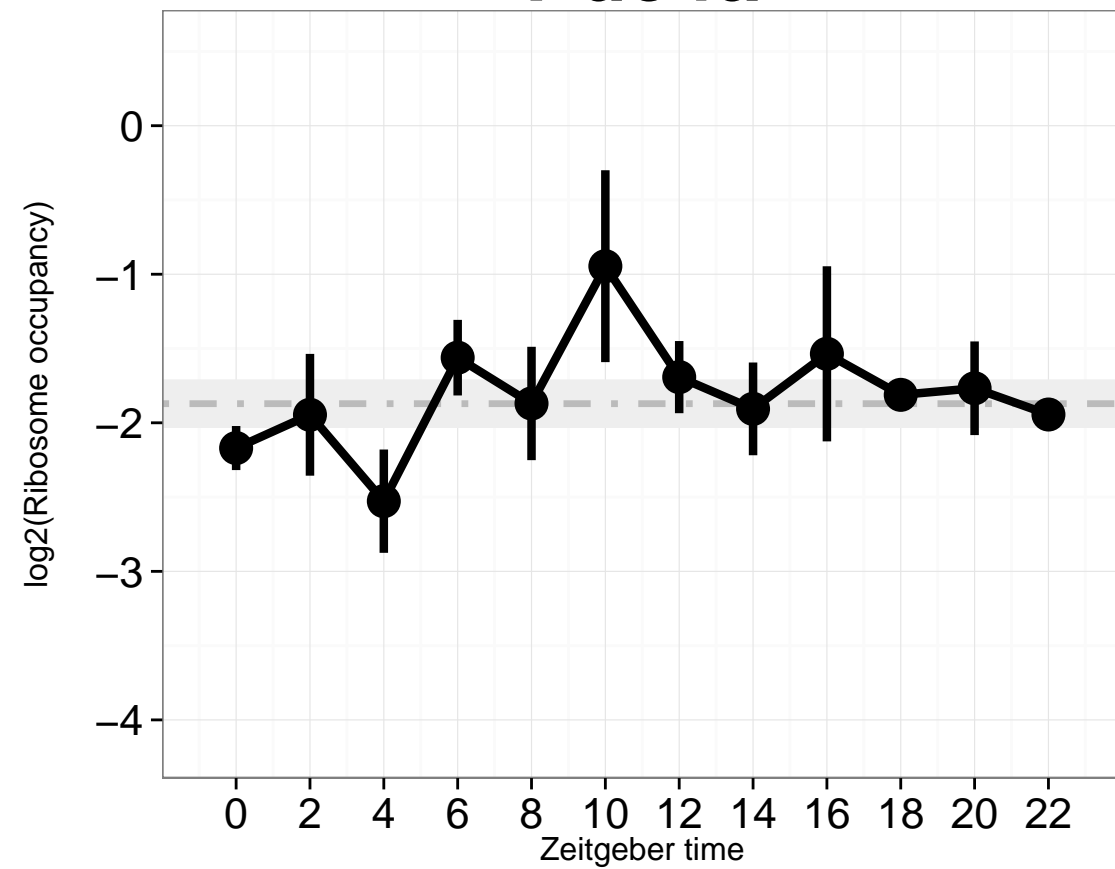

Supplement: SuppDataset_1.zip [file Pde4a_set_B.pdf › Supplemental Dataset 1/B-mRNA_rhythm_translation_nonrhyth/Pde4a_set_B.pdf]

# Pde4b

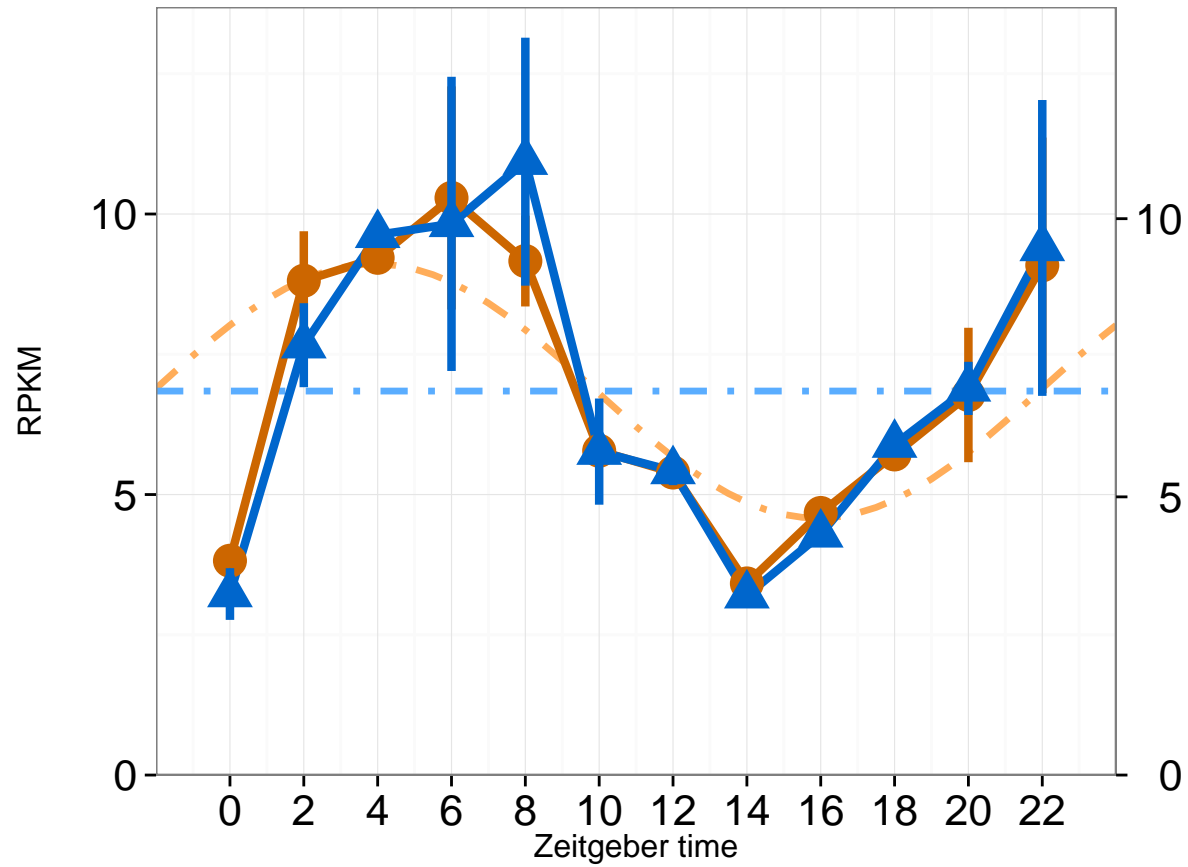

# Pde4b

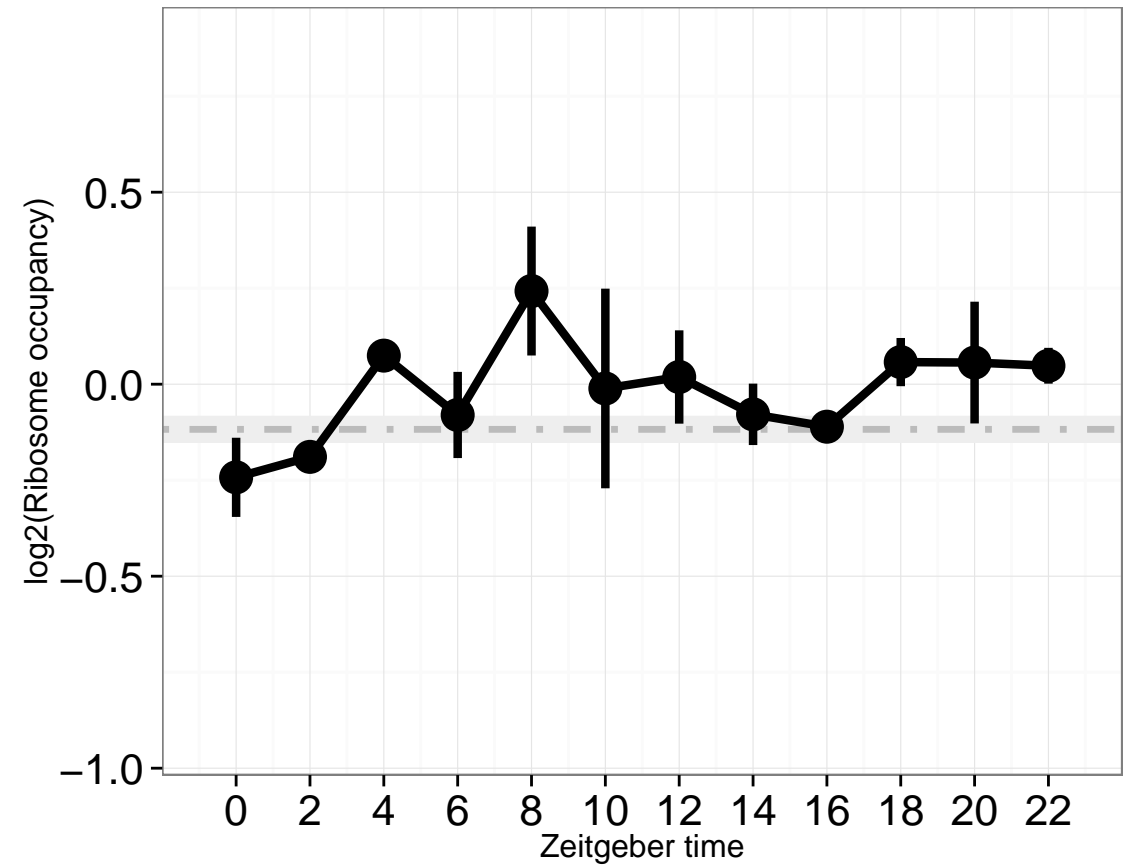

Supplement: SuppDataset_1.zip [file Pde4b_set_B.pdf › Supplemental Dataset 1/B-mRNA_rhythm_translation_nonrhyth/Pde4b_set_B.pdf]

# Pde7a

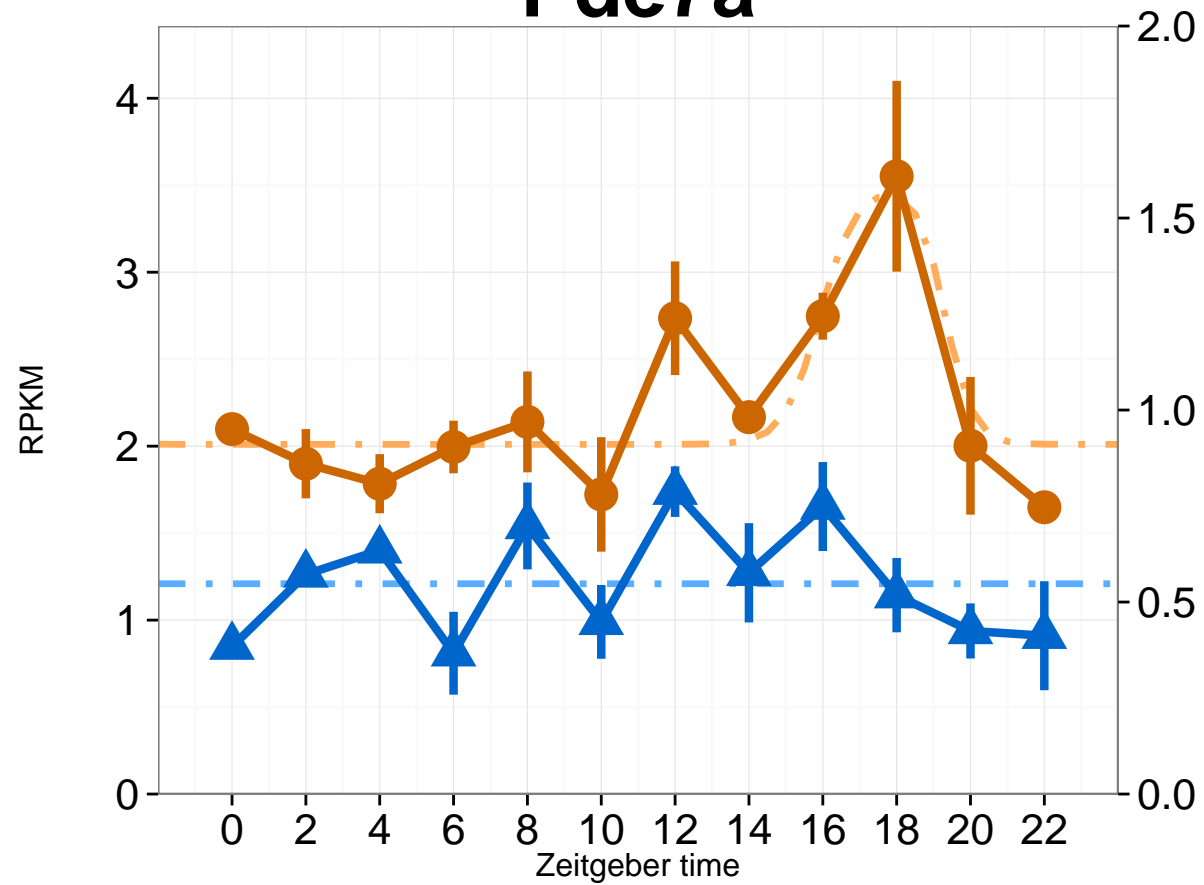

# Pde7a

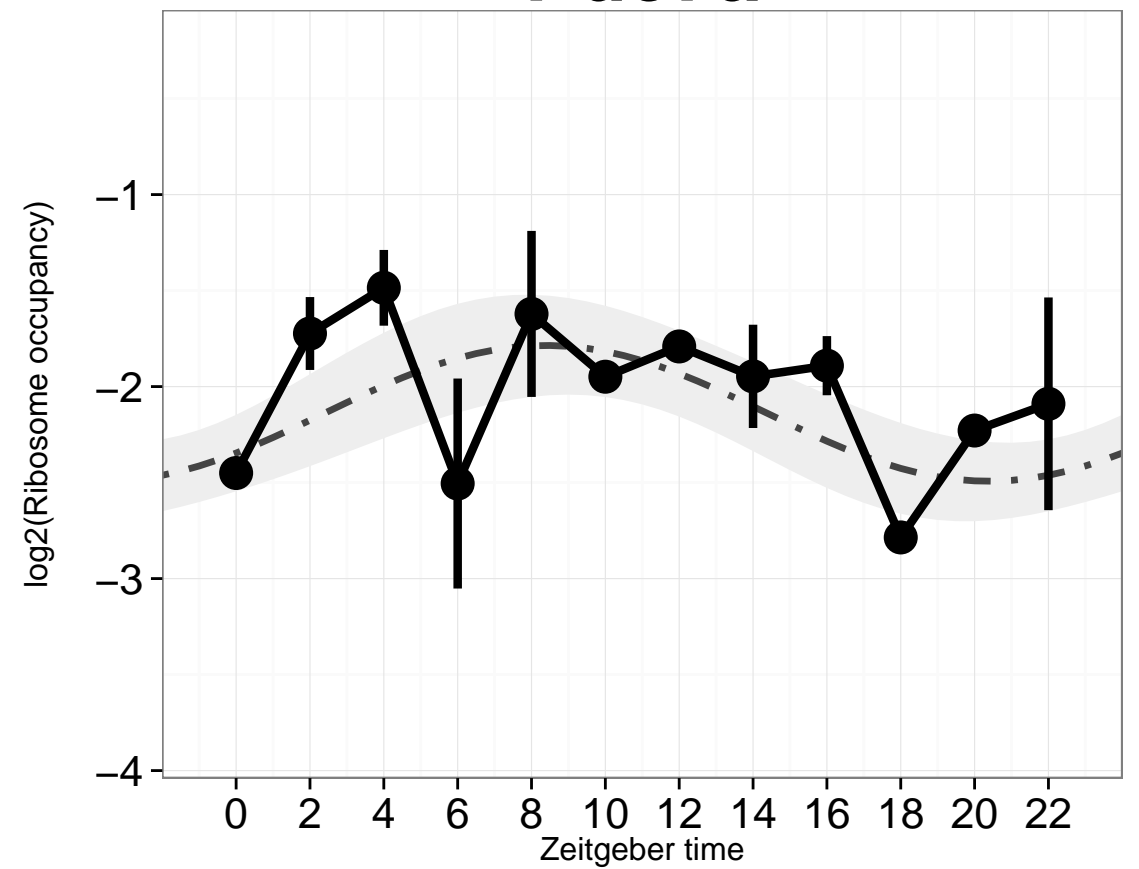

Supplement: SuppDataset_1.zip [file Pde7a_set_B.pdf › Supplemental Dataset 1/B-mRNA_rhythm_translation_nonrhyth/Pde7a_set_B.pdf]

## Pdgfc

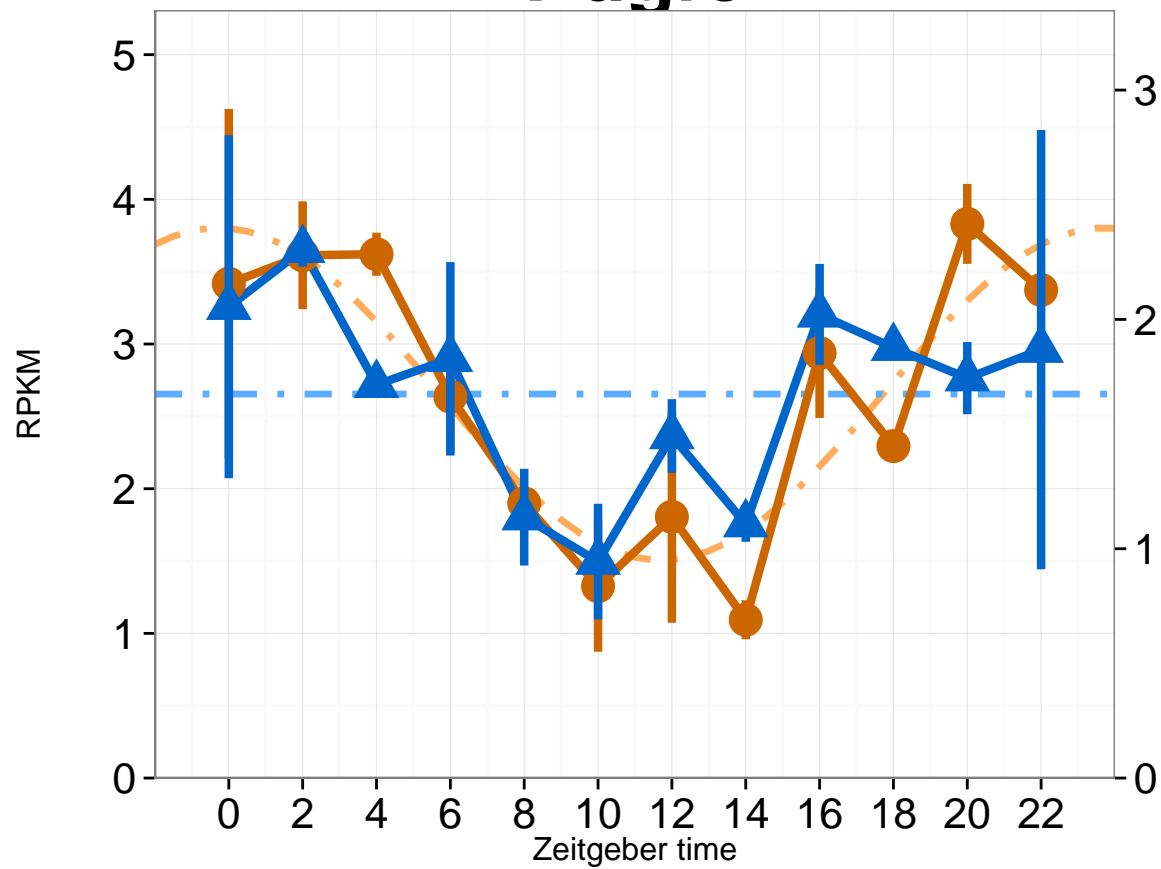

## Pdgfc

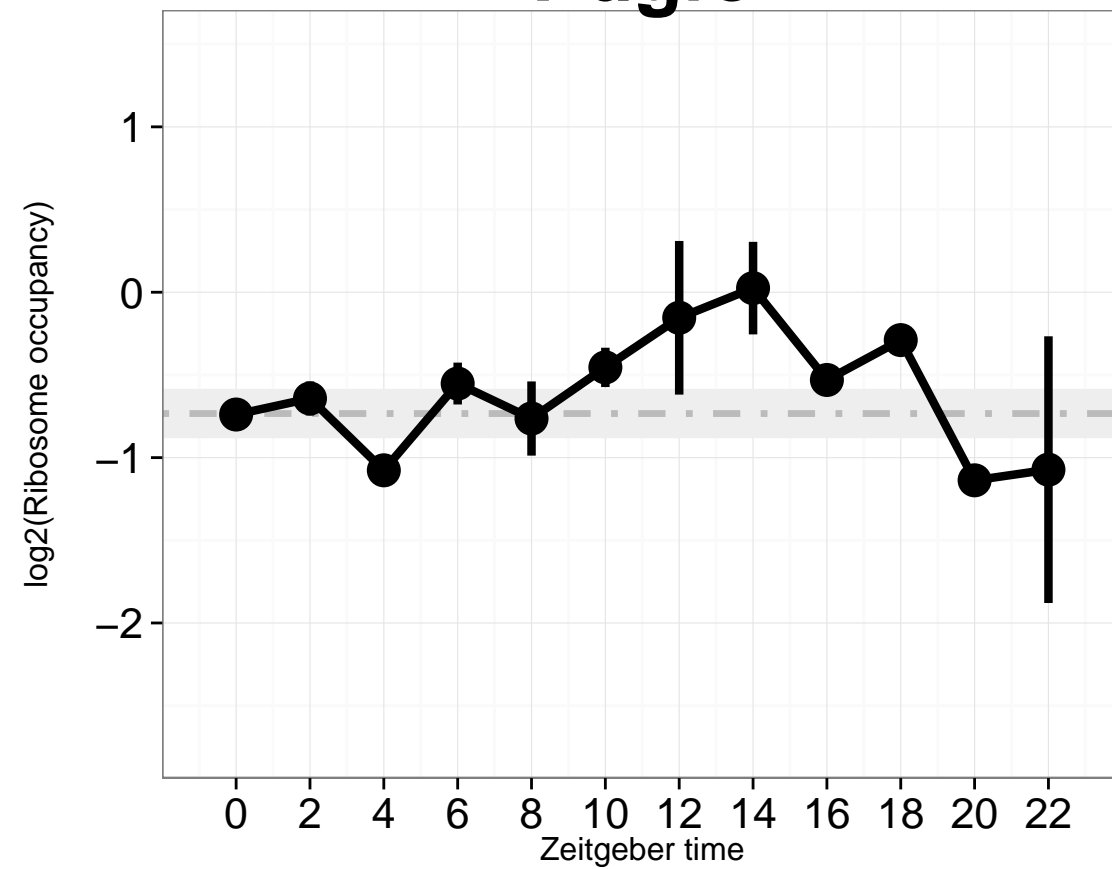

Supplement: SuppDataset_1.zip [file Pdgfc_set_B.pdf › Supplemental Dataset 1/B-mRNA_rhythm_translation_nonrhyth/Pdgfc_set_B.pdf]

# Pdgfra

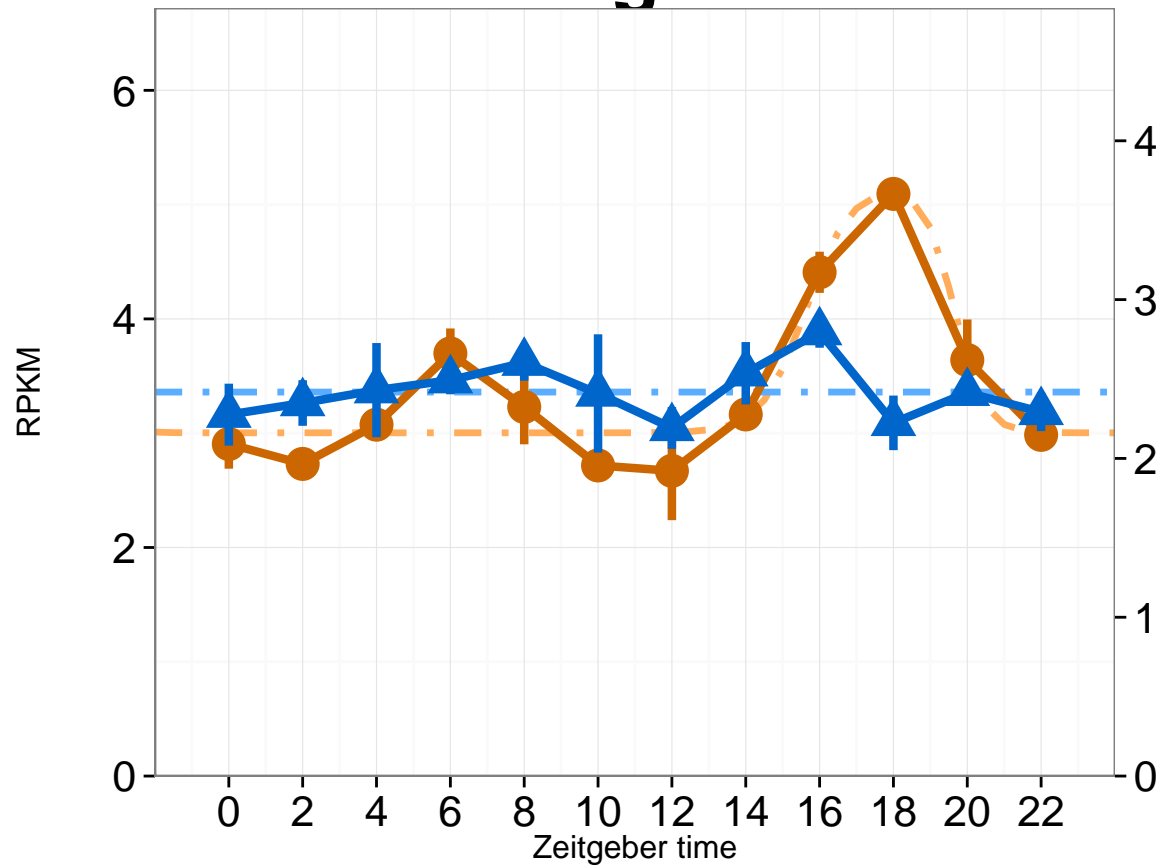

# Pdgfra

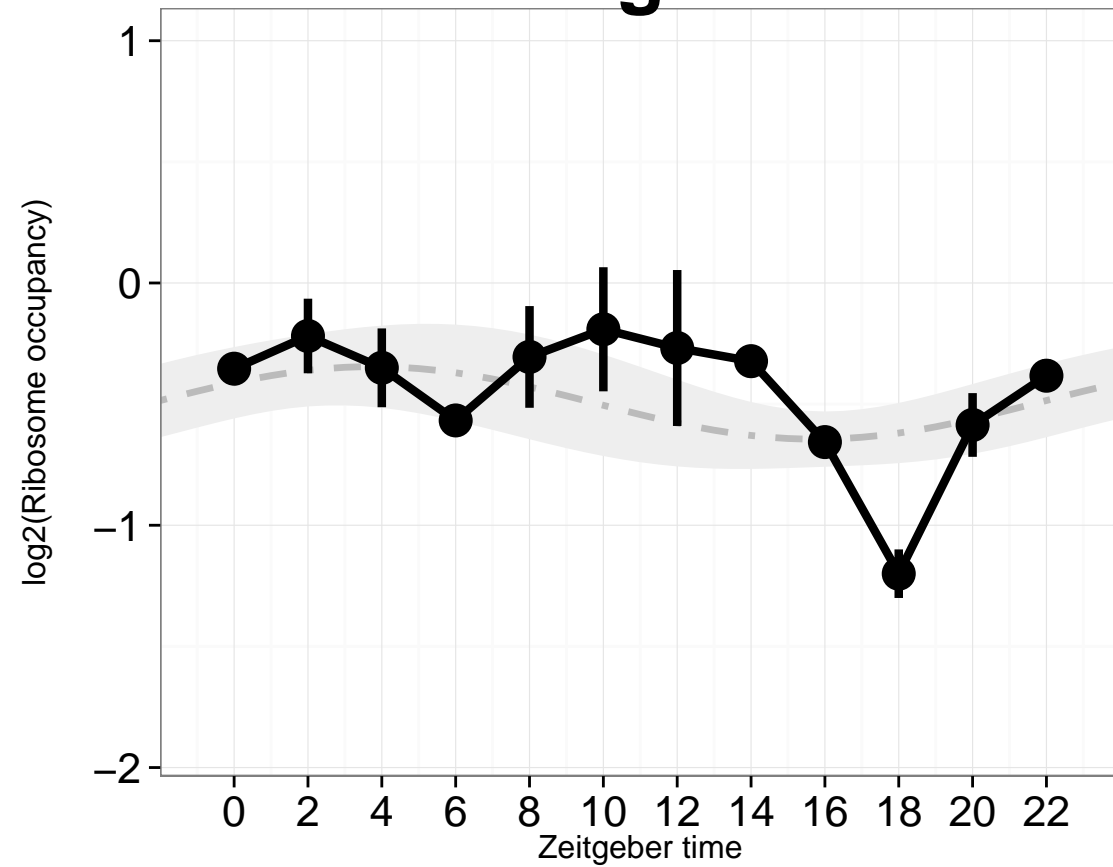

Supplement: SuppDataset_1.zip [file Pdgfra_set_B.pdf › Supplemental Dataset 1/B-mRNA_rhythm_translation_nonrhyth/Pdgfra_set_B.pdf]

# Pdp1

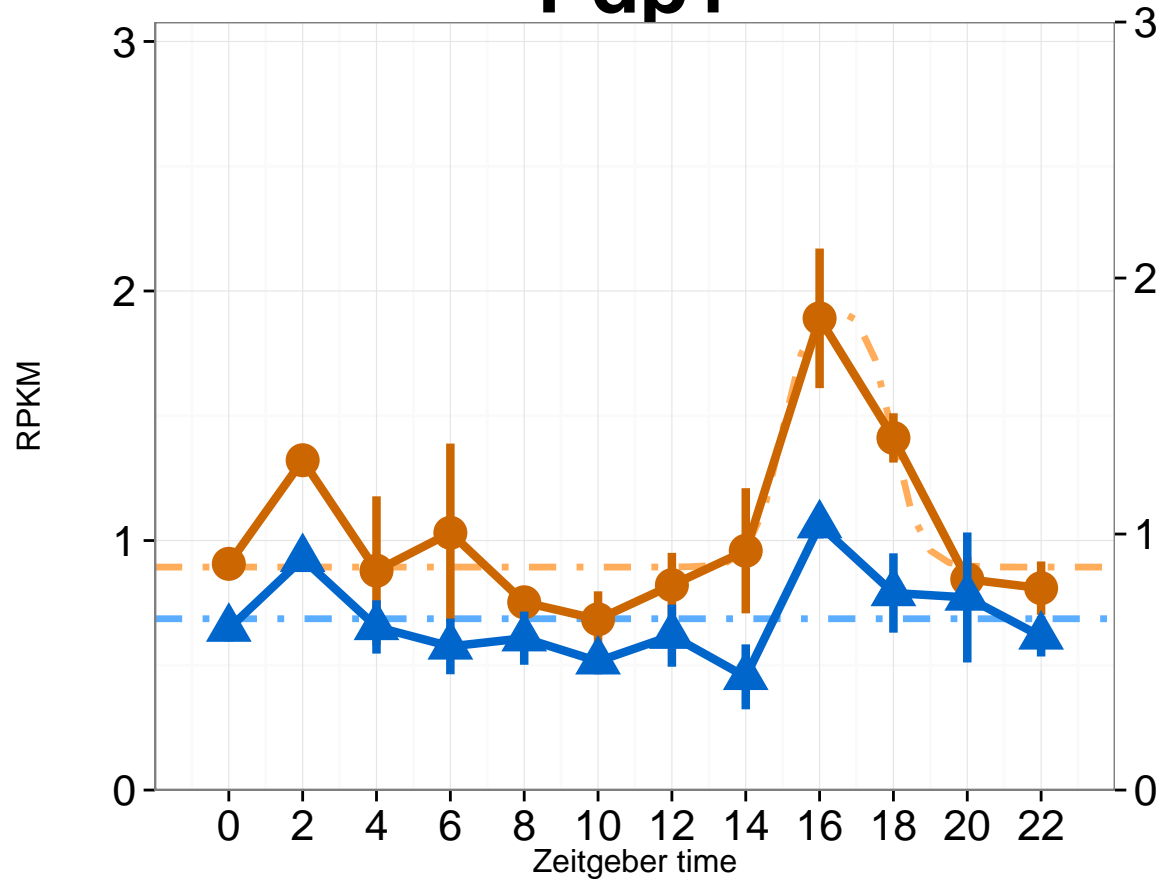

# Pdp1

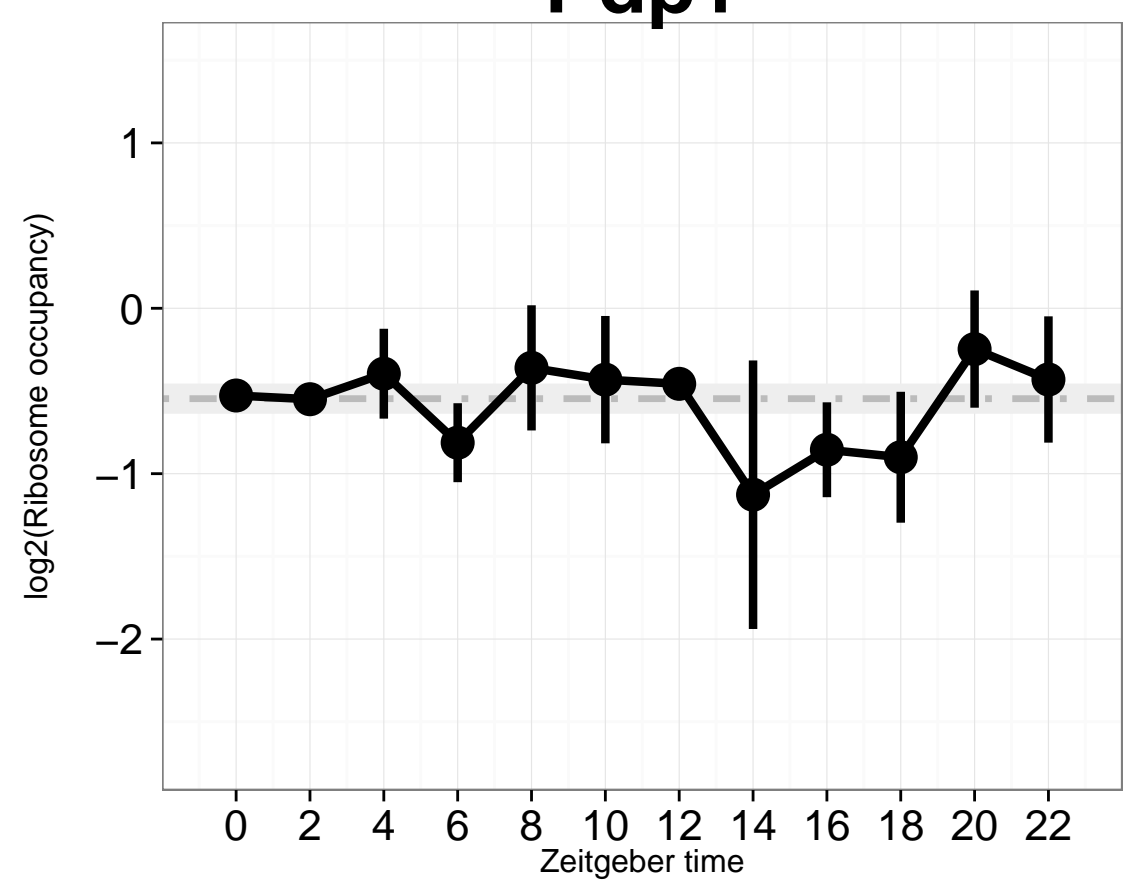

Supplement: SuppDataset_1.zip [file Pdp1_set_B.pdf › Supplemental Dataset 1/B-mRNA_rhythm_translation_nonrhyth/Pdp1_set_B.pdf]

## Pelo

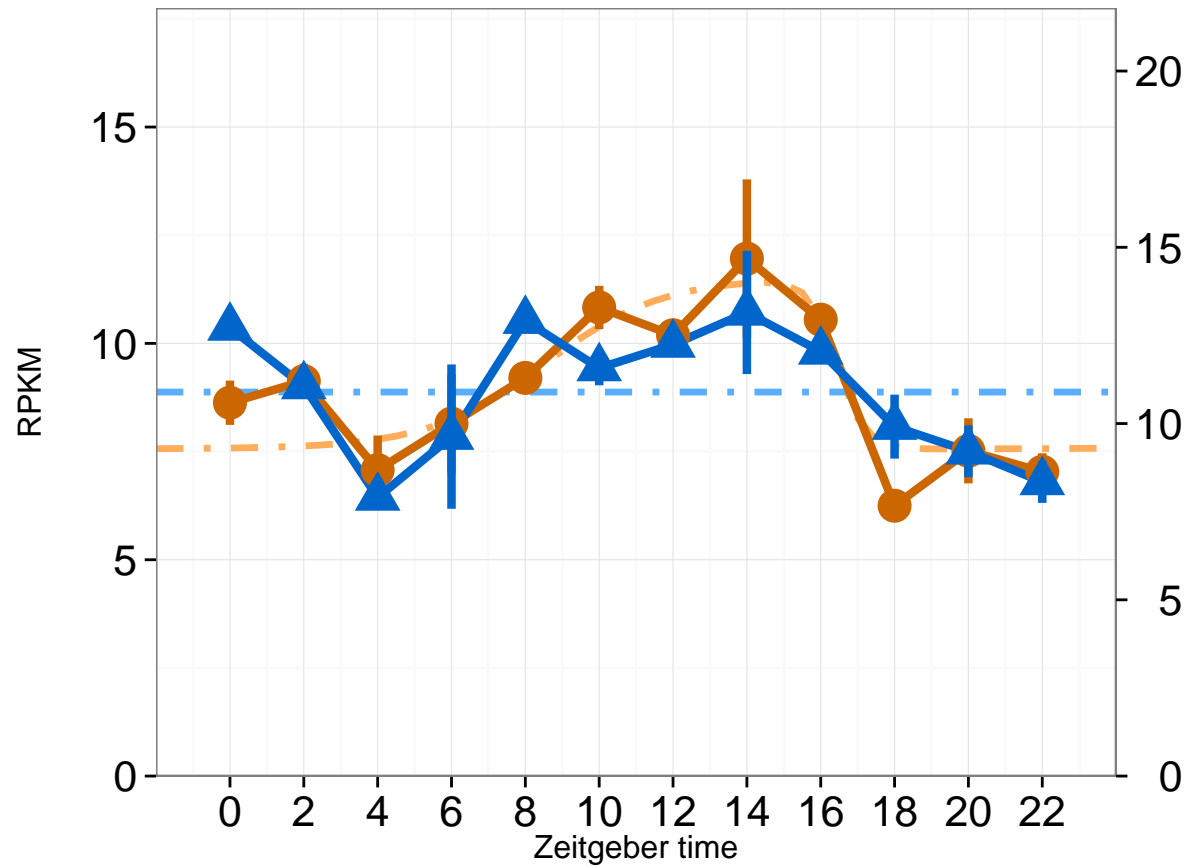

## Pelo

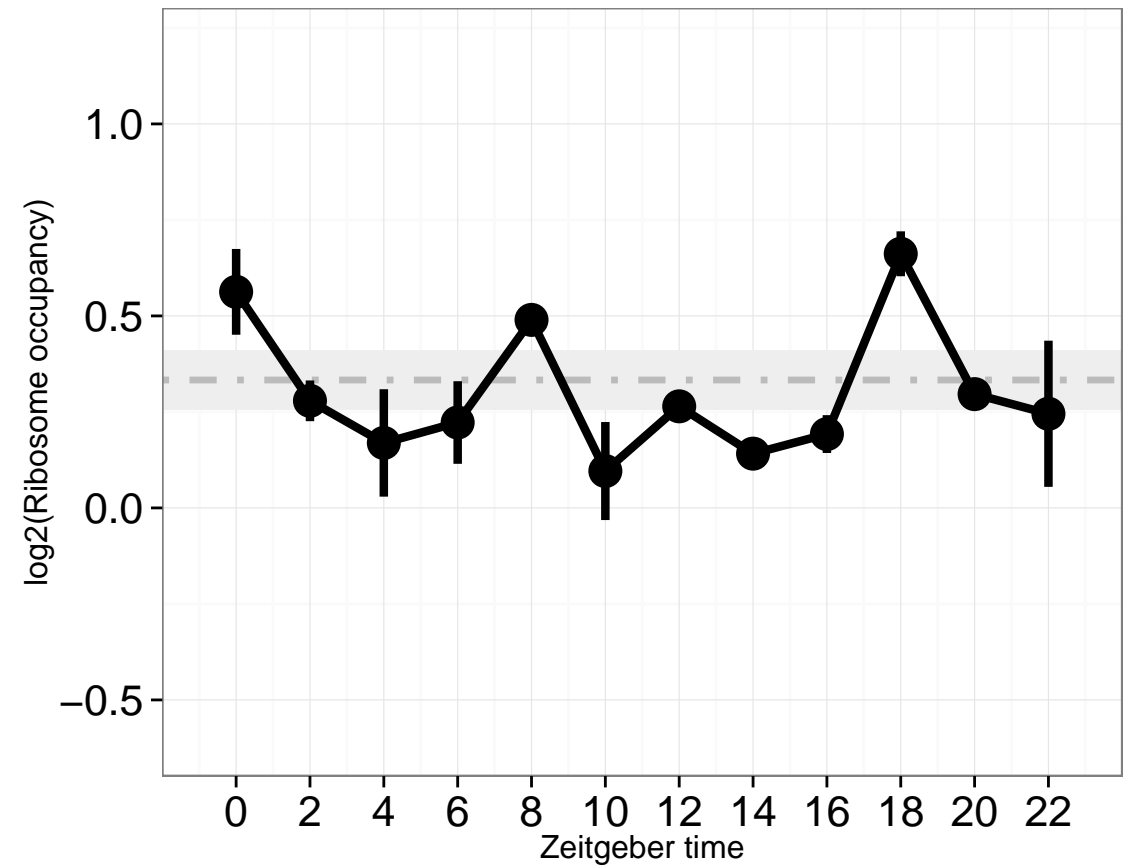

Supplement: SuppDataset_1.zip [file Pelo_set_B.pdf › Supplemental Dataset 1/B-mRNA_rhythm_translation_nonrhyth/Pelo_set_B.pdf]

## Pgd

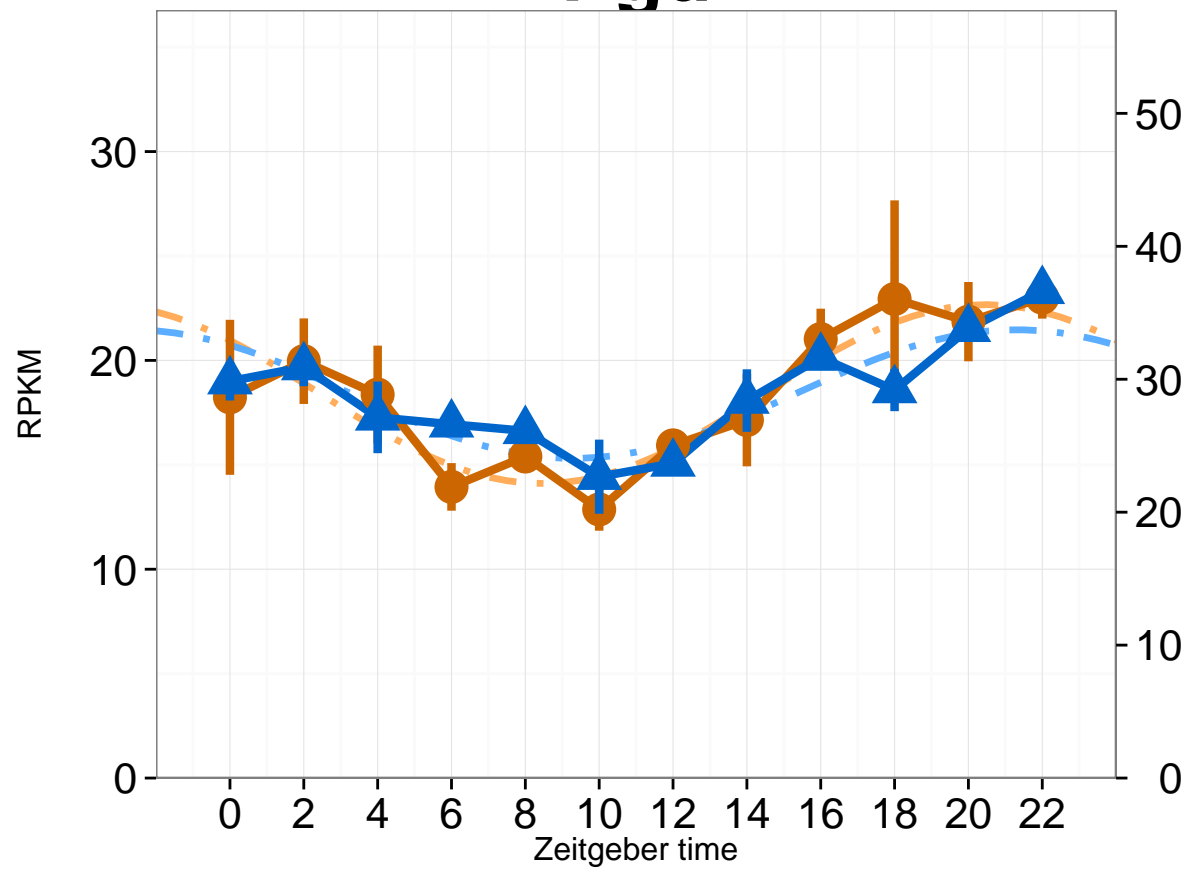

## Pgd

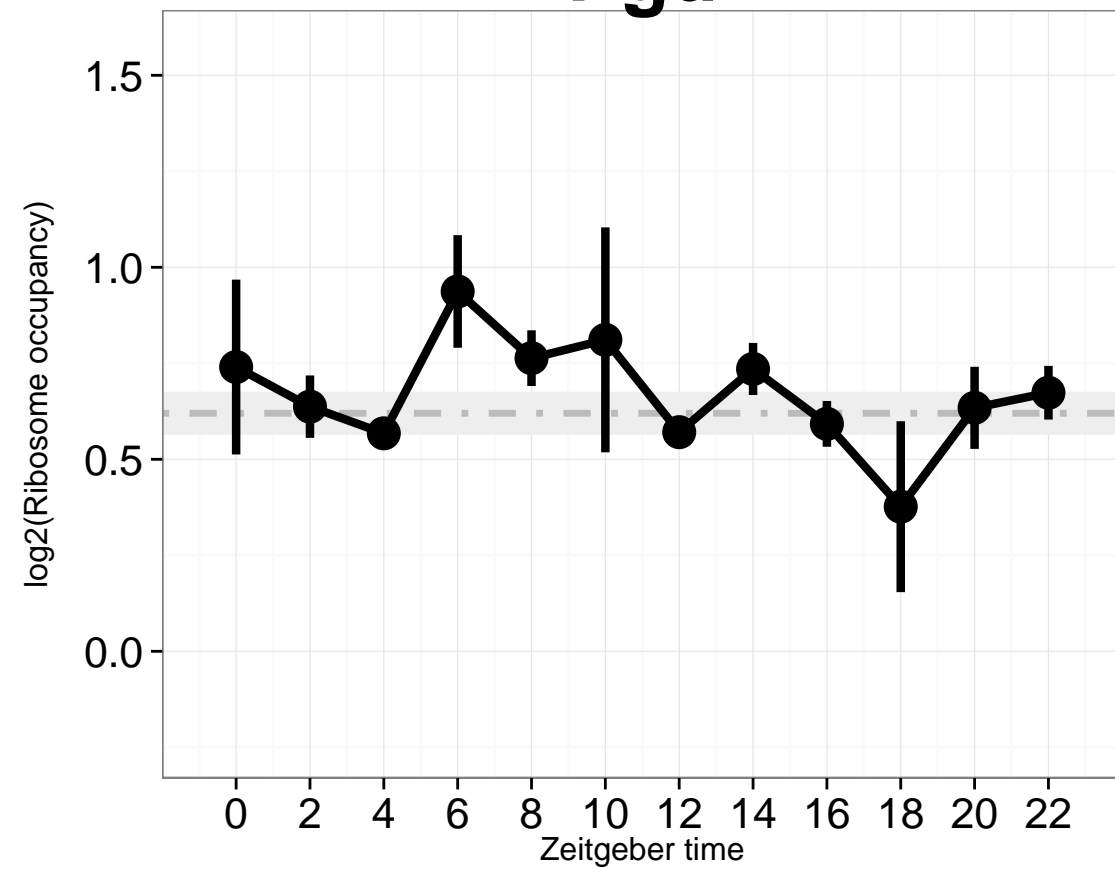

Supplement: SuppDataset_1.zip [file Pgd_set_B.pdf › Supplemental Dataset 1/B-mRNA_rhythm_translation_nonrhyth/Pgd_set_B.pdf]

## Phf14

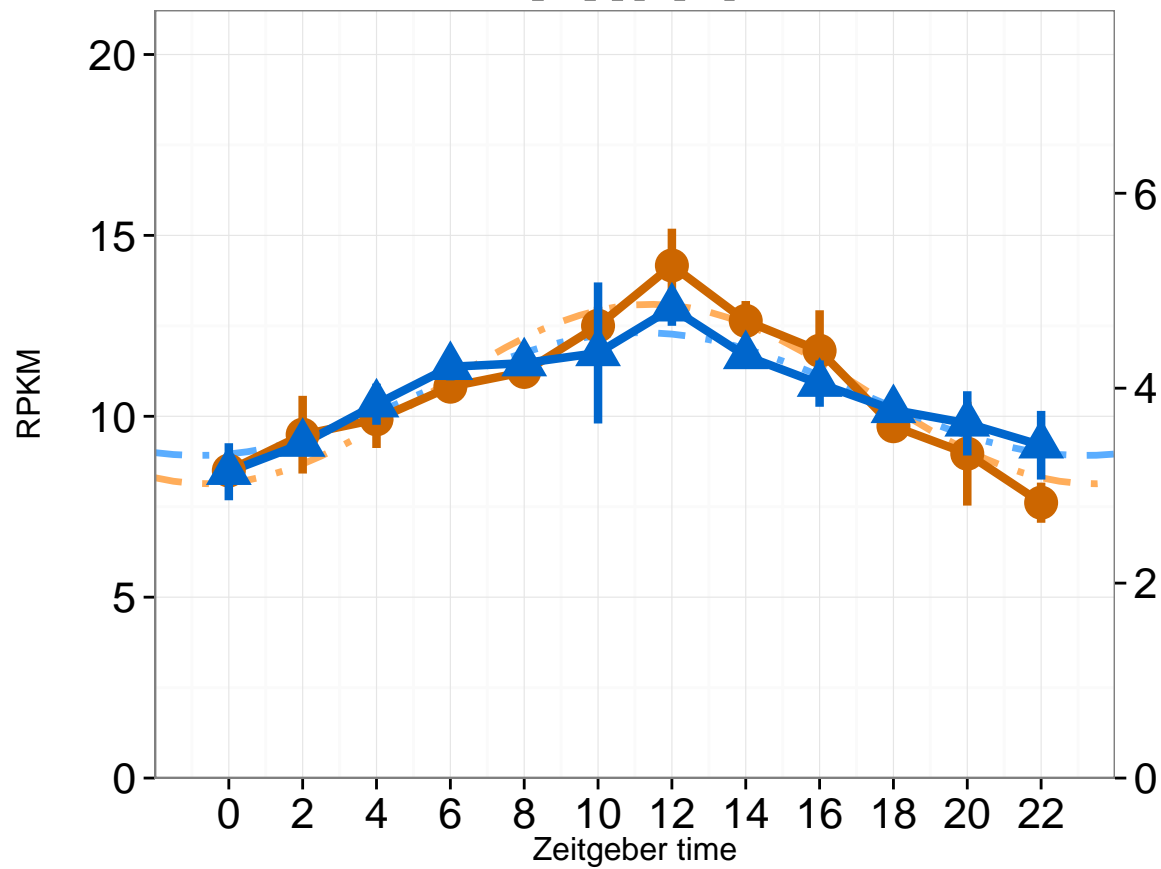

## Phf14

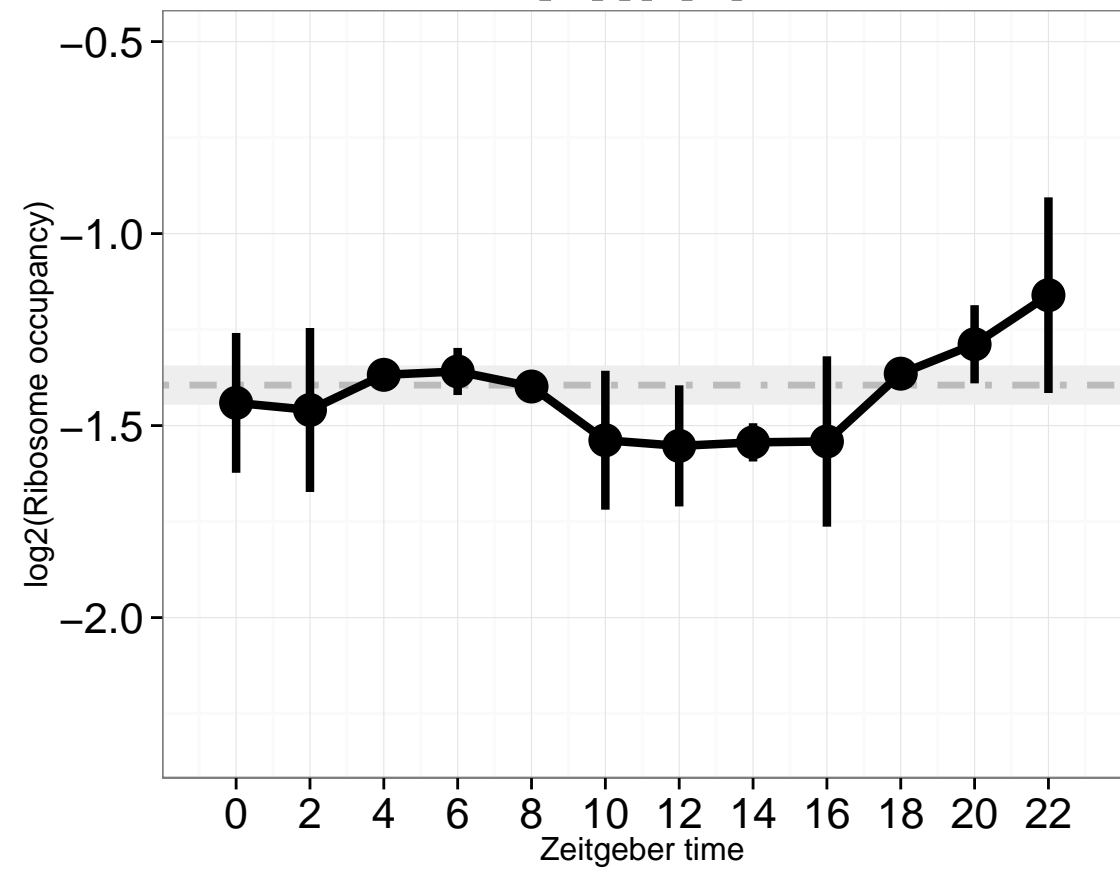

Supplement: SuppDataset_1.zip [file Phf14_set_B.pdf › Supplemental Dataset 1/B-mRNA_rhythm_translation_nonrhyth/Phf14_set_B.pdf]

# Phf20

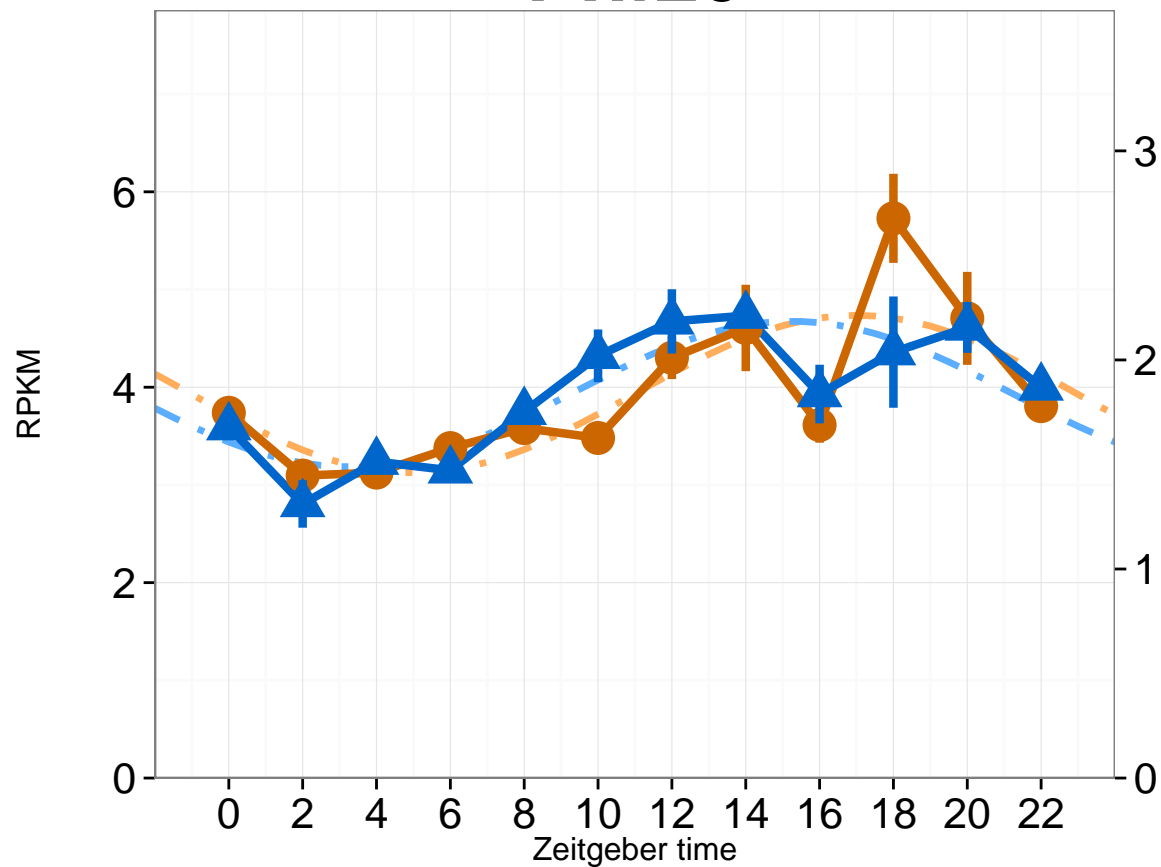

# Phf20

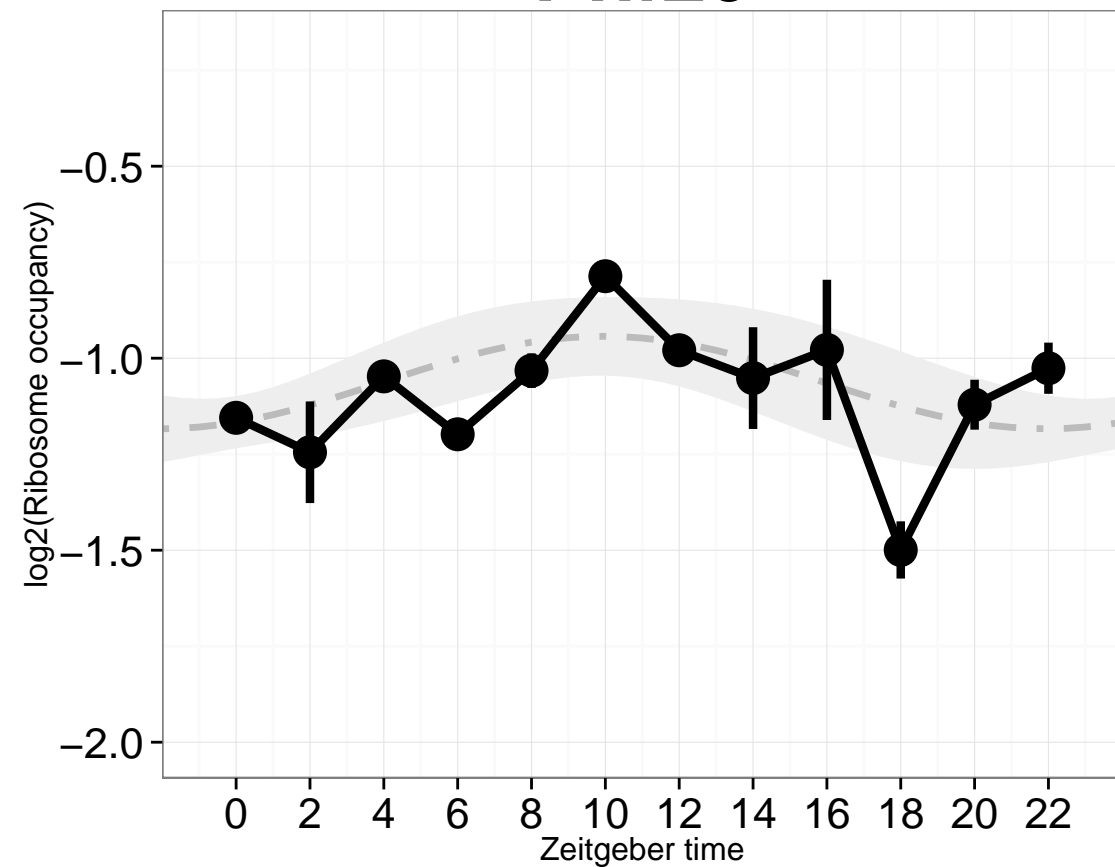

Supplement: SuppDataset_1.zip [file Phf20_set_B.pdf › Supplemental Dataset 1/B-mRNA_rhythm_translation_nonrhyth/Phf20_set_B.pdf]

# Pik3r3

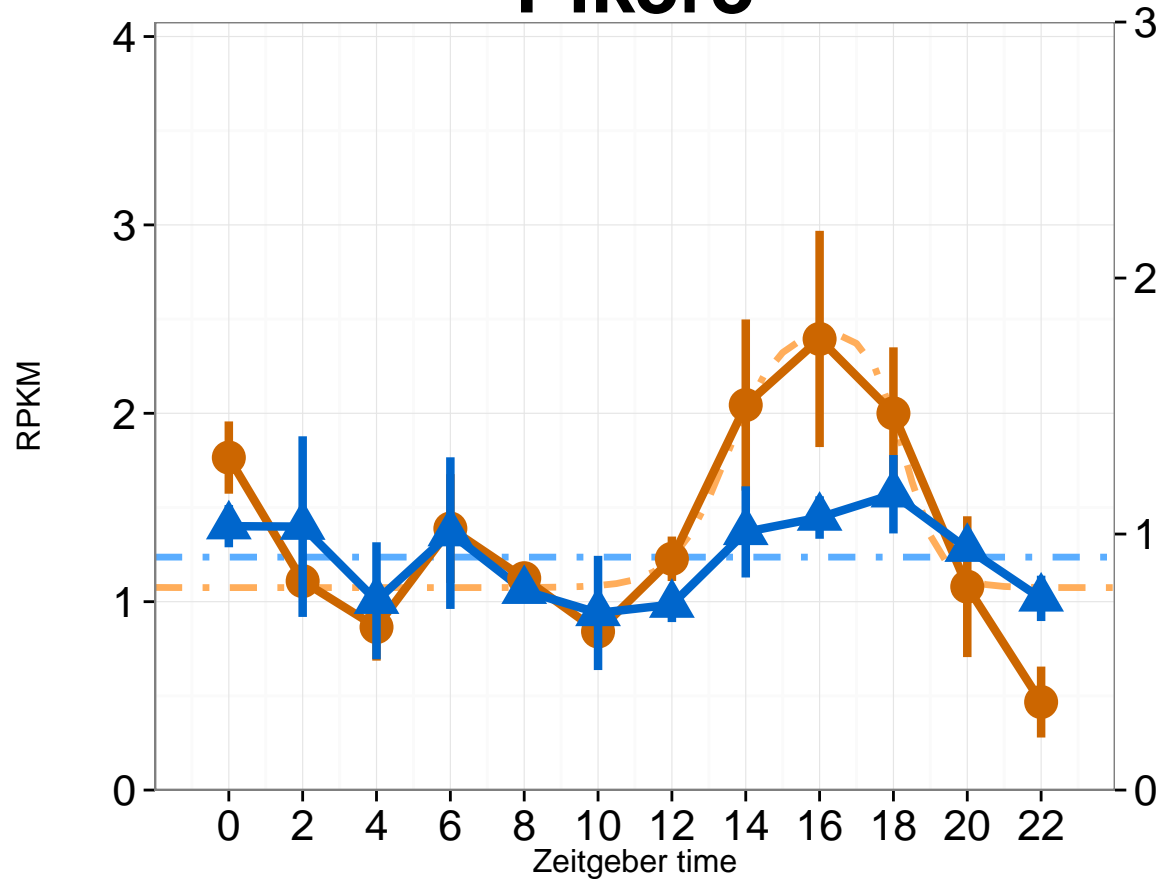

# Pik3r3

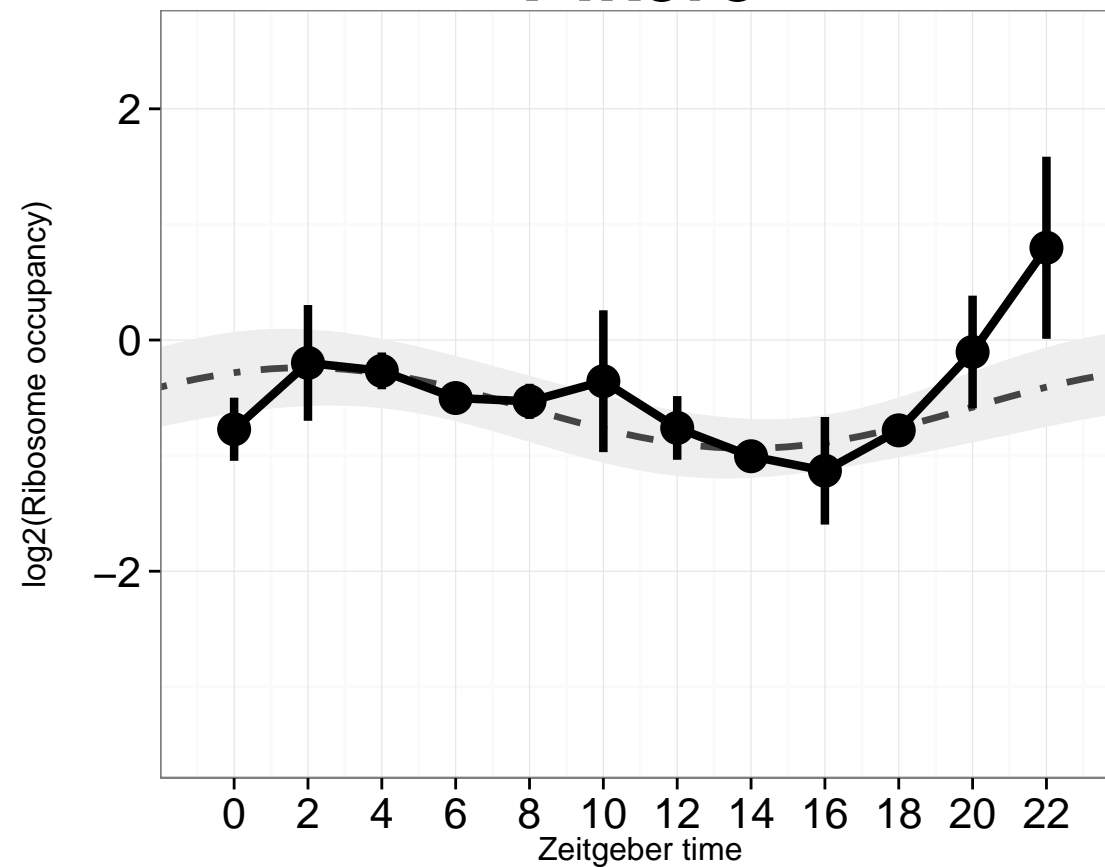

Supplement: SuppDataset_1.zip [file Pik3r3_set_B.pdf › Supplemental Dataset 1/B-mRNA_rhythm_translation_nonrhyth/Pik3r3_set_B.pdf]

## Pik3r5

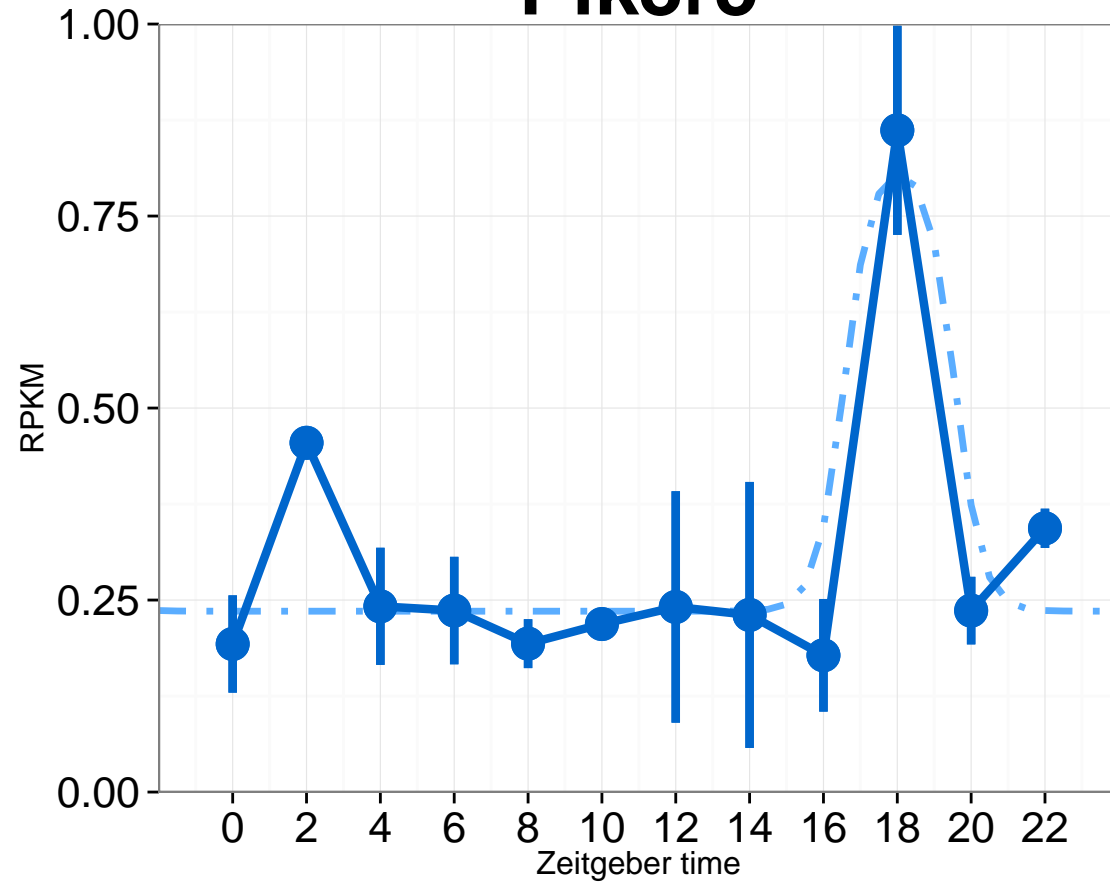

## Pik3r5 log2(Ribosome occupancy

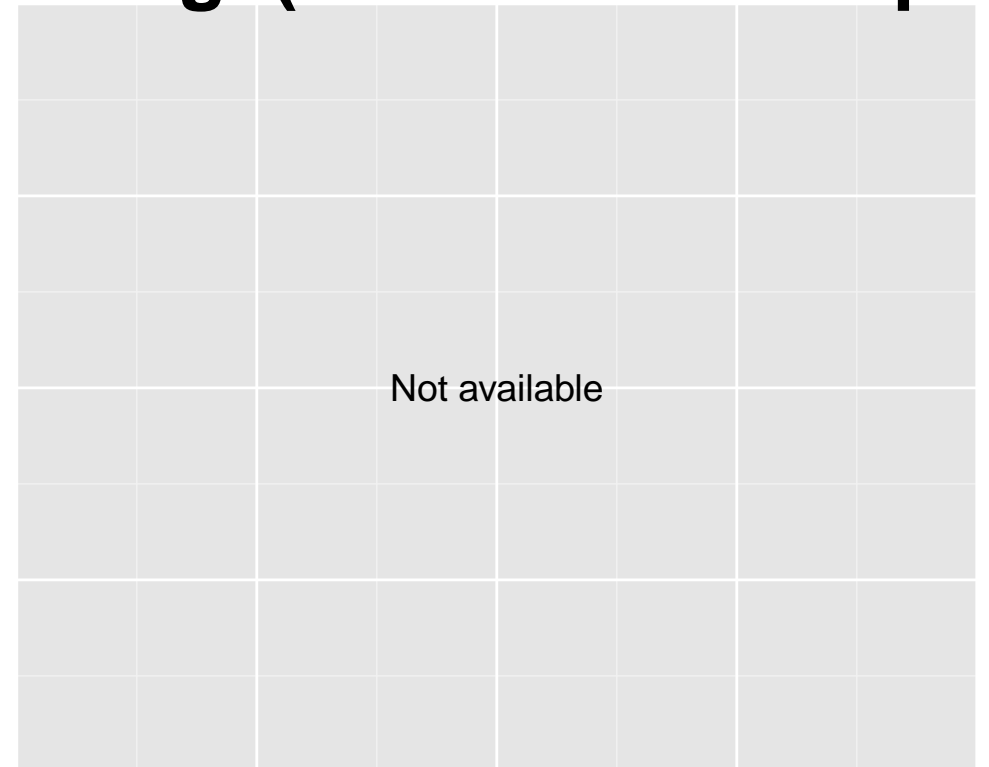

Supplement: SuppDataset_1.zip [file Pik3r5_set_B.pdf › Supplemental Dataset 1/B-mRNA_rhythm_translation_nonrhyth/Pik3r5_set_B.pdf]

## Plcb2

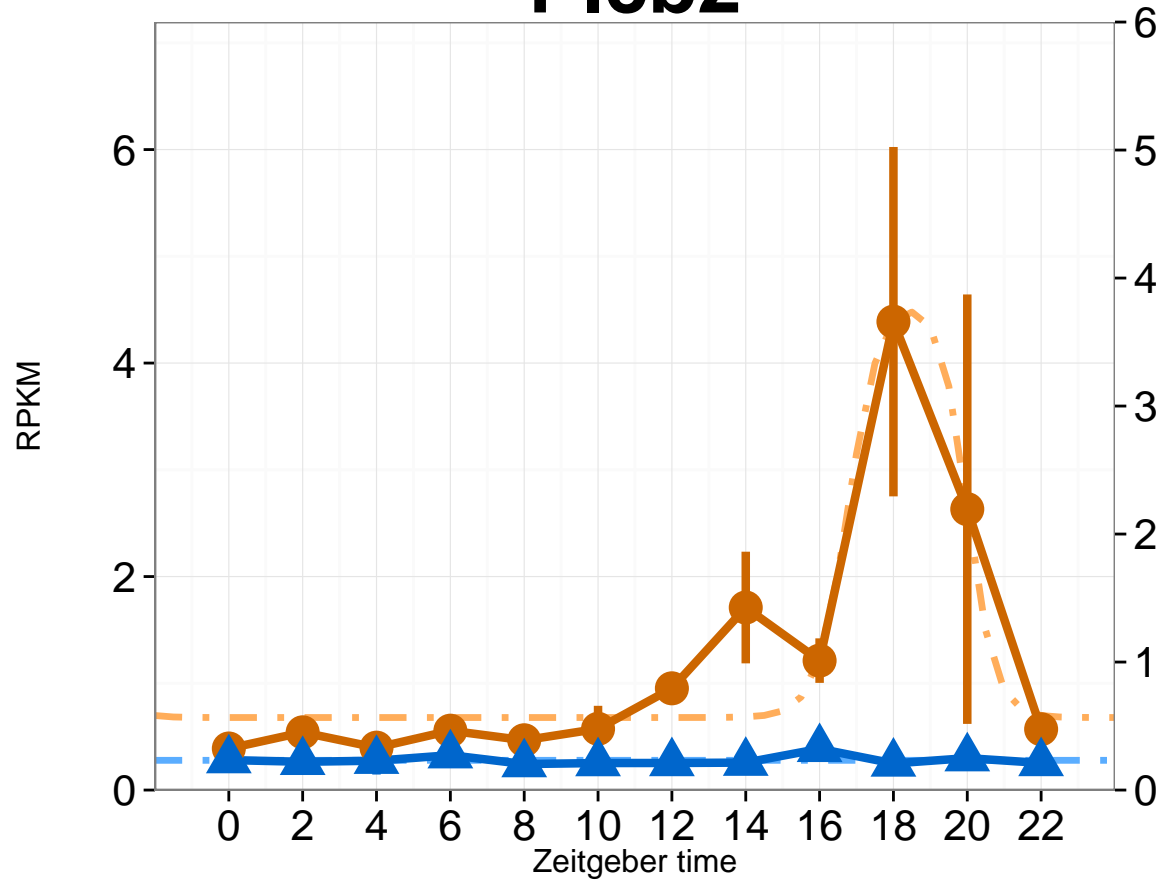

## Plcb2

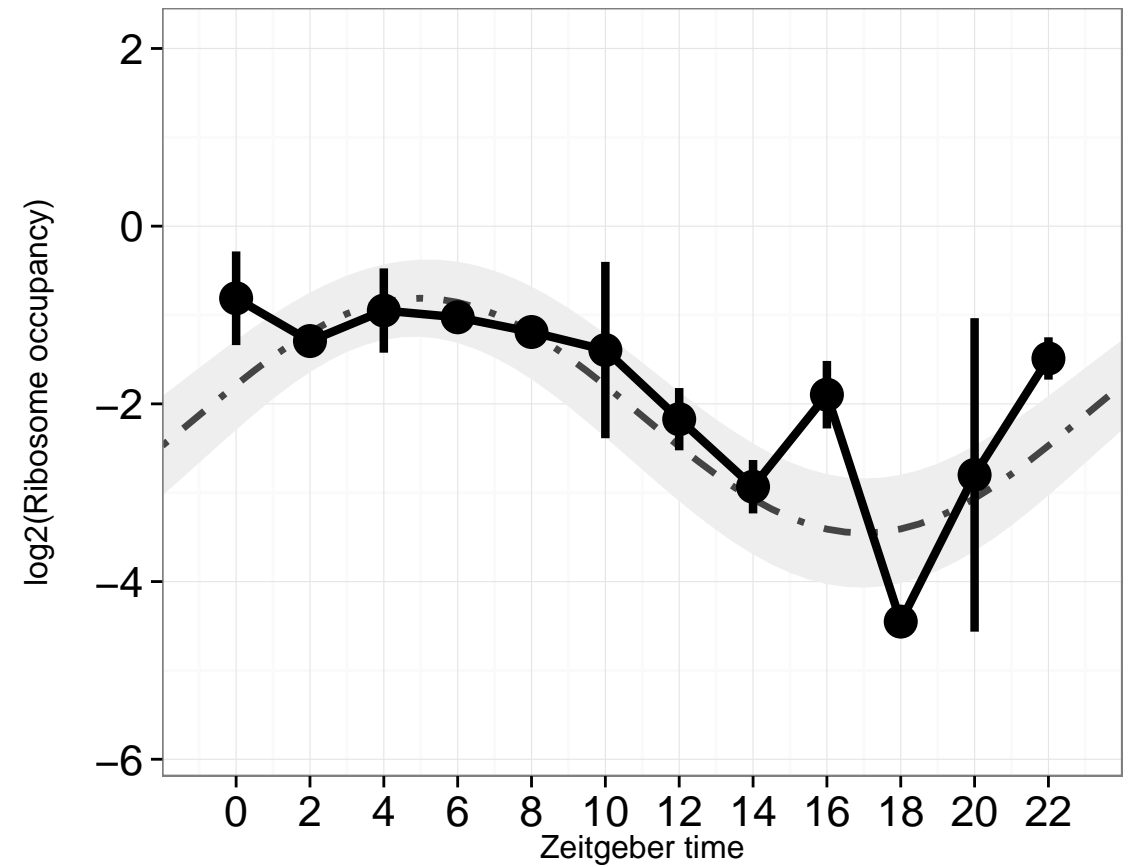

Supplement: SuppDataset_1.zip [file Plcb2_set_B.pdf › Supplemental Dataset 1/B-mRNA_rhythm_translation_nonrhyth/Plcb2_set_B.pdf]

## Plekhb2

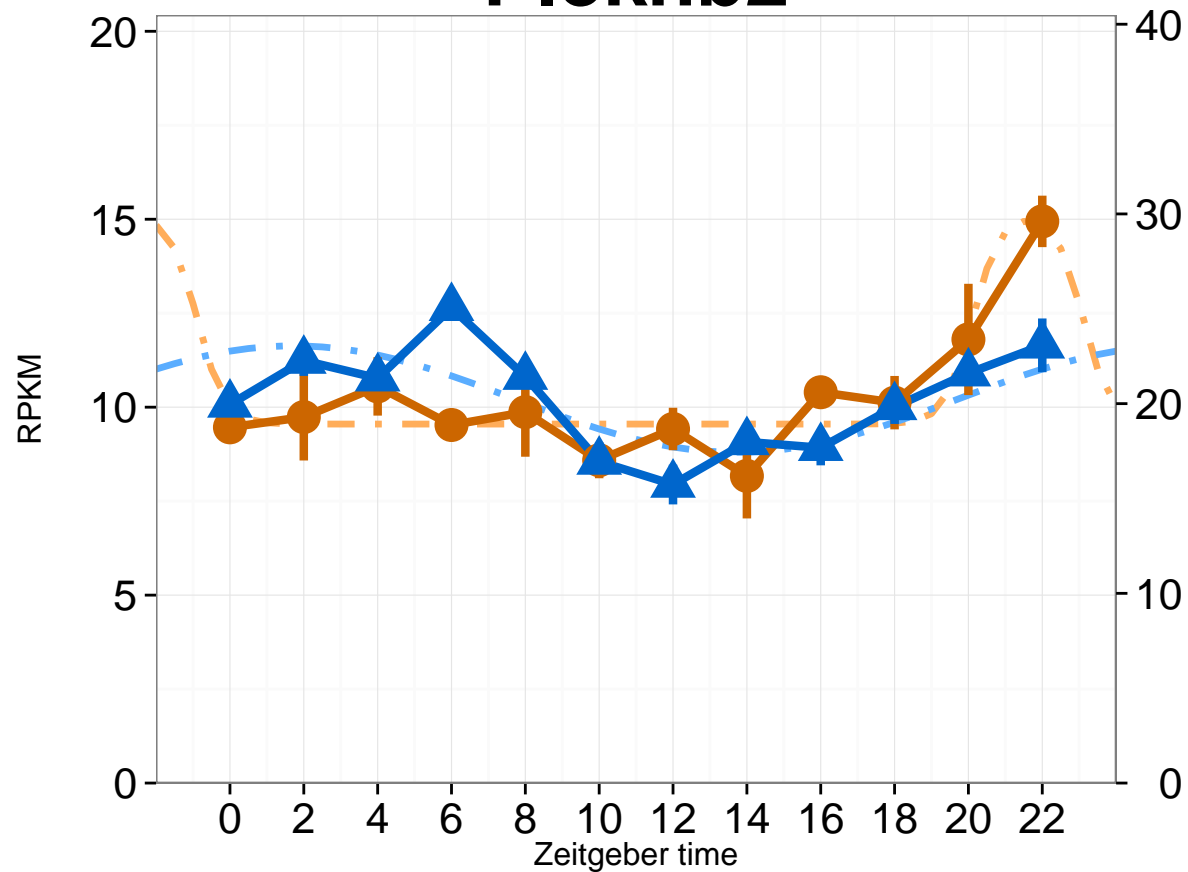

## Plekhb2

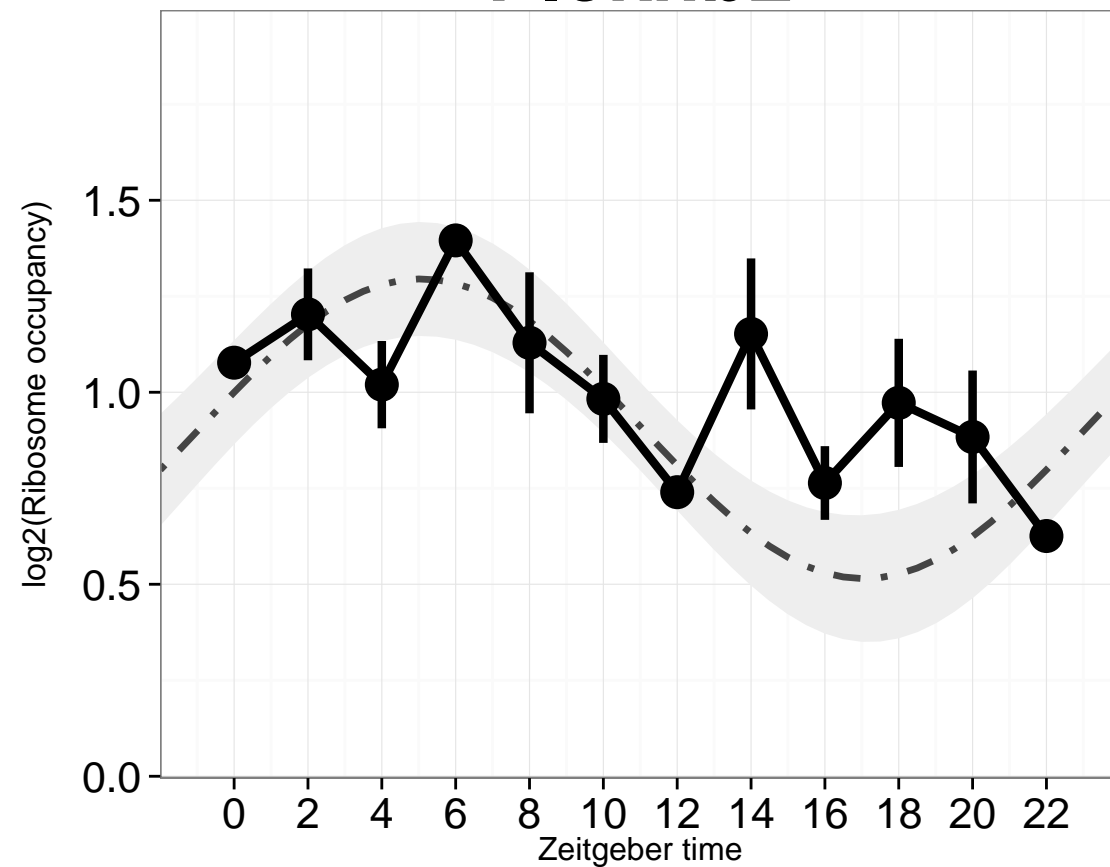

Supplement: SuppDataset_1.zip [file Plekhb2_set_B.pdf › Supplemental Dataset 1/B-mRNA_rhythm_translation_nonrhyth/Plekhb2_set_B.pdf]

# Plekhh2

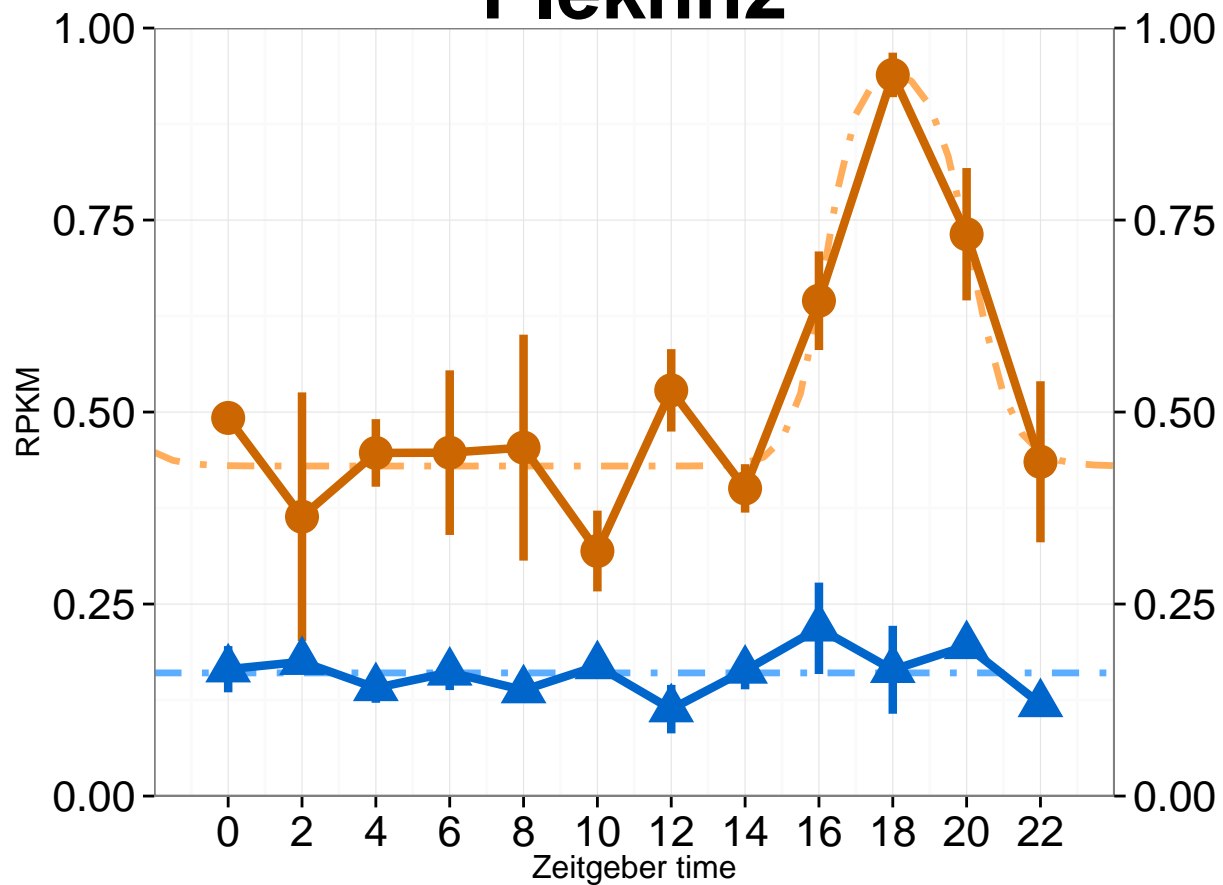

# Plekhh2

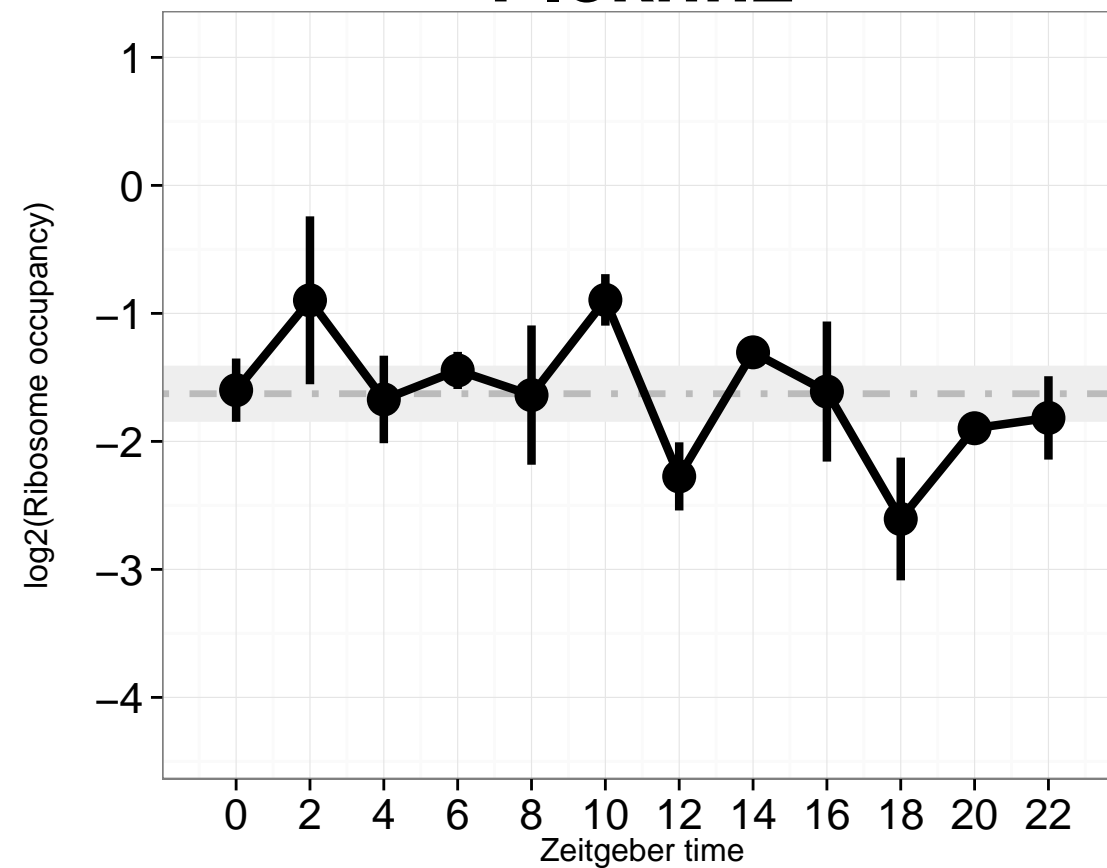

Supplement: SuppDataset_1.zip [file Plekhh2_set_B.pdf › Supplemental Dataset 1/B-mRNA_rhythm_translation_nonrhyth/Plekhh2_set_B.pdf]

# Plin4

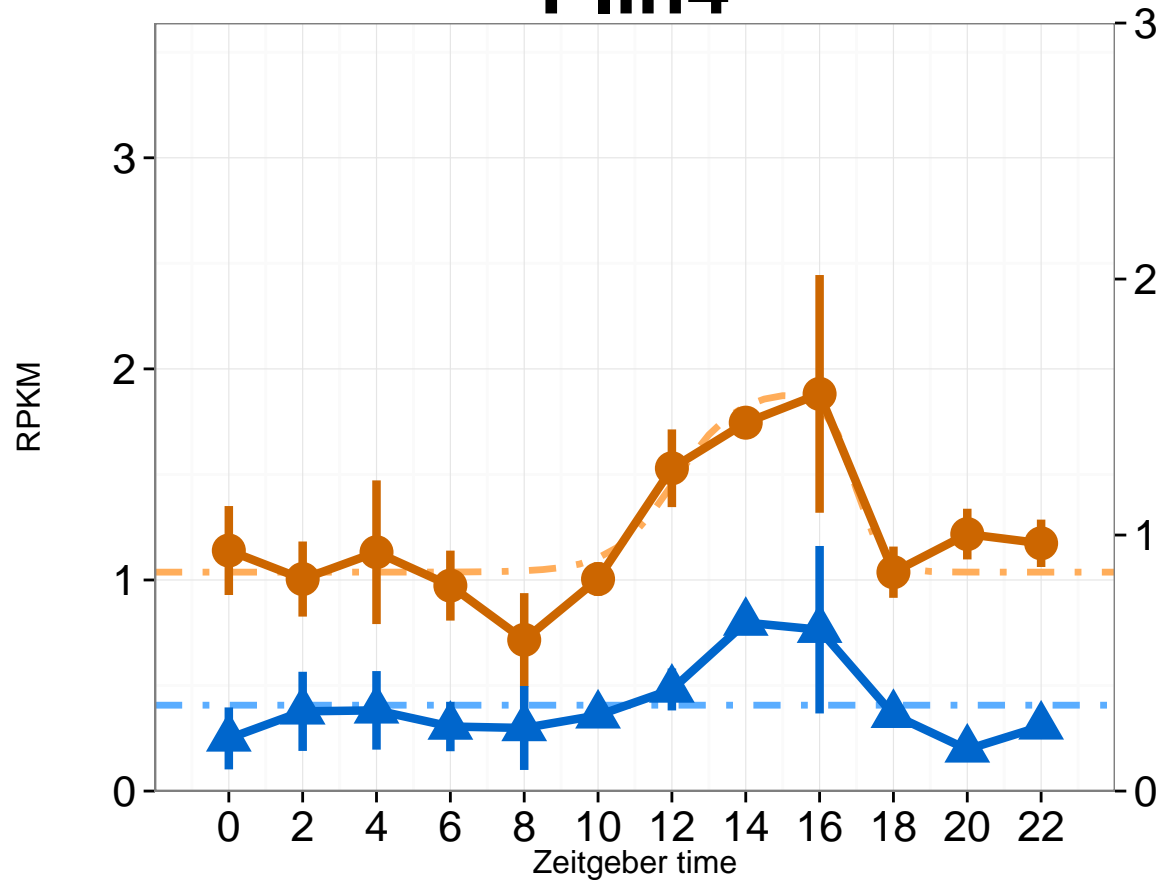

# Plin4

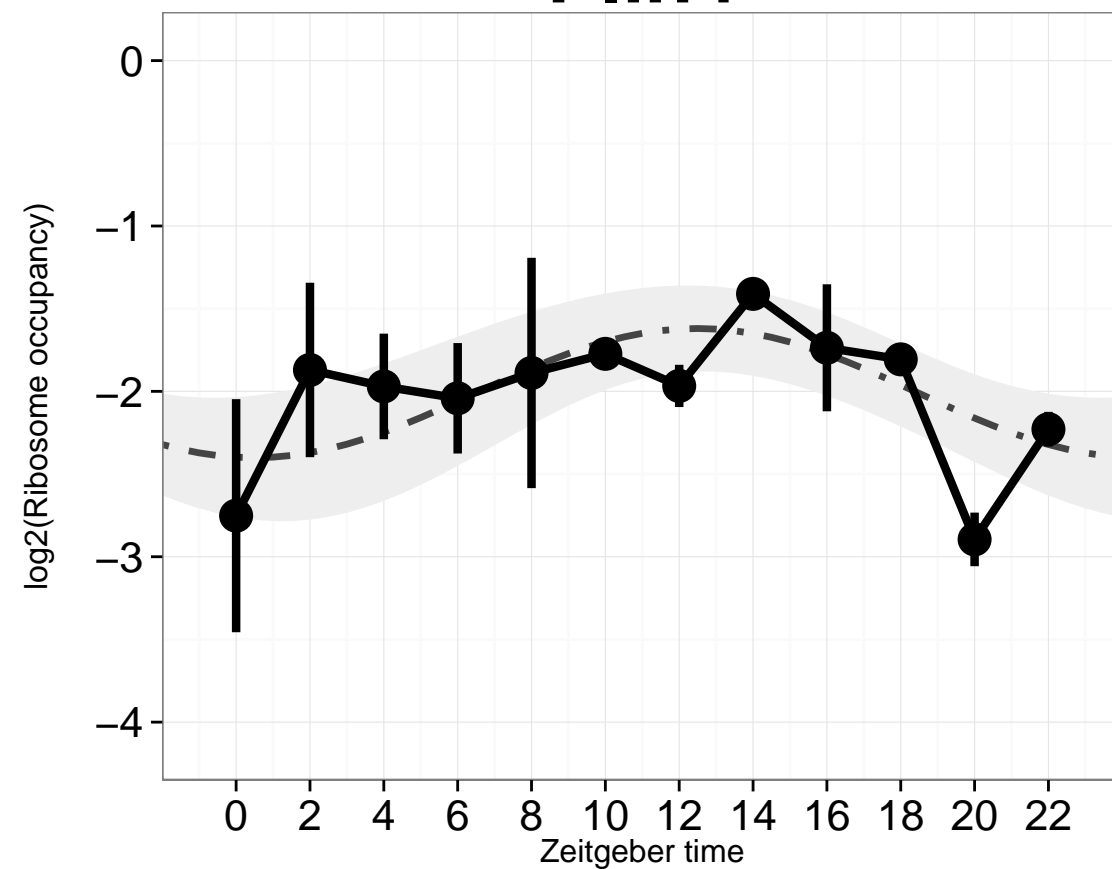

Supplement: SuppDataset_1.zip [file Plin4_set_B.pdf › Supplemental Dataset 1/B-mRNA_rhythm_translation_nonrhyth/Plin4_set_B.pdf]

# Plod2

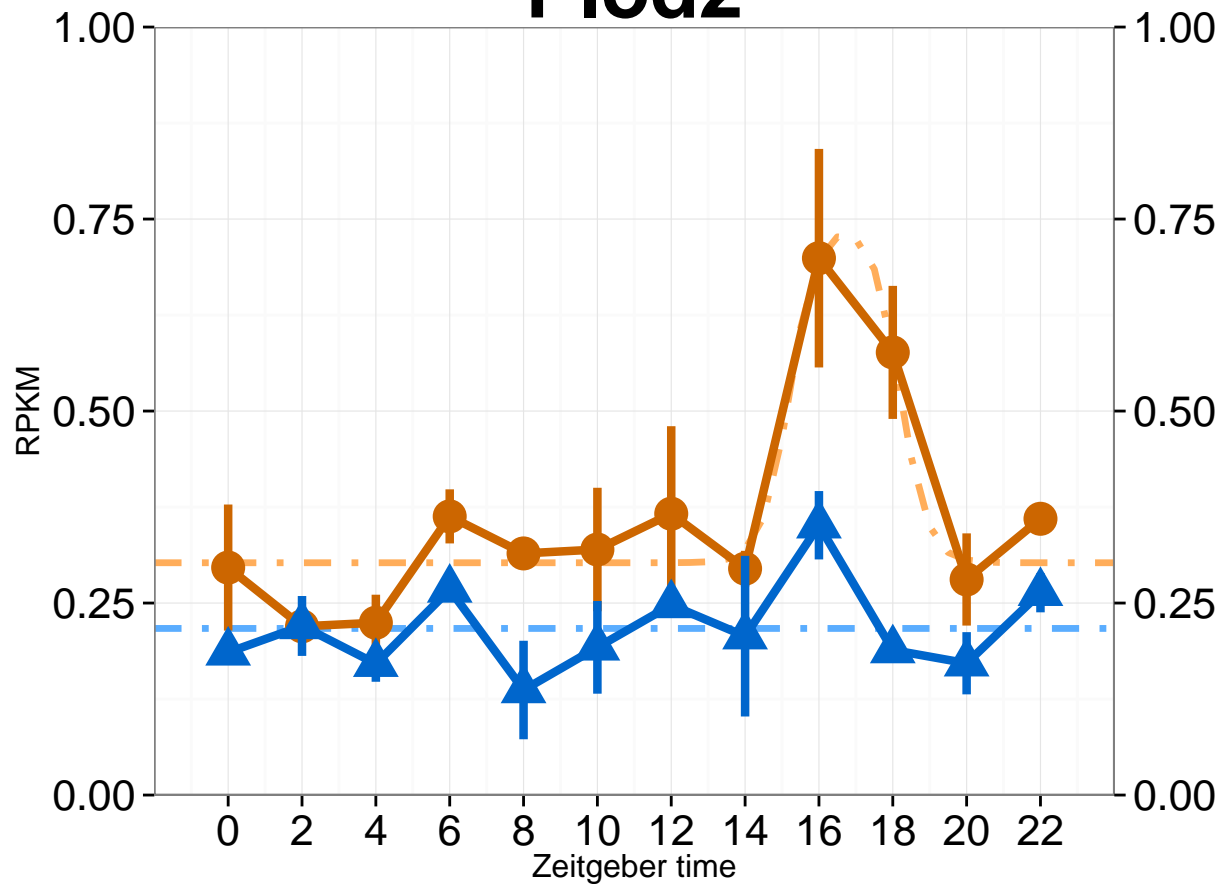

# Plod2

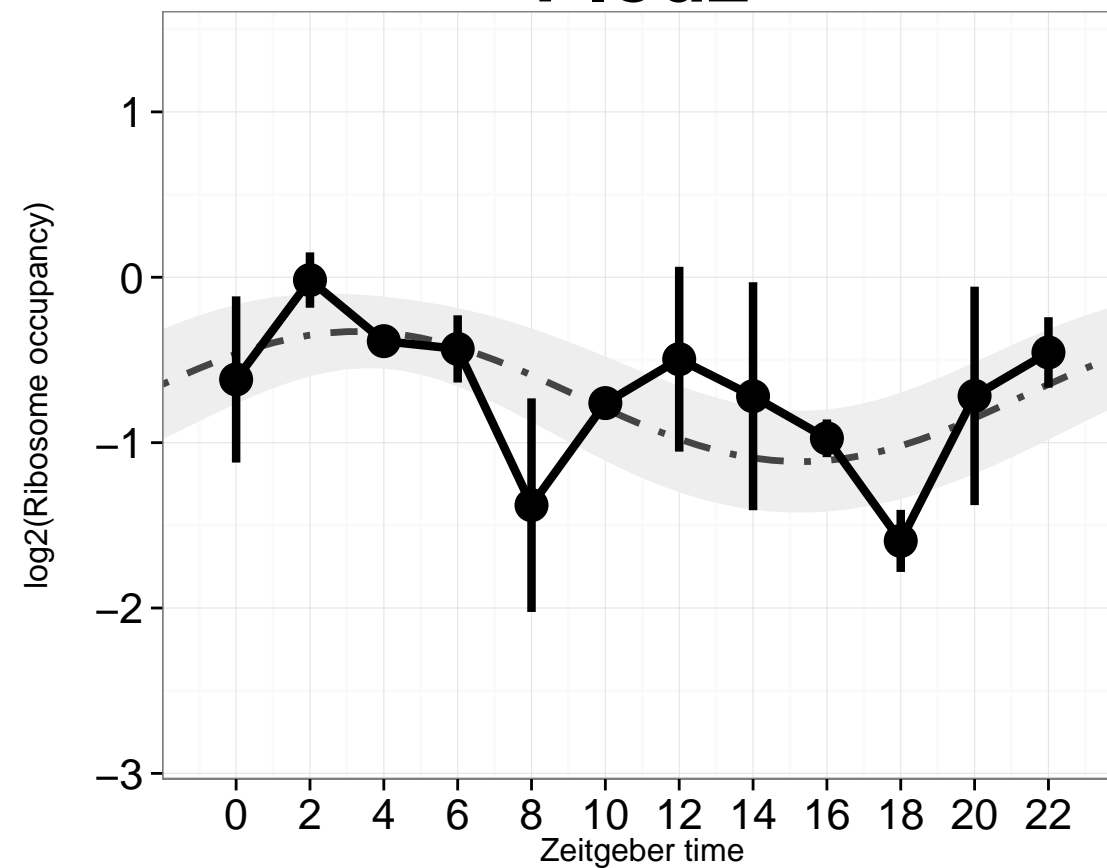

Supplement: SuppDataset_1.zip [file Plod2_set_B.pdf › Supplemental Dataset 1/B-mRNA_rhythm_translation_nonrhyth/Plod2_set_B.pdf]

# Pls1

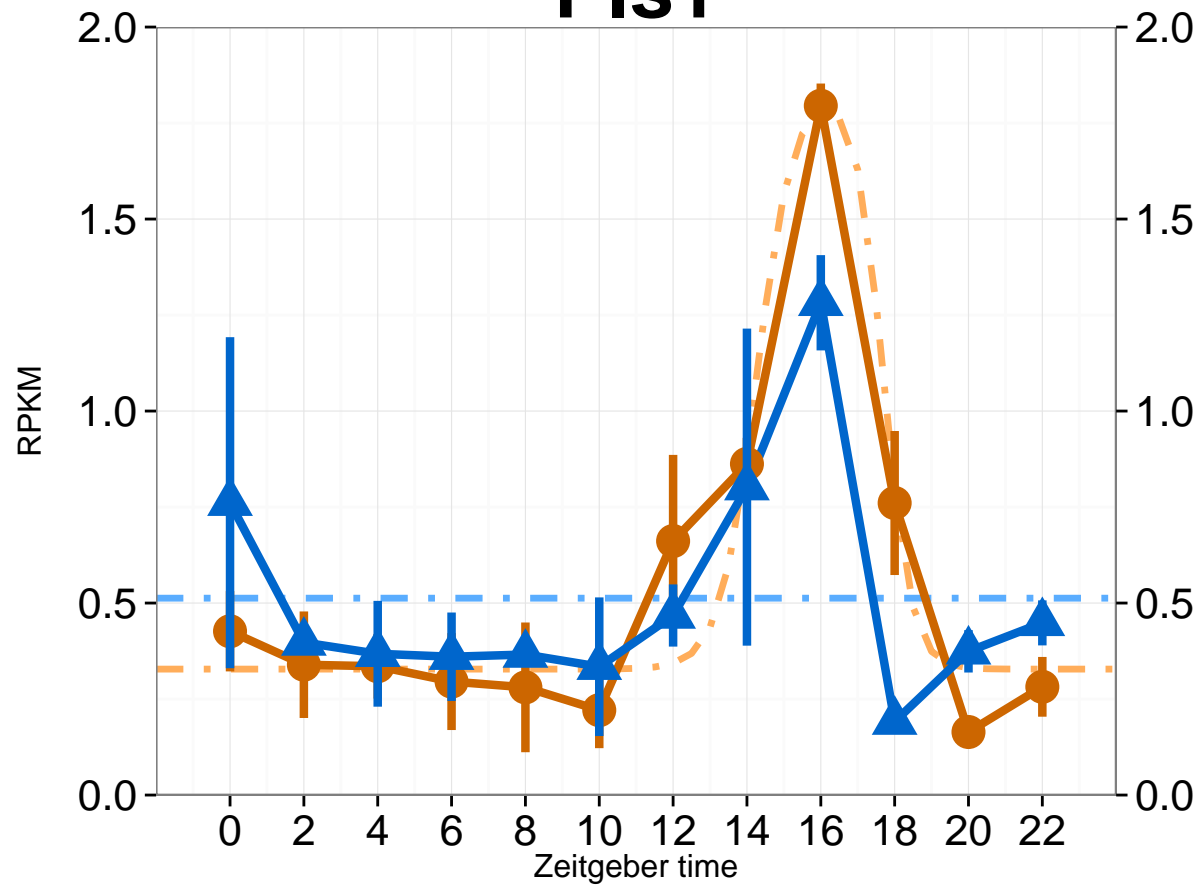

# Pls1

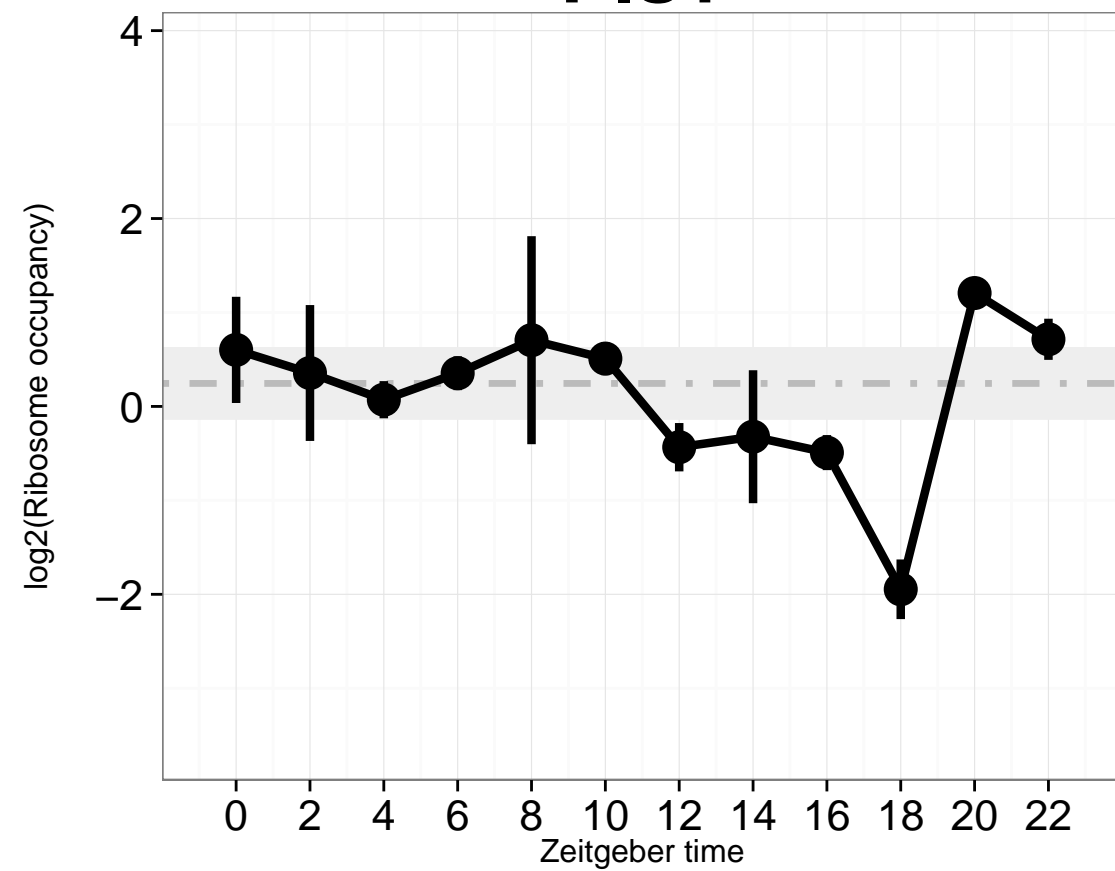

Supplement: SuppDataset_1.zip [file Pls1_set_B.pdf › Supplemental Dataset 1/B-mRNA_rhythm_translation_nonrhyth/Pls1_set_B.pdf]

## Pltp

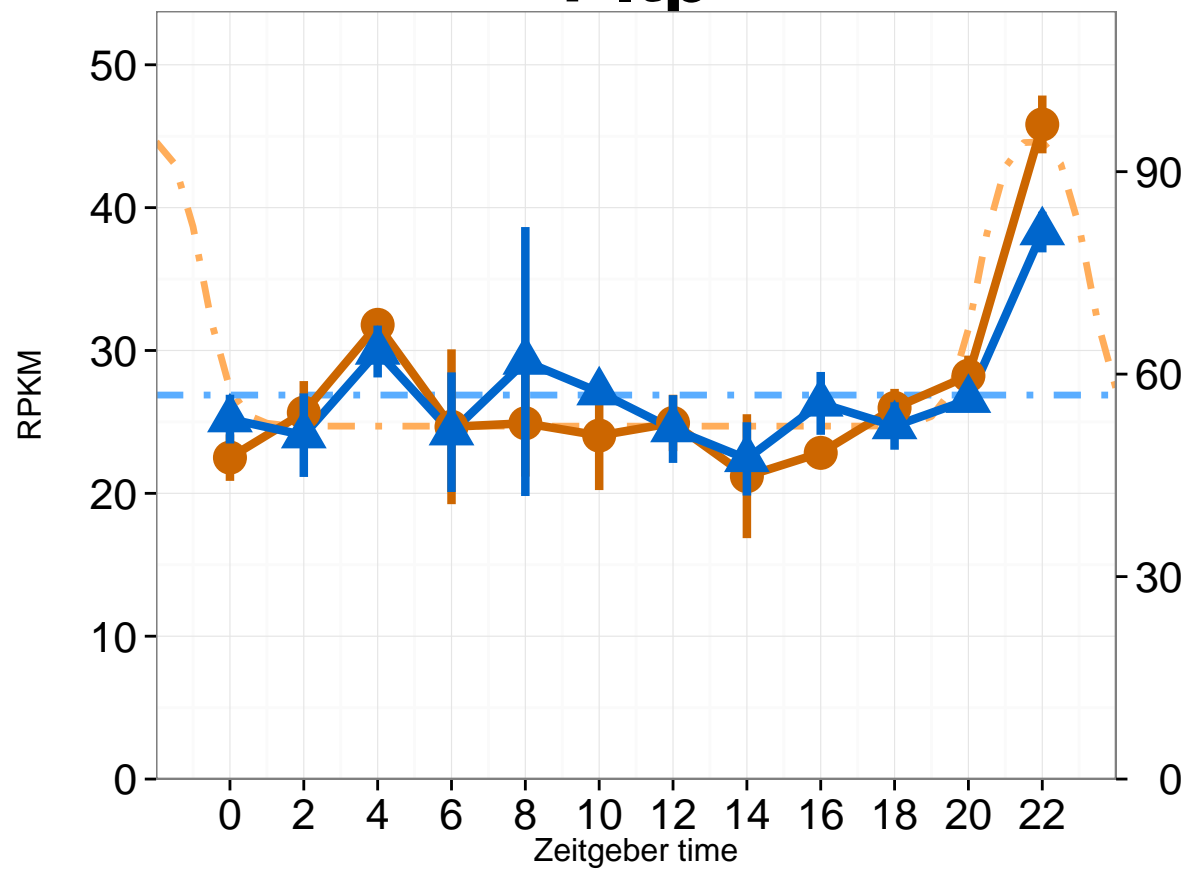

## Pltp

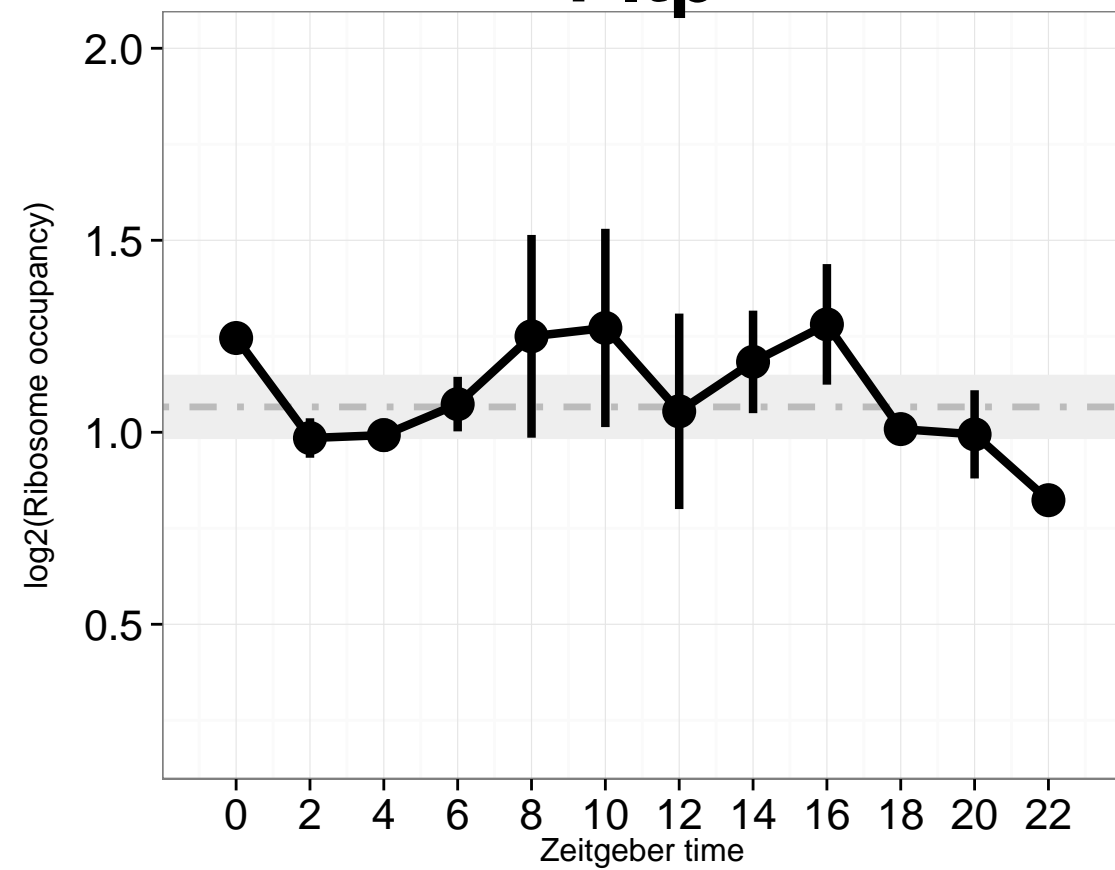

Supplement: SuppDataset_1.zip [file Pltp_set_B.pdf › Supplemental Dataset 1/B-mRNA_rhythm_translation_nonrhyth/Pltp_set_B.pdf]

# Plxdc1

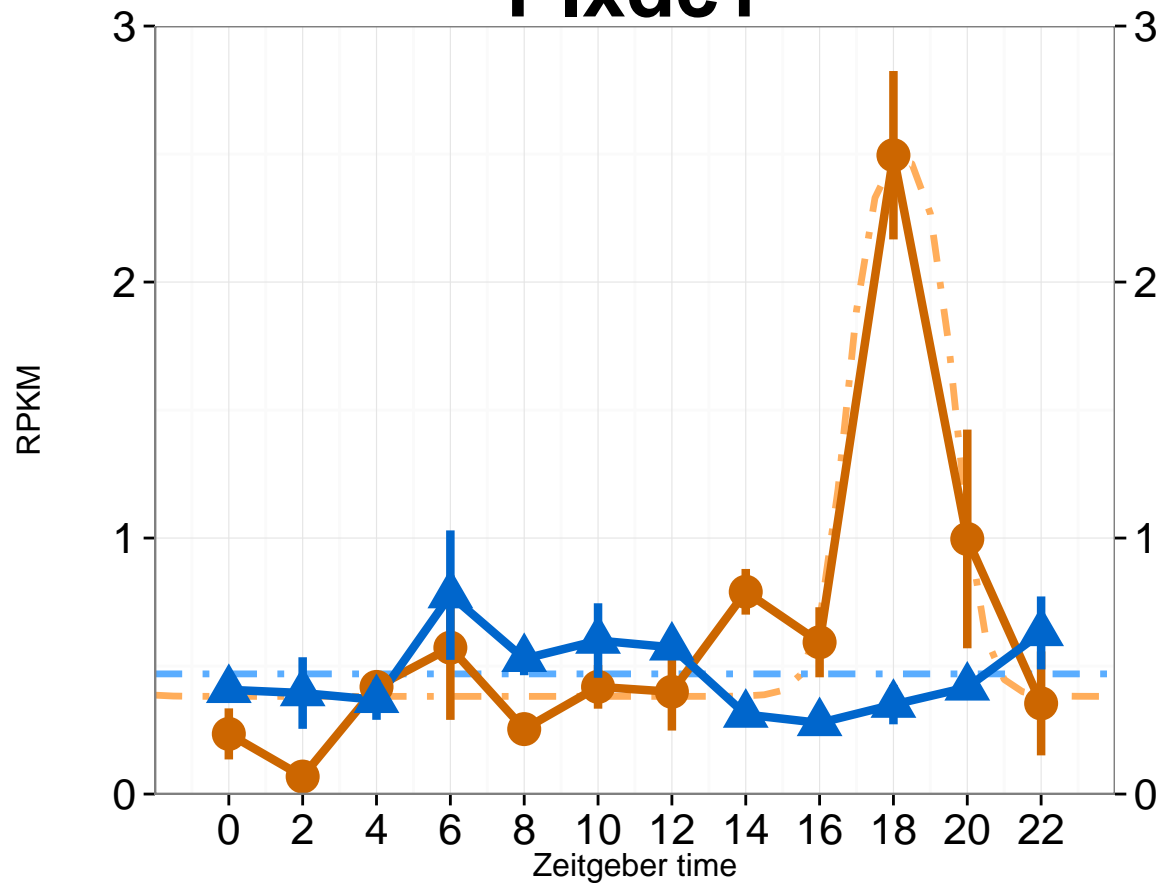

# Plxdc1

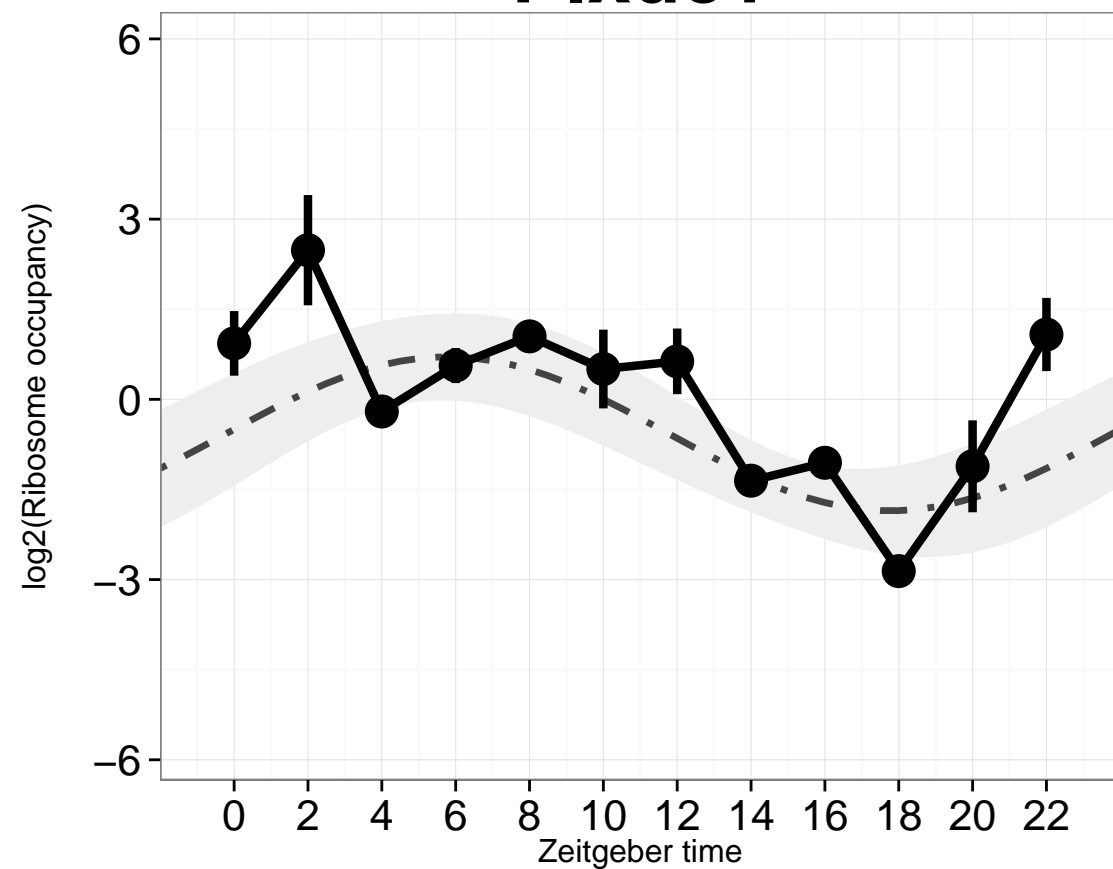

Supplement: SuppDataset_1.zip [file Plxdc1_set_B.pdf › Supplemental Dataset 1/B-mRNA_rhythm_translation_nonrhyth/Plxdc1_set_B.pdf]

# Poc1a

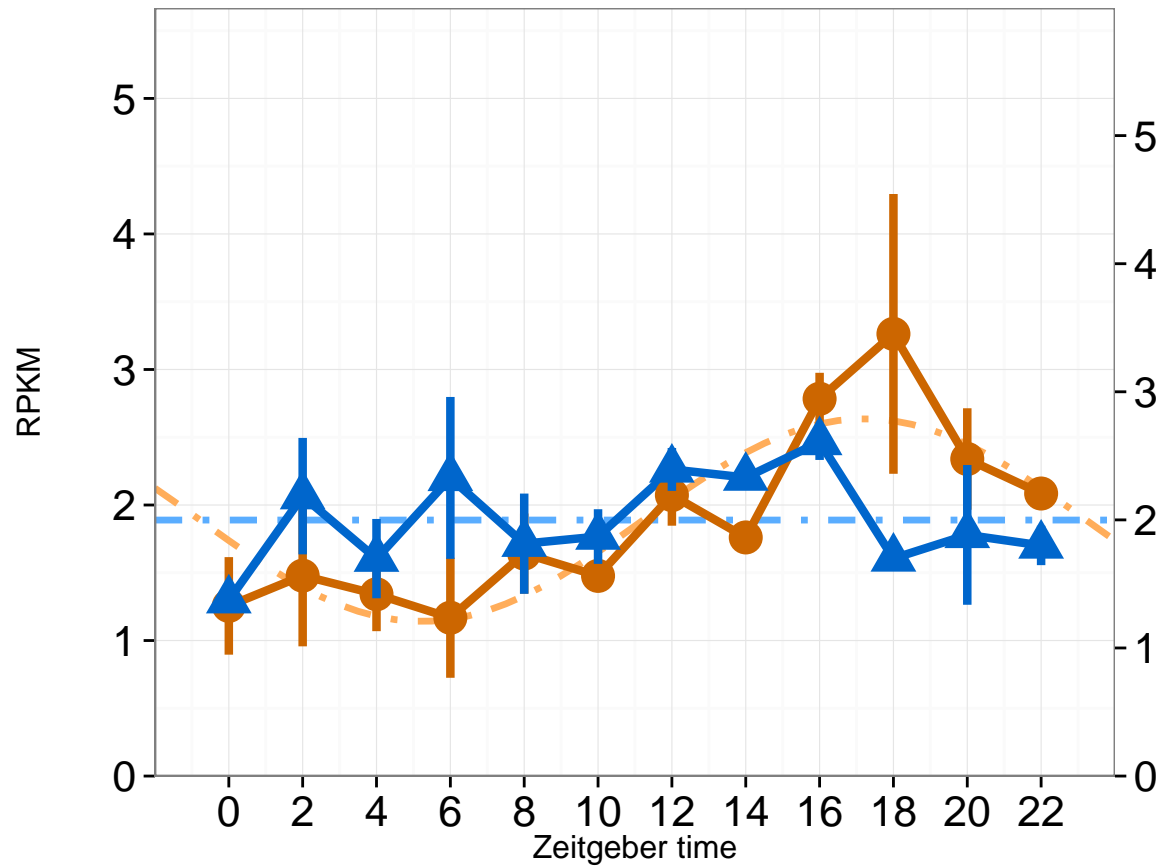

# Poc1a

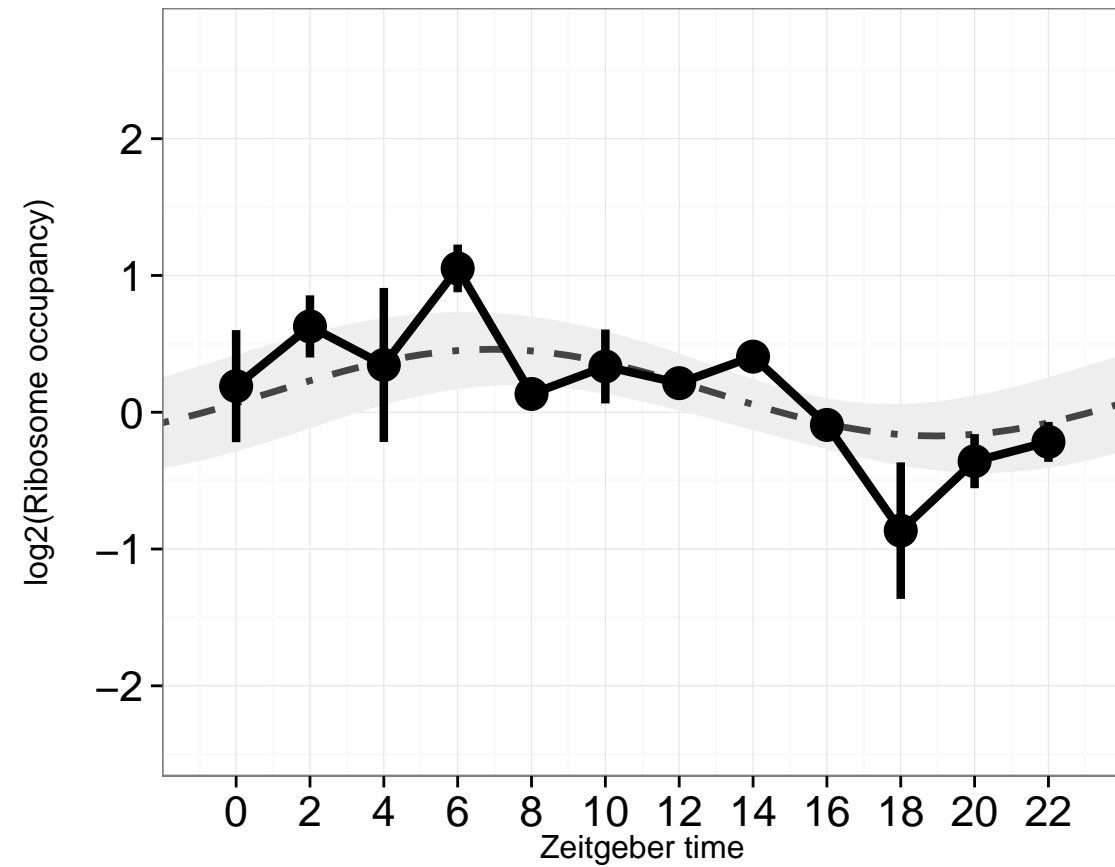

Supplement: SuppDataset_1.zip [file Poc1a_set_B.pdf › Supplemental Dataset 1/B-mRNA_rhythm_translation_nonrhyth/Poc1a_set_B.pdf]

# Pofut1

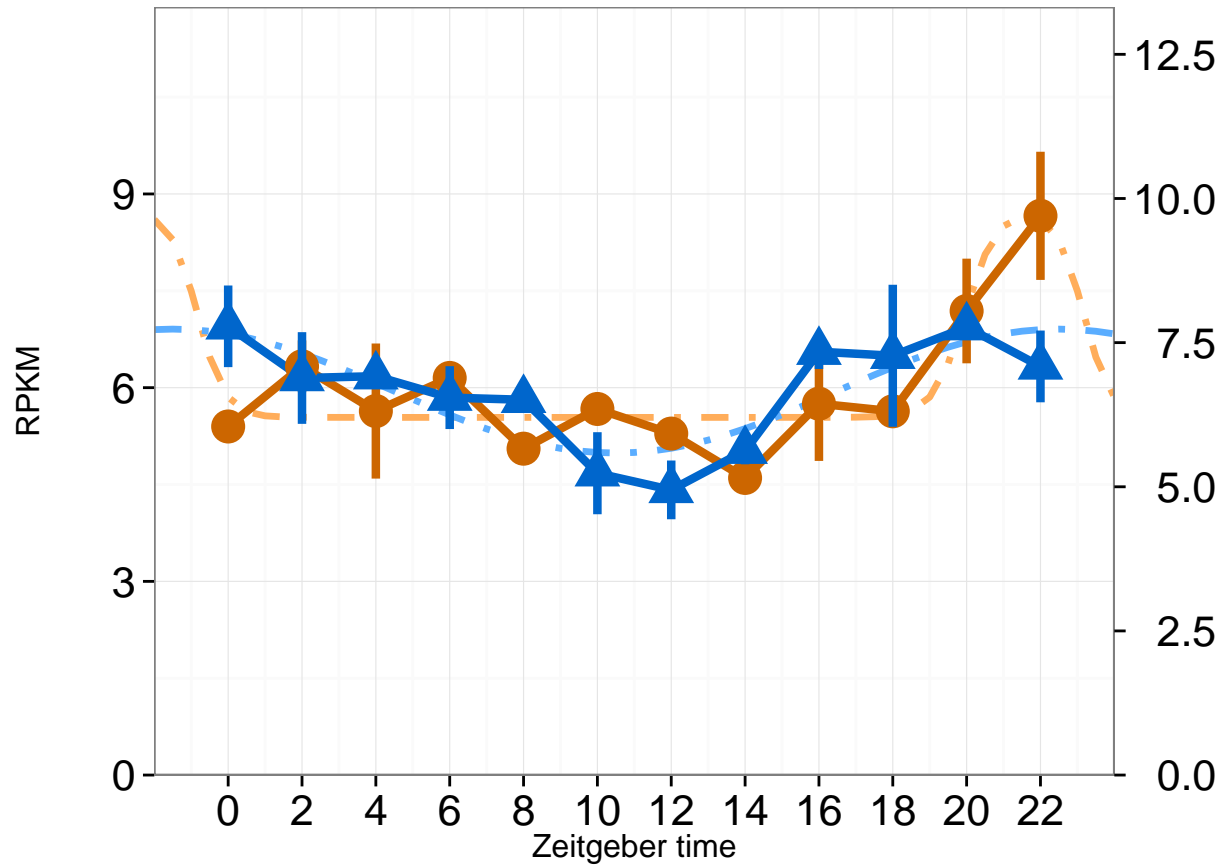

# Pofut1

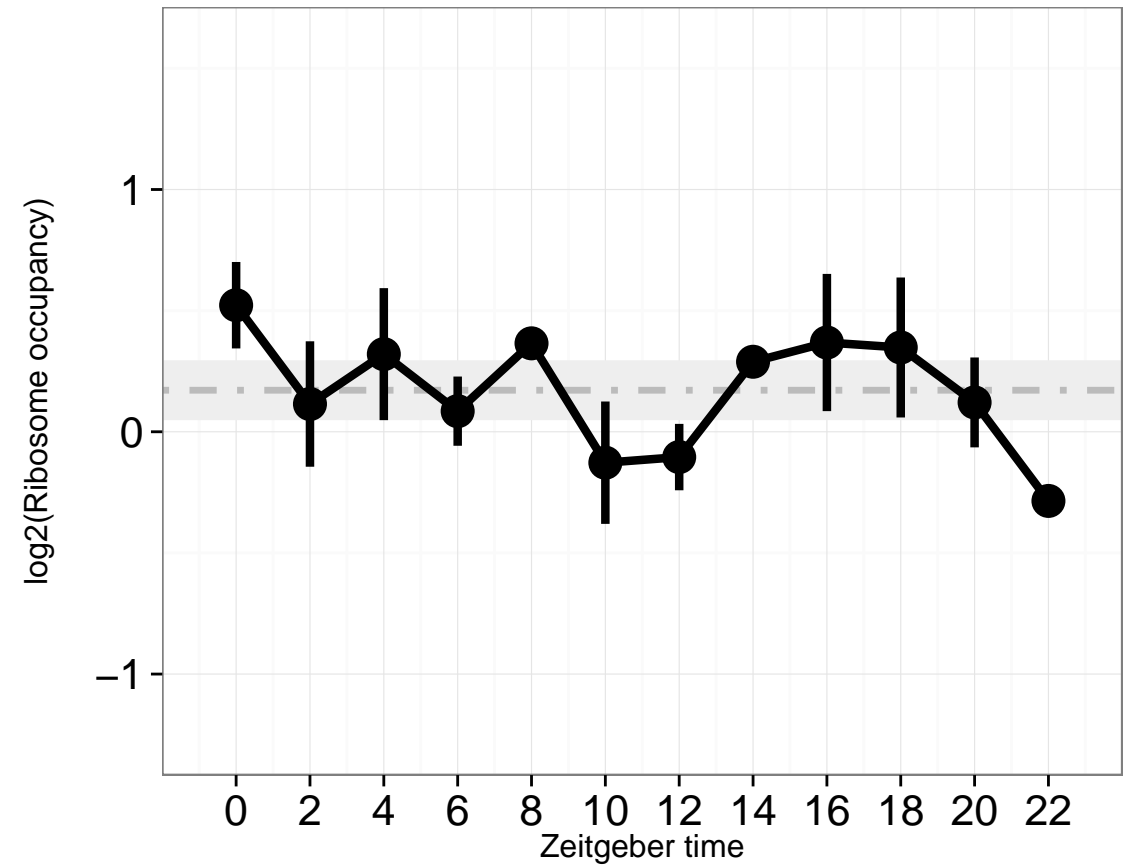

Supplement: SuppDataset_1.zip [file Pofut1_set_B.pdf › Supplemental Dataset 1/B-mRNA_rhythm_translation_nonrhyth/Pofut1_set_B.pdf]

## Polr3k

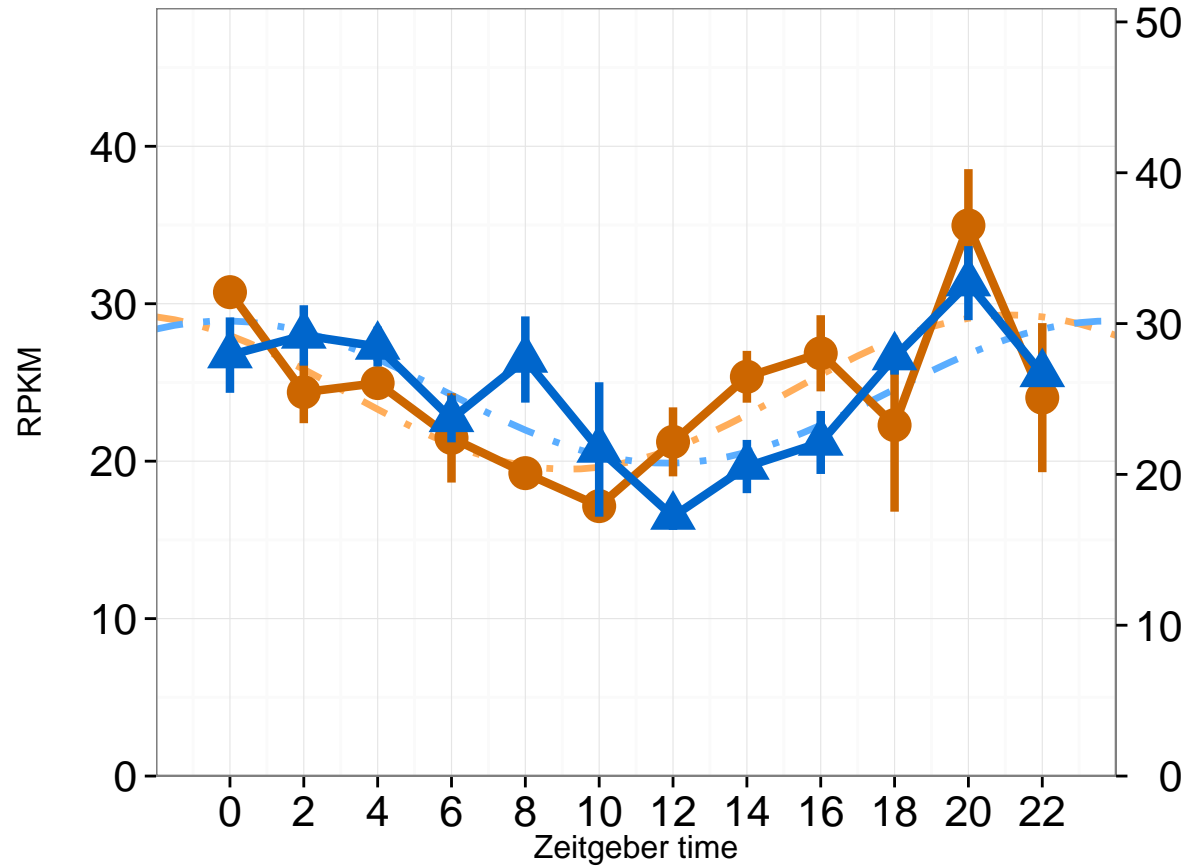

## Polr3k

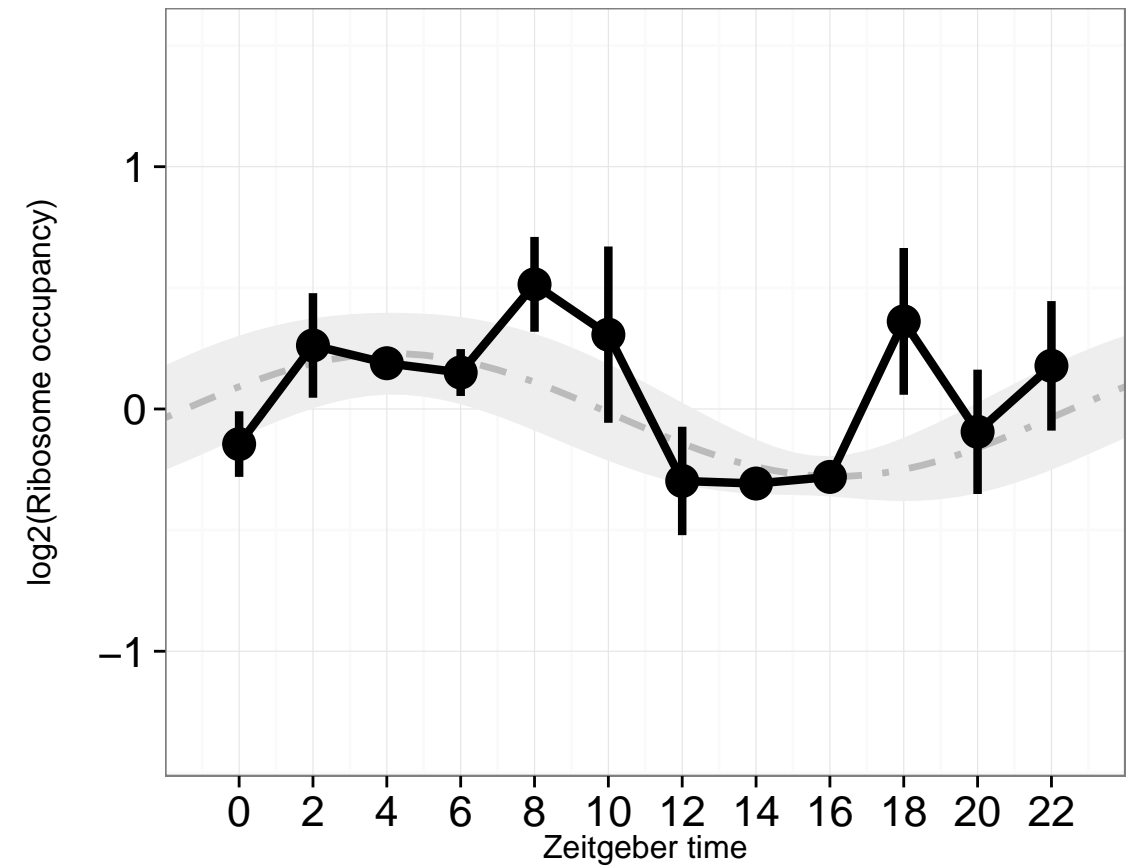

Supplement: SuppDataset_1.zip [file Polr3k_set_B.pdf › Supplemental Dataset 1/B-mRNA_rhythm_translation_nonrhyth/Polr3k_set_B.pdf]

## Pomgnt2

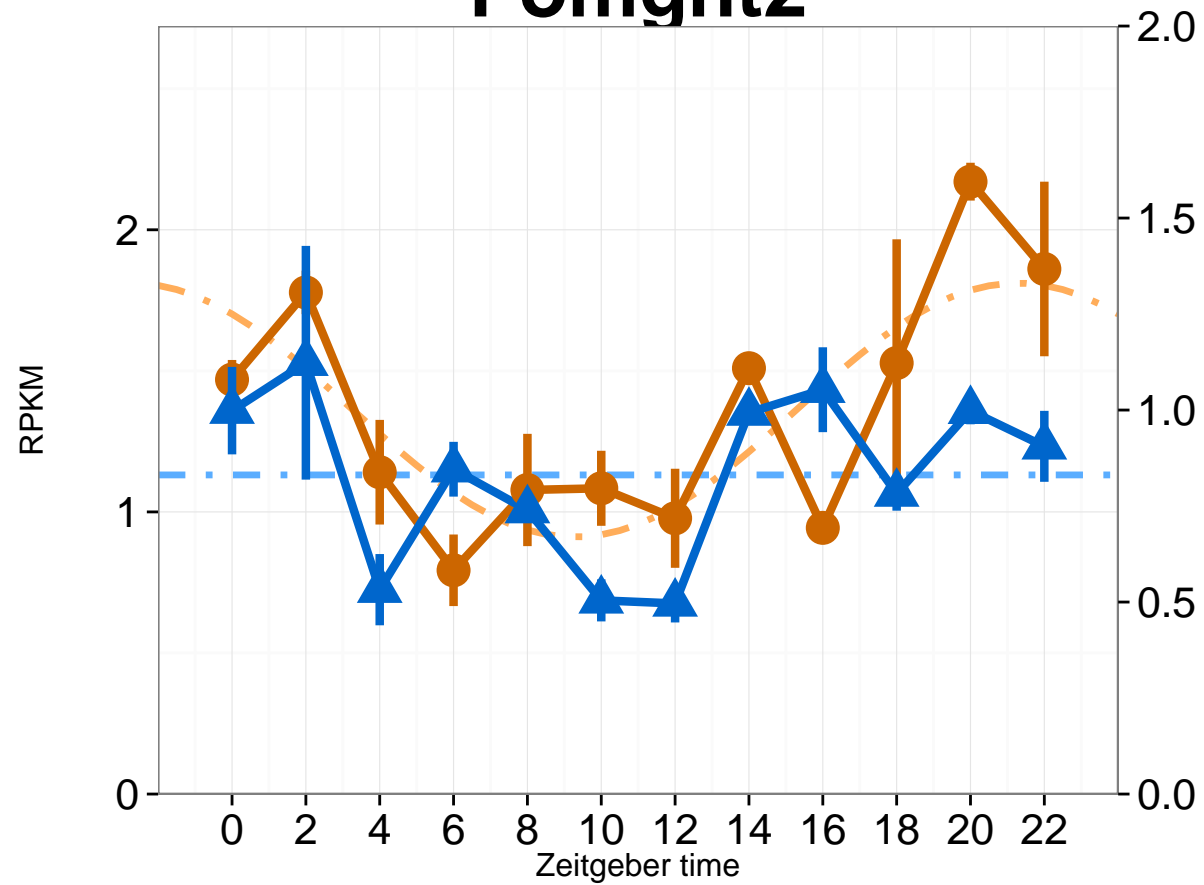

## Pomgnt2

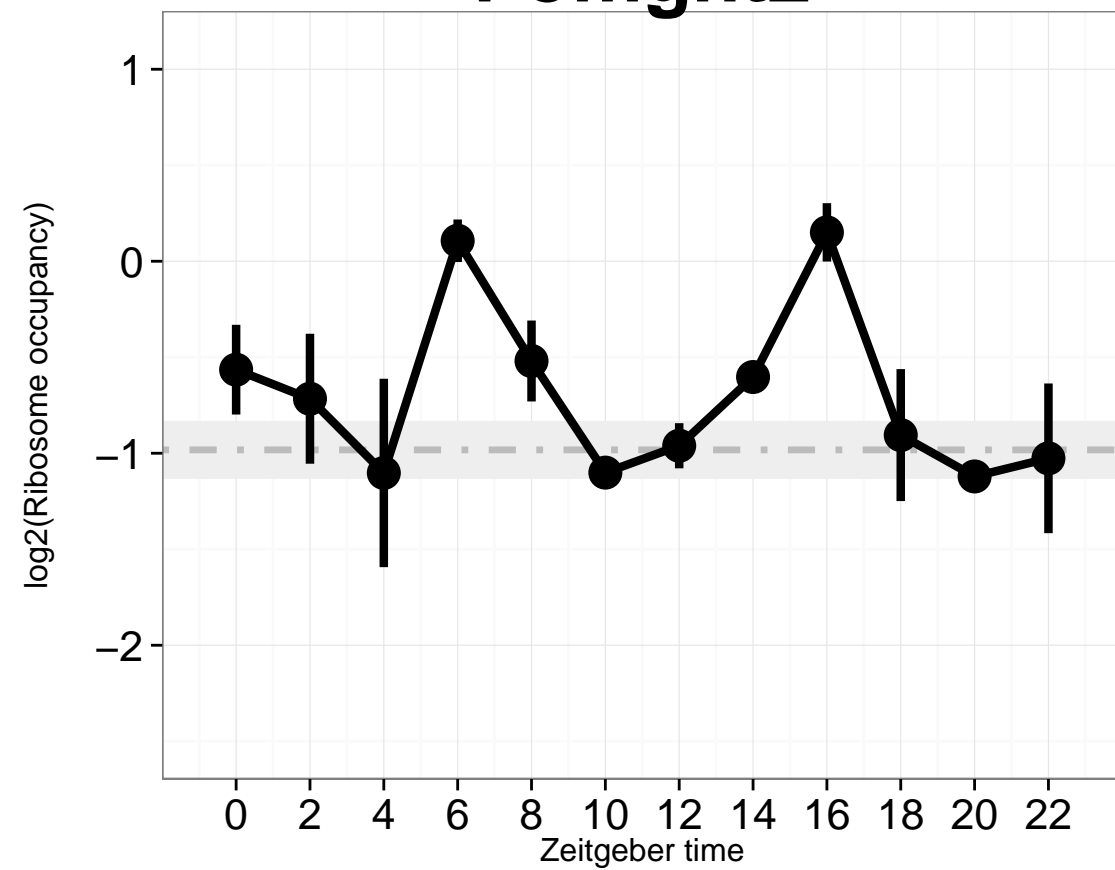

Supplement: SuppDataset_1.zip [file Pomgnt2_set_B.pdf › Supplemental Dataset 1/B-mRNA_rhythm_translation_nonrhyth/Pomgnt2_set_B.pdf]

## Pomk

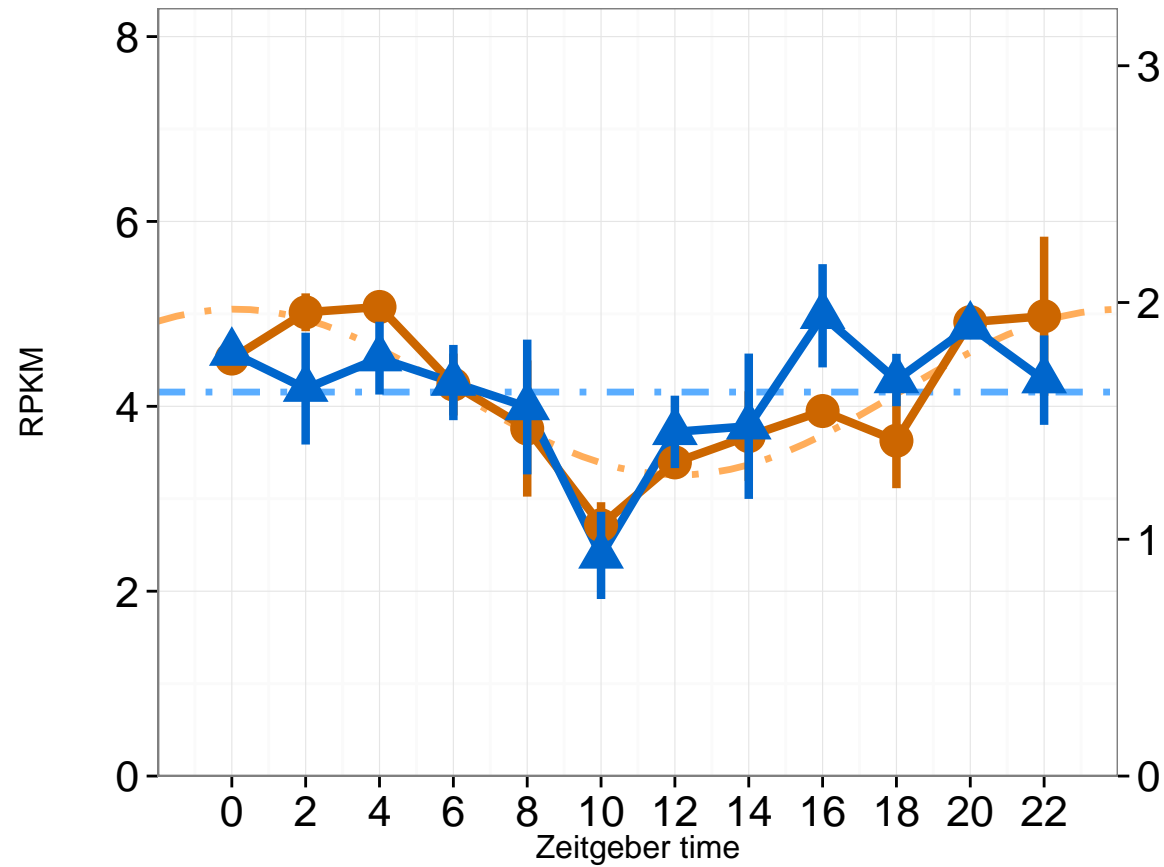

## Pomk

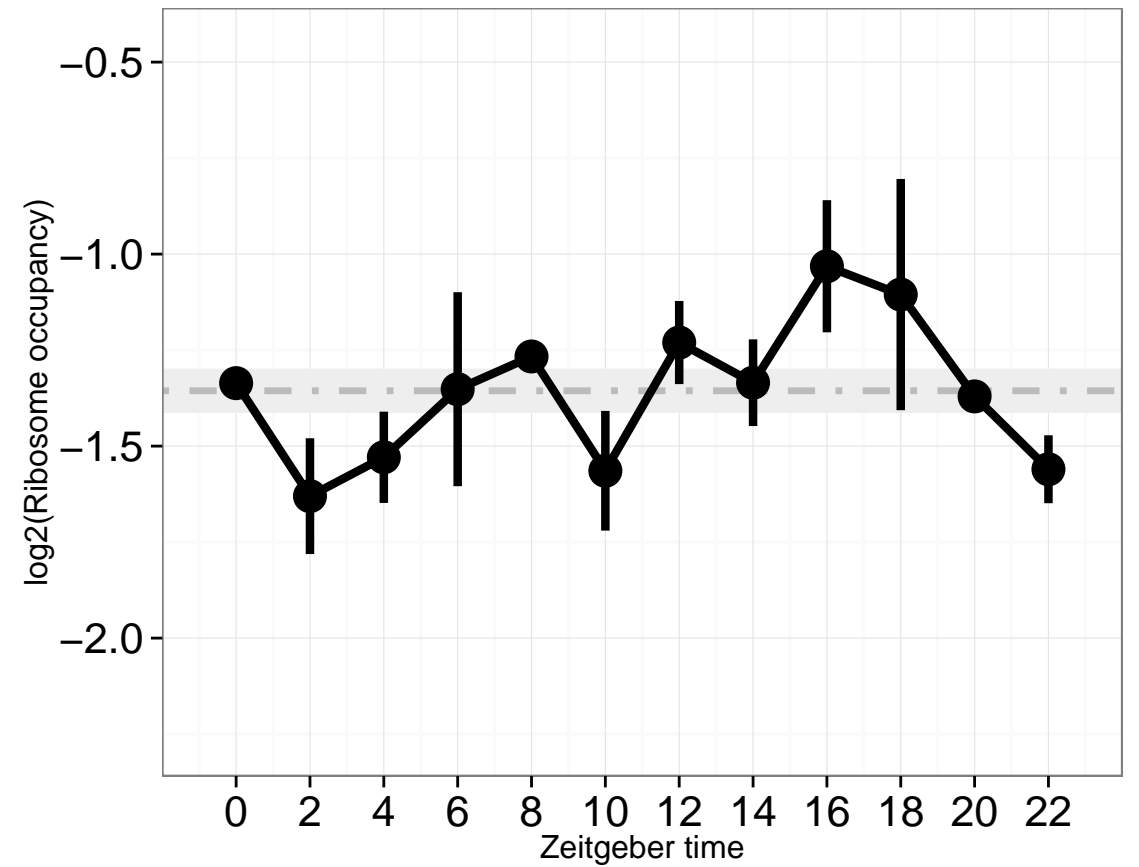

Supplement: SuppDataset_1.zip [file Pomk_set_B.pdf › Supplemental Dataset 1/B-mRNA_rhythm_translation_nonrhyth/Pomk_set_B.pdf]

# Pop1

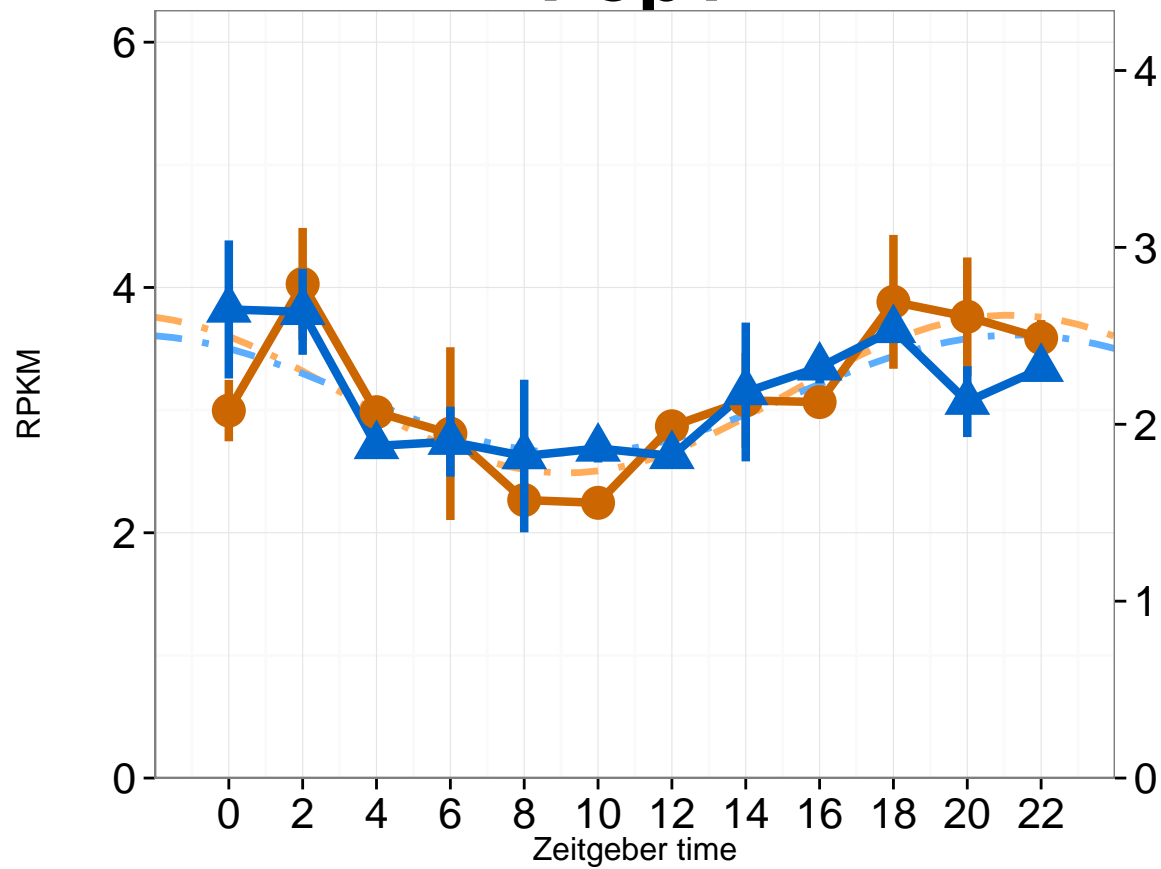

# Pop1

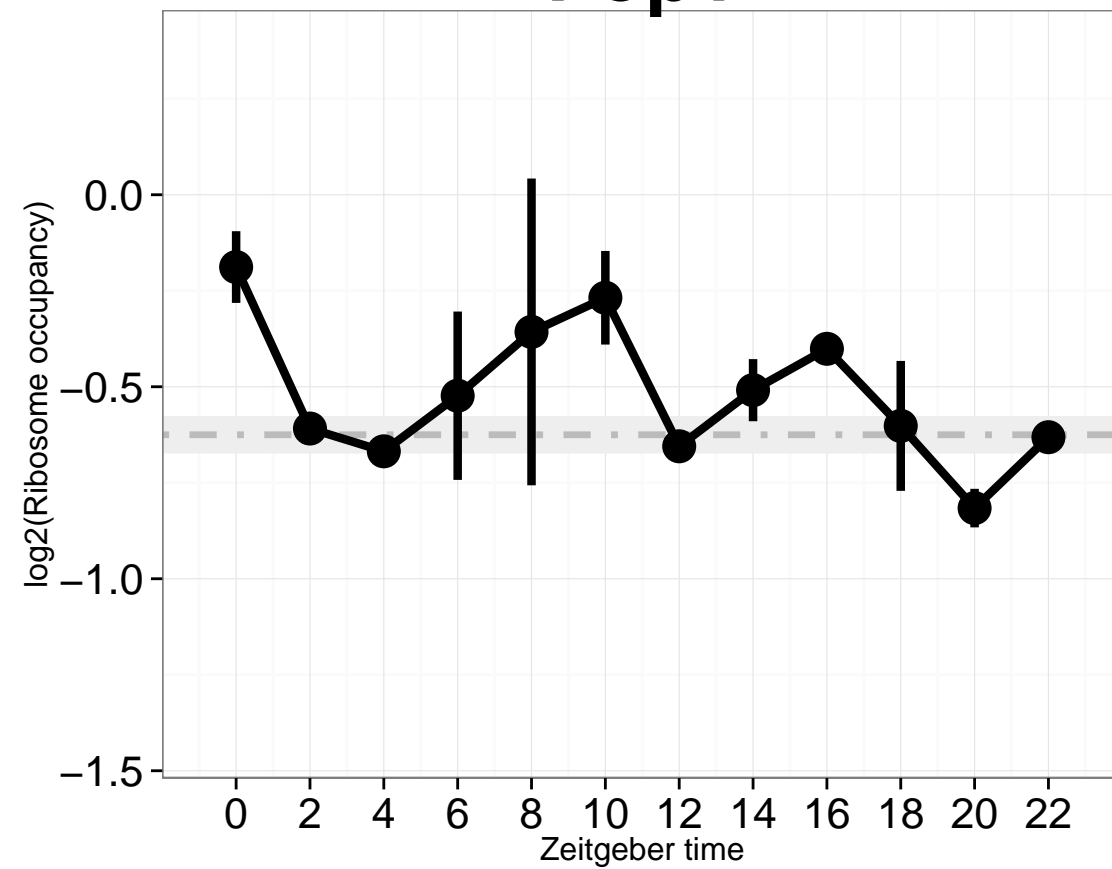

Supplement: SuppDataset_1.zip [file Pop1_set_B.pdf › Supplemental Dataset 1/B-mRNA_rhythm_translation_nonrhyth/Pop1_set_B.pdf]

# Ppapdc2

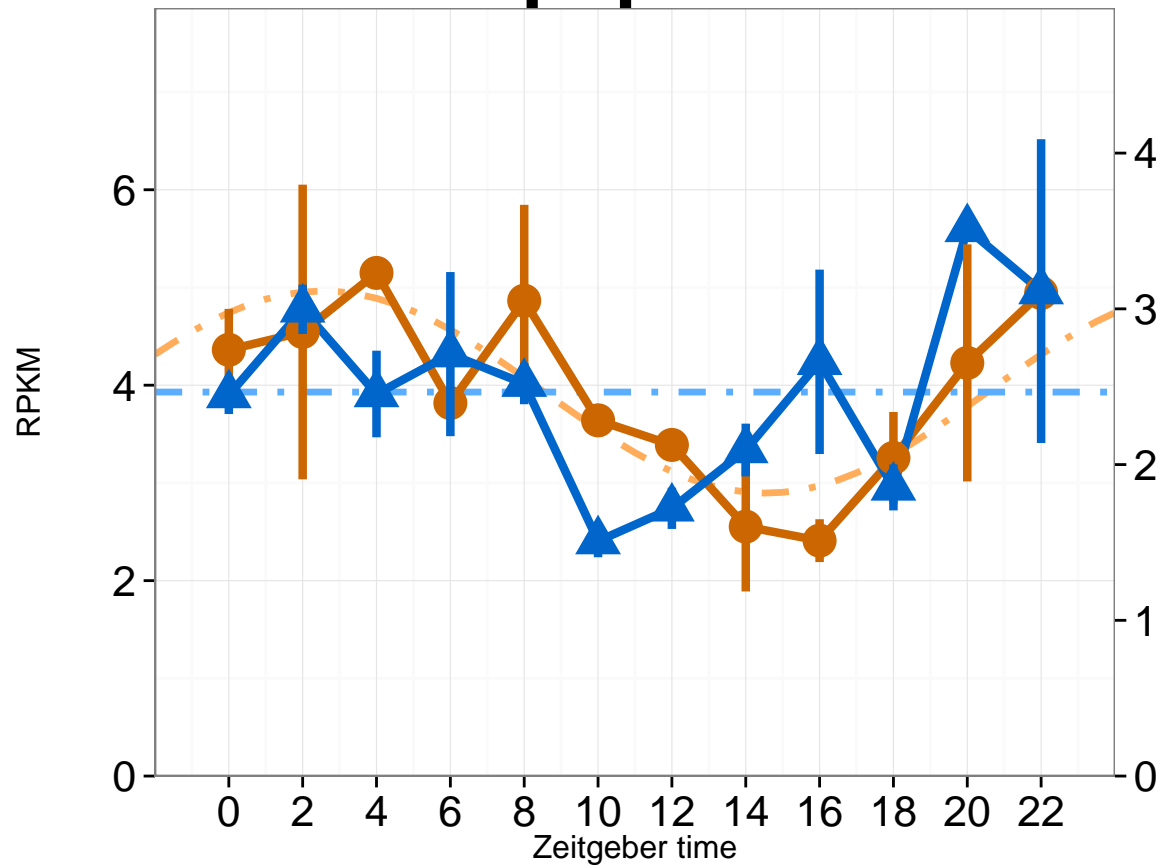

# Ppapdc2

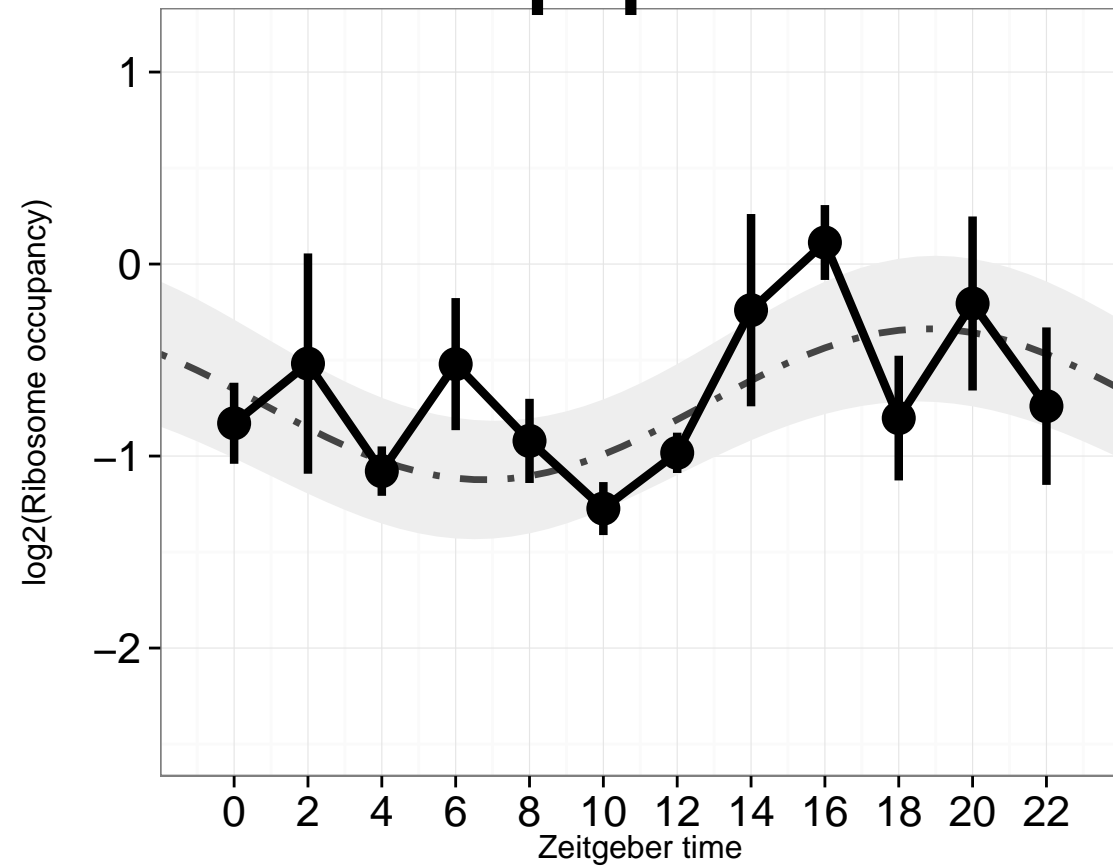

Supplement: SuppDataset_1.zip [file Ppapdc2_set_B.pdf › Supplemental Dataset 1/B-mRNA_rhythm_translation_nonrhyth/Ppapdc2_set_B.pdf]

## Ppfia2

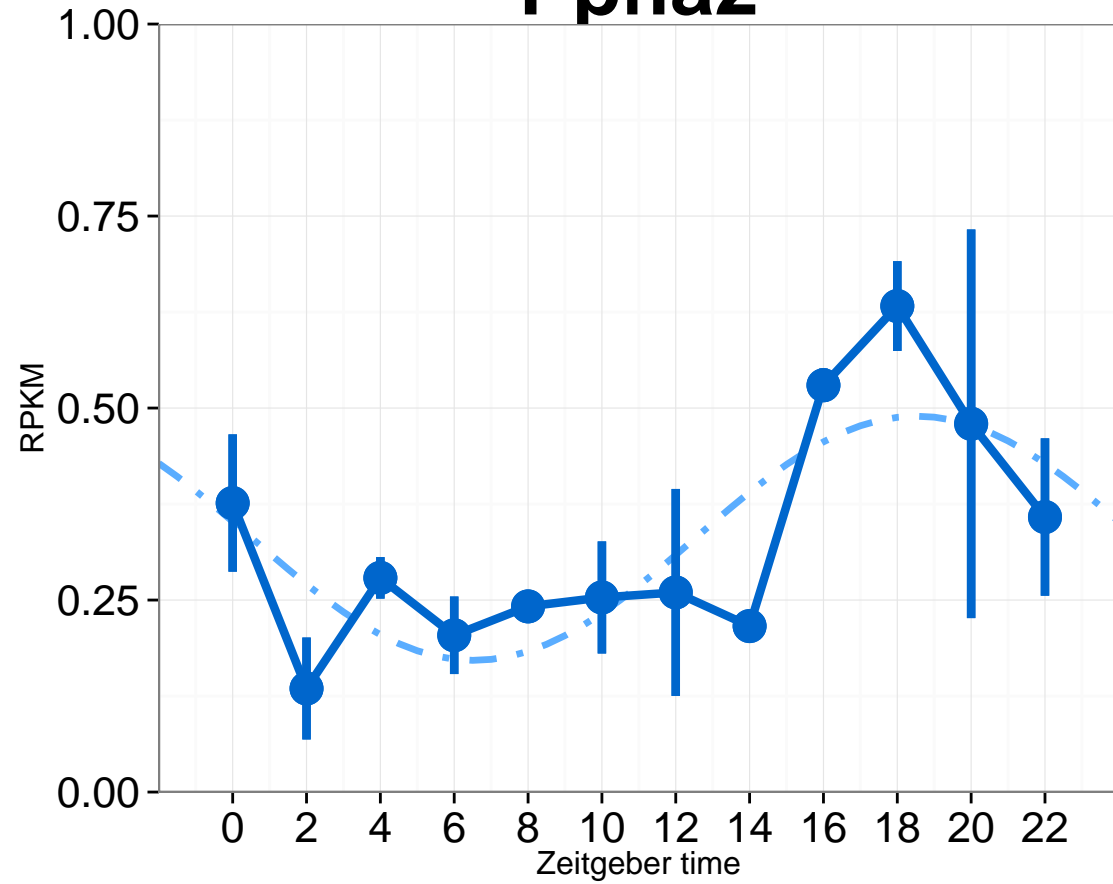

## Ppfia2 log2(Ribosome occupancy

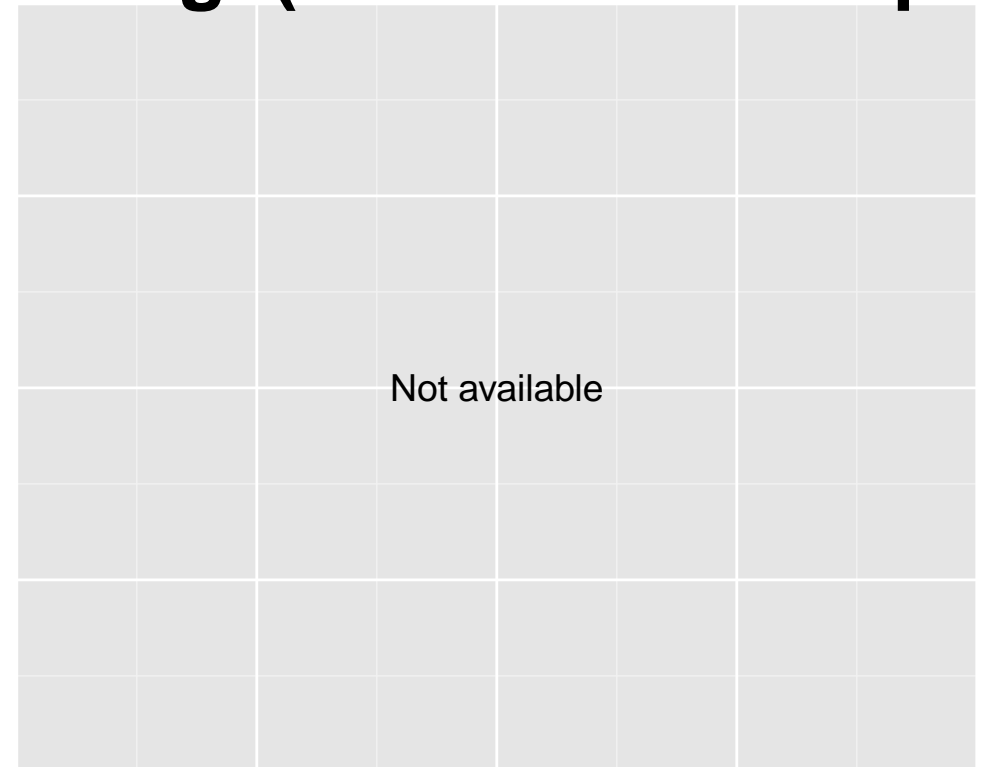

Supplement: SuppDataset_1.zip [file Ppfia2_set_B.pdf › Supplemental Dataset 1/B-mRNA_rhythm_translation_nonrhyth/Ppfia2_set_B.pdf]

## Ppox

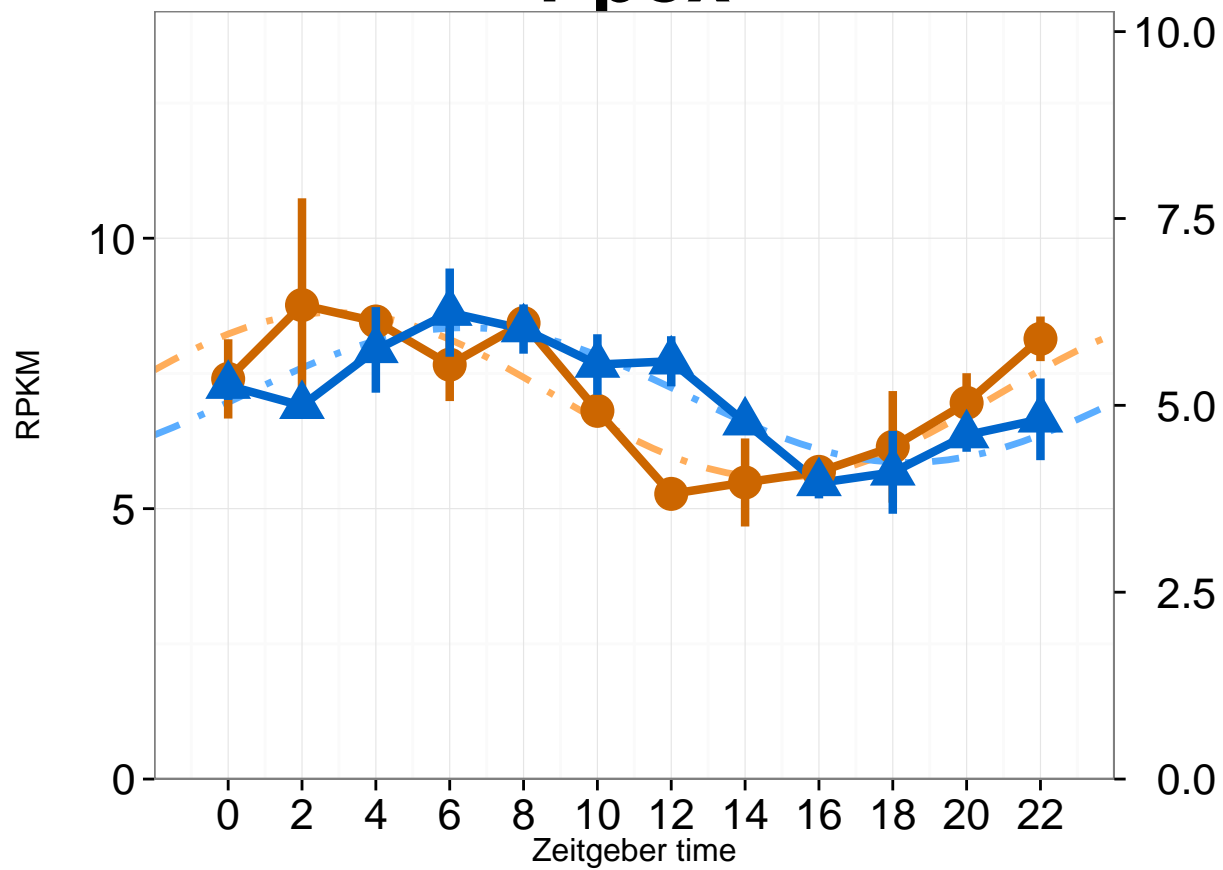

## Ppox

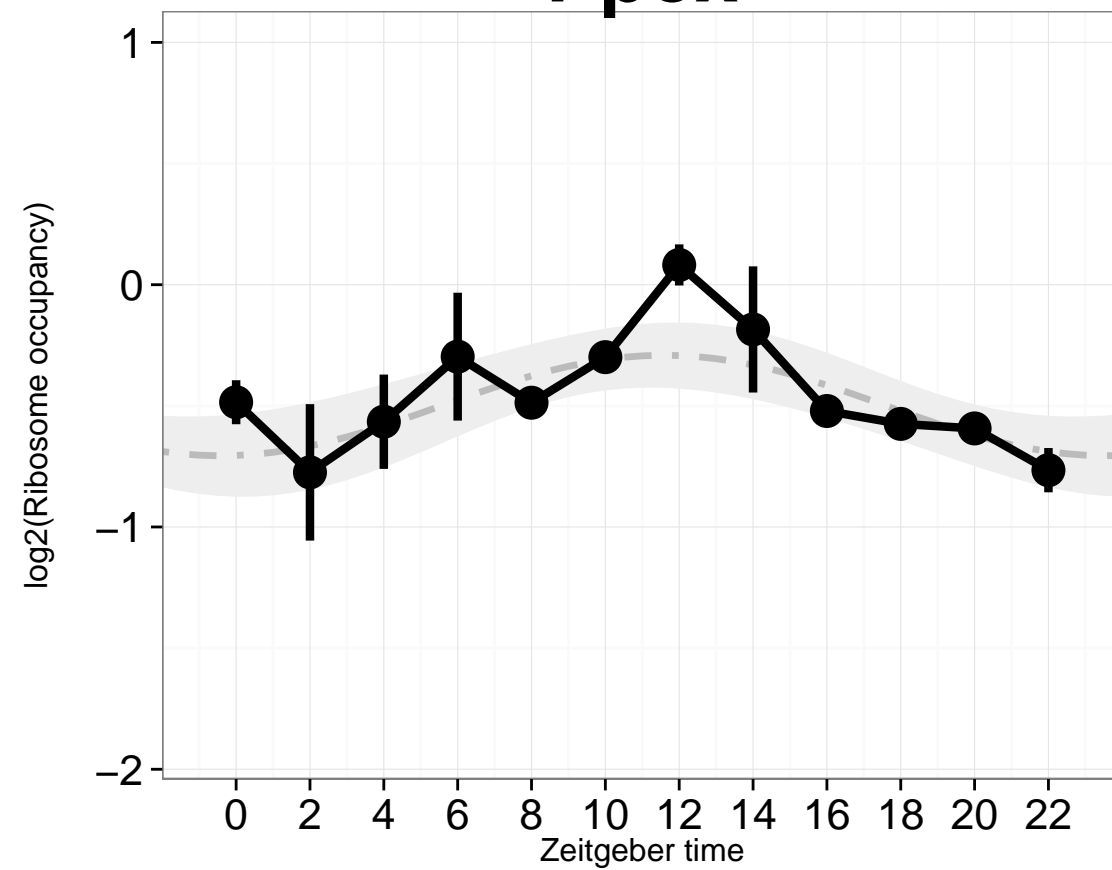

Supplement: SuppDataset_1.zip [file Ppox_set_B.pdf › Supplemental Dataset 1/B-mRNA_rhythm_translation_nonrhyth/Ppox_set_B.pdf]

# Ppp1r10

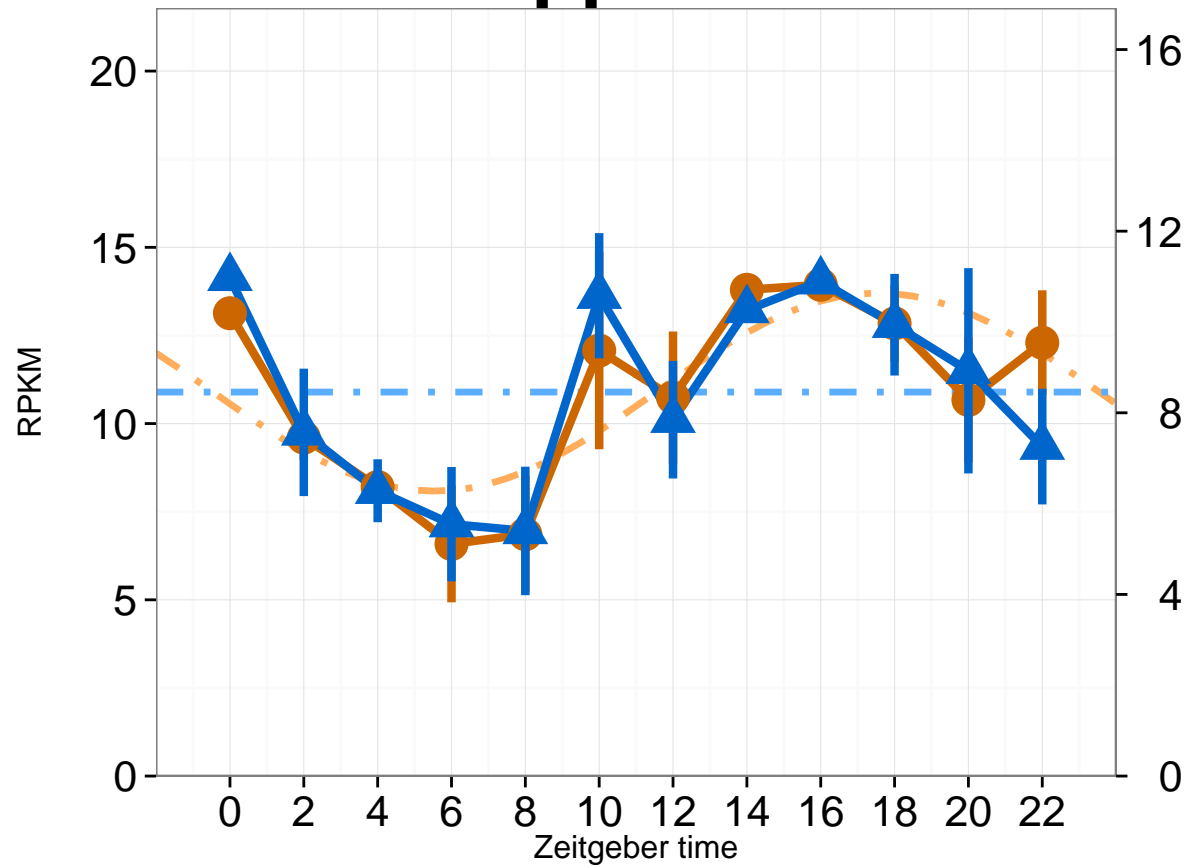

# Ppp1r10

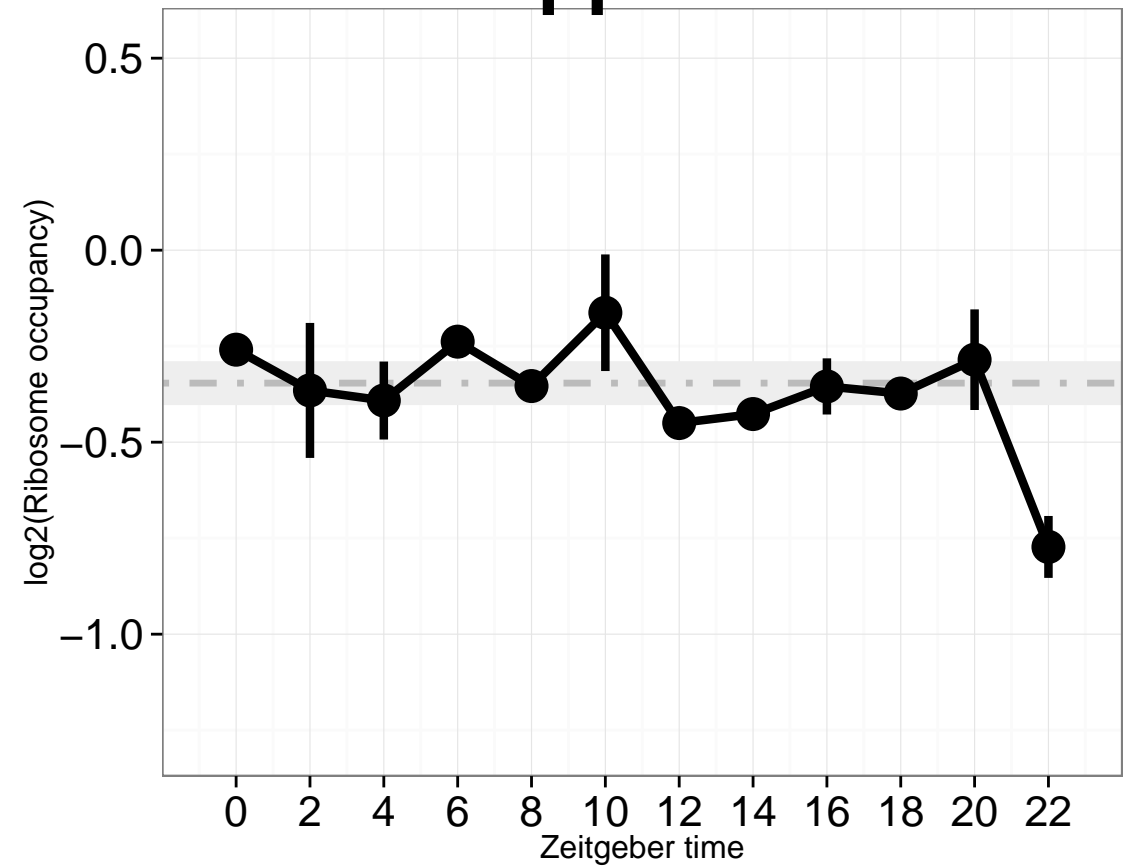

Supplement: SuppDataset_1.zip [file Ppp1r10_set_B.pdf › Supplemental Dataset 1/B-mRNA_rhythm_translation_nonrhyth/Ppp1r10_set_B.pdf]

# Ppp1r35

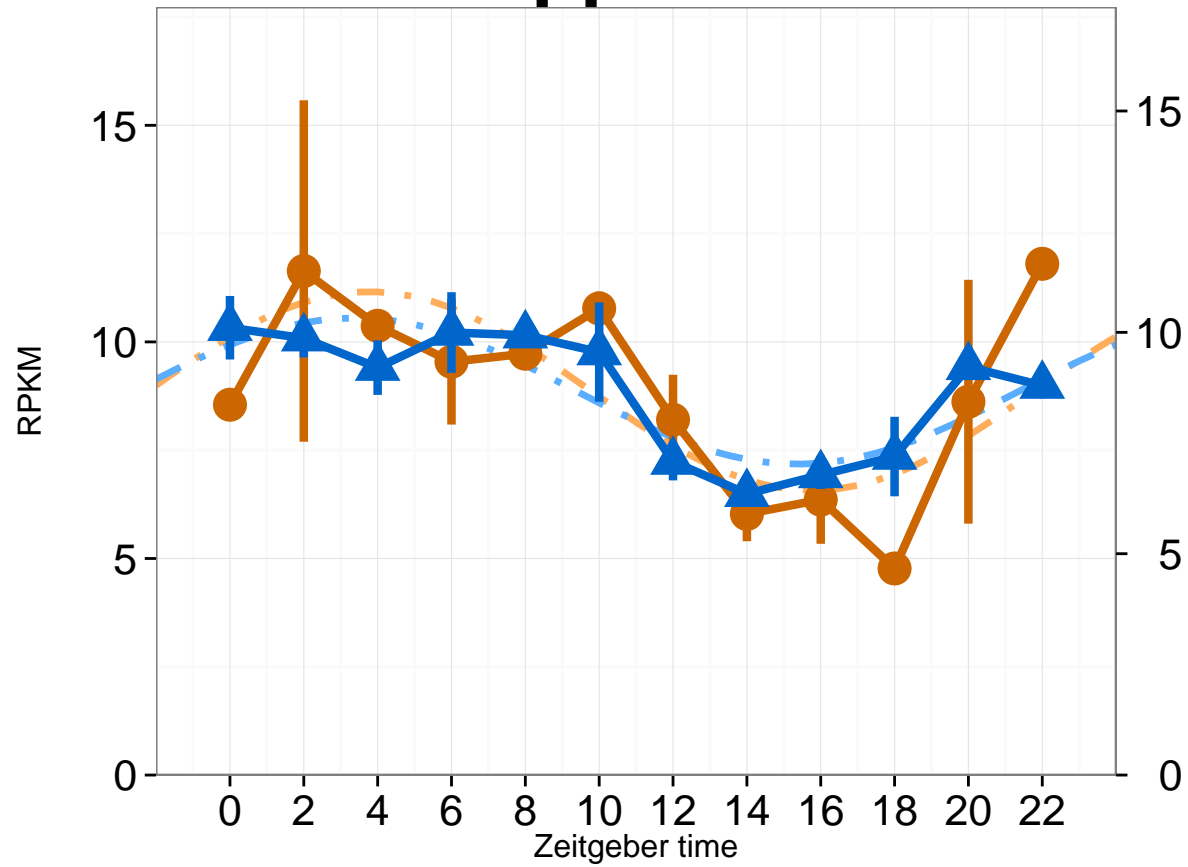

# Ppp1r35

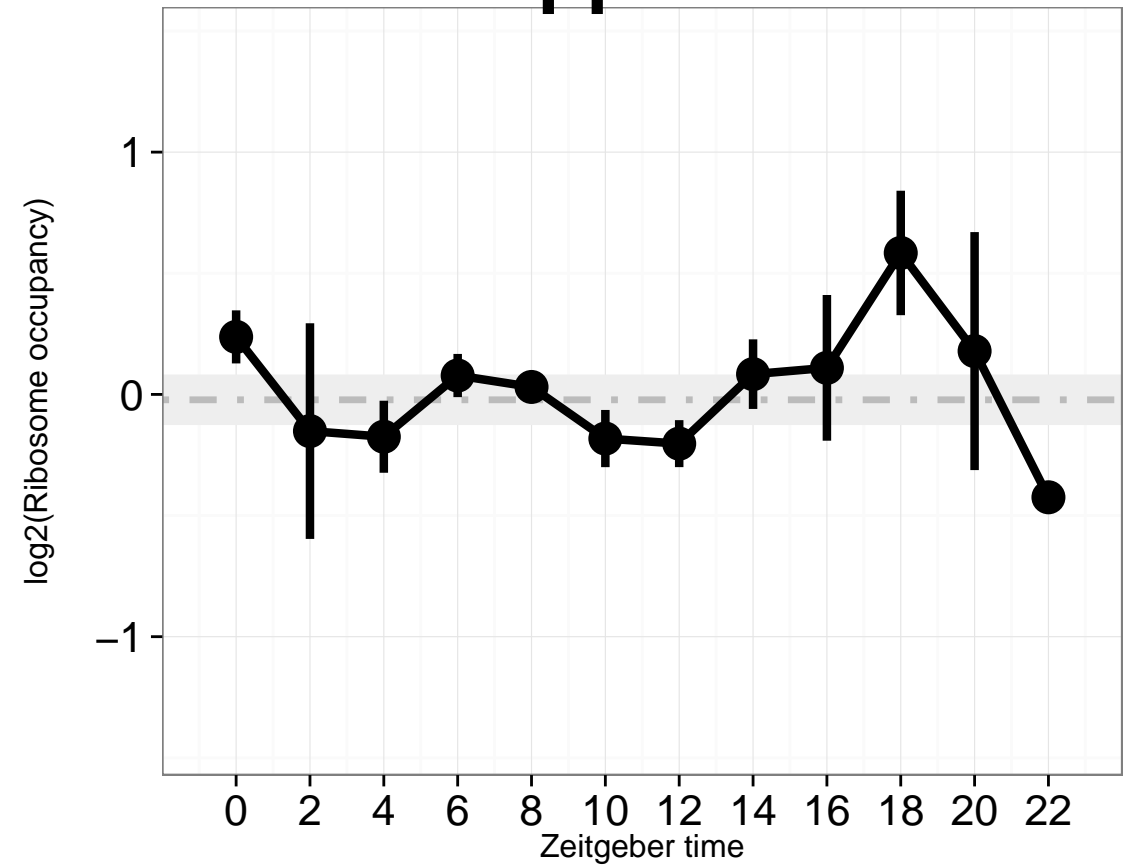

Supplement: SuppDataset_1.zip [file Ppp1r35_set_B.pdf › Supplemental Dataset 1/B-mRNA_rhythm_translation_nonrhyth/Ppp1r35_set_B.pdf]

## Prelp

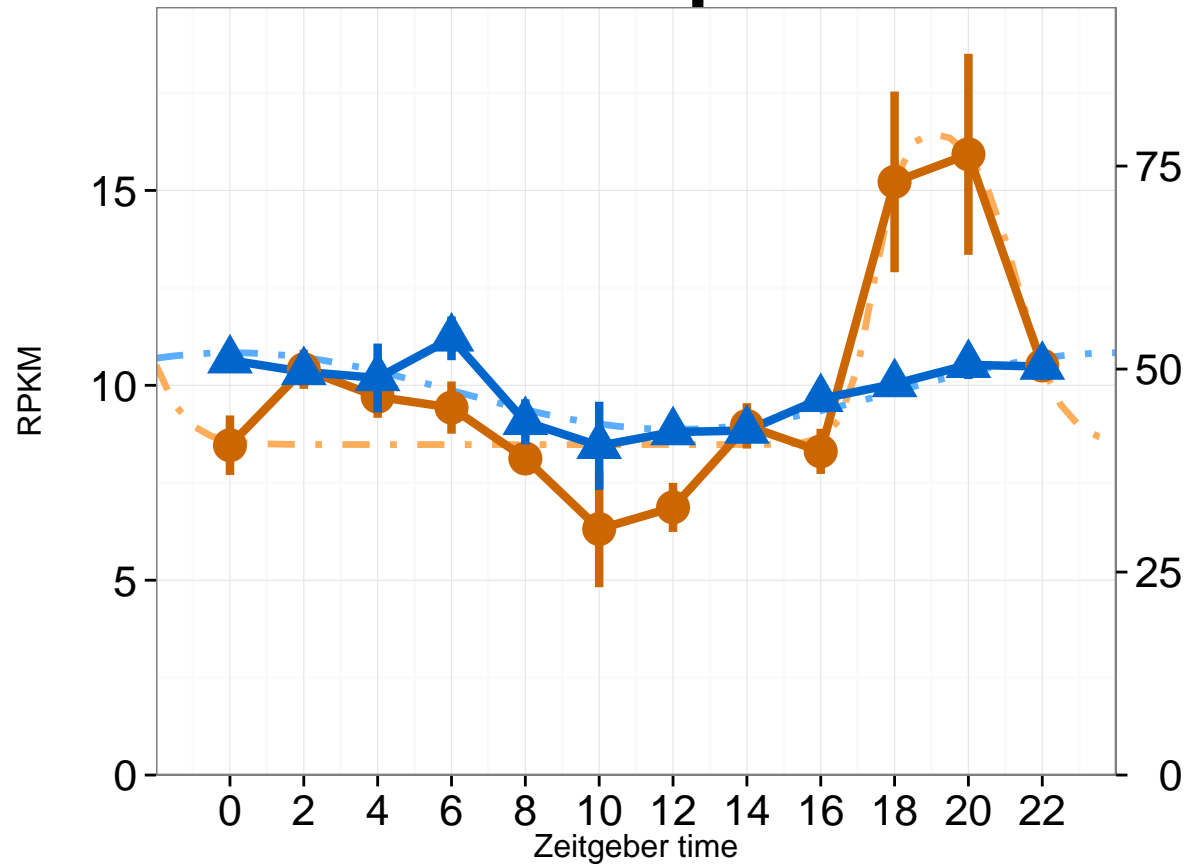

## Prelp

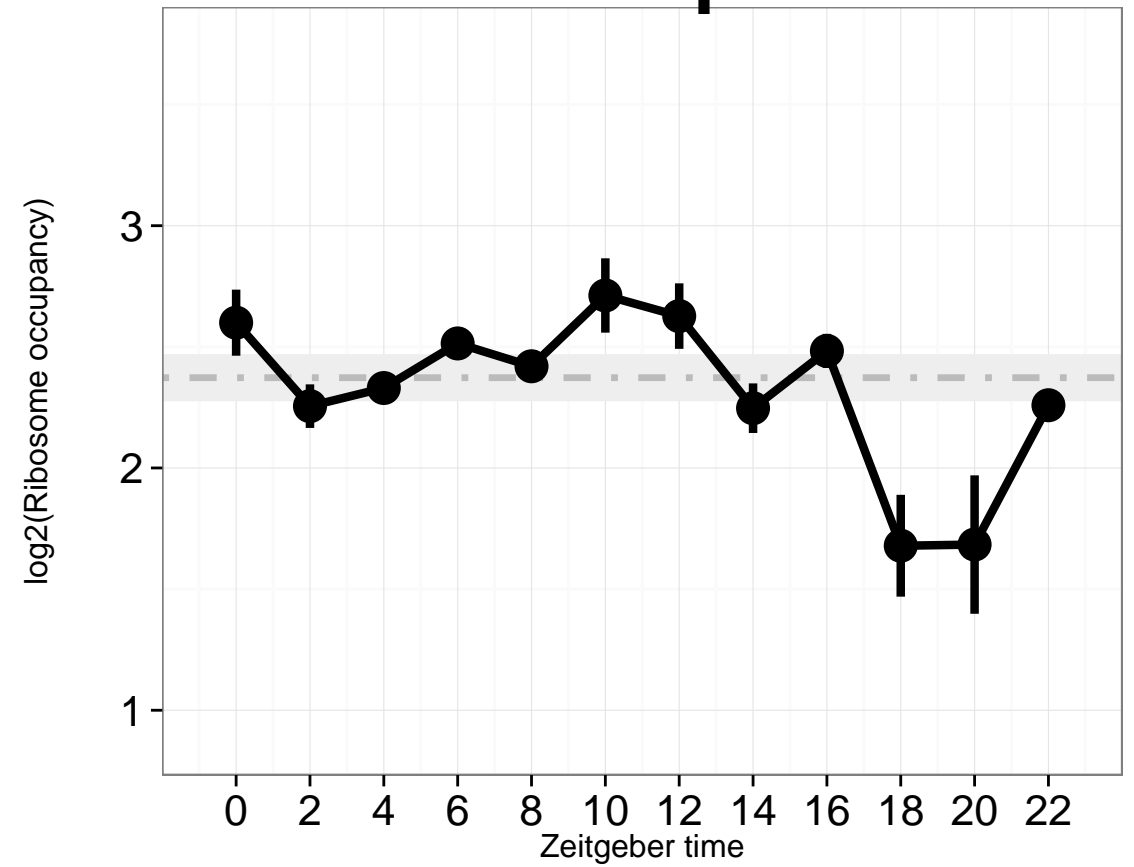

Supplement: SuppDataset_1.zip [file Prelp_set_B.pdf › Supplemental Dataset 1/B-mRNA_rhythm_translation_nonrhyth/Prelp_set_B.pdf]

## Prnp

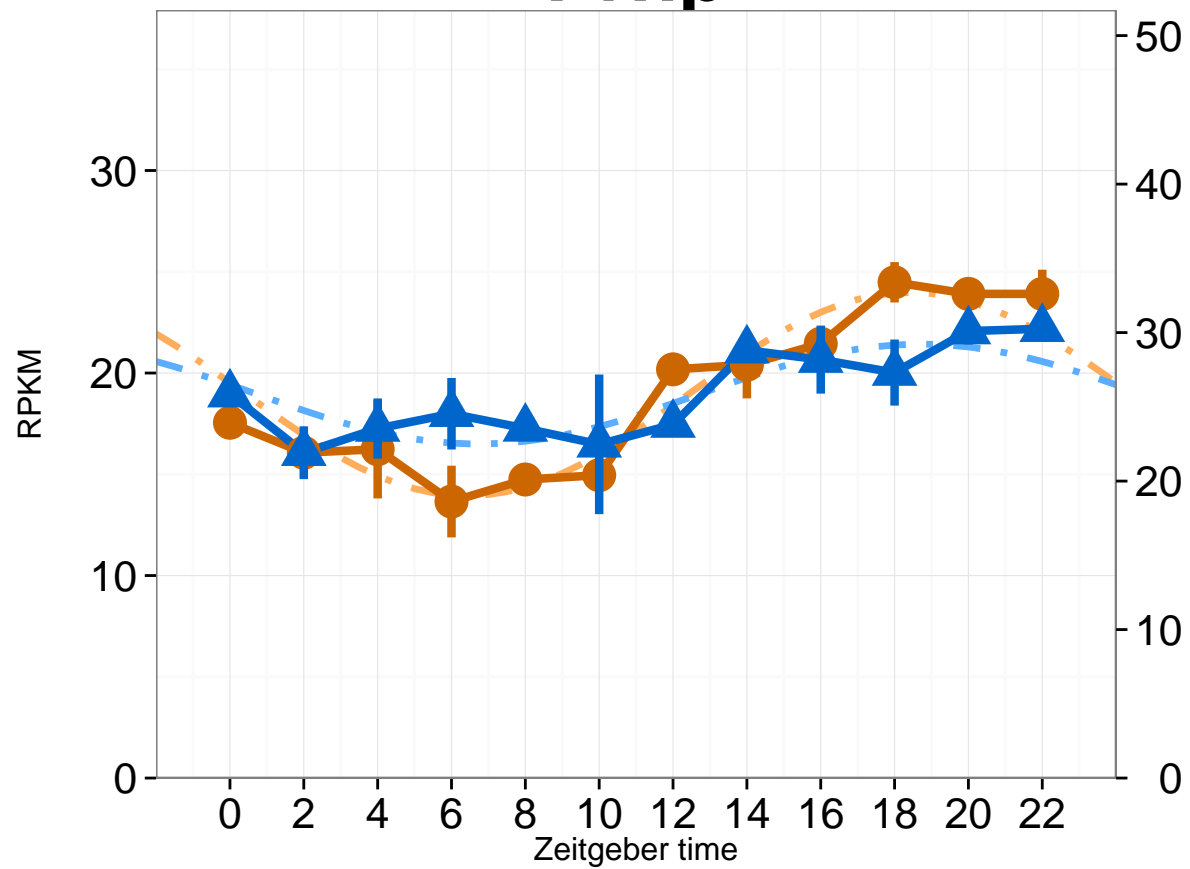

## Prnp

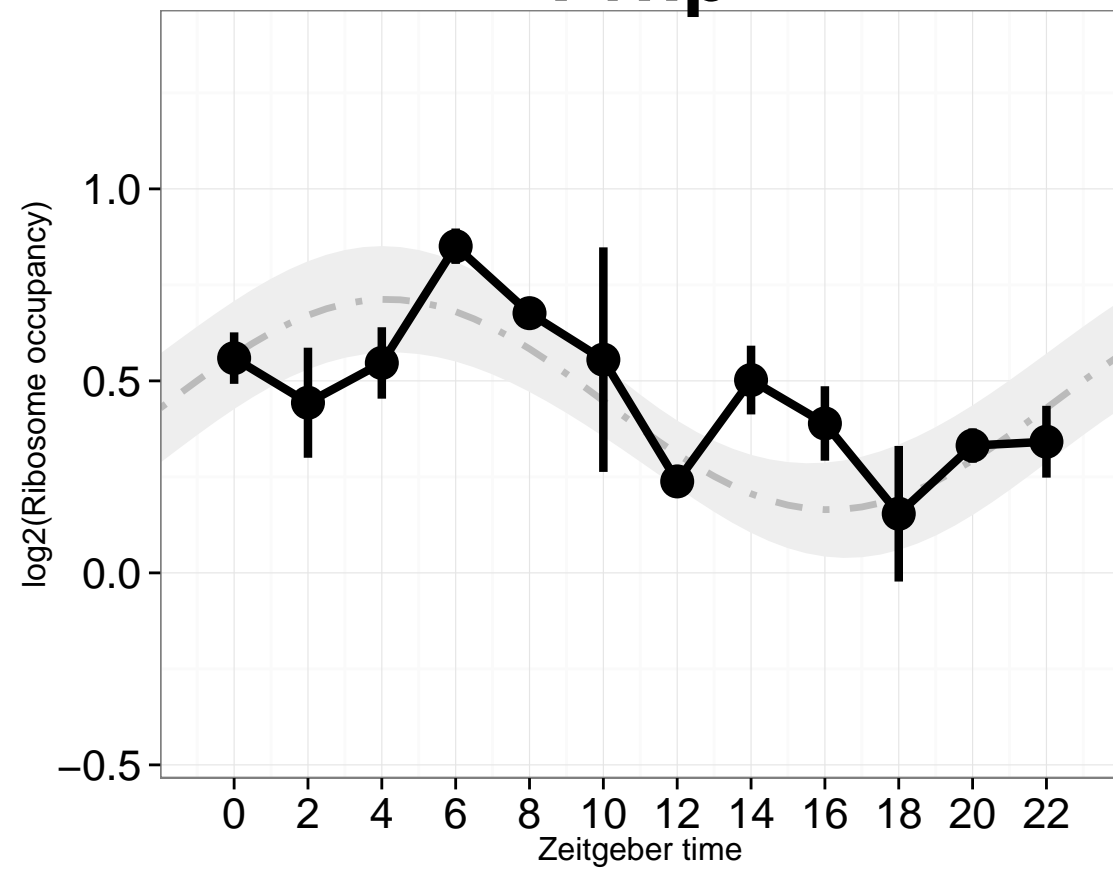

Supplement: SuppDataset_1.zip [file Prnp_set_B.pdf › Supplemental Dataset 1/B-mRNA_rhythm_translation_nonrhyth/Prnp_set_B.pdf]

## Prr13

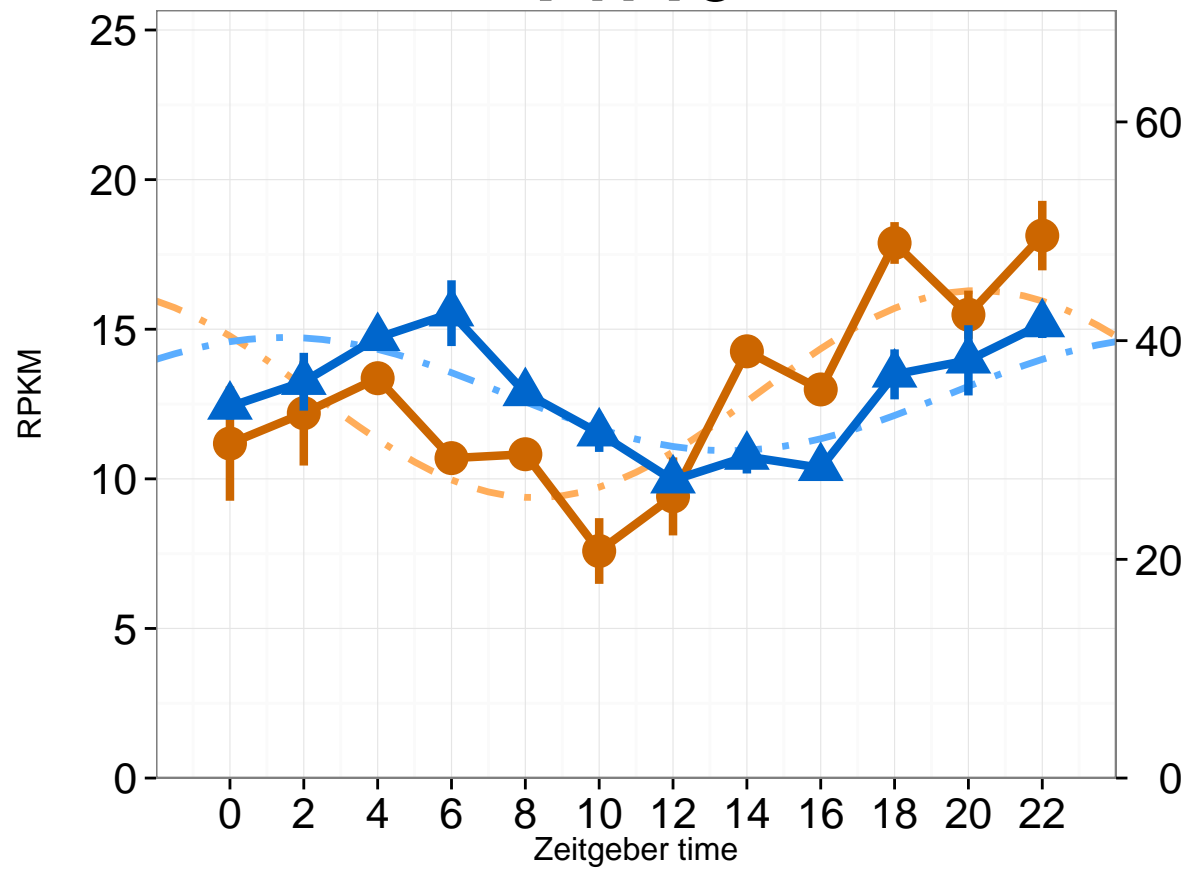

## Prr13

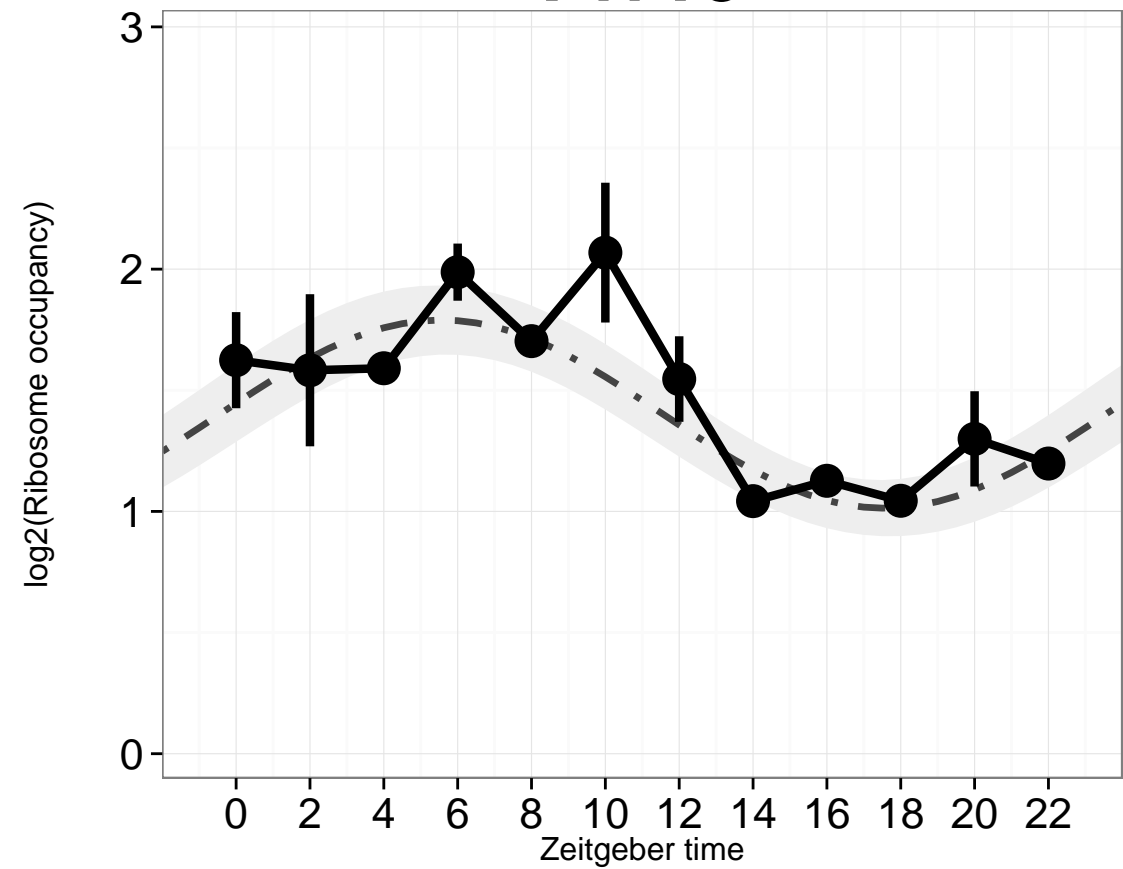

Supplement: SuppDataset_1.zip [file Prr13_set_B.pdf › Supplemental Dataset 1/B-mRNA_rhythm_translation_nonrhyth/Prr13_set_B.pdf]

## Prune

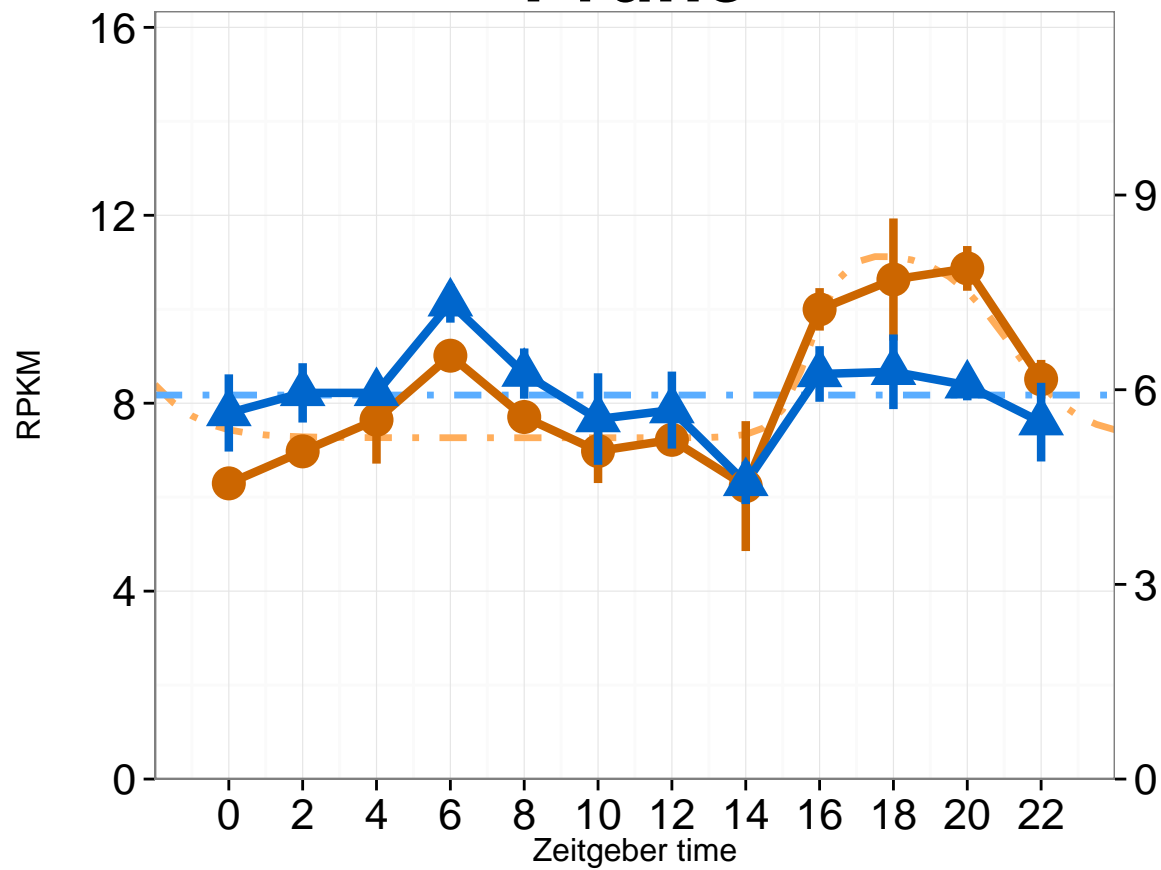

## Prune

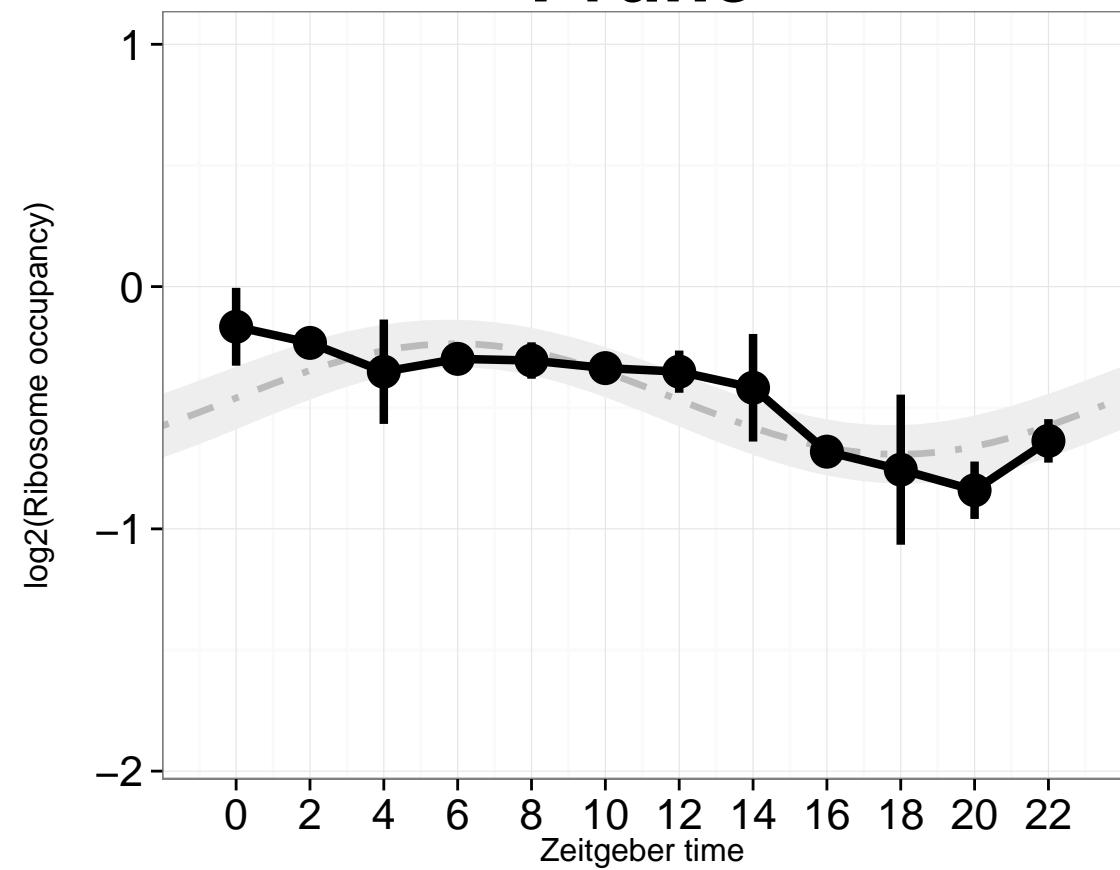

Supplement: SuppDataset_1.zip [file Prune_set_B.pdf › Supplemental Dataset 1/B-mRNA_rhythm_translation_nonrhyth/Prune_set_B.pdf]

## Pstpip2

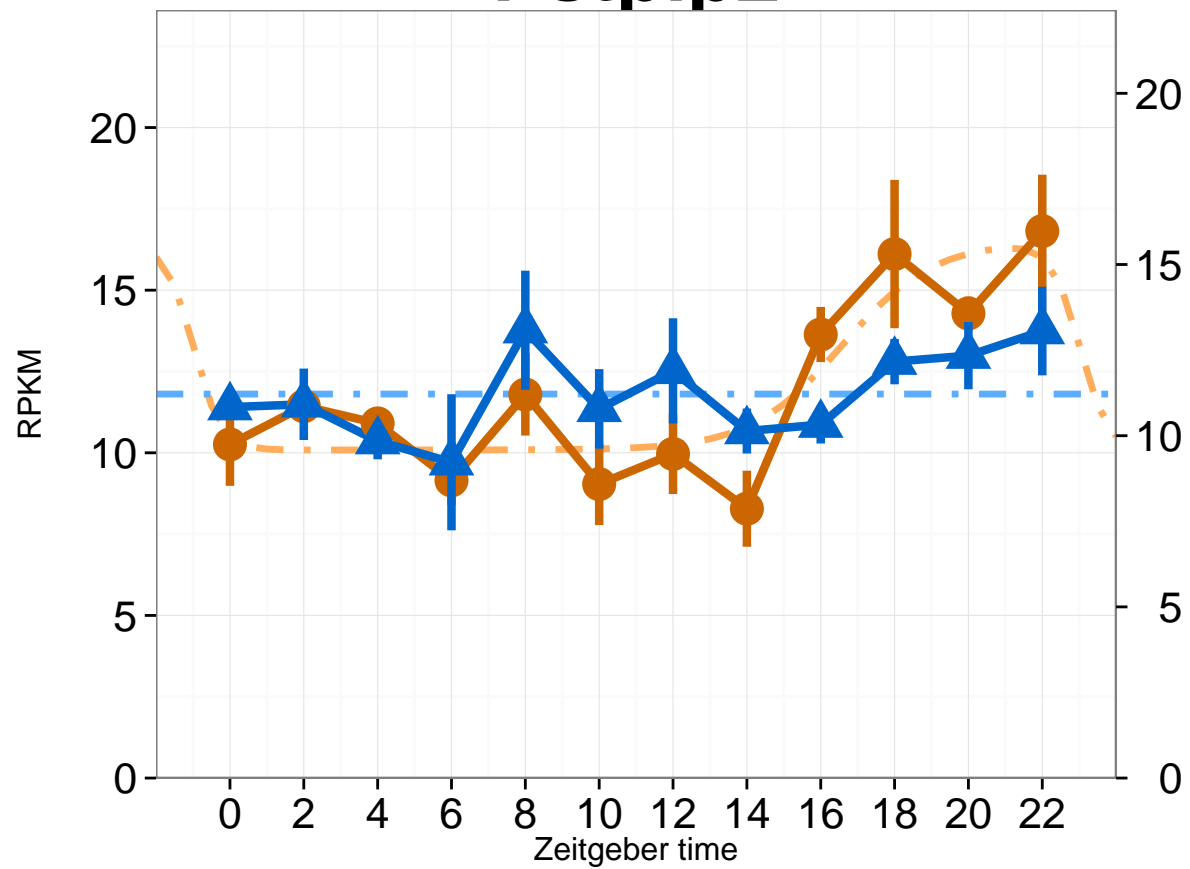

## Pstpip2

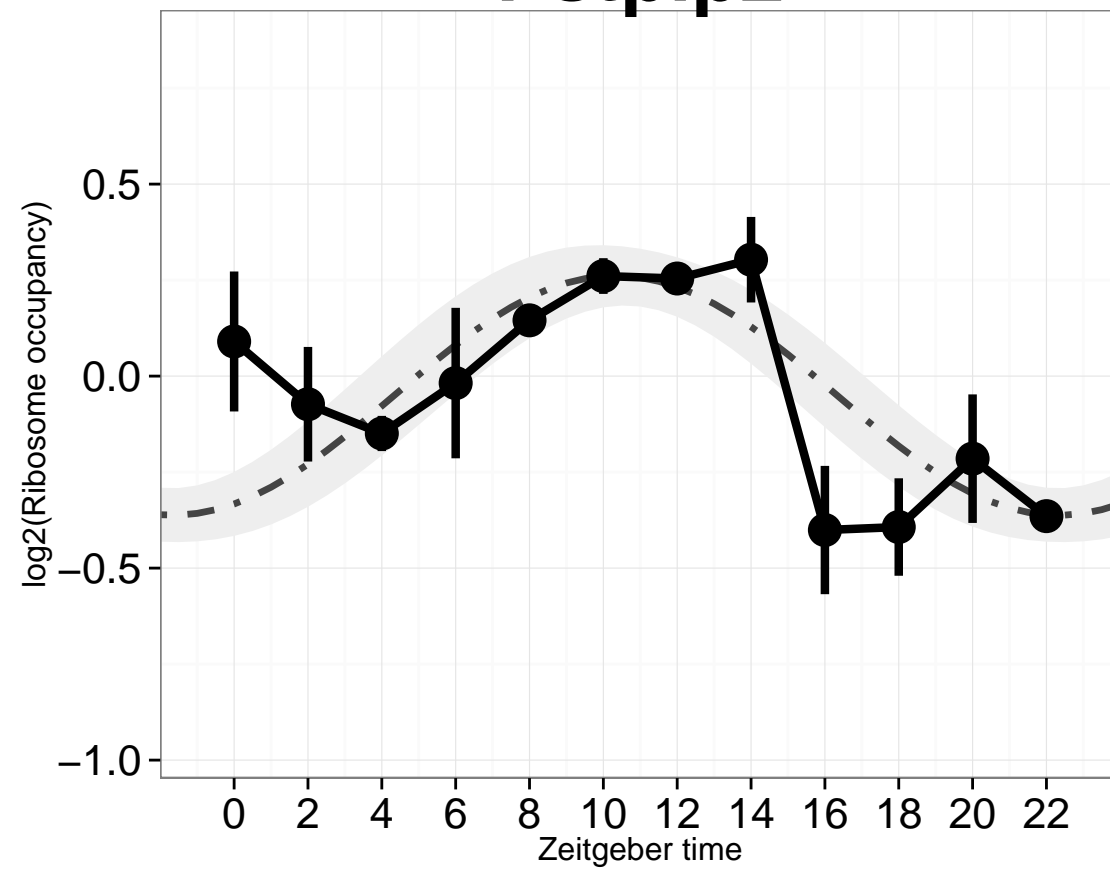

Supplement: SuppDataset_1.zip [file Pstpip2_set_B.pdf › Supplemental Dataset 1/B-mRNA_rhythm_translation_nonrhyth/Pstpip2_set_B.pdf]

# Ptgis

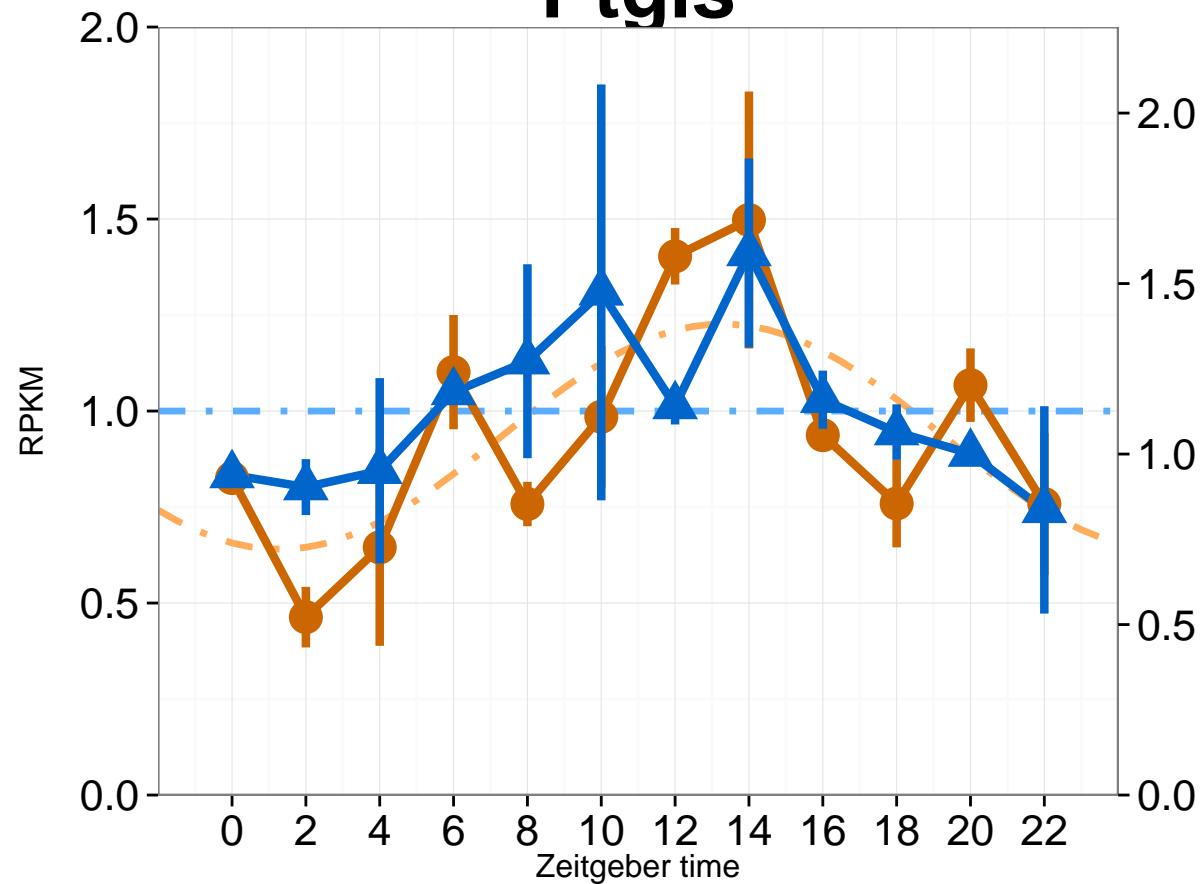

# Ptgis

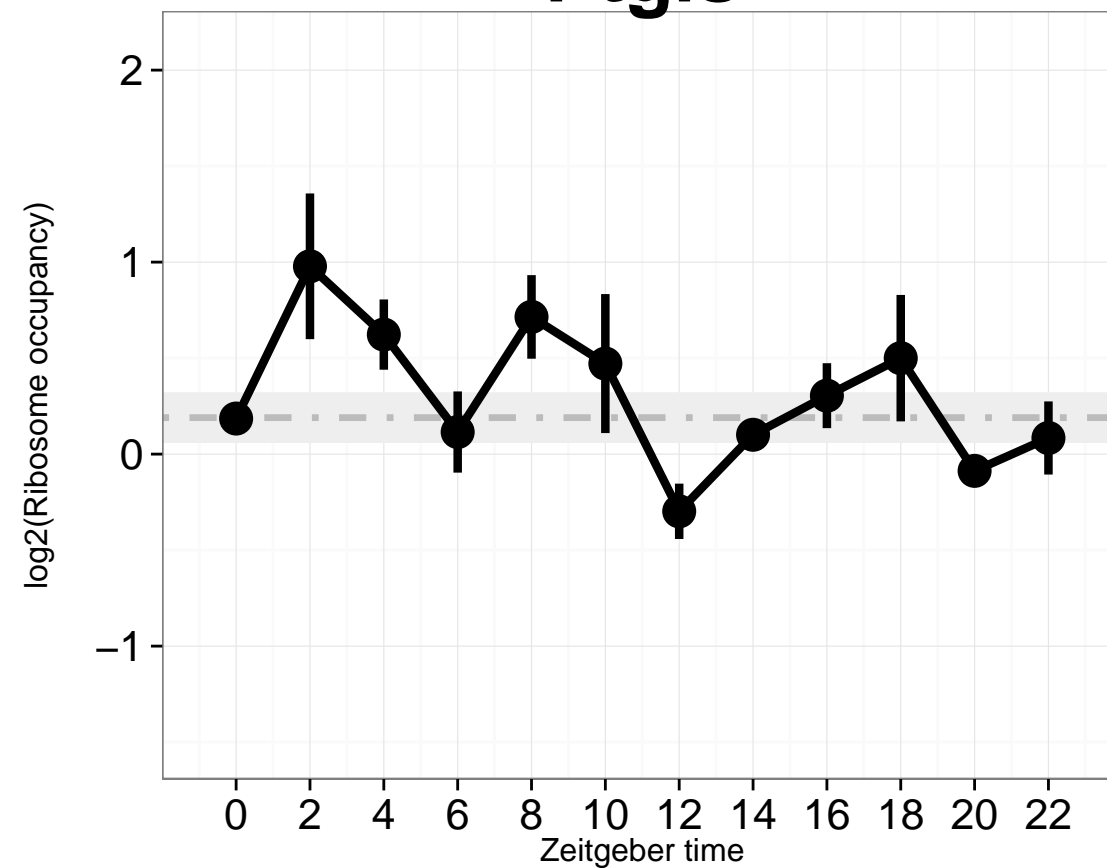

Supplement: SuppDataset_1.zip [file Ptgis_set_B.pdf › Supplemental Dataset 1/B-mRNA_rhythm_translation_nonrhyth/Ptgis_set_B.pdf]

# Ptp4a1

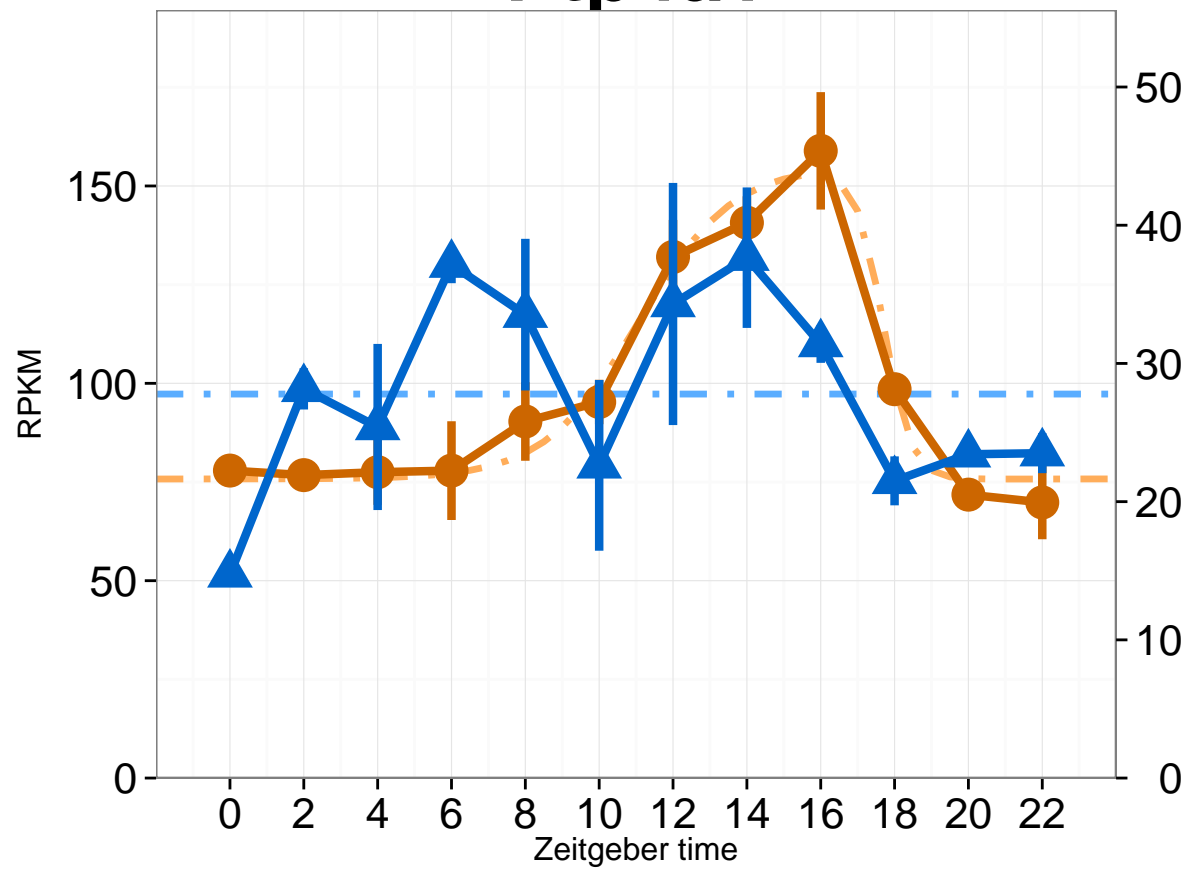

# Ptp4a1

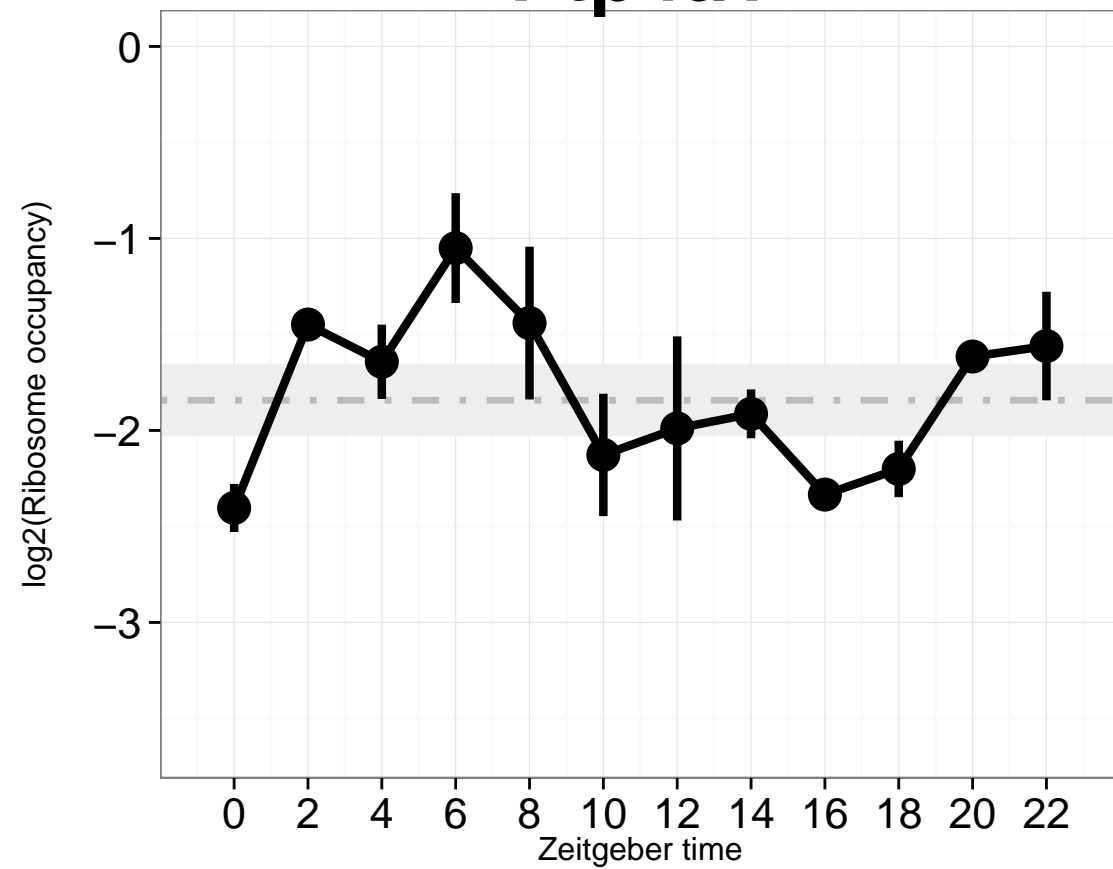

Supplement: SuppDataset_1.zip [file Ptp4a1_set_B.pdf › Supplemental Dataset 1/B-mRNA_rhythm_translation_nonrhyth/Ptp4a1_set_B.pdf]

# Ptpn13

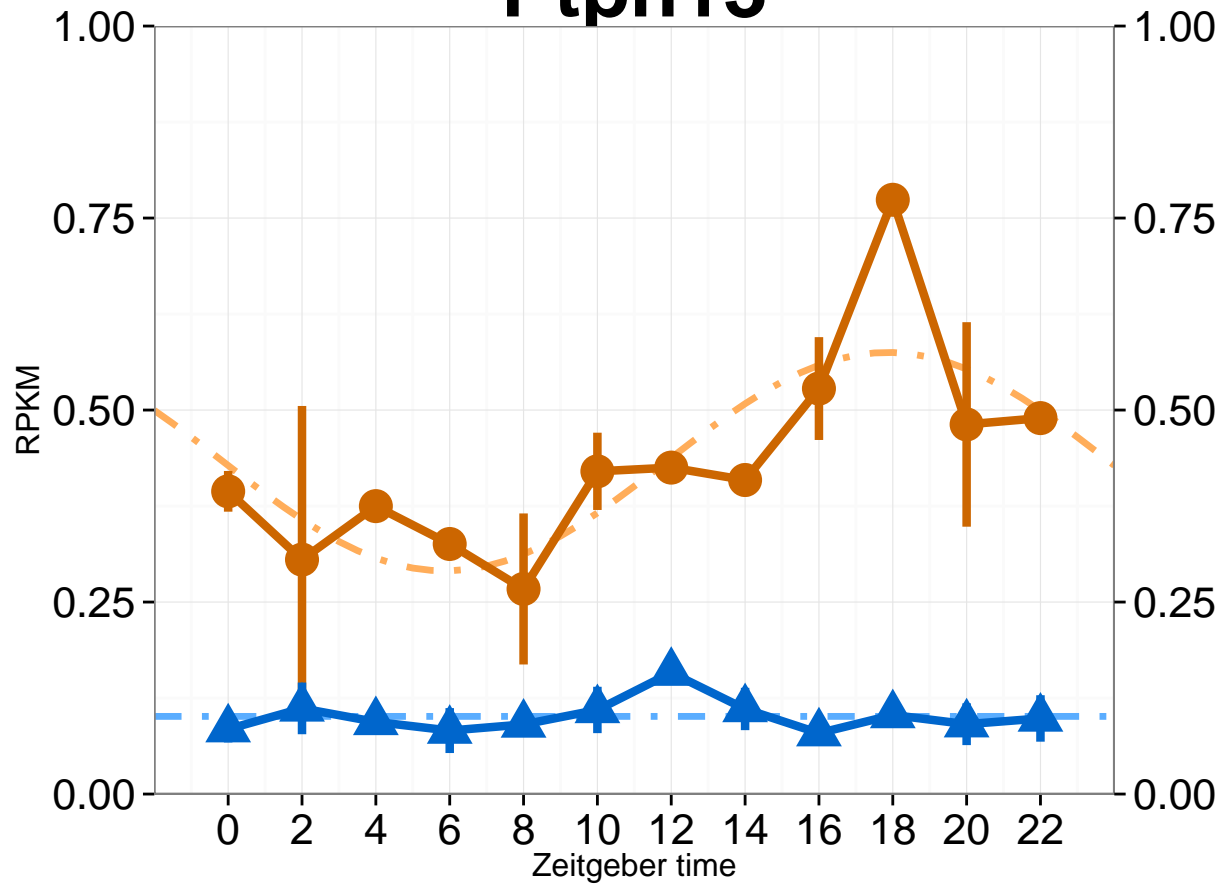

# Ptpn13

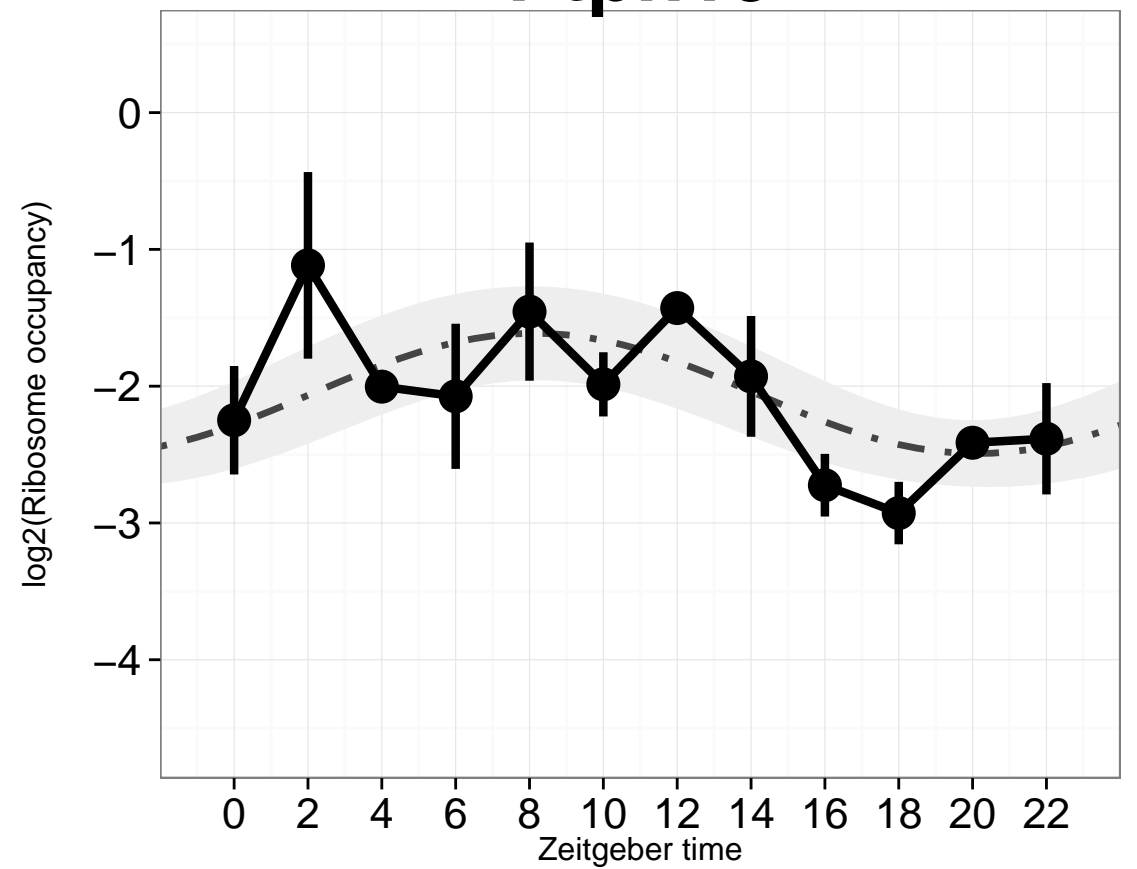

Supplement: SuppDataset_1.zip [file Ptpn13_set_B.pdf › Supplemental Dataset 1/B-mRNA_rhythm_translation_nonrhyth/Ptpn13_set_B.pdf]

## Ptpn22

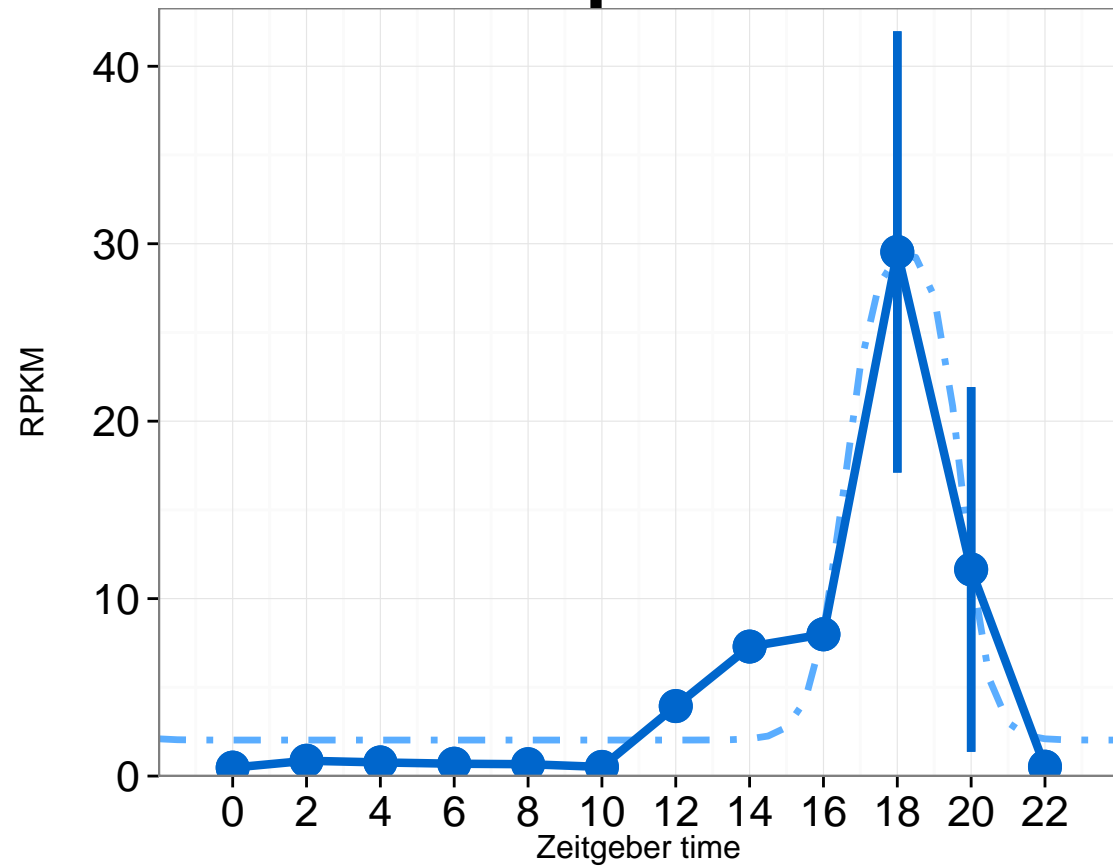

## Ptpn22 log2(Ribosome occupancy

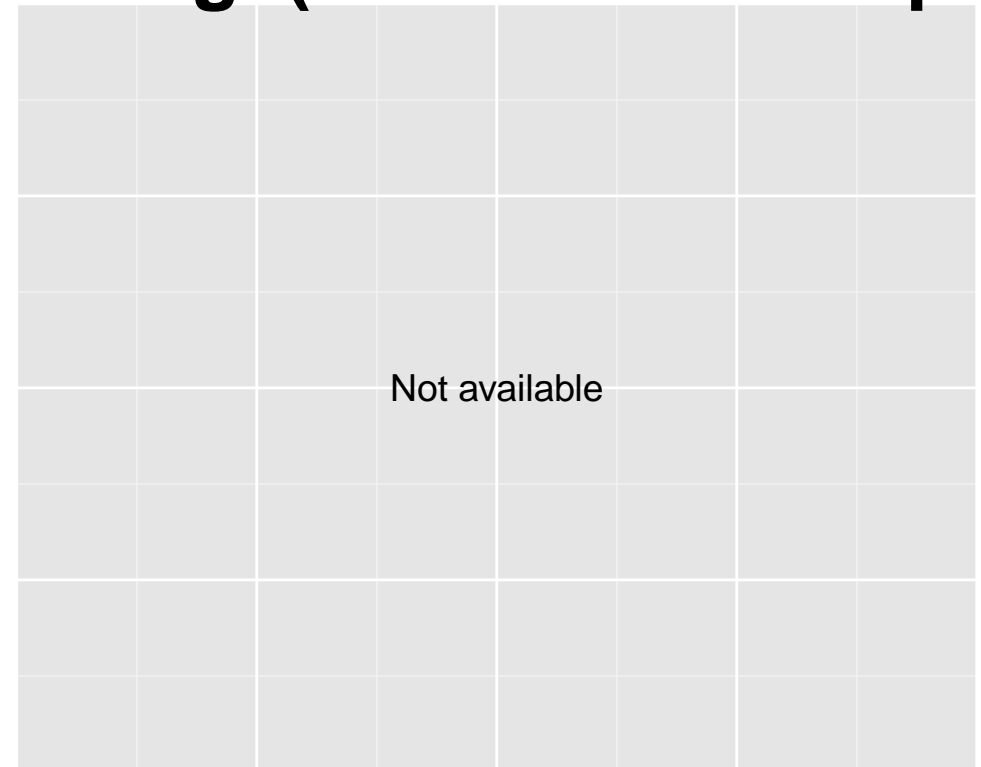

Supplement: SuppDataset_1.zip [file Ptpn22_set_B.pdf › Supplemental Dataset 1/B-mRNA_rhythm_translation_nonrhyth/Ptpn22_set_B.pdf]

**Ptpre**

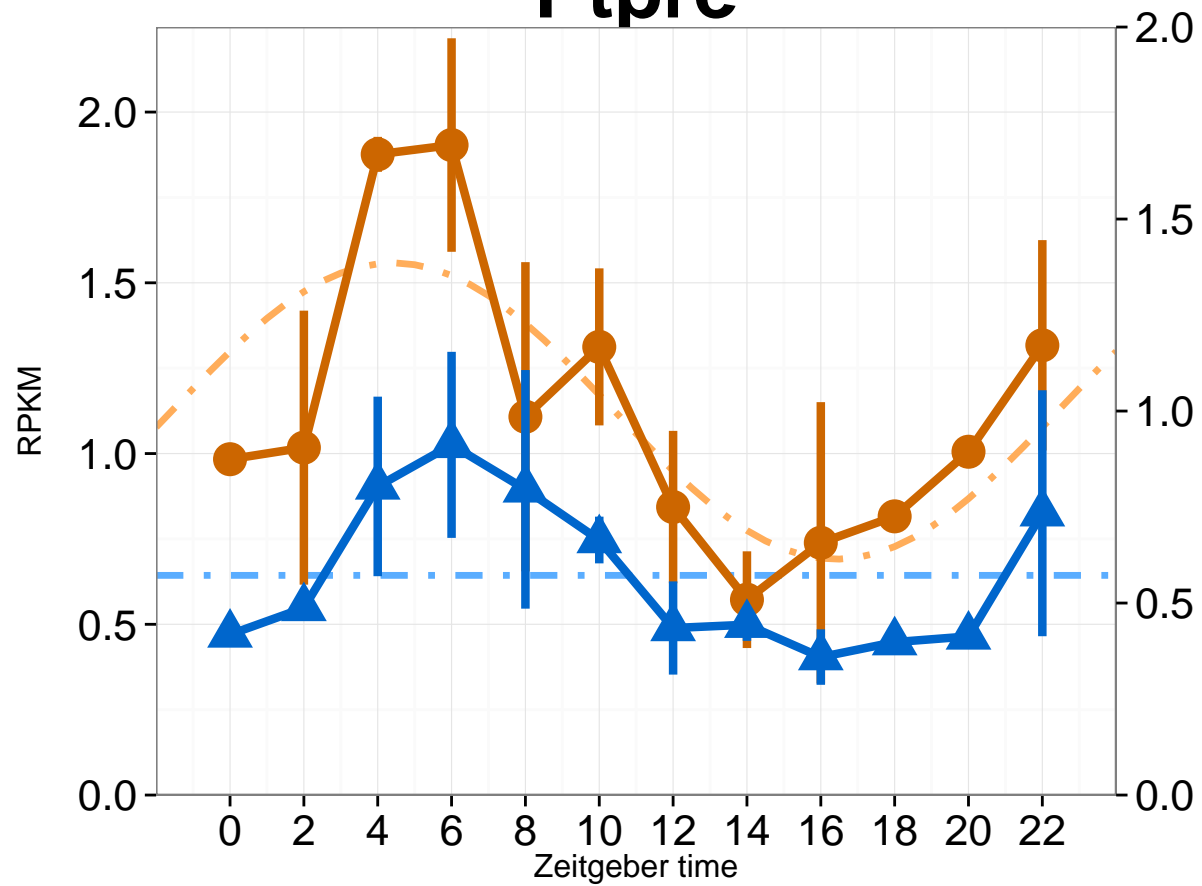

**Ptpre**

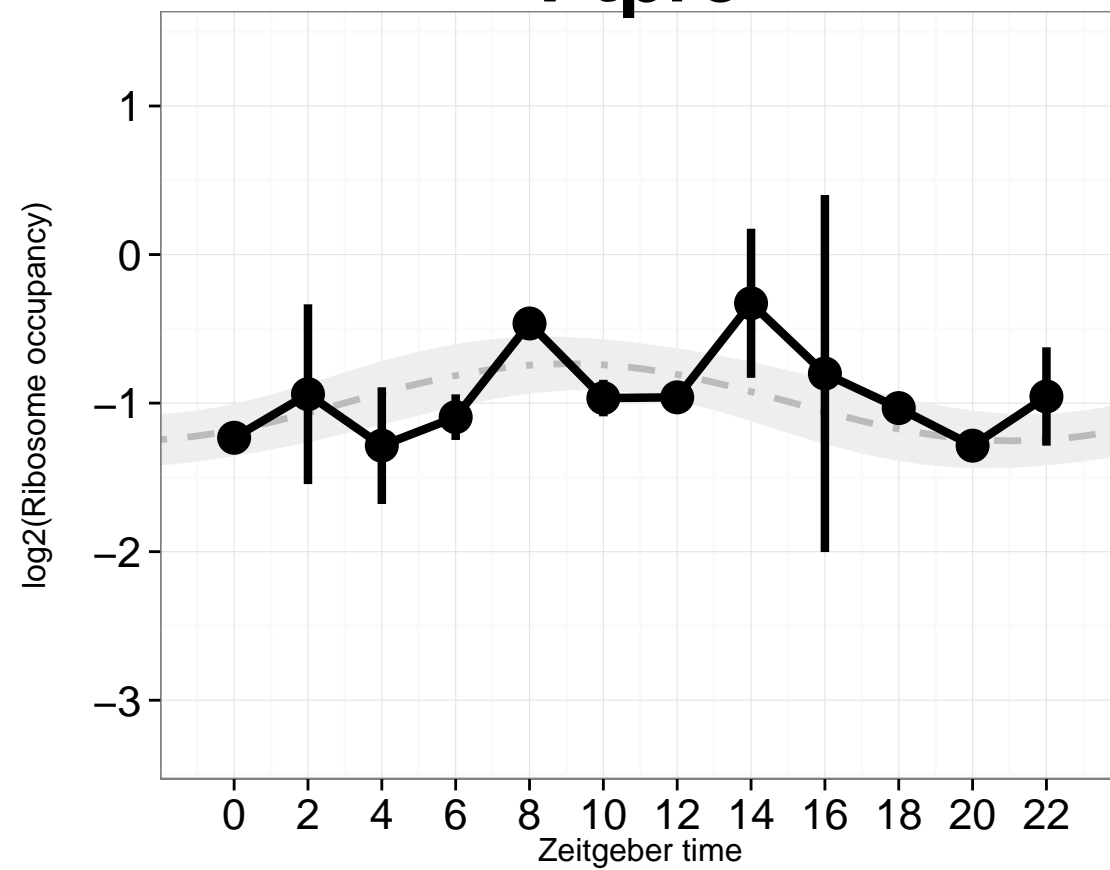

Supplement: SuppDataset_1.zip [file Ptpre_set_B.pdf › Supplemental Dataset 1/B-mRNA_rhythm_translation_nonrhyth/Ptpre_set_B.pdf]

# Qprt

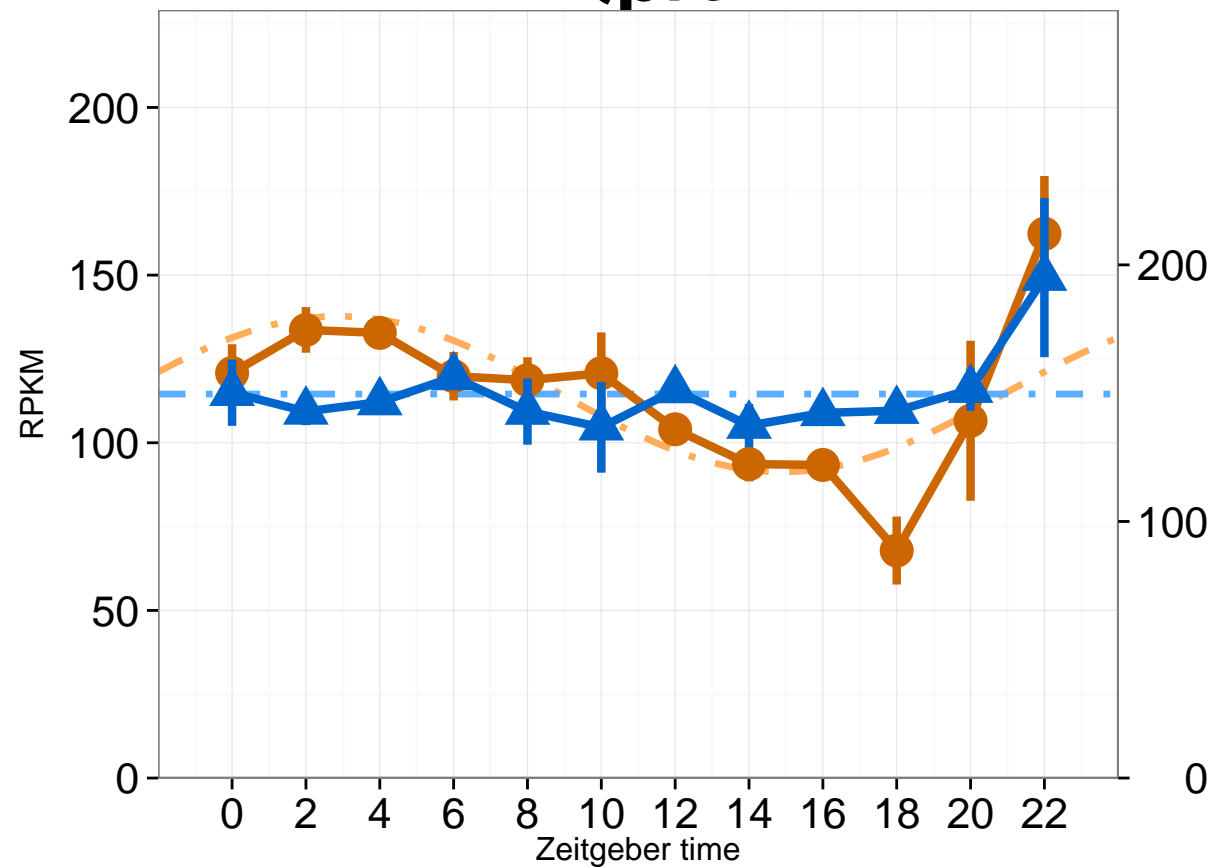

# Qprt

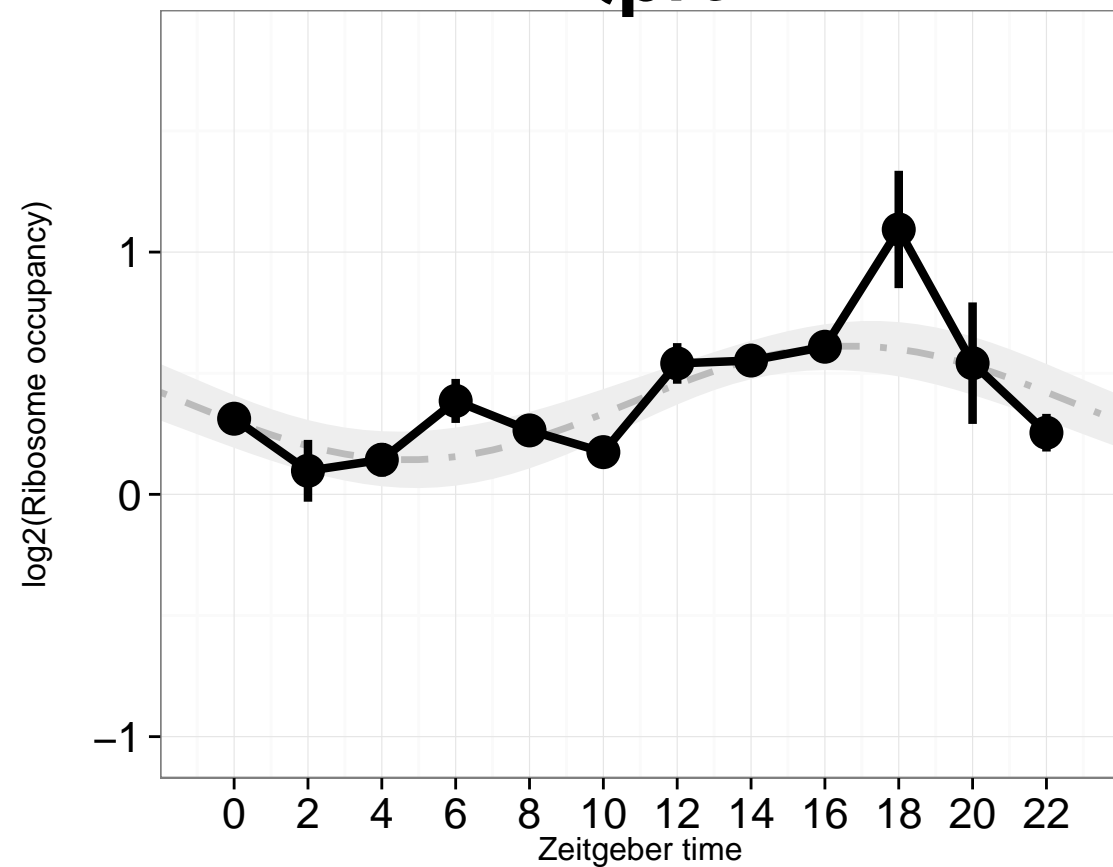

Supplement: SuppDataset_1.zip [file Qprt_set_B.pdf › Supplemental Dataset 1/B-mRNA_rhythm_translation_nonrhyth/Qprt_set_B.pdf]

# R3hcc1

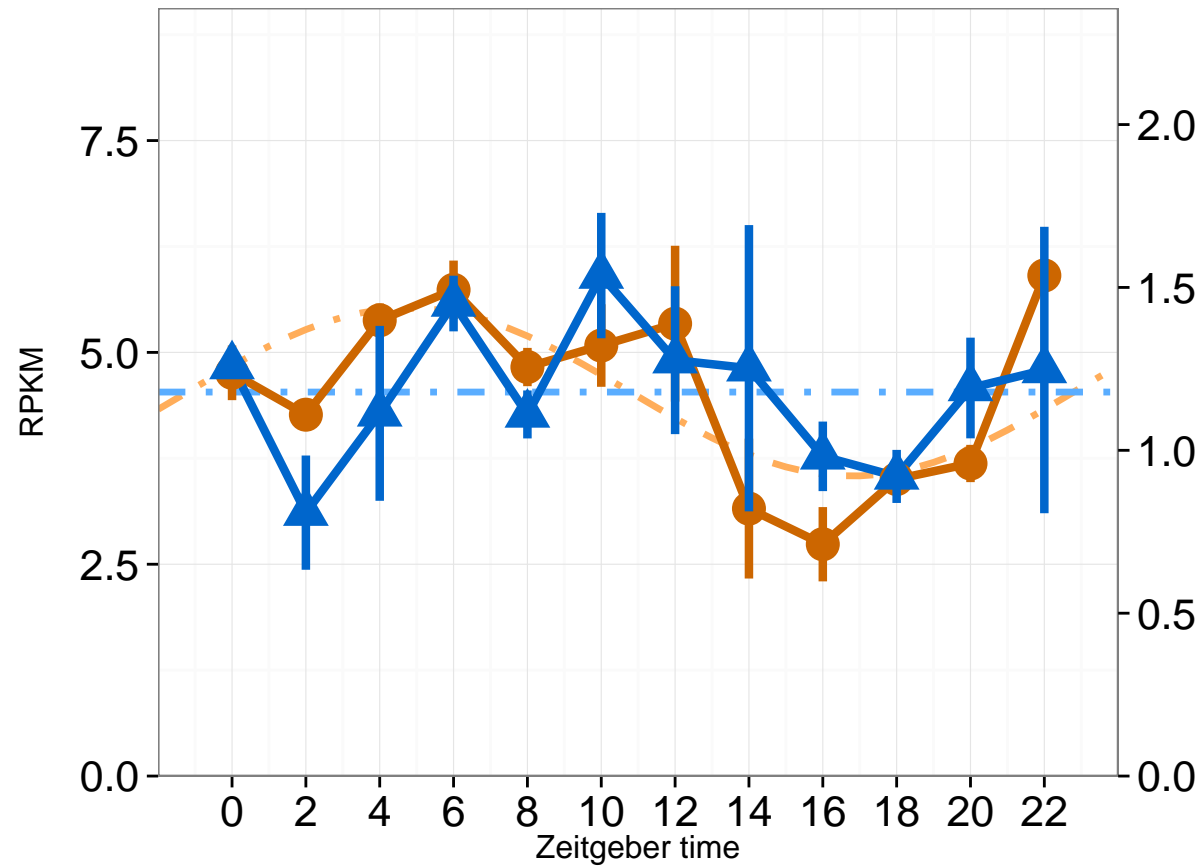

# R3hcc1

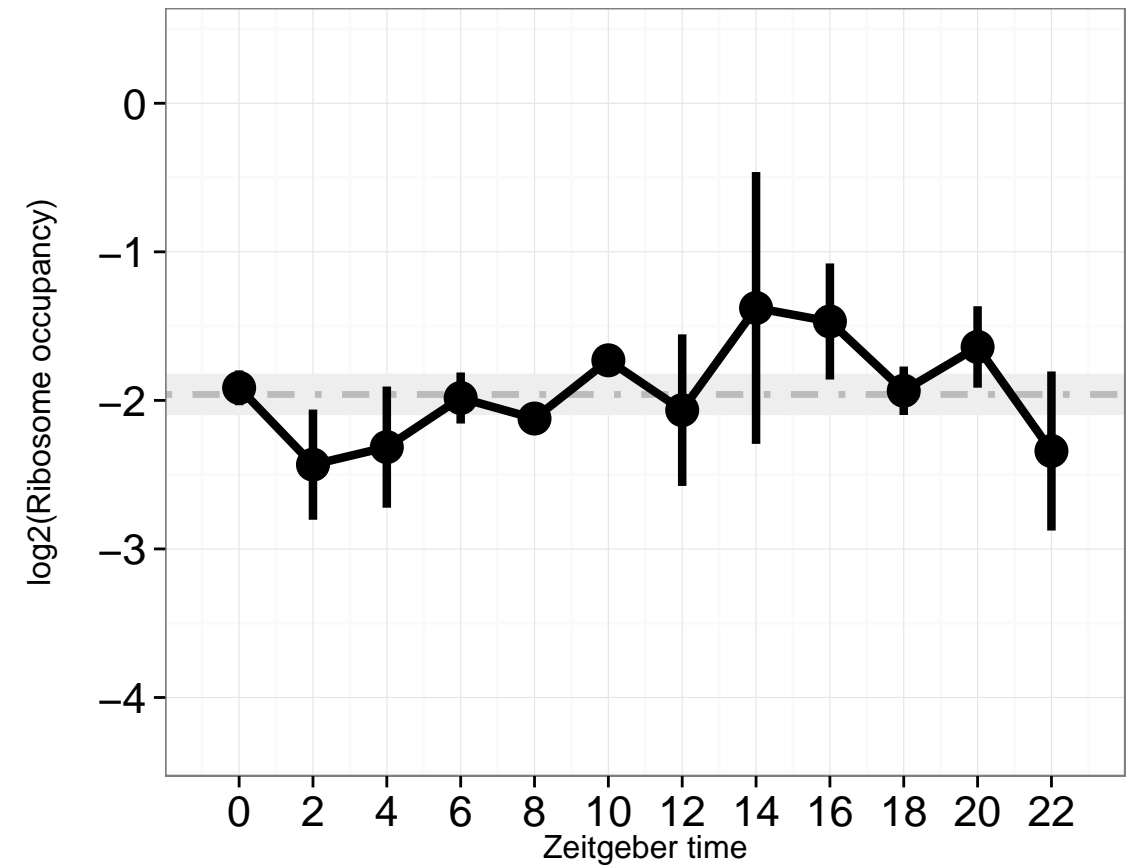

Supplement: SuppDataset_1.zip [file R3hcc1_set_B.pdf › Supplemental Dataset 1/B-mRNA_rhythm_translation_nonrhyth/R3hcc1_set_B.pdf]

## Rabgggtb

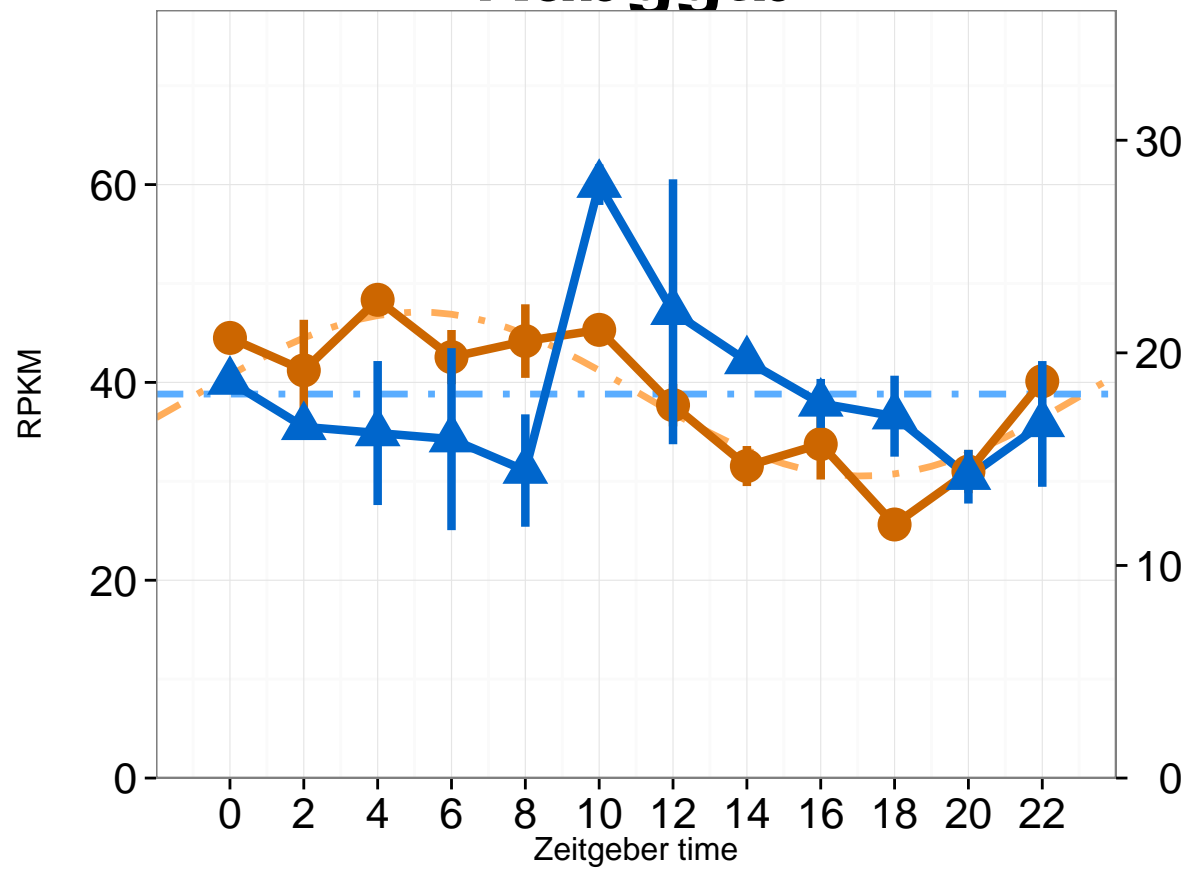

## Rabgggtb

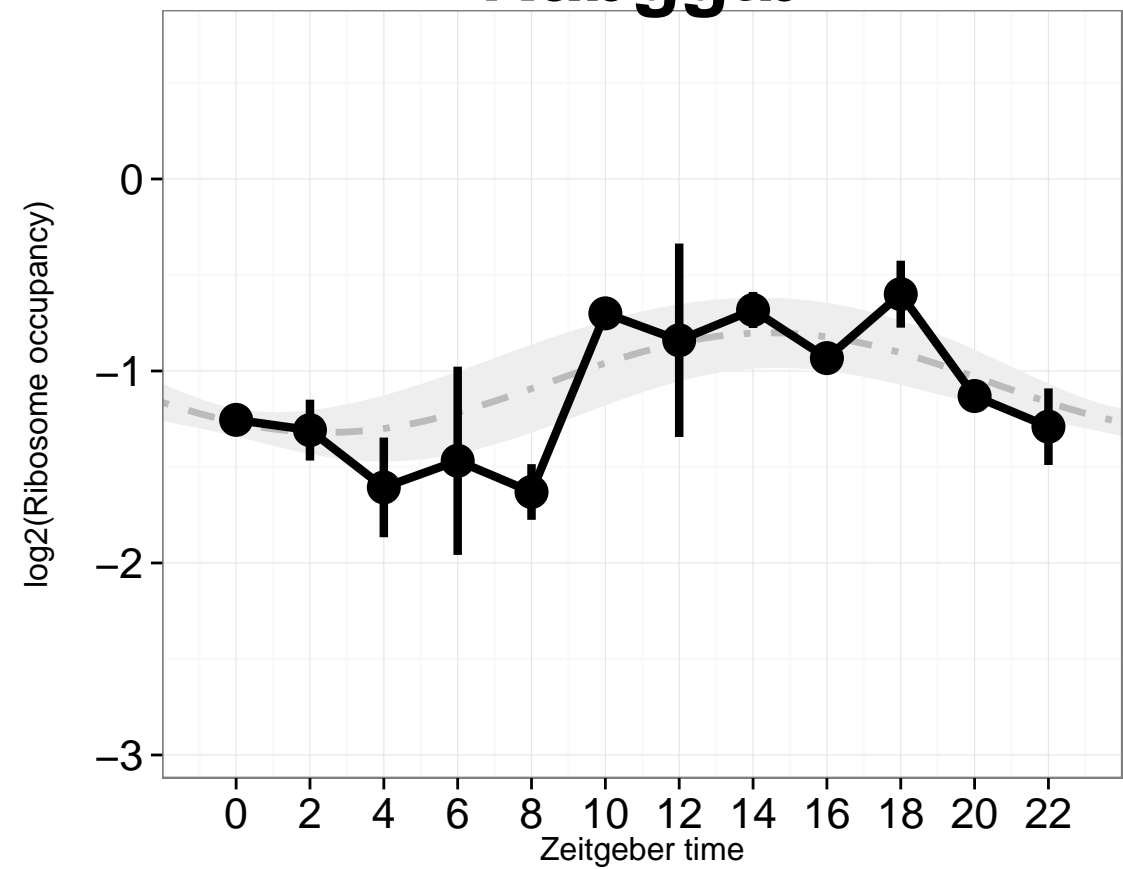

Supplement: SuppDataset_1.zip [file Rabggtb_set_B.pdf › Supplemental Dataset 1/B-mRNA_rhythm_translation_nonrhyth/Rabggtb_set_B.pdf]

## Ralgps2

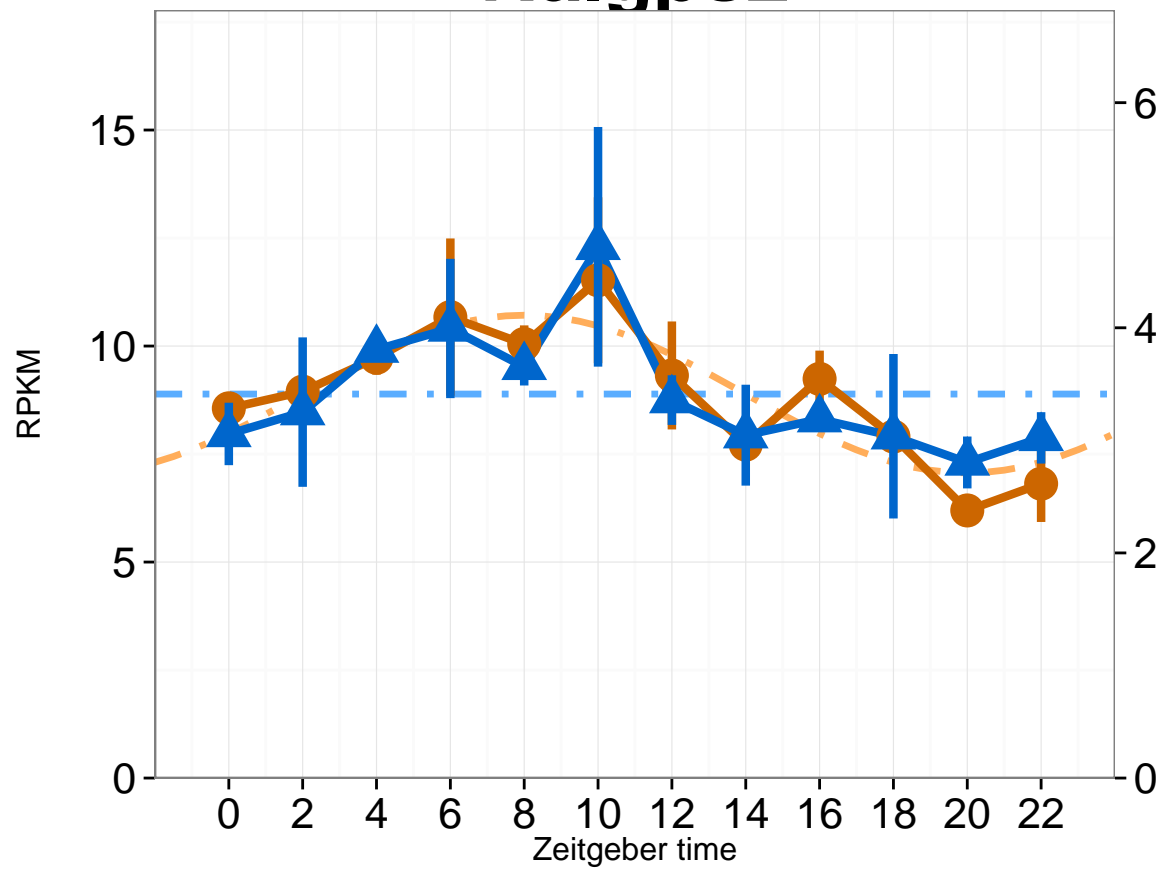

## Ralgps2

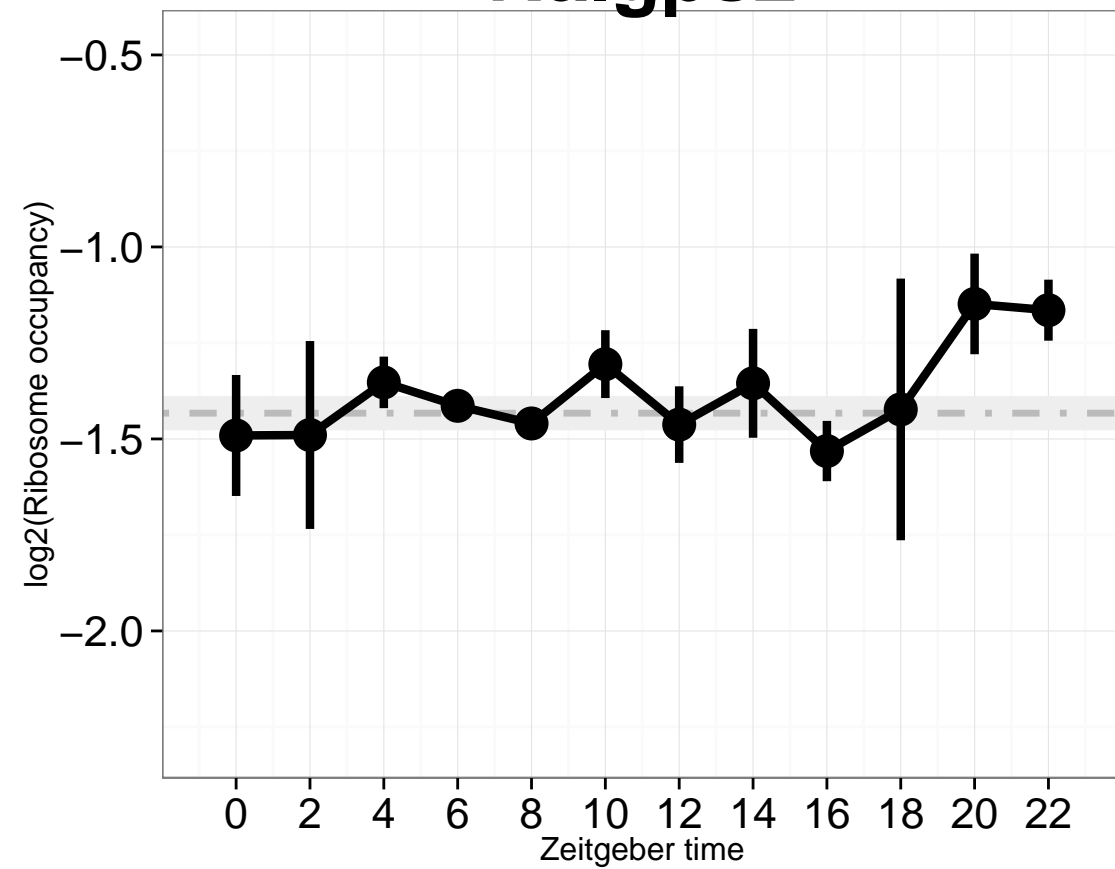

Supplement: SuppDataset_1.zip [file Ralgps2_set_B.pdf › Supplemental Dataset 1/B-mRNA_rhythm_translation_nonrhyth/Ralgps2_set_B.pdf]

## Rap1b

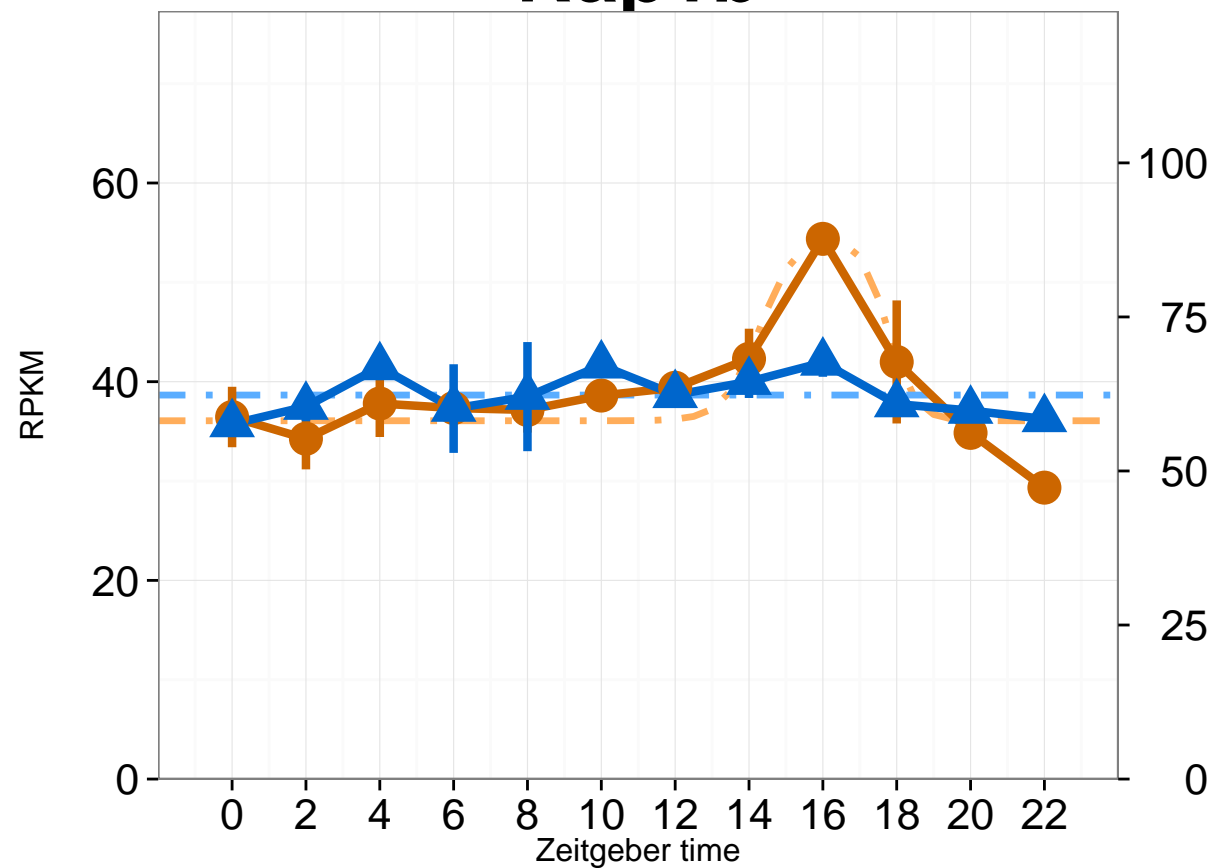

## Rap1b

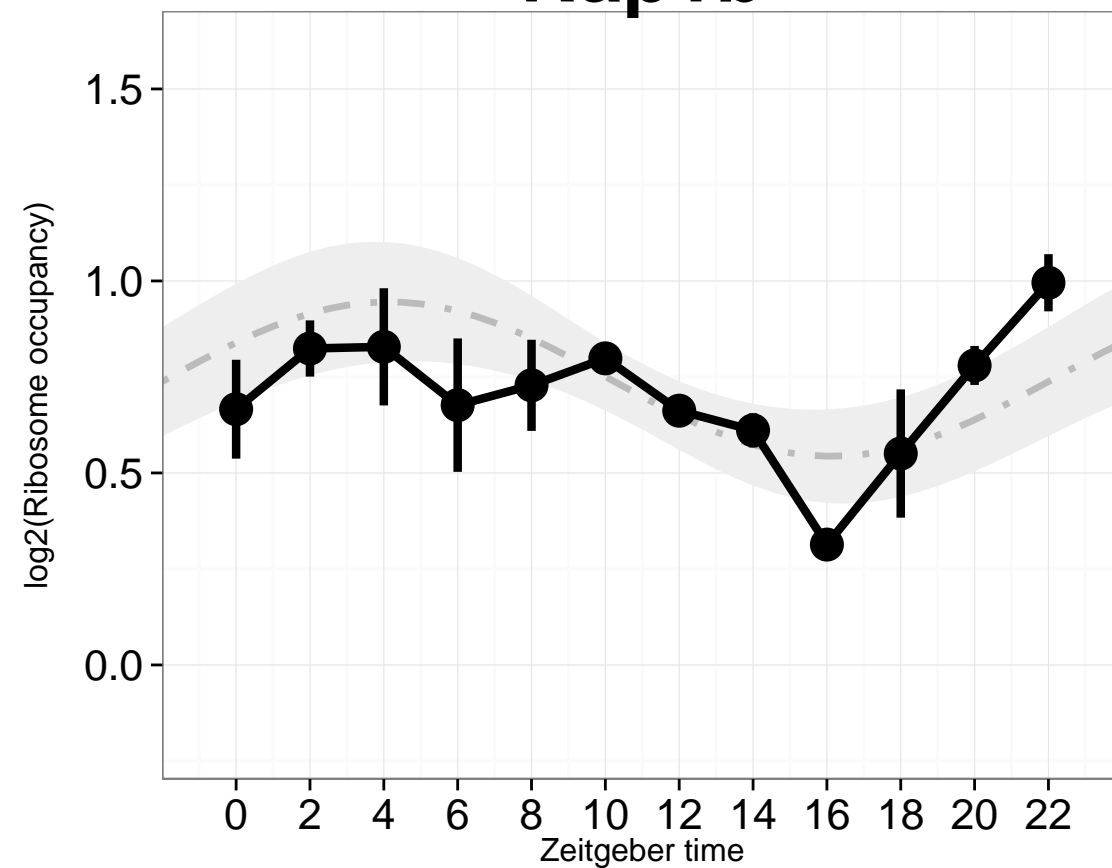

Supplement: SuppDataset_1.zip [file Rap1b_set_B.pdf › Supplemental Dataset 1/B-mRNA_rhythm_translation_nonrhyth/Rap1b_set_B.pdf]

## Rassf7

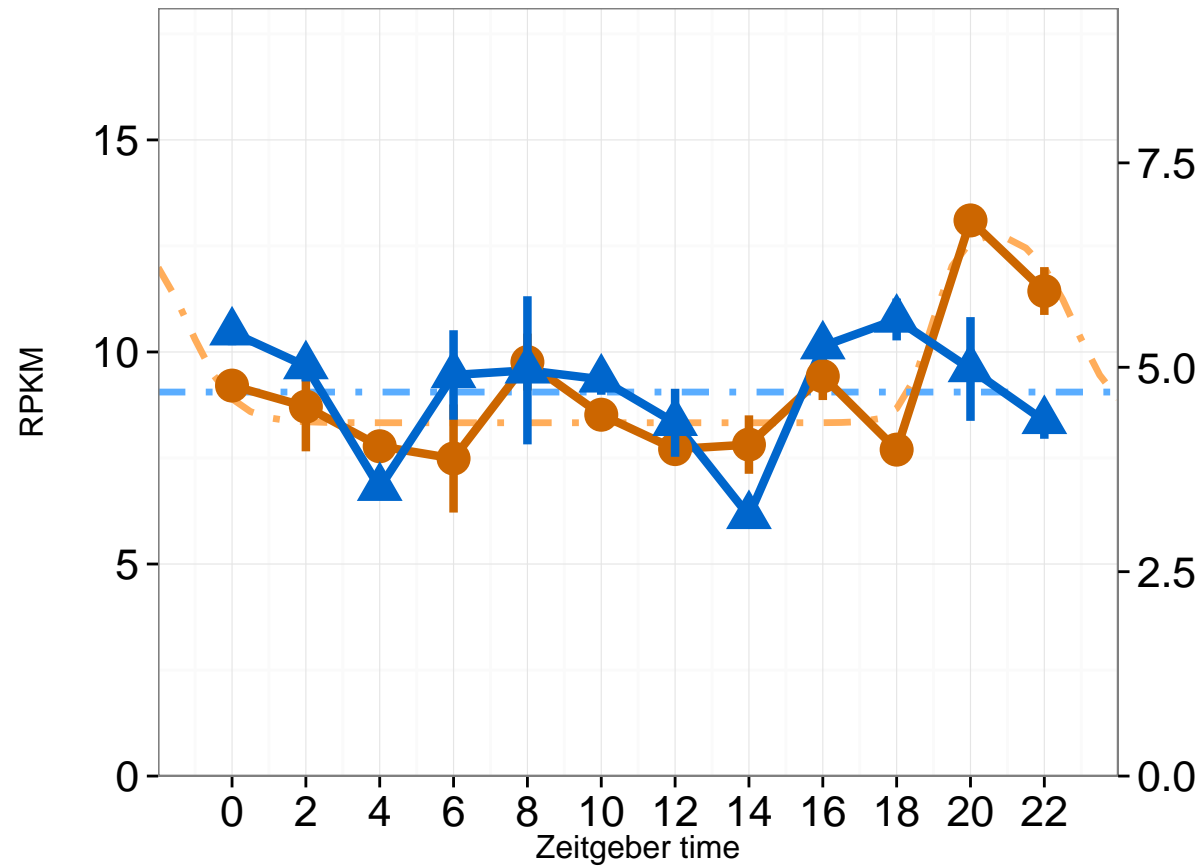

## Rassf7

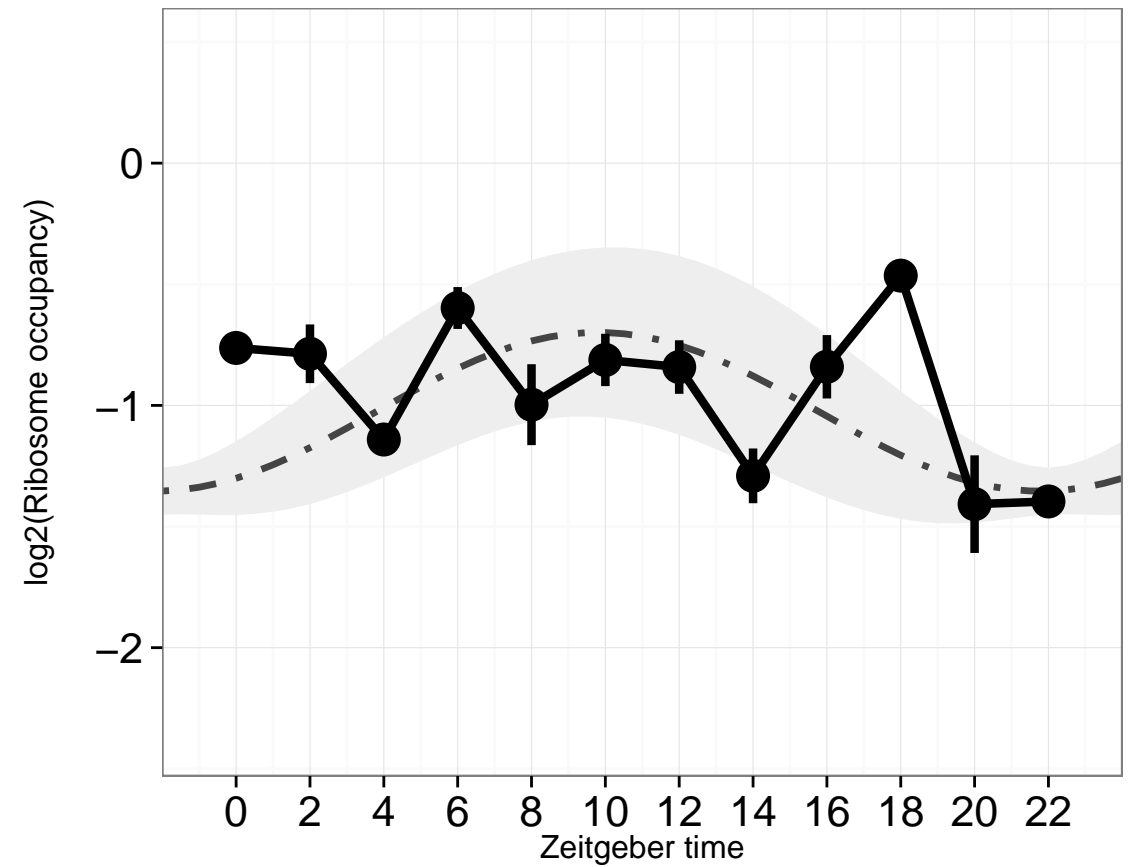

Supplement: SuppDataset_1.zip [file Rassf7_set_B.pdf › Supplemental Dataset 1/B-mRNA_rhythm_translation_nonrhyth/Rassf7_set_B.pdf]

# Rbbp8

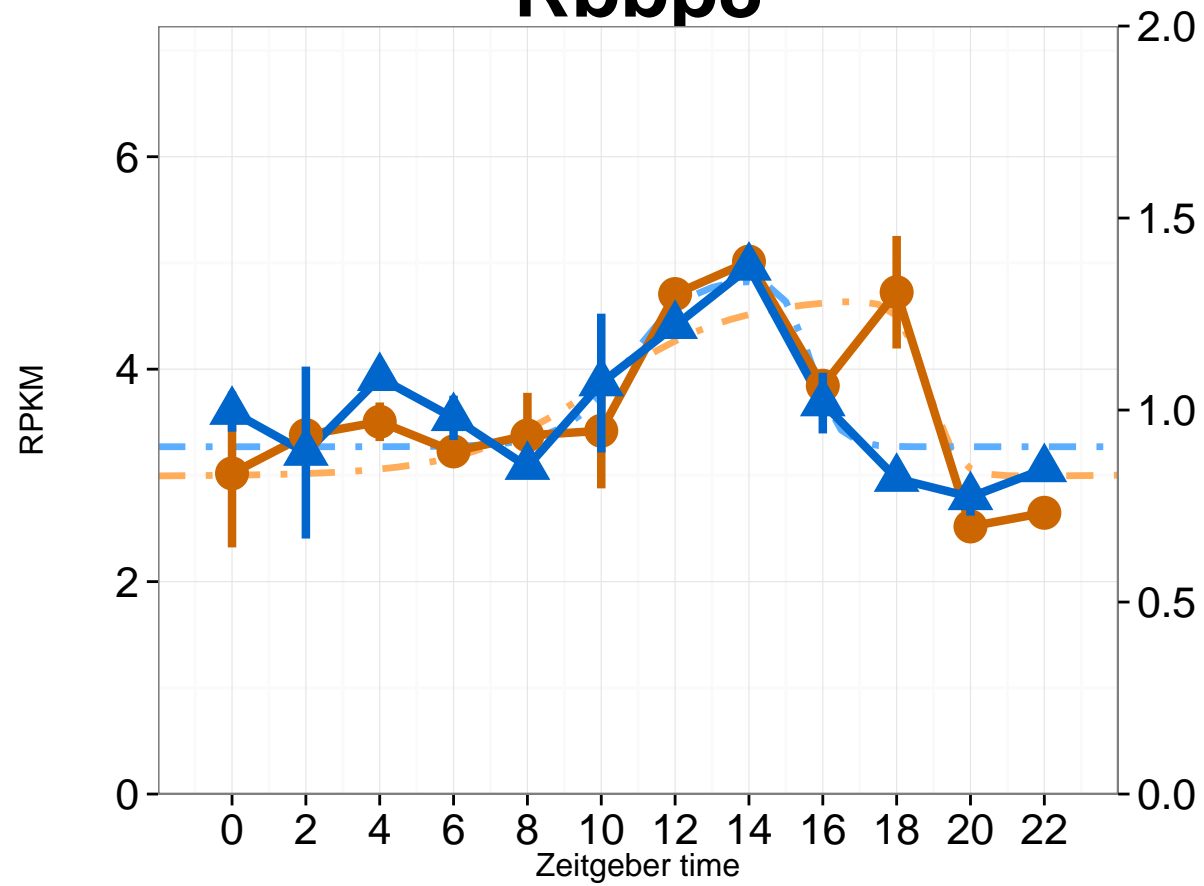

# Rbbp8

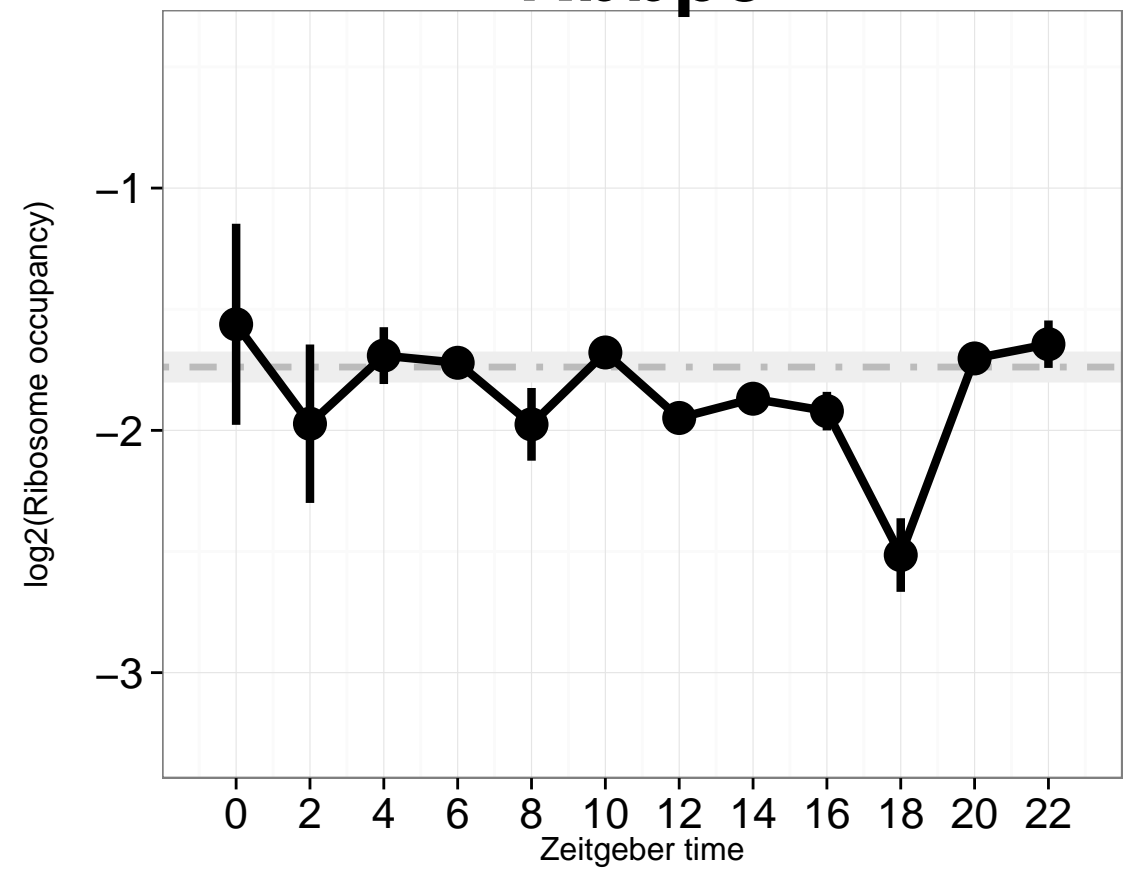

Supplement: SuppDataset_1.zip [file Rbbp8_set_B.pdf › Supplemental Dataset 1/B-mRNA_rhythm_translation_nonrhyth/Rbbp8_set_B.pdf]

# Rbbp9

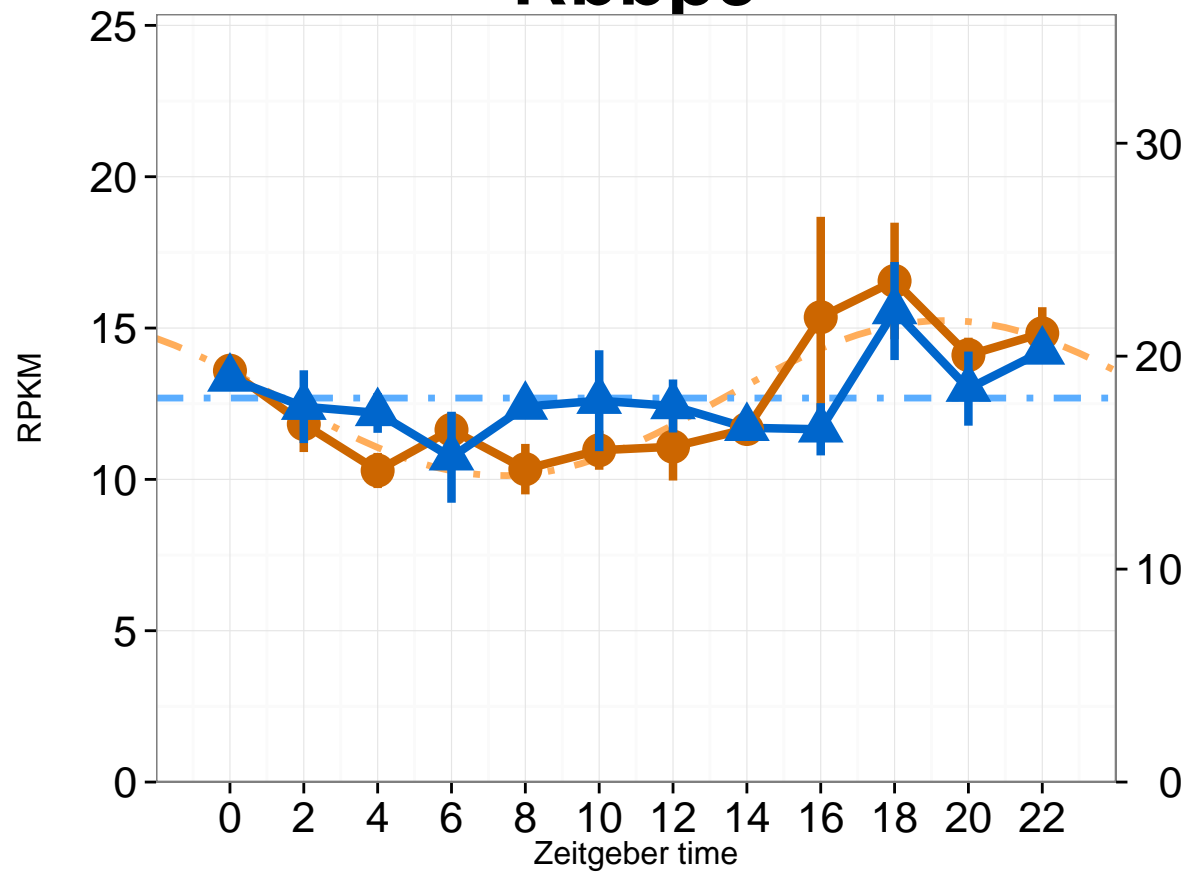

# Rbbp9

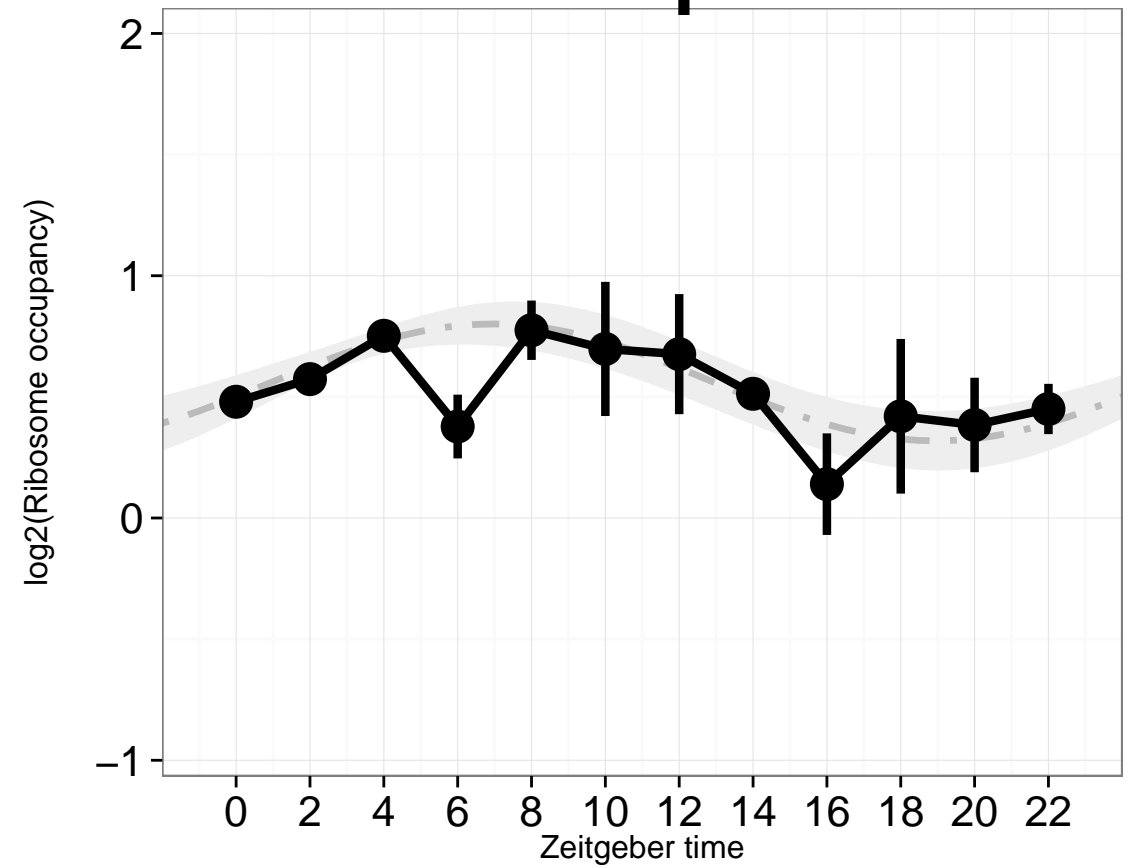

Supplement: SuppDataset_1.zip [file Rbbp9_set_B.pdf › Supplemental Dataset 1/B-mRNA_rhythm_translation_nonrhyth/Rbbp9_set_B.pdf]

# Rcan2

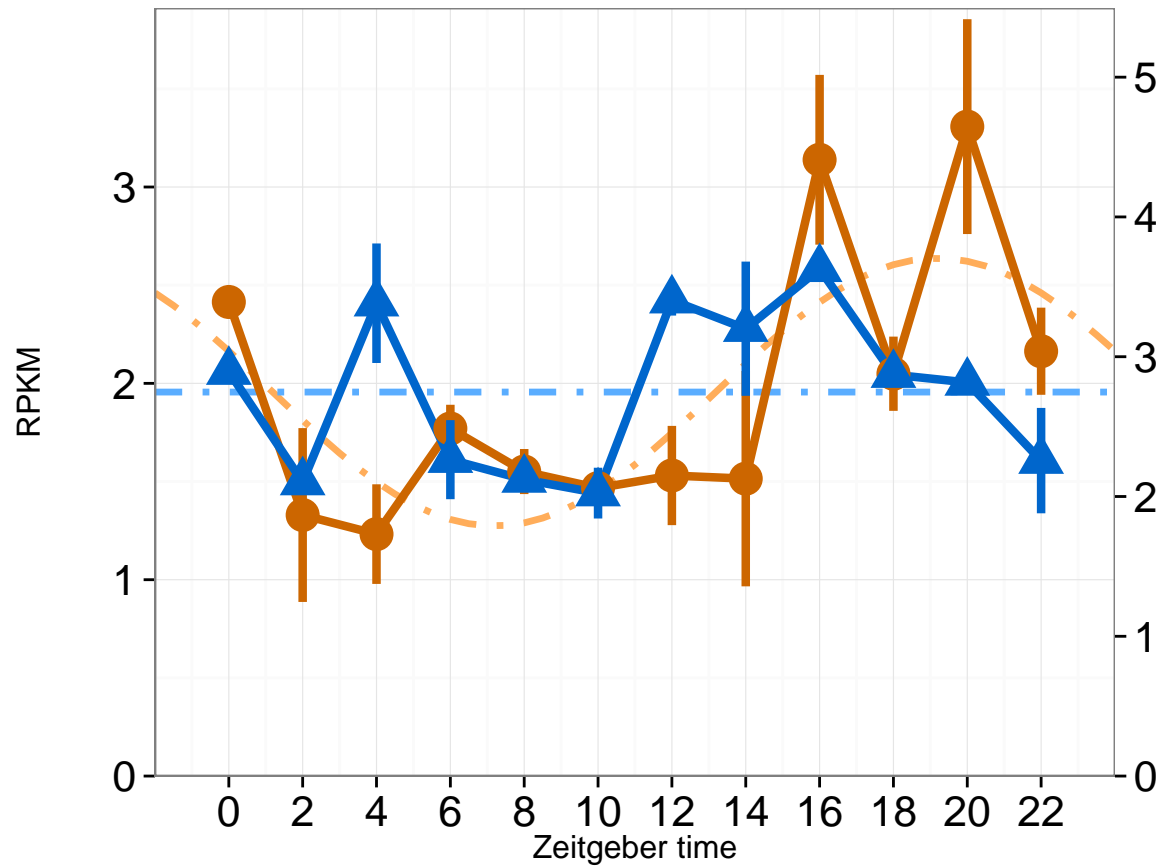

# Rcan2

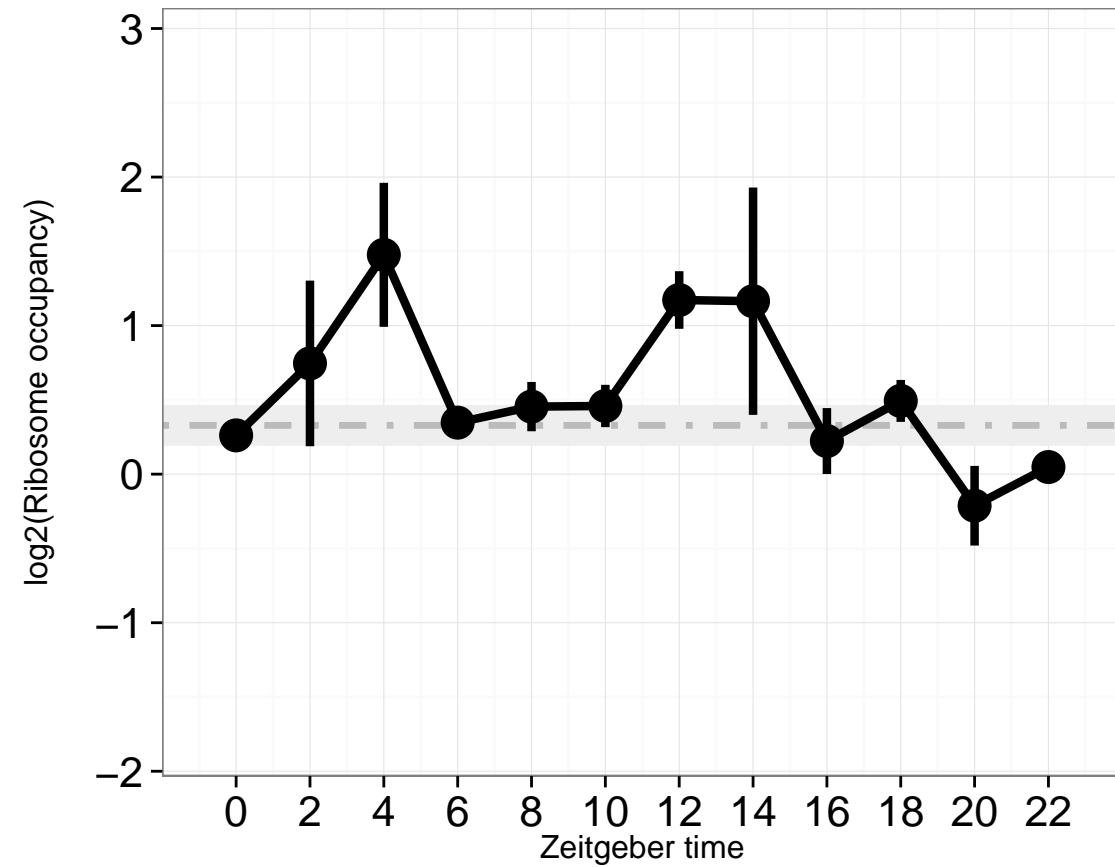

Supplement: SuppDataset_1.zip [file Rcan2_set_B.pdf › Supplemental Dataset 1/B-mRNA_rhythm_translation_nonrhyth/Rcan2_set_B.pdf]

## Rce1

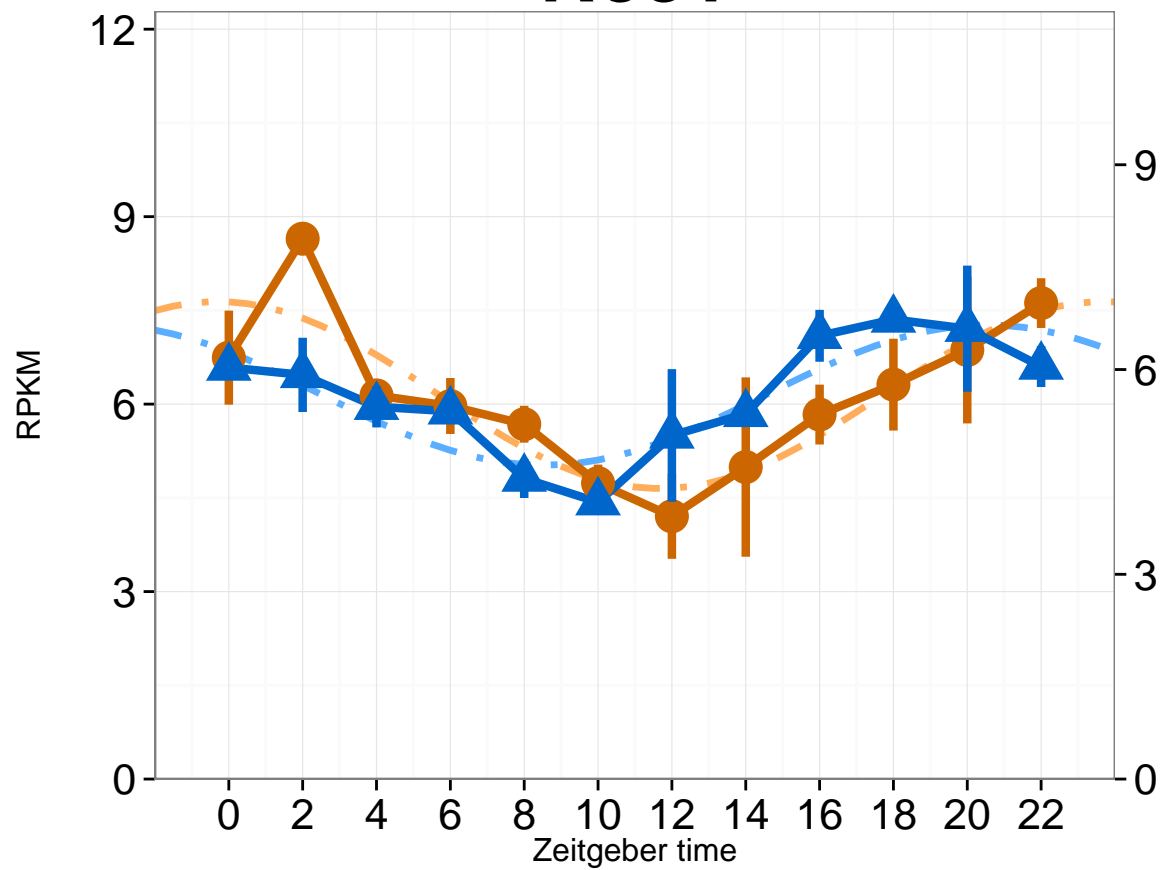

## Rce1

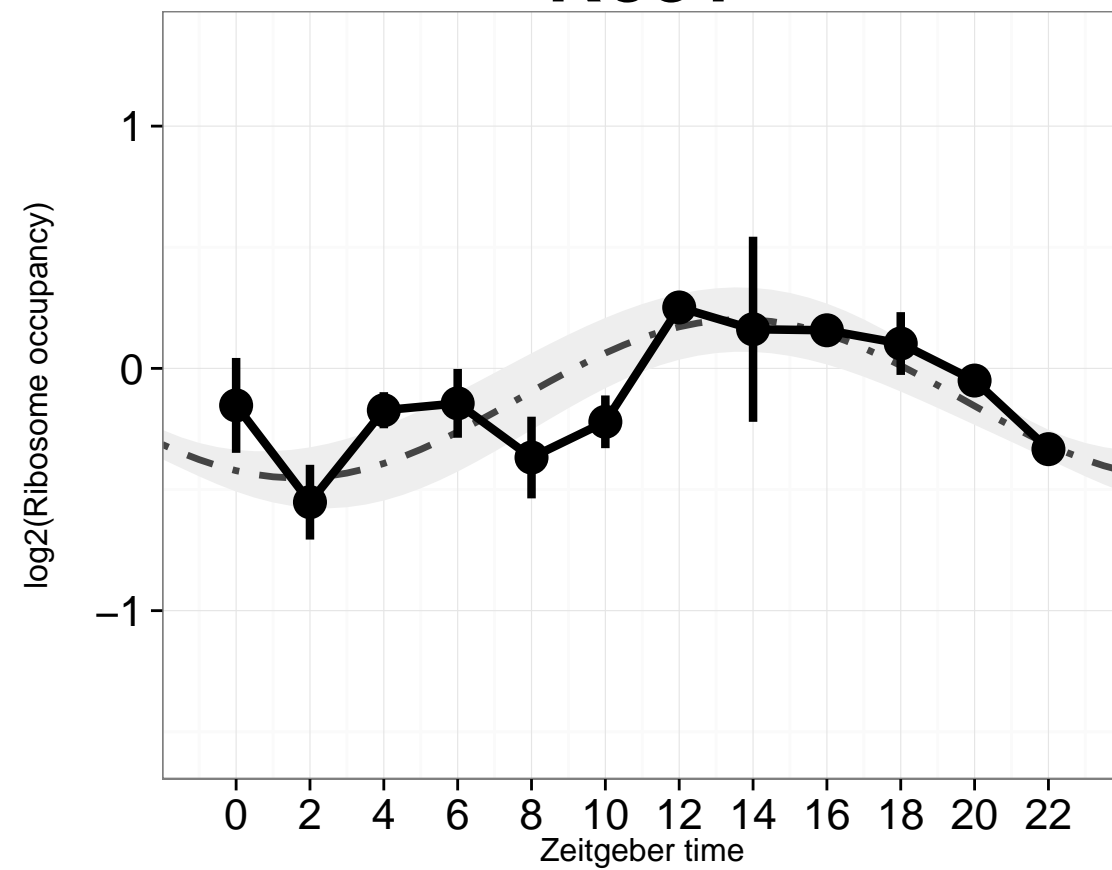

Supplement: SuppDataset_1.zip [file Rce1_set_B.pdf › Supplemental Dataset 1/B-mRNA_rhythm_translation_nonrhyth/Rce1_set_B.pdf]

# Reep4

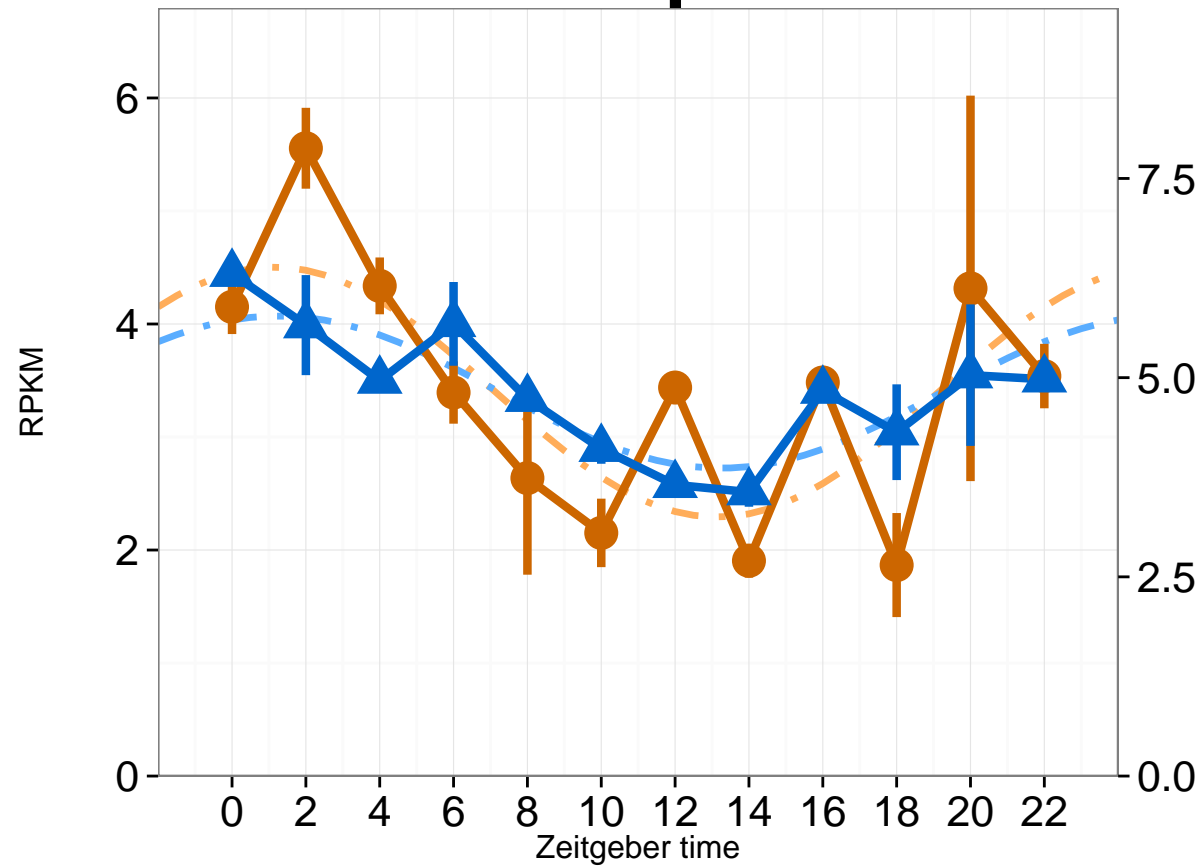

# Reep4

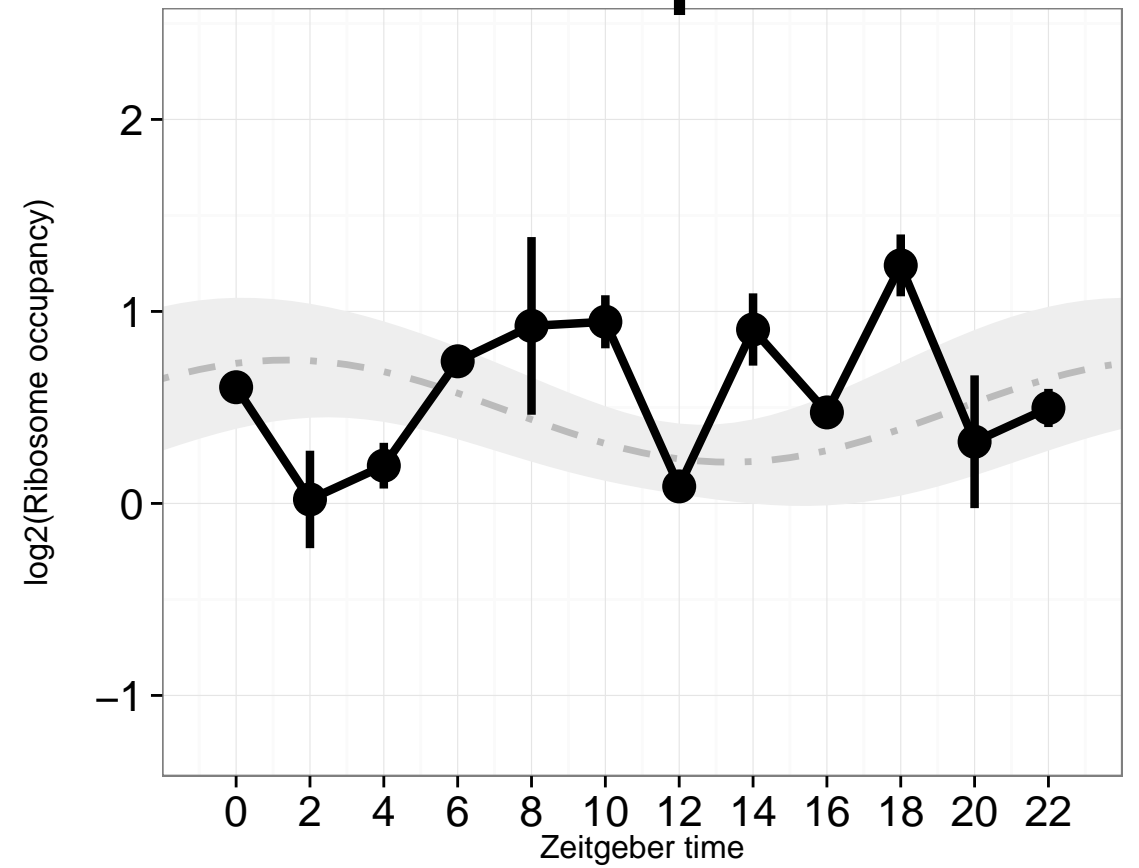

Supplement: SuppDataset_1.zip [file Reep4_set_B.pdf › Supplemental Dataset 1/B-mRNA_rhythm_translation_nonrhyth/Reep4_set_B.pdf]

# Reep5

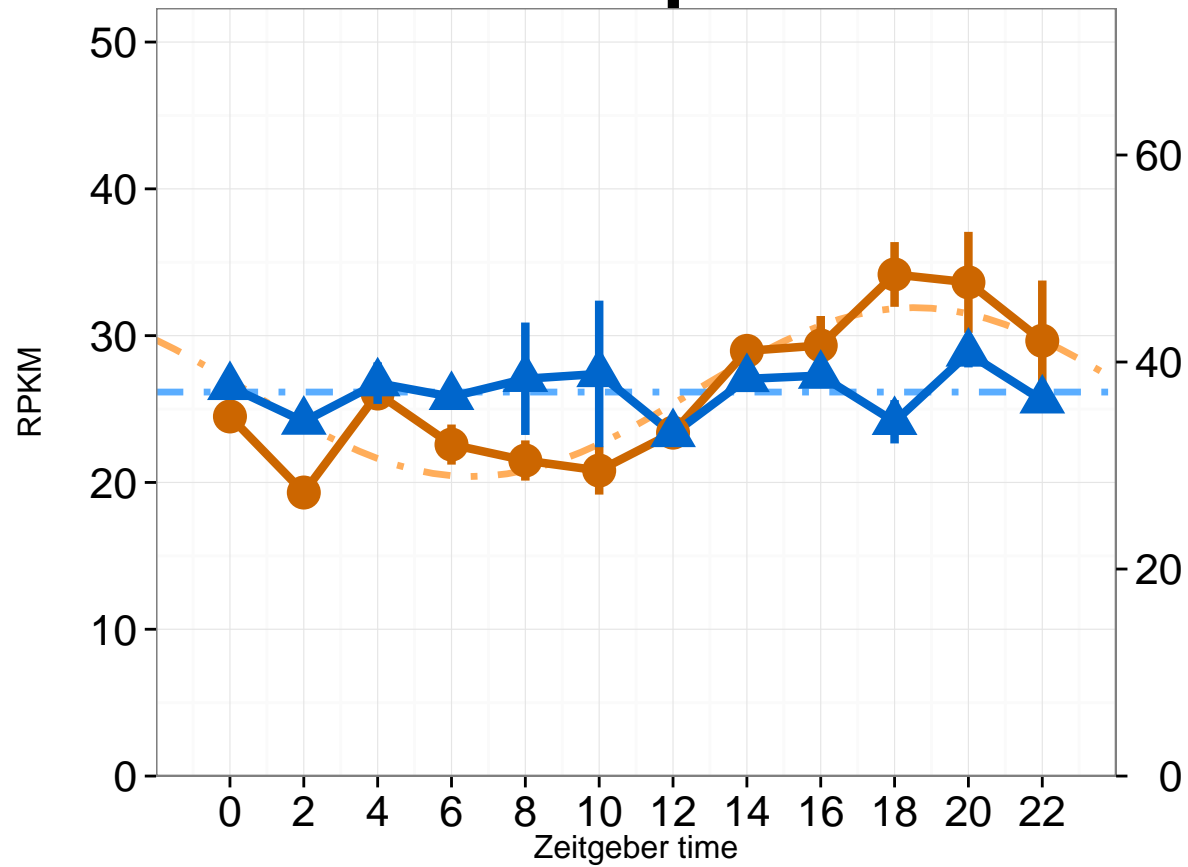

# Reep5

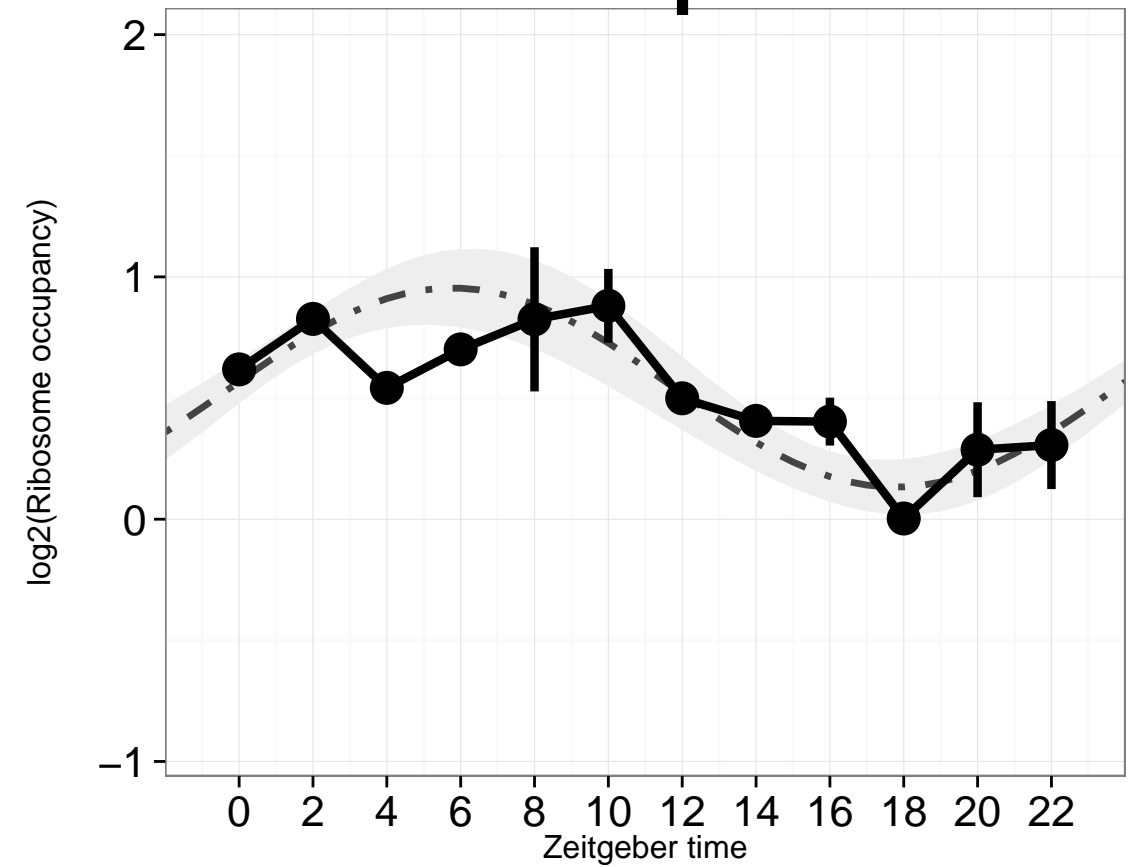

Supplement: SuppDataset_1.zip [file Reep5_set_B.pdf › Supplemental Dataset 1/B-mRNA_rhythm_translation_nonrhyth/Reep5_set_B.pdf]

# Rel

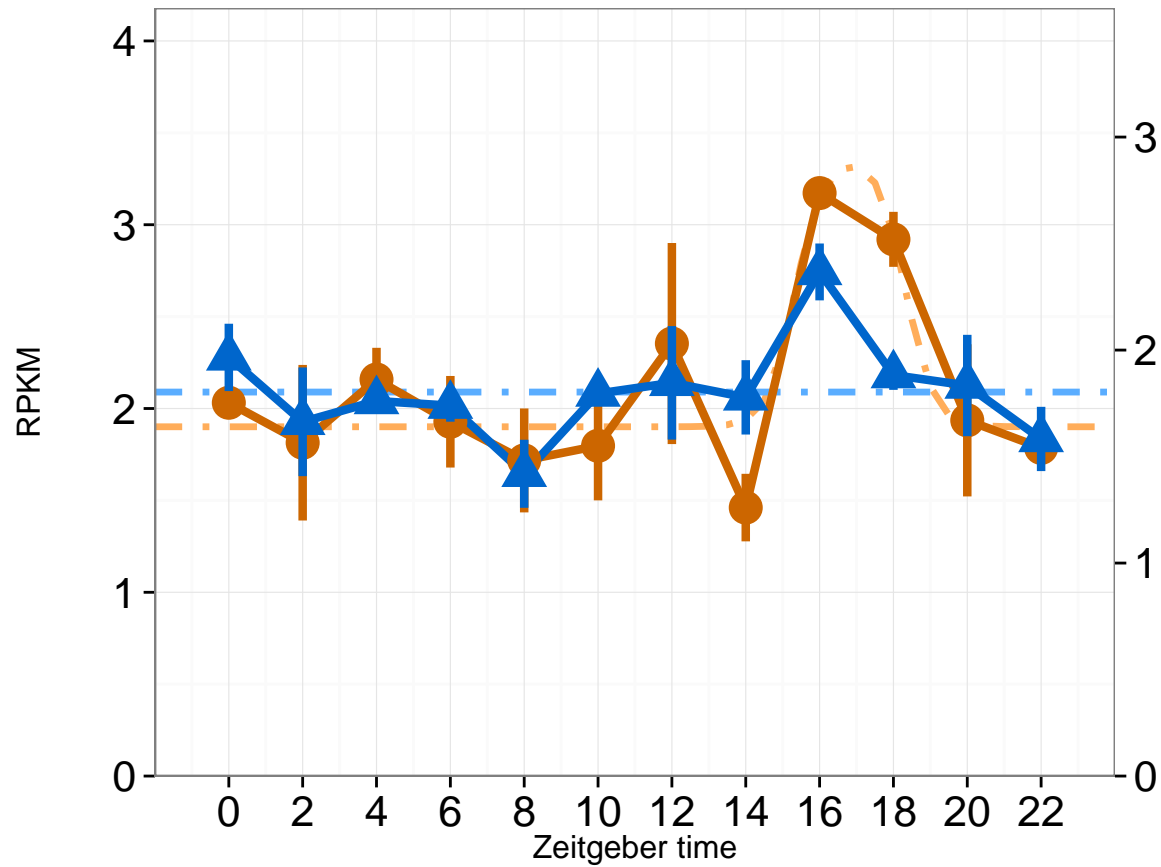

# Rel

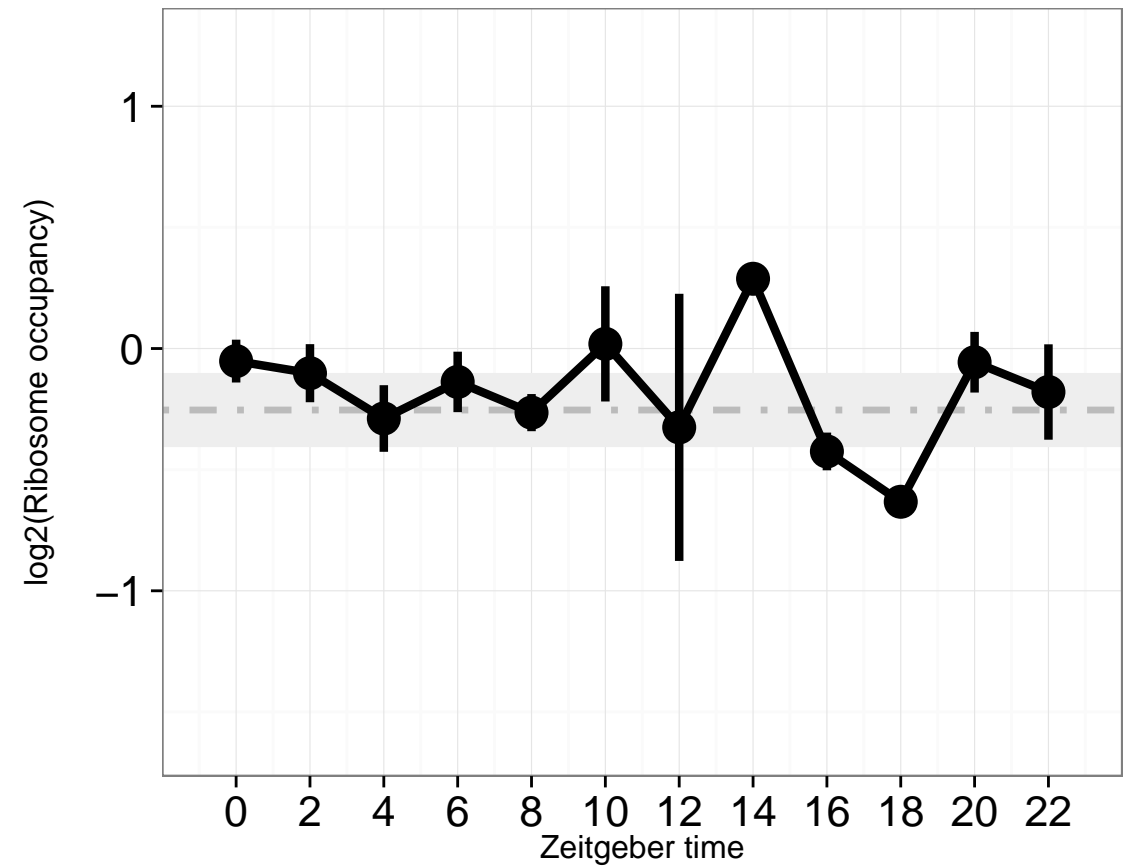

Supplement: SuppDataset_1.zip [file Rel_set_B.pdf › Supplemental Dataset 1/B-mRNA_rhythm_translation_nonrhyth/Rel_set_B.pdf]

## Retsat

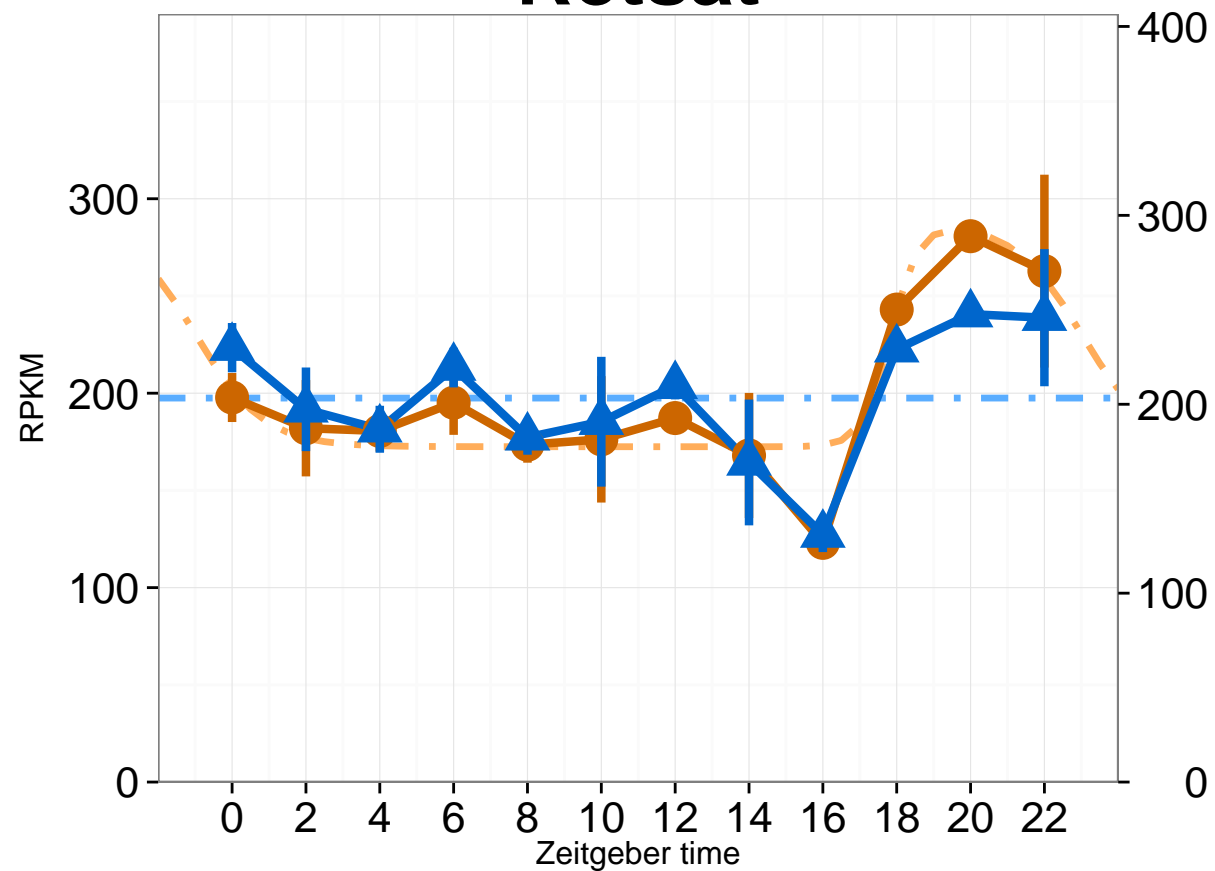

## Retsat

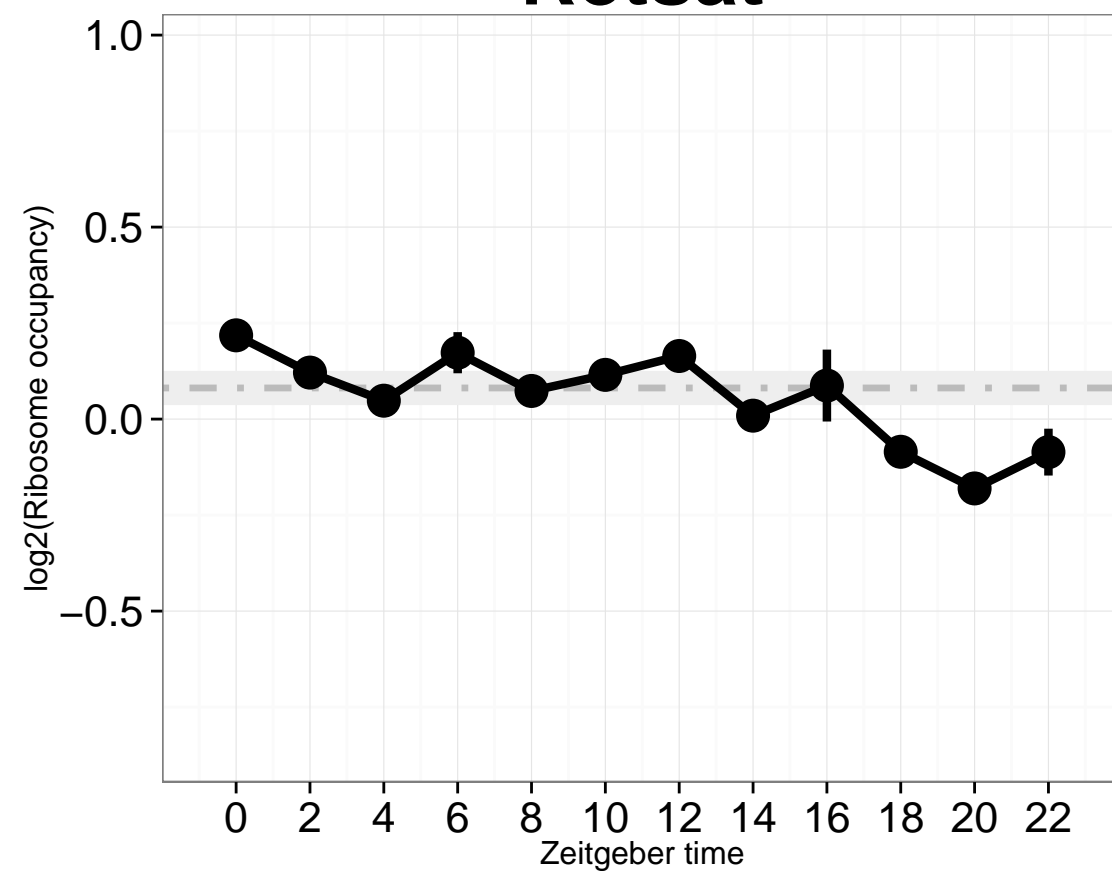

Supplement: SuppDataset_1.zip [file Retsat_set_B.pdf › Supplemental Dataset 1/B-mRNA_rhythm_translation_nonrhyth/Retsat_set_B.pdf]

# Rfng

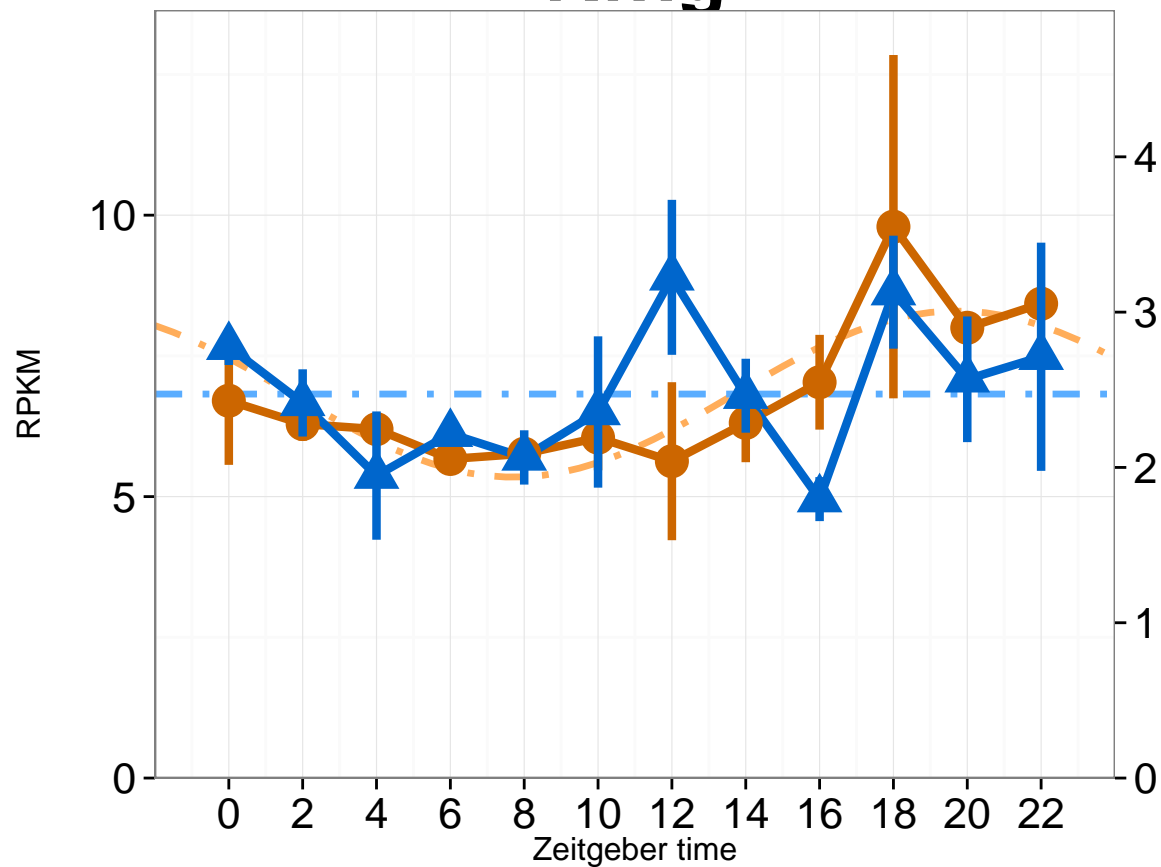

# Rfng

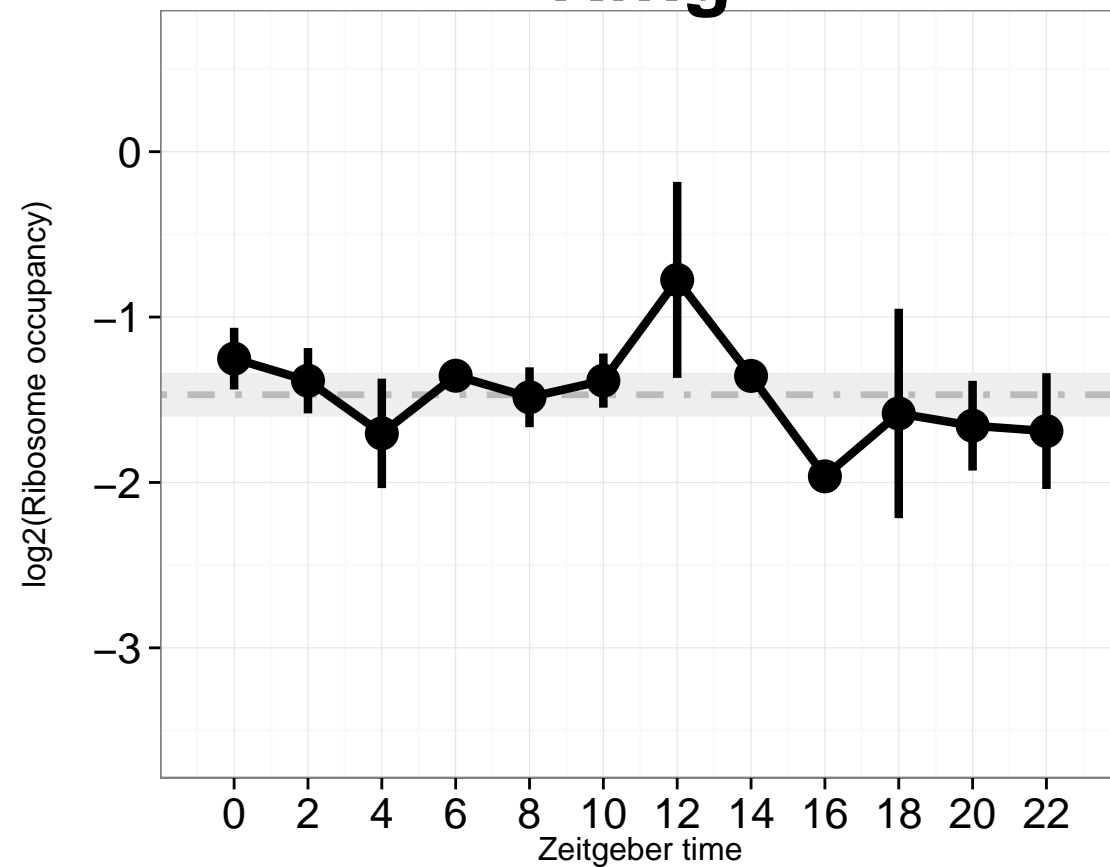

Supplement: SuppDataset_1.zip [file Rfng_set_B.pdf › Supplemental Dataset 1/B-mRNA_rhythm_translation_nonrhyth/Rfng_set_B.pdf]

## Rhbdd3

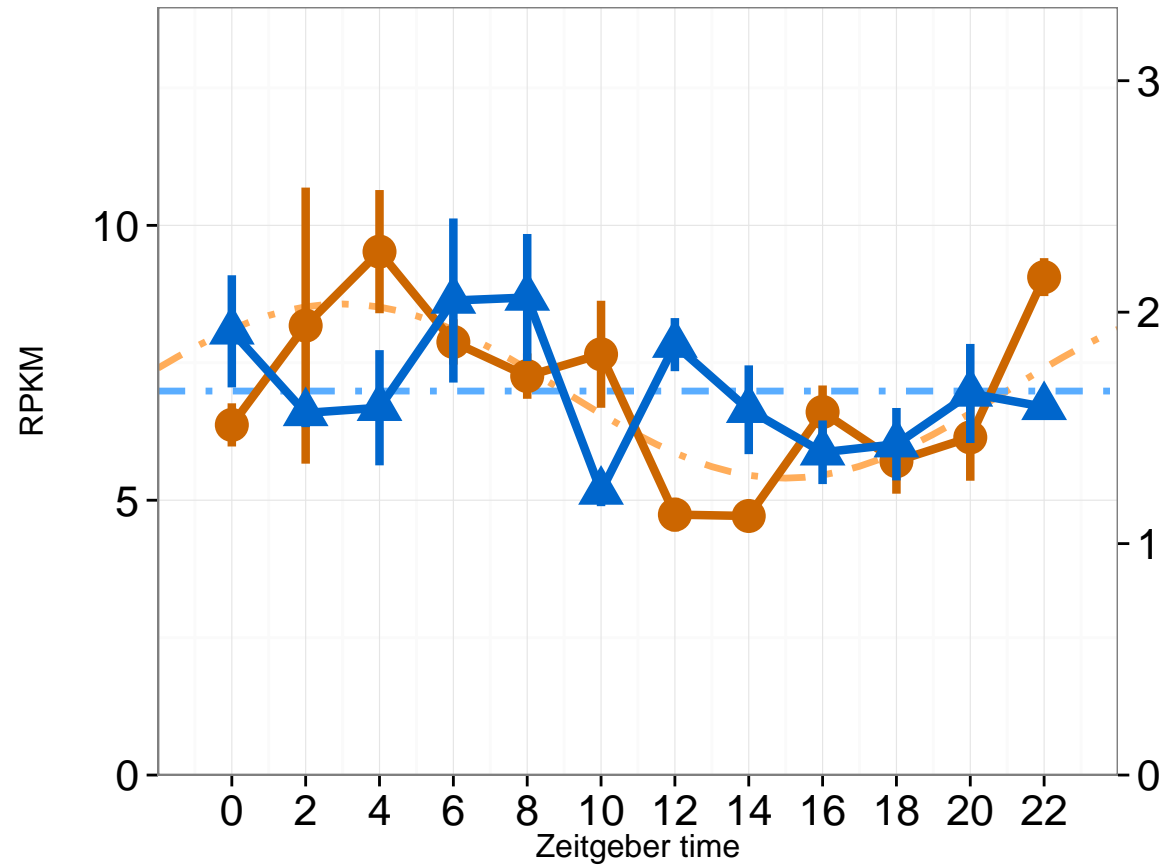

## Rhbdd3

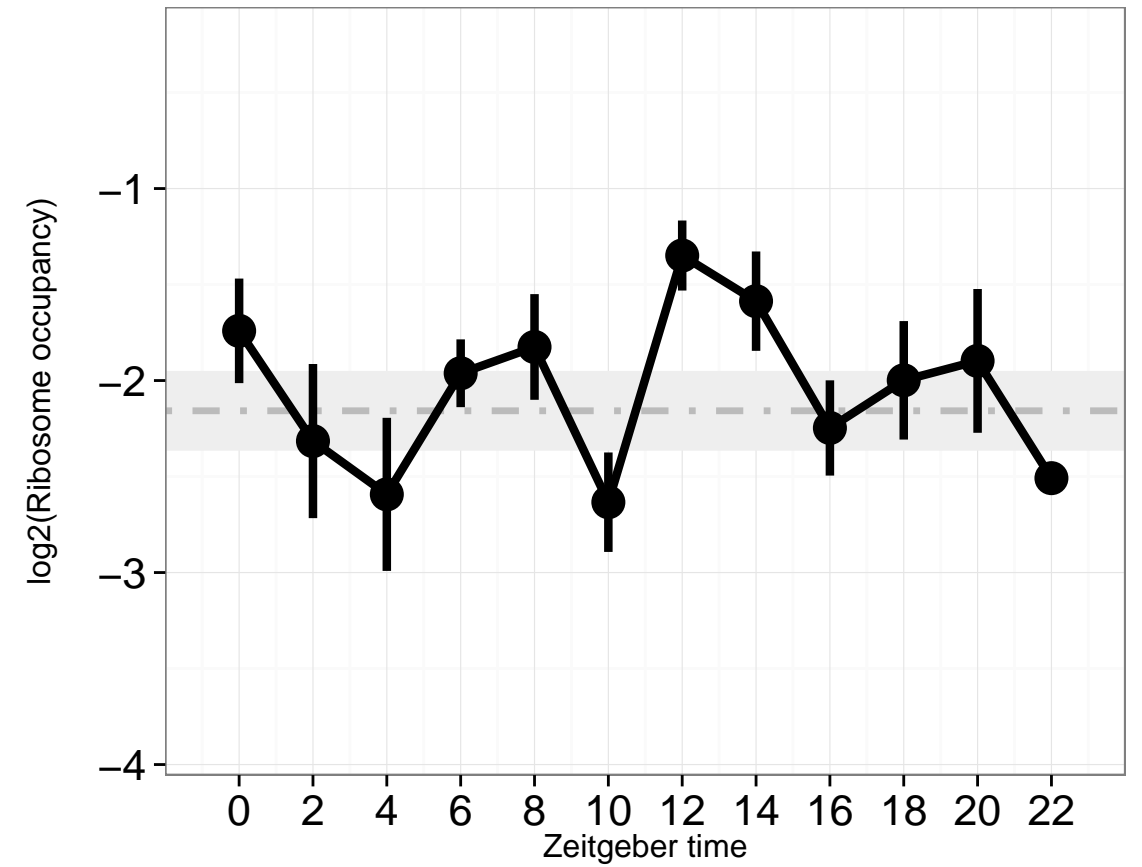

Supplement: SuppDataset_1.zip [file Rhbdd3_set_B.pdf › Supplemental Dataset 1/B-mRNA_rhythm_translation_nonrhyth/Rhbdd3_set_B.pdf]

## Rilp

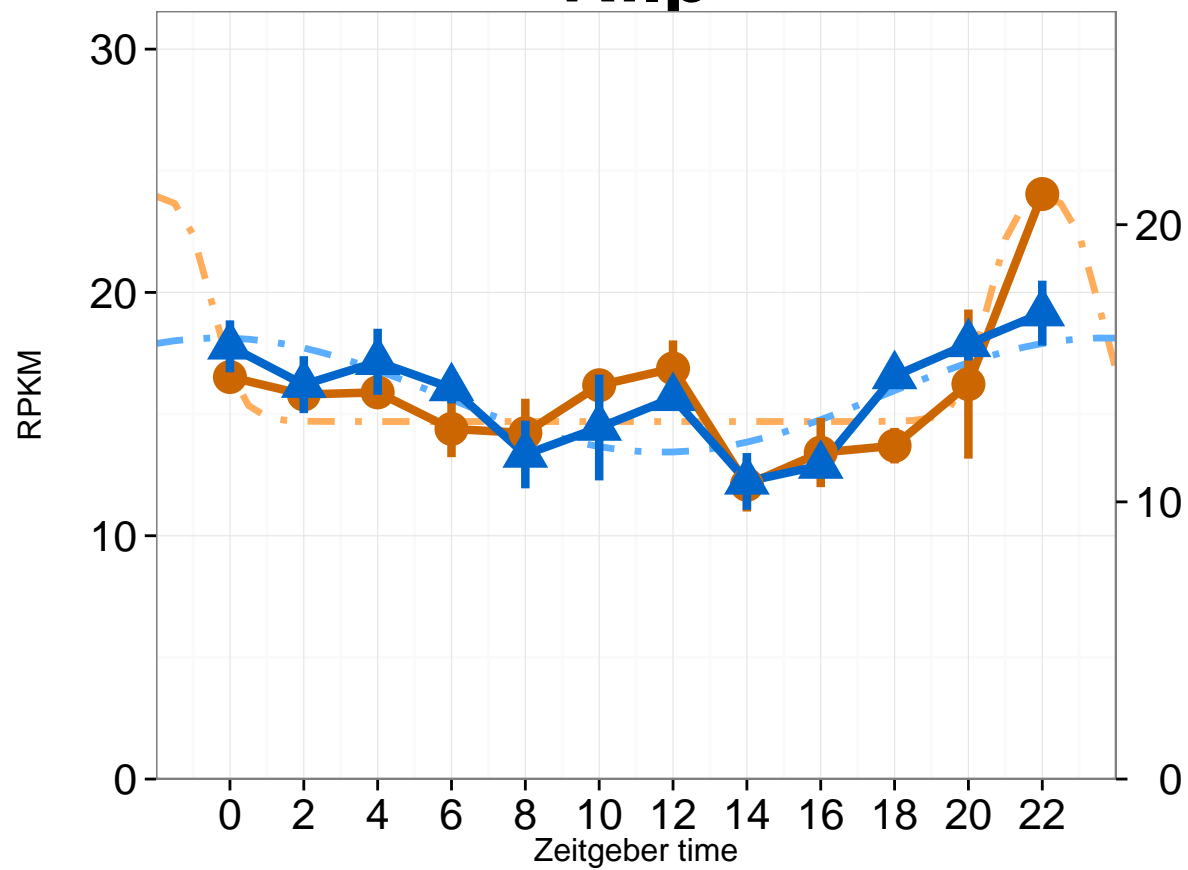

## Rilp

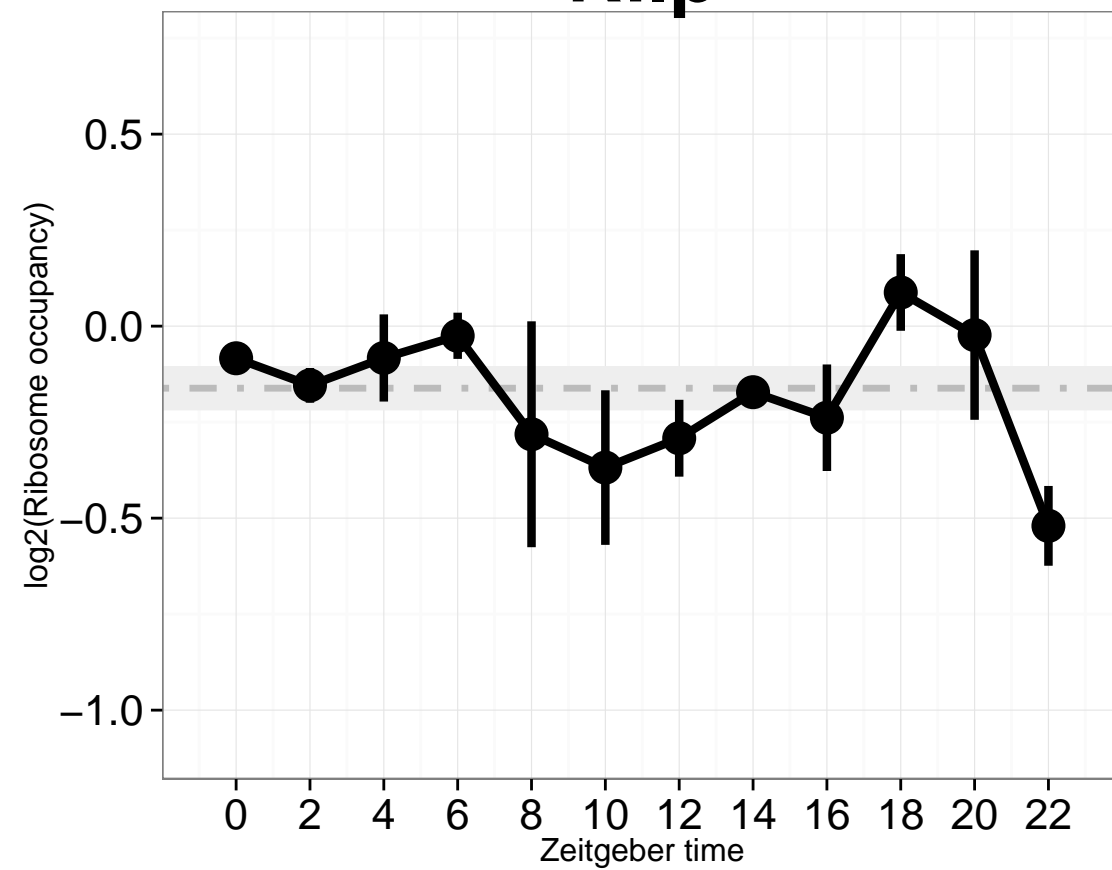

Supplement: SuppDataset_1.zip [file Rilp_set_B.pdf › Supplemental Dataset 1/B-mRNA_rhythm_translation_nonrhyth/Rilp_set_B.pdf]

# Rnd2

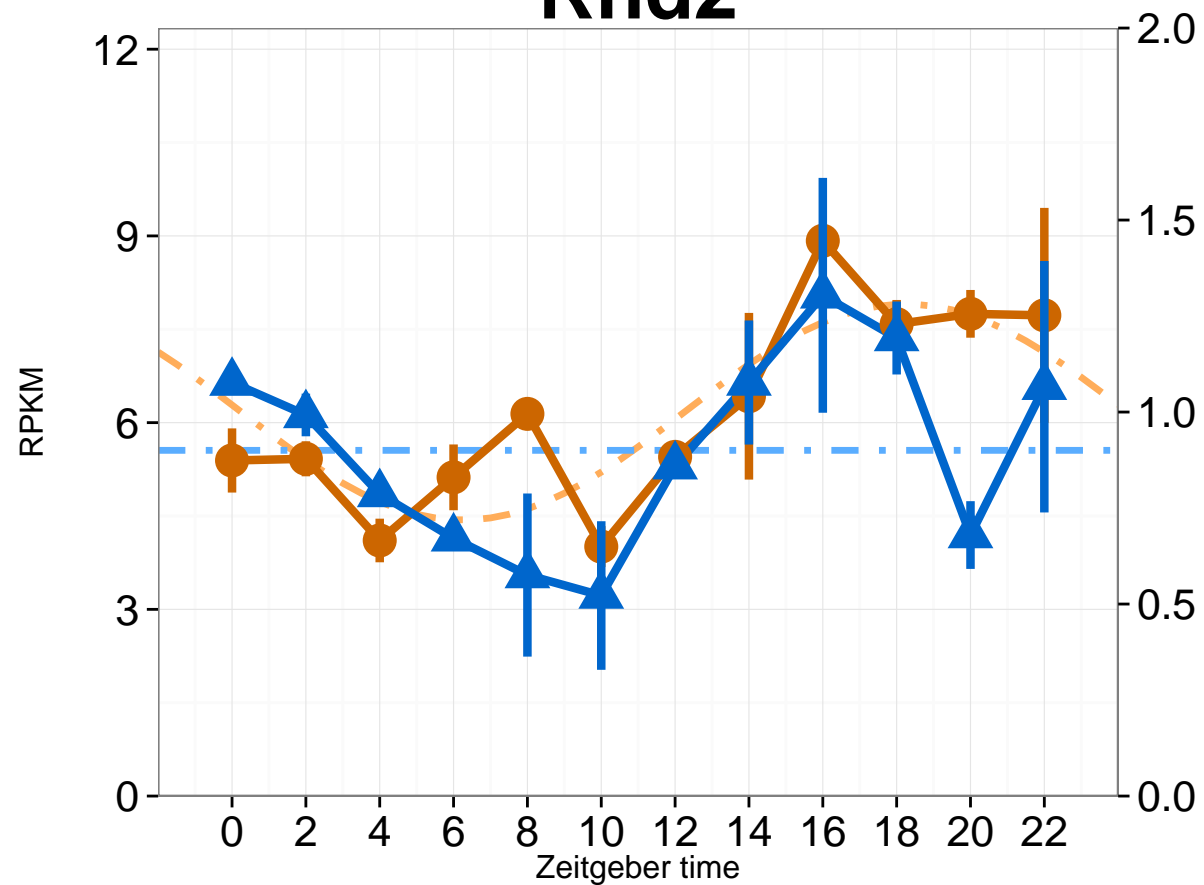

# Rnd2

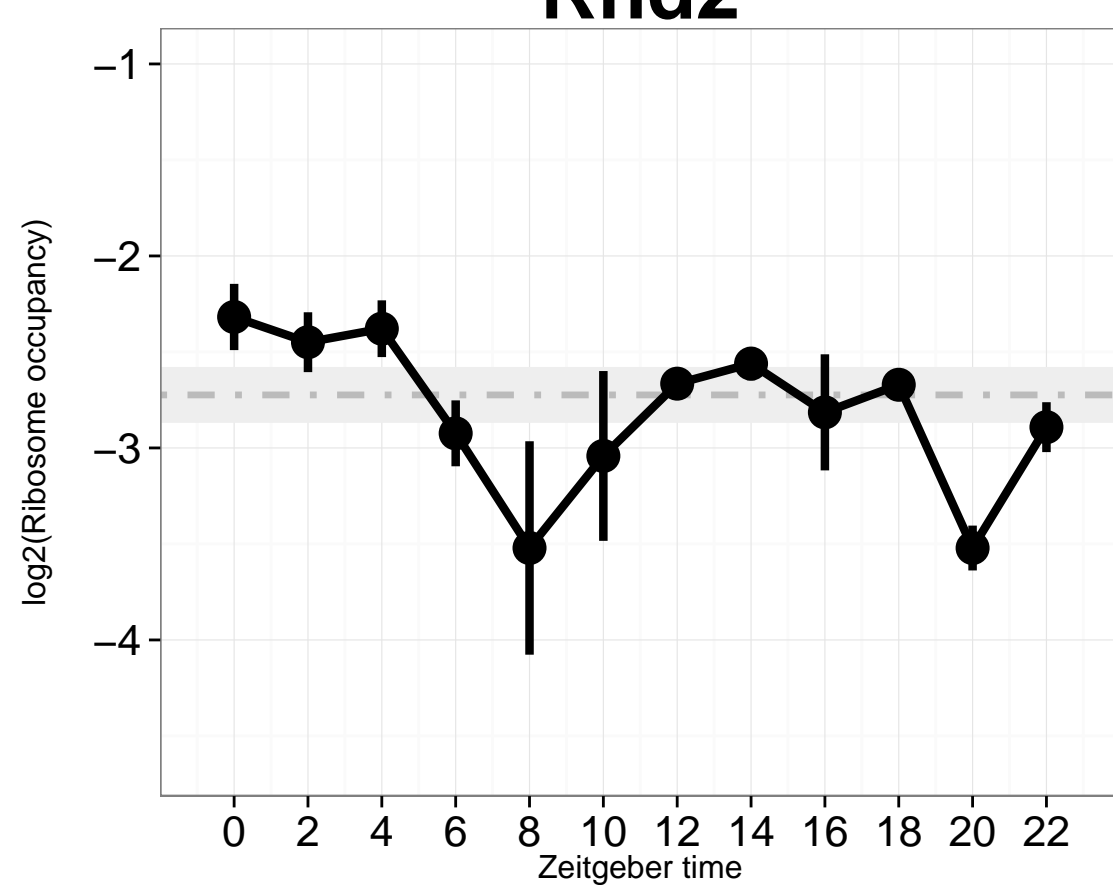

Supplement: SuppDataset_1.zip [file Rnd2_set_B.pdf › Supplemental Dataset 1/B-mRNA_rhythm_translation_nonrhyth/Rnd2_set_B.pdf]

# Rnf19b

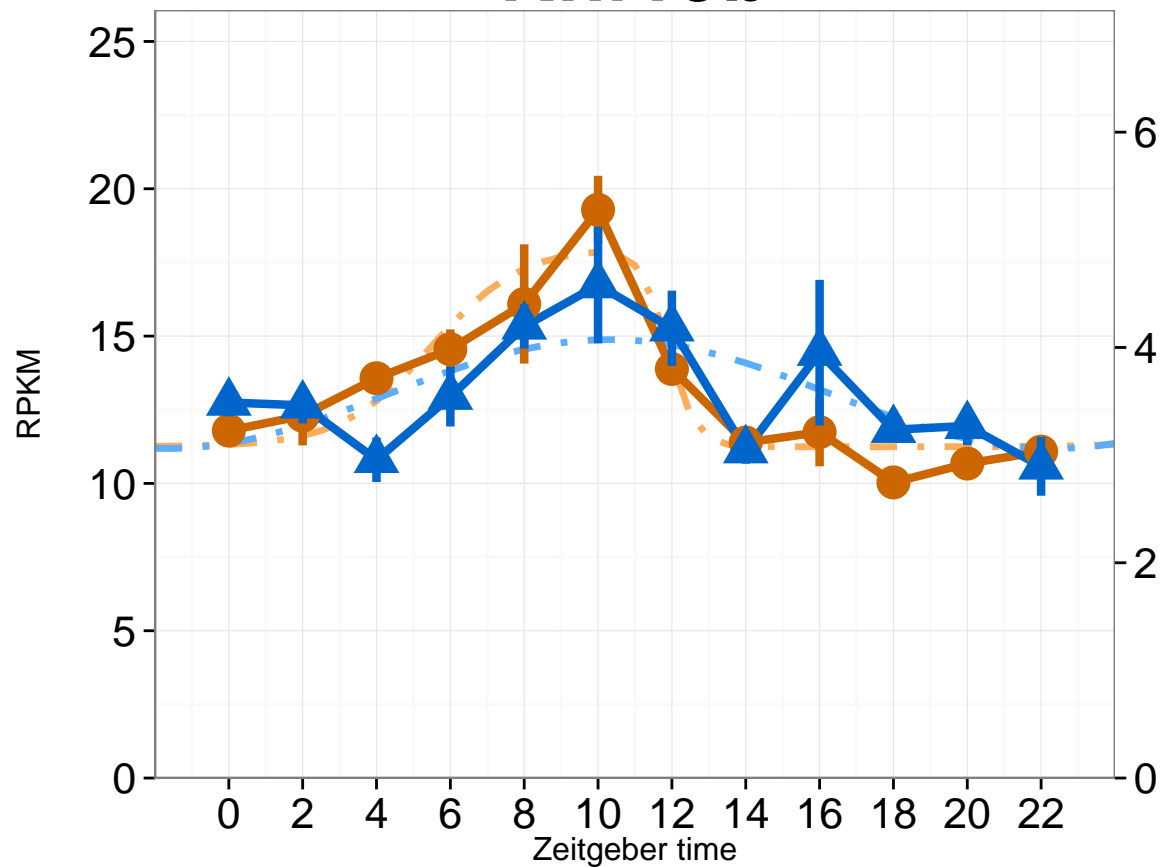

# Rnf19b

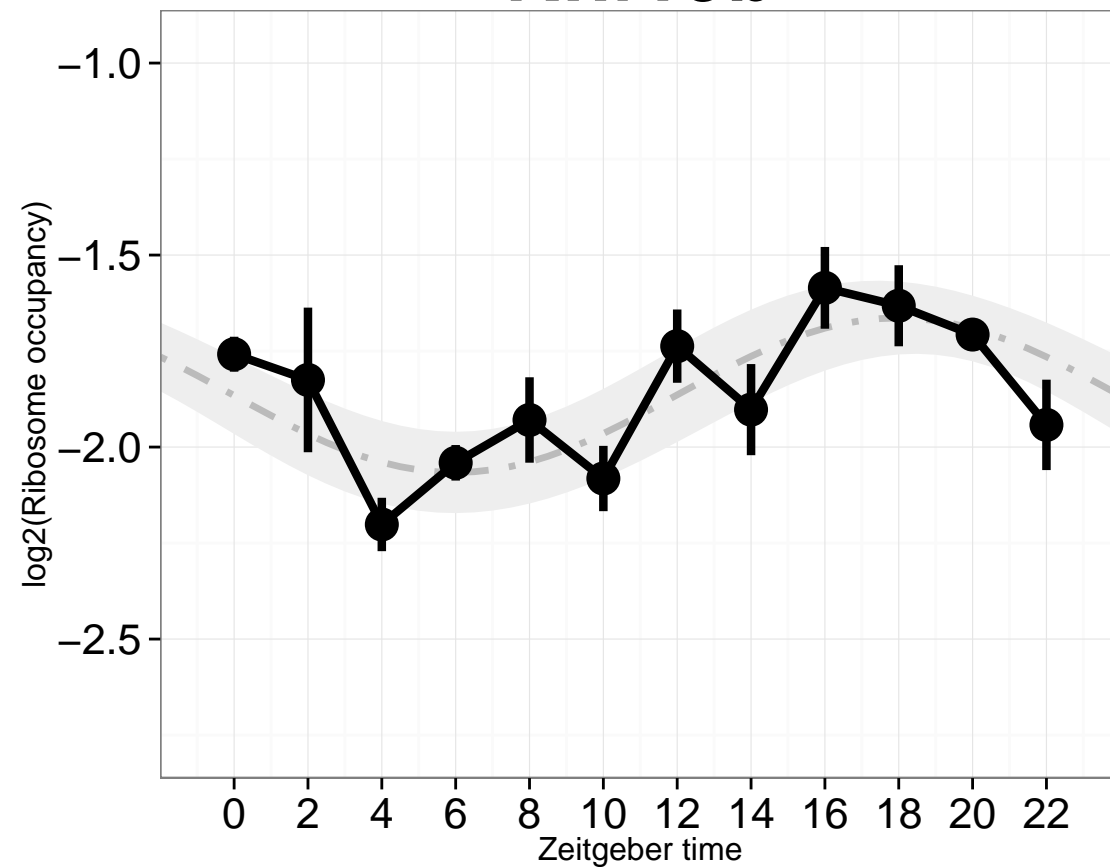

Supplement: SuppDataset_1.zip [file Rnf19b_set_B.pdf › Supplemental Dataset 1/B-mRNA_rhythm_translation_nonrhyth/Rnf19b_set_B.pdf]

## Rock2

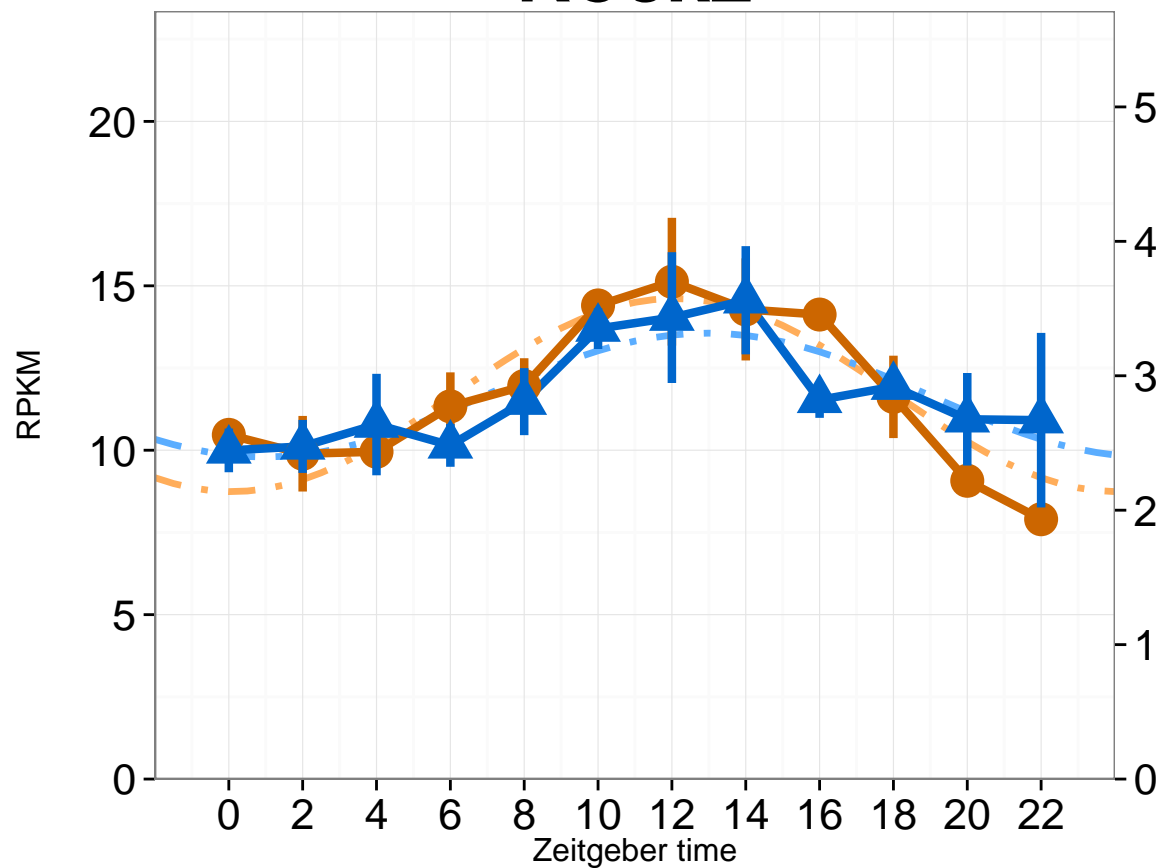

## Rock2

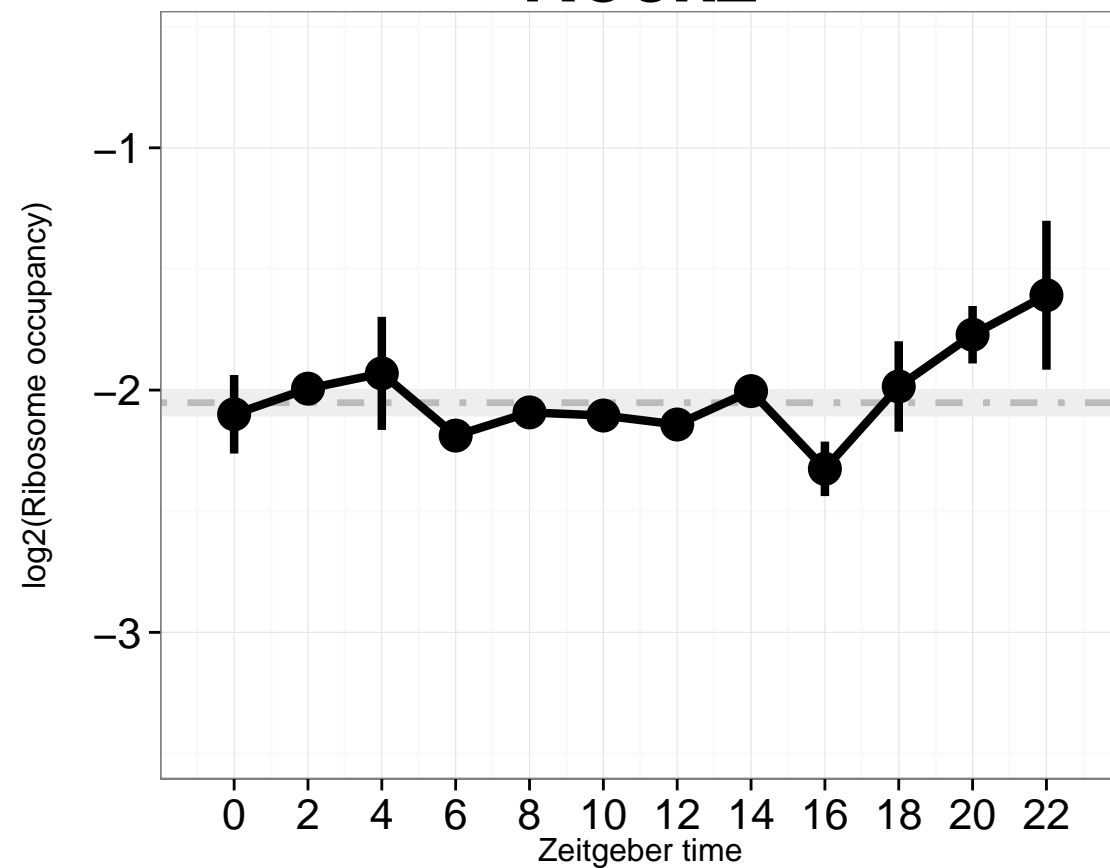

Supplement: SuppDataset_1.zip [file Rock2_set_B.pdf › Supplemental Dataset 1/B-mRNA_rhythm_translation_nonrhyth/Rock2_set_B.pdf]

# Rpl18a

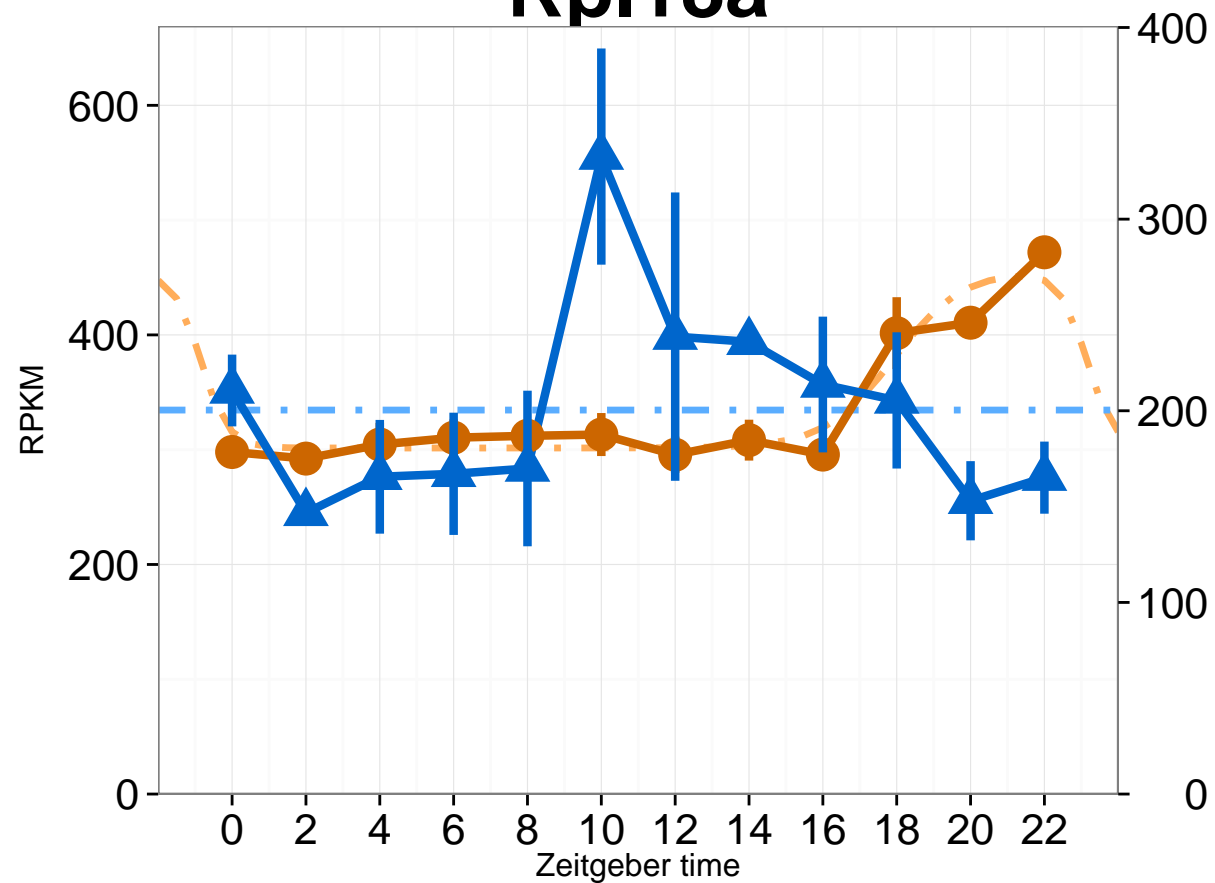

# Rpl18a

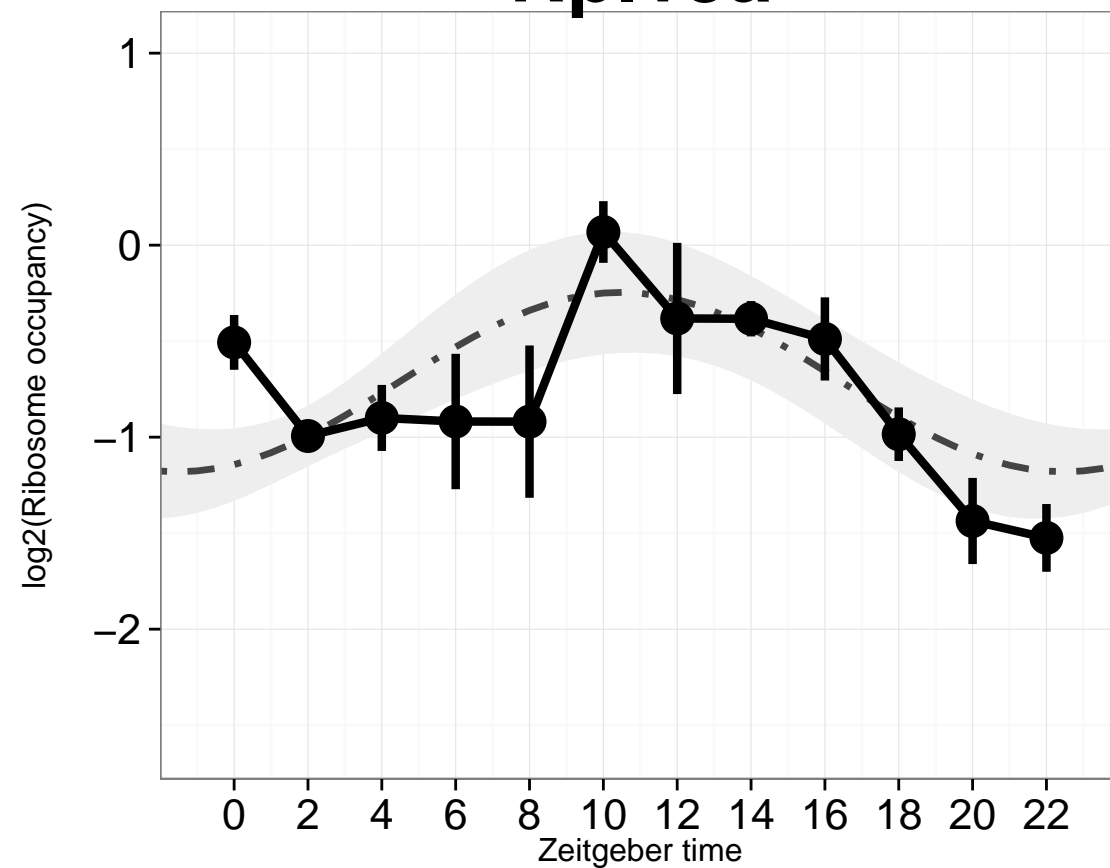

Supplement: SuppDataset_1.zip [file Rpl18a_set_B.pdf › Supplemental Dataset 1/B-mRNA_rhythm_translation_nonrhyth/Rpl18a_set_B.pdf]

## Rpl29

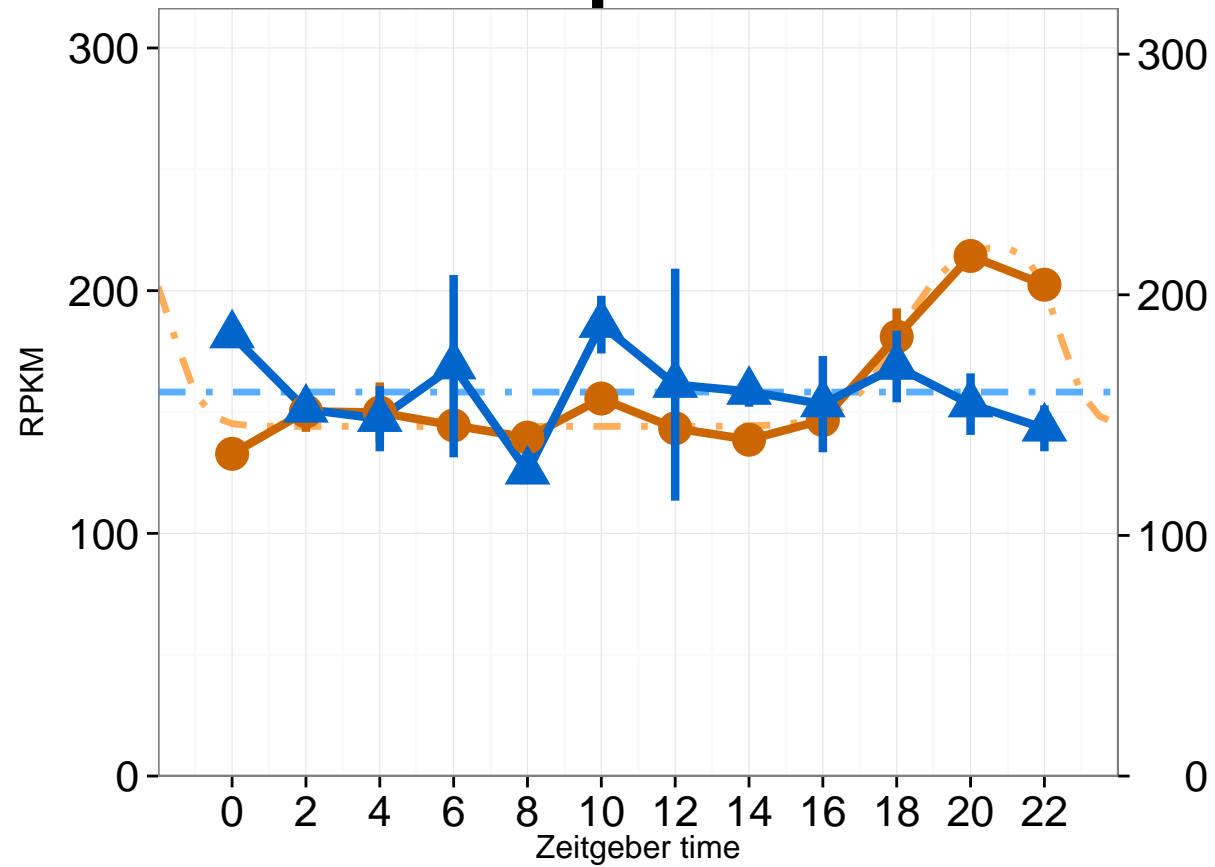

## Rpl29

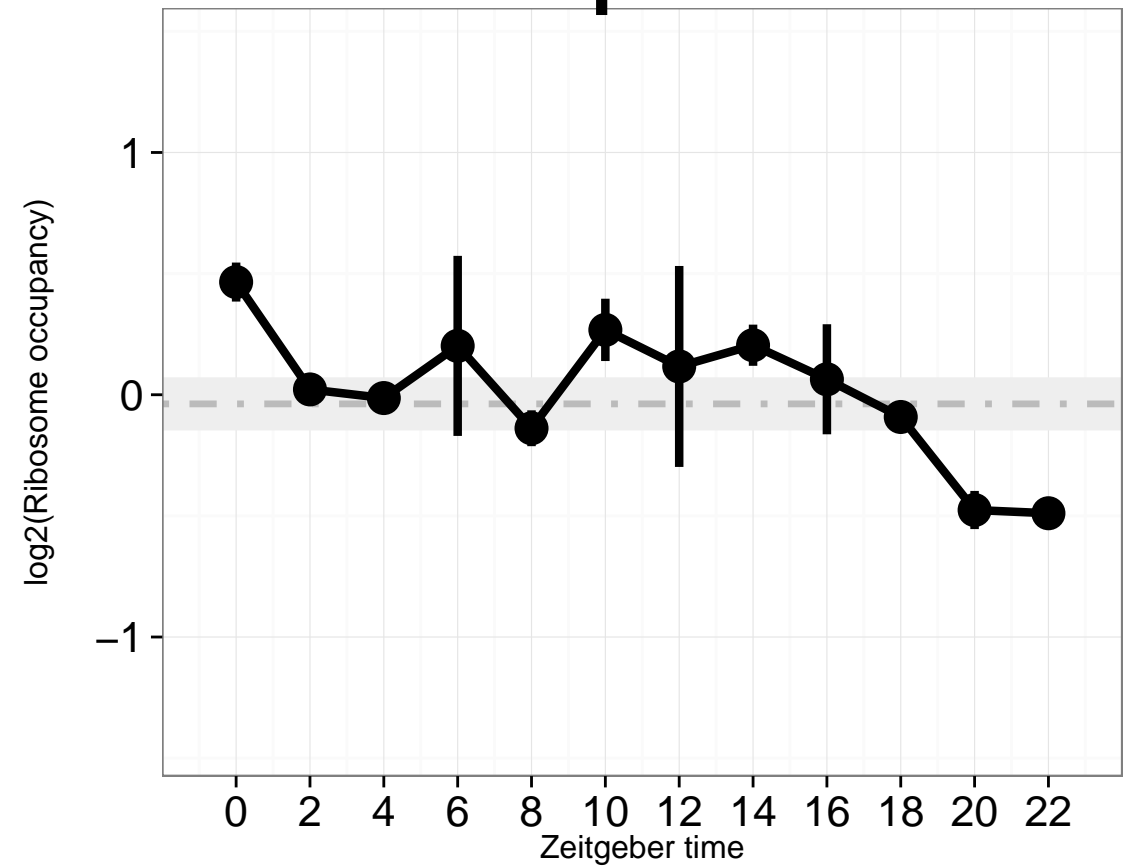

Supplement: SuppDataset_1.zip [file Rpl29_set_B.pdf › Supplemental Dataset 1/B-mRNA_rhythm_translation_nonrhyth/Rpl29_set_B.pdf]

# Rpl37a

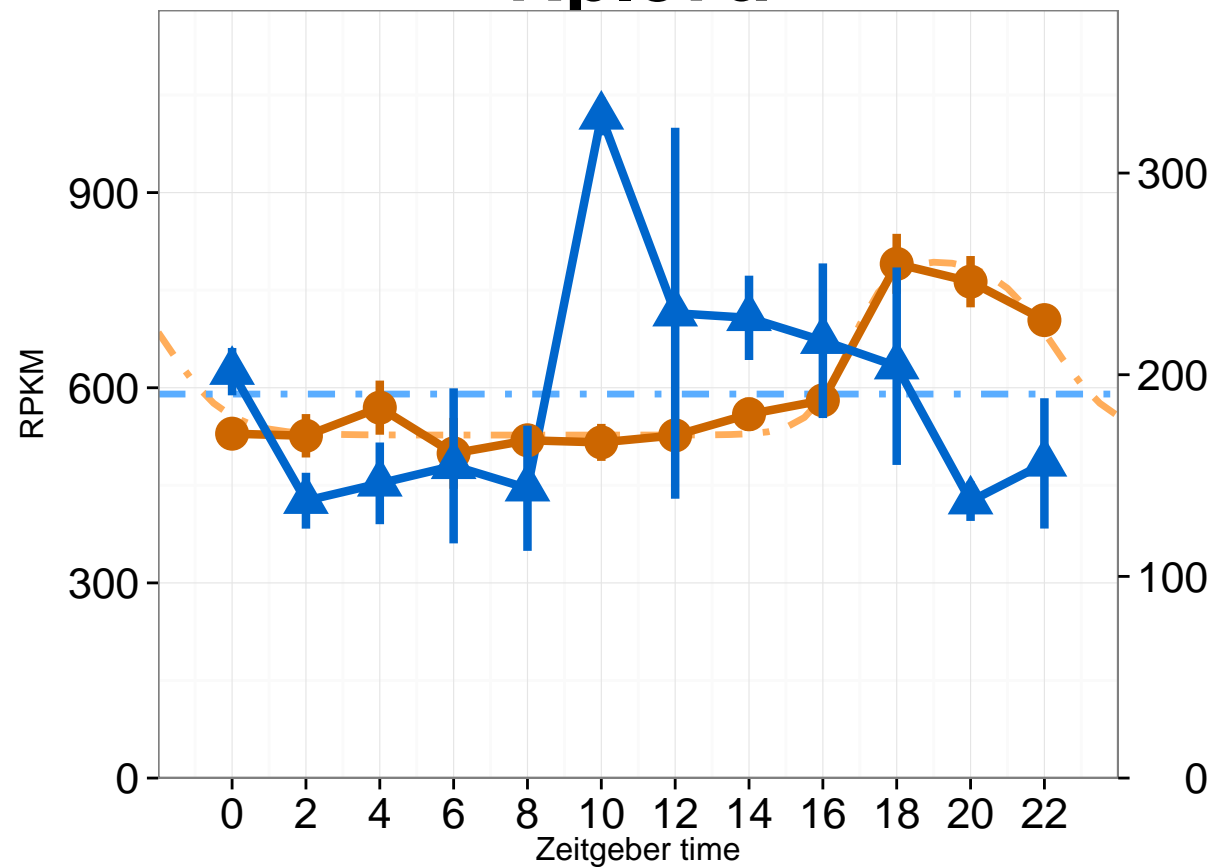

# Rpl37a

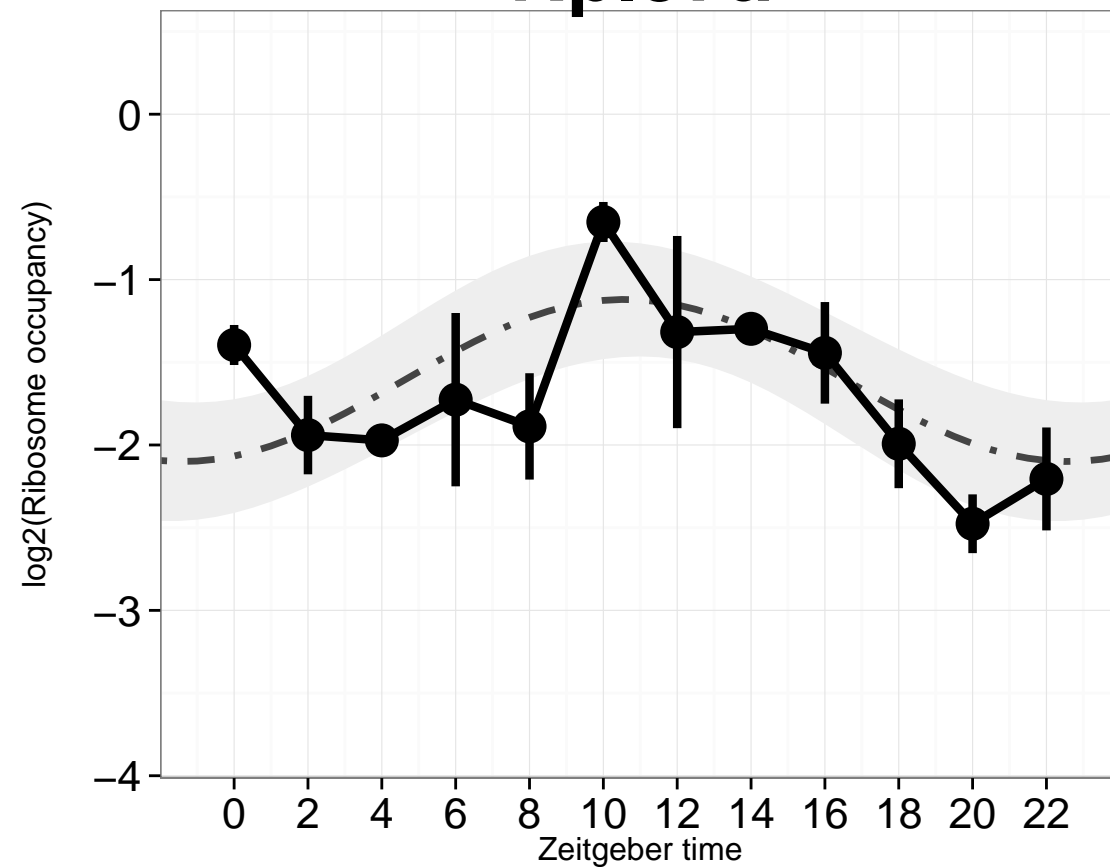

Supplement: SuppDataset_1.zip [file Rpl37a_set_B.pdf › Supplemental Dataset 1/B-mRNA_rhythm_translation_nonrhyth/Rpl37a_set_B.pdf]

# Rplp1

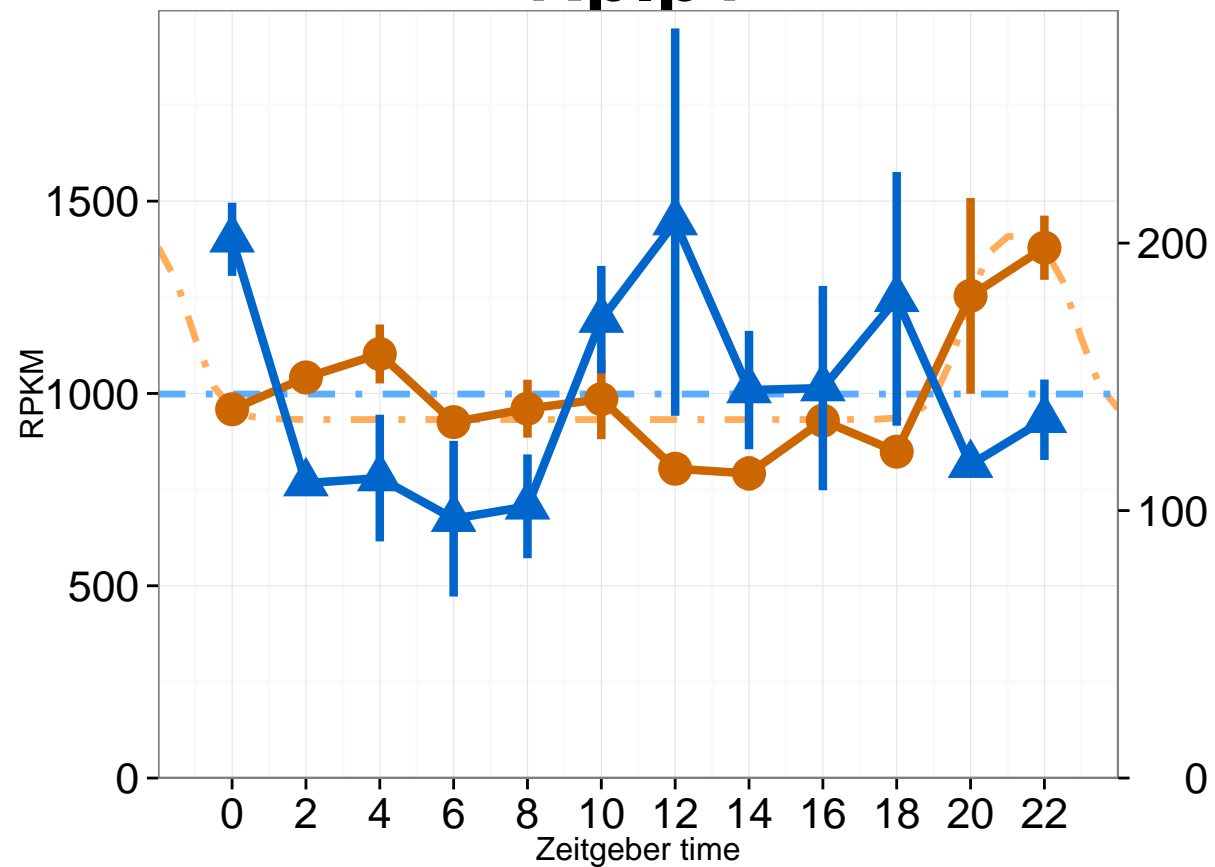

# Rplp1

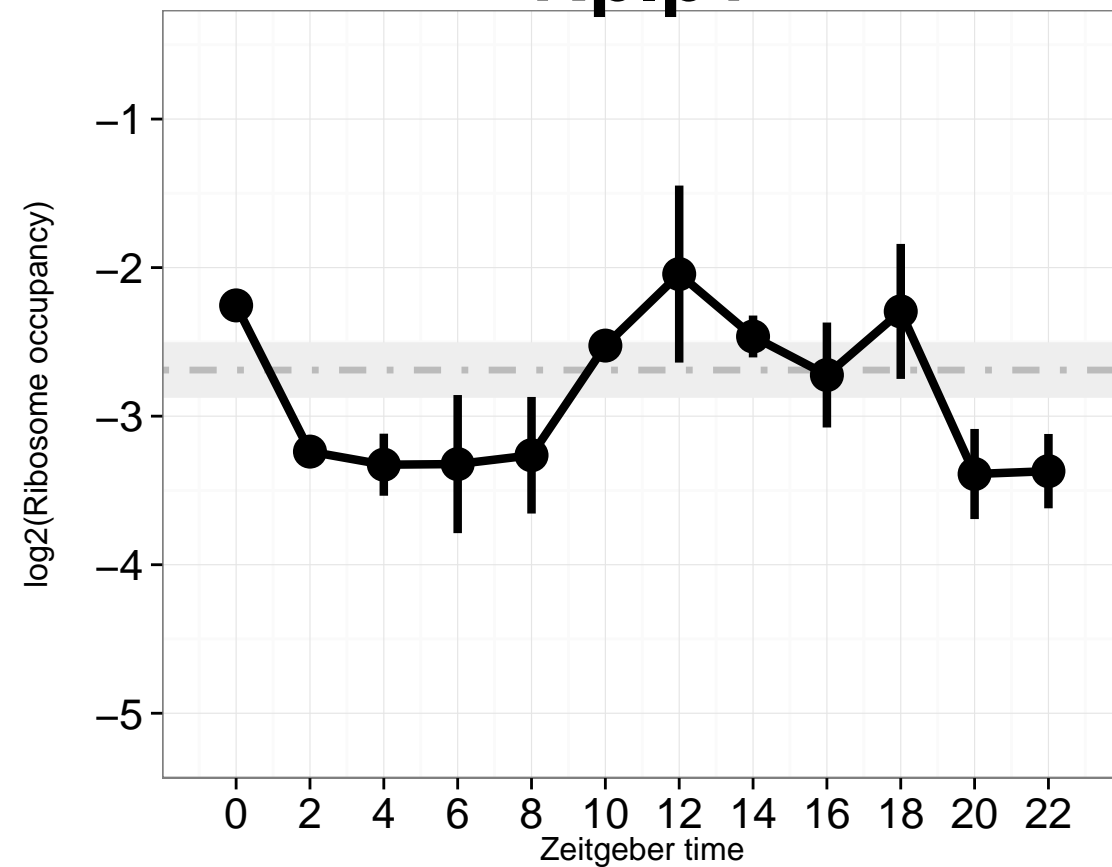

Supplement: SuppDataset_1.zip [file Rplp1_set_B.pdf › Supplemental Dataset 1/B-mRNA_rhythm_translation_nonrhyth/Rplp1_set_B.pdf]

## Rpp21

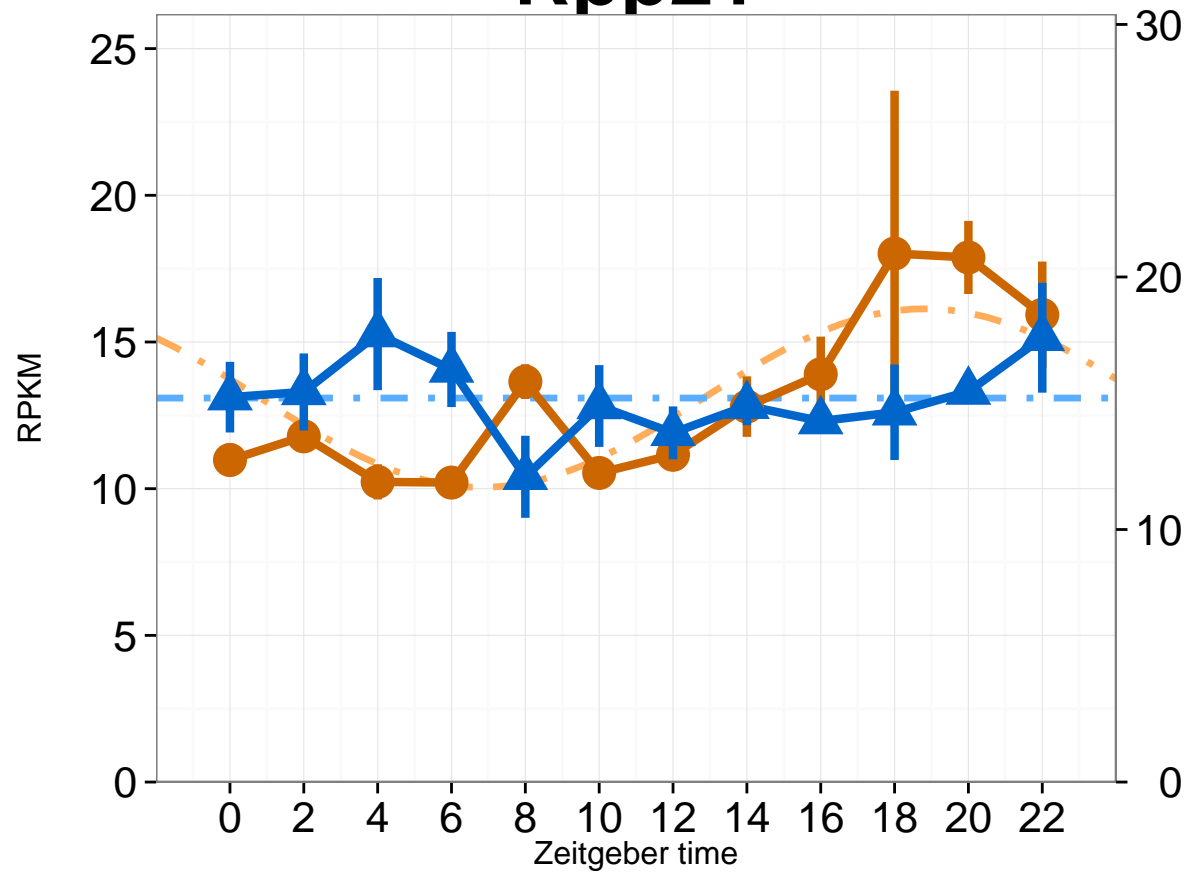

## Rpp21

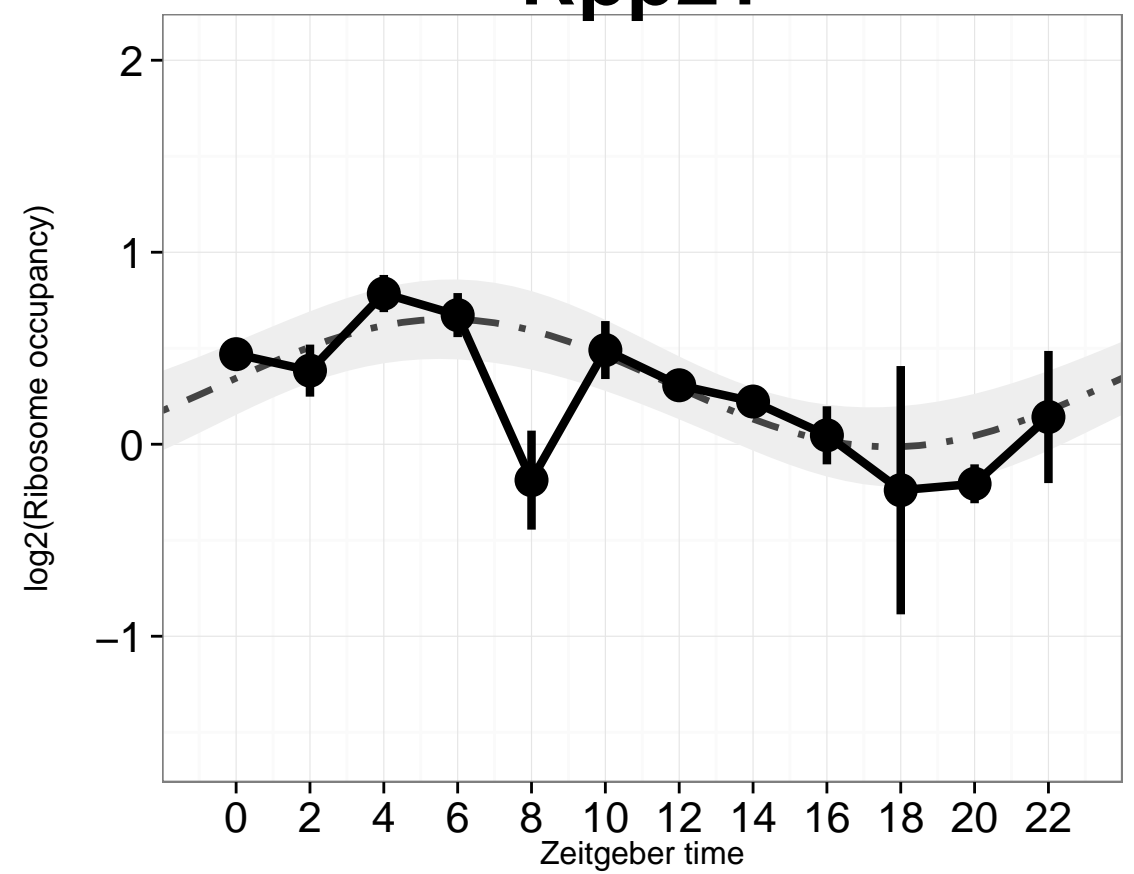

Supplement: SuppDataset_1.zip [file Rpp21_set_B.pdf › Supplemental Dataset 1/B-mRNA_rhythm_translation_nonrhyth/Rpp21_set_B.pdf]

# Rpp25l

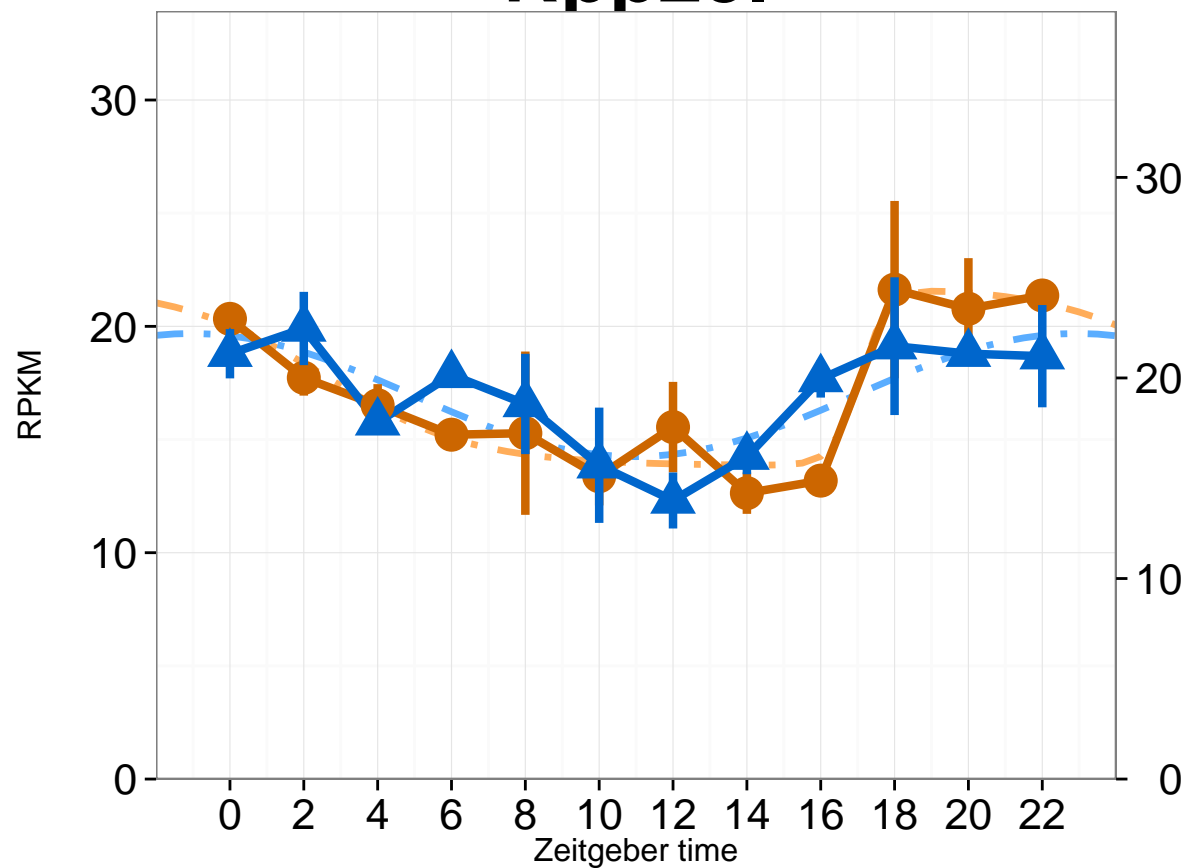

# Rpp25l

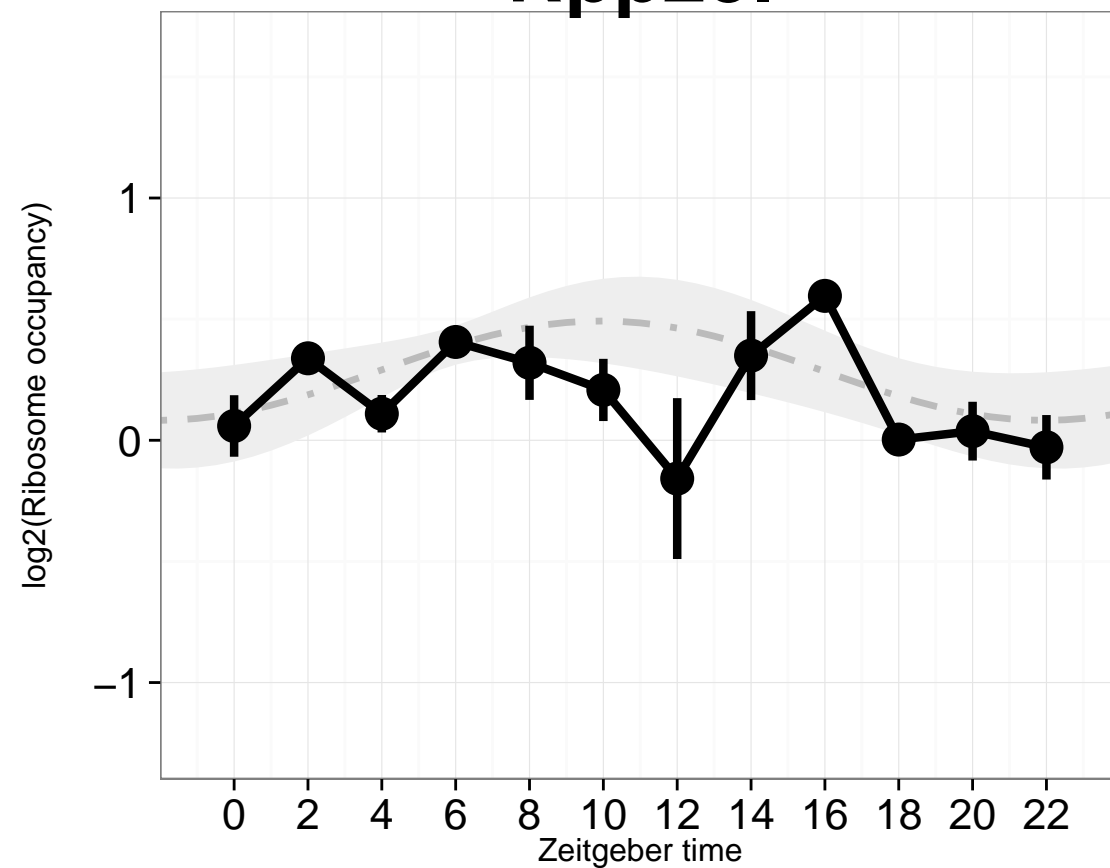

Supplement: SuppDataset_1.zip [file Rpp25l_set_B.pdf › Supplemental Dataset 1/B-mRNA_rhythm_translation_nonrhyth/Rpp25l_set_B.pdf]

# Rps26

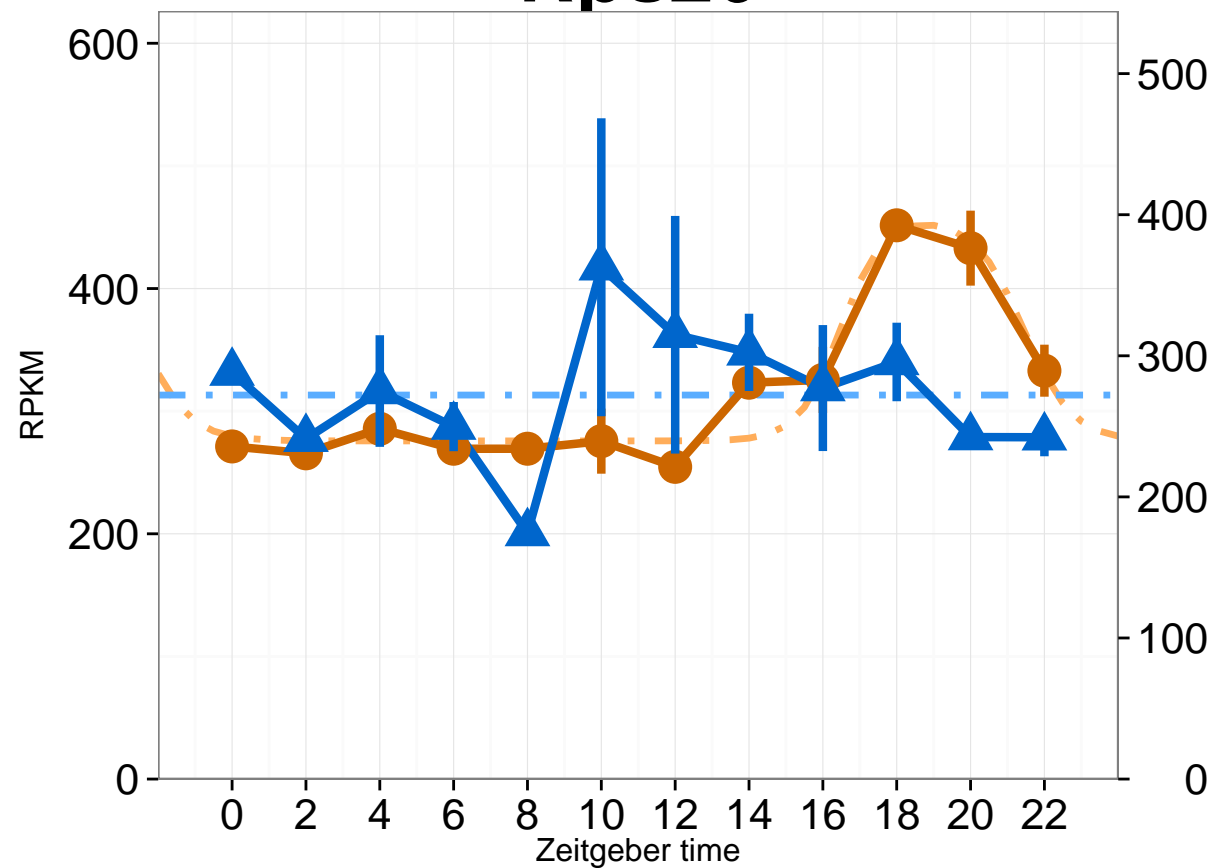

# Rps26

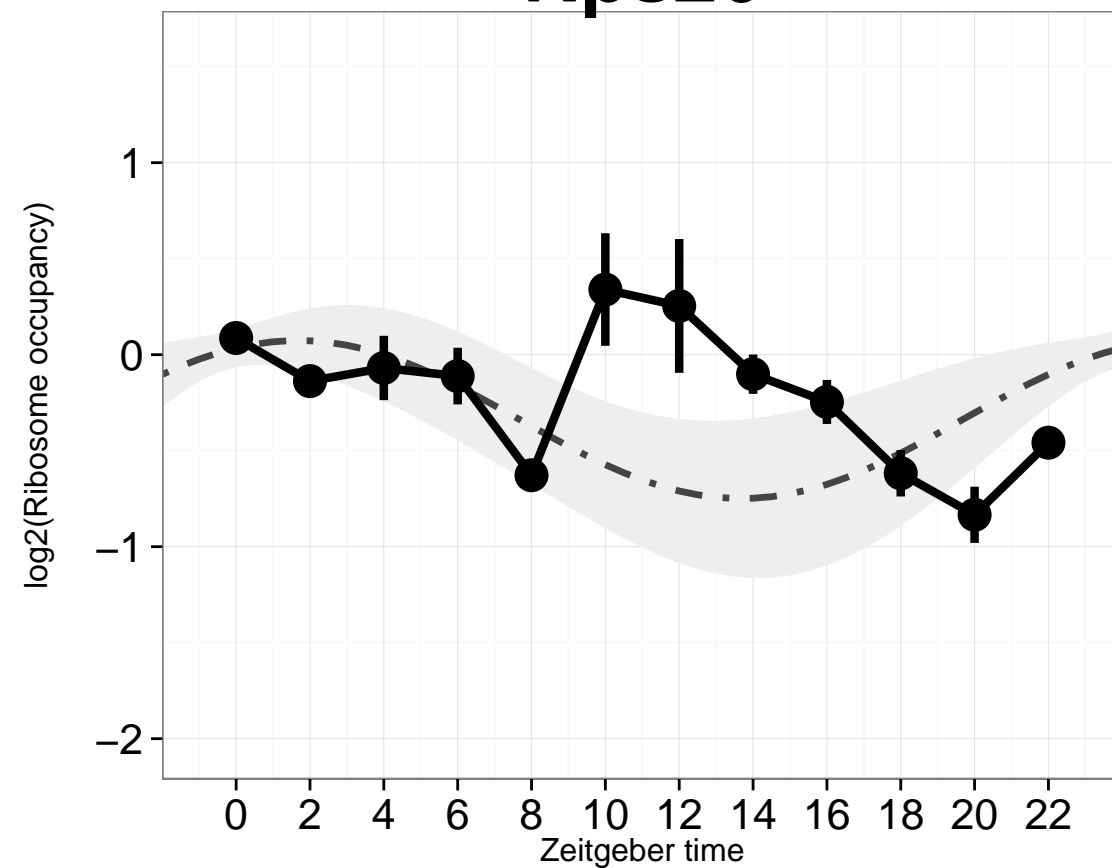

Supplement: SuppDataset_1.zip [file Rps26_set_B.pdf › Supplemental Dataset 1/B-mRNA_rhythm_translation_nonrhyth/Rps26_set_B.pdf]

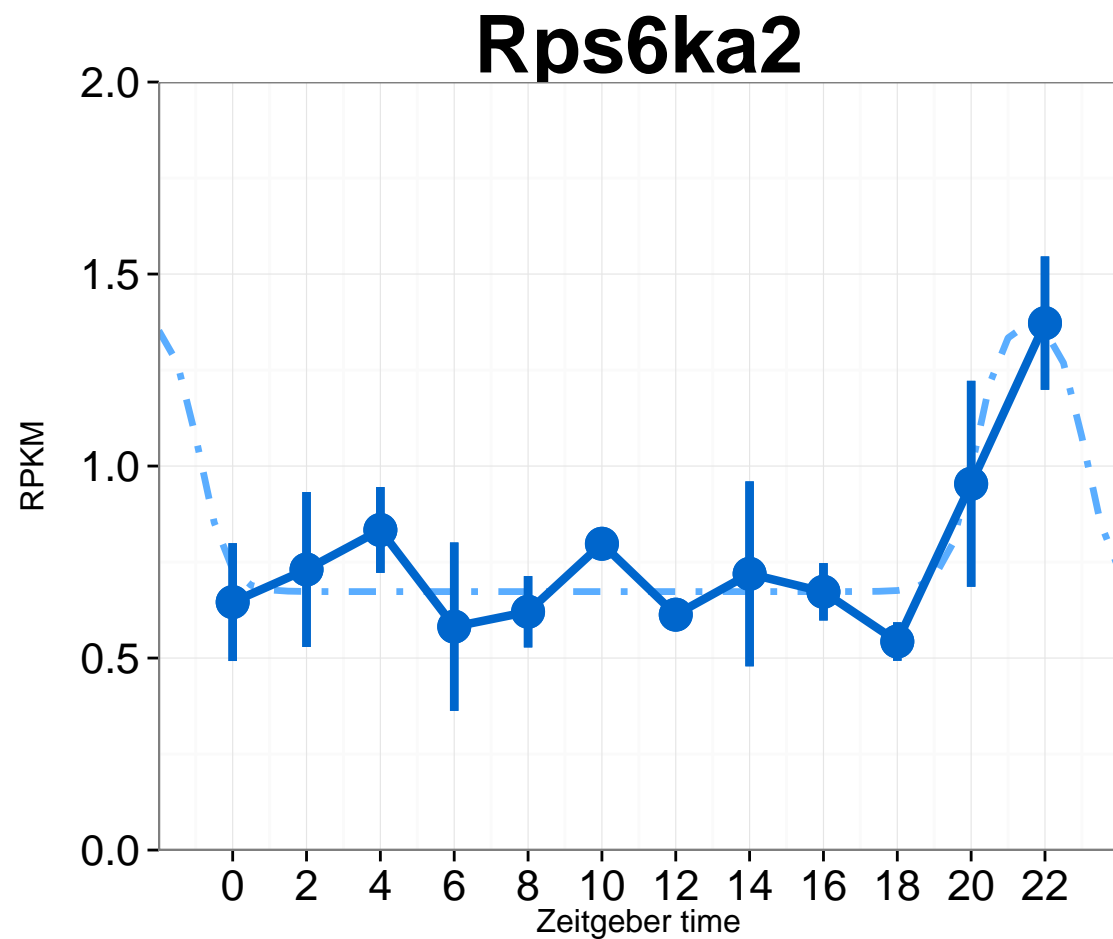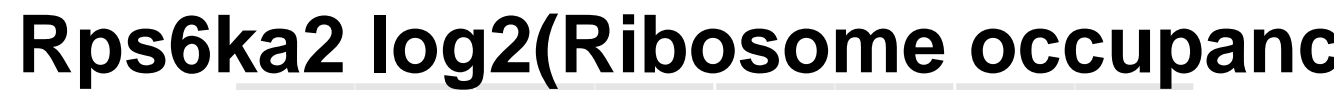

Supplement: SuppDataset_1.zip [file Rps6ka2_set_B.pdf › Supplemental Dataset 1/B-mRNA_rhythm_translation_nonrhyth/Rps6ka2_set_B.pdf]

# Rrp1b

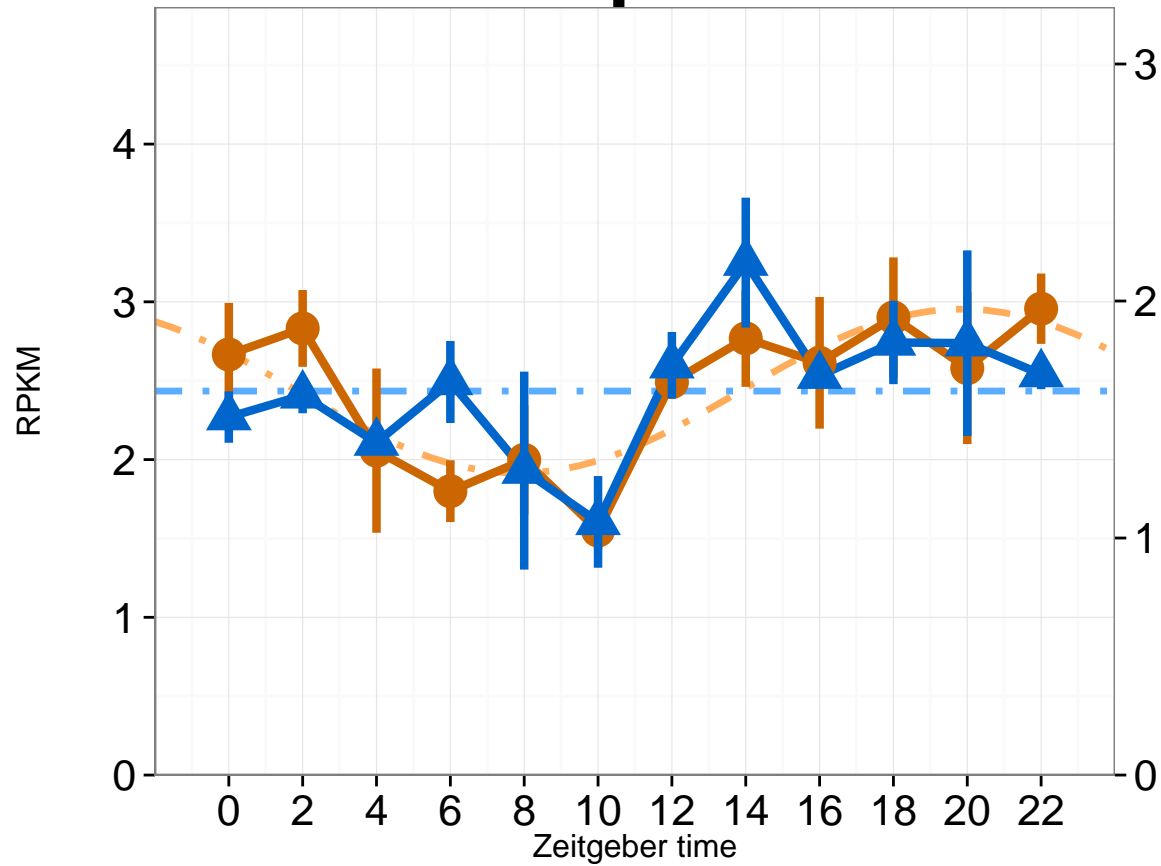

# Rrp1b

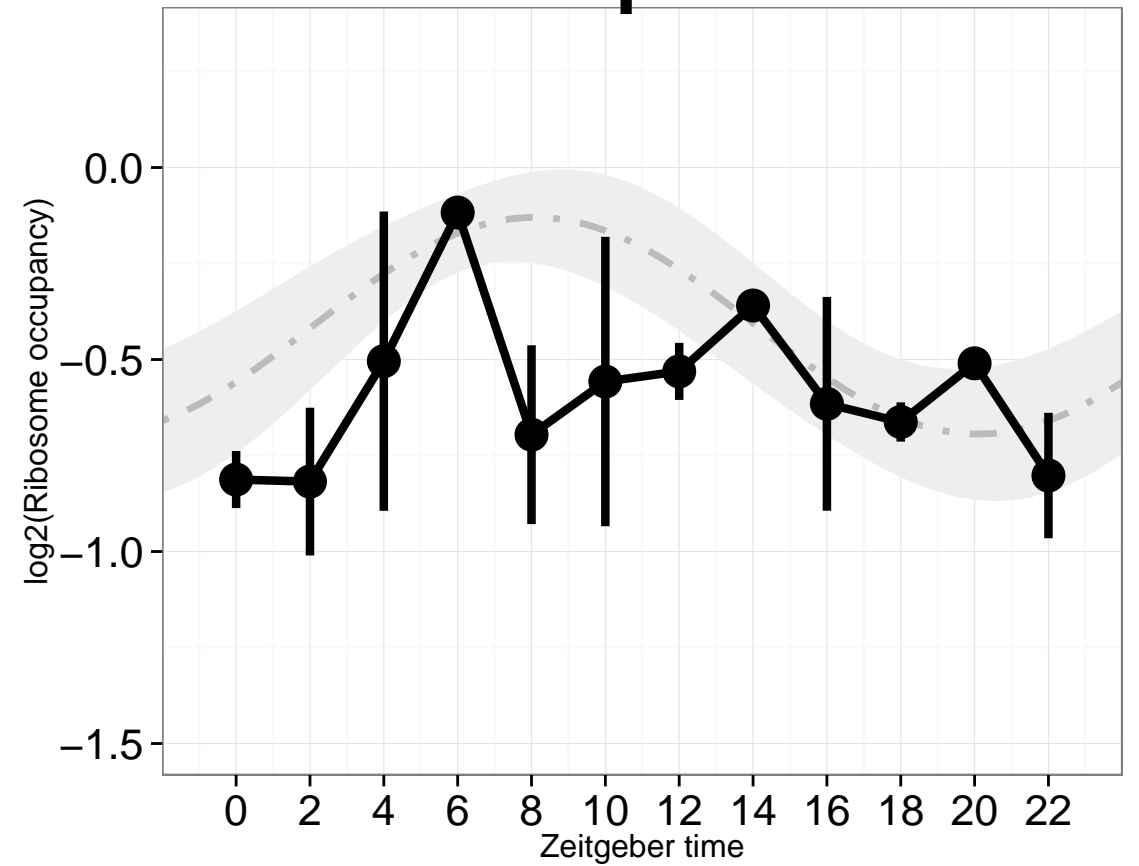

Supplement: SuppDataset_1.zip [file Rrp1b_set_B.pdf › Supplemental Dataset 1/B-mRNA_rhythm_translation_nonrhyth/Rrp1b_set_B.pdf]

## Rusc2

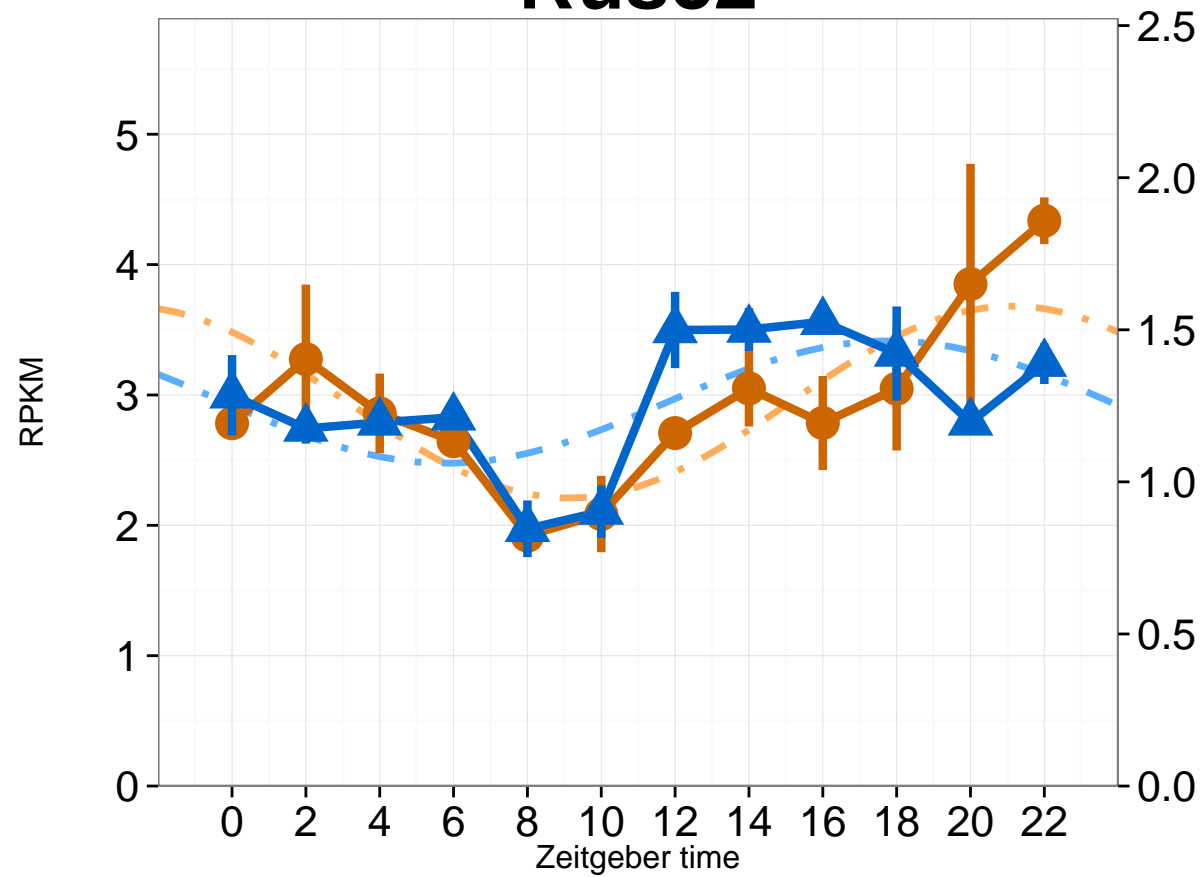

## Rusc2

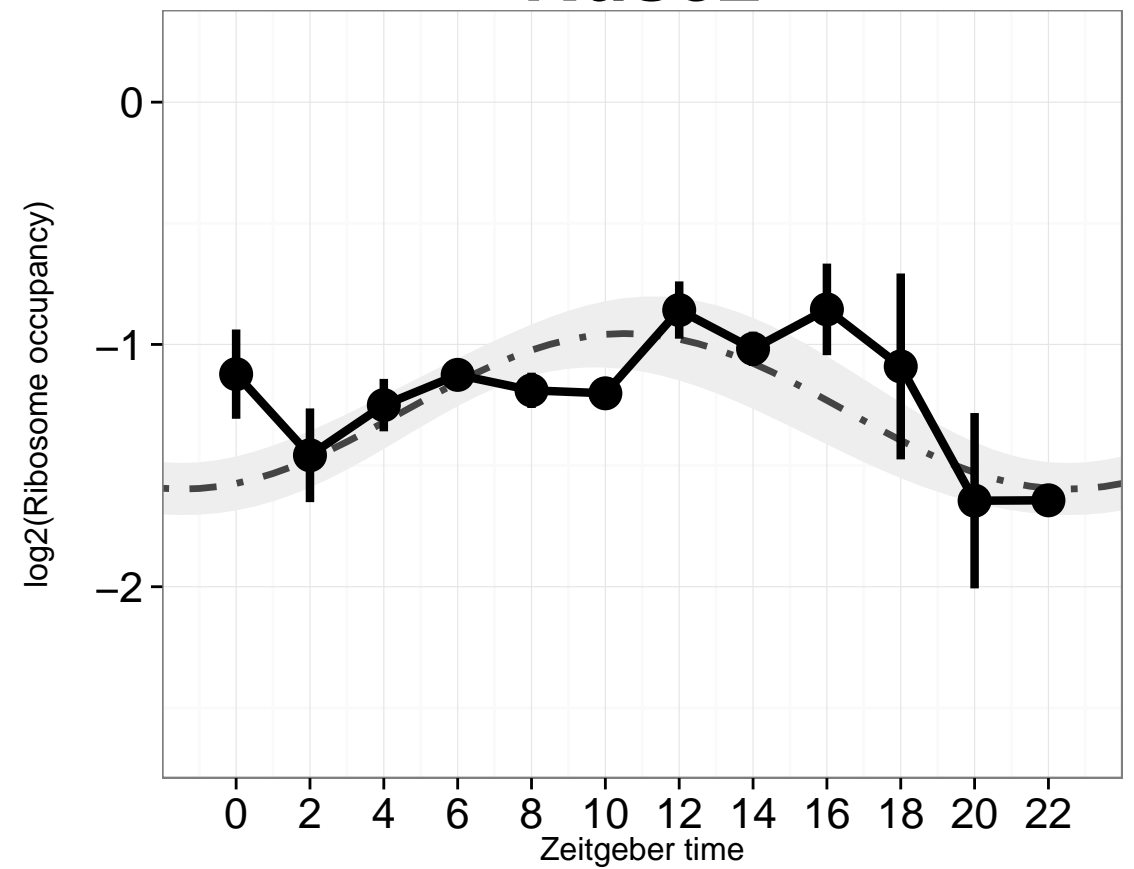

Supplement: SuppDataset_1.zip [file Rusc2_set_B.pdf › Supplemental Dataset 1/B-mRNA_rhythm_translation_nonrhyth/Rusc2_set_B.pdf]

# Samd1

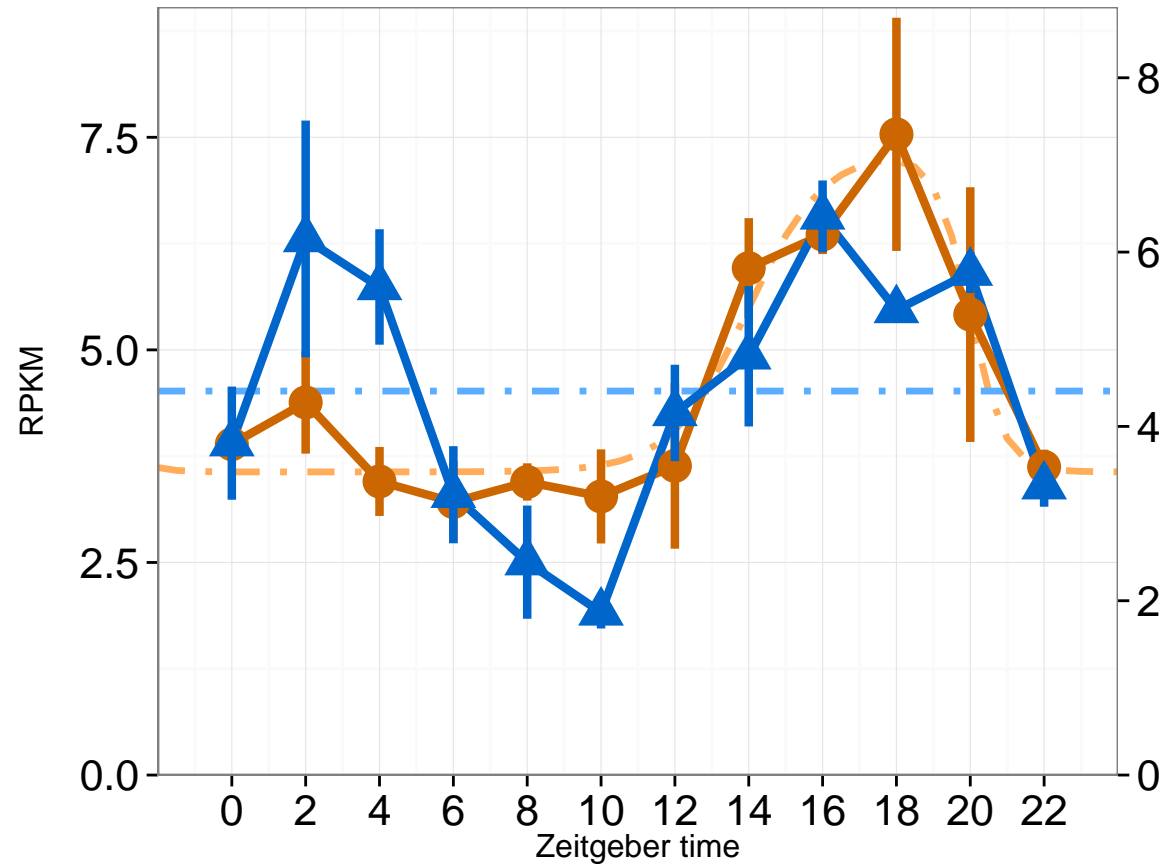

# Samd1

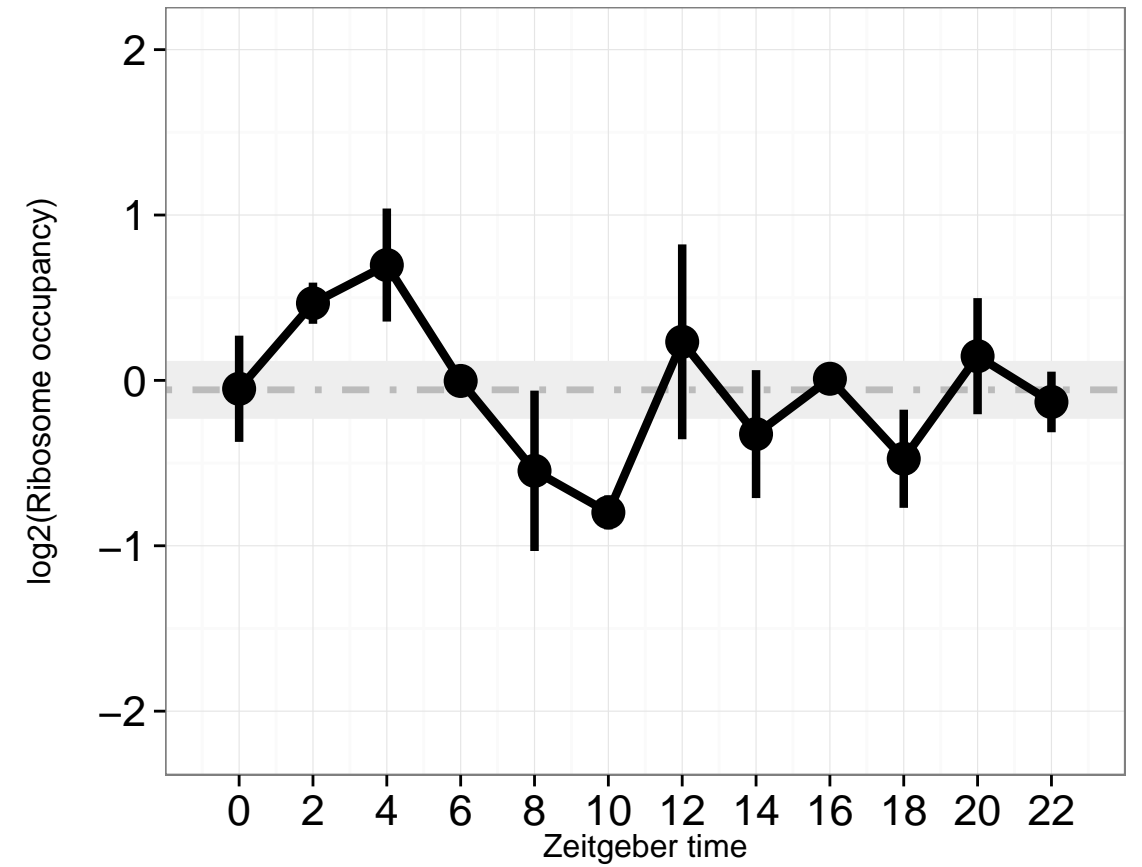

Supplement: SuppDataset_1.zip [file Samd1_set_B.pdf › Supplemental Dataset 1/B-mRNA_rhythm_translation_nonrhyth/Samd1_set_B.pdf]

# Samsn1

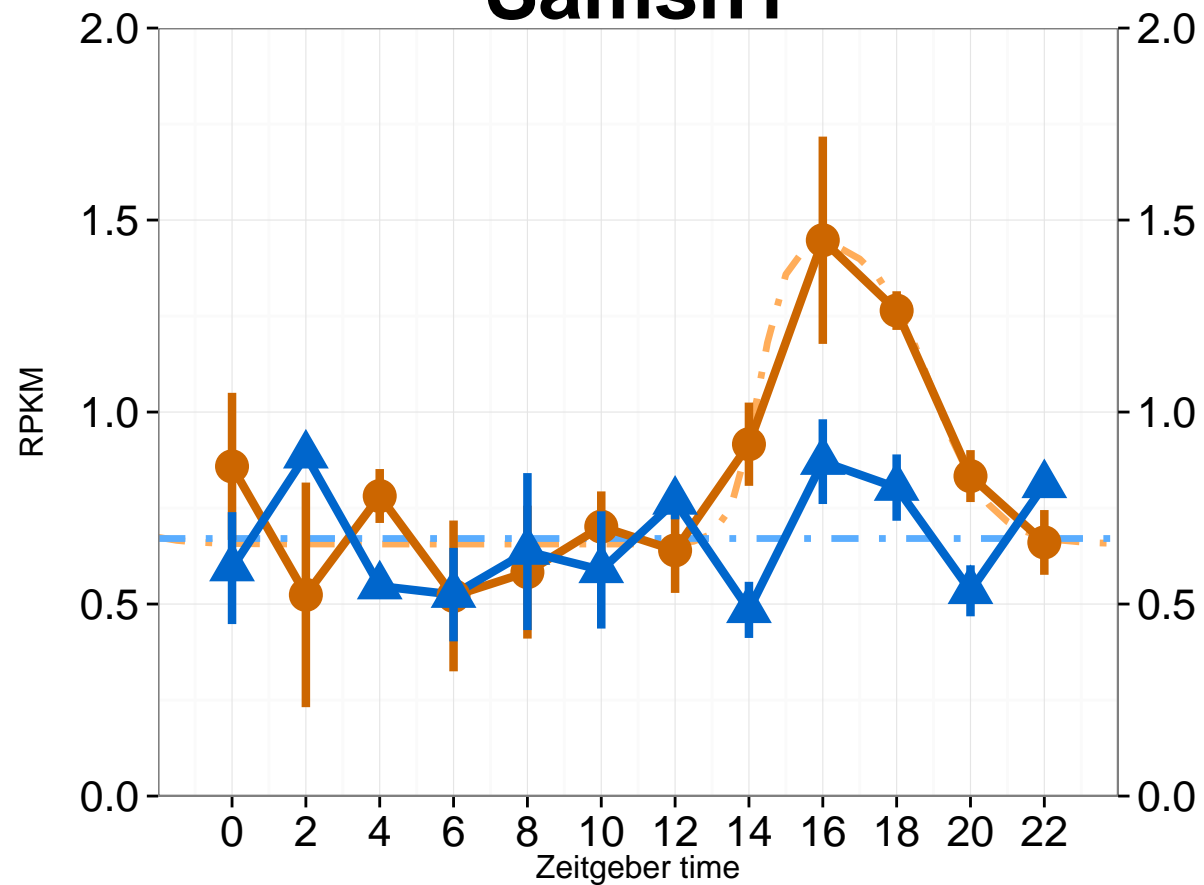

# Samsn1

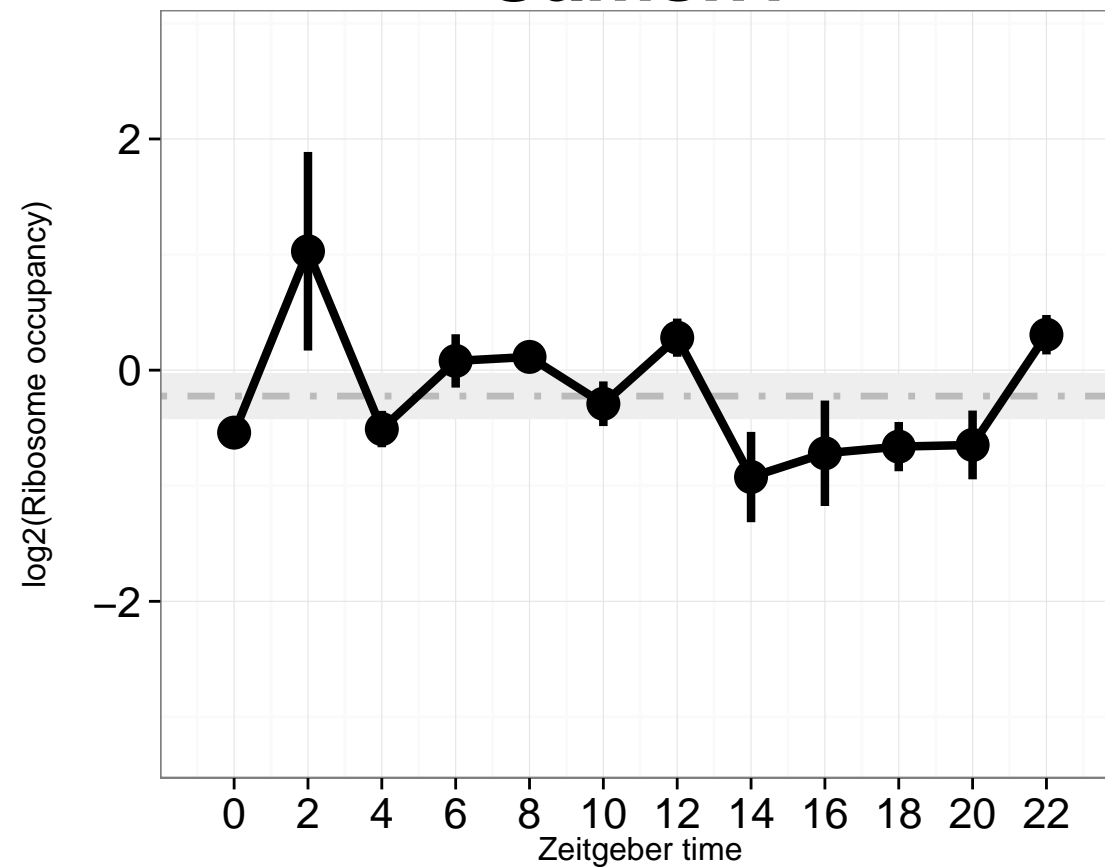

Supplement: SuppDataset_1.zip [file Samsn1_set_B.pdf › Supplemental Dataset 1/B-mRNA_rhythm_translation_nonrhyth/Samsn1_set_B.pdf]

## Sars2

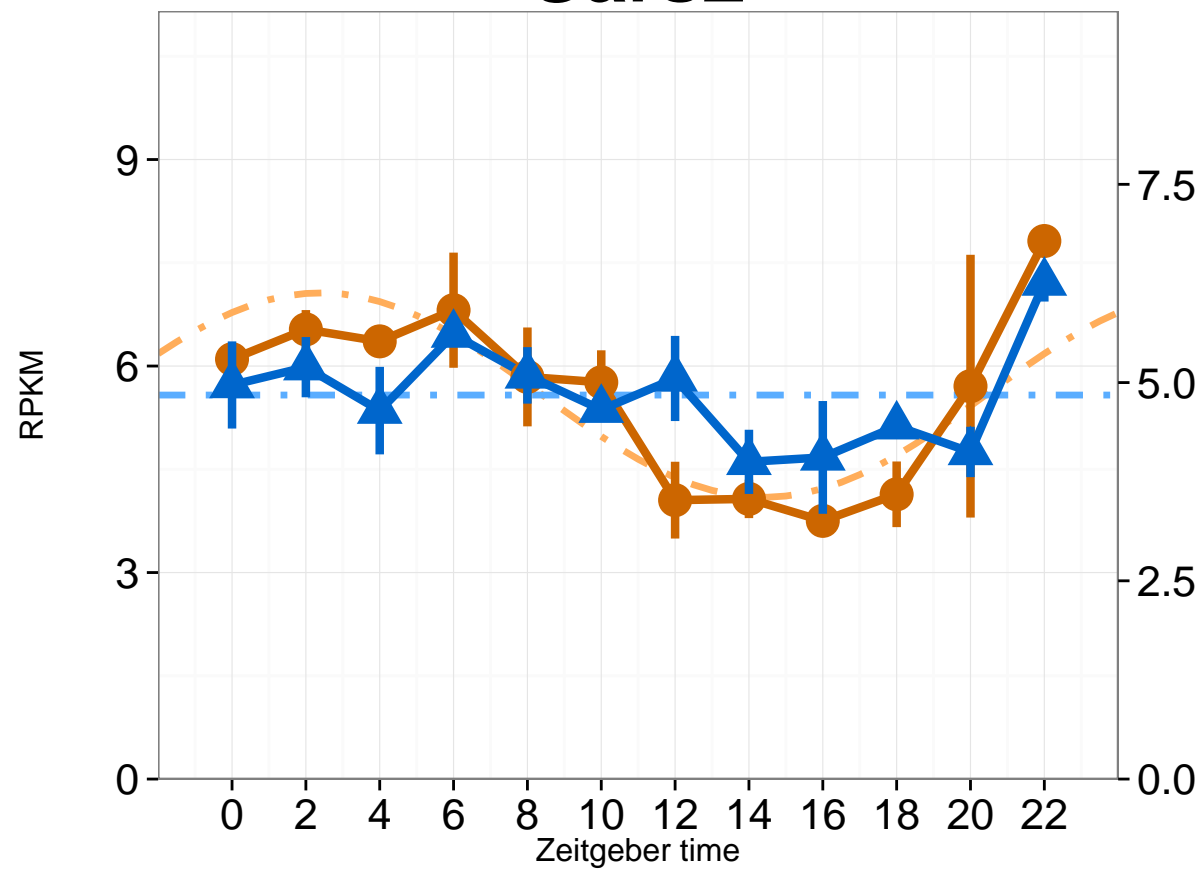

## Sars2

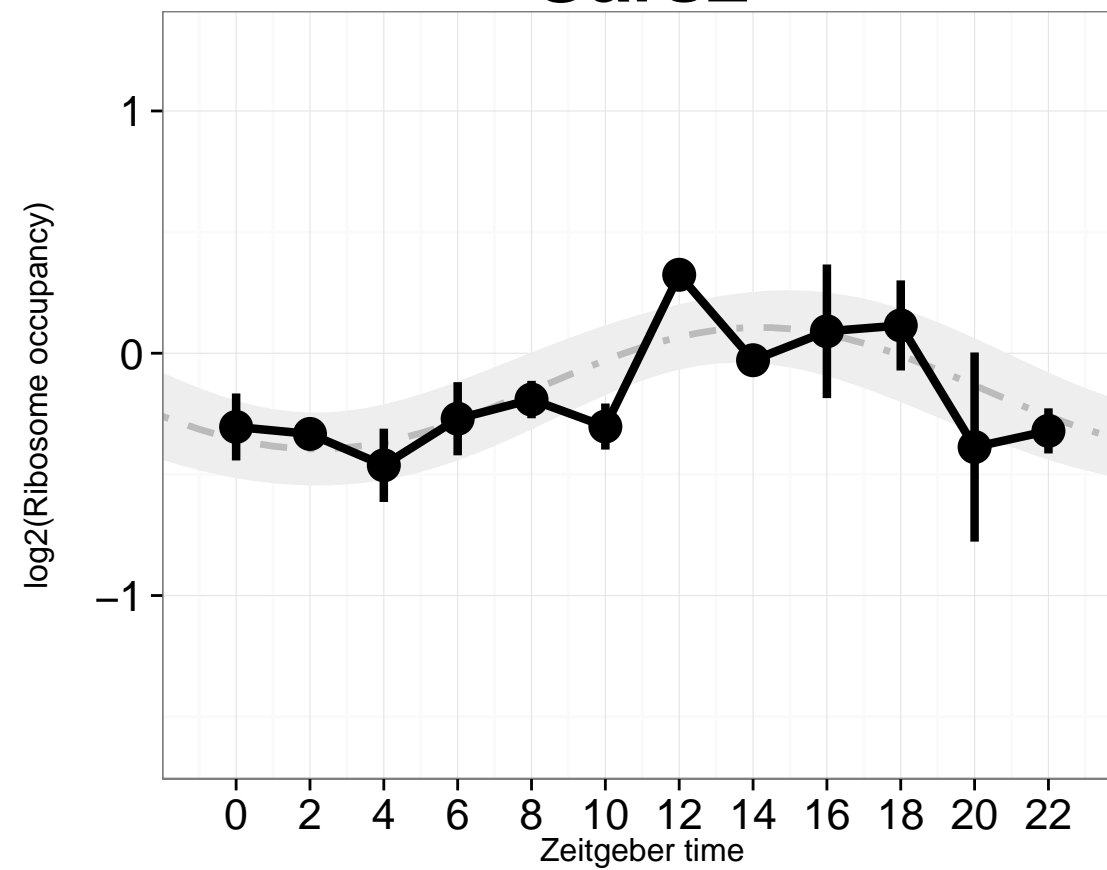

Supplement: SuppDataset_1.zip [file Sars2_set_B.pdf › Supplemental Dataset 1/B-mRNA_rhythm_translation_nonrhyth/Sars2_set_B.pdf]

# Sash3

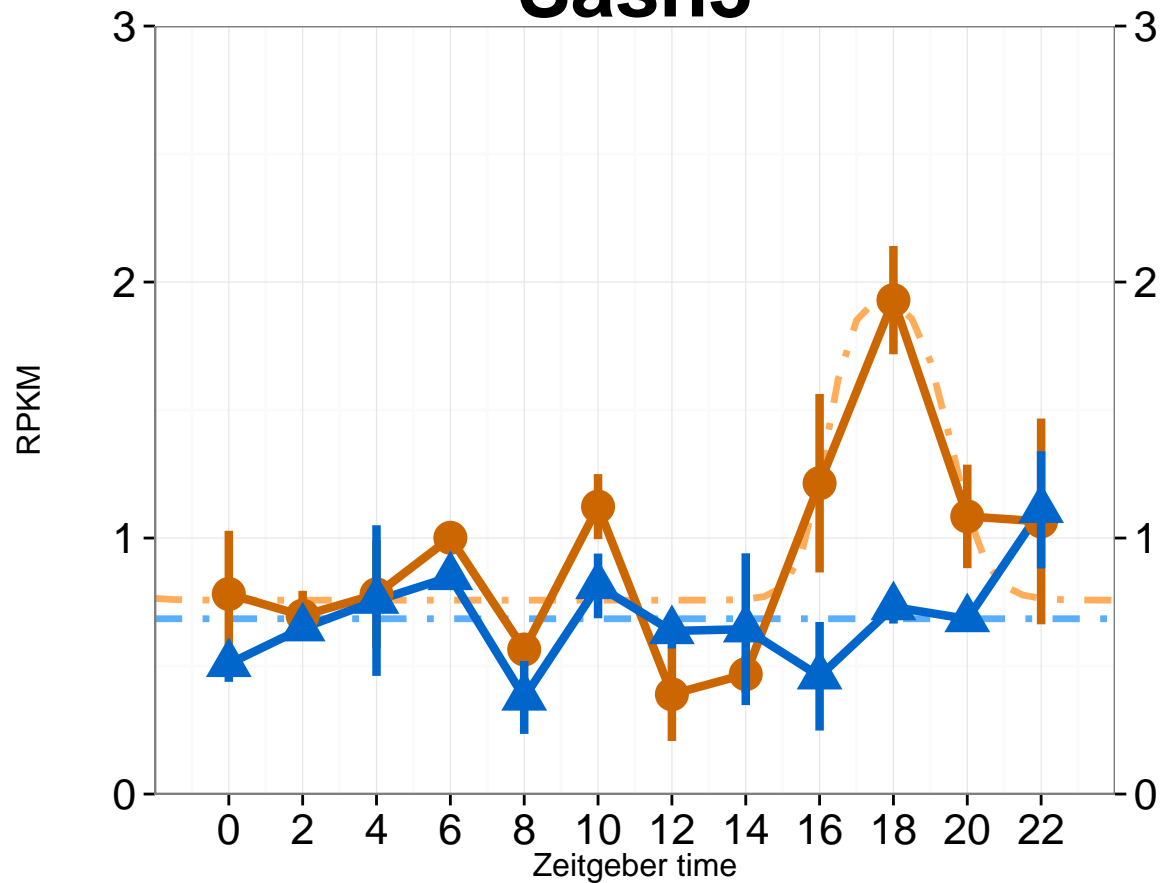

# Sash3

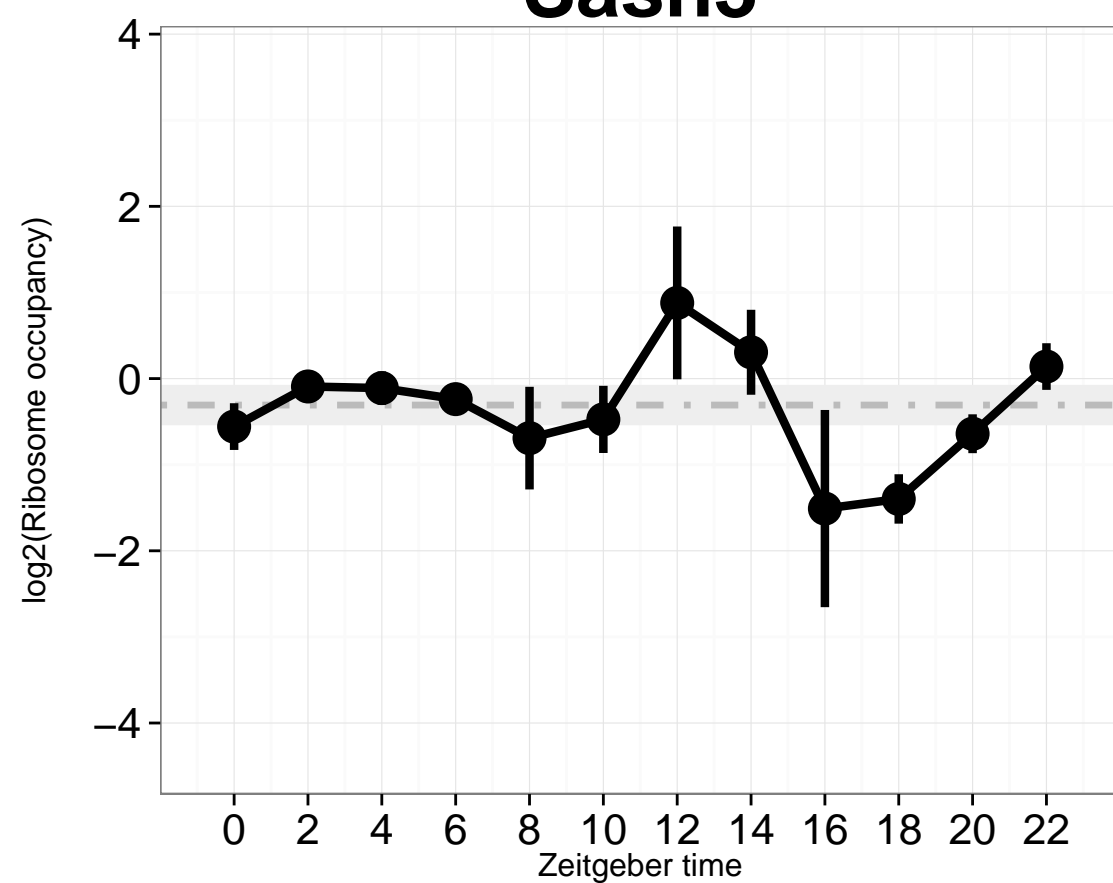

Supplement: SuppDataset_1.zip [file Sash3_set_B.pdf › Supplemental Dataset 1/B-mRNA_rhythm_translation_nonrhyth/Sash3_set_B.pdf]

Scamp3

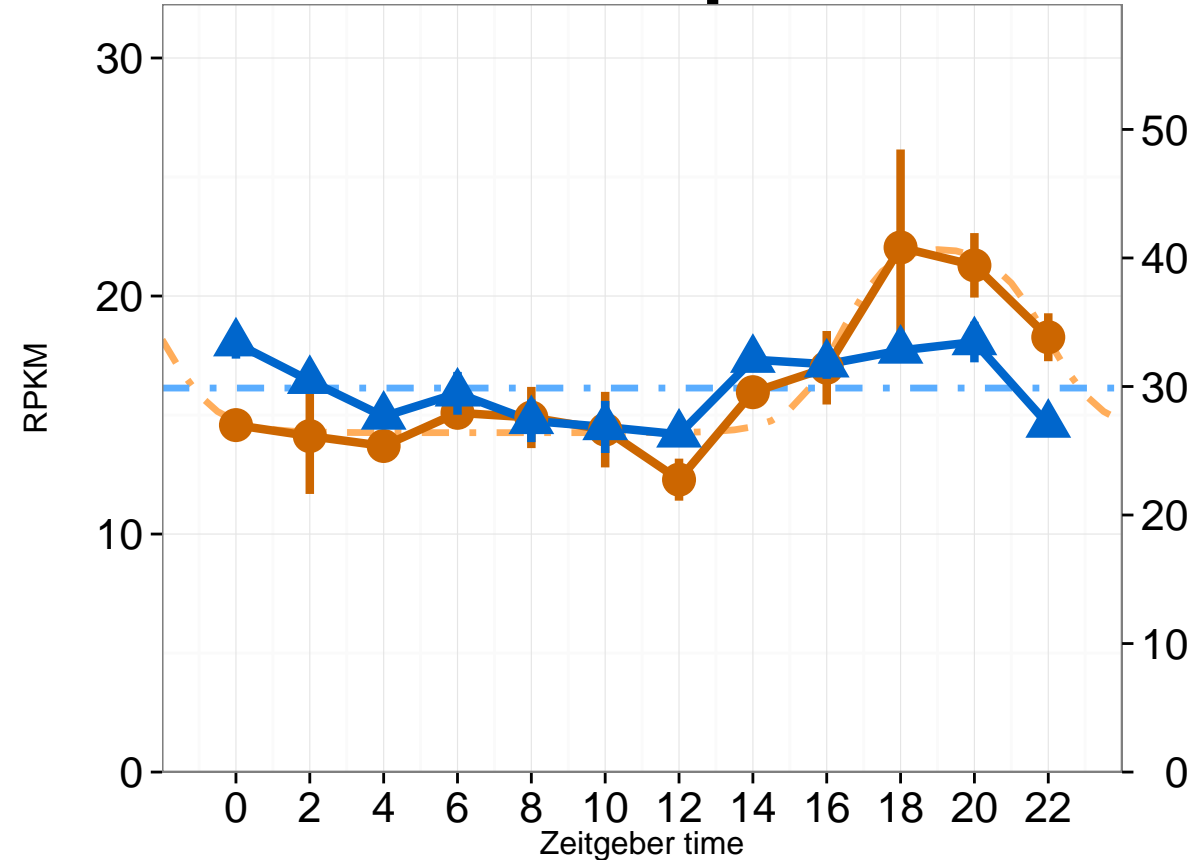

Scamp3

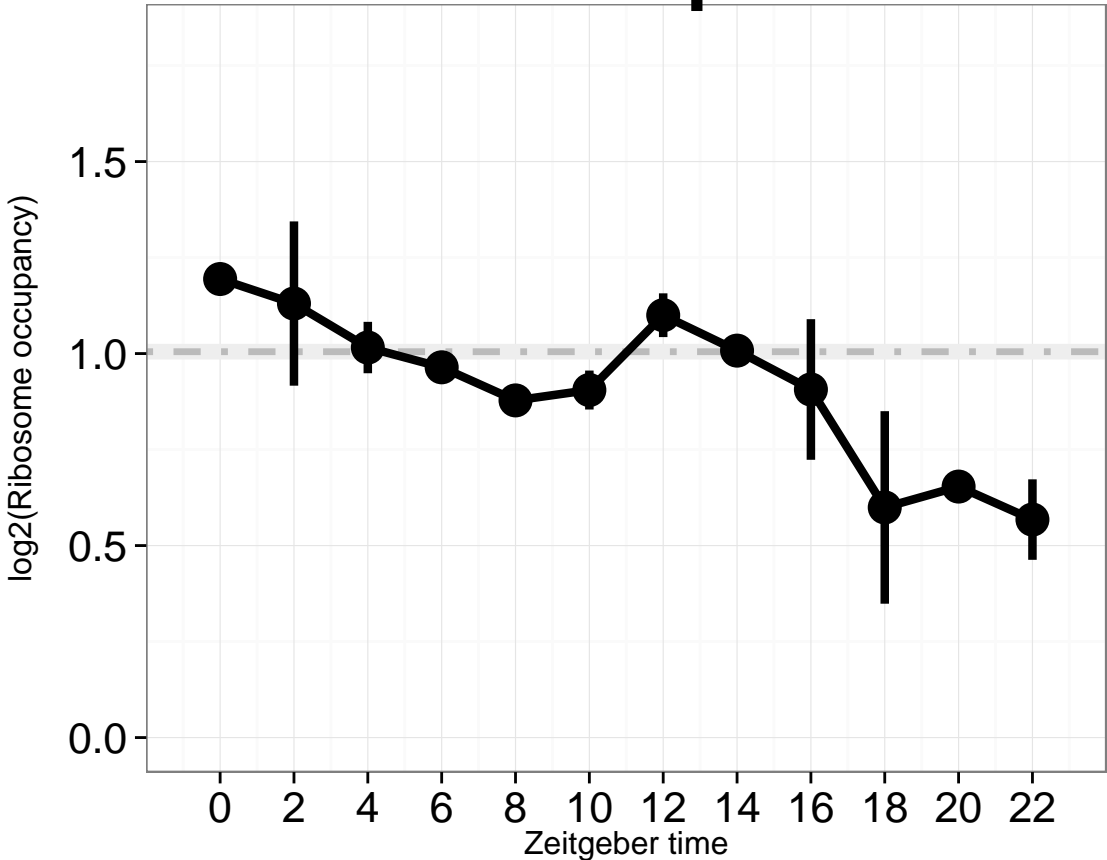

Supplement: SuppDataset_1.zip [file Scamp3_set_B.pdf › Supplemental Dataset 1/B-mRNA_rhythm_translation_nonrhyth/Scamp3_set_B.pdf]

## Scap

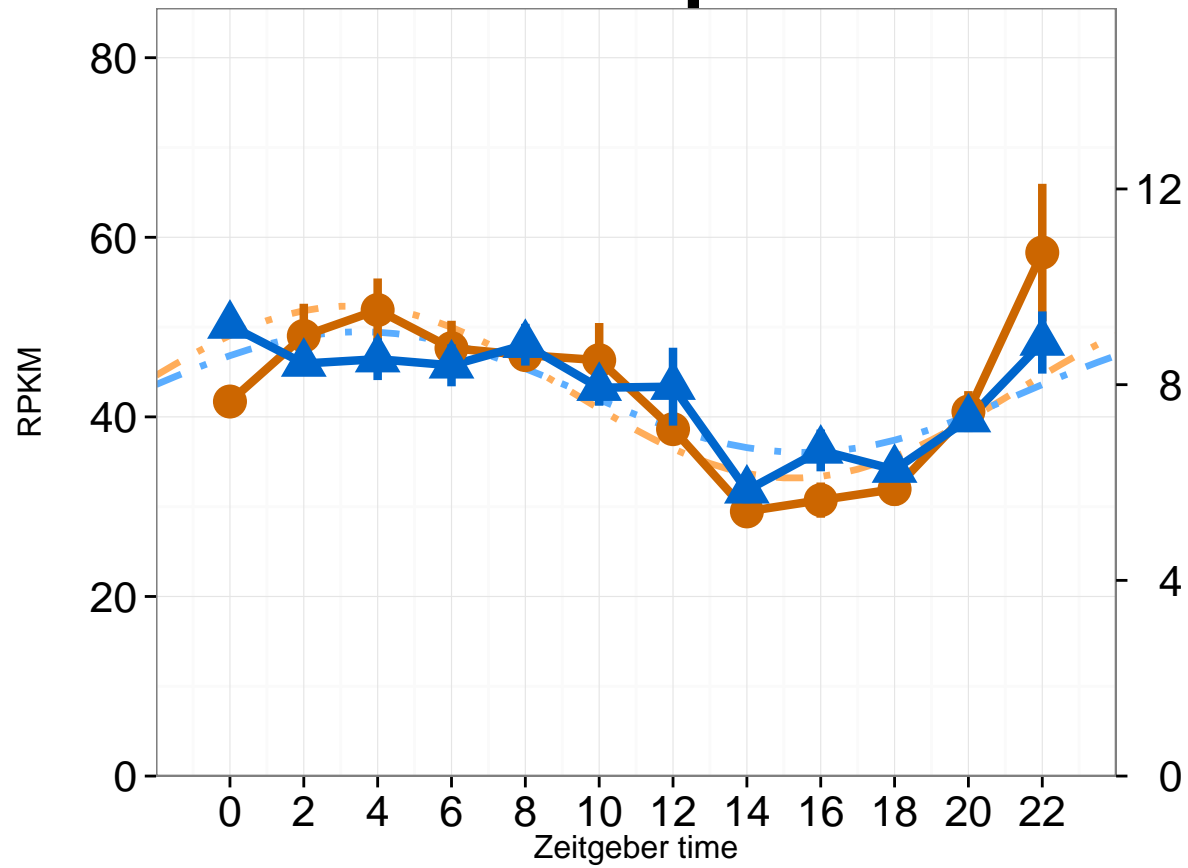

## Scap

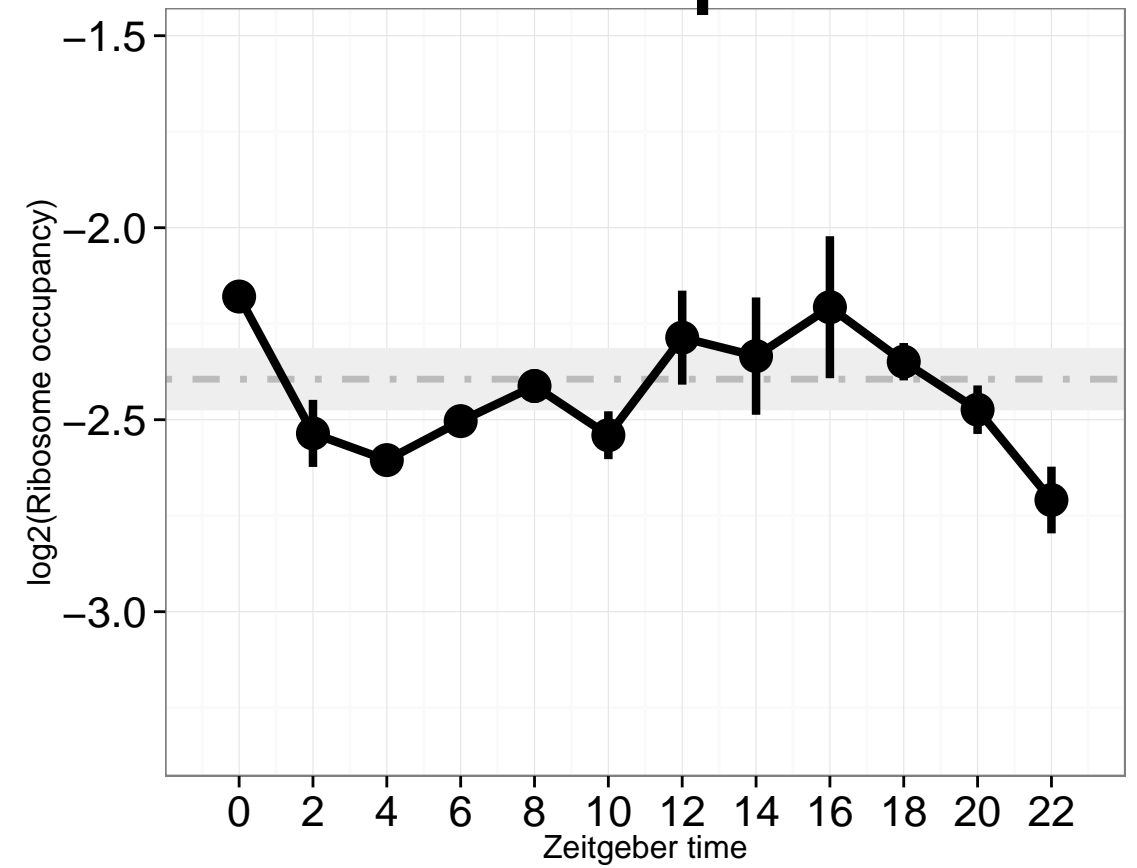

Supplement: SuppDataset_1.zip [file Scap_set_B.pdf › Supplemental Dataset 1/B-mRNA_rhythm_translation_nonrhyth/Scap_set_B.pdf]

## Scd1

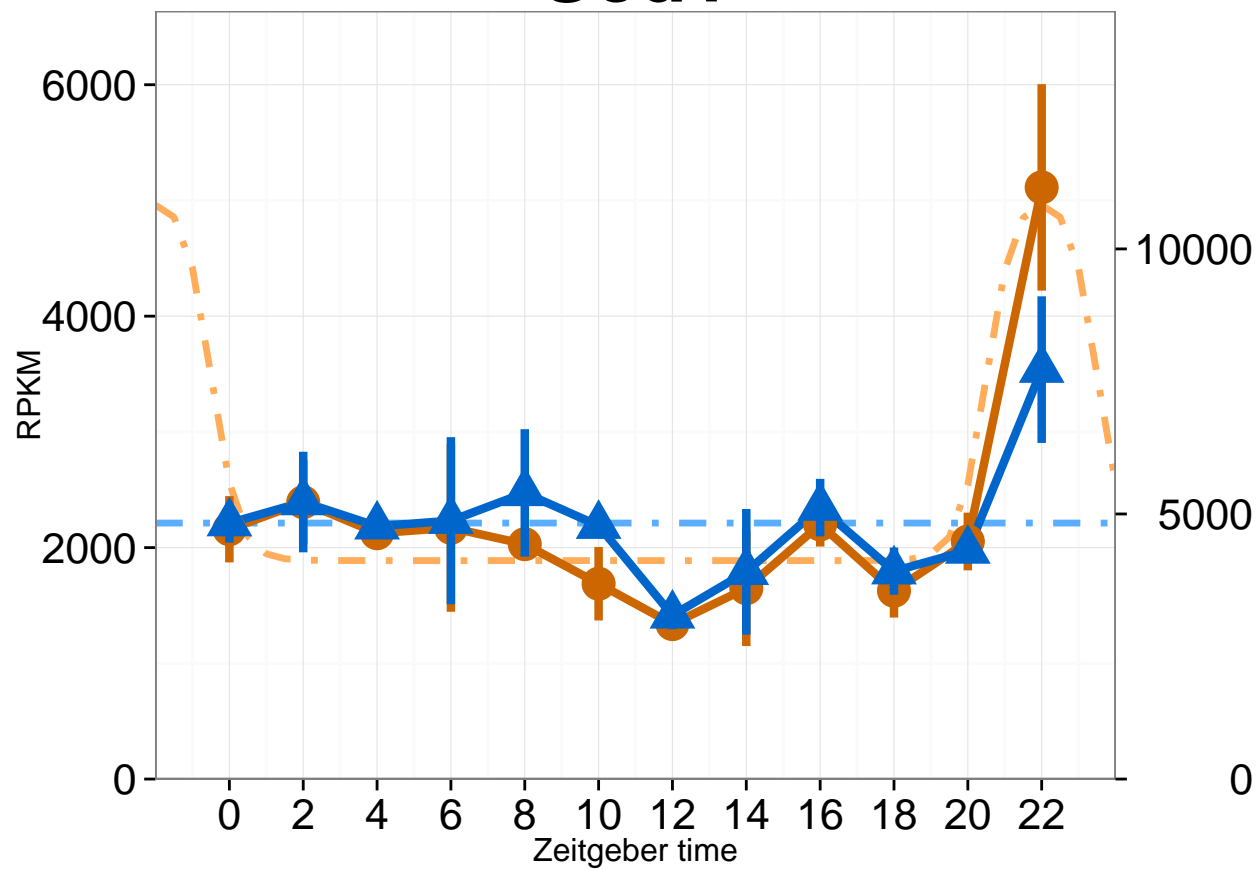

## Scd1

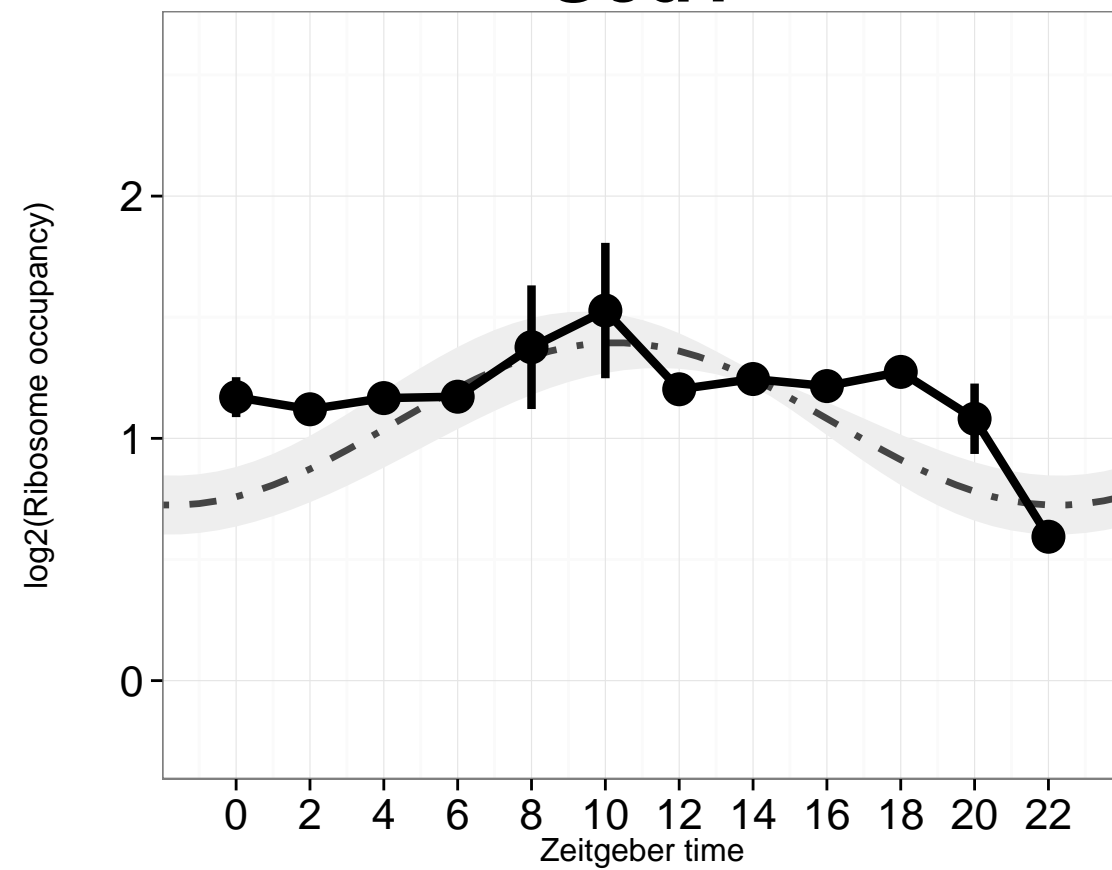

Supplement: SuppDataset_1.zip [file Scd1_set_B.pdf › Supplemental Dataset 1/B-mRNA_rhythm_translation_nonrhyth/Scd1_set_B.pdf]

## Scd4

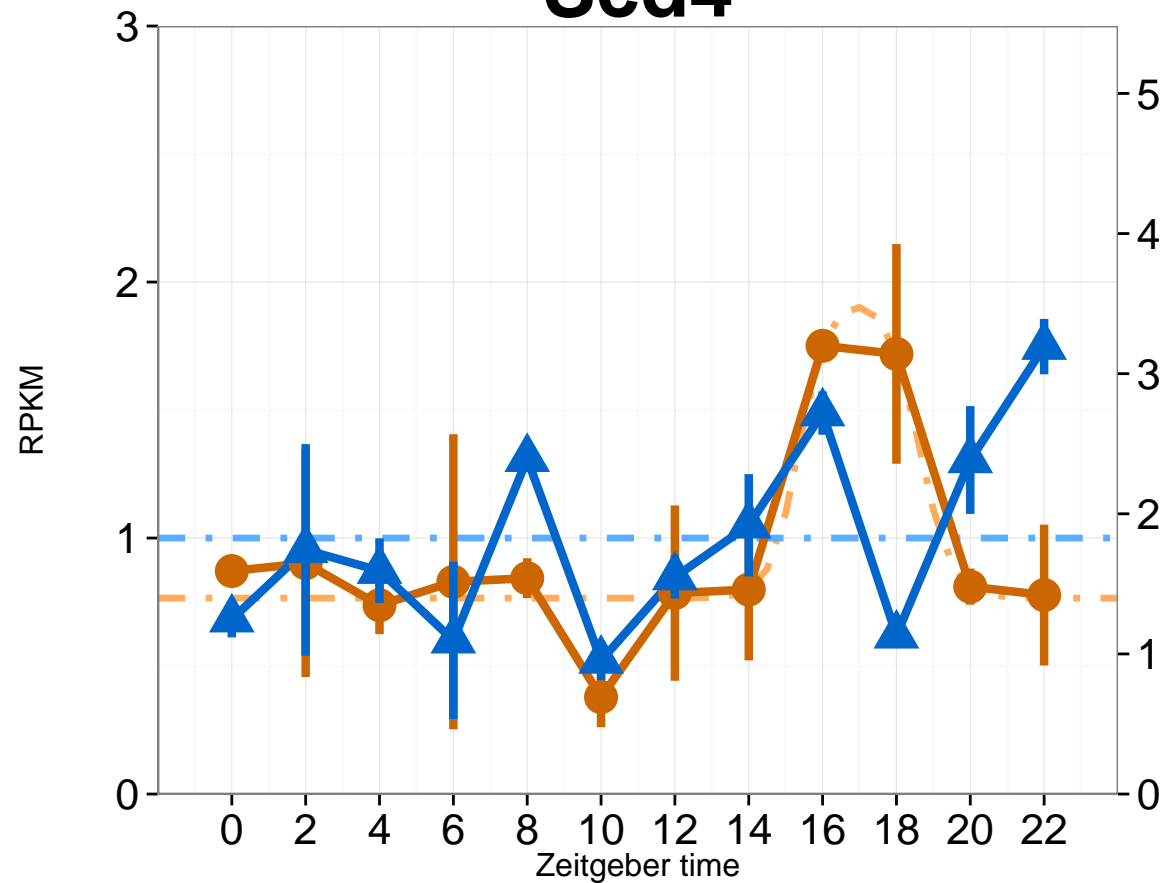

## Scd4

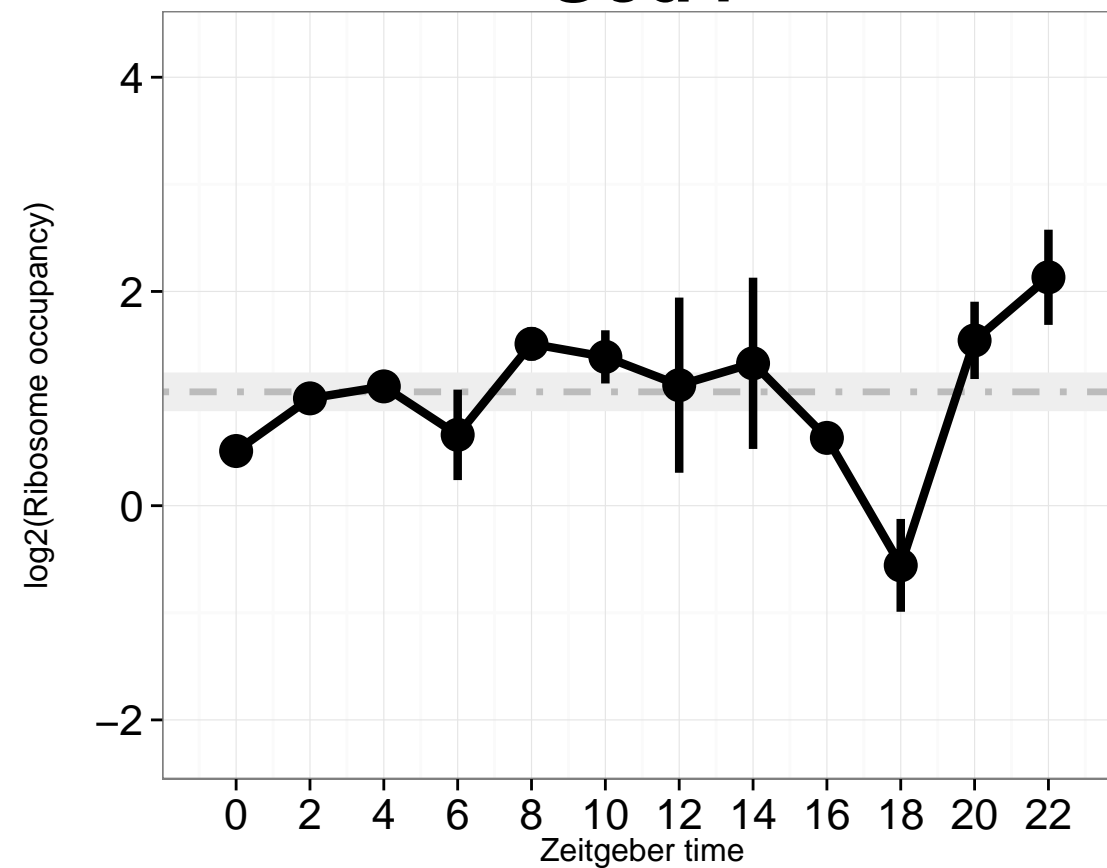

Supplement: SuppDataset_1.zip [file Scd4_set_B.pdf › Supplemental Dataset 1/B-mRNA_rhythm_translation_nonrhyth/Scd4_set_B.pdf]
