# Supplementary figures and images for: Ribosome profiling reveals the rhythmic liver translatome and circadian clock regulation by upstream open reading frames (part 109 of 113)
Source: HighWire-hosted journal article supplement (doi:10.1101/gr.195404.115), 2015-10-20

# Obfc1

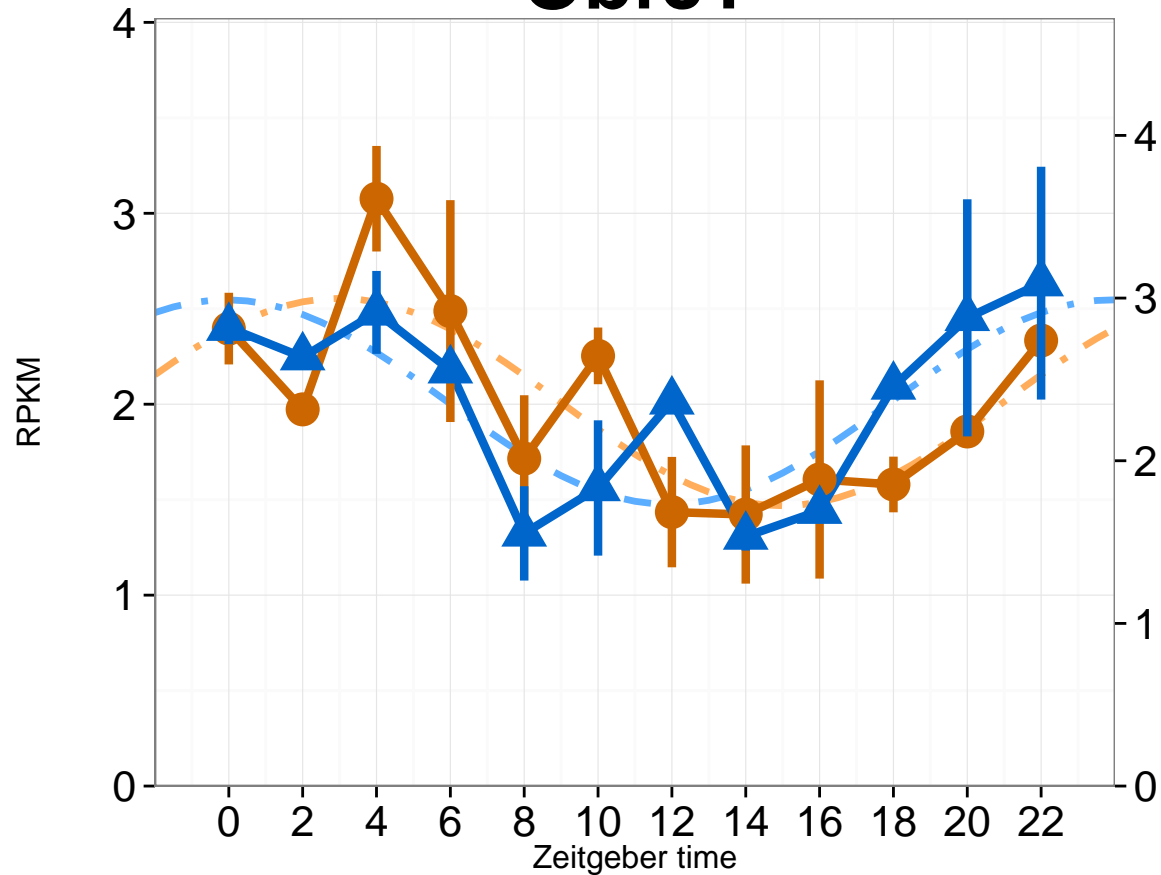

# Obfc1

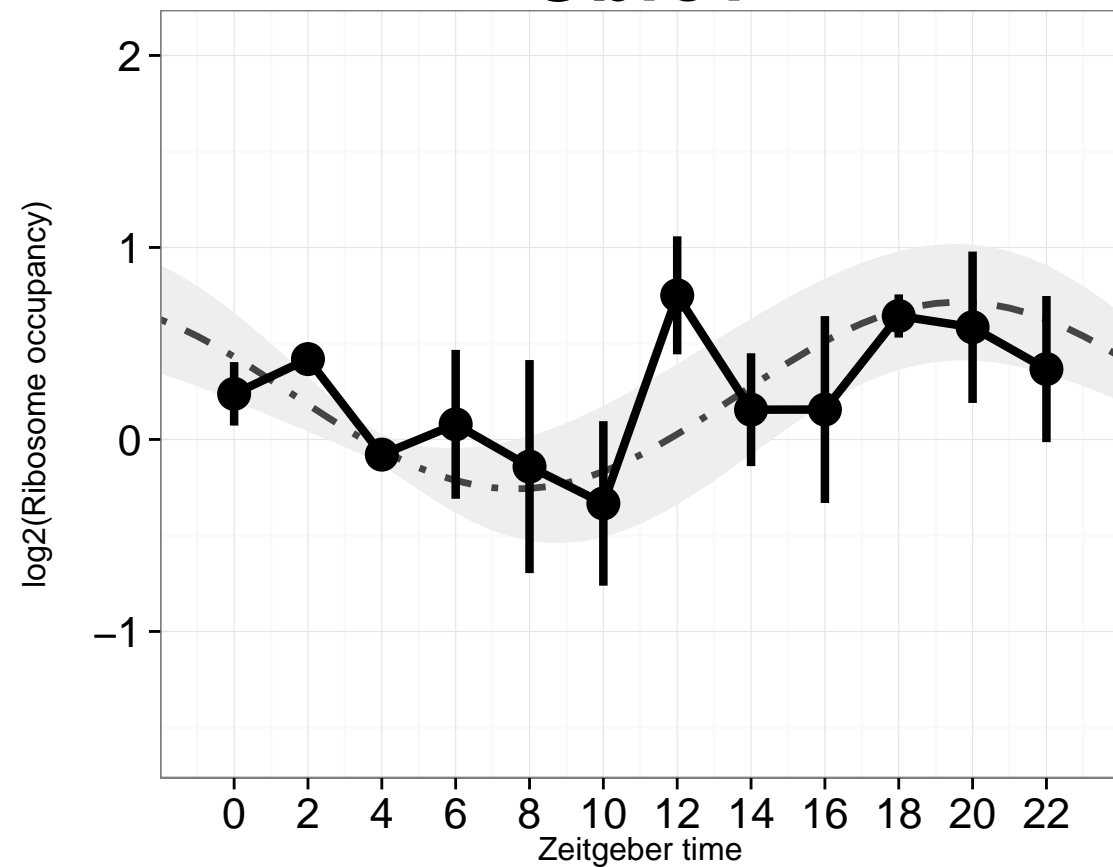

Supplement: SuppDataset_1.zip [file Obfc1_set_D.pdf › Supplemental Dataset 1/D-mRNA_rhythm_translation_rhyth/Obfc1_set_D.pdf]

## Ocln

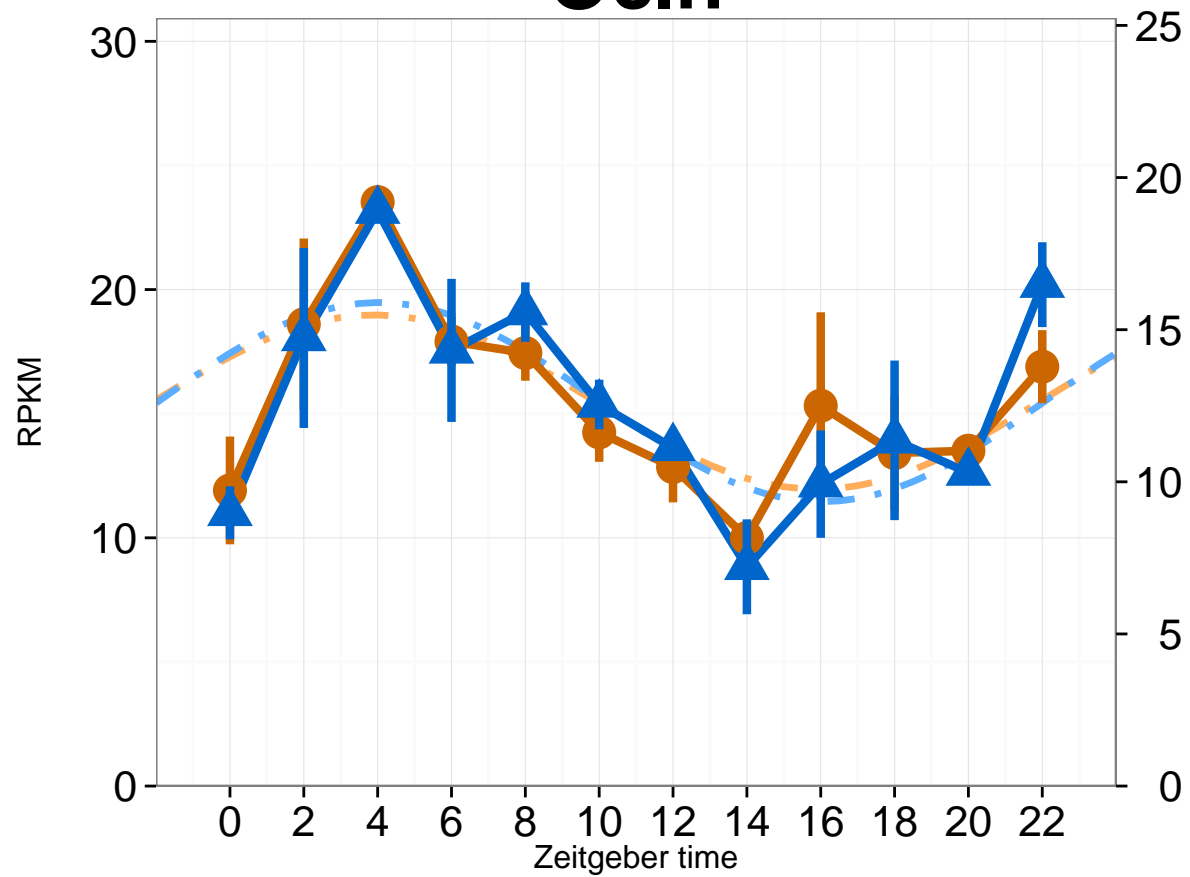

## Ocln

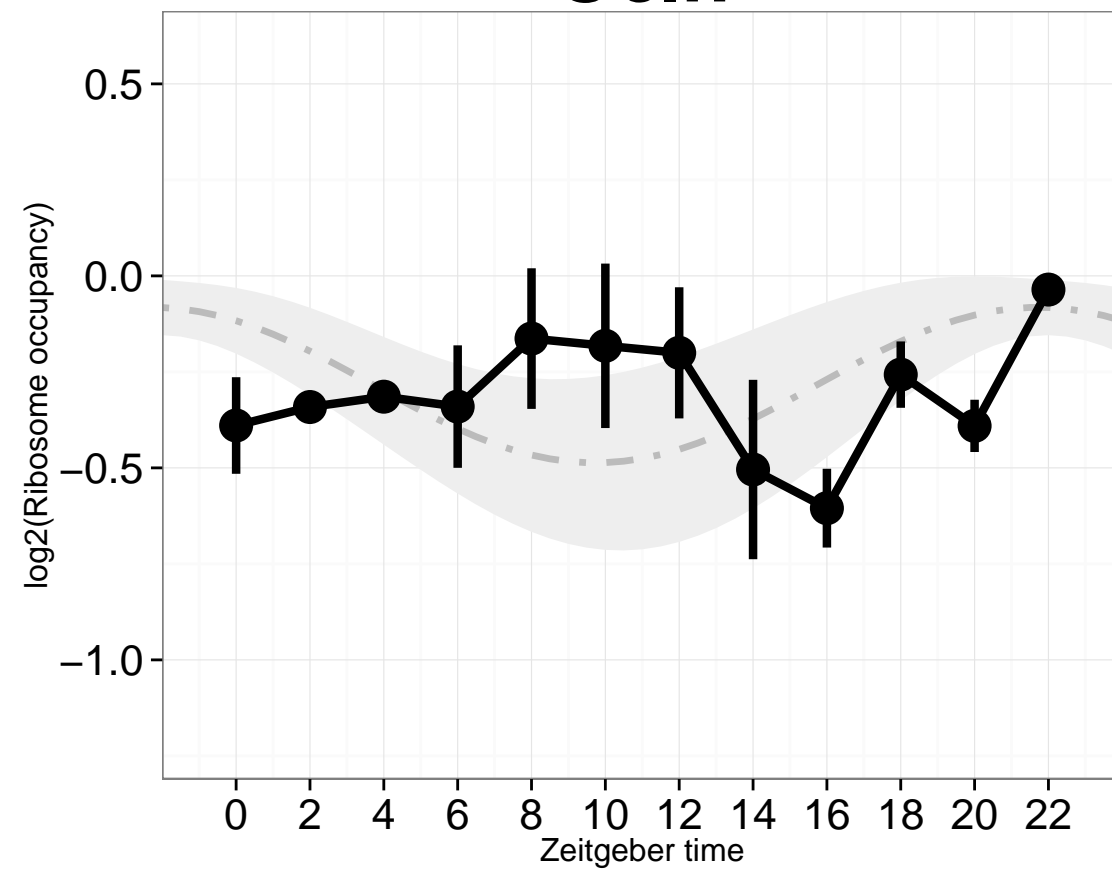

Supplement: SuppDataset_1.zip [file Ocln_set_D.pdf › Supplemental Dataset 1/D-mRNA_rhythm_translation_rhyth/Ocln_set_D.pdf]

# Odc1

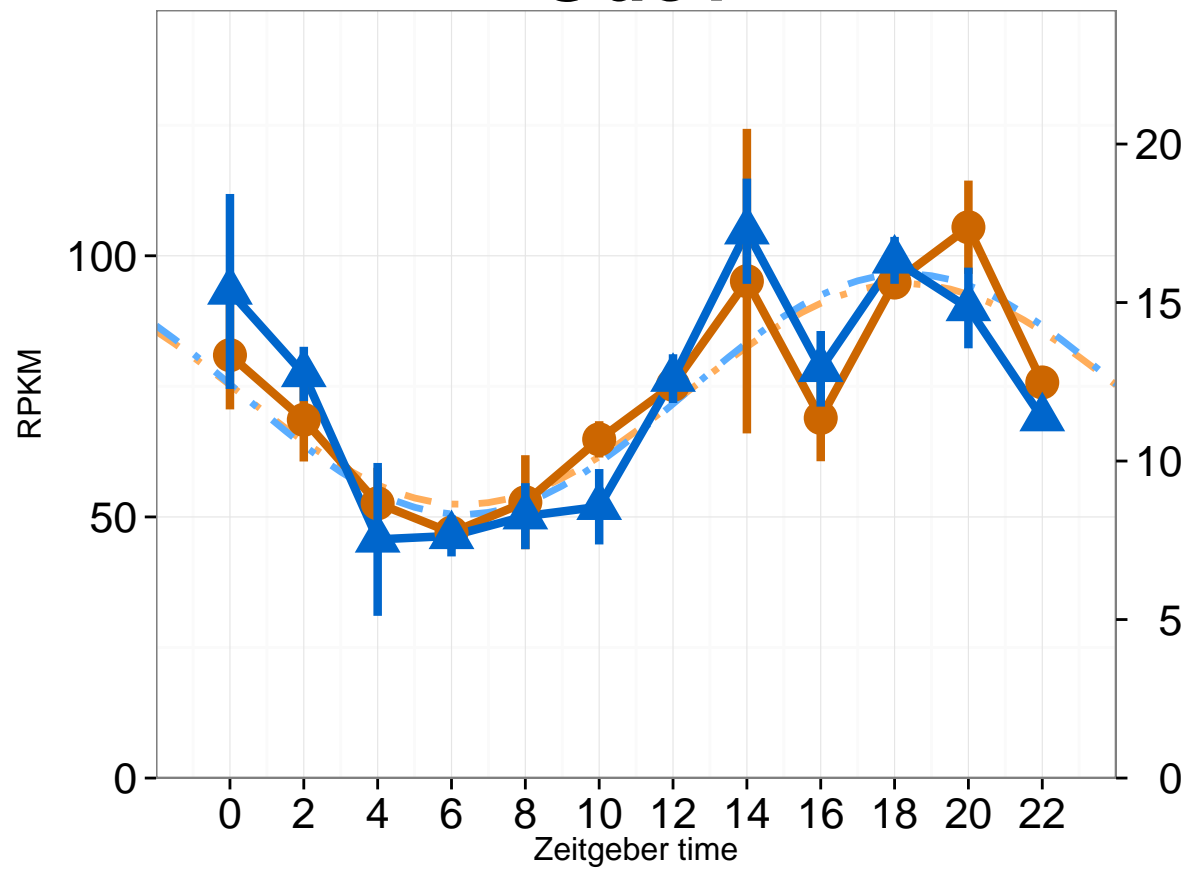

# Odc1

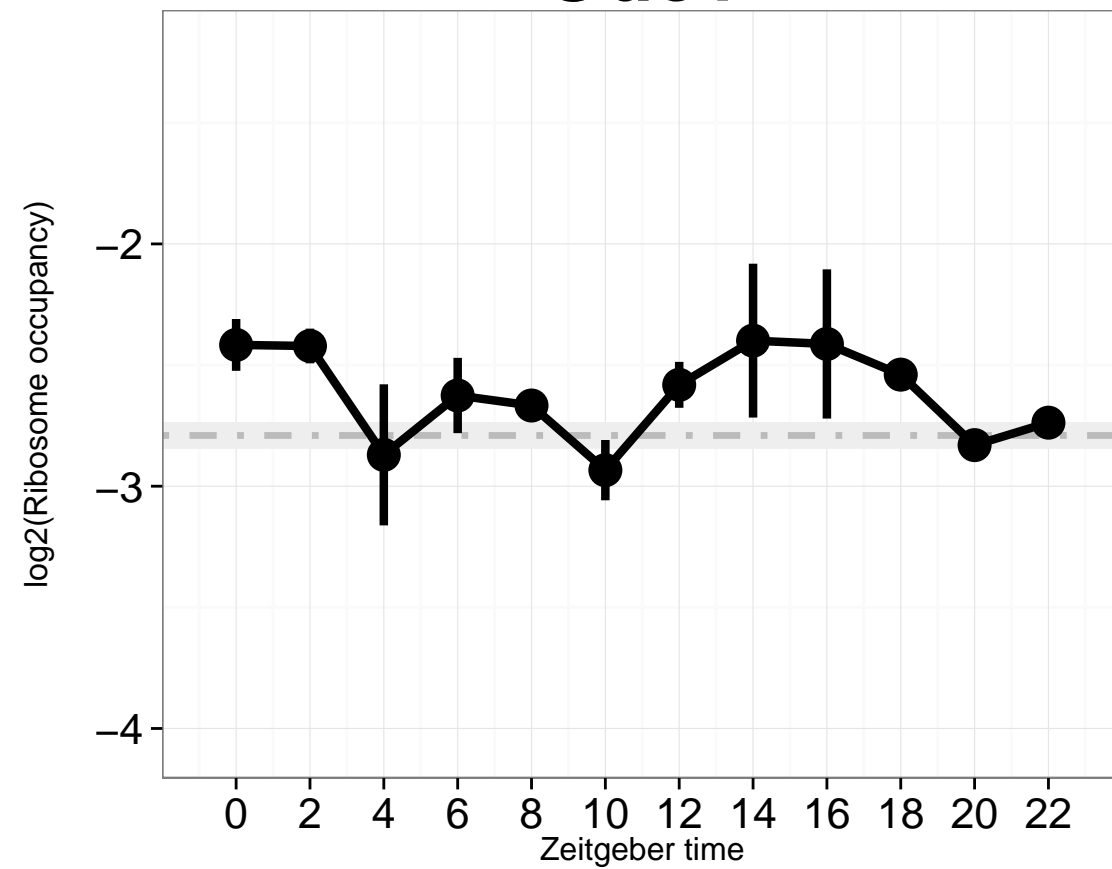

Supplement: SuppDataset_1.zip [file Odc1_set_D.pdf › Supplemental Dataset 1/D-mRNA_rhythm_translation_rhyth/Odc1_set_D.pdf]

# Odf3b

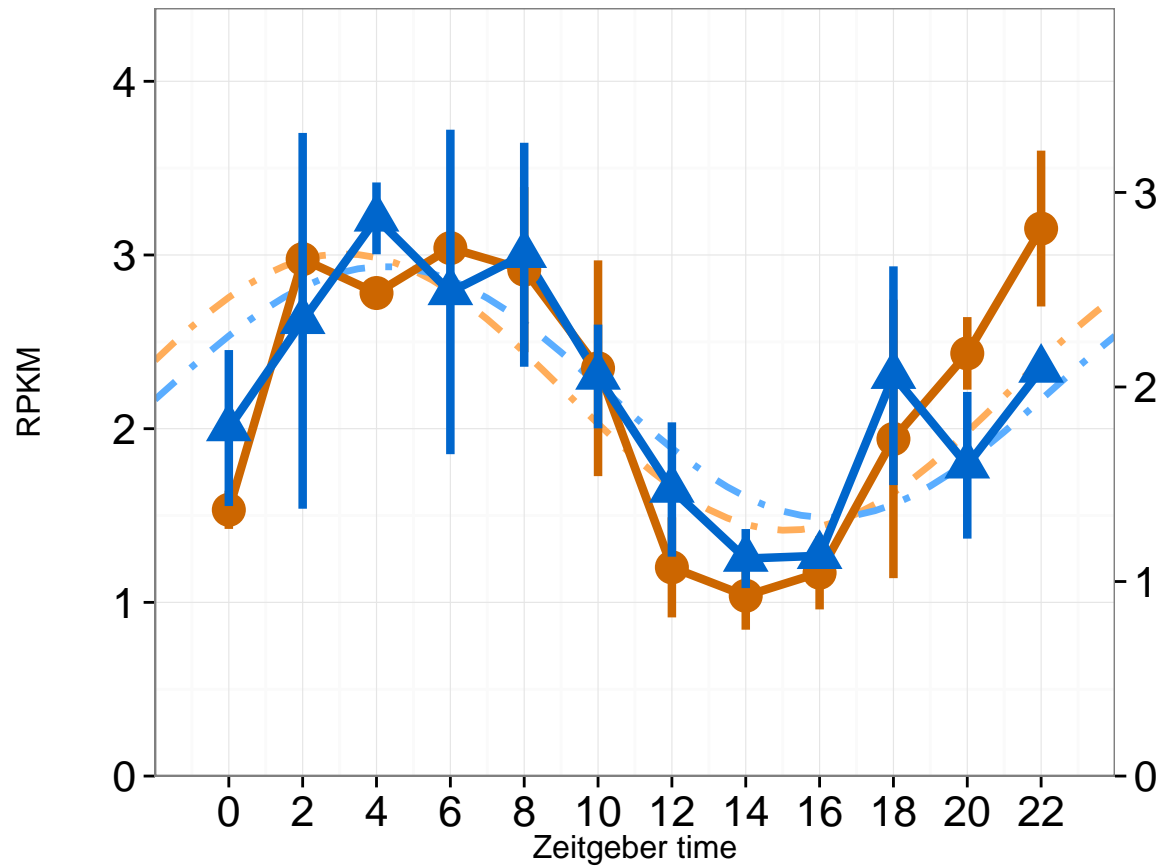

# Odf3b

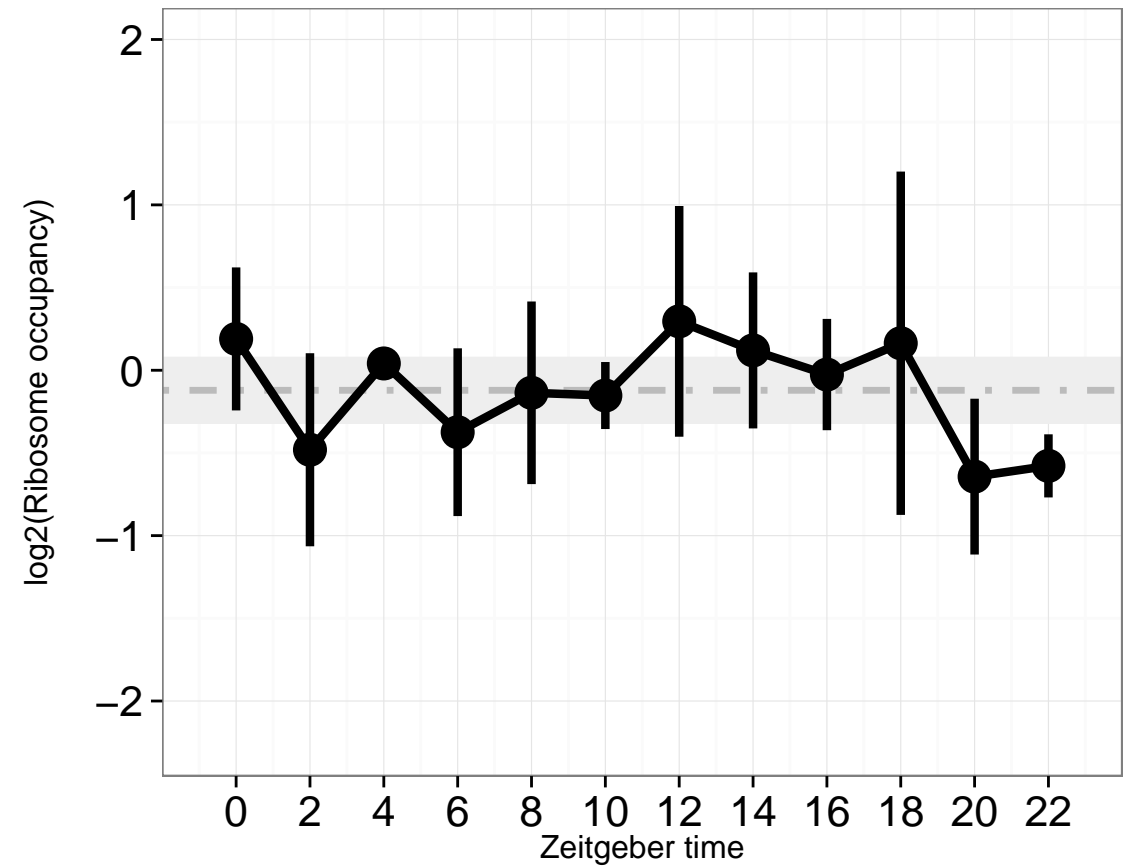

Supplement: SuppDataset_1.zip [file Odf3b_set_D.pdf › Supplemental Dataset 1/D-mRNA_rhythm_translation_rhyth/Odf3b_set_D.pdf]

# Opn3

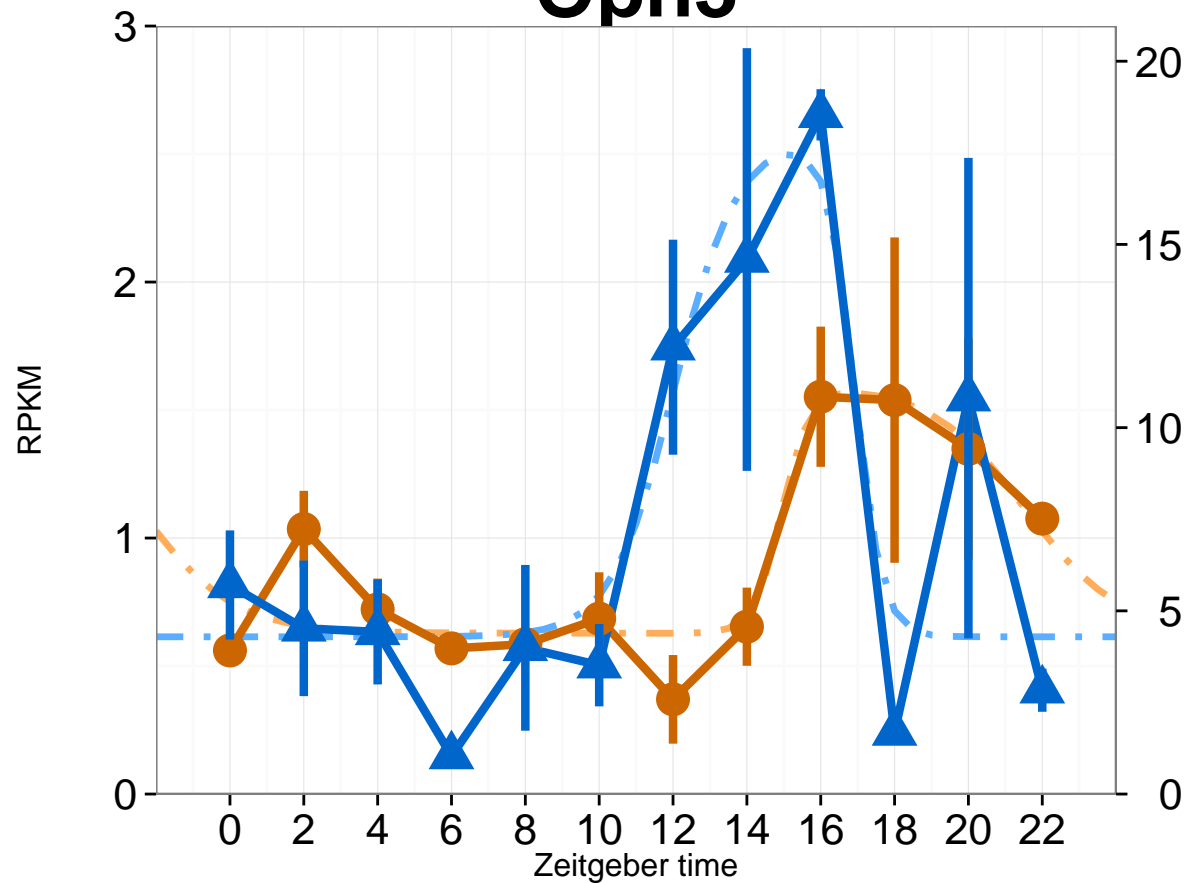

# Opn3

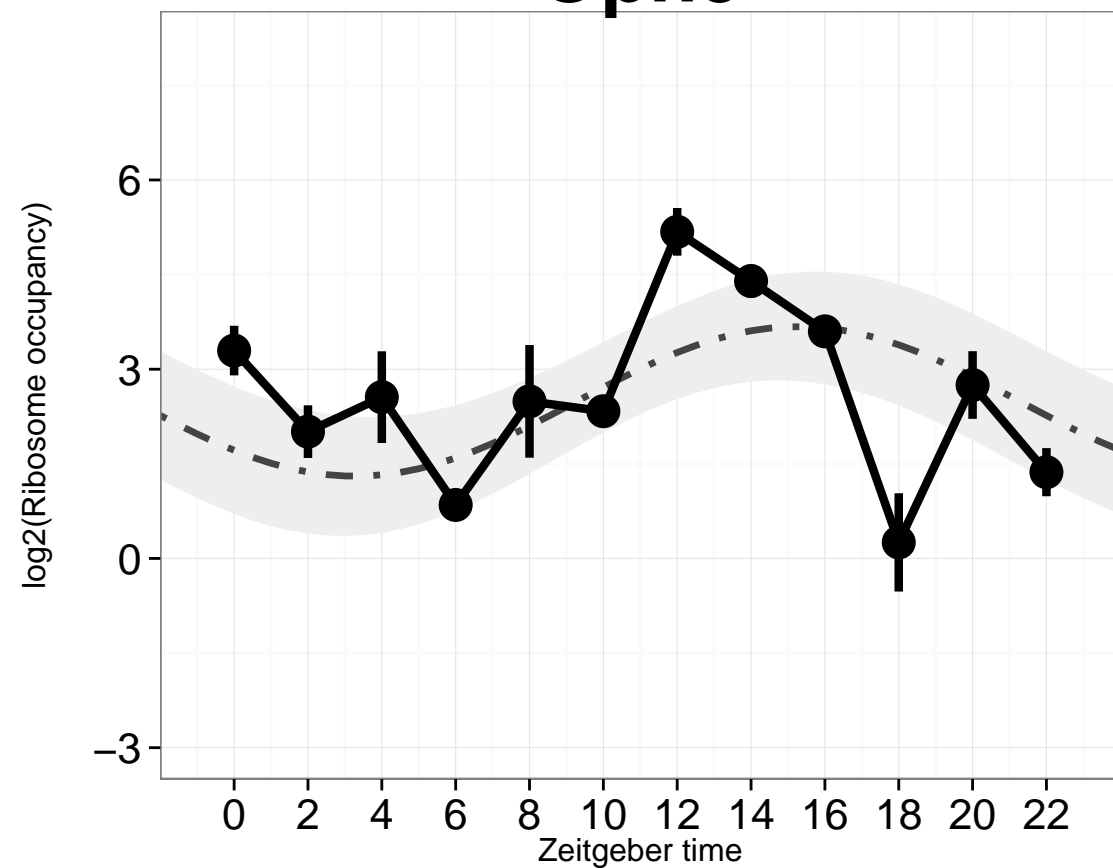

Supplement: SuppDataset_1.zip [file Opn3_set_D.pdf › Supplemental Dataset 1/D-mRNA_rhythm_translation_rhyth/Opn3_set_D.pdf]

## Orm1

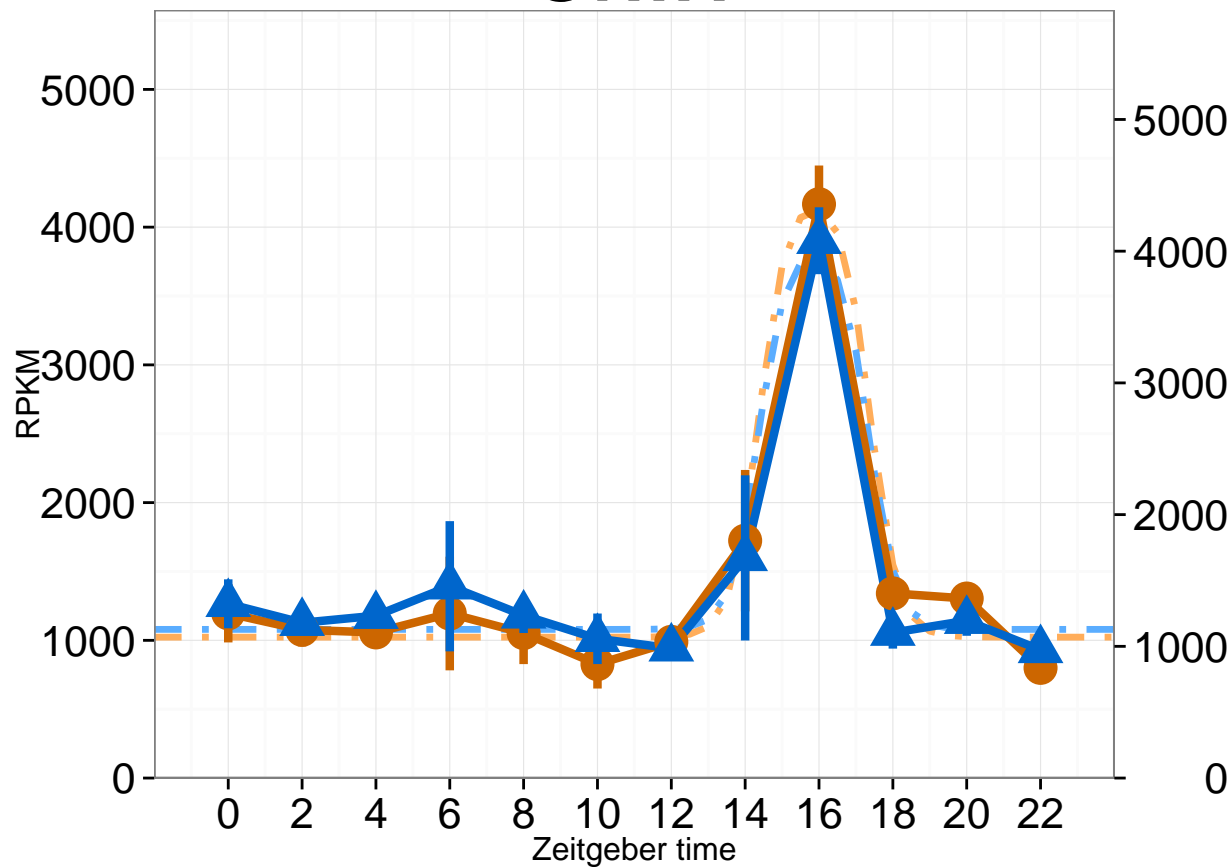

## Orm1

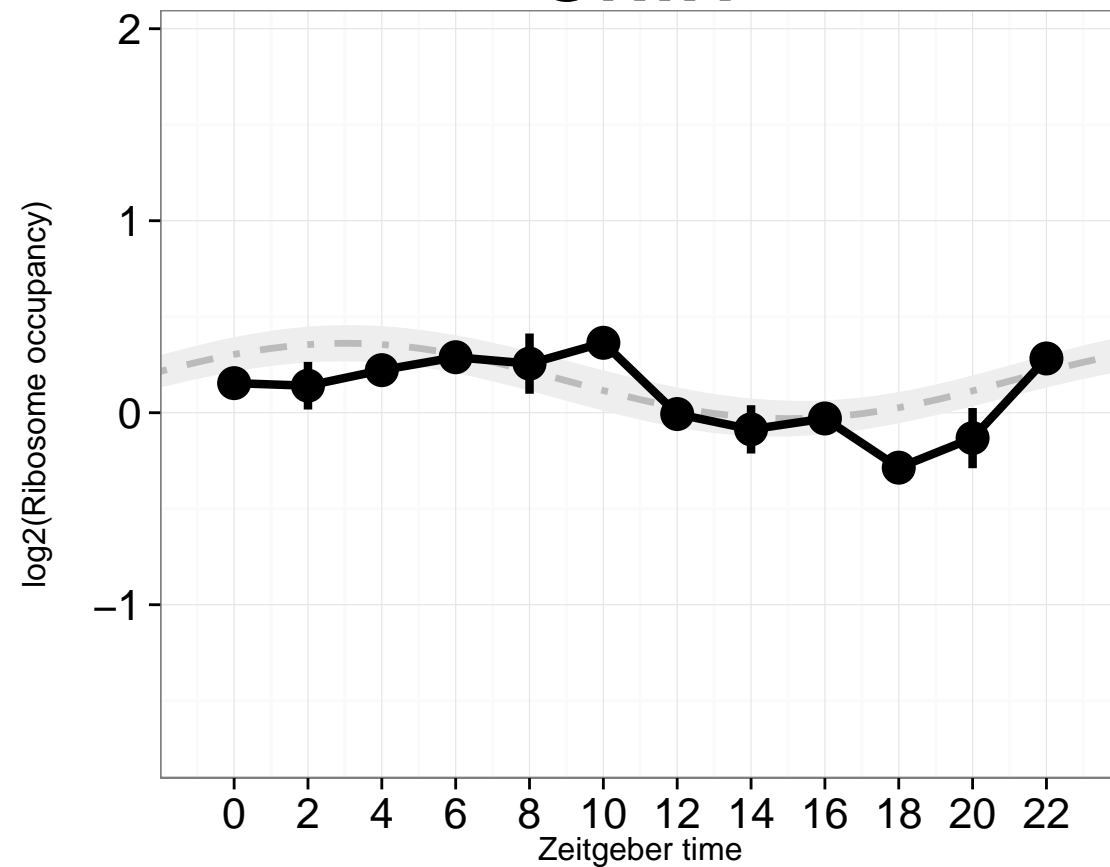

Supplement: SuppDataset_1.zip [file Orm1_set_D.pdf › Supplemental Dataset 1/D-mRNA_rhythm_translation_rhyth/Orm1_set_D.pdf]

## Orm2

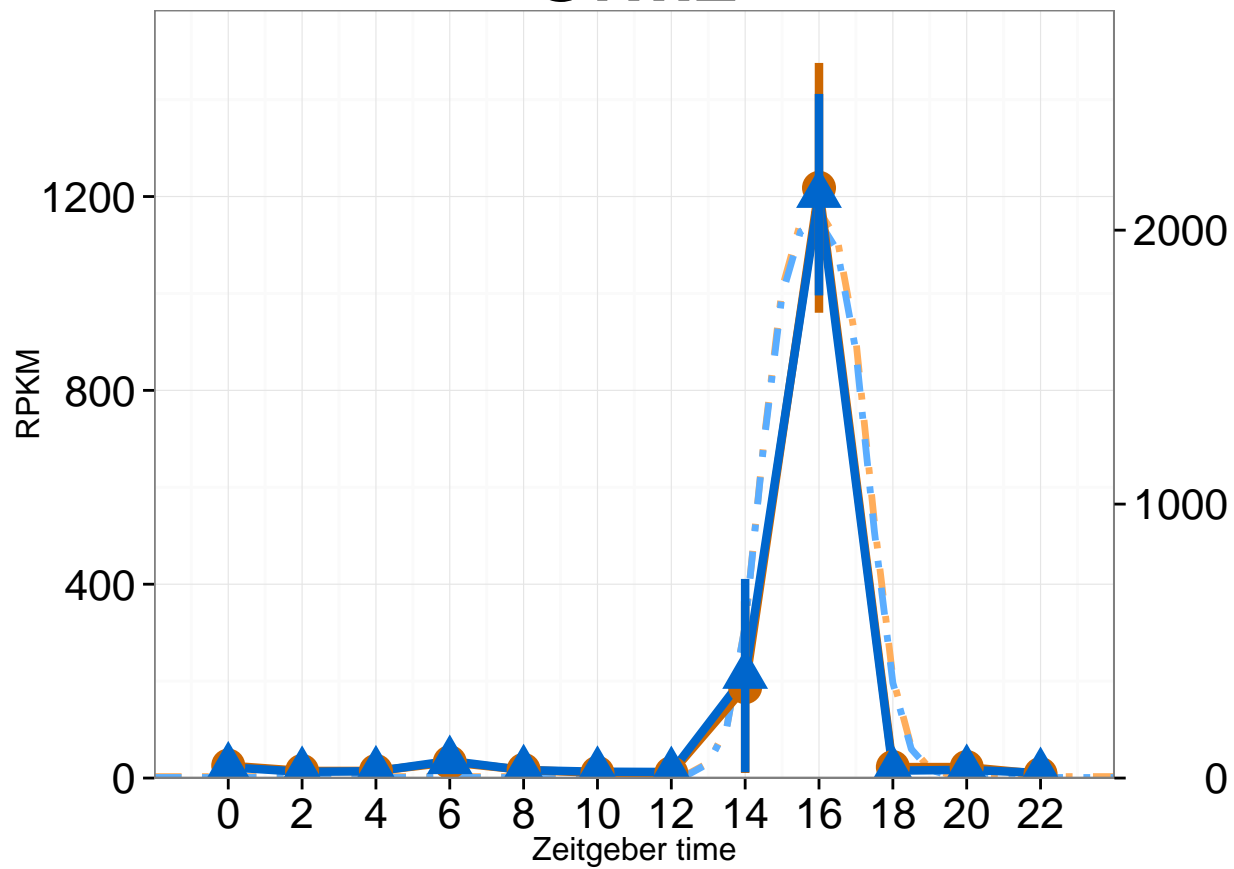

## Orm2

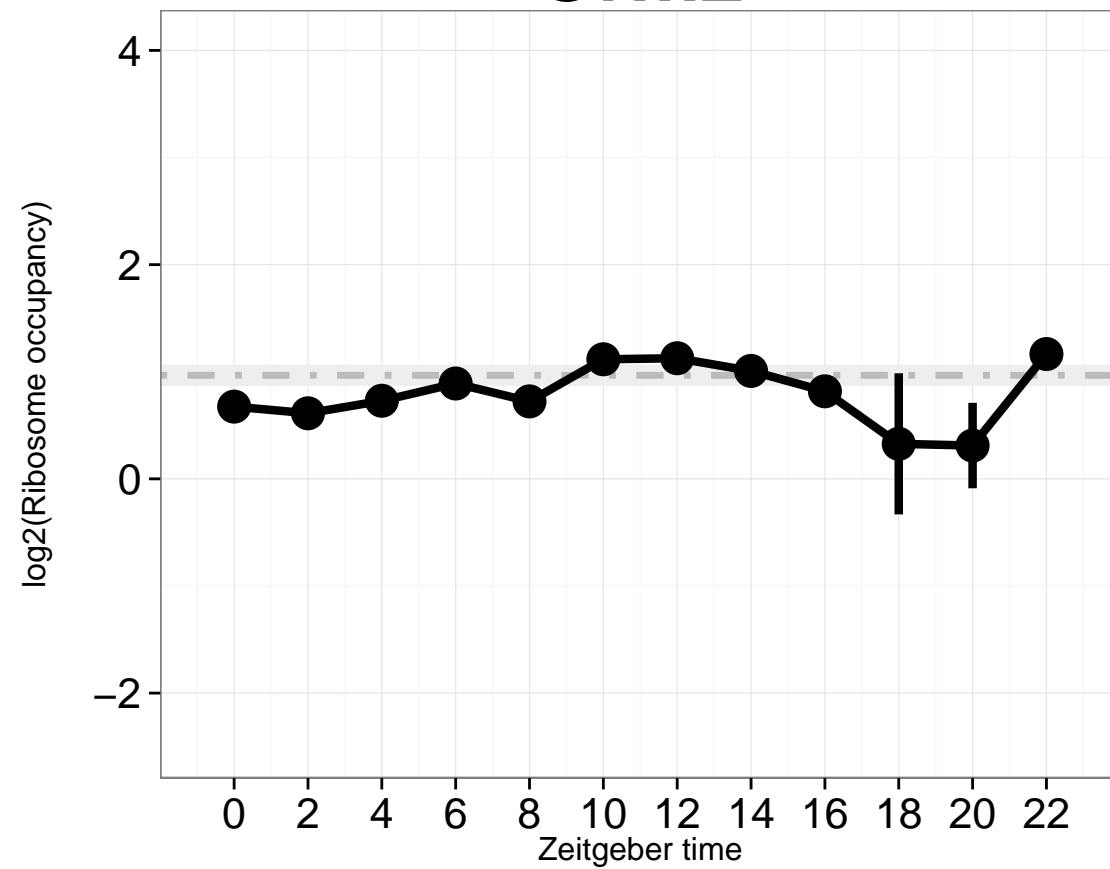

Supplement: SuppDataset_1.zip [file Orm2_set_D.pdf › Supplemental Dataset 1/D-mRNA_rhythm_translation_rhyth/Orm2_set_D.pdf]

## Orm3

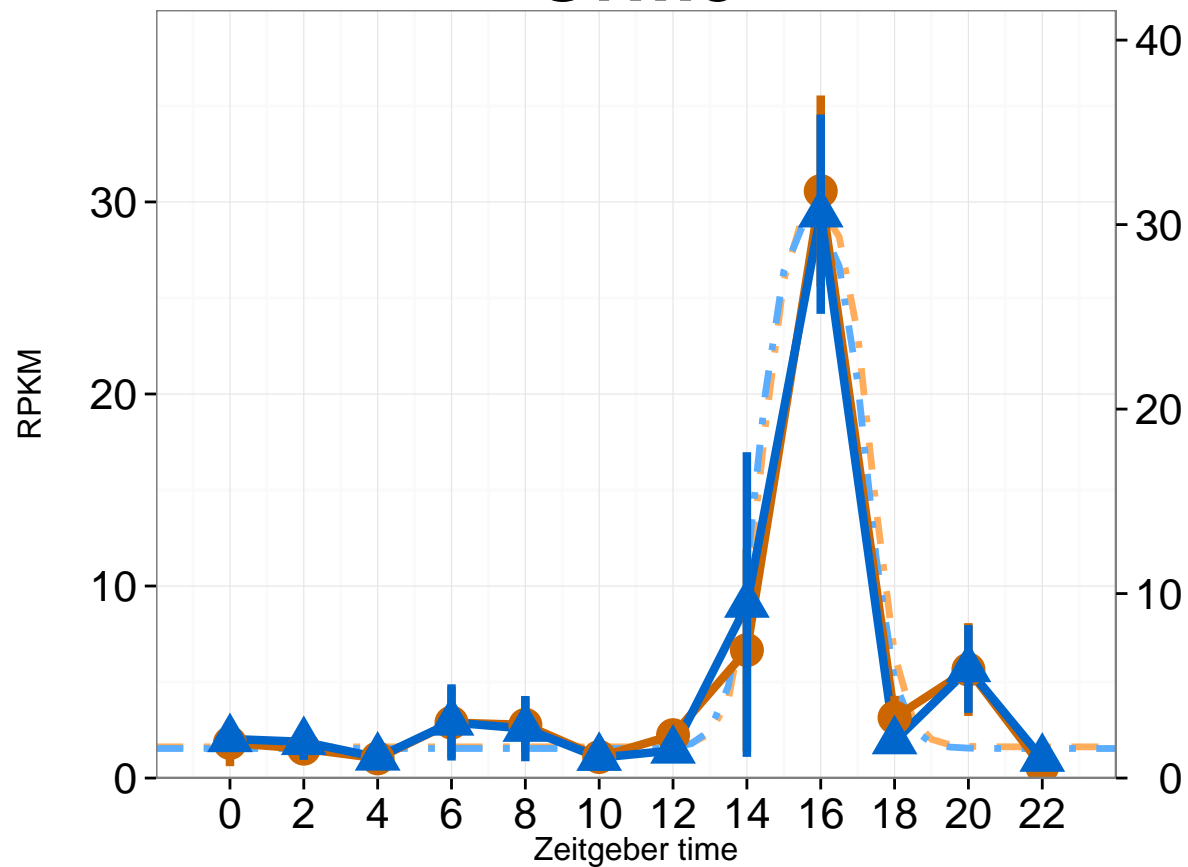

## Orm3

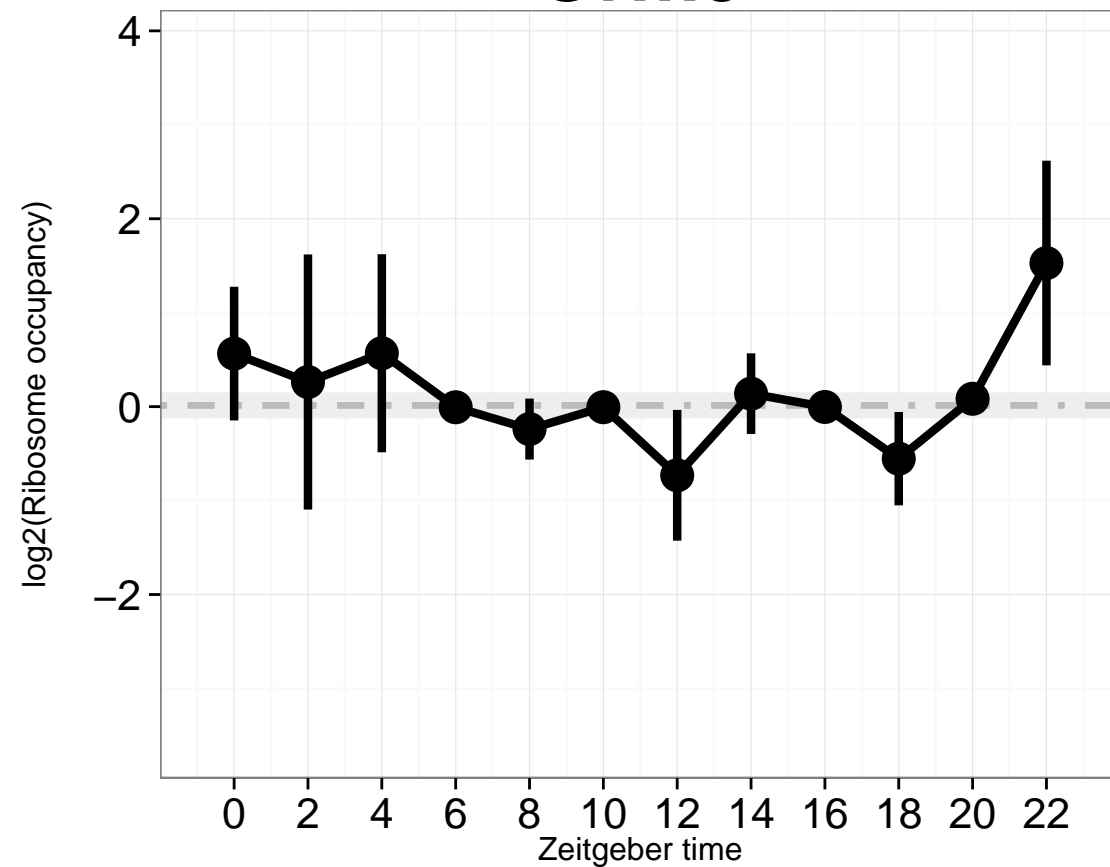

Supplement: SuppDataset_1.zip [file Orm3_set_D.pdf › Supplemental Dataset 1/D-mRNA_rhythm_translation_rhyth/Orm3_set_D.pdf]

## Ormdl3

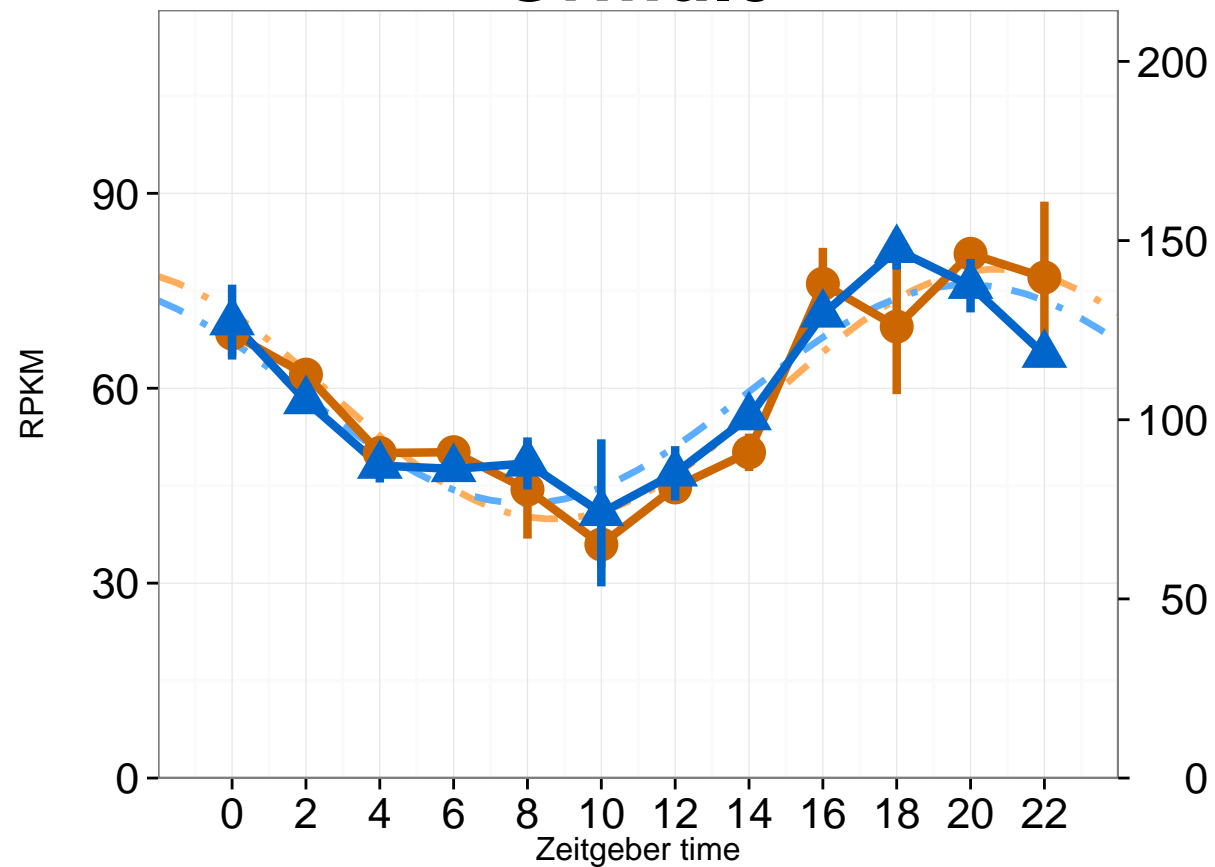

## Ormdl3

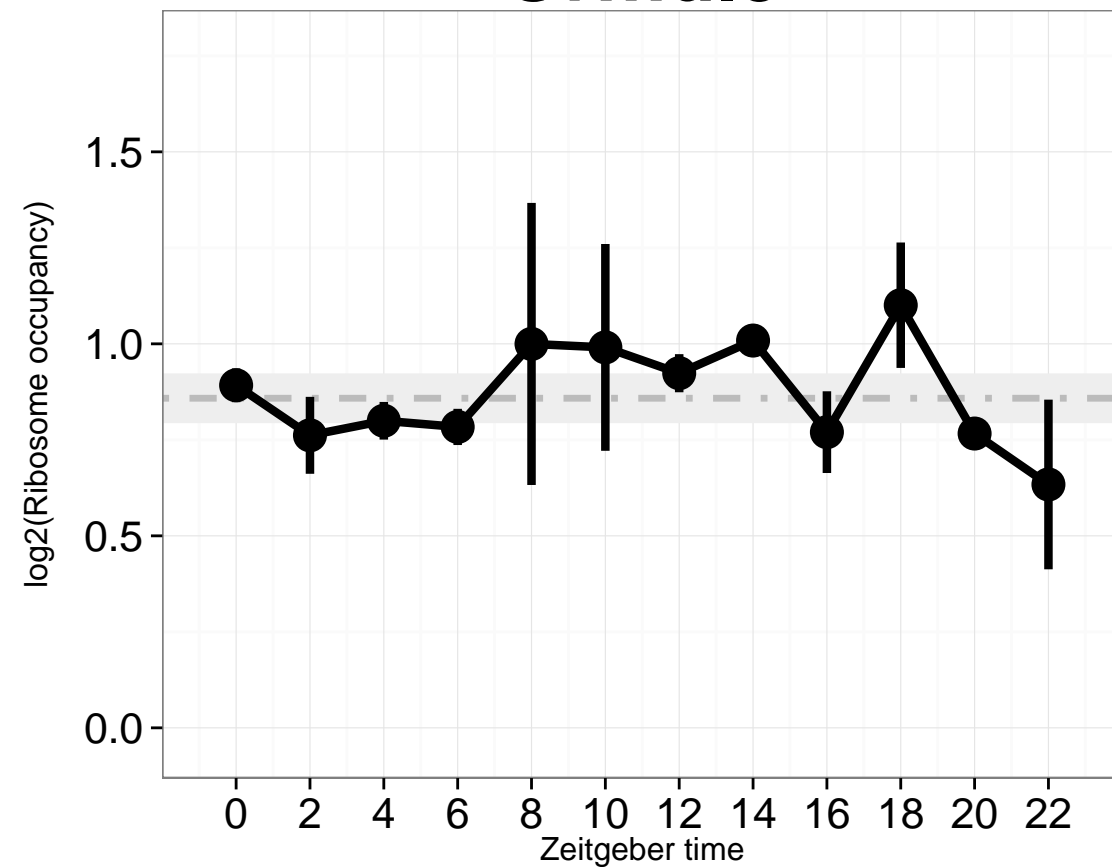

Supplement: SuppDataset_1.zip [file Ormdl3_set_D.pdf › Supplemental Dataset 1/D-mRNA_rhythm_translation_rhyth/Ormdl3_set_D.pdf]

## Osbpl5

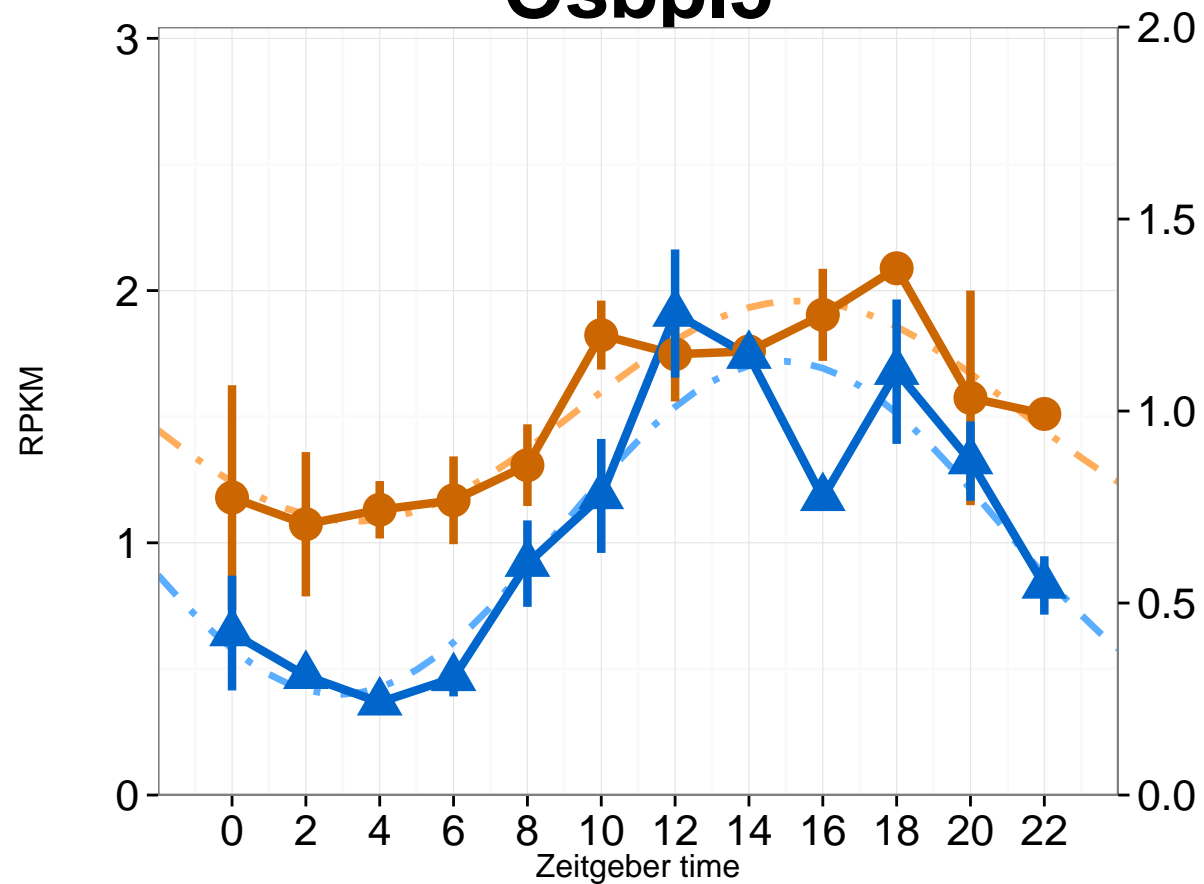

## Osbpl5

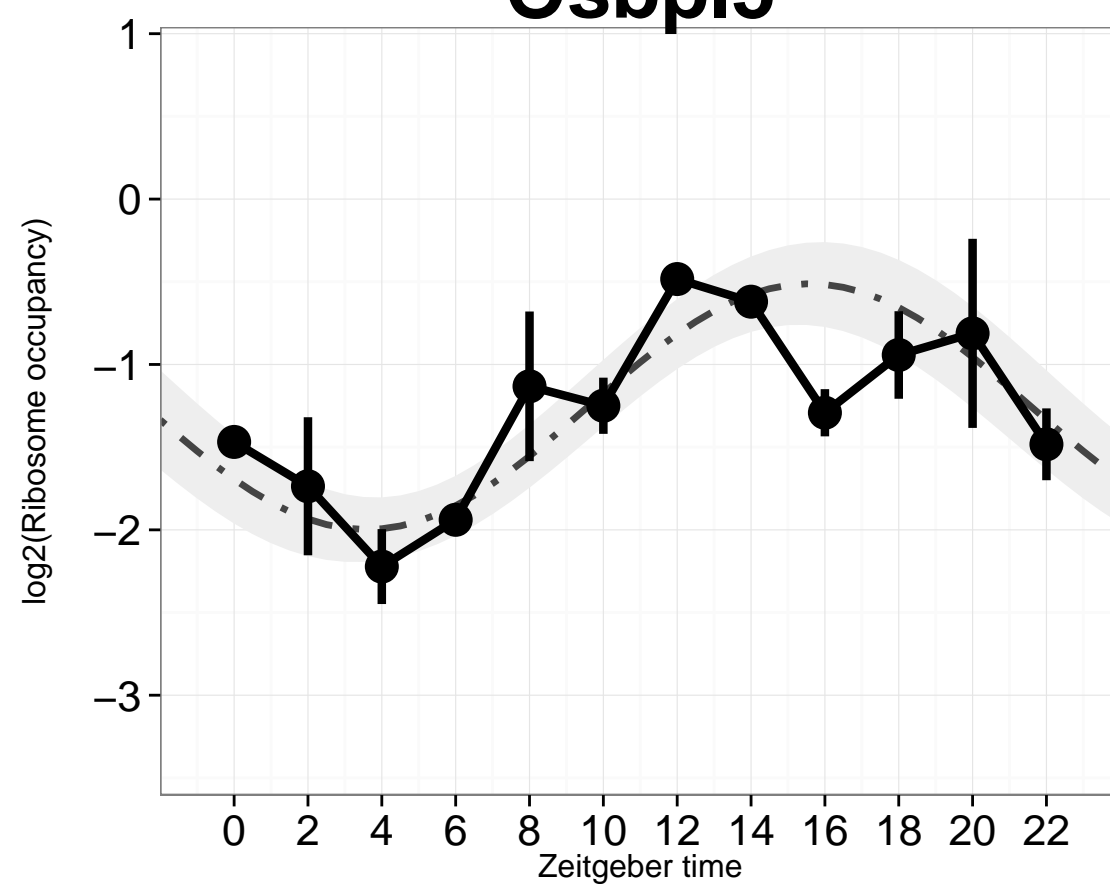

Supplement: SuppDataset_1.zip [file Osbpl5_set_D.pdf › Supplemental Dataset 1/D-mRNA_rhythm_translation_rhyth/Osbpl5_set_D.pdf]

# Osgin1

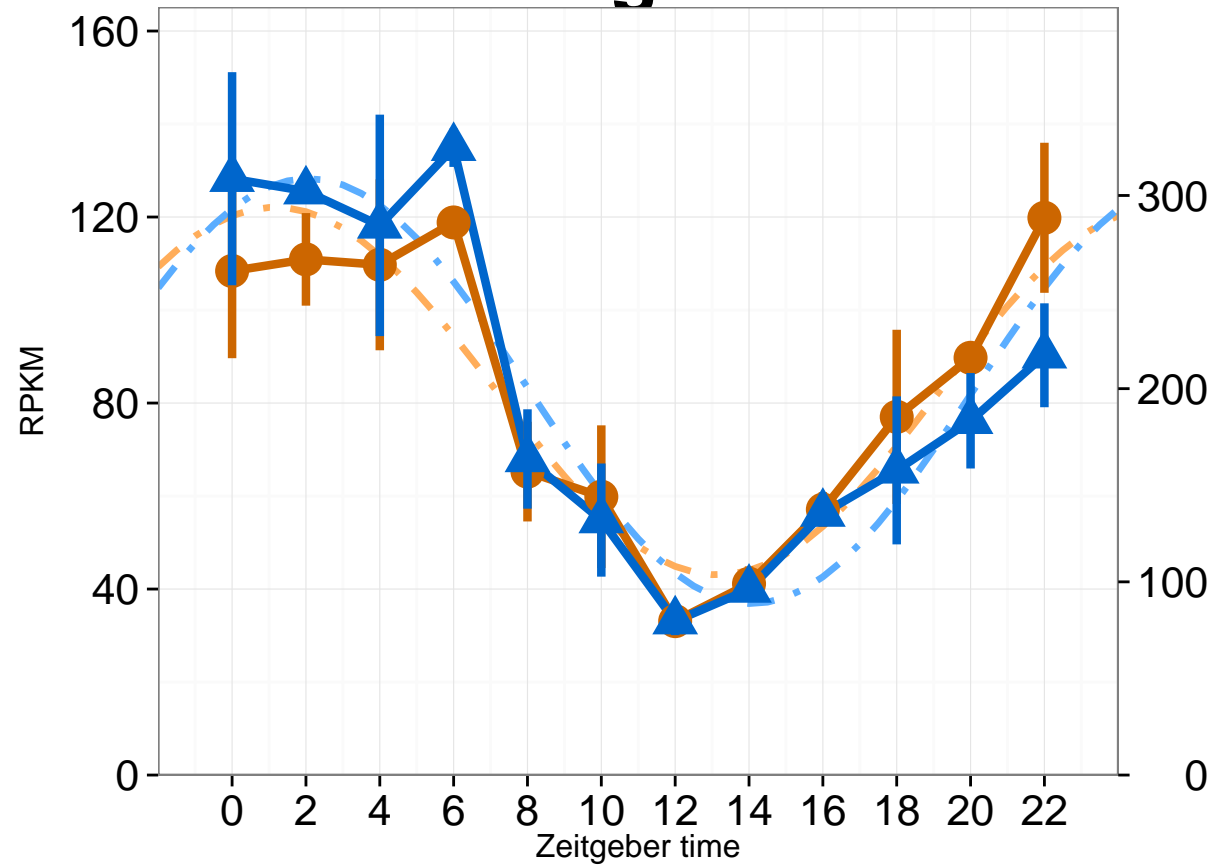

# Osgin1

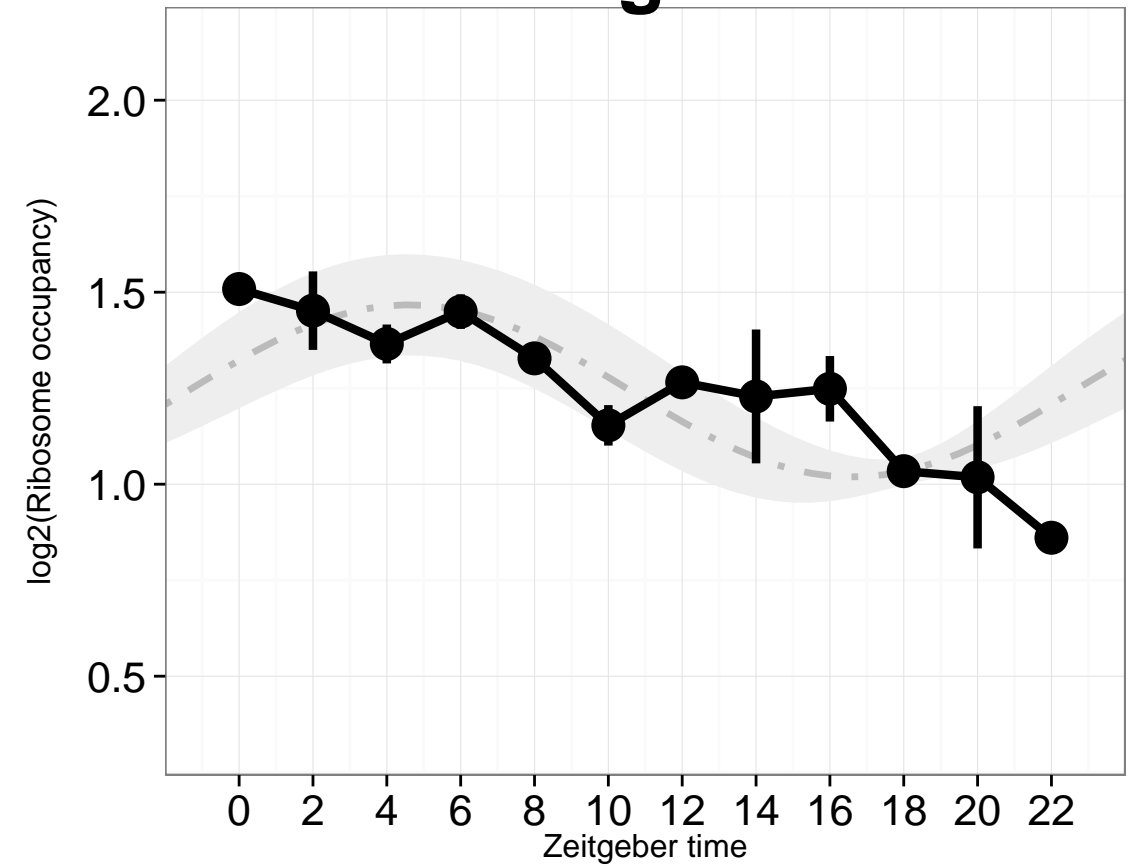

Supplement: SuppDataset_1.zip [file Osgin1_set_D.pdf › Supplemental Dataset 1/D-mRNA_rhythm_translation_rhyth/Osgin1_set_D.pdf]

## Osmr

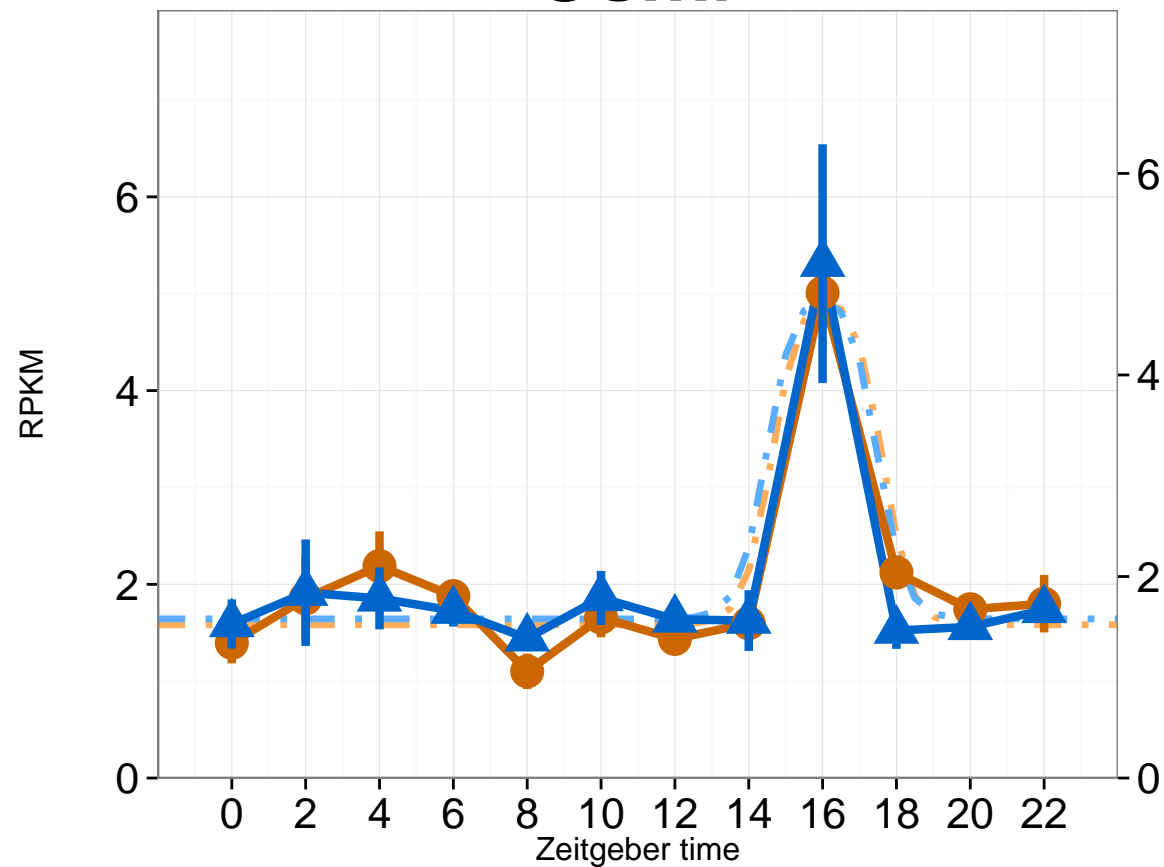

## Osmr

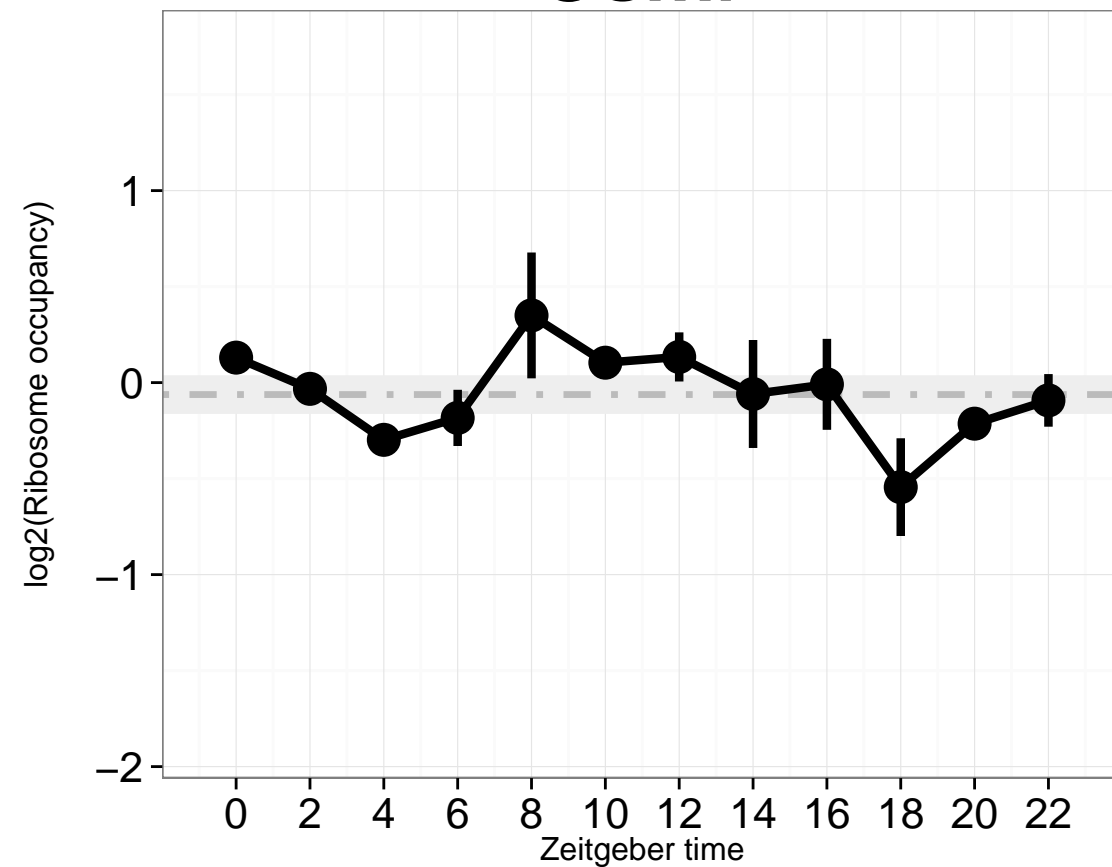

Supplement: SuppDataset_1.zip [file Osmr_set_D.pdf › Supplemental Dataset 1/D-mRNA_rhythm_translation_rhyth/Osmr_set_D.pdf]

# P2rx4

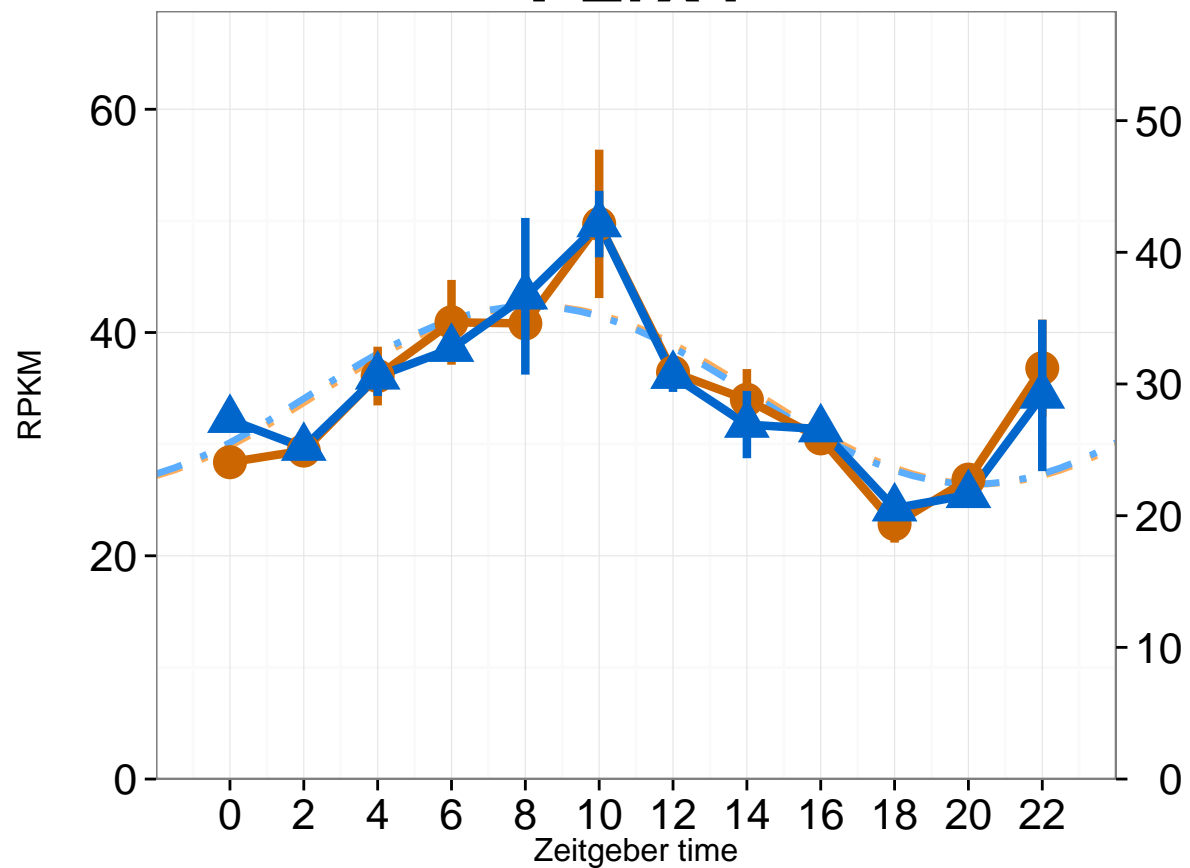

# P2rx4

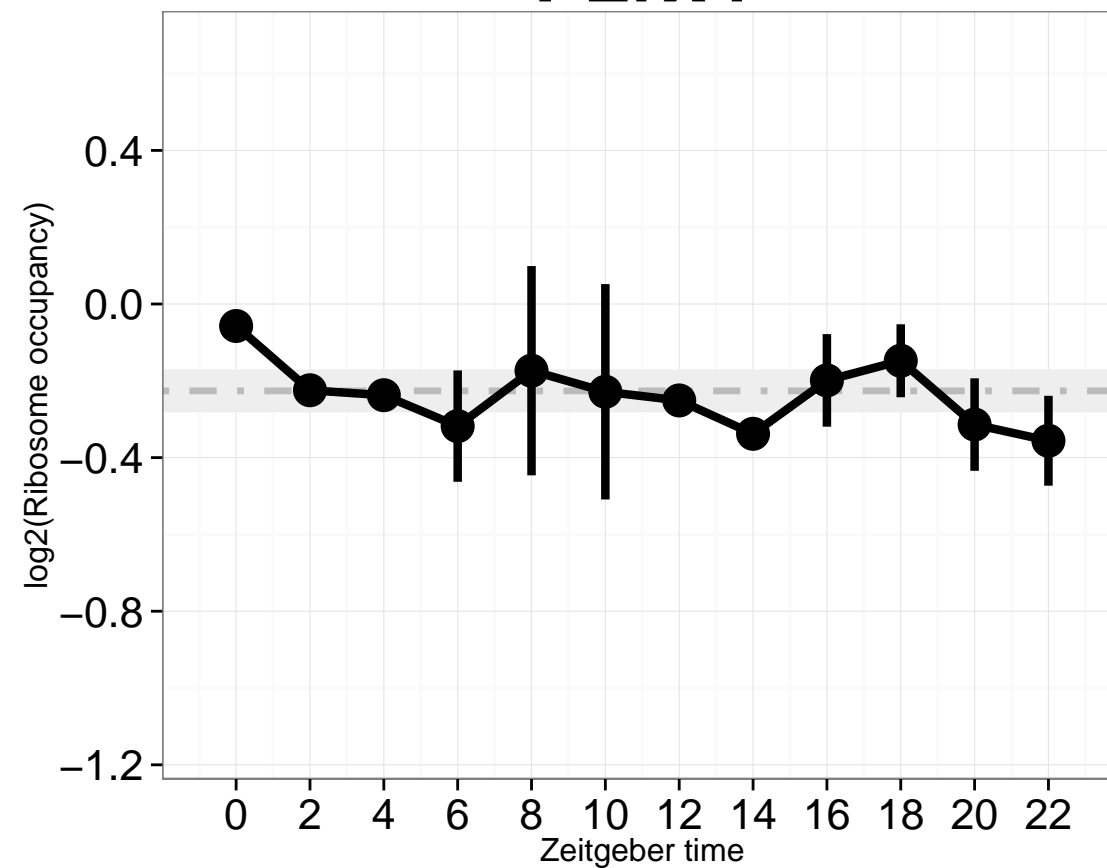

Supplement: SuppDataset_1.zip [file P2rx4_set_D.pdf › Supplemental Dataset 1/D-mRNA_rhythm_translation_rhyth/P2rx4_set_D.pdf]

**P2ry1**

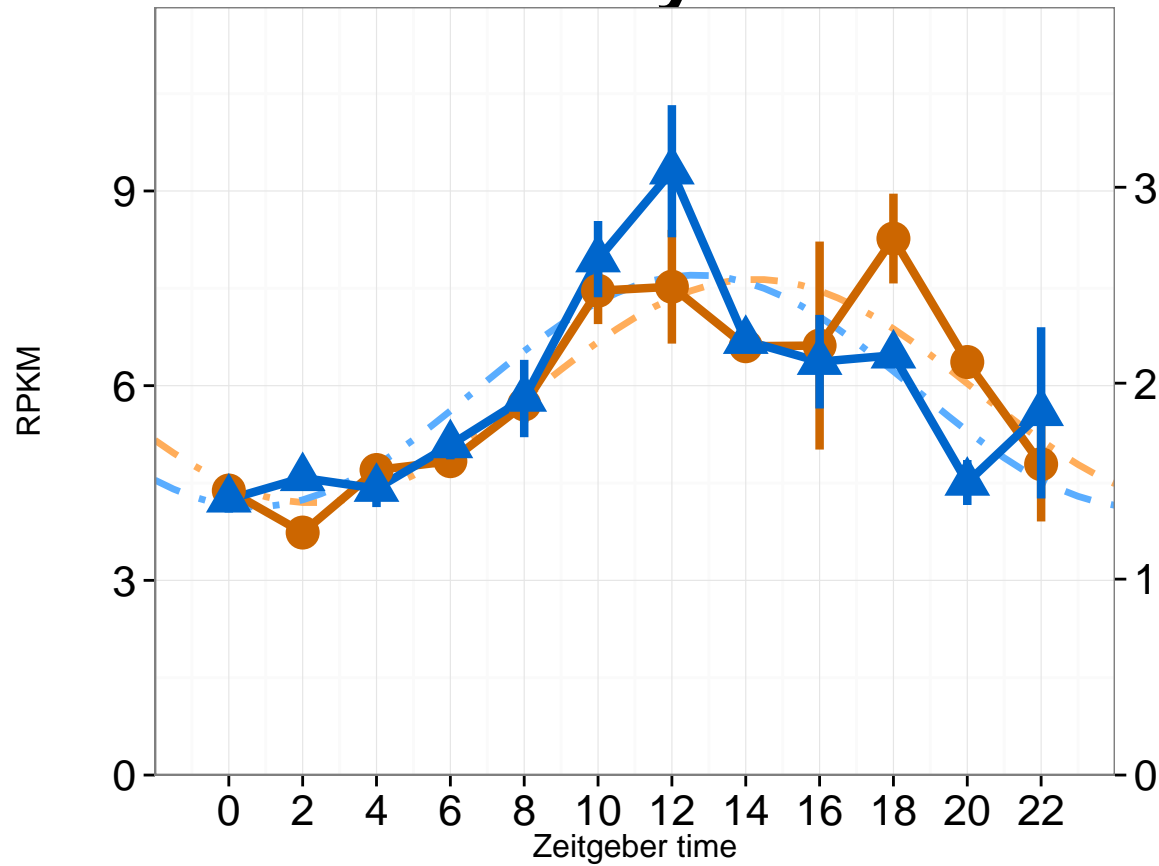

**P2ry1**

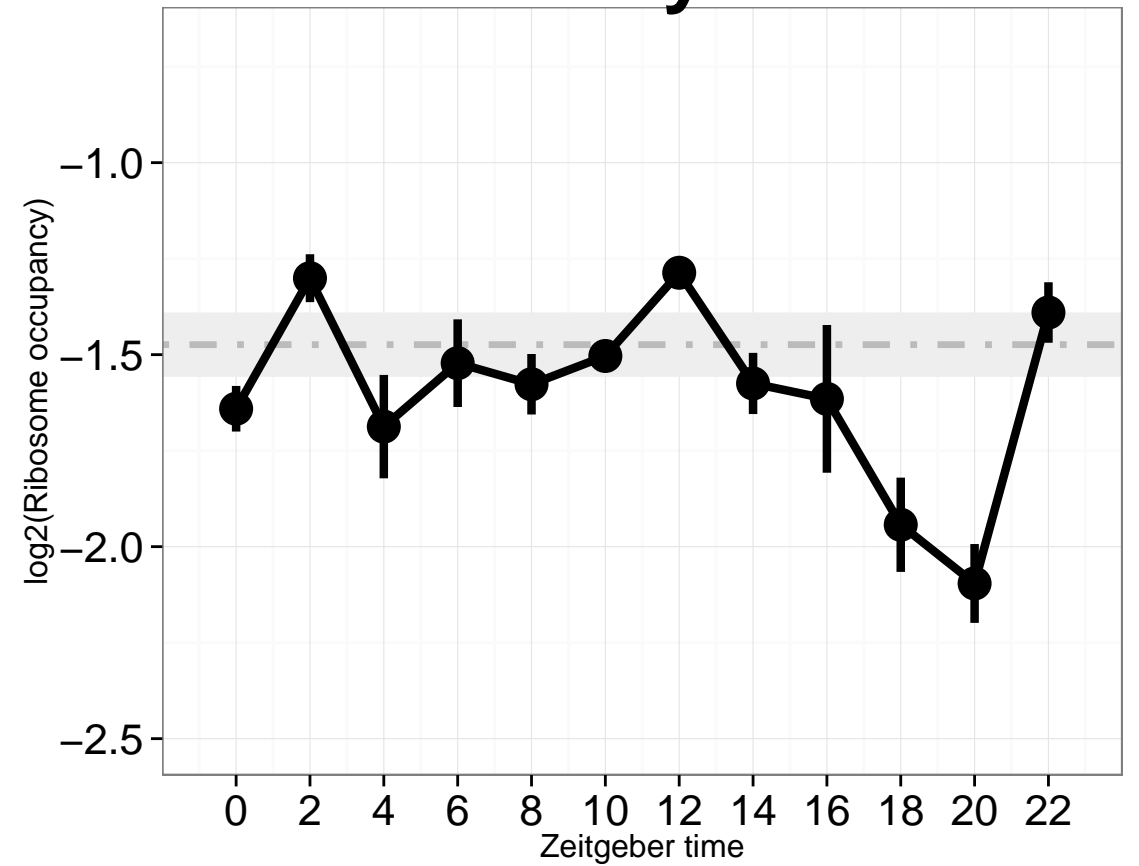

Supplement: SuppDataset_1.zip [file P2ry1_set_D.pdf › Supplemental Dataset 1/D-mRNA_rhythm_translation_rhyth/P2ry1_set_D.pdf]

**P2ry2**

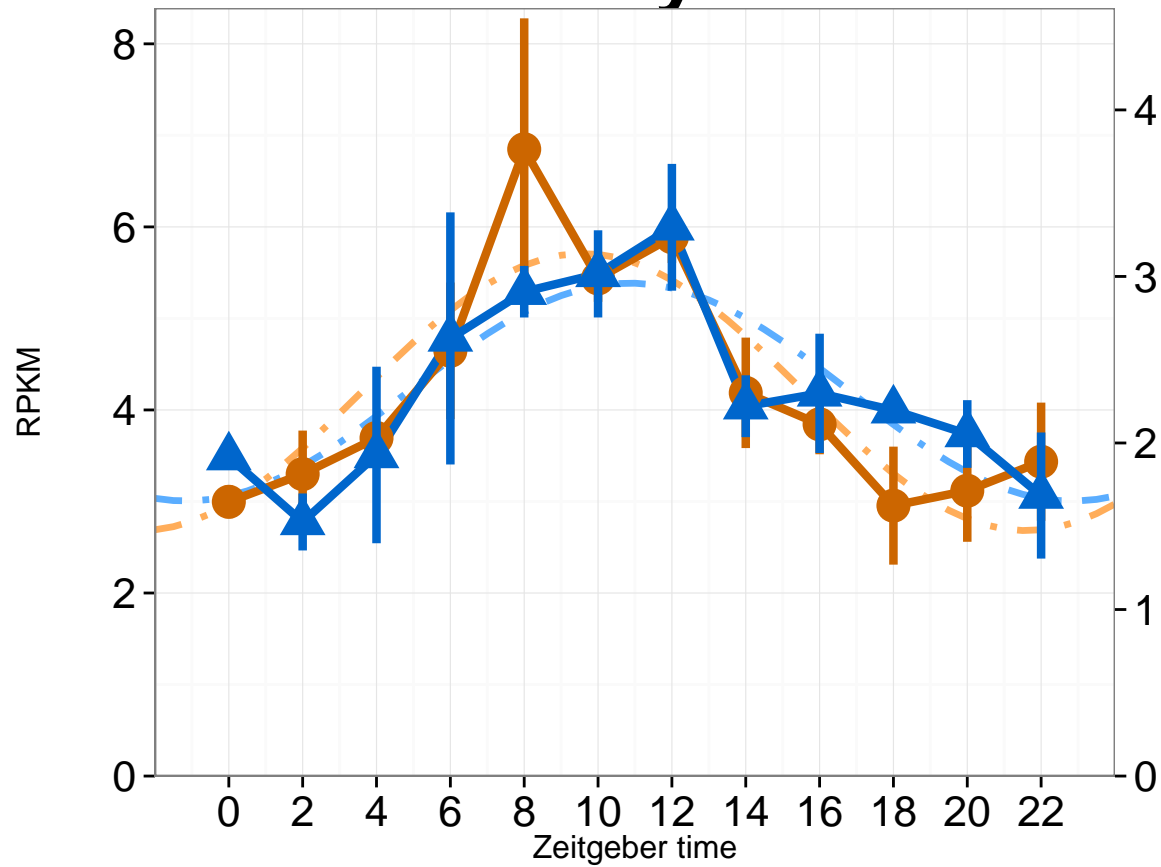

**P2ry2**

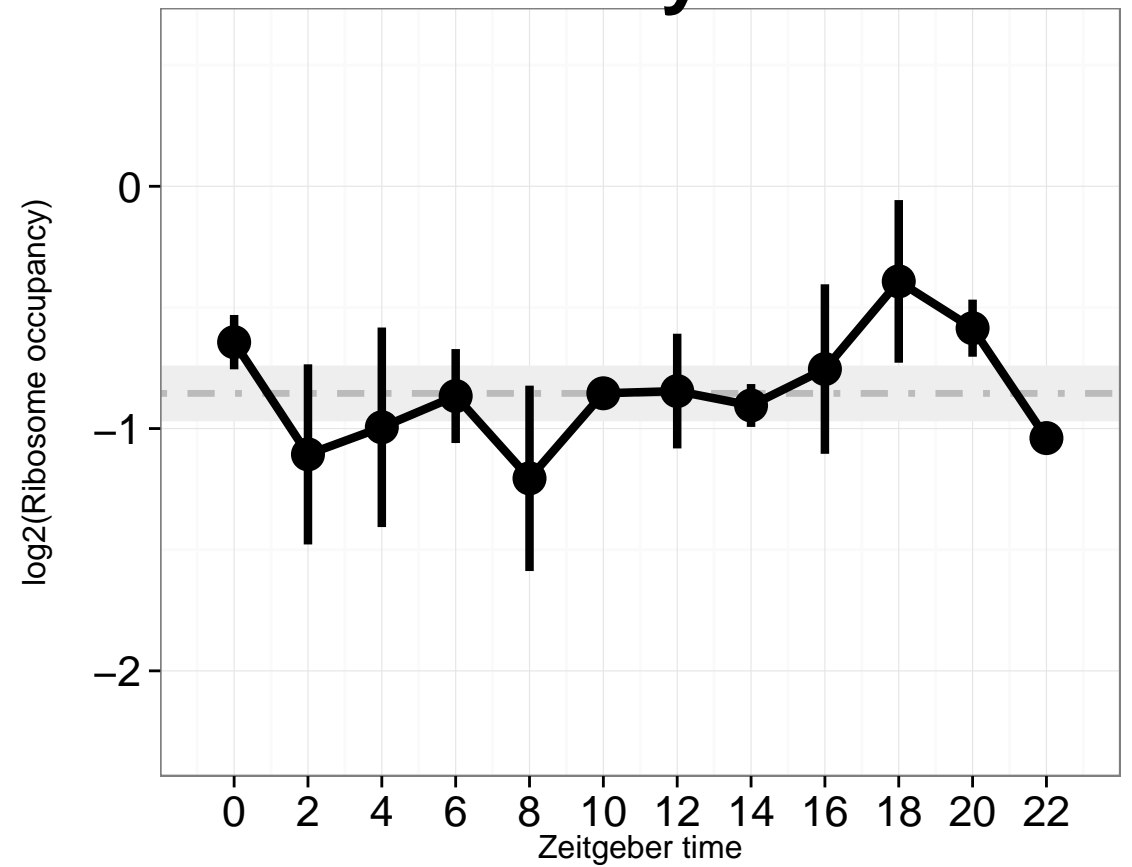

Supplement: SuppDataset_1.zip [file P2ry2_set_D.pdf › Supplemental Dataset 1/D-mRNA_rhythm_translation_rhyth/P2ry2_set_D.pdf]

**P2ry4**

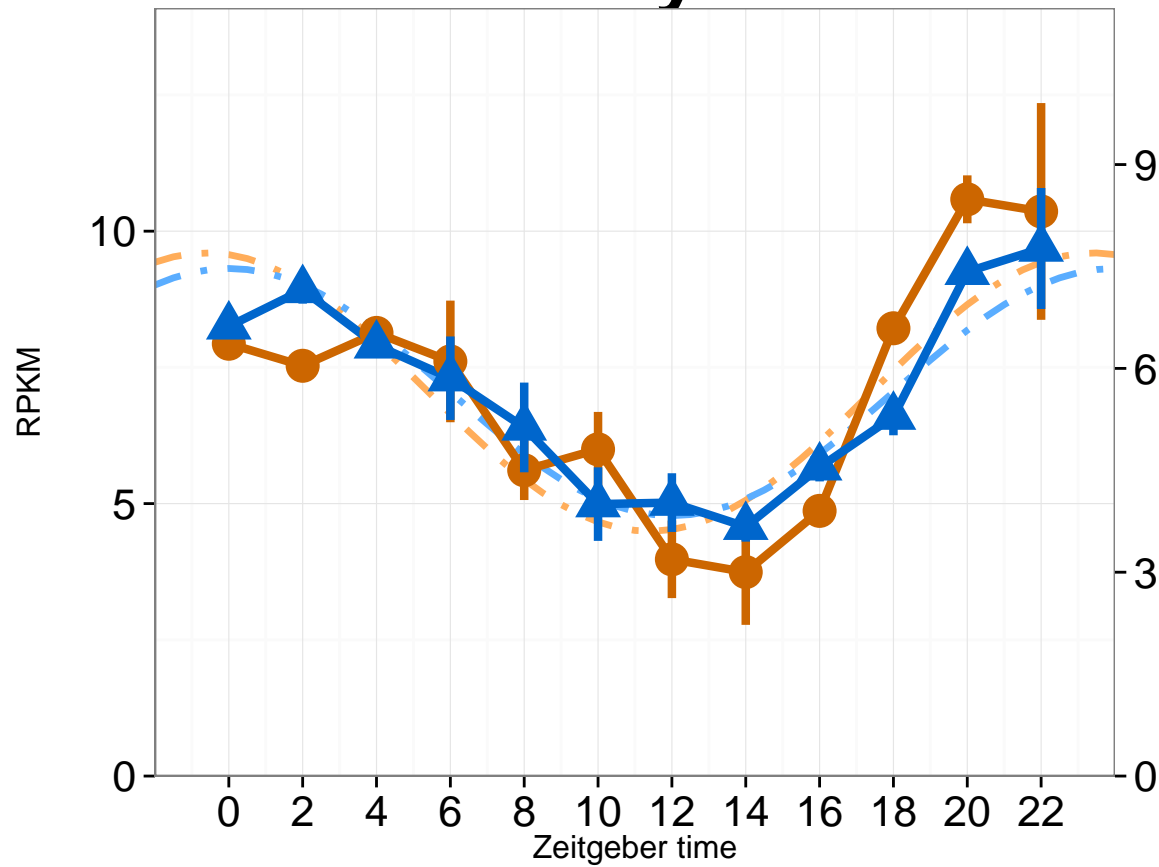

**P2ry4**

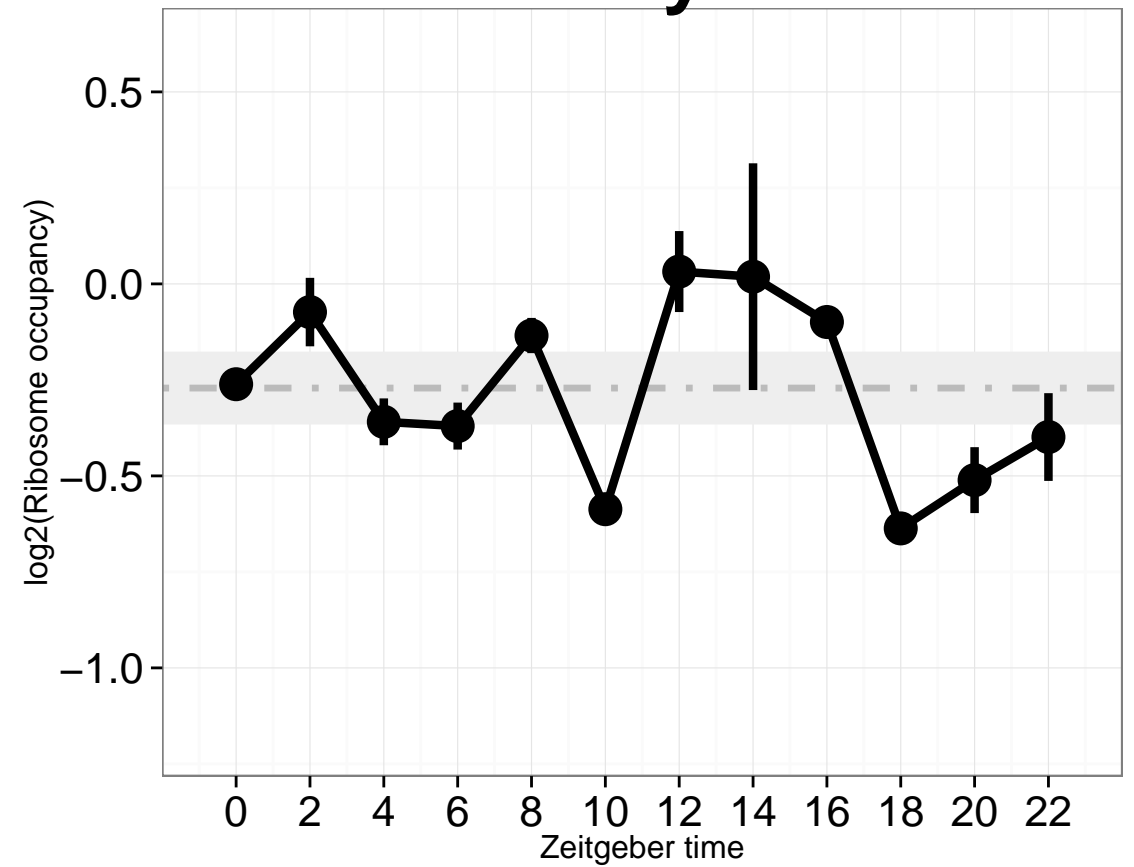

Supplement: SuppDataset_1.zip [file P2ry4_set_D.pdf › Supplemental Dataset 1/D-mRNA_rhythm_translation_rhyth/P2ry4_set_D.pdf]

# P4ha1

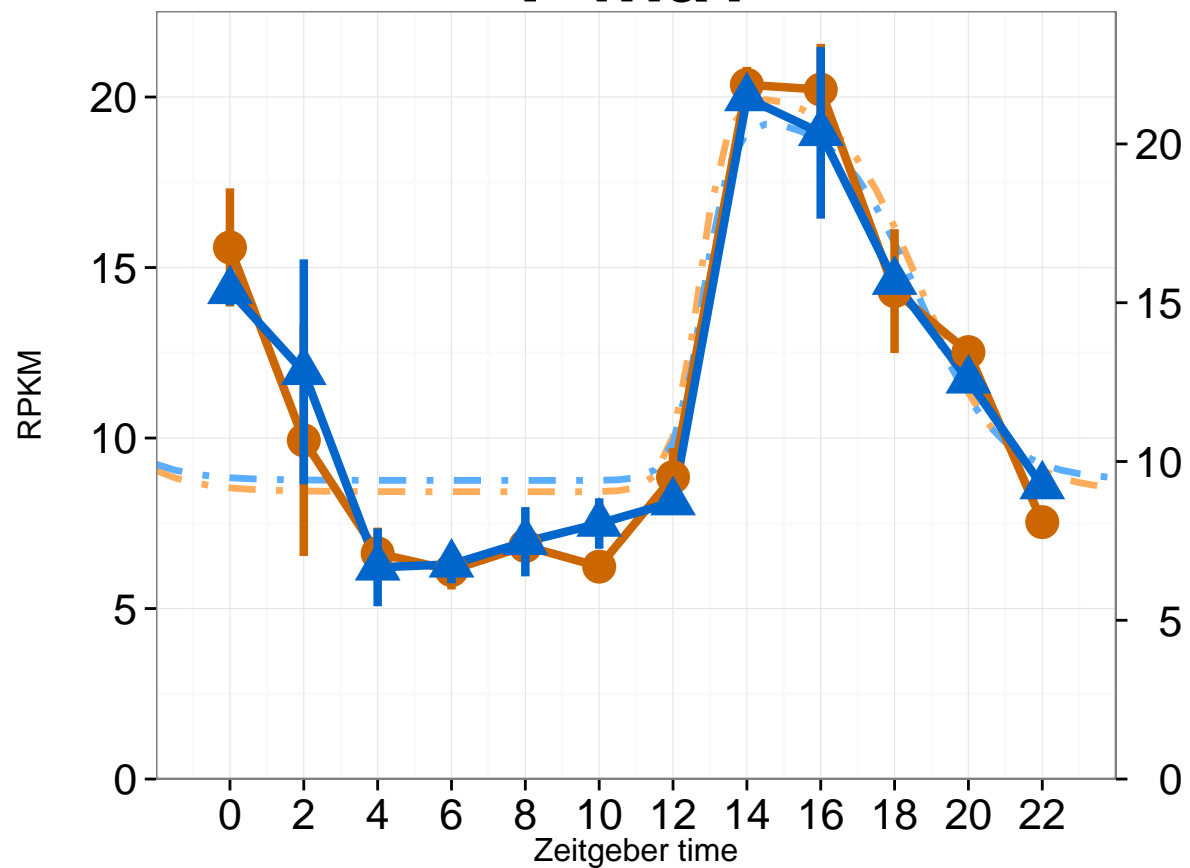

# P4ha1

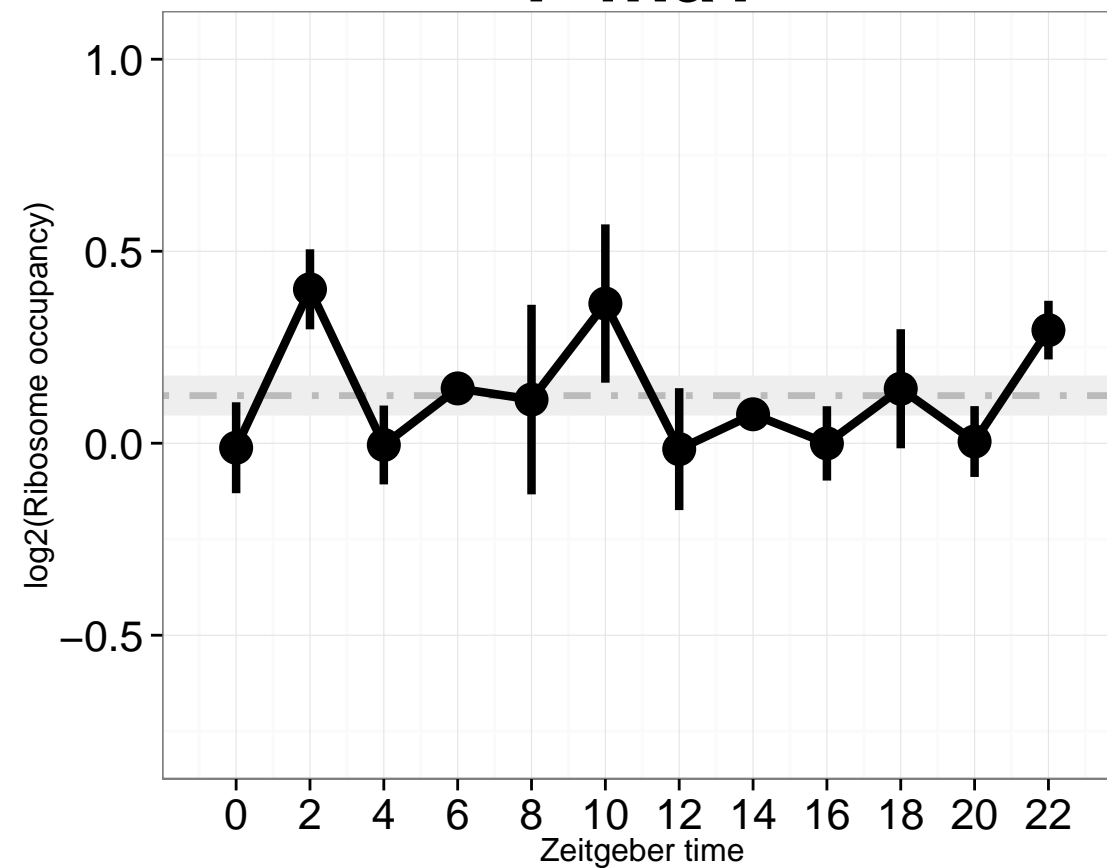

Supplement: SuppDataset_1.zip [file P4ha1_set_D.pdf › Supplemental Dataset 1/D-mRNA_rhythm_translation_rhyth/P4ha1_set_D.pdf]

# P4ha2

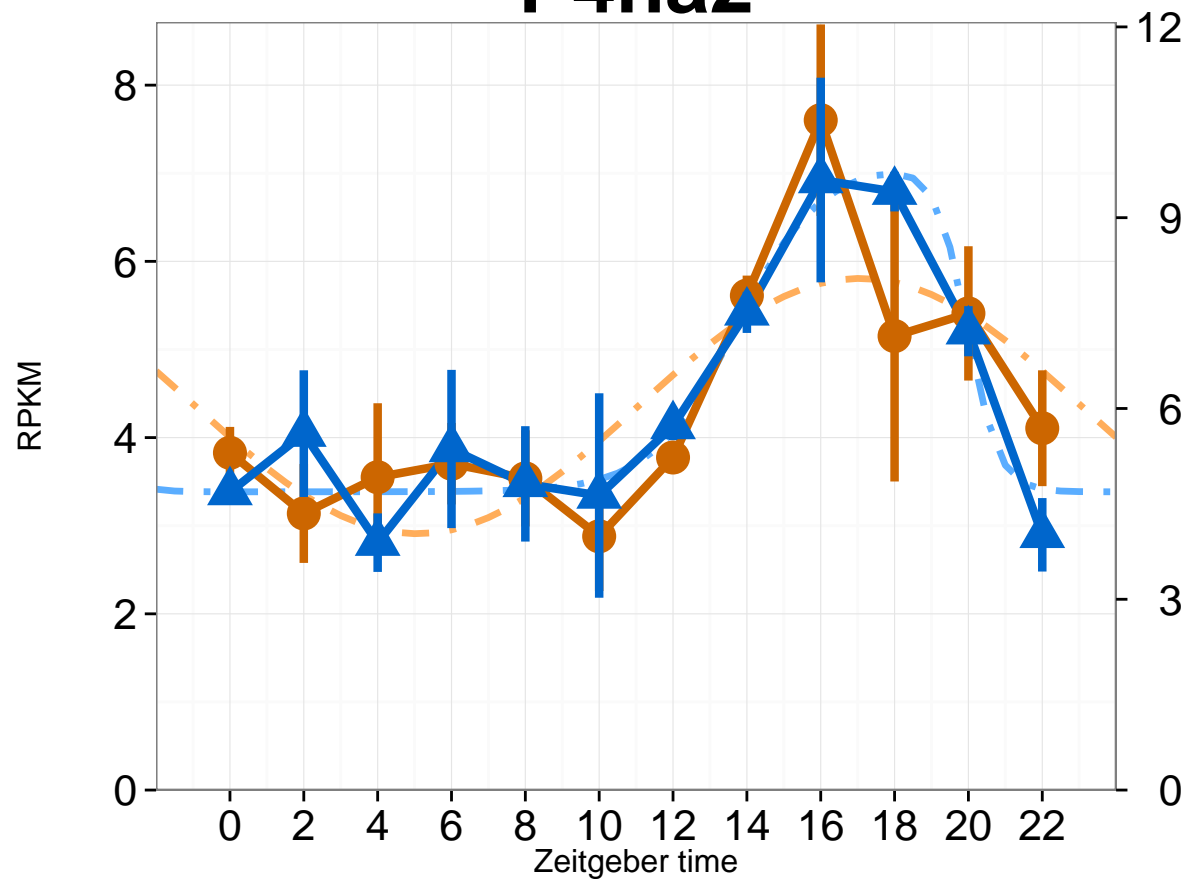

# P4ha2

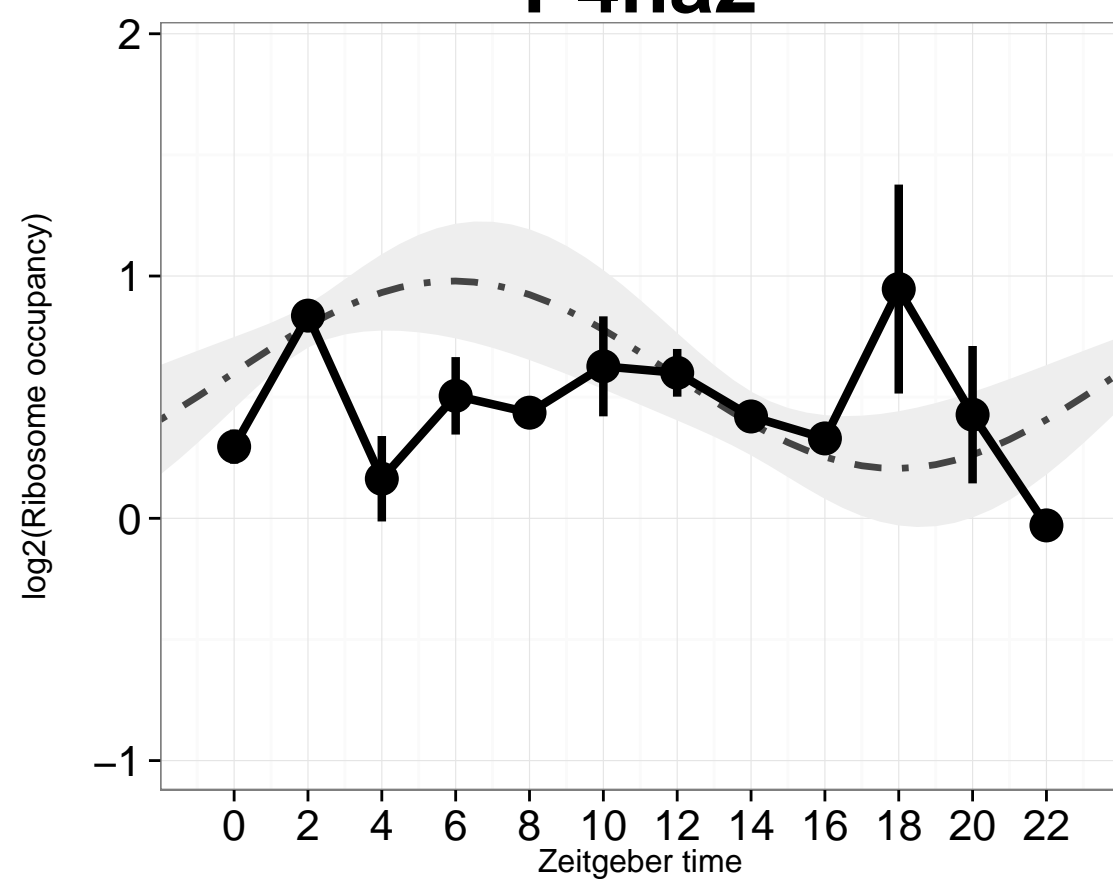

Supplement: SuppDataset_1.zip [file P4ha2_set_D.pdf › Supplemental Dataset 1/D-mRNA_rhythm_translation_rhyth/P4ha2_set_D.pdf]

## Palld

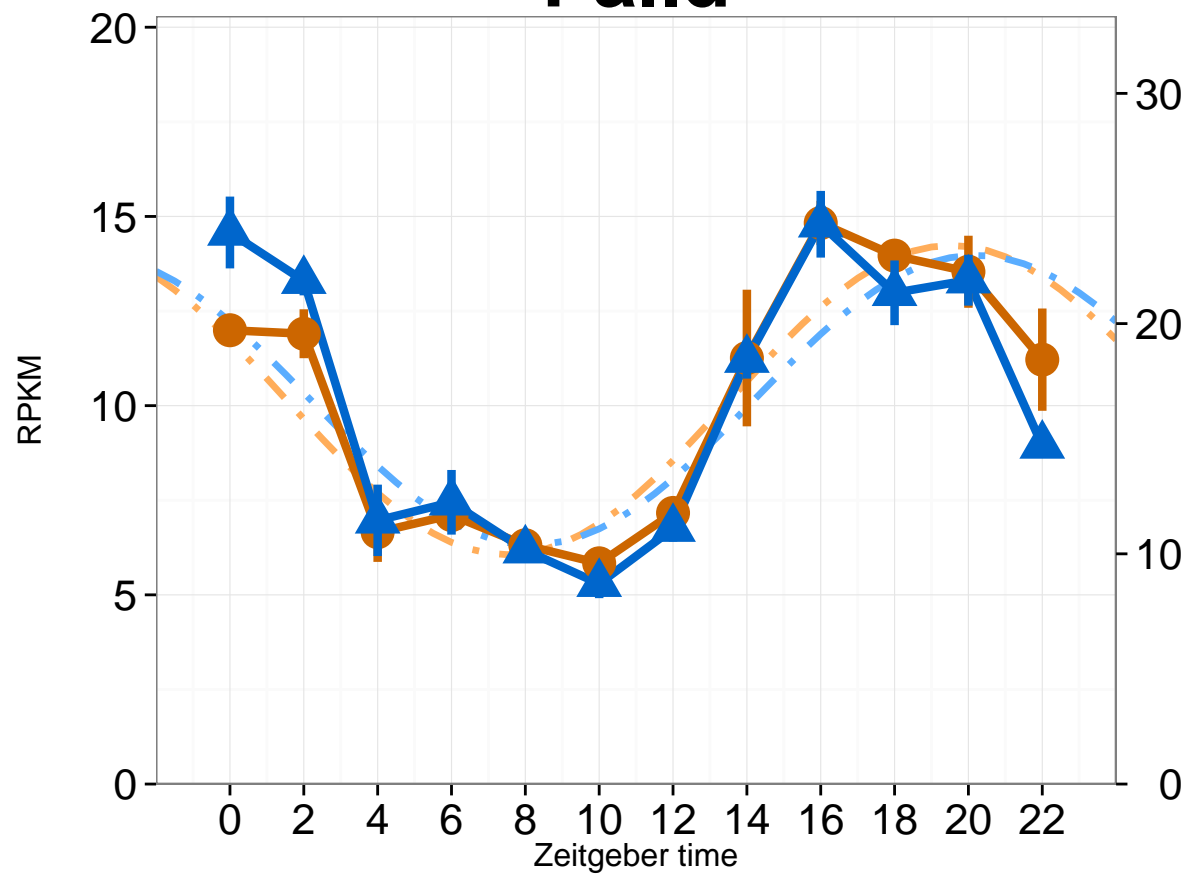

## Palld

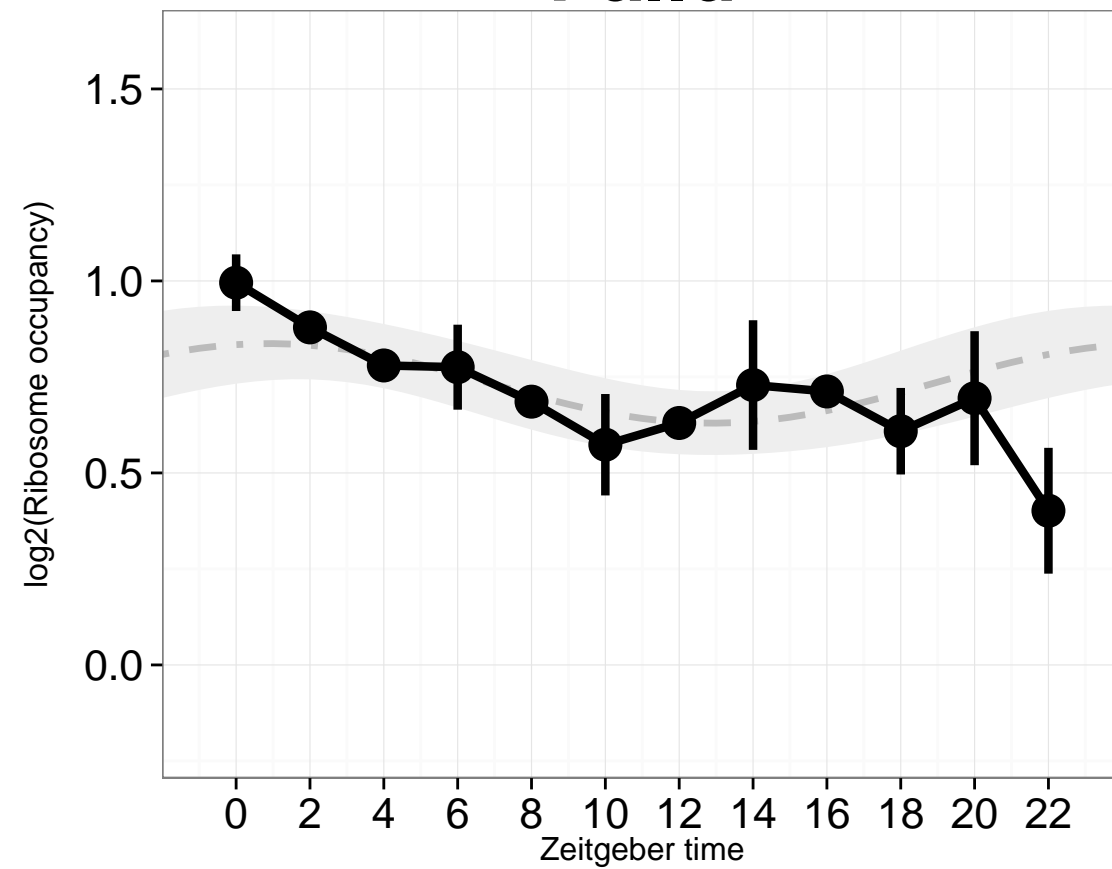

Supplement: SuppDataset_1.zip [file Palld_set_D.pdf › Supplemental Dataset 1/D-mRNA_rhythm_translation_rhyth/Palld_set_D.pdf]

# Papd7

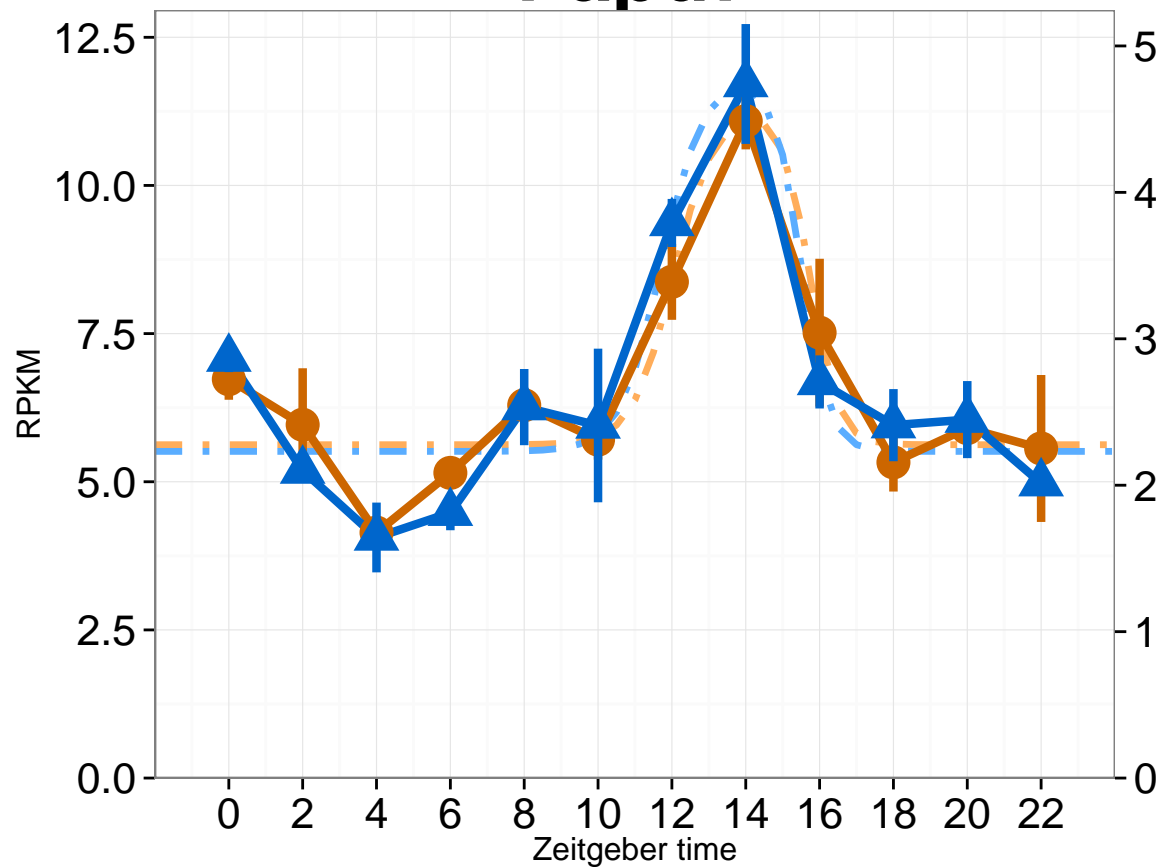

# Papd7

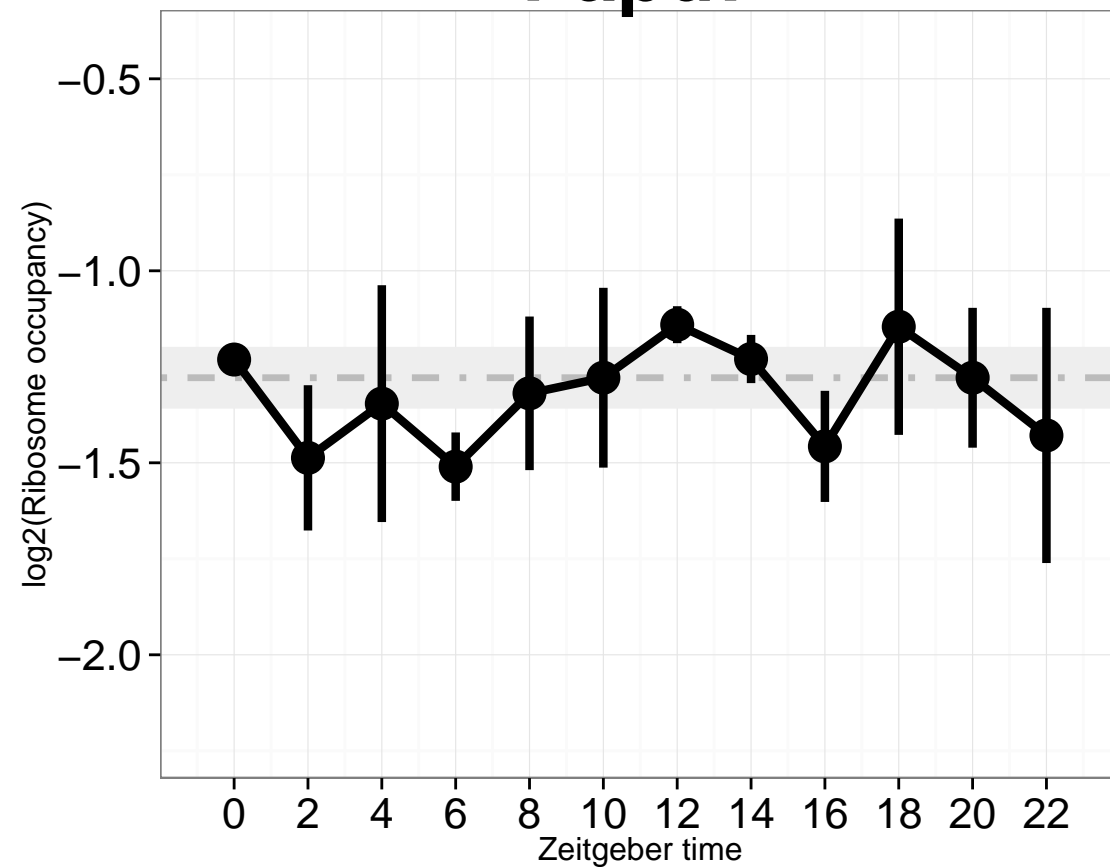

Supplement: SuppDataset_1.zip [file Papd7_set_D.pdf › Supplemental Dataset 1/D-mRNA_rhythm_translation_rhyth/Papd7_set_D.pdf]

## Papss1

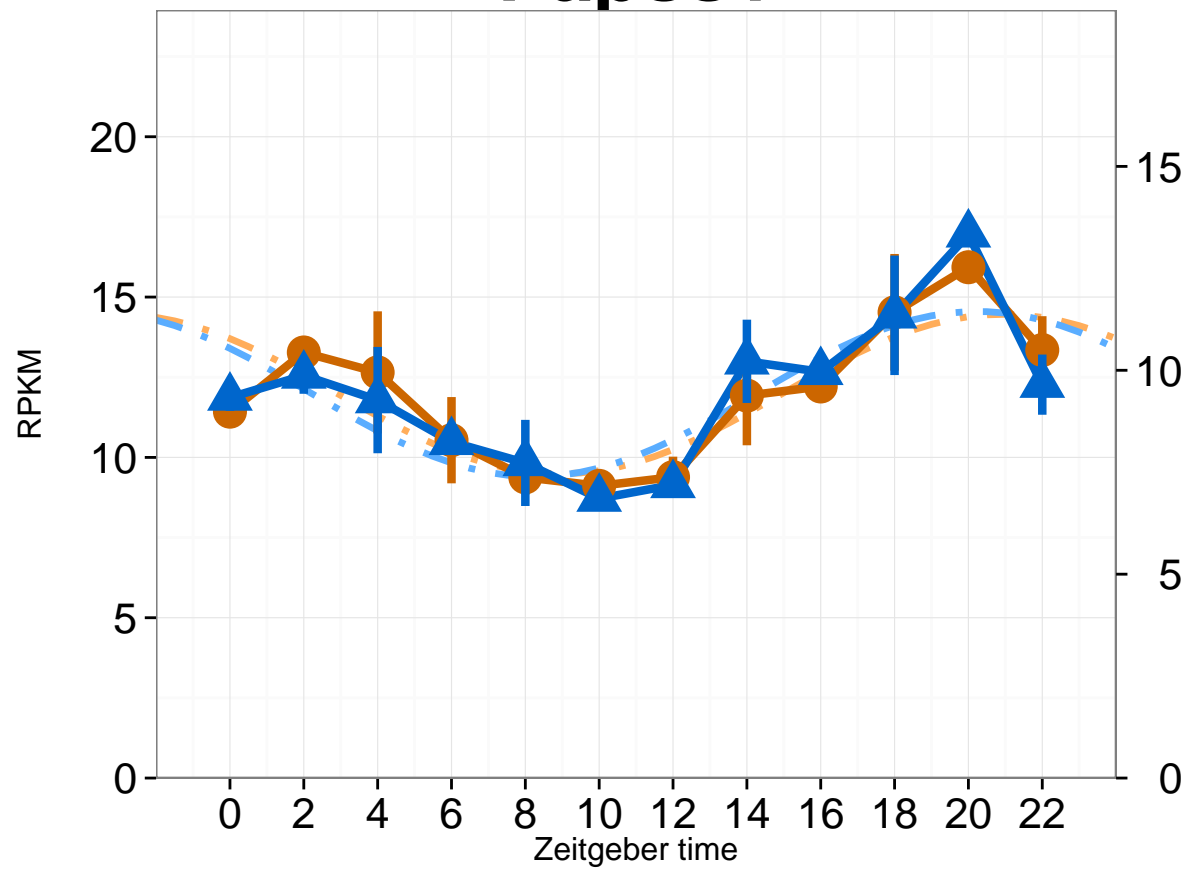

## Papss1

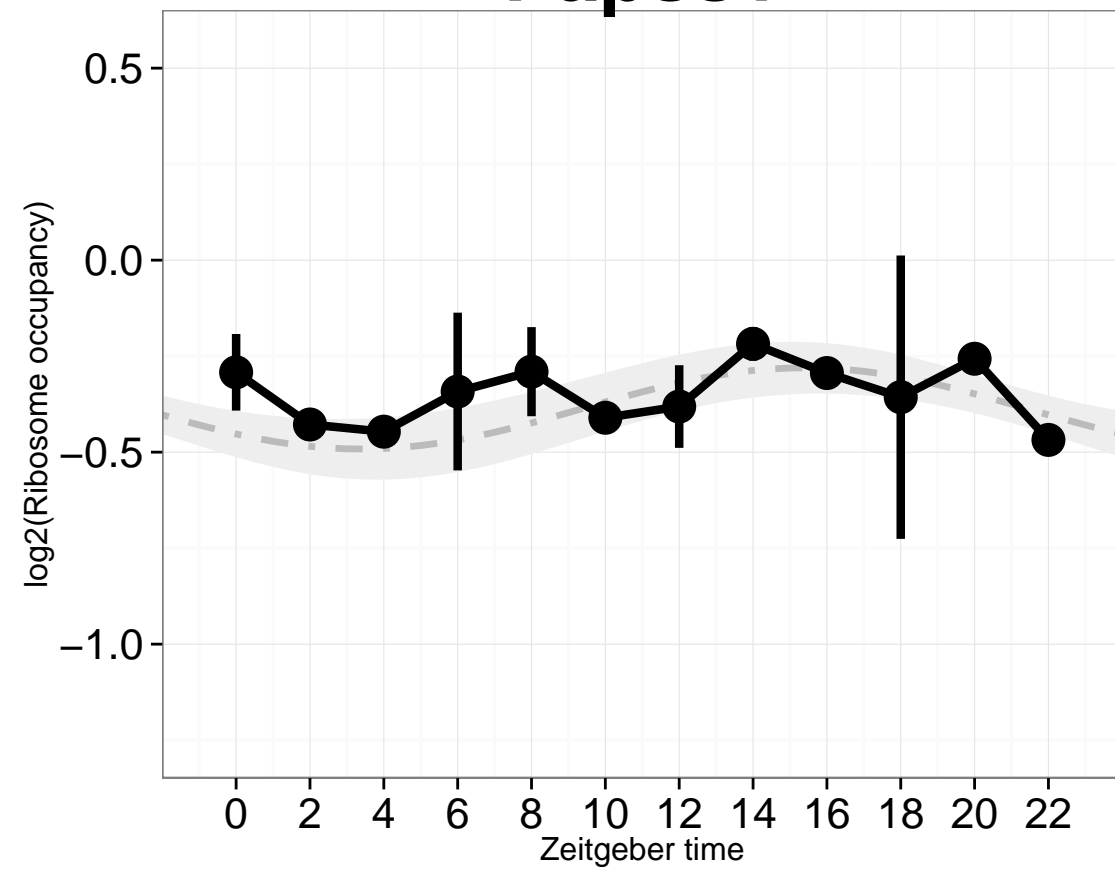

Supplement: SuppDataset_1.zip [file Papss1_set_D.pdf › Supplemental Dataset 1/D-mRNA_rhythm_translation_rhyth/Papss1_set_D.pdf]

# Paqr9

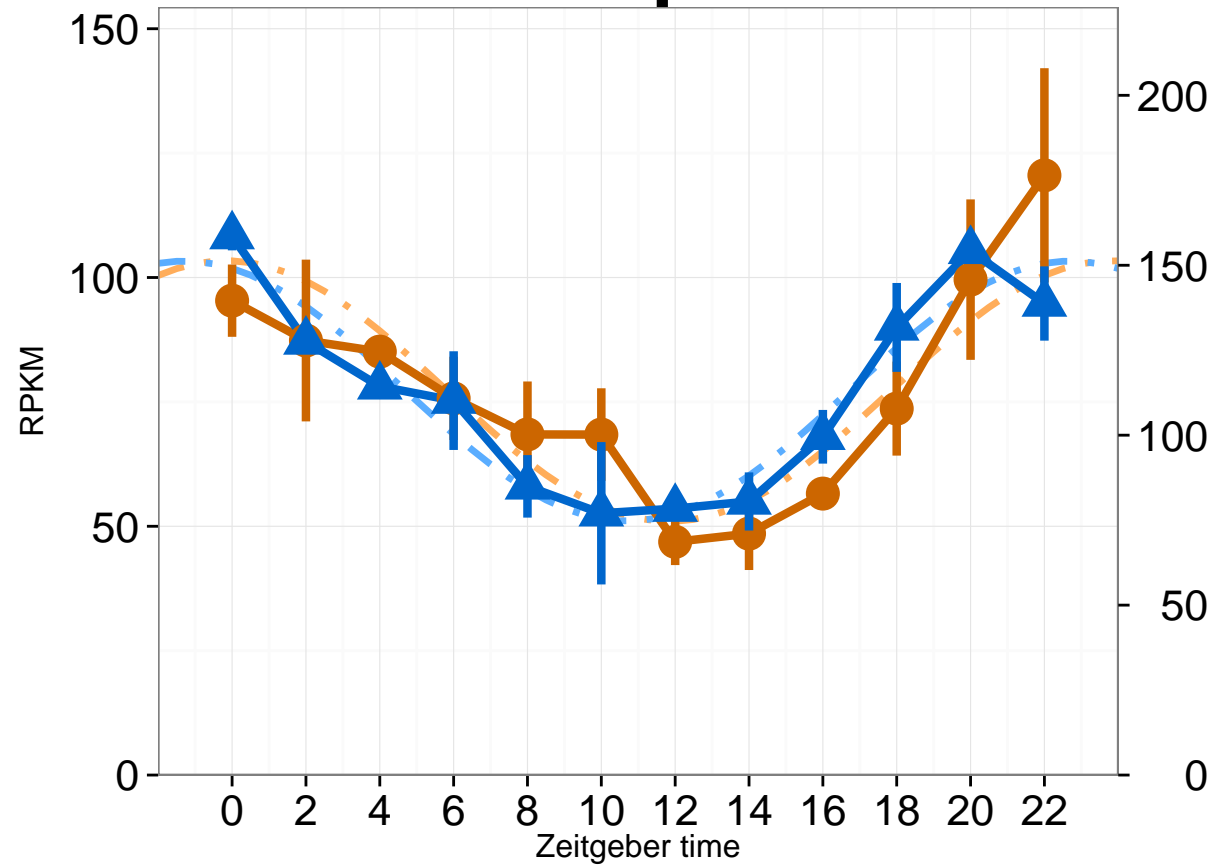

# Paqr9

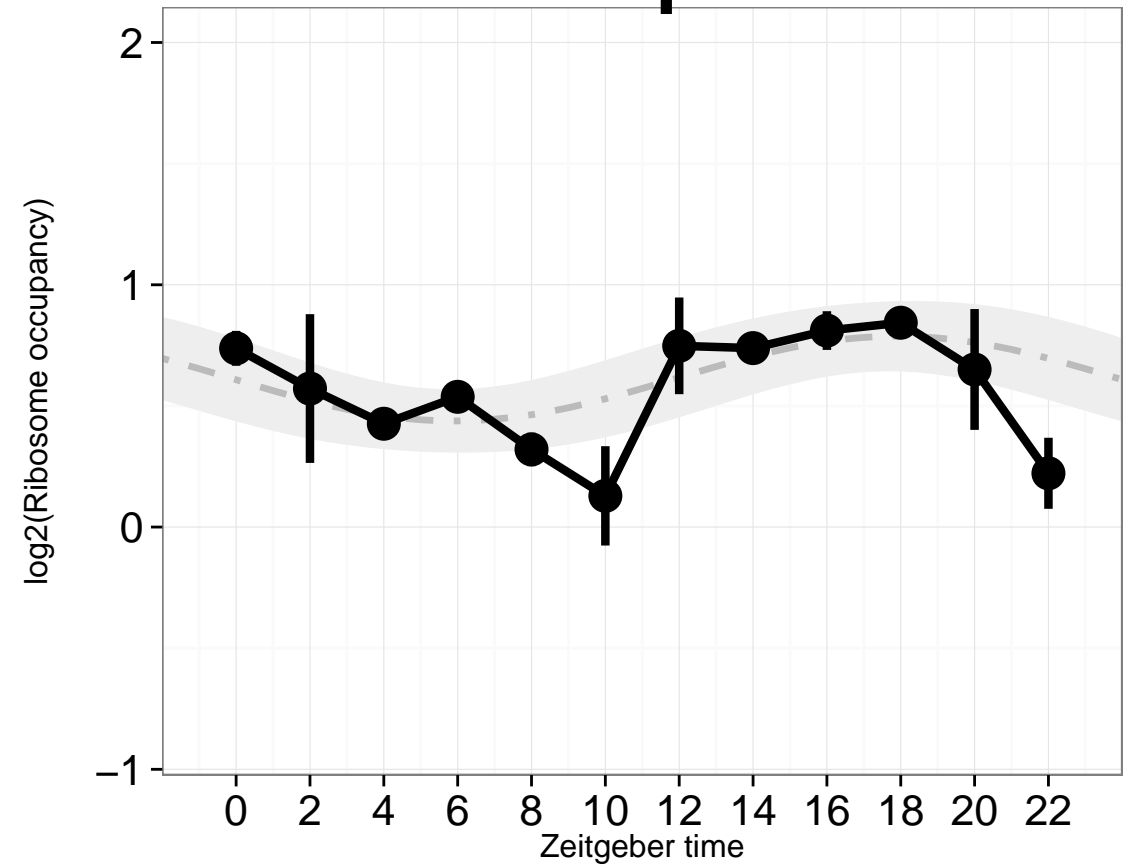

Supplement: SuppDataset_1.zip [file Paqr9_set_D.pdf › Supplemental Dataset 1/D-mRNA_rhythm_translation_rhyth/Paqr9_set_D.pdf]

# Pcbp4

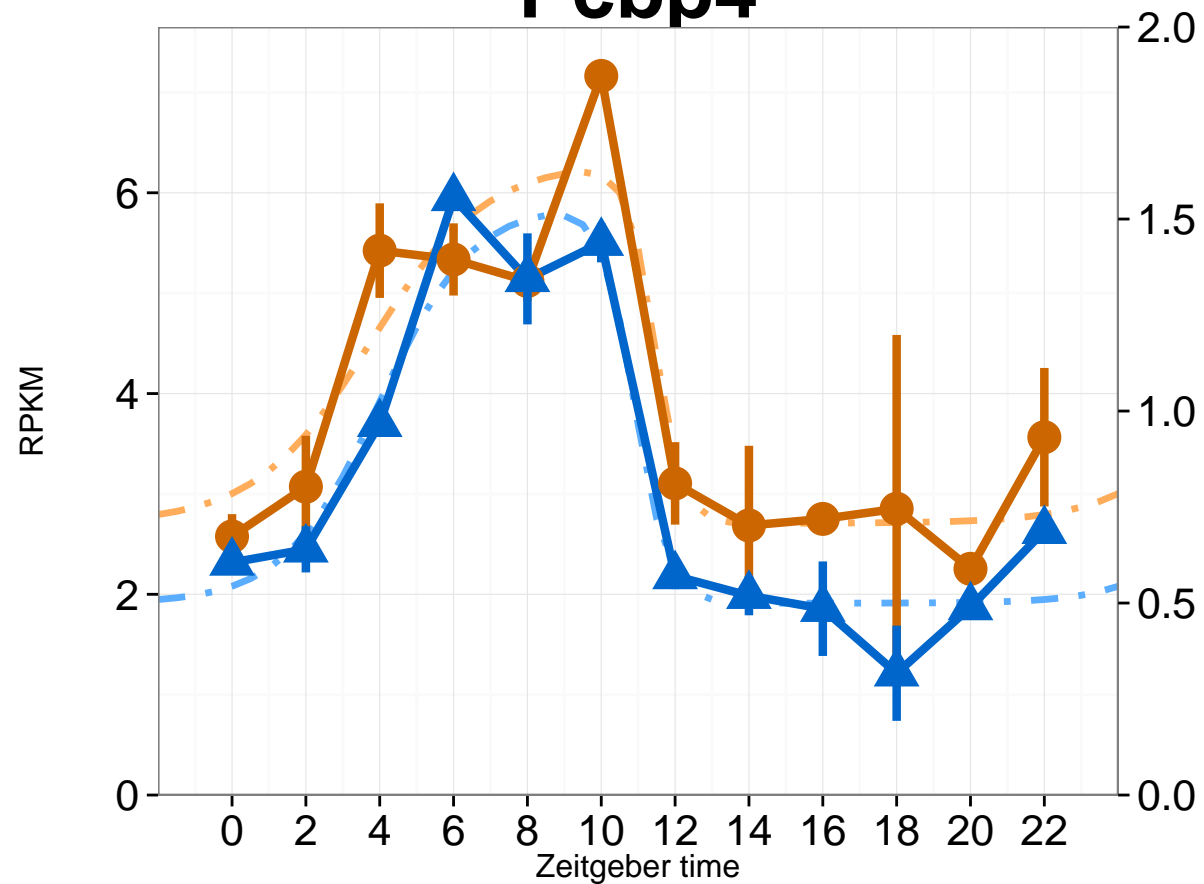

# Pcbp4

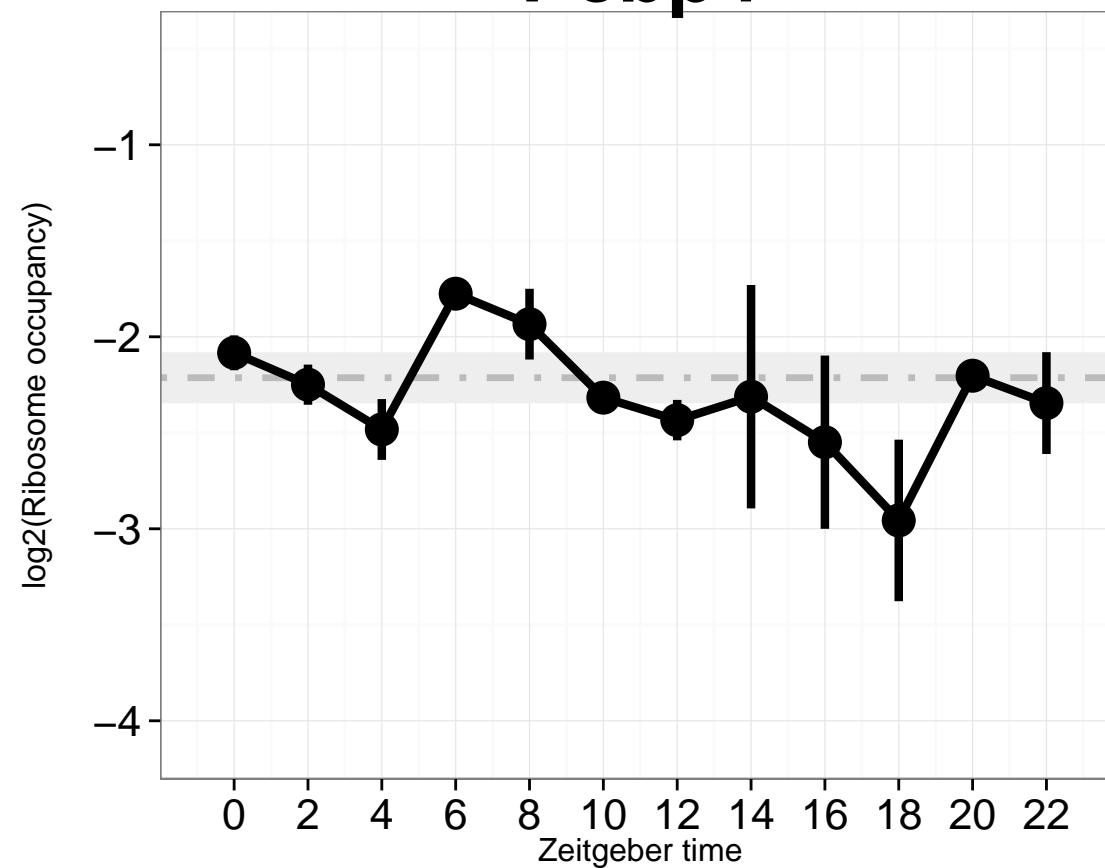

Supplement: SuppDataset_1.zip [file Pcbp4_set_D.pdf › Supplemental Dataset 1/D-mRNA_rhythm_translation_rhyth/Pcbp4_set_D.pdf]

# Pck1

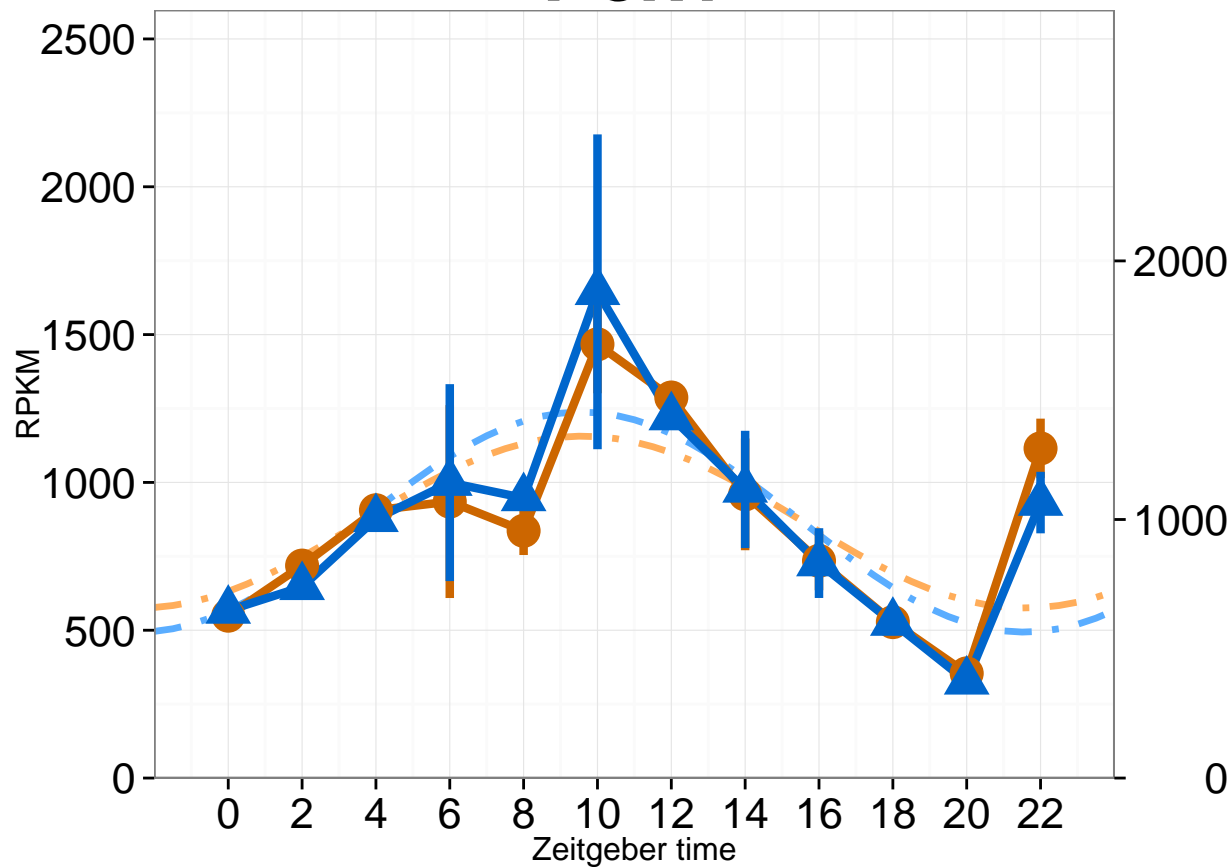

# Pck1

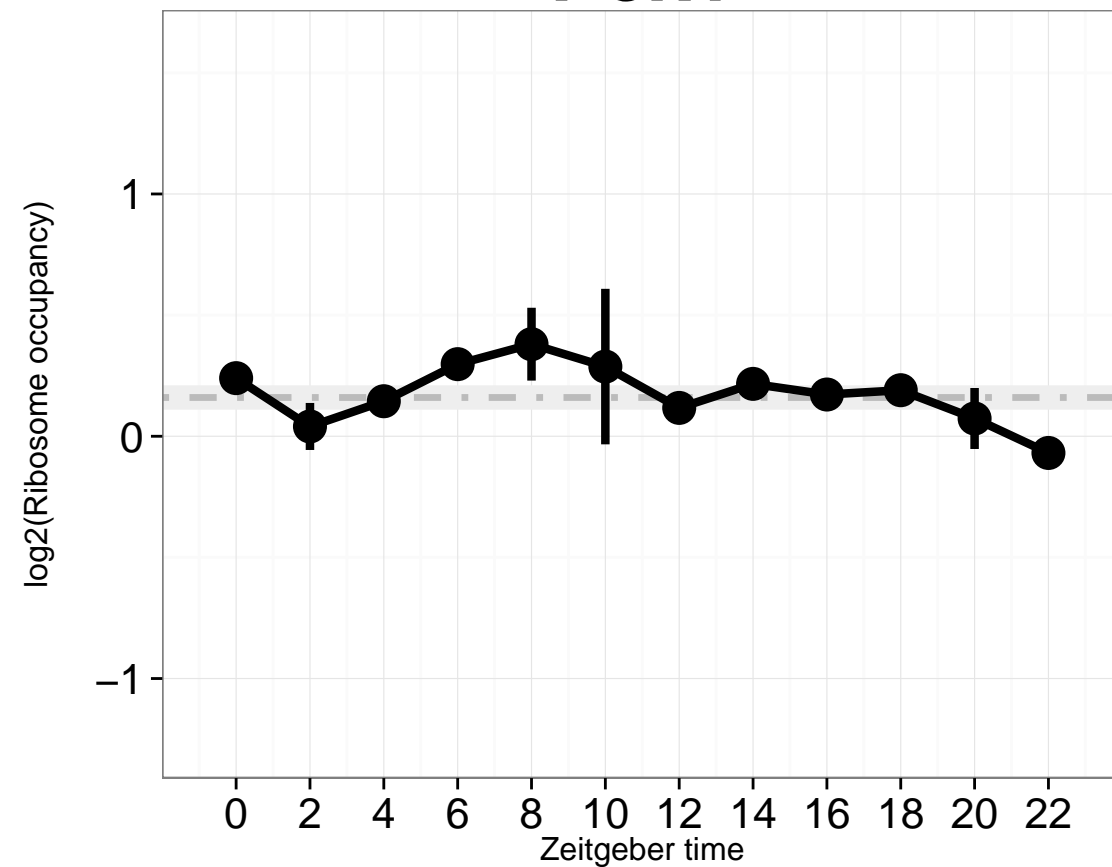

Supplement: SuppDataset_1.zip [file Pck1_set_D.pdf › Supplemental Dataset 1/D-mRNA_rhythm_translation_rhyth/Pck1_set_D.pdf]

## Pddc1

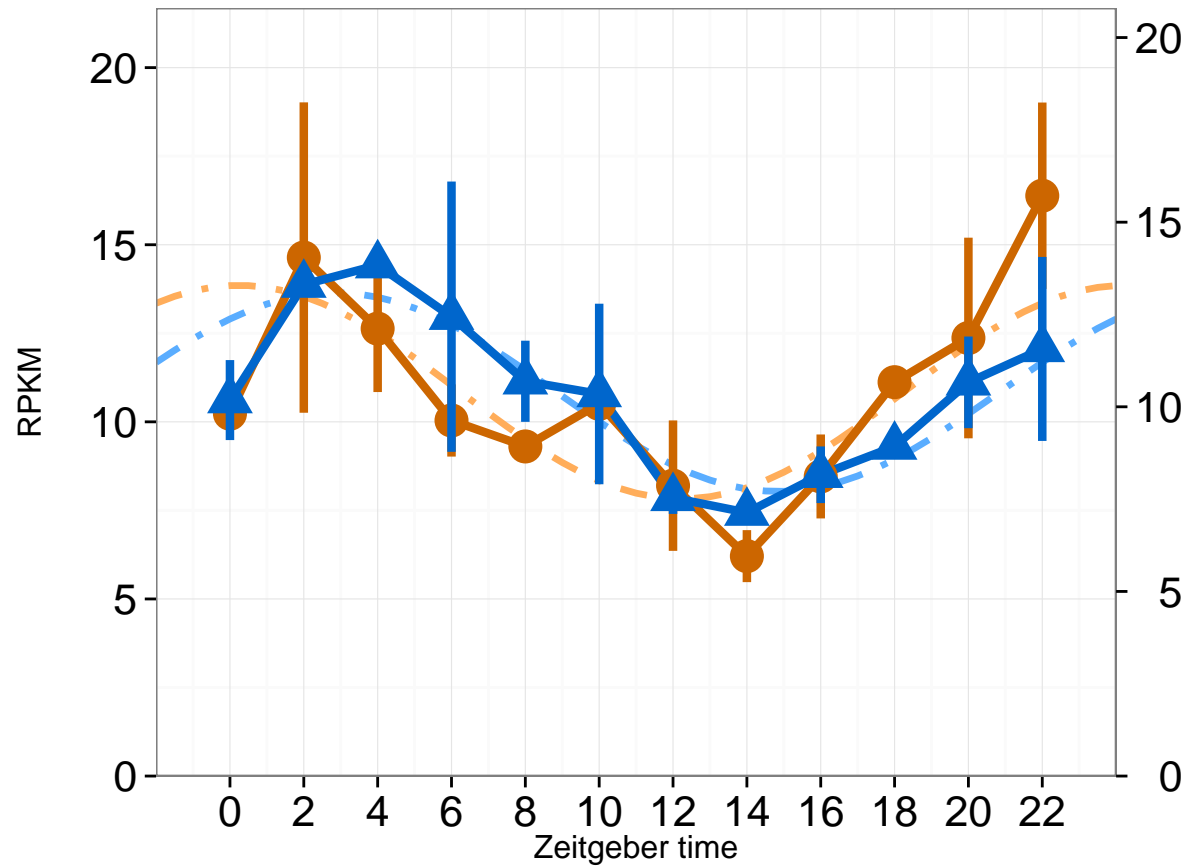

## Pddc1

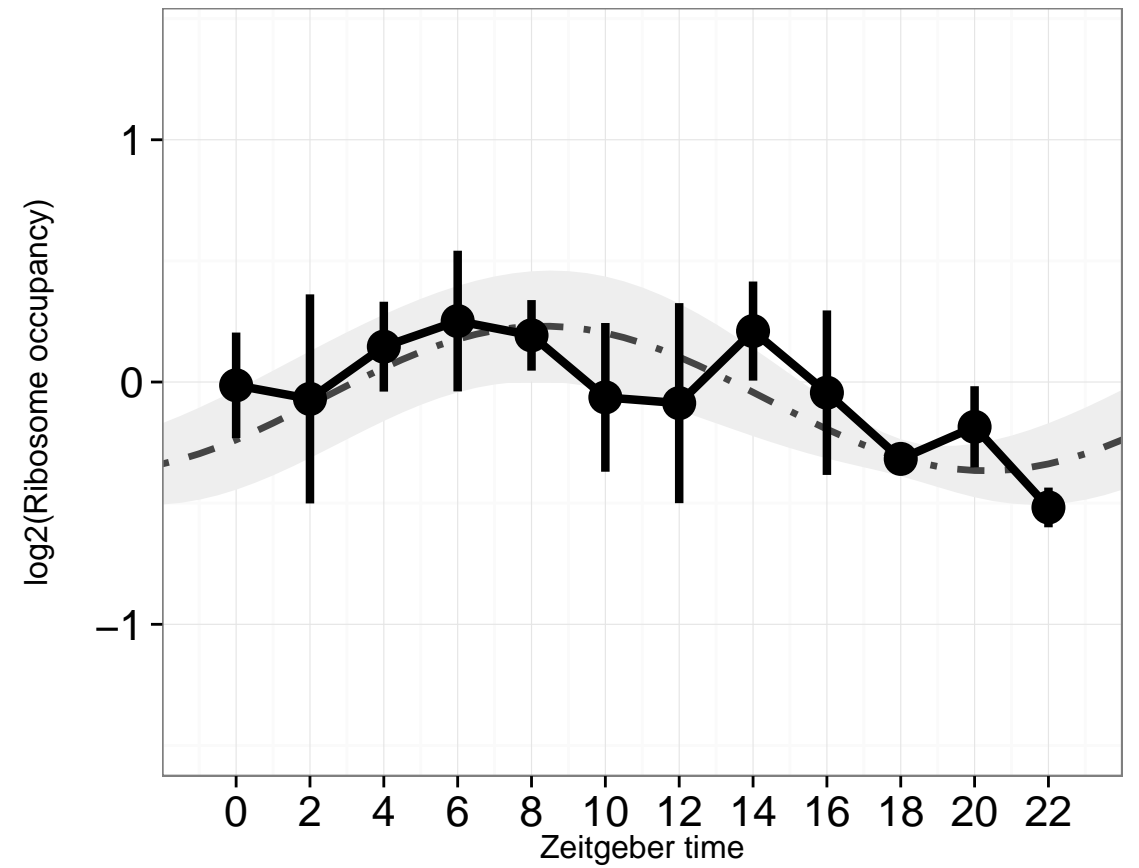

Supplement: SuppDataset_1.zip [file Pddc1_set_D.pdf › Supplemental Dataset 1/D-mRNA_rhythm_translation_rhyth/Pddc1_set_D.pdf]

# Pde4c

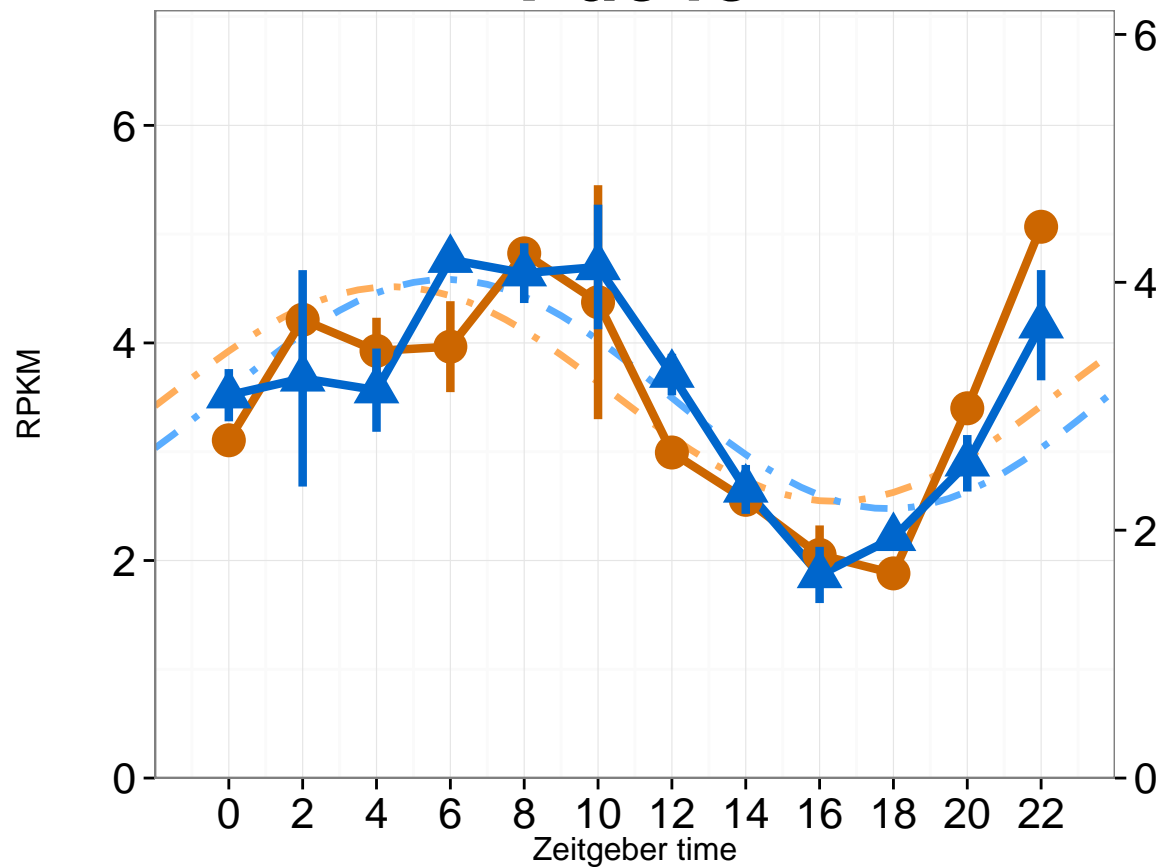

# Pde4c

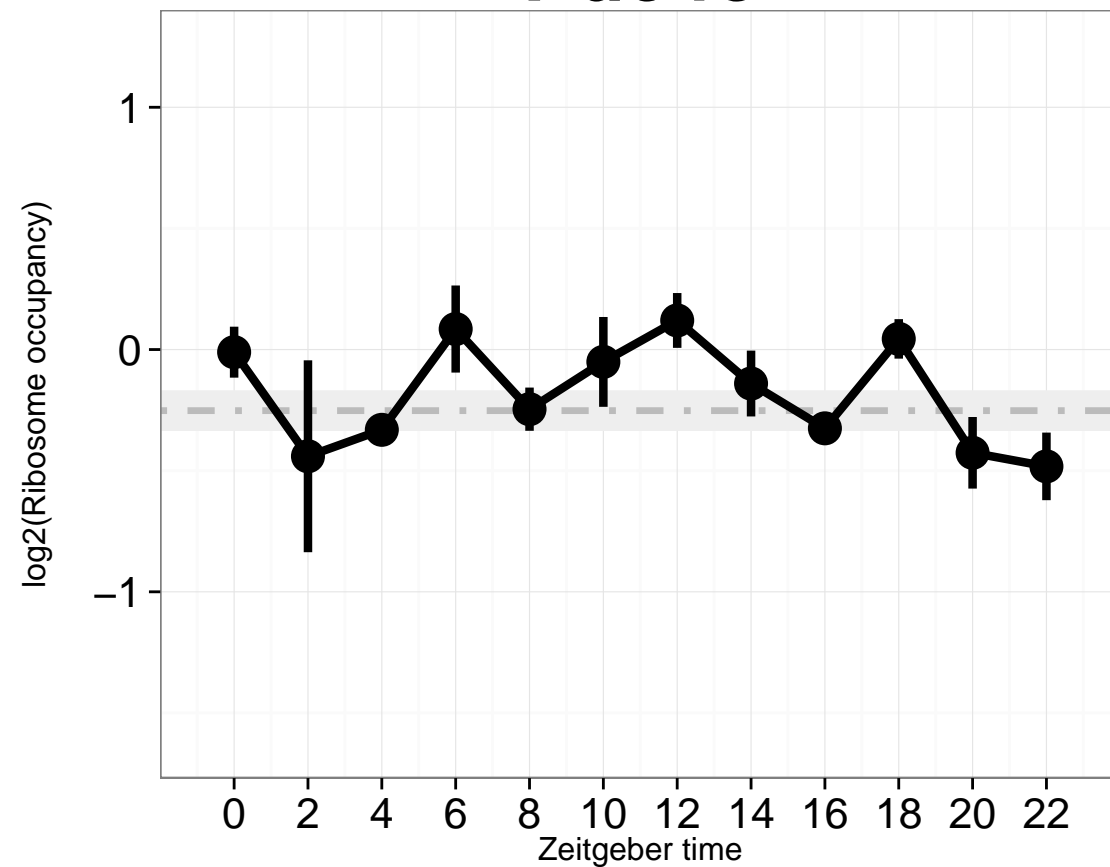

Supplement: SuppDataset_1.zip [file Pde4c_set_D.pdf › Supplemental Dataset 1/D-mRNA_rhythm_translation_rhyth/Pde4c_set_D.pdf]

# Pde9a

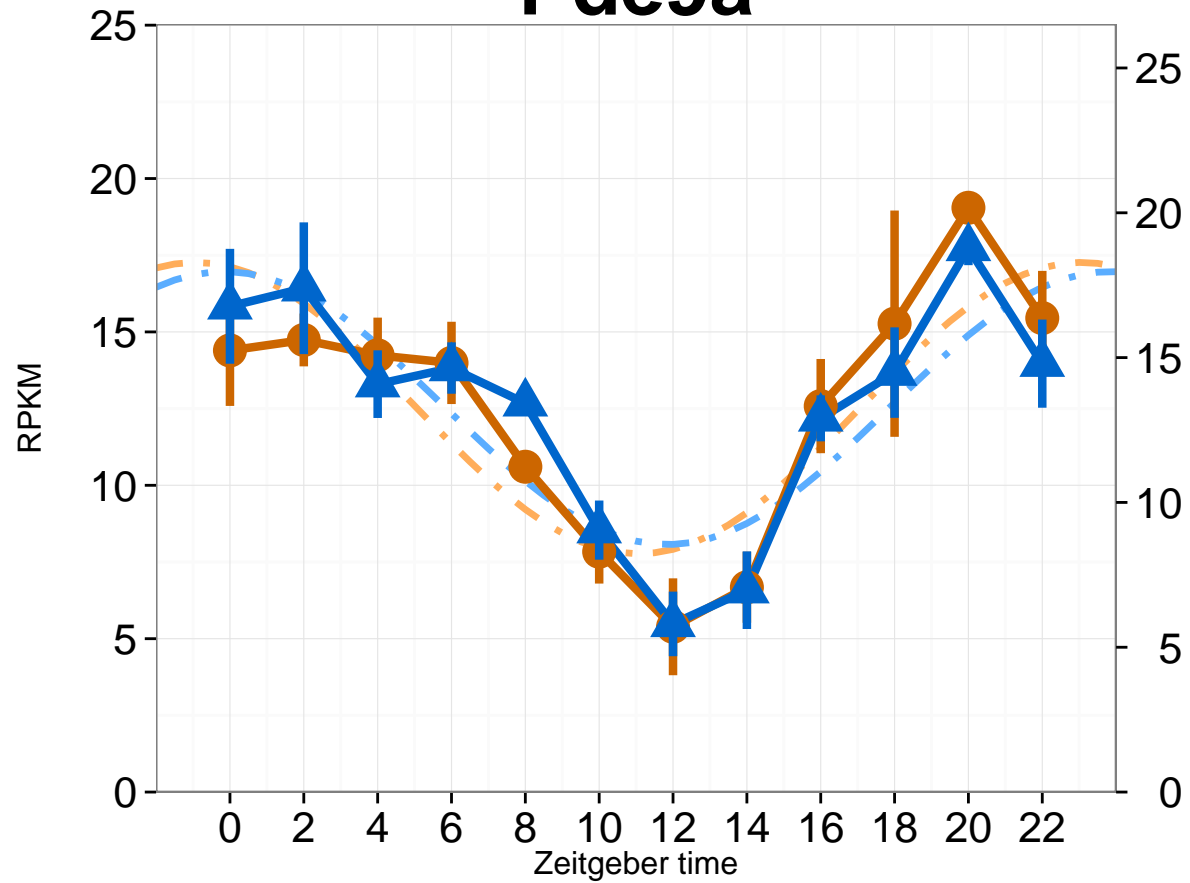

# Pde9a

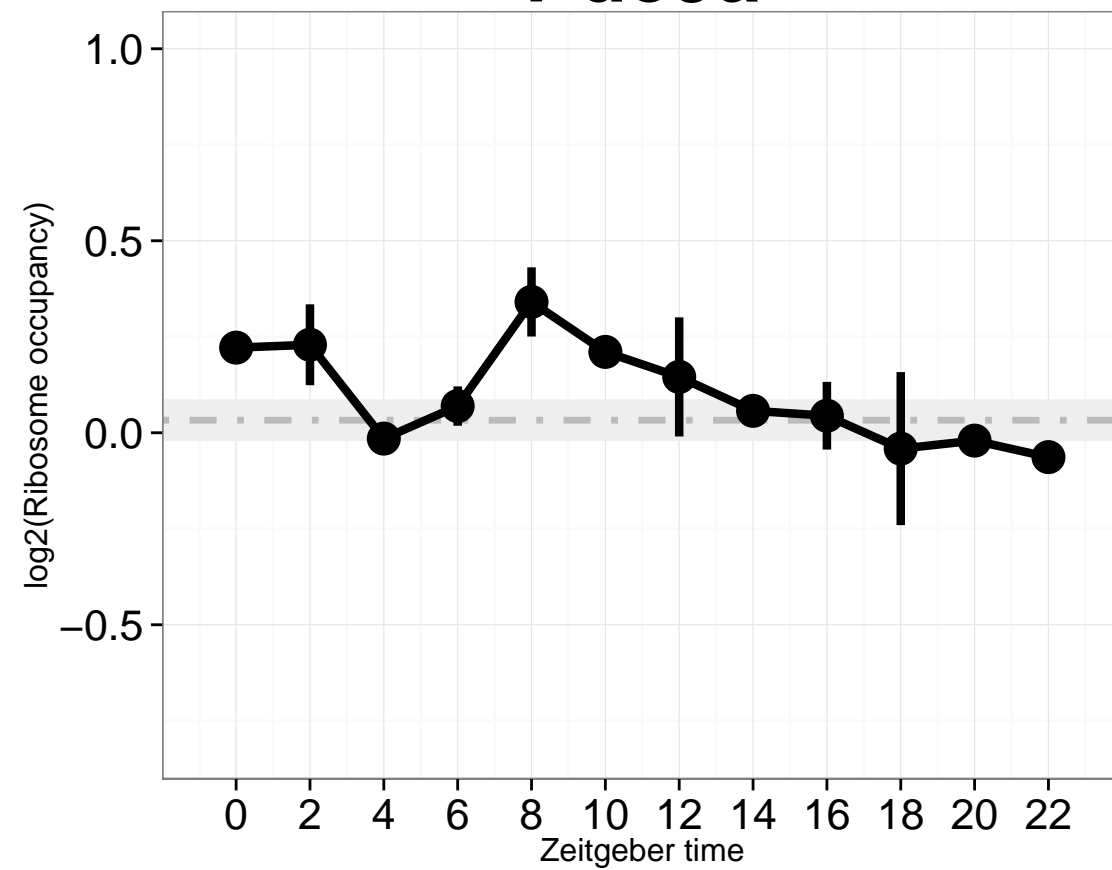

Supplement: SuppDataset_1.zip [file Pde9a_set_D.pdf › Supplemental Dataset 1/D-mRNA_rhythm_translation_rhyth/Pde9a_set_D.pdf]

# Pdgfrb

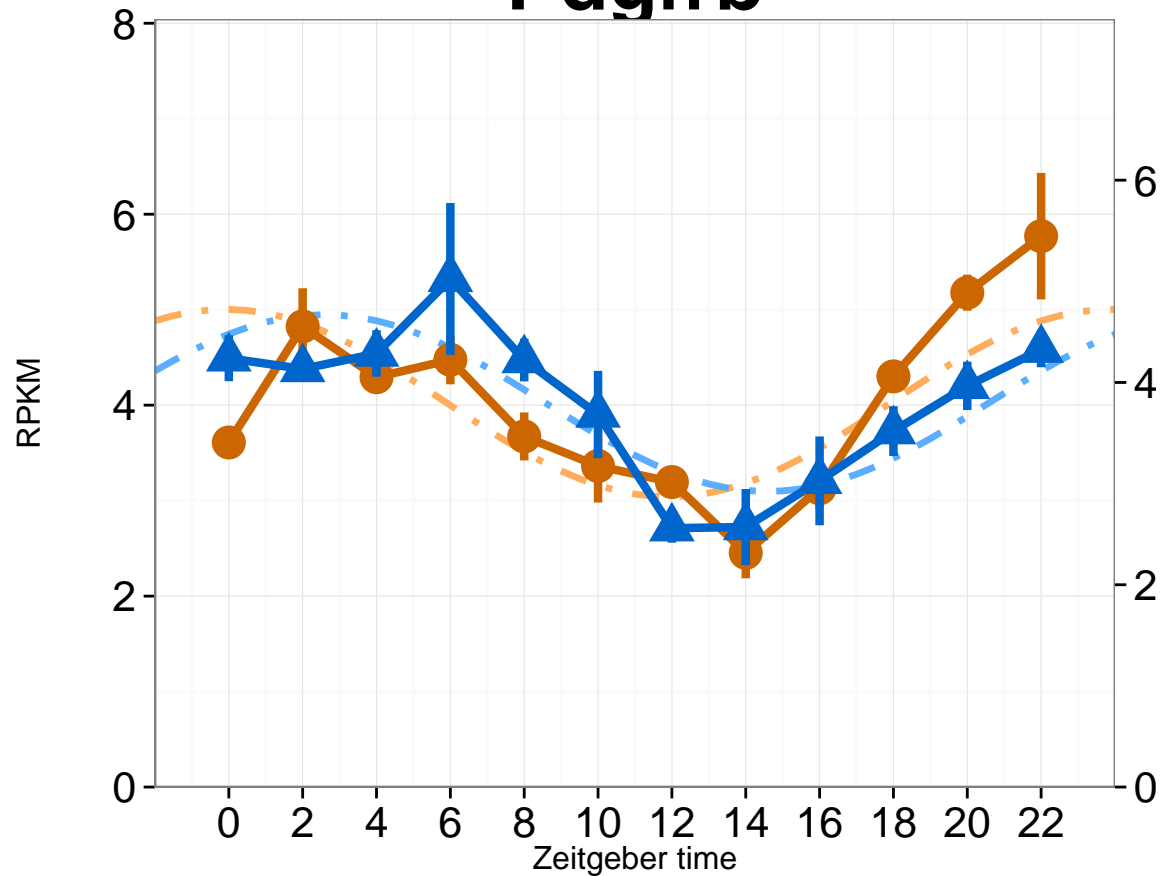

# Pdgfrb

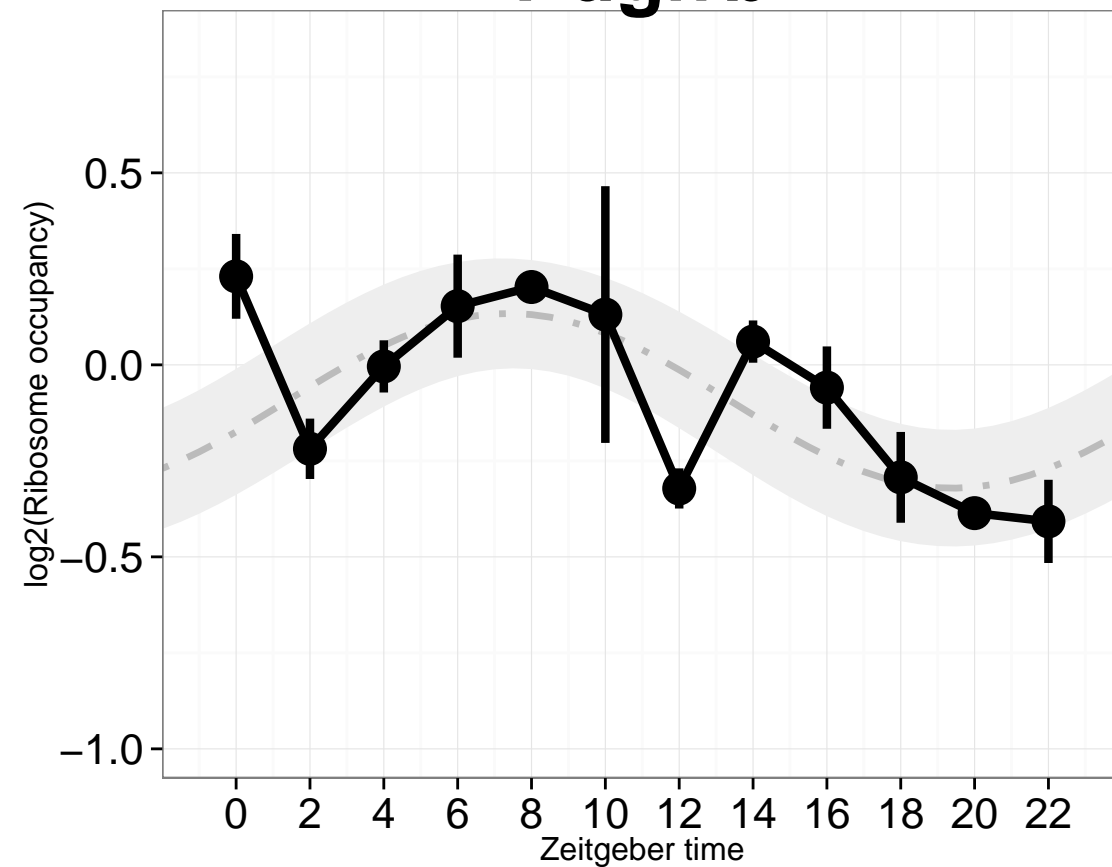

Supplement: SuppDataset_1.zip [file Pdgfrb_set_D.pdf › Supplemental Dataset 1/D-mRNA_rhythm_translation_rhyth/Pdgfrb_set_D.pdf]

## Pdhb

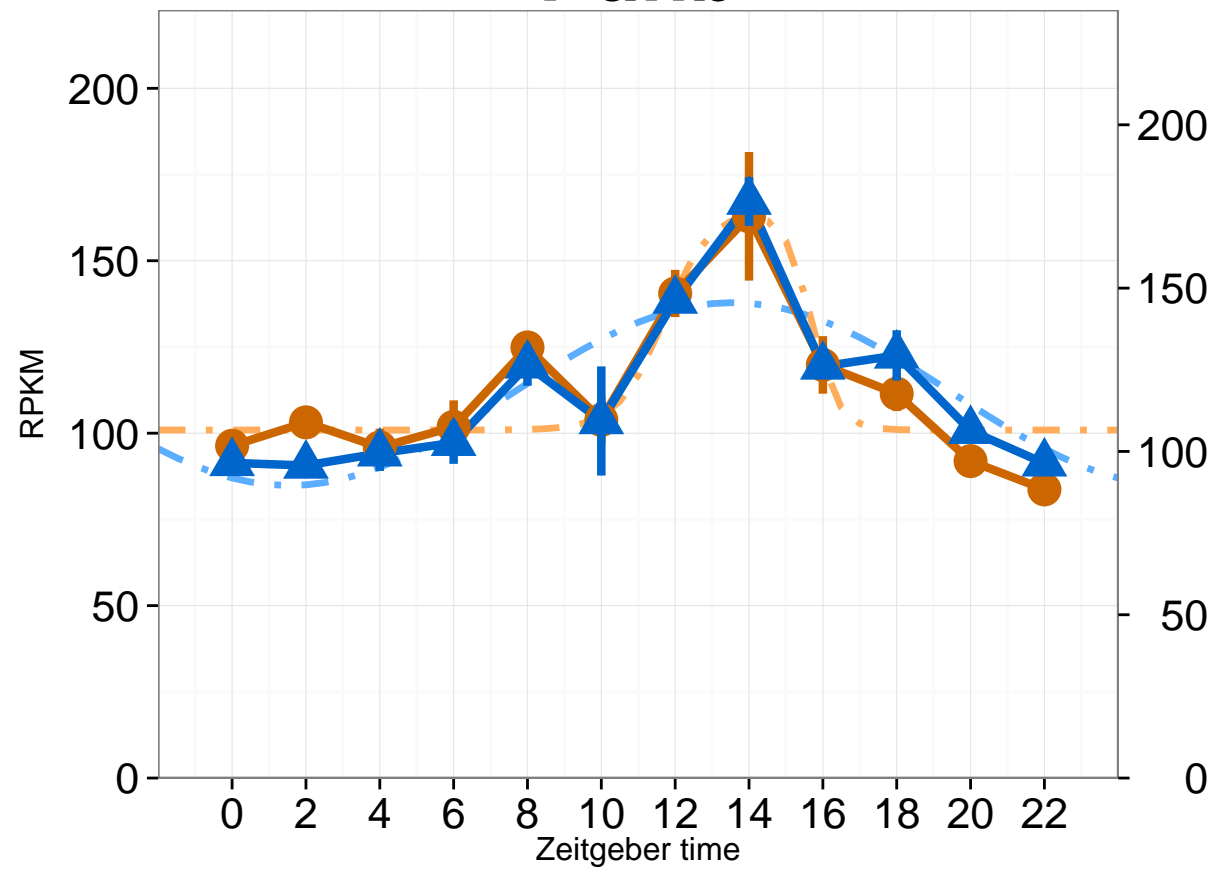

## Pdhb

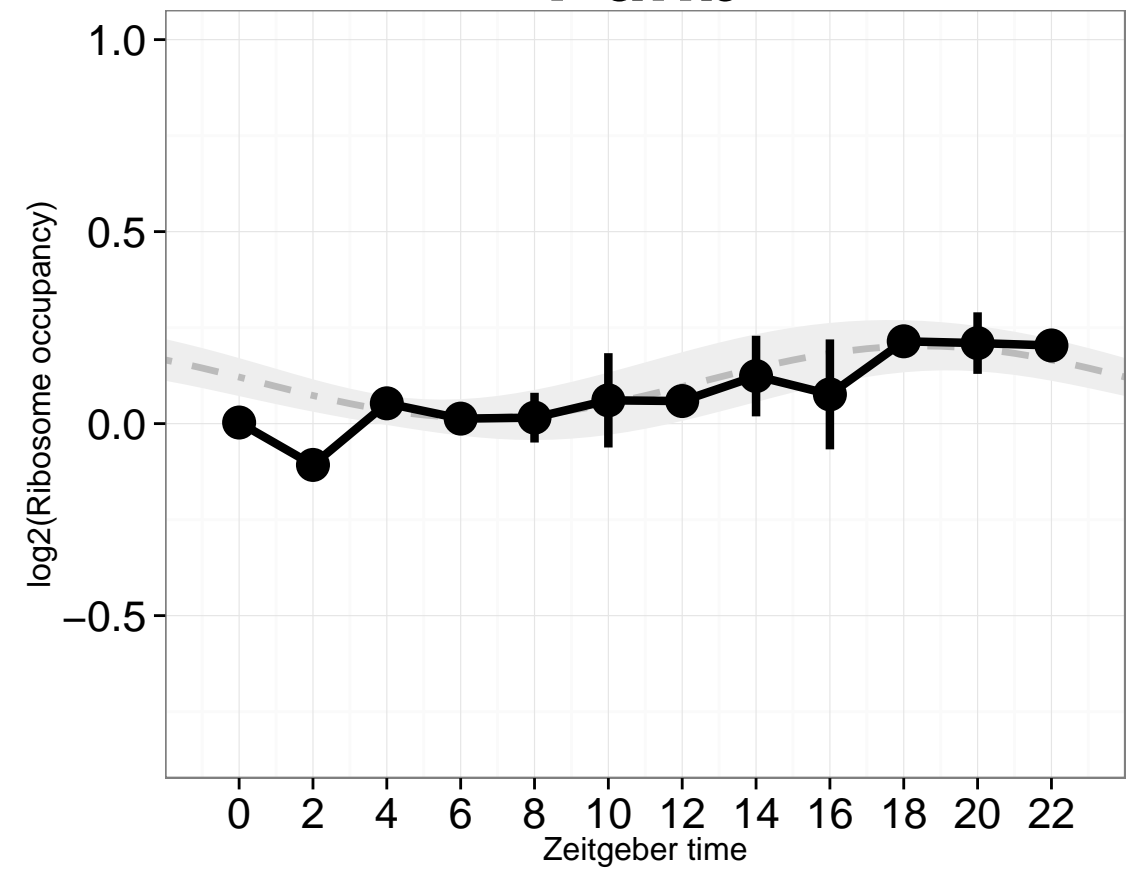

Supplement: SuppDataset_1.zip [file Pdhb_set_D.pdf › Supplemental Dataset 1/D-mRNA_rhythm_translation_rhyth/Pdhb_set_D.pdf]

## Pdk1

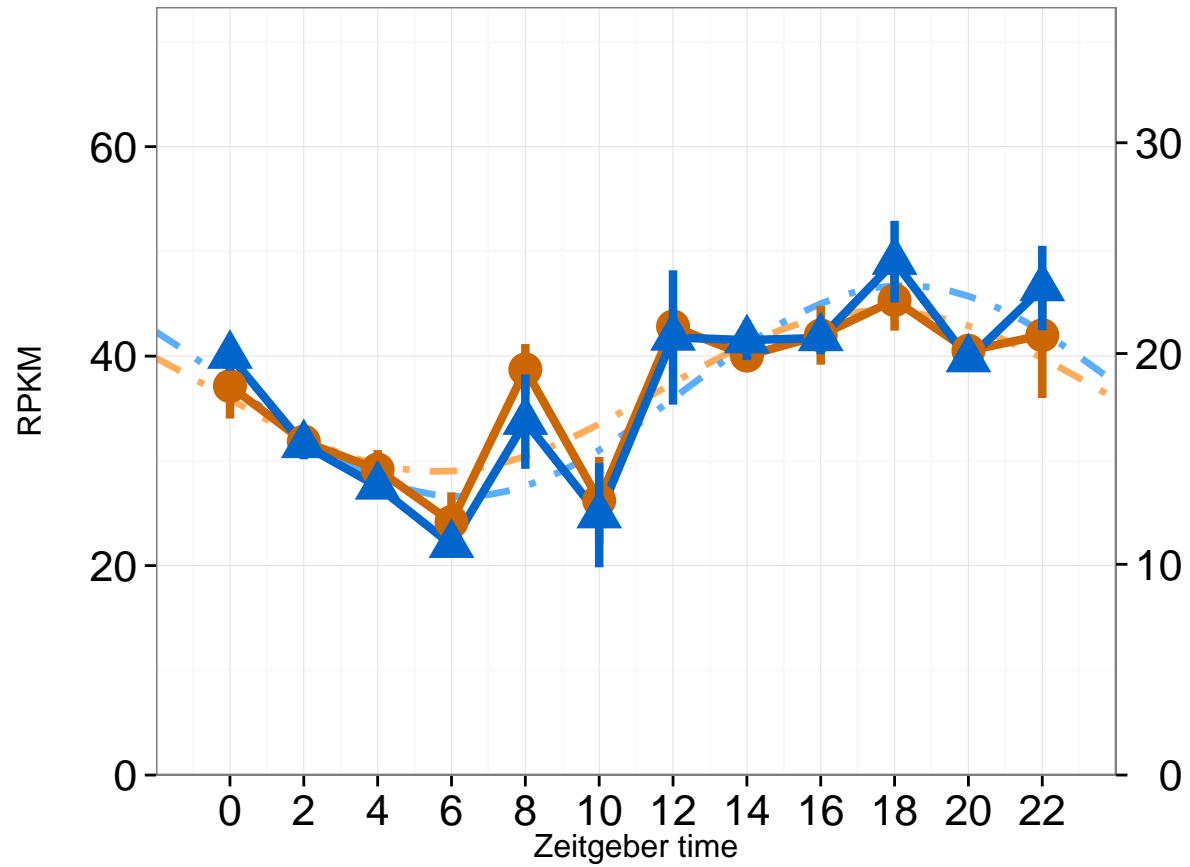

## Pdk1

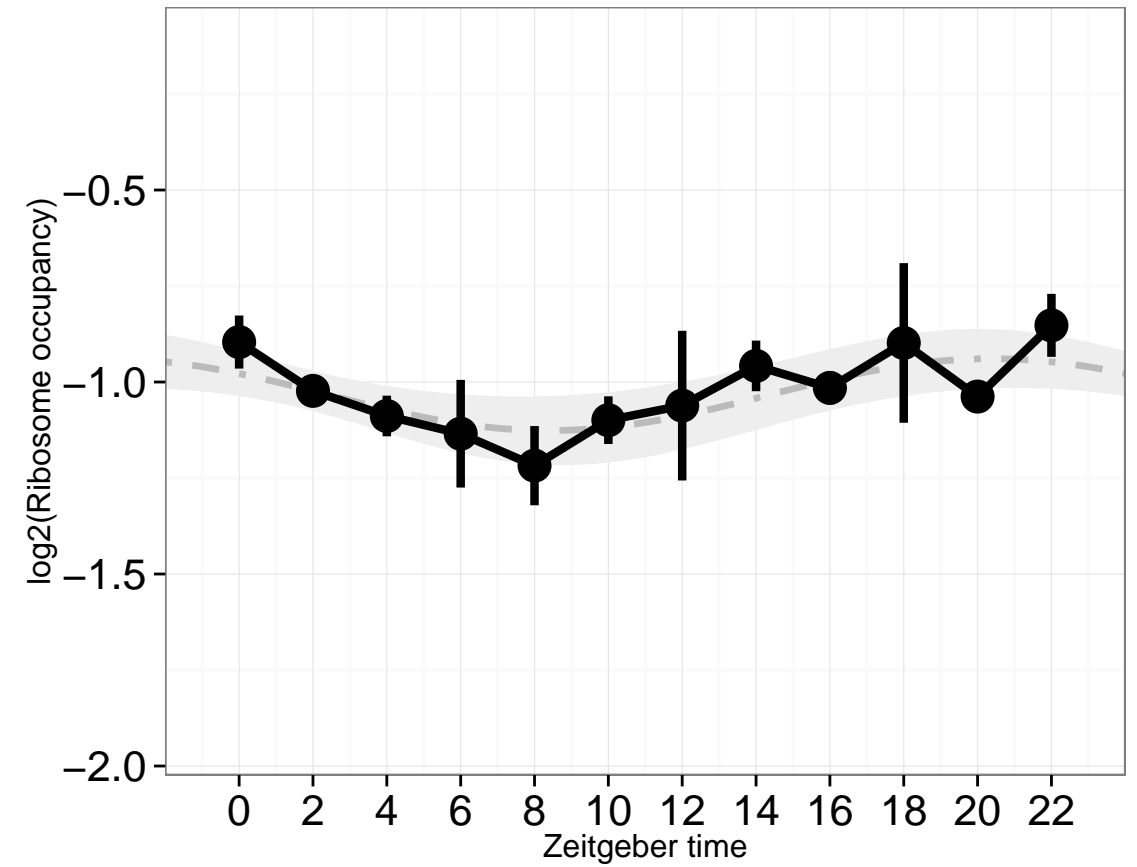

Supplement: SuppDataset_1.zip [file Pdk1_set_D.pdf › Supplemental Dataset 1/D-mRNA_rhythm_translation_rhyth/Pdk1_set_D.pdf]

## Pdk4

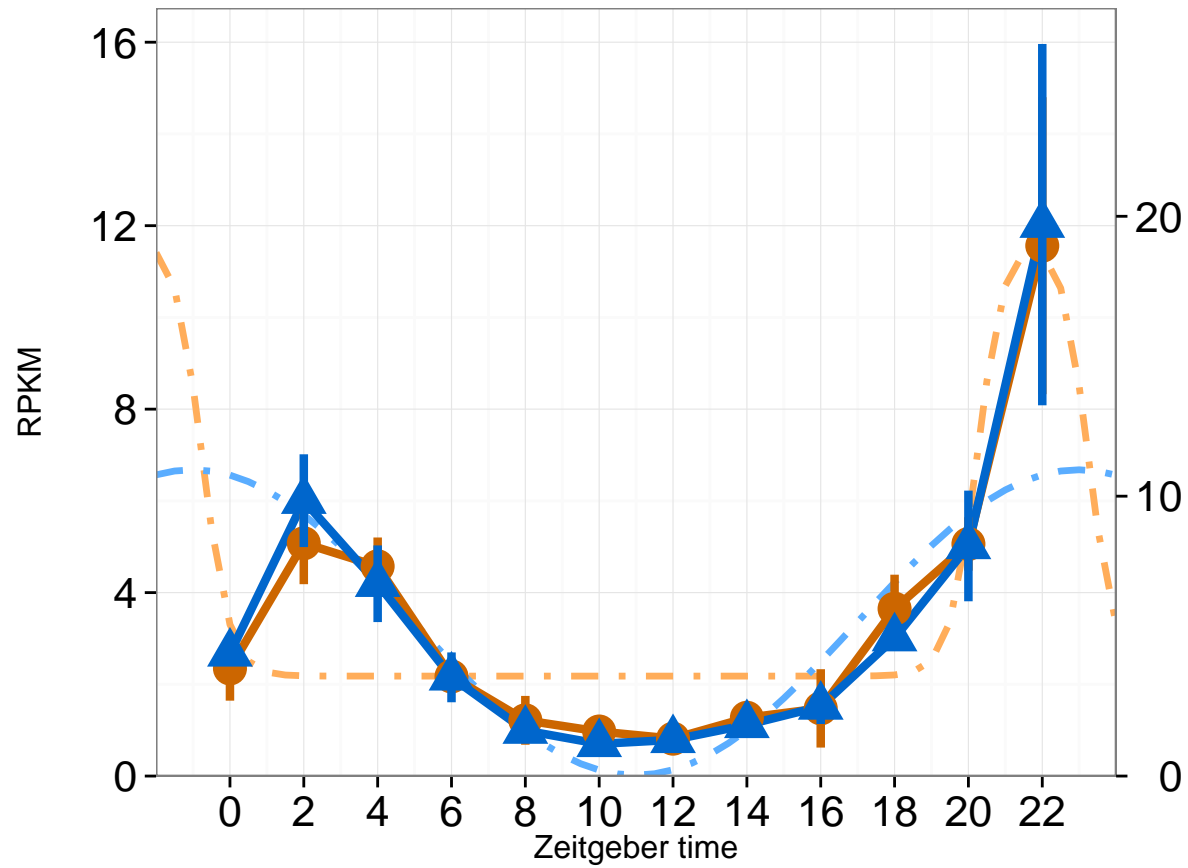

## Pdk4

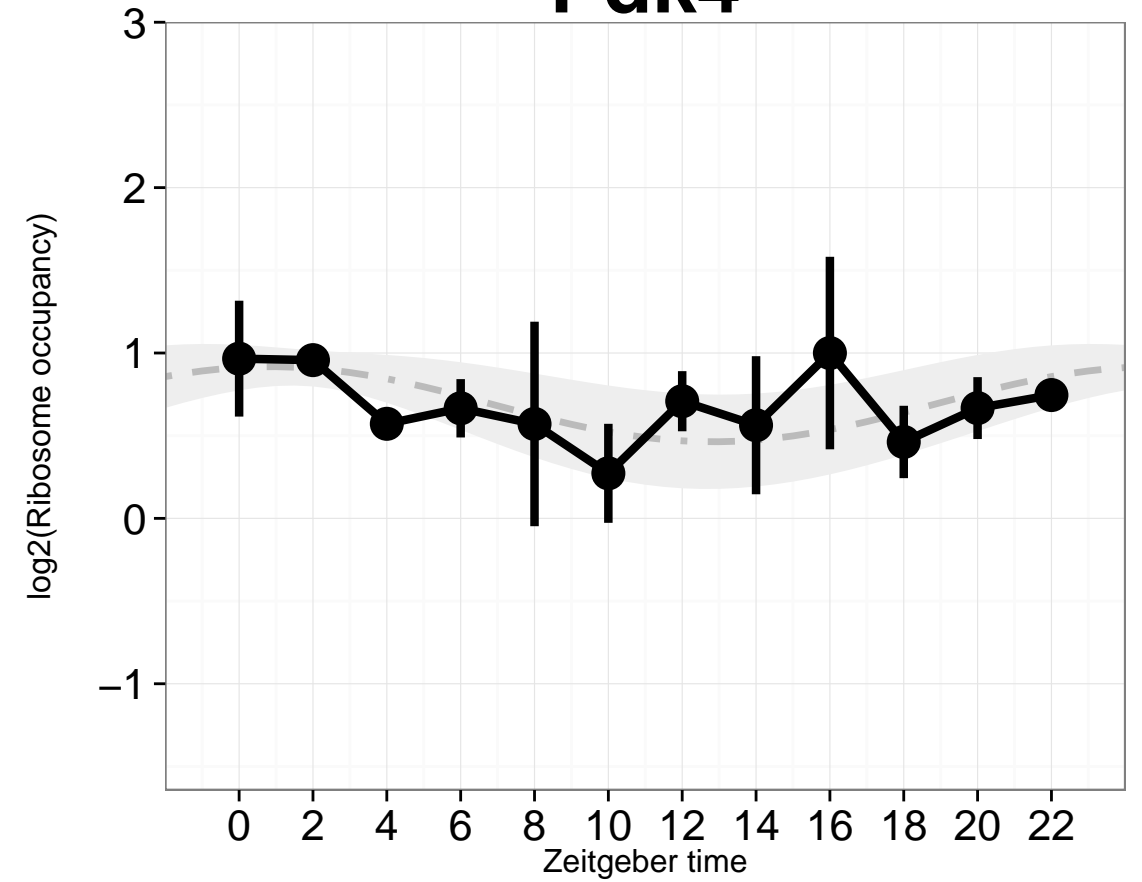

Supplement: SuppDataset_1.zip [file Pdk4_set_D.pdf › Supplemental Dataset 1/D-mRNA_rhythm_translation_rhyth/Pdk4_set_D.pdf]

## Pdxk

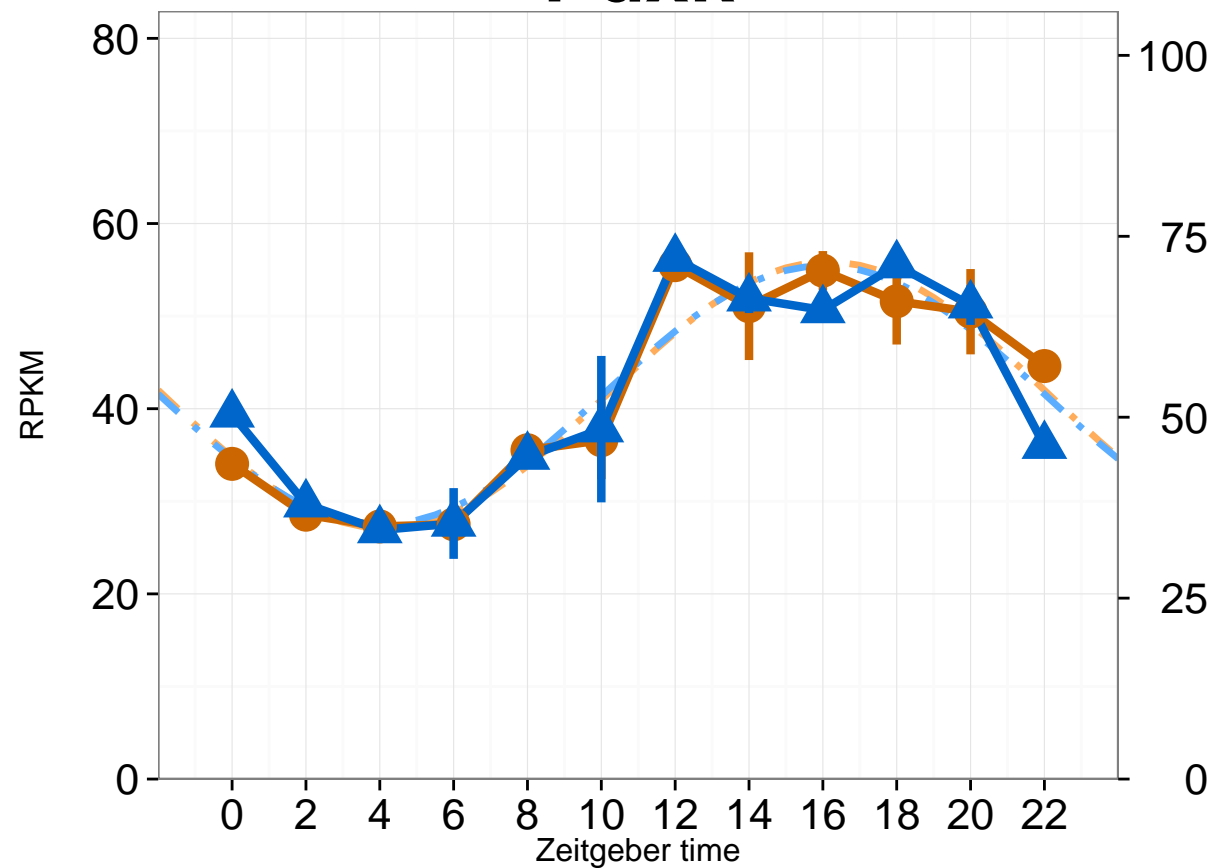

## Pdxk

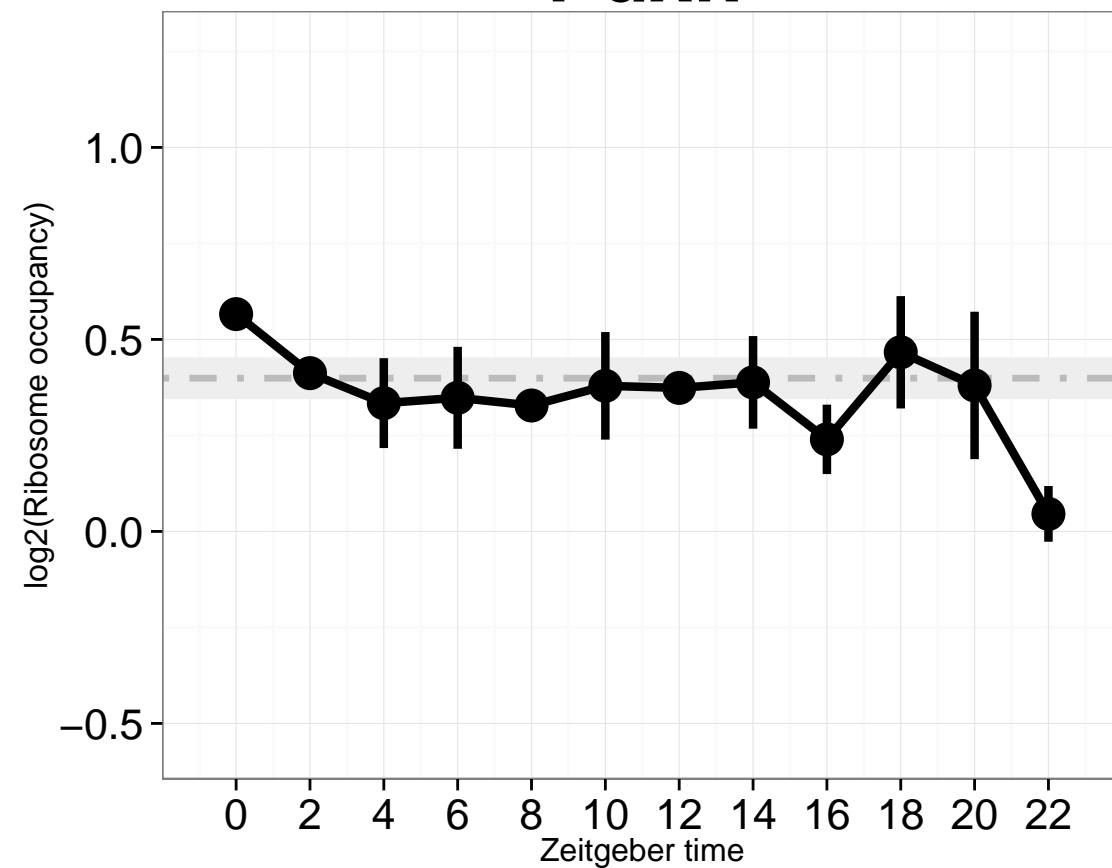

Supplement: SuppDataset_1.zip [file Pdxk_set_D.pdf › Supplemental Dataset 1/D-mRNA_rhythm_translation_rhyth/Pdxk_set_D.pdf]

# Pdzk1ip1

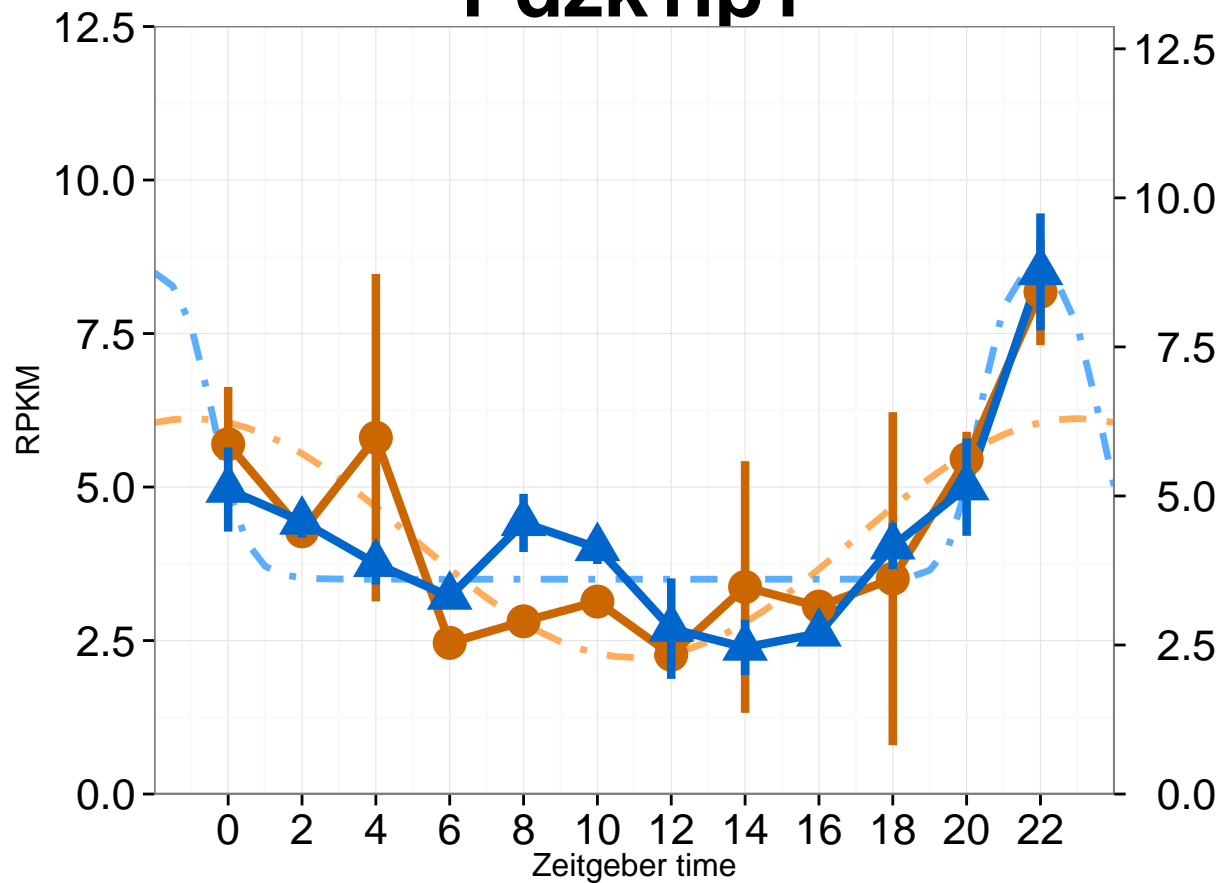

# Pdzk1ip1

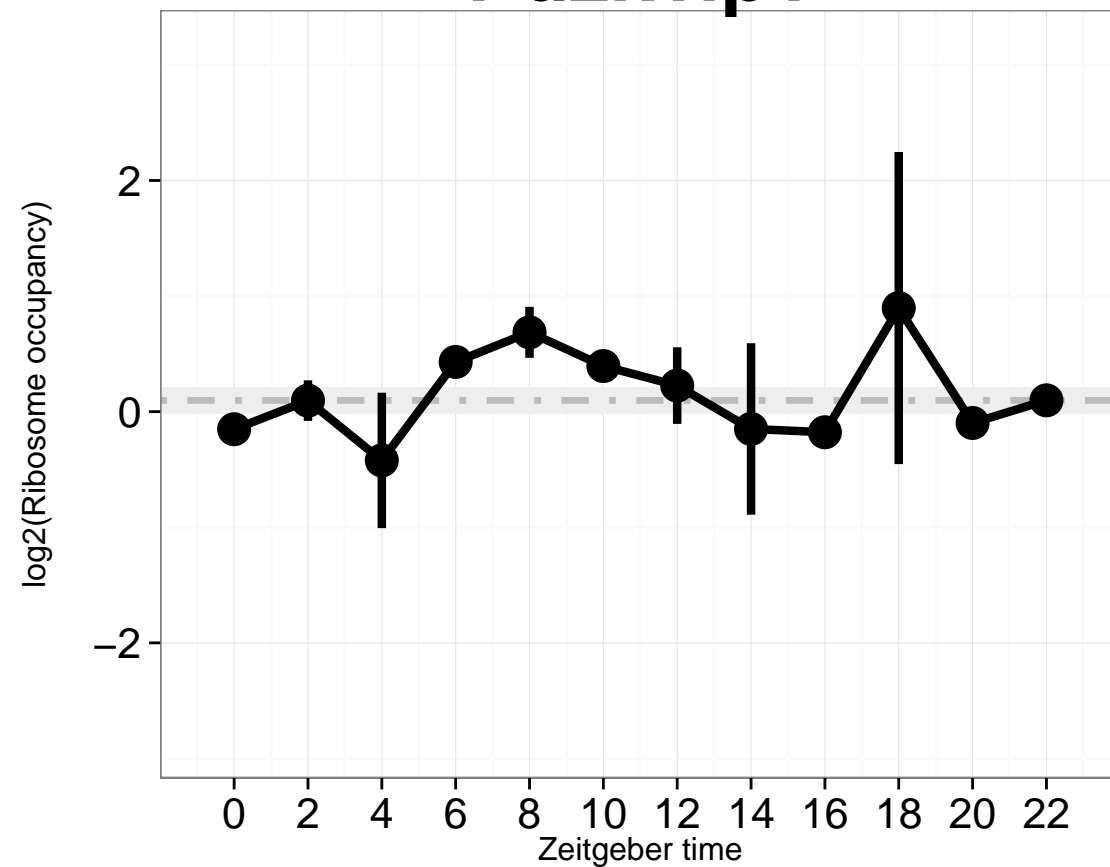

Supplement: SuppDataset_1.zip [file Pdzk1ip1_set_D.pdf › Supplemental Dataset 1/D-mRNA_rhythm_translation_rhyth/Pdzk1ip1_set_D.pdf]

# Pea15a

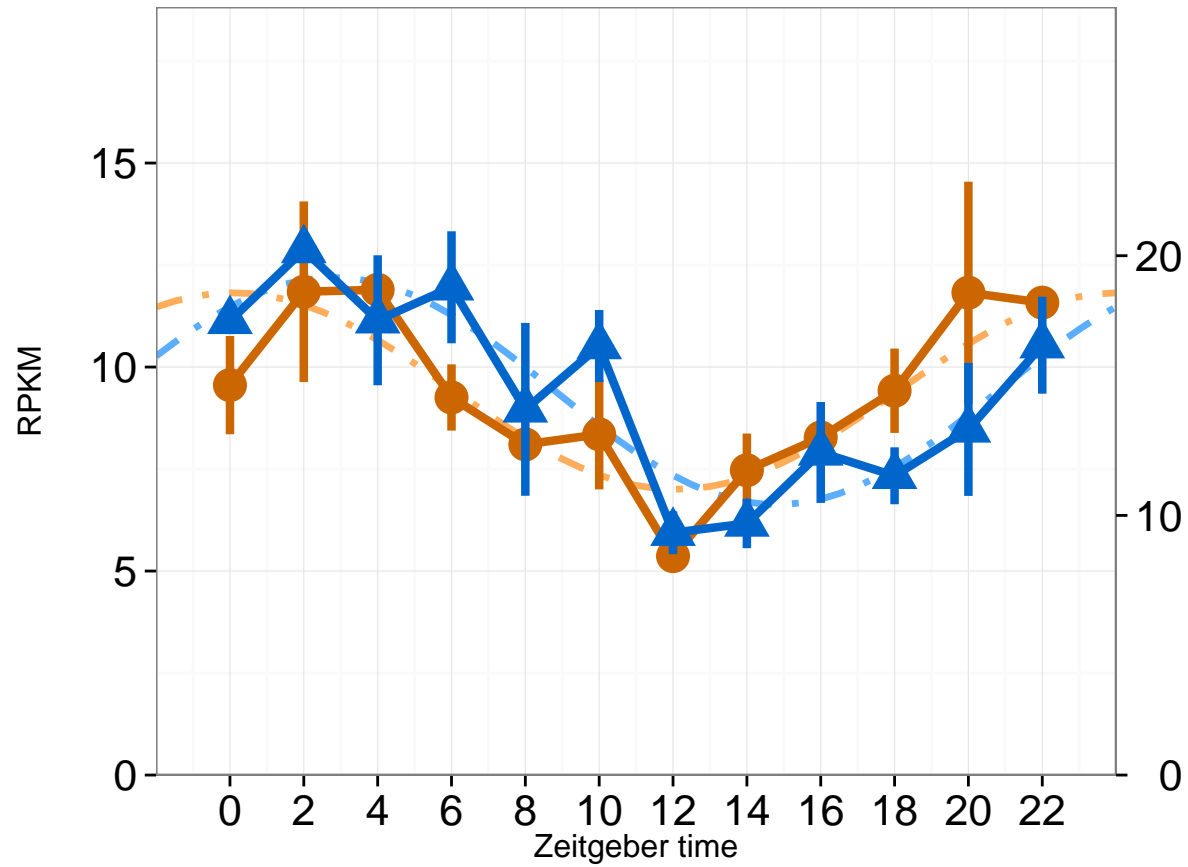

# Pea15a

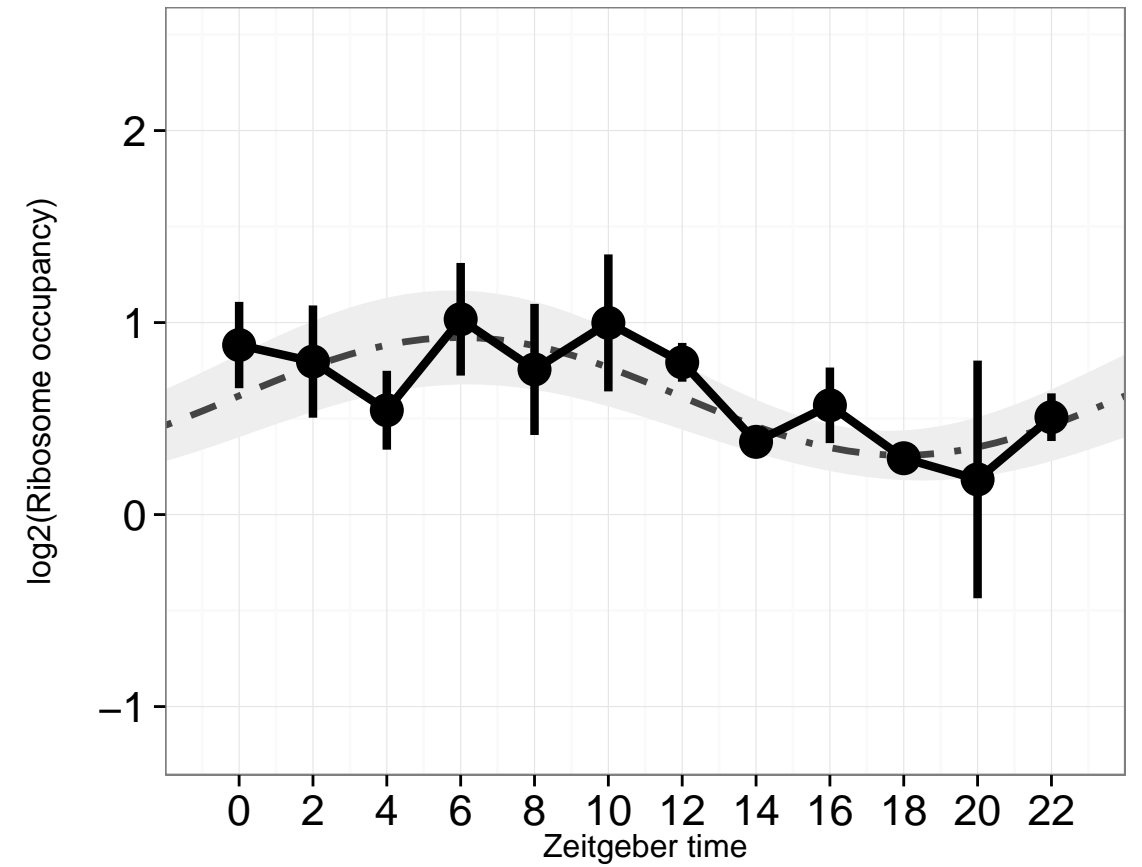

Supplement: SuppDataset_1.zip [file Pea15a_set_D.pdf › Supplemental Dataset 1/D-mRNA_rhythm_translation_rhyth/Pea15a_set_D.pdf]

## Peo1

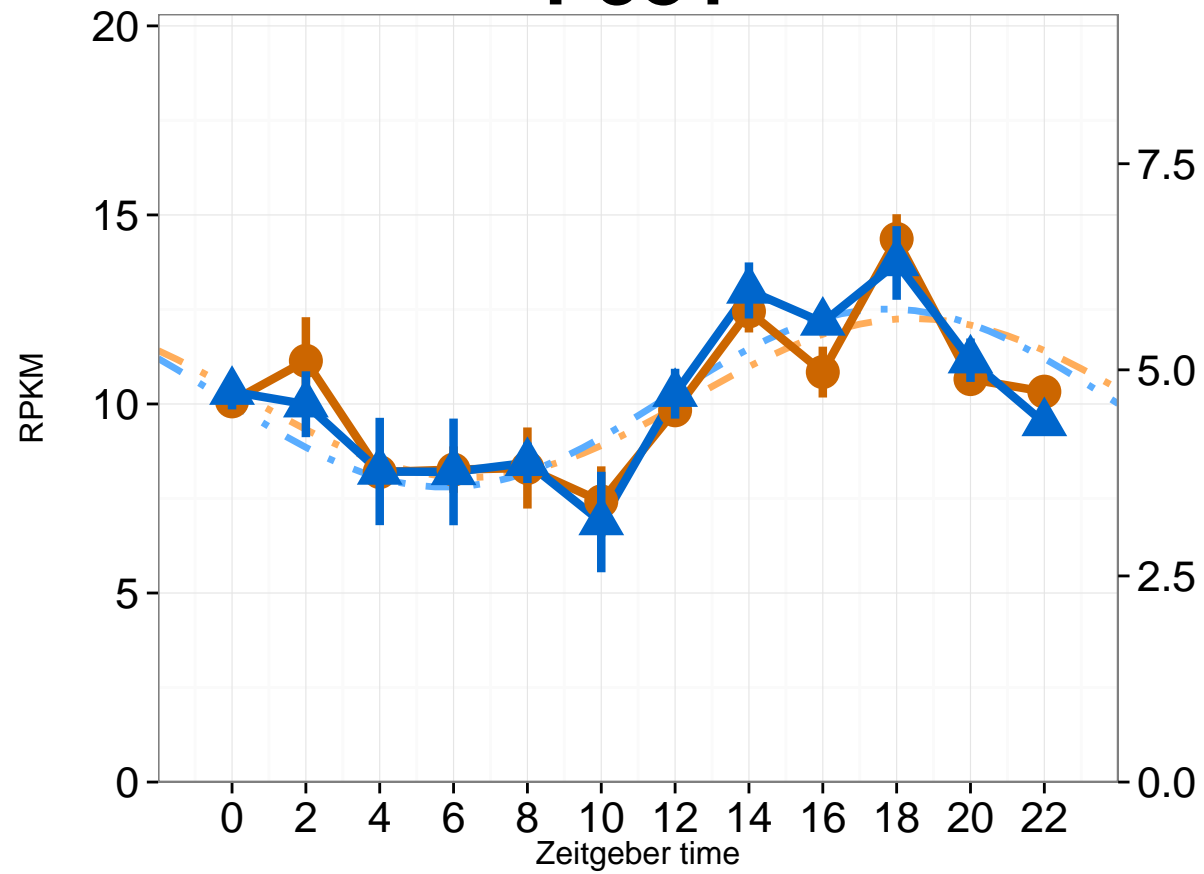

## Peo1

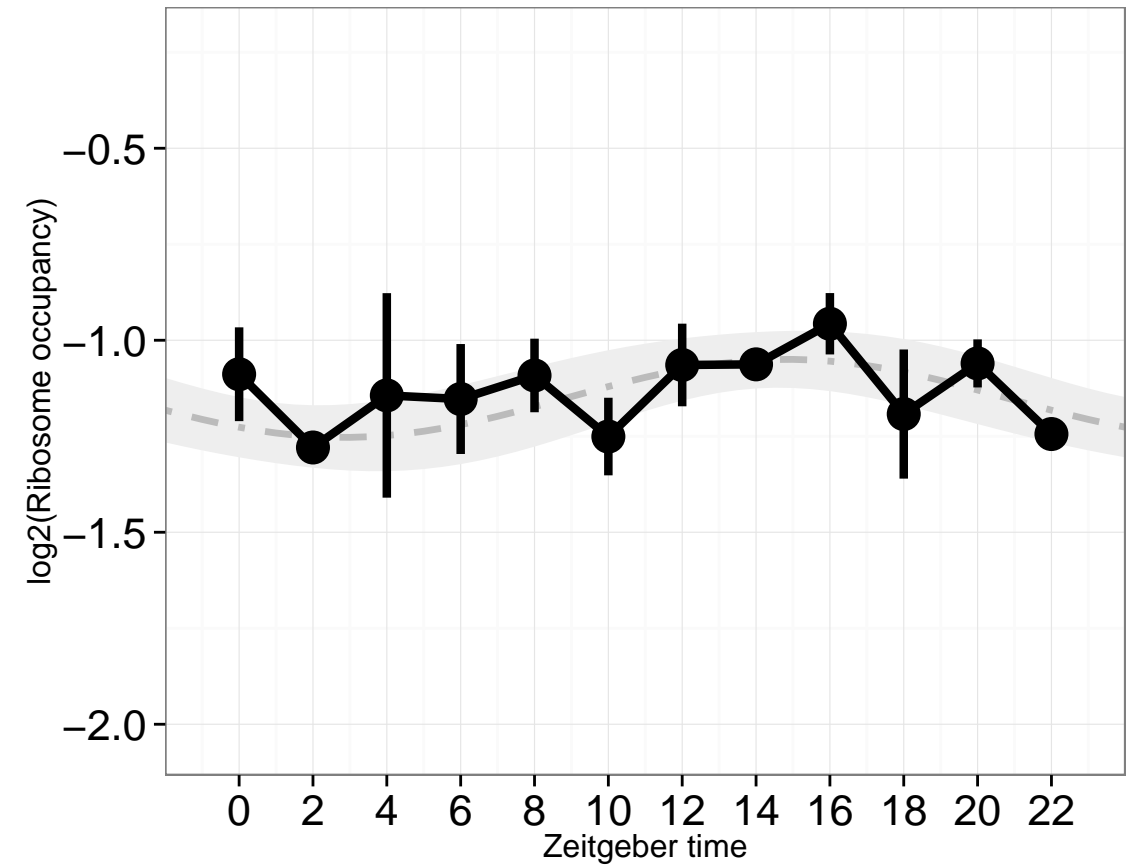

Supplement: SuppDataset_1.zip [file Peo1_set_D.pdf › Supplemental Dataset 1/D-mRNA_rhythm_translation_rhyth/Peo1_set_D.pdf]

# Per1

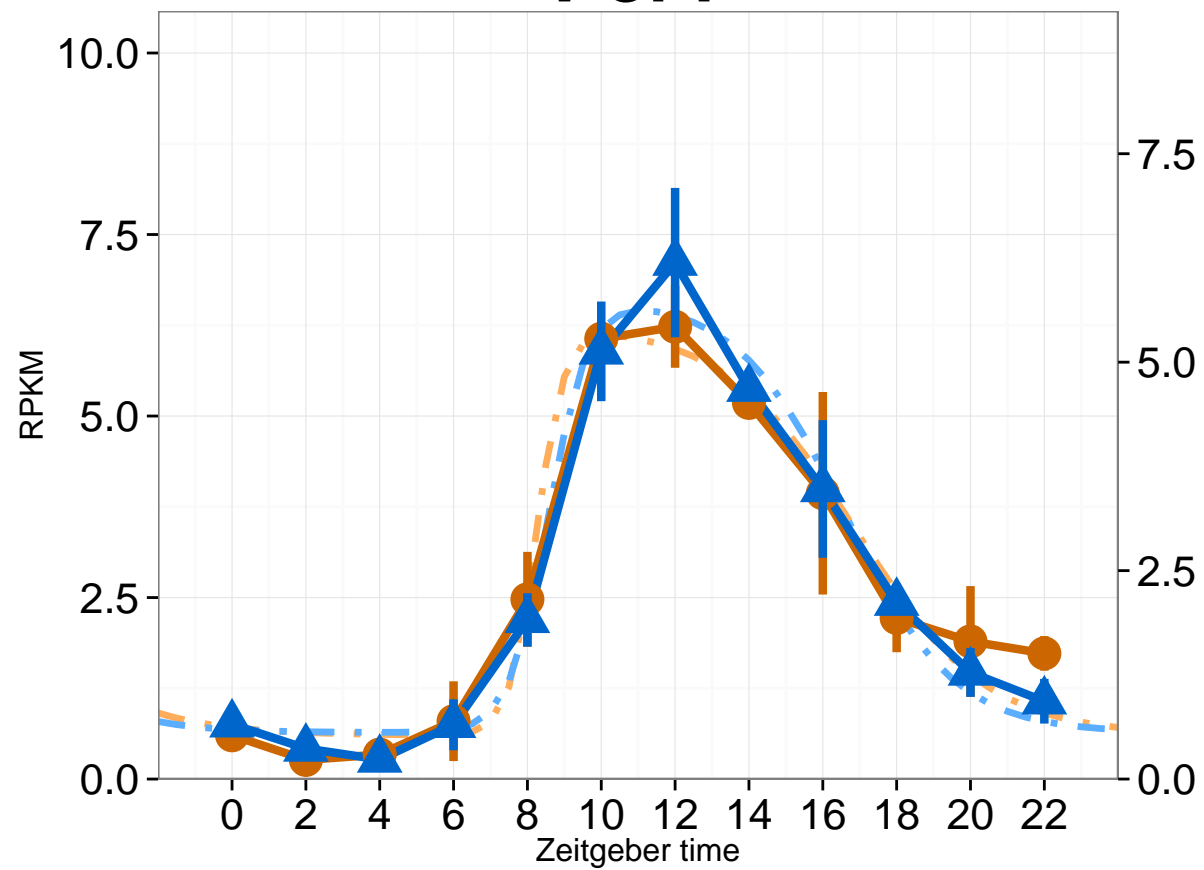

# Per1

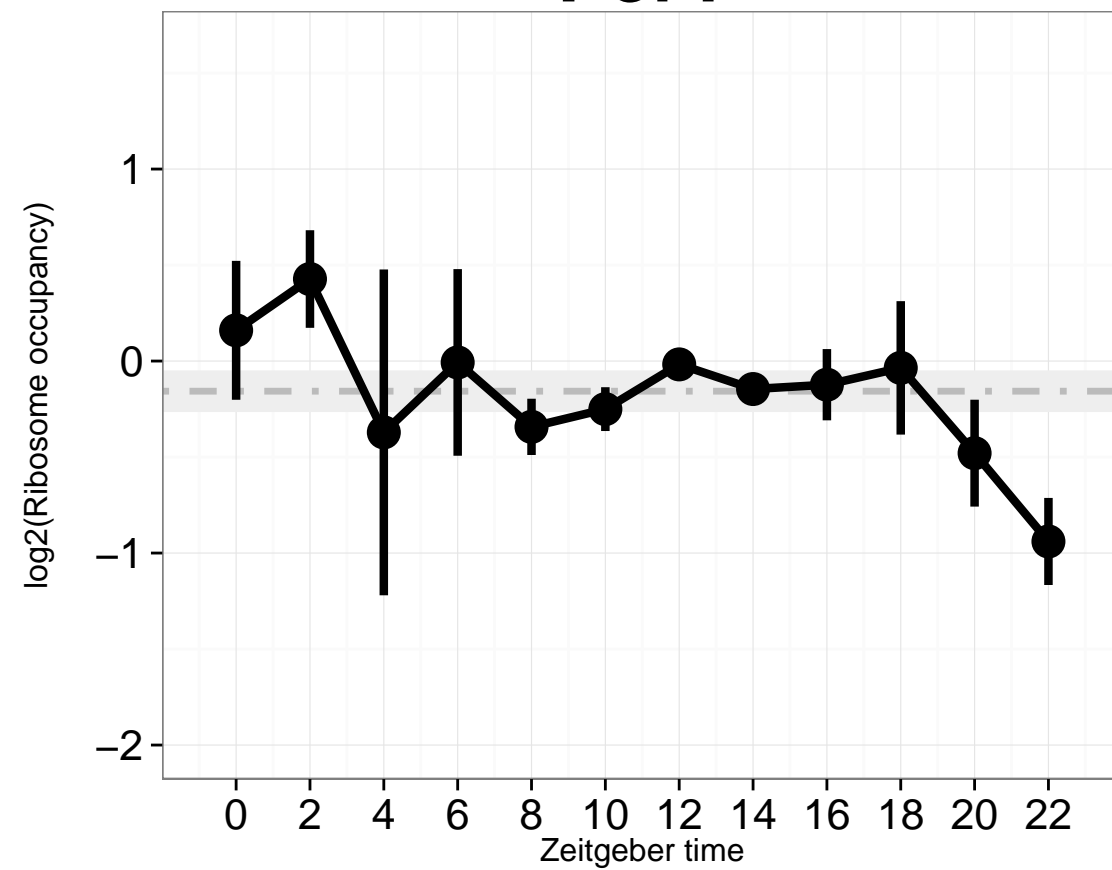

Supplement: SuppDataset_1.zip [file Per1_set_D.pdf › Supplemental Dataset 1/D-mRNA_rhythm_translation_rhyth/Per1_set_D.pdf]

# Per2

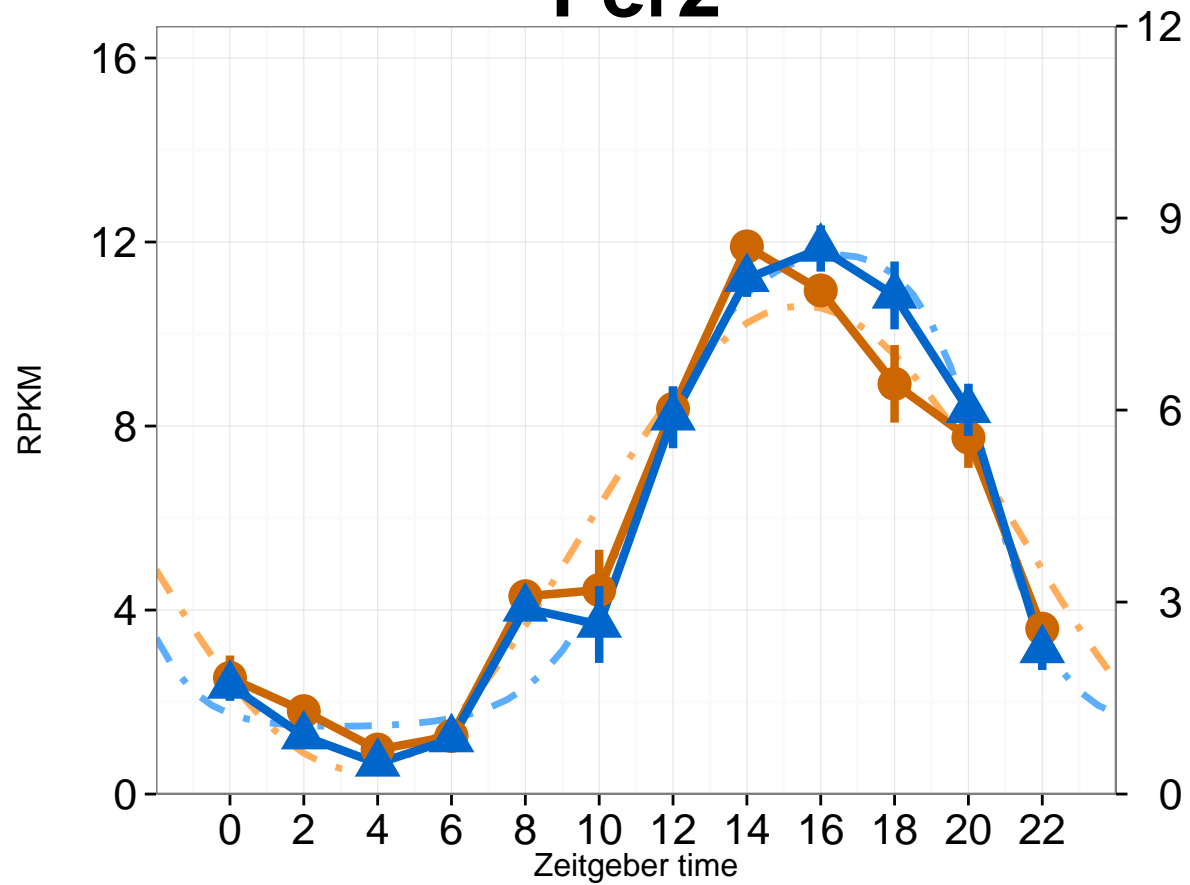

# Per2

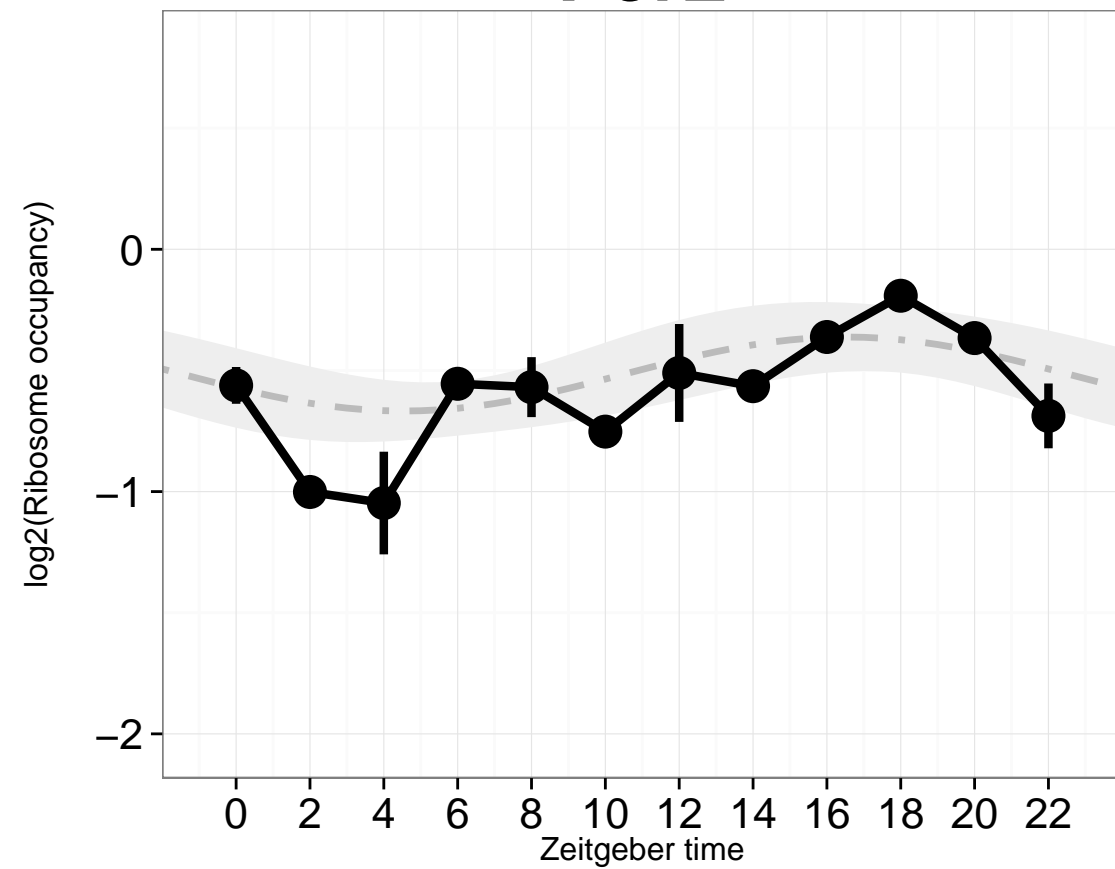

Supplement: SuppDataset_1.zip [file Per2_set_D.pdf › Supplemental Dataset 1/D-mRNA_rhythm_translation_rhyth/Per2_set_D.pdf]

## Per3

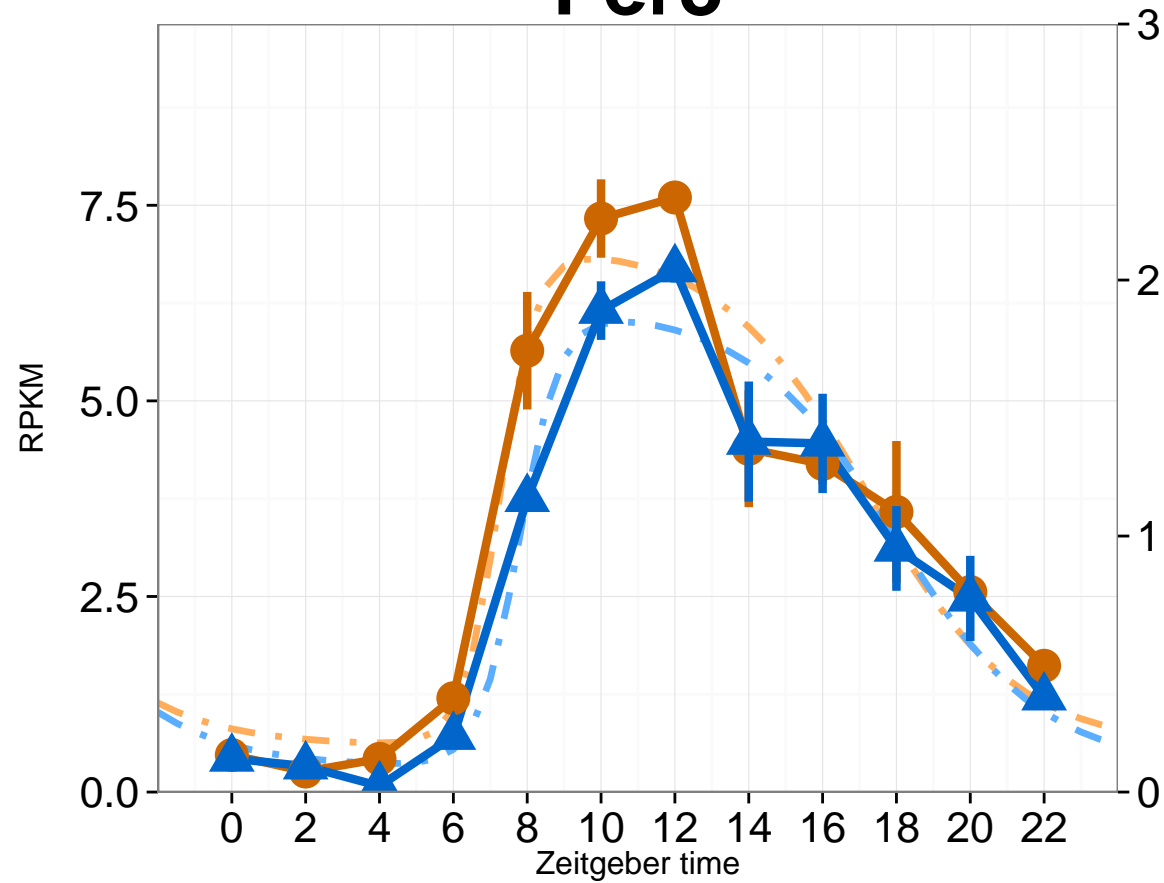

## Per3

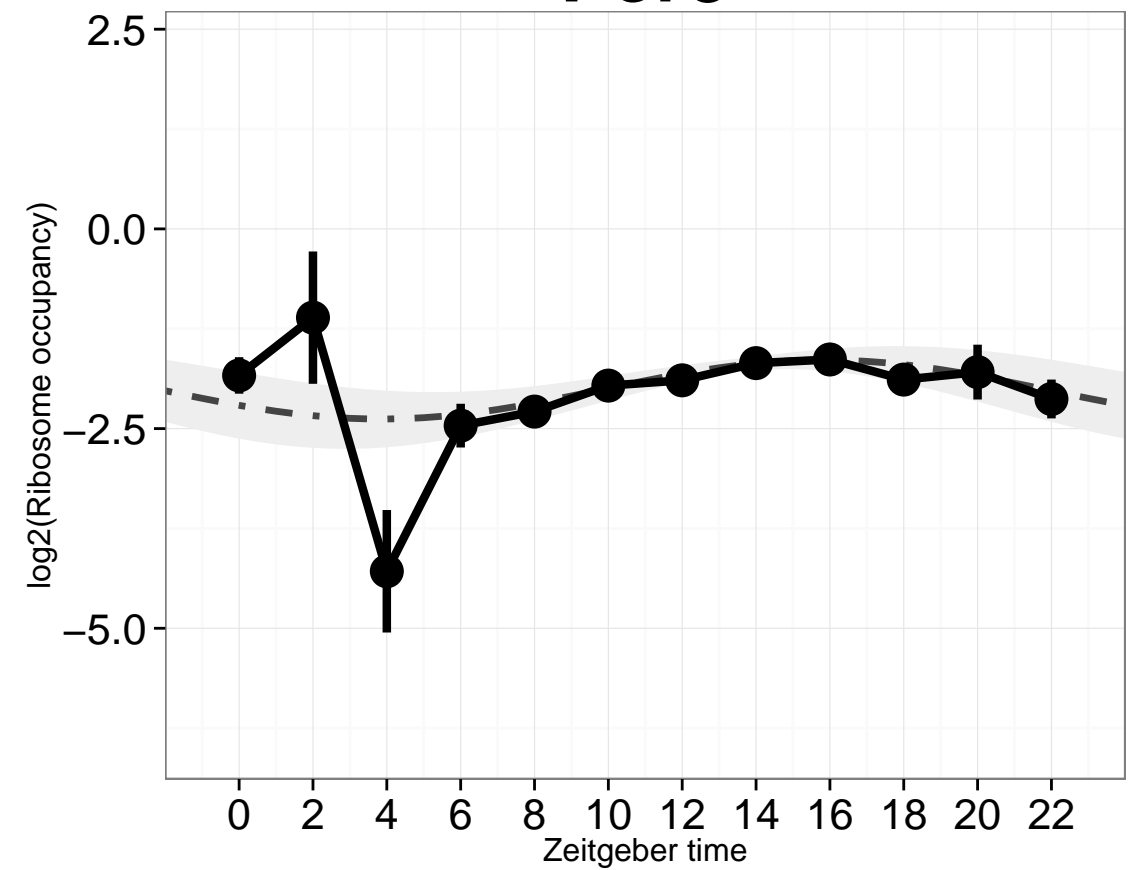

Supplement: SuppDataset_1.zip [file Per3_set_D.pdf › Supplemental Dataset 1/D-mRNA_rhythm_translation_rhyth/Per3_set_D.pdf]

# Pex11a

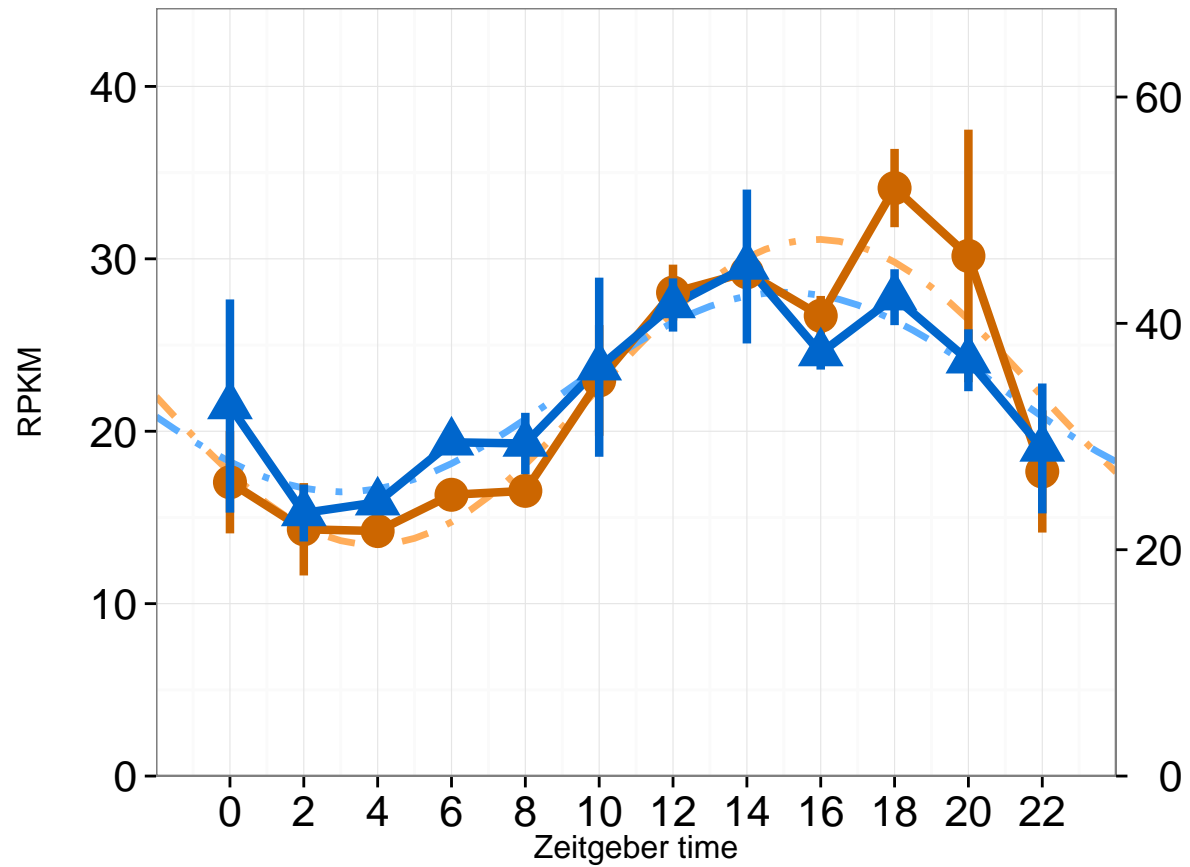

# Pex11a

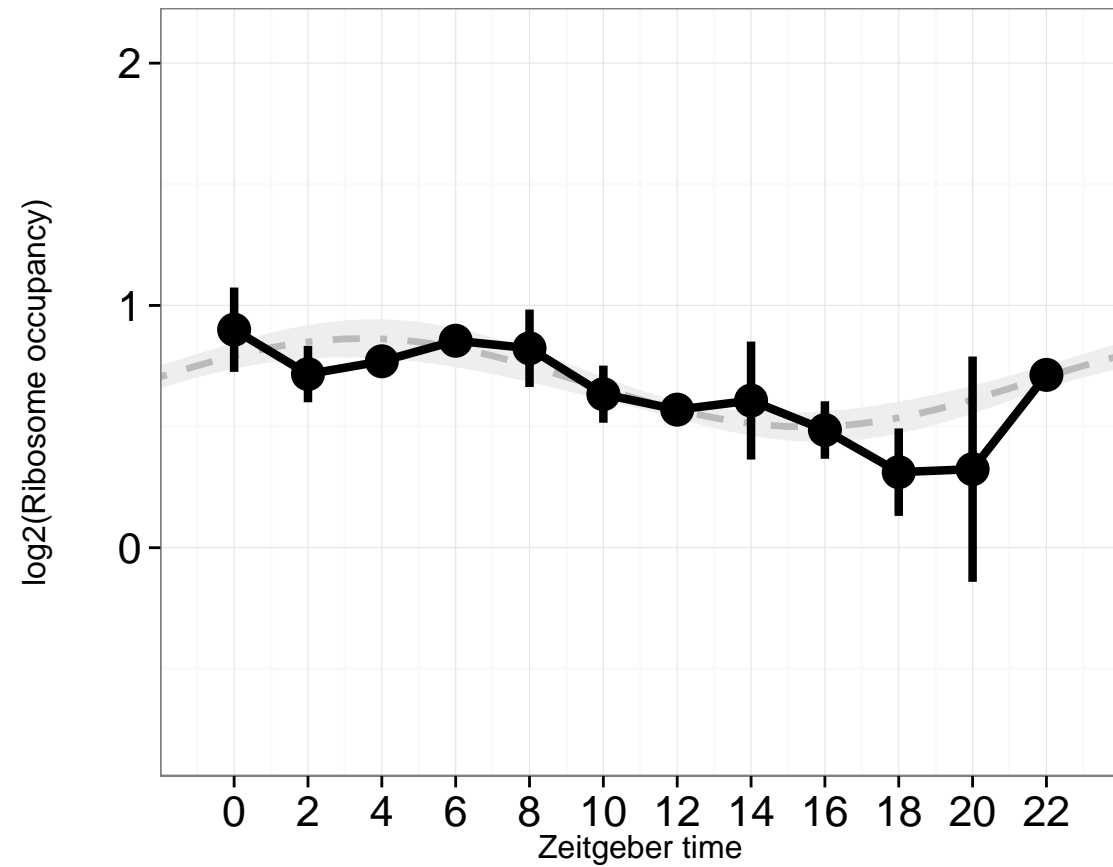

Supplement: SuppDataset_1.zip [file Pex11a_set_D.pdf › Supplemental Dataset 1/D-mRNA_rhythm_translation_rhyth/Pex11a_set_D.pdf]

# Pfkfb1

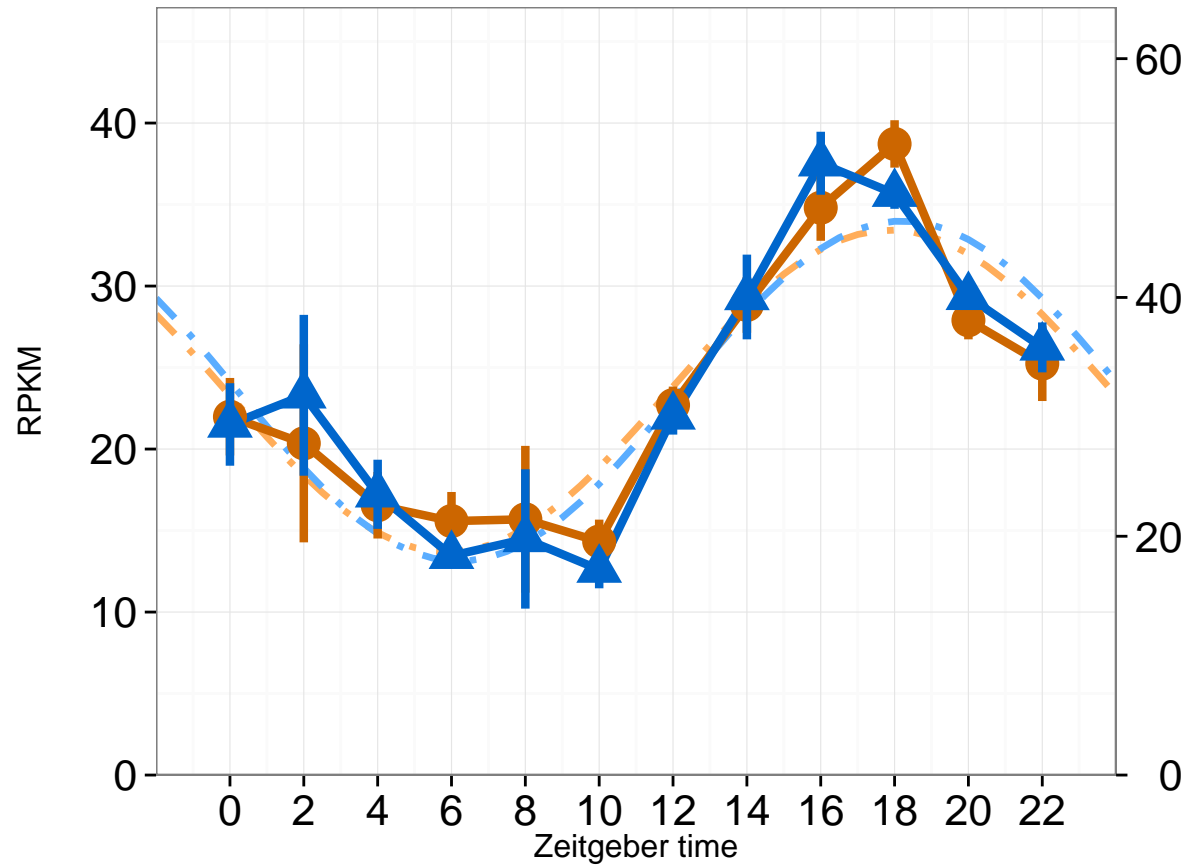

# Pfkfb1

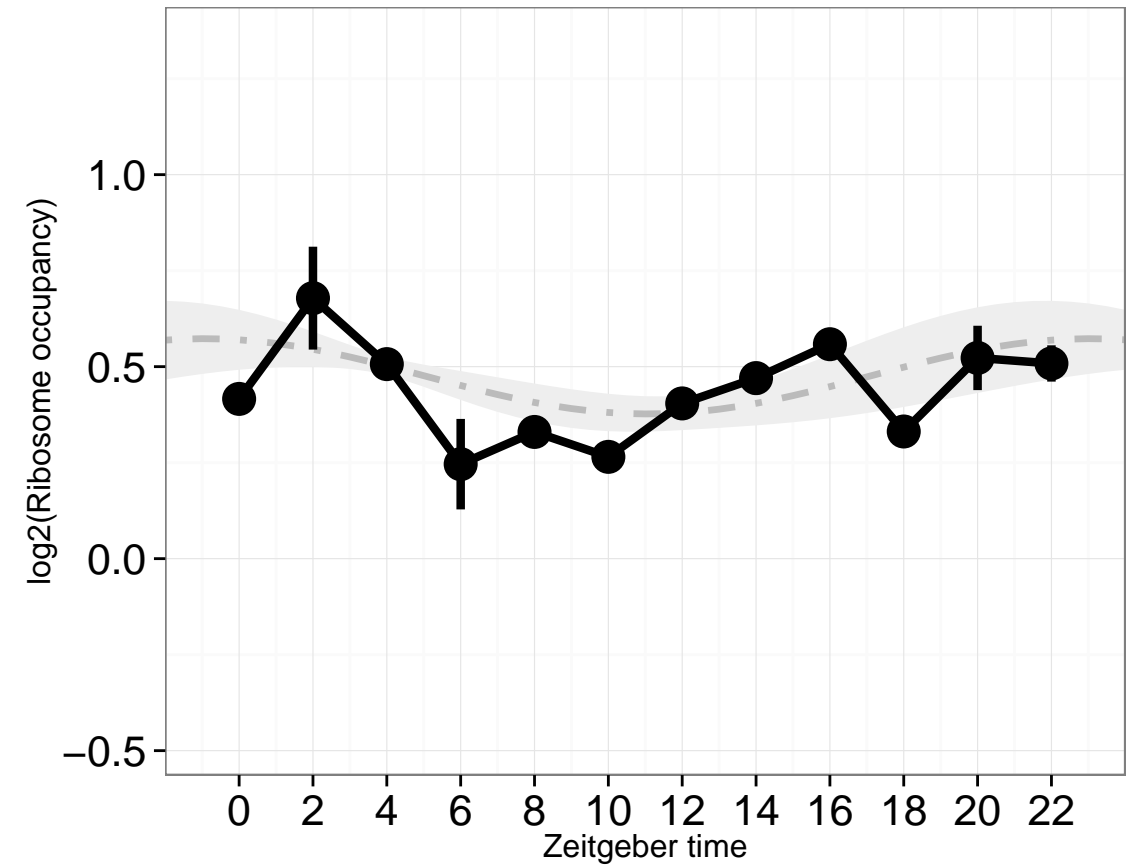

Supplement: SuppDataset_1.zip [file Pfkfb1_set_D.pdf › Supplemental Dataset 1/D-mRNA_rhythm_translation_rhyth/Pfkfb1_set_D.pdf]

# Pfkfb2

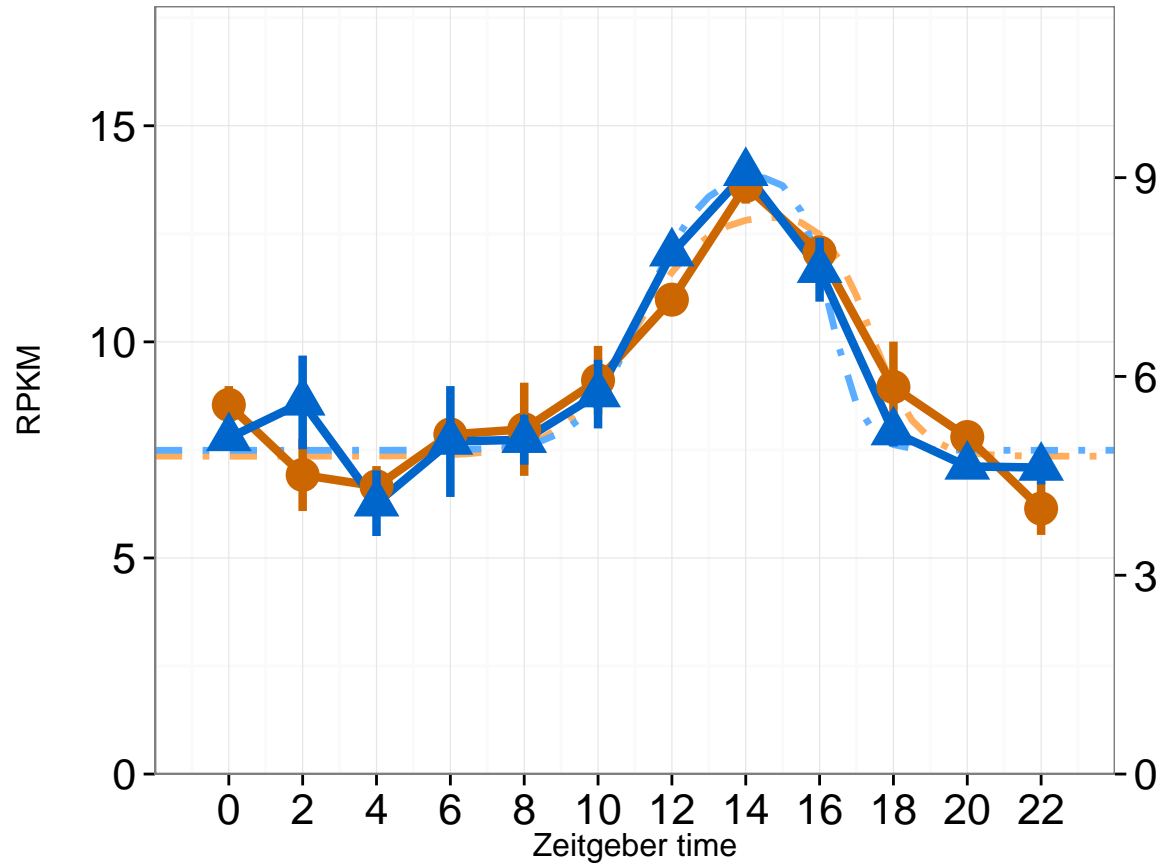

# Pfkfb2

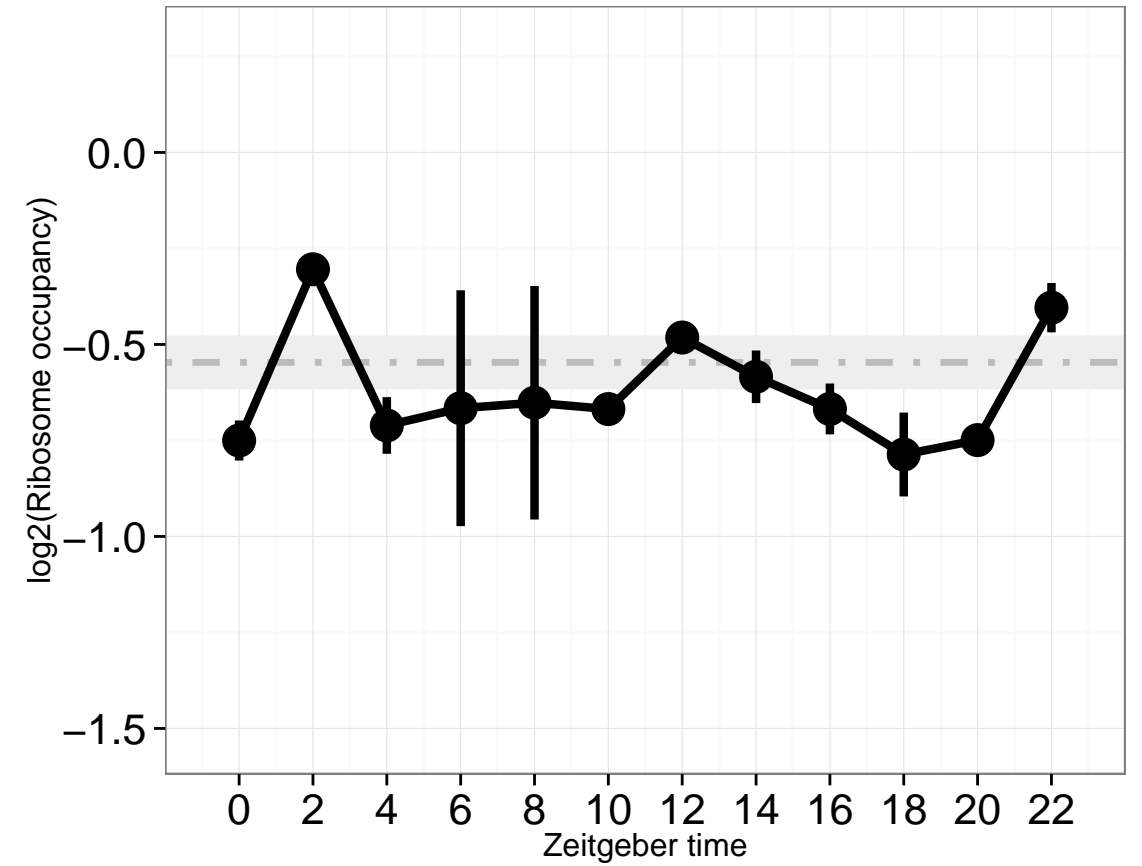

Supplement: SuppDataset_1.zip [file Pfkfb2_set_D.pdf › Supplemental Dataset 1/D-mRNA_rhythm_translation_rhyth/Pfkfb2_set_D.pdf]

# Pfkfb3

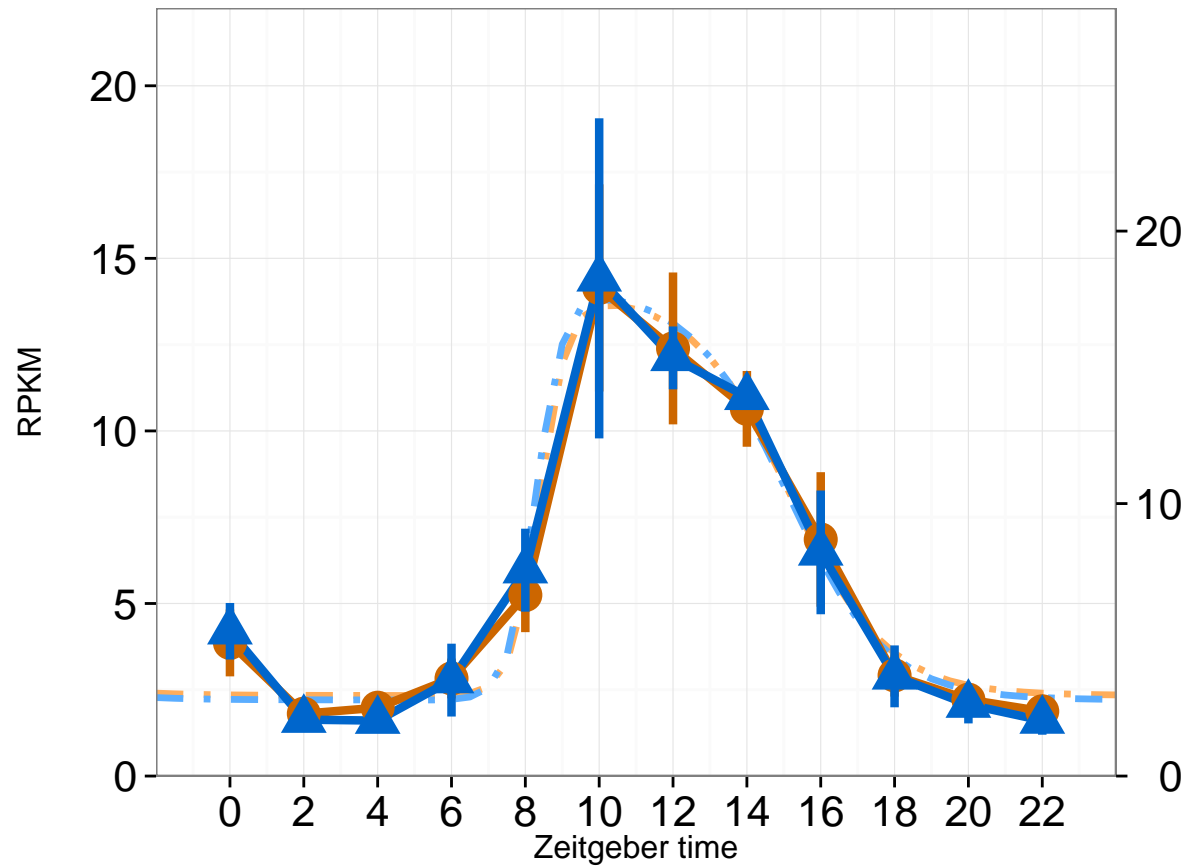

# Pfkfb3

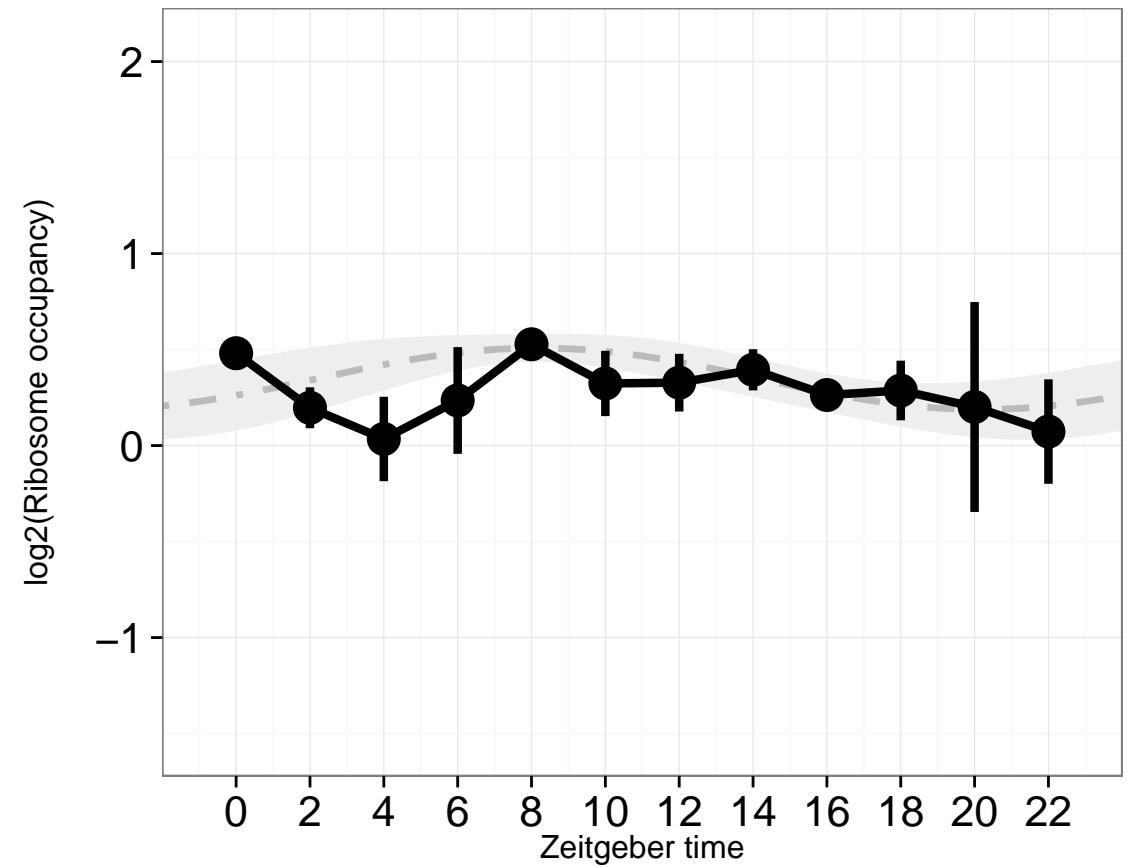

Supplement: SuppDataset_1.zip [file Pfkfb3_set_D.pdf › Supplemental Dataset 1/D-mRNA_rhythm_translation_rhyth/Pfkfb3_set_D.pdf]

## Pfkl

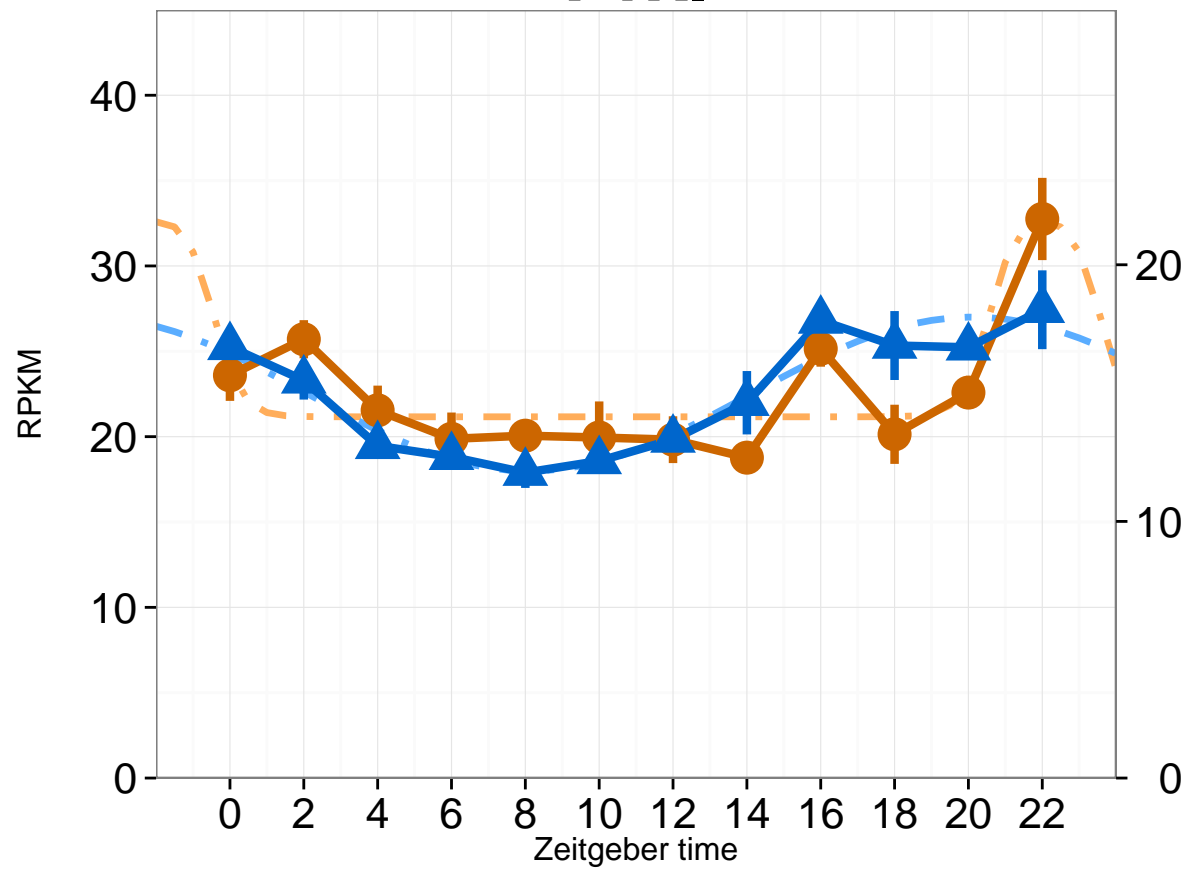

## Pfkl

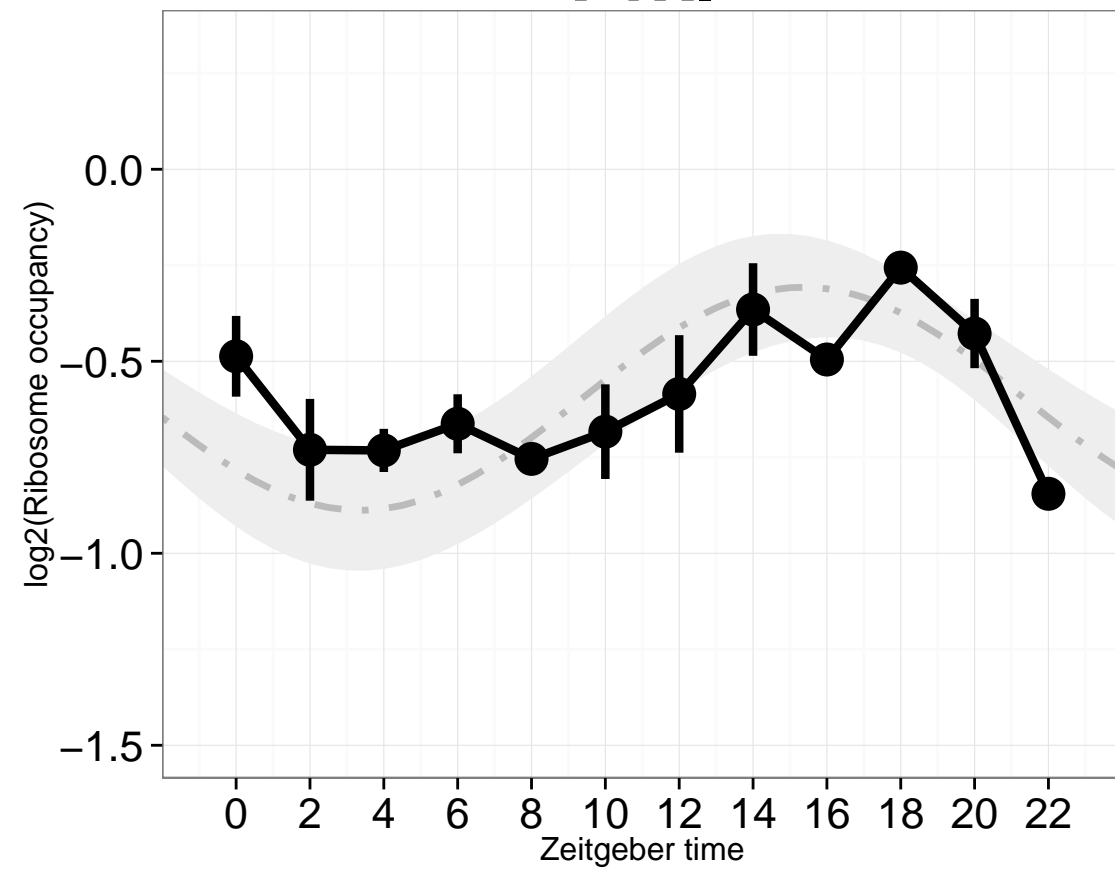

Supplement: SuppDataset_1.zip [file Pfkl_set_D.pdf › Supplemental Dataset 1/D-mRNA_rhythm_translation_rhyth/Pfkl_set_D.pdf]

# Pfkp

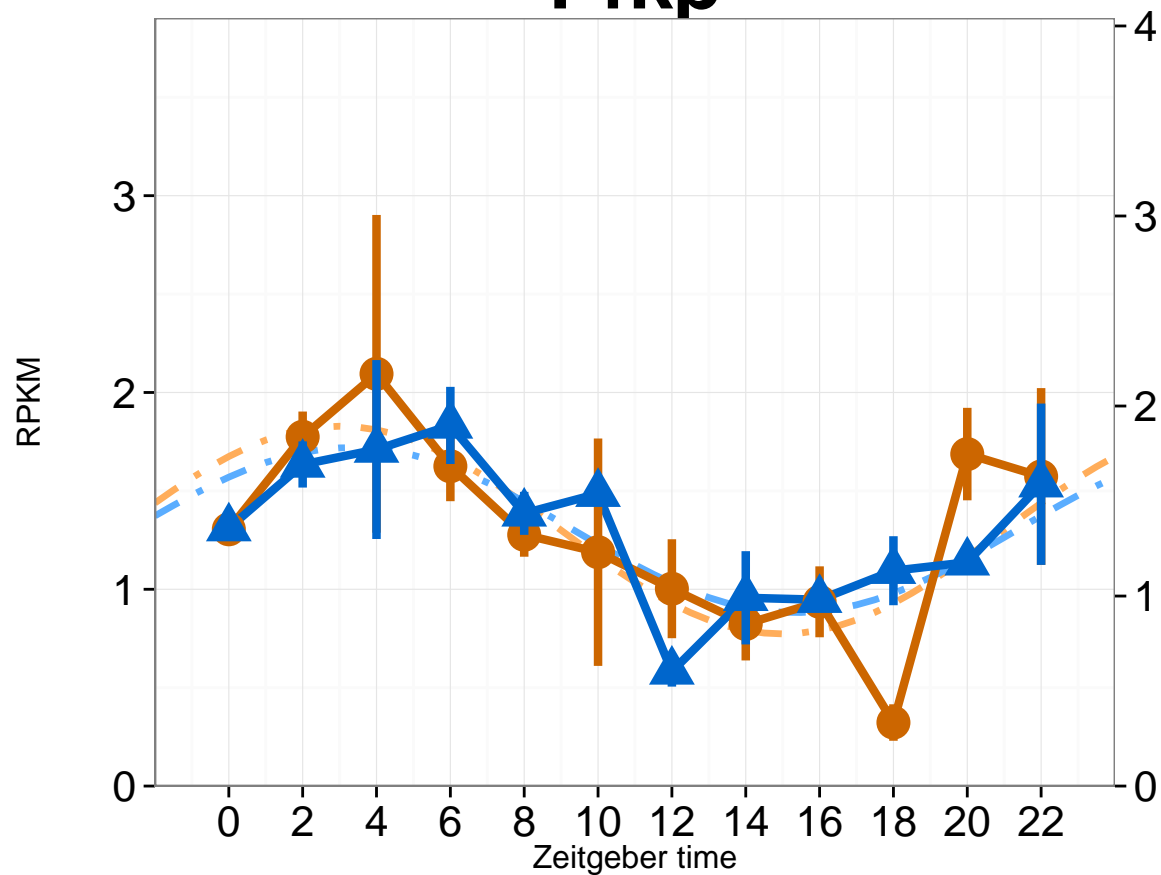

# Pfkp

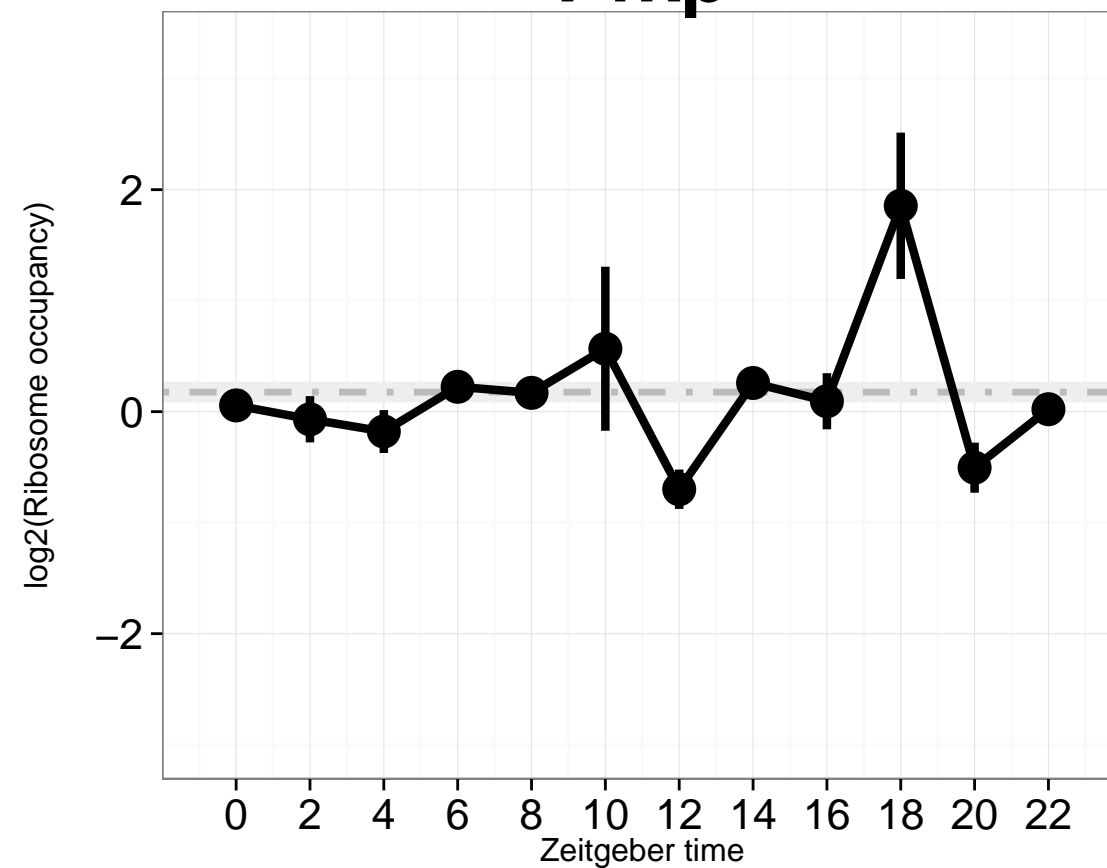

Supplement: SuppDataset_1.zip [file Pfkp_set_D.pdf › Supplemental Dataset 1/D-mRNA_rhythm_translation_rhyth/Pfkp_set_D.pdf]

# Pgap1

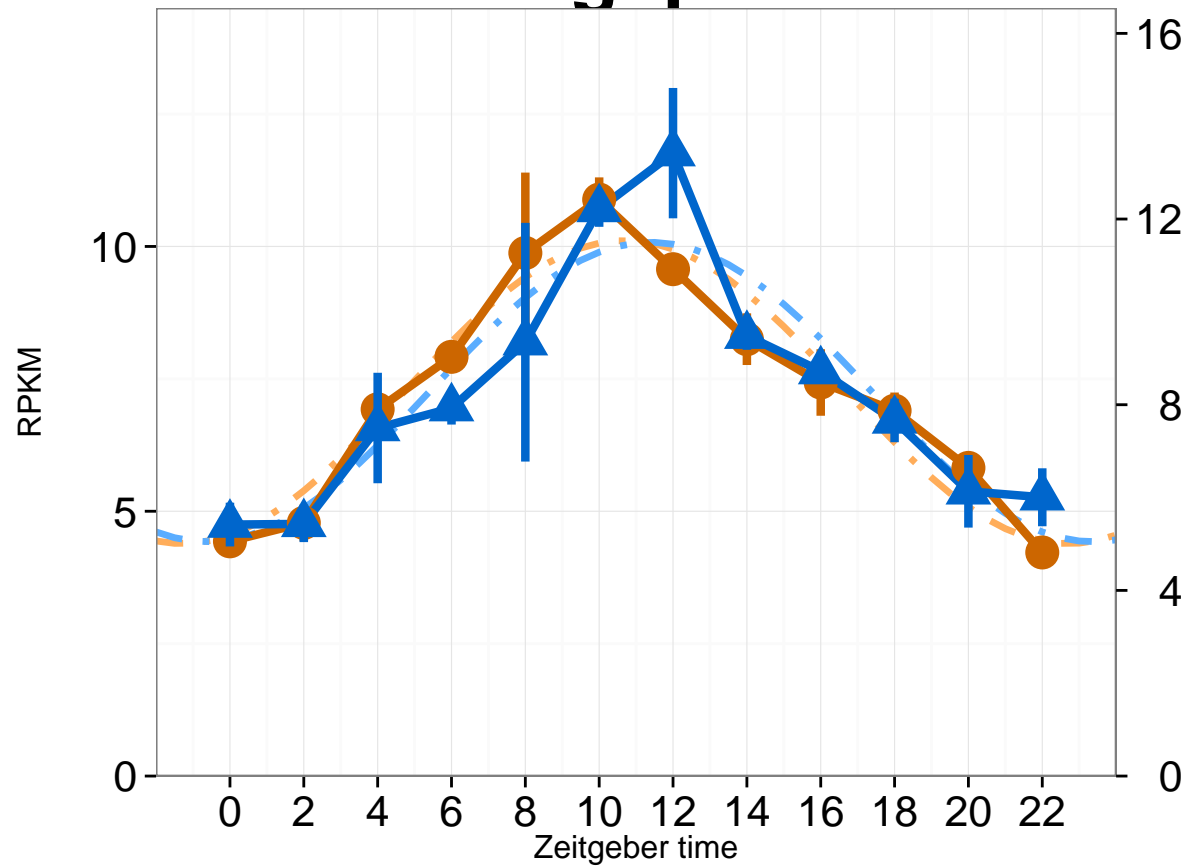

# Pgap1

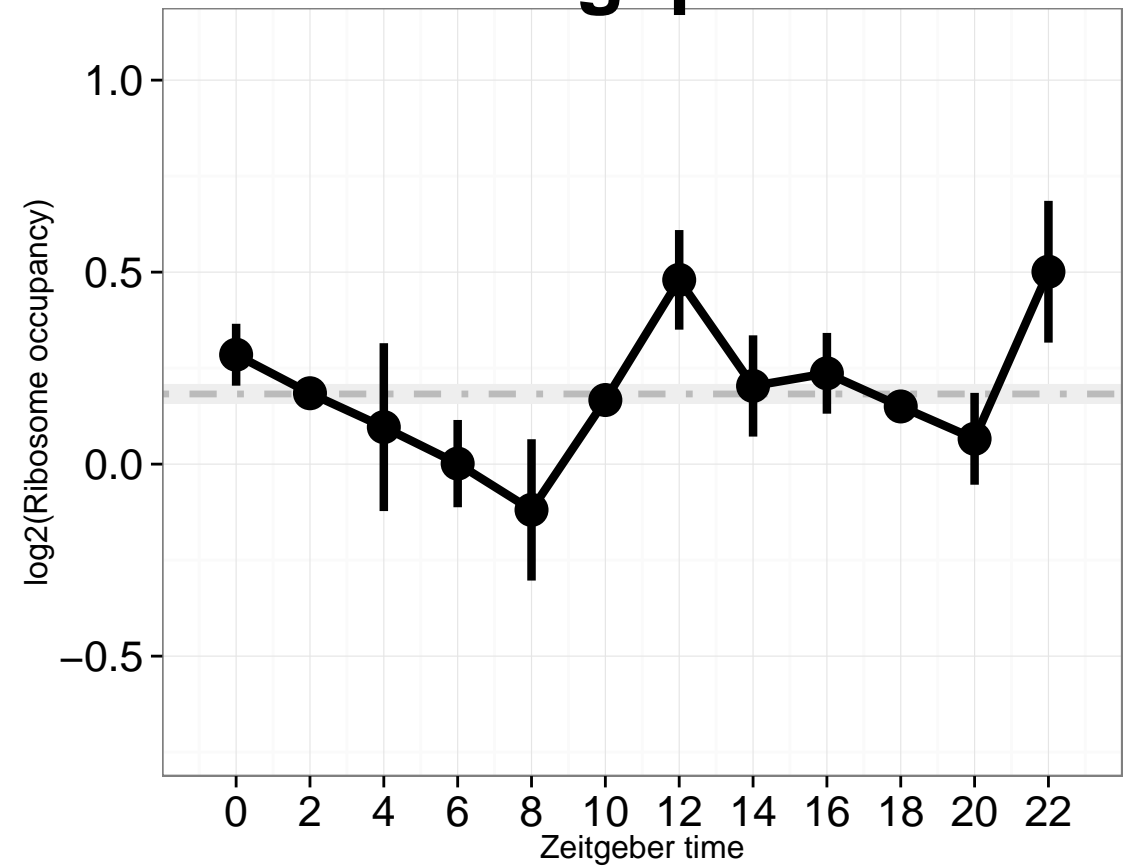

Supplement: SuppDataset_1.zip [file Pgap1_set_D.pdf › Supplemental Dataset 1/D-mRNA_rhythm_translation_rhyth/Pgap1_set_D.pdf]

# Pgm2l1

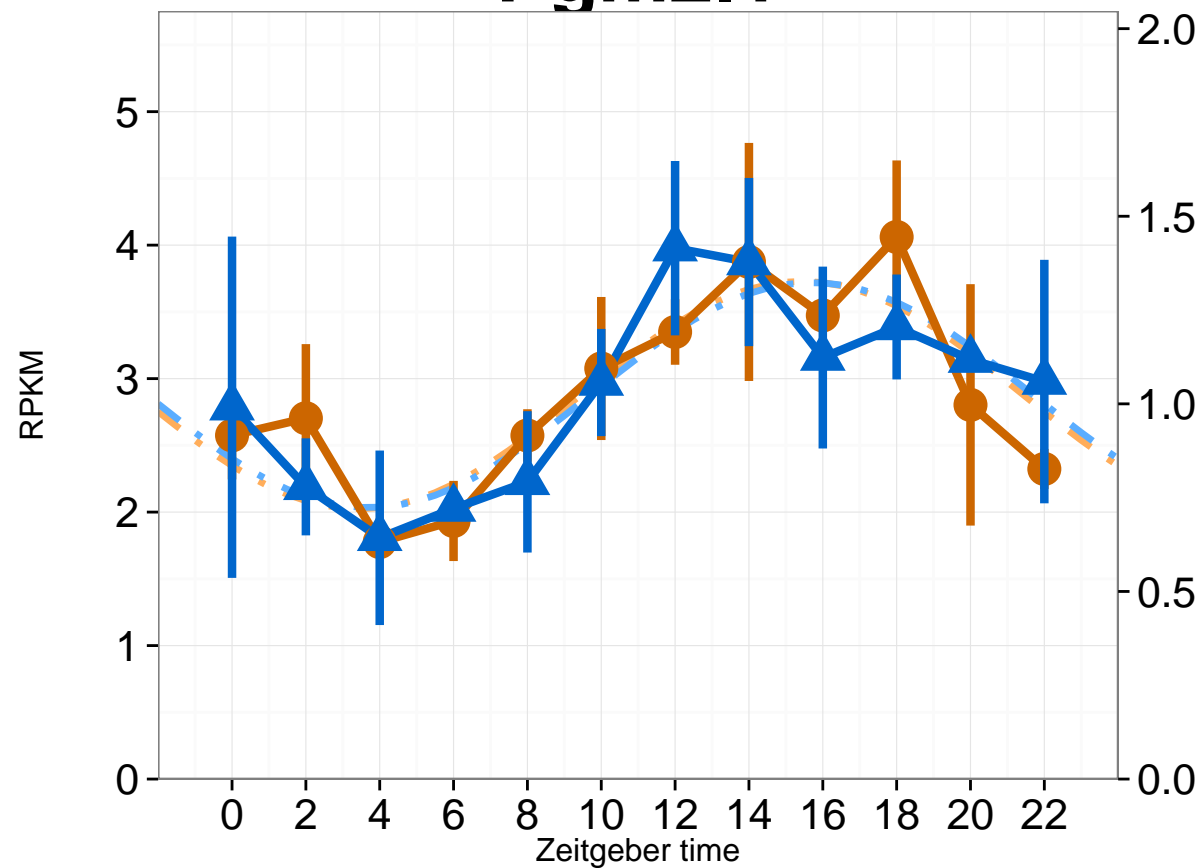

# Pgm2l1

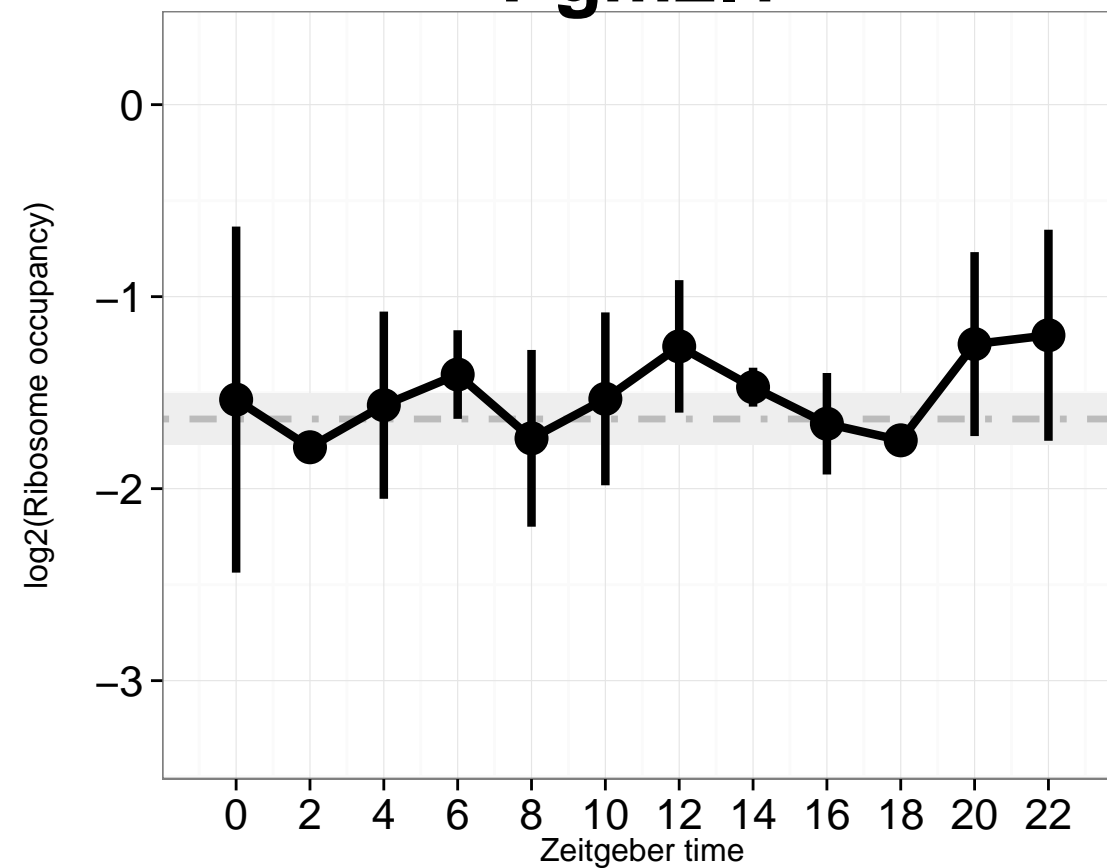

Supplement: SuppDataset_1.zip [file Pgm2l1_set_D.pdf › Supplemental Dataset 1/D-mRNA_rhythm_translation_rhyth/Pgm2l1_set_D.pdf]

# Phf17

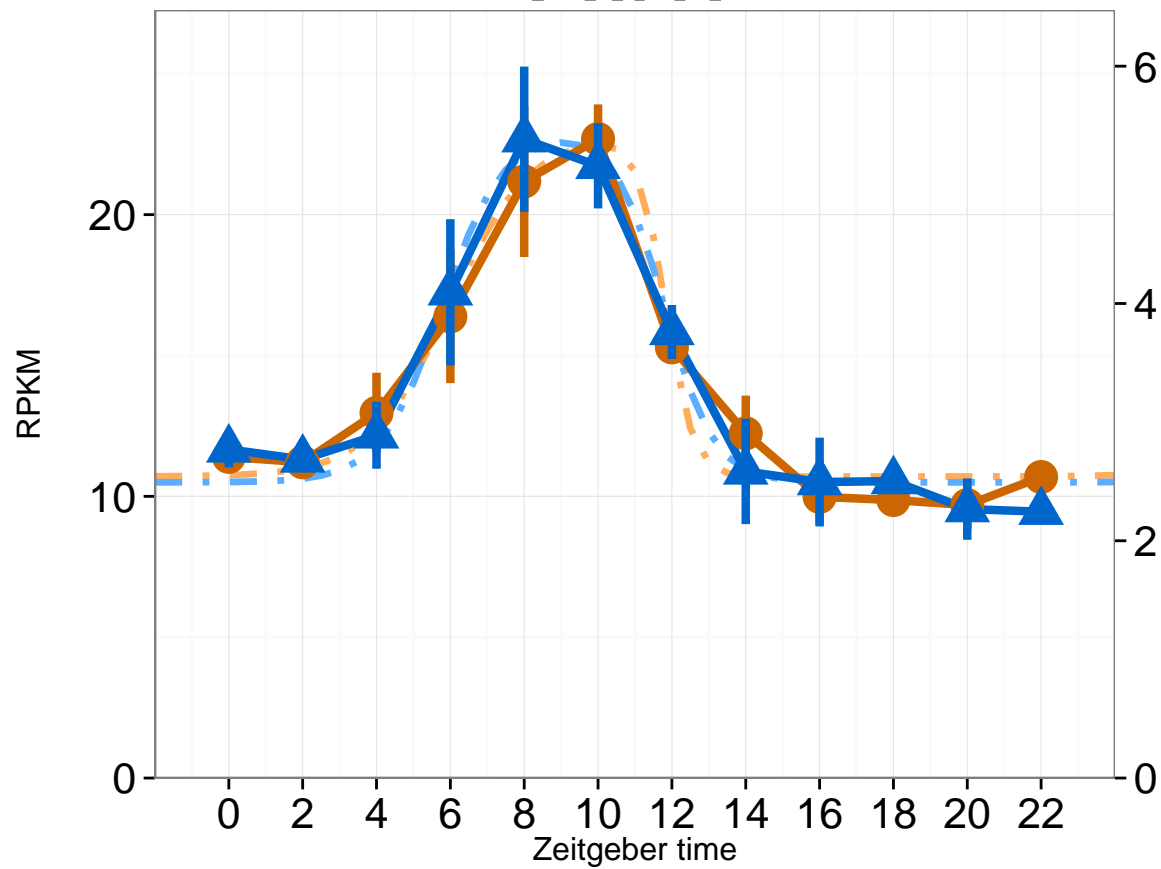

# Phf17

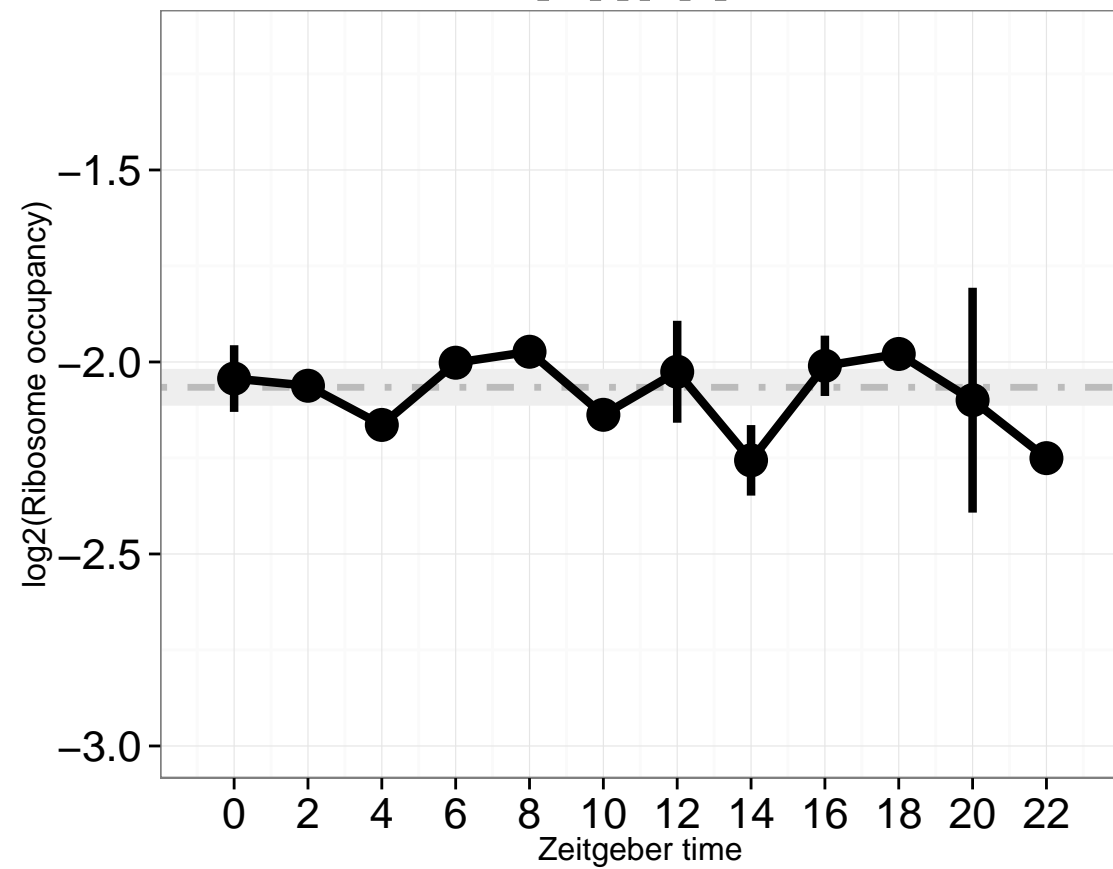

Supplement: SuppDataset_1.zip [file Phf17_set_D.pdf › Supplemental Dataset 1/D-mRNA_rhythm_translation_rhyth/Phf17_set_D.pdf]

## Phldb3

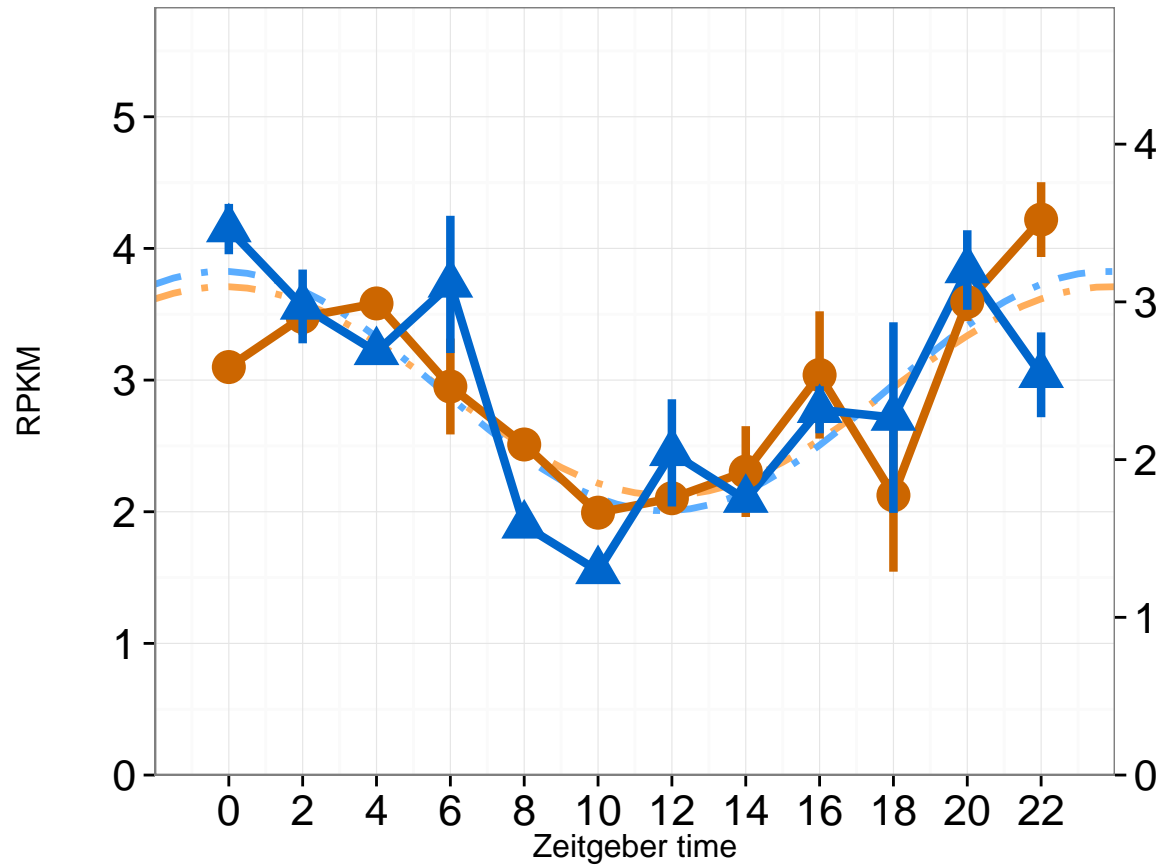

## Phldb3

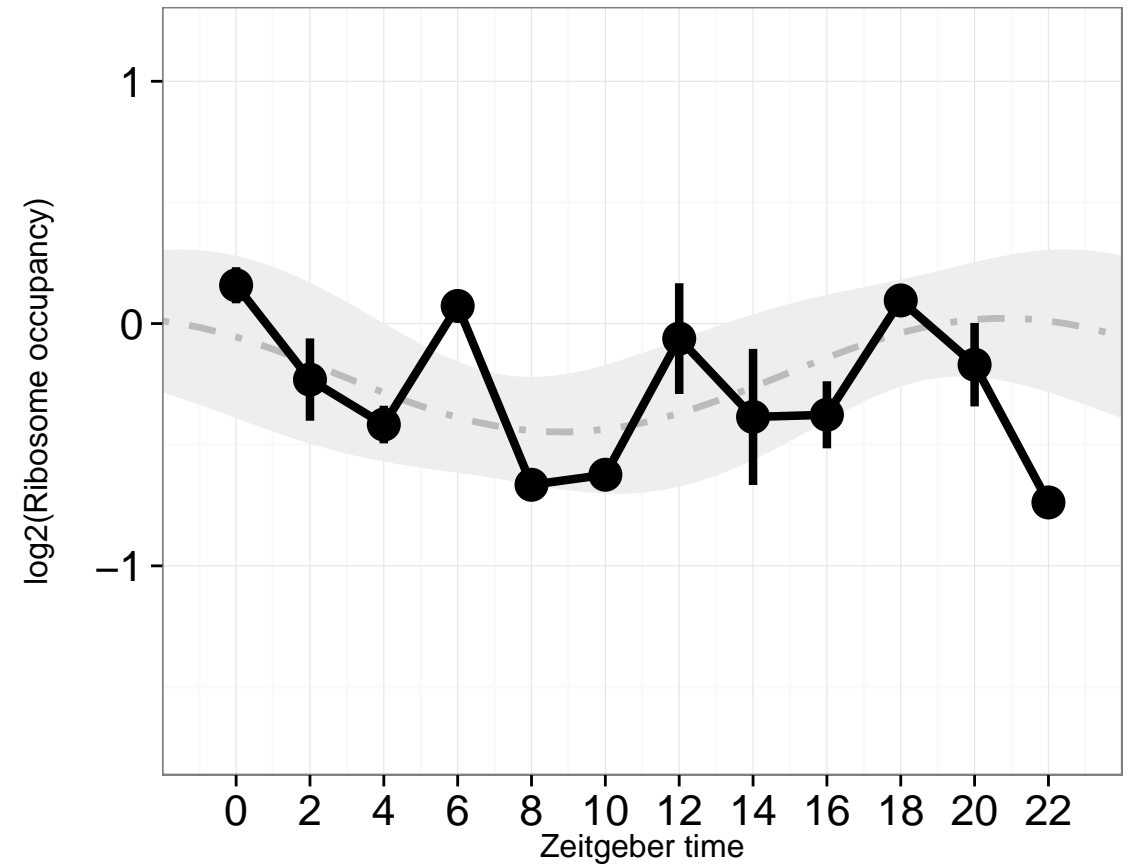

Supplement: SuppDataset_1.zip [file Phldb3_set_D.pdf › Supplemental Dataset 1/D-mRNA_rhythm_translation_rhyth/Phldb3_set_D.pdf]

# Phlpp1

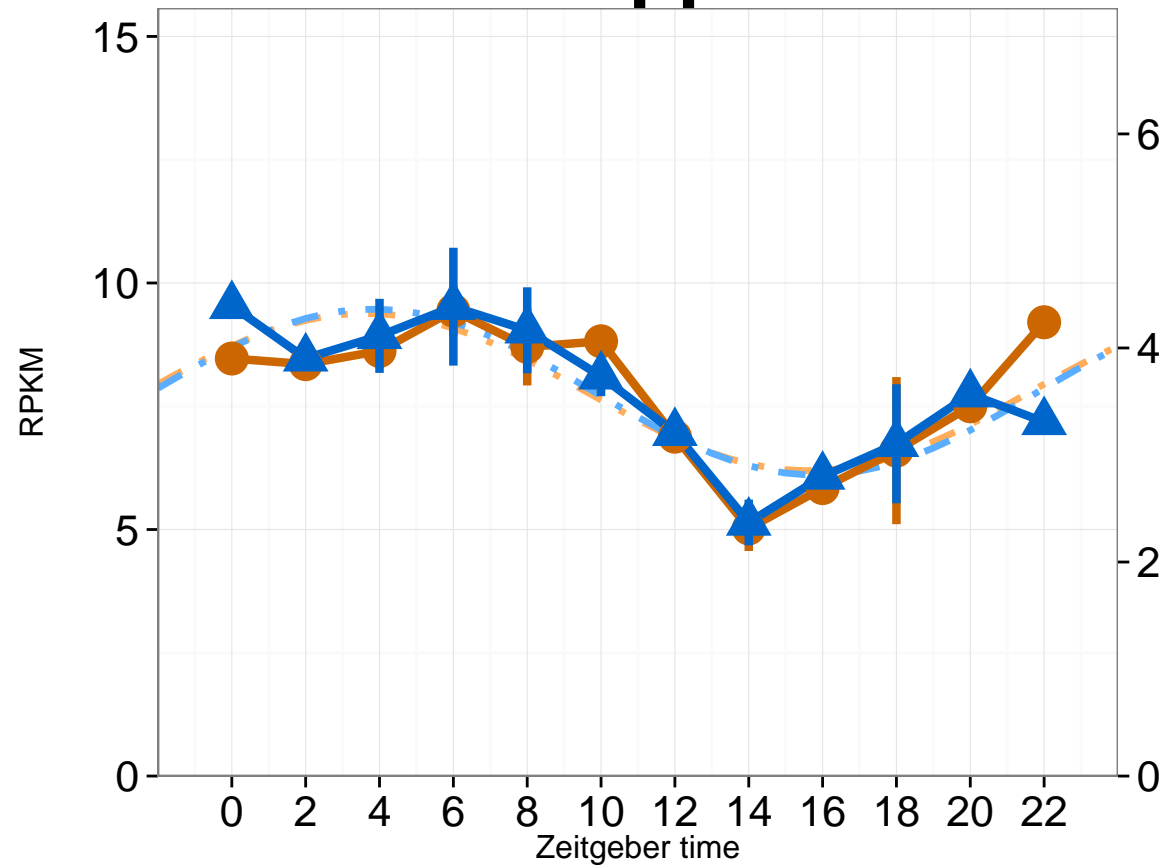

# Phlpp1

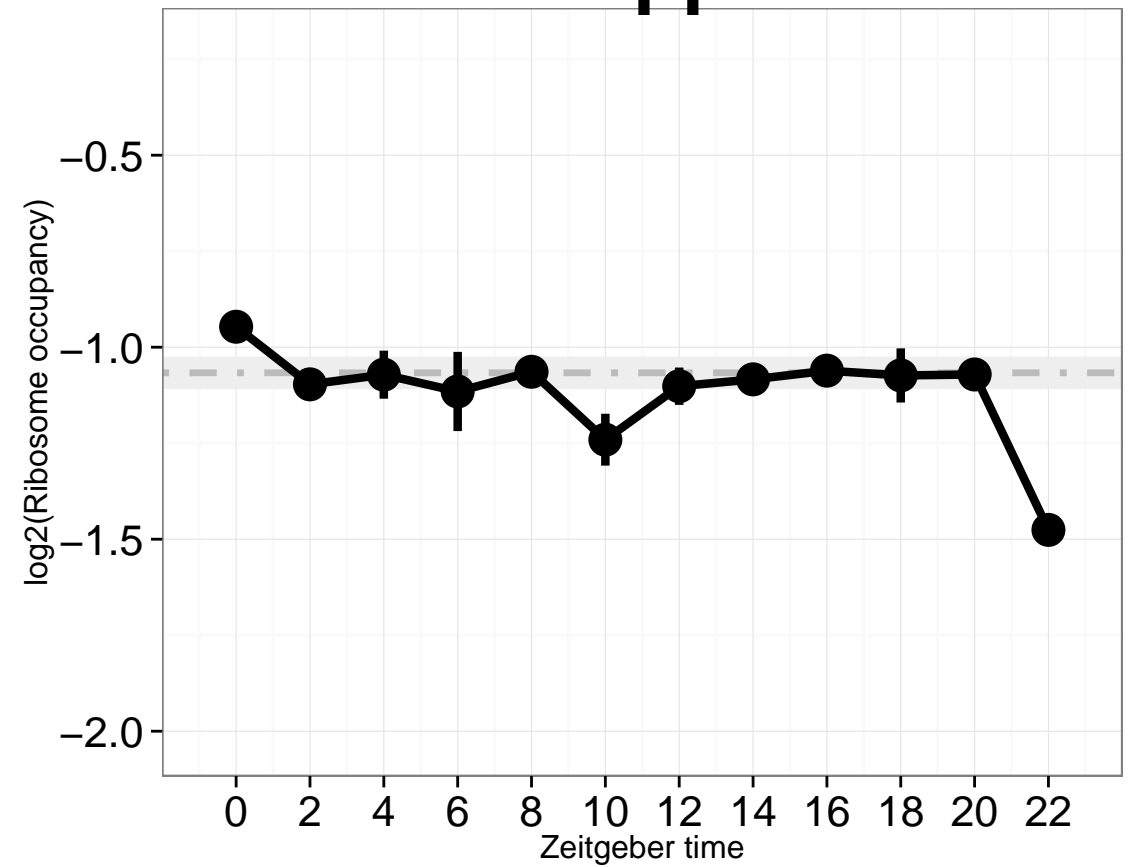

Supplement: SuppDataset_1.zip [file Phlpp1_set_D.pdf › Supplemental Dataset 1/D-mRNA_rhythm_translation_rhyth/Phlpp1_set_D.pdf]

## Pid1

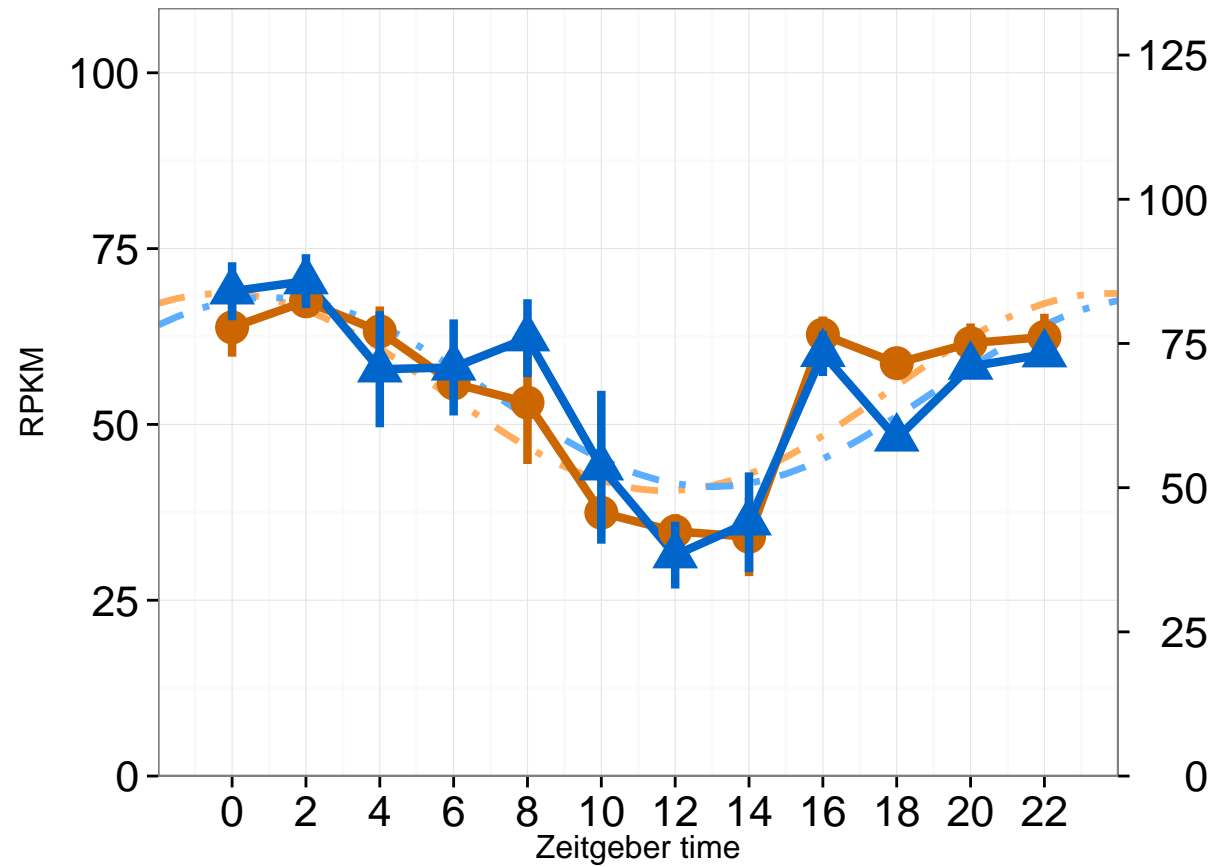

## Pid1

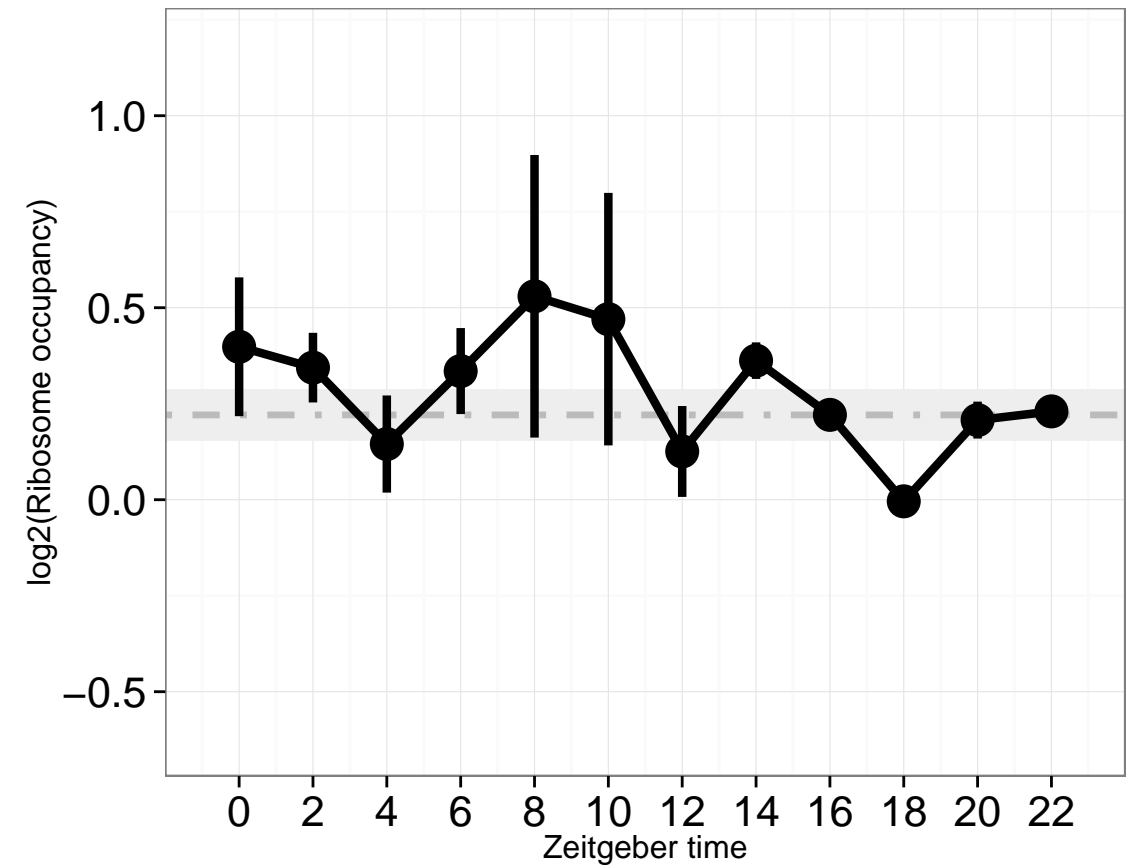

Supplement: SuppDataset_1.zip [file Pid1_set_D.pdf › Supplemental Dataset 1/D-mRNA_rhythm_translation_rhyth/Pid1_set_D.pdf]

## Piezo2

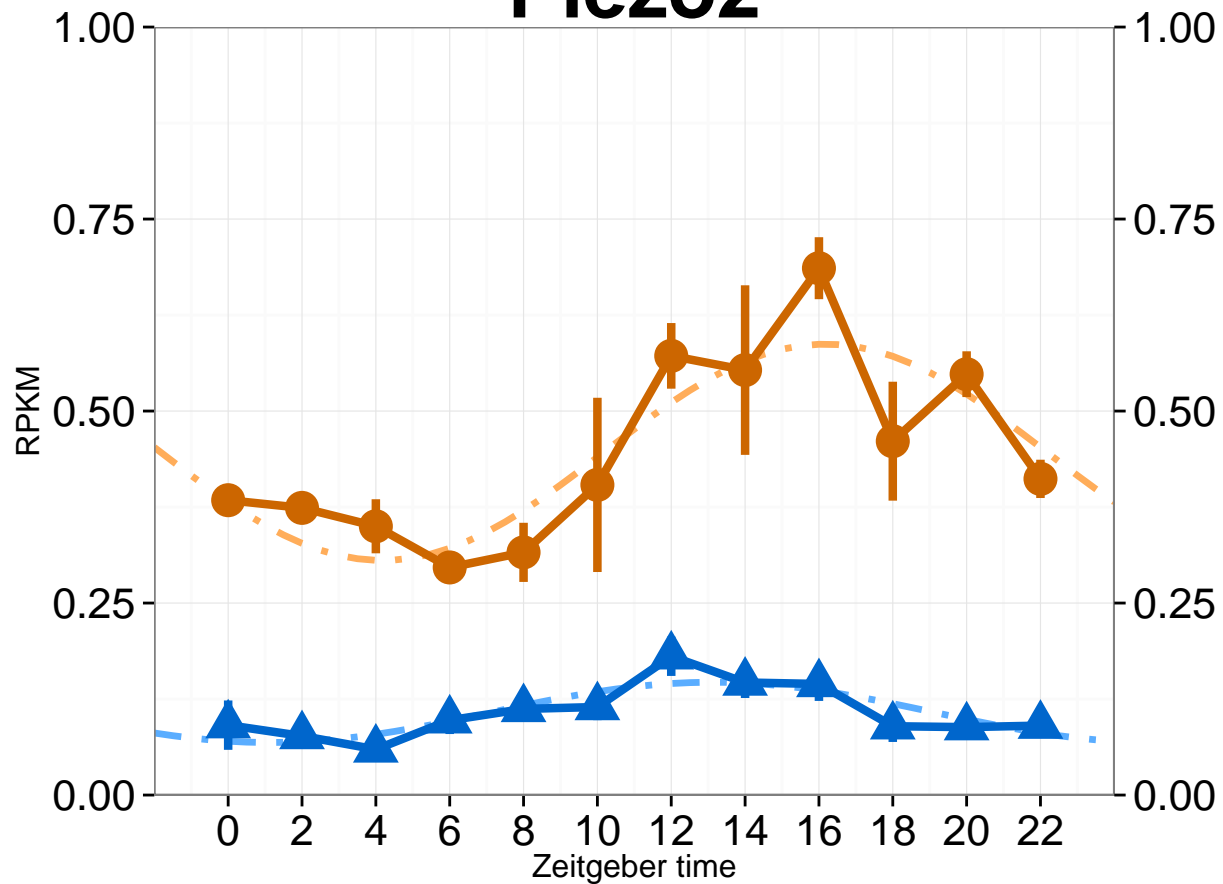

## Piezo2

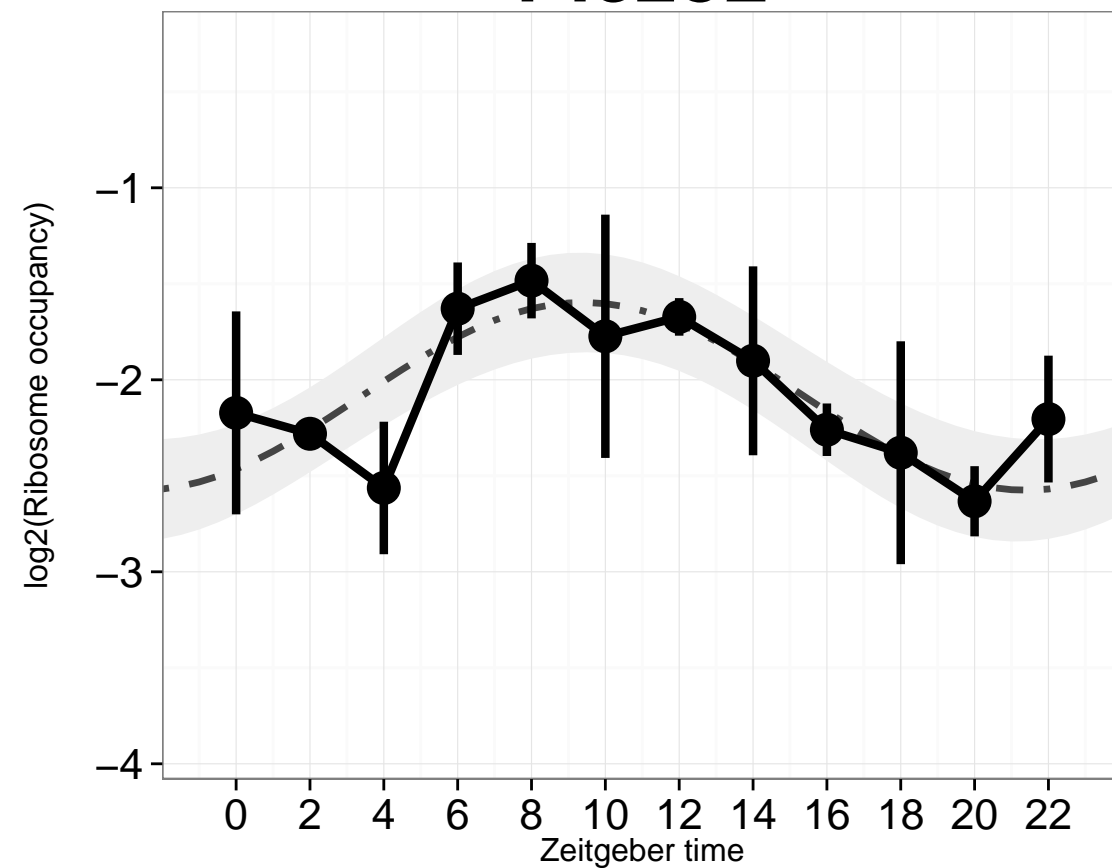

Supplement: SuppDataset_1.zip [file Piezo2_set_D.pdf › Supplemental Dataset 1/D-mRNA_rhythm_translation_rhyth/Piezo2_set_D.pdf]

## Piga

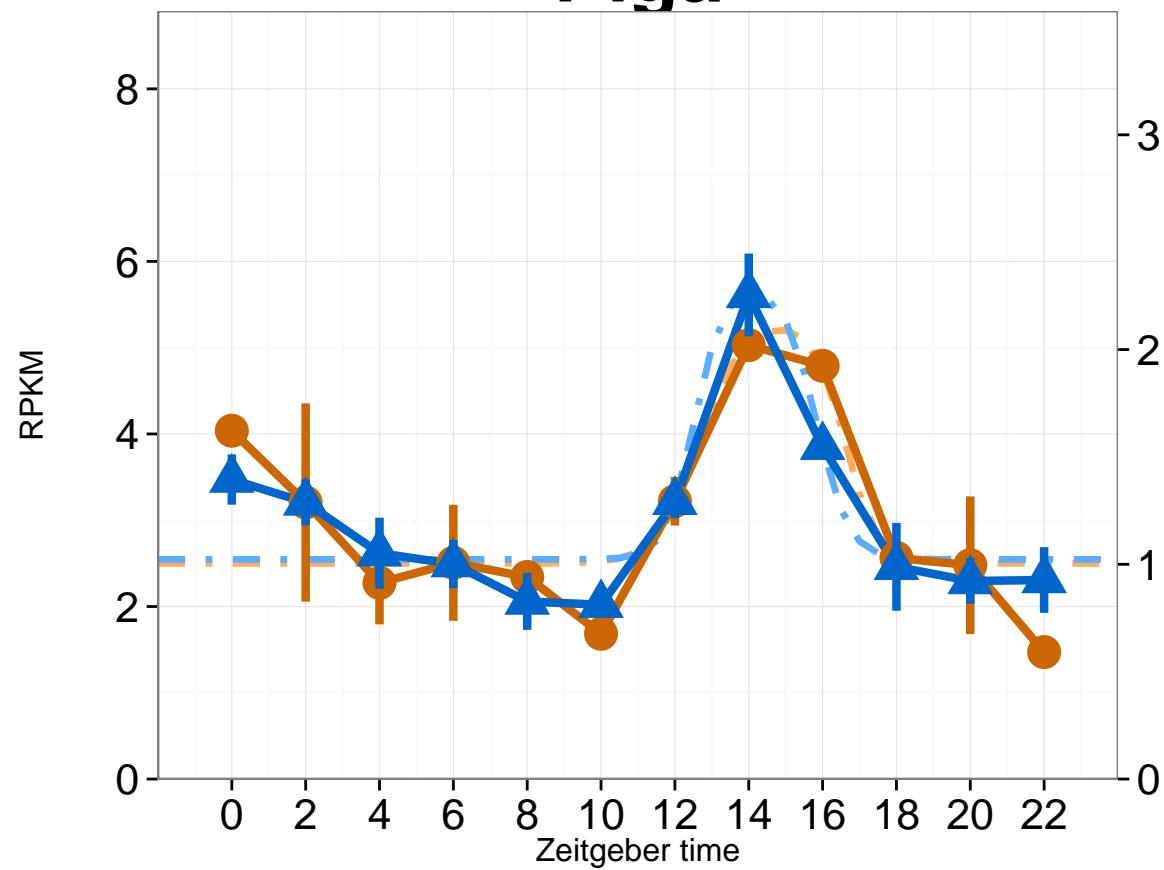

## Piga

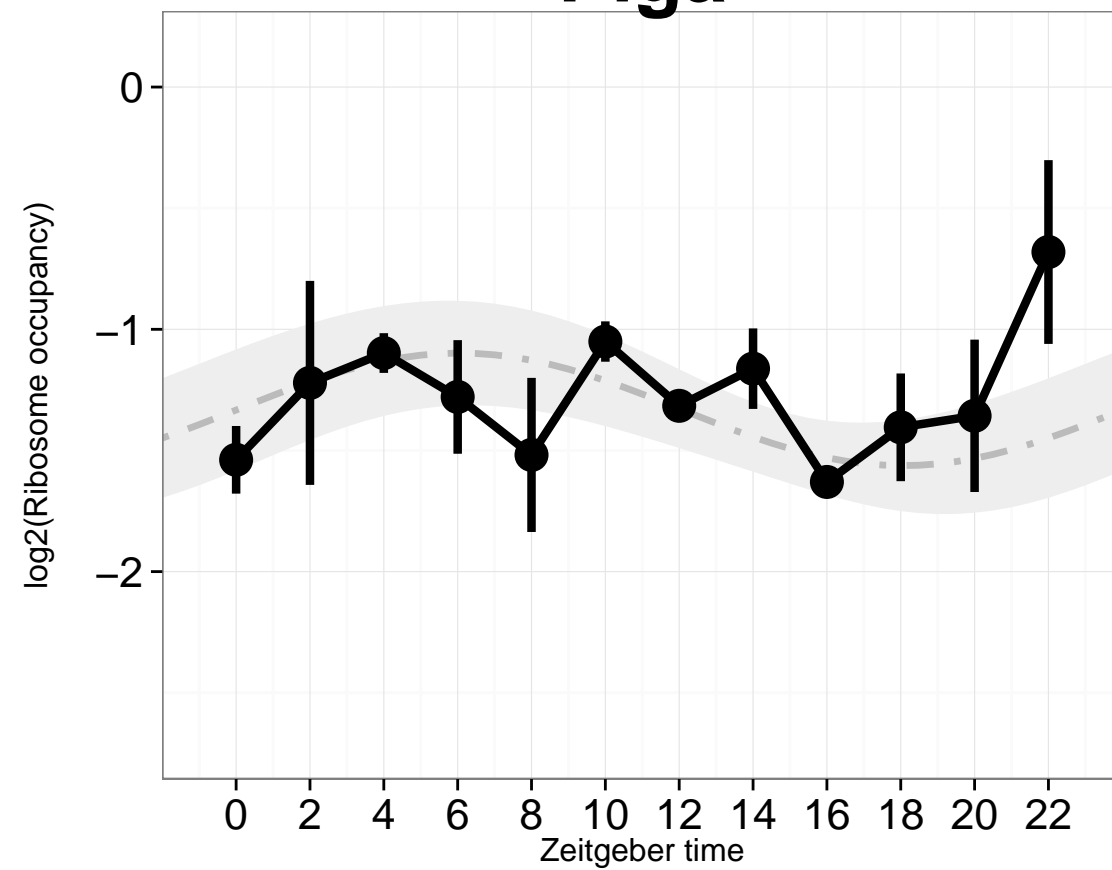

Supplement: SuppDataset_1.zip [file Piga_set_D.pdf › Supplemental Dataset 1/D-mRNA_rhythm_translation_rhyth/Piga_set_D.pdf]

# Pik3ap1

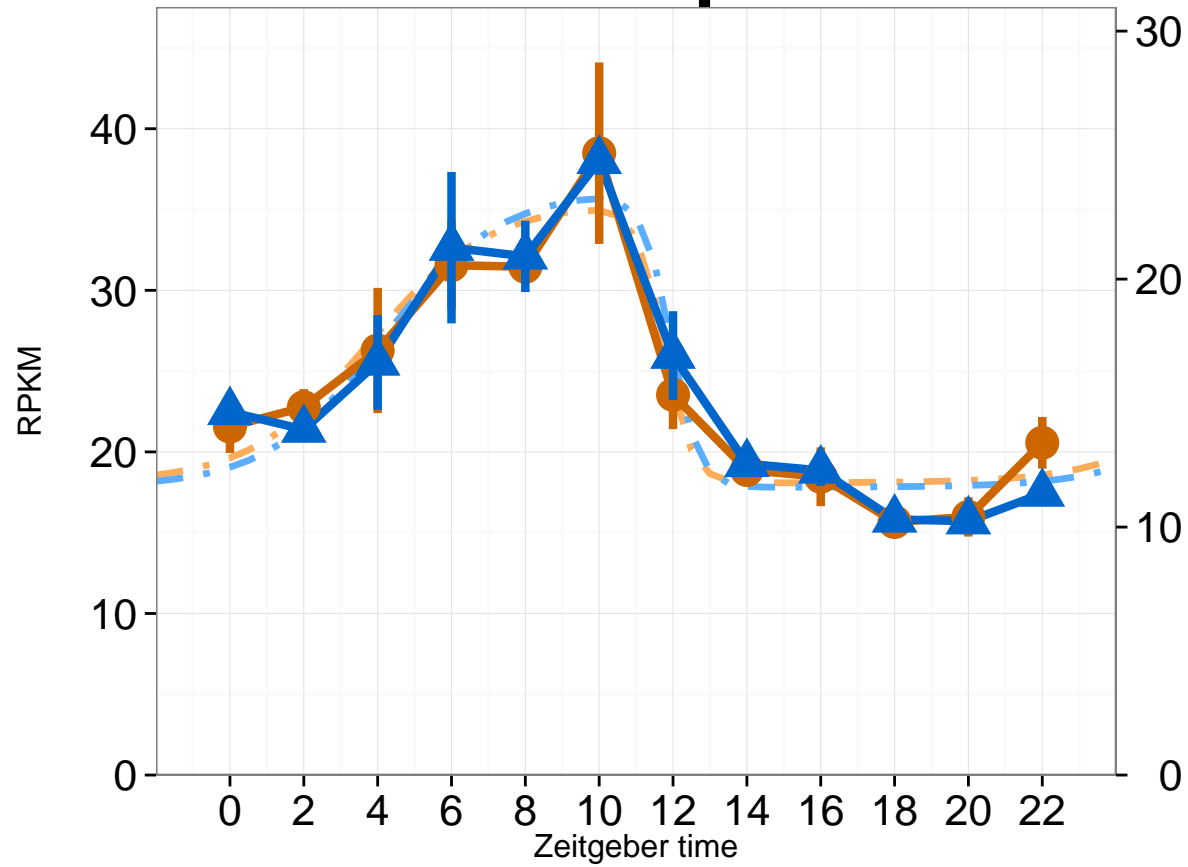

# Pik3ap1

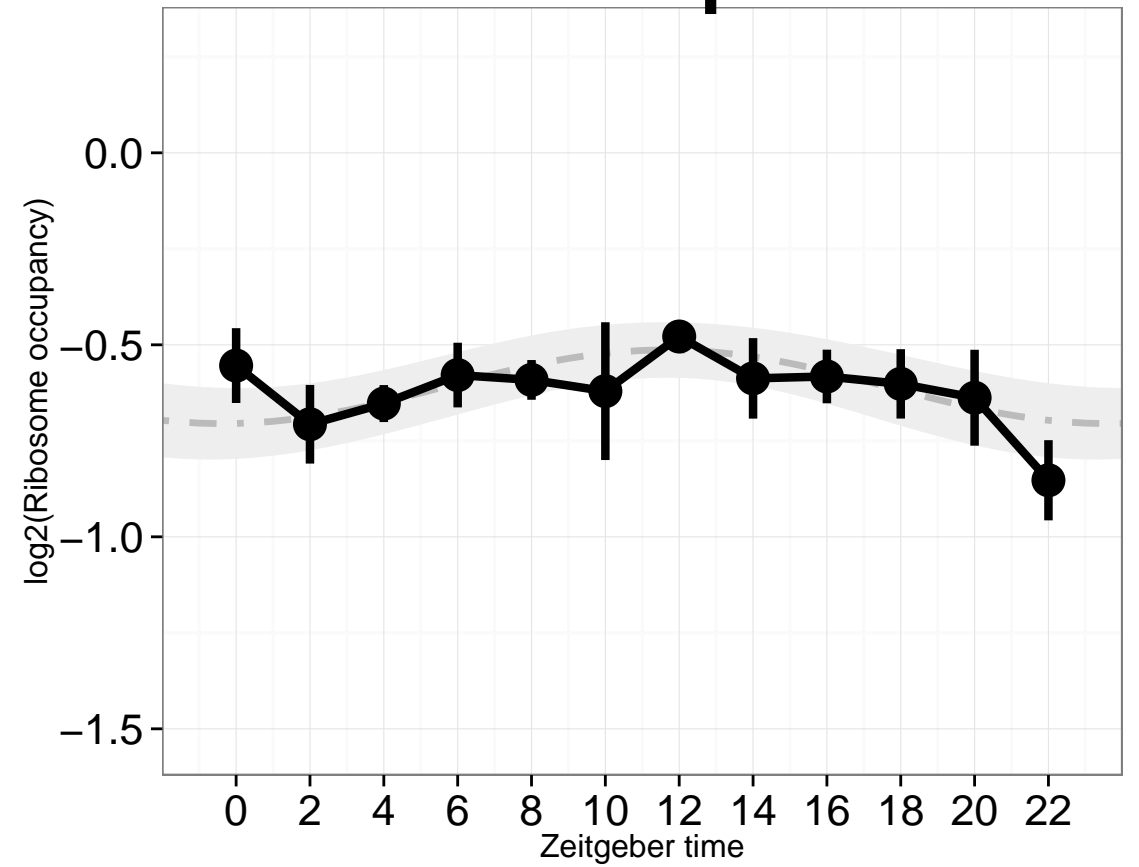

Supplement: SuppDataset_1.zip [file Pik3ap1_set_D.pdf › Supplemental Dataset 1/D-mRNA_rhythm_translation_rhyth/Pik3ap1_set_D.pdf]

# Pik3r1

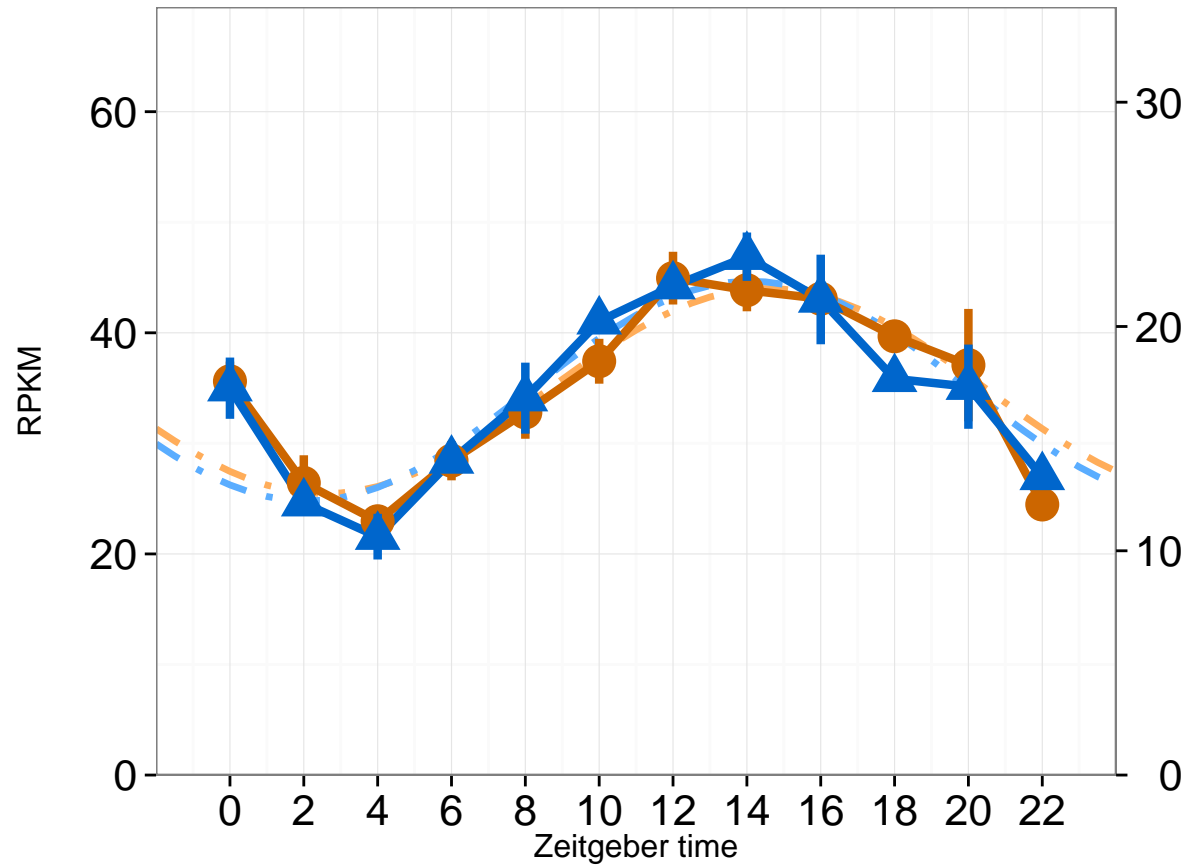

# Pik3r1

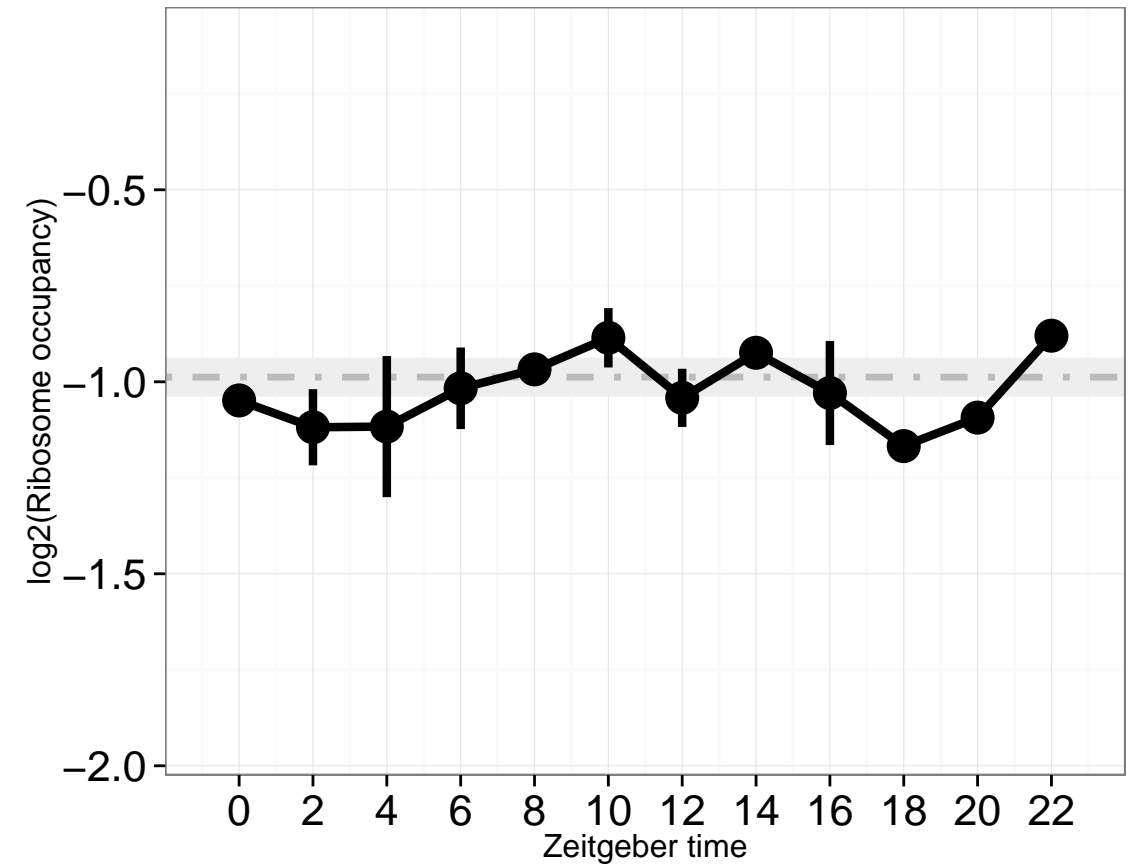

Supplement: SuppDataset_1.zip [file Pik3r1_set_D.pdf › Supplemental Dataset 1/D-mRNA_rhythm_translation_rhyth/Pik3r1_set_D.pdf]

## Pim1

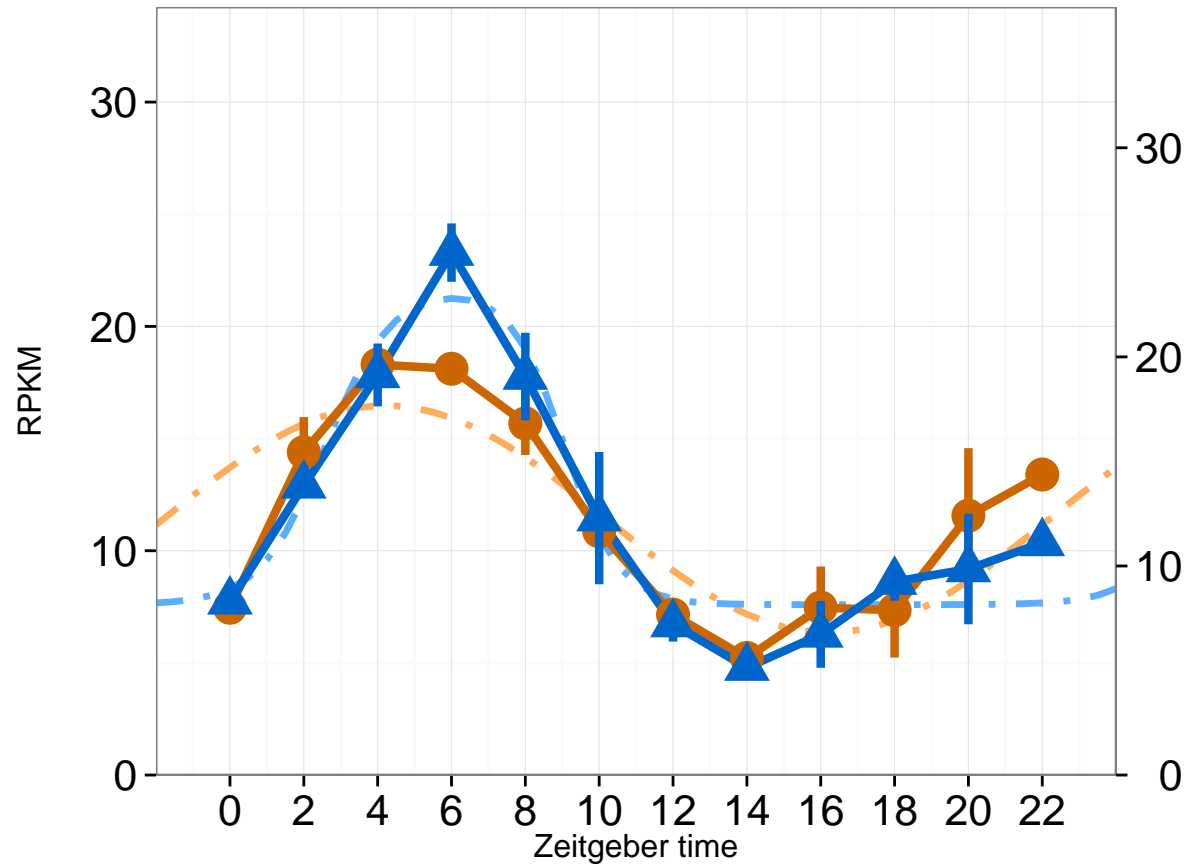

## Pim1

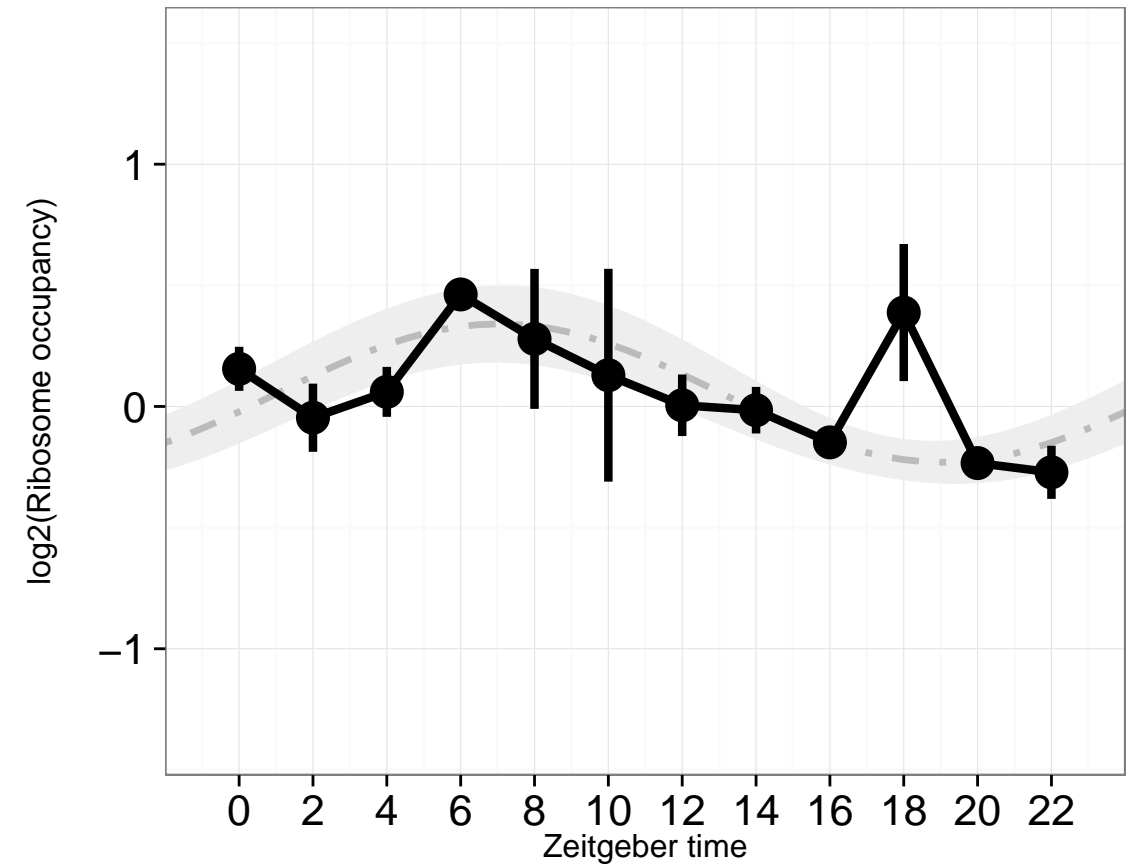

Supplement: SuppDataset_1.zip [file Pim1_set_D.pdf › Supplemental Dataset 1/D-mRNA_rhythm_translation_rhyth/Pim1_set_D.pdf]

## Pim3

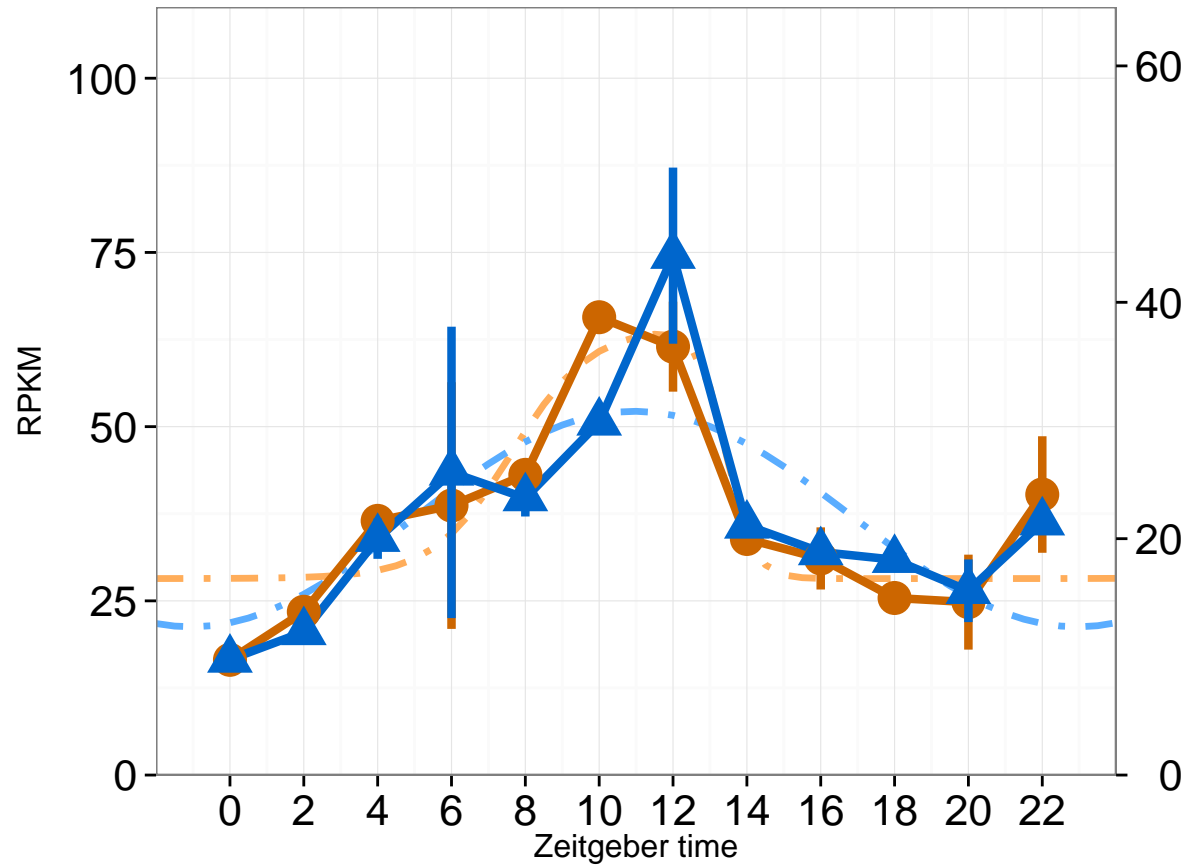

## Pim3

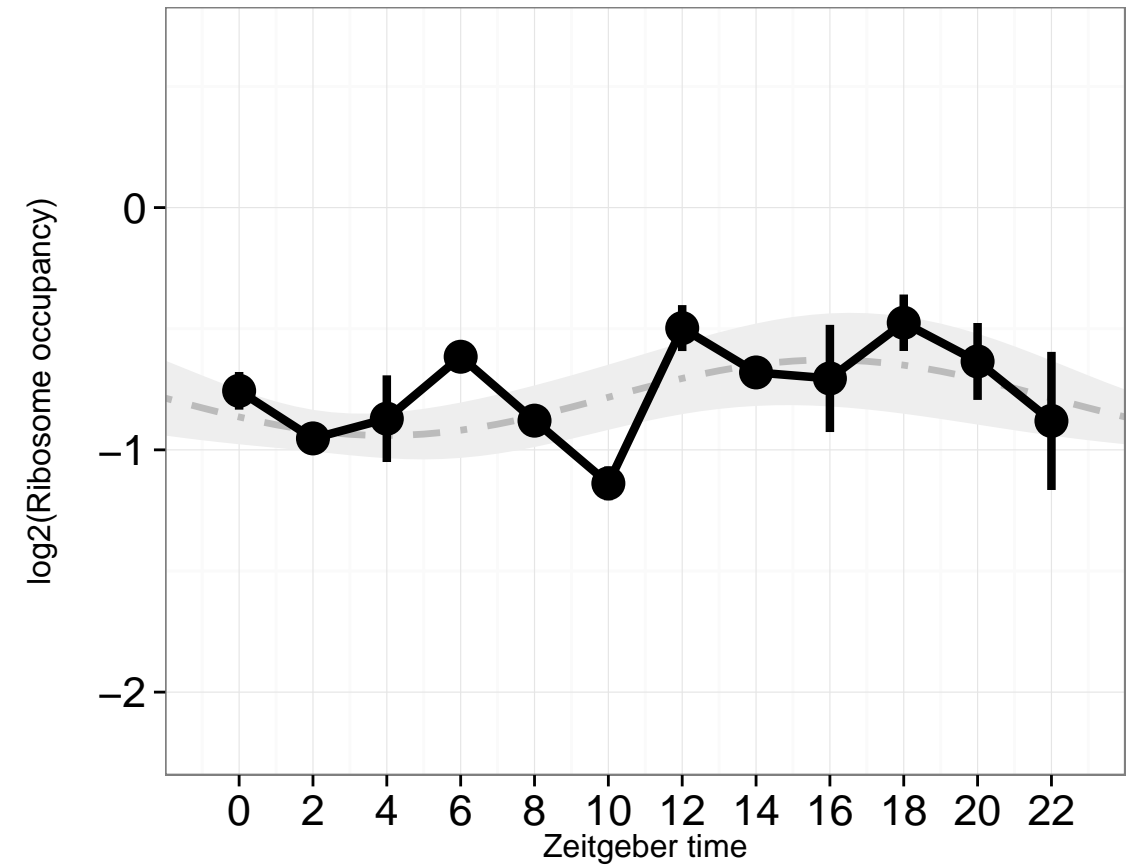

Supplement: SuppDataset_1.zip [file Pim3_set_D.pdf › Supplemental Dataset 1/D-mRNA_rhythm_translation_rhyth/Pim3_set_D.pdf]

## Pithd1

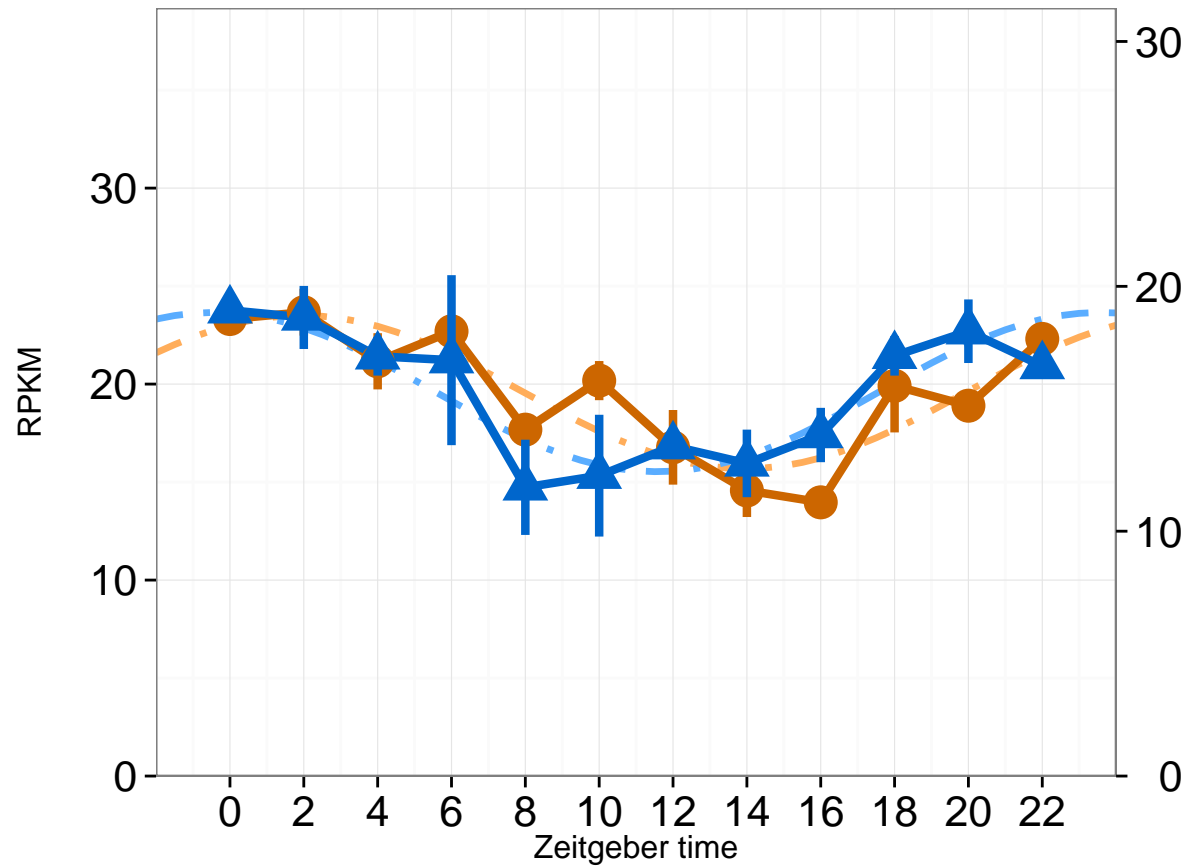

## Pithd1

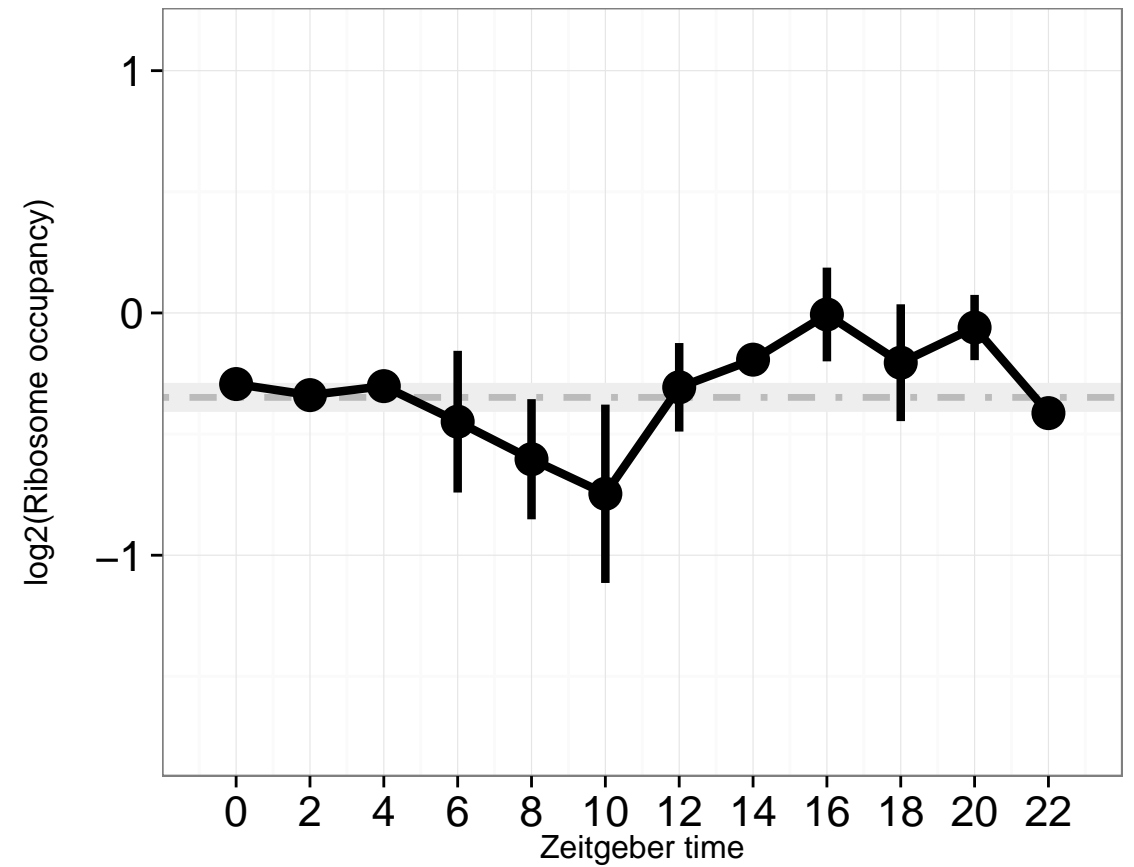

Supplement: SuppDataset_1.zip [file Pithd1_set_D.pdf › Supplemental Dataset 1/D-mRNA_rhythm_translation_rhyth/Pithd1_set_D.pdf]

# Pitpnc1

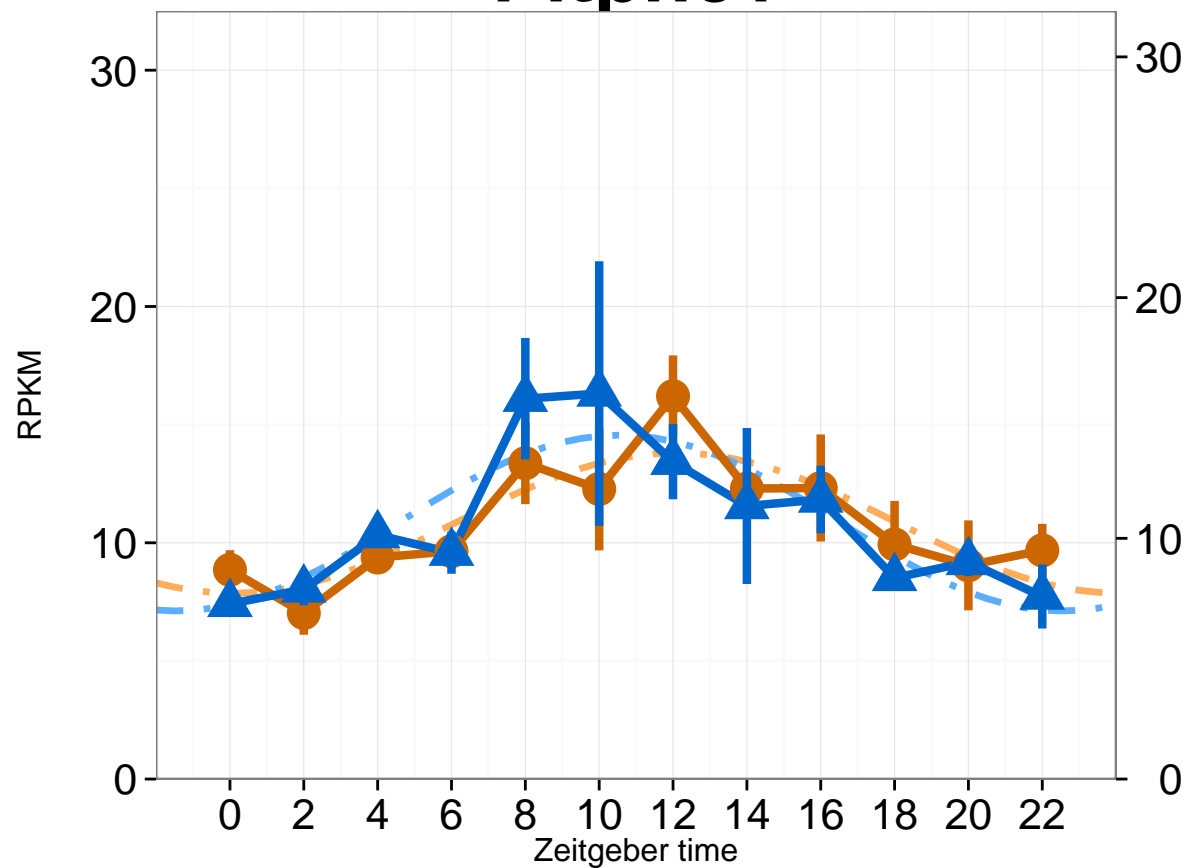

# Pitpnc1

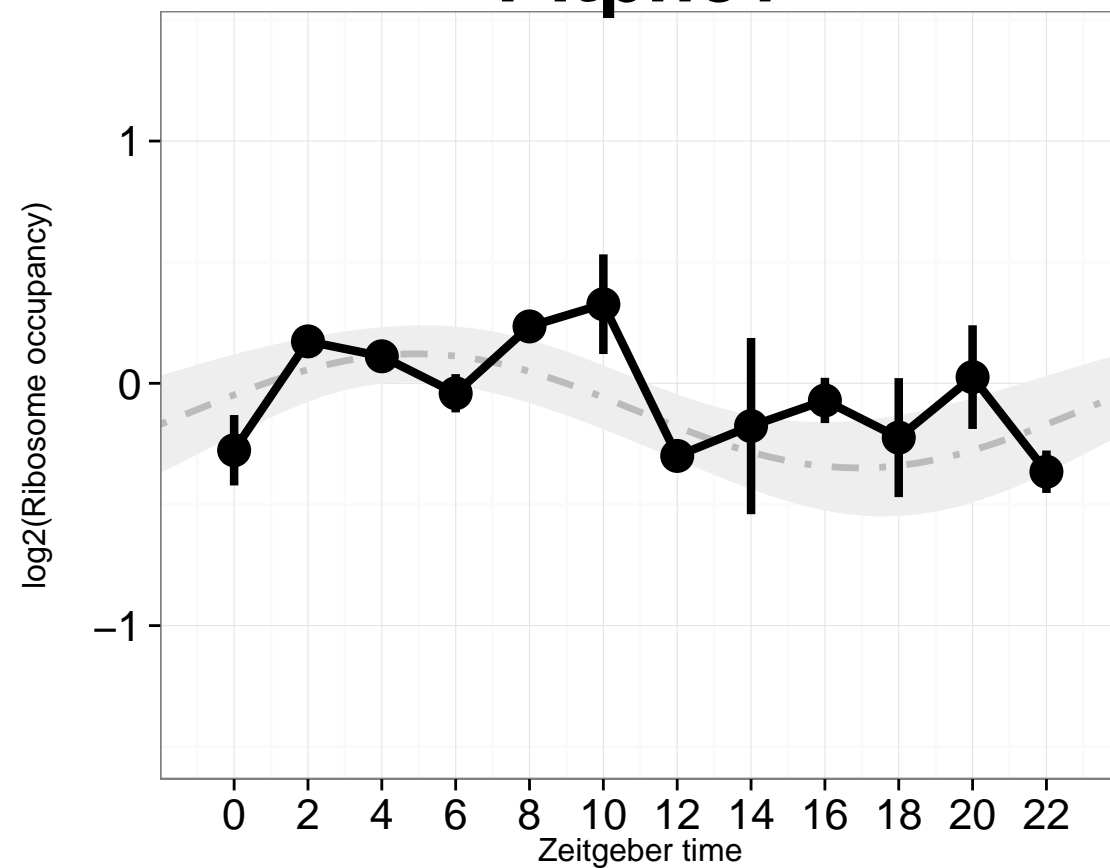

Supplement: SuppDataset_1.zip [file Pitpnc1_set_D.pdf › Supplemental Dataset 1/D-mRNA_rhythm_translation_rhyth/Pitpnc1_set_D.pdf]

## Pklr

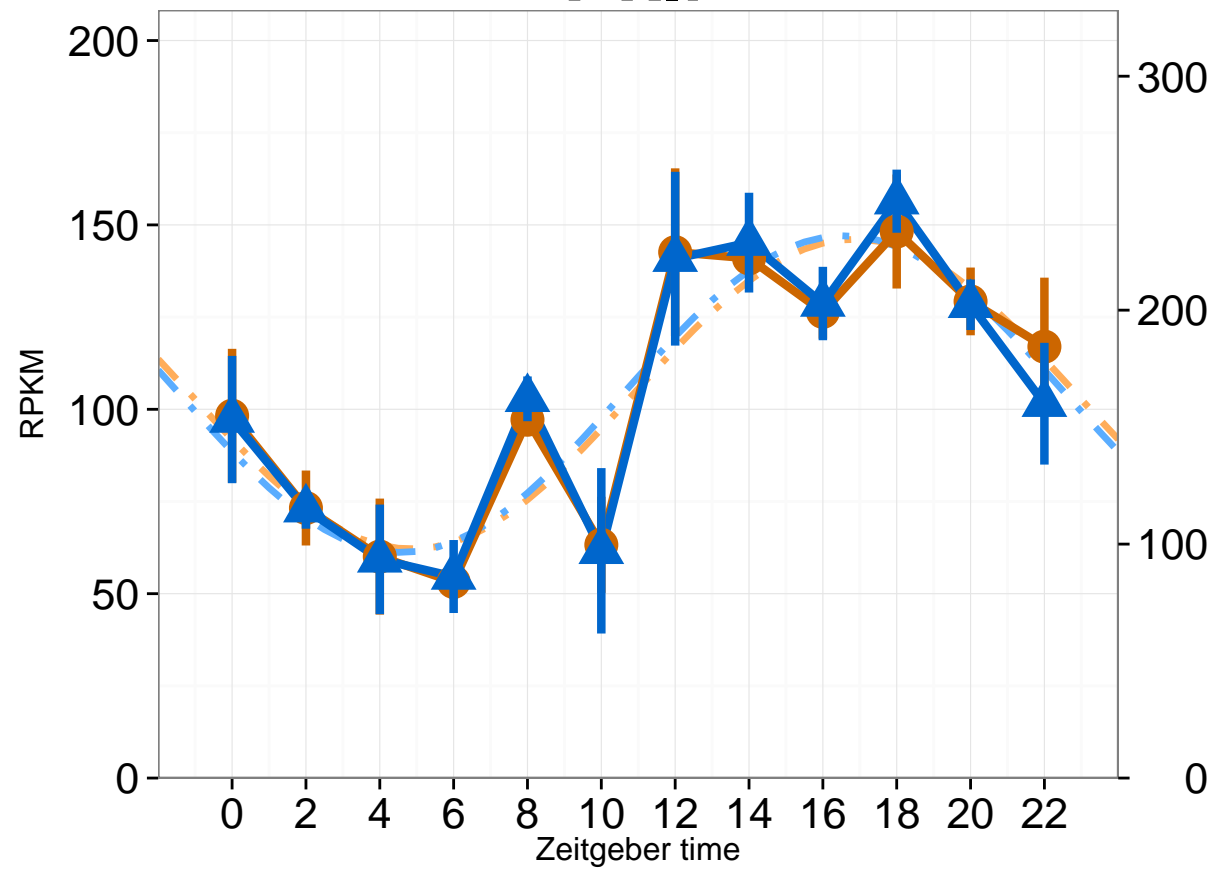

## Pklr

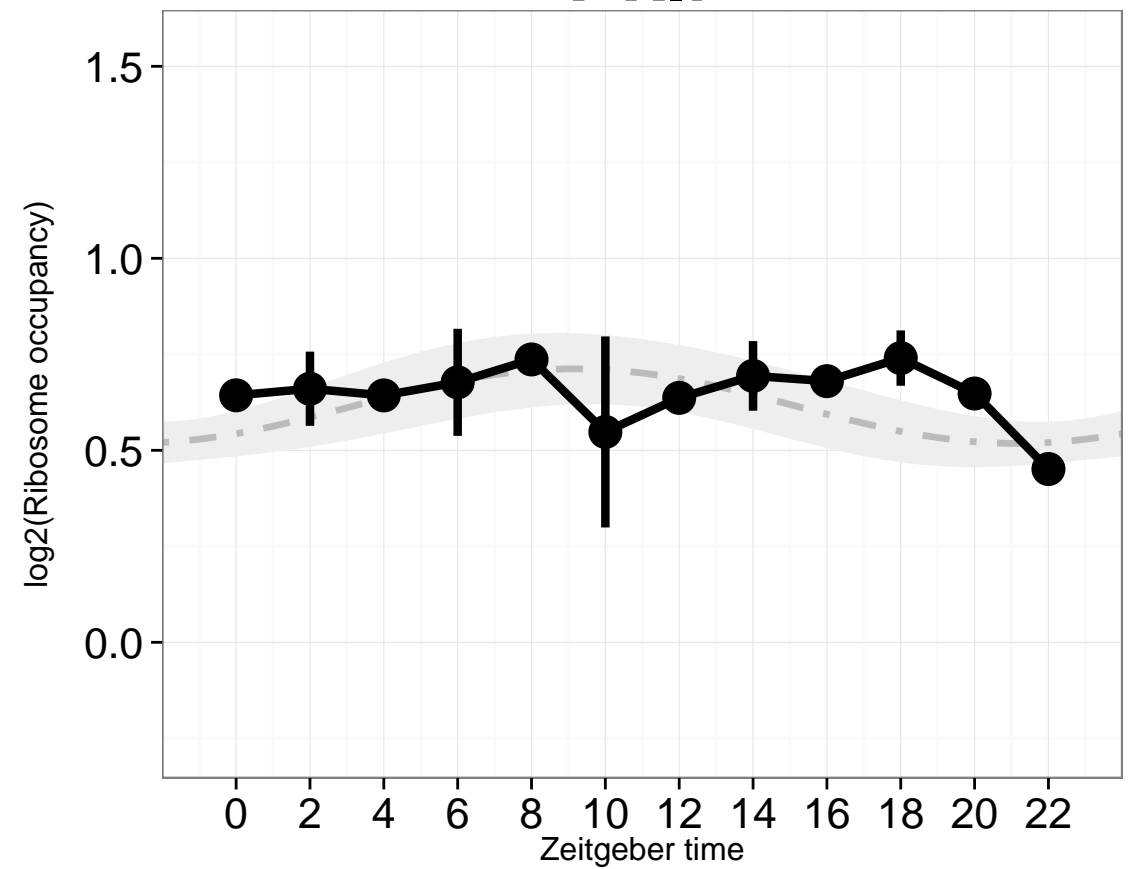

Supplement: SuppDataset_1.zip [file Pklr_set_D.pdf › Supplemental Dataset 1/D-mRNA_rhythm_translation_rhyth/Pklr_set_D.pdf]

# Pla2g12a

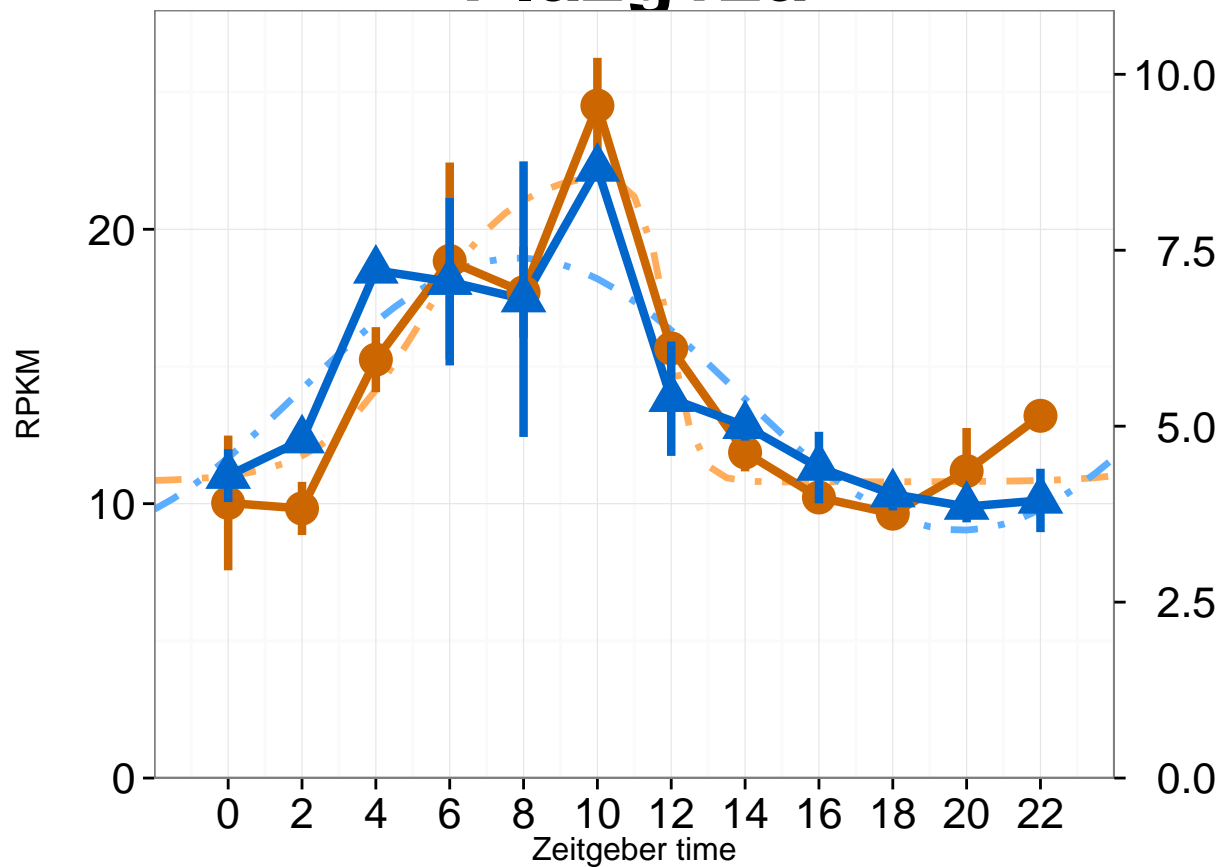

# Pla2g12a

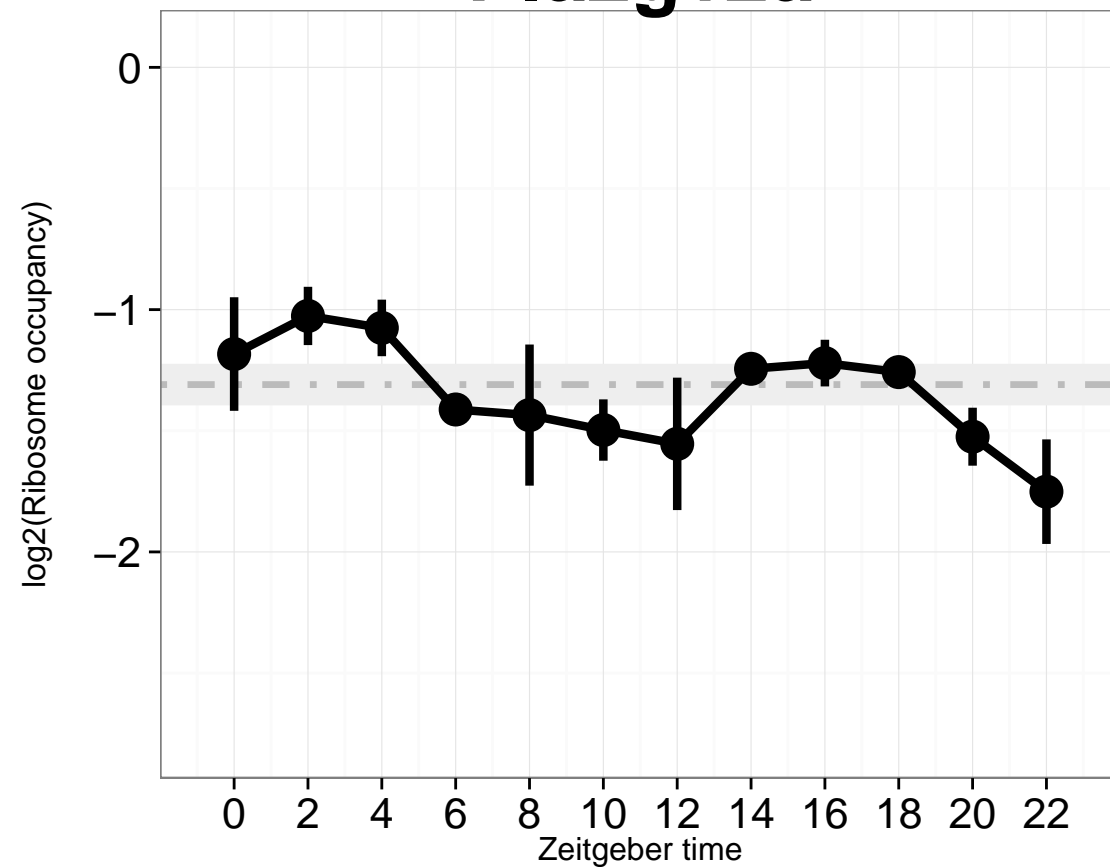

Supplement: SuppDataset_1.zip [file Pla2g12a_set_D.pdf › Supplemental Dataset 1/D-mRNA_rhythm_translation_rhyth/Pla2g12a_set_D.pdf]

# Pla2g12b

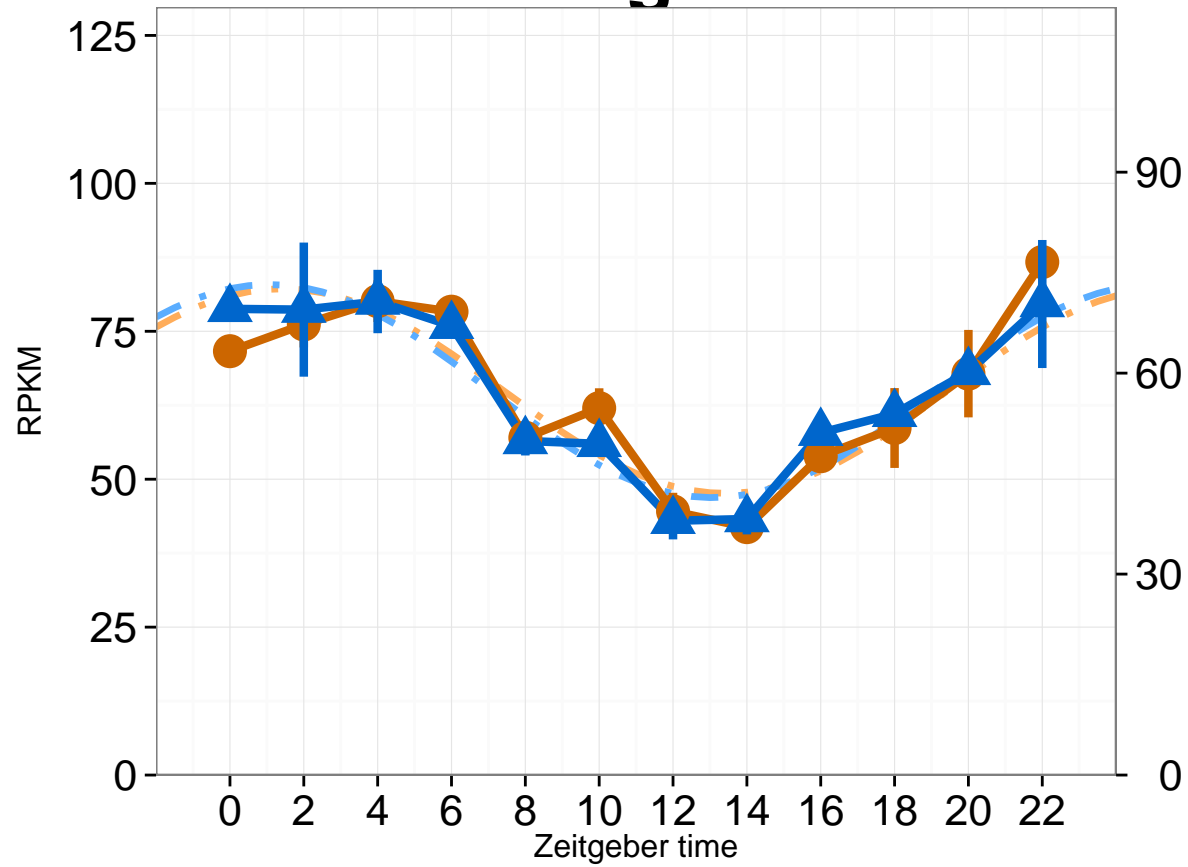

# Pla2g12b

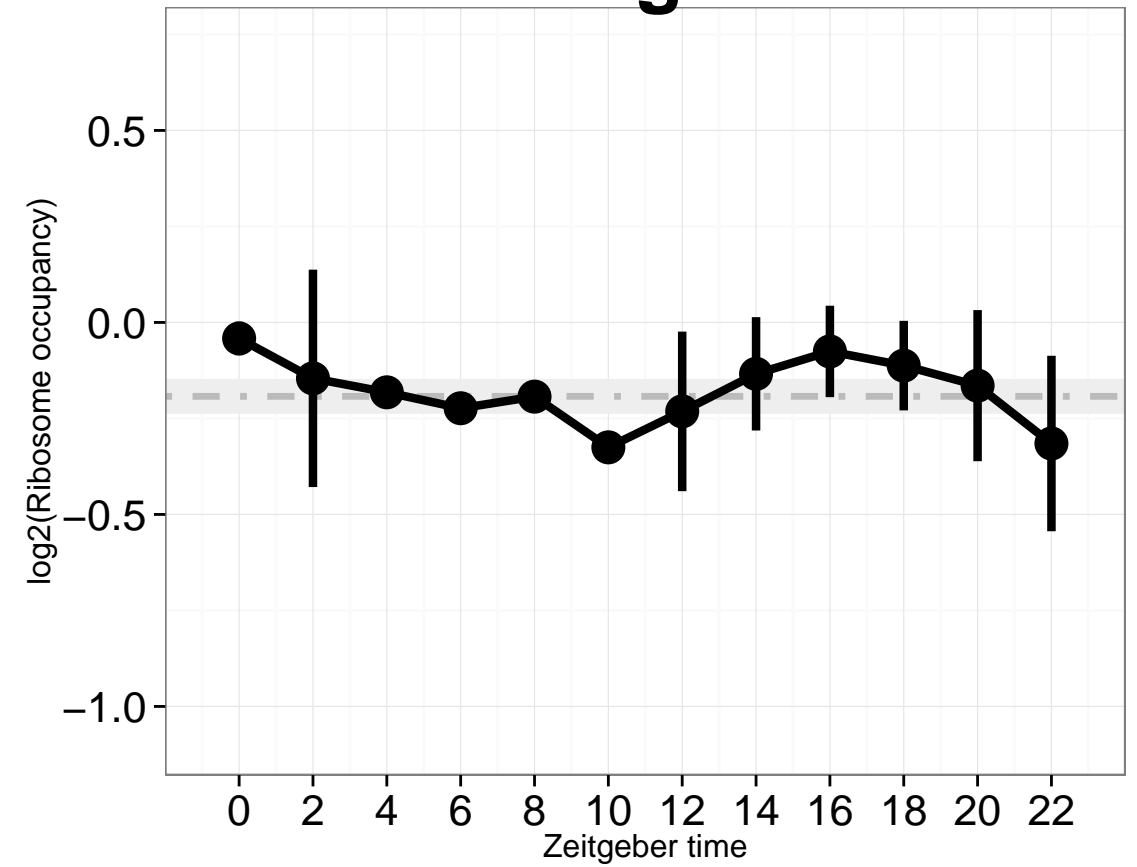

Supplement: SuppDataset_1.zip [file Pla2g12b_set_D.pdf › Supplemental Dataset 1/D-mRNA_rhythm_translation_rhyth/Pla2g12b_set_D.pdf]

## Pla2g7

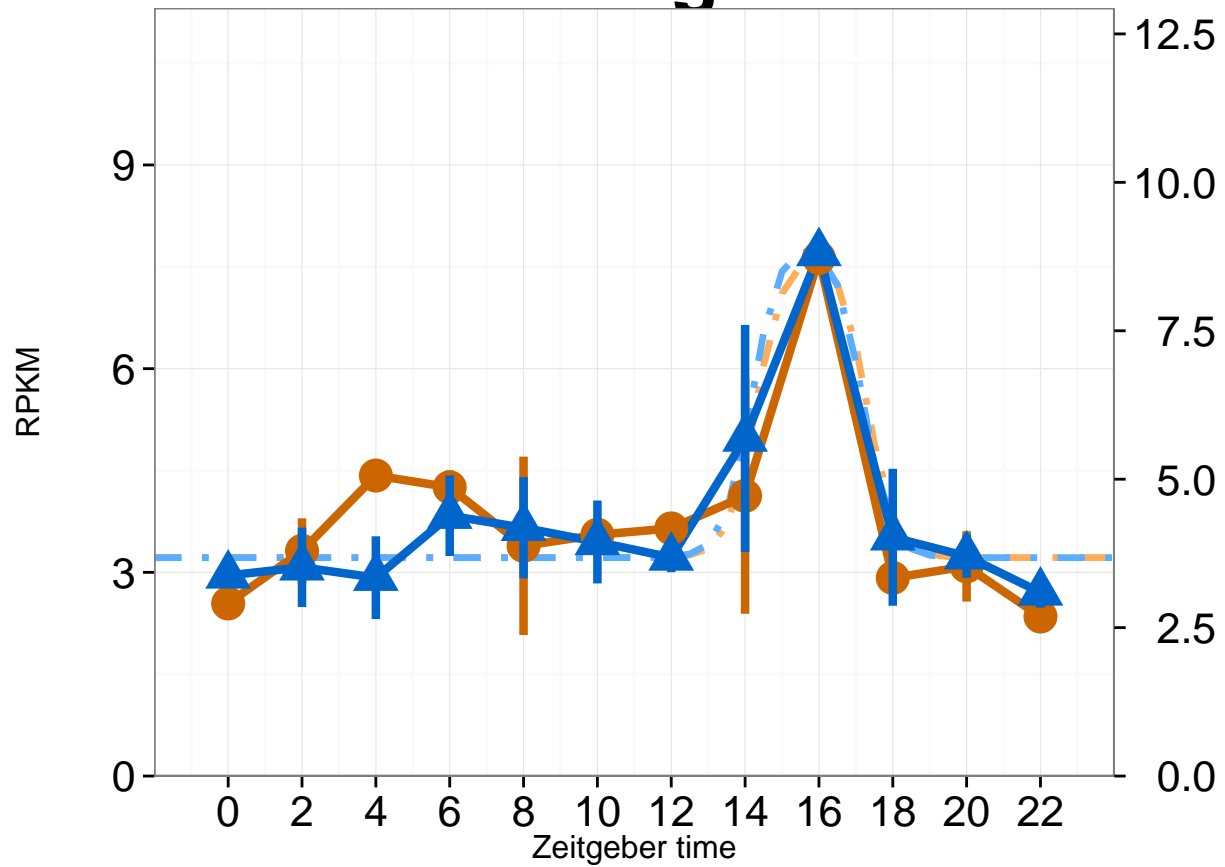

## Pla2g7

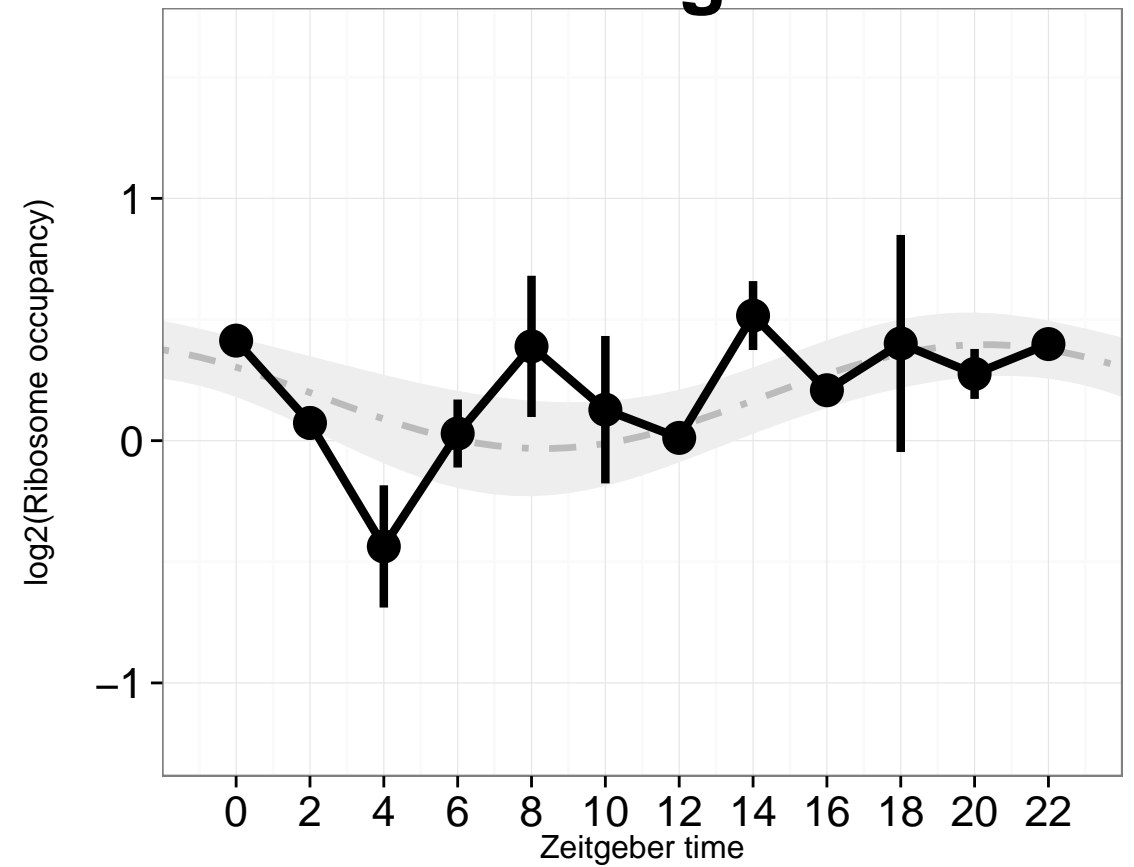

Supplement: SuppDataset_1.zip [file Pla2g7_set_D.pdf › Supplemental Dataset 1/D-mRNA_rhythm_translation_rhyth/Pla2g7_set_D.pdf]

# Plice1

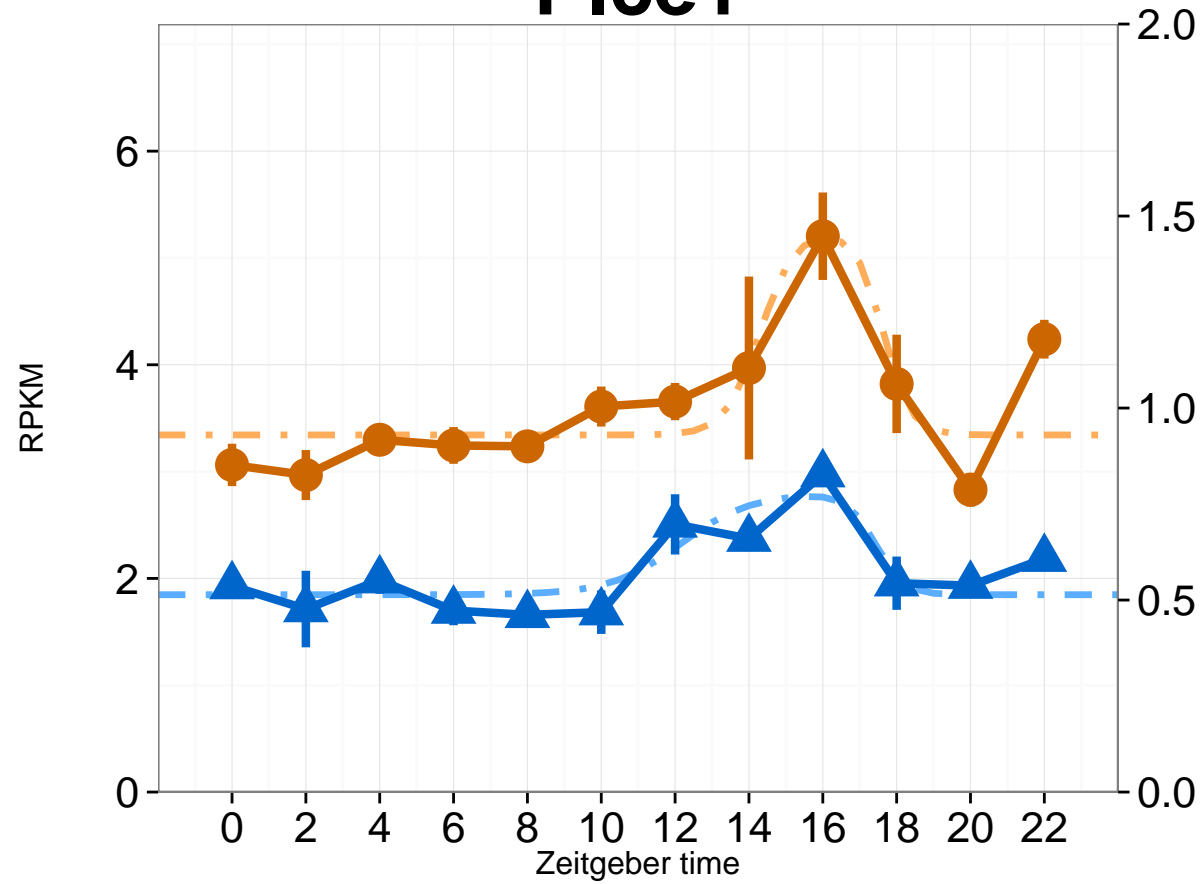

# Plice1

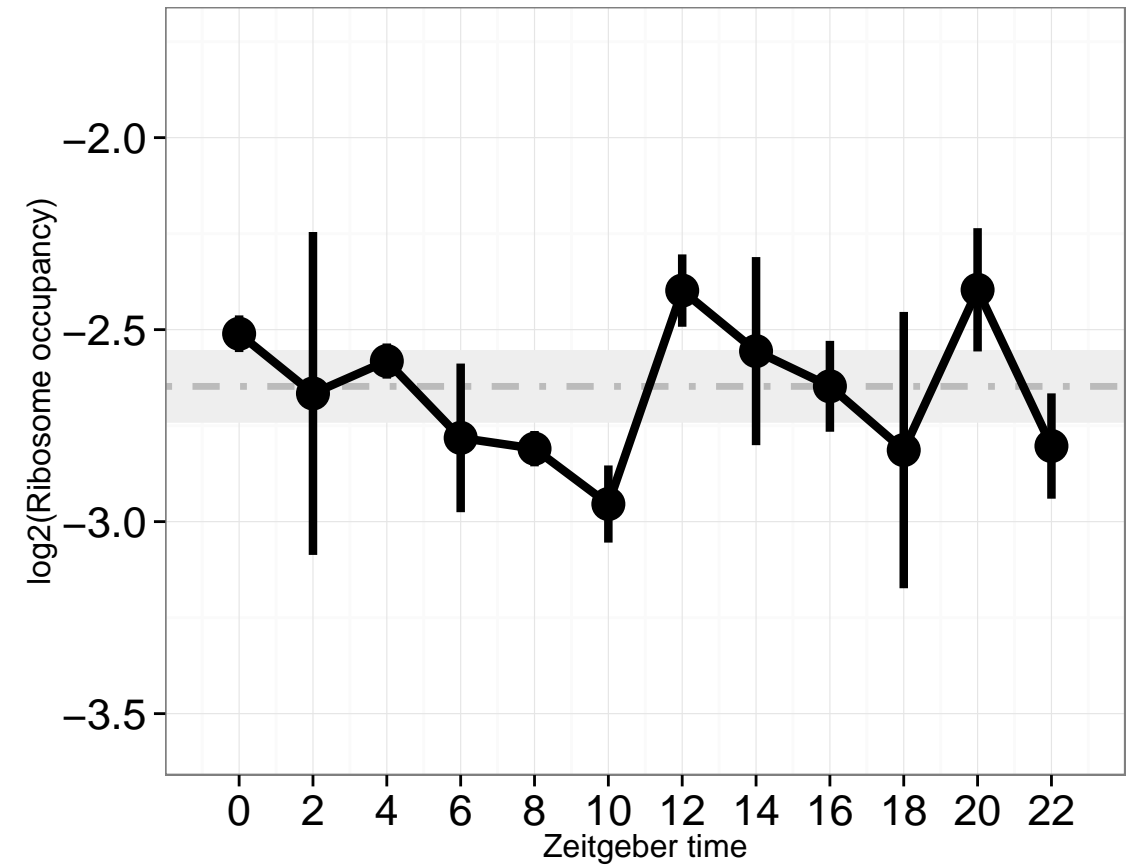

Supplement: SuppDataset_1.zip [file Plce1_set_D.pdf › Supplemental Dataset 1/D-mRNA_rhythm_translation_rhyth/Plce1_set_D.pdf]

## Plcl1

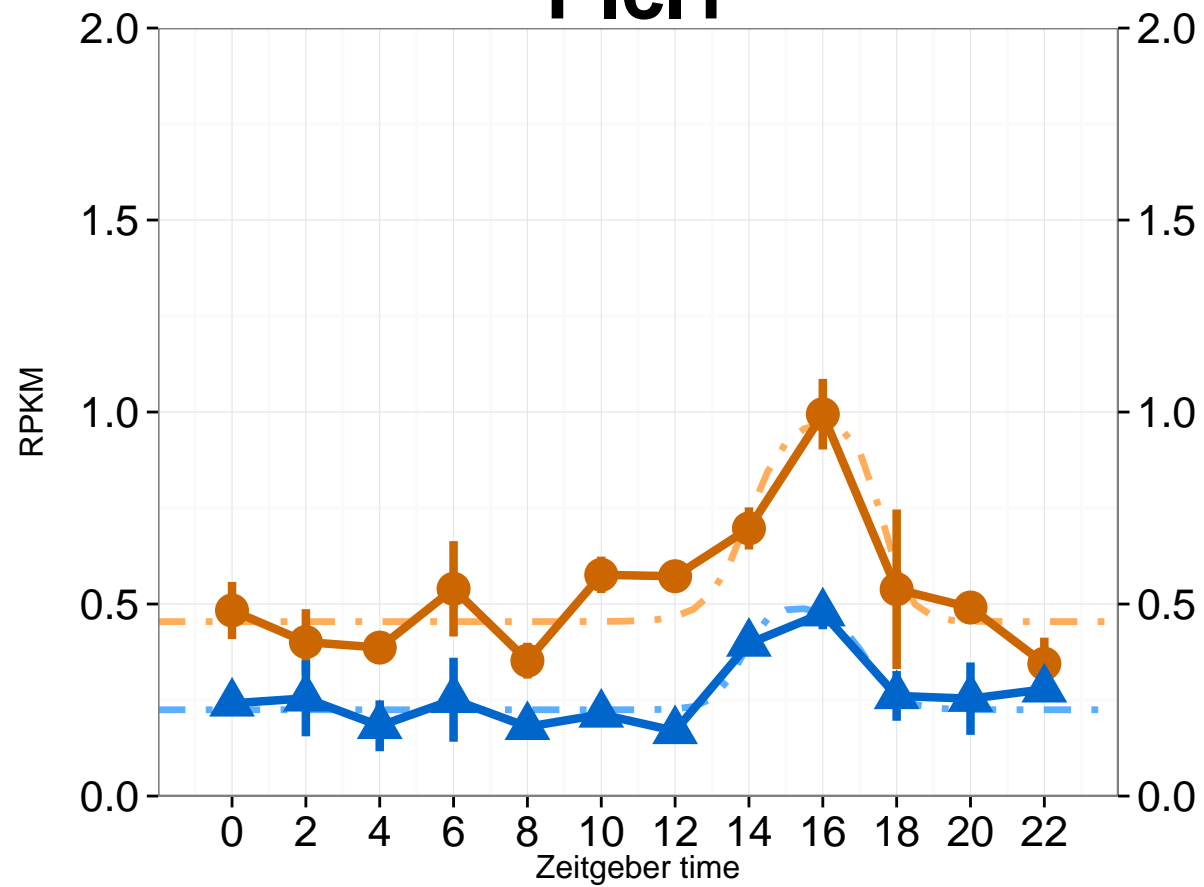

## Plcl1

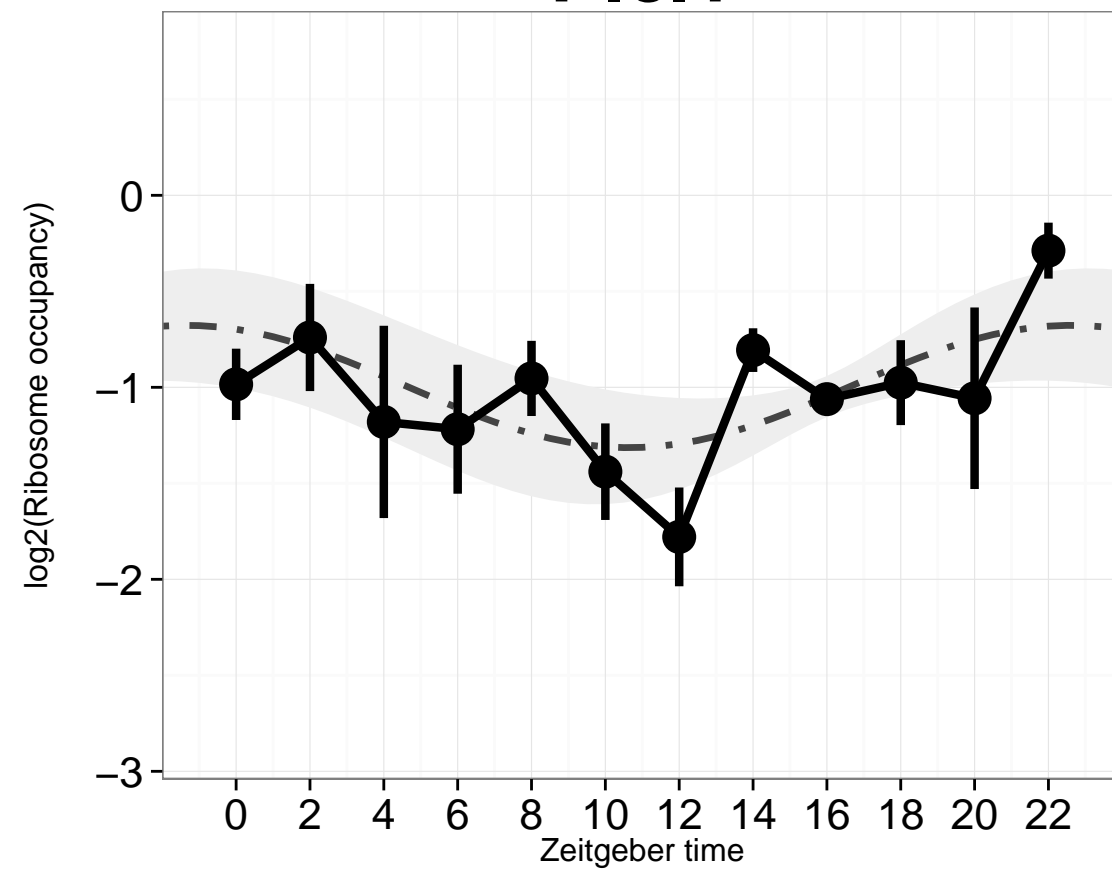

Supplement: SuppDataset_1.zip [file Plcl1_set_D.pdf › Supplemental Dataset 1/D-mRNA_rhythm_translation_rhyth/Plcl1_set_D.pdf]

## Pld1

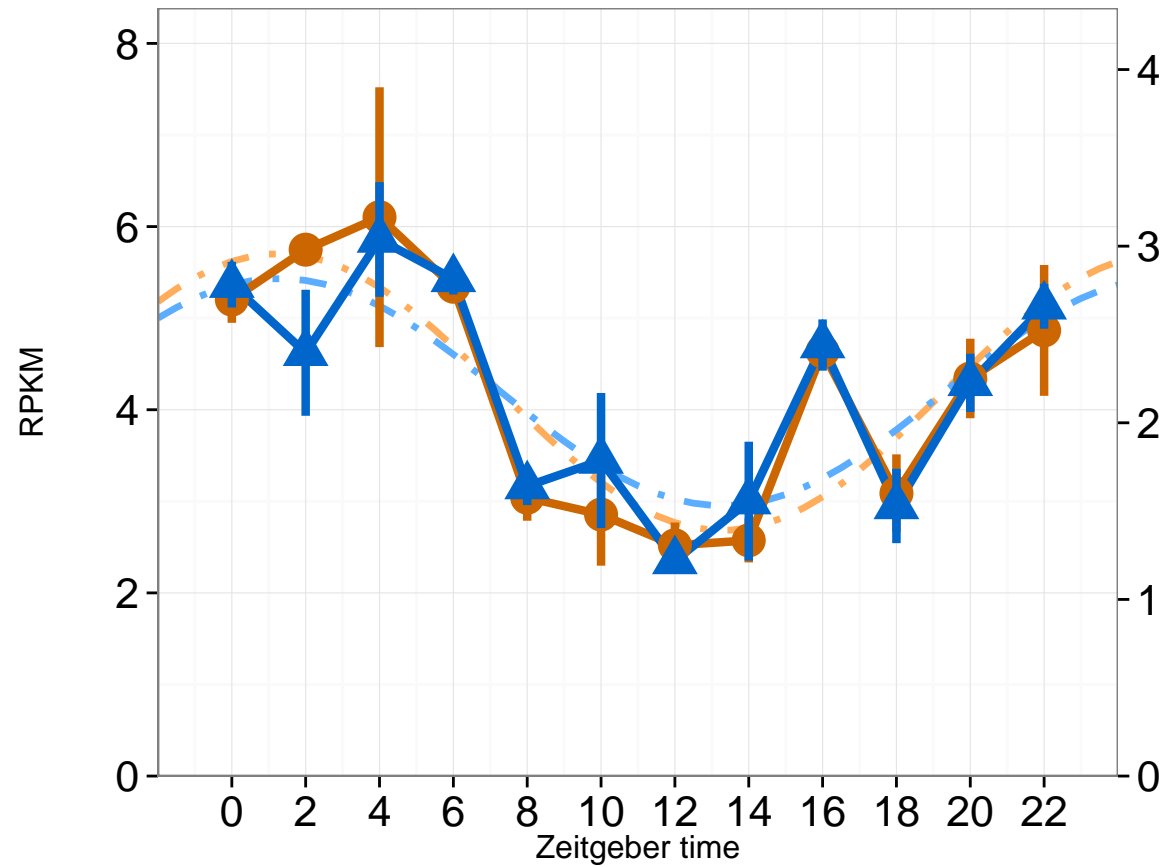

## Pld1

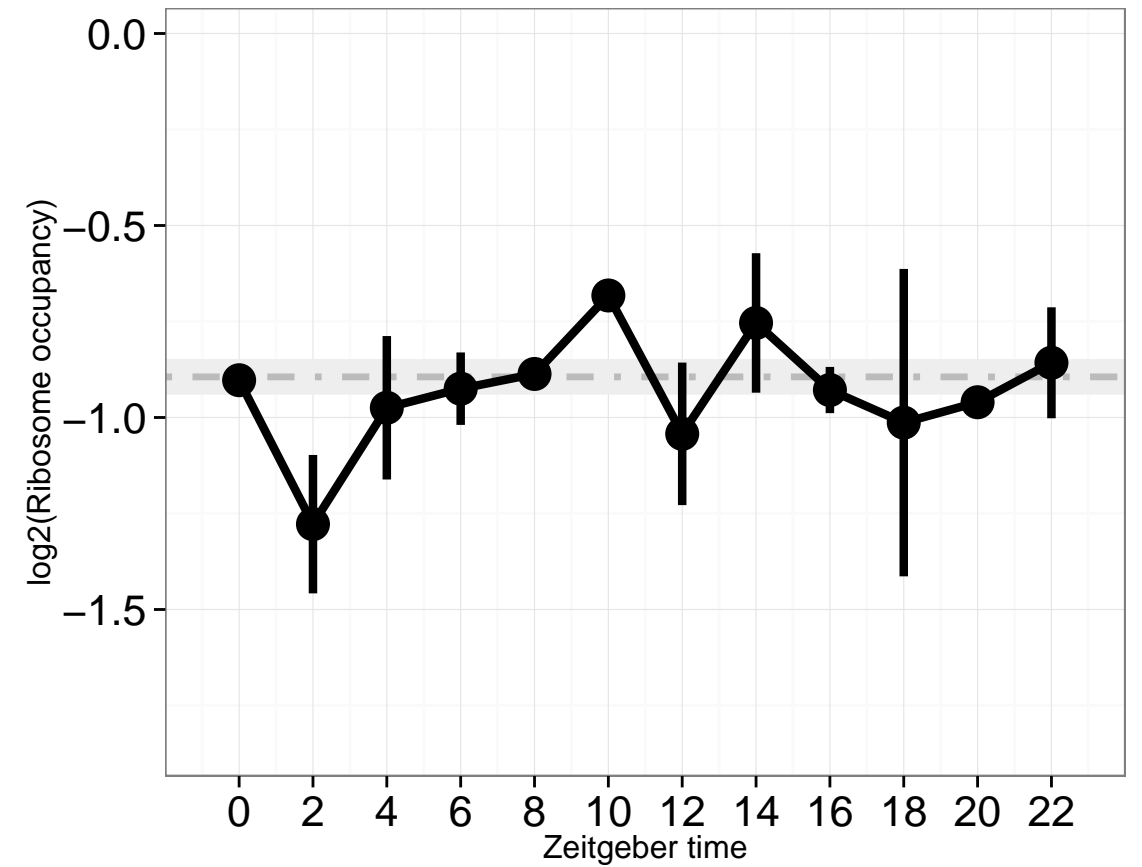

Supplement: SuppDataset_1.zip [file Pld1_set_D.pdf › Supplemental Dataset 1/D-mRNA_rhythm_translation_rhyth/Pld1_set_D.pdf]

## Plekha8

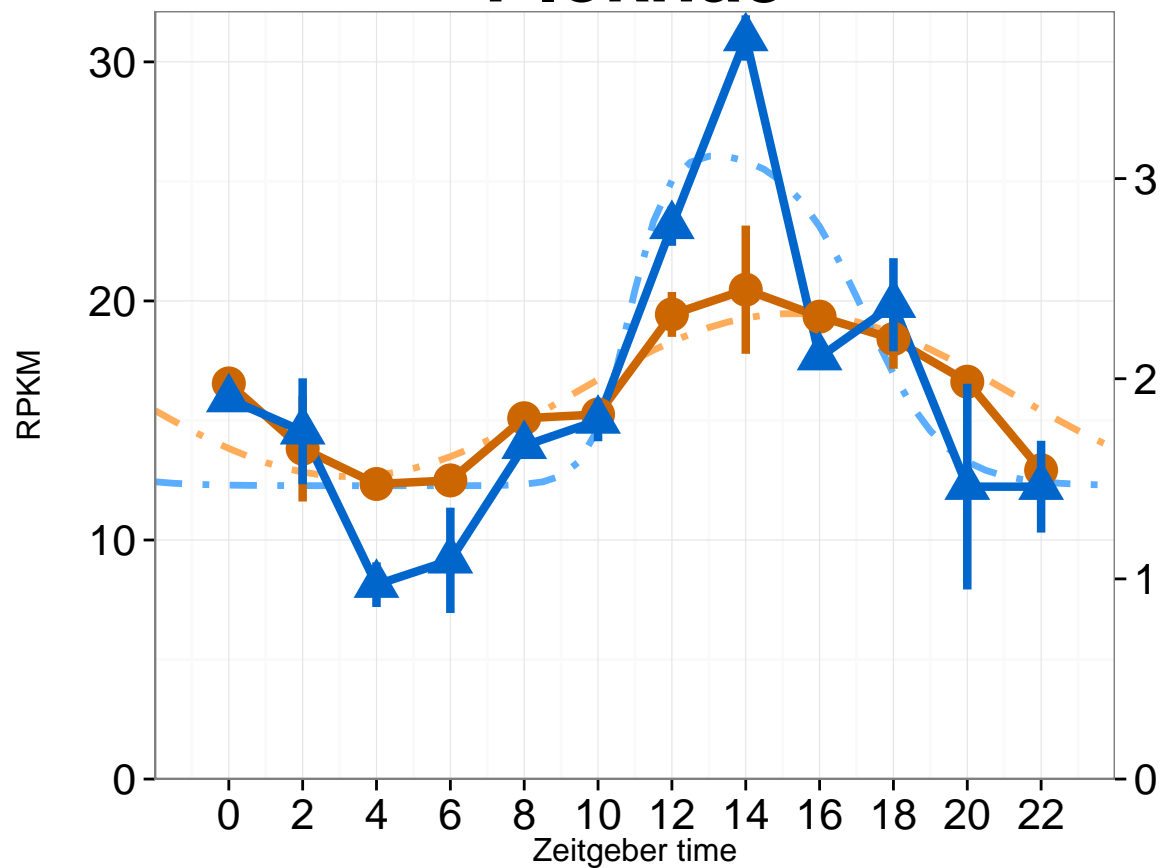

## Plekha8

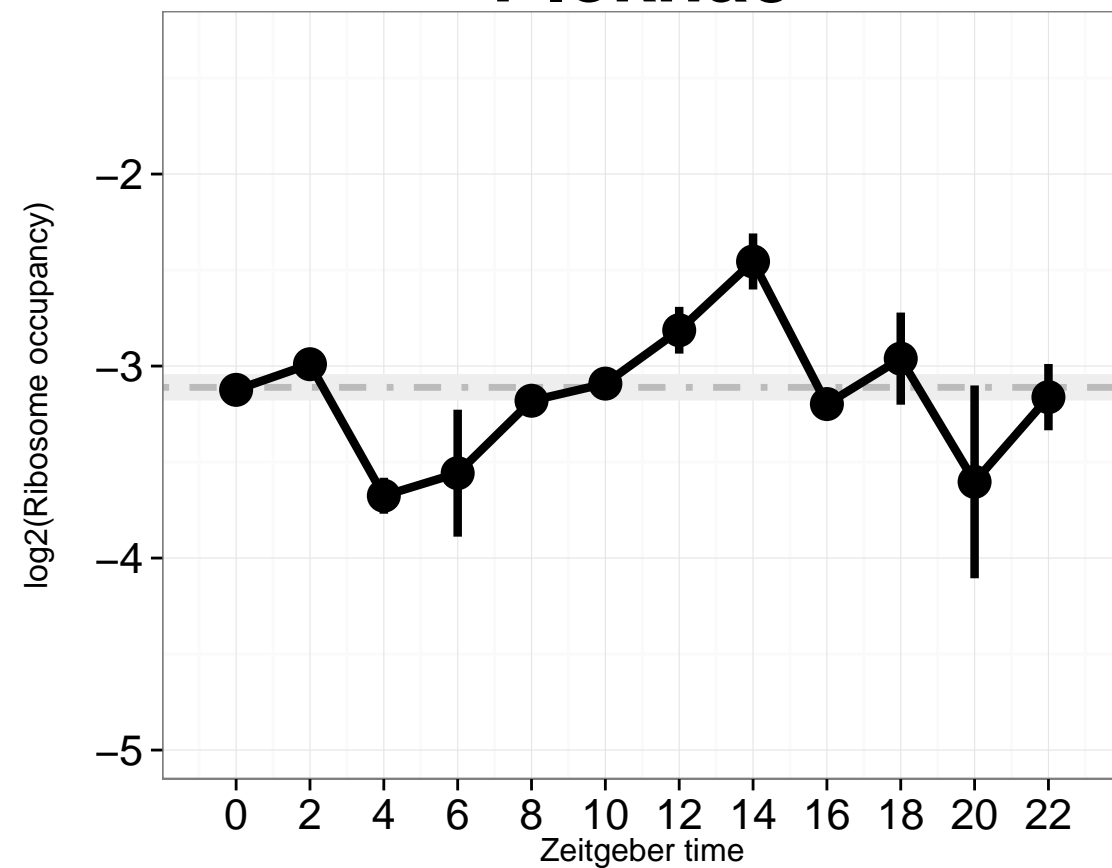

Supplement: SuppDataset_1.zip [file Plekha8_set_D.pdf › Supplemental Dataset 1/D-mRNA_rhythm_translation_rhyth/Plekha8_set_D.pdf]

## Plin2

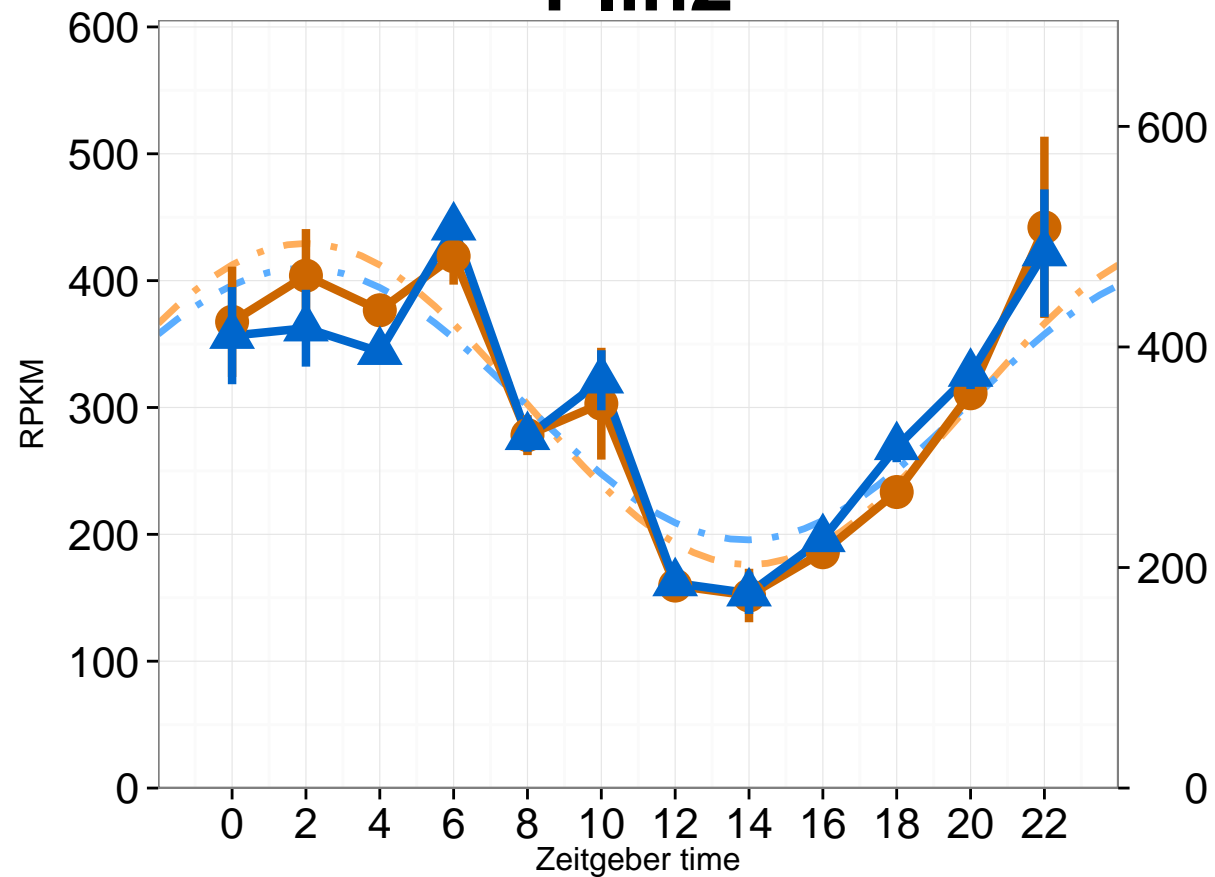

## Plin2

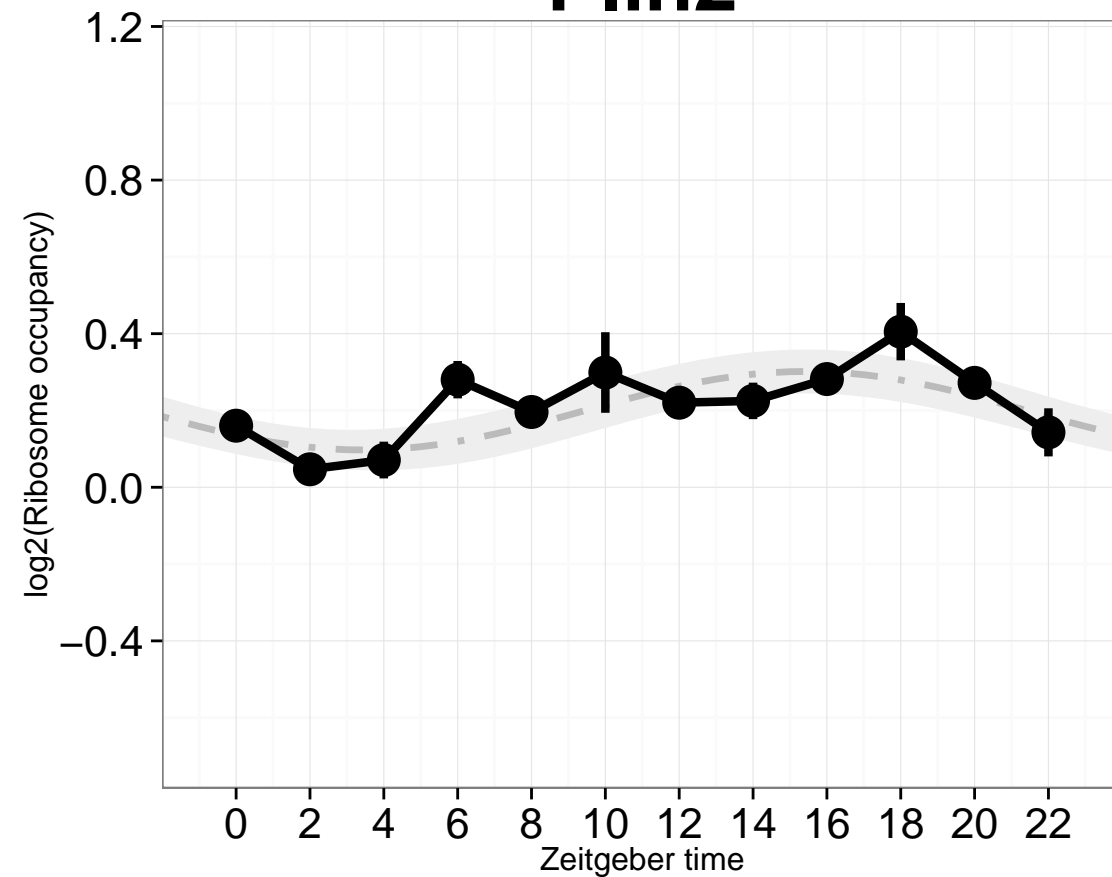

Supplement: SuppDataset_1.zip [file Plin2_set_D.pdf › Supplemental Dataset 1/D-mRNA_rhythm_translation_rhyth/Plin2_set_D.pdf]

## Plin5

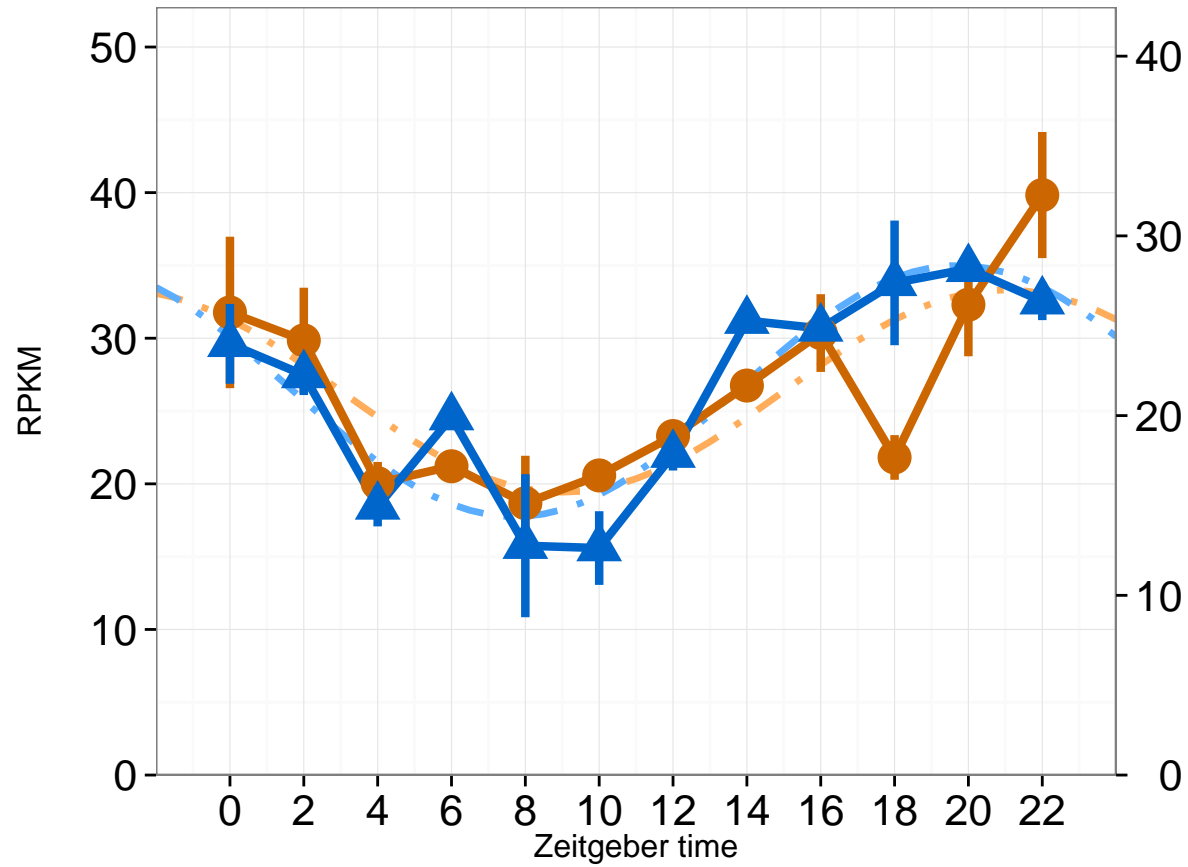

## Plin5

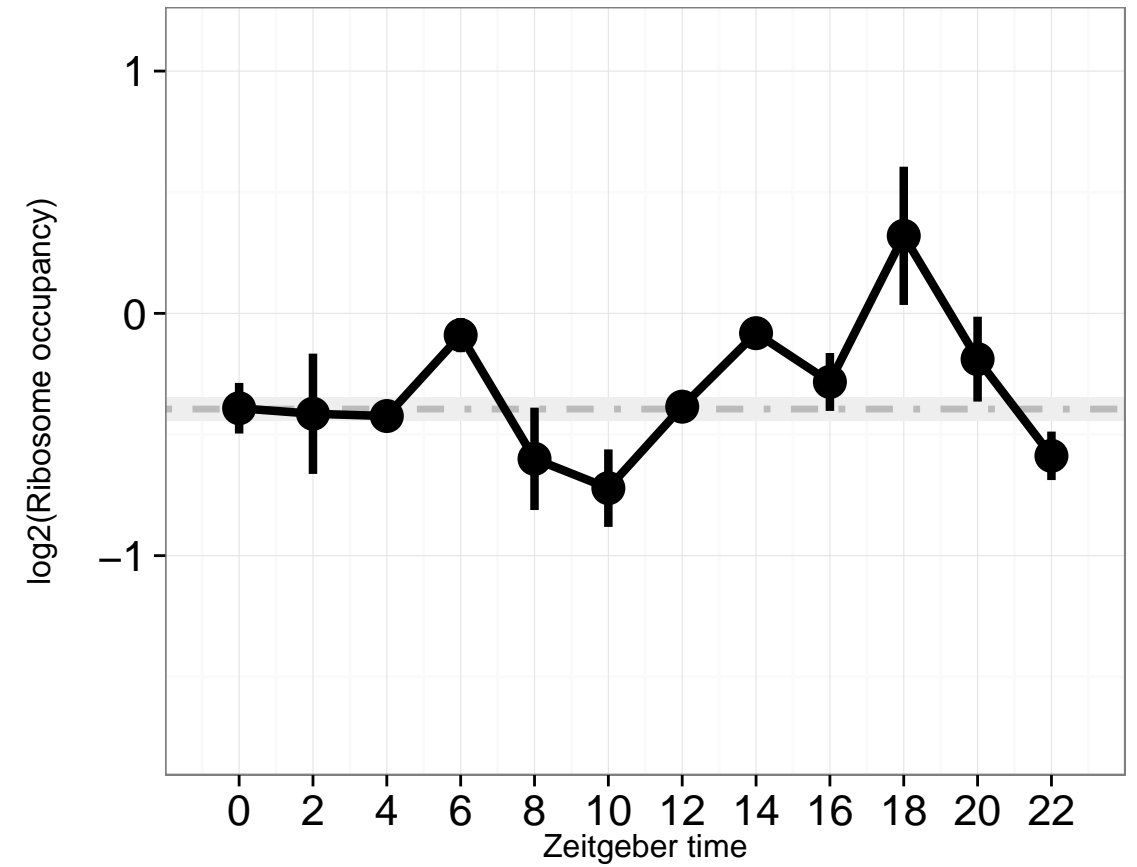

Supplement: SuppDataset_1.zip [file Plin5_set_D.pdf › Supplemental Dataset 1/D-mRNA_rhythm_translation_rhyth/Plin5_set_D.pdf]

## PIk5

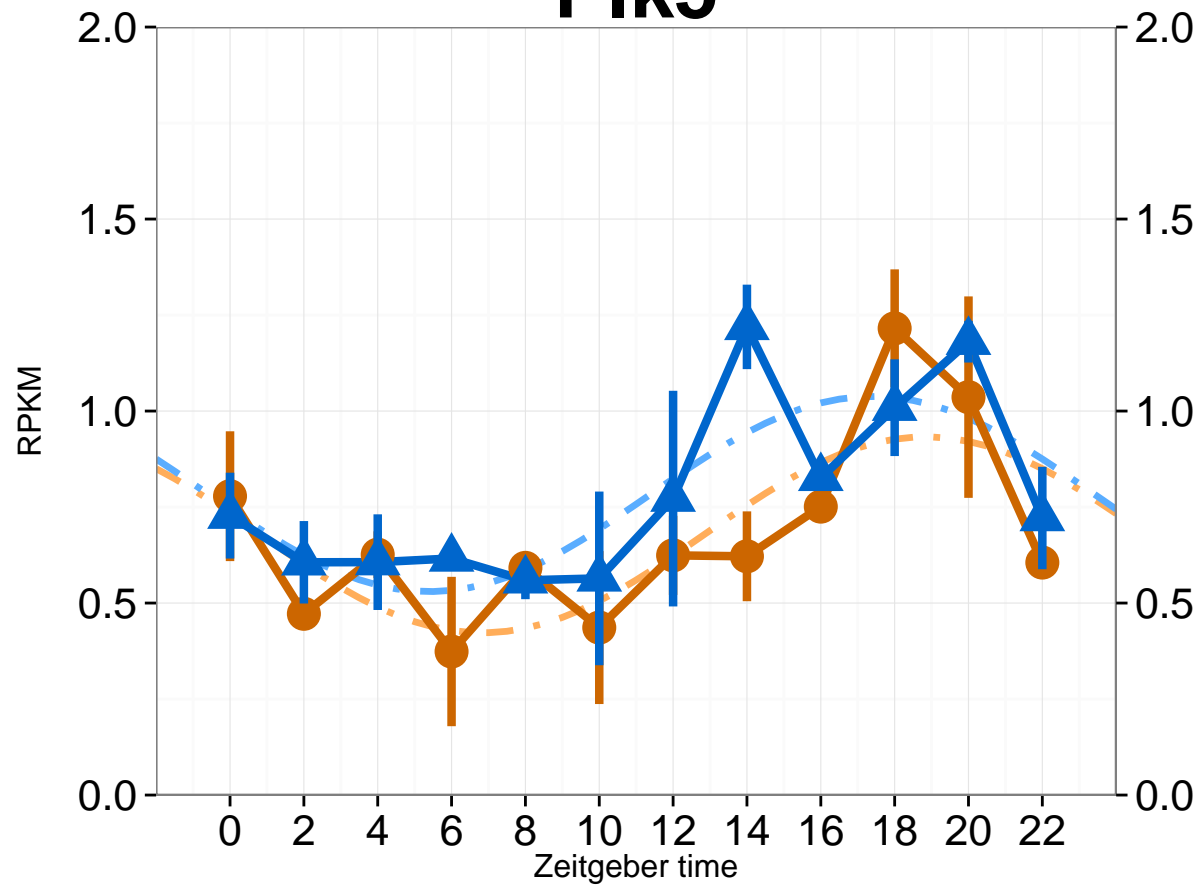

## PIk5

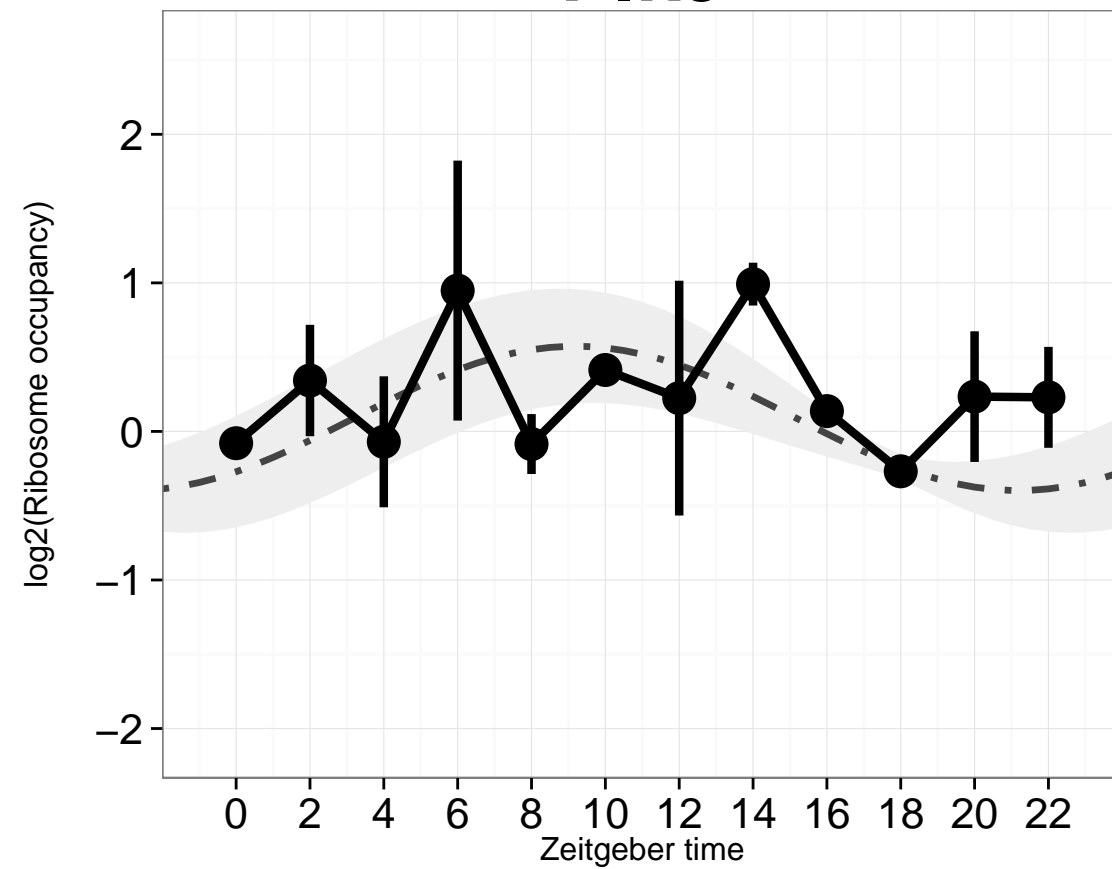

Supplement: SuppDataset_1.zip [file Plk5_set_D.pdf › Supplemental Dataset 1/D-mRNA_rhythm_translation_rhyth/Plk5_set_D.pdf]

# Plxna2

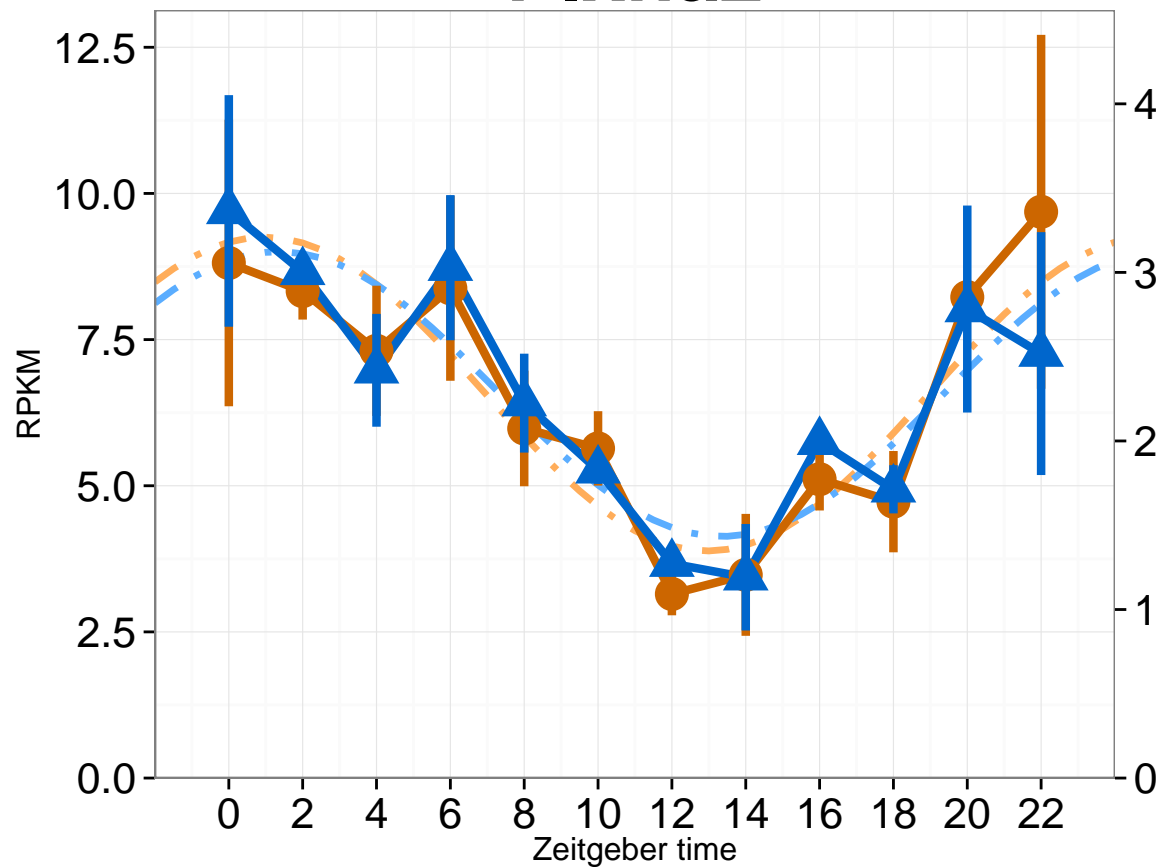

# Plxna2

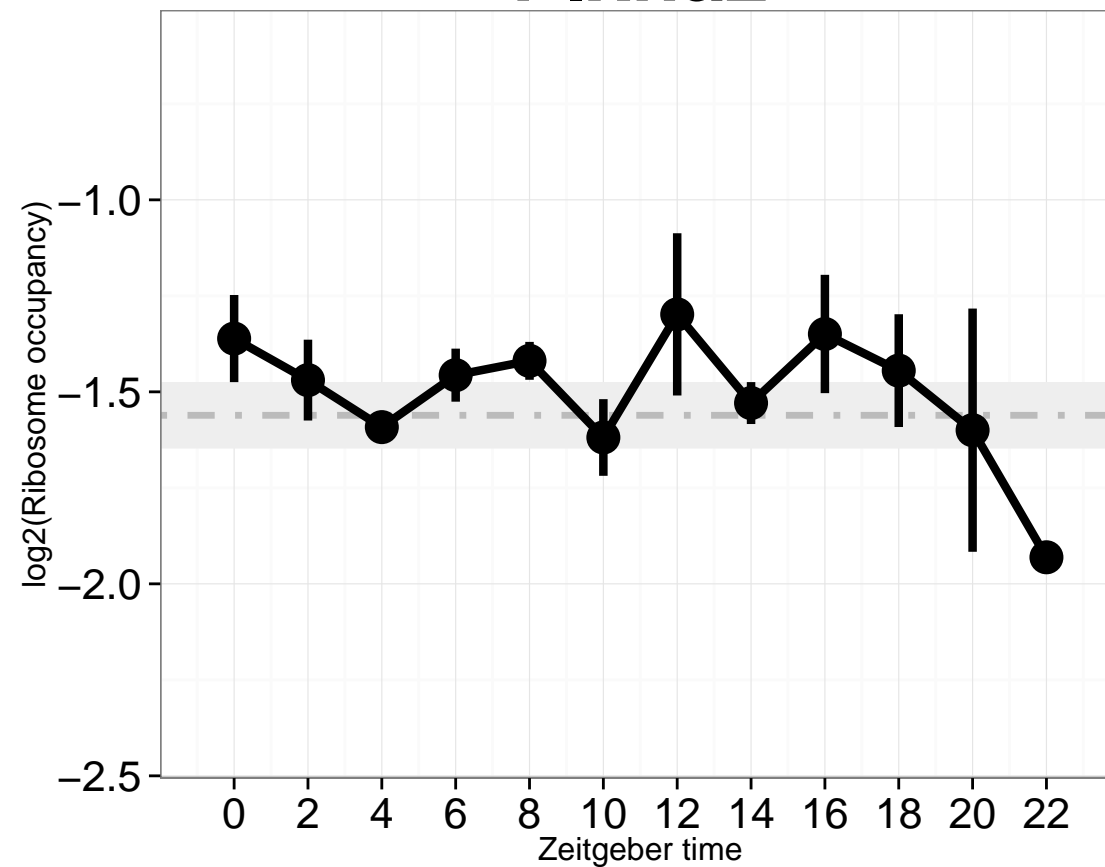

Supplement: SuppDataset_1.zip [file Plxna2_set_D.pdf › Supplemental Dataset 1/D-mRNA_rhythm_translation_rhyth/Plxna2_set_D.pdf]

# Pm20d2

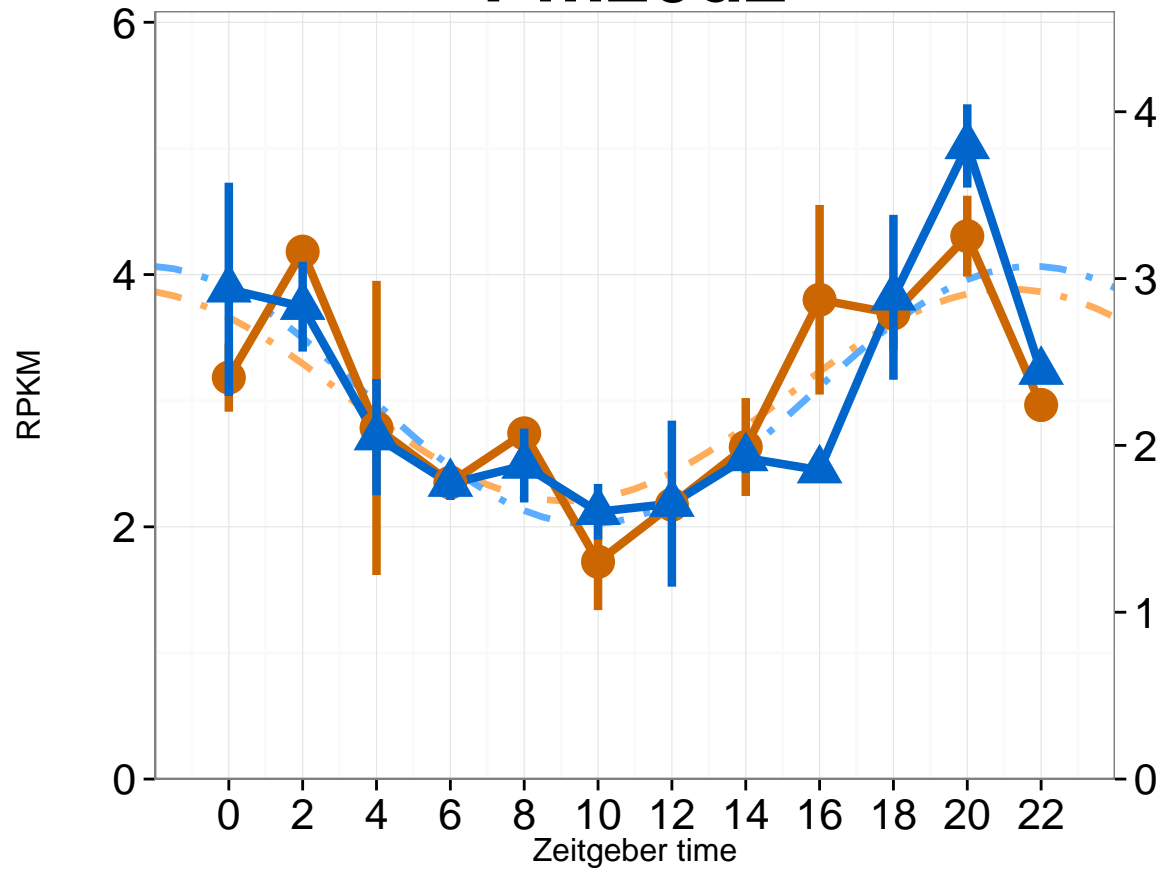

# Pm20d2

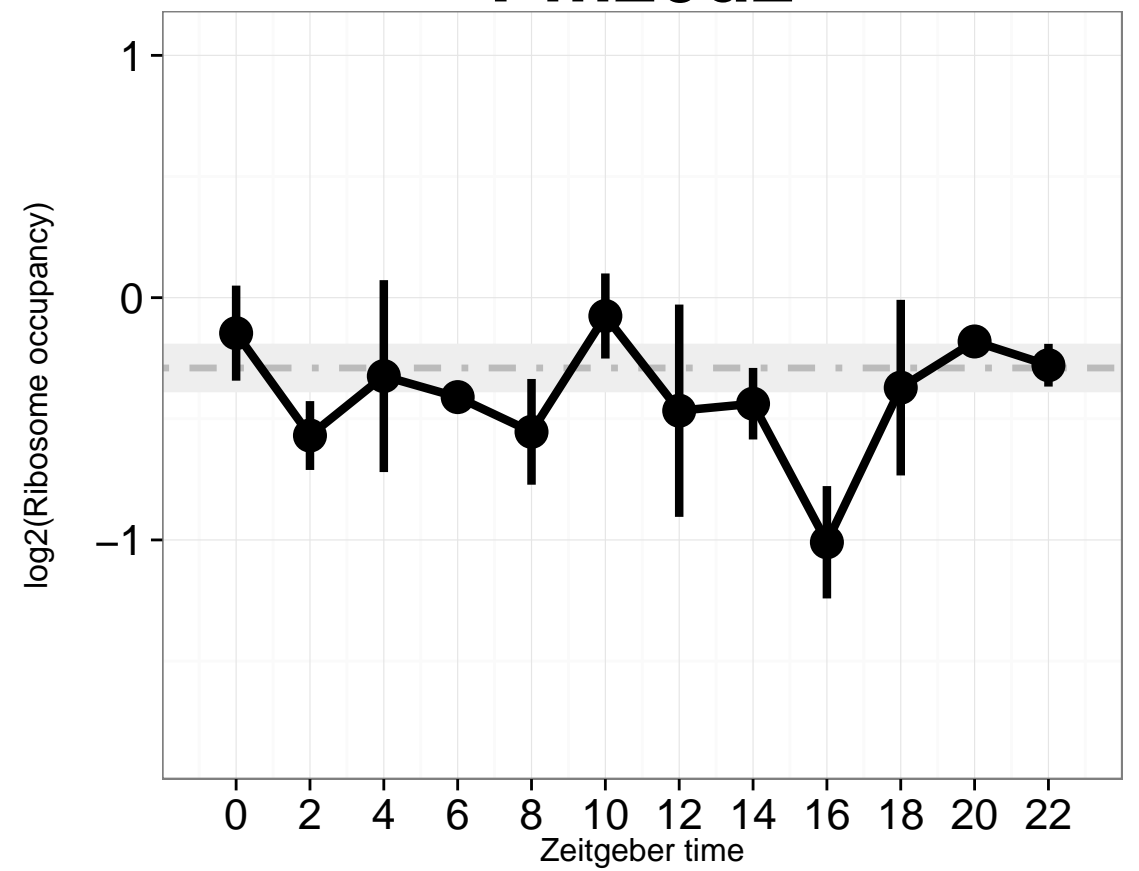

Supplement: SuppDataset_1.zip [file Pm20d2_set_D.pdf › Supplemental Dataset 1/D-mRNA_rhythm_translation_rhyth/Pm20d2_set_D.pdf]

## Pml

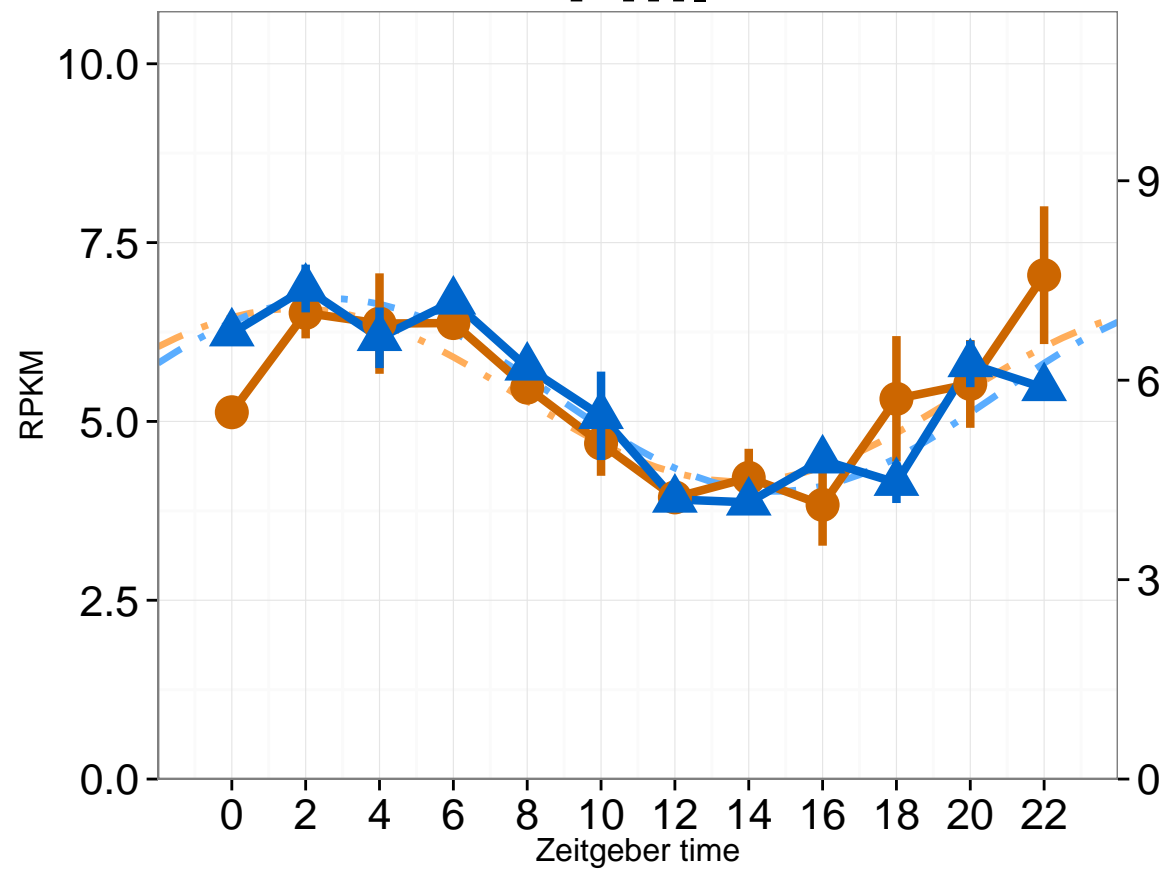

## Pml

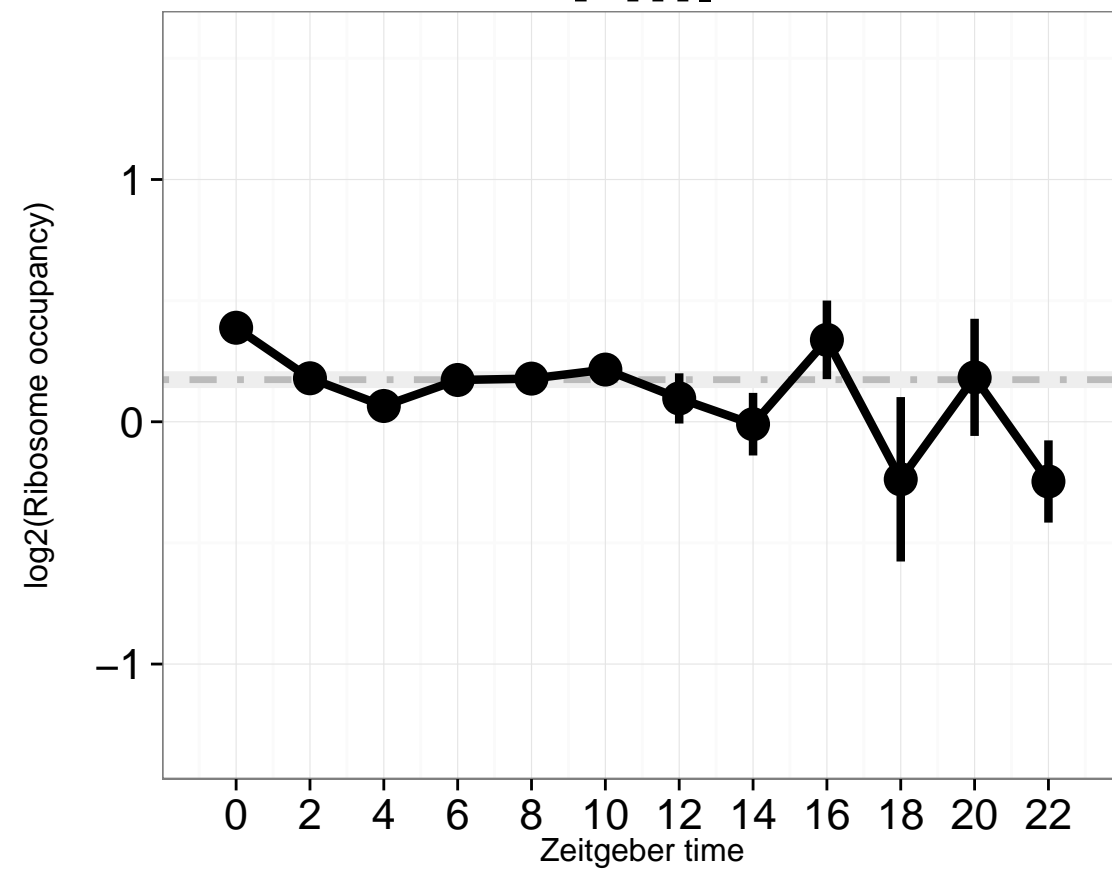

Supplement: SuppDataset_1.zip [file Pml_set_D.pdf › Supplemental Dataset 1/D-mRNA_rhythm_translation_rhyth/Pml_set_D.pdf]

## Pmvk

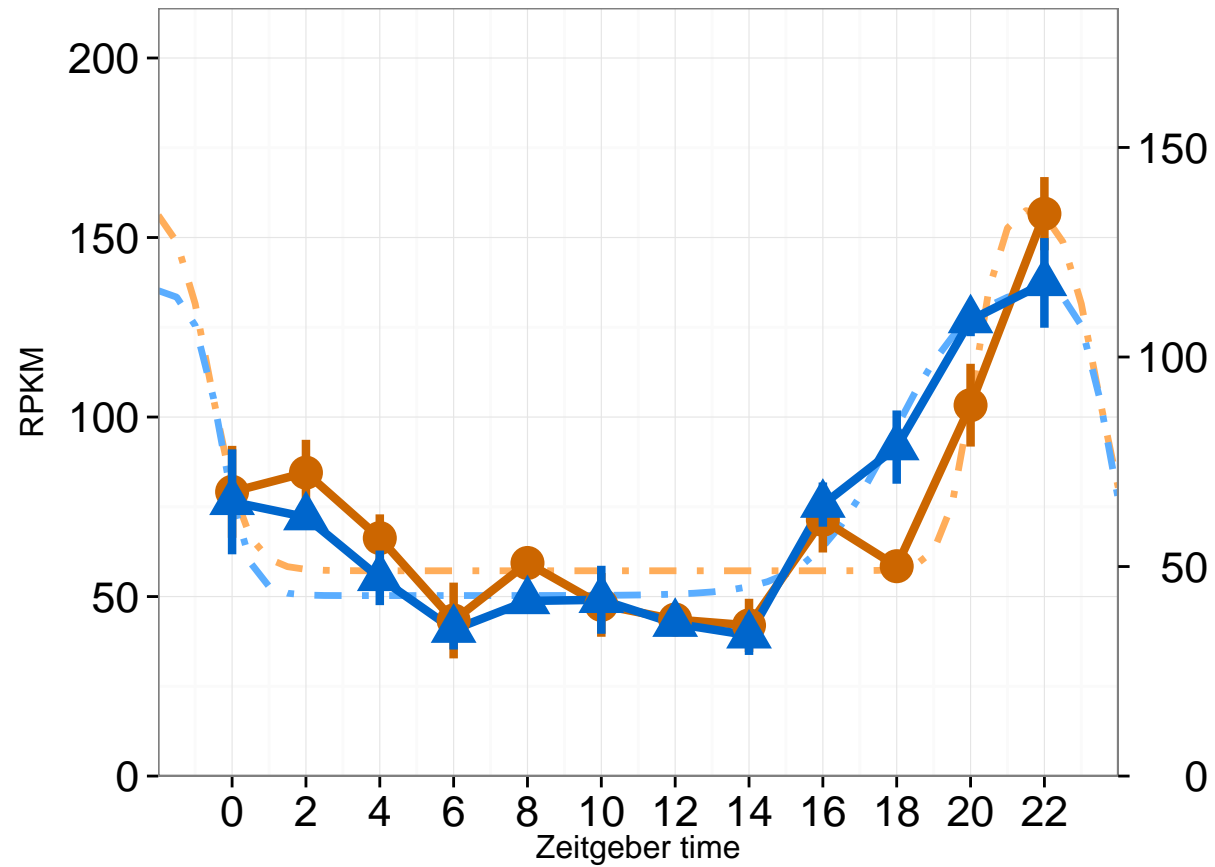

## Pmvk

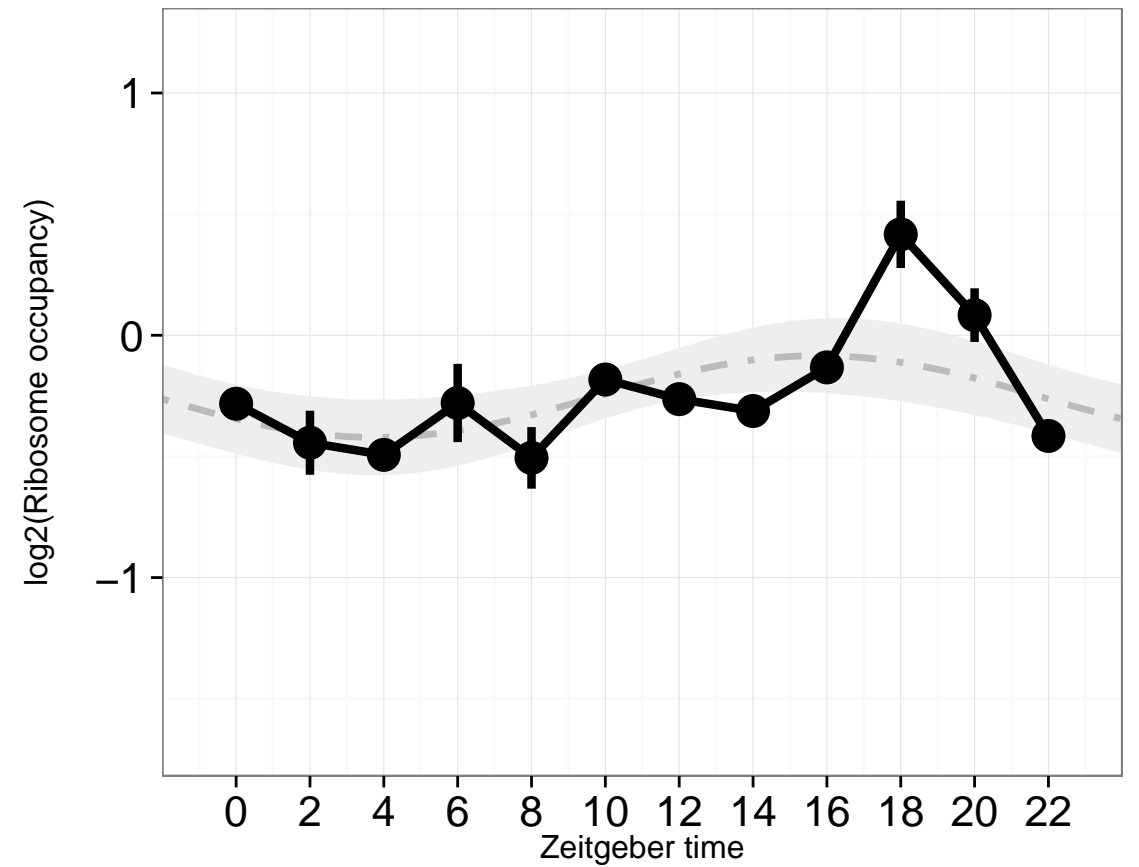

Supplement: SuppDataset_1.zip [file Pmvk_set_D.pdf › Supplemental Dataset 1/D-mRNA_rhythm_translation_rhyth/Pmvk_set_D.pdf]

## Pnkd

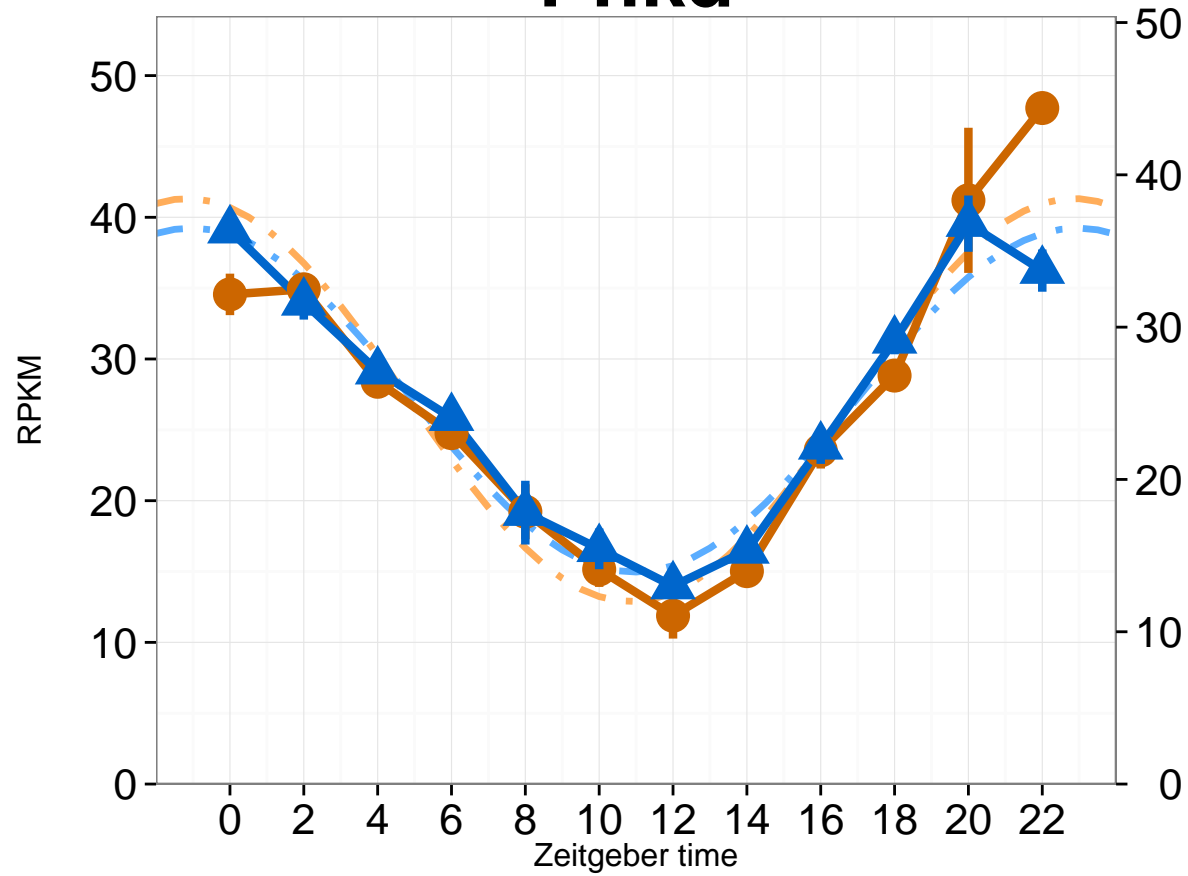

## Pnkd

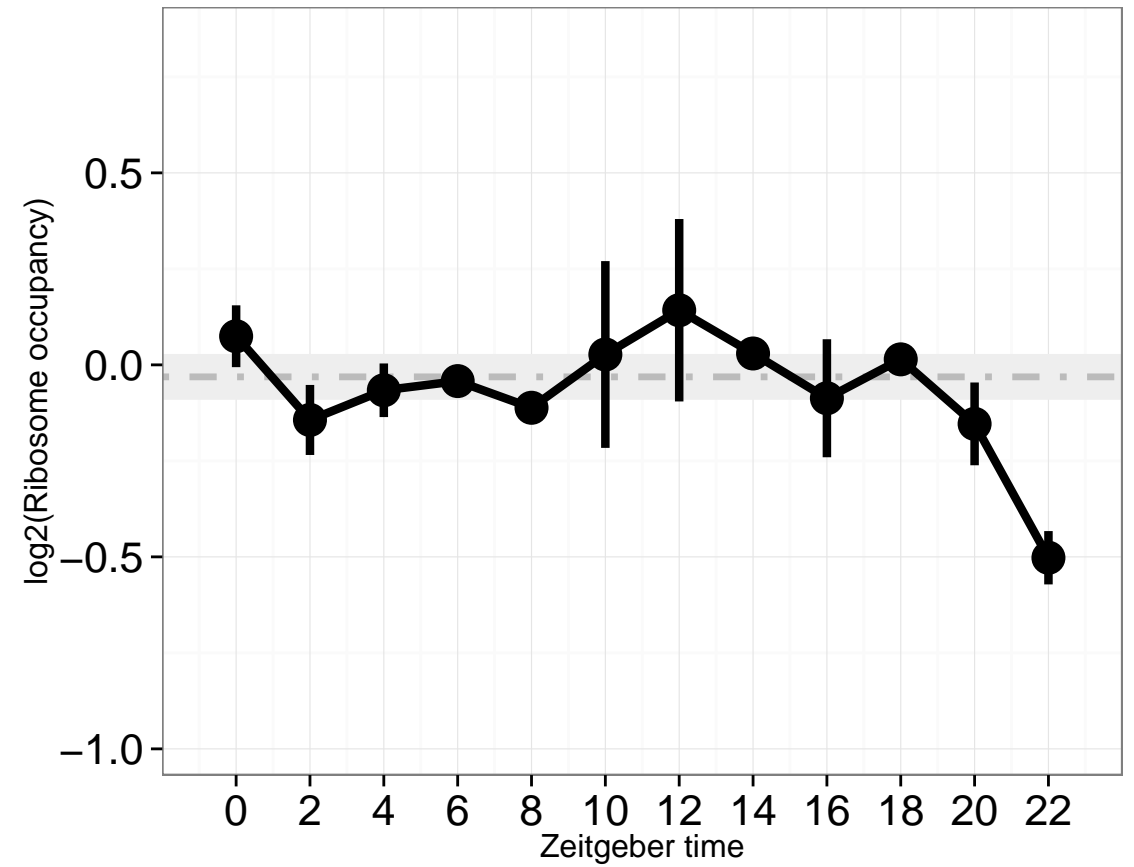

Supplement: SuppDataset_1.zip [file Pnkd_set_D.pdf › Supplemental Dataset 1/D-mRNA_rhythm_translation_rhyth/Pnkd_set_D.pdf]

## Pnkp

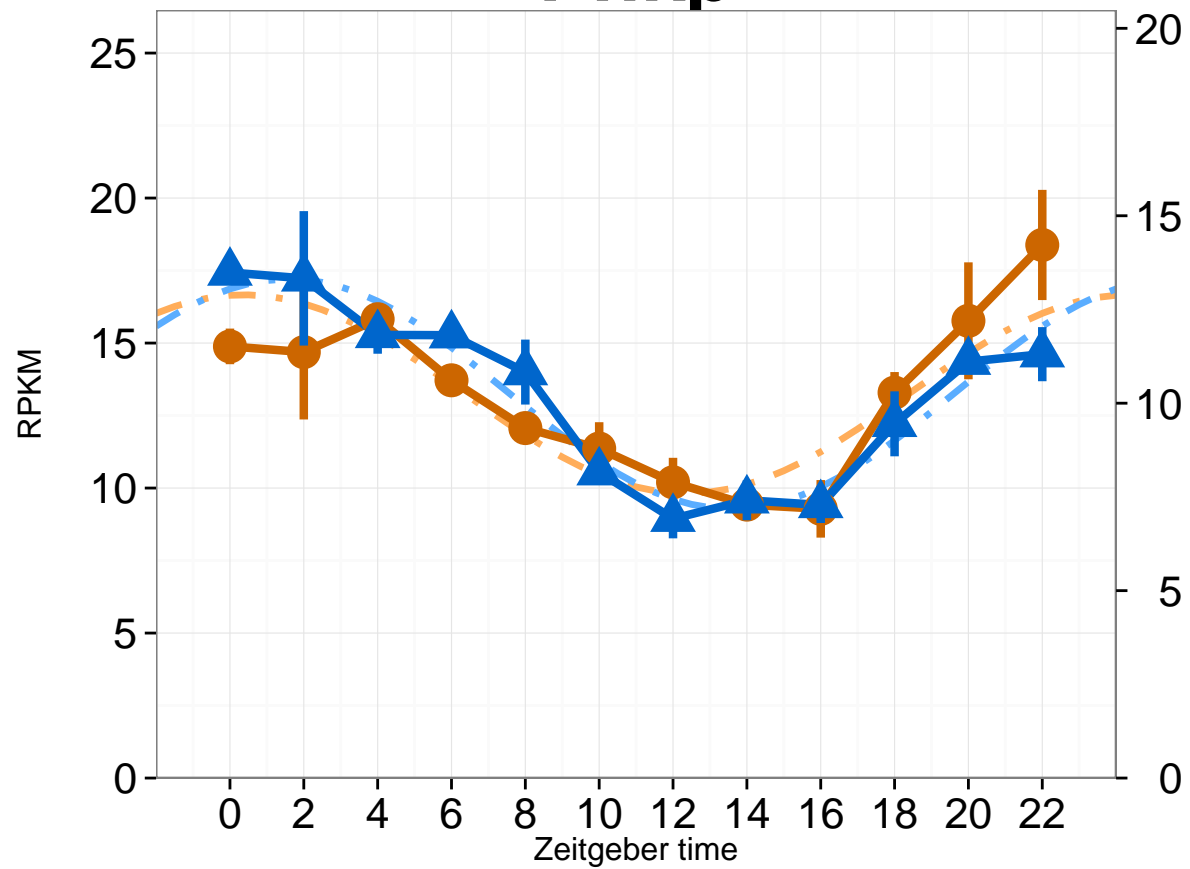

## Pnkp

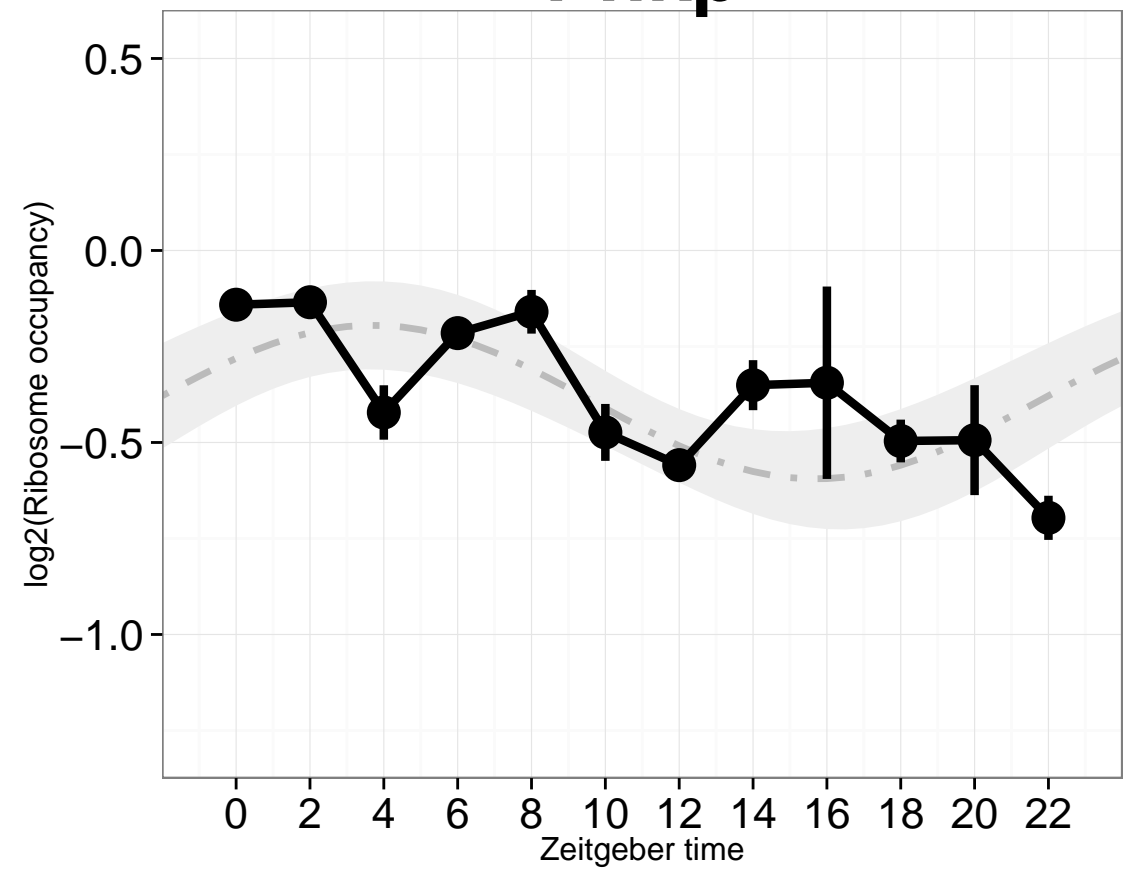

Supplement: SuppDataset_1.zip [file Pnkp_set_D.pdf › Supplemental Dataset 1/D-mRNA_rhythm_translation_rhyth/Pnkp_set_D.pdf]

## Pnp

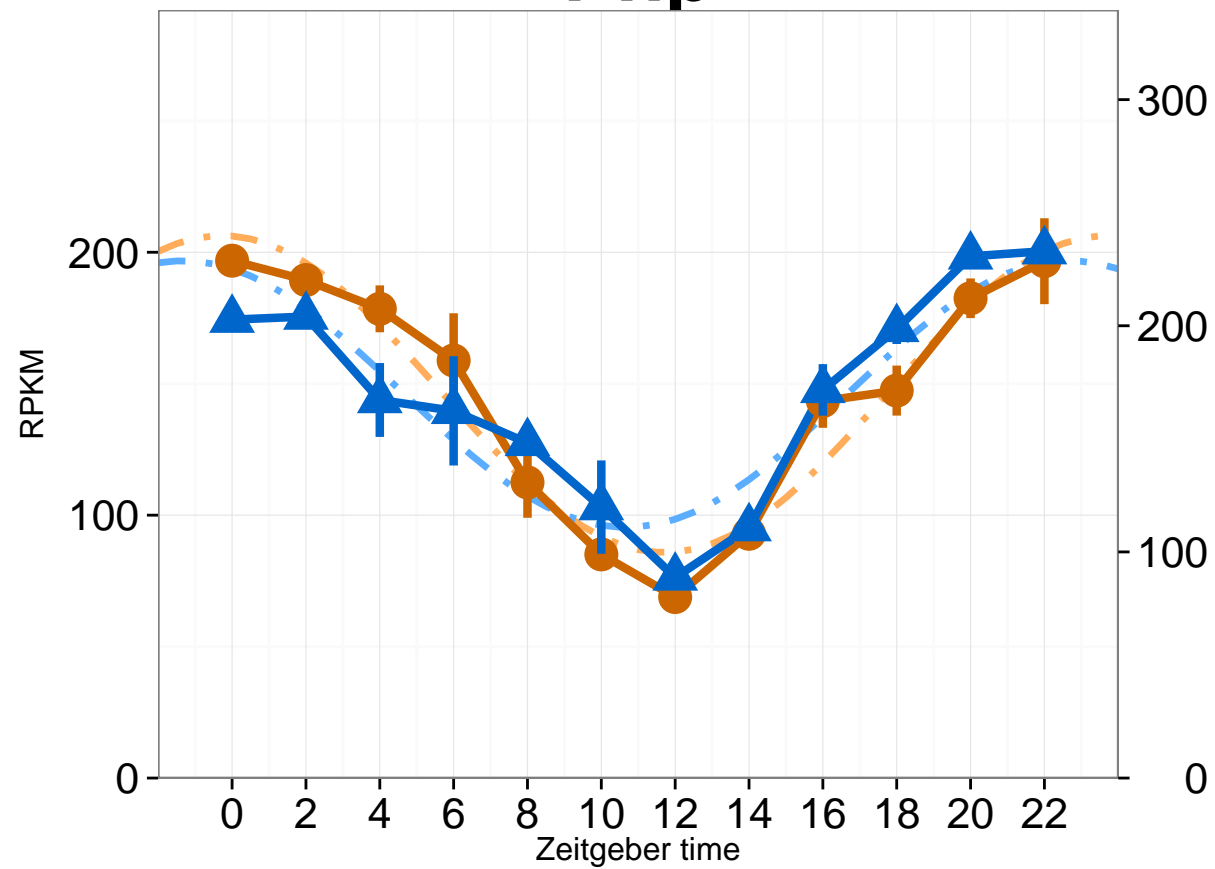

## Pnp

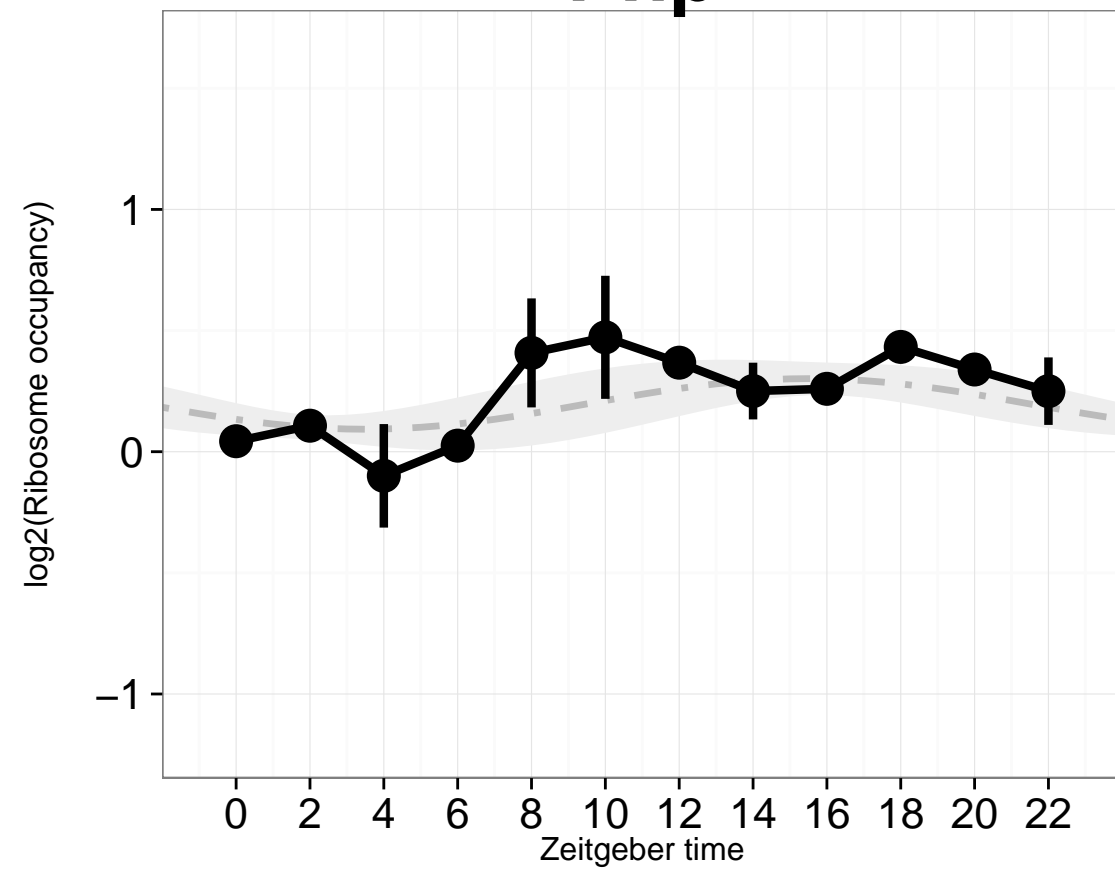

Supplement: SuppDataset_1.zip [file Pnp_set_D.pdf › Supplemental Dataset 1/D-mRNA_rhythm_translation_rhyth/Pnp_set_D.pdf]

## Pnpla2

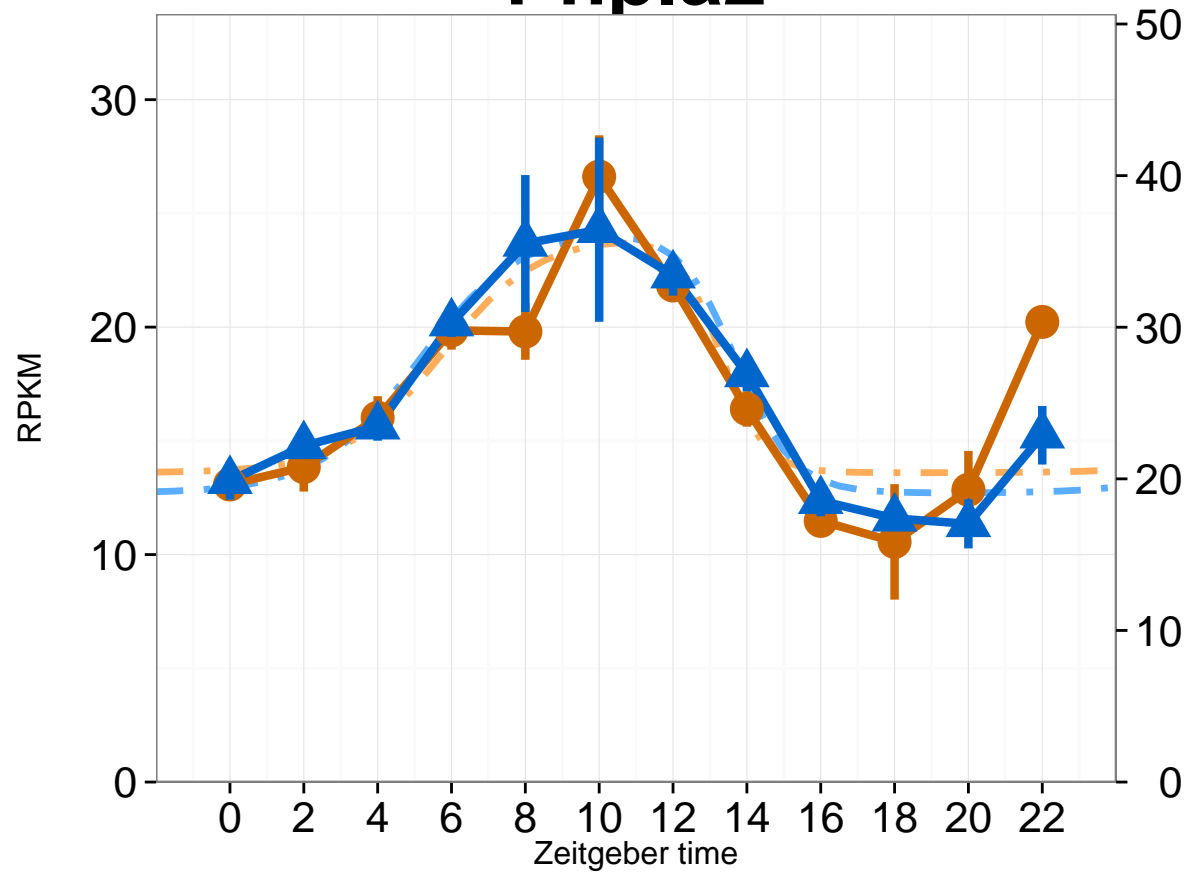

## Pnpla2

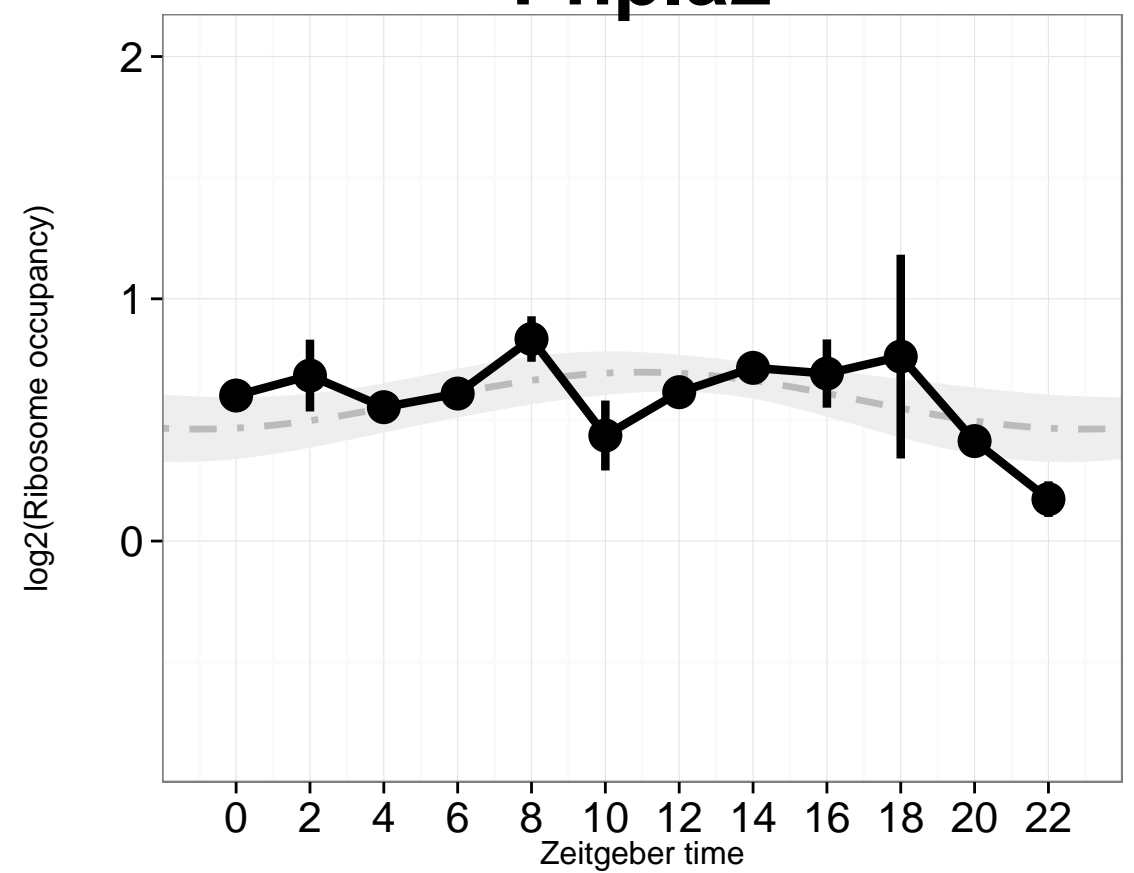

Supplement: SuppDataset_1.zip [file Pnpla2_set_D.pdf › Supplemental Dataset 1/D-mRNA_rhythm_translation_rhyth/Pnpla2_set_D.pdf]

## Pnpla3

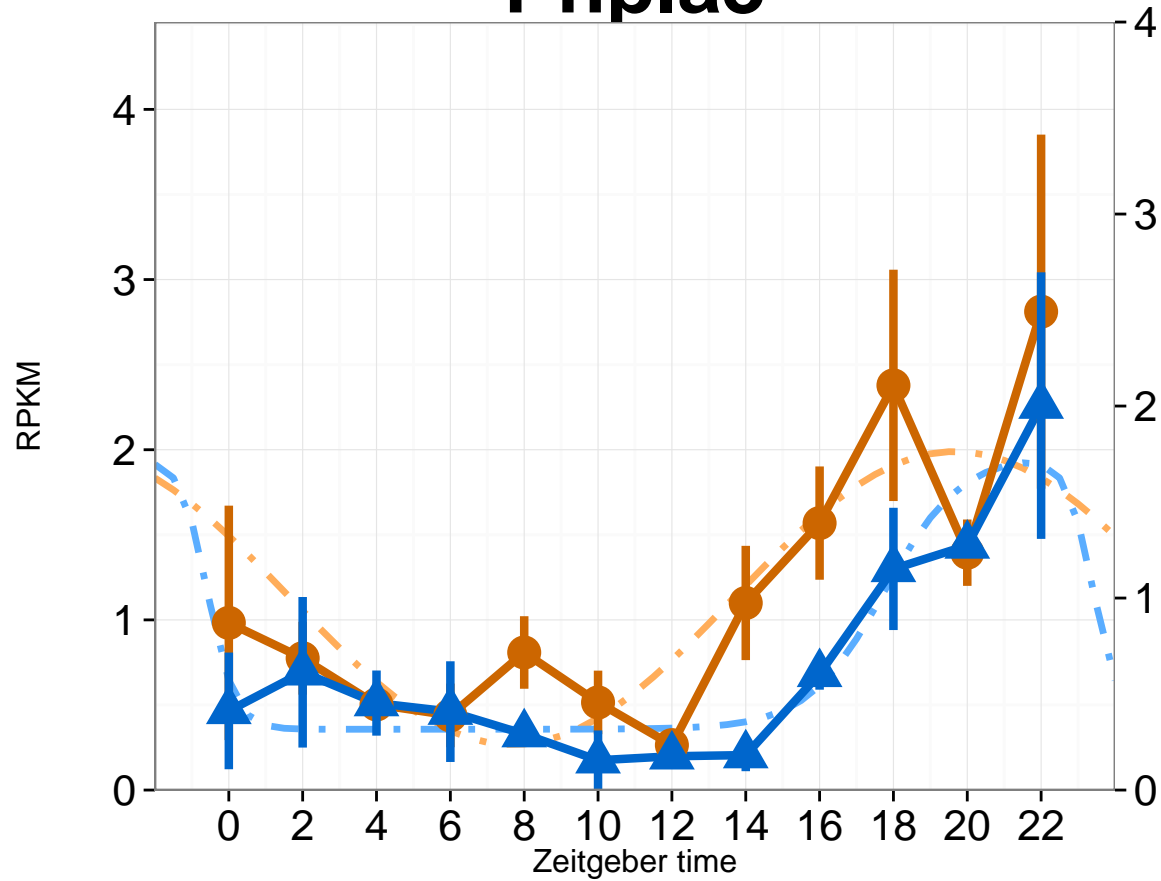

## Pnpla3

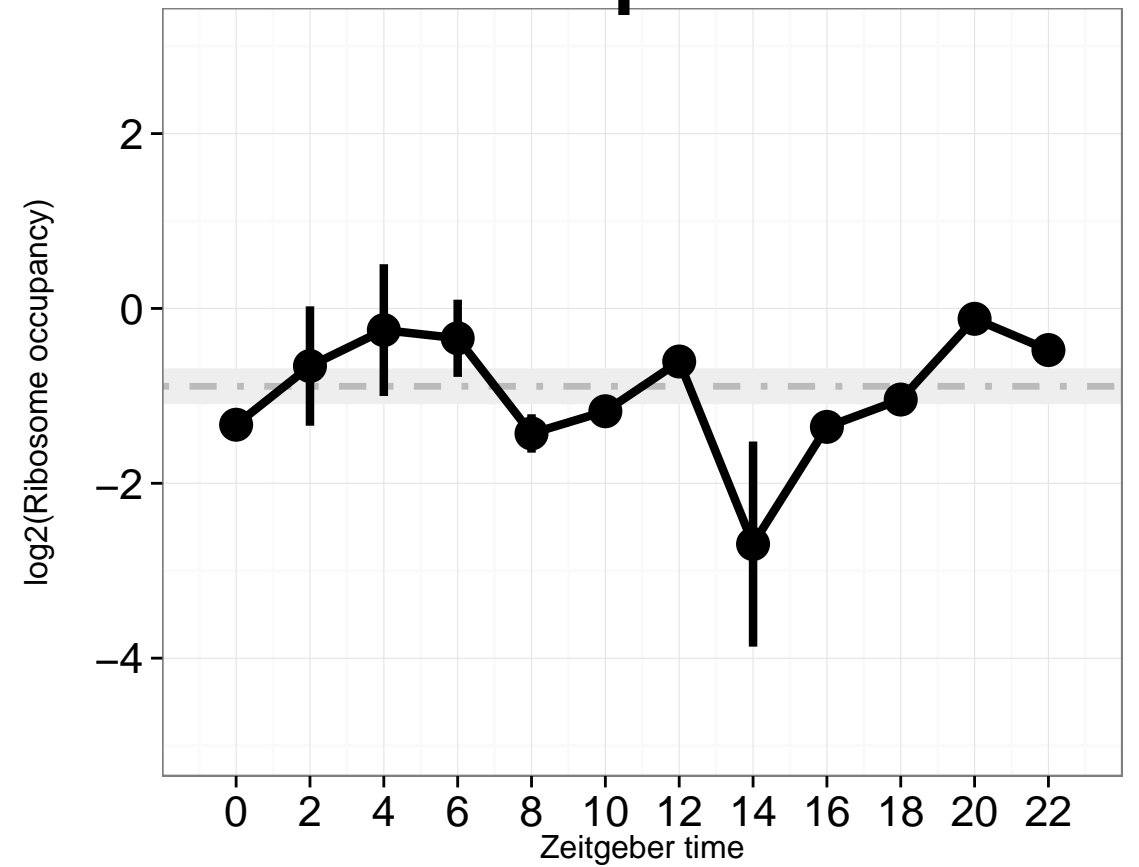

Supplement: SuppDataset_1.zip [file Pnpla3_set_D.pdf › Supplemental Dataset 1/D-mRNA_rhythm_translation_rhyth/Pnpla3_set_D.pdf]

# Pnrc1

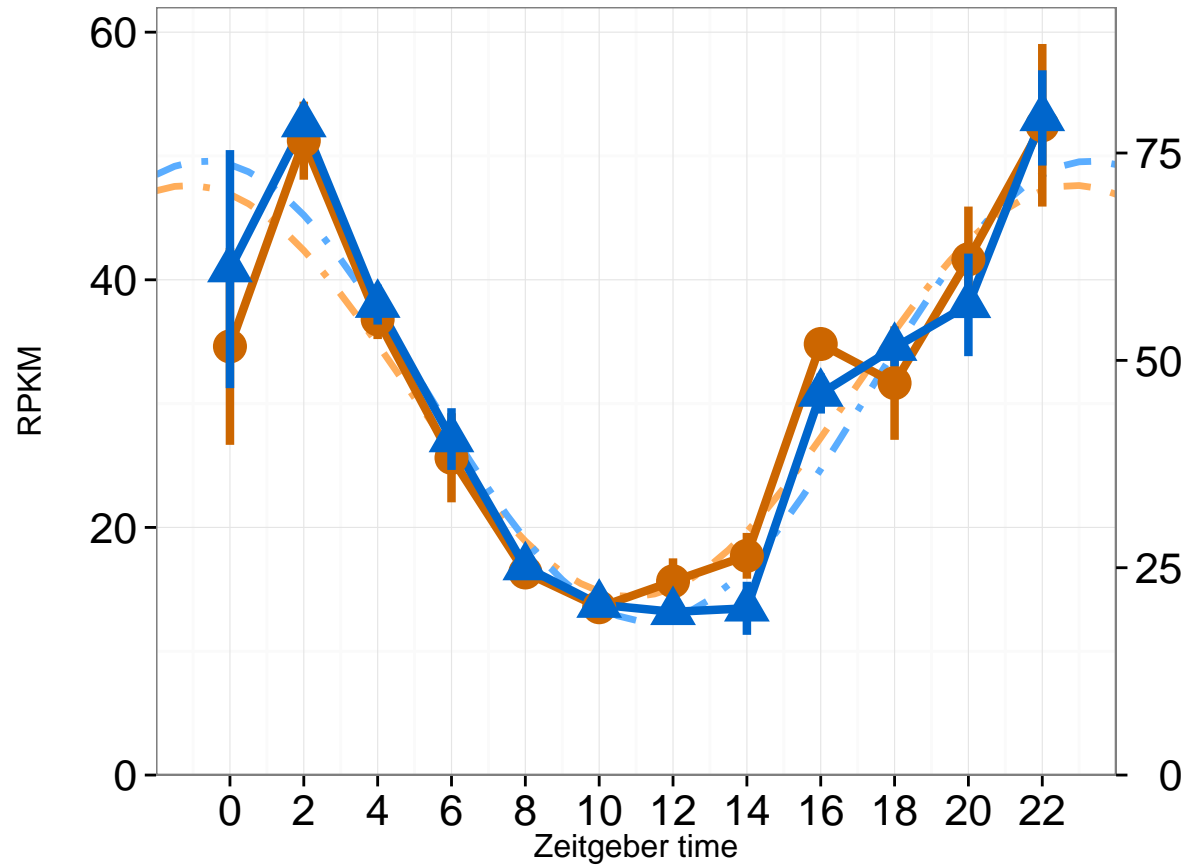

# Pnrc1

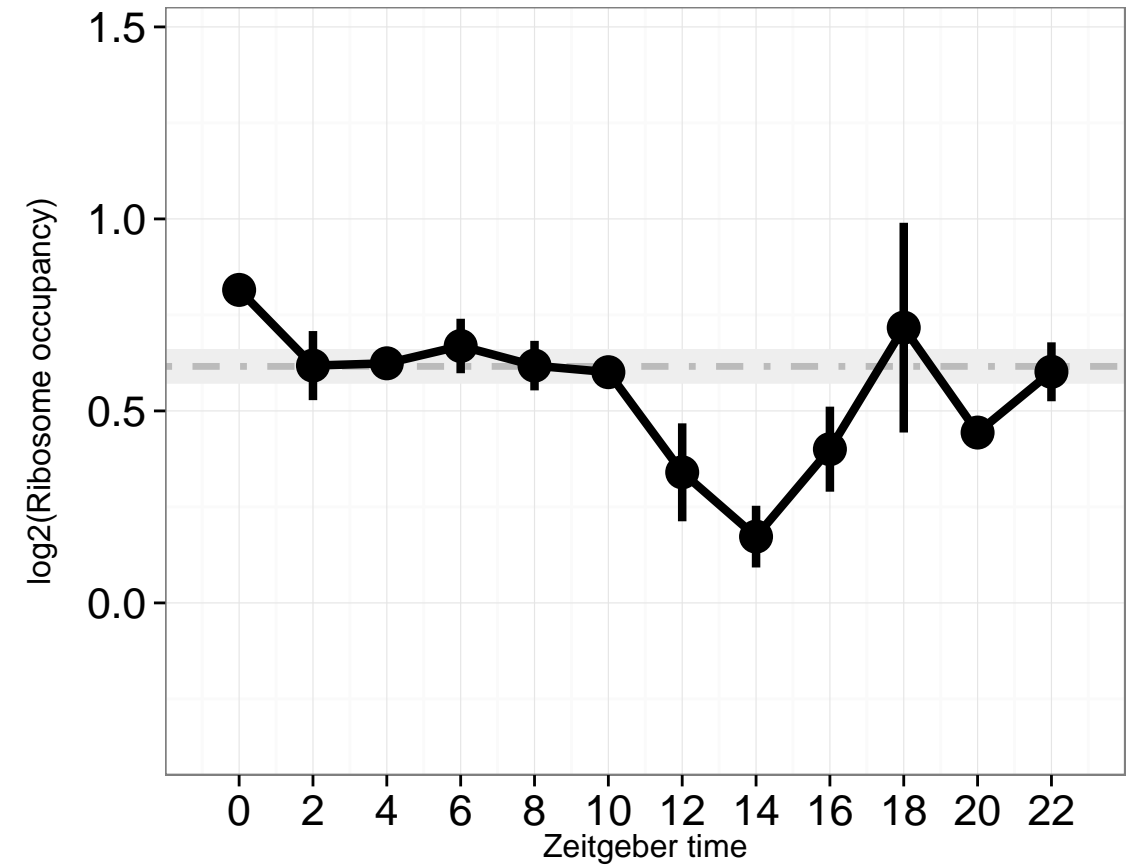

Supplement: SuppDataset_1.zip [file Pnrc1_set_D.pdf › Supplemental Dataset 1/D-mRNA_rhythm_translation_rhyth/Pnrc1_set_D.pdf]

## Podn

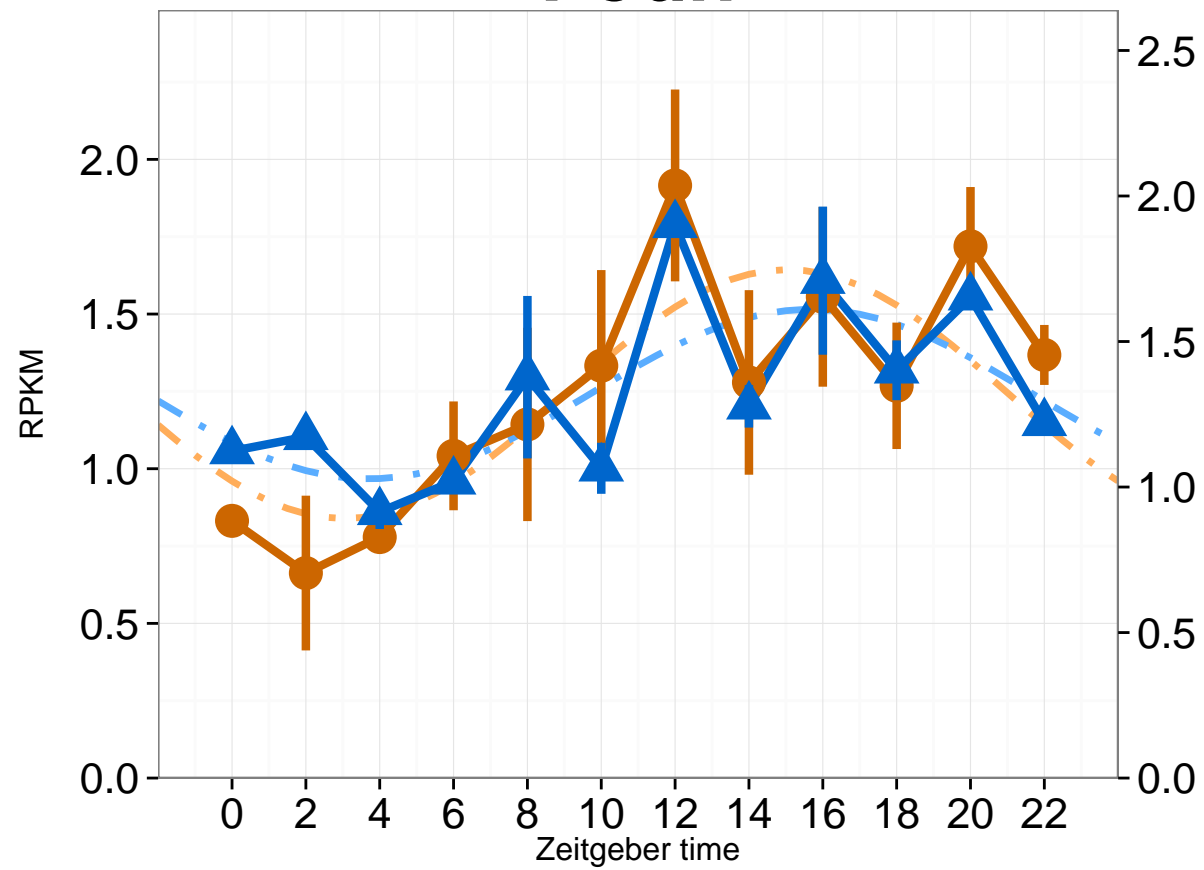

## Podn

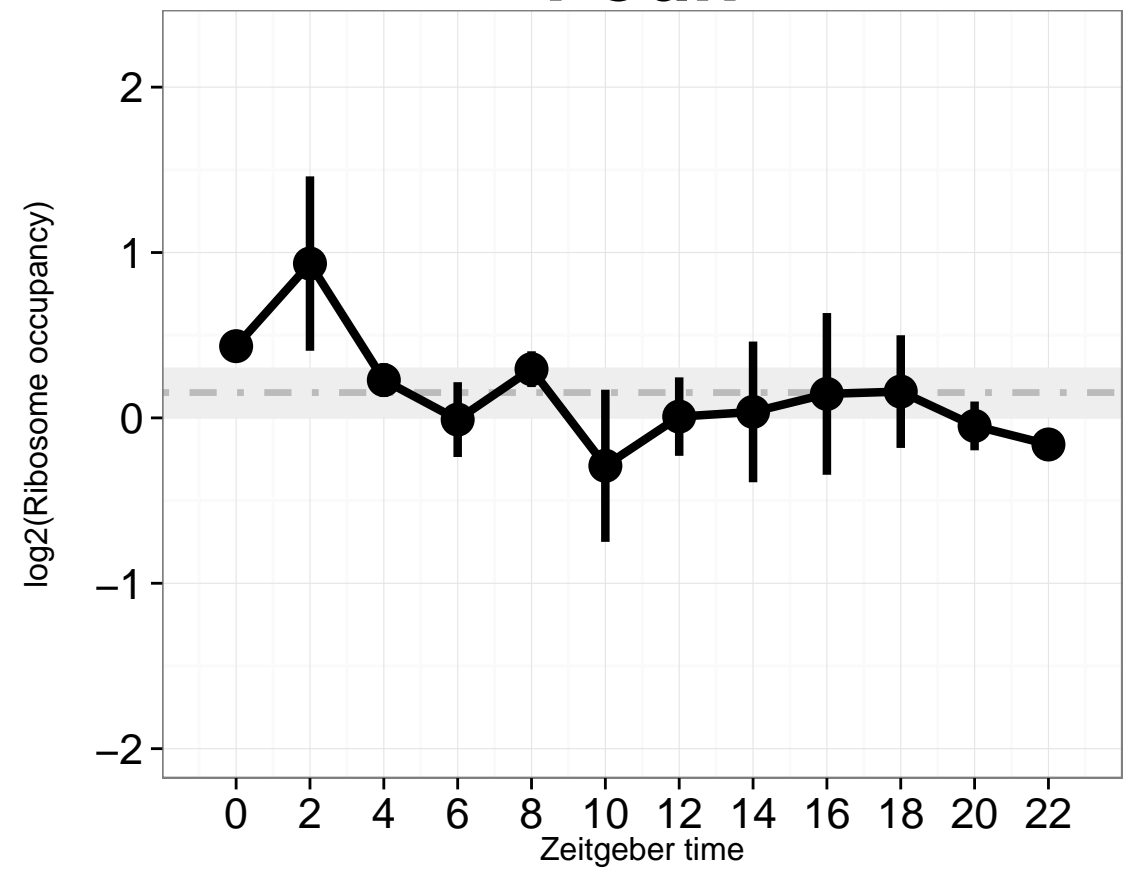

Supplement: SuppDataset_1.zip [file Podn_set_D.pdf › Supplemental Dataset 1/D-mRNA_rhythm_translation_rhyth/Podn_set_D.pdf]

# Pold1

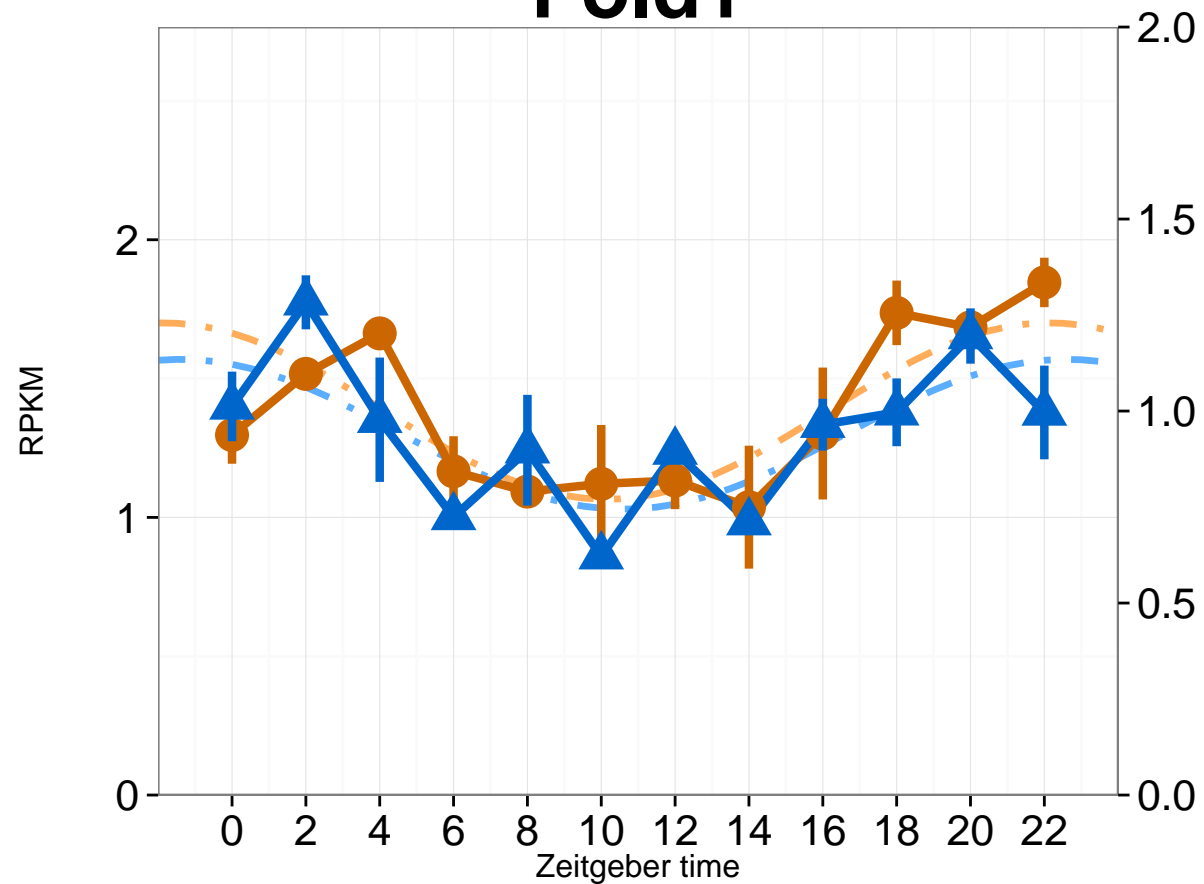

# Pold1

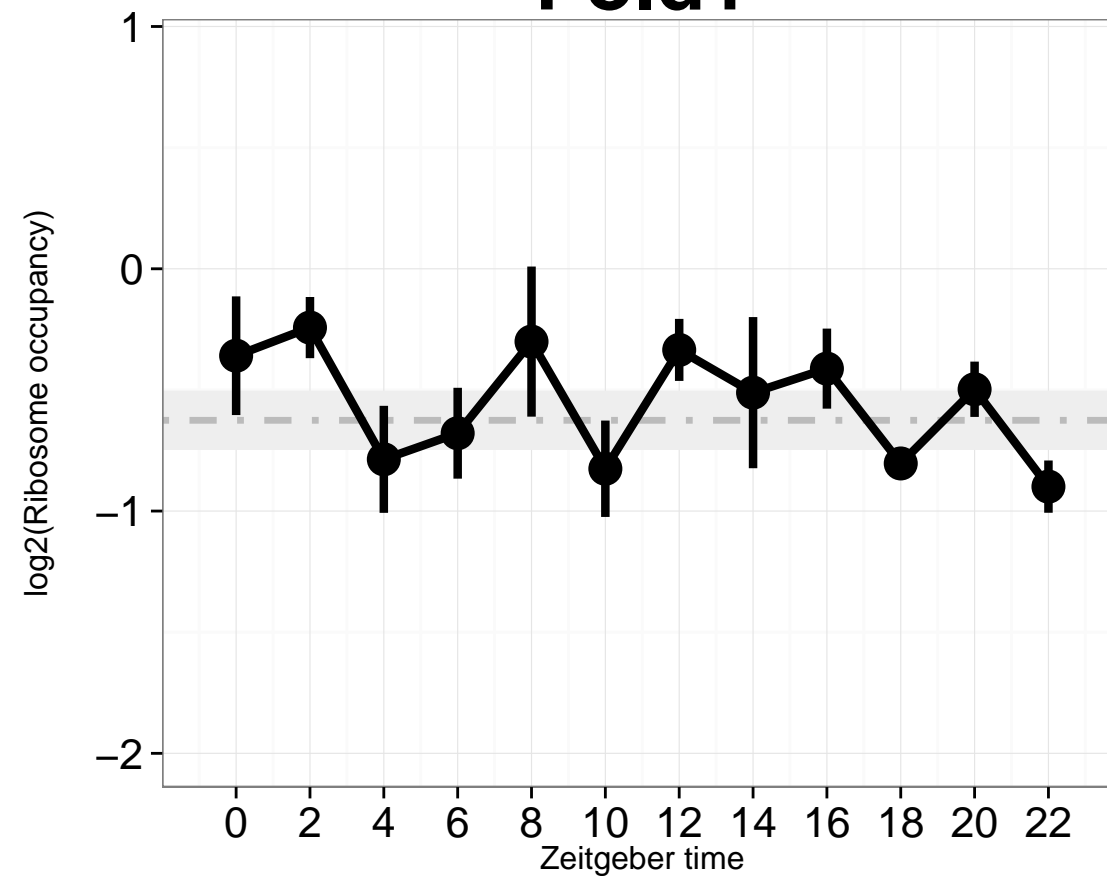

Supplement: SuppDataset_1.zip [file Pold1_set_D.pdf › Supplemental Dataset 1/D-mRNA_rhythm_translation_rhyth/Pold1_set_D.pdf]

## Poll

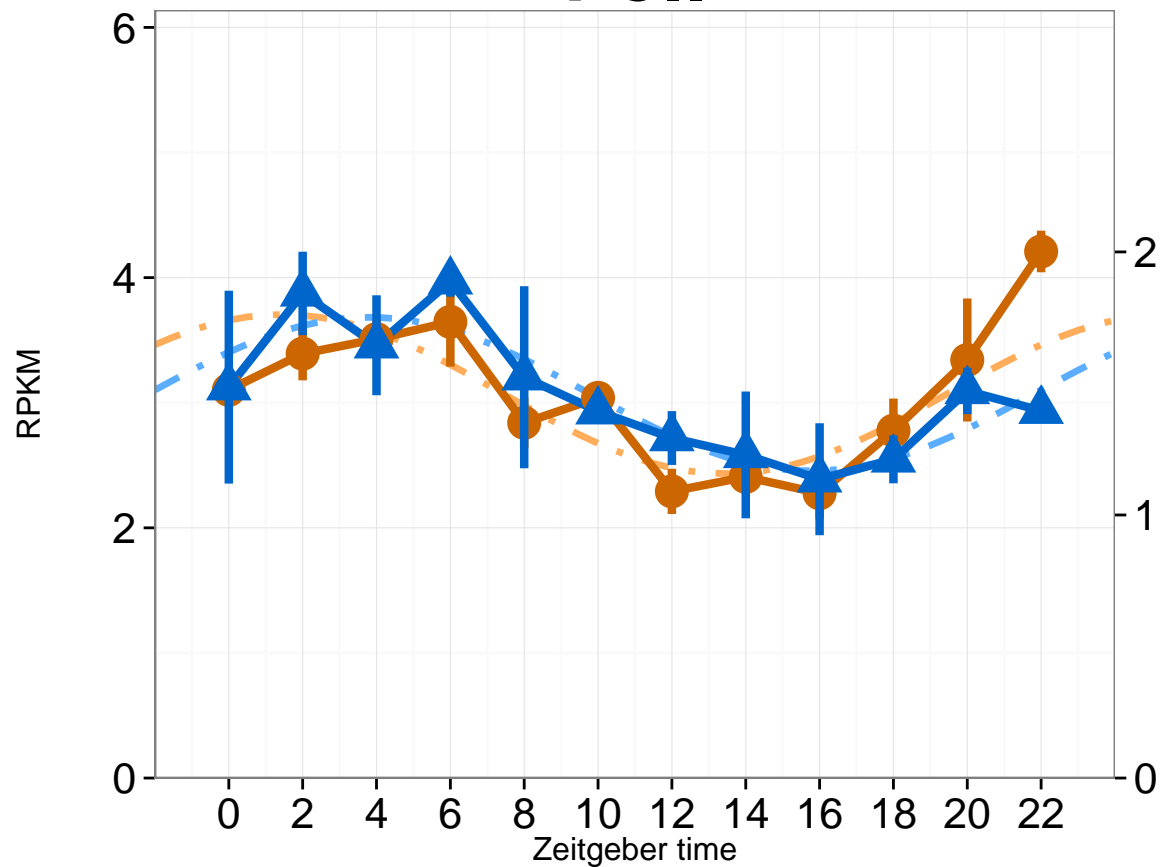

## Poll

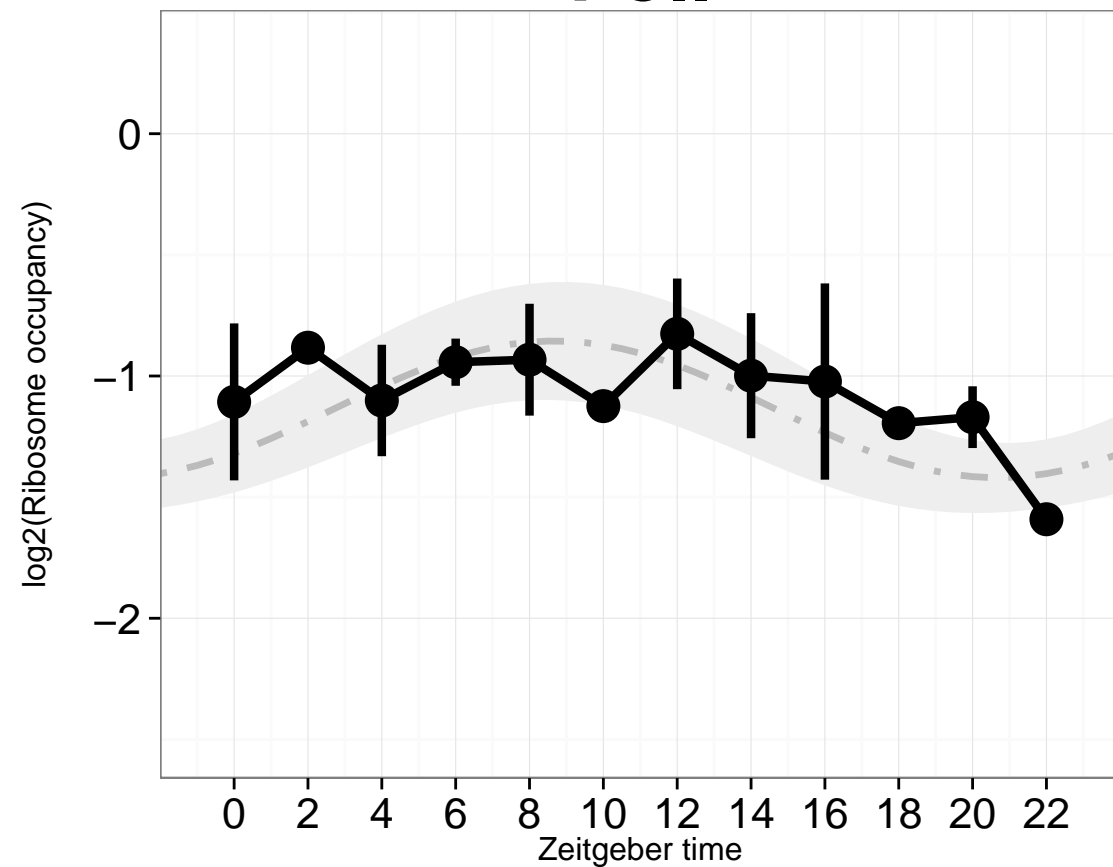

Supplement: SuppDataset_1.zip [file Poll_set_D.pdf › Supplemental Dataset 1/D-mRNA_rhythm_translation_rhyth/Poll_set_D.pdf]

# Polr2h

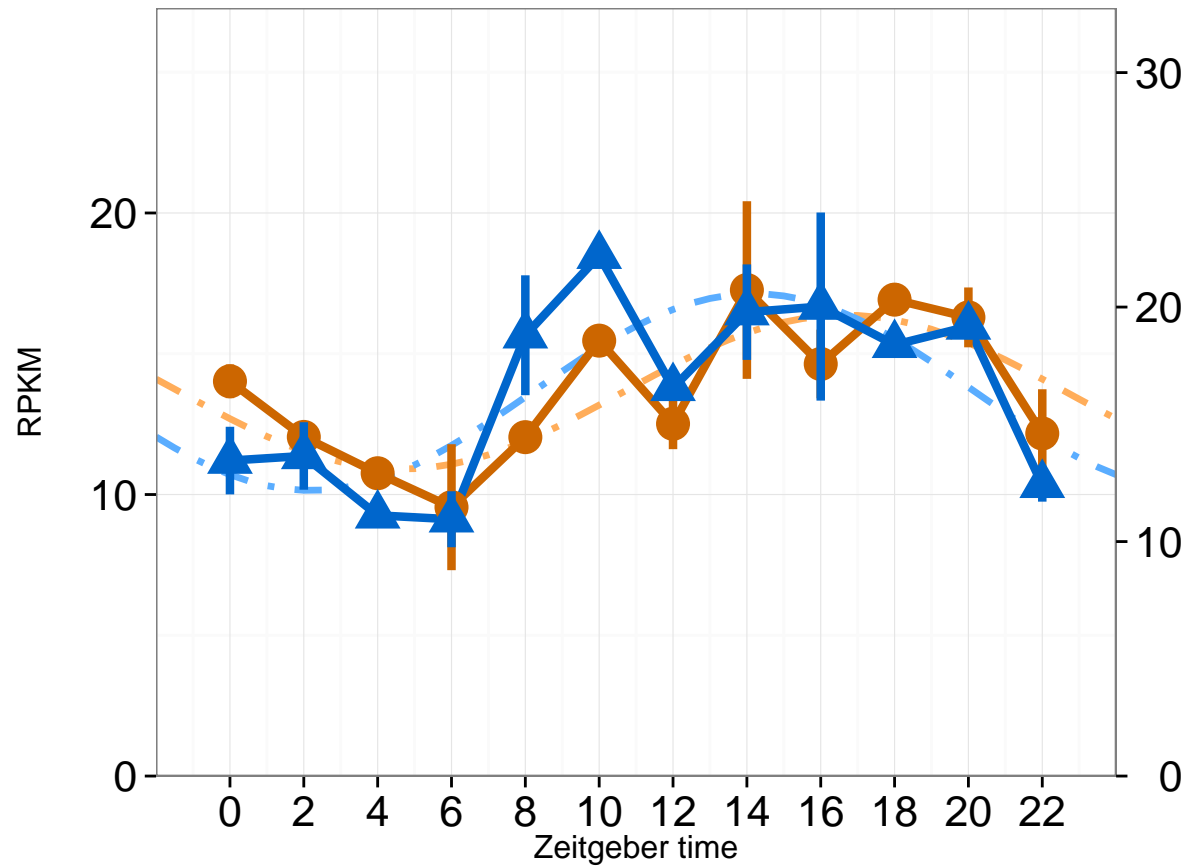

# Polr2h

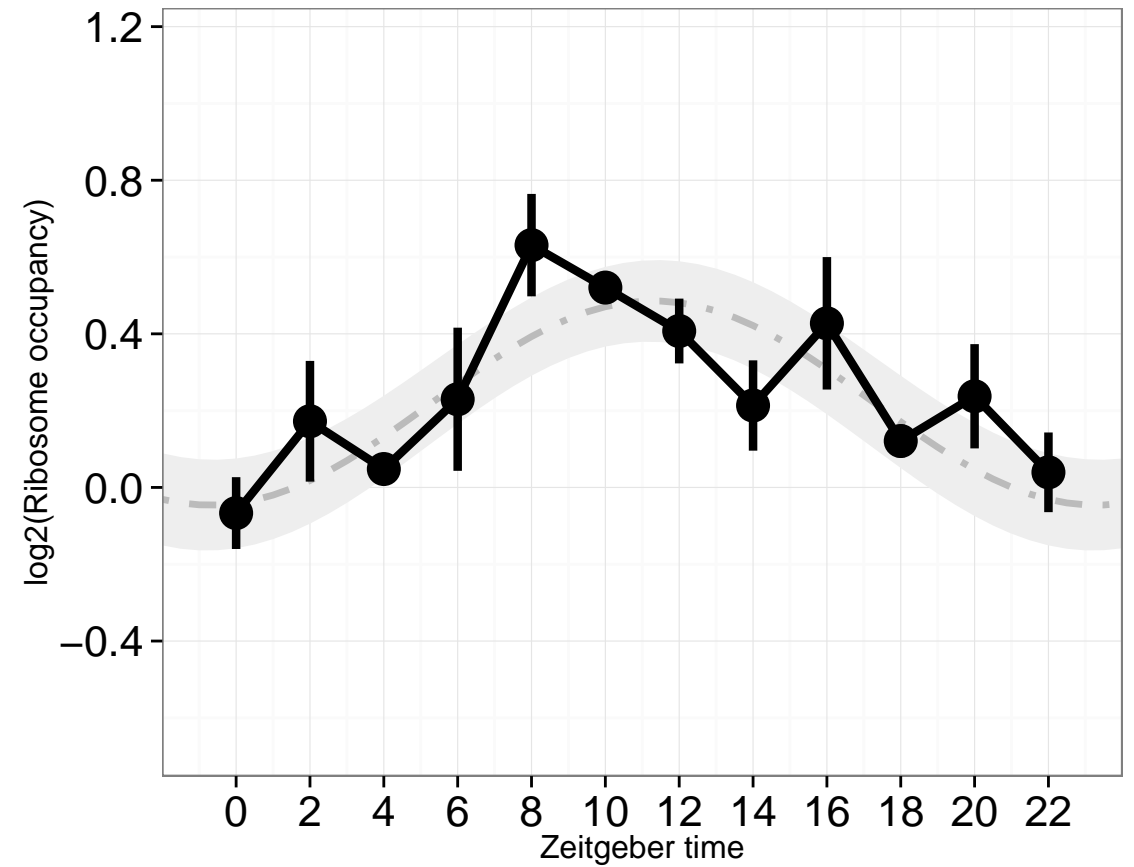

Supplement: SuppDataset_1.zip [file Polr2h_set_D.pdf › Supplemental Dataset 1/D-mRNA_rhythm_translation_rhyth/Polr2h_set_D.pdf]

# Pomt1

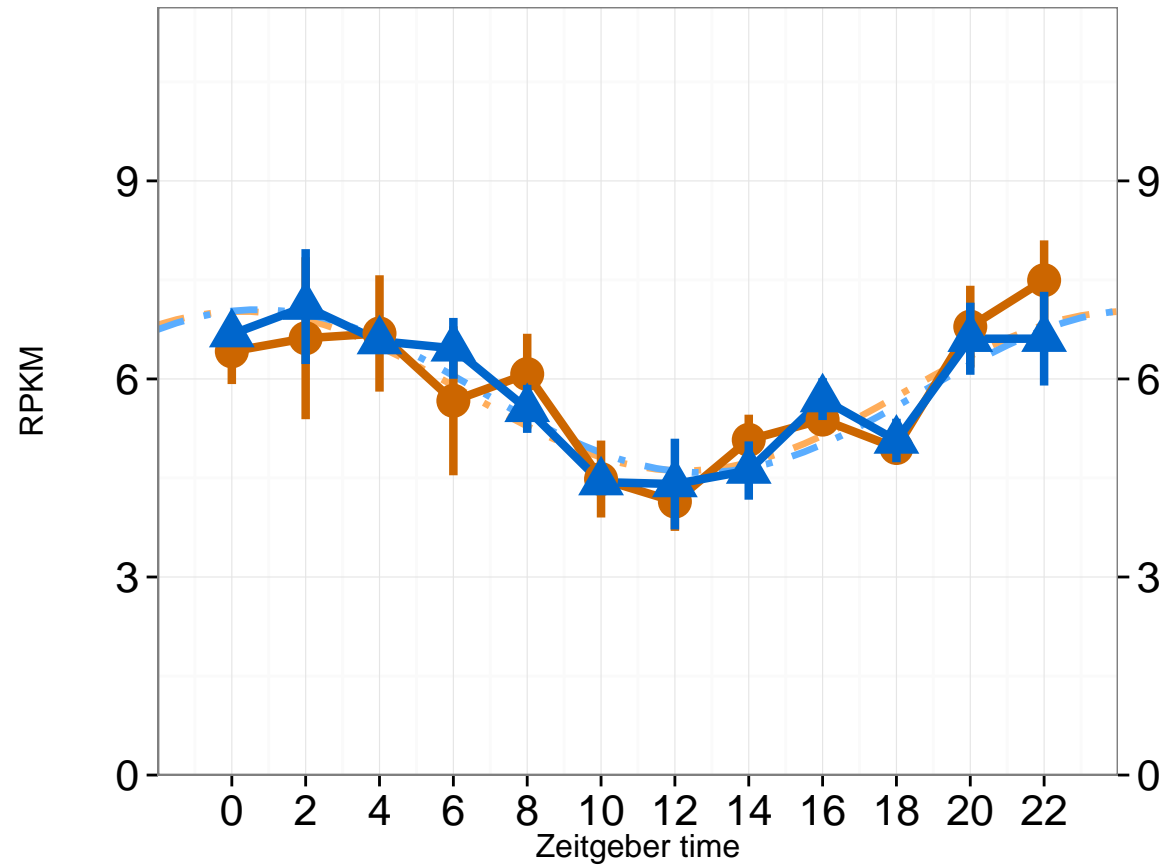

# Pomt1

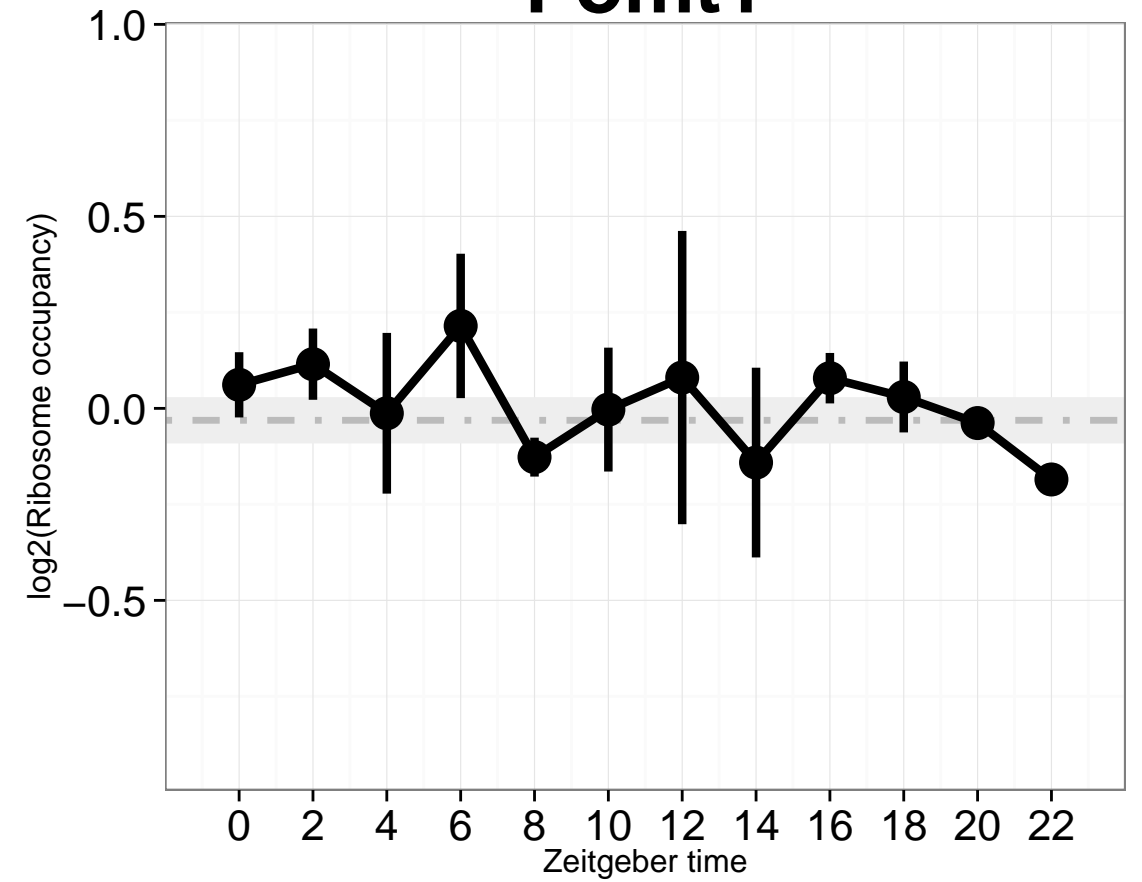

Supplement: SuppDataset_1.zip [file Pomt1_set_D.pdf › Supplemental Dataset 1/D-mRNA_rhythm_translation_rhyth/Pomt1_set_D.pdf]

## Por

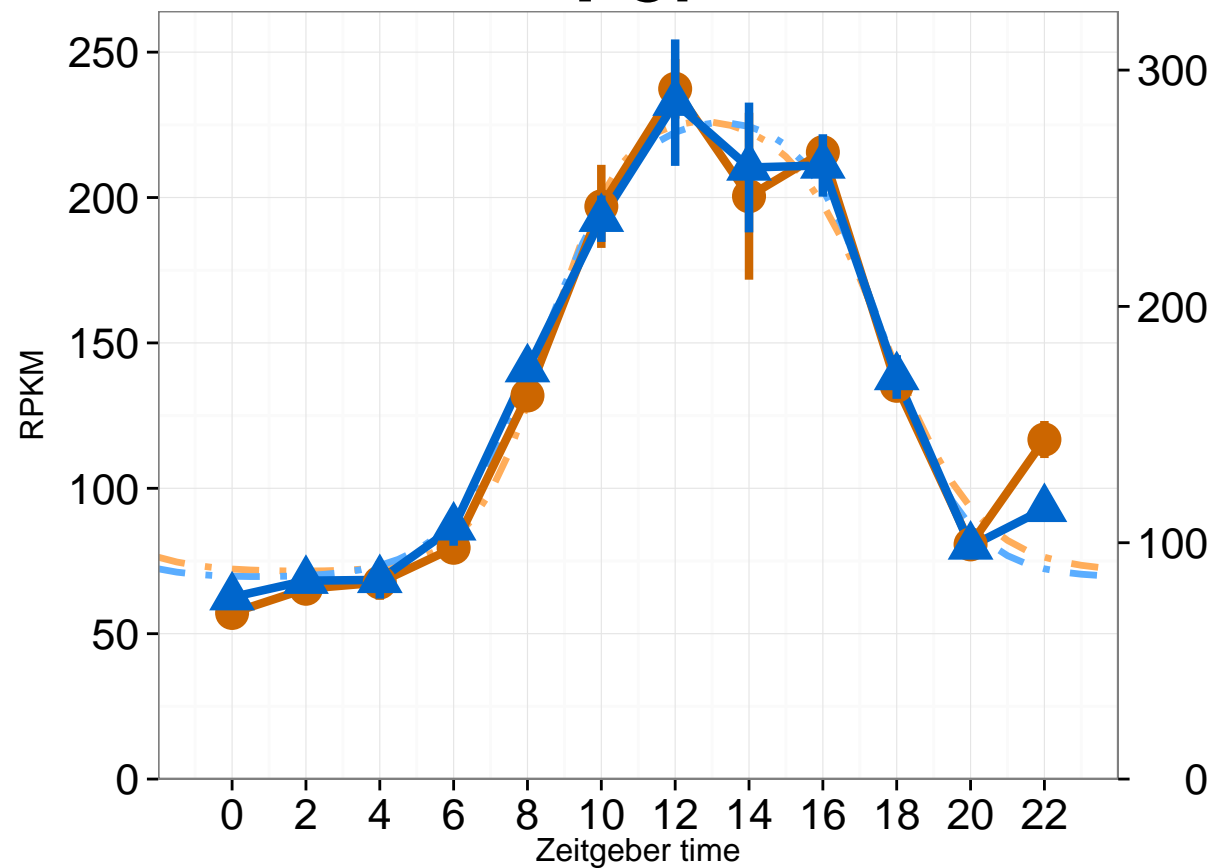

## Por

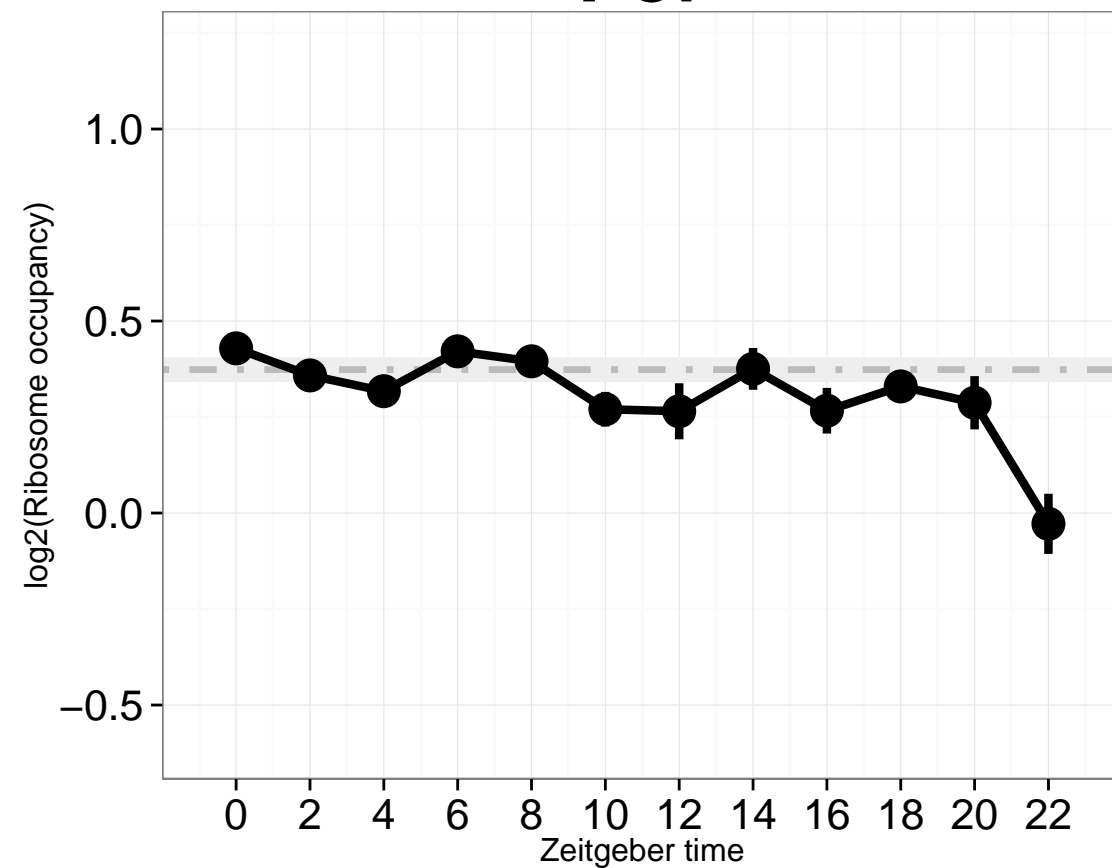

Supplement: SuppDataset_1.zip [file Por_set_D.pdf › Supplemental Dataset 1/D-mRNA_rhythm_translation_rhyth/Por_set_D.pdf]

## Ppard

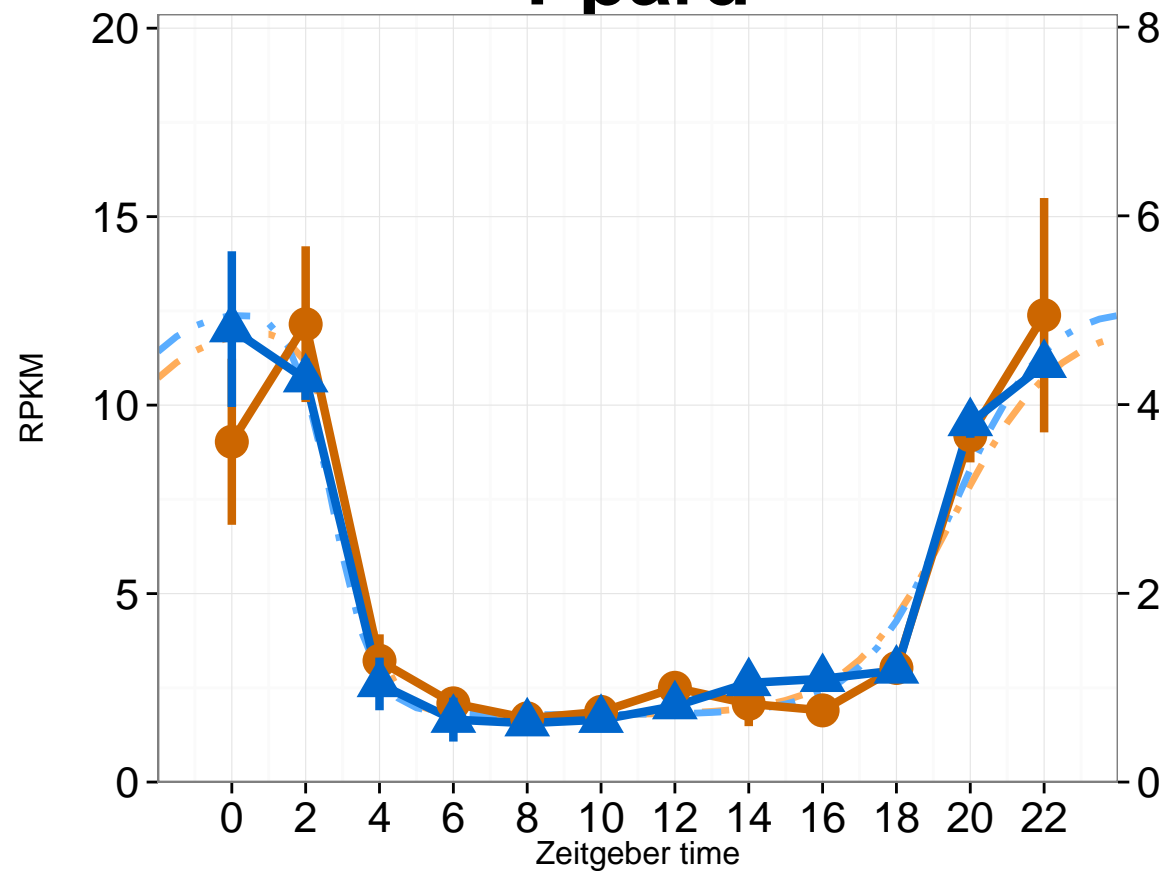

## Ppard

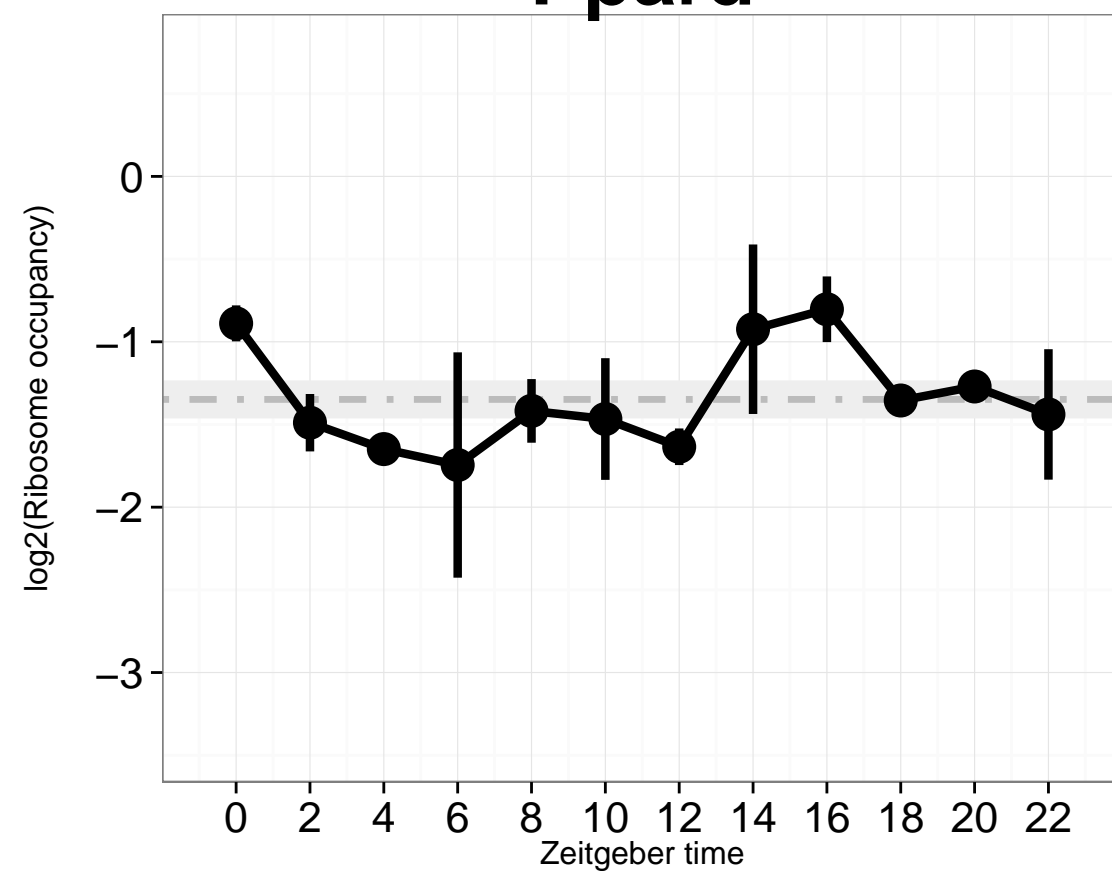

Supplement: SuppDataset_1.zip [file Ppard_set_D.pdf › Supplemental Dataset 1/D-mRNA_rhythm_translation_rhyth/Ppard_set_D.pdf]

# Ppargc1b

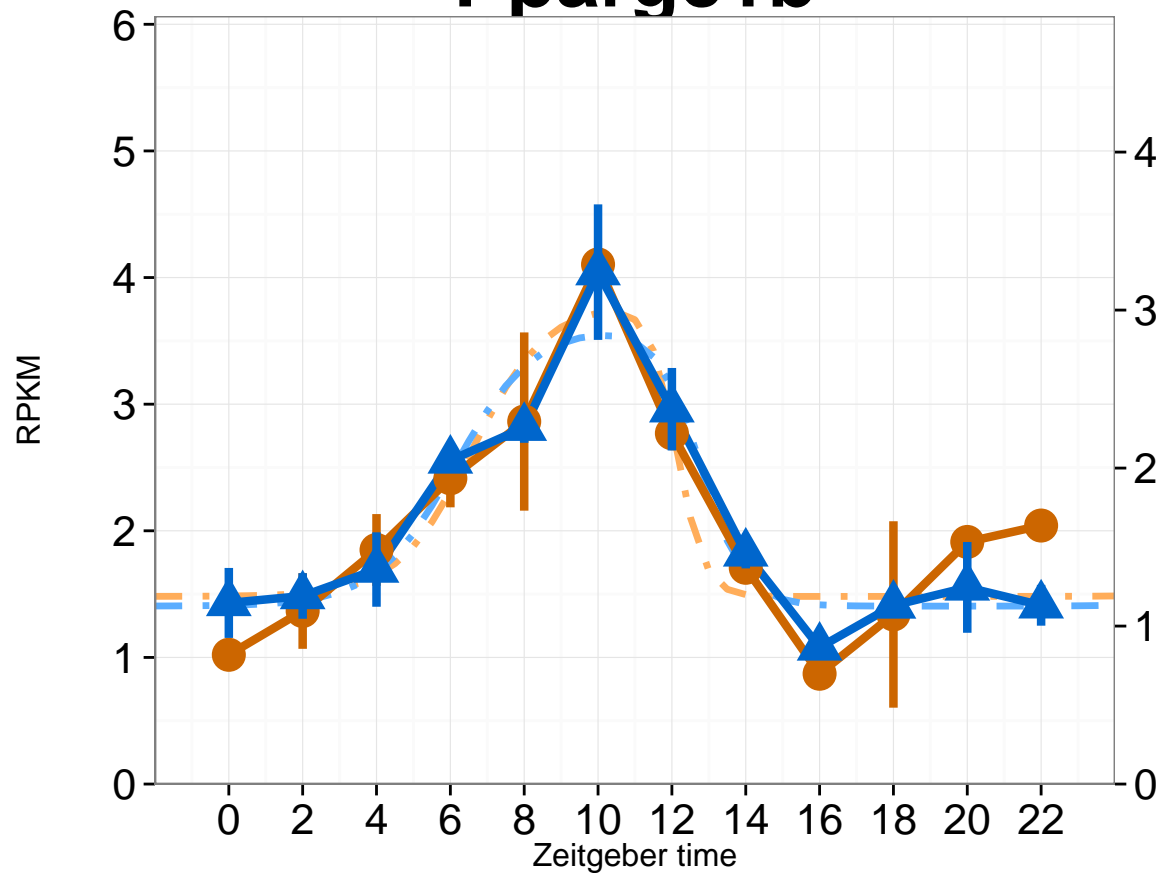

# Ppargc1b

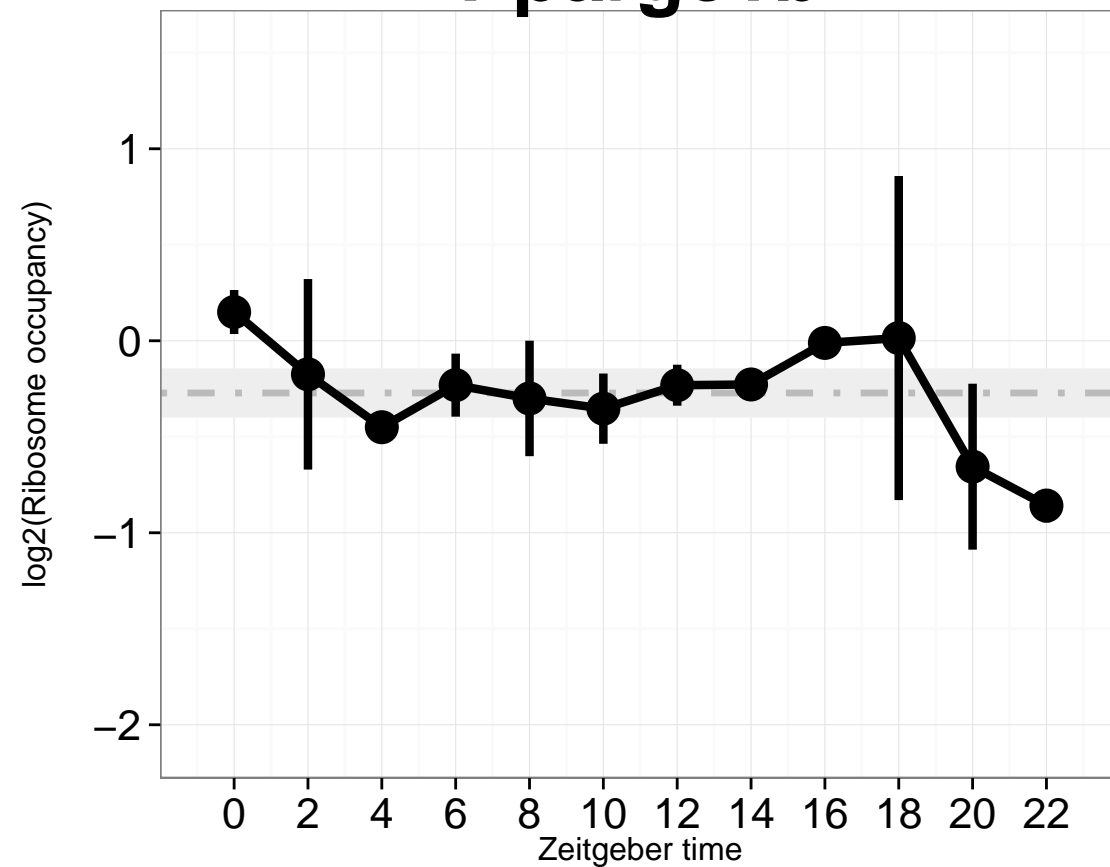

Supplement: SuppDataset_1.zip [file Ppargc1b_set_D.pdf › Supplemental Dataset 1/D-mRNA_rhythm_translation_rhyth/Ppargc1b_set_D.pdf]

## Ppat

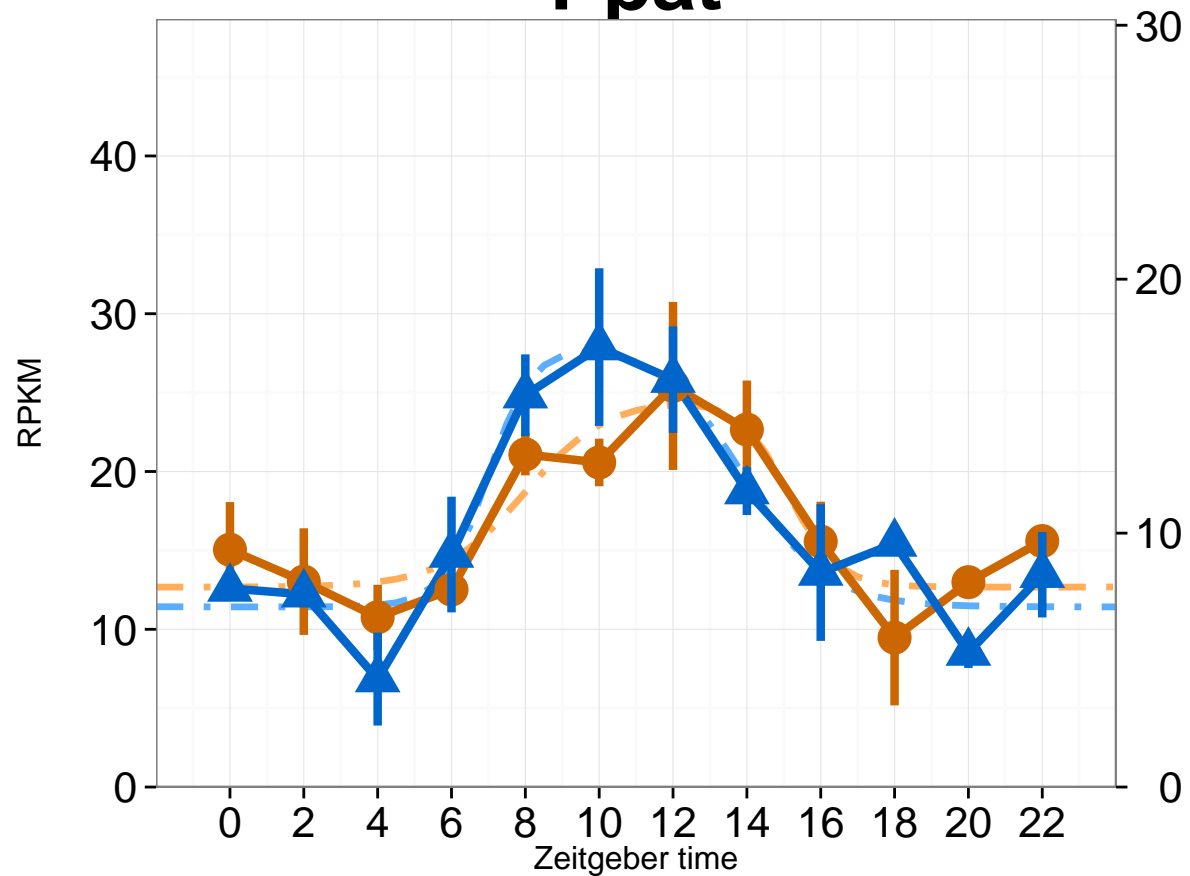

## Ppat

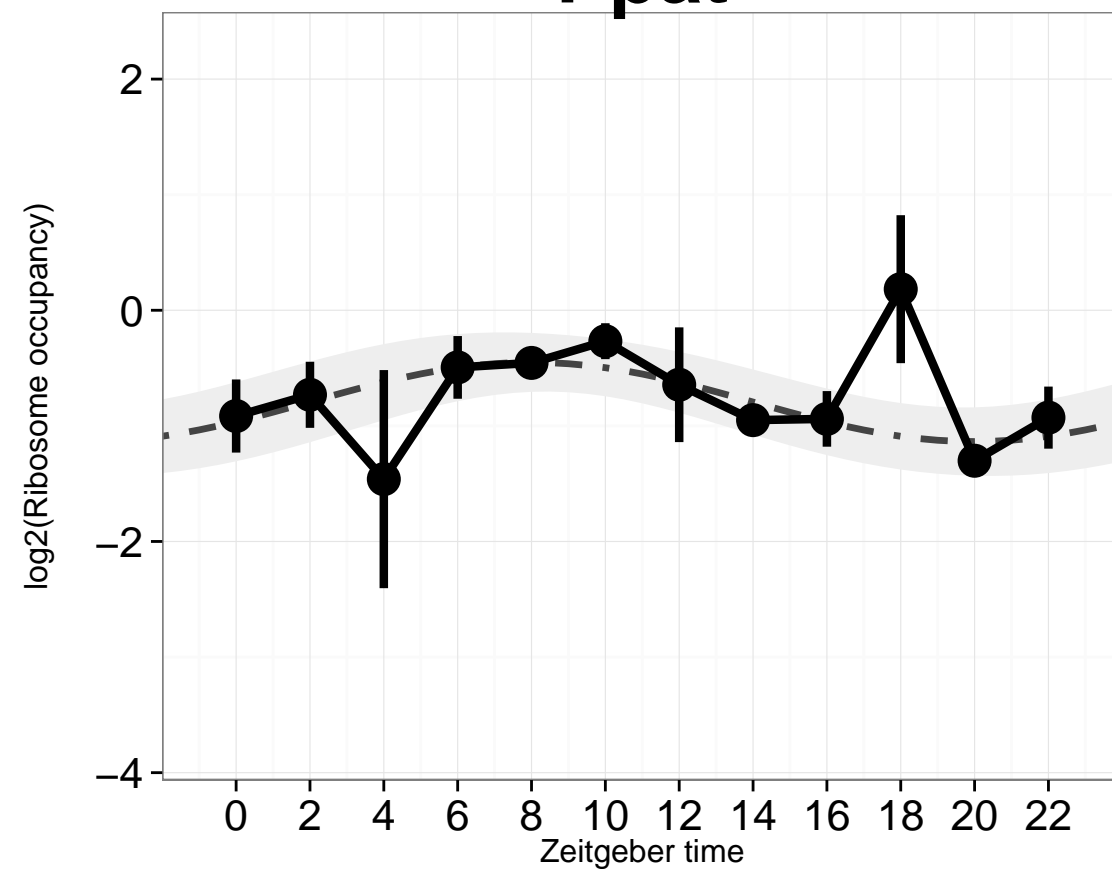

Supplement: SuppDataset_1.zip [file Ppat_set_D.pdf › Supplemental Dataset 1/D-mRNA_rhythm_translation_rhyth/Ppat_set_D.pdf]

## Ppdpf

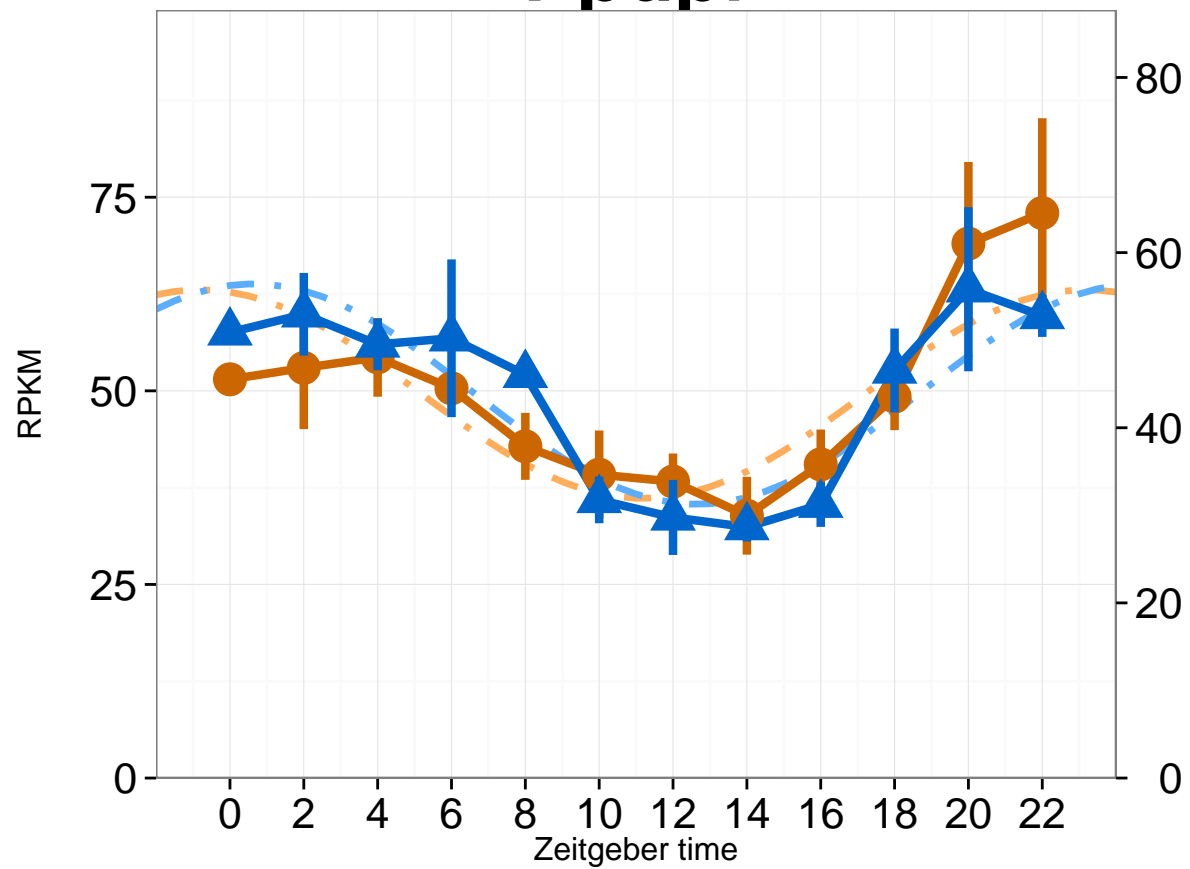

## Ppdpf

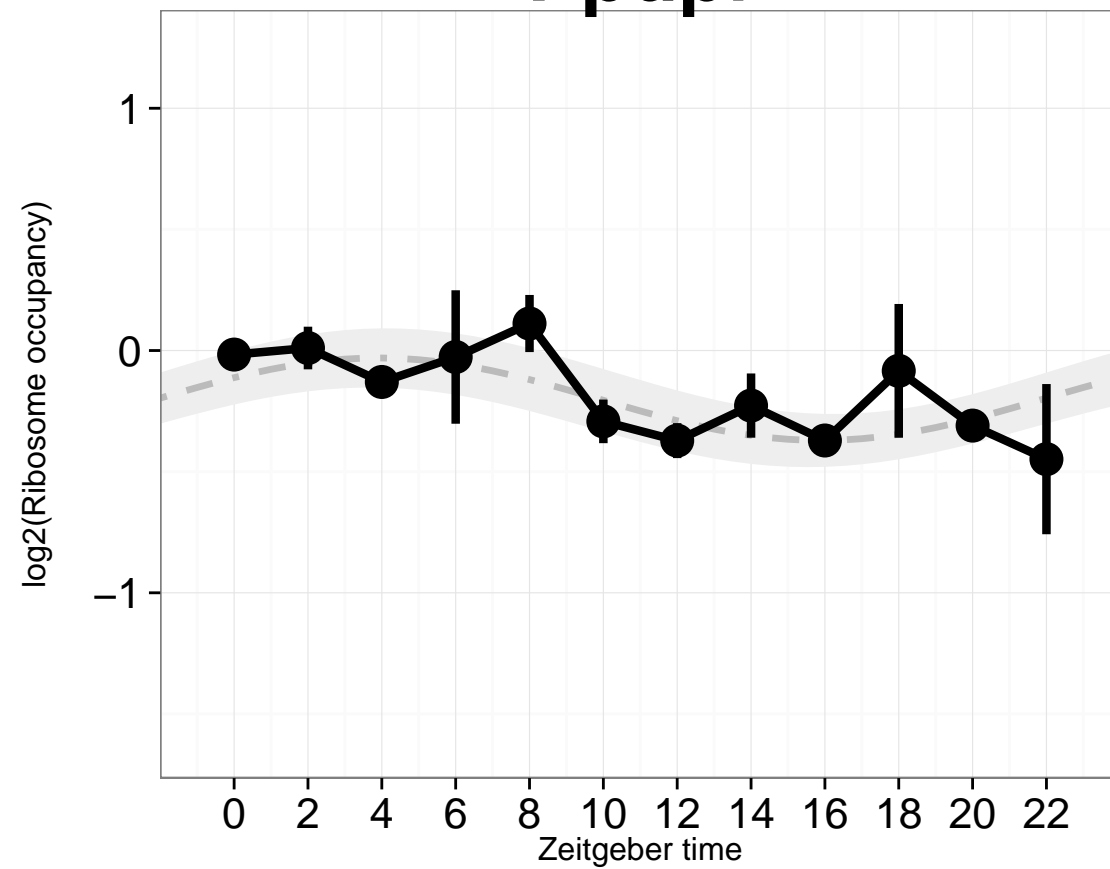

Supplement: SuppDataset_1.zip [file Ppdpf_set_D.pdf › Supplemental Dataset 1/D-mRNA_rhythm_translation_rhyth/Ppdpf_set_D.pdf]

# Ppfibp1

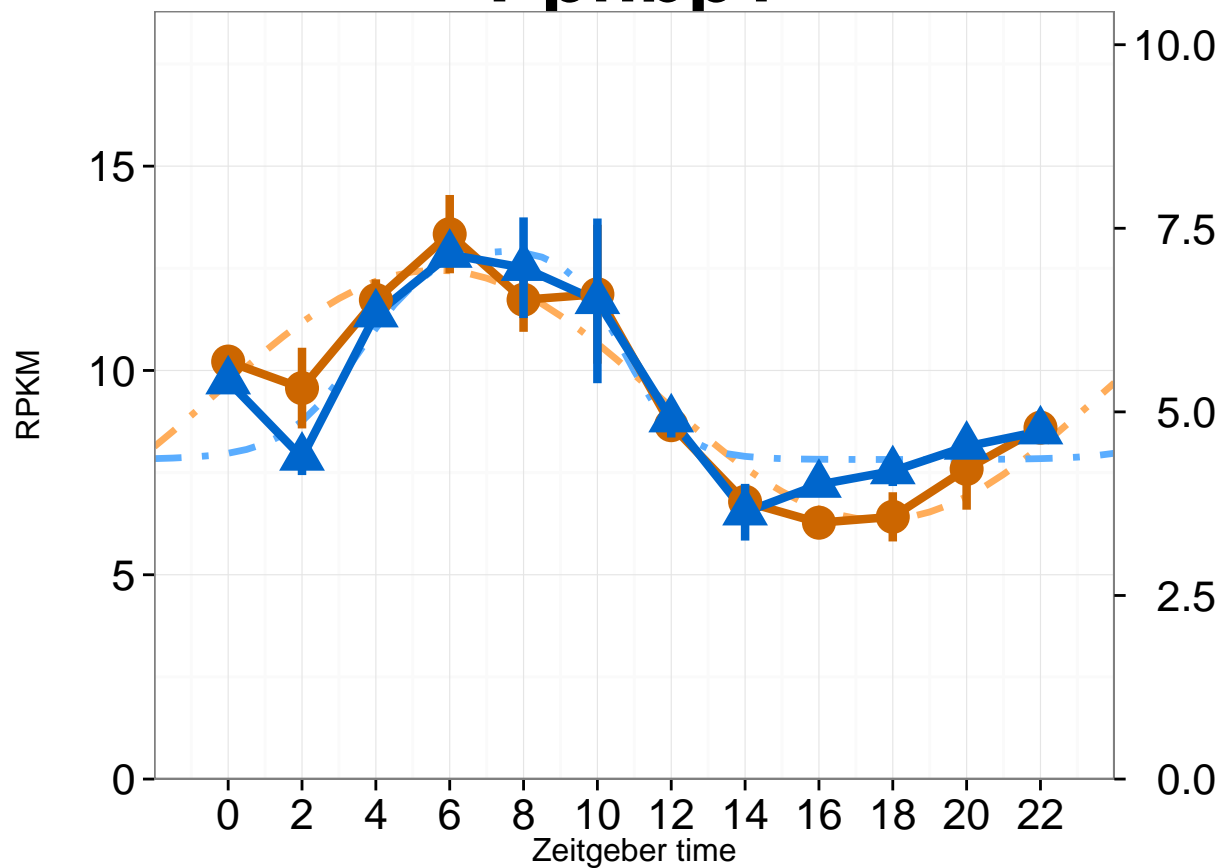

# Ppfibp1

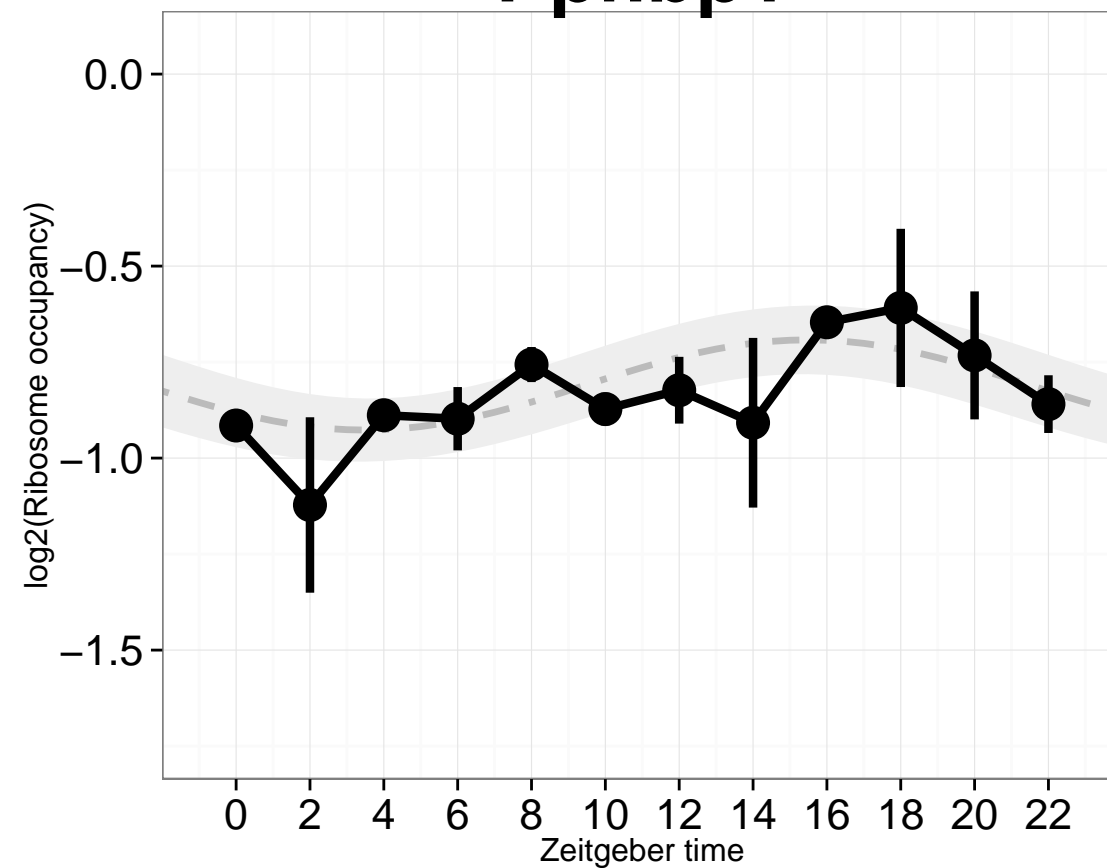

Supplement: SuppDataset_1.zip [file Ppfibp1_set_D.pdf › Supplemental Dataset 1/D-mRNA_rhythm_translation_rhyth/Ppfibp1_set_D.pdf]

## Ppif

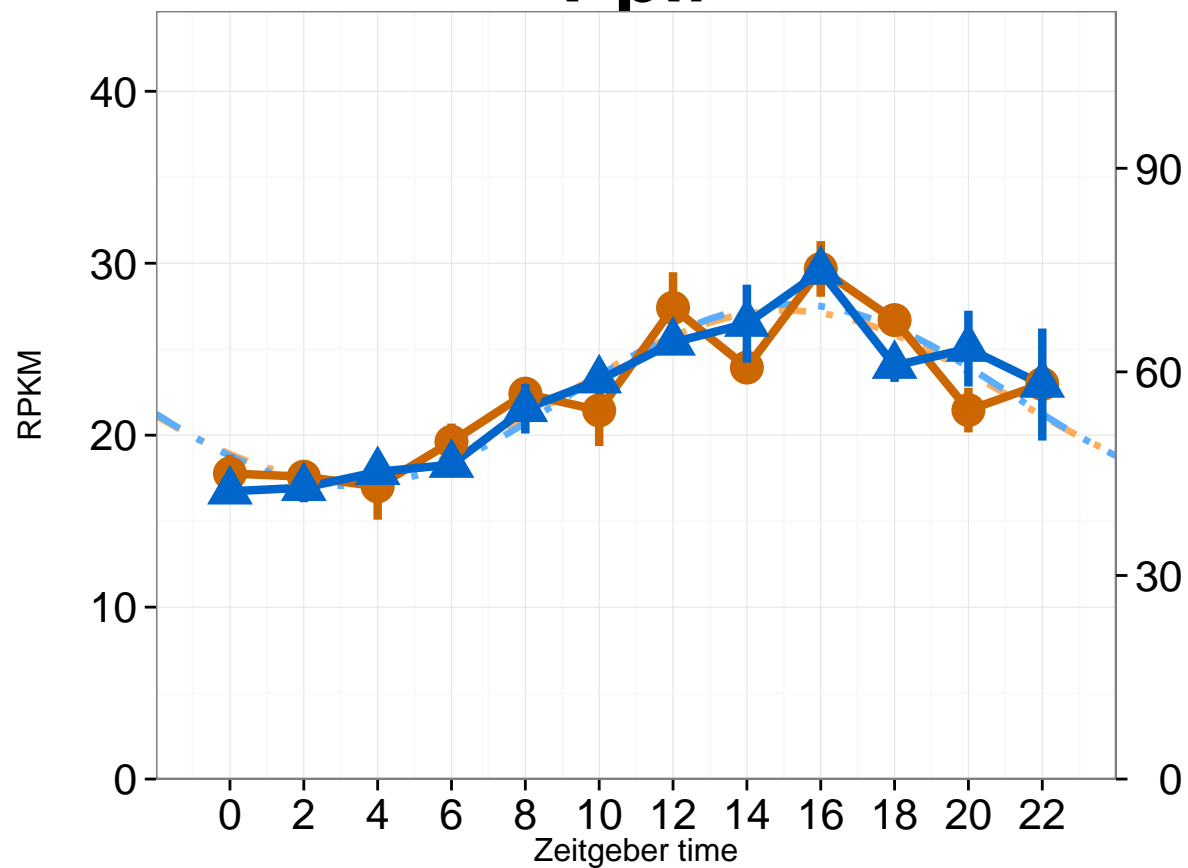

## Ppif

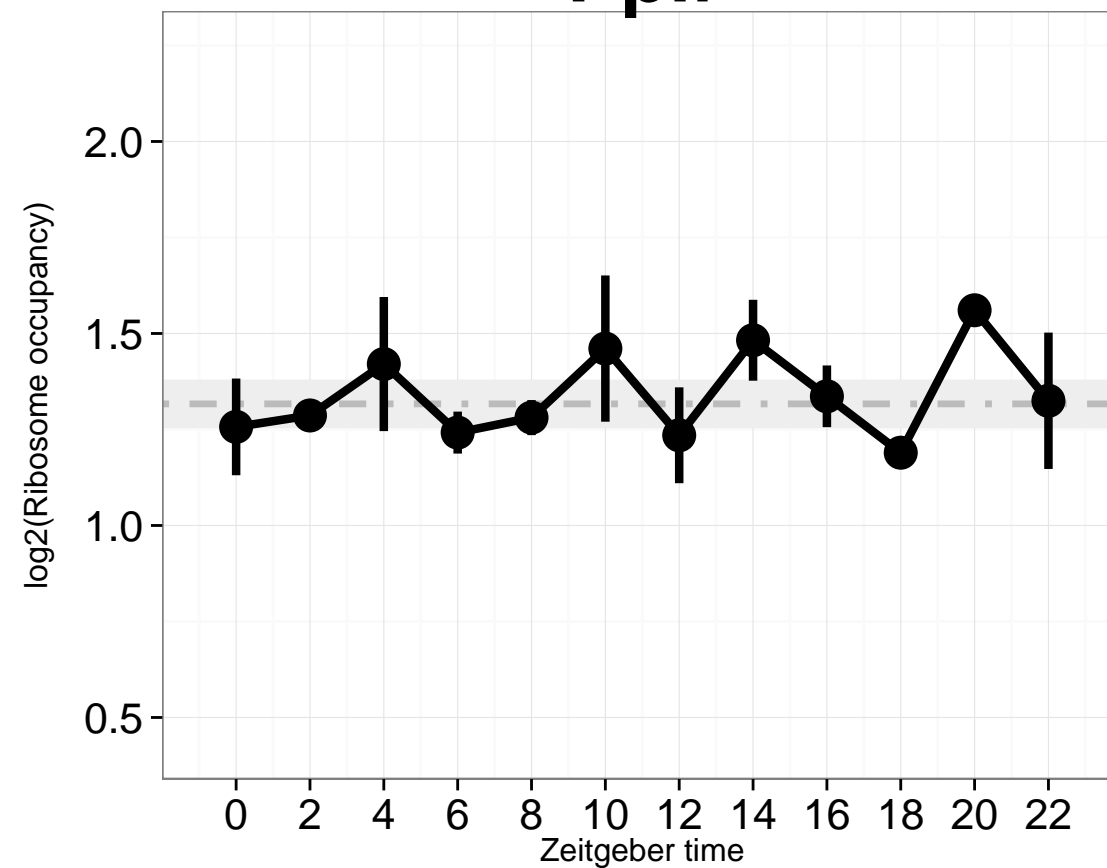

Supplement: SuppDataset_1.zip [file Ppif_set_D.pdf › Supplemental Dataset 1/D-mRNA_rhythm_translation_rhyth/Ppif_set_D.pdf]

## Ppil1

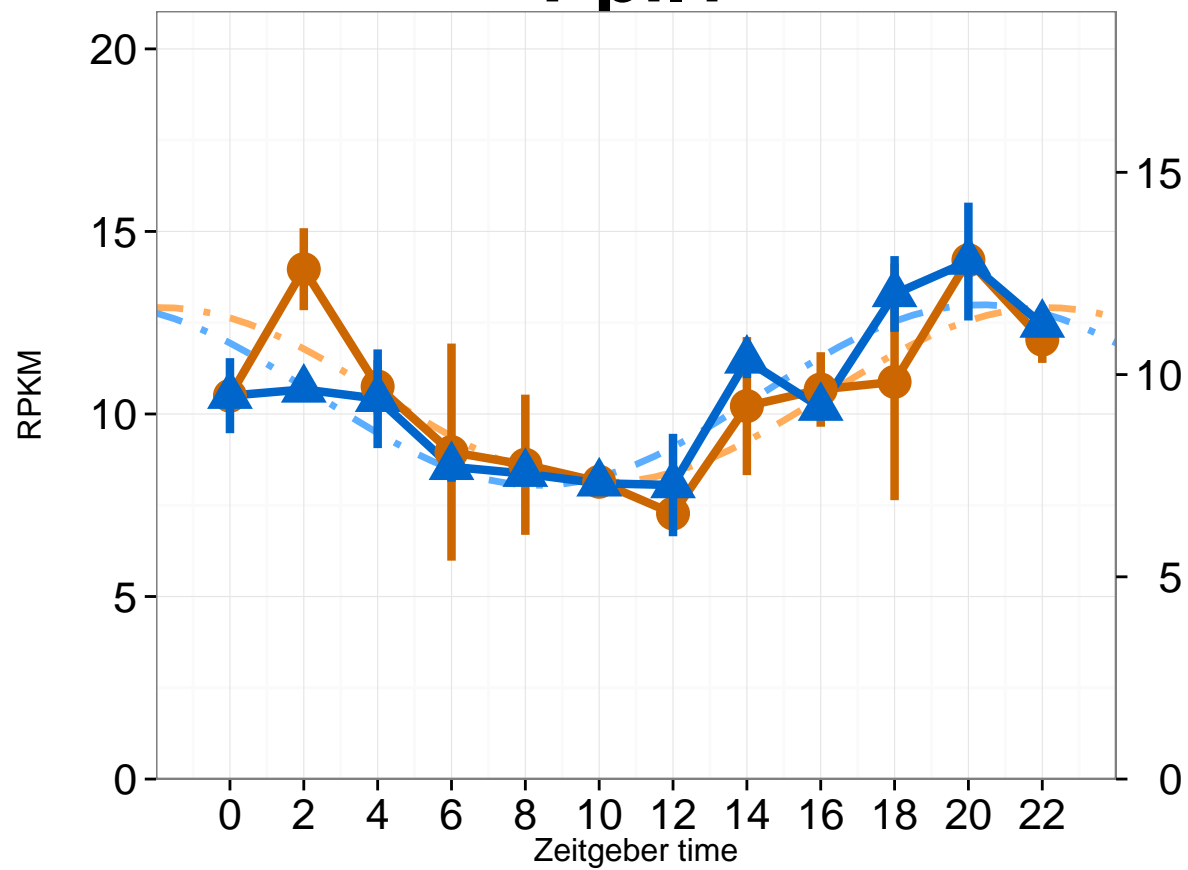

## Ppil1

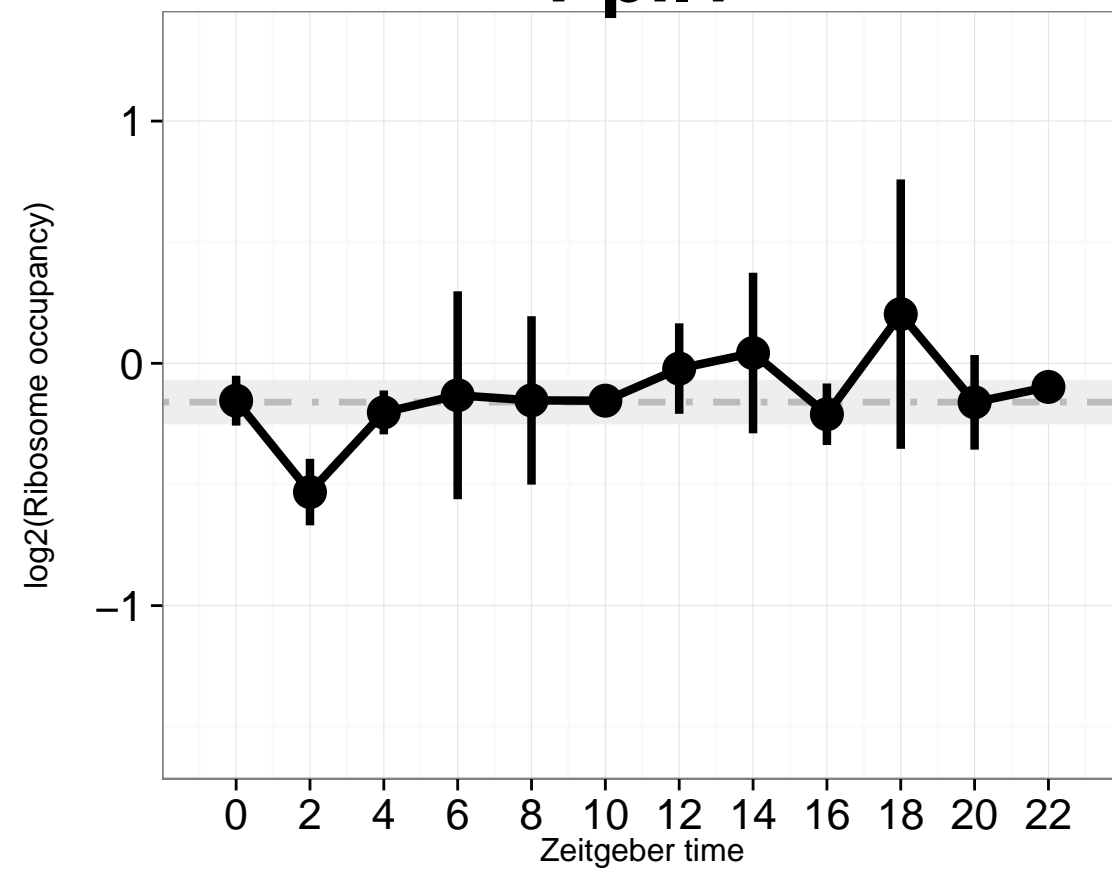

Supplement: SuppDataset_1.zip [file Ppil1_set_D.pdf › Supplemental Dataset 1/D-mRNA_rhythm_translation_rhyth/Ppil1_set_D.pdf]

# Ppm1k

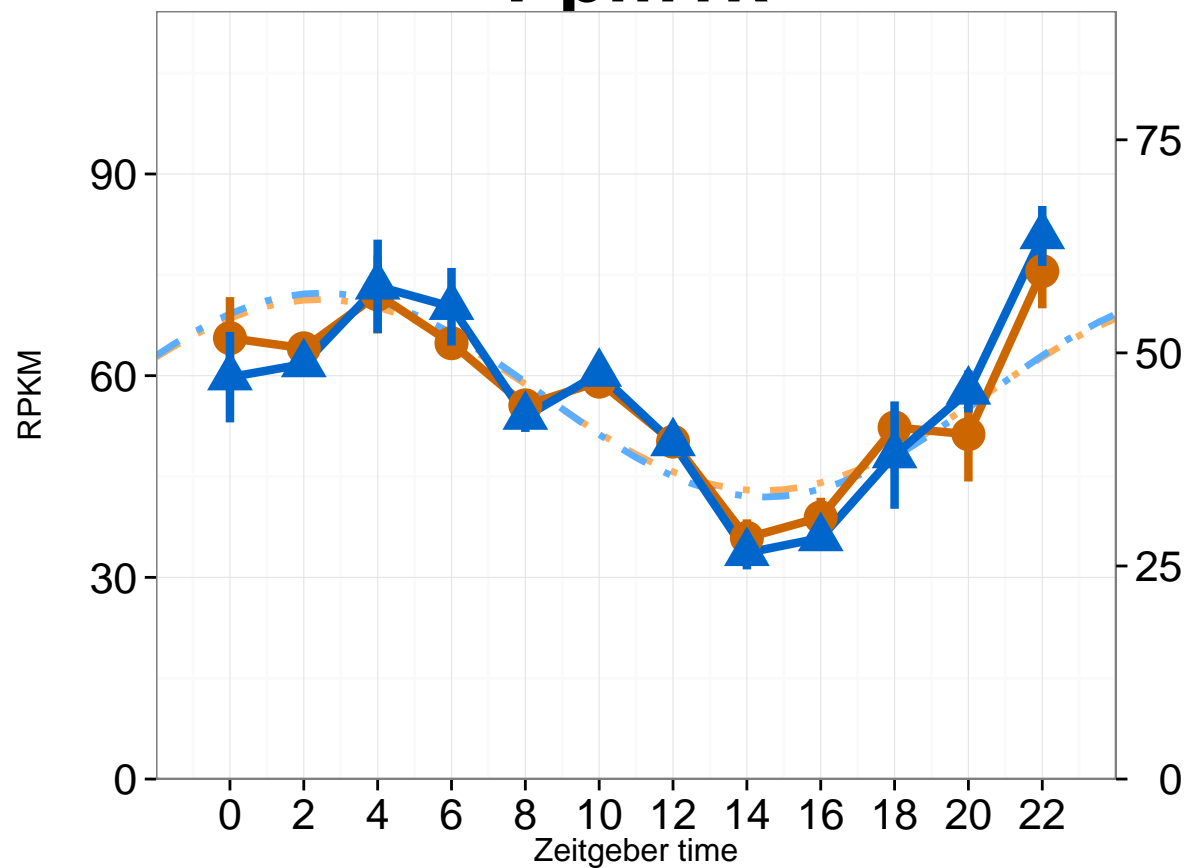

# Ppm1k

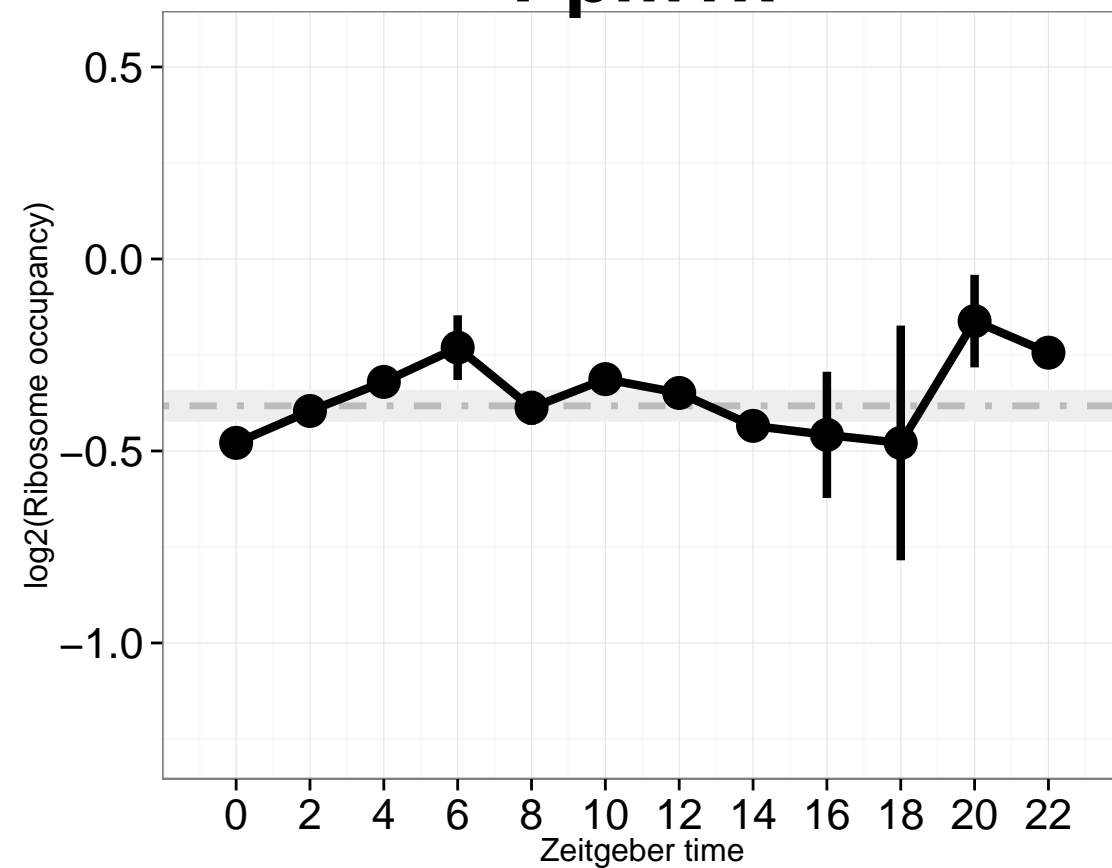

Supplement: SuppDataset_1.zip [file Ppm1k_set_D.pdf › Supplemental Dataset 1/D-mRNA_rhythm_translation_rhyth/Ppm1k_set_D.pdf]

# Ppp1r3b

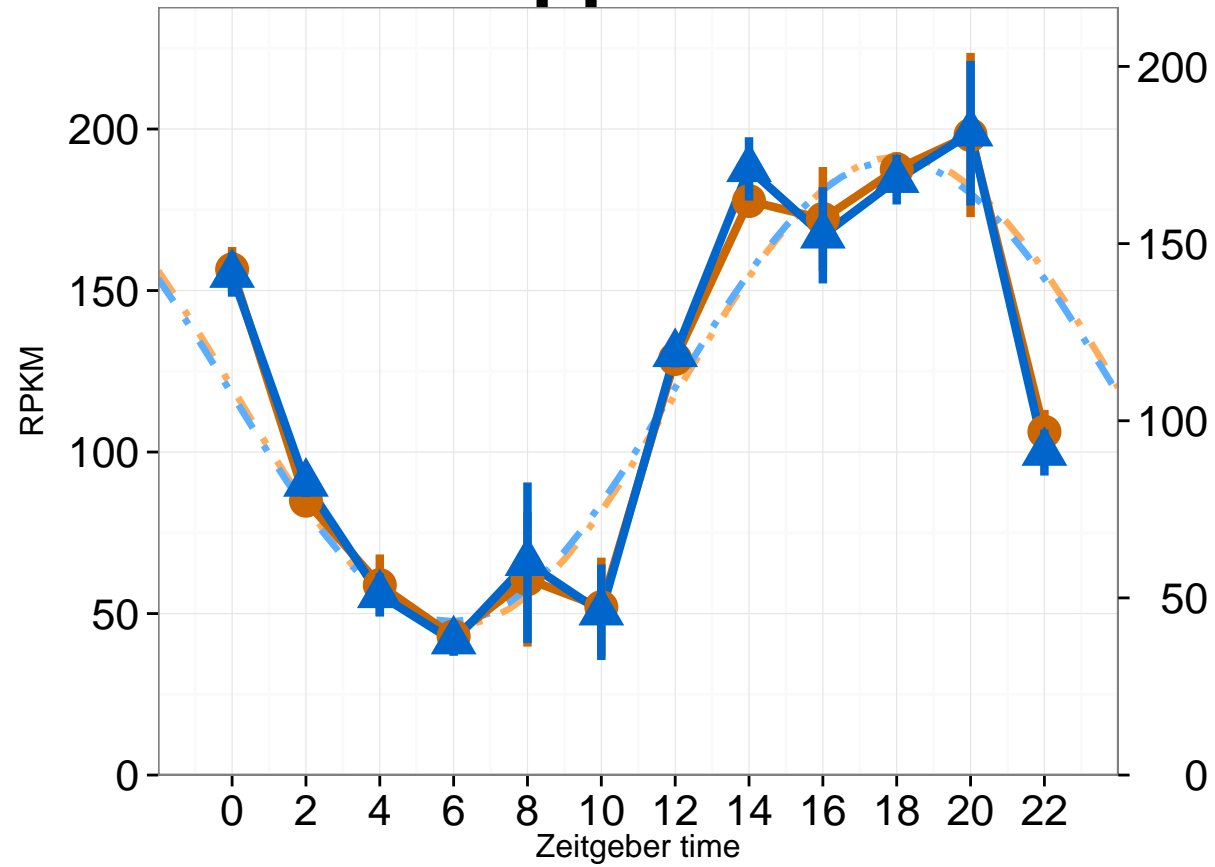

# Ppp1r3b

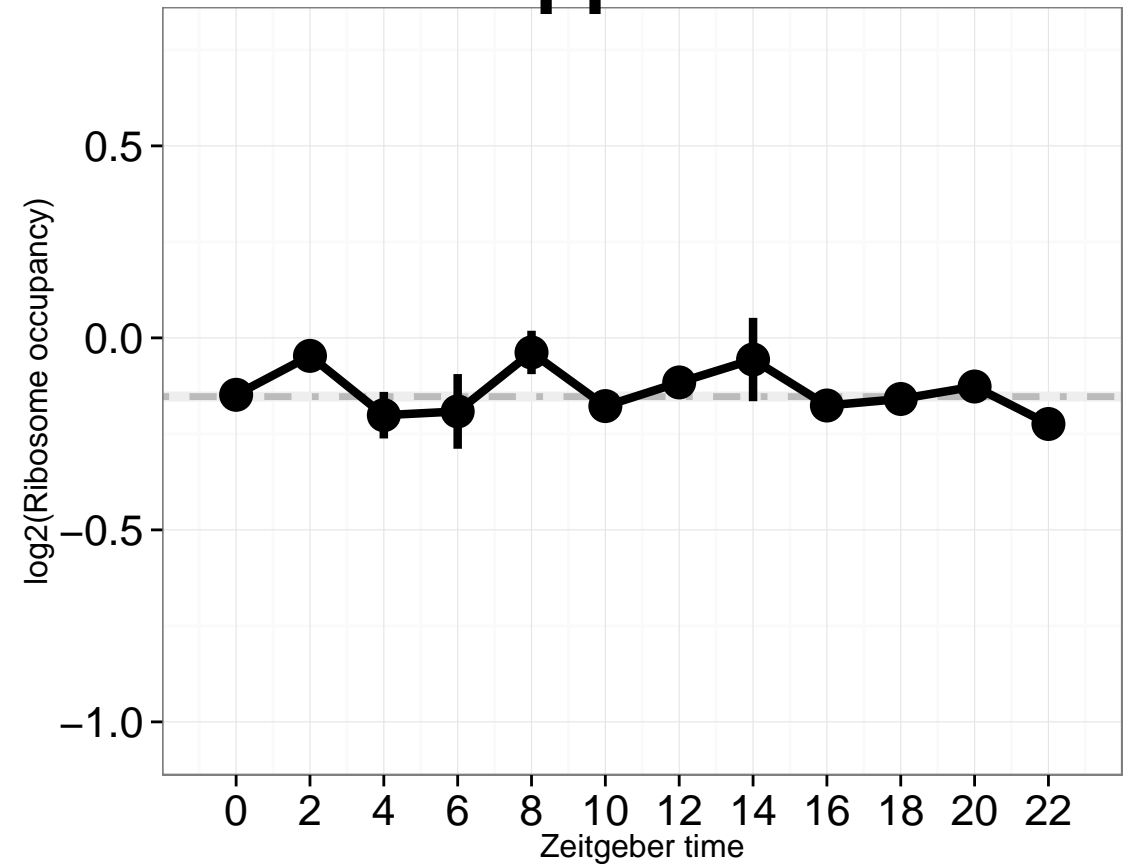

Supplement: SuppDataset_1.zip [file Ppp1r3b_set_D.pdf › Supplemental Dataset 1/D-mRNA_rhythm_translation_rhyth/Ppp1r3b_set_D.pdf]

# Ppp1r3c

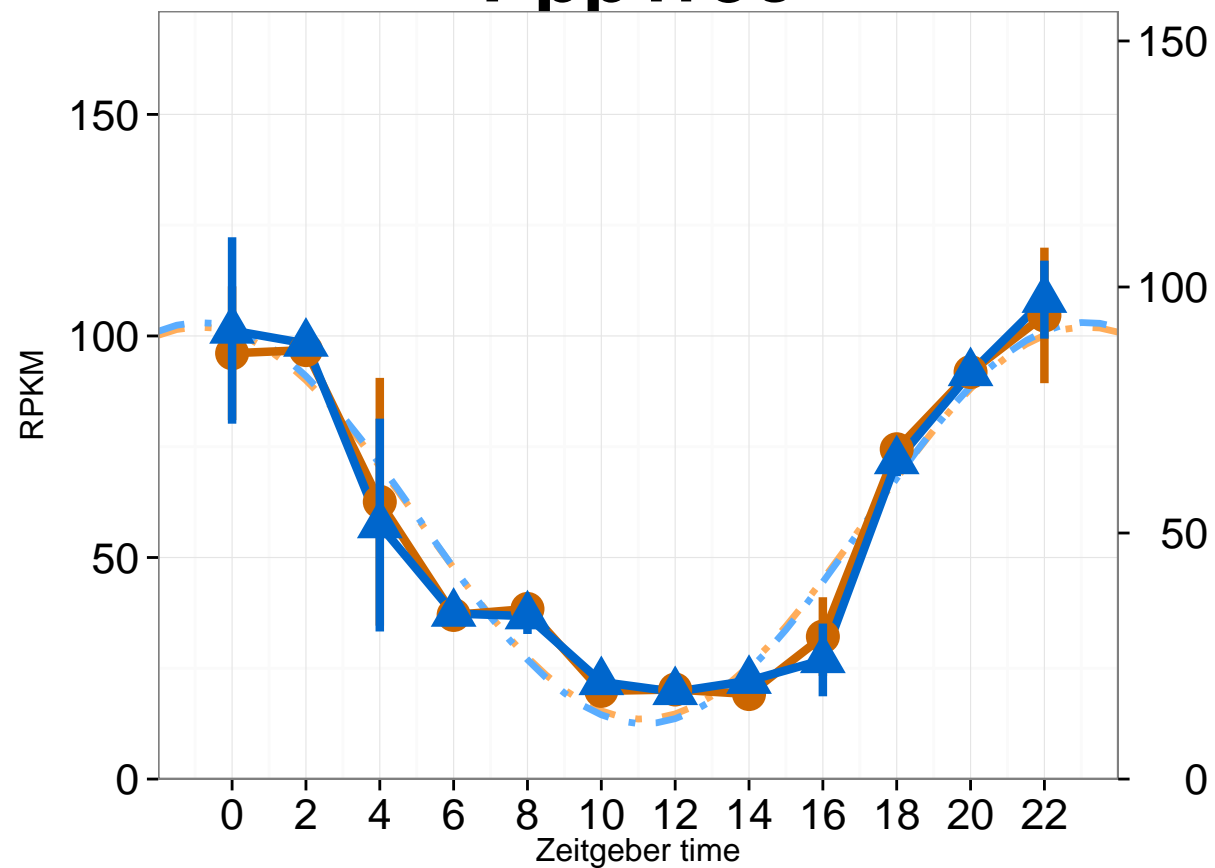

# Ppp1r3c

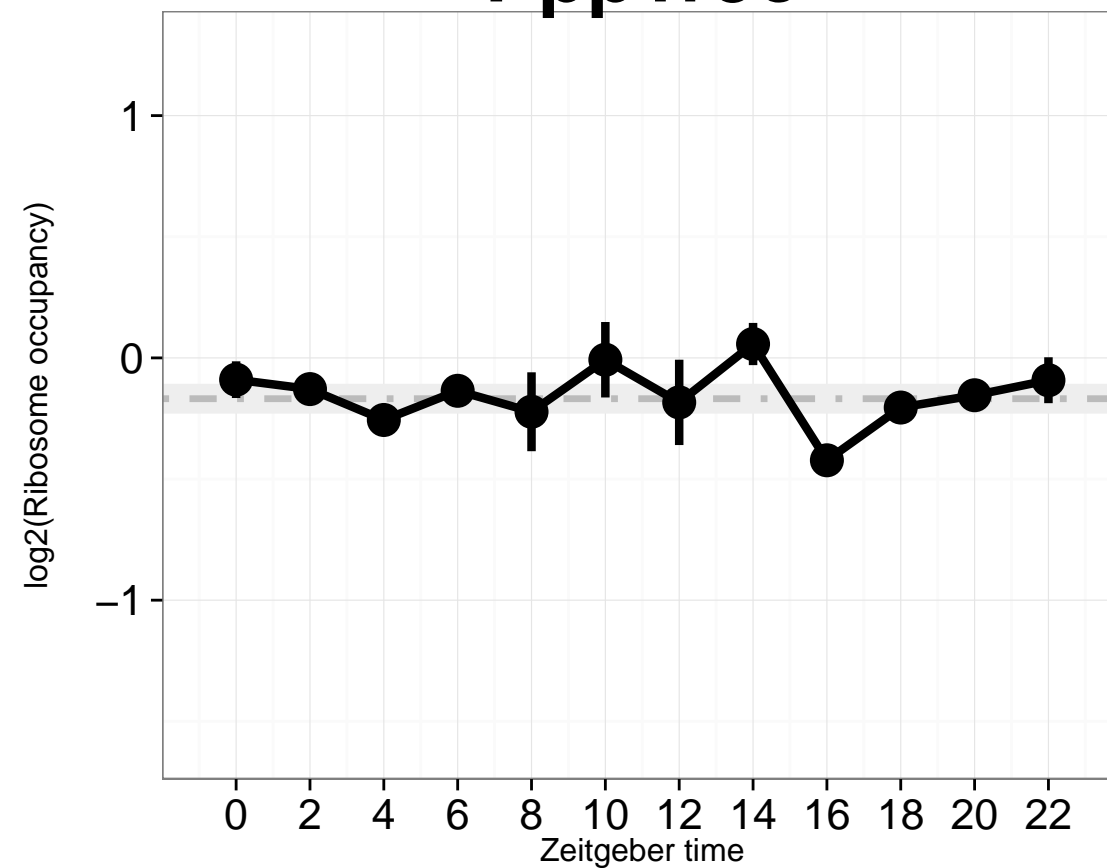

Supplement: SuppDataset_1.zip [file Ppp1r3c_set_D.pdf › Supplemental Dataset 1/D-mRNA_rhythm_translation_rhyth/Ppp1r3c_set_D.pdf]

# Ppp2r5e

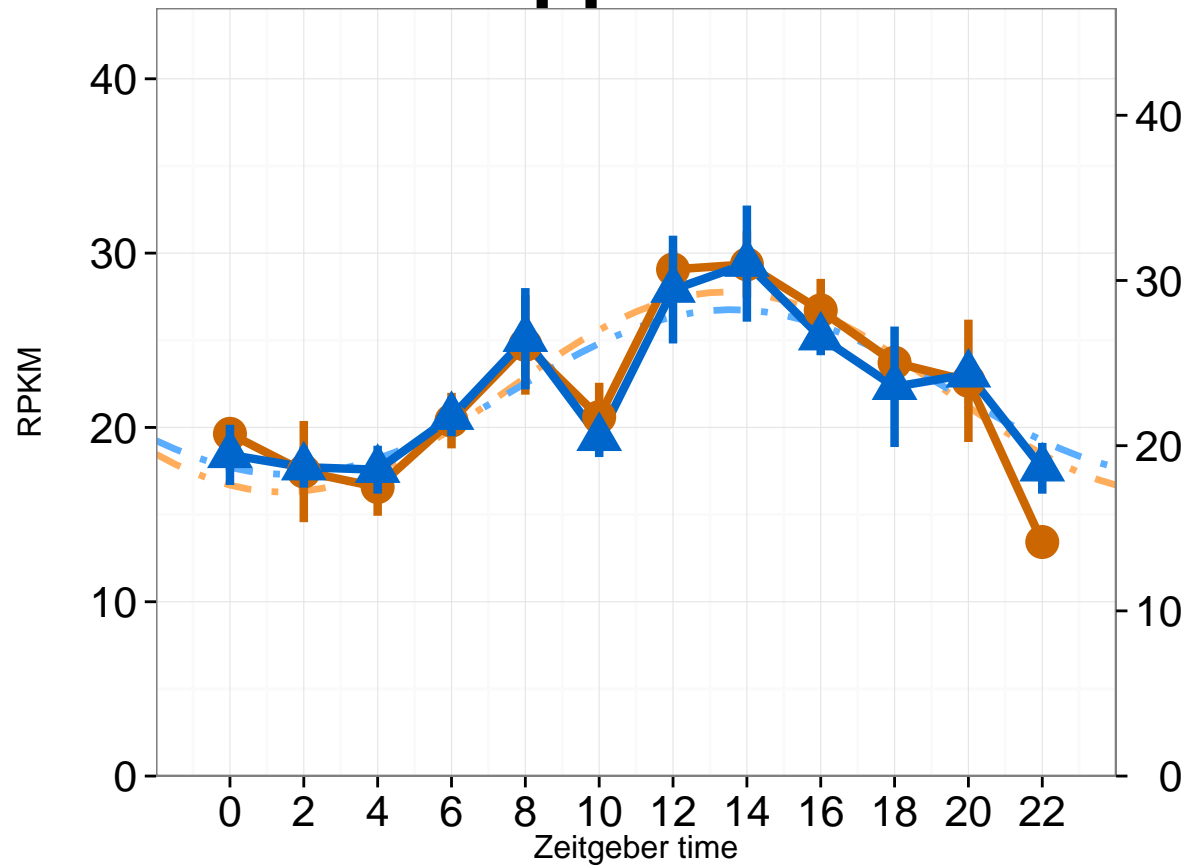

# Ppp2r5e

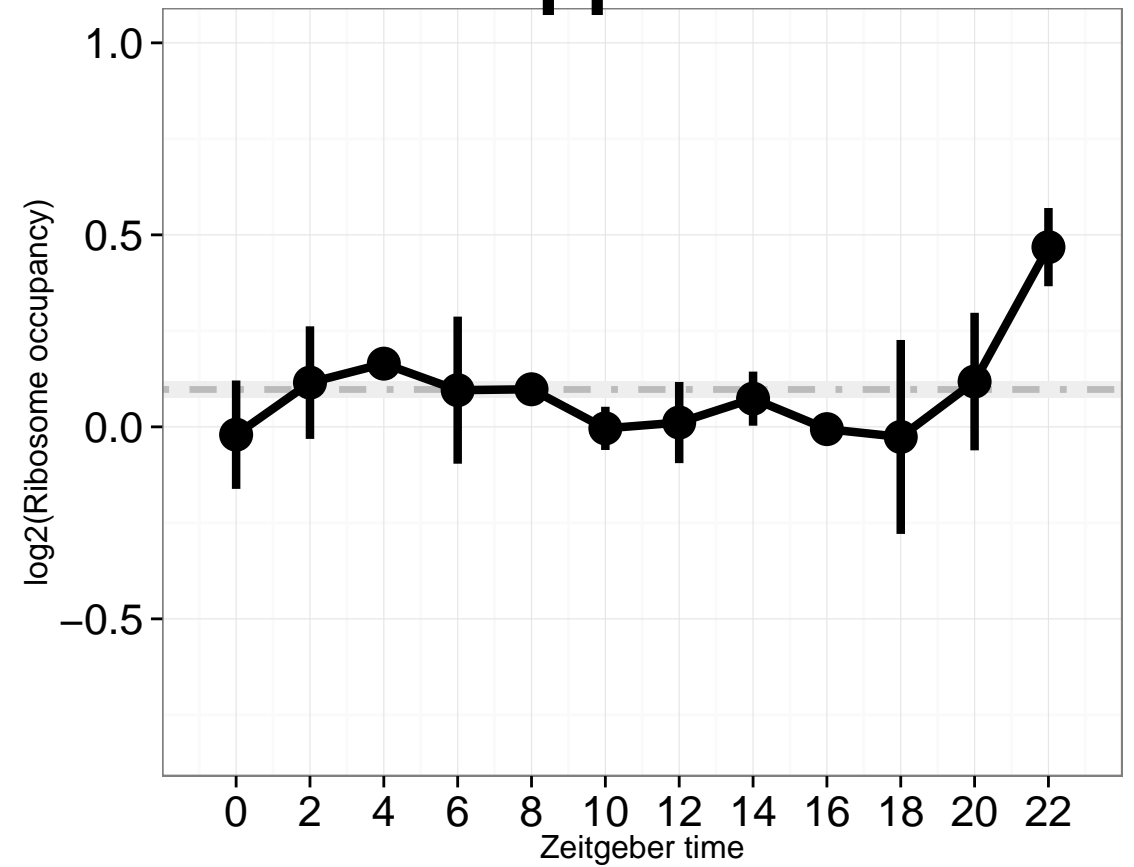

Supplement: SuppDataset_1.zip [file Ppp2r5e_set_D.pdf › Supplemental Dataset 1/D-mRNA_rhythm_translation_rhyth/Ppp2r5e_set_D.pdf]

# Prg4

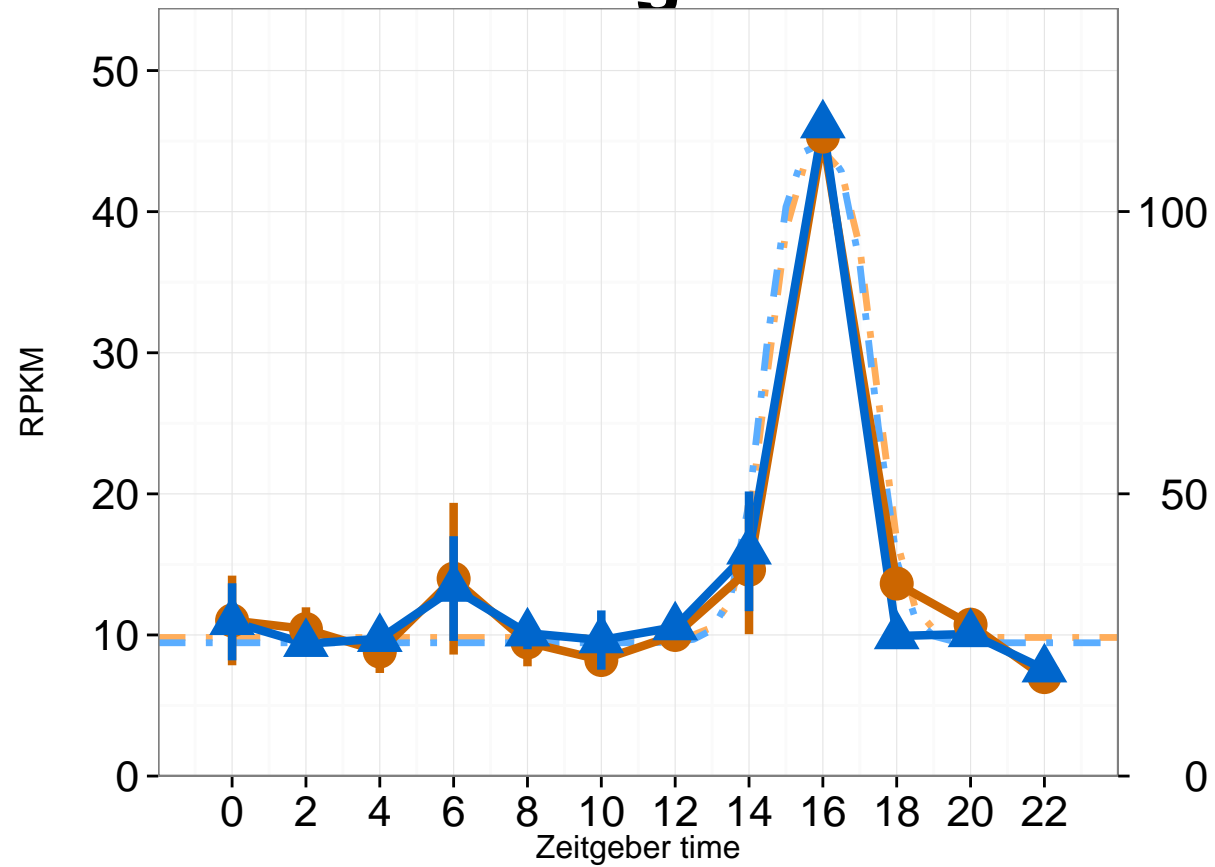

# Prg4

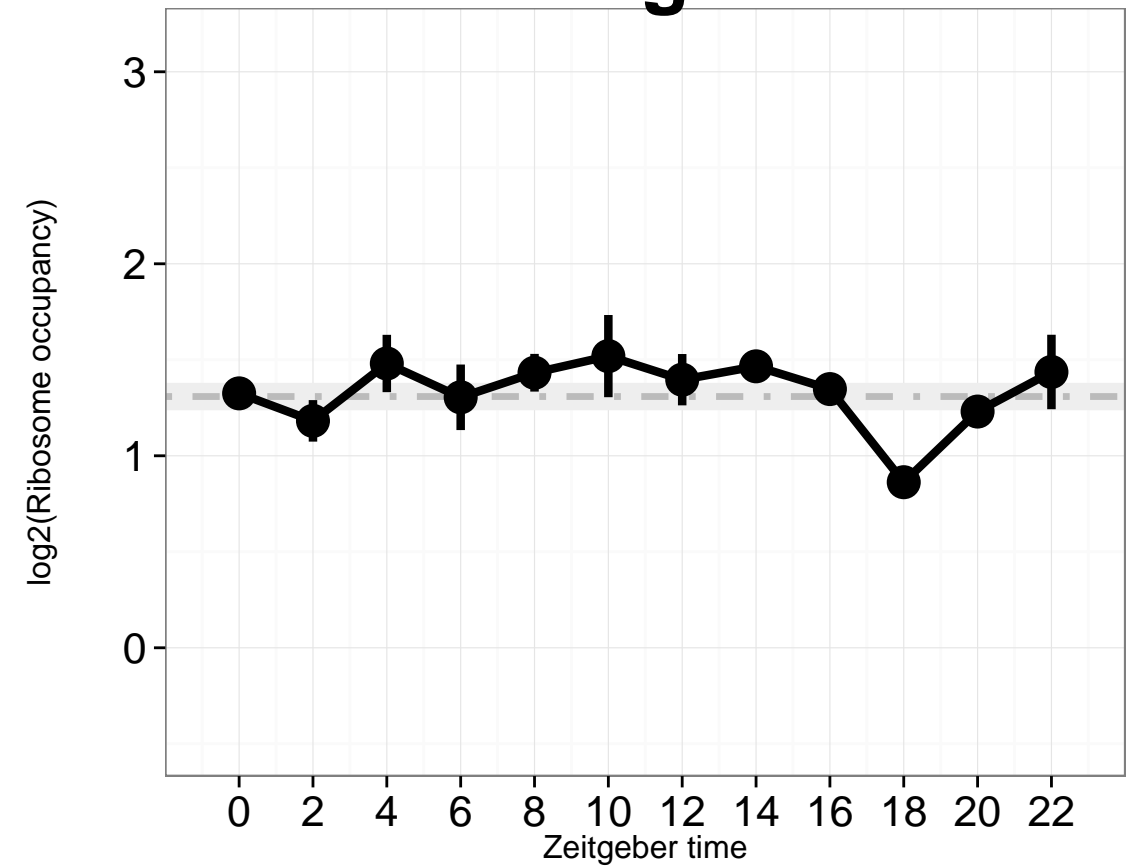

Supplement: SuppDataset_1.zip [file Prg4_set_D.pdf › Supplemental Dataset 1/D-mRNA_rhythm_translation_rhyth/Prg4_set_D.pdf]

# Prim1

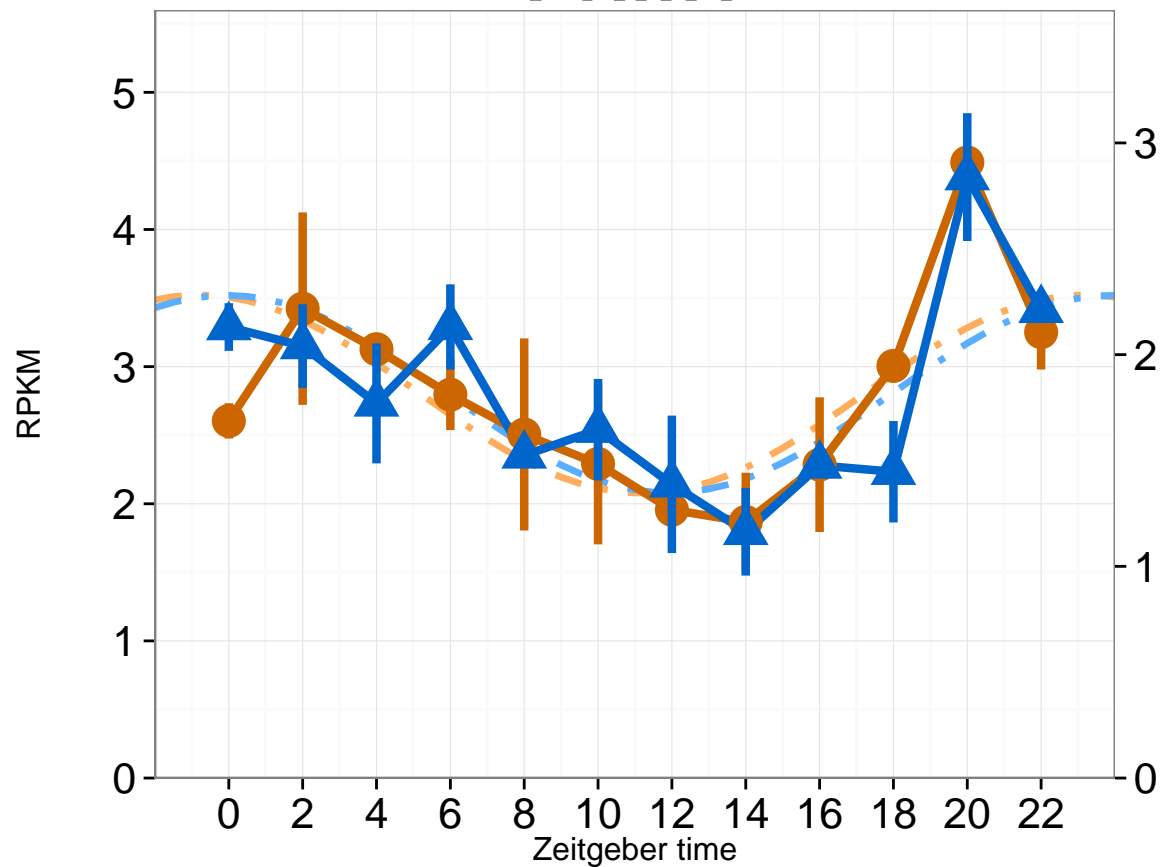

# Prim1

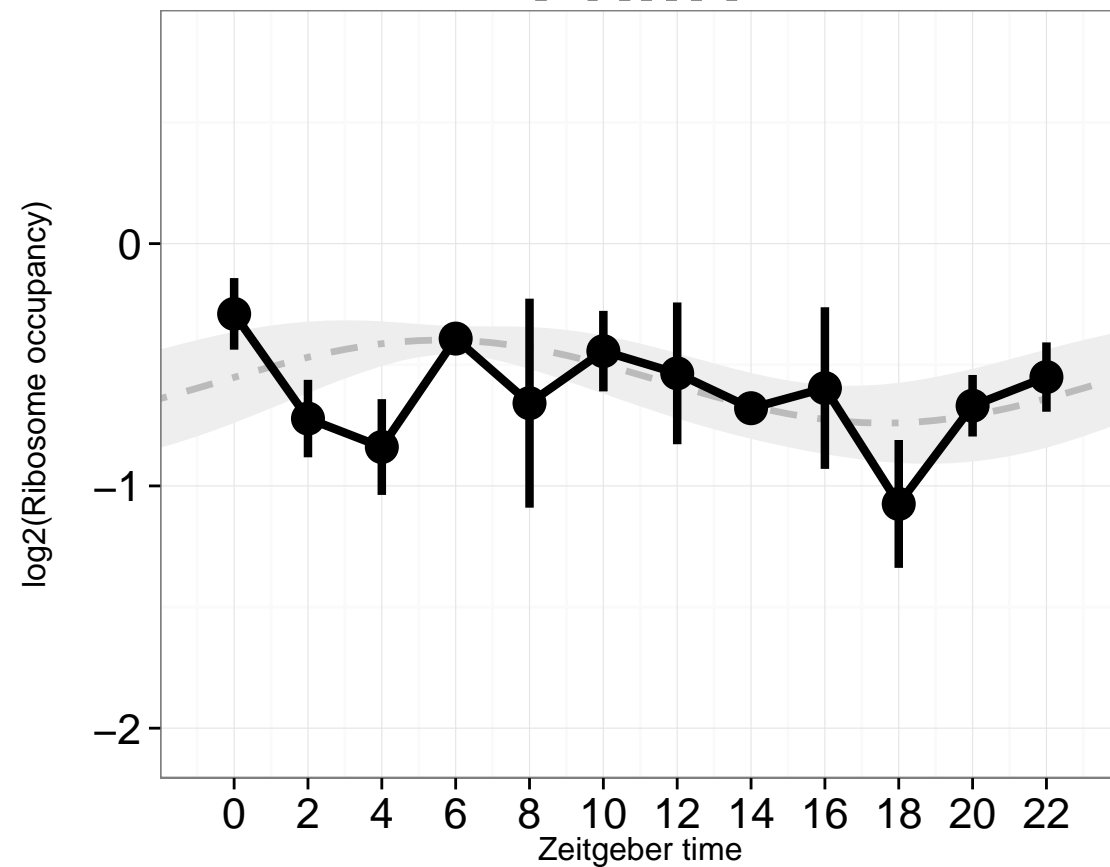

Supplement: SuppDataset_1.zip [file Prim1_set_D.pdf › Supplemental Dataset 1/D-mRNA_rhythm_translation_rhyth/Prim1_set_D.pdf]

# Prkd3

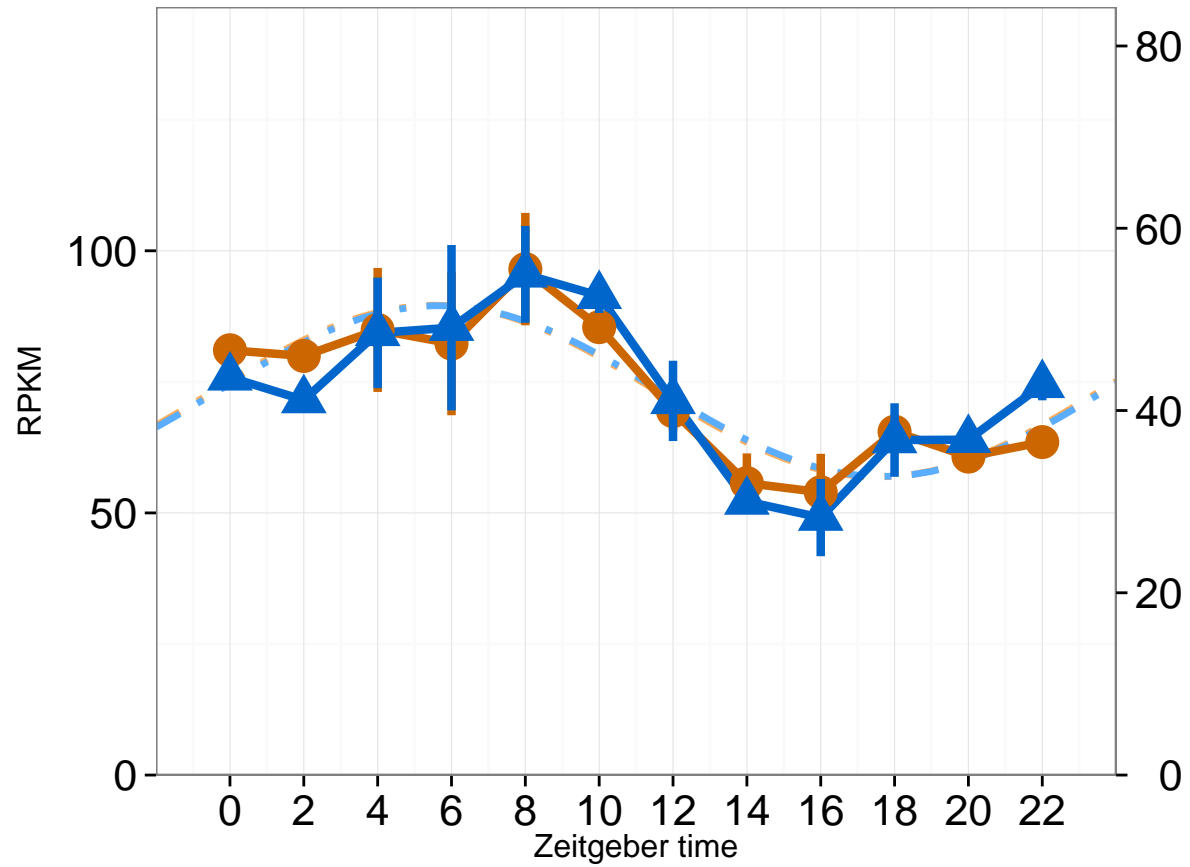

# Prkd3

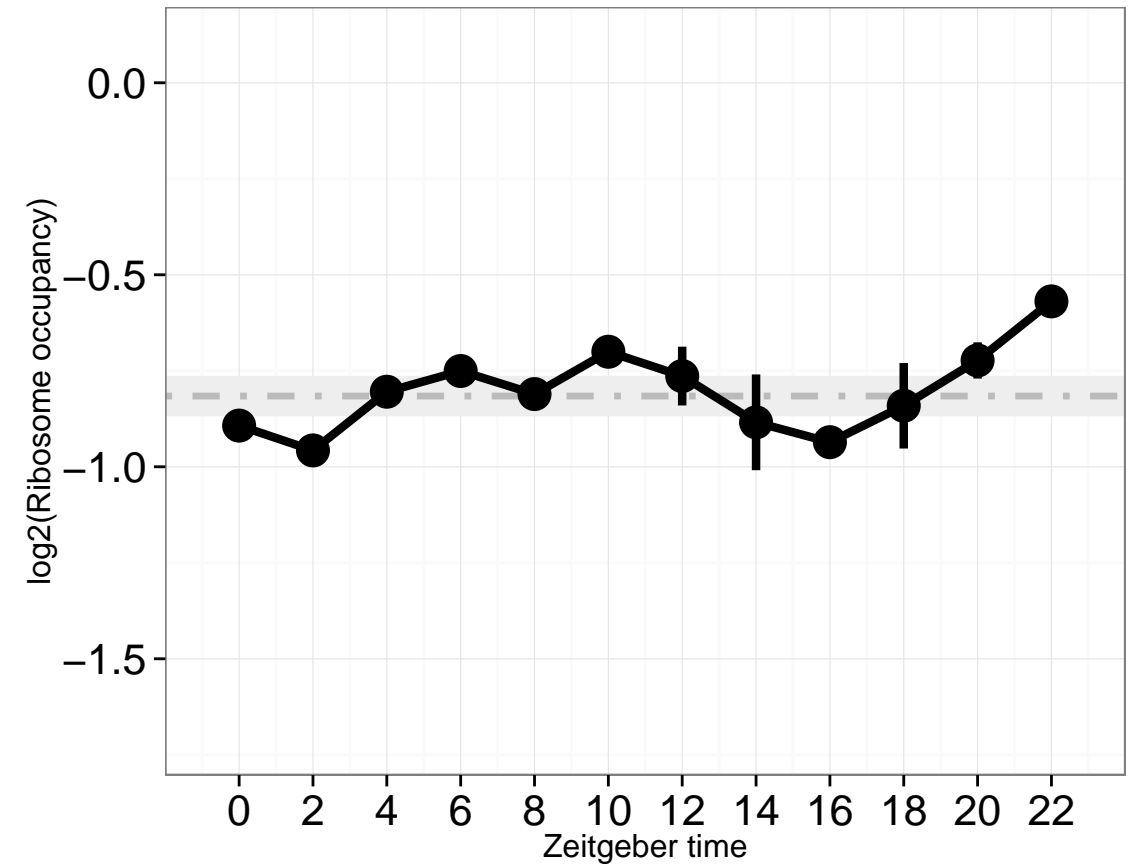

Supplement: SuppDataset_1.zip [file Prkd3_set_D.pdf › Supplemental Dataset 1/D-mRNA_rhythm_translation_rhyth/Prkd3_set_D.pdf]

## Pros1

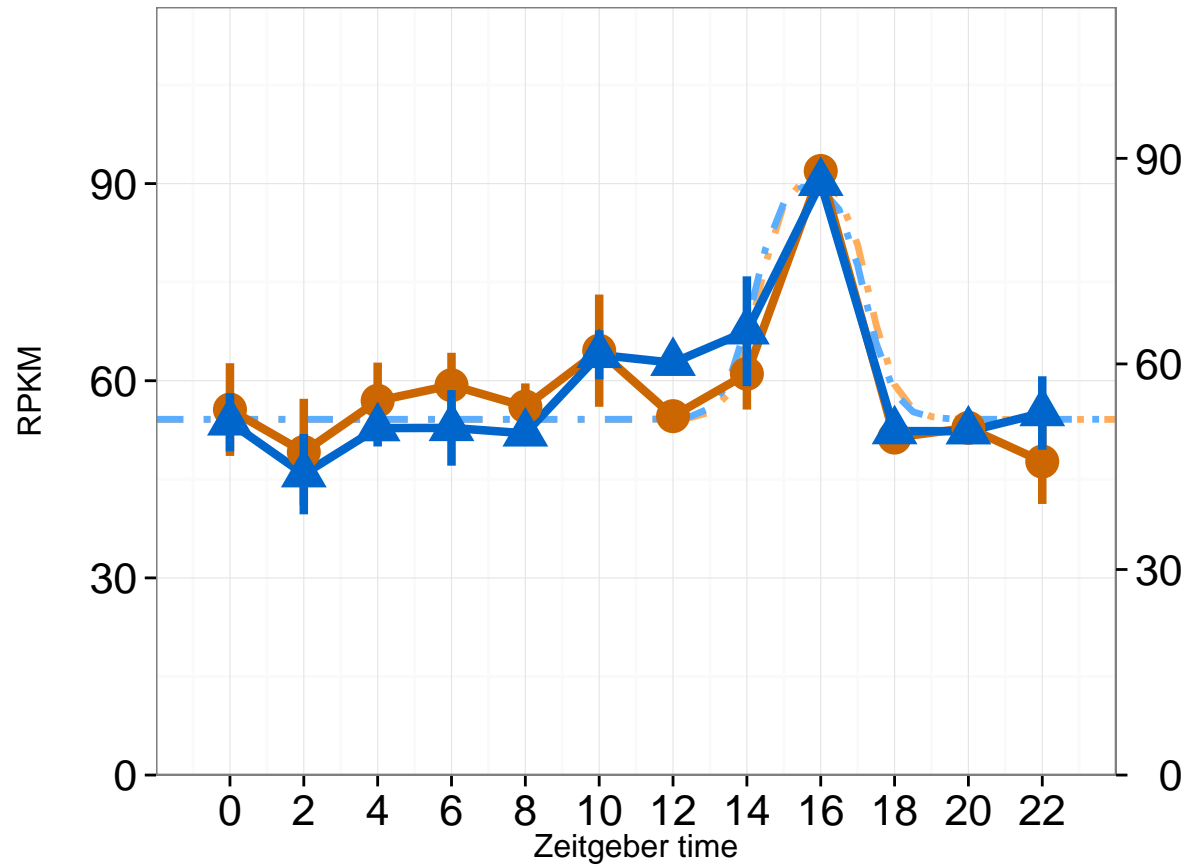

## Pros1

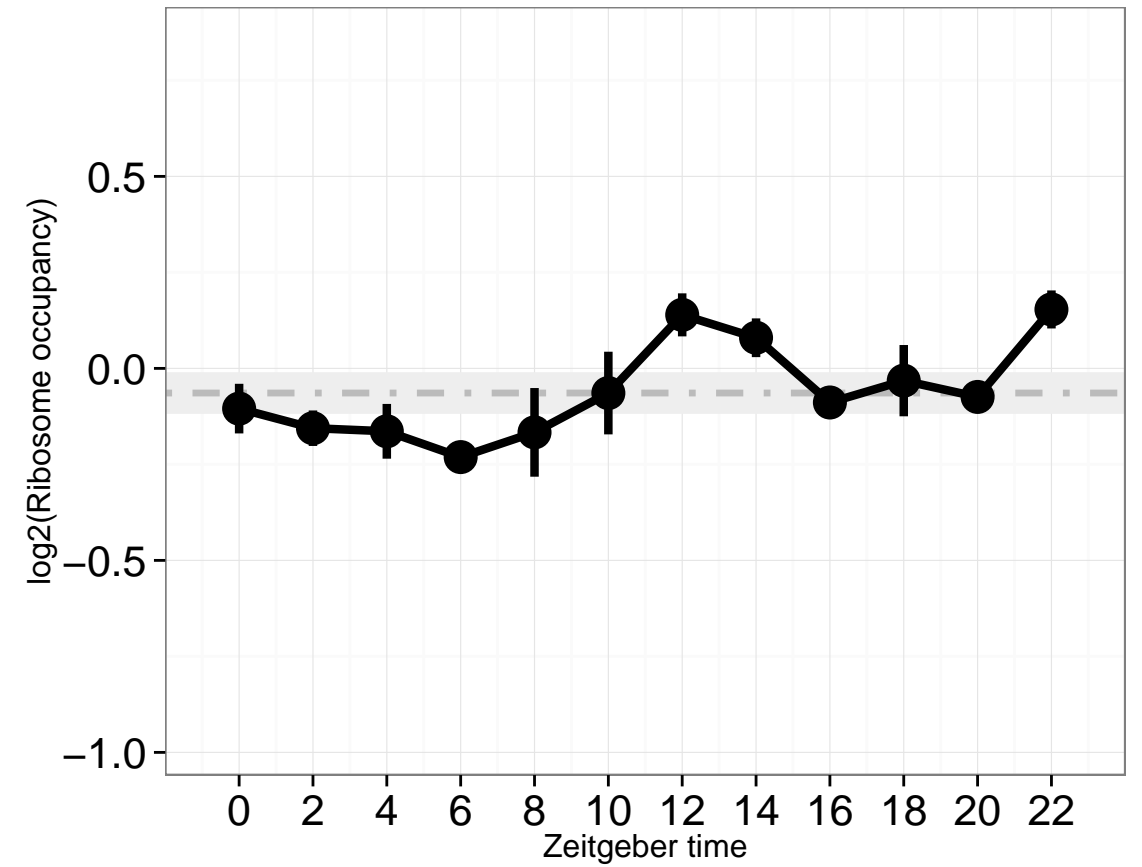

Supplement: SuppDataset_1.zip [file Pros1_set_D.pdf › Supplemental Dataset 1/D-mRNA_rhythm_translation_rhyth/Pros1_set_D.pdf]
