# Supplementary figures and images for: Ribosome profiling reveals the rhythmic liver translatome and circadian clock regulation by upstream open reading frames (part 51 of 113)
Source: HighWire-hosted journal article supplement (doi:10.1101/gr.195404.115), 2015-10-20

# Ogfrl1

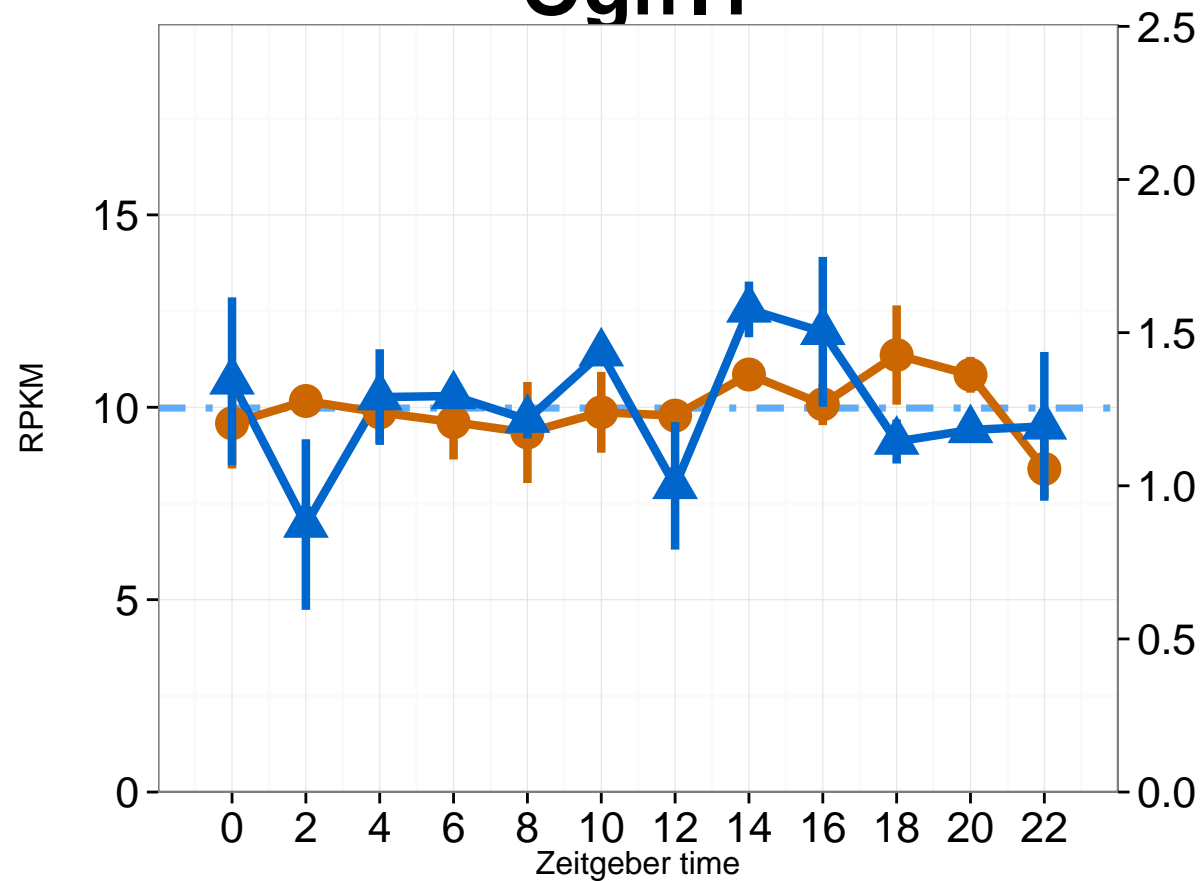

# Ogfrl1

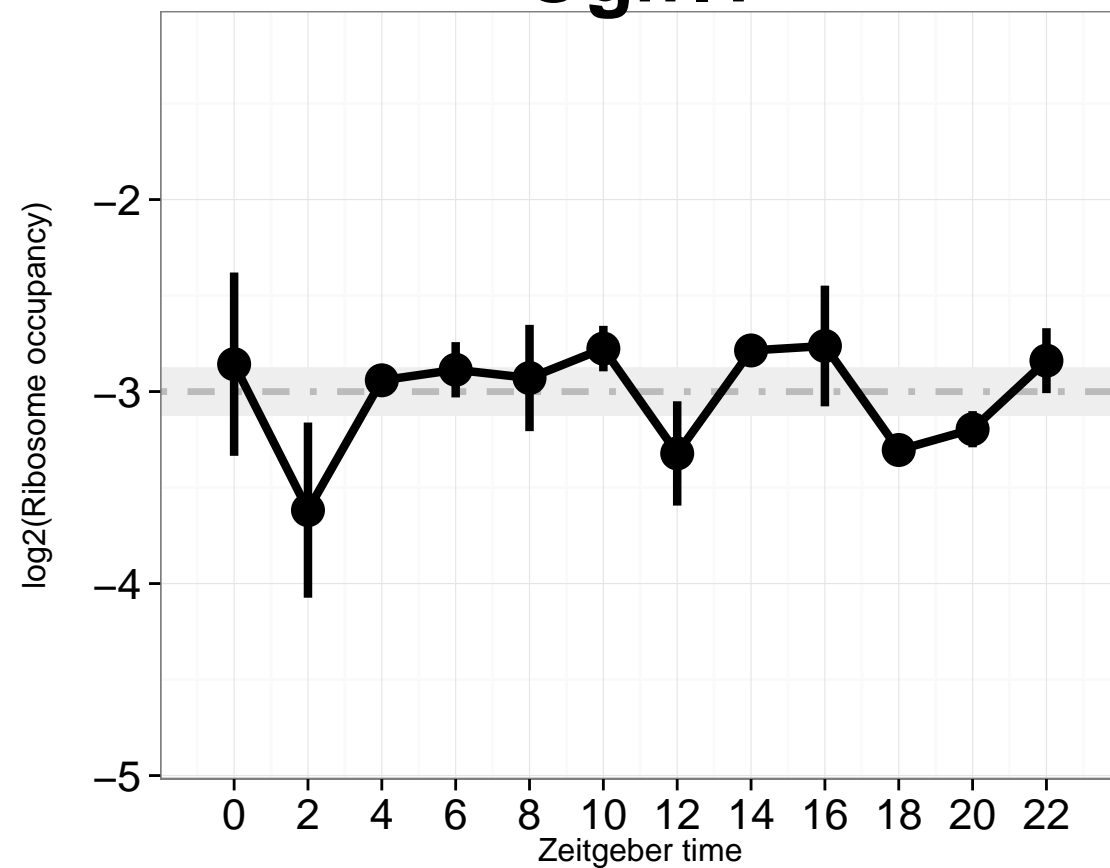

Supplement: SuppDataset_1.zip [file Ogfrl1_set_A.pdf › Supplemental Dataset 1/A-mRNA_nonrhyth_translation_nonrhyth/Ogfrl1_set_A.pdf]

## Ola1

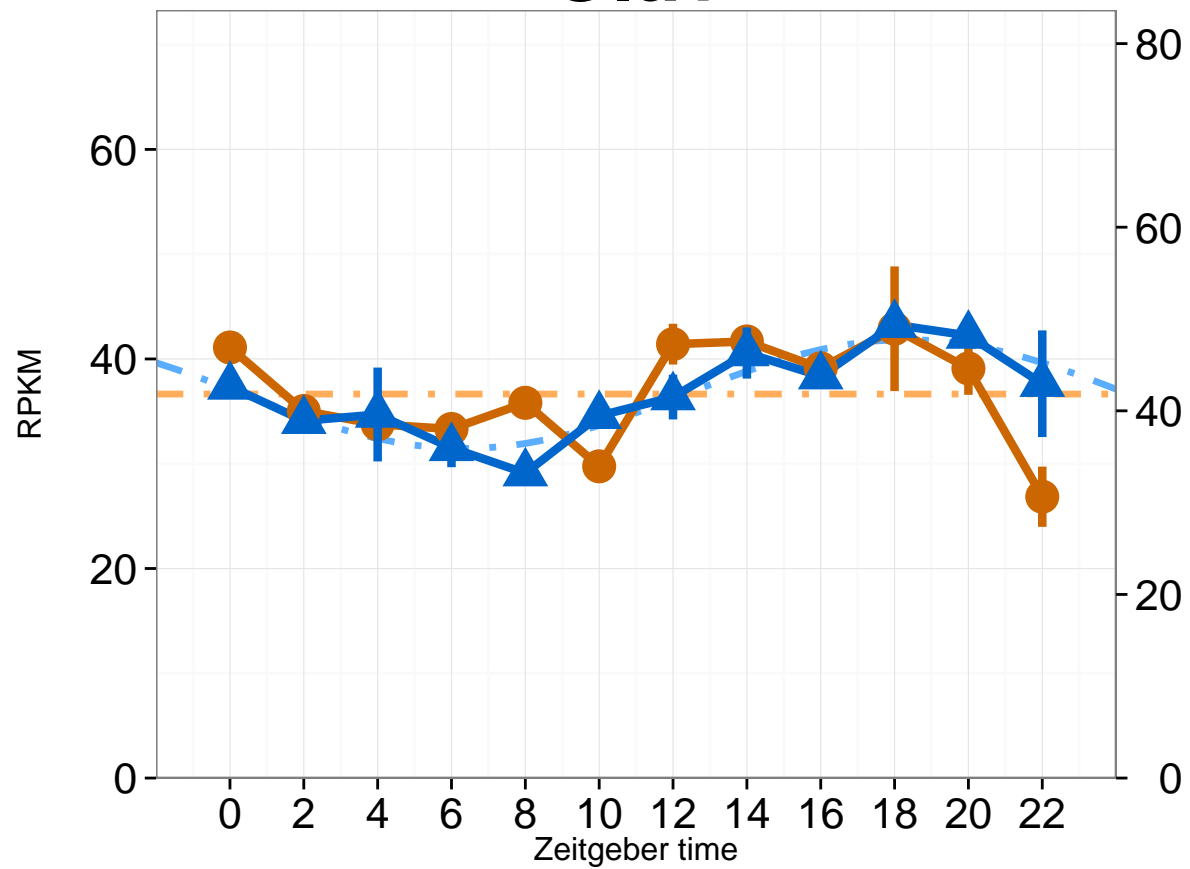

## Ola1

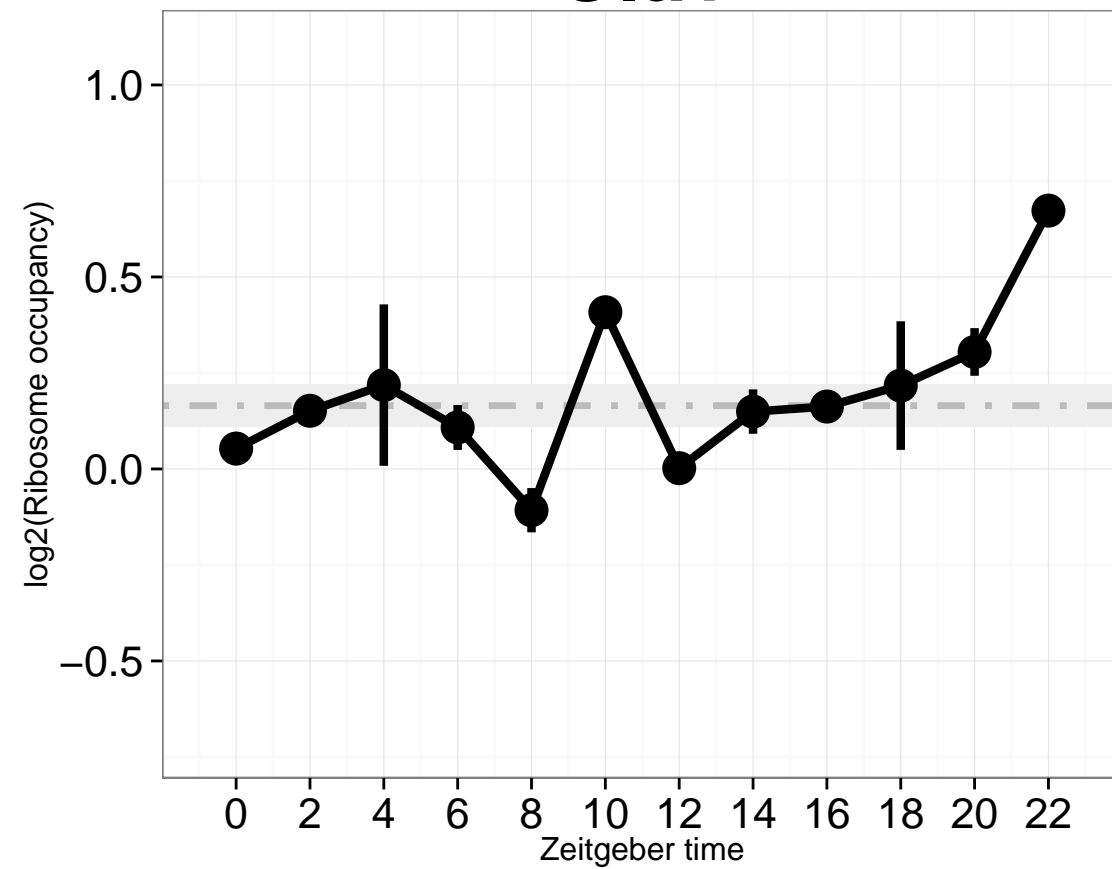

Supplement: SuppDataset_1.zip [file Ola1_set_A.pdf › Supplemental Dataset 1/A-mRNA_nonrhyth_translation_nonrhyth/Ola1_set_A.pdf]

## Olfm1

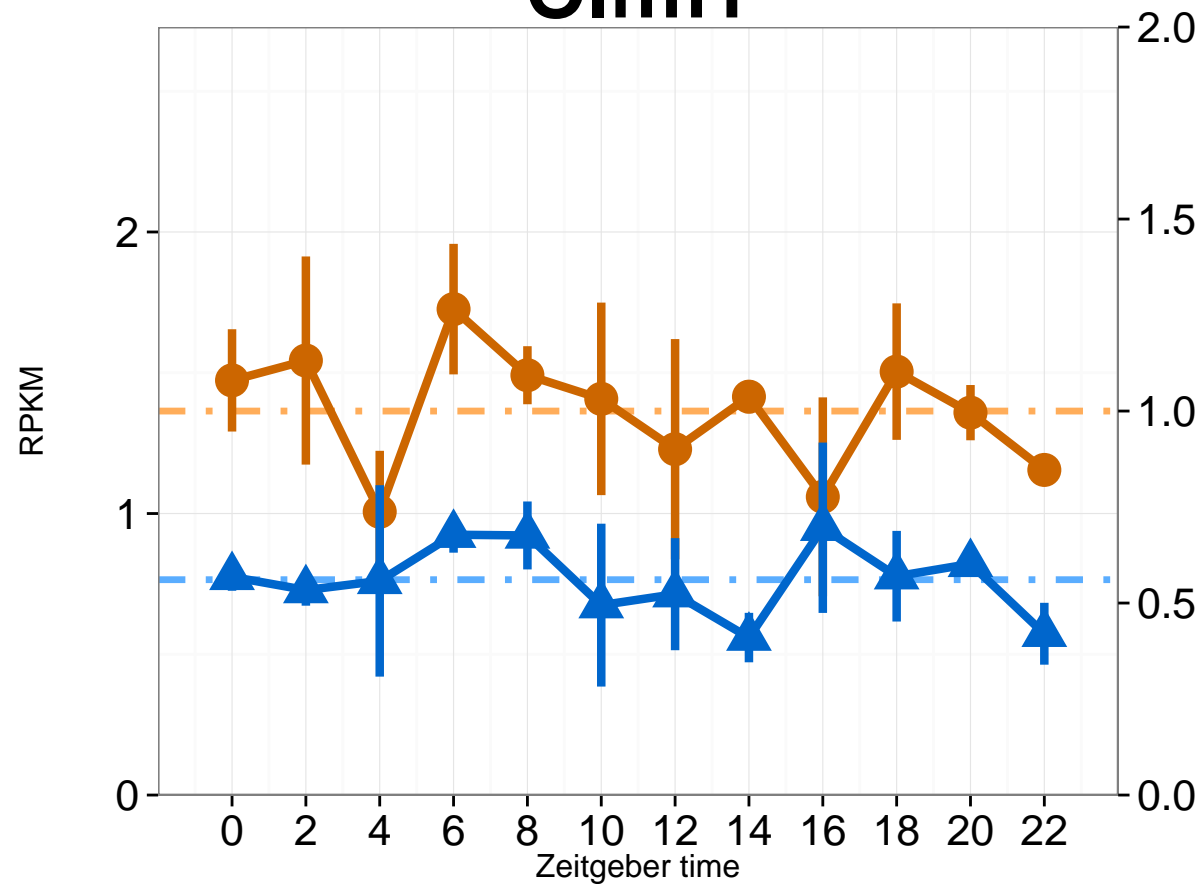

## Olfm1

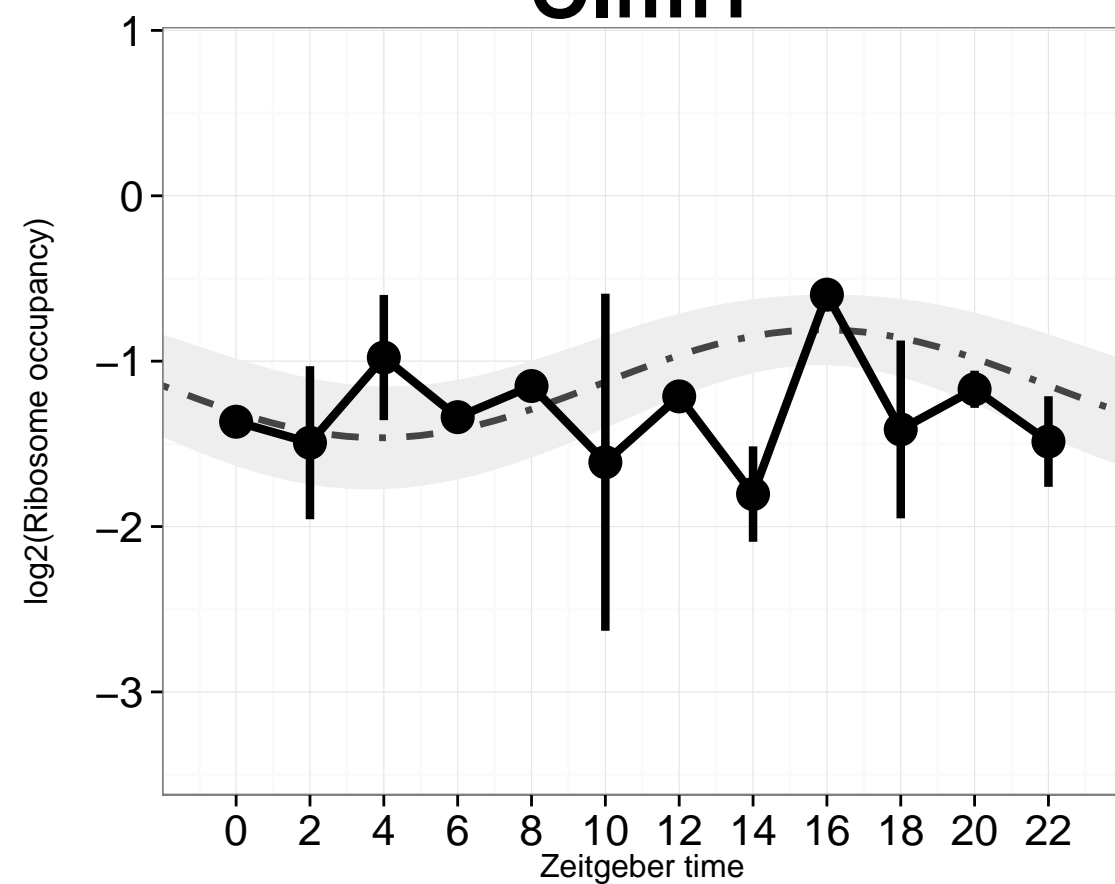

Supplement: SuppDataset_1.zip [file Olfm1_set_A.pdf › Supplemental Dataset 1/A-mRNA_nonrhyth_translation_nonrhyth/Olfm1_set_A.pdf]

## Olfm3

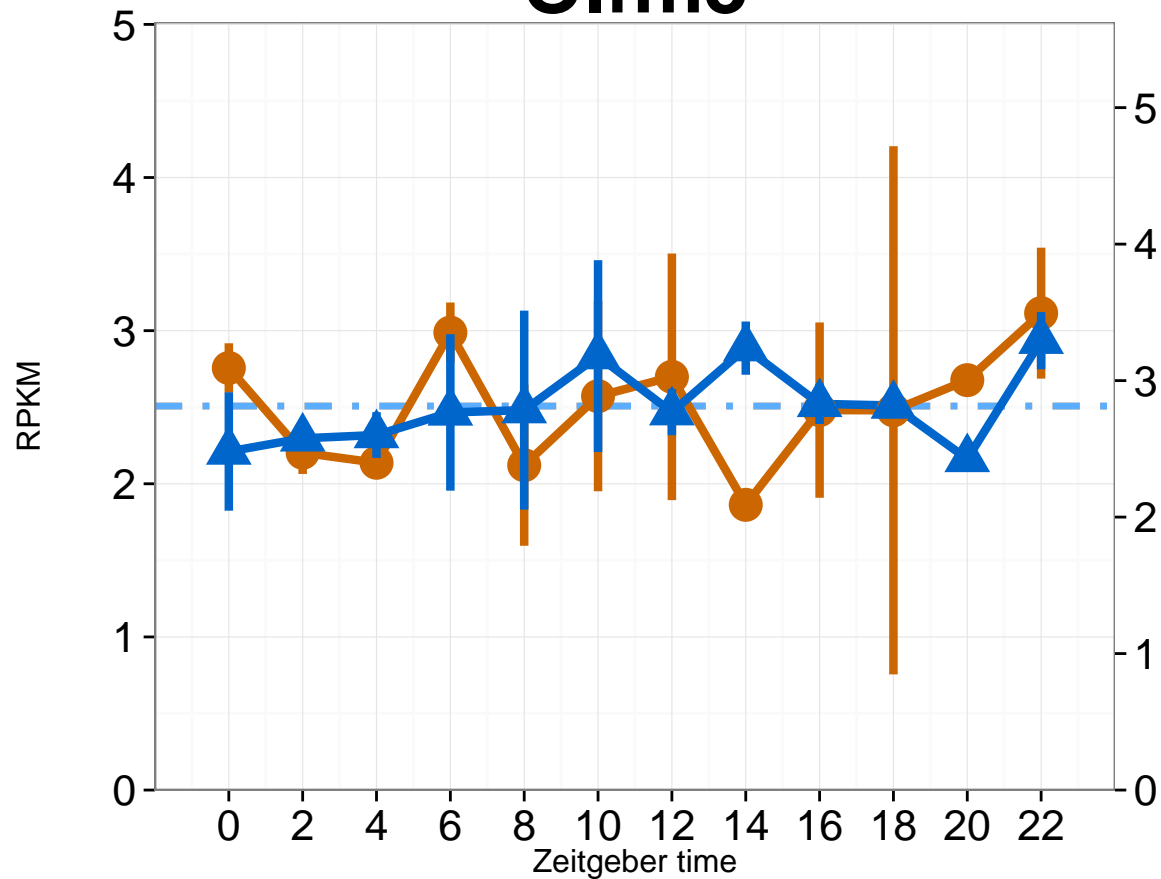

## Olfm3

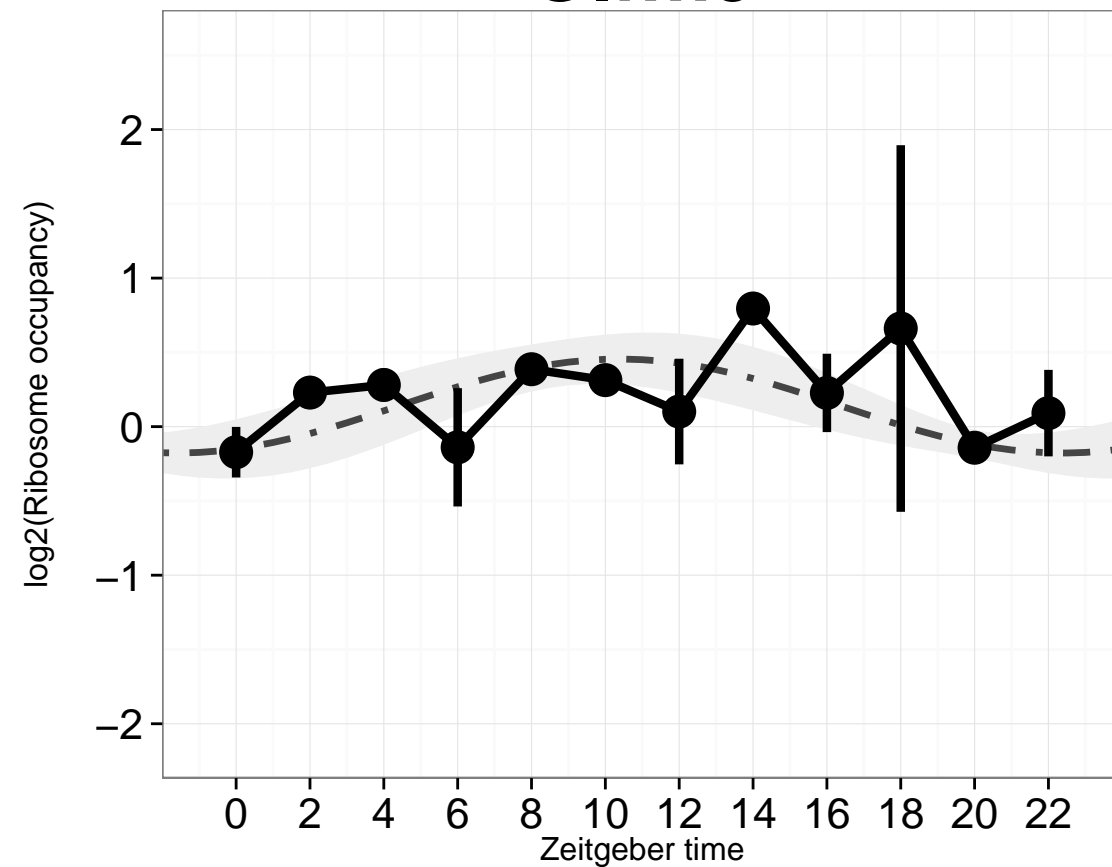

Supplement: SuppDataset_1.zip [file Olfm3_set_A.pdf › Supplemental Dataset 1/A-mRNA_nonrhyth_translation_nonrhyth/Olfm3_set_A.pdf]

## Olfml1

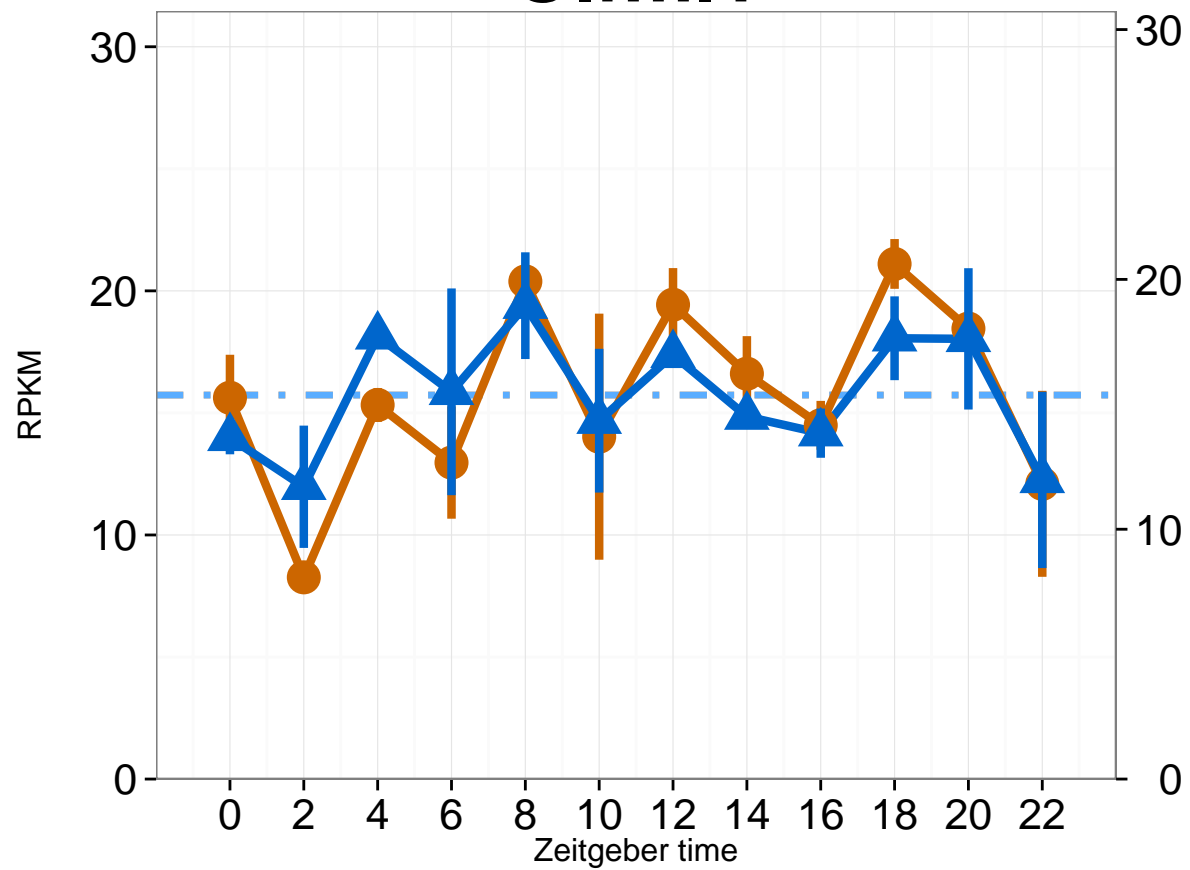

## Olfml1

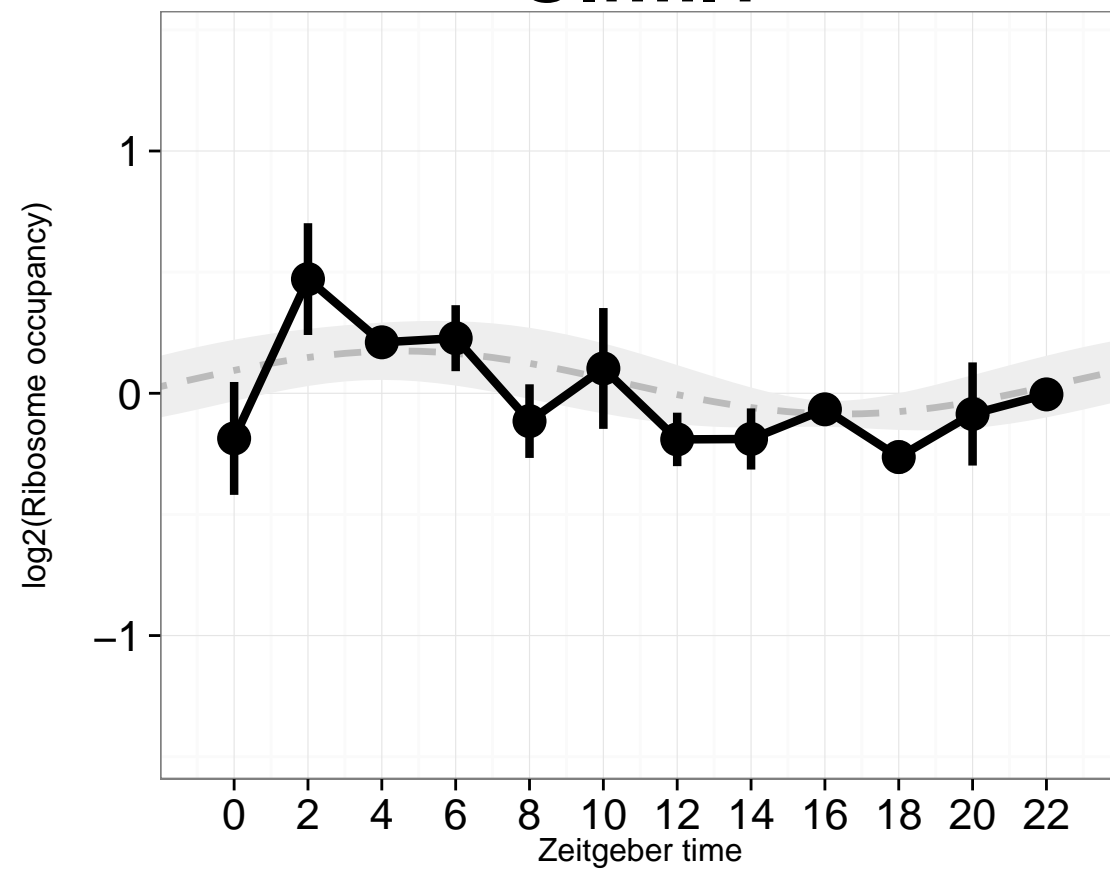

Supplement: SuppDataset_1.zip [file Olfml1_set_A.pdf › Supplemental Dataset 1/A-mRNA_nonrhyth_translation_nonrhyth/Olfml1_set_A.pdf]

## Olfml2b

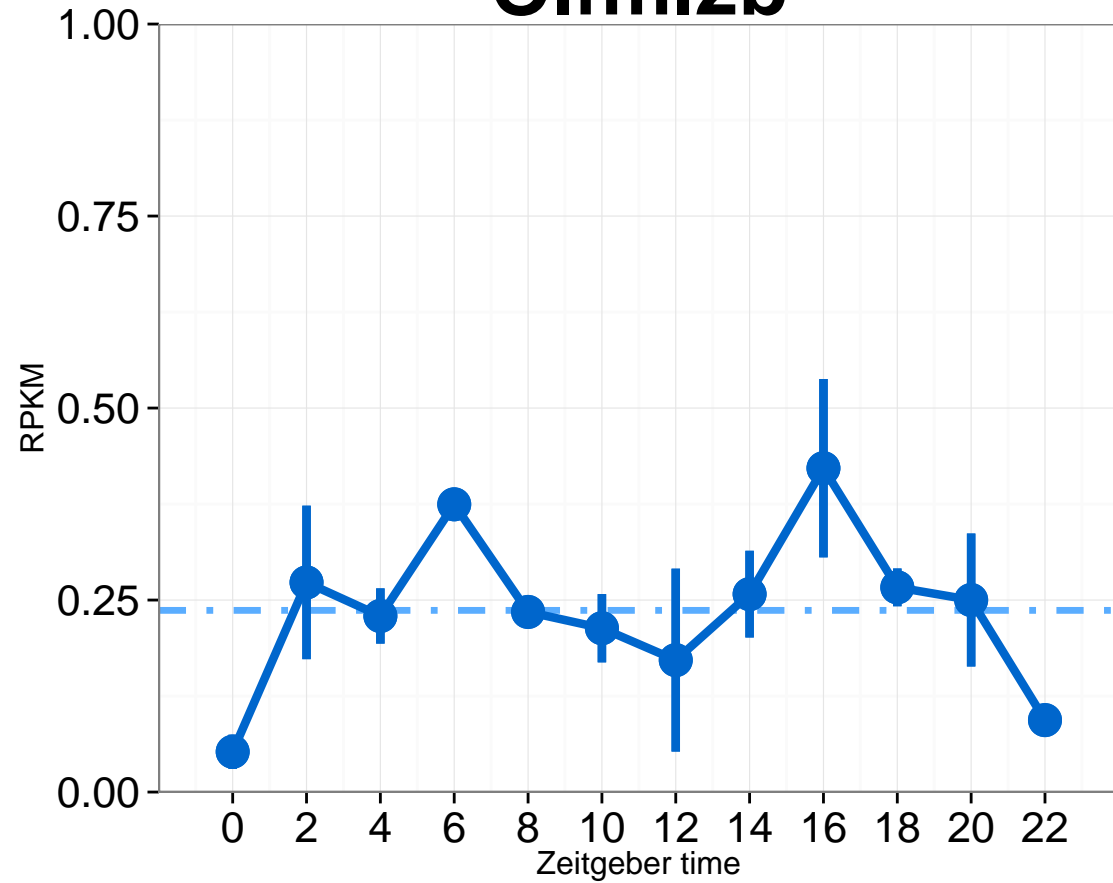

## Olfml2b log2(Ribosome occupancy)

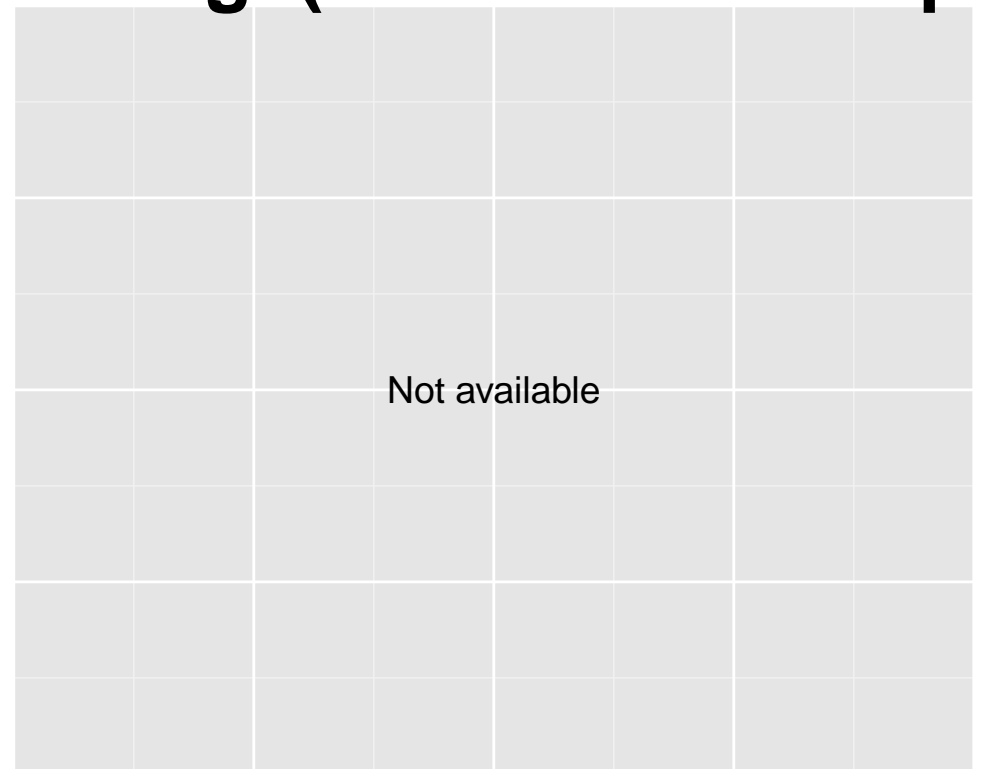

Supplement: SuppDataset_1.zip [file Olfml2b_set_A.pdf › Supplemental Dataset 1/A-mRNA_nonrhyth_translation_nonrhyth/Olfml2b_set_A.pdf]

## Olfml3

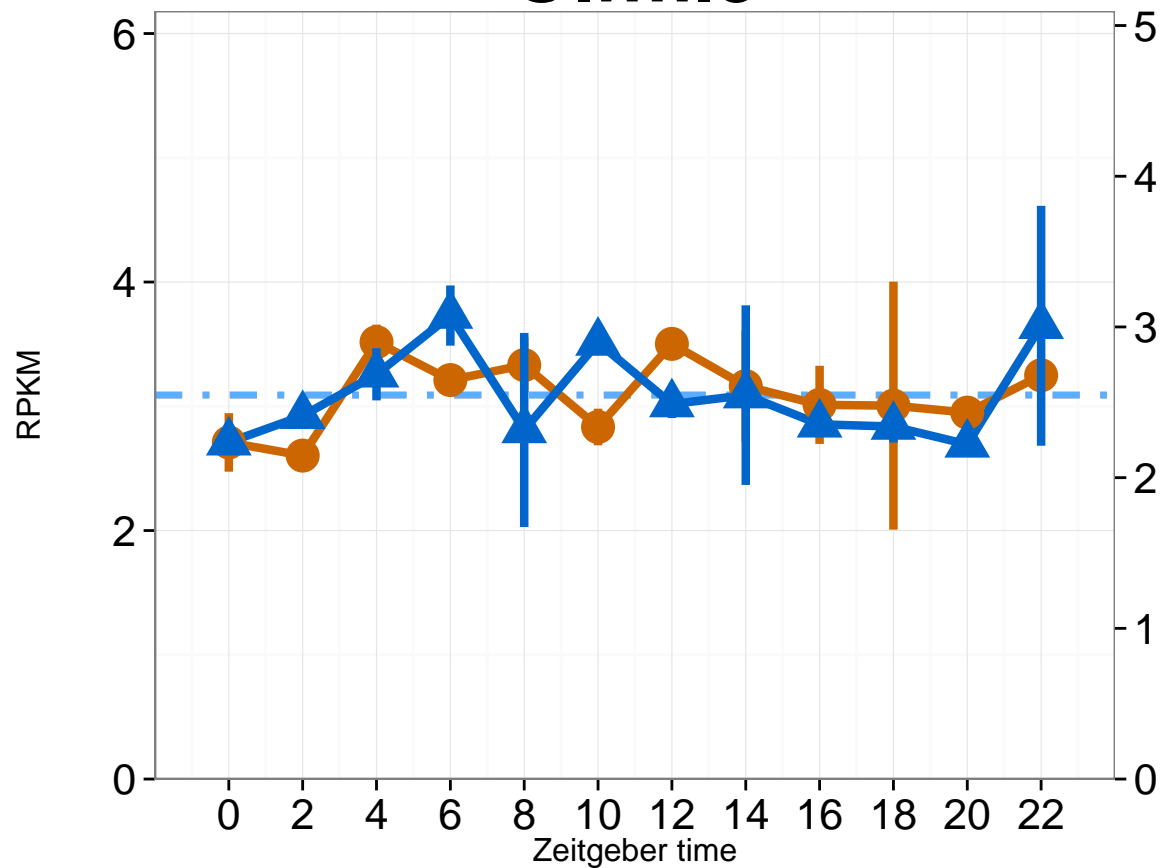

## Olfml3

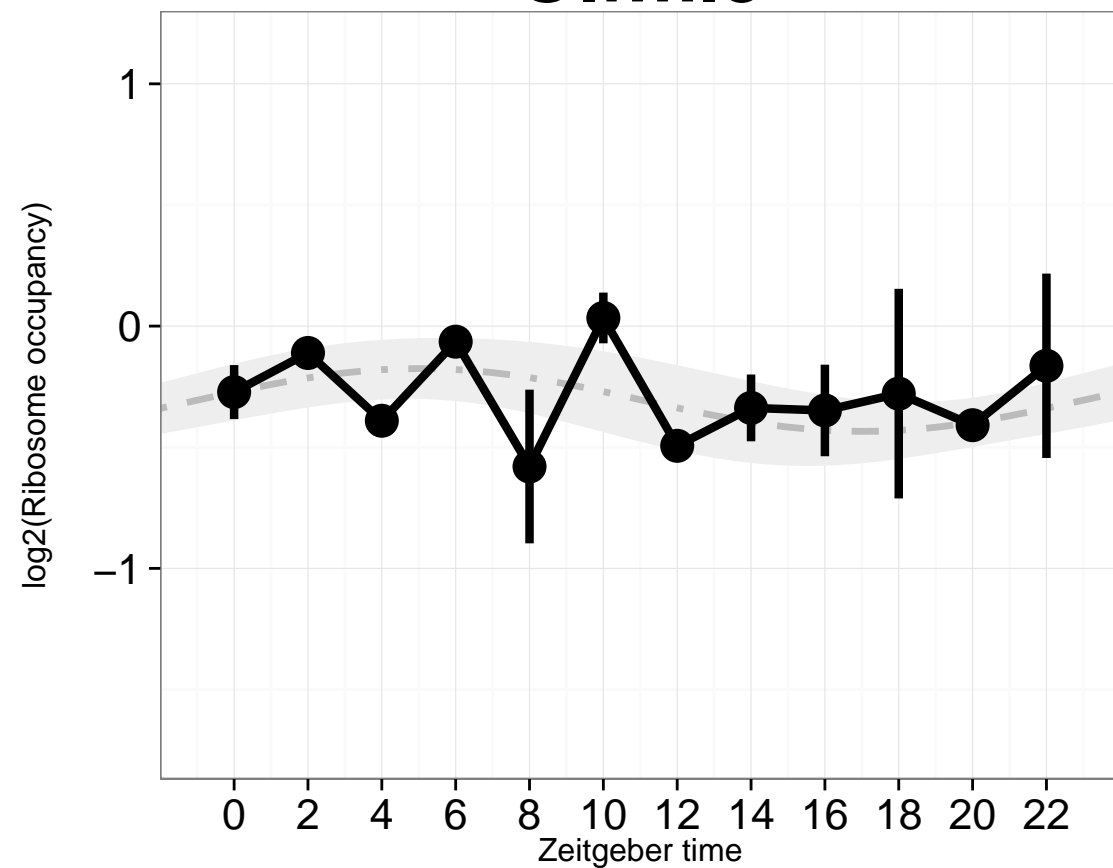

Supplement: SuppDataset_1.zip [file Olfml3_set_A.pdf › Supplemental Dataset 1/A-mRNA_nonrhyth_translation_nonrhyth/Olfml3_set_A.pdf]

# Olfr1033

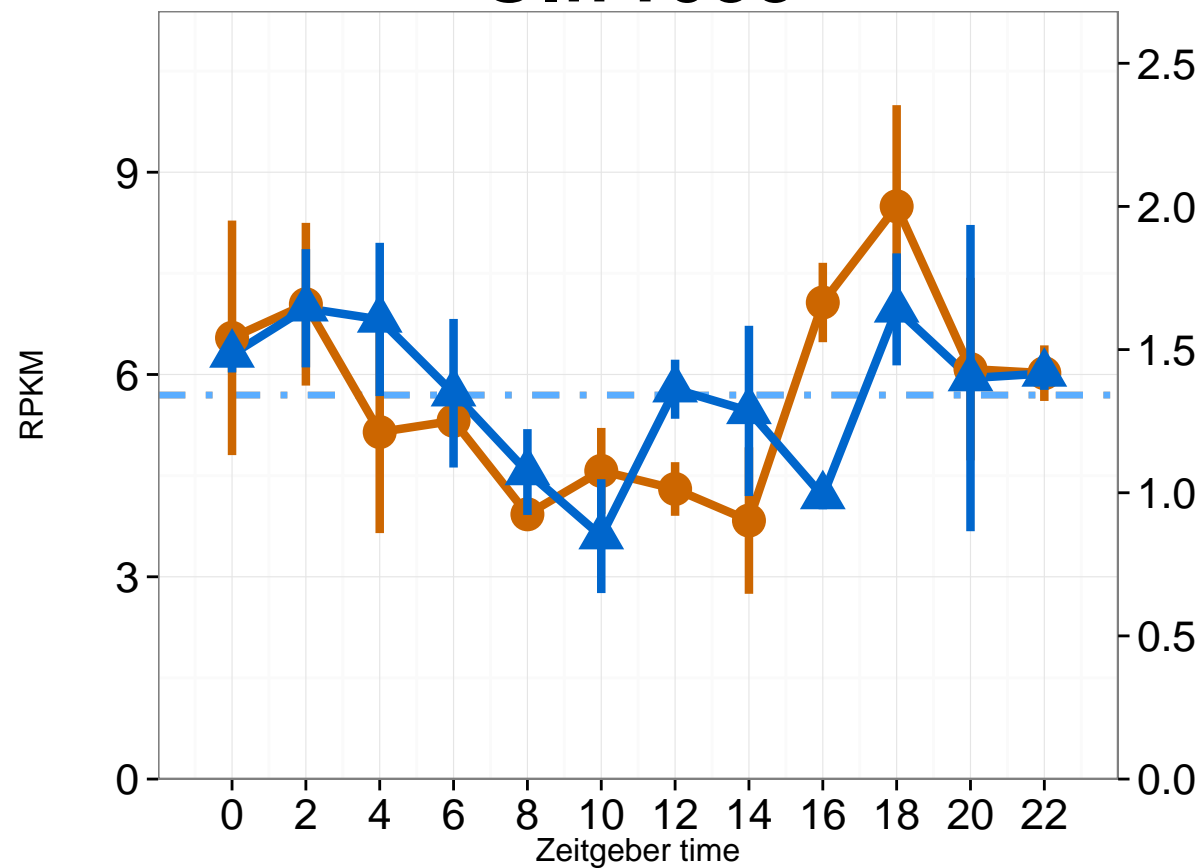

# Olfr1033

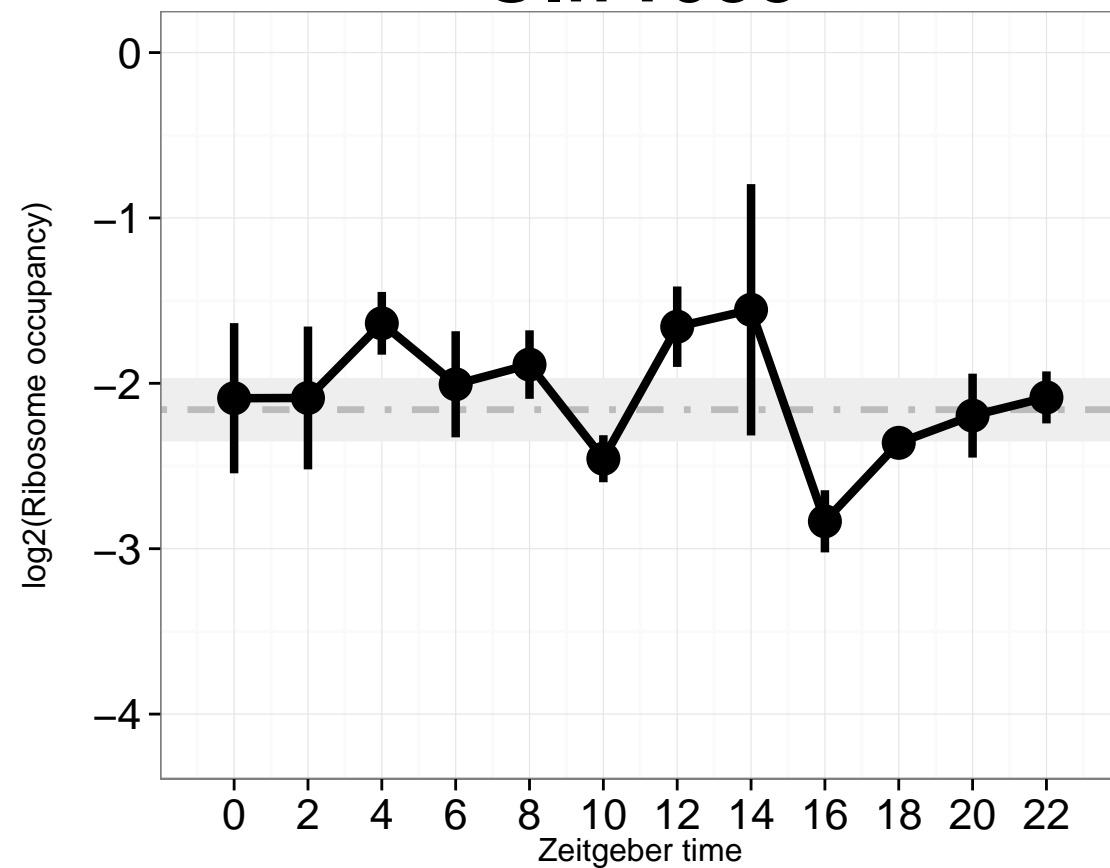

Supplement: SuppDataset_1.zip [file Olfr1033_set_A.pdf › Supplemental Dataset 1/A-mRNA_nonrhyth_translation_nonrhyth/Olfr1033_set_A.pdf]

**Olig1 TR**

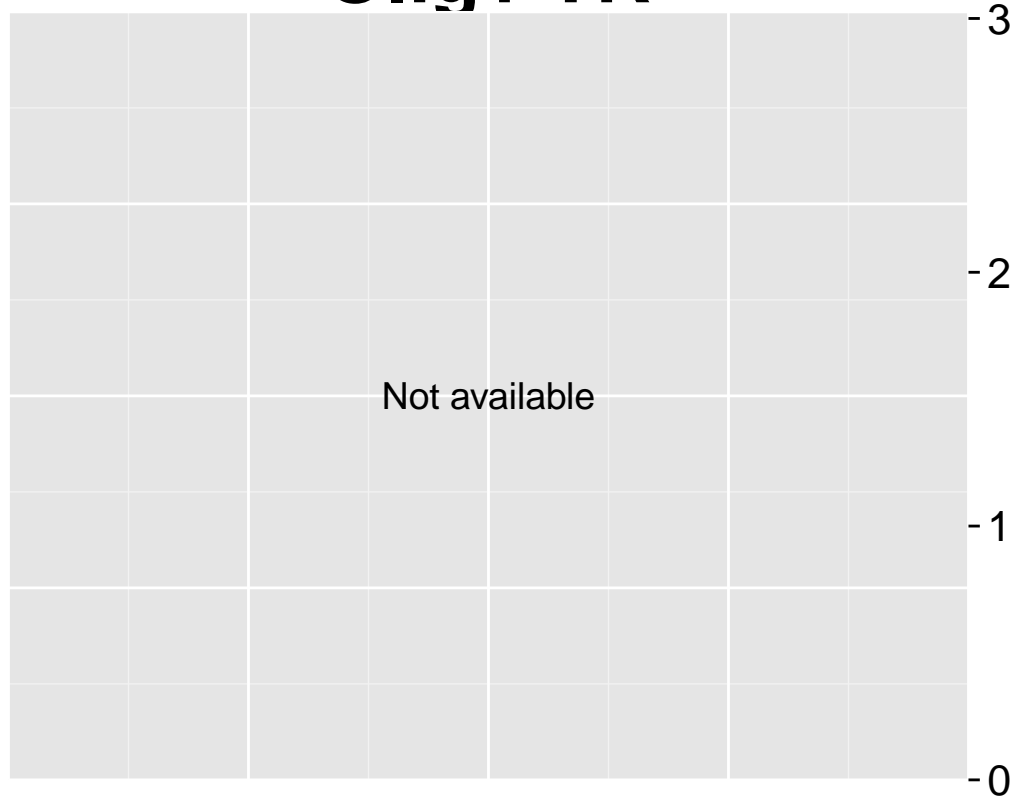

**Olig1 log2(Ribosome occupancy)**

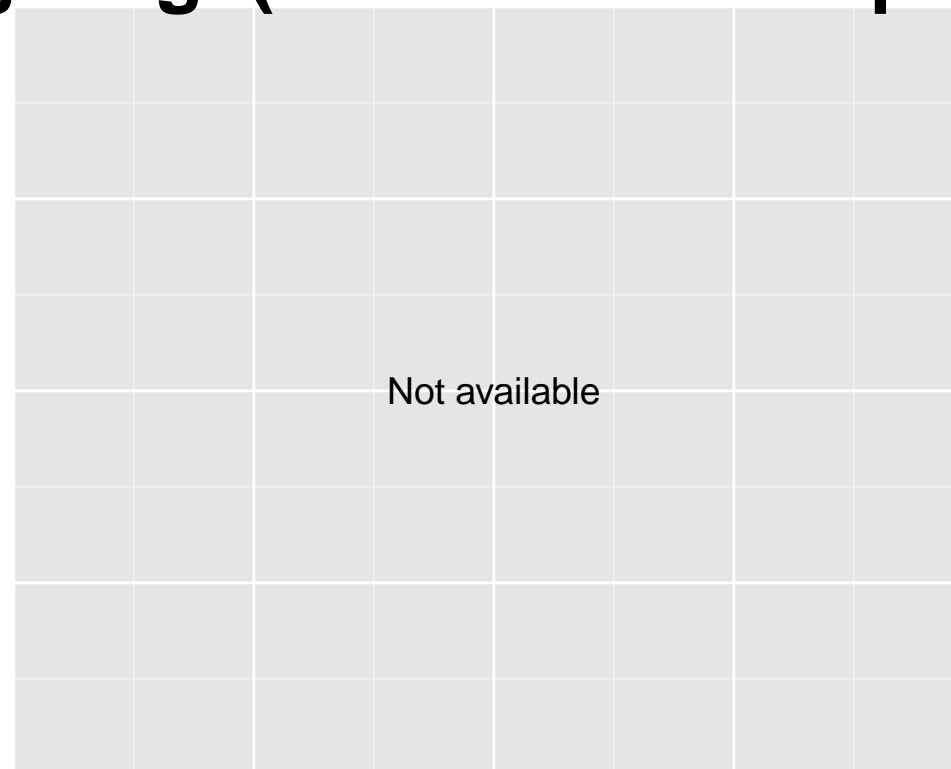

Supplement: SuppDataset_1.zip [file Olig1_set_A.pdf › Supplemental Dataset 1/A-mRNA_nonrhyth_translation_nonrhyth/Olig1_set_A.pdf]

## Oma1

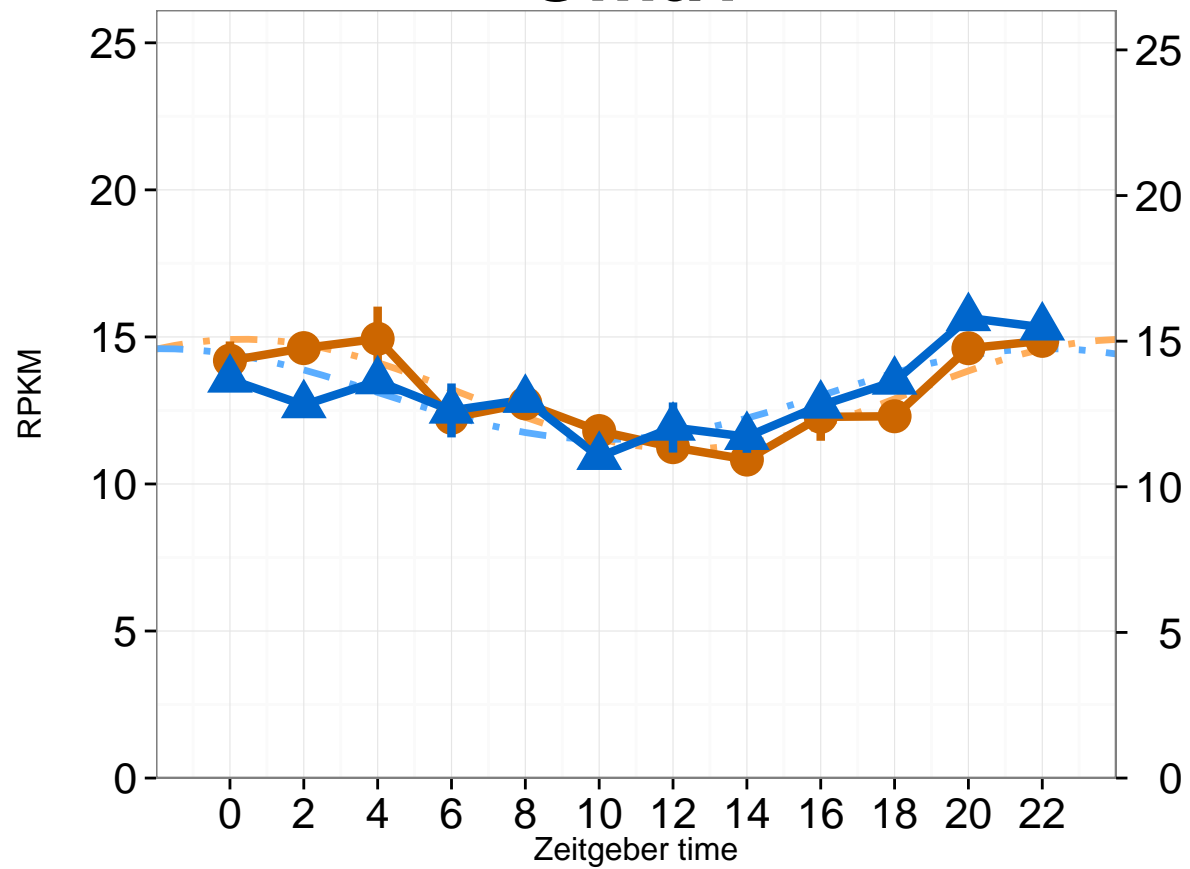

## Oma1

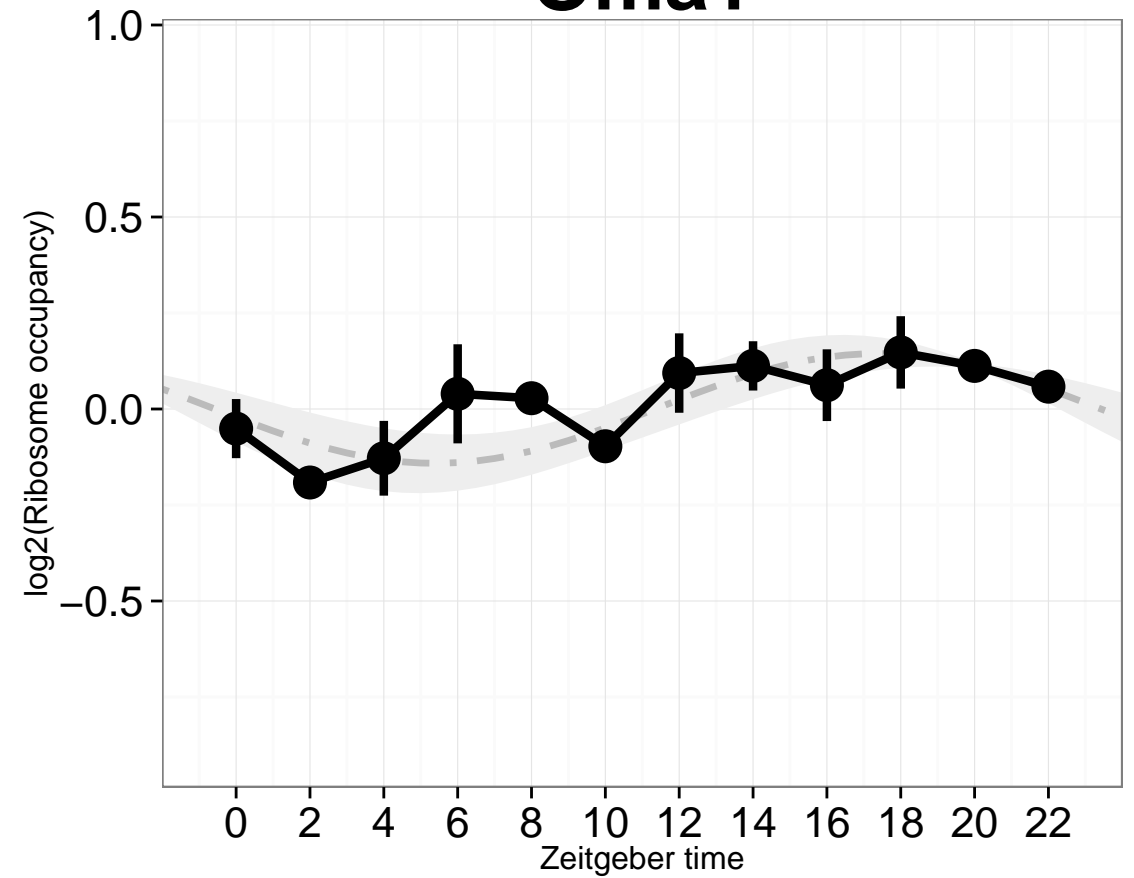

Supplement: SuppDataset_1.zip [file Oma1_set_A.pdf › Supplemental Dataset 1/A-mRNA_nonrhyth_translation_nonrhyth/Oma1_set_A.pdf]

## Onecut1

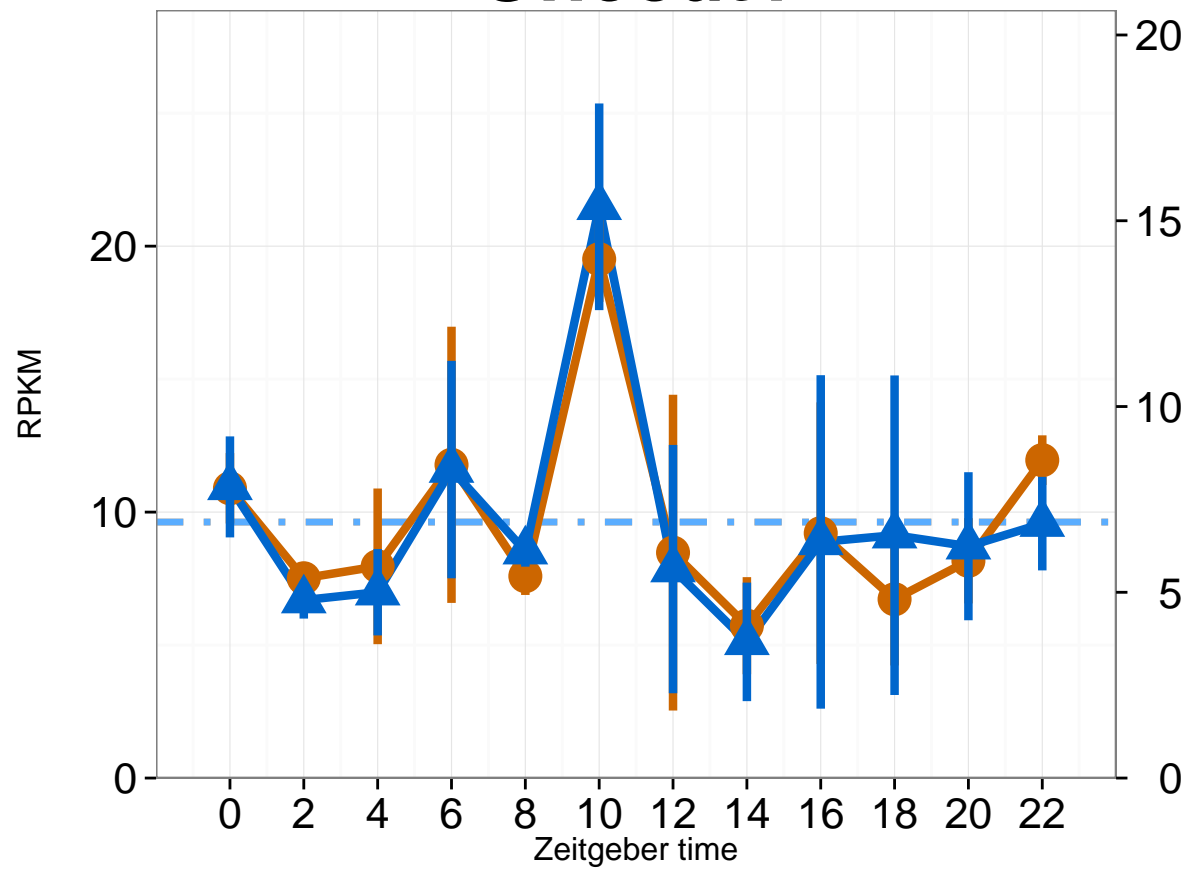

## Onecut1

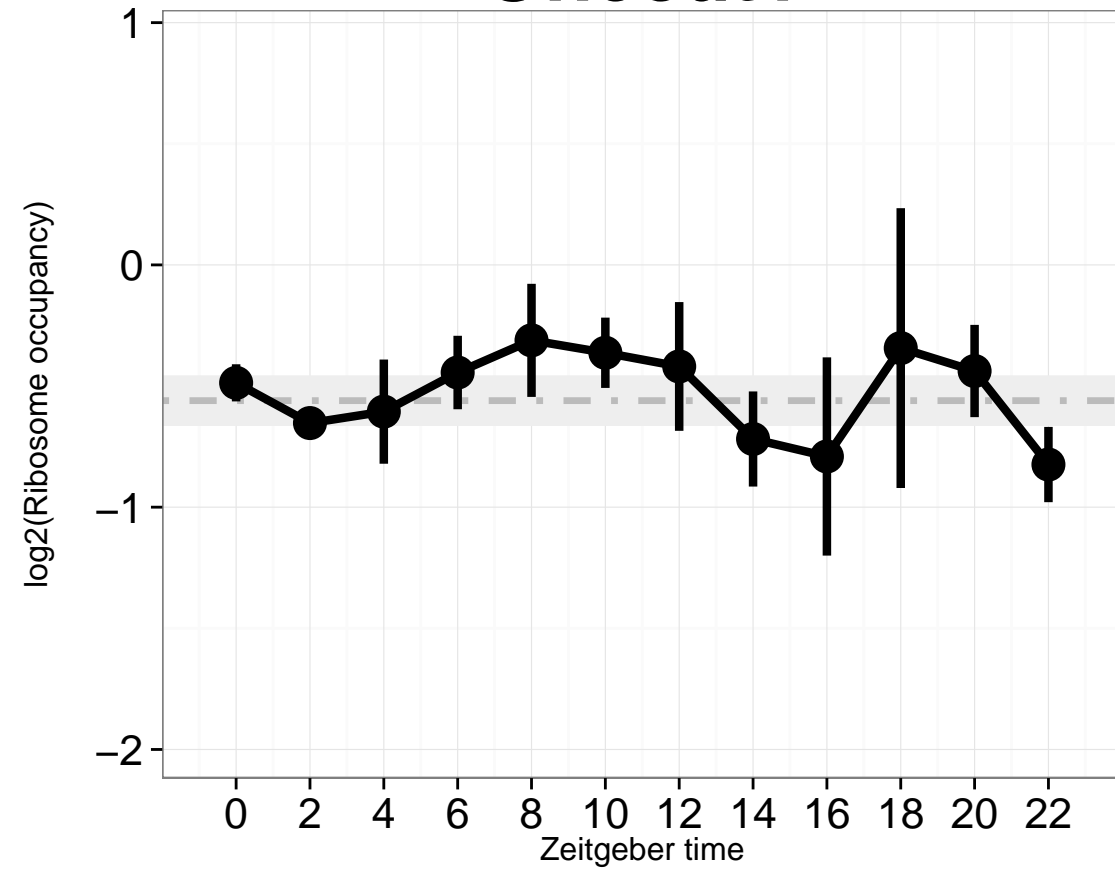

Supplement: SuppDataset_1.zip [file Onecut1_set_A.pdf › Supplemental Dataset 1/A-mRNA_nonrhyth_translation_nonrhyth/Onecut1_set_A.pdf]

## Onecut2

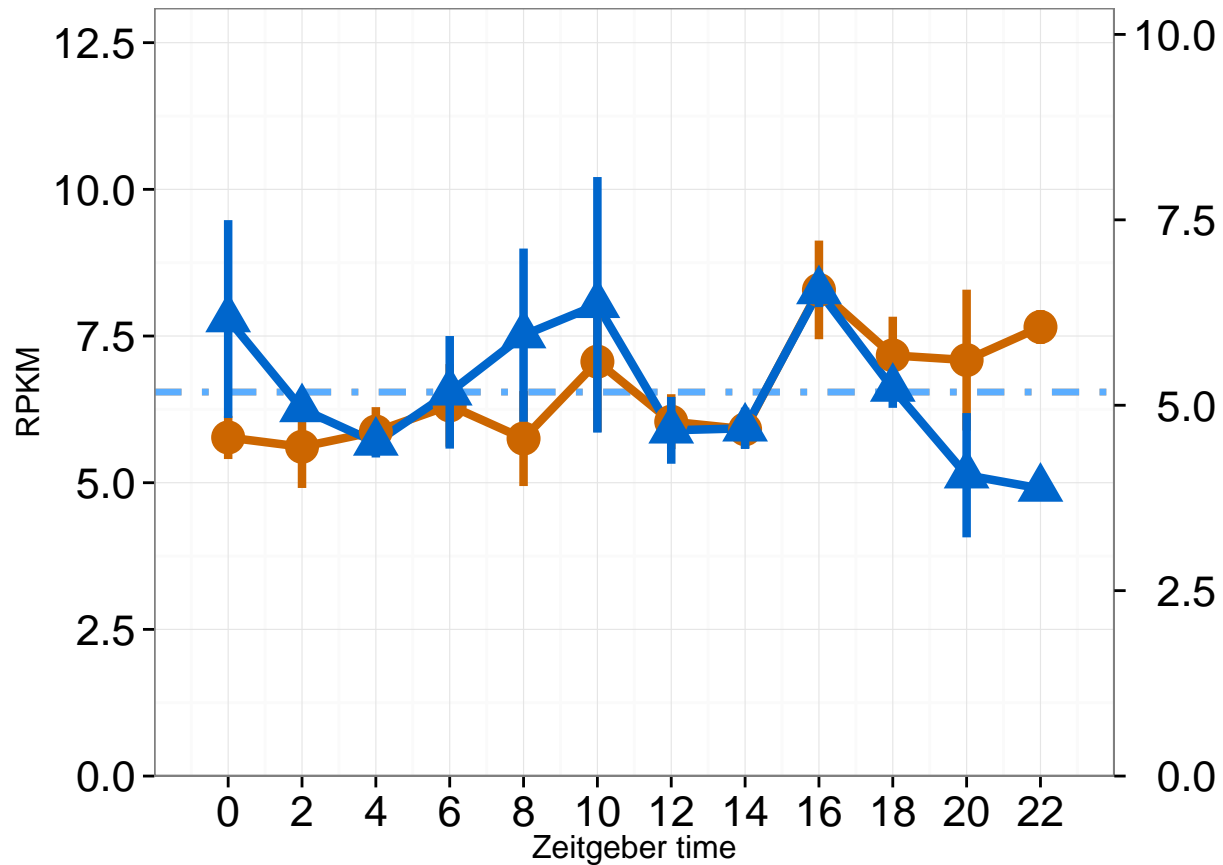

## Onecut2

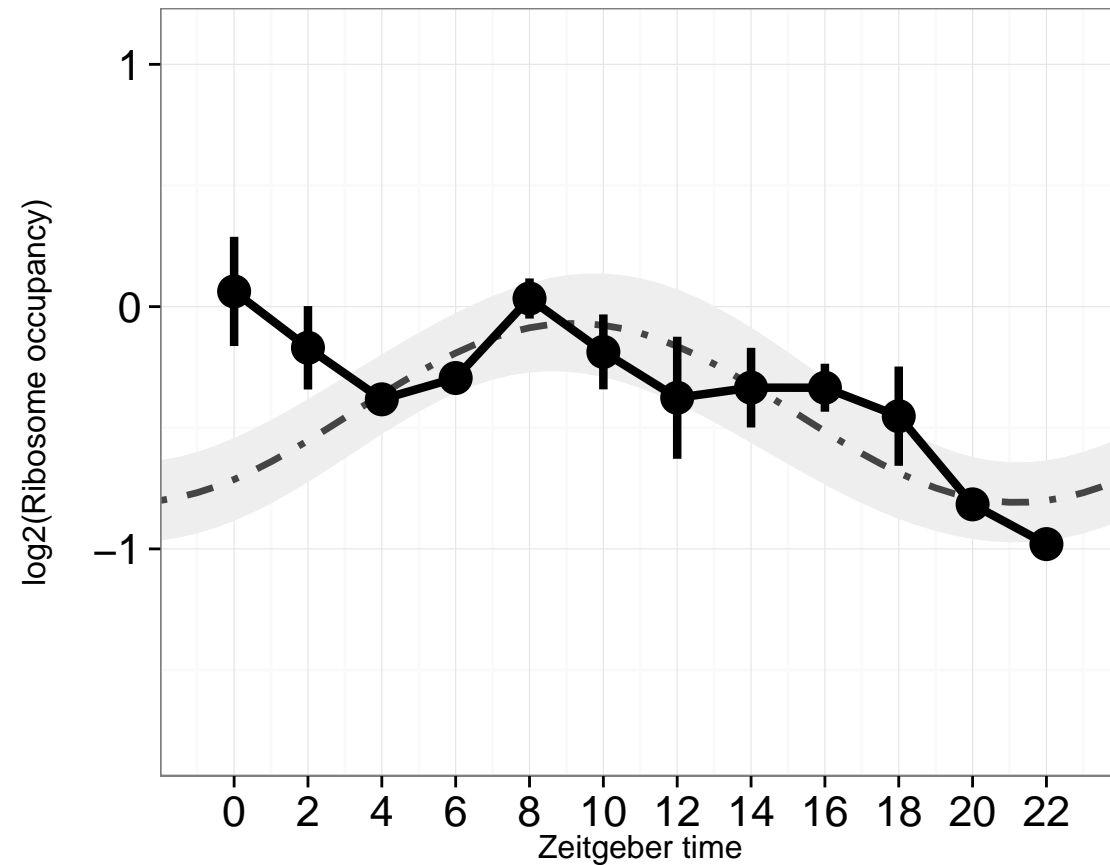

Supplement: SuppDataset_1.zip [file Onecut2_set_A.pdf › Supplemental Dataset 1/A-mRNA_nonrhyth_translation_nonrhyth/Onecut2_set_A.pdf]

# Opa1

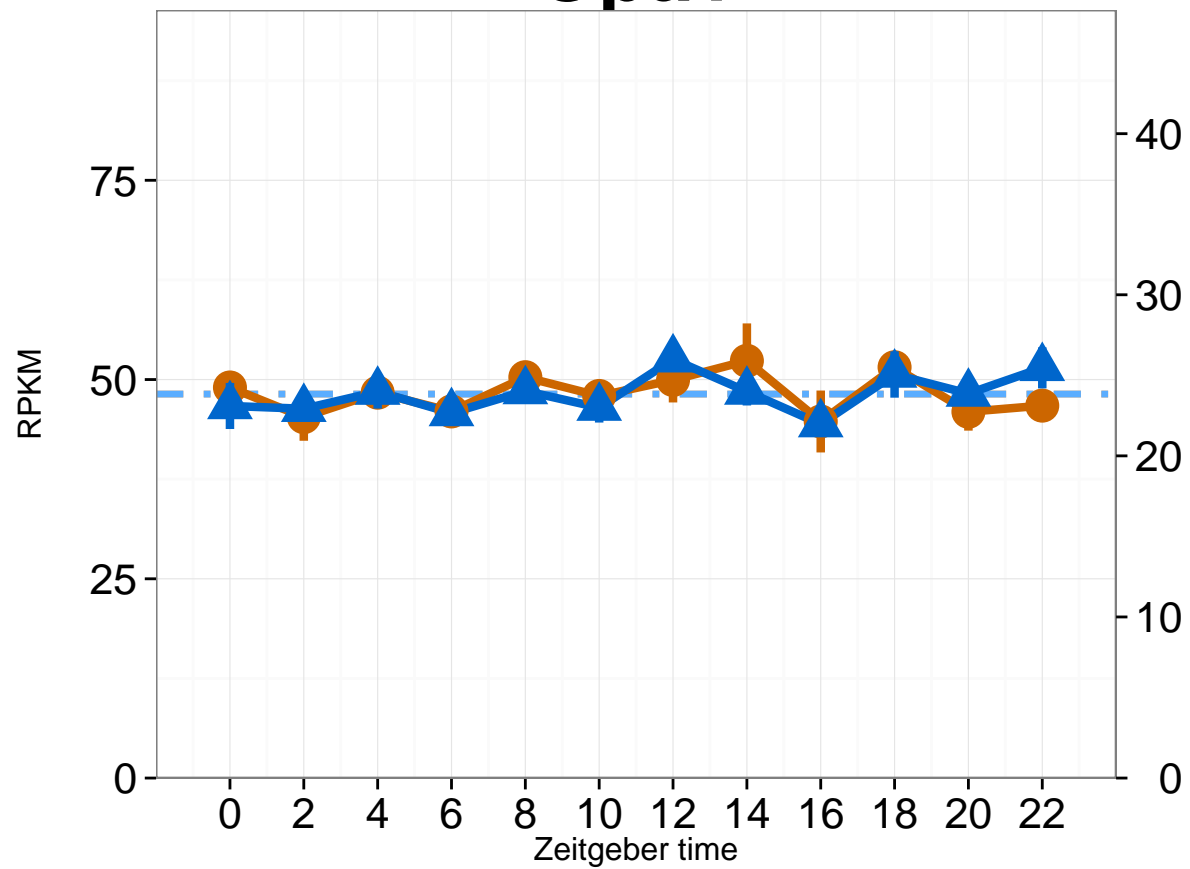

# Opa1

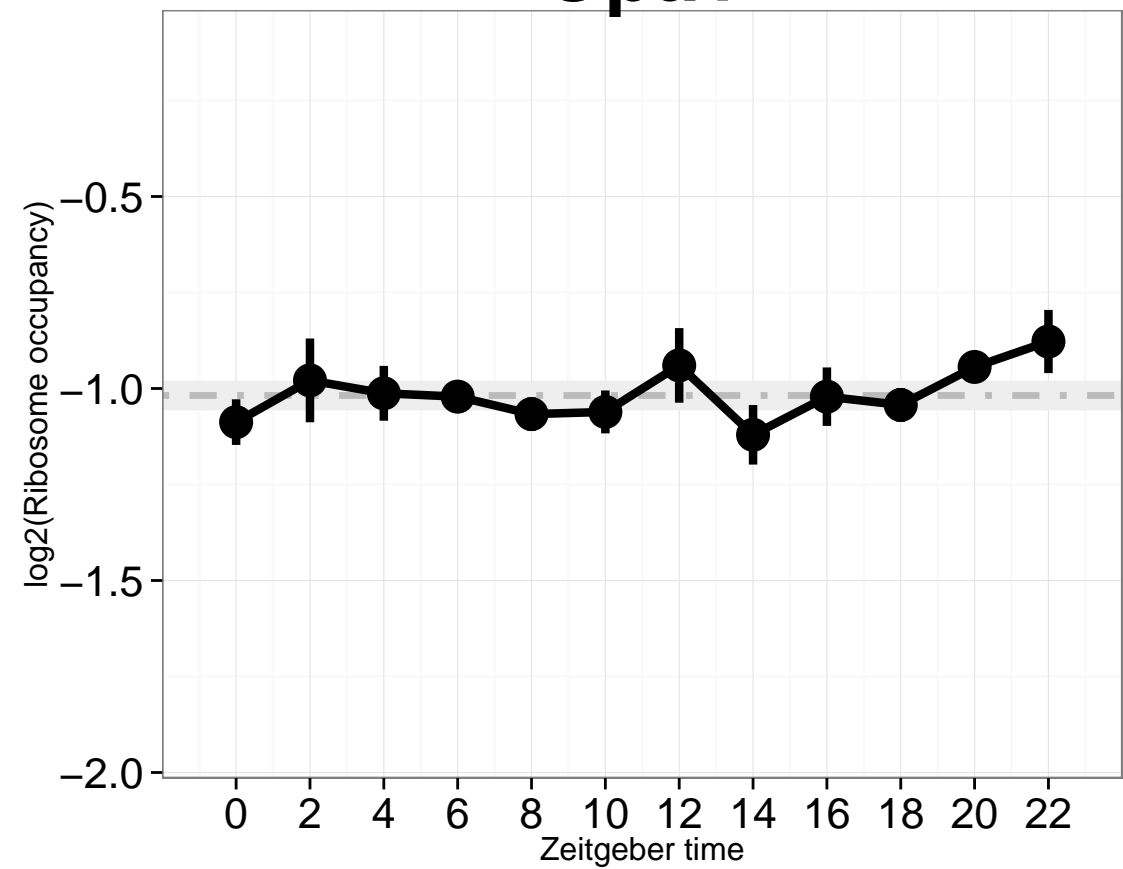

Supplement: SuppDataset_1.zip [file Opa1_set_A.pdf › Supplemental Dataset 1/A-mRNA_nonrhyth_translation_nonrhyth/Opa1_set_A.pdf]

# Opa3

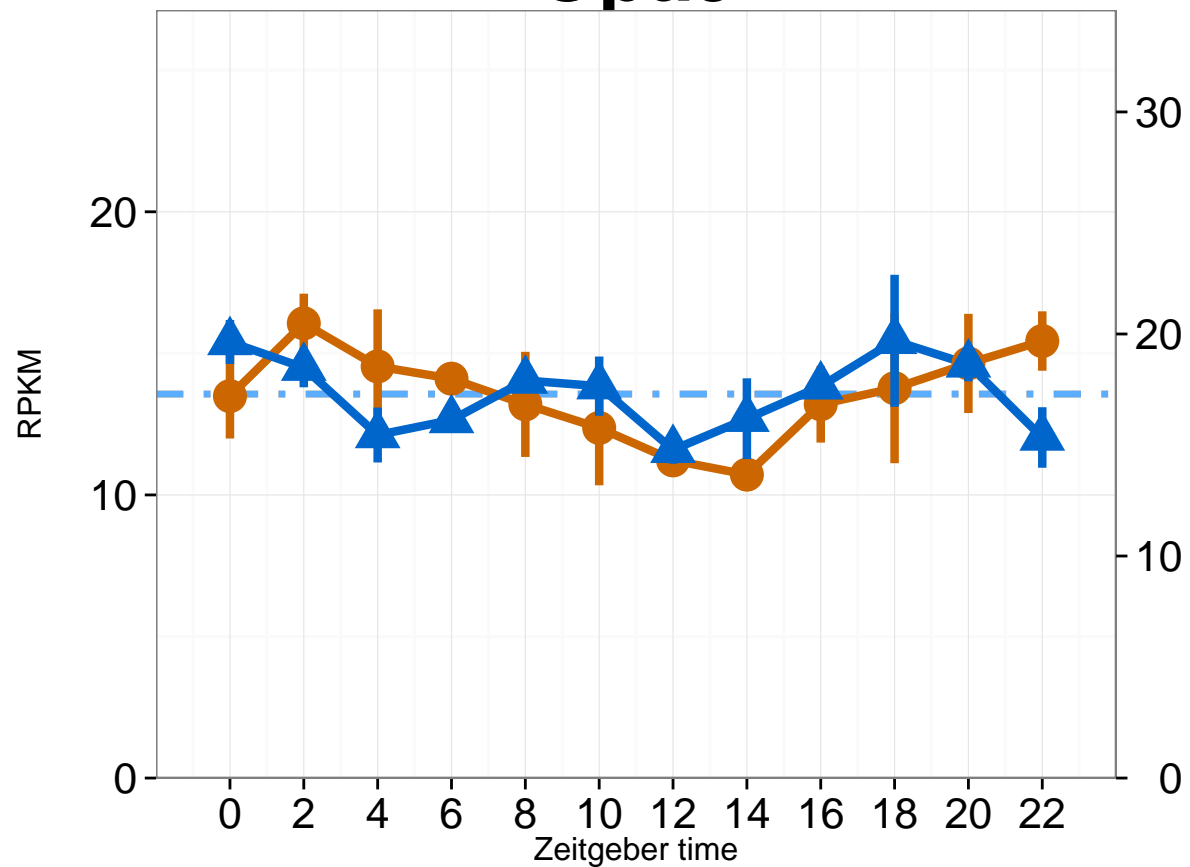

# Opa3

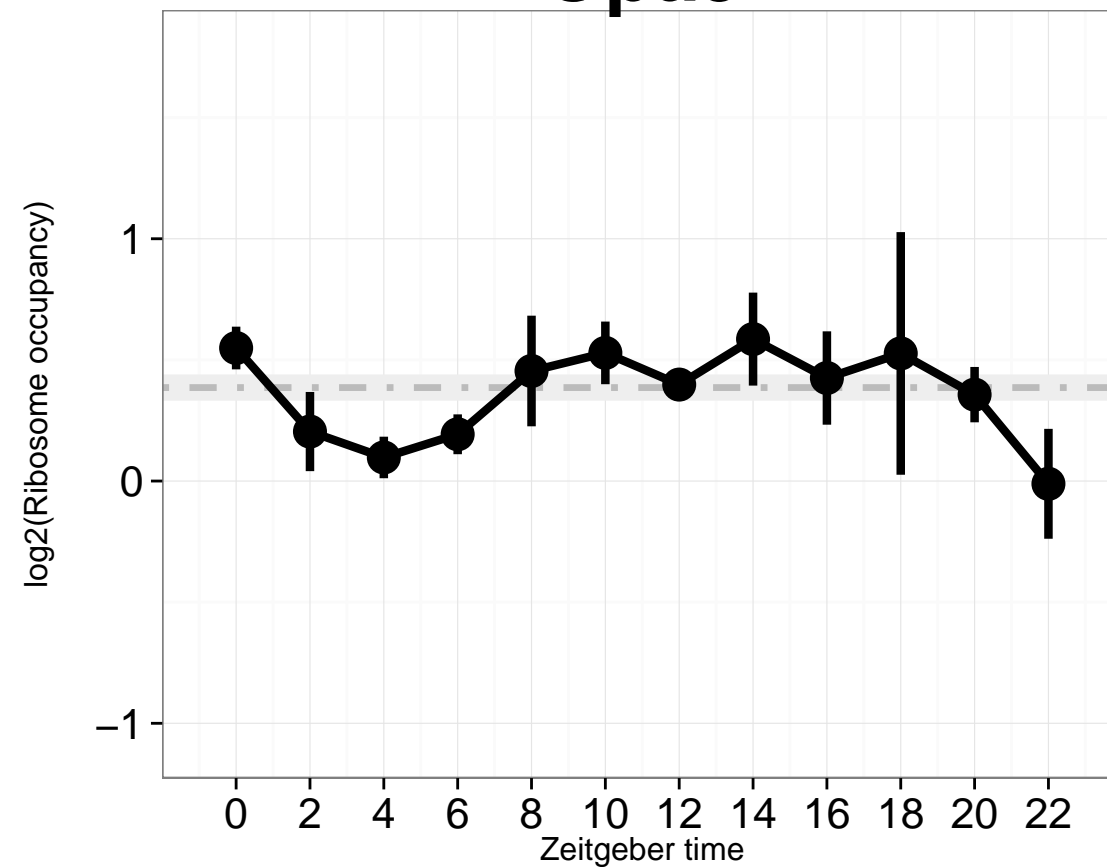

Supplement: SuppDataset_1.zip [file Opa3_set_A.pdf › Supplemental Dataset 1/A-mRNA_nonrhyth_translation_nonrhyth/Opa3_set_A.pdf]

# Ophn1

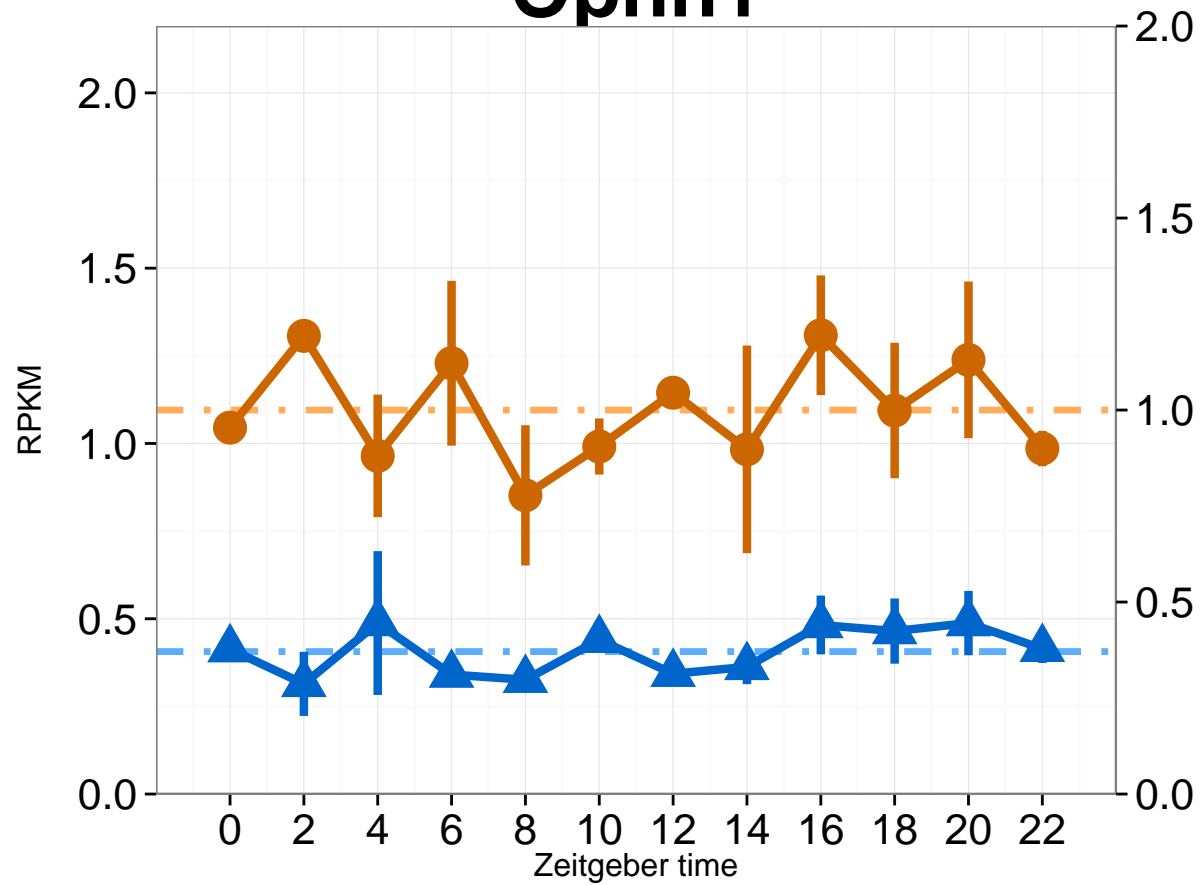

# Ophn1

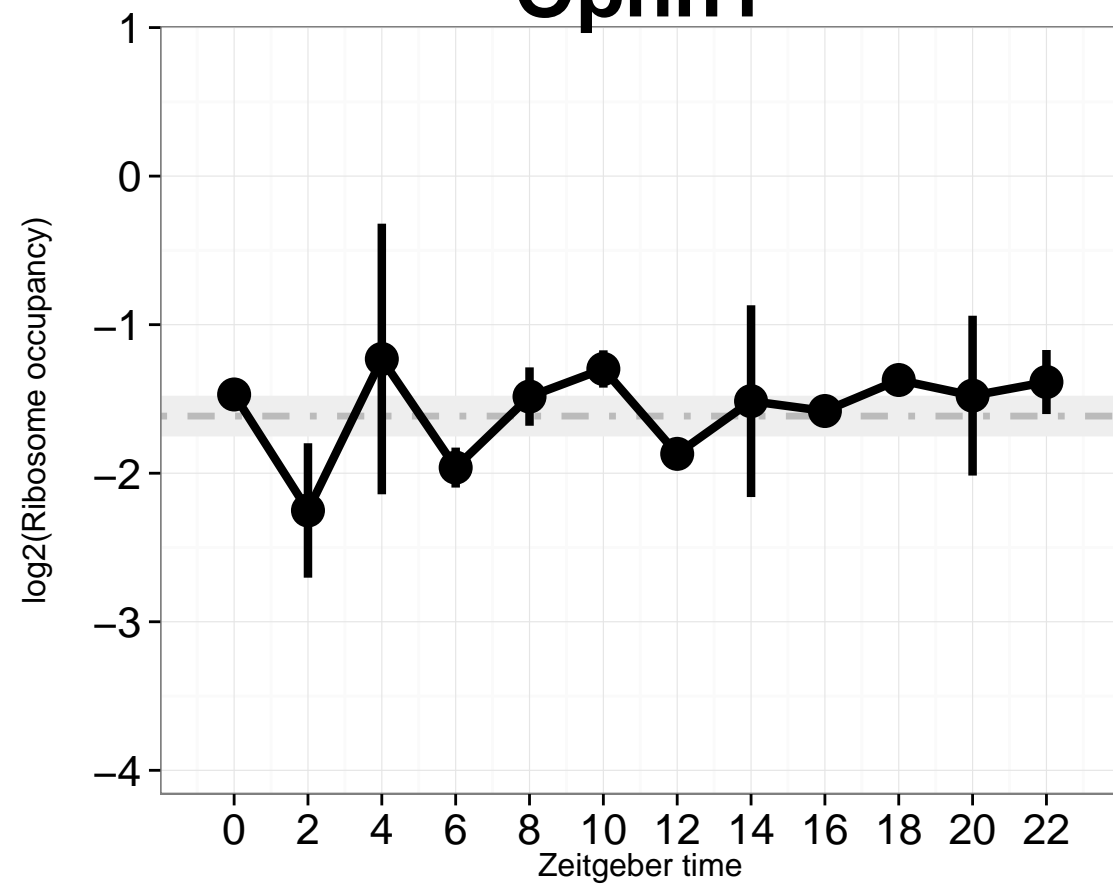

Supplement: SuppDataset_1.zip [file Ophn1_set_A.pdf › Supplemental Dataset 1/A-mRNA_nonrhyth_translation_nonrhyth/Ophn1_set_A.pdf]

## Oplah

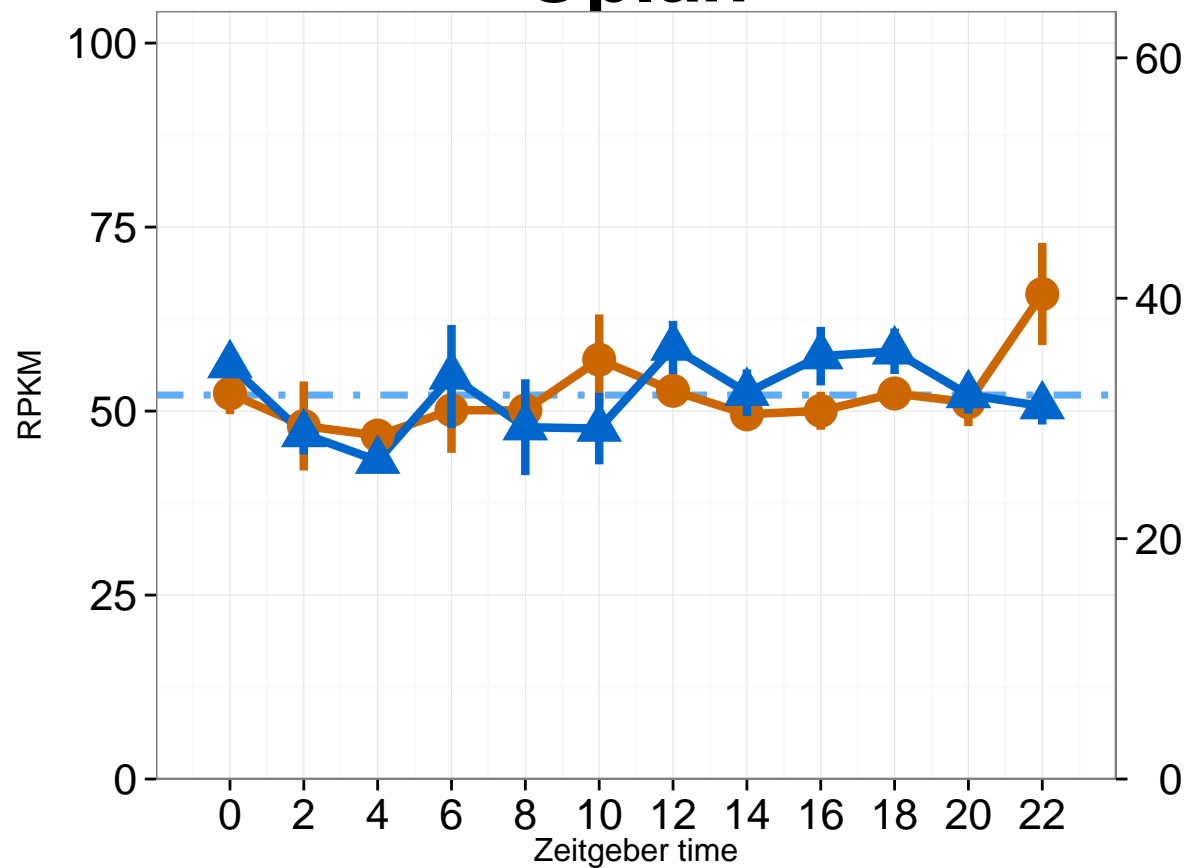

## Oplah

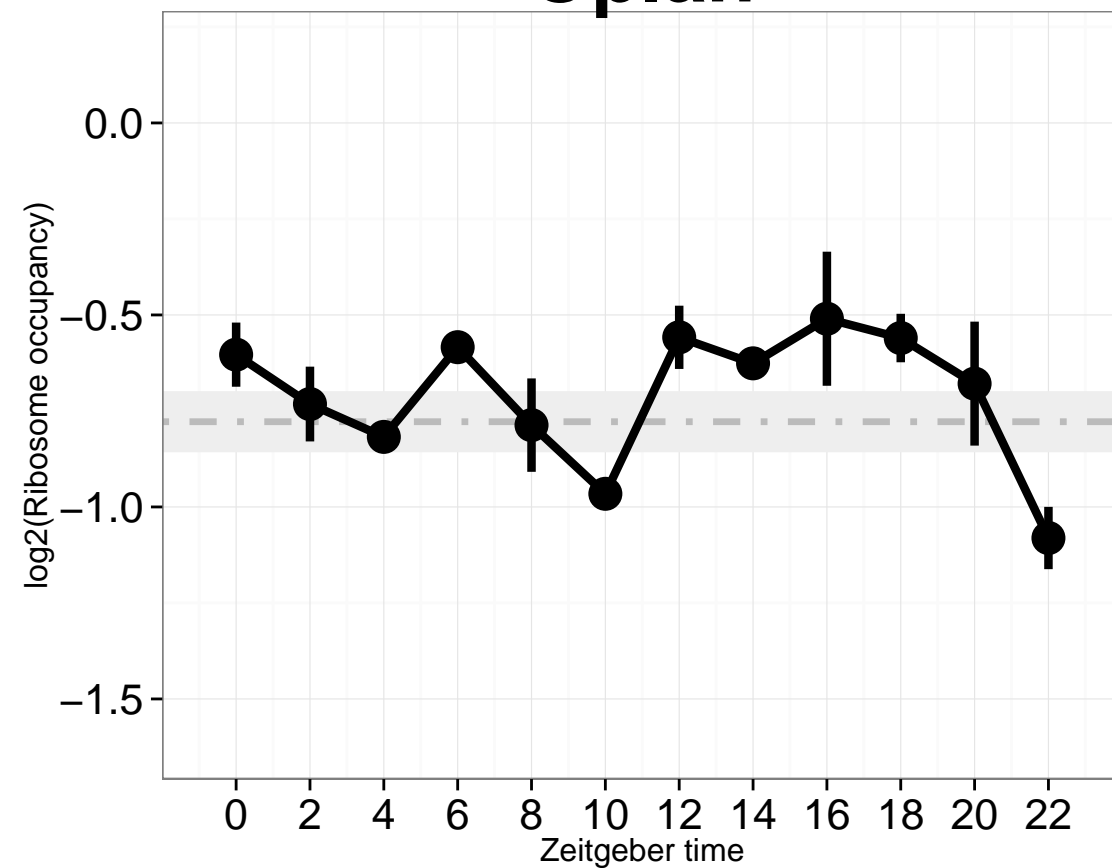

Supplement: SuppDataset_1.zip [file Oplah_set_A.pdf › Supplemental Dataset 1/A-mRNA_nonrhyth_translation_nonrhyth/Oplah_set_A.pdf]

## Optn

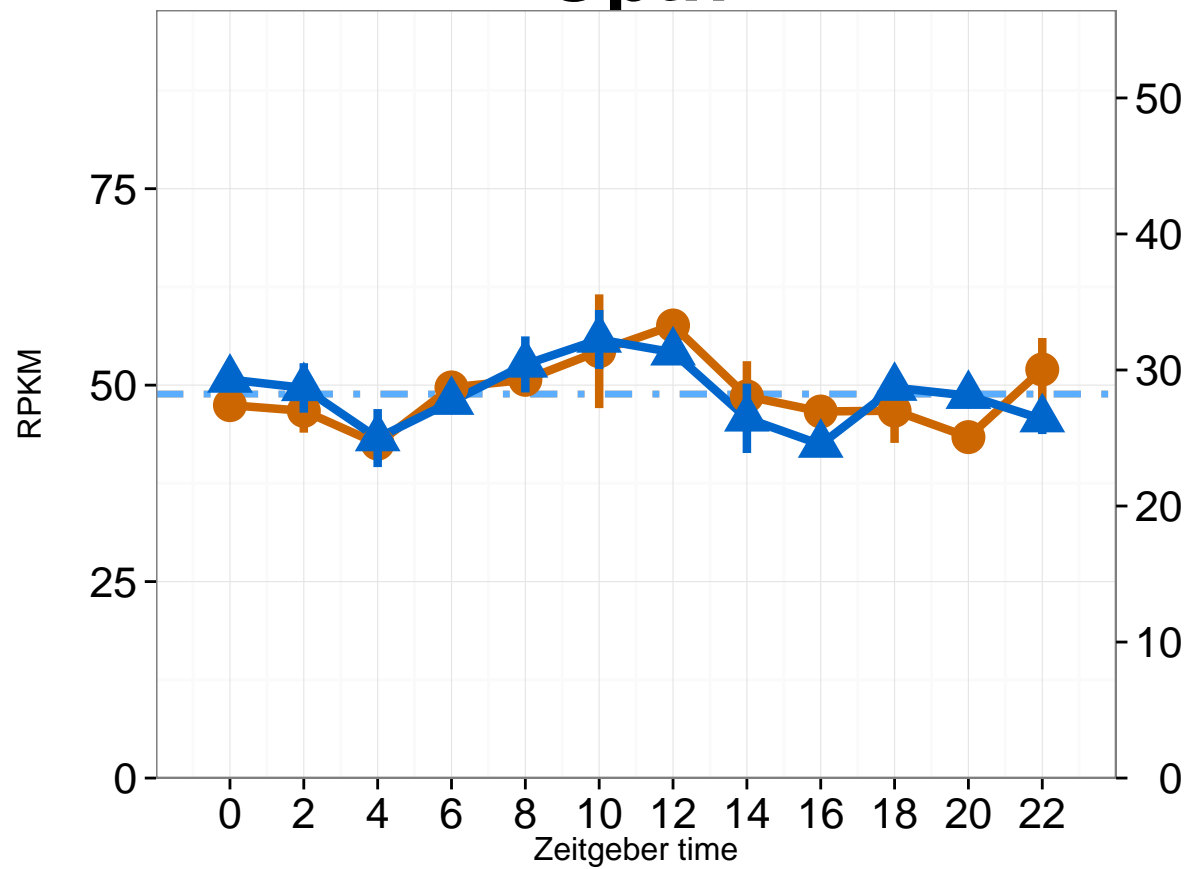

## Optn

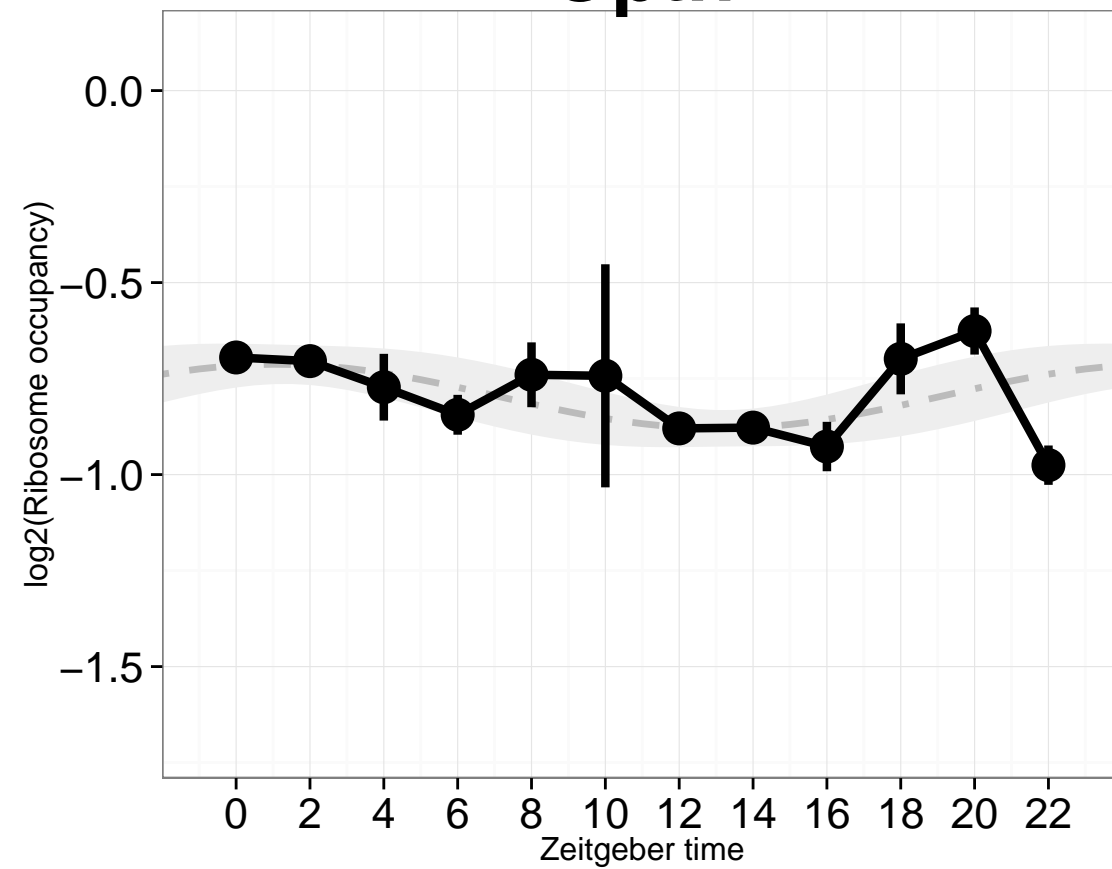

Supplement: SuppDataset_1.zip [file Optn_set_A.pdf › Supplemental Dataset 1/A-mRNA_nonrhyth_translation_nonrhyth/Optn_set_A.pdf]

## Orai1

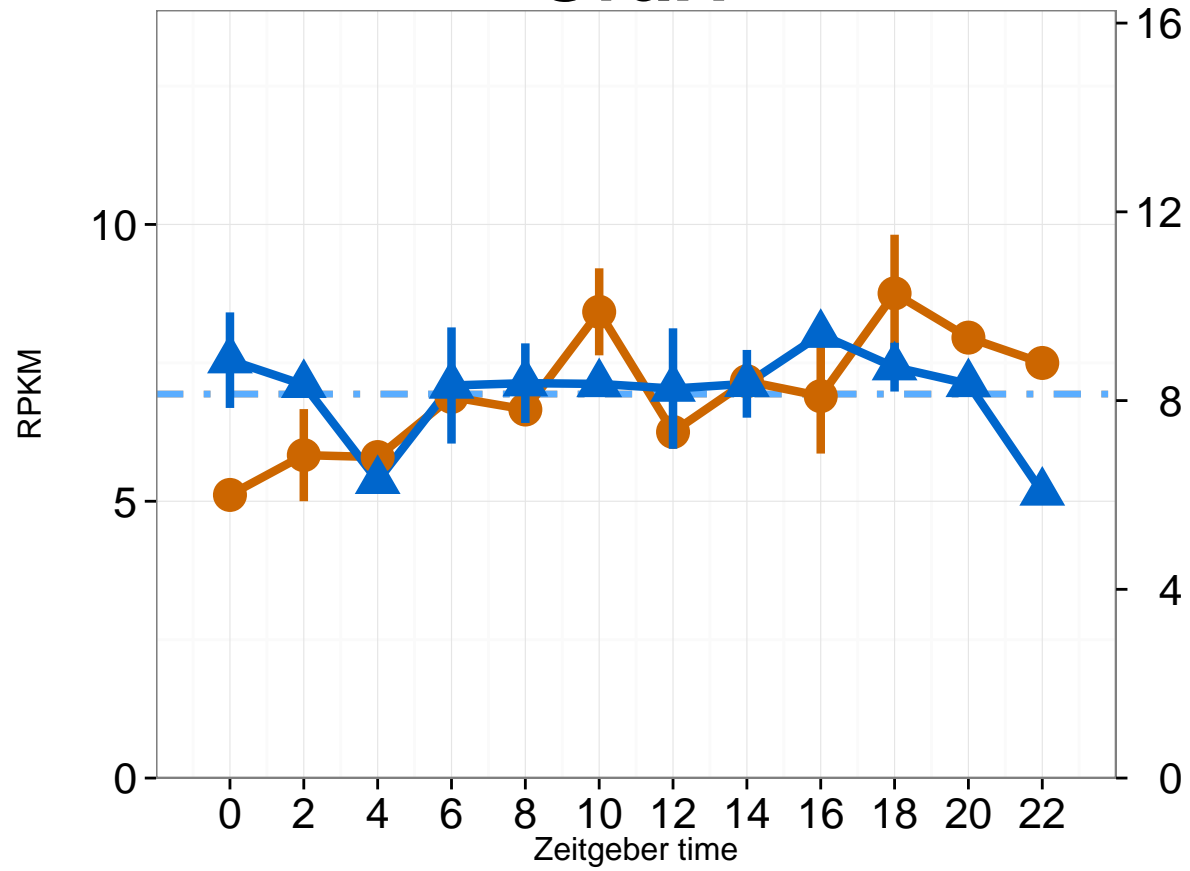

## Orai1

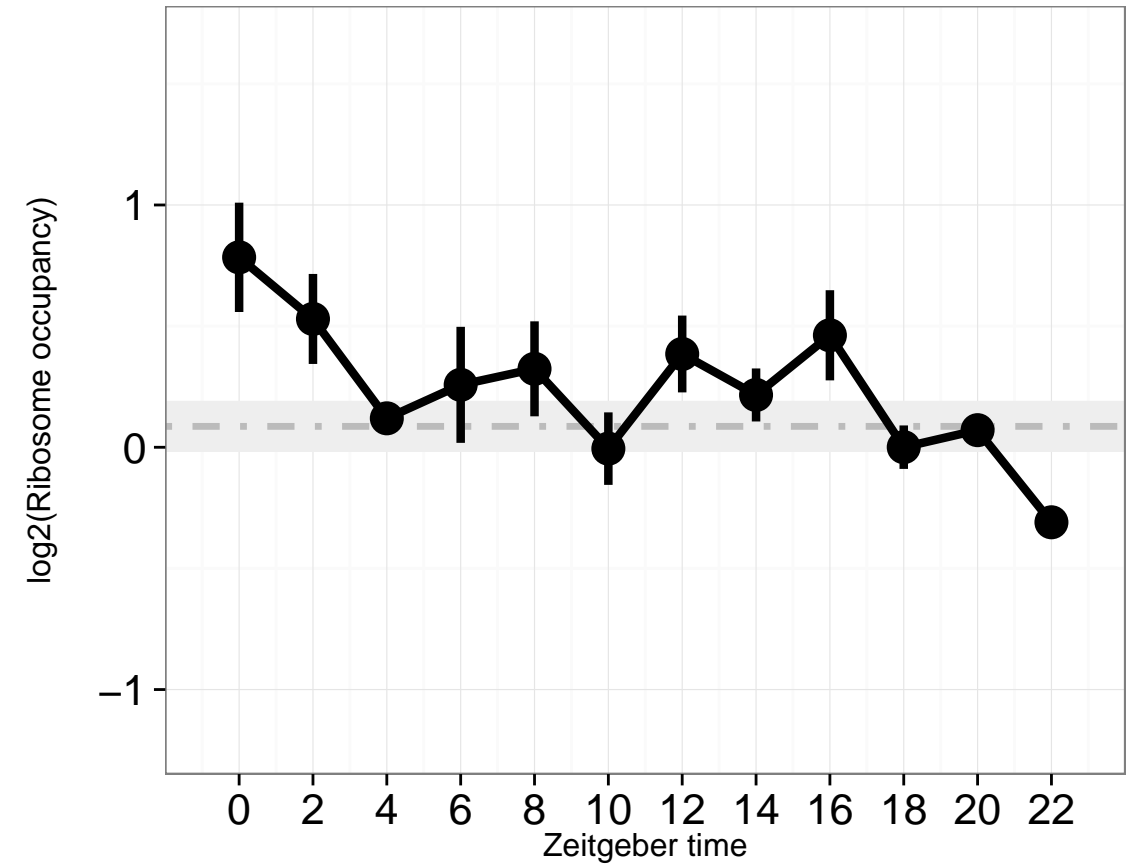

Supplement: SuppDataset_1.zip [file Orai1_set_A.pdf › Supplemental Dataset 1/A-mRNA_nonrhyth_translation_nonrhyth/Orai1_set_A.pdf]

## Orai3

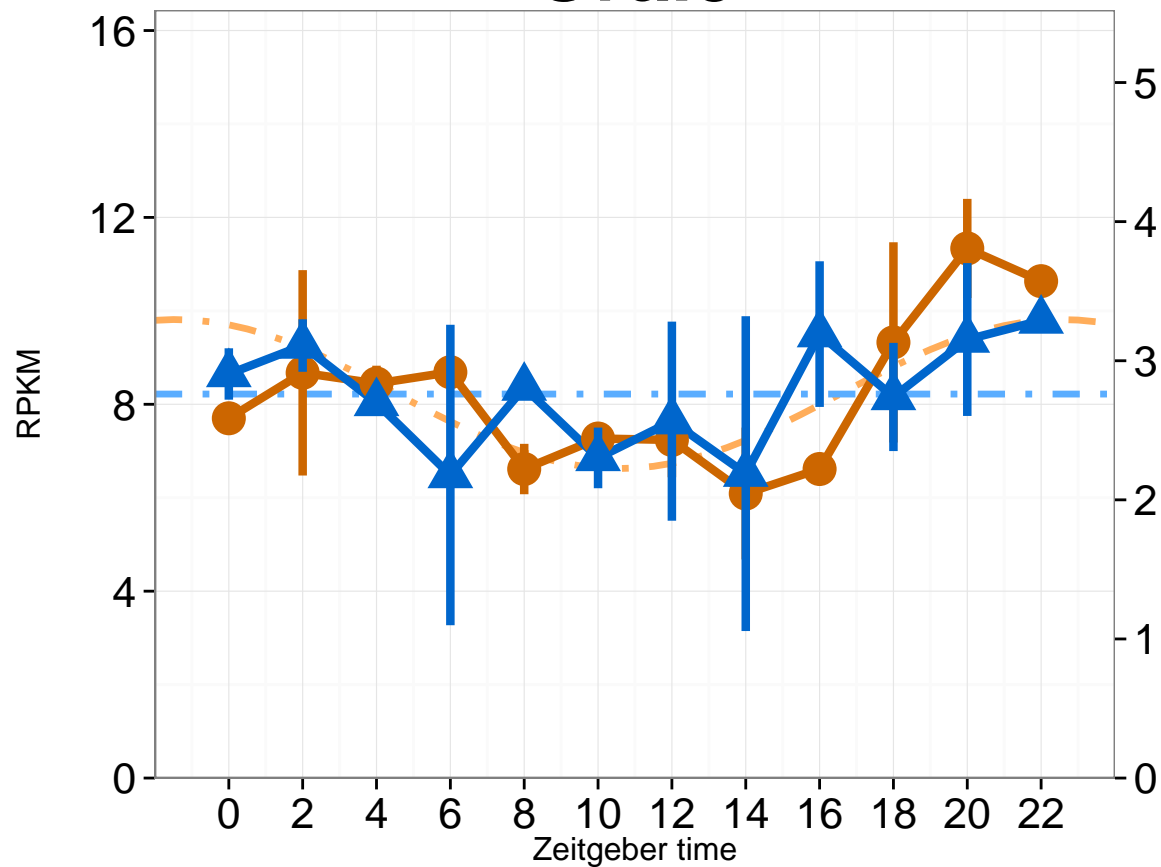

## Orai3

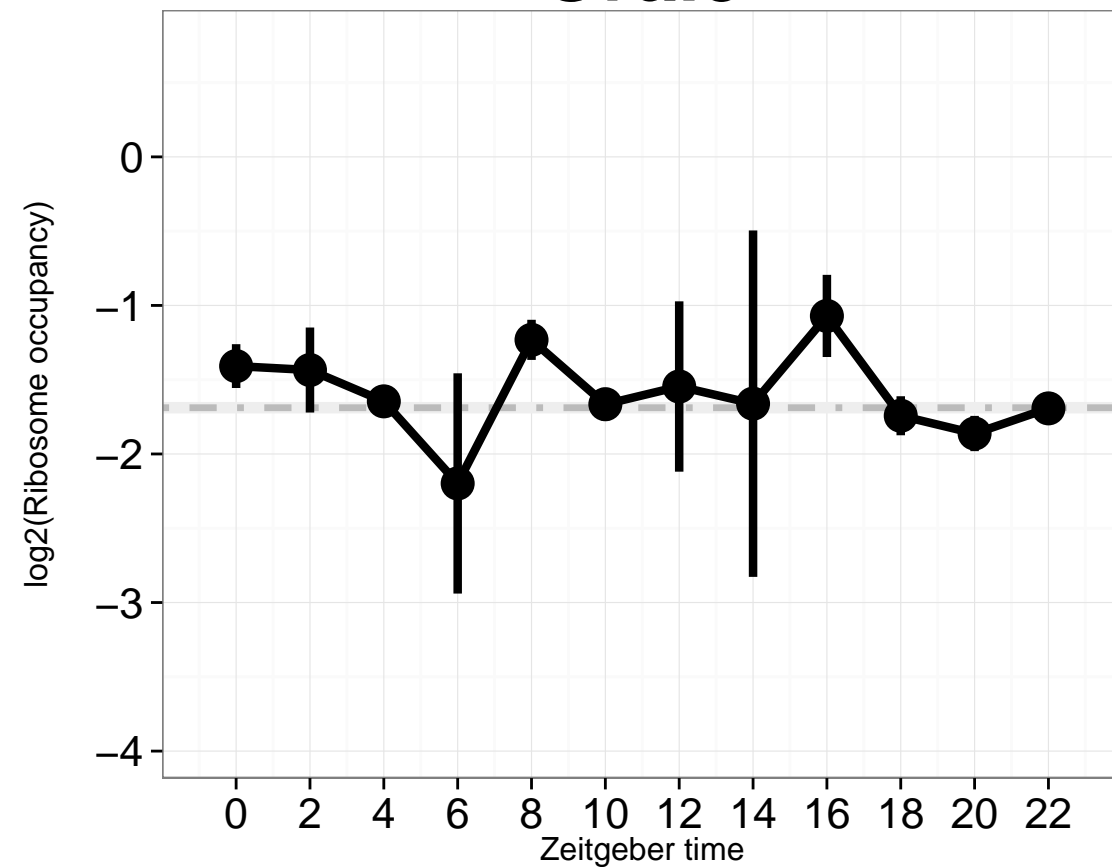

Supplement: SuppDataset_1.zip [file Orai3_set_A.pdf › Supplemental Dataset 1/A-mRNA_nonrhyth_translation_nonrhyth/Orai3_set_A.pdf]

# Oraov1

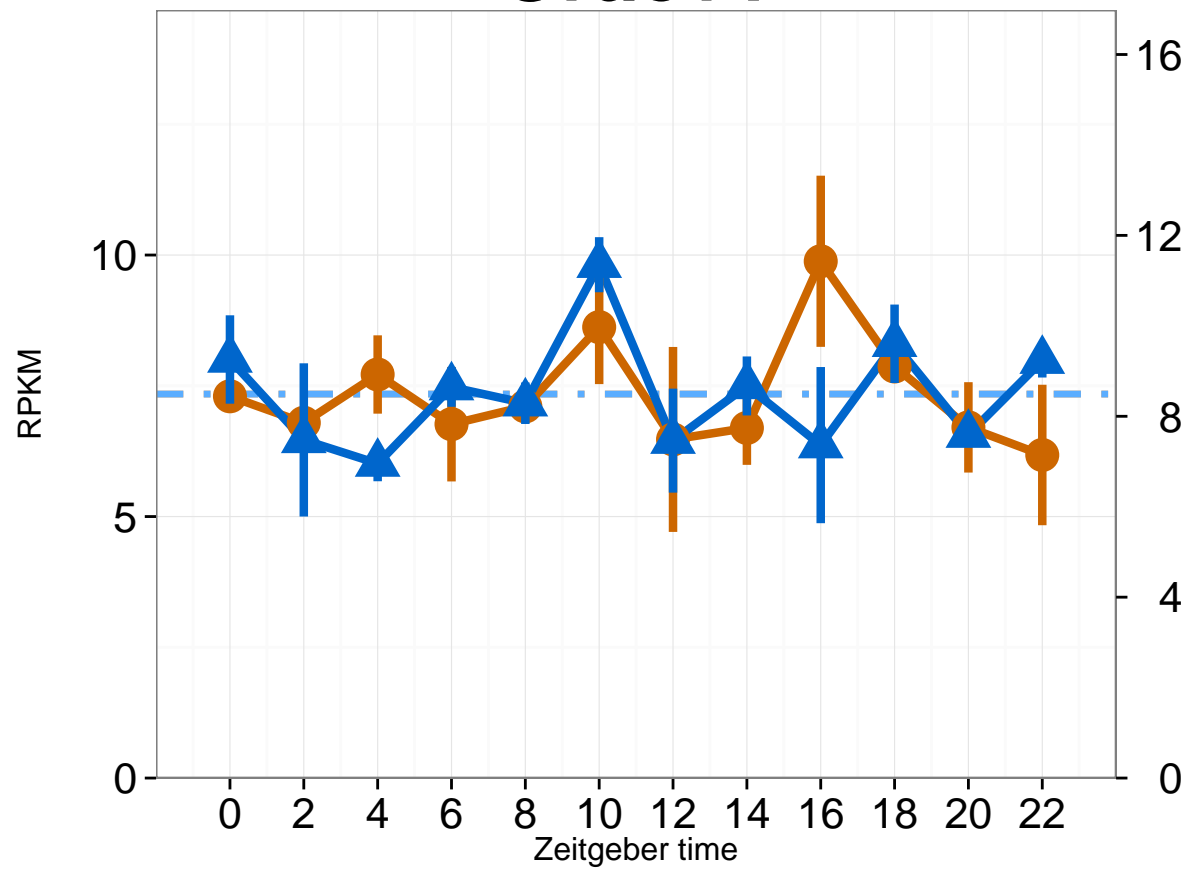

# Oraov1

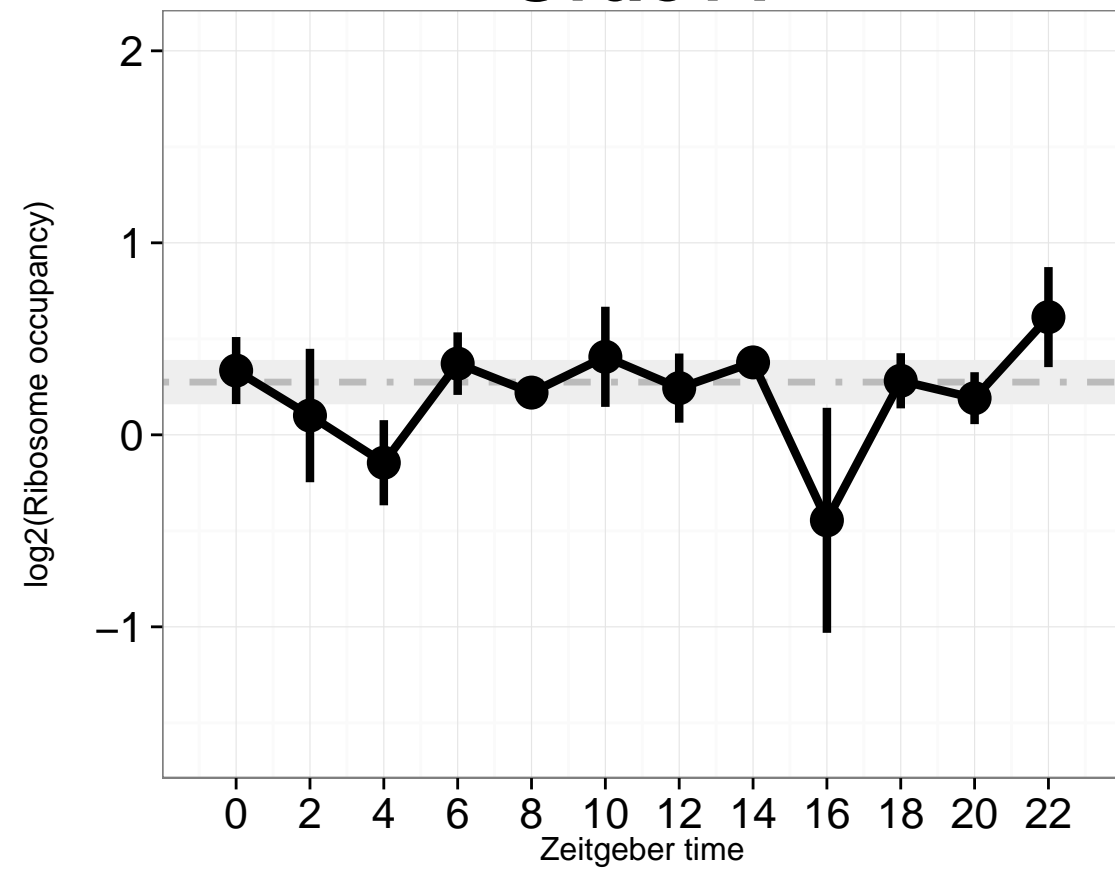

Supplement: SuppDataset_1.zip [file Oraov1_set_A.pdf › Supplemental Dataset 1/A-mRNA_nonrhyth_translation_nonrhyth/Oraov1_set_A.pdf]

## Orc2

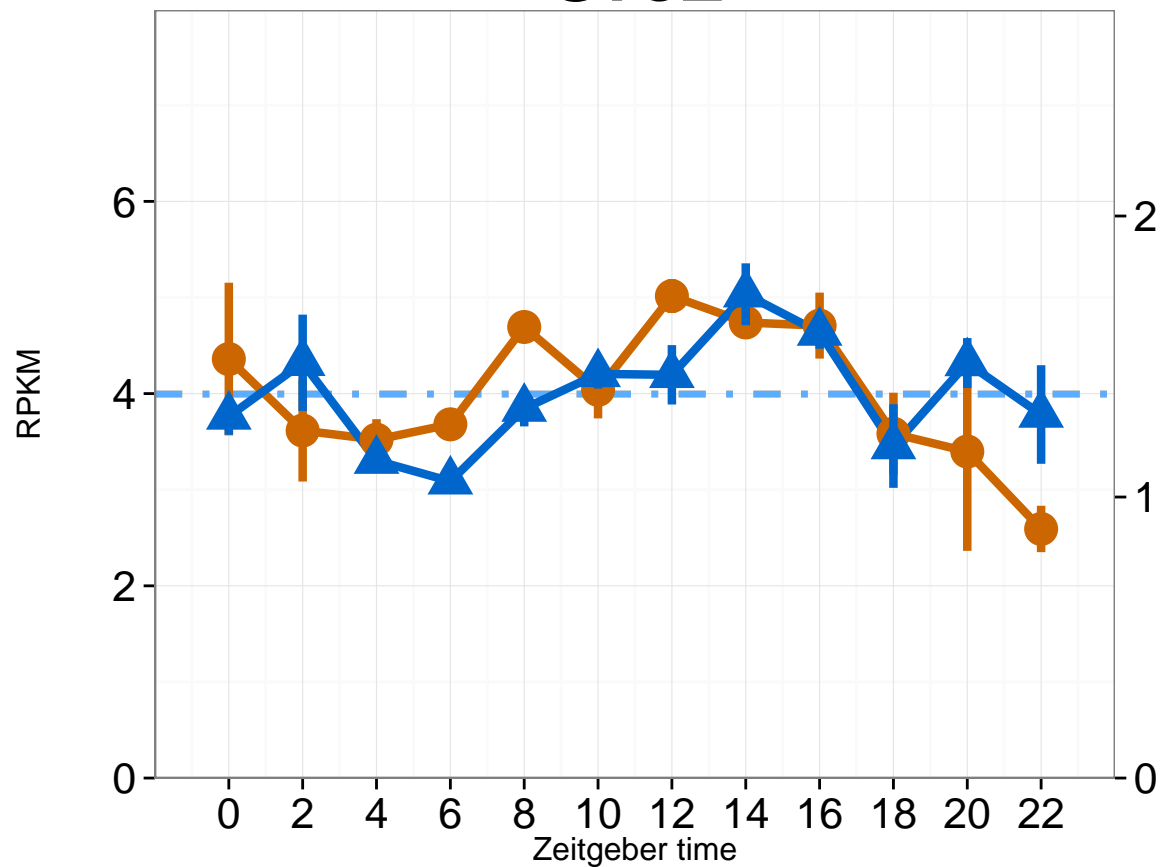

## Orc2

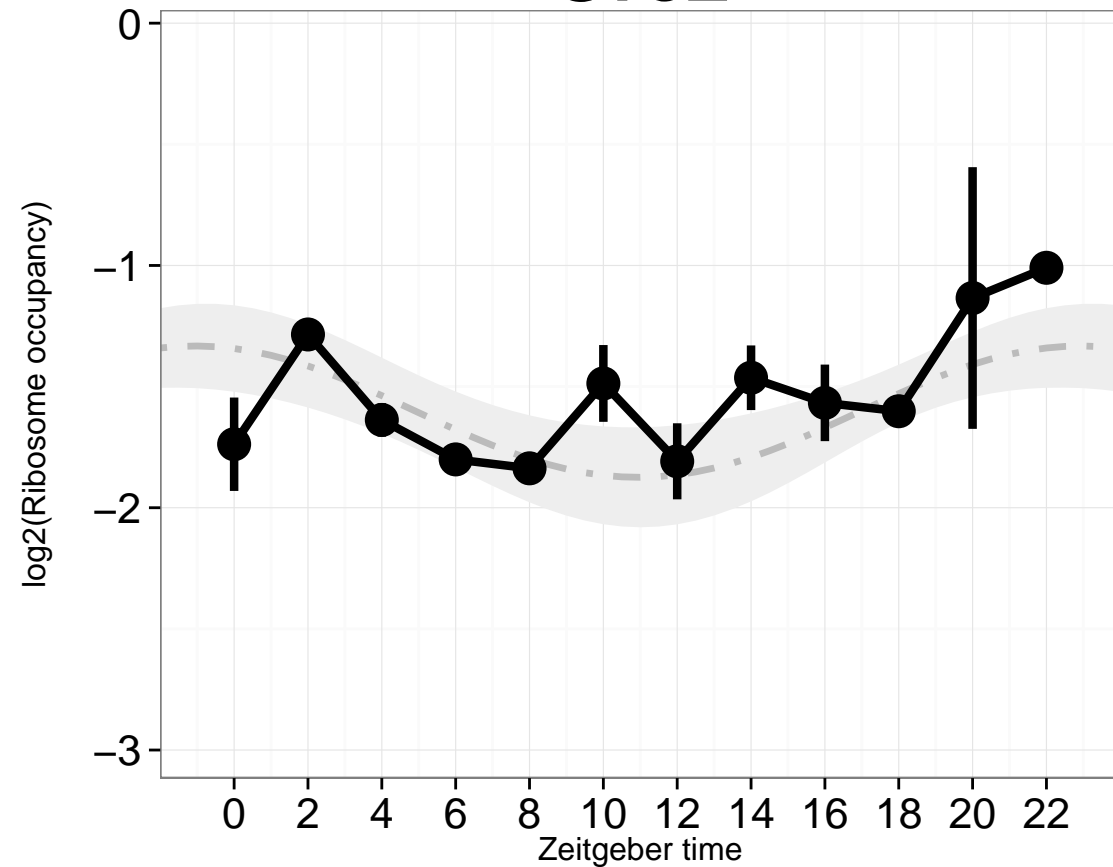

Supplement: SuppDataset_1.zip [file Orc2_set_A.pdf › Supplemental Dataset 1/A-mRNA_nonrhyth_translation_nonrhyth/Orc2_set_A.pdf]

## Orc3

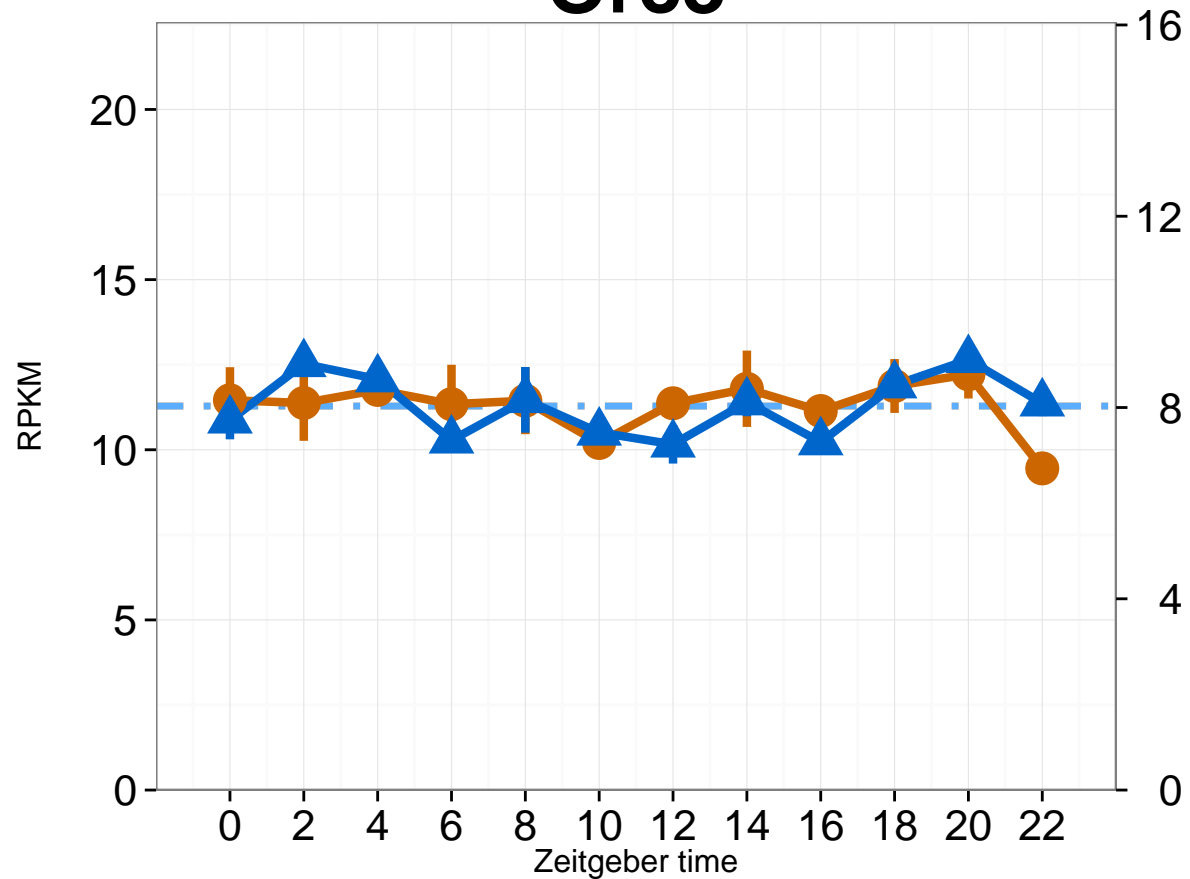

## Orc3

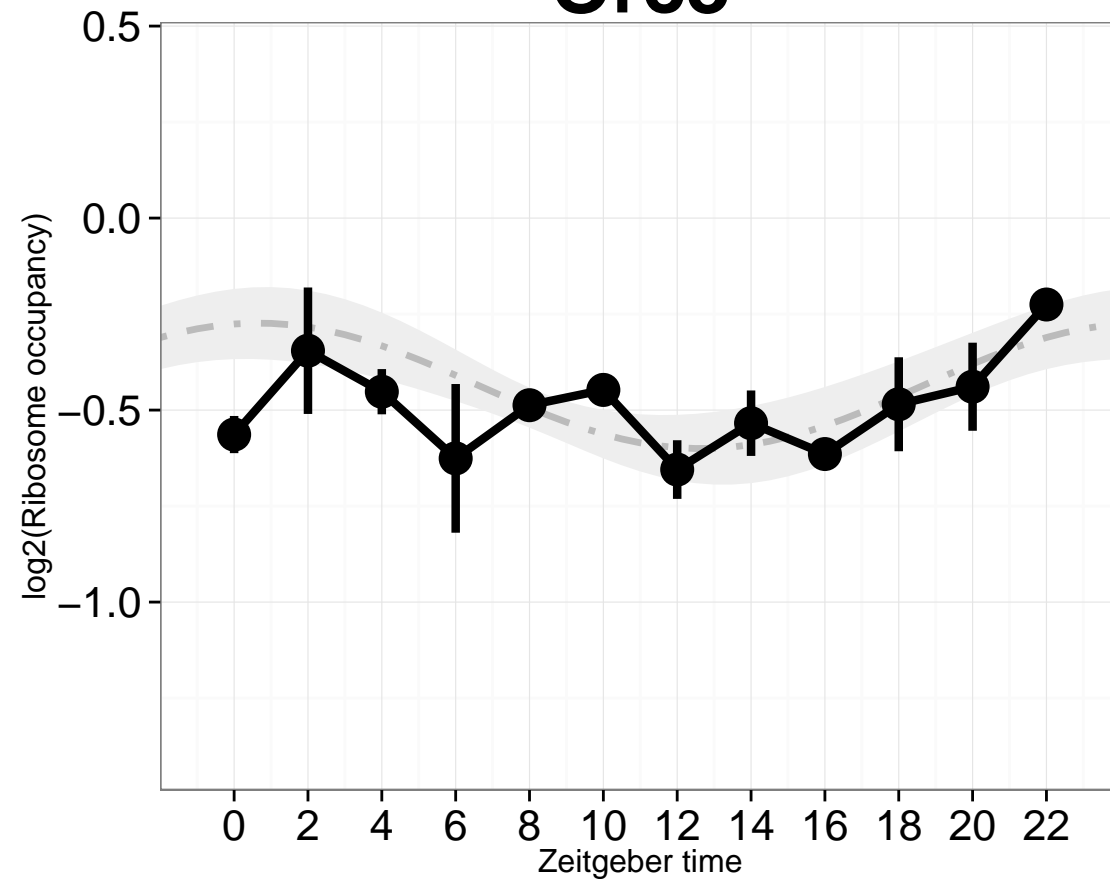

Supplement: SuppDataset_1.zip [file Orc3_set_A.pdf › Supplemental Dataset 1/A-mRNA_nonrhyth_translation_nonrhyth/Orc3_set_A.pdf]

## Orc4

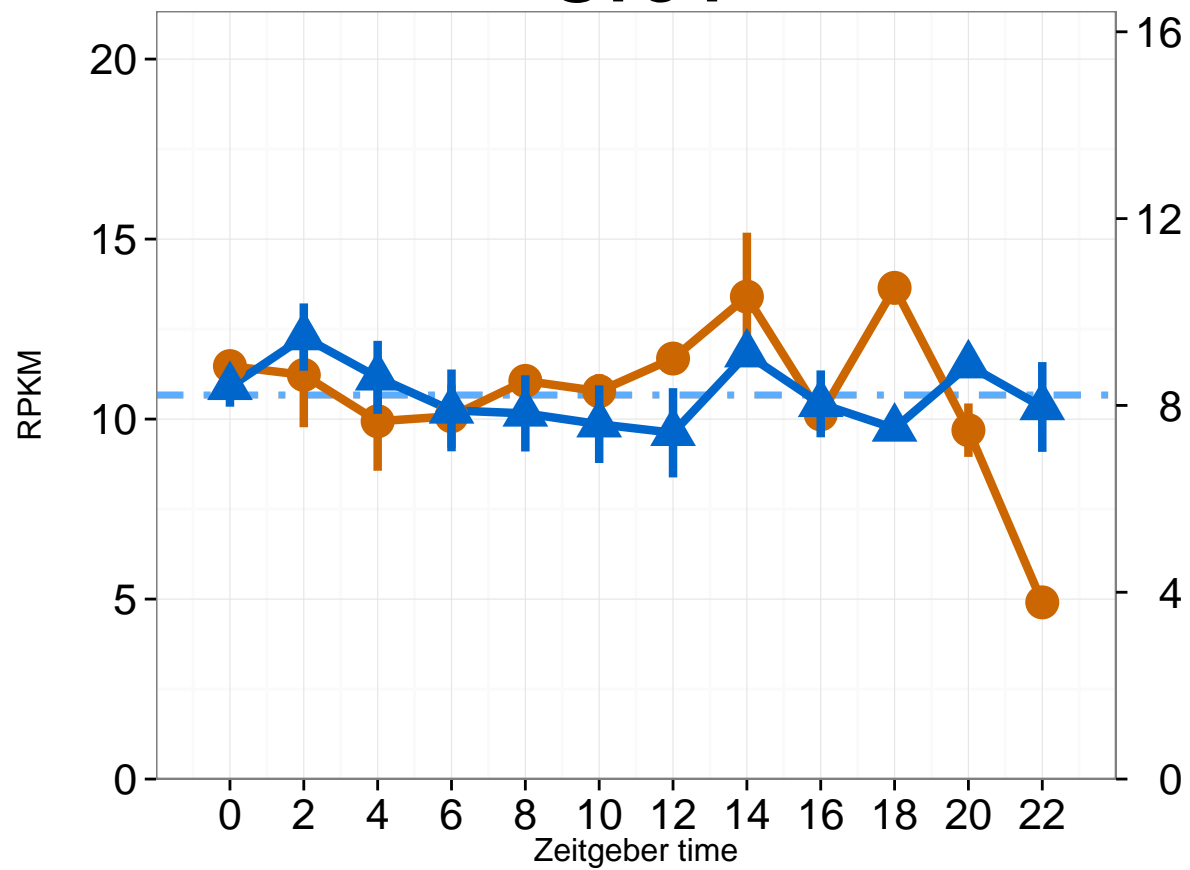

## Orc4

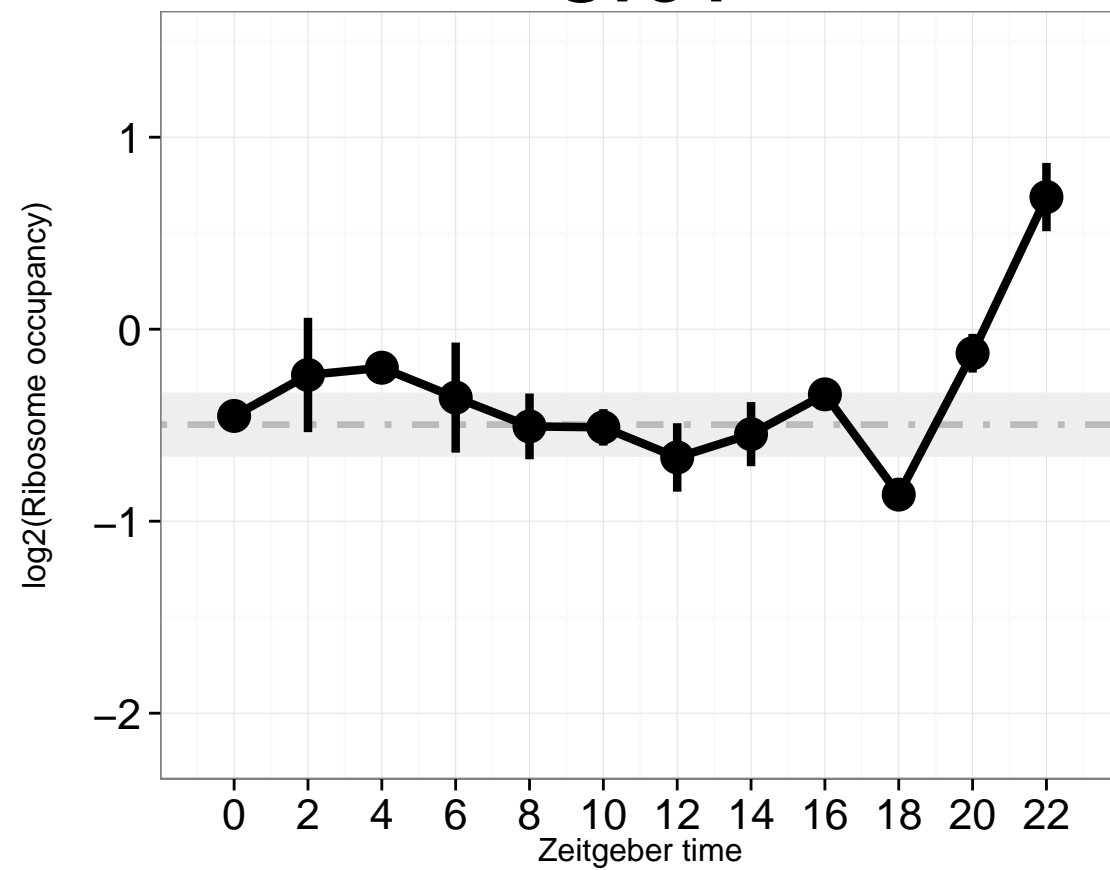

Supplement: SuppDataset_1.zip [file Orc4_set_A.pdf › Supplemental Dataset 1/A-mRNA_nonrhyth_translation_nonrhyth/Orc4_set_A.pdf]

## Orc5

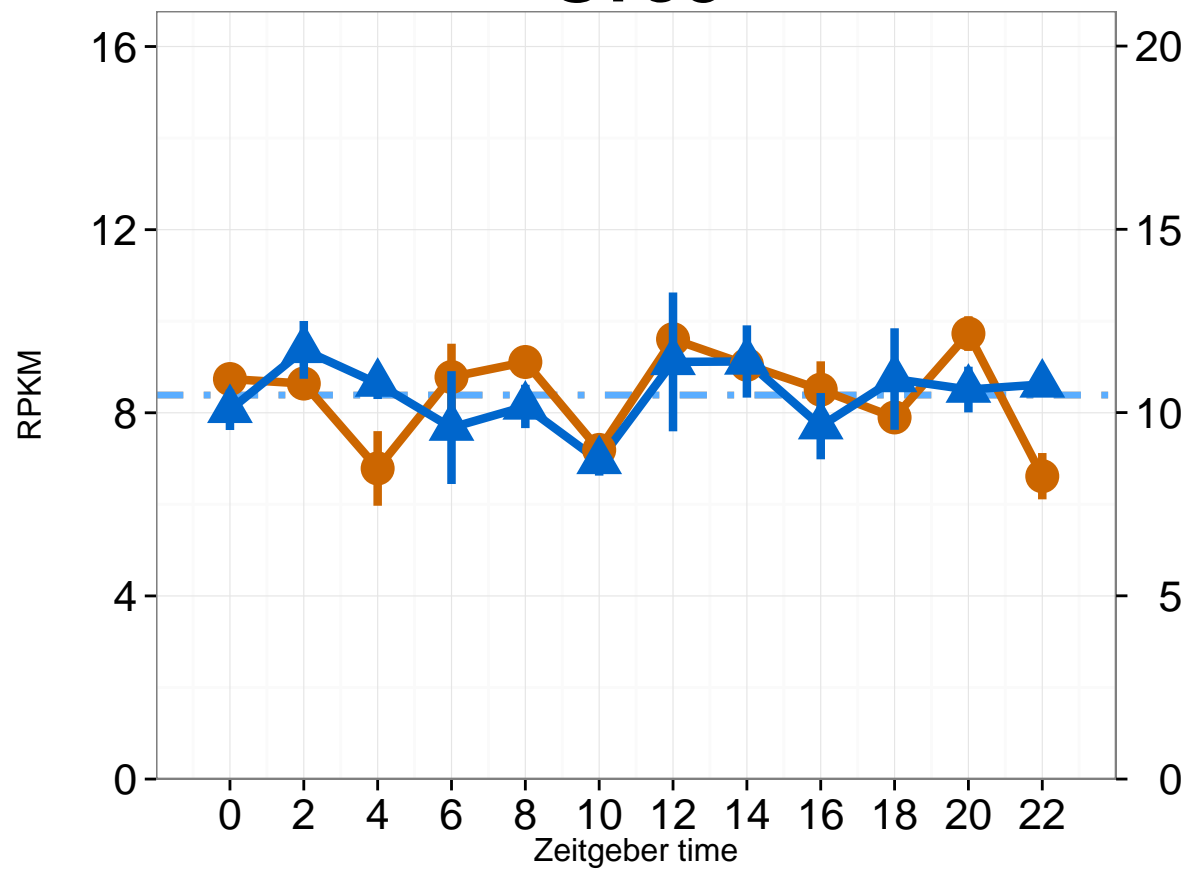

## Orc5

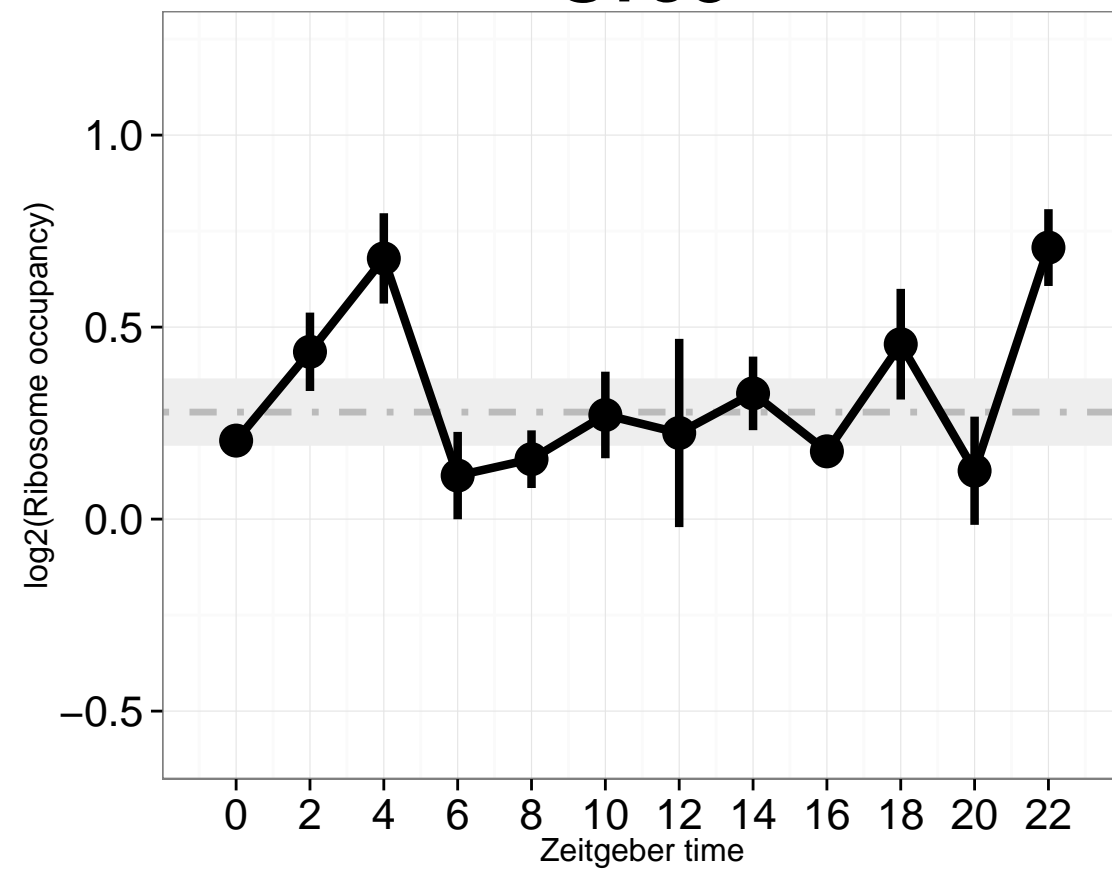

Supplement: SuppDataset_1.zip [file Orc5_set_A.pdf › Supplemental Dataset 1/A-mRNA_nonrhyth_translation_nonrhyth/Orc5_set_A.pdf]

## Orc6

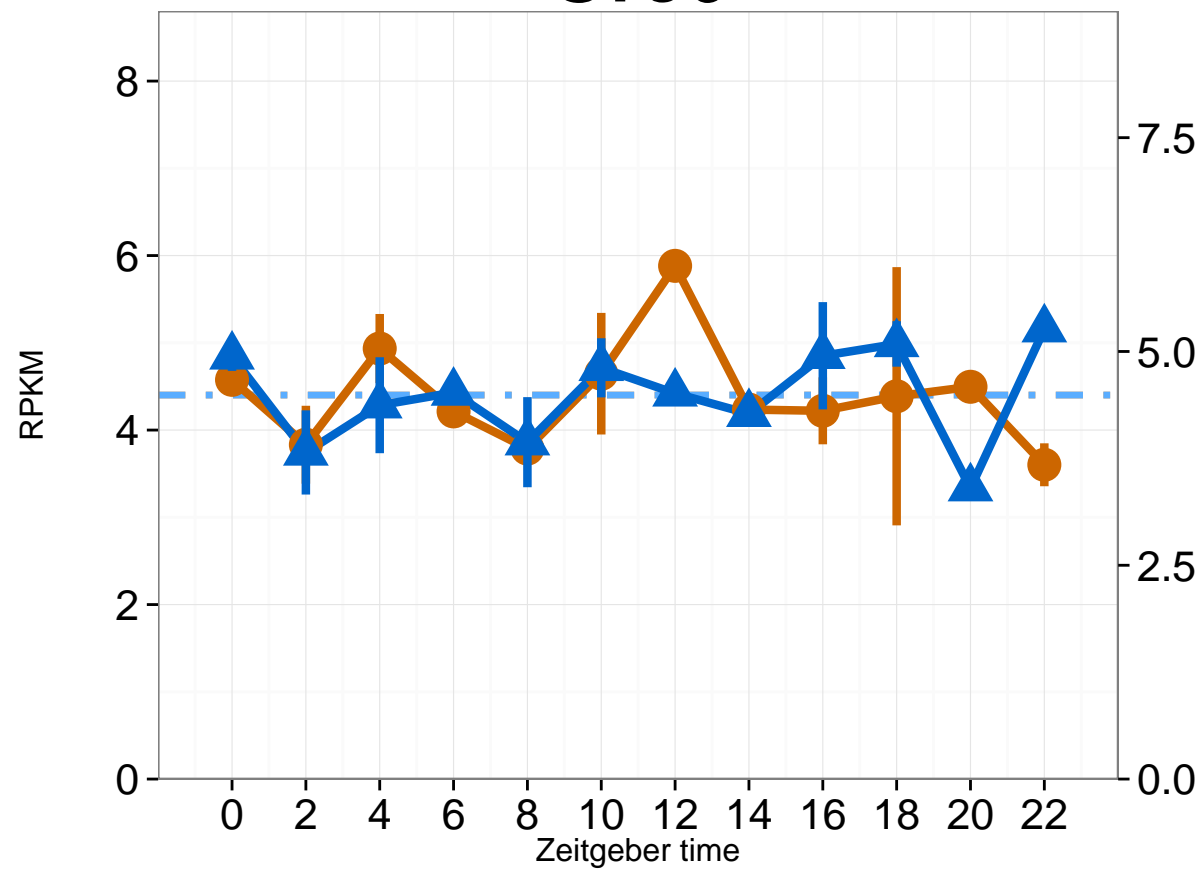

## Orc6

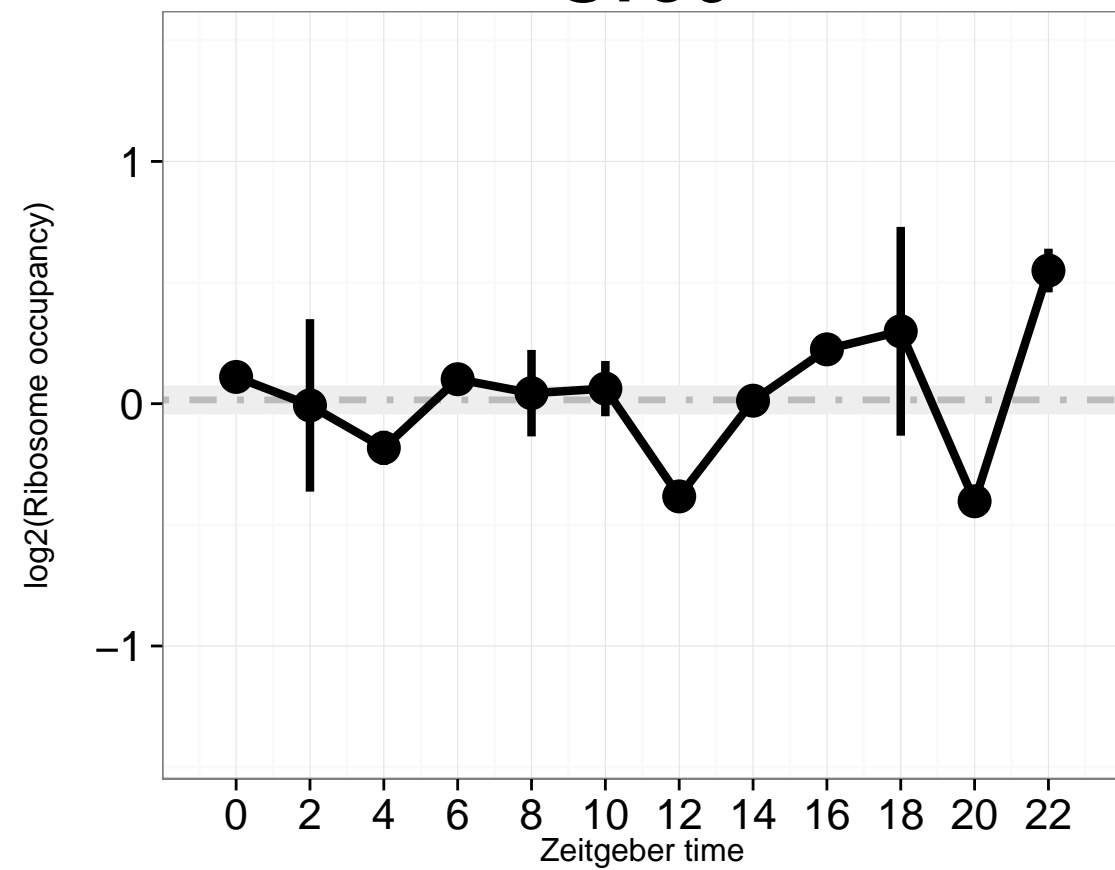

Supplement: SuppDataset_1.zip [file Orc6_set_A.pdf › Supplemental Dataset 1/A-mRNA_nonrhyth_translation_nonrhyth/Orc6_set_A.pdf]

## Ormdl1

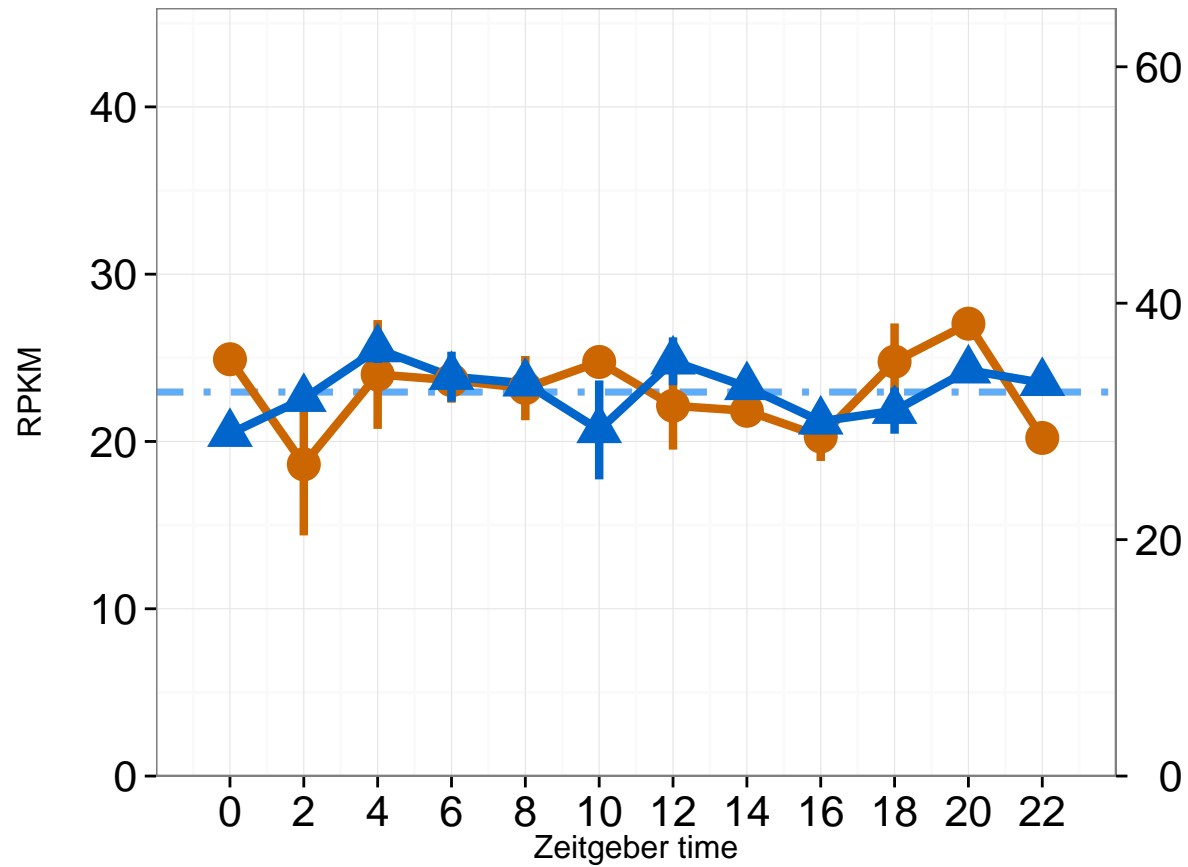

## Ormdl1

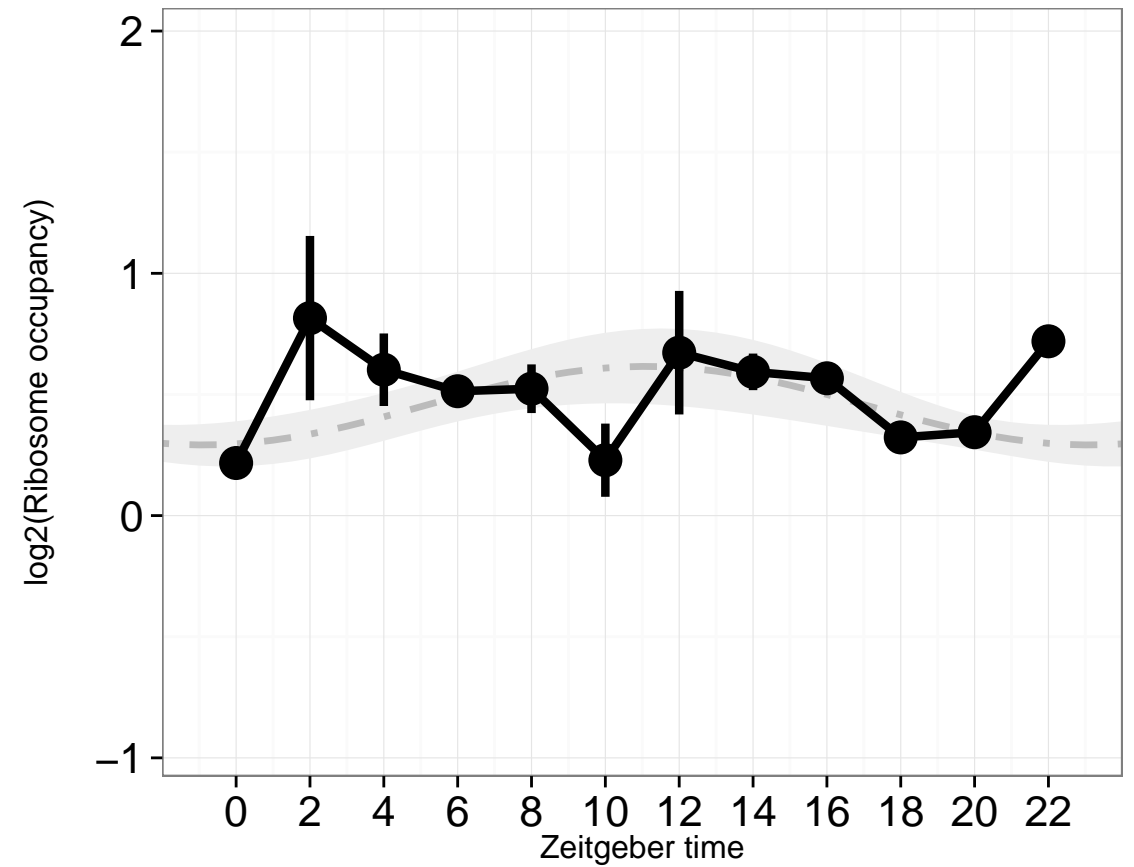

Supplement: SuppDataset_1.zip [file Ormdl1_set_A.pdf › Supplemental Dataset 1/A-mRNA_nonrhyth_translation_nonrhyth/Ormdl1_set_A.pdf]

## Os9

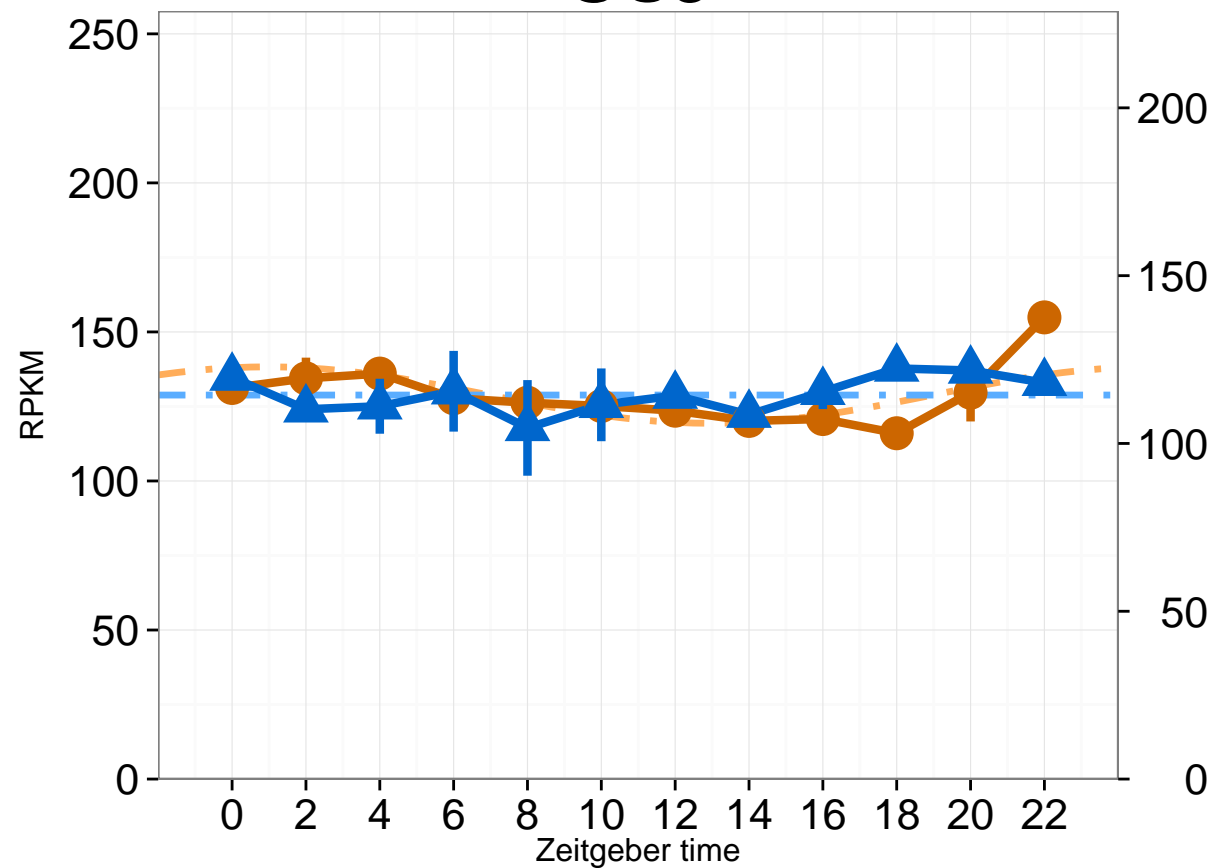

## Os9

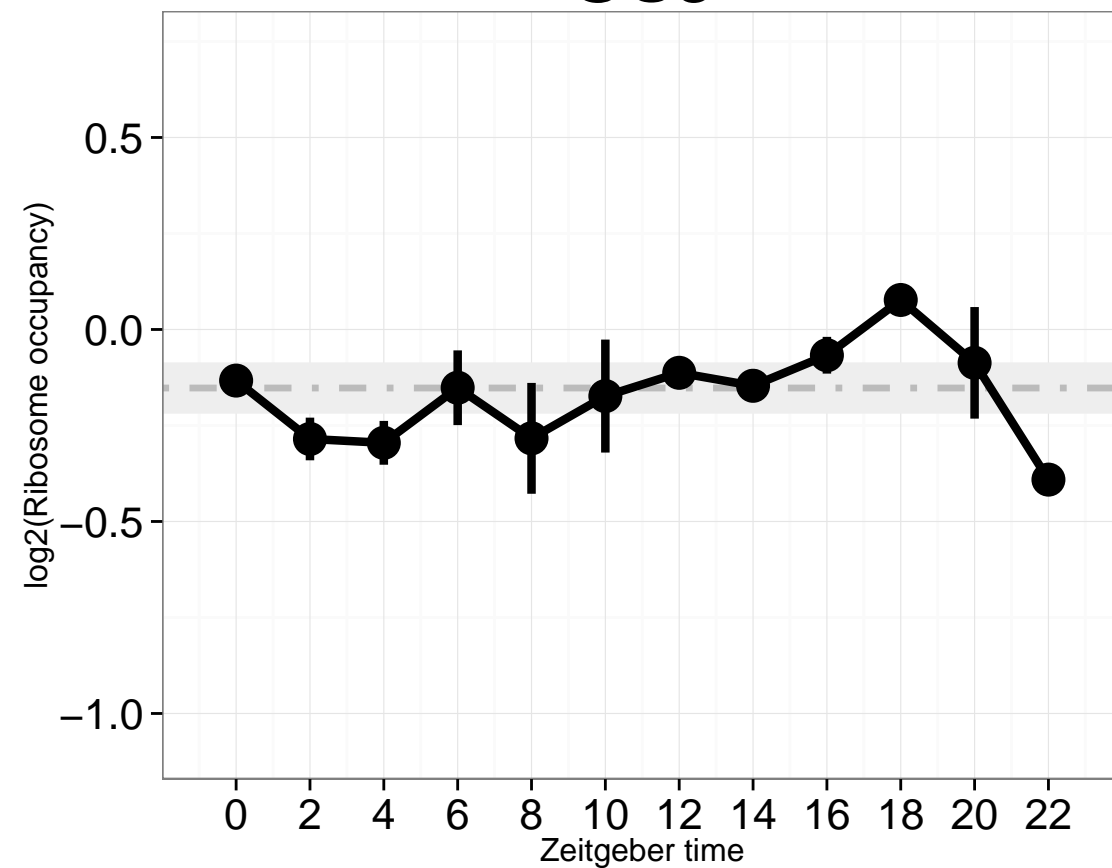

Supplement: SuppDataset_1.zip [file Os9_set_A.pdf › Supplemental Dataset 1/A-mRNA_nonrhyth_translation_nonrhyth/Os9_set_A.pdf]

## Osbp

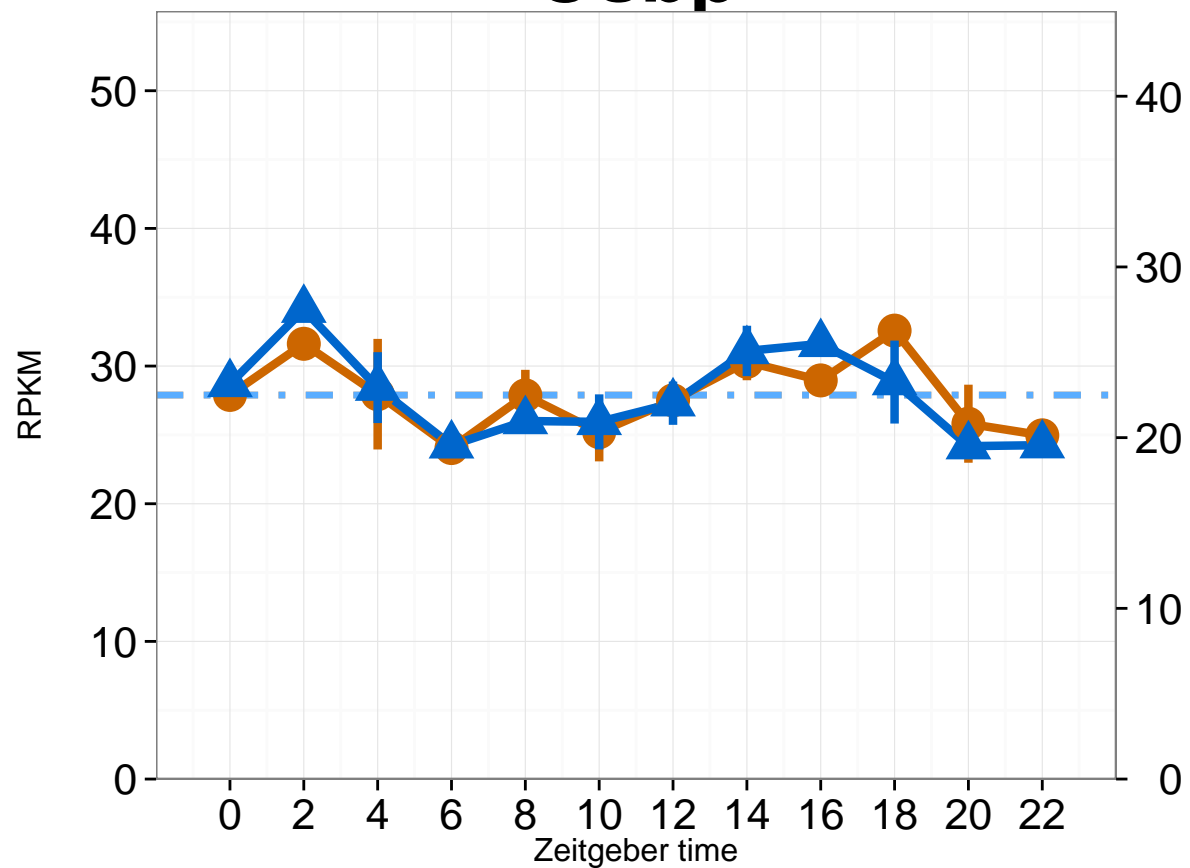

## Osbp

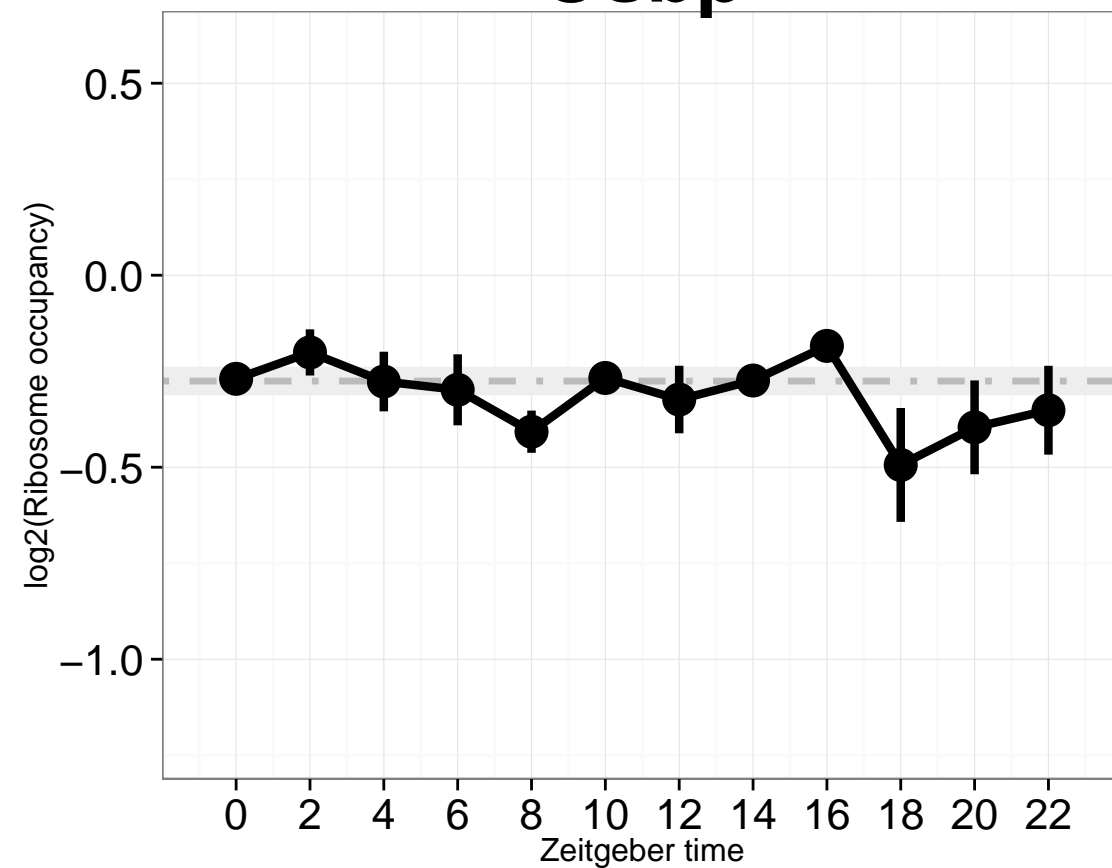

Supplement: SuppDataset_1.zip [file Osbp_set_A.pdf › Supplemental Dataset 1/A-mRNA_nonrhyth_translation_nonrhyth/Osbp_set_A.pdf]

# Osbp11

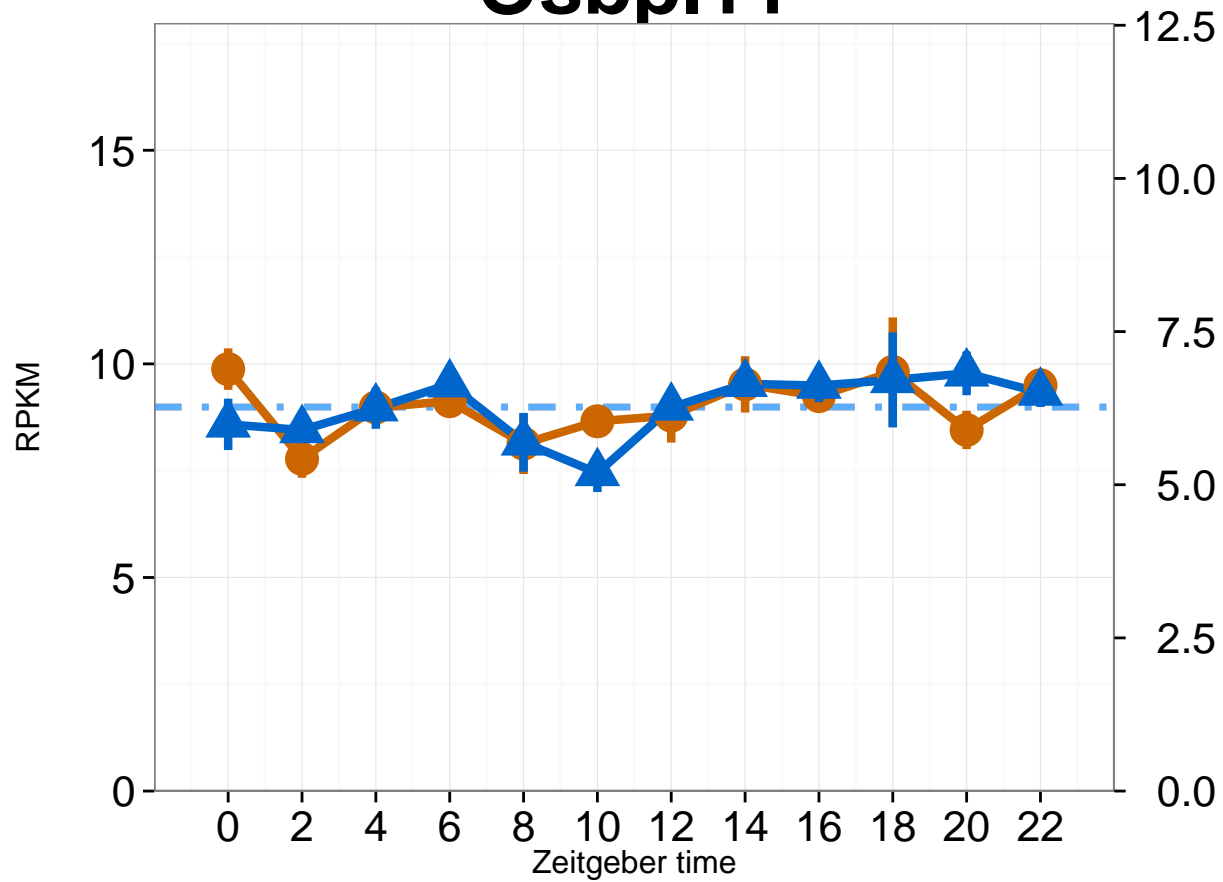

# Osbp11

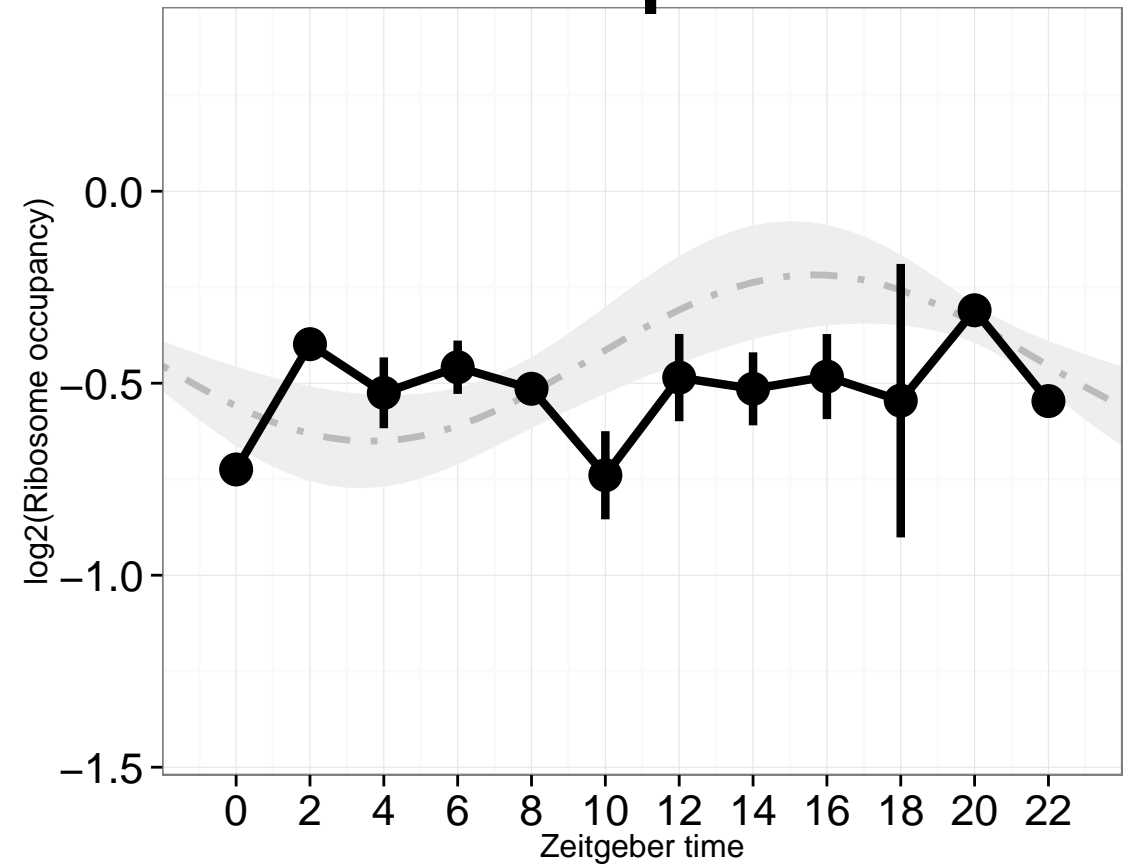

Supplement: SuppDataset_1.zip [file Osbpl11_set_A.pdf › Supplemental Dataset 1/A-mRNA_nonrhyth_translation_nonrhyth/Osbpl11_set_A.pdf]

## Osbpl1a

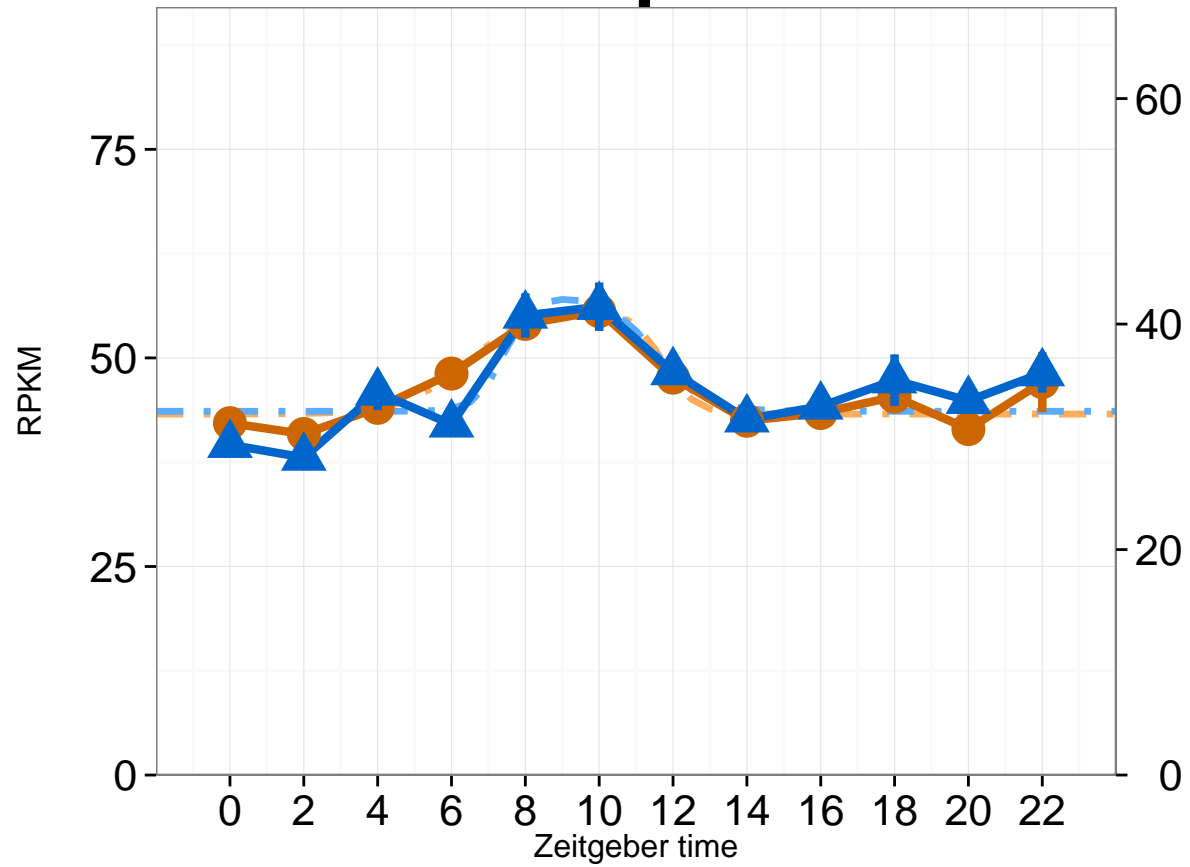

## Osbpl1a

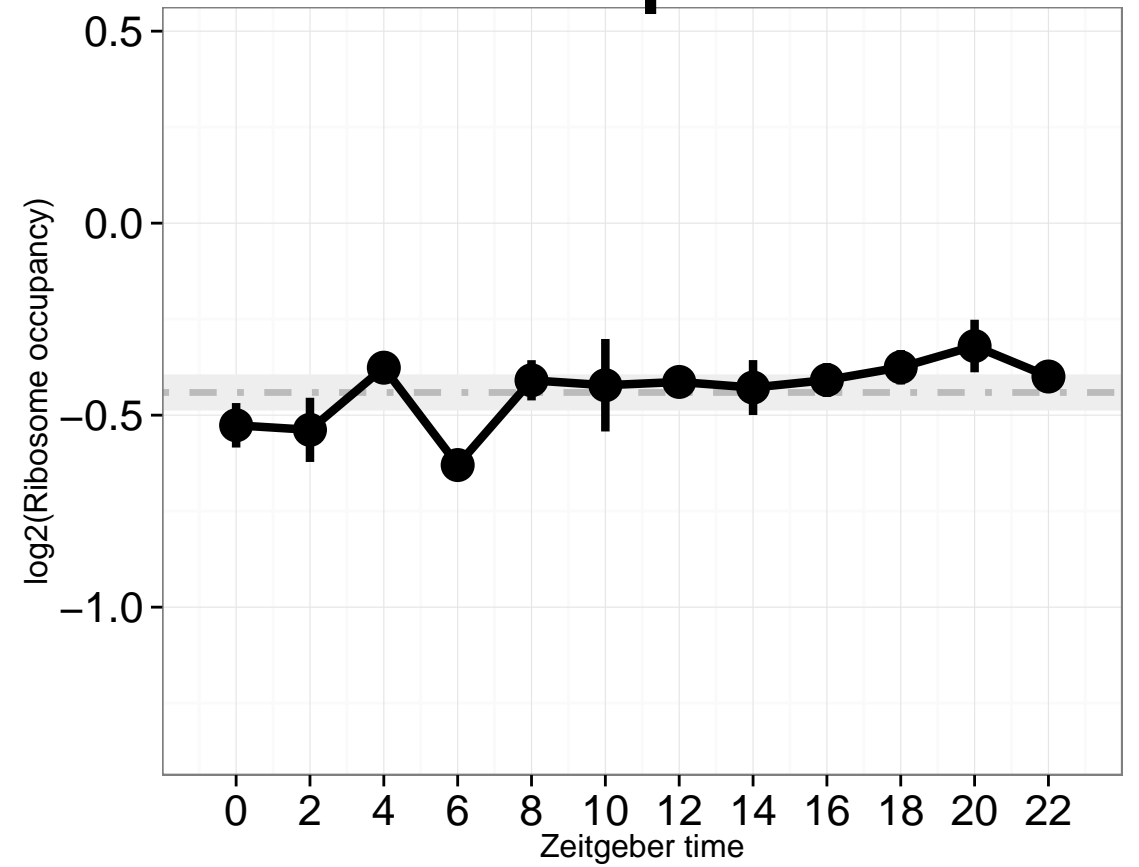

Supplement: SuppDataset_1.zip [file Osbpl1a_set_A.pdf › Supplemental Dataset 1/A-mRNA_nonrhyth_translation_nonrhyth/Osbpl1a_set_A.pdf]

## Osbp12

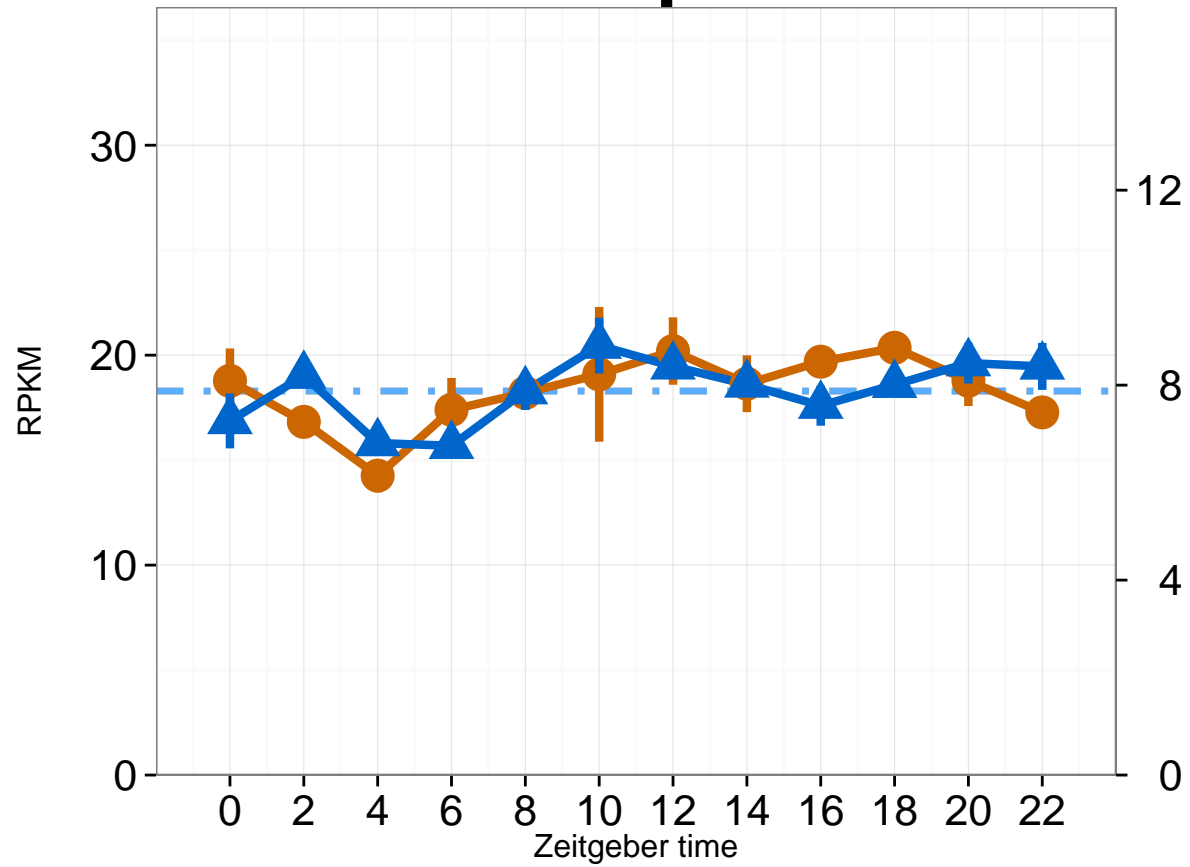

## Osbp12

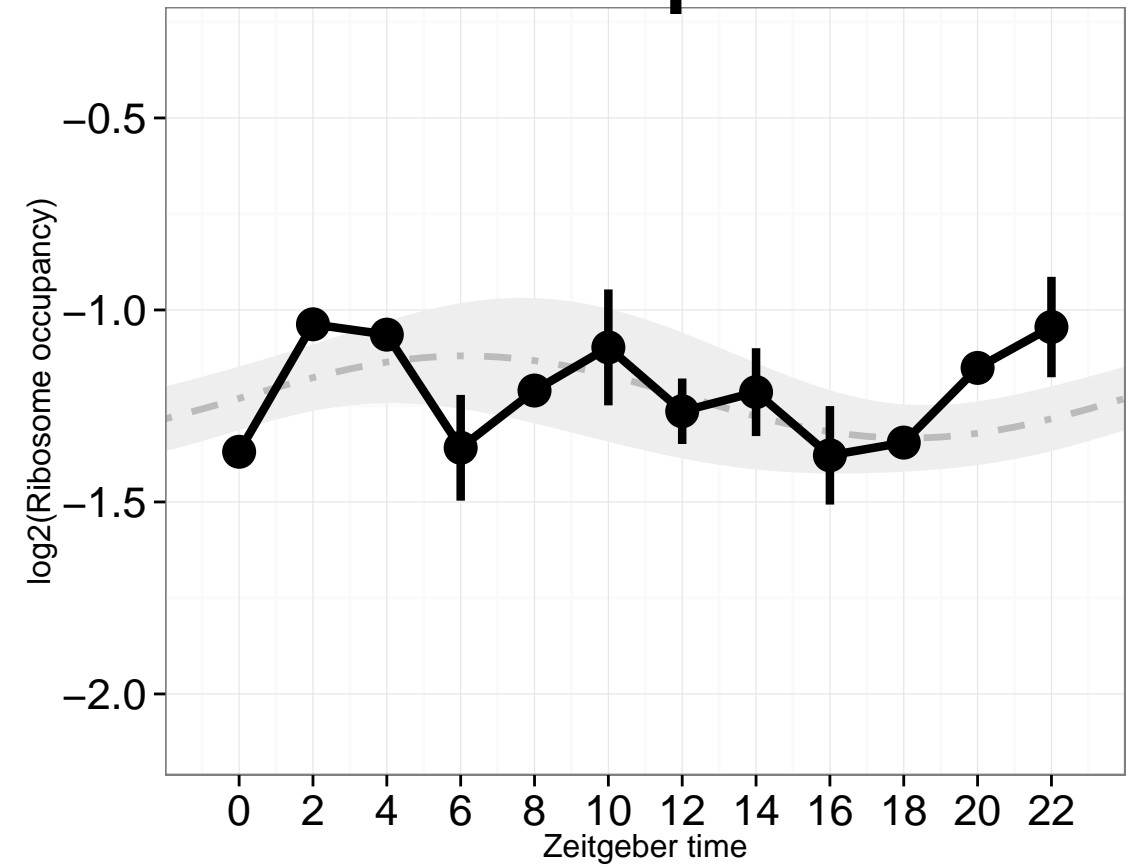

Supplement: SuppDataset_1.zip [file Osbpl2_set_A.pdf › Supplemental Dataset 1/A-mRNA_nonrhyth_translation_nonrhyth/Osbpl2_set_A.pdf]

# Osbpl3

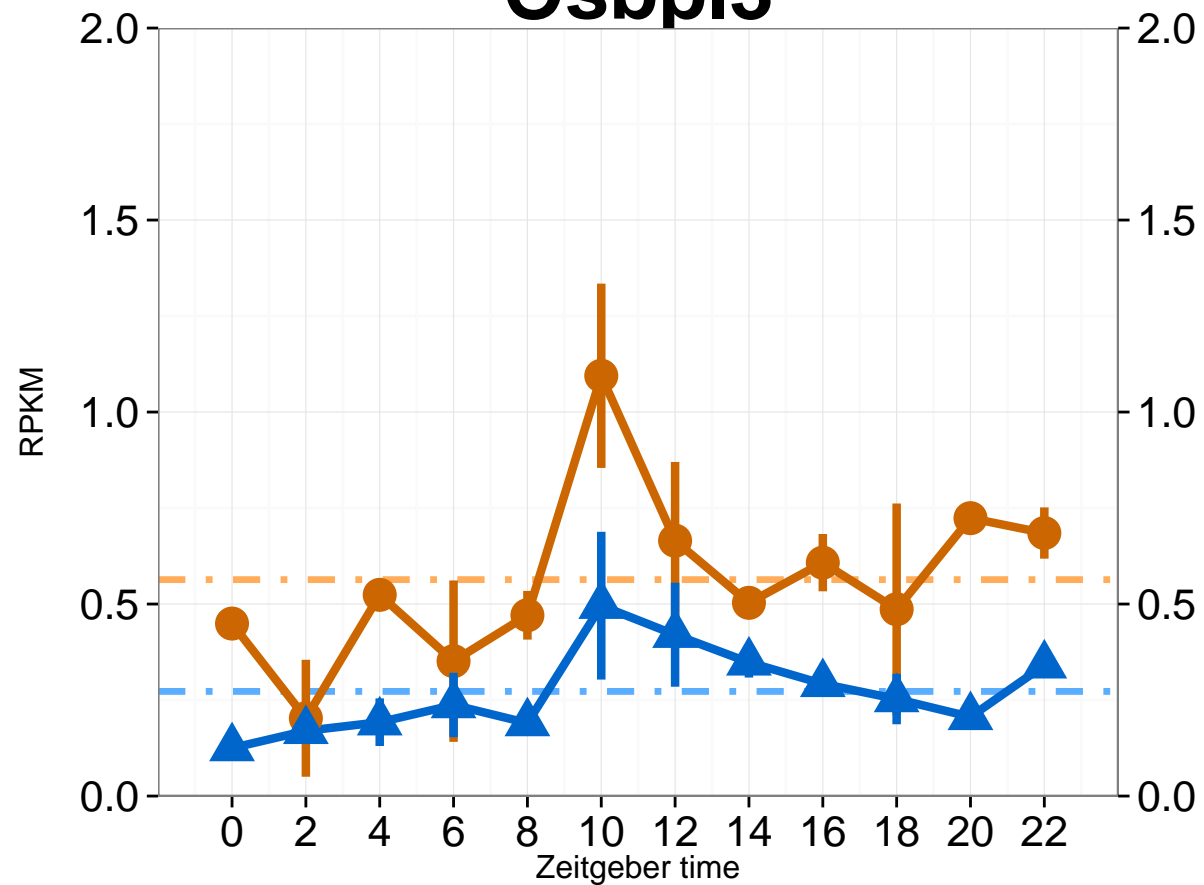

# Osbpl3

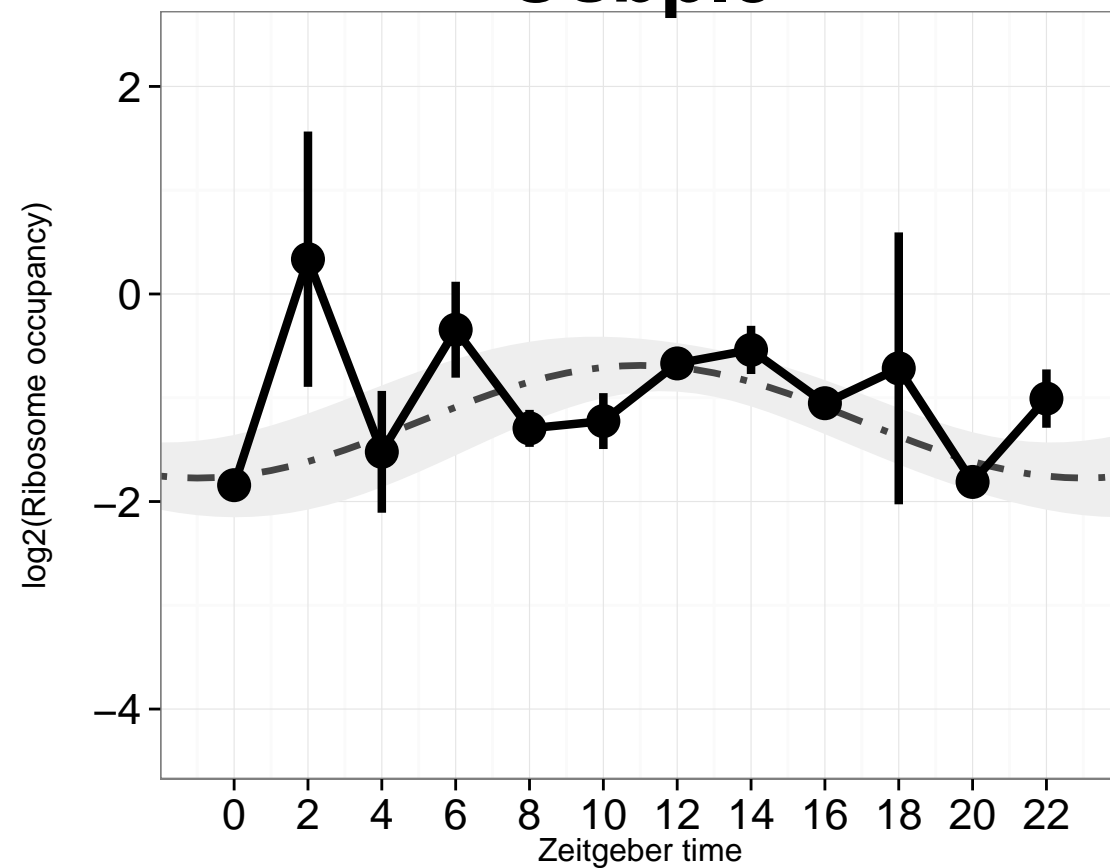

Supplement: SuppDataset_1.zip [file Osbpl3_set_A.pdf › Supplemental Dataset 1/A-mRNA_nonrhyth_translation_nonrhyth/Osbpl3_set_A.pdf]

# Osbp18

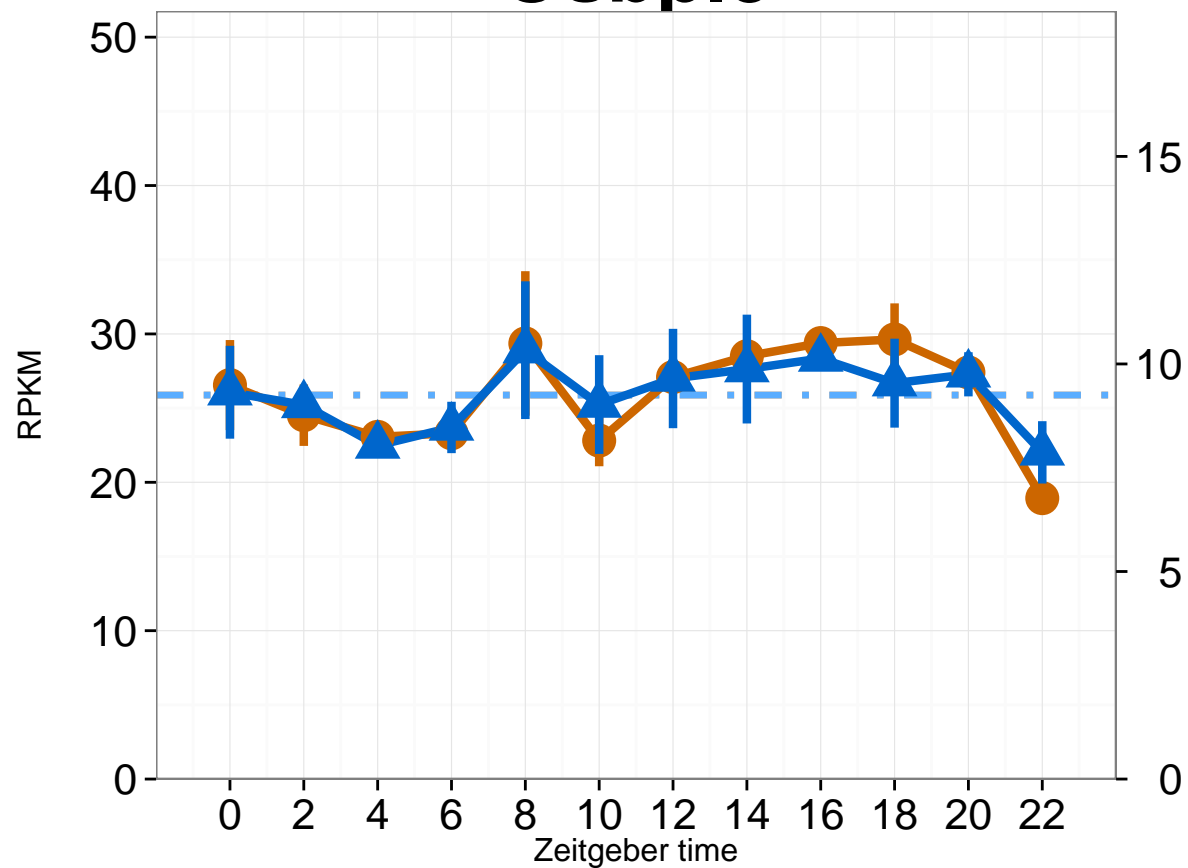

# Osbp18

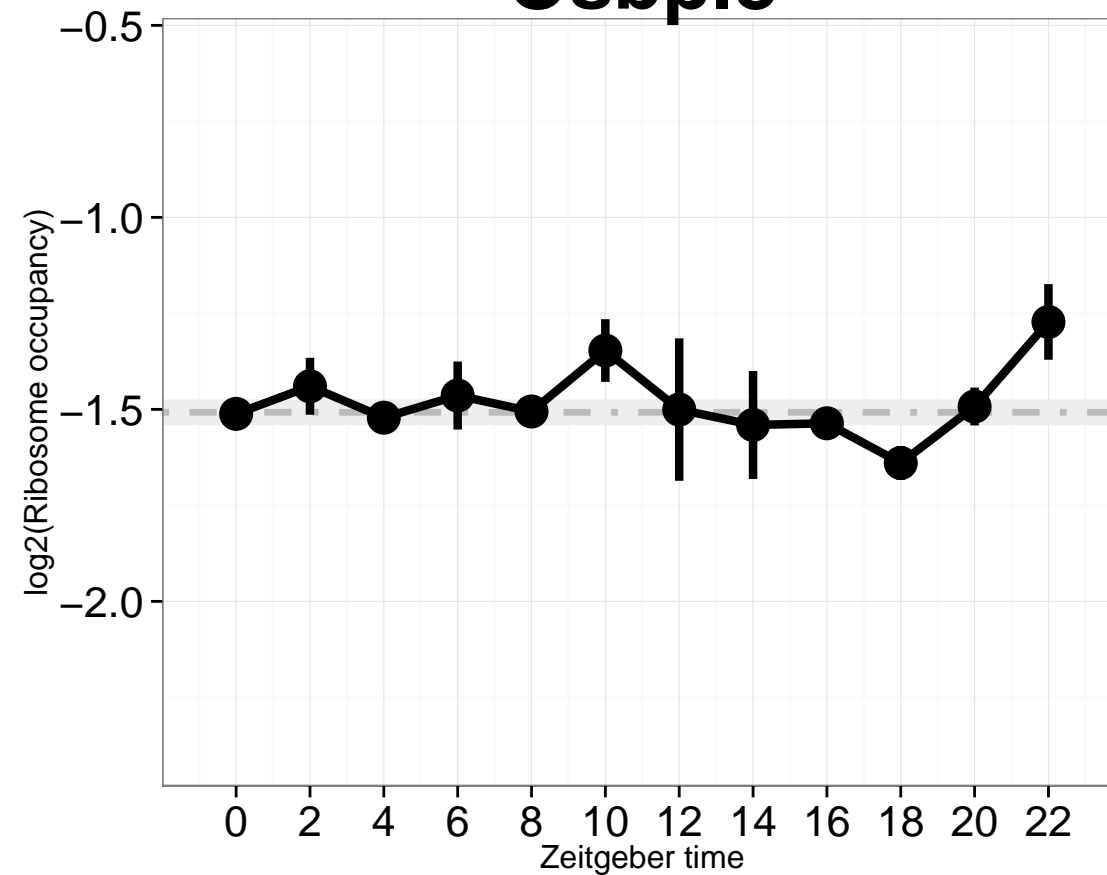

Supplement: SuppDataset_1.zip [file Osbpl8_set_A.pdf › Supplemental Dataset 1/A-mRNA_nonrhyth_translation_nonrhyth/Osbpl8_set_A.pdf]

## Osbp19

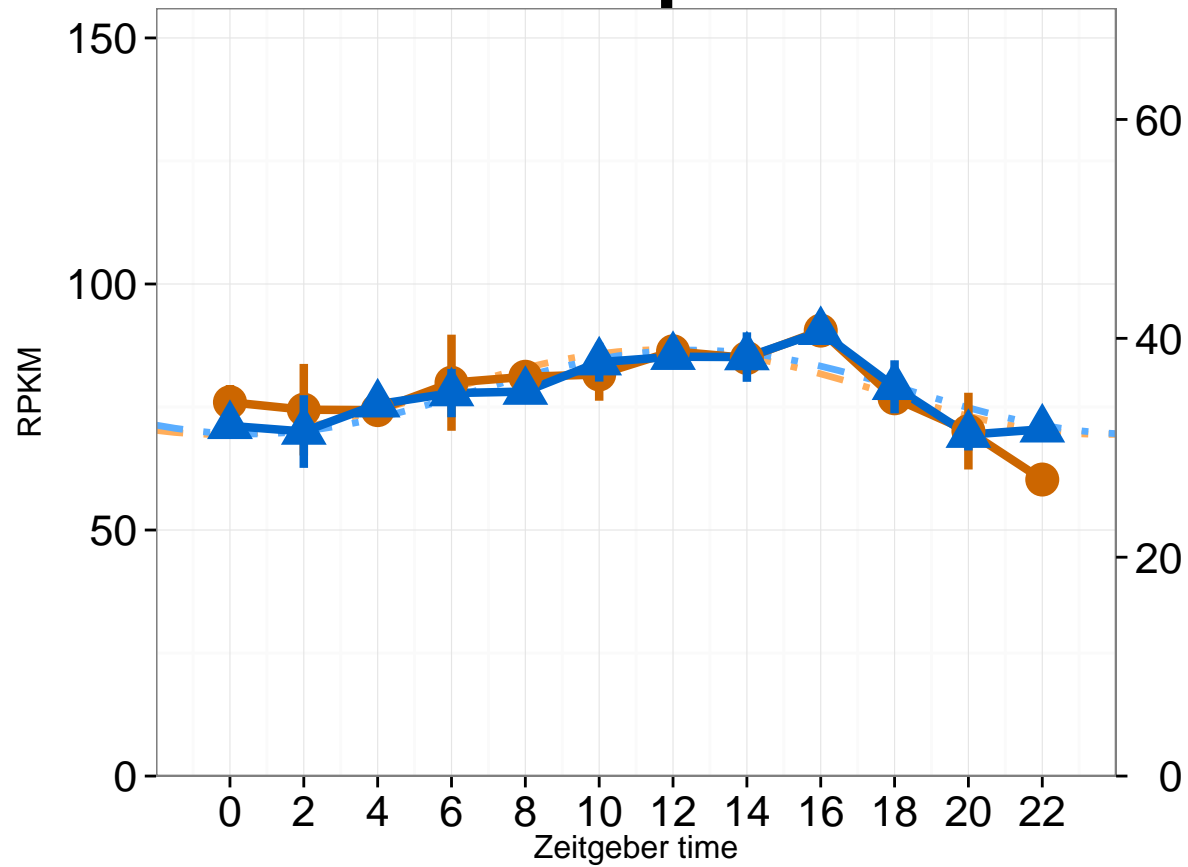

## Osbp19

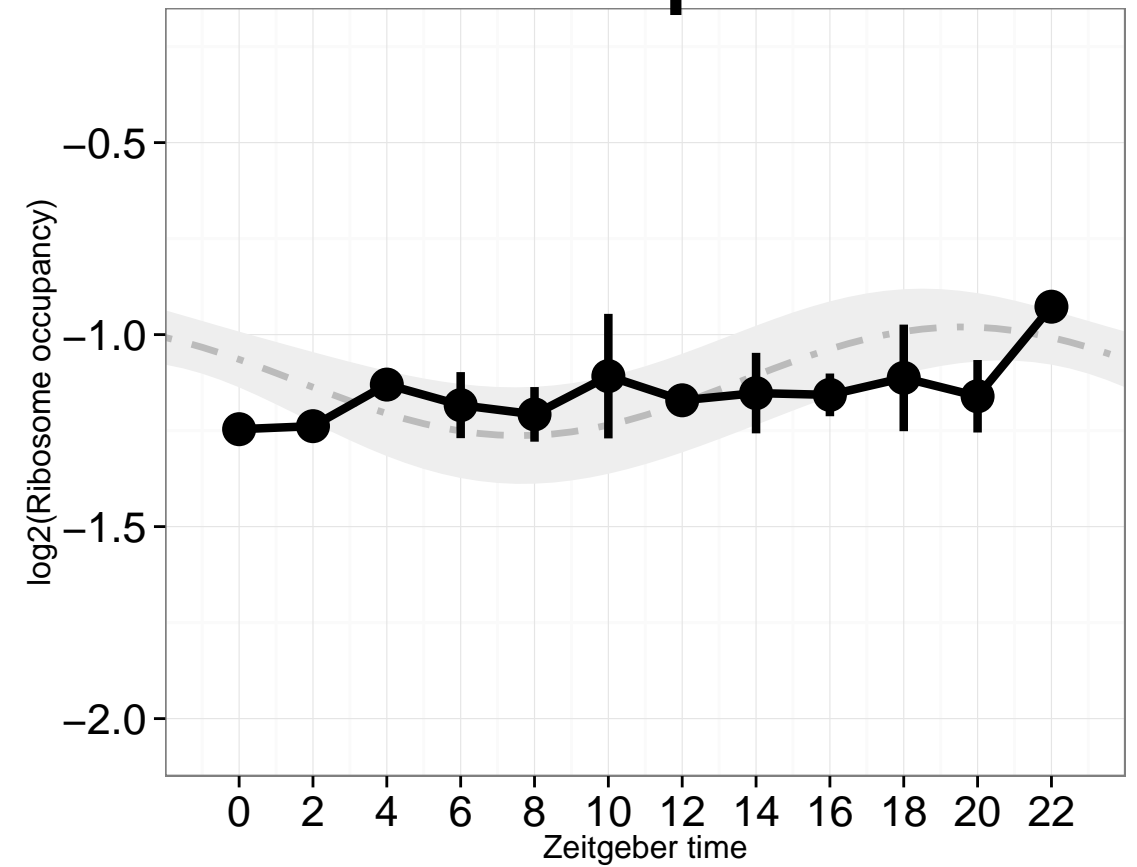

Supplement: SuppDataset_1.zip [file Osbpl9_set_A.pdf › Supplemental Dataset 1/A-mRNA_nonrhyth_translation_nonrhyth/Osbpl9_set_A.pdf]

# User1

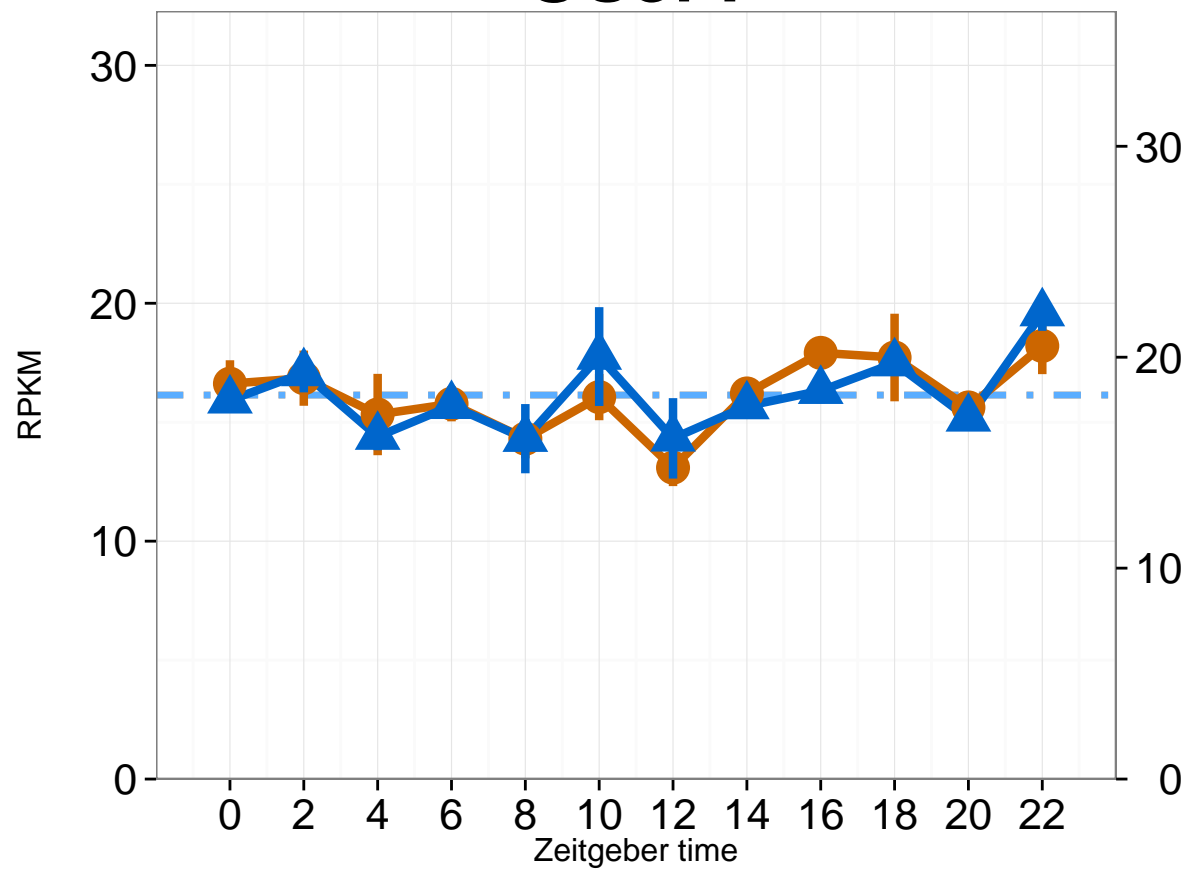

# User1

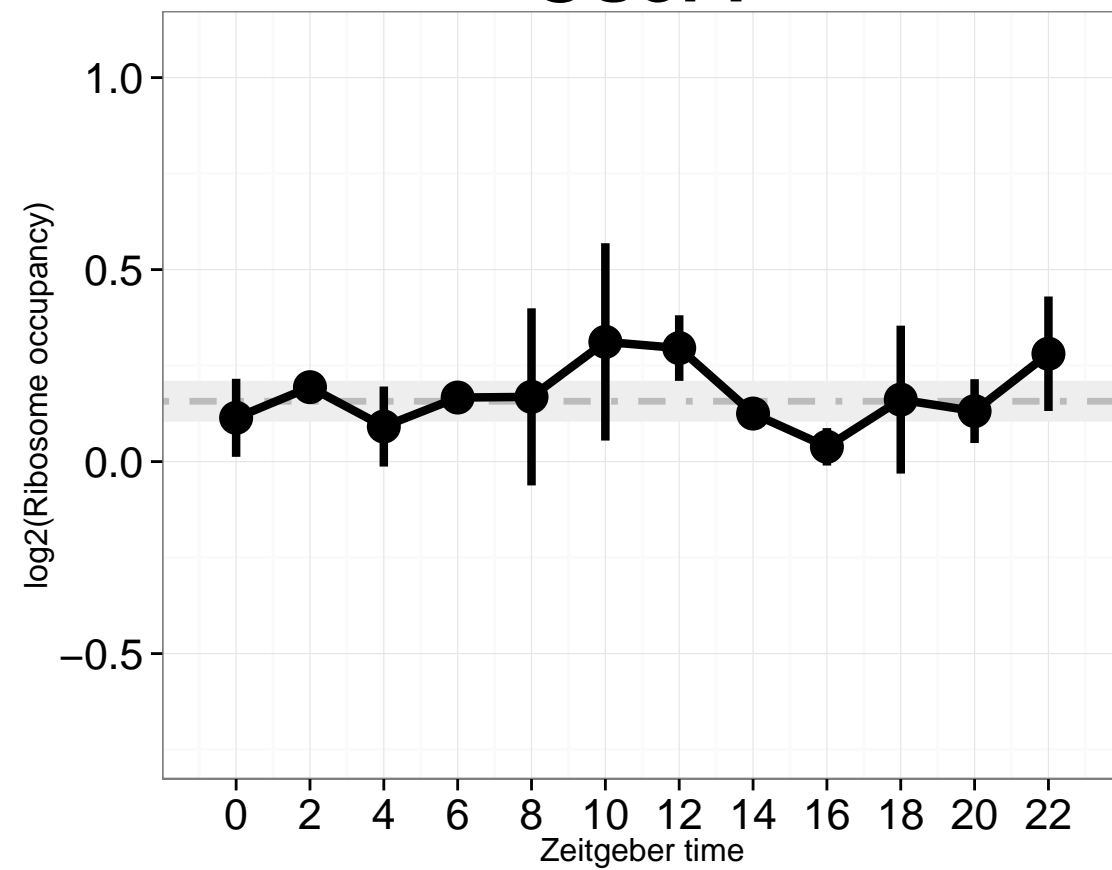

Supplement: SuppDataset_1.zip [file Oser1_set_A.pdf › Supplemental Dataset 1/A-mRNA_nonrhyth_translation_nonrhyth/Oser1_set_A.pdf]

## Osgep

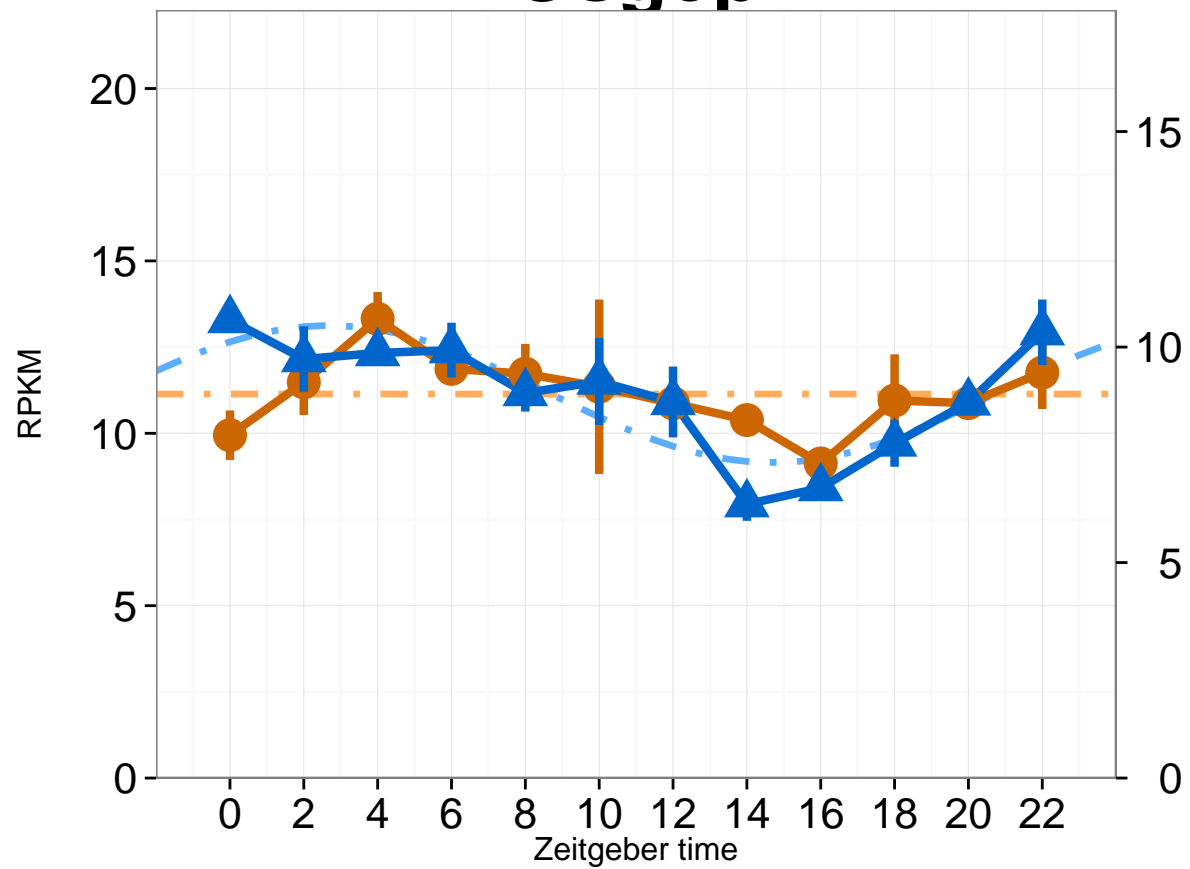

## Osgep

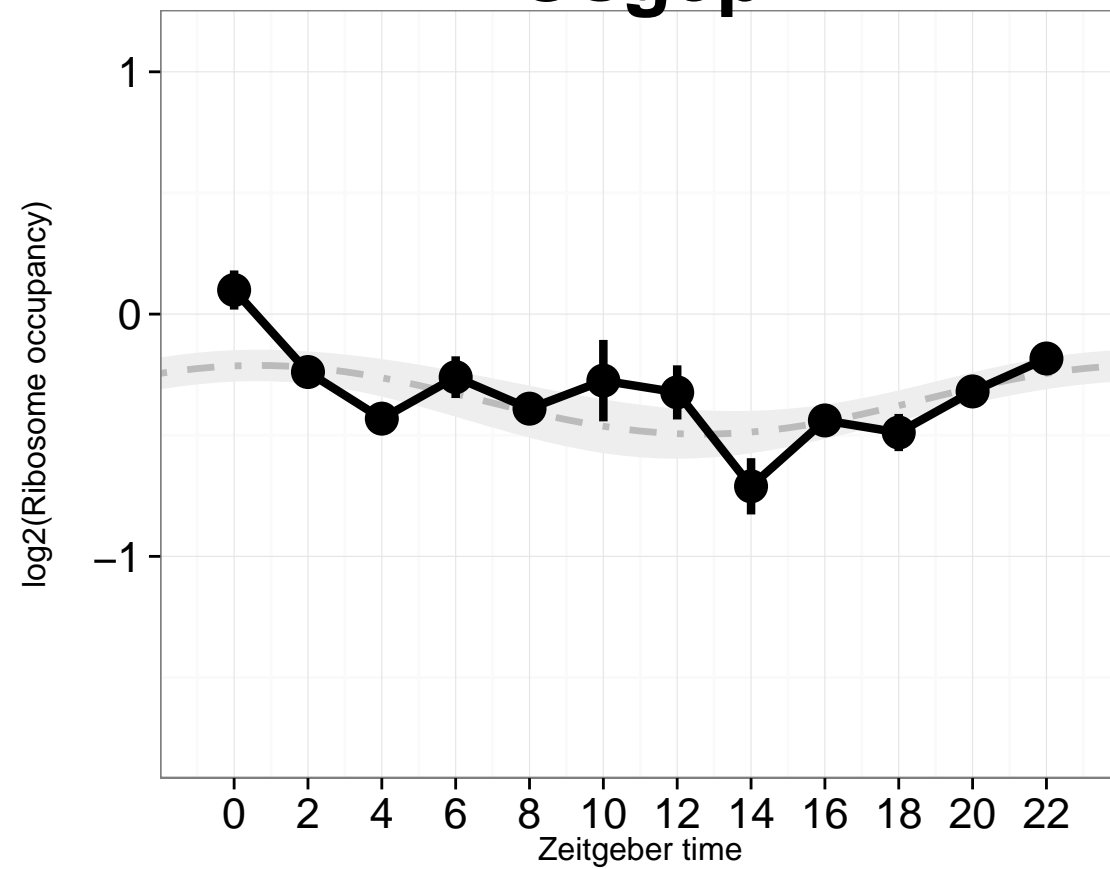

Supplement: SuppDataset_1.zip [file Osgep_set_A.pdf › Supplemental Dataset 1/A-mRNA_nonrhyth_translation_nonrhyth/Osgep_set_A.pdf]

## Osgepl1

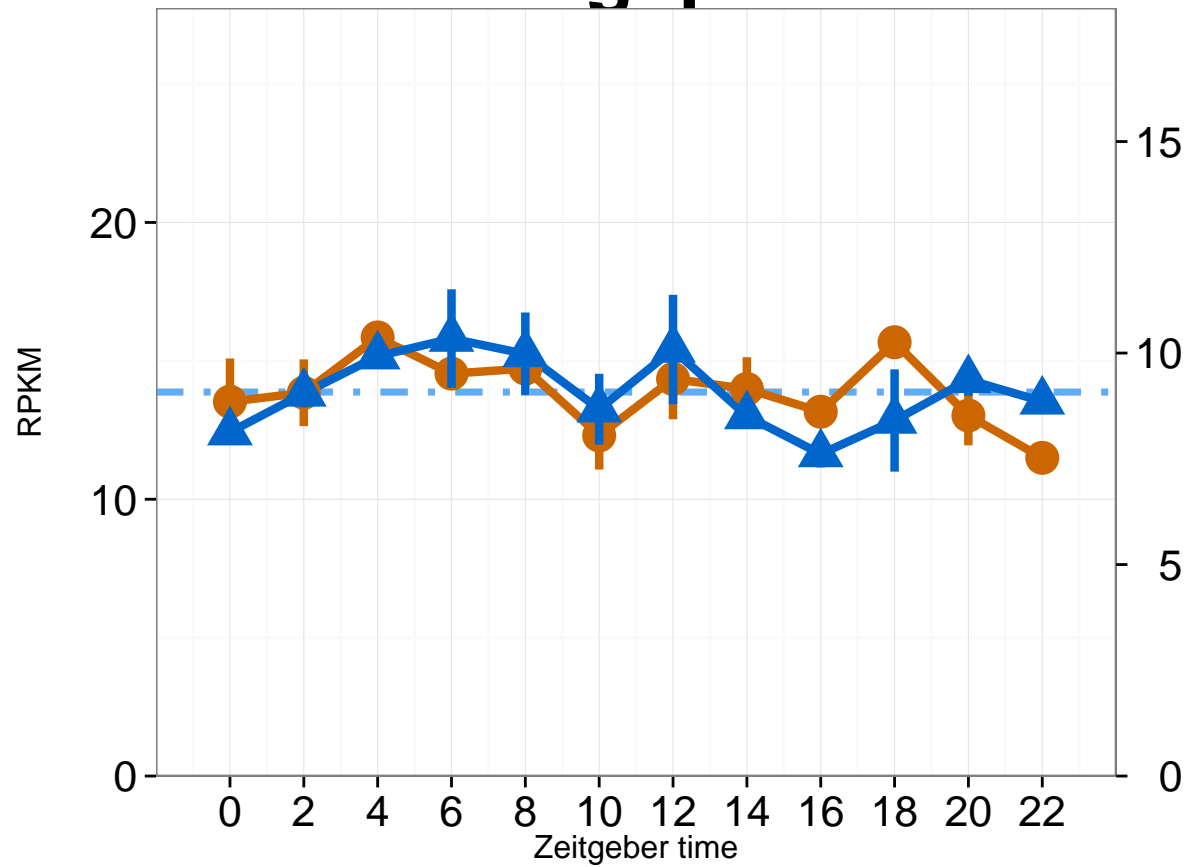

## Osgepl1

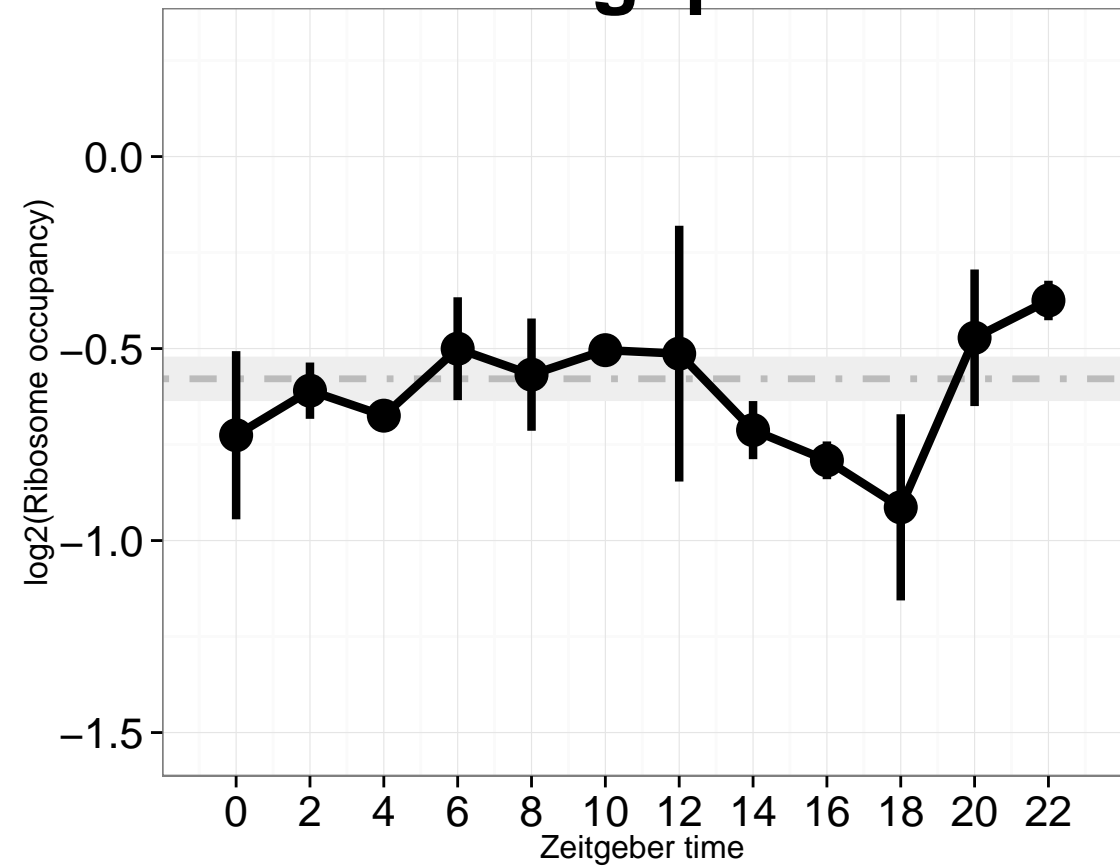

Supplement: SuppDataset_1.zip [file Osgepl1_set_A.pdf › Supplemental Dataset 1/A-mRNA_nonrhyth_translation_nonrhyth/Osgepl1_set_A.pdf]

## Osgin2

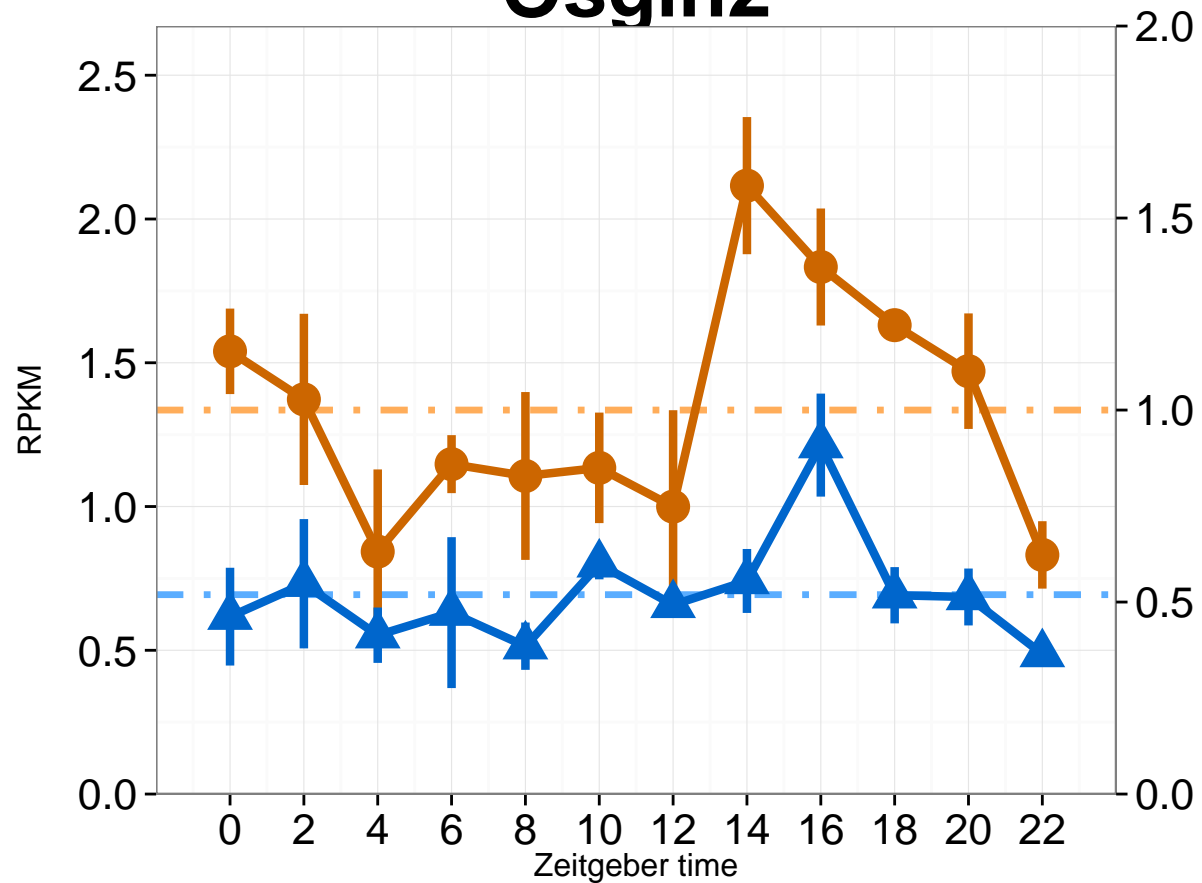

## Osgin2

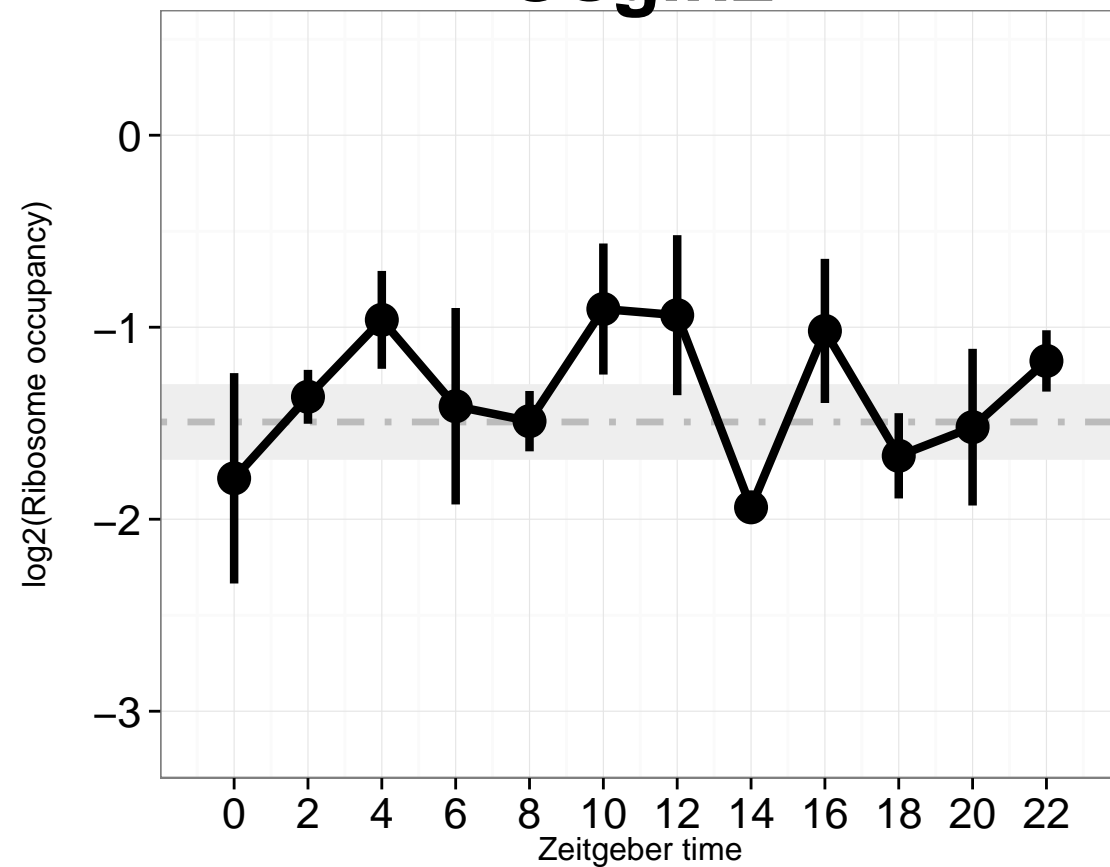

Supplement: SuppDataset_1.zip [file Osgin2_set_A.pdf › Supplemental Dataset 1/A-mRNA_nonrhyth_translation_nonrhyth/Osgin2_set_A.pdf]

## Ostf1

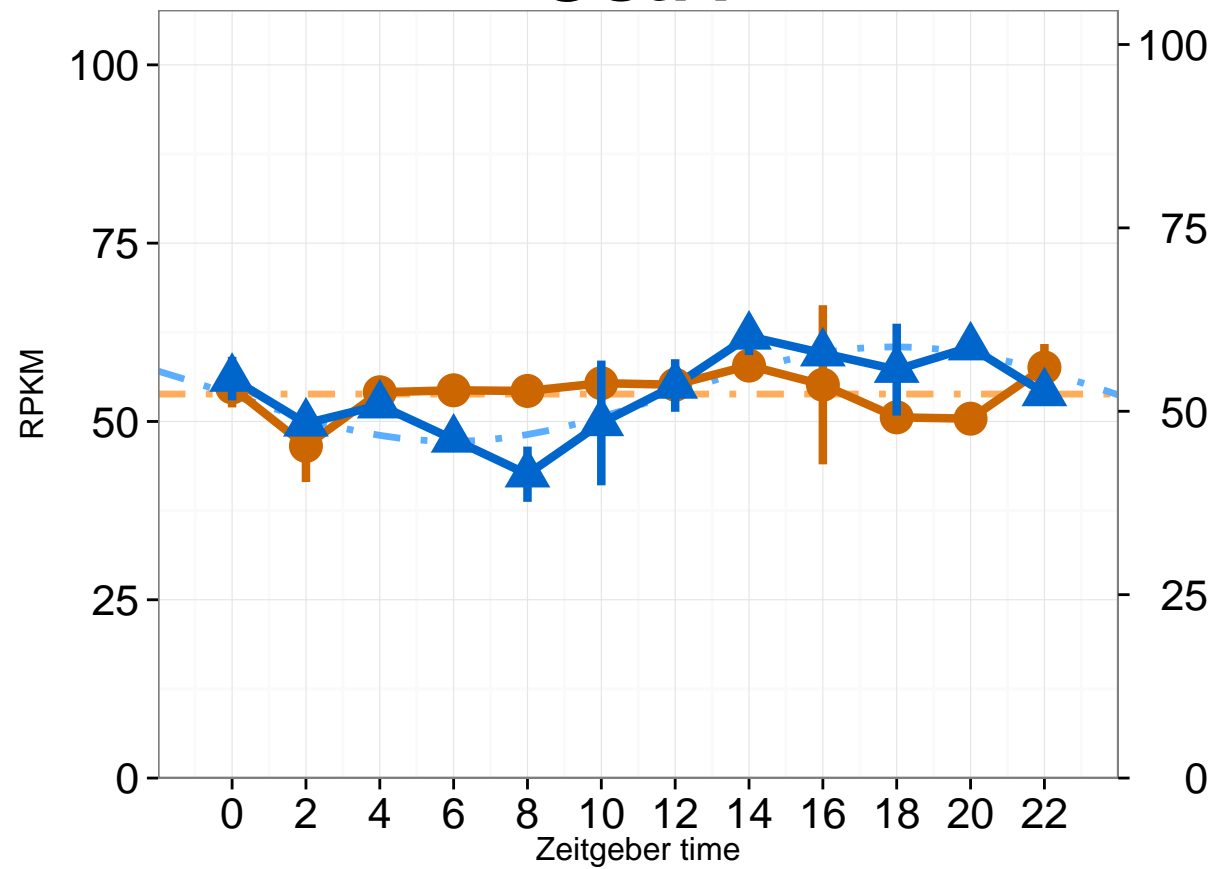

## Ostf1

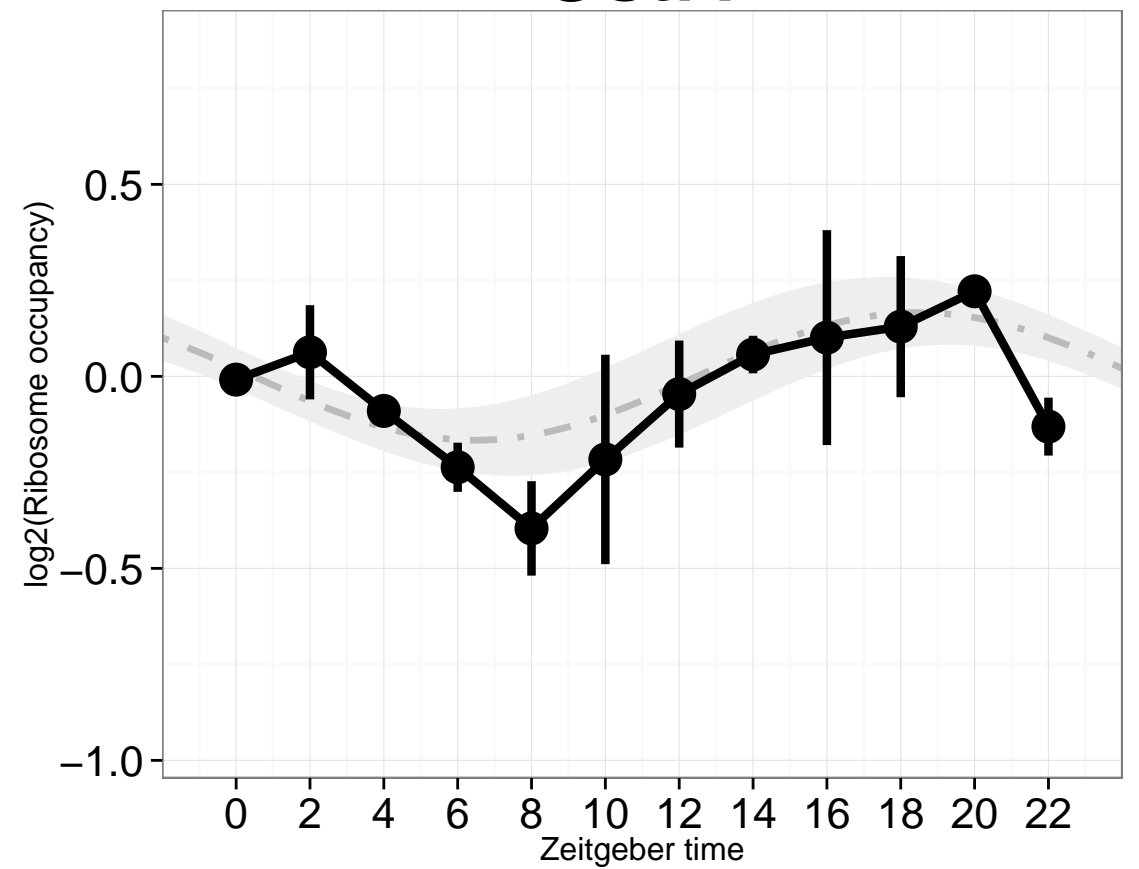

Supplement: SuppDataset_1.zip [file Ostf1_set_A.pdf › Supplemental Dataset 1/A-mRNA_nonrhyth_translation_nonrhyth/Ostf1_set_A.pdf]

## Ostm1

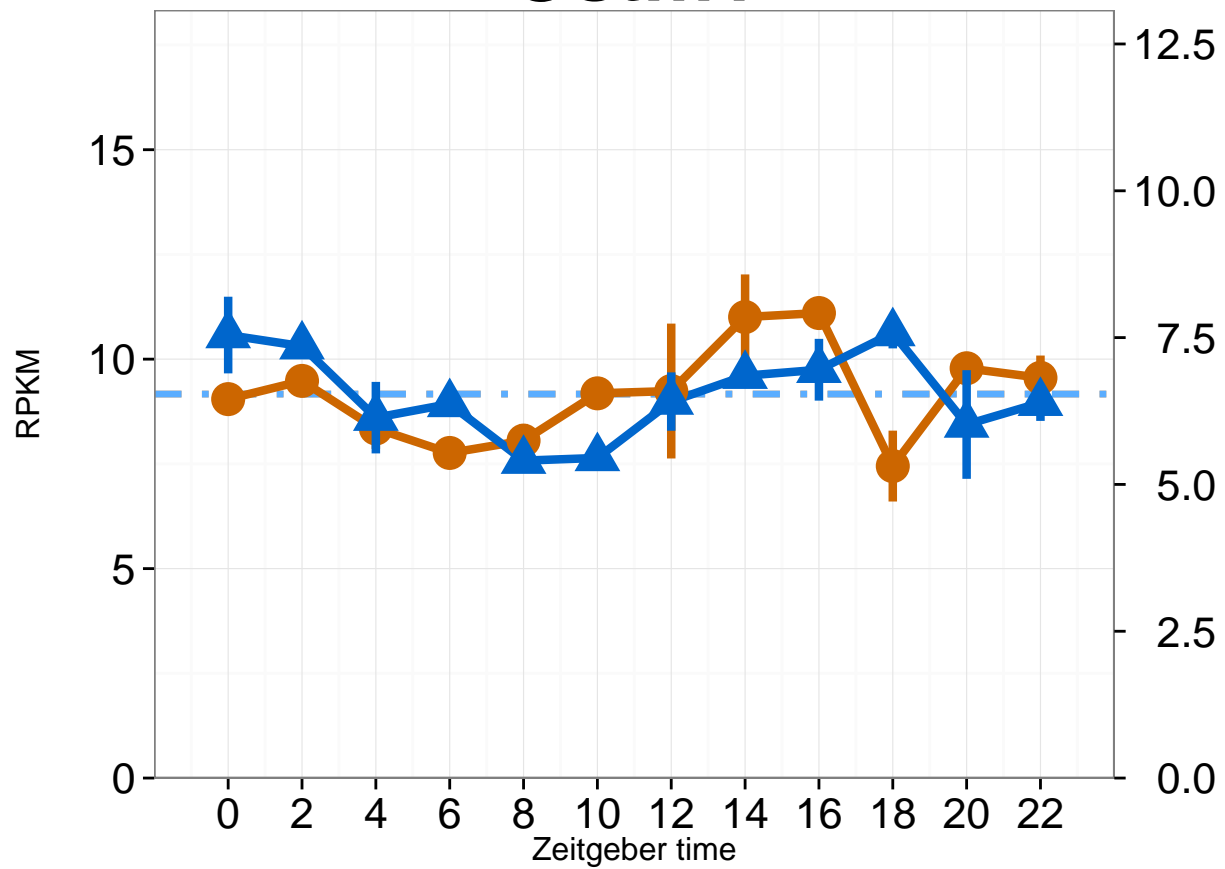

## Ostm1

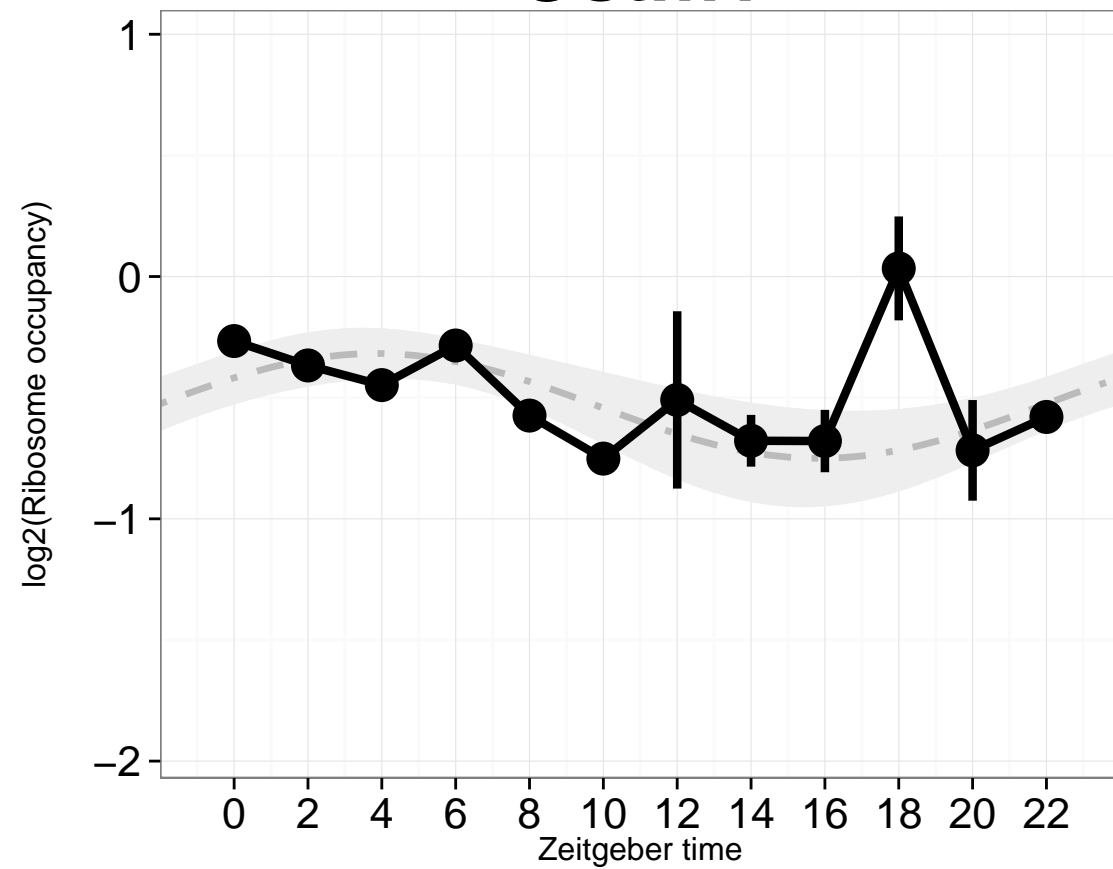

Supplement: SuppDataset_1.zip [file Ostm1_set_A.pdf › Supplemental Dataset 1/A-mRNA_nonrhyth_translation_nonrhyth/Ostm1_set_A.pdf]

## Otc

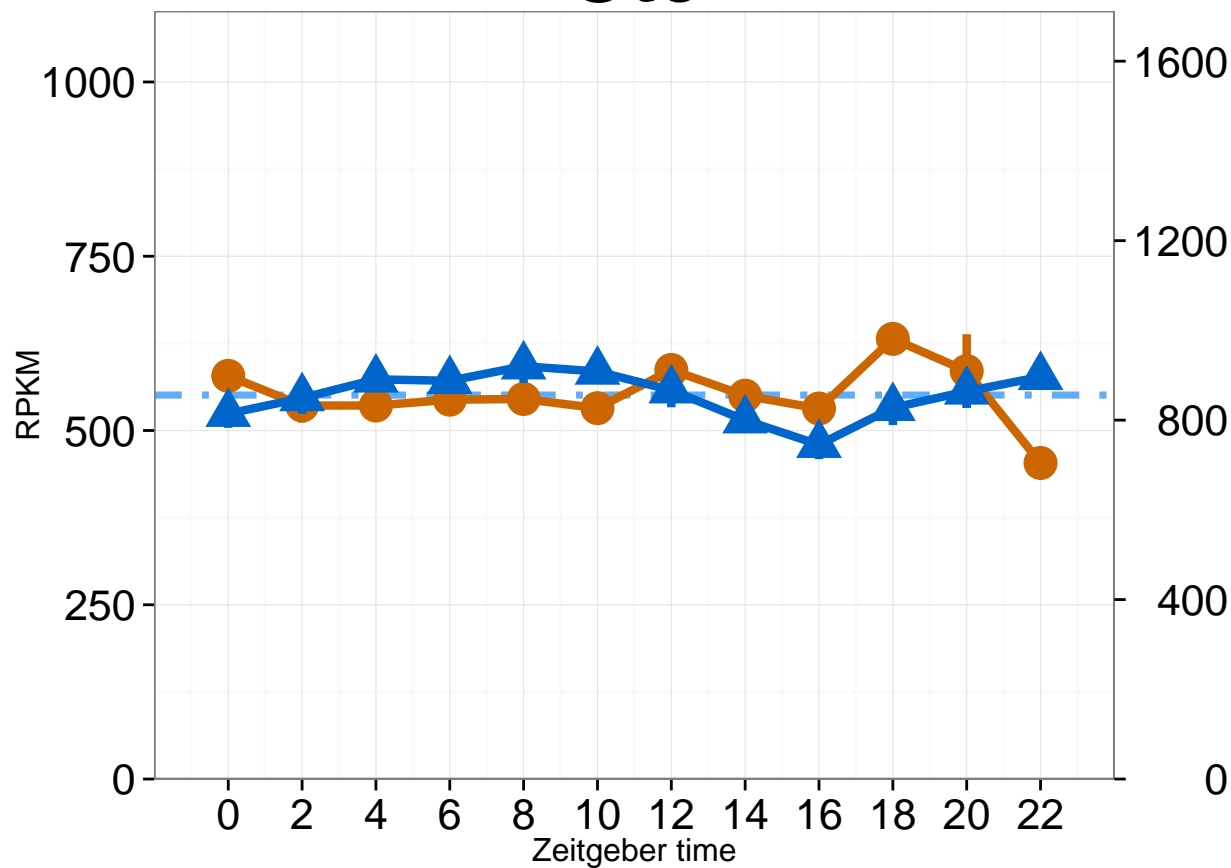

## Otc

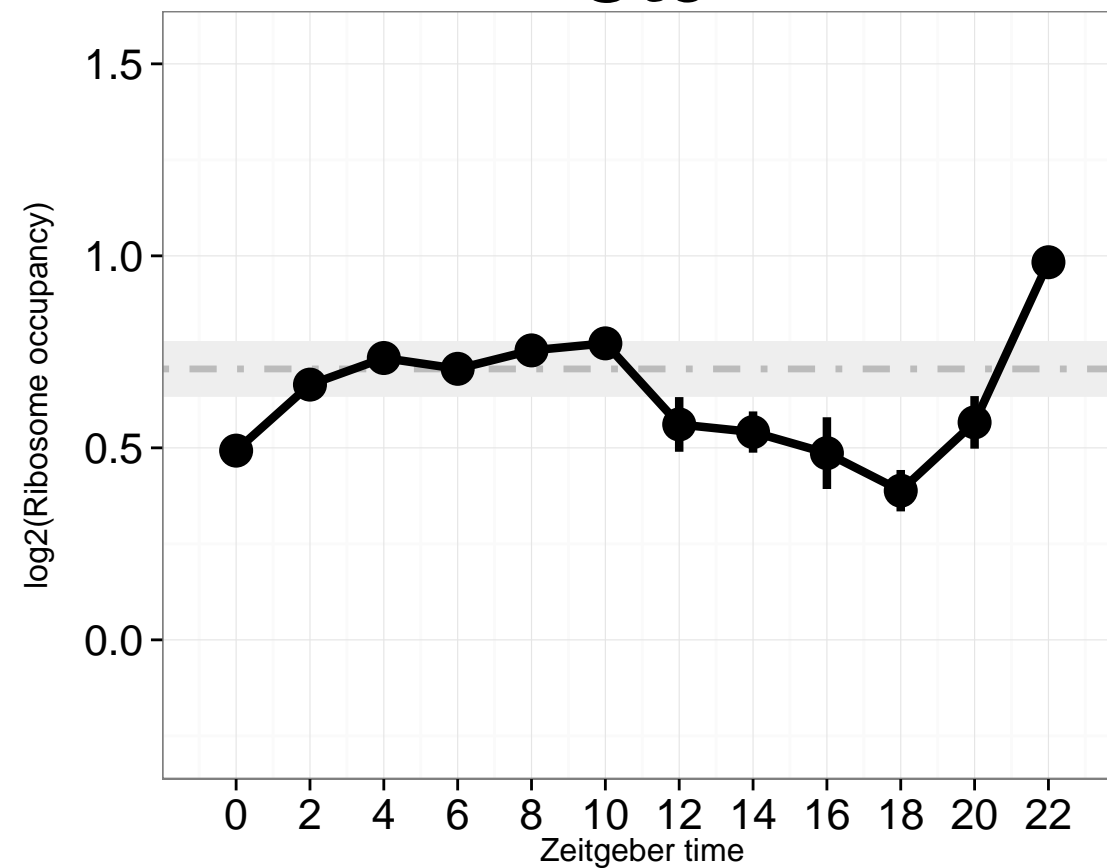

Supplement: SuppDataset_1.zip [file Otc_set_A.pdf › Supplemental Dataset 1/A-mRNA_nonrhyth_translation_nonrhyth/Otc_set_A.pdf]

# Otub1

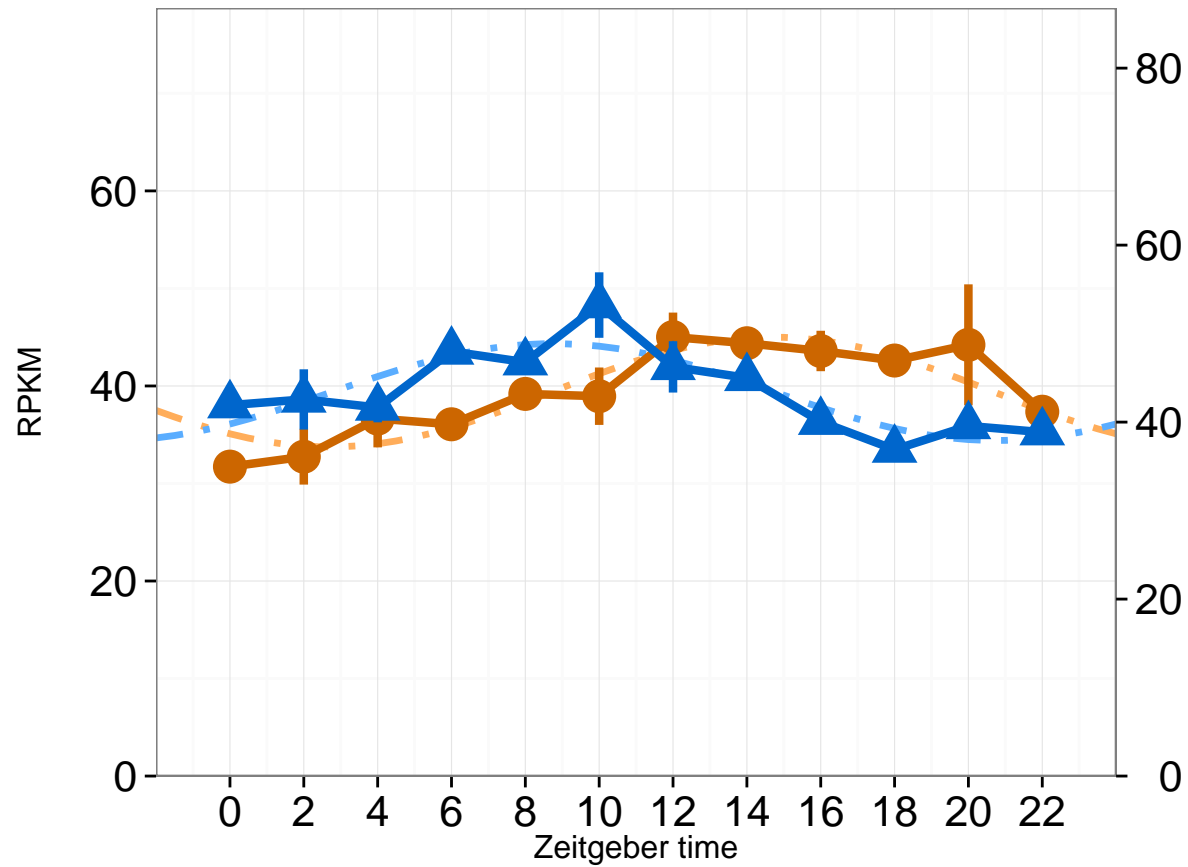

# Otub1

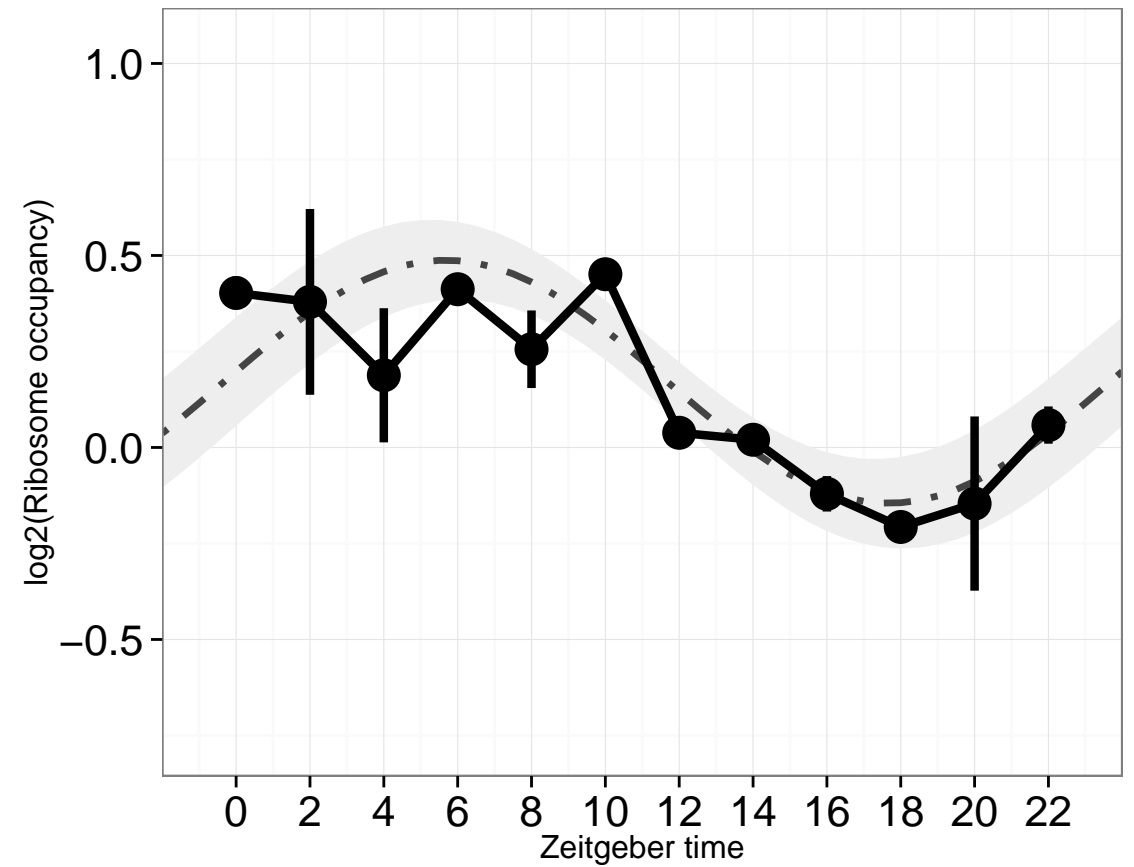

Supplement: SuppDataset_1.zip [file Otub1_set_A.pdf › Supplemental Dataset 1/A-mRNA_nonrhyth_translation_nonrhyth/Otub1_set_A.pdf]

# Otud1

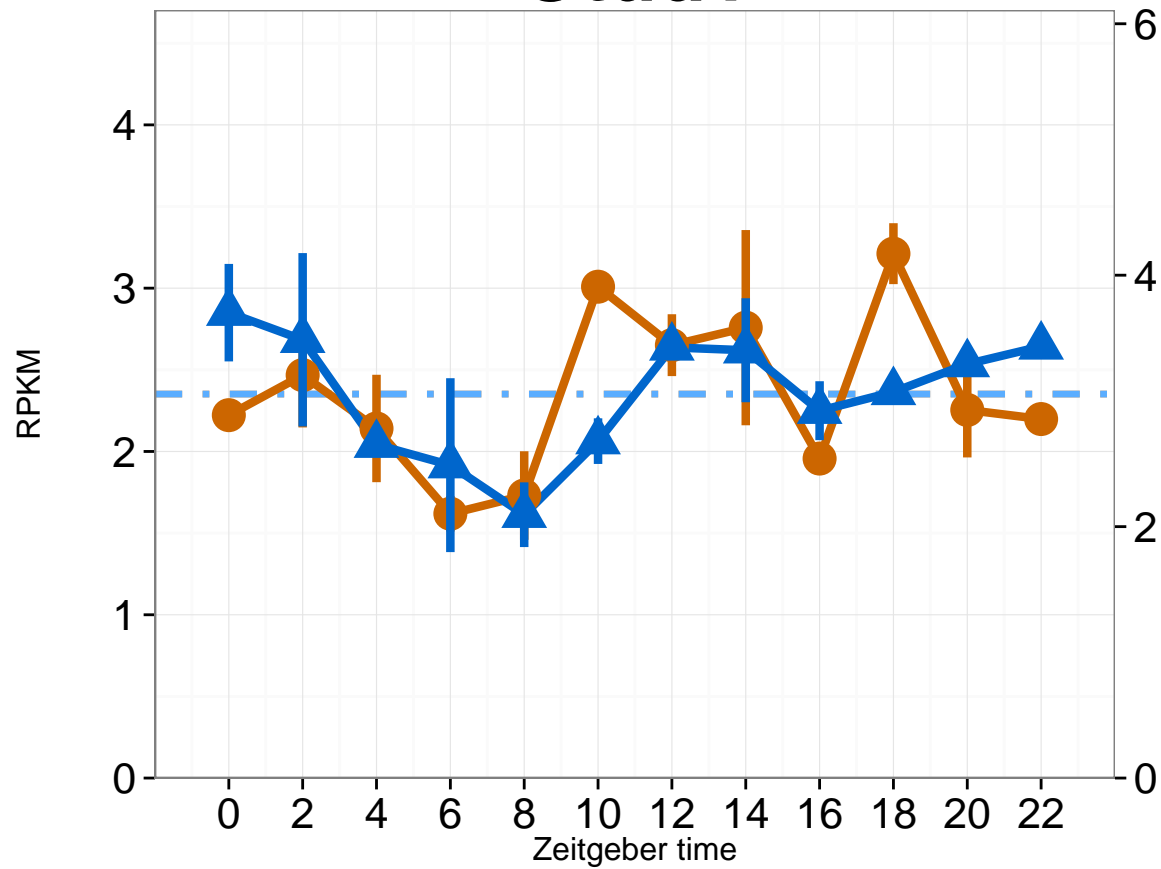

# Otud1

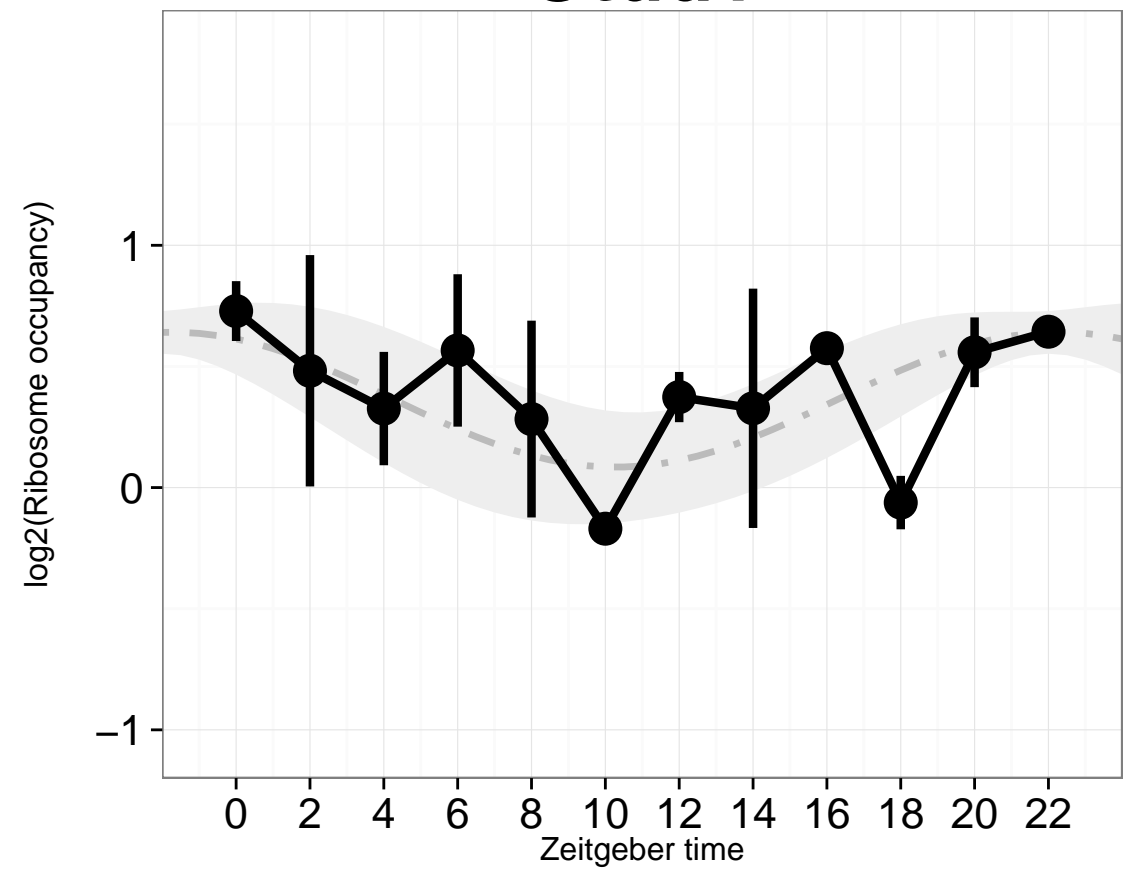

Supplement: SuppDataset_1.zip [file Otud1_set_A.pdf › Supplemental Dataset 1/A-mRNA_nonrhyth_translation_nonrhyth/Otud1_set_A.pdf]

# Otud3

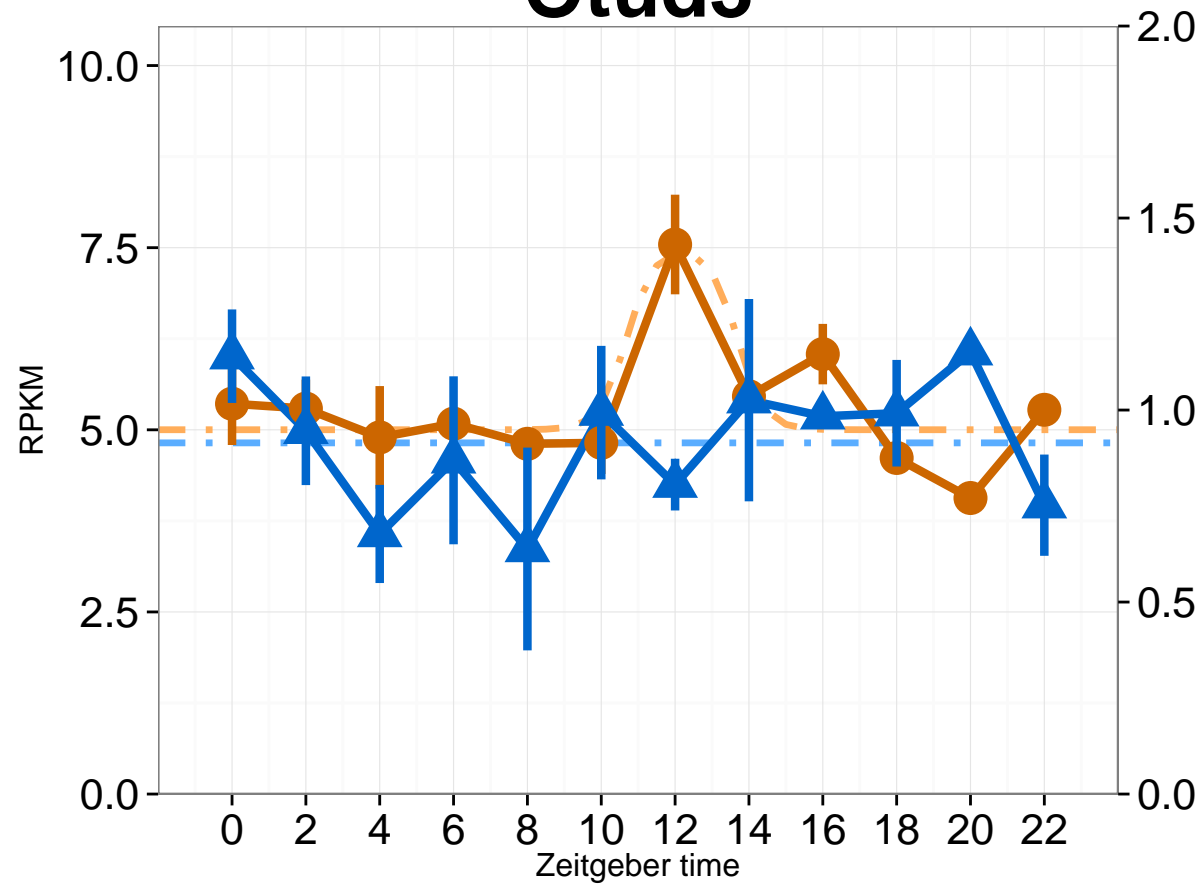

# Otud3

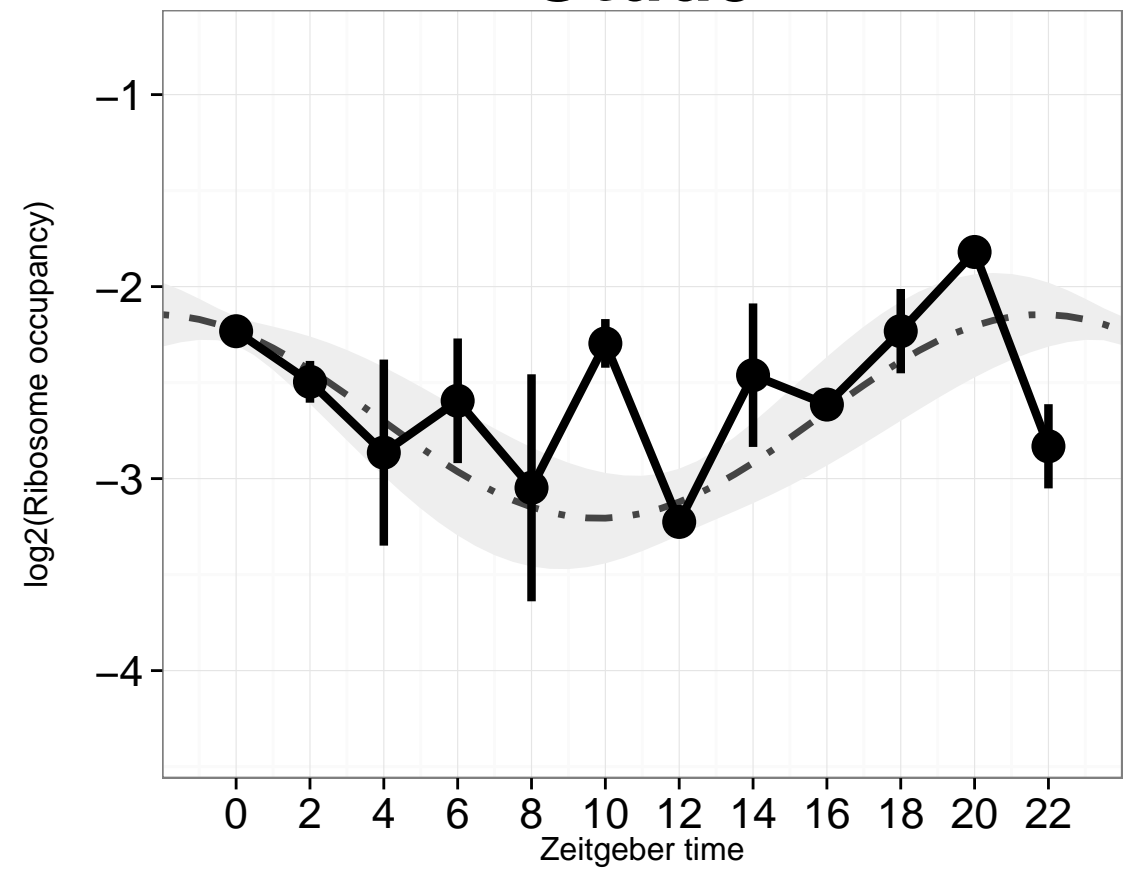

Supplement: SuppDataset_1.zip [file Otud3_set_A.pdf › Supplemental Dataset 1/A-mRNA_nonrhyth_translation_nonrhyth/Otud3_set_A.pdf]

# Otud4

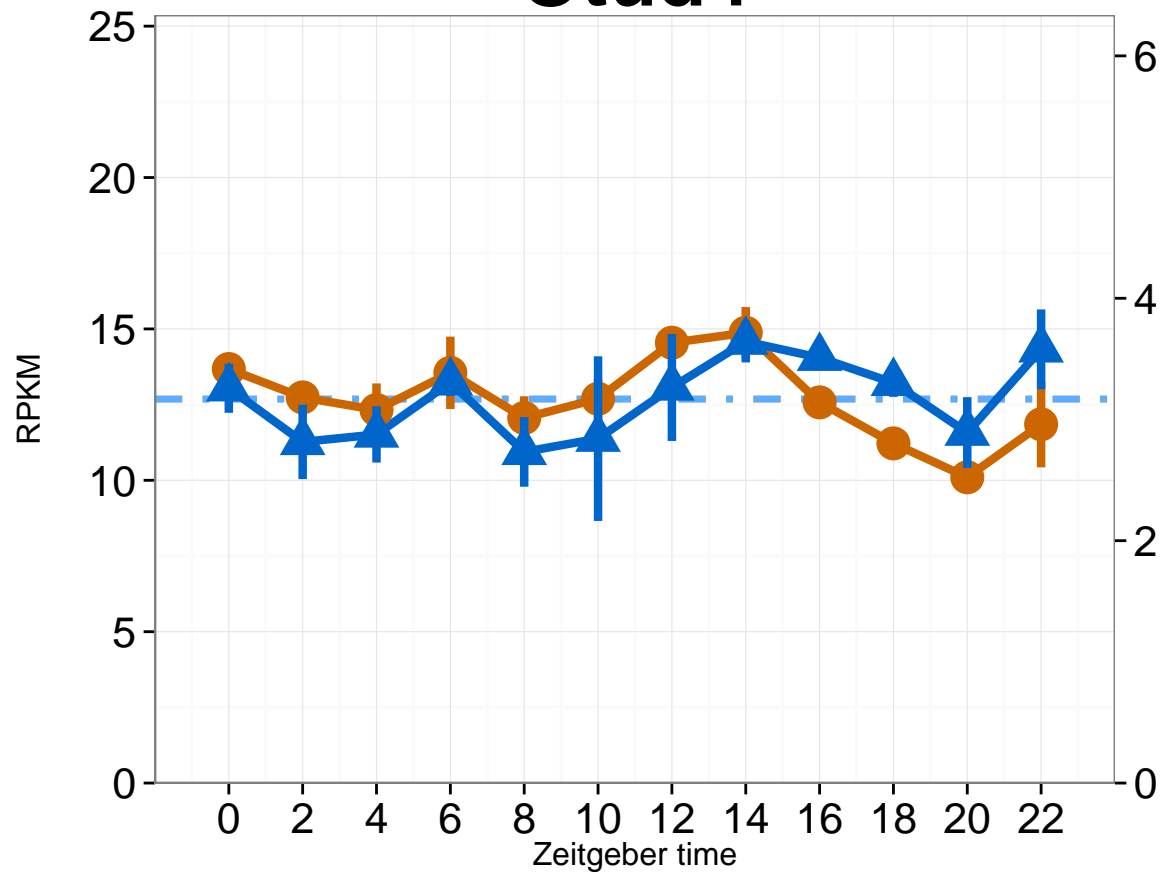

# Otud4

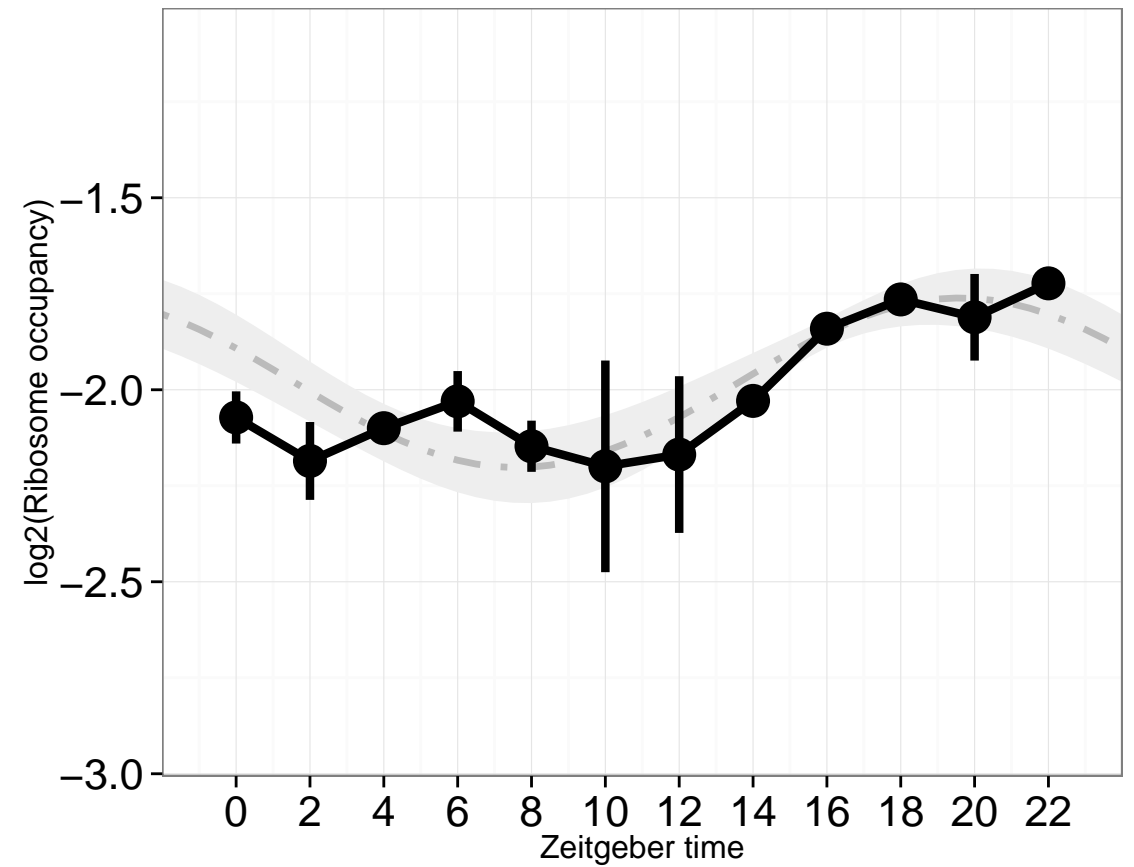

Supplement: SuppDataset_1.zip [file Otud4_set_A.pdf › Supplemental Dataset 1/A-mRNA_nonrhyth_translation_nonrhyth/Otud4_set_A.pdf]

## Otud5

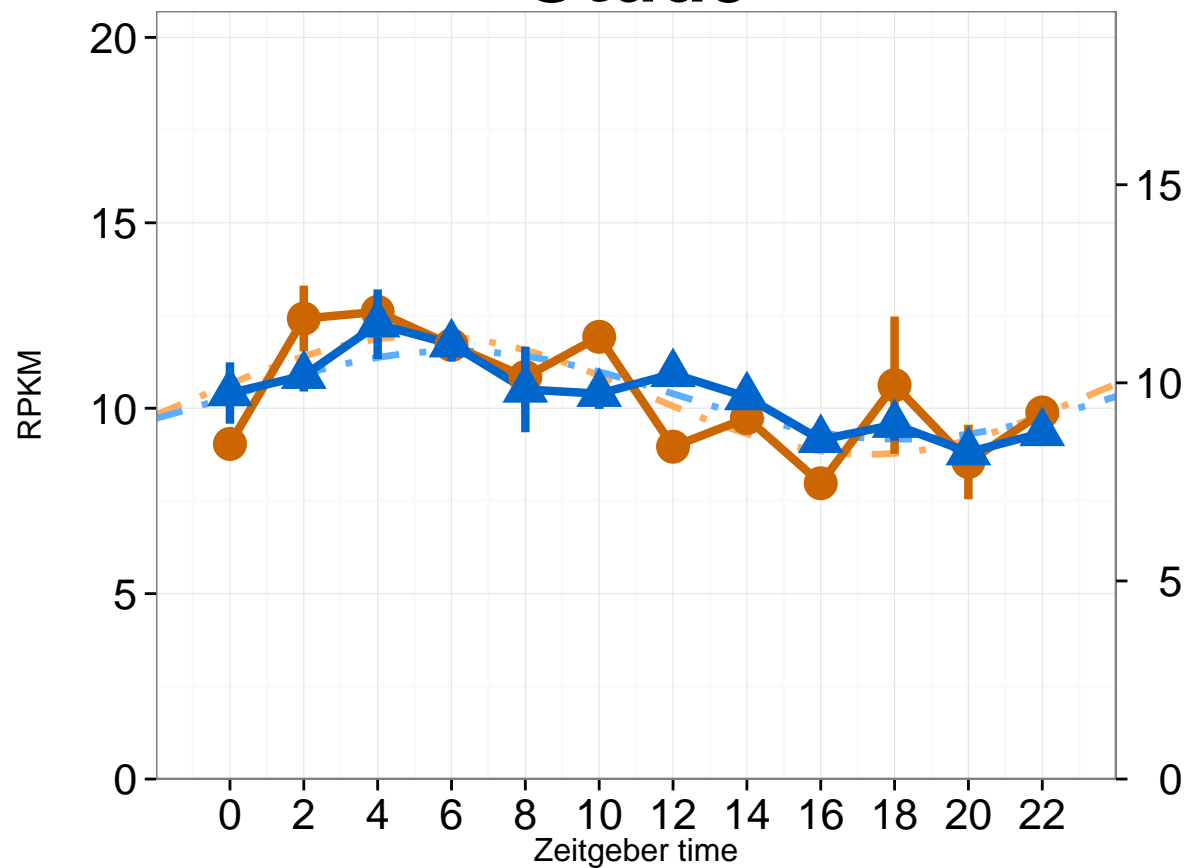

## Otud5

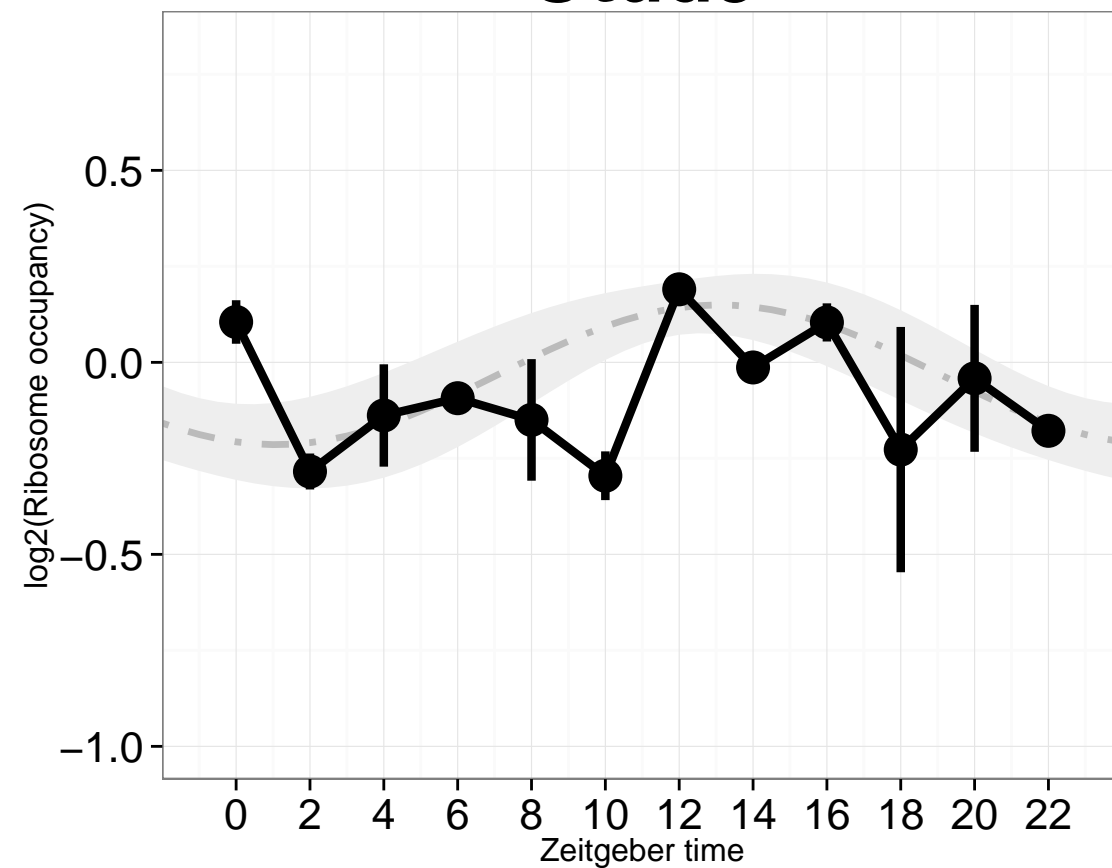

Supplement: SuppDataset_1.zip [file Otud5_set_A.pdf › Supplemental Dataset 1/A-mRNA_nonrhyth_translation_nonrhyth/Otud5_set_A.pdf]

## Otud6b

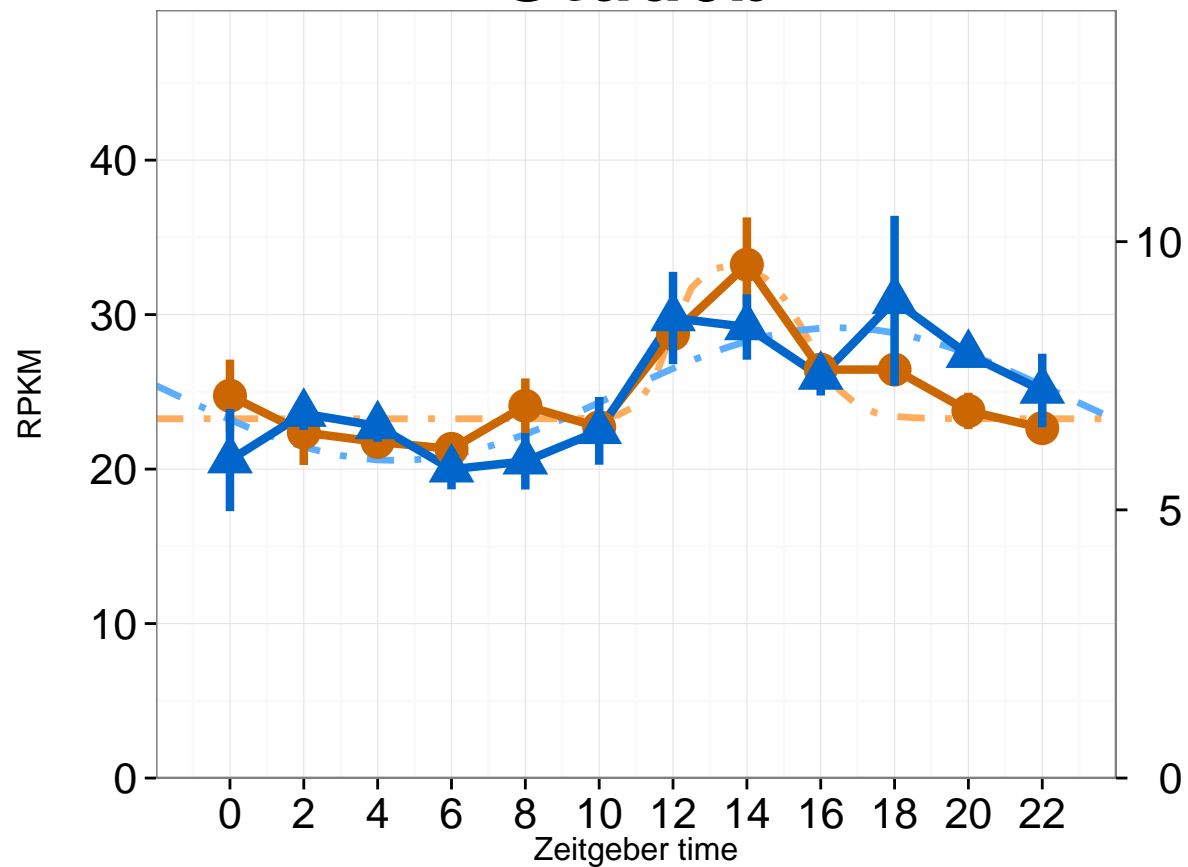

## Otud6b

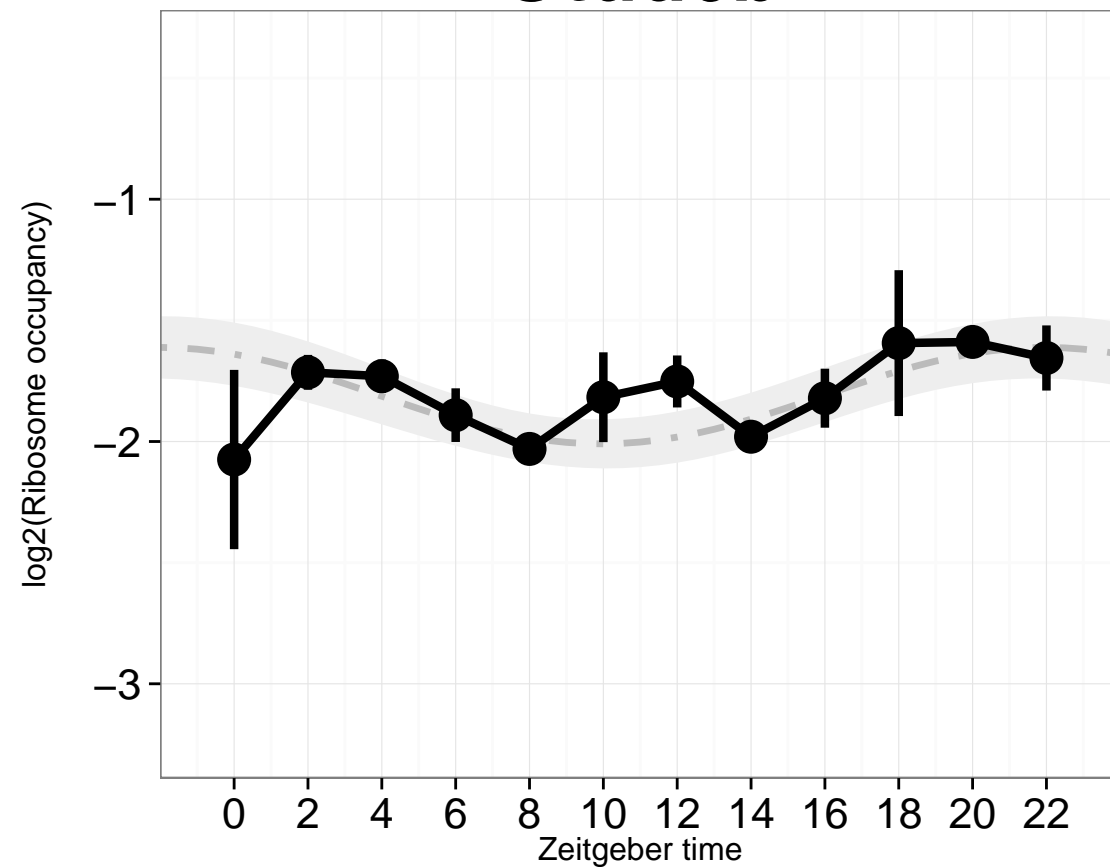

Supplement: SuppDataset_1.zip [file Otud6b_set_A.pdf › Supplemental Dataset 1/A-mRNA_nonrhyth_translation_nonrhyth/Otud6b_set_A.pdf]

# Otud7b

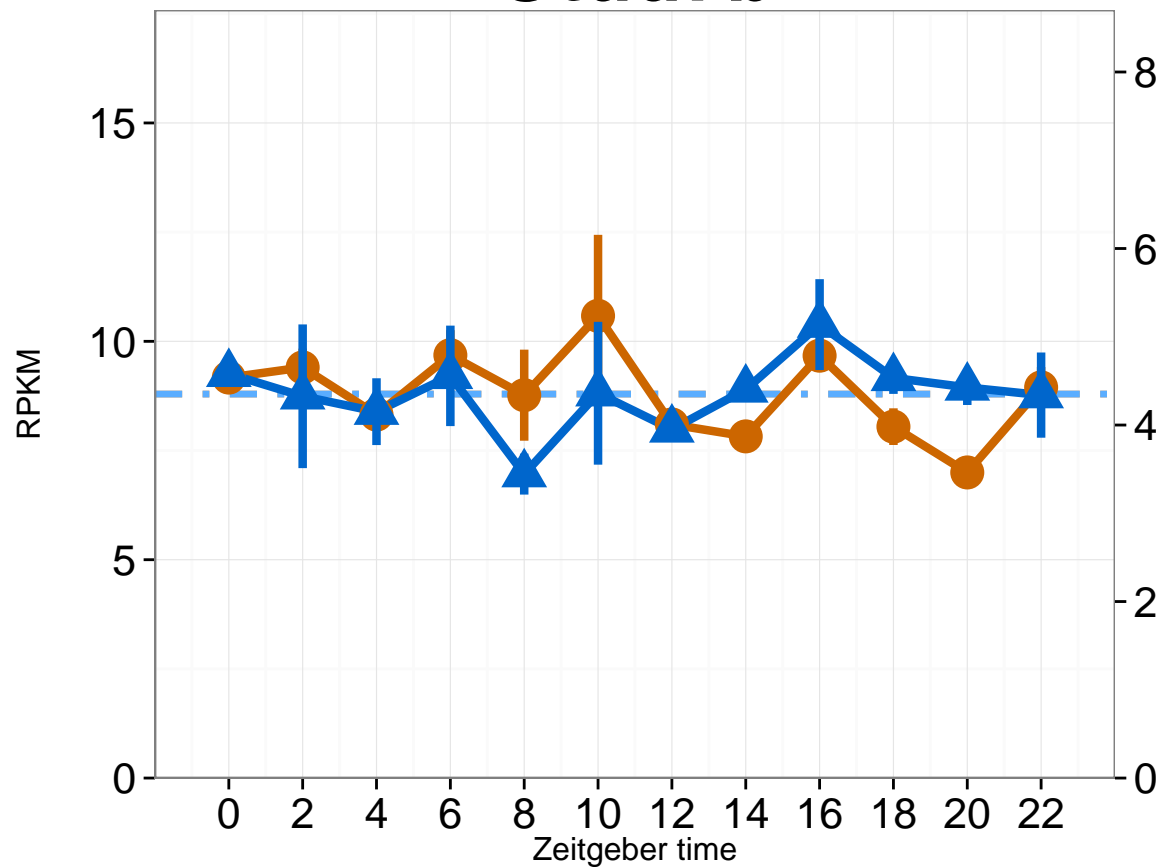

# Otud7b

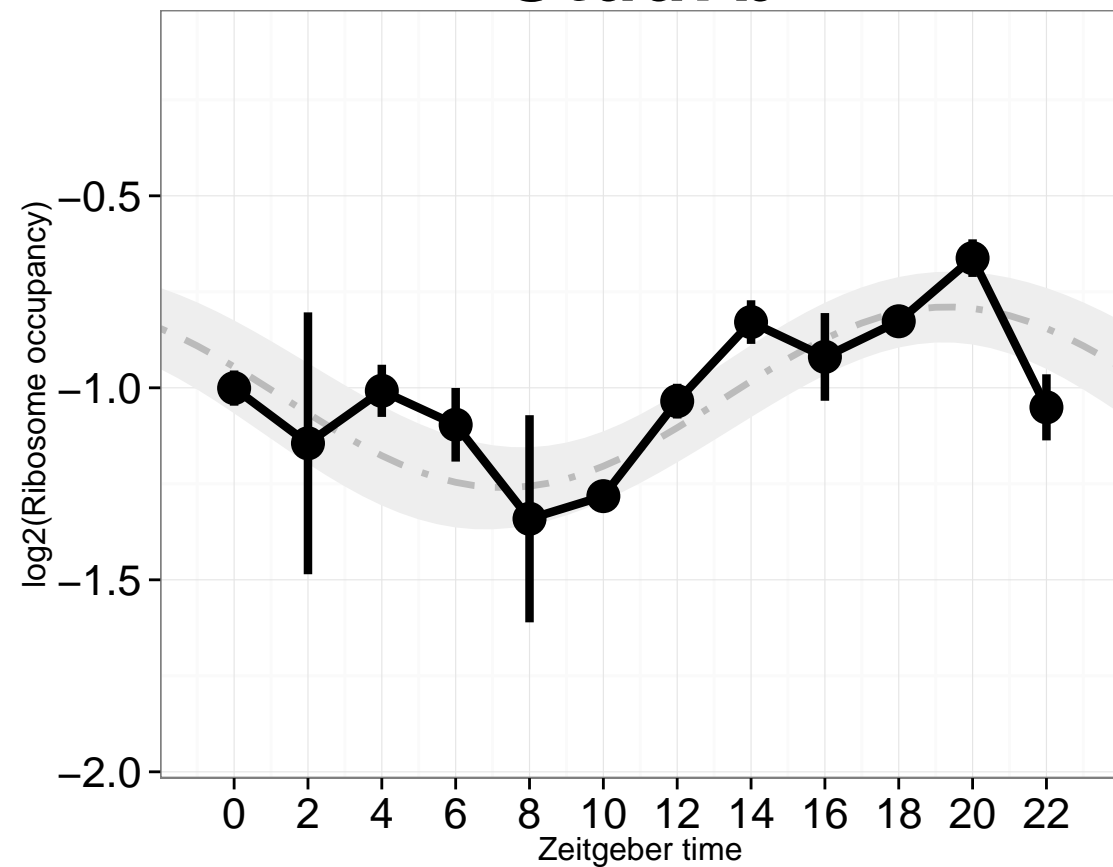

Supplement: SuppDataset_1.zip [file Otud7b_set_A.pdf › Supplemental Dataset 1/A-mRNA_nonrhyth_translation_nonrhyth/Otud7b_set_A.pdf]

## Oxa1l

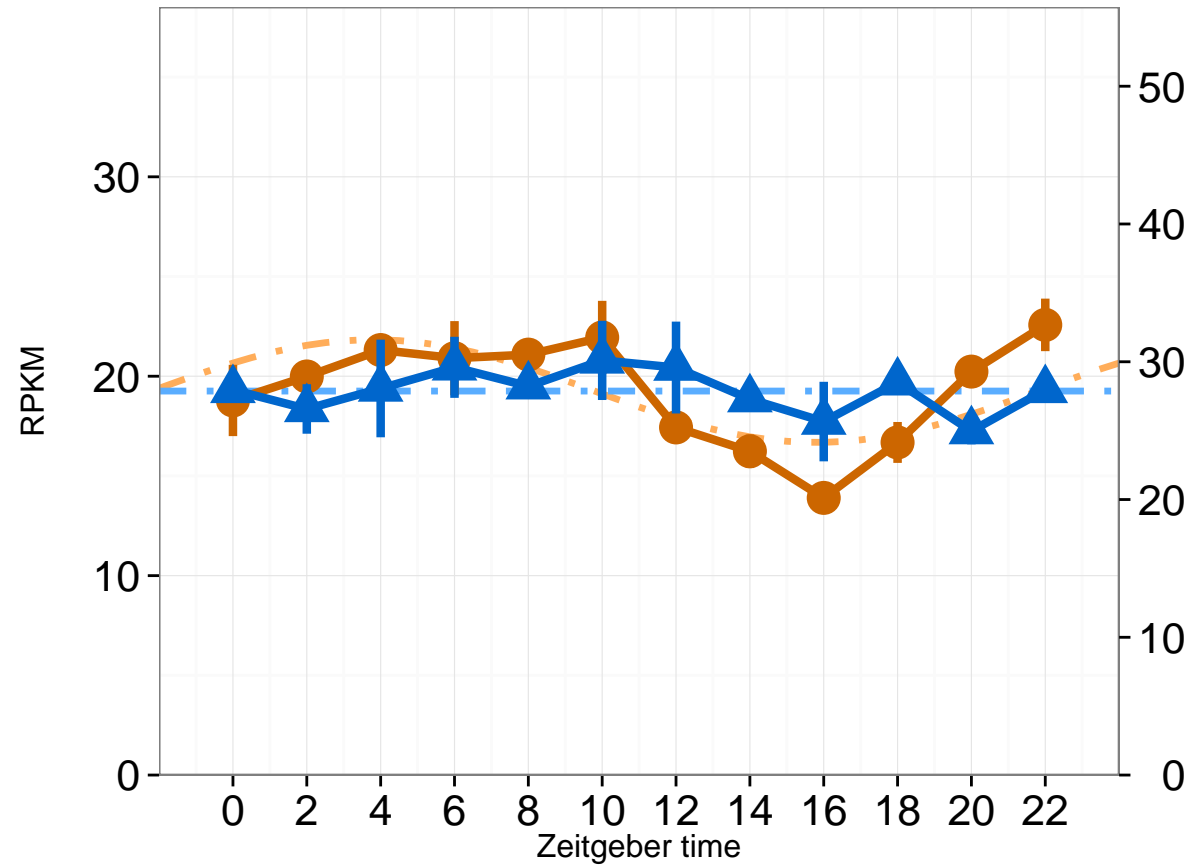

## Oxa1l

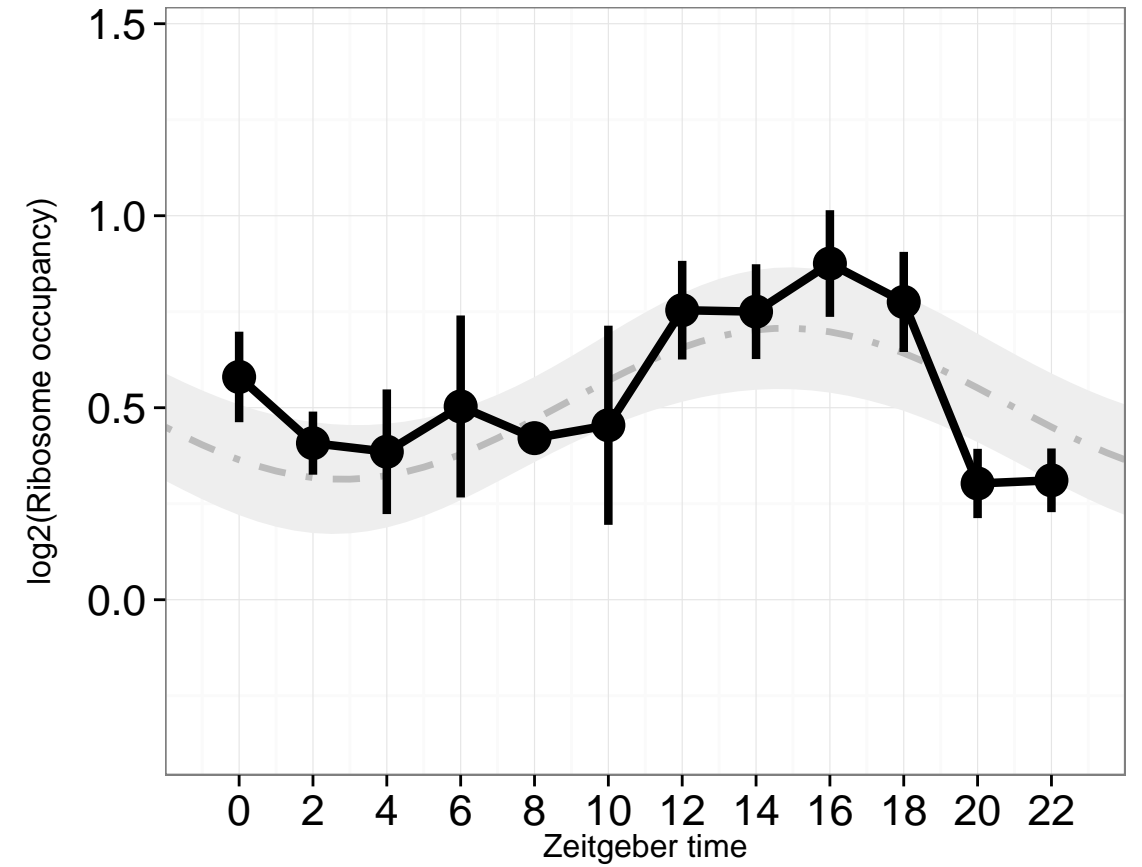

Supplement: SuppDataset_1.zip [file Oxa1l_set_A.pdf › Supplemental Dataset 1/A-mRNA_nonrhyth_translation_nonrhyth/Oxa1l_set_A.pdf]

# Oxct1

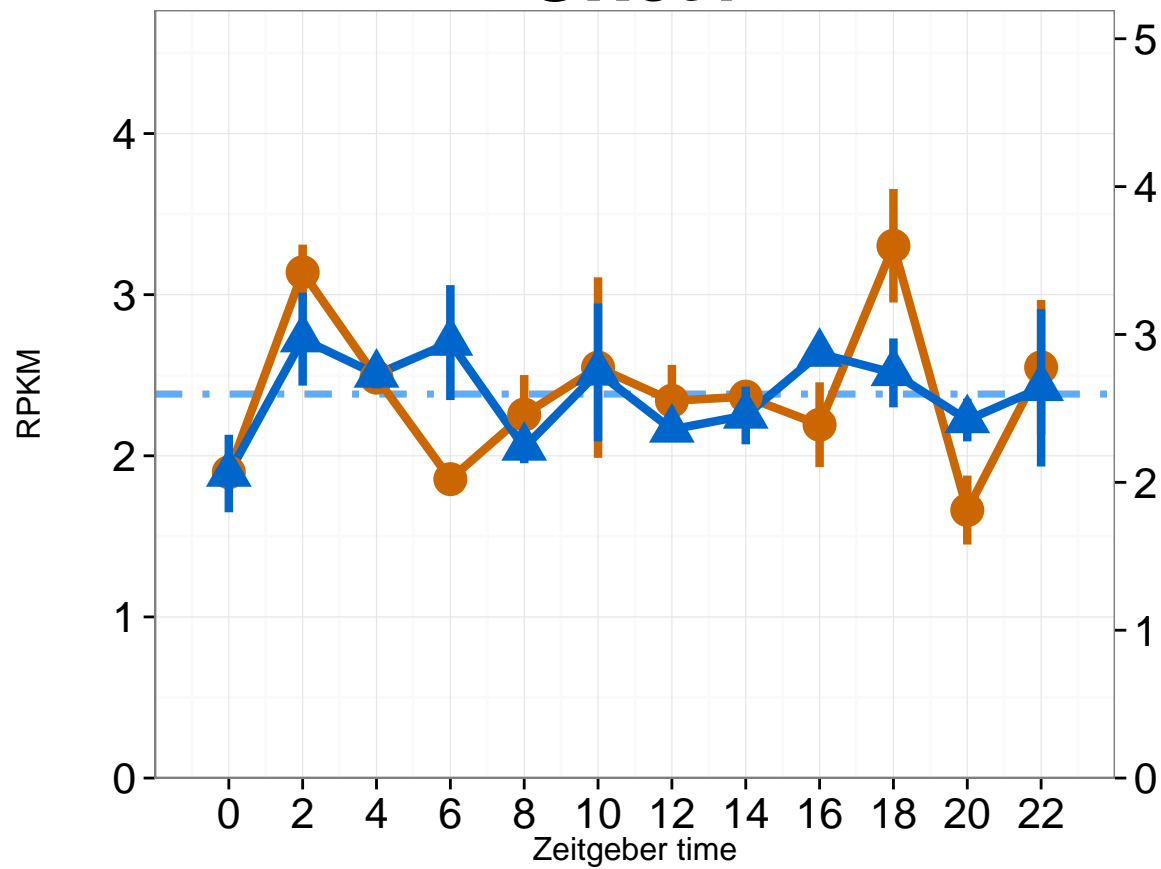

# Oxct1

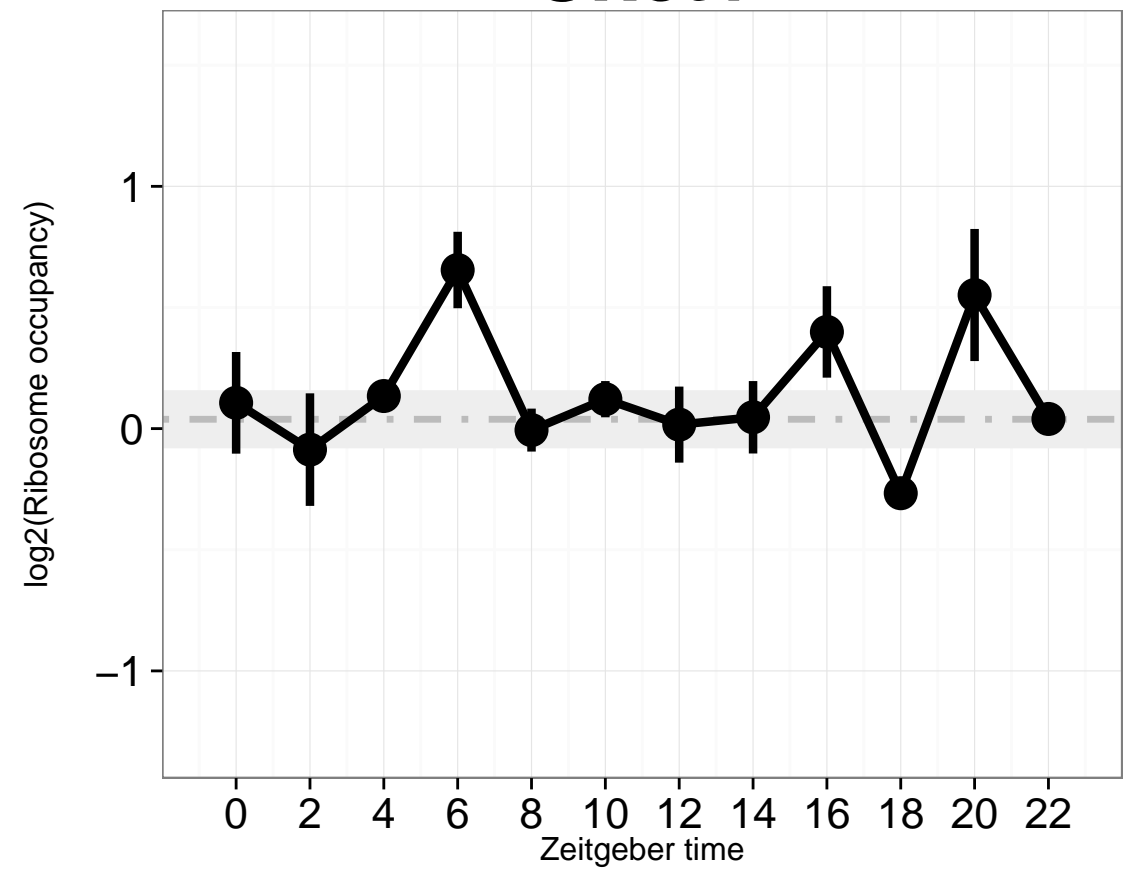

Supplement: SuppDataset_1.zip [file Oxct1_set_A.pdf › Supplemental Dataset 1/A-mRNA_nonrhyth_translation_nonrhyth/Oxct1_set_A.pdf]

## OxId1

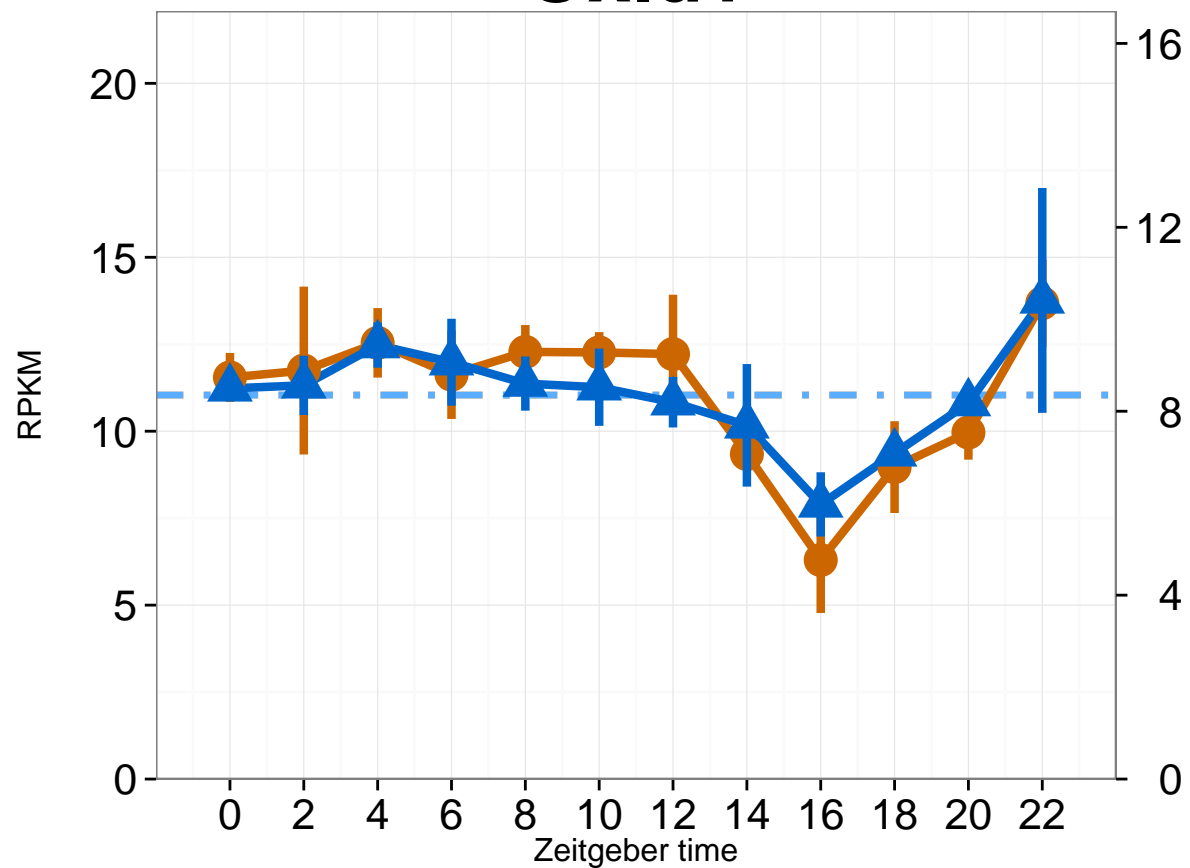

## OxId1

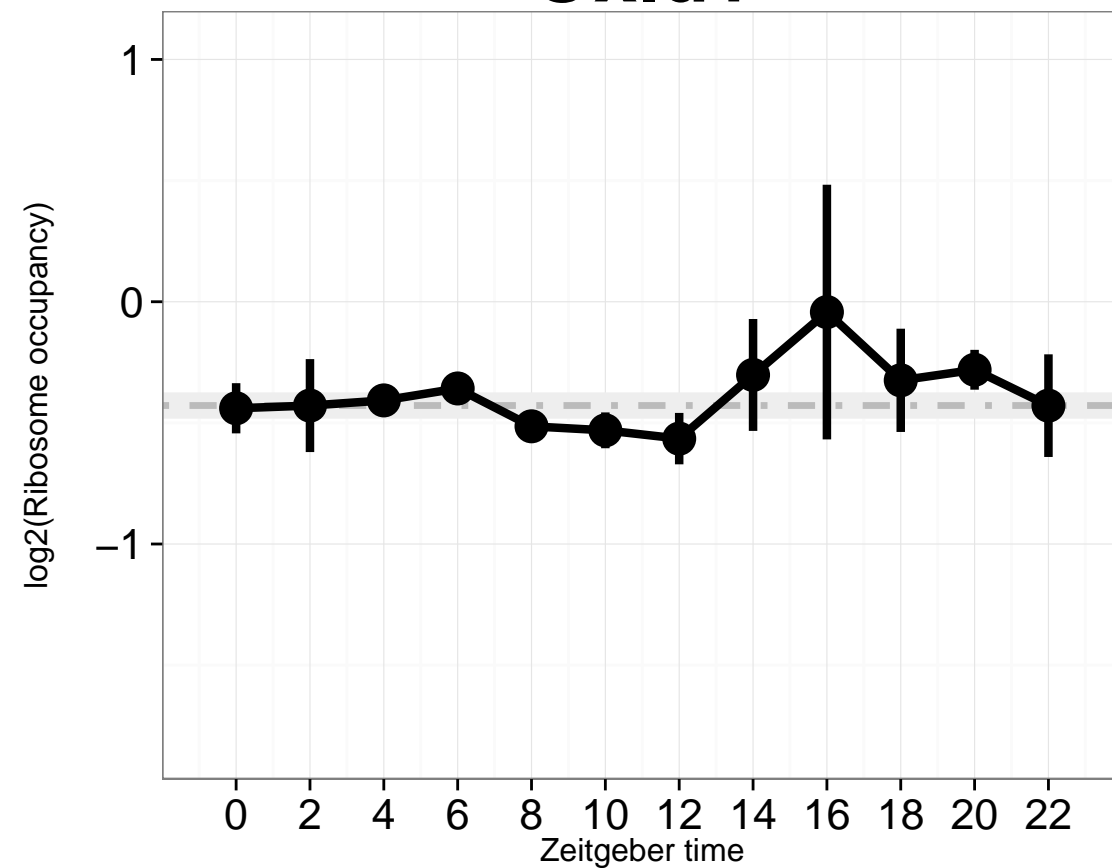

Supplement: SuppDataset_1.zip [file Oxld1_set_A.pdf › Supplemental Dataset 1/A-mRNA_nonrhyth_translation_nonrhyth/Oxld1_set_A.pdf]

## Oxnad1

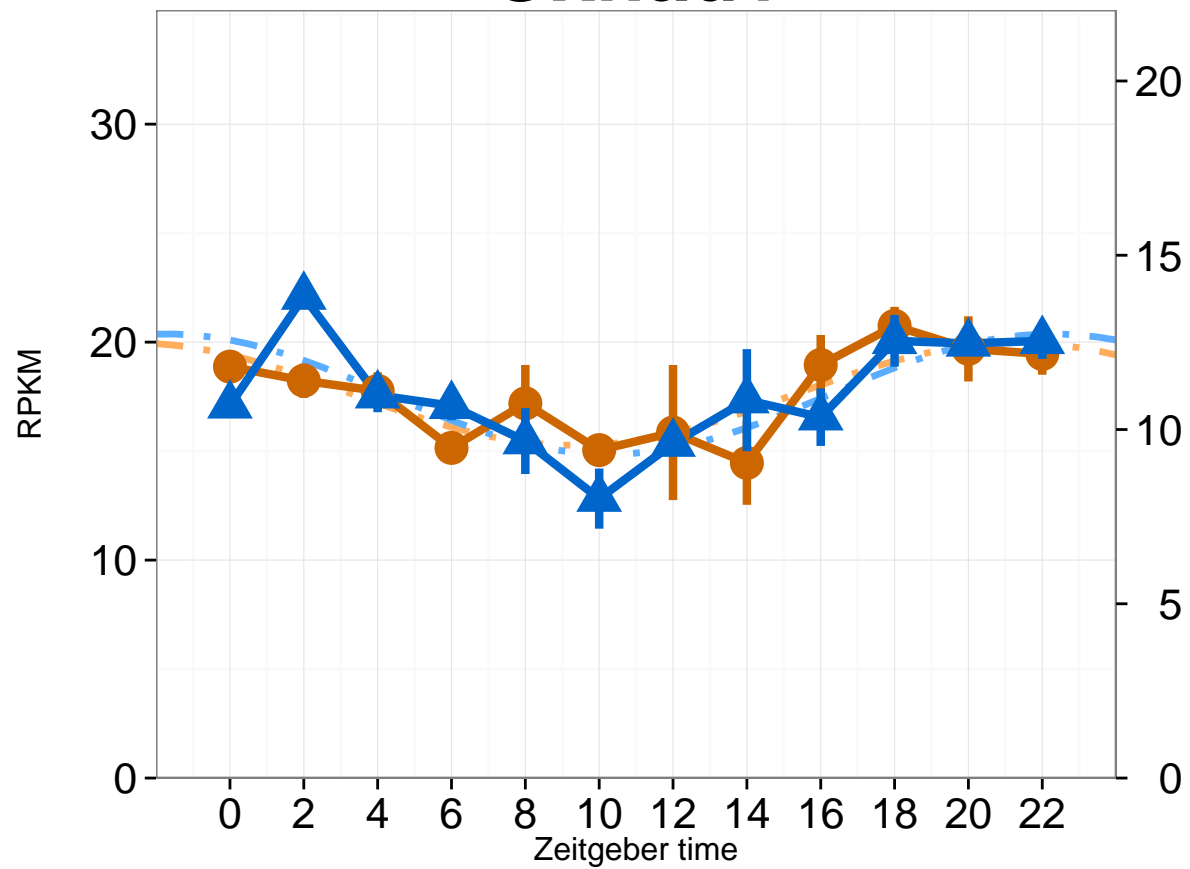

## Oxnad1

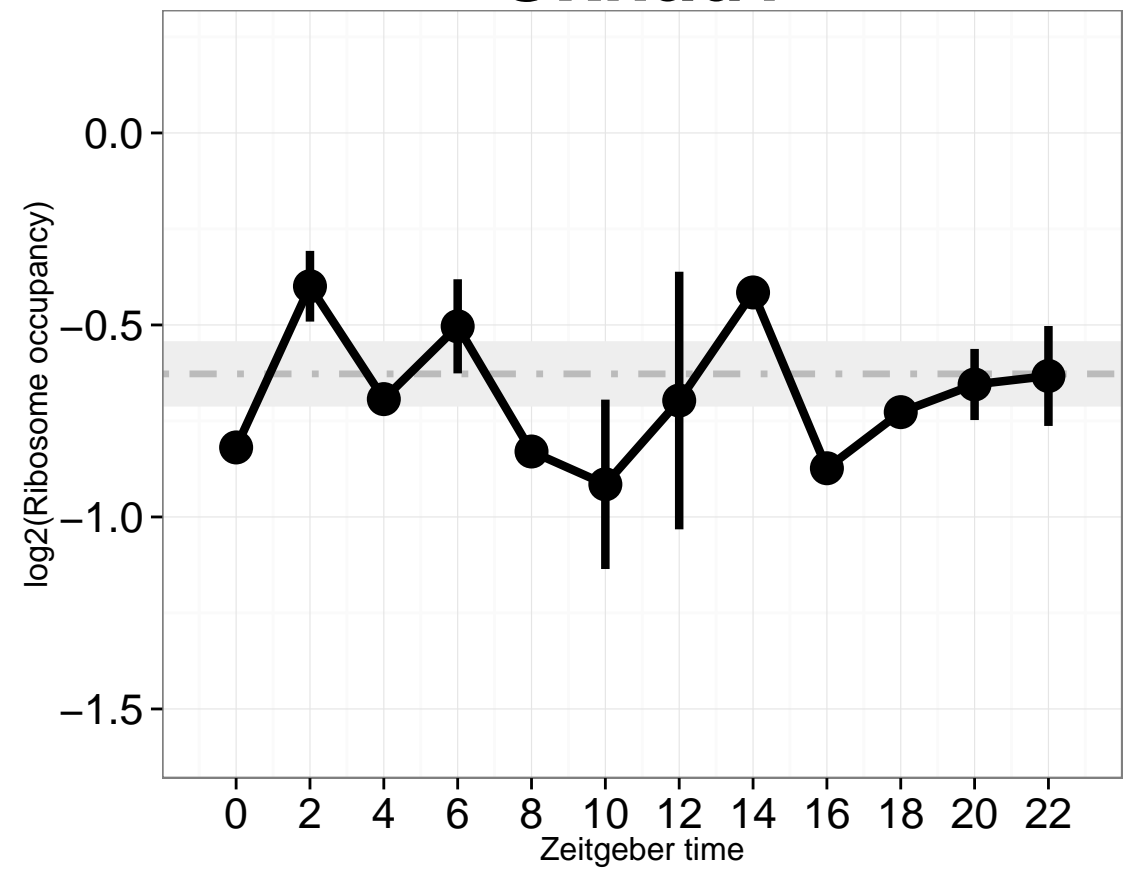

Supplement: SuppDataset_1.zip [file Oxnad1_set_A.pdf › Supplemental Dataset 1/A-mRNA_nonrhyth_translation_nonrhyth/Oxnad1_set_A.pdf]

## Oxr1

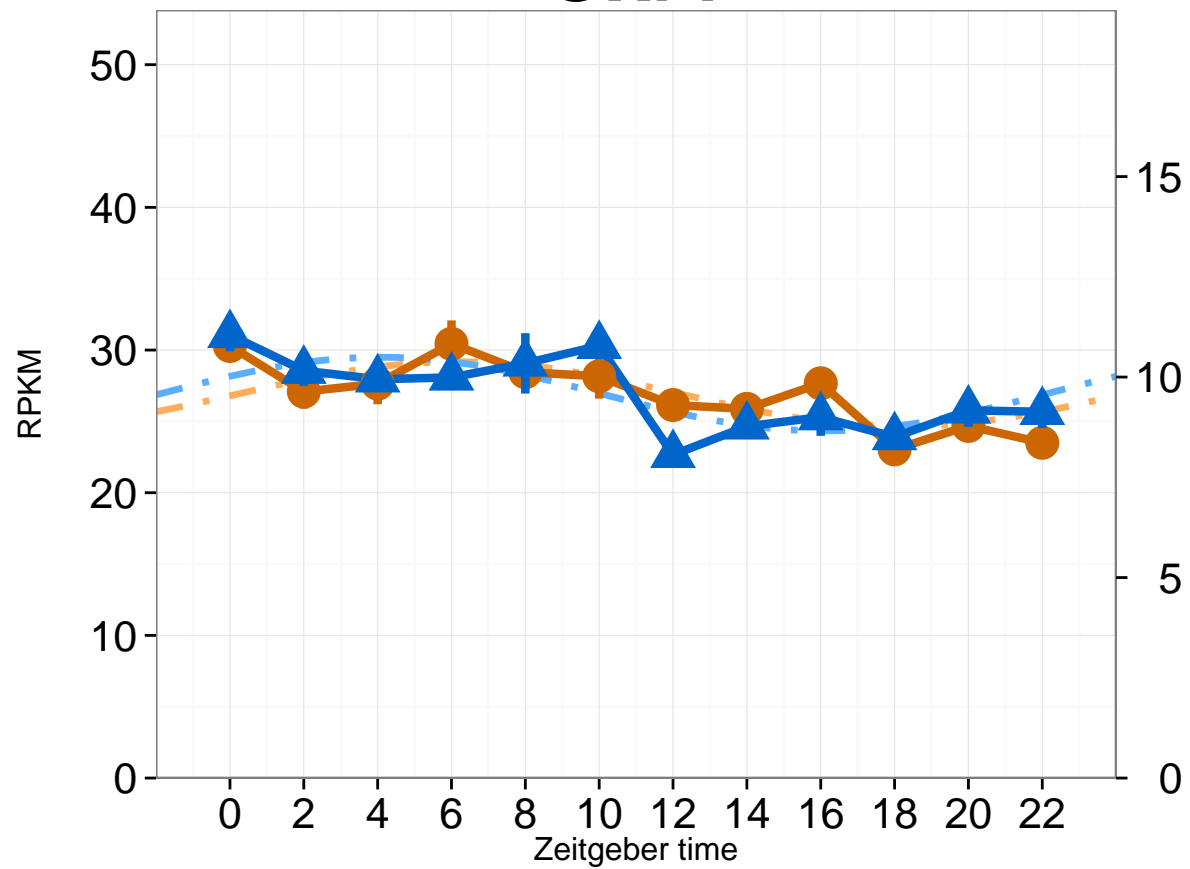

## Oxr1

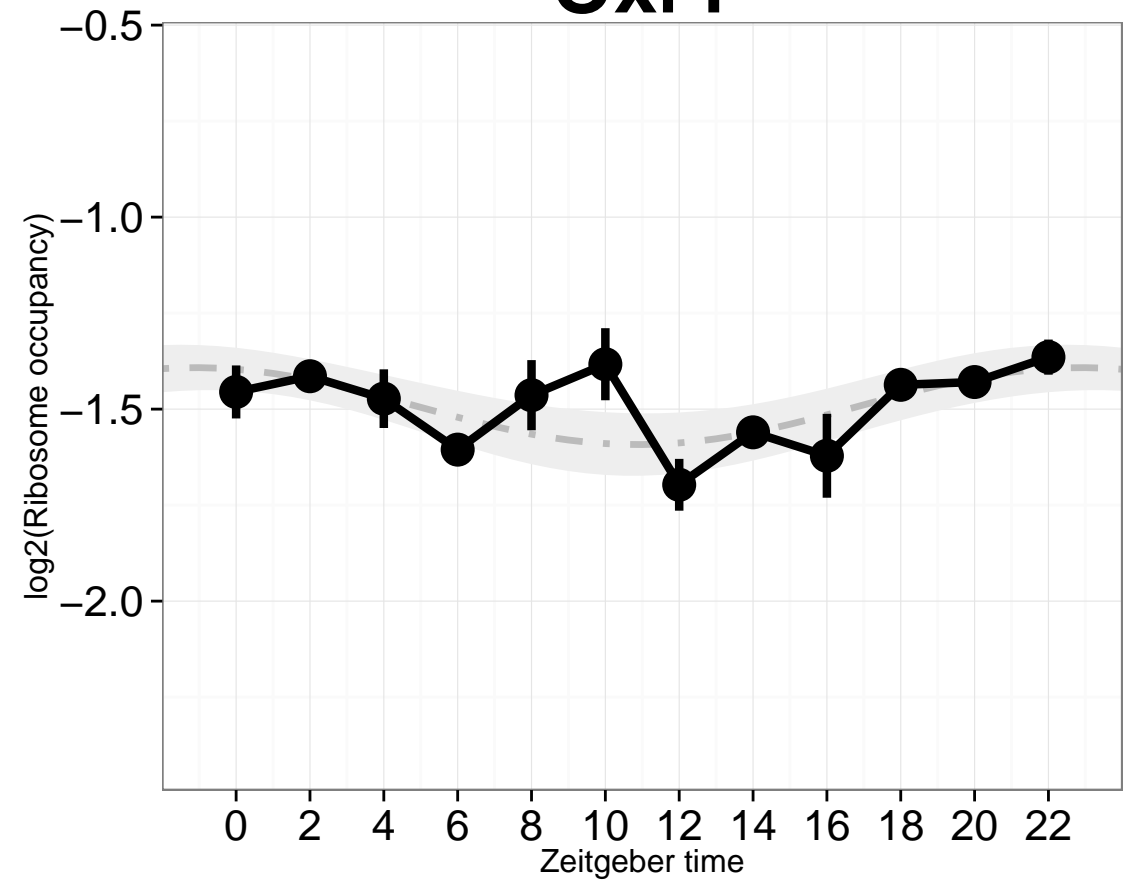

Supplement: SuppDataset_1.zip [file Oxr1_set_A.pdf › Supplemental Dataset 1/A-mRNA_nonrhyth_translation_nonrhyth/Oxr1_set_A.pdf]

## Oxsm

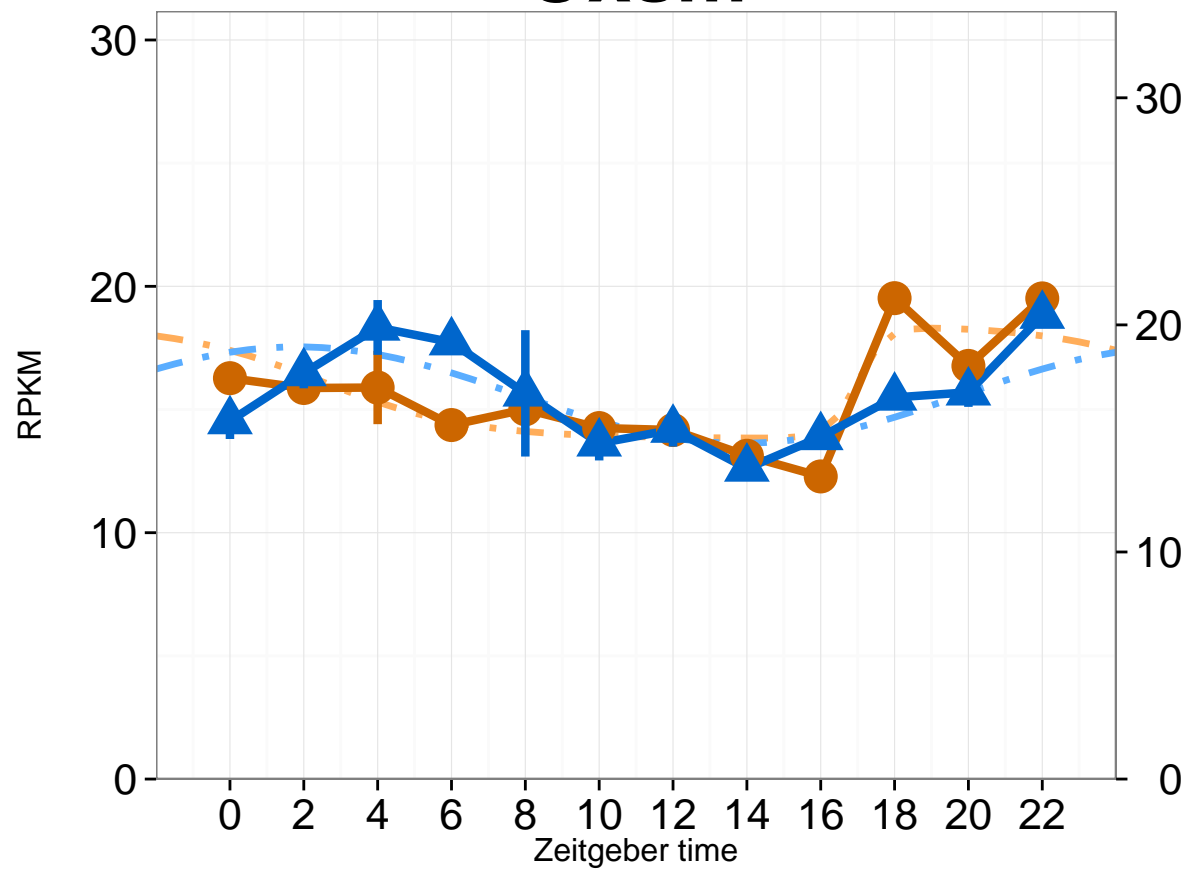

## Oxsm

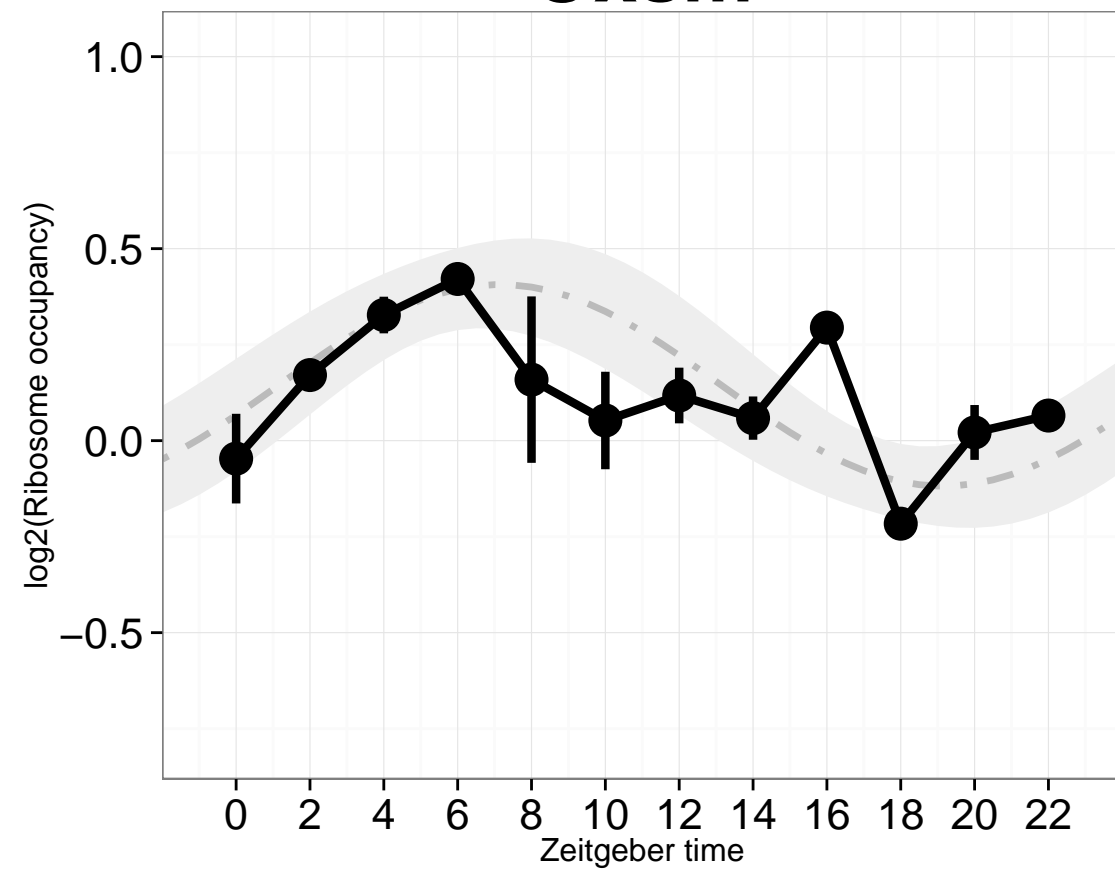

Supplement: SuppDataset_1.zip [file Oxsm_set_A.pdf › Supplemental Dataset 1/A-mRNA_nonrhyth_translation_nonrhyth/Oxsm_set_A.pdf]

## Oxsr1

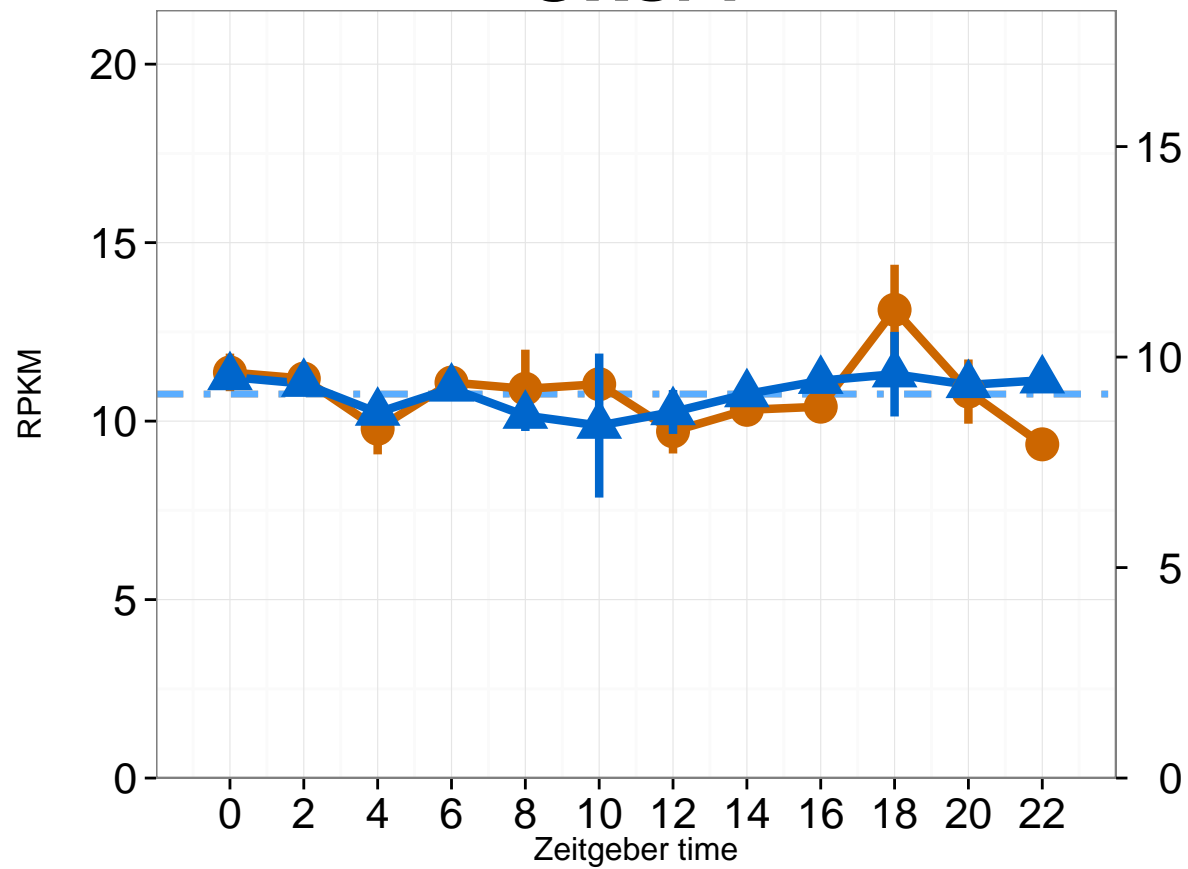

## Oxsr1

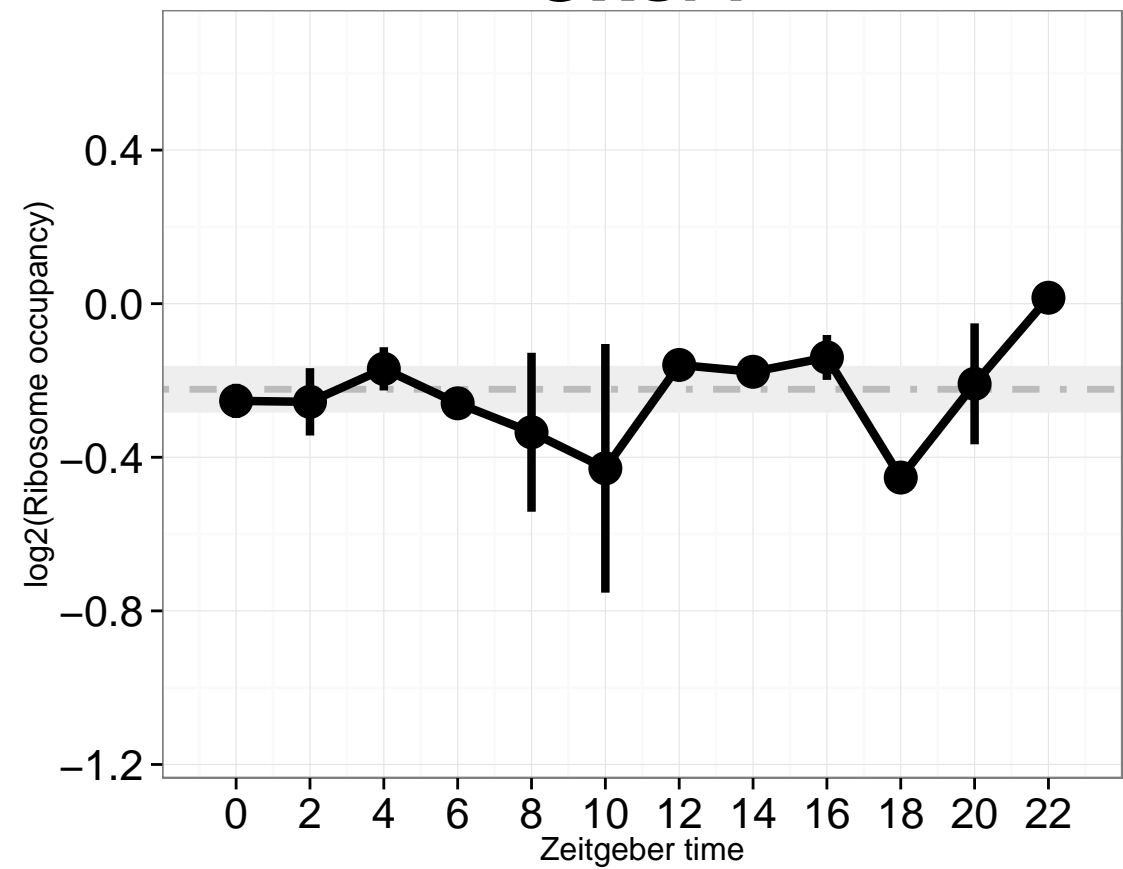

Supplement: SuppDataset_1.zip [file Oxsr1_set_A.pdf › Supplemental Dataset 1/A-mRNA_nonrhyth_translation_nonrhyth/Oxsr1_set_A.pdf]

# P2rx7

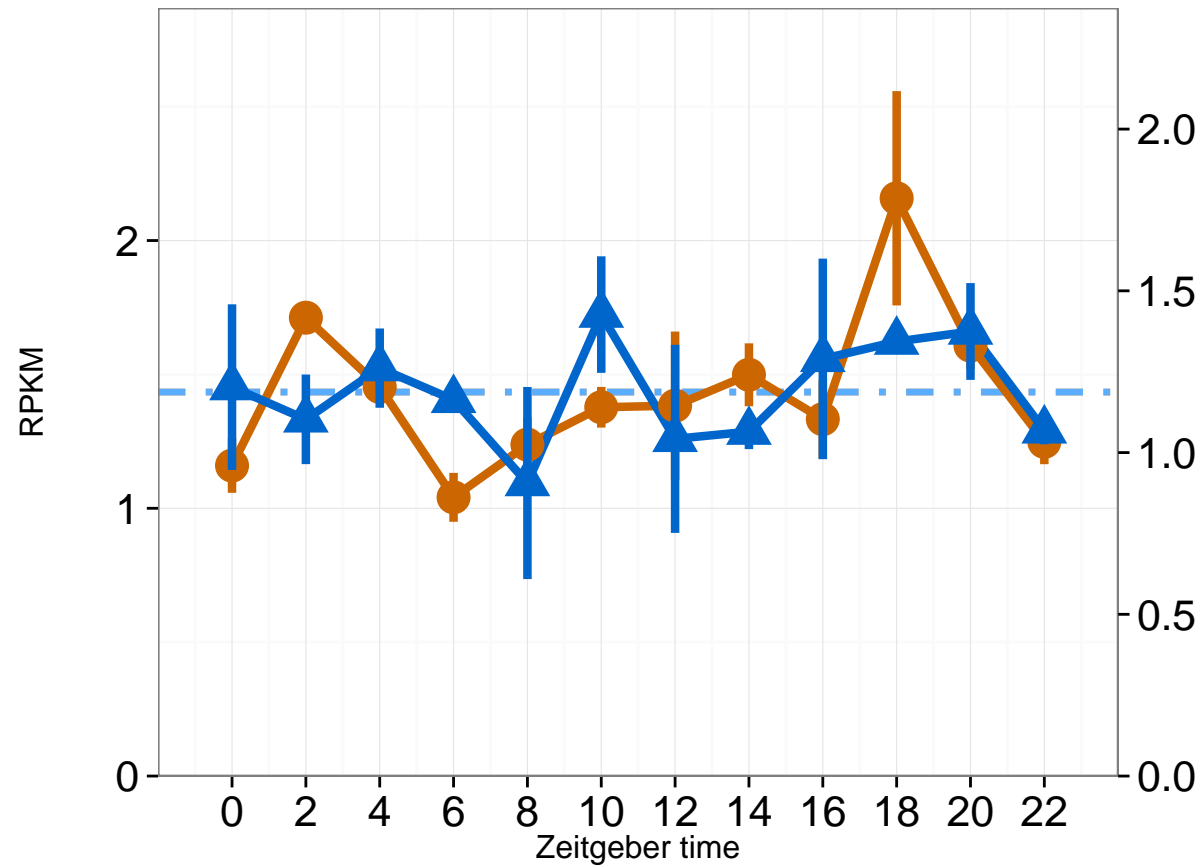

# P2rx7

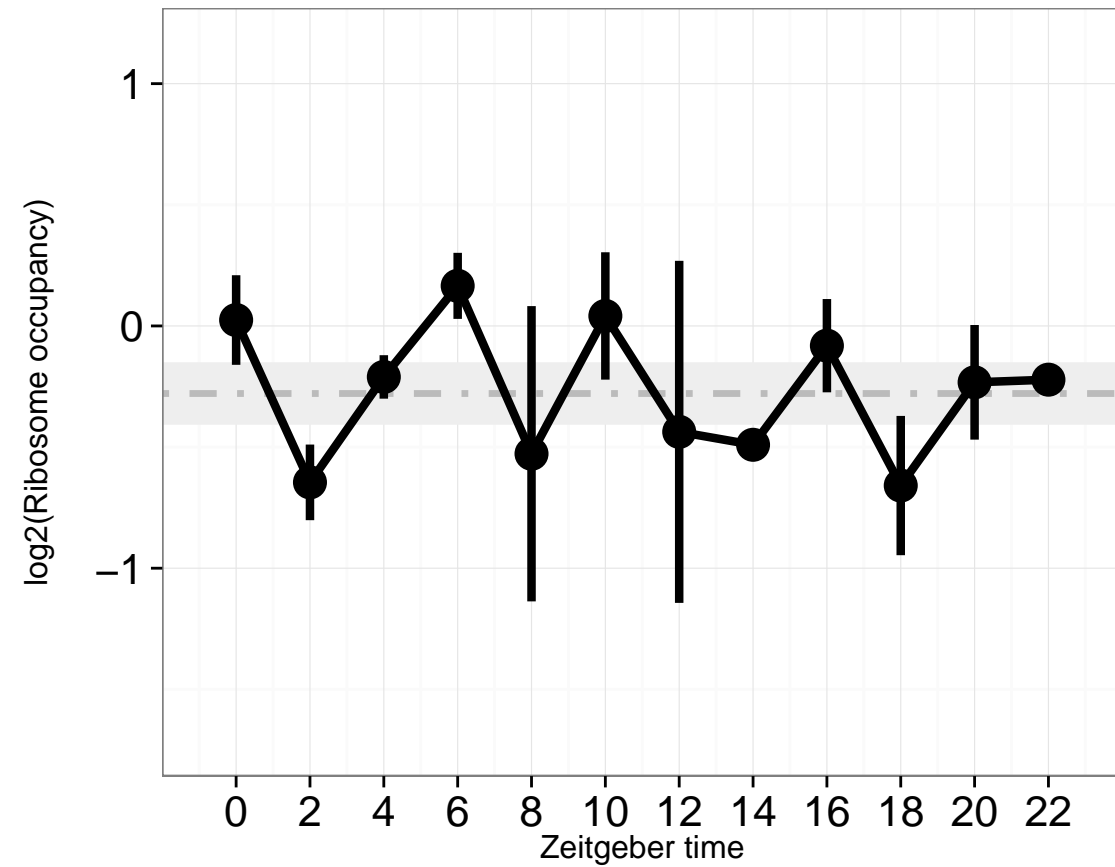

Supplement: SuppDataset_1.zip [file P2rx7_set_A.pdf › Supplemental Dataset 1/A-mRNA_nonrhyth_translation_nonrhyth/P2rx7_set_A.pdf]

# P2ry14

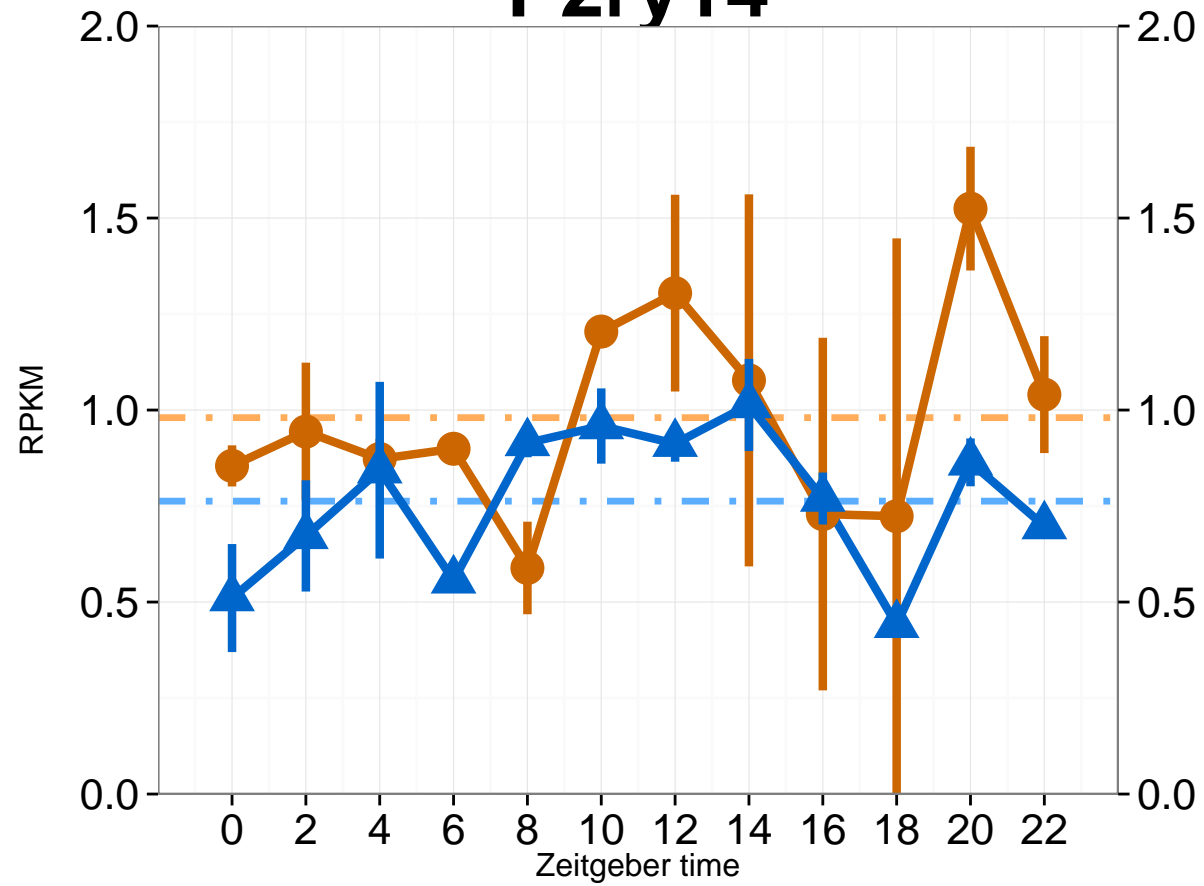

# P2ry14

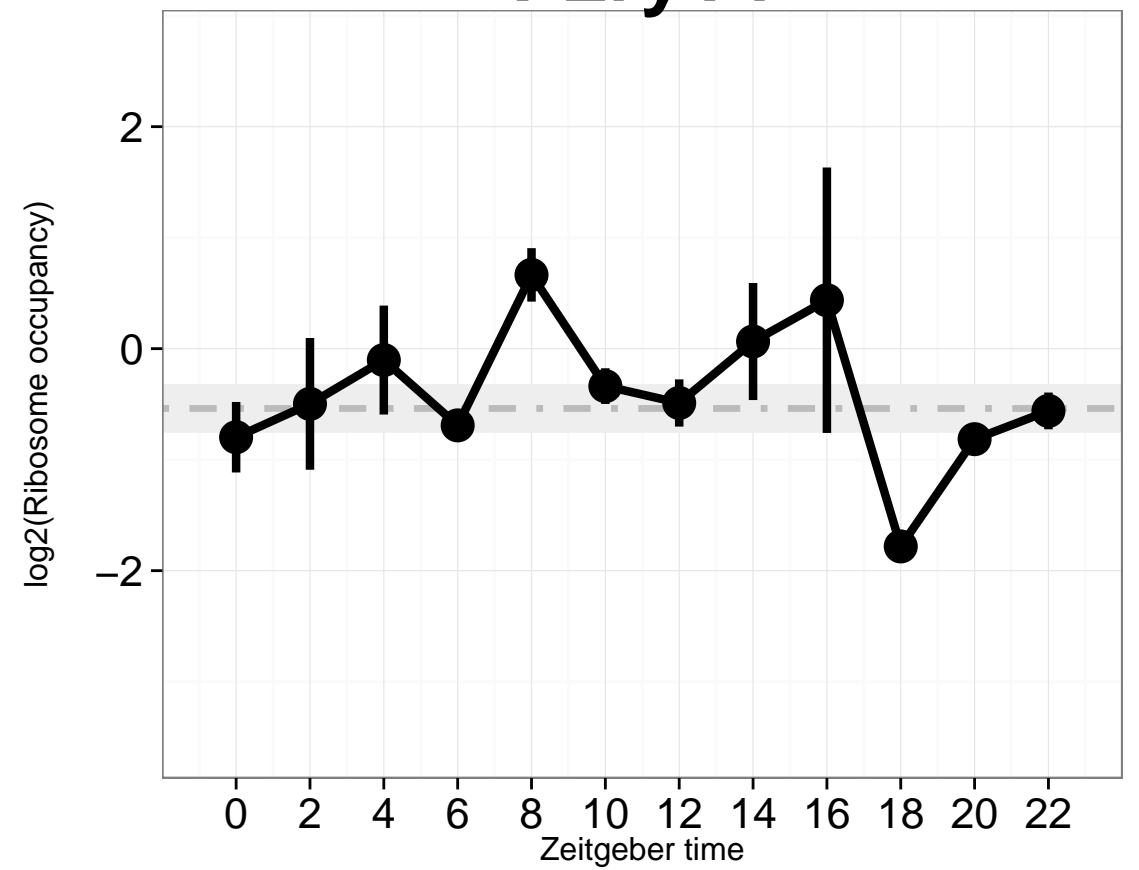

Supplement: SuppDataset_1.zip [file P2ry14_set_A.pdf › Supplemental Dataset 1/A-mRNA_nonrhyth_translation_nonrhyth/P2ry14_set_A.pdf]

**P2ry6**

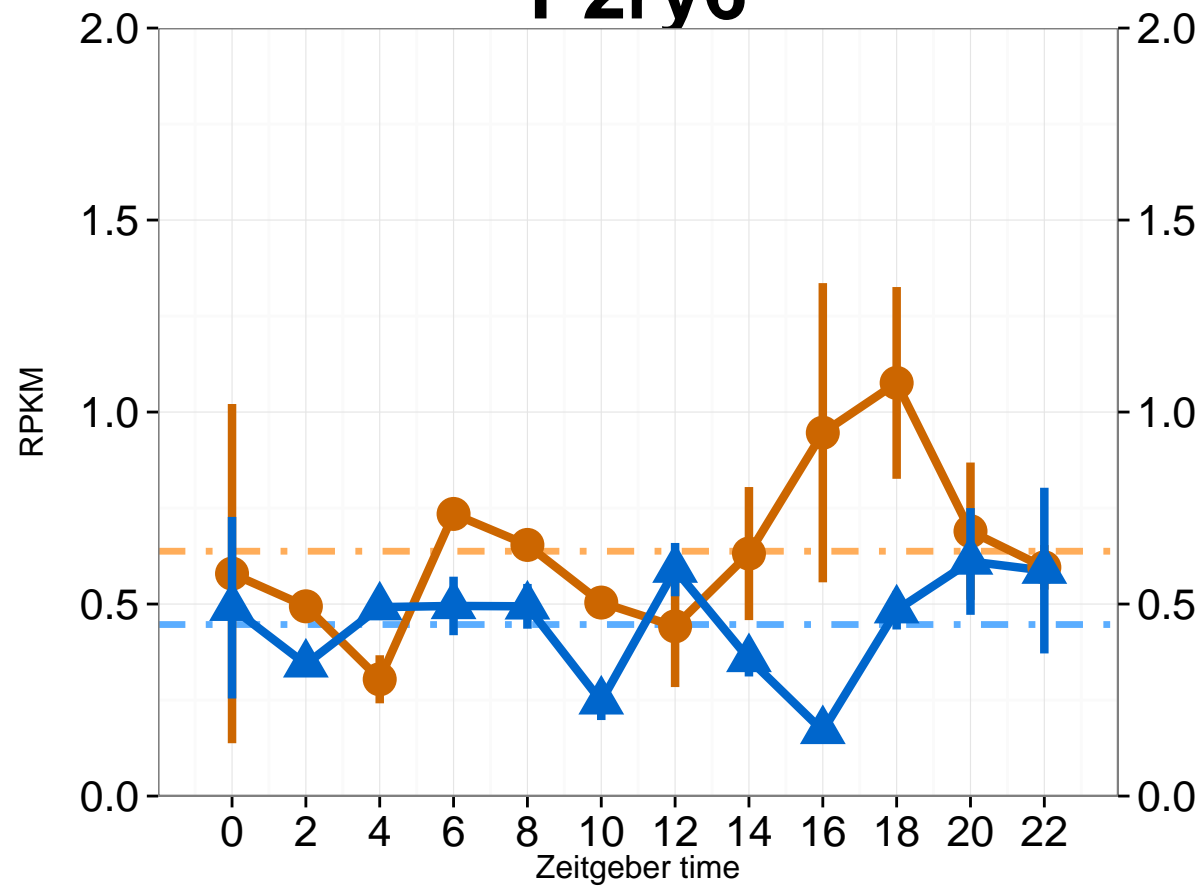

**P2ry6**

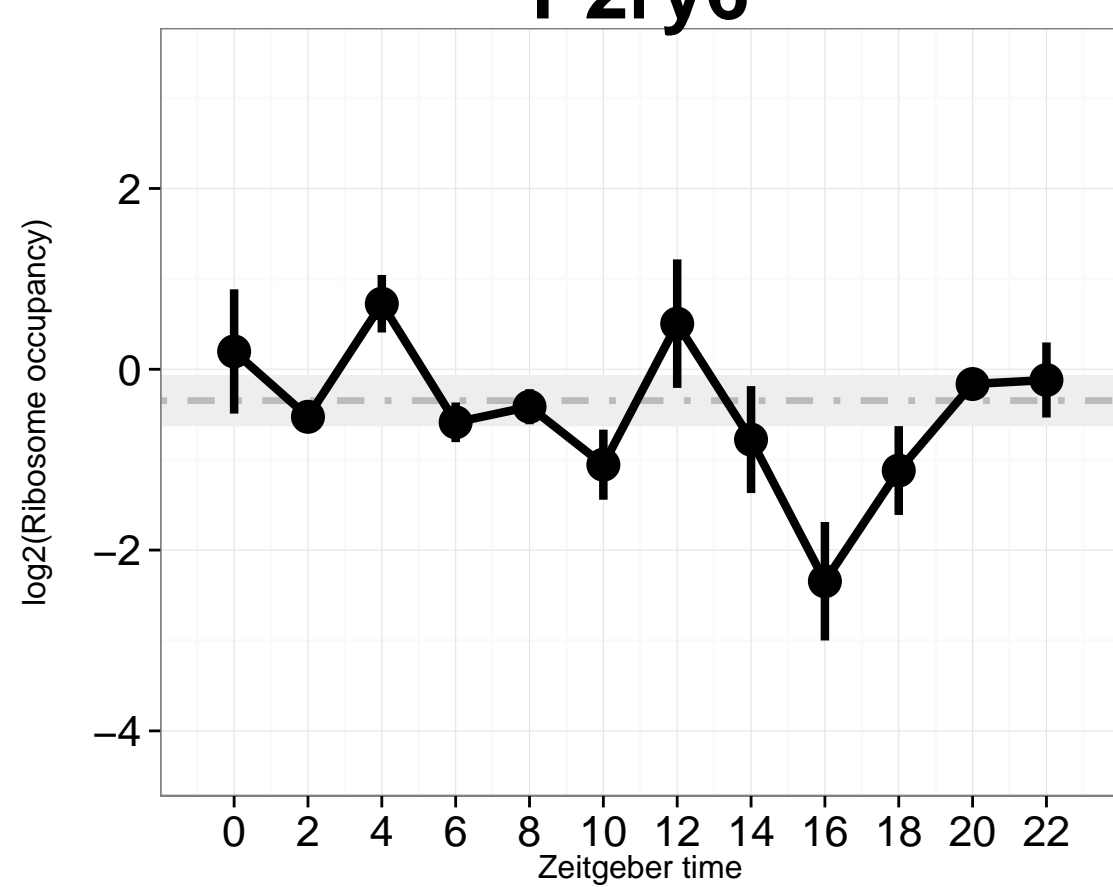

Supplement: SuppDataset_1.zip [file P2ry6_set_A.pdf › Supplemental Dataset 1/A-mRNA_nonrhyth_translation_nonrhyth/P2ry6_set_A.pdf]

## P4hb

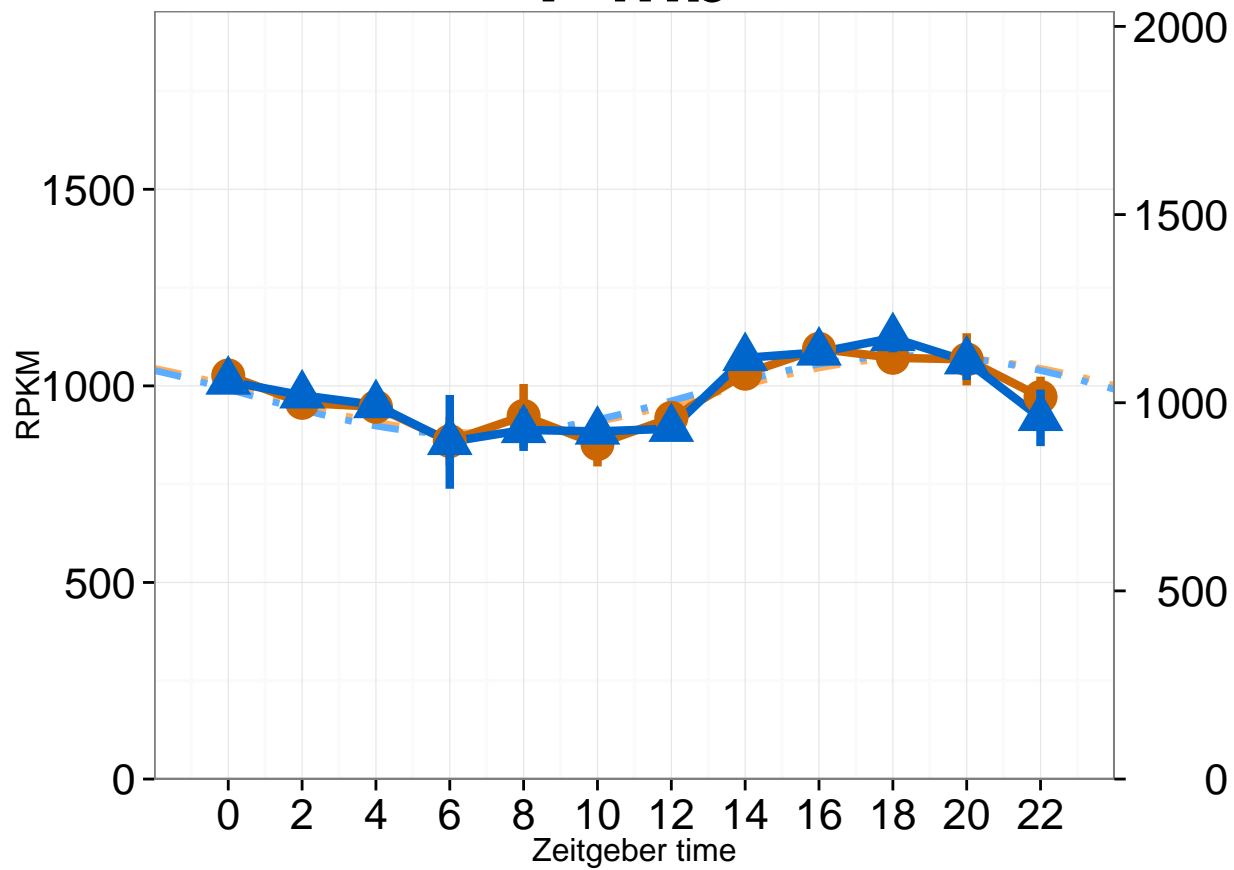

## P4hb

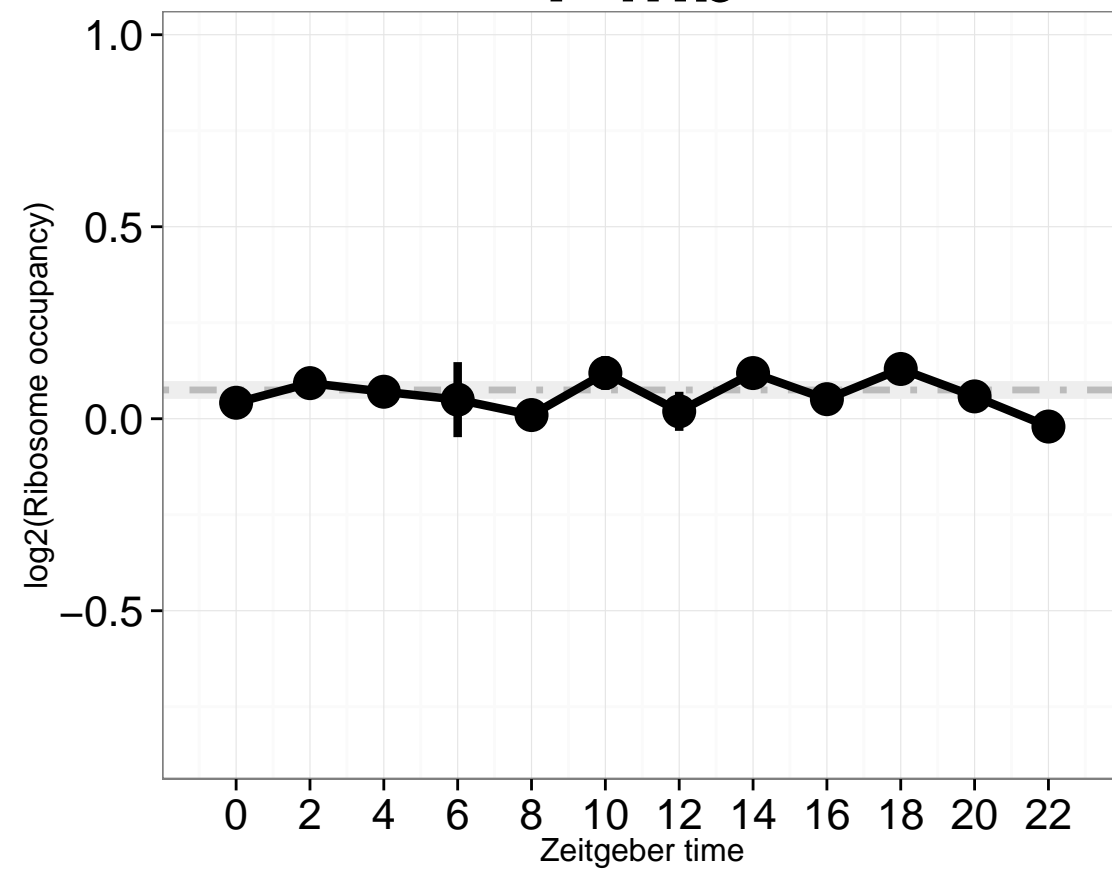

Supplement: SuppDataset_1.zip [file P4hb_set_A.pdf › Supplemental Dataset 1/A-mRNA_nonrhyth_translation_nonrhyth/P4hb_set_A.pdf]

# PYURF

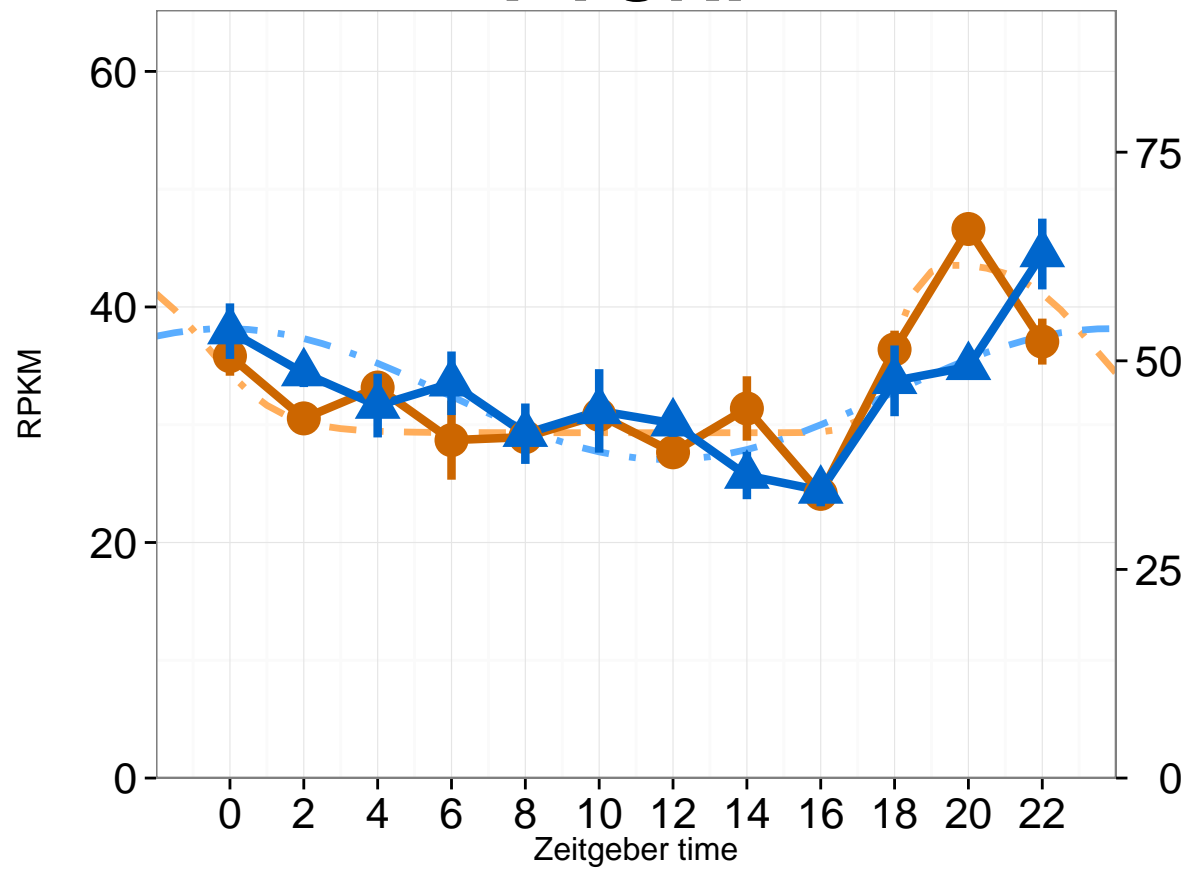

# PYURF

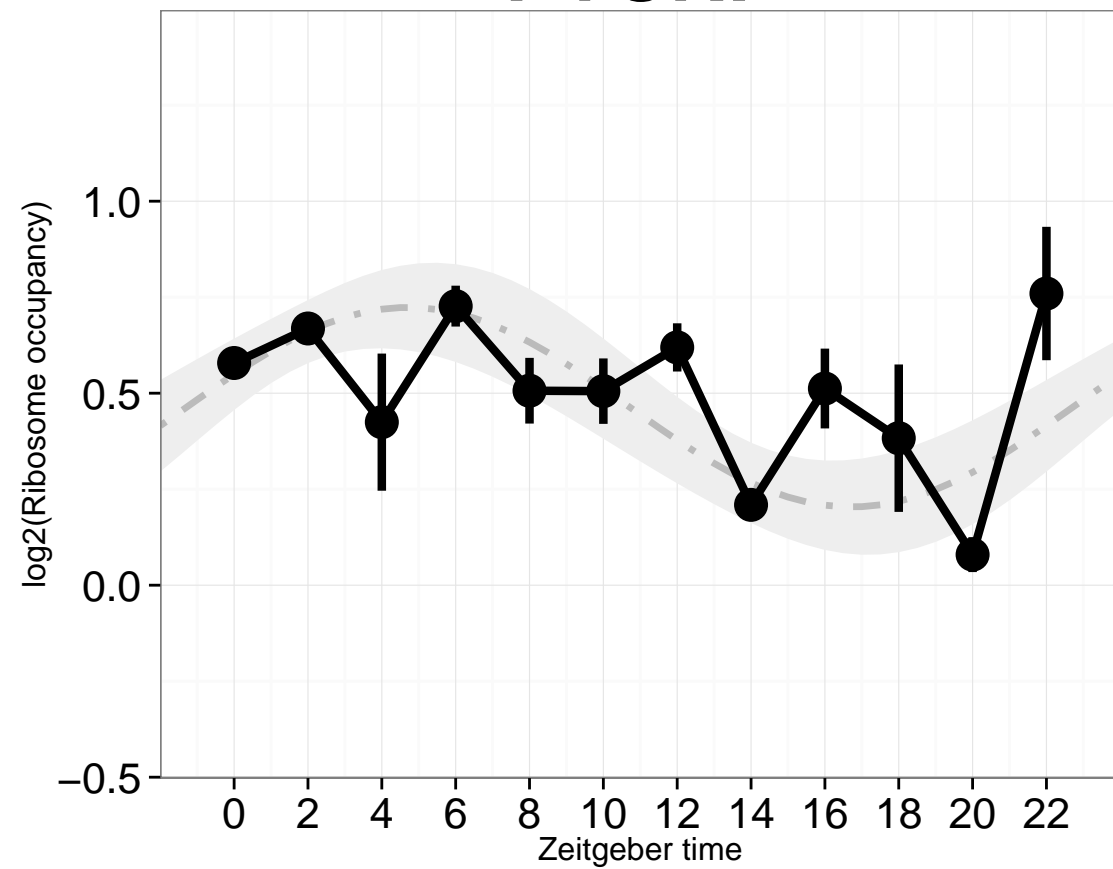

Supplement: SuppDataset_1.zip [file PYURF_set_A.pdf › Supplemental Dataset 1/A-mRNA_nonrhyth_translation_nonrhyth/PYURF_set_A.pdf]

# Pa2g4

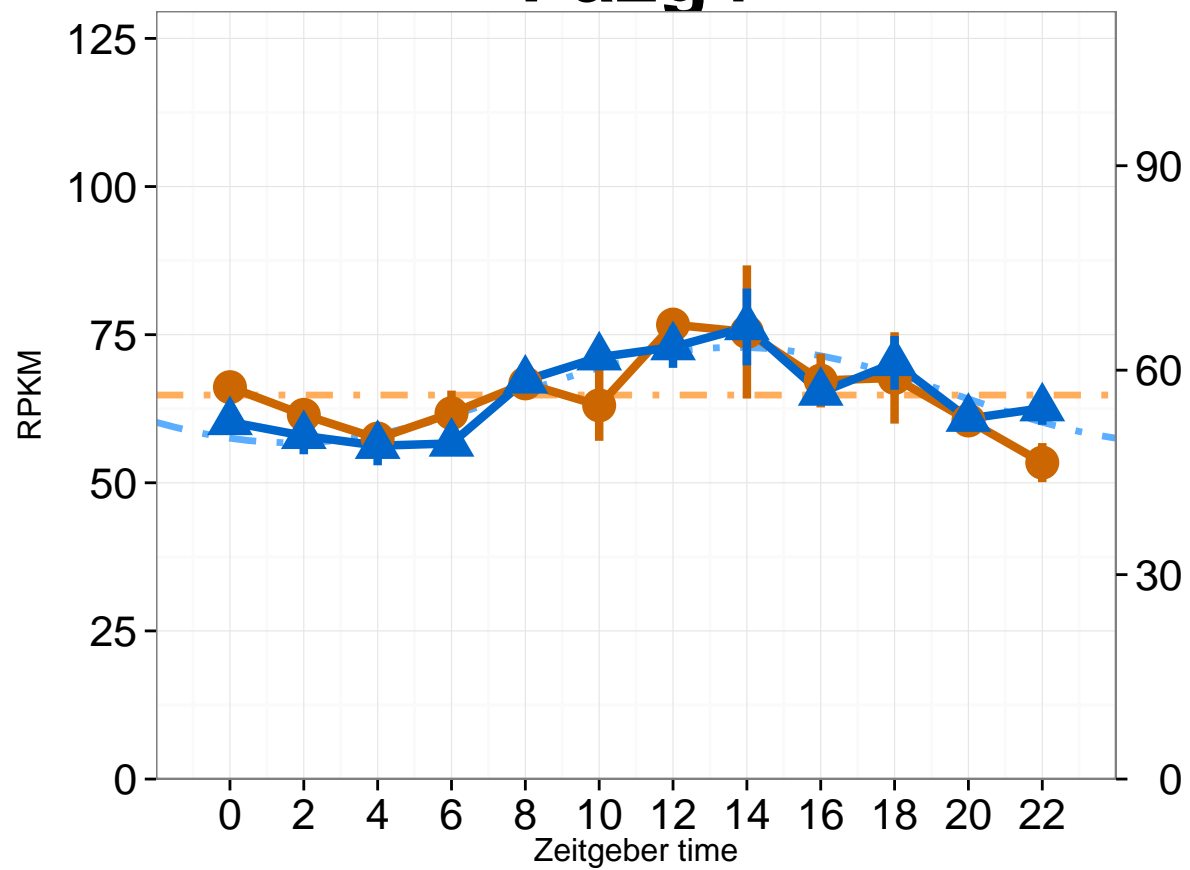

# Pa2g4

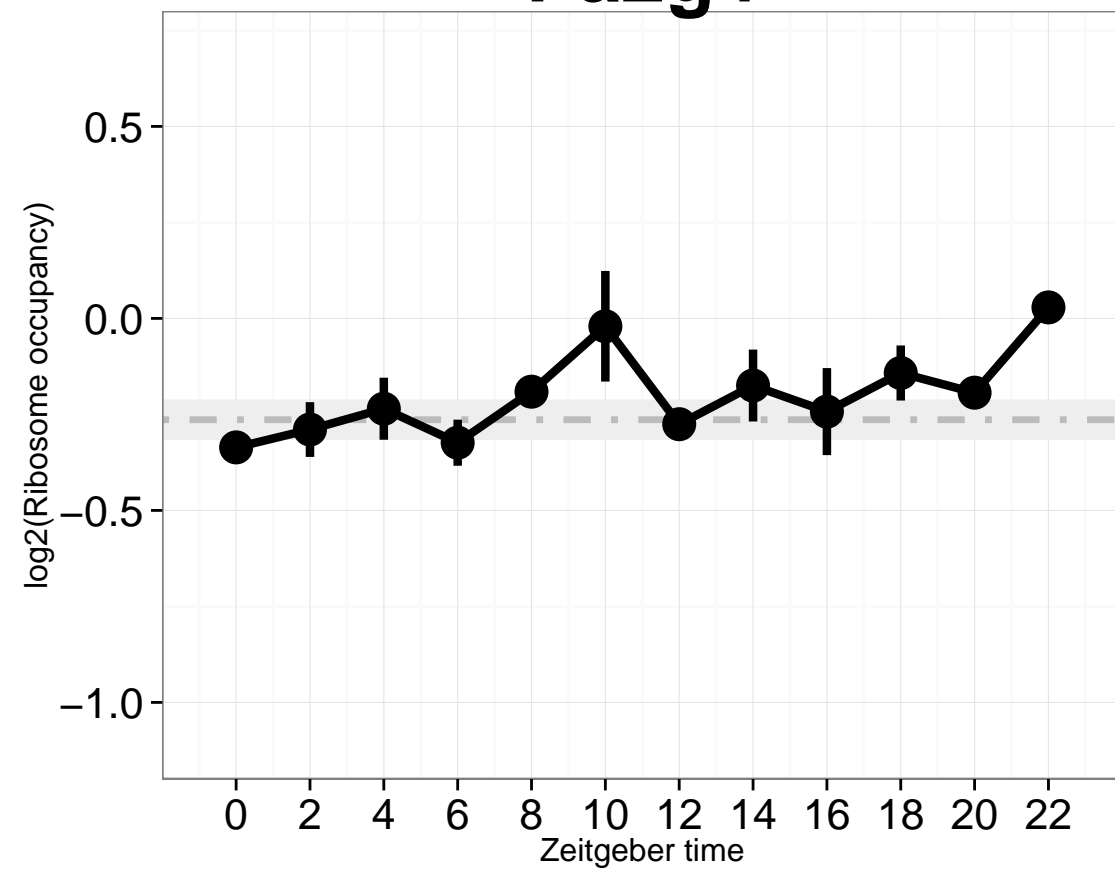

Supplement: SuppDataset_1.zip [file Pa2g4_set_A.pdf › Supplemental Dataset 1/A-mRNA_nonrhyth_translation_nonrhyth/Pa2g4_set_A.pdf]

# Pabpn1

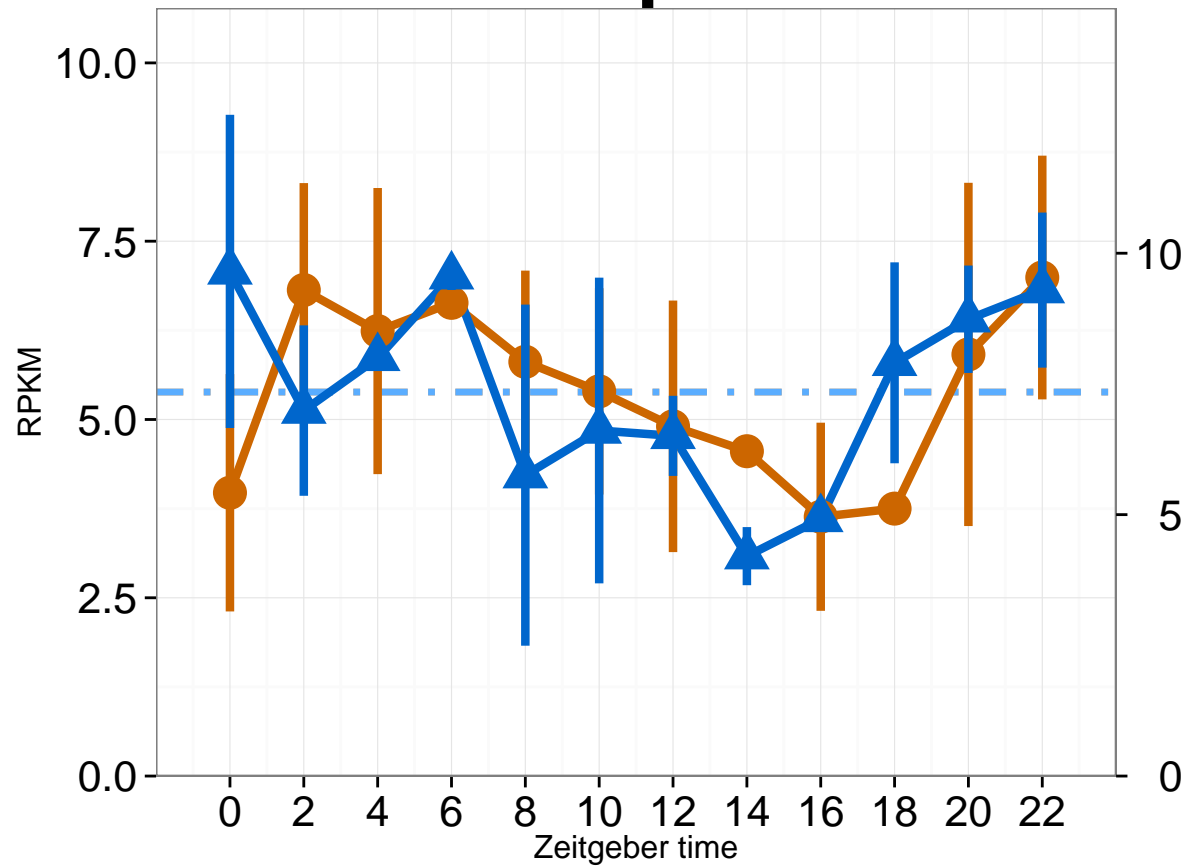

# Pabpn1

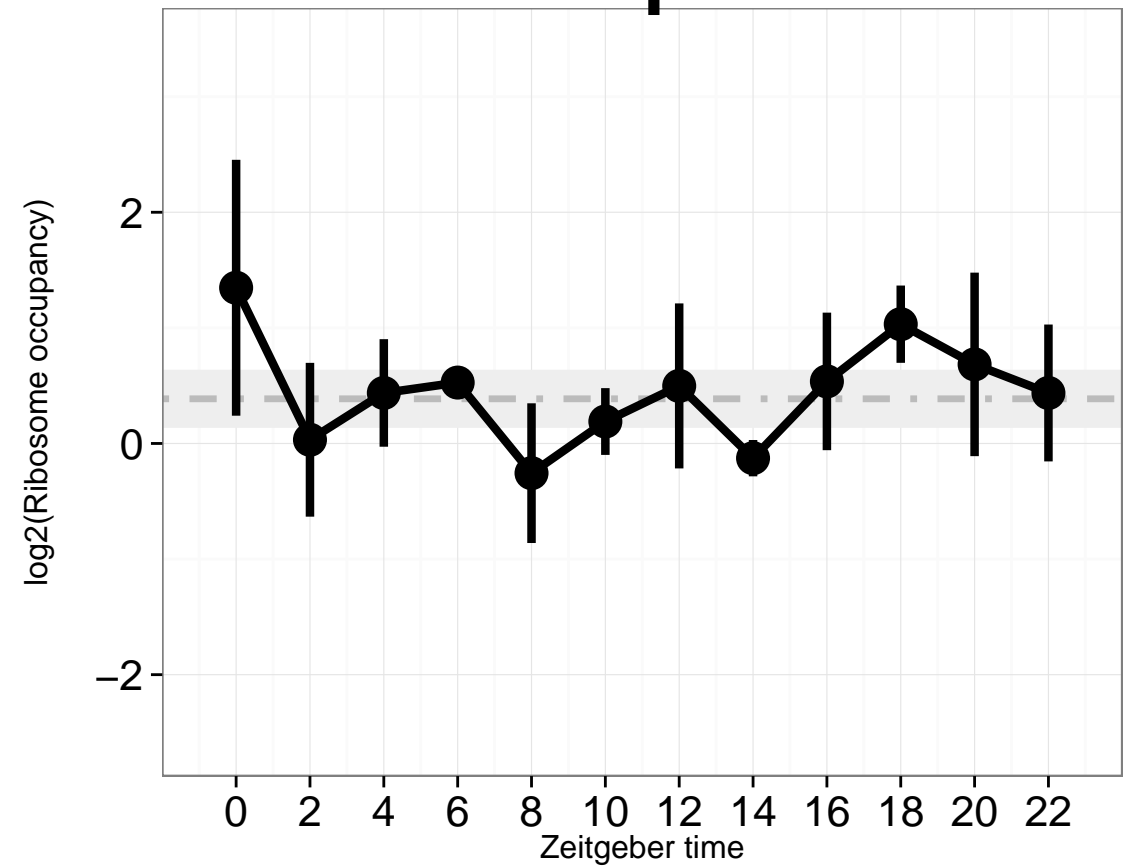

Supplement: SuppDataset_1.zip [file Pabpn1_set_A.pdf › Supplemental Dataset 1/A-mRNA_nonrhyth_translation_nonrhyth/Pabpn1_set_A.pdf]

## Pacs1

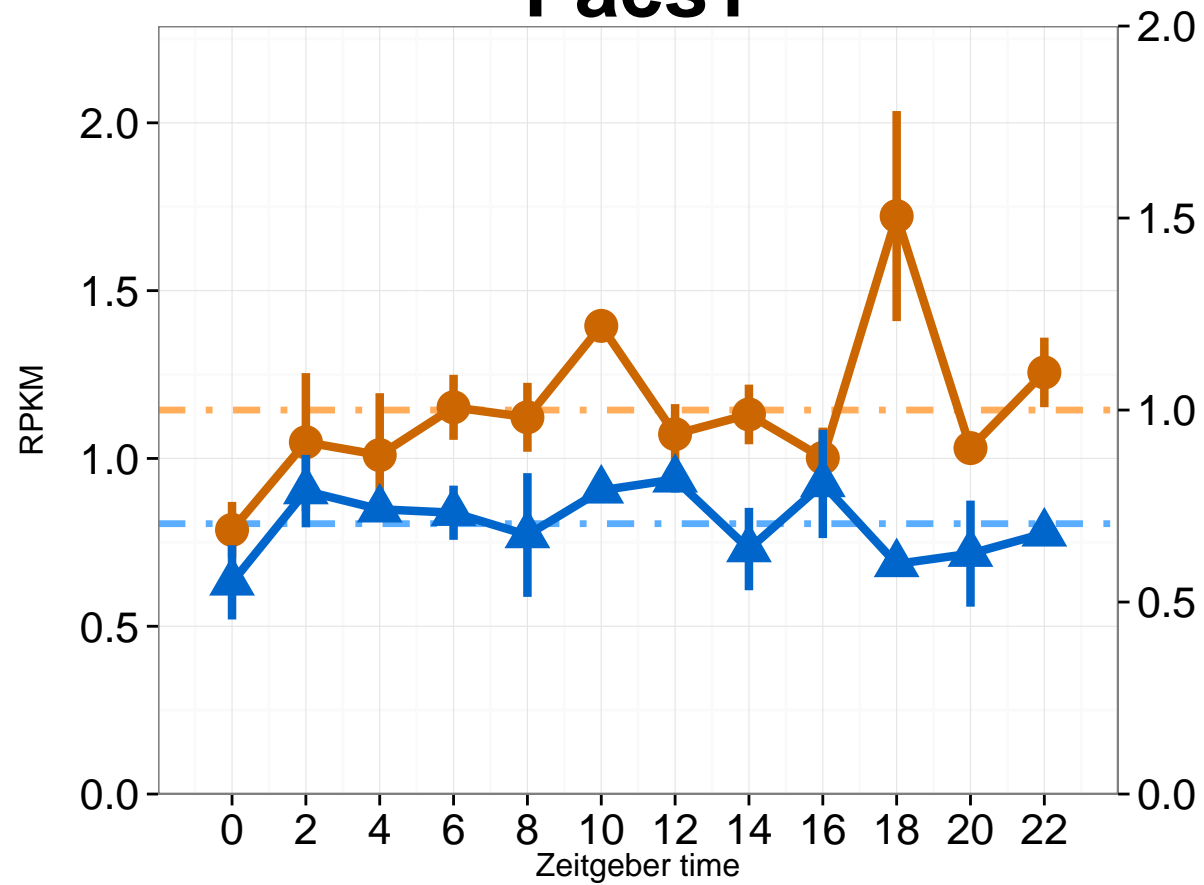

## Pacs1

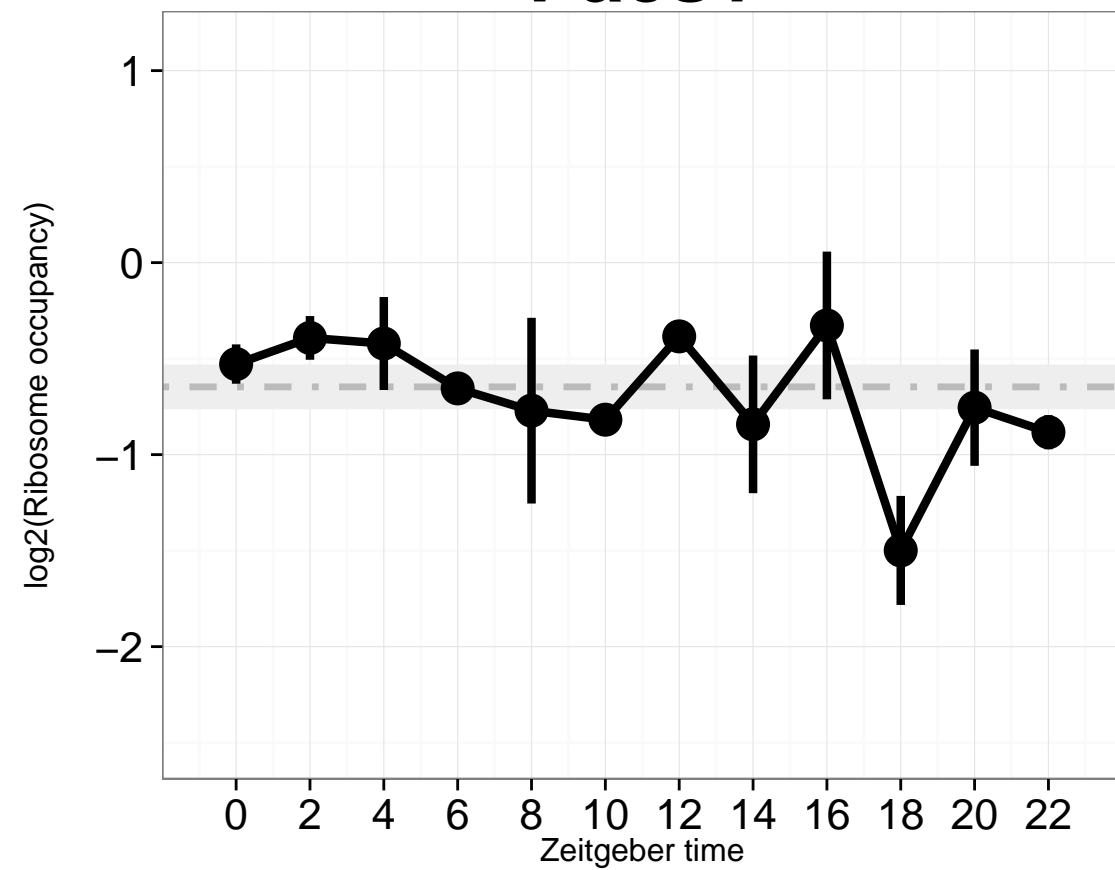

Supplement: SuppDataset_1.zip [file Pacs1_set_A.pdf › Supplemental Dataset 1/A-mRNA_nonrhyth_translation_nonrhyth/Pacs1_set_A.pdf]

## Pacs2

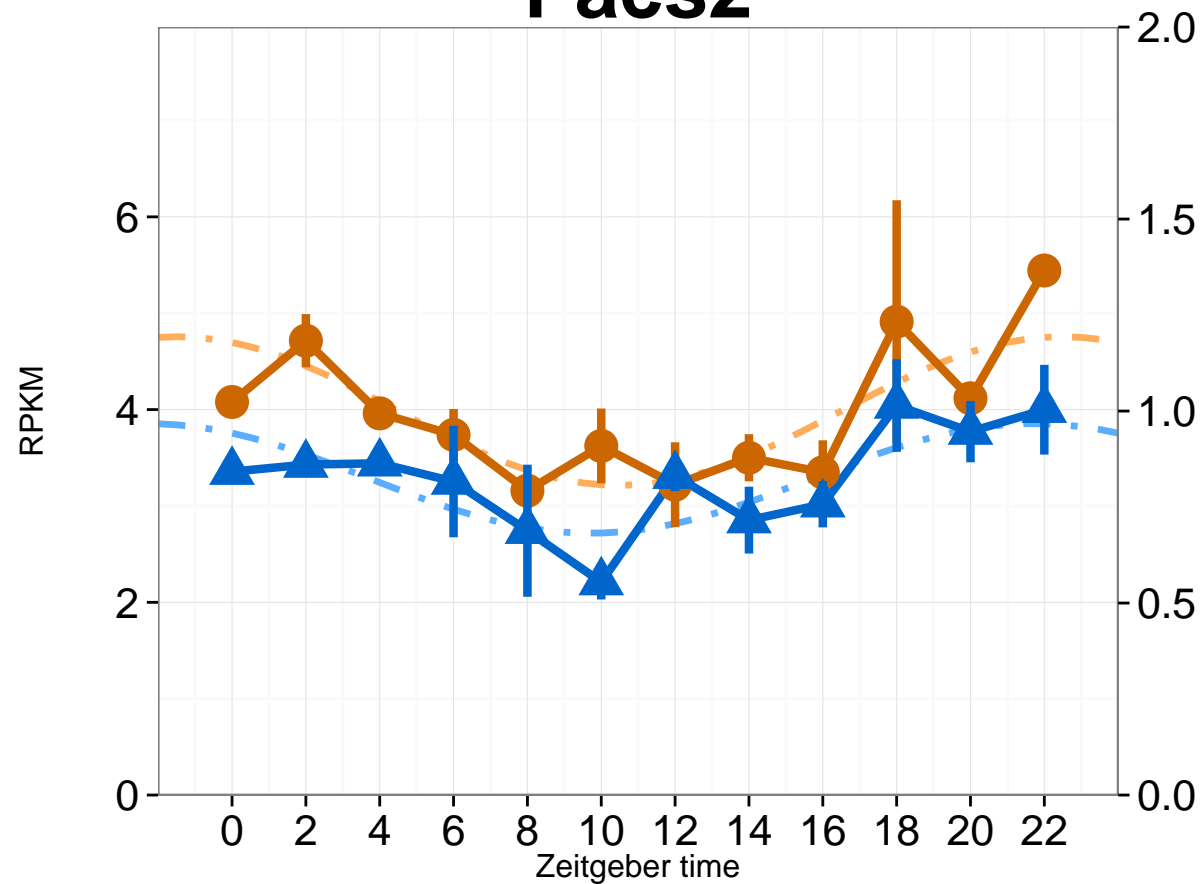

## Pacs2

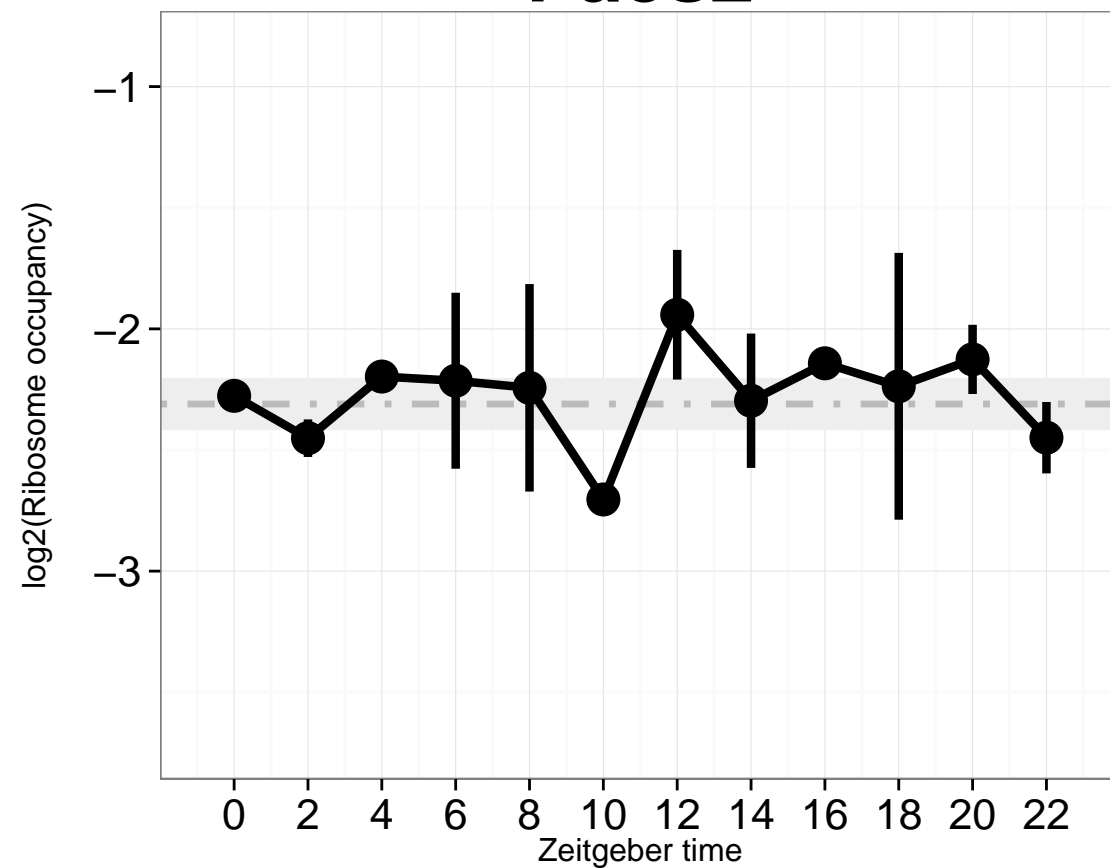

Supplement: SuppDataset_1.zip [file Pacs2_set_A.pdf › Supplemental Dataset 1/A-mRNA_nonrhyth_translation_nonrhyth/Pacs2_set_A.pdf]

## Pacsin2

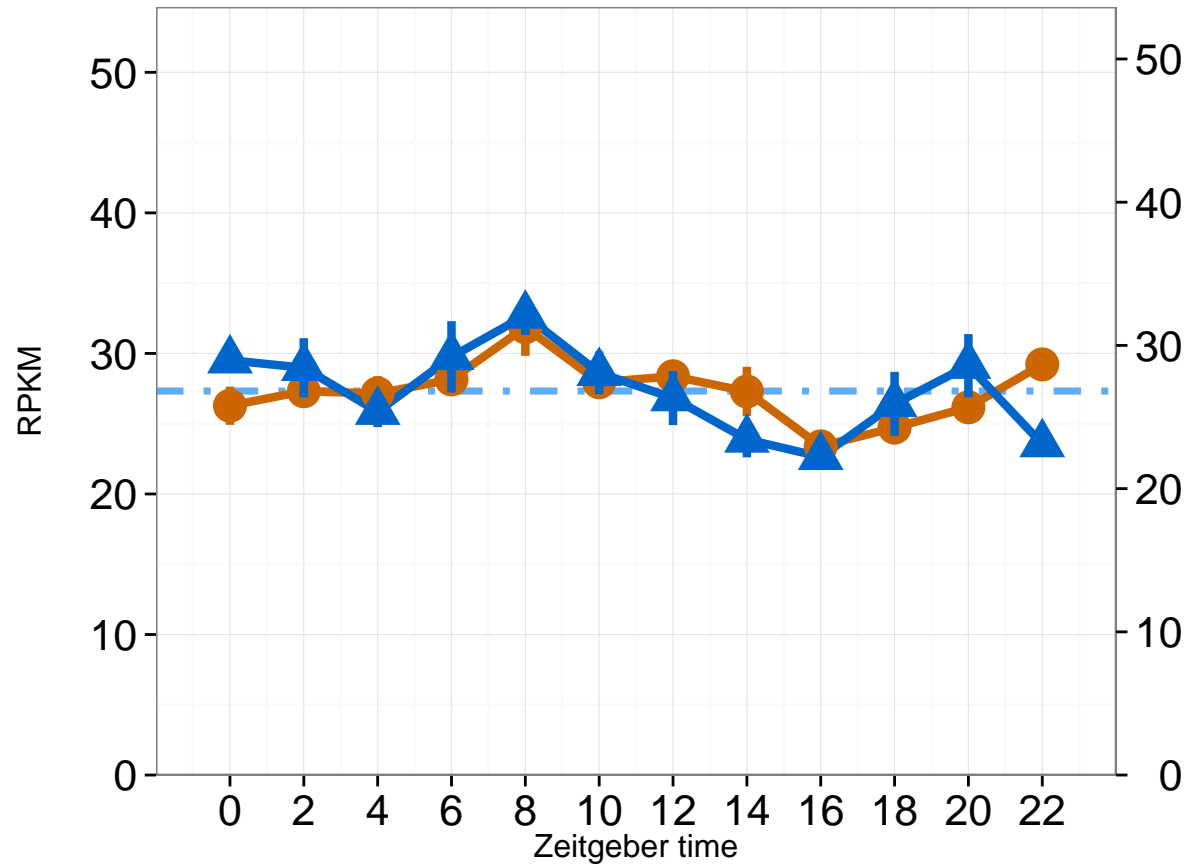

## Pacsin2

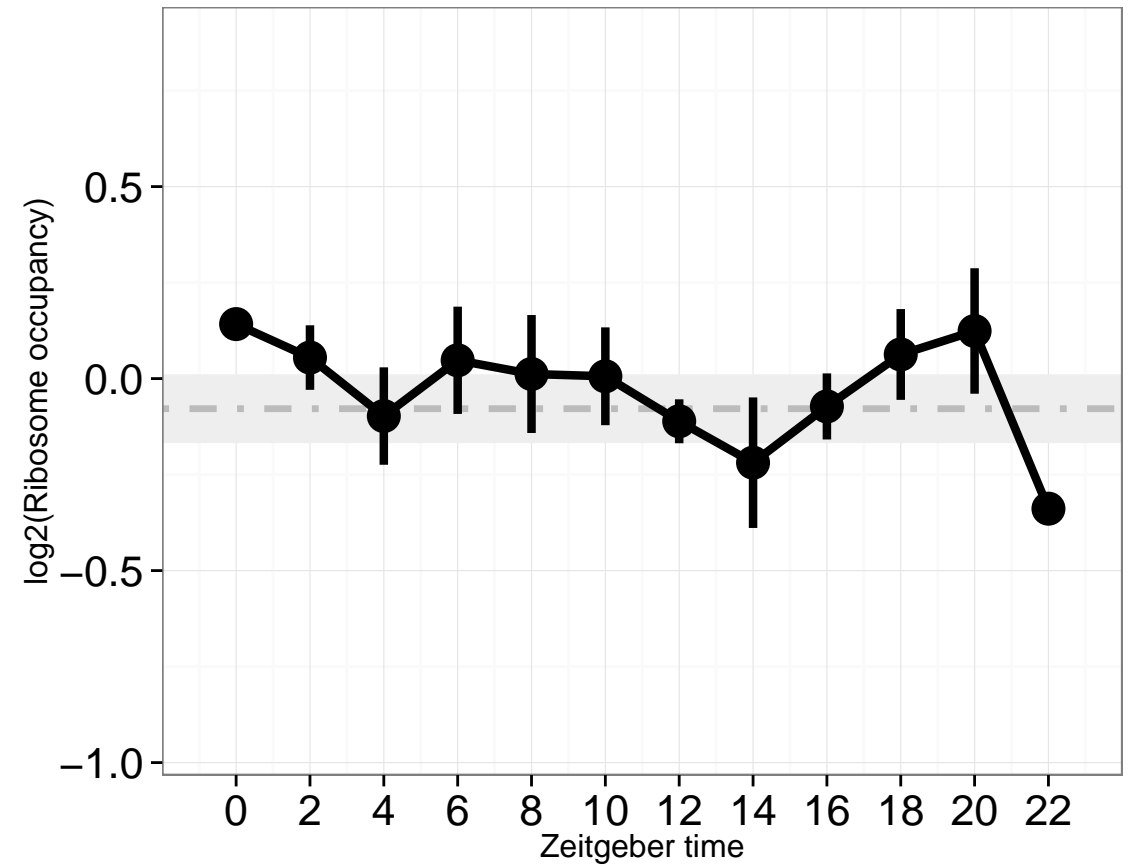

Supplement: SuppDataset_1.zip [file Pacsin2_set_A.pdf › Supplemental Dataset 1/A-mRNA_nonrhyth_translation_nonrhyth/Pacsin2_set_A.pdf]

## Pacsin3

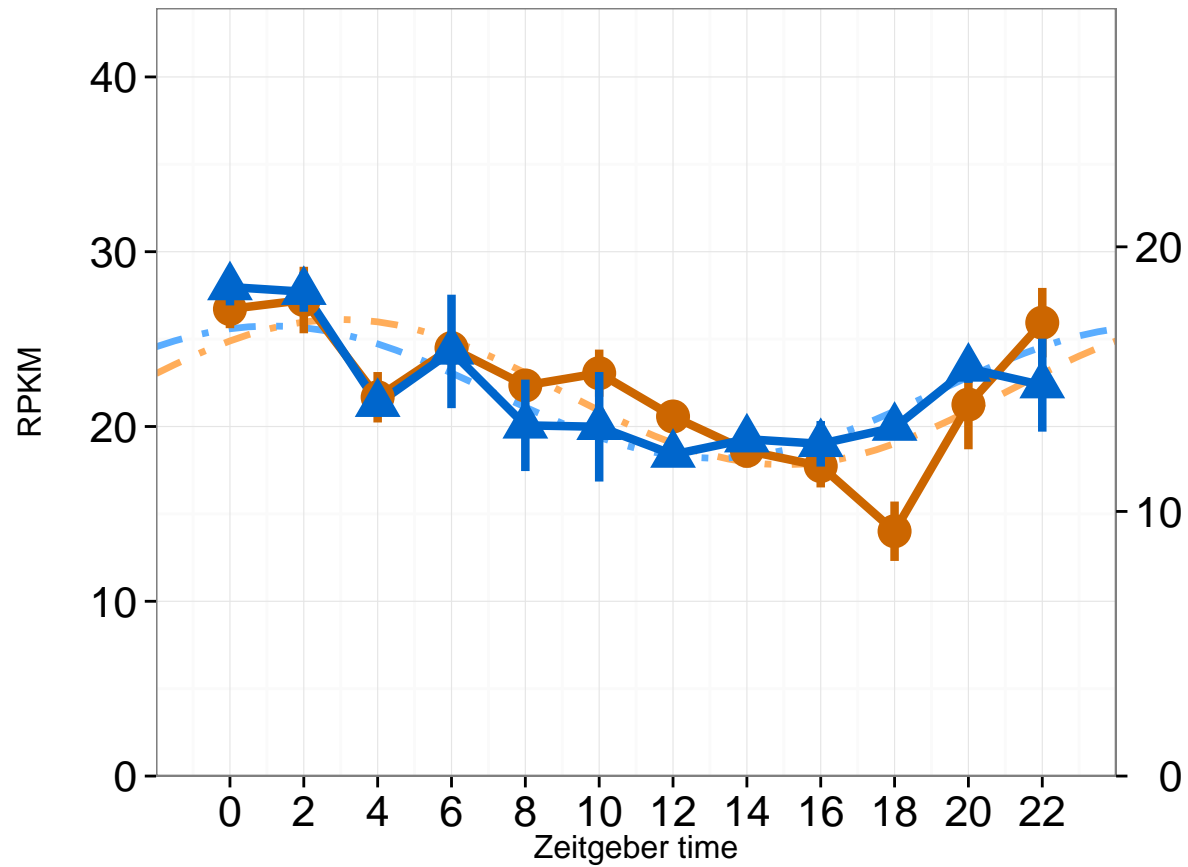

## Pacsin3

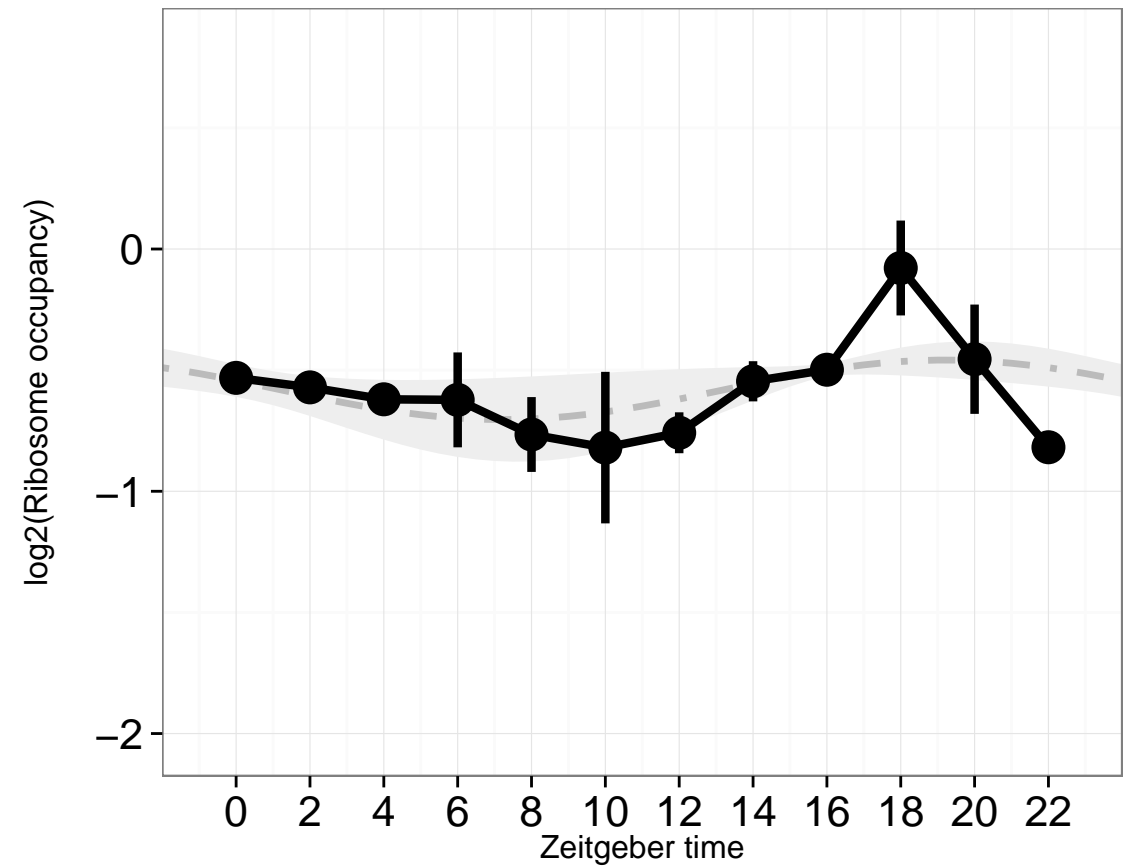

Supplement: SuppDataset_1.zip [file Pacsin3_set_A.pdf › Supplemental Dataset 1/A-mRNA_nonrhyth_translation_nonrhyth/Pacsin3_set_A.pdf]

## Paf1

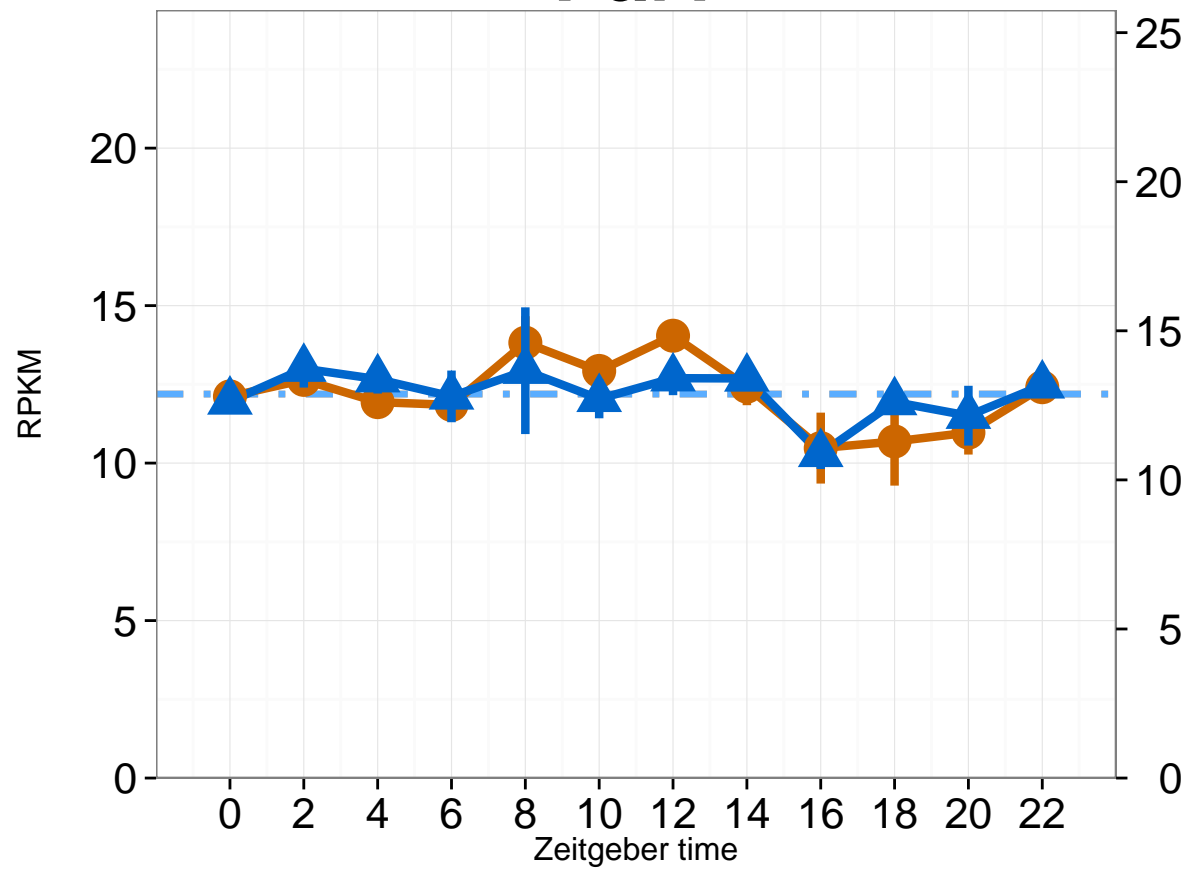

## Paf1

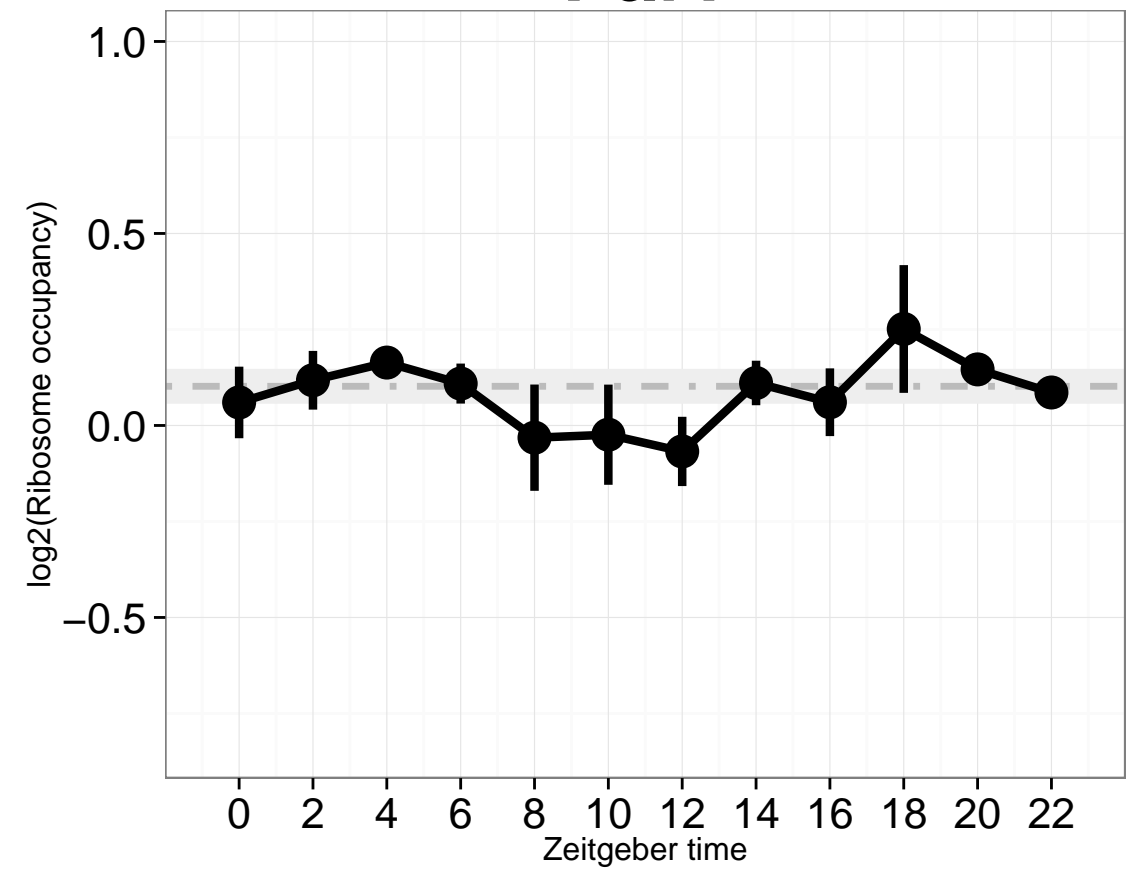

Supplement: SuppDataset_1.zip [file Paf1_set_A.pdf › Supplemental Dataset 1/A-mRNA_nonrhyth_translation_nonrhyth/Paf1_set_A.pdf]

# Pafah1b1

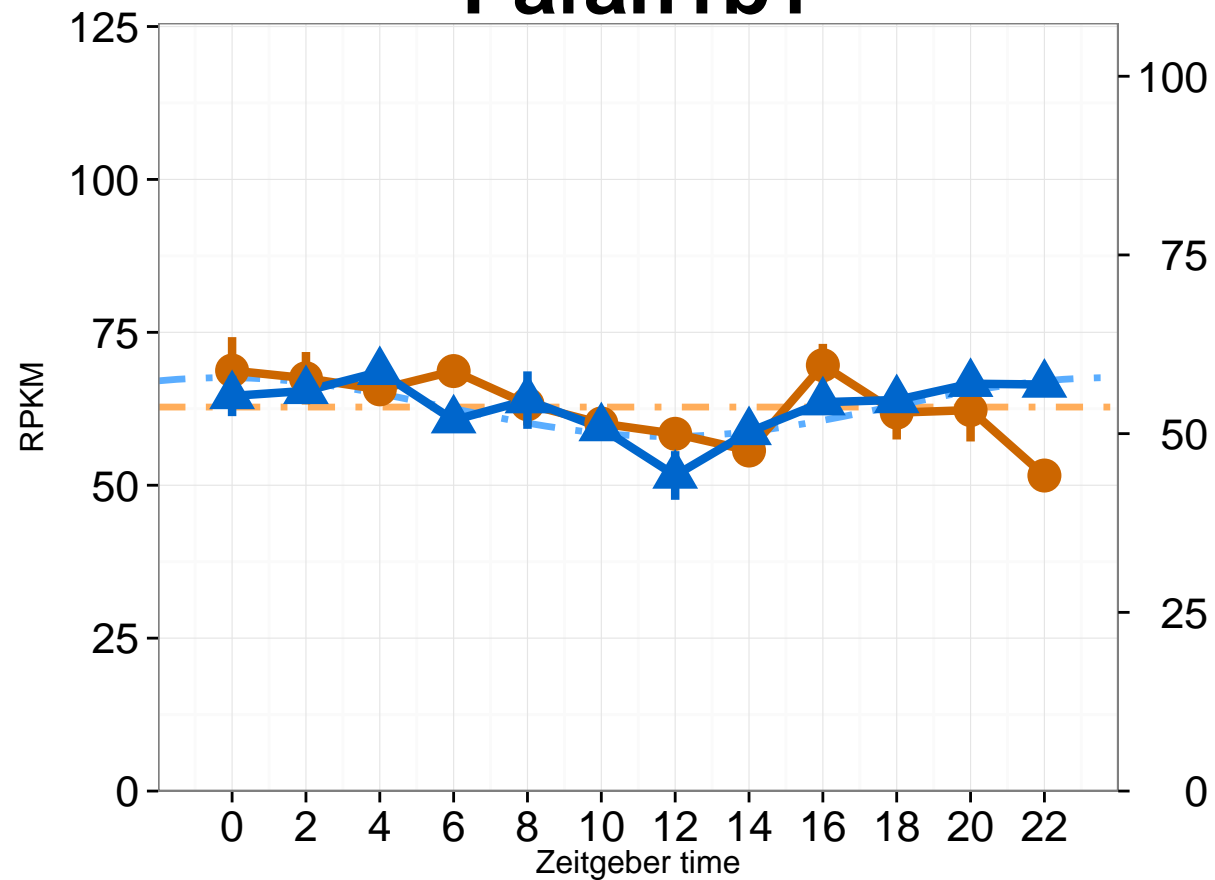

# Pafah1b1

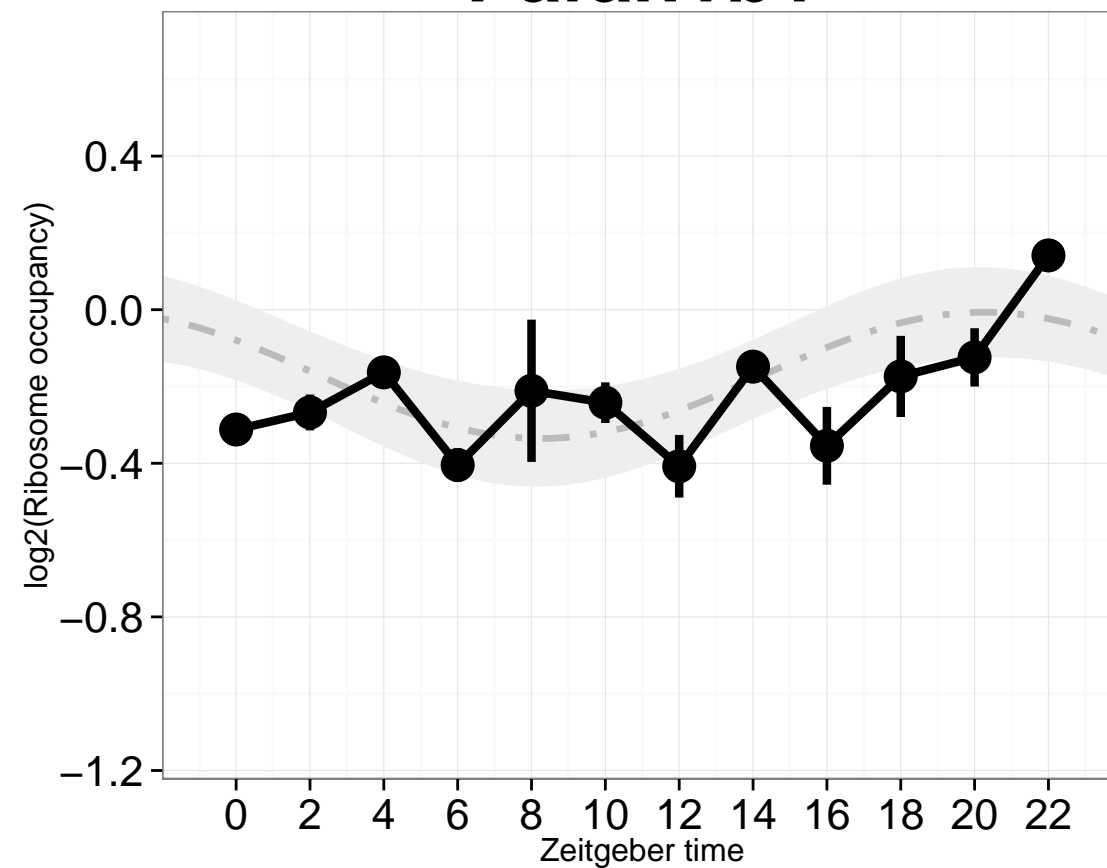

Supplement: SuppDataset_1.zip [file Pafah1b1_set_A.pdf › Supplemental Dataset 1/A-mRNA_nonrhyth_translation_nonrhyth/Pafah1b1_set_A.pdf]

# Pafah1b2

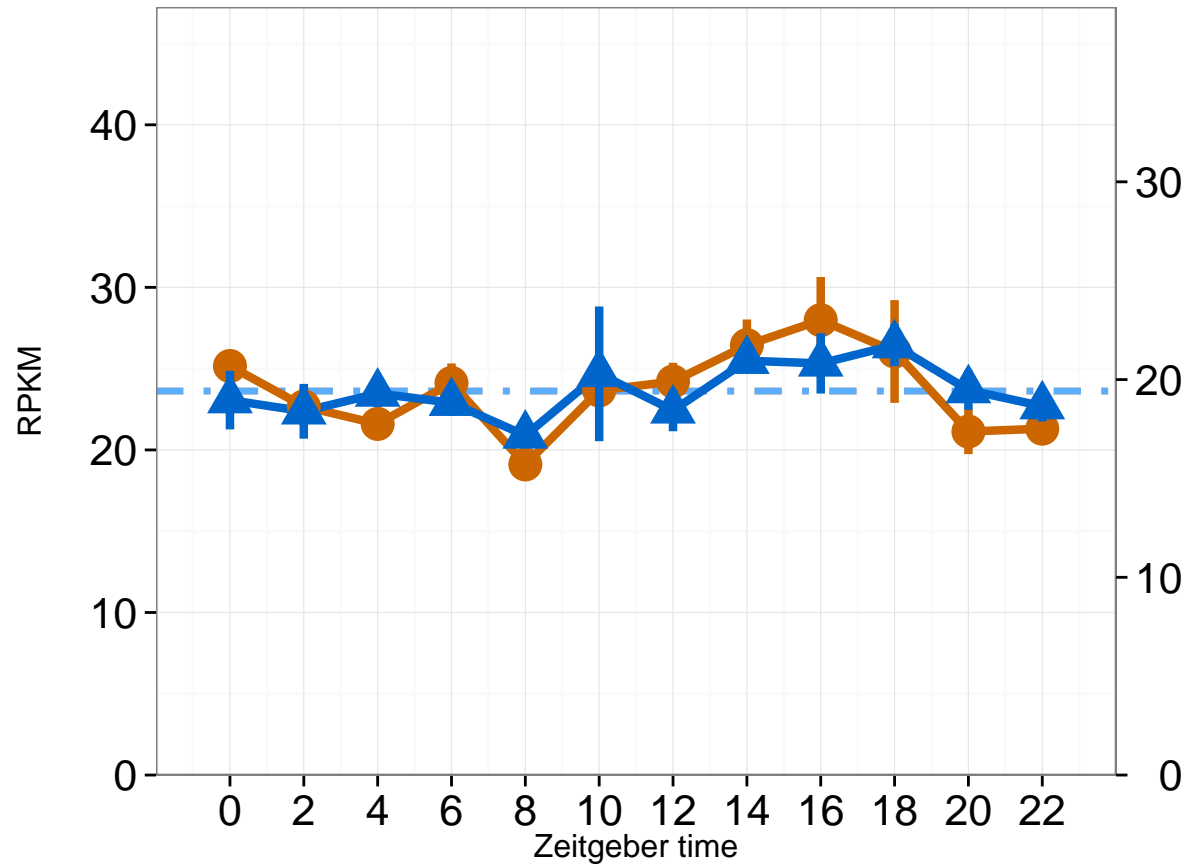

# Pafah1b2

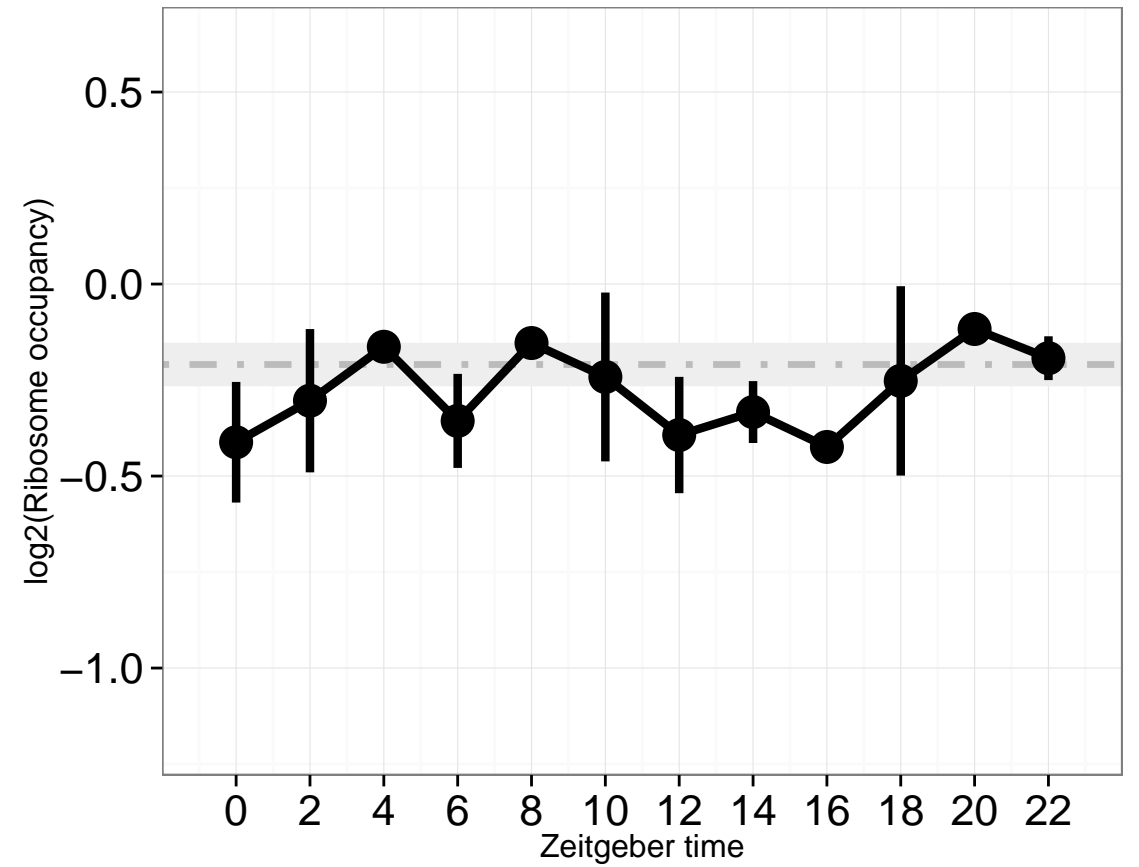

Supplement: SuppDataset_1.zip [file Pafah1b2_set_A.pdf › Supplemental Dataset 1/A-mRNA_nonrhyth_translation_nonrhyth/Pafah1b2_set_A.pdf]

# Pafah1b3

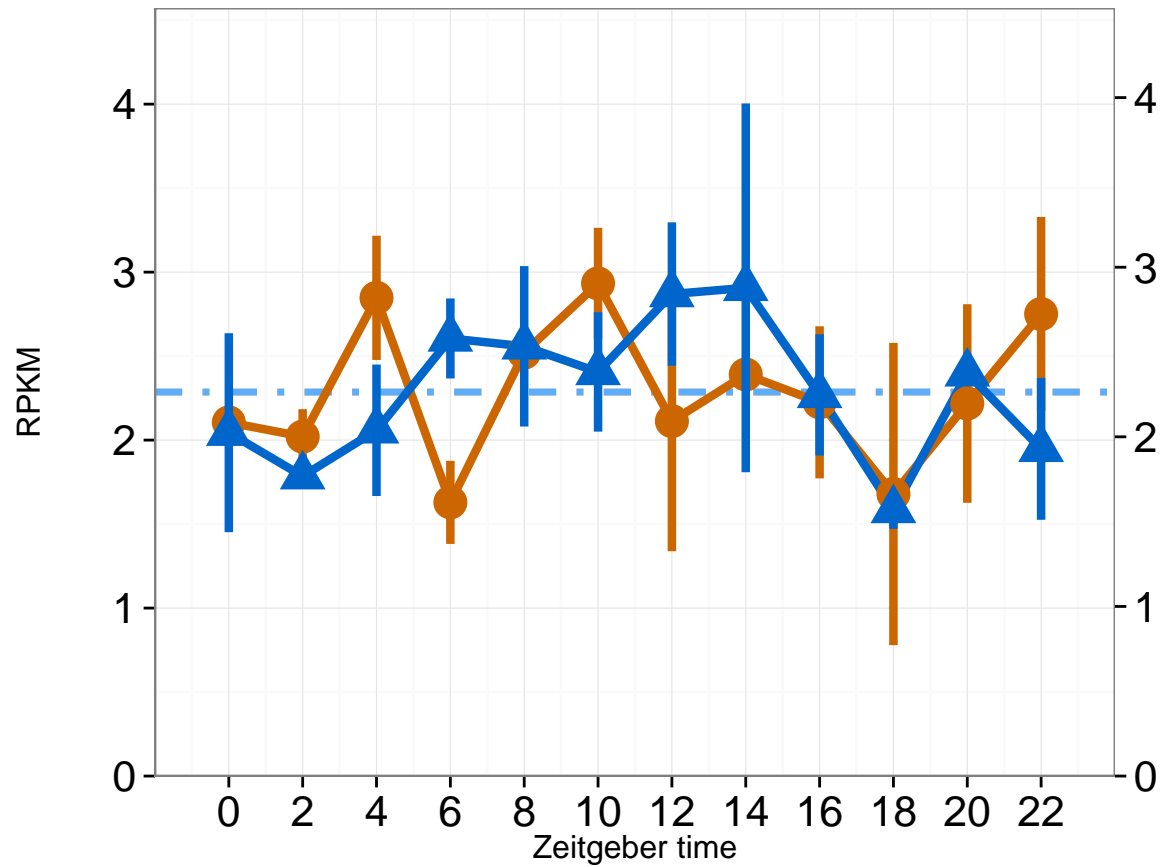

# Pafah1b3

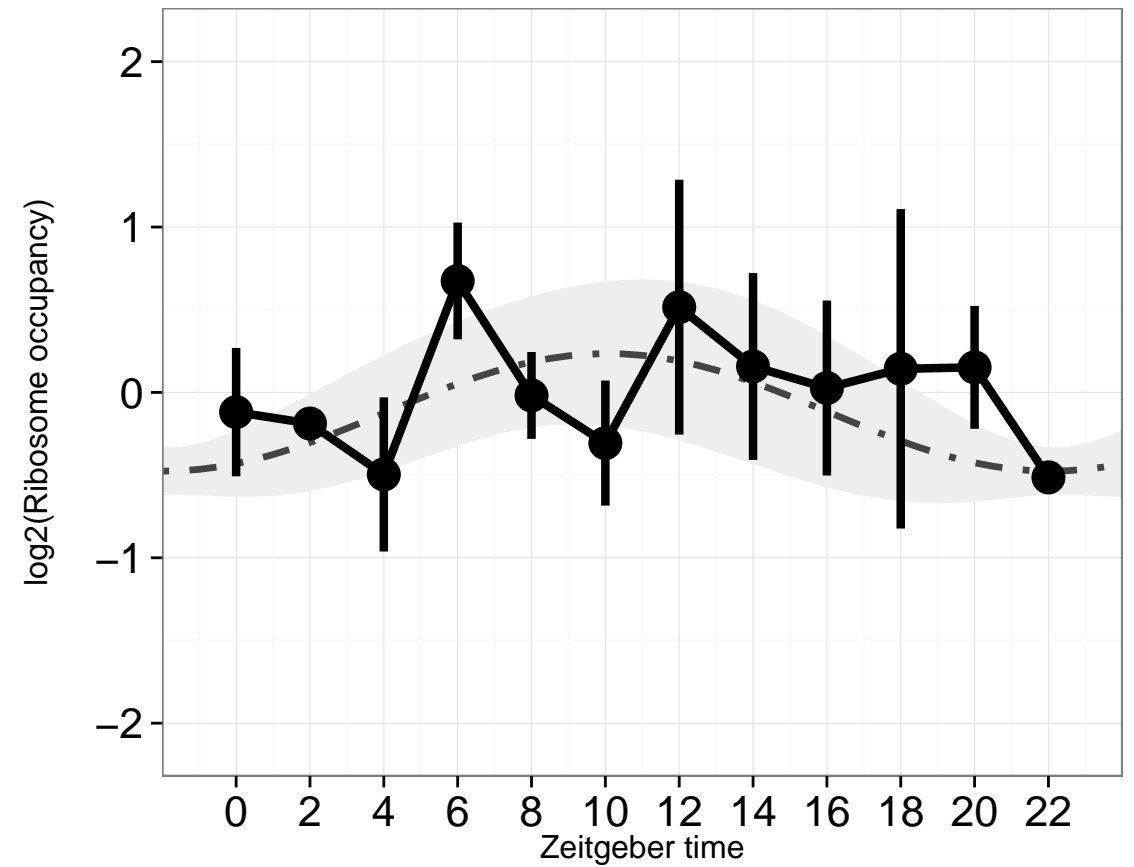

Supplement: SuppDataset_1.zip [file Pafah1b3_set_A.pdf › Supplemental Dataset 1/A-mRNA_nonrhyth_translation_nonrhyth/Pafah1b3_set_A.pdf]

## Pafah2

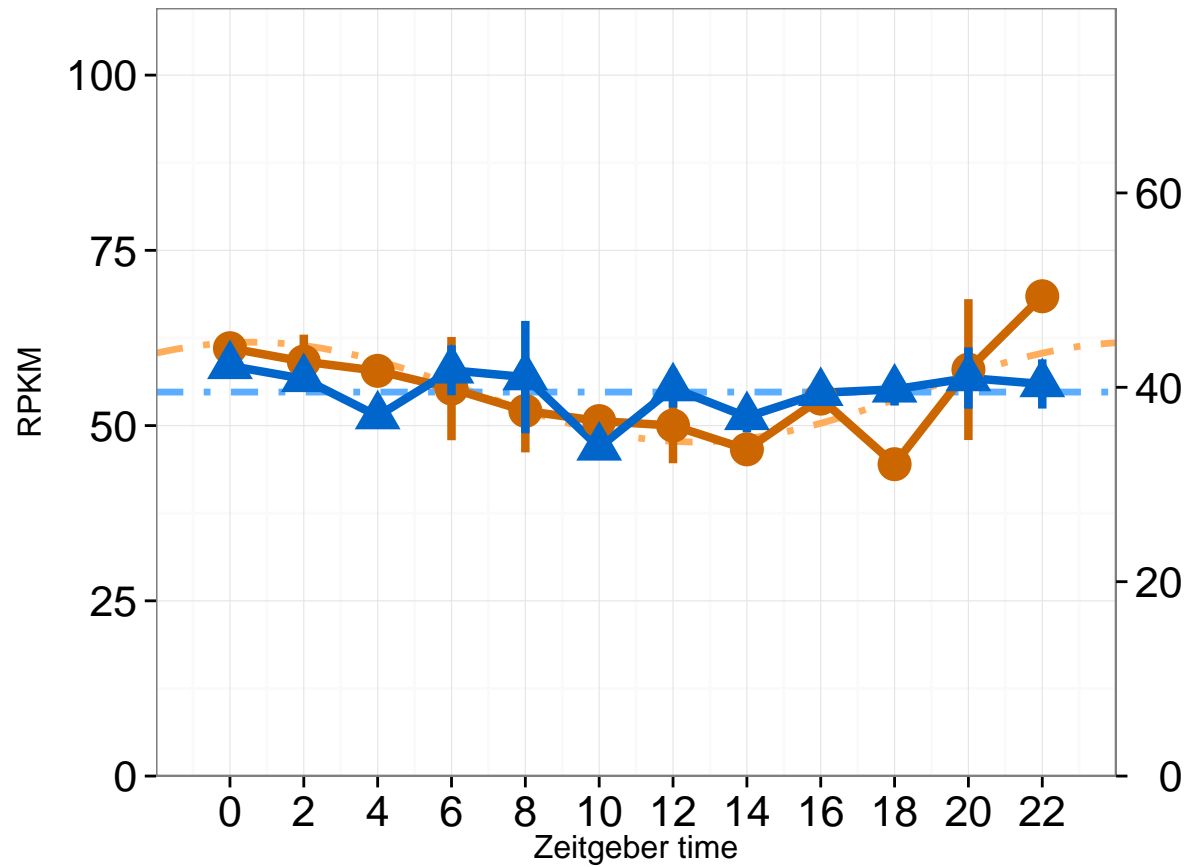

## Pafah2

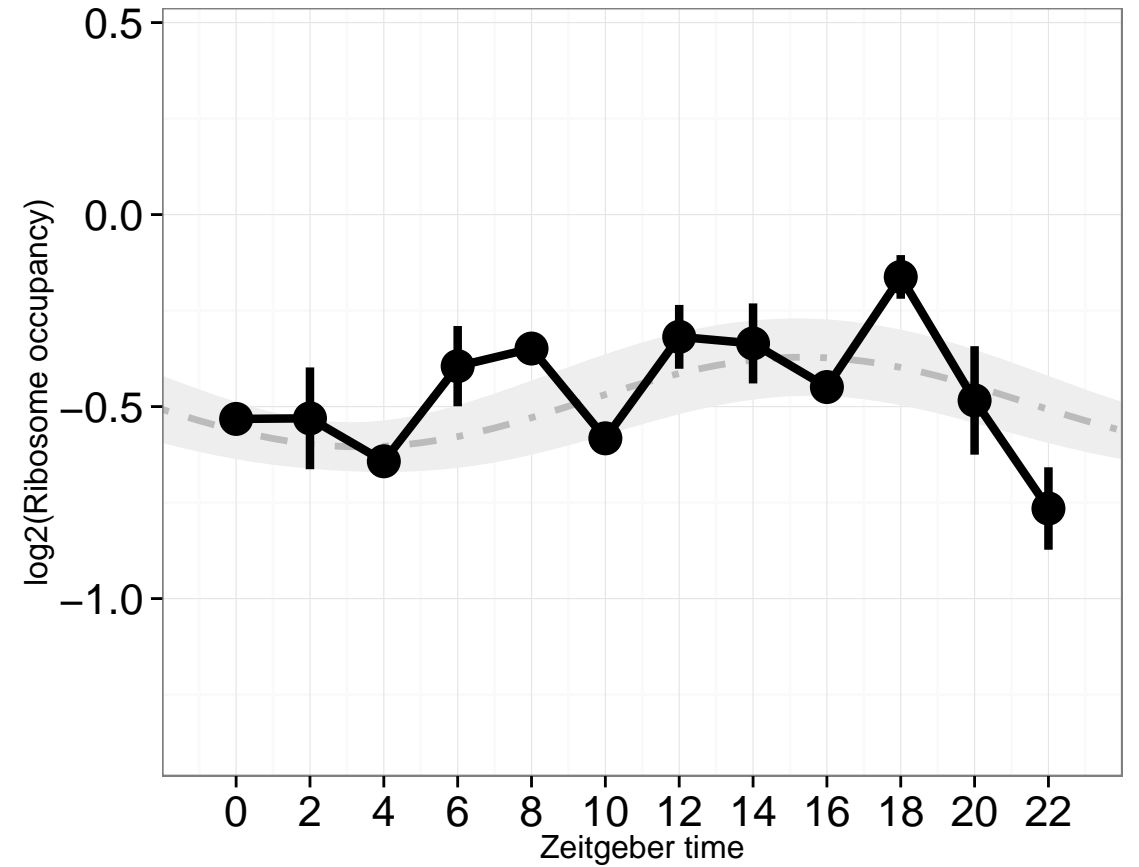

Supplement: SuppDataset_1.zip [file Pafah2_set_A.pdf › Supplemental Dataset 1/A-mRNA_nonrhyth_translation_nonrhyth/Pafah2_set_A.pdf]

# Pag1

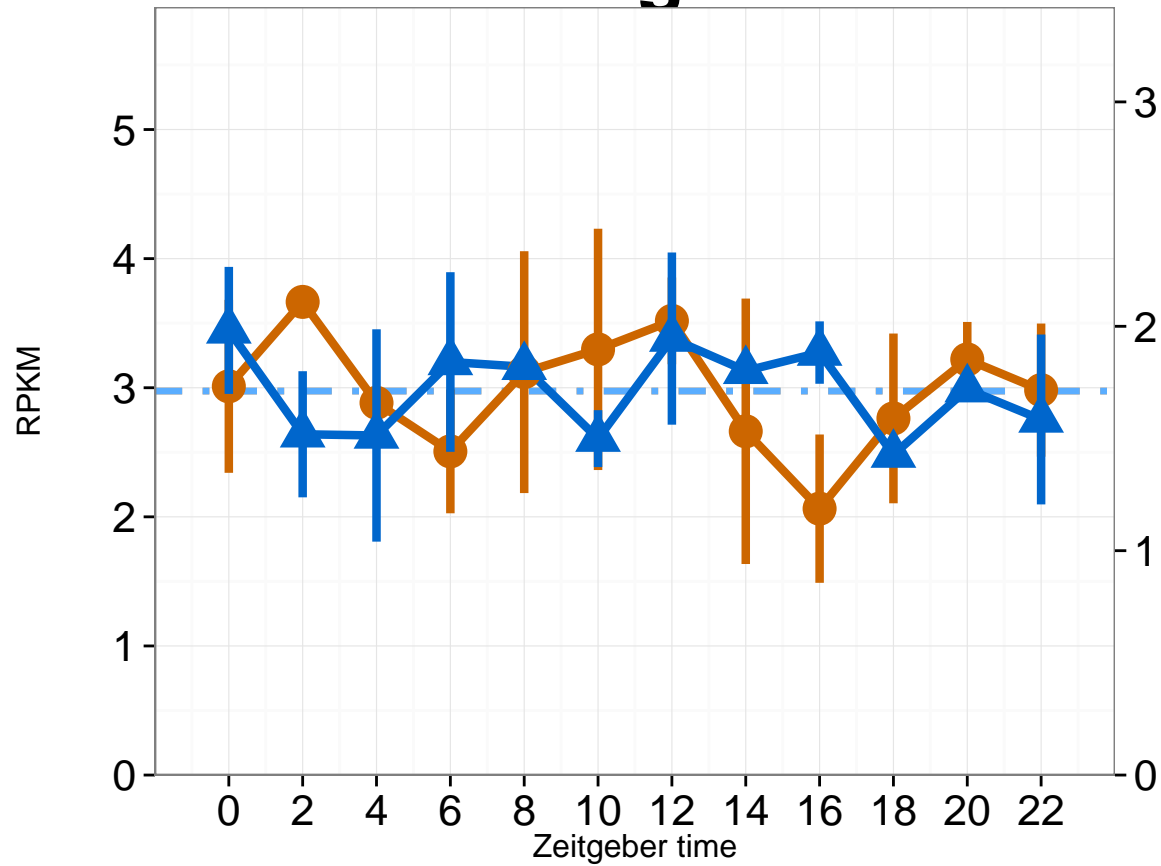

# Pag1

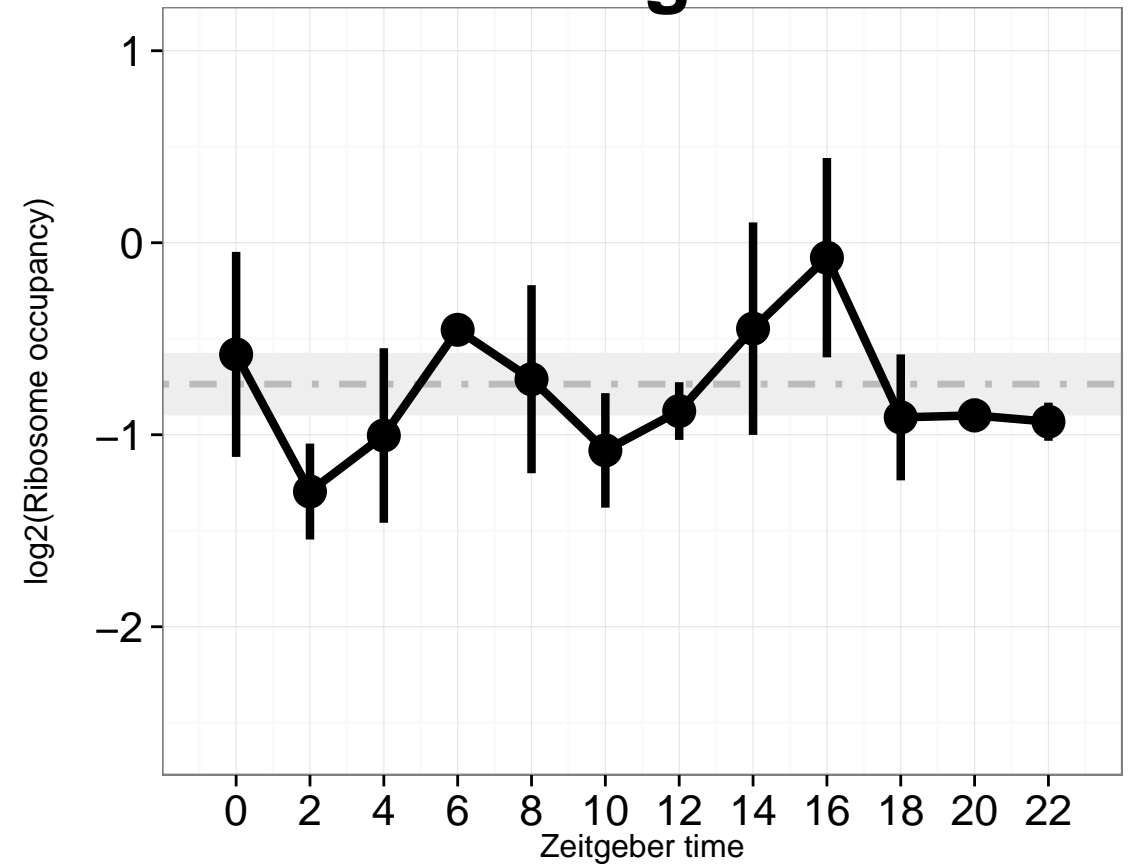

Supplement: SuppDataset_1.zip [file Pag1_set_A.pdf › Supplemental Dataset 1/A-mRNA_nonrhyth_translation_nonrhyth/Pag1_set_A.pdf]

# Pagr1a

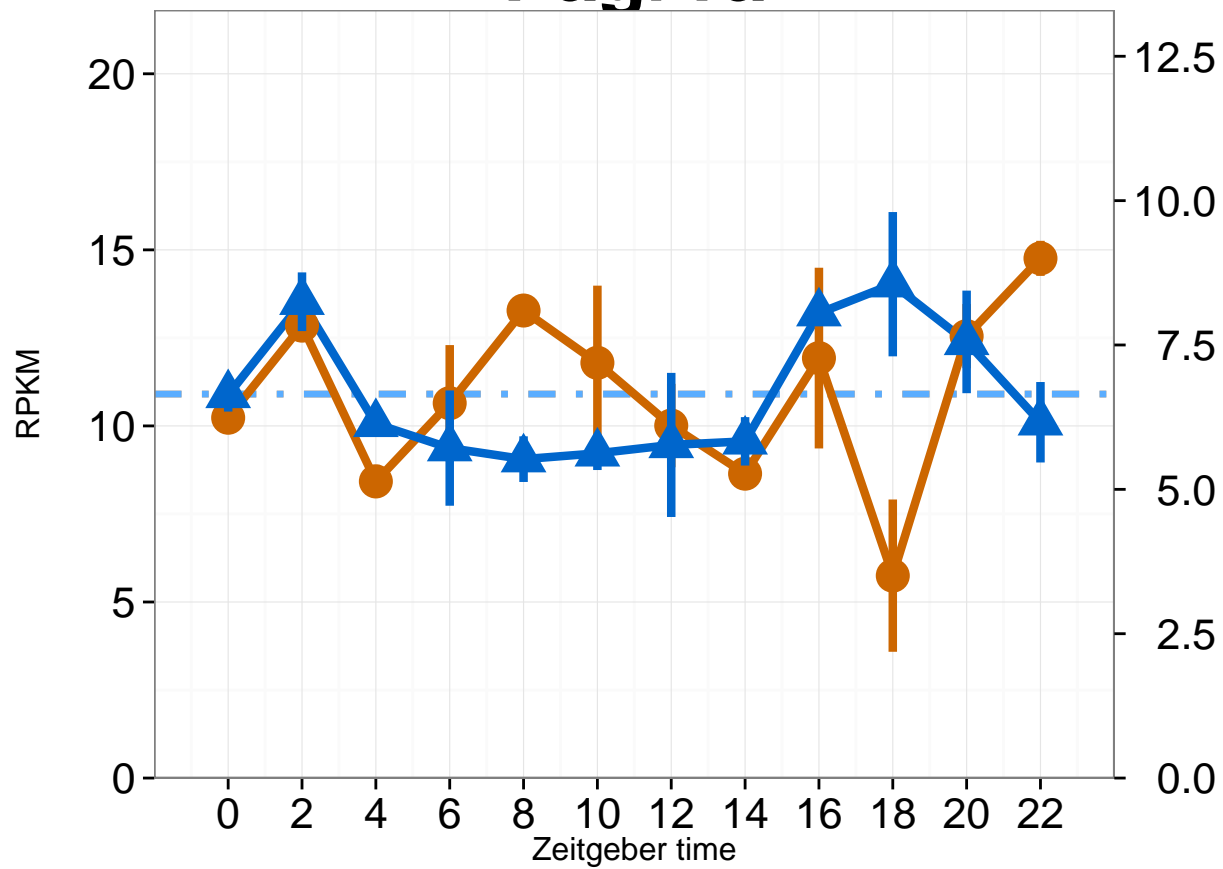

# Pagr1a

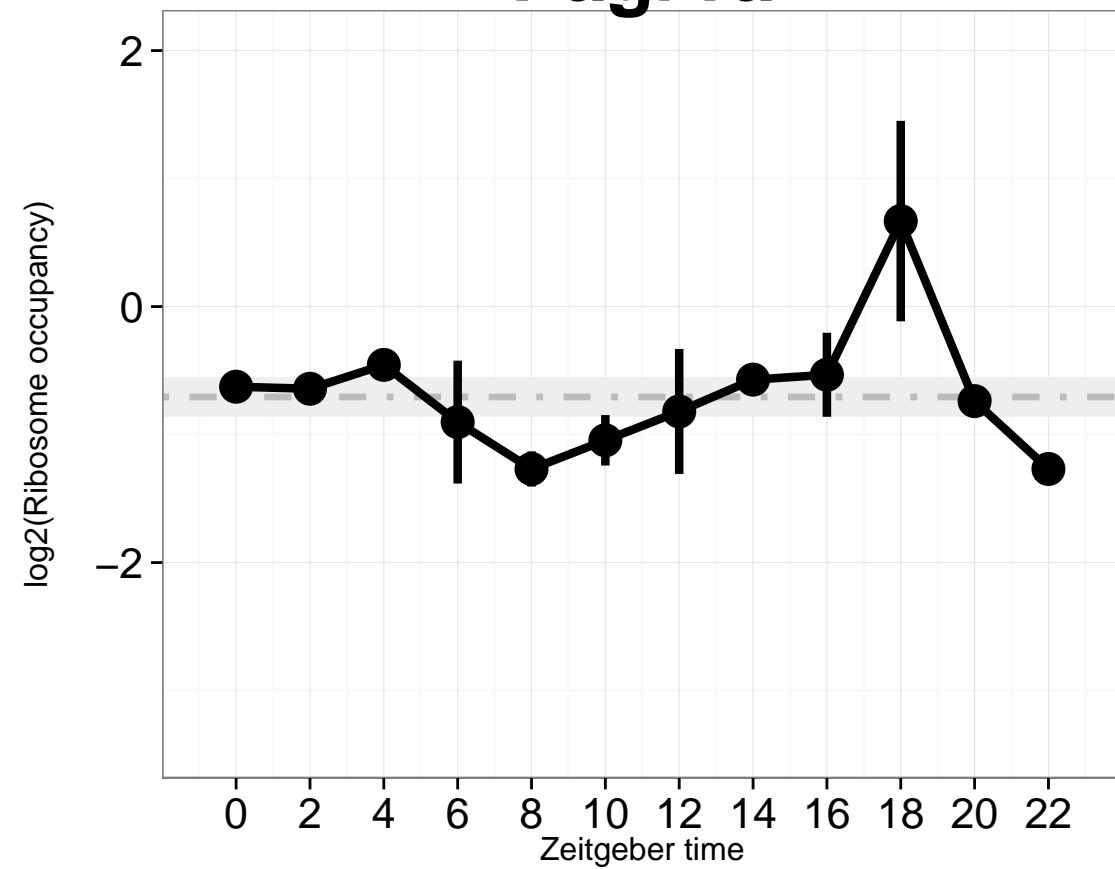

Supplement: SuppDataset_1.zip [file Pagr1a_set_A.pdf › Supplemental Dataset 1/A-mRNA_nonrhyth_translation_nonrhyth/Pagr1a_set_A.pdf]

## Pah

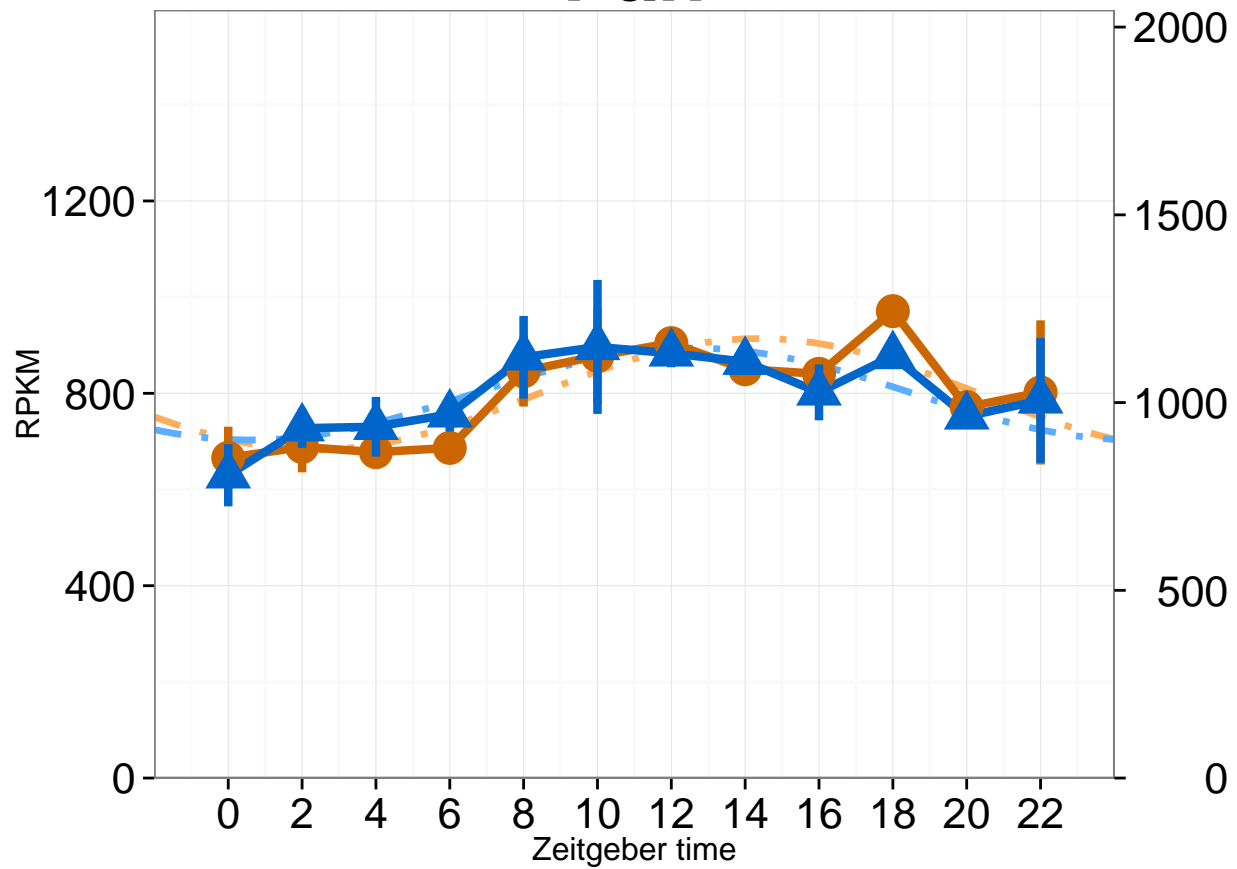

## Pah

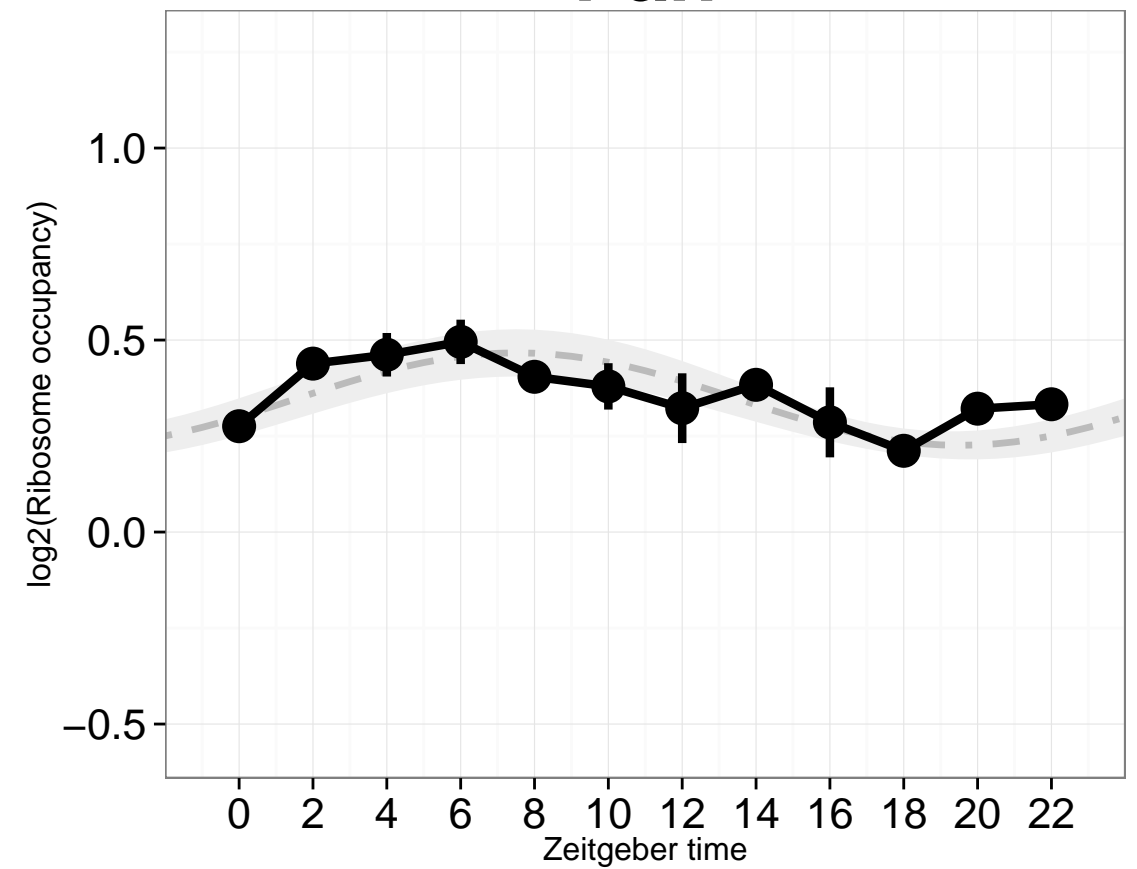

Supplement: SuppDataset_1.zip [file Pah_set_A.pdf › Supplemental Dataset 1/A-mRNA_nonrhyth_translation_nonrhyth/Pah_set_A.pdf]

## Paics

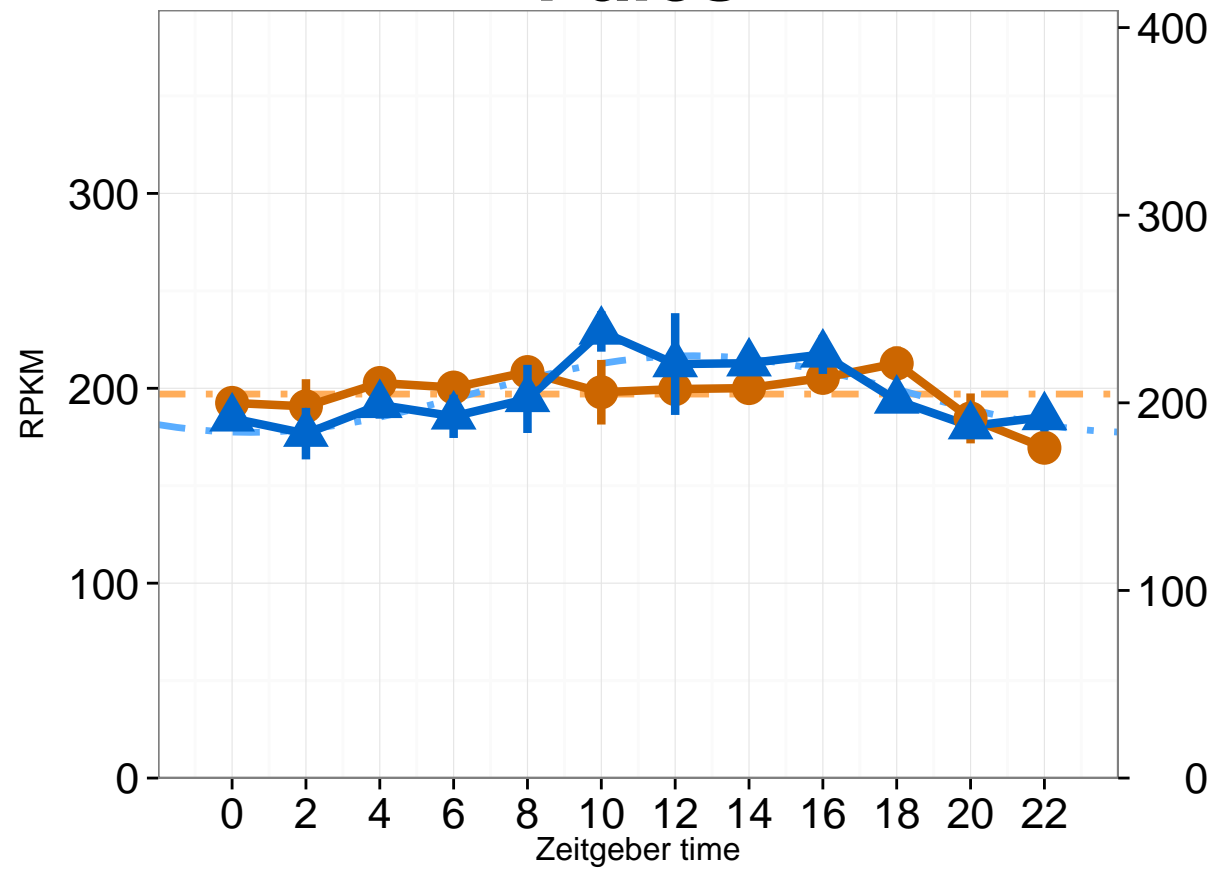

## Paics

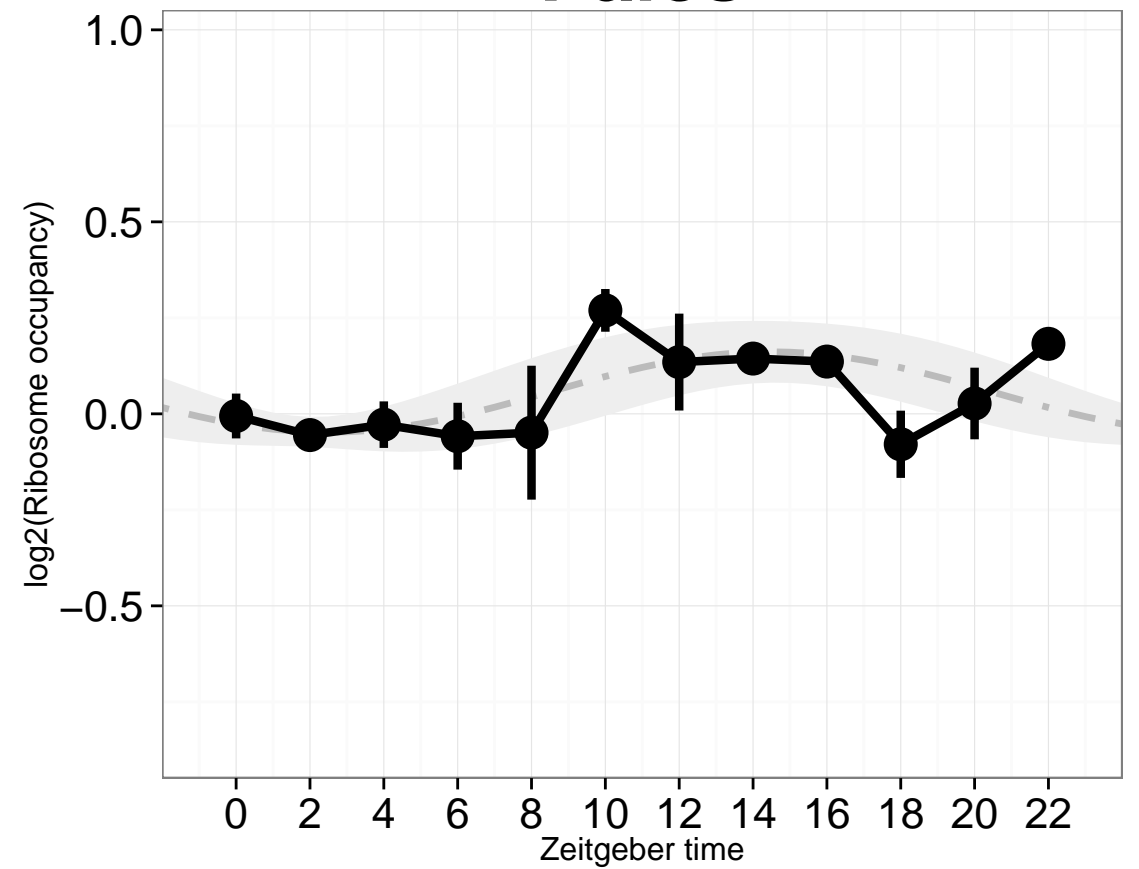

Supplement: SuppDataset_1.zip [file Paics_set_A.pdf › Supplemental Dataset 1/A-mRNA_nonrhyth_translation_nonrhyth/Paics_set_A.pdf]

## Paip1

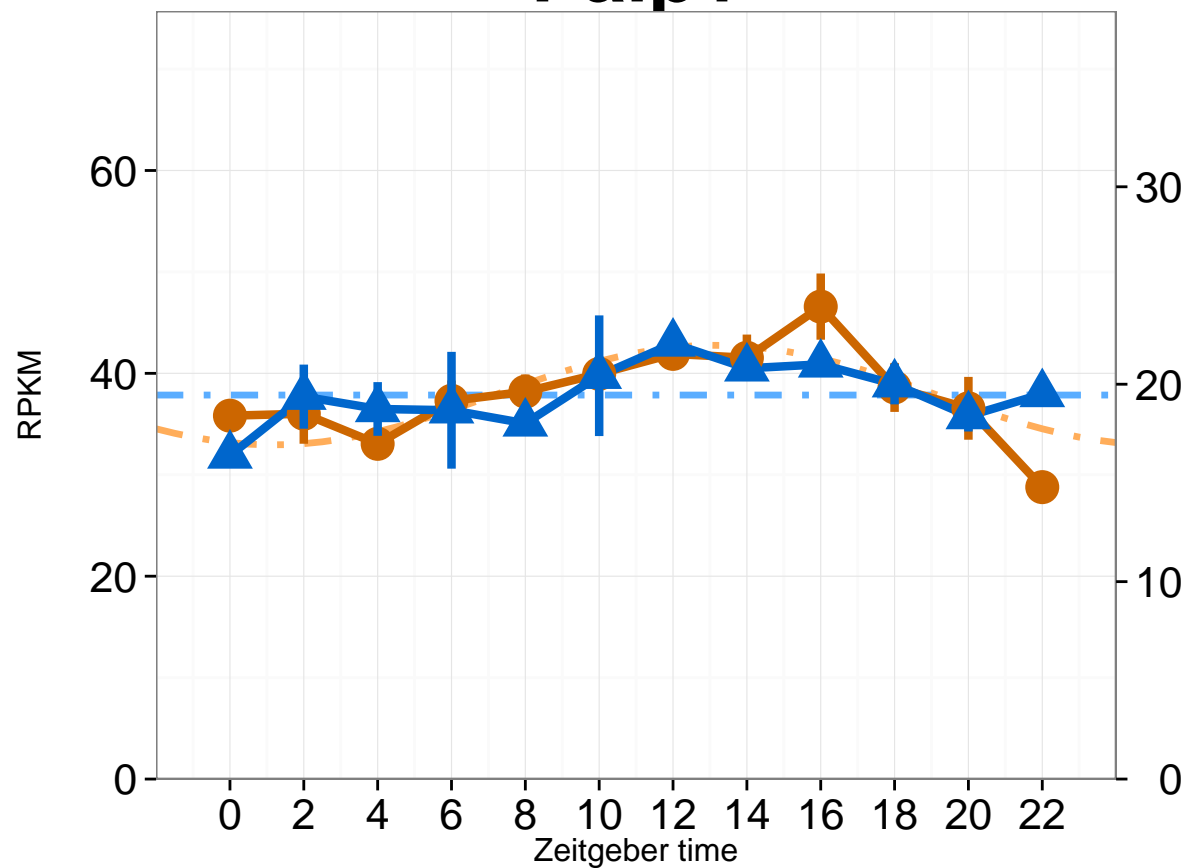

## Paip1

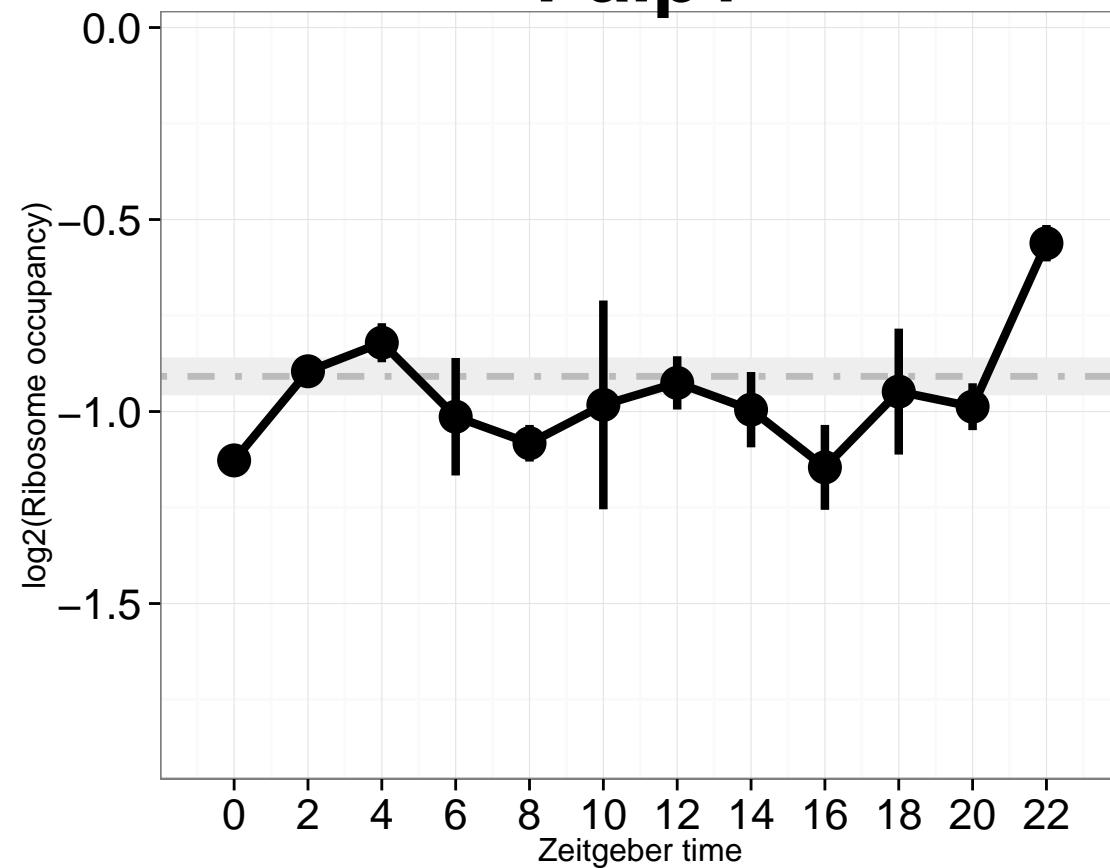

Supplement: SuppDataset_1.zip [file Paip1_set_A.pdf › Supplemental Dataset 1/A-mRNA_nonrhyth_translation_nonrhyth/Paip1_set_A.pdf]

# Paip2

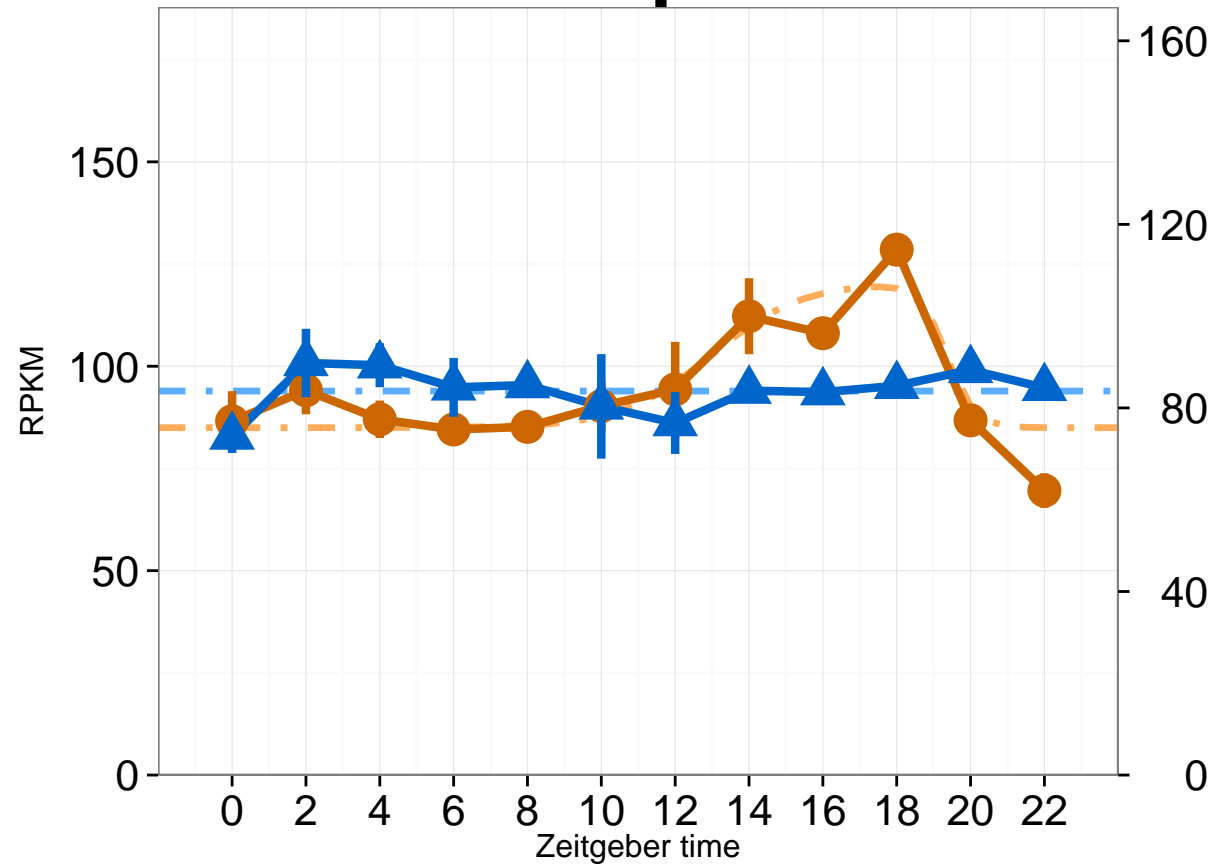

# Paip2

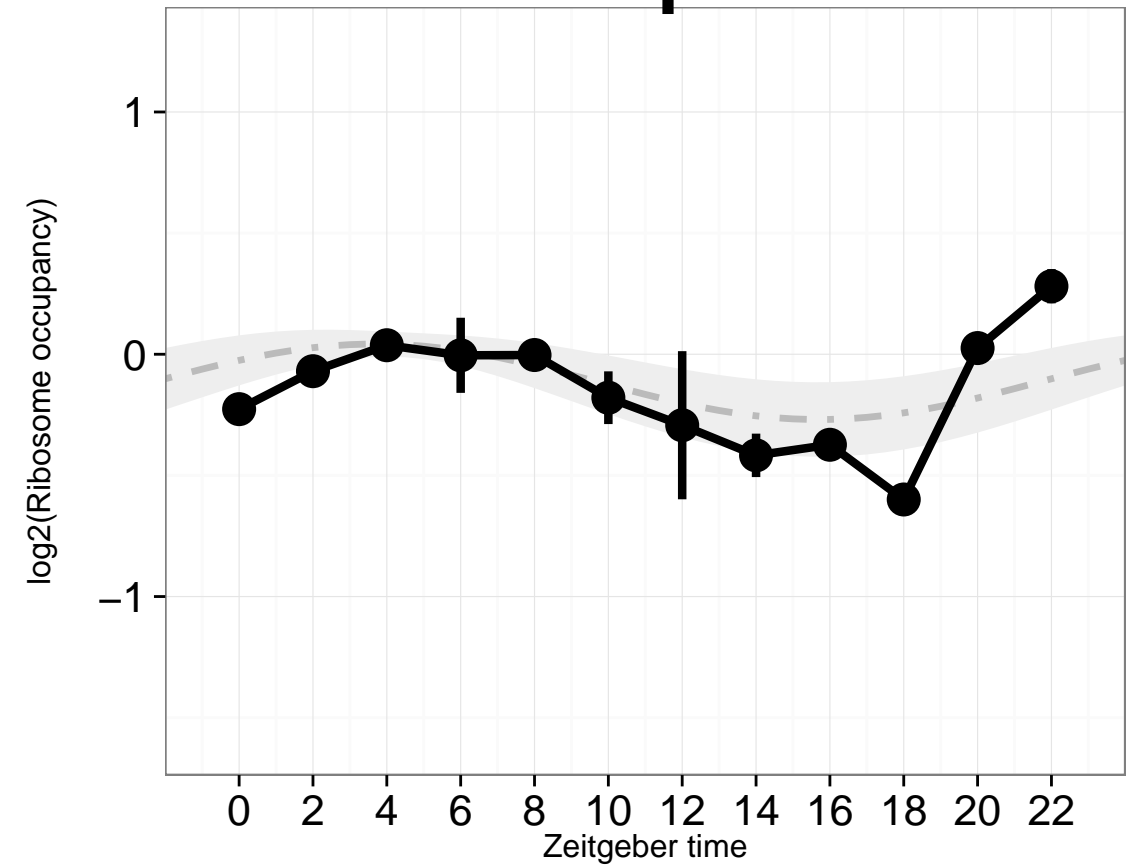

Supplement: SuppDataset_1.zip [file Paip2_set_A.pdf › Supplemental Dataset 1/A-mRNA_nonrhyth_translation_nonrhyth/Paip2_set_A.pdf]

## Pak1

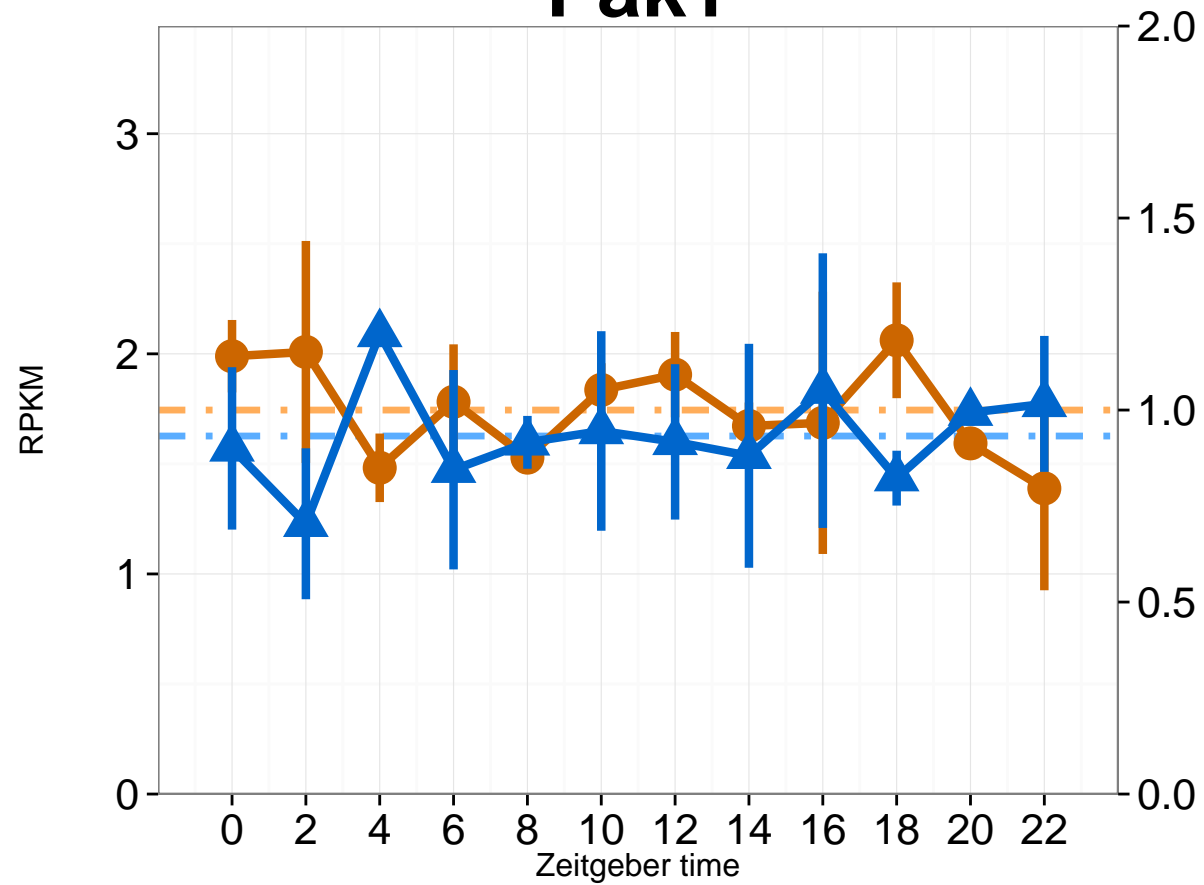

## Pak1

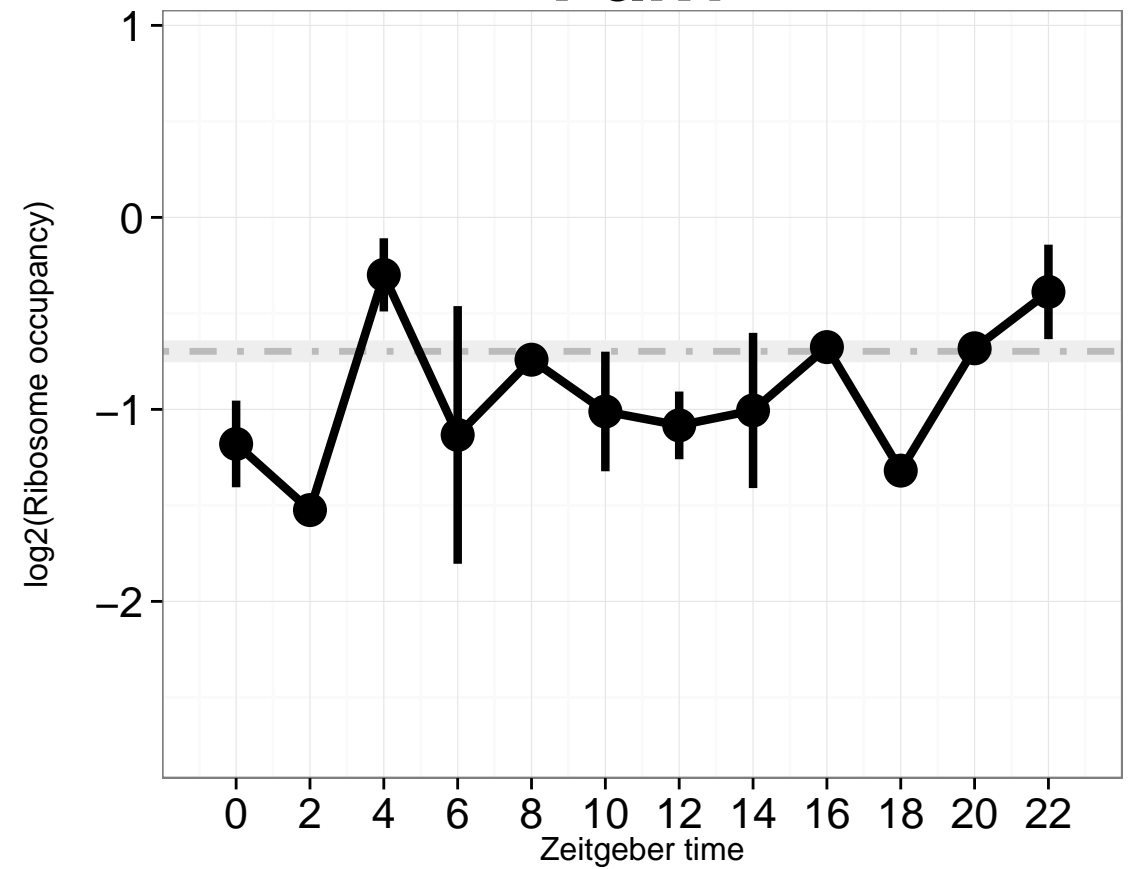

Supplement: SuppDataset_1.zip [file Pak1_set_A.pdf › Supplemental Dataset 1/A-mRNA_nonrhyth_translation_nonrhyth/Pak1_set_A.pdf]

## Pak1ip1

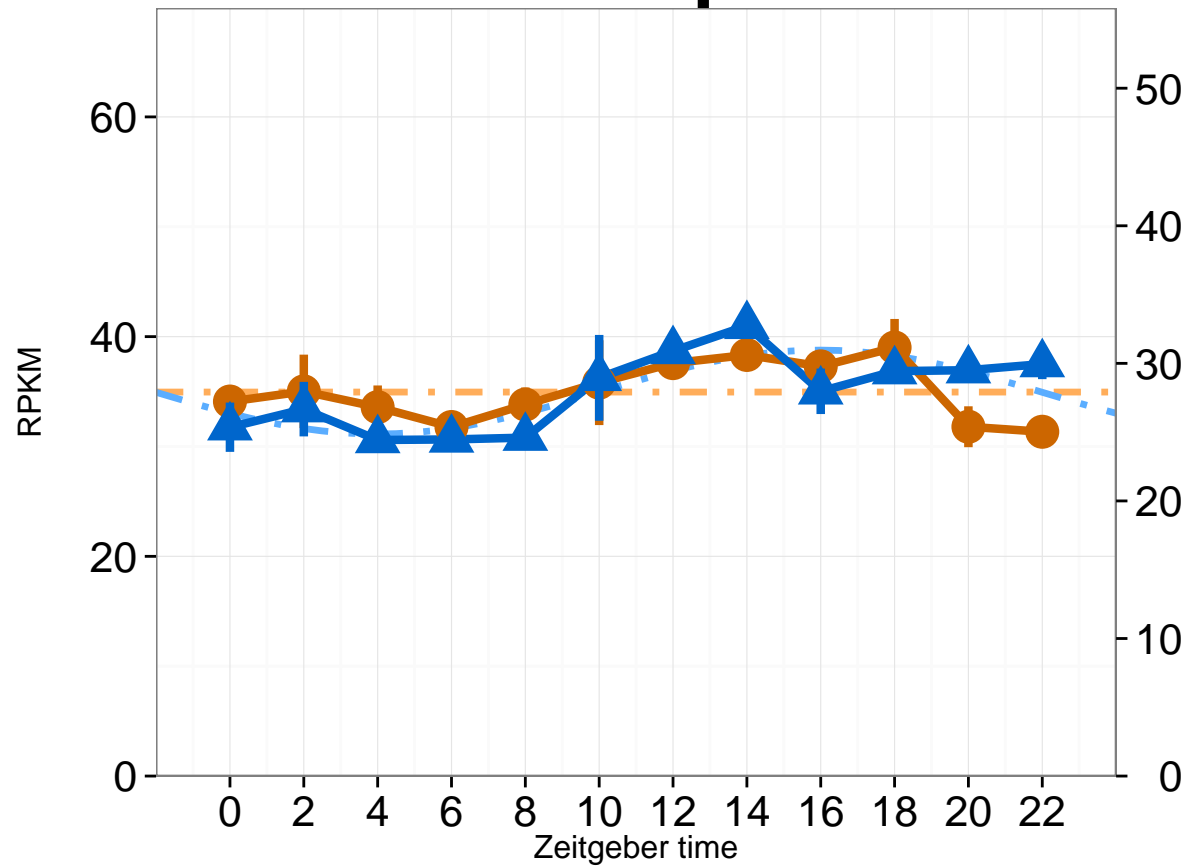

## Pak1ip1

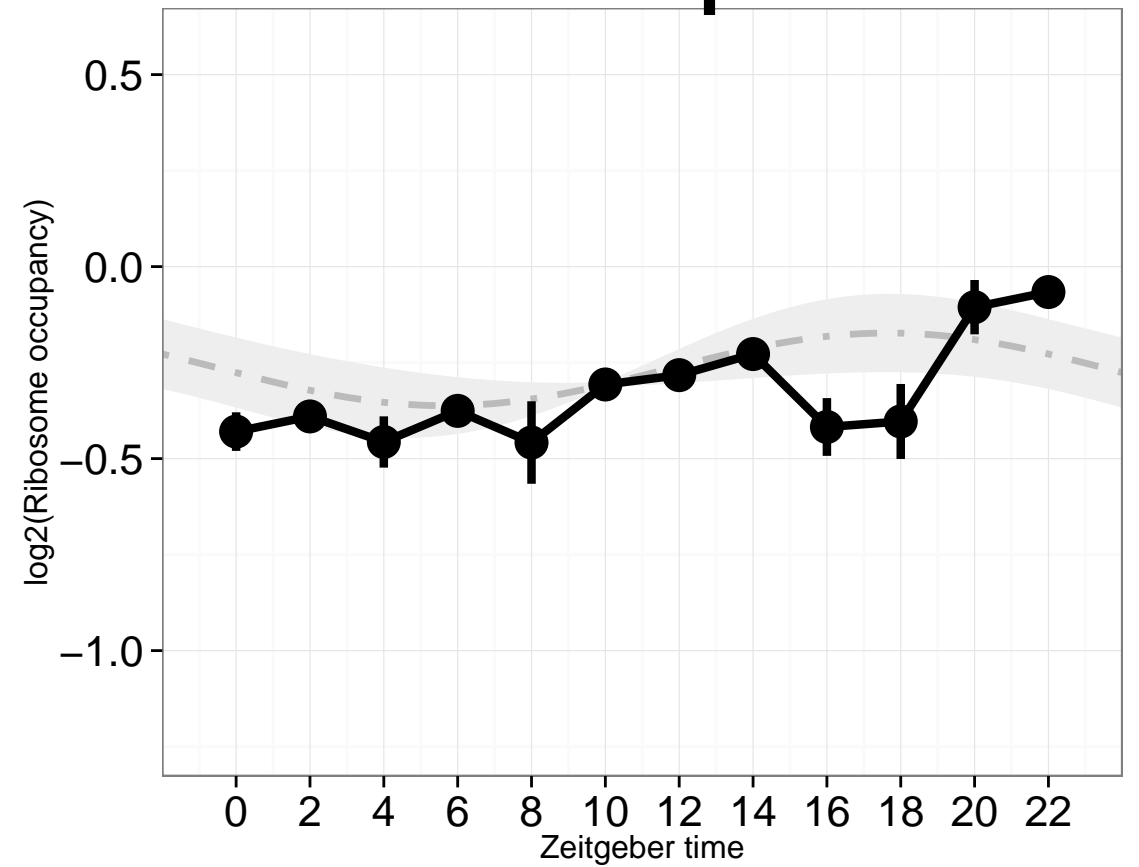

Supplement: SuppDataset_1.zip [file Pak1ip1_set_A.pdf › Supplemental Dataset 1/A-mRNA_nonrhyth_translation_nonrhyth/Pak1ip1_set_A.pdf]

## Pak2

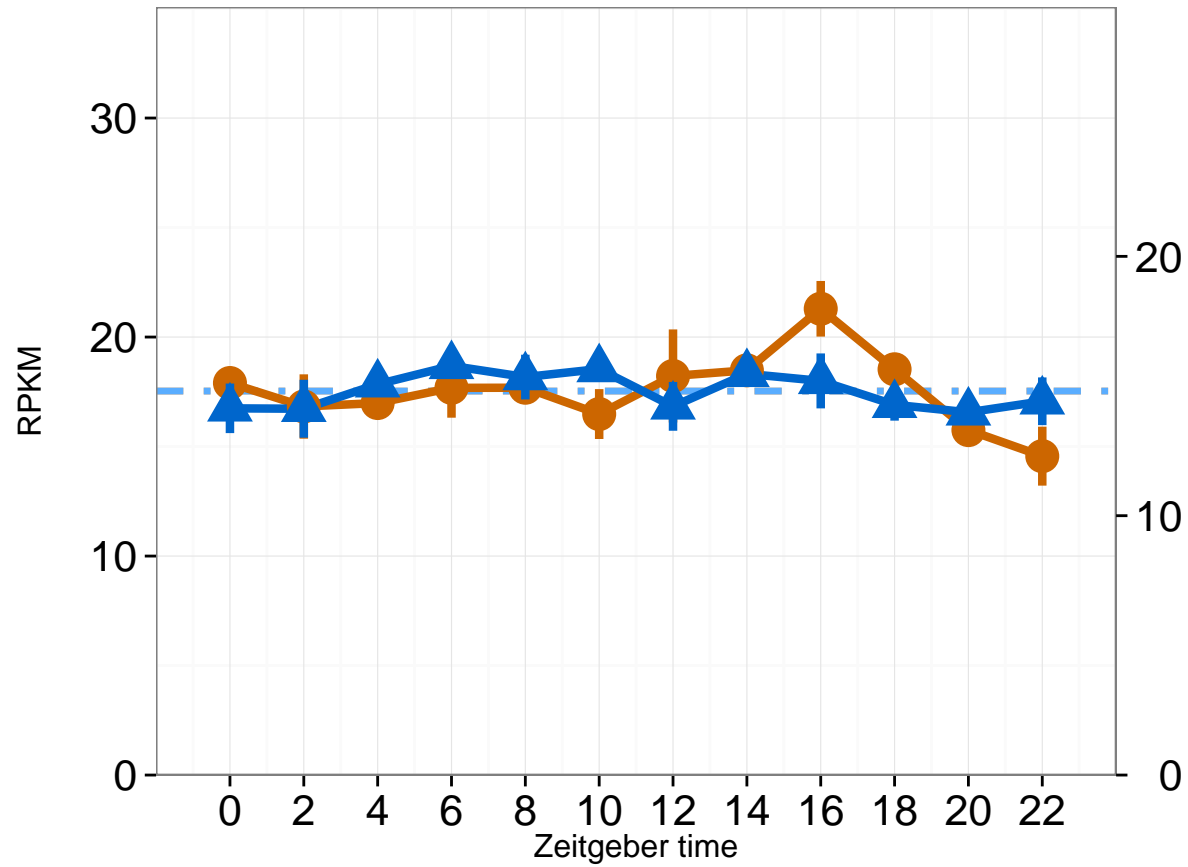

## Pak2

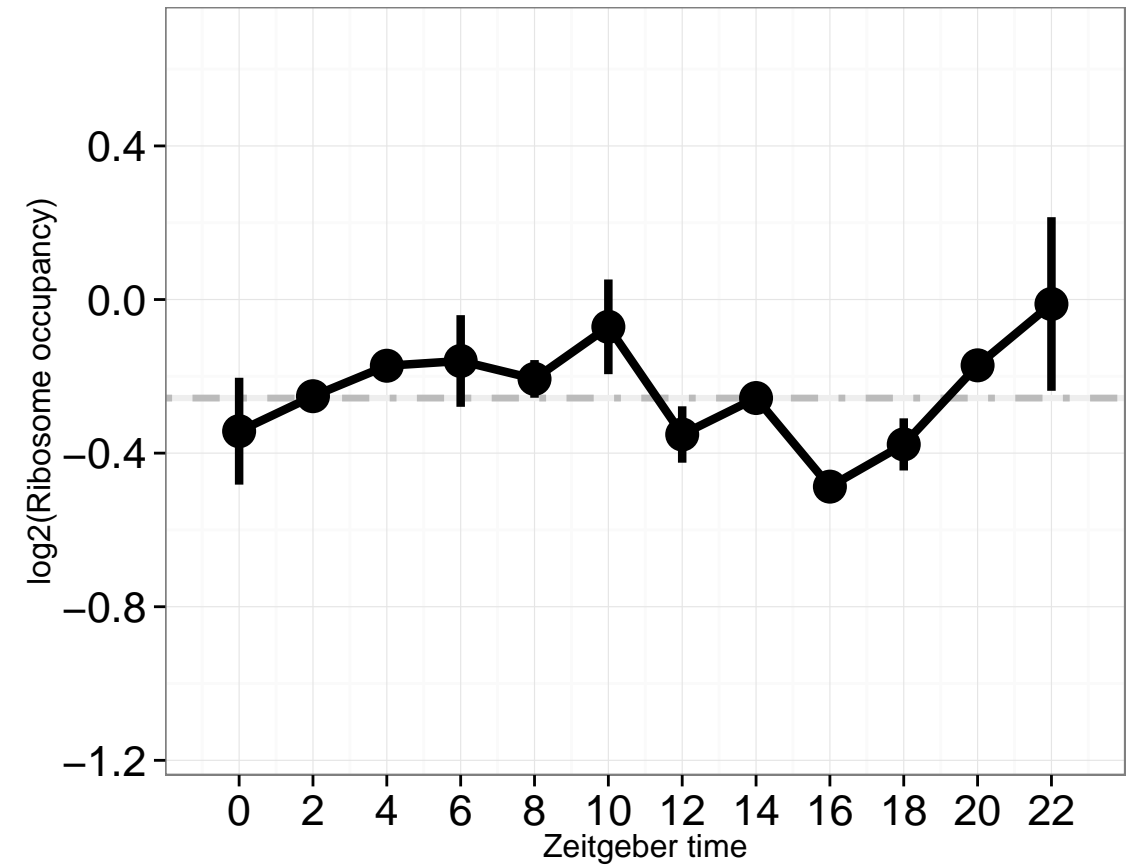

Supplement: SuppDataset_1.zip [file Pak2_set_A.pdf › Supplemental Dataset 1/A-mRNA_nonrhyth_translation_nonrhyth/Pak2_set_A.pdf]

## Pak4

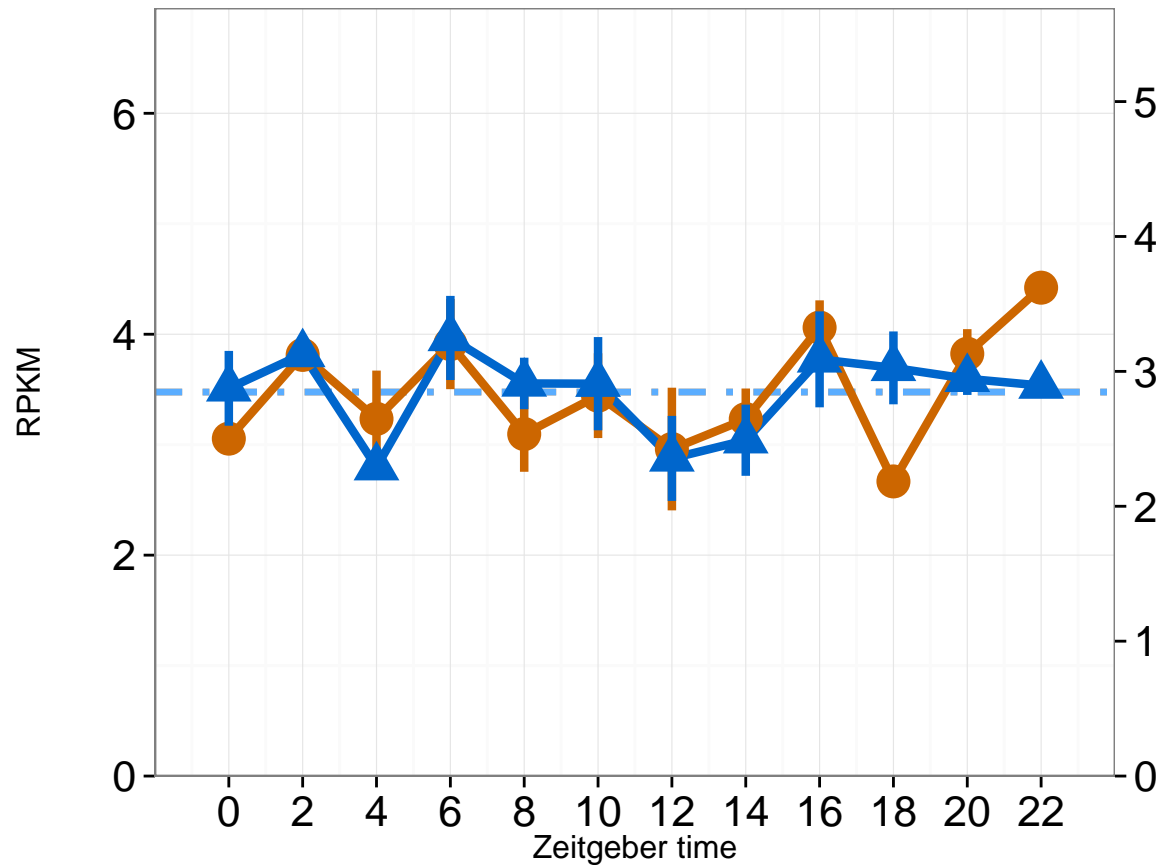

## Pak4

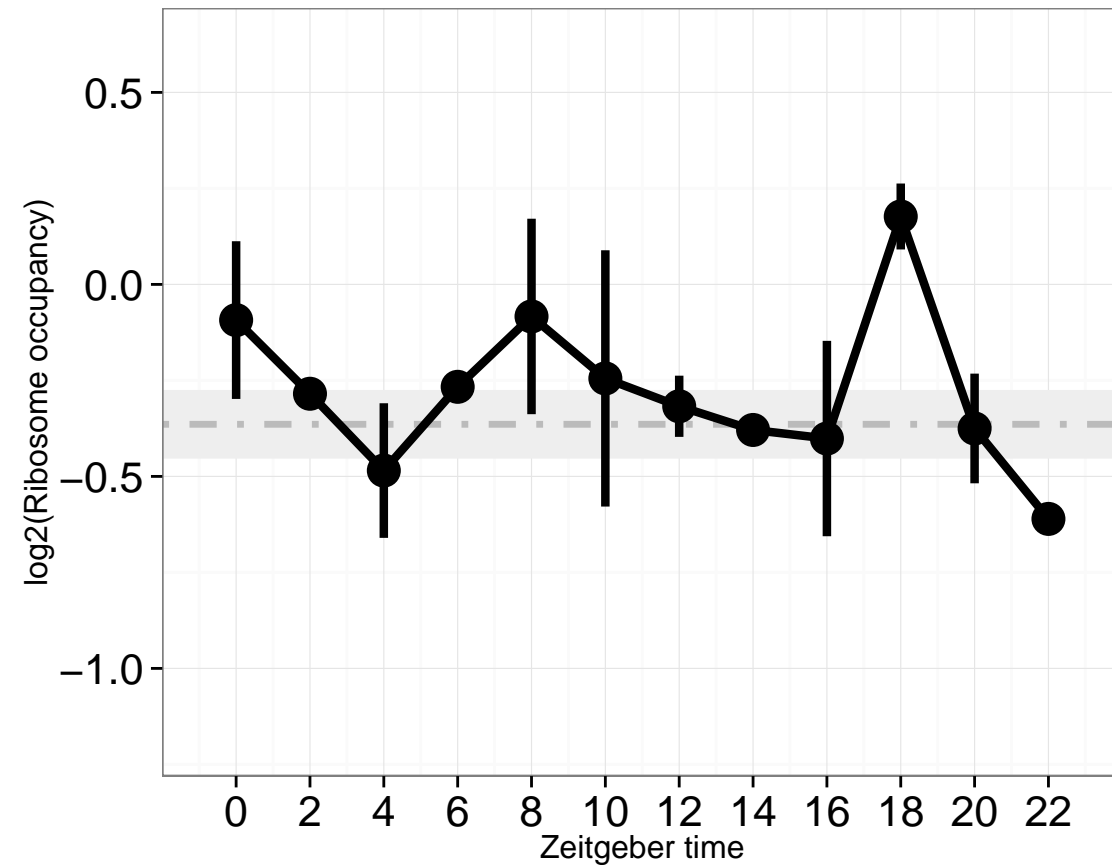

Supplement: SuppDataset_1.zip [file Pak4_set_A.pdf › Supplemental Dataset 1/A-mRNA_nonrhyth_translation_nonrhyth/Pak4_set_A.pdf]

## Palmd

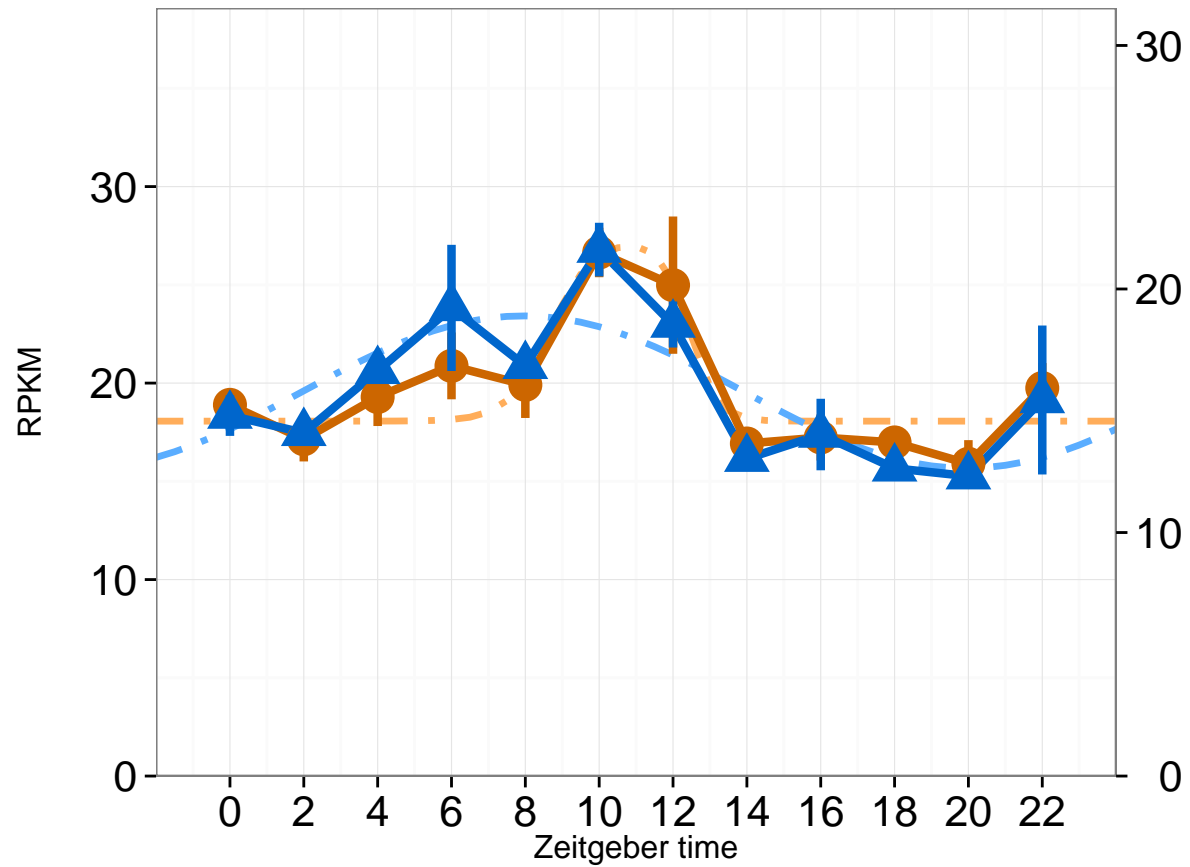

## Palmd

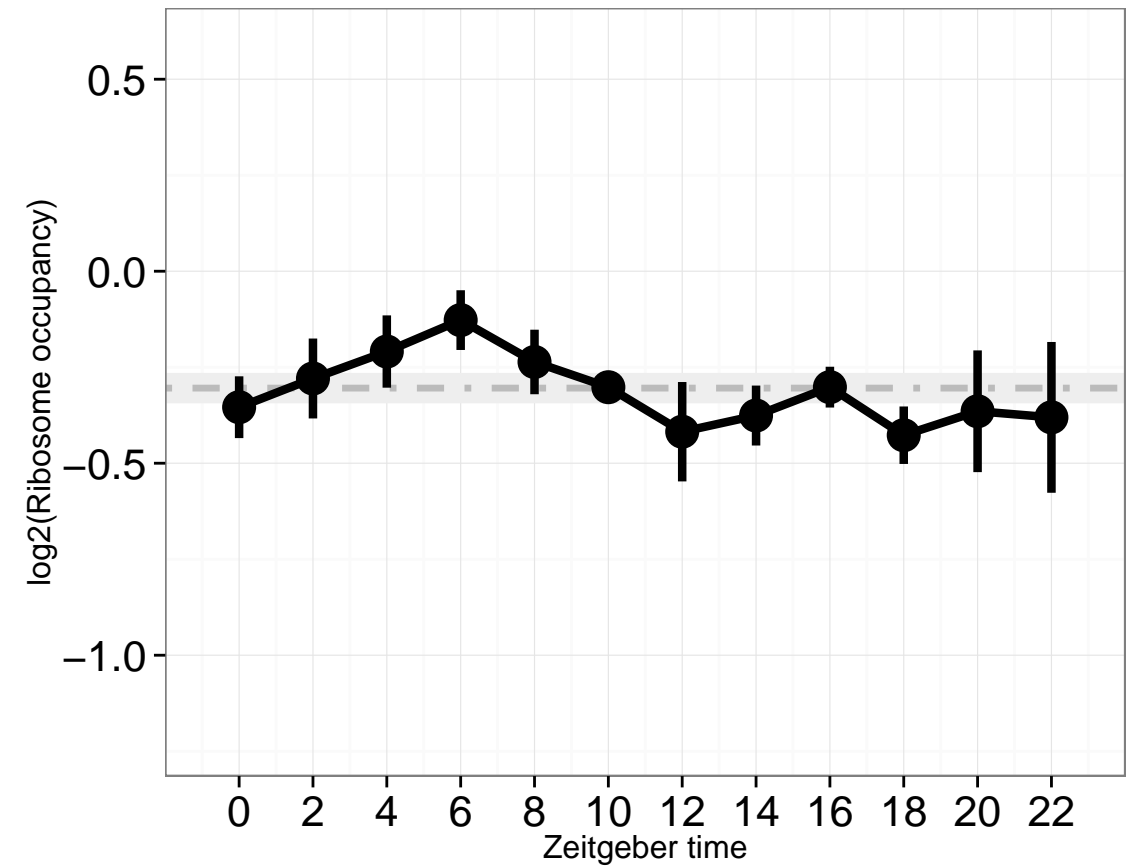

Supplement: SuppDataset_1.zip [file Palmd_set_A.pdf › Supplemental Dataset 1/A-mRNA_nonrhyth_translation_nonrhyth/Palmd_set_A.pdf]

# Pam16

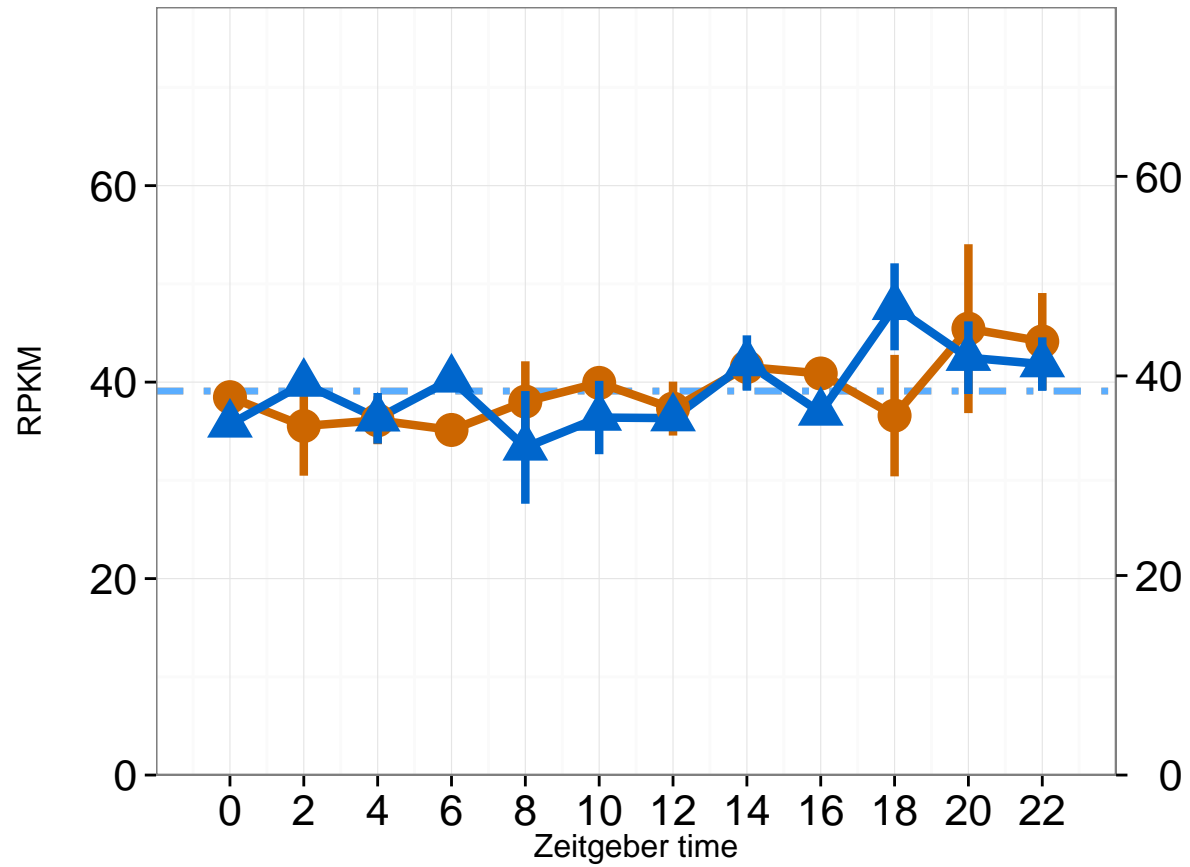

# Pam16

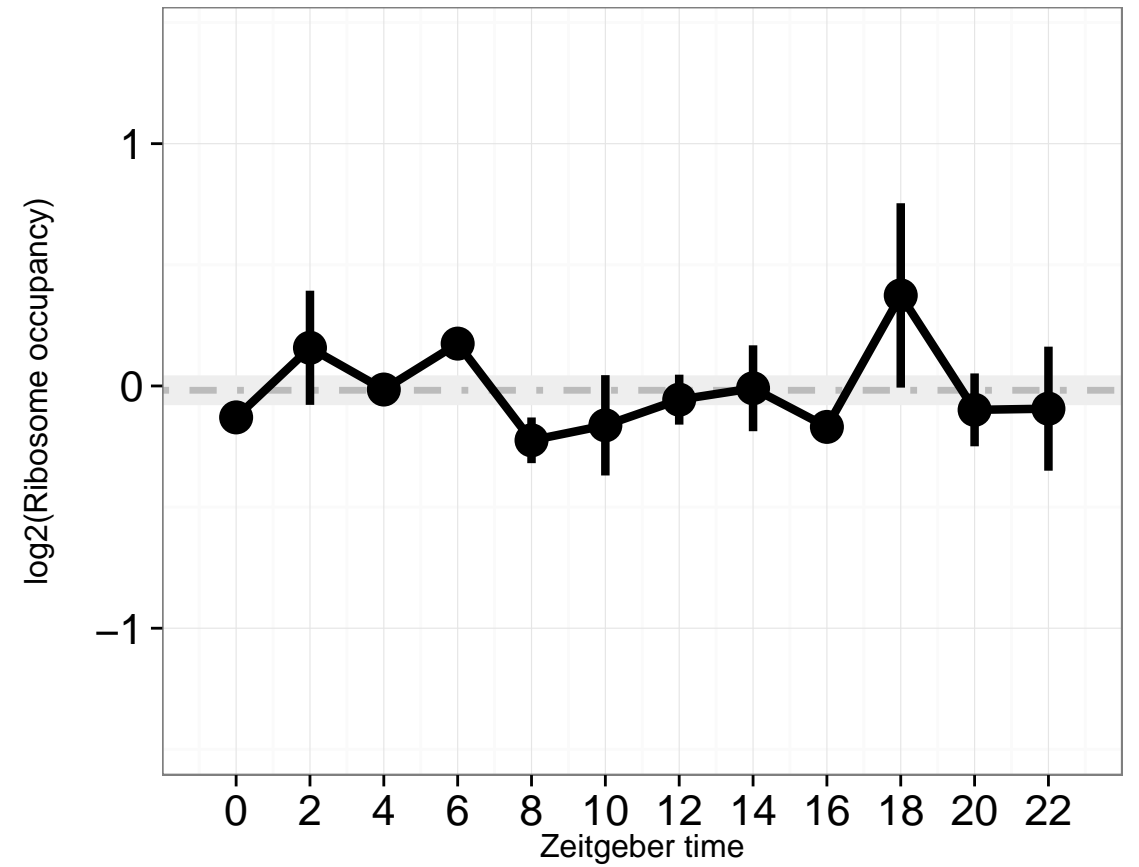

Supplement: SuppDataset_1.zip [file Pam16_set_A.pdf › Supplemental Dataset 1/A-mRNA_nonrhyth_translation_nonrhyth/Pam16_set_A.pdf]

## Pam

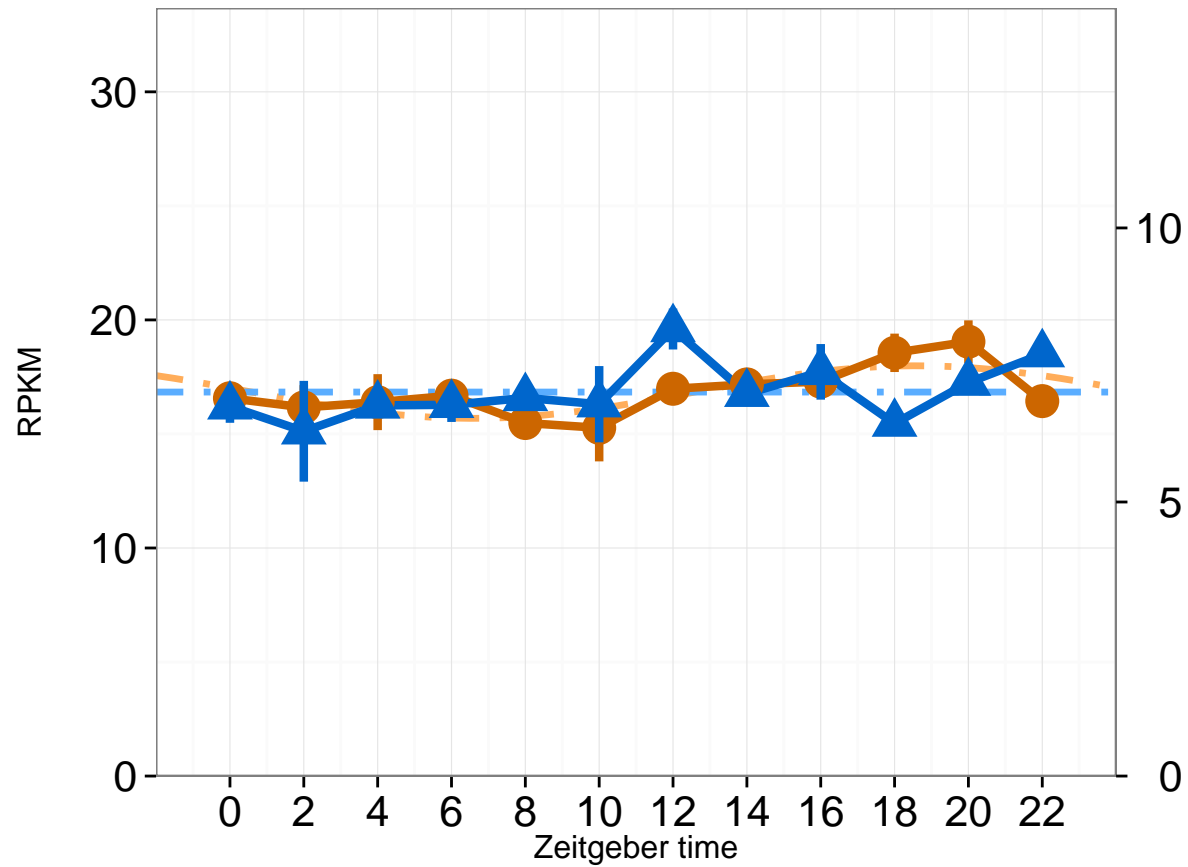

## Pam

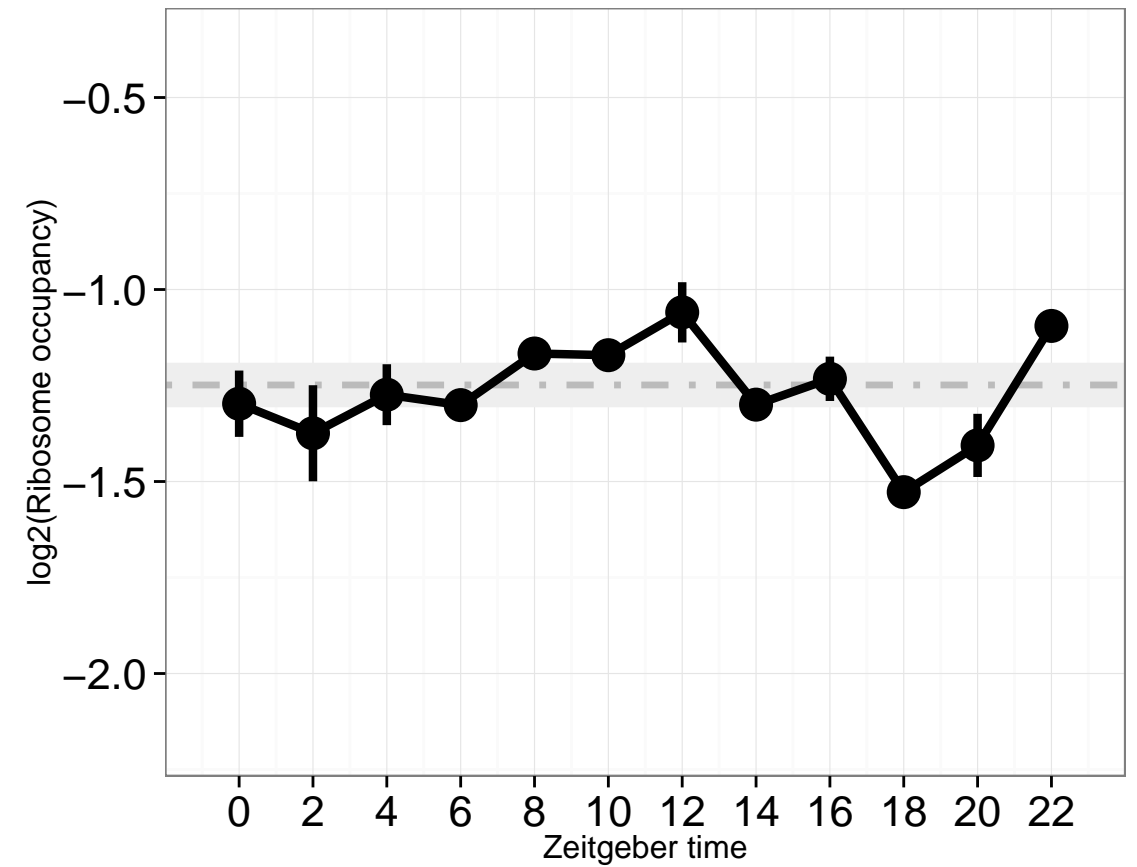

Supplement: SuppDataset_1.zip [file Pam_set_A.pdf › Supplemental Dataset 1/A-mRNA_nonrhyth_translation_nonrhyth/Pam_set_A.pdf]

## Pan2

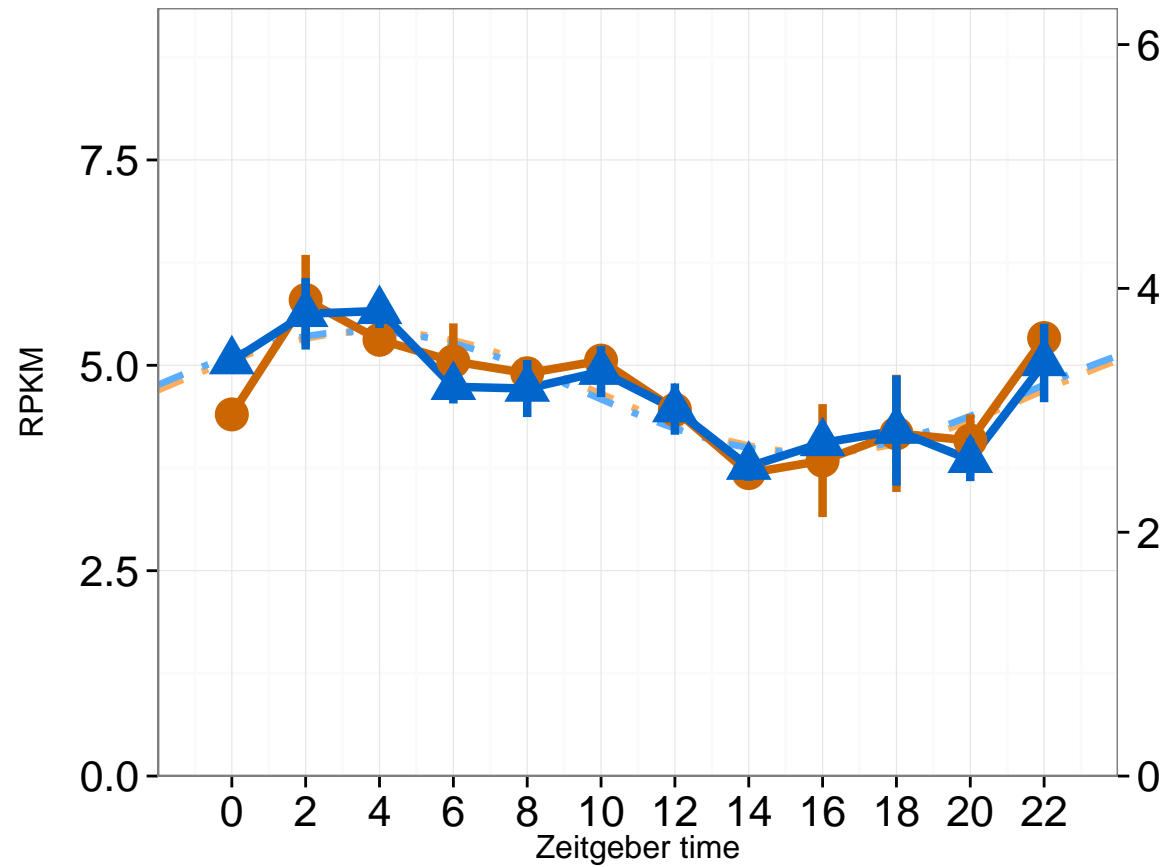

## Pan2

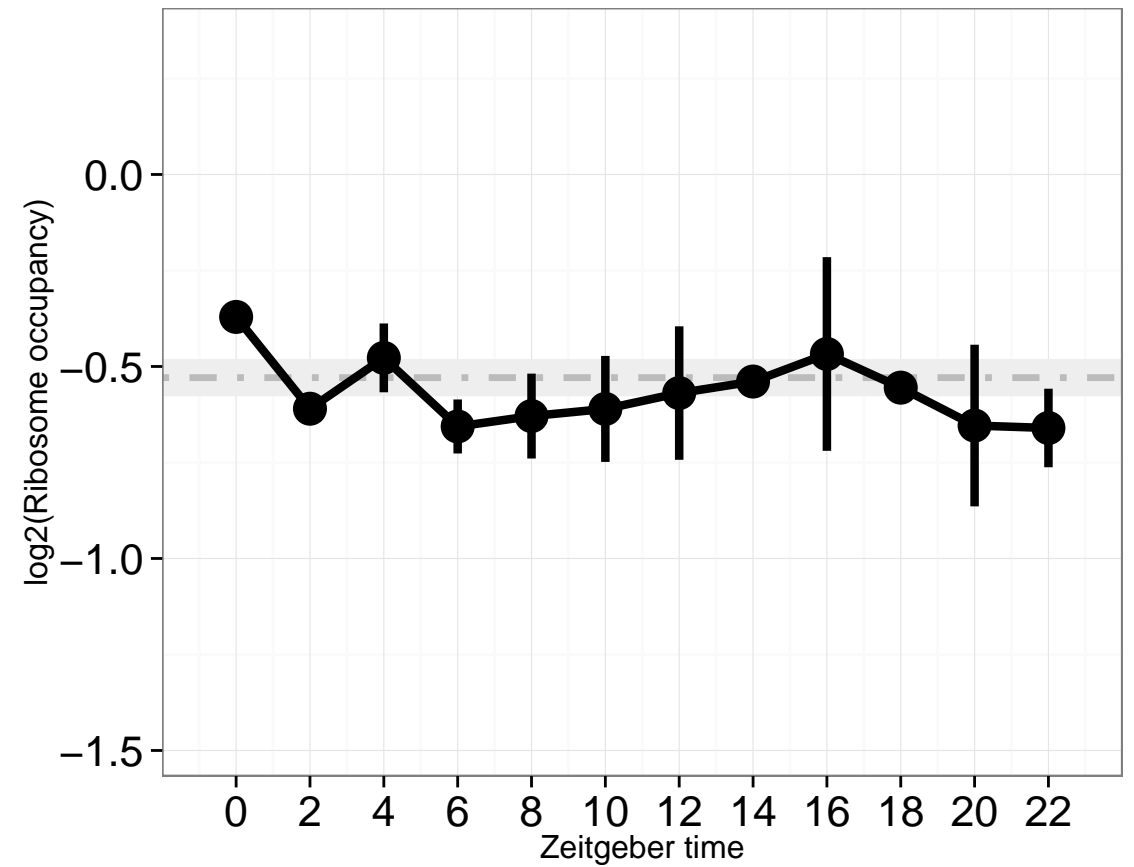

Supplement: SuppDataset_1.zip [file Pan2_set_A.pdf › Supplemental Dataset 1/A-mRNA_nonrhyth_translation_nonrhyth/Pan2_set_A.pdf]

# Pan3

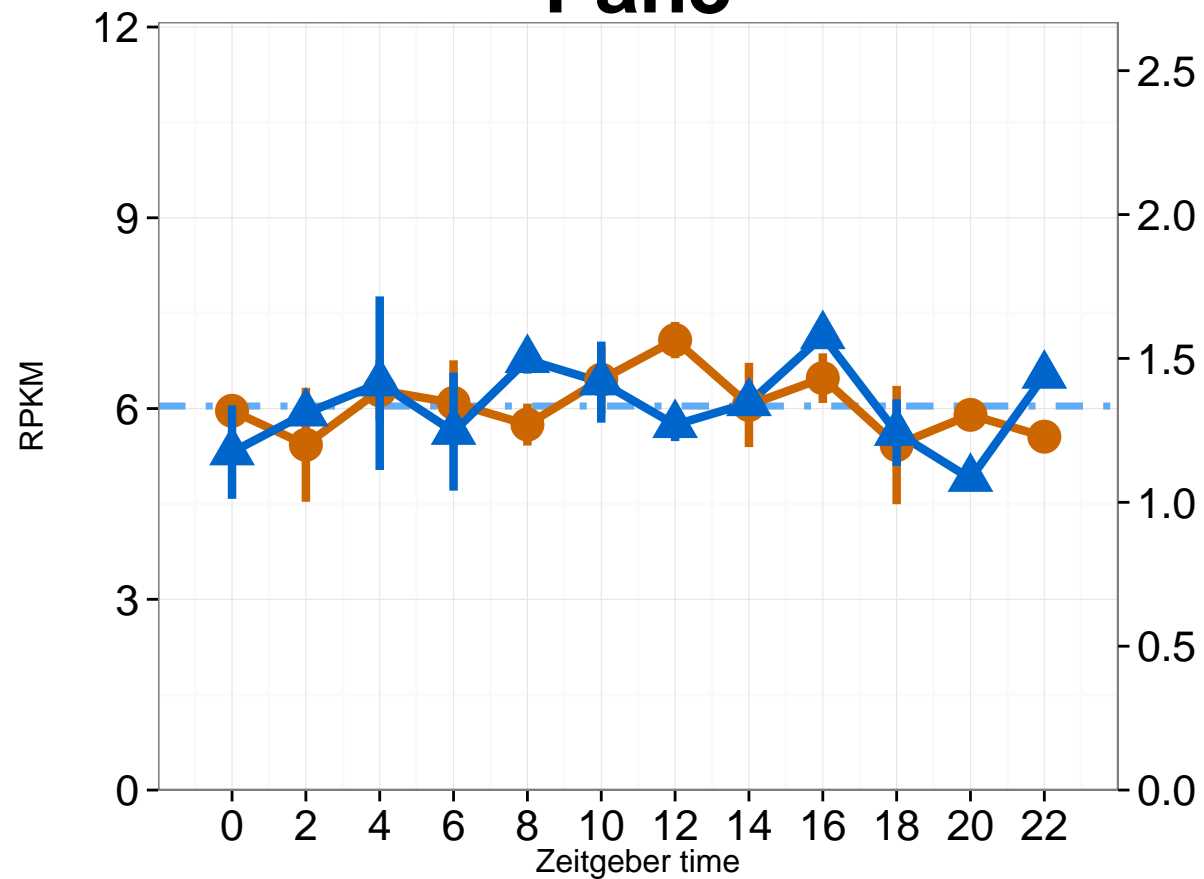

# Pan3

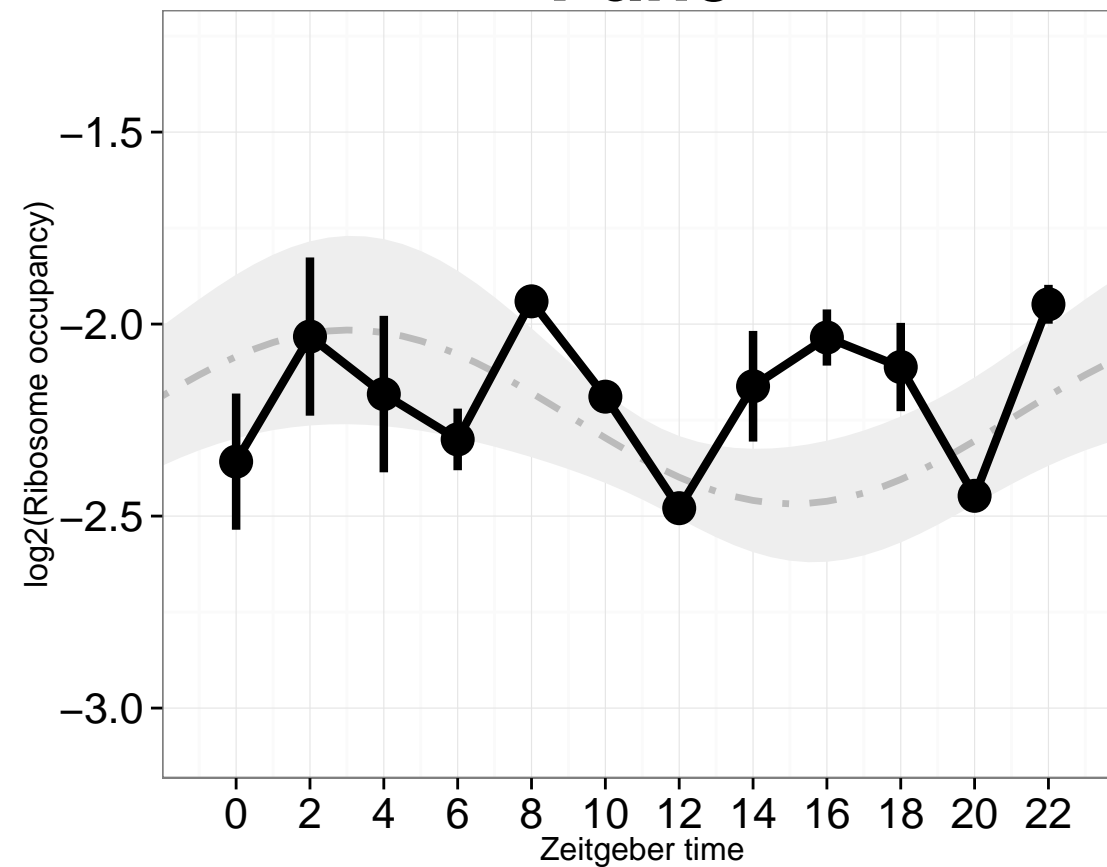

Supplement: SuppDataset_1.zip [file Pan3_set_A.pdf › Supplemental Dataset 1/A-mRNA_nonrhyth_translation_nonrhyth/Pan3_set_A.pdf]

# Pank1

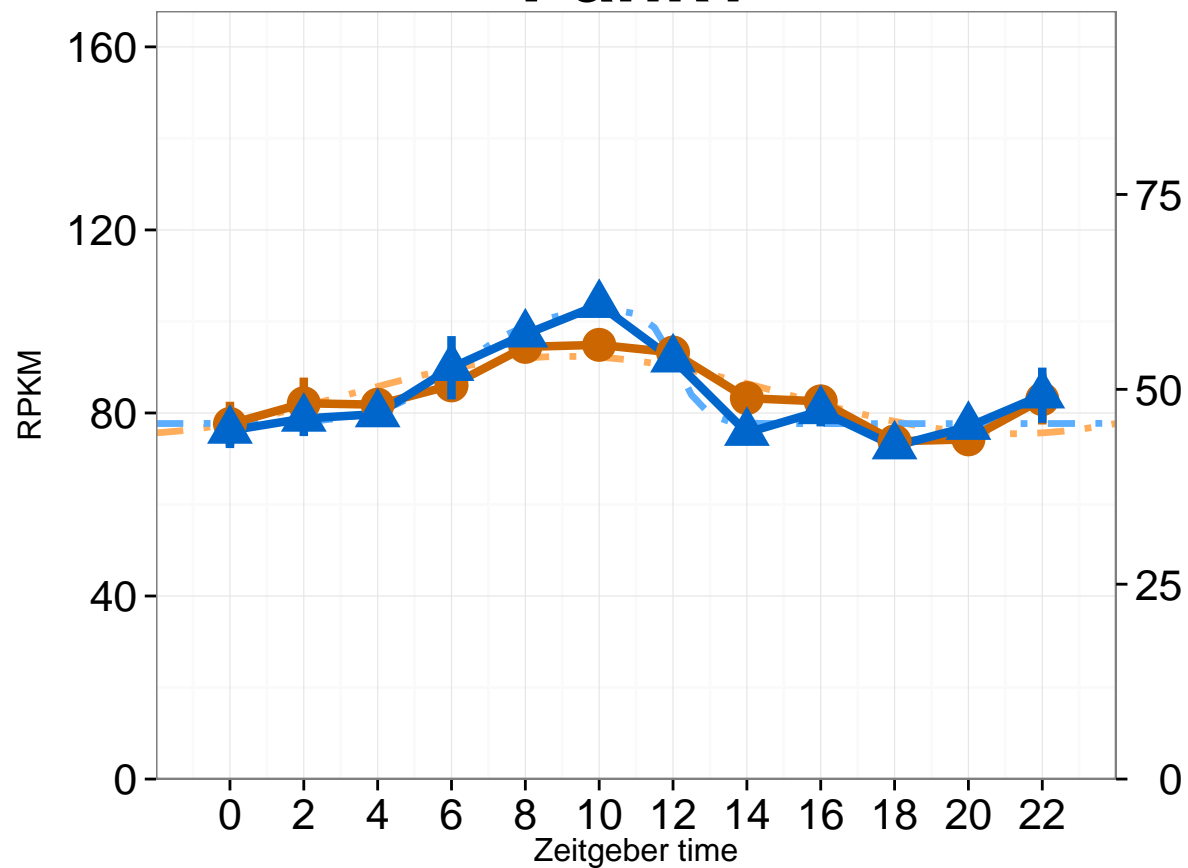

# Pank1

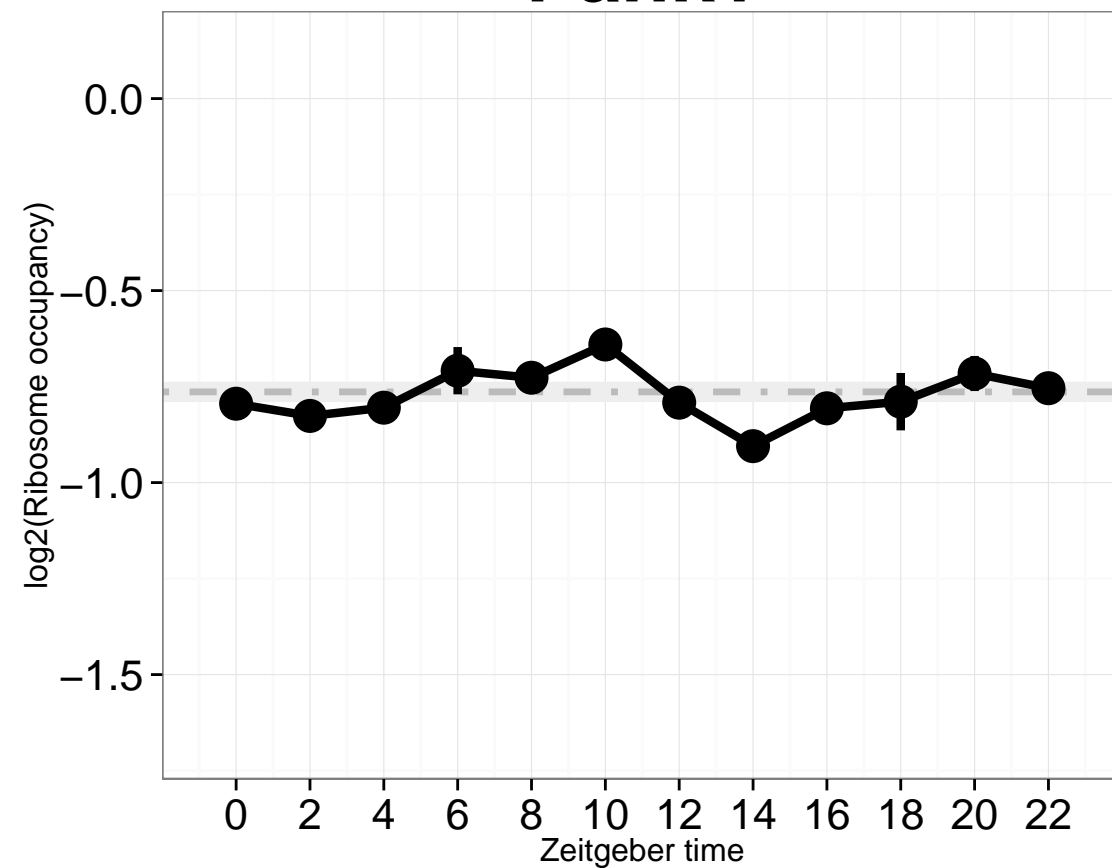

Supplement: SuppDataset_1.zip [file Pank1_set_A.pdf › Supplemental Dataset 1/A-mRNA_nonrhyth_translation_nonrhyth/Pank1_set_A.pdf]

# Pank2

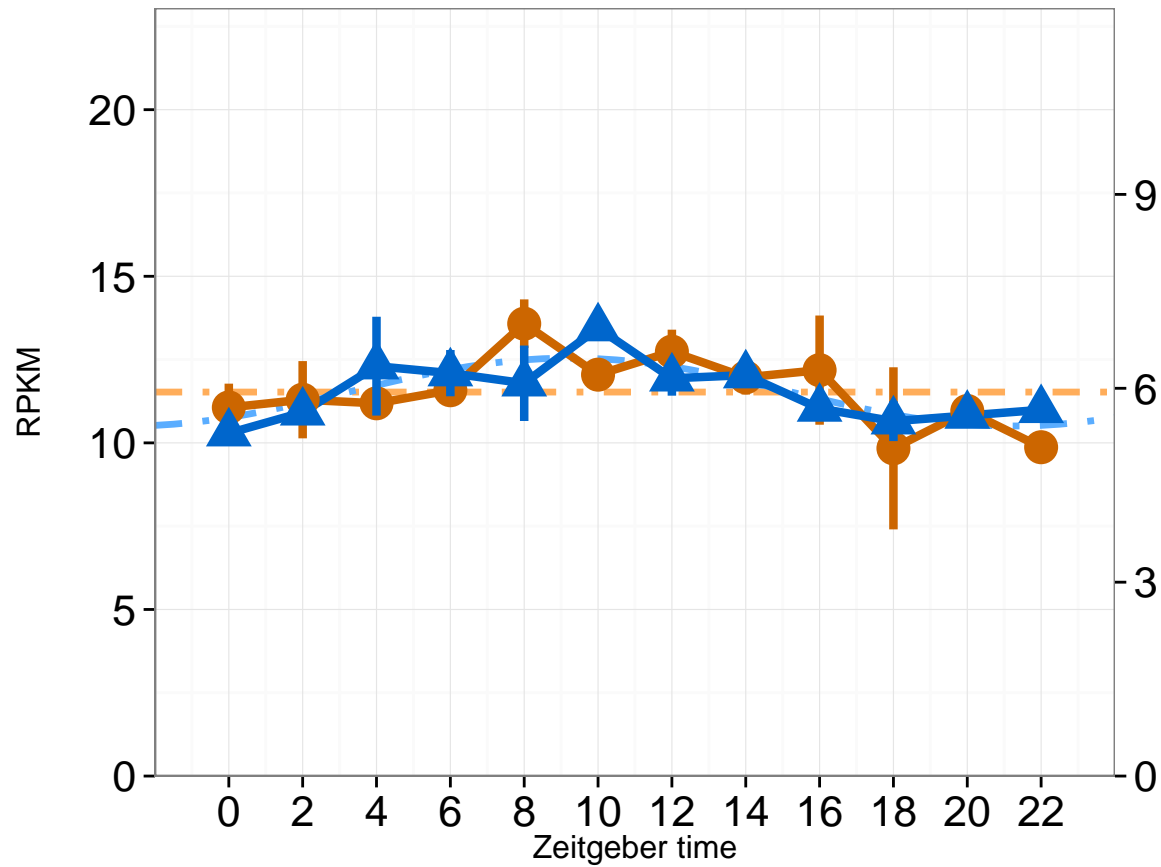

# Pank2

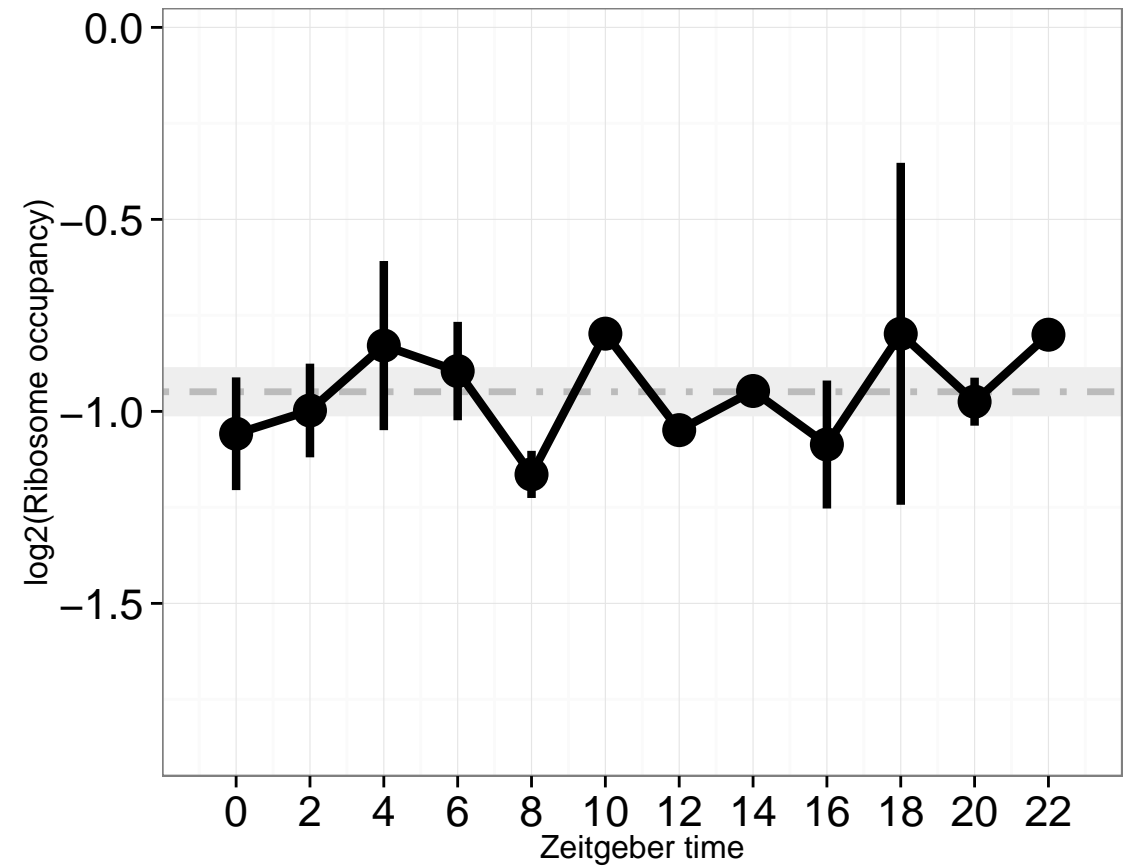

Supplement: SuppDataset_1.zip [file Pank2_set_A.pdf › Supplemental Dataset 1/A-mRNA_nonrhyth_translation_nonrhyth/Pank2_set_A.pdf]

# Pank3

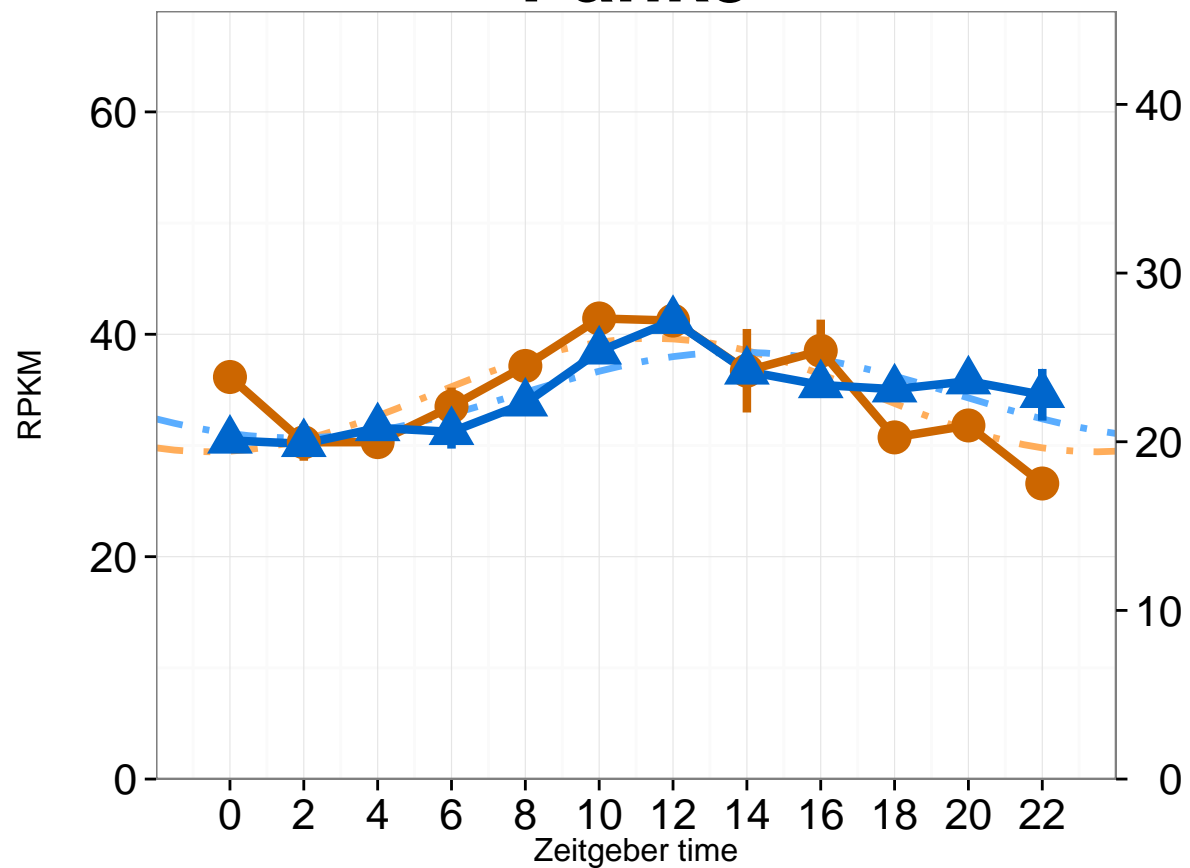

# Pank3

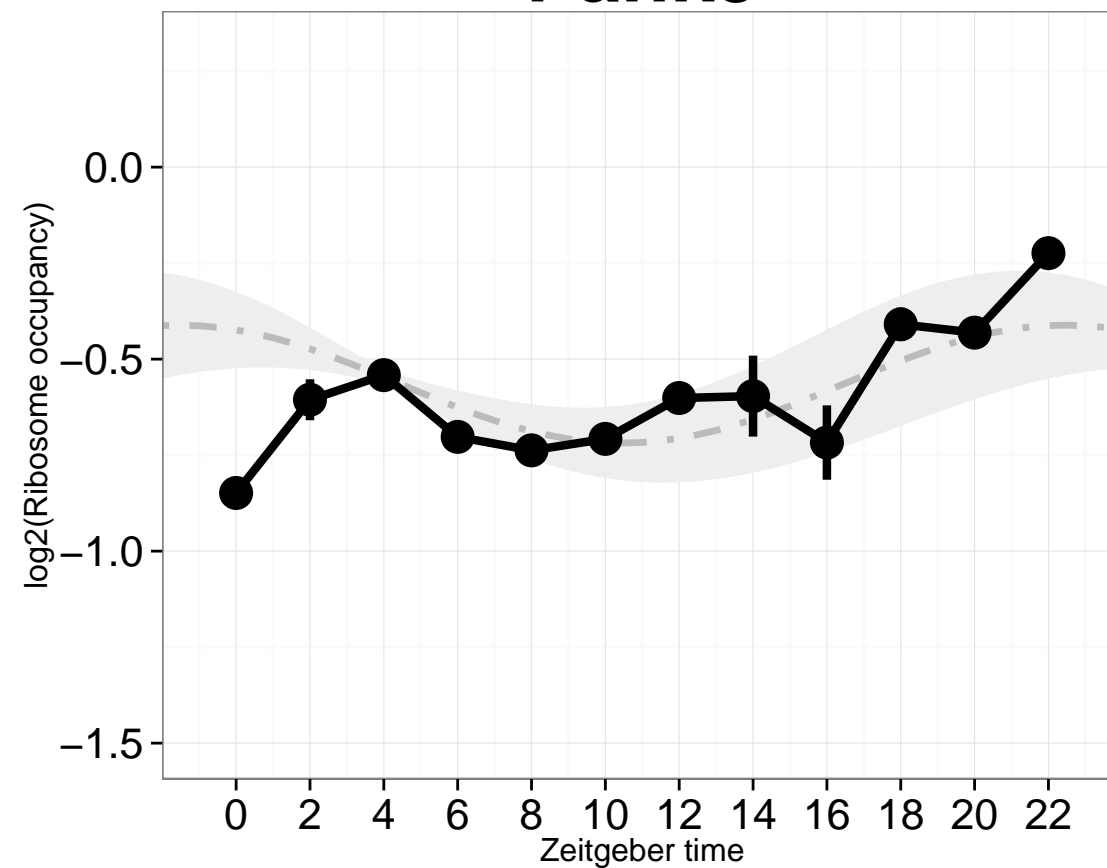

Supplement: SuppDataset_1.zip [file Pank3_set_A.pdf › Supplemental Dataset 1/A-mRNA_nonrhyth_translation_nonrhyth/Pank3_set_A.pdf]

# Pank4

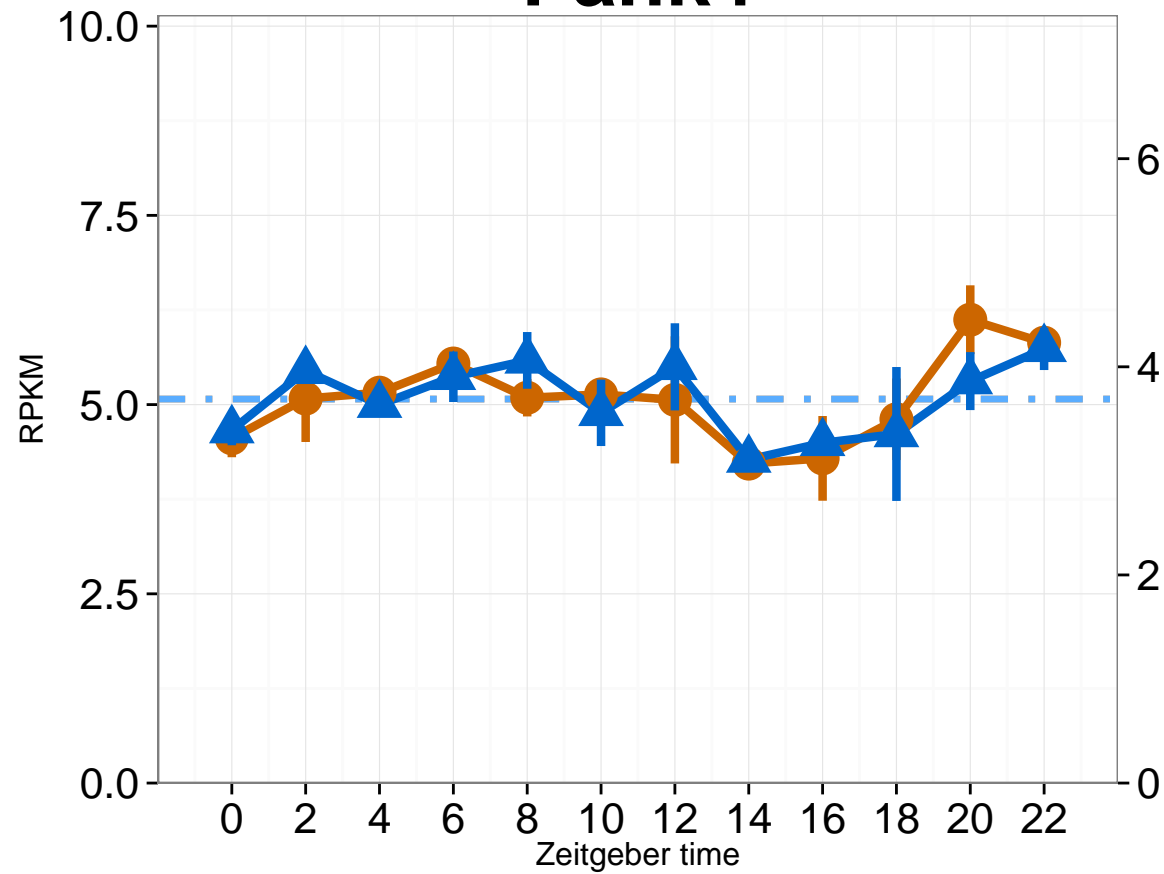

# Pank4

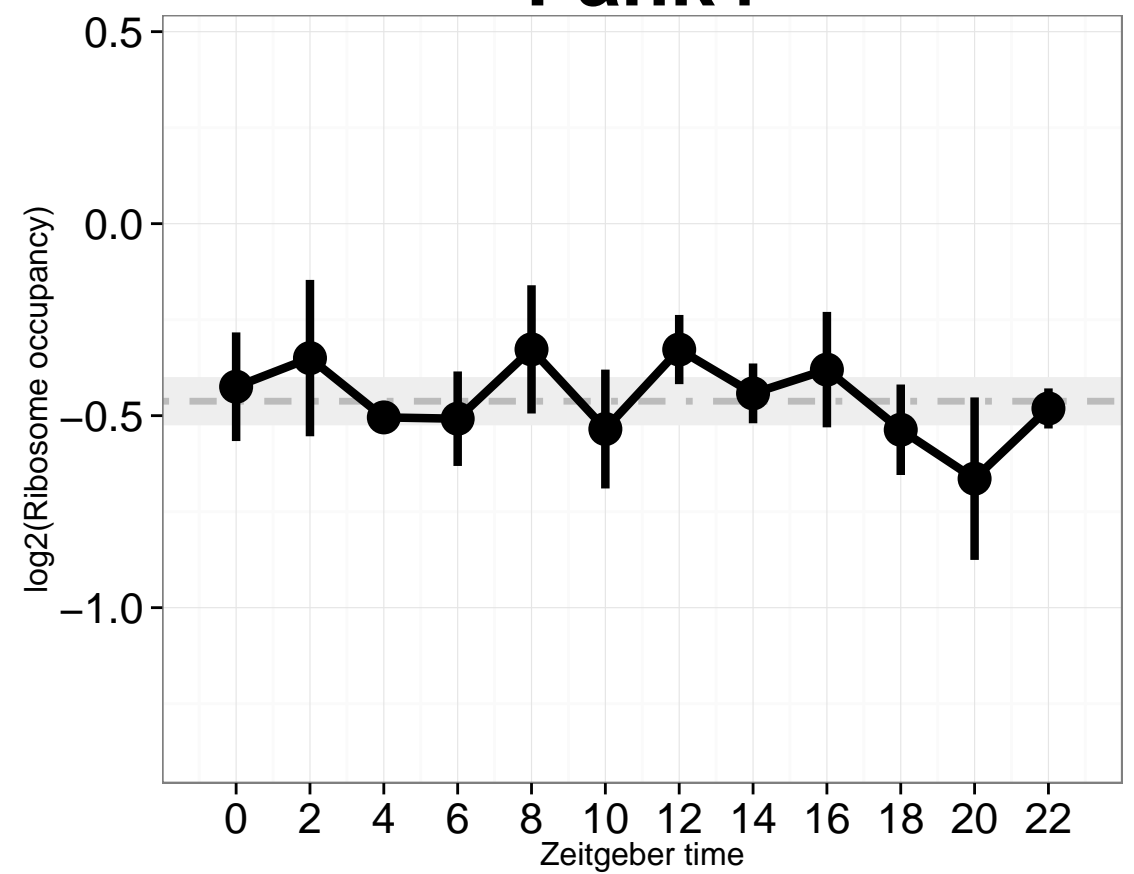

Supplement: SuppDataset_1.zip [file Pank4_set_A.pdf › Supplemental Dataset 1/A-mRNA_nonrhyth_translation_nonrhyth/Pank4_set_A.pdf]

## Paox

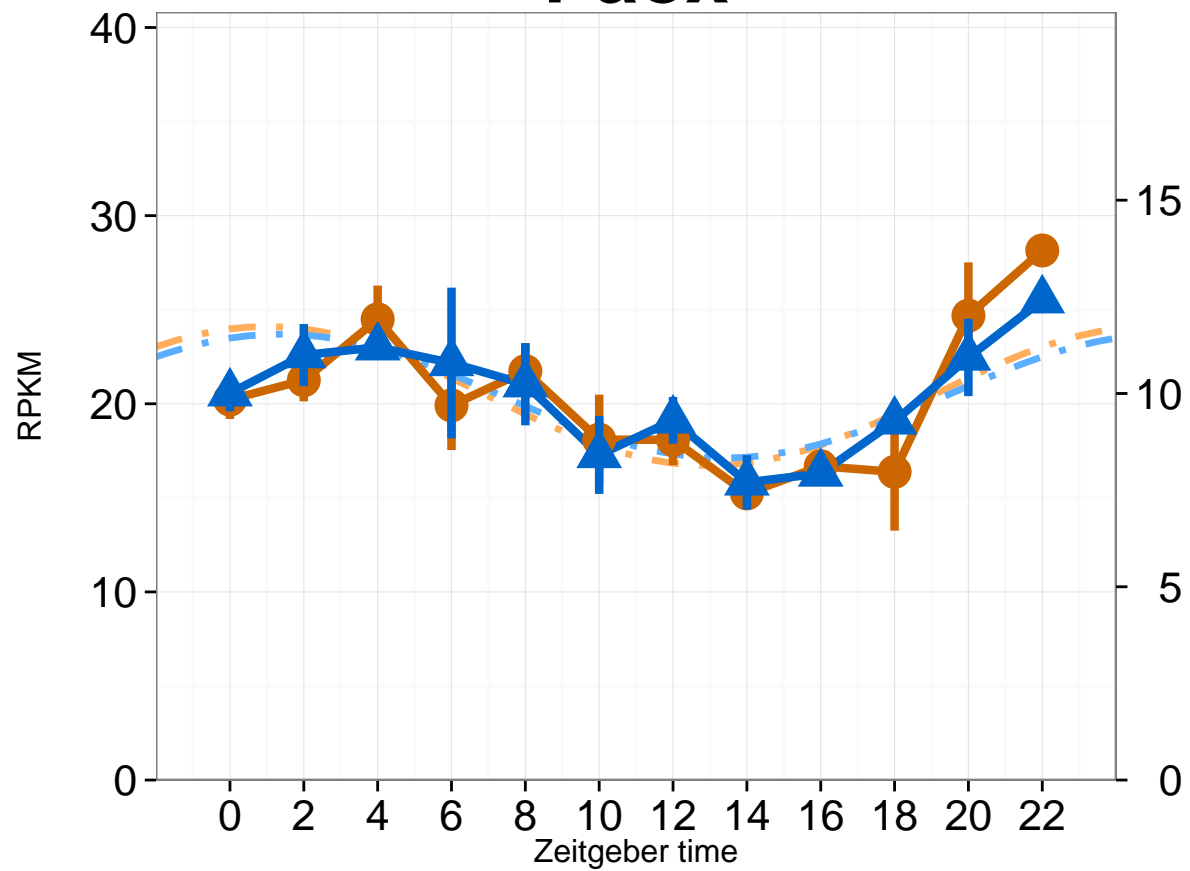

## Paox

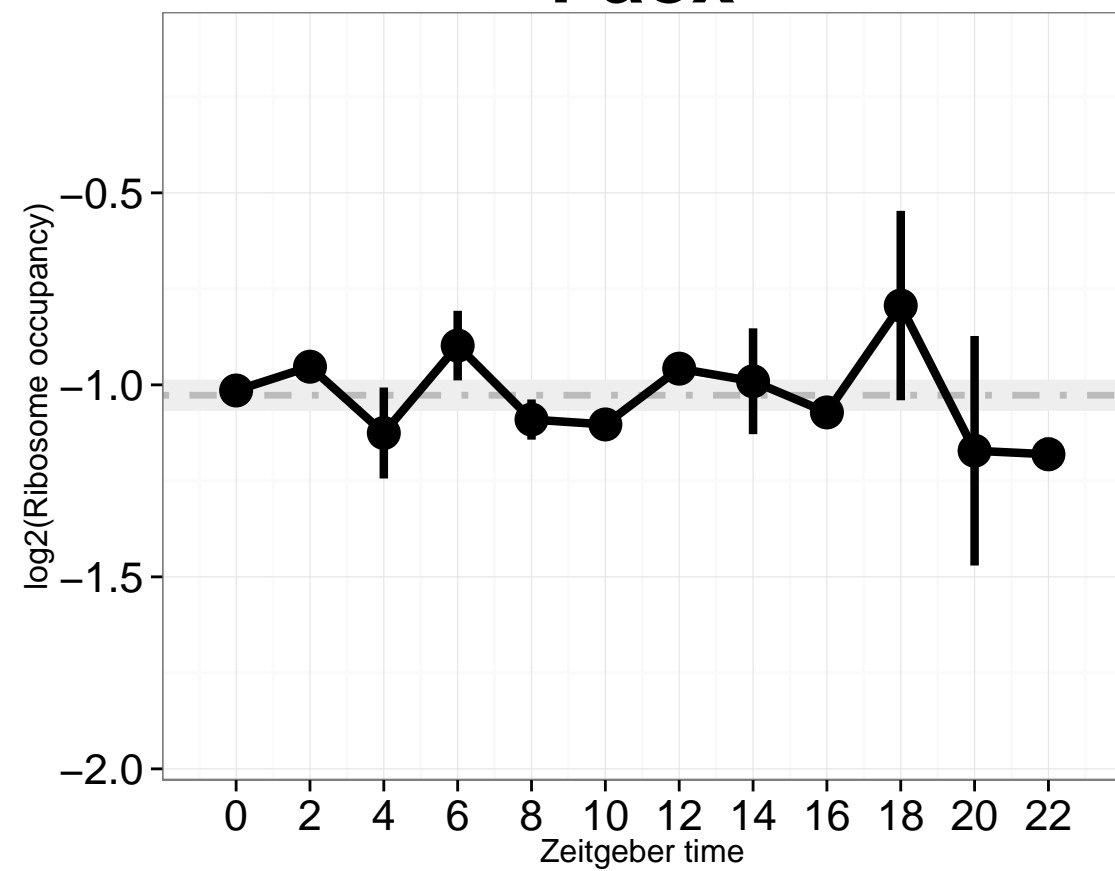

Supplement: SuppDataset_1.zip [file Paox_set_A.pdf › Supplemental Dataset 1/A-mRNA_nonrhyth_translation_nonrhyth/Paox_set_A.pdf]

## Papd4

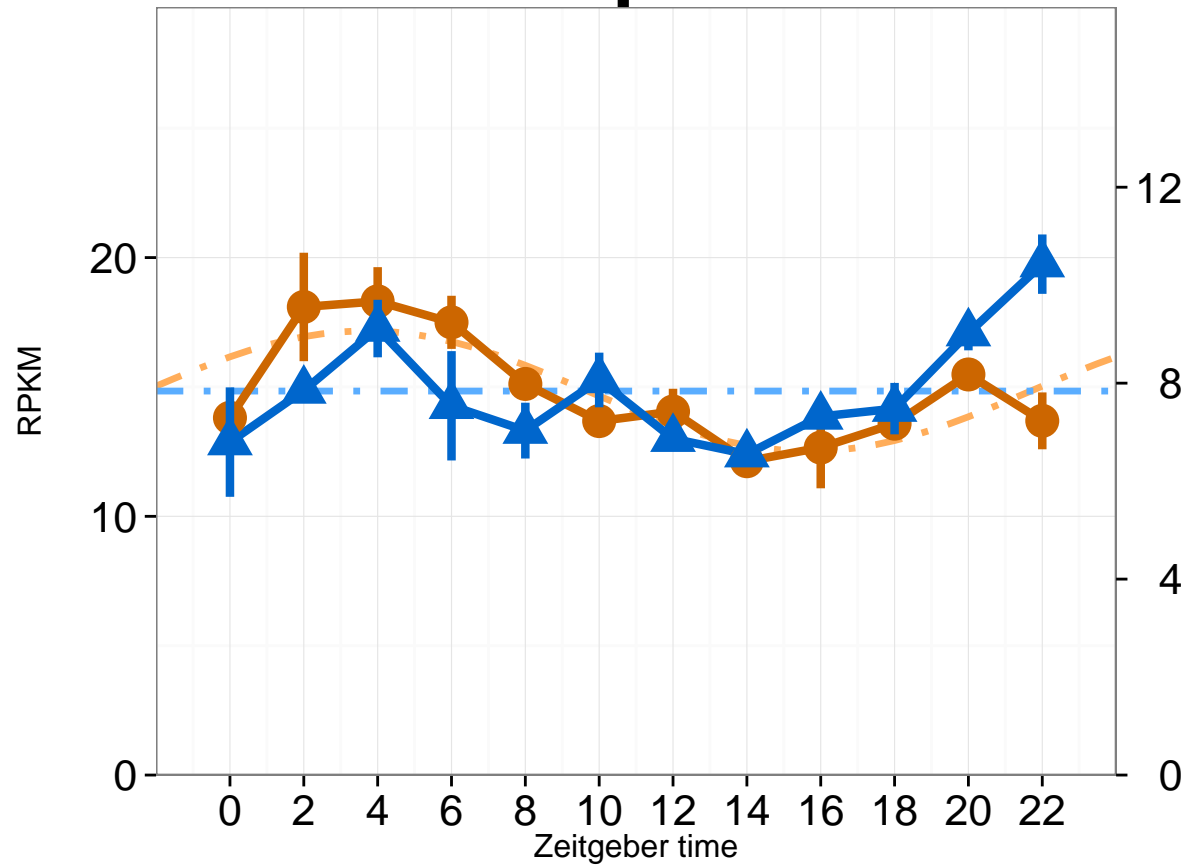

## Papd4

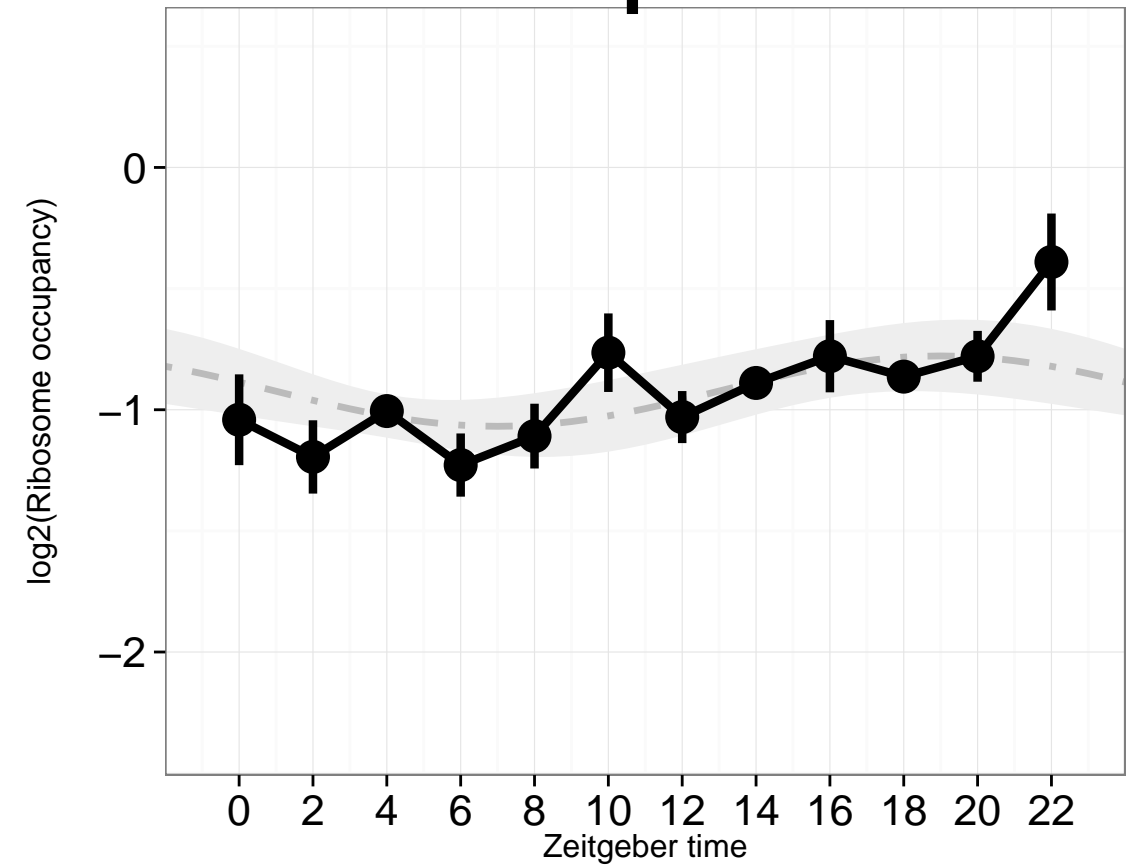

Supplement: SuppDataset_1.zip [file Papd4_set_A.pdf › Supplemental Dataset 1/A-mRNA_nonrhyth_translation_nonrhyth/Papd4_set_A.pdf]

# Papd5

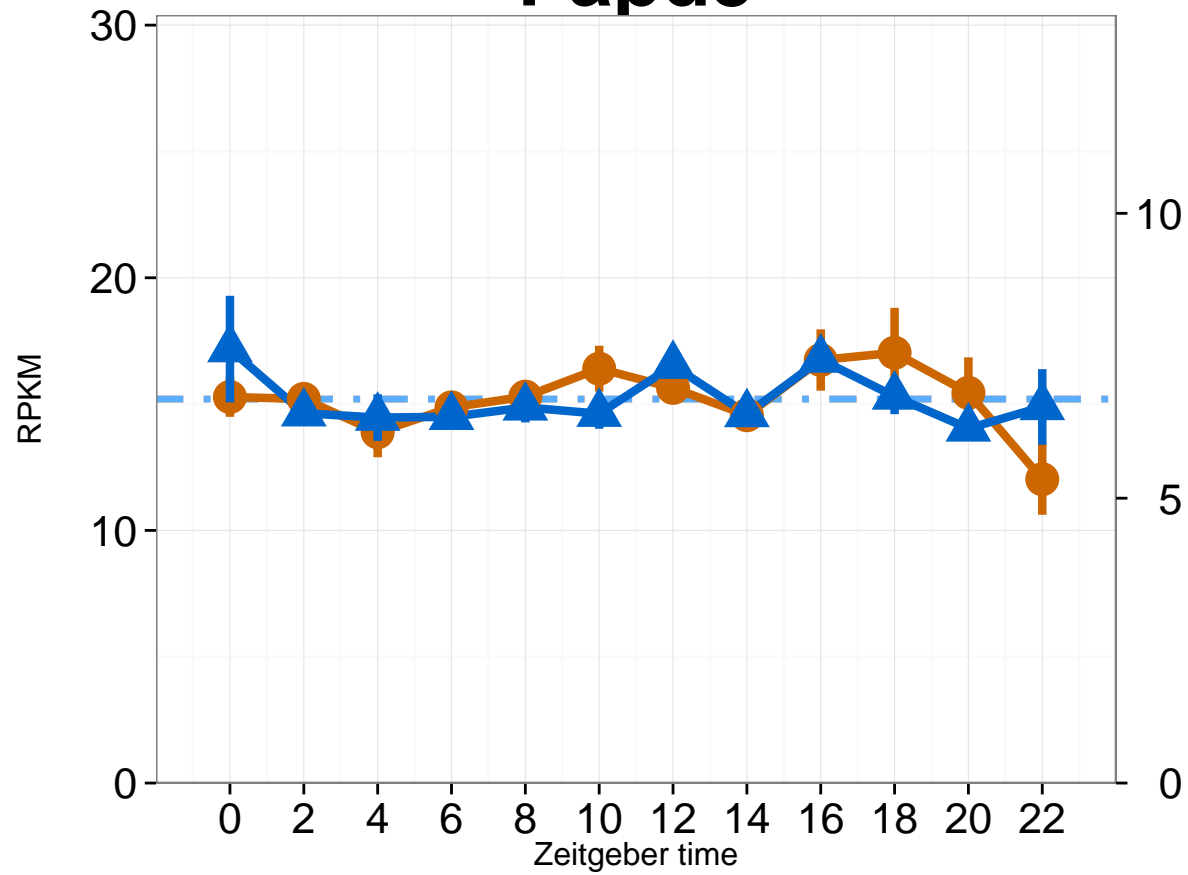

# Papd5

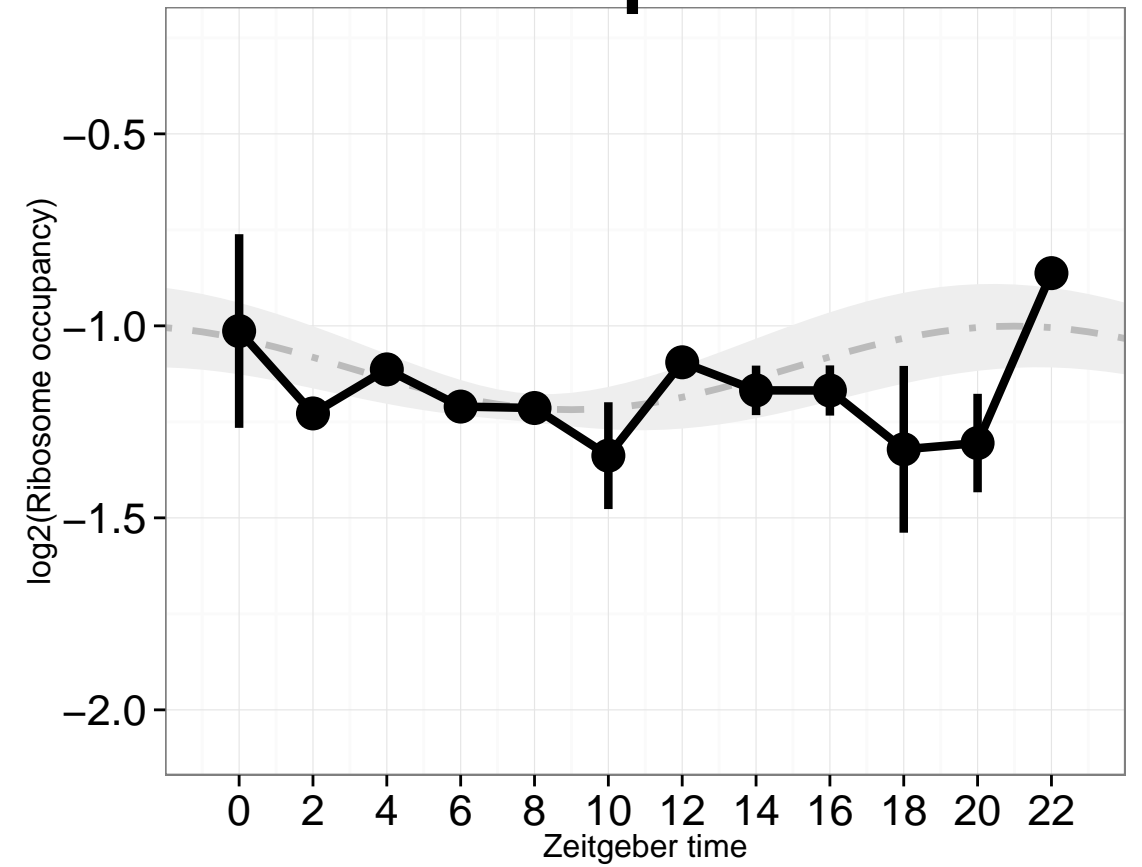

Supplement: SuppDataset_1.zip [file Papd5_set_A.pdf › Supplemental Dataset 1/A-mRNA_nonrhyth_translation_nonrhyth/Papd5_set_A.pdf]

## PapIn

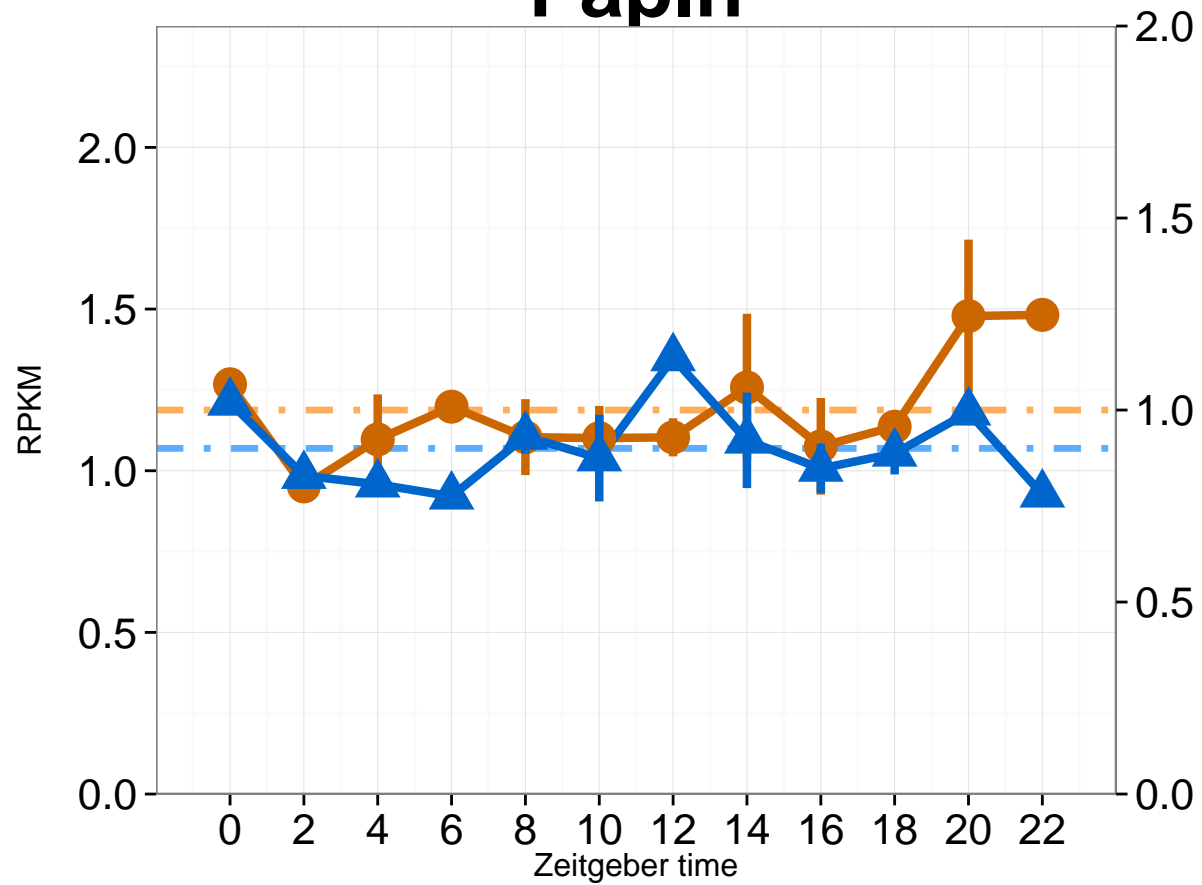

## PapIn

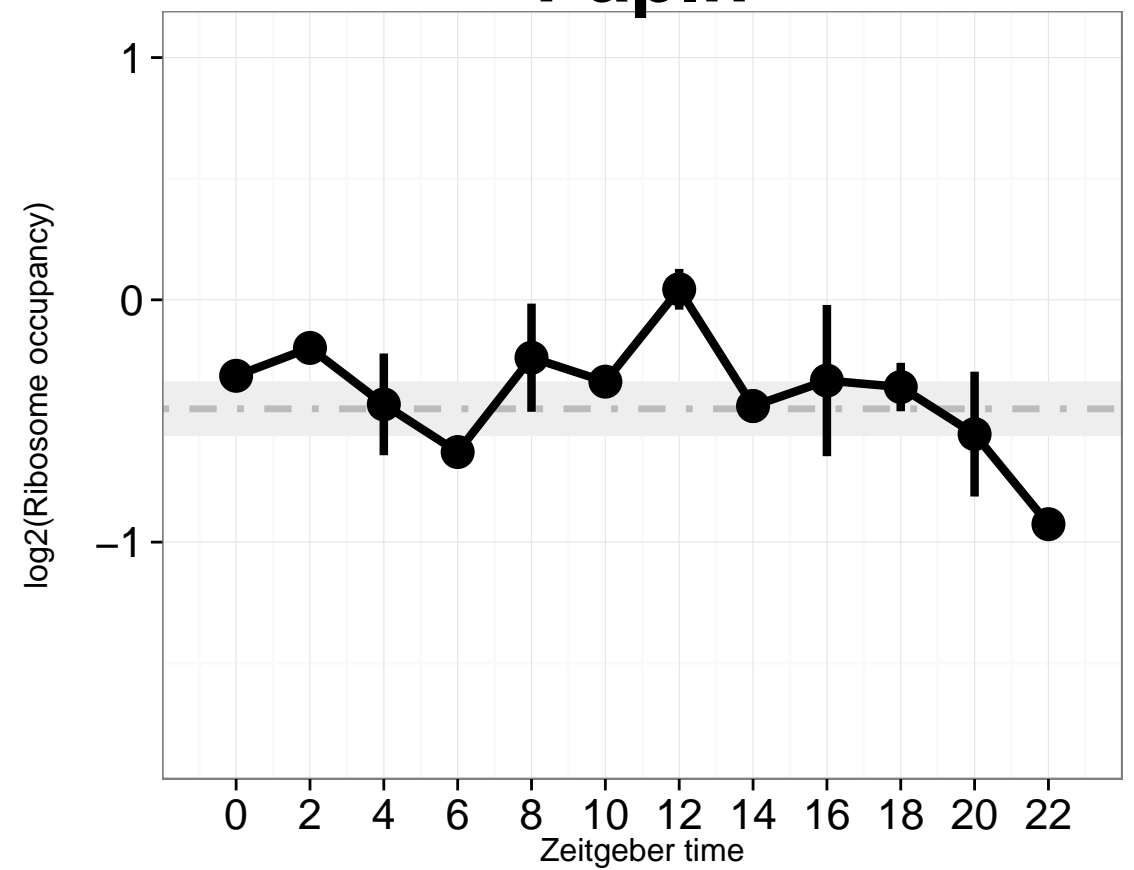

Supplement: SuppDataset_1.zip [file Papln_set_A.pdf › Supplemental Dataset 1/A-mRNA_nonrhyth_translation_nonrhyth/Papln_set_A.pdf]

## Papola

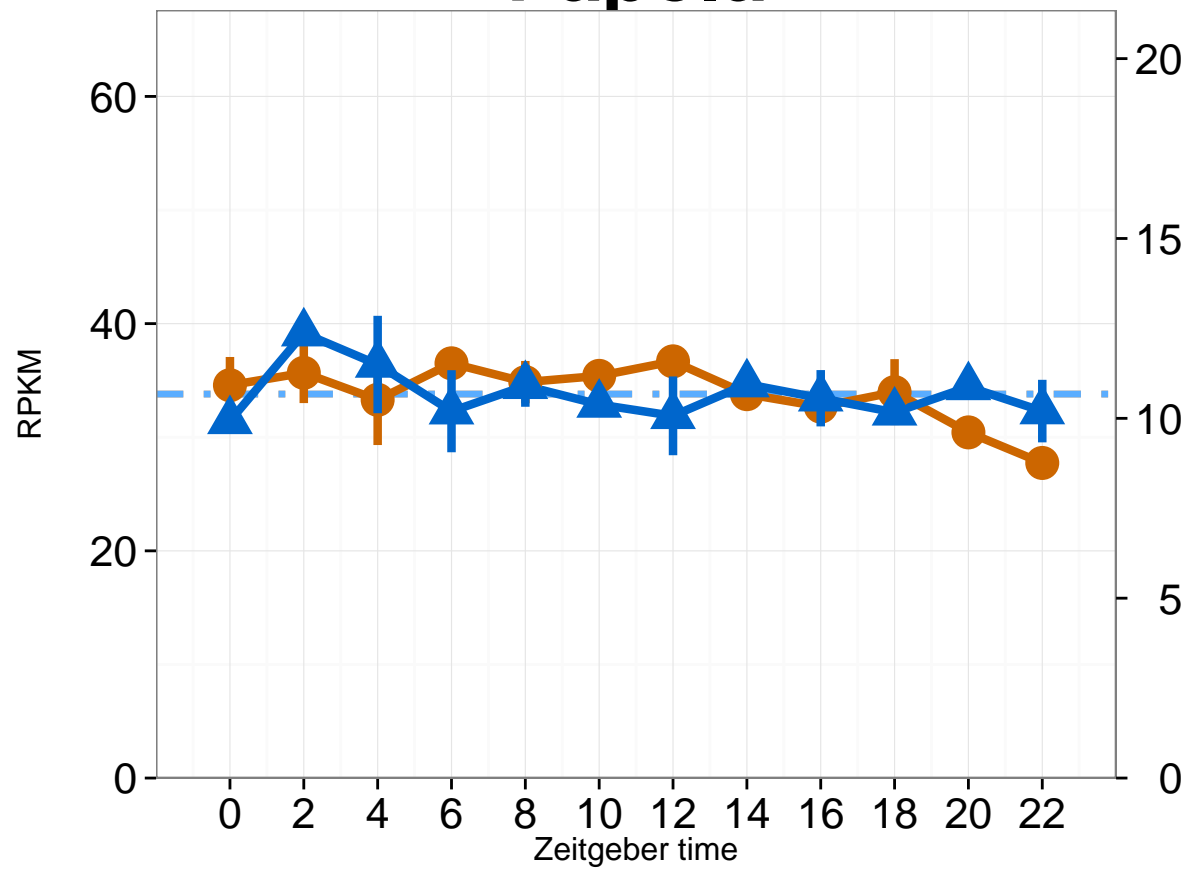

## Papola

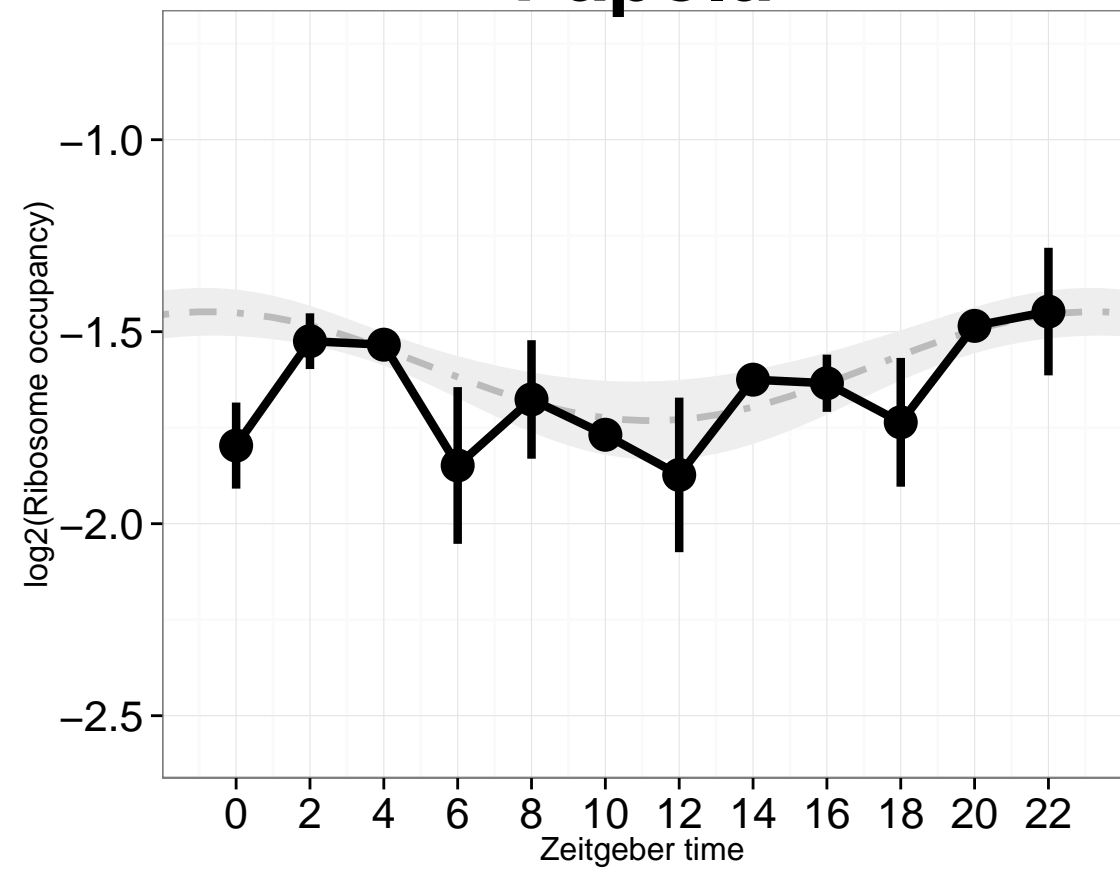

Supplement: SuppDataset_1.zip [file Papola_set_A.pdf › Supplemental Dataset 1/A-mRNA_nonrhyth_translation_nonrhyth/Papola_set_A.pdf]

## Papolg

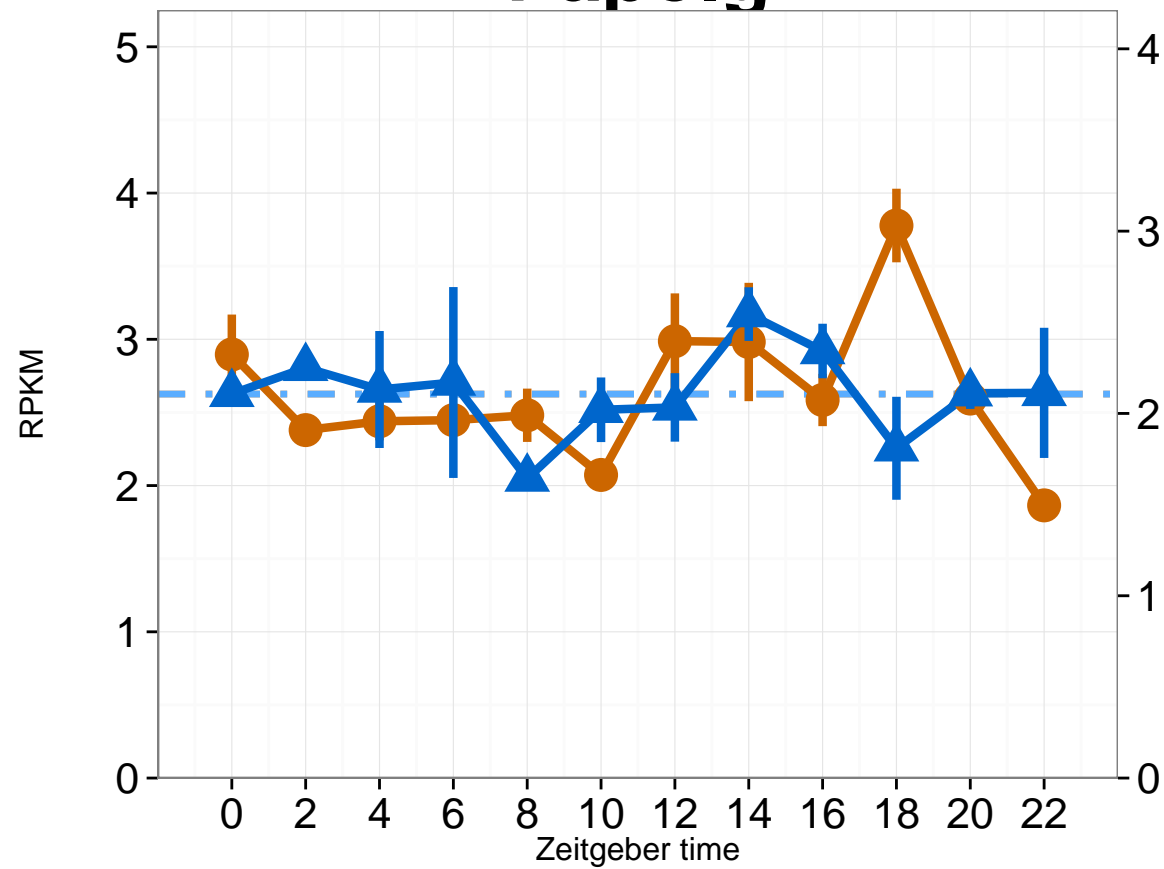

## Papolg

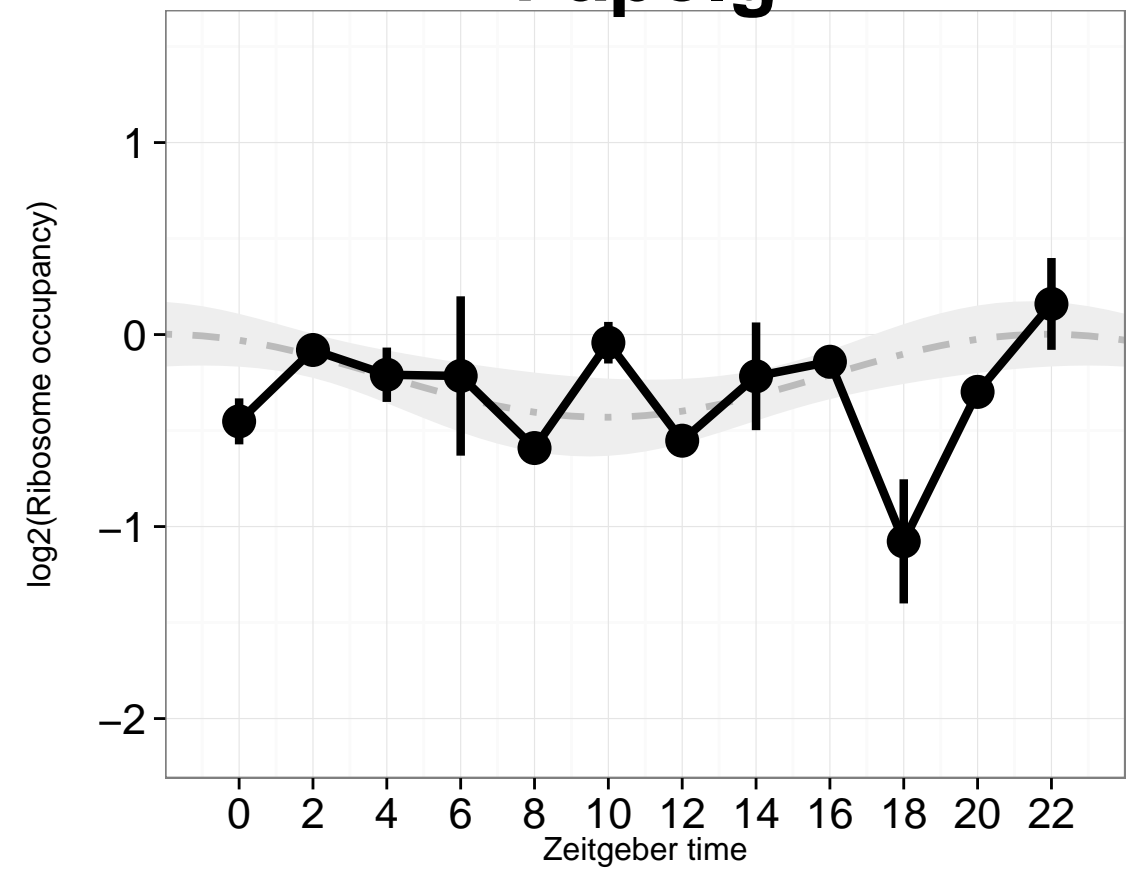

Supplement: SuppDataset_1.zip [file Papolg_set_A.pdf › Supplemental Dataset 1/A-mRNA_nonrhyth_translation_nonrhyth/Papolg_set_A.pdf]

# Papss2

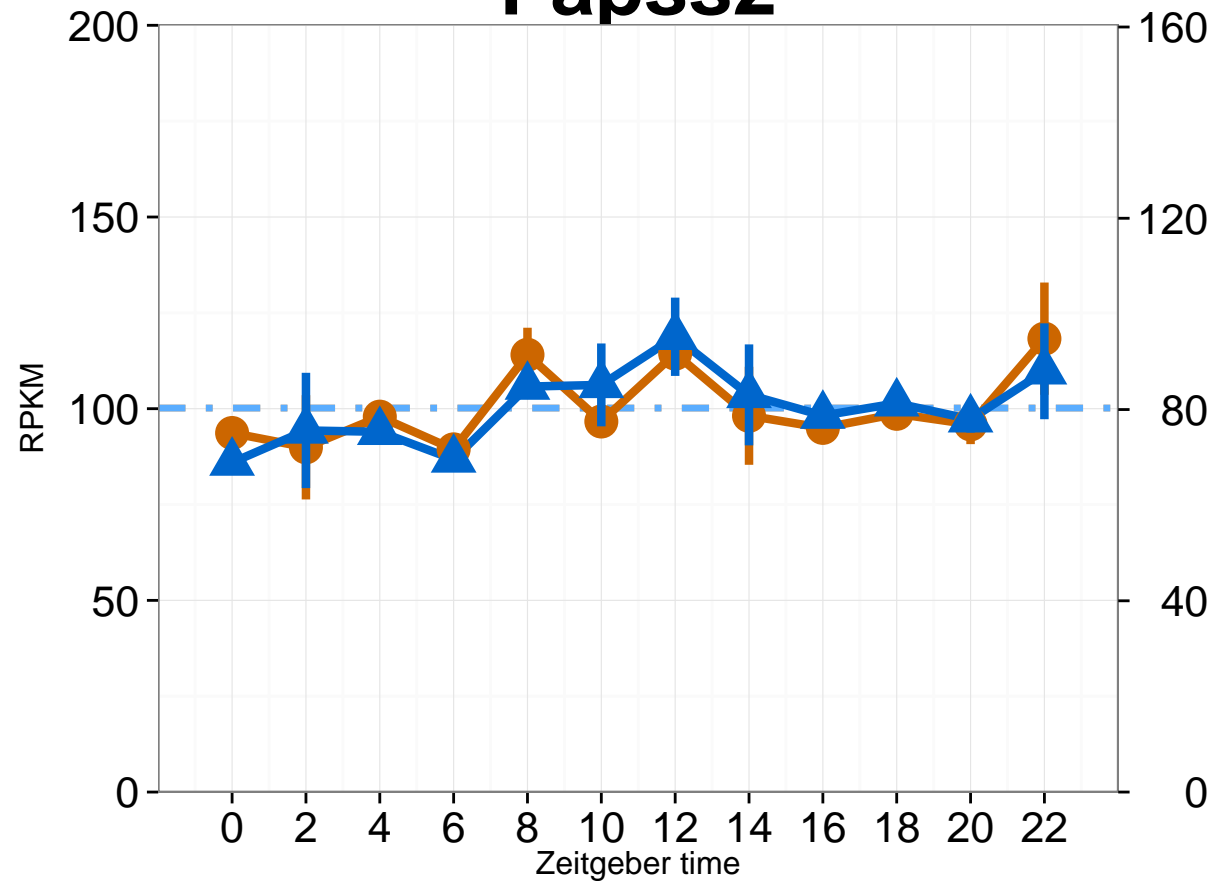

# Papss2

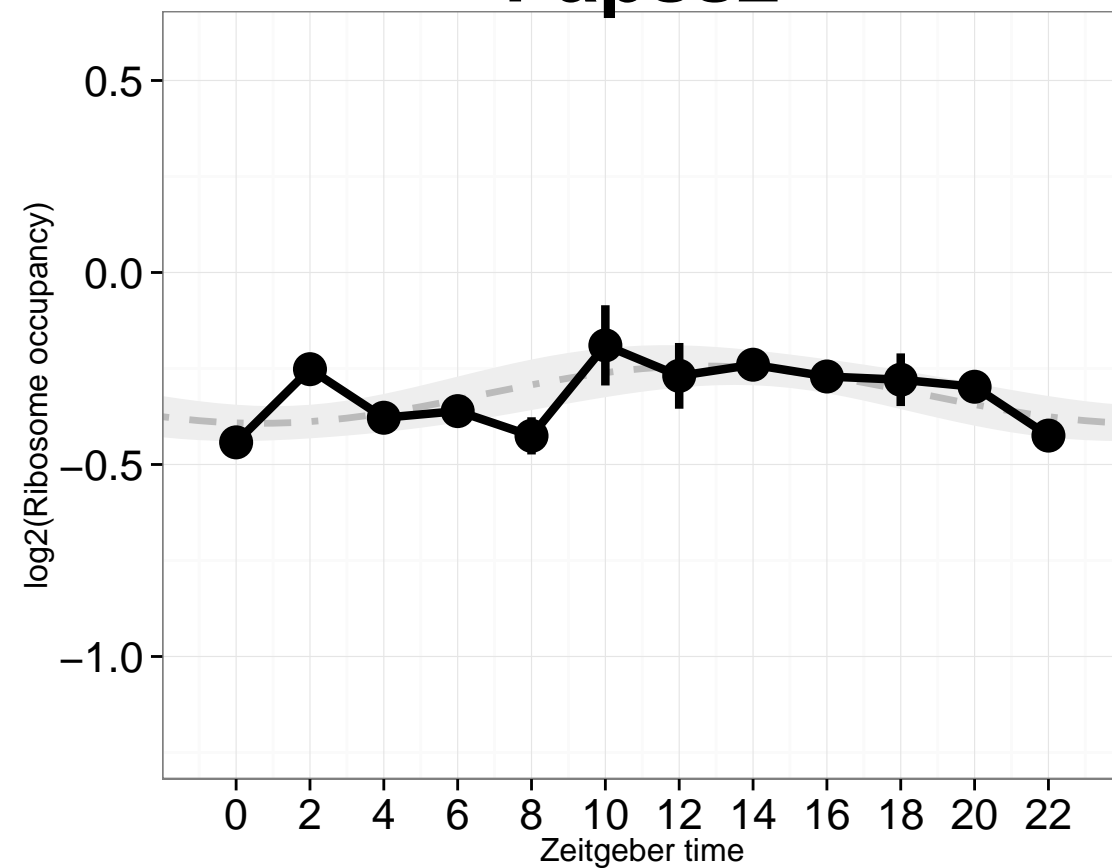

Supplement: SuppDataset_1.zip [file Papss2_set_A.pdf › Supplemental Dataset 1/A-mRNA_nonrhyth_translation_nonrhyth/Papss2_set_A.pdf]

# Paqr3

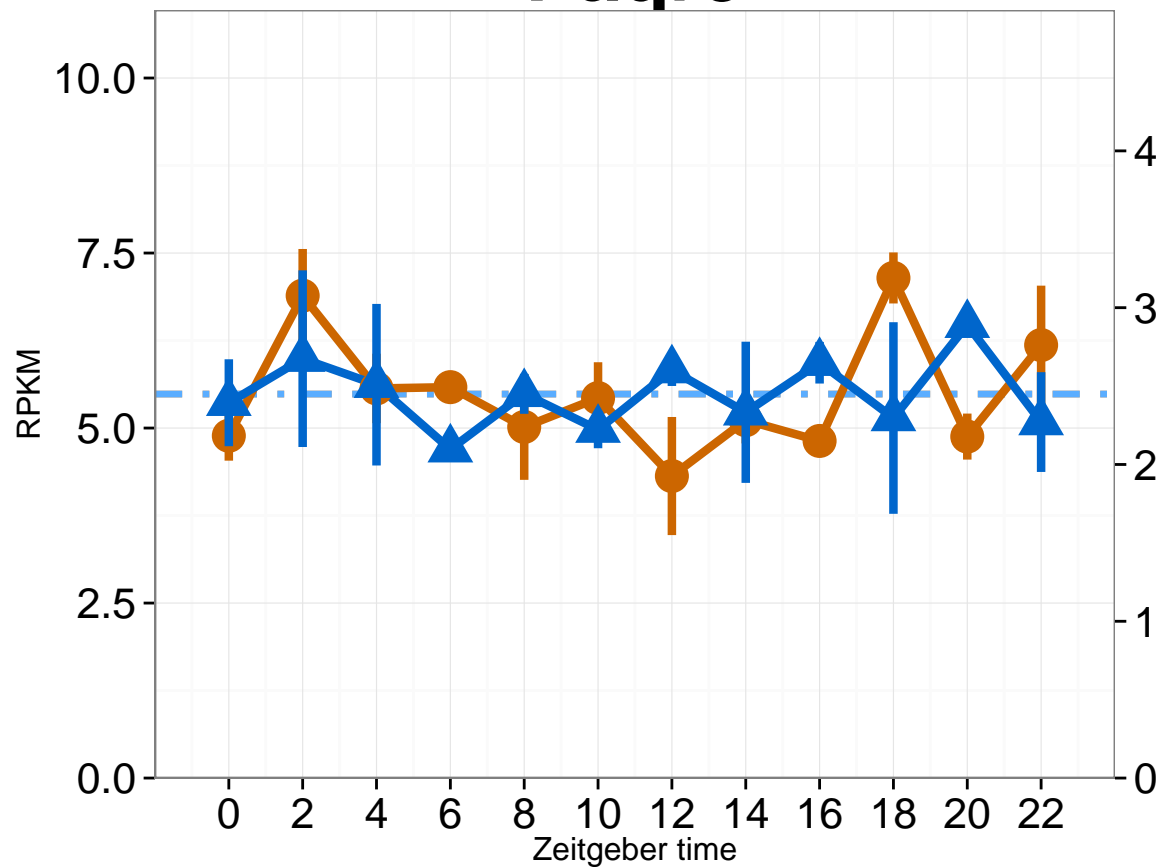

# Paqr3

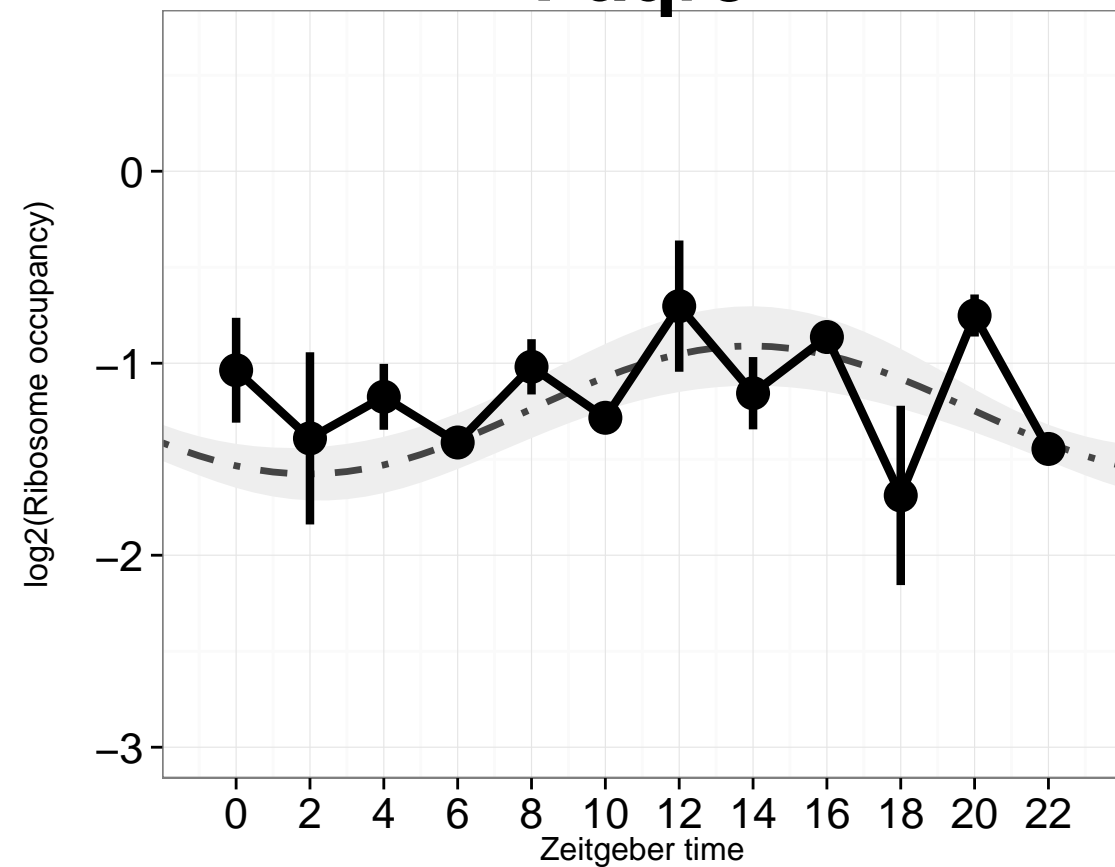

Supplement: SuppDataset_1.zip [file Paqr3_set_A.pdf › Supplemental Dataset 1/A-mRNA_nonrhyth_translation_nonrhyth/Paqr3_set_A.pdf]

# Paqr7

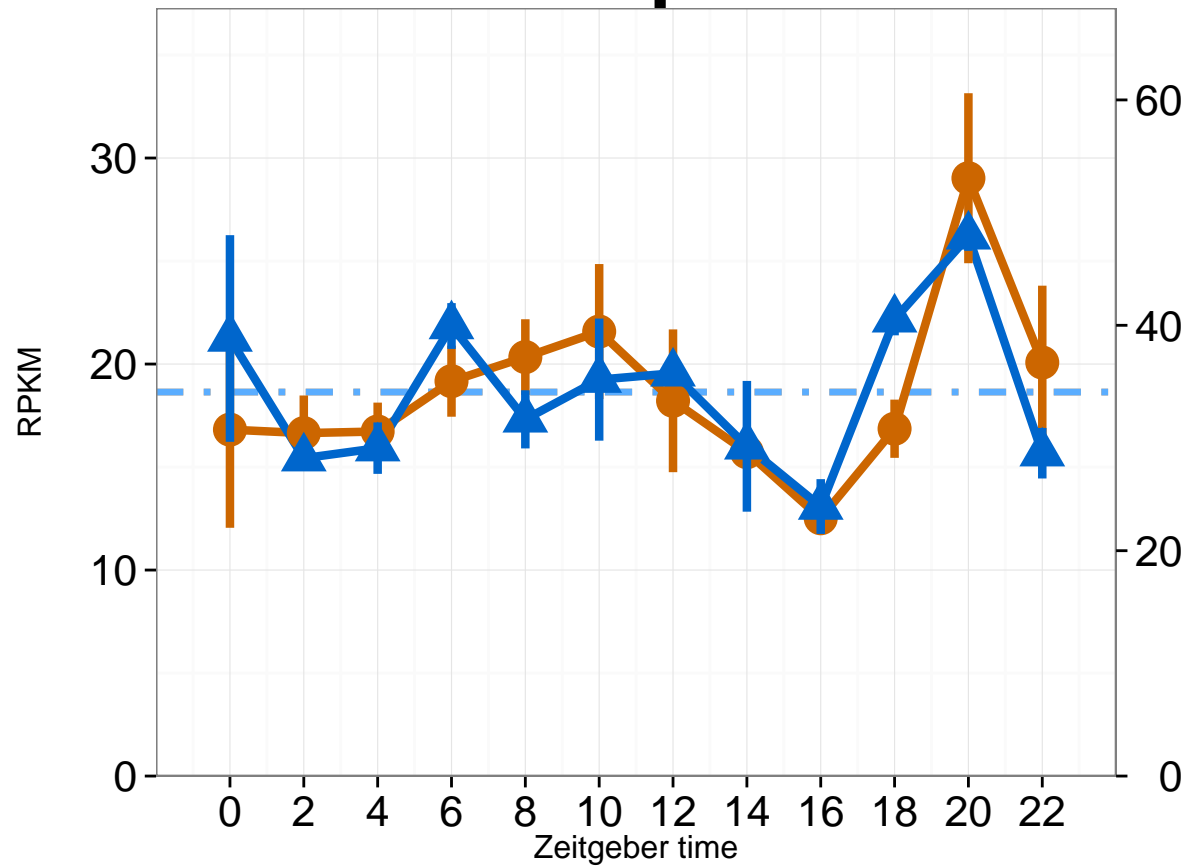

# Paqr7

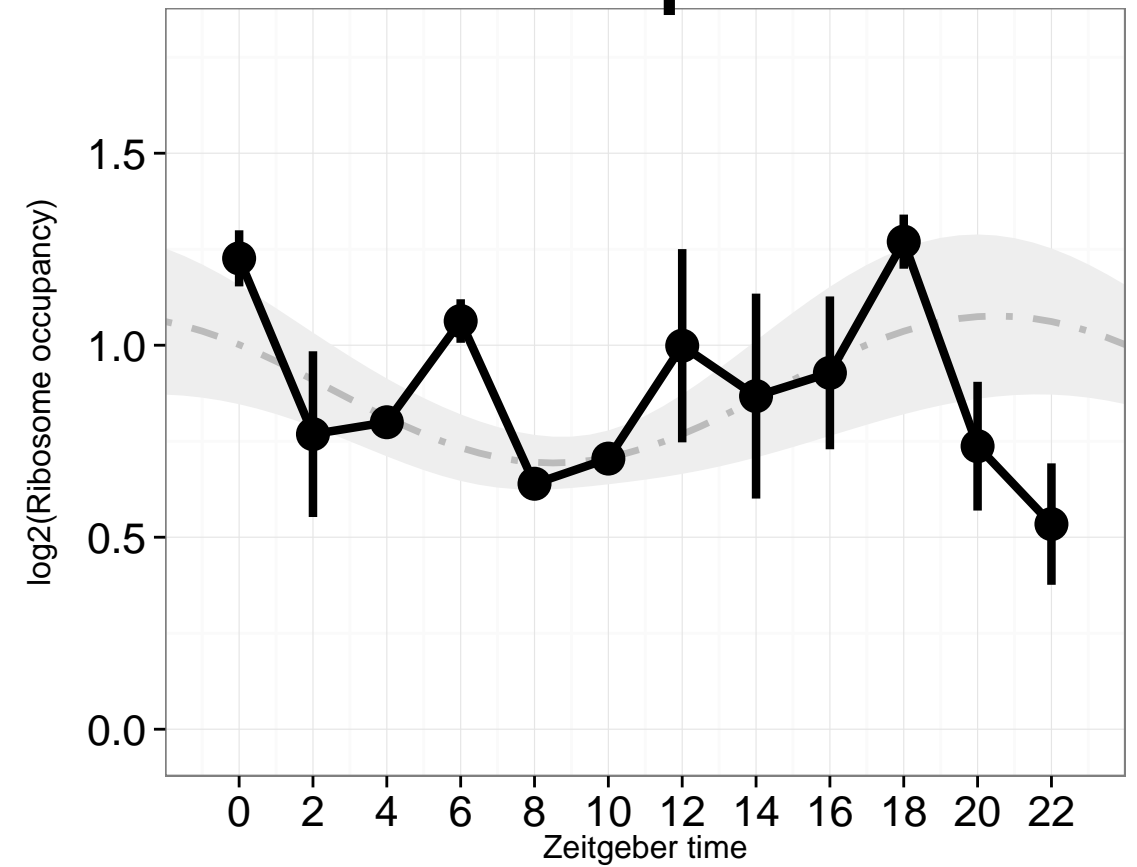

Supplement: SuppDataset_1.zip [file Paqr7_set_A.pdf › Supplemental Dataset 1/A-mRNA_nonrhyth_translation_nonrhyth/Paqr7_set_A.pdf]

# Pard3

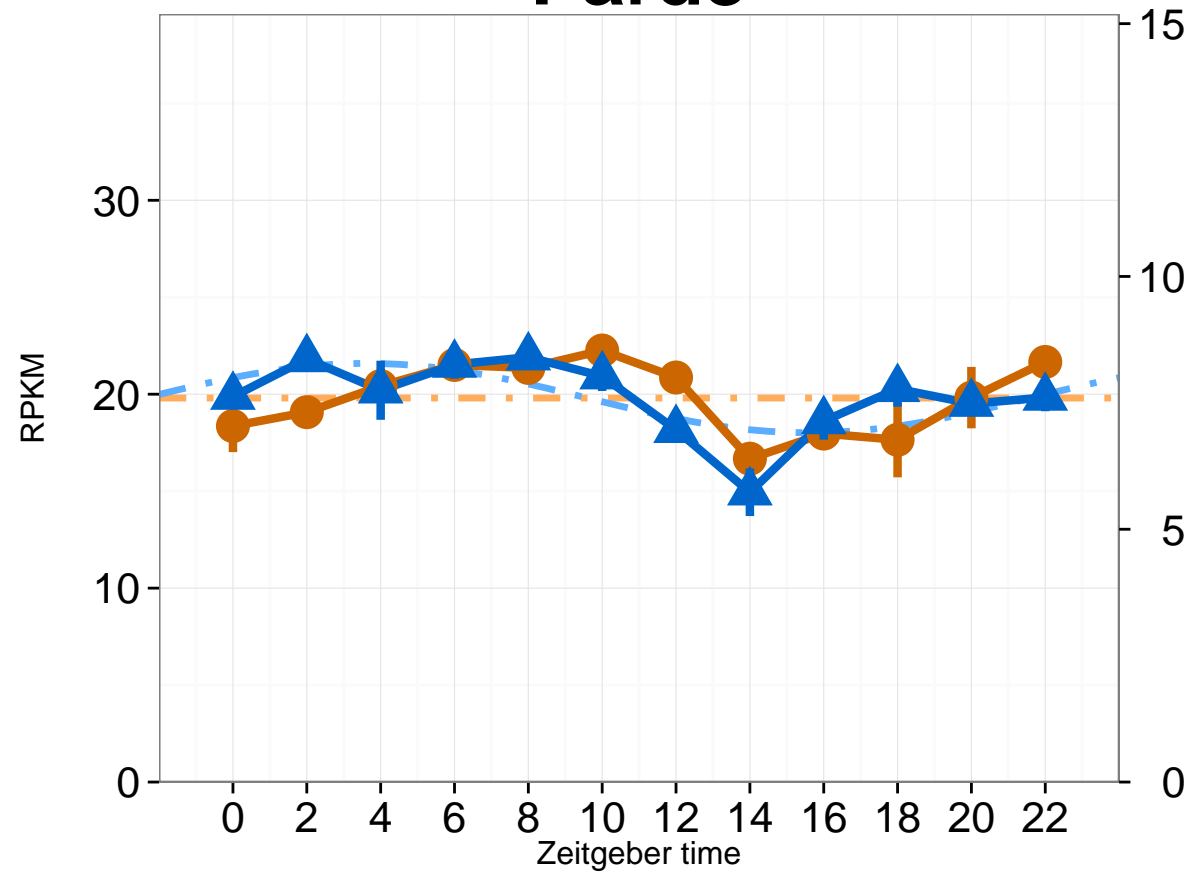

# Pard3

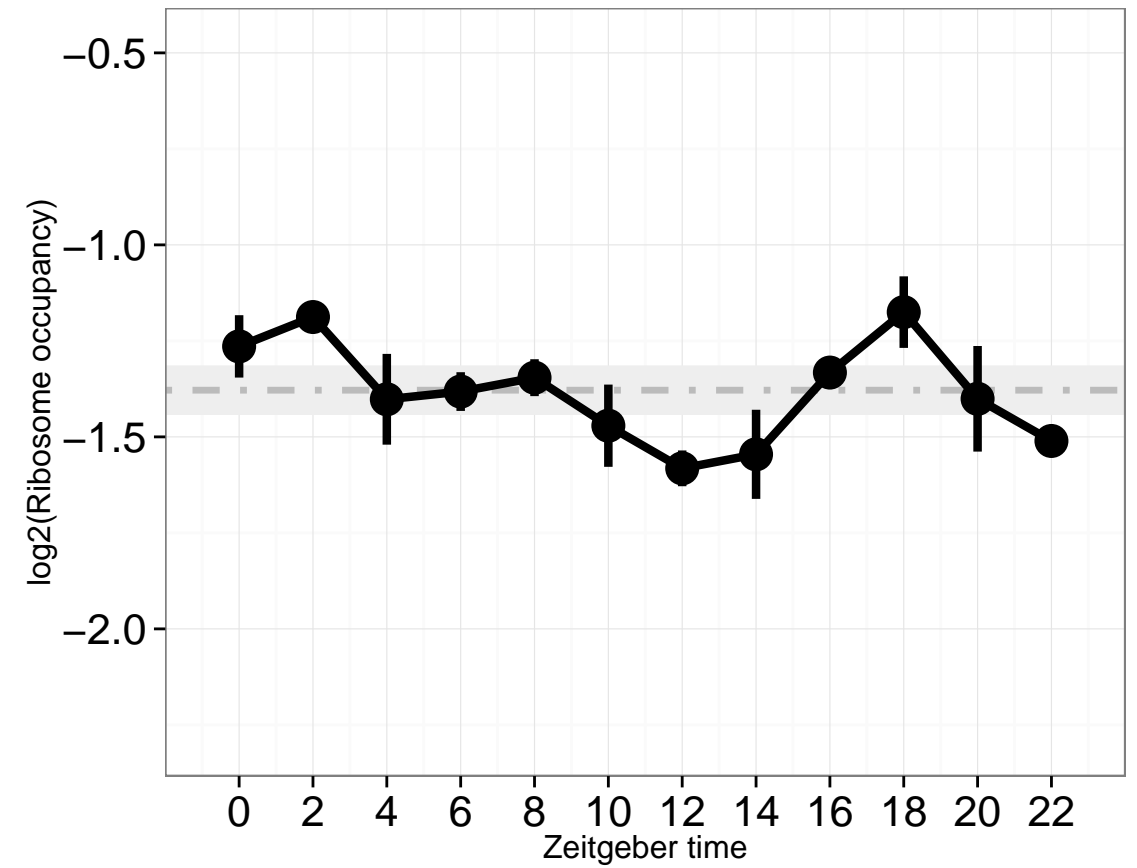

Supplement: SuppDataset_1.zip [file Pard3_set_A.pdf › Supplemental Dataset 1/A-mRNA_nonrhyth_translation_nonrhyth/Pard3_set_A.pdf]
