# Supplementary figures and images for: Ribosome profiling reveals the rhythmic liver translatome and circadian clock regulation by upstream open reading frames (part 52 of 113)
Source: HighWire-hosted journal article supplement (doi:10.1101/gr.195404.115), 2015-10-20

# Pard3b

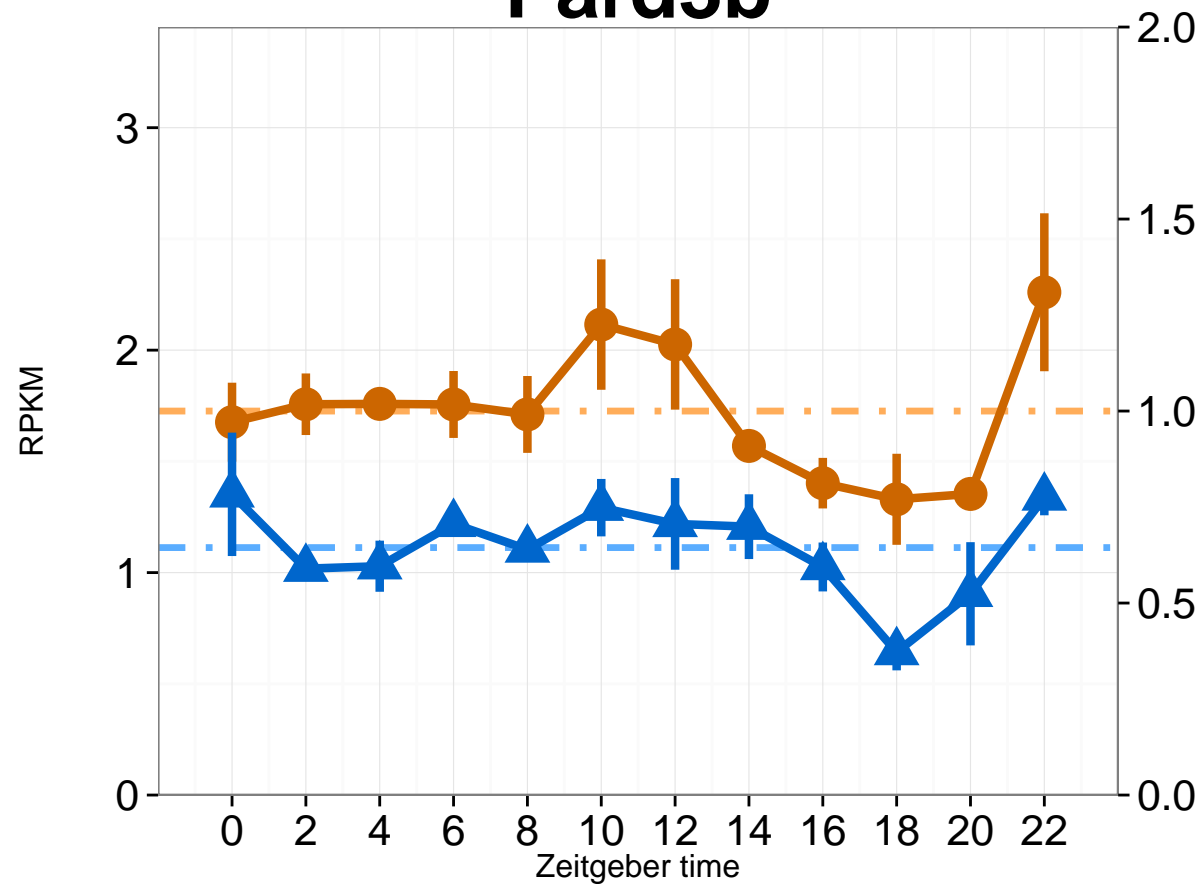

# Pard3b

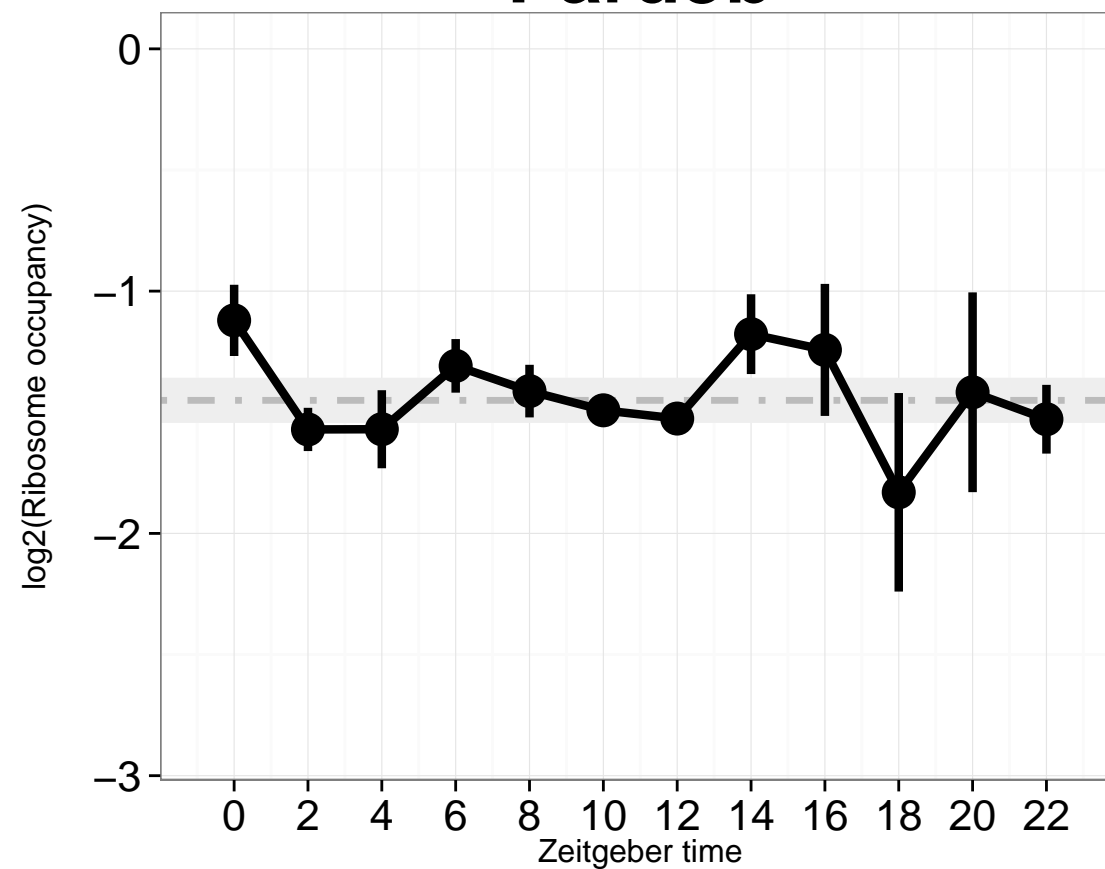

Supplement: SuppDataset_1.zip [file Pard3b_set_A.pdf › Supplemental Dataset 1/A-mRNA_nonrhyth_translation_nonrhyth/Pard3b_set_A.pdf]

# Pard6b

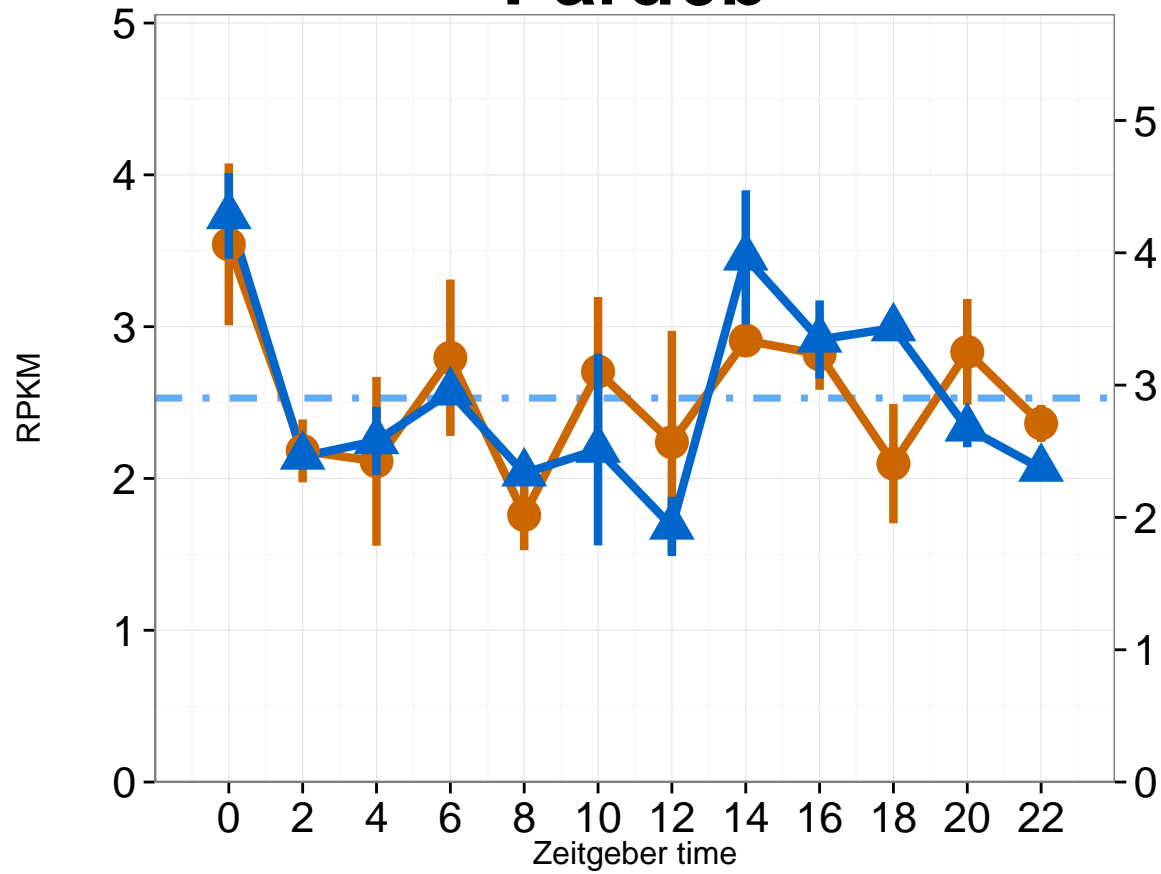

# Pard6b

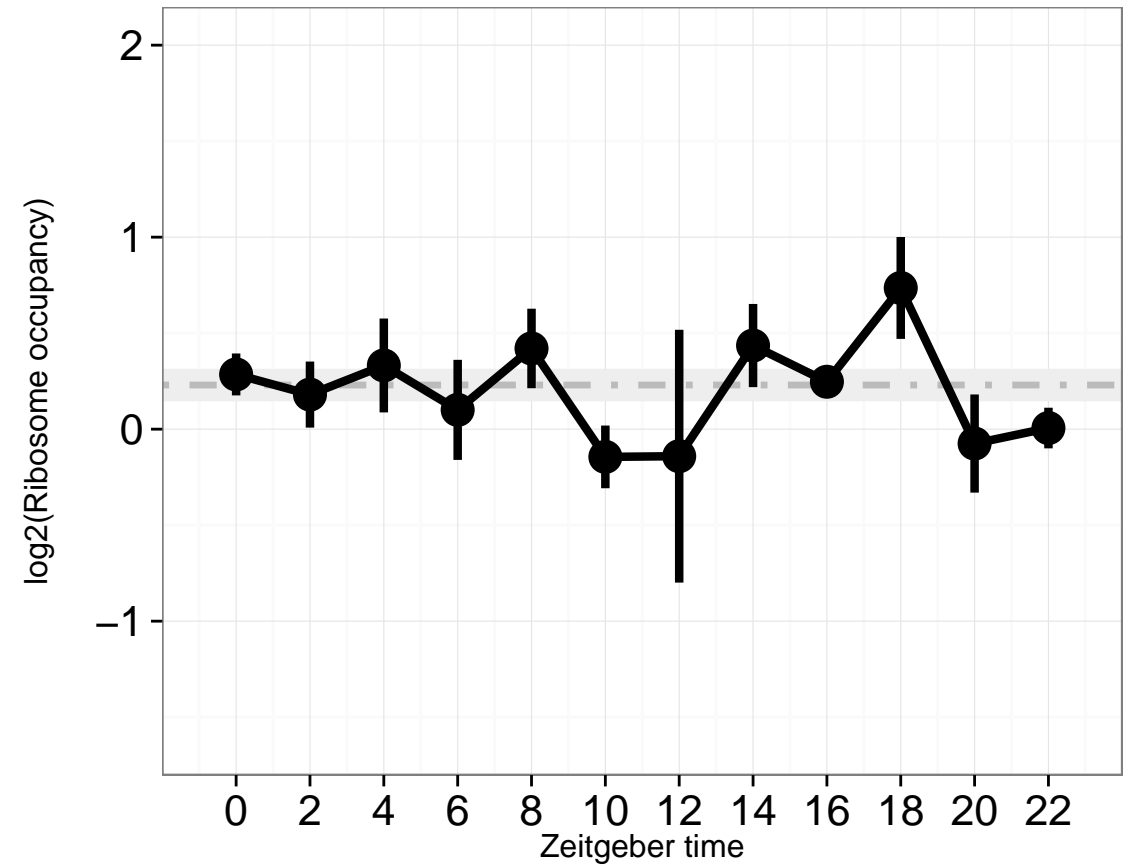

Supplement: SuppDataset_1.zip [file Pard6b_set_A.pdf › Supplemental Dataset 1/A-mRNA_nonrhyth_translation_nonrhyth/Pard6b_set_A.pdf]

## Parg

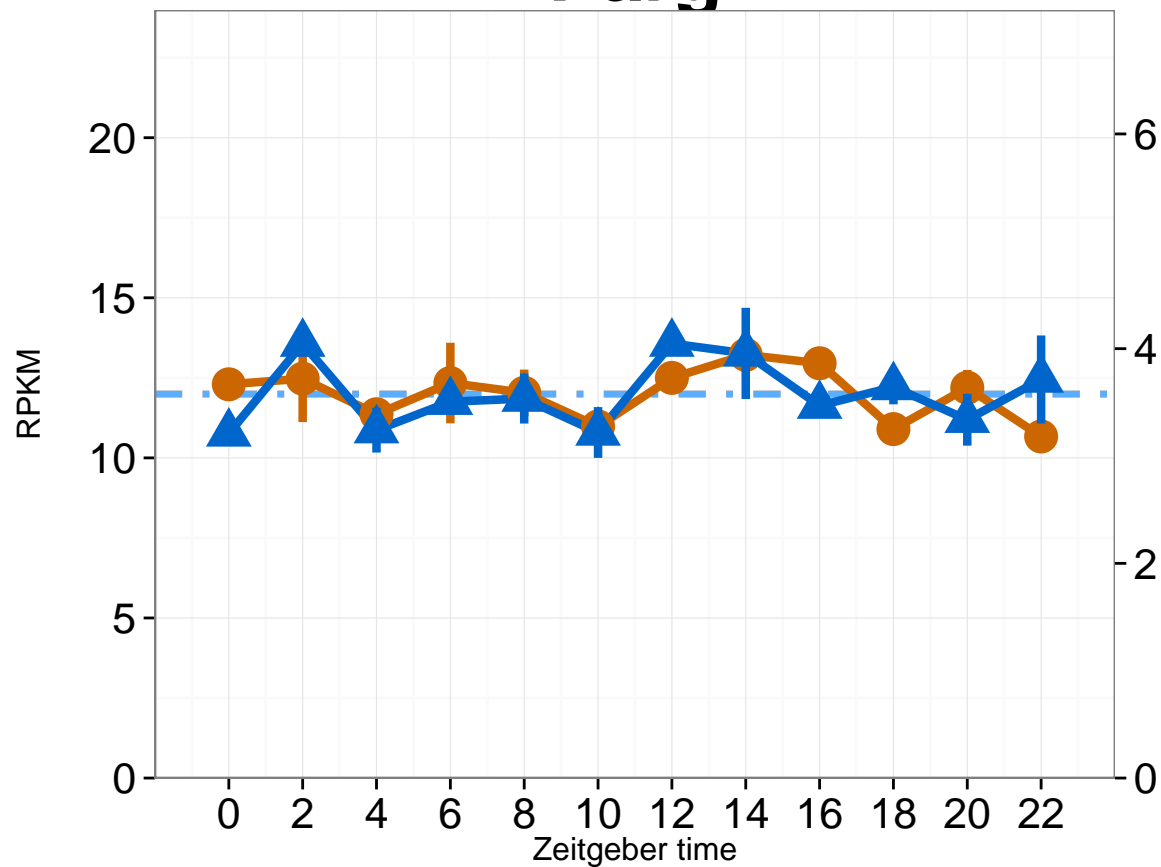

## Parg

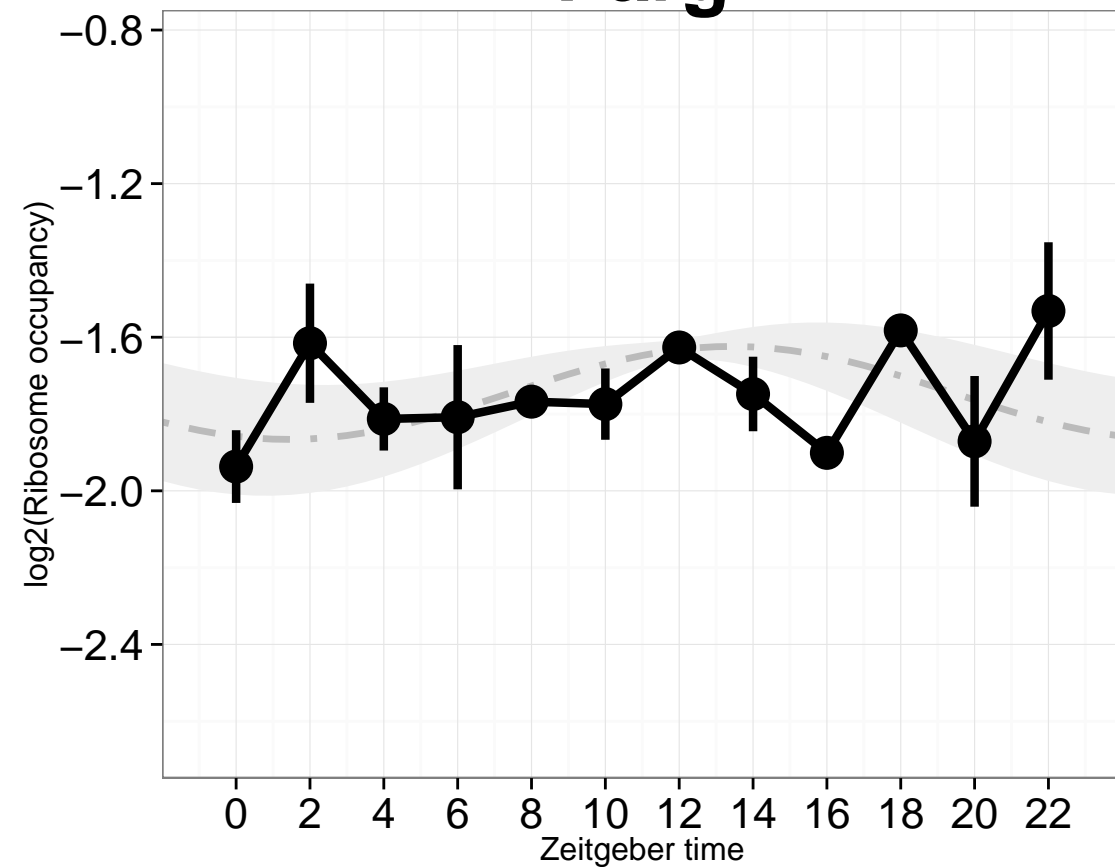

Supplement: SuppDataset_1.zip [file Parg_set_A.pdf › Supplemental Dataset 1/A-mRNA_nonrhyth_translation_nonrhyth/Parg_set_A.pdf]

# Park7

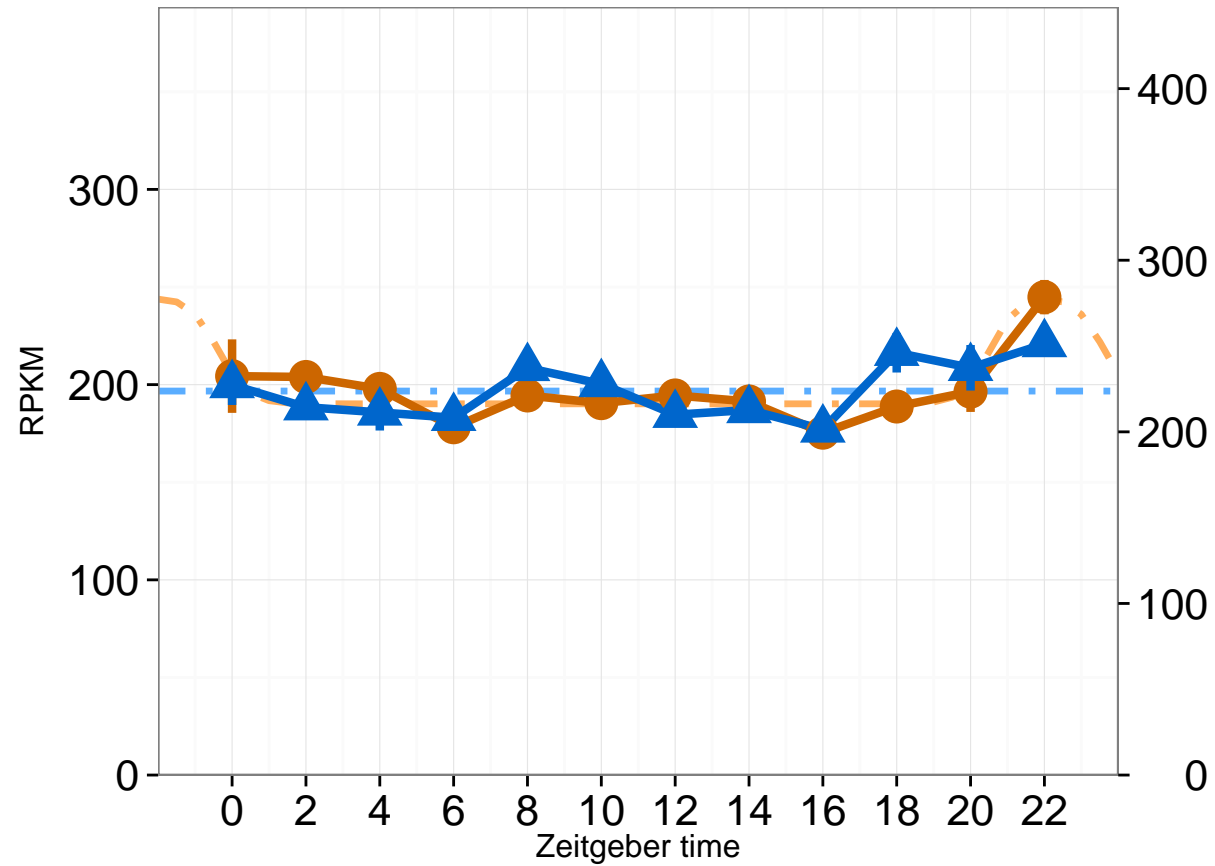

# Park7

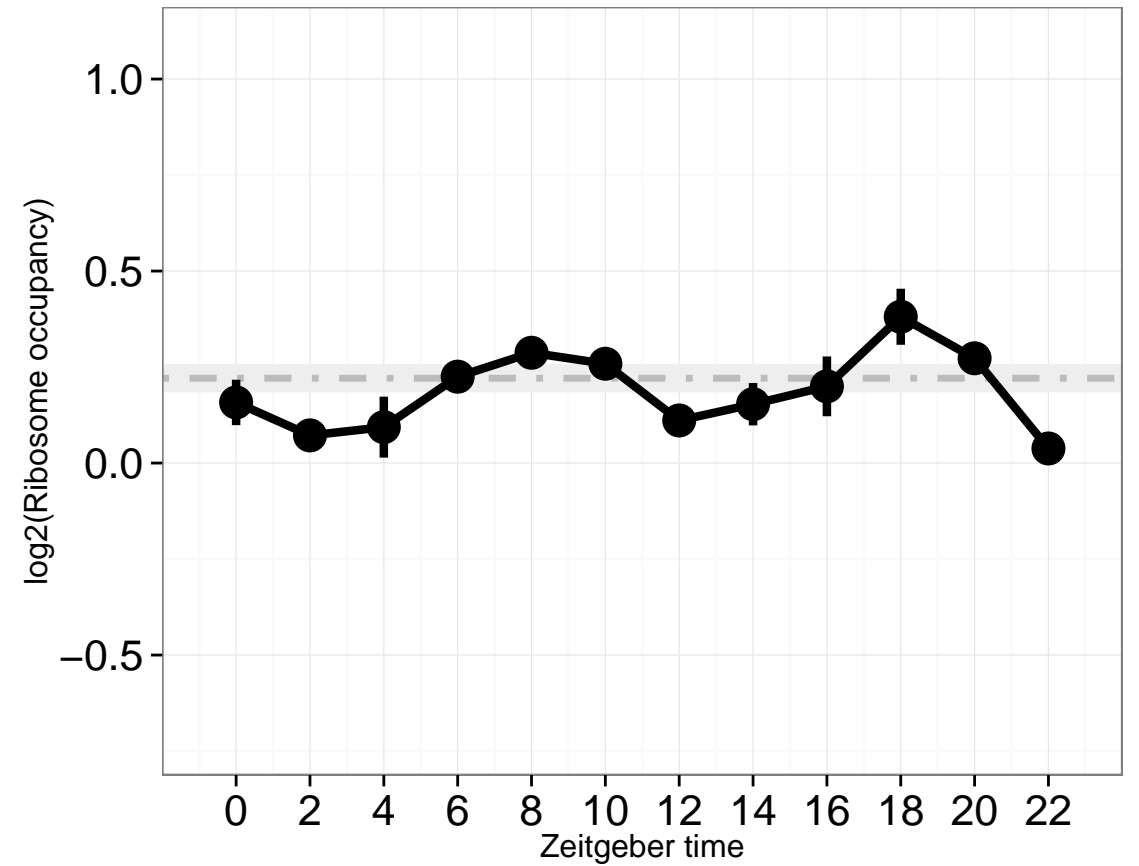

Supplement: SuppDataset_1.zip [file Park7_set_A.pdf › Supplemental Dataset 1/A-mRNA_nonrhyth_translation_nonrhyth/Park7_set_A.pdf]

## Parl

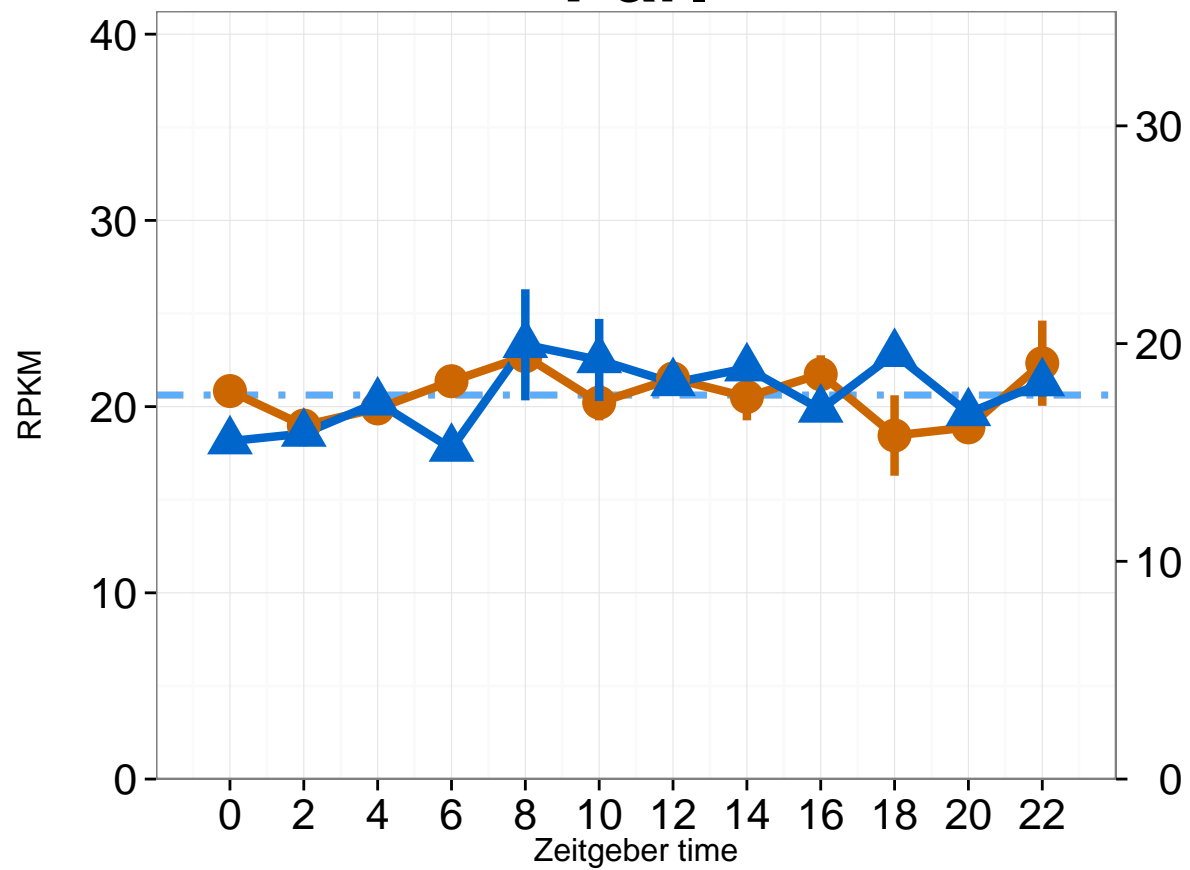

## Parl

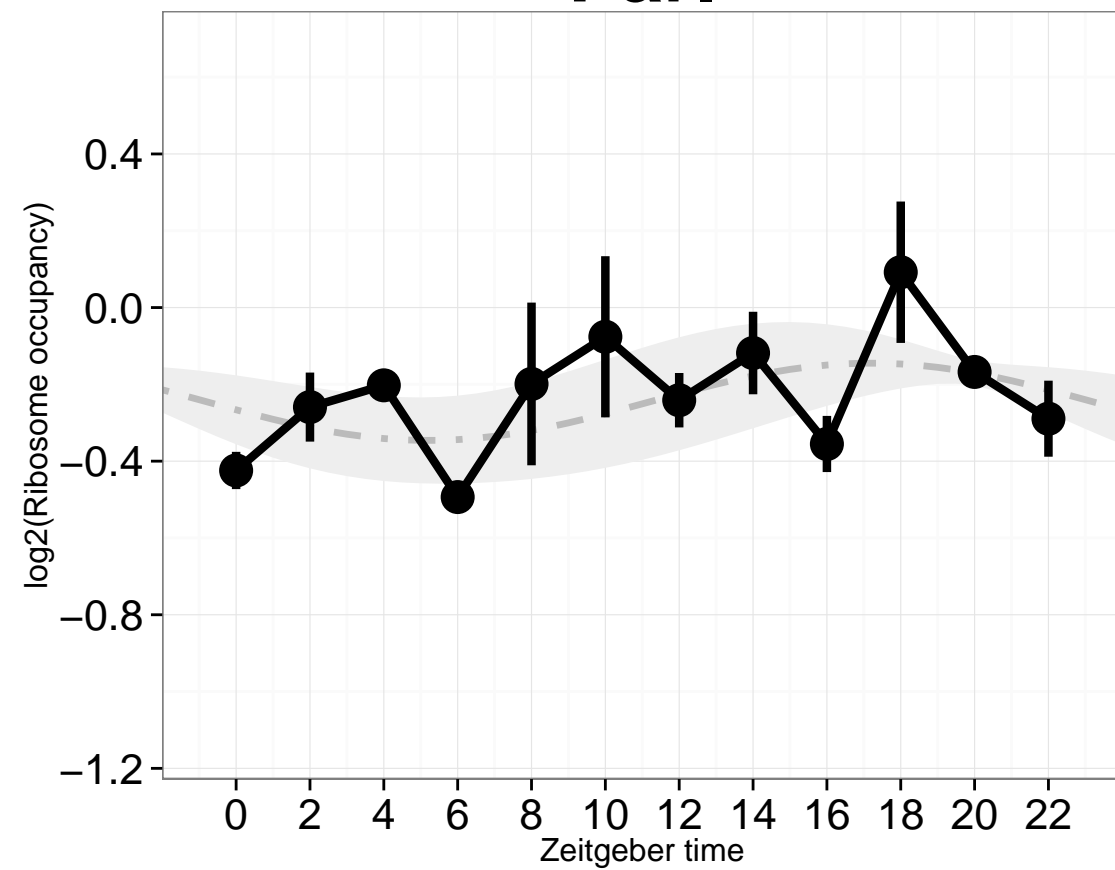

Supplement: SuppDataset_1.zip [file Parl_set_A.pdf › Supplemental Dataset 1/A-mRNA_nonrhyth_translation_nonrhyth/Parl_set_A.pdf]

## Parn

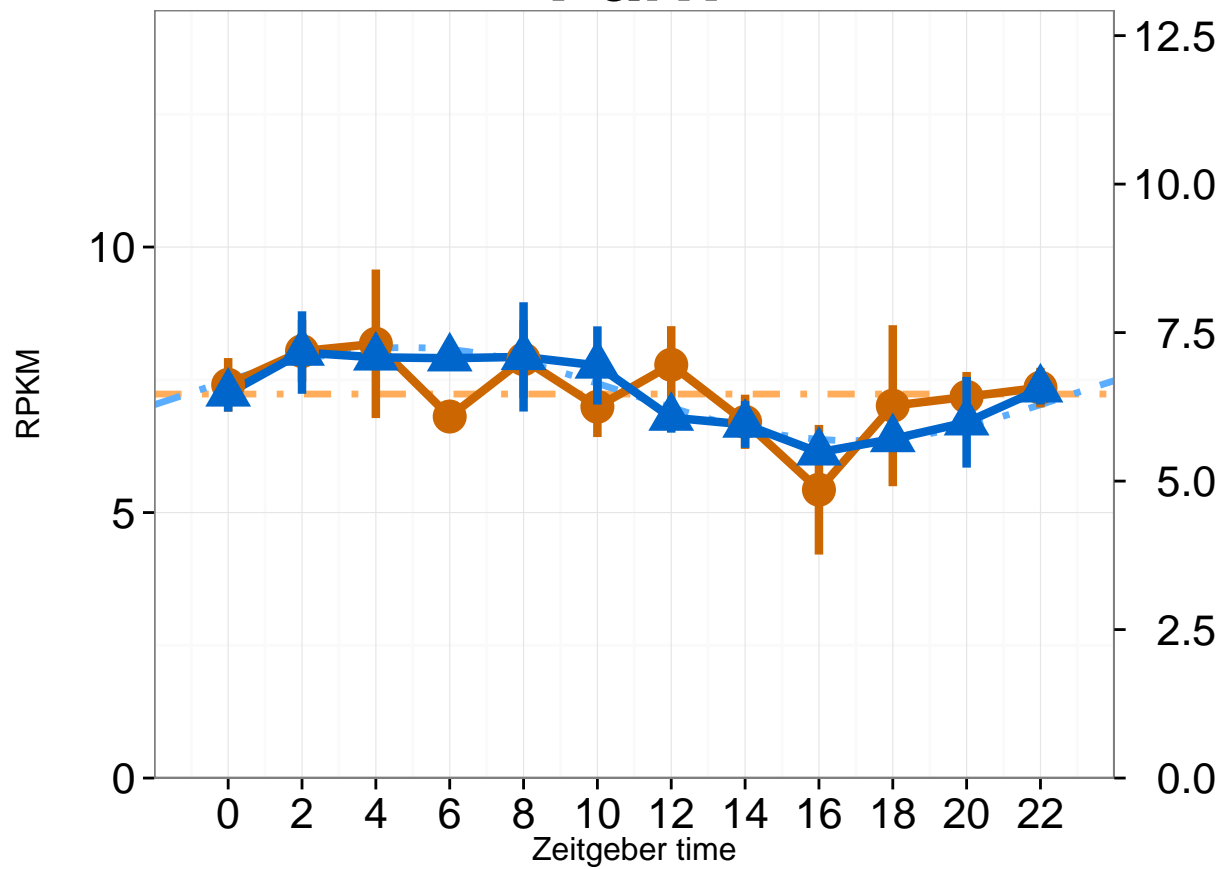

## Parn

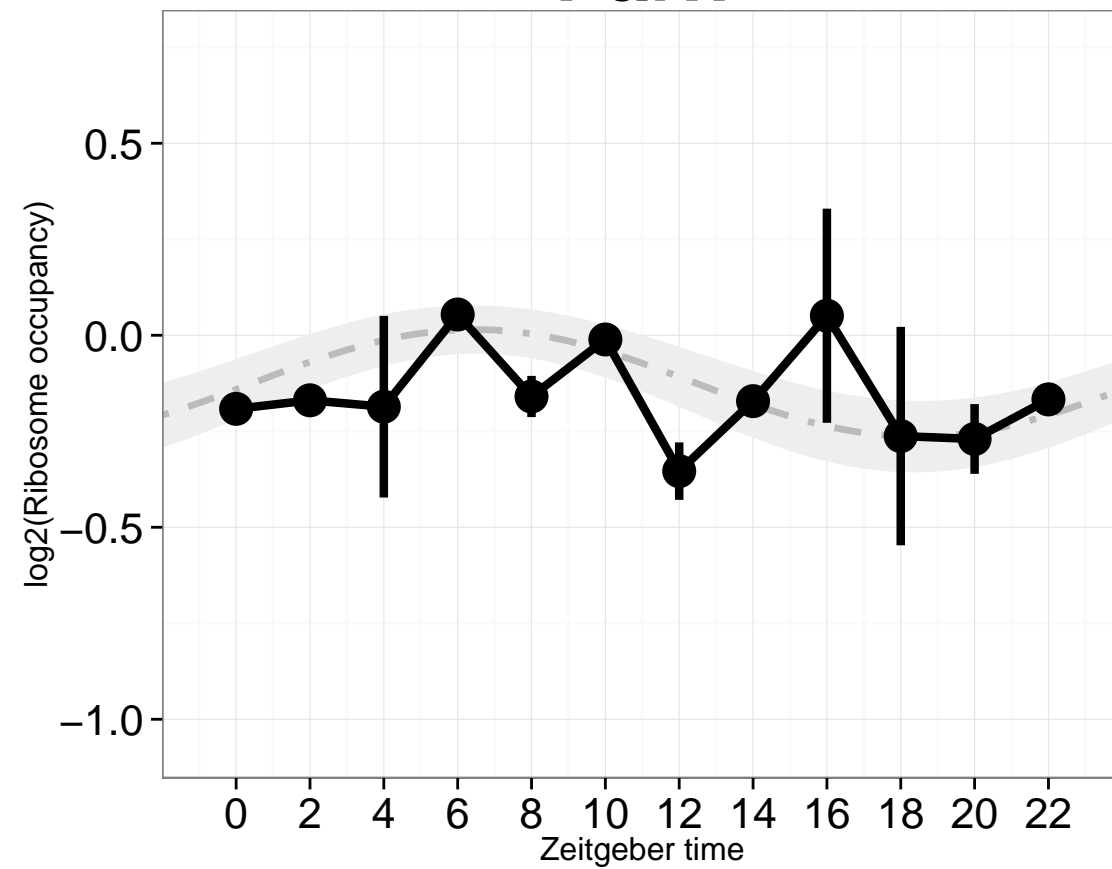

Supplement: SuppDataset_1.zip [file Parn_set_A.pdf › Supplemental Dataset 1/A-mRNA_nonrhyth_translation_nonrhyth/Parn_set_A.pdf]

## Parp11

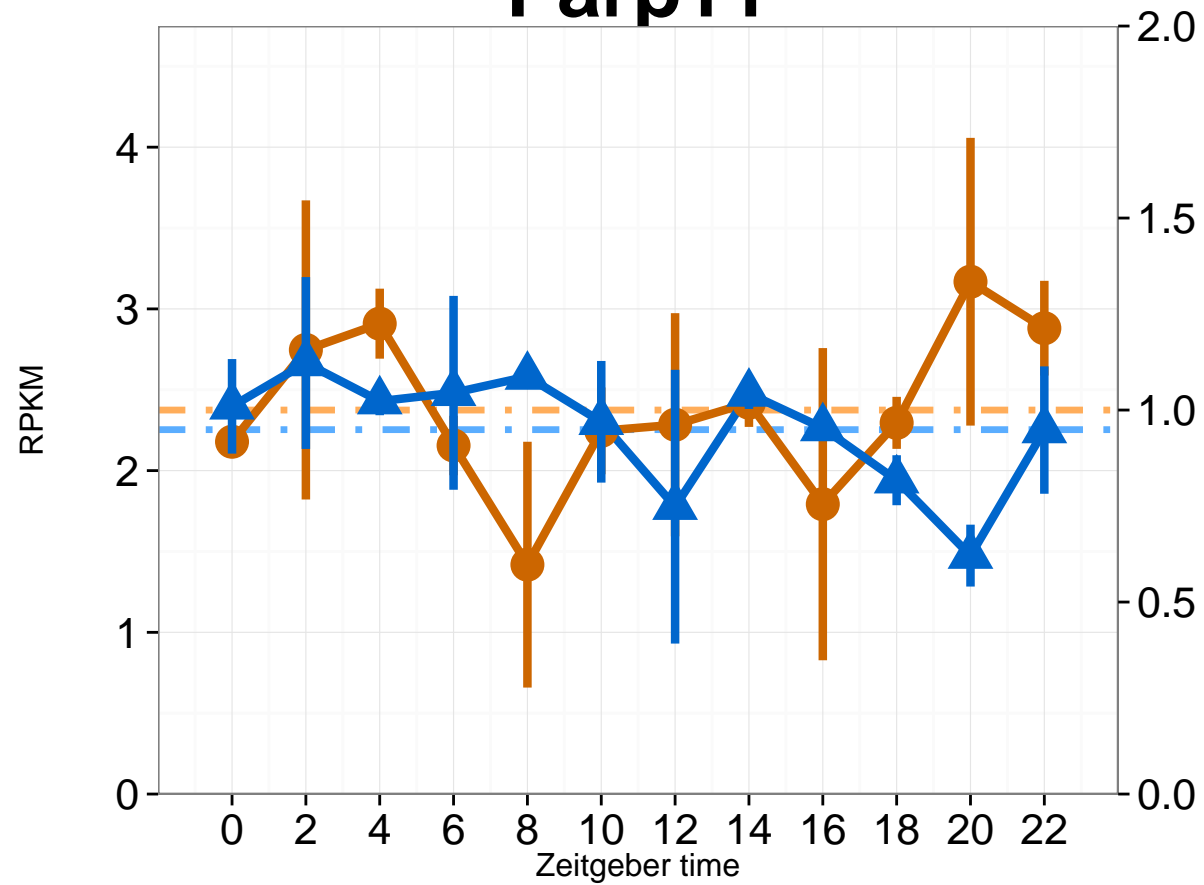

## Parp11

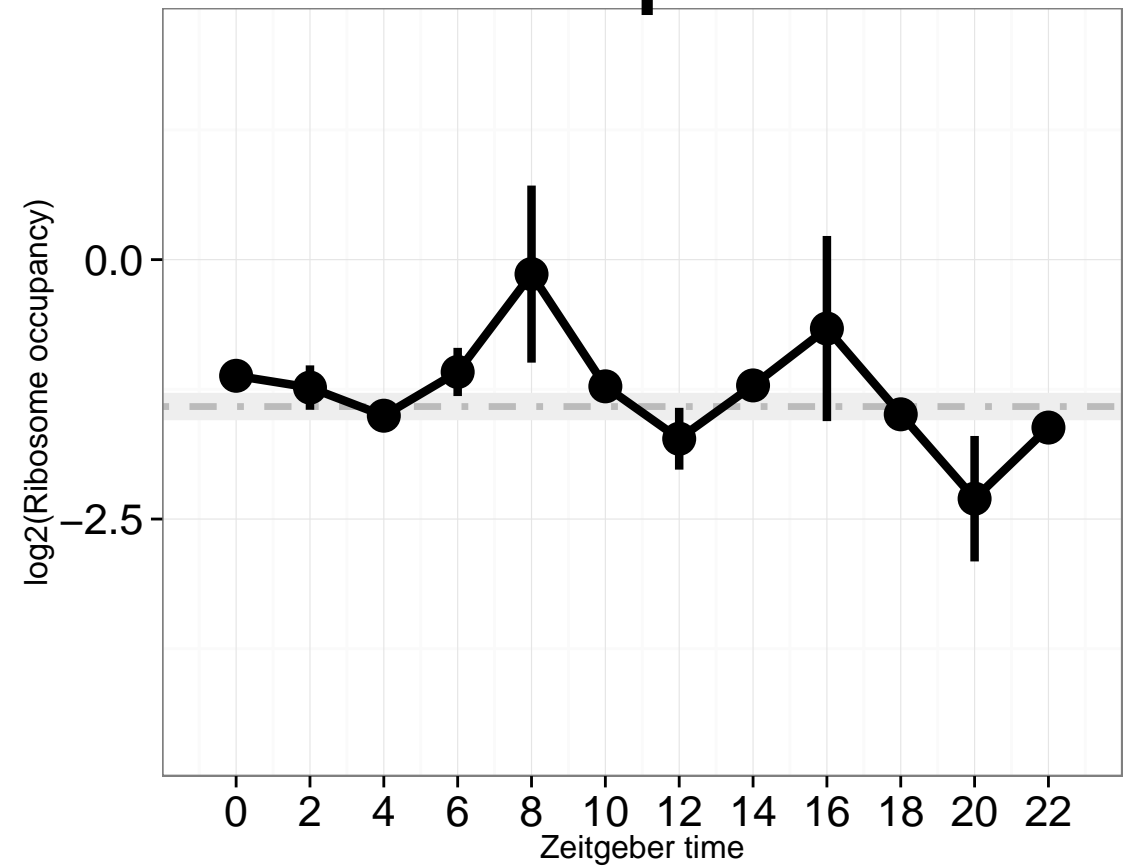

Supplement: SuppDataset_1.zip [file Parp11_set_A.pdf › Supplemental Dataset 1/A-mRNA_nonrhyth_translation_nonrhyth/Parp11_set_A.pdf]

## Parp12

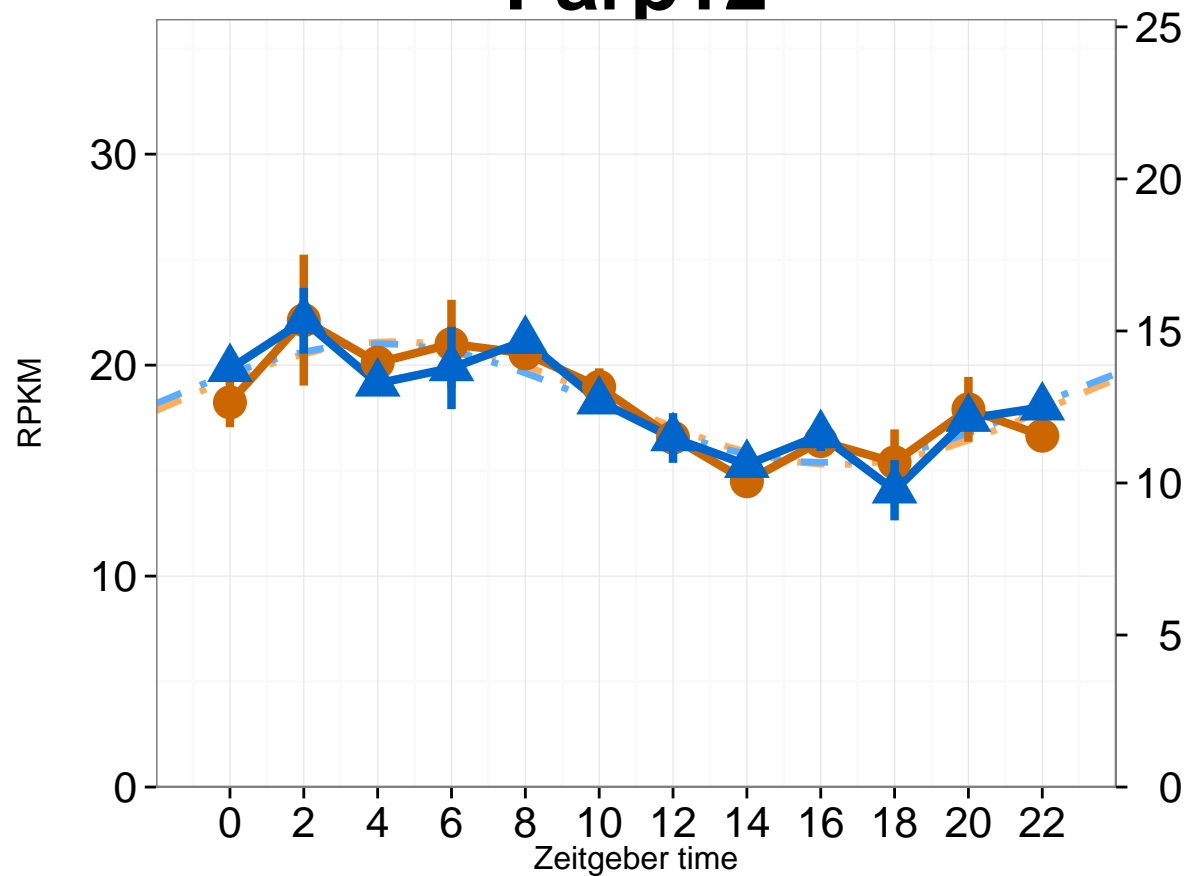

## Parp12

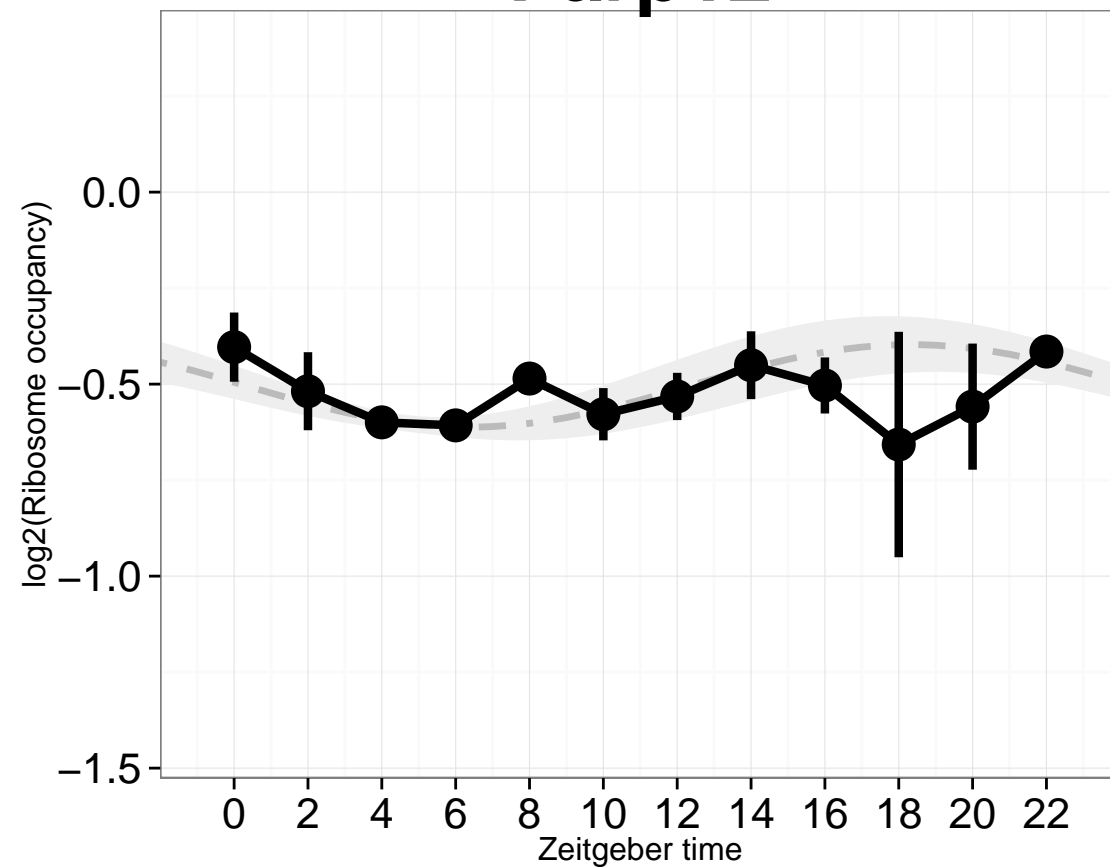

Supplement: SuppDataset_1.zip [file Parp12_set_A.pdf › Supplemental Dataset 1/A-mRNA_nonrhyth_translation_nonrhyth/Parp12_set_A.pdf]

## Parp14

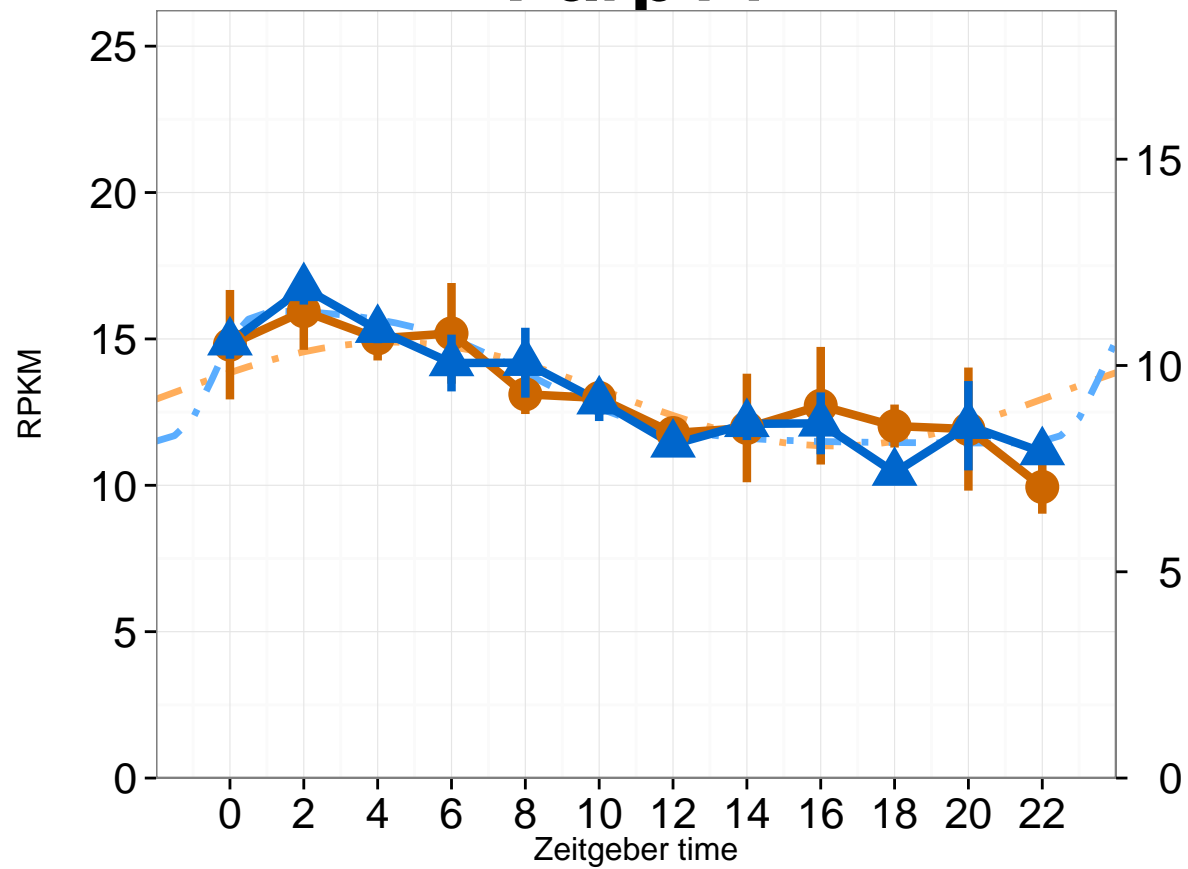

## Parp14

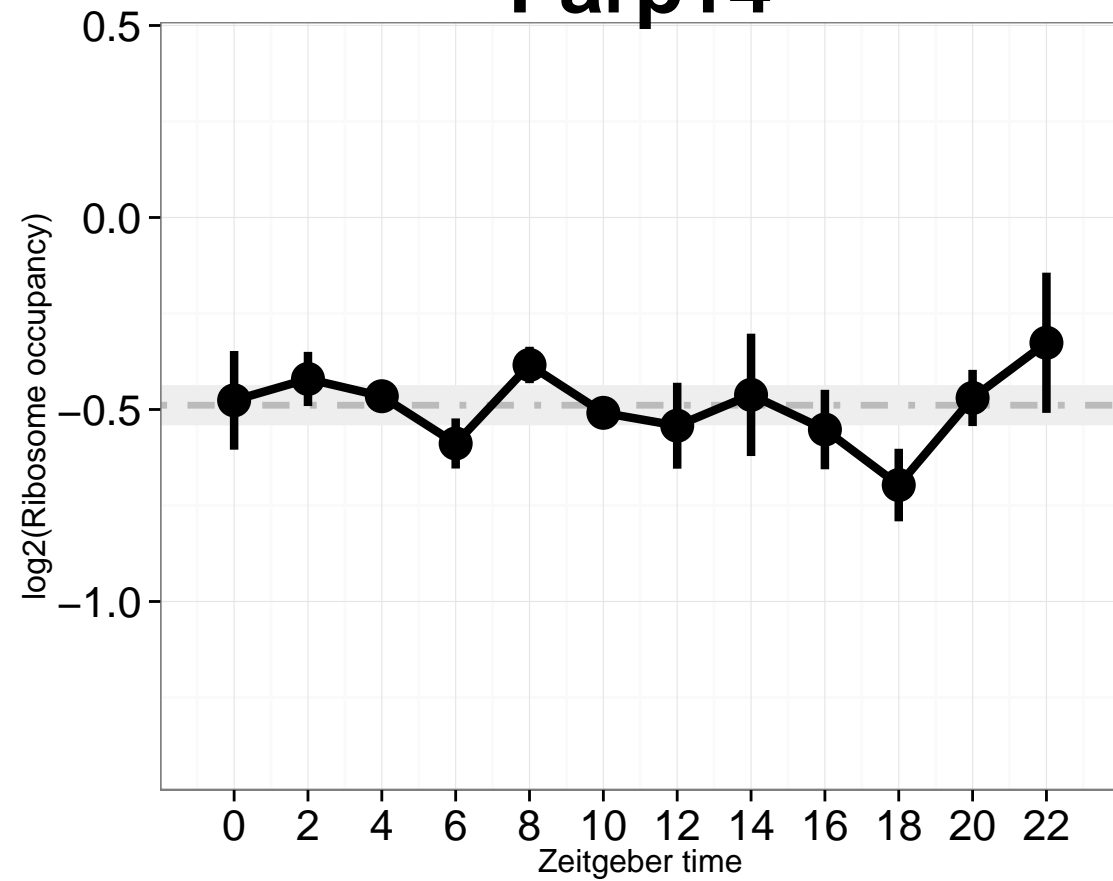

Supplement: SuppDataset_1.zip [file Parp14_set_A.pdf › Supplemental Dataset 1/A-mRNA_nonrhyth_translation_nonrhyth/Parp14_set_A.pdf]

## Parp1

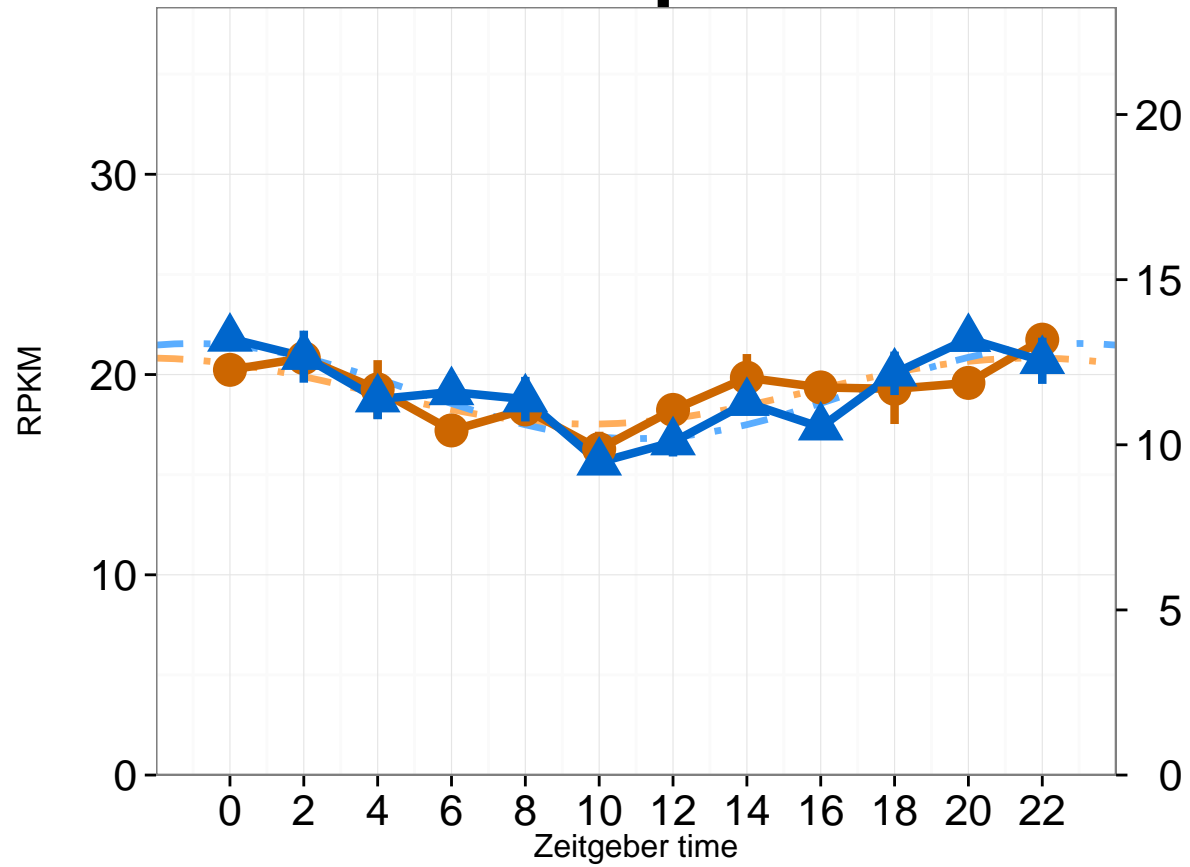

## Parp1

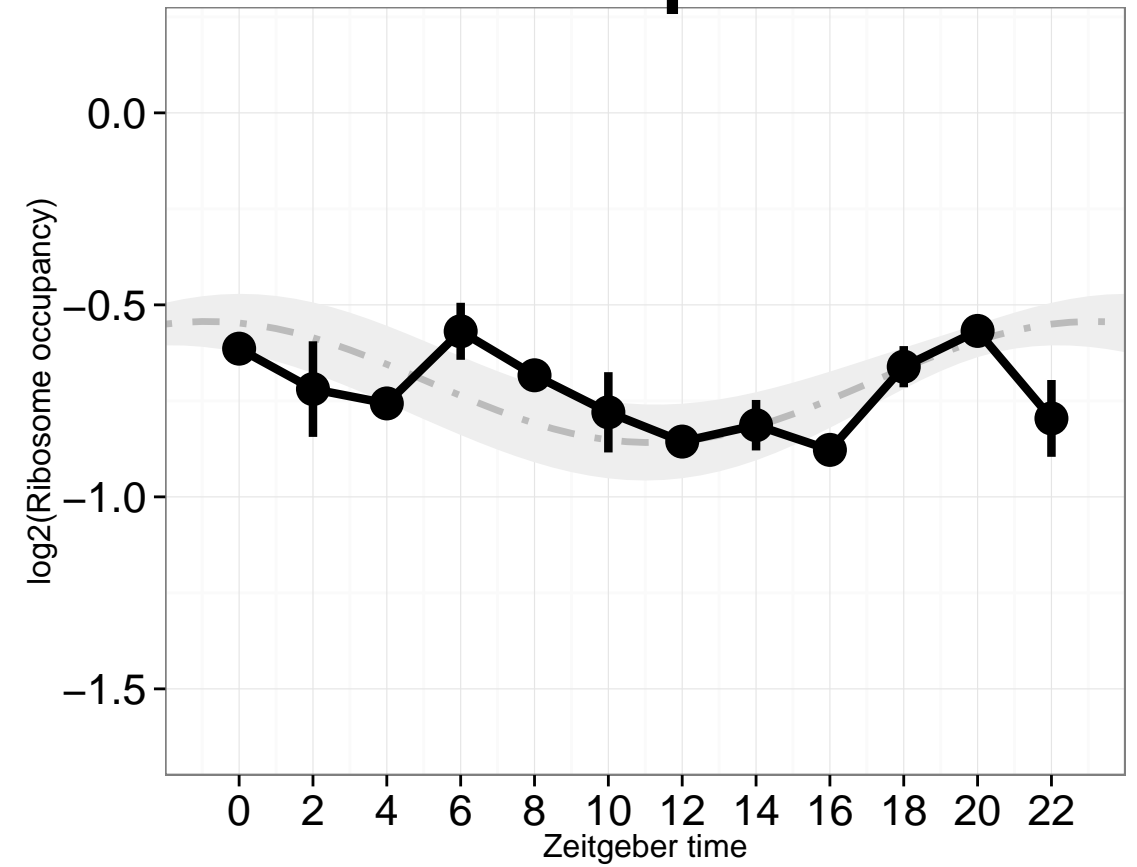

Supplement: SuppDataset_1.zip [file Parp1_set_A.pdf › Supplemental Dataset 1/A-mRNA_nonrhyth_translation_nonrhyth/Parp1_set_A.pdf]

## Parp6

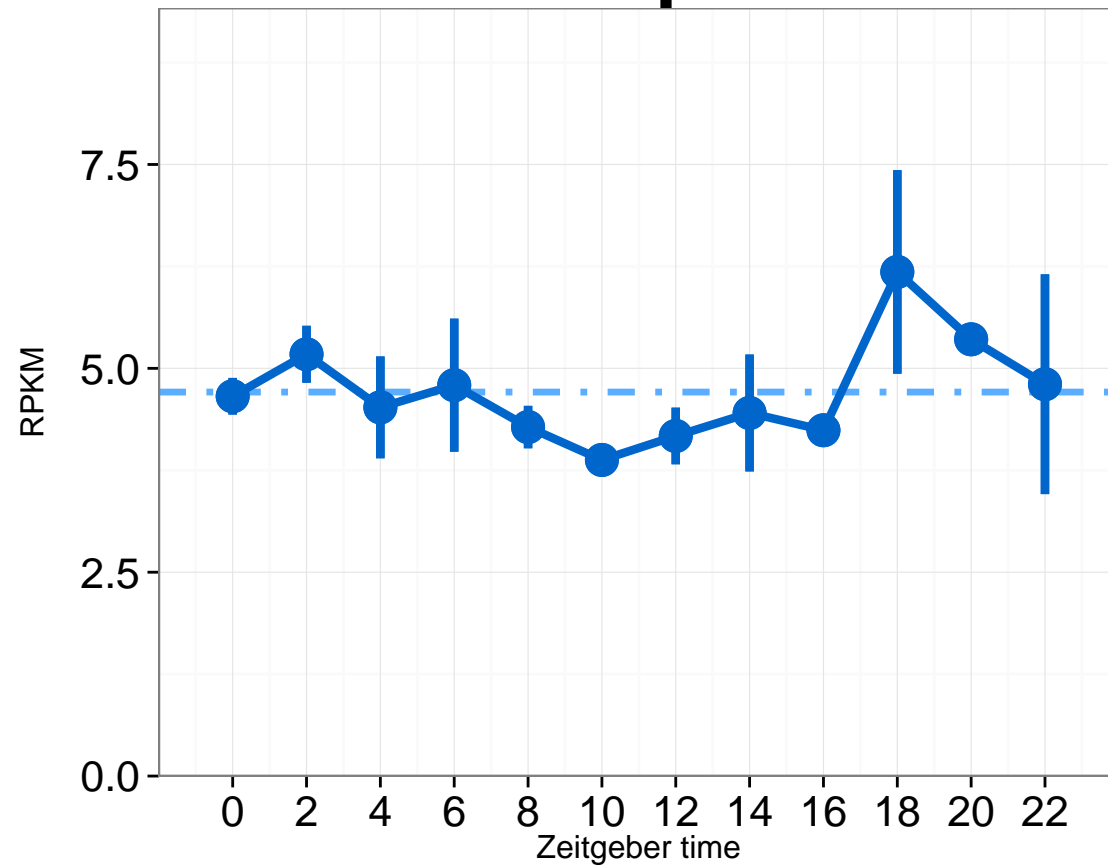

## Parp6 log2(Ribosome occupancy

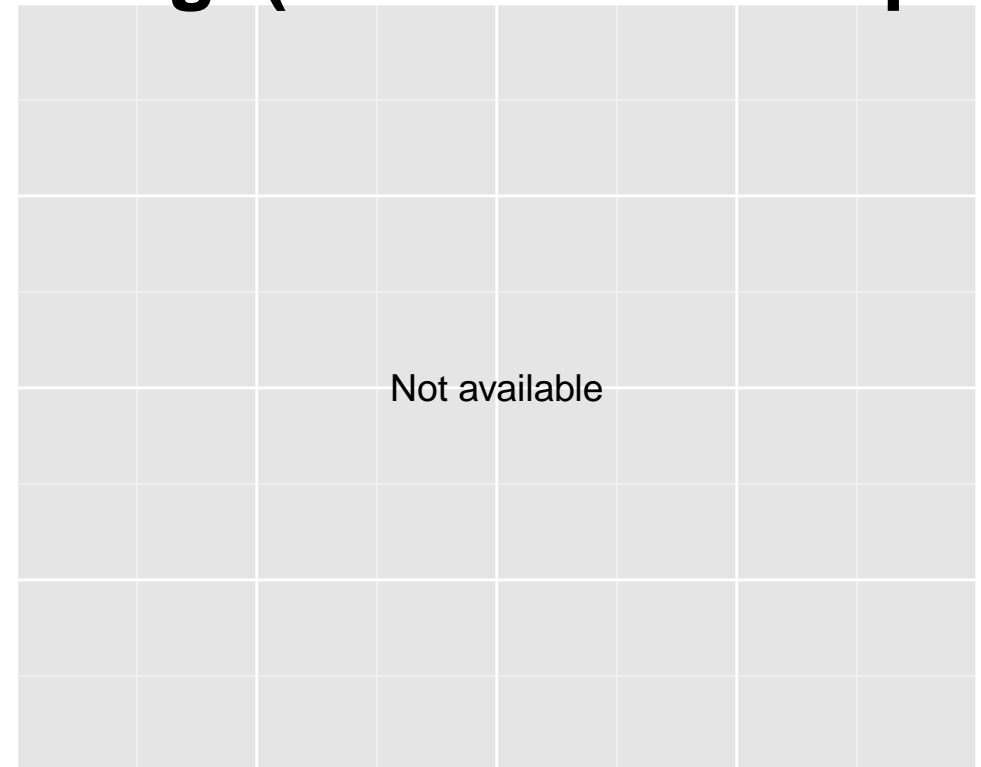

Supplement: SuppDataset_1.zip [file Parp6_set_A.pdf › Supplemental Dataset 1/A-mRNA_nonrhyth_translation_nonrhyth/Parp6_set_A.pdf]

# Parp8

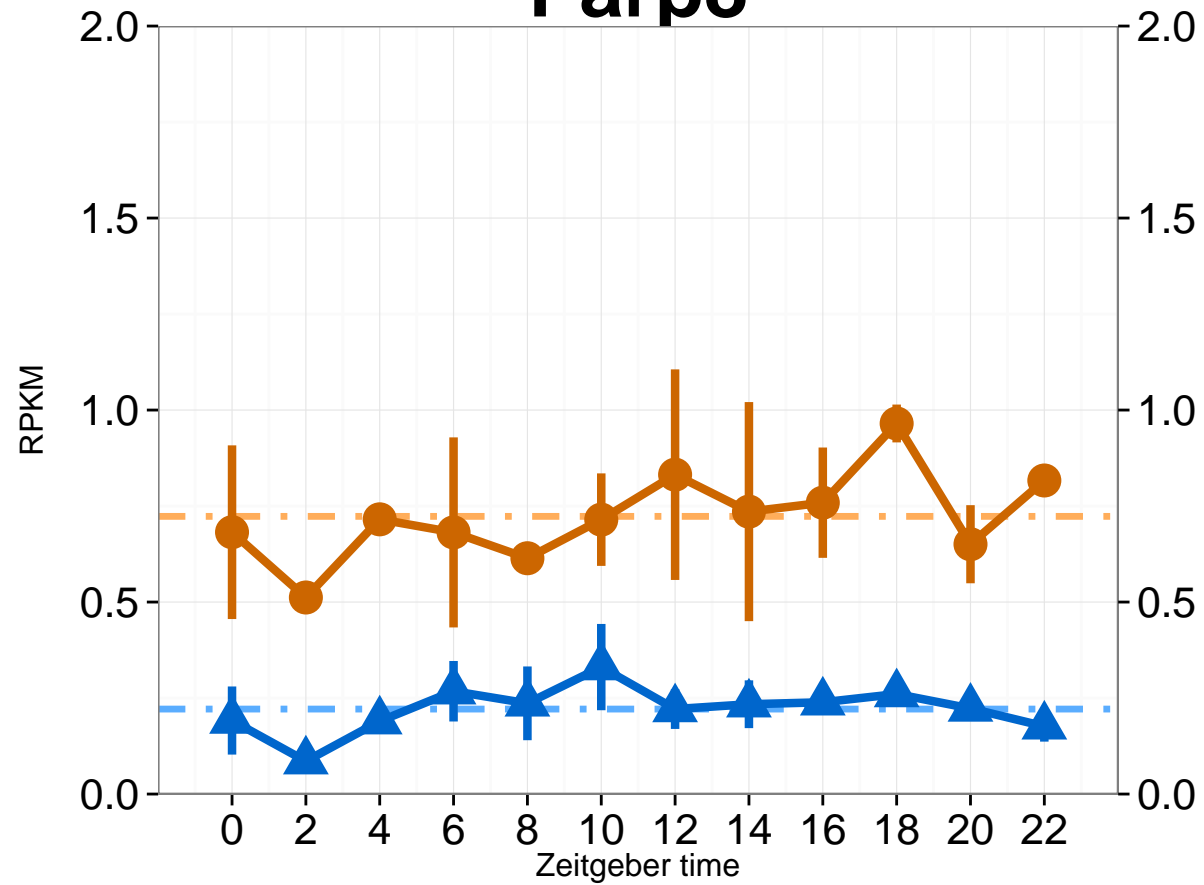

# Parp8

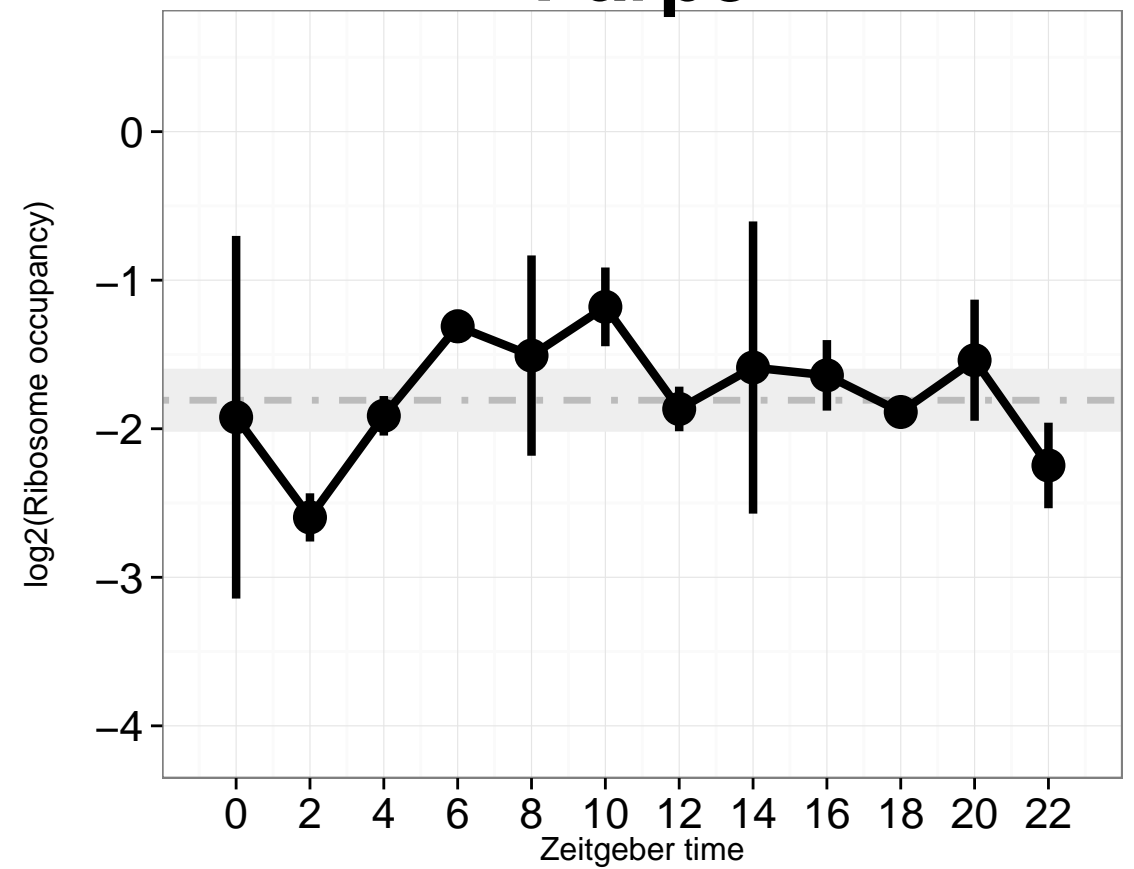

Supplement: SuppDataset_1.zip [file Parp8_set_A.pdf › Supplemental Dataset 1/A-mRNA_nonrhyth_translation_nonrhyth/Parp8_set_A.pdf]

## Parp9

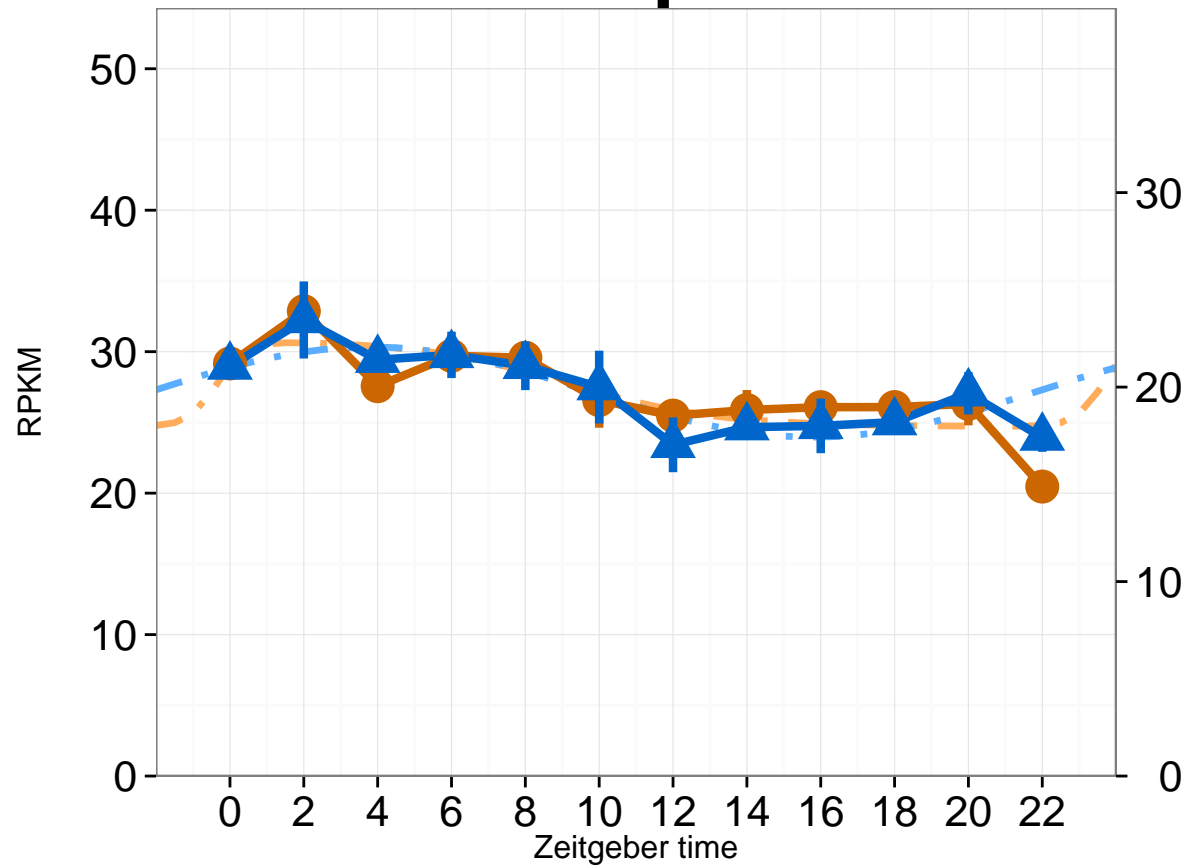

## Parp9

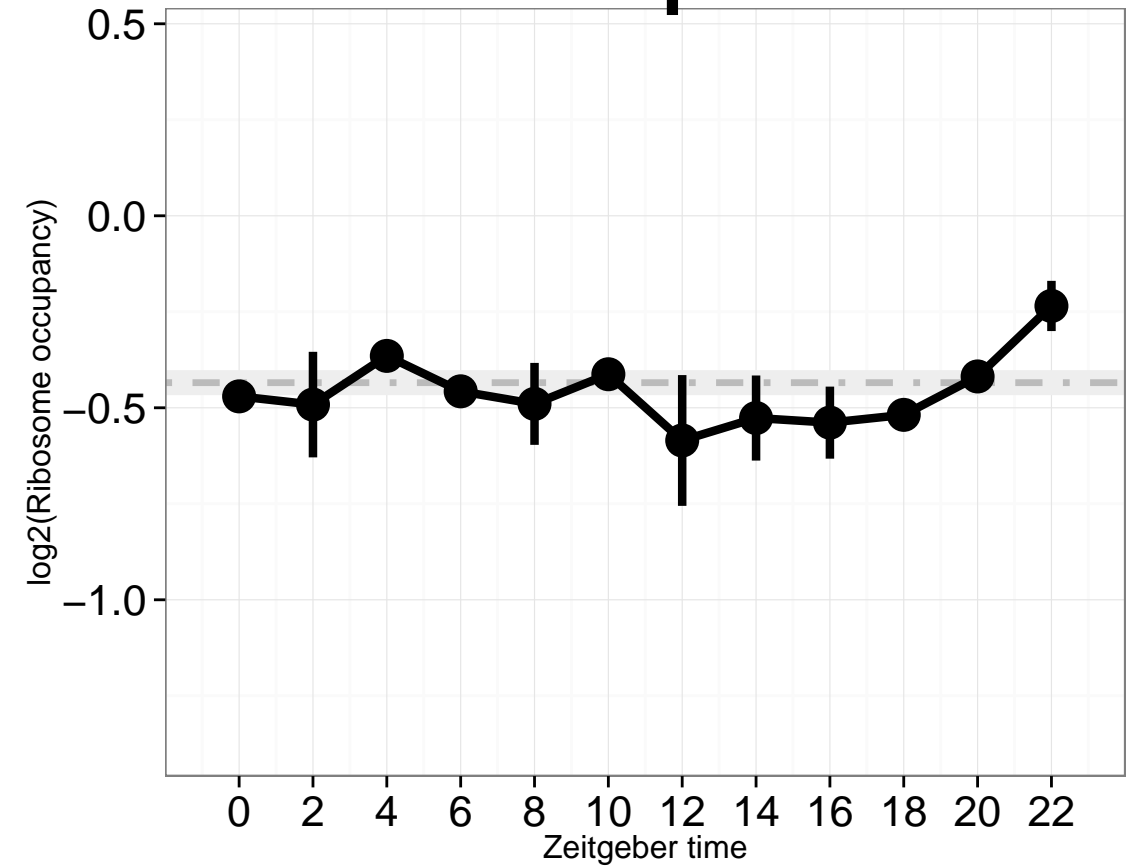

Supplement: SuppDataset_1.zip [file Parp9_set_A.pdf › Supplemental Dataset 1/A-mRNA_nonrhyth_translation_nonrhyth/Parp9_set_A.pdf]

# Pars2

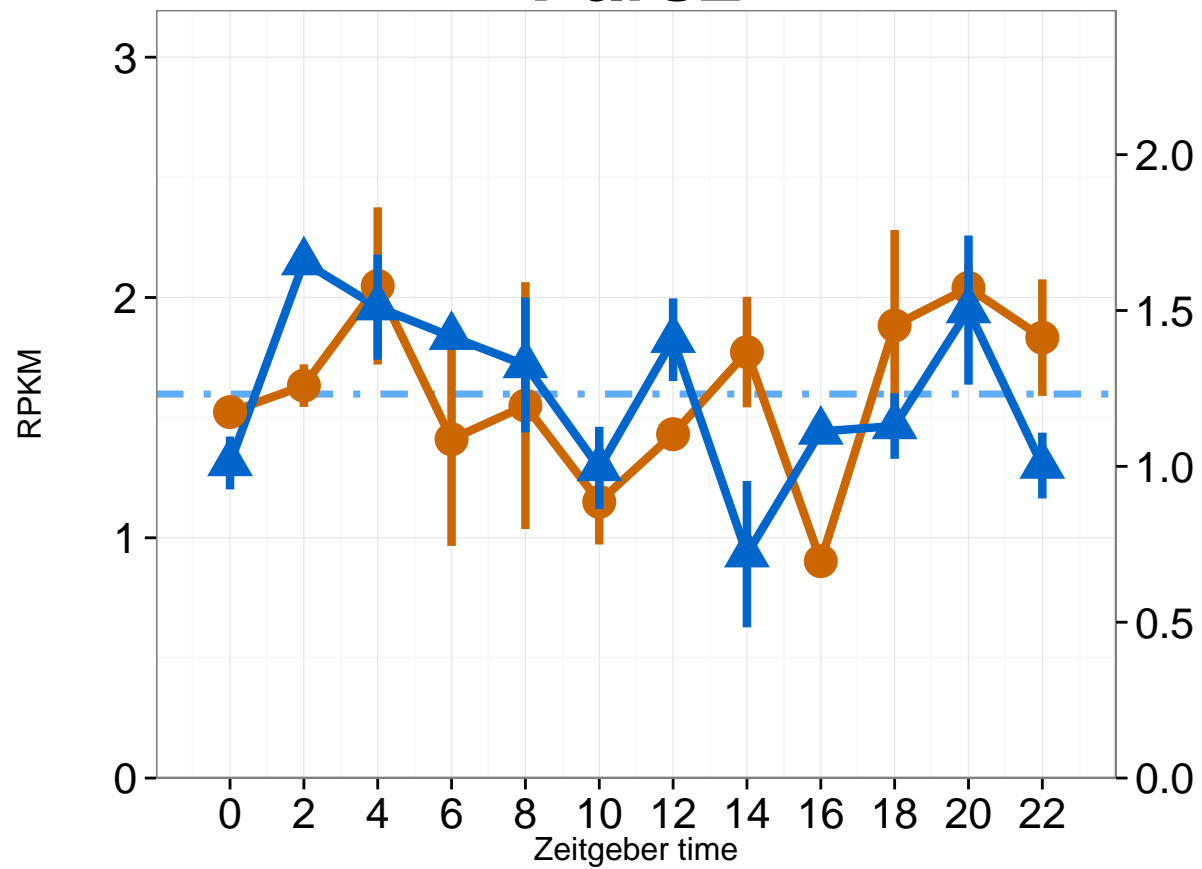

# Pars2

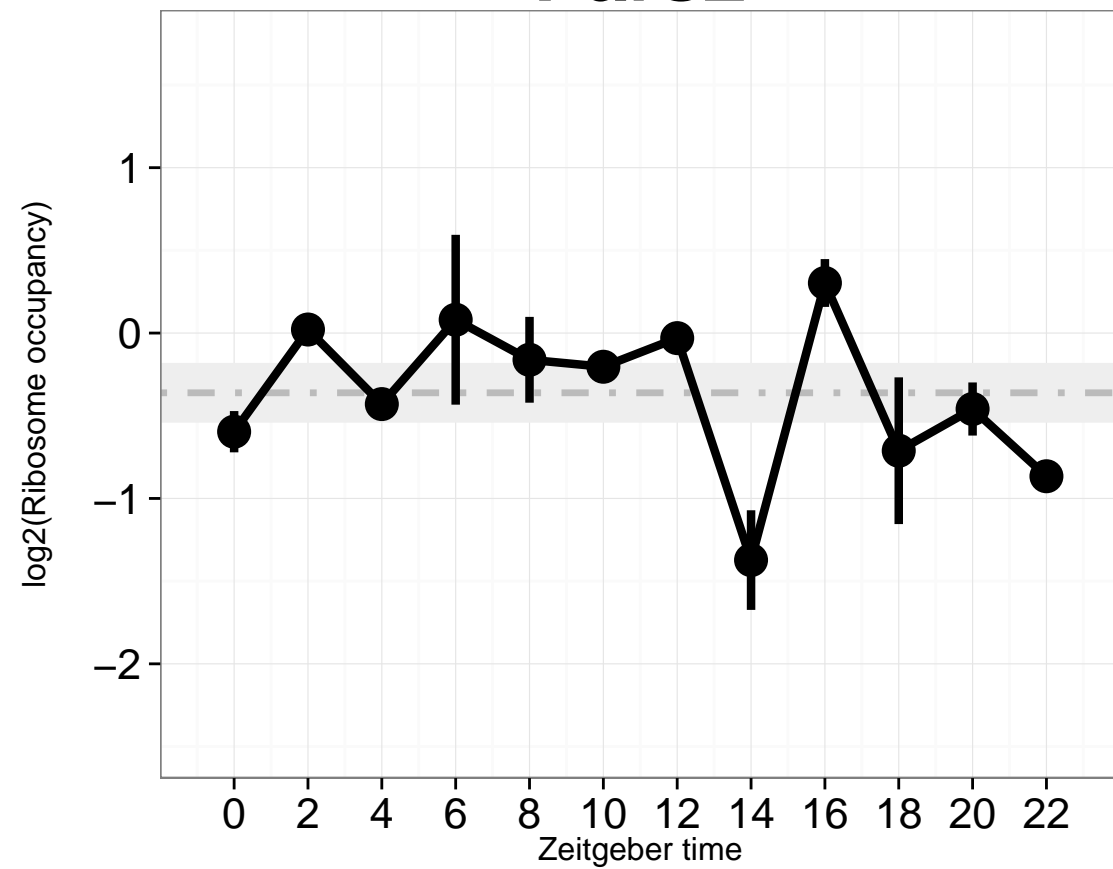

Supplement: SuppDataset_1.zip [file Pars2_set_A.pdf › Supplemental Dataset 1/A-mRNA_nonrhyth_translation_nonrhyth/Pars2_set_A.pdf]

## Parva

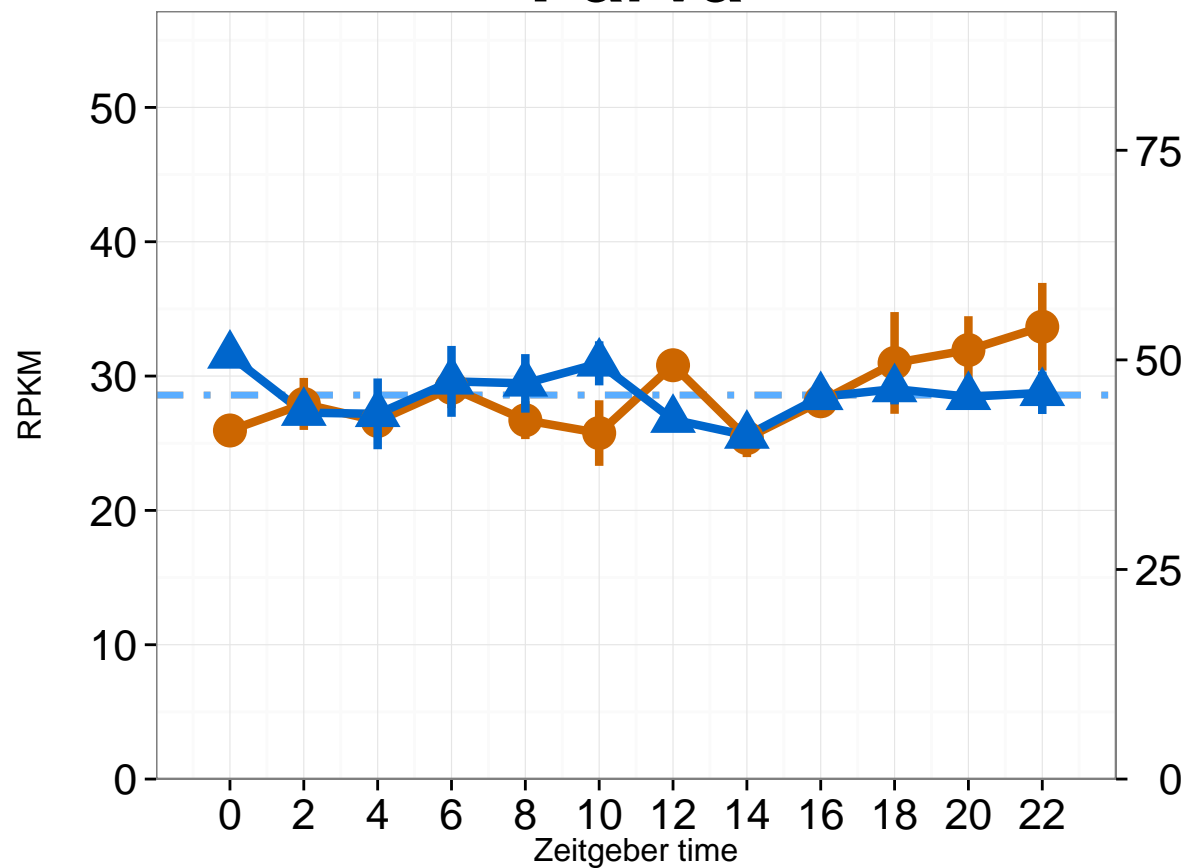

## Parva

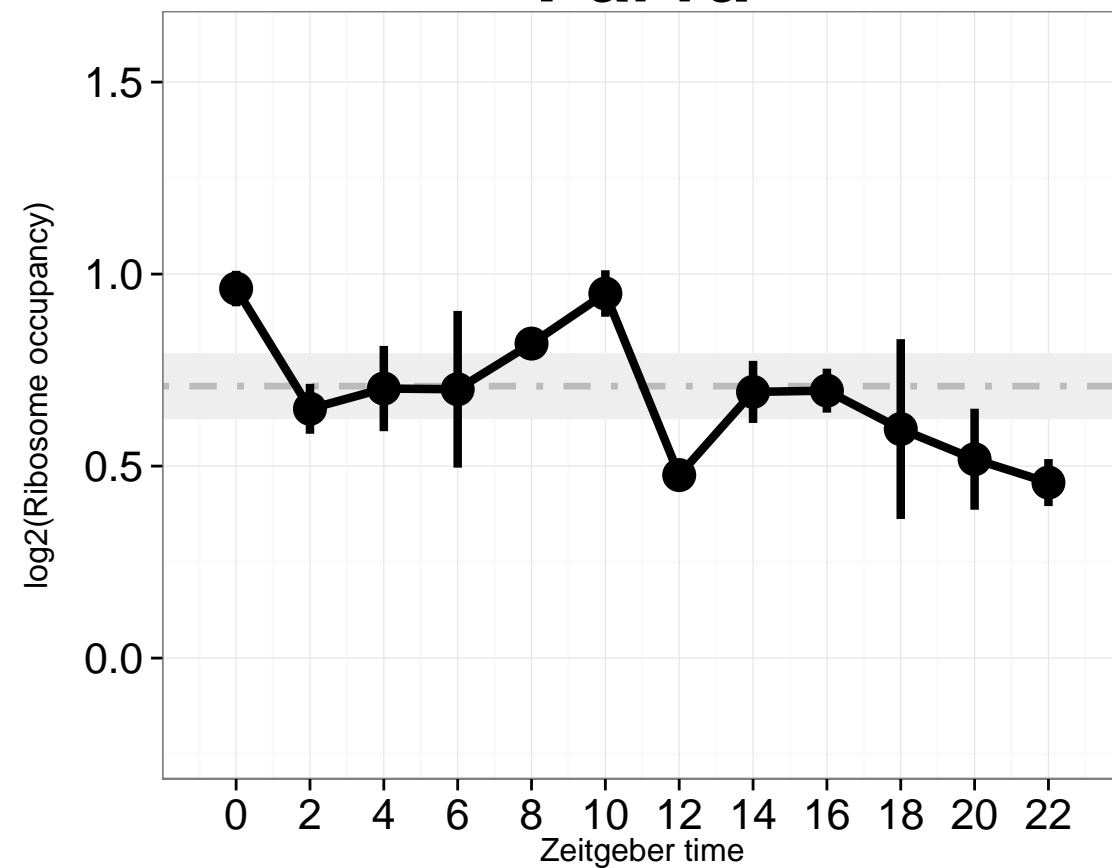

Supplement: SuppDataset_1.zip [file Parva_set_A.pdf › Supplemental Dataset 1/A-mRNA_nonrhyth_translation_nonrhyth/Parva_set_A.pdf]

## Parvb

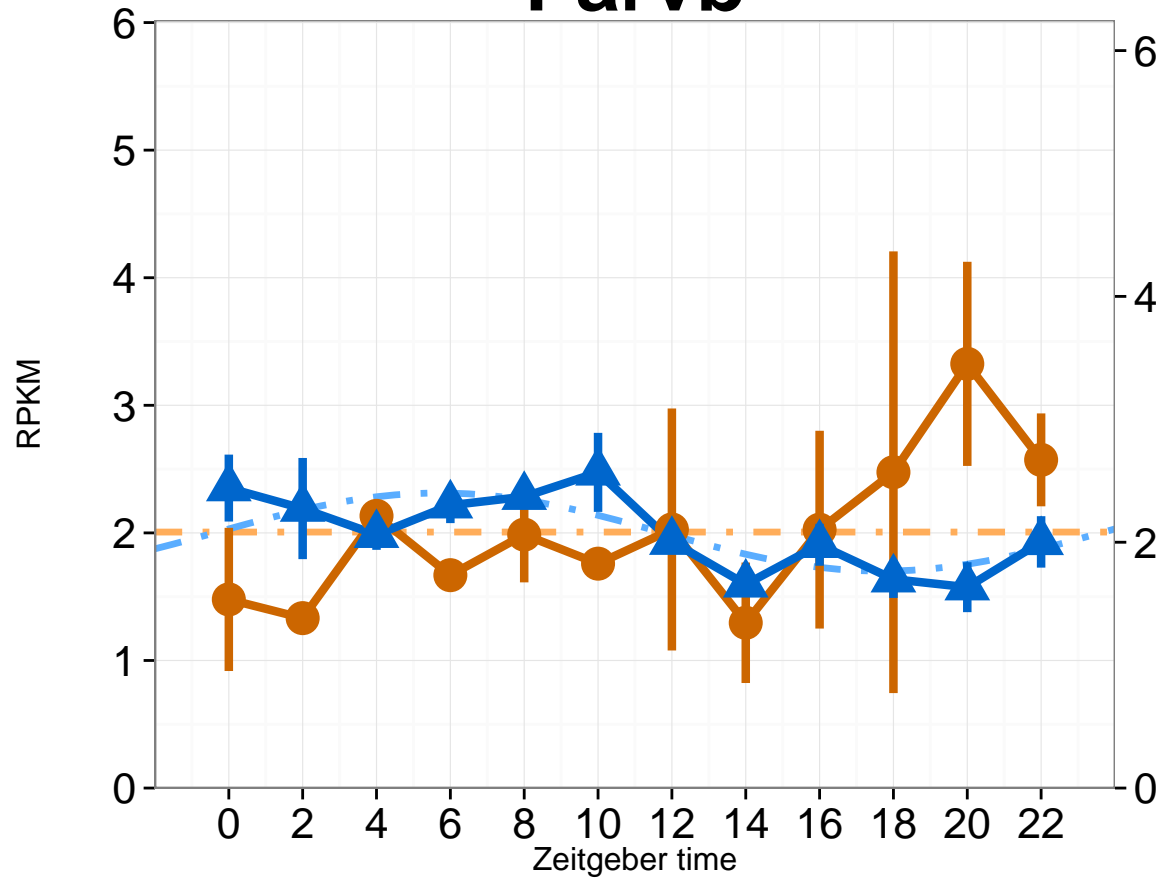

## Parvb

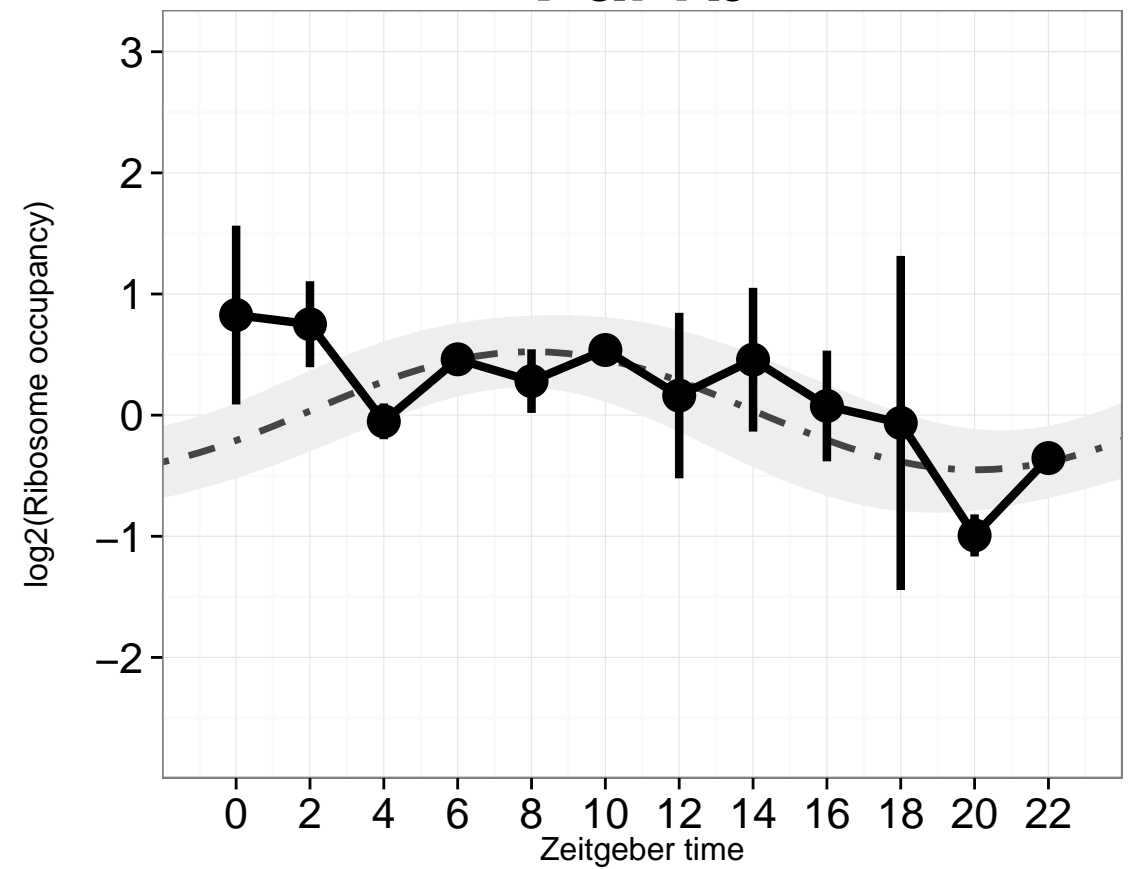

Supplement: SuppDataset_1.zip [file Parvb_set_A.pdf › Supplemental Dataset 1/A-mRNA_nonrhyth_translation_nonrhyth/Parvb_set_A.pdf]

**Parvg TR**

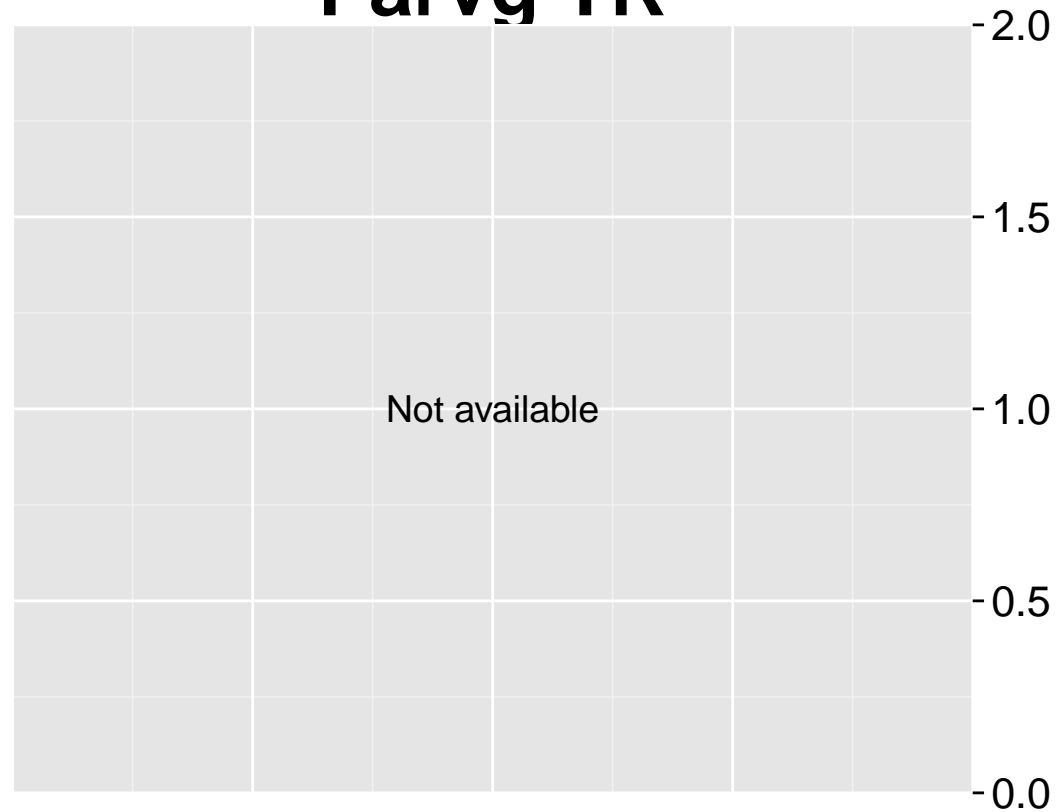

**Parvg log2(Ribosome occupancy**

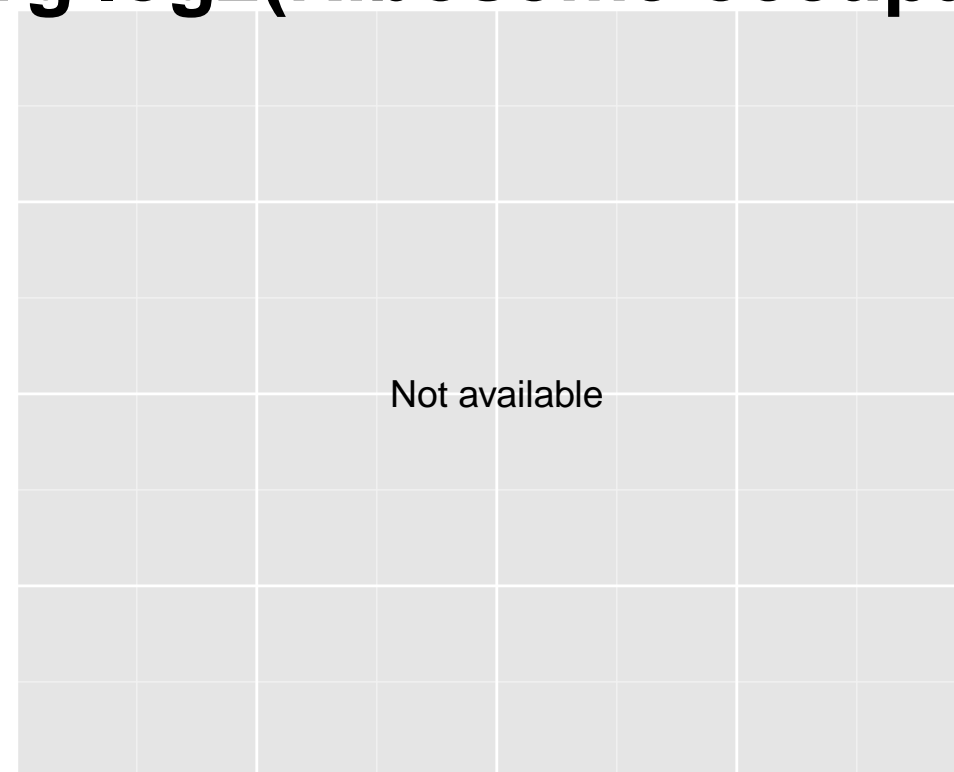

Supplement: SuppDataset_1.zip [file Parvg_set_A.pdf › Supplemental Dataset 1/A-mRNA_nonrhyth_translation_nonrhyth/Parvg_set_A.pdf]

# Patl1

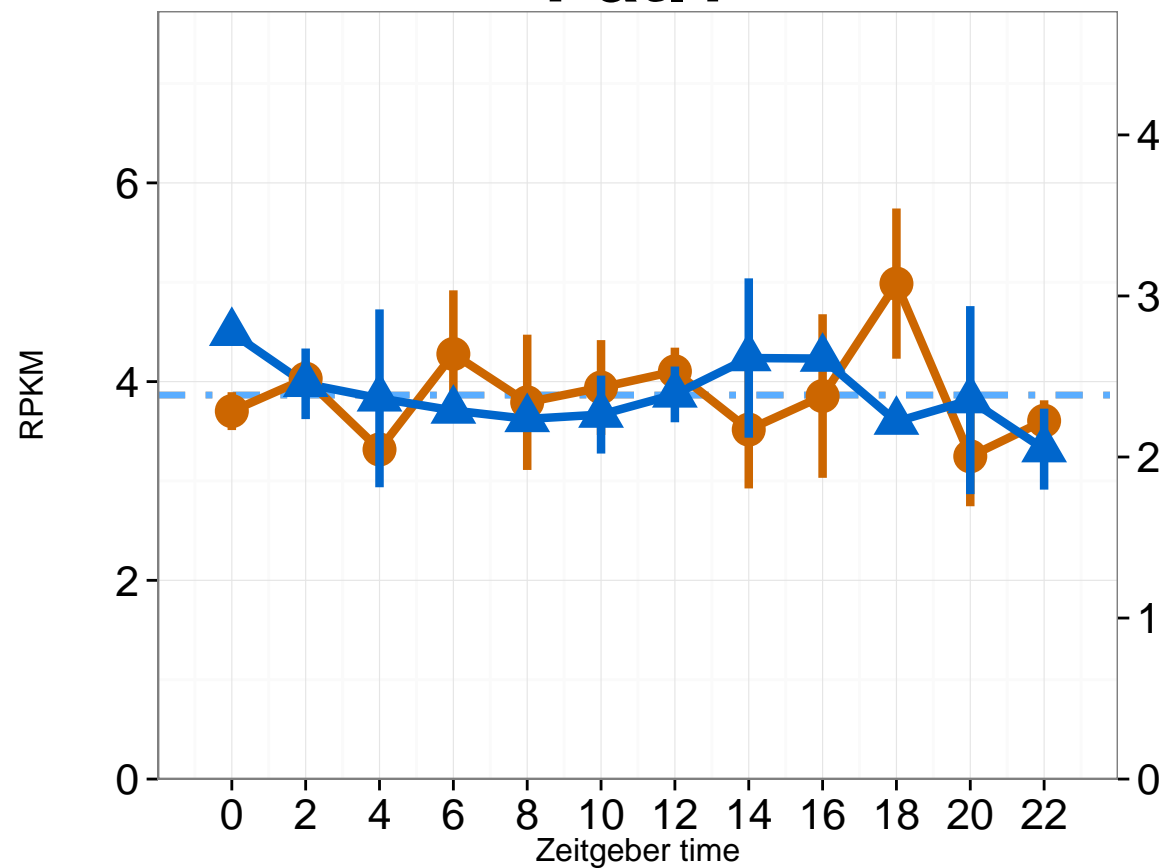

# Patl1

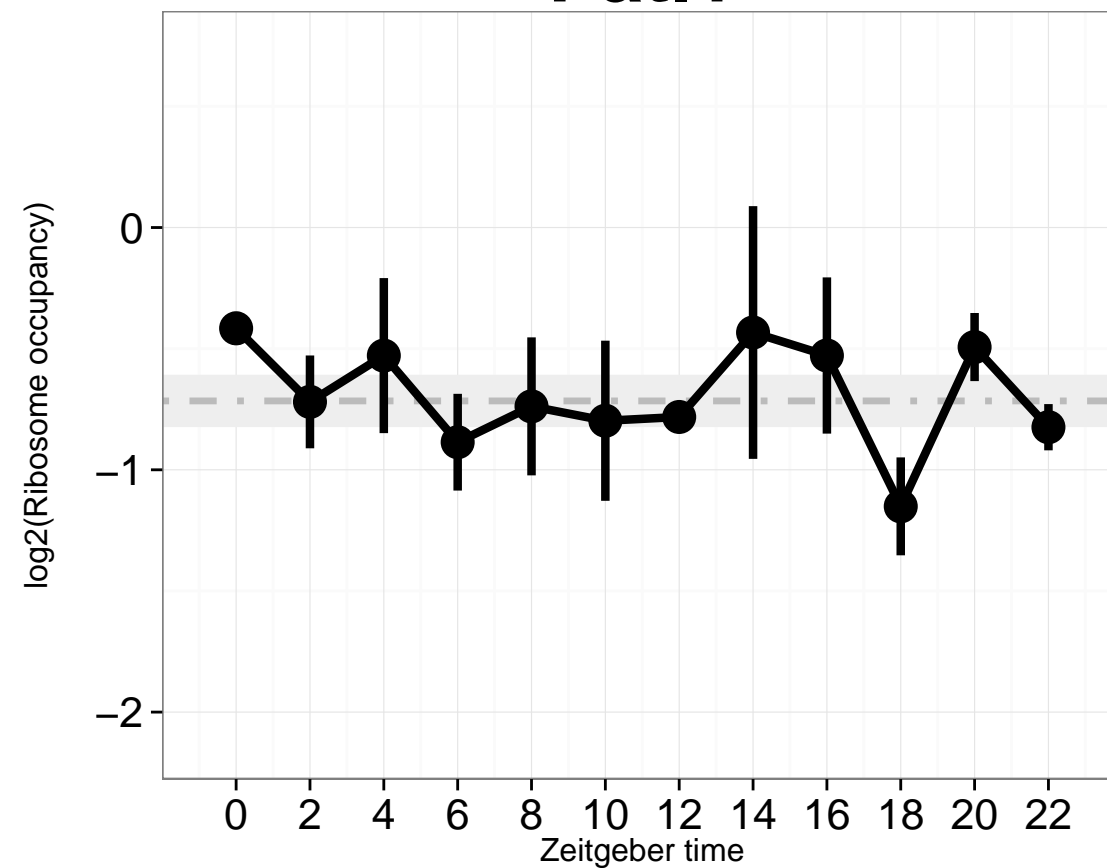

Supplement: SuppDataset_1.zip [file Patl1_set_A.pdf › Supplemental Dataset 1/A-mRNA_nonrhyth_translation_nonrhyth/Patl1_set_A.pdf]

## Pawr

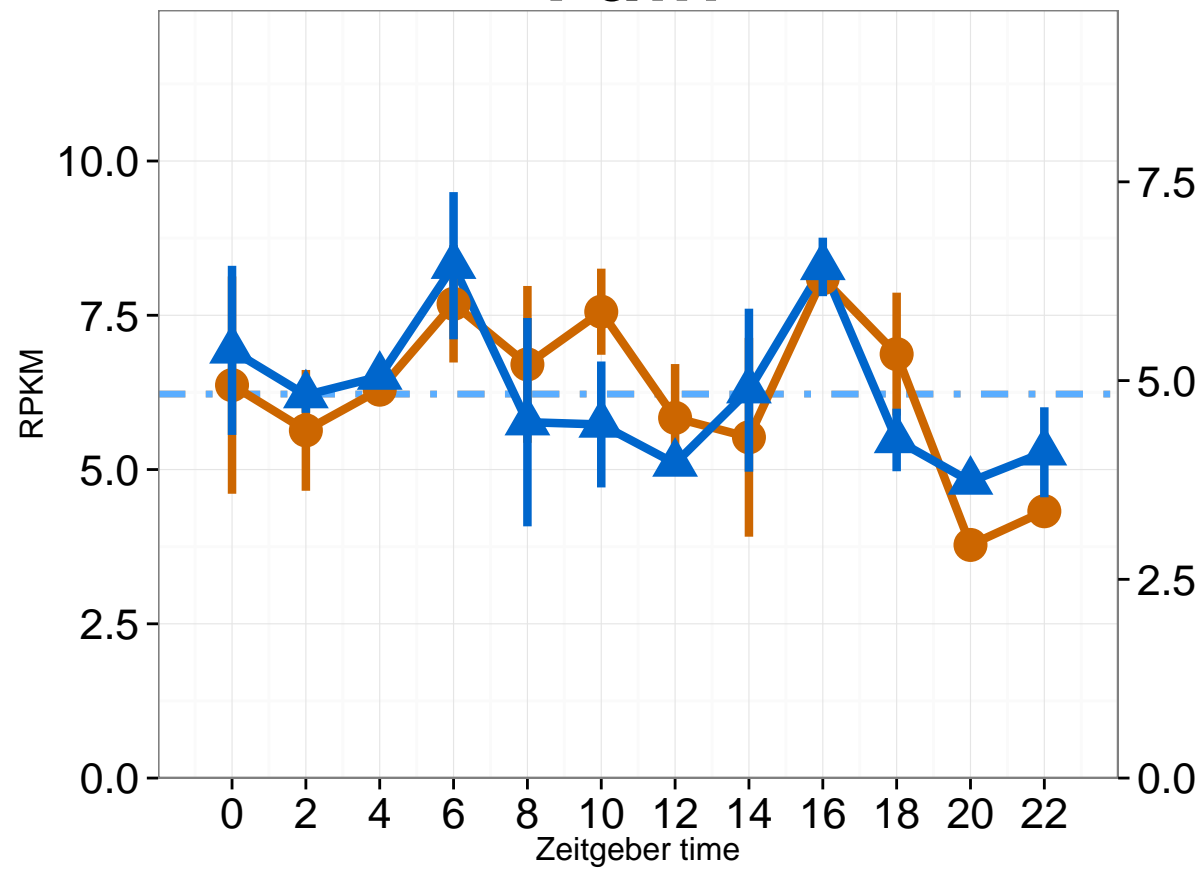

## Pawr

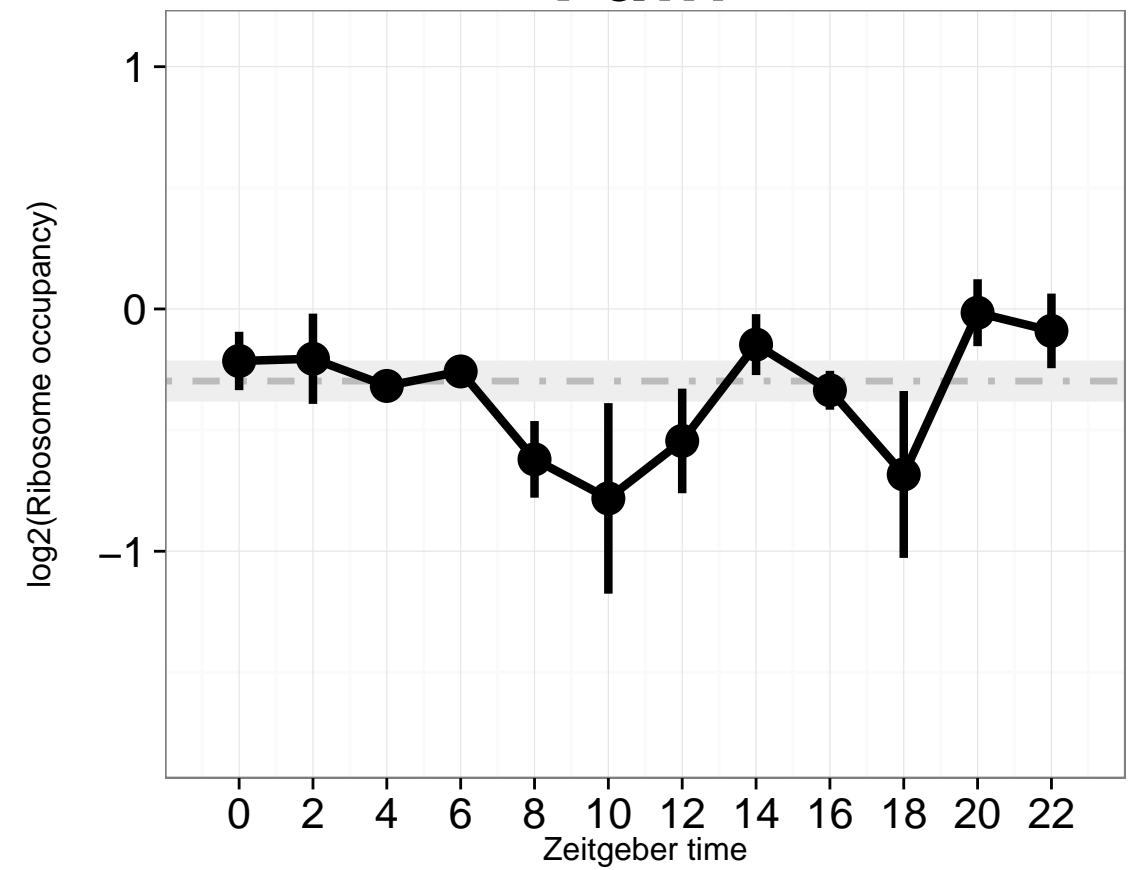

Supplement: SuppDataset_1.zip [file Pawr_set_A.pdf › Supplemental Dataset 1/A-mRNA_nonrhyth_translation_nonrhyth/Pawr_set_A.pdf]

## Paxbp1

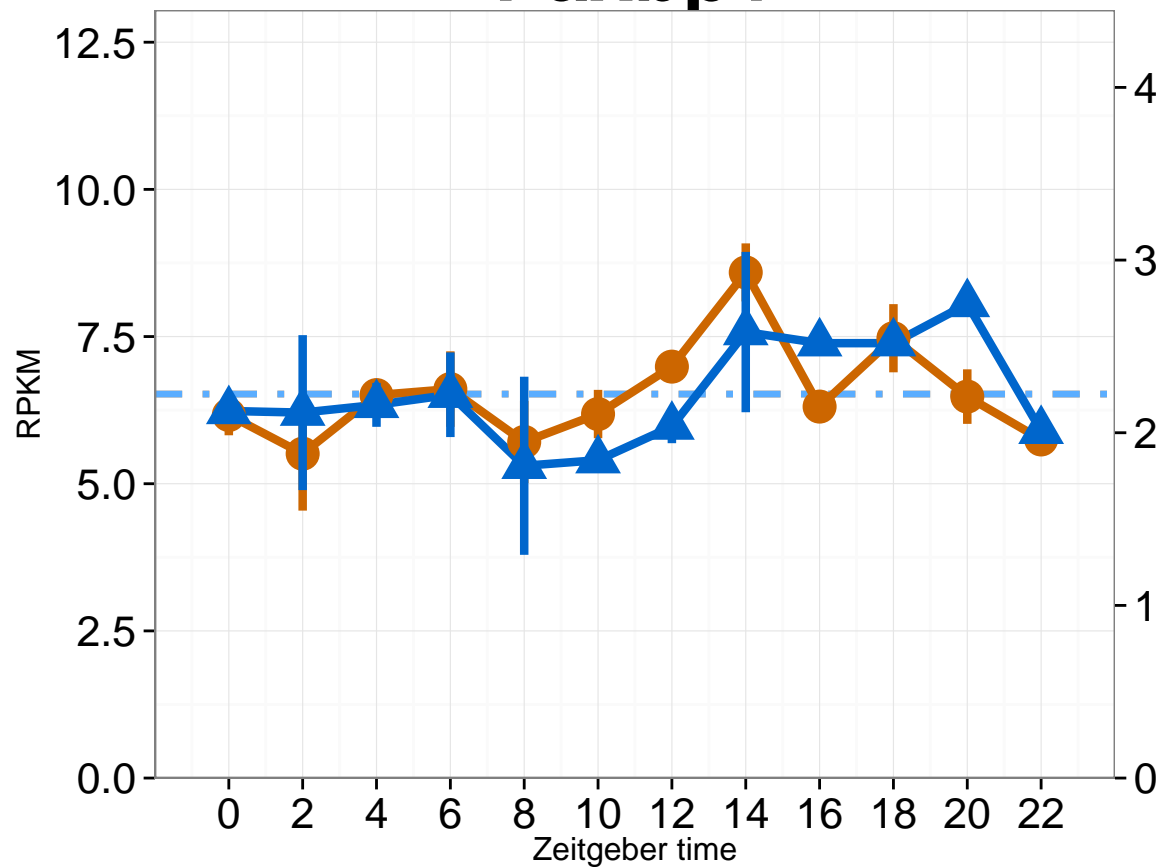

## Paxbp1

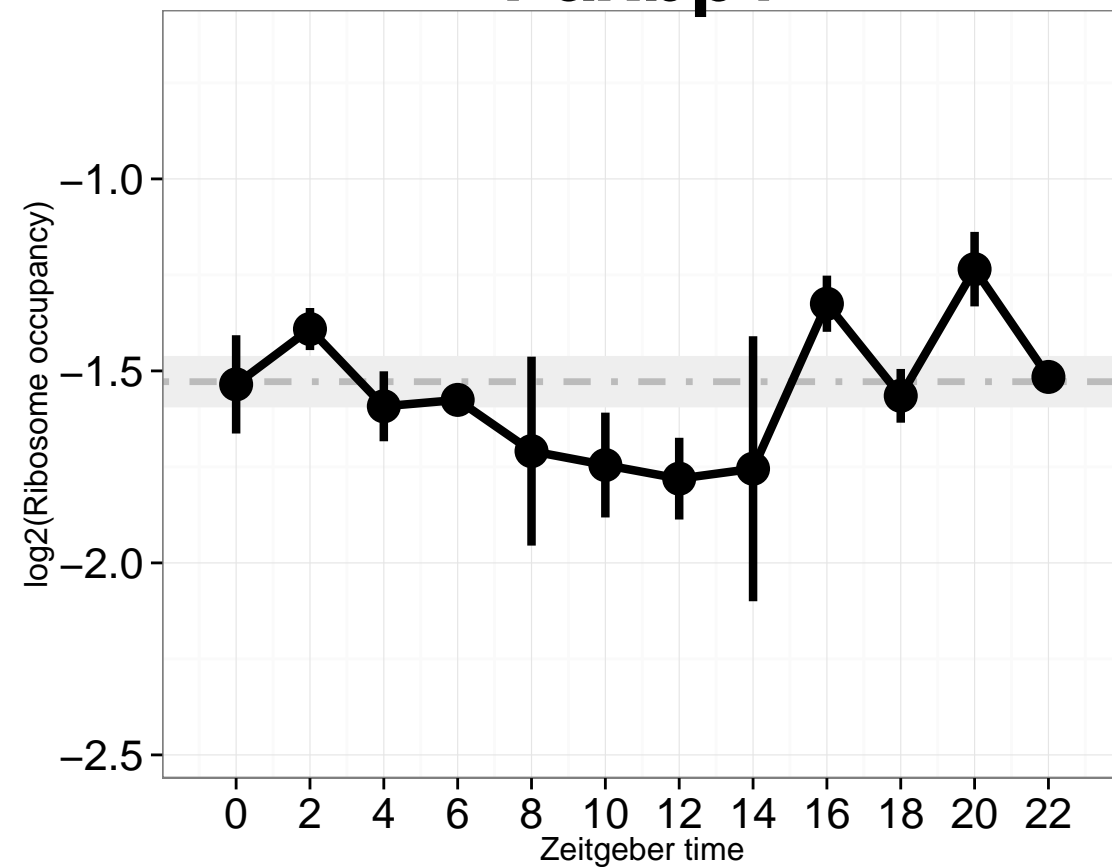

Supplement: SuppDataset_1.zip [file Paxbp1_set_A.pdf › Supplemental Dataset 1/A-mRNA_nonrhyth_translation_nonrhyth/Paxbp1_set_A.pdf]

# Paxip1

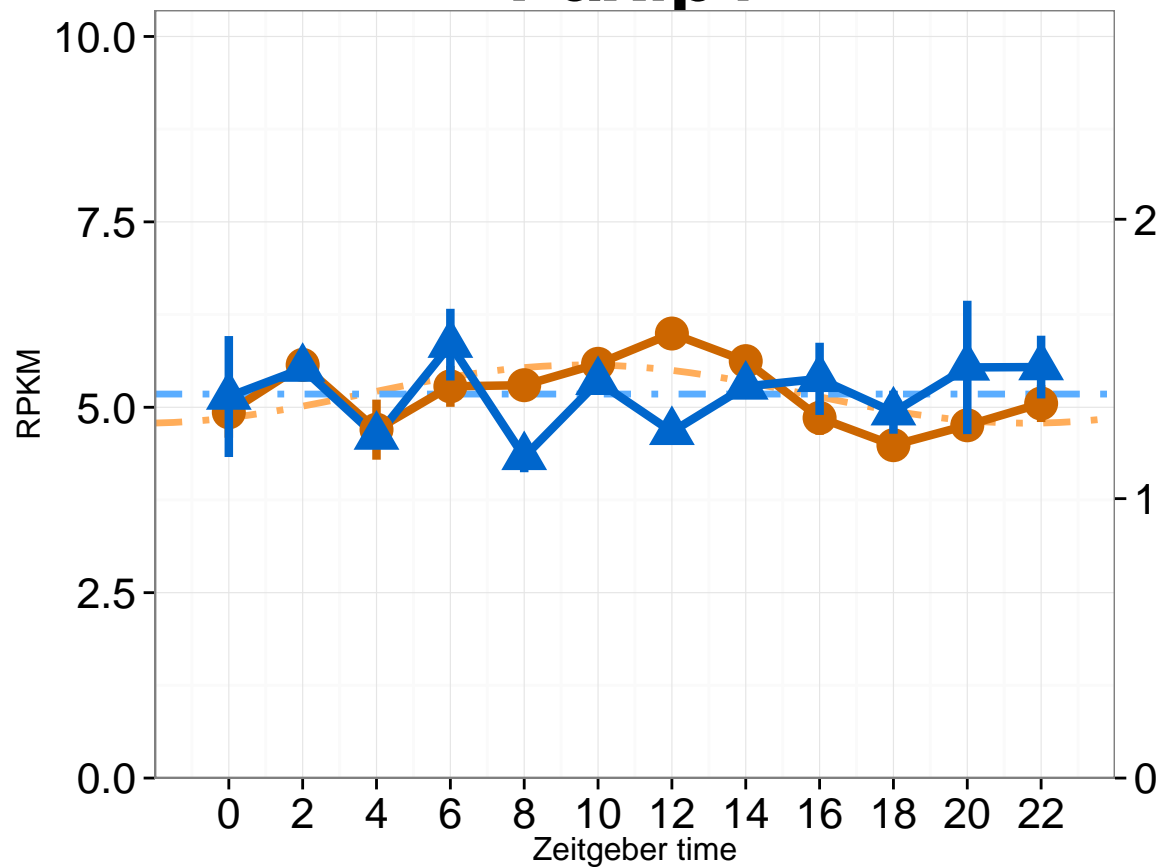

# Paxip1

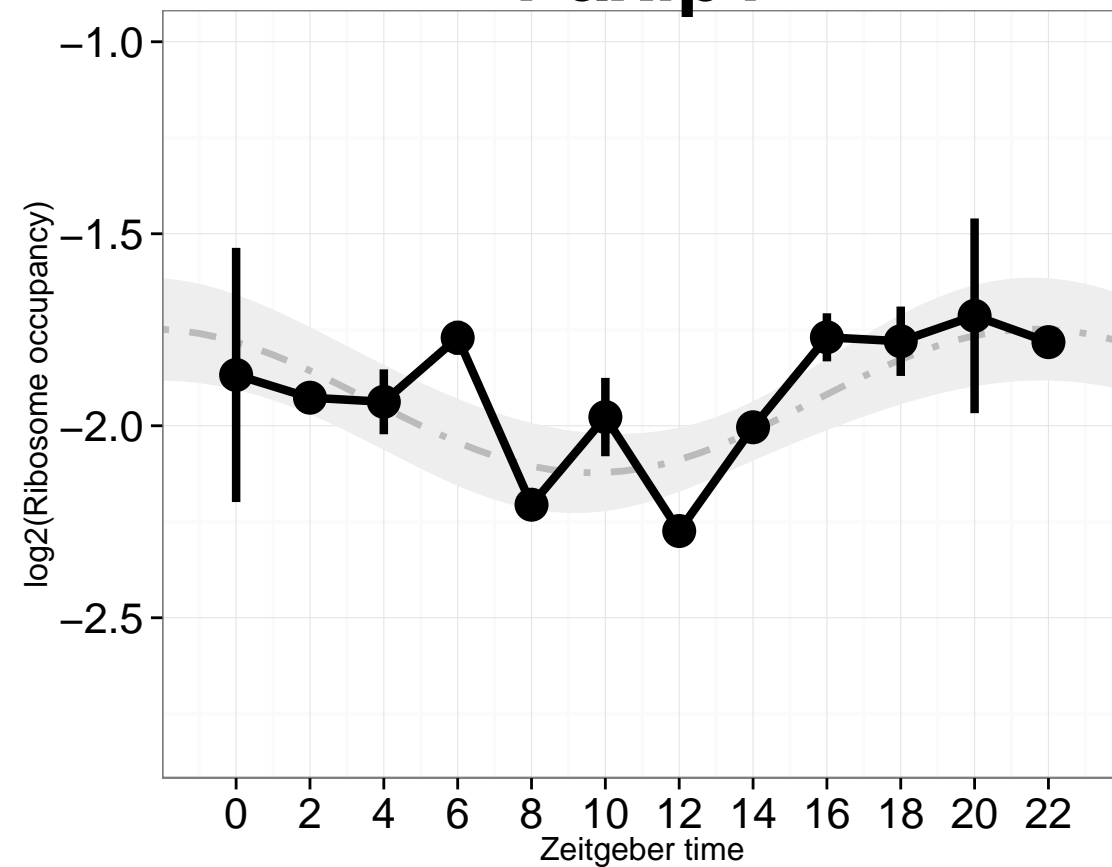

Supplement: SuppDataset_1.zip [file Paxip1_set_A.pdf › Supplemental Dataset 1/A-mRNA_nonrhyth_translation_nonrhyth/Paxip1_set_A.pdf]

## Pbdc1

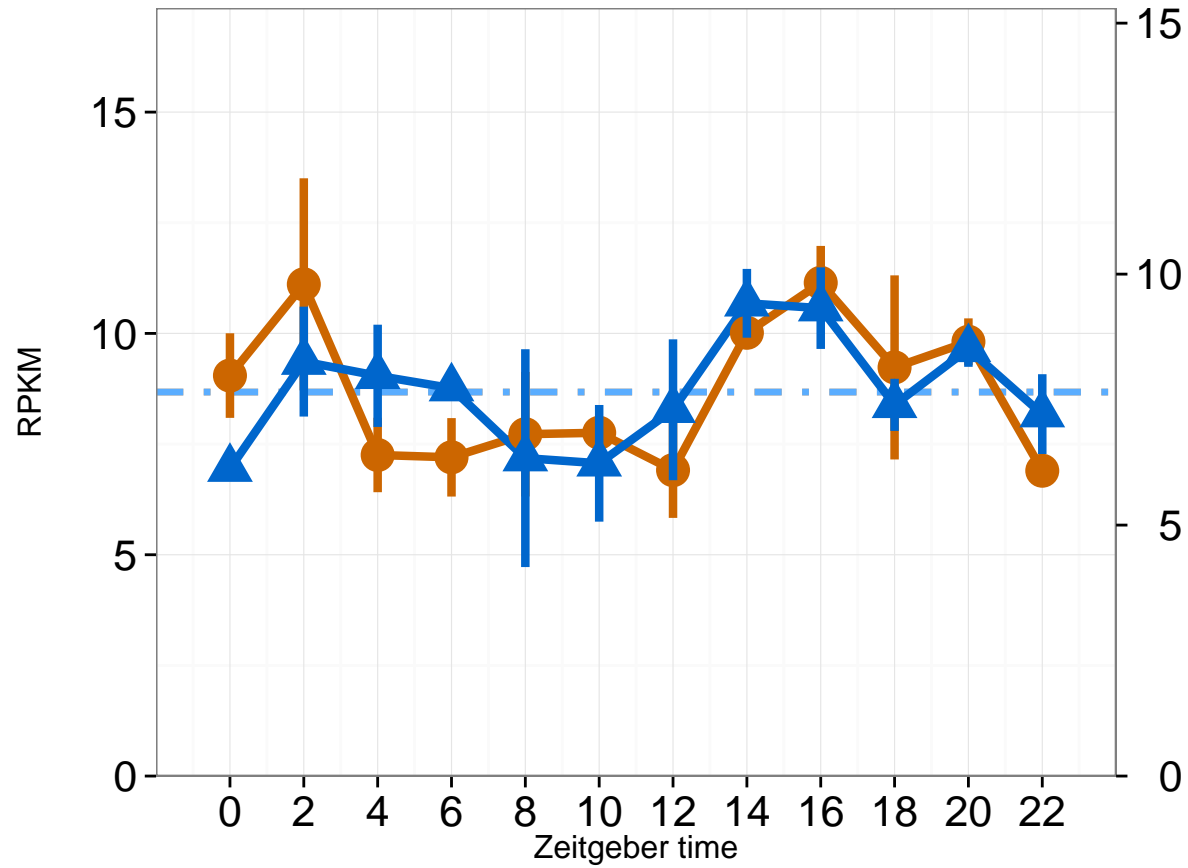

## Pbdc1

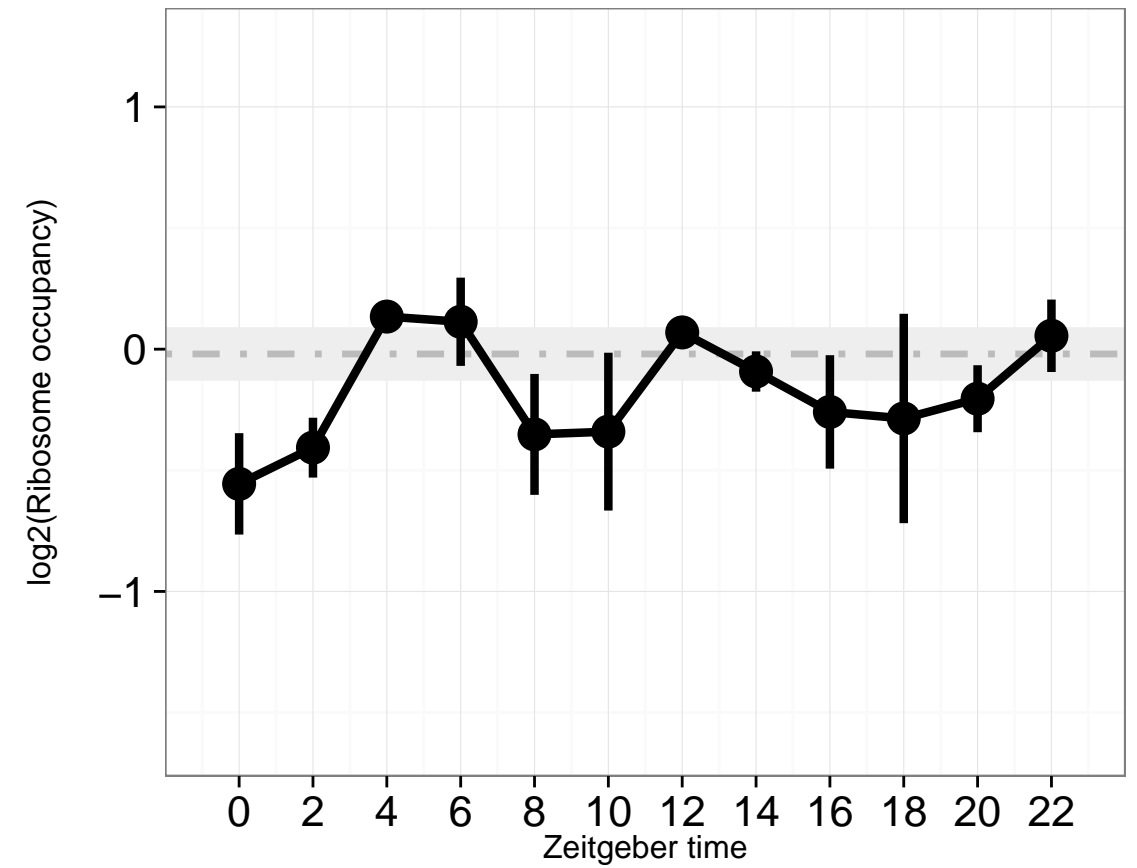

Supplement: SuppDataset_1.zip [file Pbdc1_set_A.pdf › Supplemental Dataset 1/A-mRNA_nonrhyth_translation_nonrhyth/Pbdc1_set_A.pdf]

**Pbk TR**

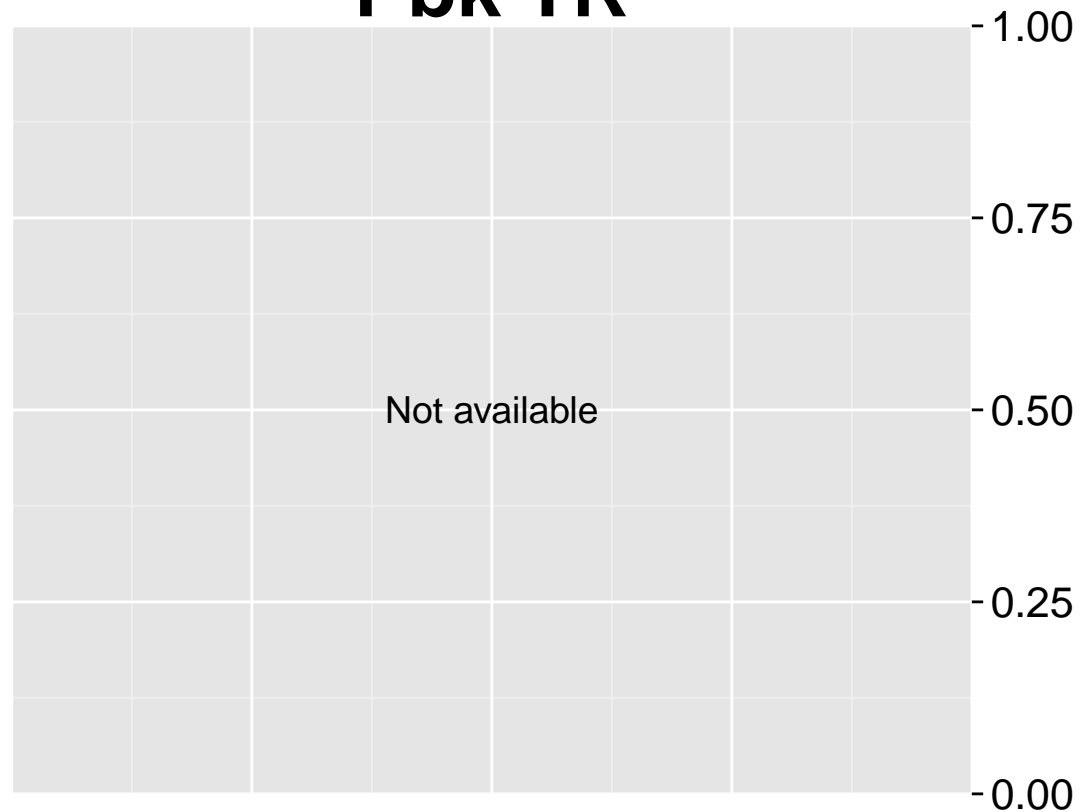

**Pbk log2(Ribosome occupancy)**

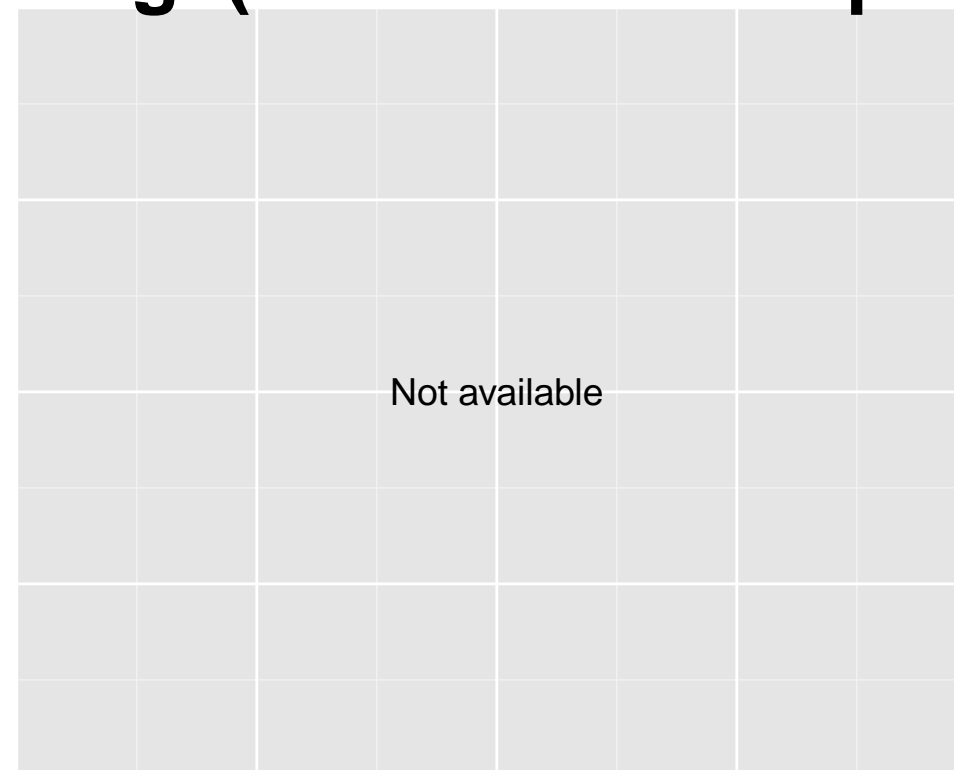

Supplement: SuppDataset_1.zip [file Pbk_set_A.pdf › Supplemental Dataset 1/A-mRNA_nonrhyth_translation_nonrhyth/Pbk_set_A.pdf]

# Pbld1

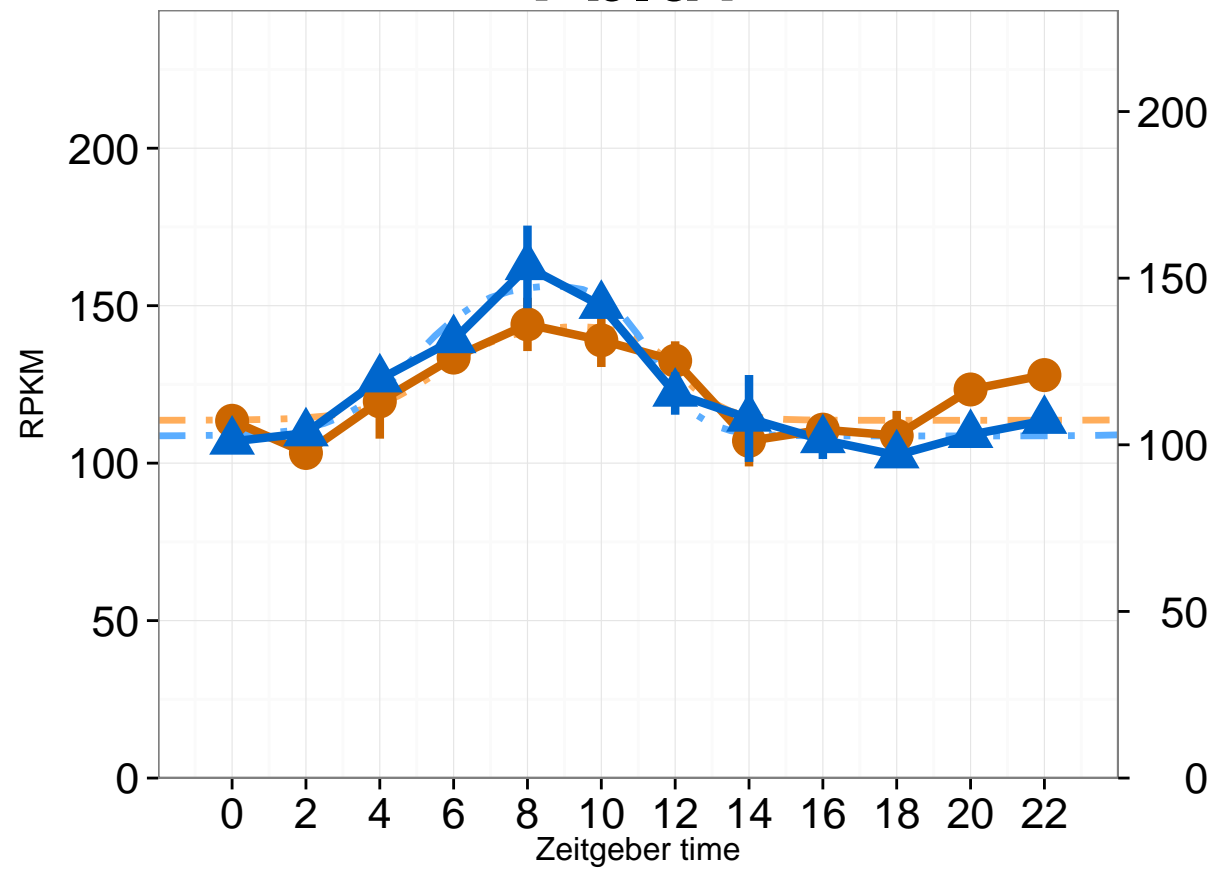

# Pbld1

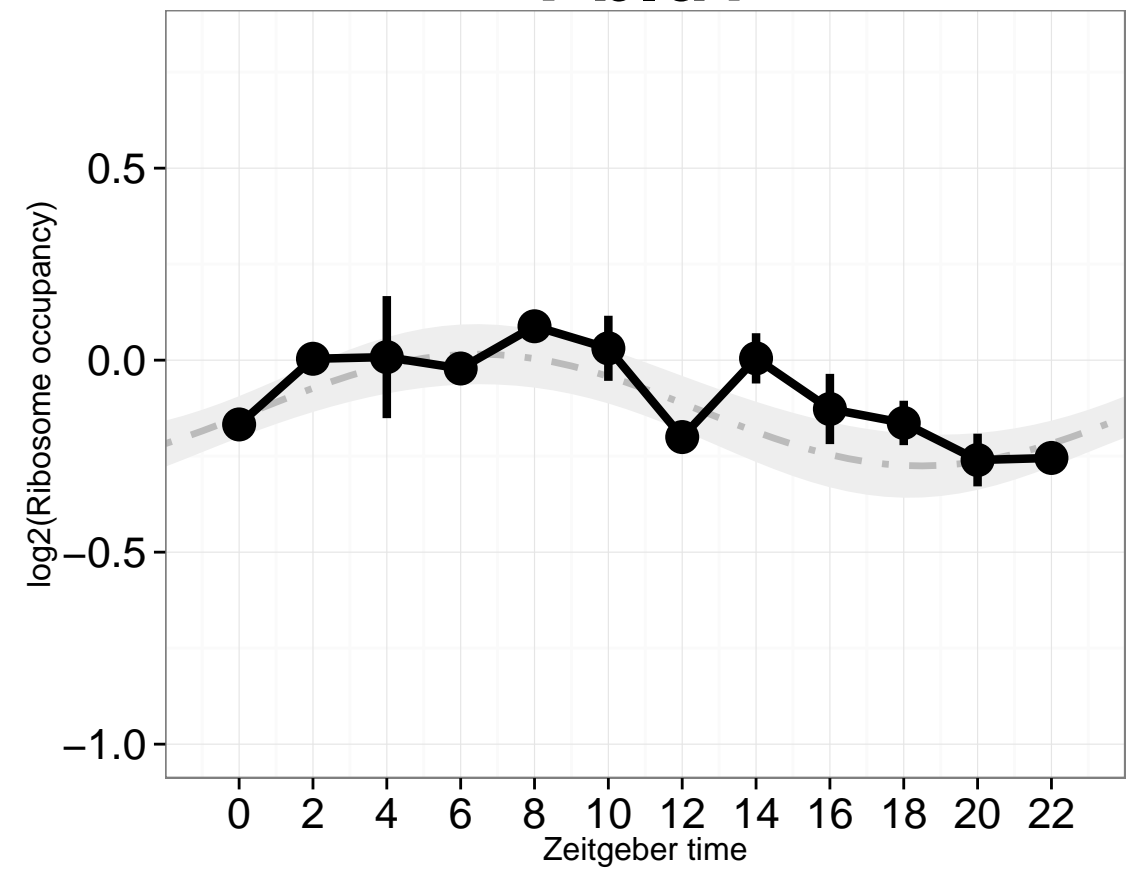

Supplement: SuppDataset_1.zip [file Pbld1_set_A.pdf › Supplemental Dataset 1/A-mRNA_nonrhyth_translation_nonrhyth/Pbld1_set_A.pdf]

## Pbld2

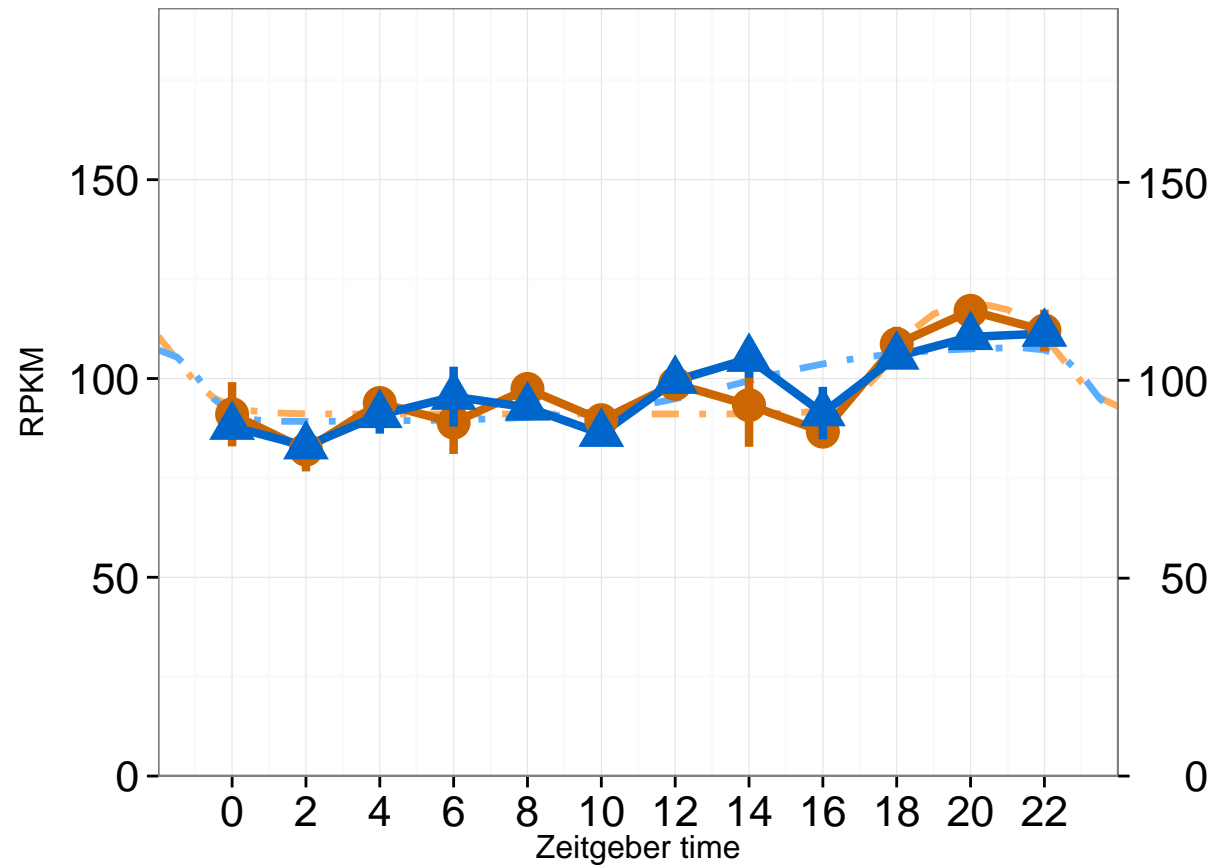

## Pbld2

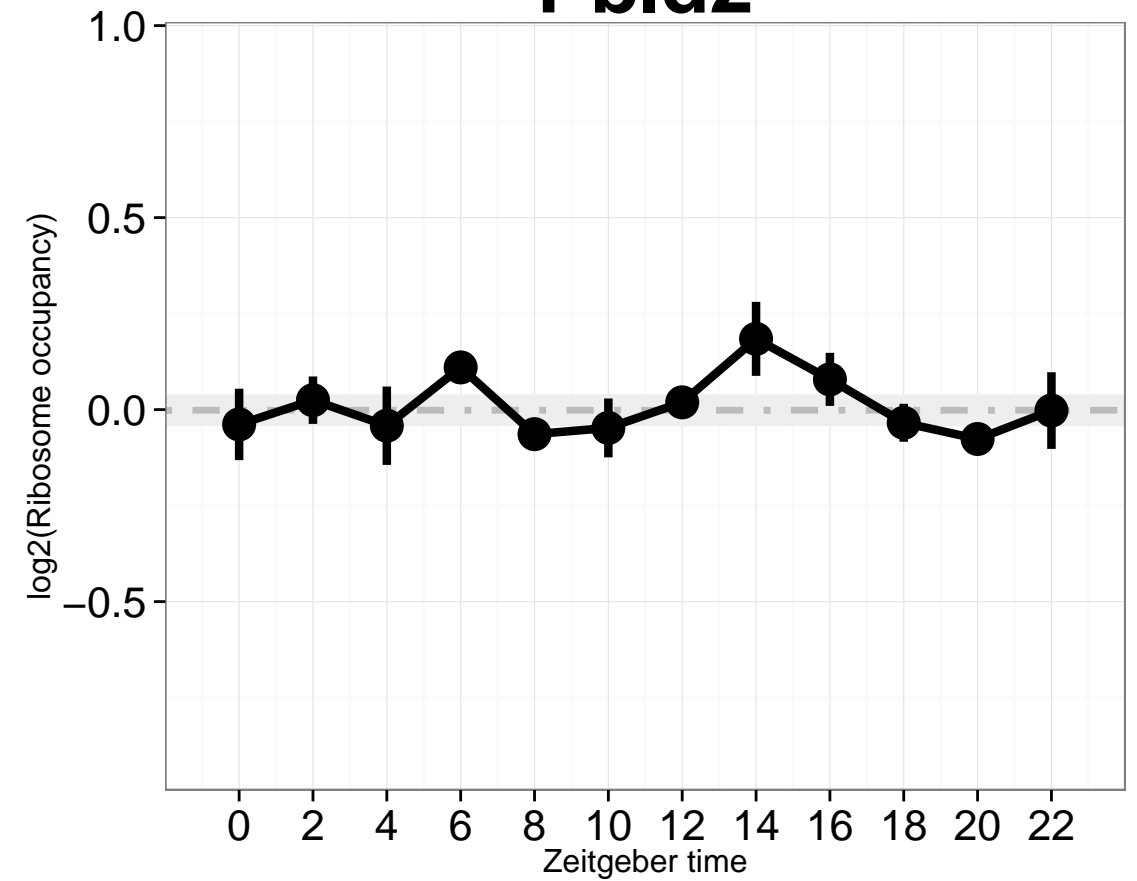

Supplement: SuppDataset_1.zip [file Pbld2_set_A.pdf › Supplemental Dataset 1/A-mRNA_nonrhyth_translation_nonrhyth/Pbld2_set_A.pdf]

# Pbrm1

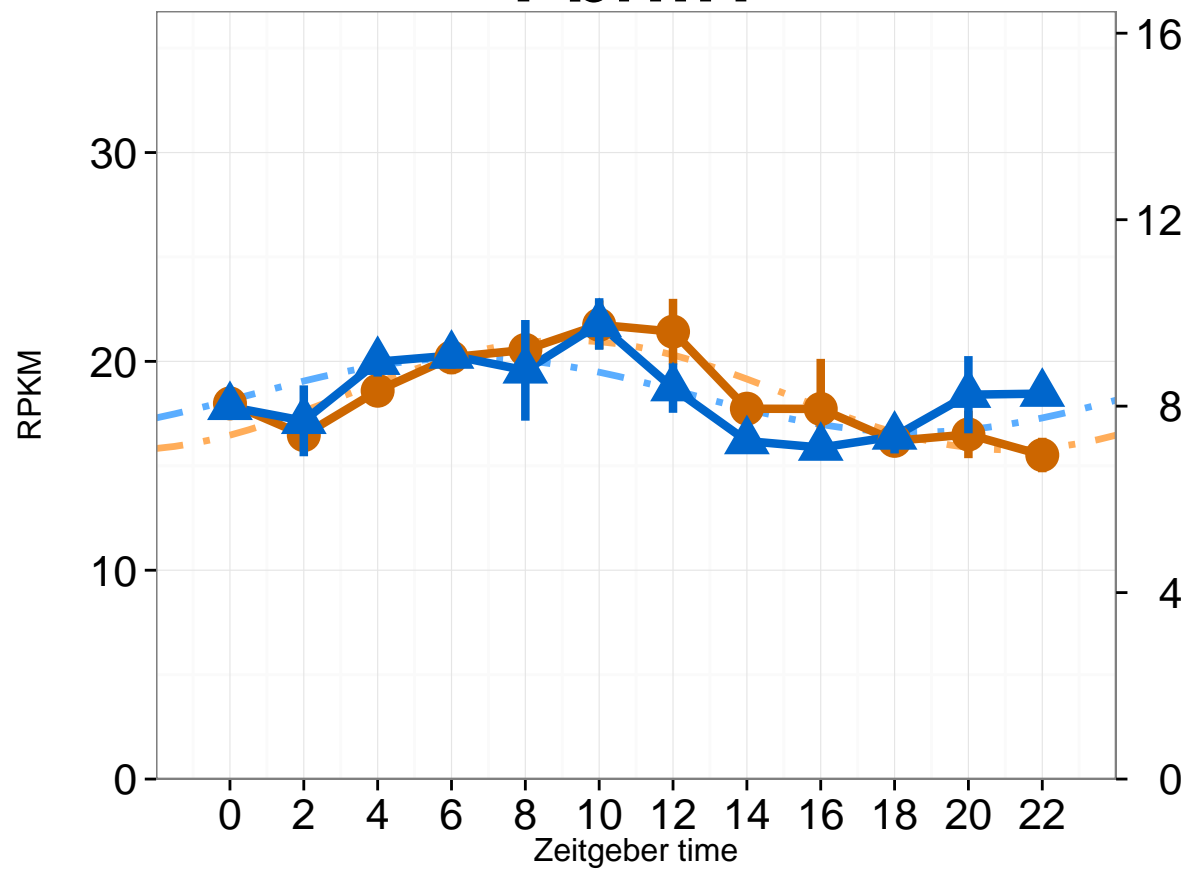

# Pbrm1

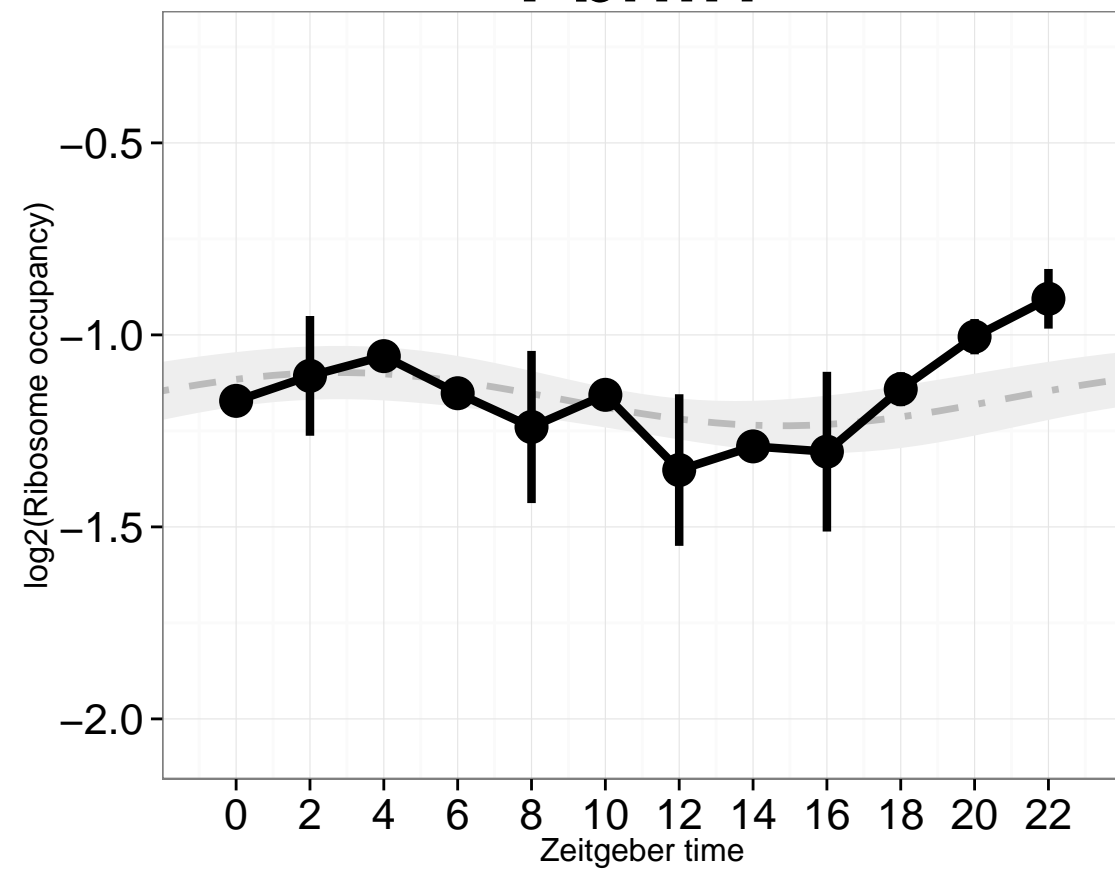

Supplement: SuppDataset_1.zip [file Pbrm1_set_A.pdf › Supplemental Dataset 1/A-mRNA_nonrhyth_translation_nonrhyth/Pbrm1_set_A.pdf]

# Pbx1

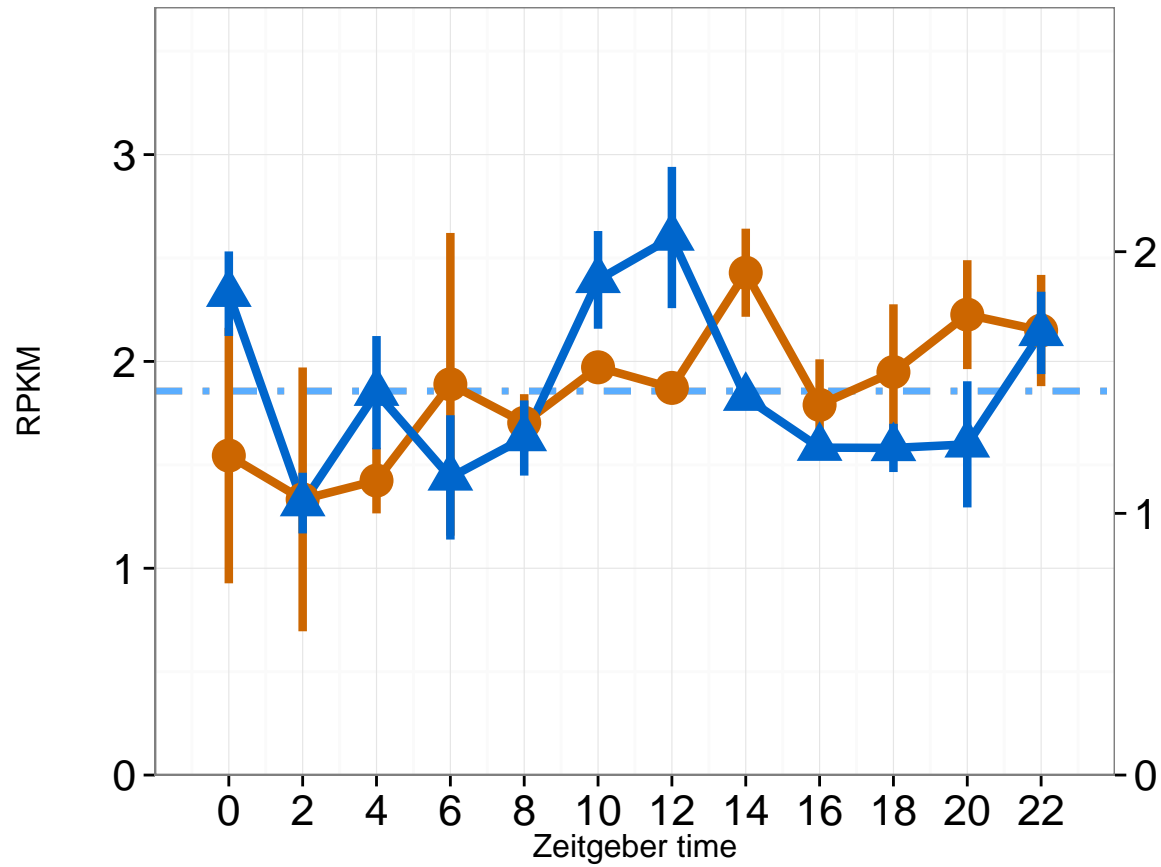

# Pbx1

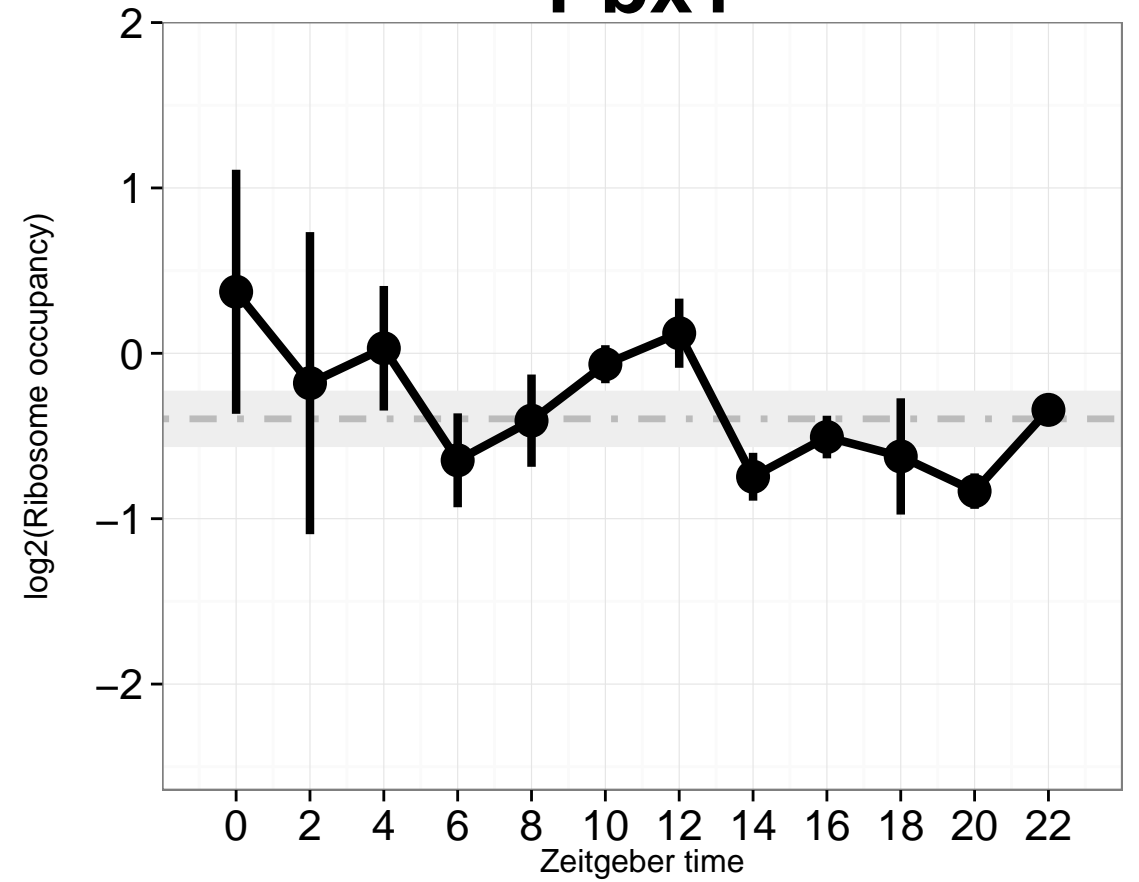

Supplement: SuppDataset_1.zip [file Pbx1_set_A.pdf › Supplemental Dataset 1/A-mRNA_nonrhyth_translation_nonrhyth/Pbx1_set_A.pdf]

## Pbx2

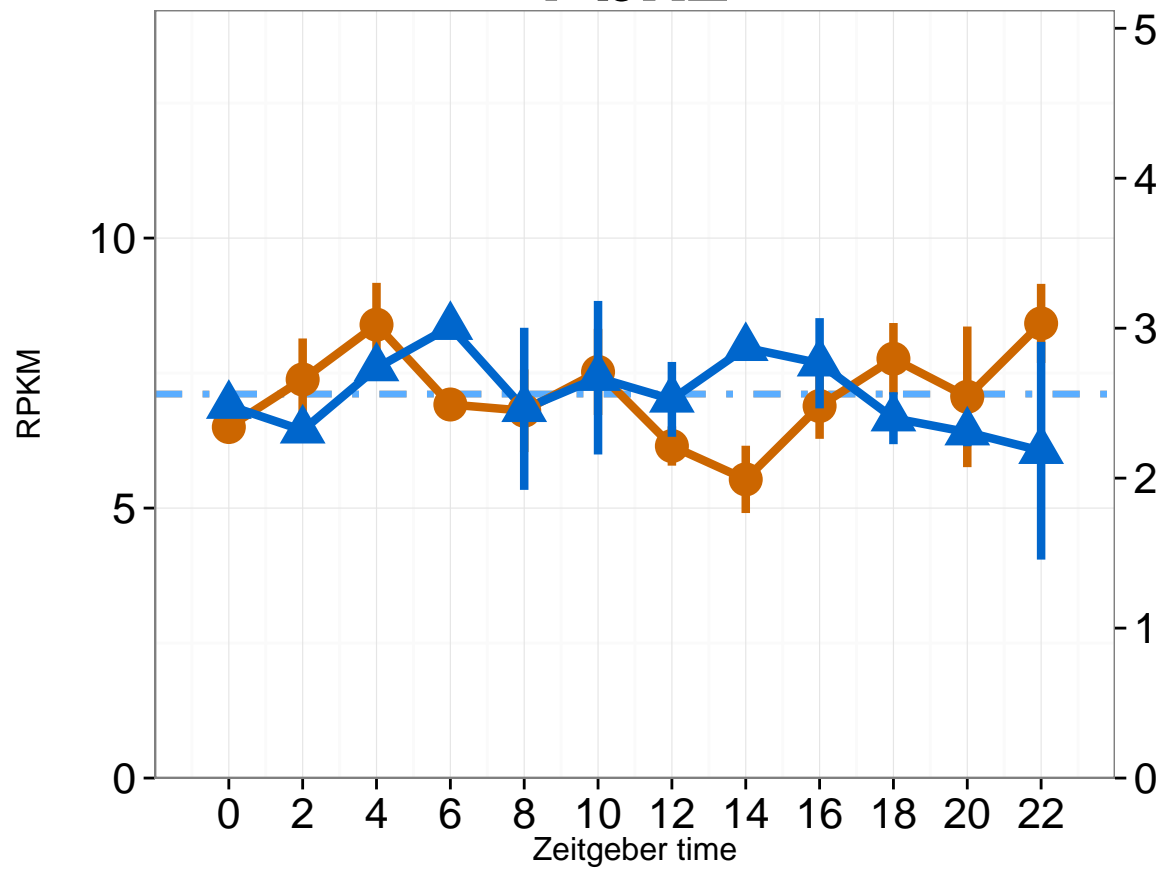

## Pbx2

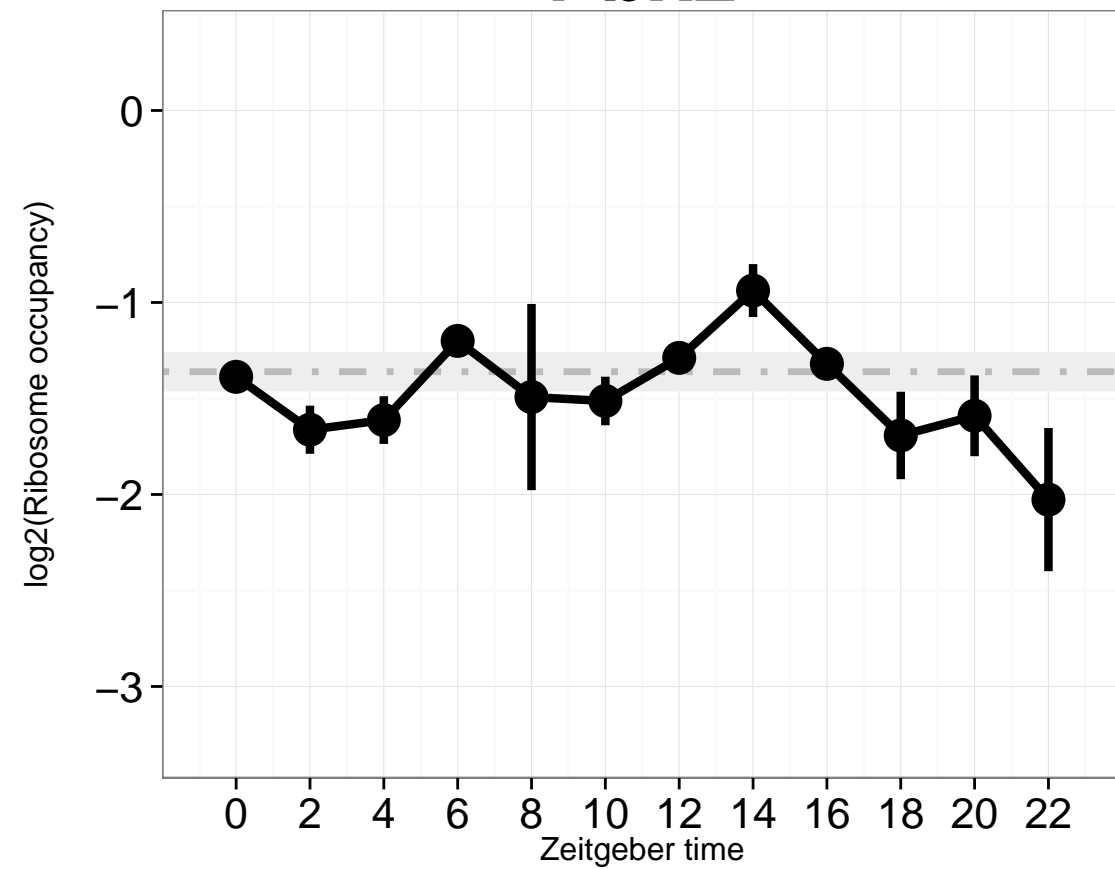

Supplement: SuppDataset_1.zip [file Pbx2_set_A.pdf › Supplemental Dataset 1/A-mRNA_nonrhyth_translation_nonrhyth/Pbx2_set_A.pdf]

## Pbx3

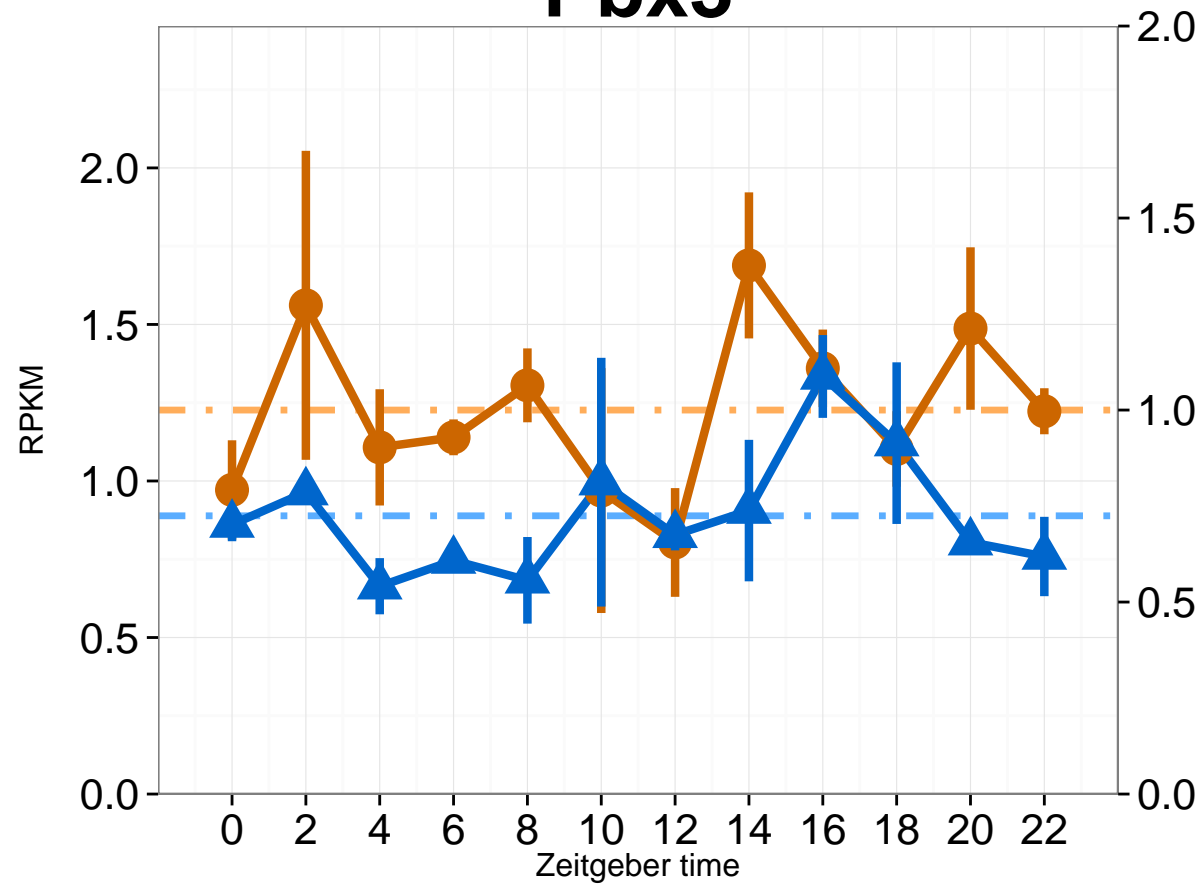

## Pbx3

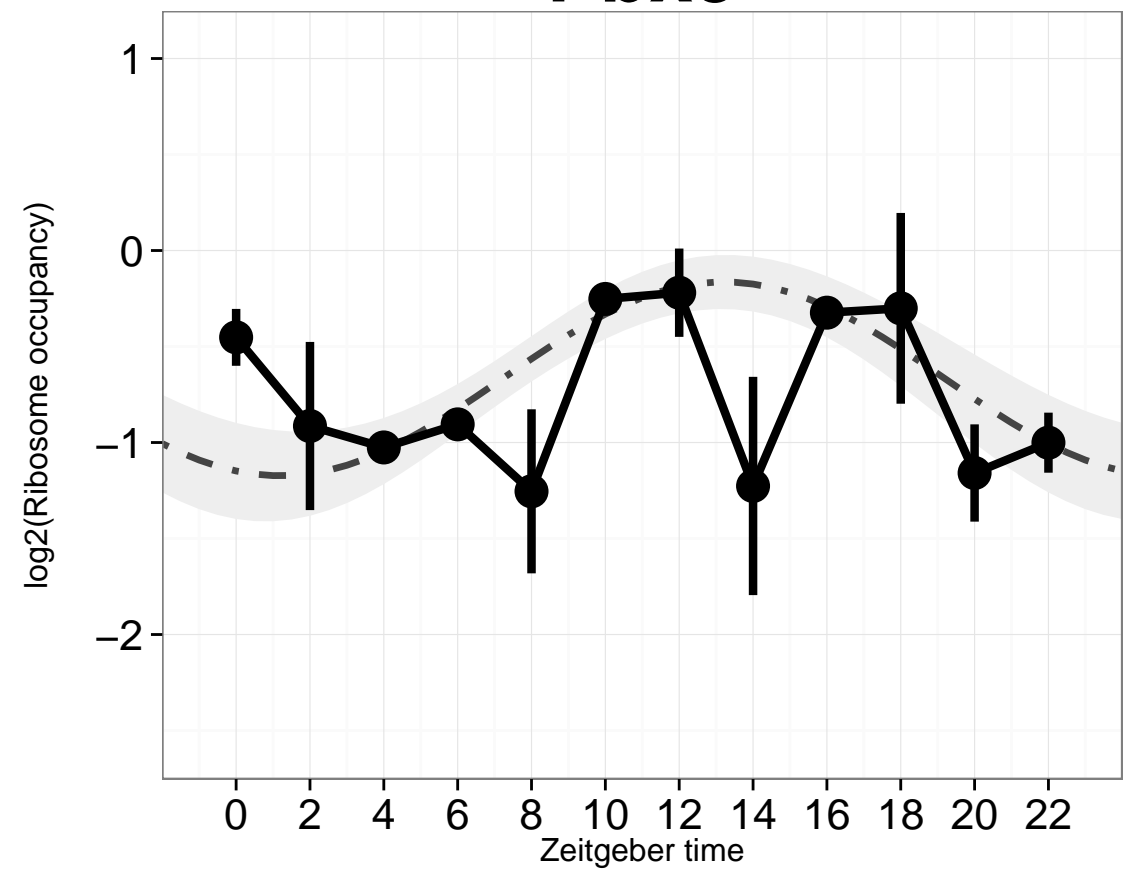

Supplement: SuppDataset_1.zip [file Pbx3_set_A.pdf › Supplemental Dataset 1/A-mRNA_nonrhyth_translation_nonrhyth/Pbx3_set_A.pdf]

# Pbxip1

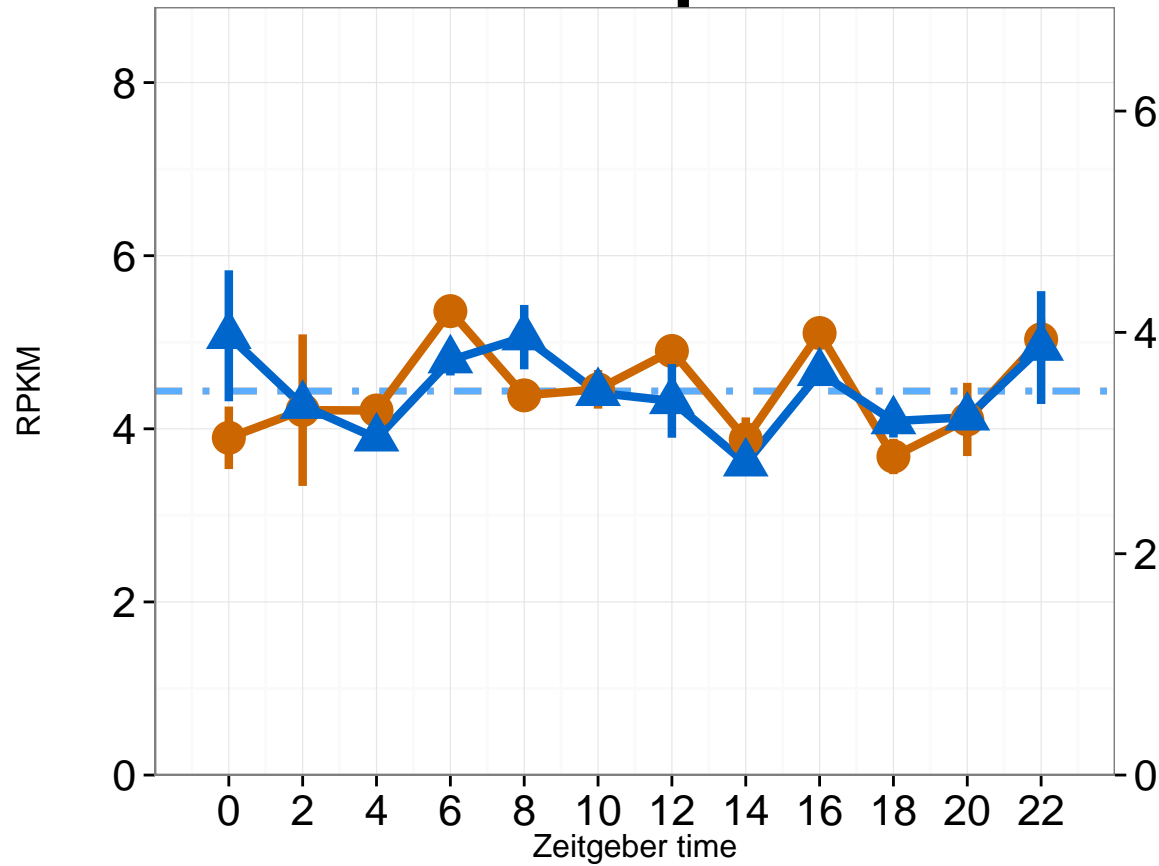

# Pbxip1

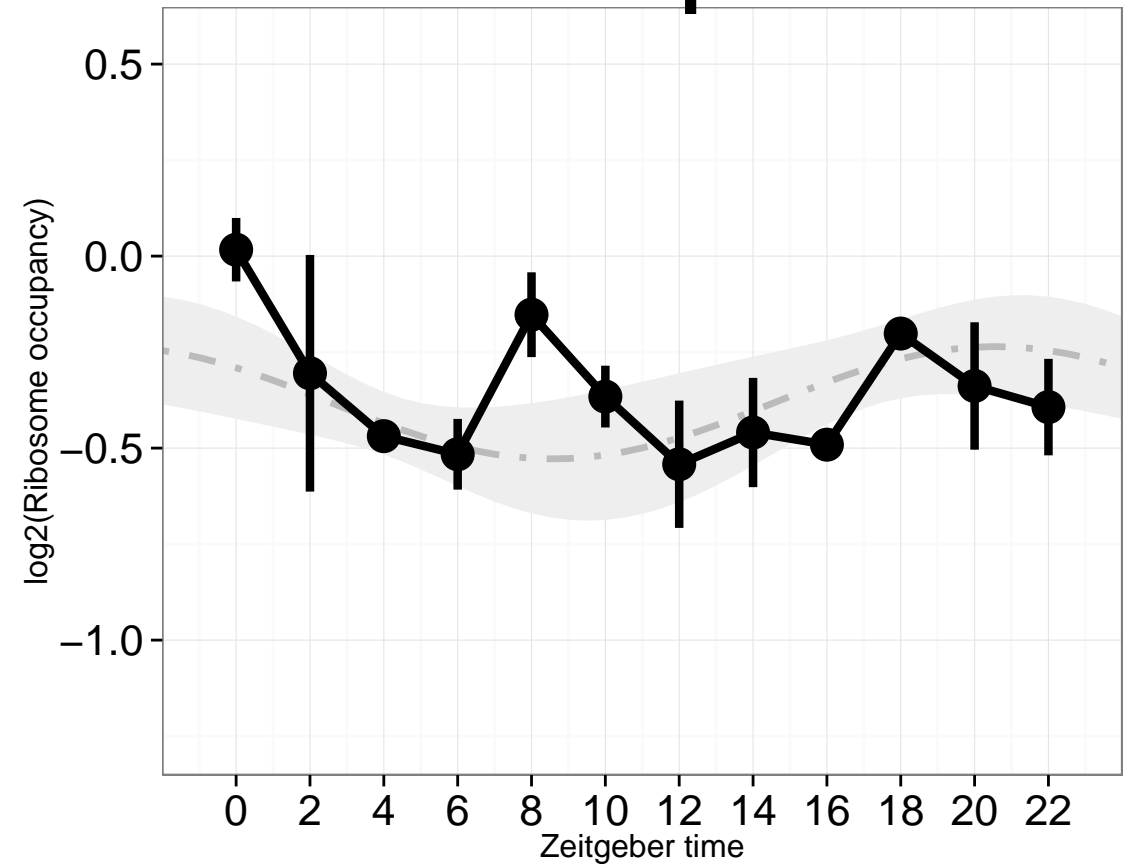

Supplement: SuppDataset_1.zip [file Pbxip1_set_A.pdf › Supplemental Dataset 1/A-mRNA_nonrhyth_translation_nonrhyth/Pbxip1_set_A.pdf]

## Pcbd2

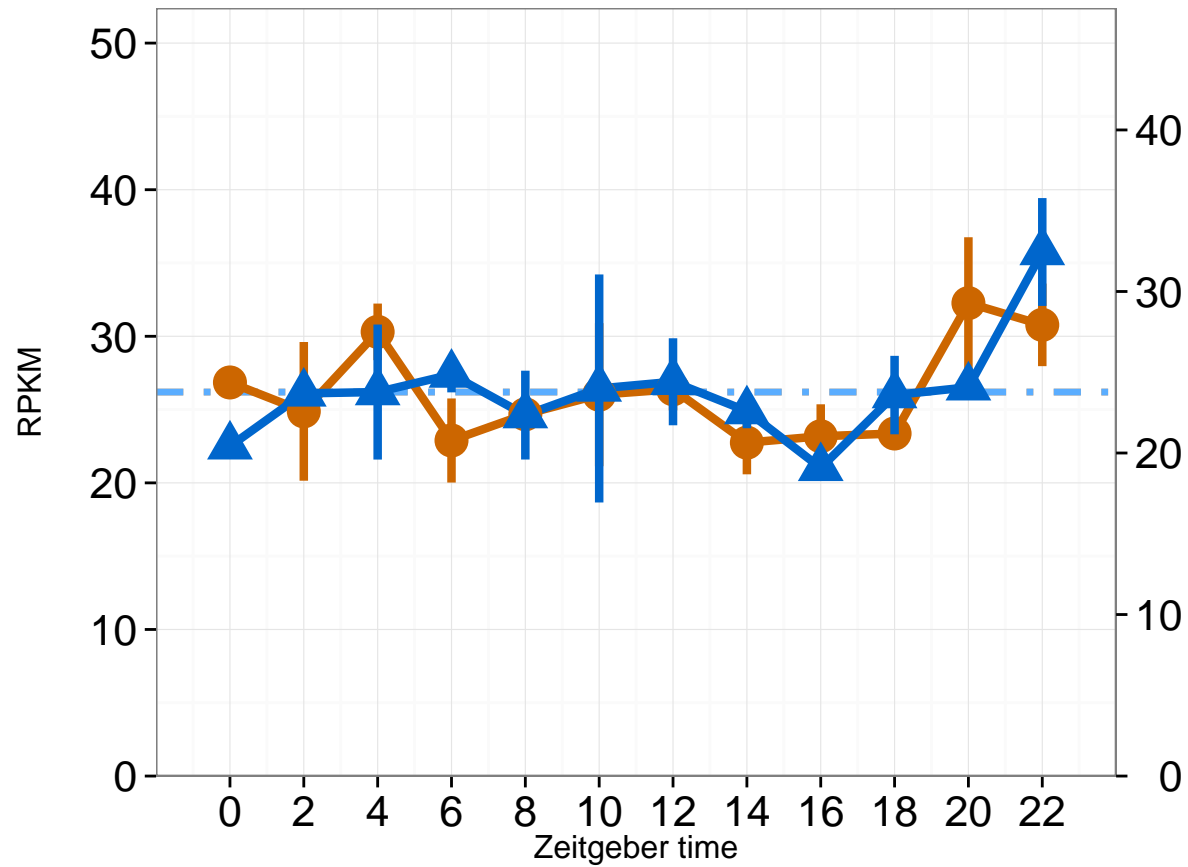

## Pcbd2

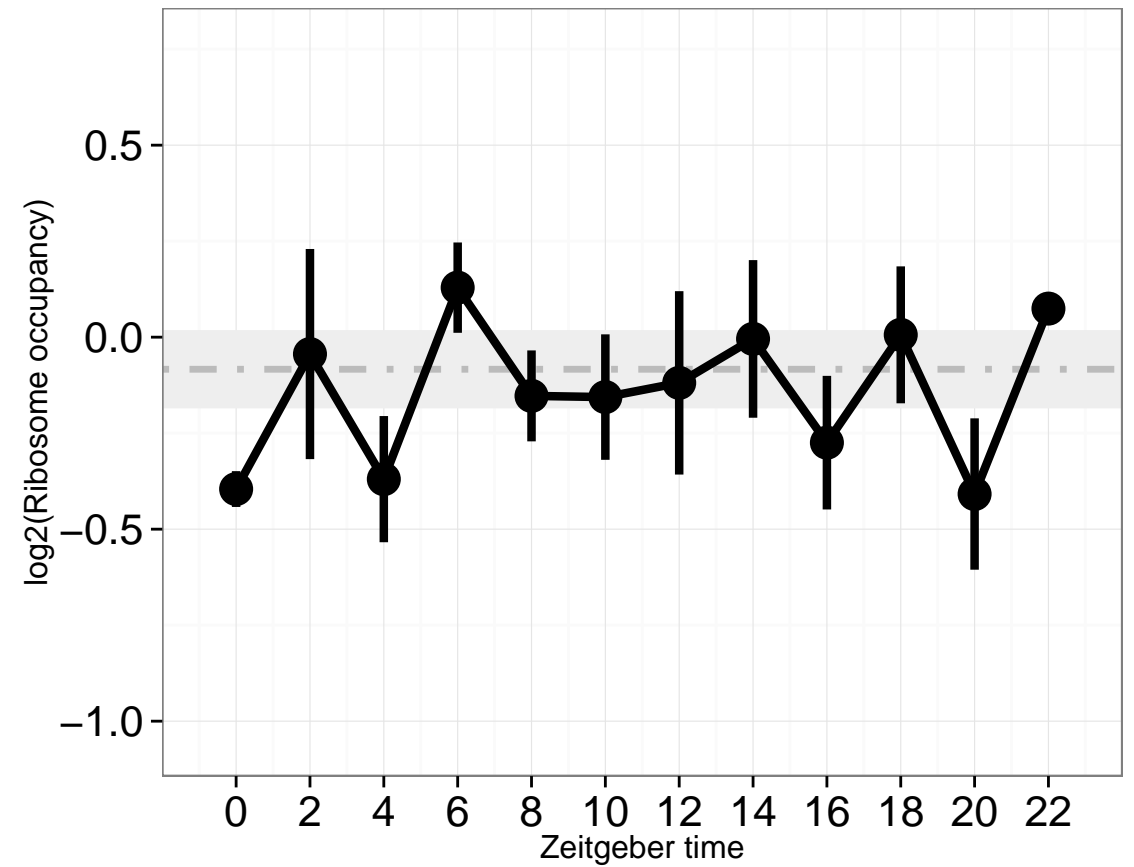

Supplement: SuppDataset_1.zip [file Pcbd2_set_A.pdf › Supplemental Dataset 1/A-mRNA_nonrhyth_translation_nonrhyth/Pcbd2_set_A.pdf]

## Pcbp1

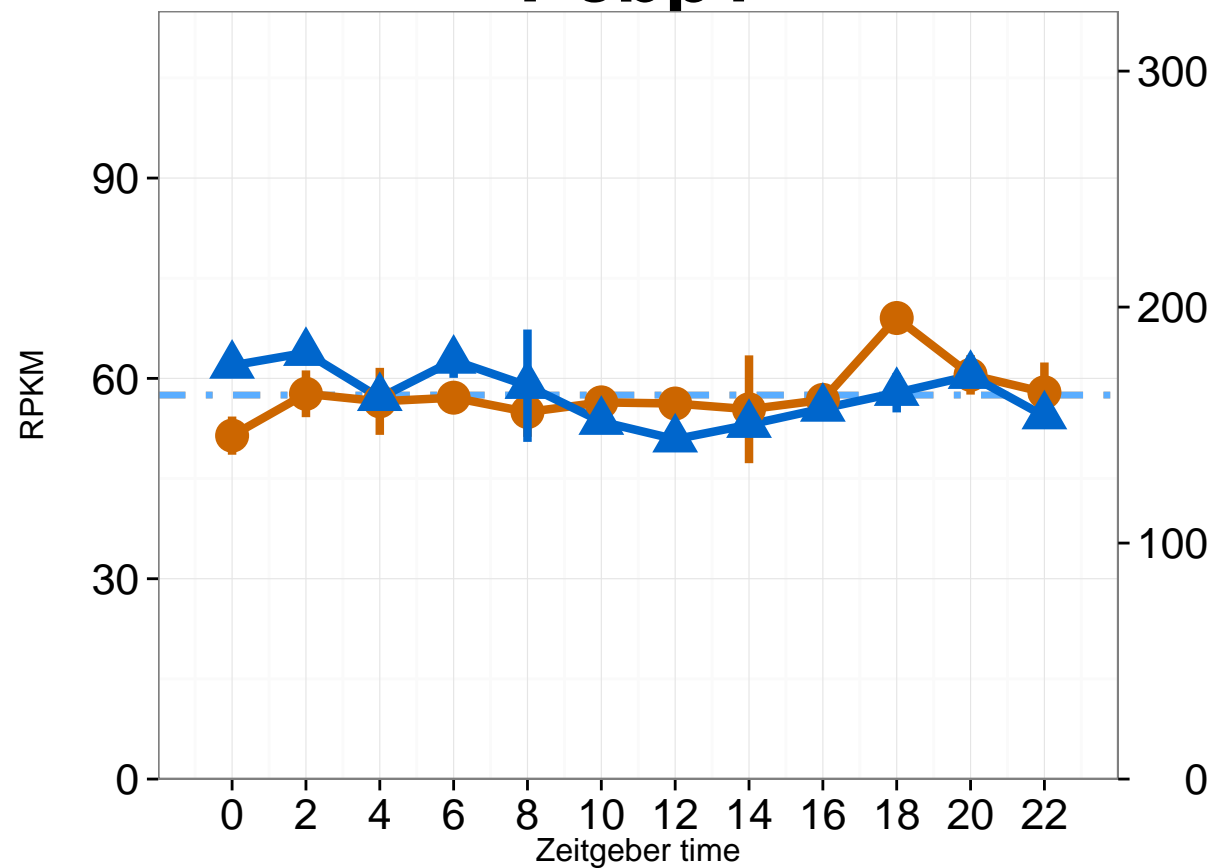

## Pcbp1

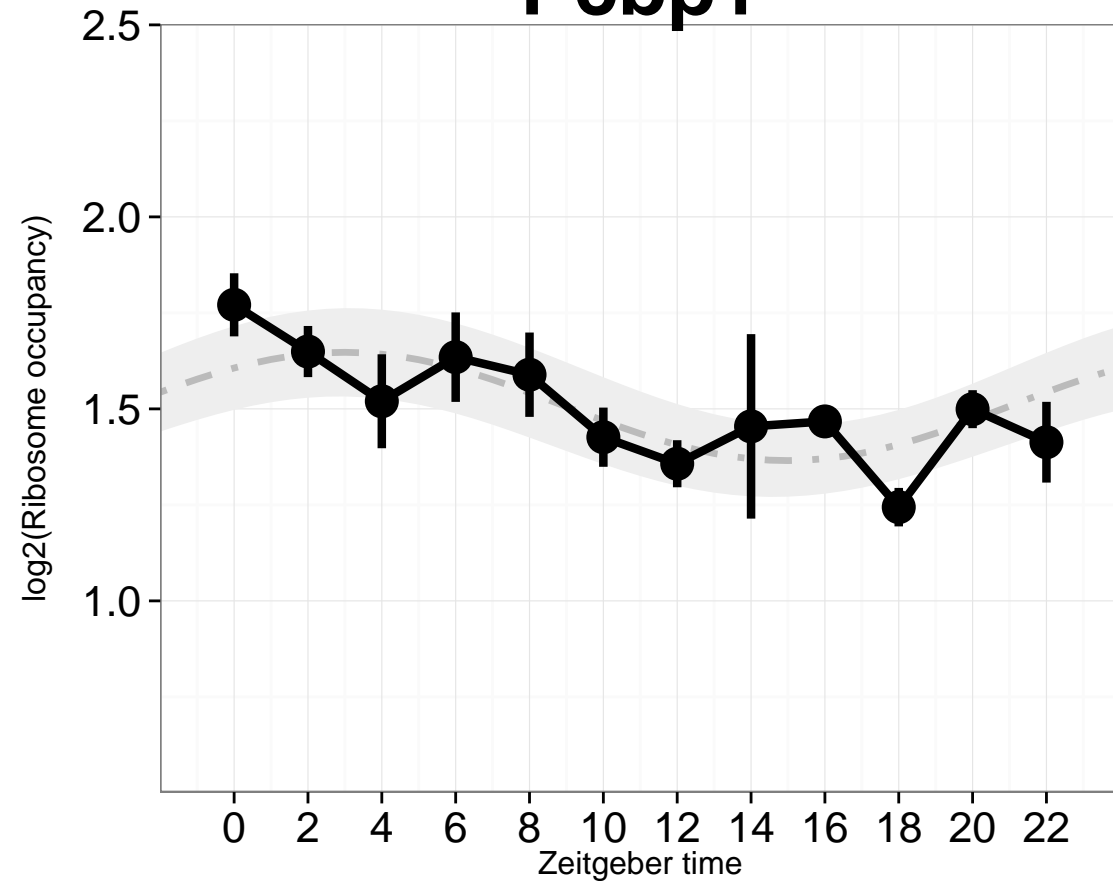

Supplement: SuppDataset_1.zip [file Pcbp1_set_A.pdf › Supplemental Dataset 1/A-mRNA_nonrhyth_translation_nonrhyth/Pcbp1_set_A.pdf]

## Pcbp2

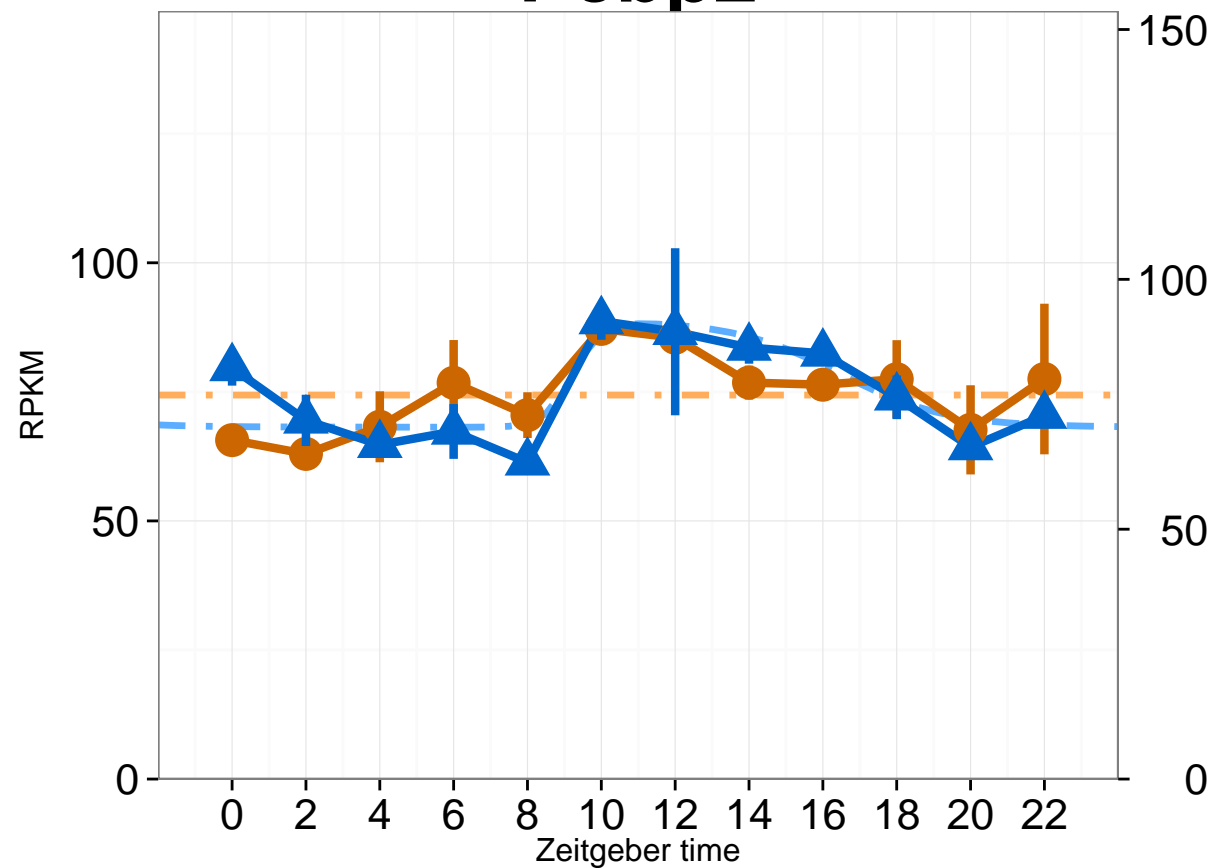

## Pcbp2

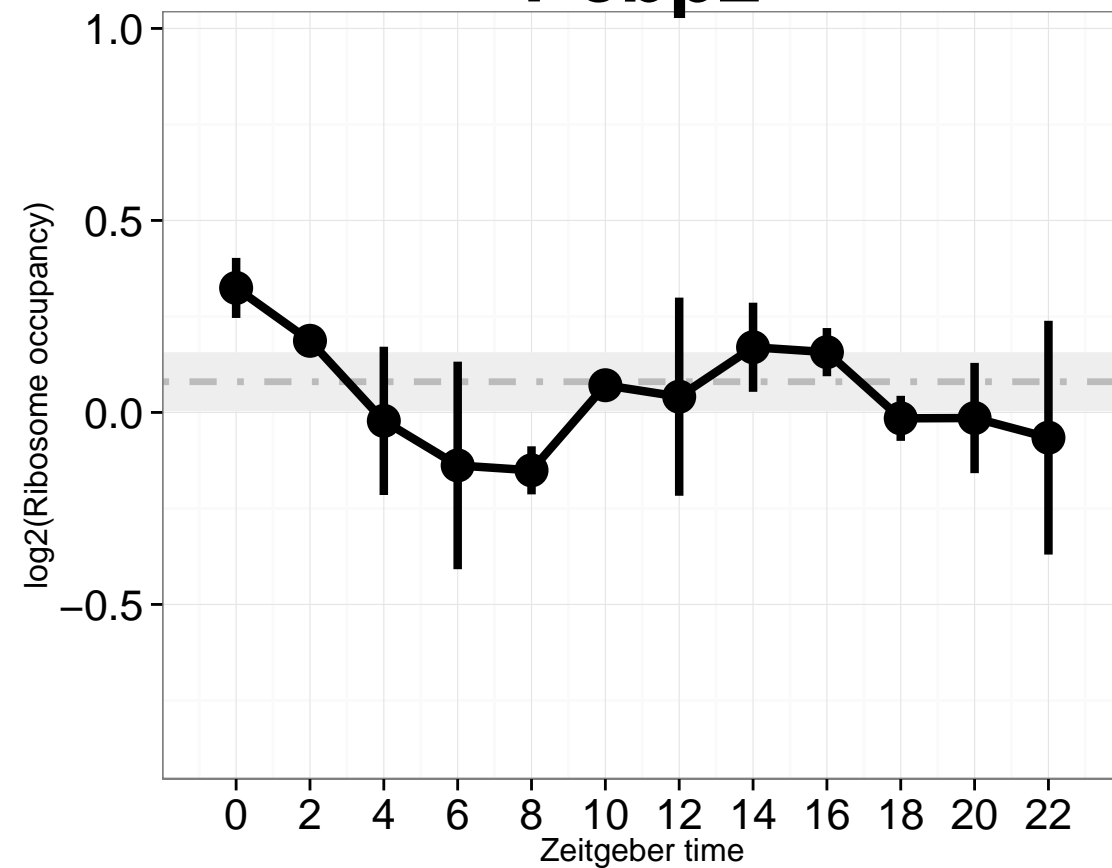

Supplement: SuppDataset_1.zip [file Pcbp2_set_A.pdf › Supplemental Dataset 1/A-mRNA_nonrhyth_translation_nonrhyth/Pcbp2_set_A.pdf]

**Pcbp3 TR**

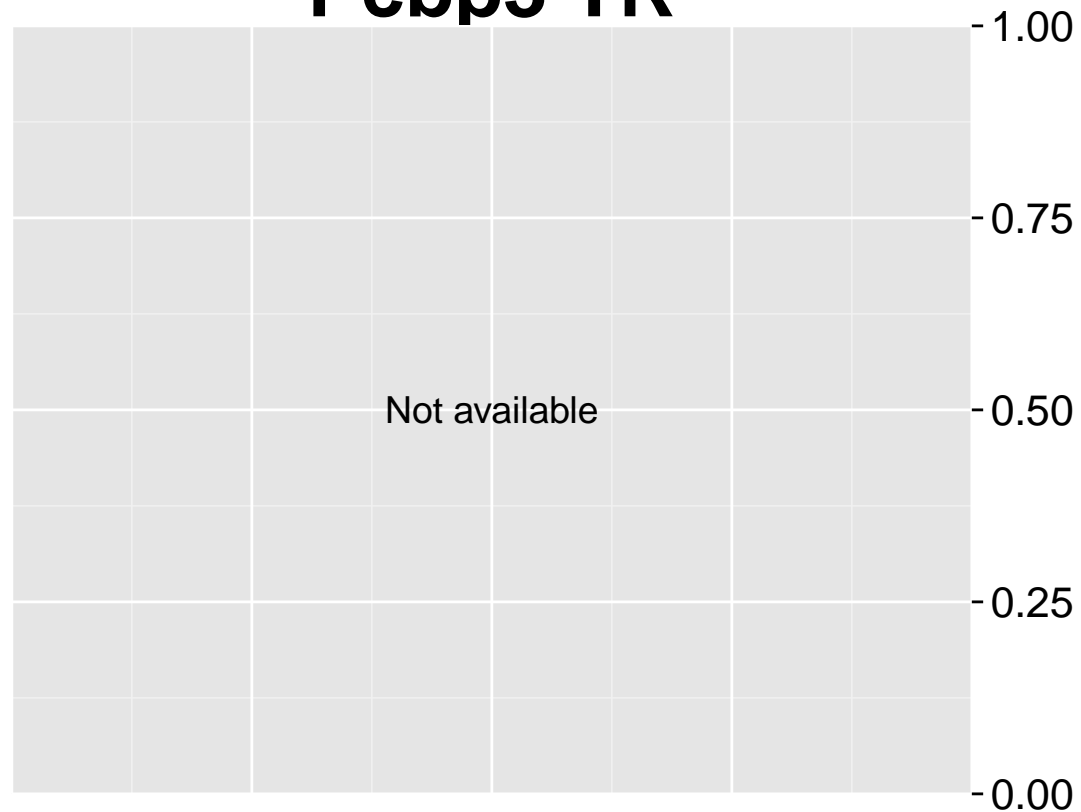

**Pcbp3 log2(Ribosome occupancy**

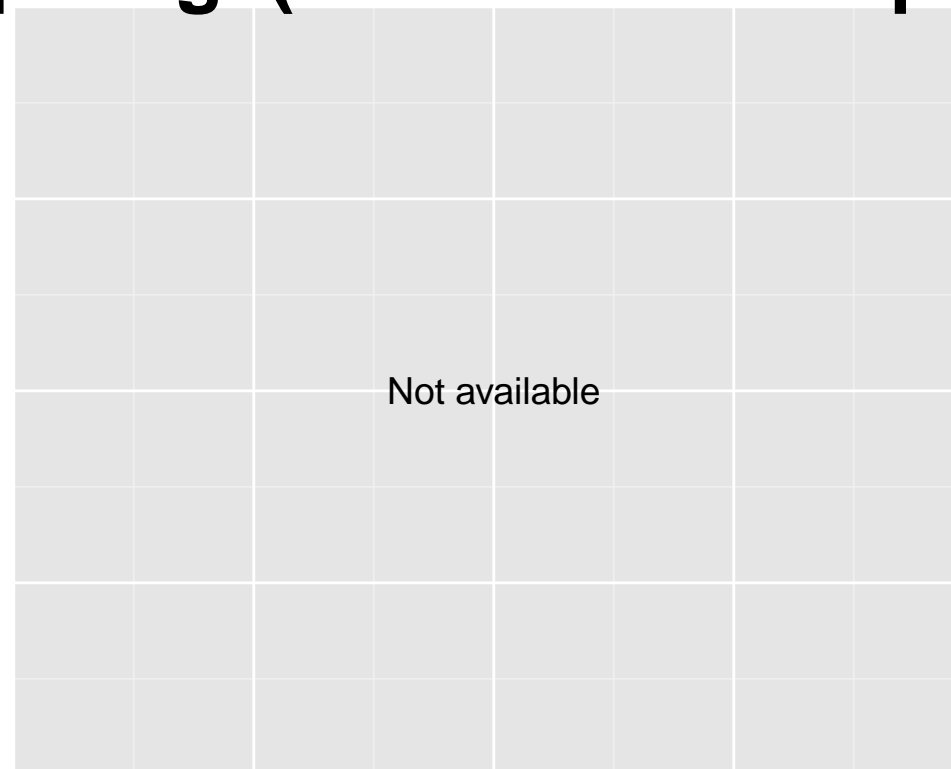

Supplement: SuppDataset_1.zip [file Pcbp3_set_A.pdf › Supplemental Dataset 1/A-mRNA_nonrhyth_translation_nonrhyth/Pcbp3_set_A.pdf]

## Pcca

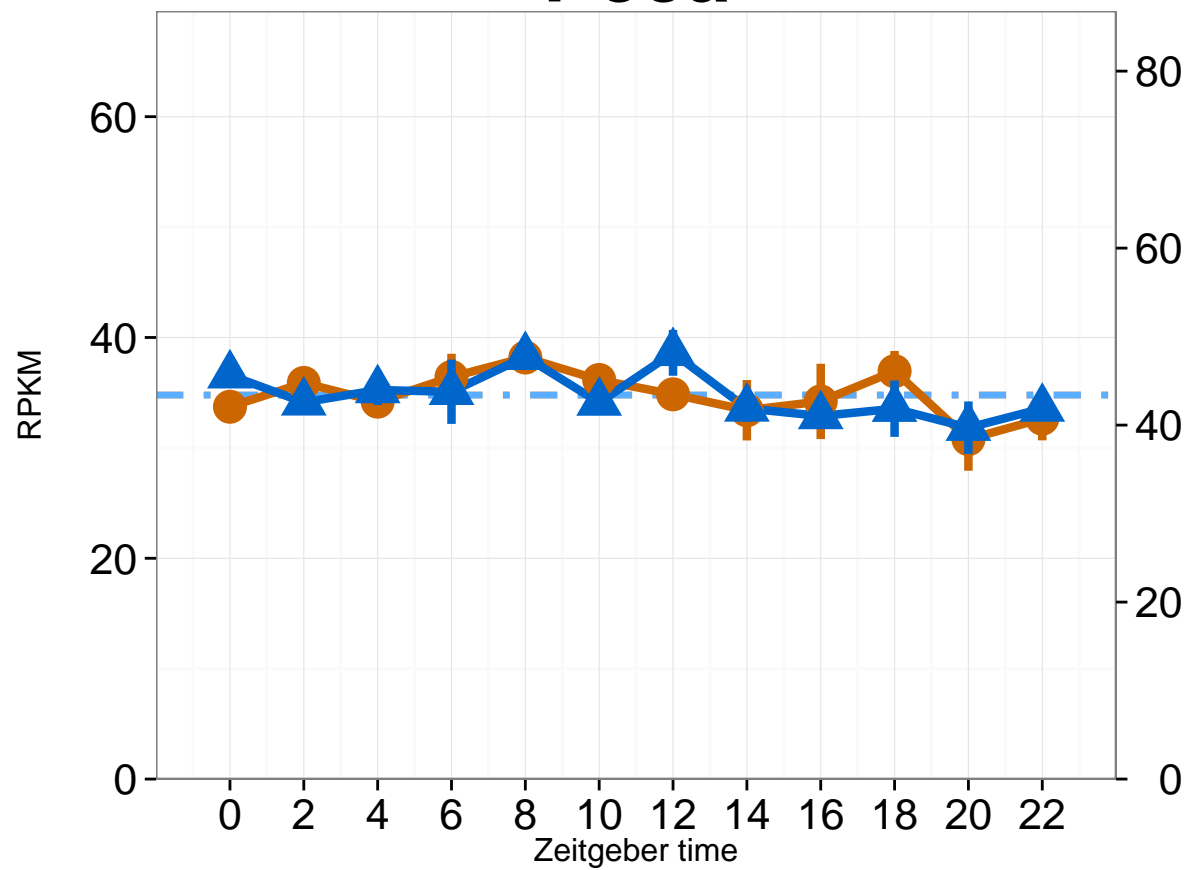

## Pcca

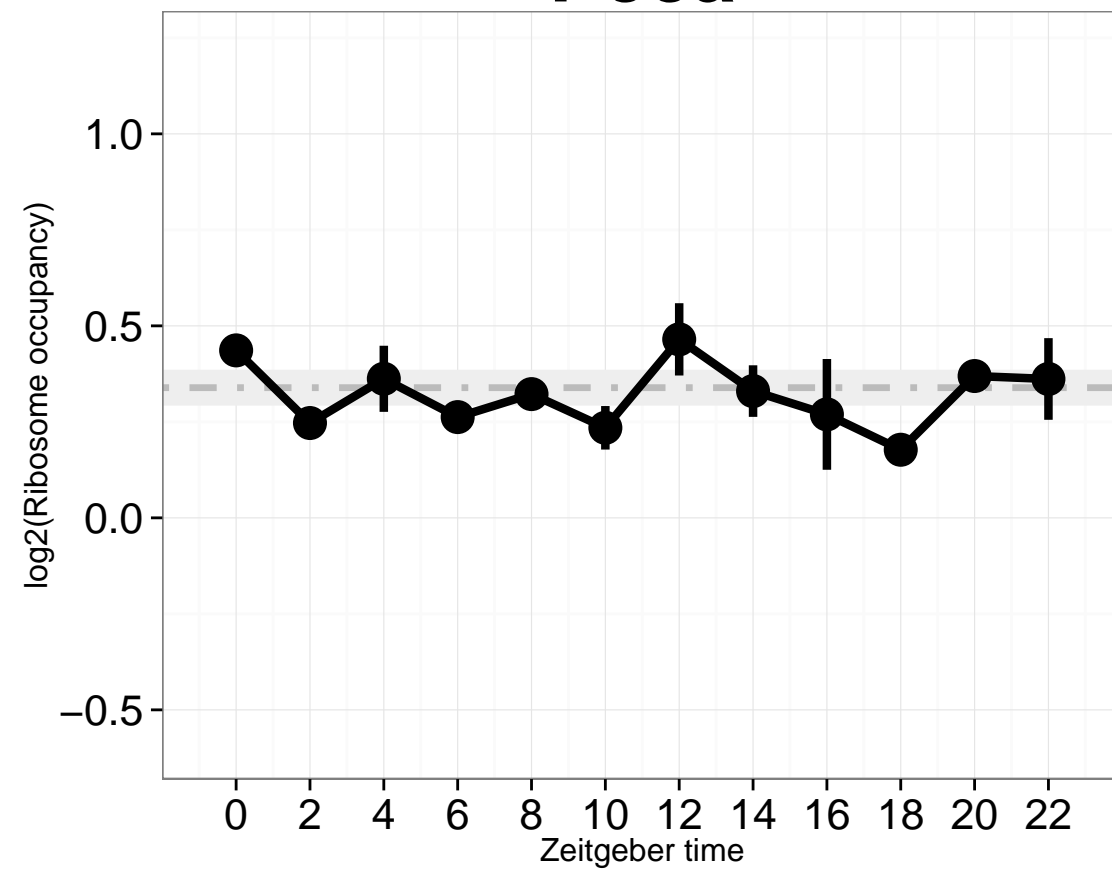

Supplement: SuppDataset_1.zip [file Pcca_set_A.pdf › Supplemental Dataset 1/A-mRNA_nonrhyth_translation_nonrhyth/Pcca_set_A.pdf]

## Pccb

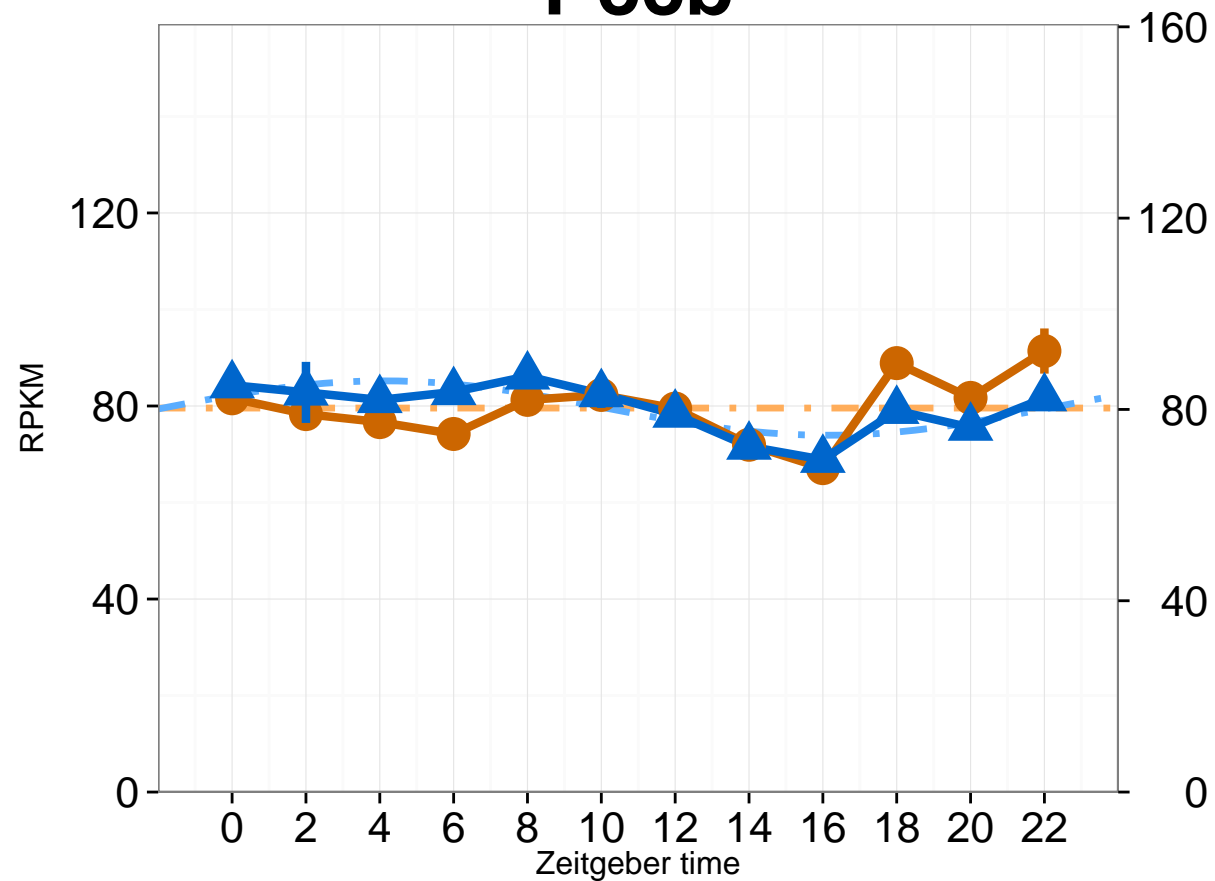

## Pccb

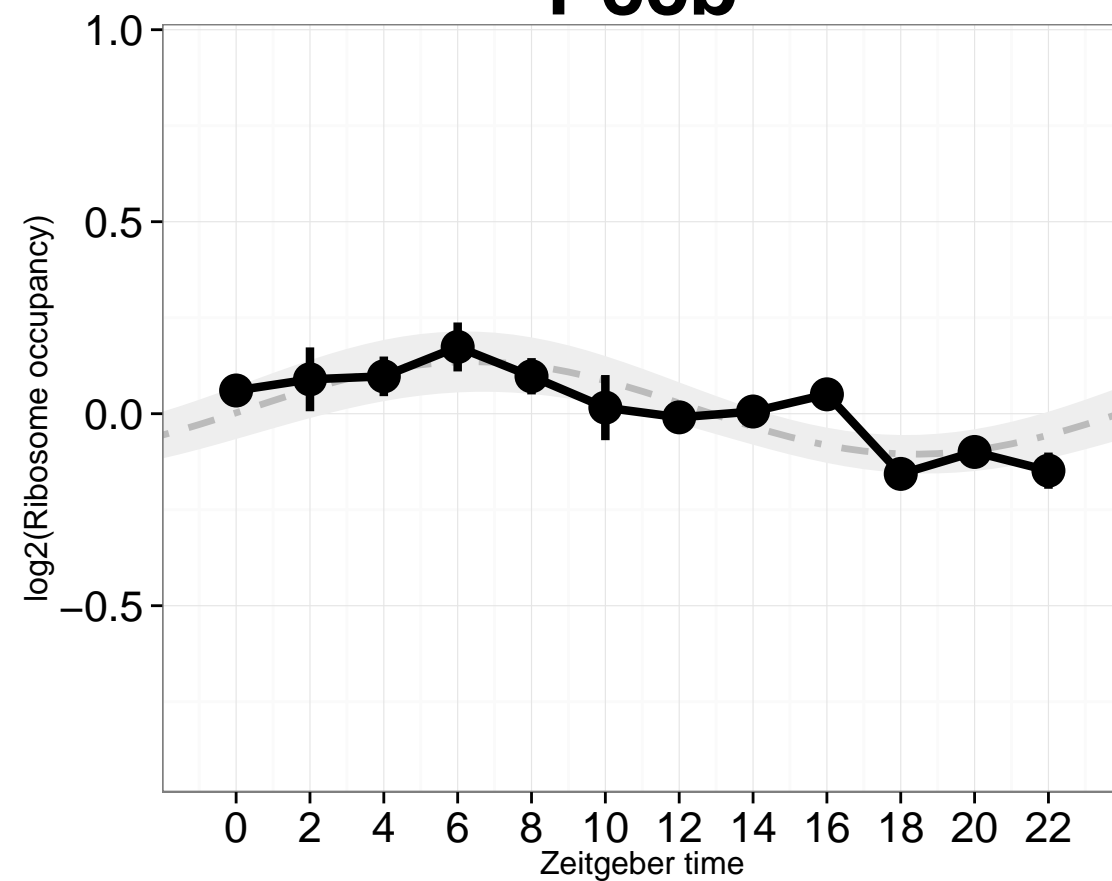

Supplement: SuppDataset_1.zip [file Pccb_set_A.pdf › Supplemental Dataset 1/A-mRNA_nonrhyth_translation_nonrhyth/Pccb_set_A.pdf]

## Pcdh12

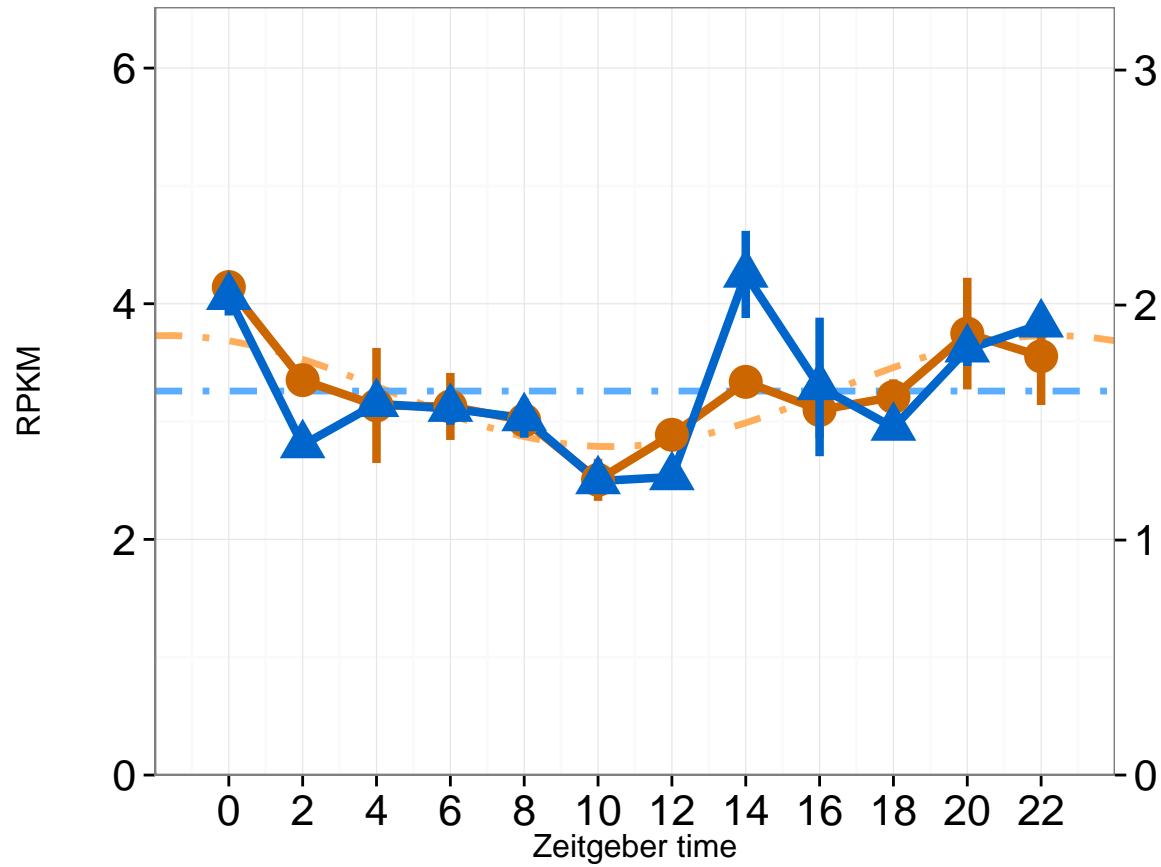

## Pcdh12

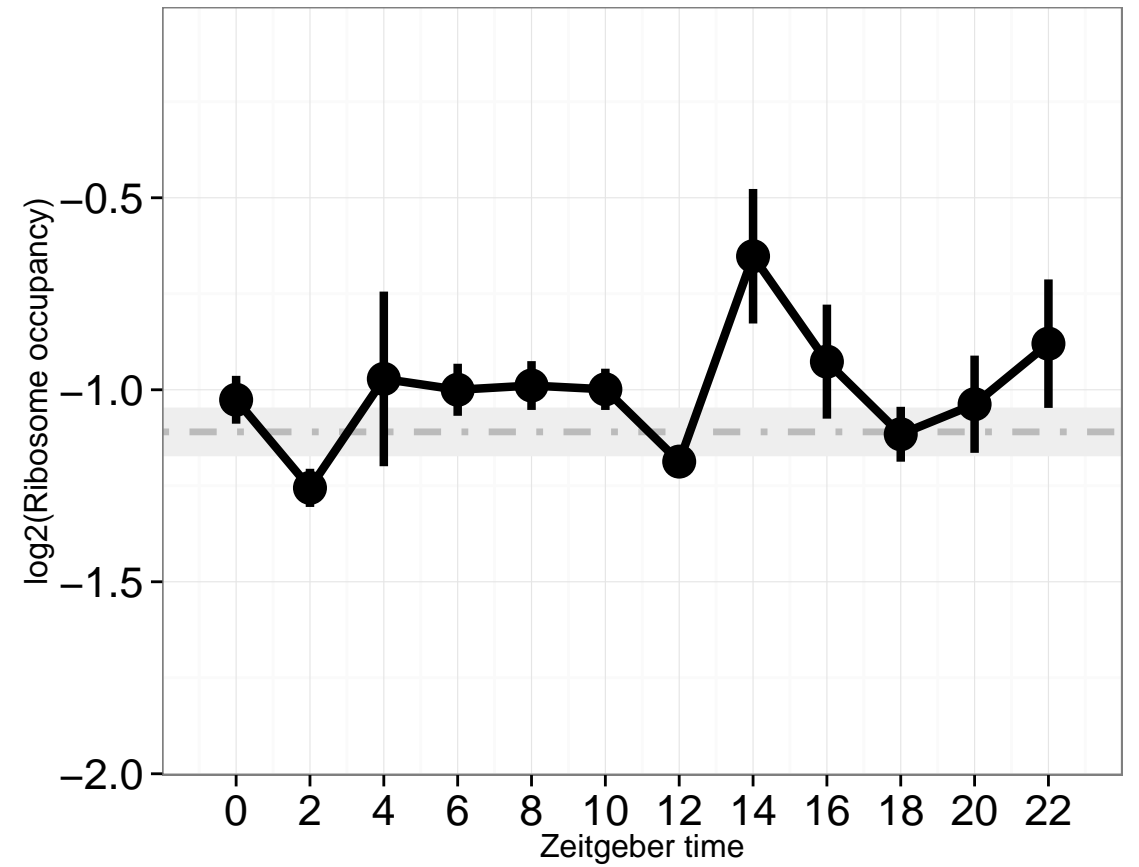

Supplement: SuppDataset_1.zip [file Pcdh12_set_A.pdf › Supplemental Dataset 1/A-mRNA_nonrhyth_translation_nonrhyth/Pcdh12_set_A.pdf]

## Pcdh17

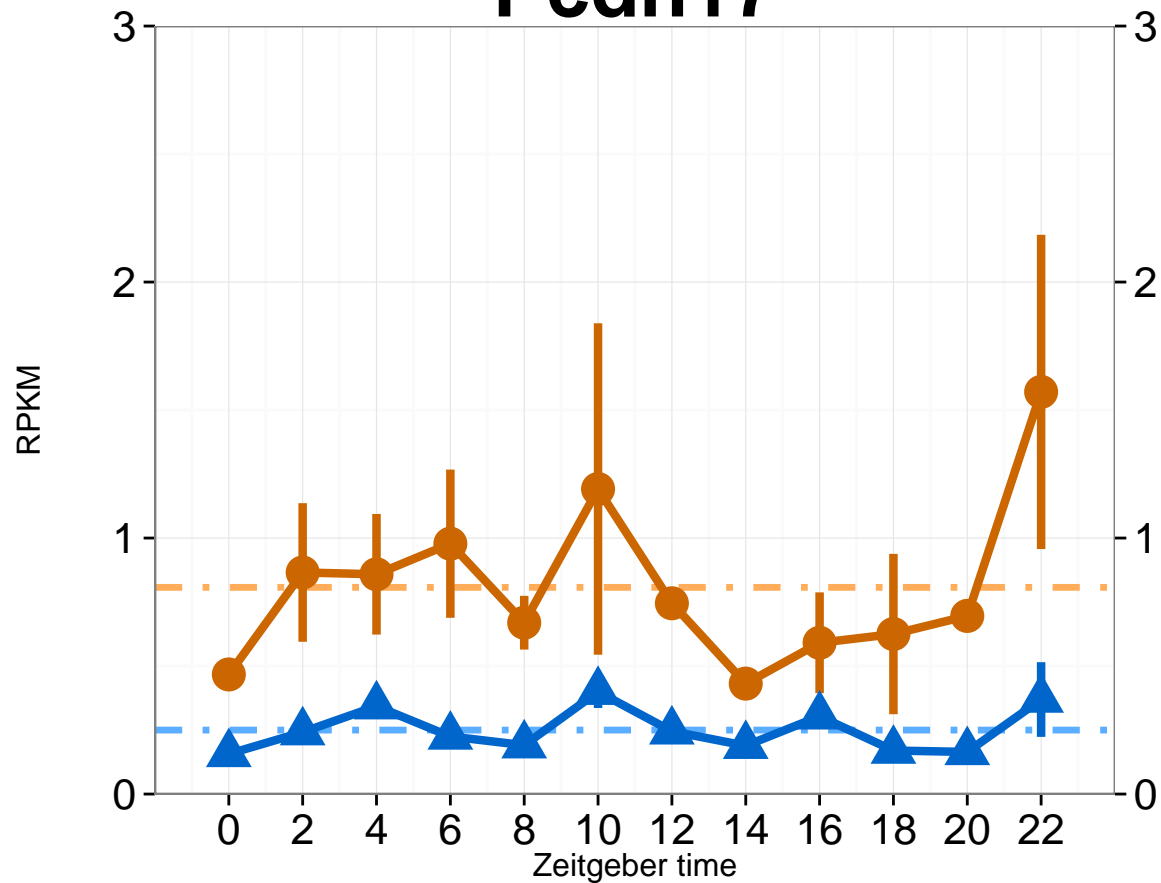

## Pcdh17

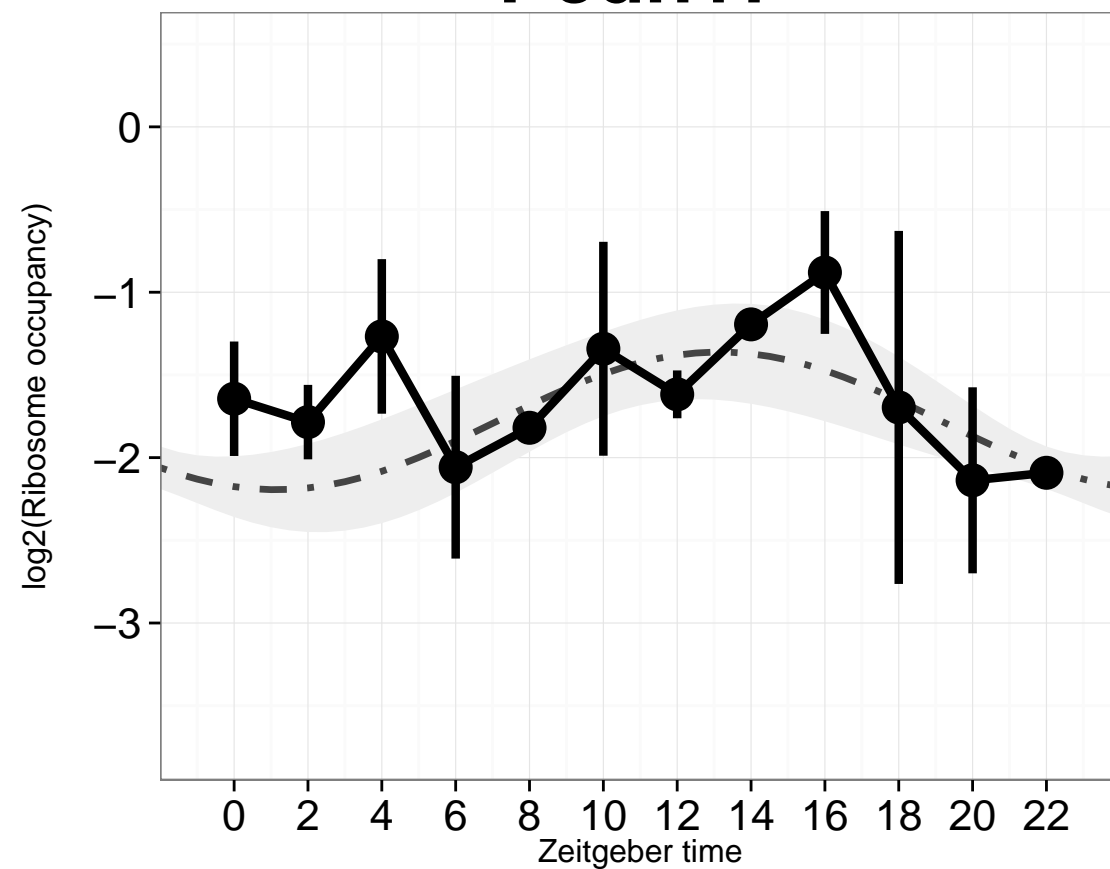

Supplement: SuppDataset_1.zip [file Pcdh17_set_A.pdf › Supplemental Dataset 1/A-mRNA_nonrhyth_translation_nonrhyth/Pcdh17_set_A.pdf]

# Pcdh18

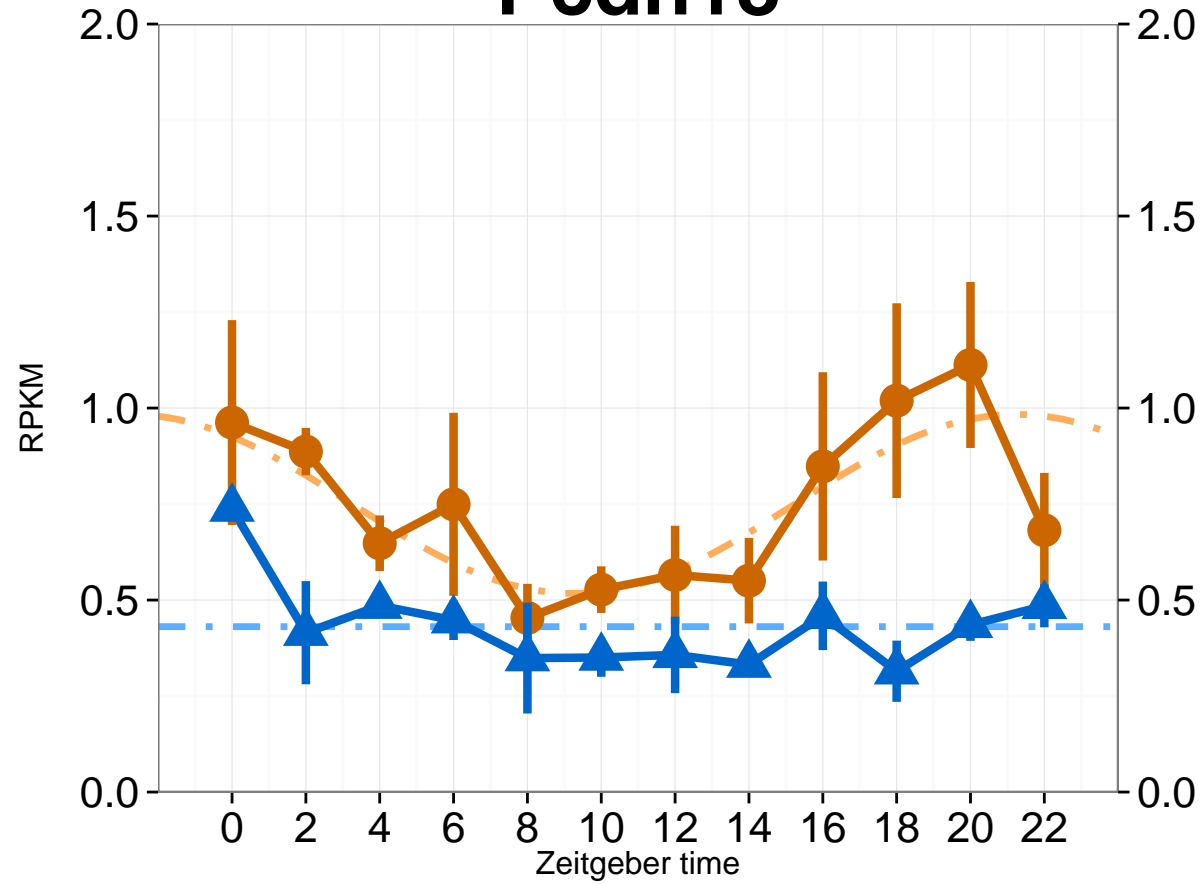

# Pcdh18

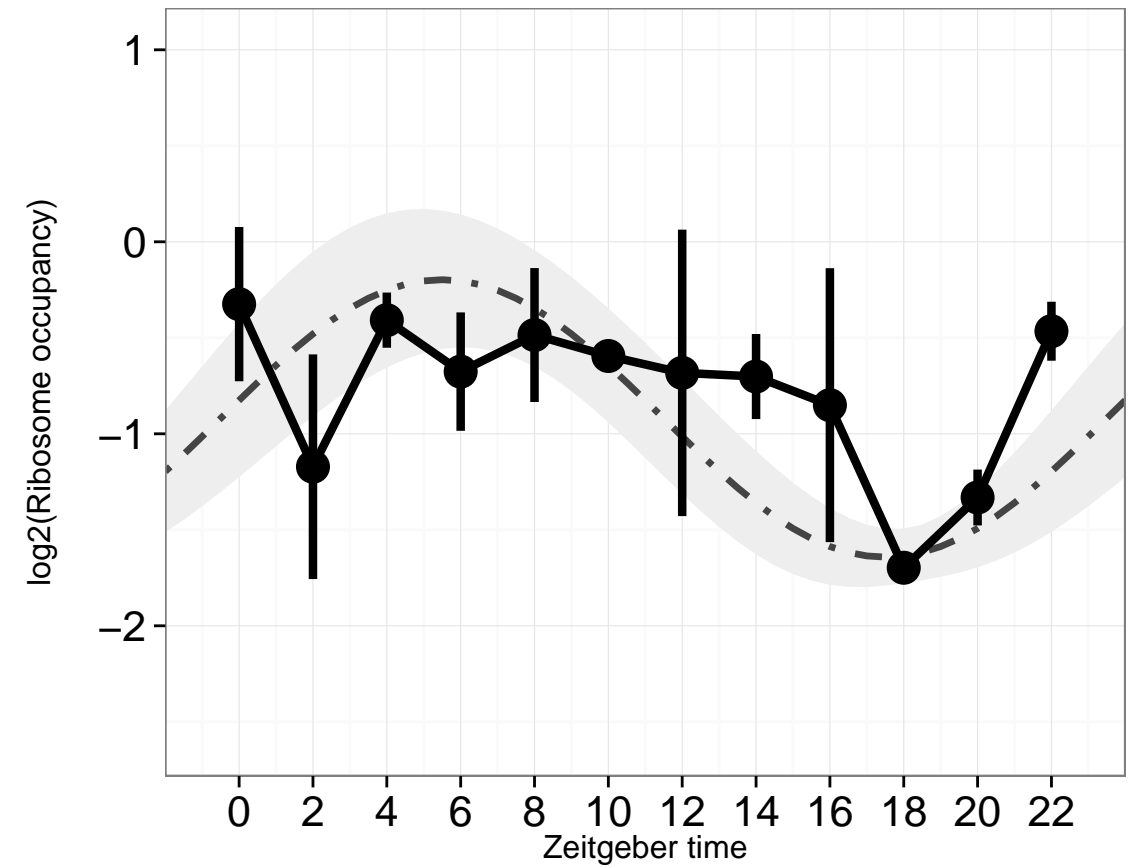

Supplement: SuppDataset_1.zip [file Pcdh18_set_A.pdf › Supplemental Dataset 1/A-mRNA_nonrhyth_translation_nonrhyth/Pcdh18_set_A.pdf]

## Pcdh1

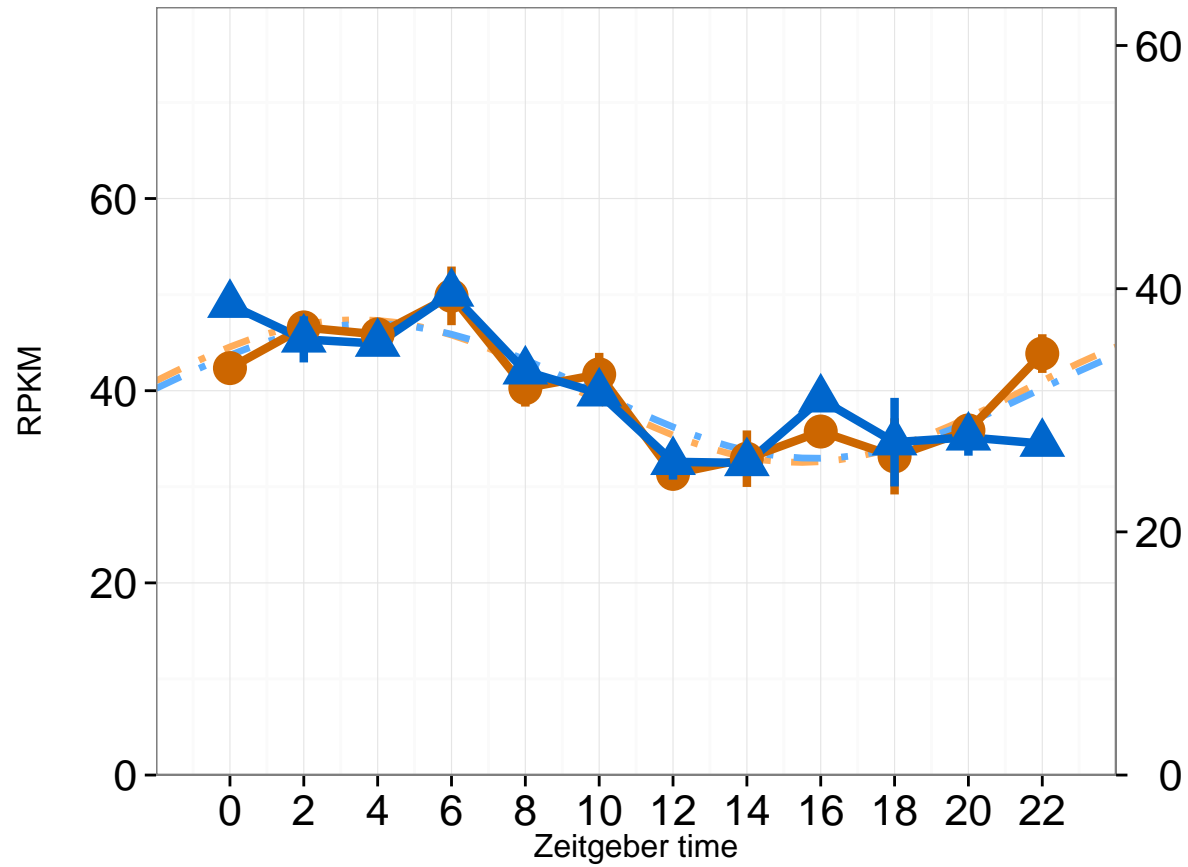

## Pcdh1

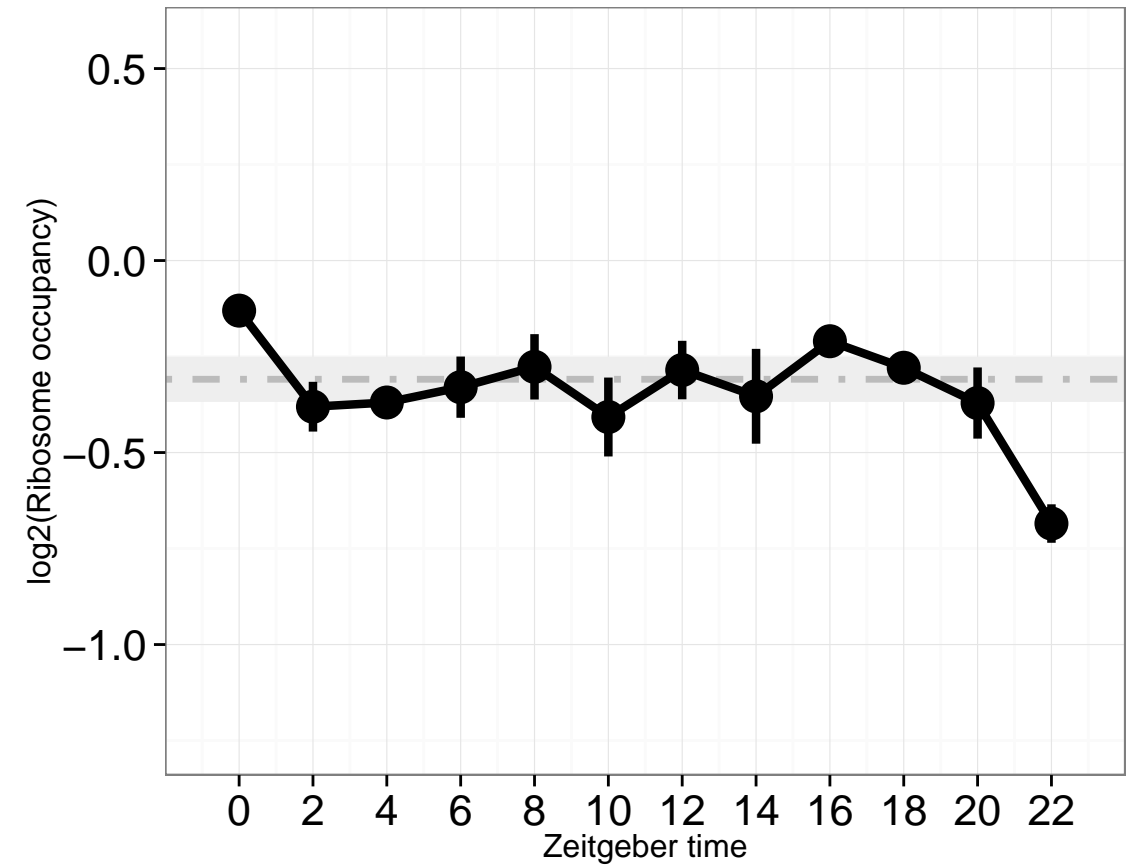

Supplement: SuppDataset_1.zip [file Pcdh1_set_A.pdf › Supplemental Dataset 1/A-mRNA_nonrhyth_translation_nonrhyth/Pcdh1_set_A.pdf]

**Pcdhb14 TR**

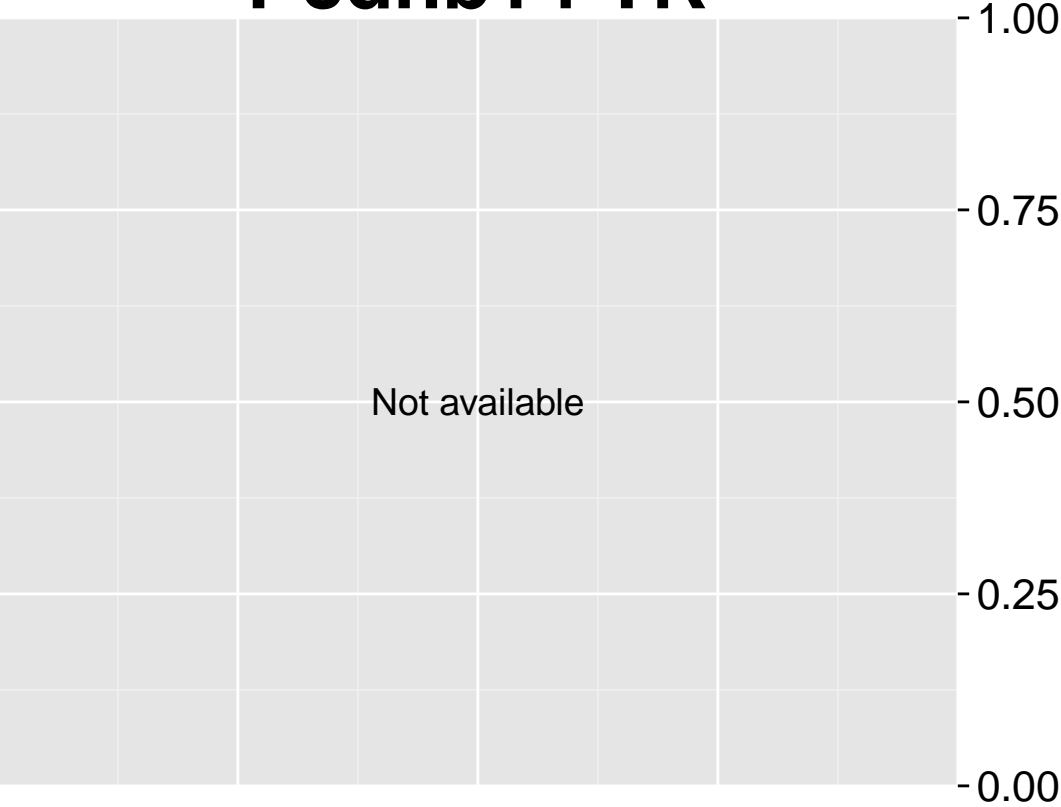

**Pcdhb14 log2(Ribosome occupanc**

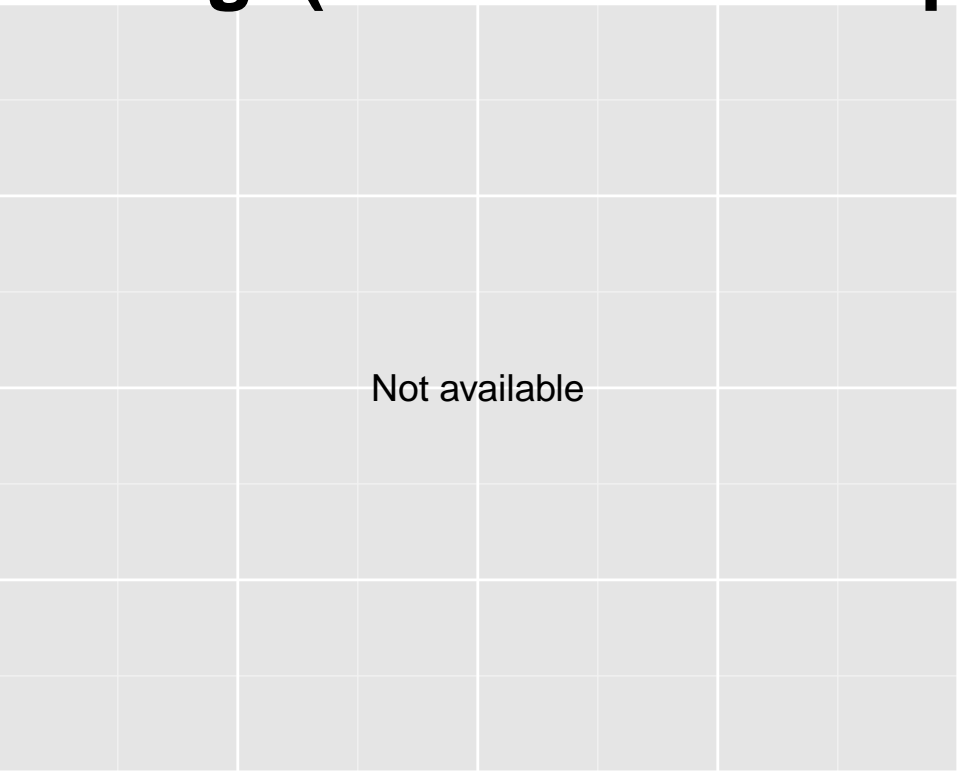

Supplement: SuppDataset_1.zip [file Pcdhb14_set_A.pdf › Supplemental Dataset 1/A-mRNA_nonrhyth_translation_nonrhyth/Pcdhb14_set_A.pdf]

## Pcdhb17

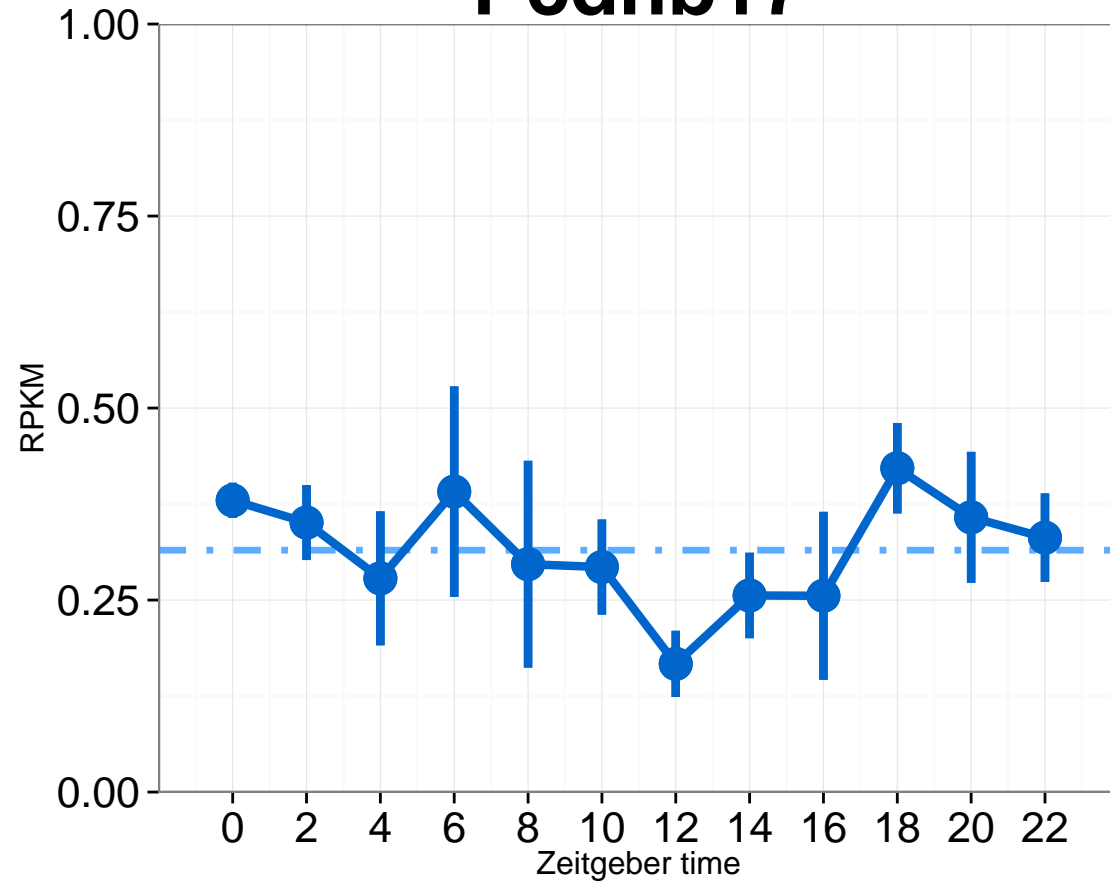

## Pcdhb17 log2(Ribosome occupanc

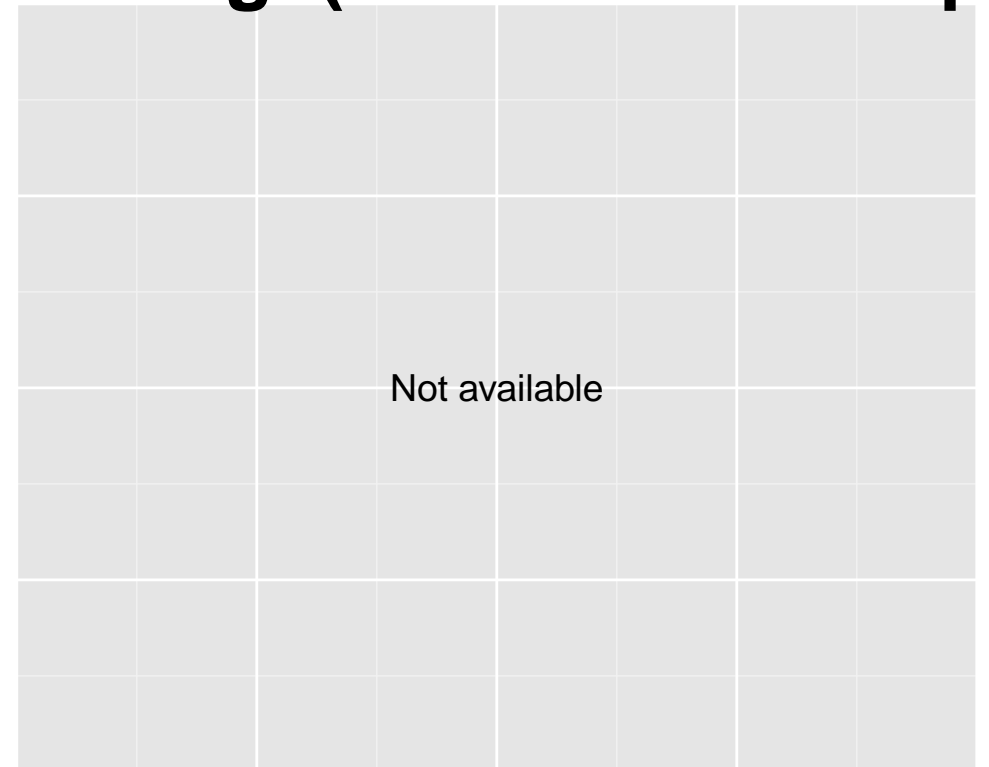

Supplement: SuppDataset_1.zip [file Pcdhb17_set_A.pdf › Supplemental Dataset 1/A-mRNA_nonrhyth_translation_nonrhyth/Pcdhb17_set_A.pdf]

# Pcdhga9

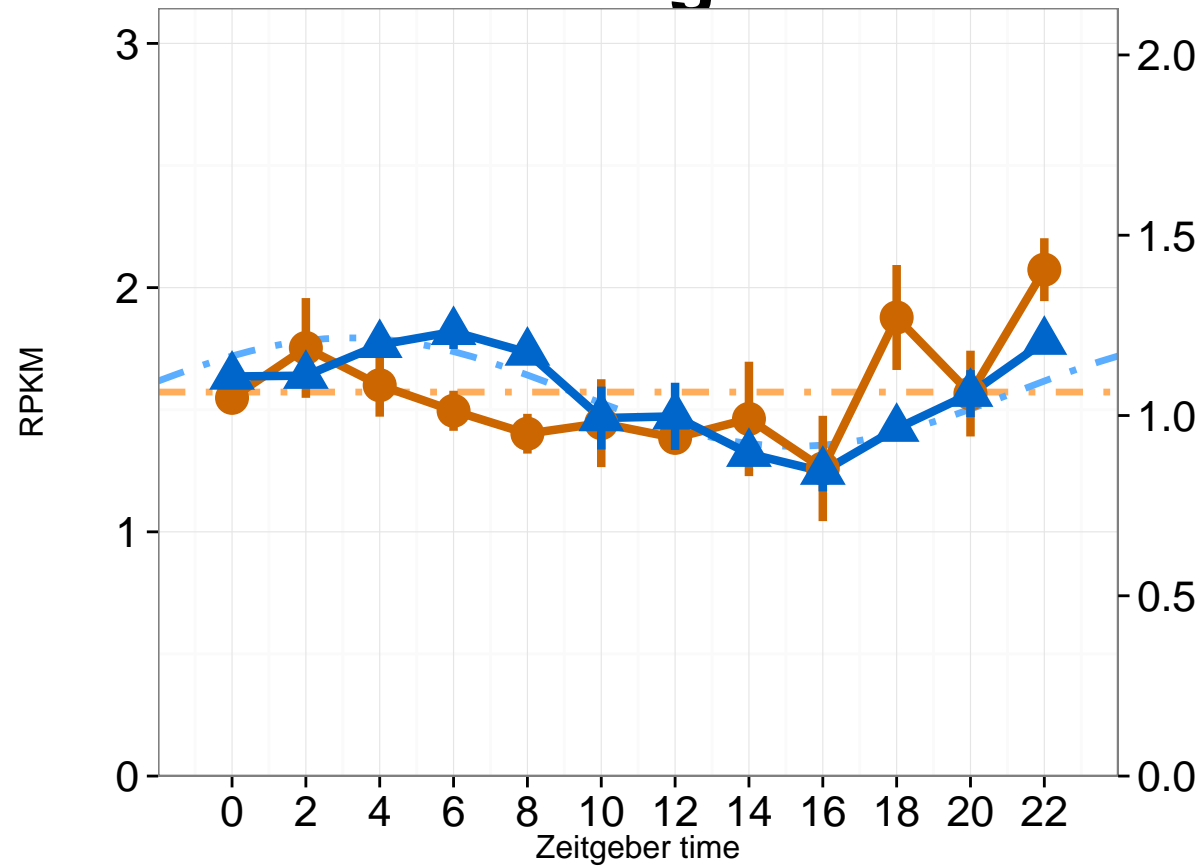

# Pcdhga9

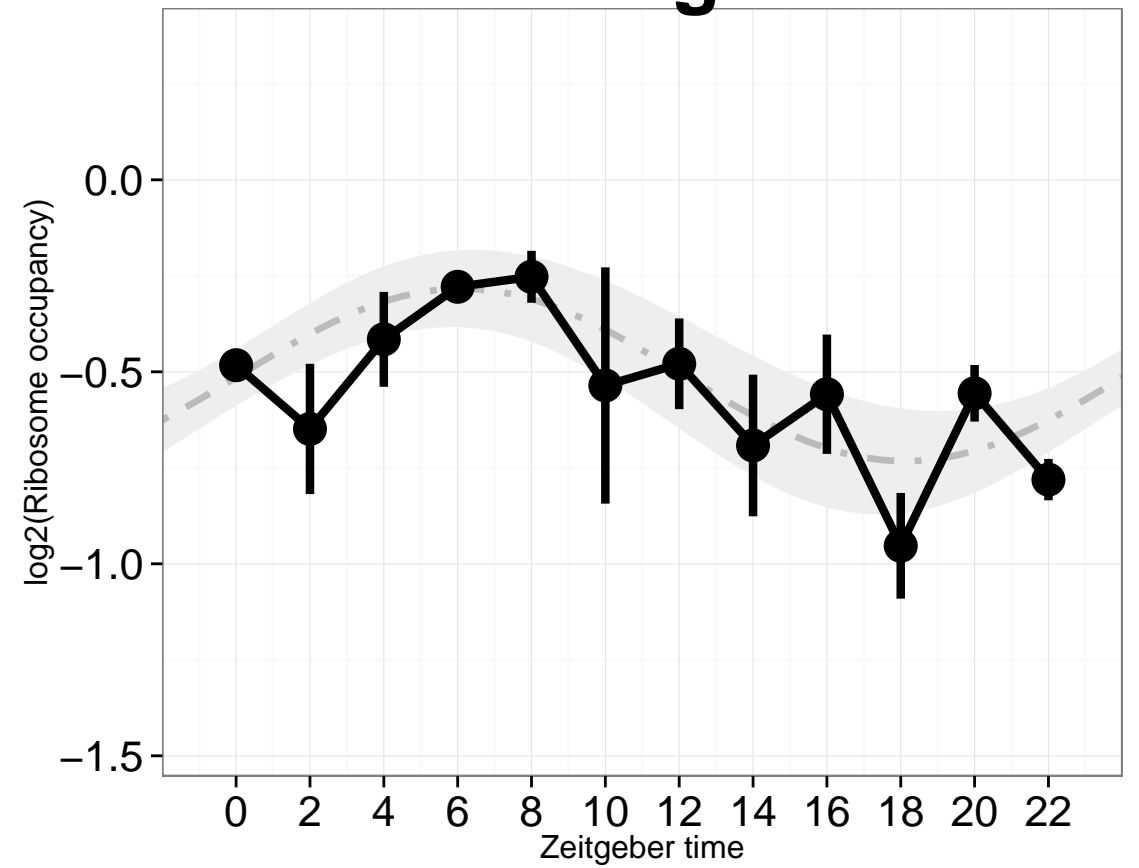

Supplement: SuppDataset_1.zip [file Pcdhga9_set_A.pdf › Supplemental Dataset 1/A-mRNA_nonrhyth_translation_nonrhyth/Pcdhga9_set_A.pdf]

# Pced1a

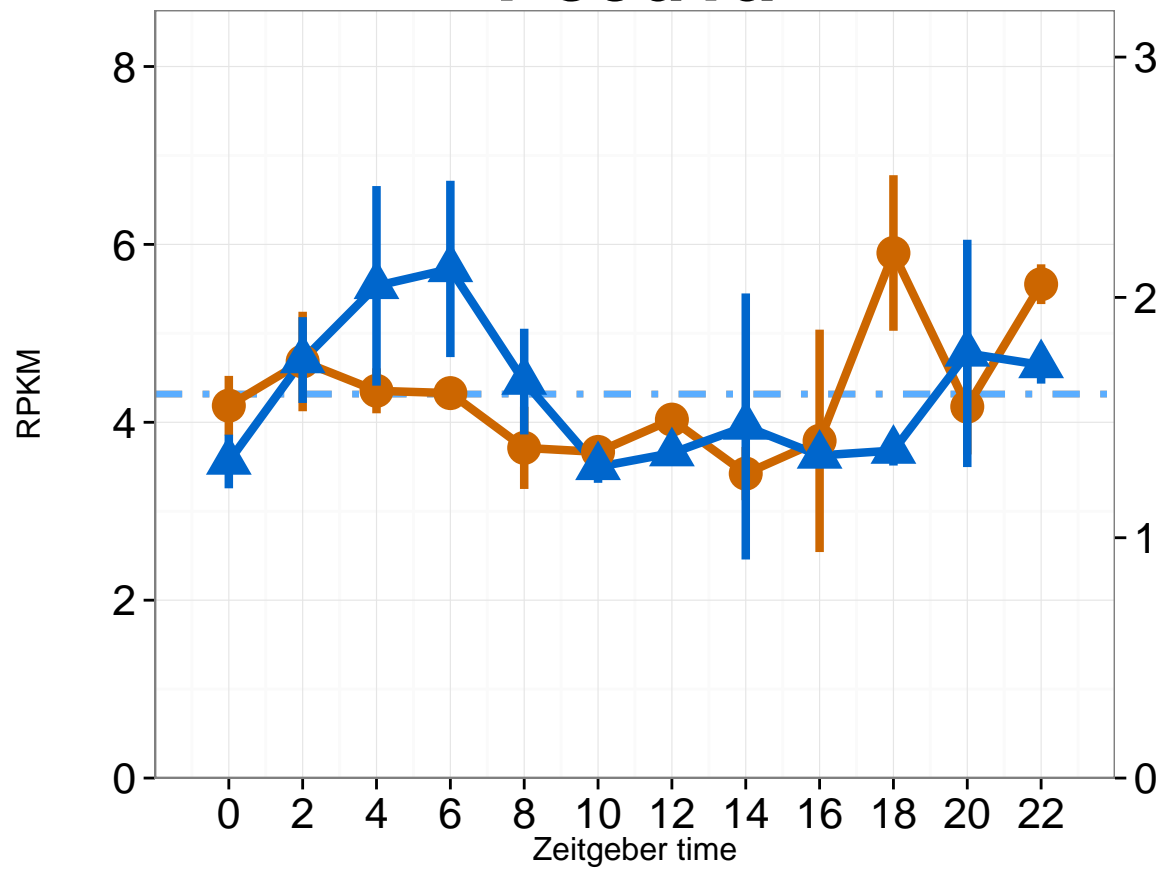

# Pced1a

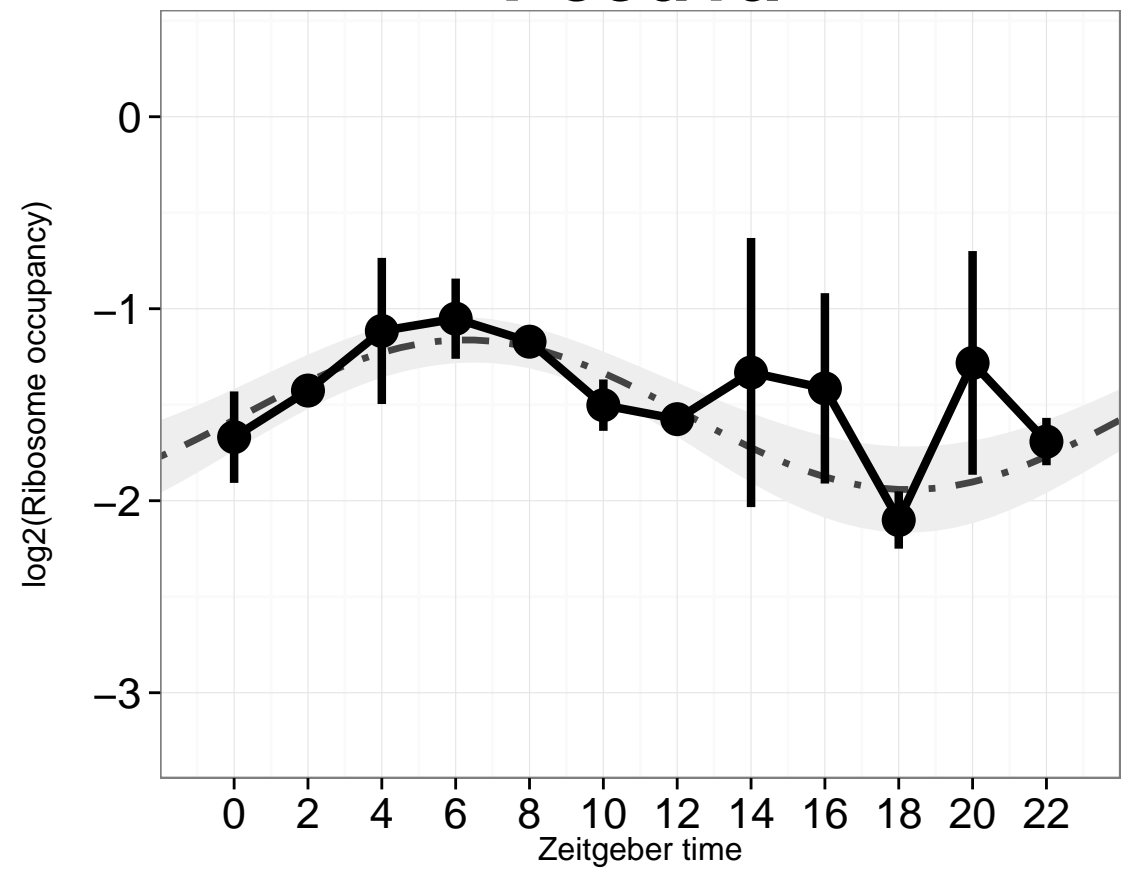

Supplement: SuppDataset_1.zip [file Pced1a_set_A.pdf › Supplemental Dataset 1/A-mRNA_nonrhyth_translation_nonrhyth/Pced1a_set_A.pdf]

# Pced1b

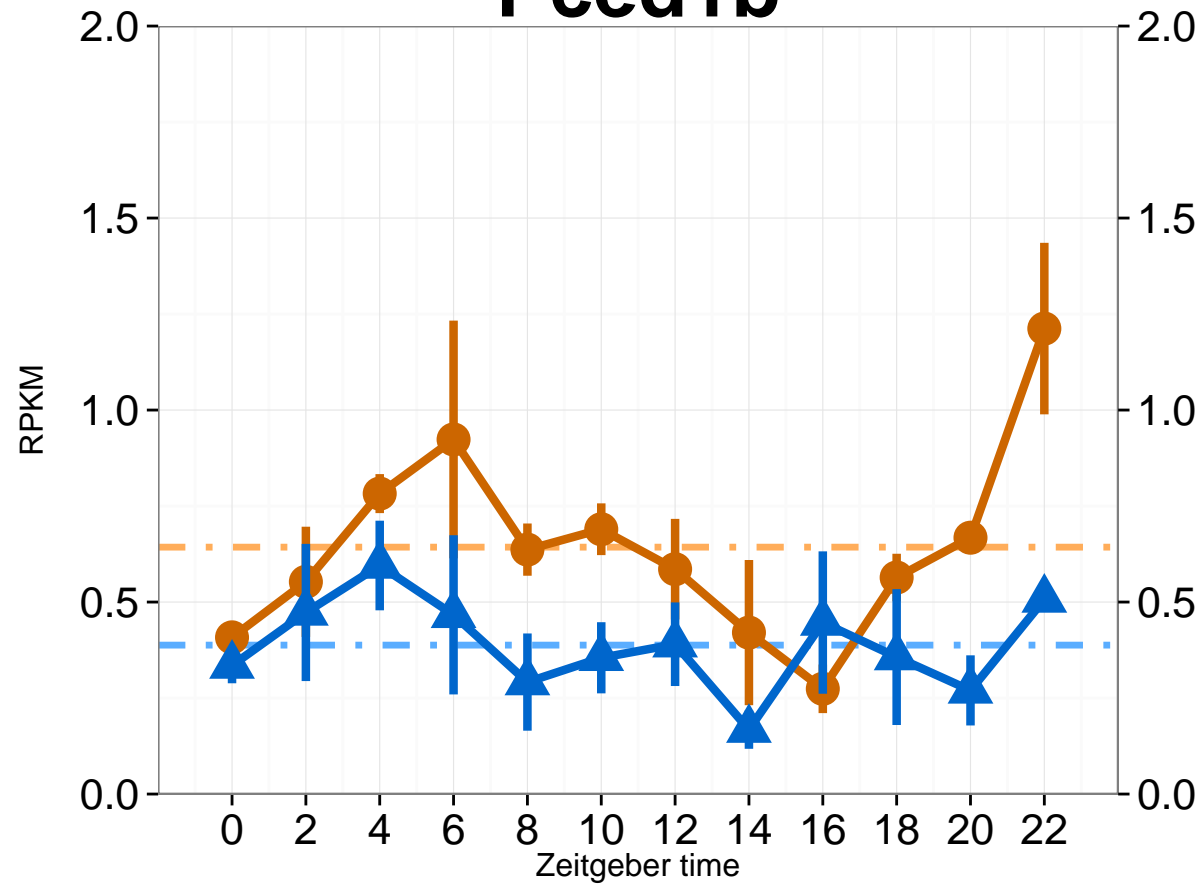

# Pced1b

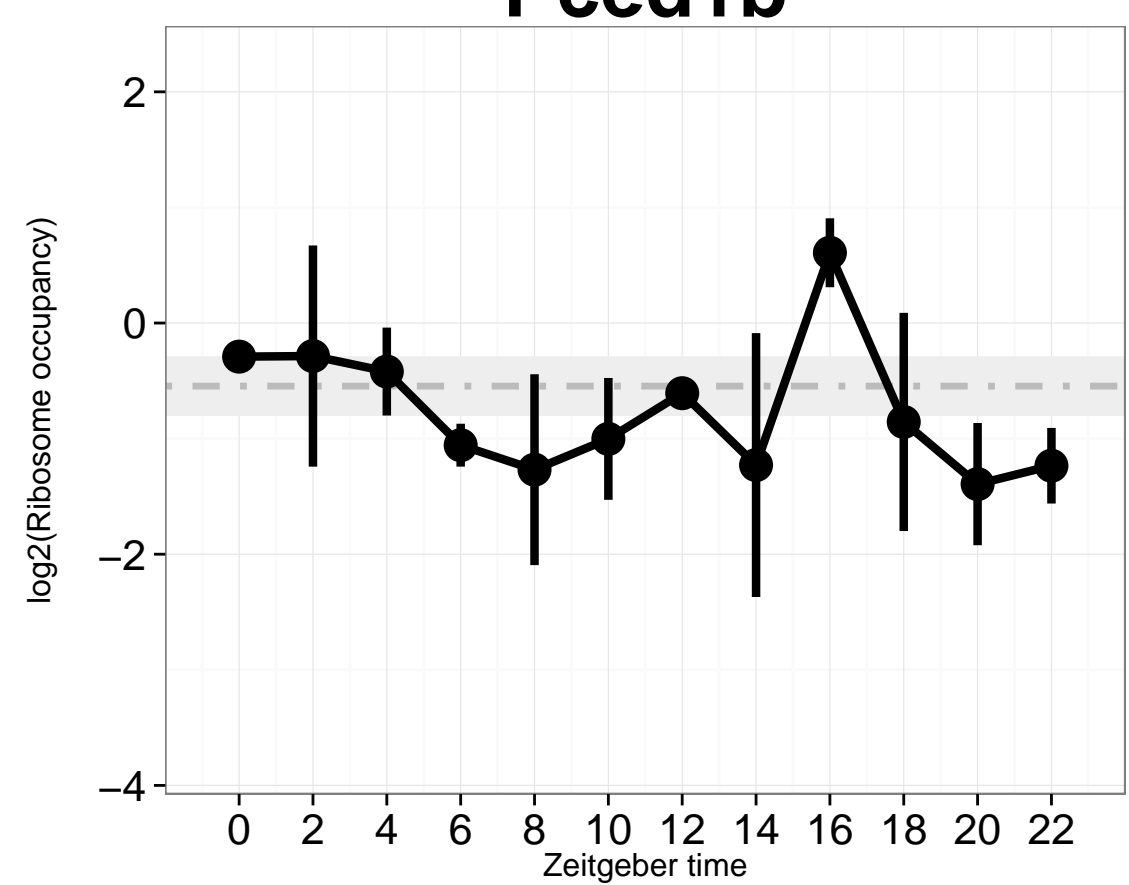

Supplement: SuppDataset_1.zip [file Pced1b_set_A.pdf › Supplemental Dataset 1/A-mRNA_nonrhyth_translation_nonrhyth/Pced1b_set_A.pdf]

# Pcf11

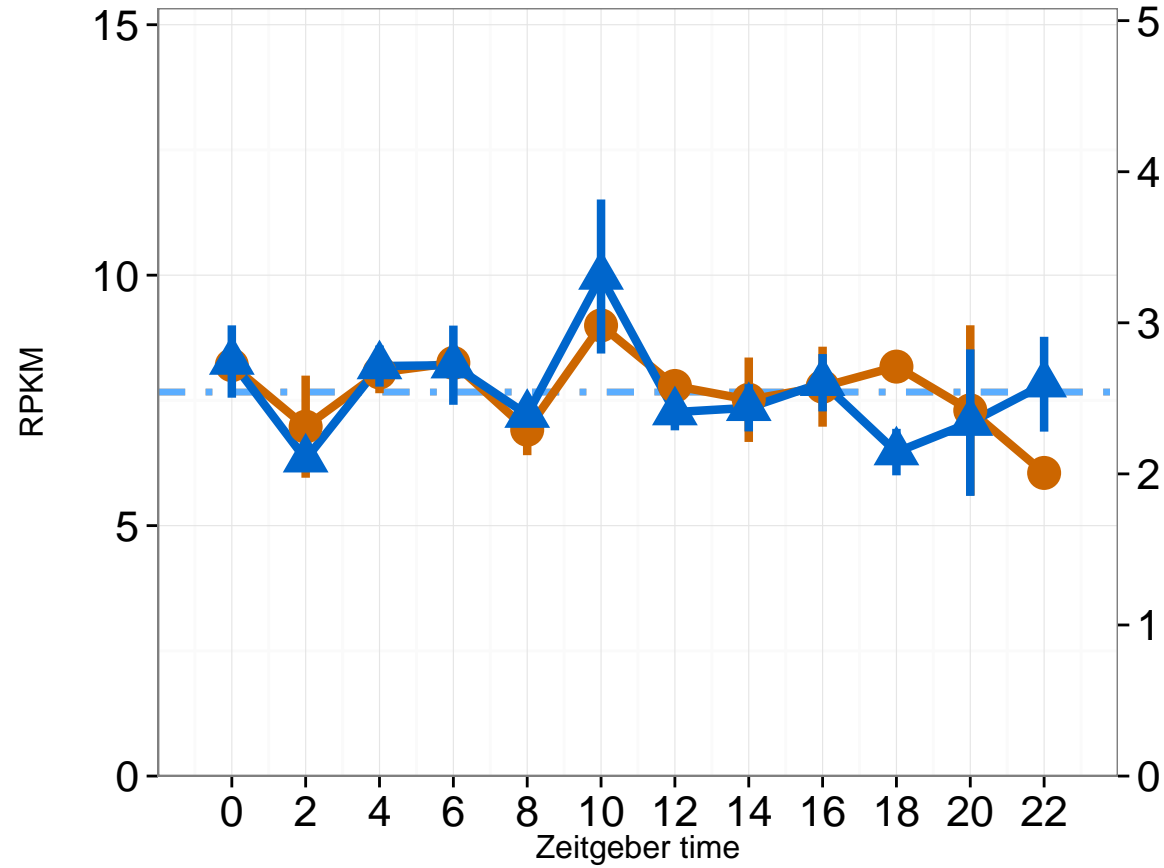

# Pcf11

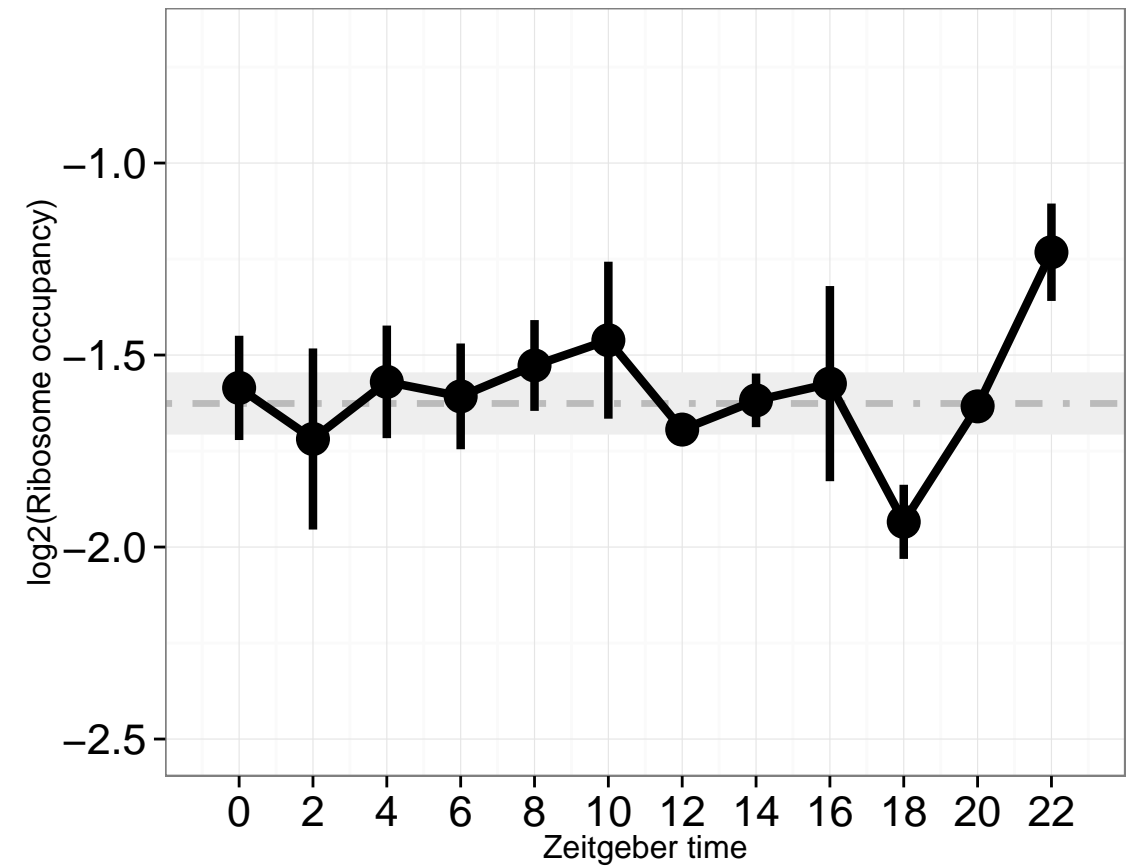

Supplement: SuppDataset_1.zip [file Pcf11_set_A.pdf › Supplemental Dataset 1/A-mRNA_nonrhyth_translation_nonrhyth/Pcf11_set_A.pdf]

# Pcgf1

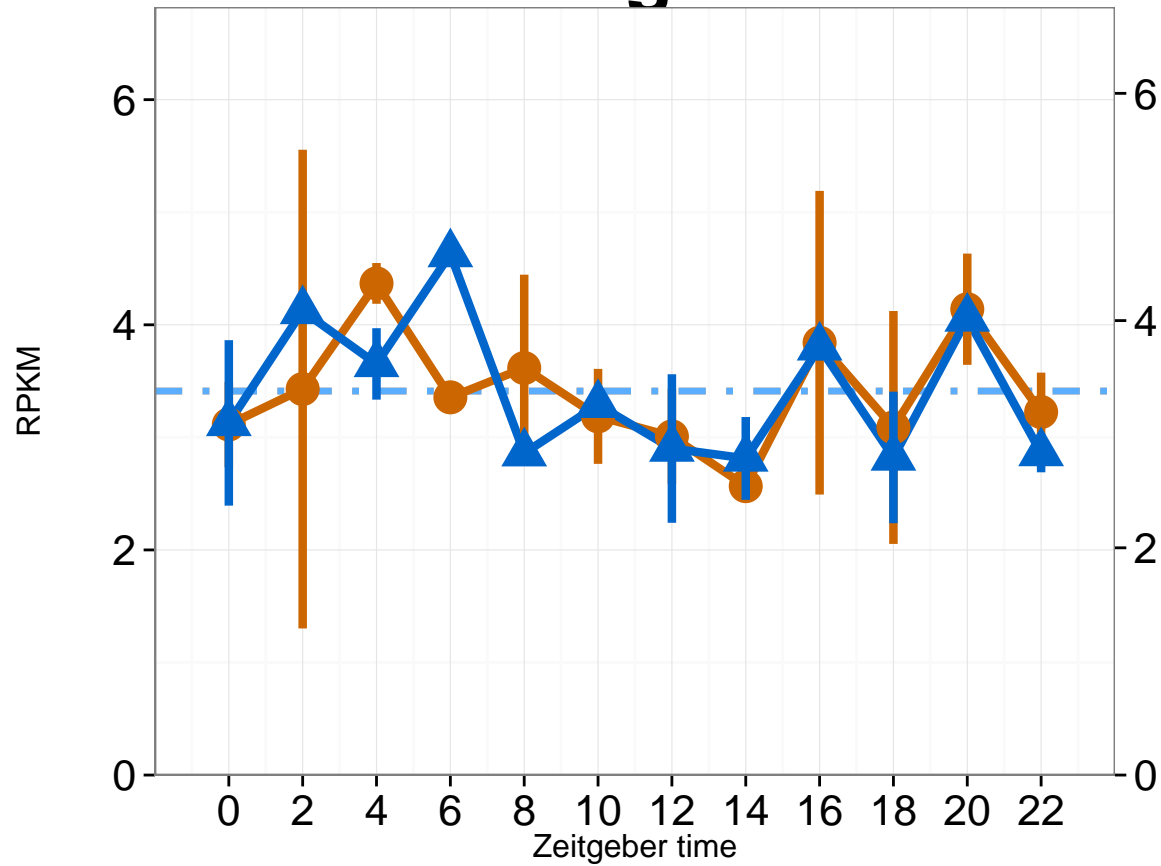

# Pcgf1

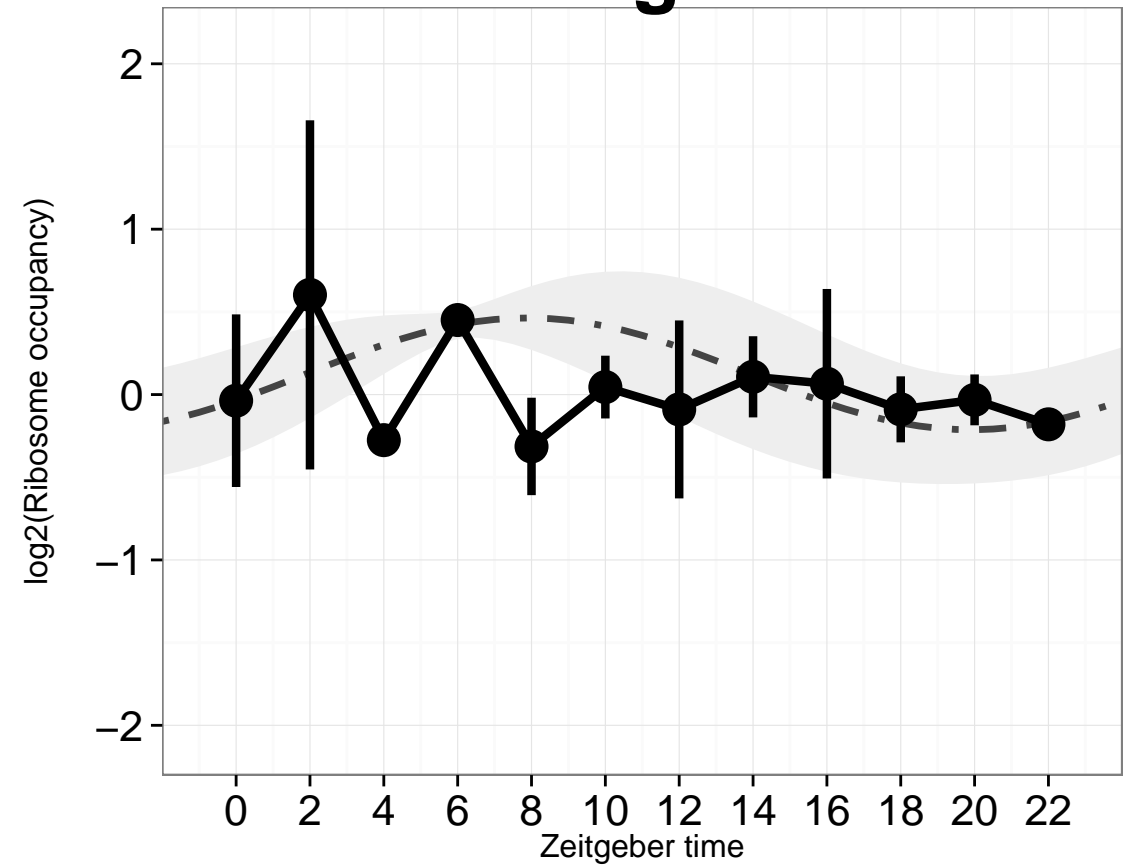

Supplement: SuppDataset_1.zip [file Pcgf1_set_A.pdf › Supplemental Dataset 1/A-mRNA_nonrhyth_translation_nonrhyth/Pcgf1_set_A.pdf]

# Pcgf2

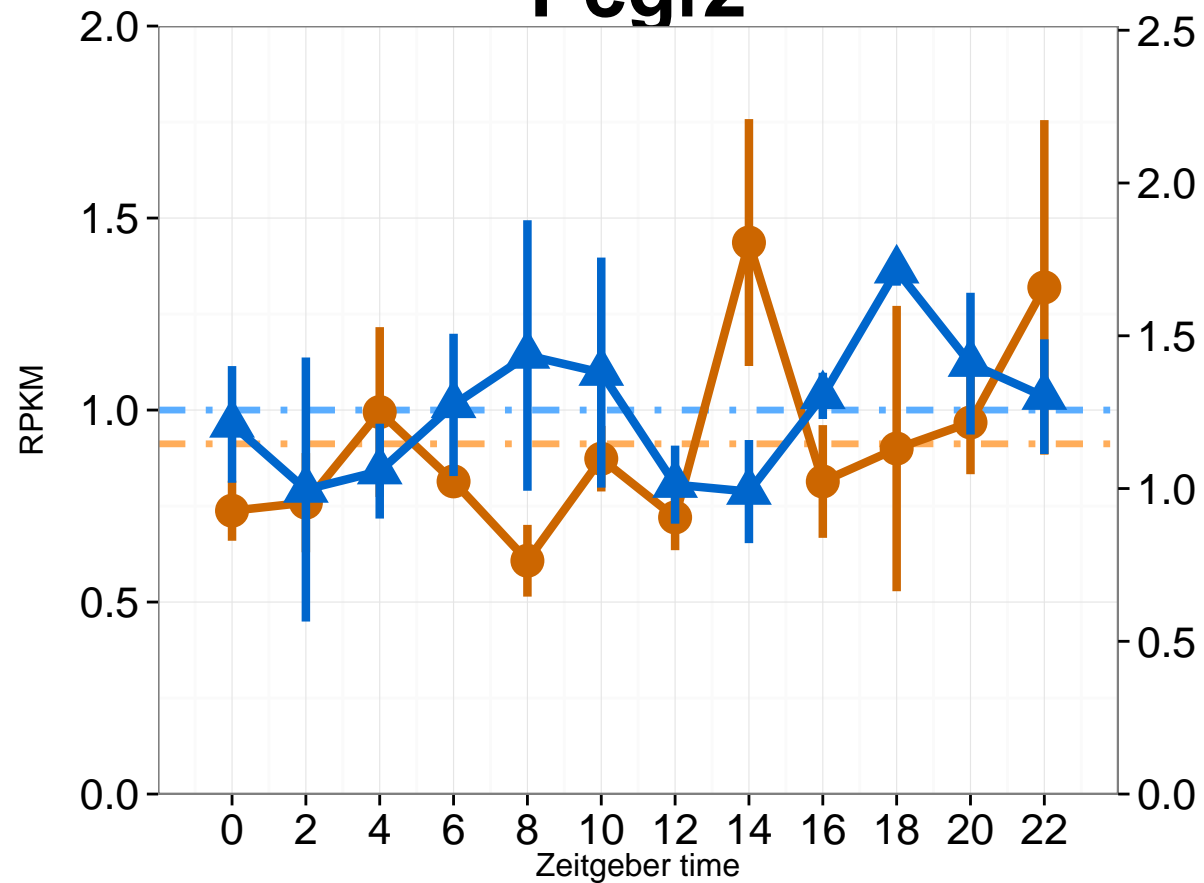

# Pcgf2

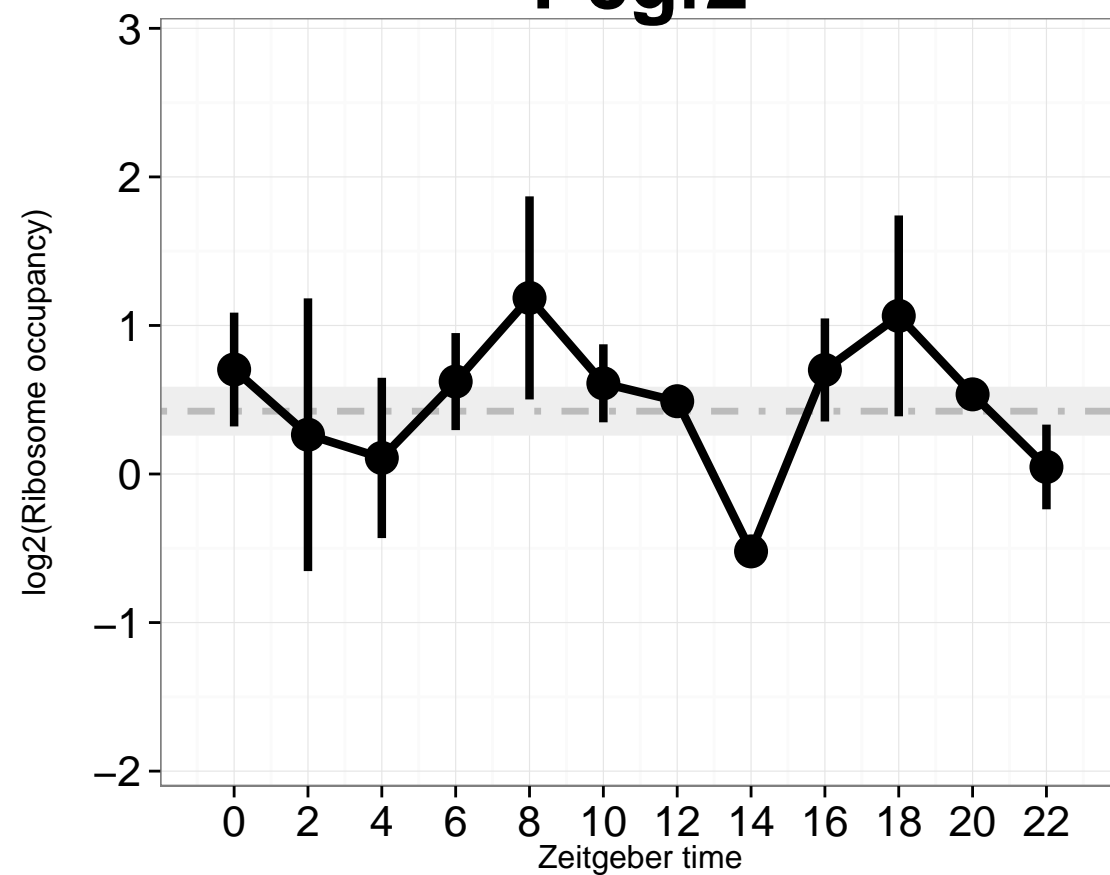

Supplement: SuppDataset_1.zip [file Pcgf2_set_A.pdf › Supplemental Dataset 1/A-mRNA_nonrhyth_translation_nonrhyth/Pcgf2_set_A.pdf]

# Pcgf3

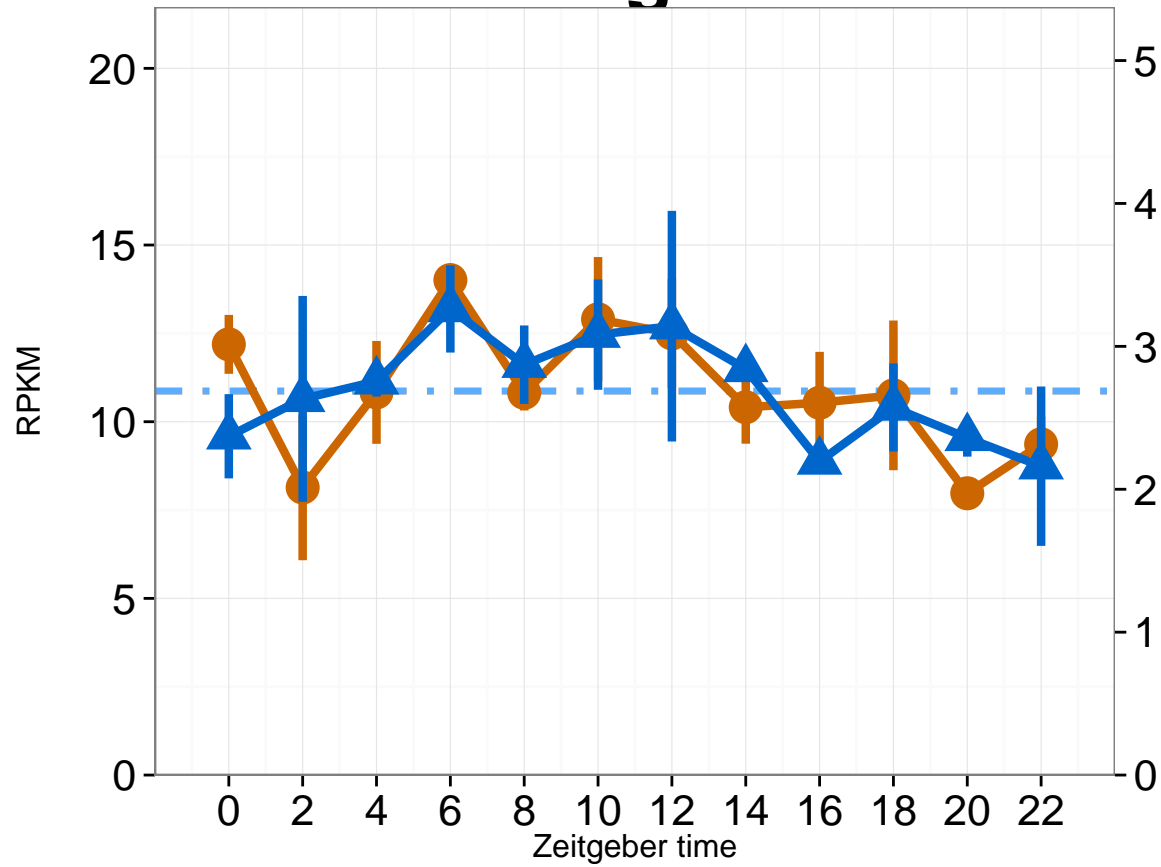

# Pcgf3

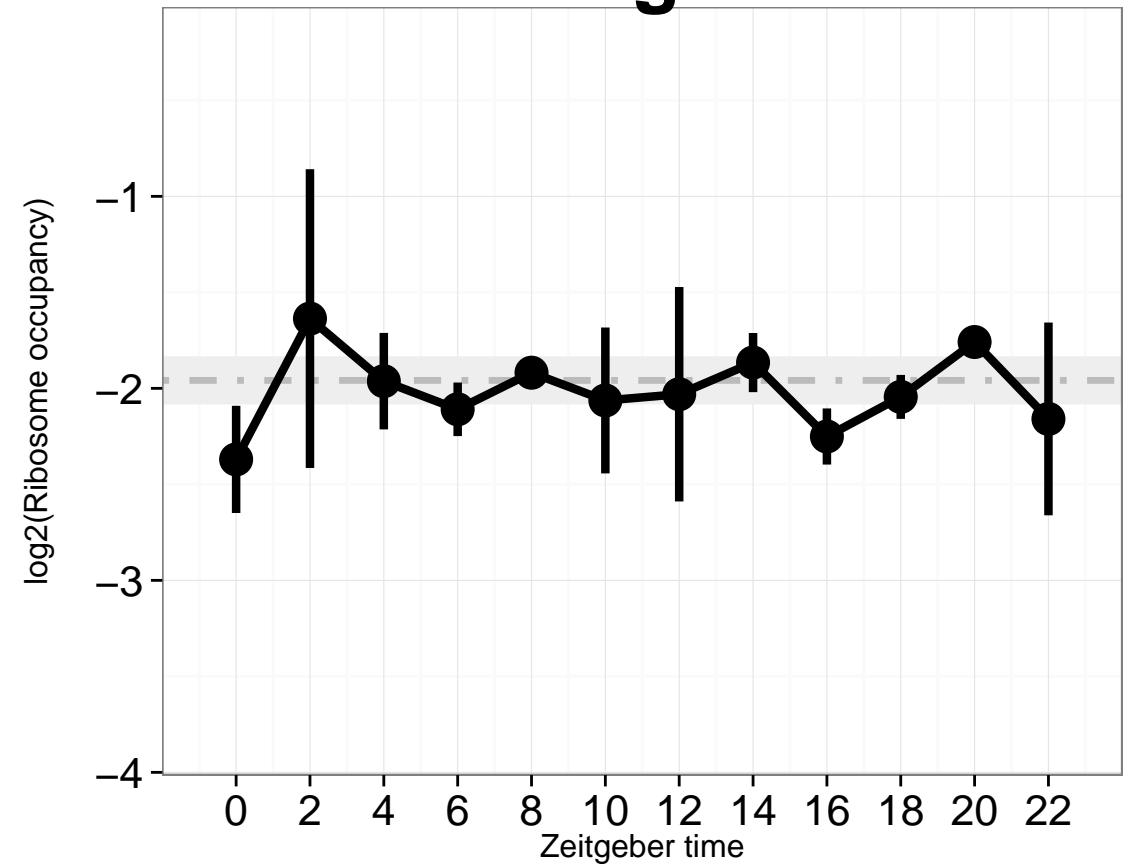

Supplement: SuppDataset_1.zip [file Pcgf3_set_A.pdf › Supplemental Dataset 1/A-mRNA_nonrhyth_translation_nonrhyth/Pcgf3_set_A.pdf]

# Pcgf6

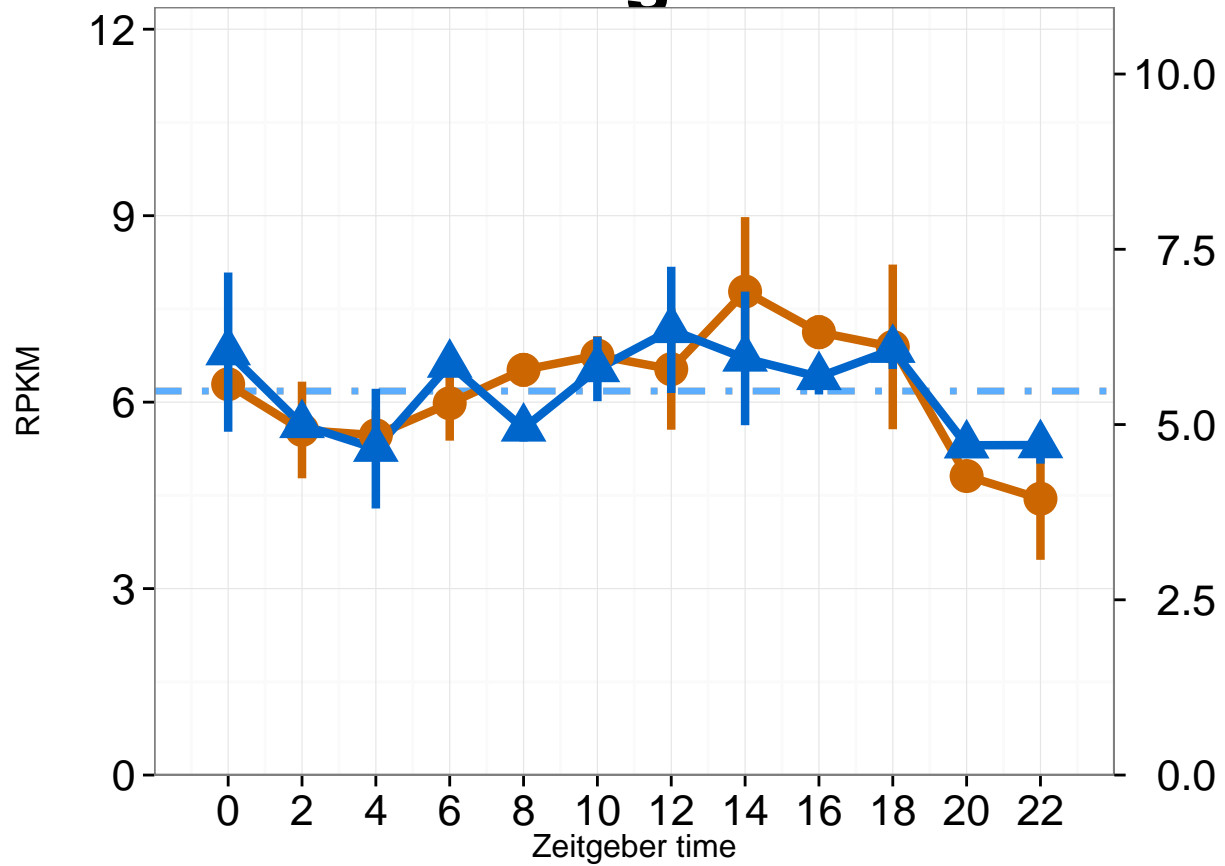

# Pcgf6

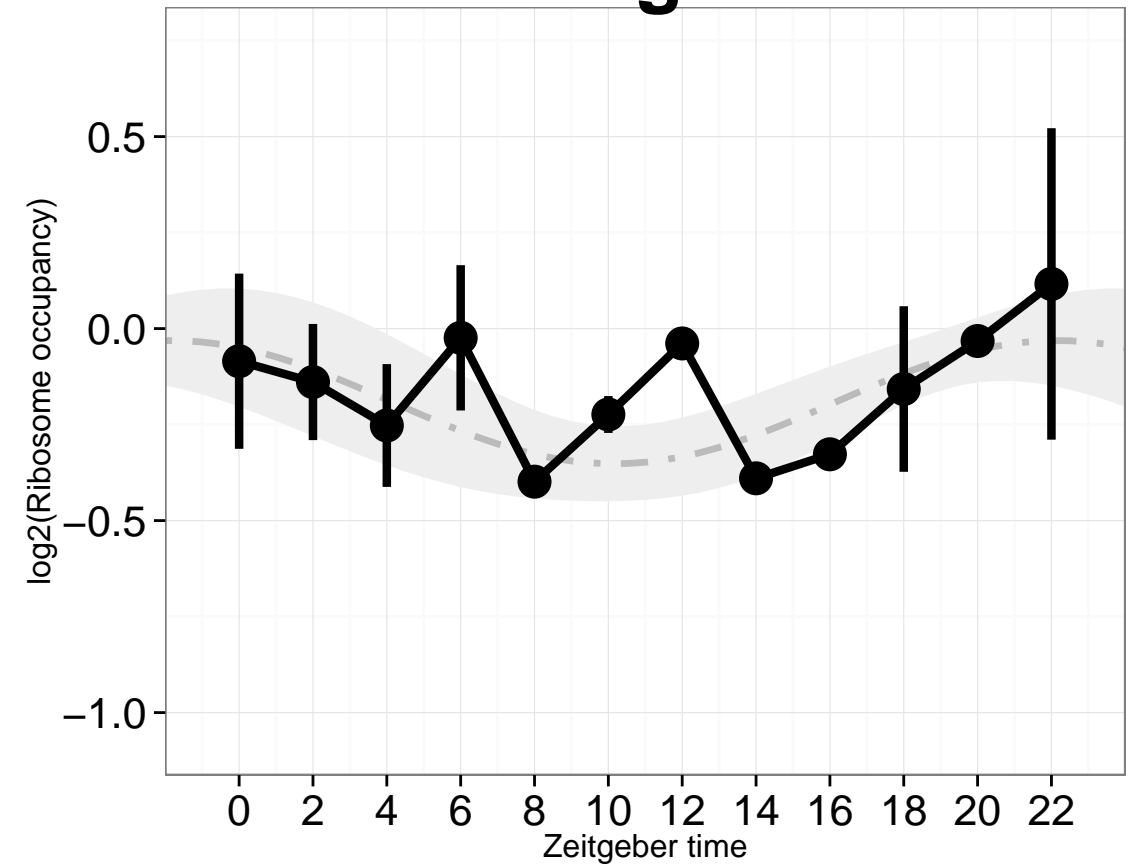

Supplement: SuppDataset_1.zip [file Pcgf6_set_A.pdf › Supplemental Dataset 1/A-mRNA_nonrhyth_translation_nonrhyth/Pcgf6_set_A.pdf]

## Pcid2

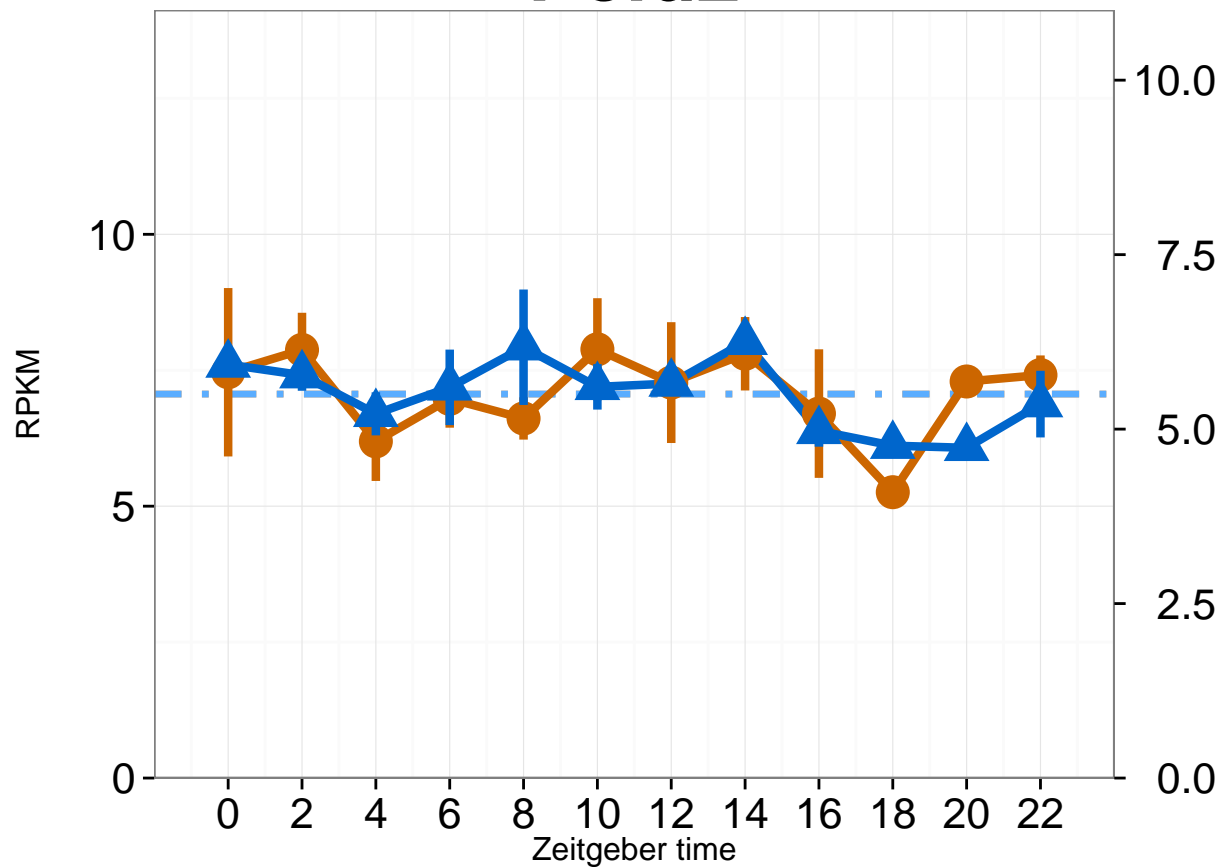

## Pcid2

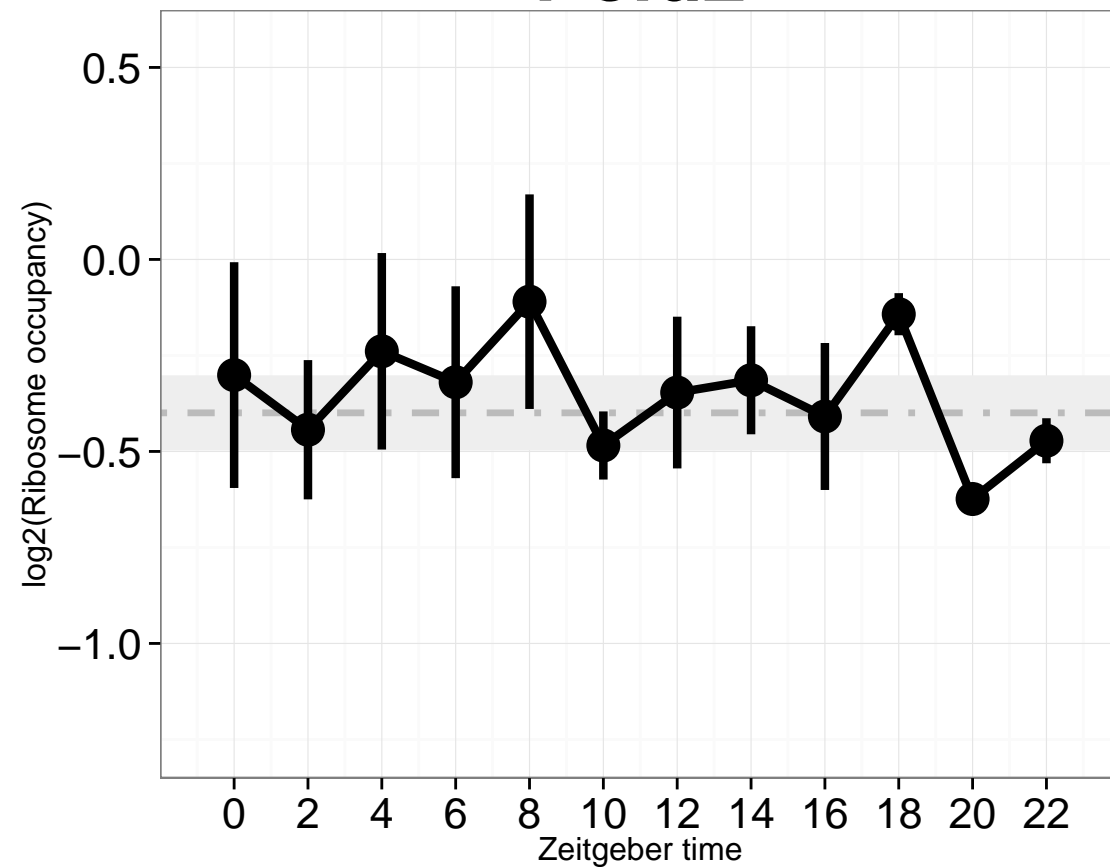

Supplement: SuppDataset_1.zip [file Pcid2_set_A.pdf › Supplemental Dataset 1/A-mRNA_nonrhyth_translation_nonrhyth/Pcid2_set_A.pdf]

# Pck2

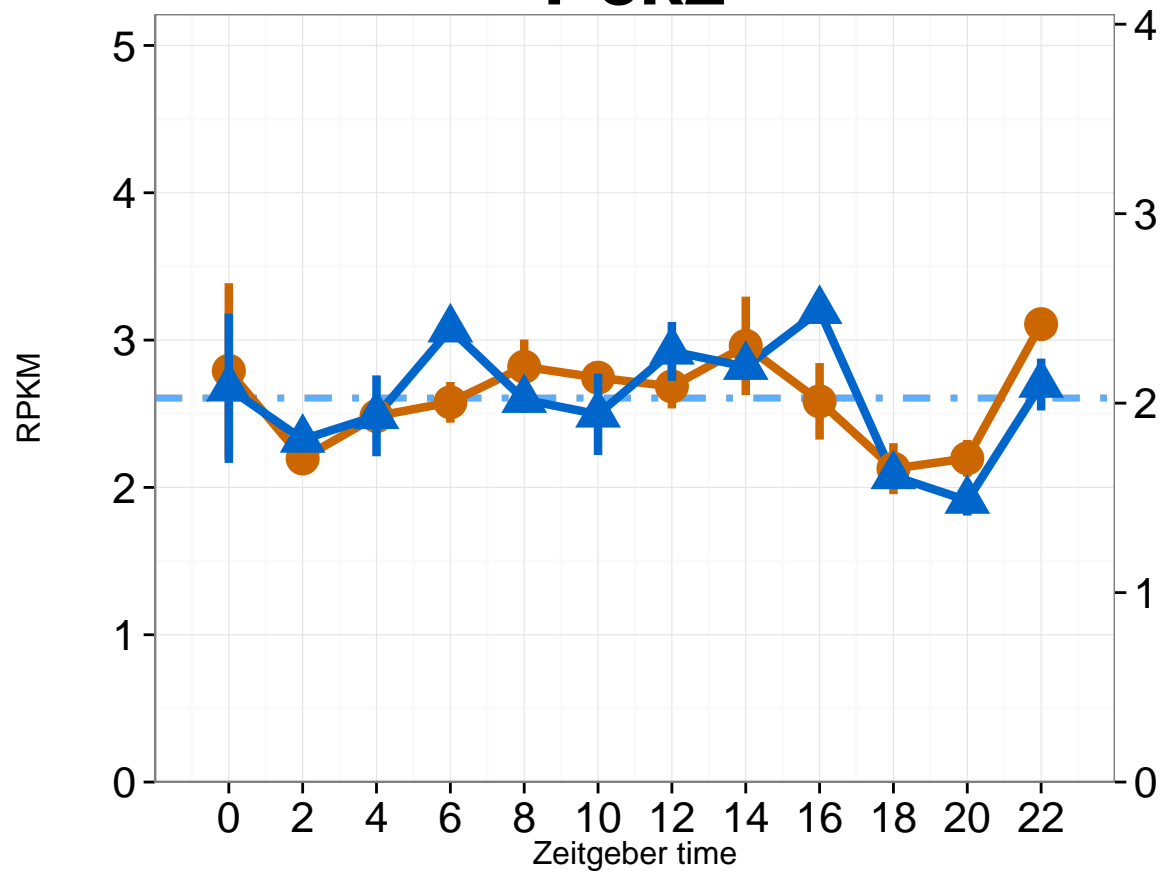

# Pck2

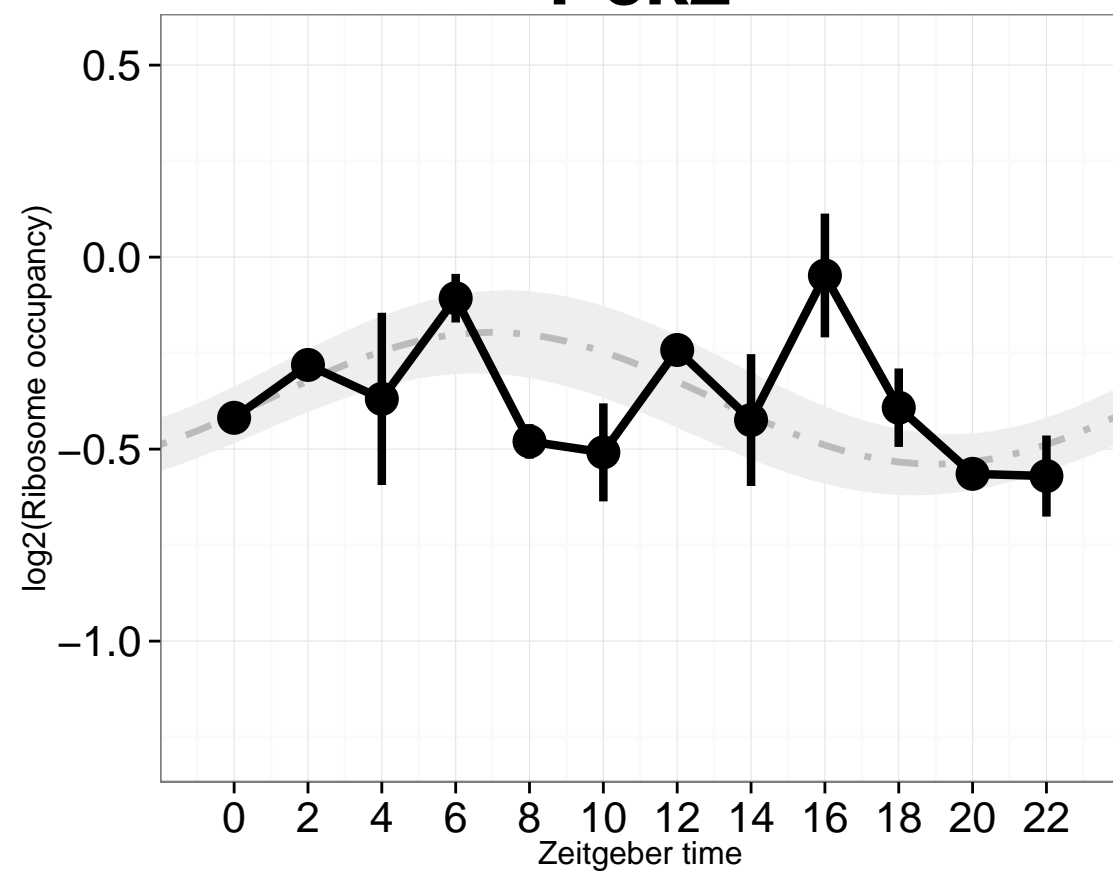

Supplement: SuppDataset_1.zip [file Pck2_set_A.pdf › Supplemental Dataset 1/A-mRNA_nonrhyth_translation_nonrhyth/Pck2_set_A.pdf]

# Pcm1

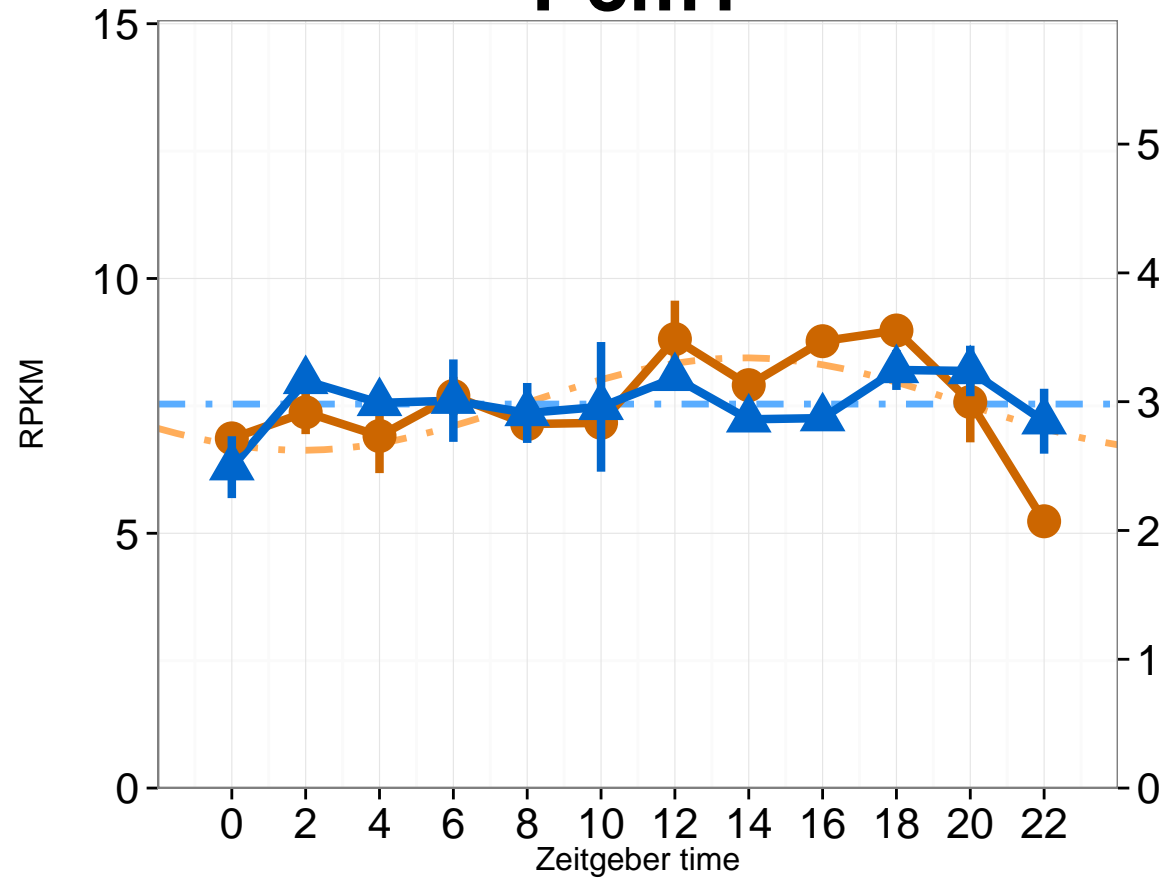

# Pcm1

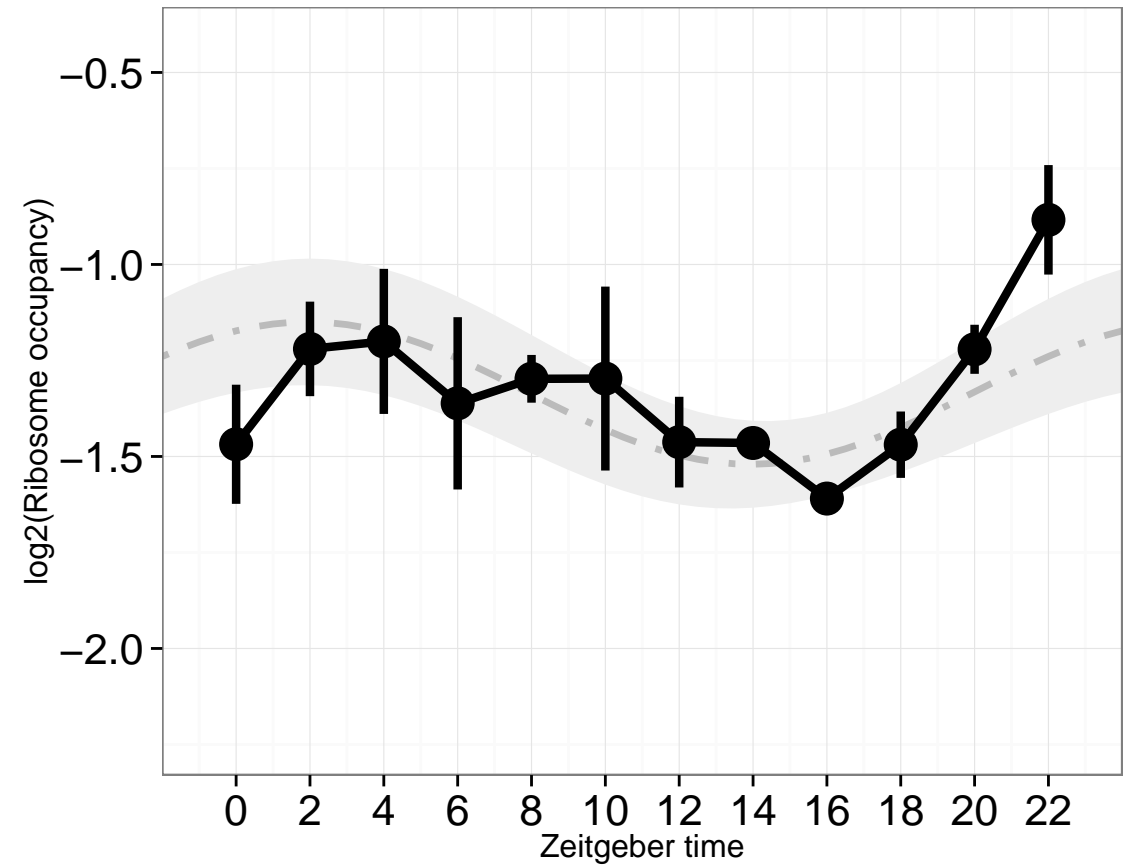

Supplement: SuppDataset_1.zip [file Pcm1_set_A.pdf › Supplemental Dataset 1/A-mRNA_nonrhyth_translation_nonrhyth/Pcm1_set_A.pdf]

# Pcmt1

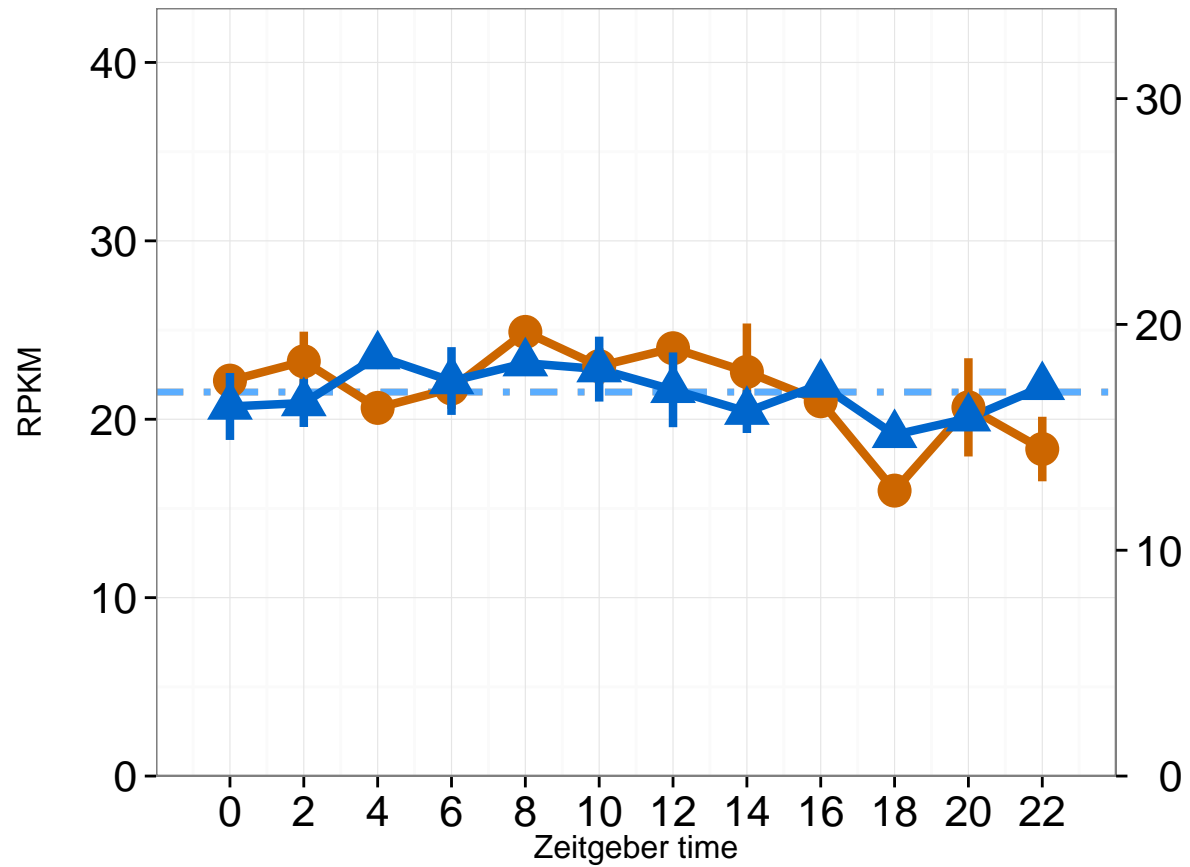

# Pcmt1

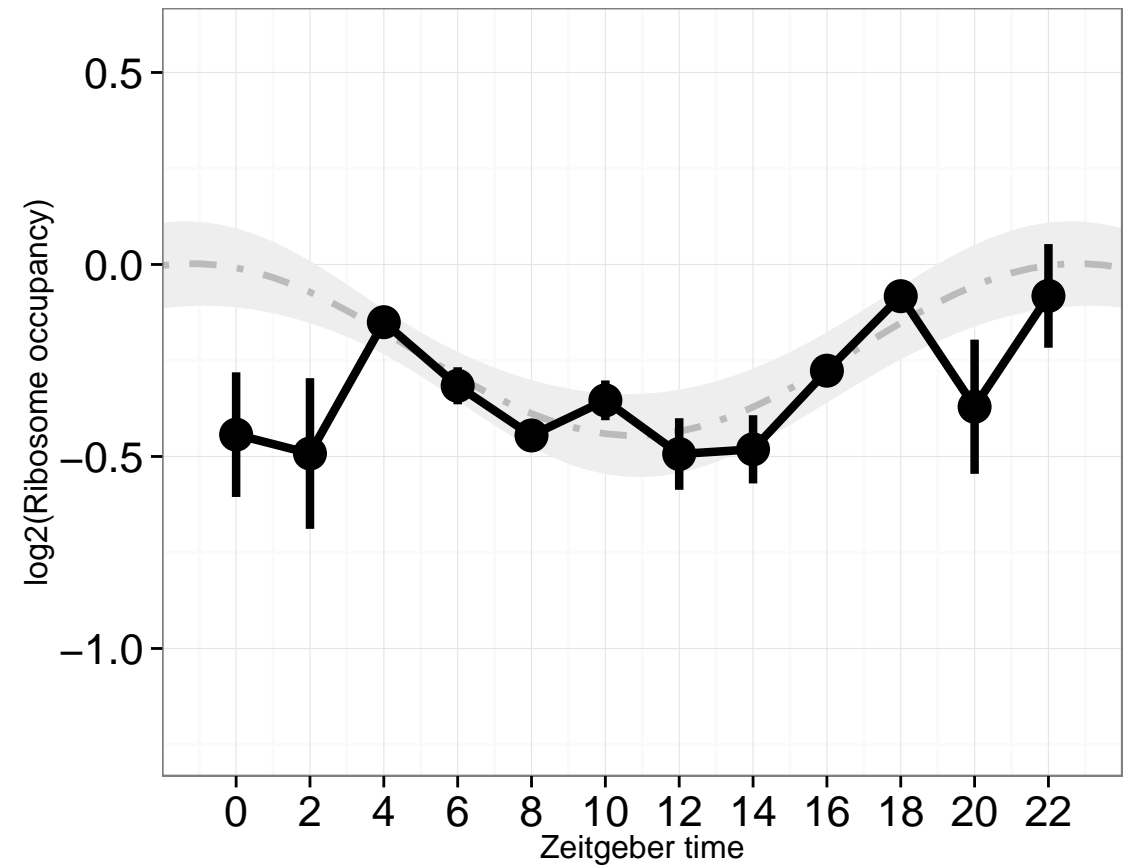

Supplement: SuppDataset_1.zip [file Pcmt1_set_A.pdf › Supplemental Dataset 1/A-mRNA_nonrhyth_translation_nonrhyth/Pcmt1_set_A.pdf]

# Pcmdt1

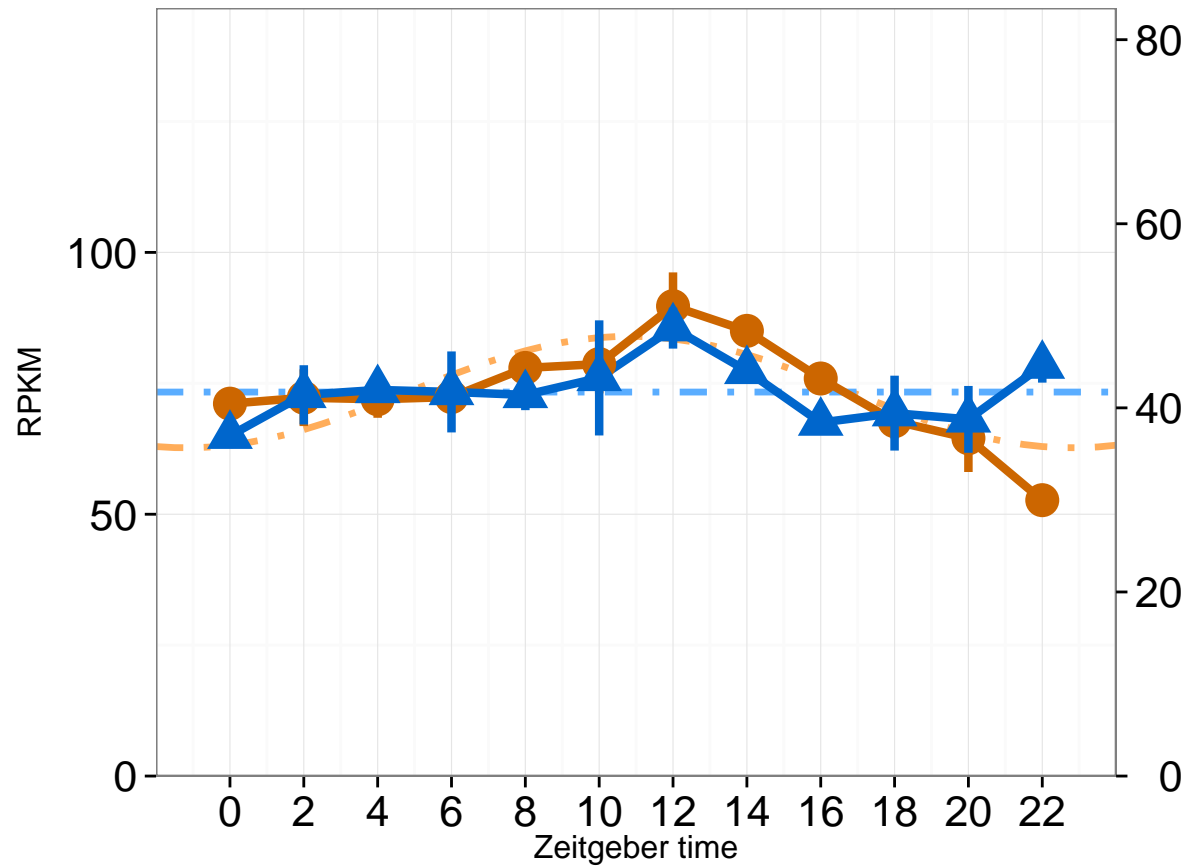

# Pcmdt1

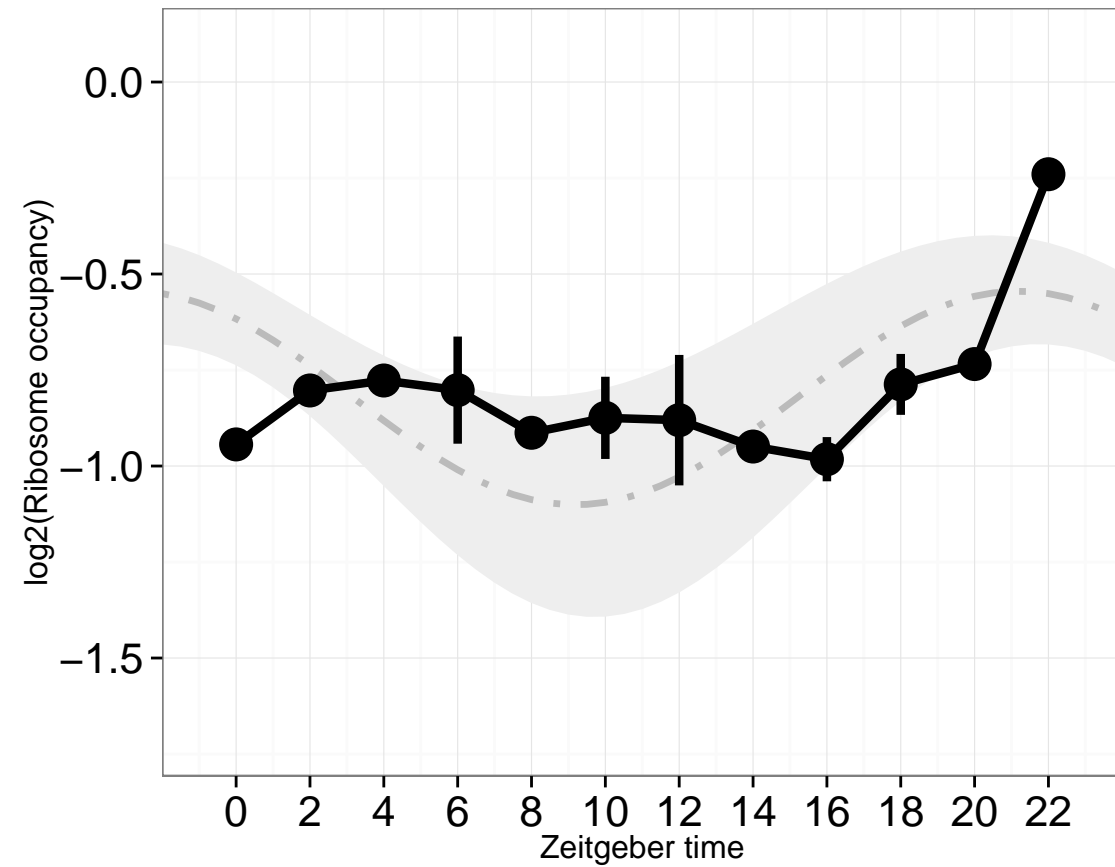

Supplement: SuppDataset_1.zip [file Pcmtd1_set_A.pdf › Supplemental Dataset 1/A-mRNA_nonrhyth_translation_nonrhyth/Pcmtd1_set_A.pdf]

## Pcmdt2

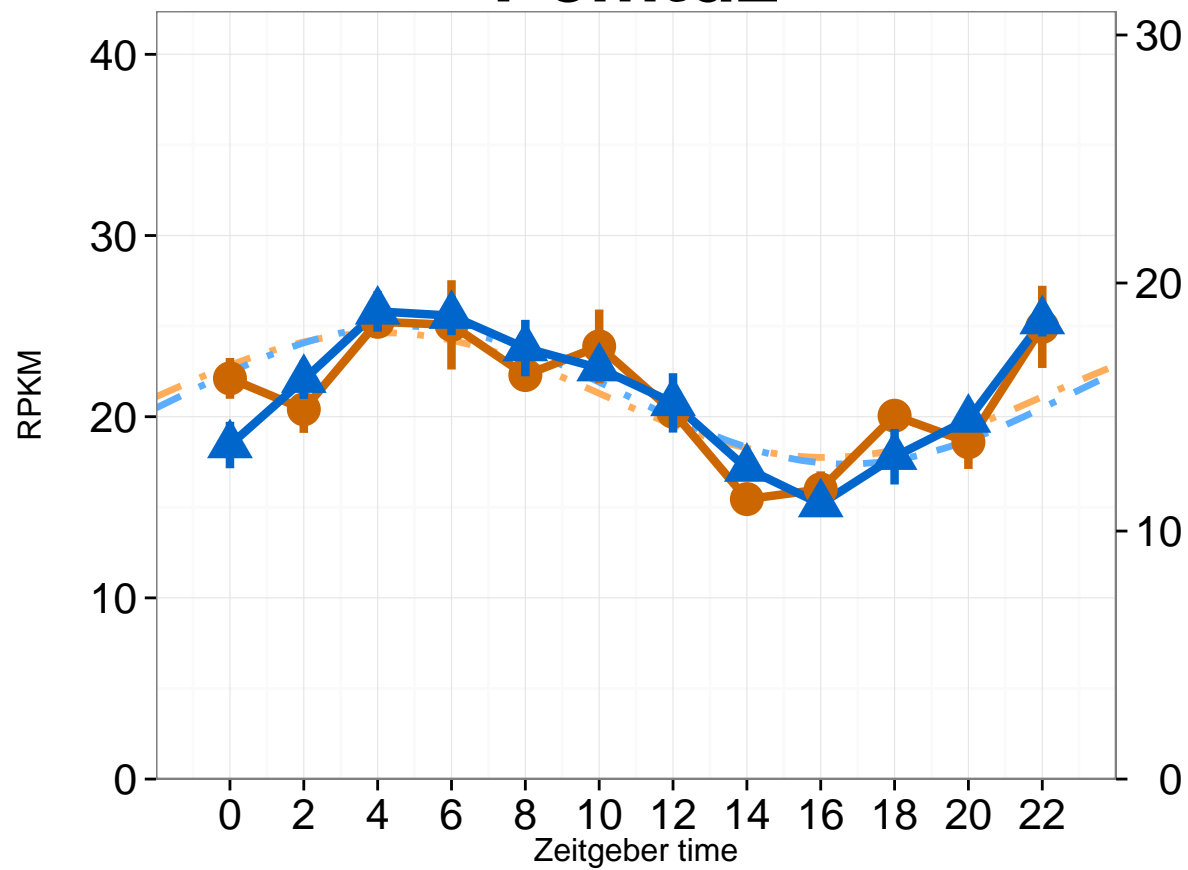

## Pcmdt2

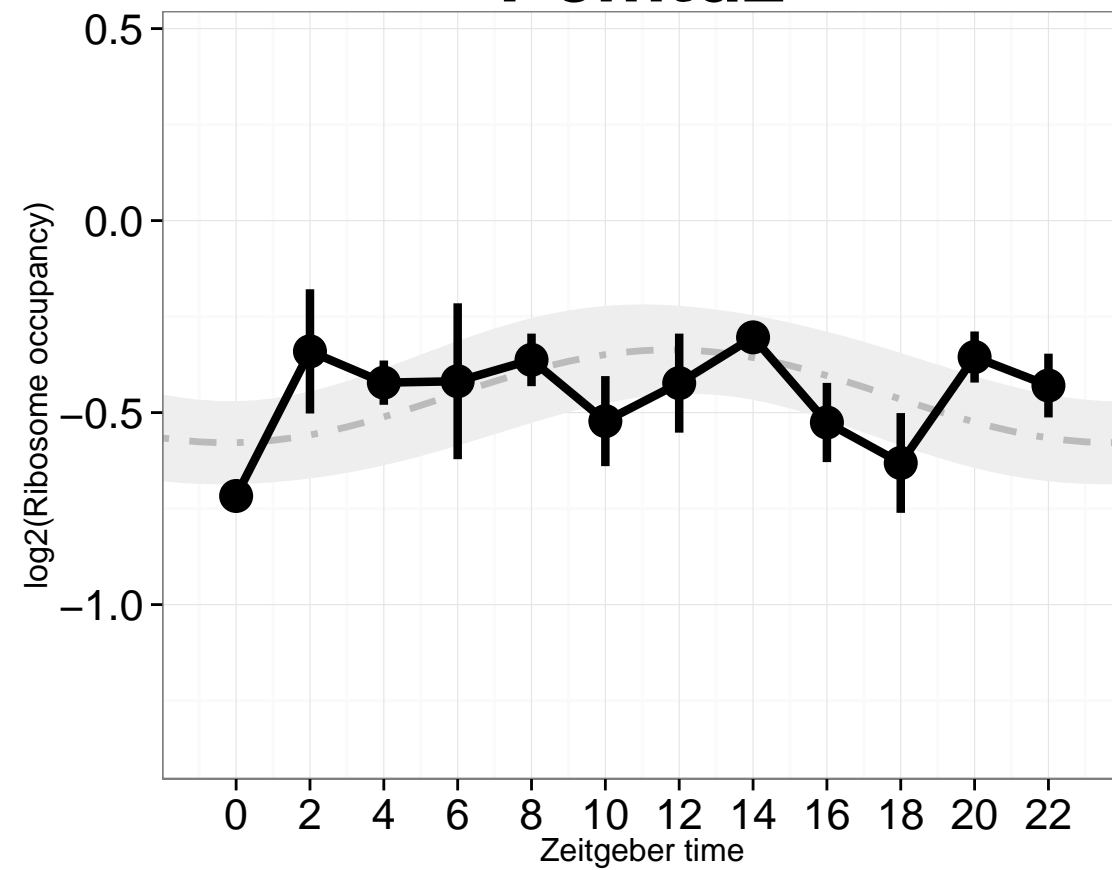

Supplement: SuppDataset_1.zip [file Pcmtd2_set_A.pdf › Supplemental Dataset 1/A-mRNA_nonrhyth_translation_nonrhyth/Pcmtd2_set_A.pdf]

## Pcna

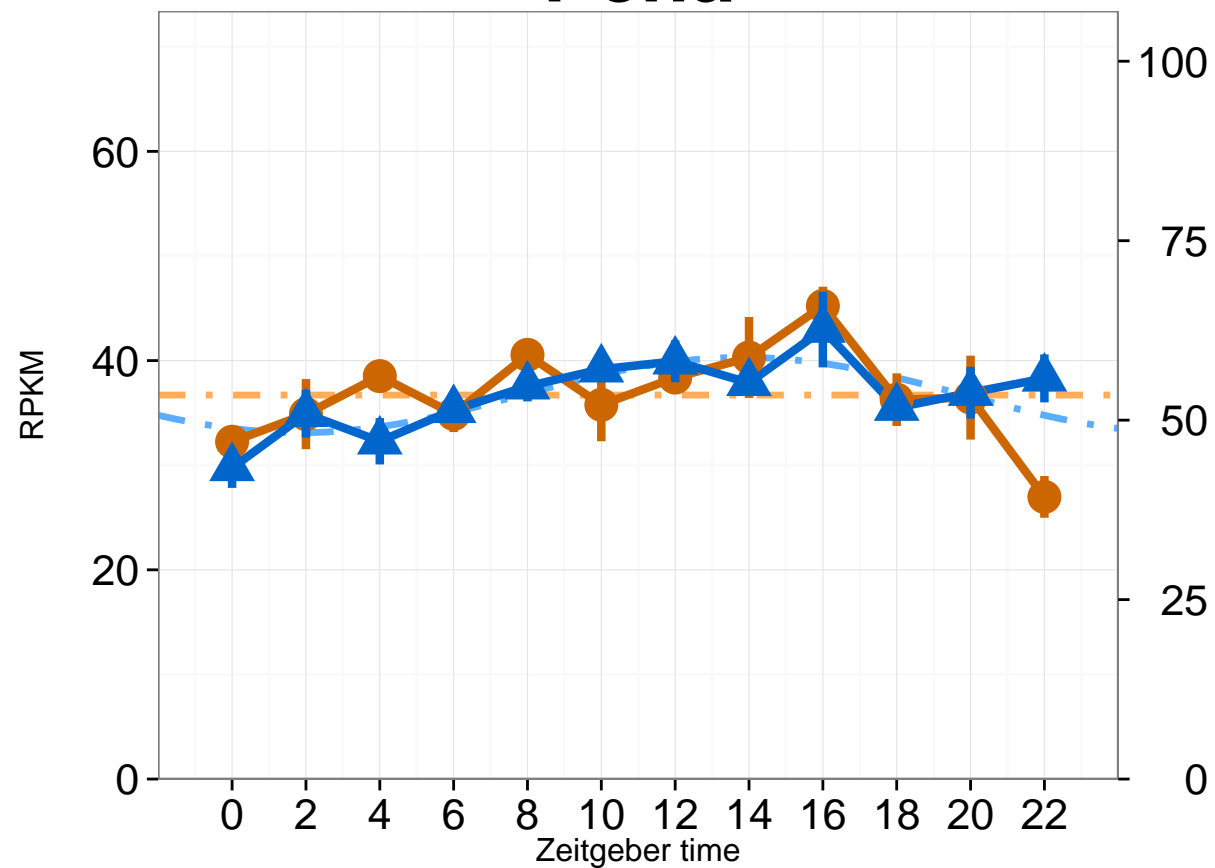

## Pcna

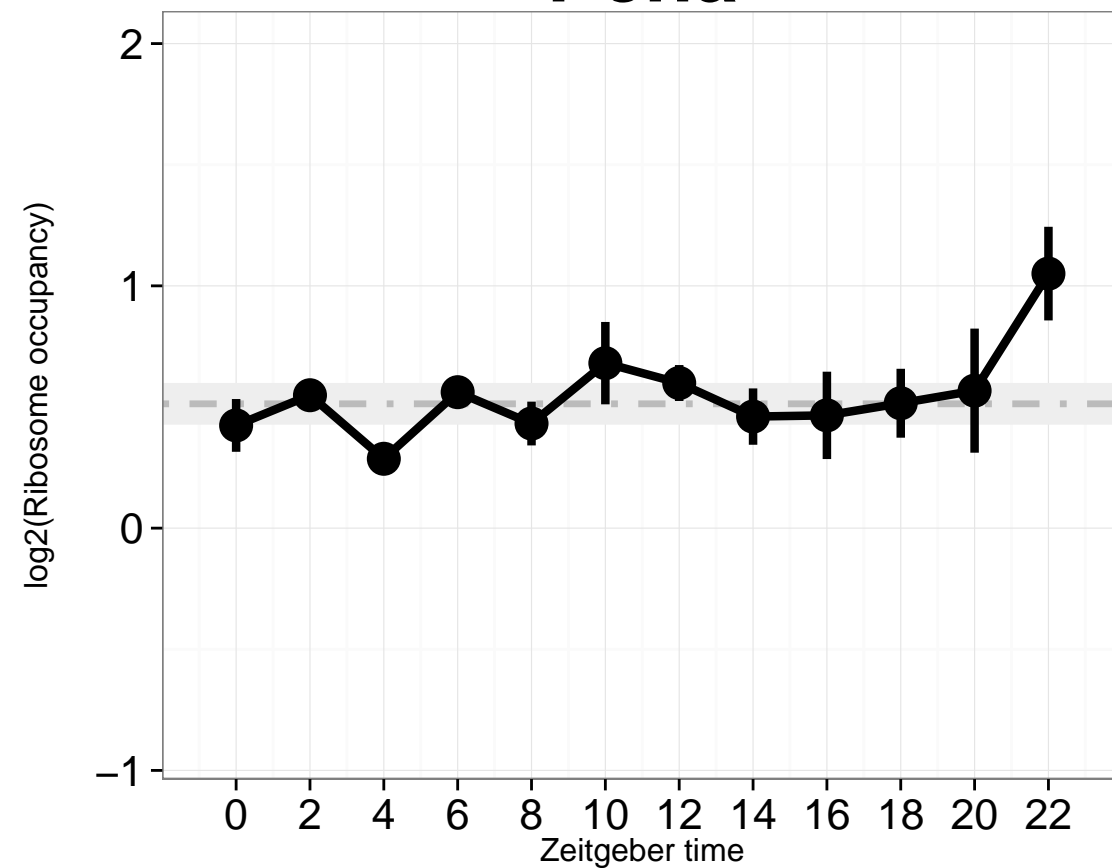

Supplement: SuppDataset_1.zip [file Pcna_set_A.pdf › Supplemental Dataset 1/A-mRNA_nonrhyth_translation_nonrhyth/Pcna_set_A.pdf]

## Pcnp

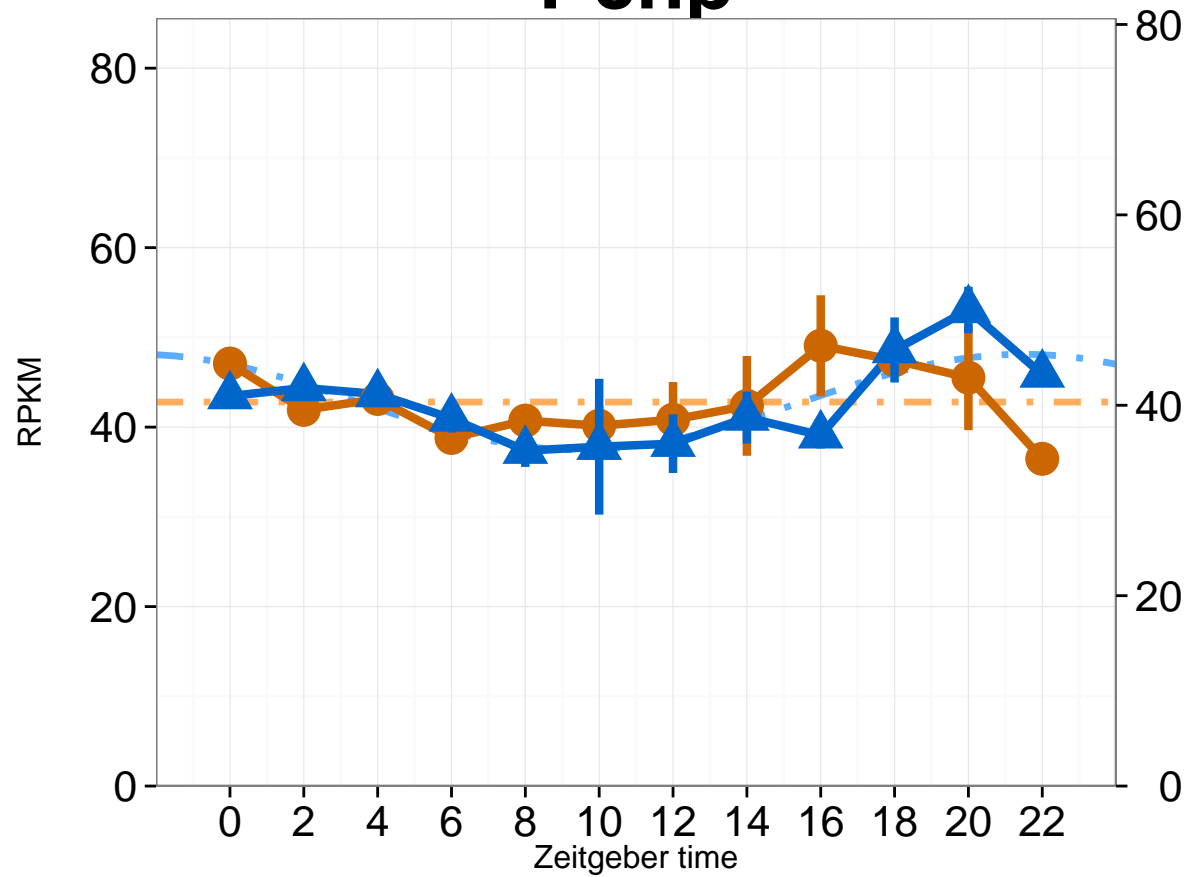

## Pcnp

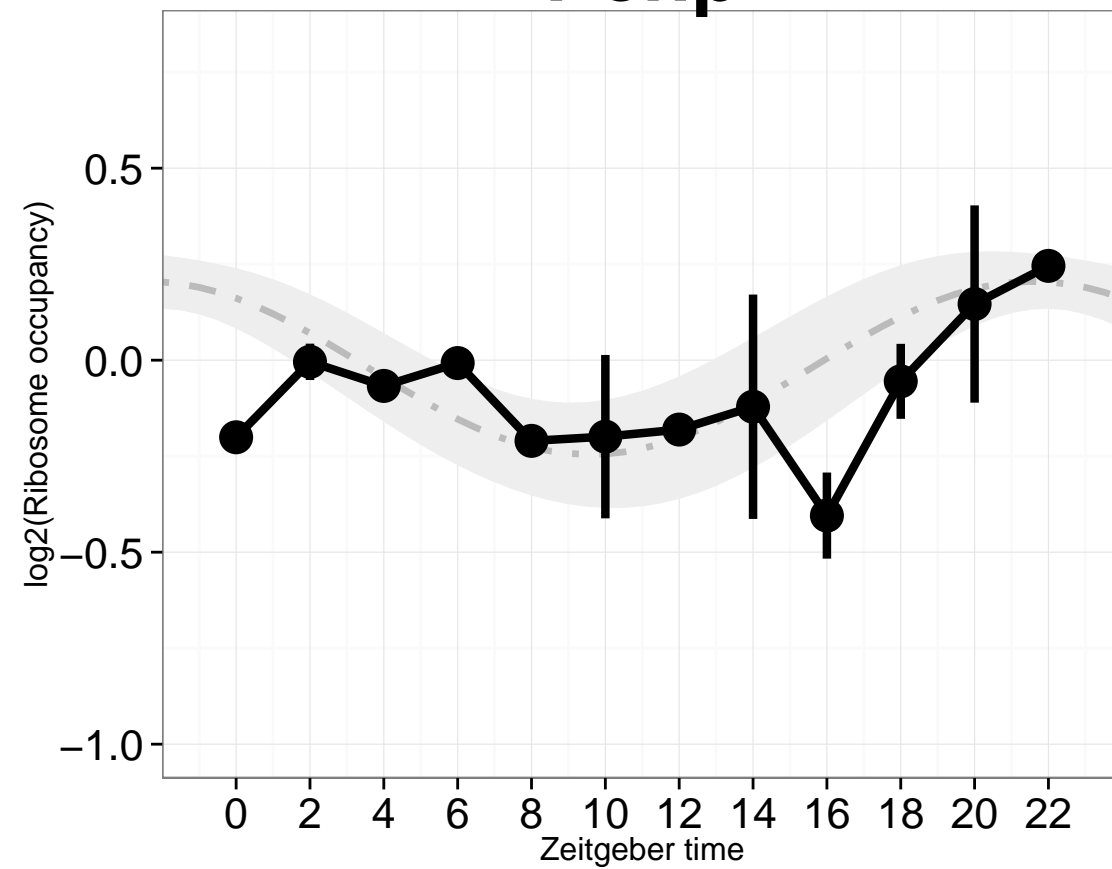

Supplement: SuppDataset_1.zip [file Pcnp_set_A.pdf › Supplemental Dataset 1/A-mRNA_nonrhyth_translation_nonrhyth/Pcnp_set_A.pdf]

## Pcnt

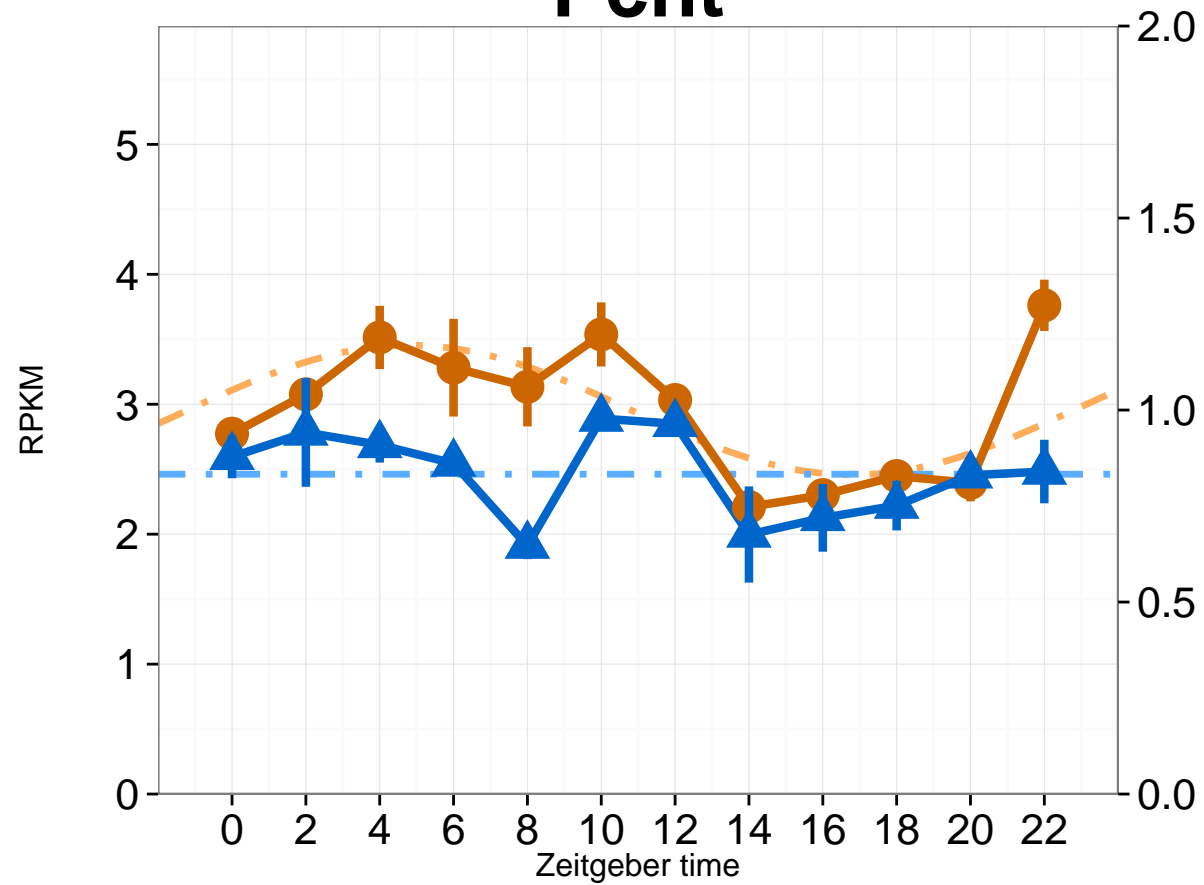

## Pcnt

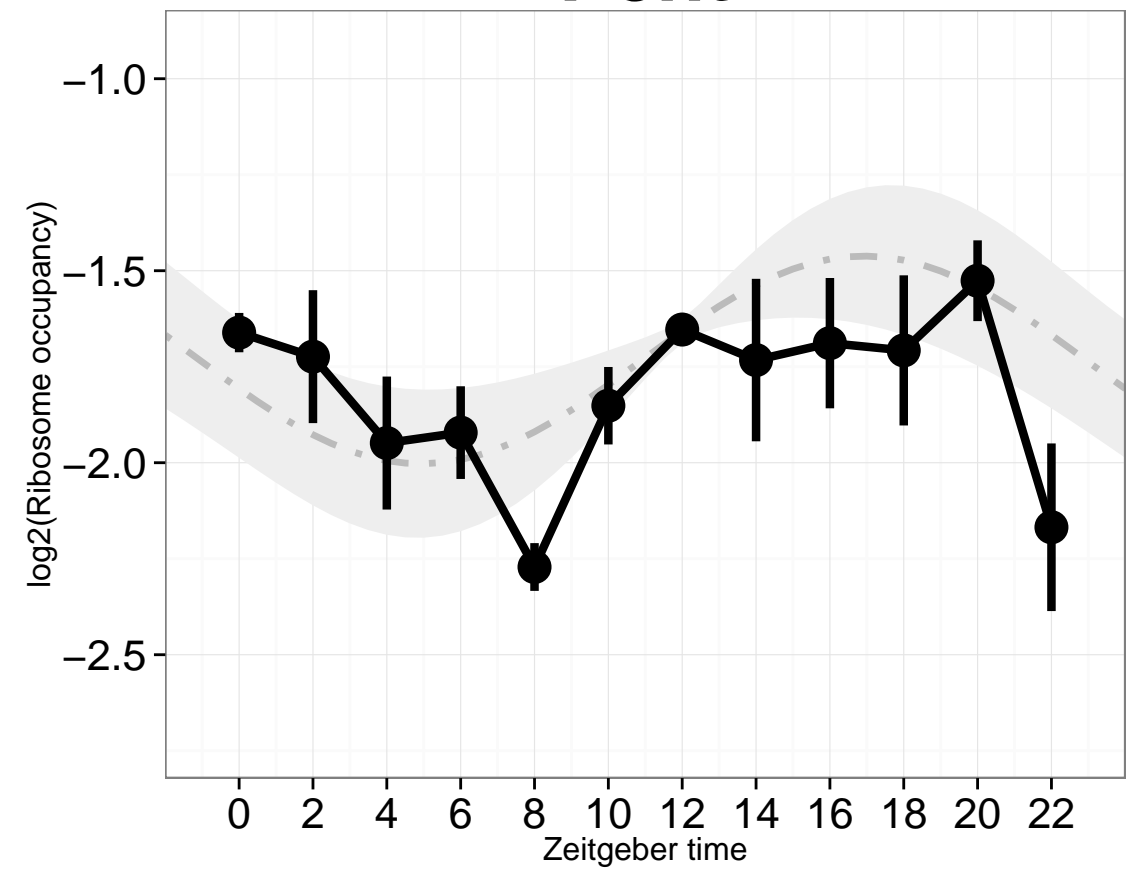

Supplement: SuppDataset_1.zip [file Pcnt_set_A.pdf › Supplemental Dataset 1/A-mRNA_nonrhyth_translation_nonrhyth/Pcnt_set_A.pdf]

## Pcnx

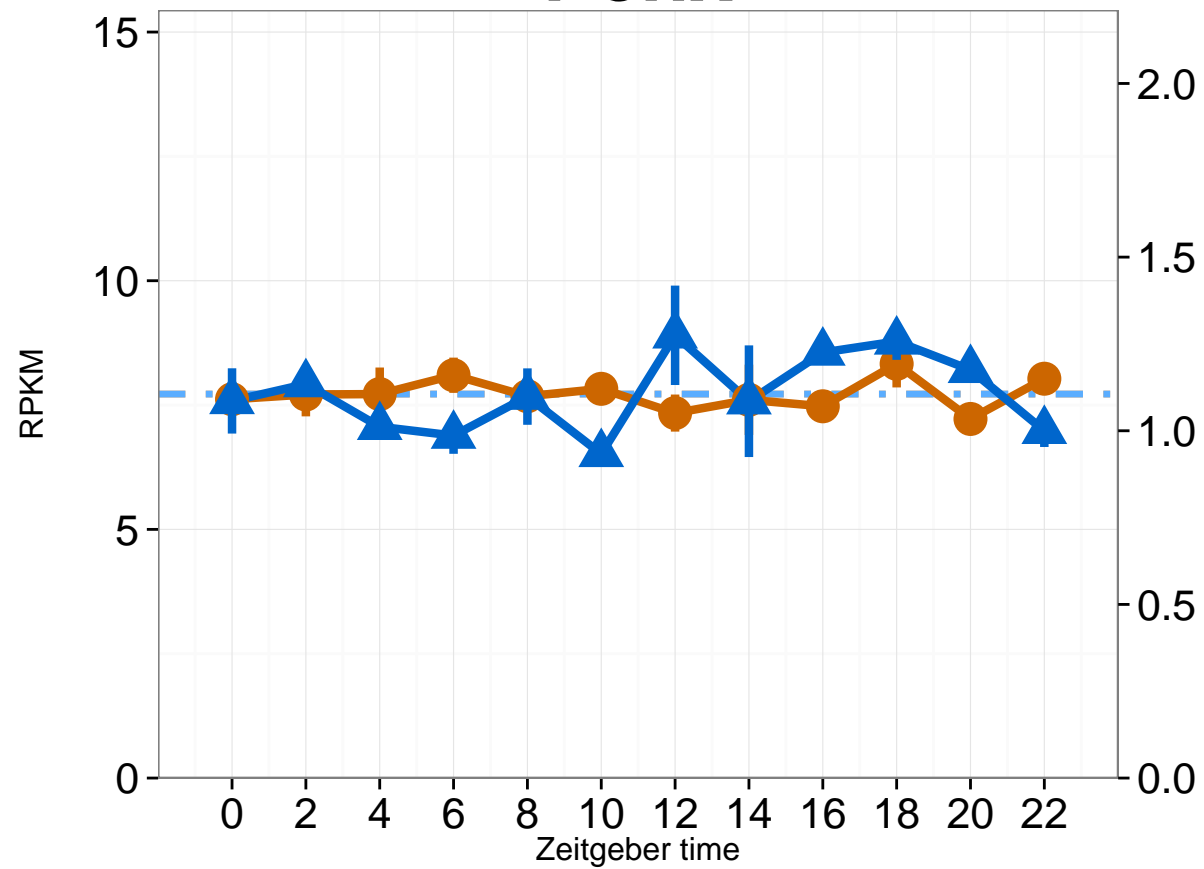

## Pcnx

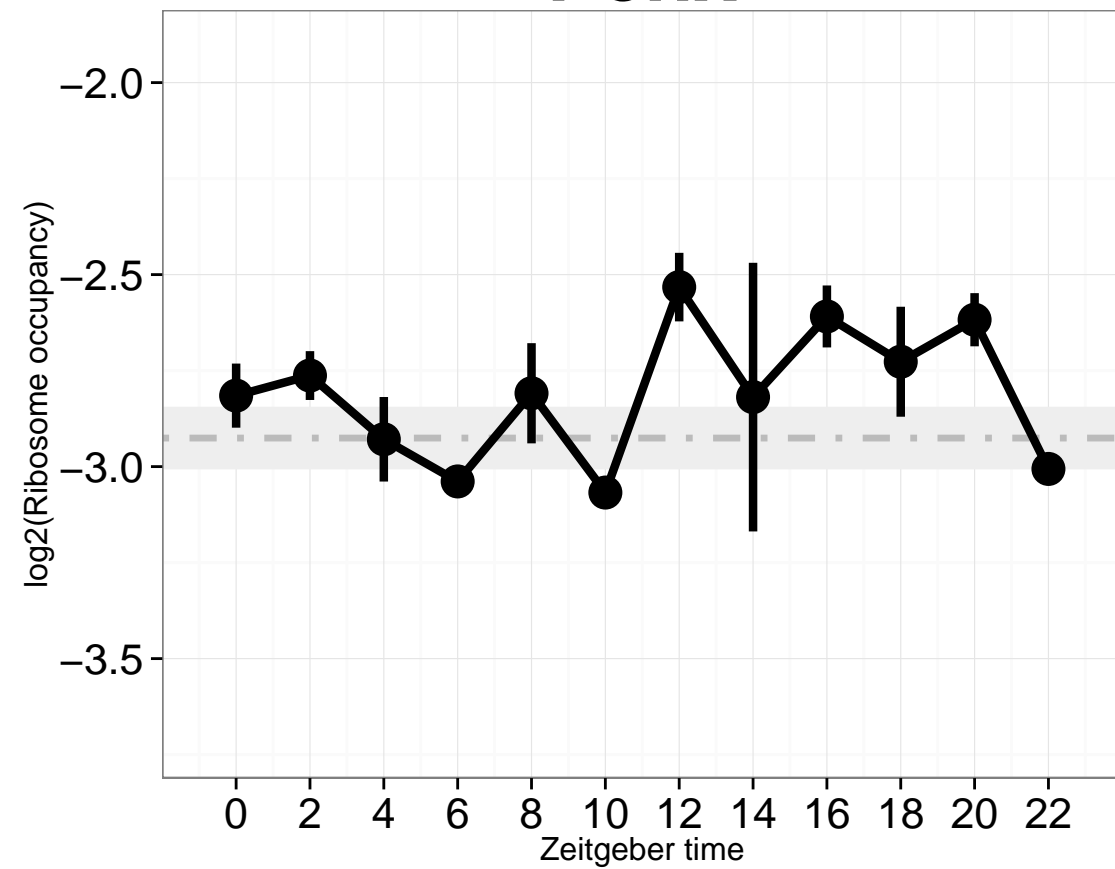

Supplement: SuppDataset_1.zip [file Pcnx_set_A.pdf › Supplemental Dataset 1/A-mRNA_nonrhyth_translation_nonrhyth/Pcnx_set_A.pdf]

## Pcnxl3

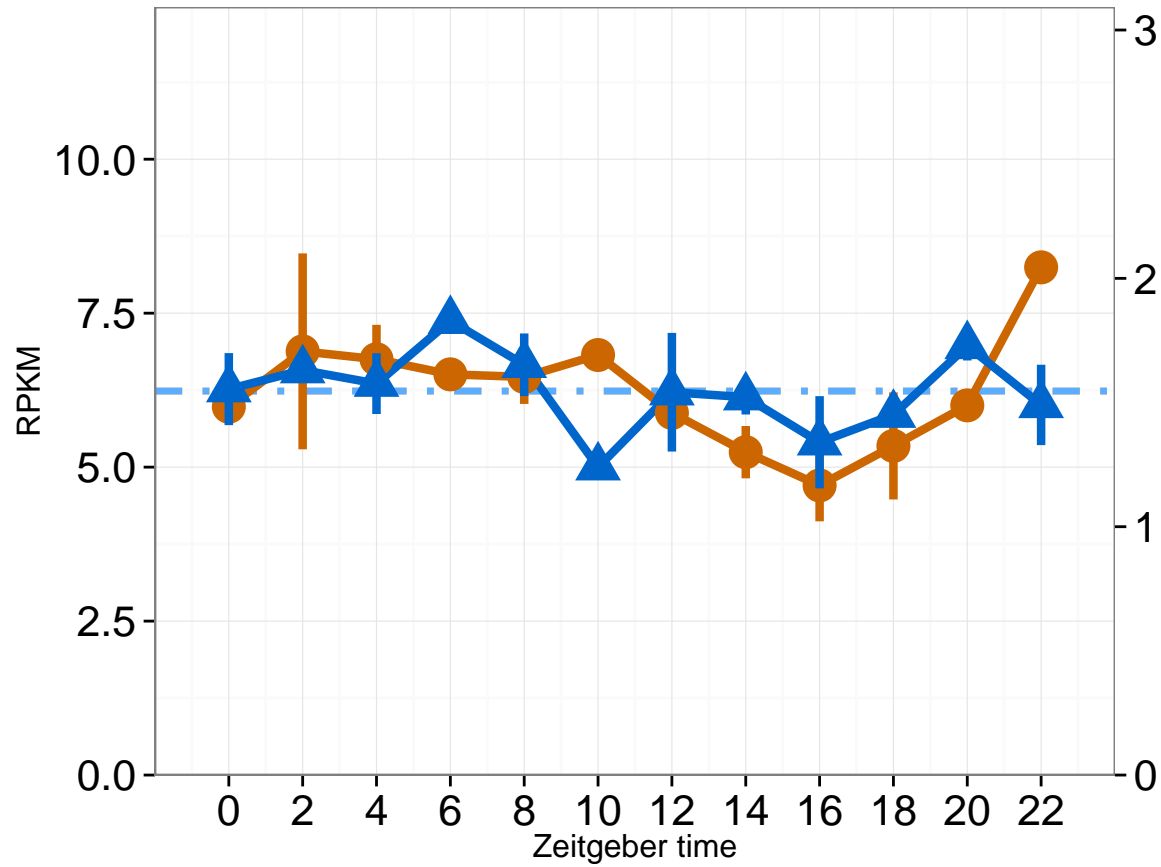

## Pcnxl3

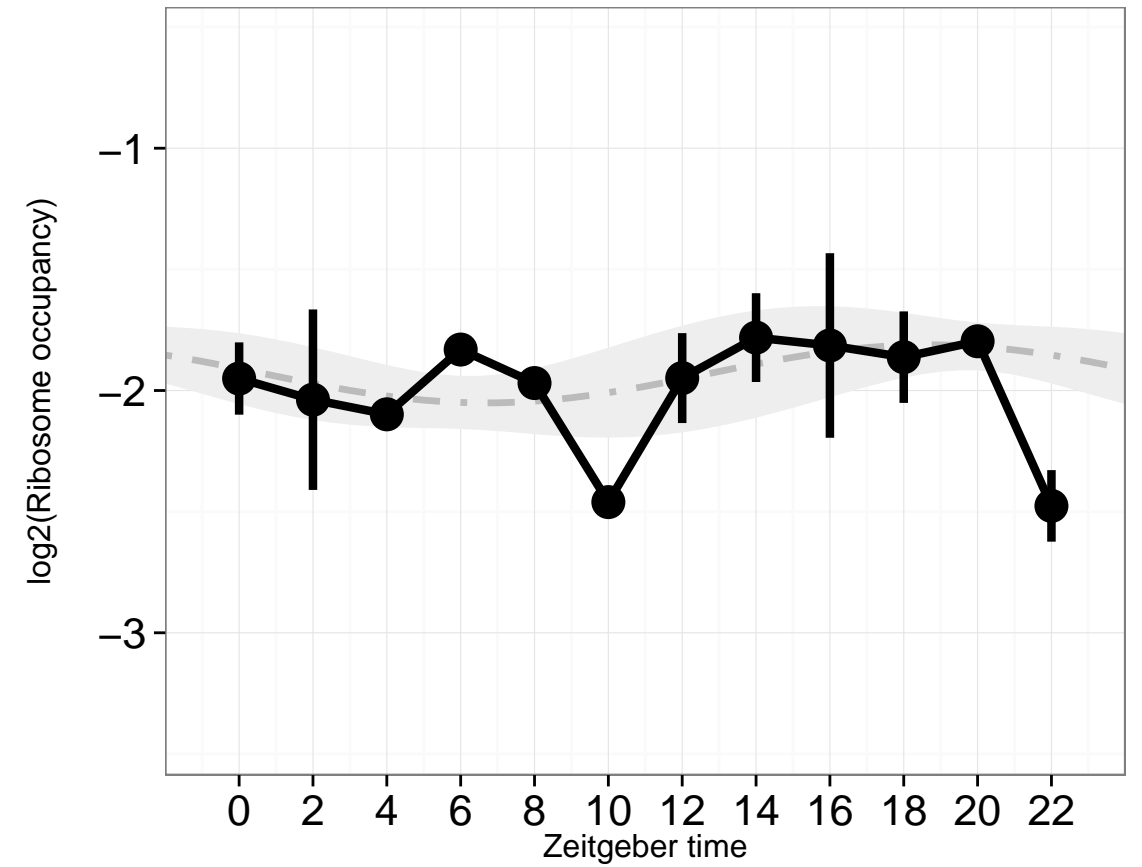

Supplement: SuppDataset_1.zip [file Pcnxl3_set_A.pdf › Supplemental Dataset 1/A-mRNA_nonrhyth_translation_nonrhyth/Pcnxl3_set_A.pdf]

## Pcnxl4

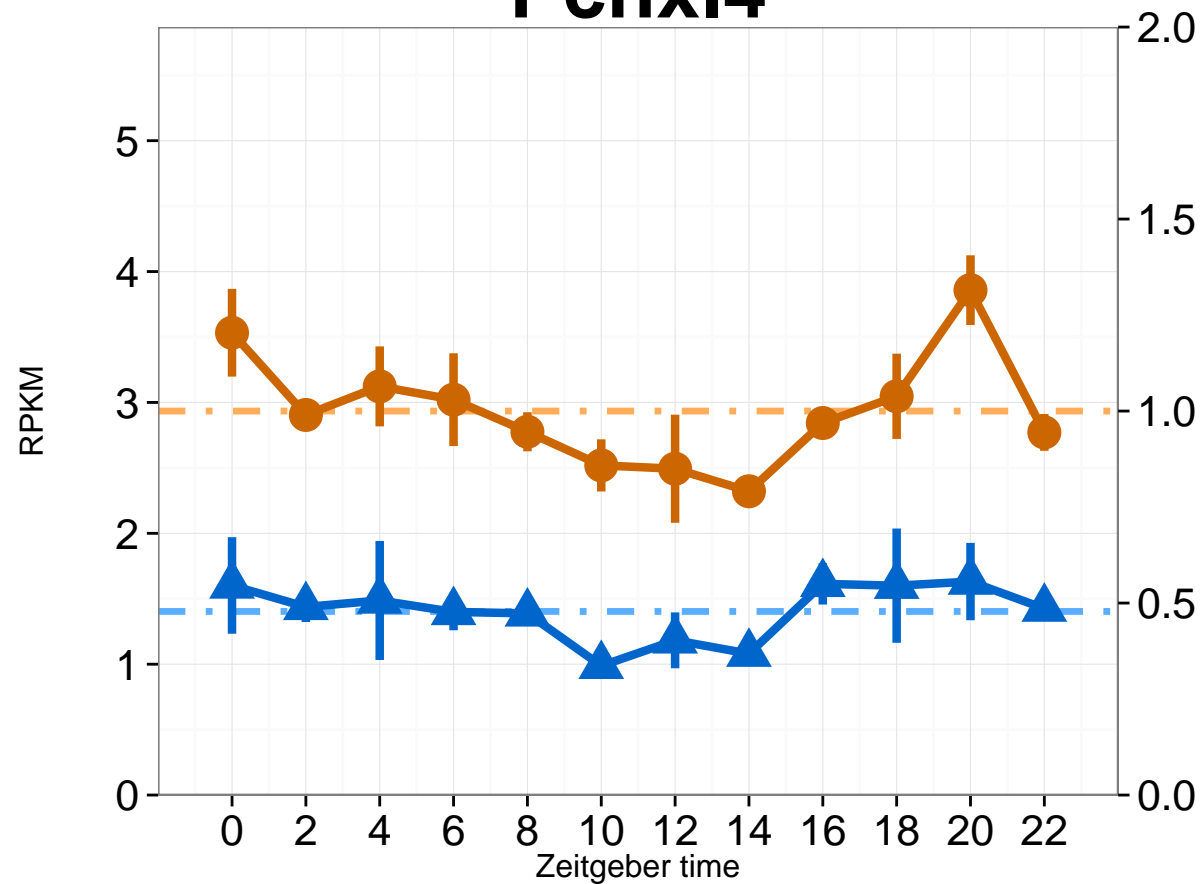

## Pcnxl4

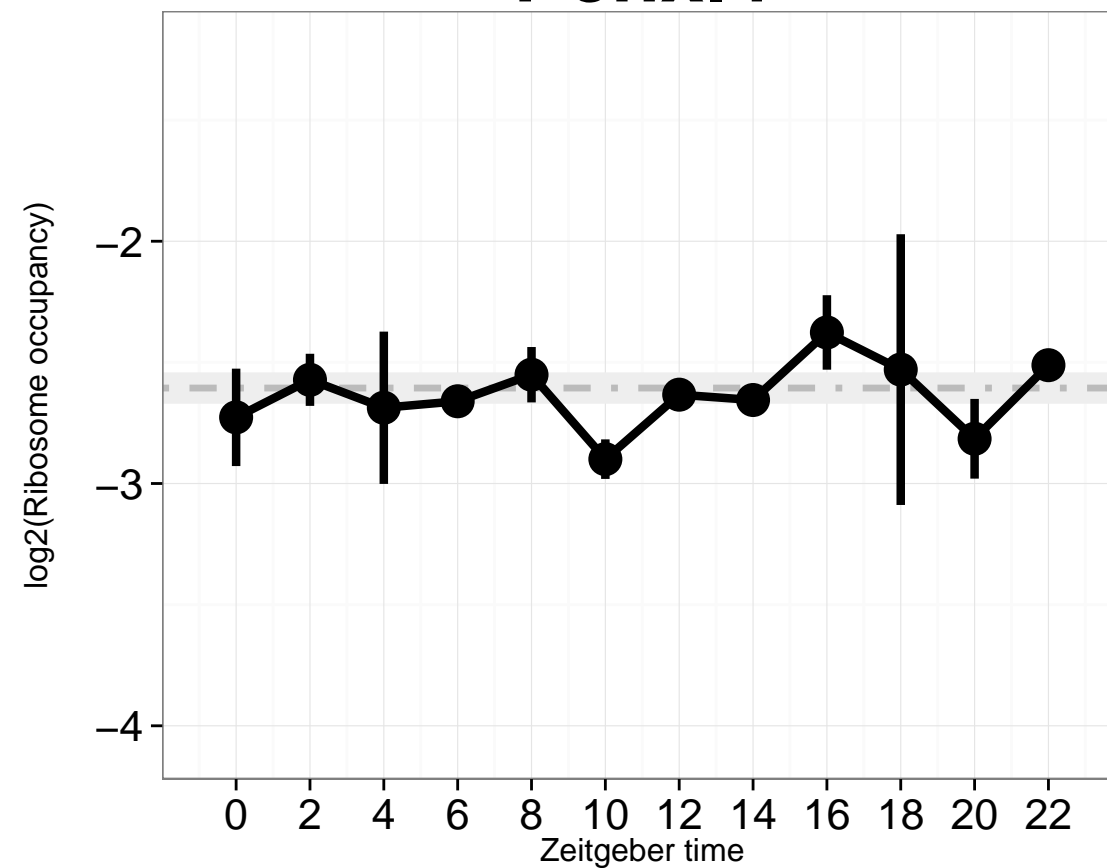

Supplement: SuppDataset_1.zip [file Pcnxl4_set_A.pdf › Supplemental Dataset 1/A-mRNA_nonrhyth_translation_nonrhyth/Pcnxl4_set_A.pdf]

## Pcolce2

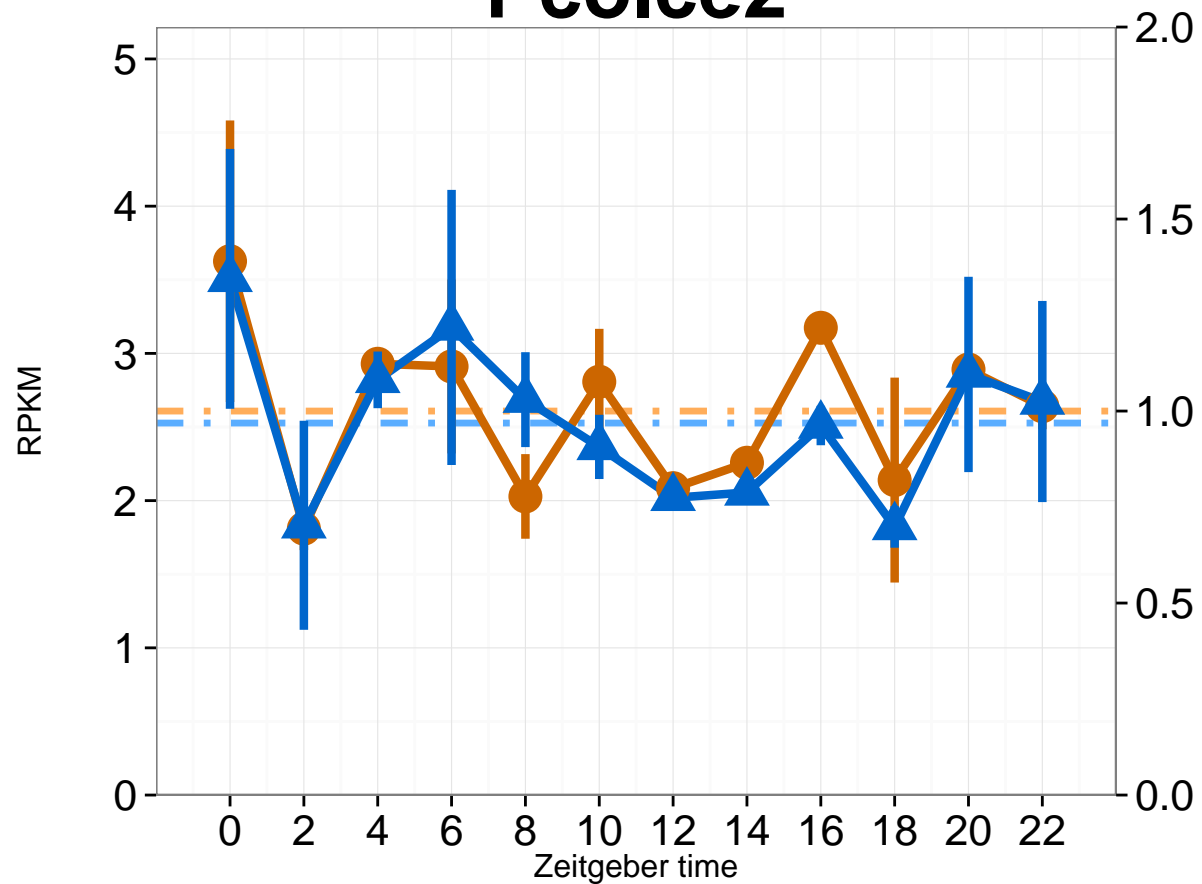

## Pcolce2

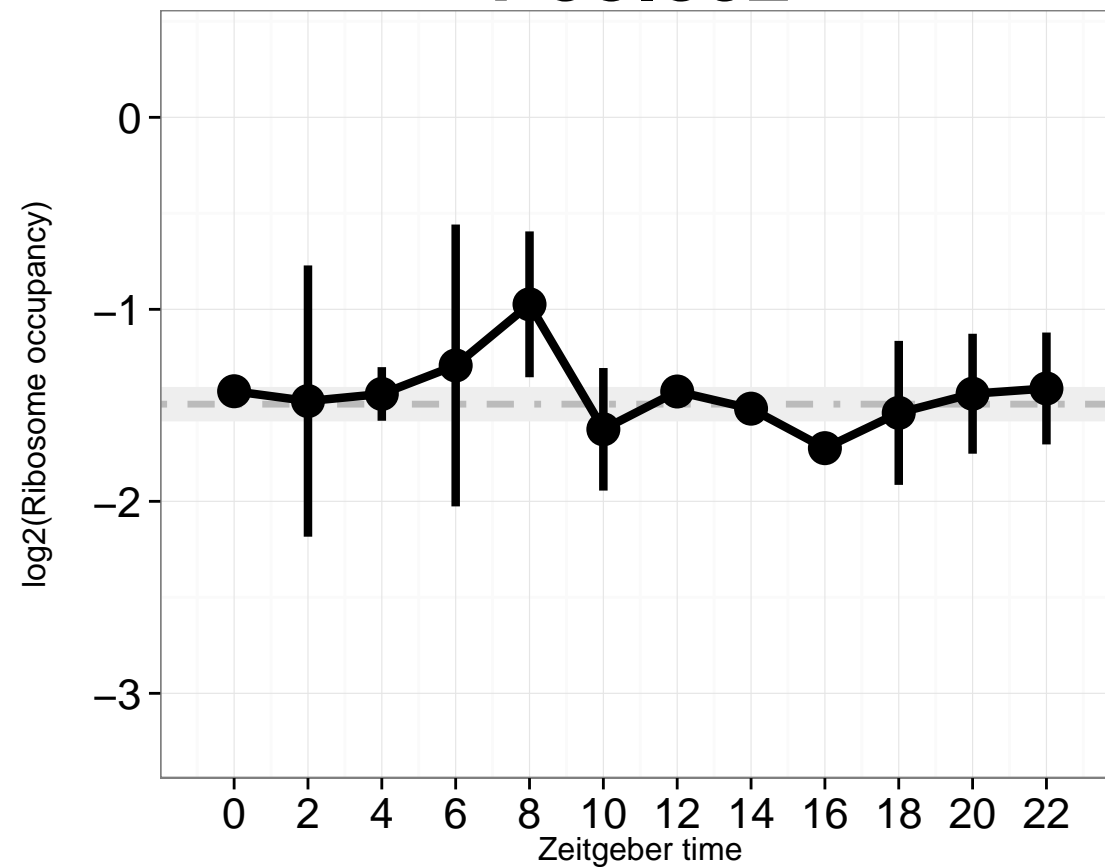

Supplement: SuppDataset_1.zip [file Pcolce2_set_A.pdf › Supplemental Dataset 1/A-mRNA_nonrhyth_translation_nonrhyth/Pcolce2_set_A.pdf]

## Pcolce

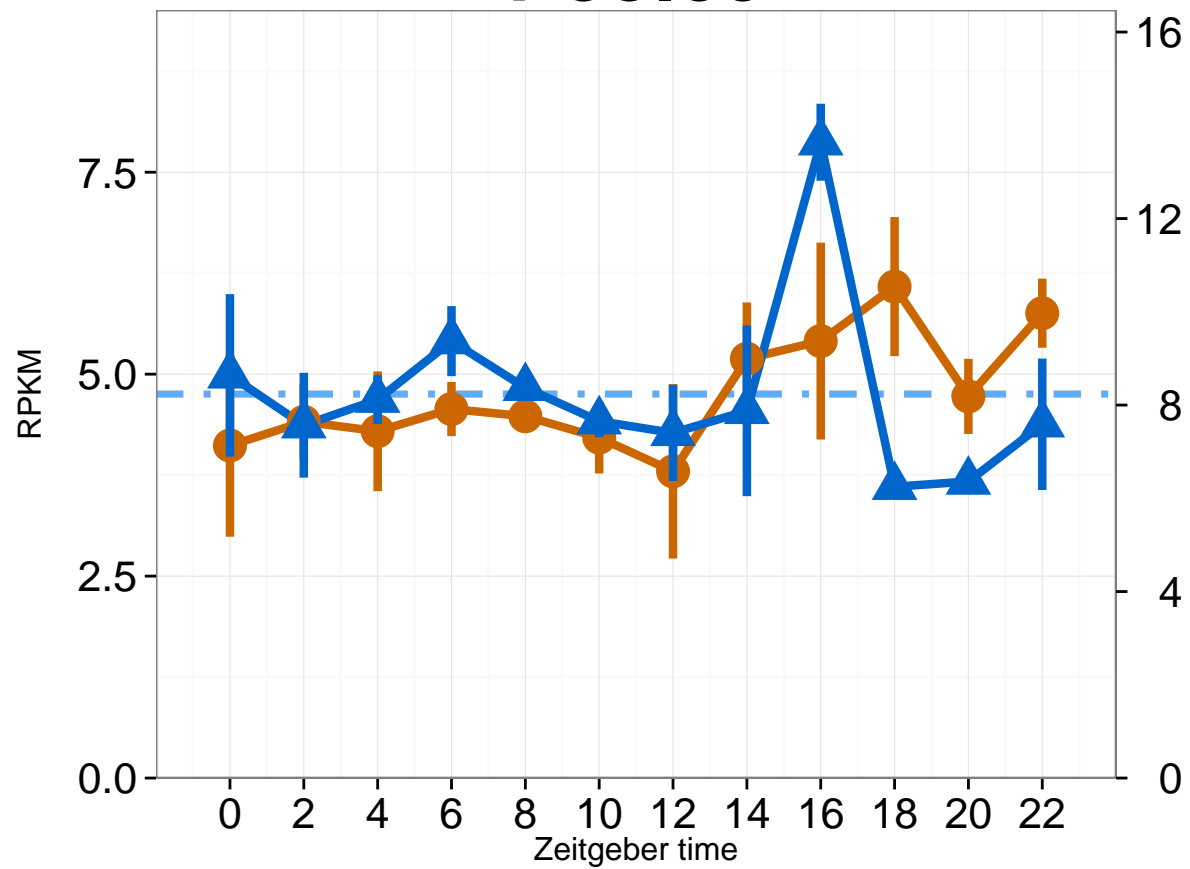

## Pcolce

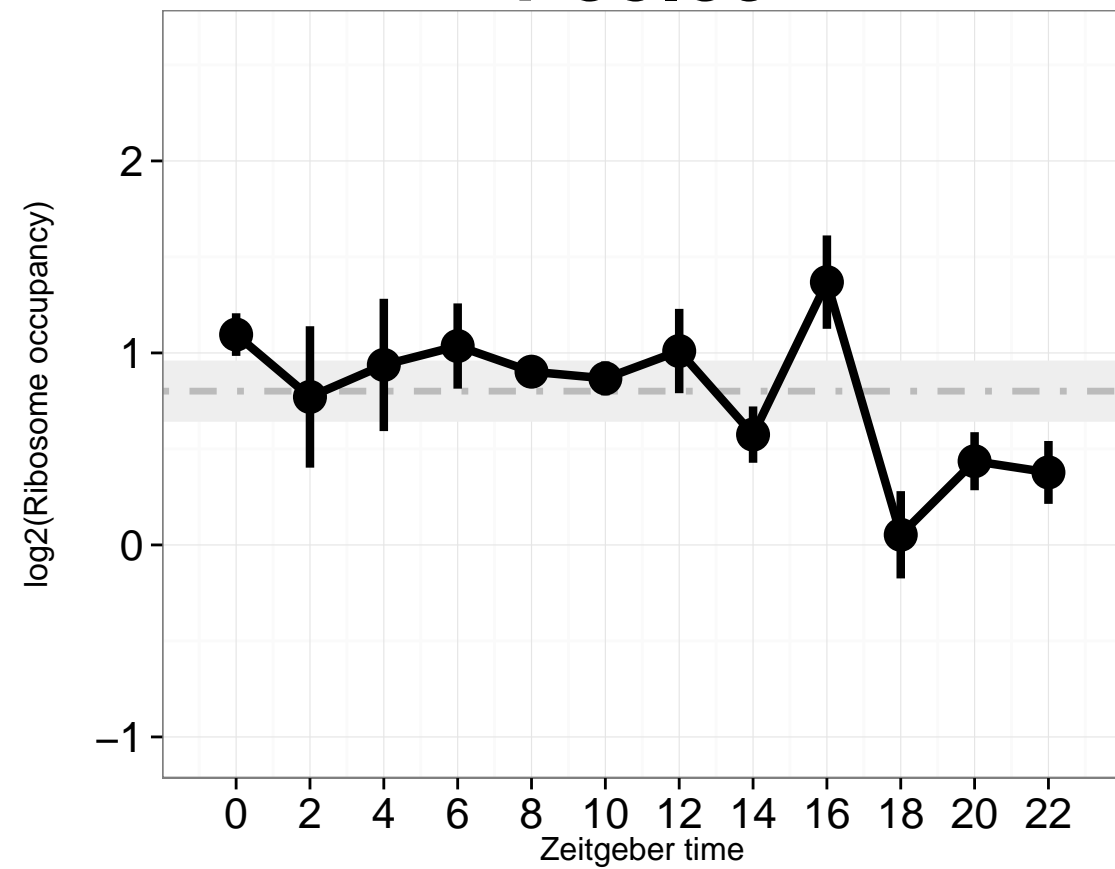

Supplement: SuppDataset_1.zip [file Pcolce_set_A.pdf › Supplemental Dataset 1/A-mRNA_nonrhyth_translation_nonrhyth/Pcolce_set_A.pdf]

# Pcsk5

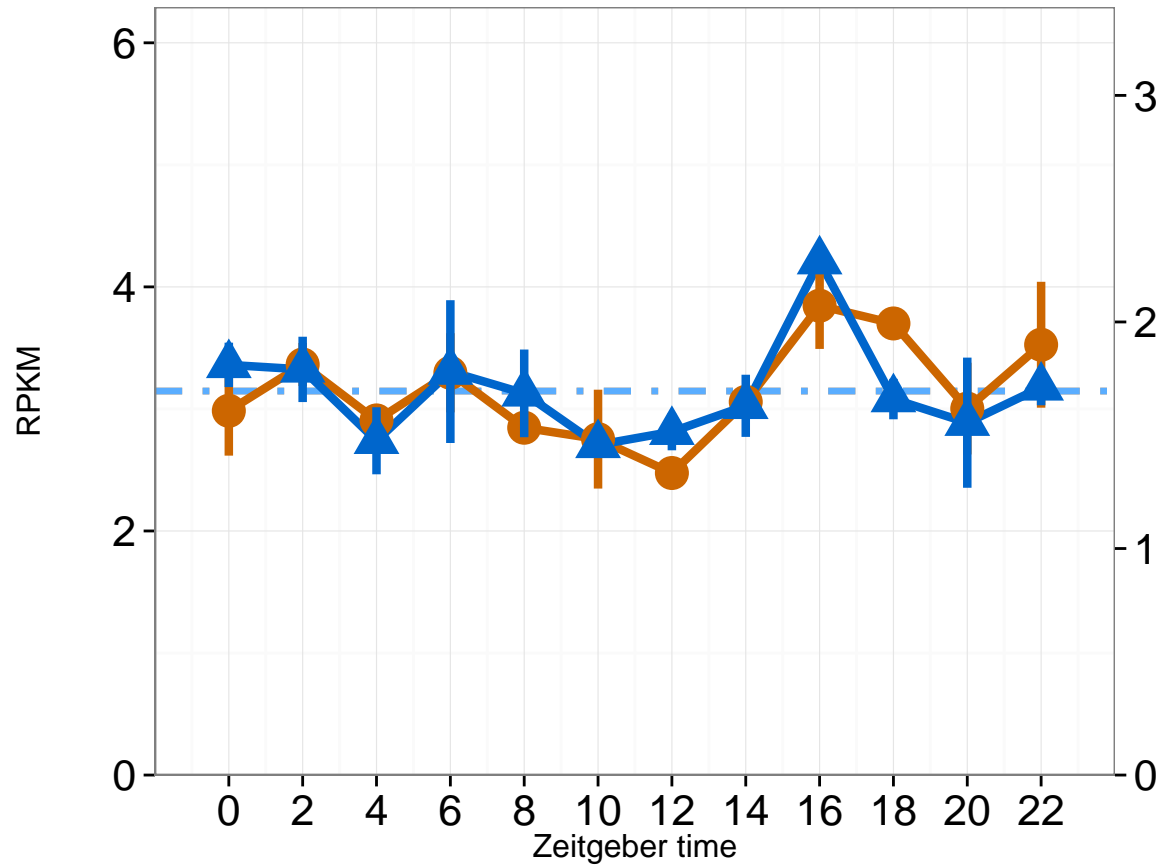

# Pcsk5

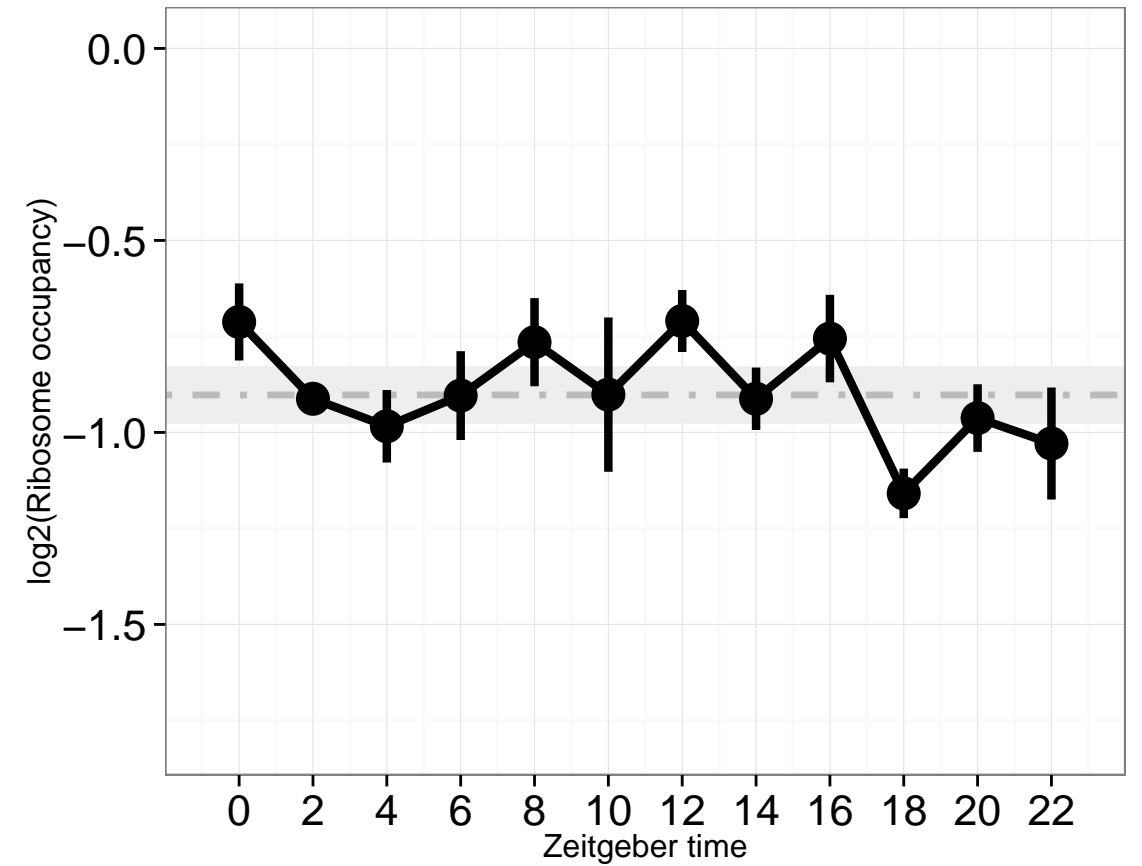

Supplement: SuppDataset_1.zip [file Pcsk5_set_A.pdf › Supplemental Dataset 1/A-mRNA_nonrhyth_translation_nonrhyth/Pcsk5_set_A.pdf]

## Pcsk6

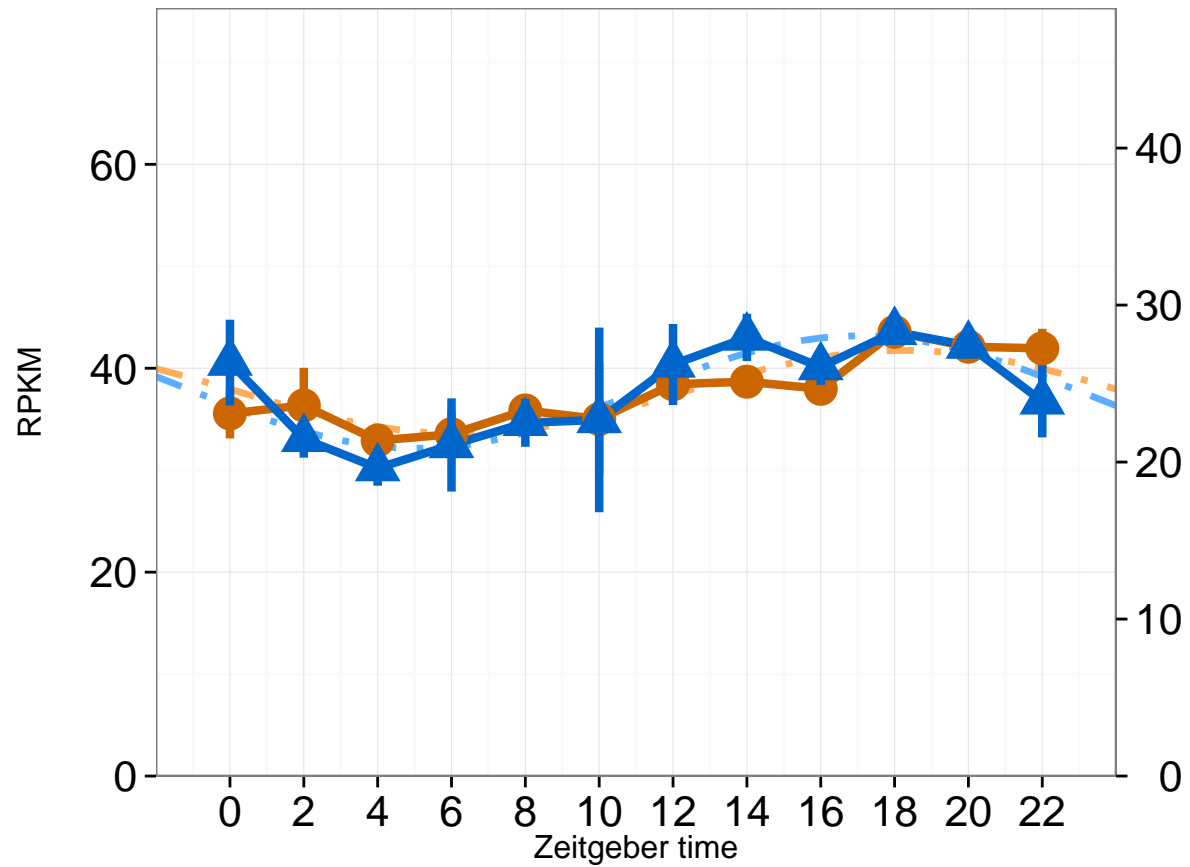

## Pcsk6

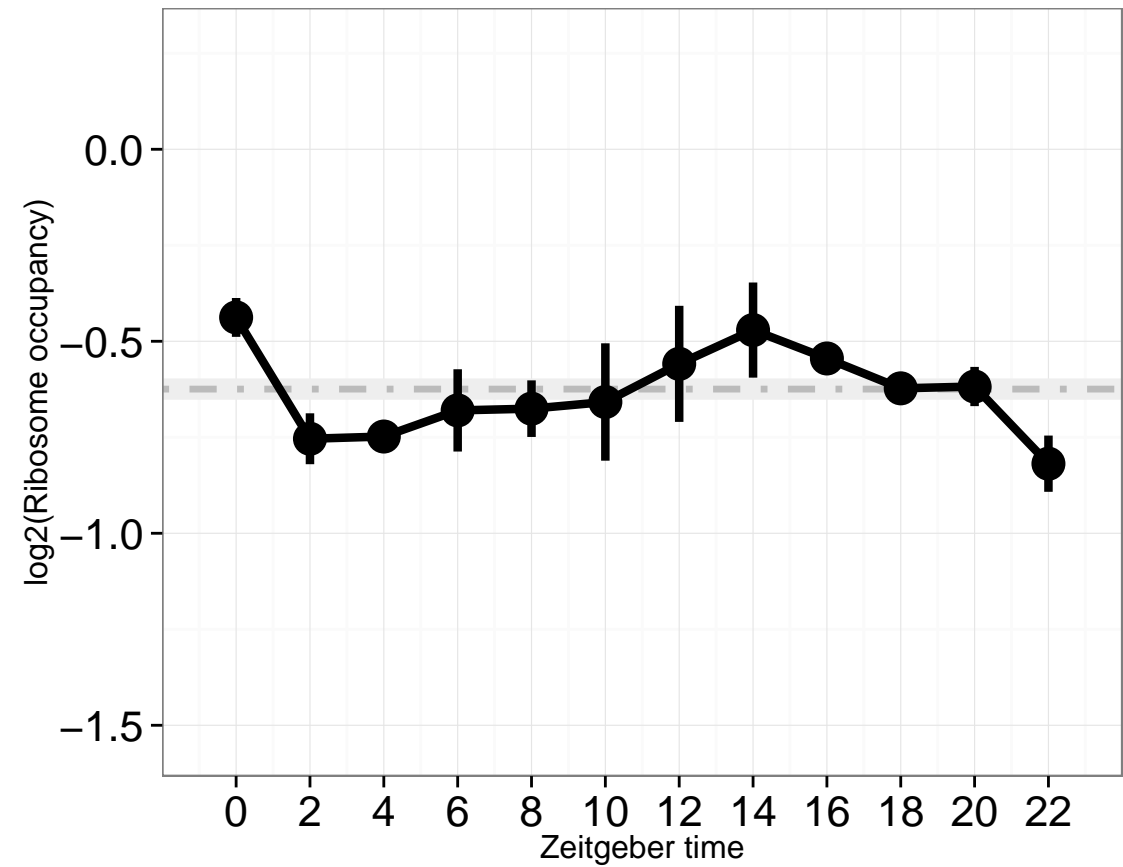

Supplement: SuppDataset_1.zip [file Pcsk6_set_A.pdf › Supplemental Dataset 1/A-mRNA_nonrhyth_translation_nonrhyth/Pcsk6_set_A.pdf]

## Pcsk7

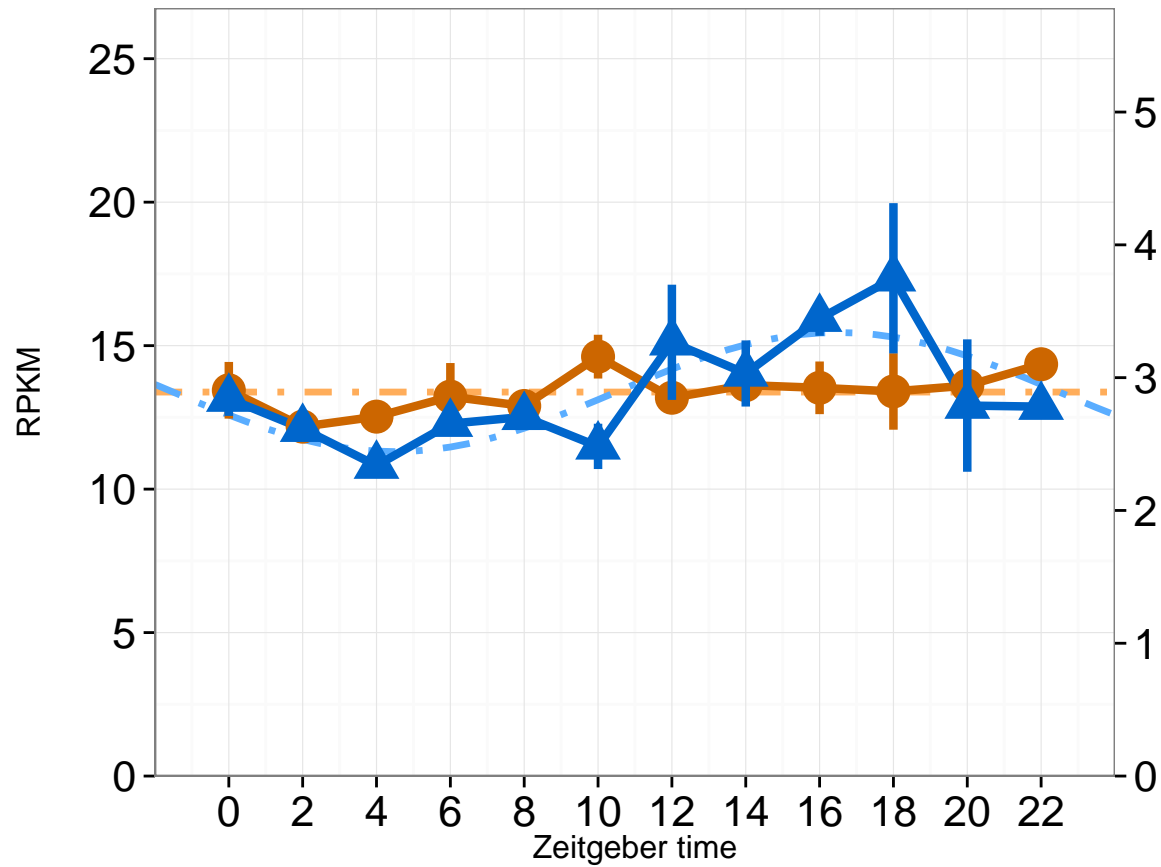

## Pcsk7

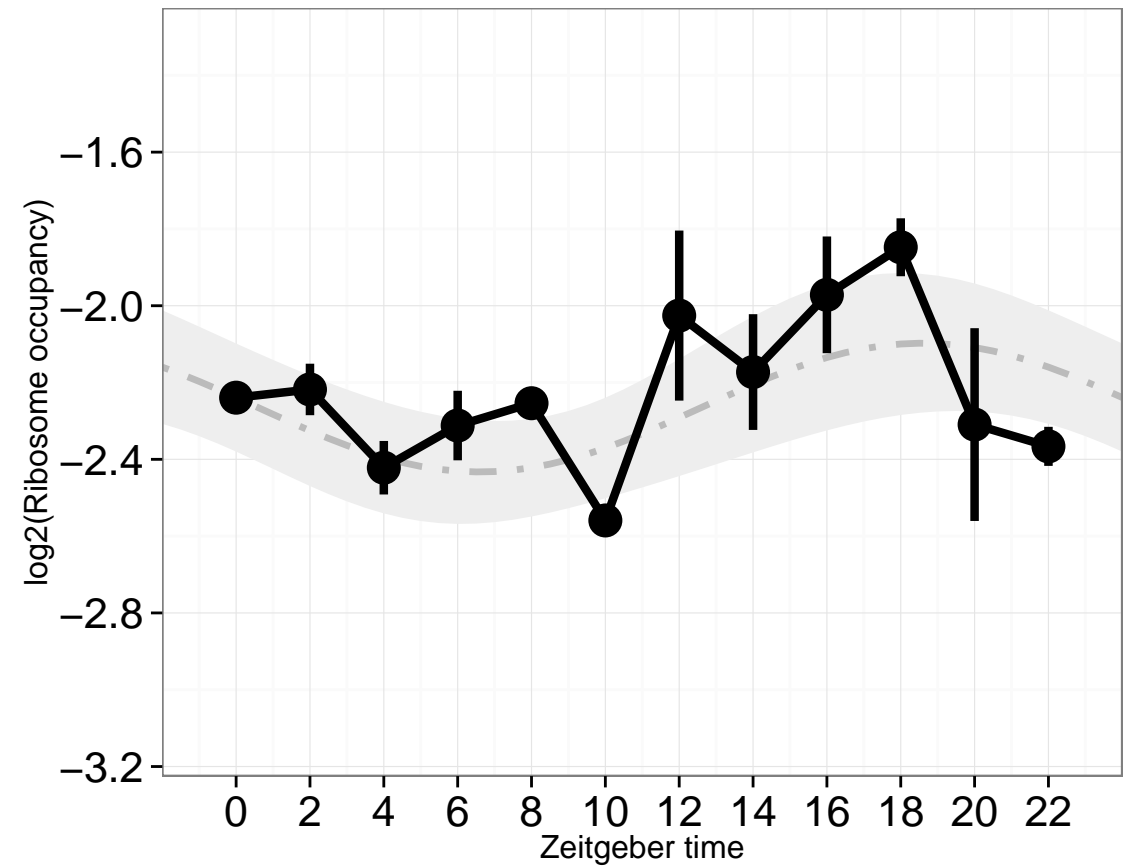

Supplement: SuppDataset_1.zip [file Pcsk7_set_A.pdf › Supplemental Dataset 1/A-mRNA_nonrhyth_translation_nonrhyth/Pcsk7_set_A.pdf]

## Pcsk9

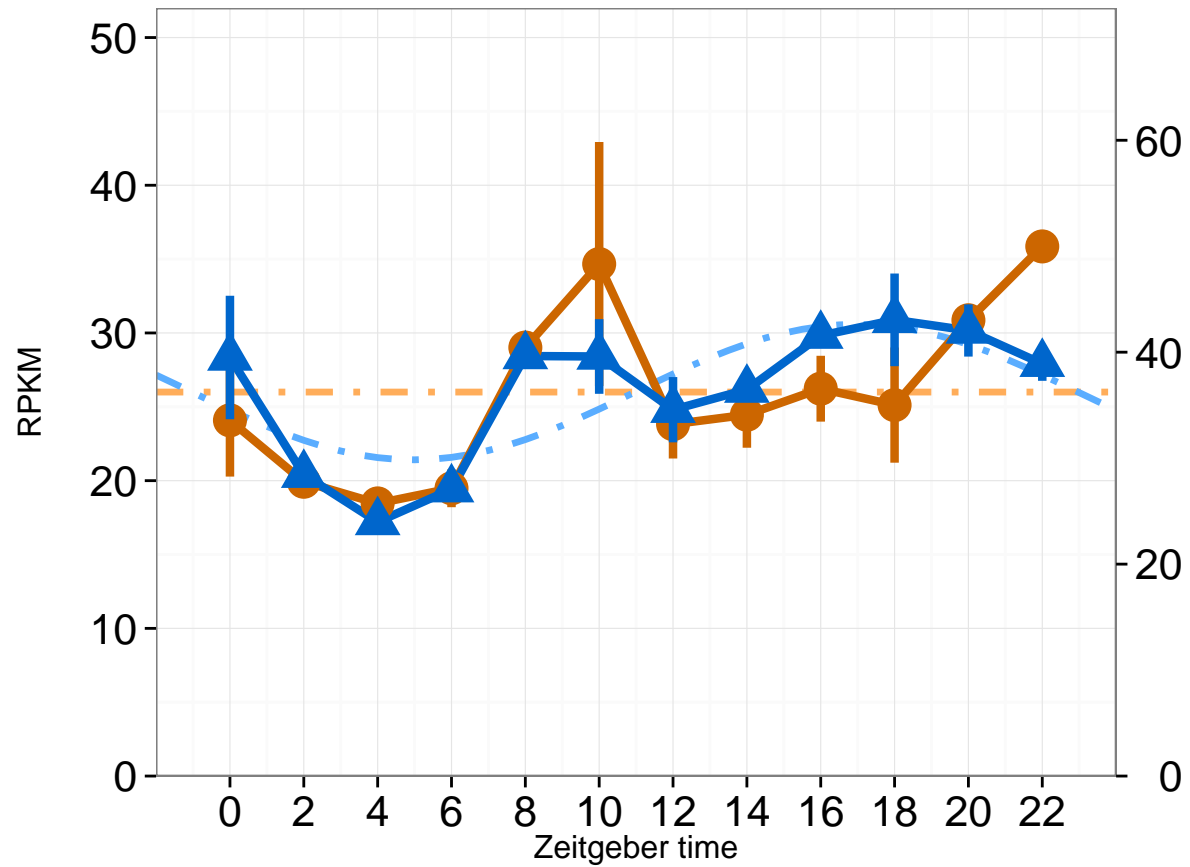

## Pcsk9

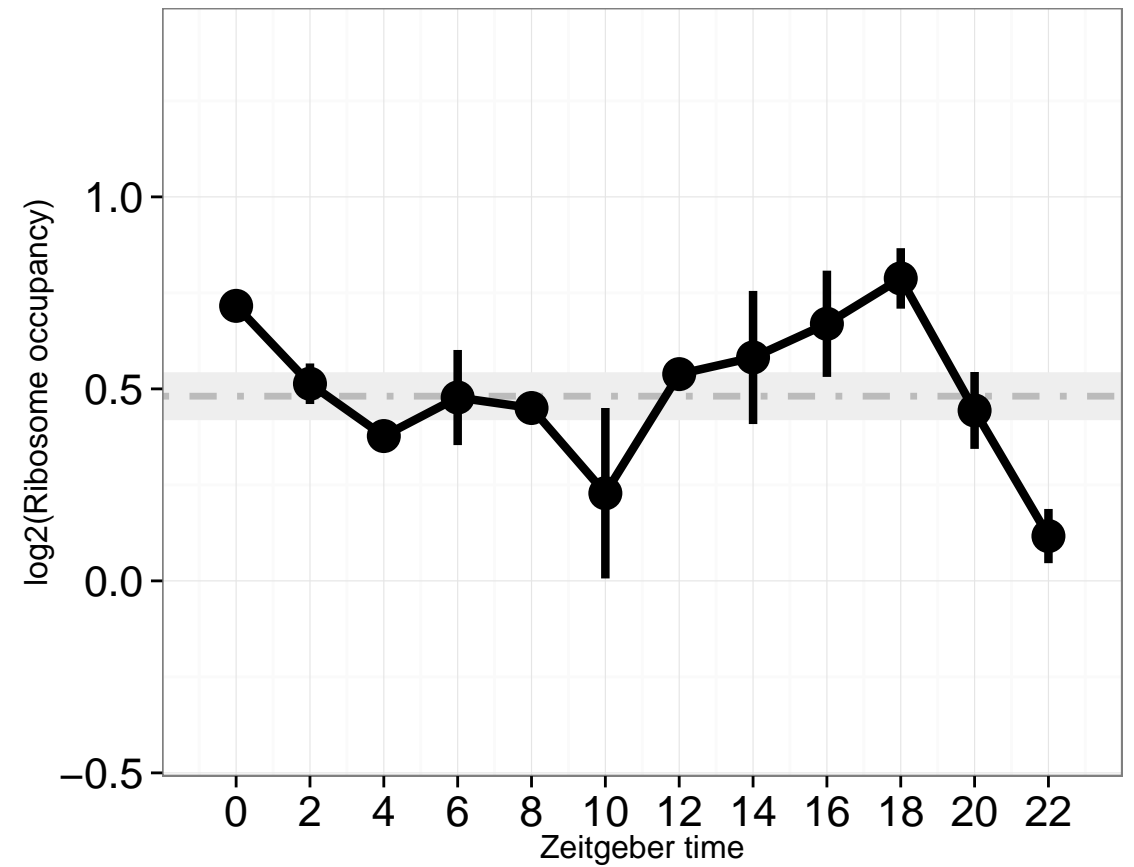

Supplement: SuppDataset_1.zip [file Pcsk9_set_A.pdf › Supplemental Dataset 1/A-mRNA_nonrhyth_translation_nonrhyth/Pcsk9_set_A.pdf]

## Pctp

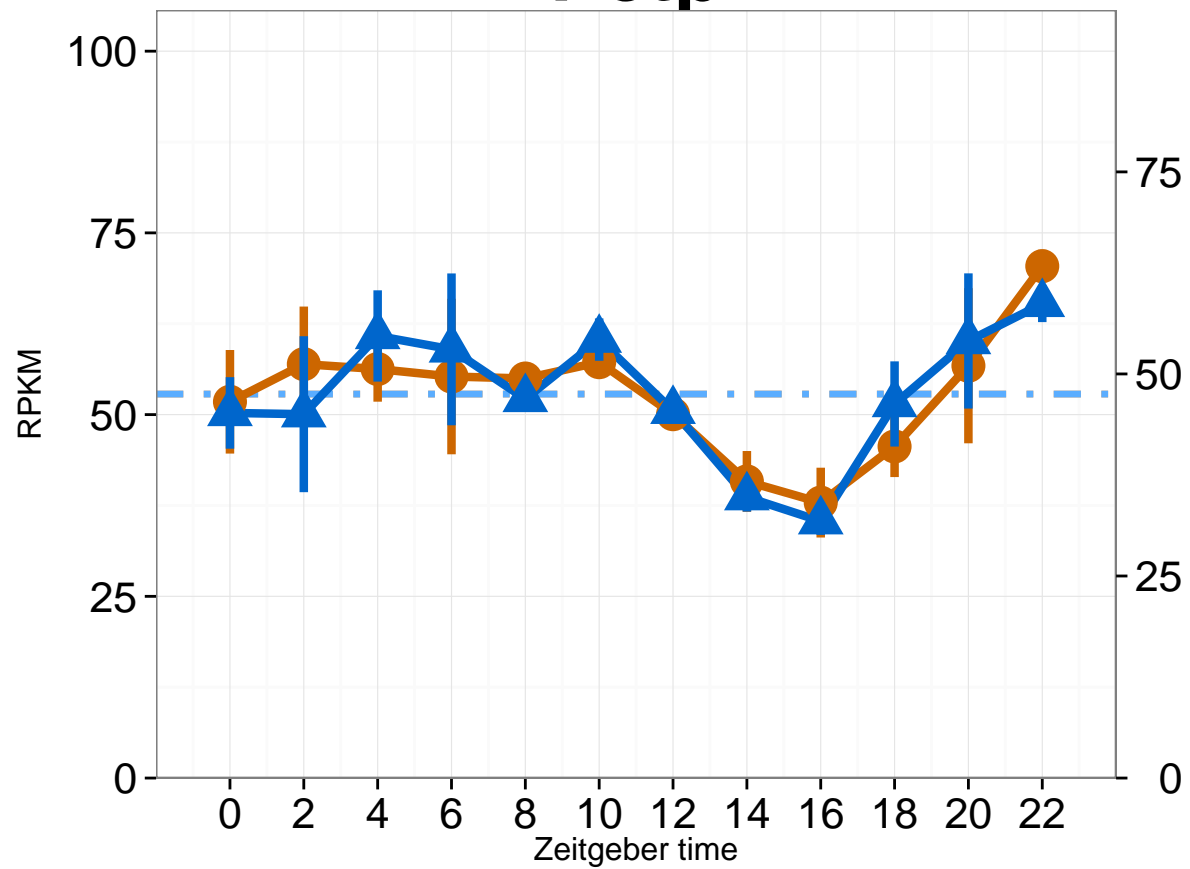

## Pctp

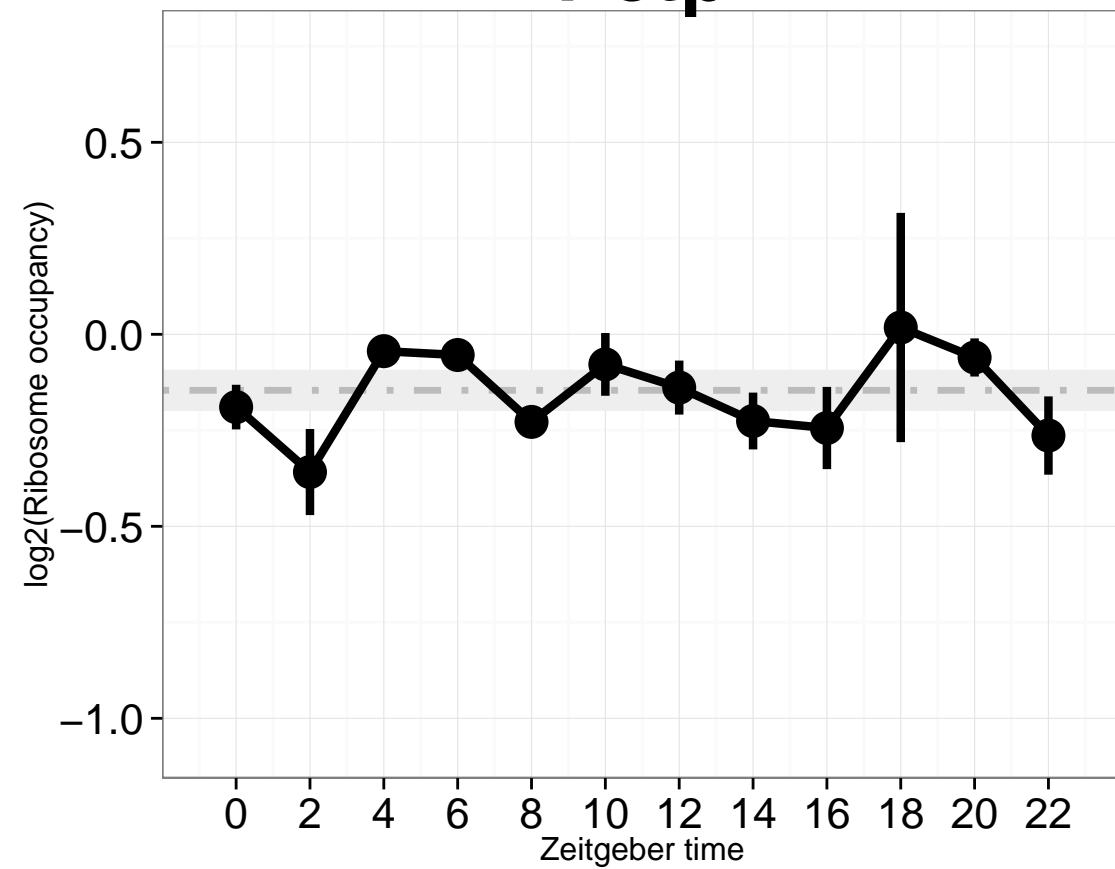

Supplement: SuppDataset_1.zip [file Pctp_set_A.pdf › Supplemental Dataset 1/A-mRNA_nonrhyth_translation_nonrhyth/Pctp_set_A.pdf]

## Pcx

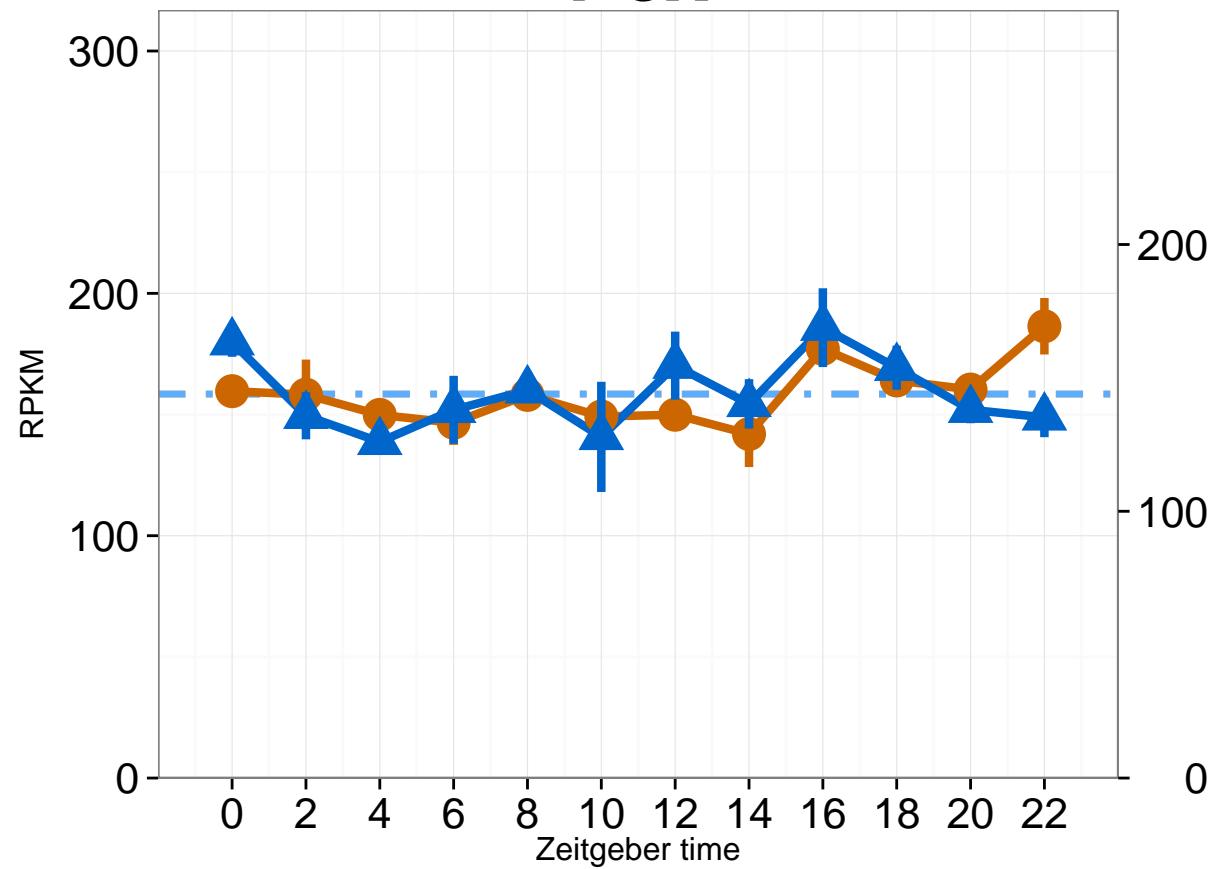

## Pcx

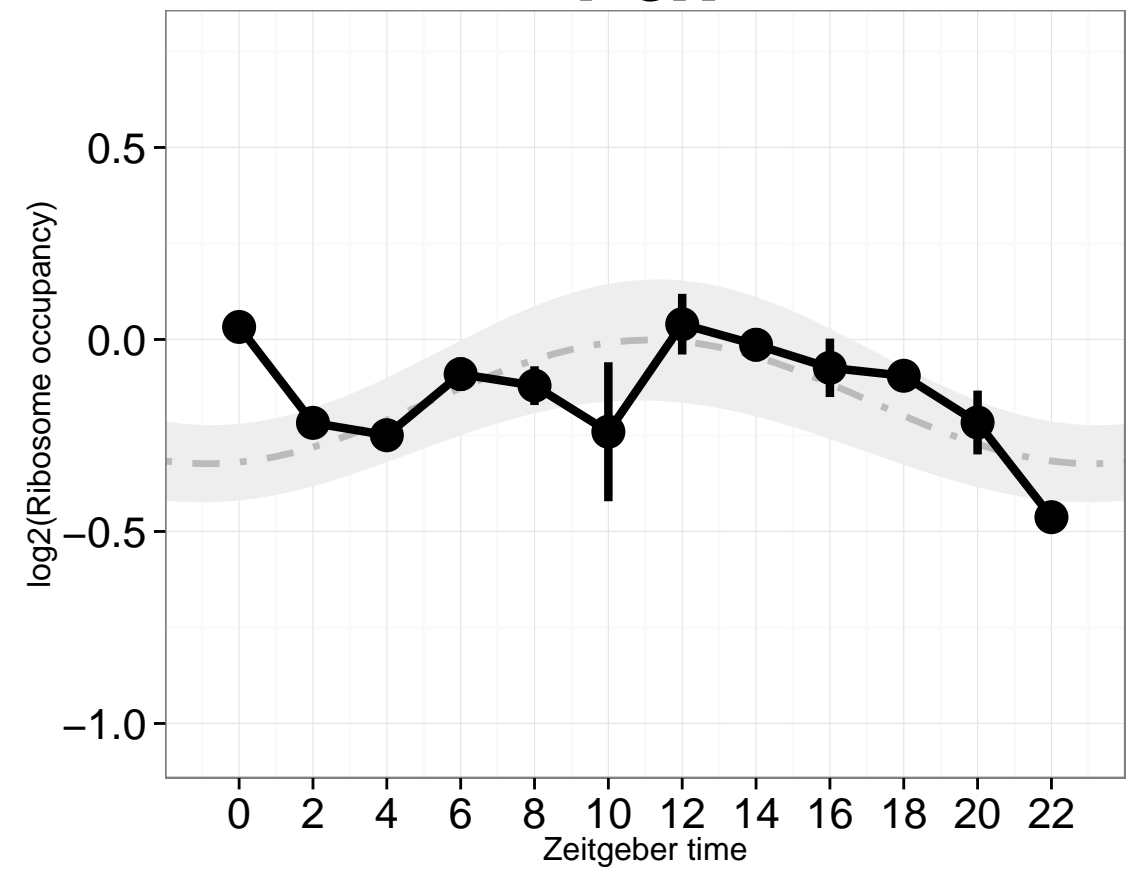

Supplement: SuppDataset_1.zip [file Pcx_set_A.pdf › Supplemental Dataset 1/A-mRNA_nonrhyth_translation_nonrhyth/Pcx_set_A.pdf]

# Pcyox1

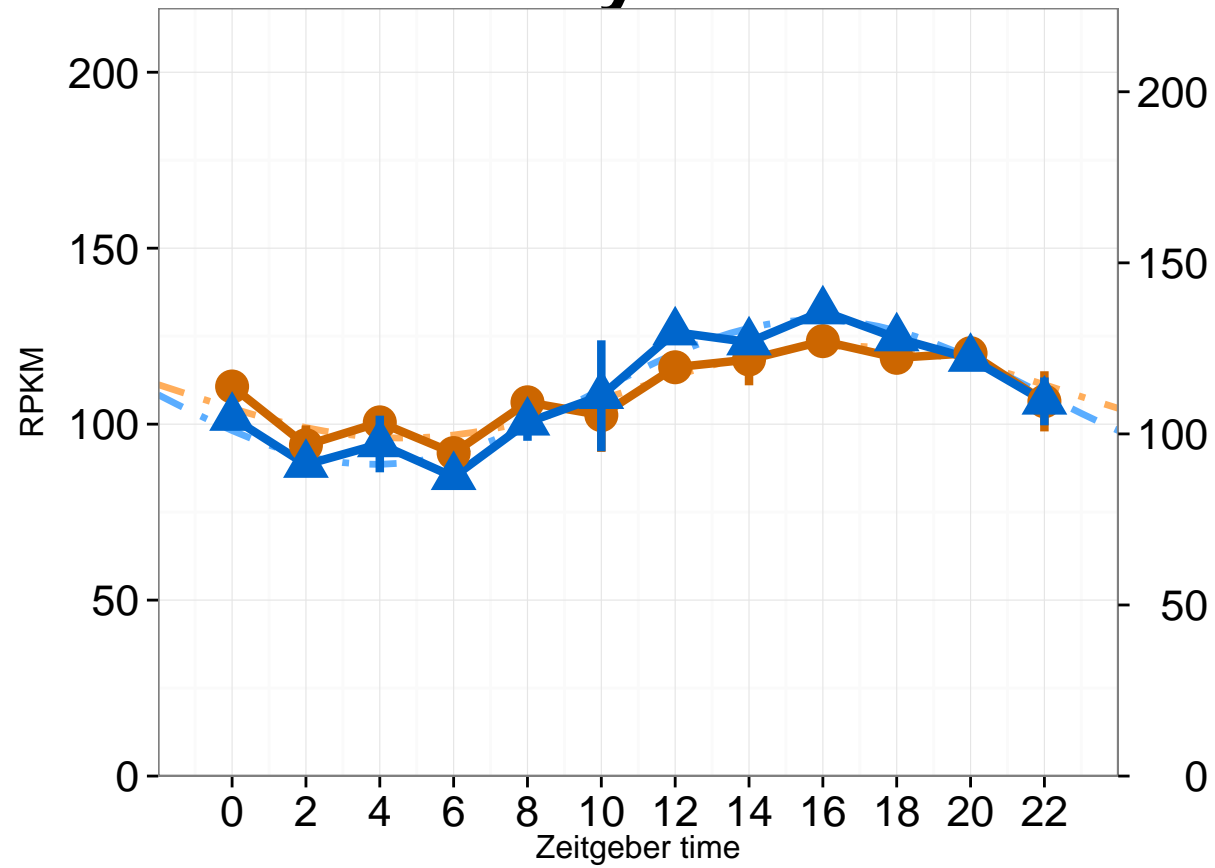

# Pcyox1

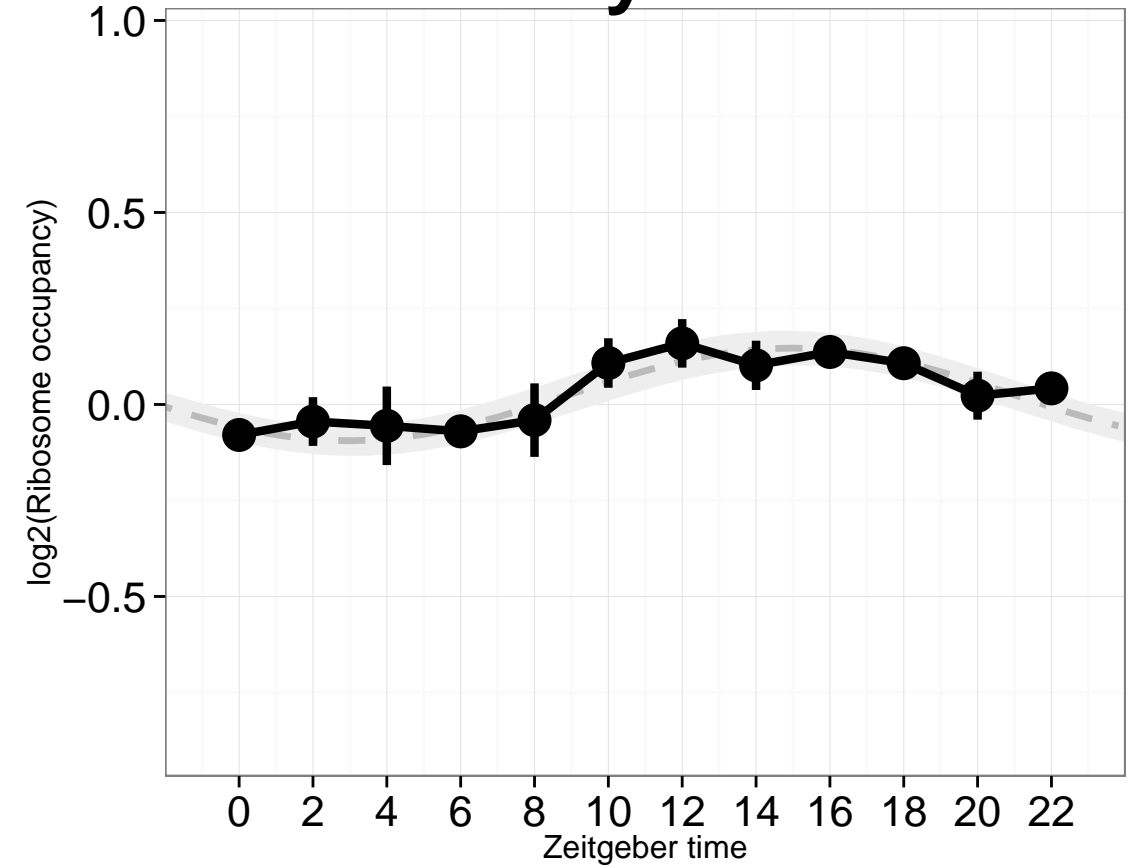

Supplement: SuppDataset_1.zip [file Pcyox1_set_A.pdf › Supplemental Dataset 1/A-mRNA_nonrhyth_translation_nonrhyth/Pcyox1_set_A.pdf]

## Pcyt1a

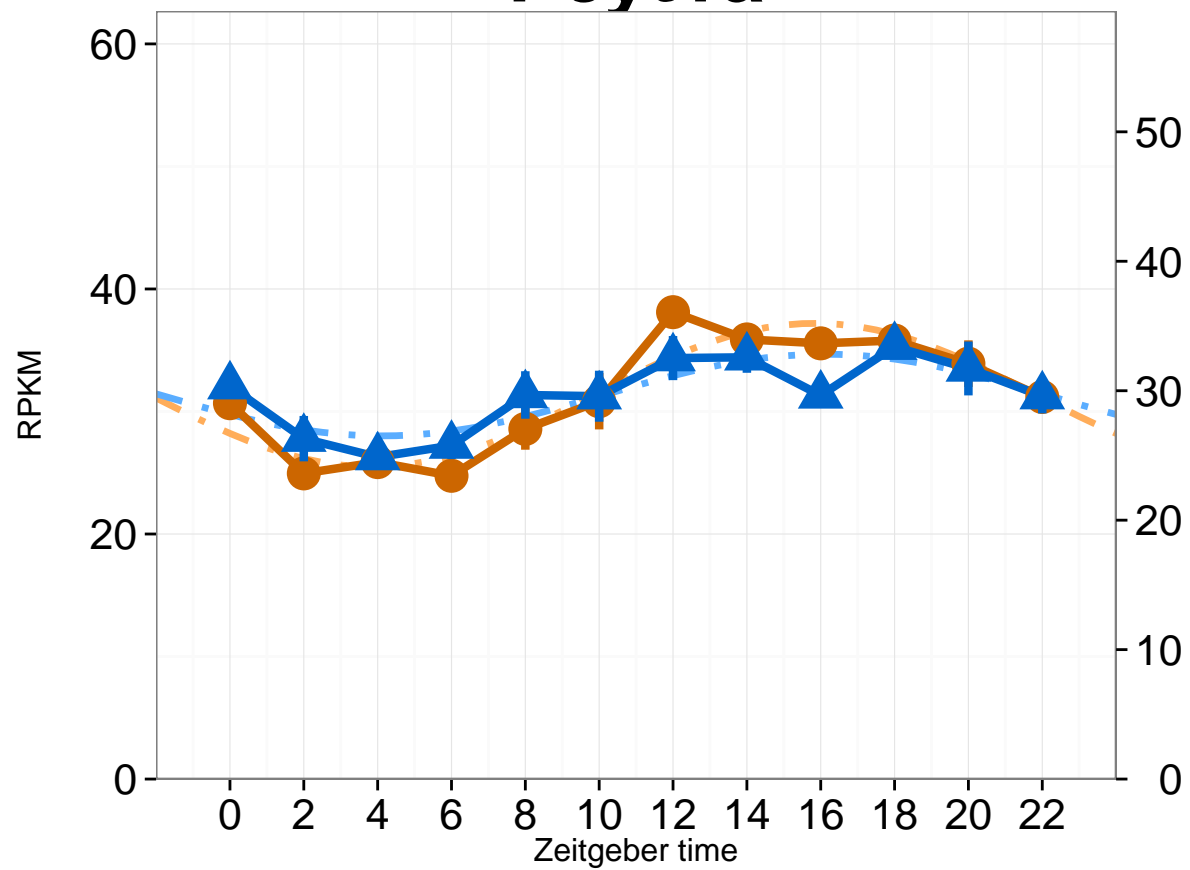

## Pcyt1a

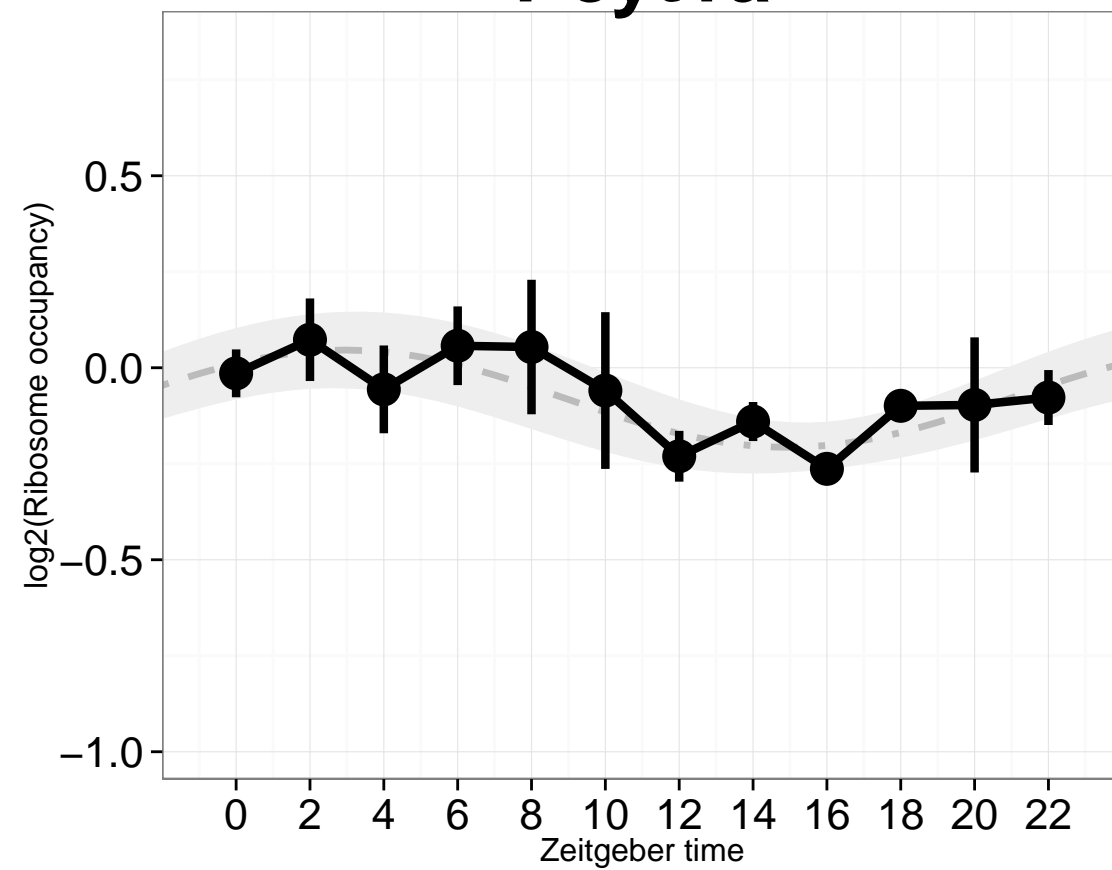

Supplement: SuppDataset_1.zip [file Pcyt1a_set_A.pdf › Supplemental Dataset 1/A-mRNA_nonrhyth_translation_nonrhyth/Pcyt1a_set_A.pdf]

# Pcyt2

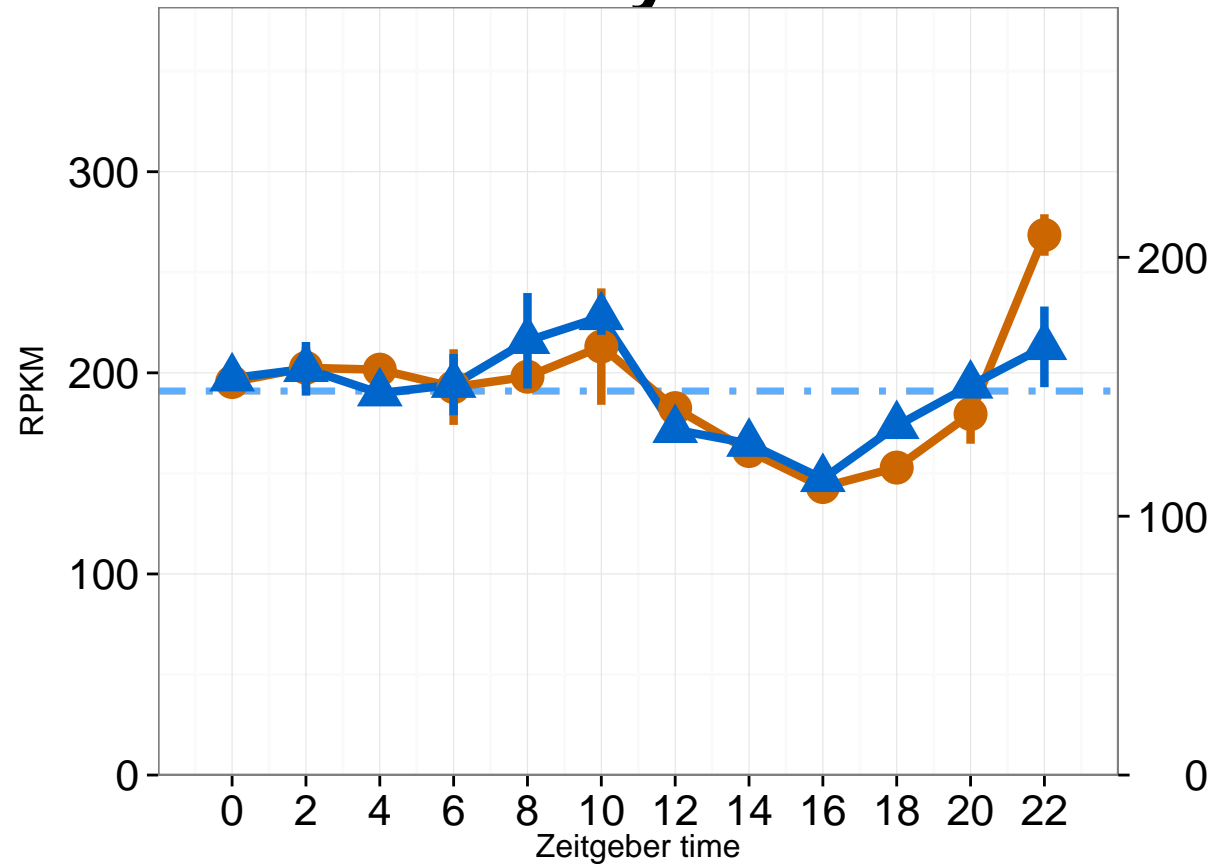

# Pcyt2

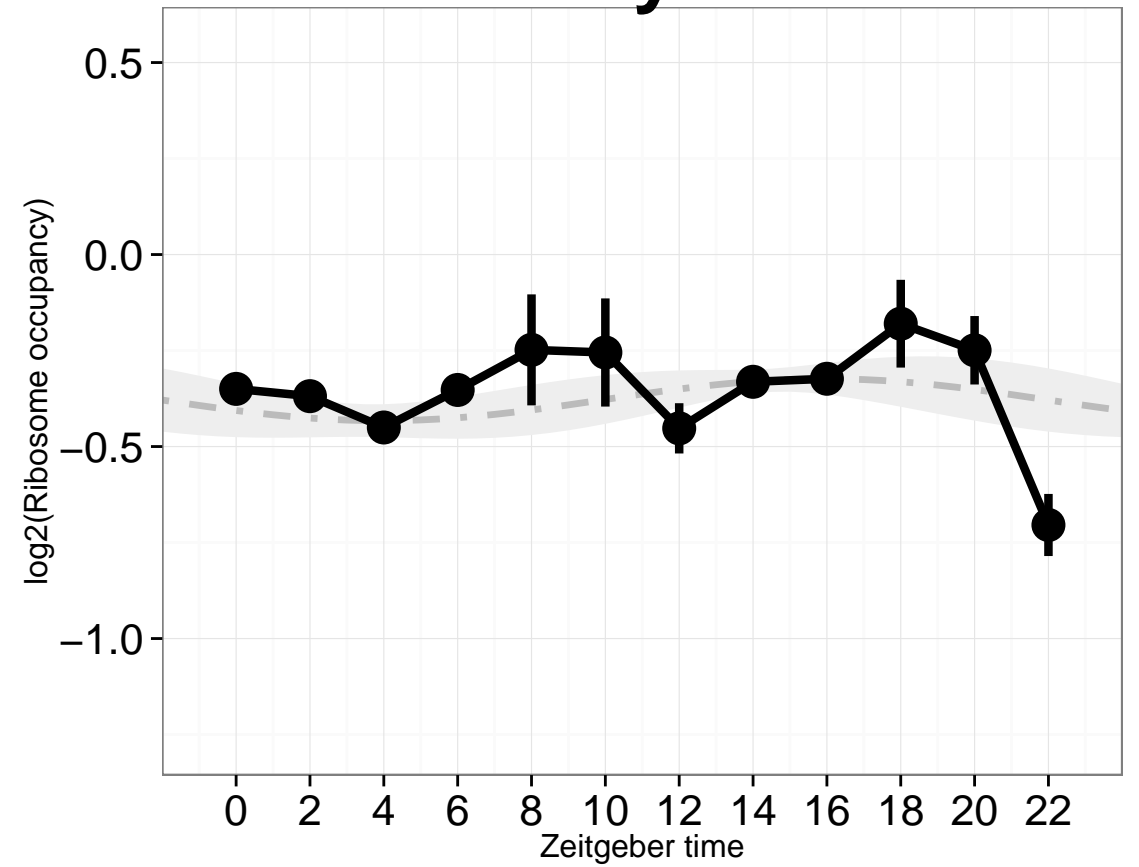

Supplement: SuppDataset_1.zip [file Pcyt2_set_A.pdf › Supplemental Dataset 1/A-mRNA_nonrhyth_translation_nonrhyth/Pcyt2_set_A.pdf]

## Pdap1

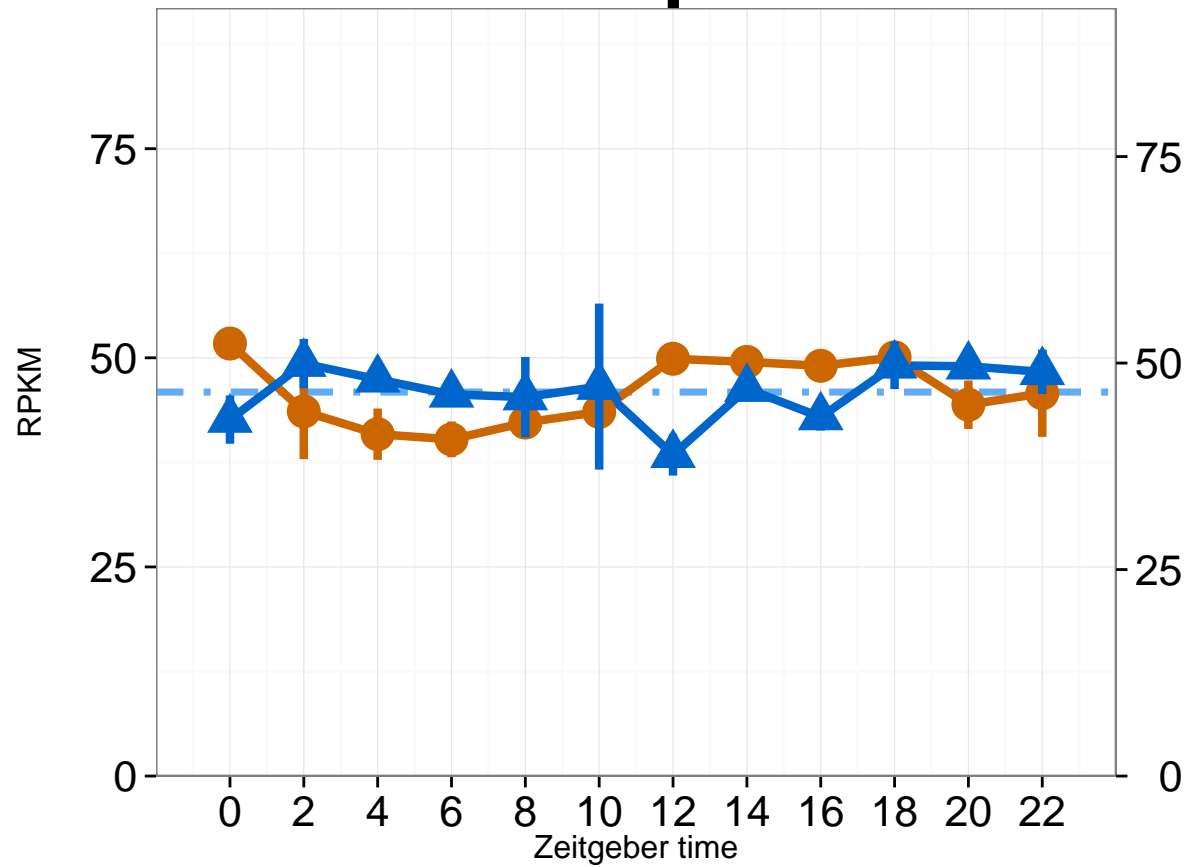

## Pdap1

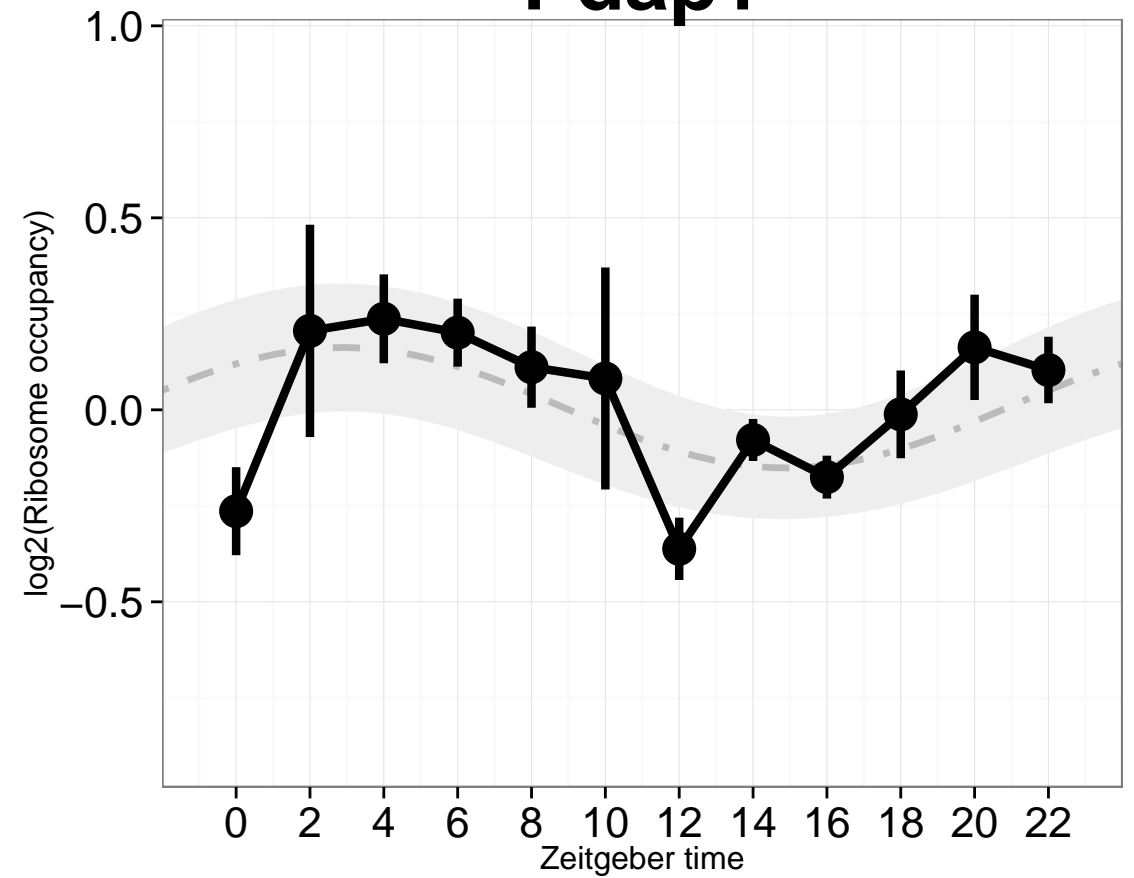

Supplement: SuppDataset_1.zip [file Pdap1_set_A.pdf › Supplemental Dataset 1/A-mRNA_nonrhyth_translation_nonrhyth/Pdap1_set_A.pdf]

## Pdcd10

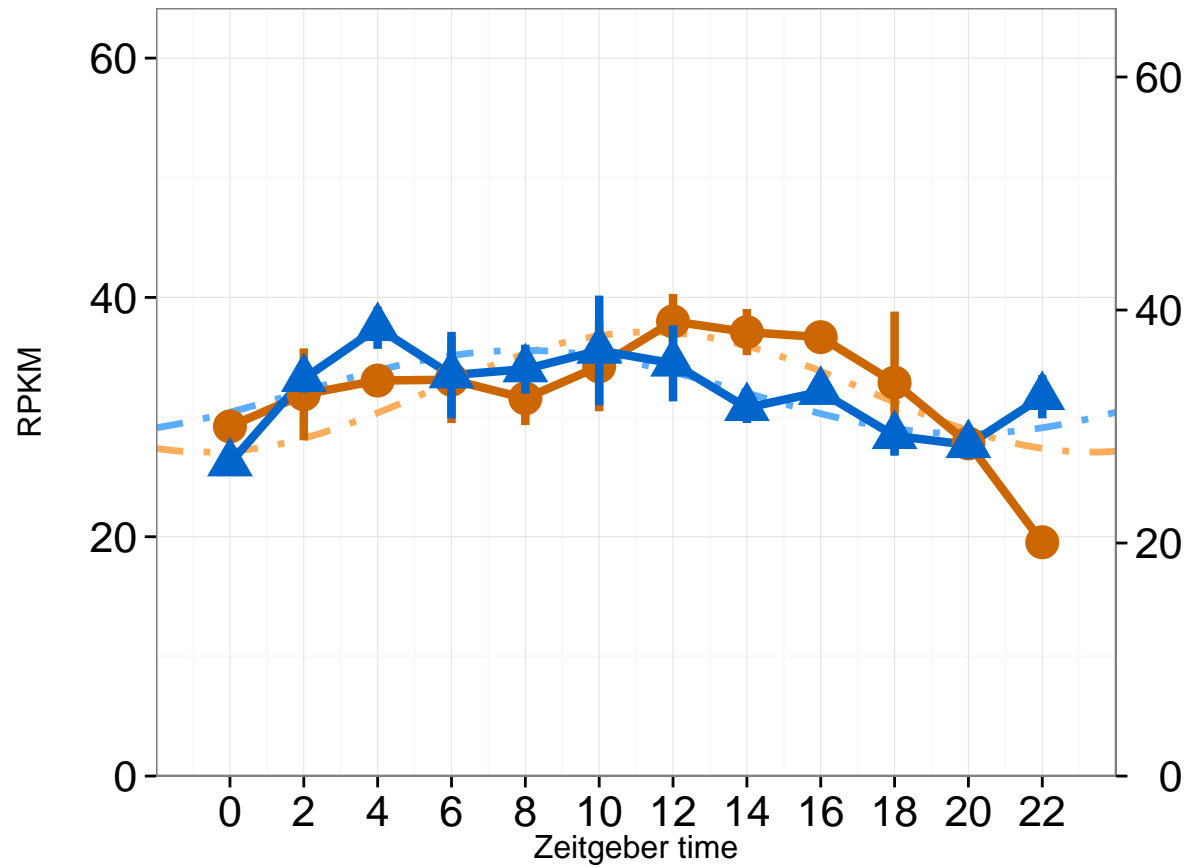

## Pdcd10

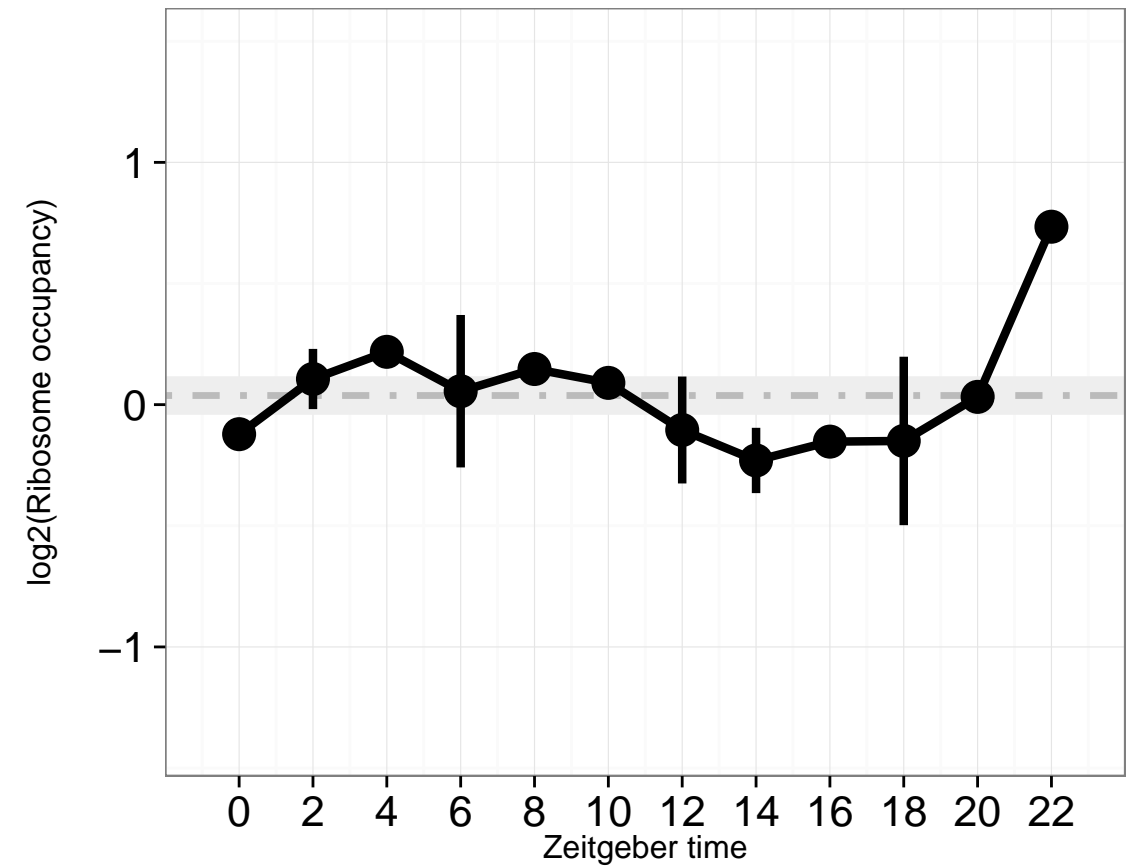

Supplement: SuppDataset_1.zip [file Pdcd10_set_A.pdf › Supplemental Dataset 1/A-mRNA_nonrhyth_translation_nonrhyth/Pdcd10_set_A.pdf]

## Pdcd11

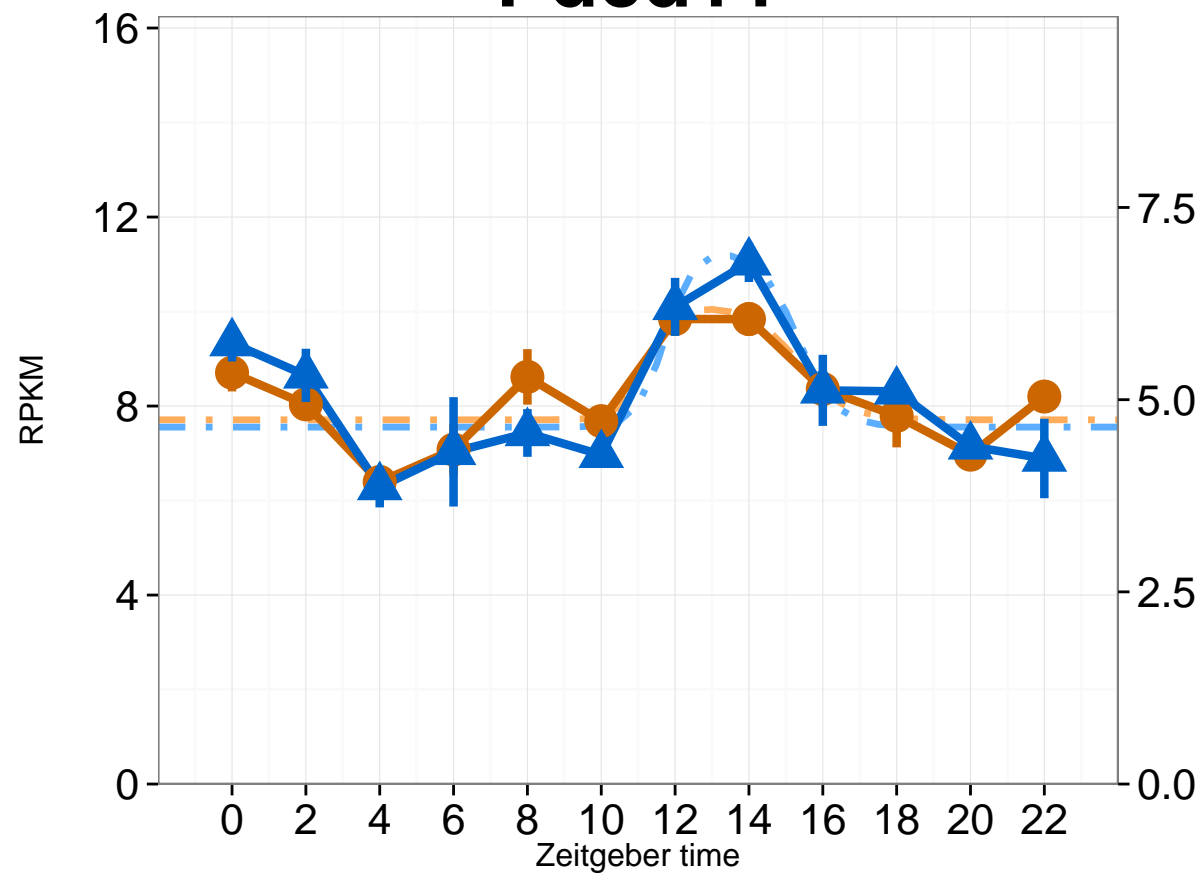

## Pdcd11

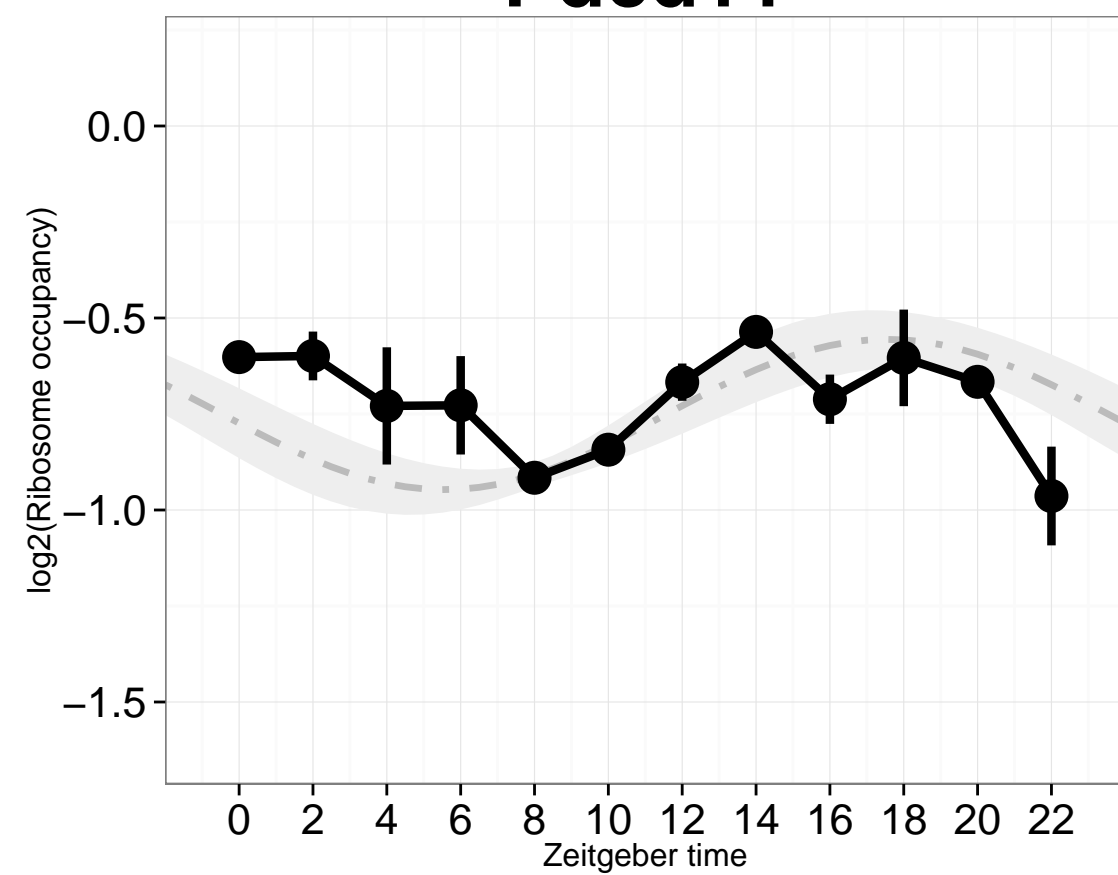

Supplement: SuppDataset_1.zip [file Pdcd11_set_A.pdf › Supplemental Dataset 1/A-mRNA_nonrhyth_translation_nonrhyth/Pdcd11_set_A.pdf]

## Pdcd2

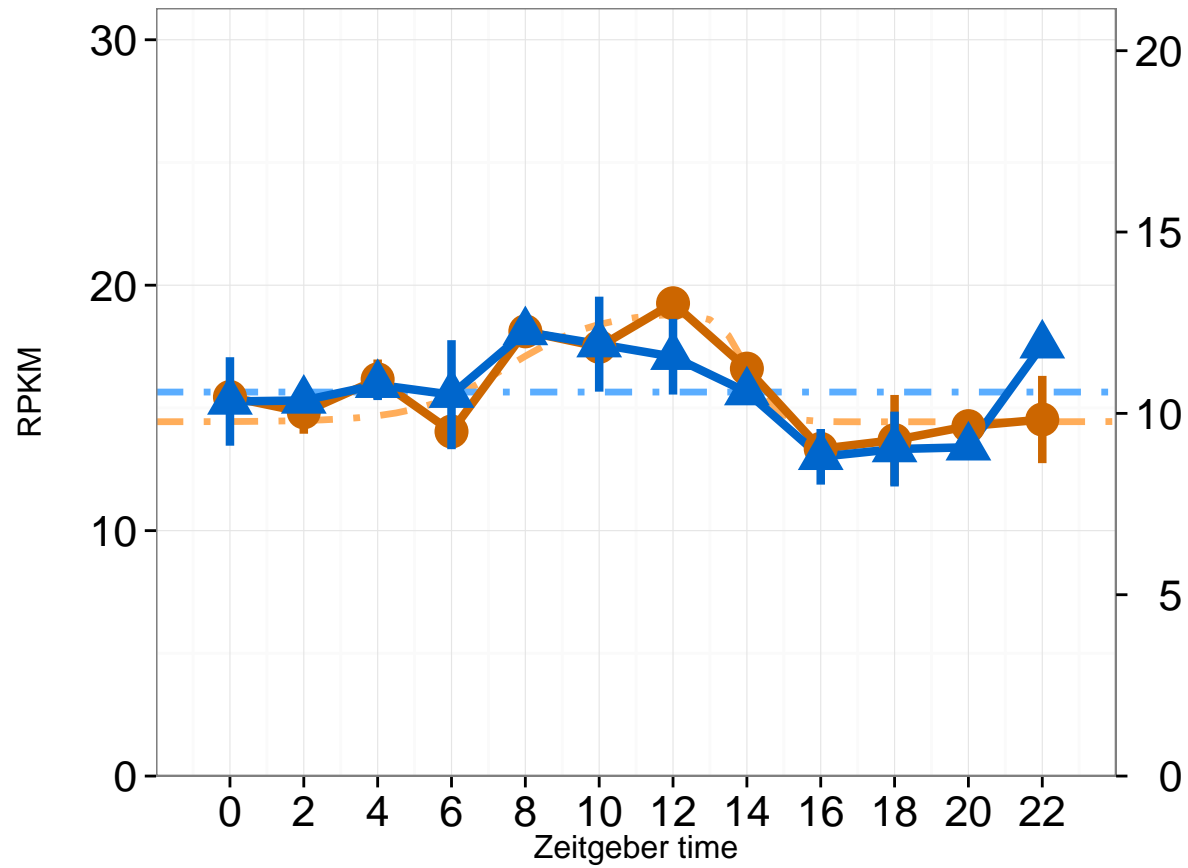

## Pdcd2

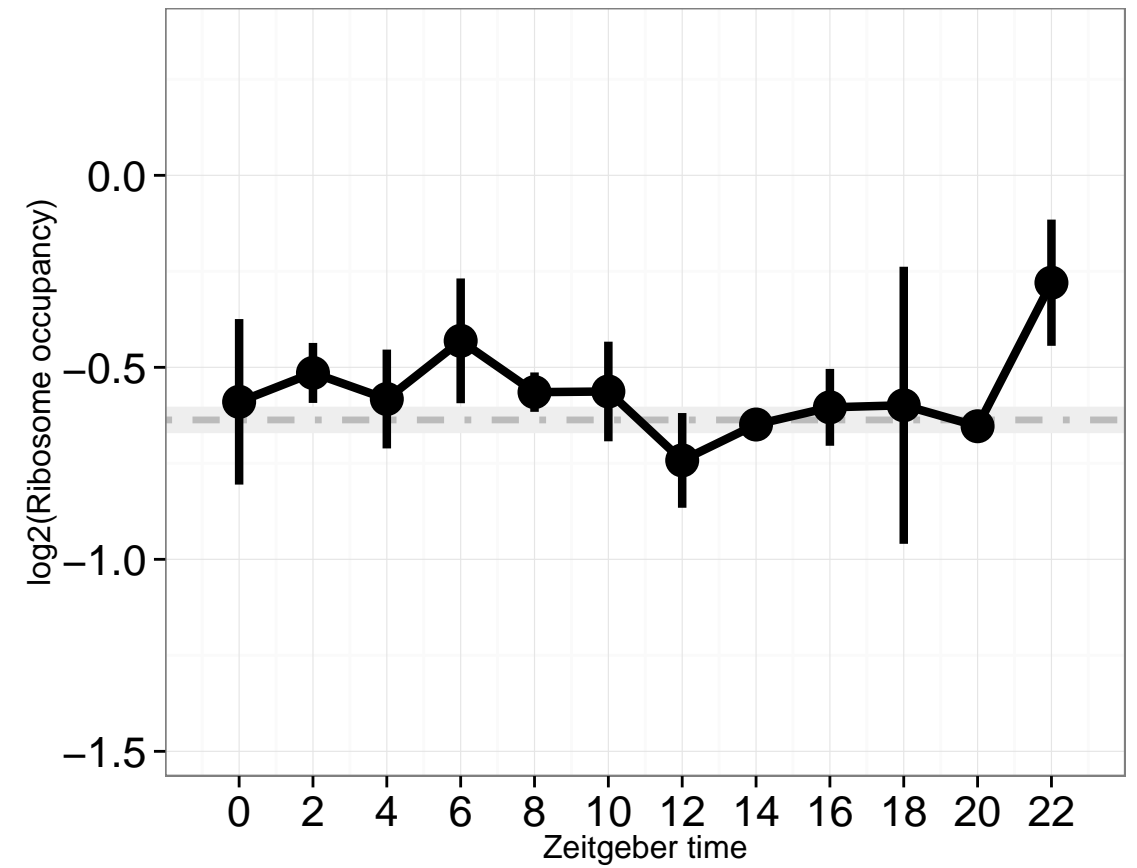

Supplement: SuppDataset_1.zip [file Pdcd2_set_A.pdf › Supplemental Dataset 1/A-mRNA_nonrhyth_translation_nonrhyth/Pdcd2_set_A.pdf]

## Pdcd5

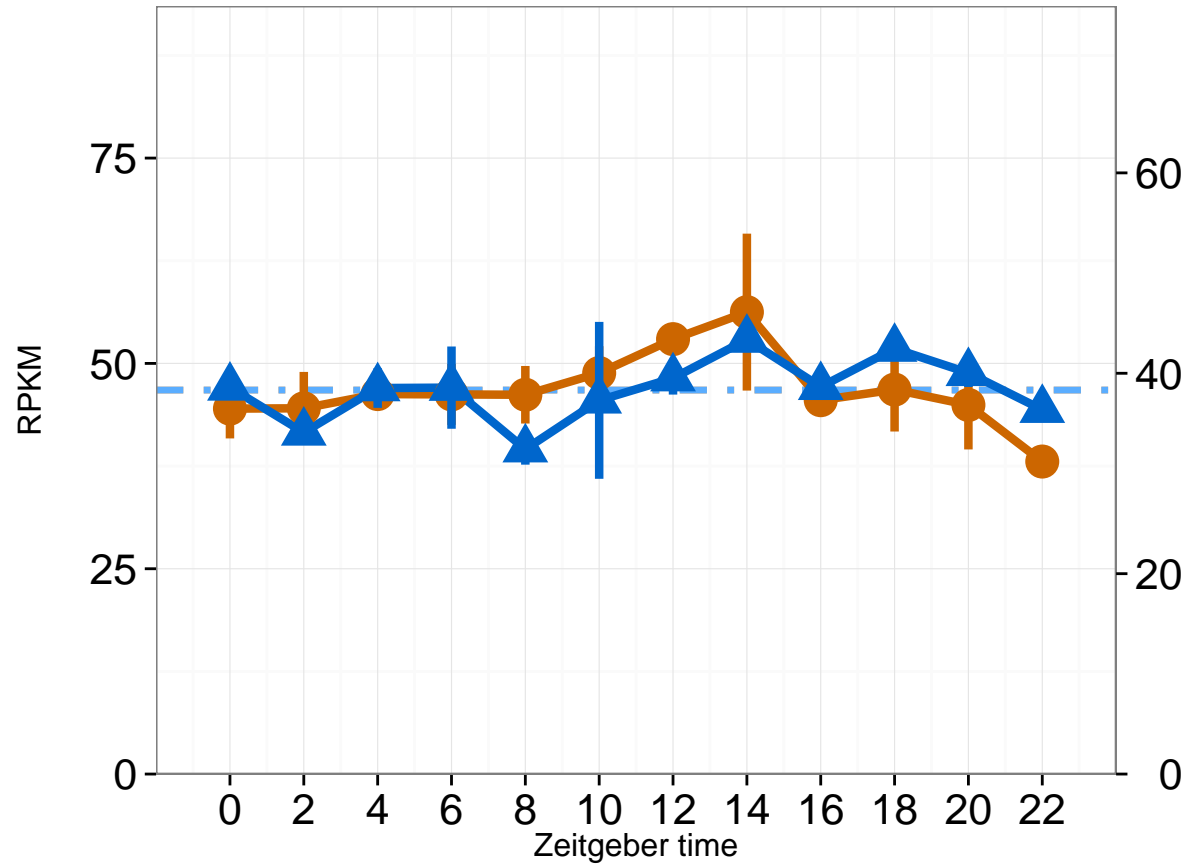

## Pdcd5

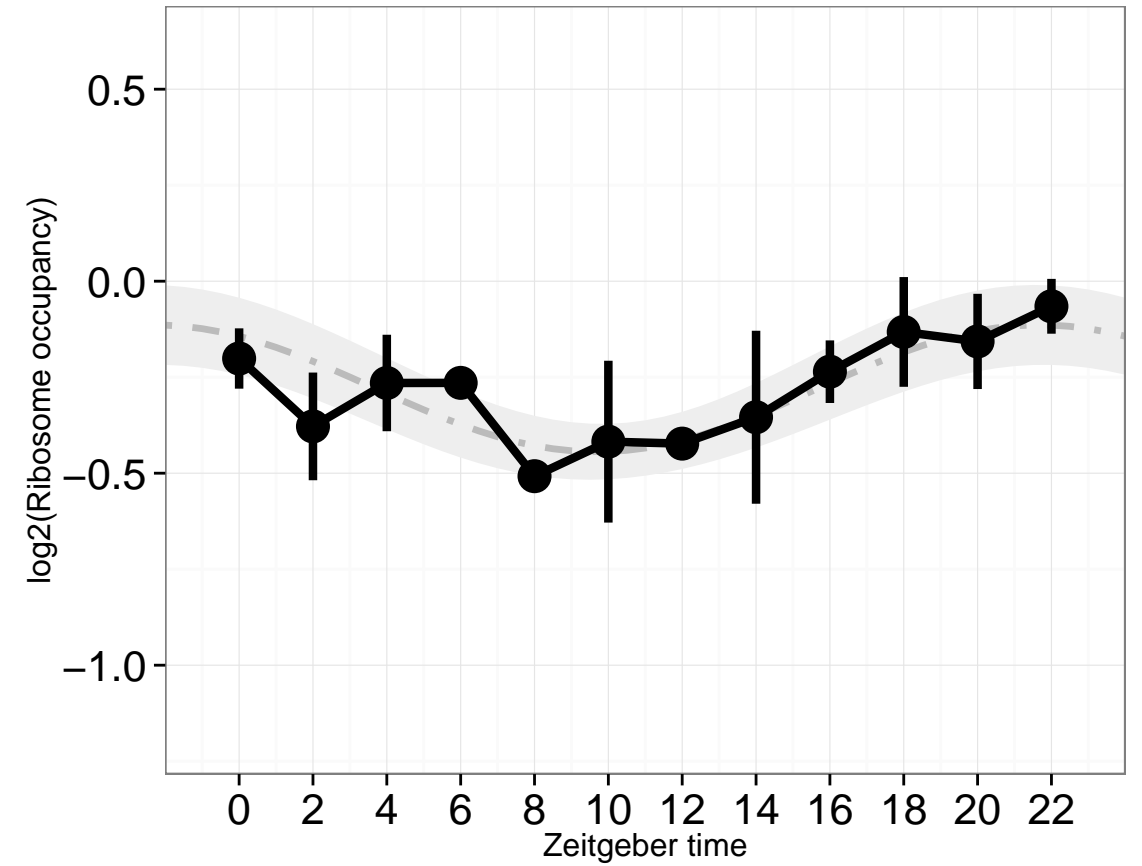

Supplement: SuppDataset_1.zip [file Pdcd5_set_A.pdf › Supplemental Dataset 1/A-mRNA_nonrhyth_translation_nonrhyth/Pdcd5_set_A.pdf]

## Pdcd6

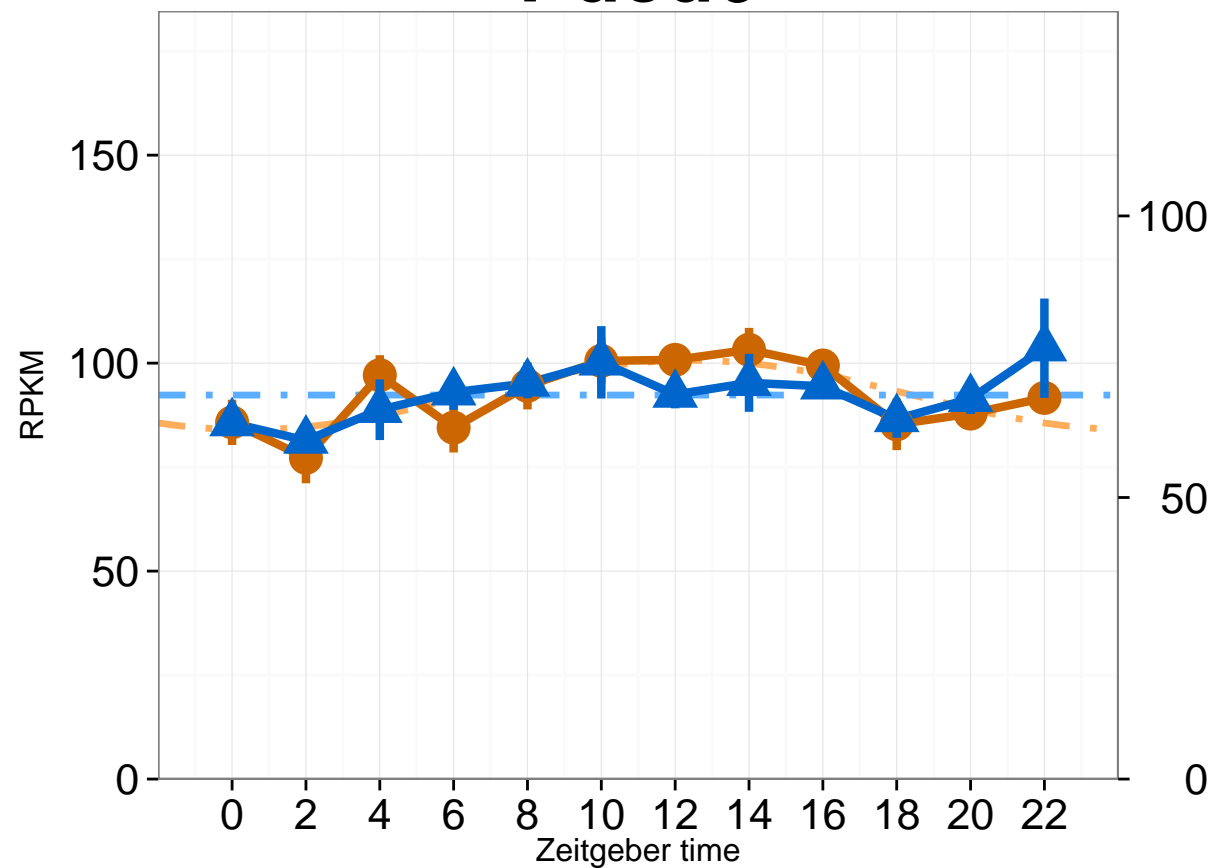

## Pdcd6

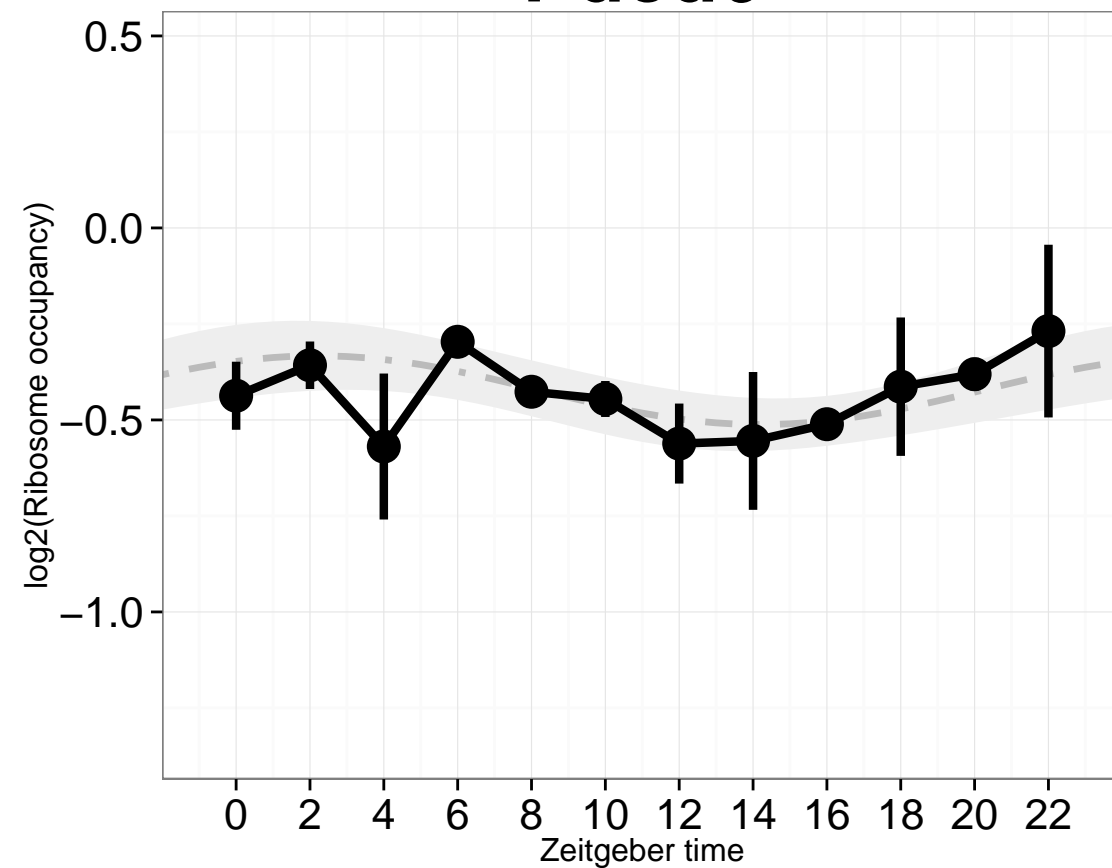

Supplement: SuppDataset_1.zip [file Pdcd6_set_A.pdf › Supplemental Dataset 1/A-mRNA_nonrhyth_translation_nonrhyth/Pdcd6_set_A.pdf]

## Pdcd6ip

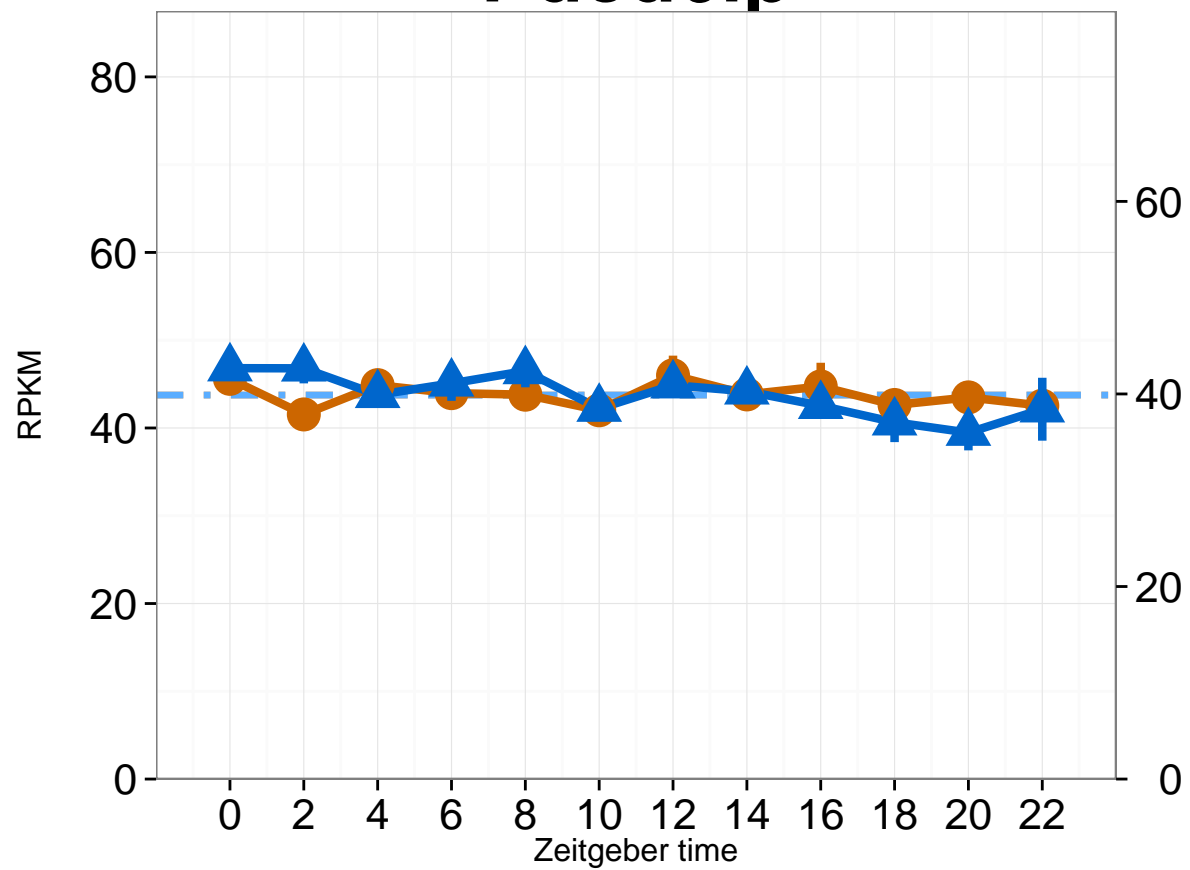

## Pdcd6ip

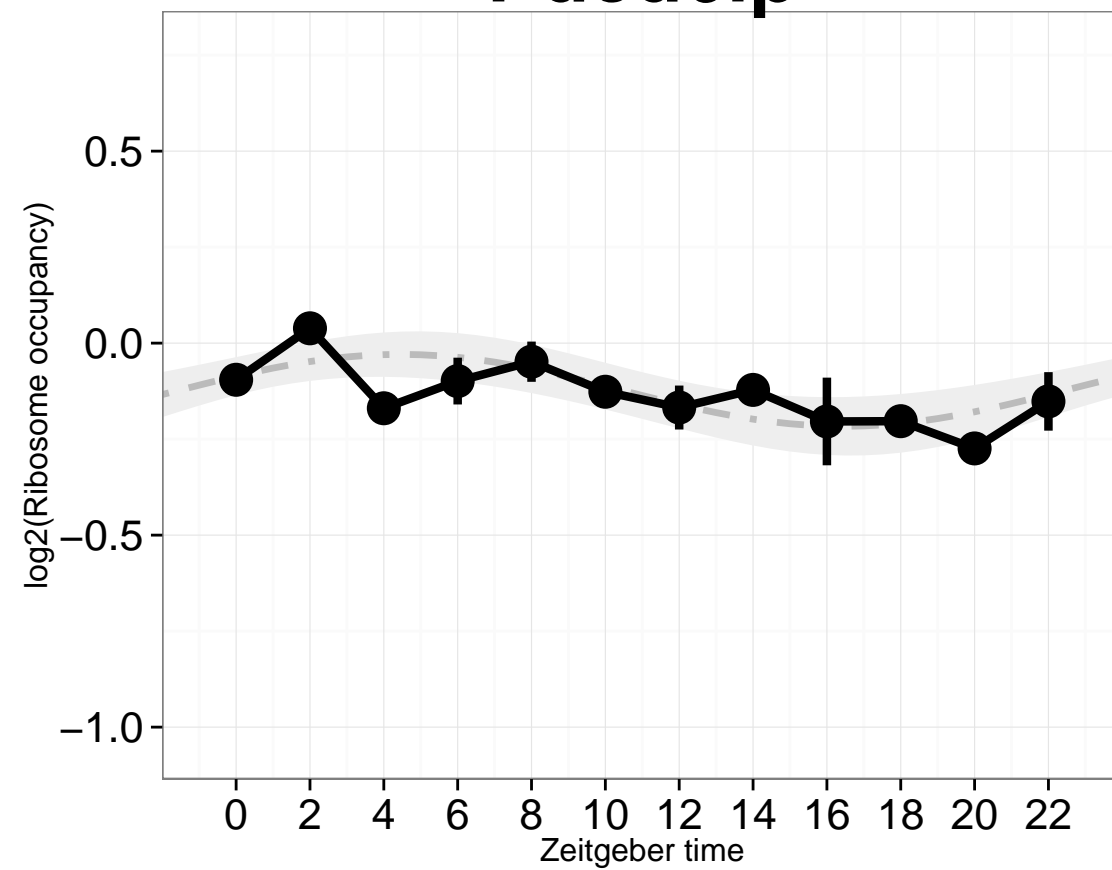

Supplement: SuppDataset_1.zip [file Pdcd6ip_set_A.pdf › Supplemental Dataset 1/A-mRNA_nonrhyth_translation_nonrhyth/Pdcd6ip_set_A.pdf]

## Pdcd7

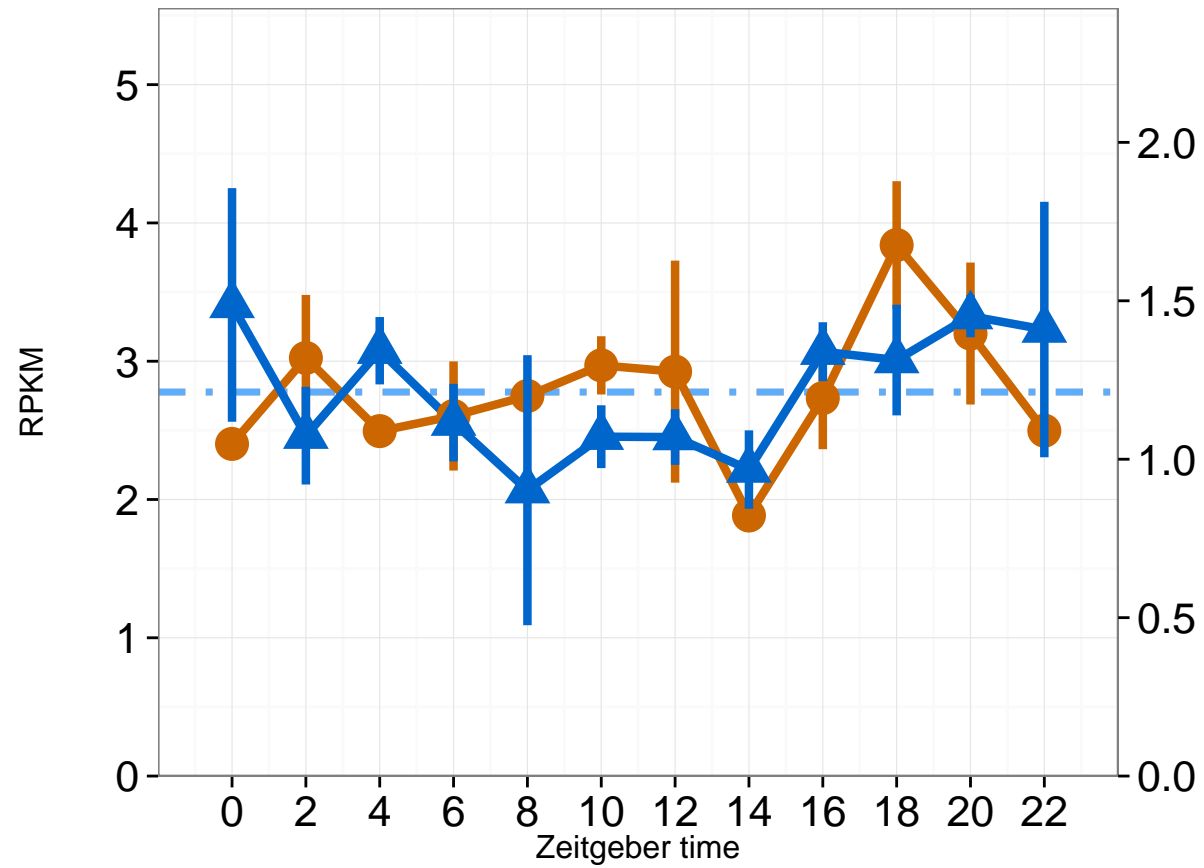

## Pdcd7

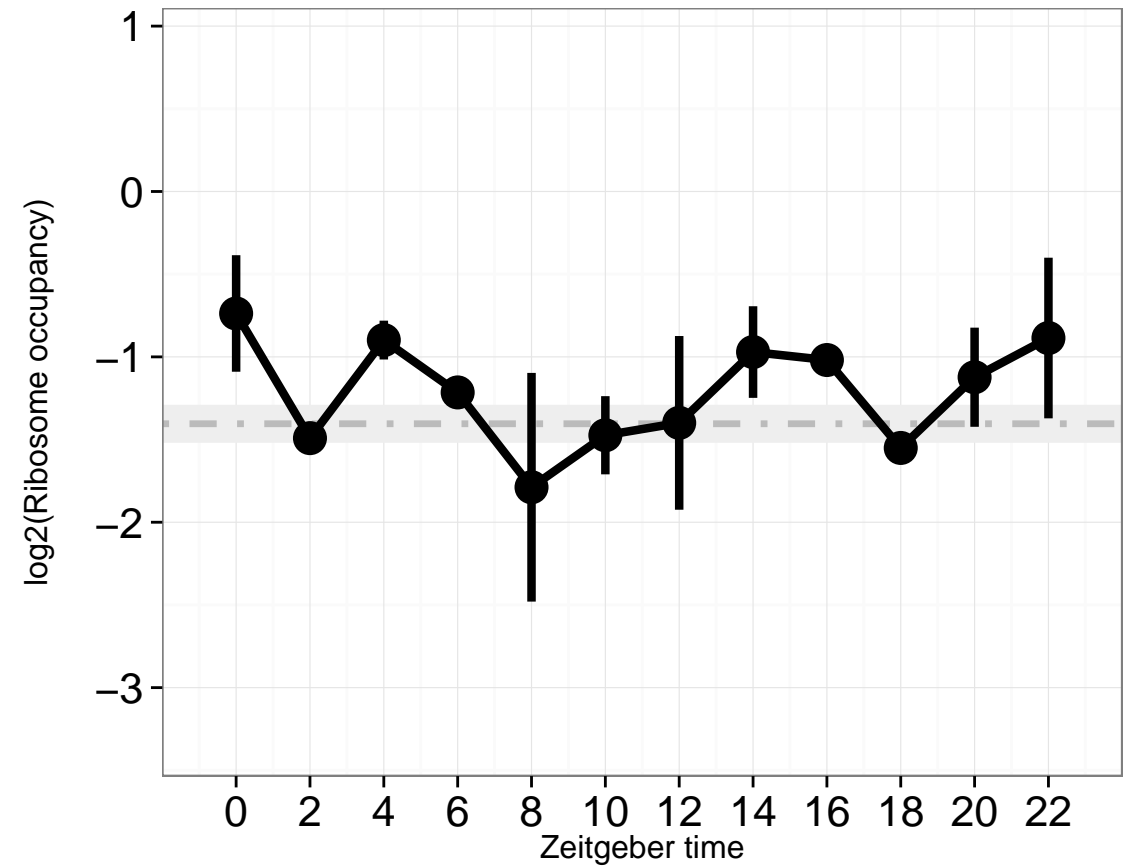

Supplement: SuppDataset_1.zip [file Pdcd7_set_A.pdf › Supplemental Dataset 1/A-mRNA_nonrhyth_translation_nonrhyth/Pdcd7_set_A.pdf]

## Pdcl3

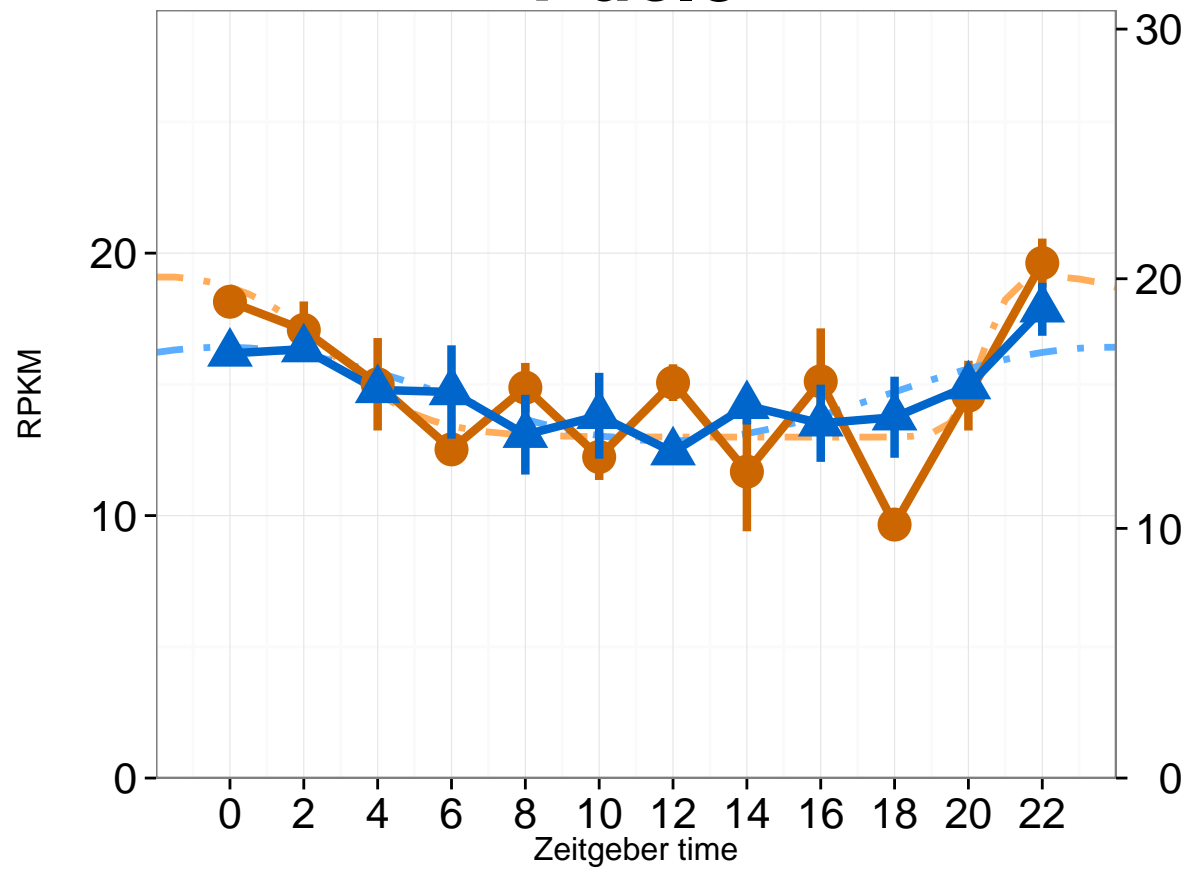

## Pdcl3

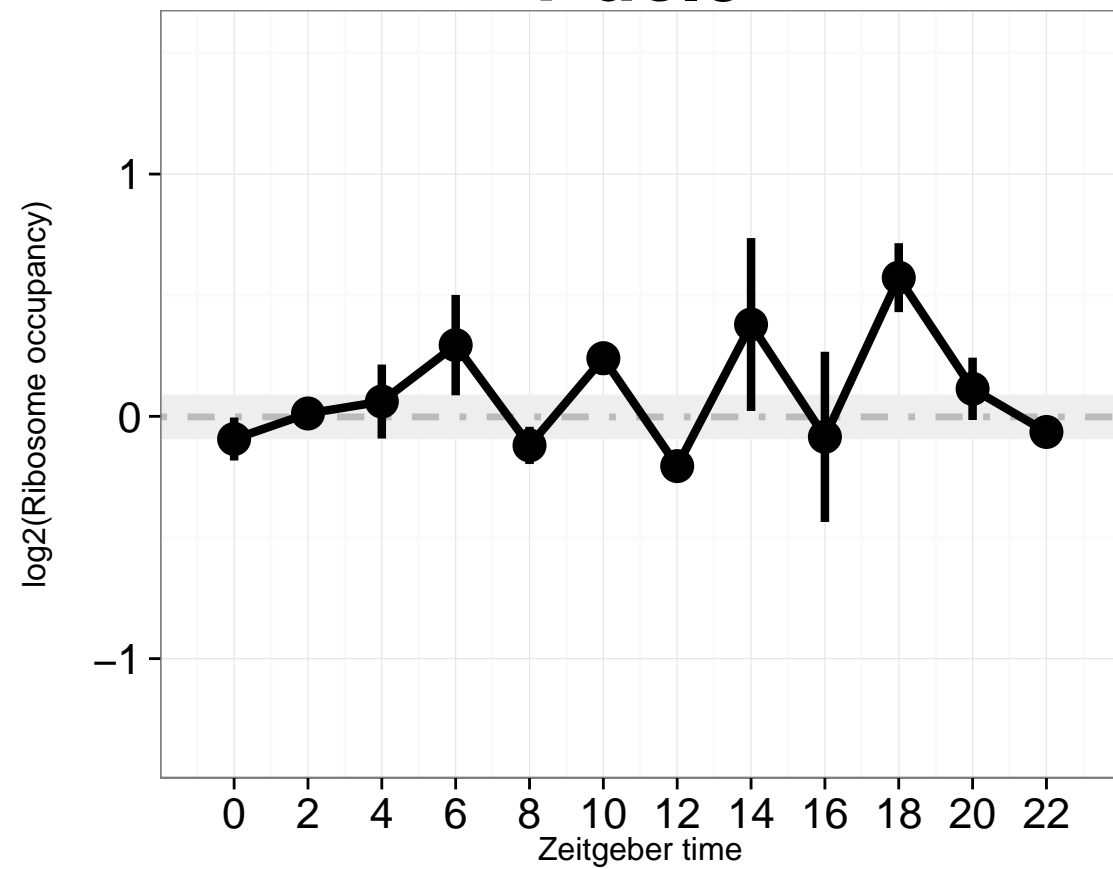

Supplement: SuppDataset_1.zip [file Pdcl3_set_A.pdf › Supplemental Dataset 1/A-mRNA_nonrhyth_translation_nonrhyth/Pdcl3_set_A.pdf]

## Pdcl

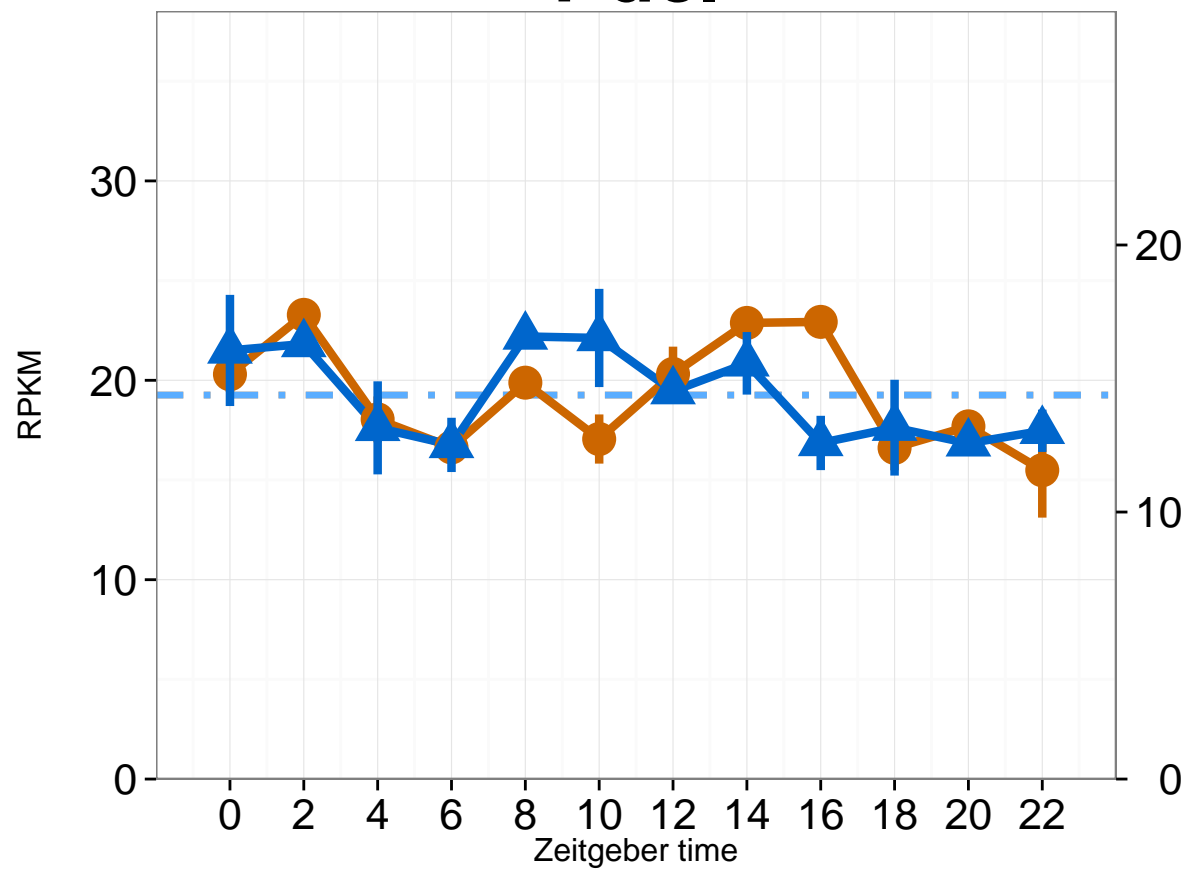

## Pdcl

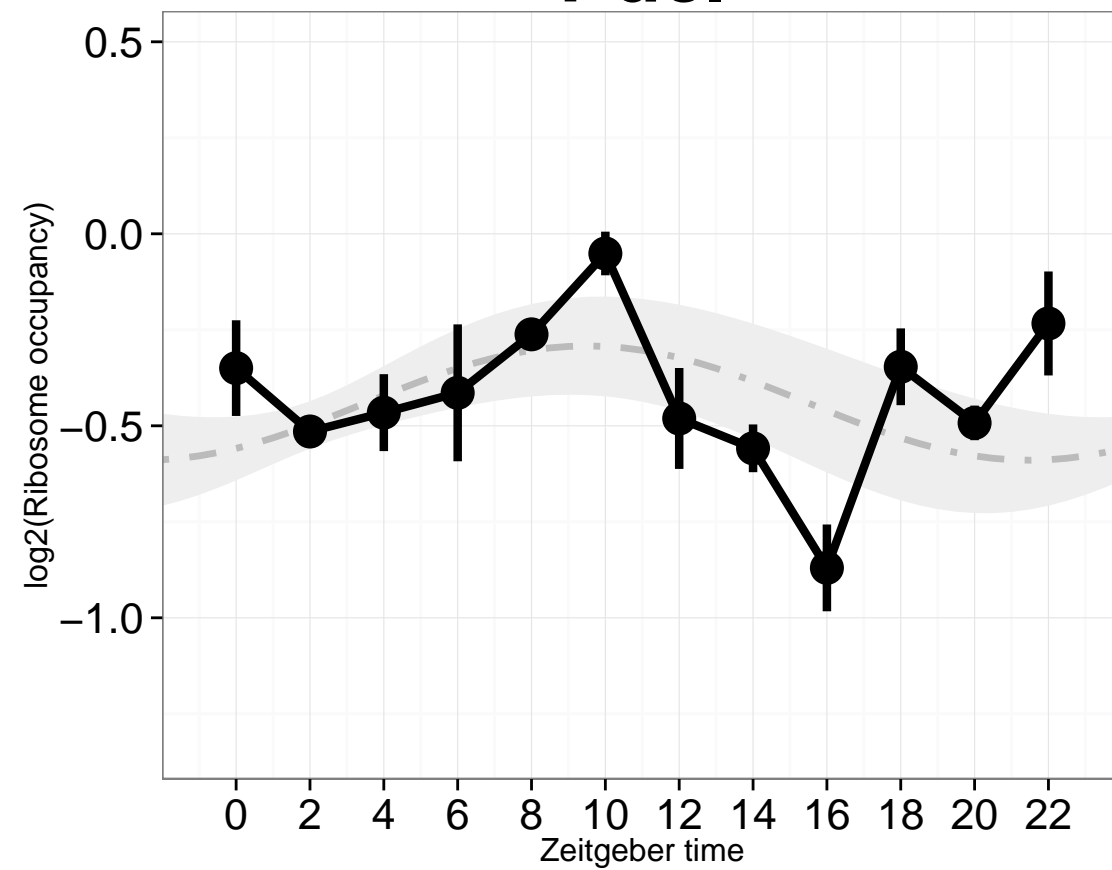

Supplement: SuppDataset_1.zip [file Pdcl_set_A.pdf › Supplemental Dataset 1/A-mRNA_nonrhyth_translation_nonrhyth/Pdcl_set_A.pdf]

## Pde12

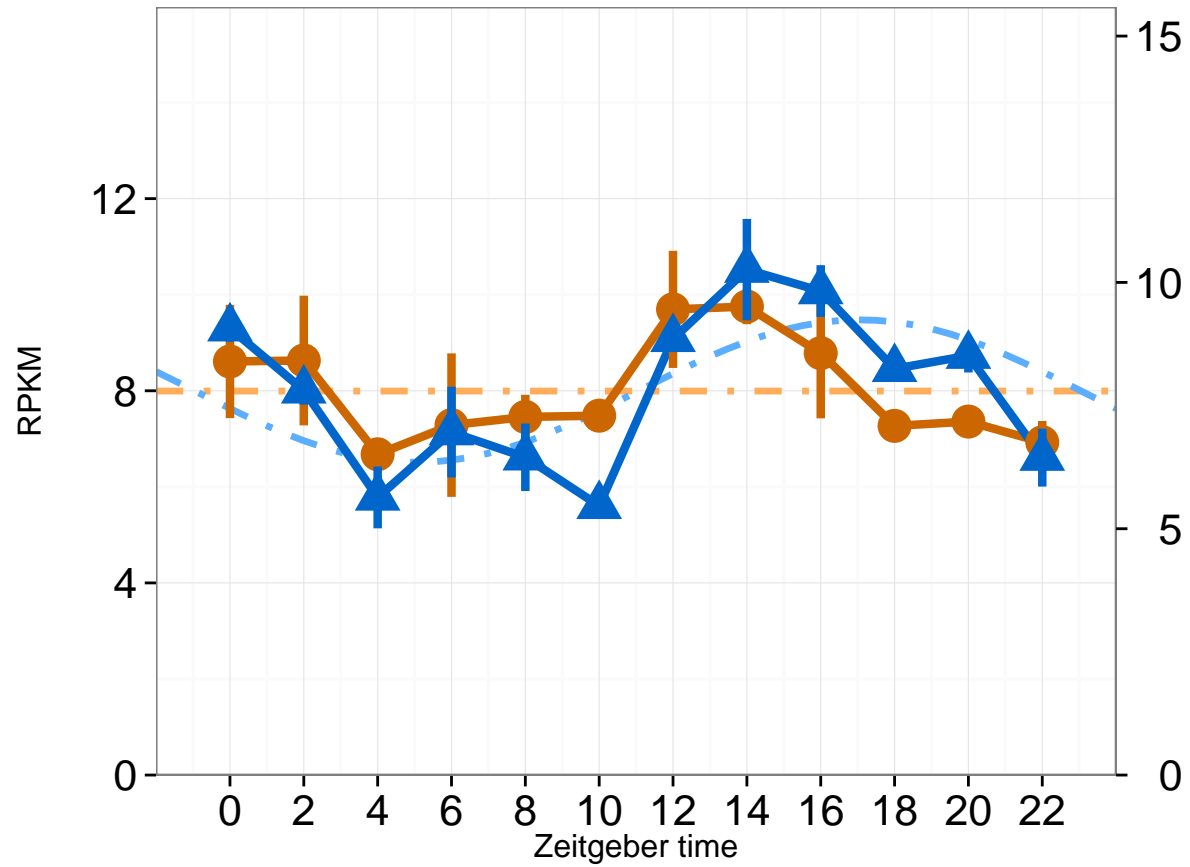

## Pde12

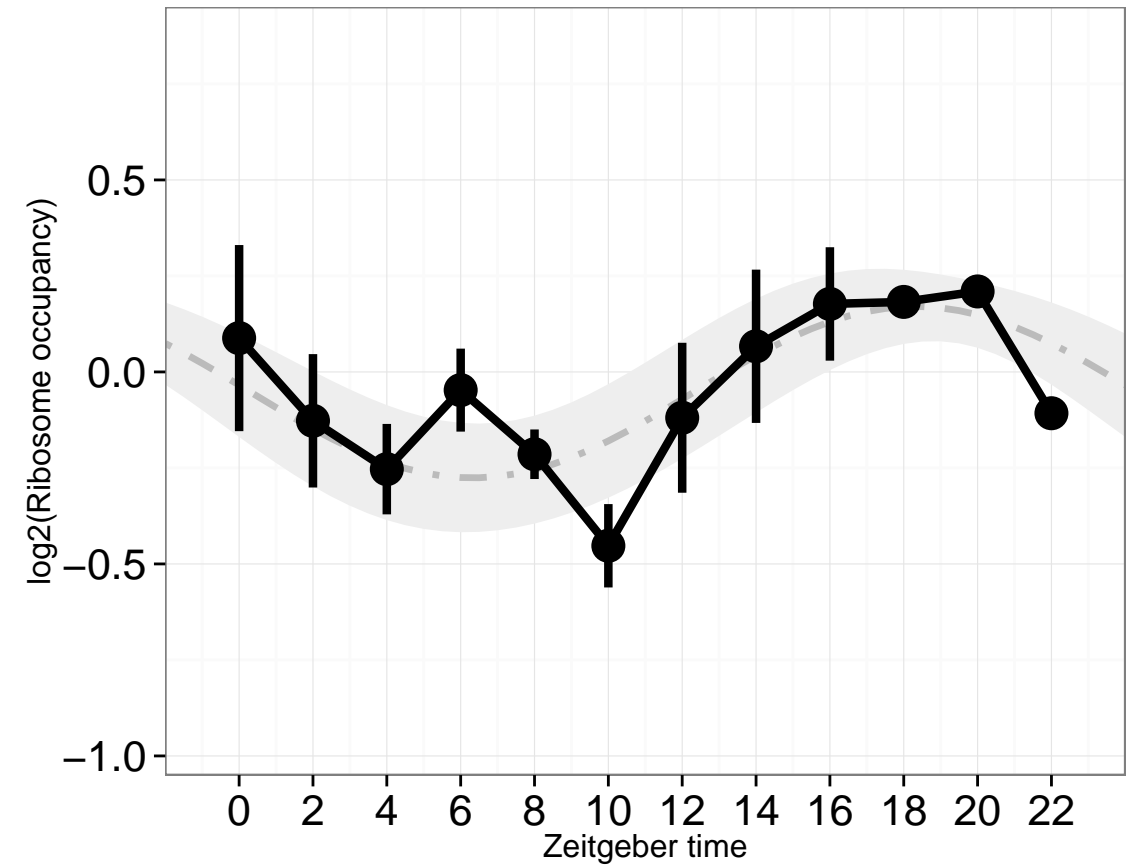

Supplement: SuppDataset_1.zip [file Pde12_set_A.pdf › Supplemental Dataset 1/A-mRNA_nonrhyth_translation_nonrhyth/Pde12_set_A.pdf]

# Pde1a

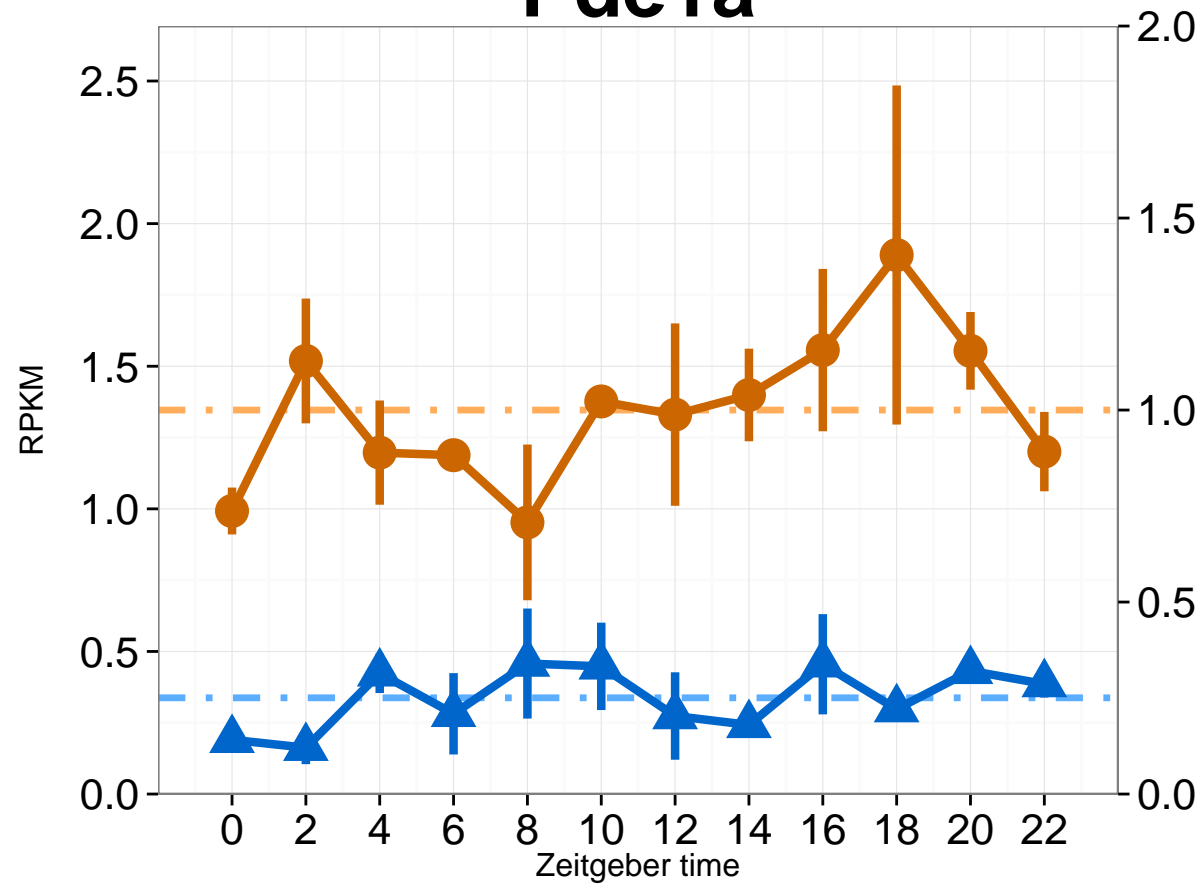

# Pde1a

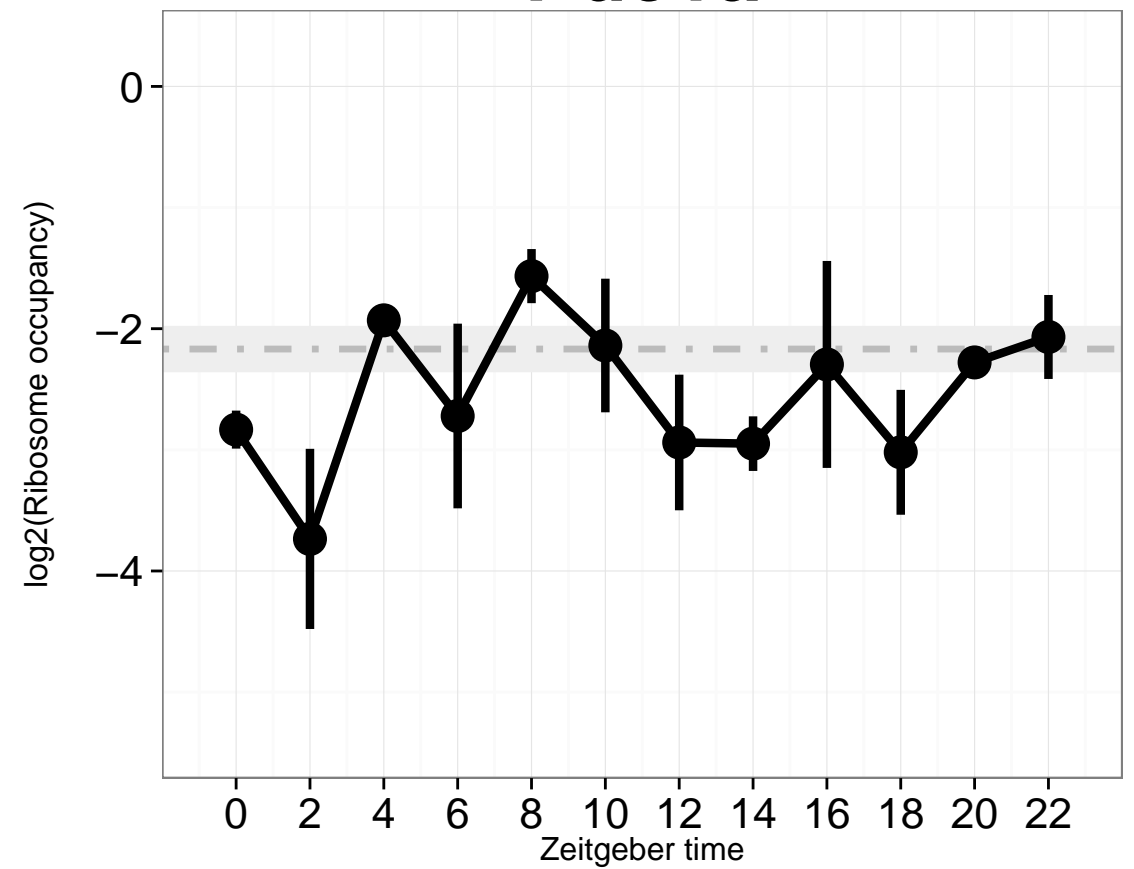

Supplement: SuppDataset_1.zip [file Pde1a_set_A.pdf › Supplemental Dataset 1/A-mRNA_nonrhyth_translation_nonrhyth/Pde1a_set_A.pdf]

# Pde3a

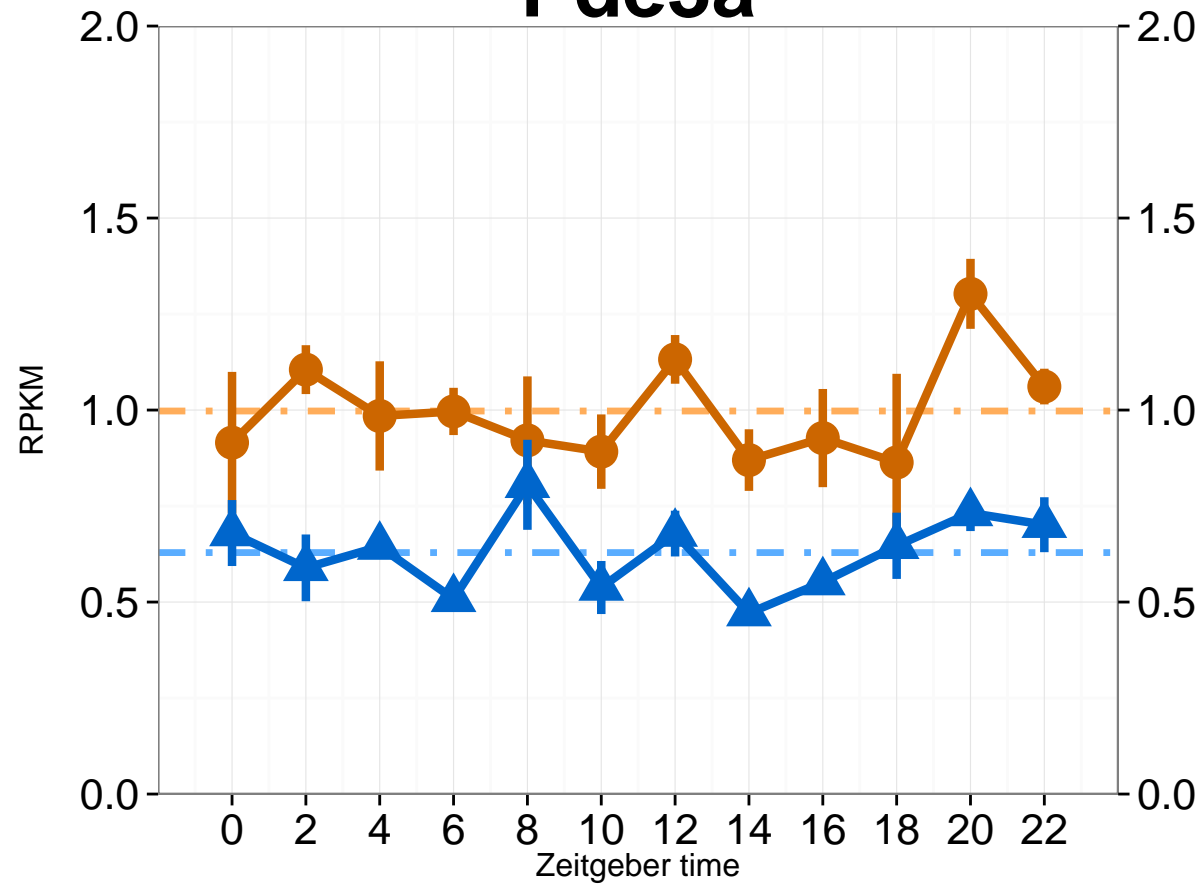

# Pde3a

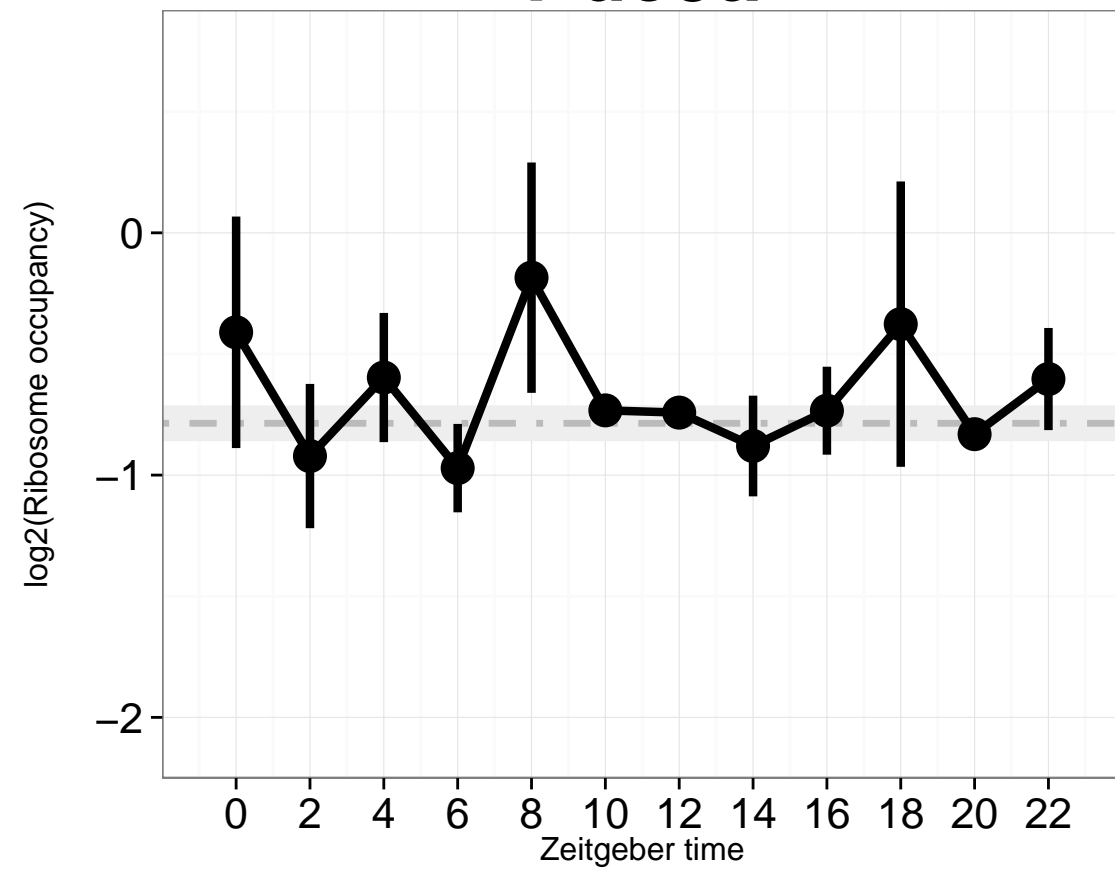

Supplement: SuppDataset_1.zip [file Pde3a_set_A.pdf › Supplemental Dataset 1/A-mRNA_nonrhyth_translation_nonrhyth/Pde3a_set_A.pdf]

# Pde3b

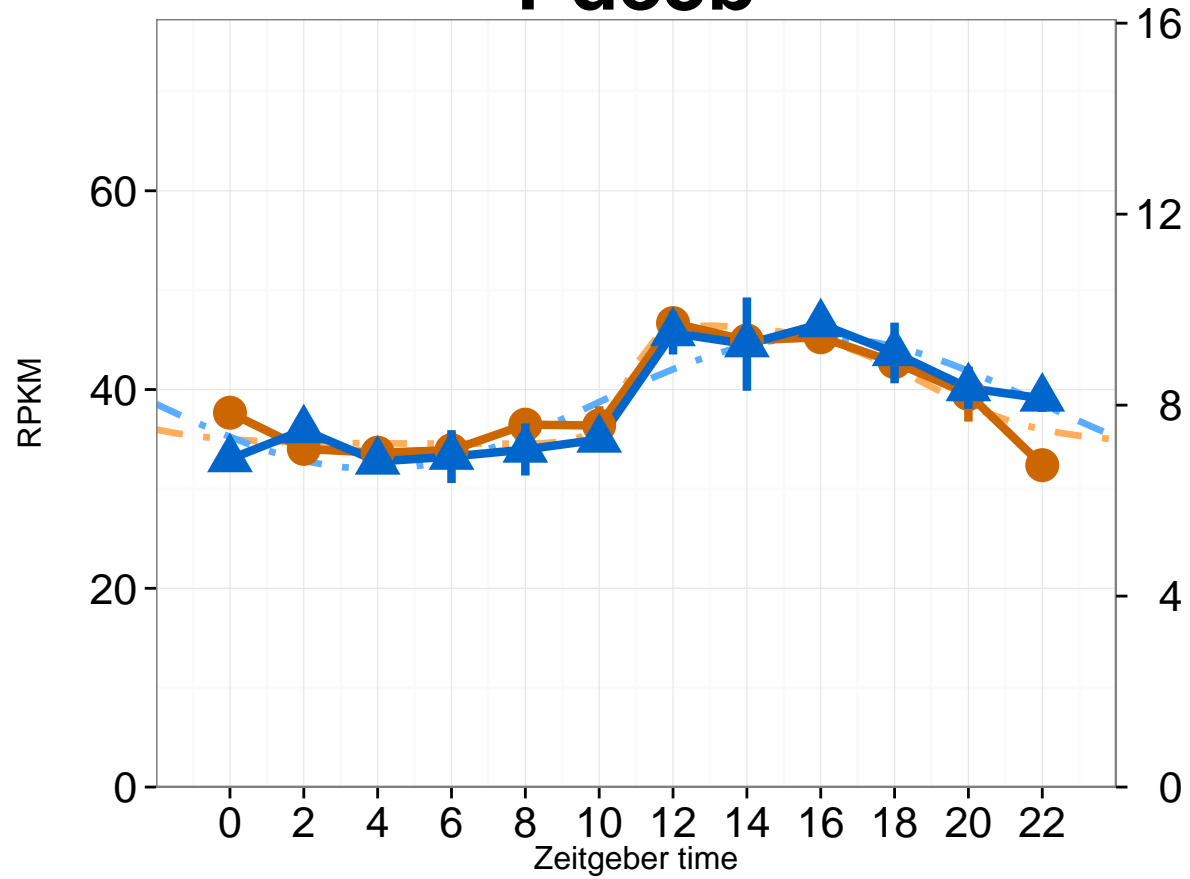

# Pde3b

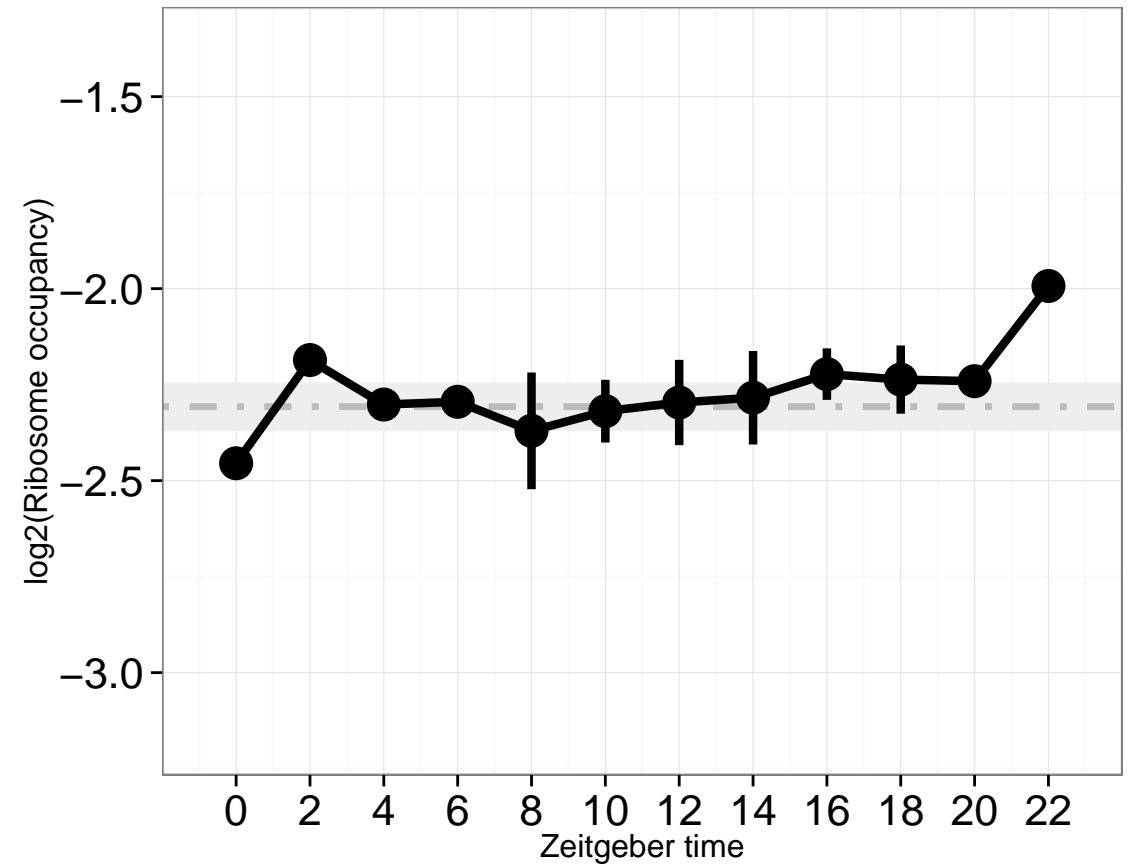

Supplement: SuppDataset_1.zip [file Pde3b_set_A.pdf › Supplemental Dataset 1/A-mRNA_nonrhyth_translation_nonrhyth/Pde3b_set_A.pdf]

## Pde4d

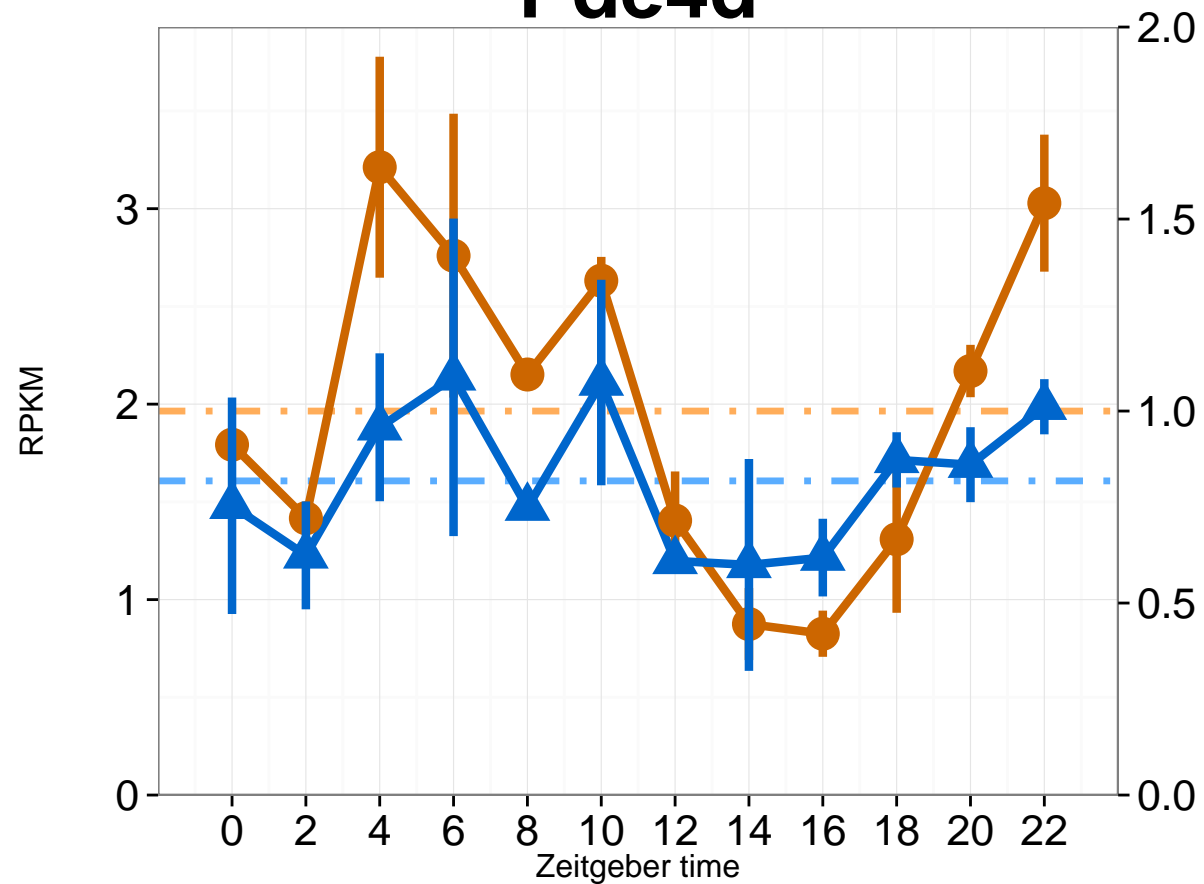

## Pde4d

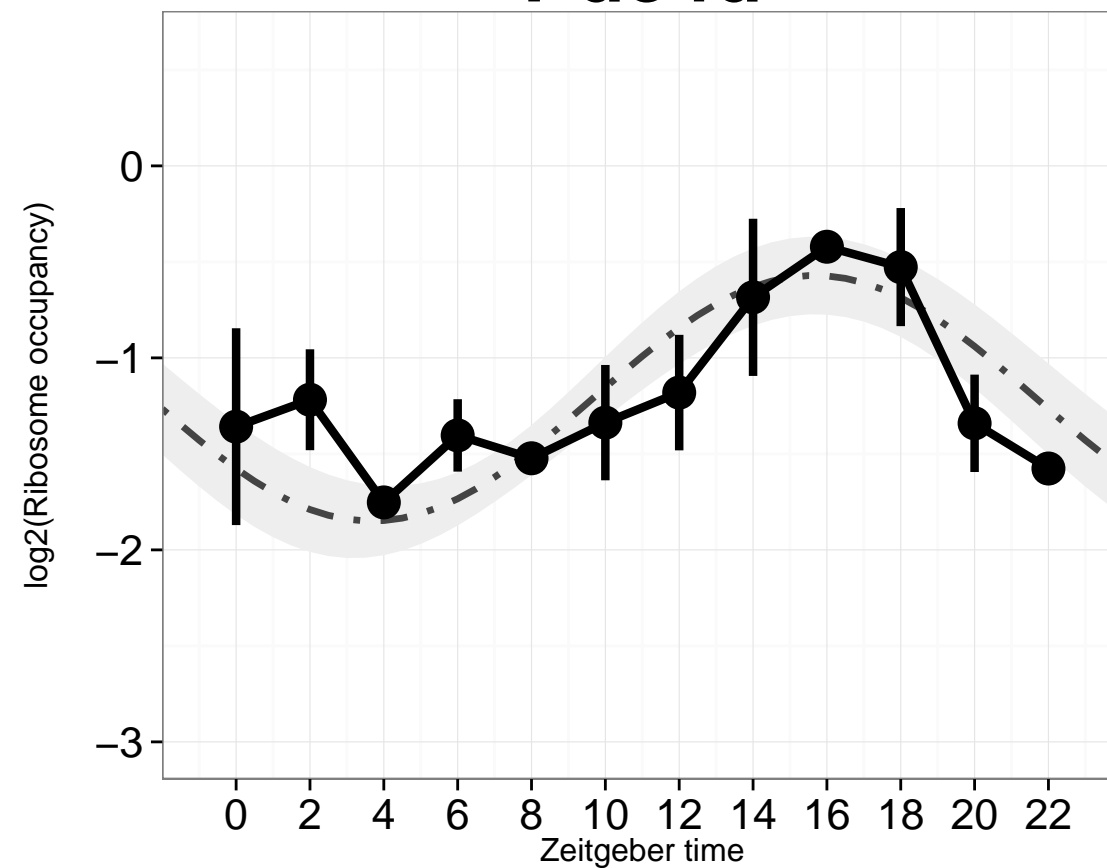

Supplement: SuppDataset_1.zip [file Pde4d_set_A.pdf › Supplemental Dataset 1/A-mRNA_nonrhyth_translation_nonrhyth/Pde4d_set_A.pdf]

## Pde4dip

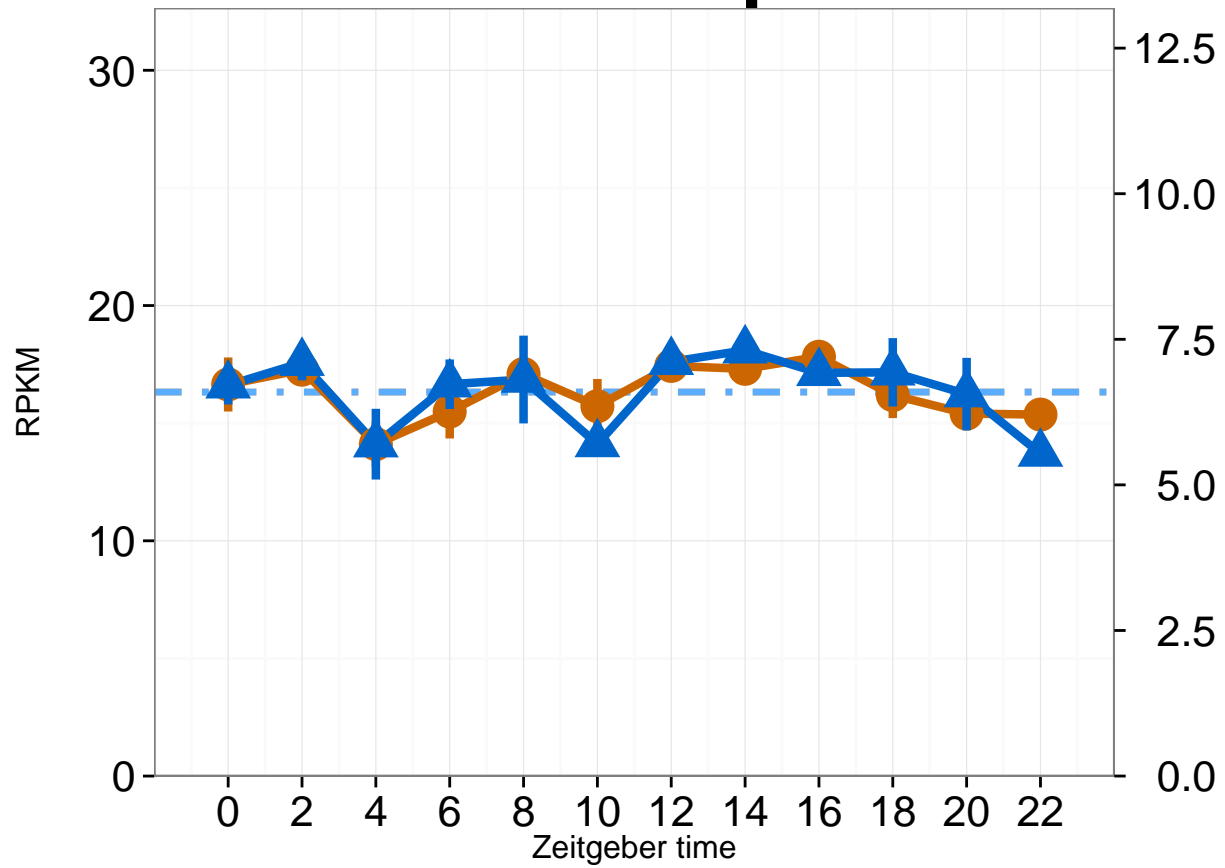

## Pde4dip

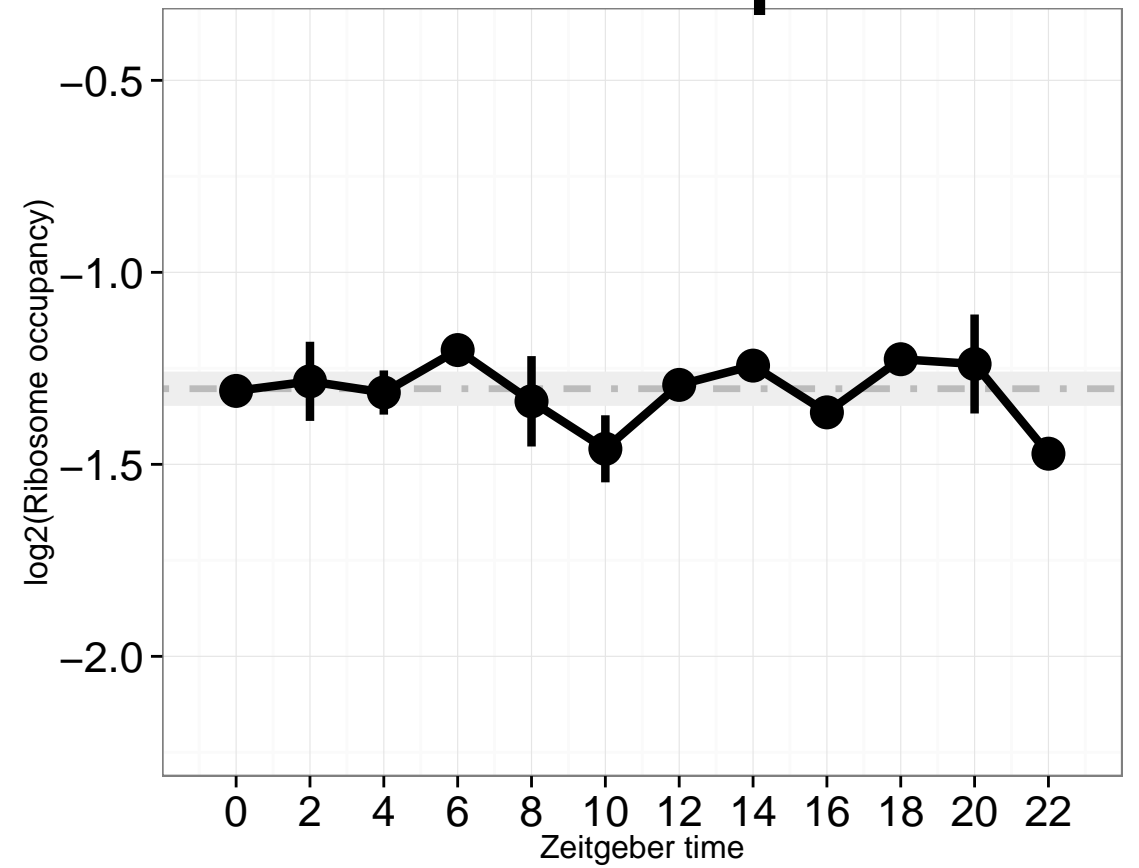

Supplement: SuppDataset_1.zip [file Pde4dip_set_A.pdf › Supplemental Dataset 1/A-mRNA_nonrhyth_translation_nonrhyth/Pde4dip_set_A.pdf]

## Pde6d

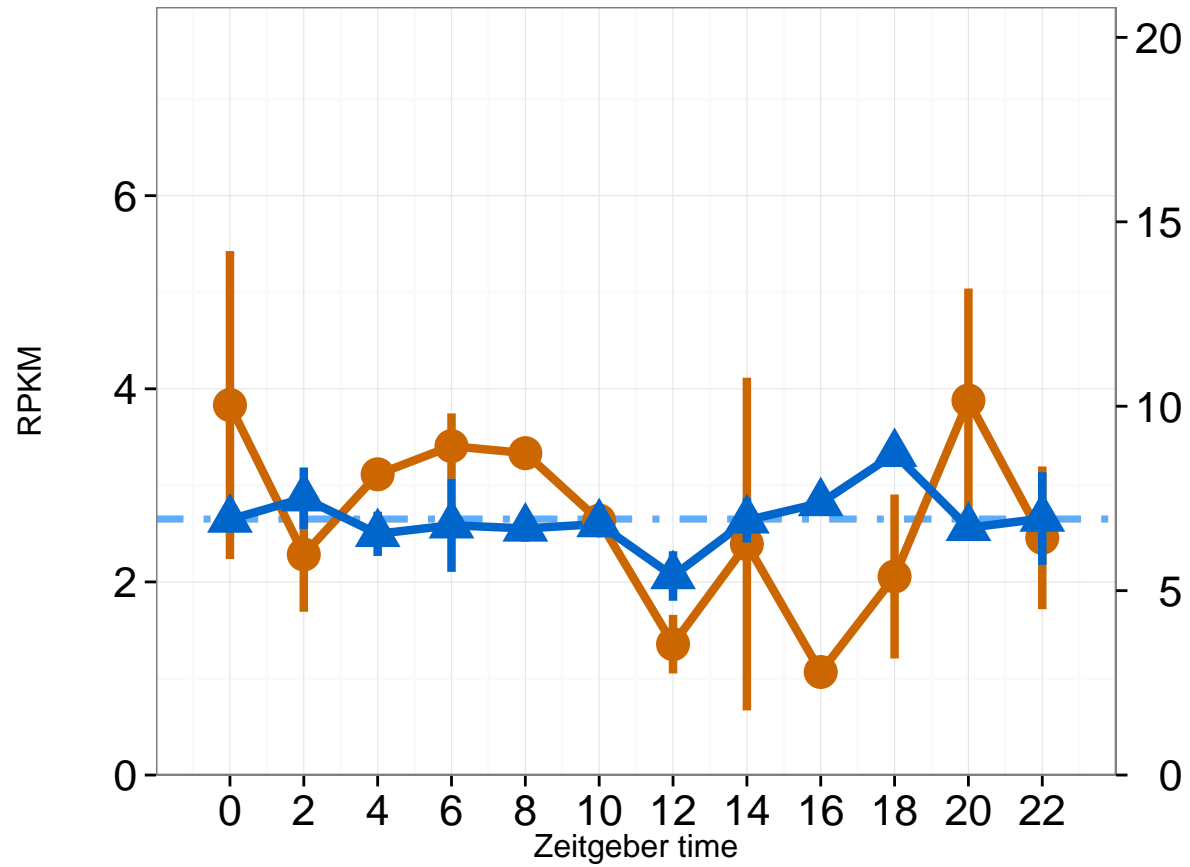

## Pde6d

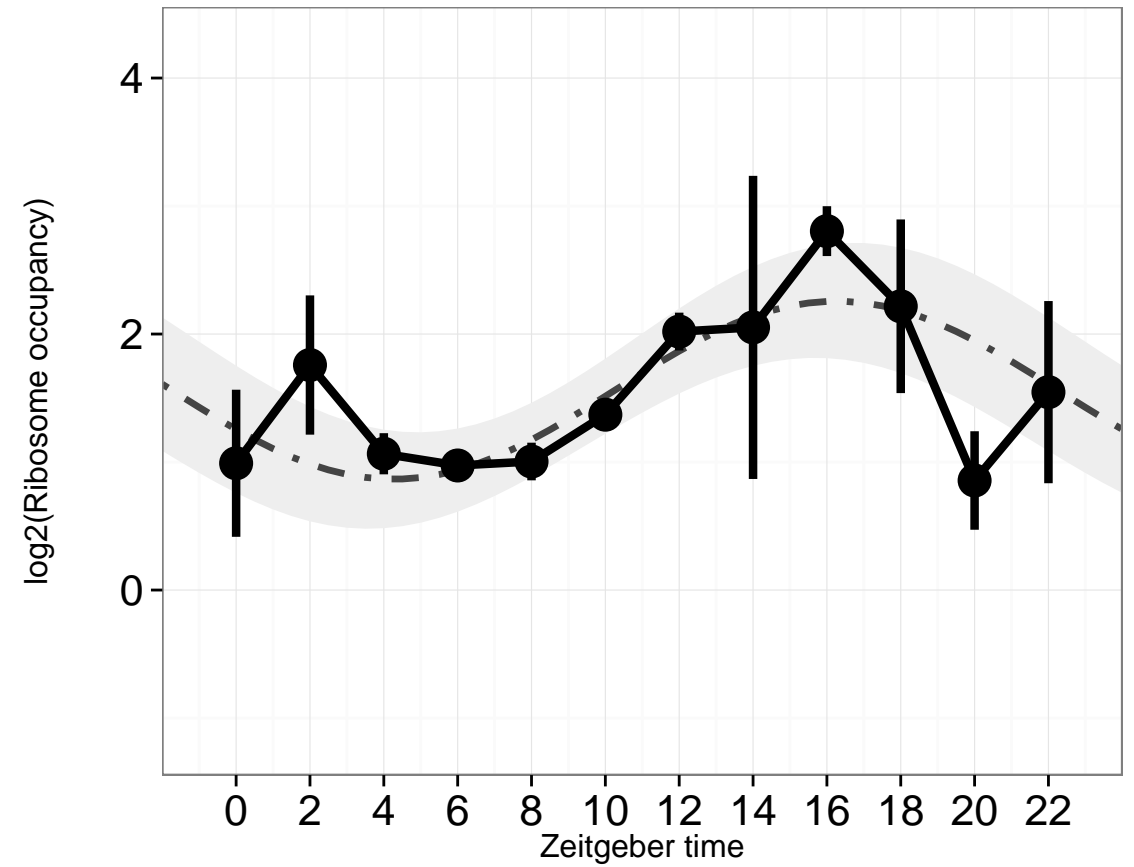

Supplement: SuppDataset_1.zip [file Pde6d_set_A.pdf › Supplemental Dataset 1/A-mRNA_nonrhyth_translation_nonrhyth/Pde6d_set_A.pdf]

# Pde7b

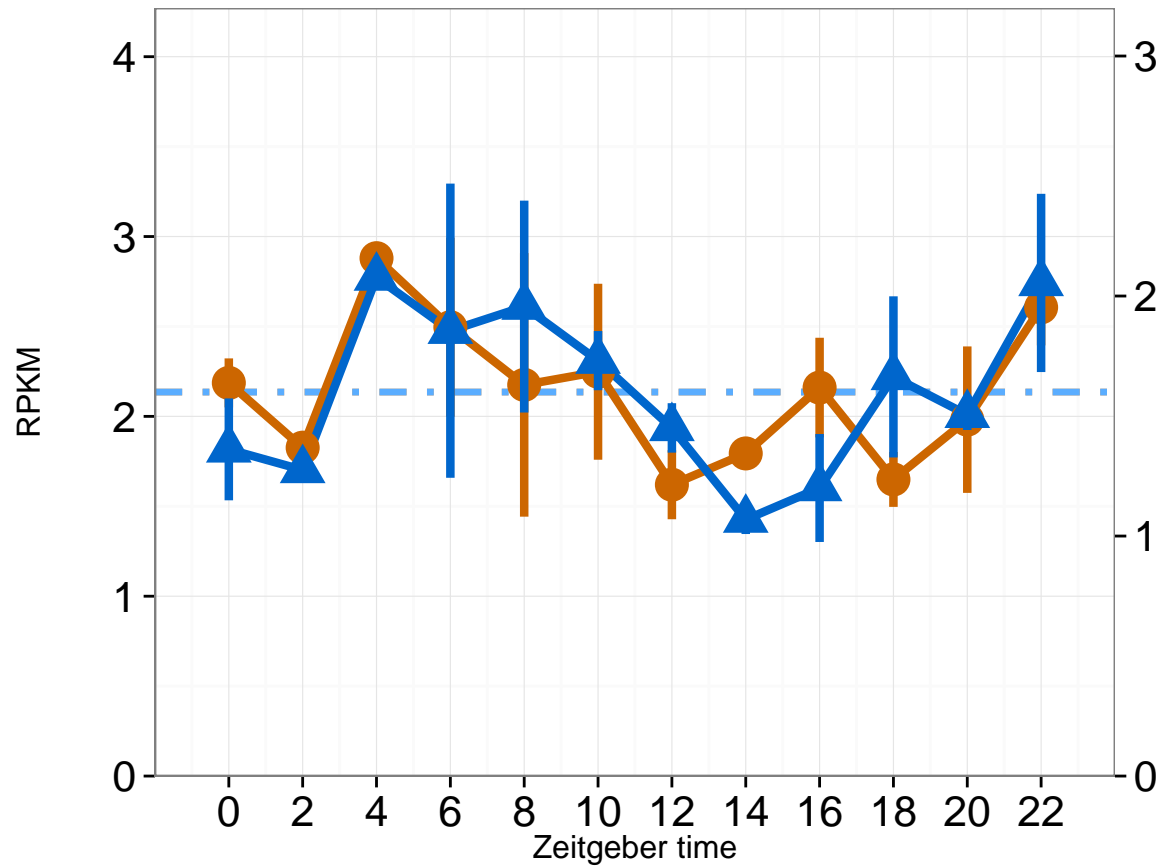

# Pde7b

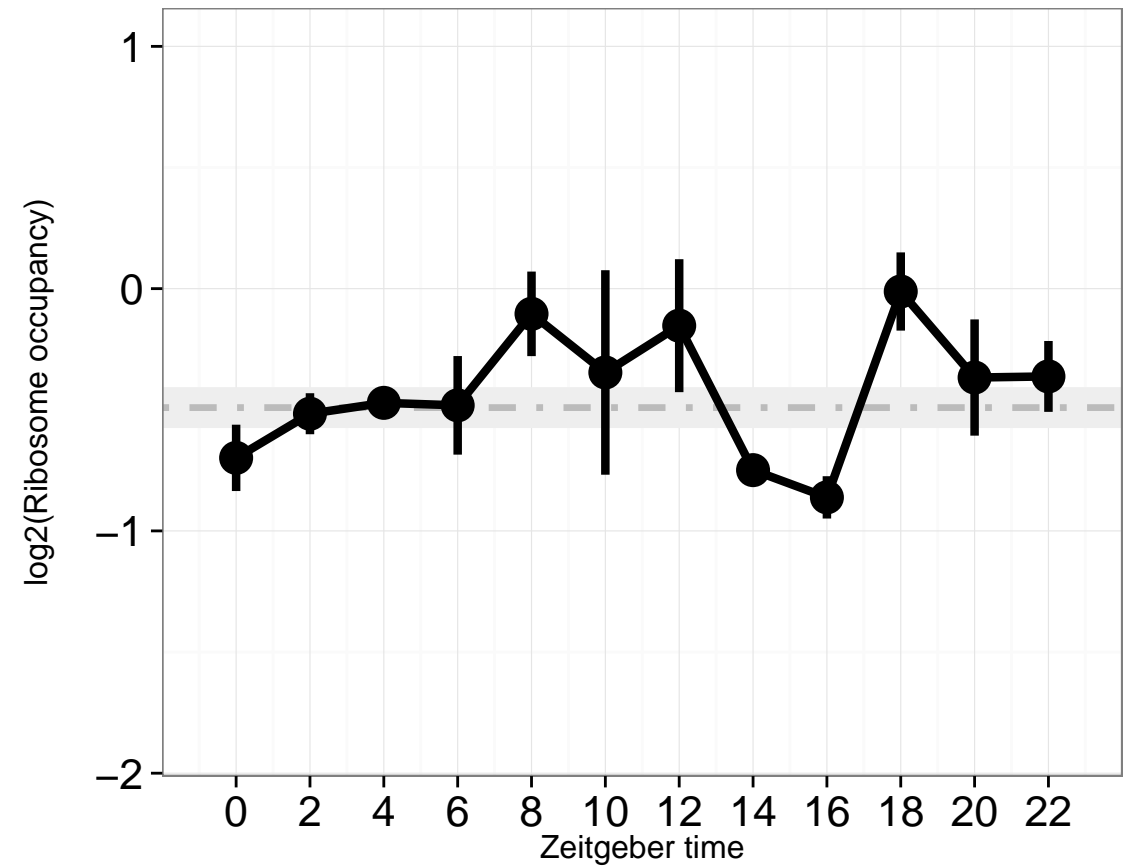

Supplement: SuppDataset_1.zip [file Pde7b_set_A.pdf › Supplemental Dataset 1/A-mRNA_nonrhyth_translation_nonrhyth/Pde7b_set_A.pdf]

# Pde8a

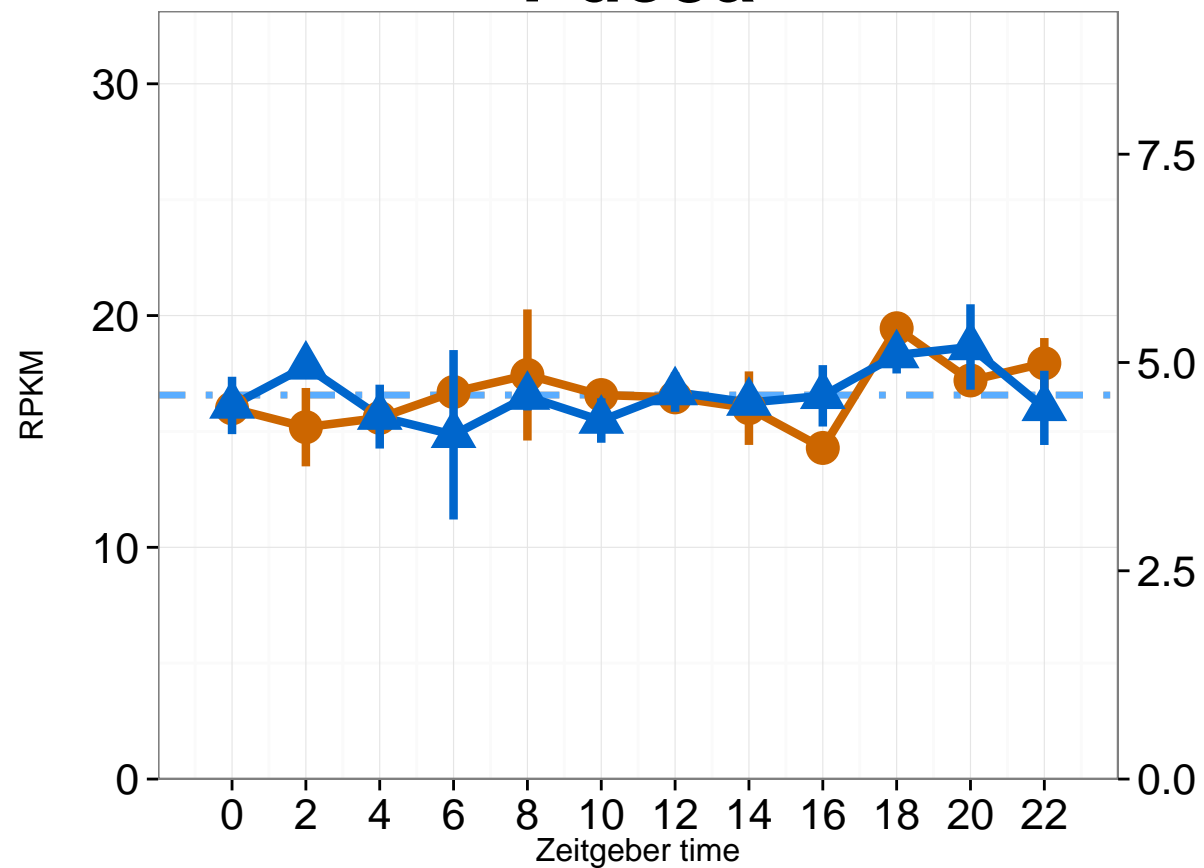

# Pde8a

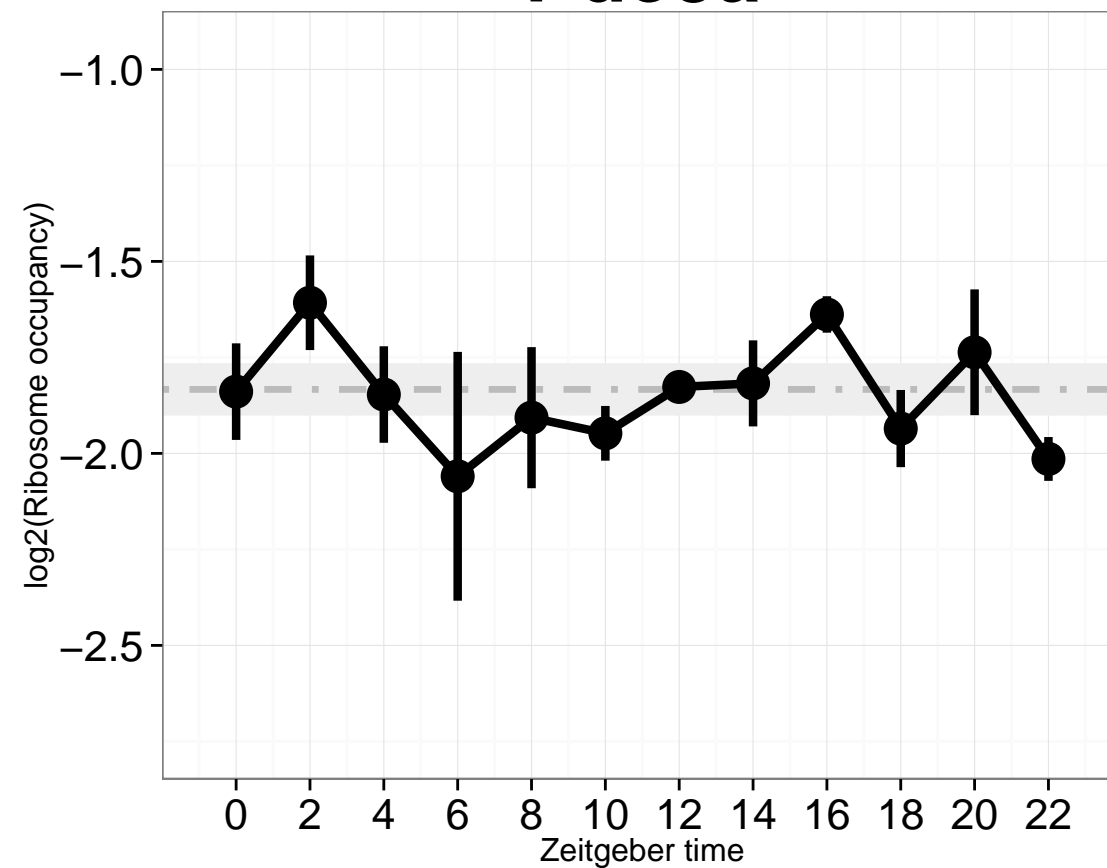

Supplement: SuppDataset_1.zip [file Pde8a_set_A.pdf › Supplemental Dataset 1/A-mRNA_nonrhyth_translation_nonrhyth/Pde8a_set_A.pdf]

**Pdf**

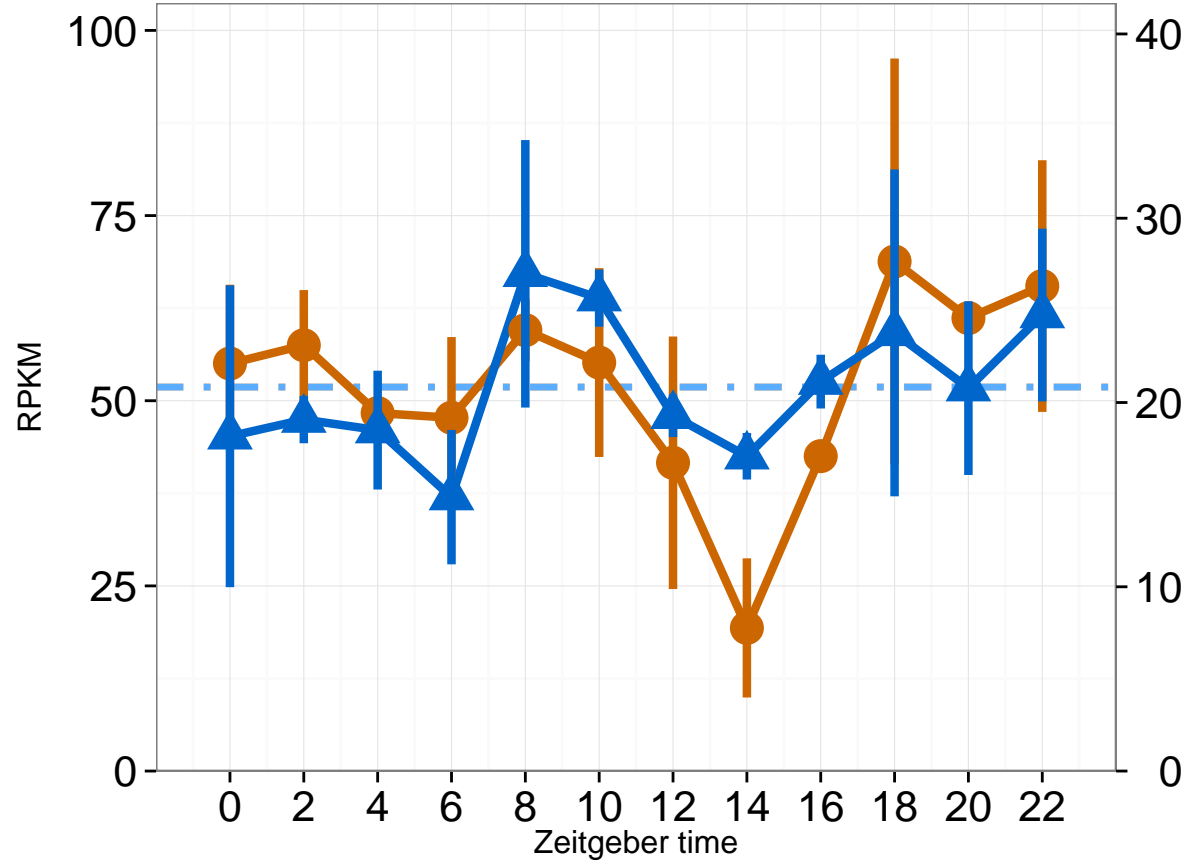

**Pdf**

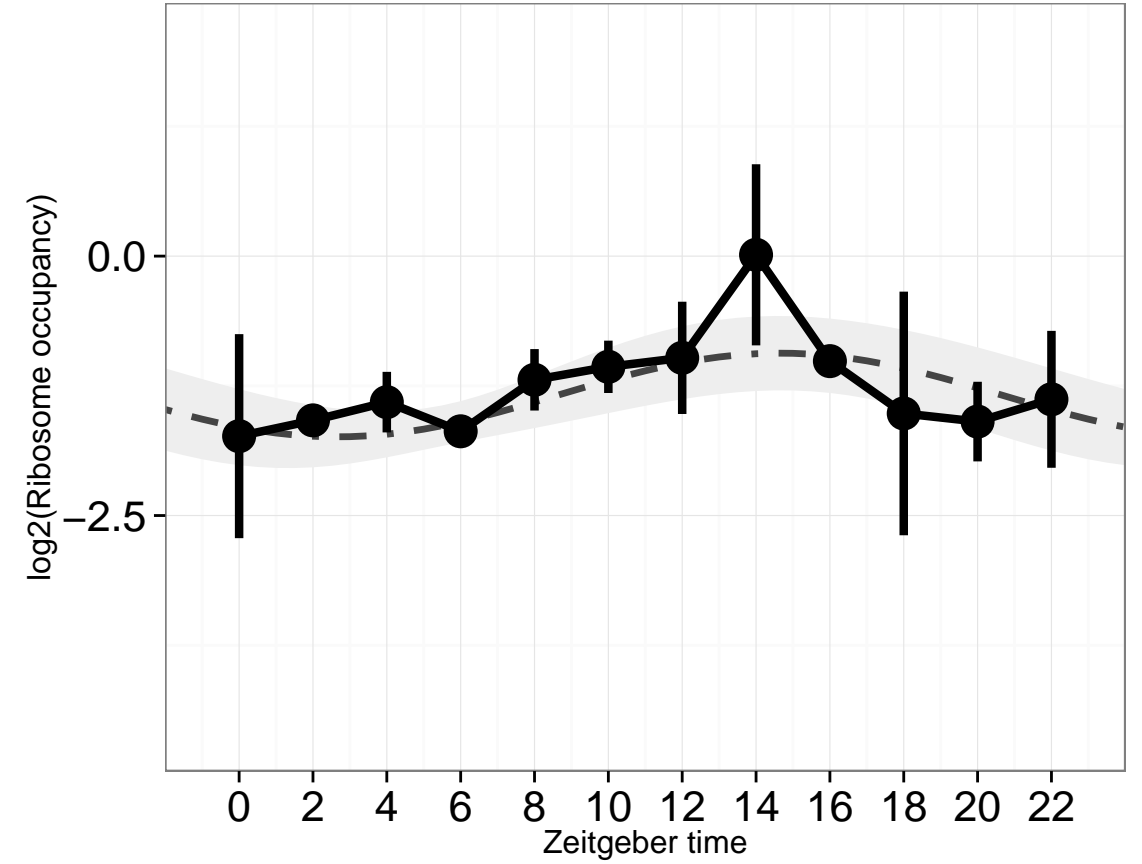

Supplement: SuppDataset_1.zip [file Pdf_set_A.pdf › Supplemental Dataset 1/A-mRNA_nonrhyth_translation_nonrhyth/Pdf_set_A.pdf]

## Pdgfa

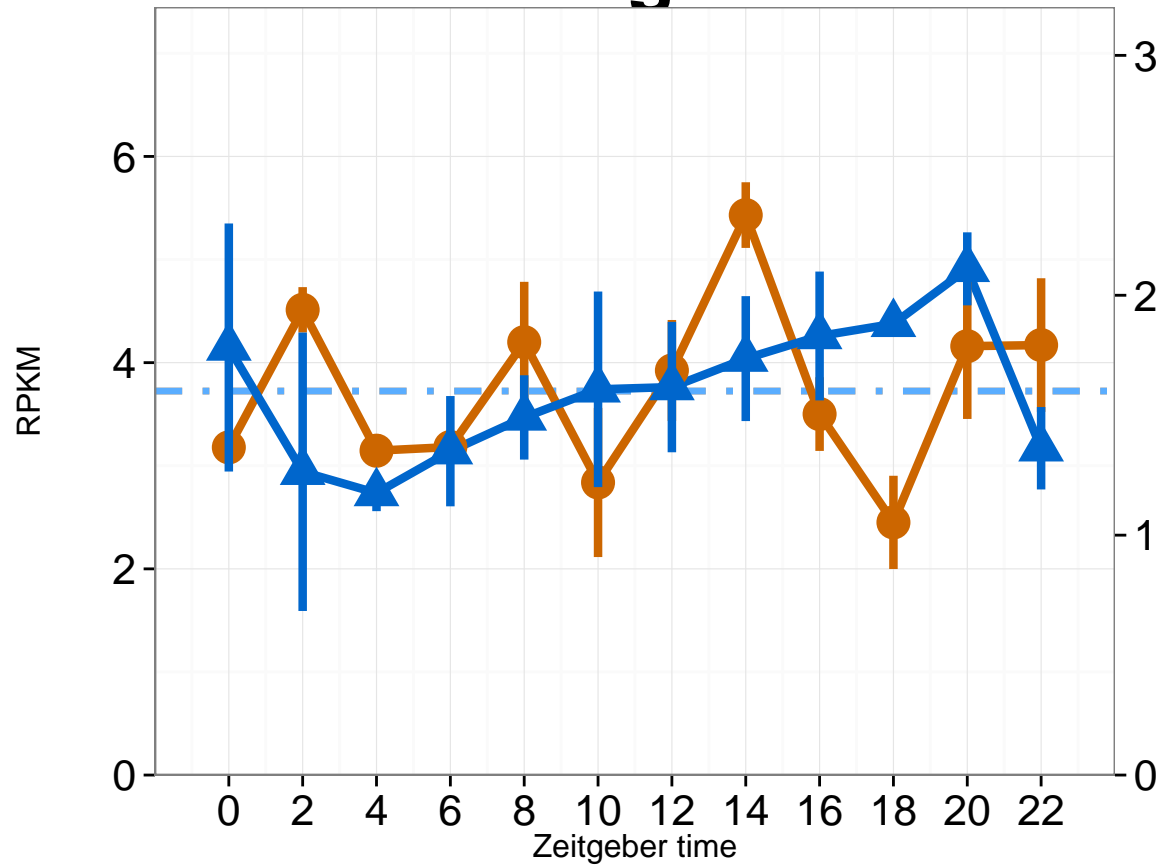

## Pdgfa

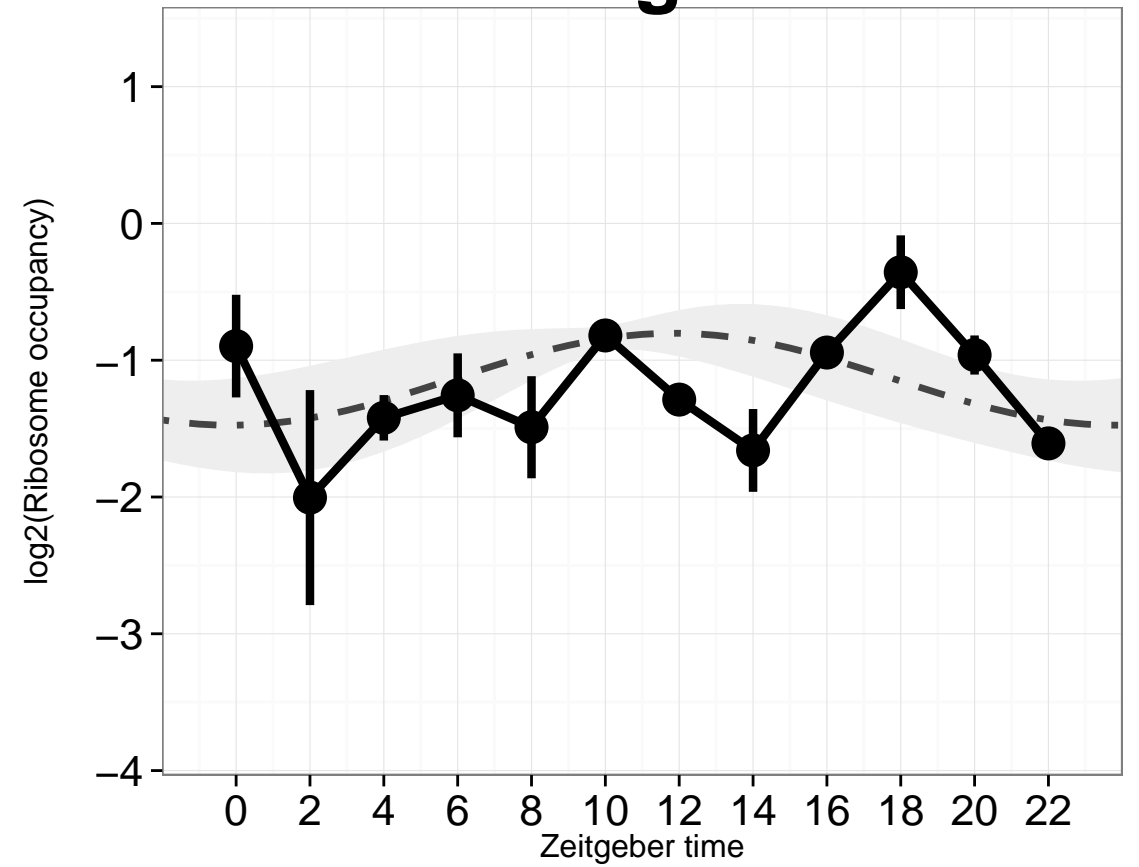

Supplement: SuppDataset_1.zip [file Pdgfa_set_A.pdf › Supplemental Dataset 1/A-mRNA_nonrhyth_translation_nonrhyth/Pdgfa_set_A.pdf]

## Pdgfb

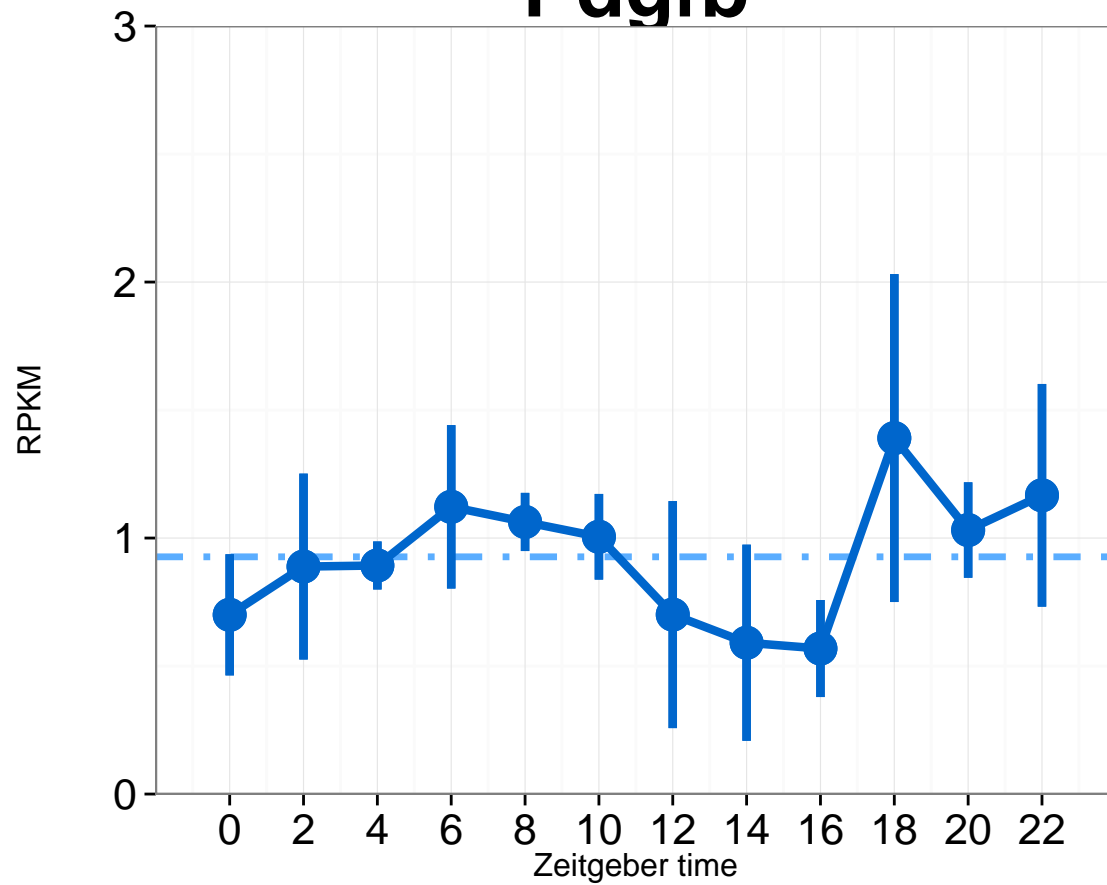

## Pdgfb log2(Ribosome occupancy

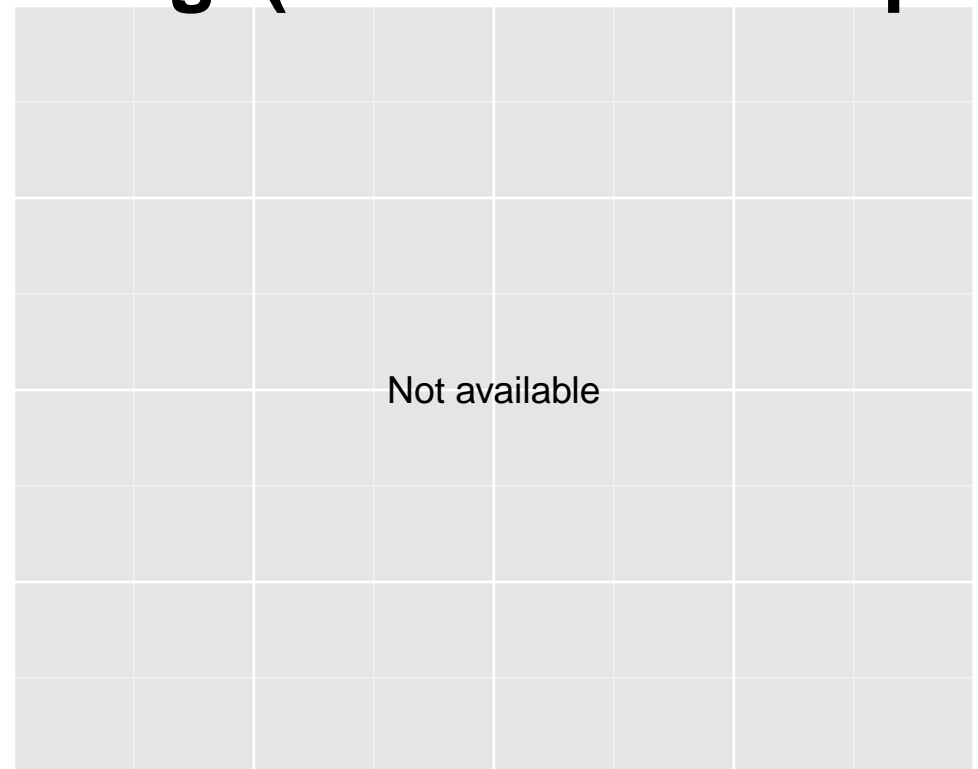

Supplement: SuppDataset_1.zip [file Pdgfb_set_A.pdf › Supplemental Dataset 1/A-mRNA_nonrhyth_translation_nonrhyth/Pdgfb_set_A.pdf]

## Pdgfd

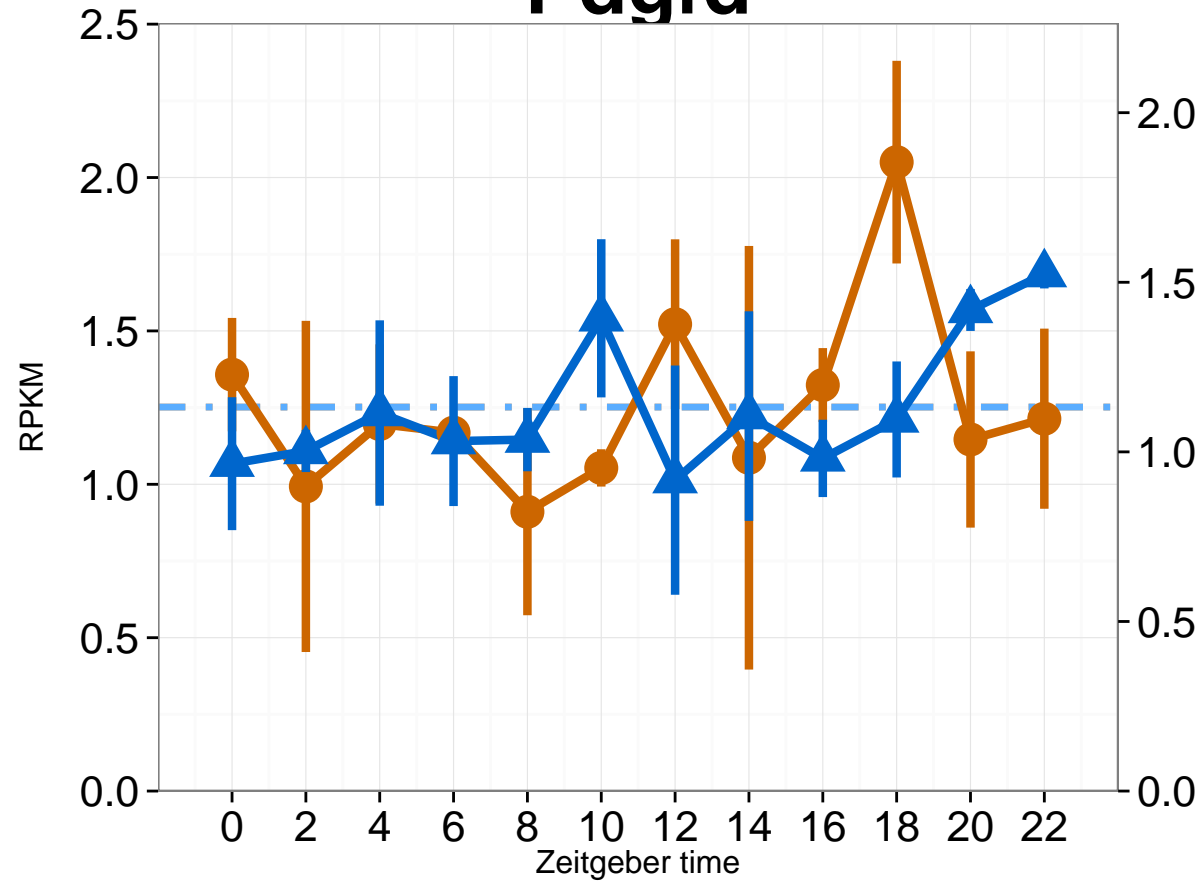

## Pdgfd

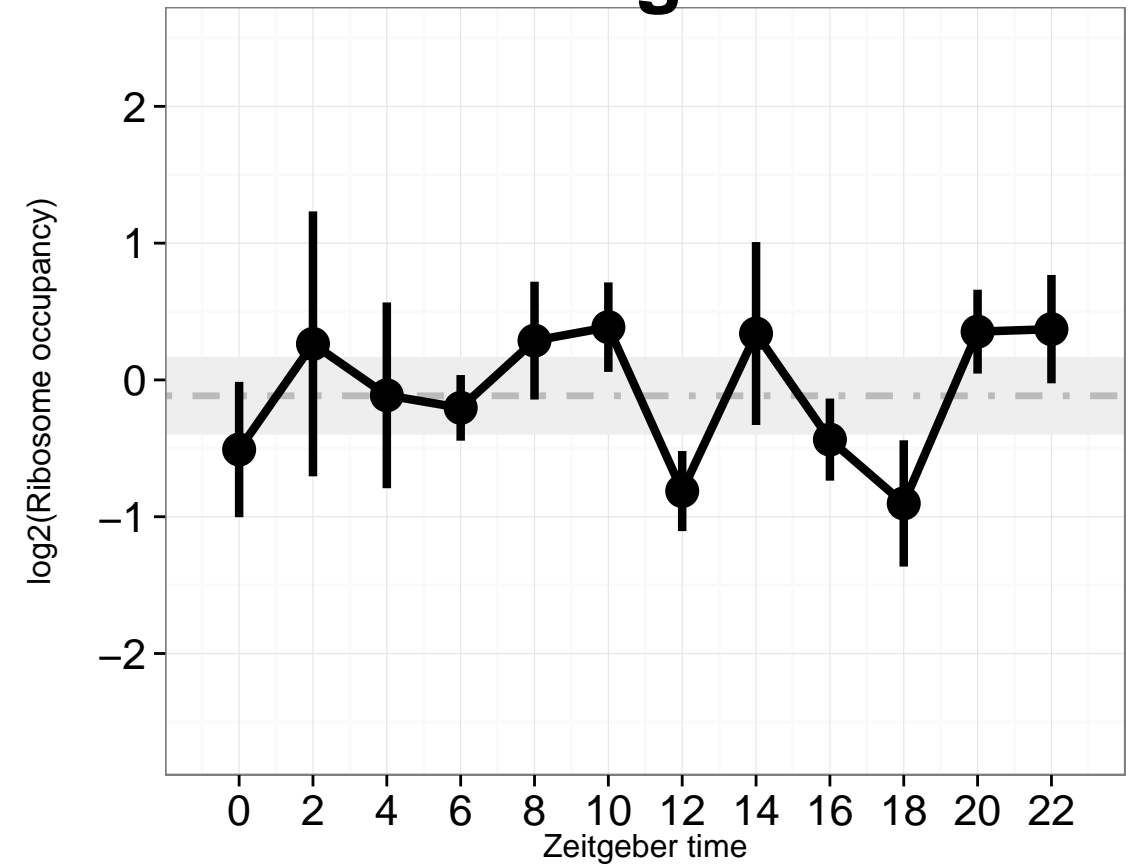

Supplement: SuppDataset_1.zip [file Pdgfd_set_A.pdf › Supplemental Dataset 1/A-mRNA_nonrhyth_translation_nonrhyth/Pdgfd_set_A.pdf]

**Pdgfrl TR**

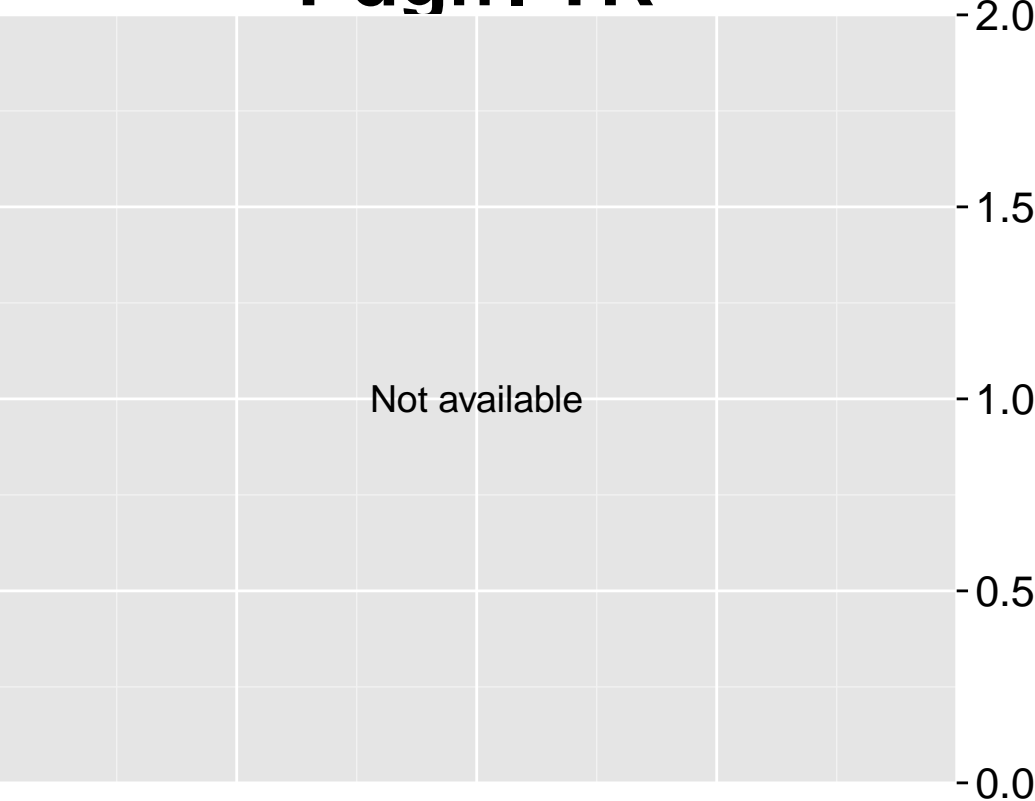

**Pdgfrl log2(Ribosome occupancy**

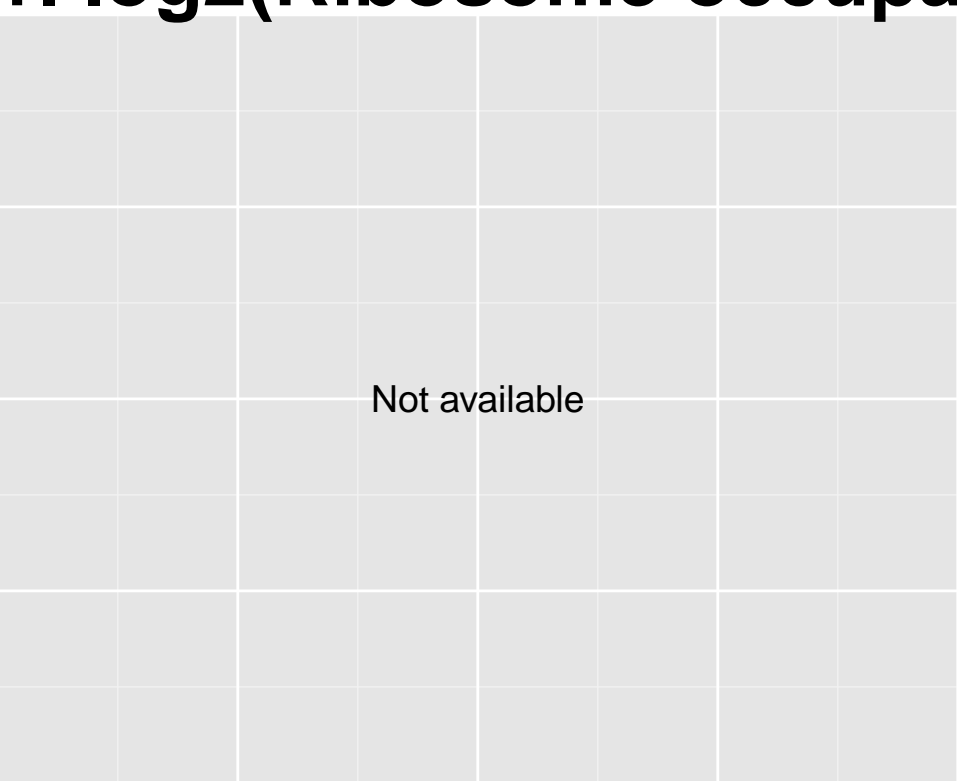

Supplement: SuppDataset_1.zip [file Pdgfrl_set_A.pdf › Supplemental Dataset 1/A-mRNA_nonrhyth_translation_nonrhyth/Pdgfrl_set_A.pdf]

## Pdha1

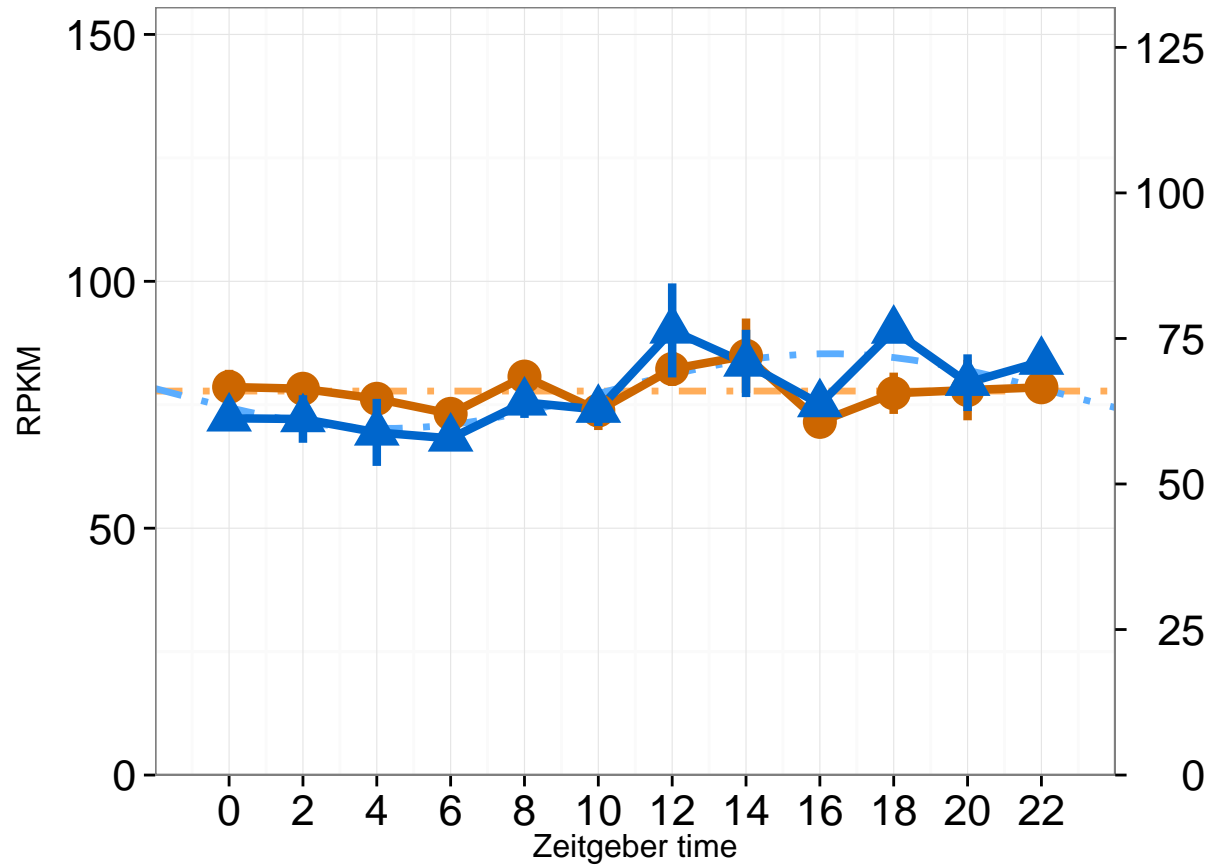

## Pdha1

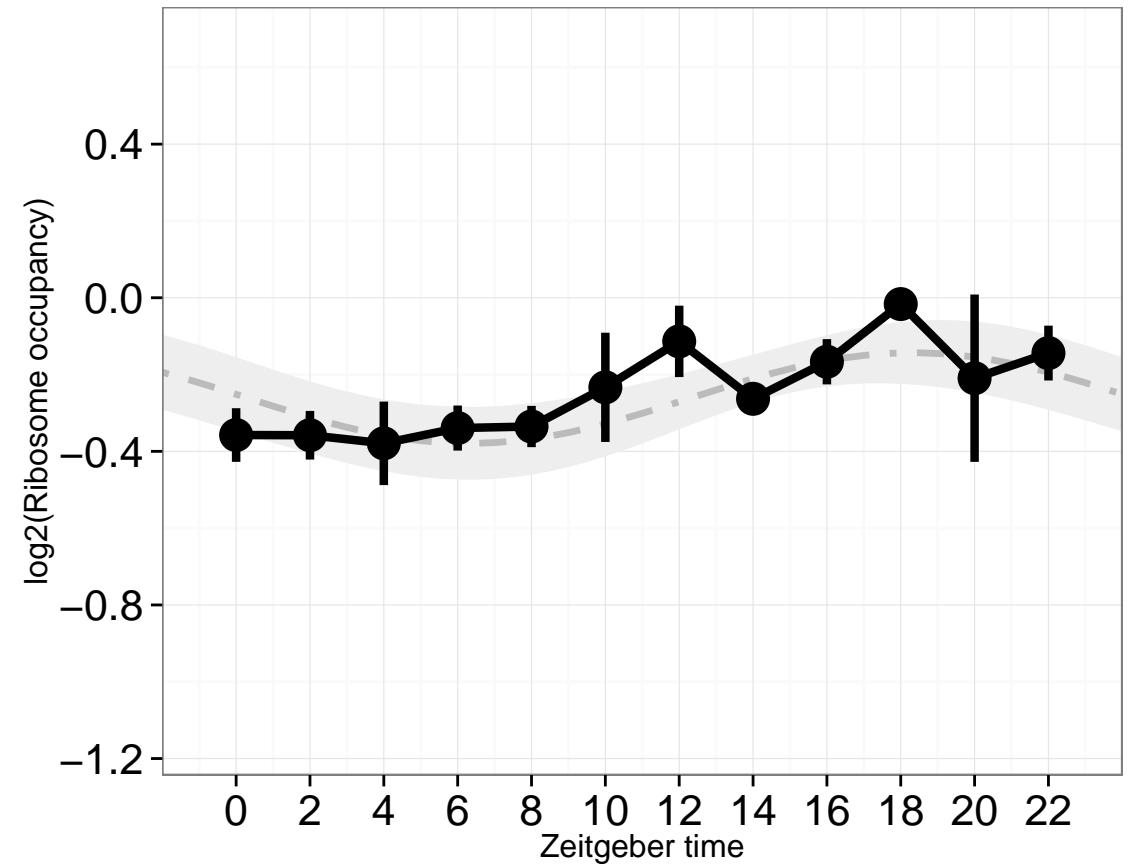

Supplement: SuppDataset_1.zip [file Pdha1_set_A.pdf › Supplemental Dataset 1/A-mRNA_nonrhyth_translation_nonrhyth/Pdha1_set_A.pdf]

## Pdhx

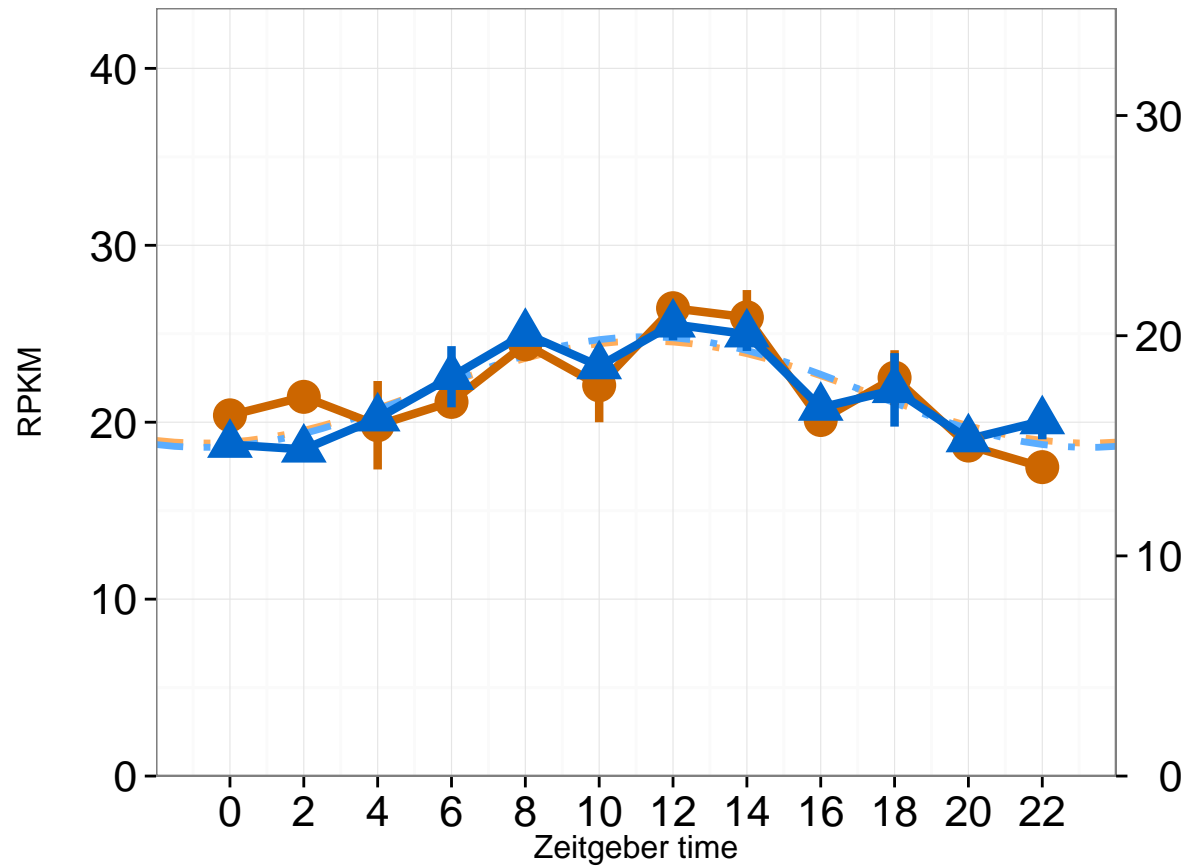

## Pdhx

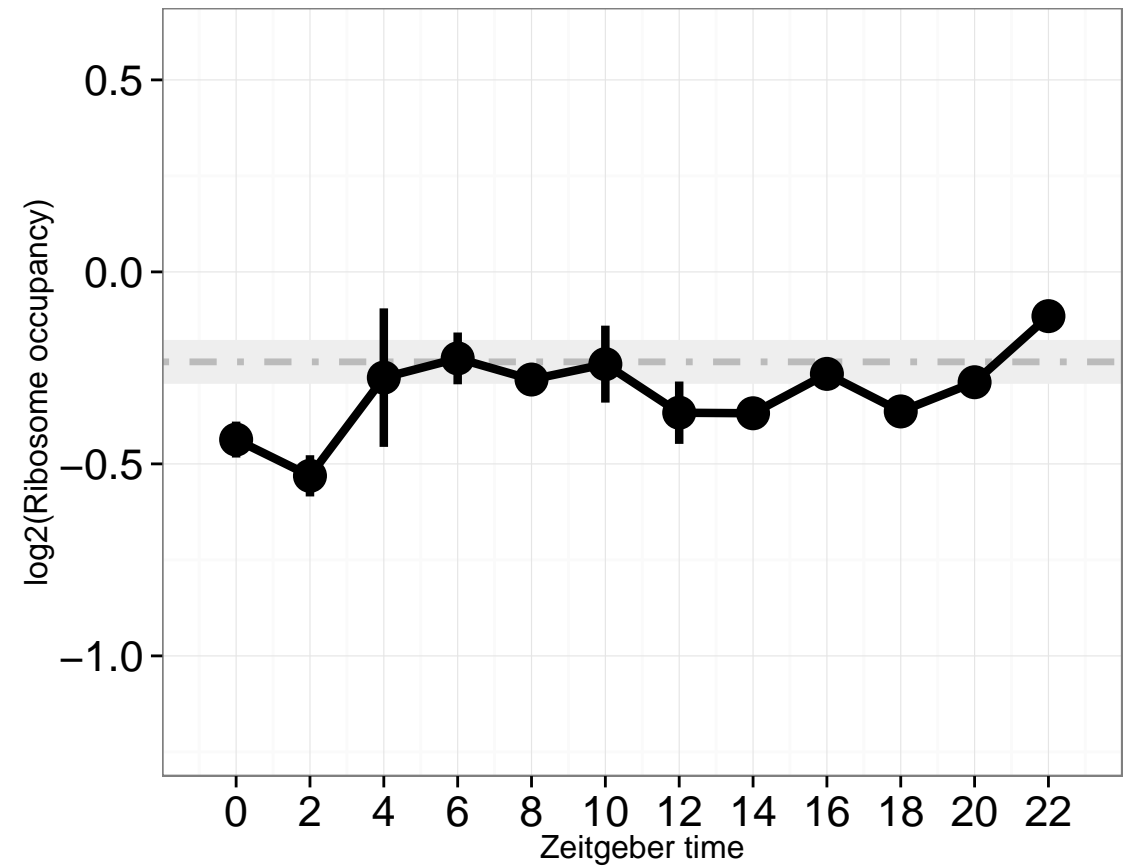

Supplement: SuppDataset_1.zip [file Pdhx_set_A.pdf › Supplemental Dataset 1/A-mRNA_nonrhyth_translation_nonrhyth/Pdhx_set_A.pdf]

## Pdia2

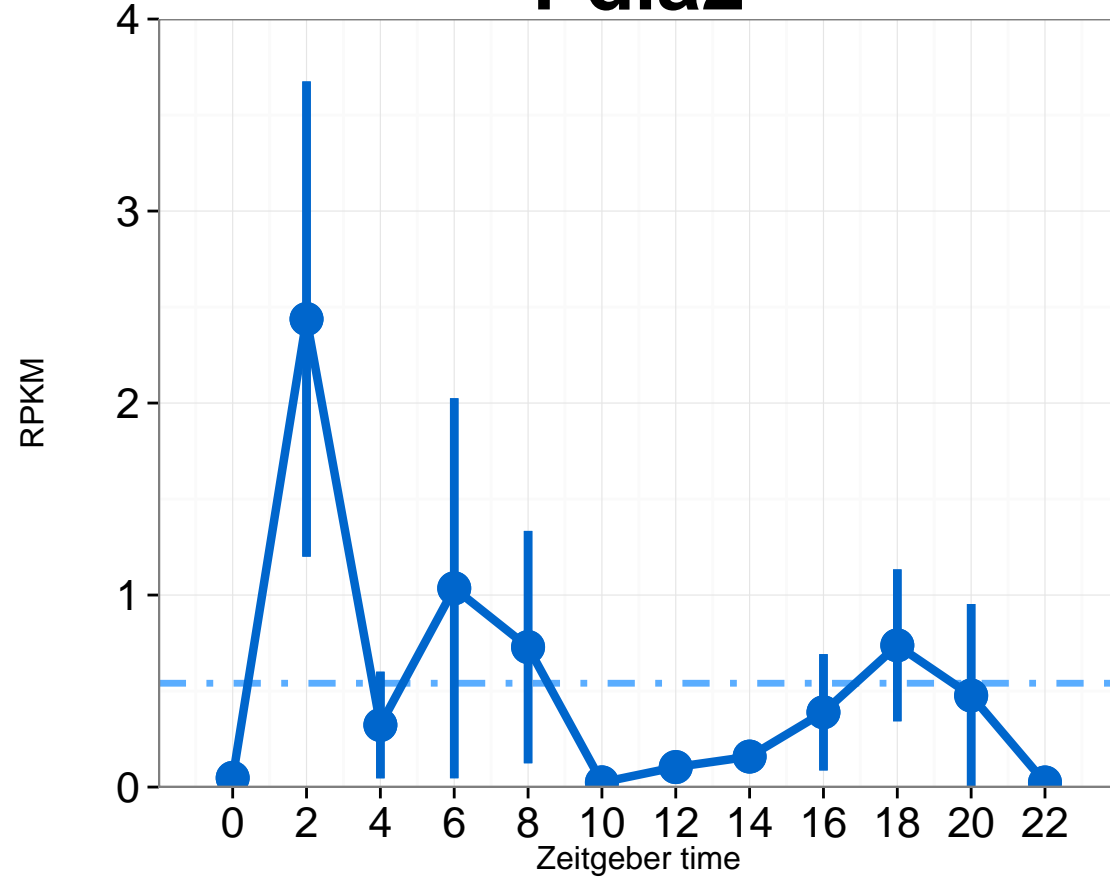

## Pdia2 log2(Ribosome occupancy)

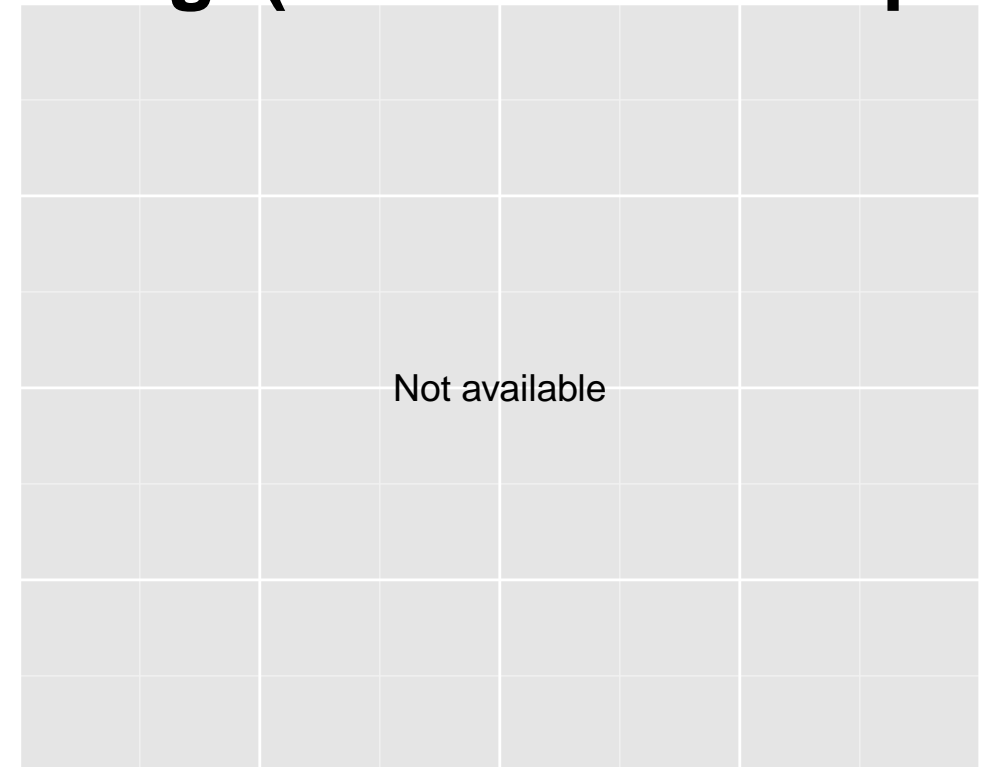

Supplement: SuppDataset_1.zip [file Pdia2_set_A.pdf › Supplemental Dataset 1/A-mRNA_nonrhyth_translation_nonrhyth/Pdia2_set_A.pdf]
