# Supplementary figures and images for: Ribosome profiling reveals the rhythmic liver translatome and circadian clock regulation by upstream open reading frames (part 53 of 113)
Source: HighWire-hosted journal article supplement (doi:10.1101/gr.195404.115), 2015-10-20

## Pdia3

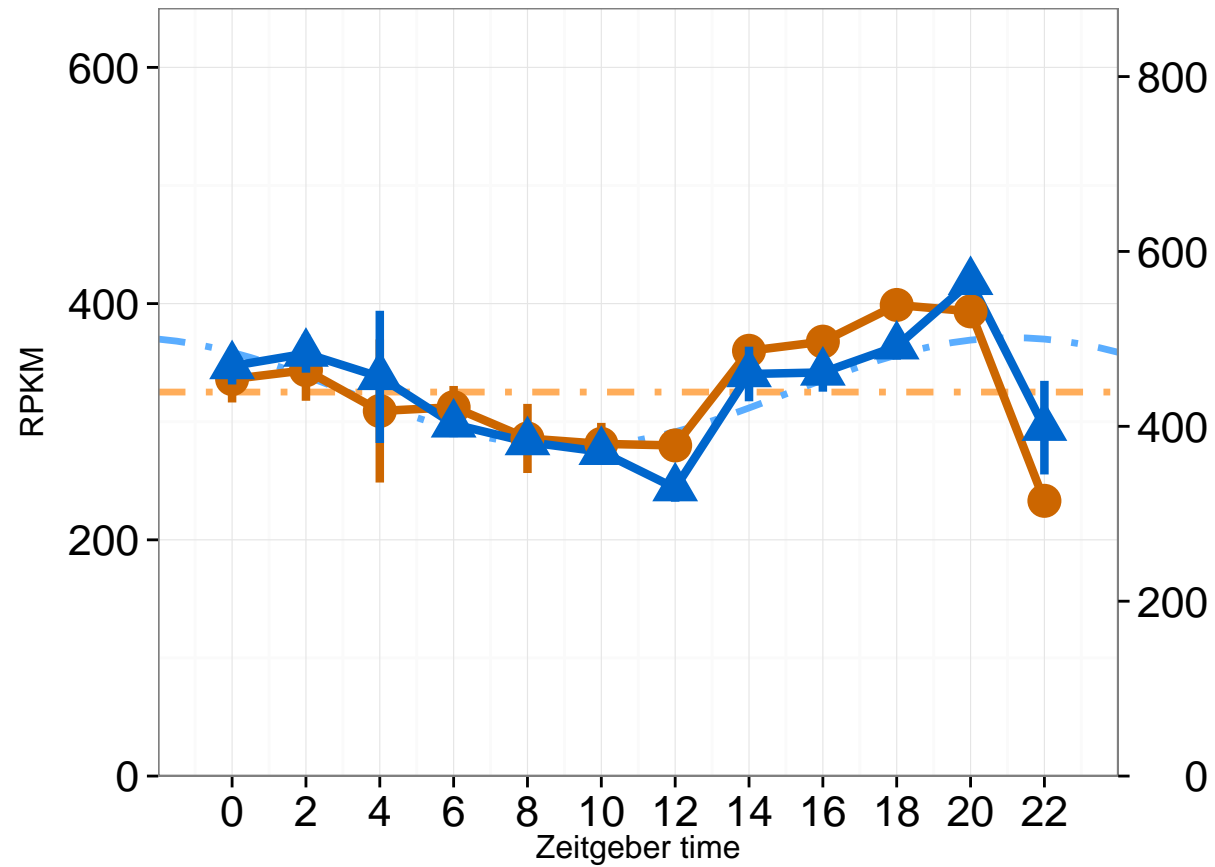

## Pdia3

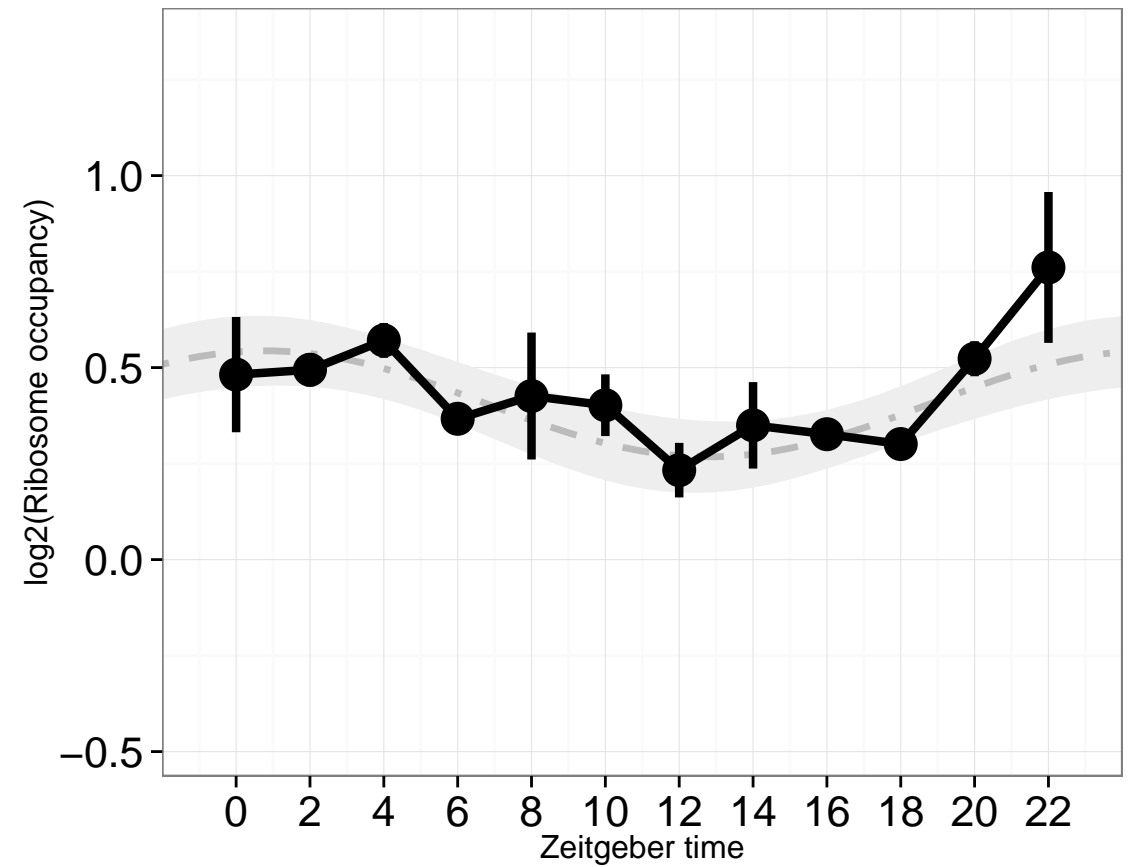

Supplement: SuppDataset_1.zip [file Pdia3_set_A.pdf › Supplemental Dataset 1/A-mRNA_nonrhyth_translation_nonrhyth/Pdia3_set_A.pdf]

## Pdia5

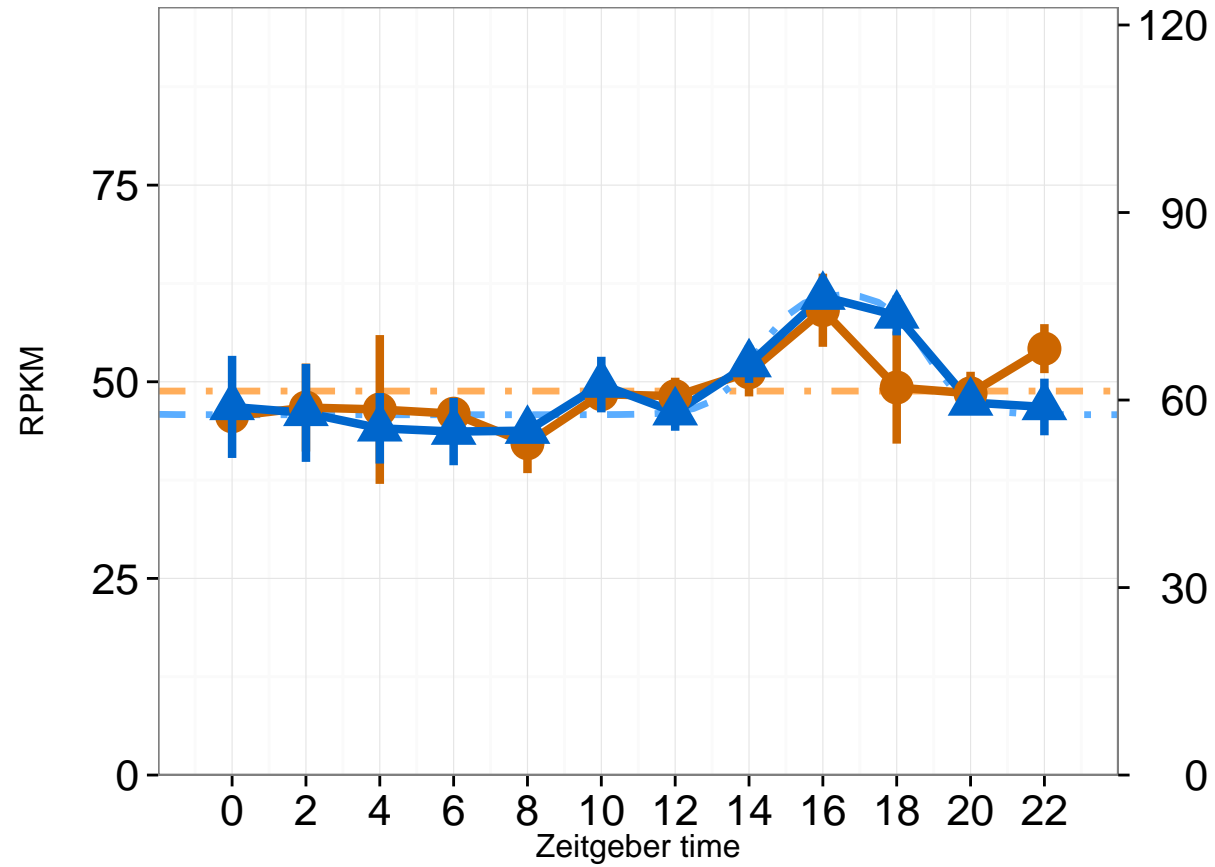

## Pdia5

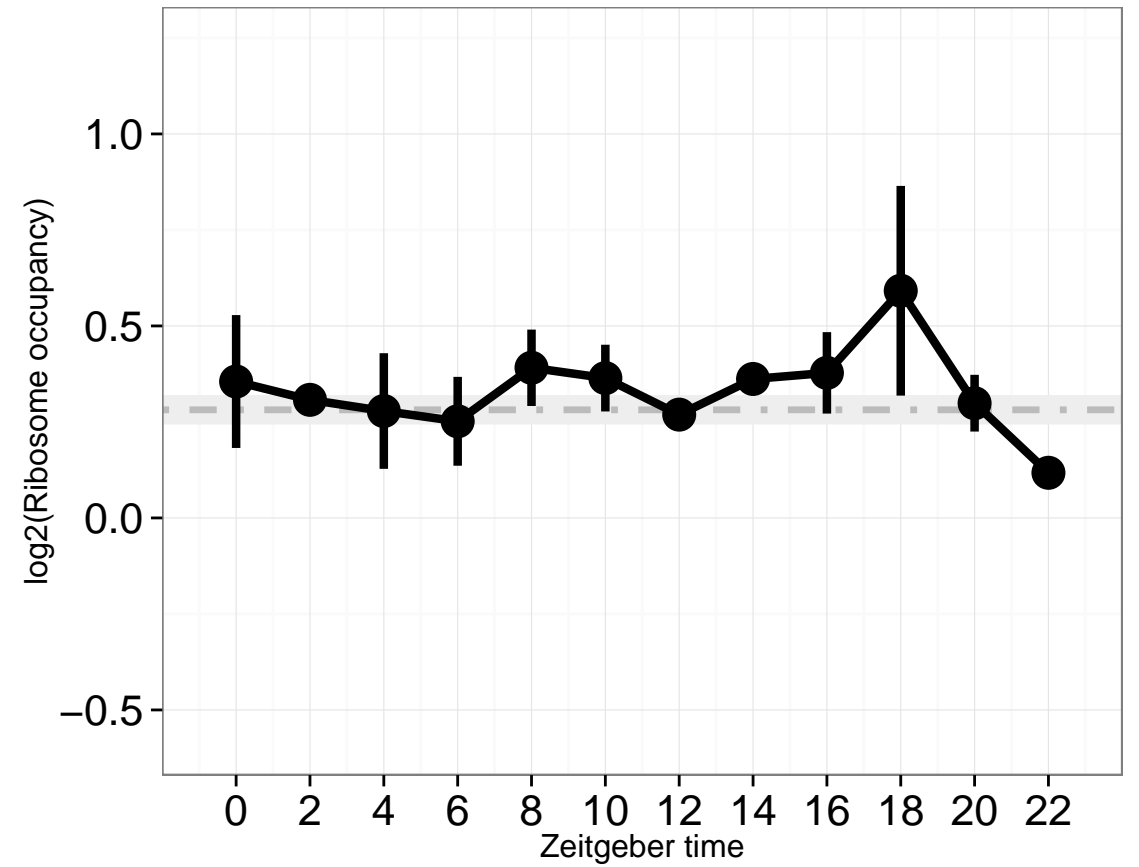

Supplement: SuppDataset_1.zip [file Pdia5_set_A.pdf › Supplemental Dataset 1/A-mRNA_nonrhyth_translation_nonrhyth/Pdia5_set_A.pdf]

## Pdia6

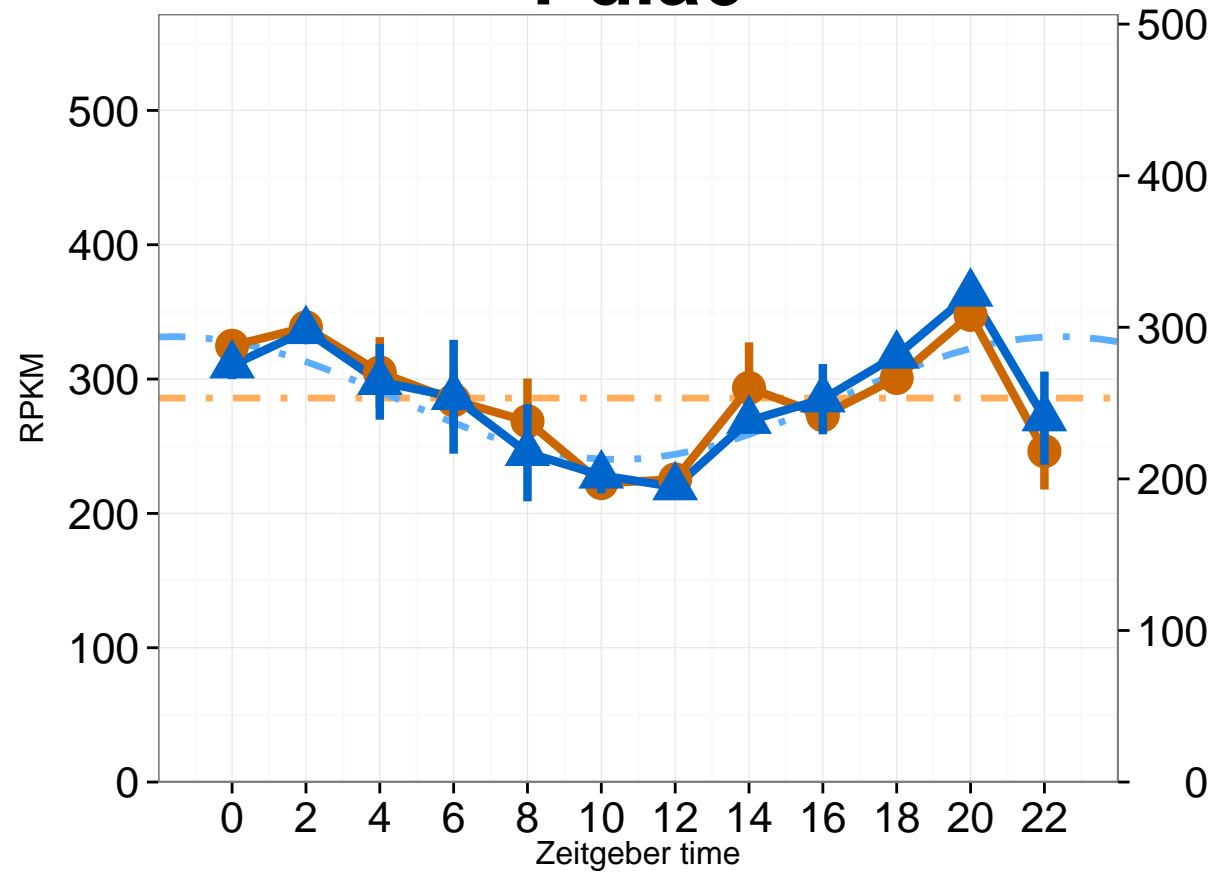

## Pdia6

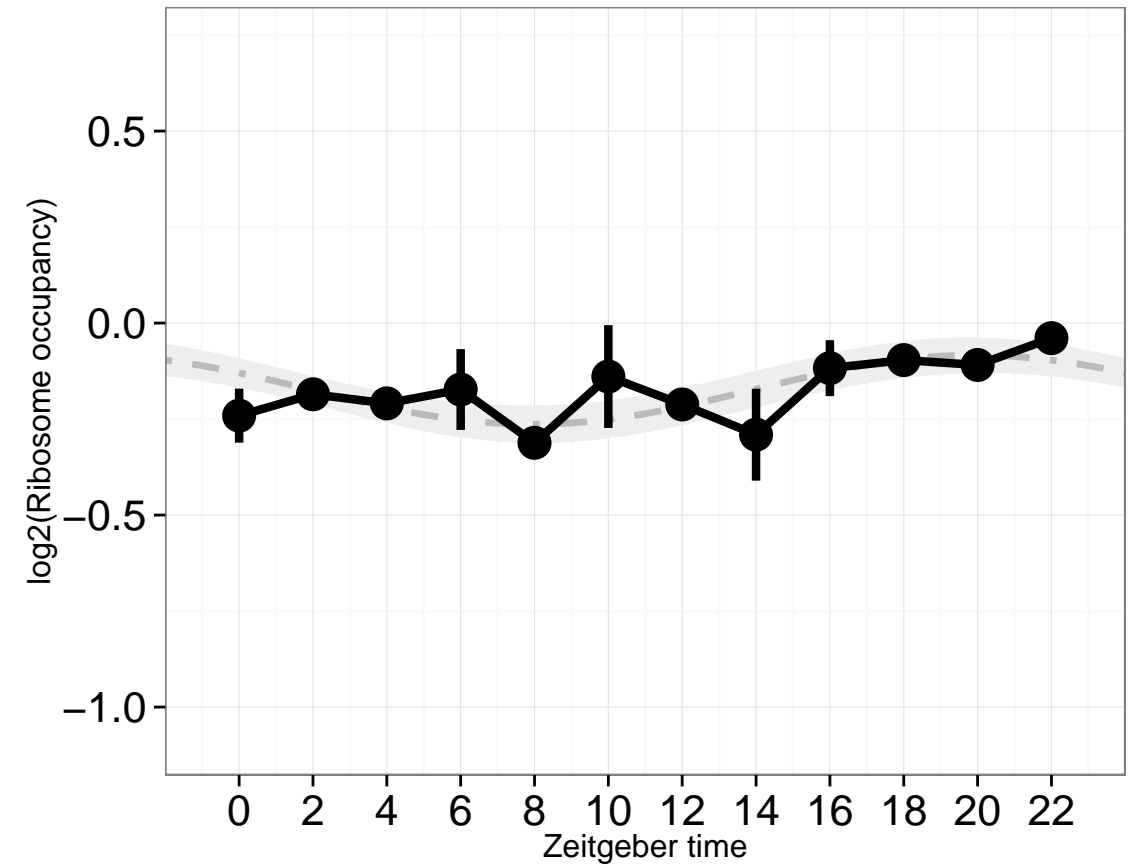

Supplement: SuppDataset_1.zip [file Pdia6_set_A.pdf › Supplemental Dataset 1/A-mRNA_nonrhyth_translation_nonrhyth/Pdia6_set_A.pdf]

## Pdik1l

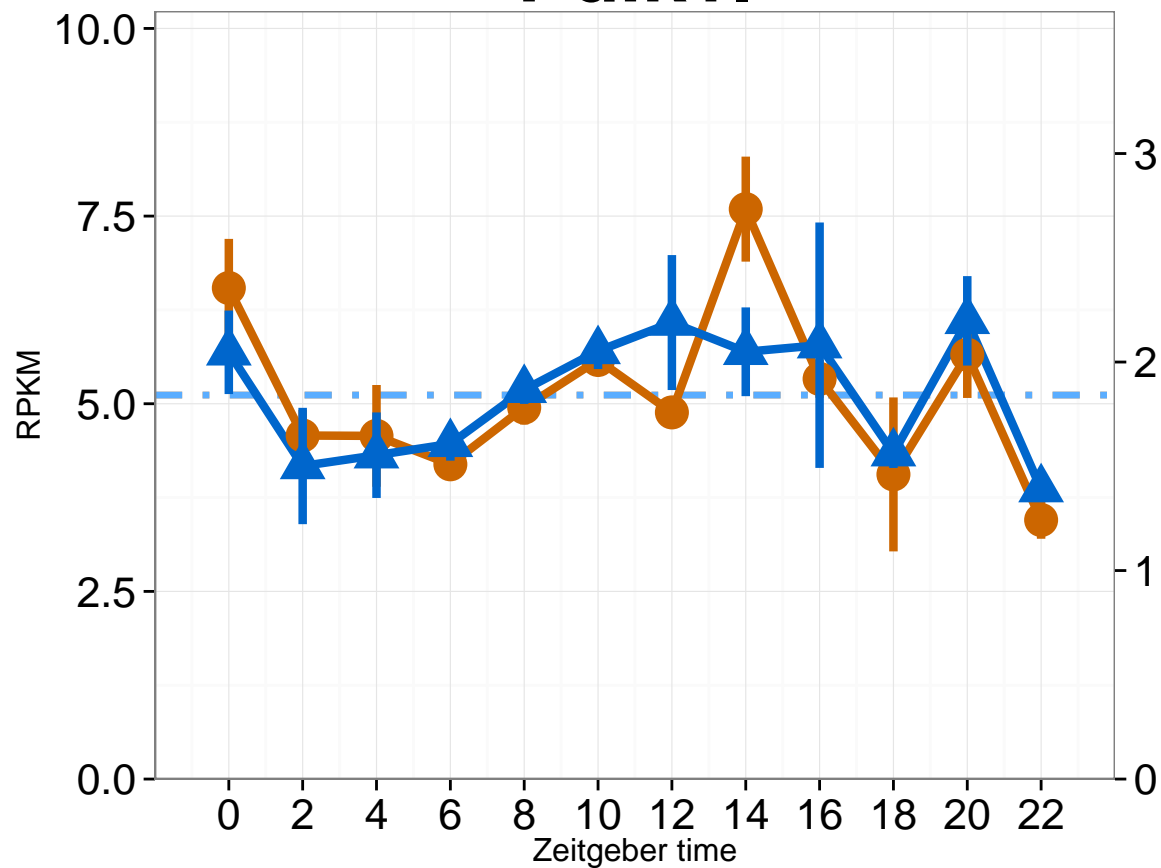

## Pdik1l

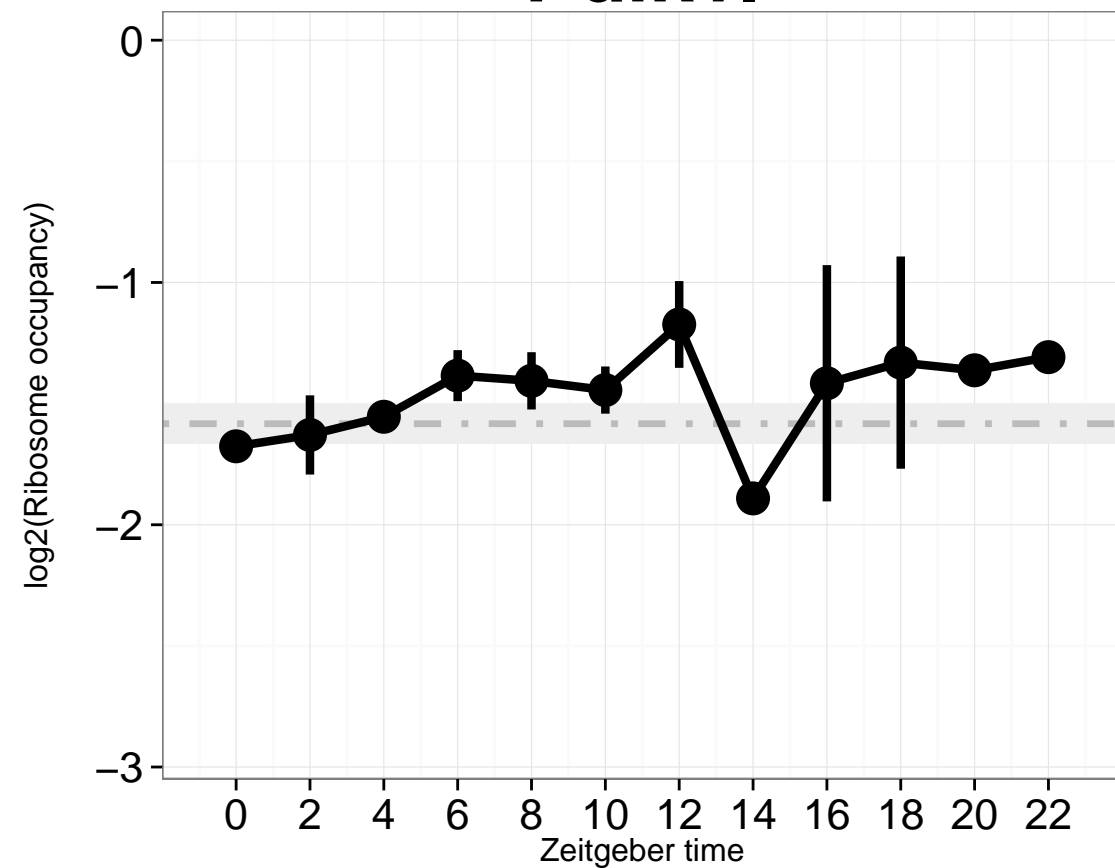

Supplement: SuppDataset_1.zip [file Pdik1l_set_A.pdf › Supplemental Dataset 1/A-mRNA_nonrhyth_translation_nonrhyth/Pdik1l_set_A.pdf]

## Pdilt

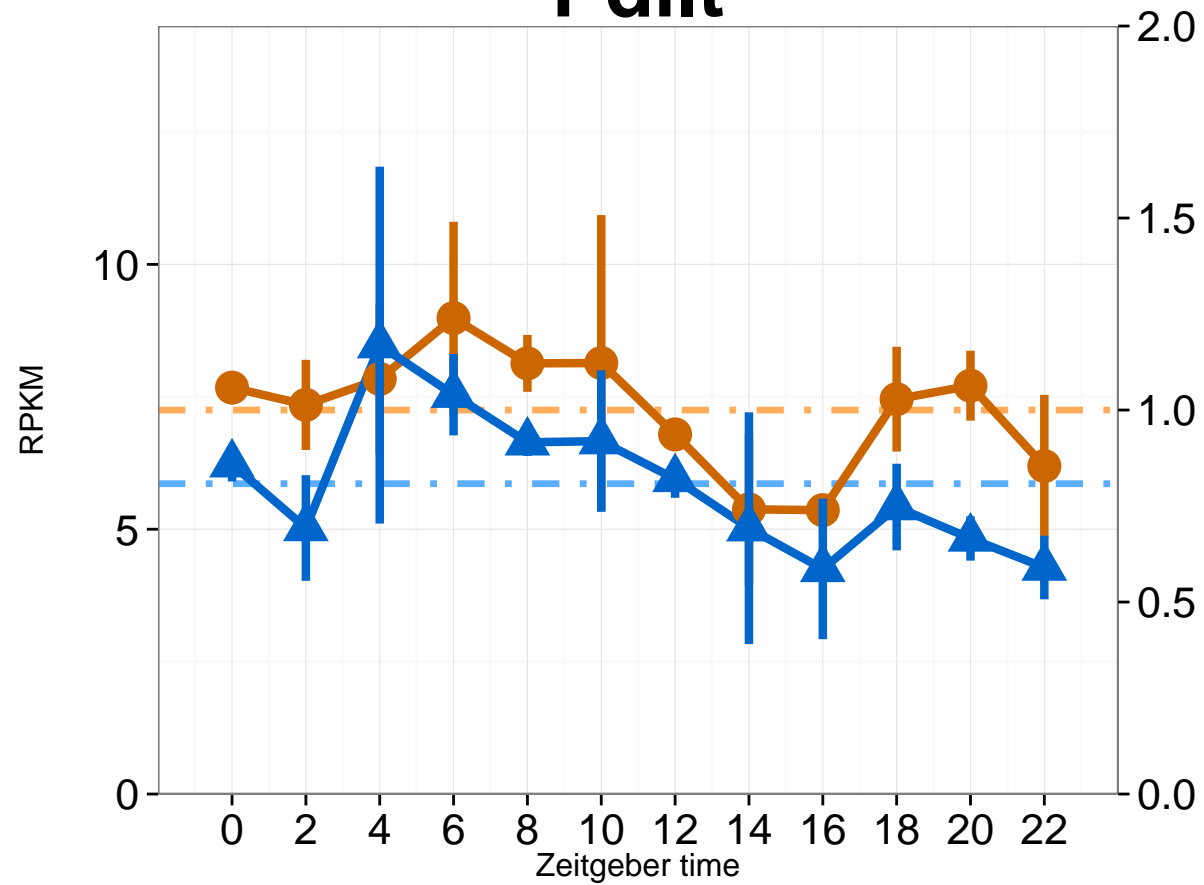

## Pdilt

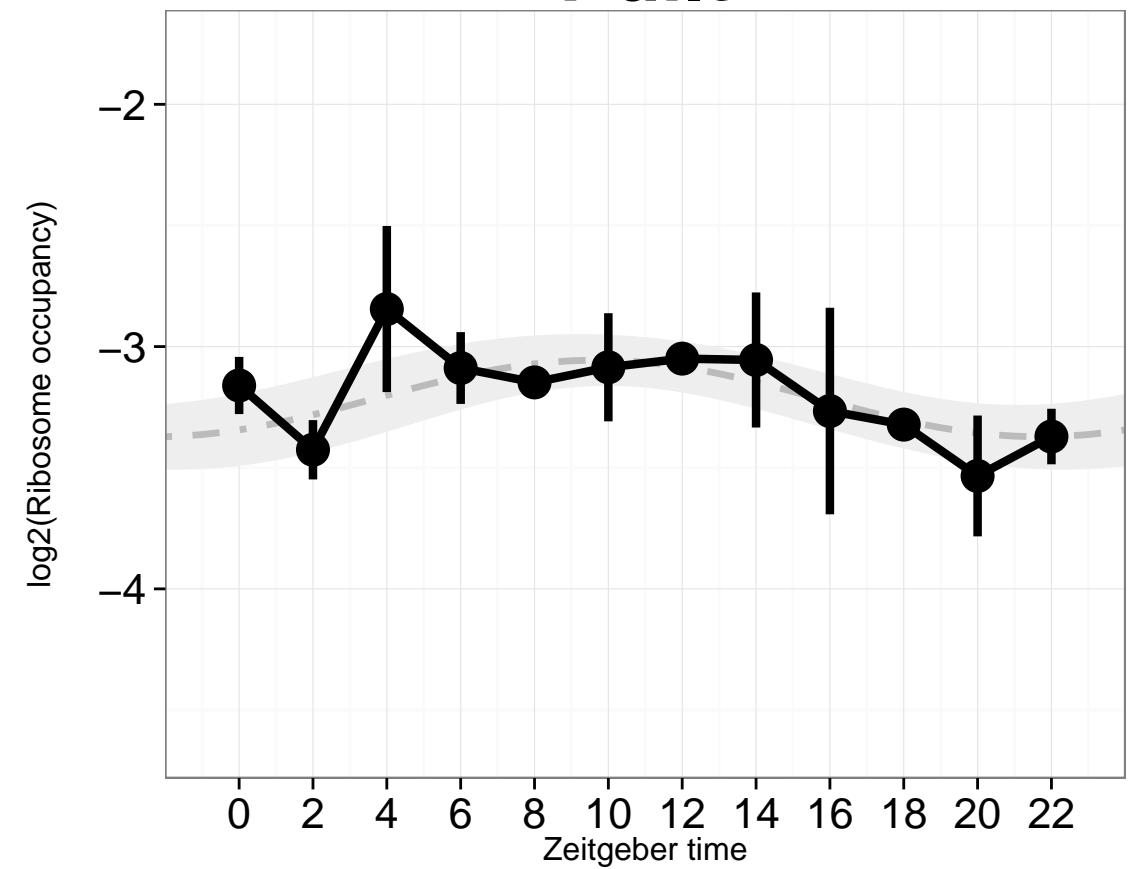

Supplement: SuppDataset_1.zip [file Pdilt_set_A.pdf › Supplemental Dataset 1/A-mRNA_nonrhyth_translation_nonrhyth/Pdilt_set_A.pdf]

## Pdk2

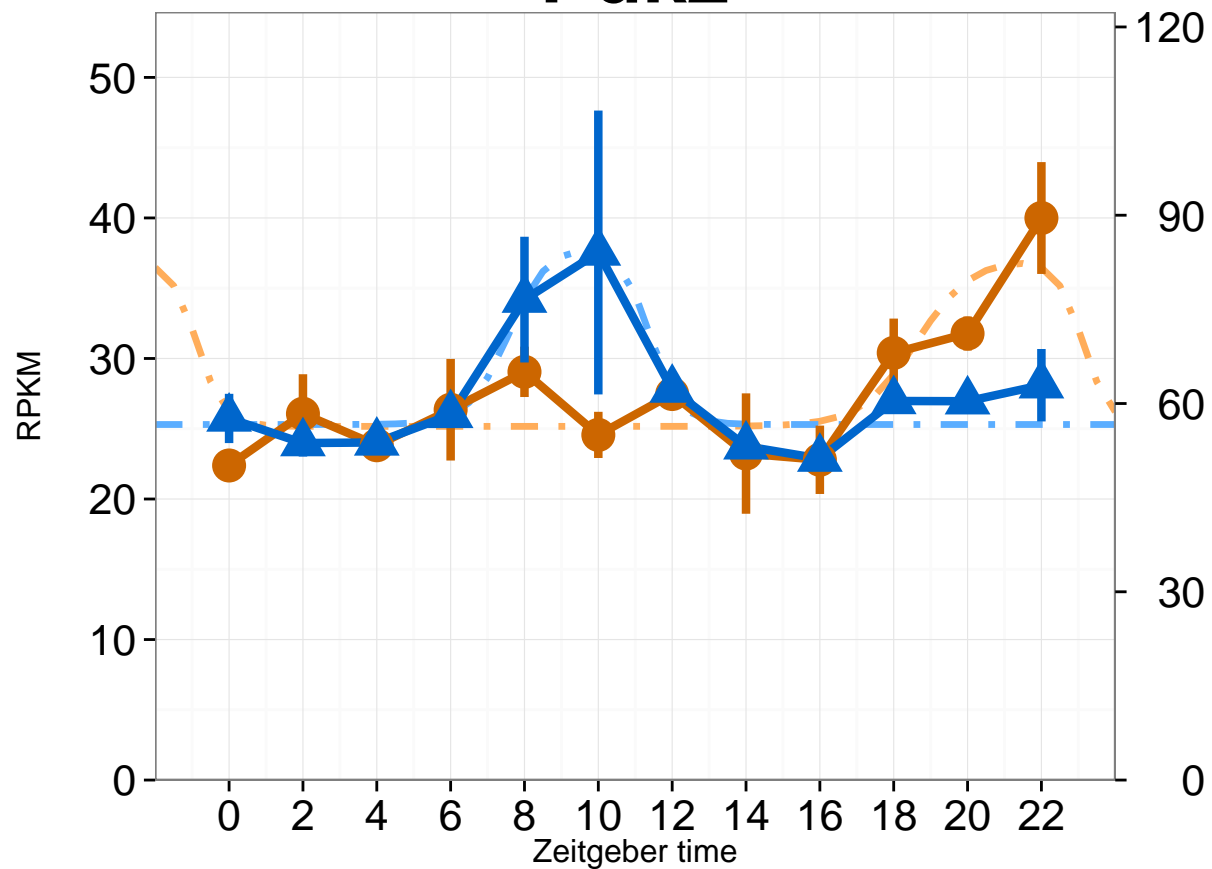

## Pdk2

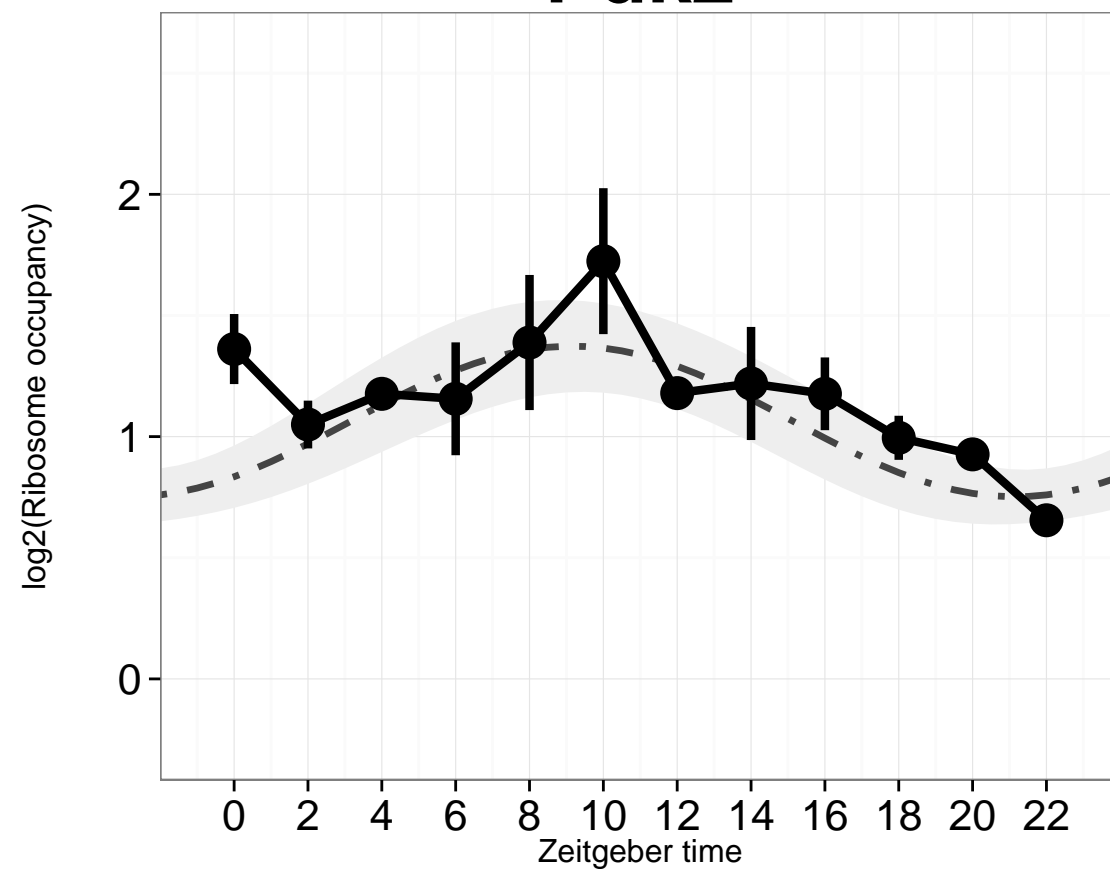

Supplement: SuppDataset_1.zip [file Pdk2_set_A.pdf › Supplemental Dataset 1/A-mRNA_nonrhyth_translation_nonrhyth/Pdk2_set_A.pdf]

## Pdlim1

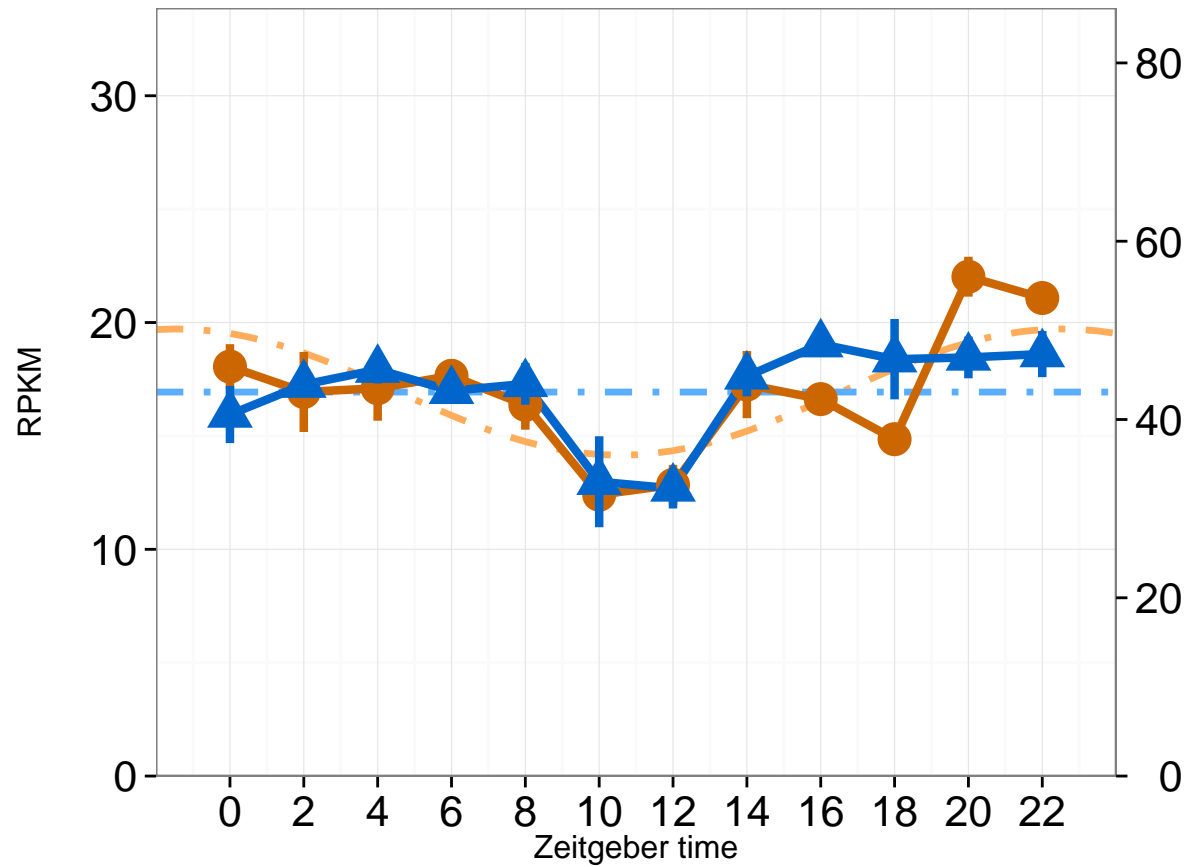

## Pdlim1

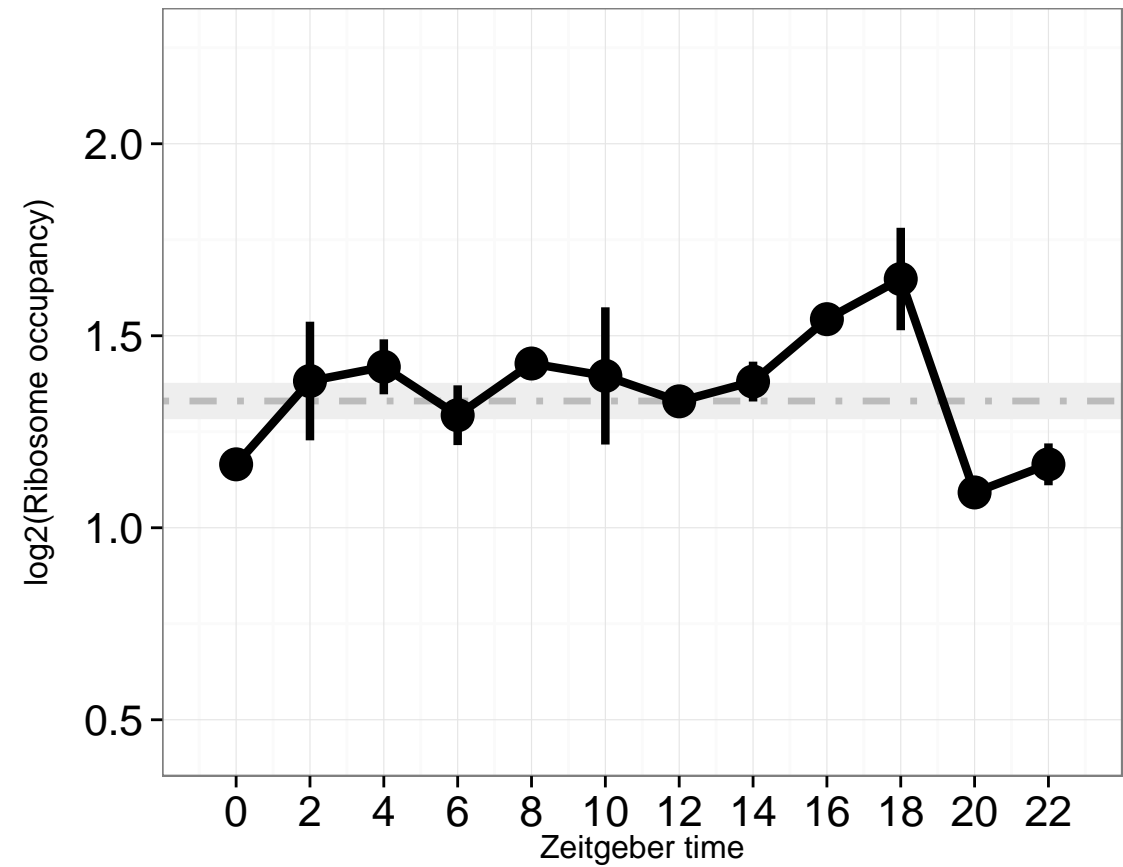

Supplement: SuppDataset_1.zip [file Pdlim1_set_A.pdf › Supplemental Dataset 1/A-mRNA_nonrhyth_translation_nonrhyth/Pdlim1_set_A.pdf]

## Pdlim2

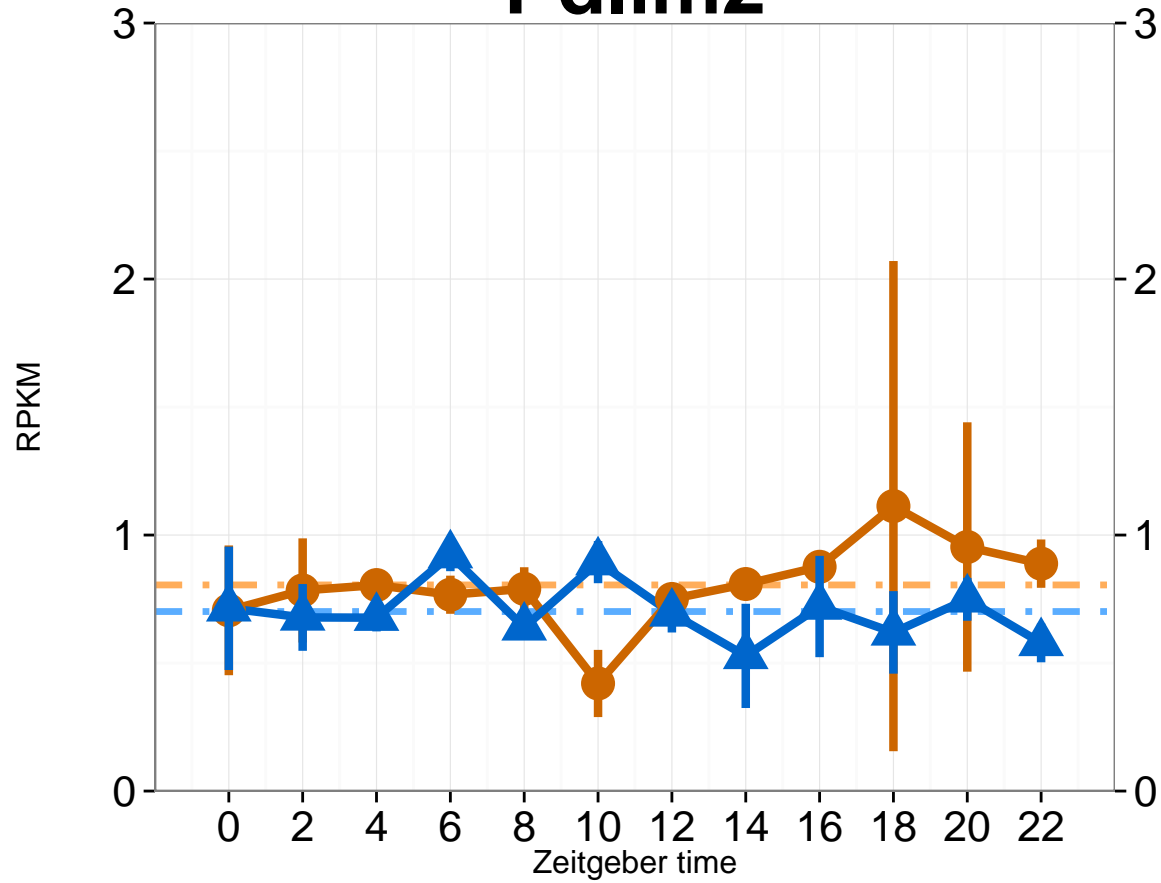

## Pdlim2

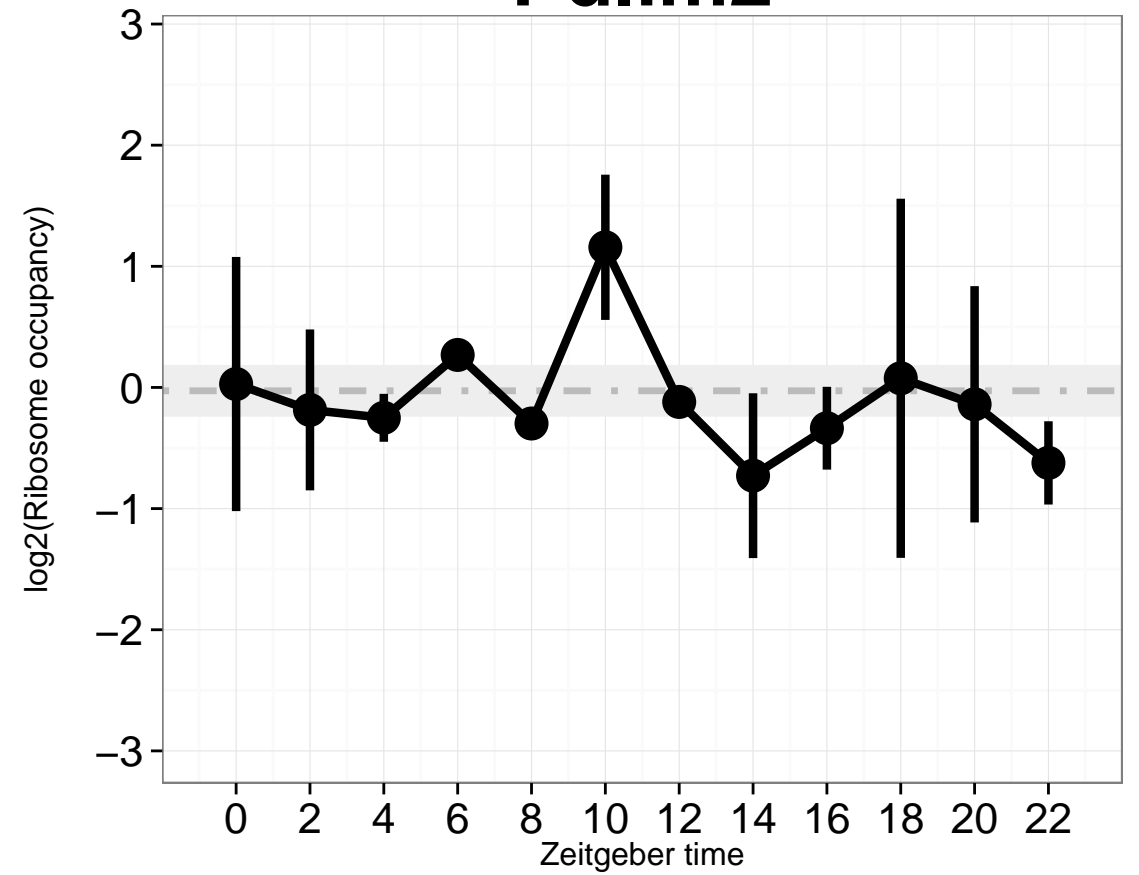

Supplement: SuppDataset_1.zip [file Pdlim2_set_A.pdf › Supplemental Dataset 1/A-mRNA_nonrhyth_translation_nonrhyth/Pdlim2_set_A.pdf]

## Pdlim5

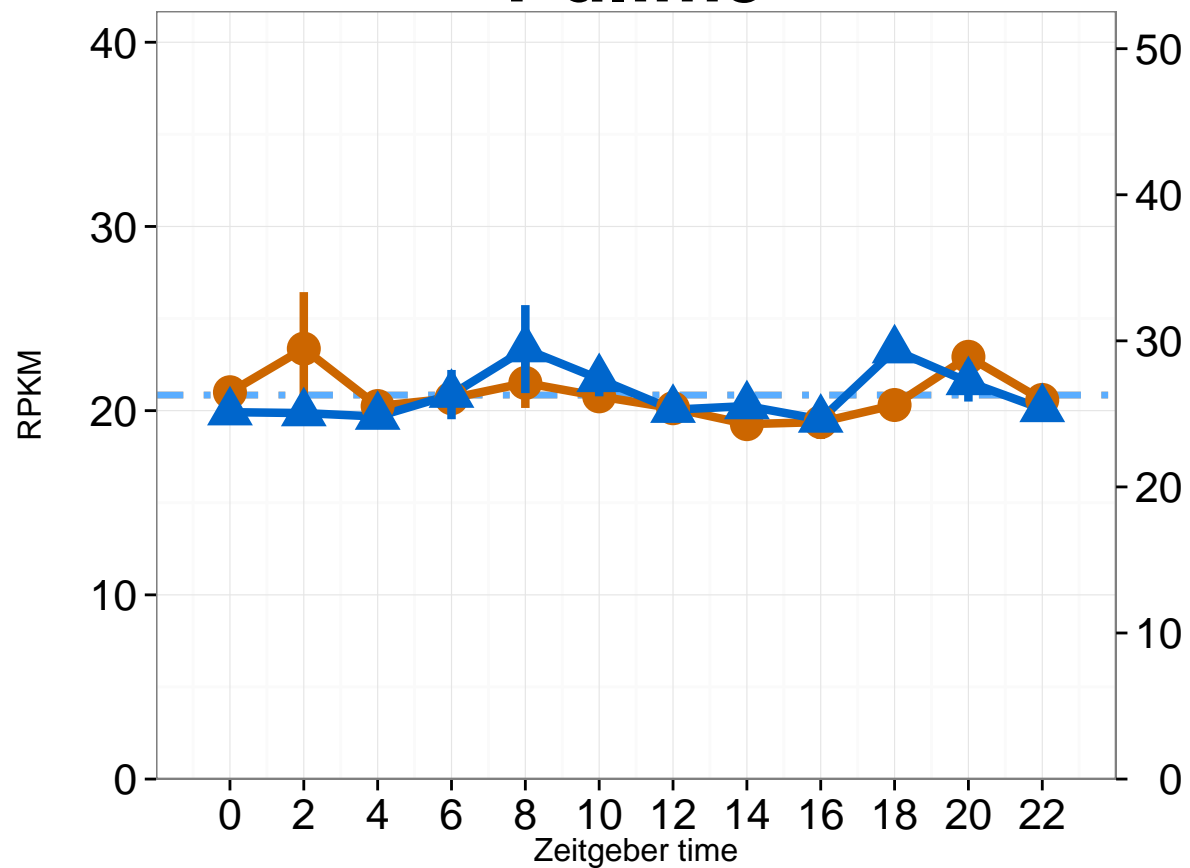

## Pdlim5

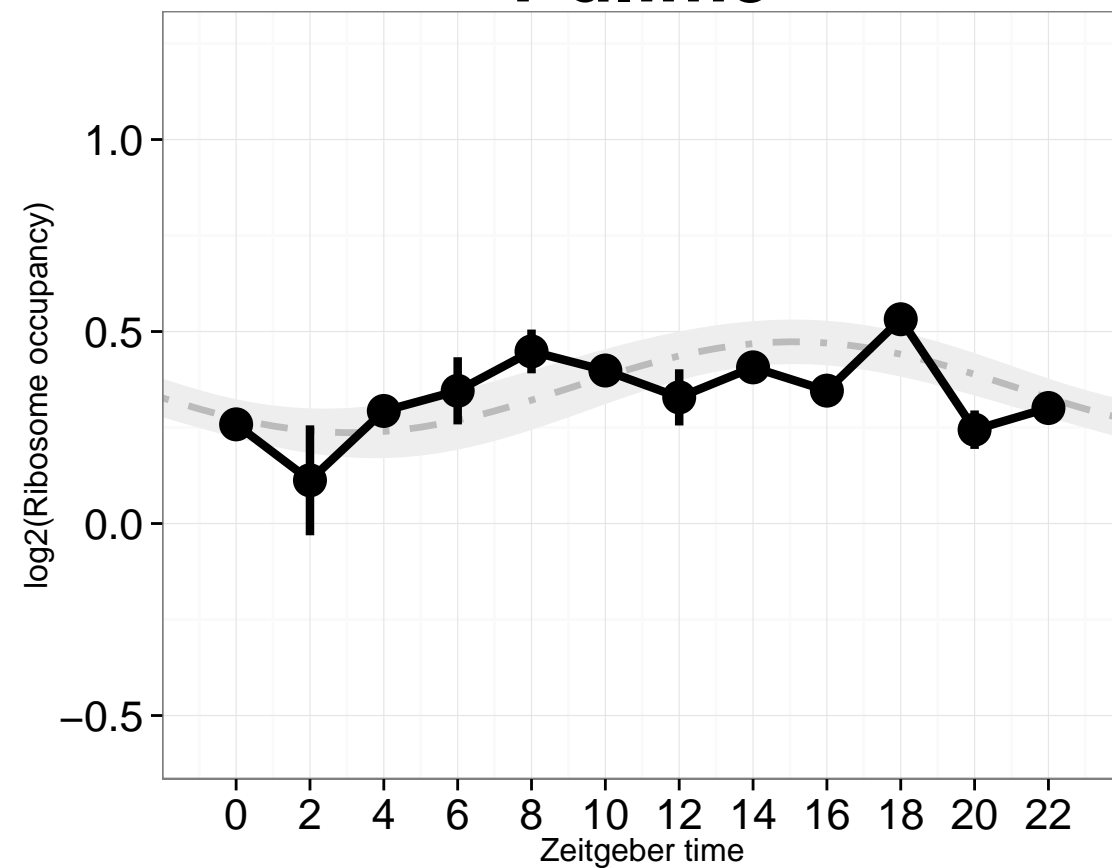

Supplement: SuppDataset_1.zip [file Pdlim5_set_A.pdf › Supplemental Dataset 1/A-mRNA_nonrhyth_translation_nonrhyth/Pdlim5_set_A.pdf]

## Pdlim7

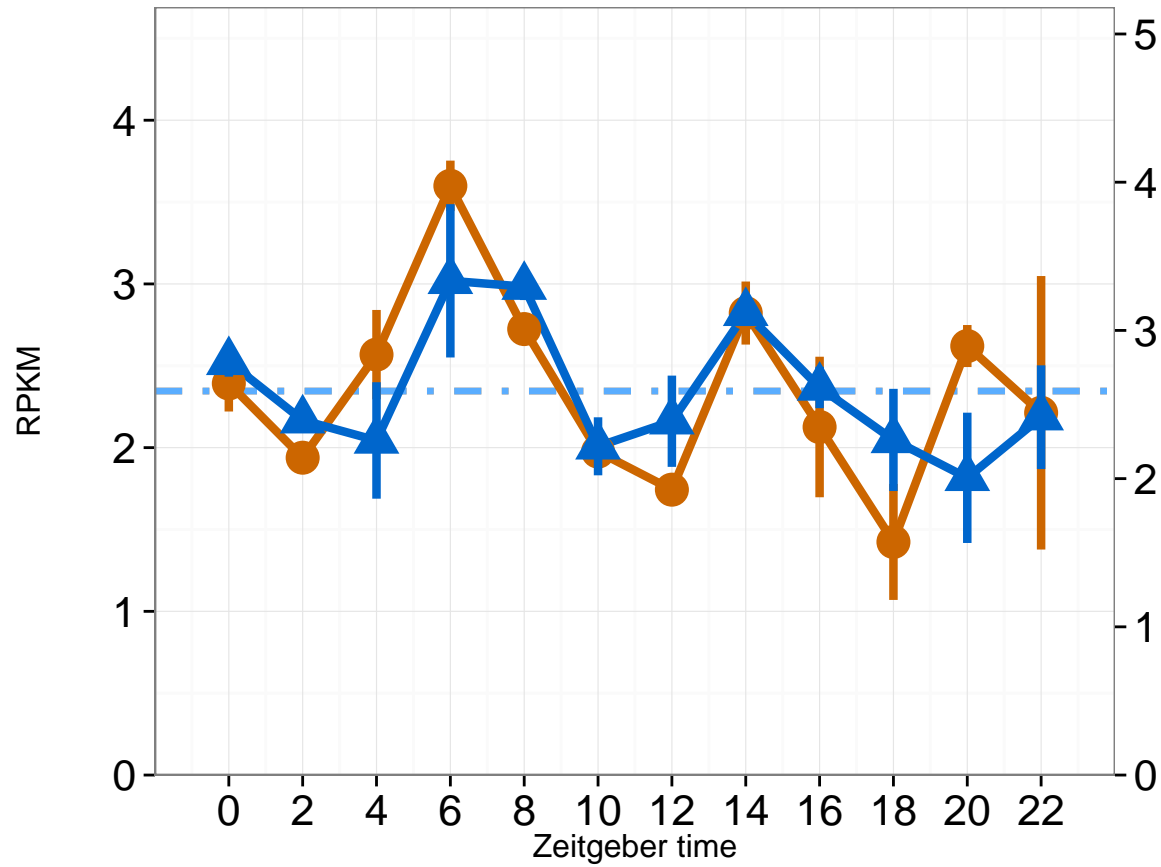

## Pdlim7

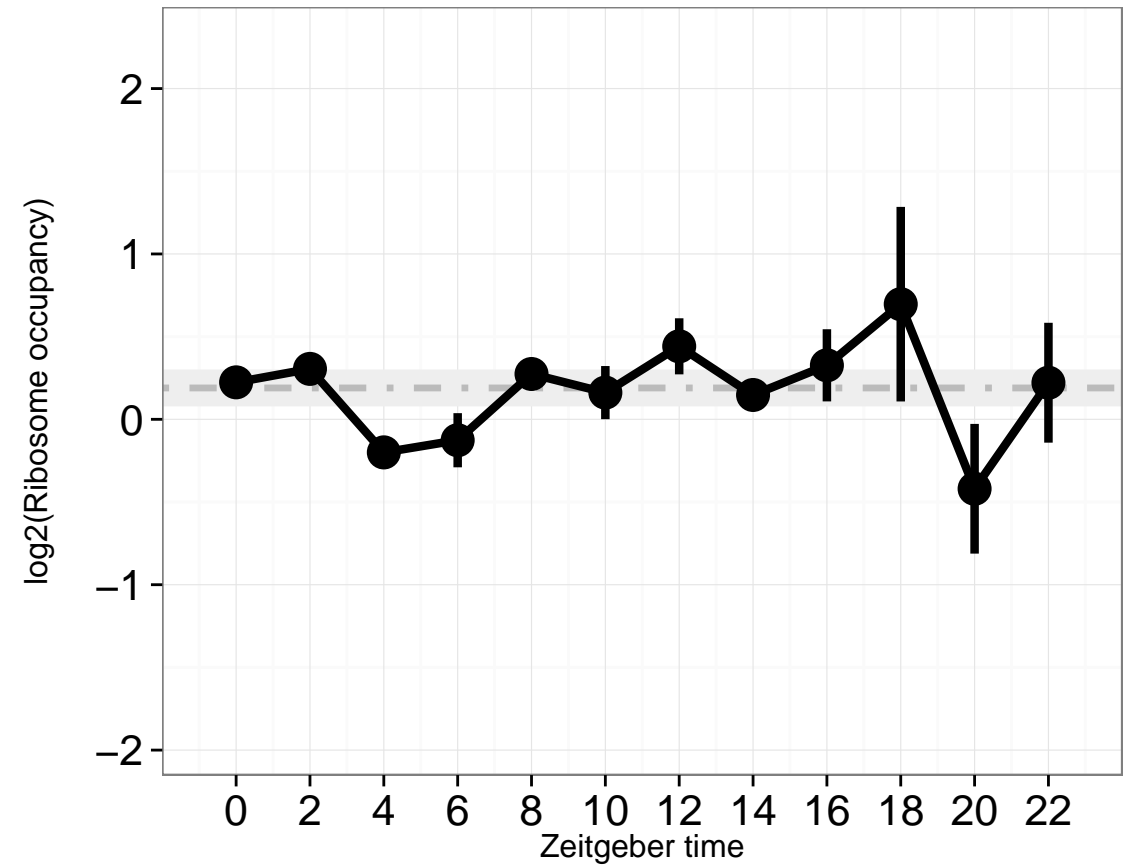

Supplement: SuppDataset_1.zip [file Pdlim7_set_A.pdf › Supplemental Dataset 1/A-mRNA_nonrhyth_translation_nonrhyth/Pdlim7_set_A.pdf]

## Pdp2

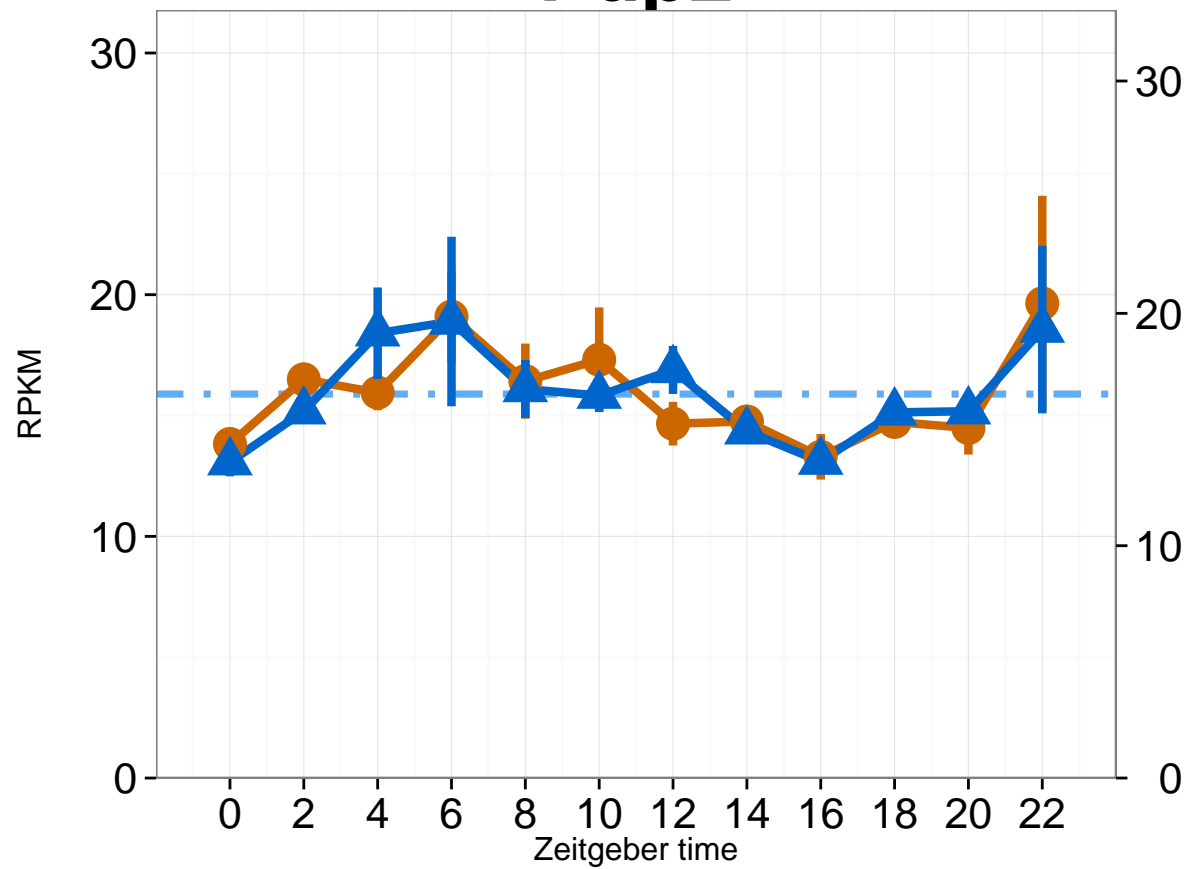

## Pdp2

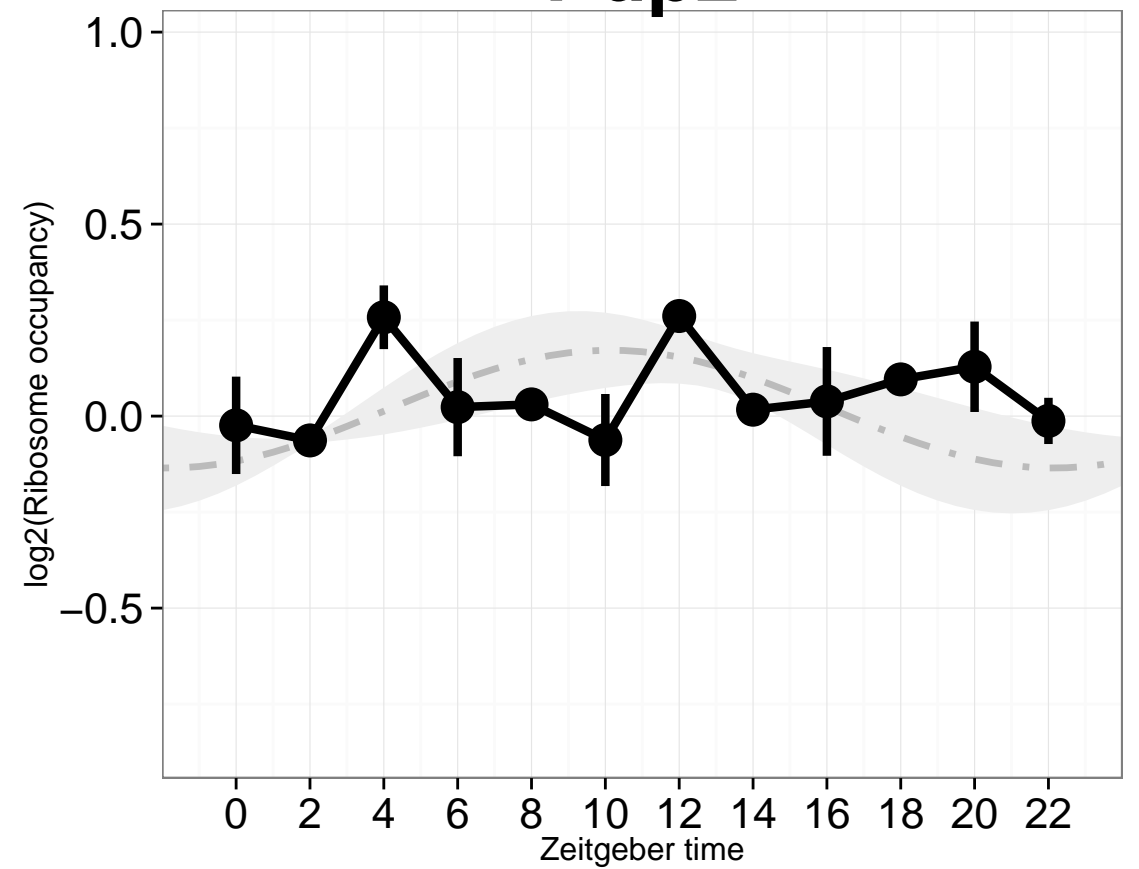

Supplement: SuppDataset_1.zip [file Pdp2_set_A.pdf › Supplemental Dataset 1/A-mRNA_nonrhyth_translation_nonrhyth/Pdp2_set_A.pdf]

## Pdpk1

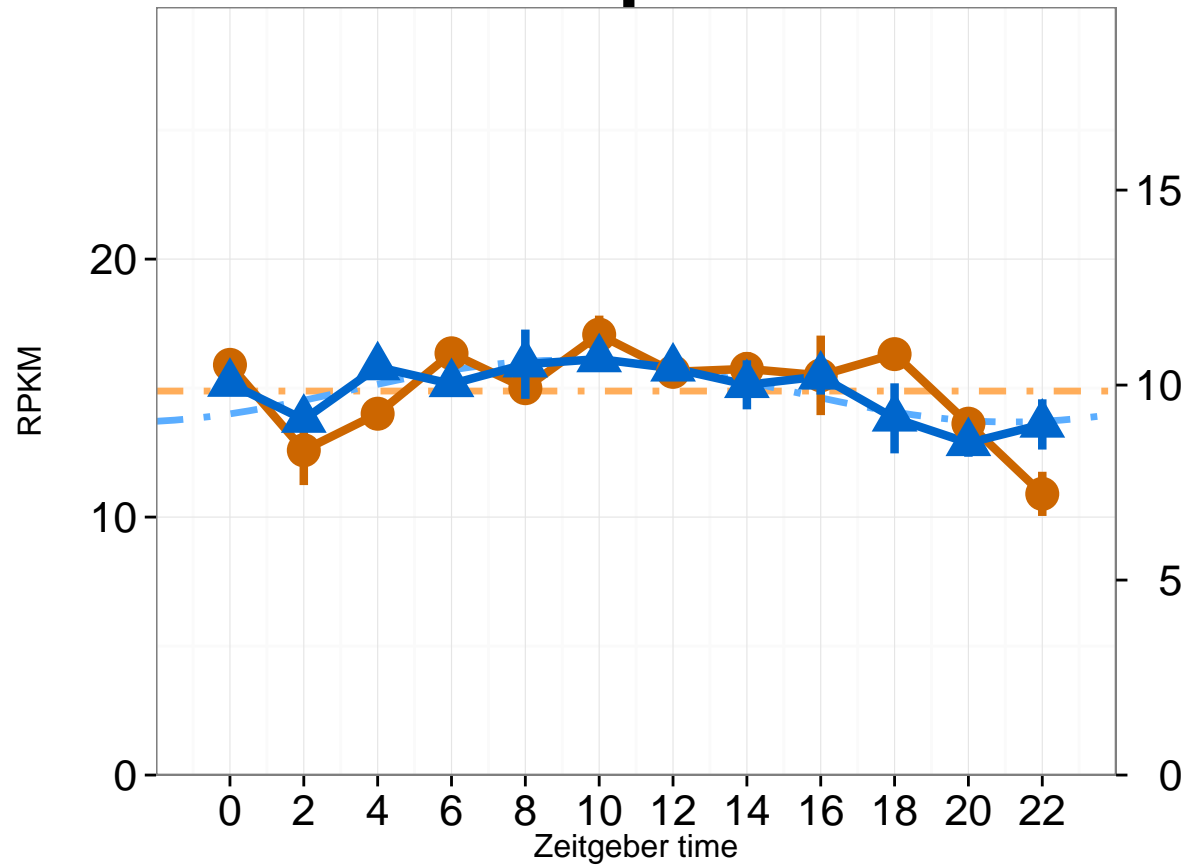

## Pdpc1

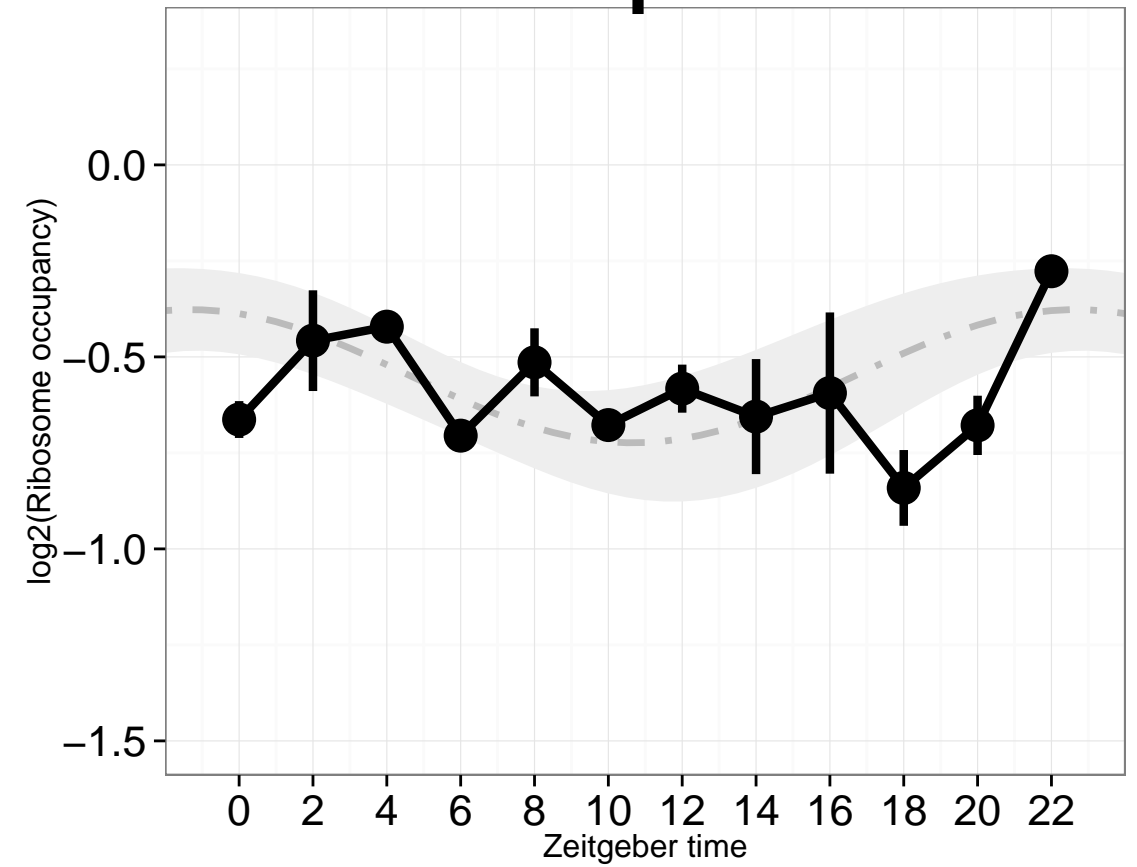

Supplement: SuppDataset_1.zip [file Pdpk1_set_A.pdf › Supplemental Dataset 1/A-mRNA_nonrhyth_translation_nonrhyth/Pdpk1_set_A.pdf]

# Pdpr

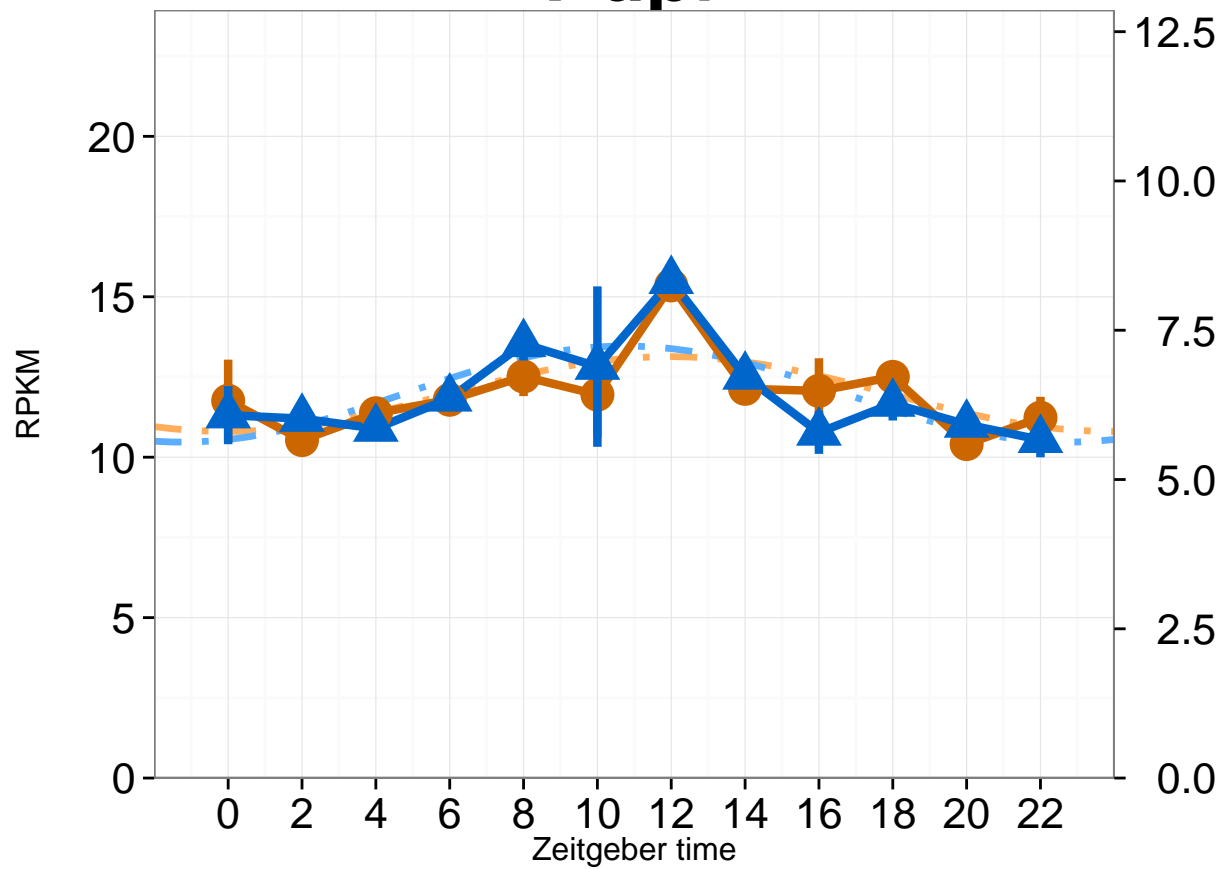

# Pdpr

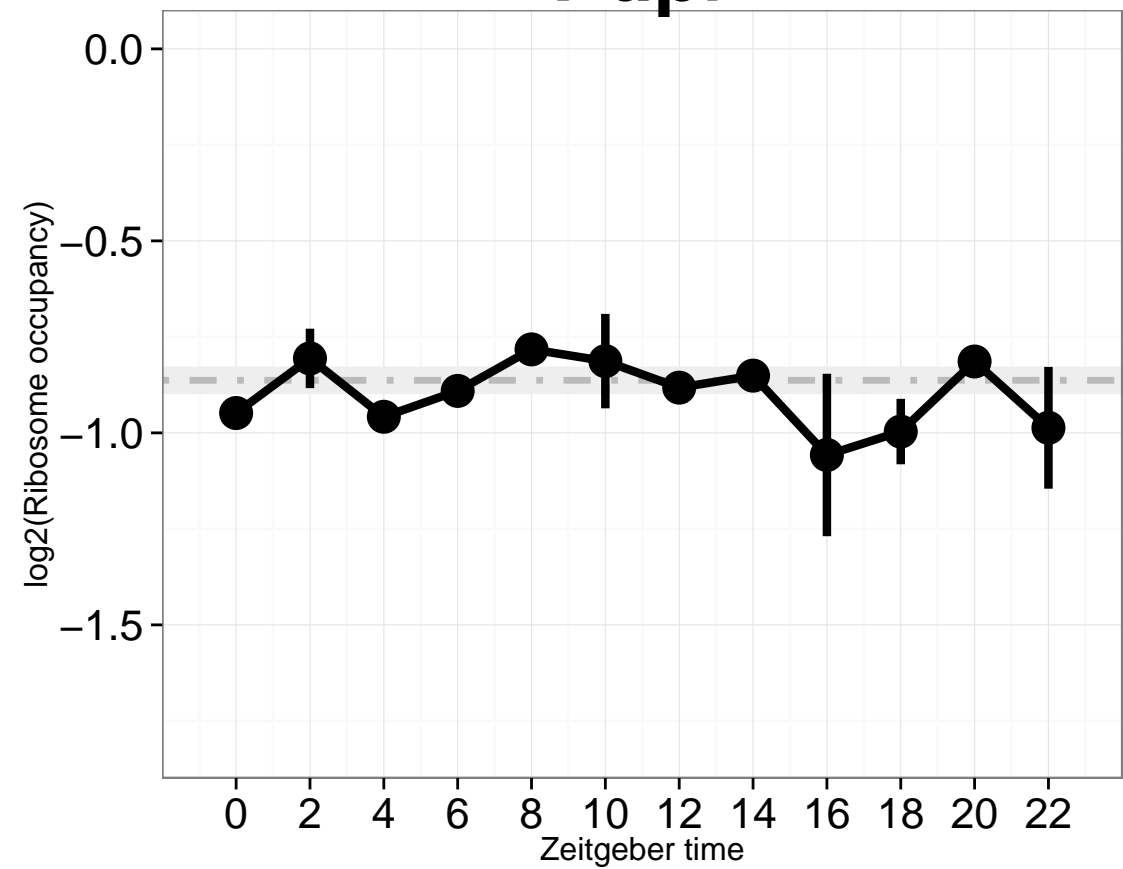

Supplement: SuppDataset_1.zip [file Pdpr_set_A.pdf › Supplemental Dataset 1/A-mRNA_nonrhyth_translation_nonrhyth/Pdpr_set_A.pdf]

# Pdrg1

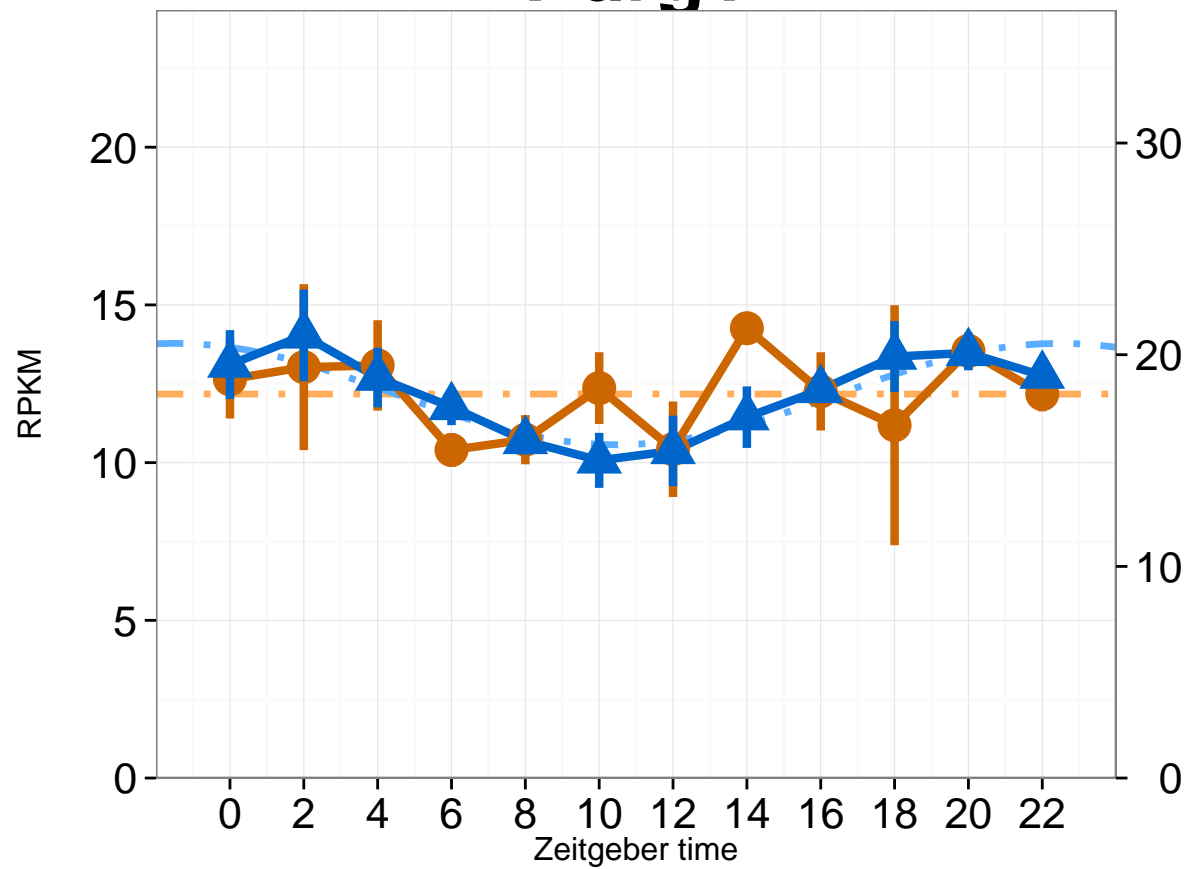

# Pdrg1

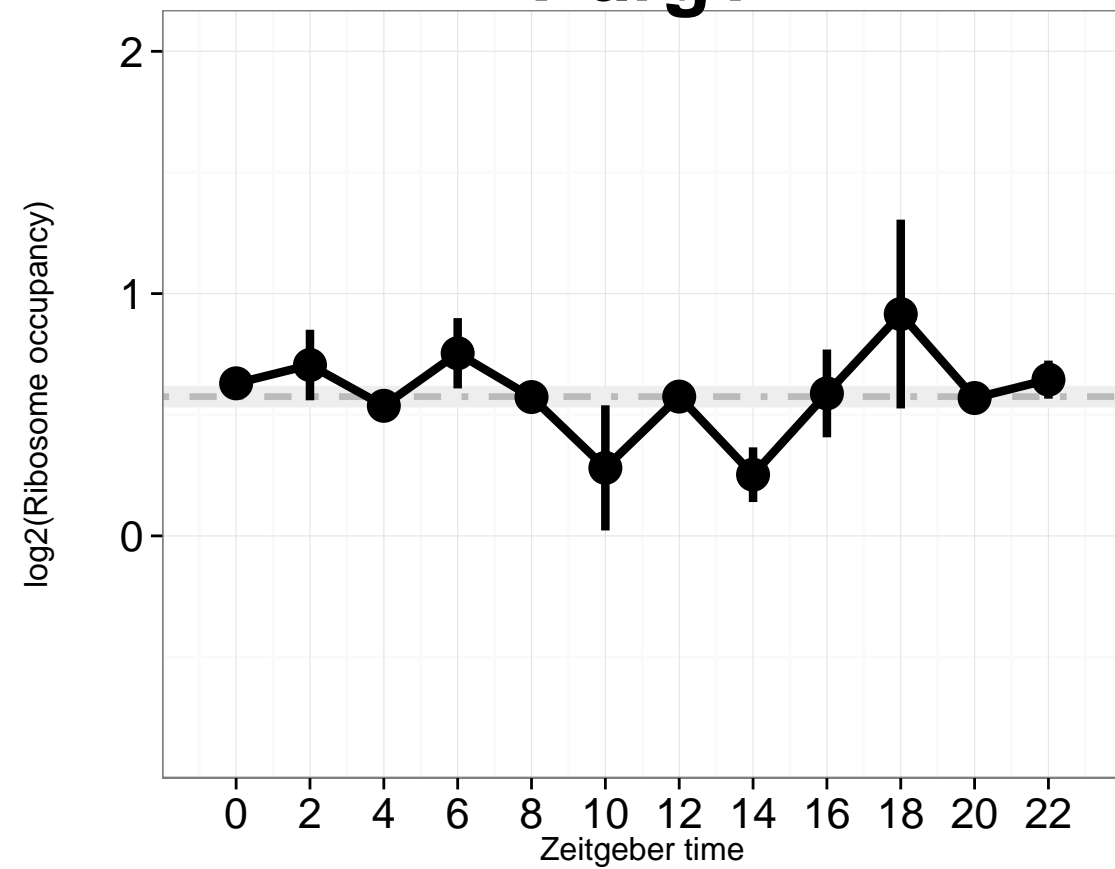

Supplement: SuppDataset_1.zip [file Pdrg1_set_A.pdf › Supplemental Dataset 1/A-mRNA_nonrhyth_translation_nonrhyth/Pdrg1_set_A.pdf]

# Pds5a

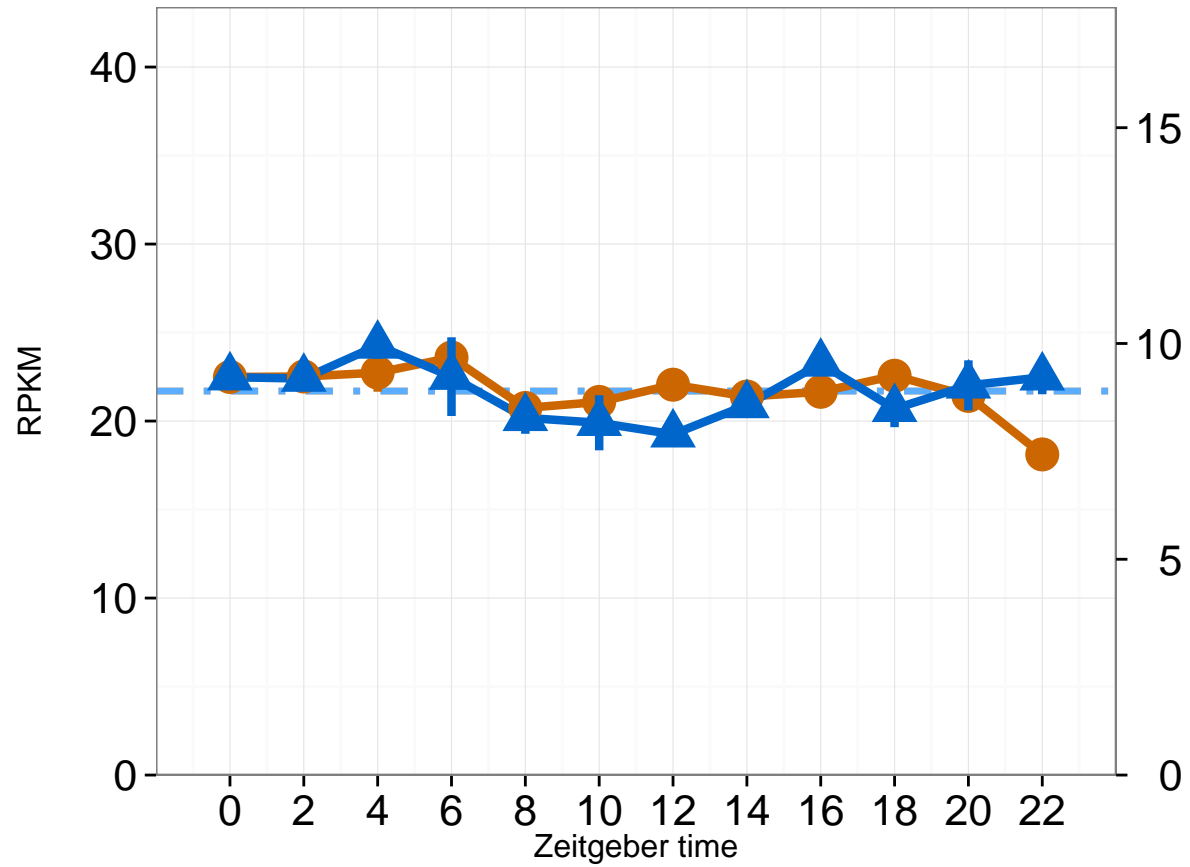

# Pds5a

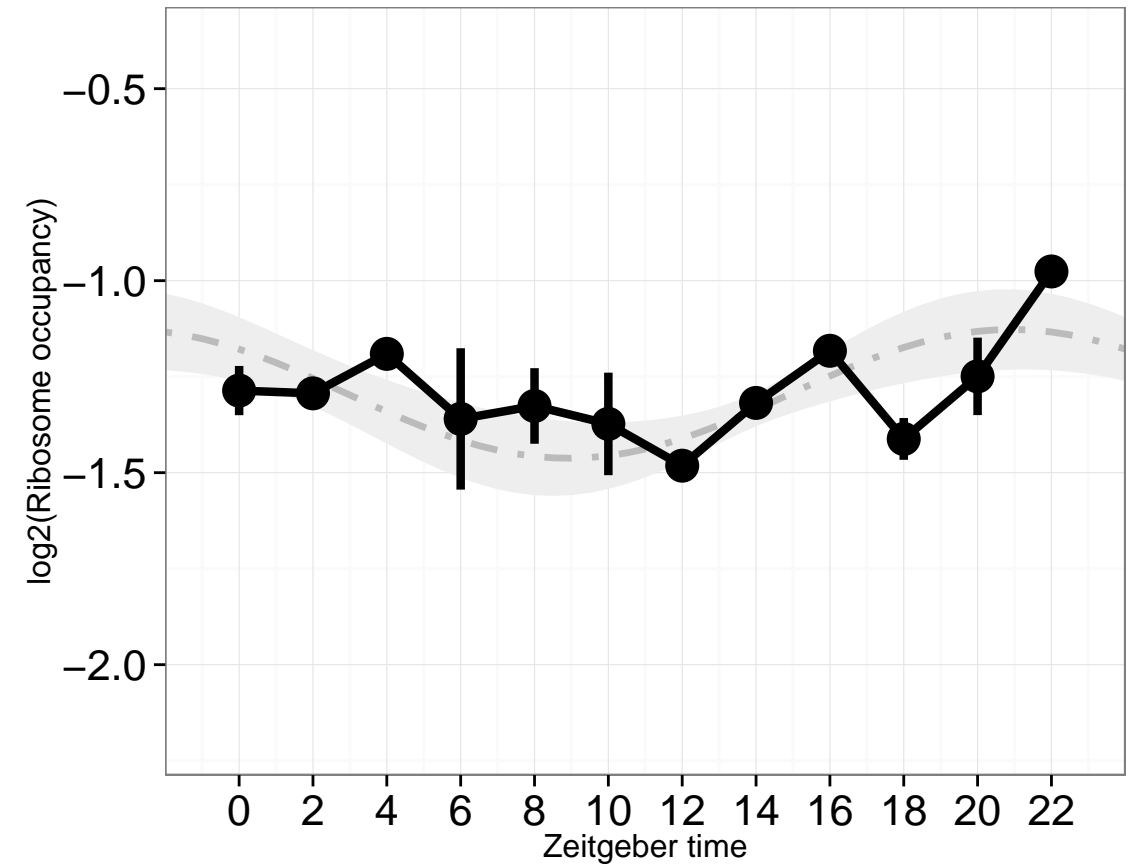

Supplement: SuppDataset_1.zip [file Pds5a_set_A.pdf › Supplemental Dataset 1/A-mRNA_nonrhyth_translation_nonrhyth/Pds5a_set_A.pdf]

# Pds5b

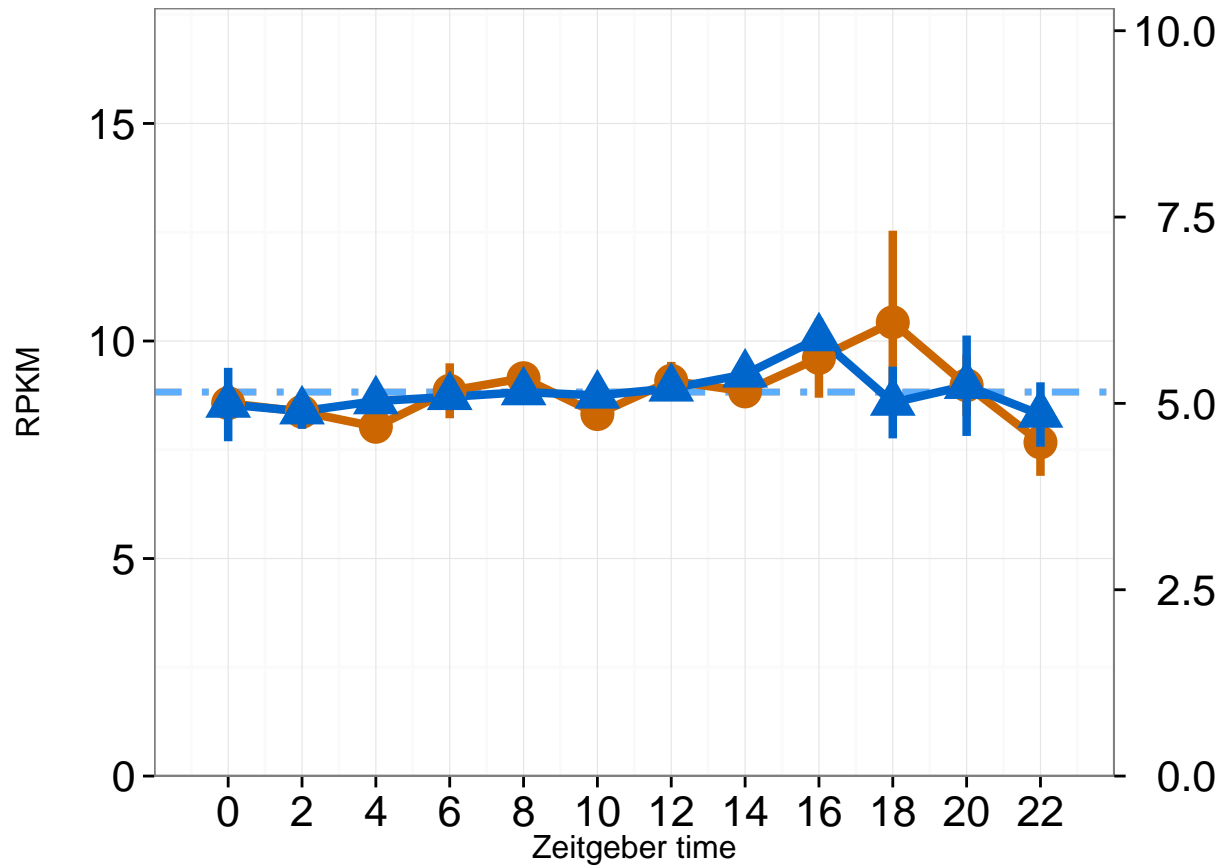

# Pds5b

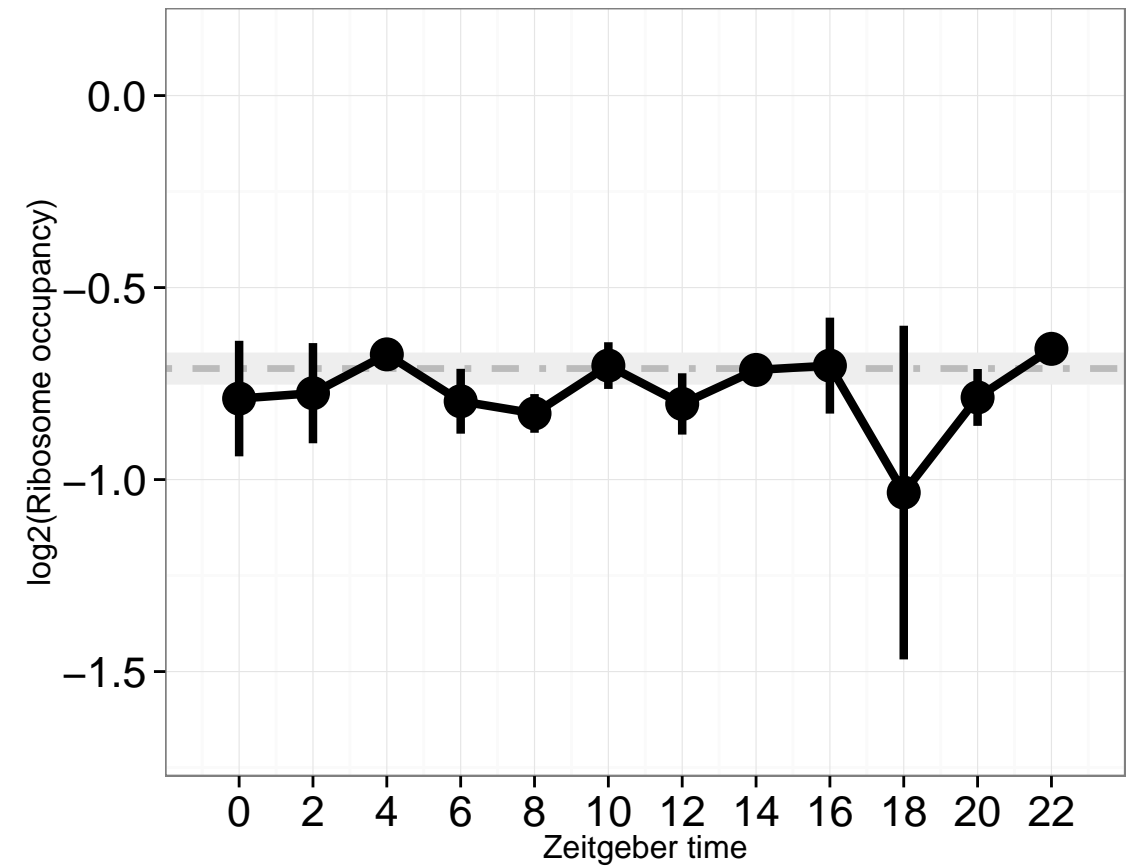

Supplement: SuppDataset_1.zip [file Pds5b_set_A.pdf › Supplemental Dataset 1/A-mRNA_nonrhyth_translation_nonrhyth/Pds5b_set_A.pdf]

## Pdss2

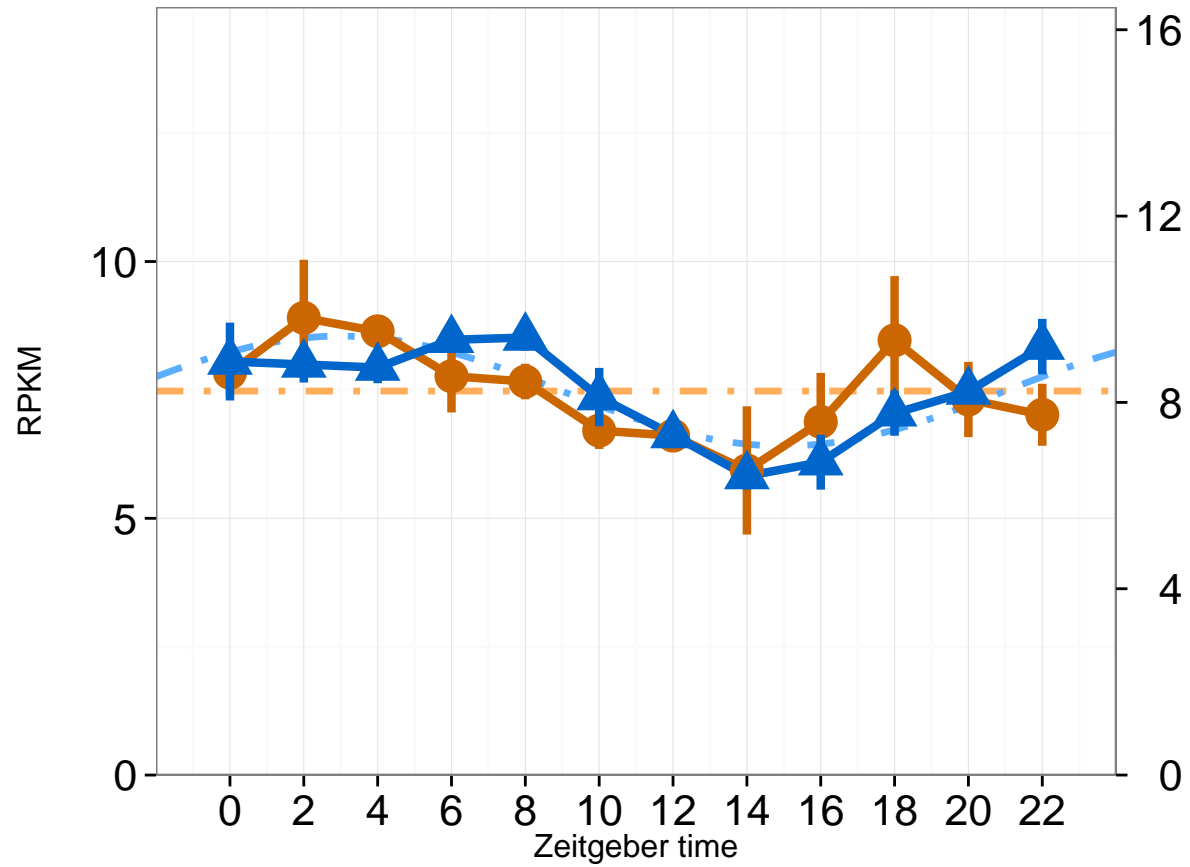

## Pdss2

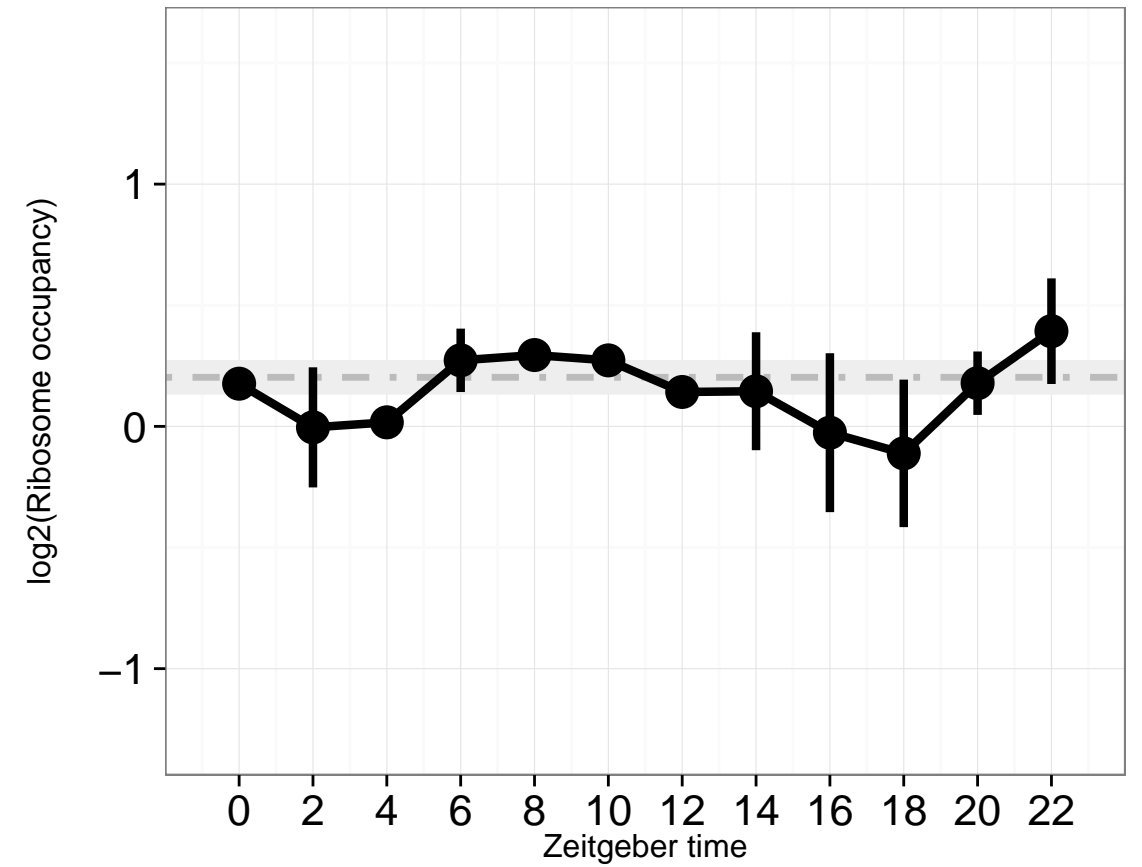

Supplement: SuppDataset_1.zip [file Pdss2_set_A.pdf › Supplemental Dataset 1/A-mRNA_nonrhyth_translation_nonrhyth/Pdss2_set_A.pdf]

## Pdxdc1

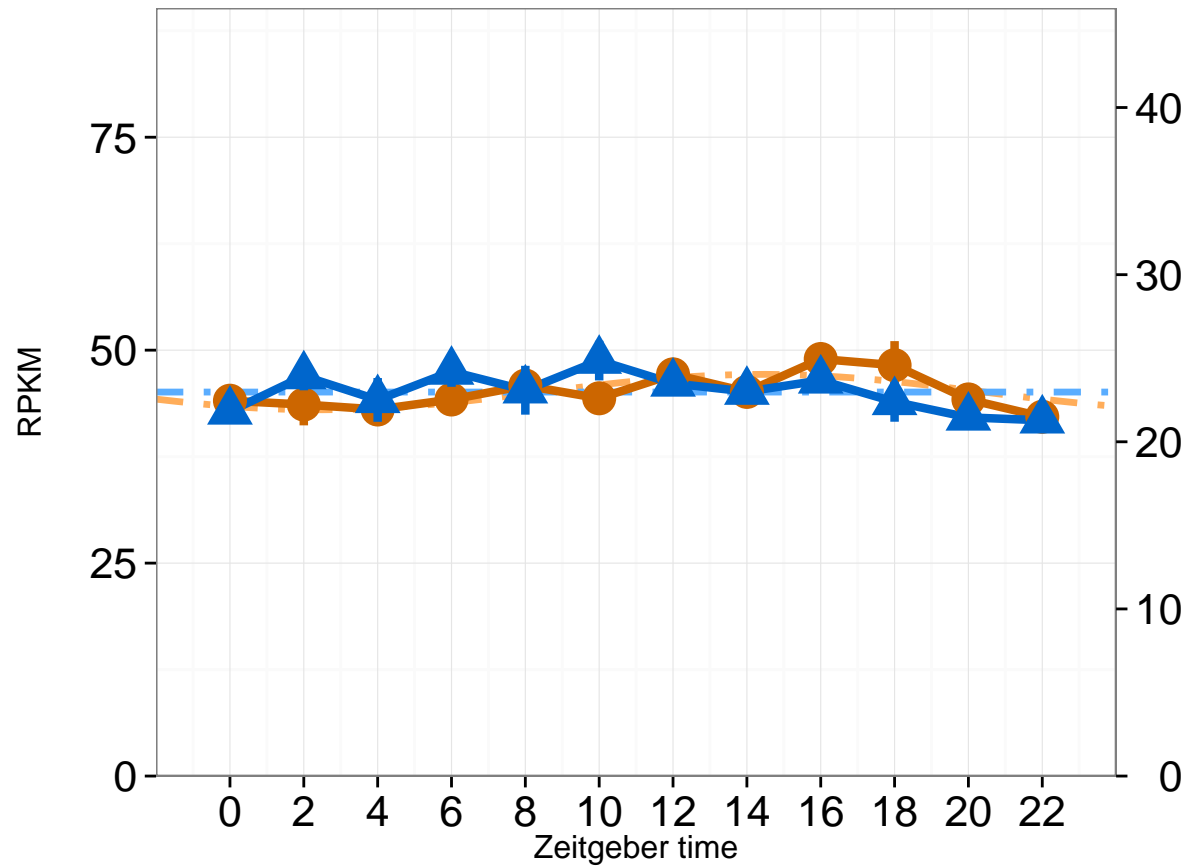

## Pdxdc1

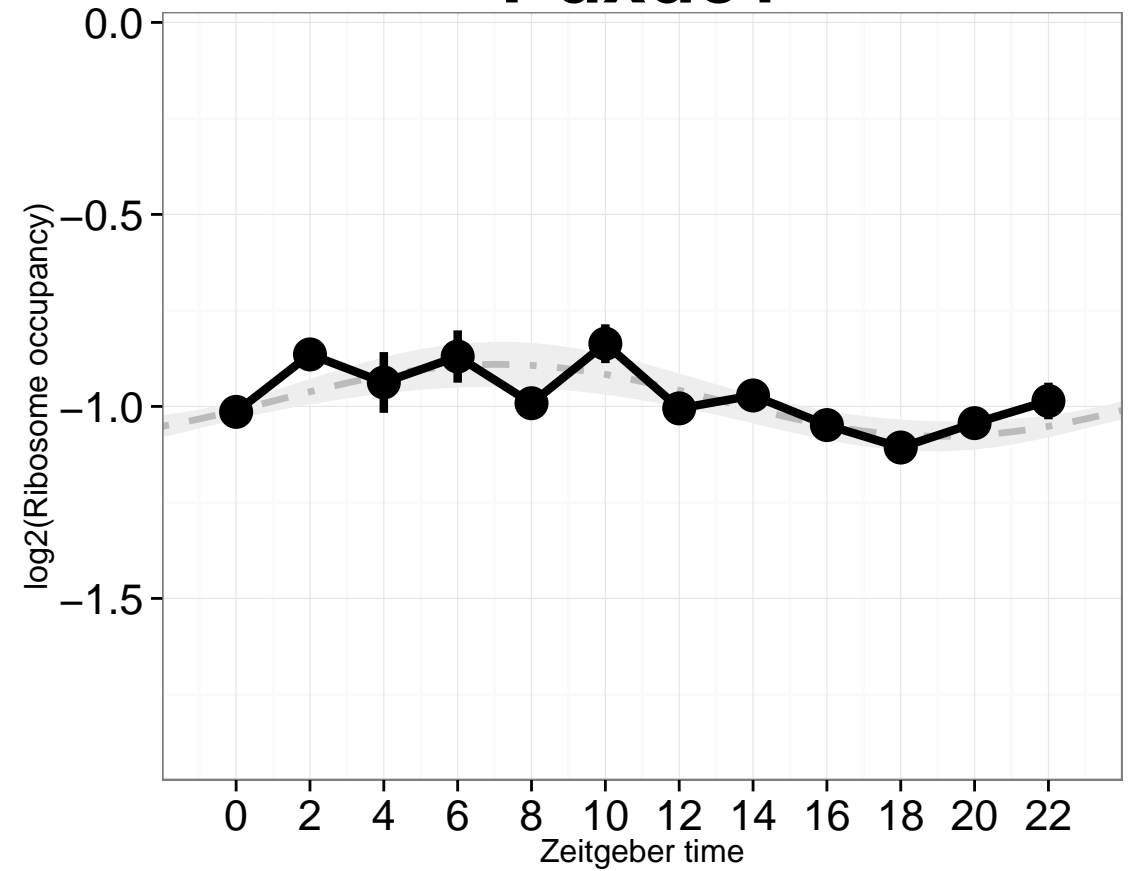

Supplement: SuppDataset_1.zip [file Pdxdc1_set_A.pdf › Supplemental Dataset 1/A-mRNA_nonrhyth_translation_nonrhyth/Pdxdc1_set_A.pdf]

## Pdzd11

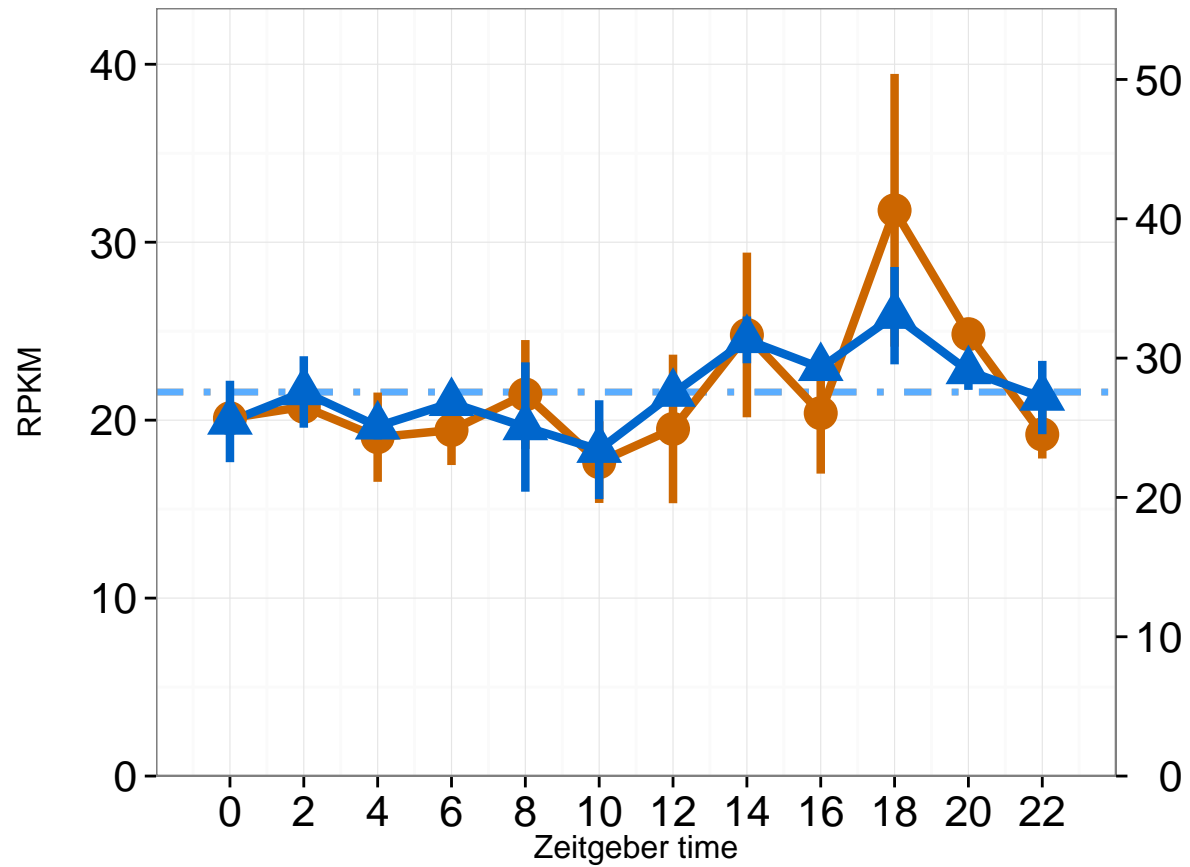

## Pdzd11

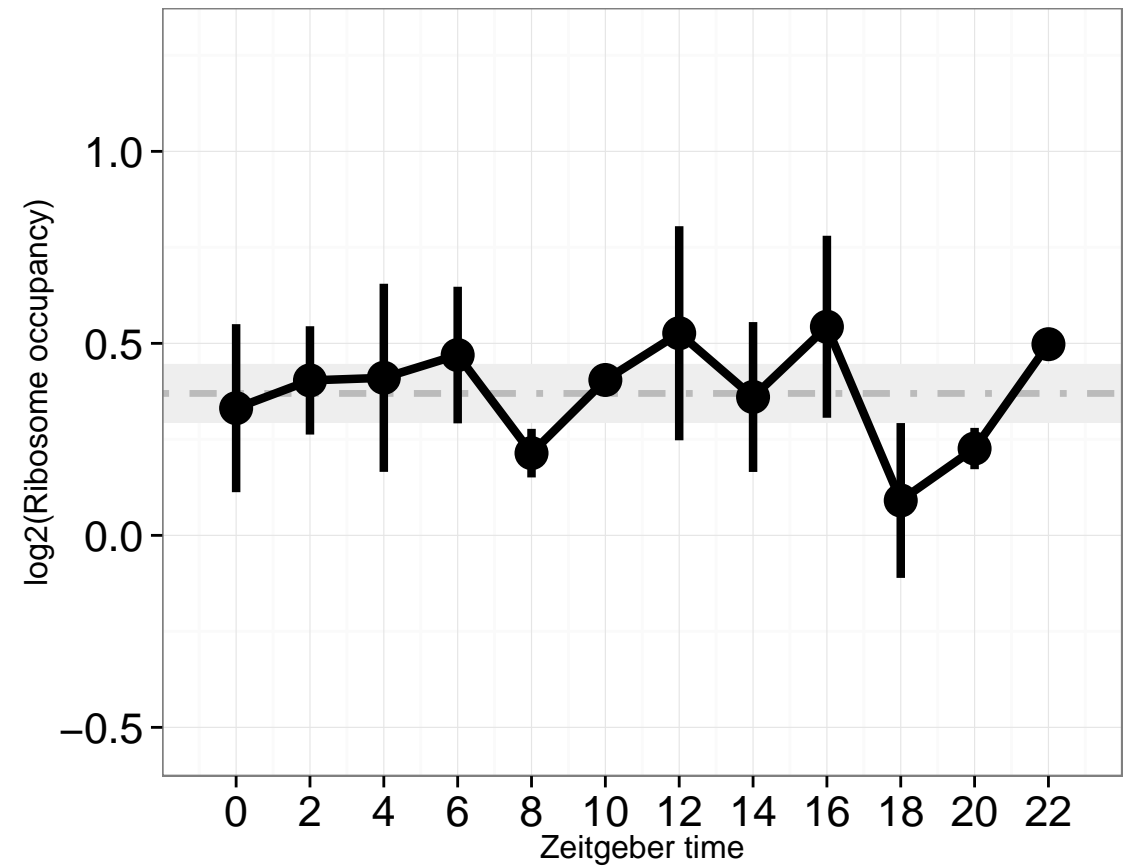

Supplement: SuppDataset_1.zip [file Pdzd11_set_A.pdf › Supplemental Dataset 1/A-mRNA_nonrhyth_translation_nonrhyth/Pdzd11_set_A.pdf]

## Pdzd2

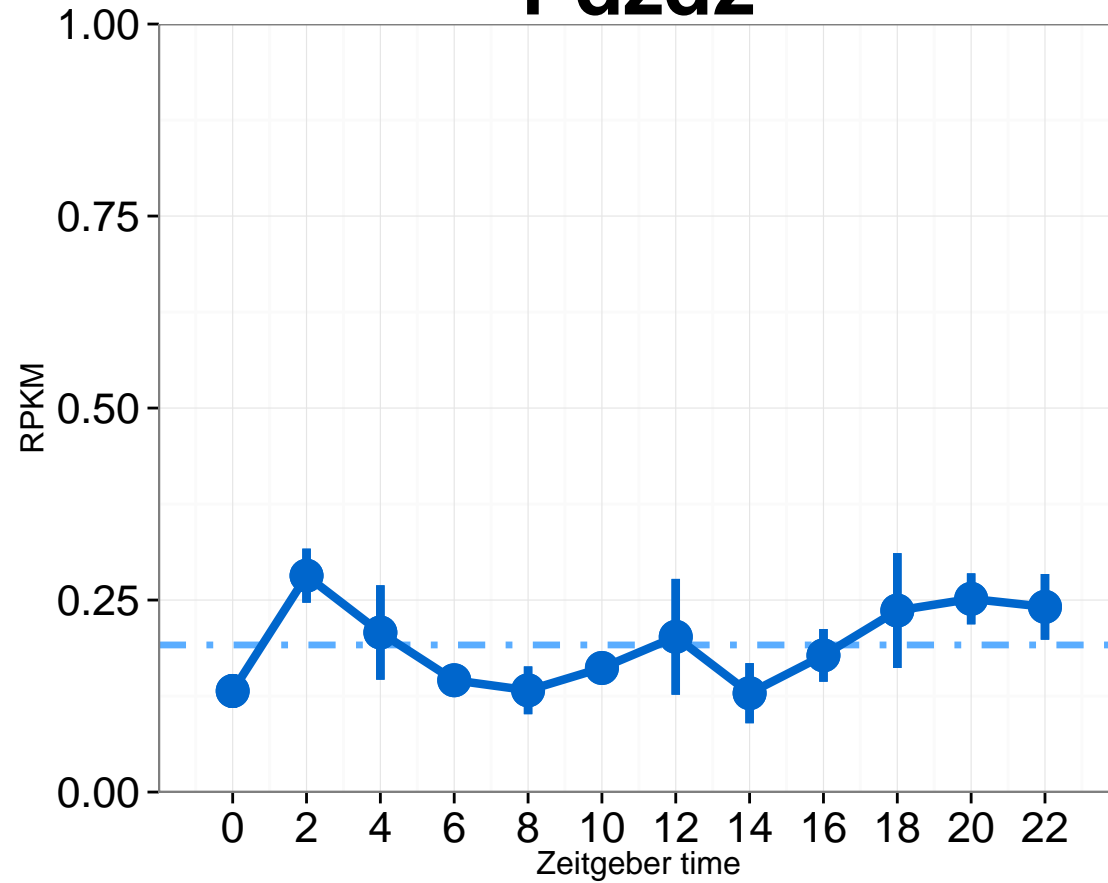

## Pdzd2 log2(Ribosome occupancy

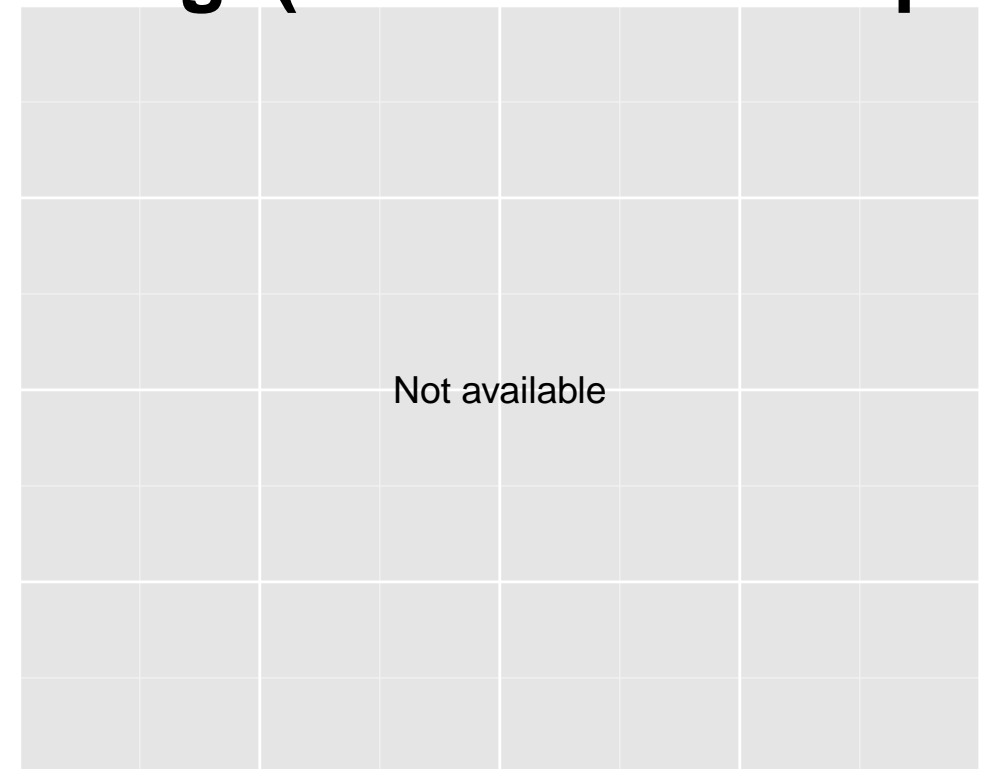

Supplement: SuppDataset_1.zip [file Pdzd2_set_A.pdf › Supplemental Dataset 1/A-mRNA_nonrhyth_translation_nonrhyth/Pdzd2_set_A.pdf]

## Pdzd8

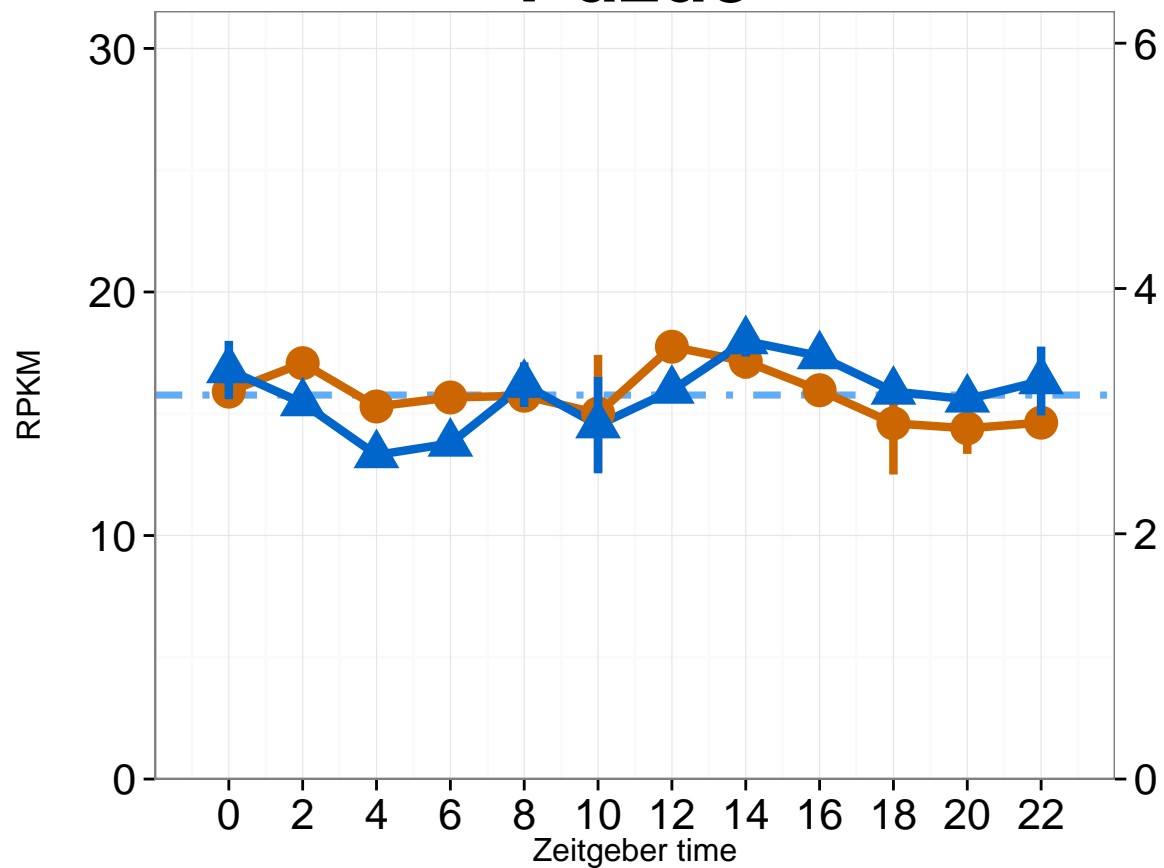

## Pdzd8

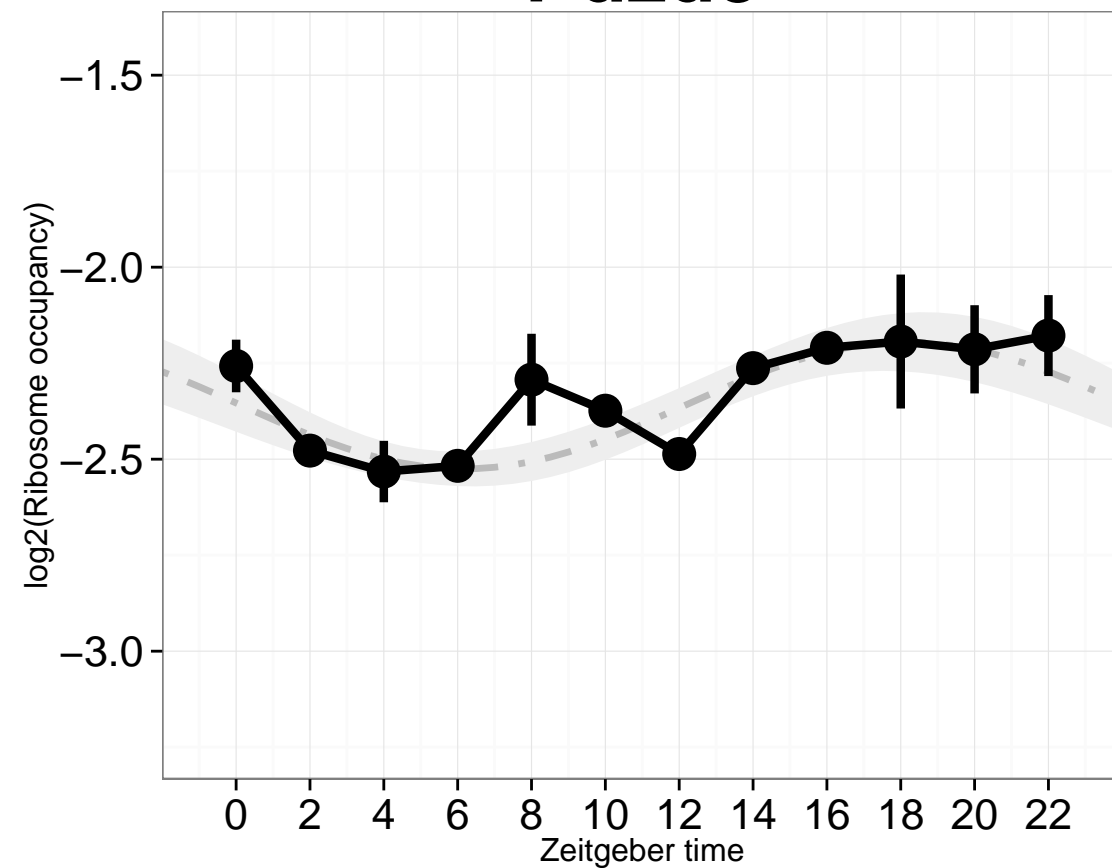

Supplement: SuppDataset_1.zip [file Pdzd8_set_A.pdf › Supplemental Dataset 1/A-mRNA_nonrhyth_translation_nonrhyth/Pdzd8_set_A.pdf]

# Pdzk1

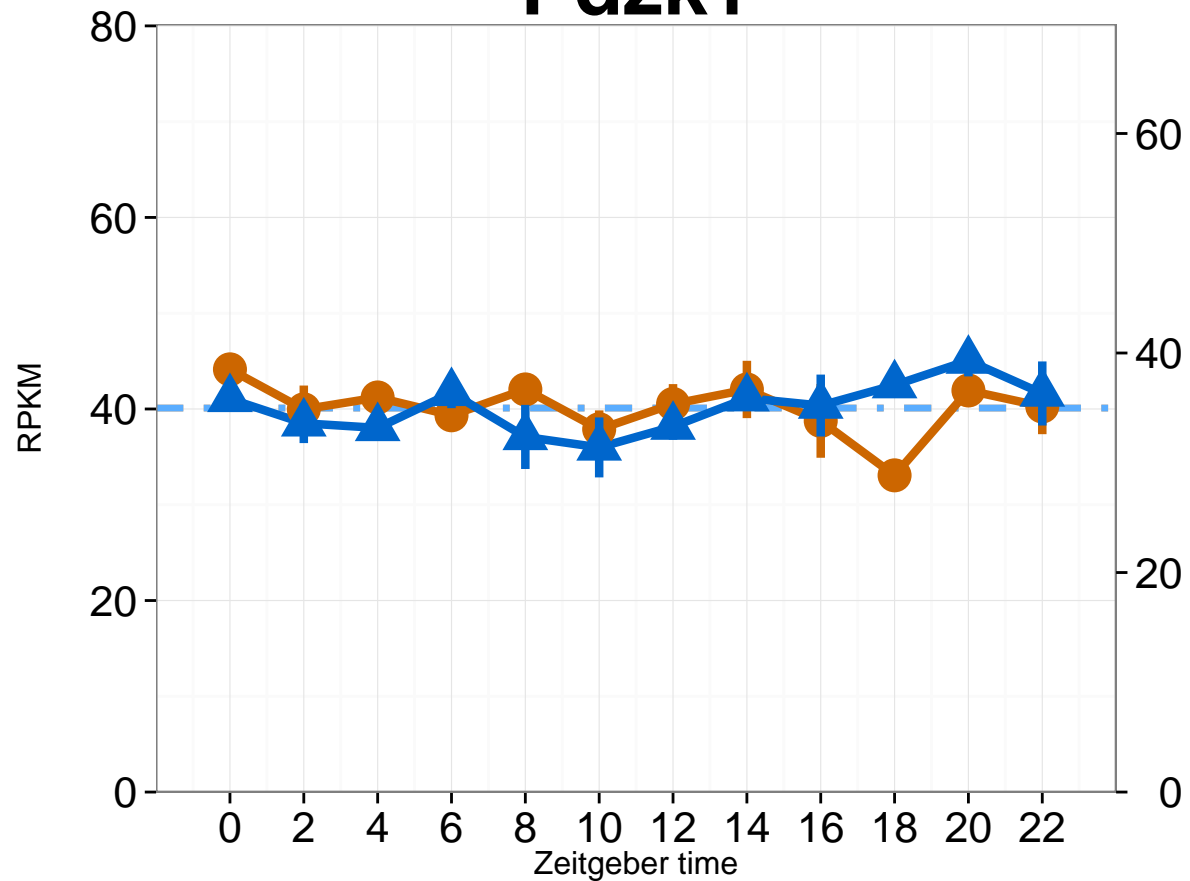

# Pdzk1

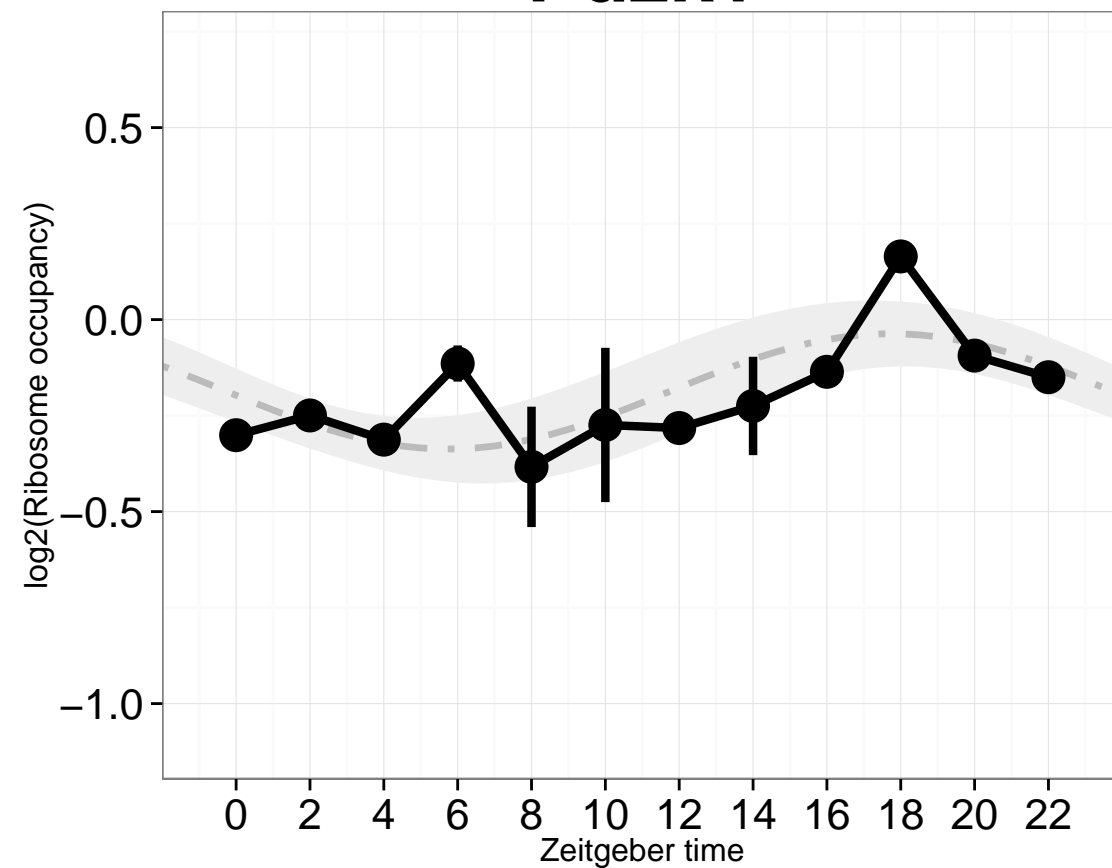

Supplement: SuppDataset_1.zip [file Pdzk1_set_A.pdf › Supplemental Dataset 1/A-mRNA_nonrhyth_translation_nonrhyth/Pdzk1_set_A.pdf]

# Pear1

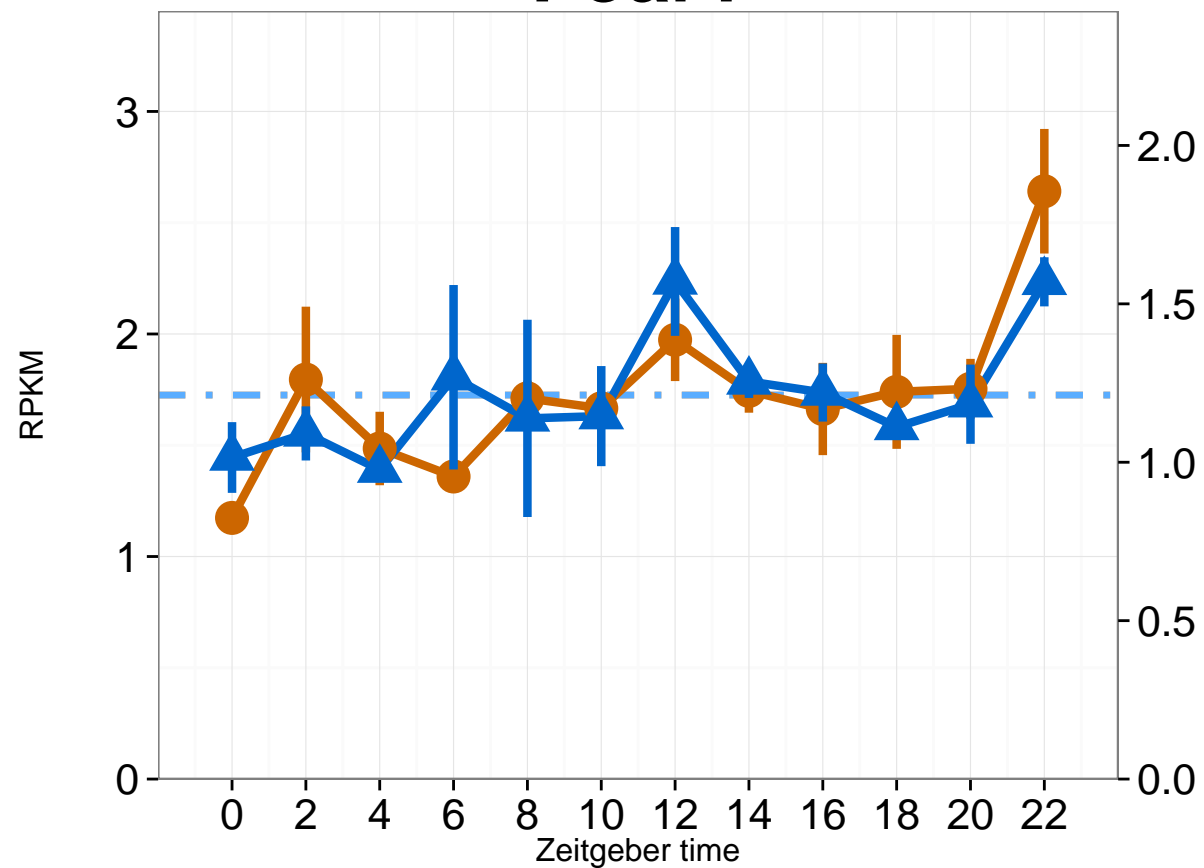

# Pear1

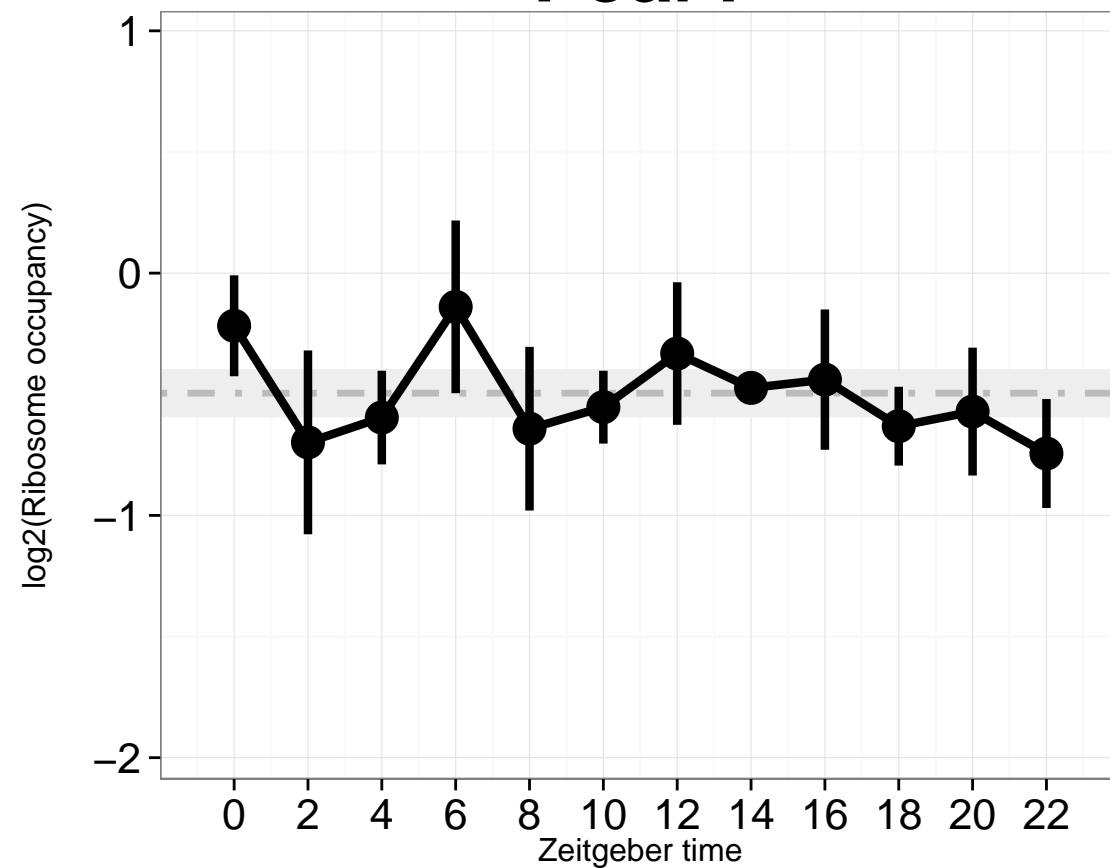

Supplement: SuppDataset_1.zip [file Pear1_set_A.pdf › Supplemental Dataset 1/A-mRNA_nonrhyth_translation_nonrhyth/Pear1_set_A.pdf]

# Pebp1

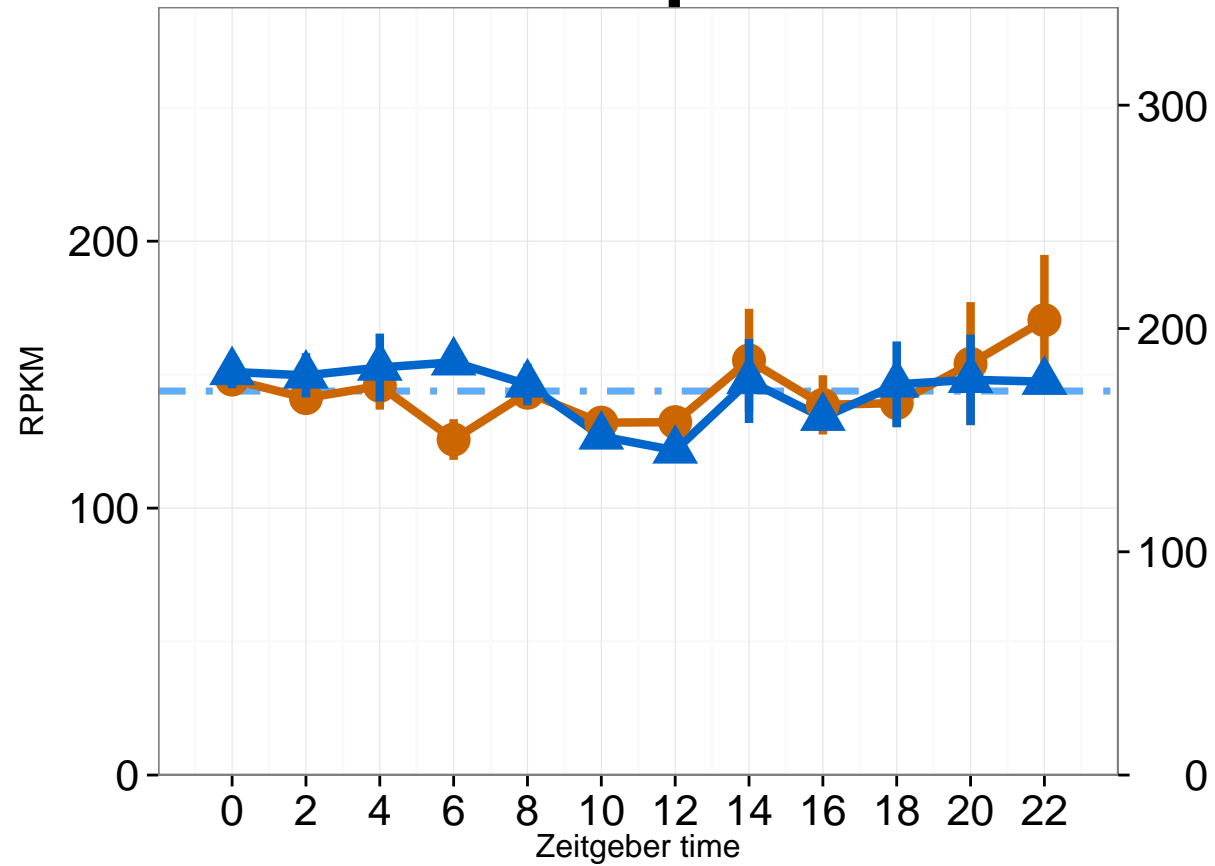

# Pebp1

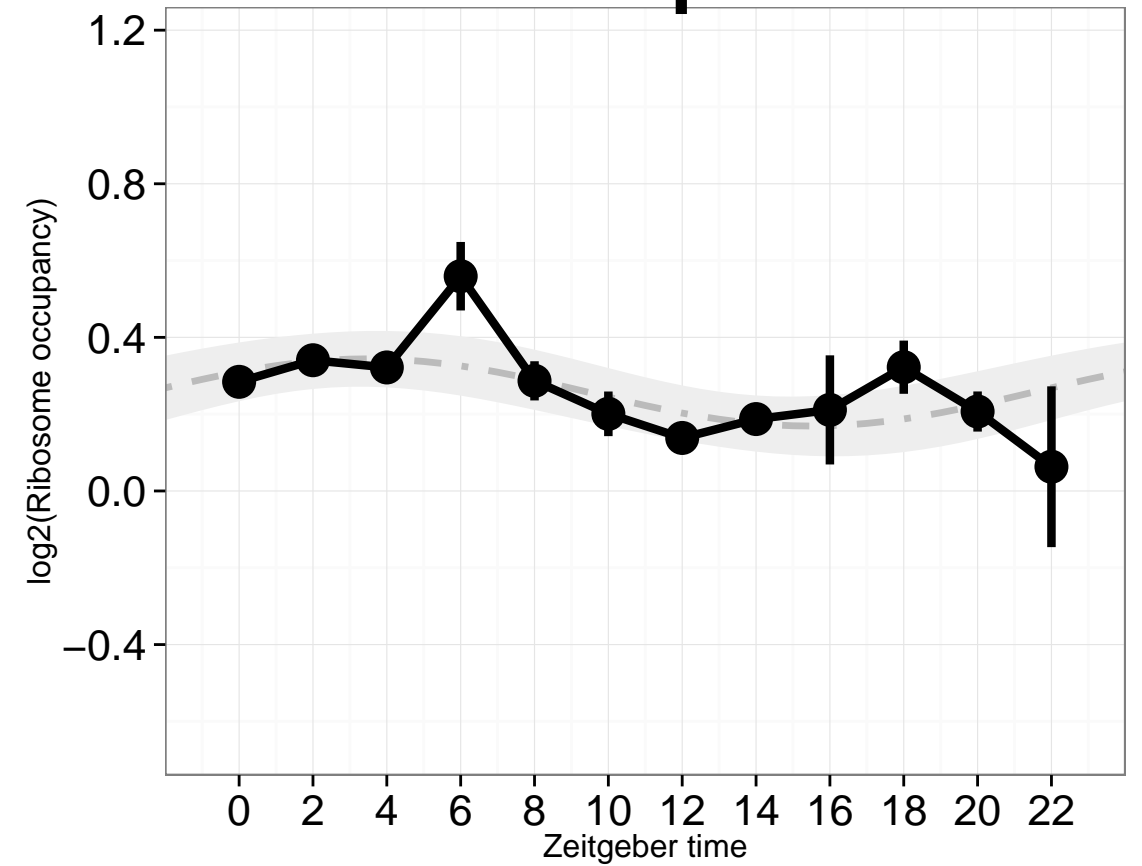

Supplement: SuppDataset_1.zip [file Pebp1_set_A.pdf › Supplemental Dataset 1/A-mRNA_nonrhyth_translation_nonrhyth/Pebp1_set_A.pdf]

# Pecam1

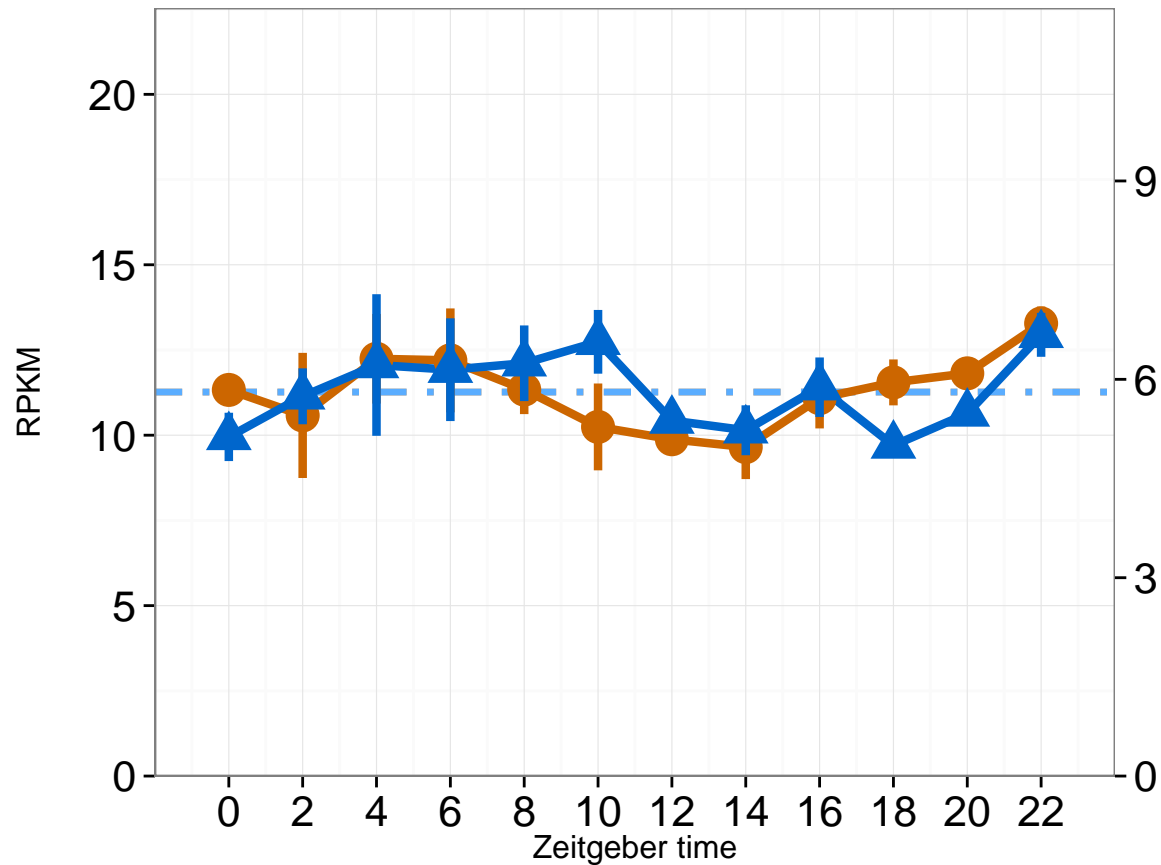

# Pecam1

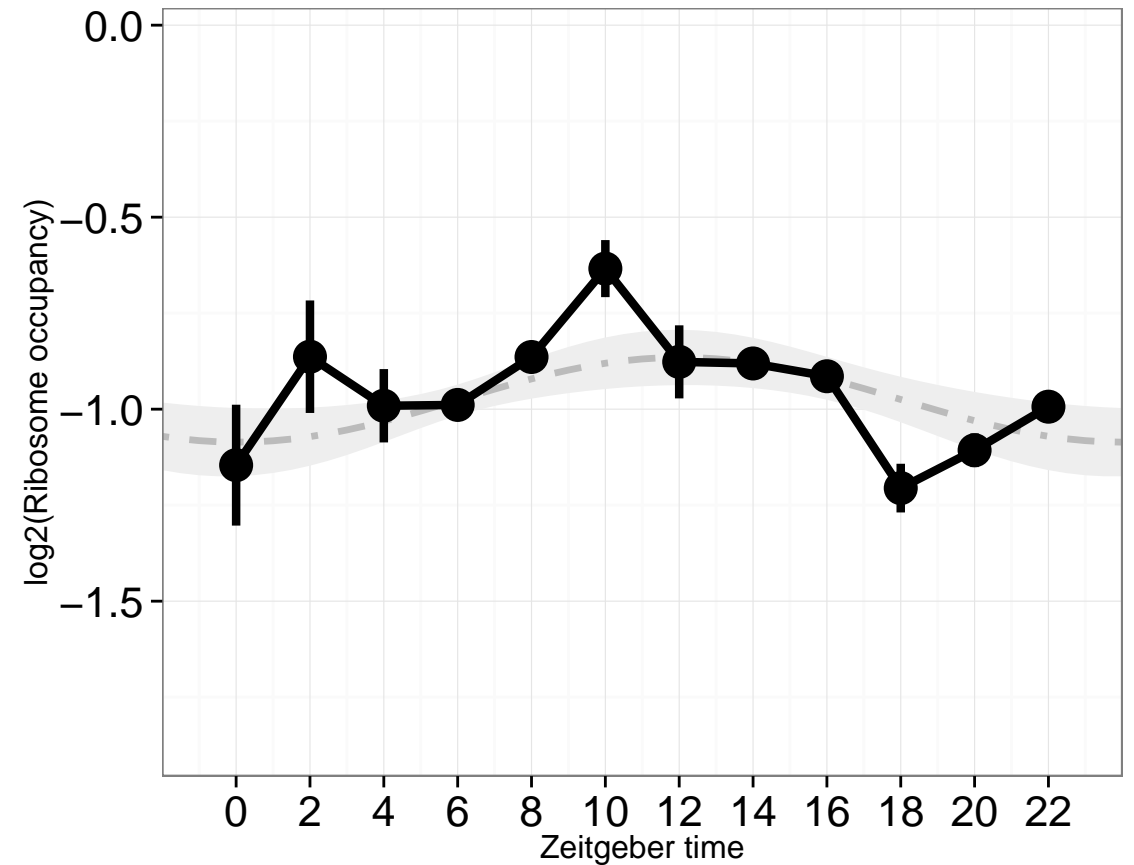

Supplement: SuppDataset_1.zip [file Pecam1_set_A.pdf › Supplemental Dataset 1/A-mRNA_nonrhyth_translation_nonrhyth/Pecam1_set_A.pdf]

## Pecr

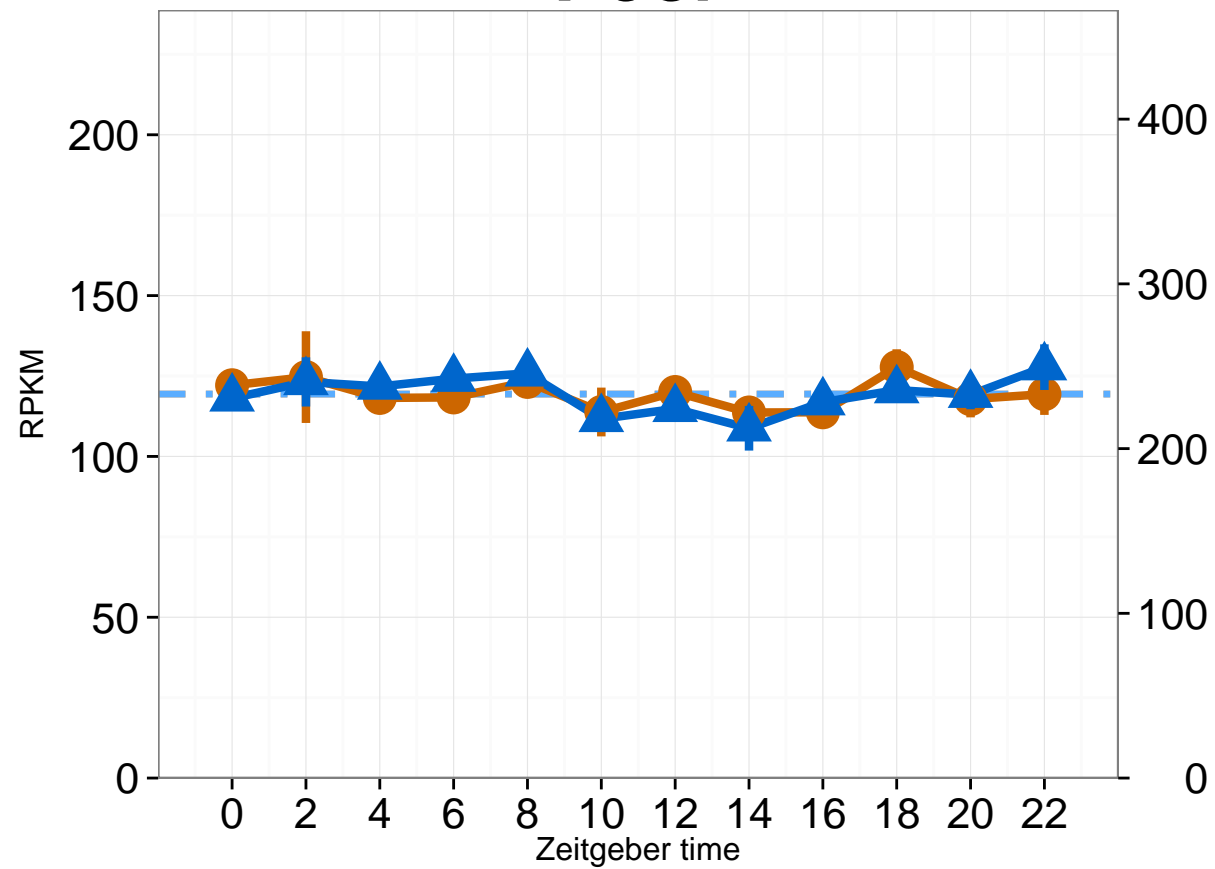

## Pecr

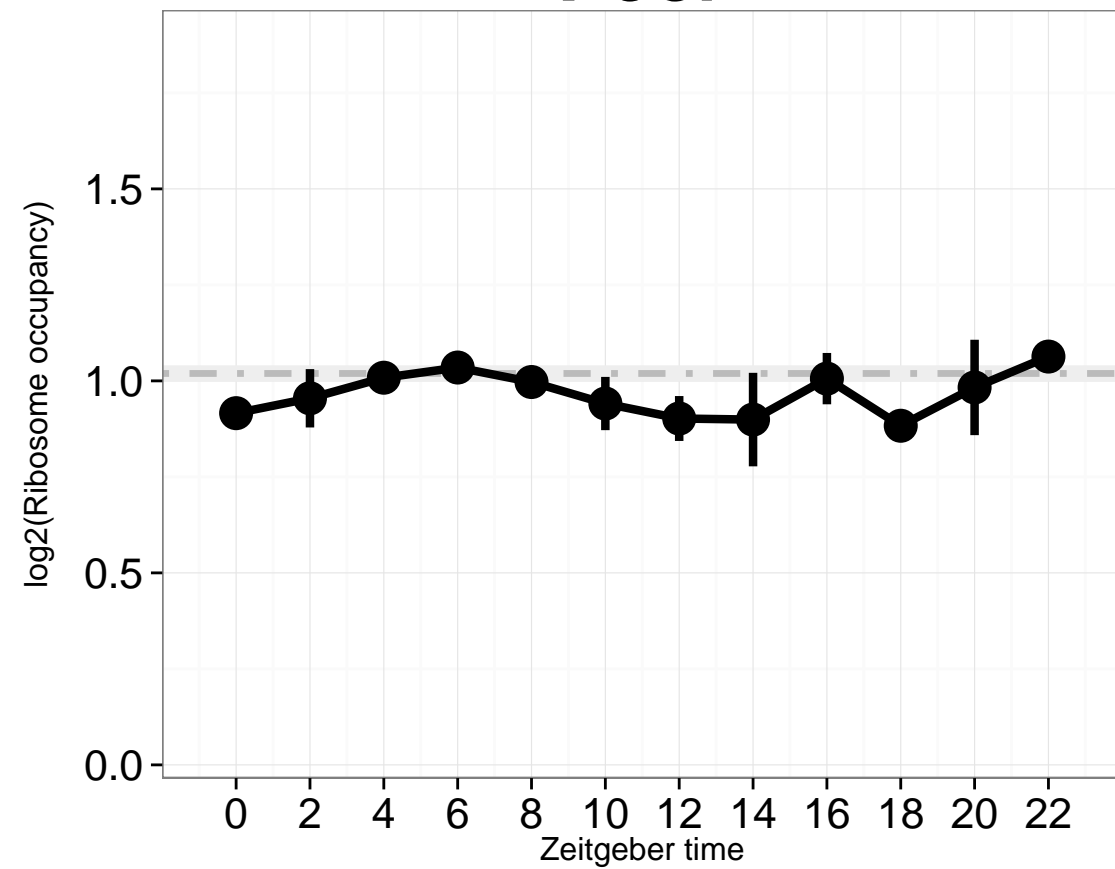

Supplement: SuppDataset_1.zip [file Pecr_set_A.pdf › Supplemental Dataset 1/A-mRNA_nonrhyth_translation_nonrhyth/Pecr_set_A.pdf]

## Peg10

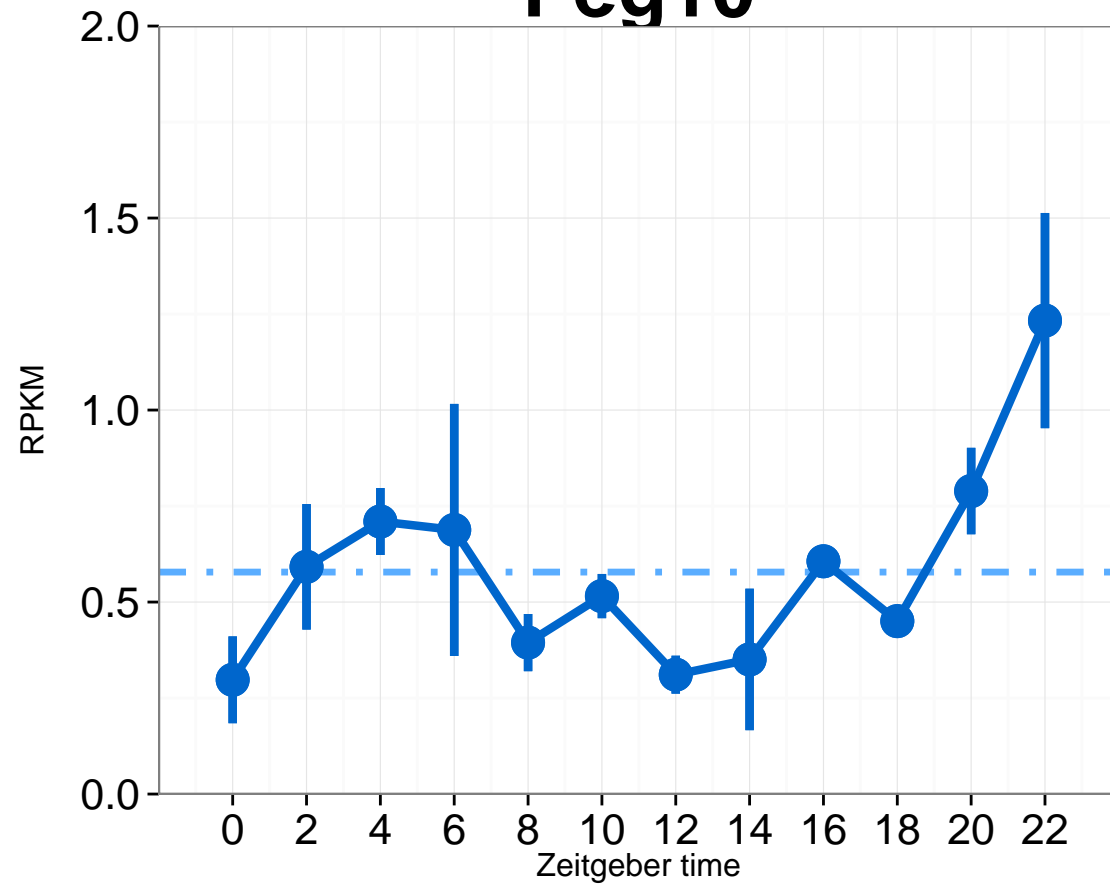

## Peg10 log2(Ribosome occupancy

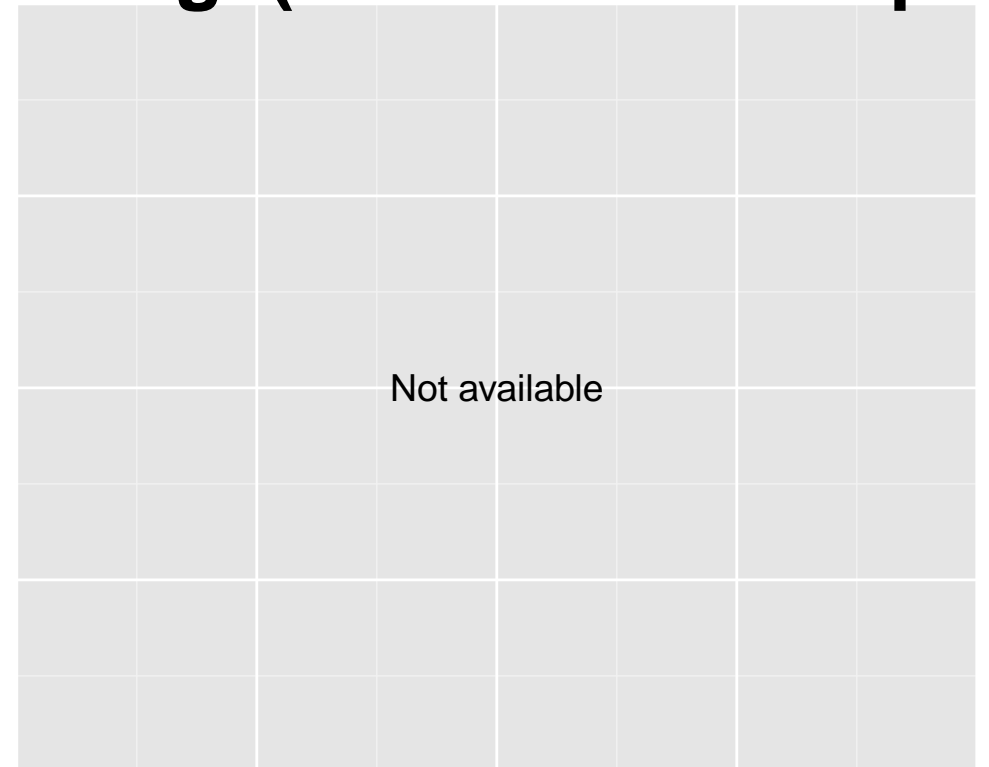

Supplement: SuppDataset_1.zip [file Peg10_set_A.pdf › Supplemental Dataset 1/A-mRNA_nonrhyth_translation_nonrhyth/Peg10_set_A.pdf]

## Peg12

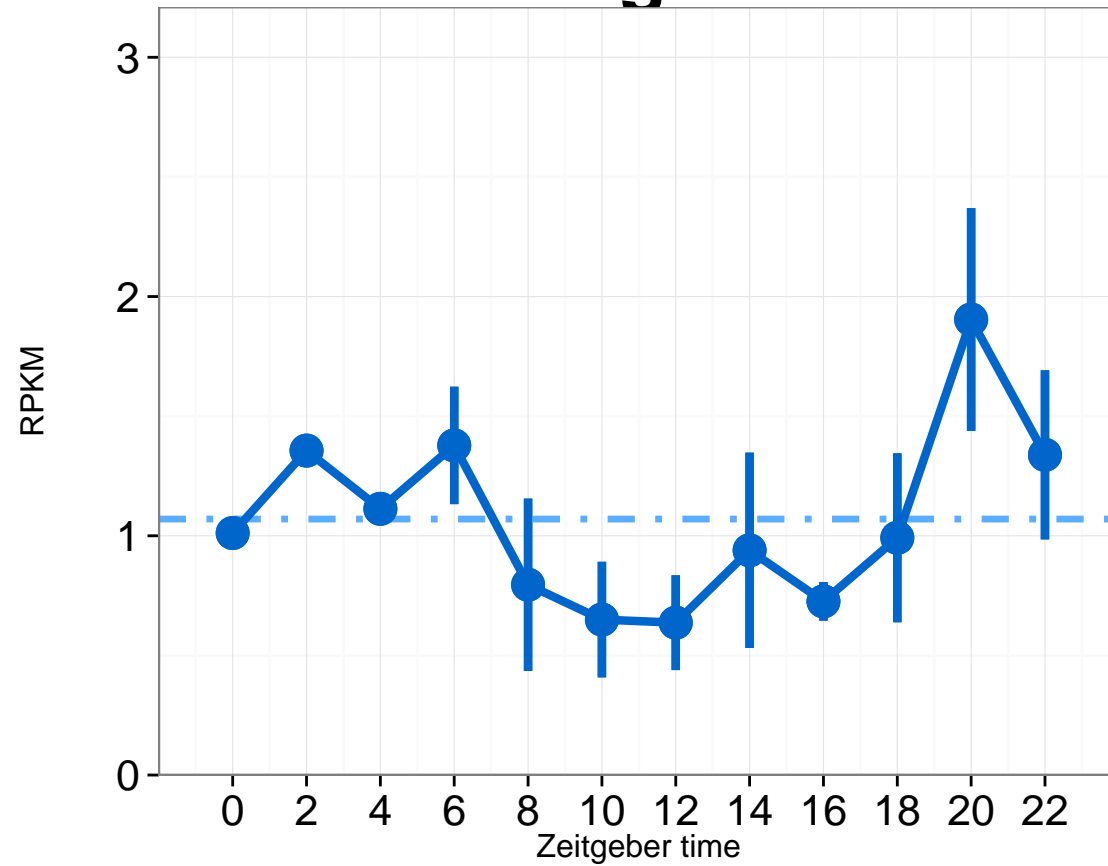

## Peg12 log2(Ribosome occupancy

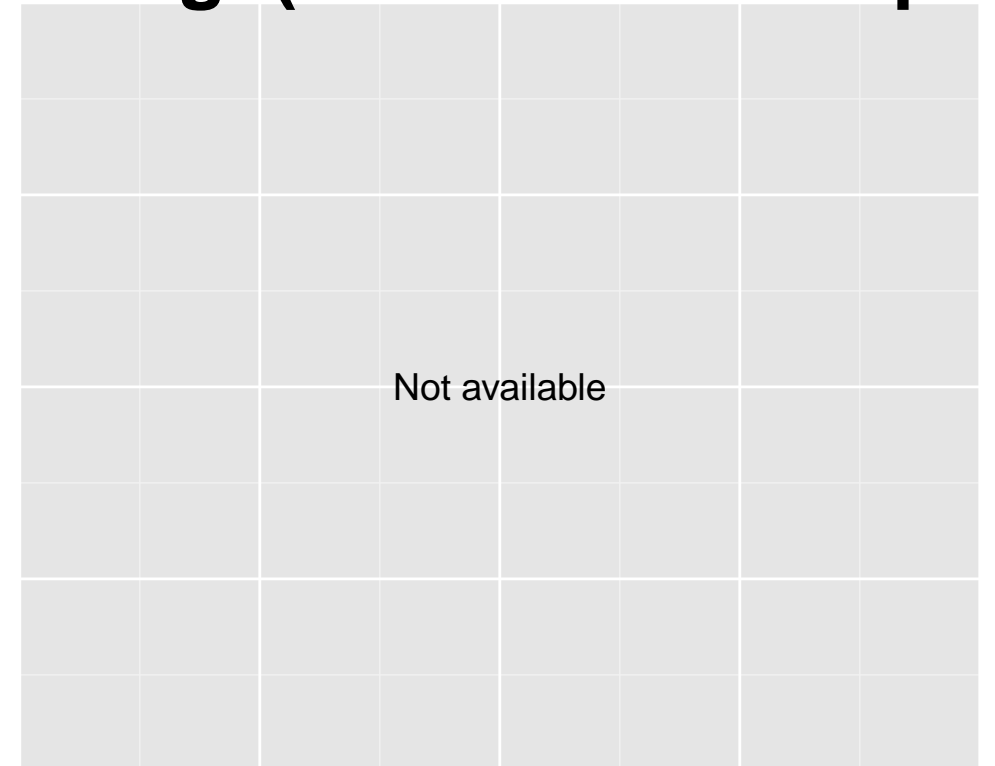

Supplement: SuppDataset_1.zip [file Peg12_set_A.pdf › Supplemental Dataset 1/A-mRNA_nonrhyth_translation_nonrhyth/Peg12_set_A.pdf]

# Peg3

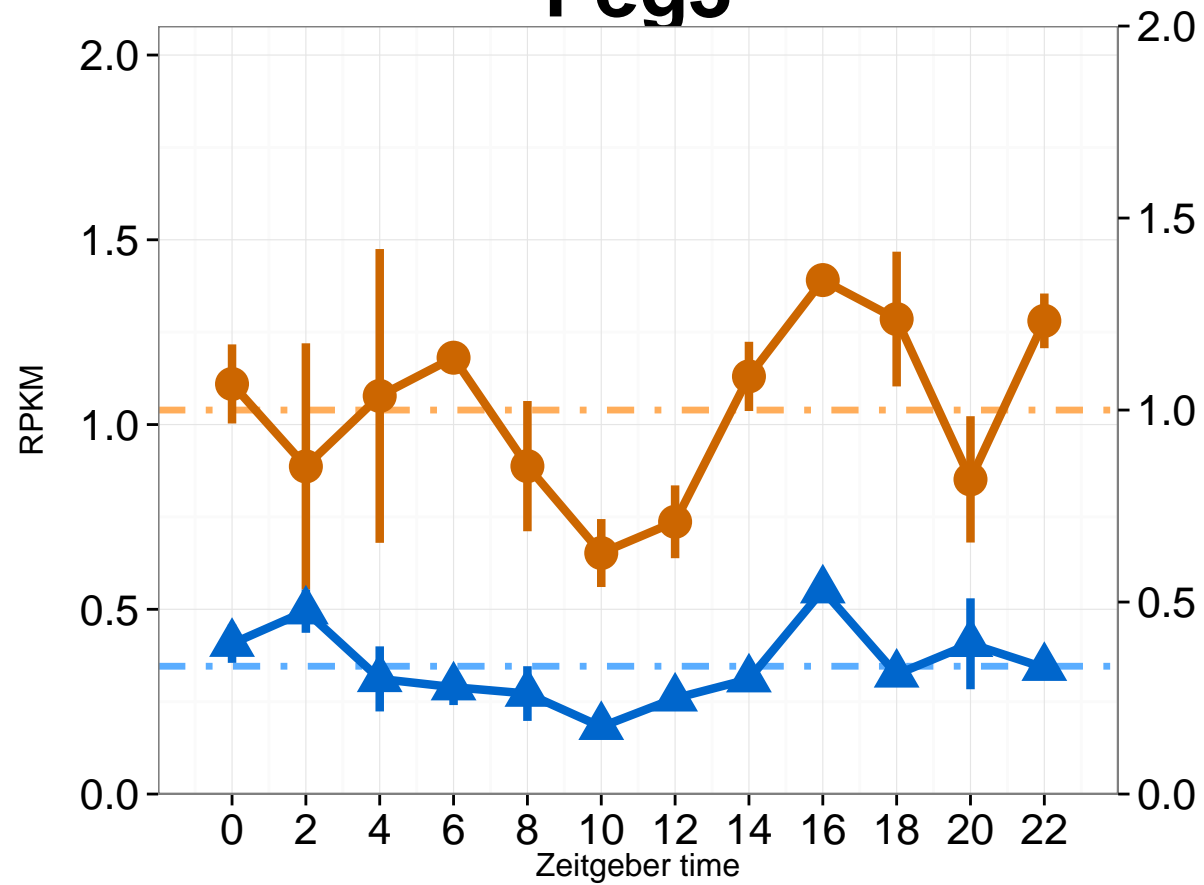

# Peg3

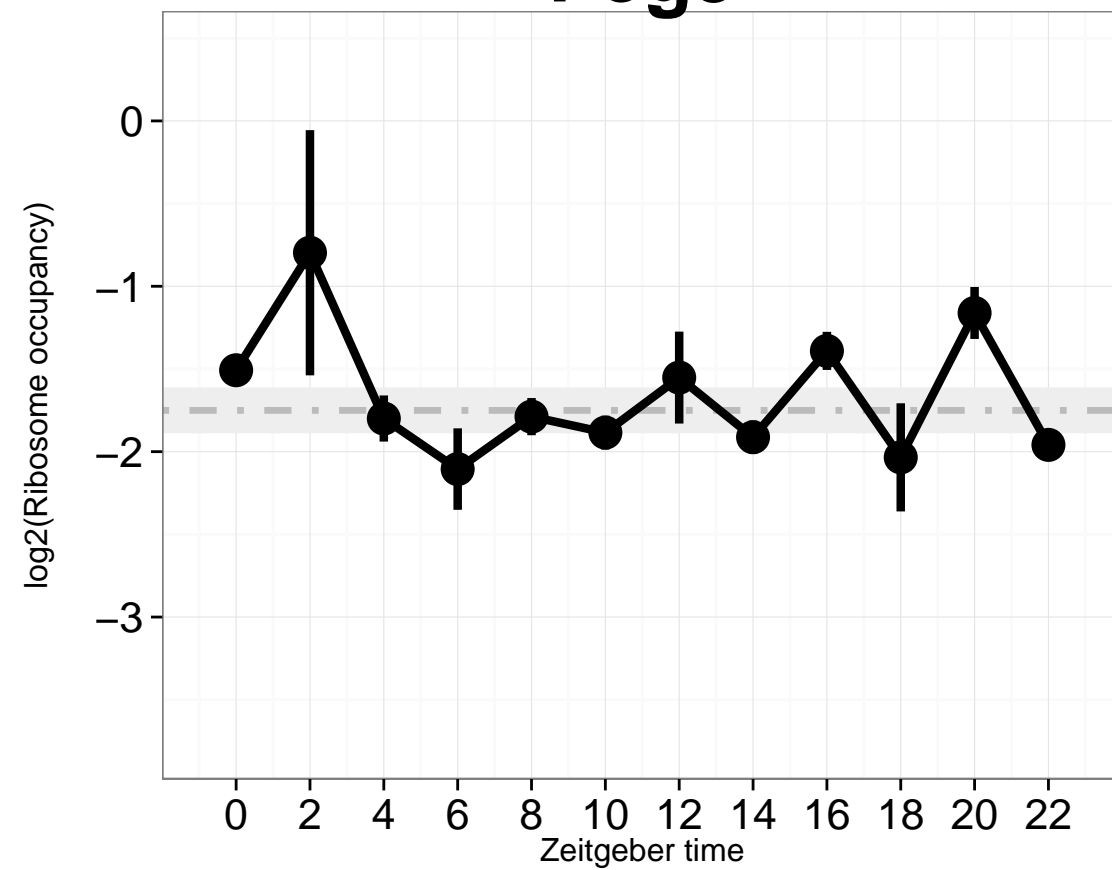

Supplement: SuppDataset_1.zip [file Peg3_set_A.pdf › Supplemental Dataset 1/A-mRNA_nonrhyth_translation_nonrhyth/Peg3_set_A.pdf]

## Peli1

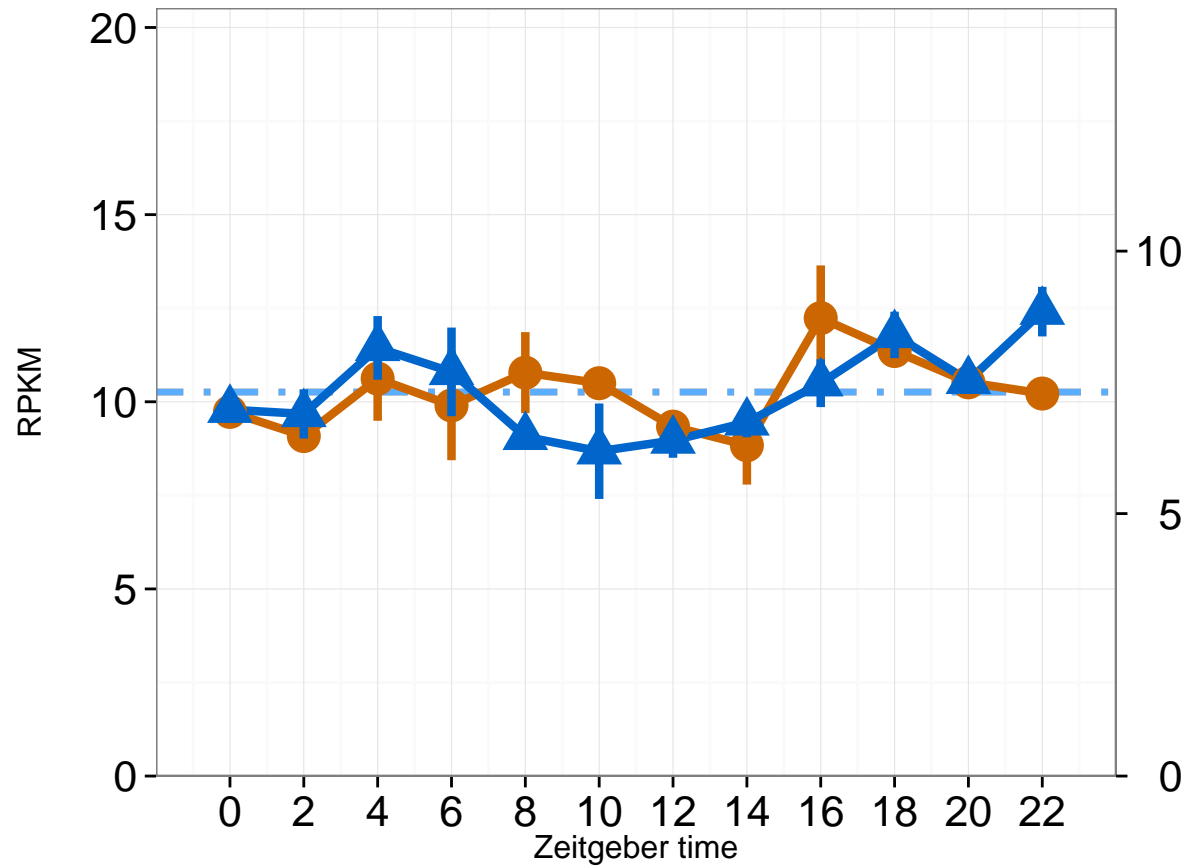

## Peli1

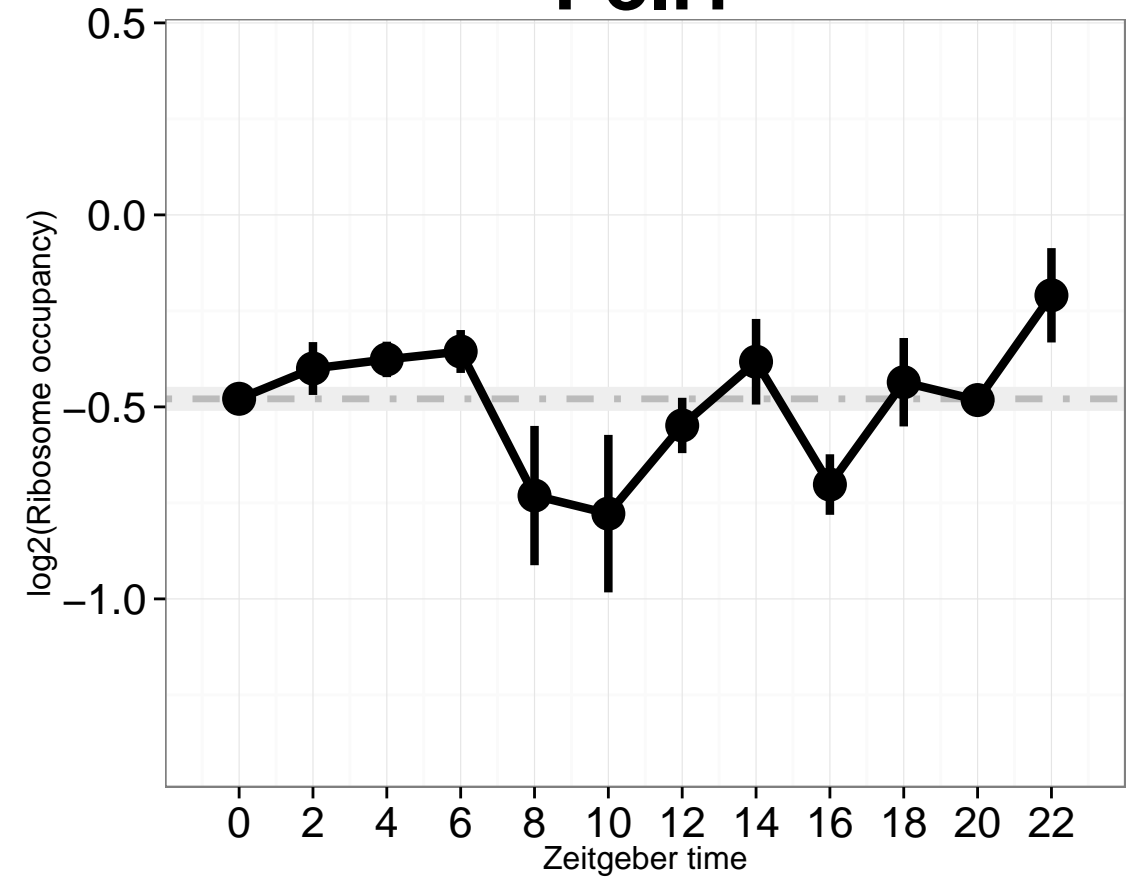

Supplement: SuppDataset_1.zip [file Peli1_set_A.pdf › Supplemental Dataset 1/A-mRNA_nonrhyth_translation_nonrhyth/Peli1_set_A.pdf]

## Peli2

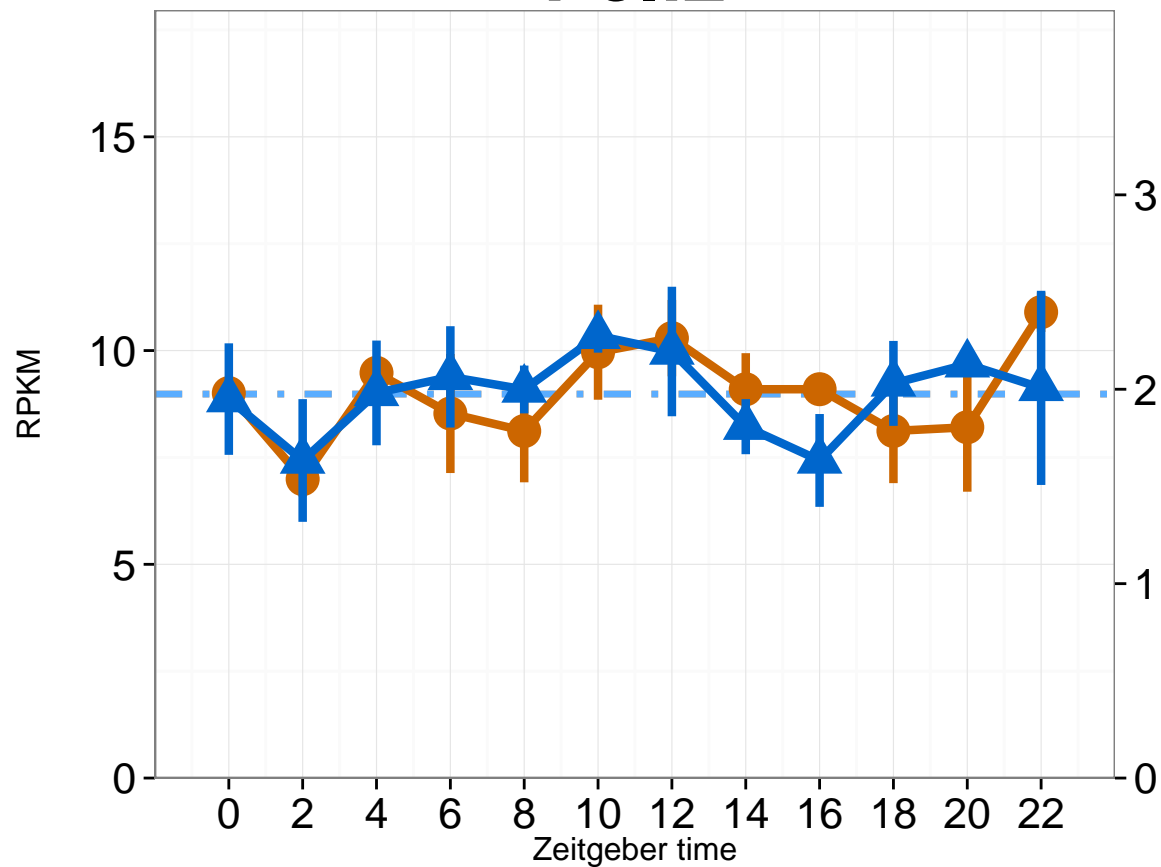

## Peli2

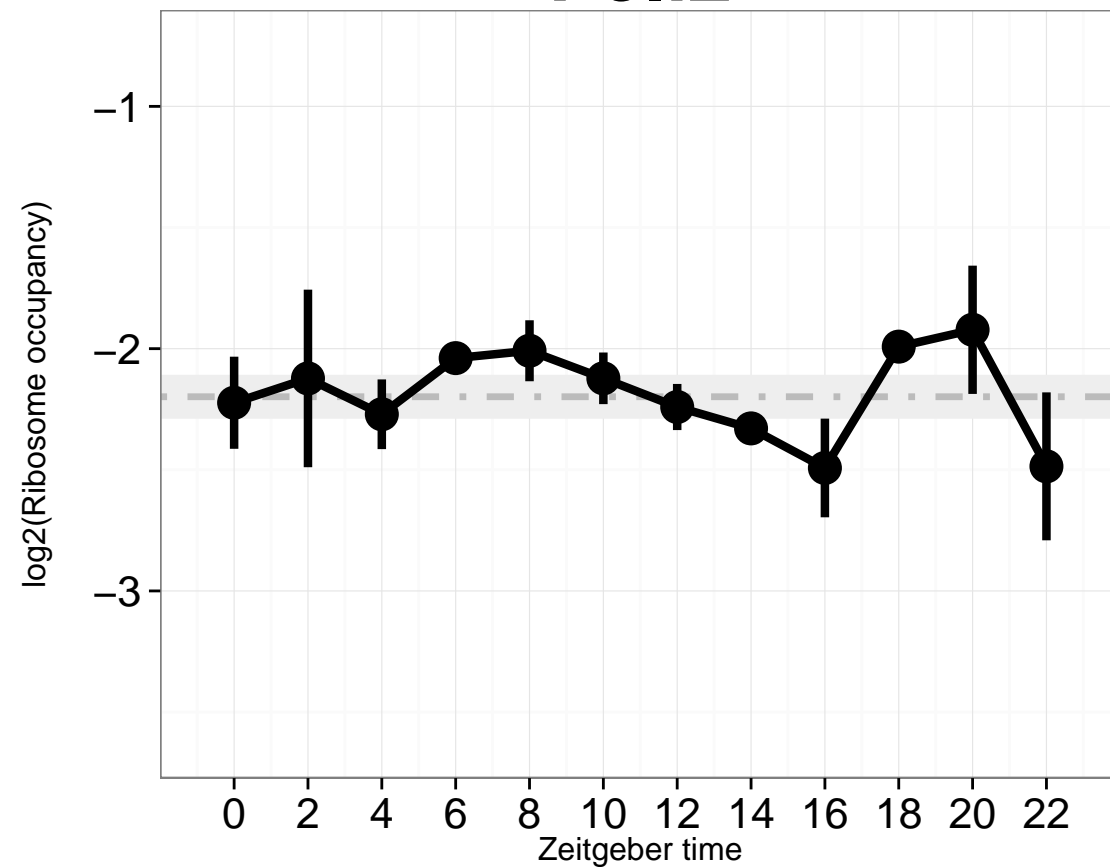

Supplement: SuppDataset_1.zip [file Peli2_set_A.pdf › Supplemental Dataset 1/A-mRNA_nonrhyth_translation_nonrhyth/Peli2_set_A.pdf]

## Peli3

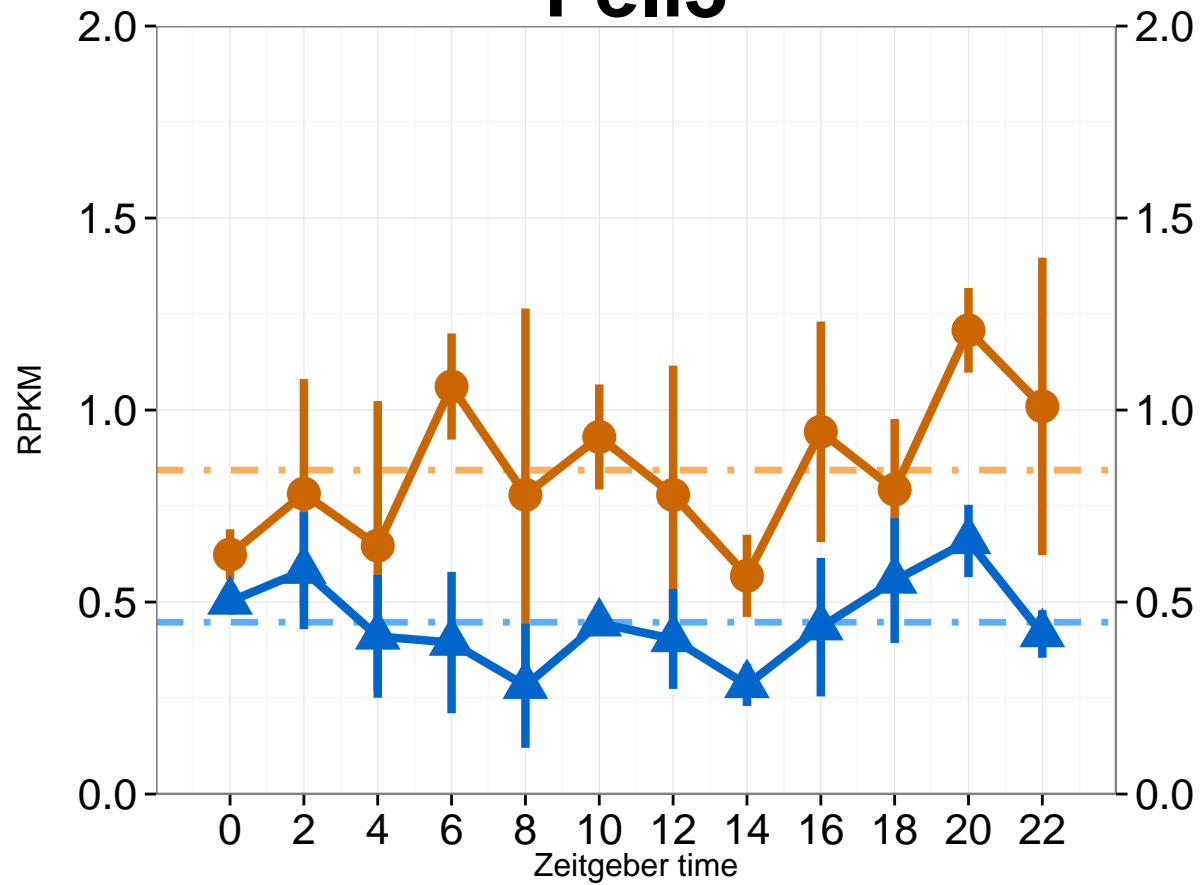

## Peli3

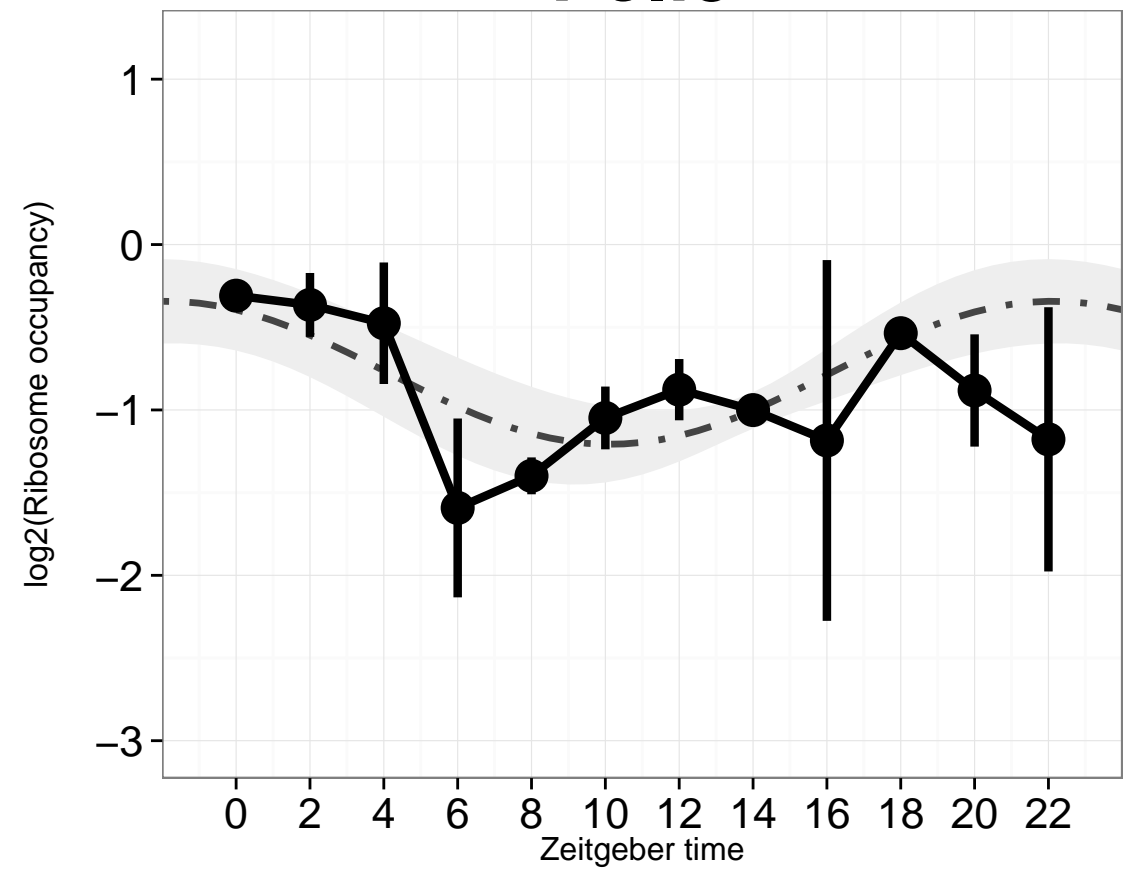

Supplement: SuppDataset_1.zip [file Peli3_set_A.pdf › Supplemental Dataset 1/A-mRNA_nonrhyth_translation_nonrhyth/Peli3_set_A.pdf]

# Pelp1

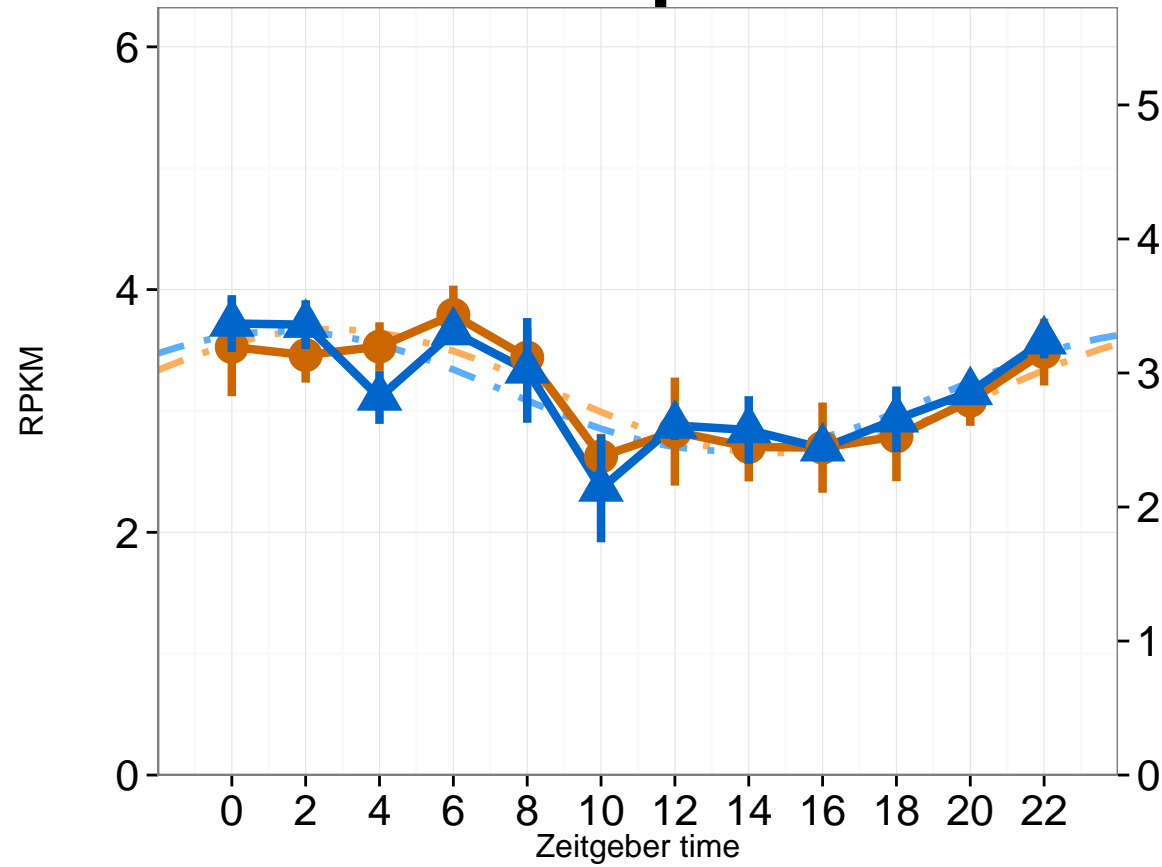

# Pelp1

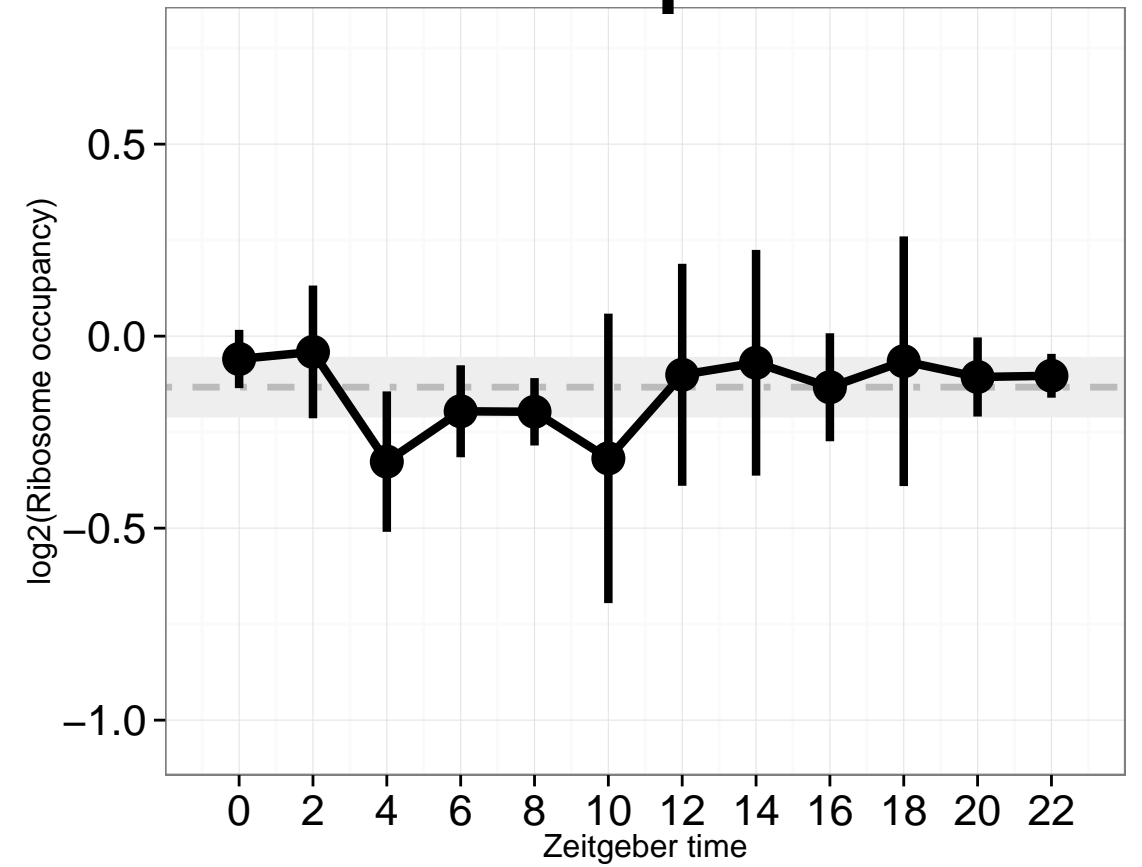

Supplement: SuppDataset_1.zip [file Pelp1_set_A.pdf › Supplemental Dataset 1/A-mRNA_nonrhyth_translation_nonrhyth/Pelp1_set_A.pdf]

## Pemt

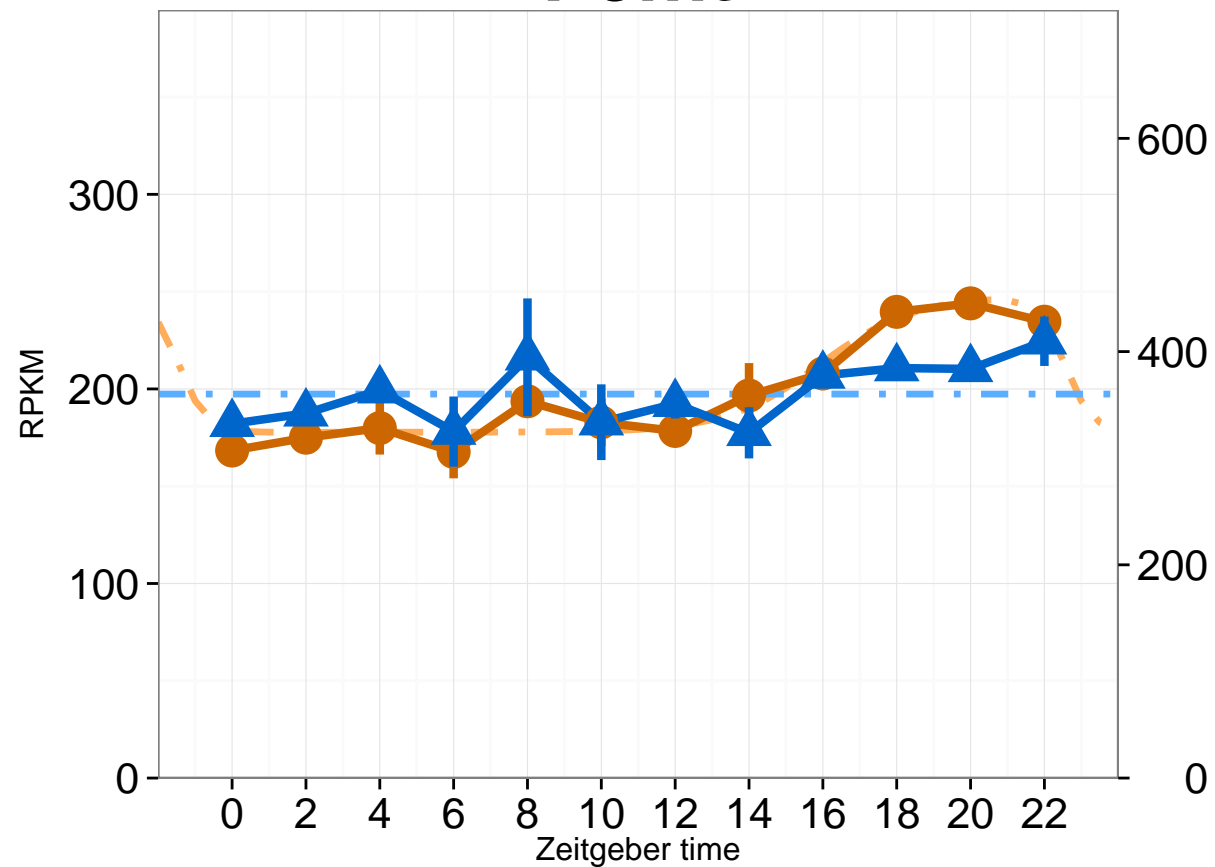

## Pemt

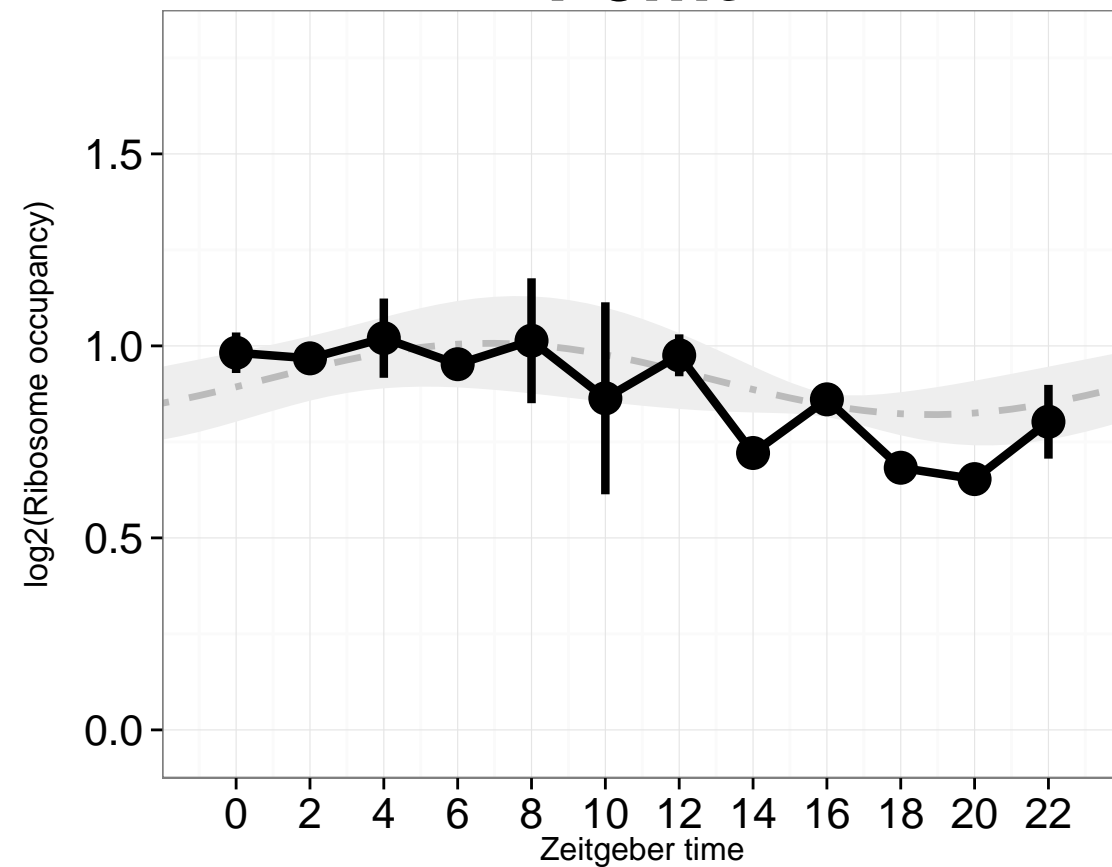

Supplement: SuppDataset_1.zip [file Pemt_set_A.pdf › Supplemental Dataset 1/A-mRNA_nonrhyth_translation_nonrhyth/Pemt_set_A.pdf]

## Pepd

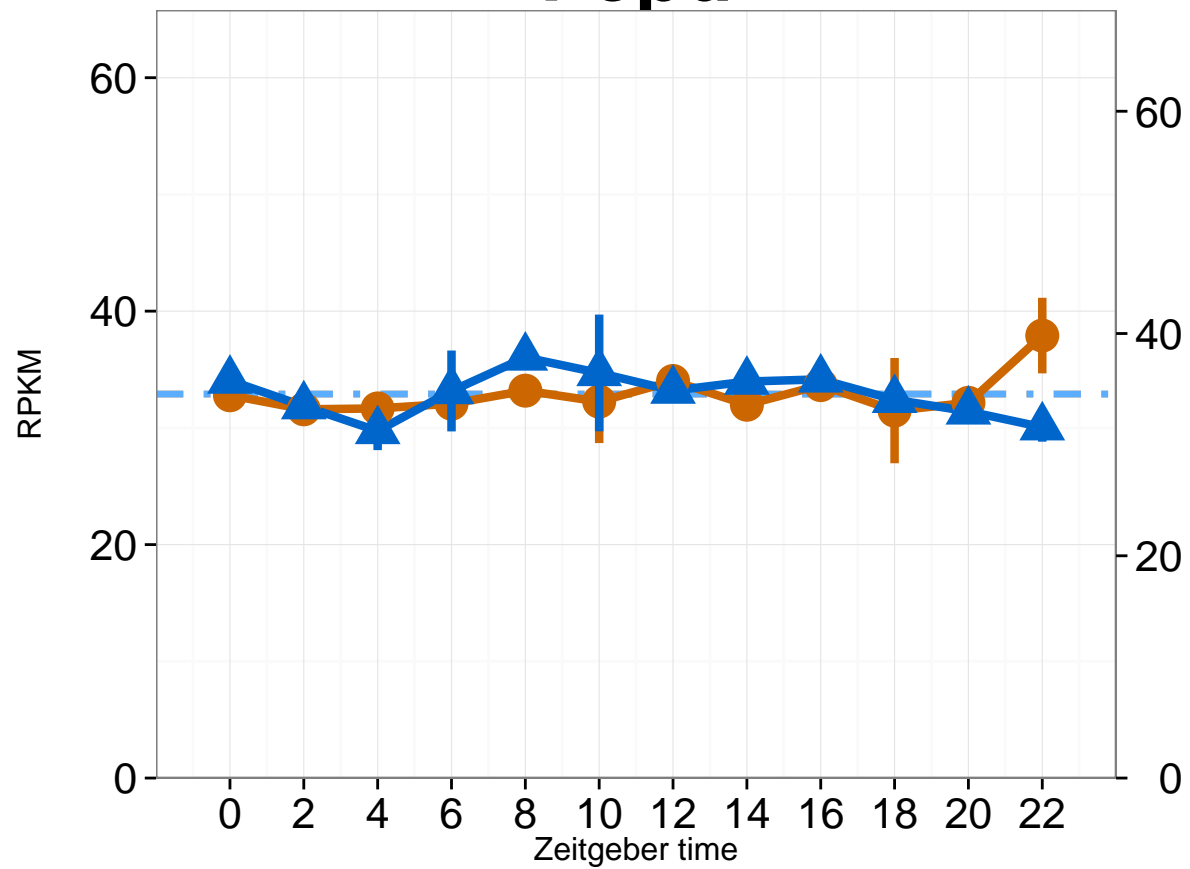

## Pepd

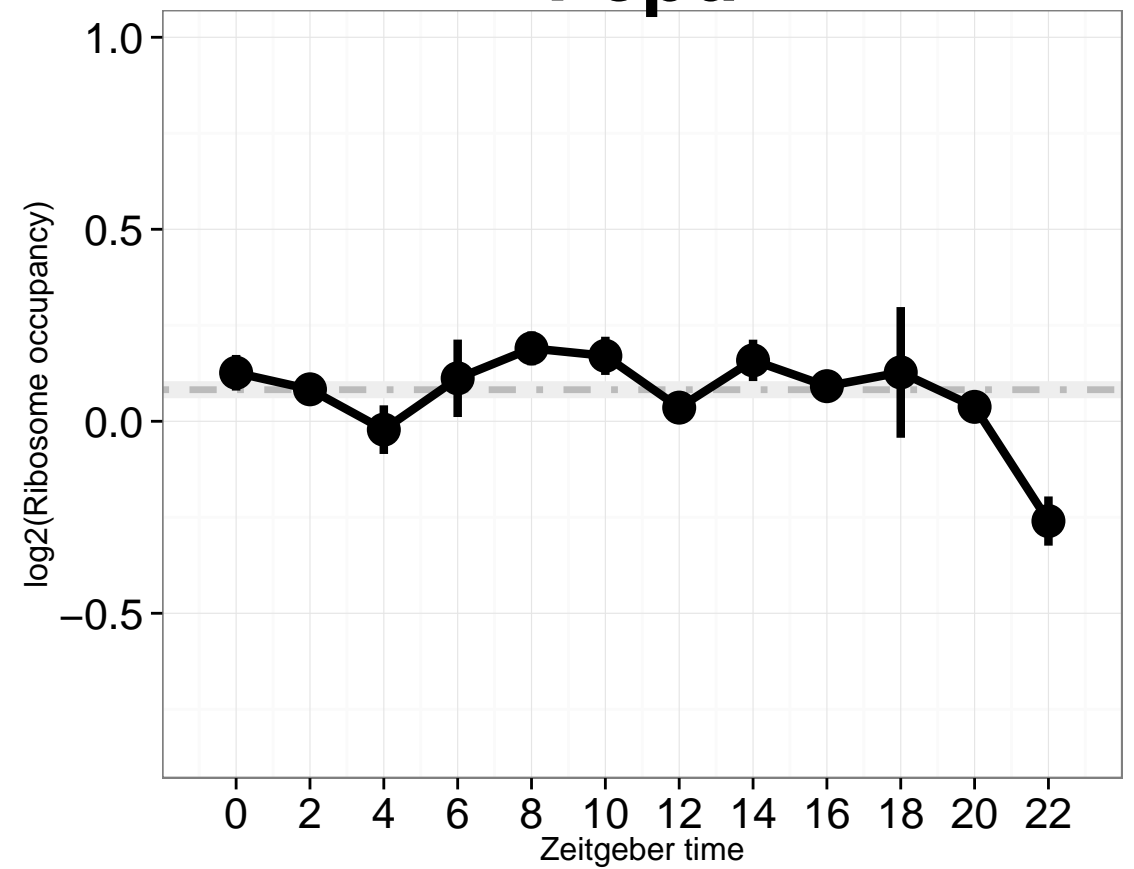

Supplement: SuppDataset_1.zip [file Pepd_set_A.pdf › Supplemental Dataset 1/A-mRNA_nonrhyth_translation_nonrhyth/Pepd_set_A.pdf]

## Perp

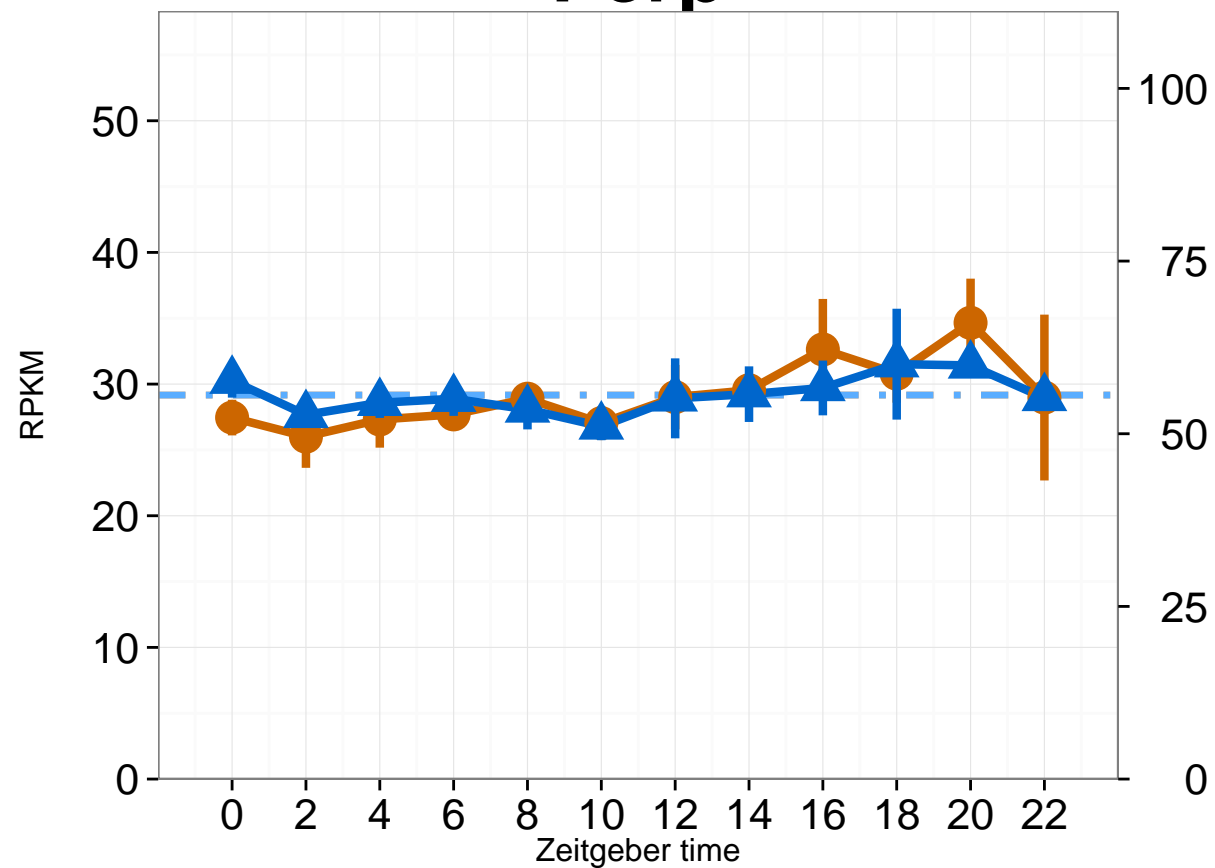

## Perp

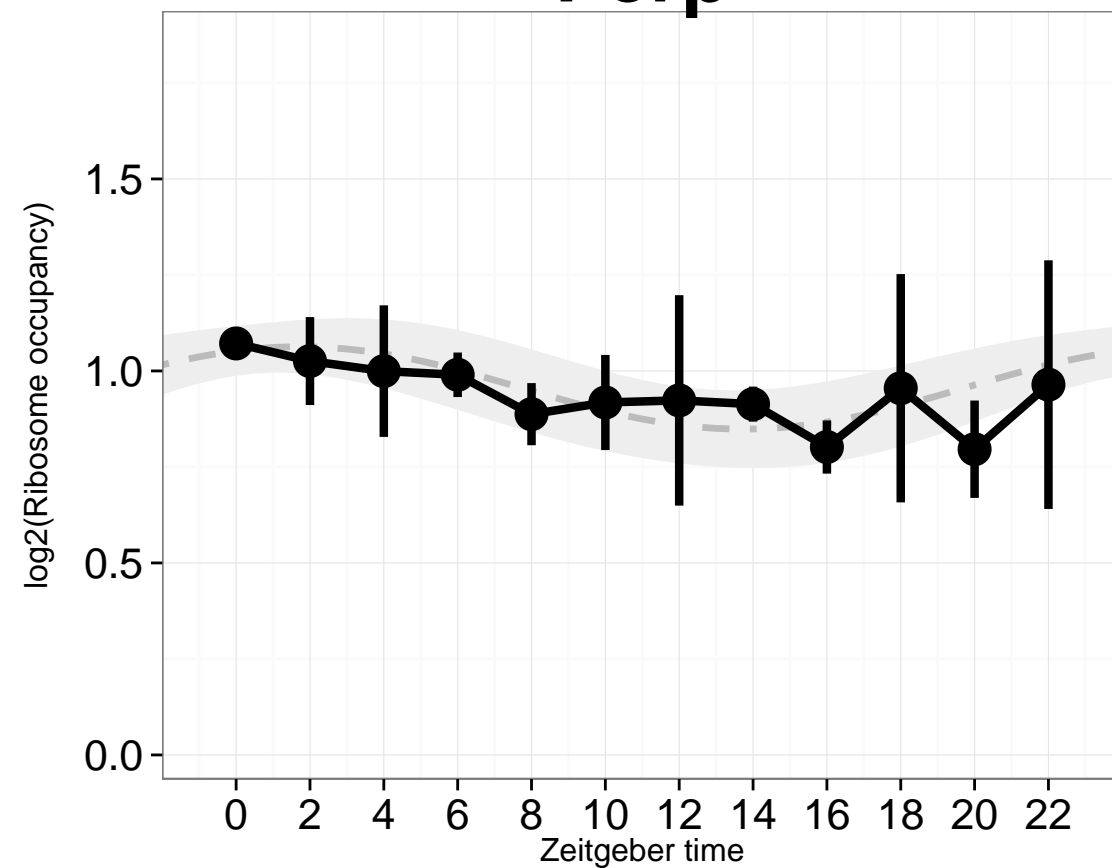

Supplement: SuppDataset_1.zip [file Perp_set_A.pdf › Supplemental Dataset 1/A-mRNA_nonrhyth_translation_nonrhyth/Perp_set_A.pdf]

## Pes1

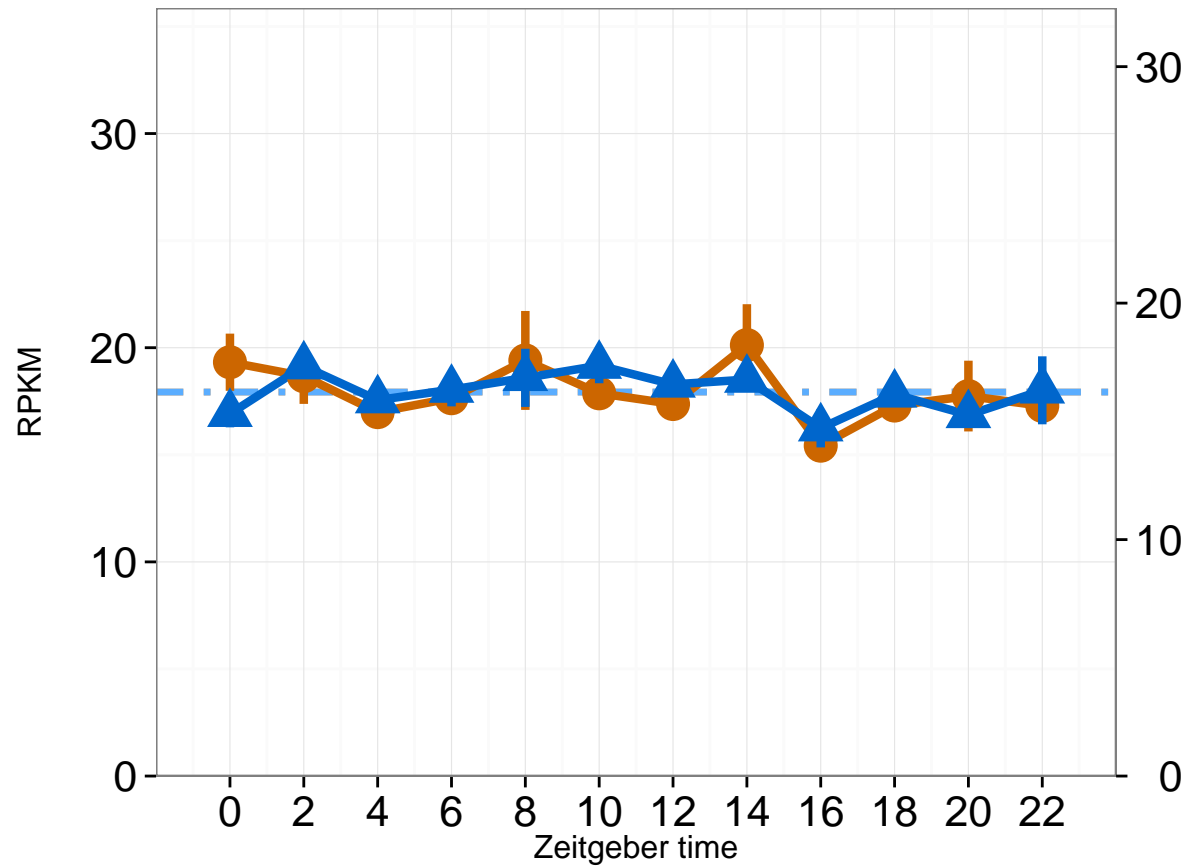

## Pes1

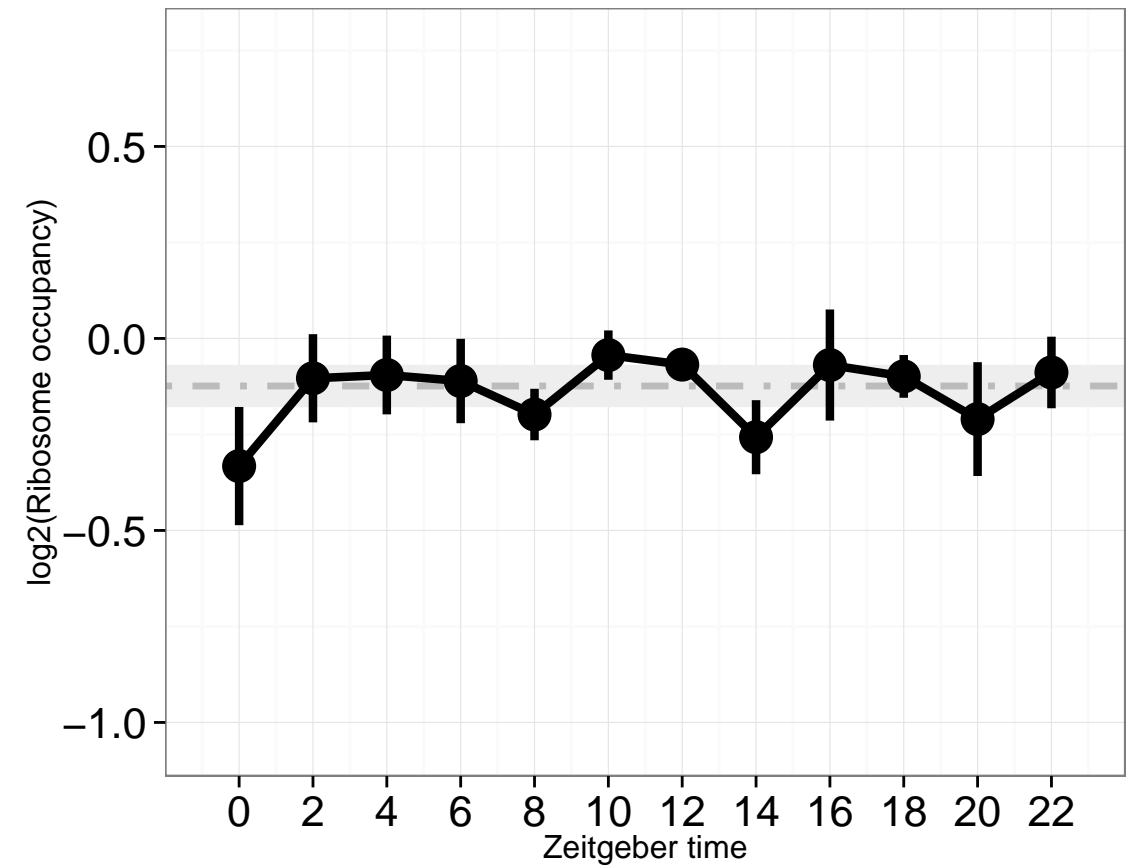

Supplement: SuppDataset_1.zip [file Pes1_set_A.pdf › Supplemental Dataset 1/A-mRNA_nonrhyth_translation_nonrhyth/Pes1_set_A.pdf]

# Pet100

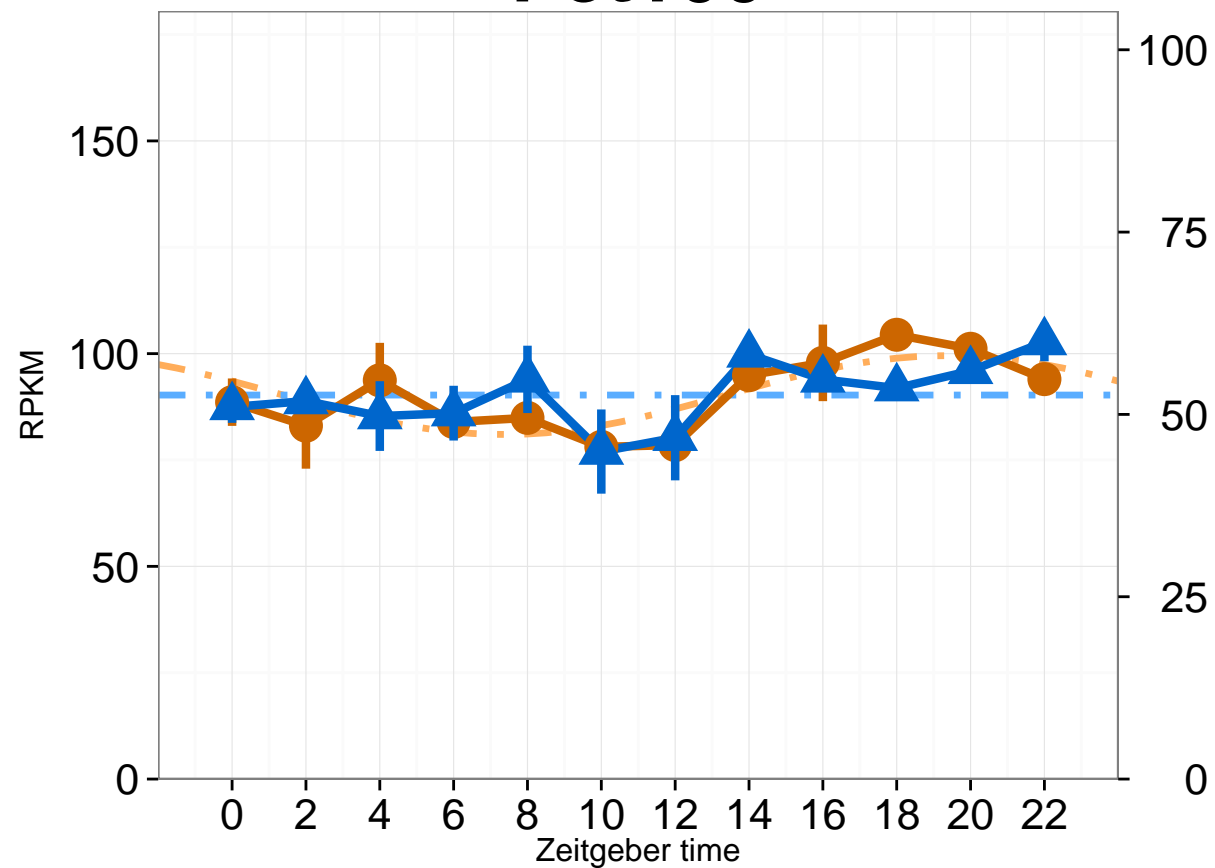

# Pet100

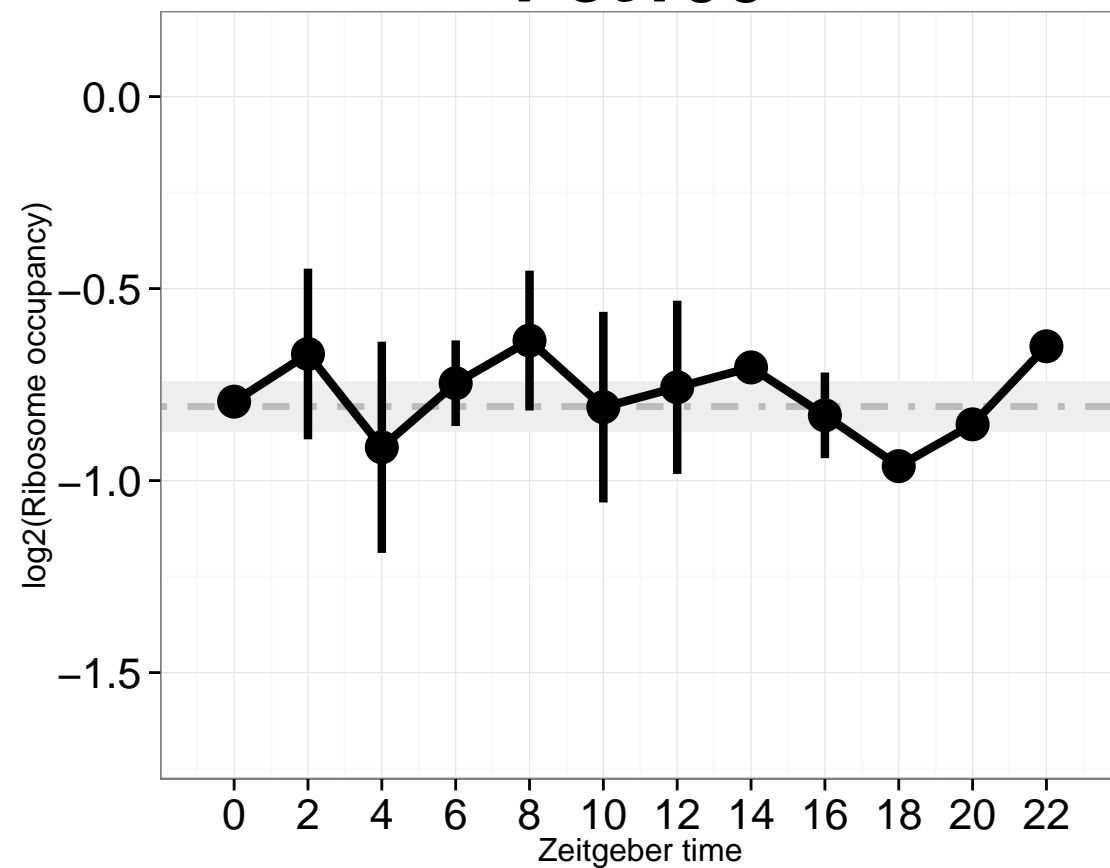

Supplement: SuppDataset_1.zip [file Pet100_set_A.pdf › Supplemental Dataset 1/A-mRNA_nonrhyth_translation_nonrhyth/Pet100_set_A.pdf]

# Pet112

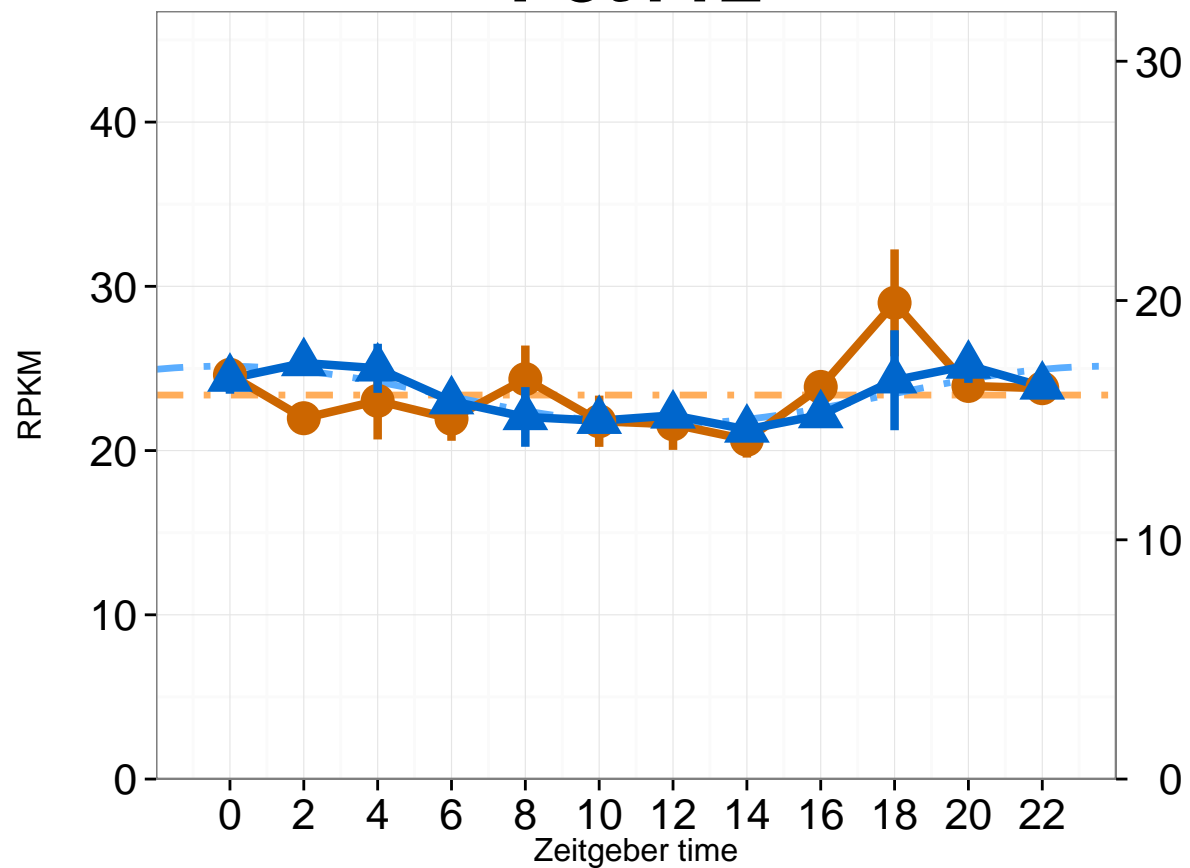

# Pet112

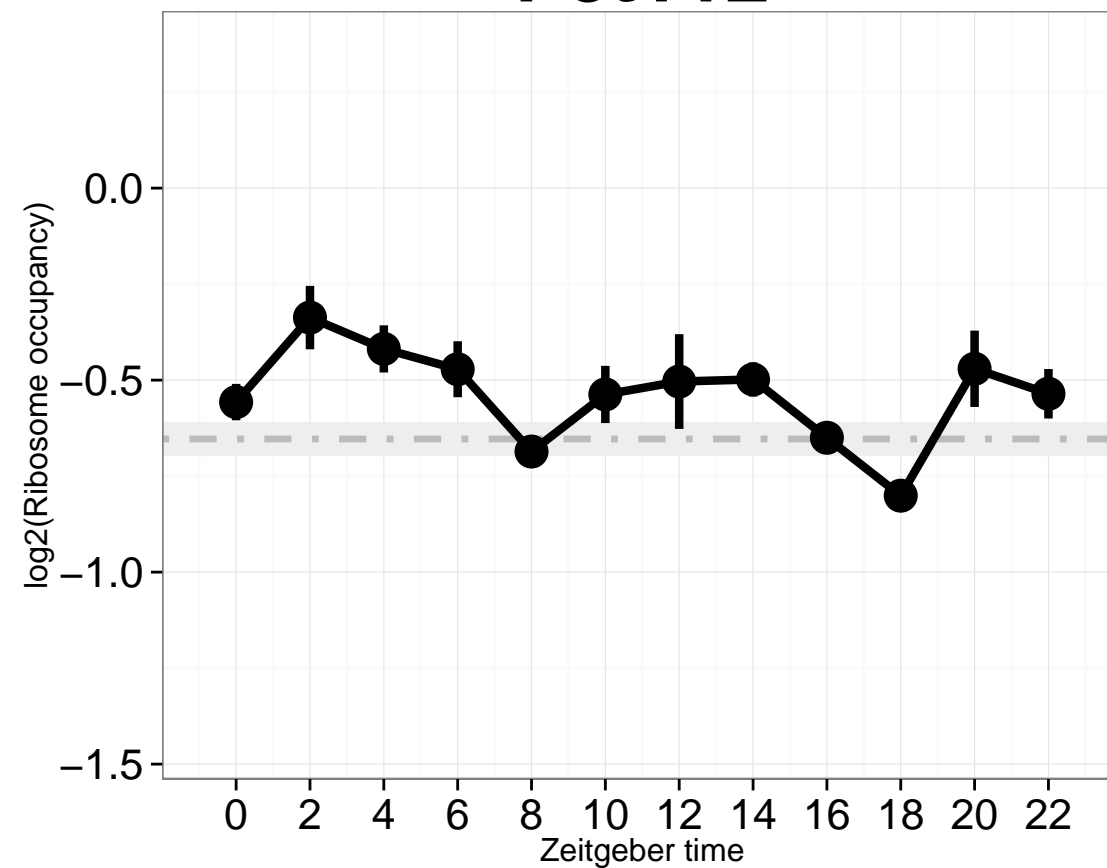

Supplement: SuppDataset_1.zip [file Pet112_set_A.pdf › Supplemental Dataset 1/A-mRNA_nonrhyth_translation_nonrhyth/Pet112_set_A.pdf]

## Pex10

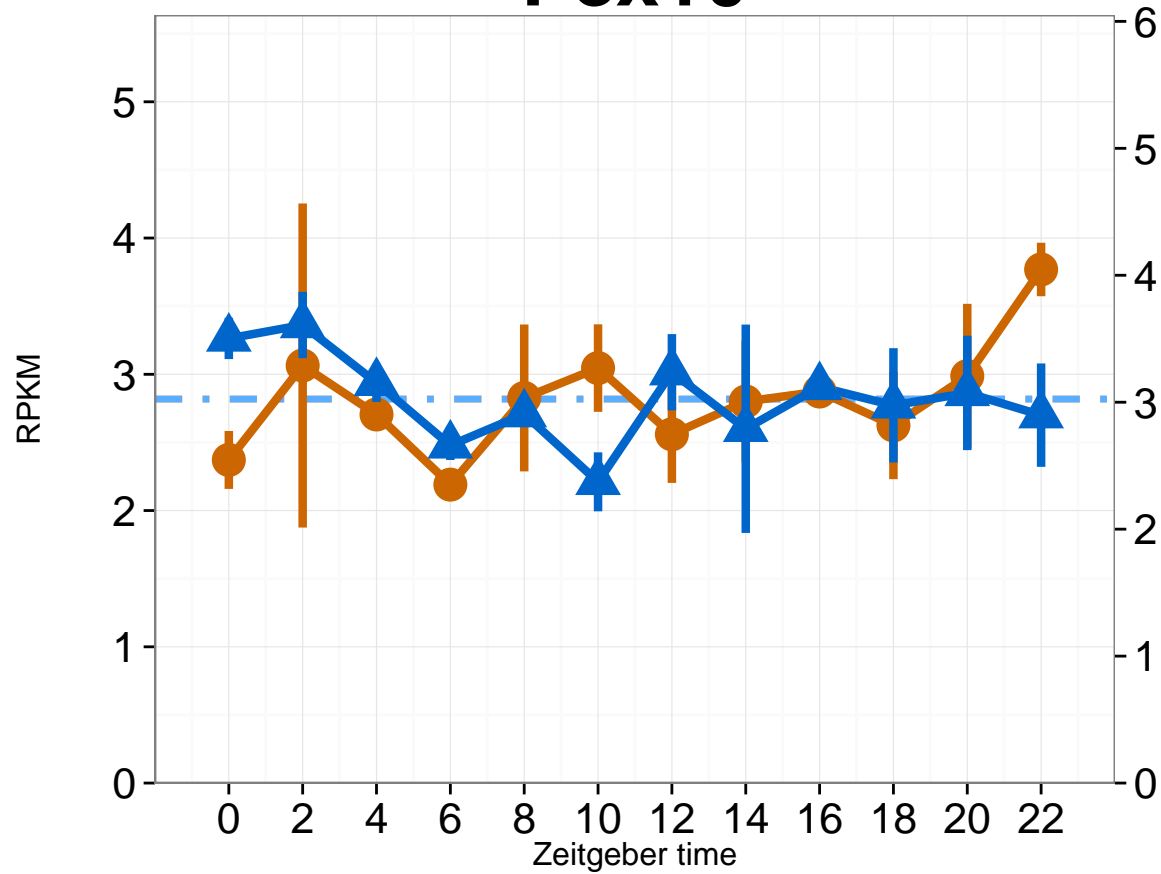

## Pex10

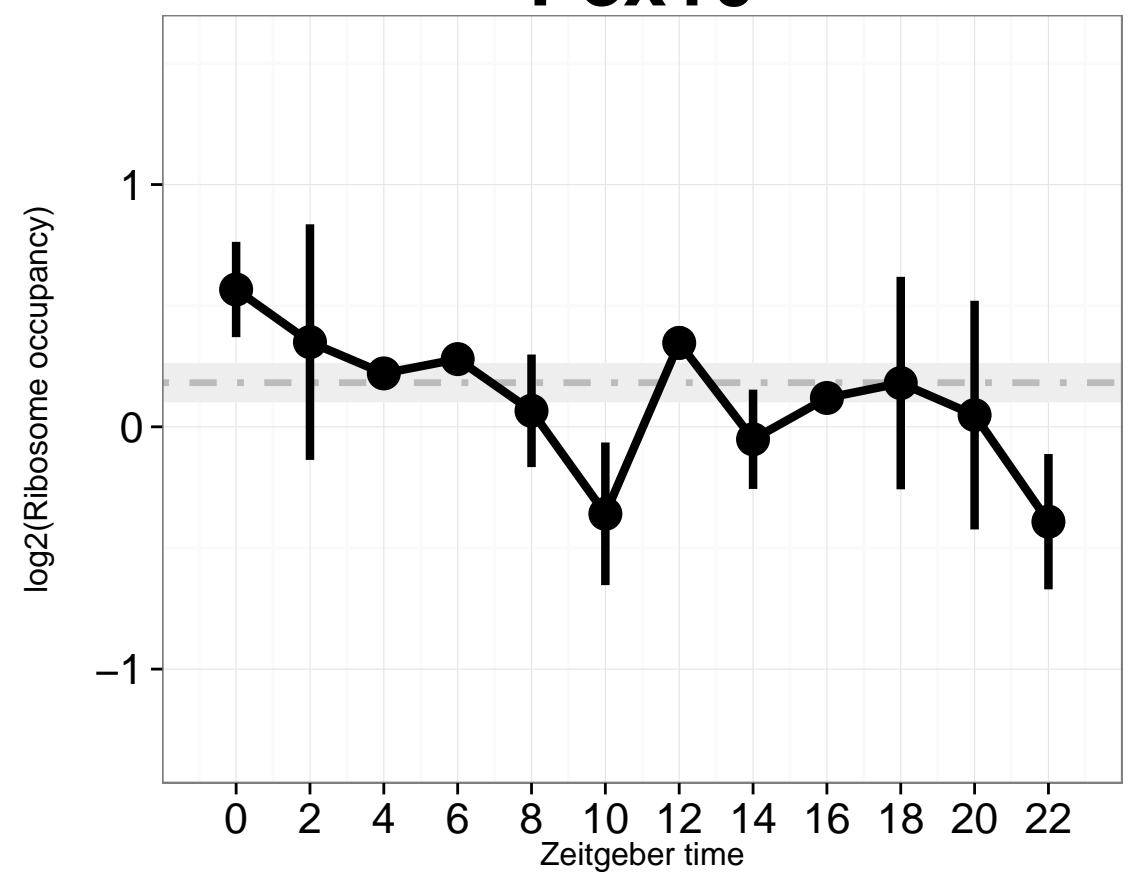

Supplement: SuppDataset_1.zip [file Pex10_set_A.pdf › Supplemental Dataset 1/A-mRNA_nonrhyth_translation_nonrhyth/Pex10_set_A.pdf]

# Pex11b

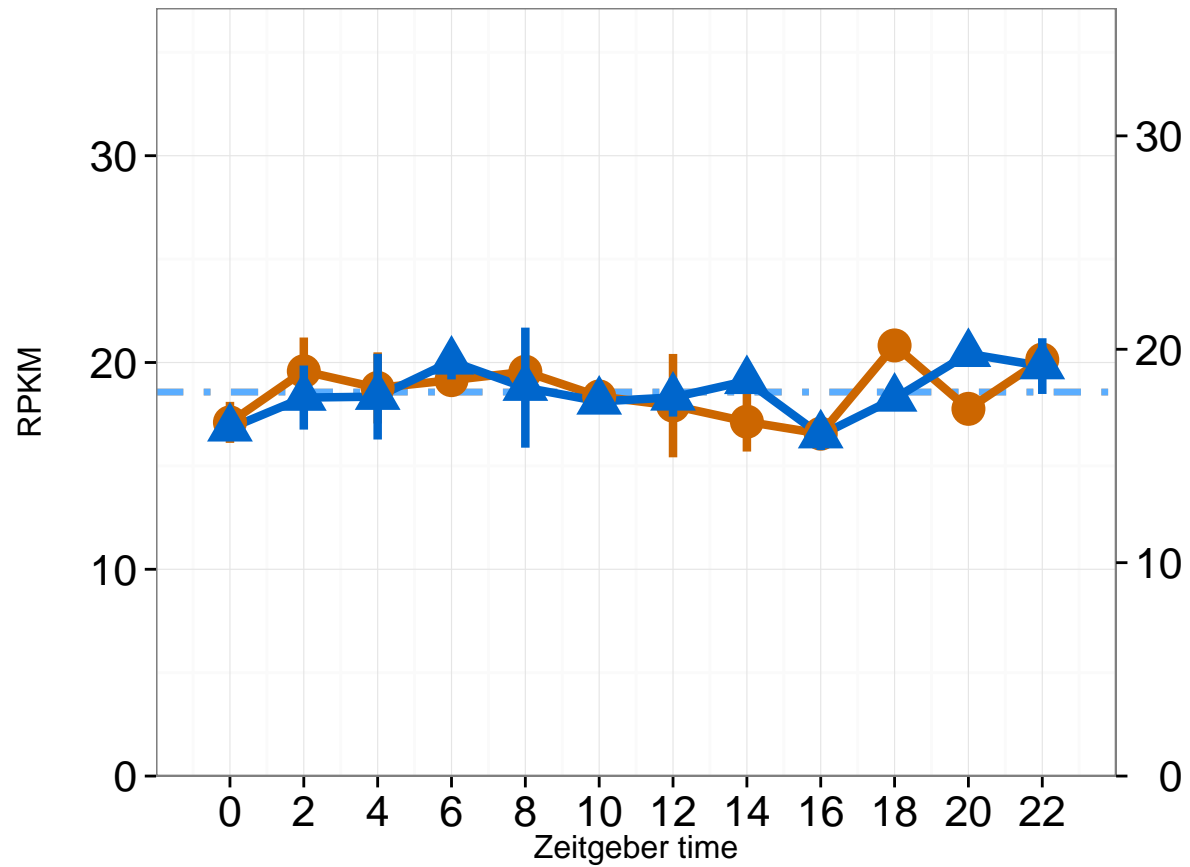

# Pex11b

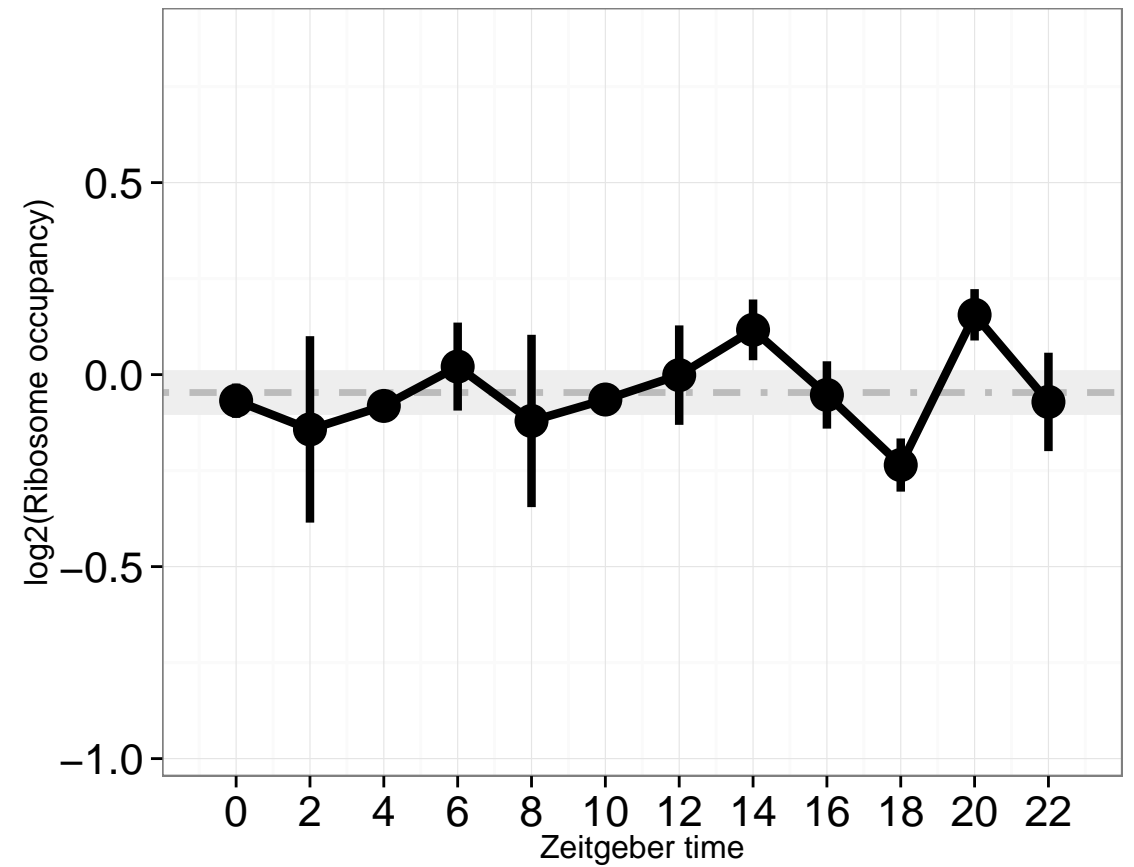

Supplement: SuppDataset_1.zip [file Pex11b_set_A.pdf › Supplemental Dataset 1/A-mRNA_nonrhyth_translation_nonrhyth/Pex11b_set_A.pdf]

## Pex11g

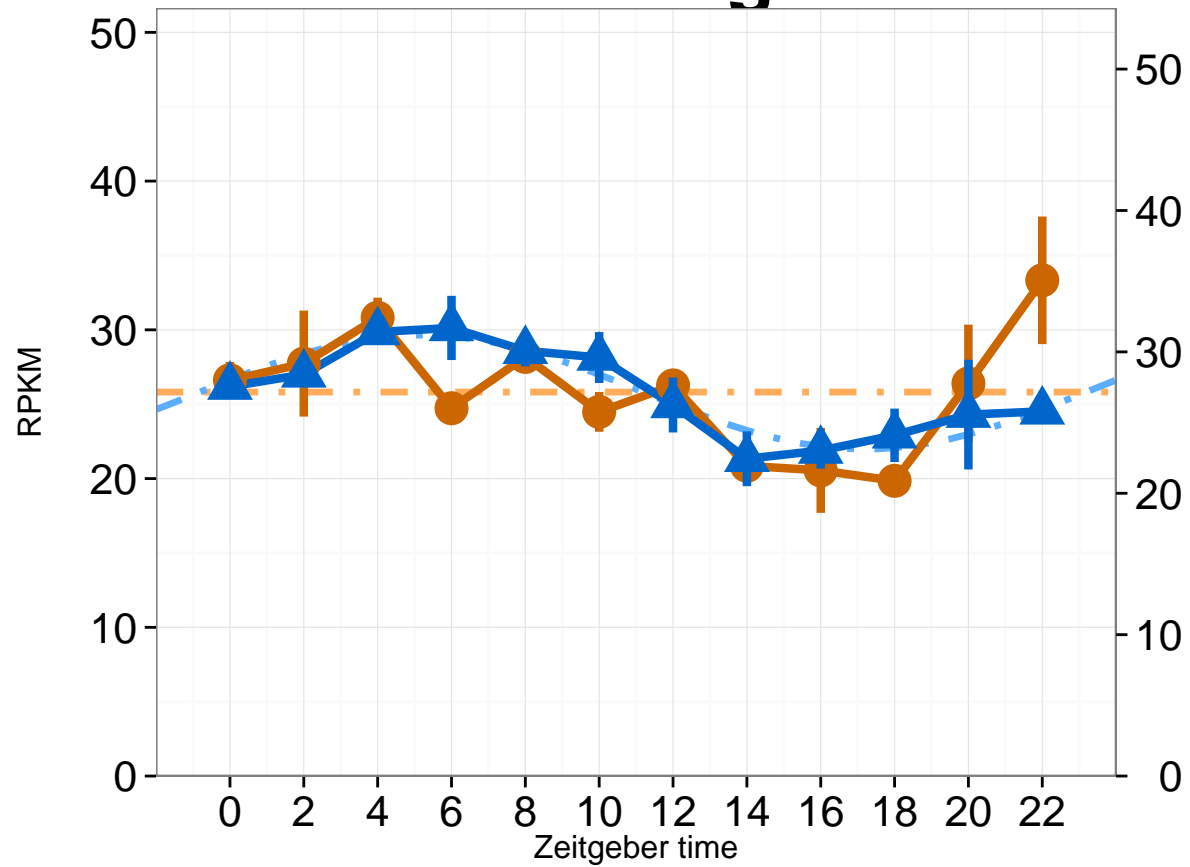

## Pex11g

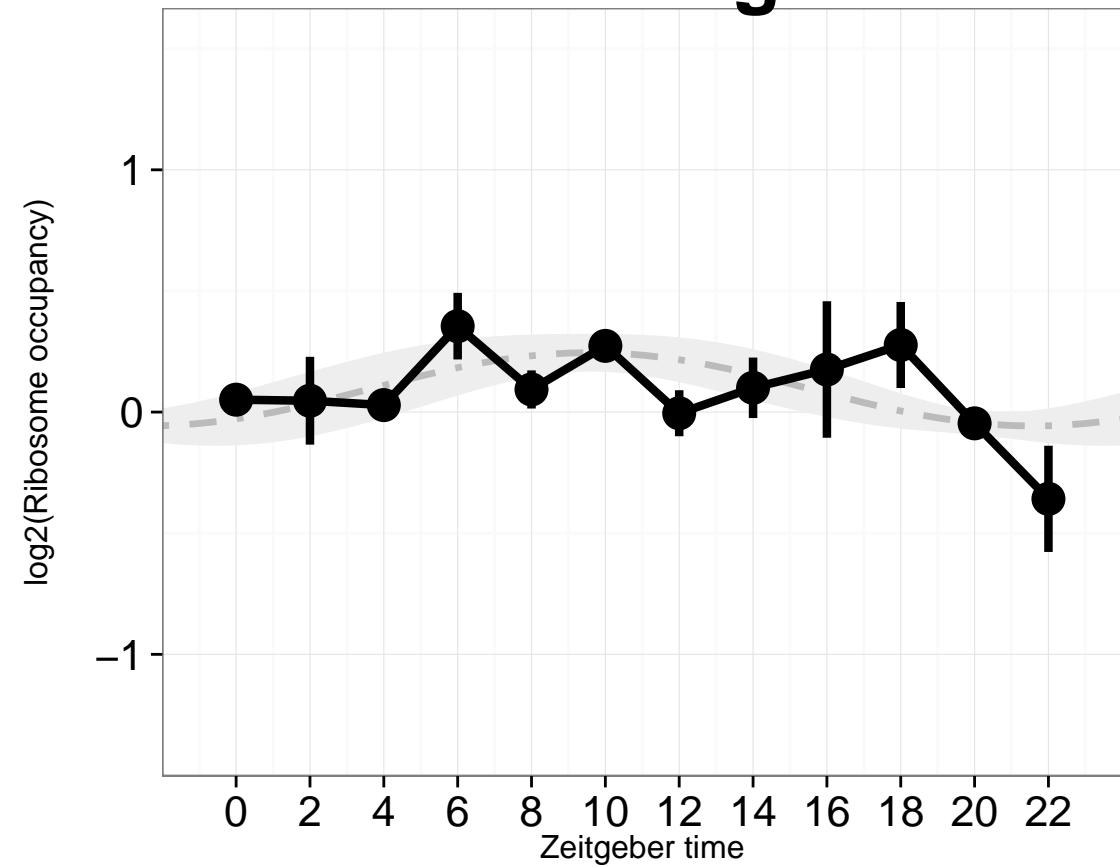

Supplement: SuppDataset_1.zip [file Pex11g_set_A.pdf › Supplemental Dataset 1/A-mRNA_nonrhyth_translation_nonrhyth/Pex11g_set_A.pdf]

## Pex12

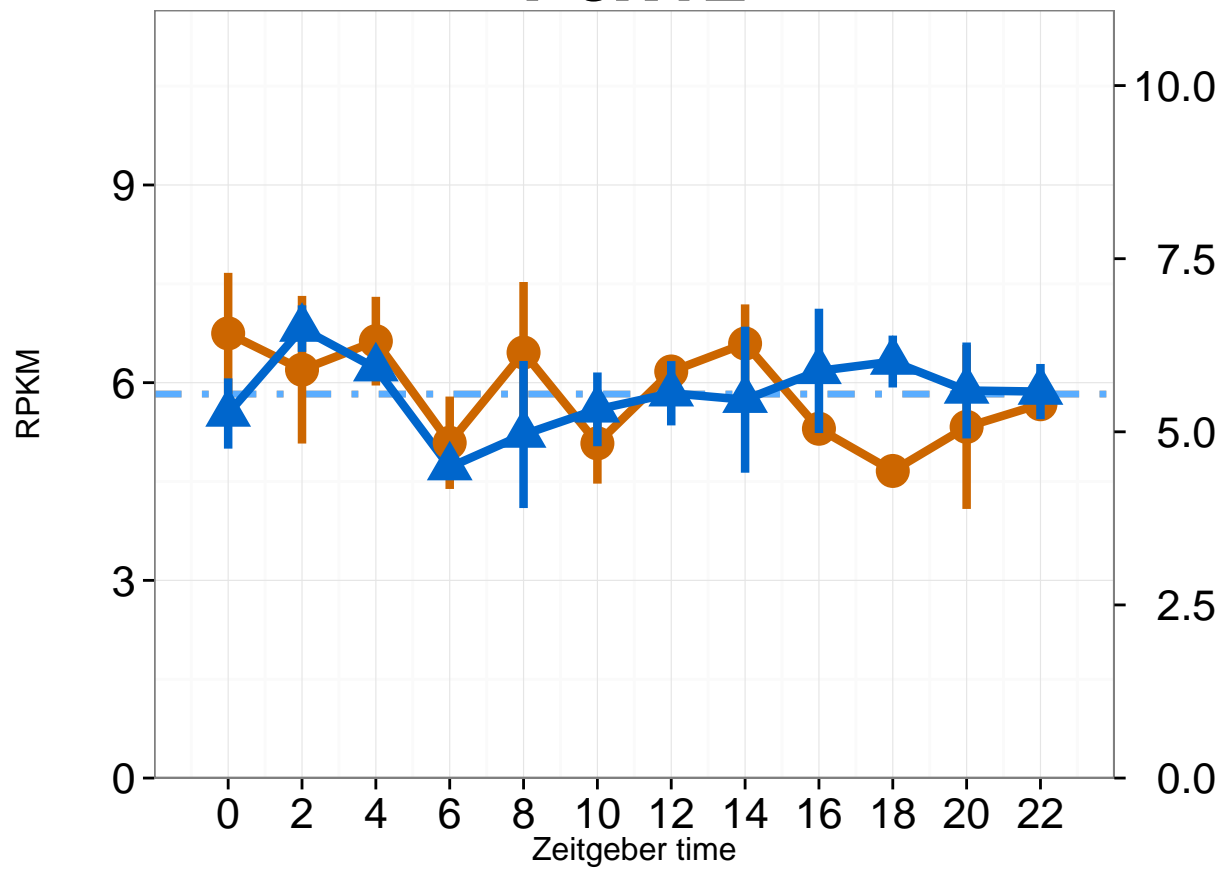

## Pex12

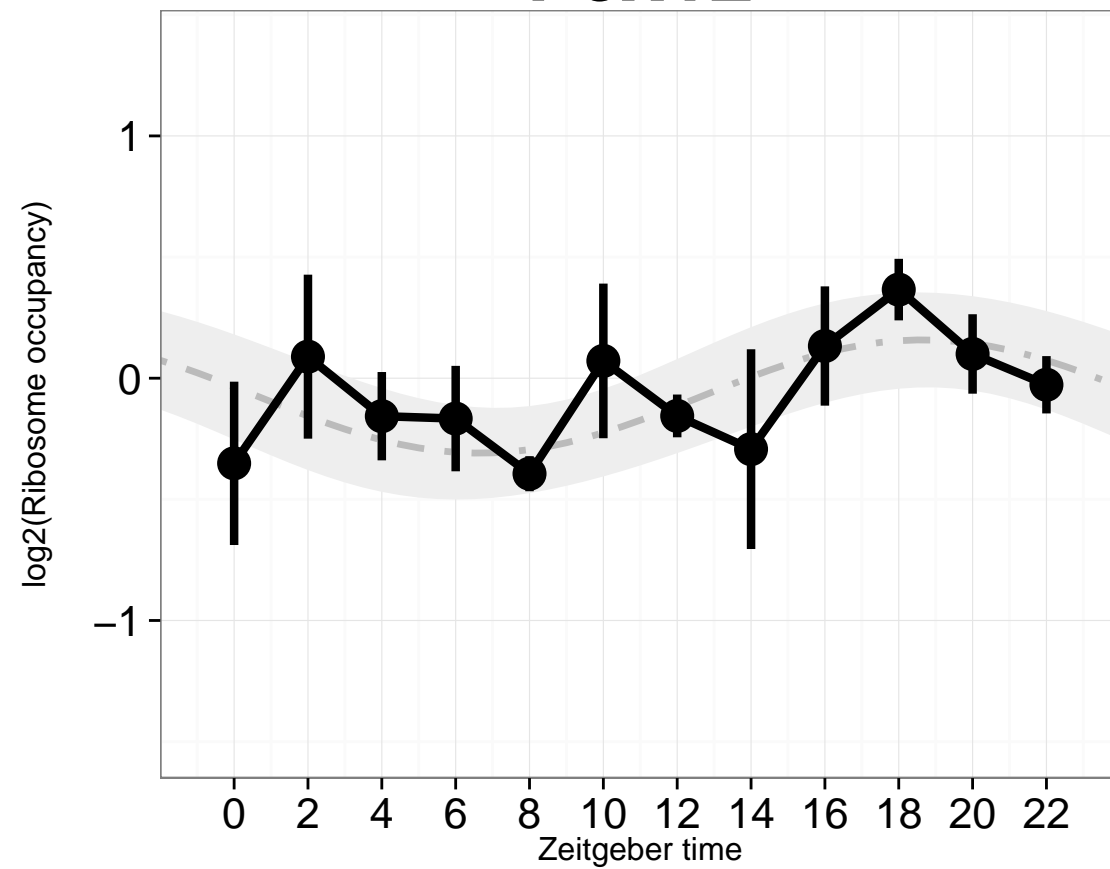

Supplement: SuppDataset_1.zip [file Pex12_set_A.pdf › Supplemental Dataset 1/A-mRNA_nonrhyth_translation_nonrhyth/Pex12_set_A.pdf]

## Pex13

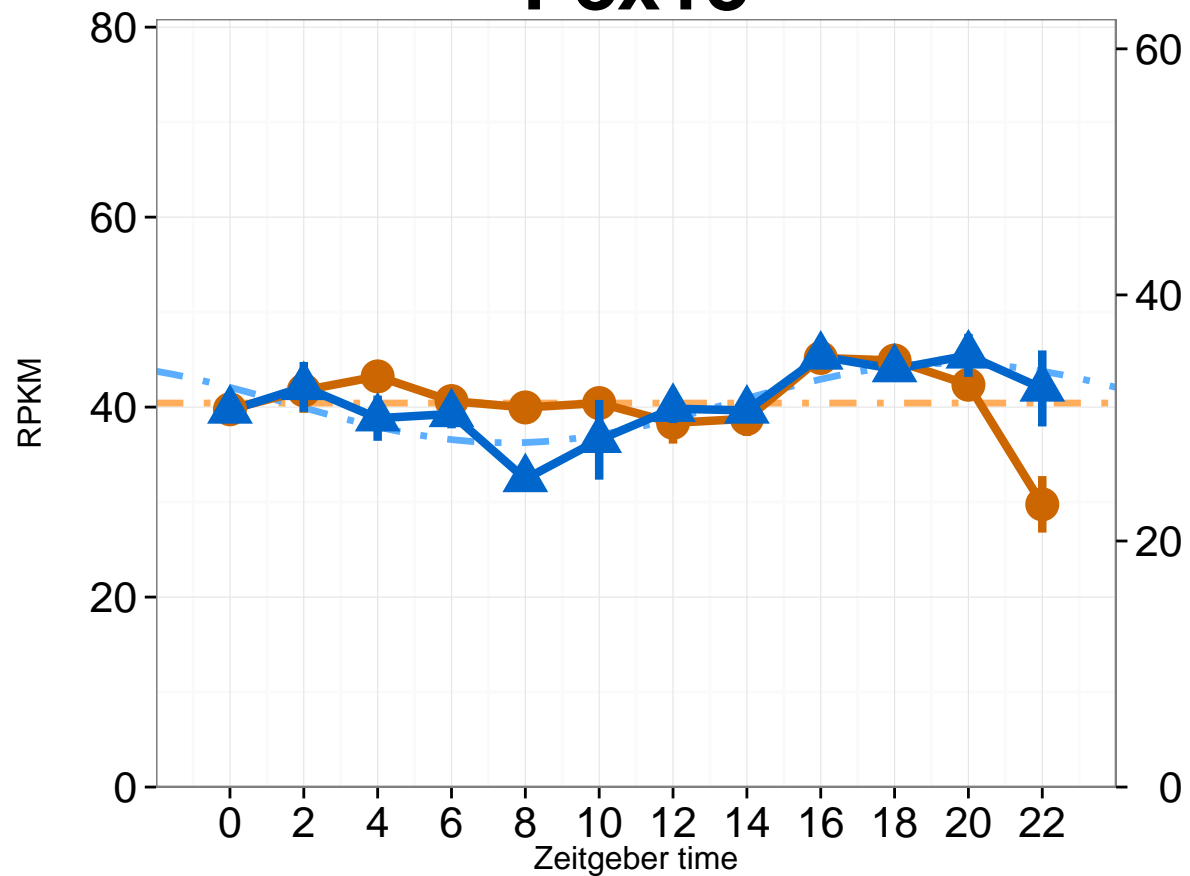

## Pex13

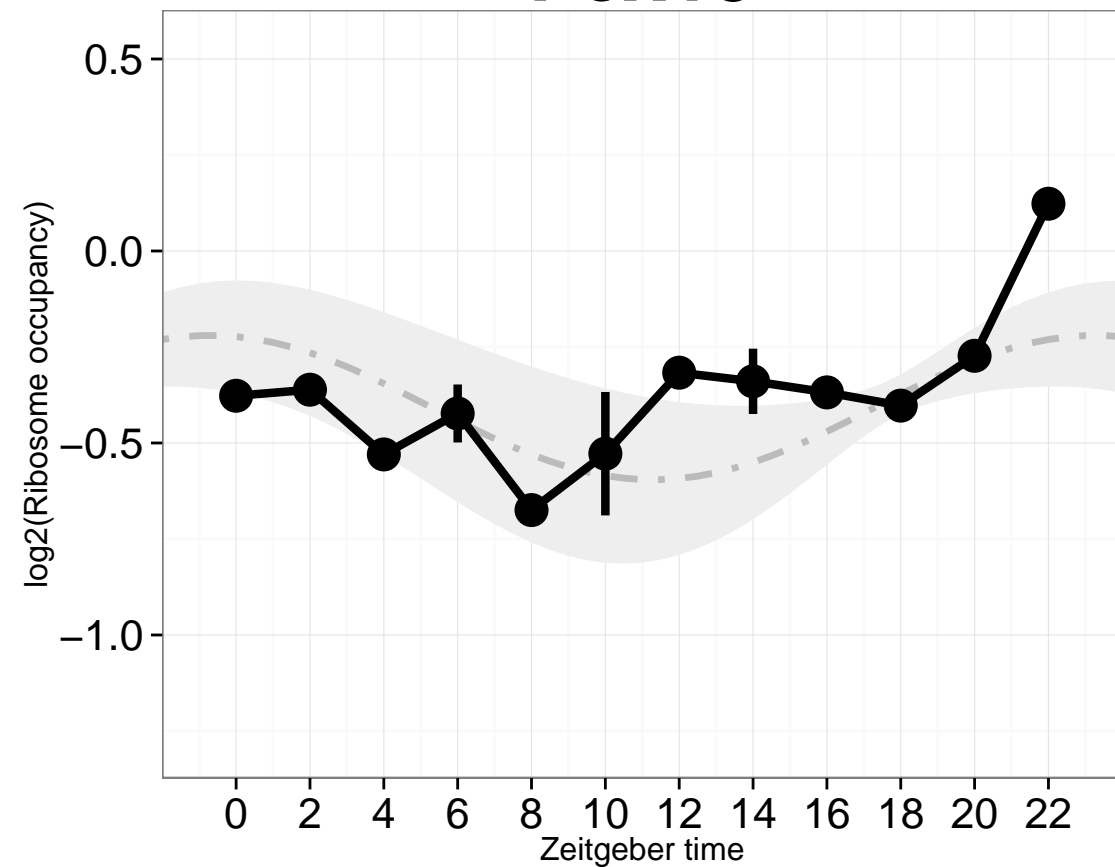

Supplement: SuppDataset_1.zip [file Pex13_set_A.pdf › Supplemental Dataset 1/A-mRNA_nonrhyth_translation_nonrhyth/Pex13_set_A.pdf]

## Pex14

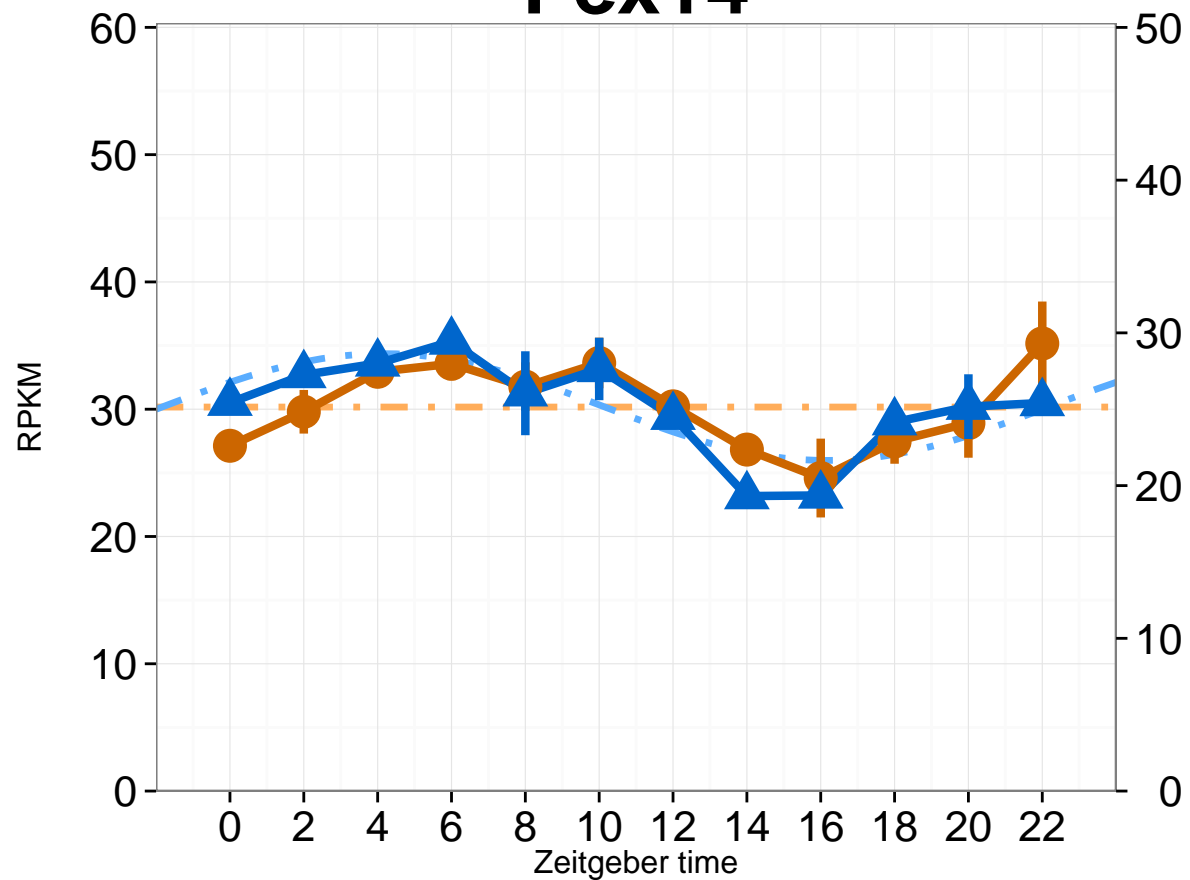

## Pex14

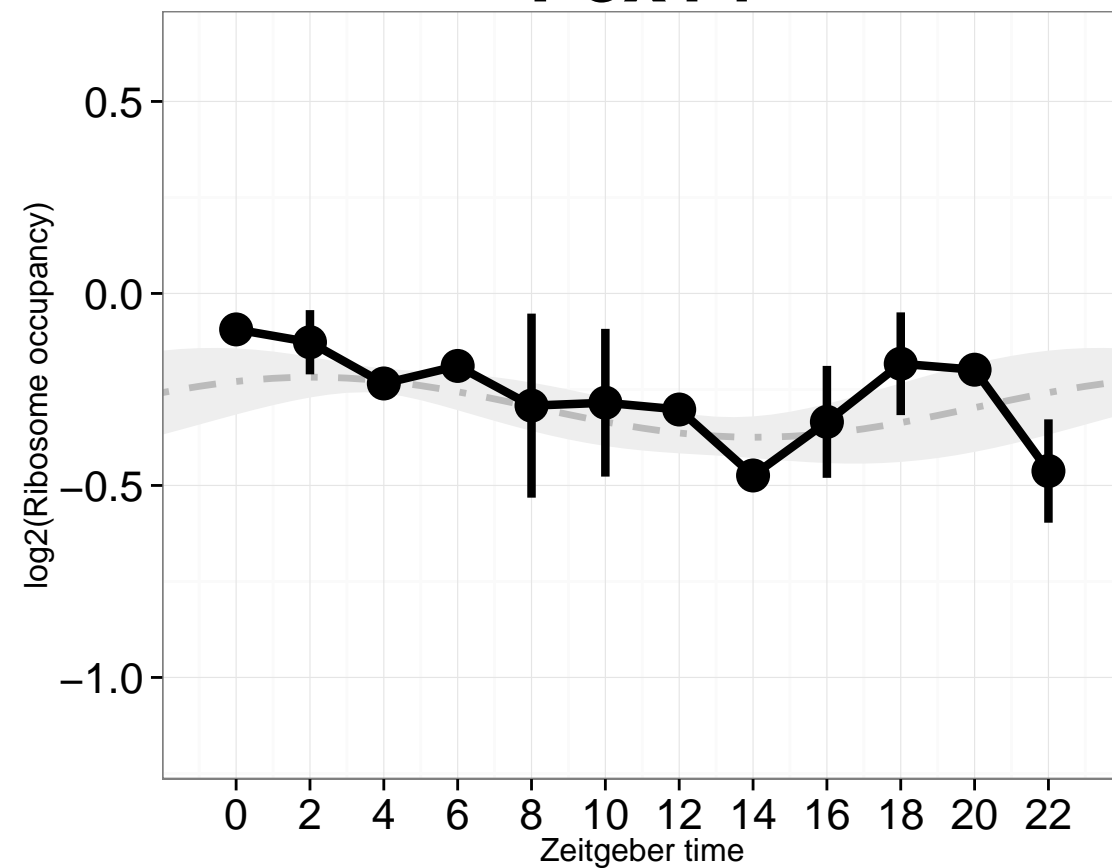

Supplement: SuppDataset_1.zip [file Pex14_set_A.pdf › Supplemental Dataset 1/A-mRNA_nonrhyth_translation_nonrhyth/Pex14_set_A.pdf]

## Pex16

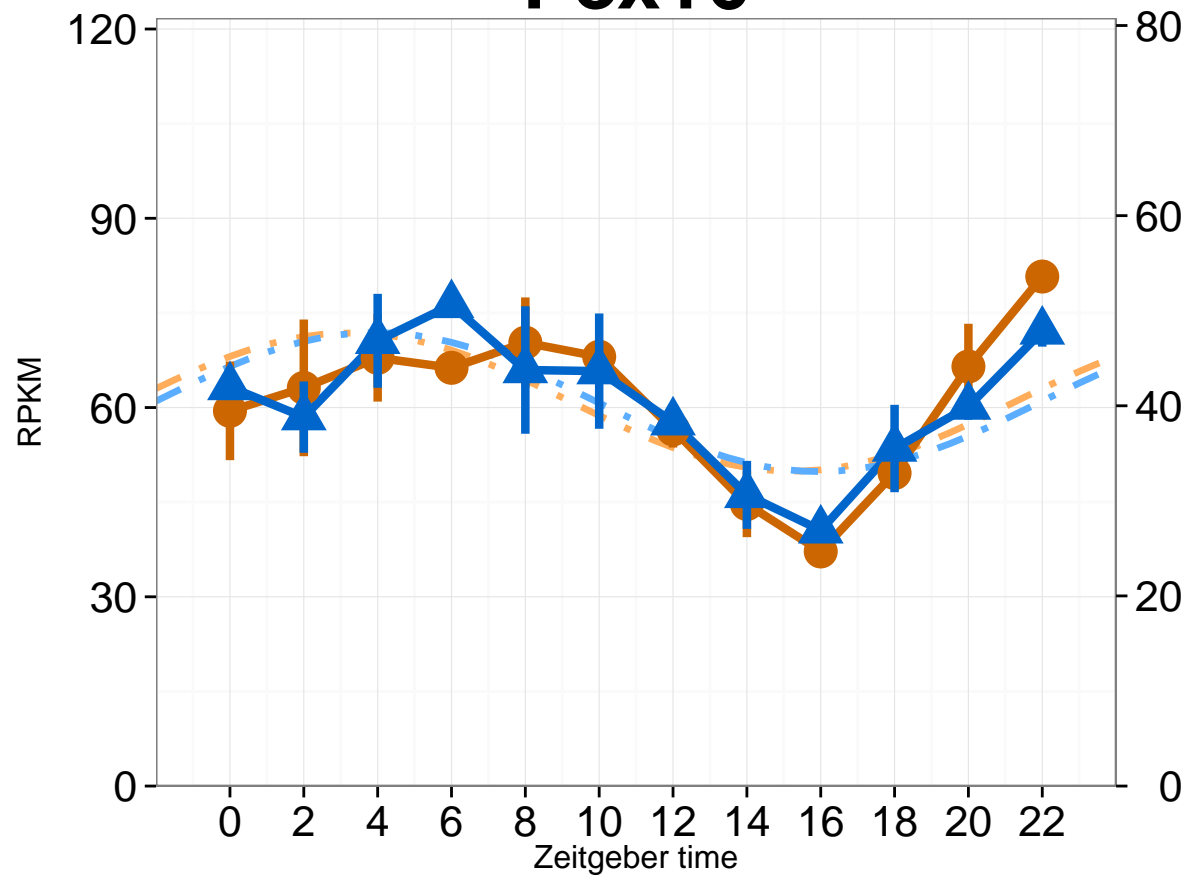

## Pex16

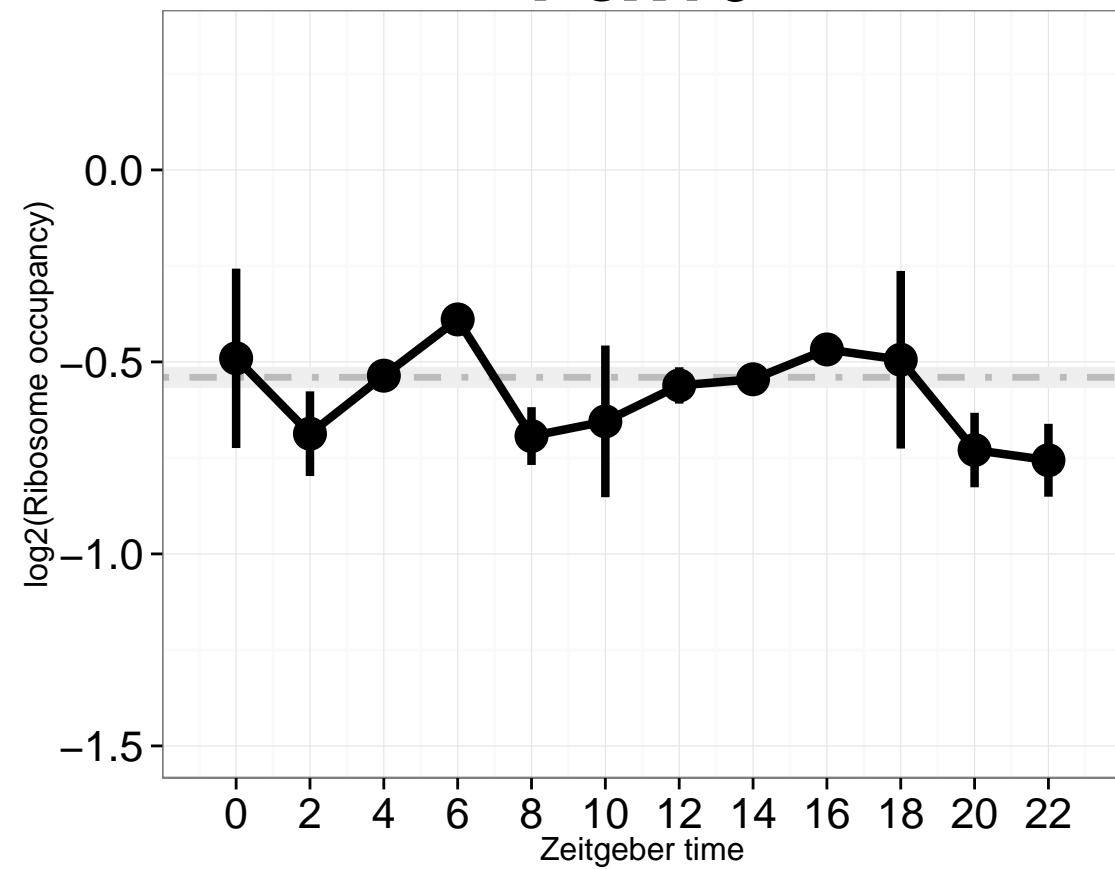

Supplement: SuppDataset_1.zip [file Pex16_set_A.pdf › Supplemental Dataset 1/A-mRNA_nonrhyth_translation_nonrhyth/Pex16_set_A.pdf]

## Pex19

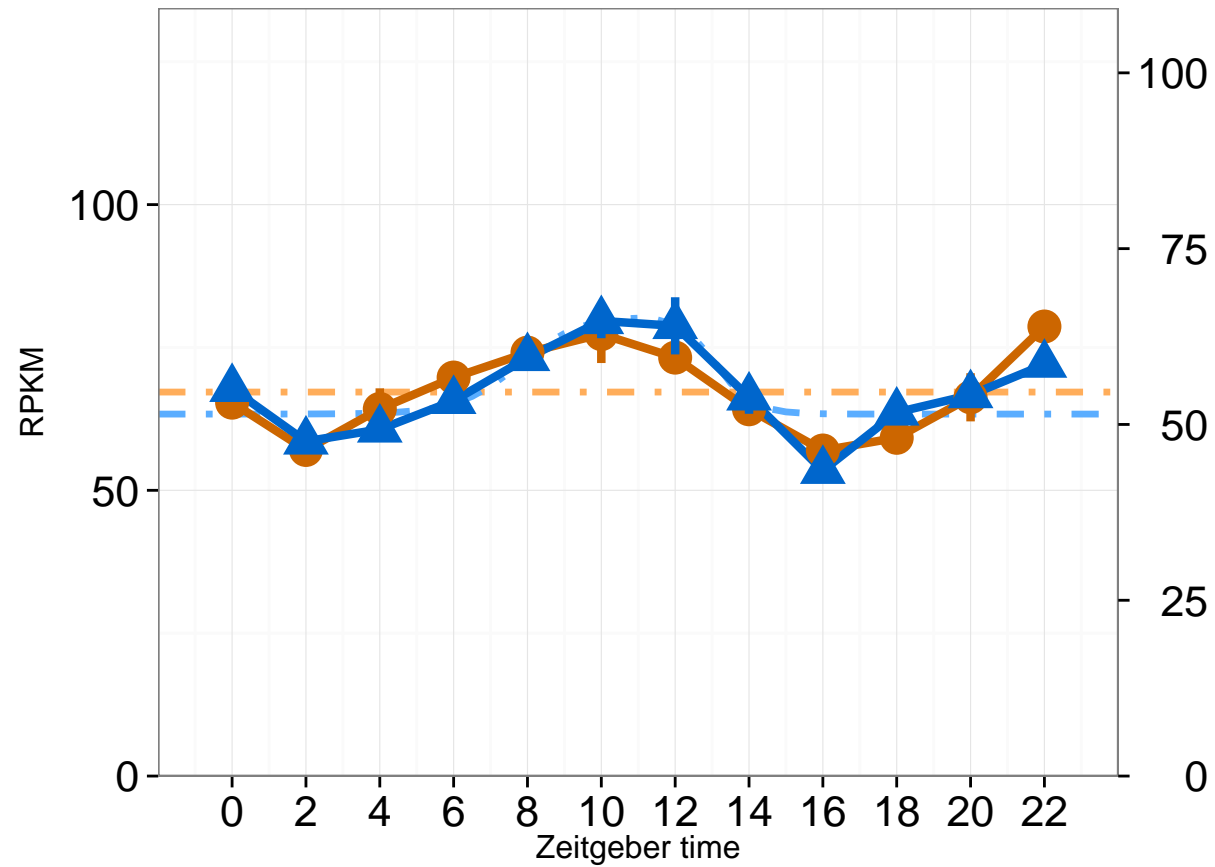

## Pex19

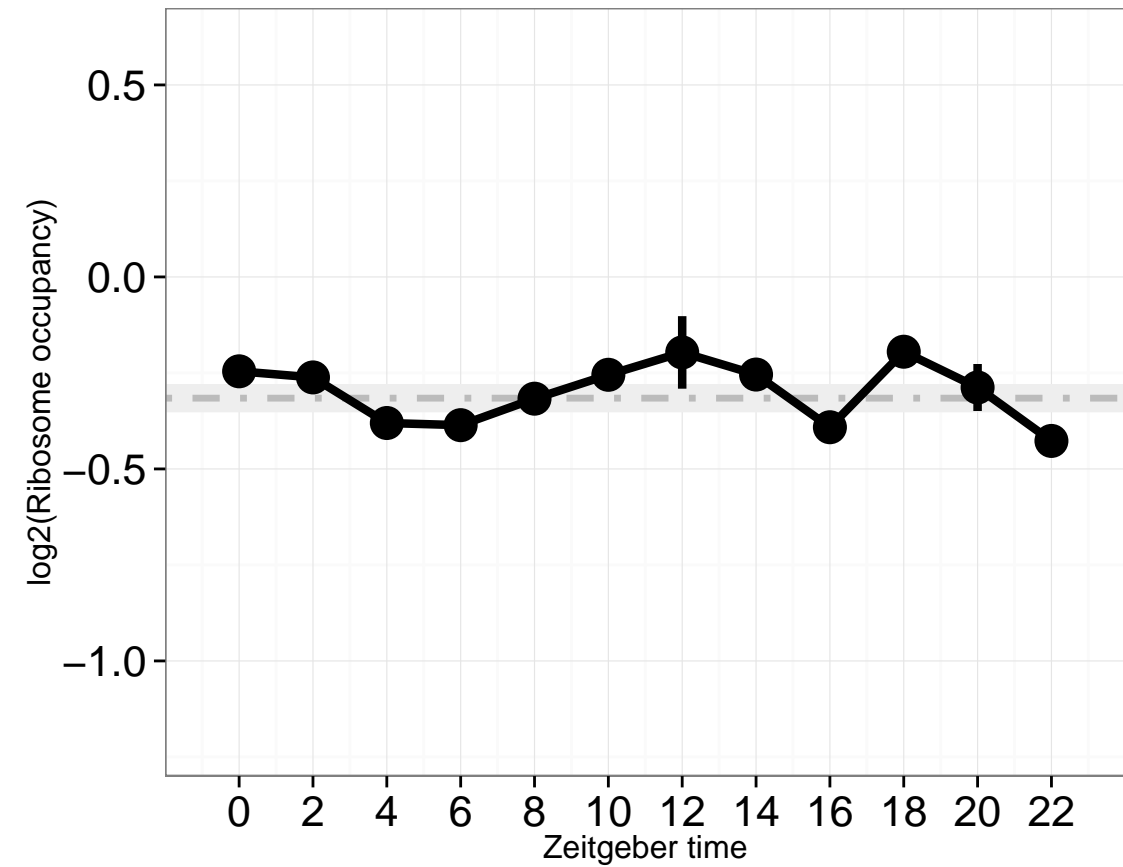

Supplement: SuppDataset_1.zip [file Pex19_set_A.pdf › Supplemental Dataset 1/A-mRNA_nonrhyth_translation_nonrhyth/Pex19_set_A.pdf]

## Pex1

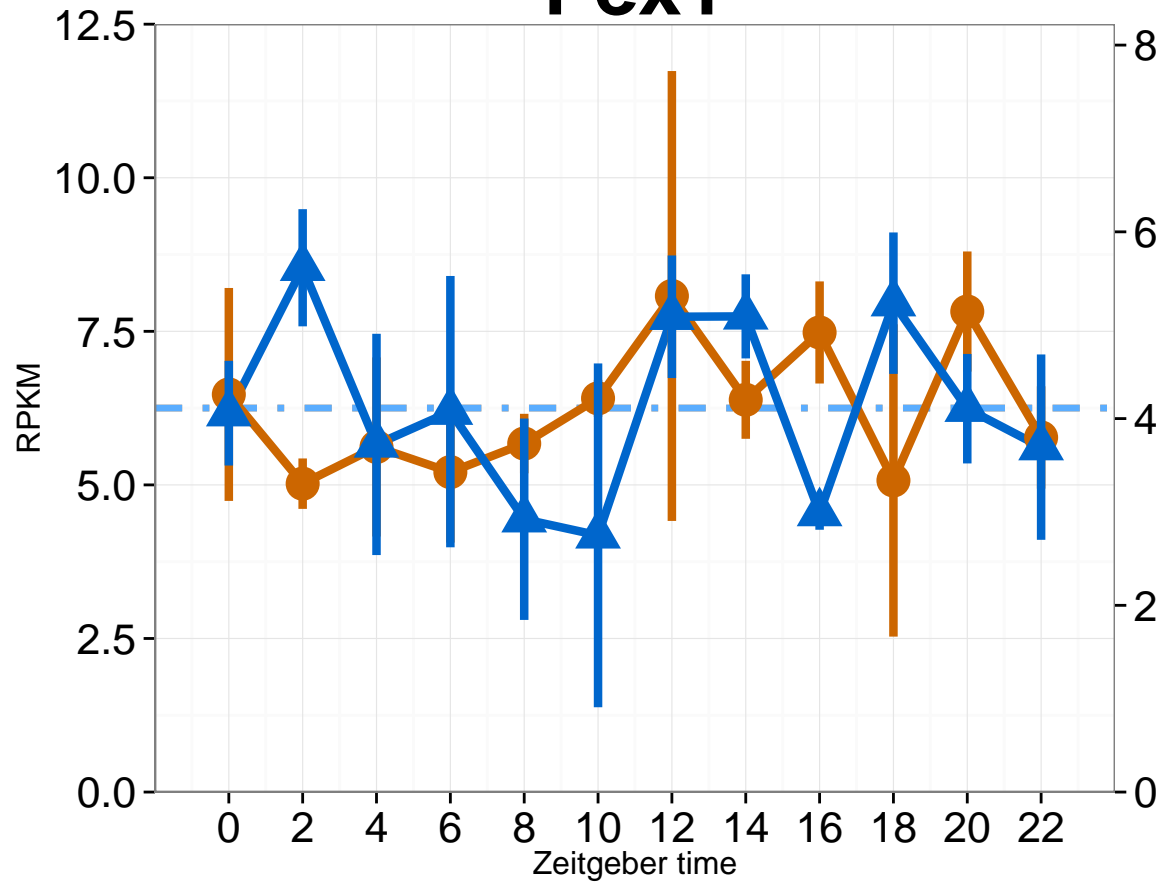

## Pex1

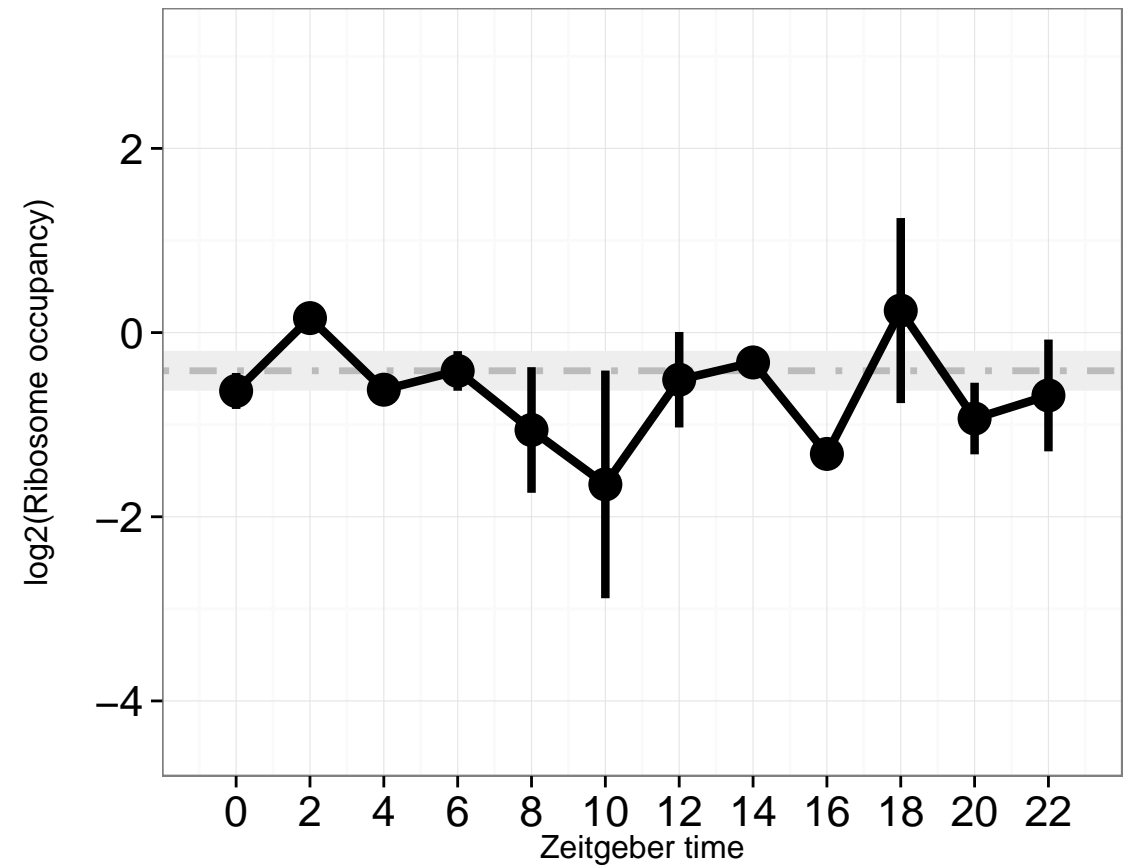

Supplement: SuppDataset_1.zip [file Pex1_set_A.pdf › Supplemental Dataset 1/A-mRNA_nonrhyth_translation_nonrhyth/Pex1_set_A.pdf]

## Pex2

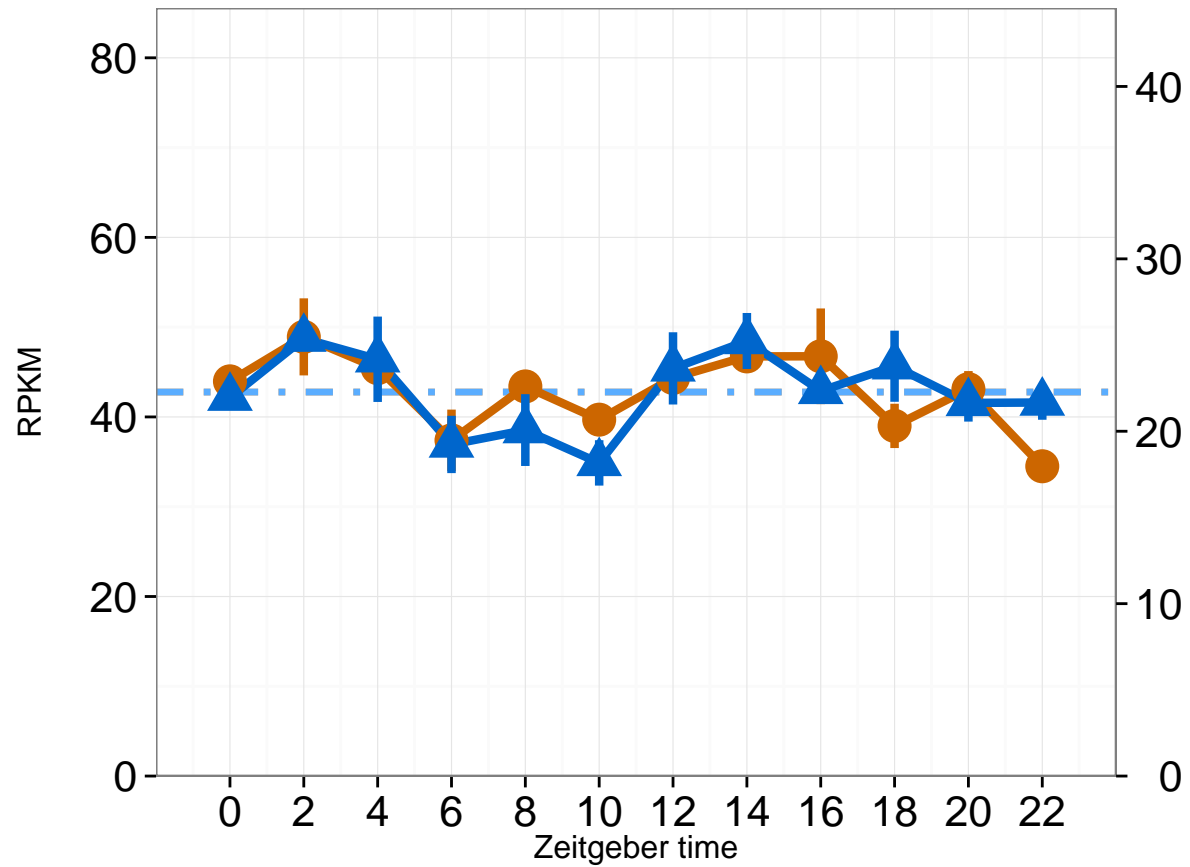

## Pex2

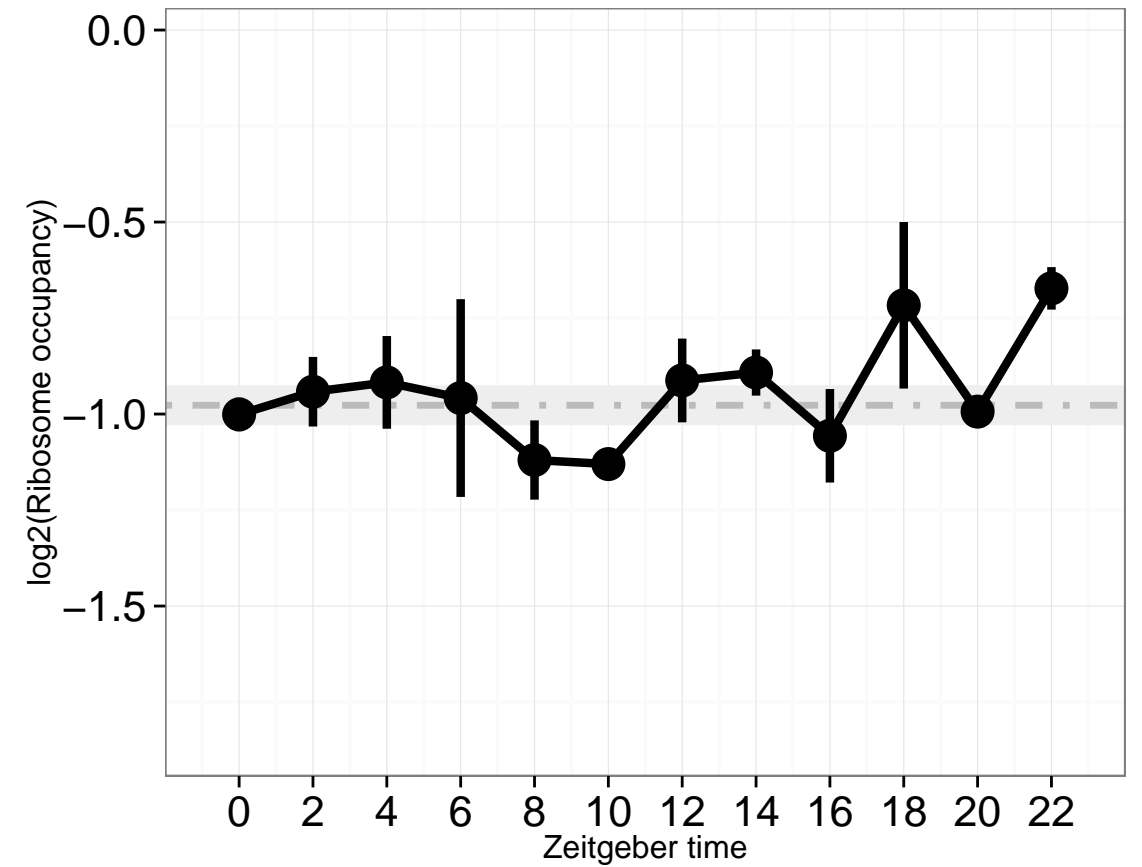

Supplement: SuppDataset_1.zip [file Pex2_set_A.pdf › Supplemental Dataset 1/A-mRNA_nonrhyth_translation_nonrhyth/Pex2_set_A.pdf]

## Pex3

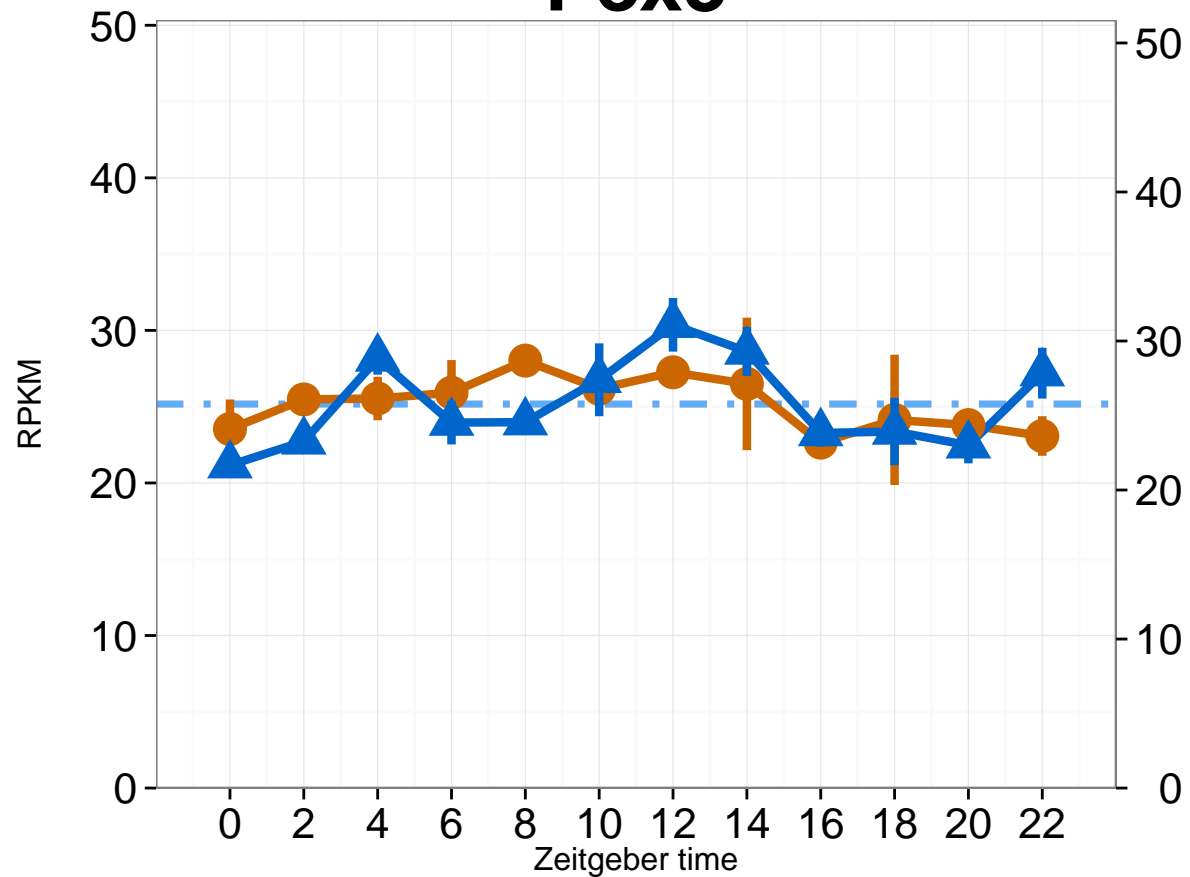

## Pex3

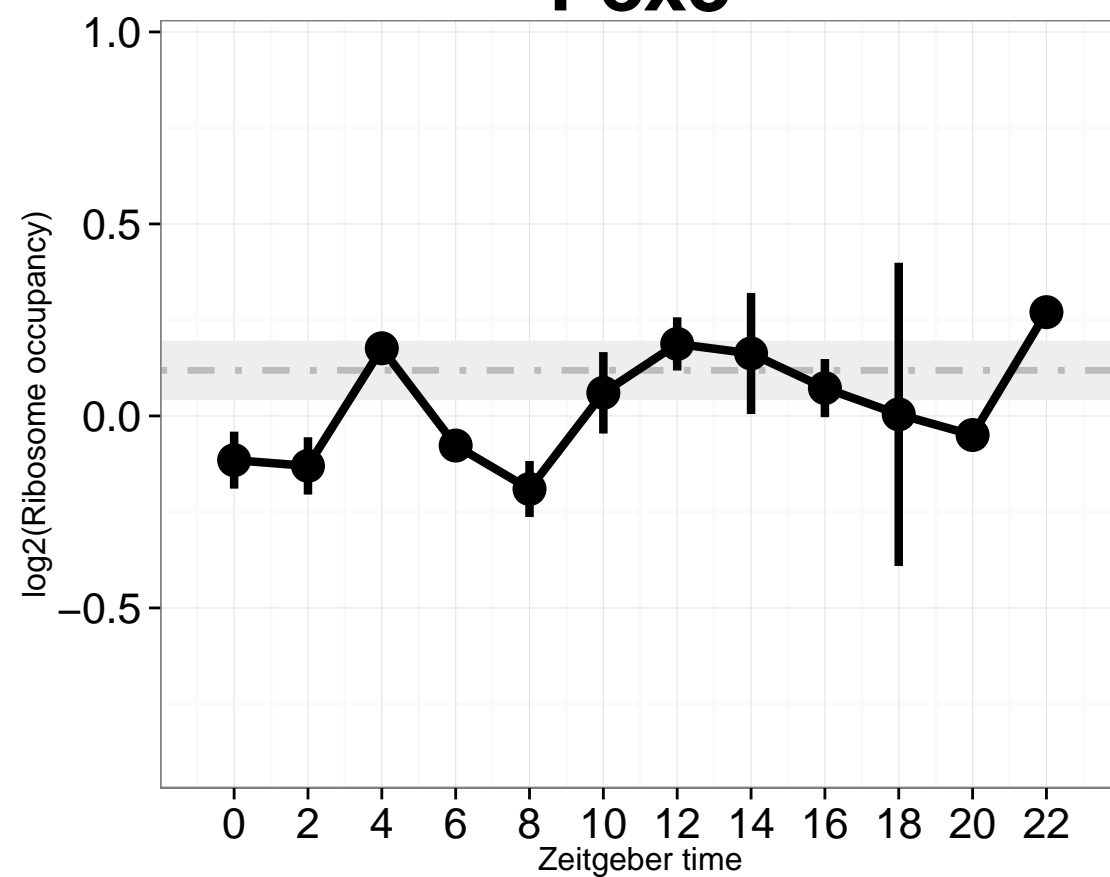

Supplement: SuppDataset_1.zip [file Pex3_set_A.pdf › Supplemental Dataset 1/A-mRNA_nonrhyth_translation_nonrhyth/Pex3_set_A.pdf]

## Pex5

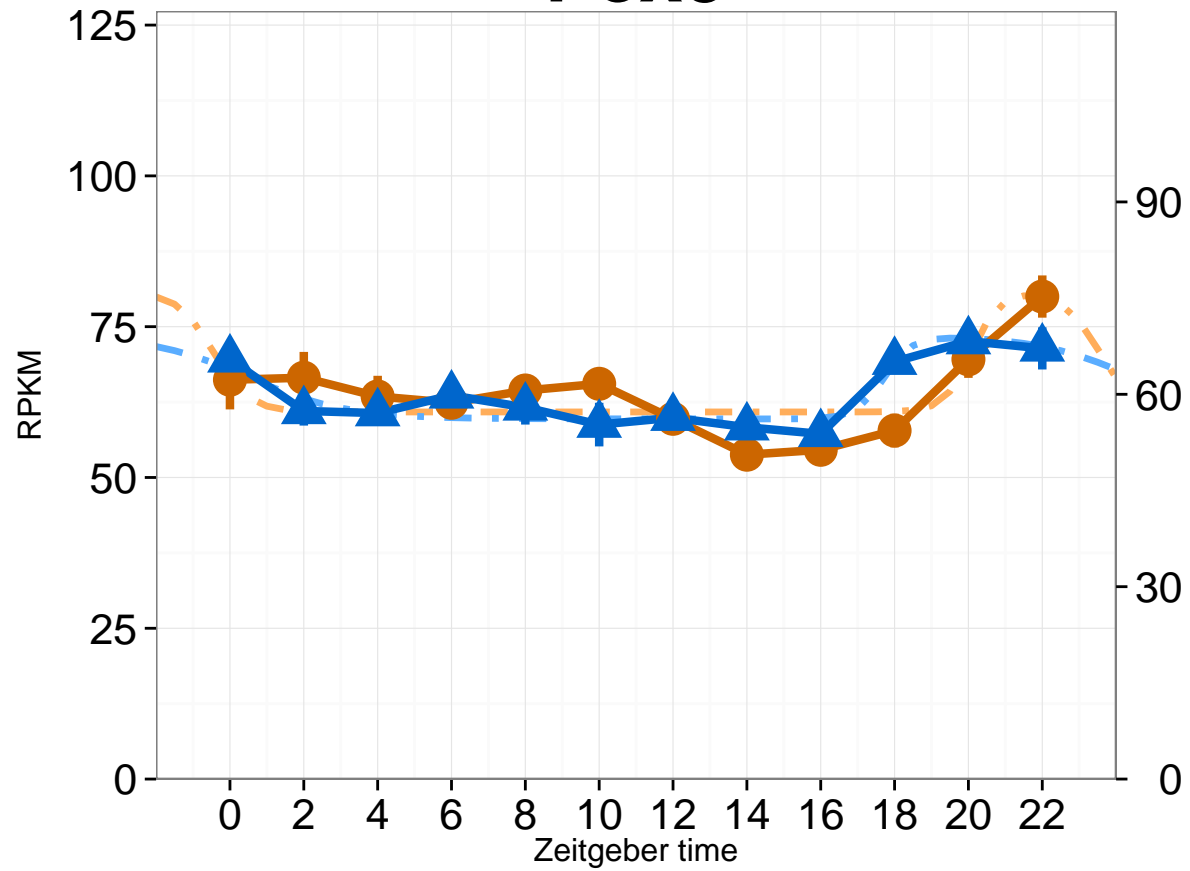

## Pex5

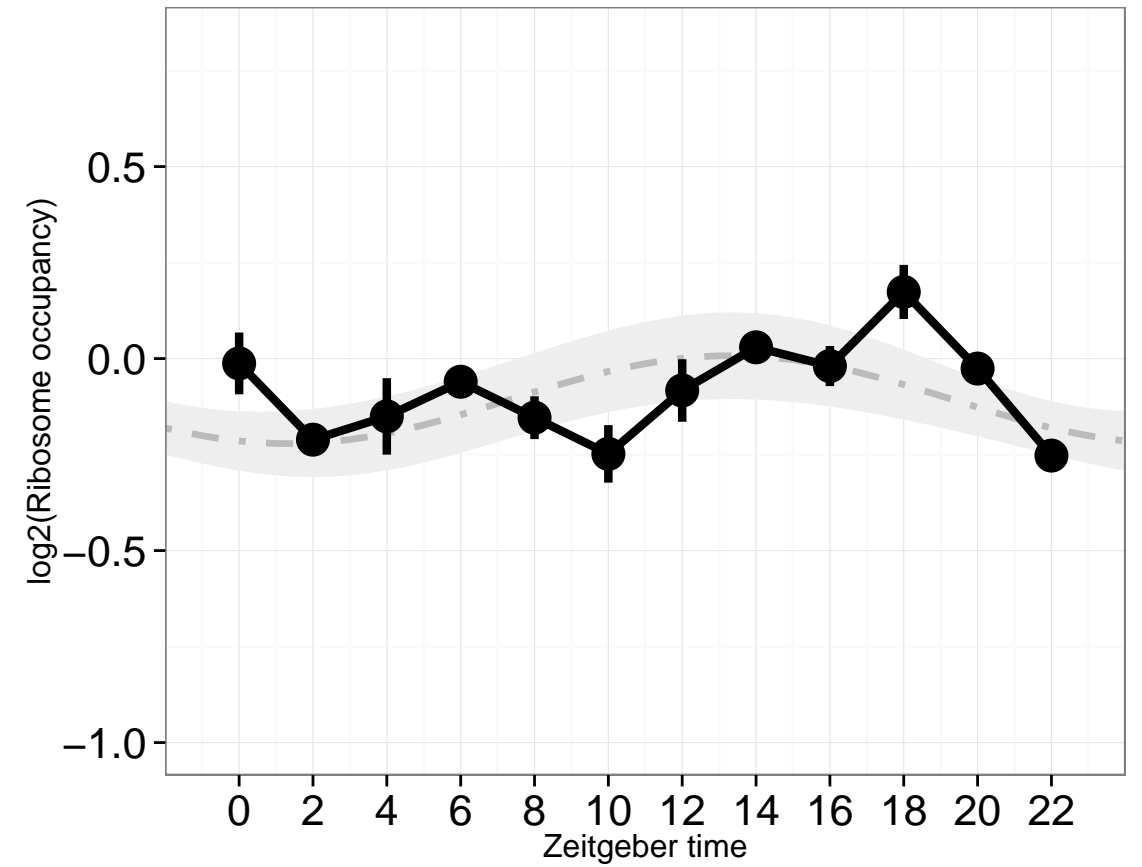

Supplement: SuppDataset_1.zip [file Pex5_set_A.pdf › Supplemental Dataset 1/A-mRNA_nonrhyth_translation_nonrhyth/Pex5_set_A.pdf]

## Pex6

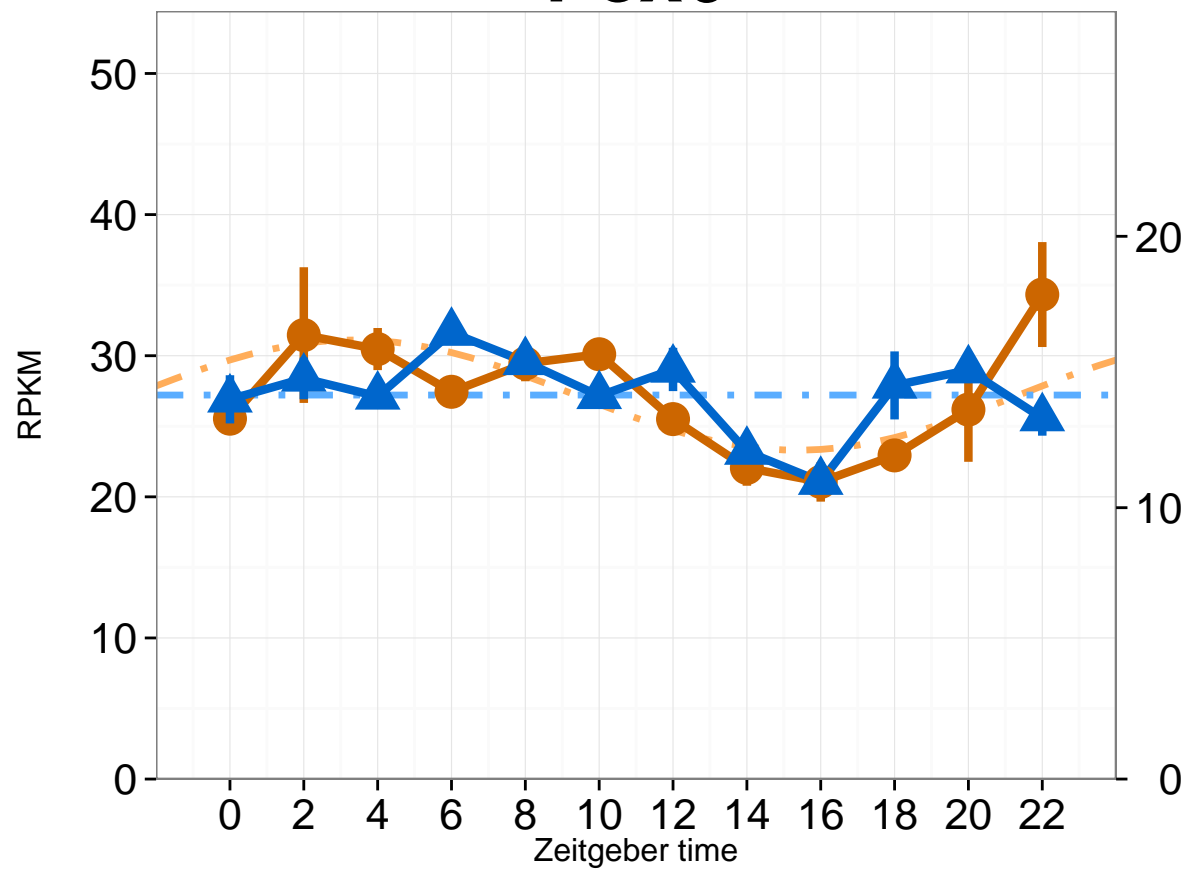

## Pex6

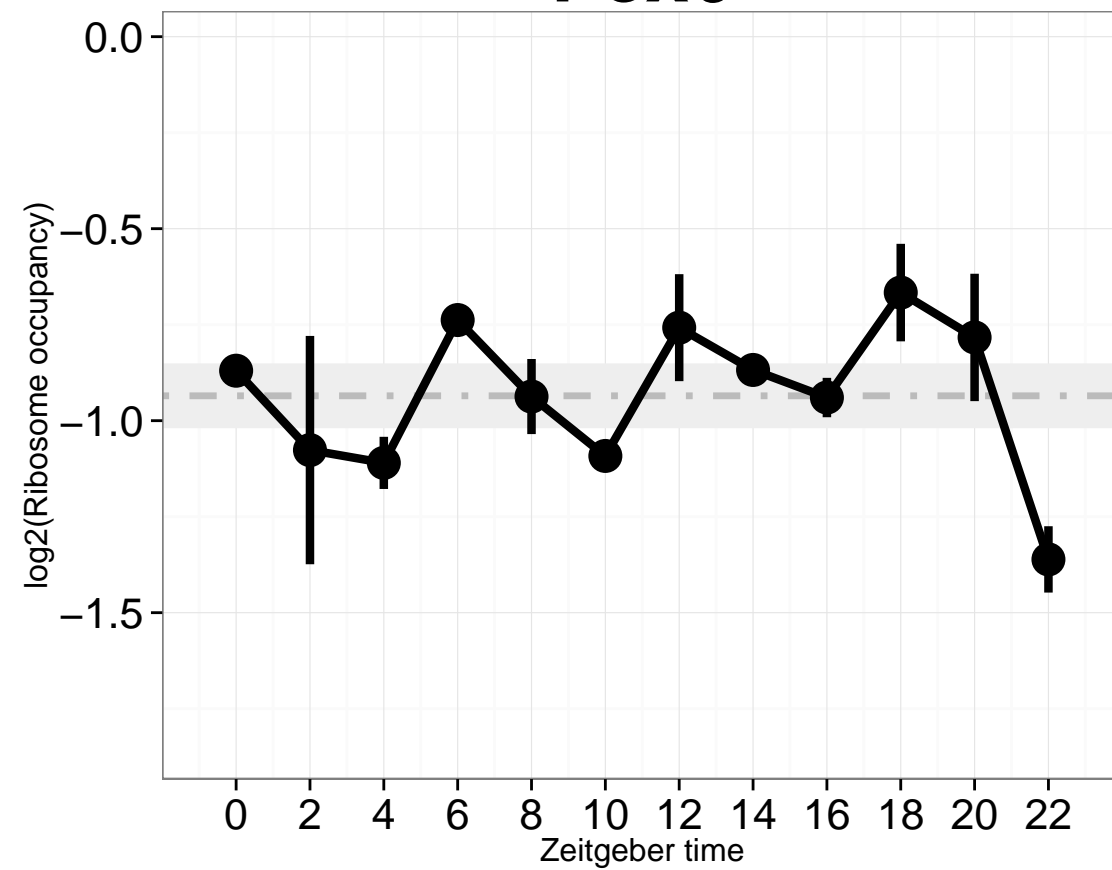

Supplement: SuppDataset_1.zip [file Pex6_set_A.pdf › Supplemental Dataset 1/A-mRNA_nonrhyth_translation_nonrhyth/Pex6_set_A.pdf]

## Pex7

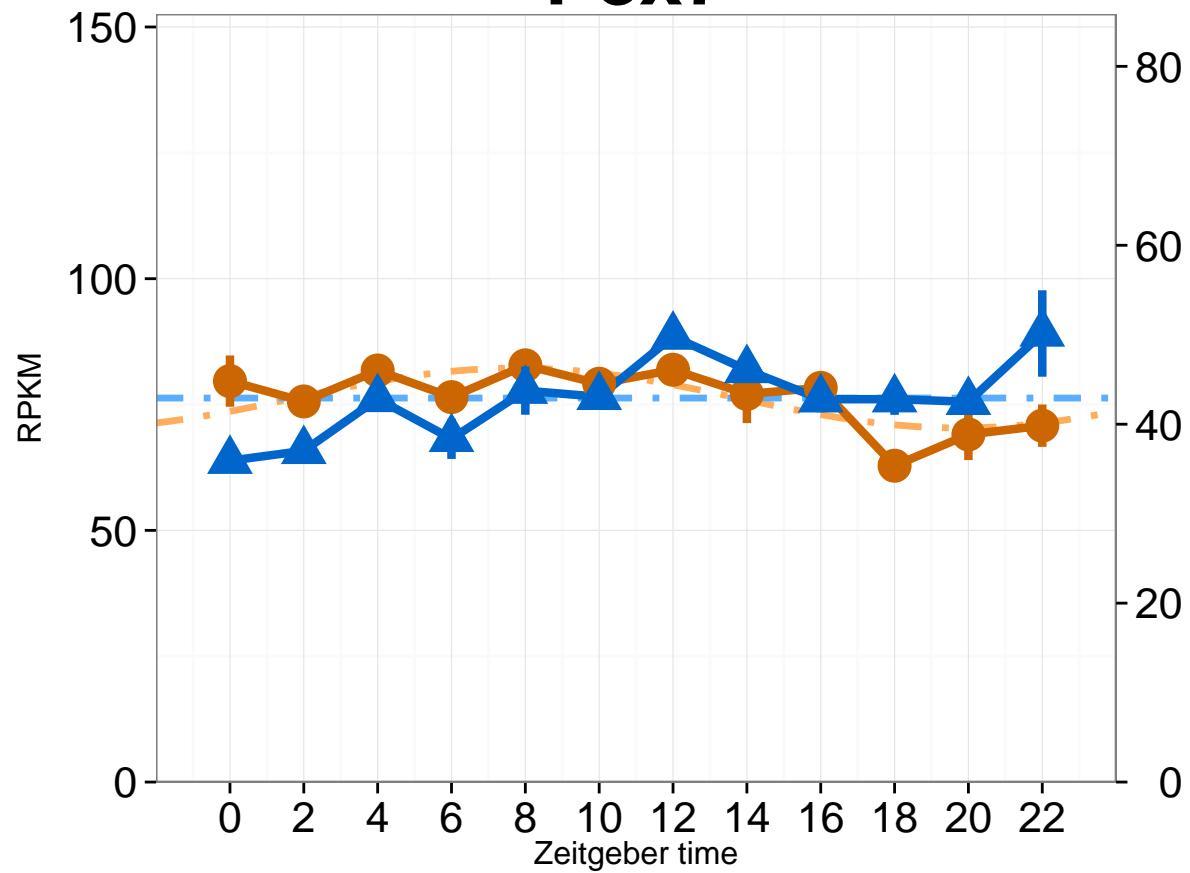

## Pex7

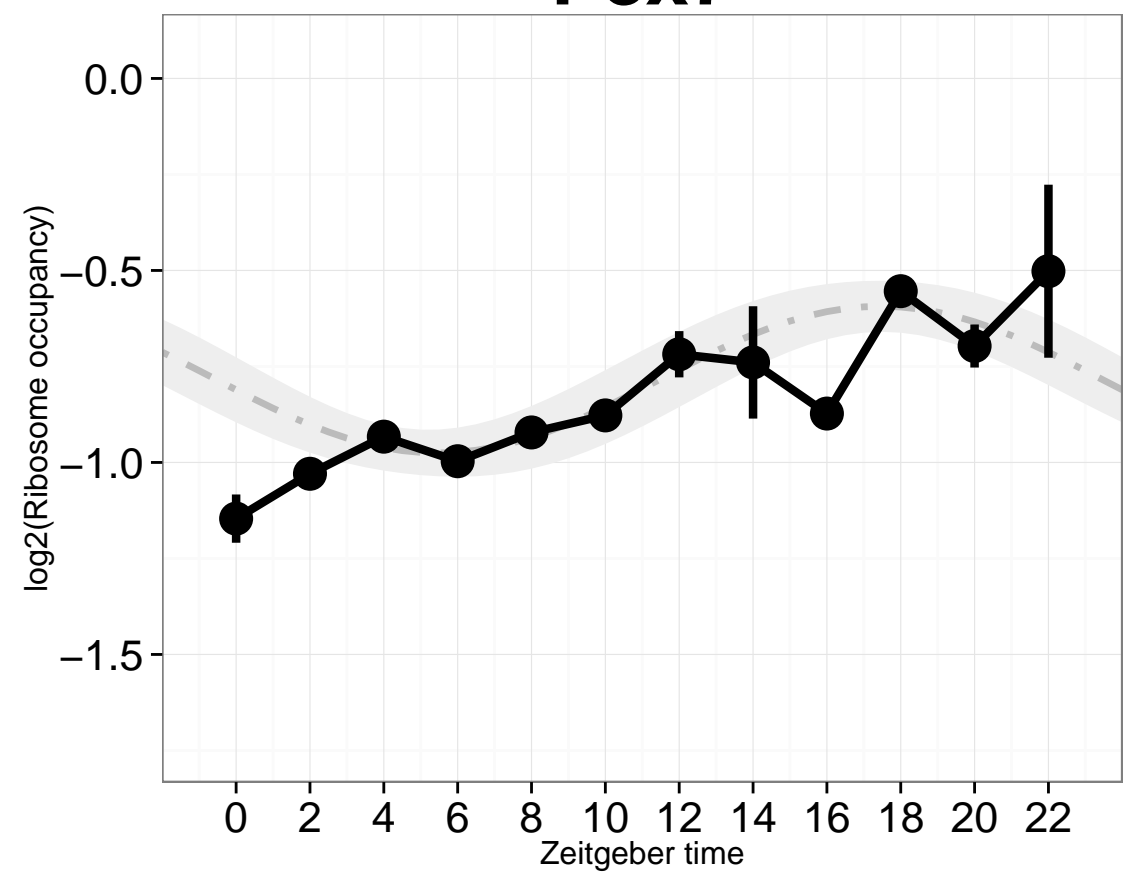

Supplement: SuppDataset_1.zip [file Pex7_set_A.pdf › Supplemental Dataset 1/A-mRNA_nonrhyth_translation_nonrhyth/Pex7_set_A.pdf]

## Pfas

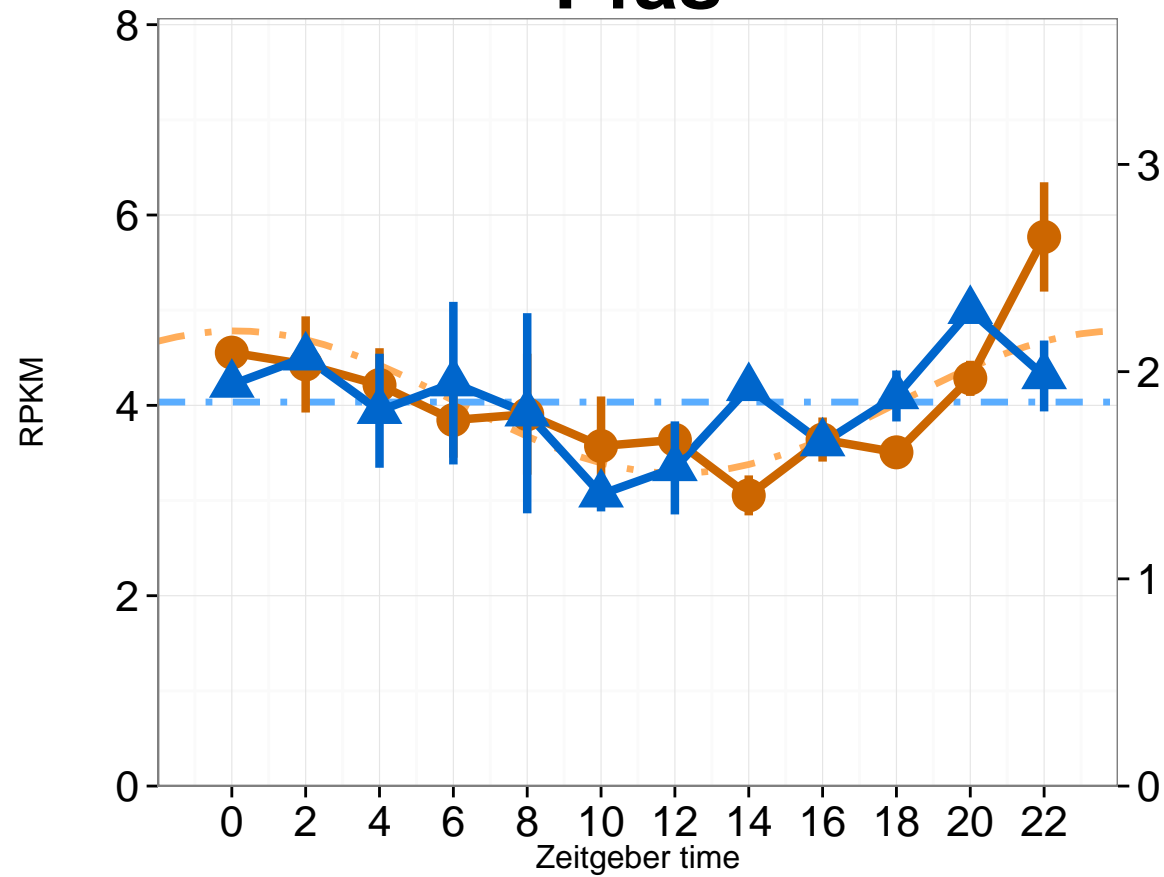

## Pfas

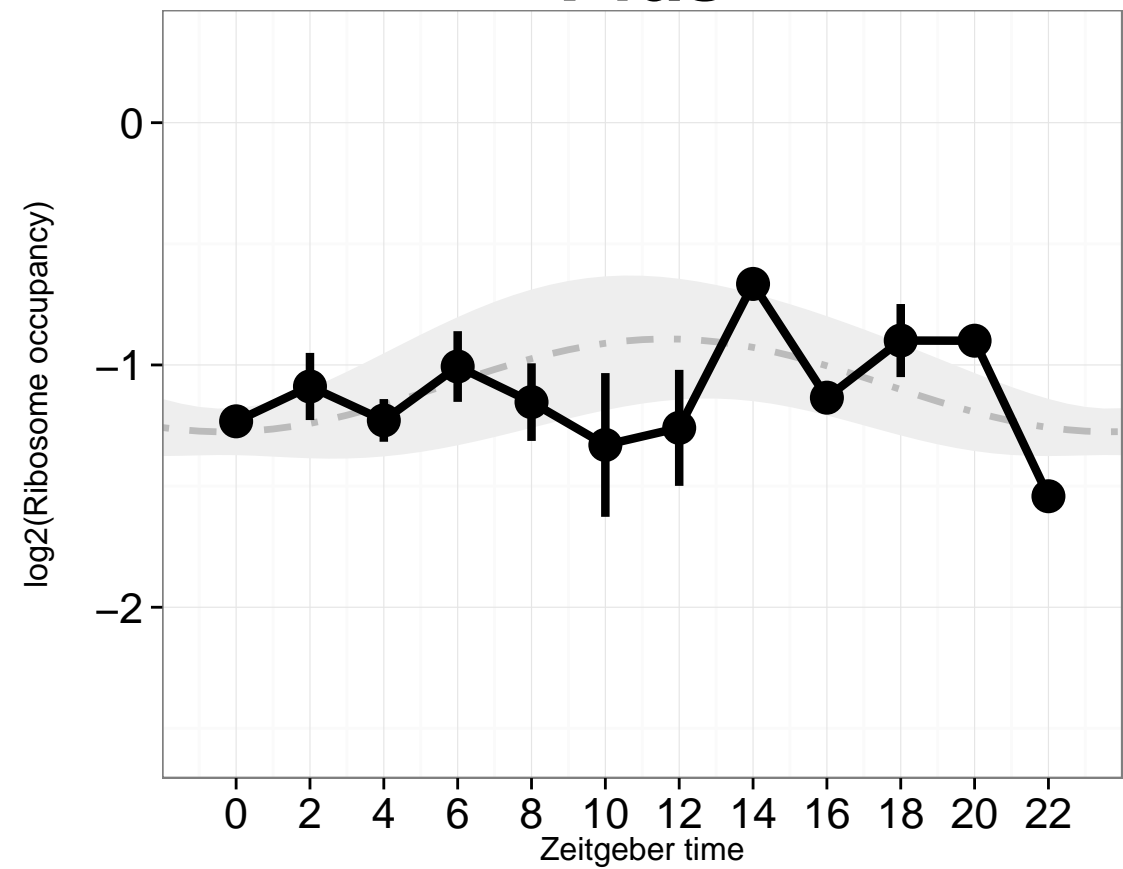

Supplement: SuppDataset_1.zip [file Pfas_set_A.pdf › Supplemental Dataset 1/A-mRNA_nonrhyth_translation_nonrhyth/Pfas_set_A.pdf]

## Pfdn1

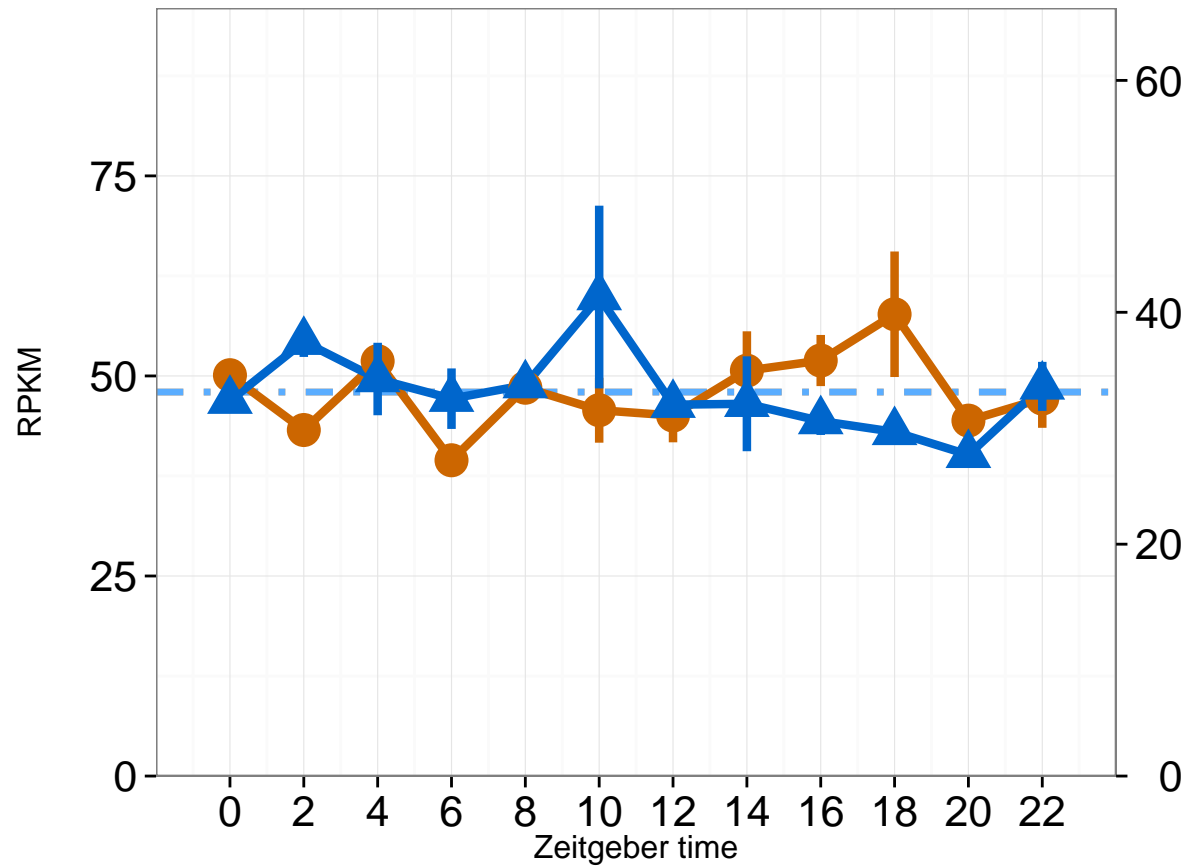

## Pfdn1

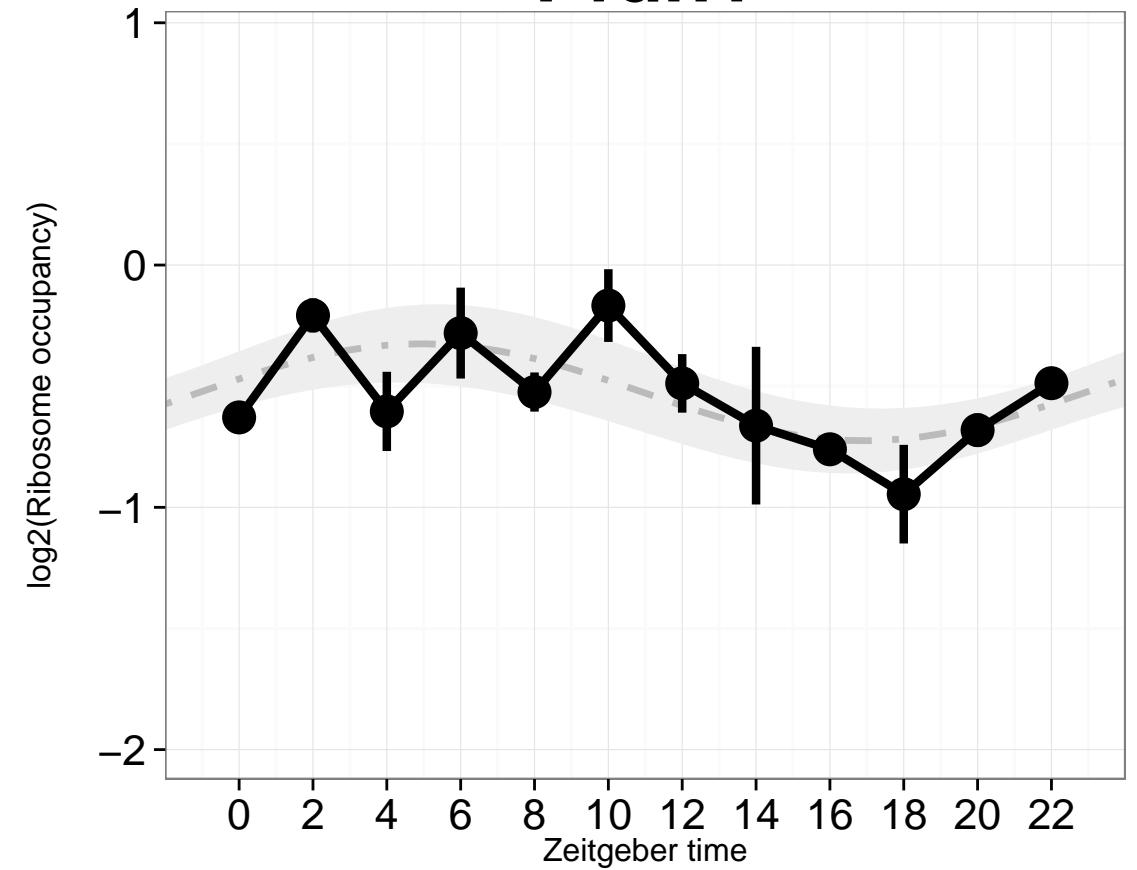

Supplement: SuppDataset_1.zip [file Pfdn1_set_A.pdf › Supplemental Dataset 1/A-mRNA_nonrhyth_translation_nonrhyth/Pfdn1_set_A.pdf]

## Pfdn2

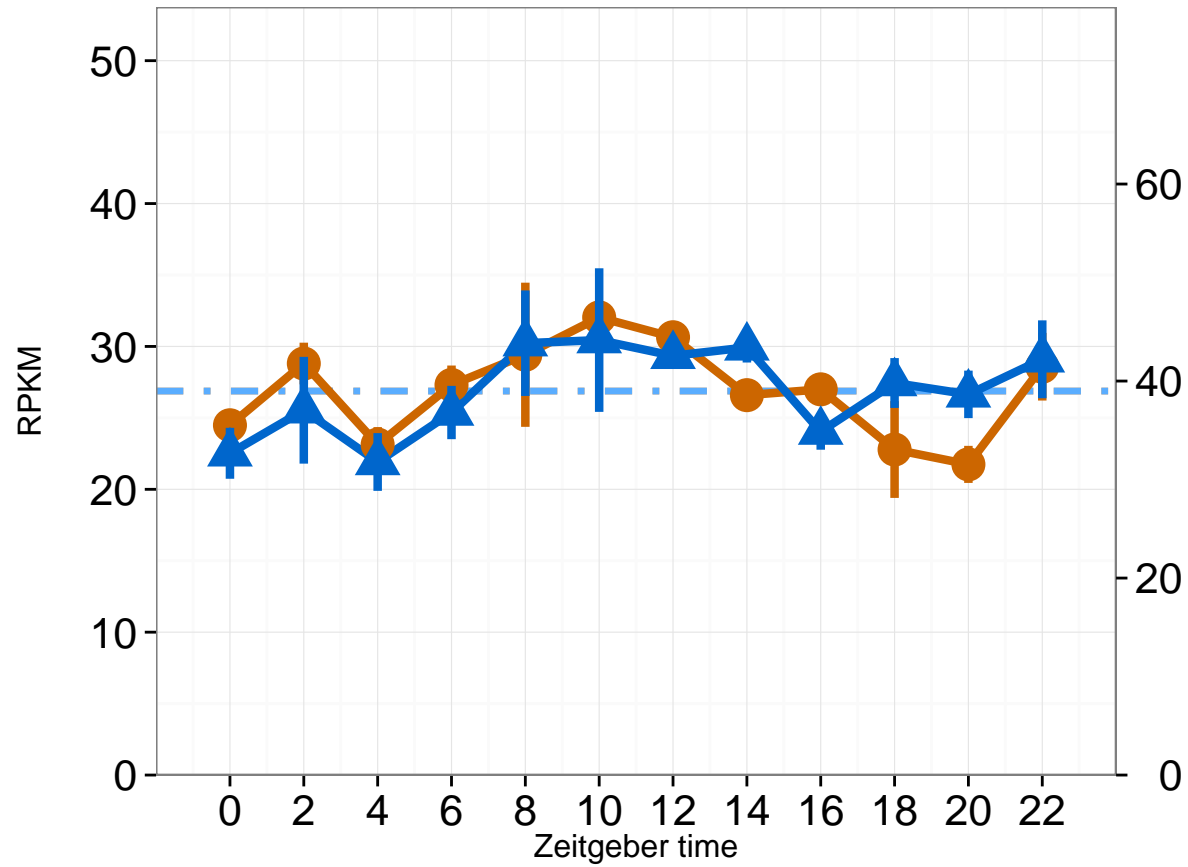

## Pfdn2

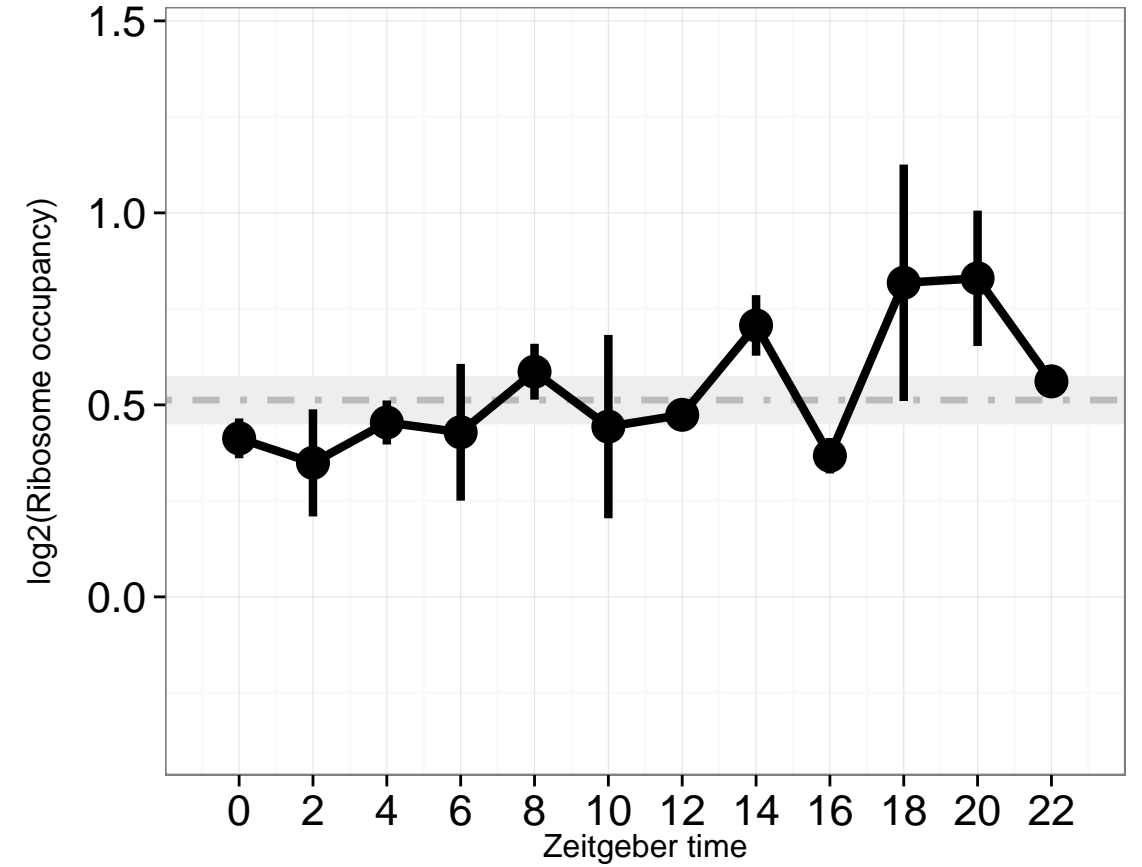

Supplement: SuppDataset_1.zip [file Pfdn2_set_A.pdf › Supplemental Dataset 1/A-mRNA_nonrhyth_translation_nonrhyth/Pfdn2_set_A.pdf]

## Pfdn4

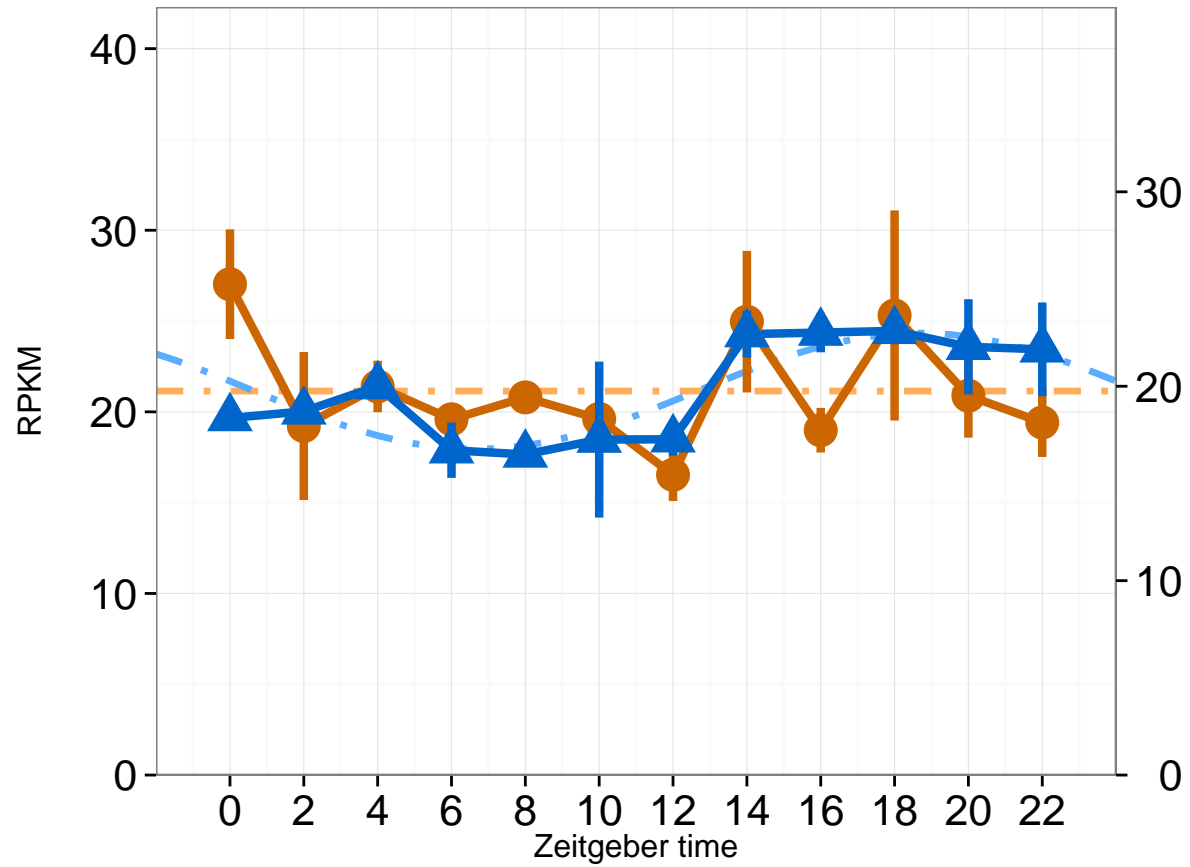

## Pfdn4

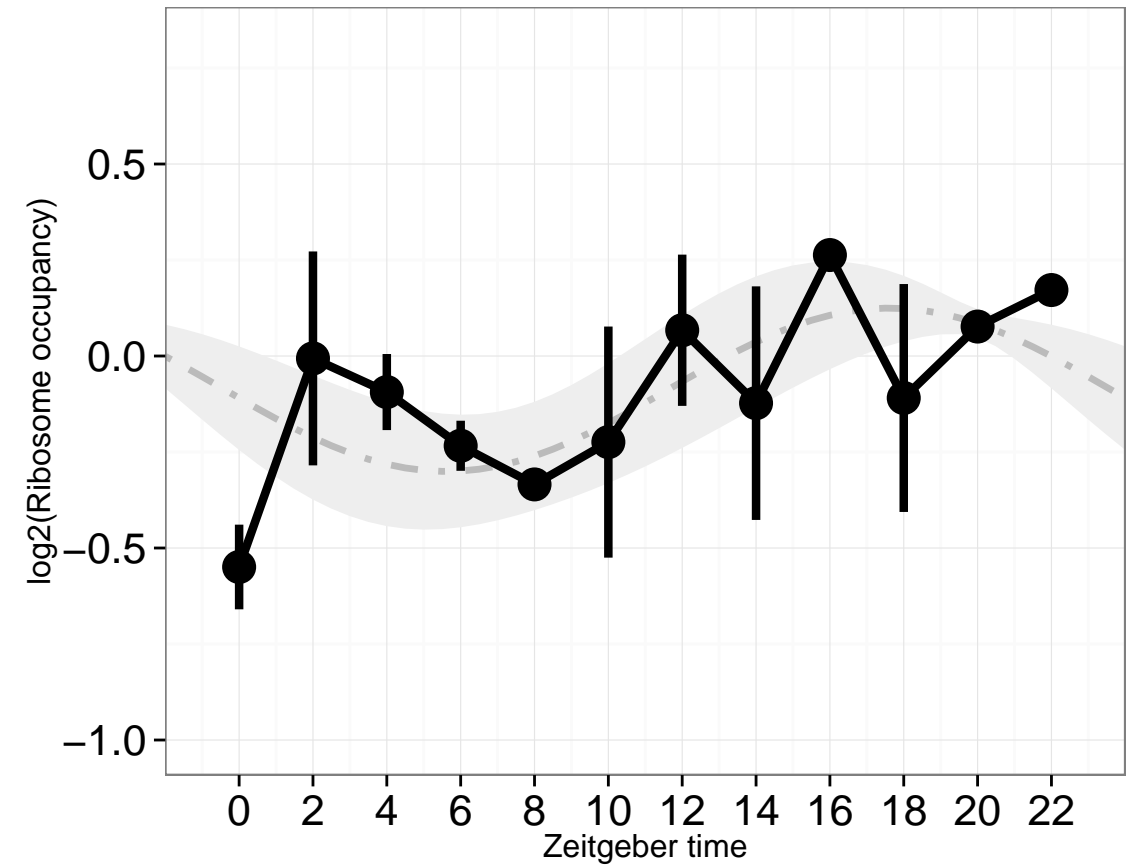

Supplement: SuppDataset_1.zip [file Pfdn4_set_A.pdf › Supplemental Dataset 1/A-mRNA_nonrhyth_translation_nonrhyth/Pfdn4_set_A.pdf]

## Pfdn5

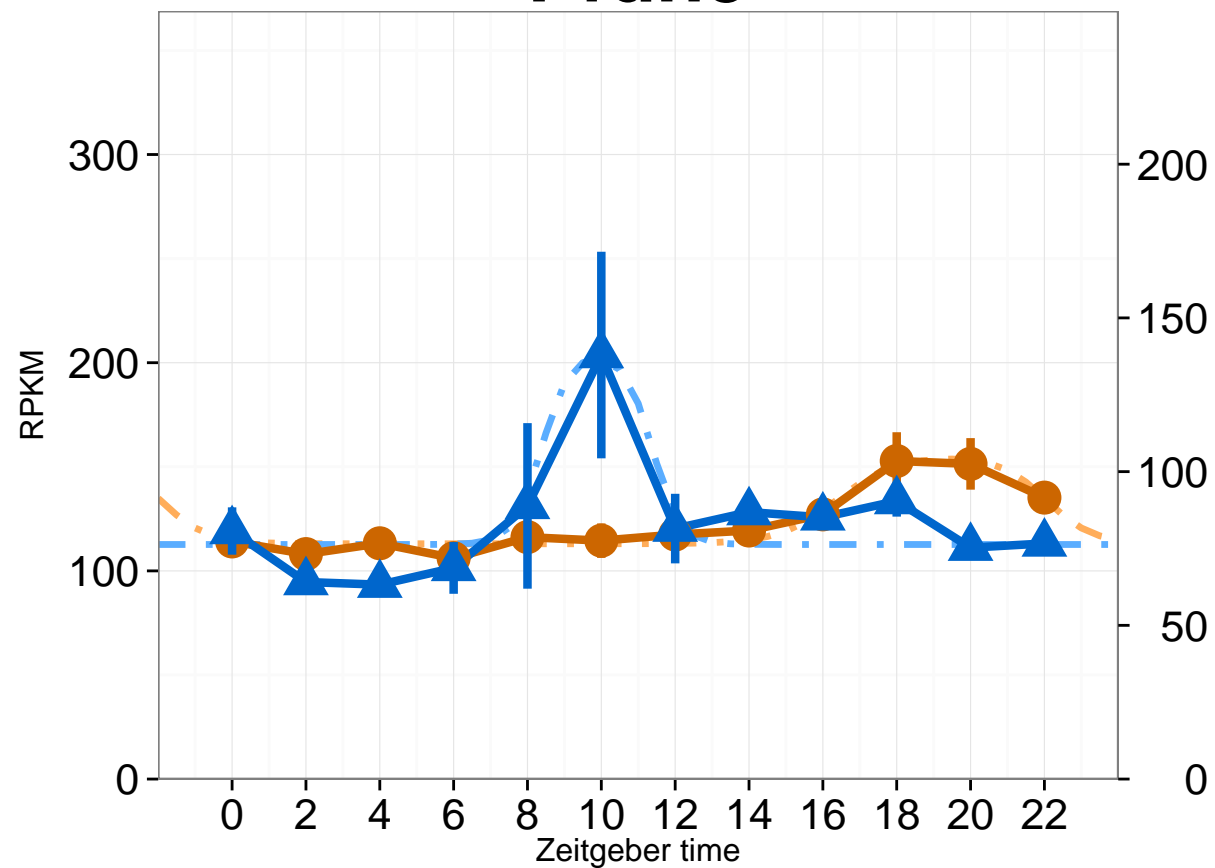

## Pfdn5

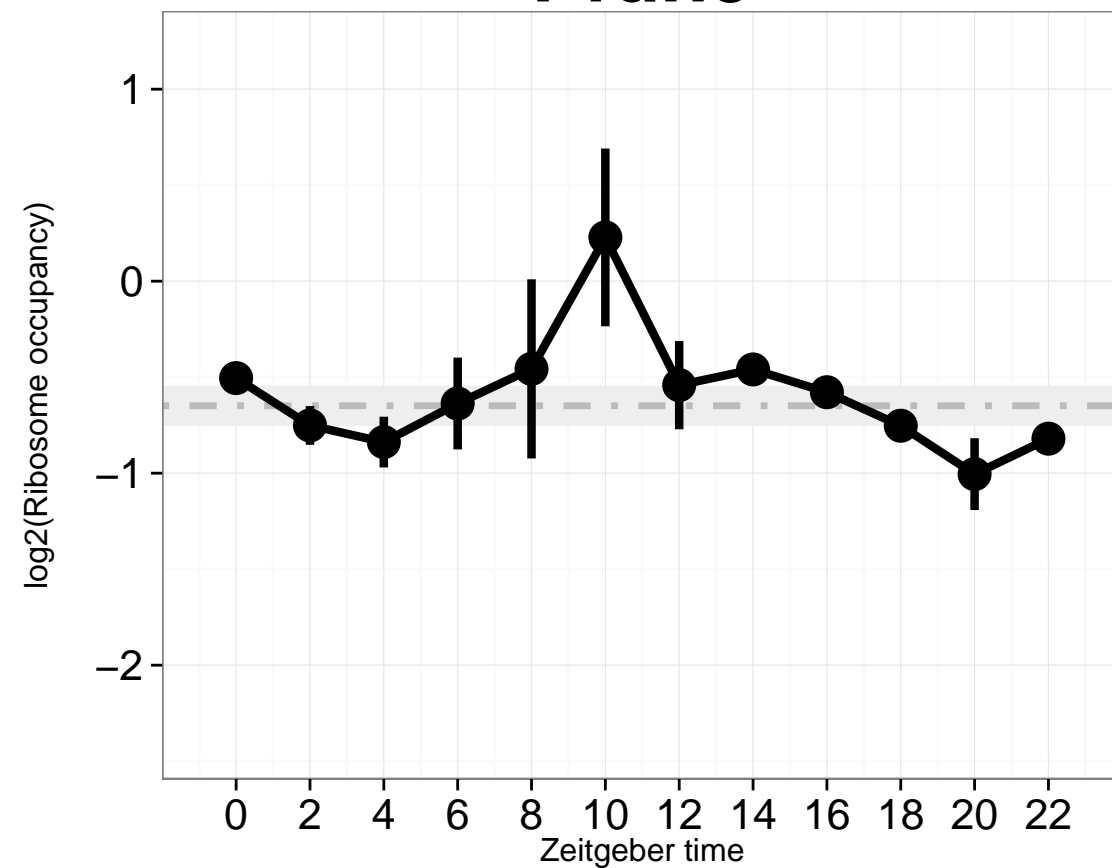

Supplement: SuppDataset_1.zip [file Pfdn5_set_A.pdf › Supplemental Dataset 1/A-mRNA_nonrhyth_translation_nonrhyth/Pfdn5_set_A.pdf]

# Pfkm

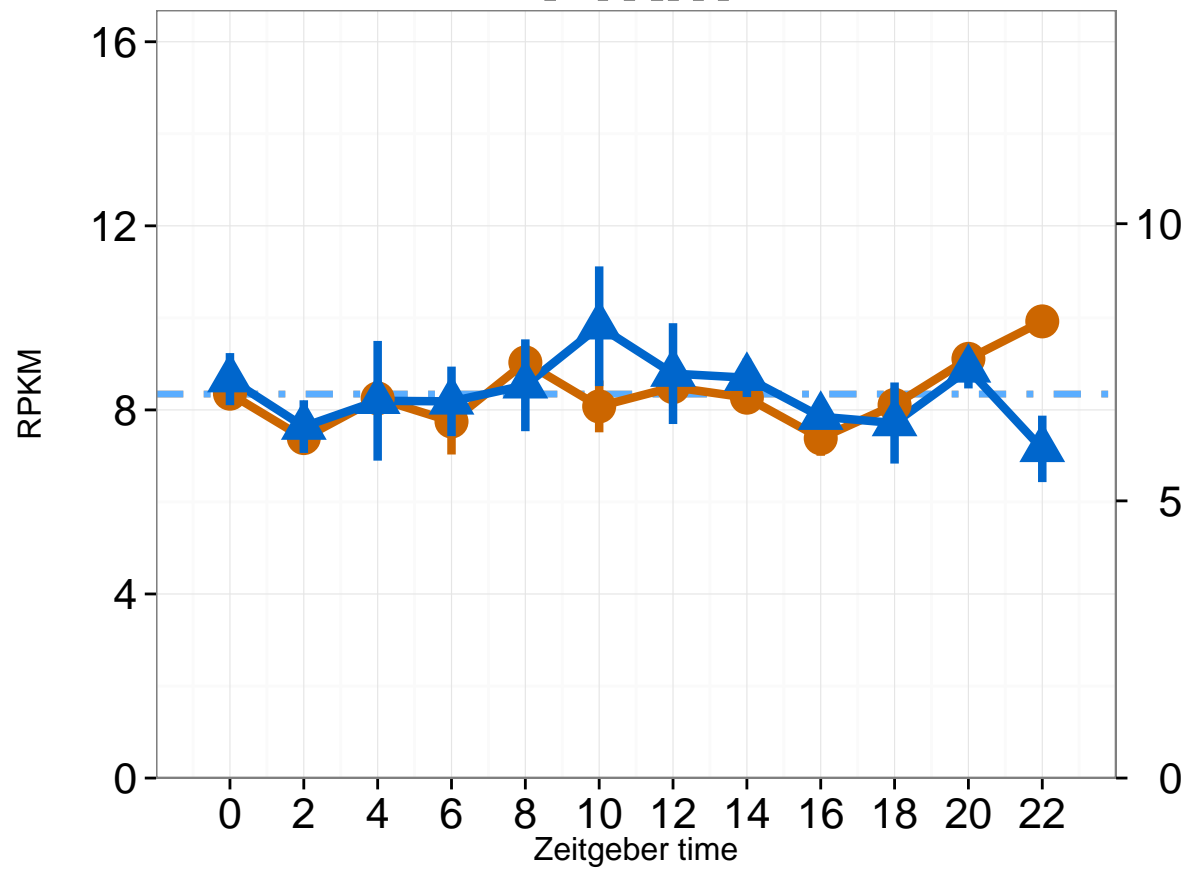

# Pfkm

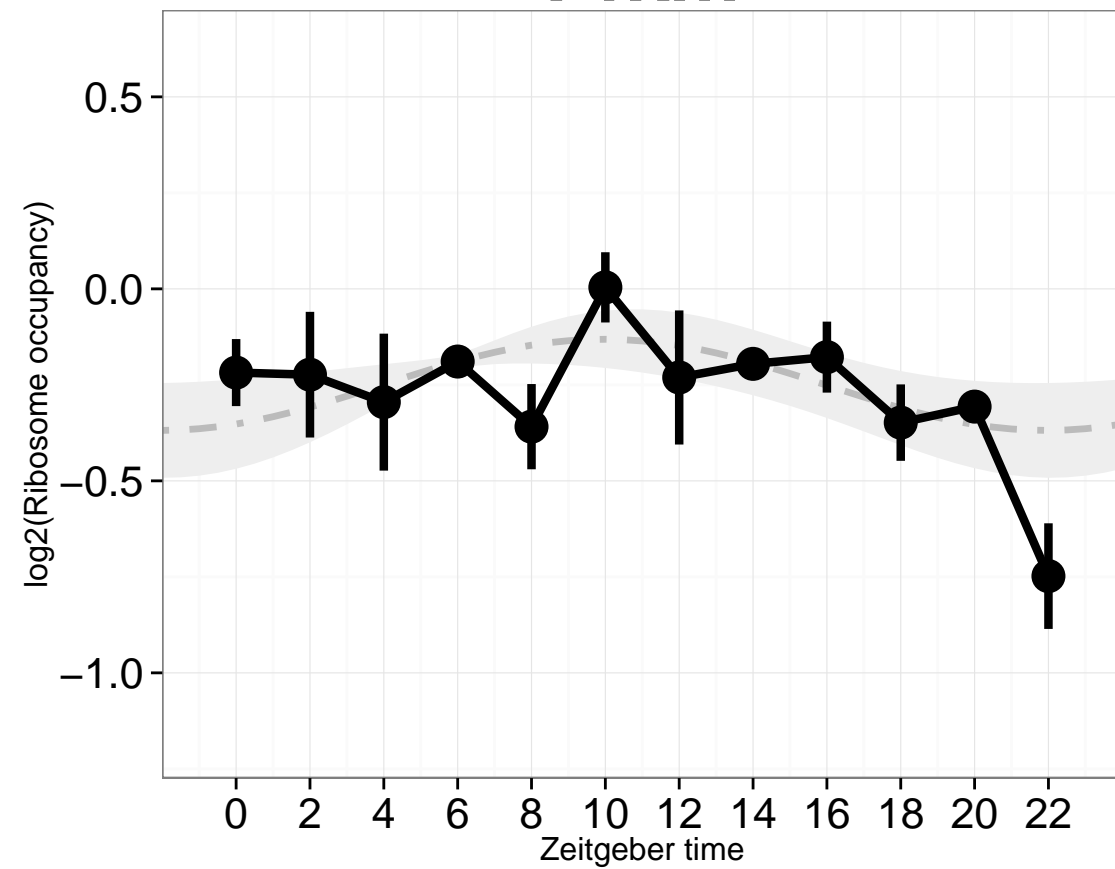

Supplement: SuppDataset_1.zip [file Pfkm_set_A.pdf › Supplemental Dataset 1/A-mRNA_nonrhyth_translation_nonrhyth/Pfkm_set_A.pdf]

## Pfn1

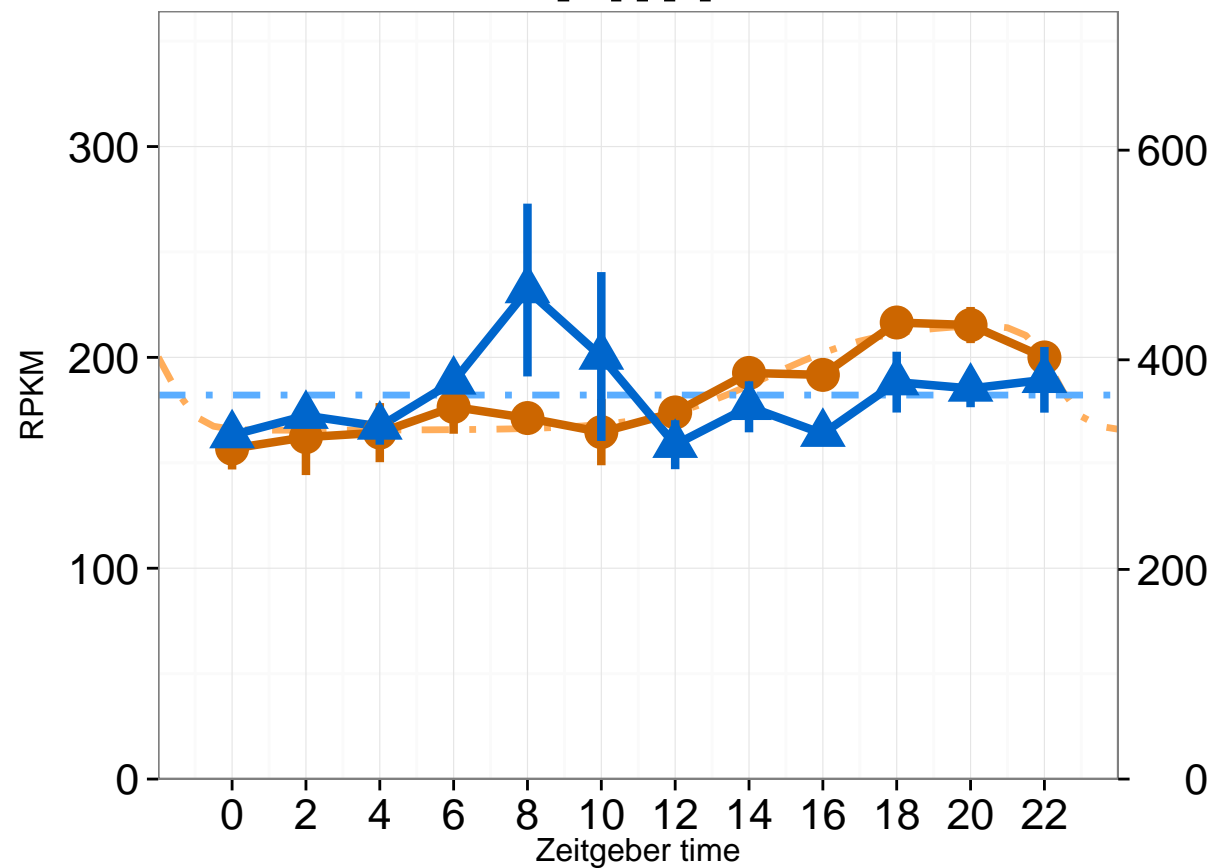

## Pfn1

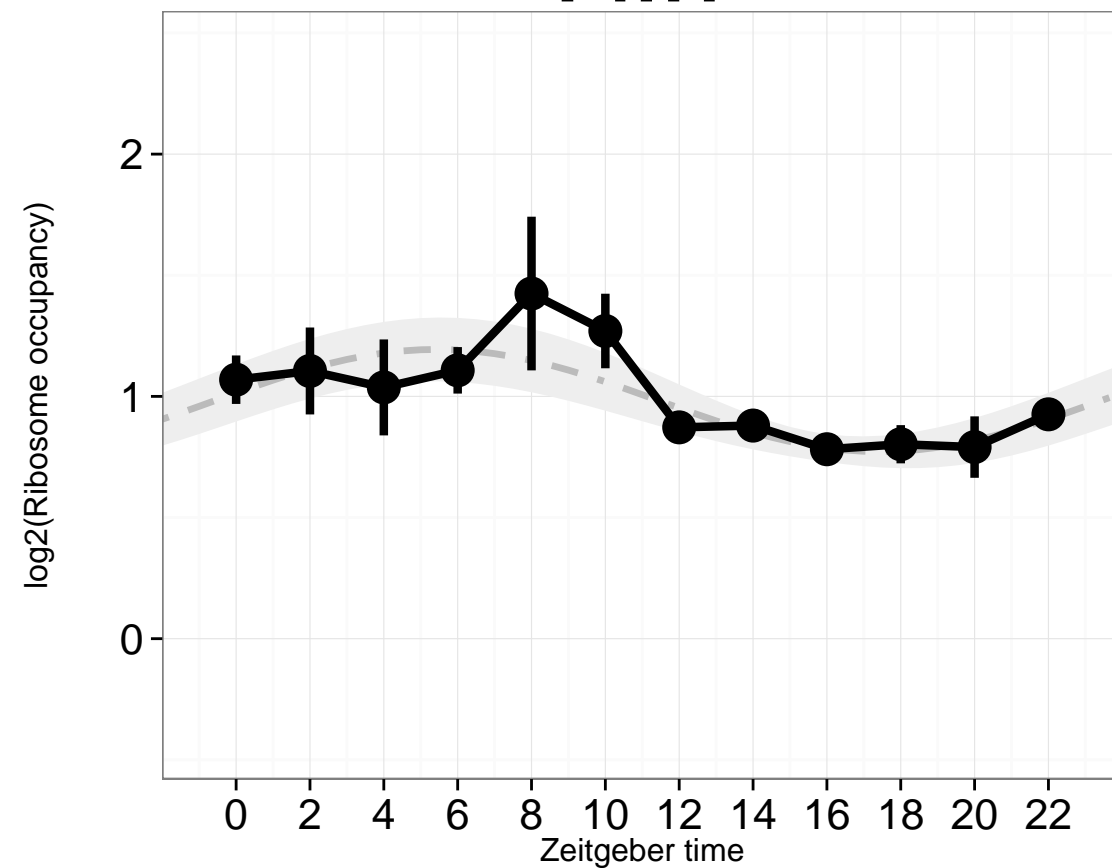

Supplement: SuppDataset_1.zip [file Pfn1_set_A.pdf › Supplemental Dataset 1/A-mRNA_nonrhyth_translation_nonrhyth/Pfn1_set_A.pdf]

# Pfn2

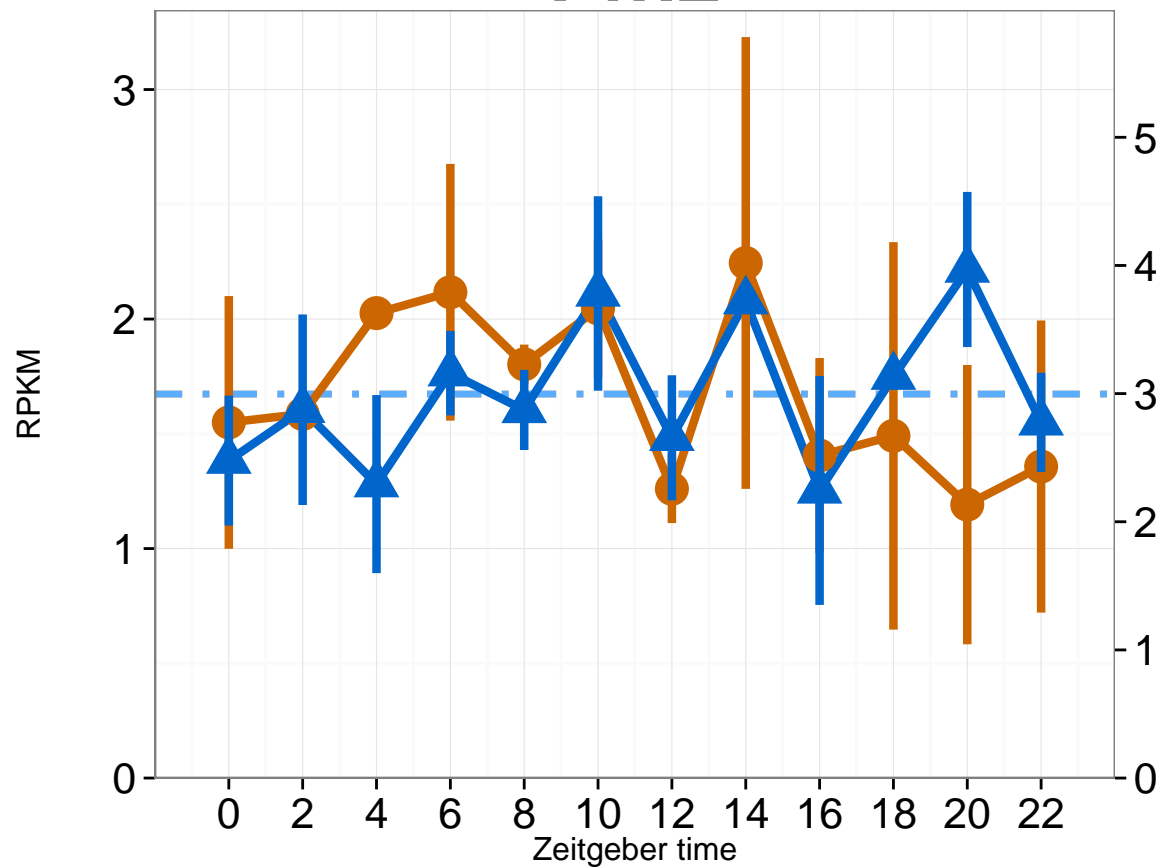

# Pfn2

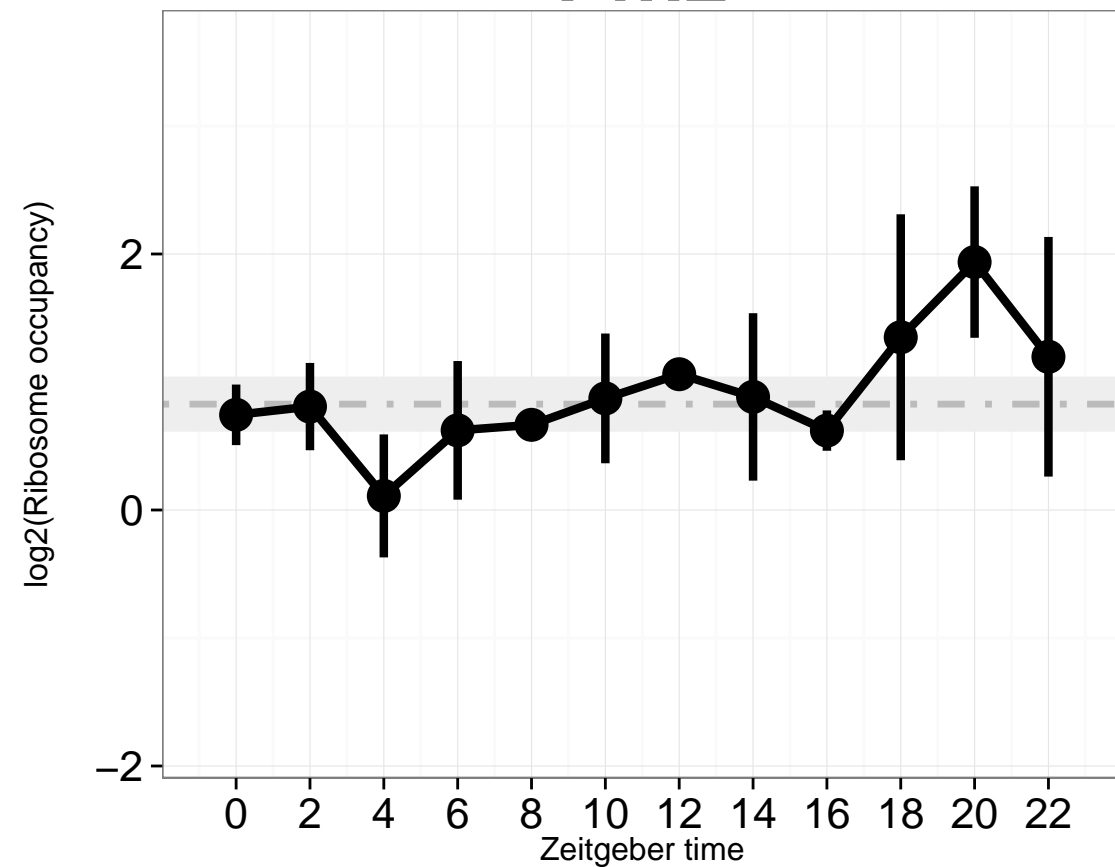

Supplement: SuppDataset_1.zip [file Pfn2_set_A.pdf › Supplemental Dataset 1/A-mRNA_nonrhyth_translation_nonrhyth/Pfn2_set_A.pdf]

# Pgam1

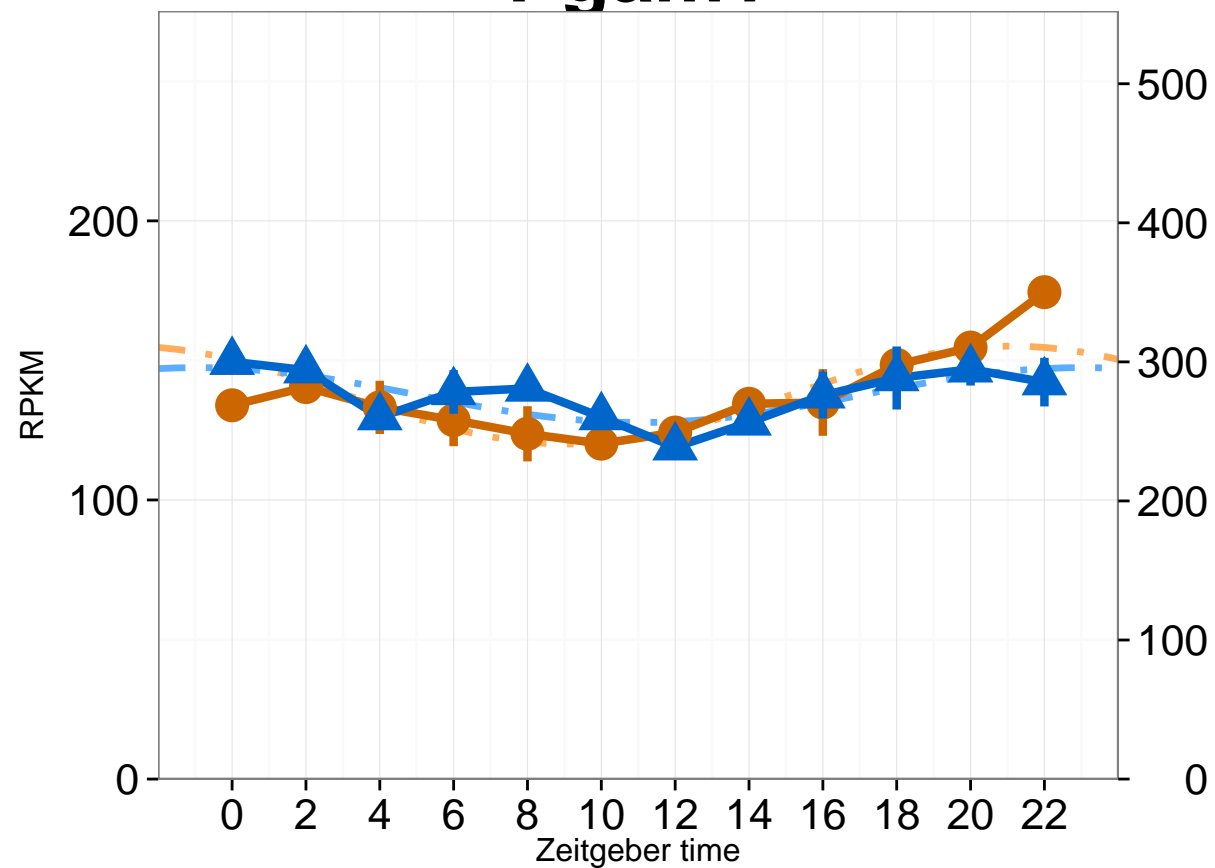

# Pgam1

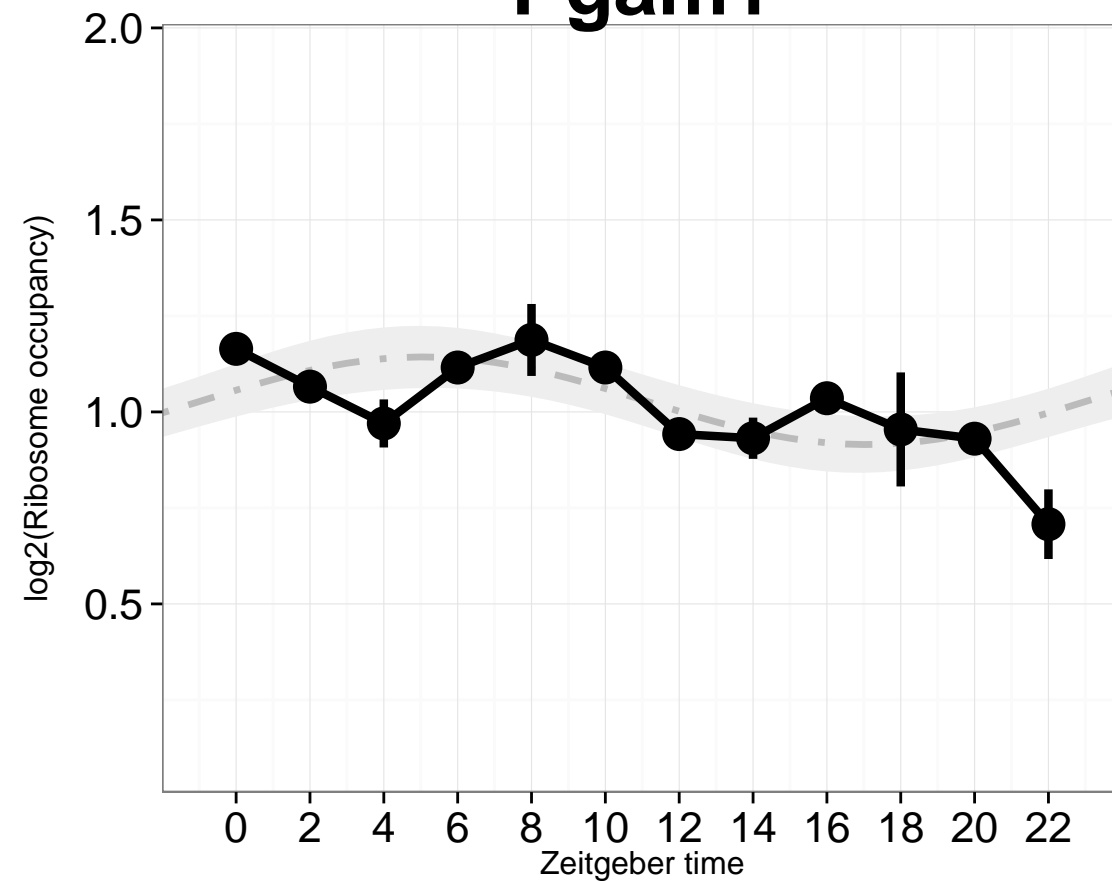

Supplement: SuppDataset_1.zip [file Pgam1_set_A.pdf › Supplemental Dataset 1/A-mRNA_nonrhyth_translation_nonrhyth/Pgam1_set_A.pdf]

## Pgam5

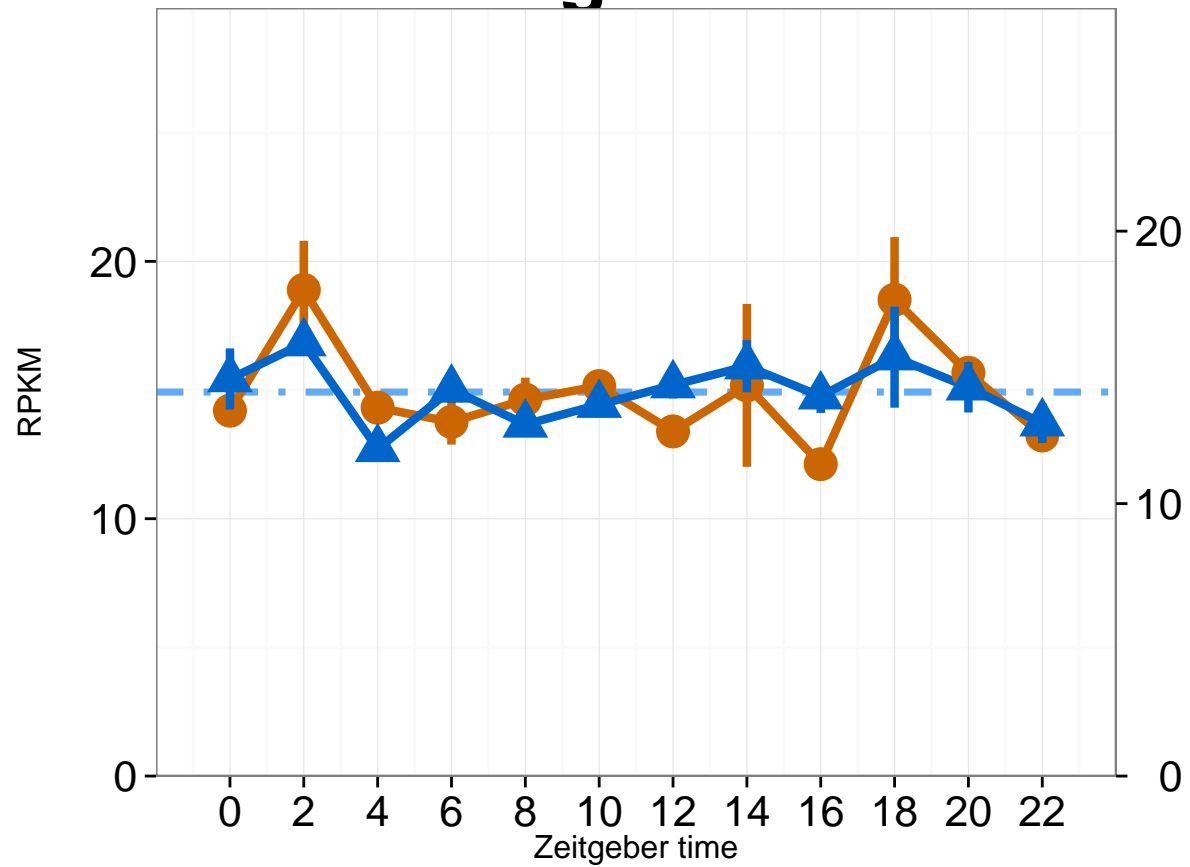

## Pgam5

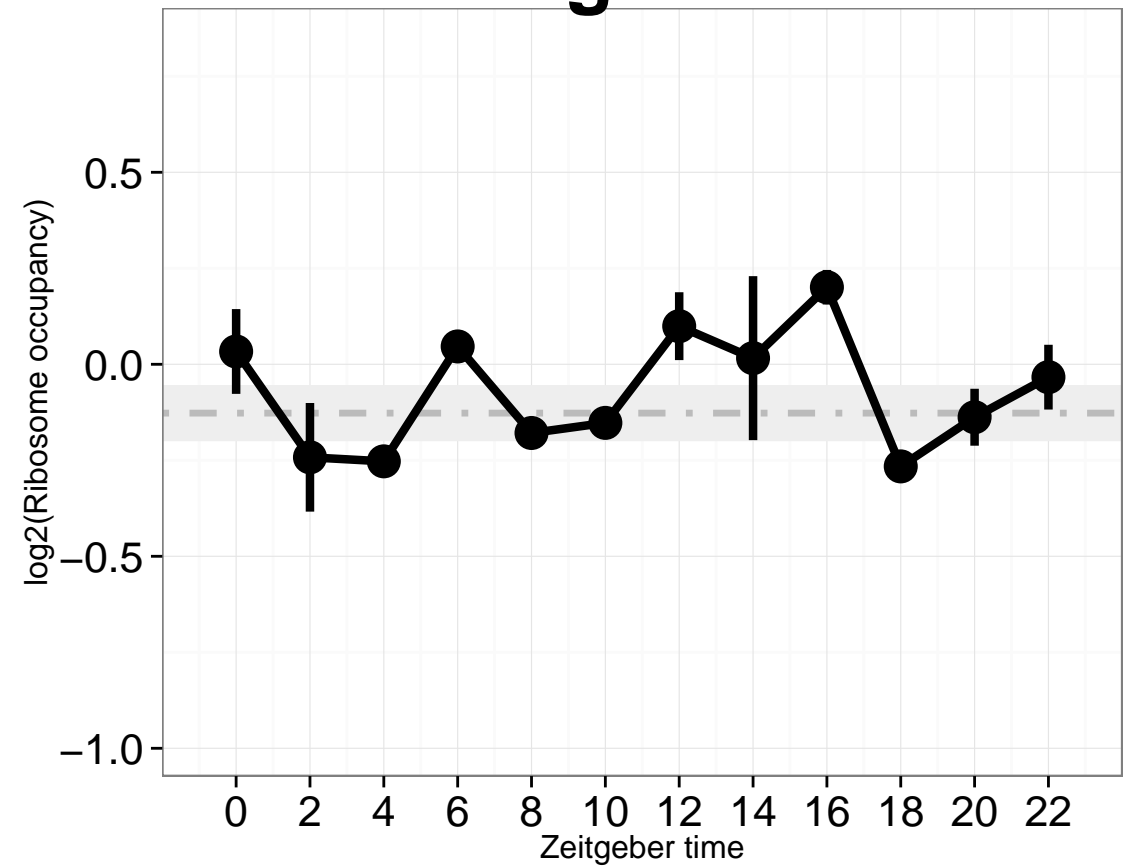

Supplement: SuppDataset_1.zip [file Pgam5_set_A.pdf › Supplemental Dataset 1/A-mRNA_nonrhyth_translation_nonrhyth/Pgam5_set_A.pdf]

## Pgap2

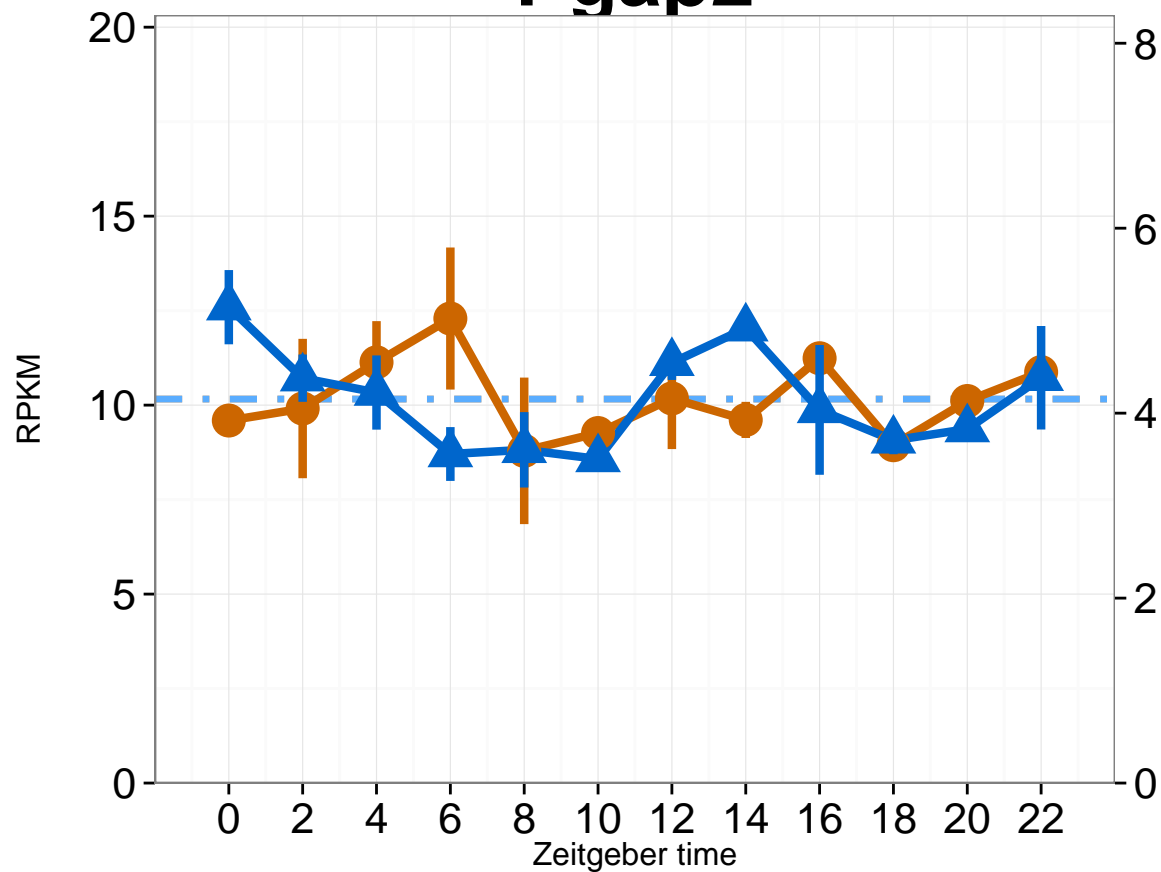

## Pgap2

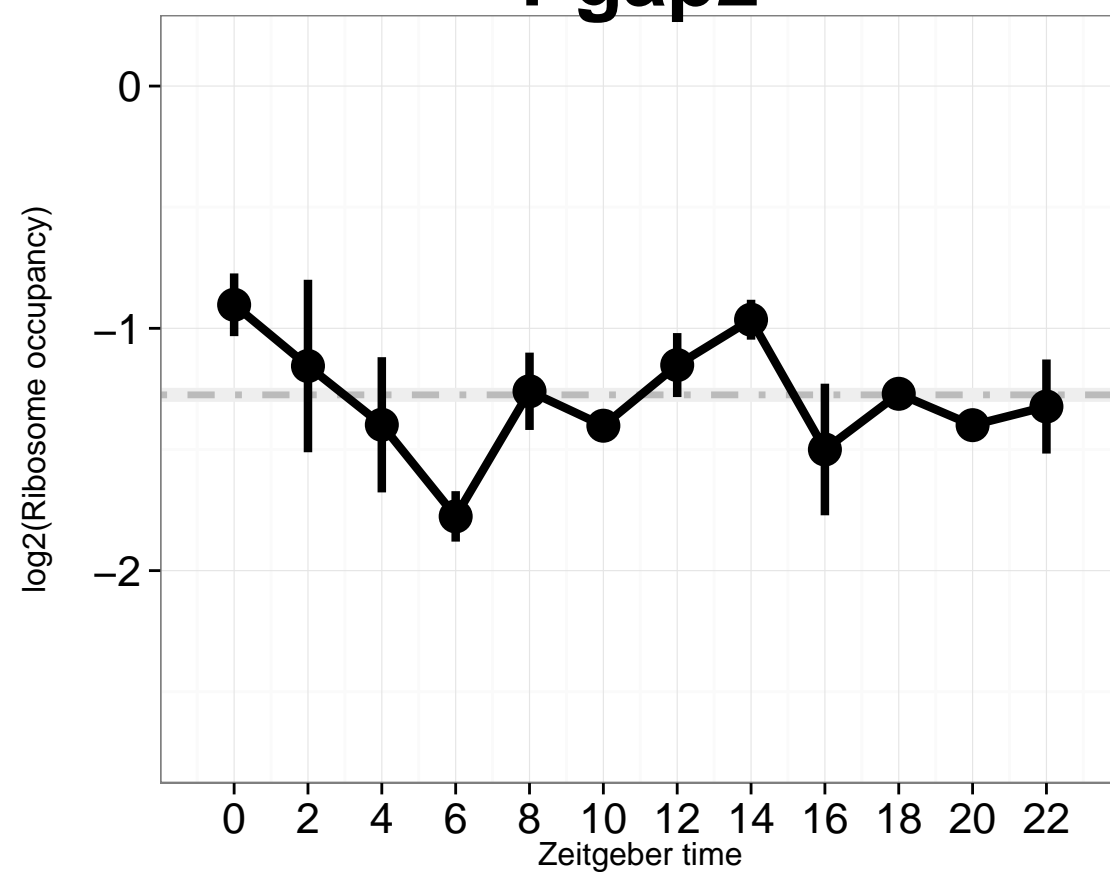

Supplement: SuppDataset_1.zip [file Pgap2_set_A.pdf › Supplemental Dataset 1/A-mRNA_nonrhyth_translation_nonrhyth/Pgap2_set_A.pdf]

**Pgap3 TR**

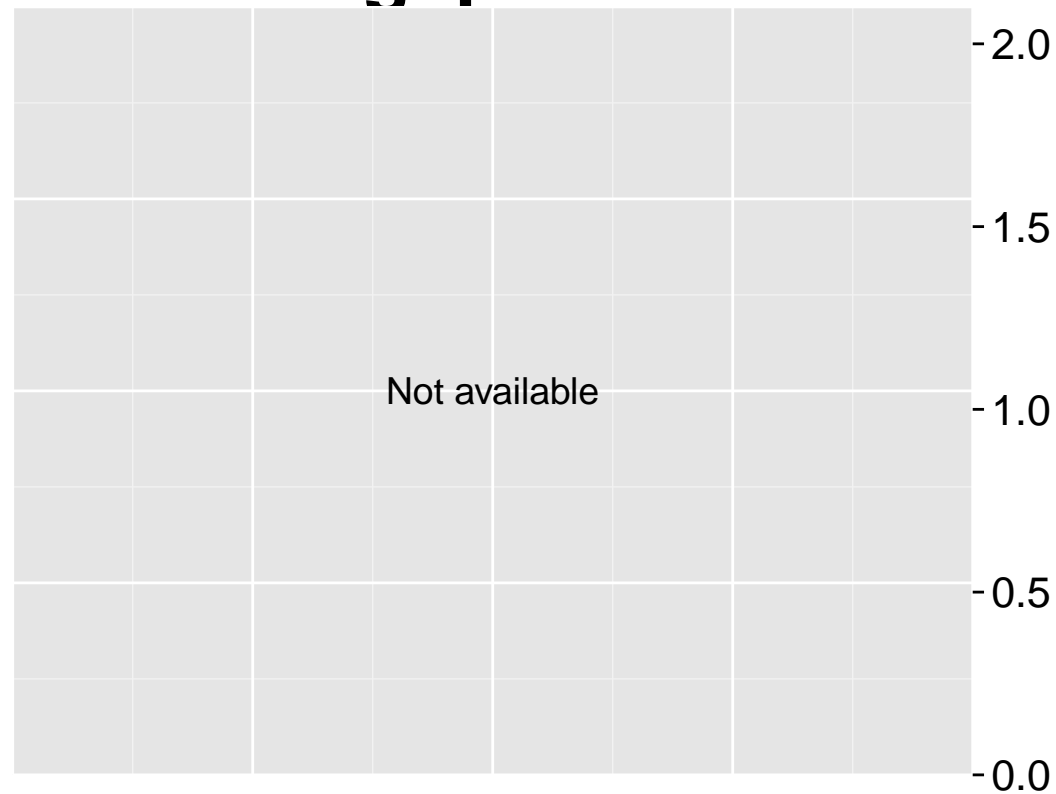

**Pgap3 log2(Ribosome occupancy**

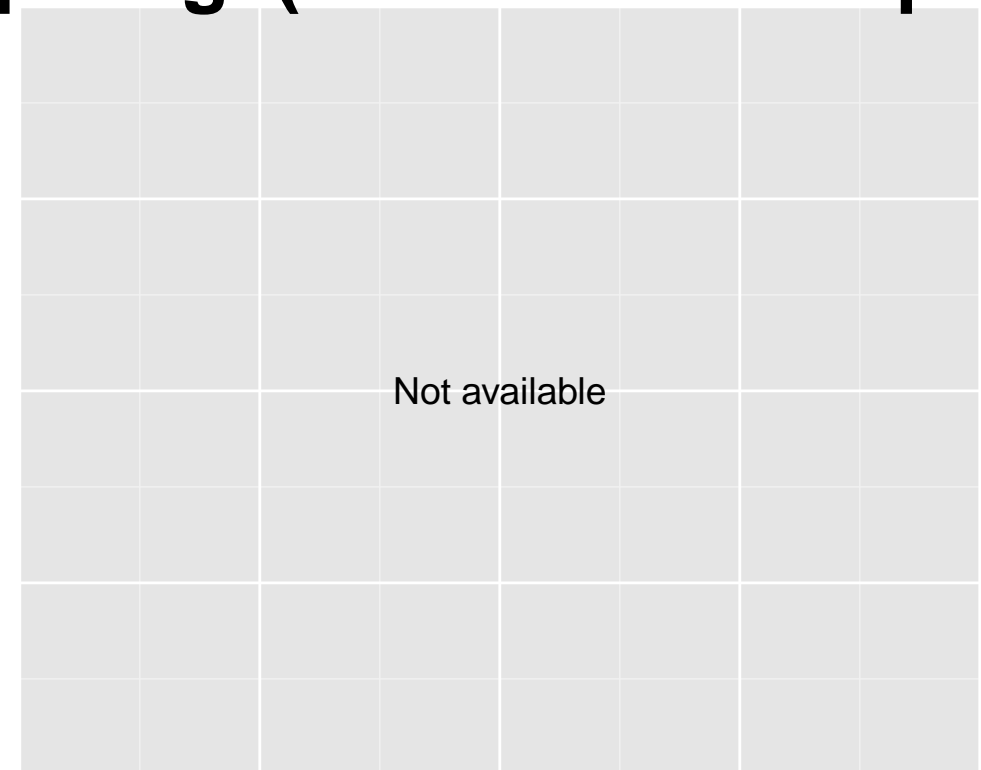

Supplement: SuppDataset_1.zip [file Pgap3_set_A.pdf › Supplemental Dataset 1/A-mRNA_nonrhyth_translation_nonrhyth/Pgap3_set_A.pdf]

# Pggt1b

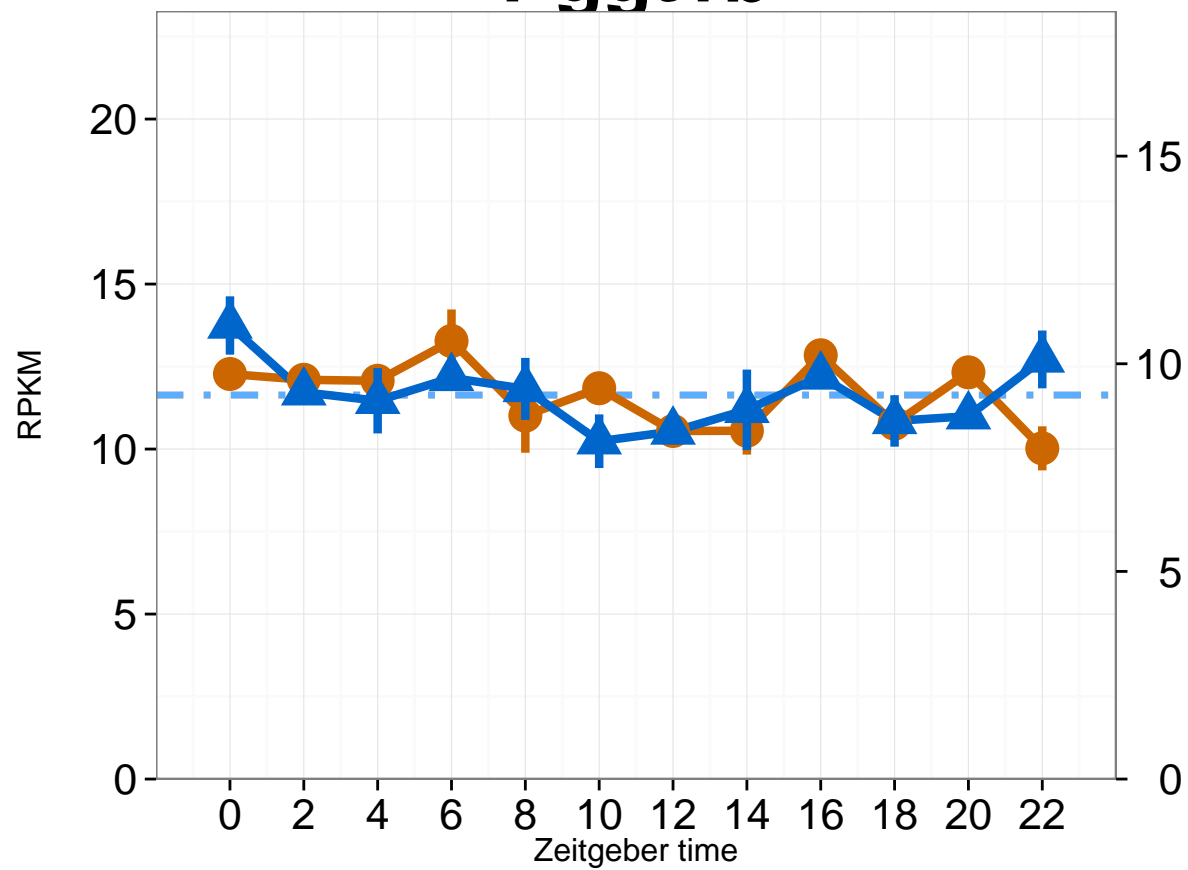

# Pggt1b

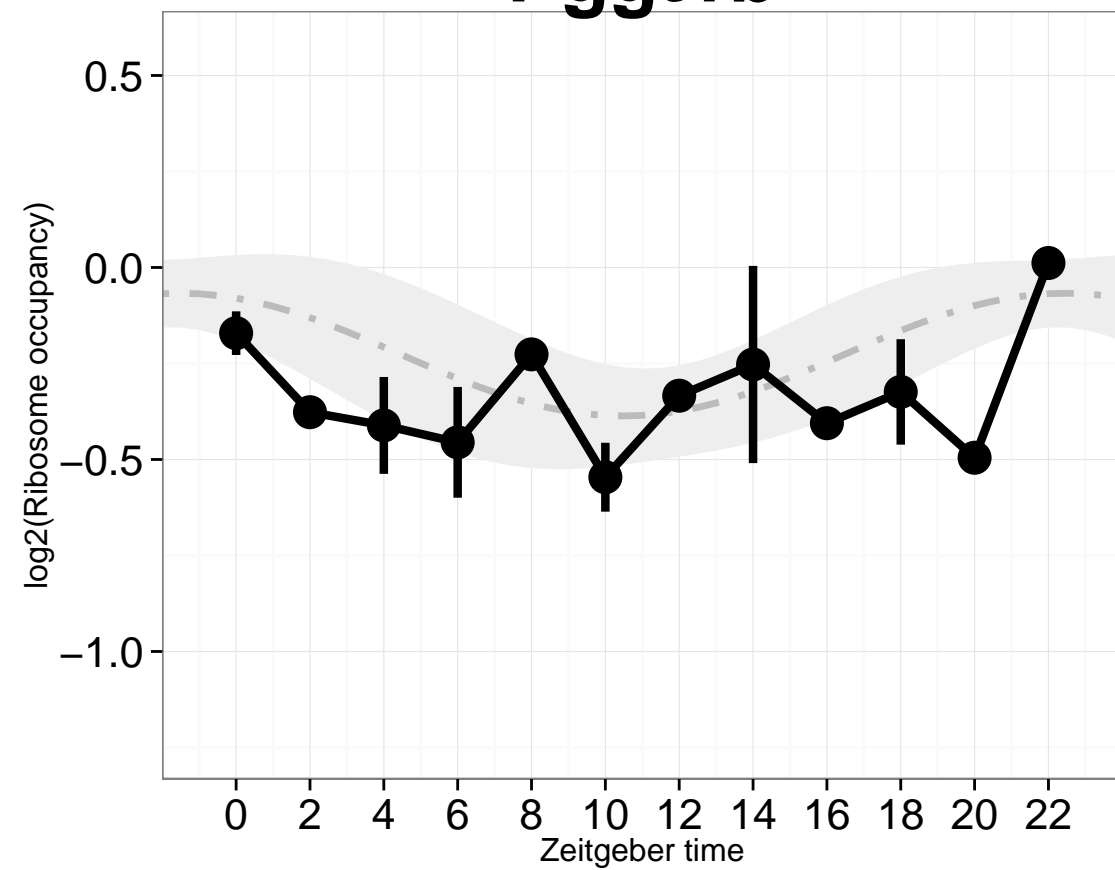

Supplement: SuppDataset_1.zip [file Pggt1b_set_A.pdf › Supplemental Dataset 1/A-mRNA_nonrhyth_translation_nonrhyth/Pggt1b_set_A.pdf]

## Pgk1

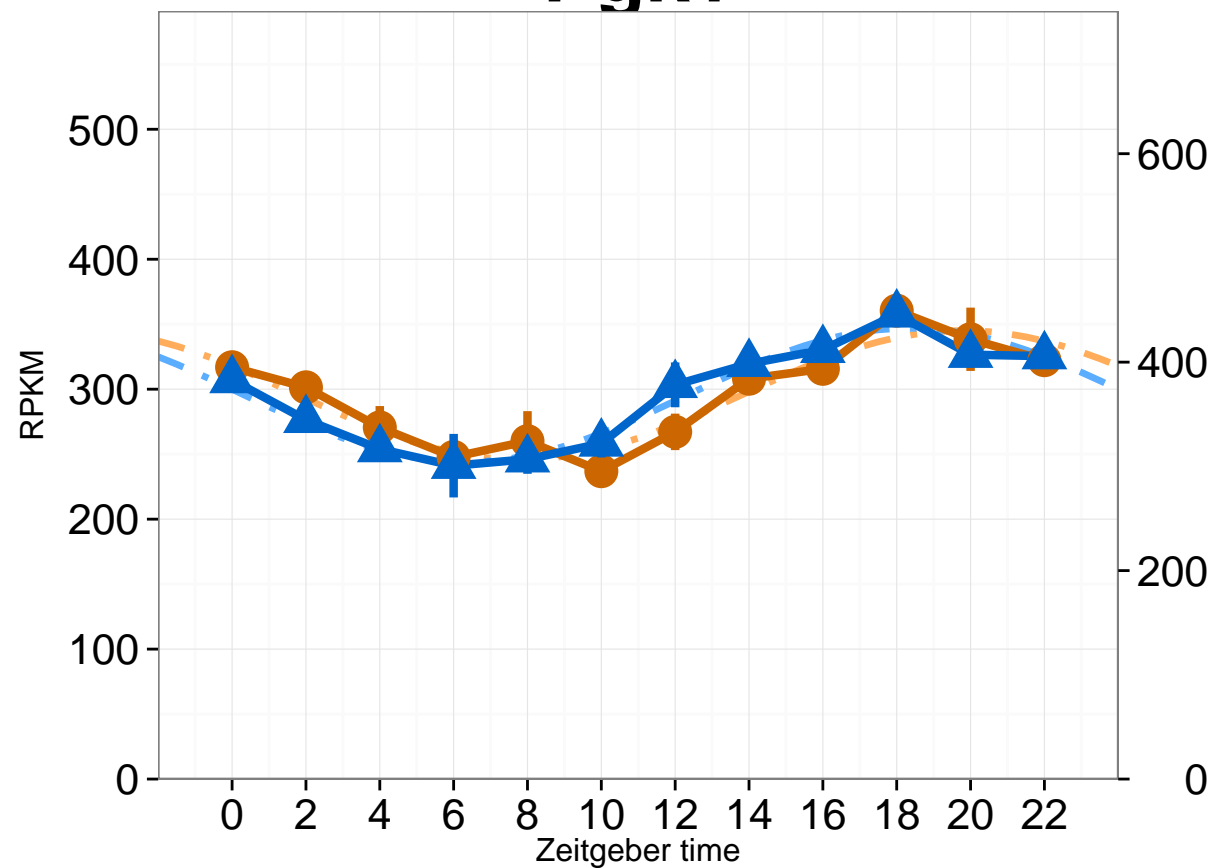

## Pgk1

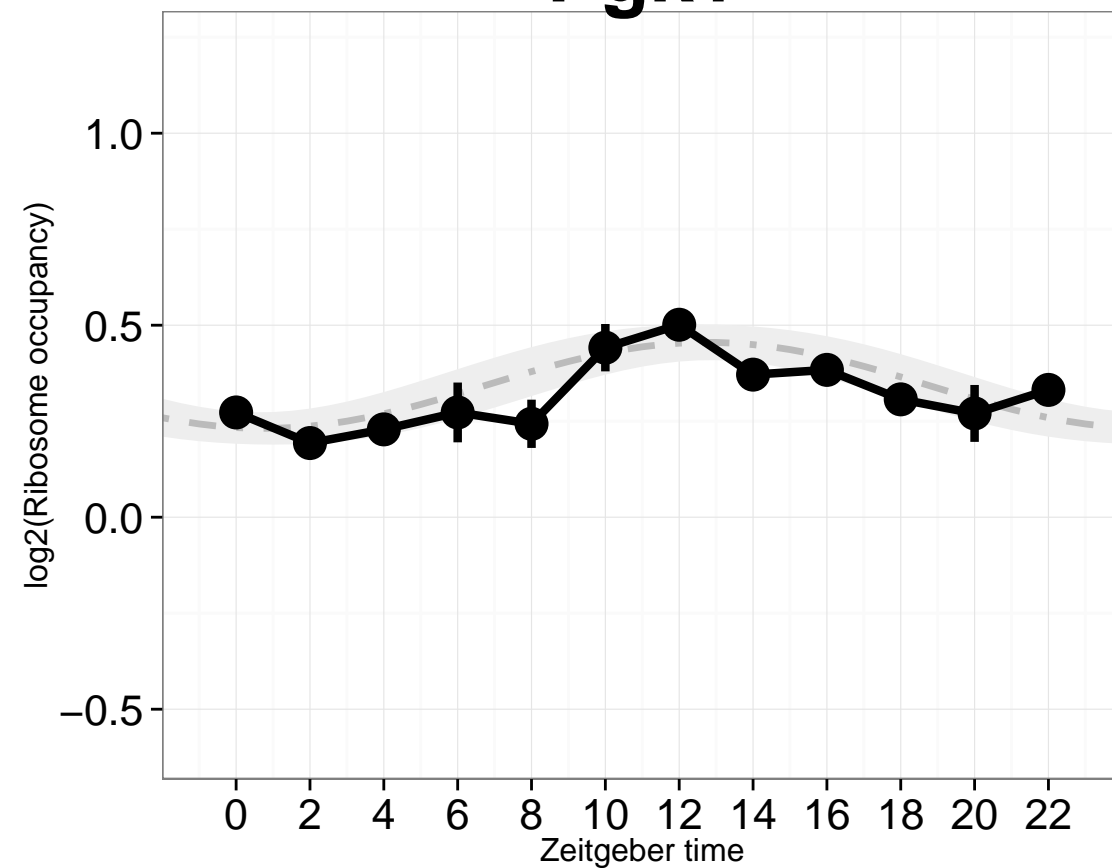

Supplement: SuppDataset_1.zip [file Pgk1_set_A.pdf › Supplemental Dataset 1/A-mRNA_nonrhyth_translation_nonrhyth/Pgk1_set_A.pdf]

## Pgls

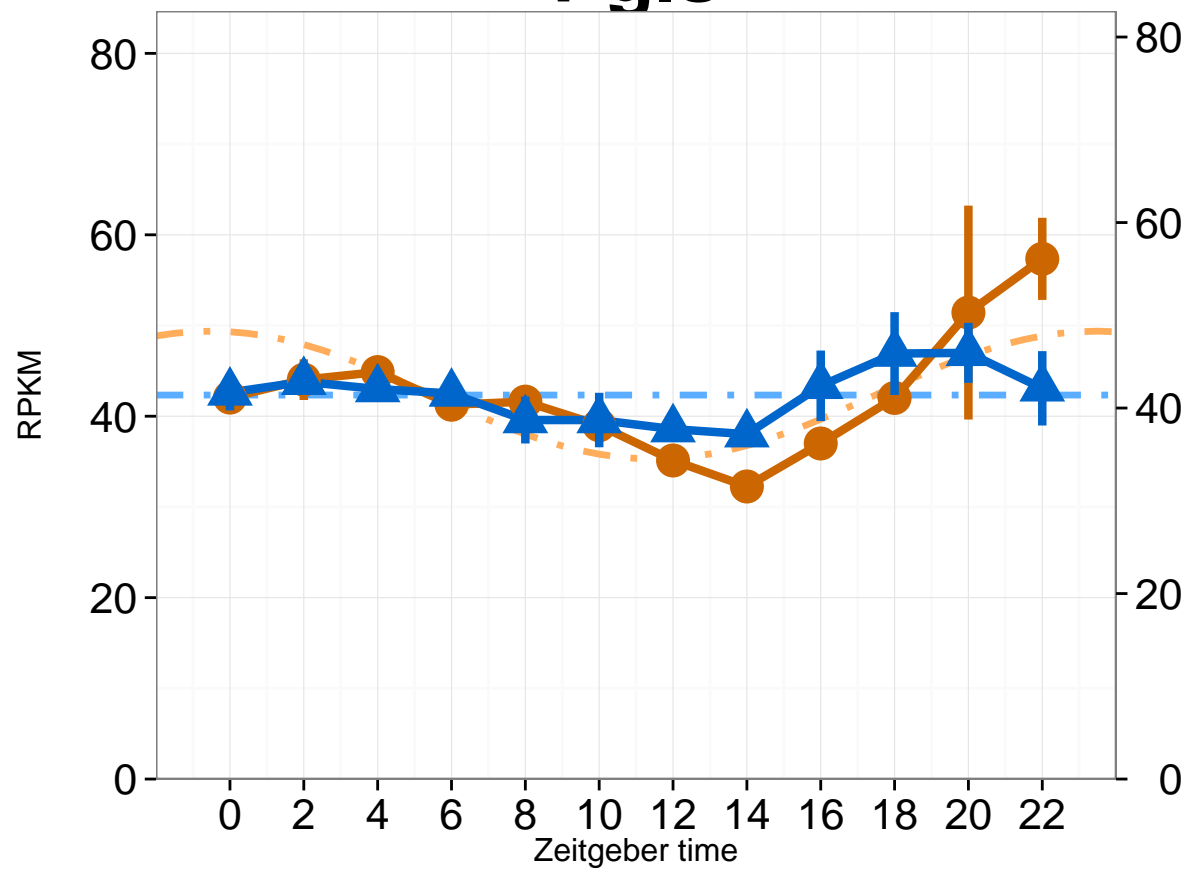

## Pgls

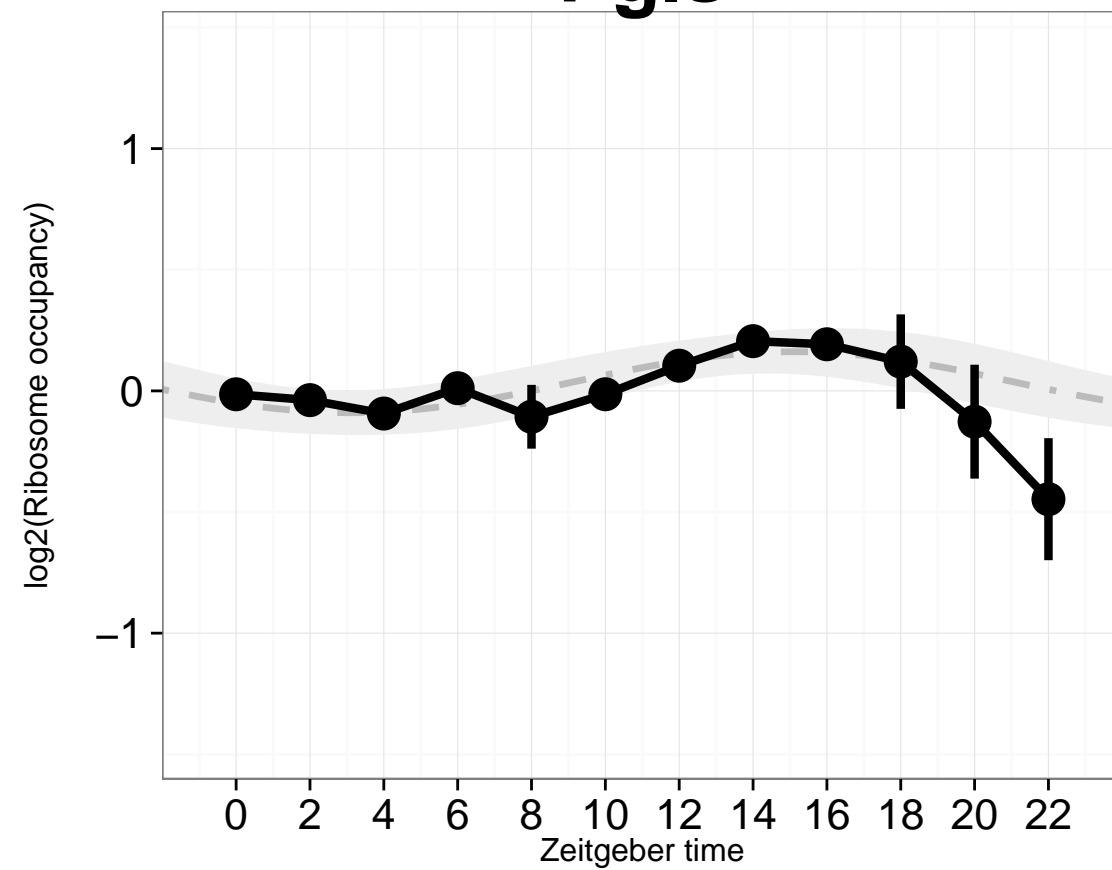

Supplement: SuppDataset_1.zip [file Pgls_set_A.pdf › Supplemental Dataset 1/A-mRNA_nonrhyth_translation_nonrhyth/Pgls_set_A.pdf]

# Pglyrp2

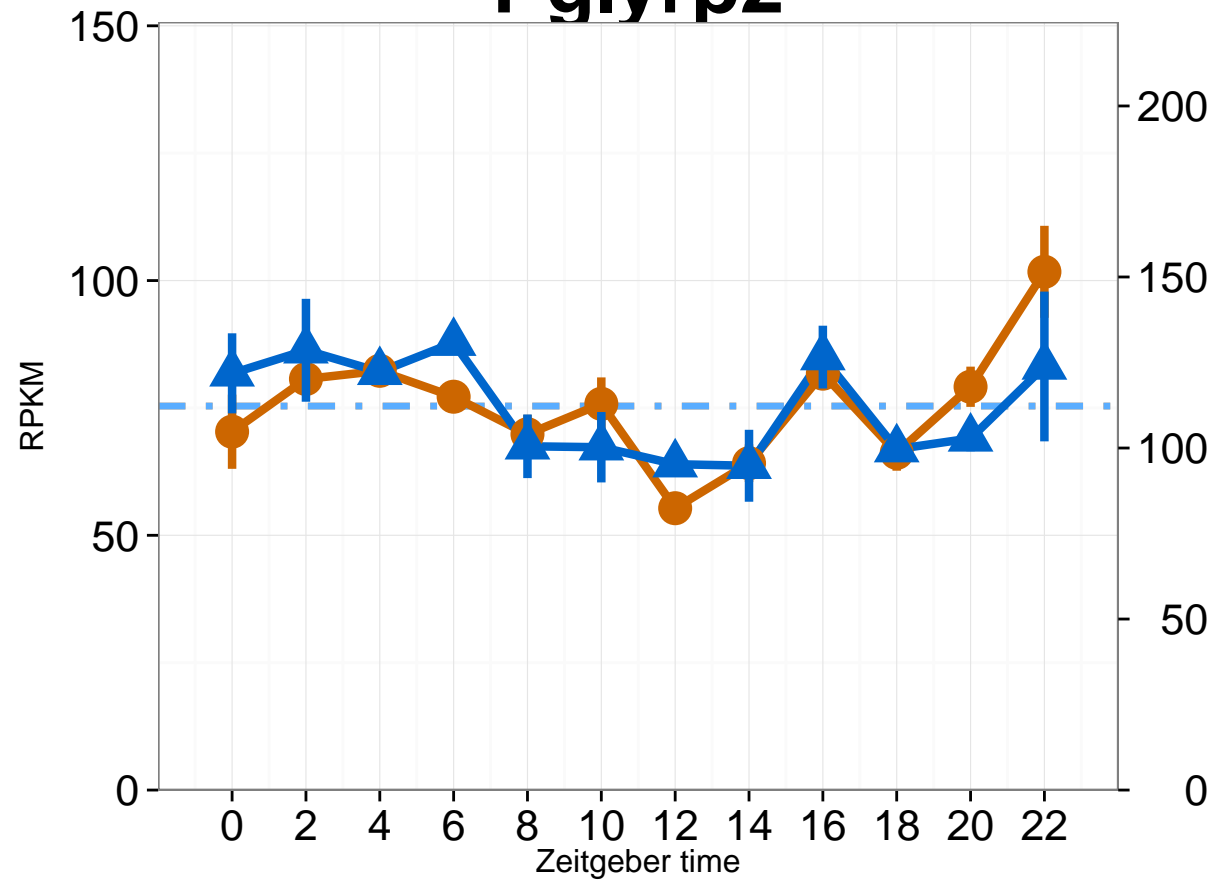

# Pglyrp2

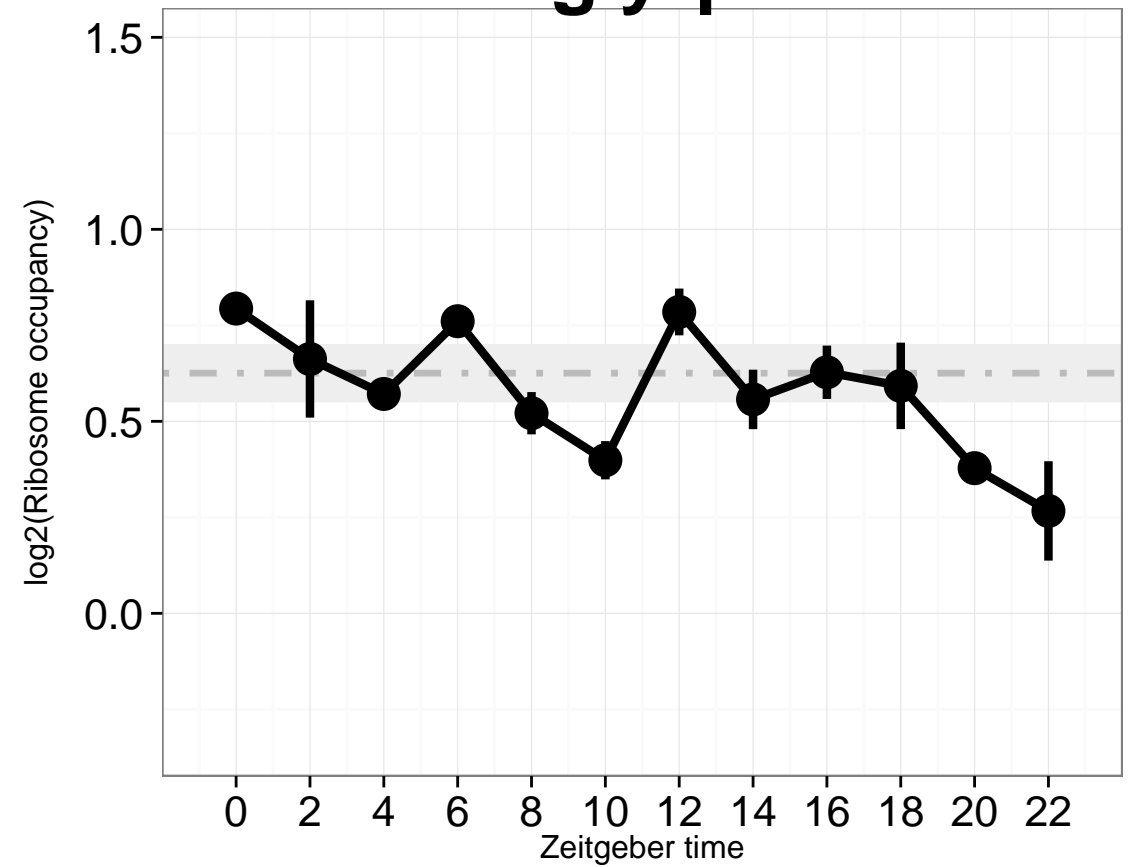

Supplement: SuppDataset_1.zip [file Pglyrp2_set_A.pdf › Supplemental Dataset 1/A-mRNA_nonrhyth_translation_nonrhyth/Pglyrp2_set_A.pdf]

# Pgm1

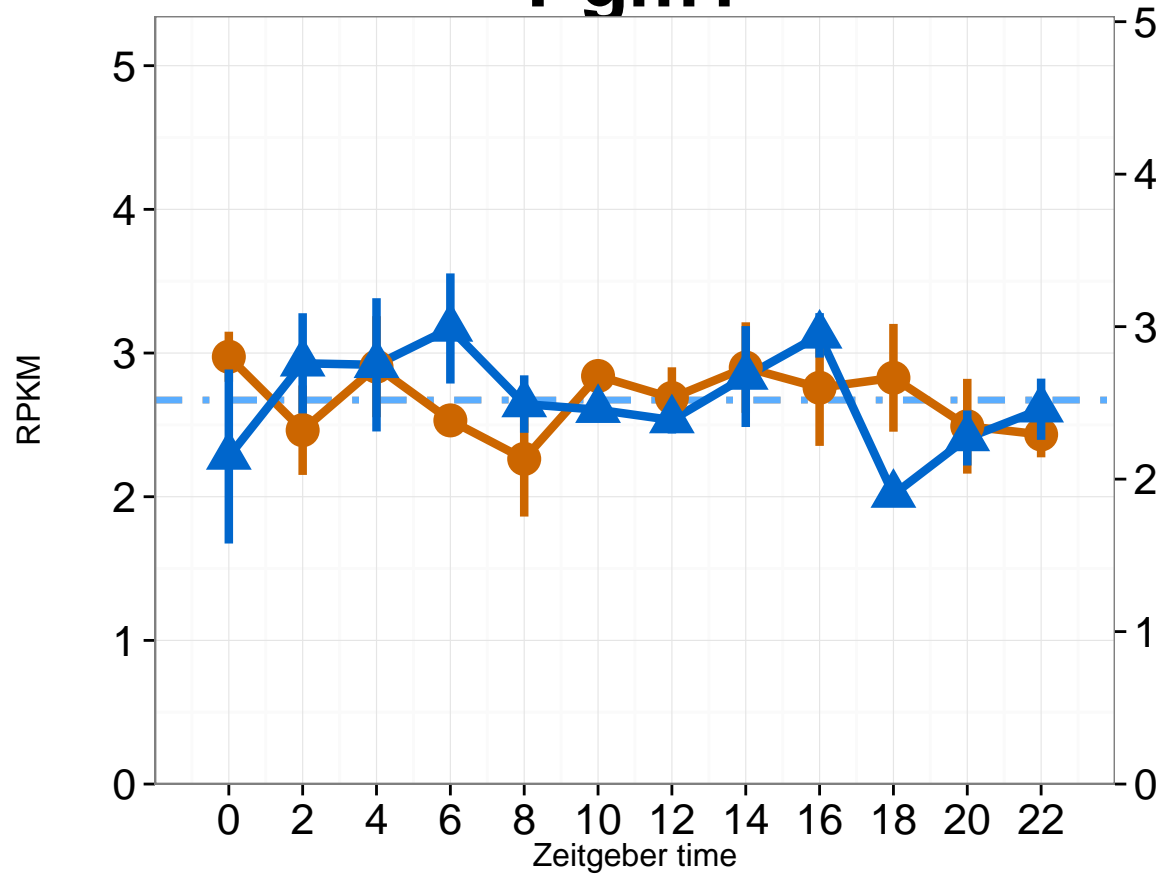

# Pgm1

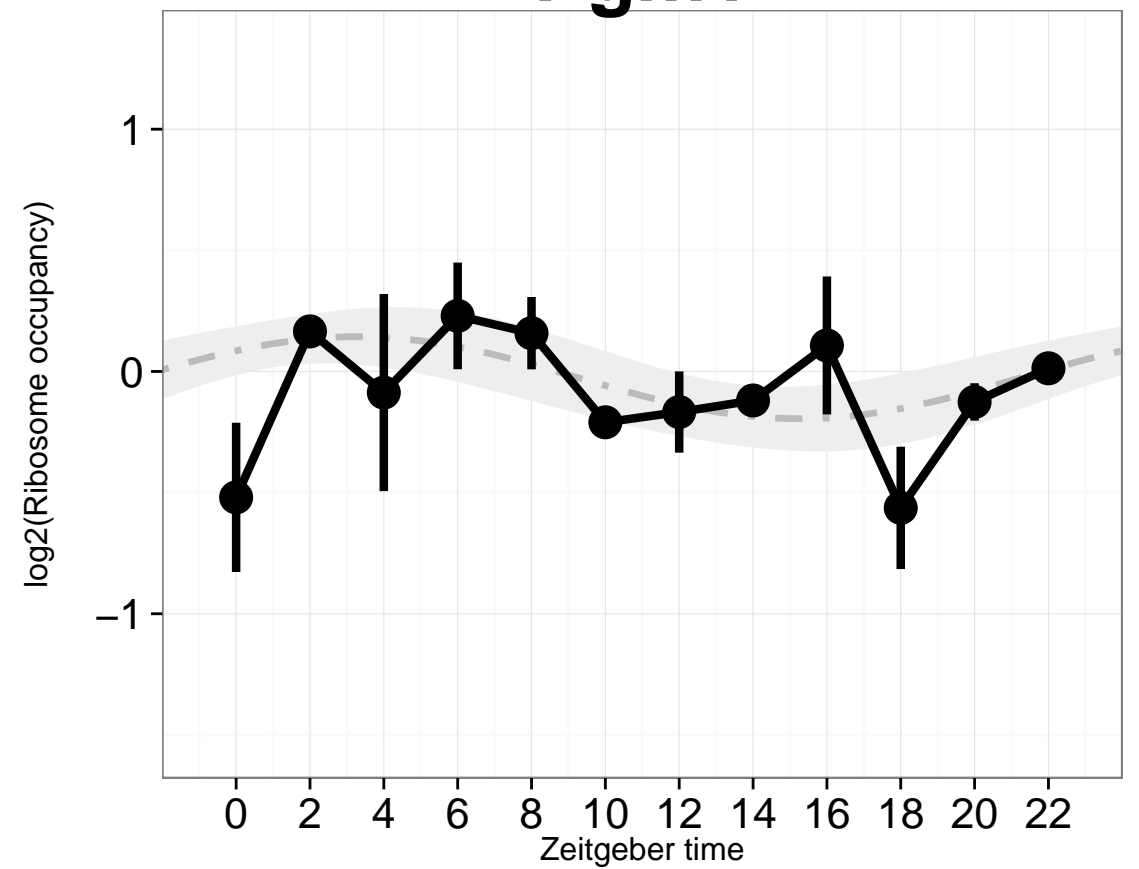

Supplement: SuppDataset_1.zip [file Pgm1_set_A.pdf › Supplemental Dataset 1/A-mRNA_nonrhyth_translation_nonrhyth/Pgm1_set_A.pdf]

# Pgm2

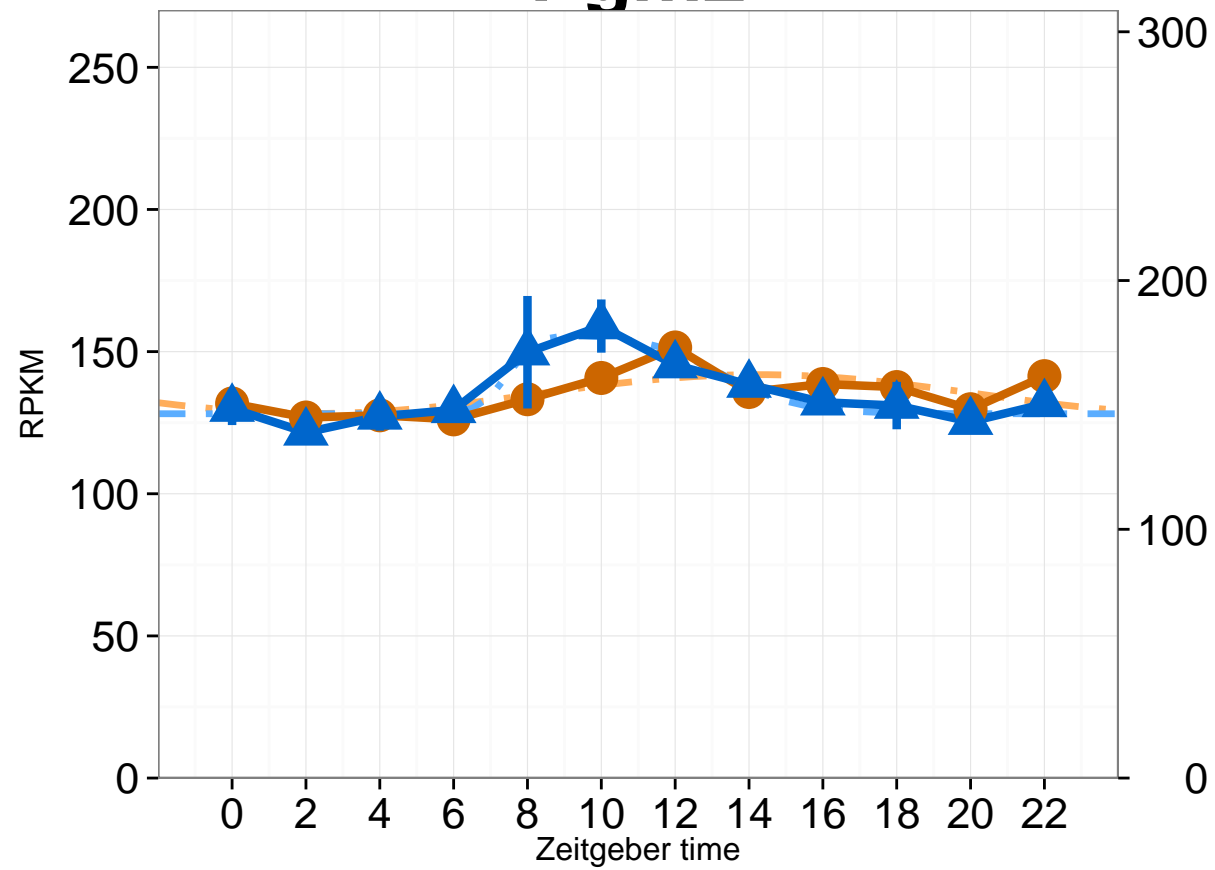

# Pgm2

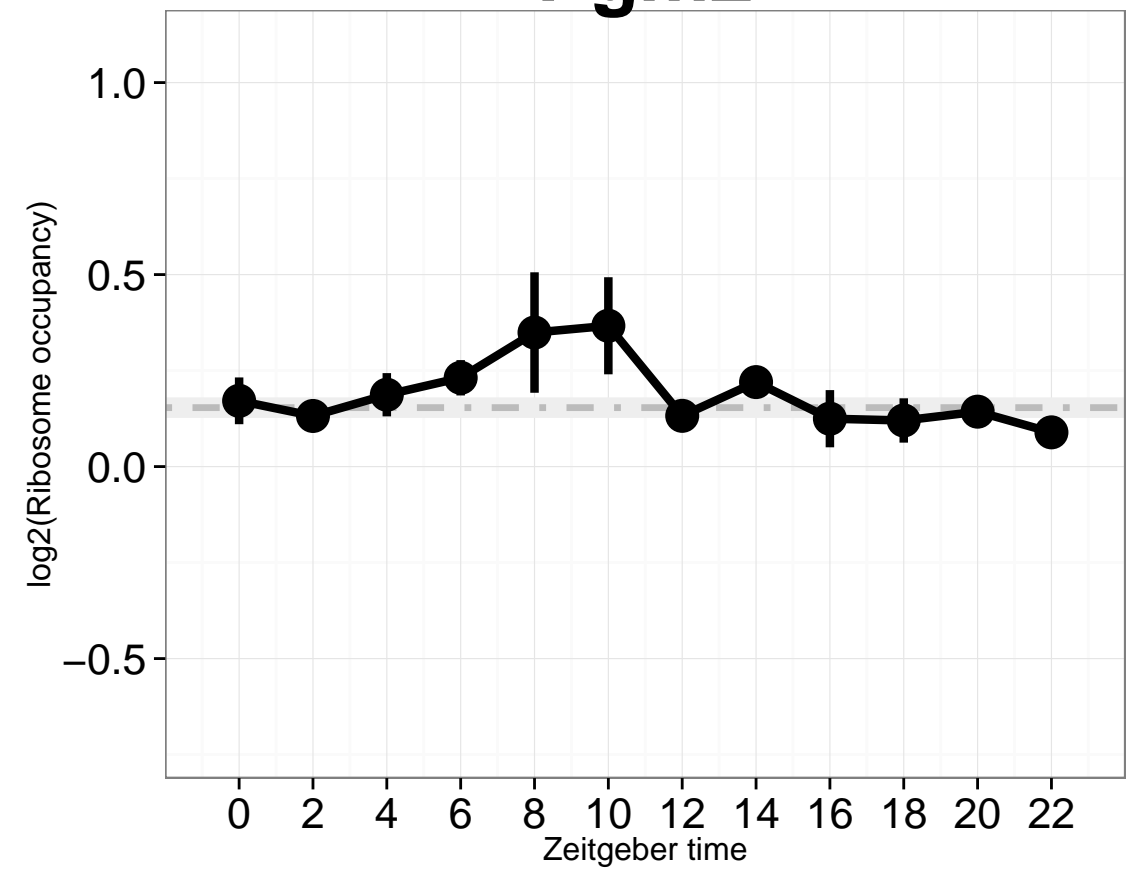

Supplement: SuppDataset_1.zip [file Pgm2_set_A.pdf › Supplemental Dataset 1/A-mRNA_nonrhyth_translation_nonrhyth/Pgm2_set_A.pdf]

## Pgm3

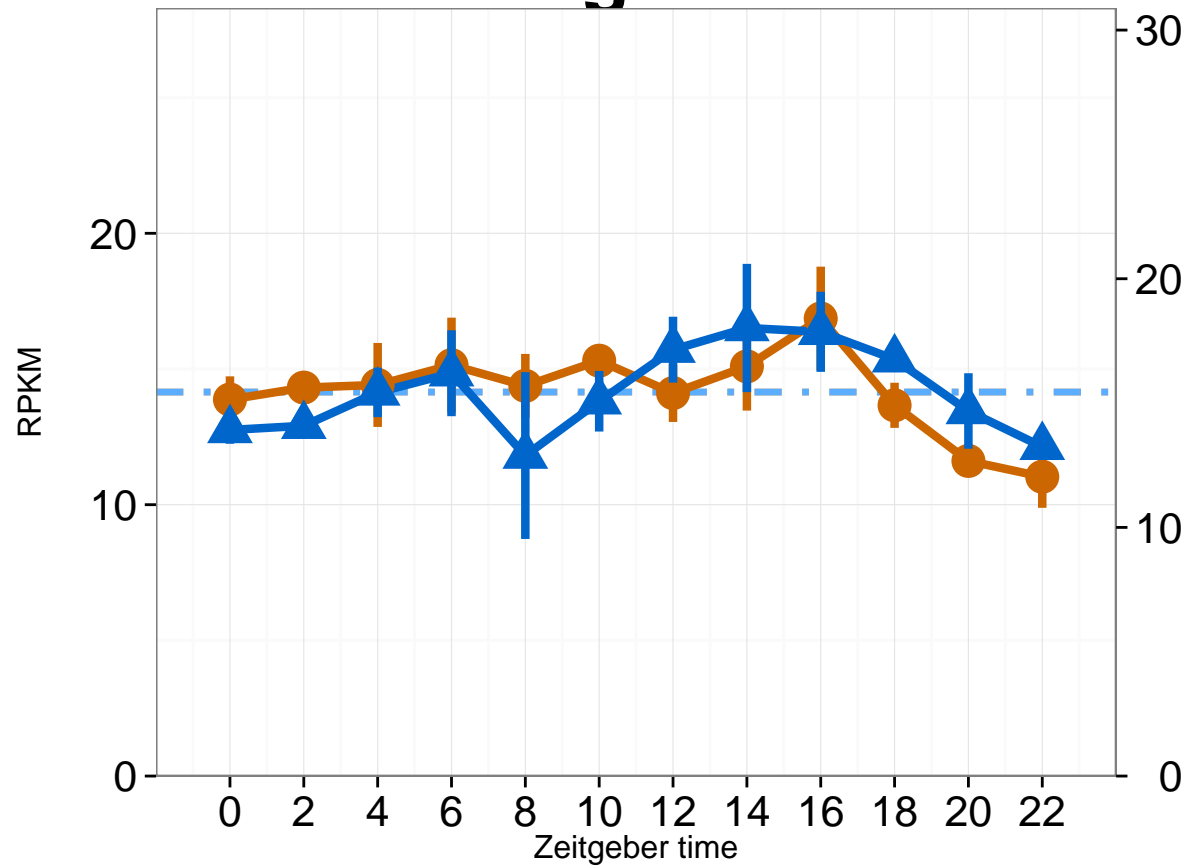

## Pgm3

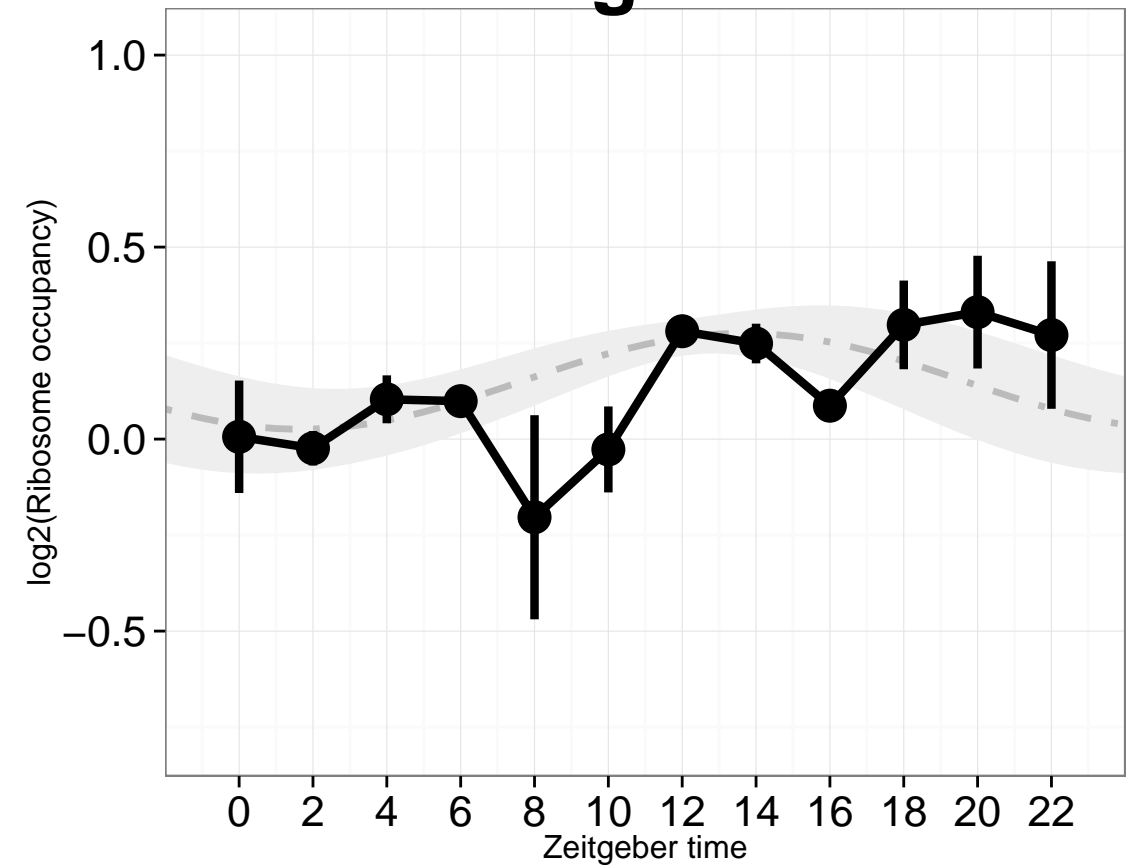

Supplement: SuppDataset_1.zip [file Pgm3_set_A.pdf › Supplemental Dataset 1/A-mRNA_nonrhyth_translation_nonrhyth/Pgm3_set_A.pdf]

# Pgm5

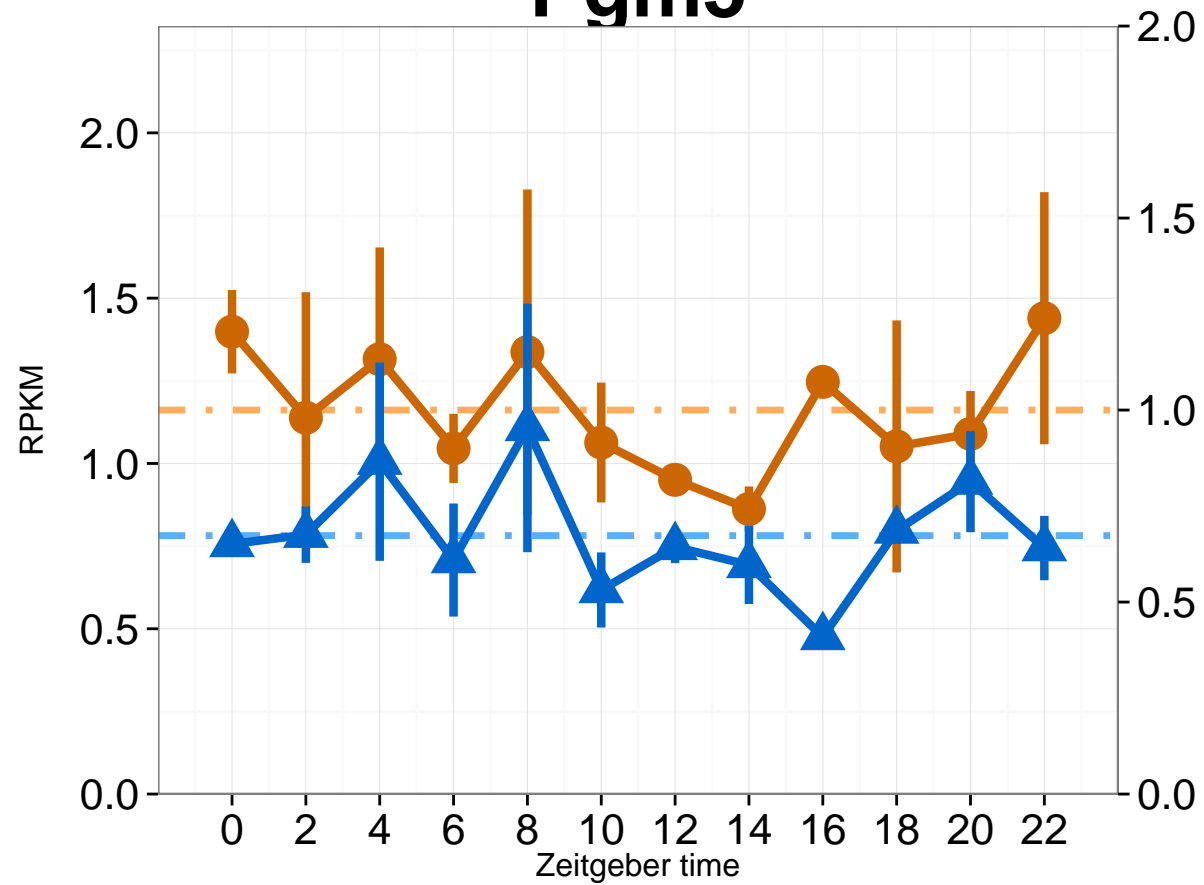

# Pgm5

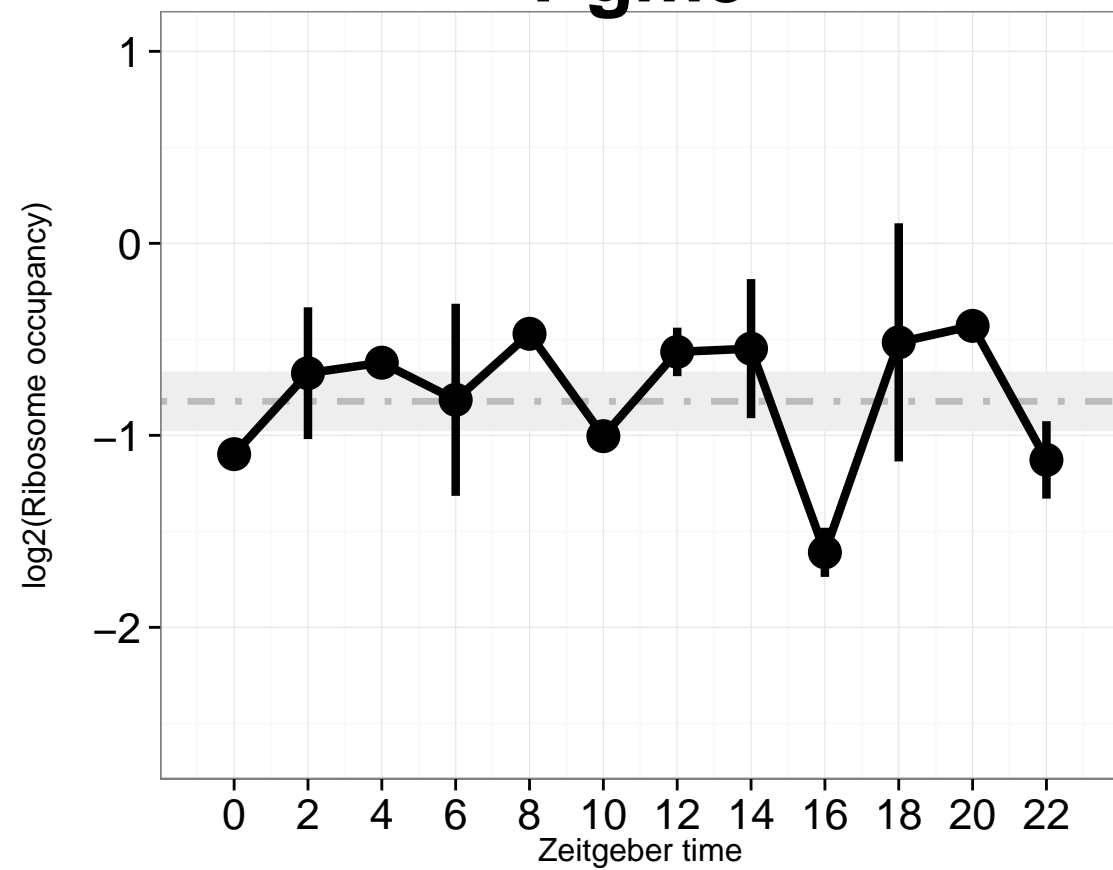

Supplement: SuppDataset_1.zip [file Pgm5_set_A.pdf › Supplemental Dataset 1/A-mRNA_nonrhyth_translation_nonrhyth/Pgm5_set_A.pdf]

## Pgp

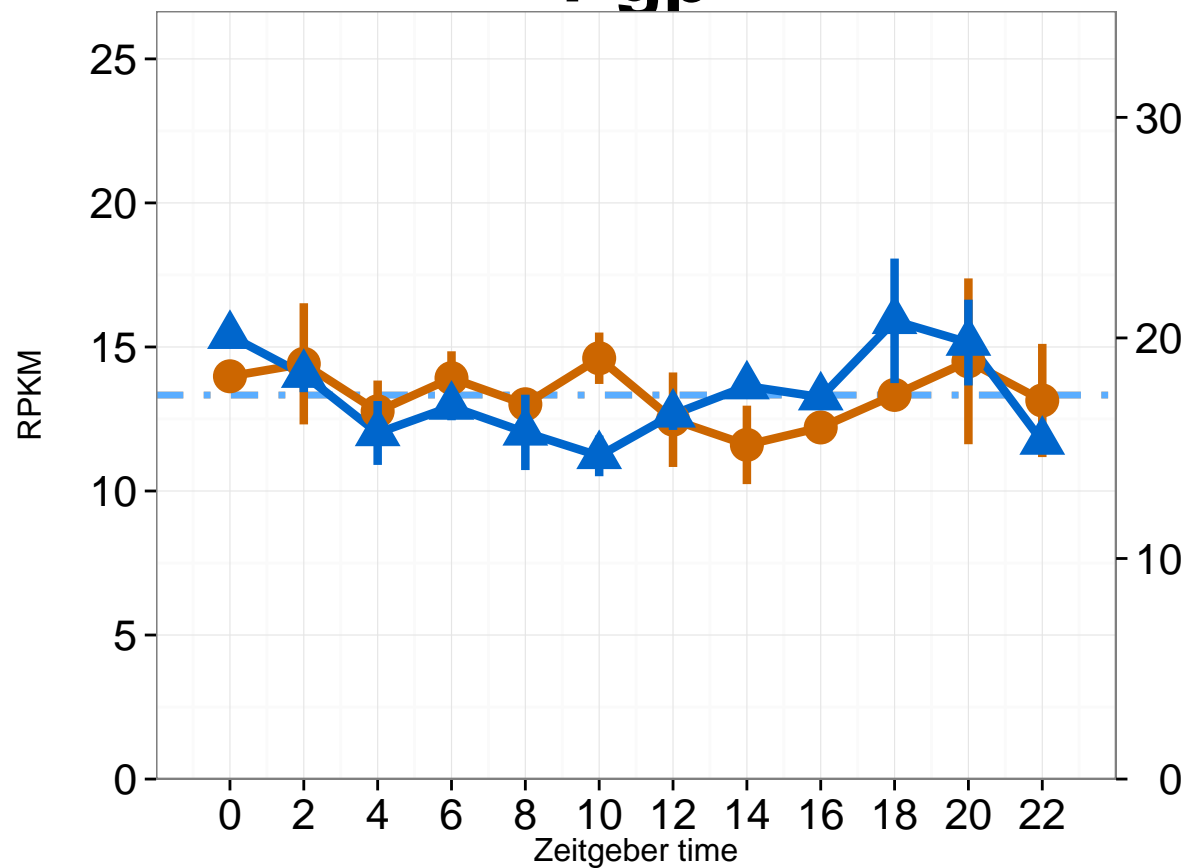

## Pgp

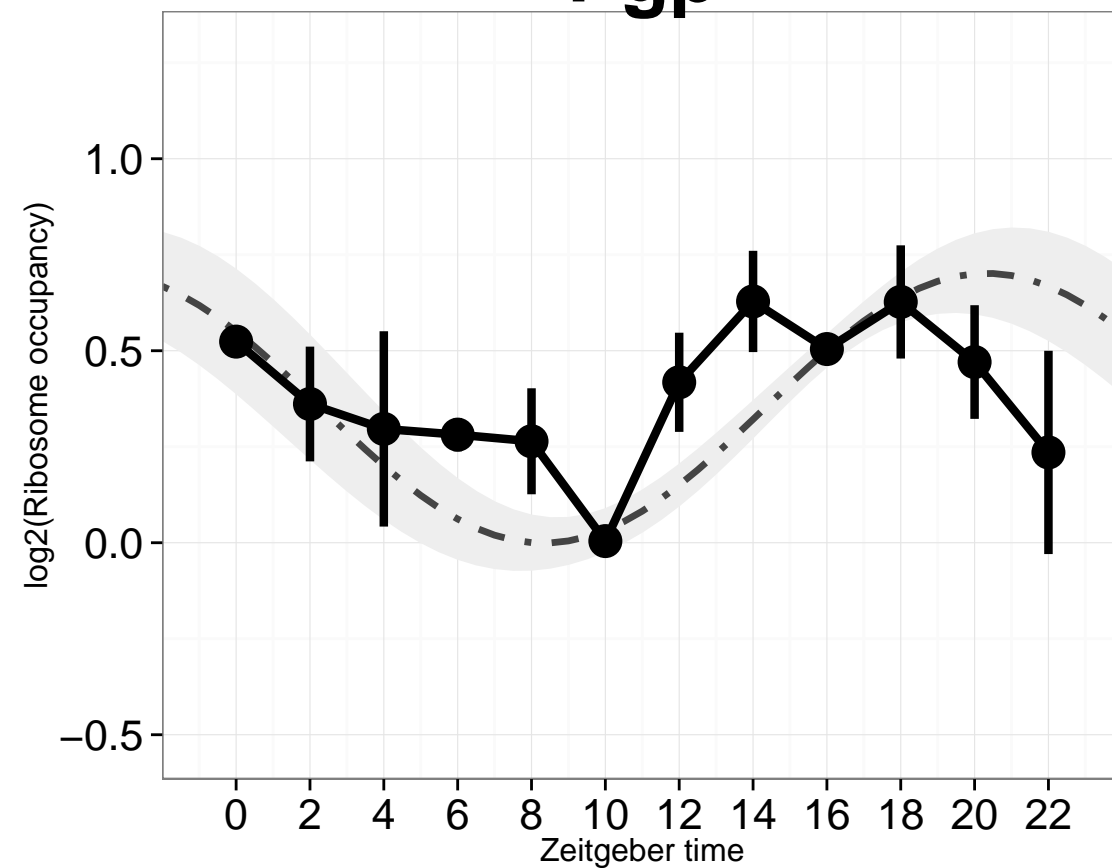

Supplement: SuppDataset_1.zip [file Pgp_set_A.pdf › Supplemental Dataset 1/A-mRNA_nonrhyth_translation_nonrhyth/Pgp_set_A.pdf]

**Pgpep1**

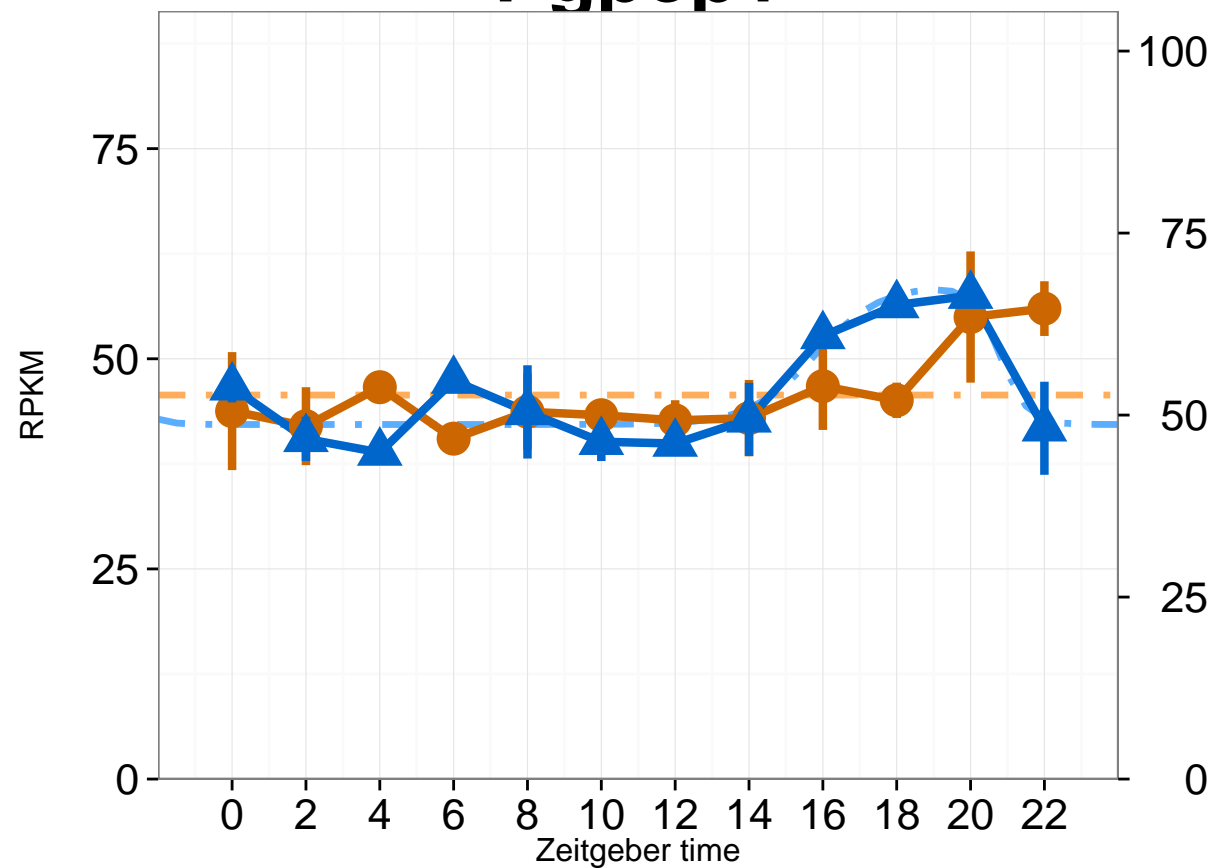

**Pgpep1**

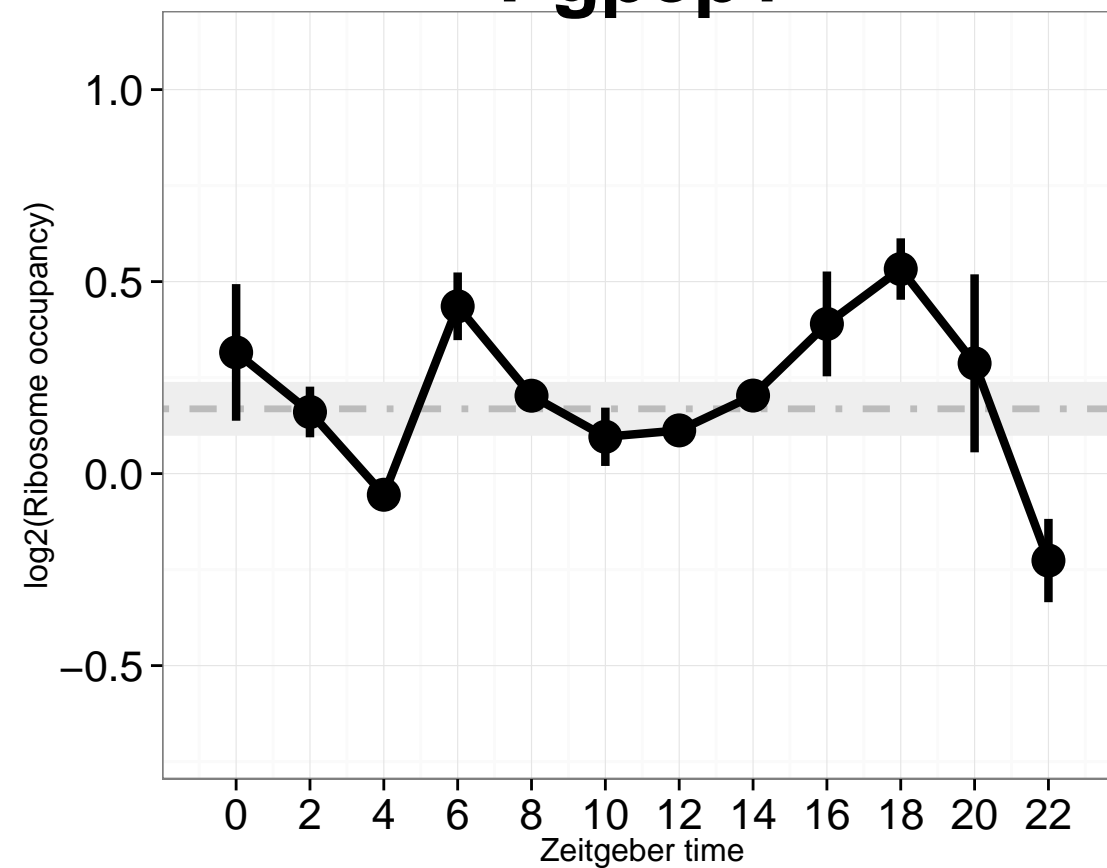

Supplement: SuppDataset_1.zip [file Pgpep1_set_A.pdf › Supplemental Dataset 1/A-mRNA_nonrhyth_translation_nonrhyth/Pgpep1_set_A.pdf]

# Pgrmc1

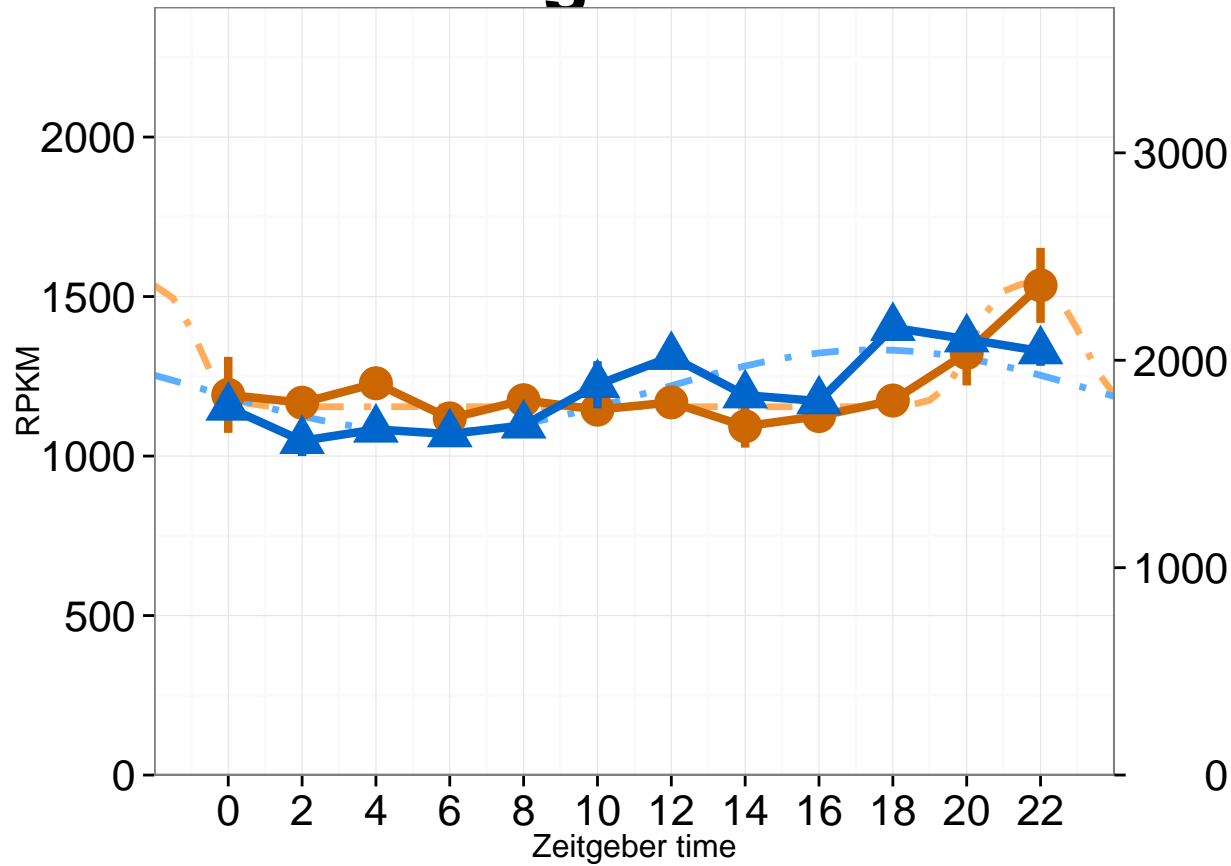

# Pgrmc1

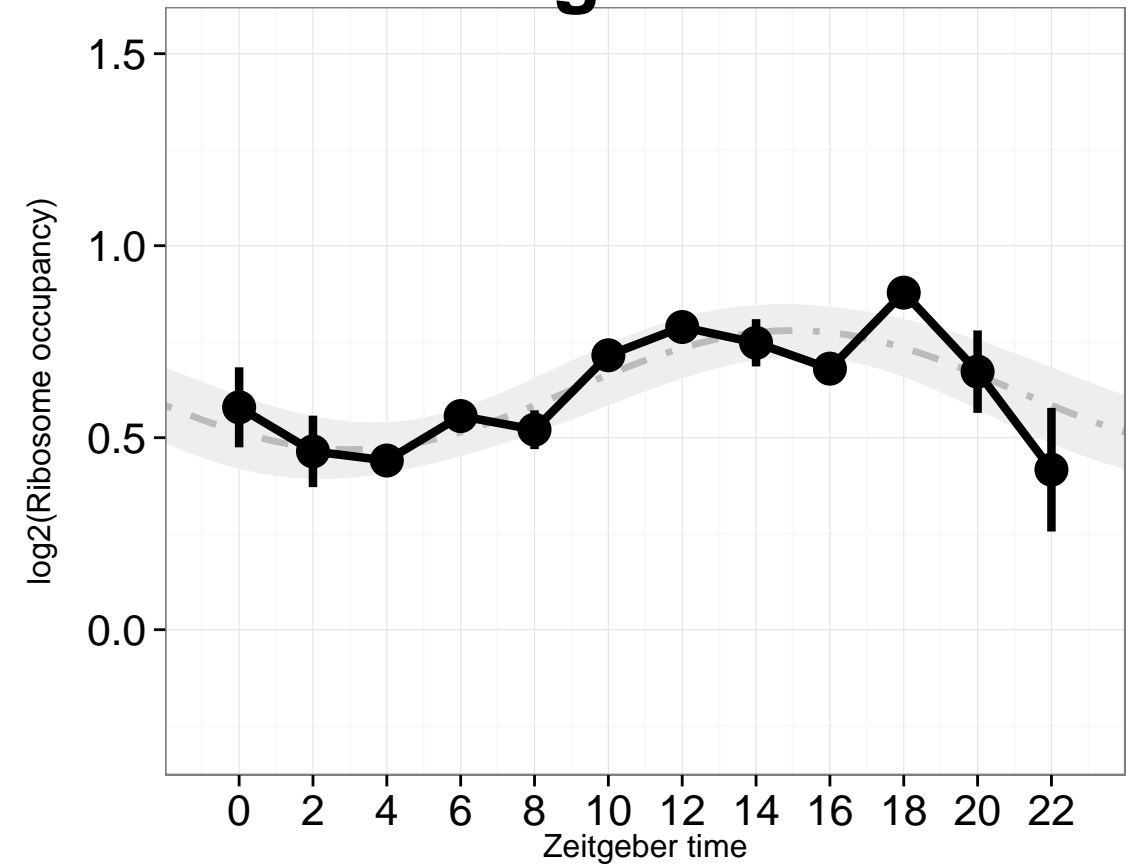

Supplement: SuppDataset_1.zip [file Pgrmc1_set_A.pdf › Supplemental Dataset 1/A-mRNA_nonrhyth_translation_nonrhyth/Pgrmc1_set_A.pdf]

## Pgrmc2

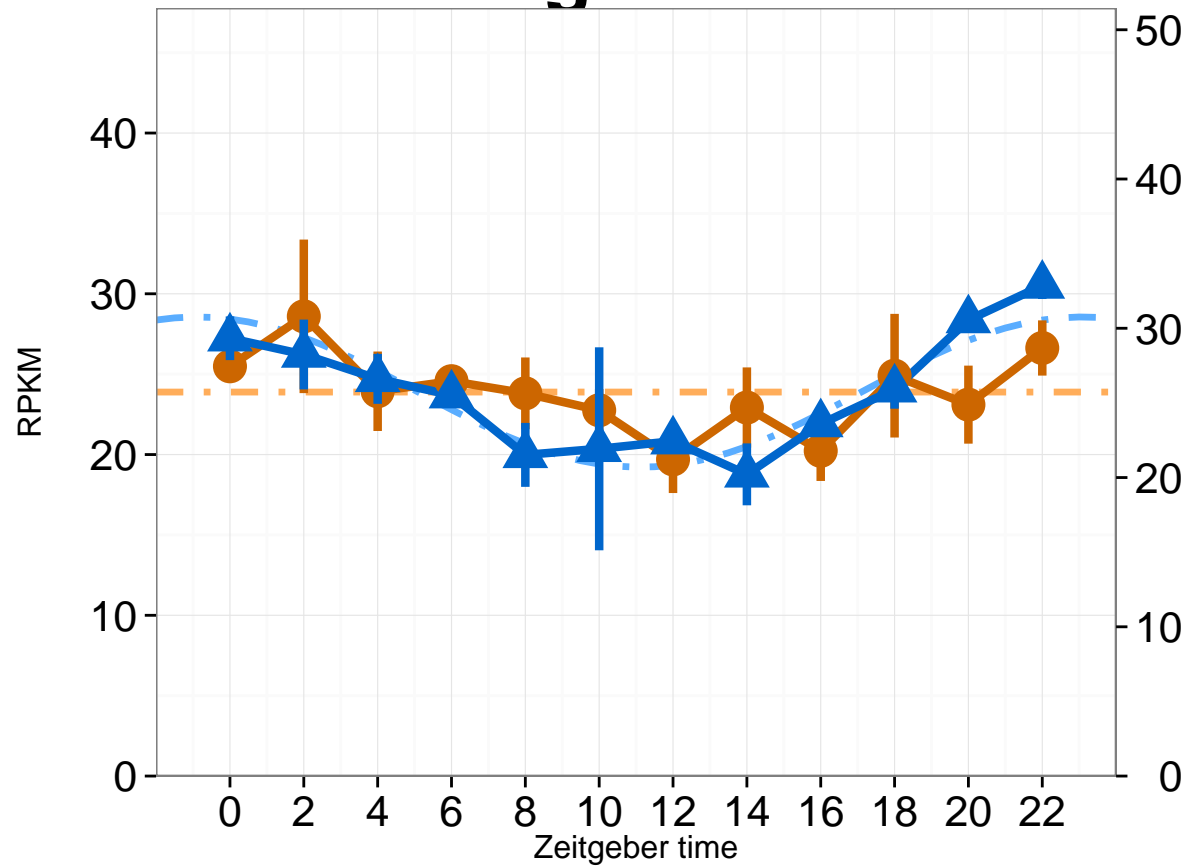

## Pgrmc2

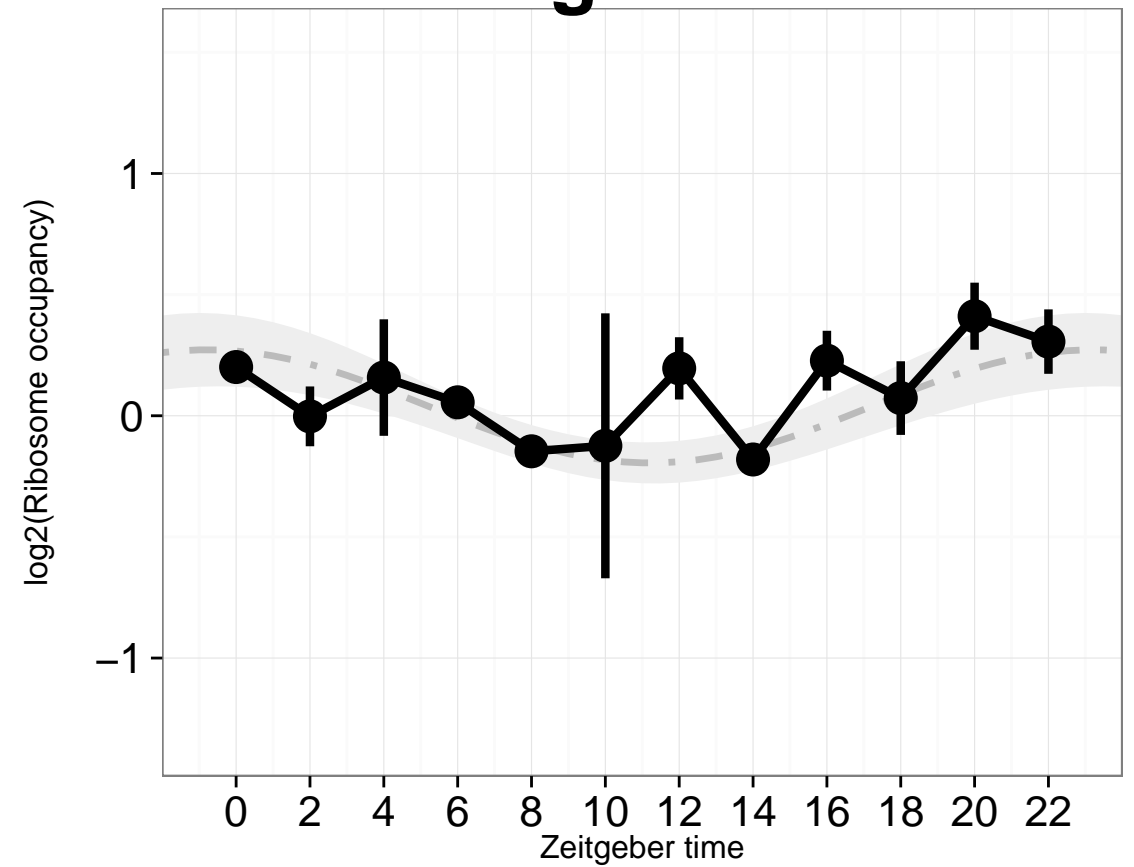

Supplement: SuppDataset_1.zip [file Pgrmc2_set_A.pdf › Supplemental Dataset 1/A-mRNA_nonrhyth_translation_nonrhyth/Pgrmc2_set_A.pdf]

## Pgs1

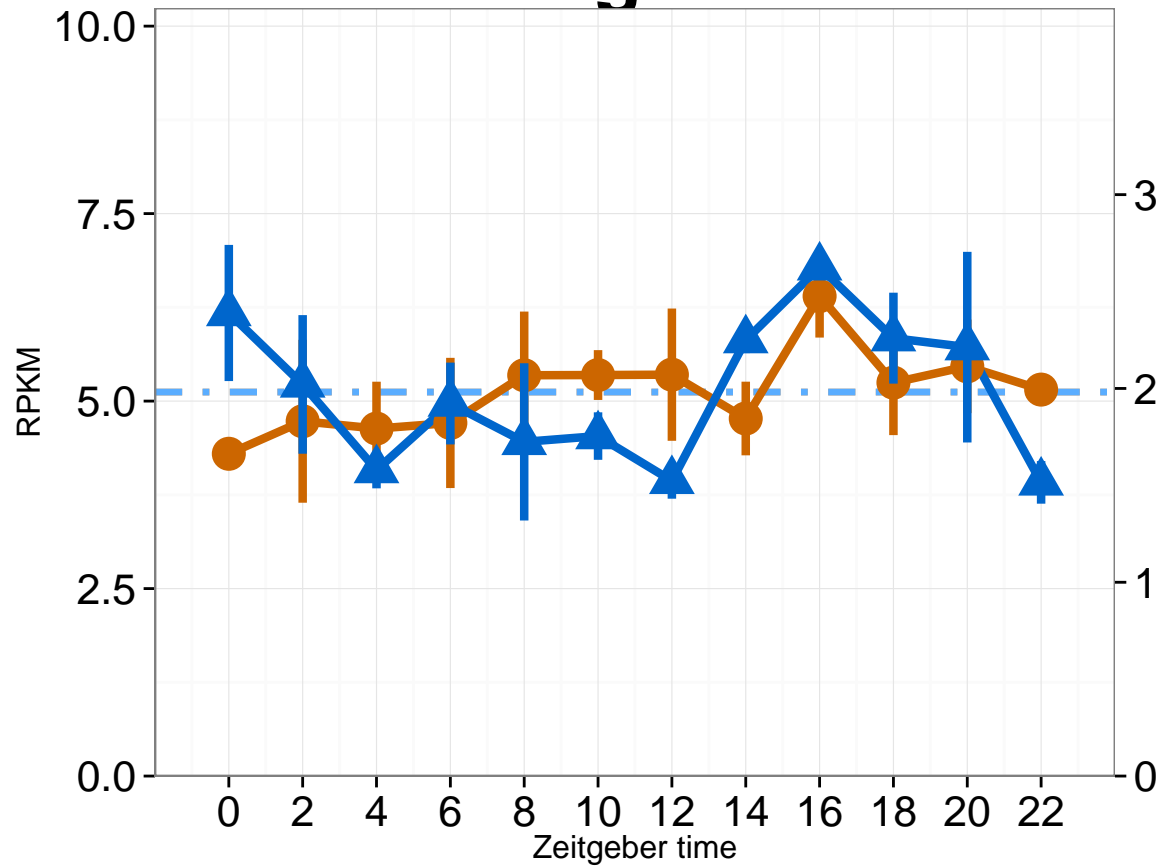

## Pgs1

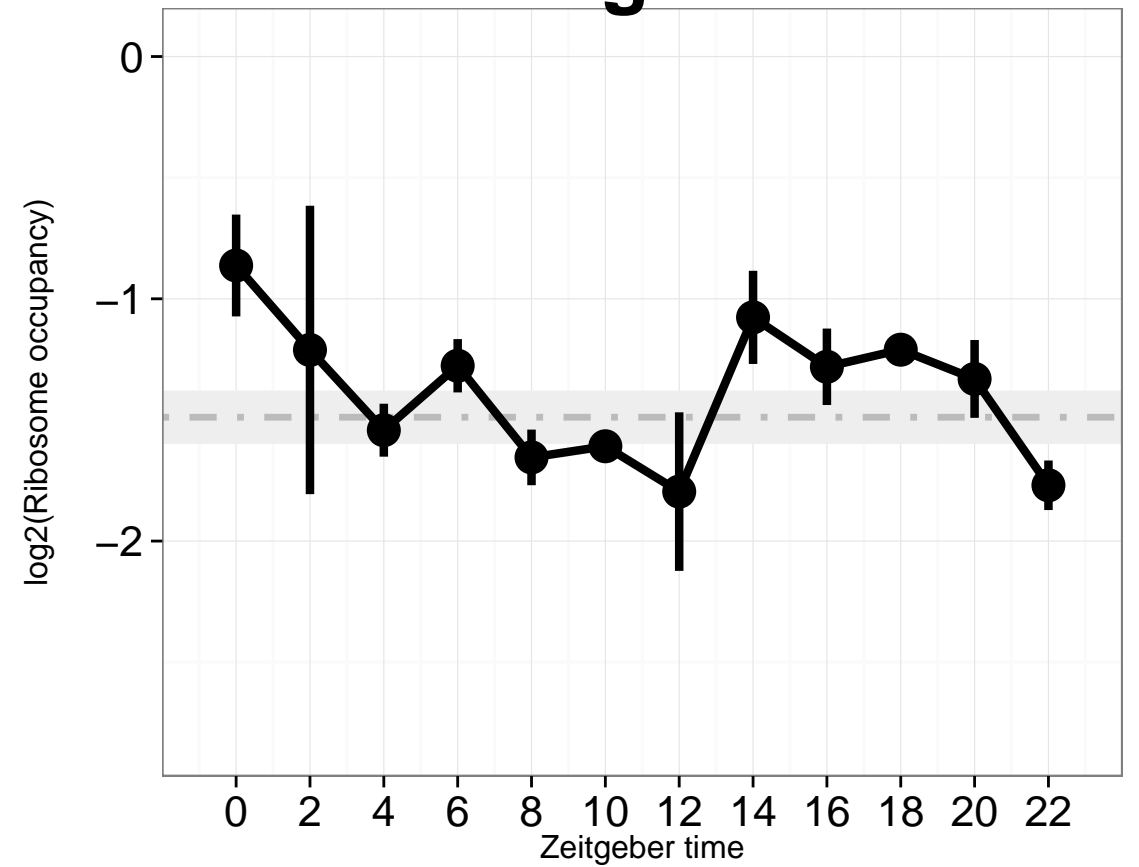

Supplement: SuppDataset_1.zip [file Pgs1_set_A.pdf › Supplemental Dataset 1/A-mRNA_nonrhyth_translation_nonrhyth/Pgs1_set_A.pdf]

## Phactr2

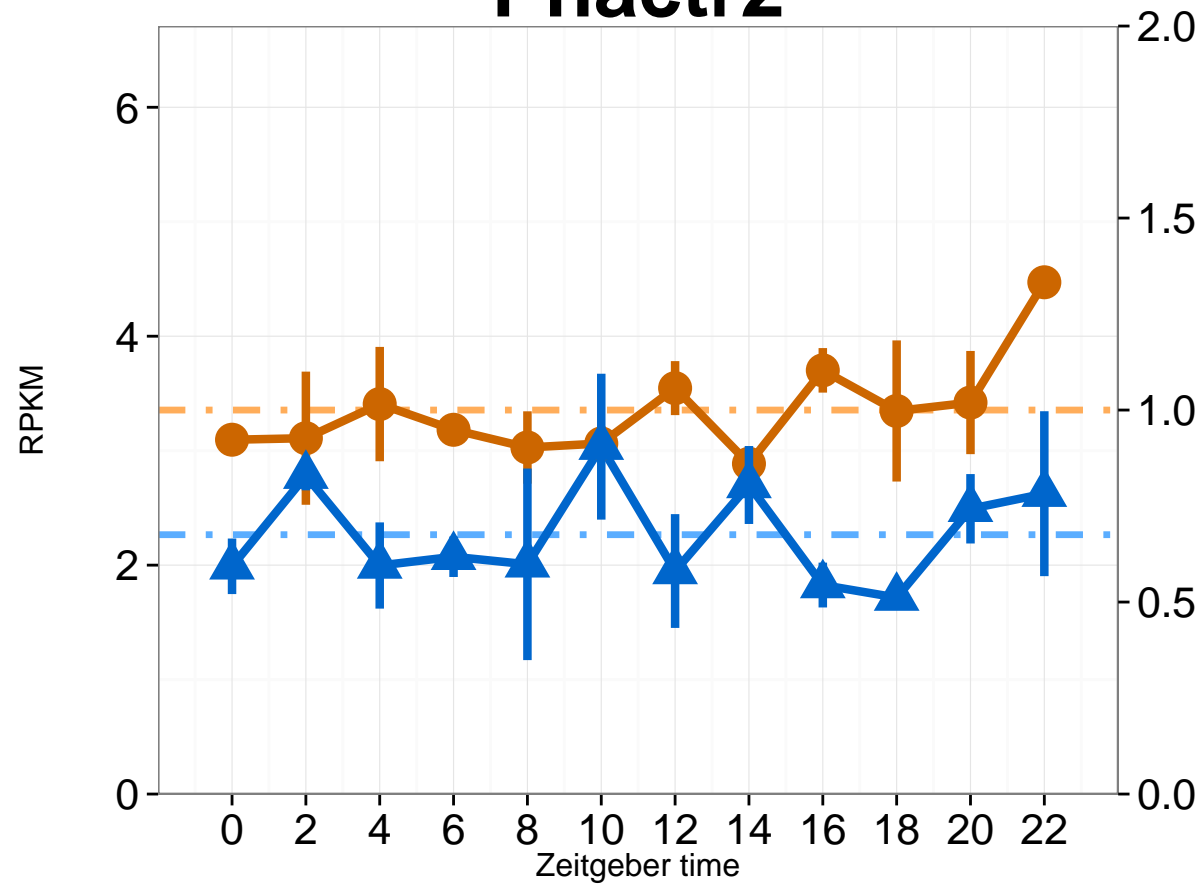

## Phactr2

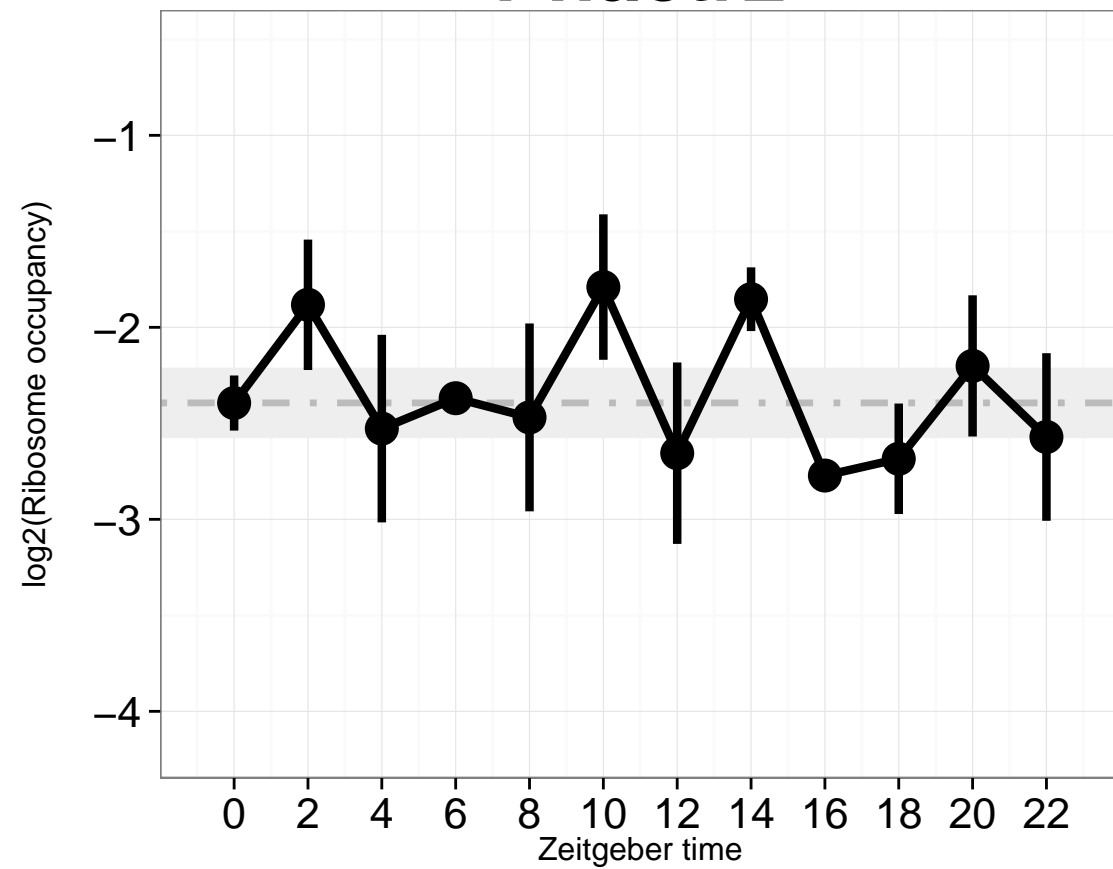

Supplement: SuppDataset_1.zip [file Phactr2_set_A.pdf › Supplemental Dataset 1/A-mRNA_nonrhyth_translation_nonrhyth/Phactr2_set_A.pdf]

## Phactr4

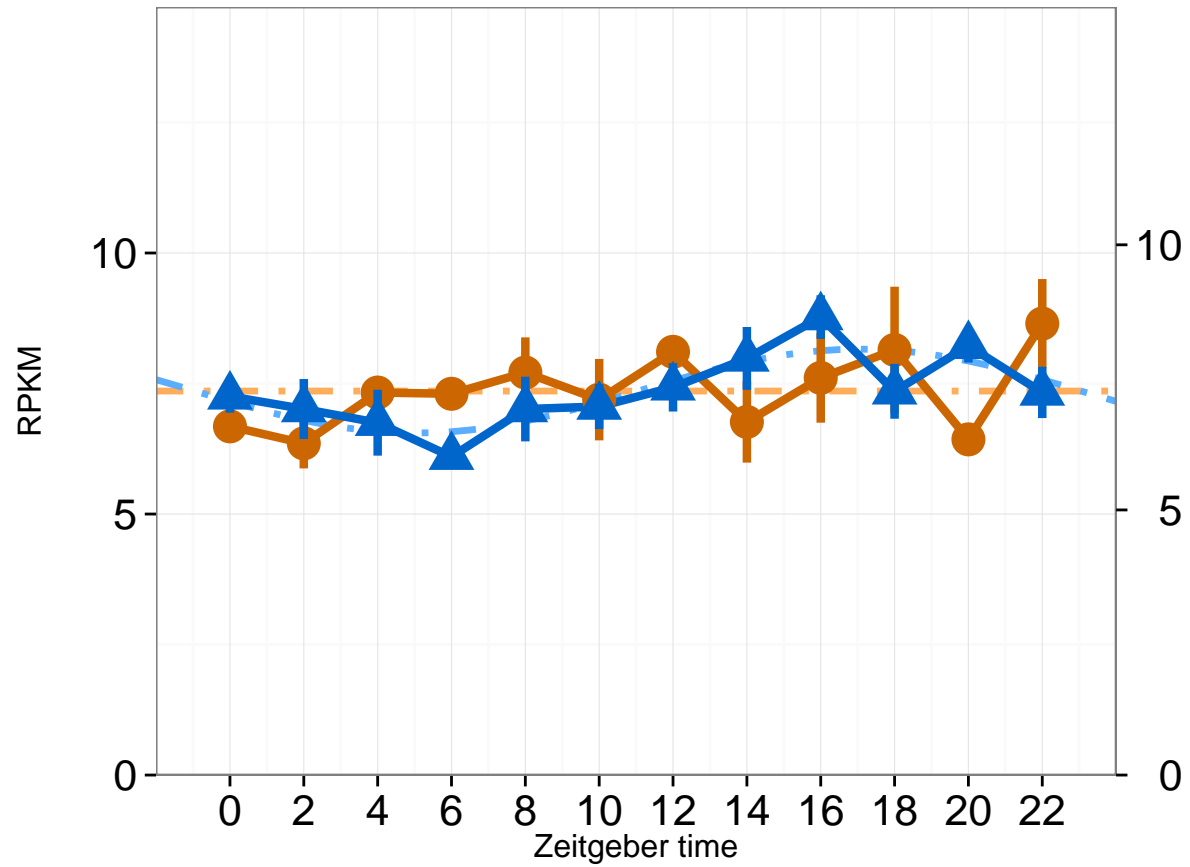

## Phactr4

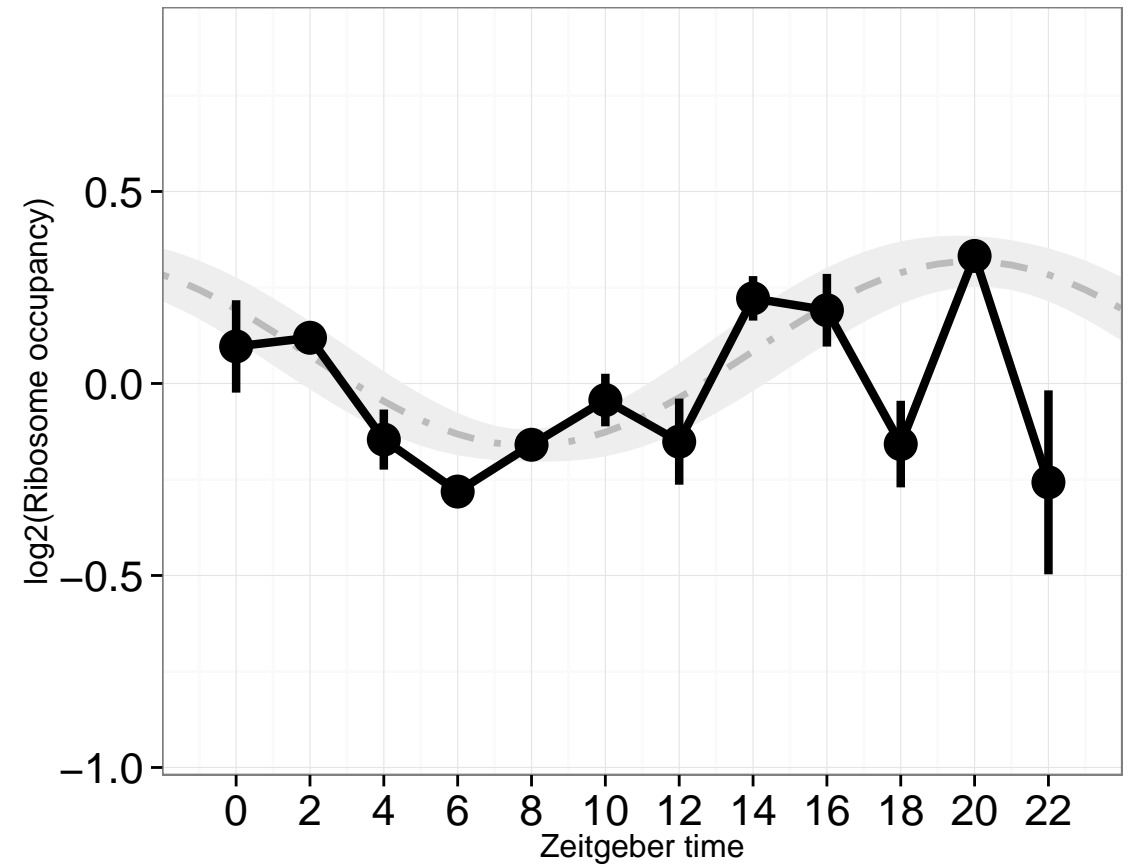

Supplement: SuppDataset_1.zip [file Phactr4_set_A.pdf › Supplemental Dataset 1/A-mRNA_nonrhyth_translation_nonrhyth/Phactr4_set_A.pdf]

## Phax

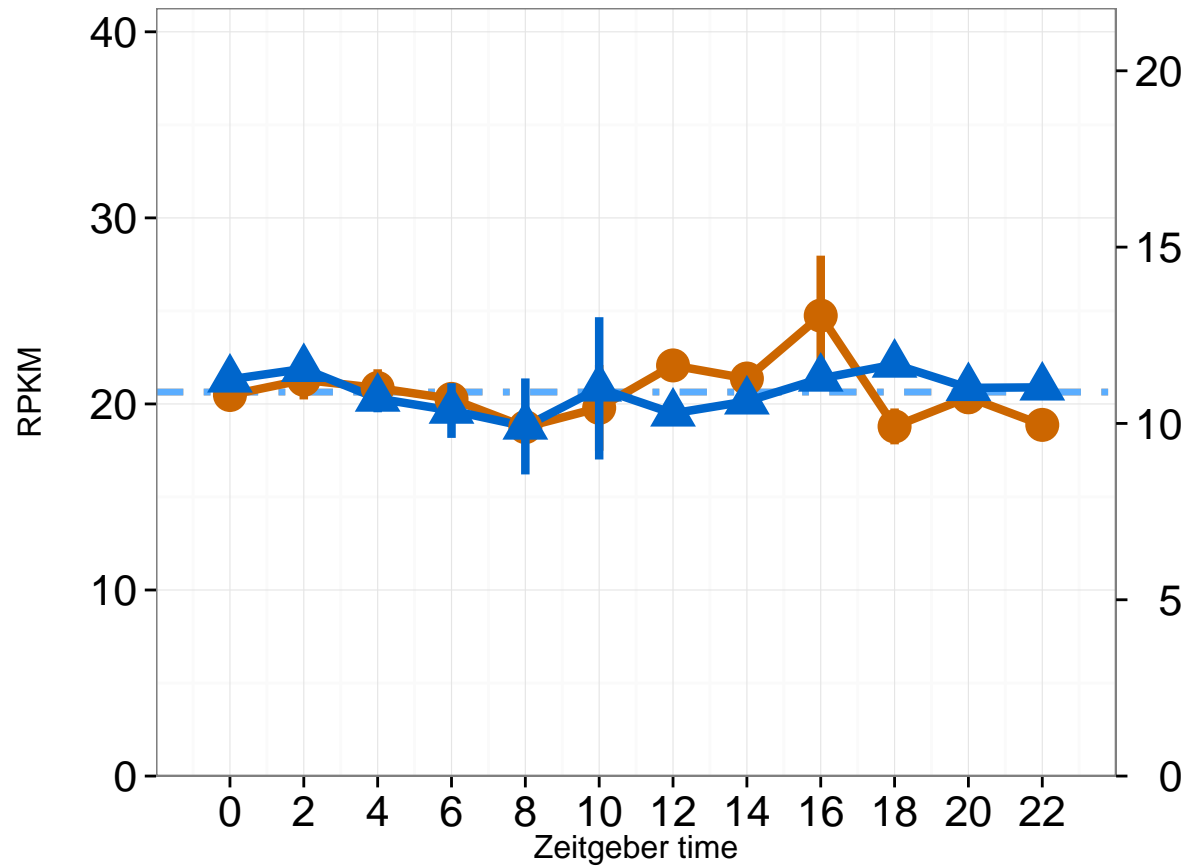

## Phax

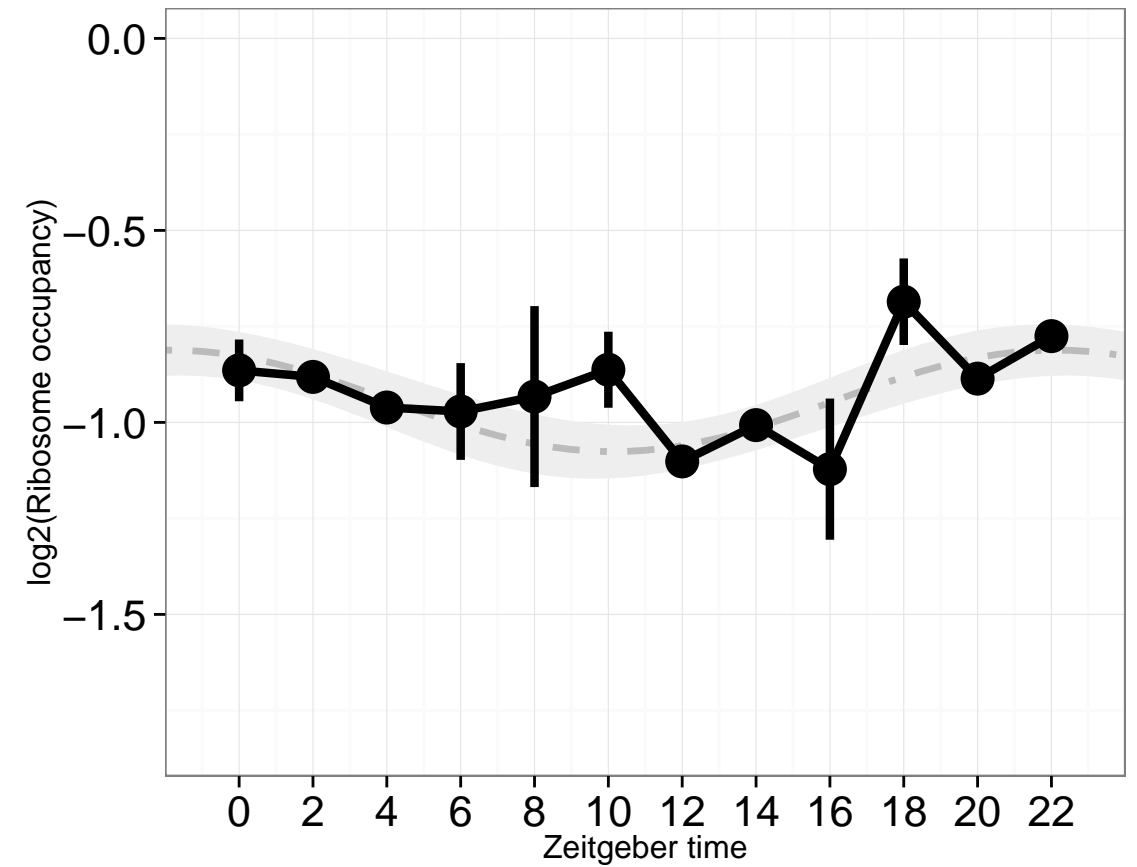

Supplement: SuppDataset_1.zip [file Phax_set_A.pdf › Supplemental Dataset 1/A-mRNA_nonrhyth_translation_nonrhyth/Phax_set_A.pdf]

## Phb2

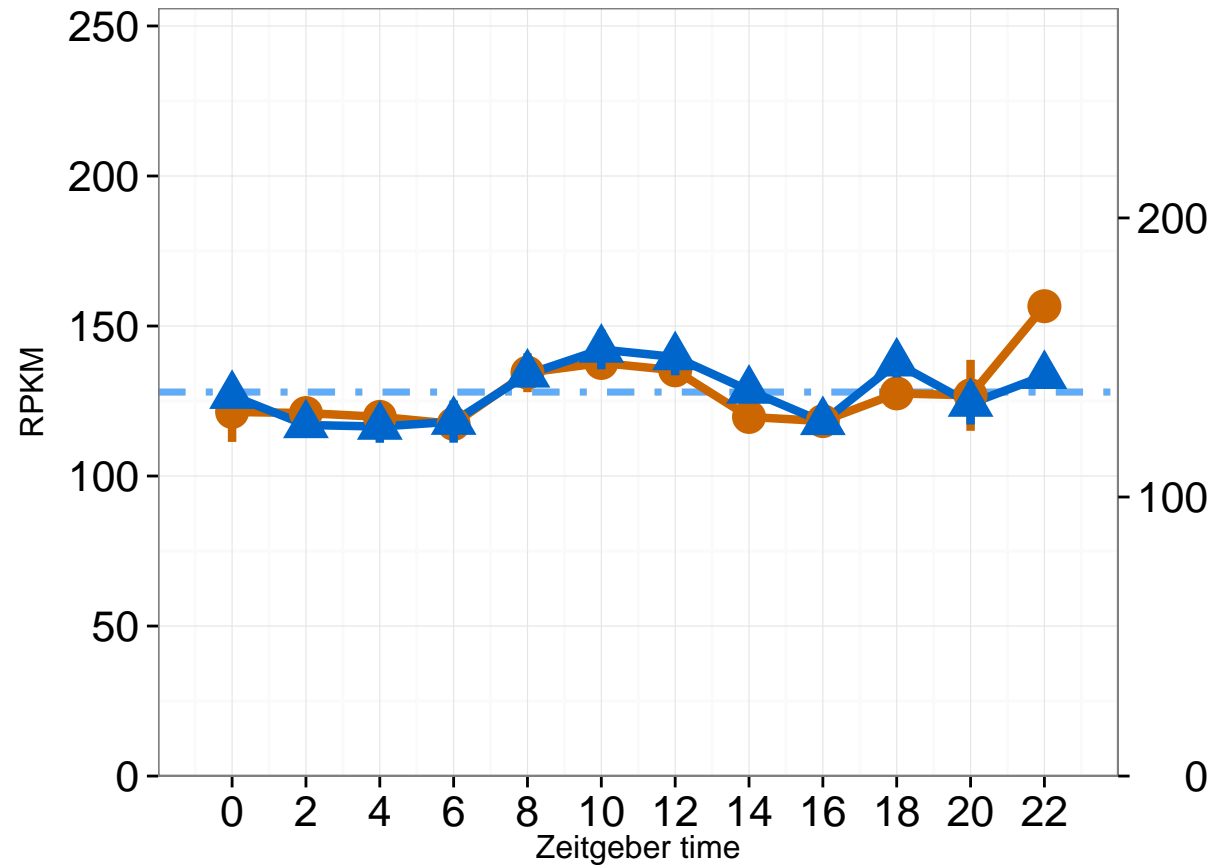

## Phb2

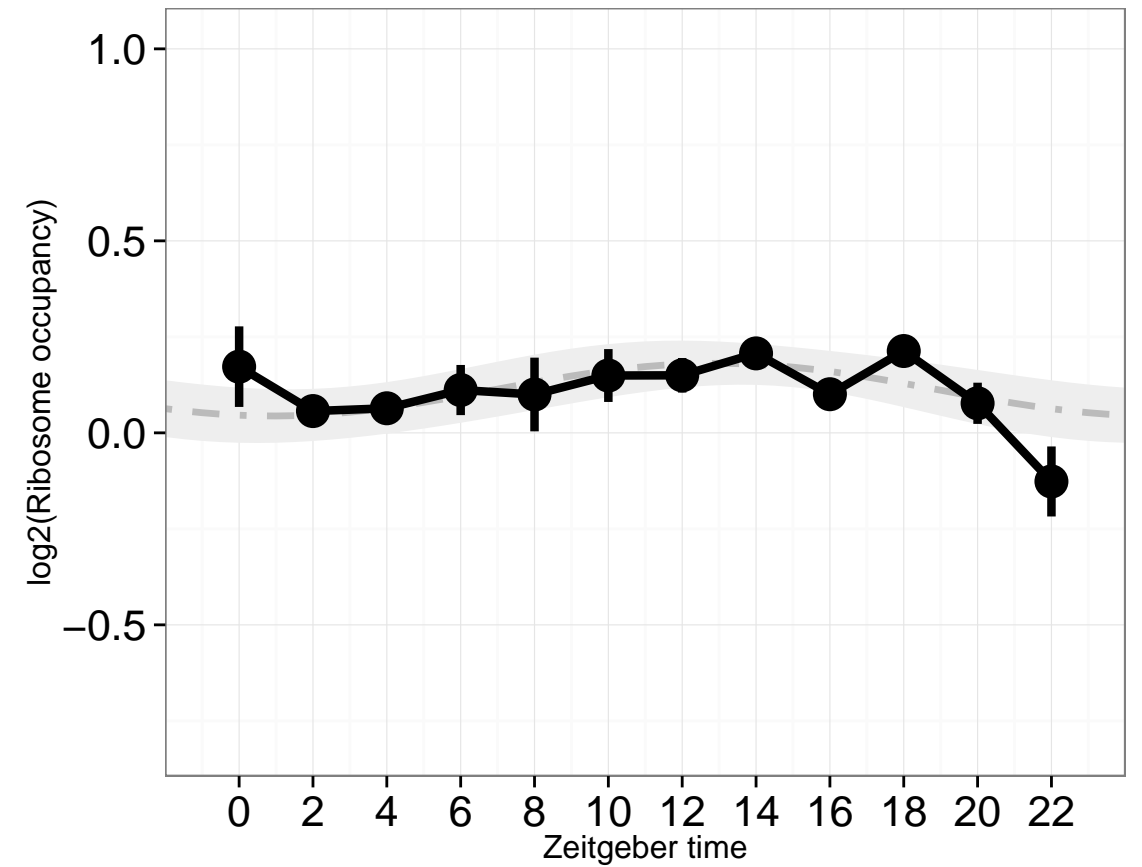

Supplement: SuppDataset_1.zip [file Phb2_set_A.pdf › Supplemental Dataset 1/A-mRNA_nonrhyth_translation_nonrhyth/Phb2_set_A.pdf]

## Phb

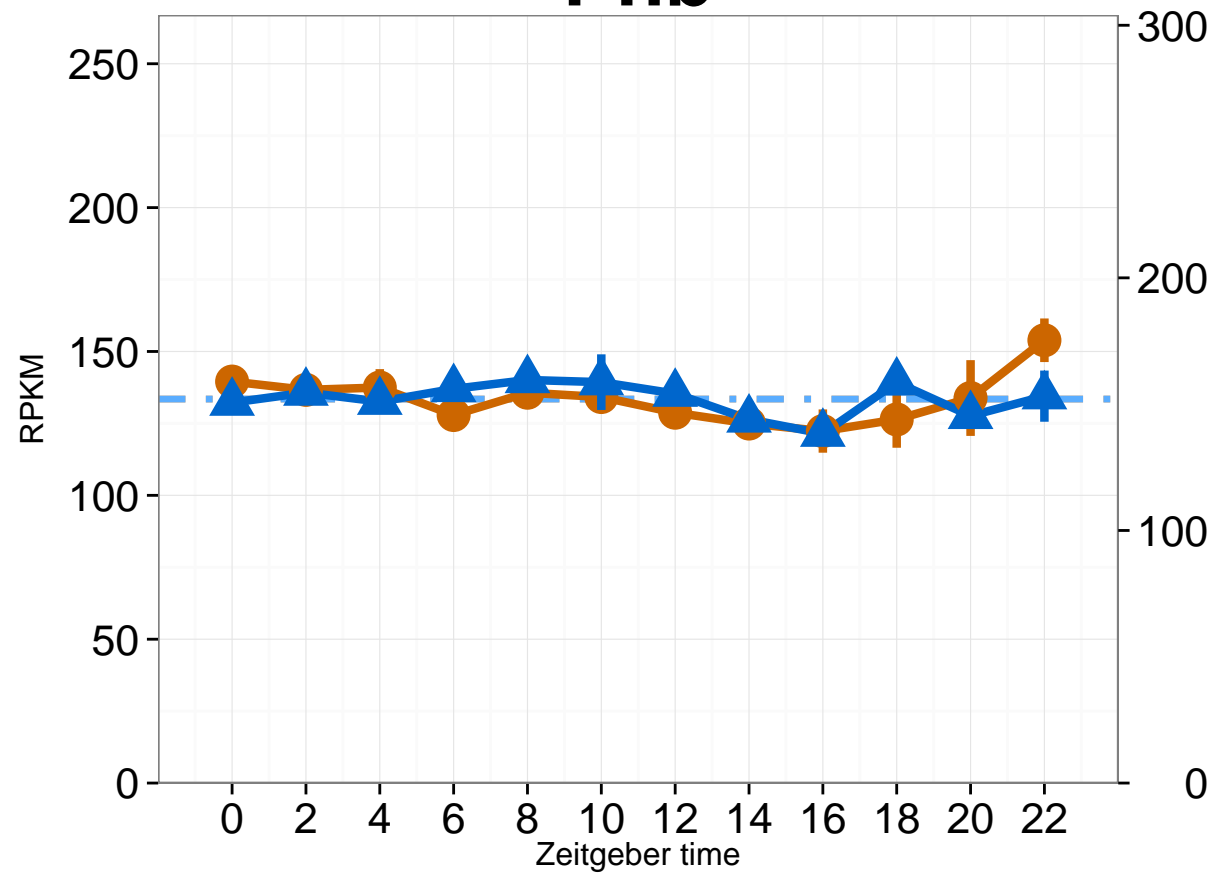

## Phb

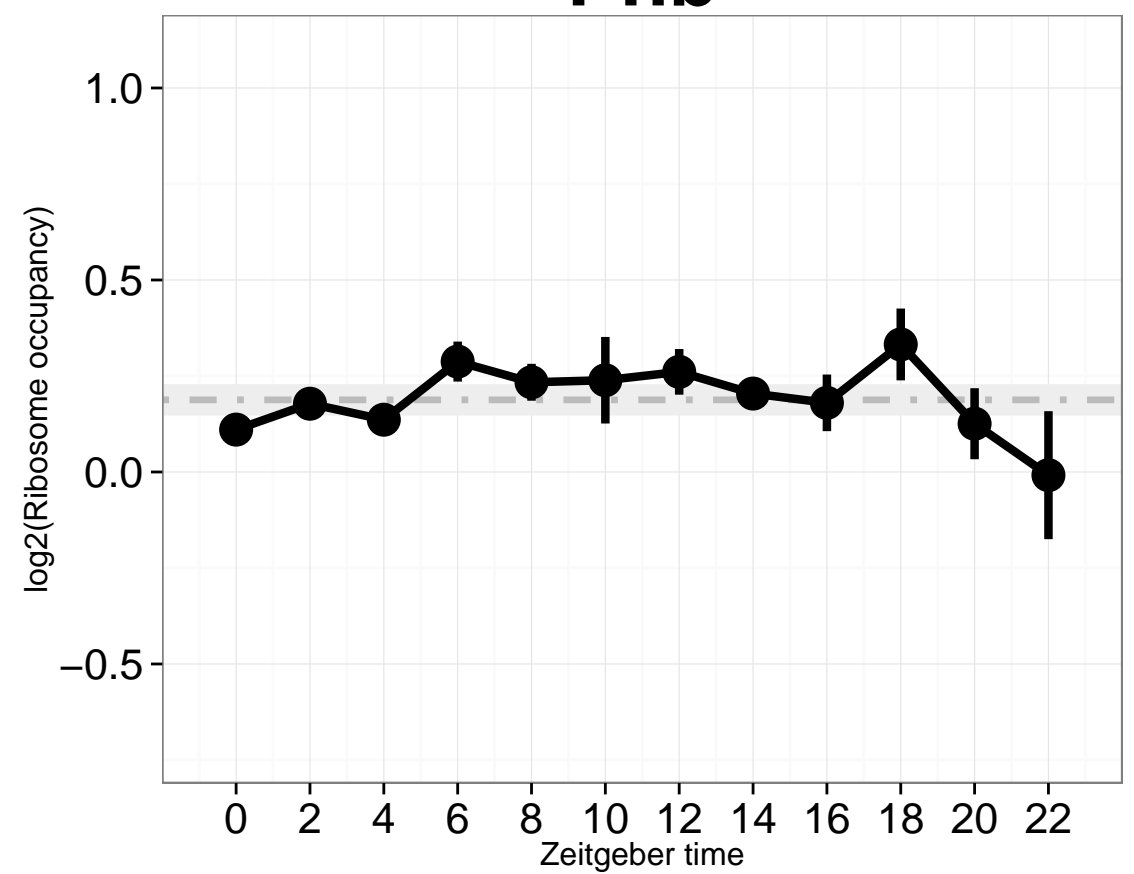

Supplement: SuppDataset_1.zip [file Phb_set_A.pdf › Supplemental Dataset 1/A-mRNA_nonrhyth_translation_nonrhyth/Phb_set_A.pdf]

## Phc2

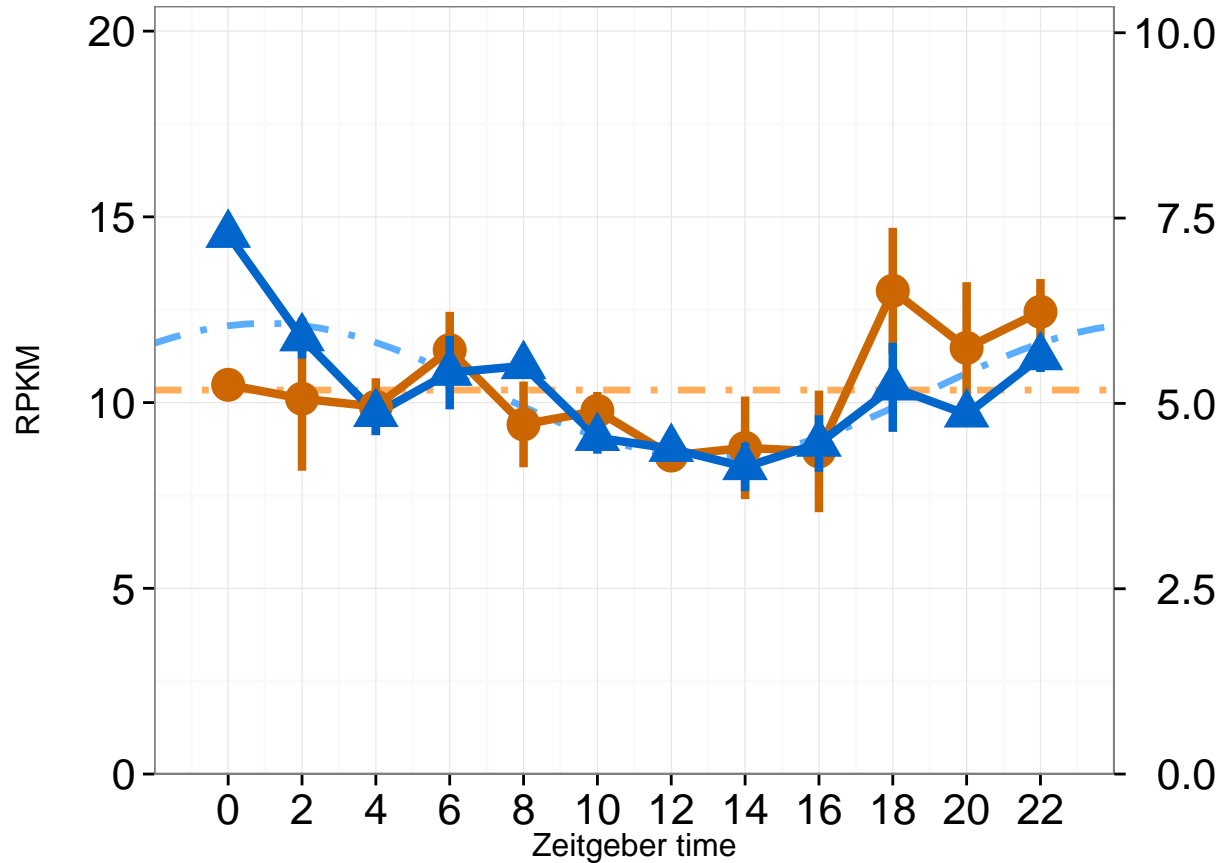

## Phc2

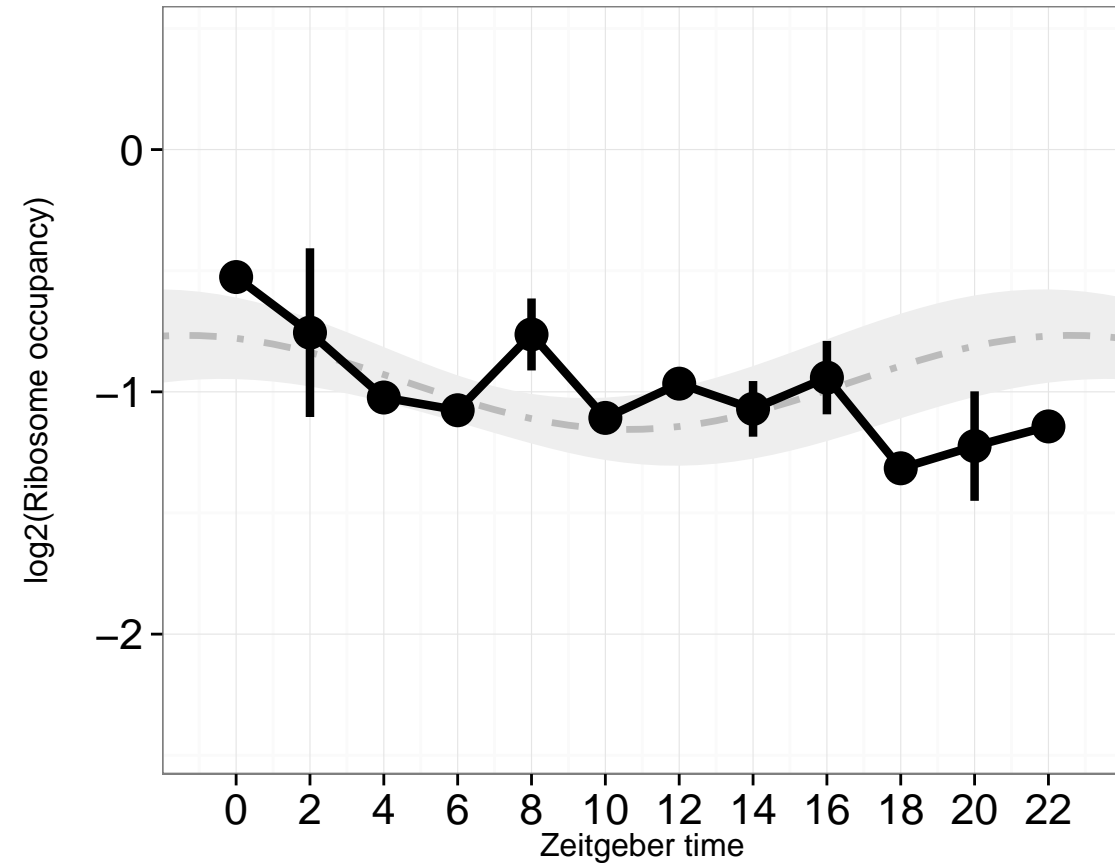

Supplement: SuppDataset_1.zip [file Phc2_set_A.pdf › Supplemental Dataset 1/A-mRNA_nonrhyth_translation_nonrhyth/Phc2_set_A.pdf]

## Phc3

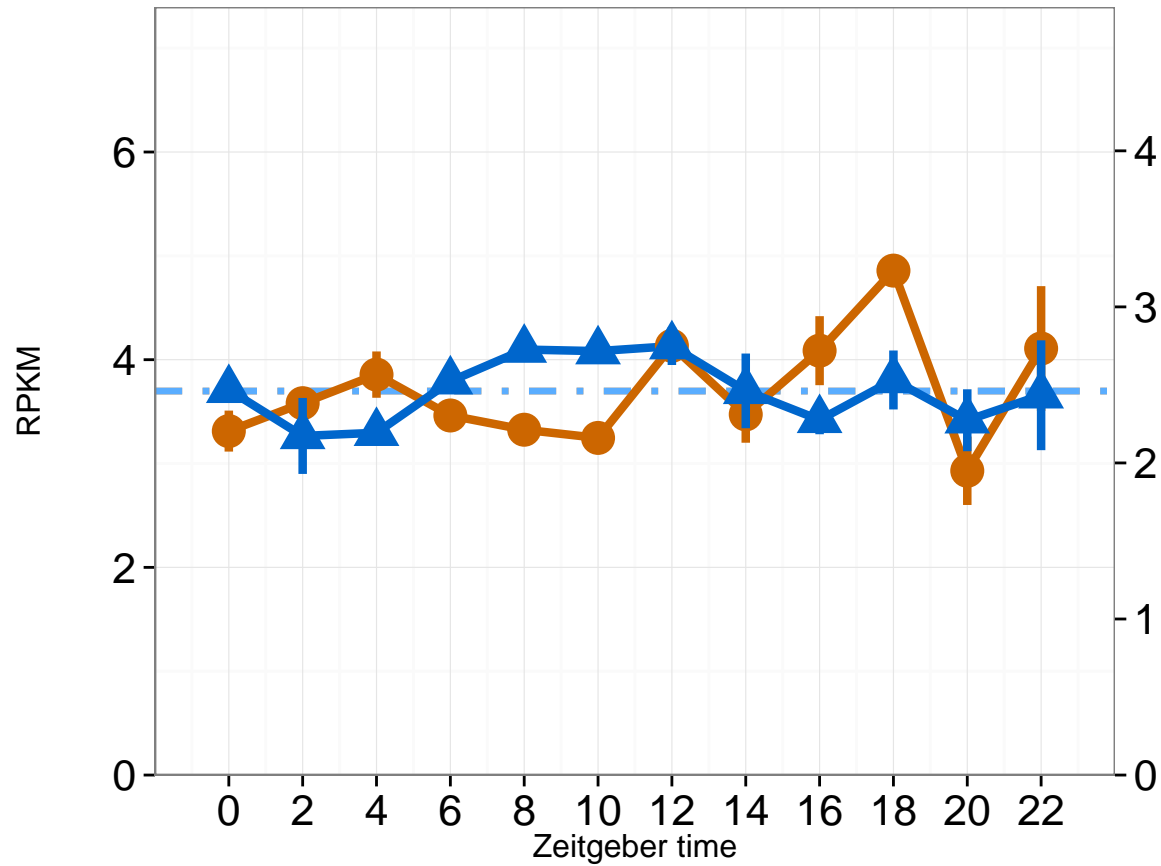

## Phc3

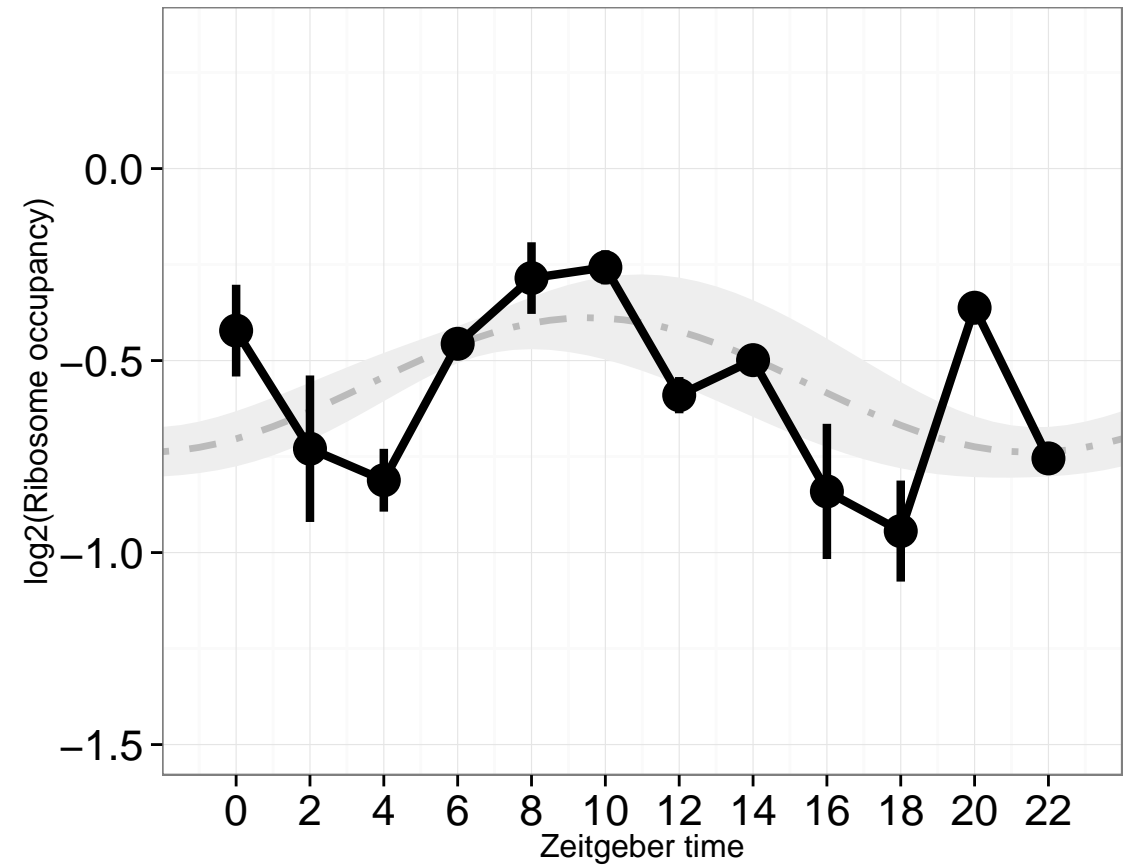

Supplement: SuppDataset_1.zip [file Phc3_set_A.pdf › Supplemental Dataset 1/A-mRNA_nonrhyth_translation_nonrhyth/Phc3_set_A.pdf]

## Phf10

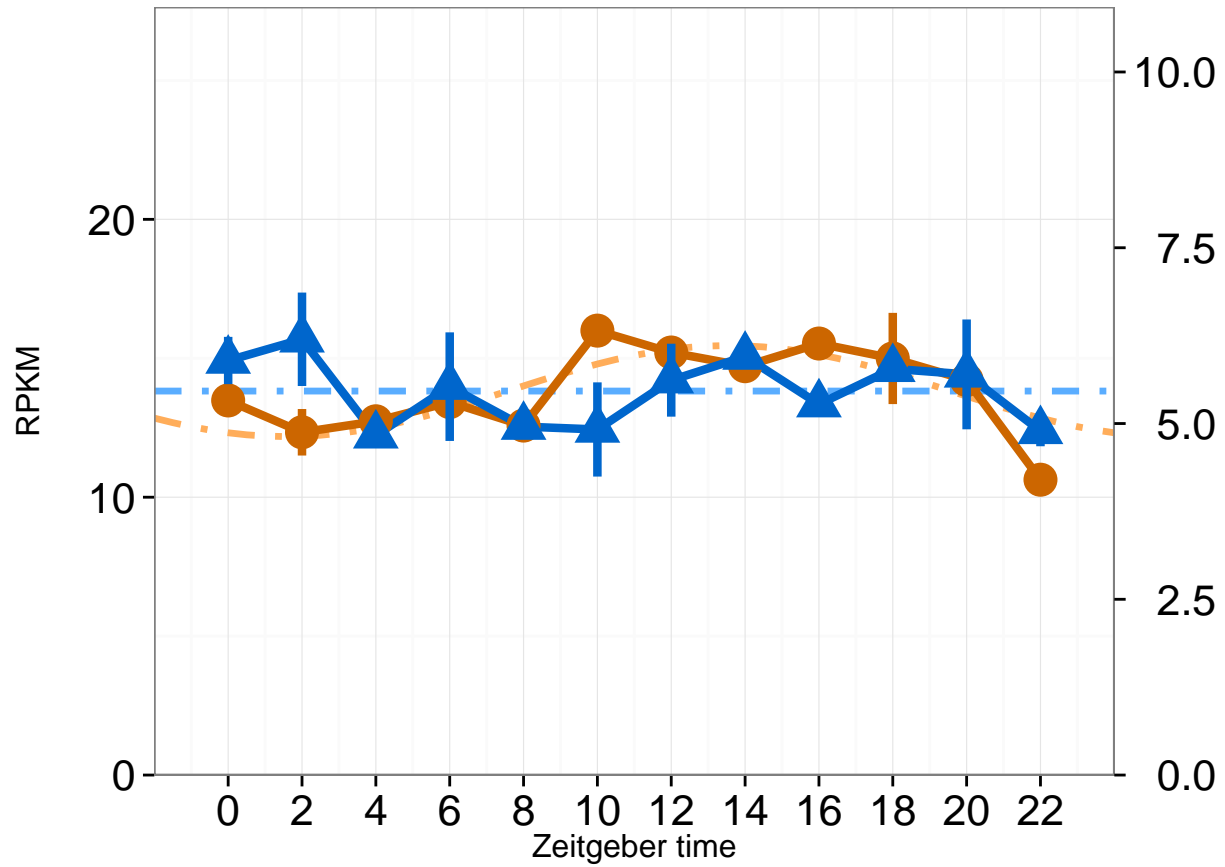

## Phf10

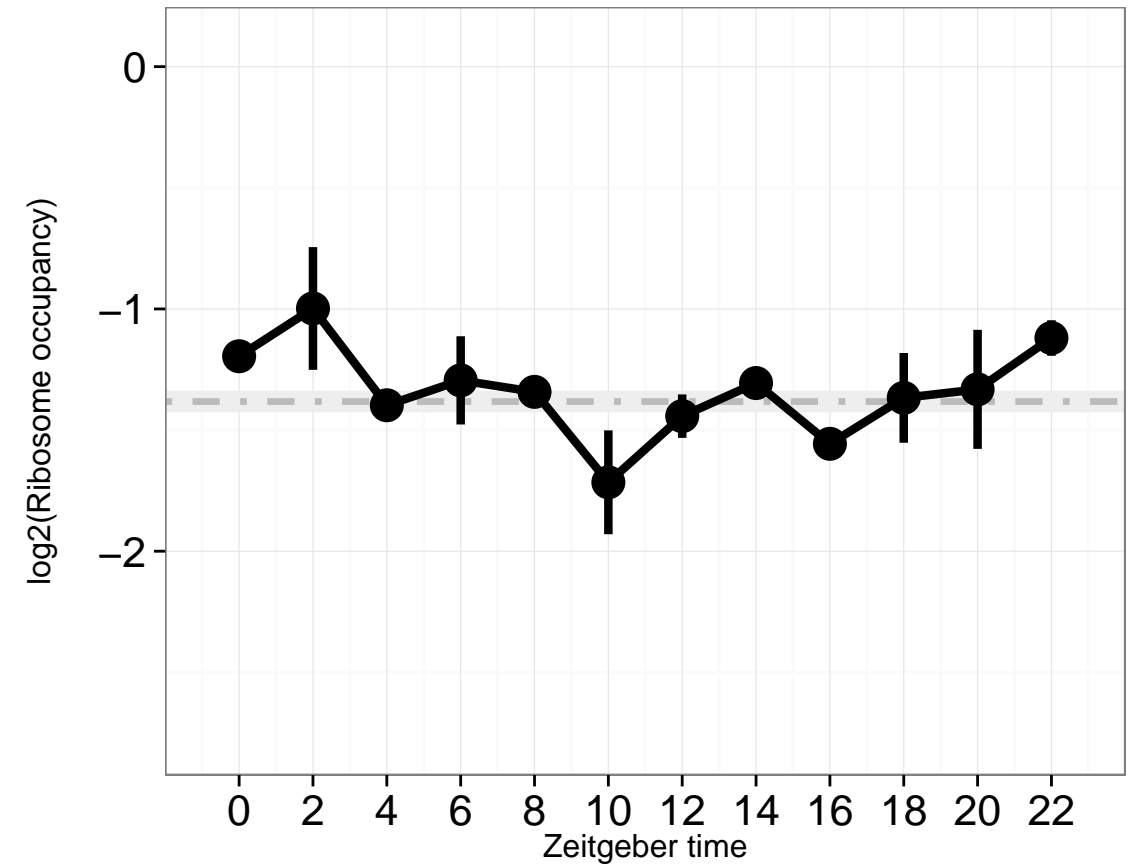

Supplement: SuppDataset_1.zip [file Phf10_set_A.pdf › Supplemental Dataset 1/A-mRNA_nonrhyth_translation_nonrhyth/Phf10_set_A.pdf]

**Phf11a TR**

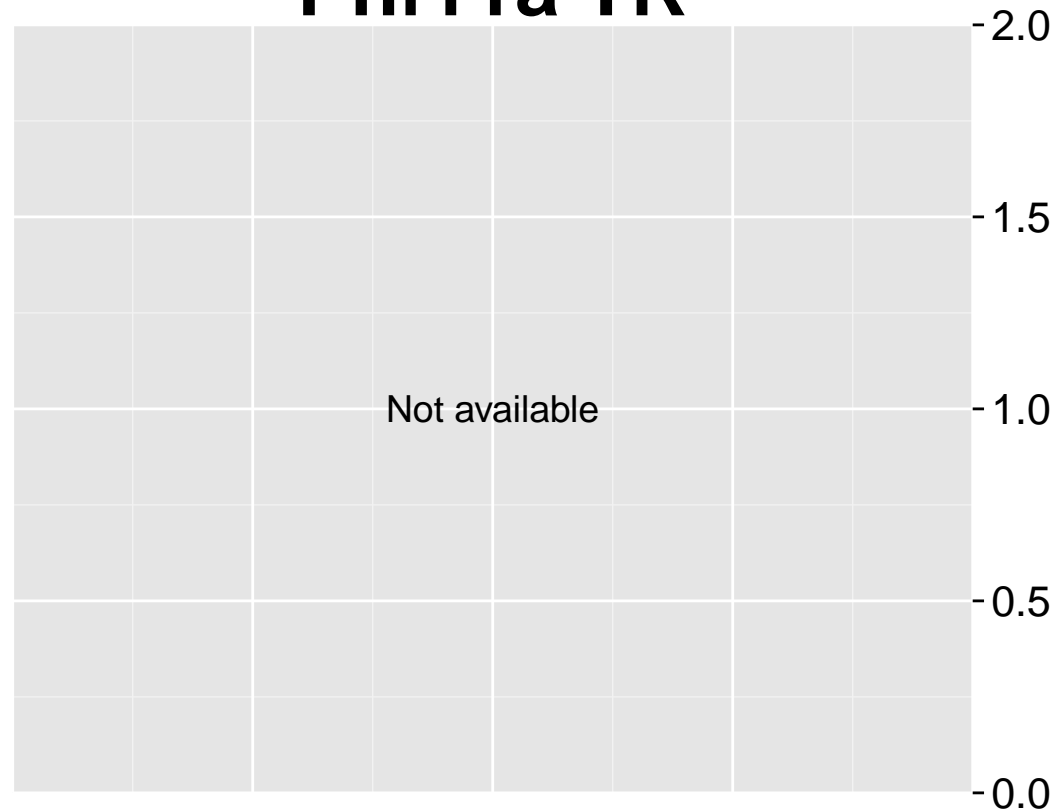

**Phf11a log2(Ribosome occupancy**

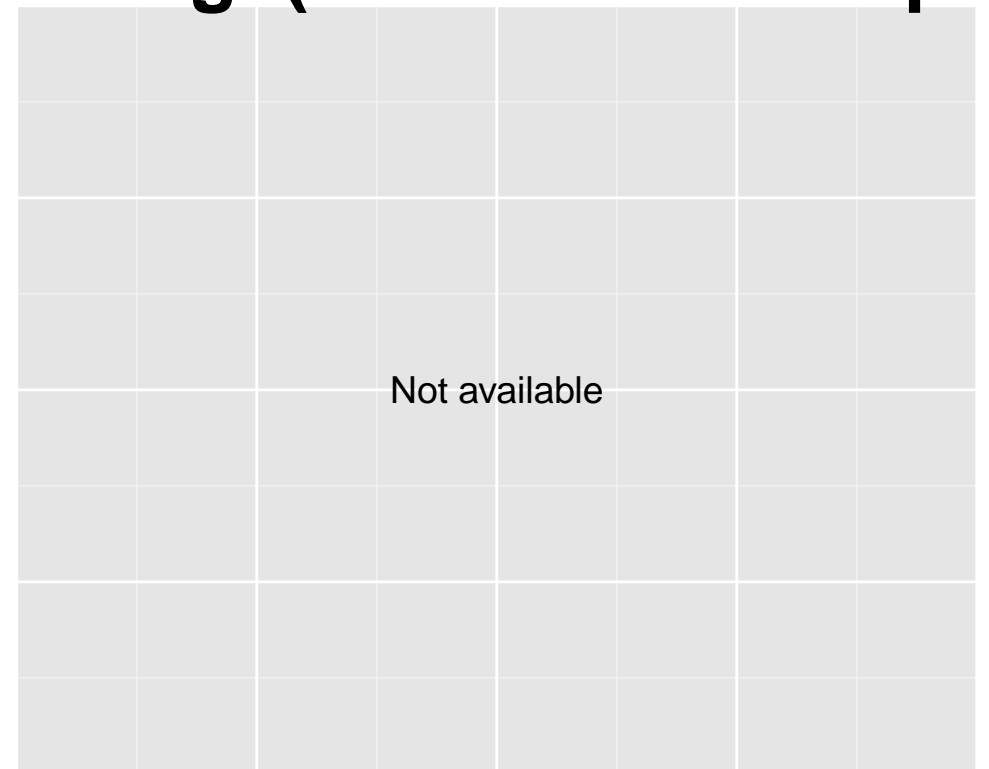

Supplement: SuppDataset_1.zip [file Phf11a_set_A.pdf › Supplemental Dataset 1/A-mRNA_nonrhyth_translation_nonrhyth/Phf11a_set_A.pdf]

# Phf12

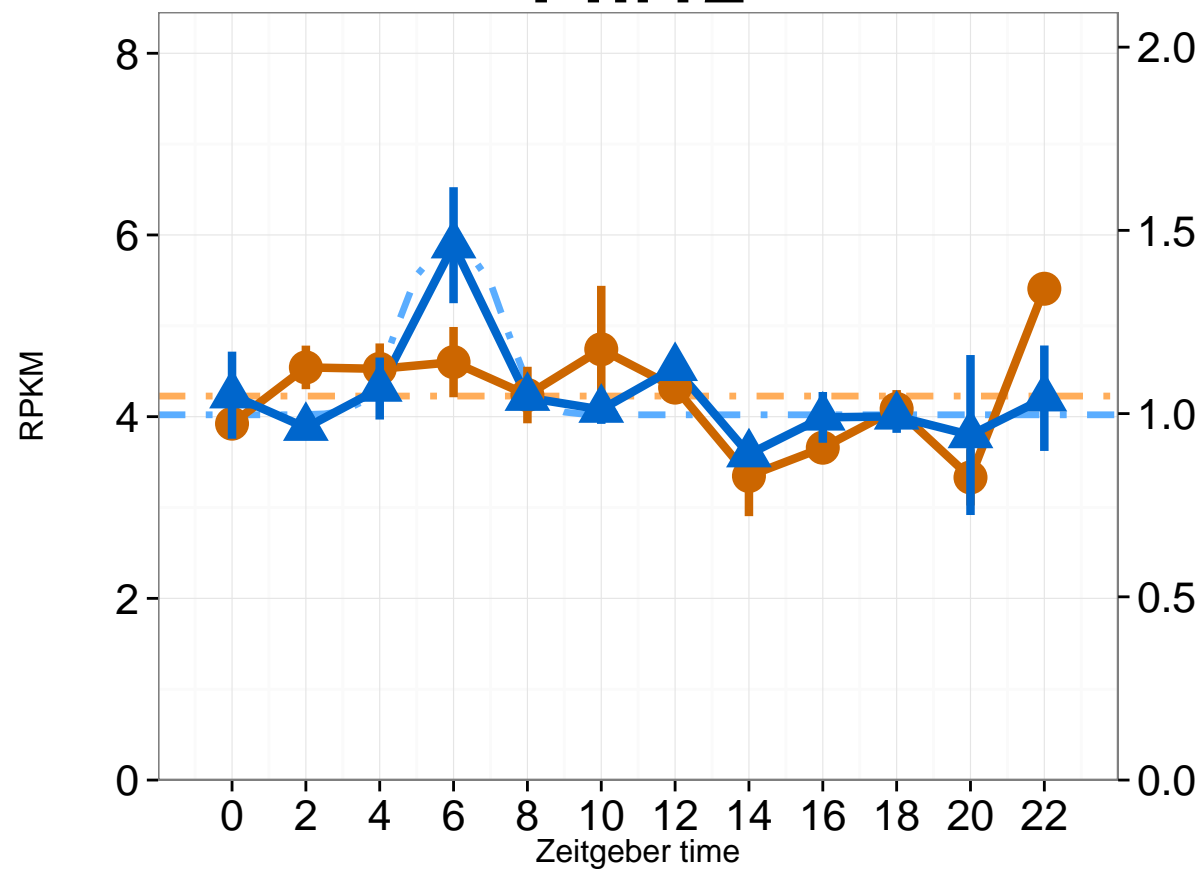

# Phf12

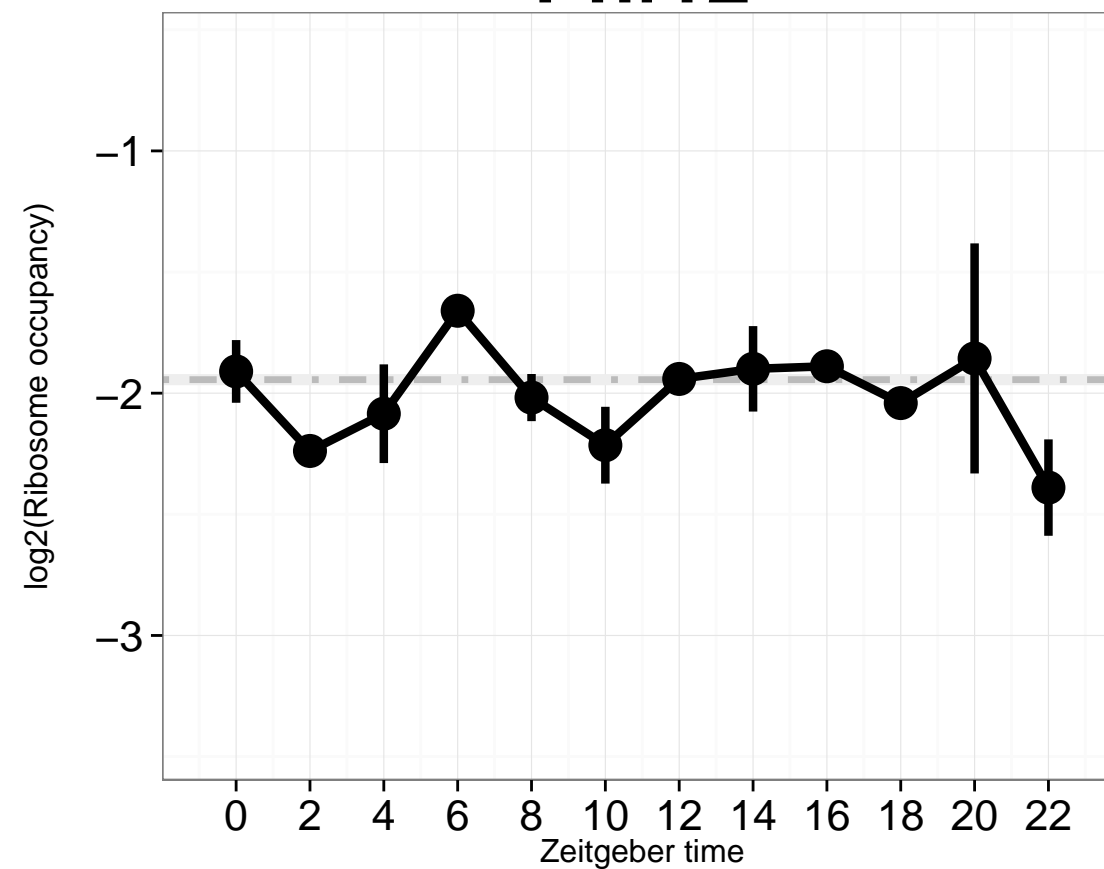

Supplement: SuppDataset_1.zip [file Phf12_set_A.pdf › Supplemental Dataset 1/A-mRNA_nonrhyth_translation_nonrhyth/Phf12_set_A.pdf]

# Phf13

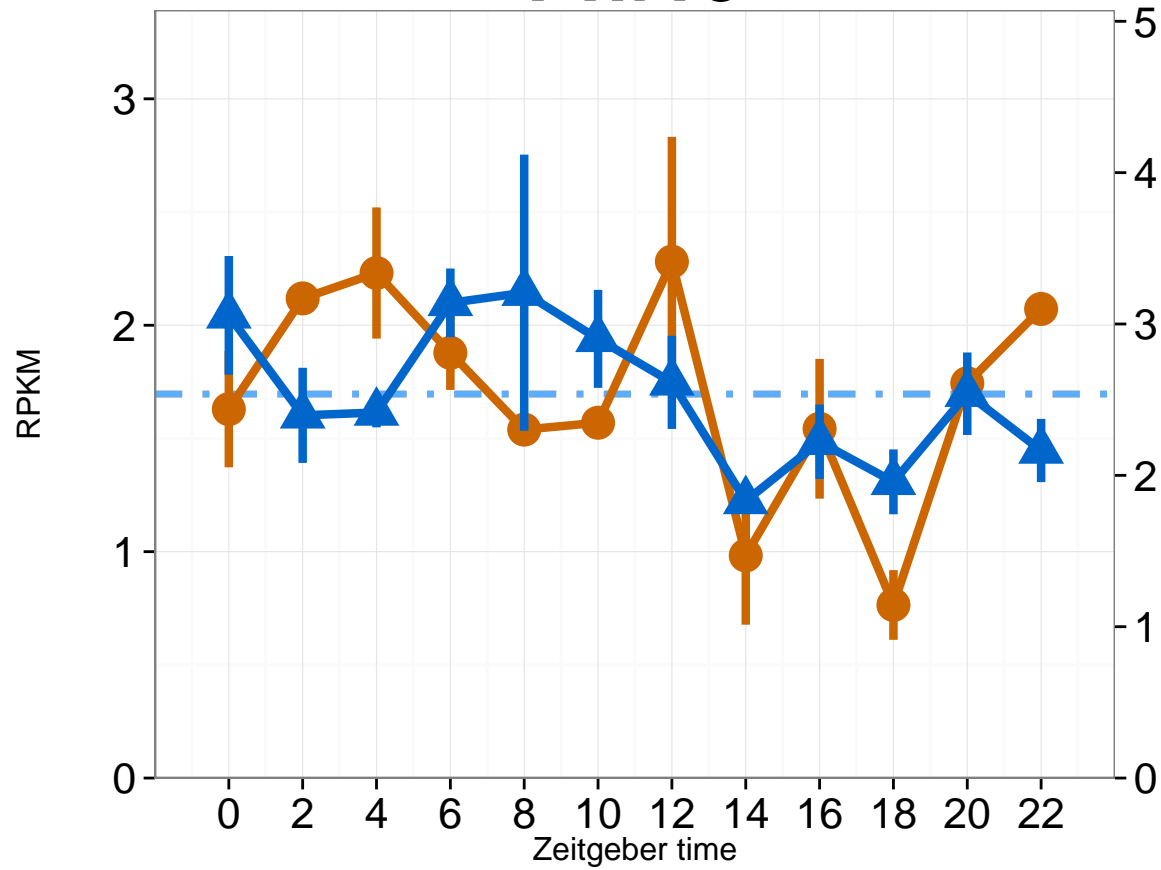

# Phf13

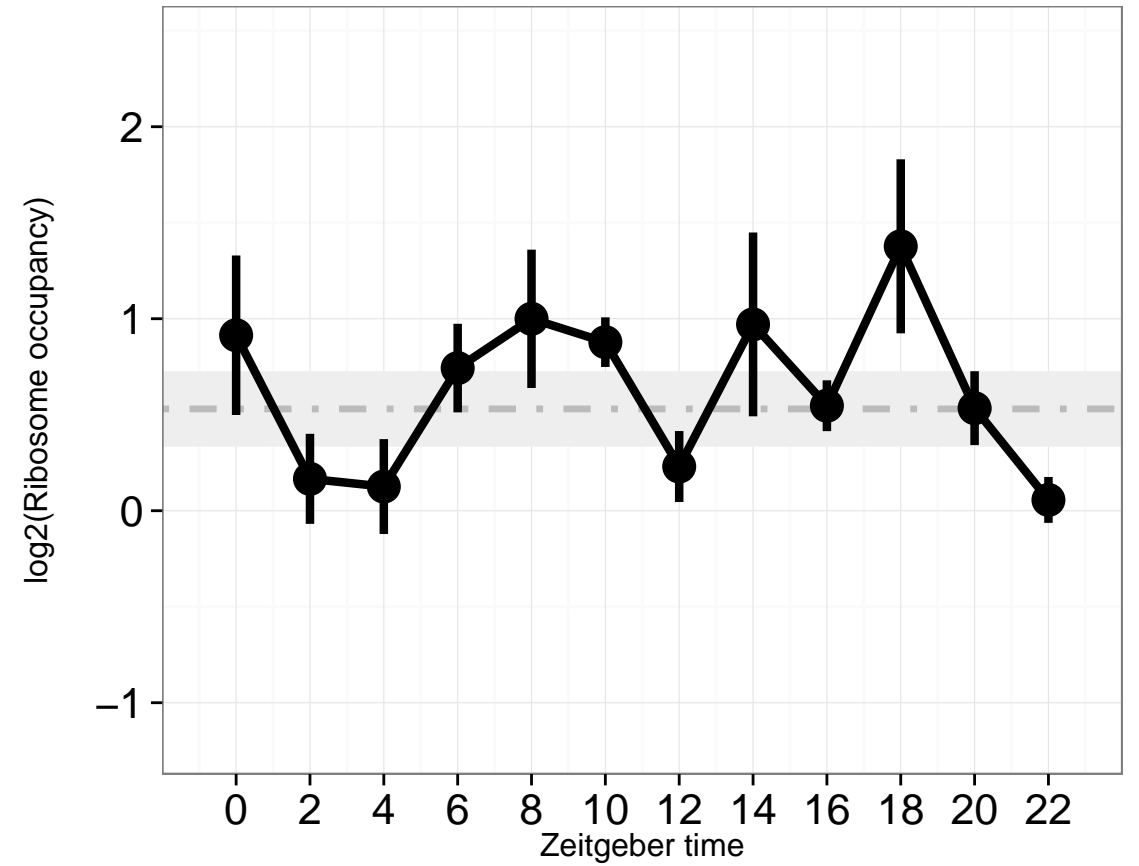

Supplement: SuppDataset_1.zip [file Phf13_set_A.pdf › Supplemental Dataset 1/A-mRNA_nonrhyth_translation_nonrhyth/Phf13_set_A.pdf]

## Phf15

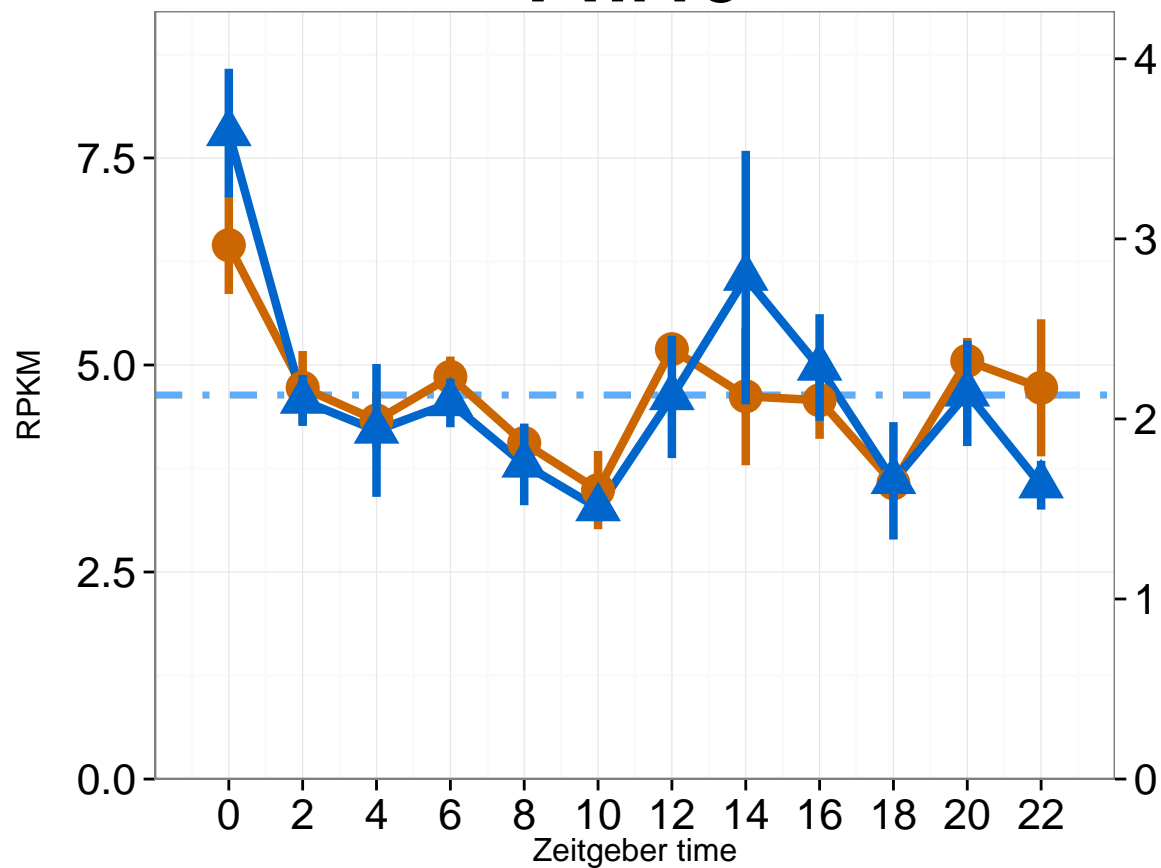

## Phf15

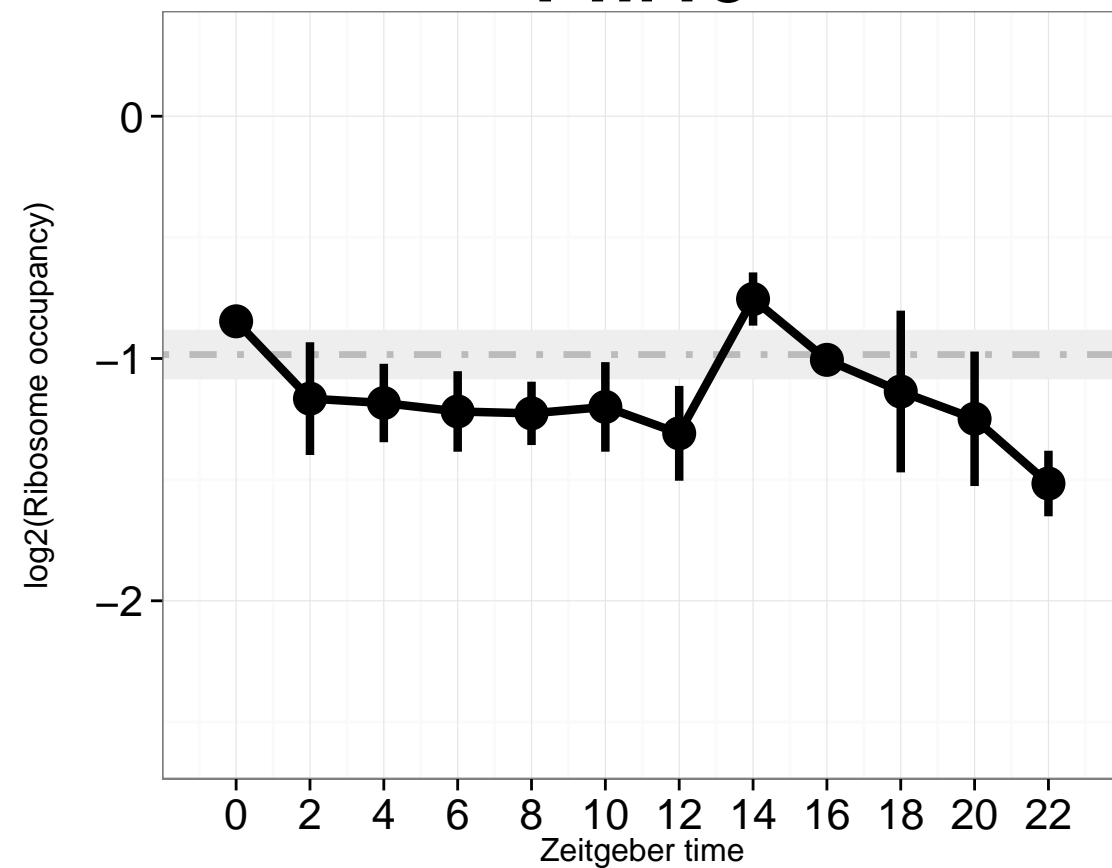

Supplement: SuppDataset_1.zip [file Phf15_set_A.pdf › Supplemental Dataset 1/A-mRNA_nonrhyth_translation_nonrhyth/Phf15_set_A.pdf]

# Phf16

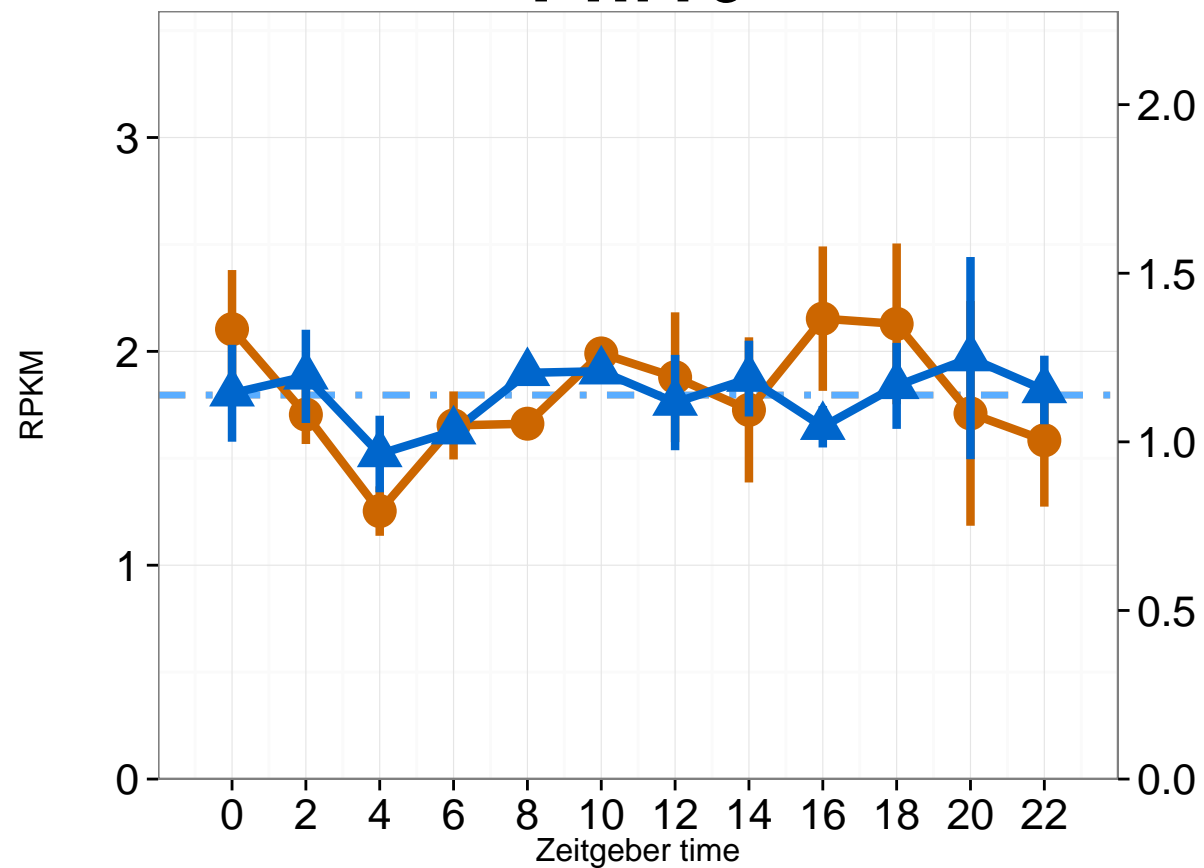

# Phf16

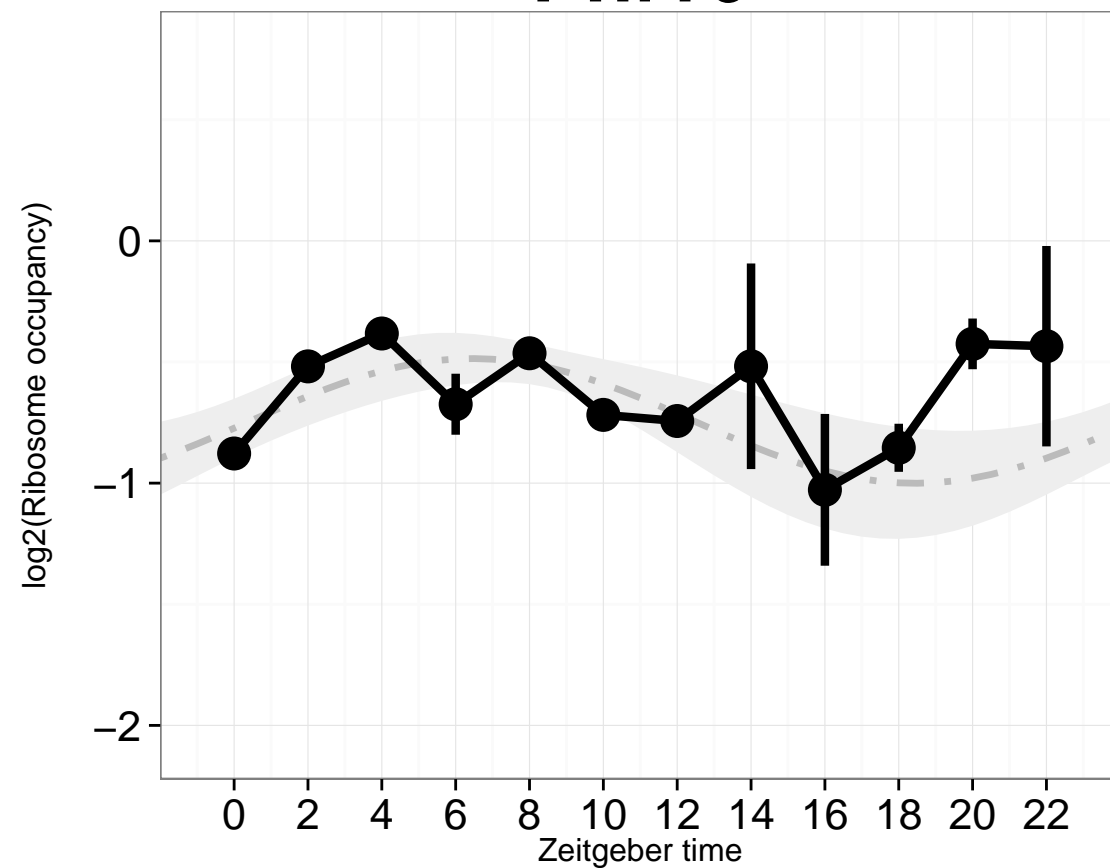

Supplement: SuppDataset_1.zip [file Phf16_set_A.pdf › Supplemental Dataset 1/A-mRNA_nonrhyth_translation_nonrhyth/Phf16_set_A.pdf]

## Phf1

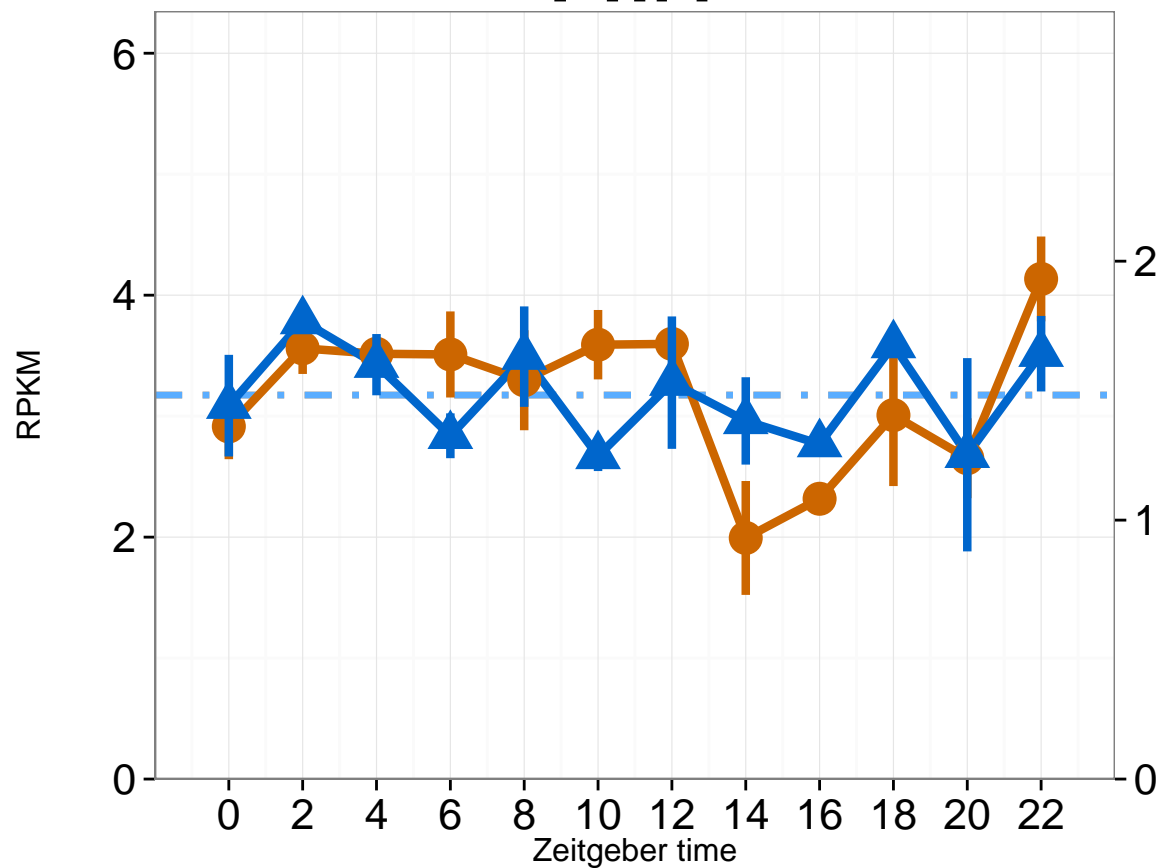

## Phf1

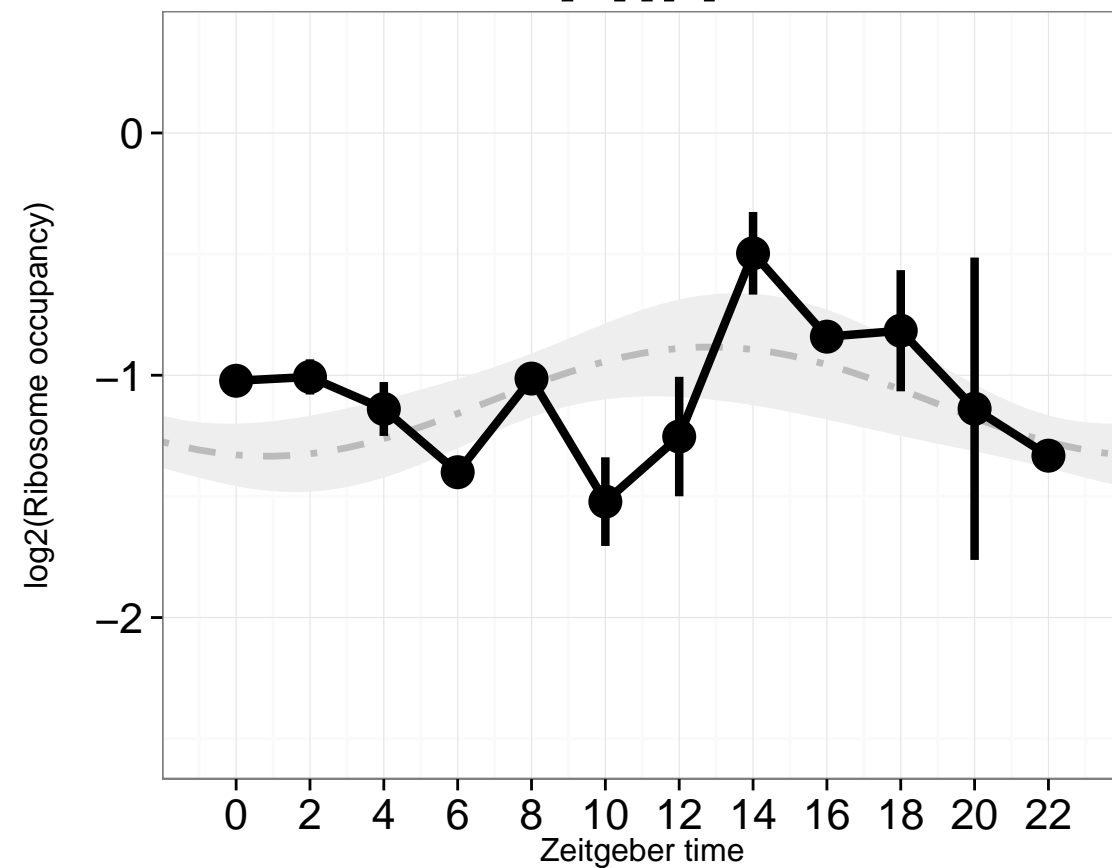

Supplement: SuppDataset_1.zip [file Phf1_set_A.pdf › Supplemental Dataset 1/A-mRNA_nonrhyth_translation_nonrhyth/Phf1_set_A.pdf]

## Phf20l1

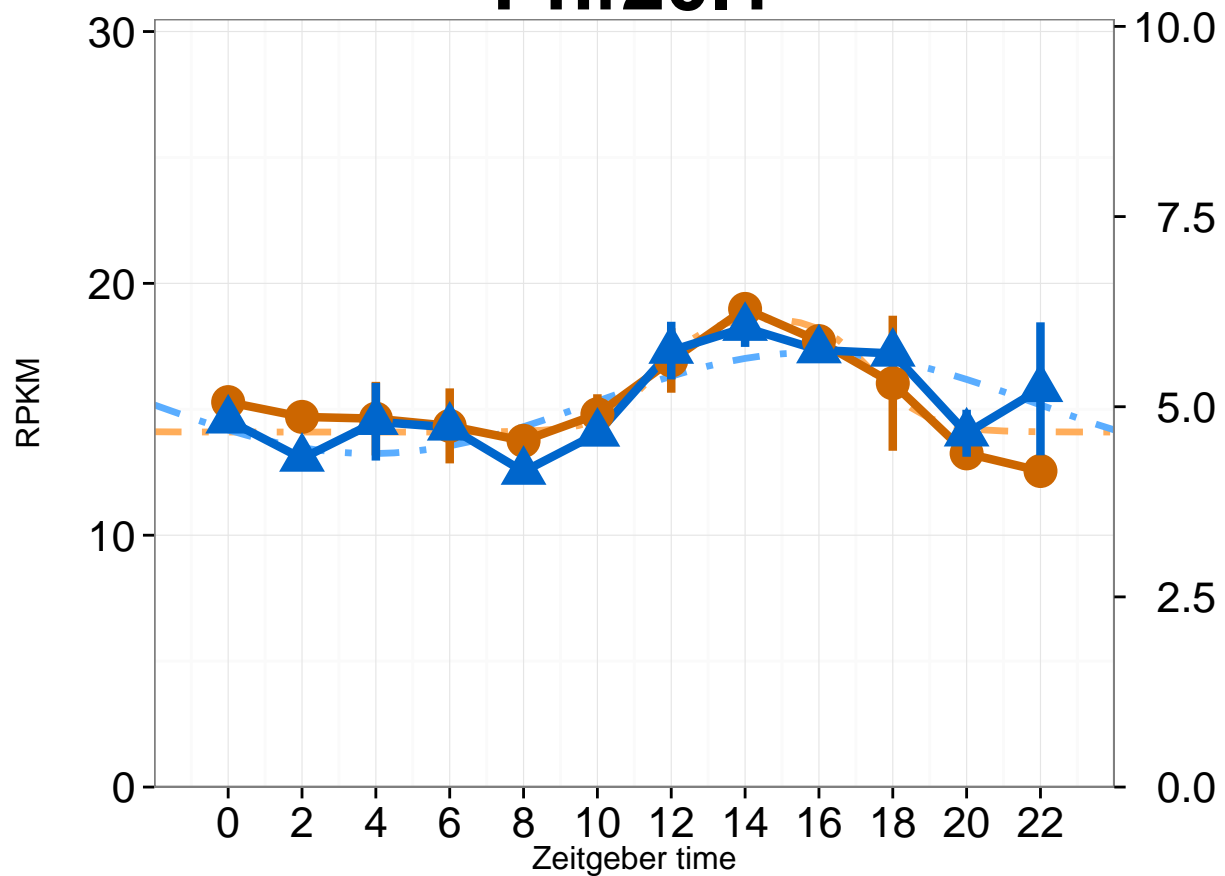

## Phf20l1

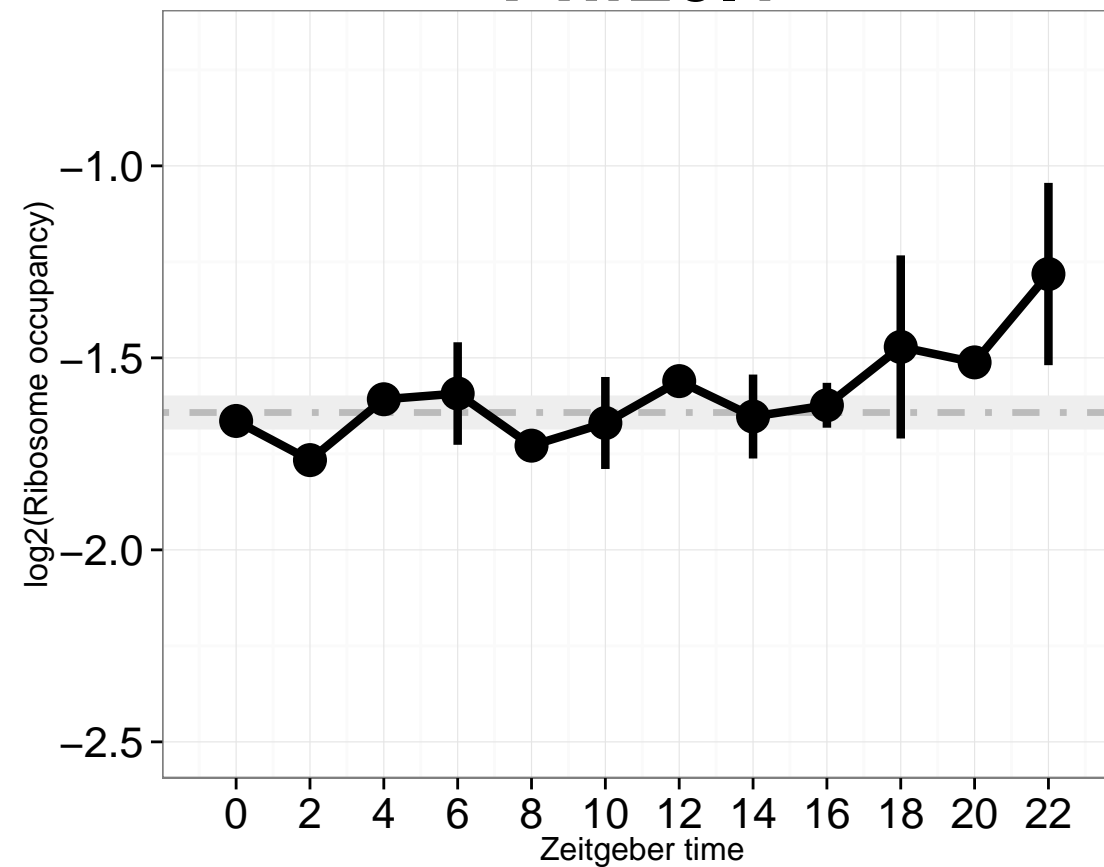

Supplement: SuppDataset_1.zip [file Phf20l1_set_A.pdf › Supplemental Dataset 1/A-mRNA_nonrhyth_translation_nonrhyth/Phf20l1_set_A.pdf]

# Phf21a

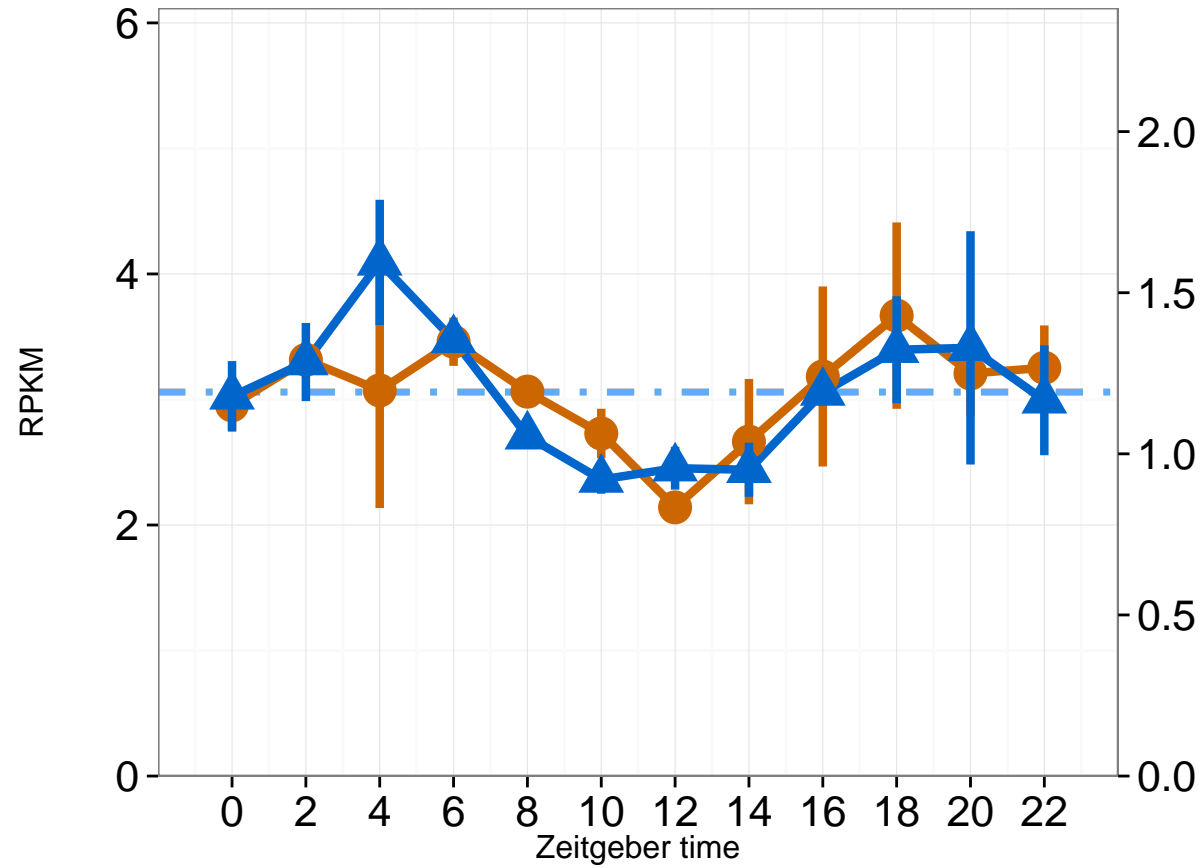

# Phf21a

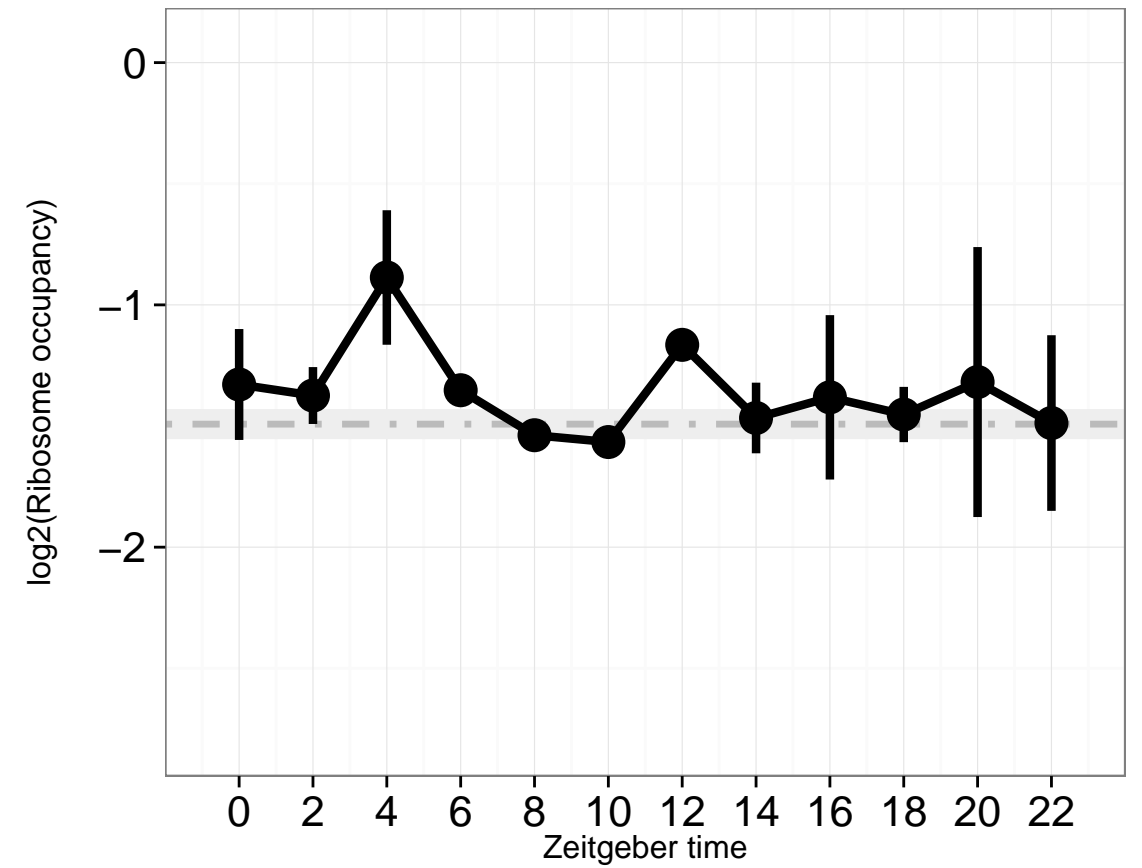

Supplement: SuppDataset_1.zip [file Phf21a_set_A.pdf › Supplemental Dataset 1/A-mRNA_nonrhyth_translation_nonrhyth/Phf21a_set_A.pdf]

## Phf23

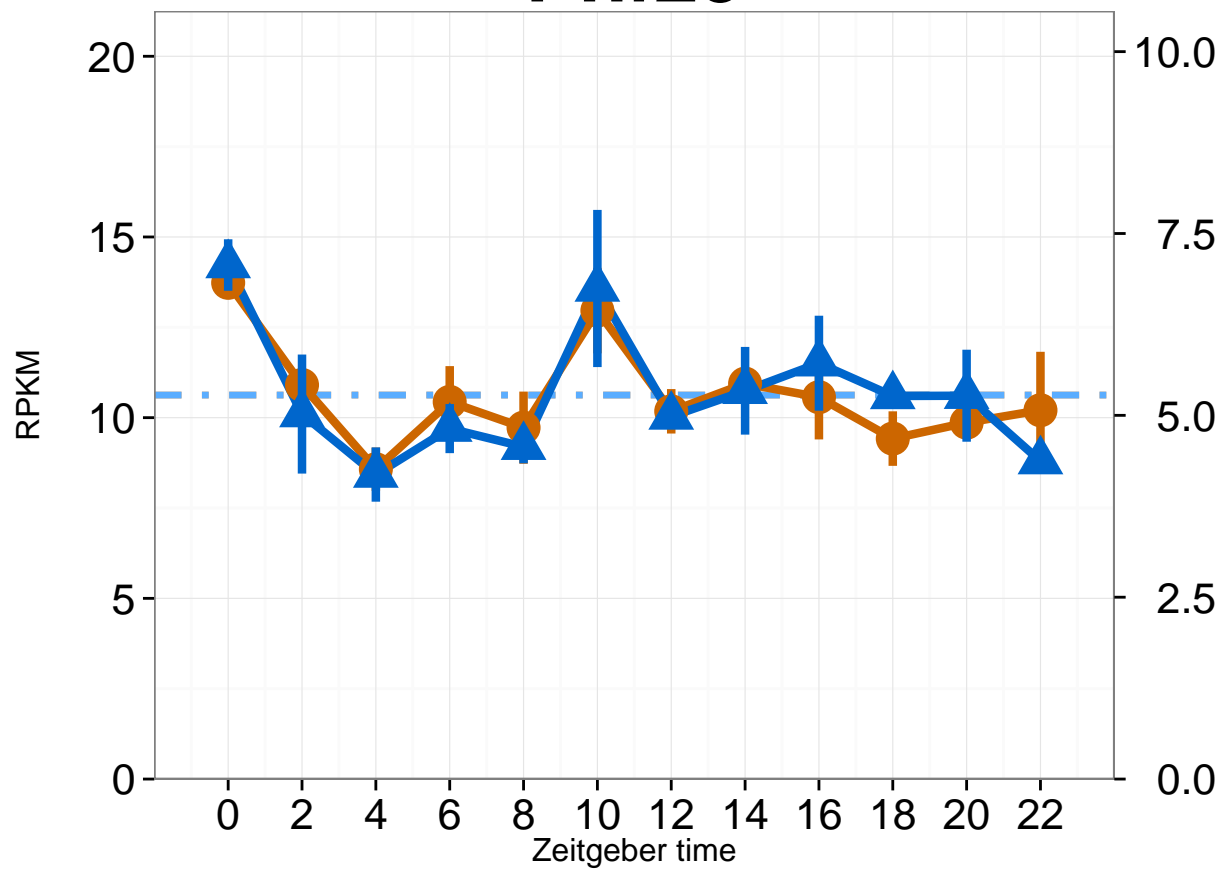

## Phf23

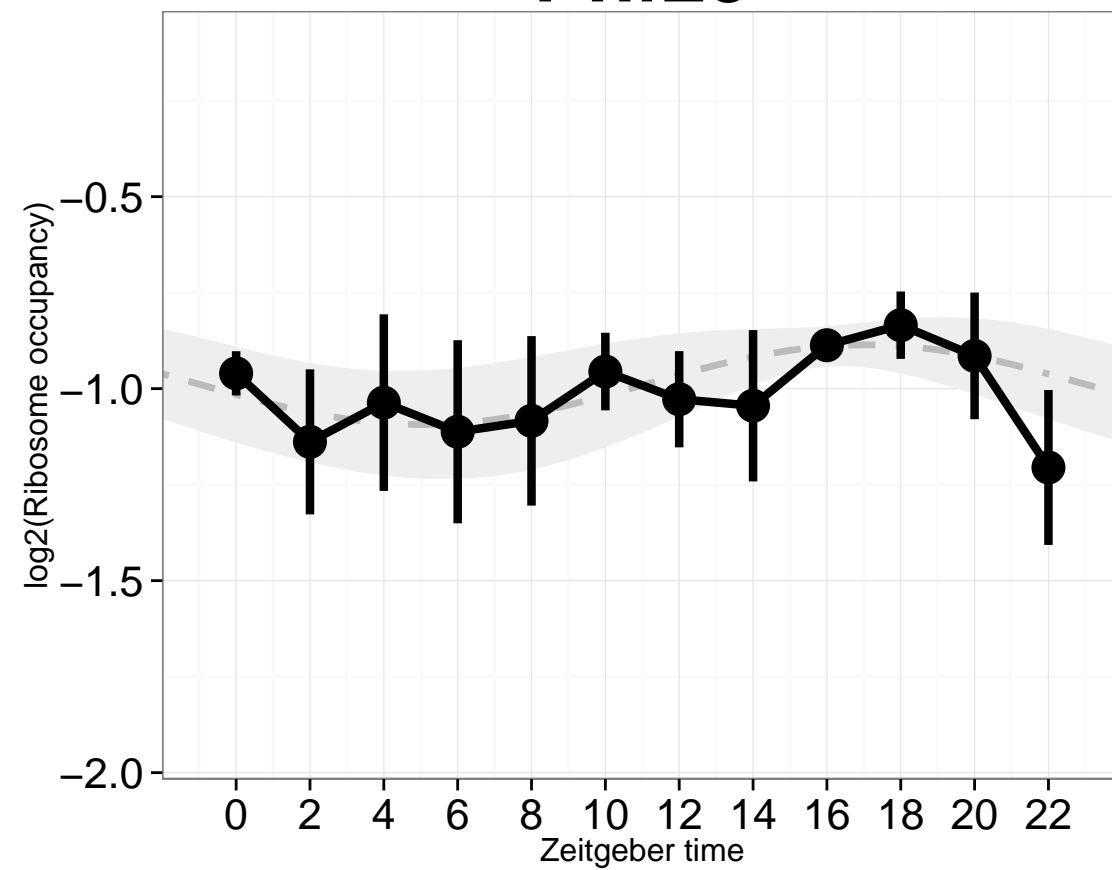

Supplement: SuppDataset_1.zip [file Phf23_set_A.pdf › Supplemental Dataset 1/A-mRNA_nonrhyth_translation_nonrhyth/Phf23_set_A.pdf]

## Phf2

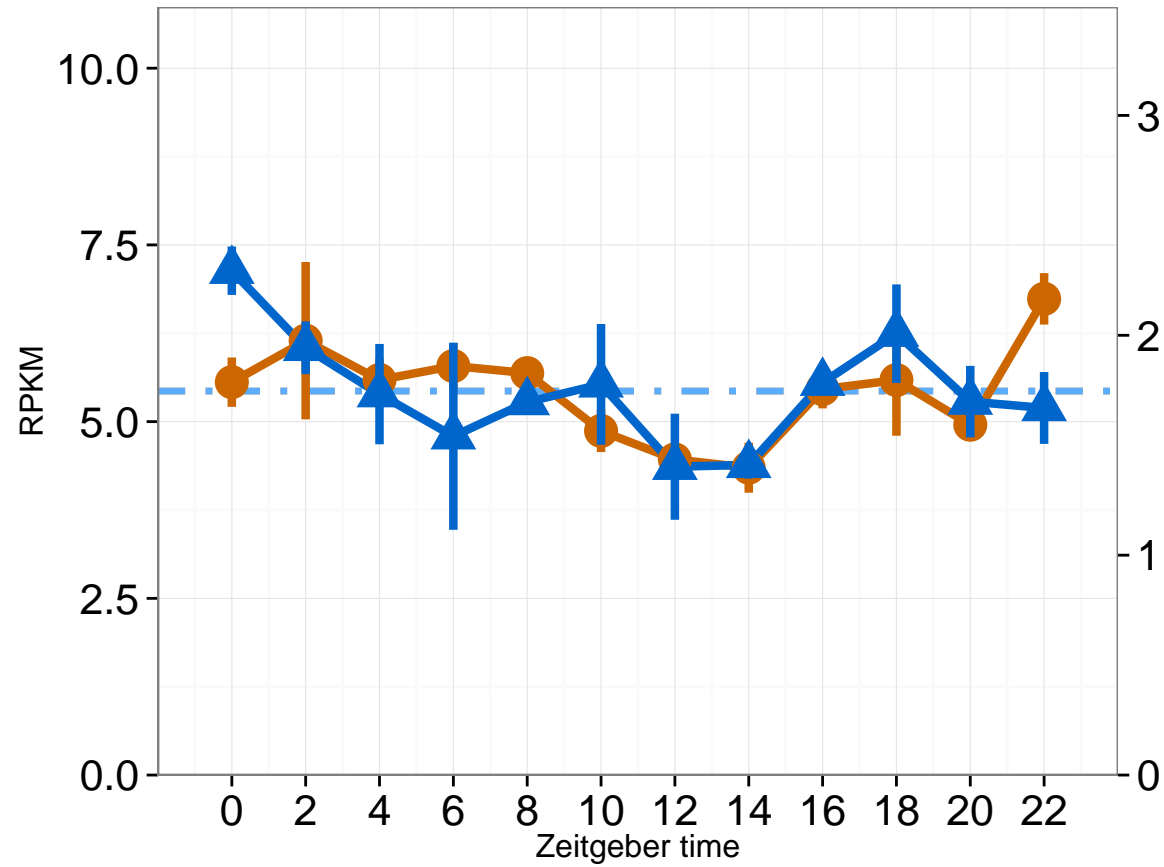

## Phf2

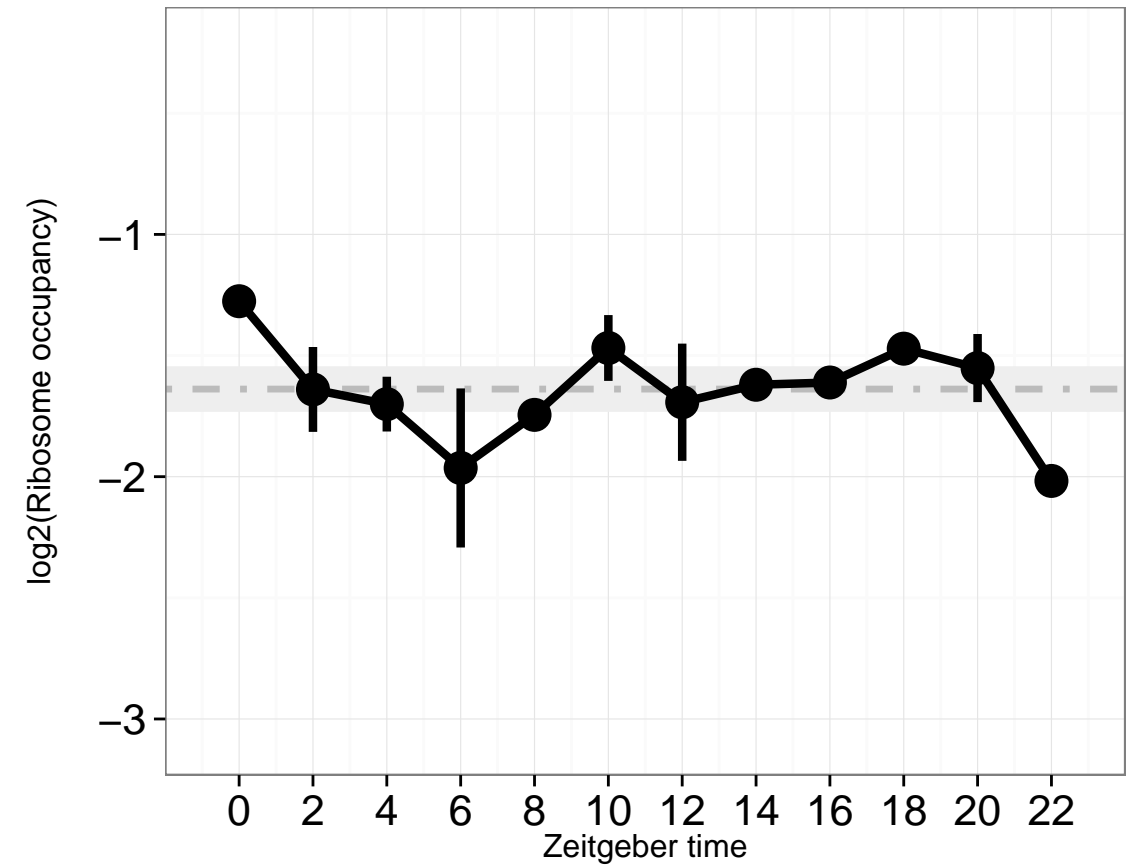

Supplement: SuppDataset_1.zip [file Phf2_set_A.pdf › Supplemental Dataset 1/A-mRNA_nonrhyth_translation_nonrhyth/Phf2_set_A.pdf]

## Phf3

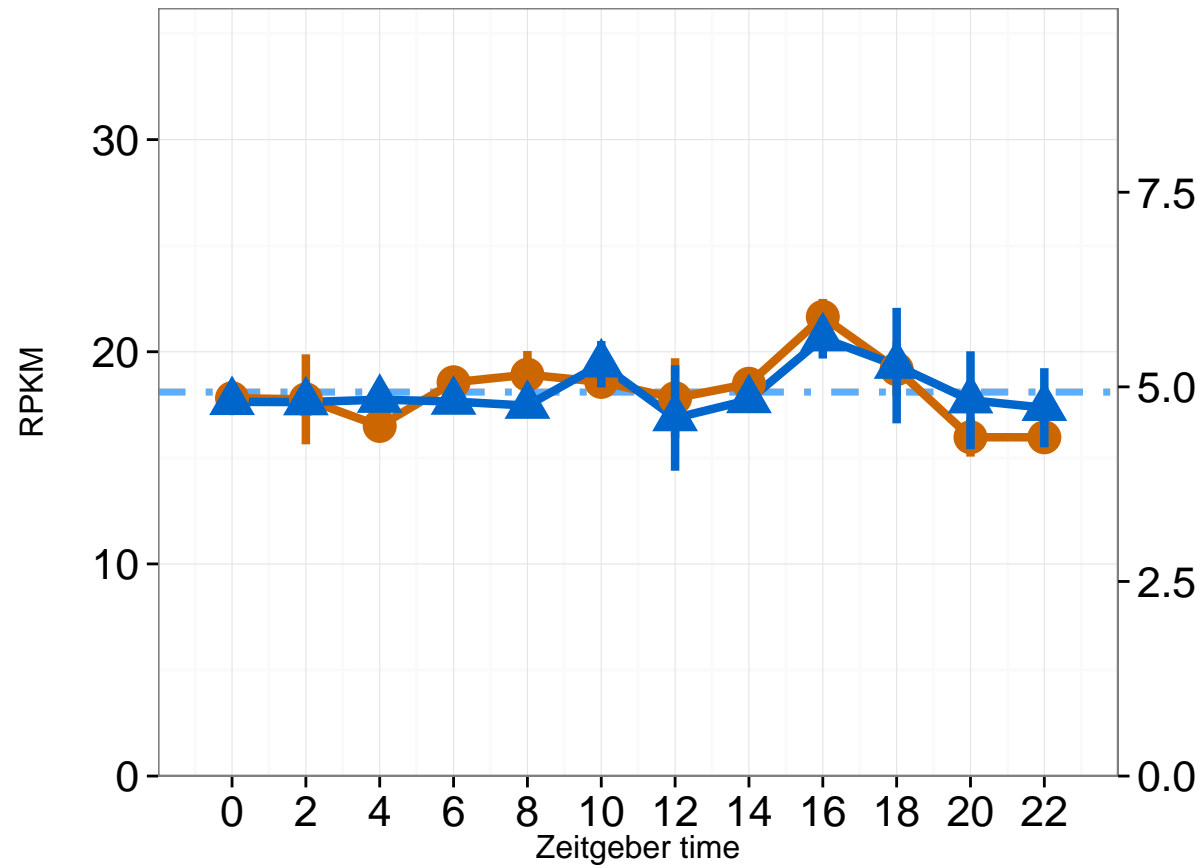

## Phf3

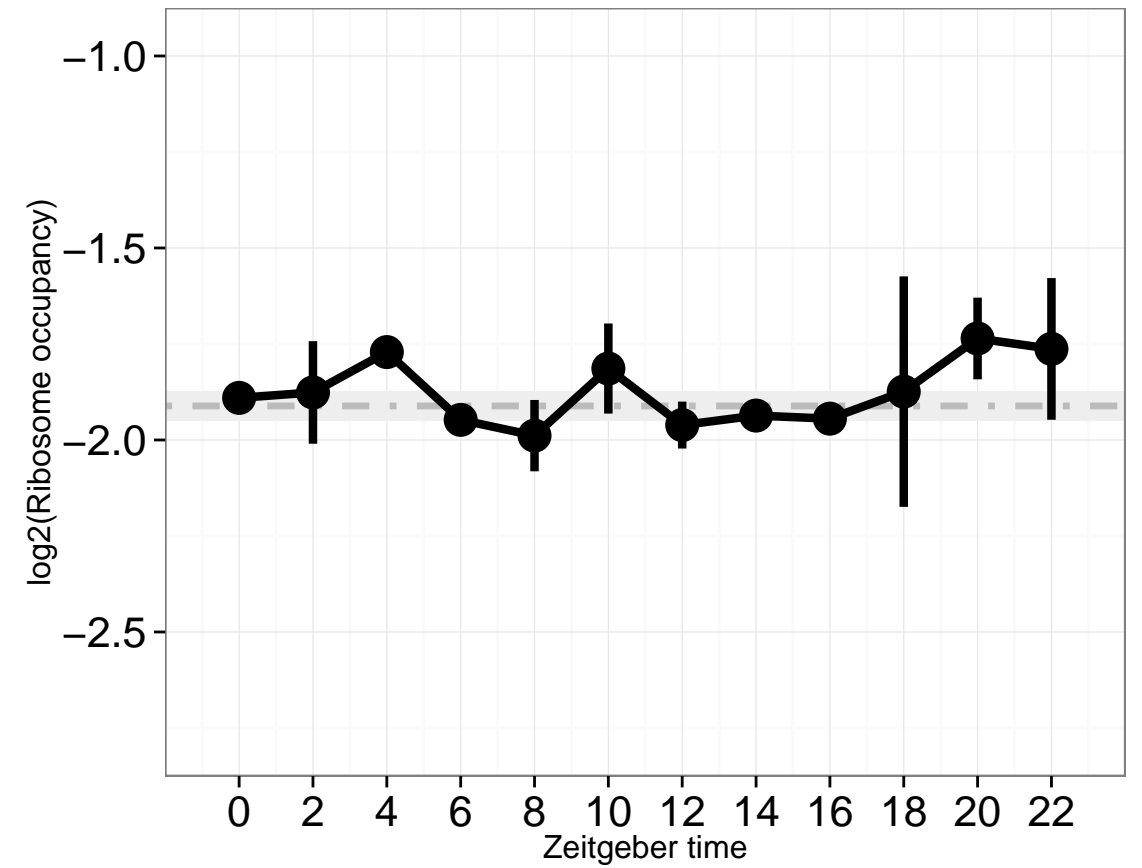

Supplement: SuppDataset_1.zip [file Phf3_set_A.pdf › Supplemental Dataset 1/A-mRNA_nonrhyth_translation_nonrhyth/Phf3_set_A.pdf]

# Phf5a

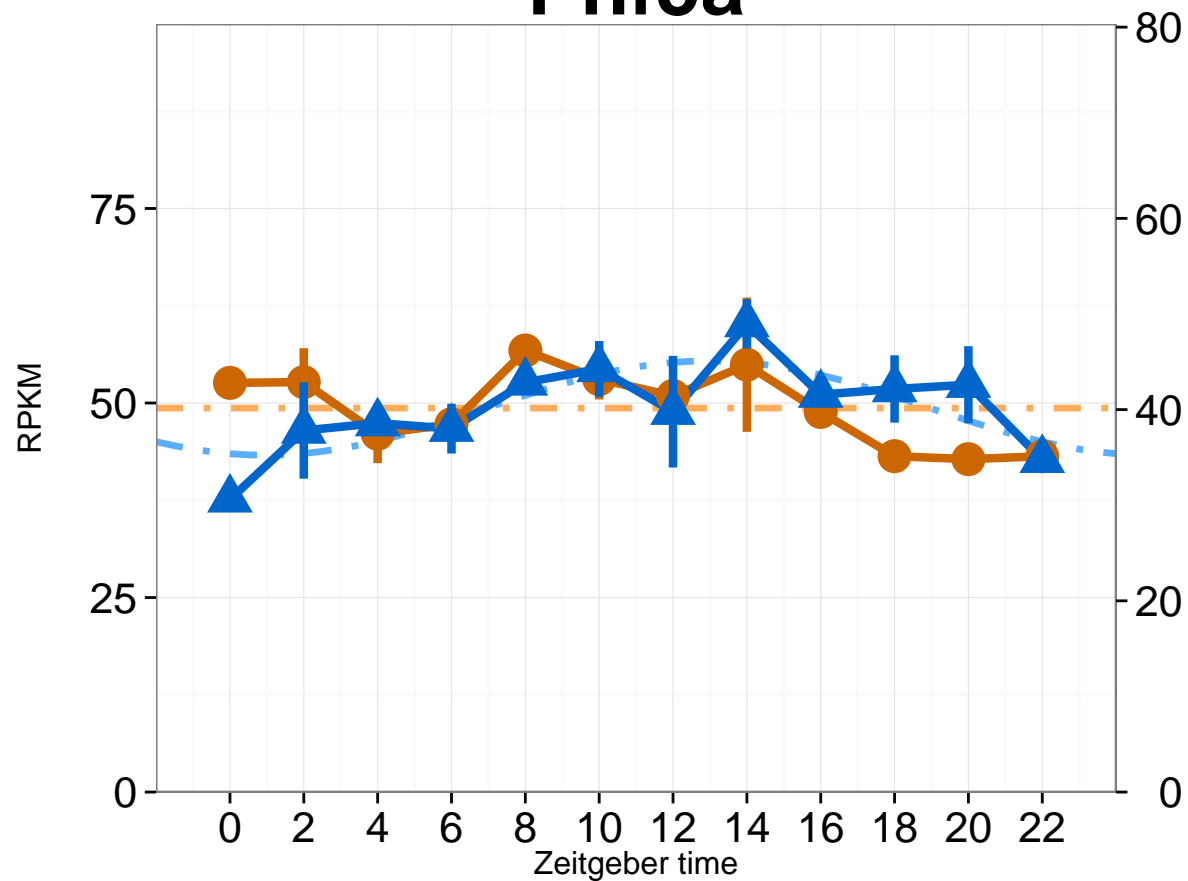

# Phf5a

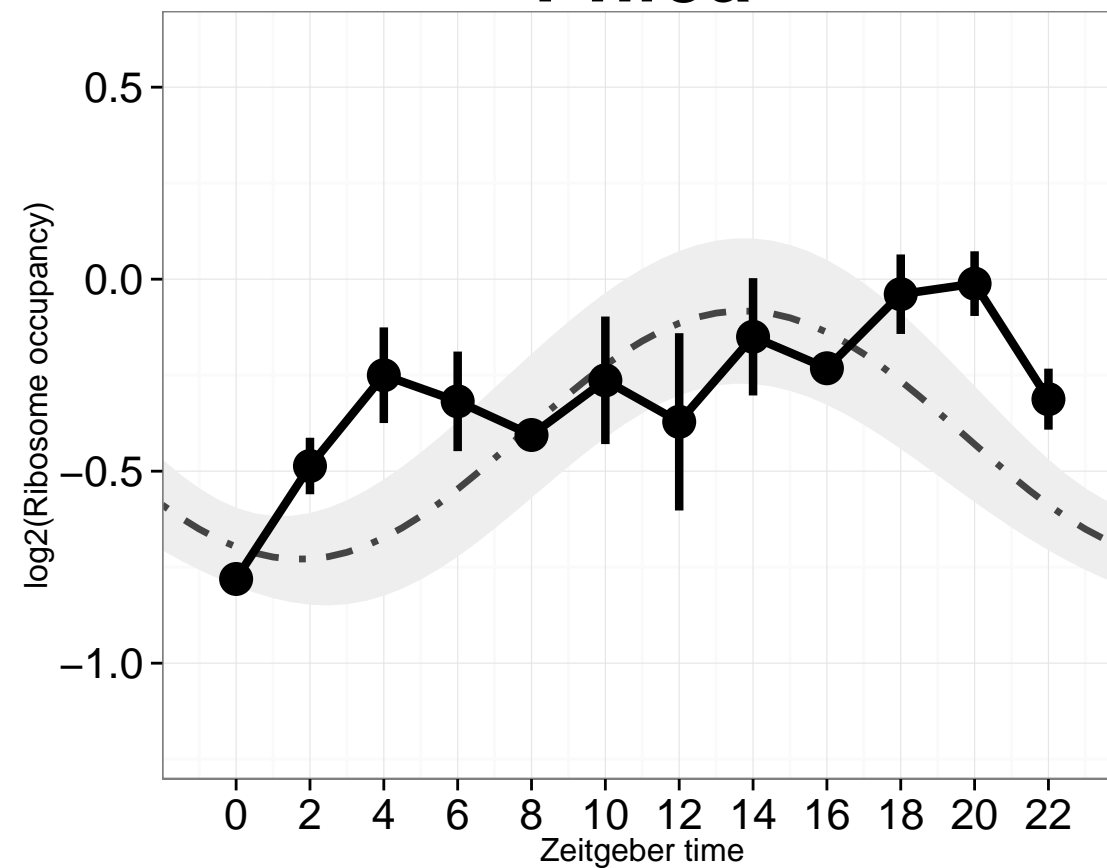

Supplement: SuppDataset_1.zip [file Phf5a_set_A.pdf › Supplemental Dataset 1/A-mRNA_nonrhyth_translation_nonrhyth/Phf5a_set_A.pdf]

## Phf6

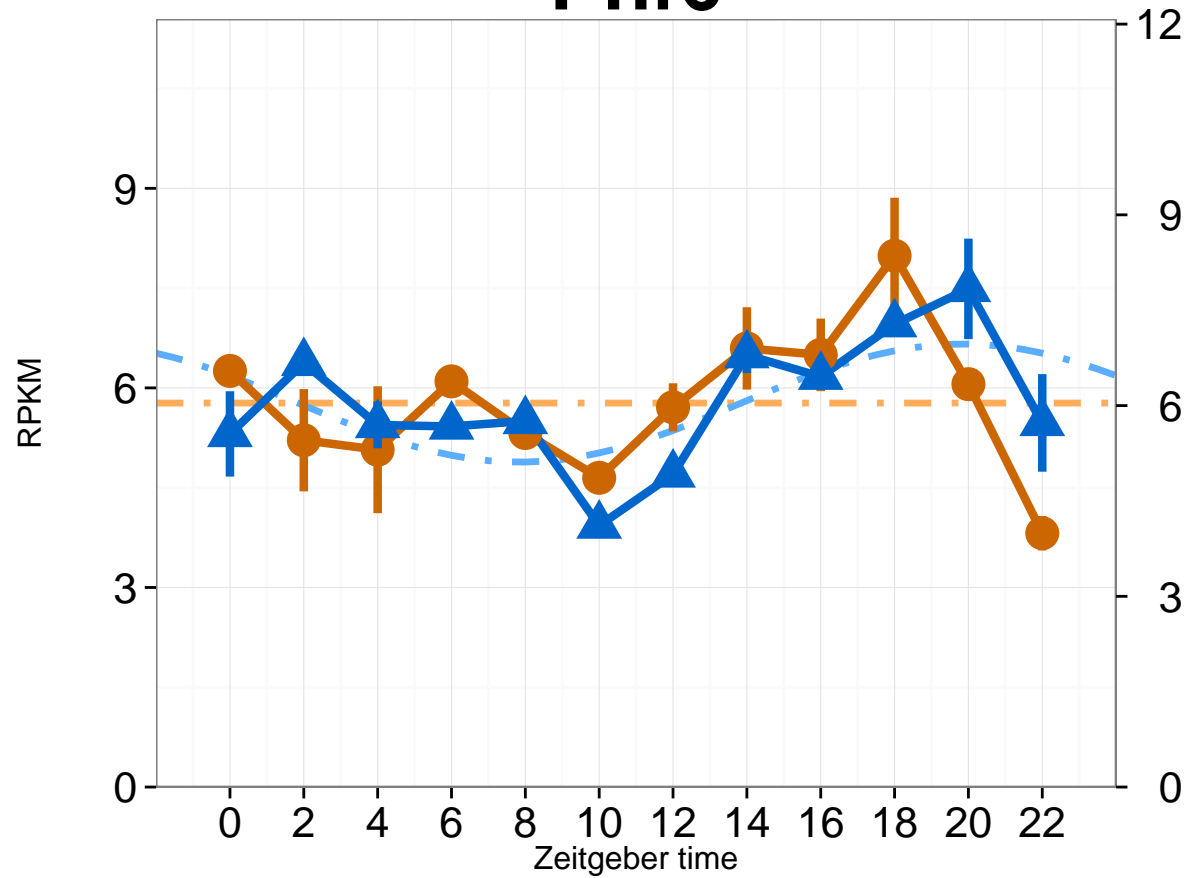

## Phf6

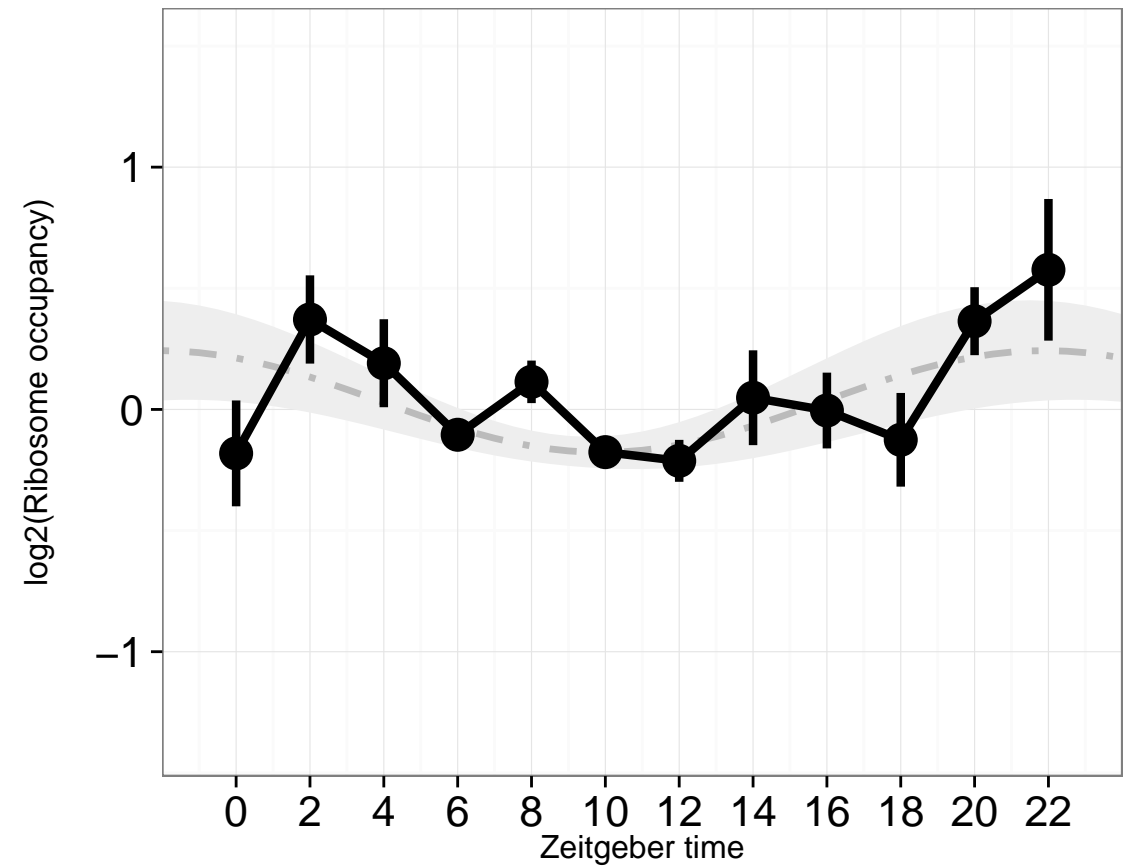

Supplement: SuppDataset_1.zip [file Phf6_set_A.pdf › Supplemental Dataset 1/A-mRNA_nonrhyth_translation_nonrhyth/Phf6_set_A.pdf]

## Phf7

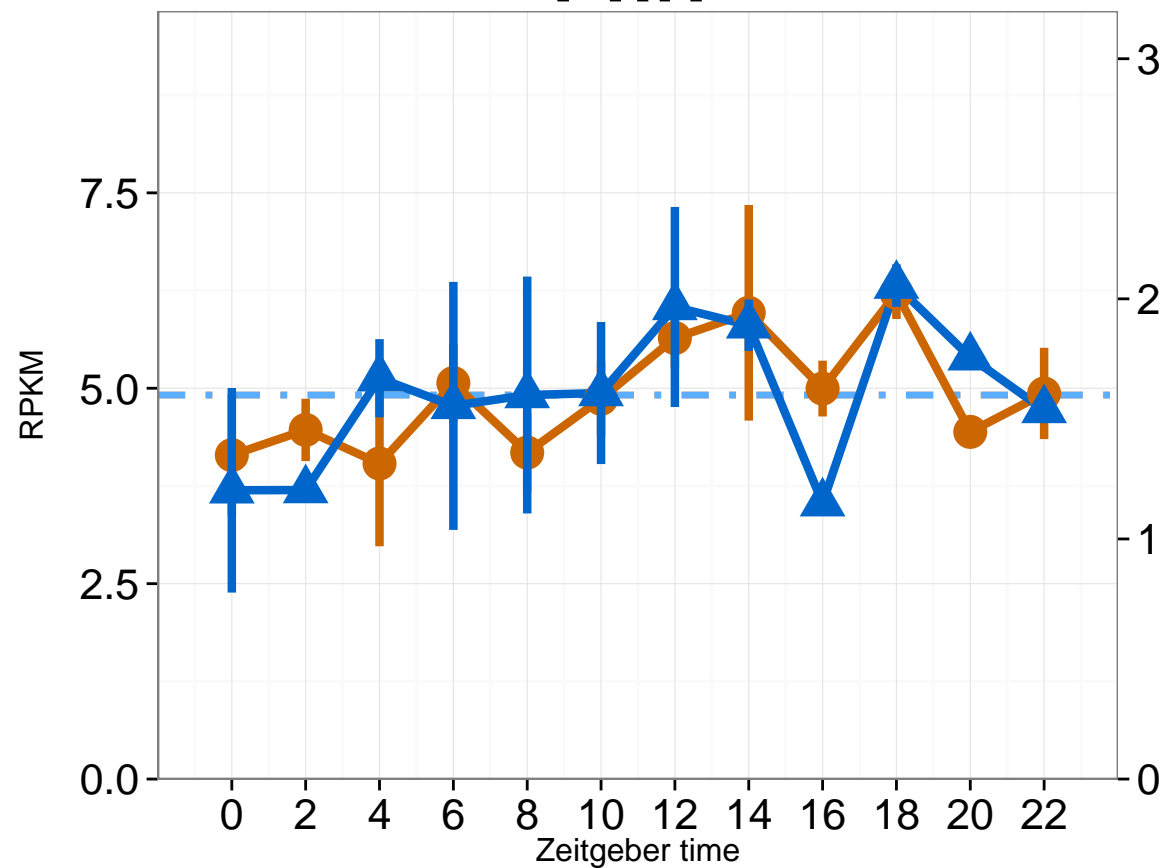

## Phf7

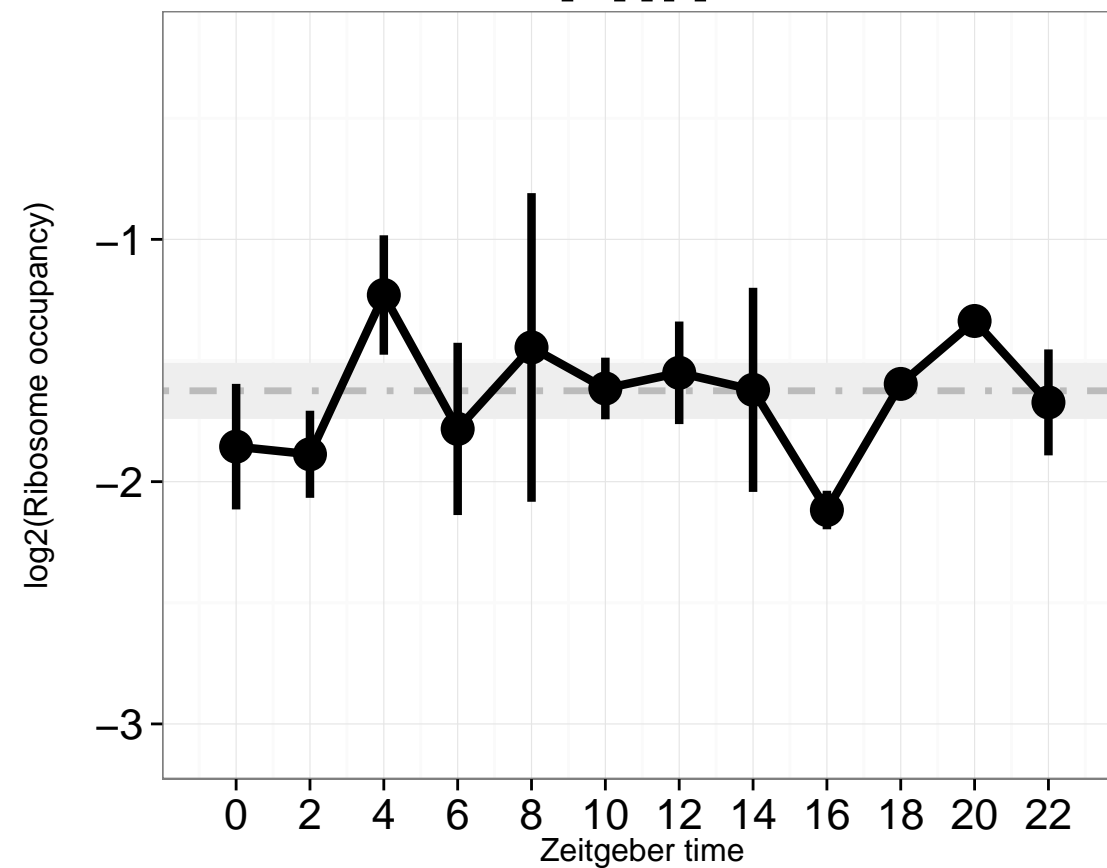

Supplement: SuppDataset_1.zip [file Phf7_set_A.pdf › Supplemental Dataset 1/A-mRNA_nonrhyth_translation_nonrhyth/Phf7_set_A.pdf]
