# Supplementary figures and images for: Ribosome profiling reveals the rhythmic liver translatome and circadian clock regulation by upstream open reading frames (part 54 of 113)
Source: HighWire-hosted journal article supplement (doi:10.1101/gr.195404.115), 2015-10-20

## Phf8

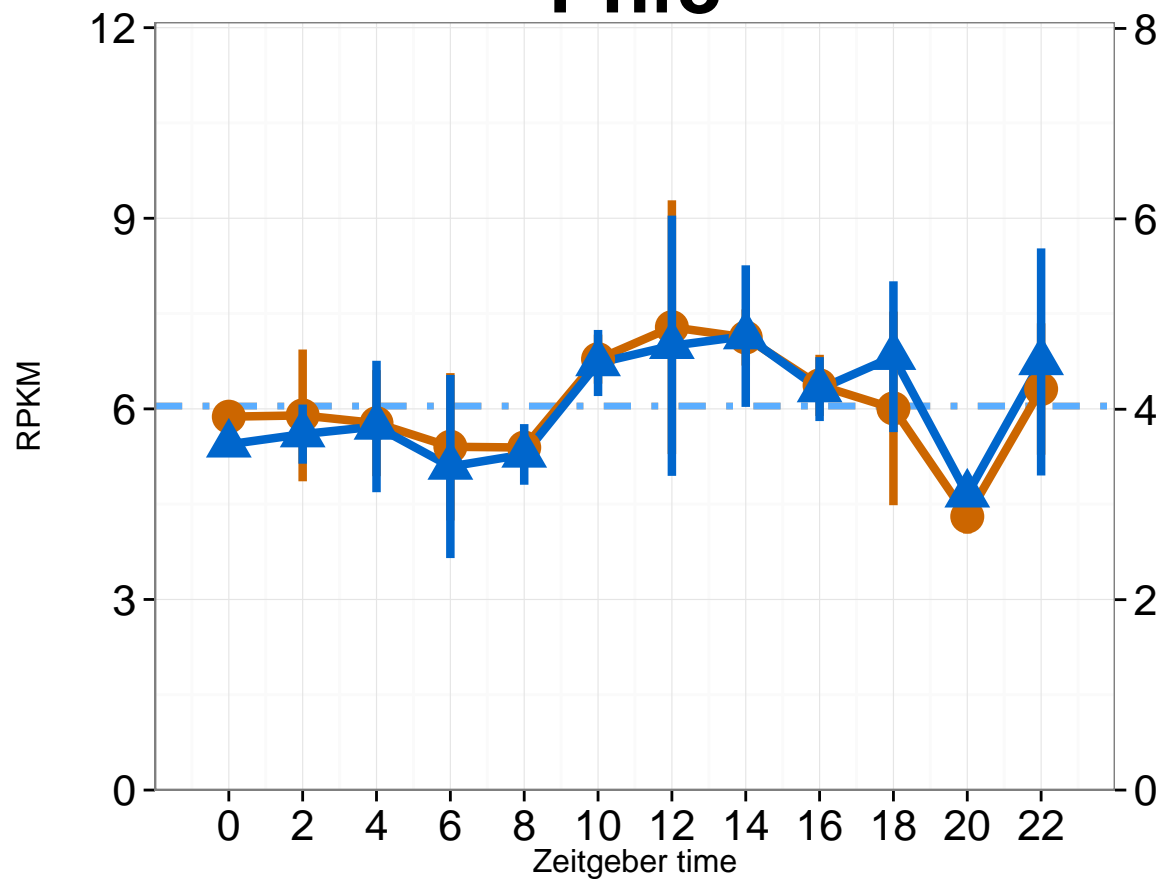

## Phf8

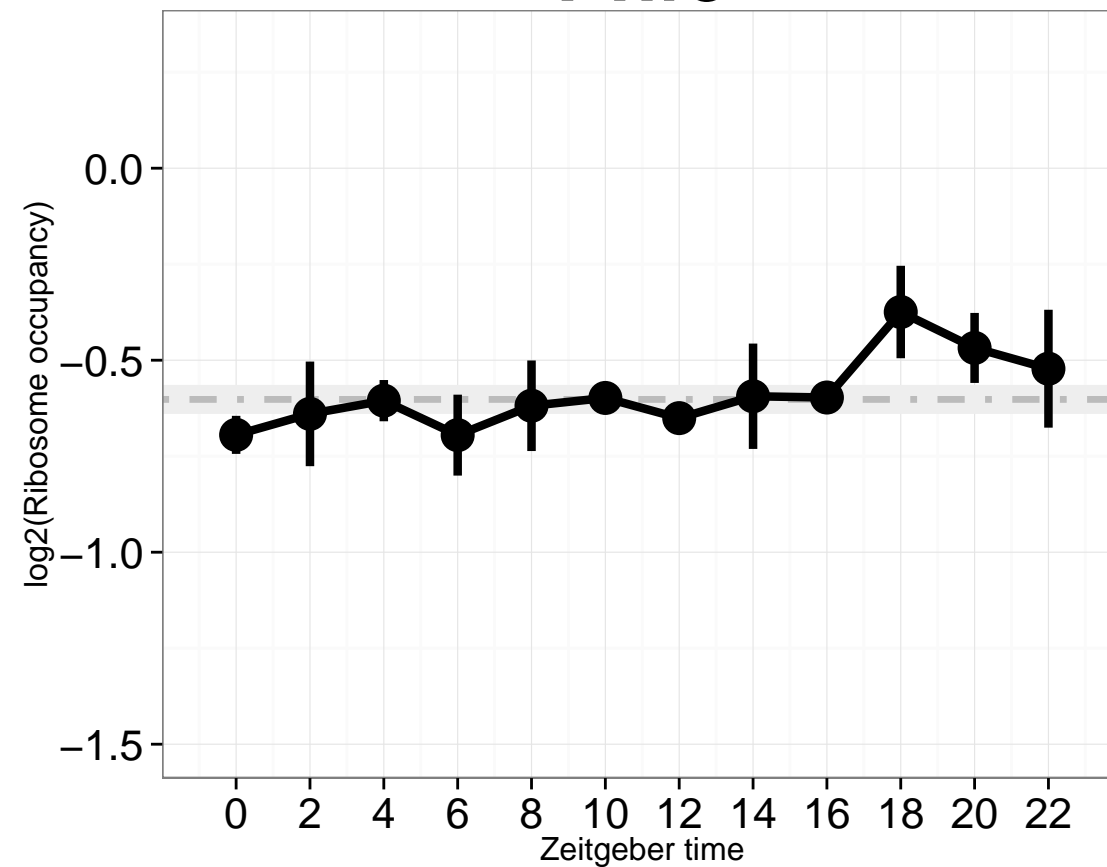

Supplement: SuppDataset_1.zip [file Phf8_set_A.pdf › Supplemental Dataset 1/A-mRNA_nonrhyth_translation_nonrhyth/Phf8_set_A.pdf]

# Phip

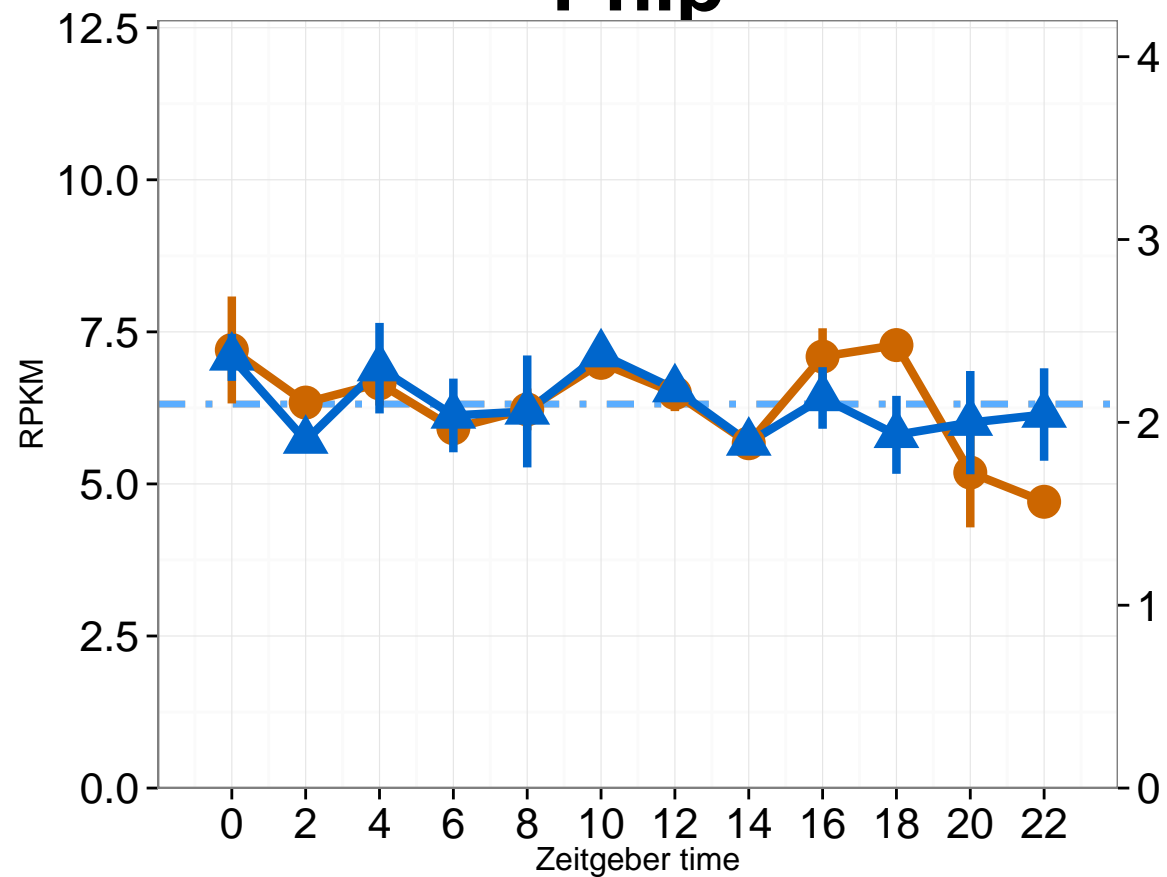

# Phip

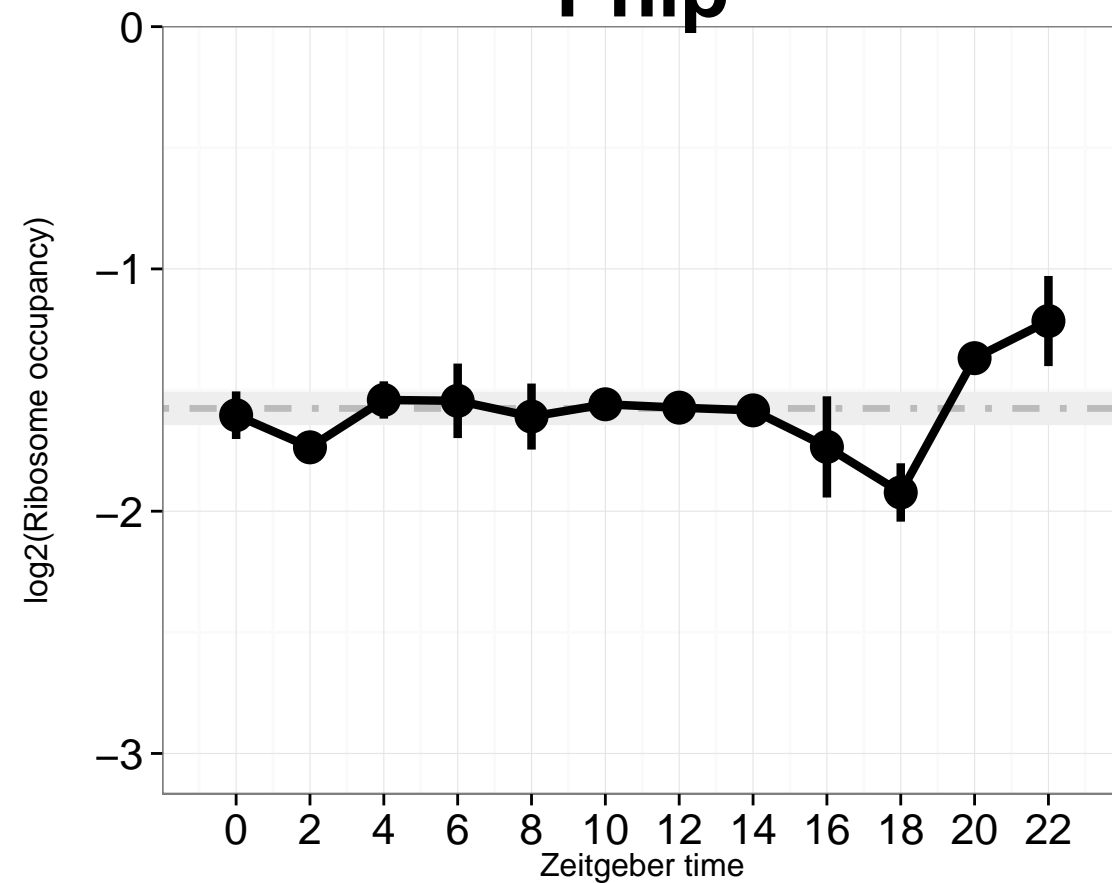

Supplement: SuppDataset_1.zip [file Phip_set_A.pdf › Supplemental Dataset 1/A-mRNA_nonrhyth_translation_nonrhyth/Phip_set_A.pdf]

# Phka1

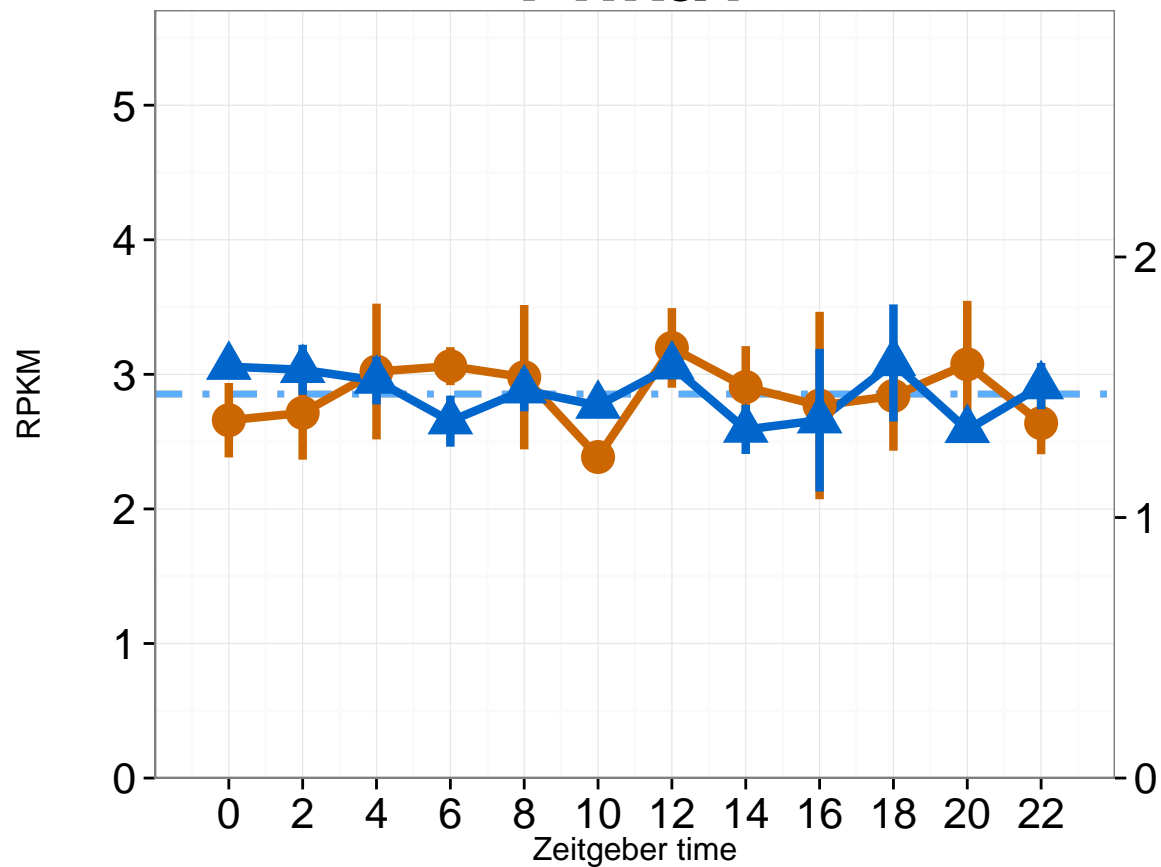

# Phka1

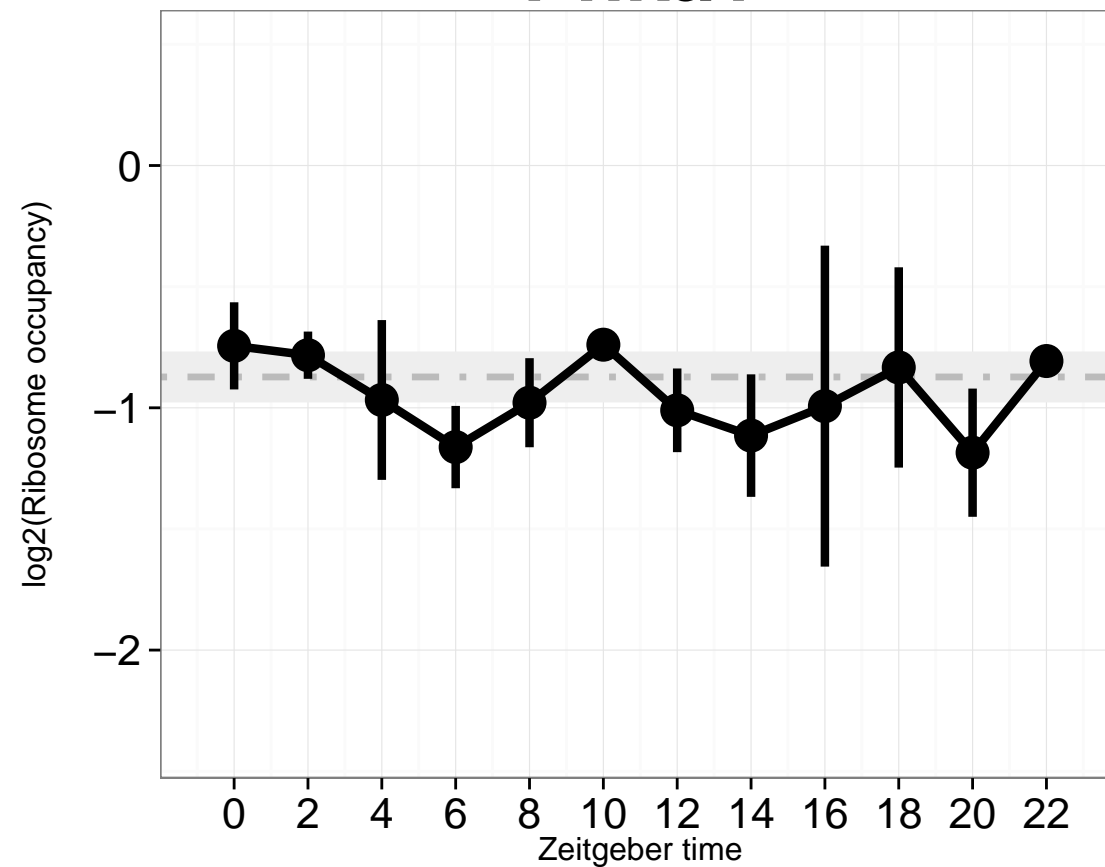

Supplement: SuppDataset_1.zip [file Phka1_set_A.pdf › Supplemental Dataset 1/A-mRNA_nonrhyth_translation_nonrhyth/Phka1_set_A.pdf]

## Phka2

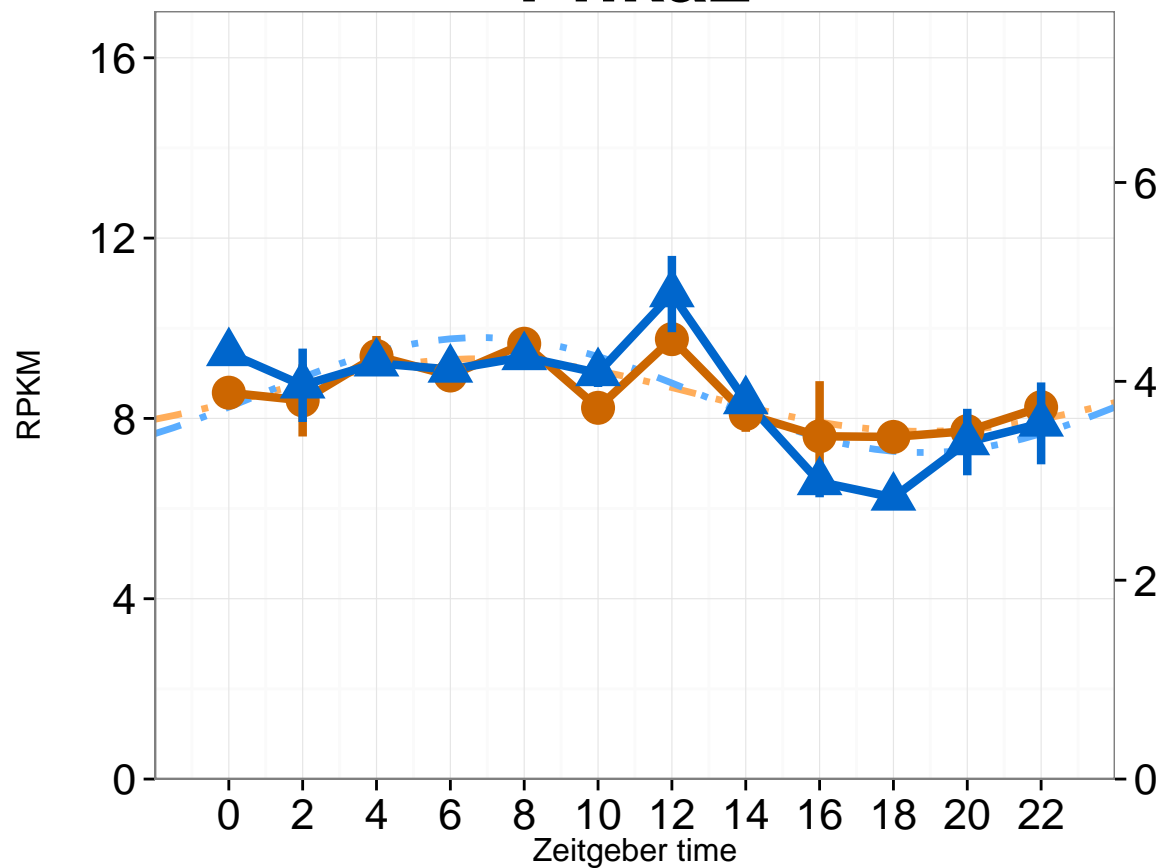

## Phka2

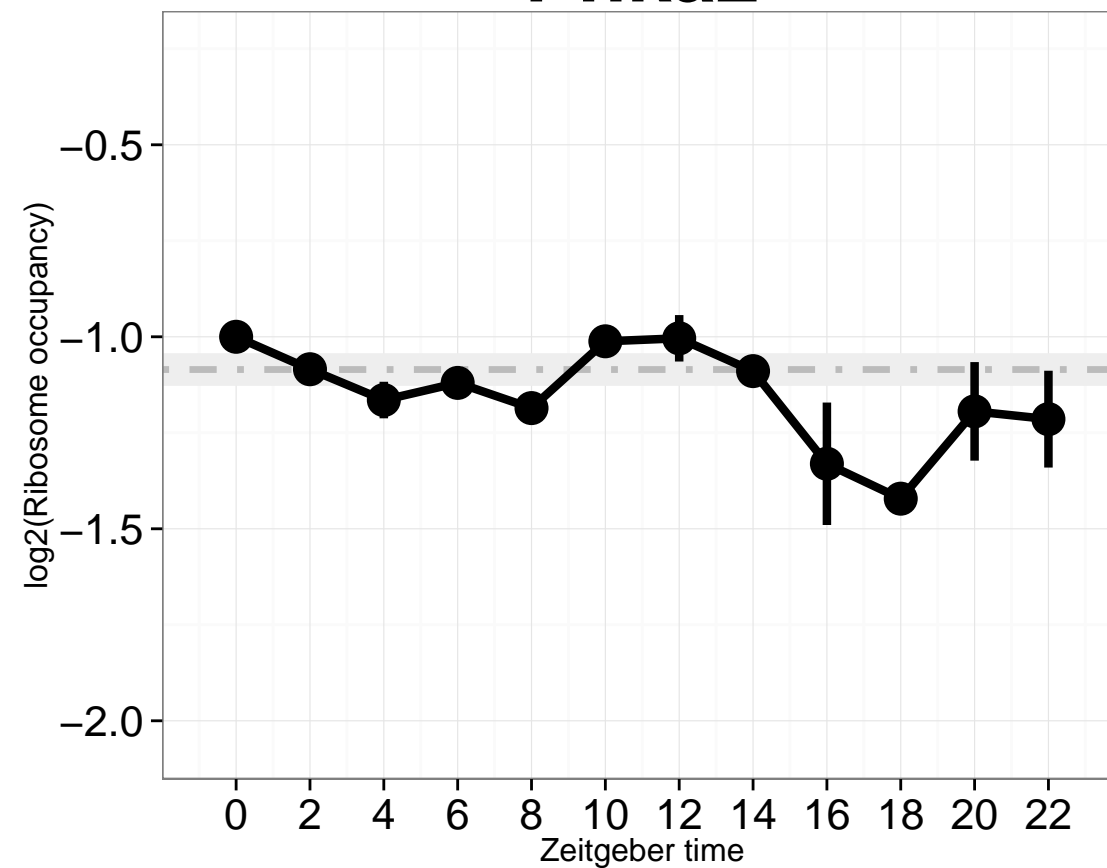

Supplement: SuppDataset_1.zip [file Phka2_set_A.pdf › Supplemental Dataset 1/A-mRNA_nonrhyth_translation_nonrhyth/Phka2_set_A.pdf]

## Phkb

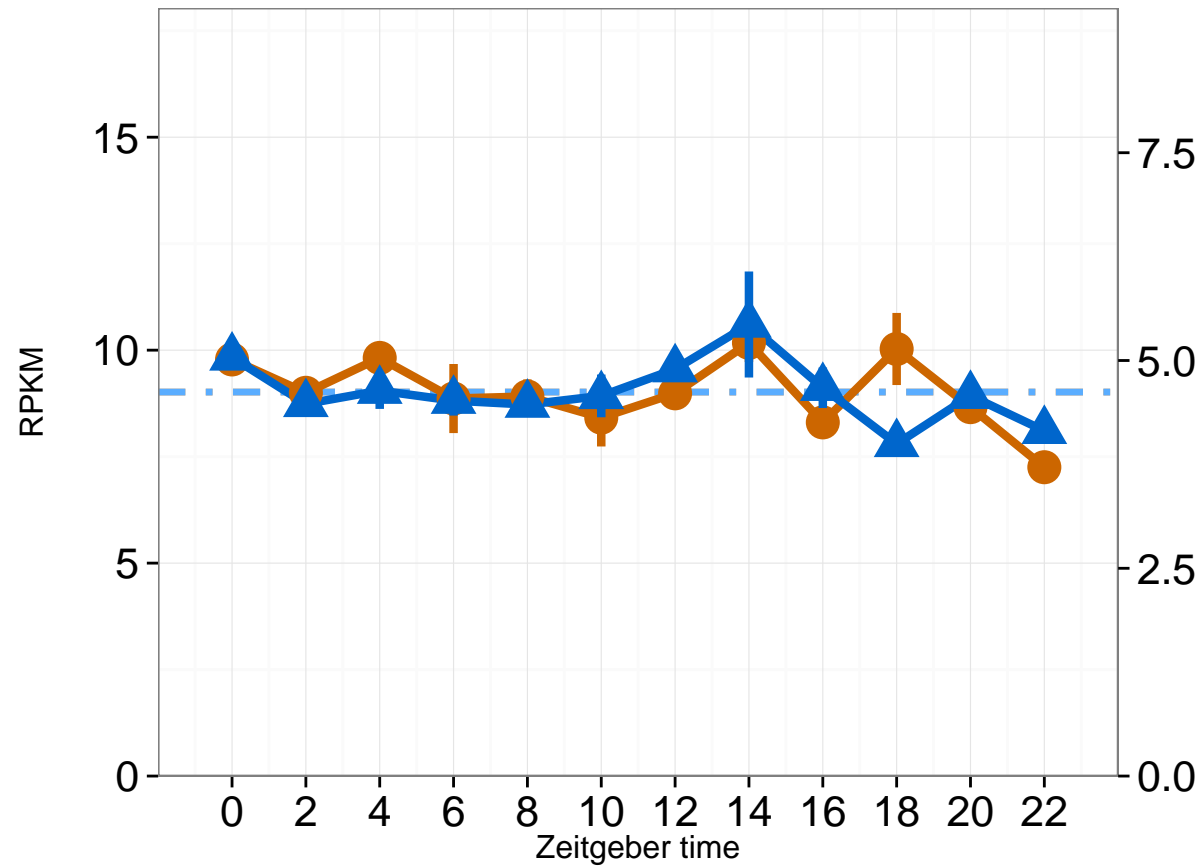

## Phkb

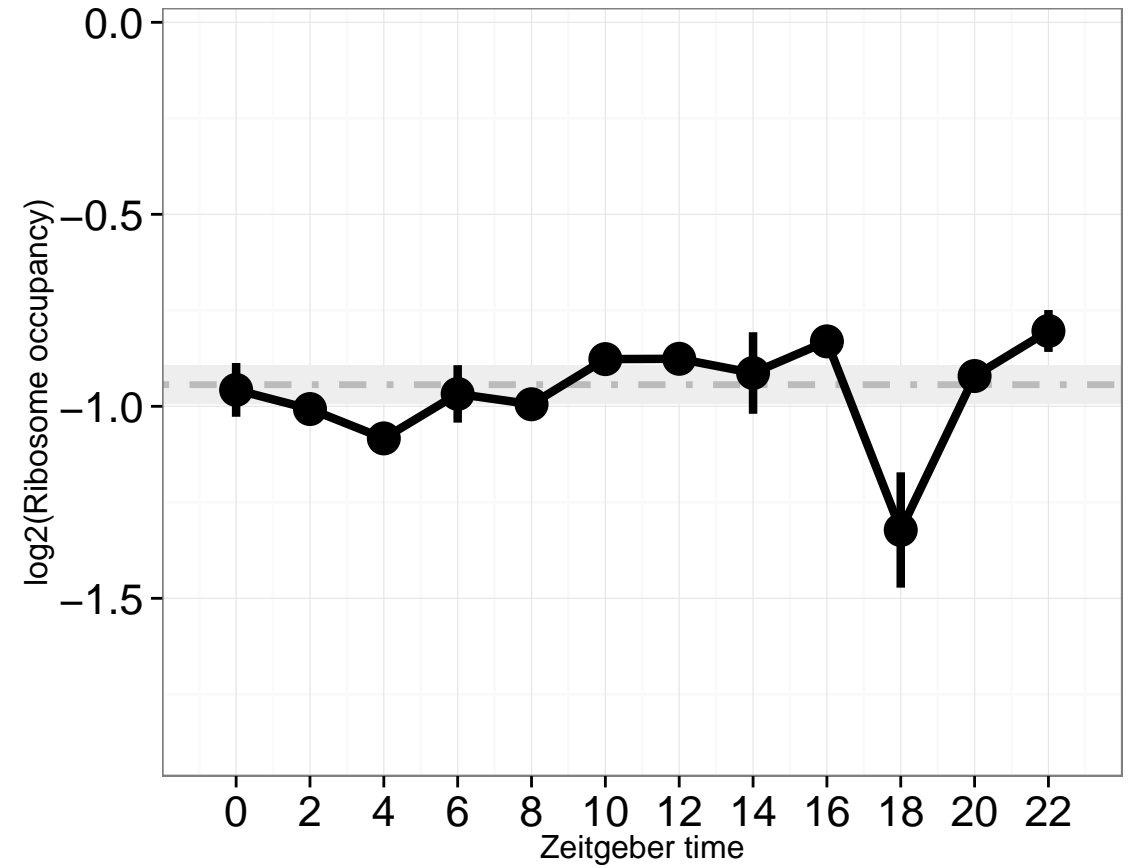

Supplement: SuppDataset_1.zip [file Phkb_set_A.pdf › Supplemental Dataset 1/A-mRNA_nonrhyth_translation_nonrhyth/Phkb_set_A.pdf]

# Phlda1

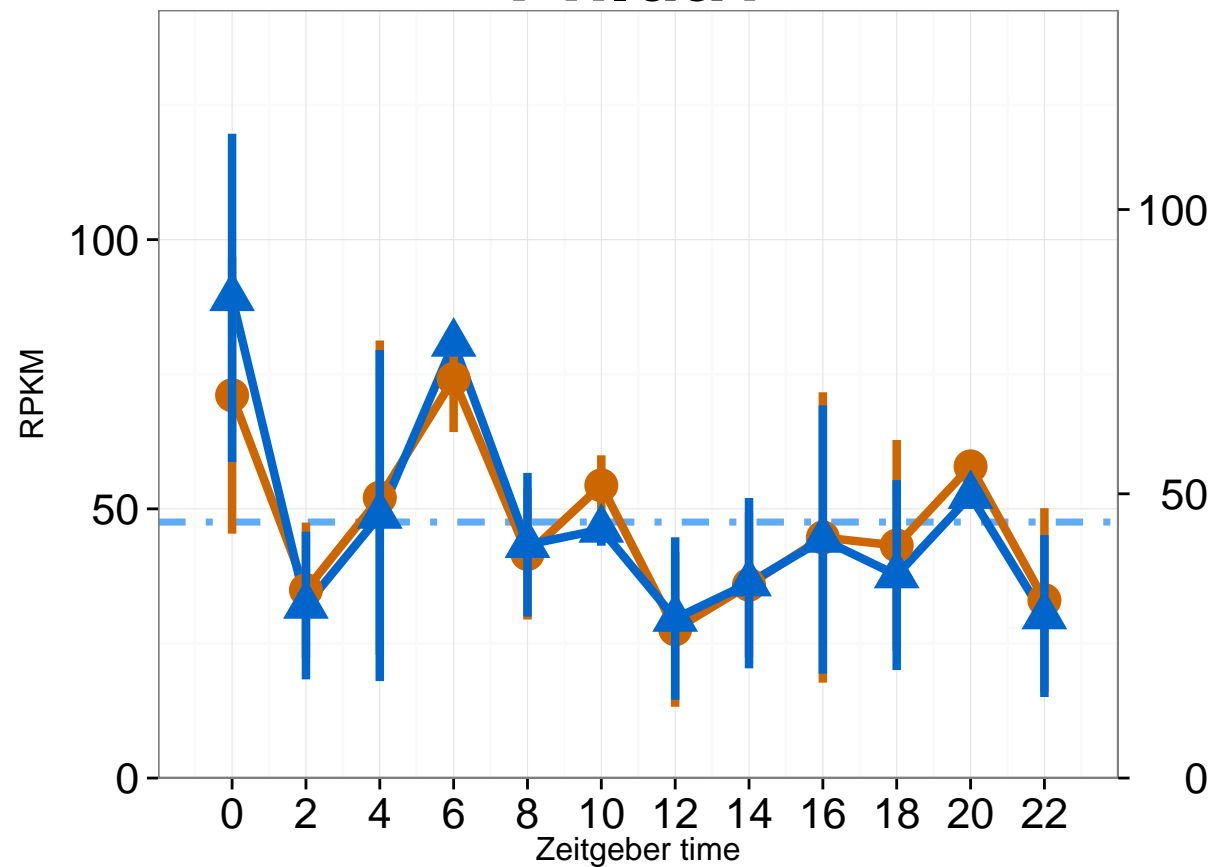

# Phlda1

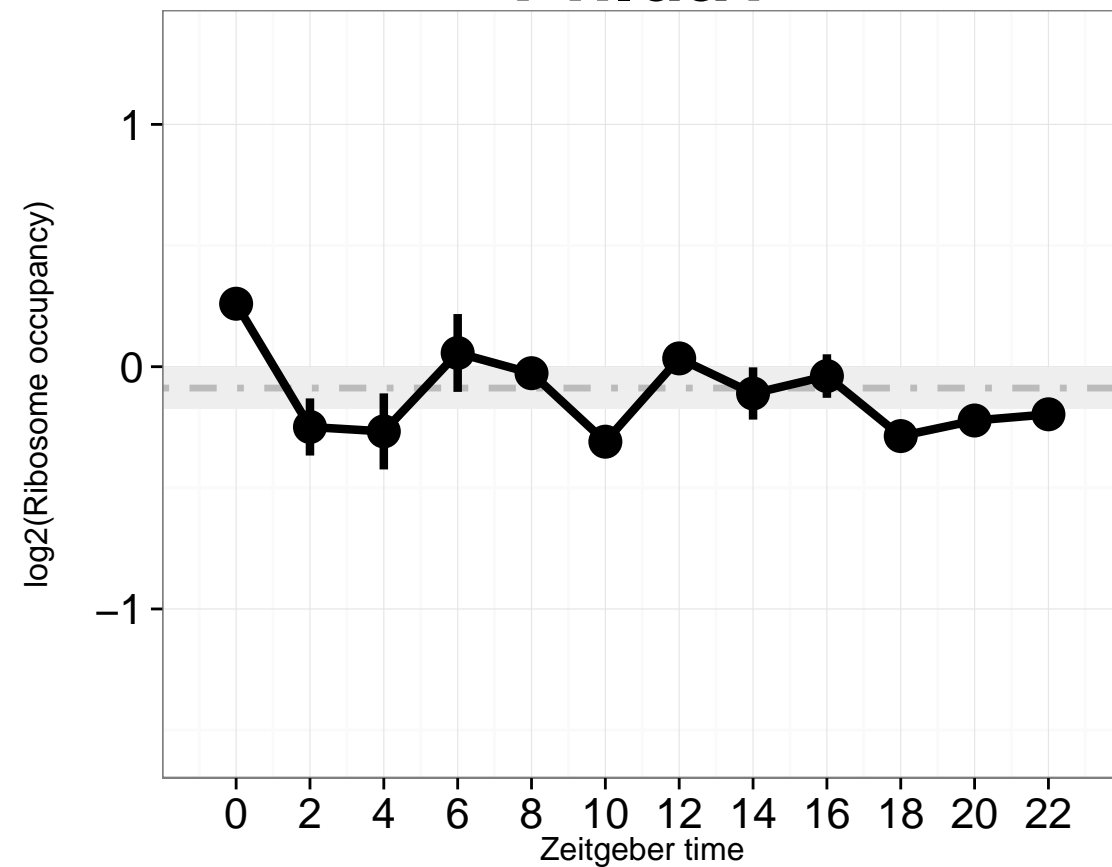

Supplement: SuppDataset_1.zip [file Phlda1_set_A.pdf › Supplemental Dataset 1/A-mRNA_nonrhyth_translation_nonrhyth/Phlda1_set_A.pdf]

## Phldb1

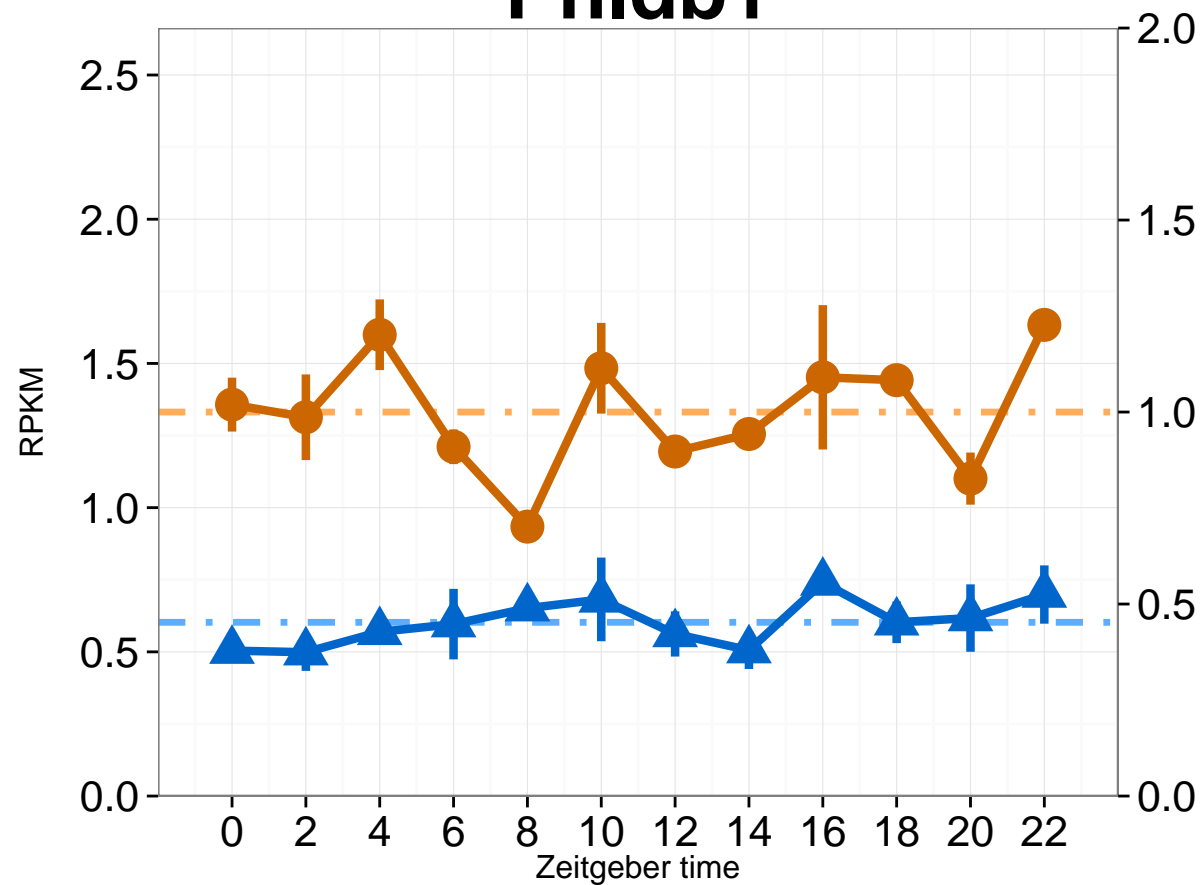

## Phldb1

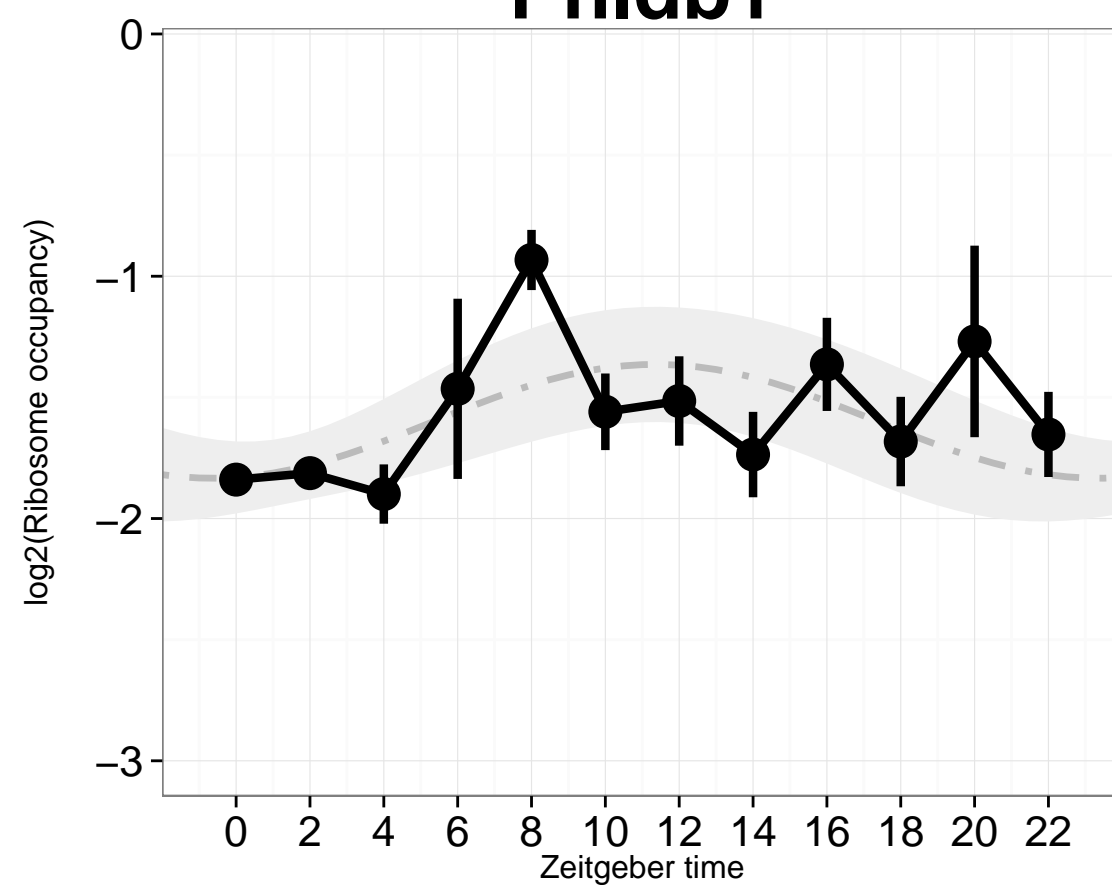

Supplement: SuppDataset_1.zip [file Phldb1_set_A.pdf › Supplemental Dataset 1/A-mRNA_nonrhyth_translation_nonrhyth/Phldb1_set_A.pdf]

# Phldb2

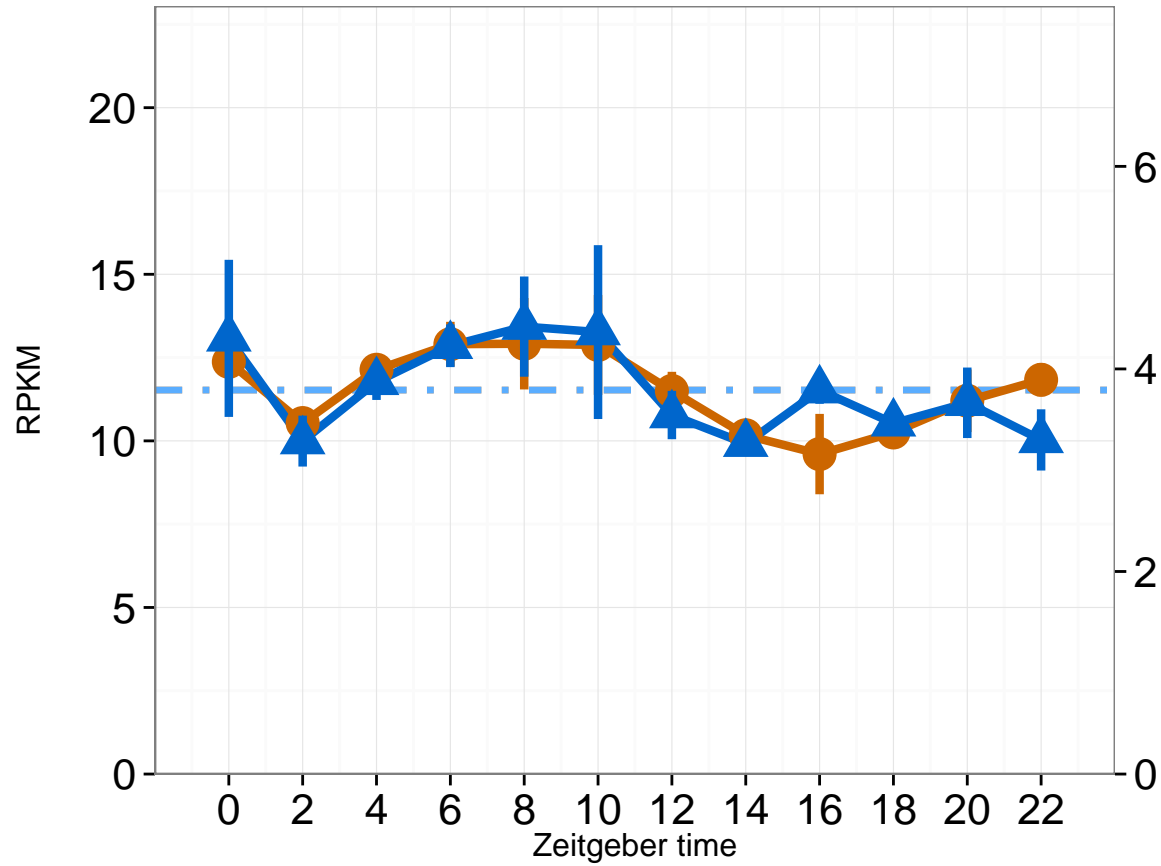

# Phldb2

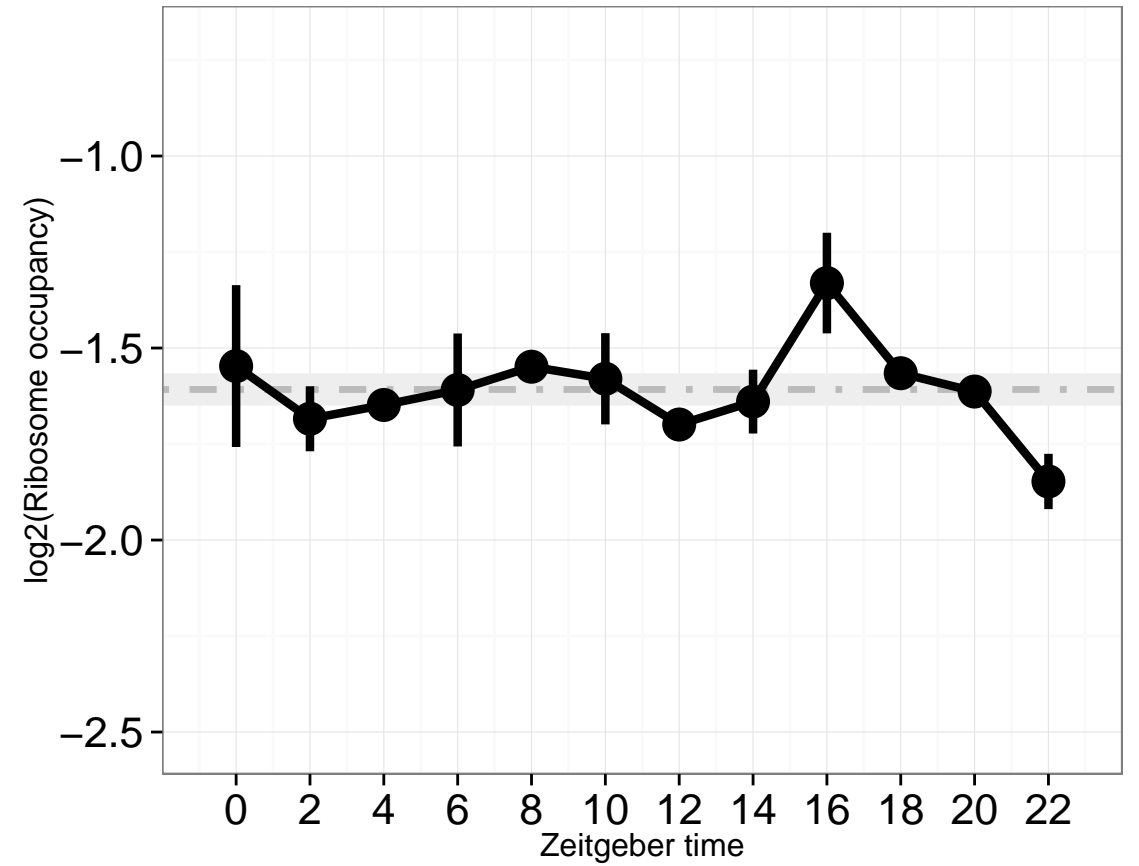

Supplement: SuppDataset_1.zip [file Phldb2_set_A.pdf › Supplemental Dataset 1/A-mRNA_nonrhyth_translation_nonrhyth/Phldb2_set_A.pdf]

## Phospho2

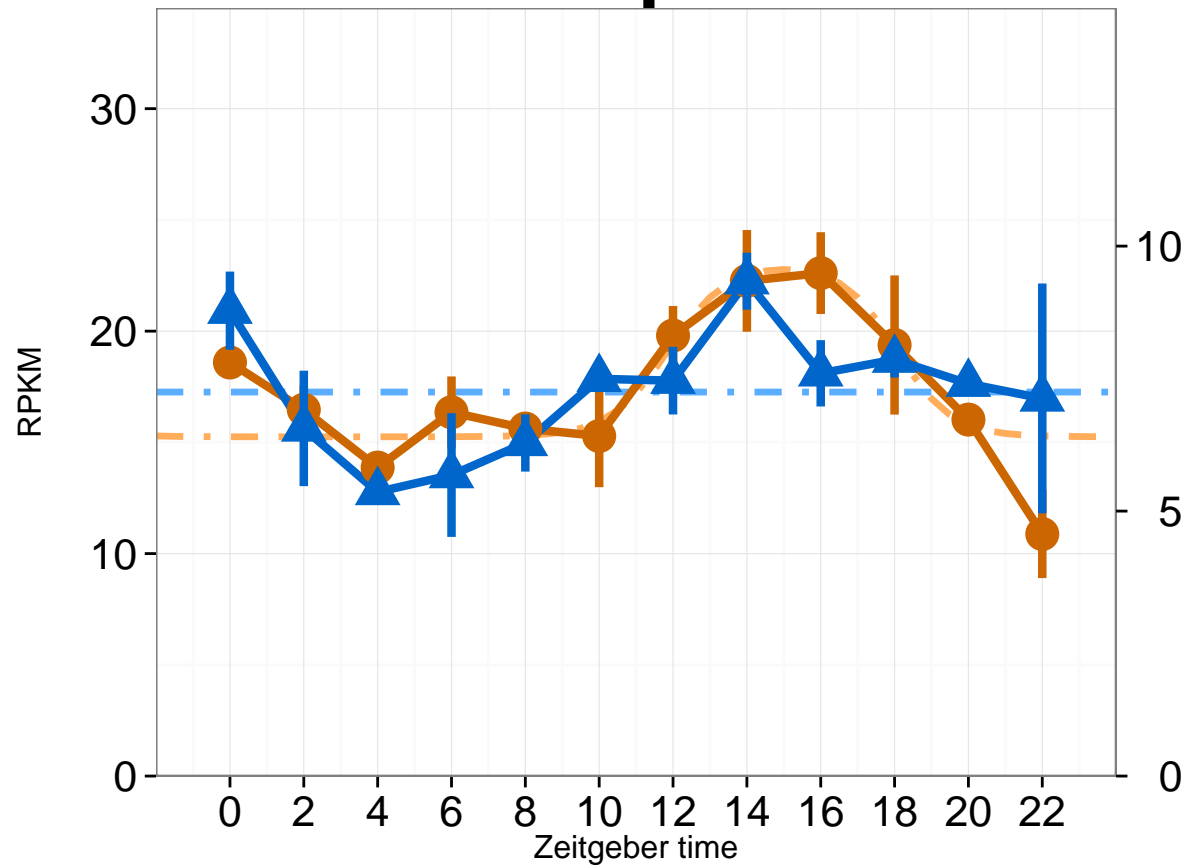

## Phospho2

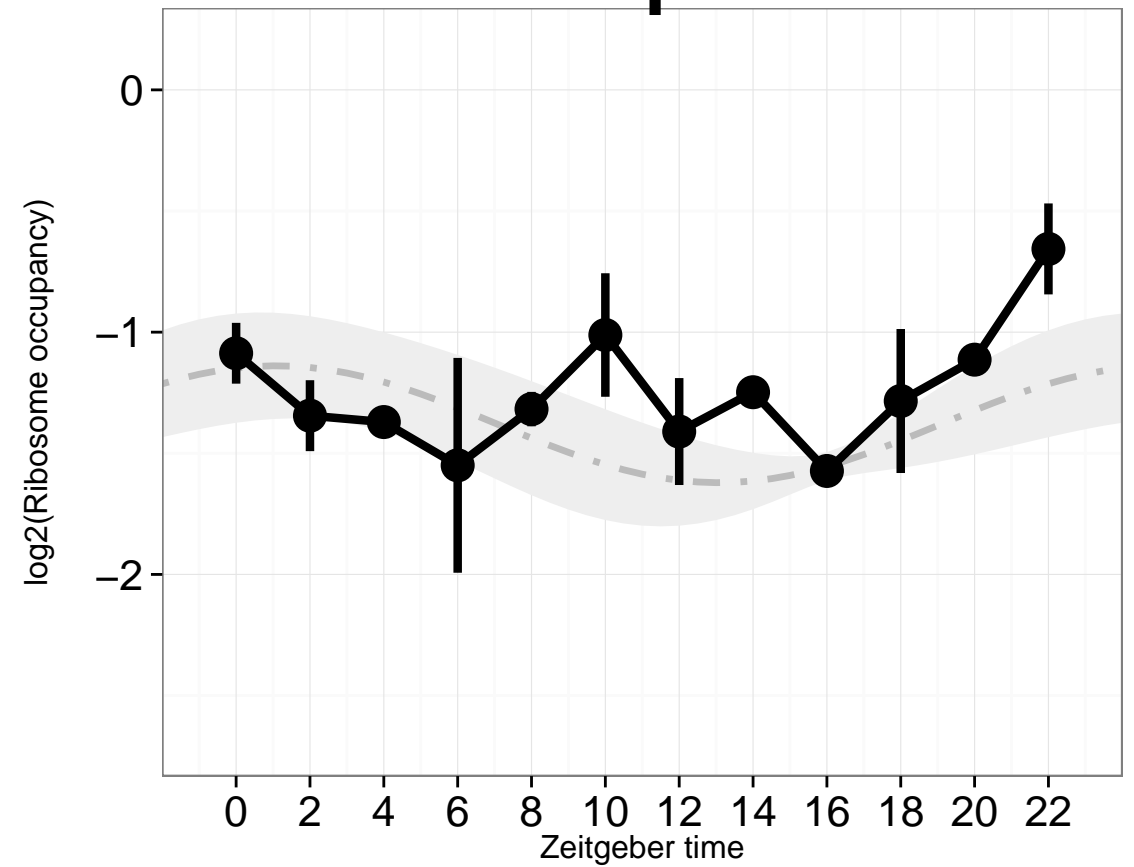

Supplement: SuppDataset_1.zip [file Phospho2_set_A.pdf › Supplemental Dataset 1/A-mRNA_nonrhyth_translation_nonrhyth/Phospho2_set_A.pdf]

# Phpt1

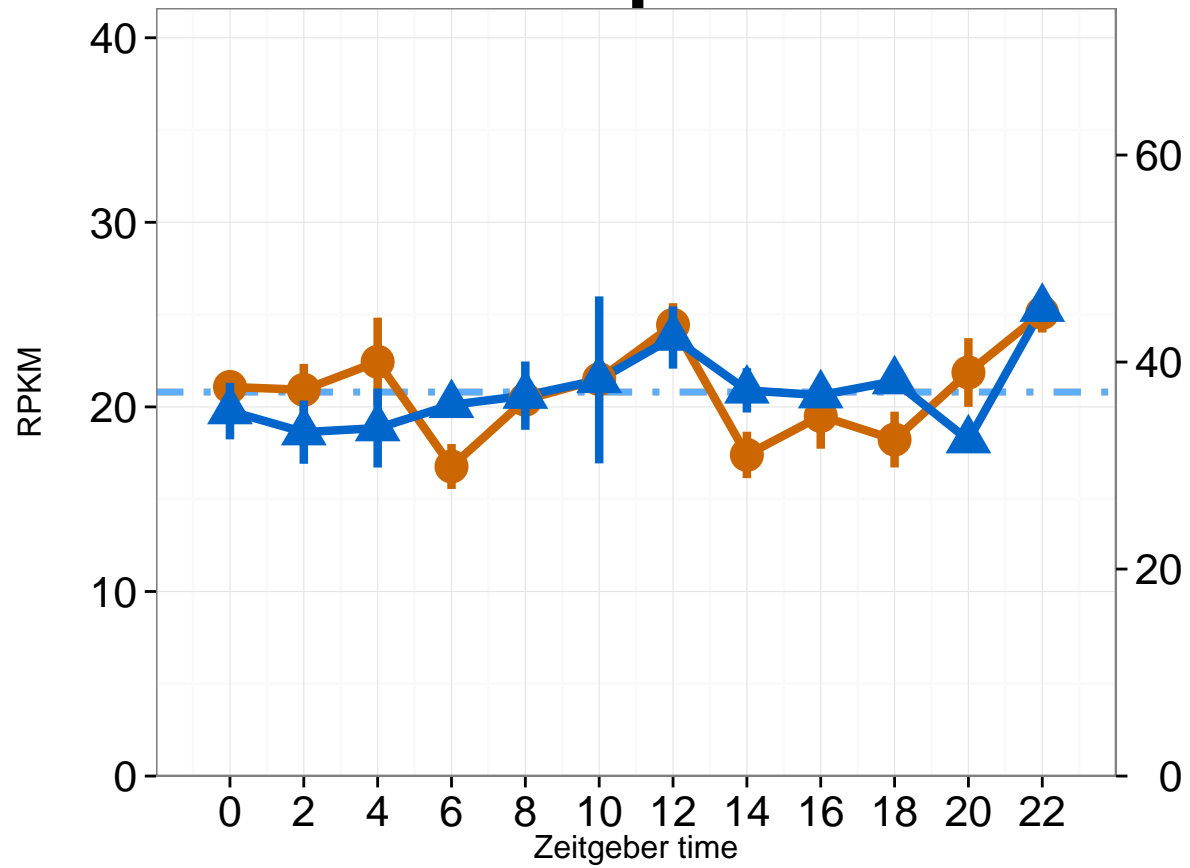

# Phpt1

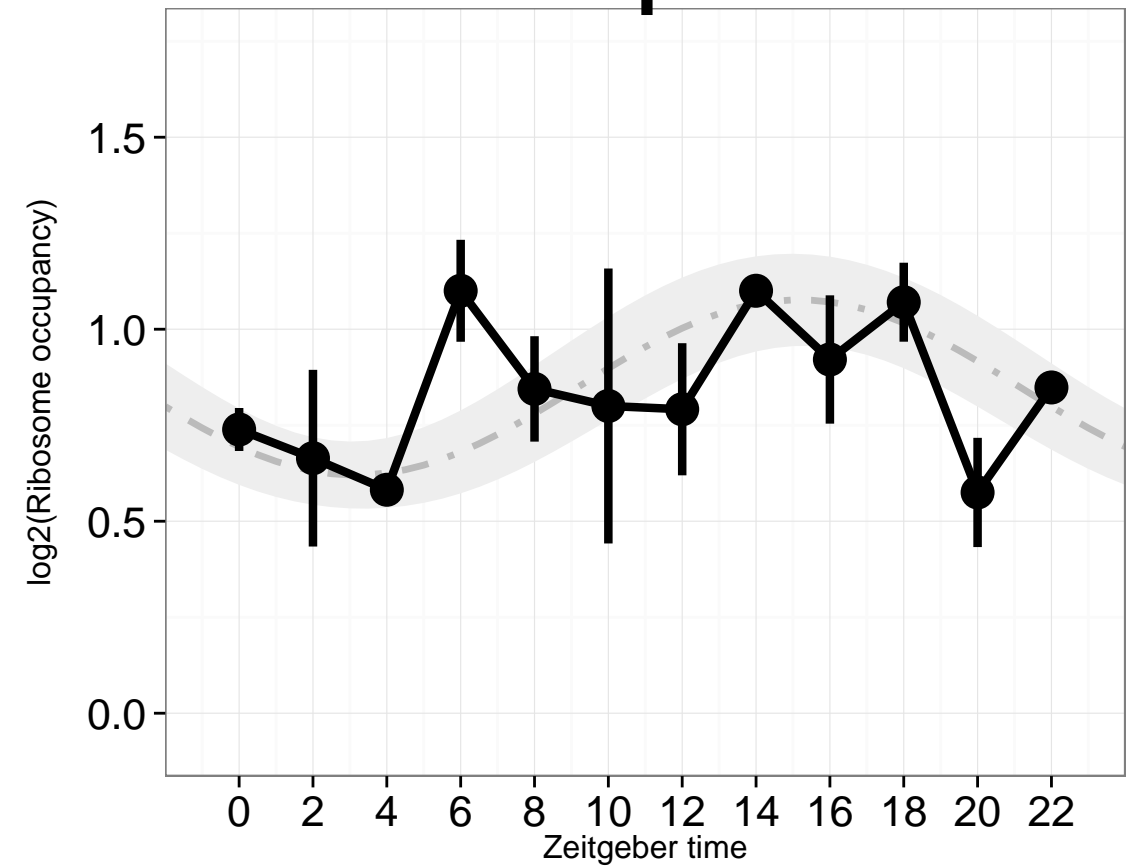

Supplement: SuppDataset_1.zip [file Phpt1_set_A.pdf › Supplemental Dataset 1/A-mRNA_nonrhyth_translation_nonrhyth/Phpt1_set_A.pdf]

## Phrf1

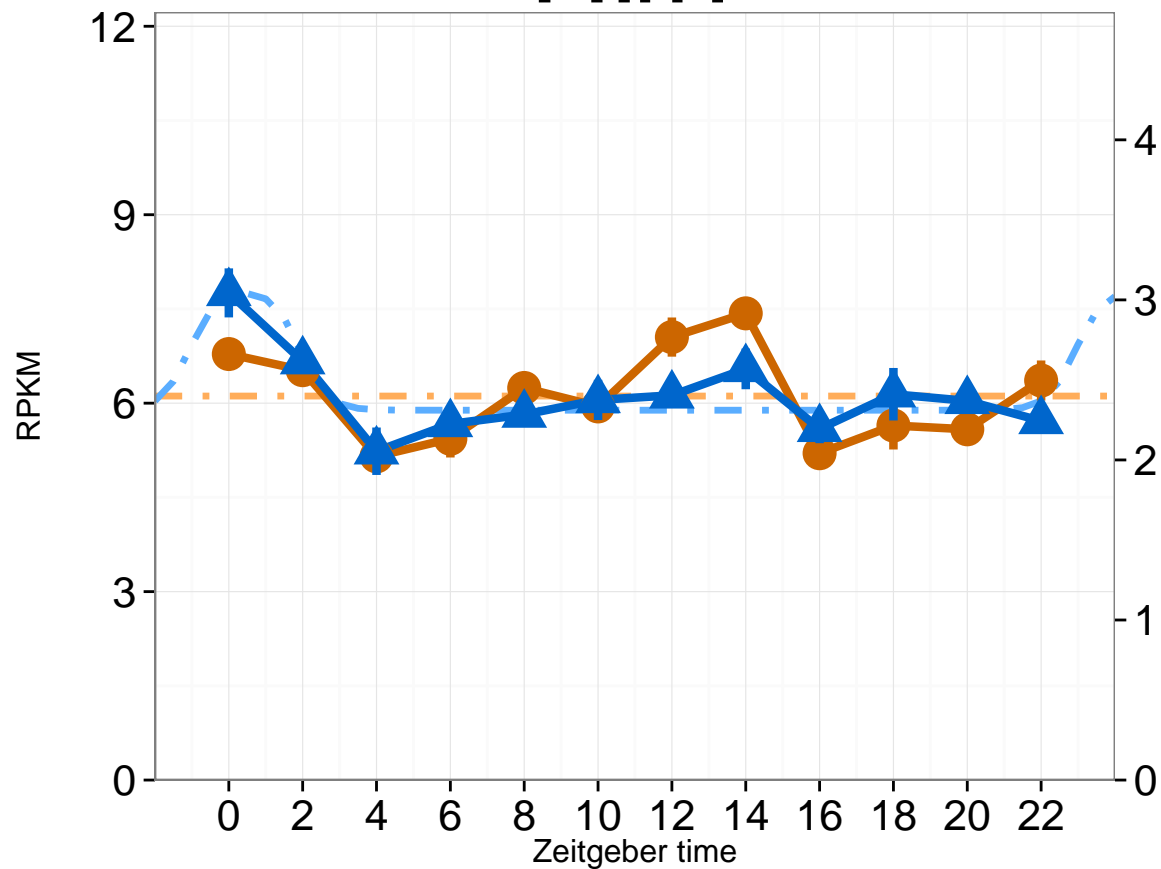

## Phrf1

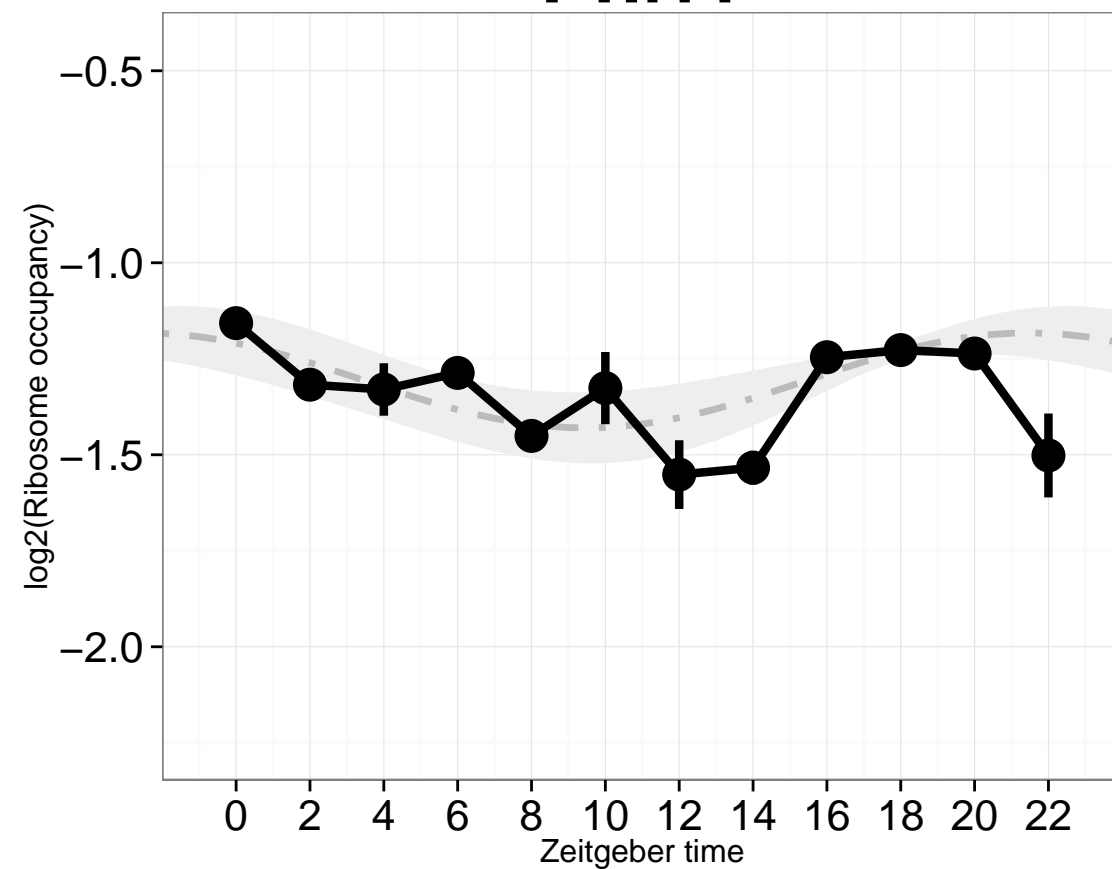

Supplement: SuppDataset_1.zip [file Phrf1_set_A.pdf › Supplemental Dataset 1/A-mRNA_nonrhyth_translation_nonrhyth/Phrf1_set_A.pdf]

# Phtf1

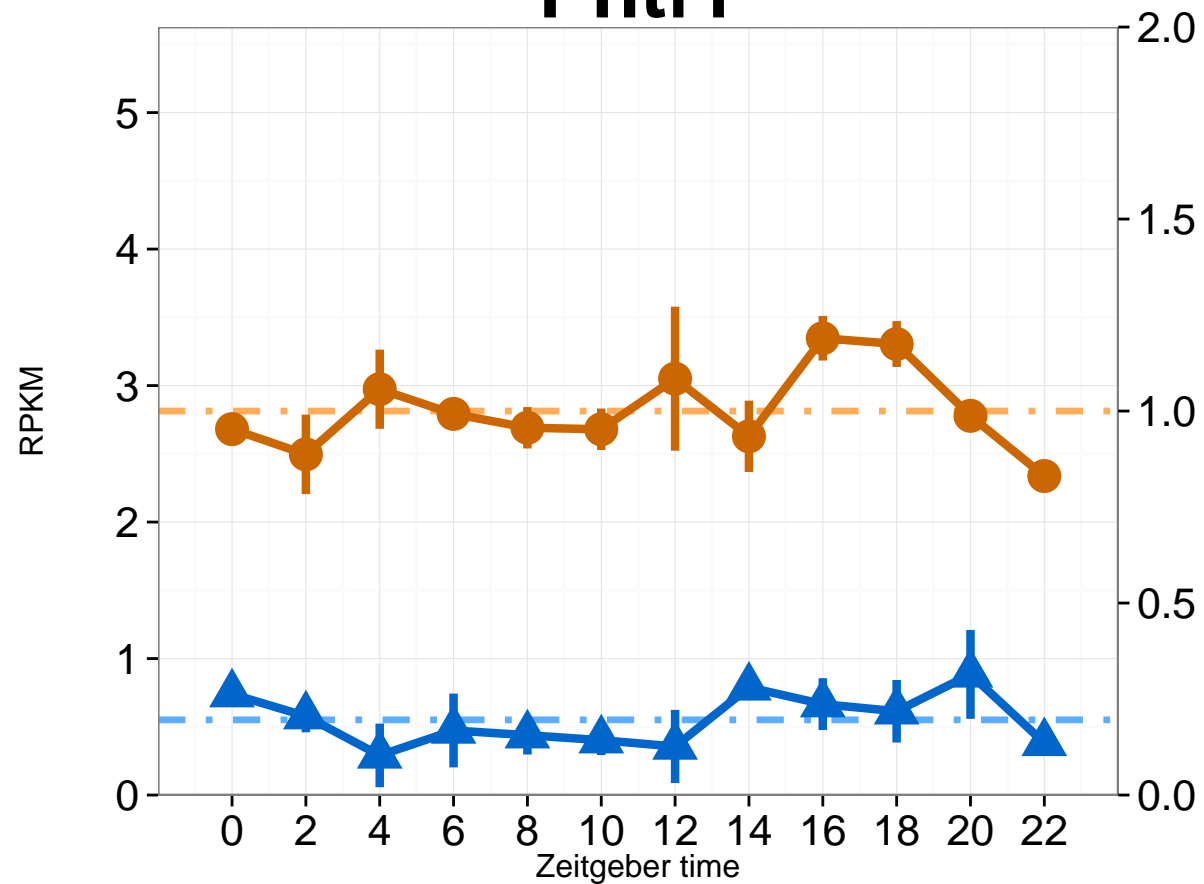

# Phtf1

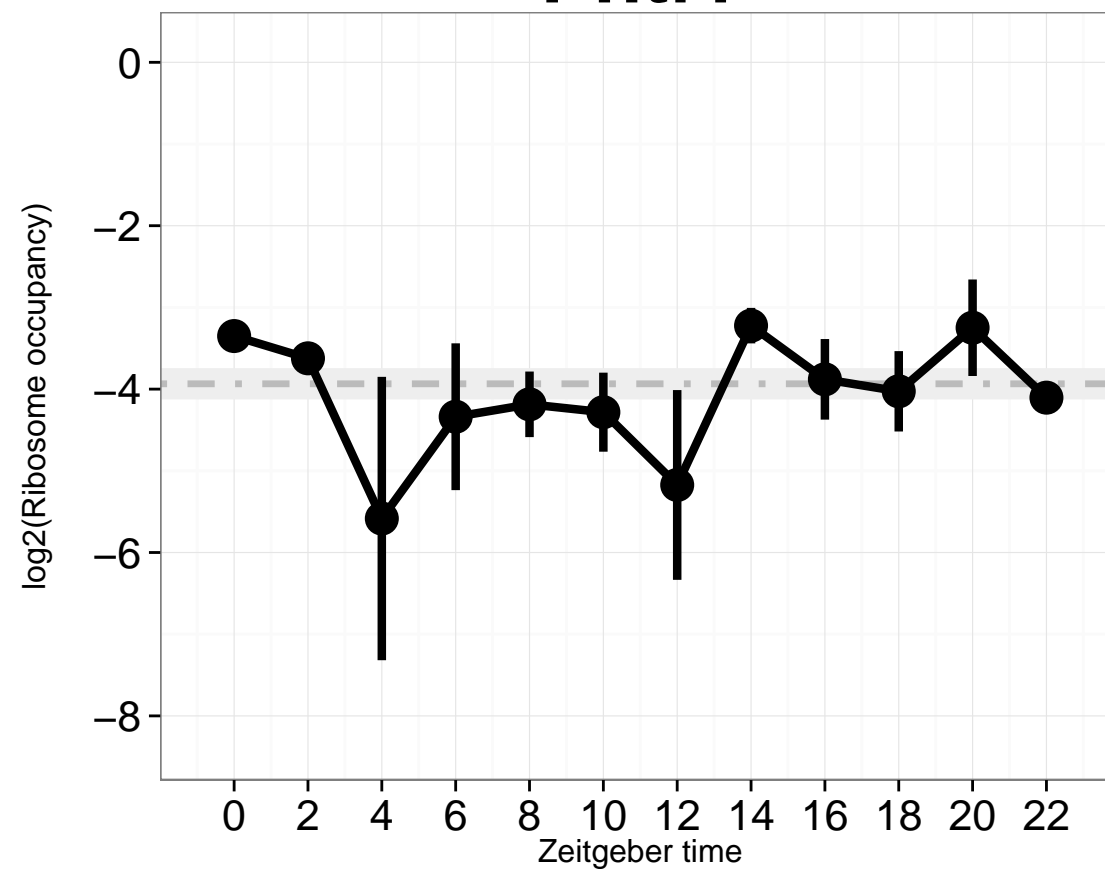

Supplement: SuppDataset_1.zip [file Phtf1_set_A.pdf › Supplemental Dataset 1/A-mRNA_nonrhyth_translation_nonrhyth/Phtf1_set_A.pdf]

# Phyh

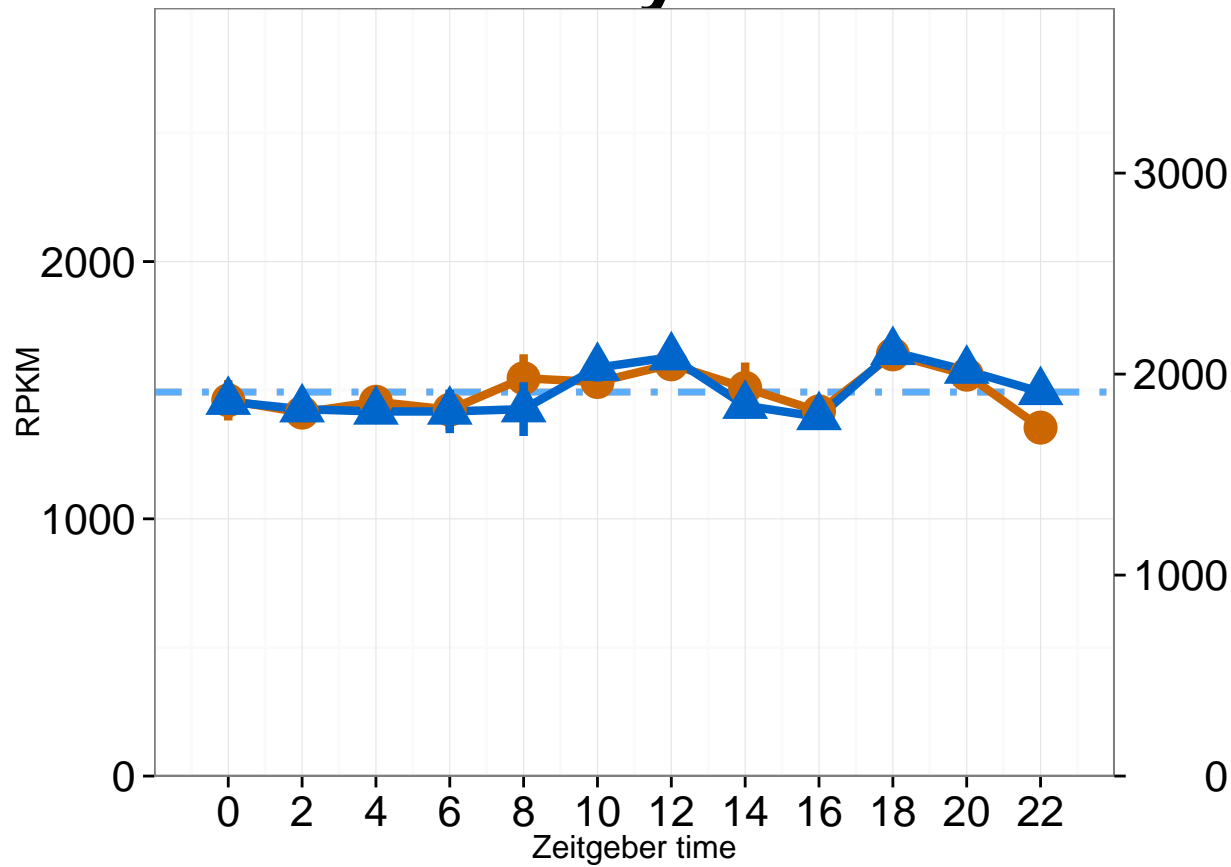

# Phyh

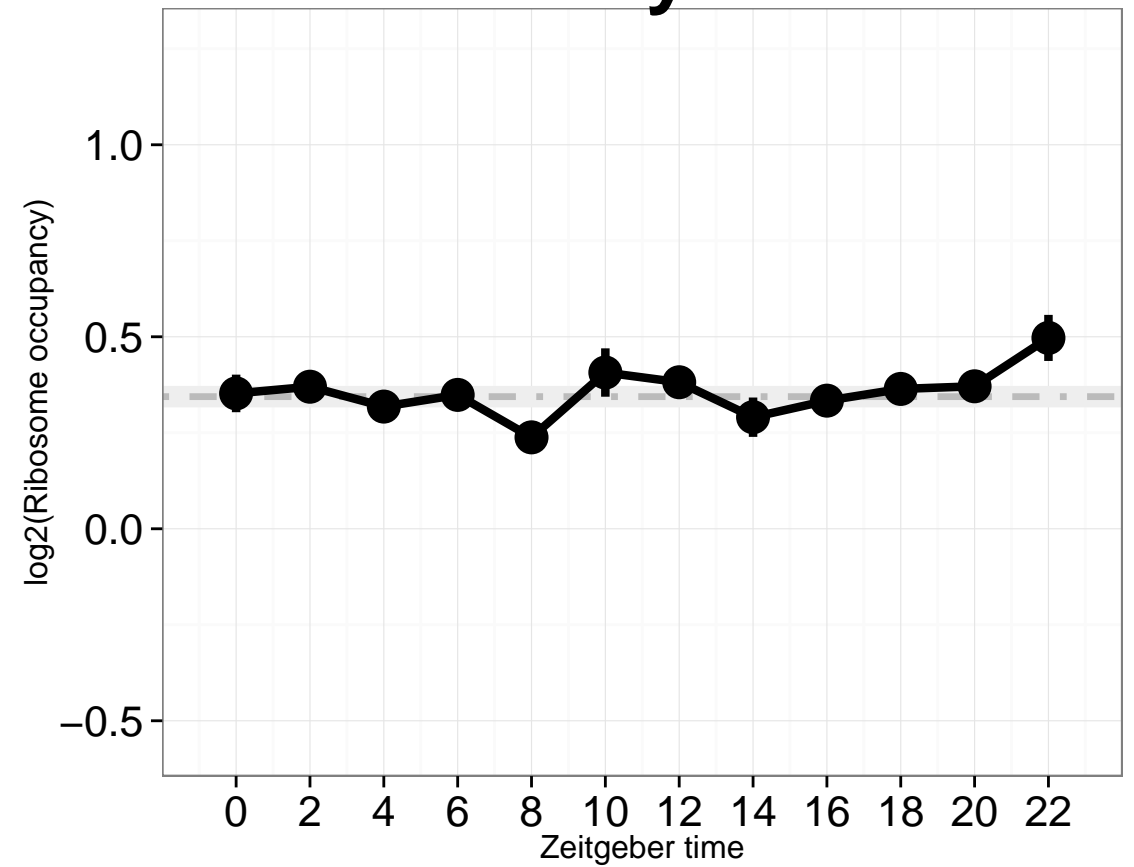

Supplement: SuppDataset_1.zip [file Phyh_set_A.pdf › Supplemental Dataset 1/A-mRNA_nonrhyth_translation_nonrhyth/Phyh_set_A.pdf]

# Phyhd1

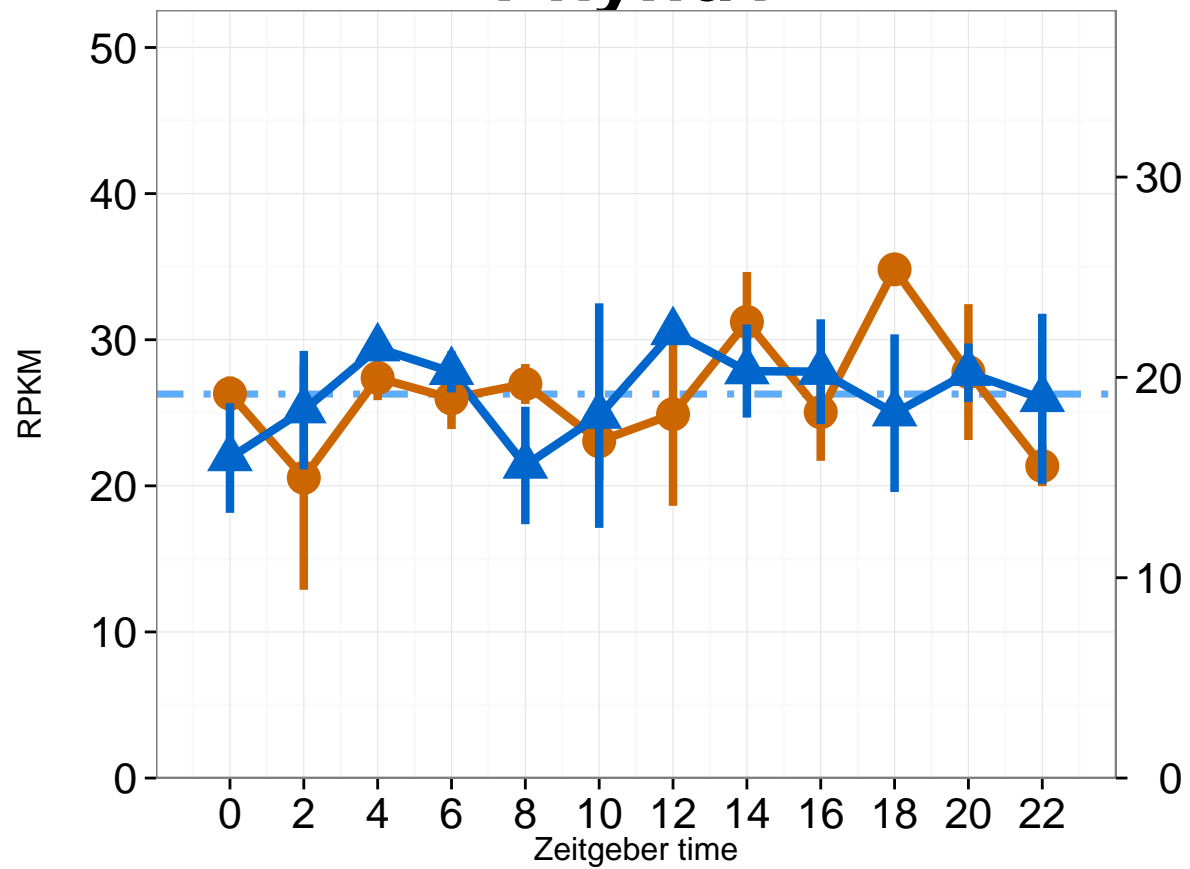

# Phyhd1

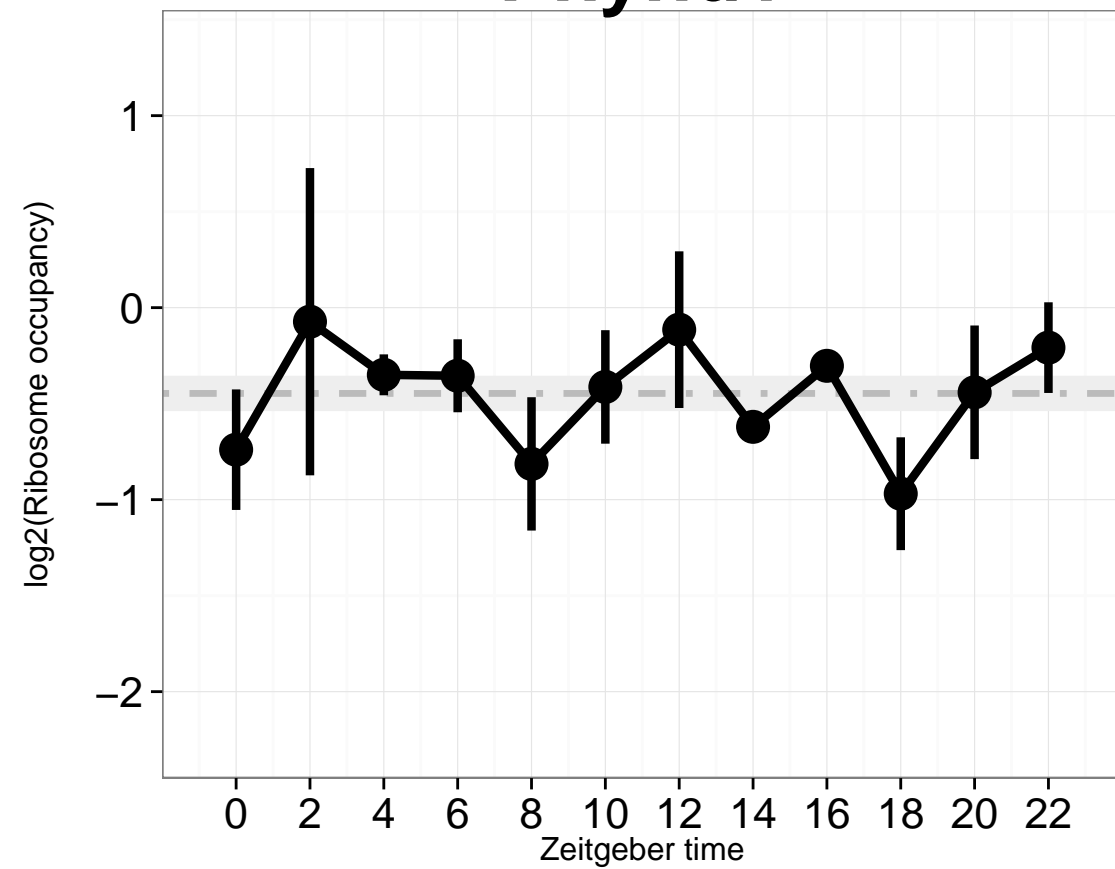

Supplement: SuppDataset_1.zip [file Phyhd1_set_A.pdf › Supplemental Dataset 1/A-mRNA_nonrhyth_translation_nonrhyth/Phyhd1_set_A.pdf]

# Phykpl

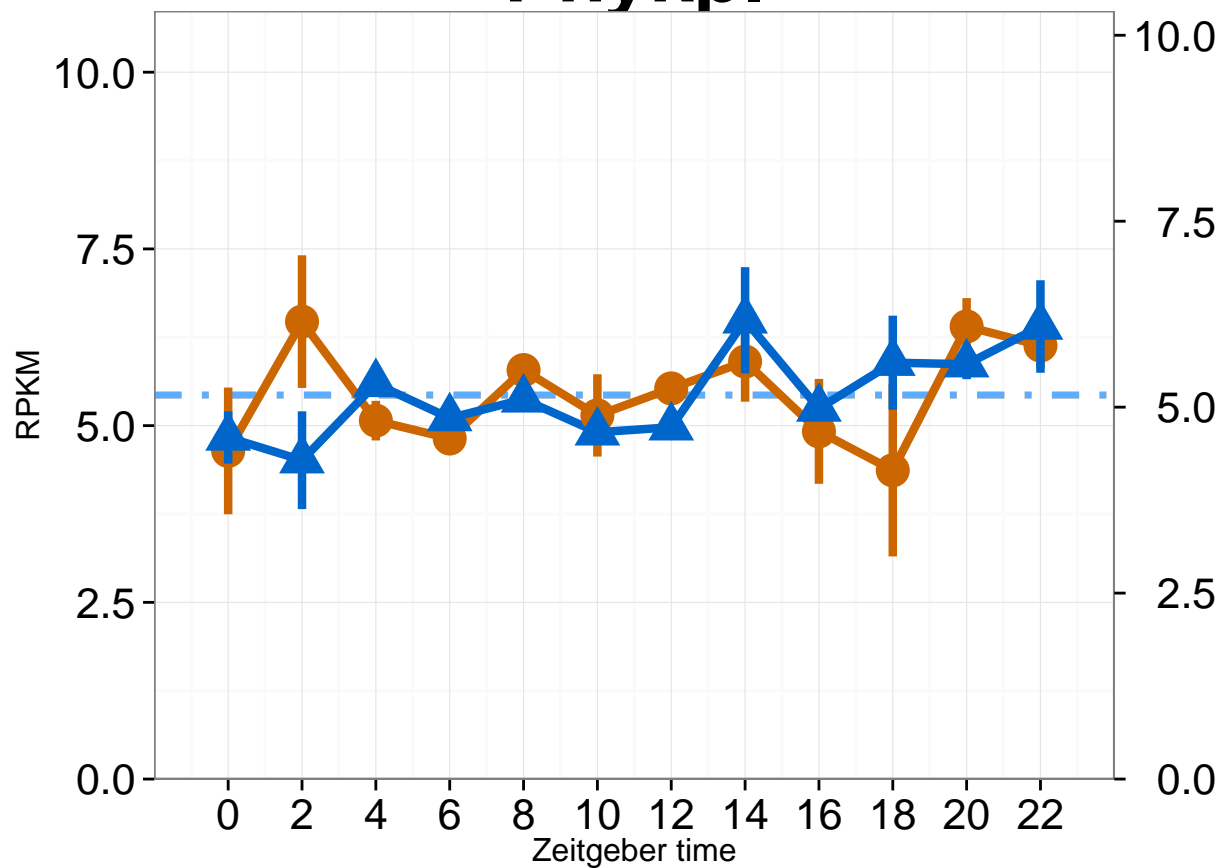

# Phykpl

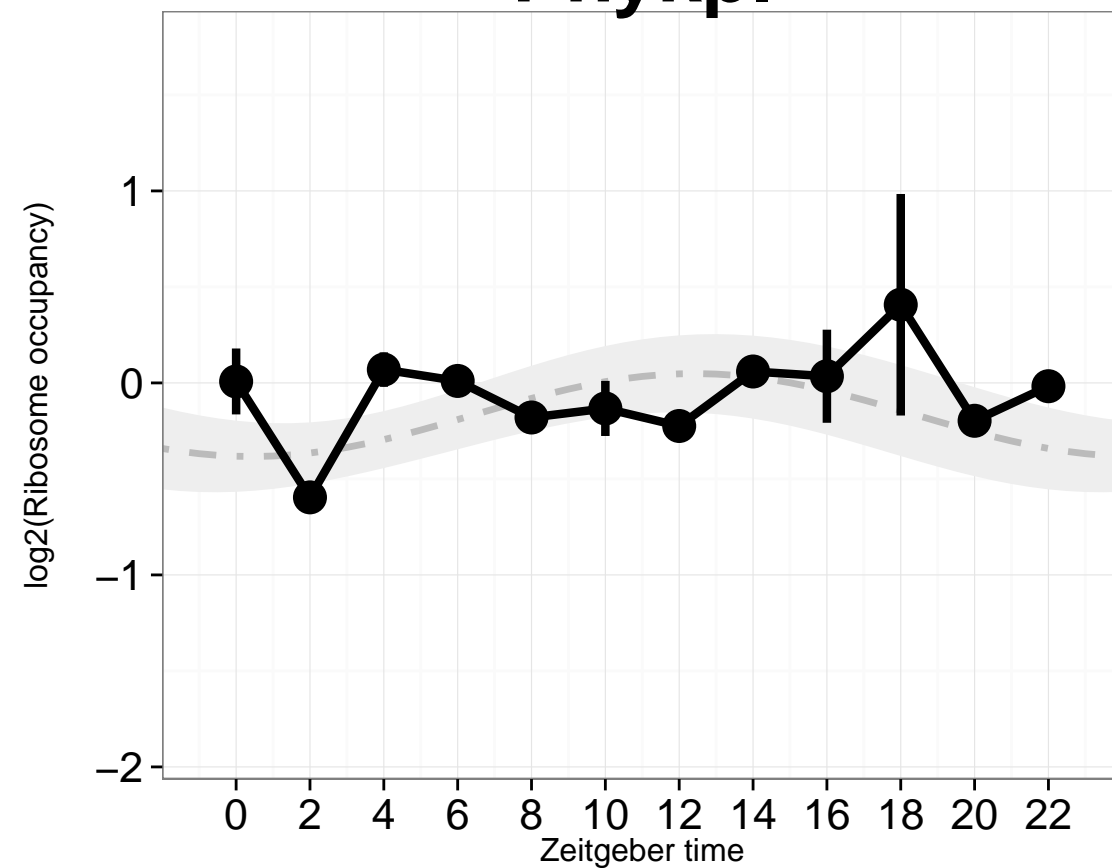

Supplement: SuppDataset_1.zip [file Phykpl_set_A.pdf › Supplemental Dataset 1/A-mRNA_nonrhyth_translation_nonrhyth/Phykpl_set_A.pdf]

# Pi4ka

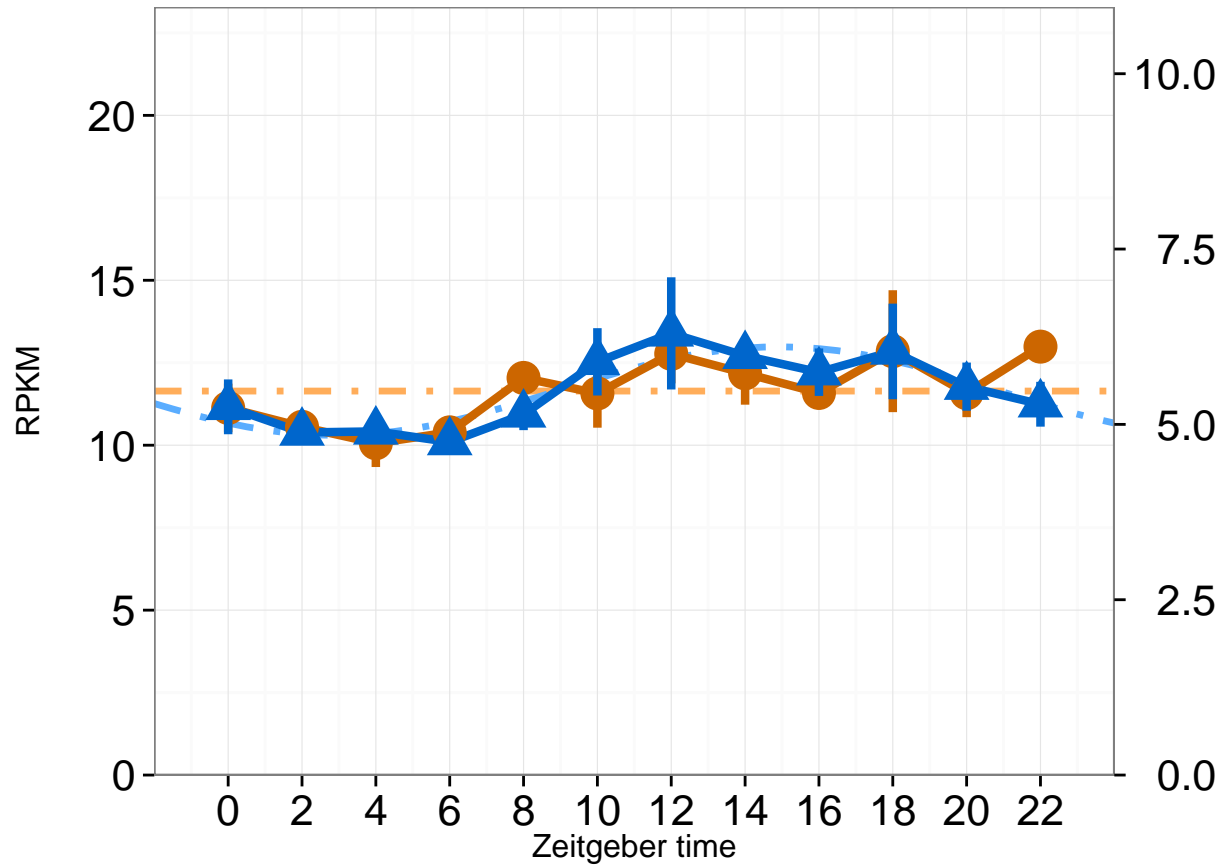

# Pi4ka

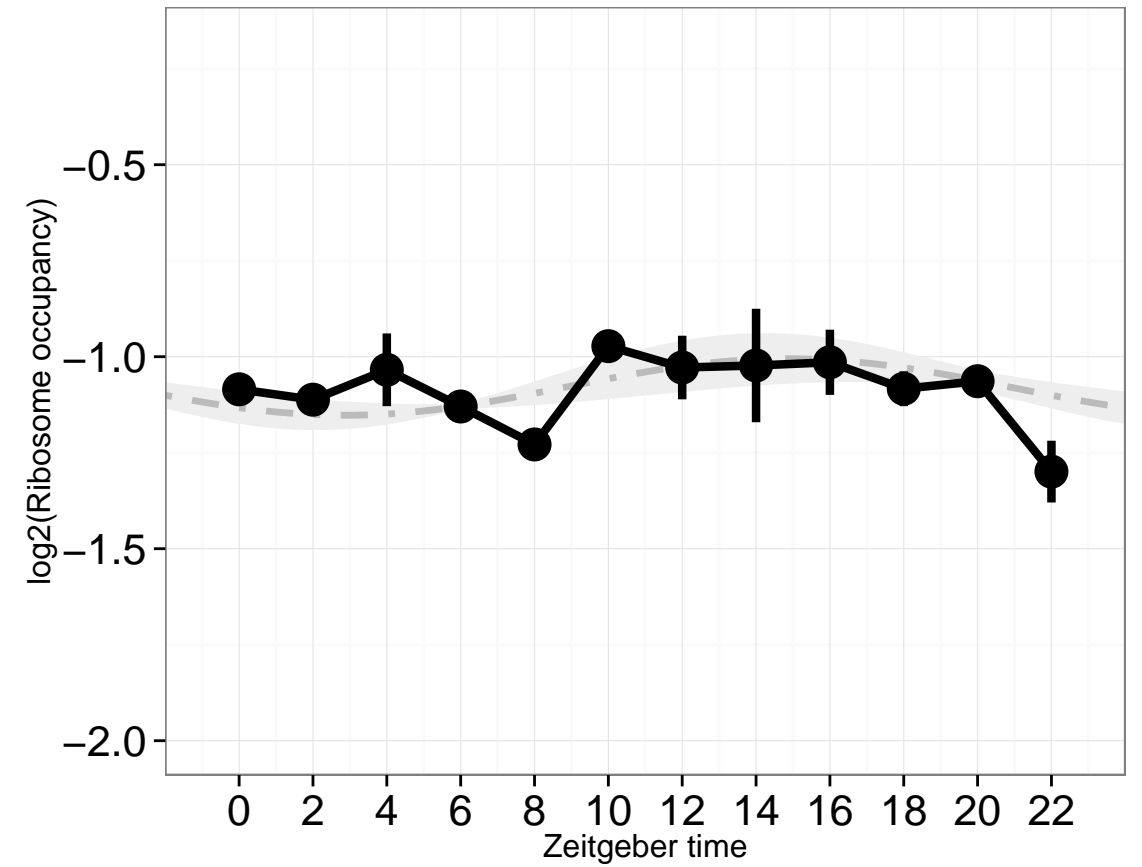

Supplement: SuppDataset_1.zip [file Pi4ka_set_A.pdf › Supplemental Dataset 1/A-mRNA_nonrhyth_translation_nonrhyth/Pi4ka_set_A.pdf]

# Pi4kb

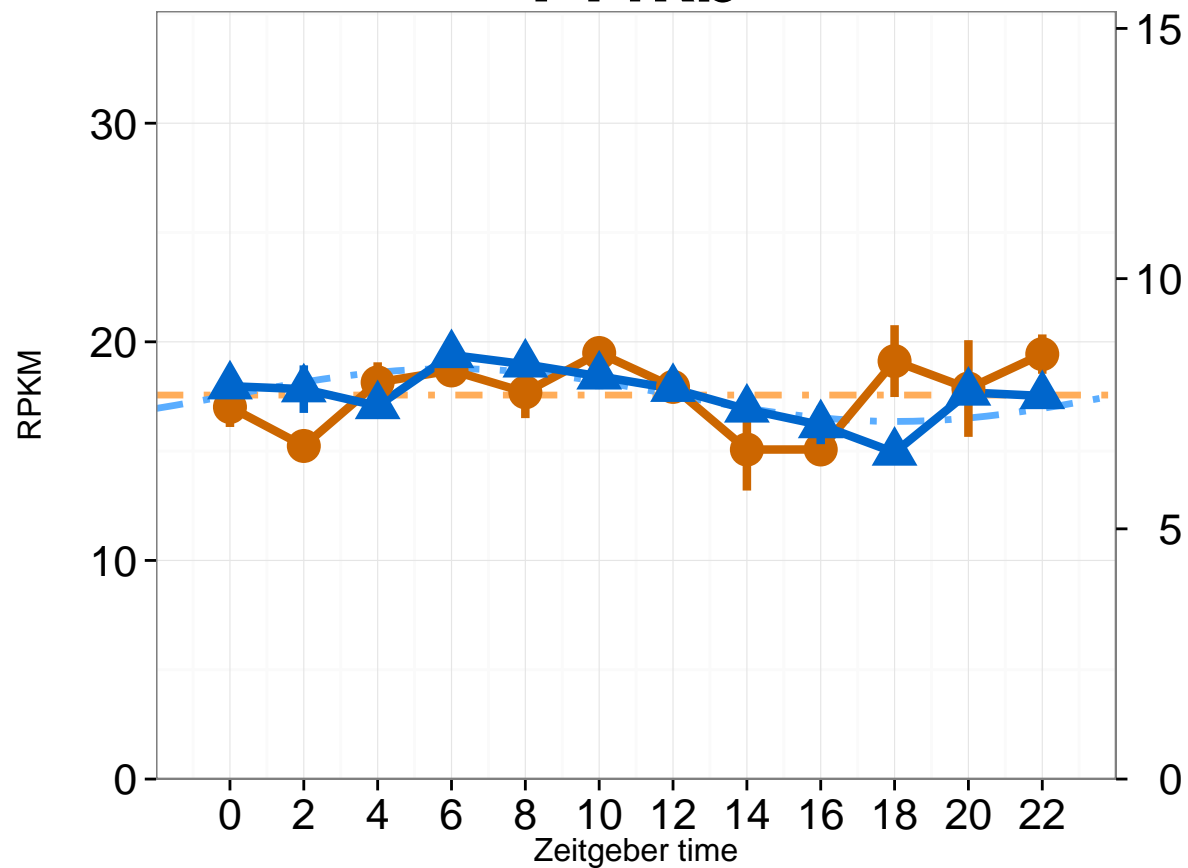

# Pi4kb

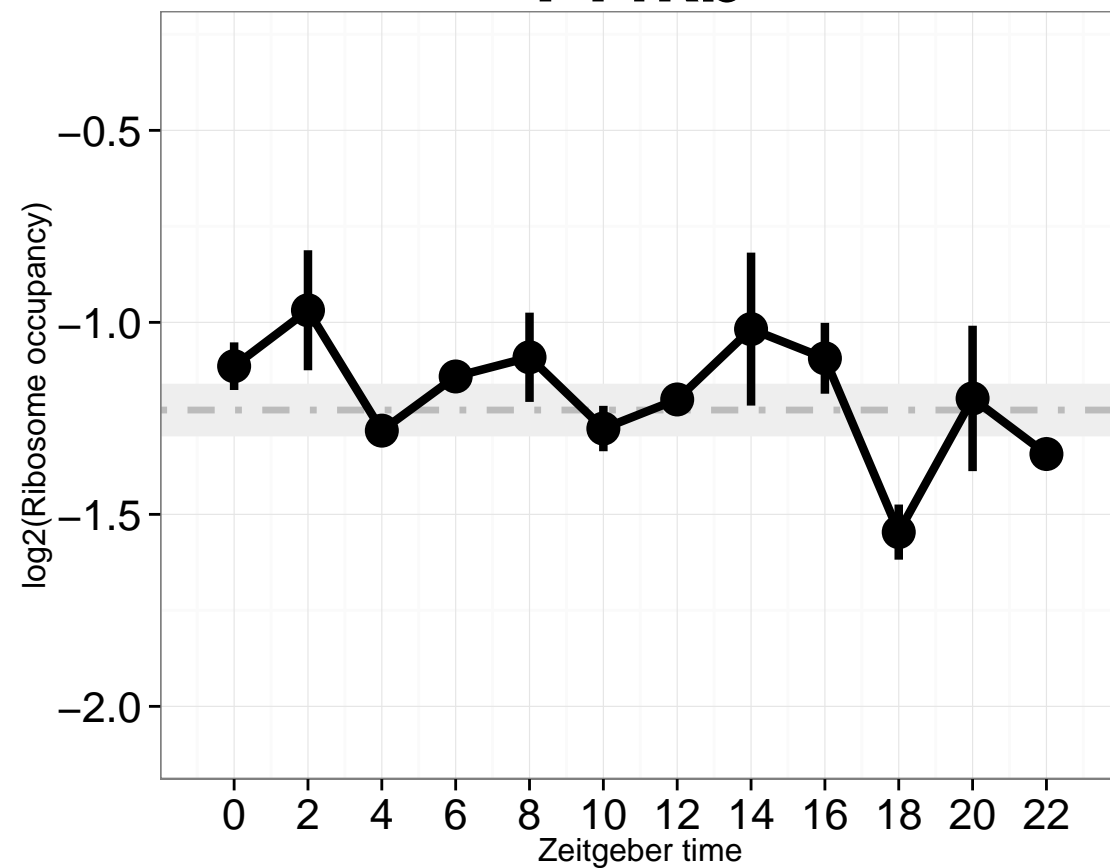

Supplement: SuppDataset_1.zip [file Pi4kb_set_A.pdf › Supplemental Dataset 1/A-mRNA_nonrhyth_translation_nonrhyth/Pi4kb_set_A.pdf]

## Pias1

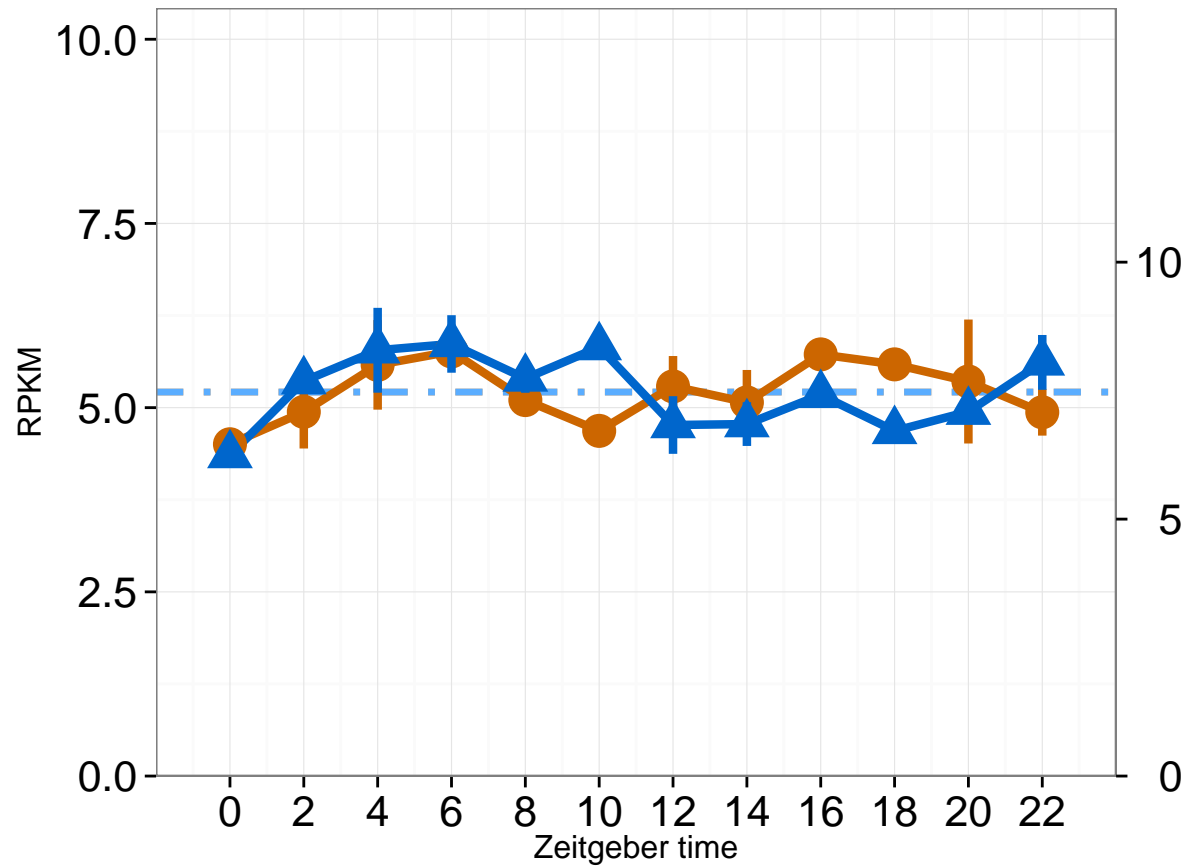

## Pias1

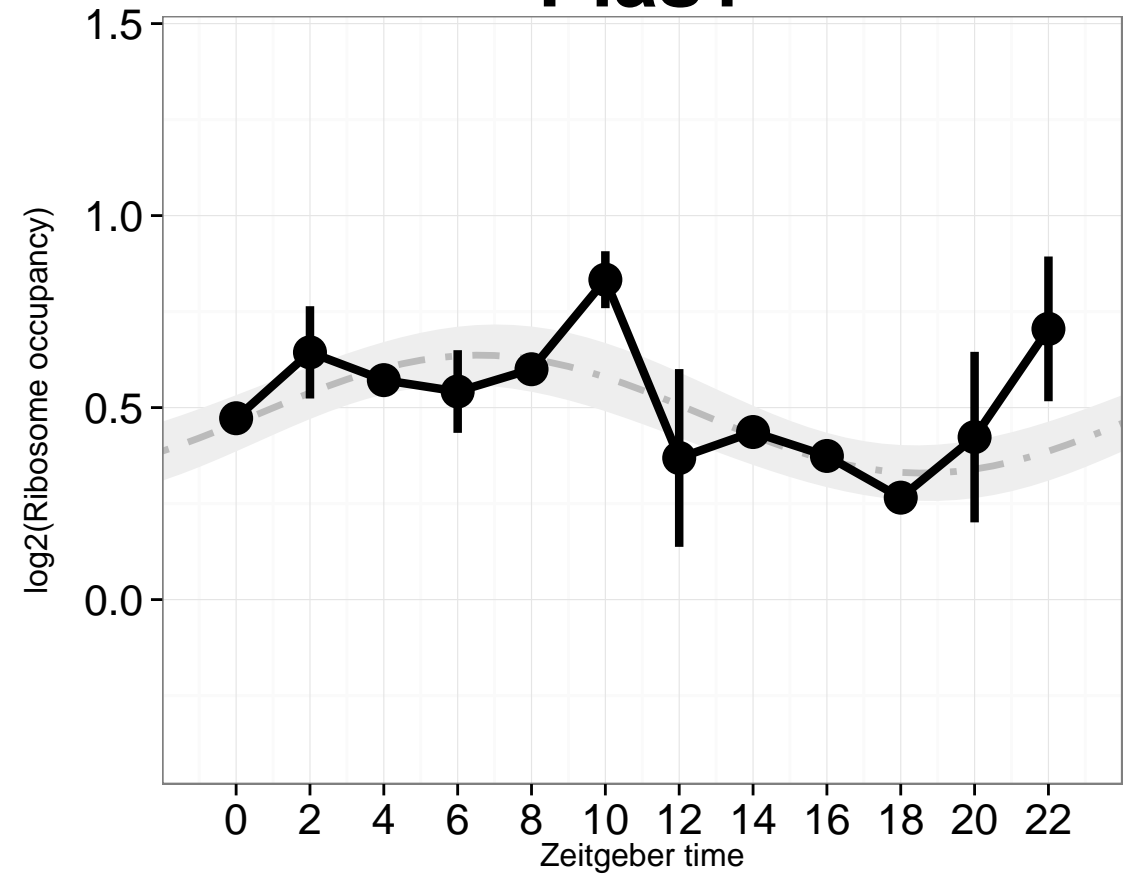

Supplement: SuppDataset_1.zip [file Pias1_set_A.pdf › Supplemental Dataset 1/A-mRNA_nonrhyth_translation_nonrhyth/Pias1_set_A.pdf]

## Pias2

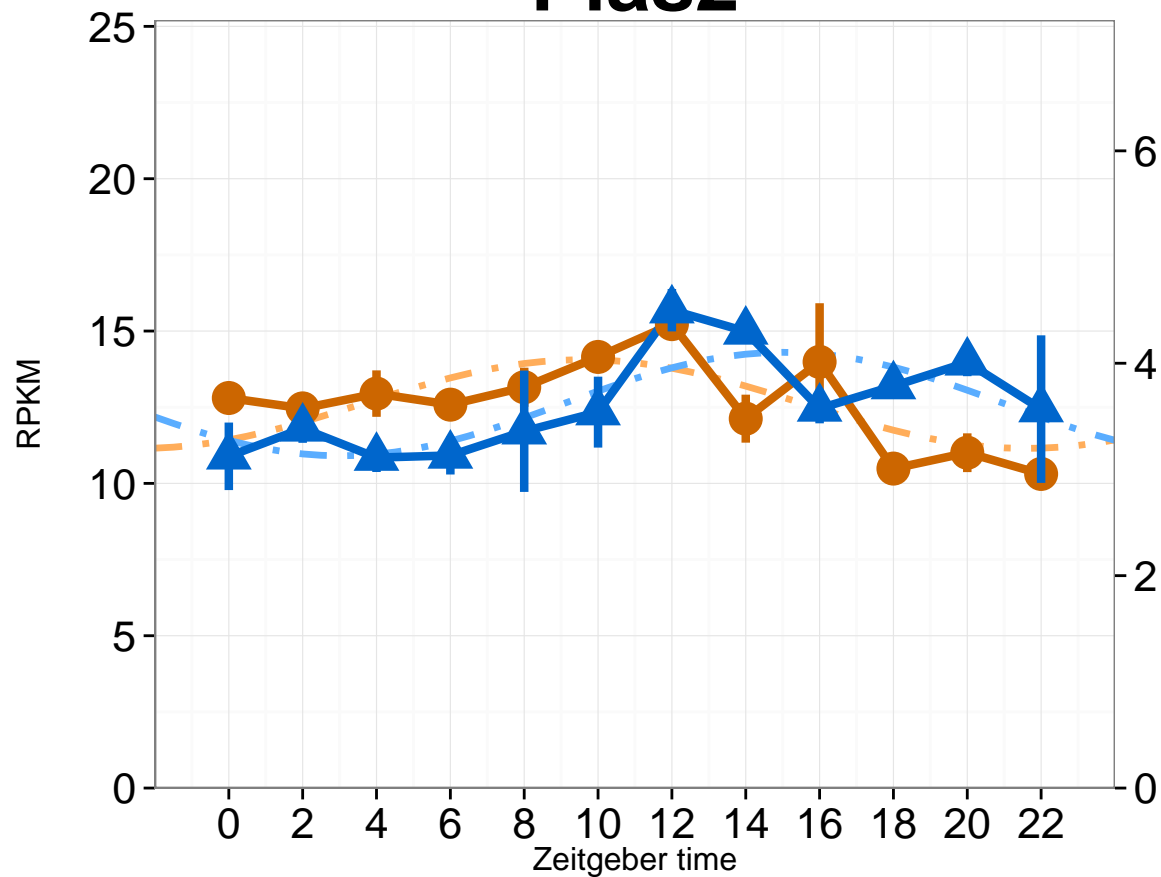

## Pias2

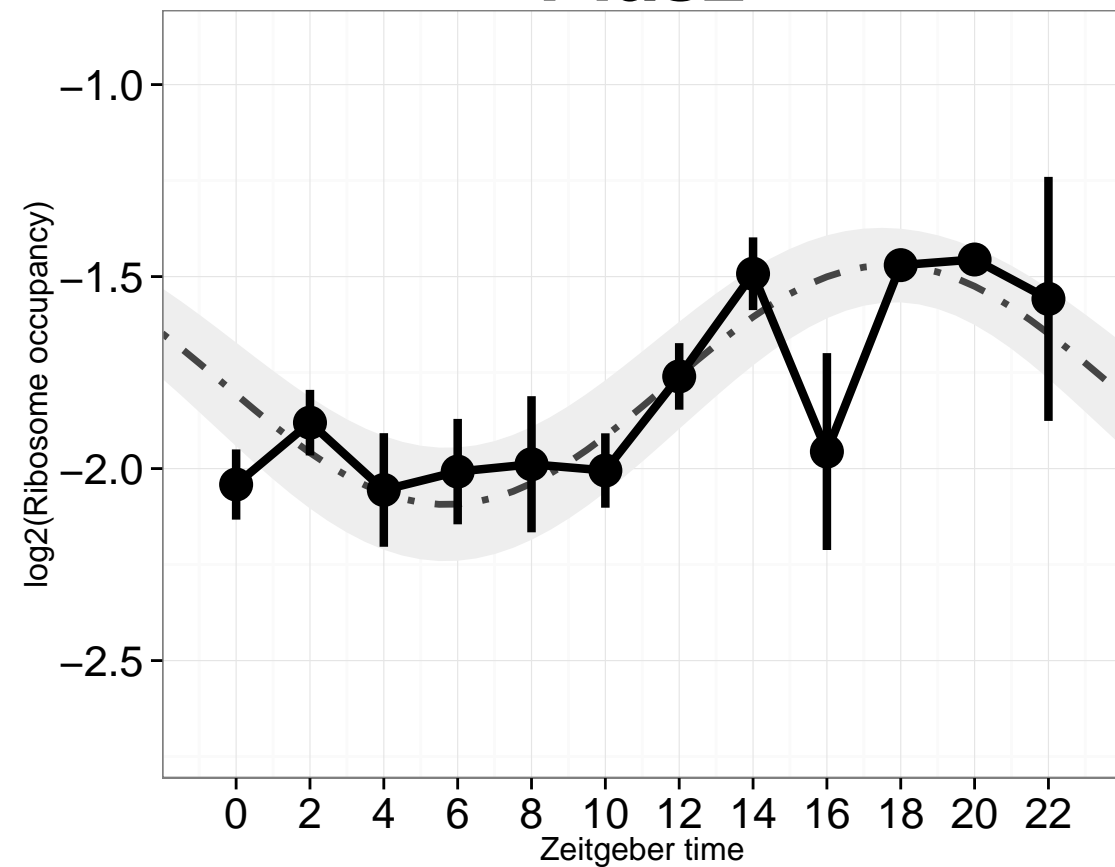

Supplement: SuppDataset_1.zip [file Pias2_set_A.pdf › Supplemental Dataset 1/A-mRNA_nonrhyth_translation_nonrhyth/Pias2_set_A.pdf]

## Pias3

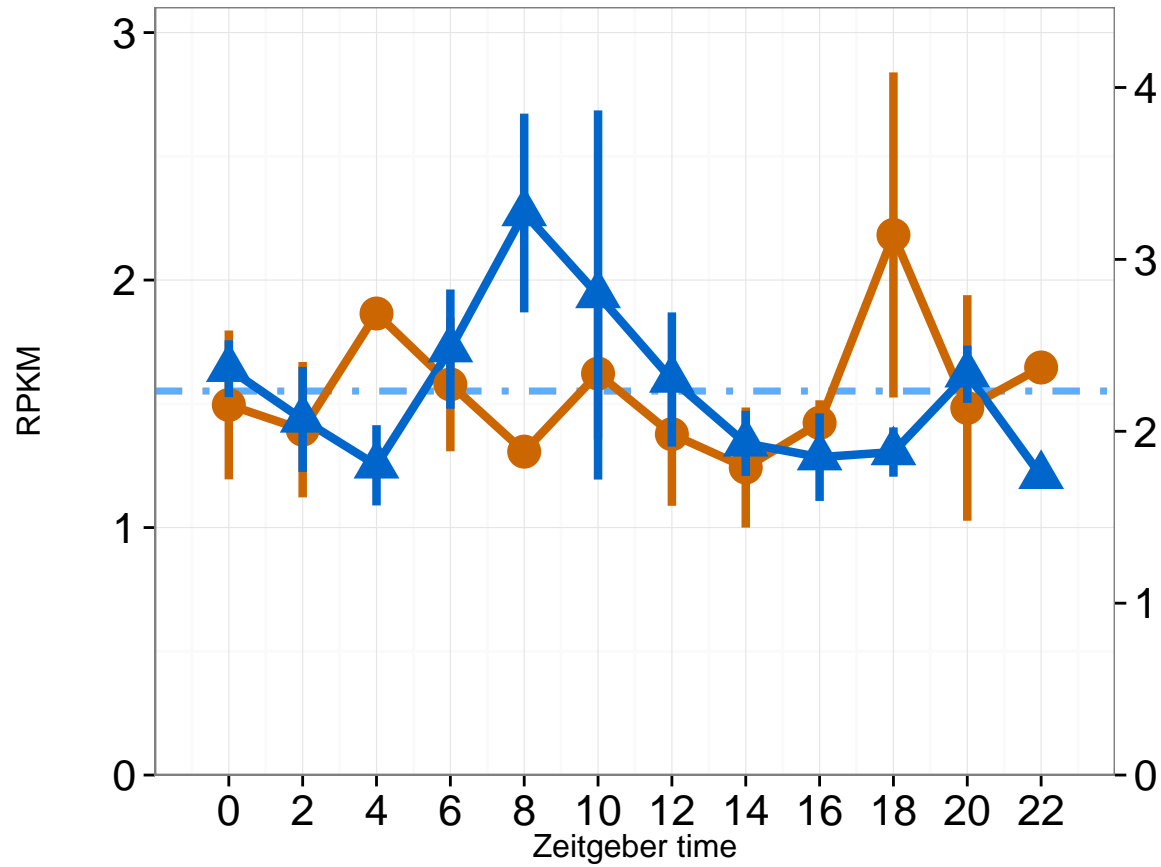

## Pias3

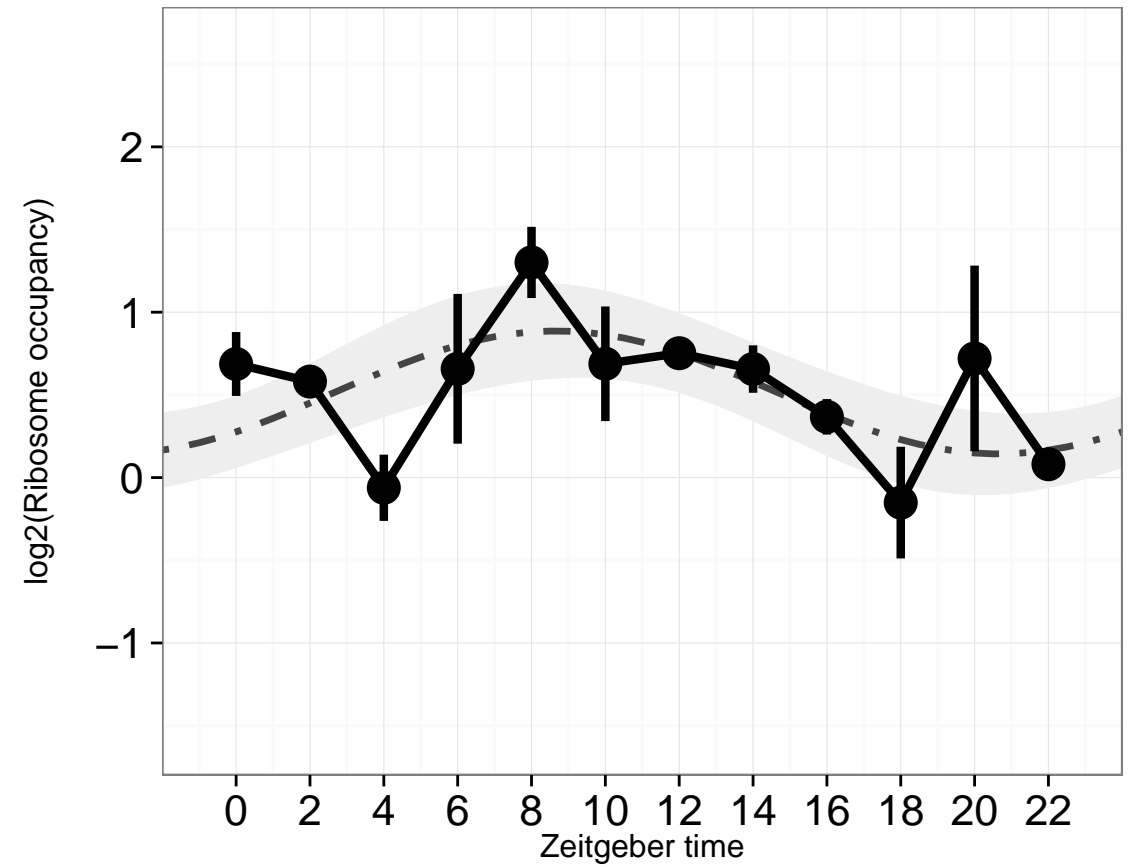

Supplement: SuppDataset_1.zip [file Pias3_set_A.pdf › Supplemental Dataset 1/A-mRNA_nonrhyth_translation_nonrhyth/Pias3_set_A.pdf]

## Pias4

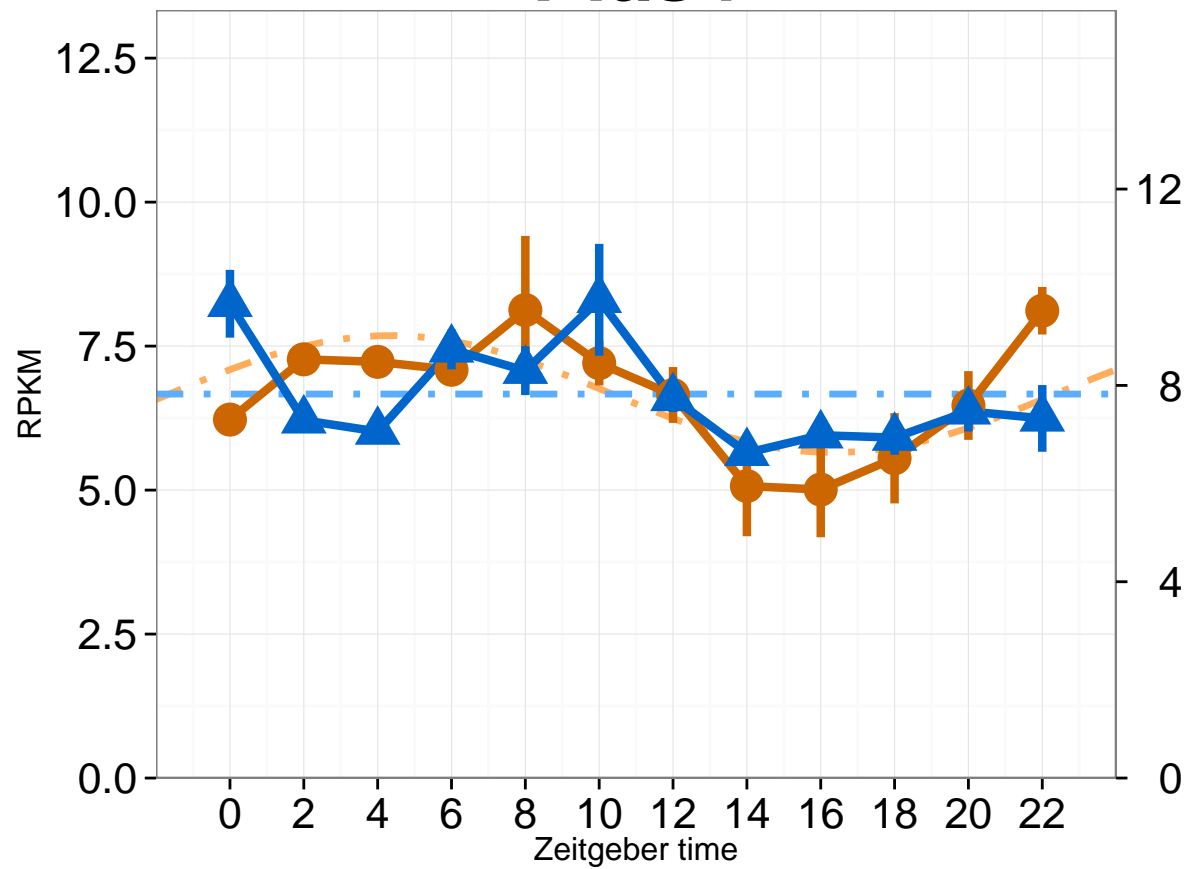

## Pias4

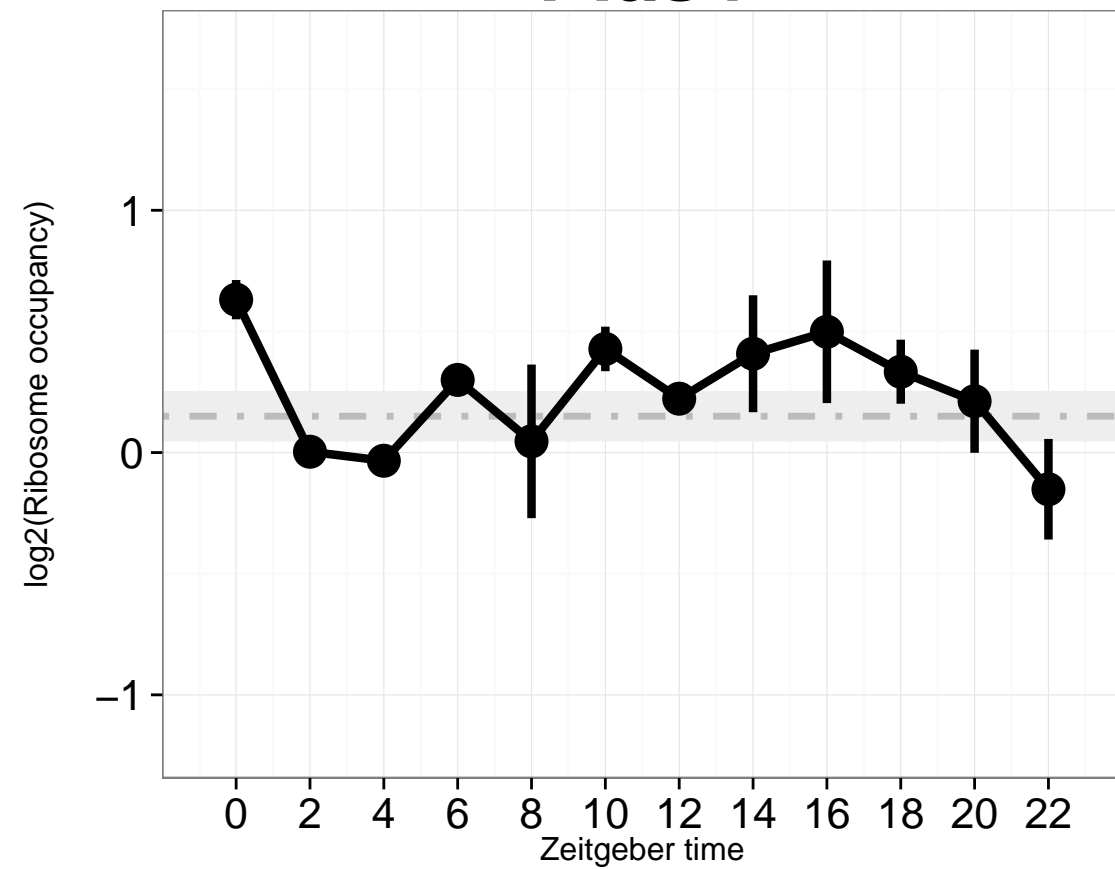

Supplement: SuppDataset_1.zip [file Pias4_set_A.pdf › Supplemental Dataset 1/A-mRNA_nonrhyth_translation_nonrhyth/Pias4_set_A.pdf]

## Picalm

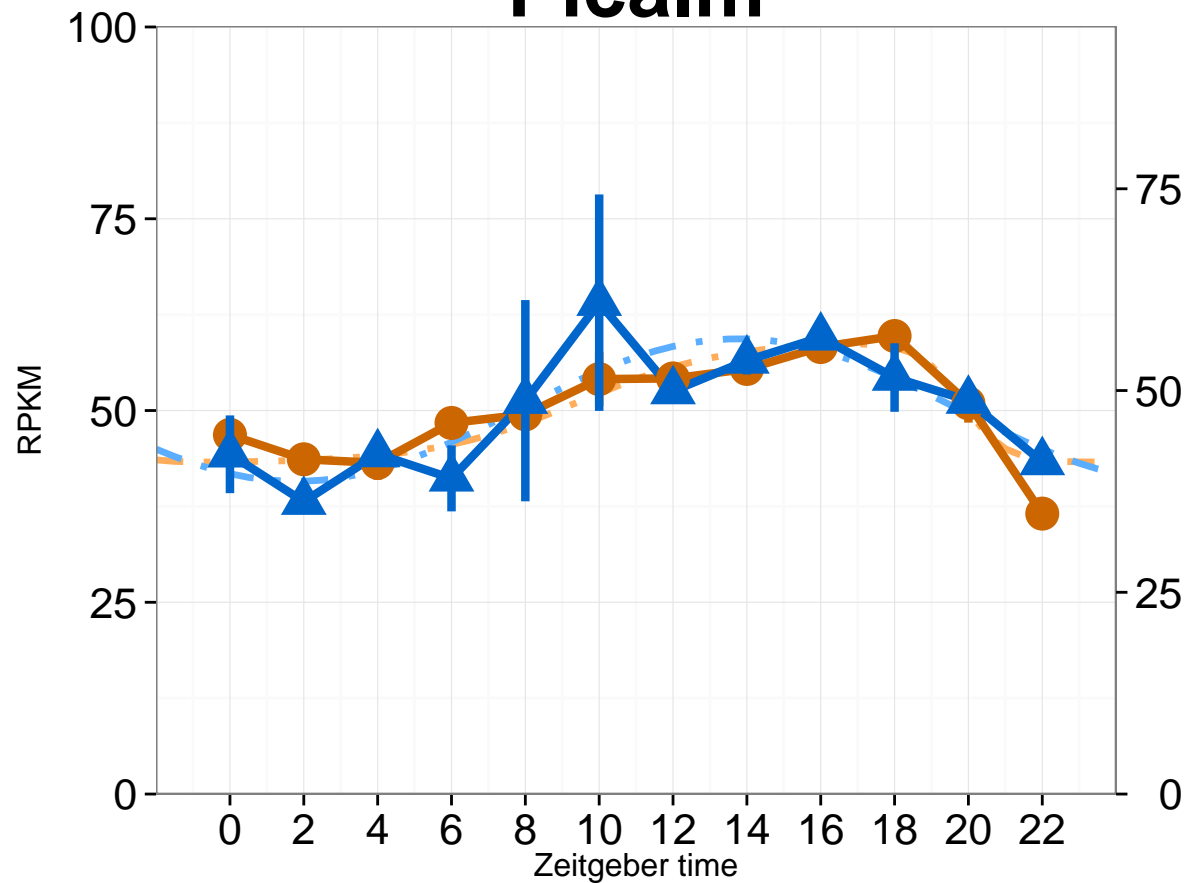

## Picalm

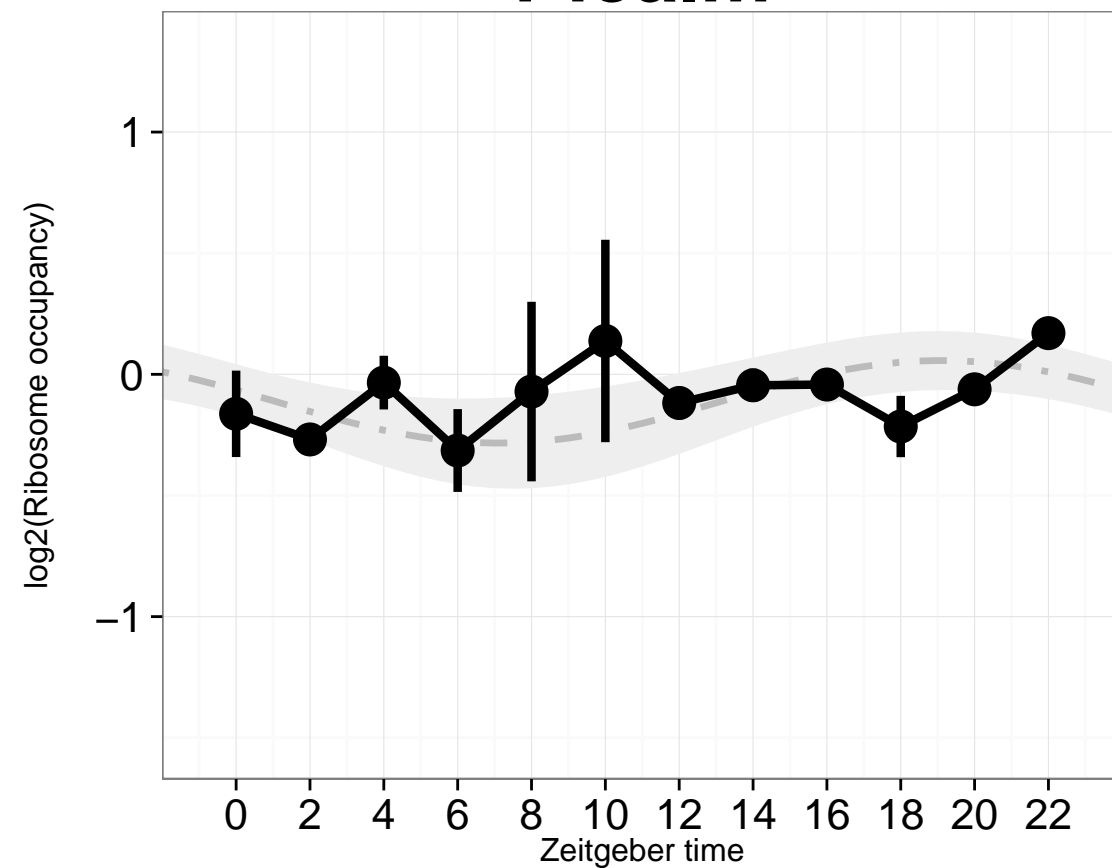

Supplement: SuppDataset_1.zip [file Picalm_set_A.pdf › Supplemental Dataset 1/A-mRNA_nonrhyth_translation_nonrhyth/Picalm_set_A.pdf]

# Pick1

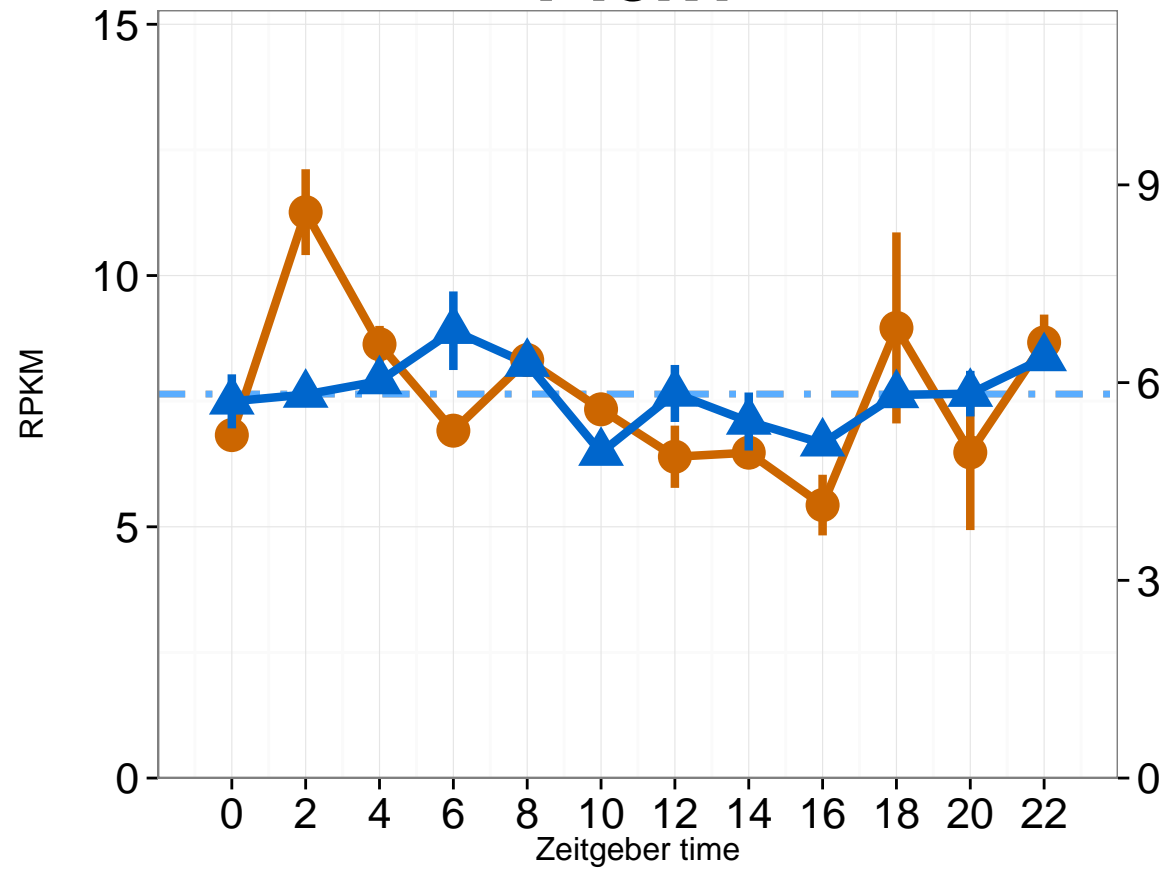

# Pick1

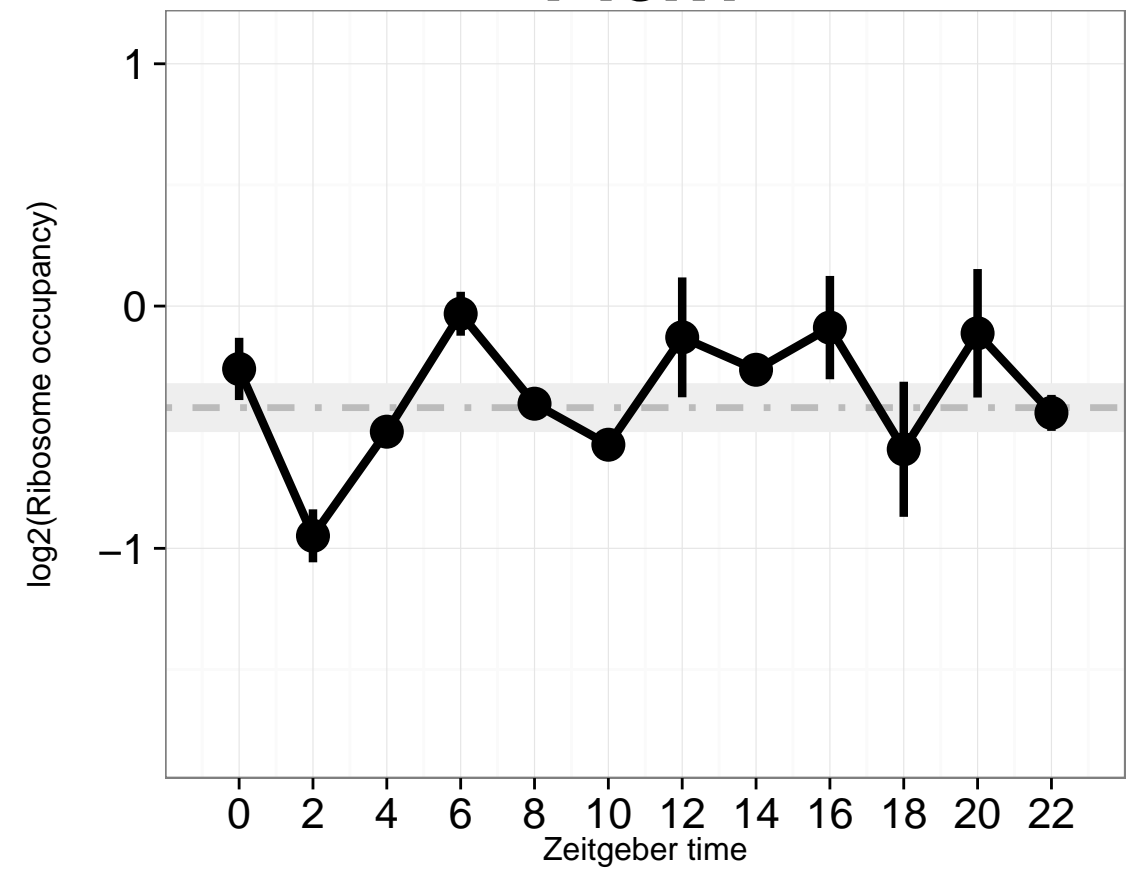

Supplement: SuppDataset_1.zip [file Pick1_set_A.pdf › Supplemental Dataset 1/A-mRNA_nonrhyth_translation_nonrhyth/Pick1_set_A.pdf]

## Pigb

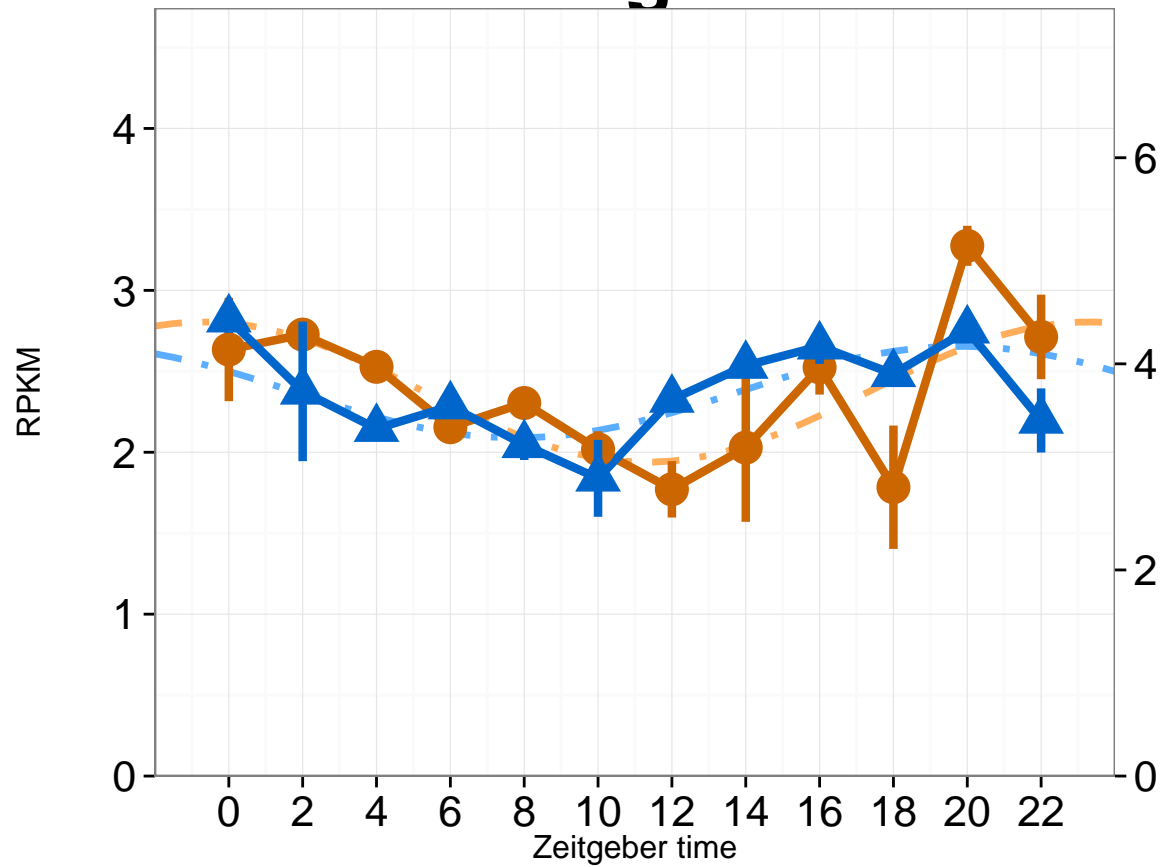

## Pigb

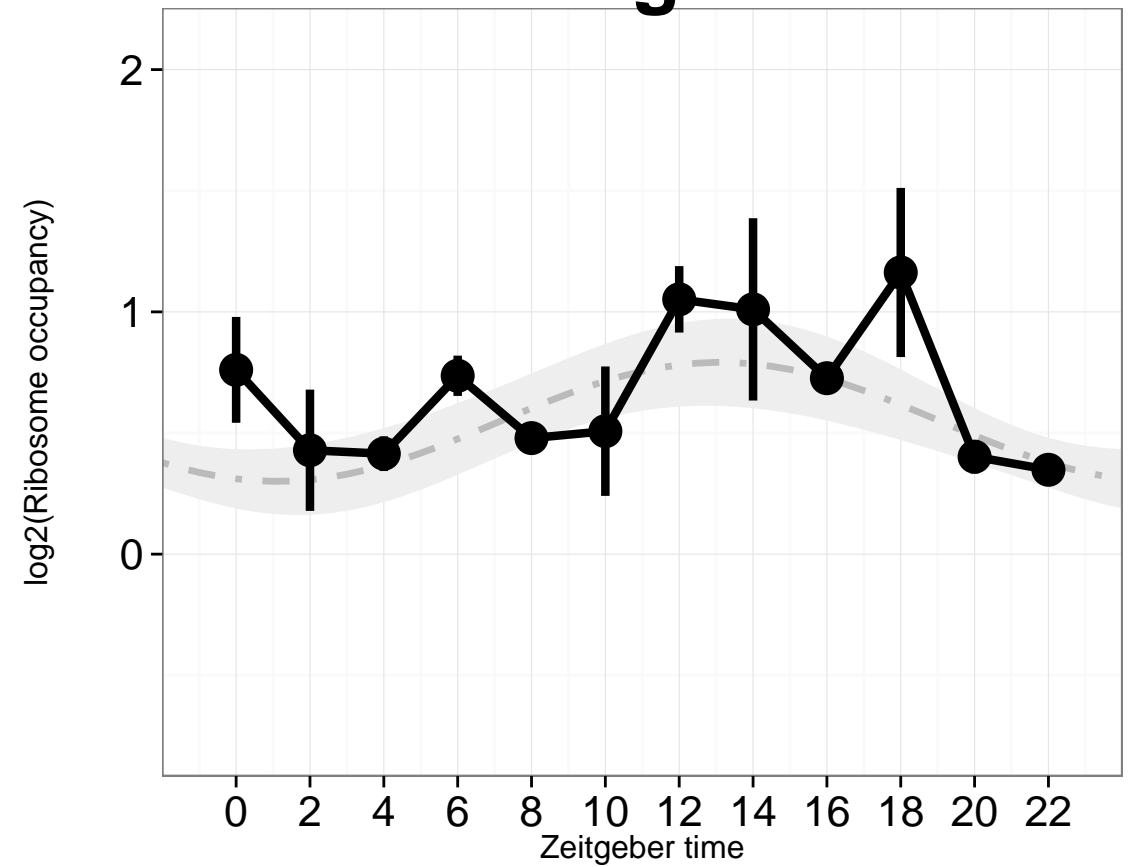

Supplement: SuppDataset_1.zip [file Pigb_set_A.pdf › Supplemental Dataset 1/A-mRNA_nonrhyth_translation_nonrhyth/Pigb_set_A.pdf]

## Pigc

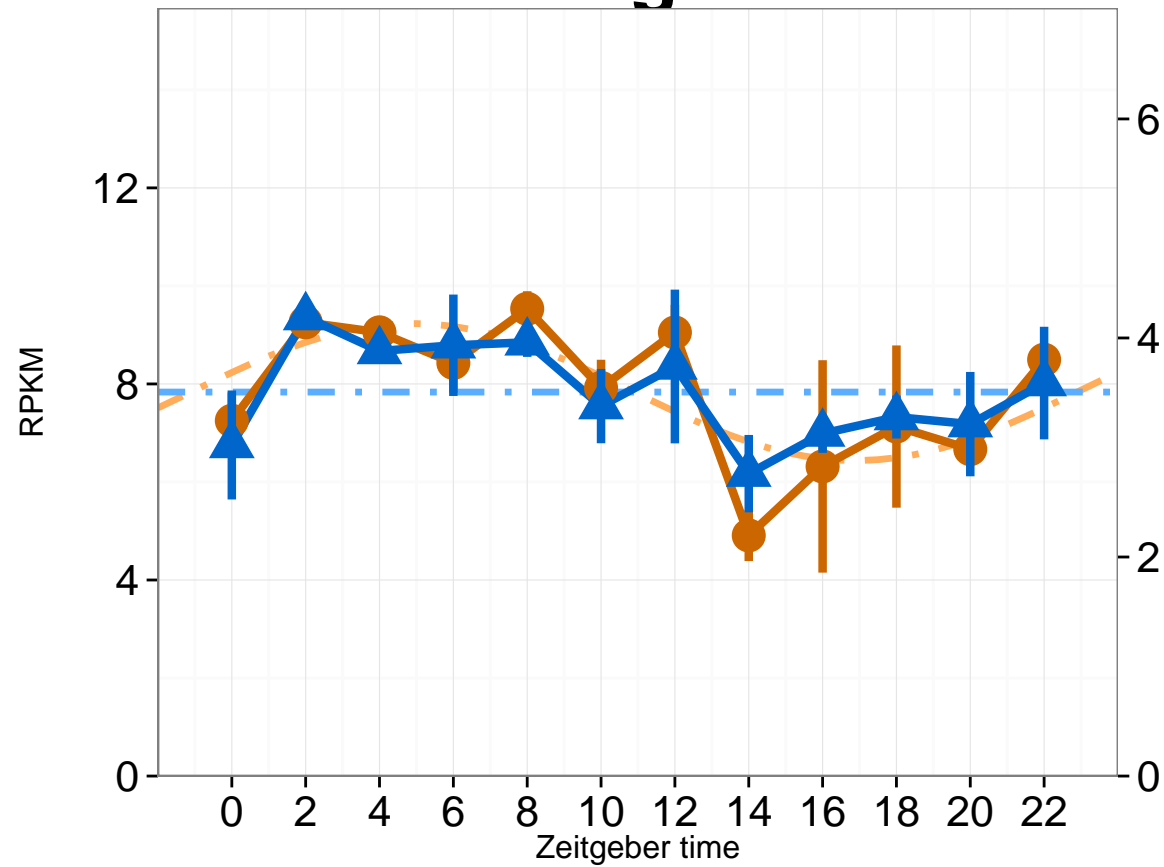

## Pigc

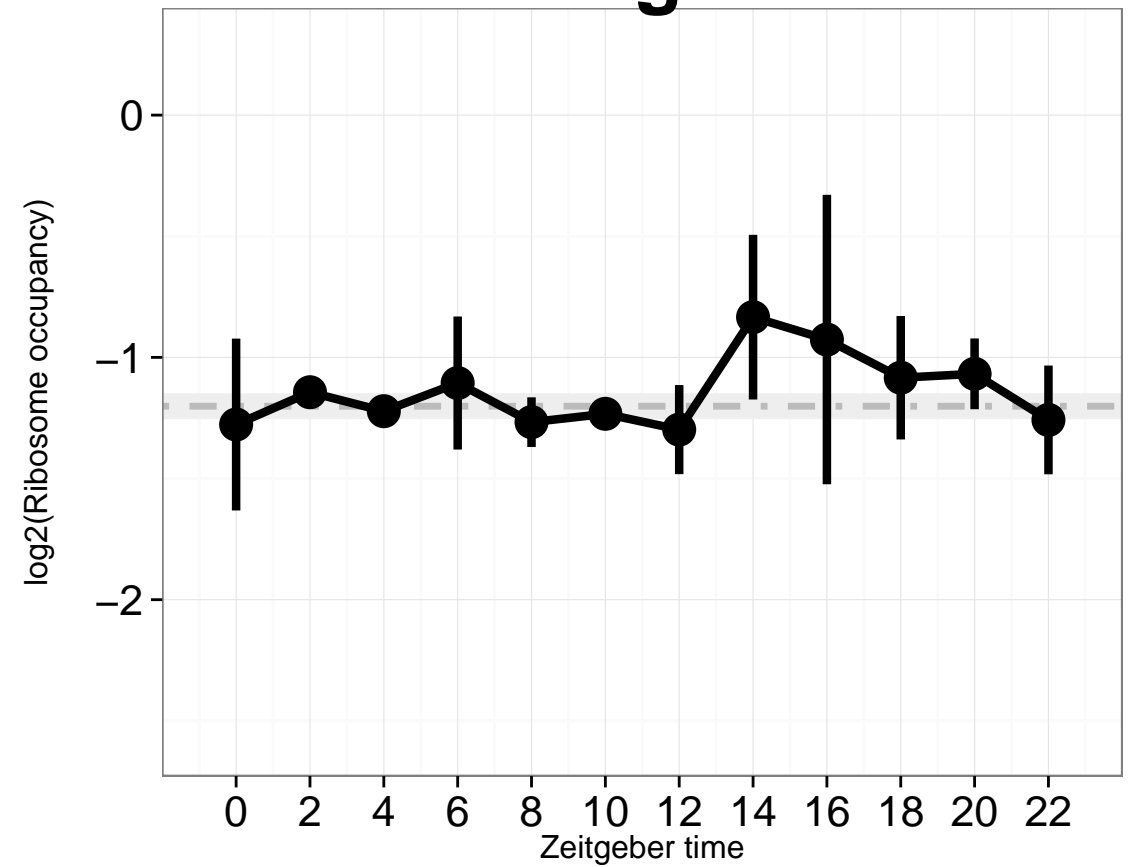

Supplement: SuppDataset_1.zip [file Pigc_set_A.pdf › Supplemental Dataset 1/A-mRNA_nonrhyth_translation_nonrhyth/Pigc_set_A.pdf]

## Pigg

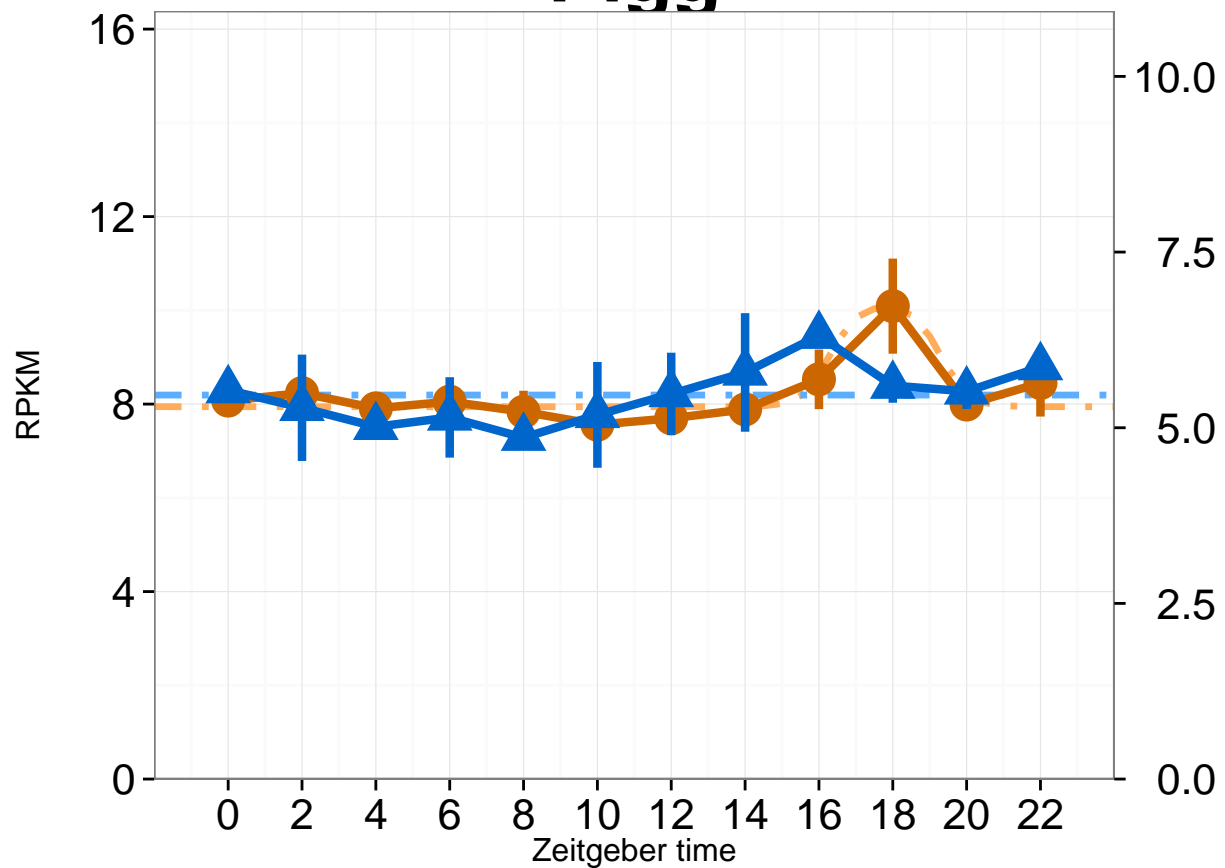

## Pigg

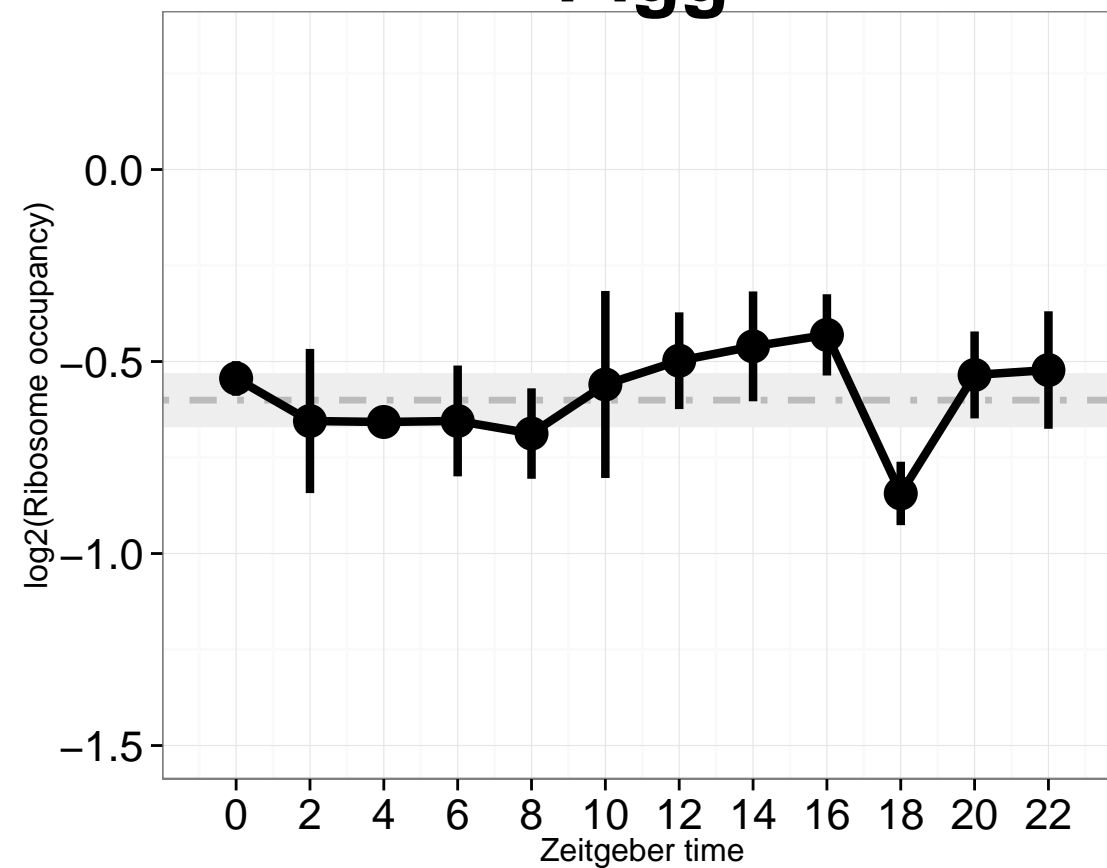

Supplement: SuppDataset_1.zip [file Pigg_set_A.pdf › Supplemental Dataset 1/A-mRNA_nonrhyth_translation_nonrhyth/Pigg_set_A.pdf]

## Pigh

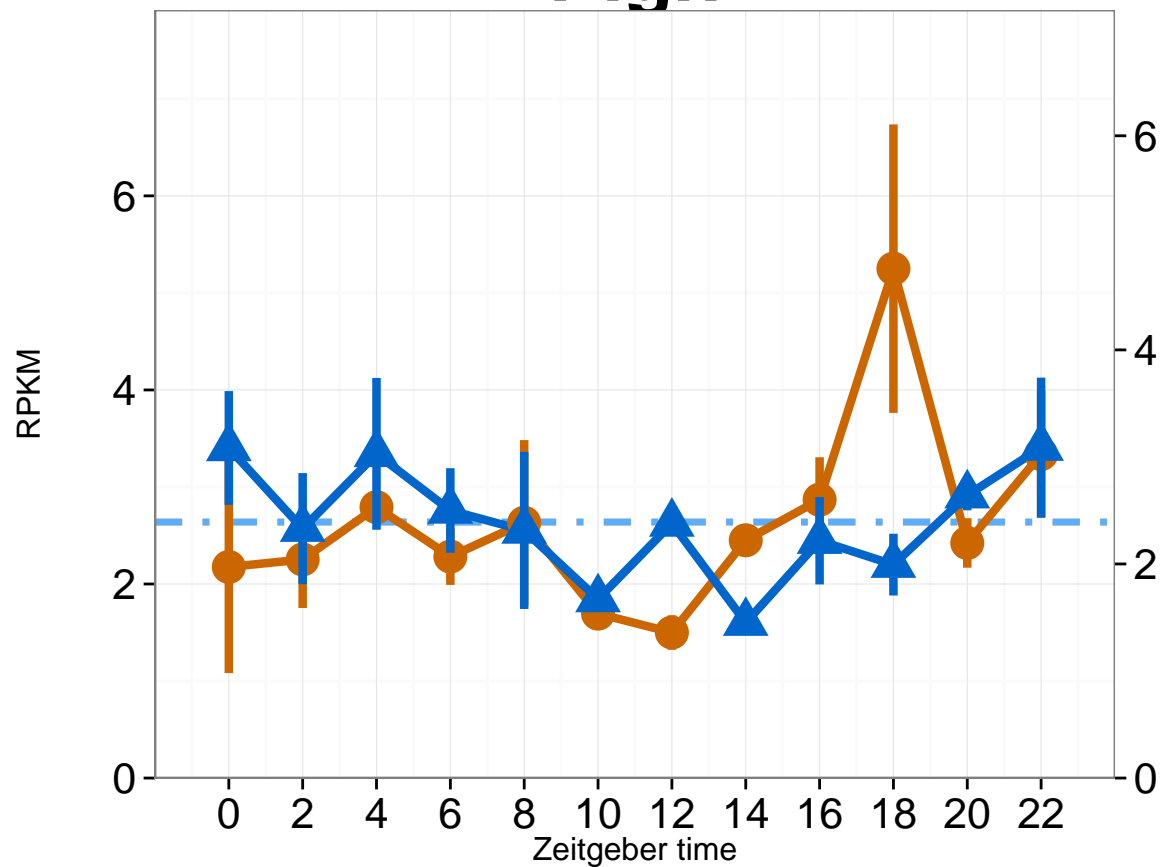

## Pigh

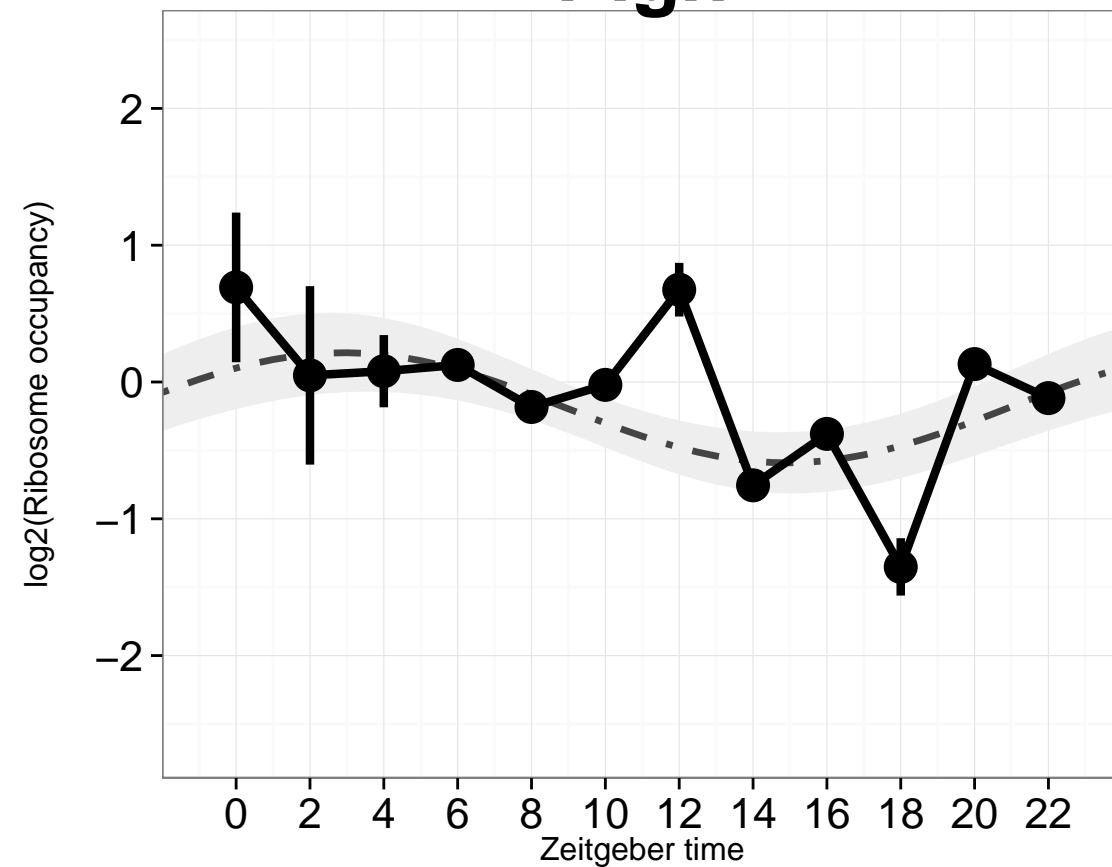

Supplement: SuppDataset_1.zip [file Pigh_set_A.pdf › Supplemental Dataset 1/A-mRNA_nonrhyth_translation_nonrhyth/Pigh_set_A.pdf]

# Pigk

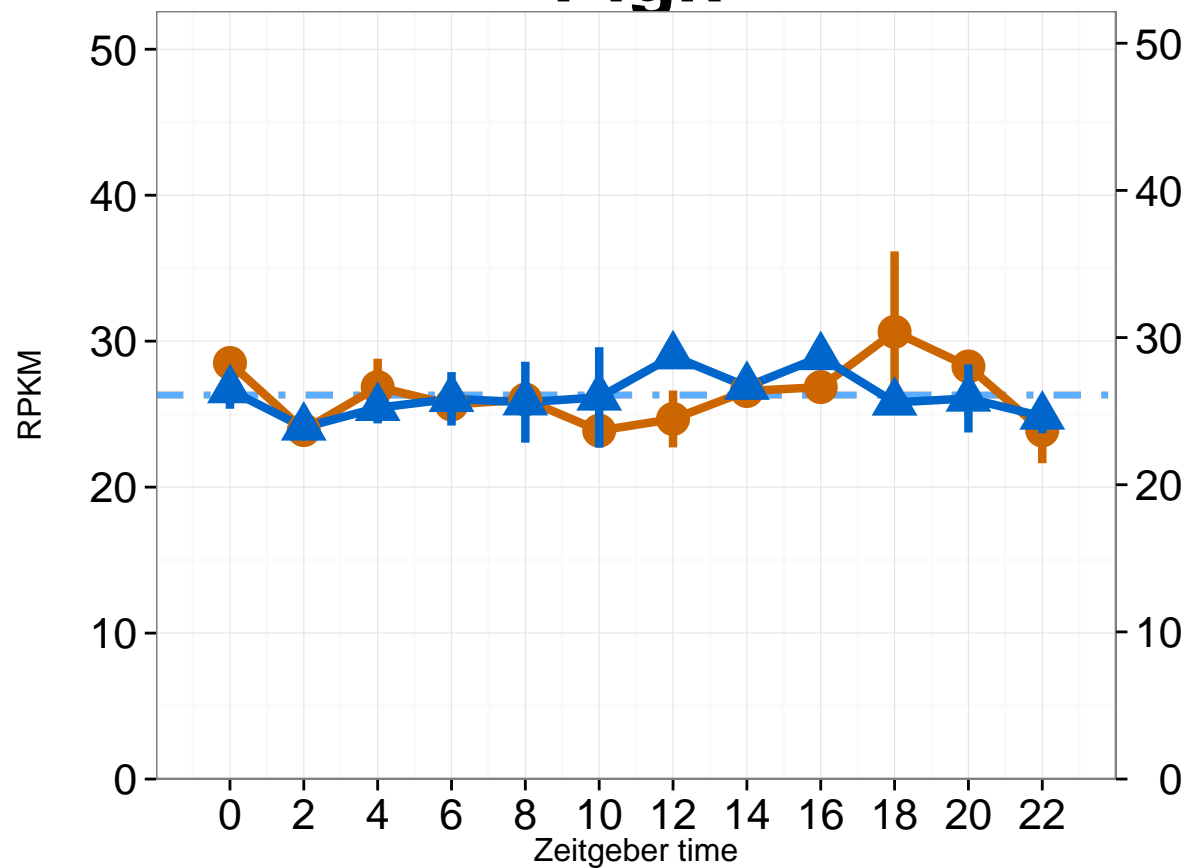

# Pigk

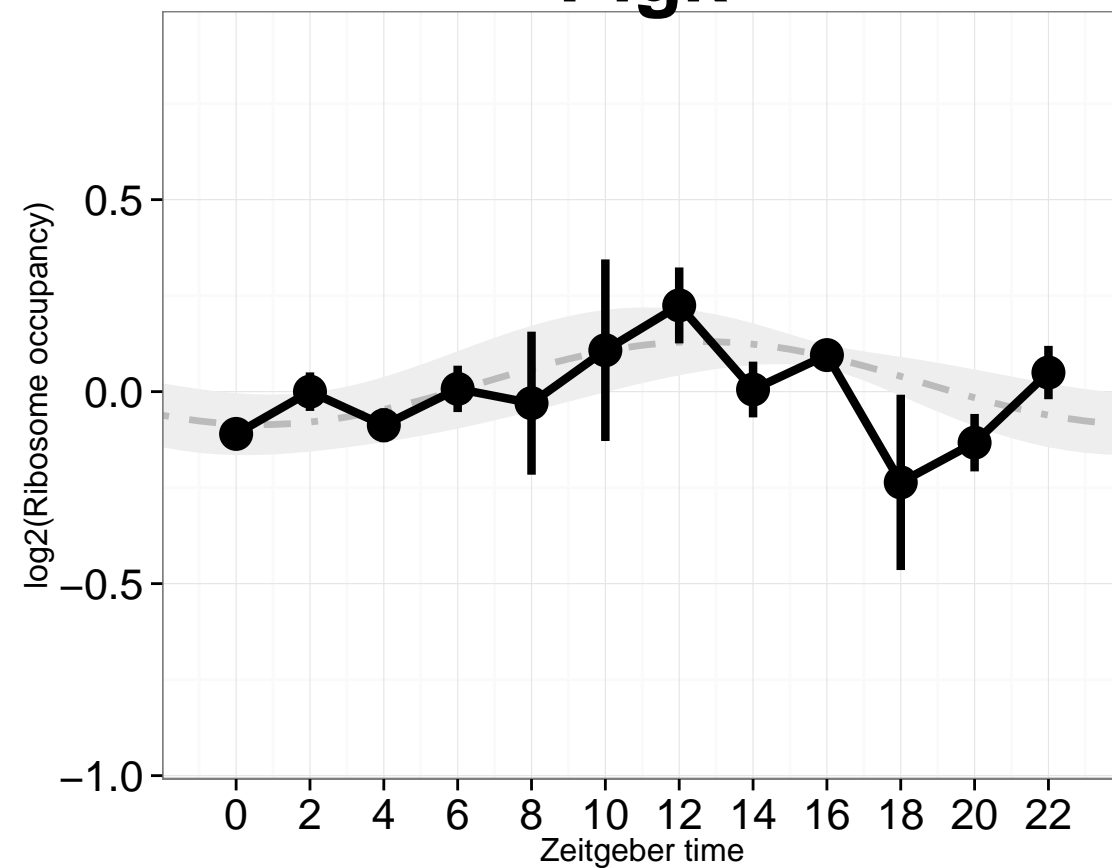

Supplement: SuppDataset_1.zip [file Pigk_set_A.pdf › Supplemental Dataset 1/A-mRNA_nonrhyth_translation_nonrhyth/Pigk_set_A.pdf]

# Pigl

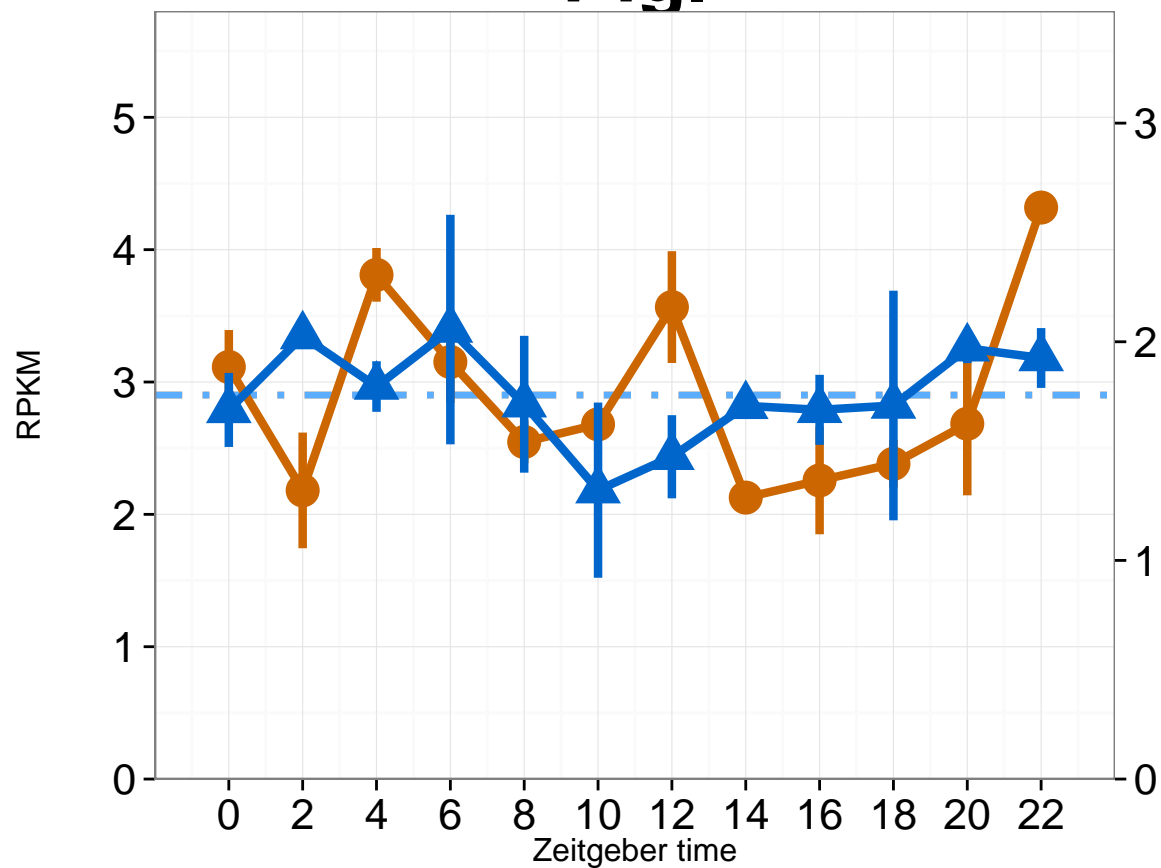

# Pigl

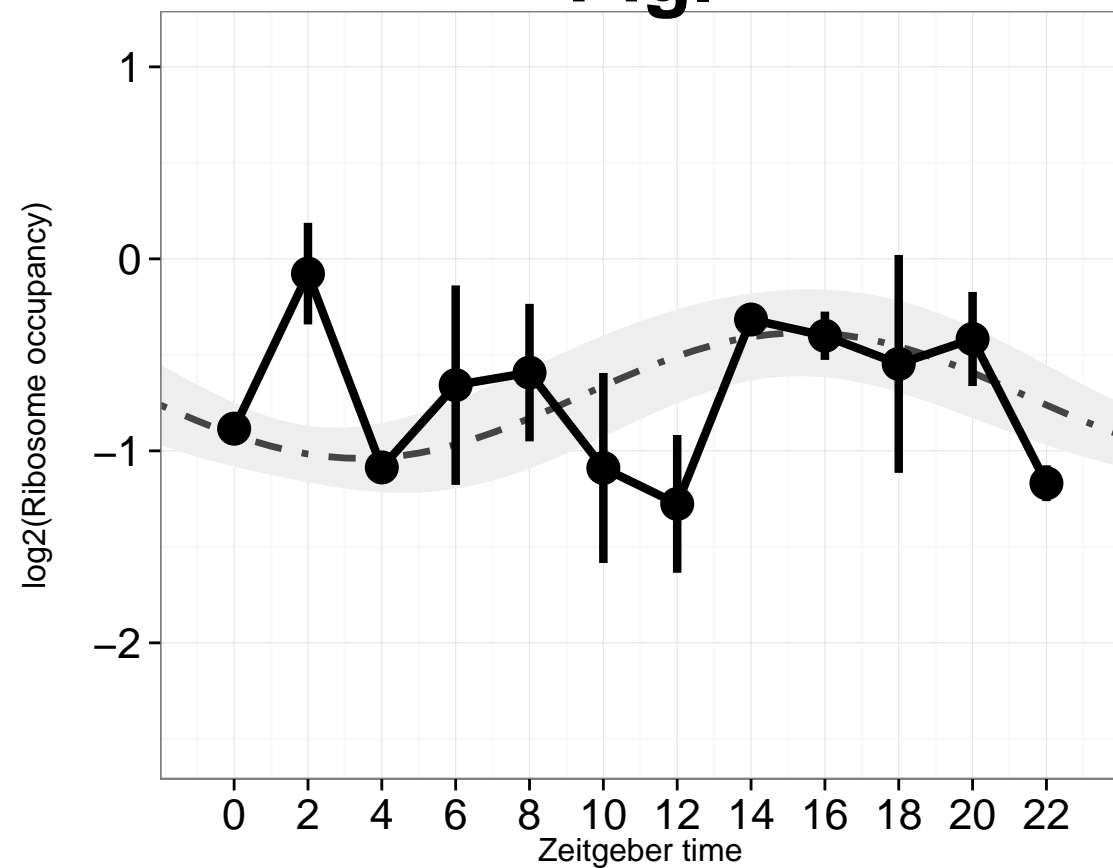

Supplement: SuppDataset_1.zip [file Pigl_set_A.pdf › Supplemental Dataset 1/A-mRNA_nonrhyth_translation_nonrhyth/Pigl_set_A.pdf]

## Pigm

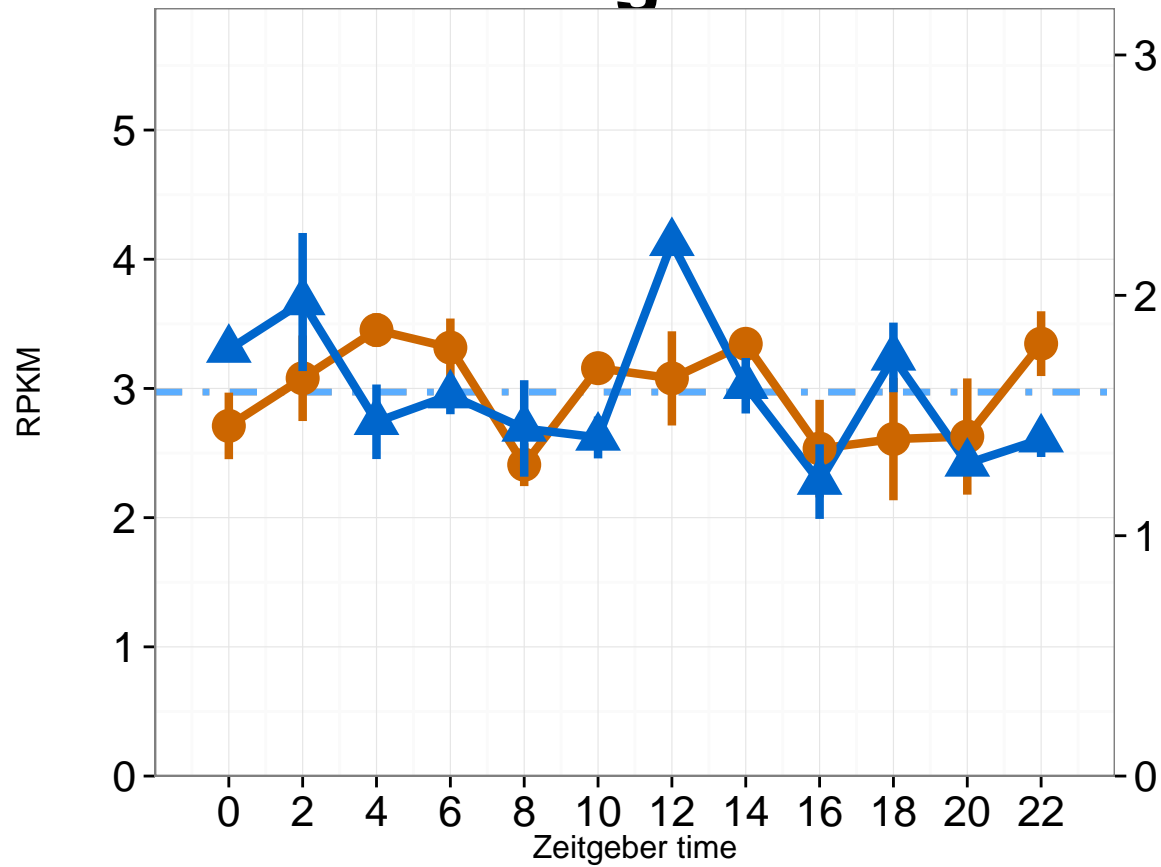

## Pigm

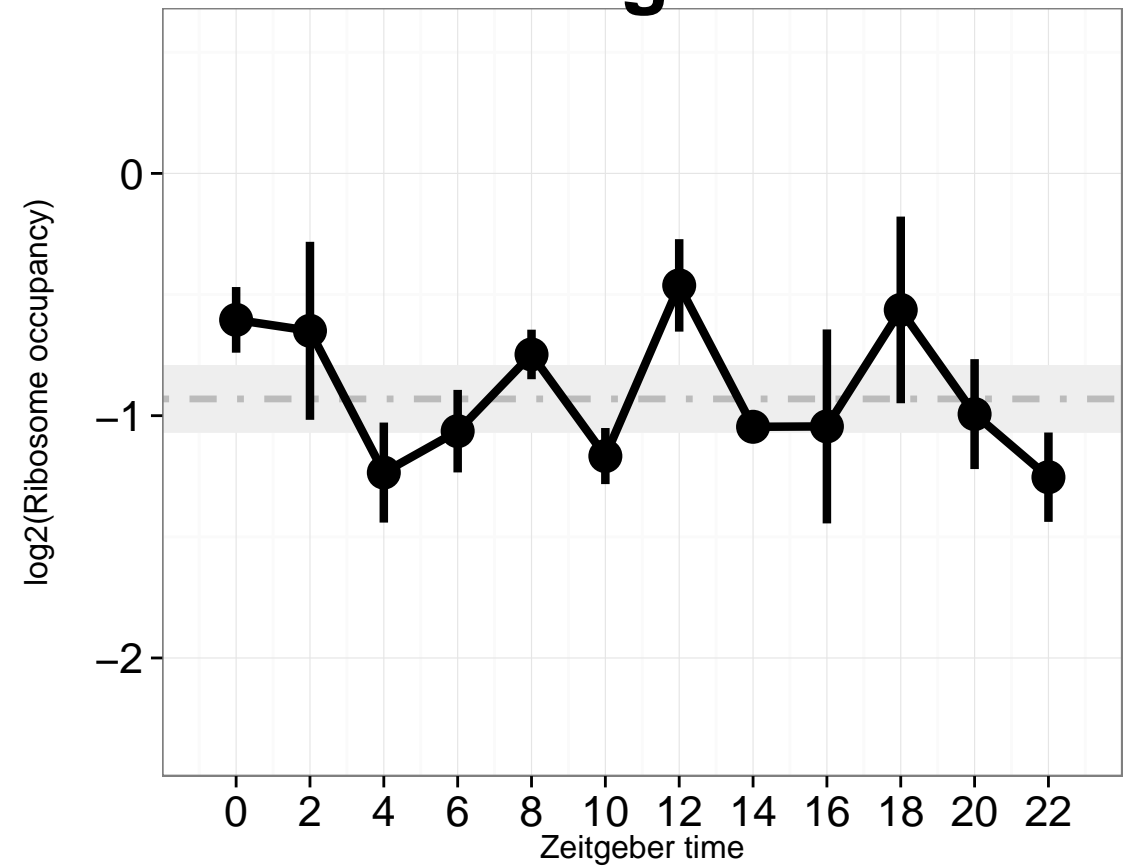

Supplement: SuppDataset_1.zip [file Pigm_set_A.pdf › Supplemental Dataset 1/A-mRNA_nonrhyth_translation_nonrhyth/Pigm_set_A.pdf]

## Pign

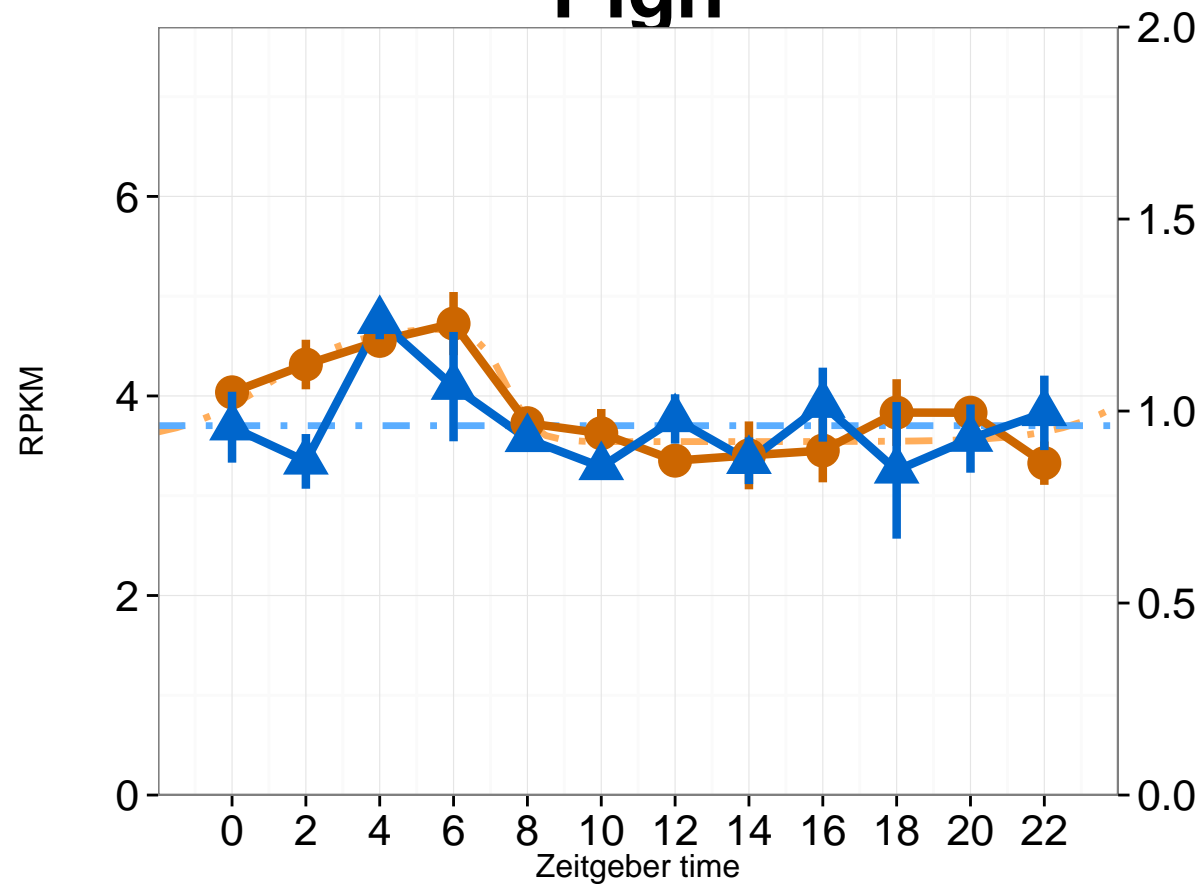

## Pign

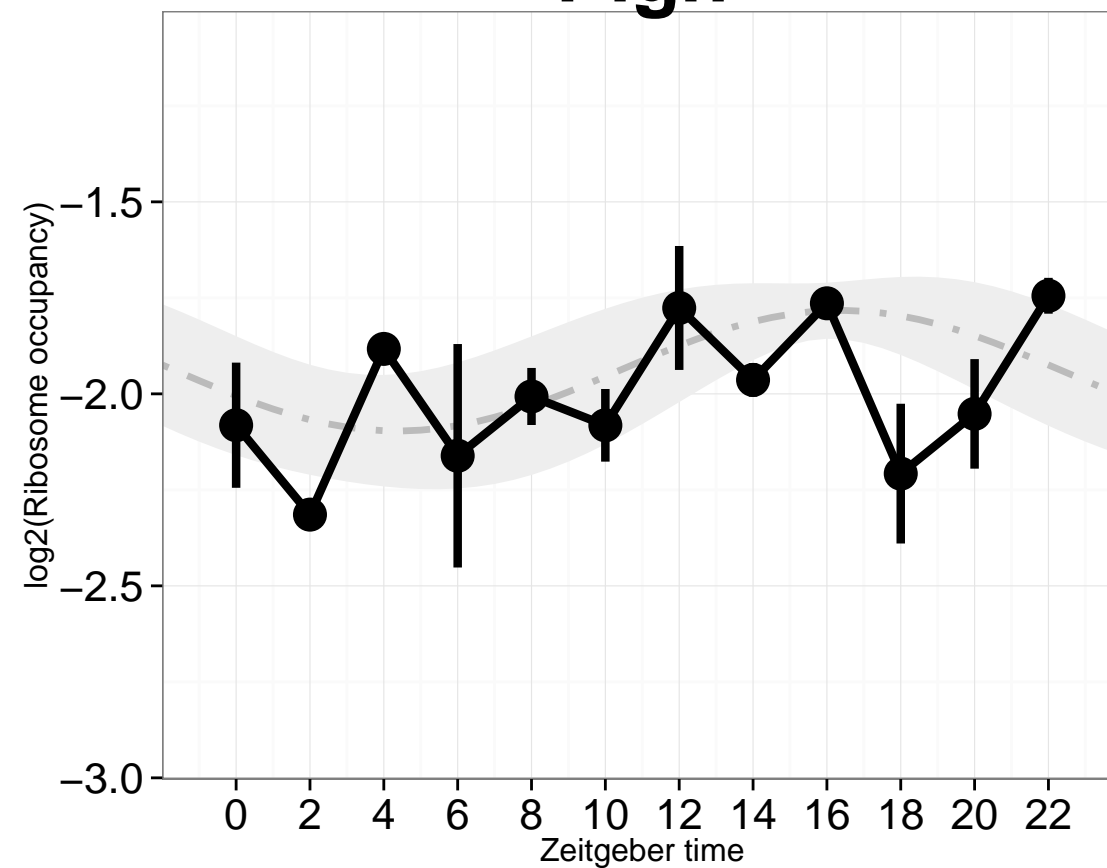

Supplement: SuppDataset_1.zip [file Pign_set_A.pdf › Supplemental Dataset 1/A-mRNA_nonrhyth_translation_nonrhyth/Pign_set_A.pdf]

## Pigo

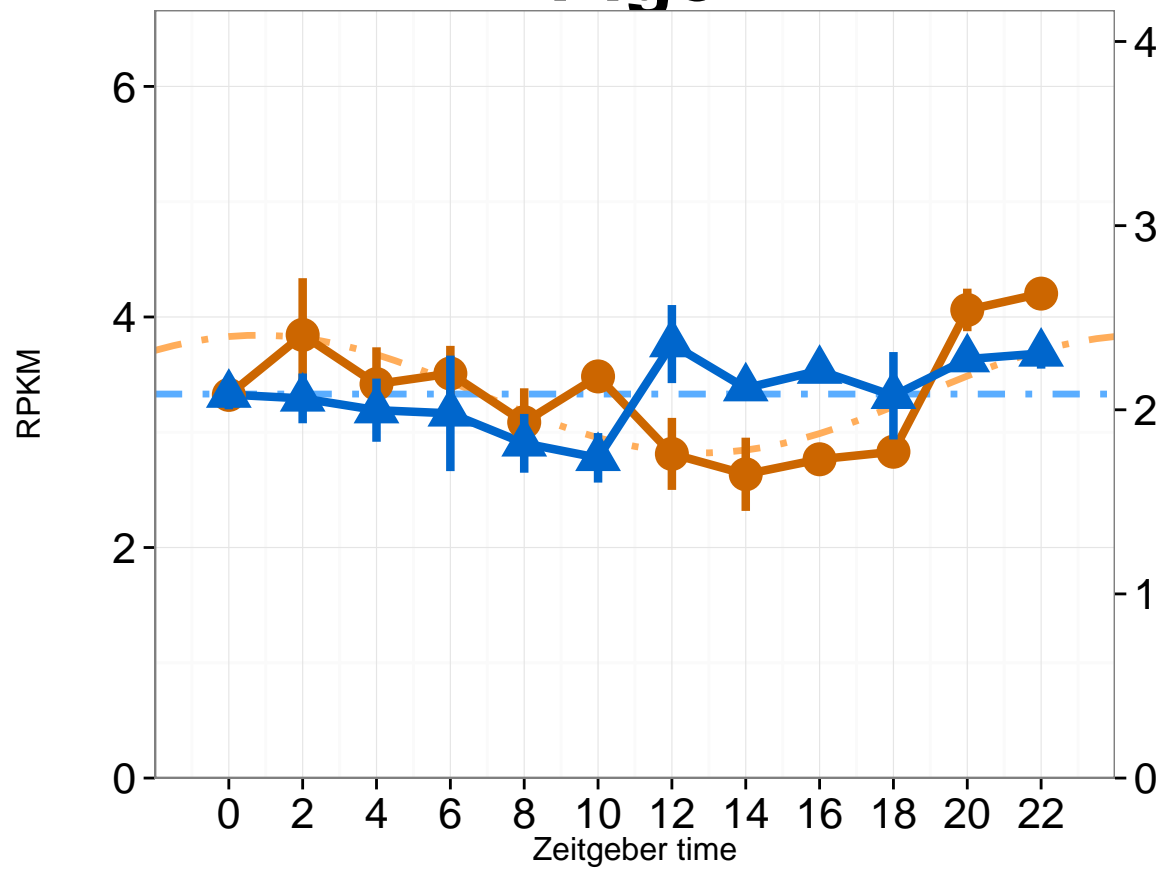

## Pigo

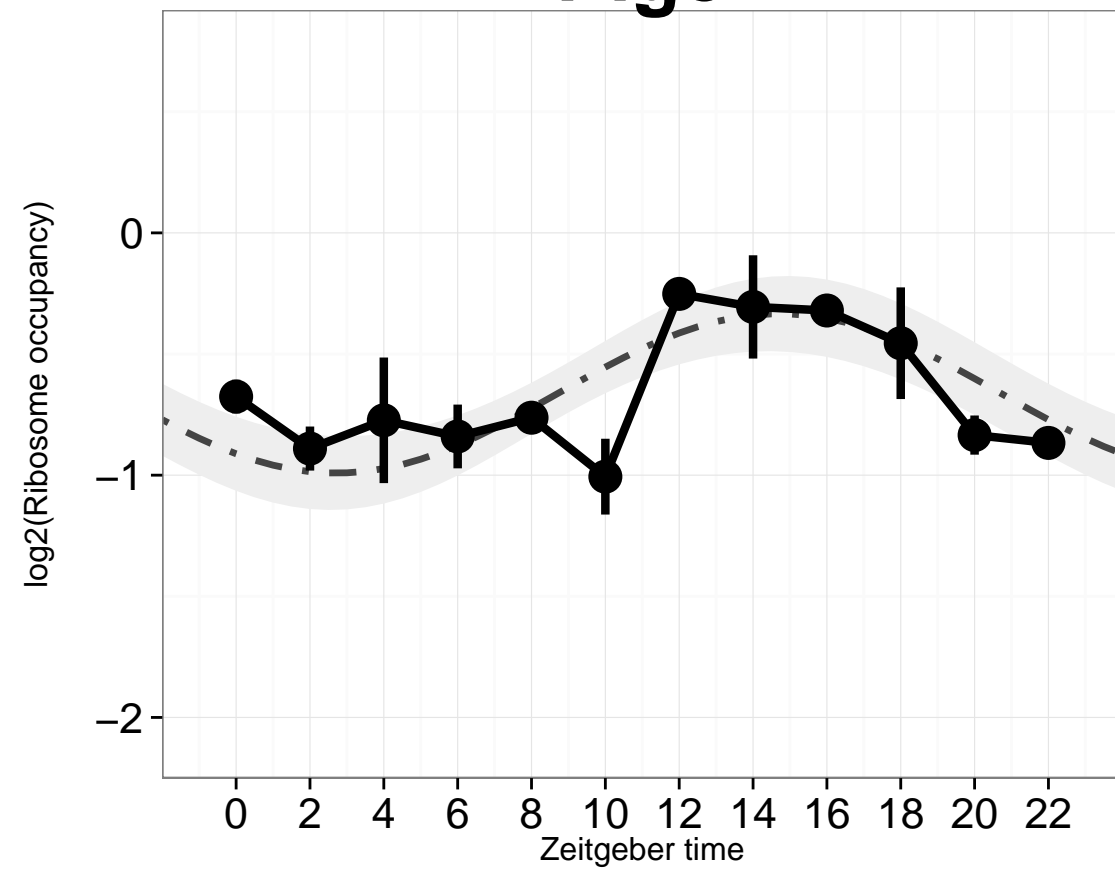

Supplement: SuppDataset_1.zip [file Pigo_set_A.pdf › Supplemental Dataset 1/A-mRNA_nonrhyth_translation_nonrhyth/Pigo_set_A.pdf]

## Pigp

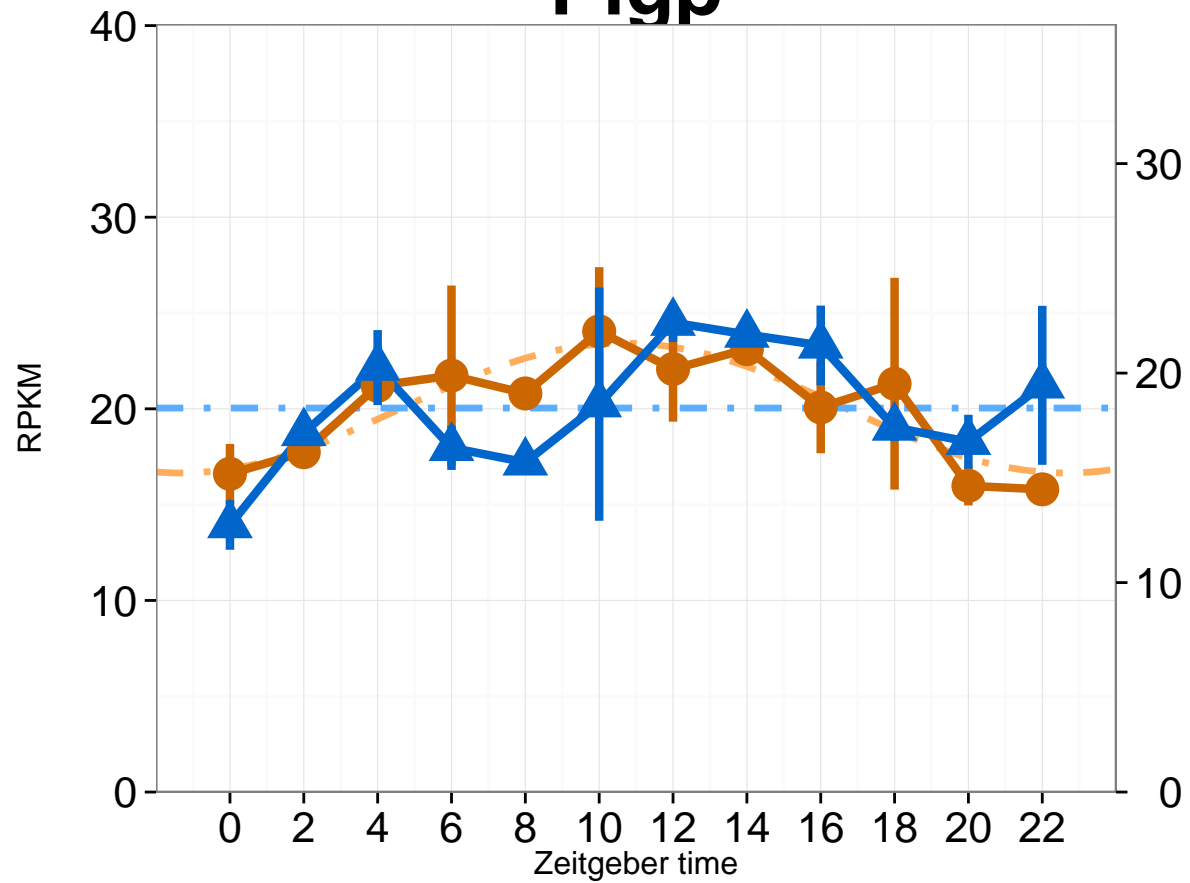

## Pigp

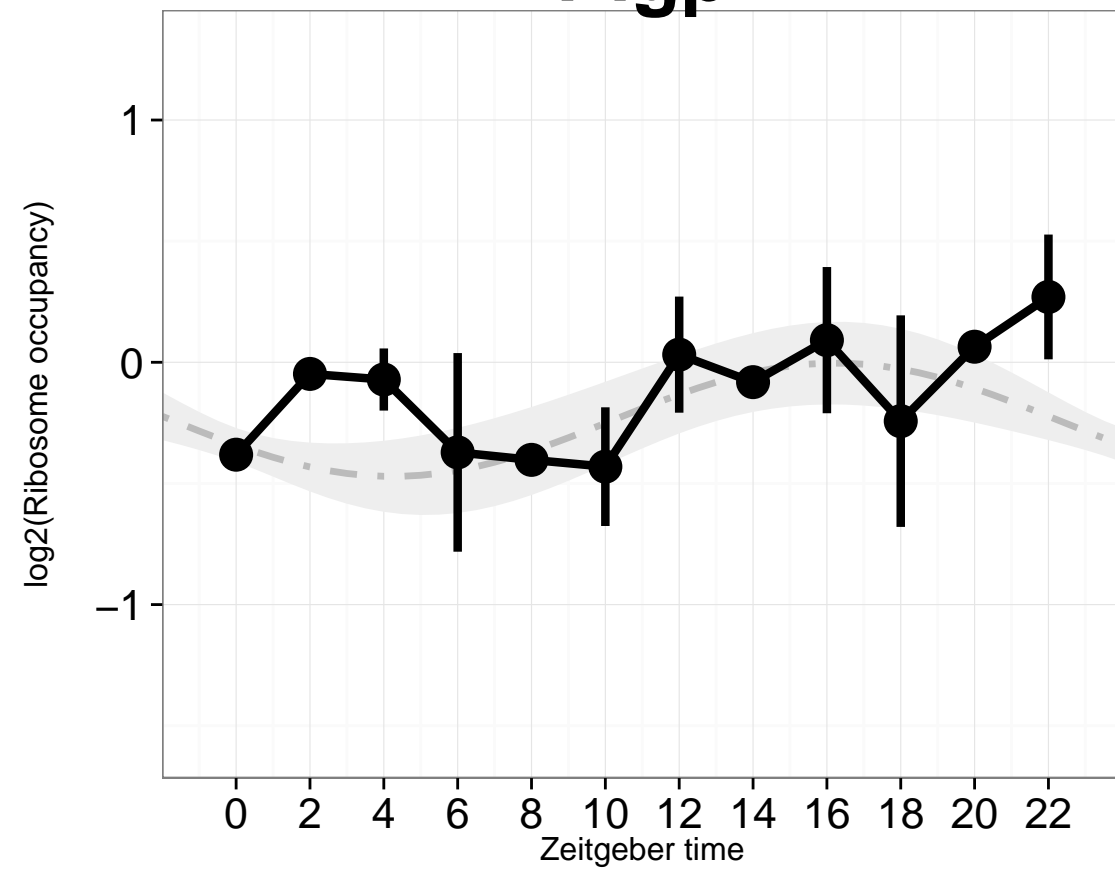

Supplement: SuppDataset_1.zip [file Pigp_set_A.pdf › Supplemental Dataset 1/A-mRNA_nonrhyth_translation_nonrhyth/Pigp_set_A.pdf]

## Pigq

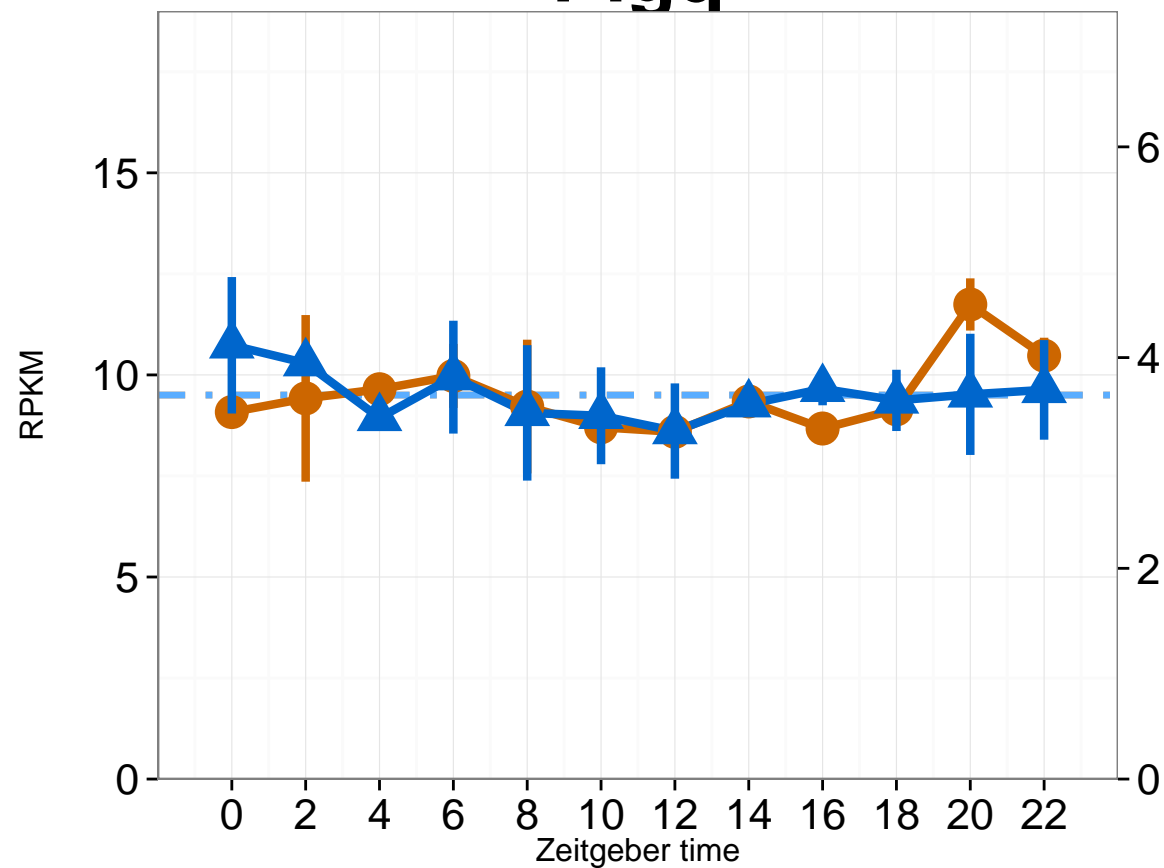

## Pigq

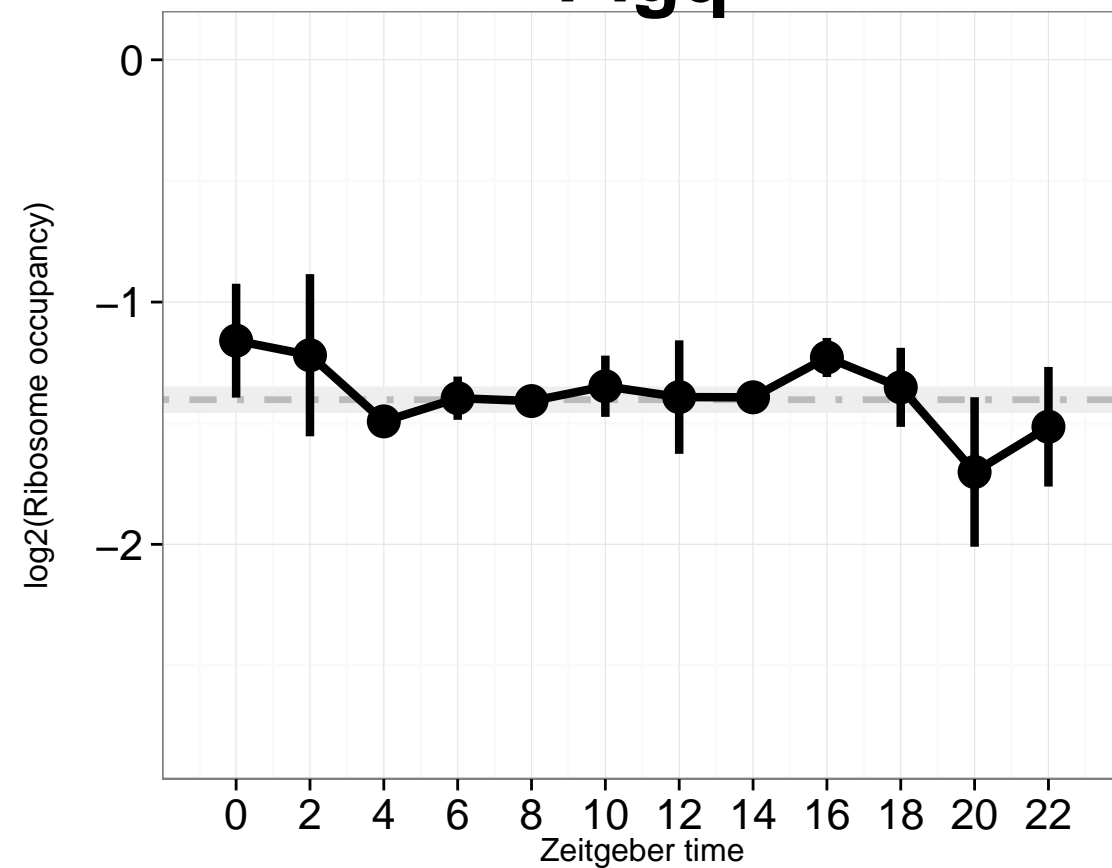

Supplement: SuppDataset_1.zip [file Pigq_set_A.pdf › Supplemental Dataset 1/A-mRNA_nonrhyth_translation_nonrhyth/Pigq_set_A.pdf]

## Pigr

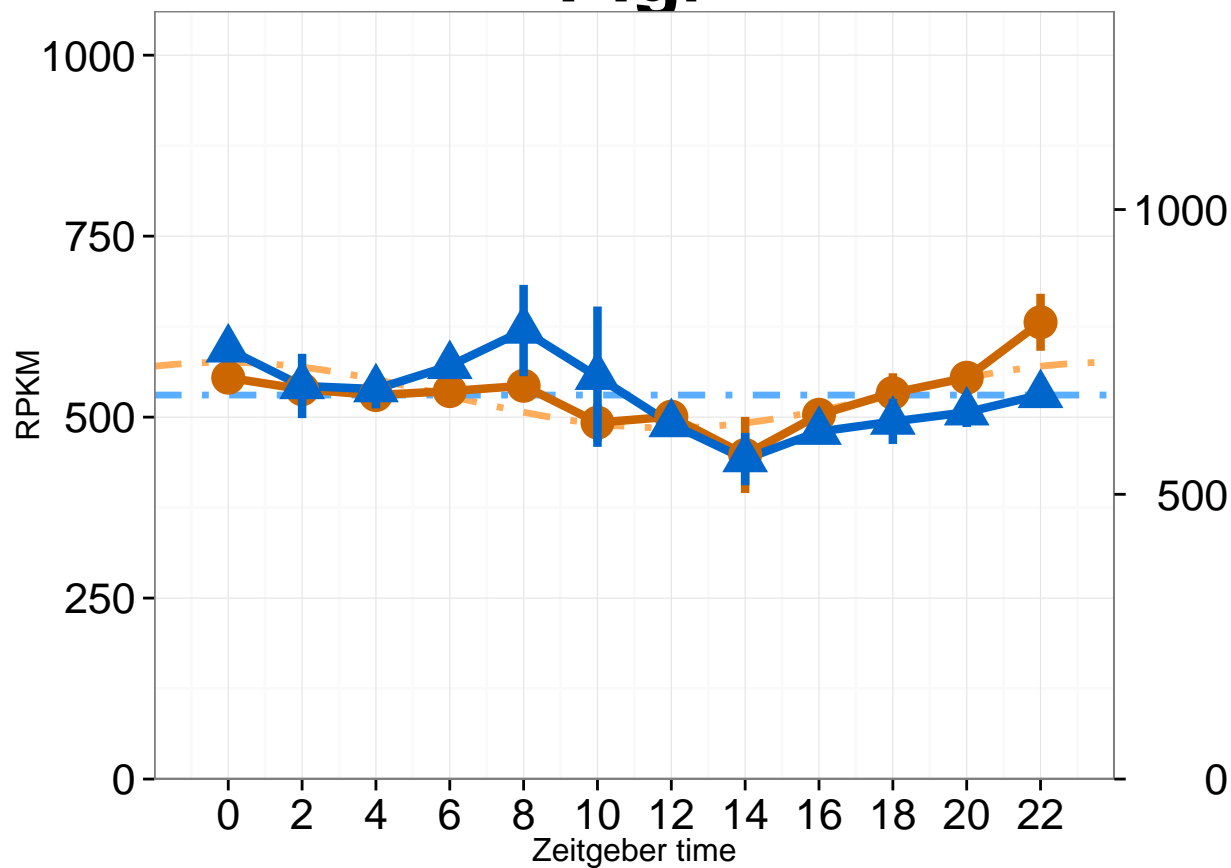

## Pigr

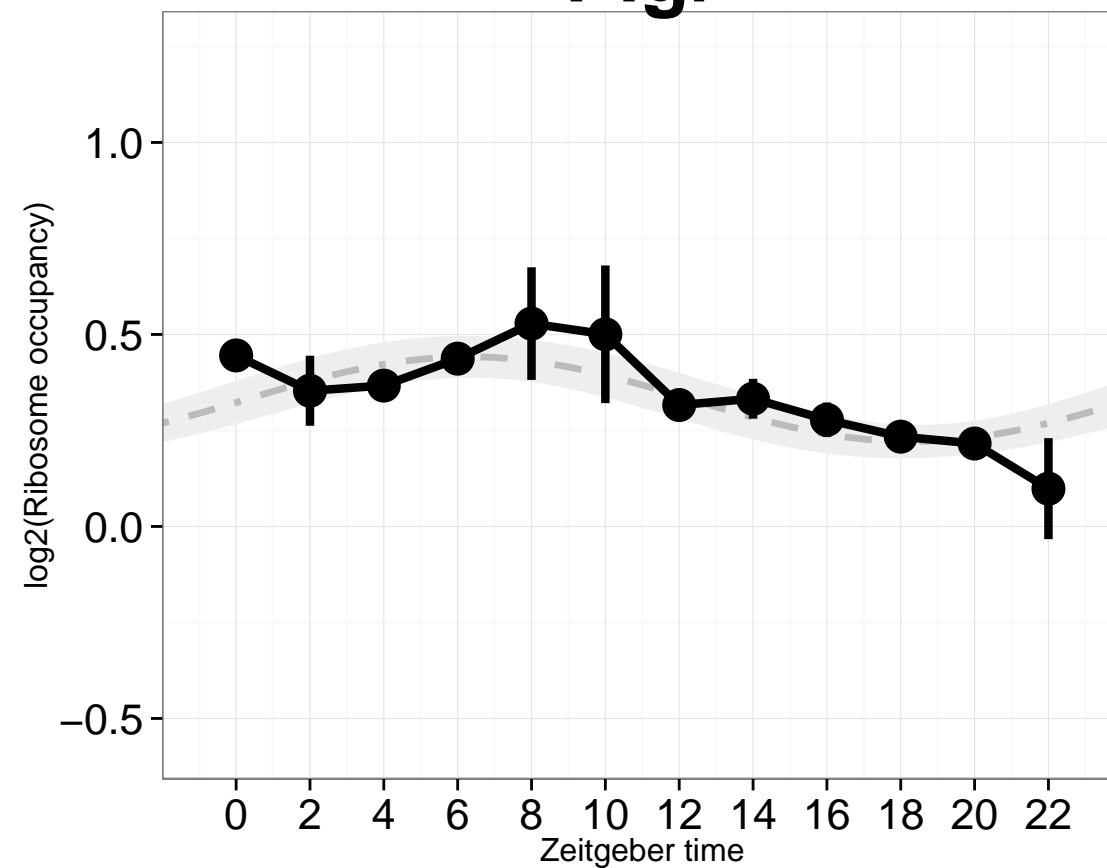

Supplement: SuppDataset_1.zip [file Pigr_set_A.pdf › Supplemental Dataset 1/A-mRNA_nonrhyth_translation_nonrhyth/Pigr_set_A.pdf]

## Pigs

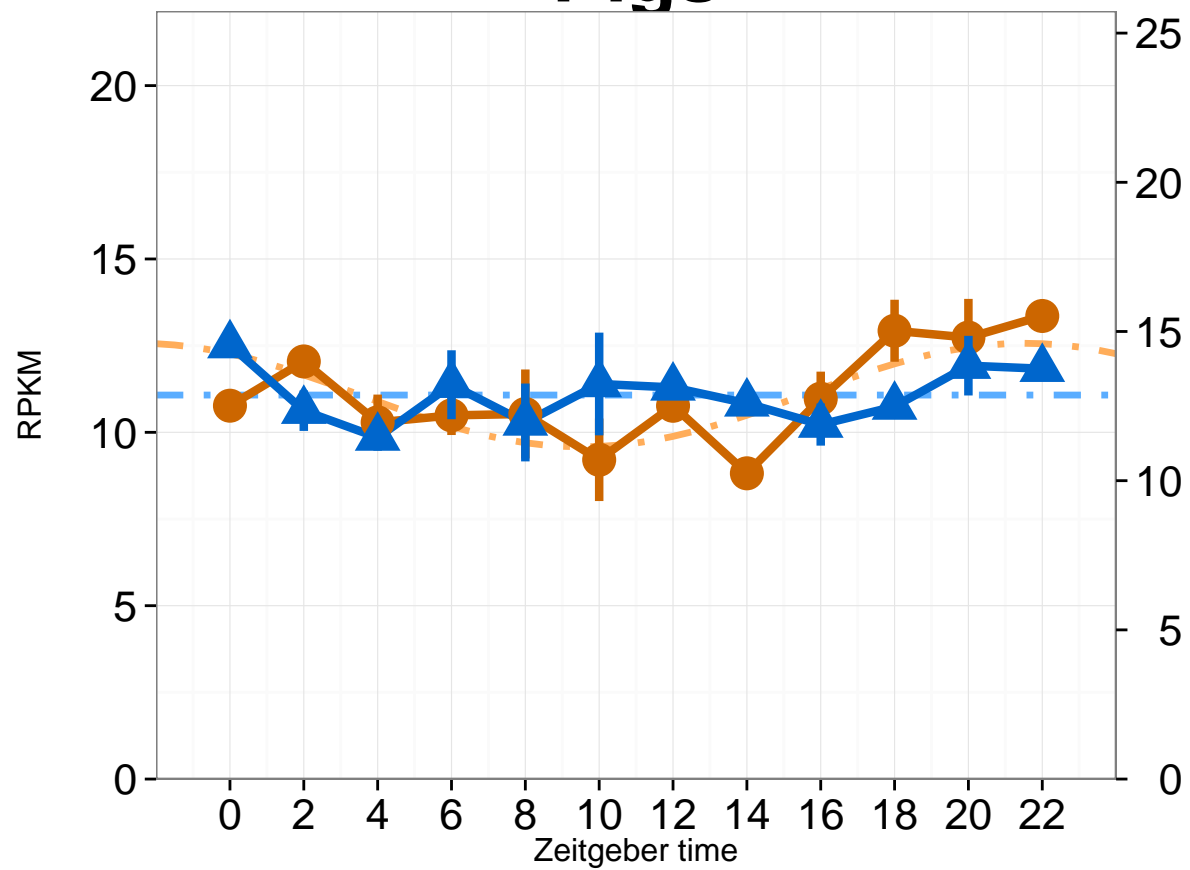

## Pigs

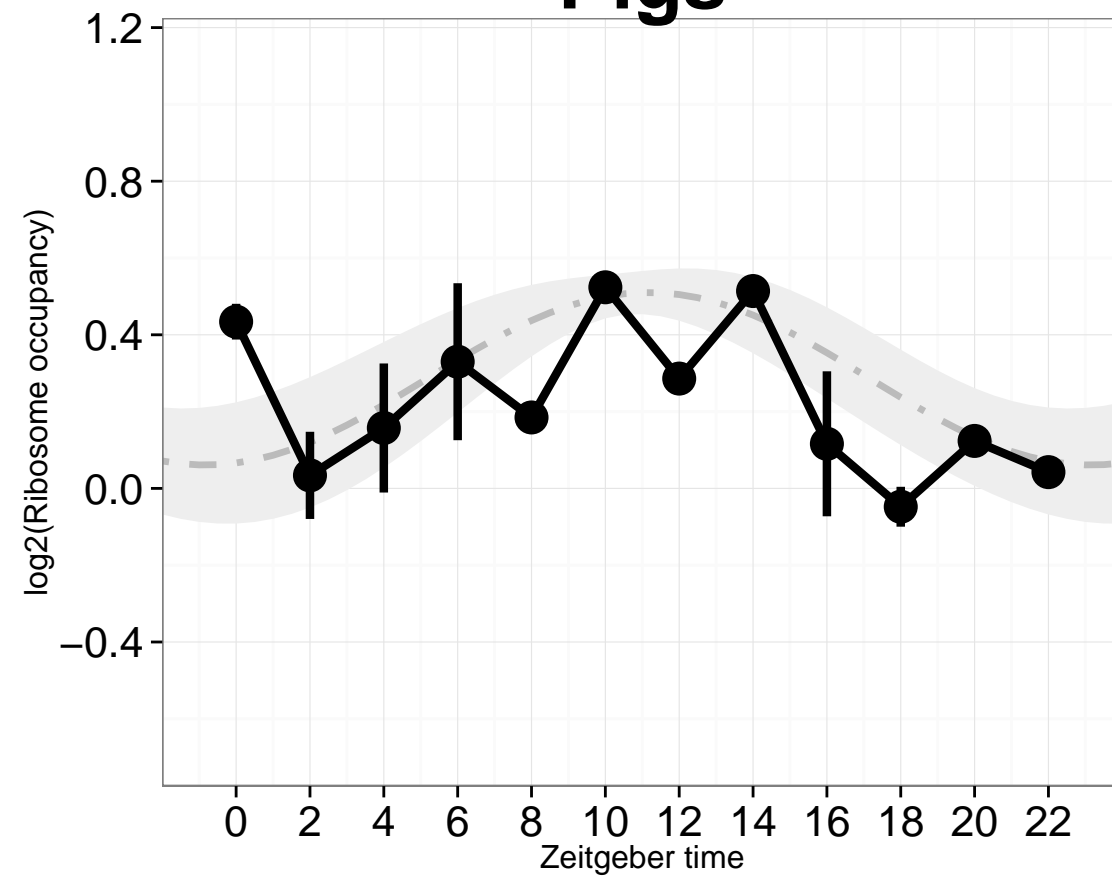

Supplement: SuppDataset_1.zip [file Pigs_set_A.pdf › Supplemental Dataset 1/A-mRNA_nonrhyth_translation_nonrhyth/Pigs_set_A.pdf]

## Pigt

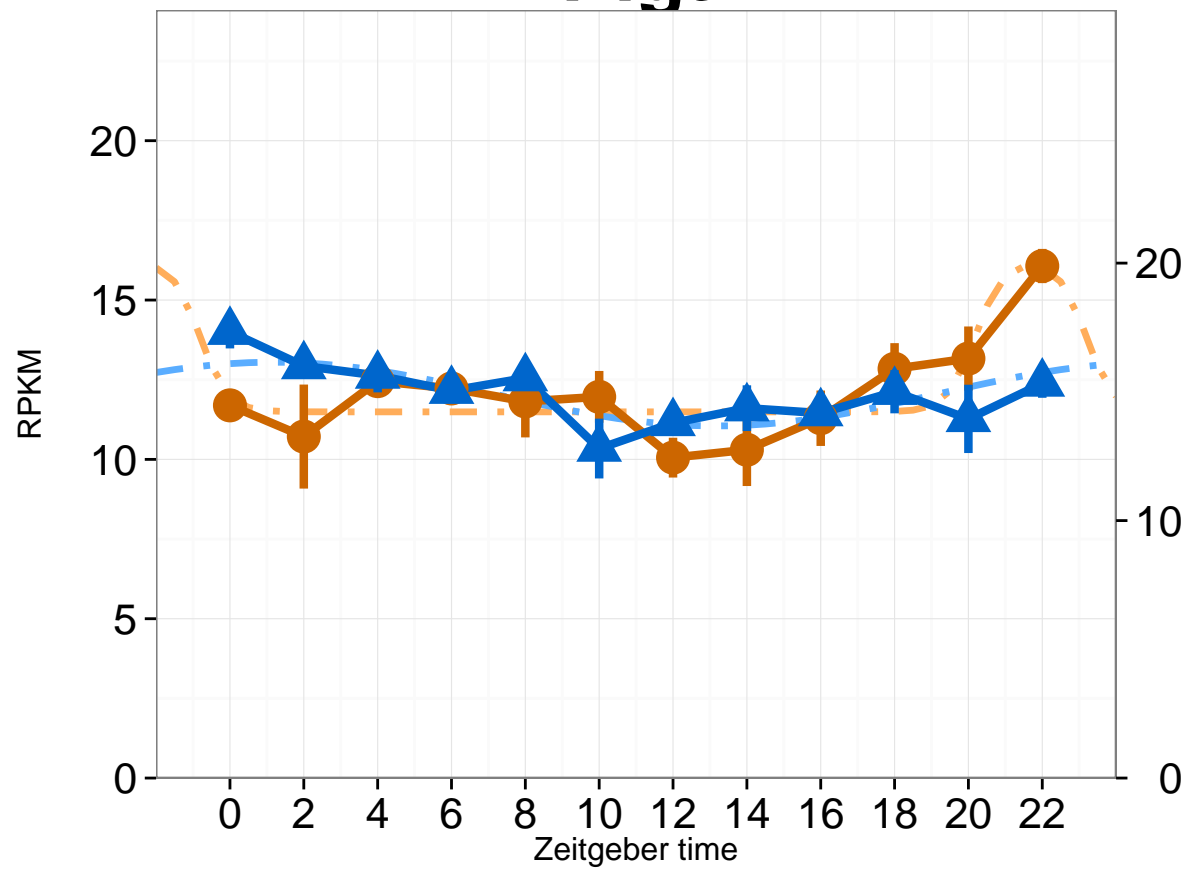

## Pigt

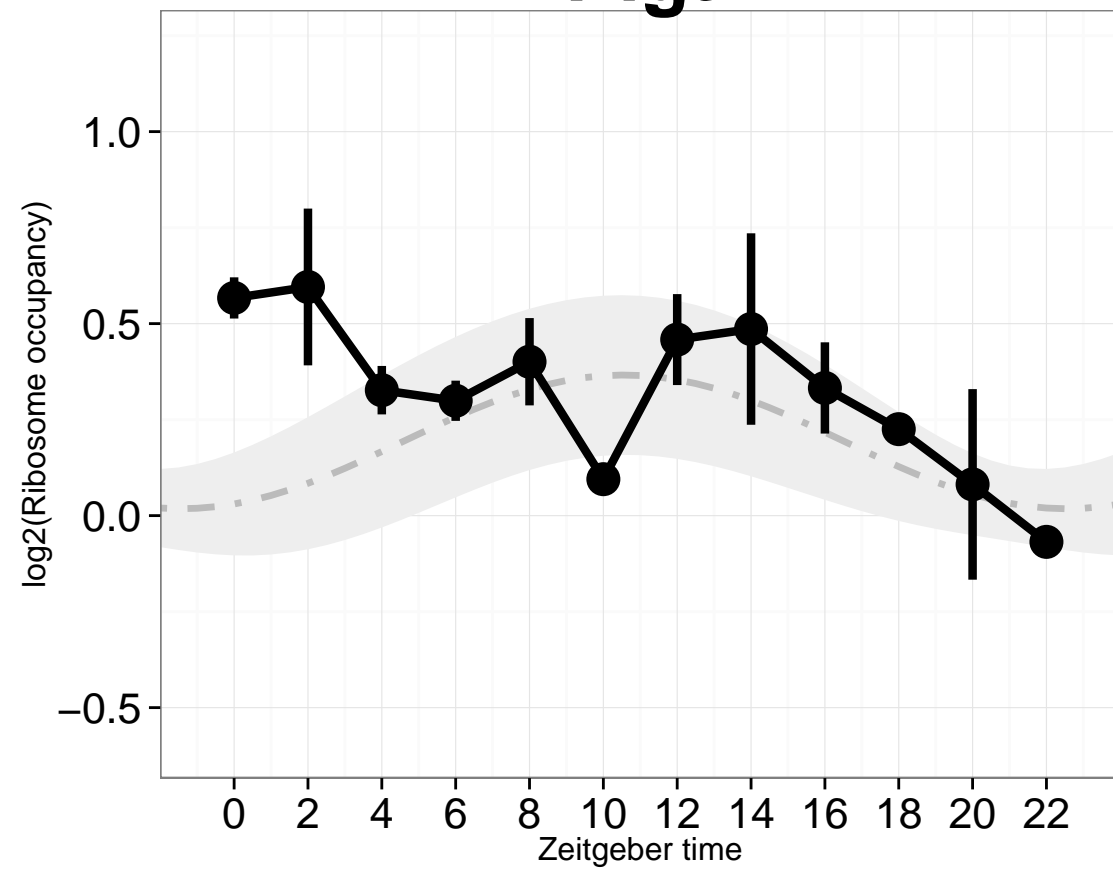

Supplement: SuppDataset_1.zip [file Pigt_set_A.pdf › Supplemental Dataset 1/A-mRNA_nonrhyth_translation_nonrhyth/Pigt_set_A.pdf]

## Pigu

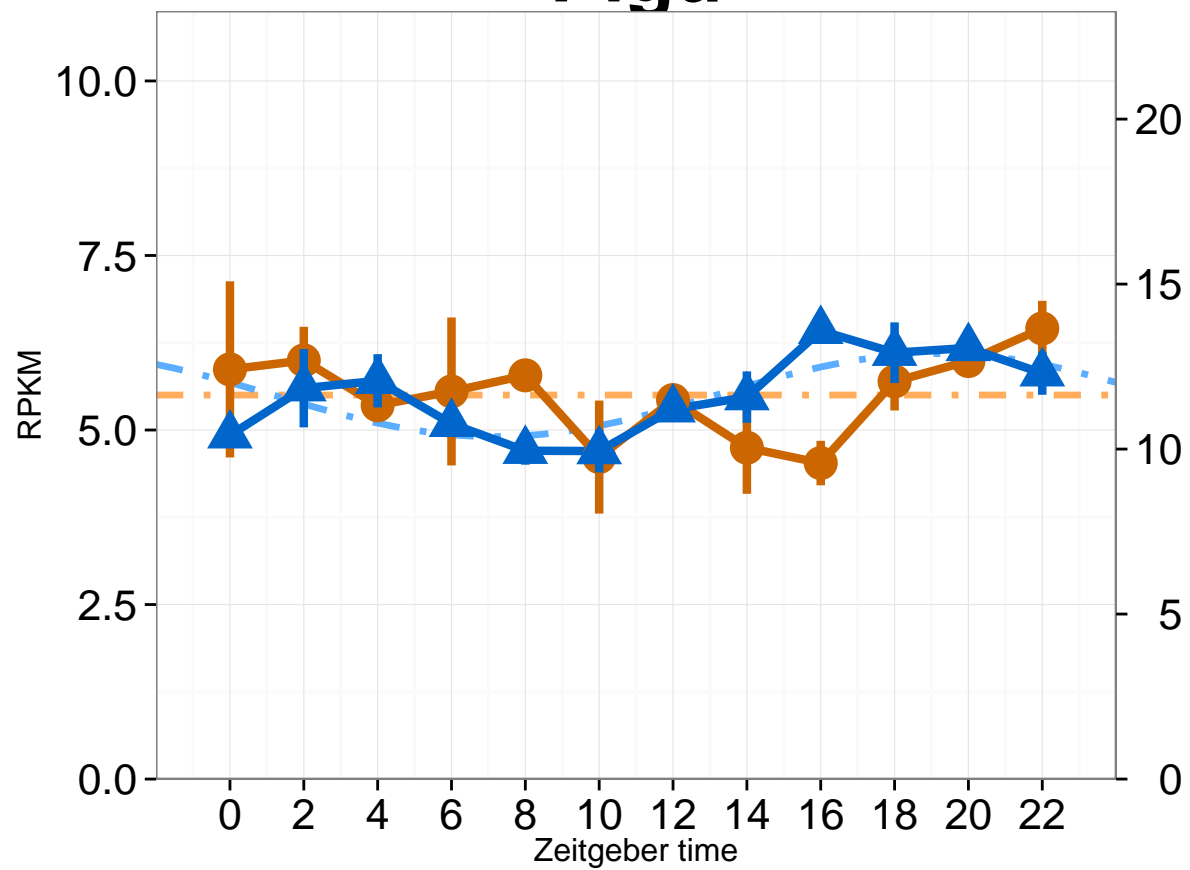

## Pigu

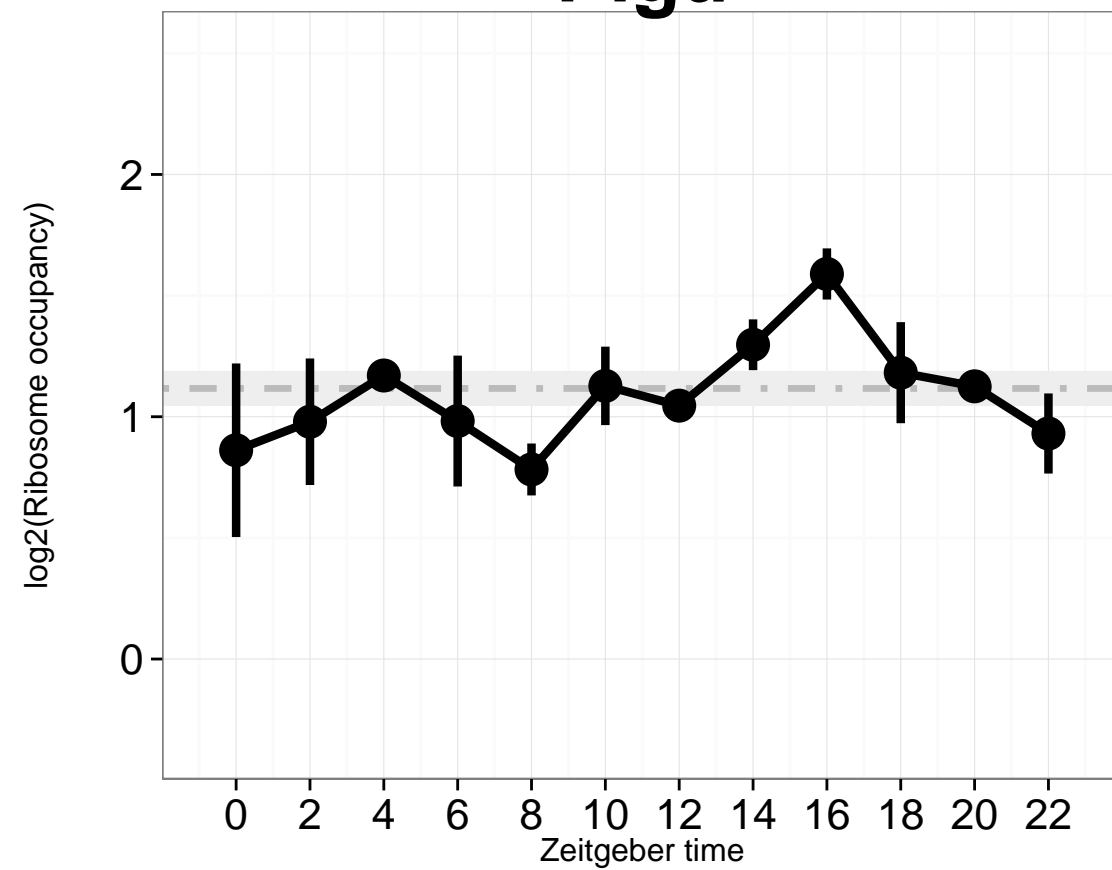

Supplement: SuppDataset_1.zip [file Pigu_set_A.pdf › Supplemental Dataset 1/A-mRNA_nonrhyth_translation_nonrhyth/Pigu_set_A.pdf]

## Pigv

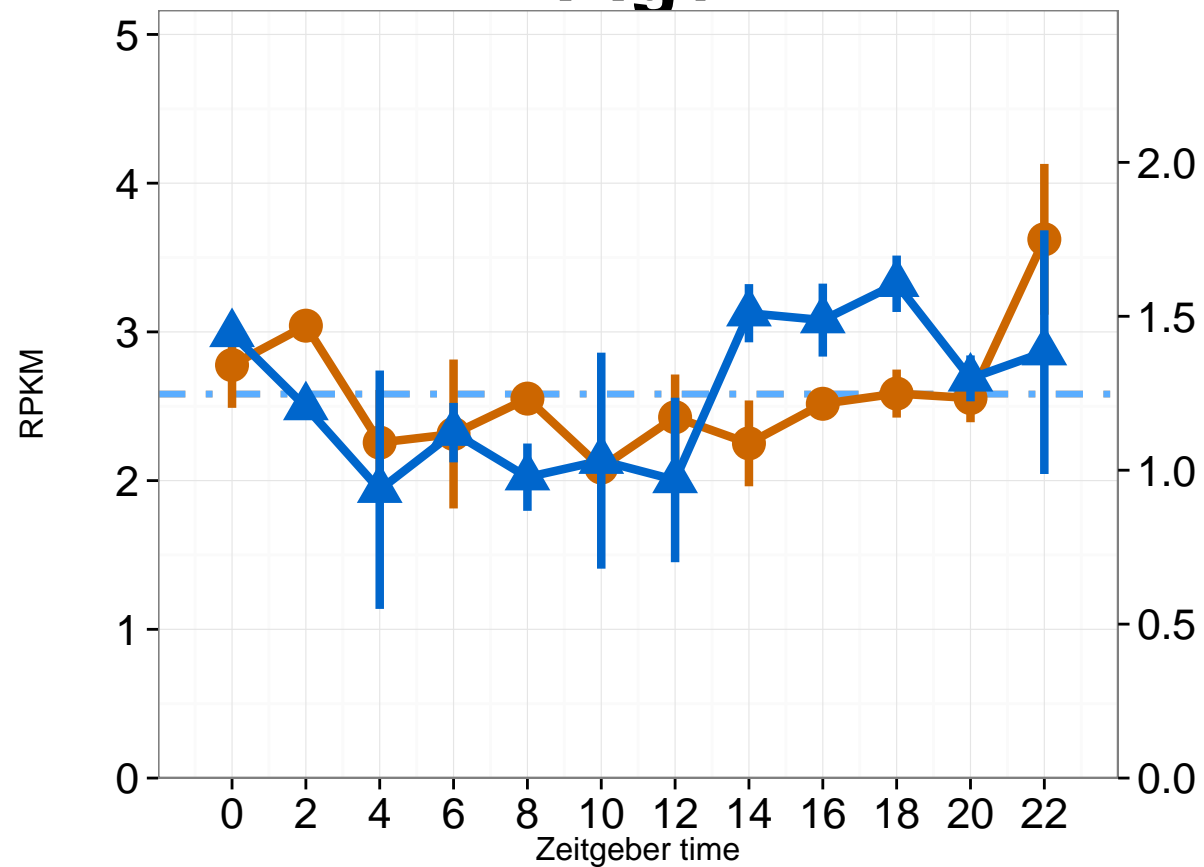

## Pigv

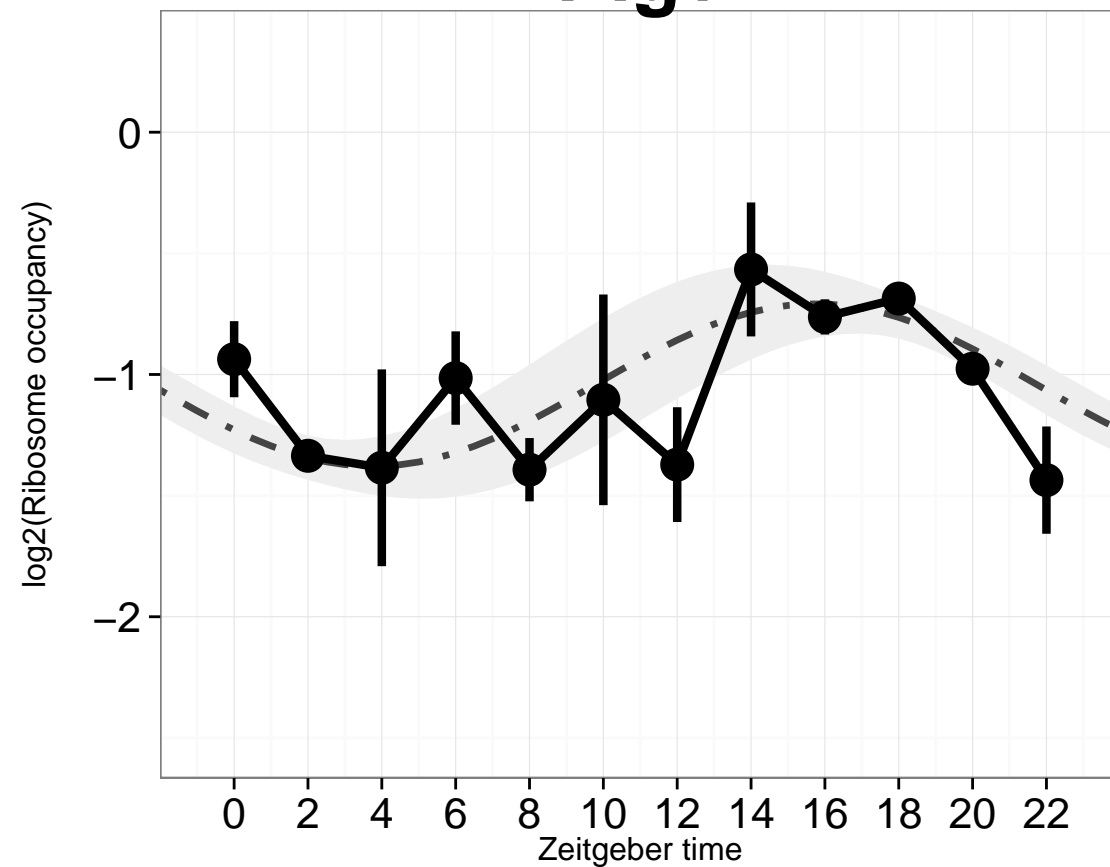

Supplement: SuppDataset_1.zip [file Pigv_set_A.pdf › Supplemental Dataset 1/A-mRNA_nonrhyth_translation_nonrhyth/Pigv_set_A.pdf]

# Pigw

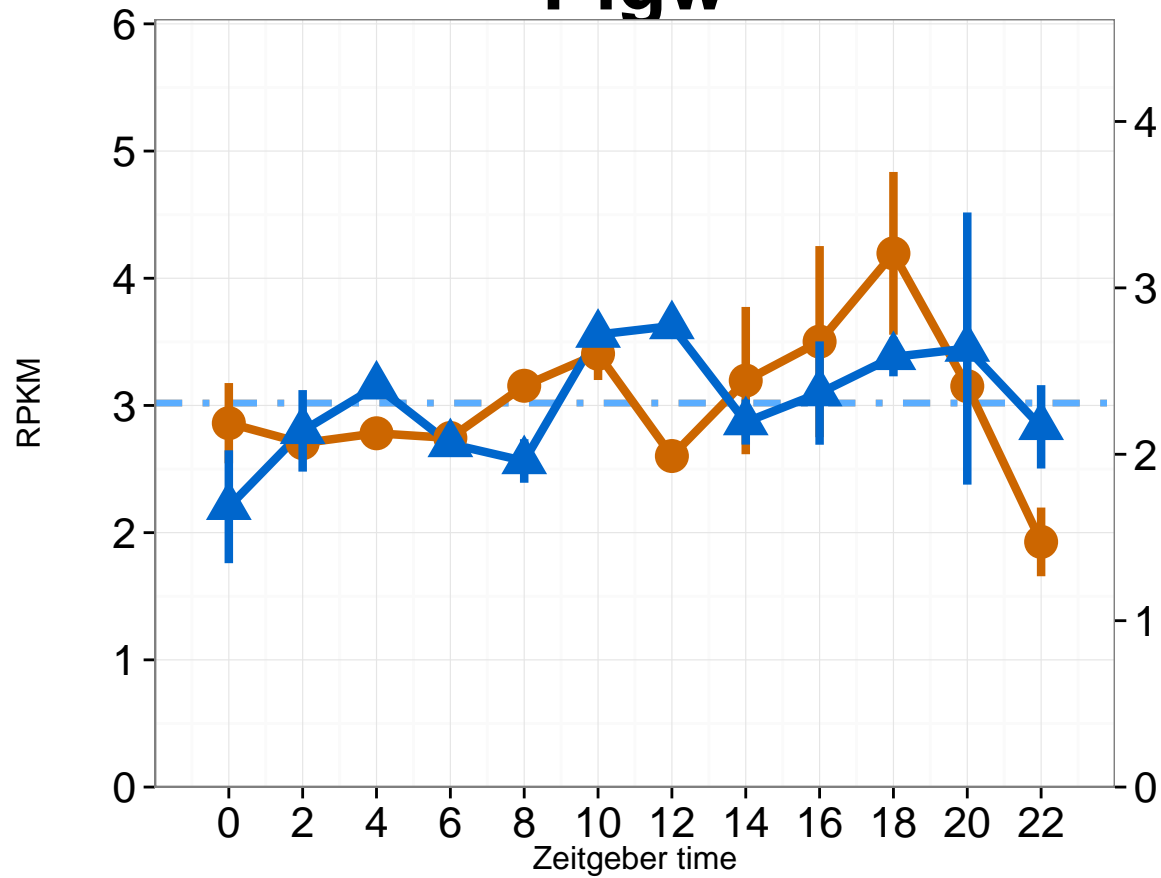

# Pigw

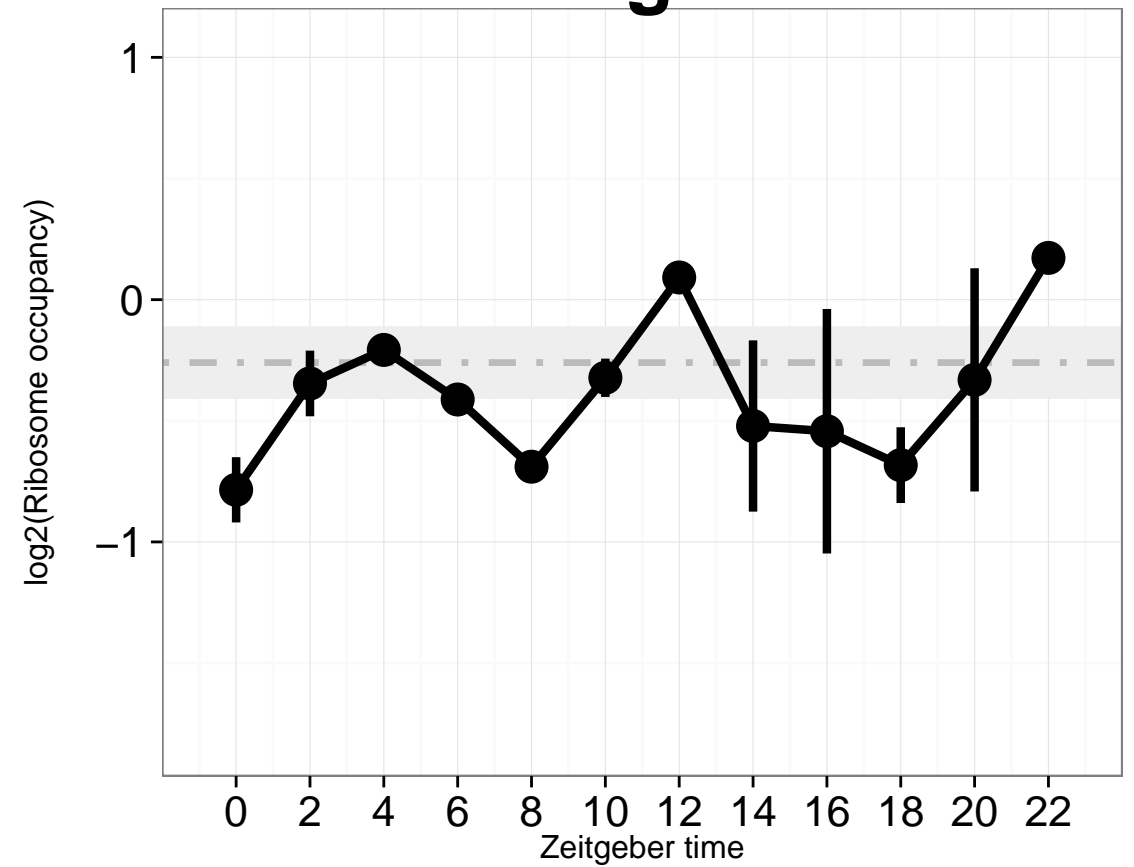

Supplement: SuppDataset_1.zip [file Pigw_set_A.pdf › Supplemental Dataset 1/A-mRNA_nonrhyth_translation_nonrhyth/Pigw_set_A.pdf]

## Pigx

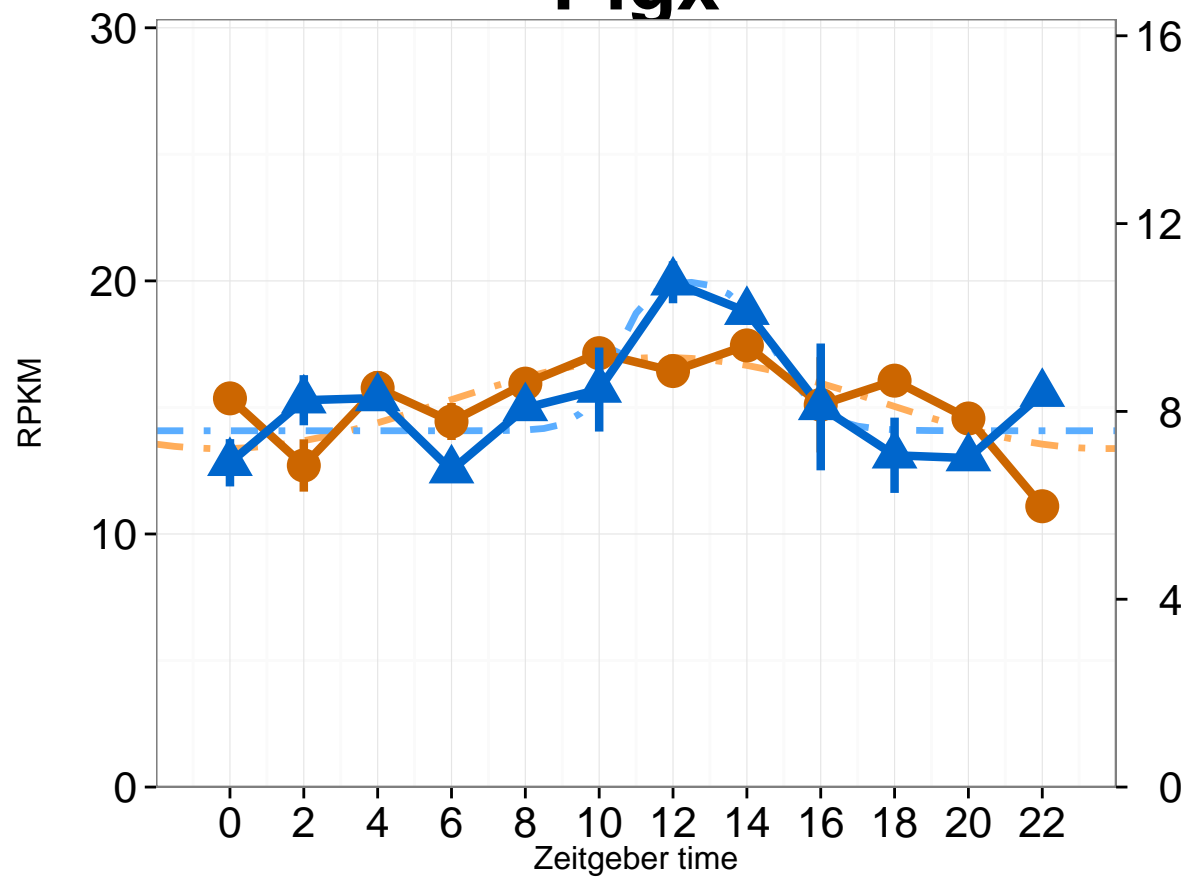

## Pigx

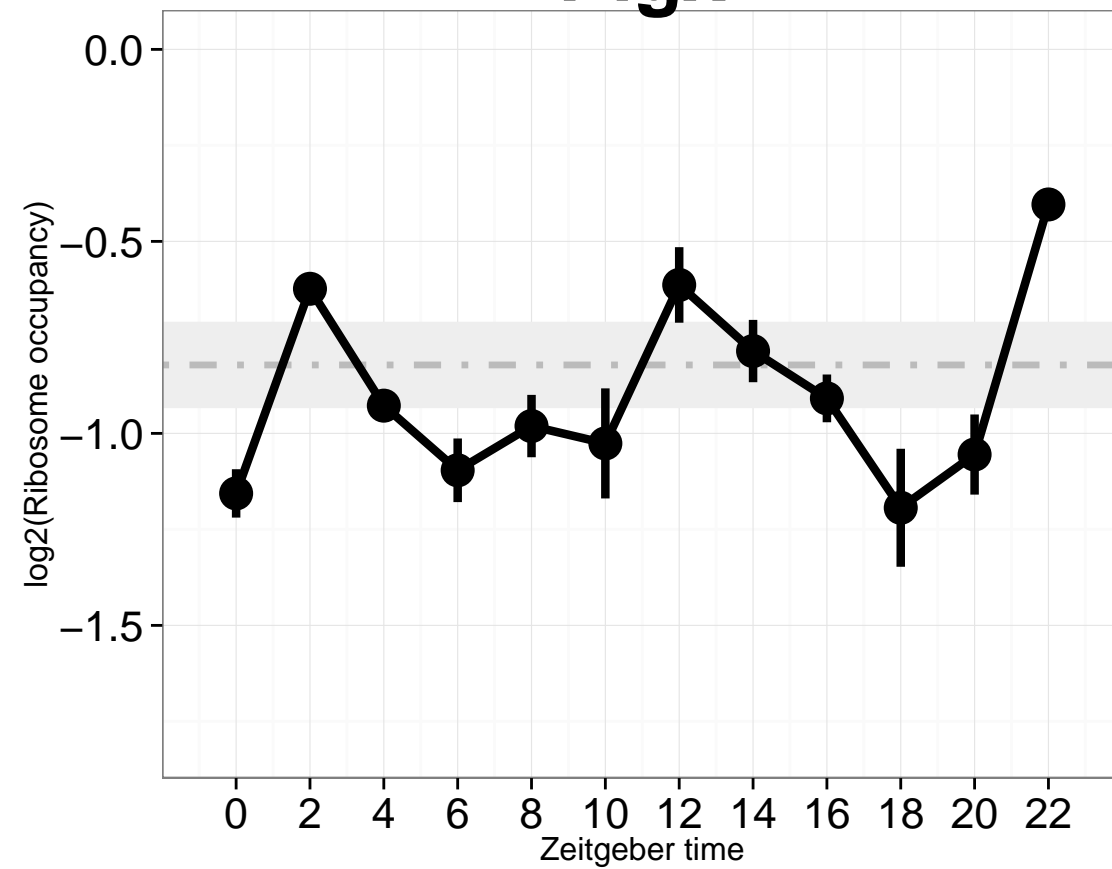

Supplement: SuppDataset_1.zip [file Pigx_set_A.pdf › Supplemental Dataset 1/A-mRNA_nonrhyth_translation_nonrhyth/Pigx_set_A.pdf]

## Pigyl

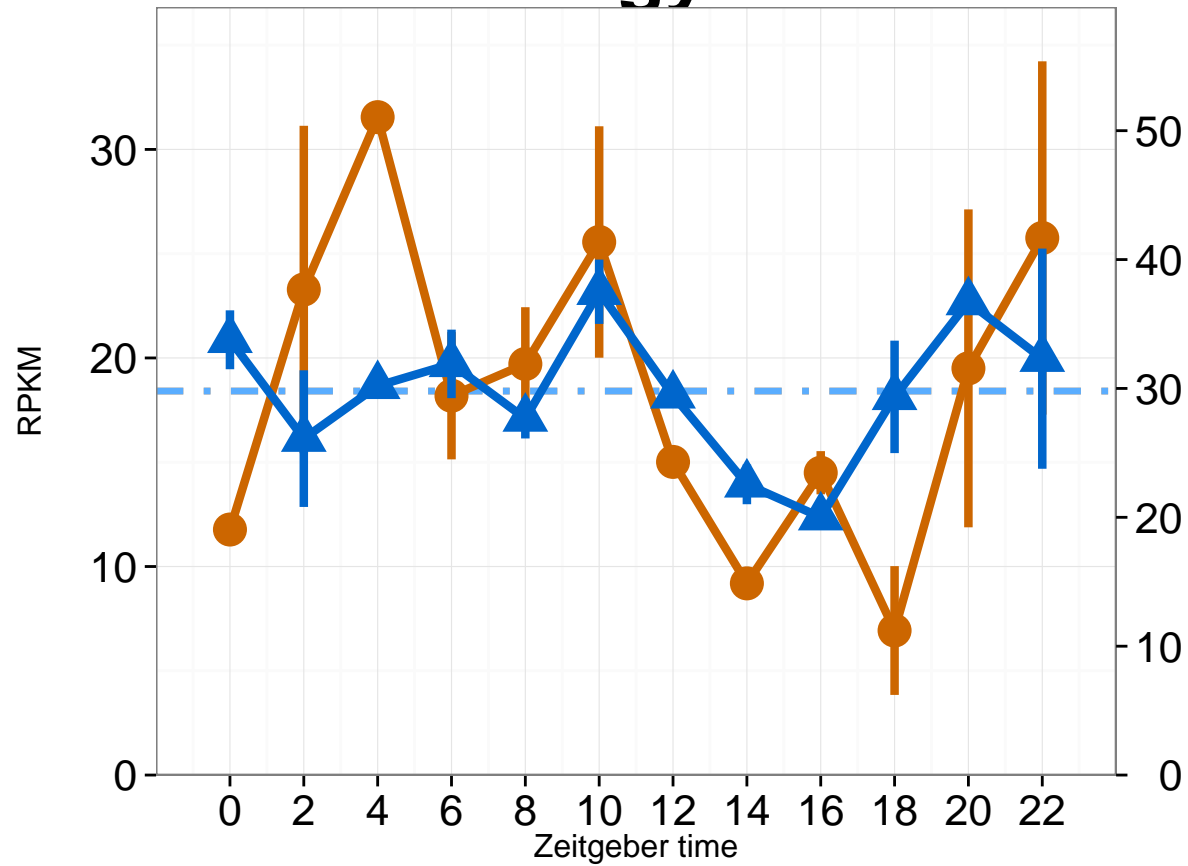

## Pigyl

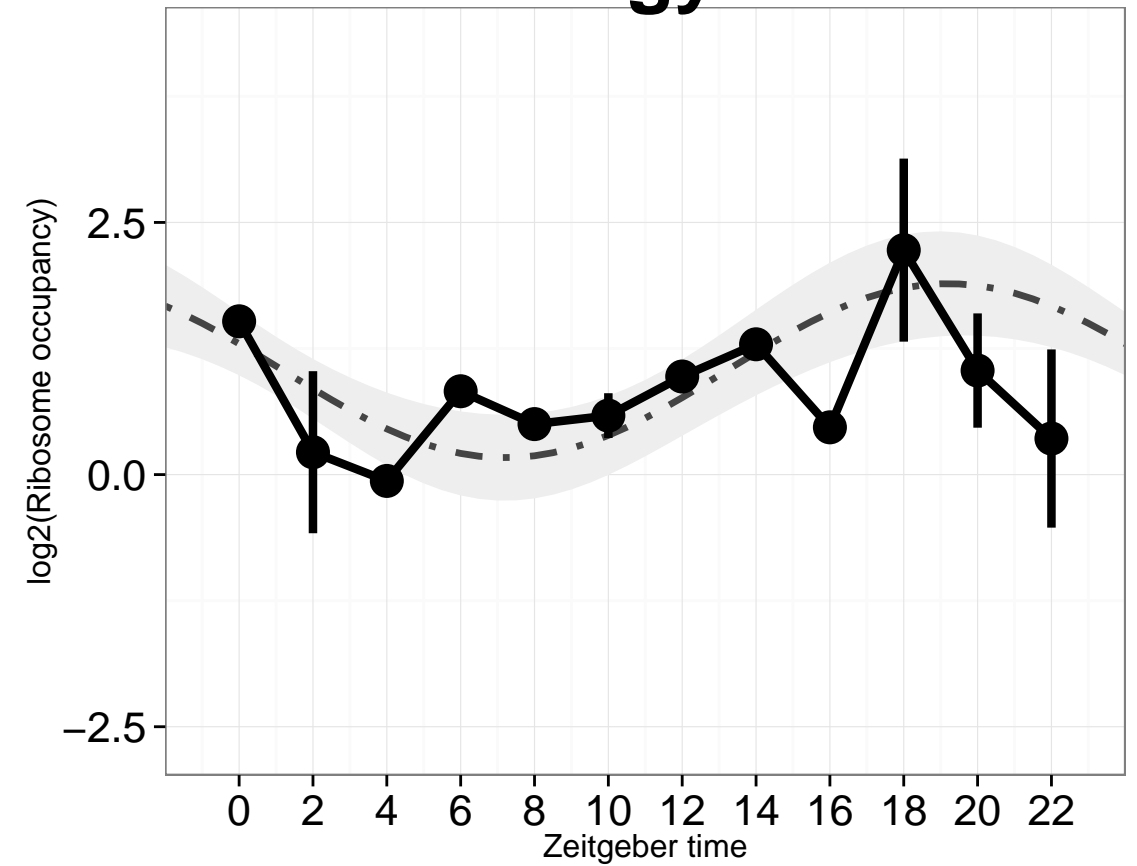

Supplement: SuppDataset_1.zip [file Pigyl_set_A.pdf › Supplemental Dataset 1/A-mRNA_nonrhyth_translation_nonrhyth/Pigyl_set_A.pdf]

# Pih1d1

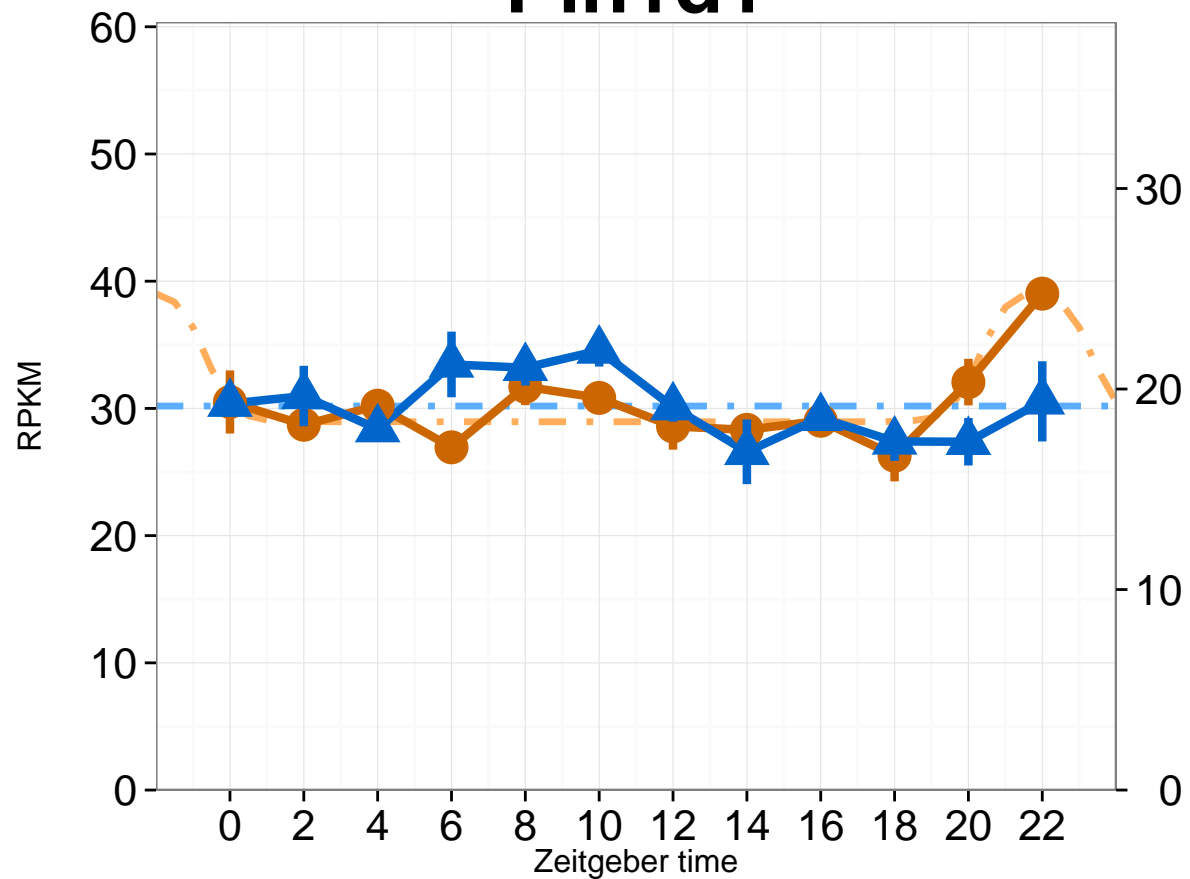

# Pih1d1

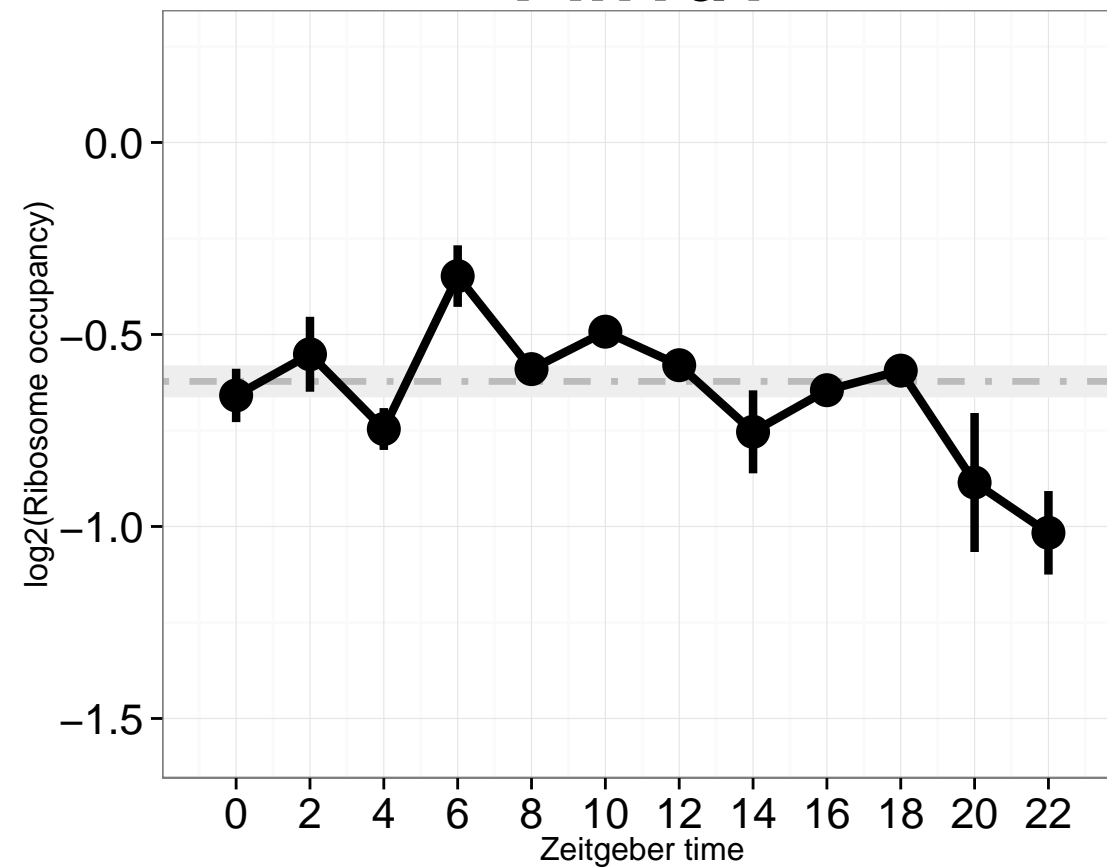

Supplement: SuppDataset_1.zip [file Pih1d1_set_A.pdf › Supplemental Dataset 1/A-mRNA_nonrhyth_translation_nonrhyth/Pih1d1_set_A.pdf]

# Pik3c2a

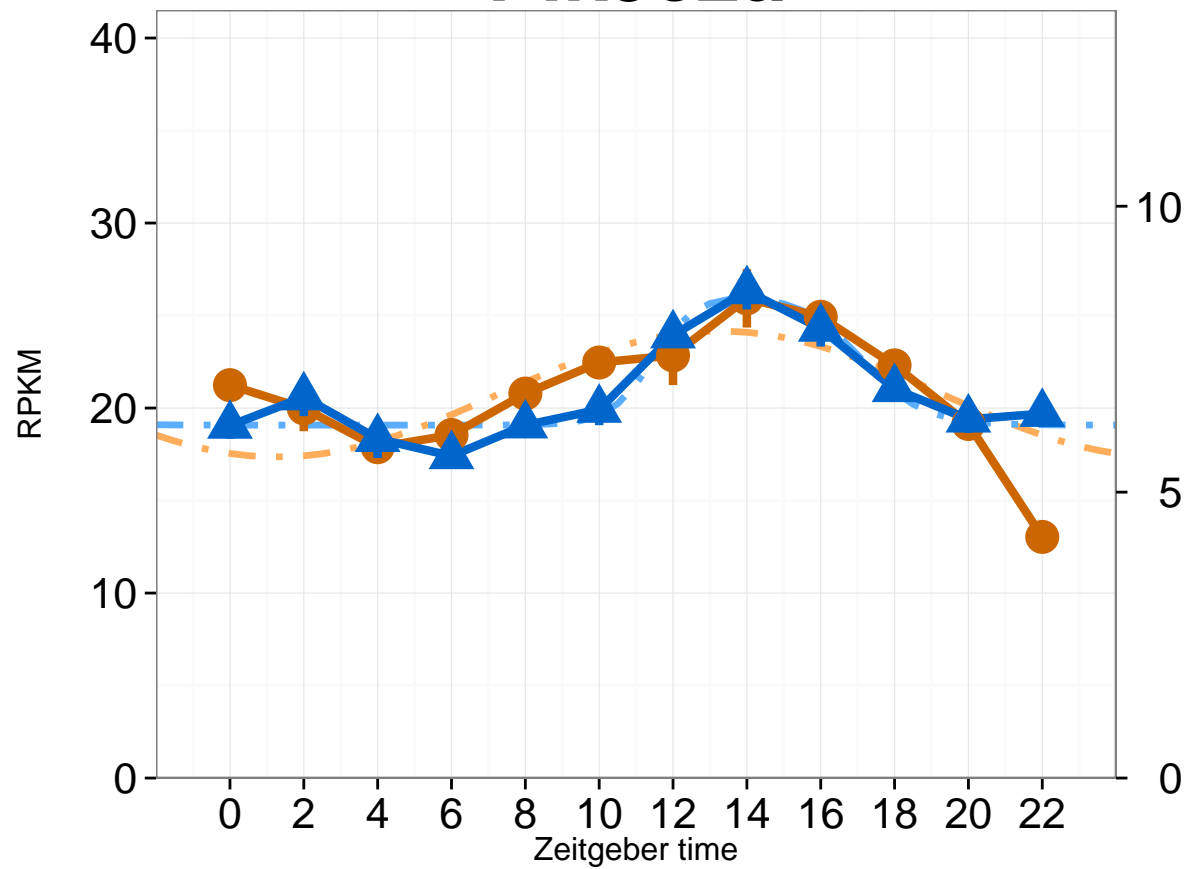

# Pik3c2a

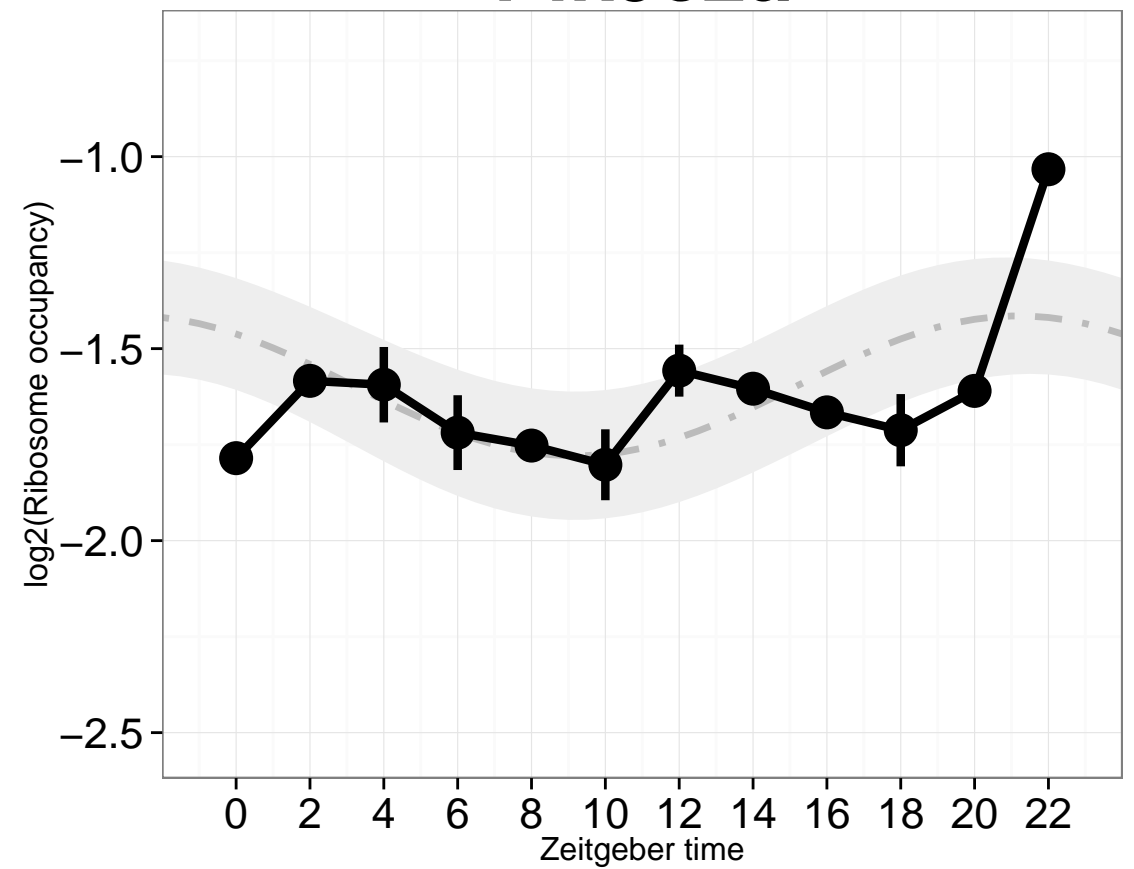

Supplement: SuppDataset_1.zip [file Pik3c2a_set_A.pdf › Supplemental Dataset 1/A-mRNA_nonrhyth_translation_nonrhyth/Pik3c2a_set_A.pdf]

**Pik3c2g**

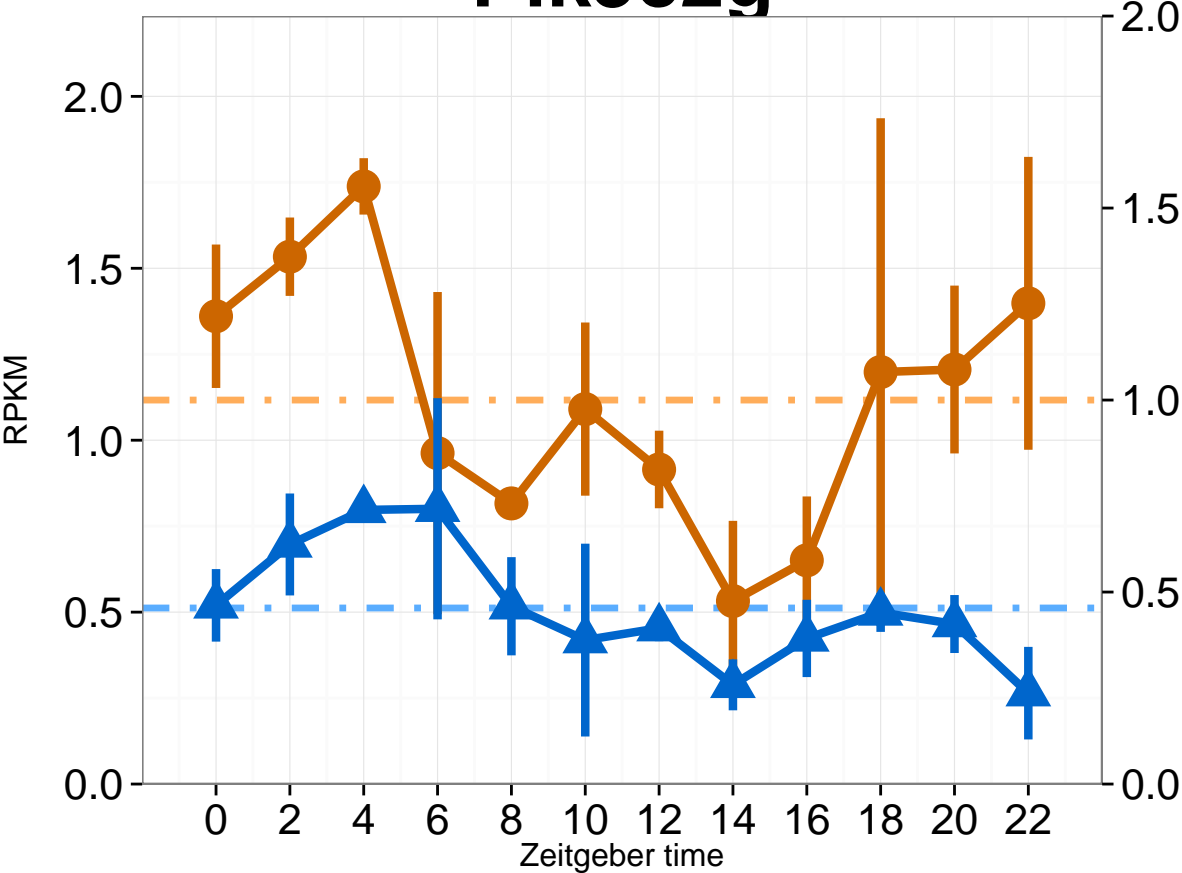

**Pik3c2g**

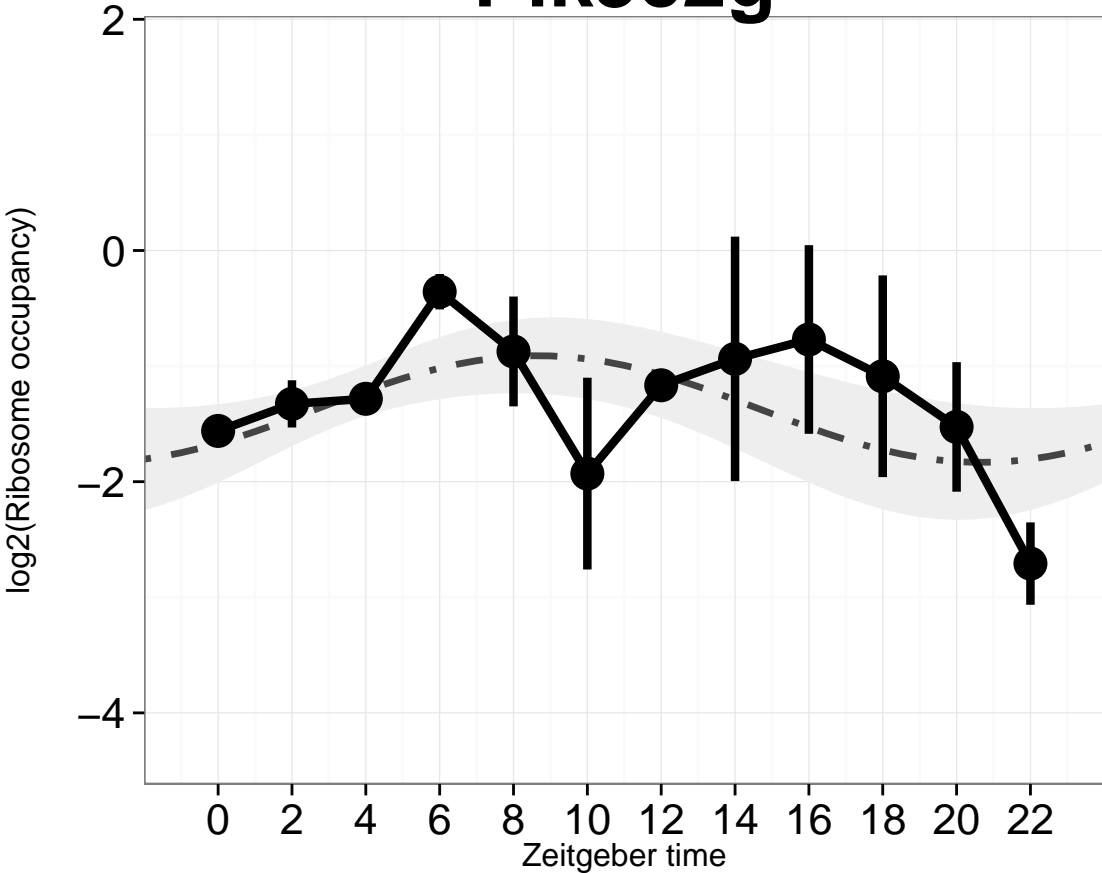

Supplement: SuppDataset_1.zip [file Pik3c2g_set_A.pdf › Supplemental Dataset 1/A-mRNA_nonrhyth_translation_nonrhyth/Pik3c2g_set_A.pdf]

## Pik3c3

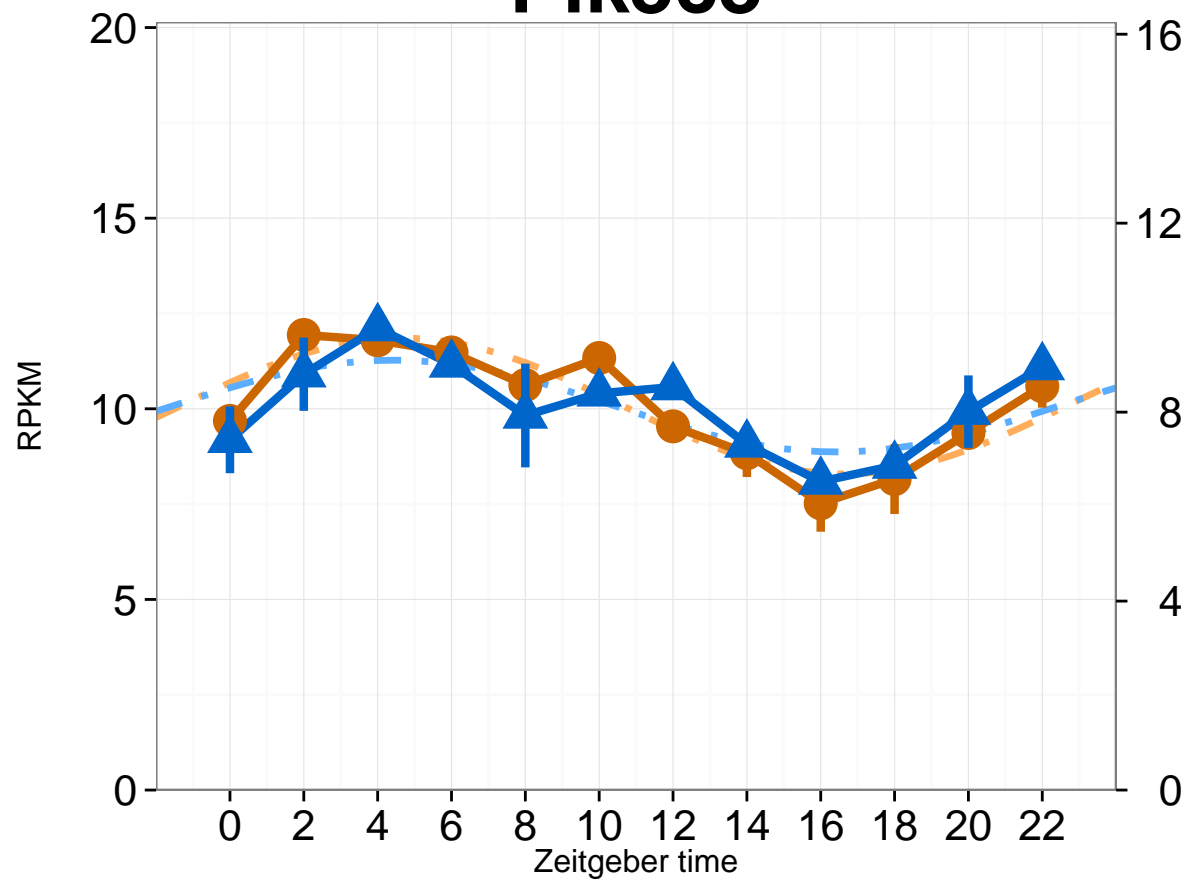

## Pik3c3

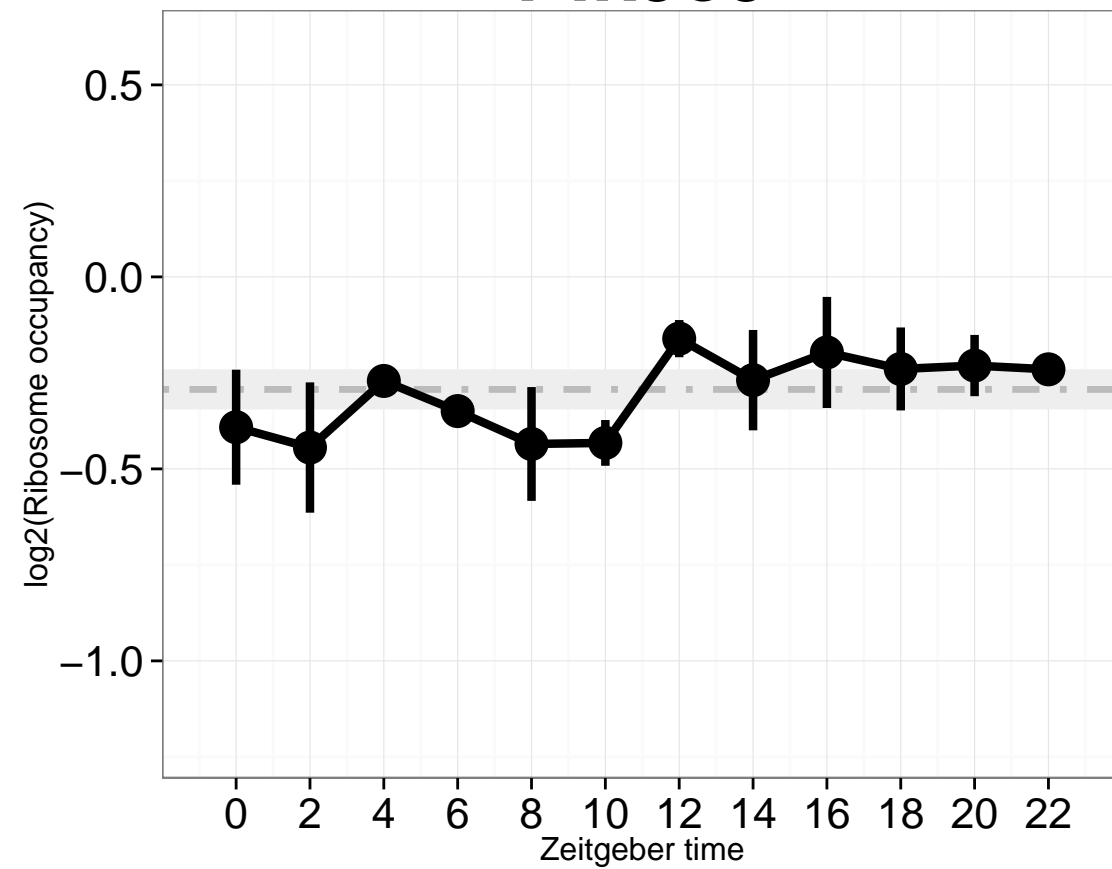

Supplement: SuppDataset_1.zip [file Pik3c3_set_A.pdf › Supplemental Dataset 1/A-mRNA_nonrhyth_translation_nonrhyth/Pik3c3_set_A.pdf]

## Pik3ca

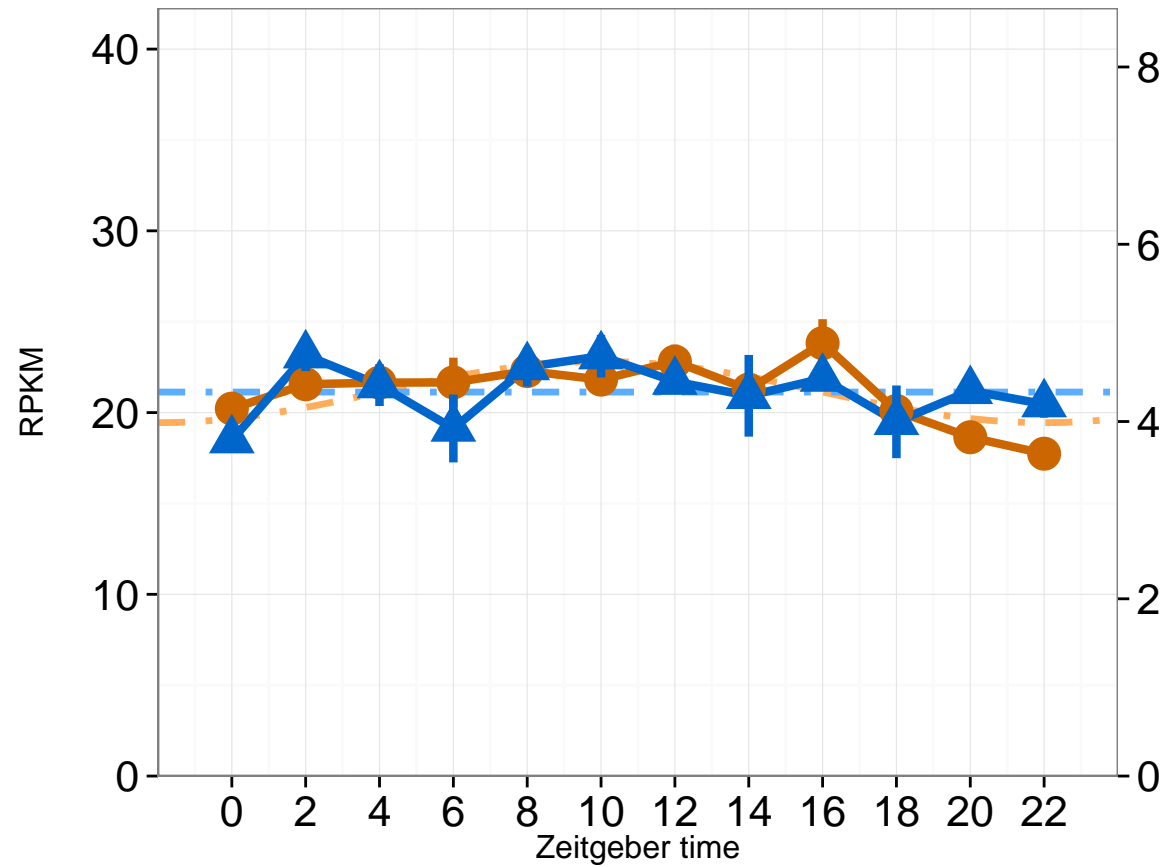

## Pik3ca

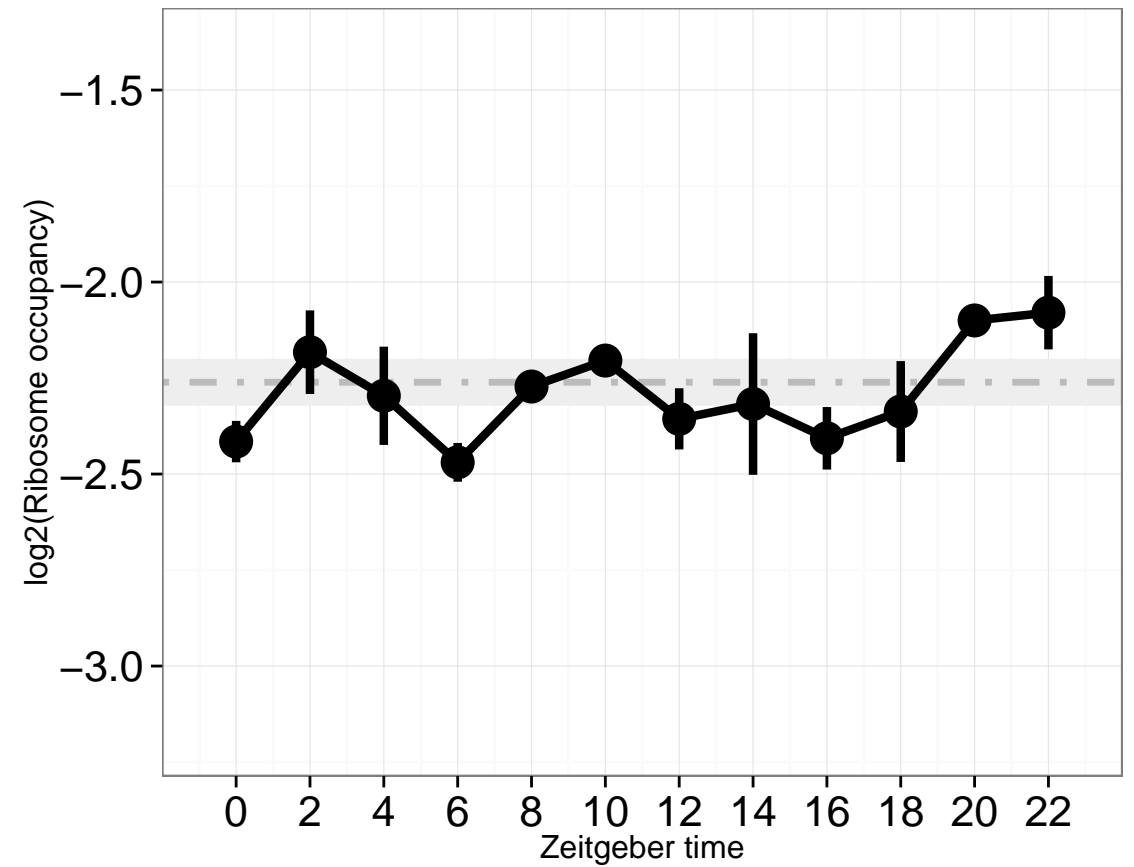

Supplement: SuppDataset_1.zip [file Pik3ca_set_A.pdf › Supplemental Dataset 1/A-mRNA_nonrhyth_translation_nonrhyth/Pik3ca_set_A.pdf]

# Pik3cb

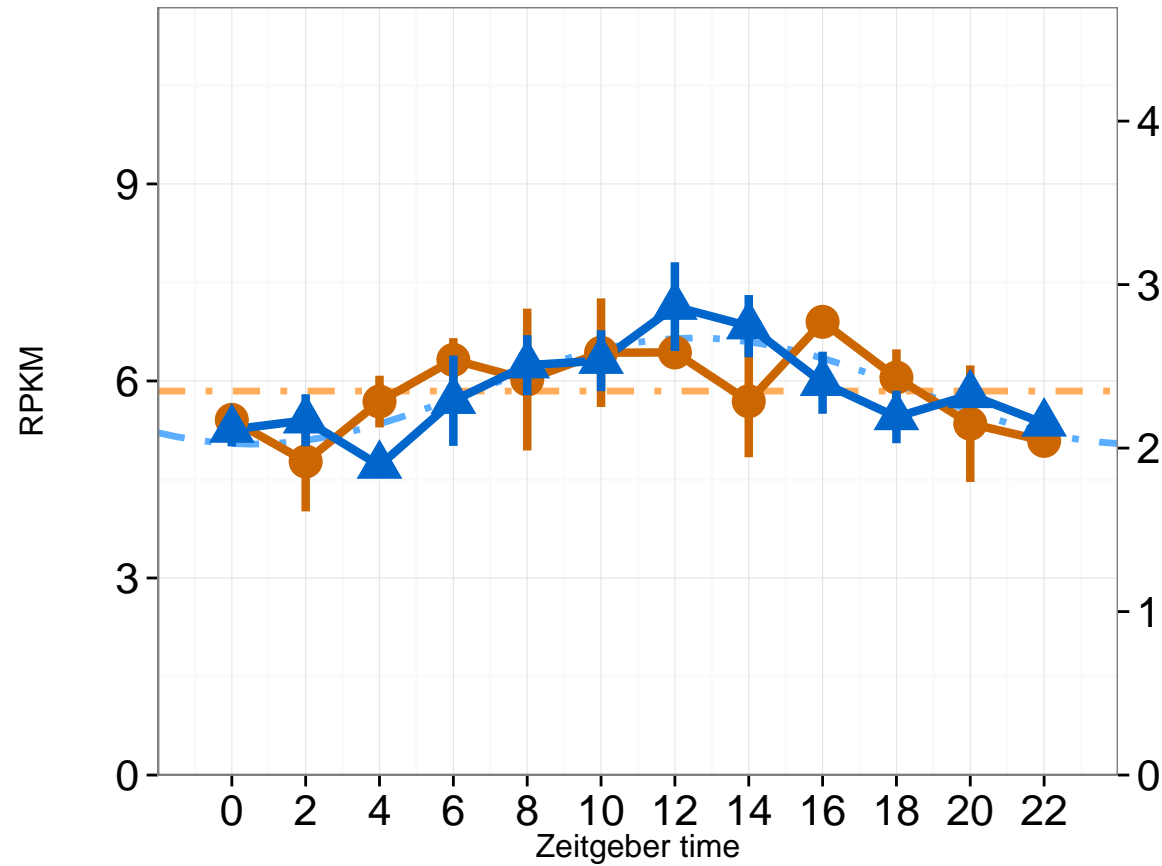

# Pik3cb

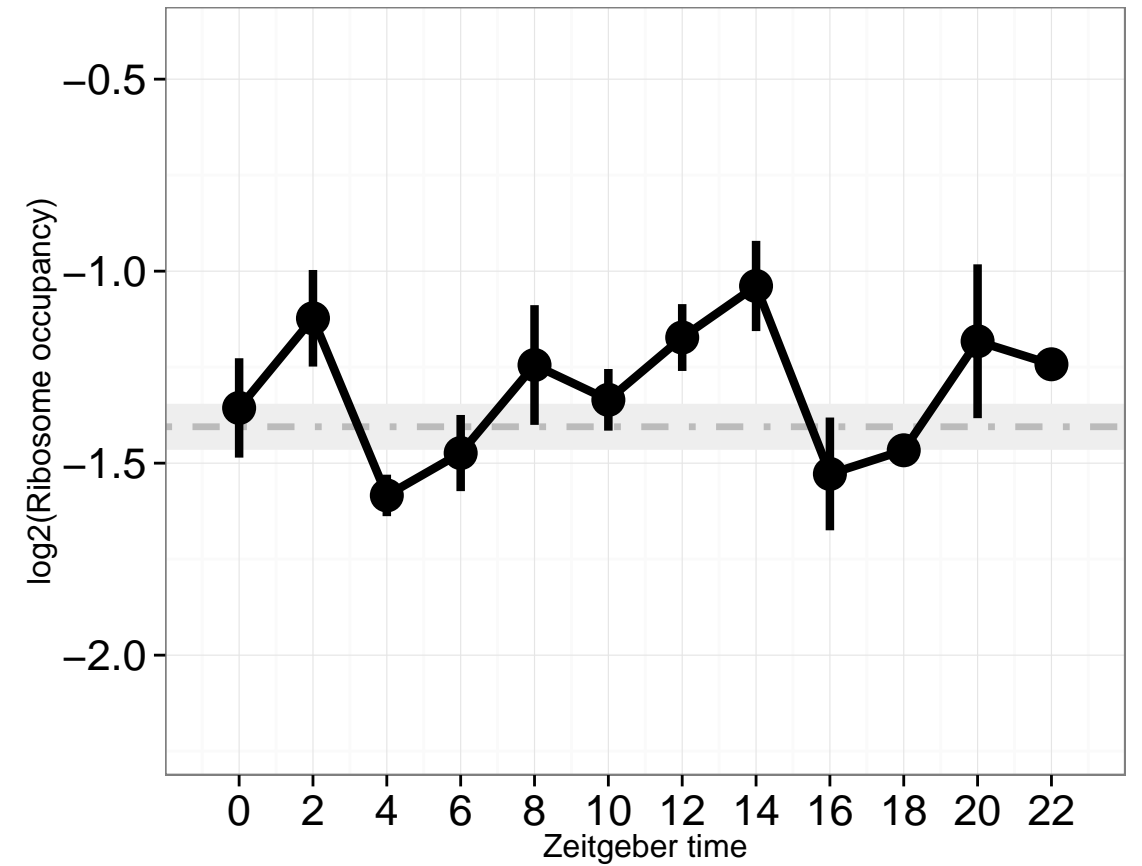

Supplement: SuppDataset_1.zip [file Pik3cb_set_A.pdf › Supplemental Dataset 1/A-mRNA_nonrhyth_translation_nonrhyth/Pik3cb_set_A.pdf]

## Pik3cd

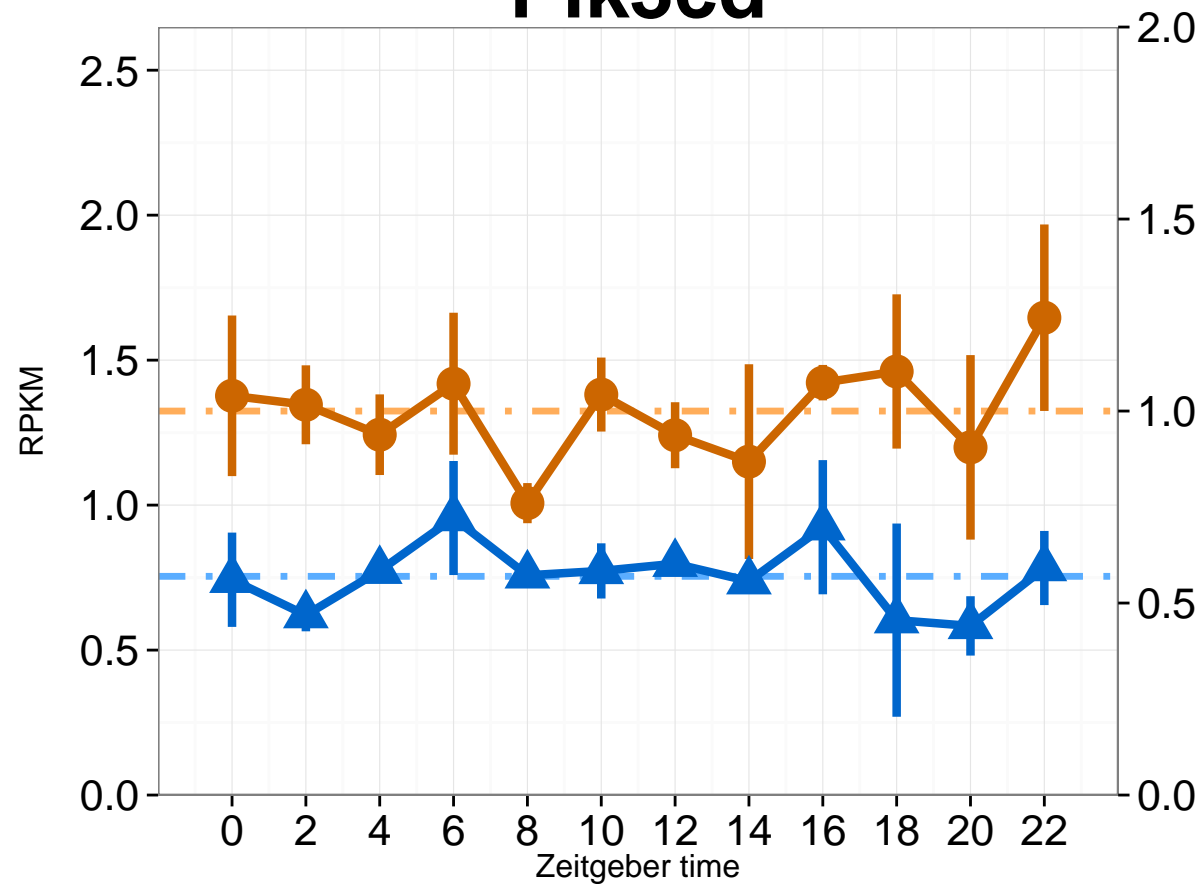

## Pik3cd

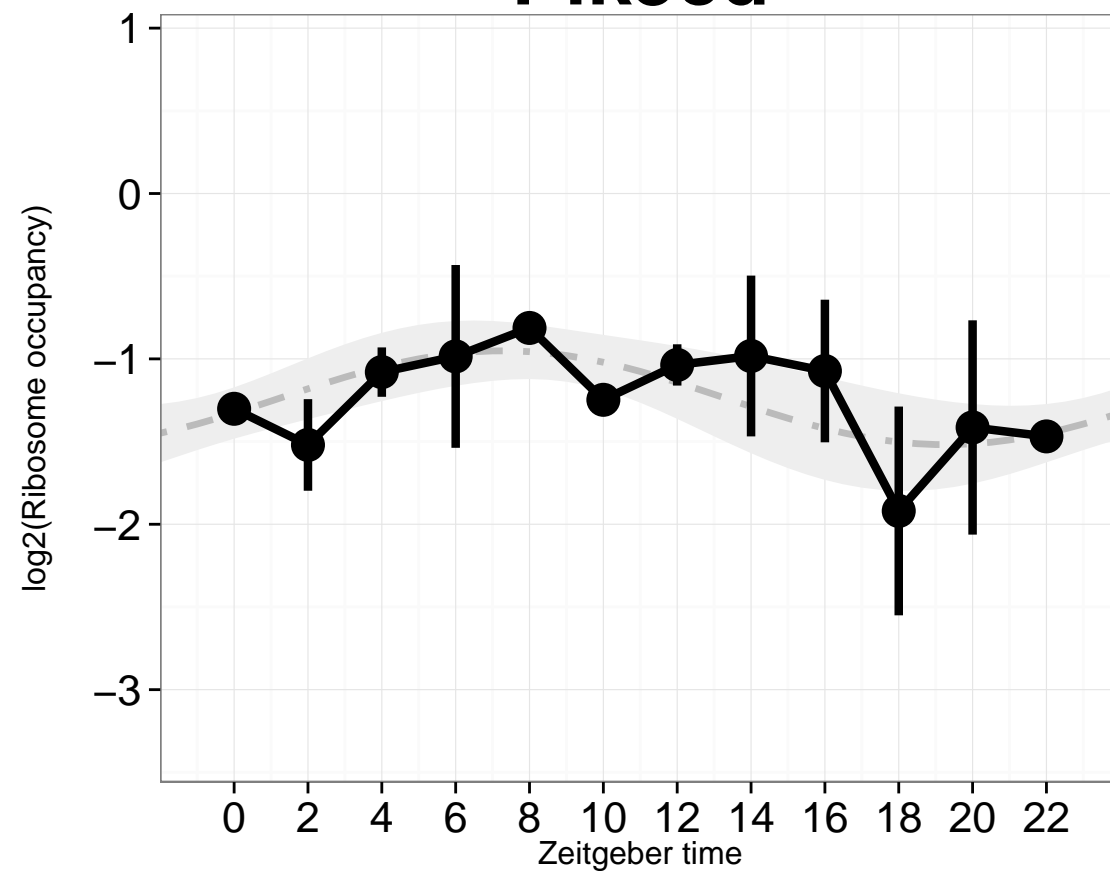

Supplement: SuppDataset_1.zip [file Pik3cd_set_A.pdf › Supplemental Dataset 1/A-mRNA_nonrhyth_translation_nonrhyth/Pik3cd_set_A.pdf]

# Pik3cg

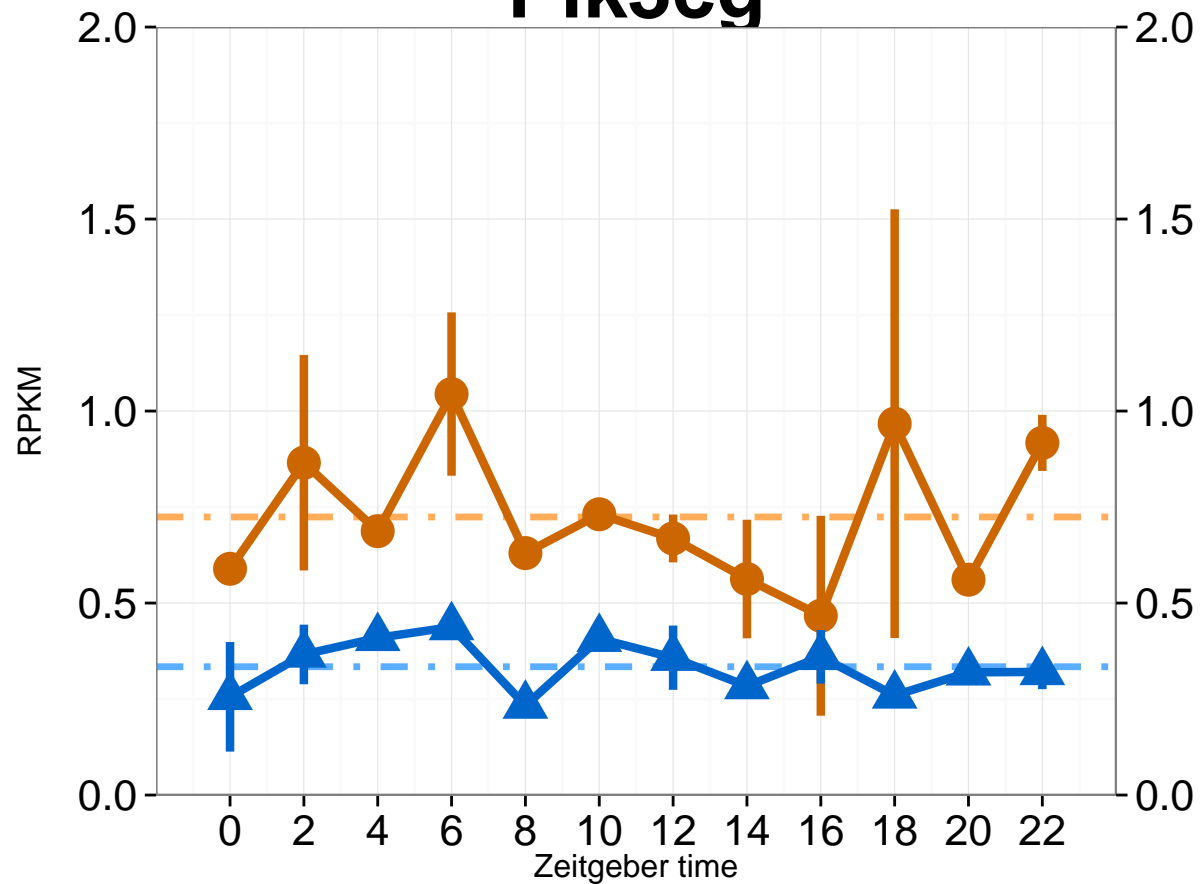

# Pik3cg

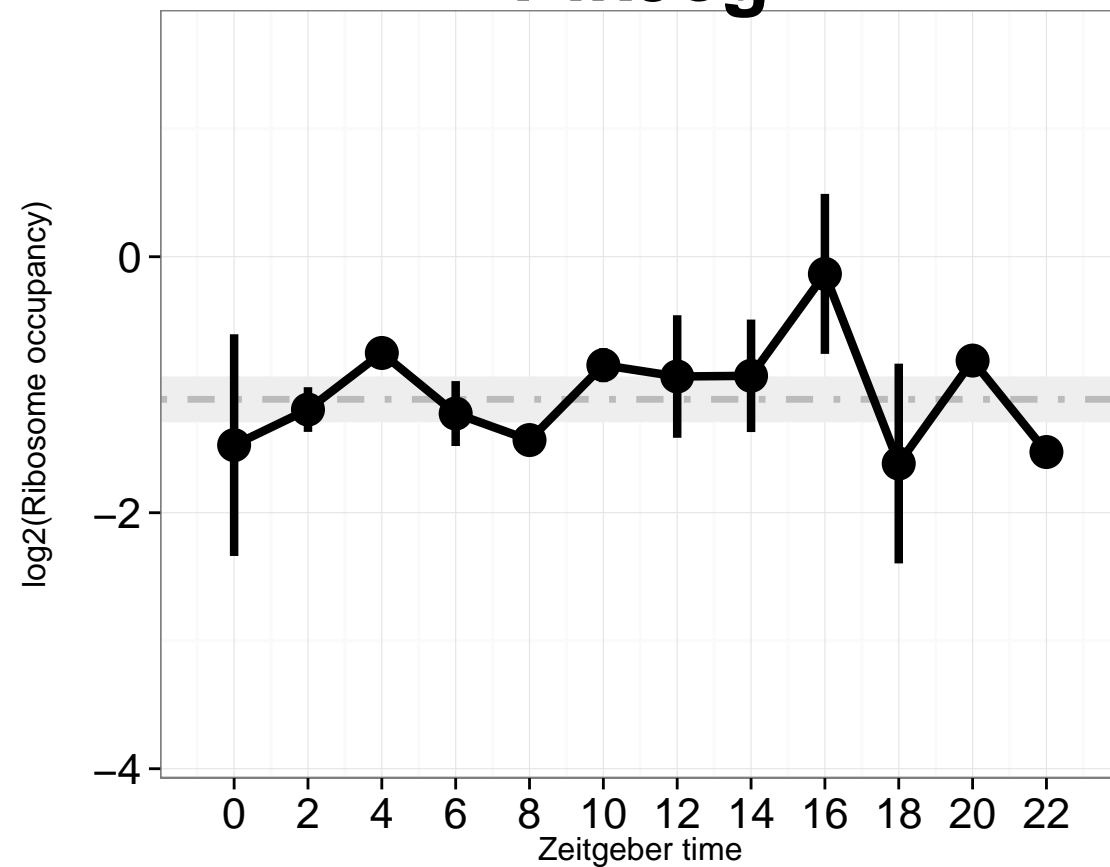

Supplement: SuppDataset_1.zip [file Pik3cg_set_A.pdf › Supplemental Dataset 1/A-mRNA_nonrhyth_translation_nonrhyth/Pik3cg_set_A.pdf]

# Pik3r2

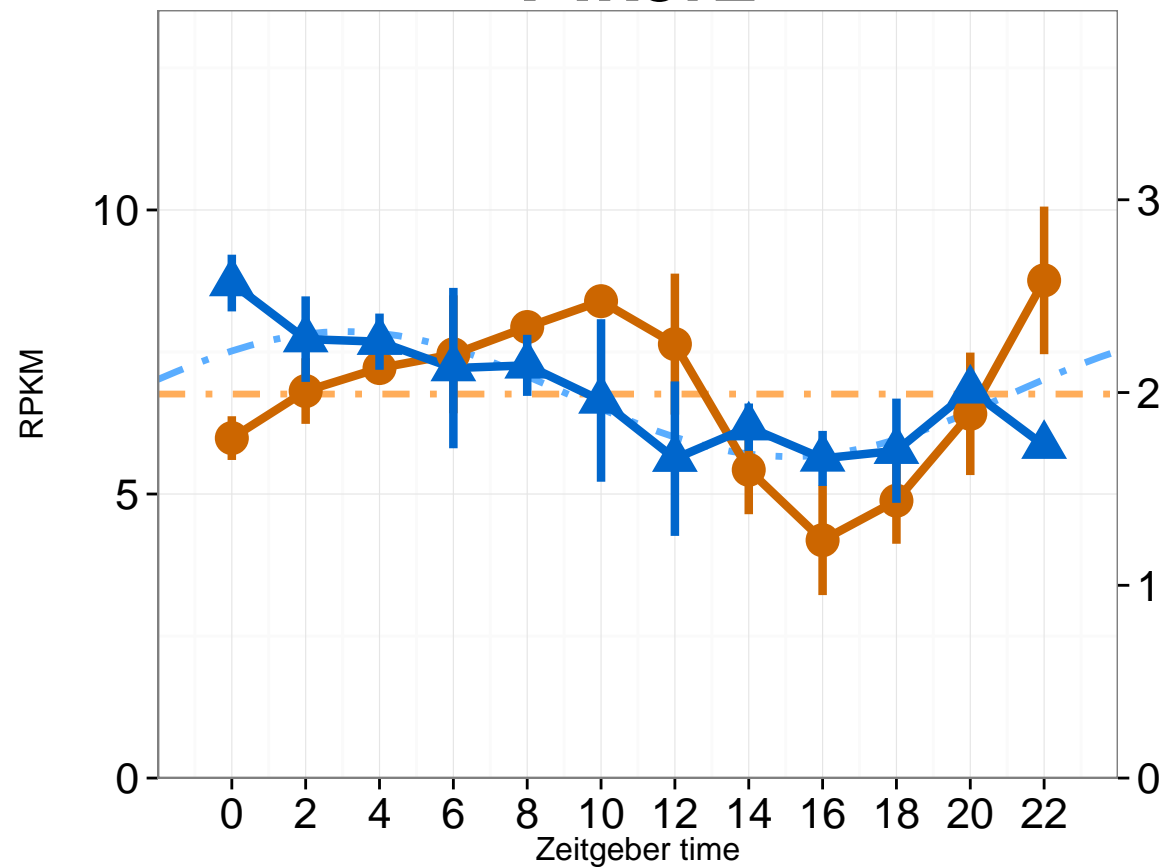

# Pik3r2

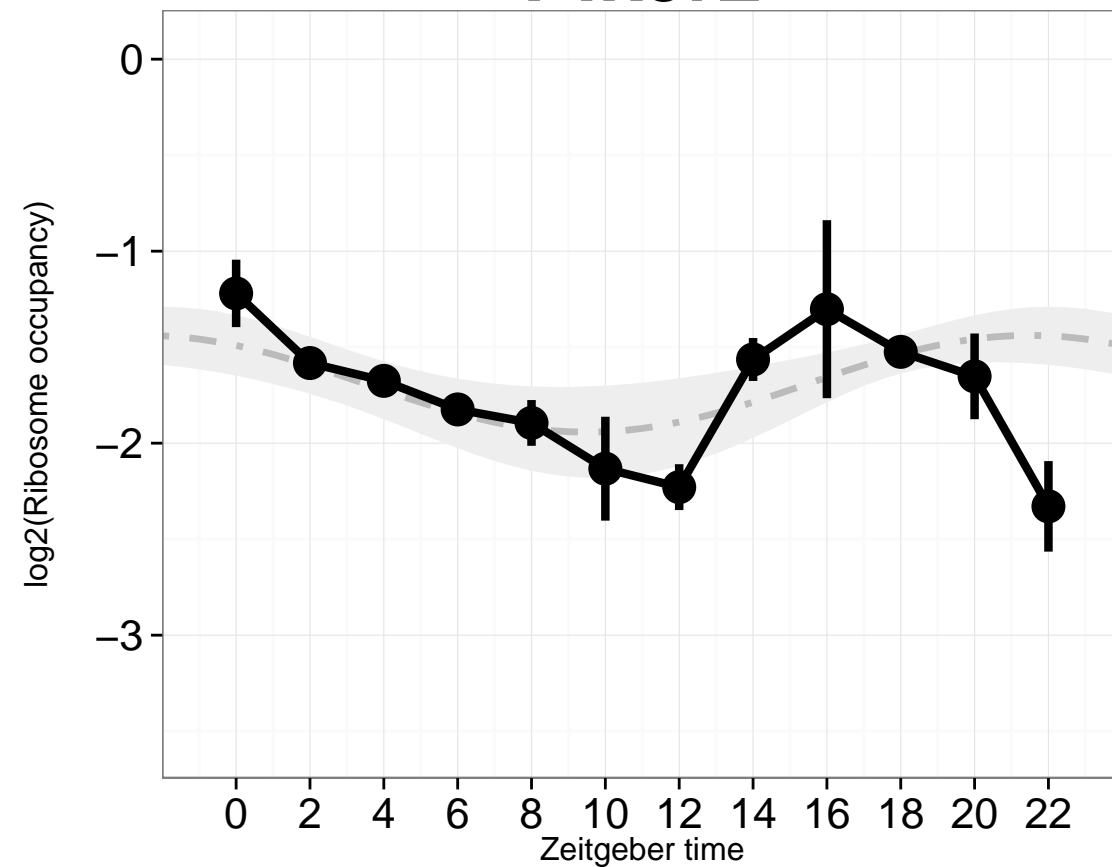

Supplement: SuppDataset_1.zip [file Pik3r2_set_A.pdf › Supplemental Dataset 1/A-mRNA_nonrhyth_translation_nonrhyth/Pik3r2_set_A.pdf]

## Pik3r4

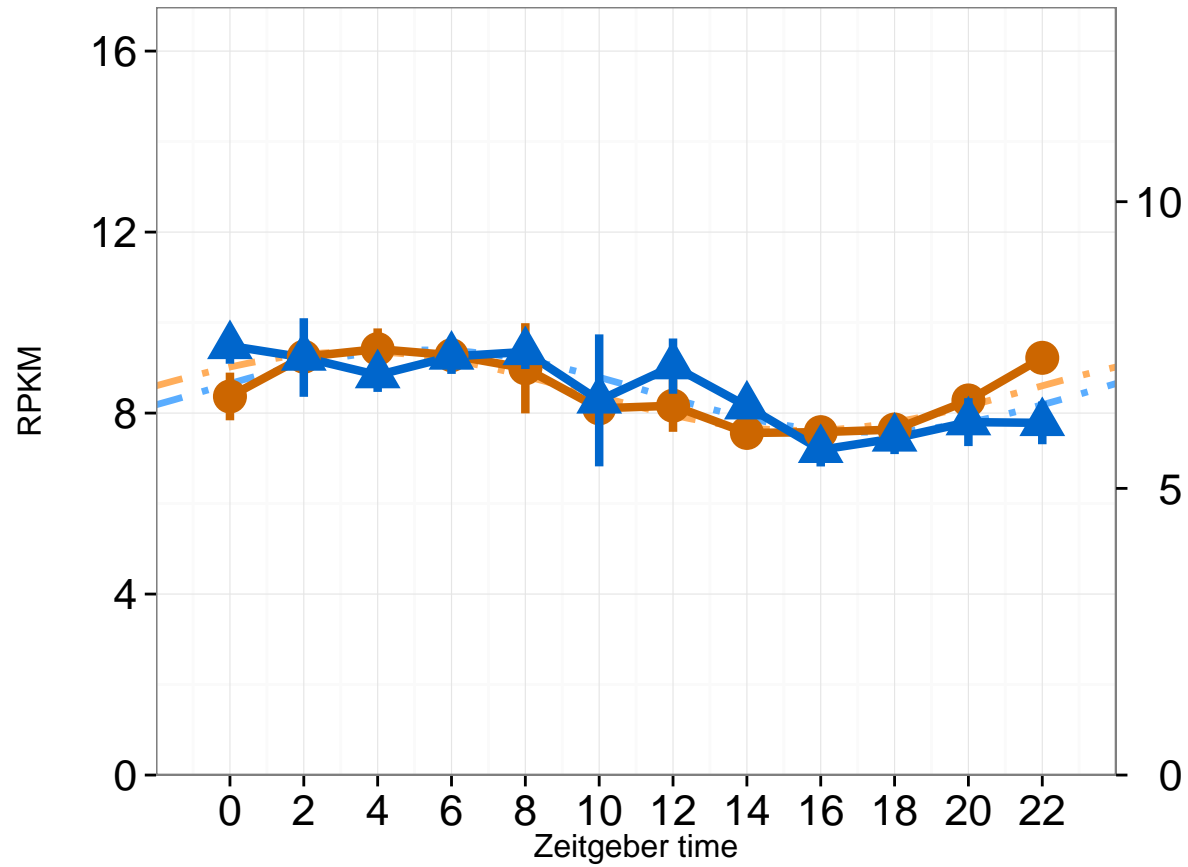

## Pik3r4

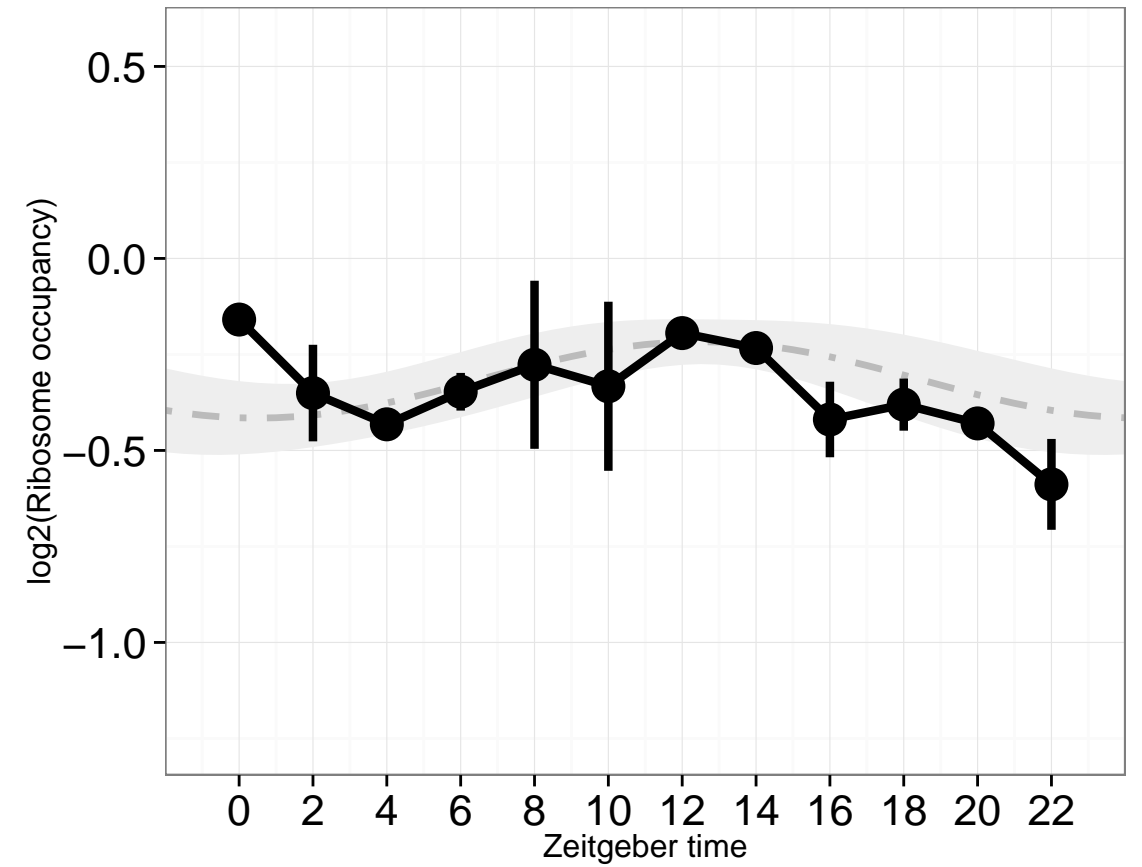

Supplement: SuppDataset_1.zip [file Pik3r4_set_A.pdf › Supplemental Dataset 1/A-mRNA_nonrhyth_translation_nonrhyth/Pik3r4_set_A.pdf]

## Pikfyve

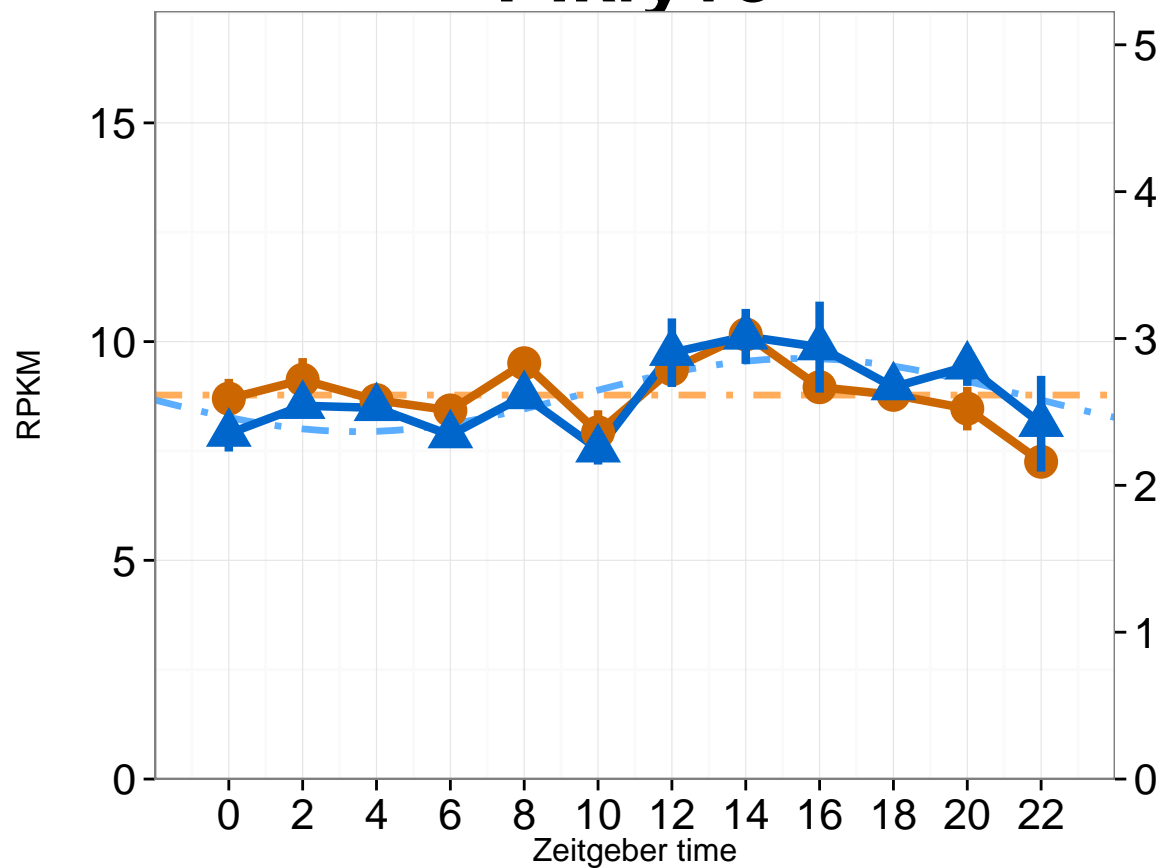

## Pikfyve

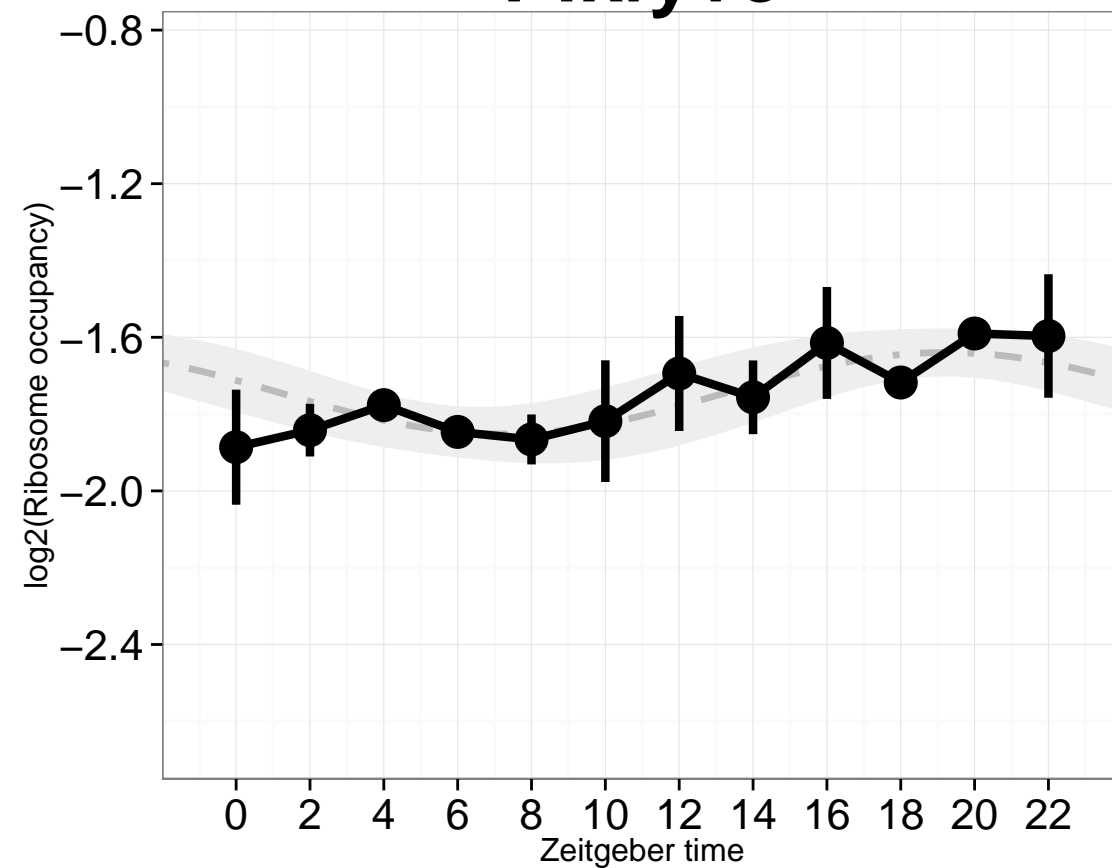

Supplement: SuppDataset_1.zip [file Pikfyve_set_A.pdf › Supplemental Dataset 1/A-mRNA_nonrhyth_translation_nonrhyth/Pikfyve_set_A.pdf]

## Pilra

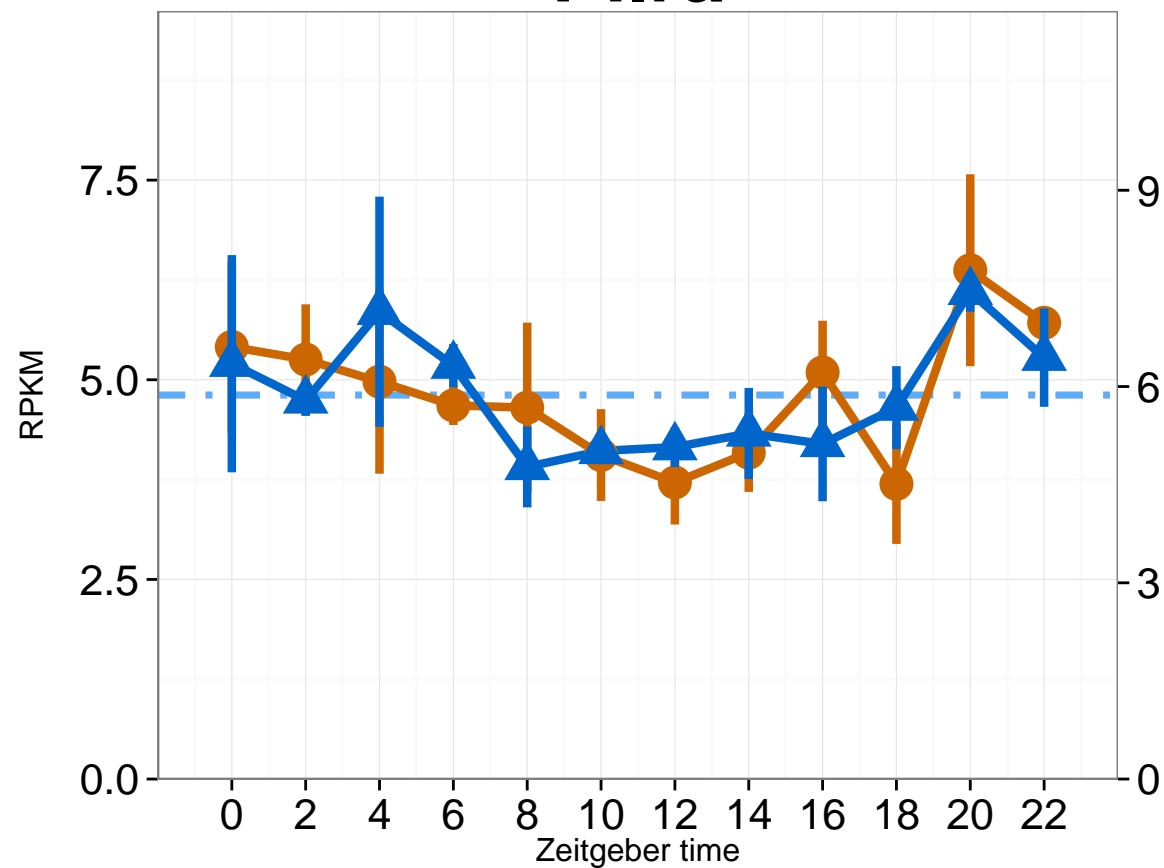

## Pilra

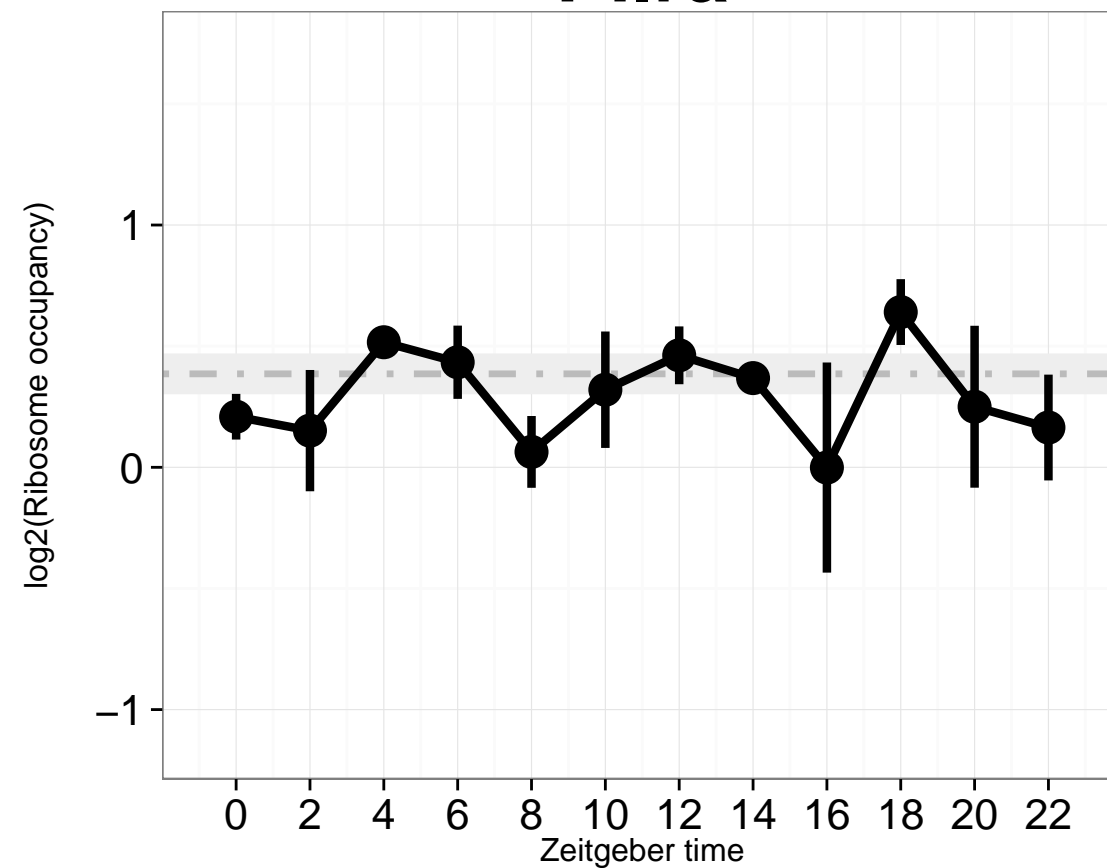

Supplement: SuppDataset_1.zip [file Pilra_set_A.pdf › Supplemental Dataset 1/A-mRNA_nonrhyth_translation_nonrhyth/Pilra_set_A.pdf]

# Pilrb1

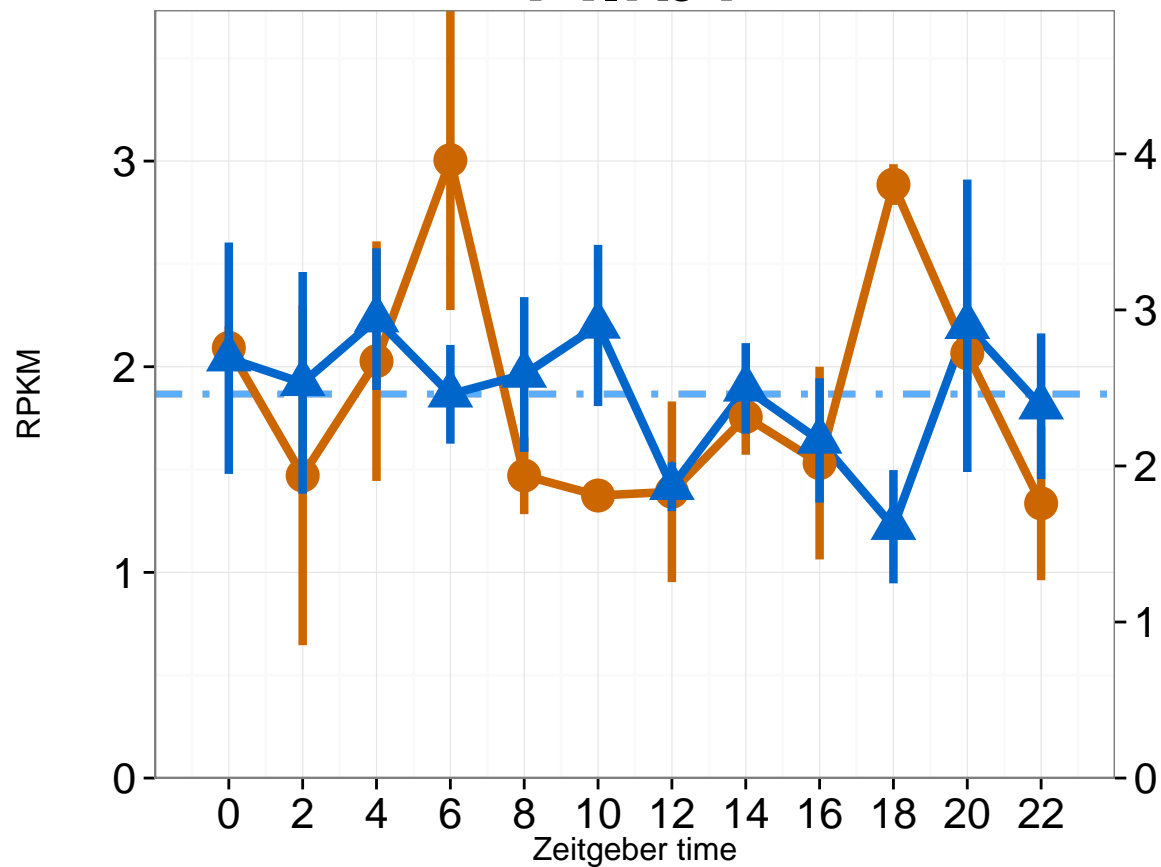

# Pilrb1

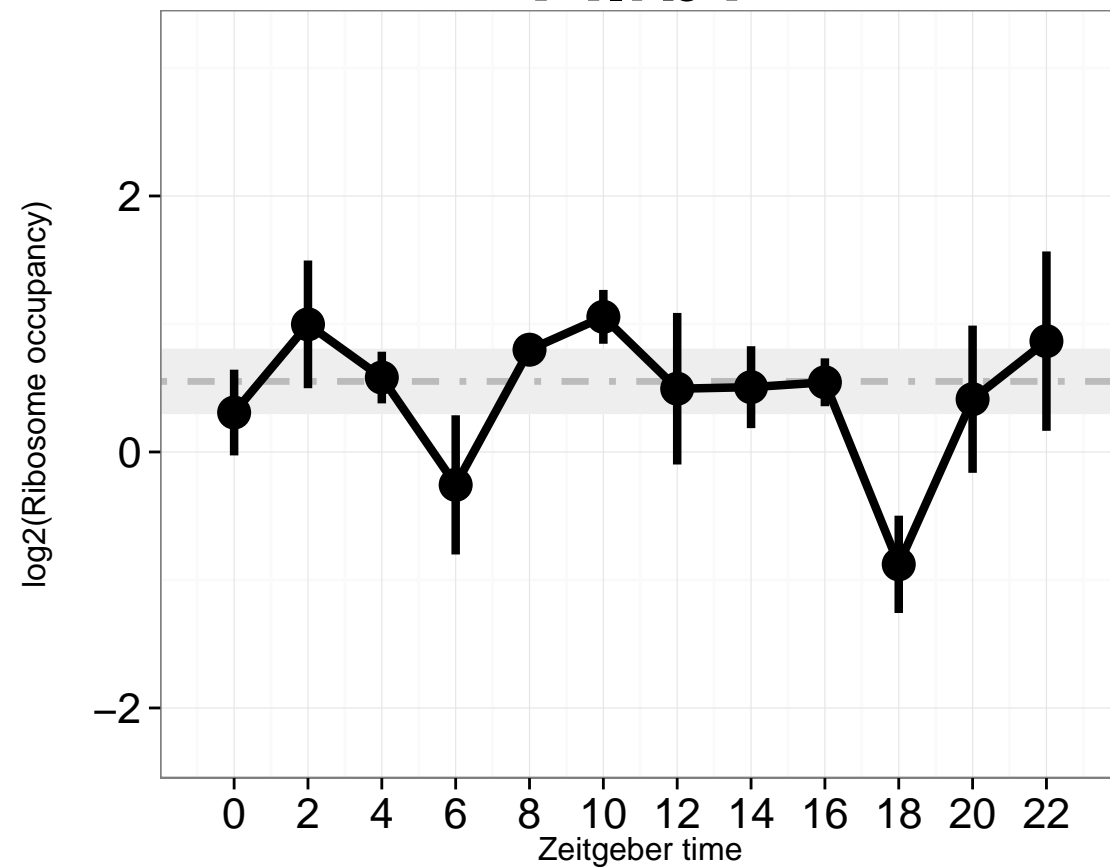

Supplement: SuppDataset_1.zip [file Pilrb1_set_A.pdf › Supplemental Dataset 1/A-mRNA_nonrhyth_translation_nonrhyth/Pilrb1_set_A.pdf]

# Pim2

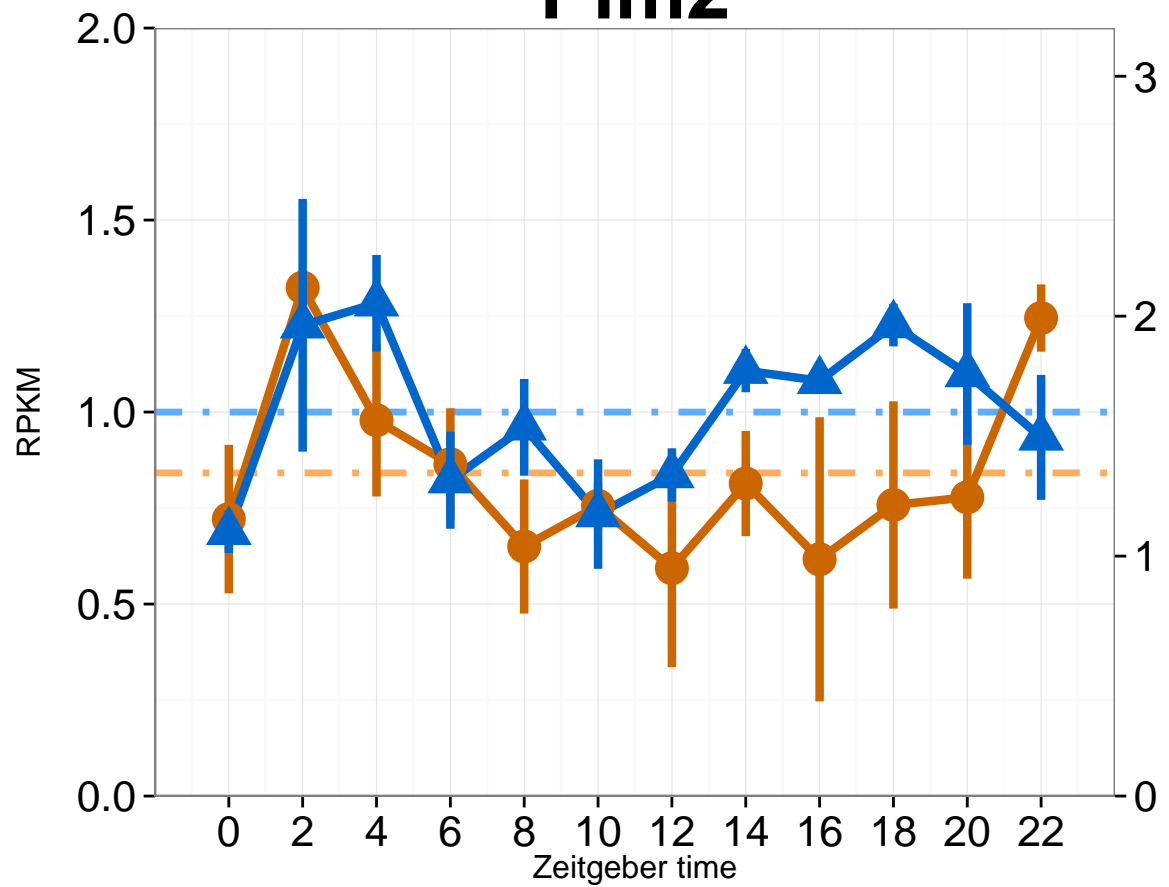

# Pim2

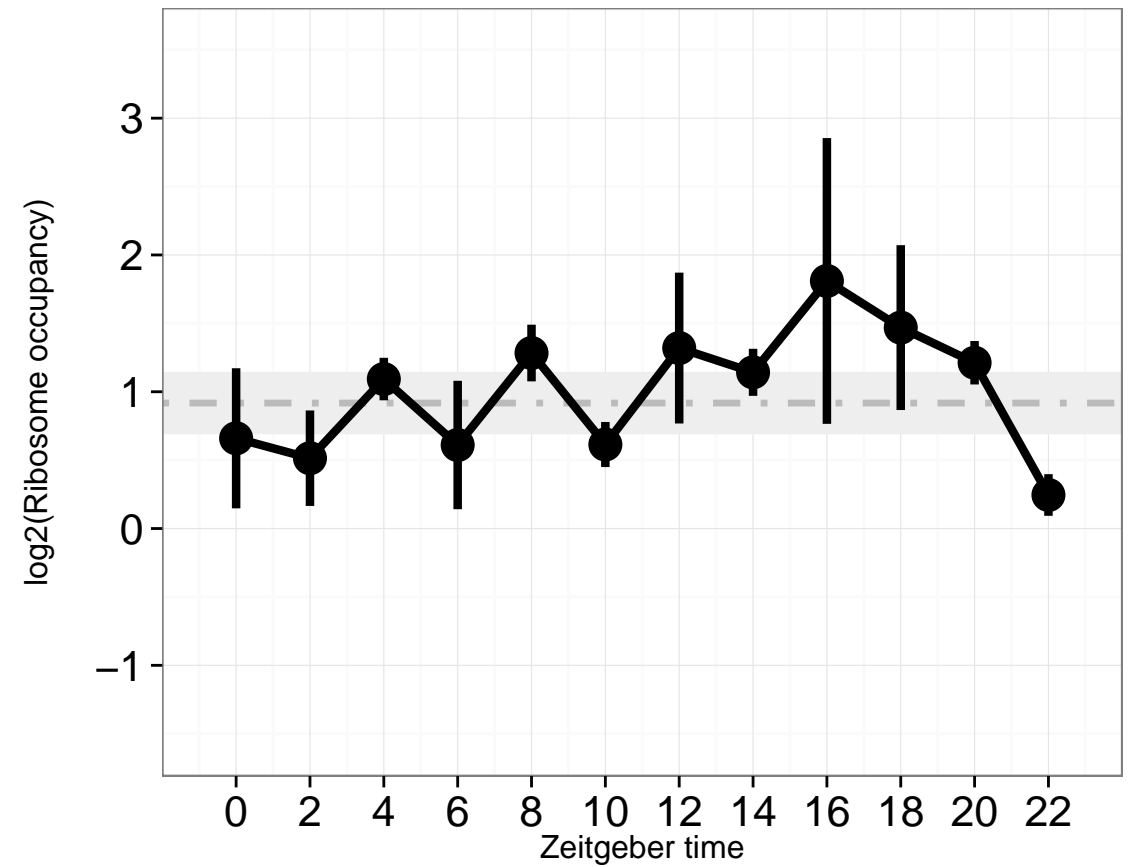

Supplement: SuppDataset_1.zip [file Pim2_set_A.pdf › Supplemental Dataset 1/A-mRNA_nonrhyth_translation_nonrhyth/Pim2_set_A.pdf]

## Pin1

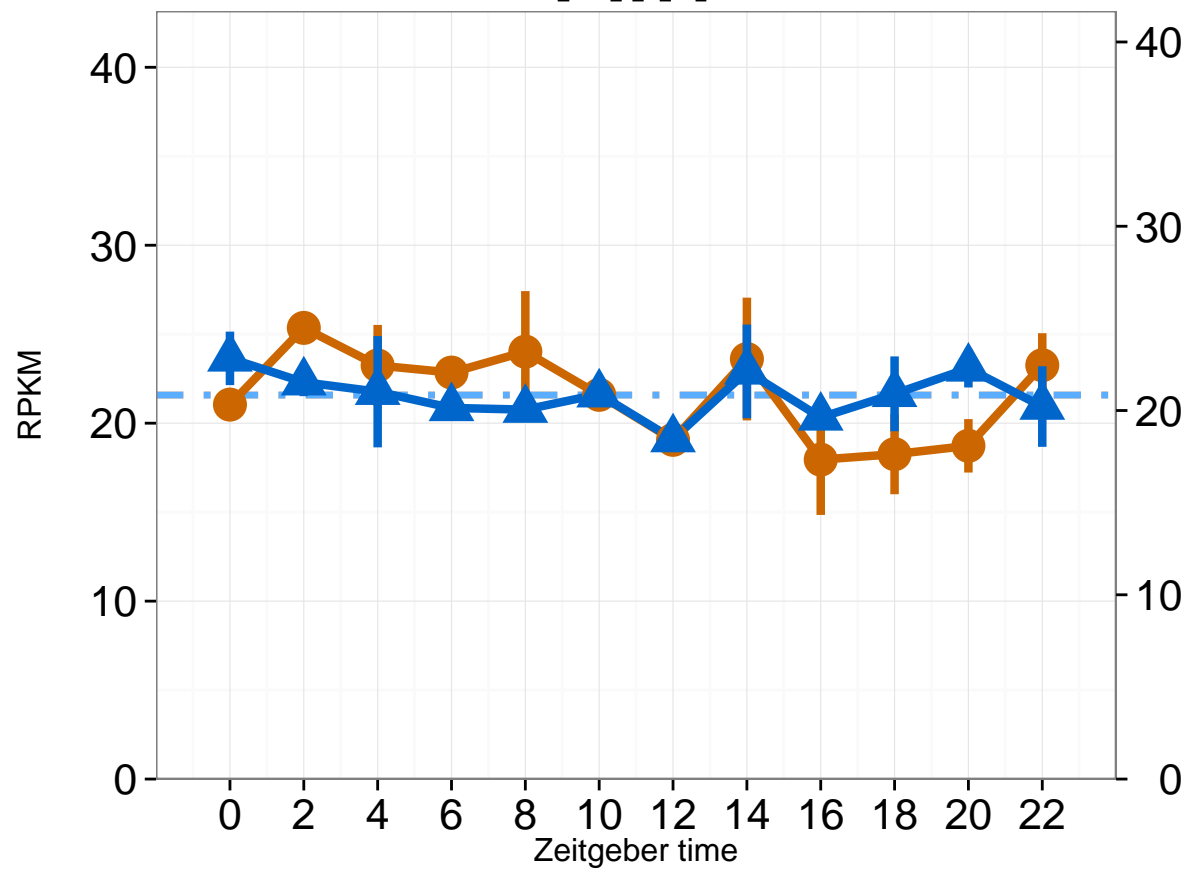

## Pin1

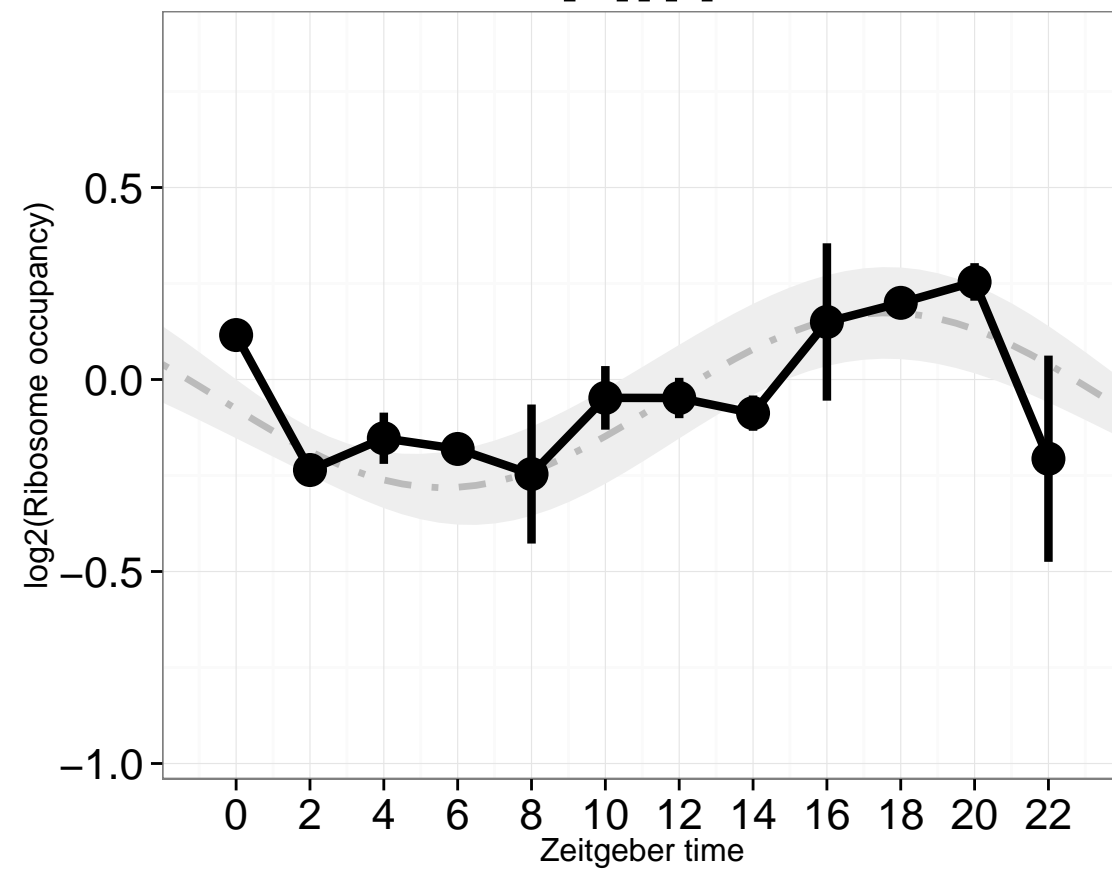

Supplement: SuppDataset_1.zip [file Pin1_set_A.pdf › Supplemental Dataset 1/A-mRNA_nonrhyth_translation_nonrhyth/Pin1_set_A.pdf]

## Pin4

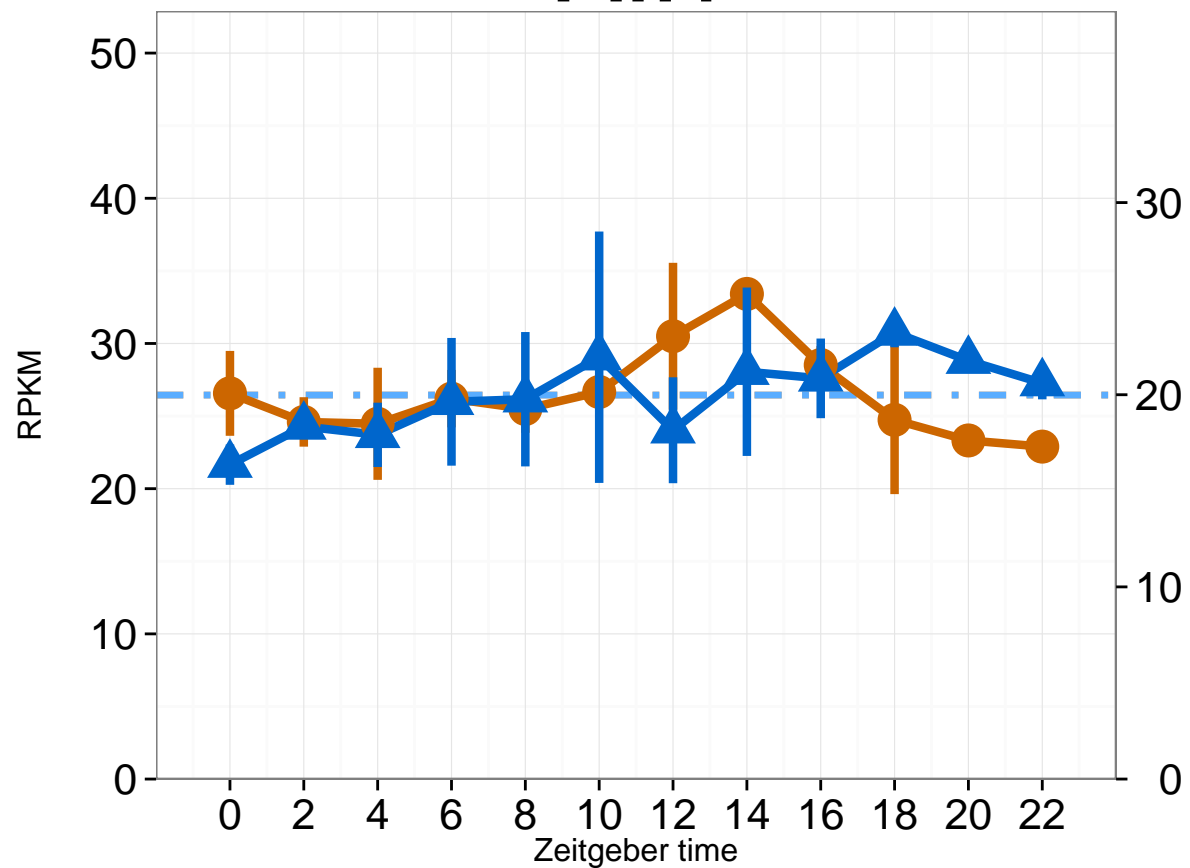

## Pin4

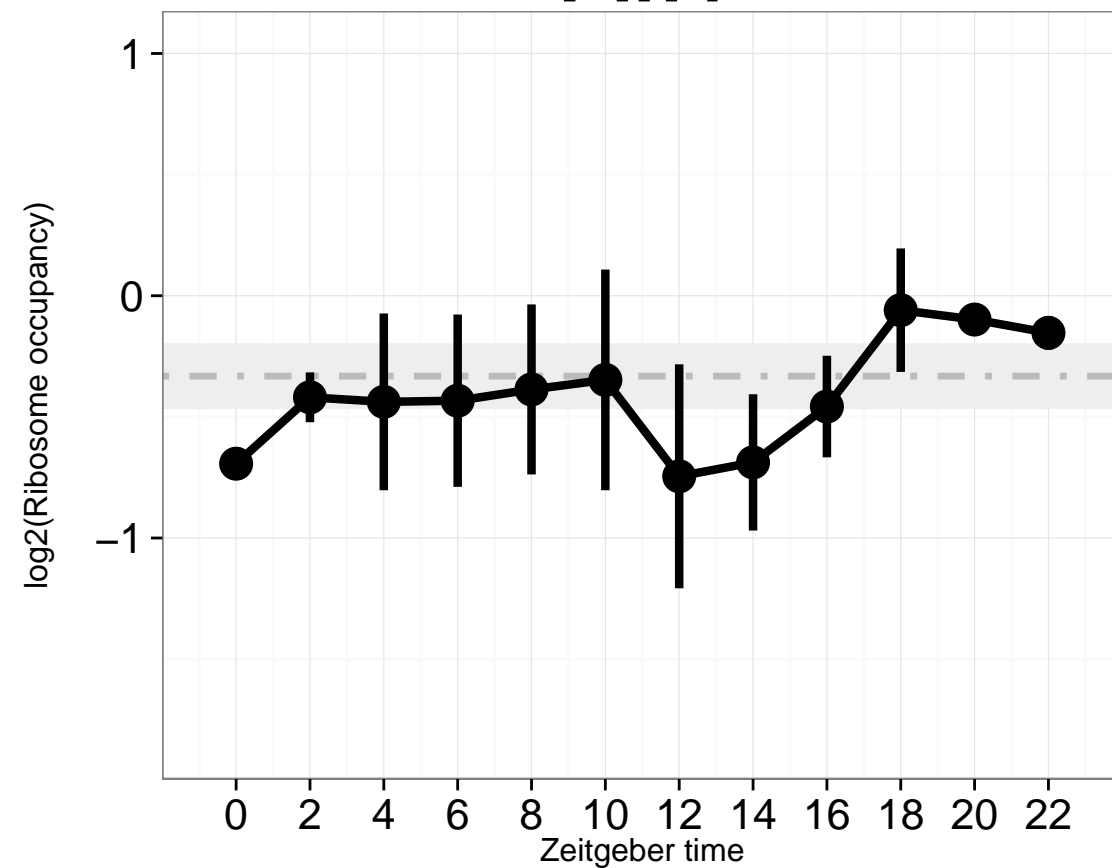

Supplement: SuppDataset_1.zip [file Pin4_set_A.pdf › Supplemental Dataset 1/A-mRNA_nonrhyth_translation_nonrhyth/Pin4_set_A.pdf]

# Pink1

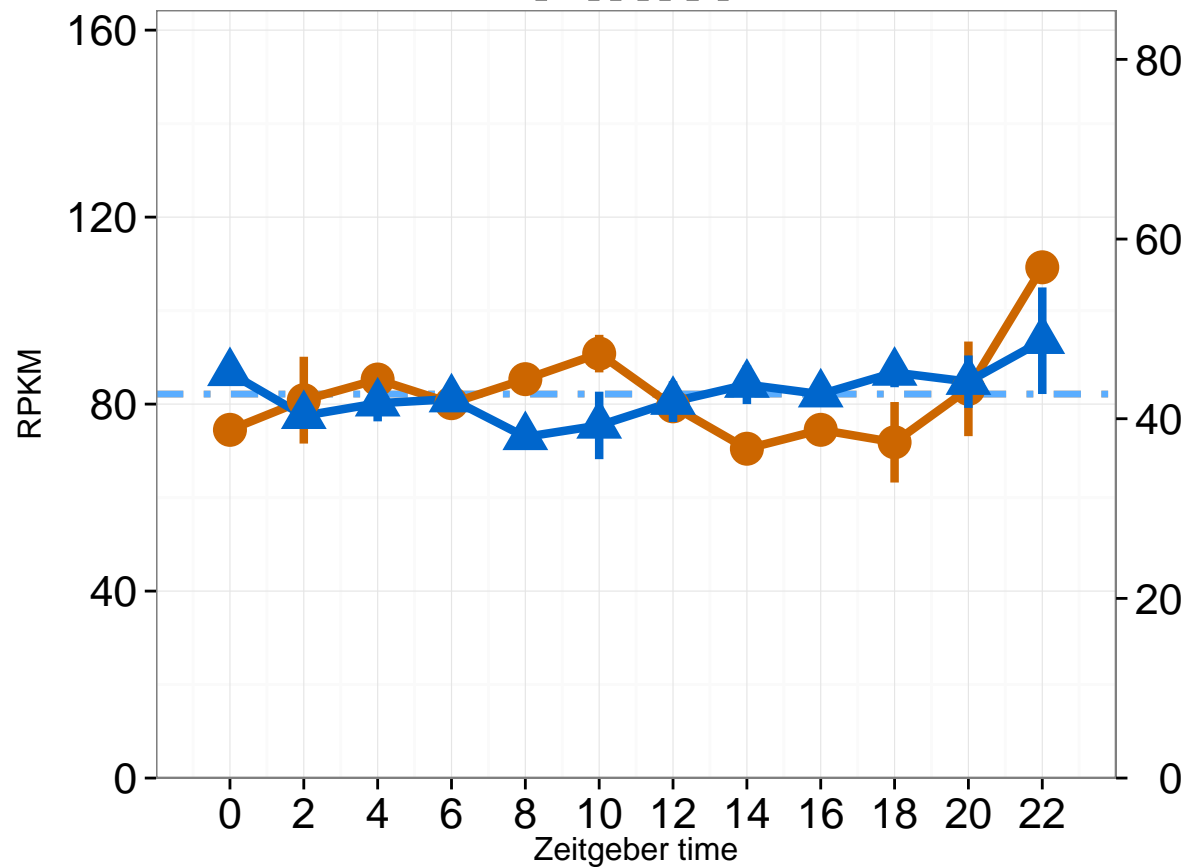

# Pink1

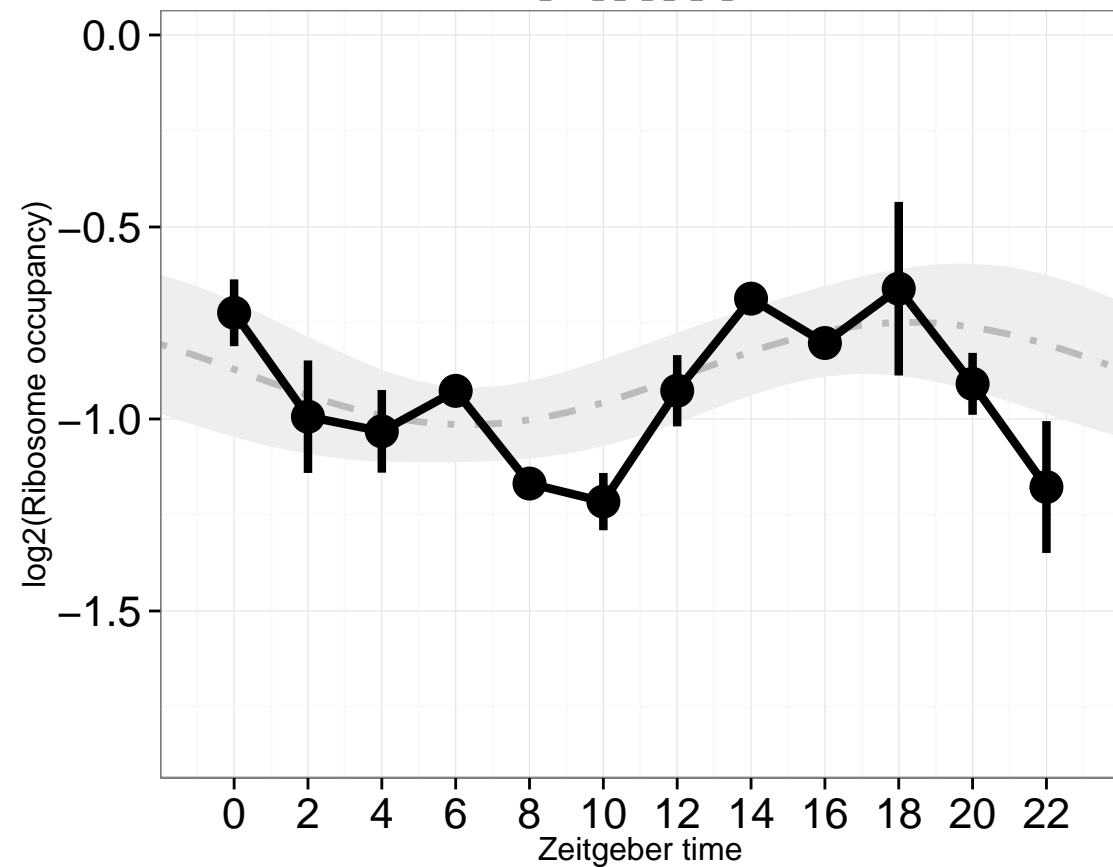

Supplement: SuppDataset_1.zip [file Pink1_set_A.pdf › Supplemental Dataset 1/A-mRNA_nonrhyth_translation_nonrhyth/Pink1_set_A.pdf]

# Pinx1

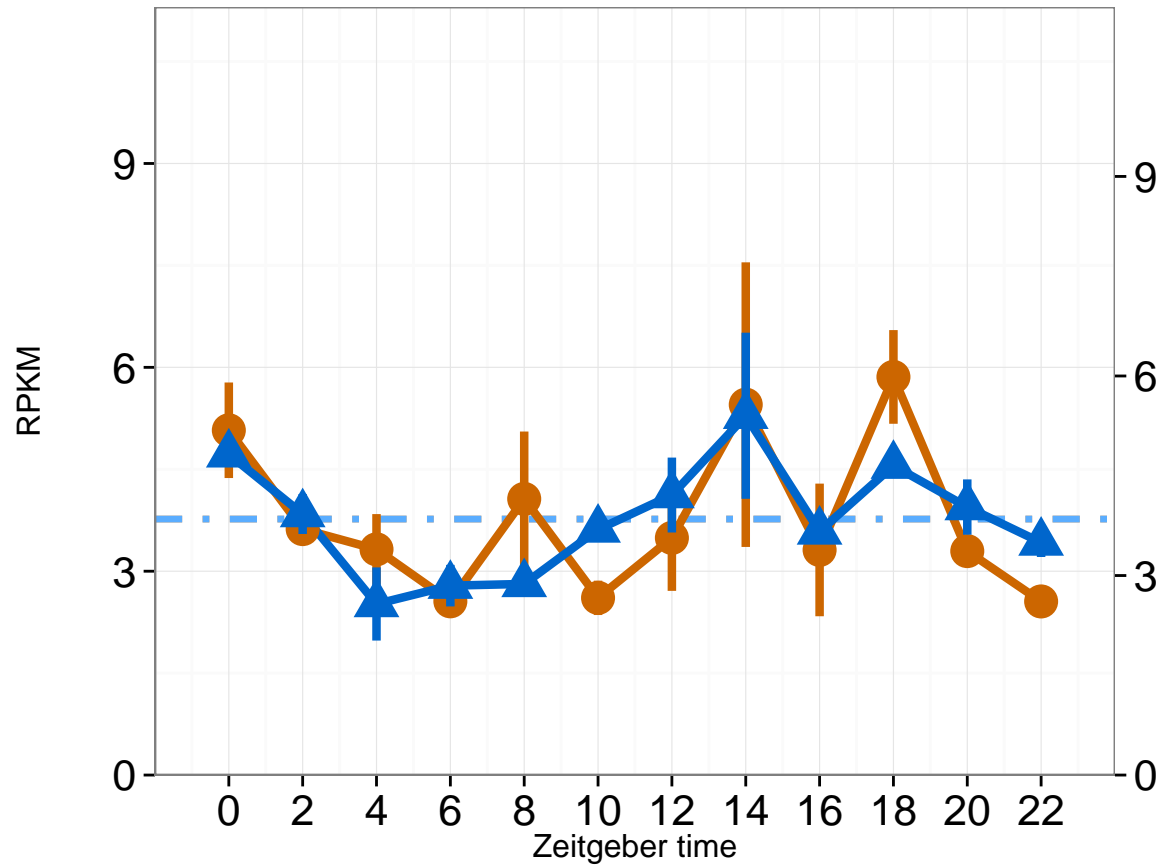

# Pinx1

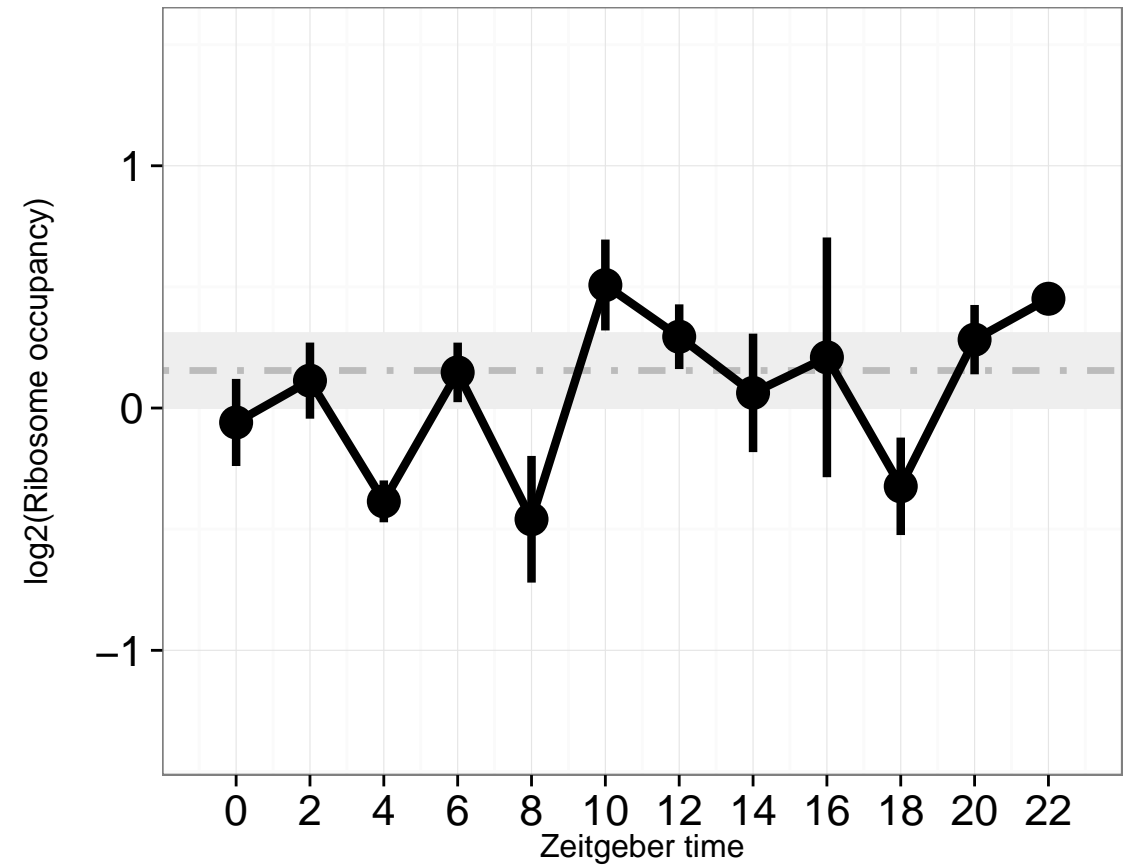

Supplement: SuppDataset_1.zip [file Pinx1_set_A.pdf › Supplemental Dataset 1/A-mRNA_nonrhyth_translation_nonrhyth/Pinx1_set_A.pdf]

# Pip4k2a

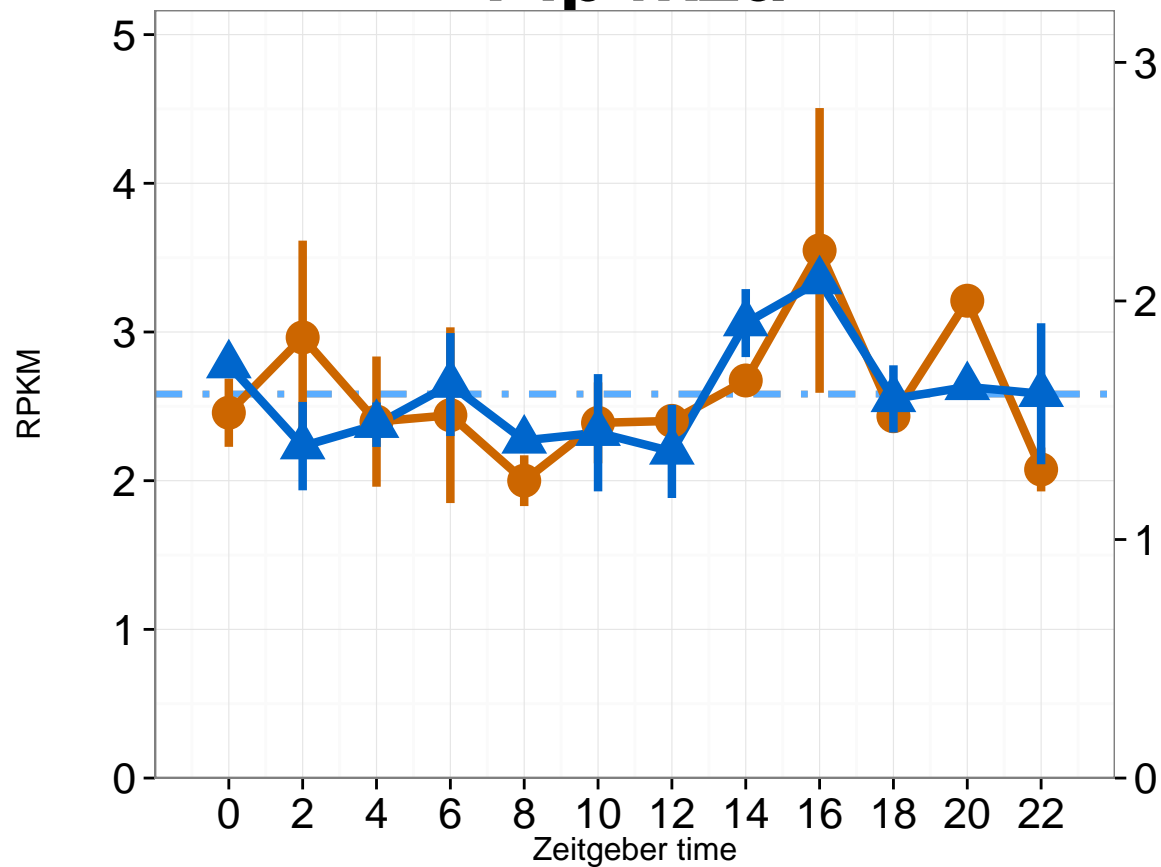

# Pip4k2a

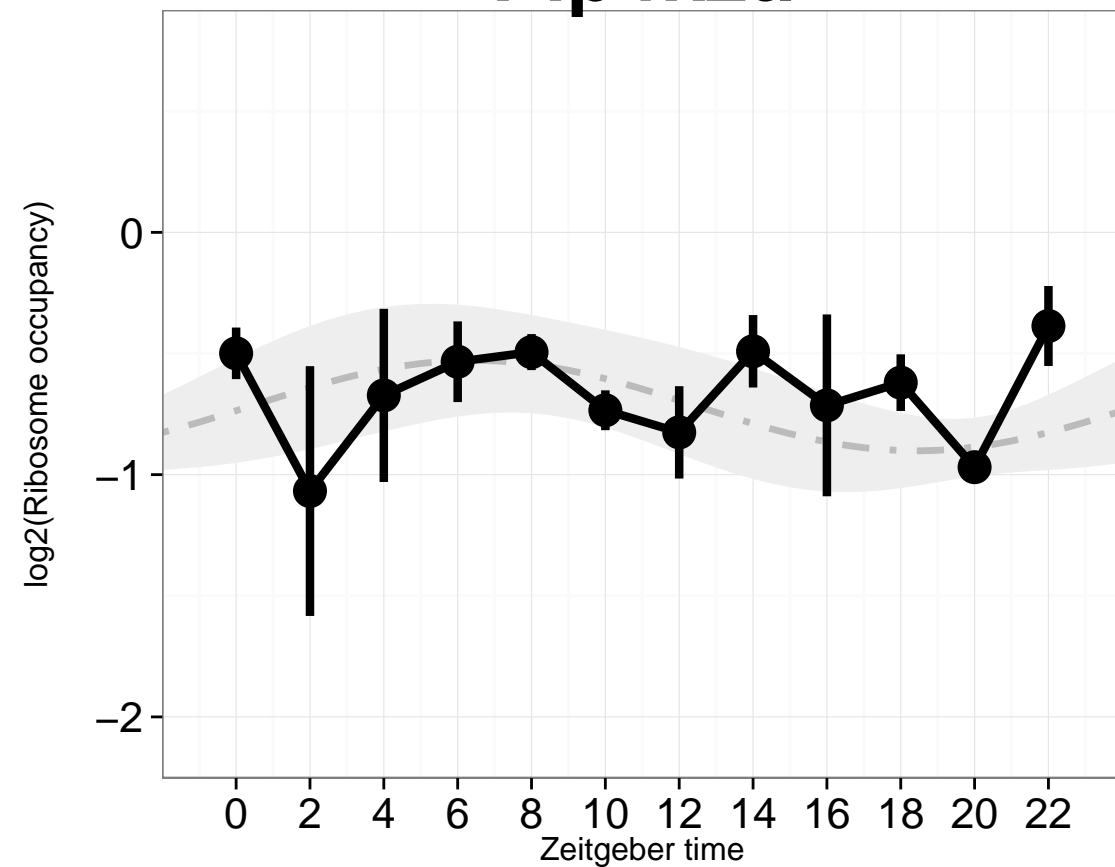

Supplement: SuppDataset_1.zip [file Pip4k2a_set_A.pdf › Supplemental Dataset 1/A-mRNA_nonrhyth_translation_nonrhyth/Pip4k2a_set_A.pdf]

# Pip4k2b

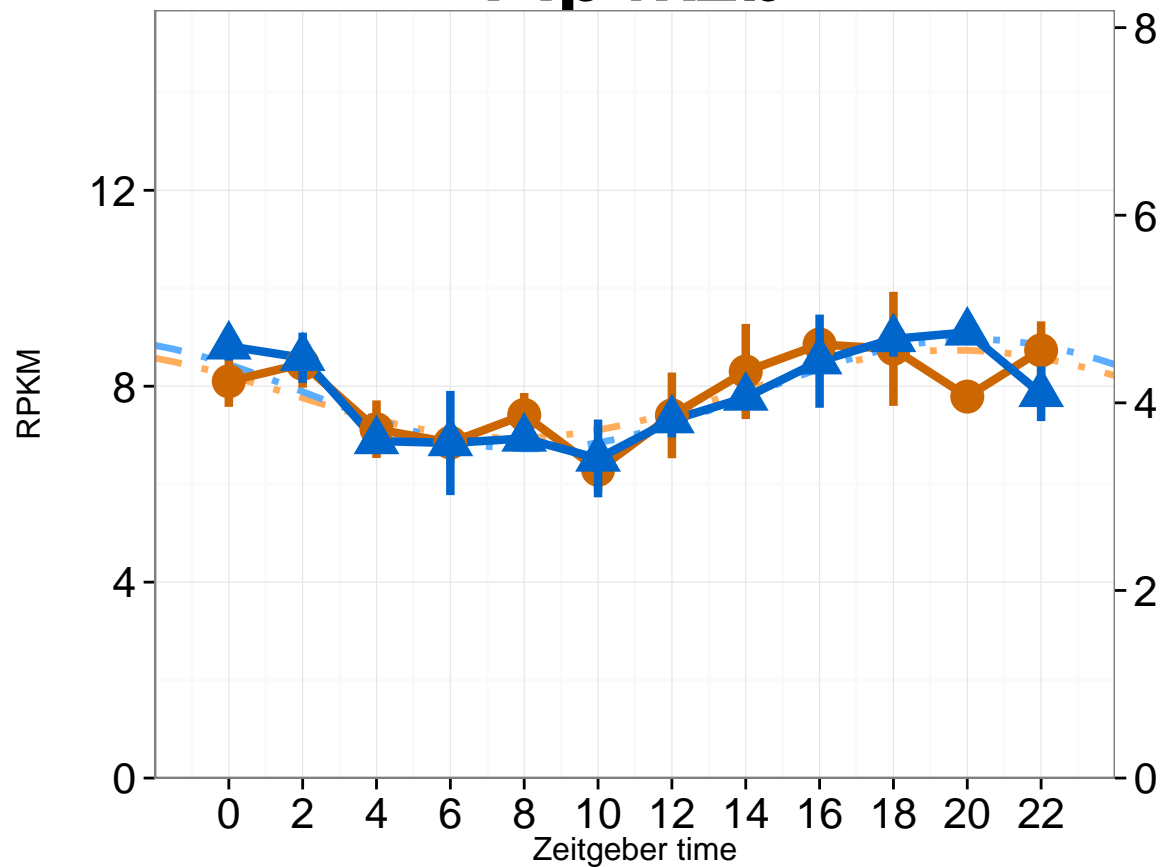

# Pip4k2b

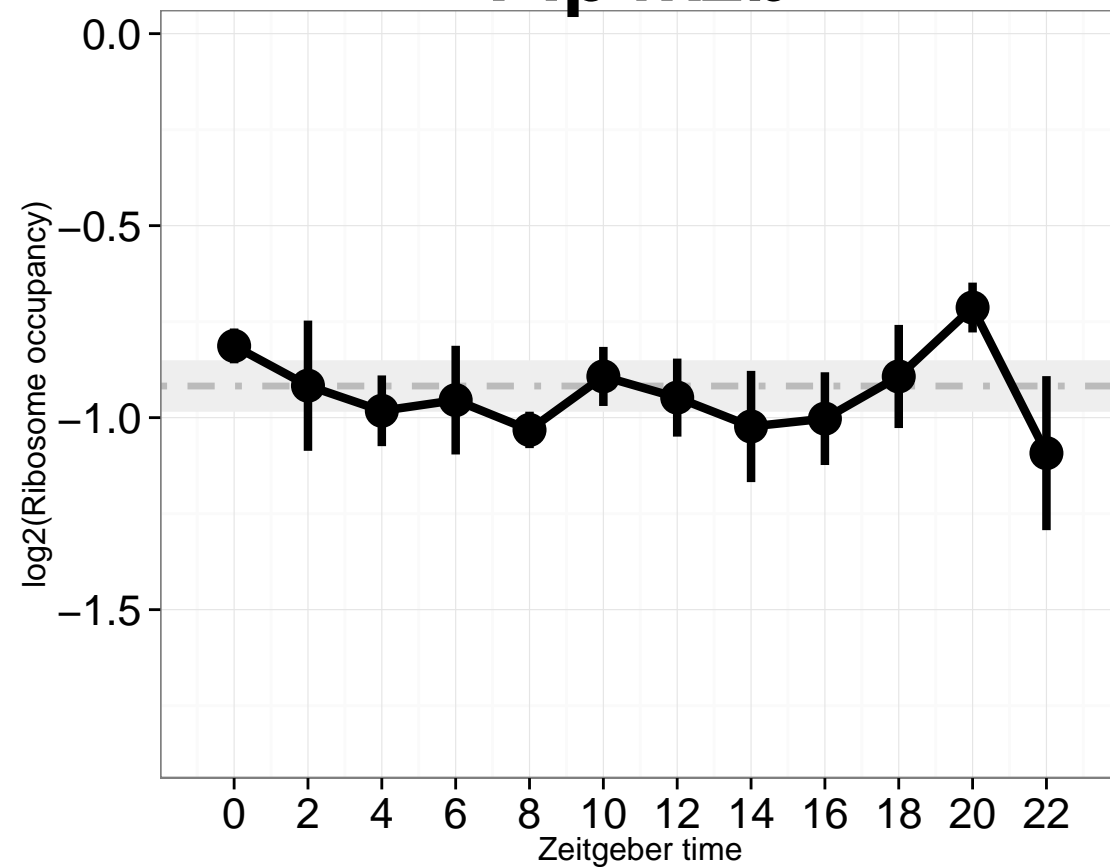

Supplement: SuppDataset_1.zip [file Pip4k2b_set_A.pdf › Supplemental Dataset 1/A-mRNA_nonrhyth_translation_nonrhyth/Pip4k2b_set_A.pdf]

# Pip4k2c

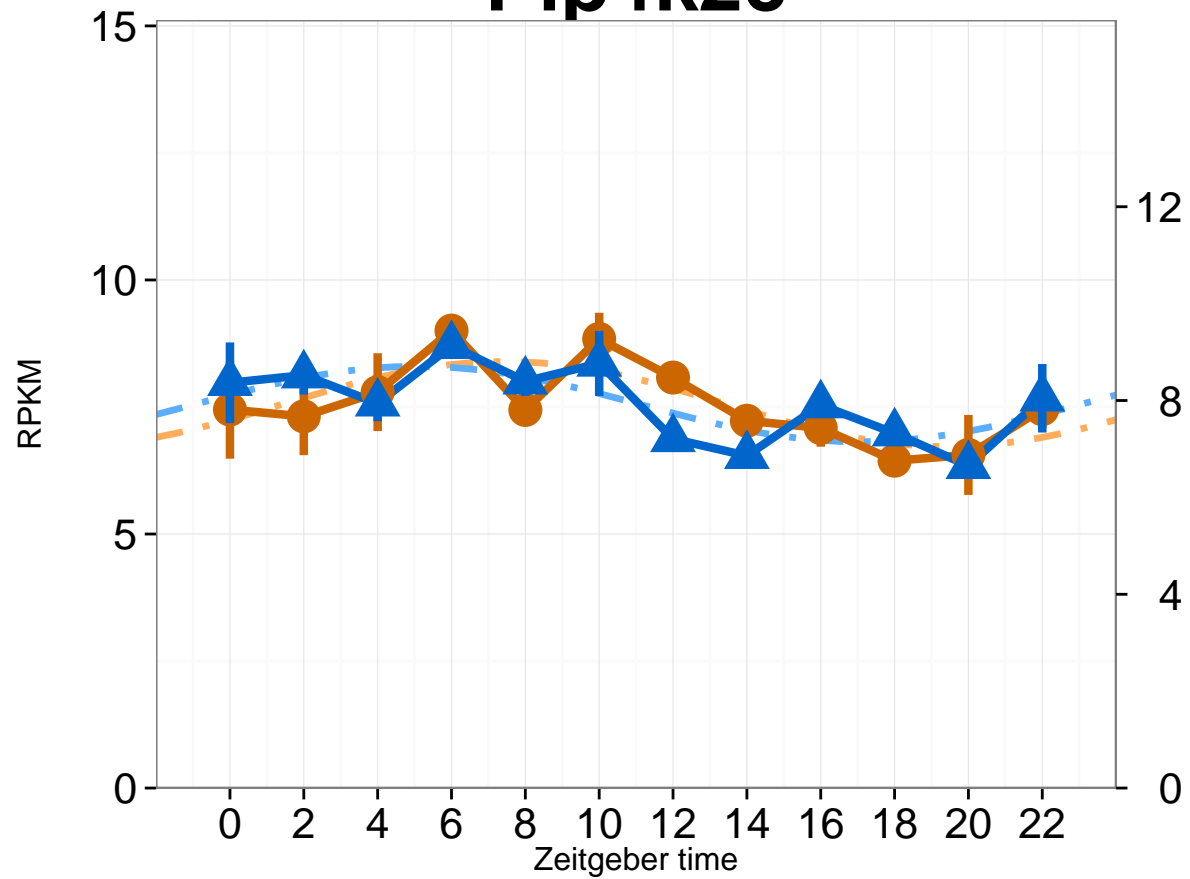

# Pip4k2c

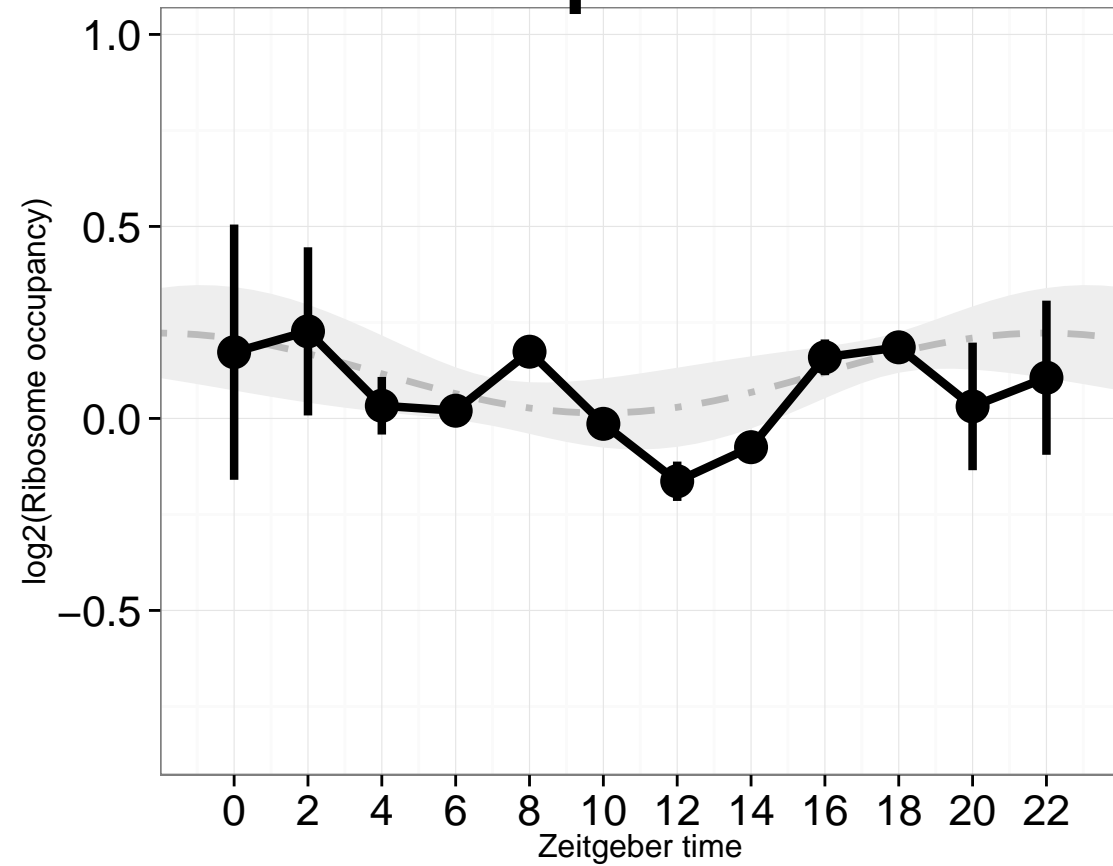

Supplement: SuppDataset_1.zip [file Pip4k2c_set_A.pdf › Supplemental Dataset 1/A-mRNA_nonrhyth_translation_nonrhyth/Pip4k2c_set_A.pdf]

# Pip5k1a

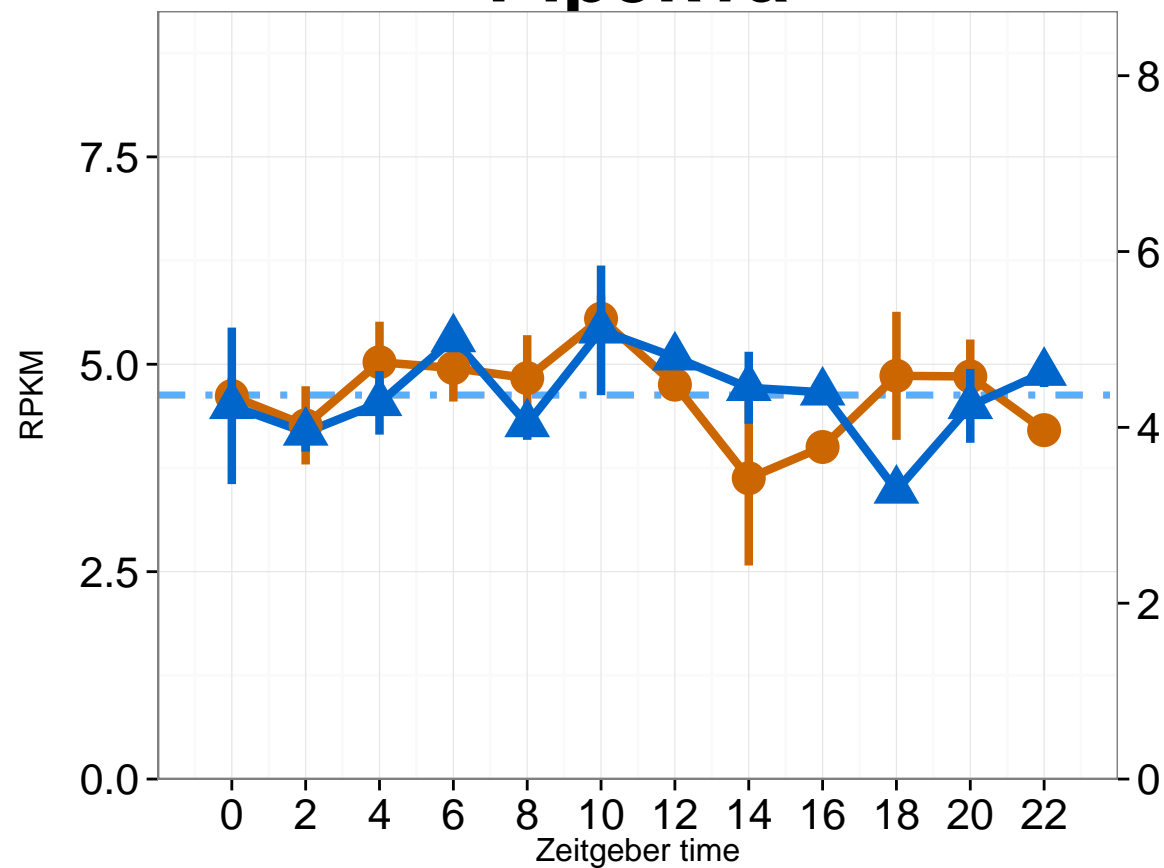

# Pip5k1a

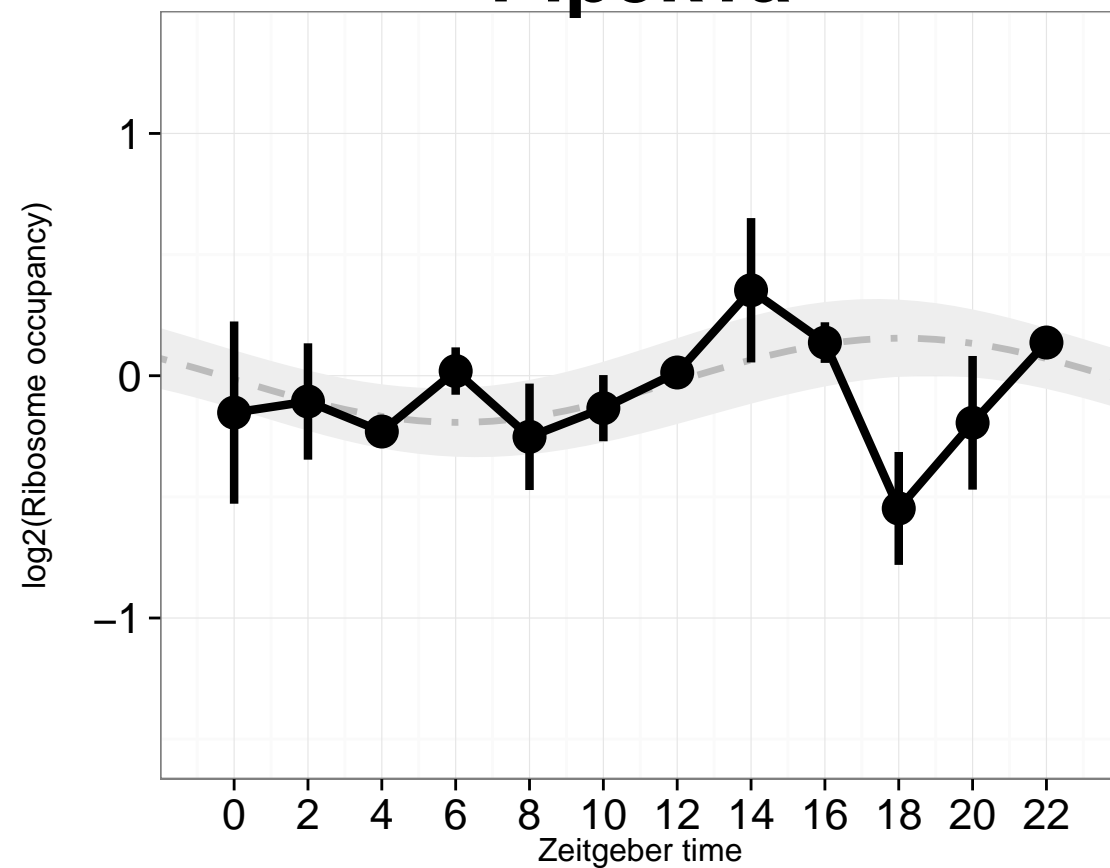

Supplement: SuppDataset_1.zip [file Pip5k1a_set_A.pdf › Supplemental Dataset 1/A-mRNA_nonrhyth_translation_nonrhyth/Pip5k1a_set_A.pdf]

# Pip5k1c

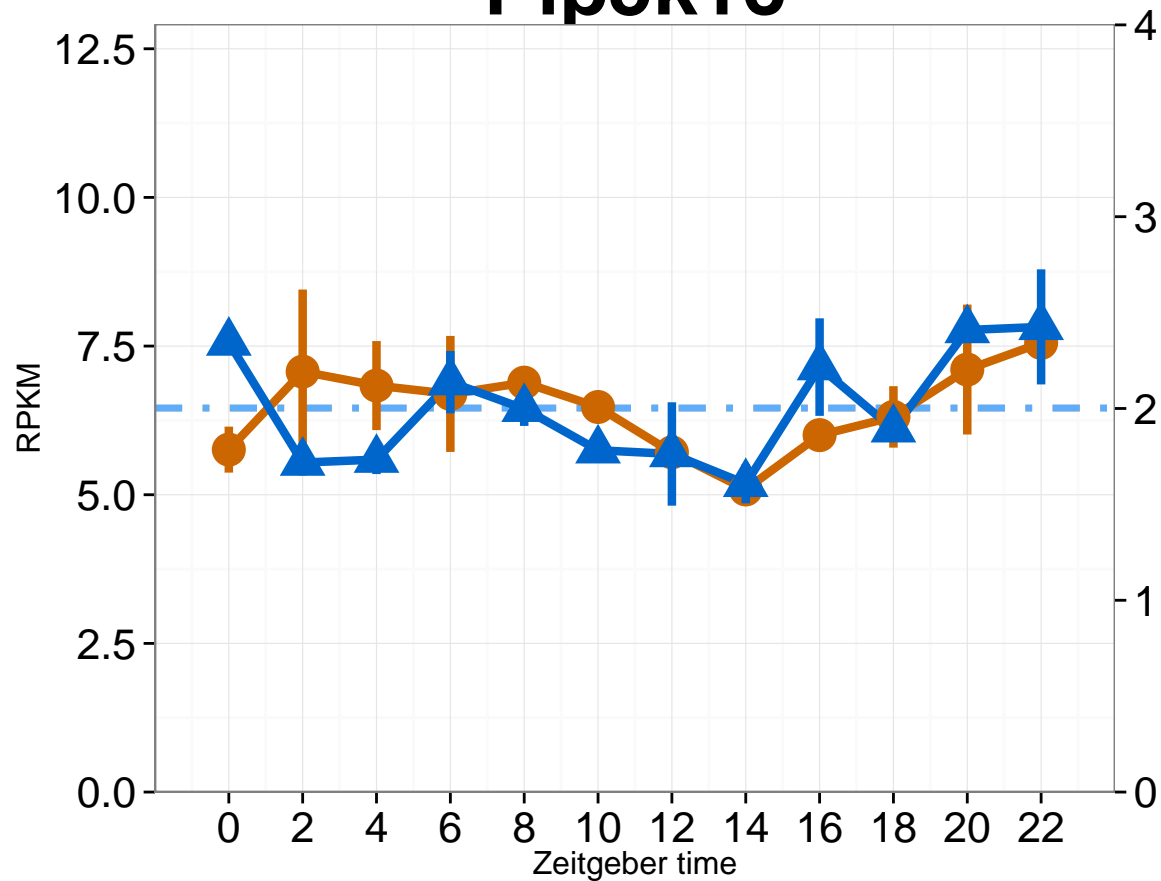

# Pip5k1c

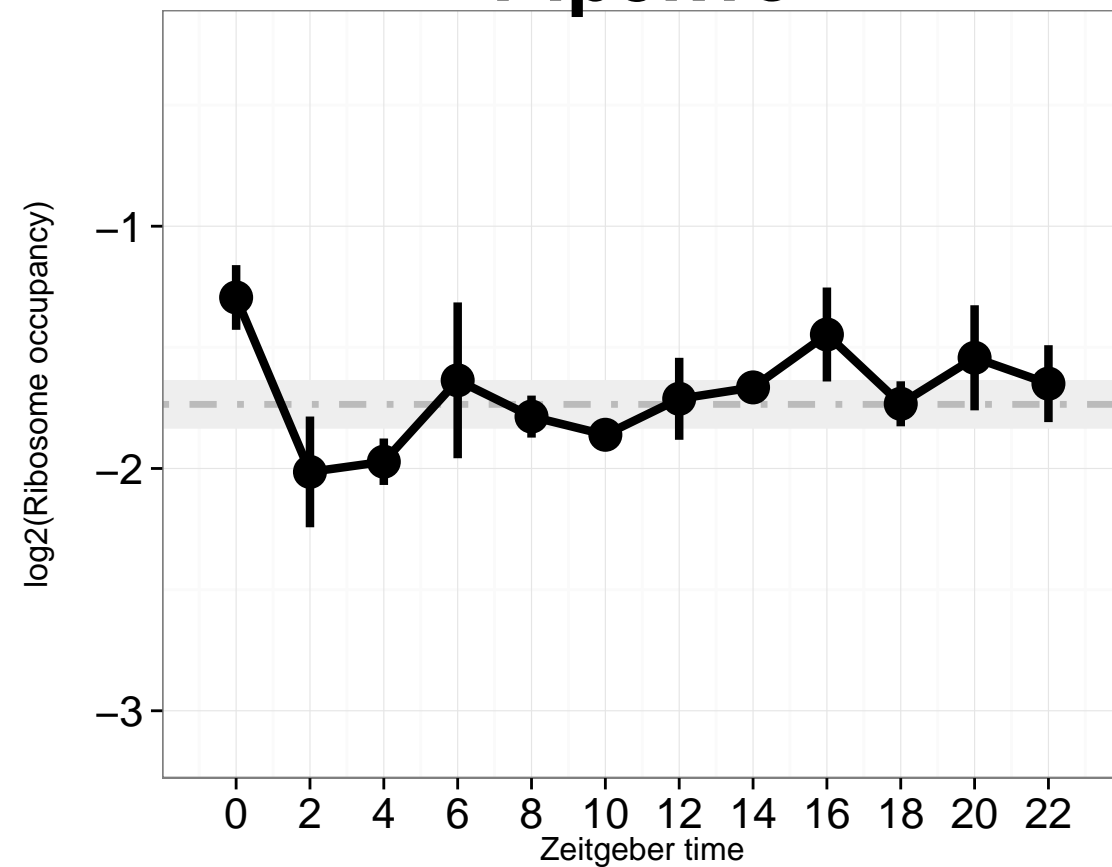

Supplement: SuppDataset_1.zip [file Pip5k1c_set_A.pdf › Supplemental Dataset 1/A-mRNA_nonrhyth_translation_nonrhyth/Pip5k1c_set_A.pdf]

## Pipox

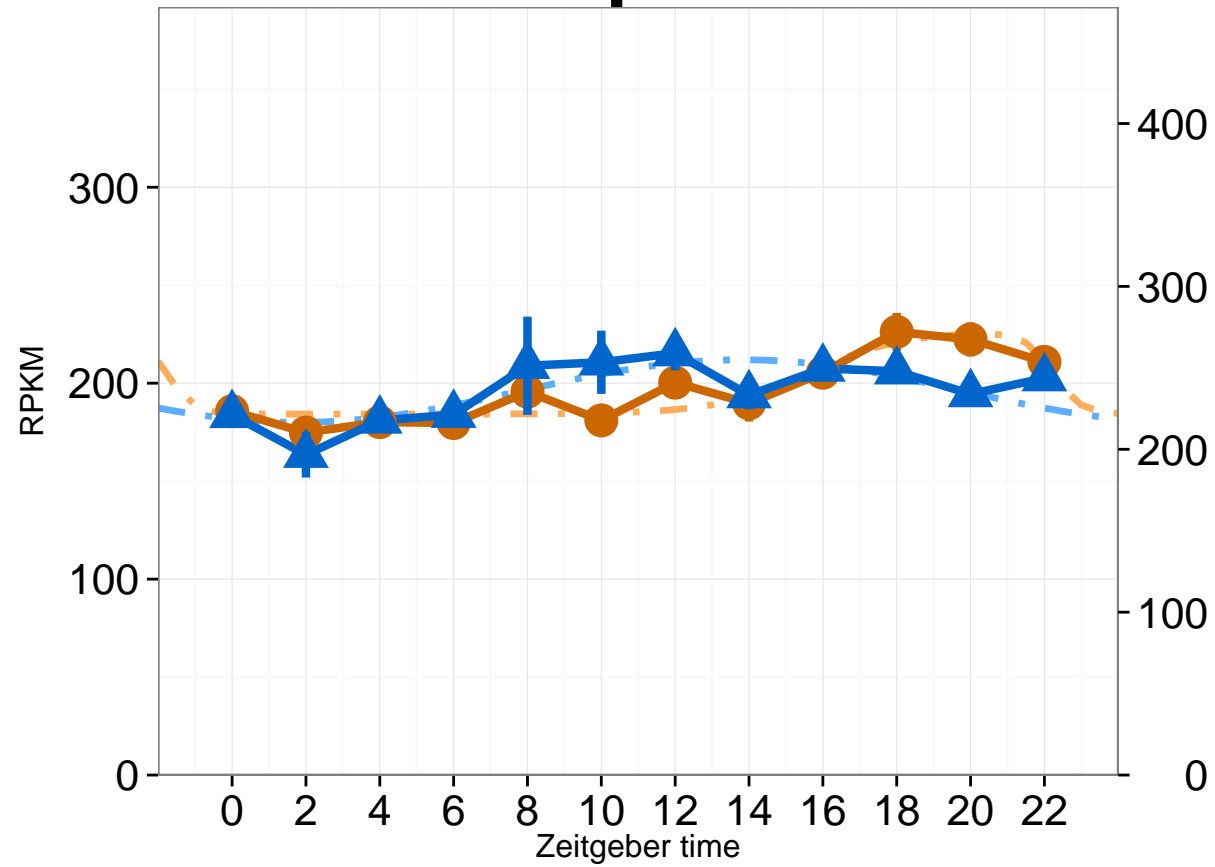

## Pipox

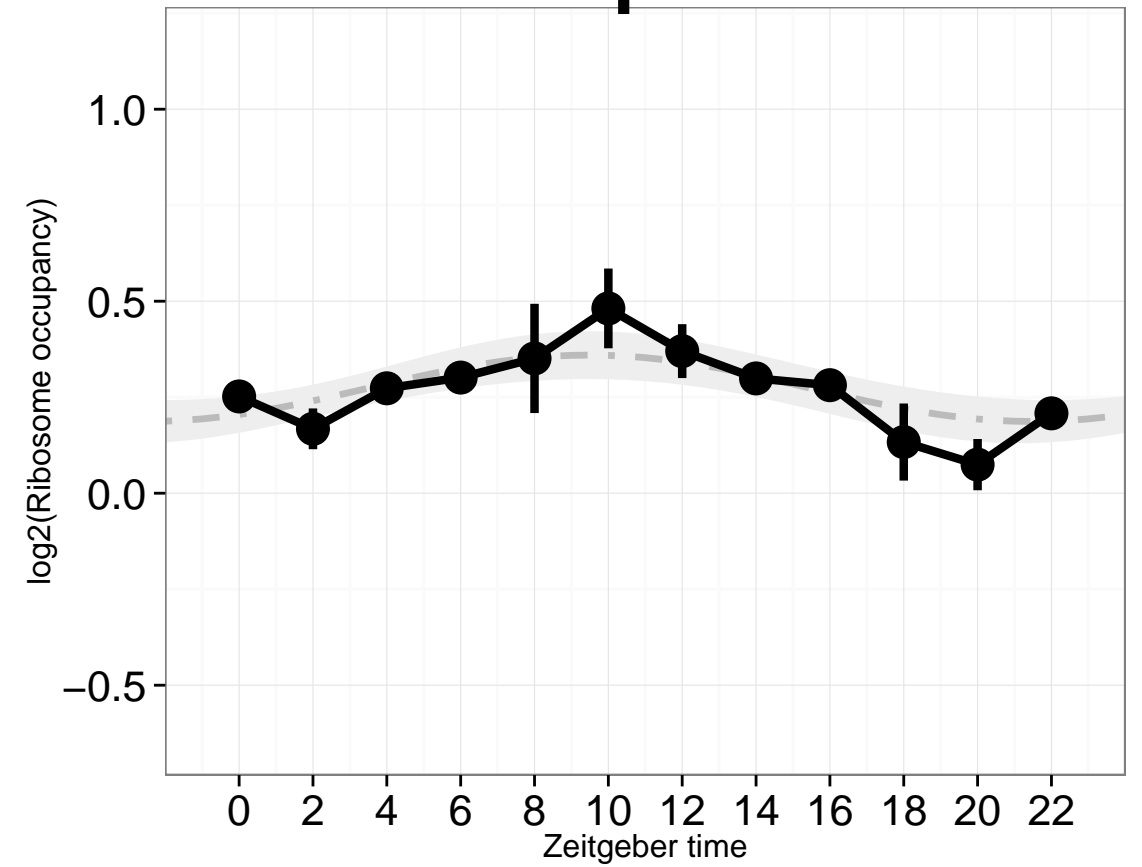

Supplement: SuppDataset_1.zip [file Pipox_set_A.pdf › Supplemental Dataset 1/A-mRNA_nonrhyth_translation_nonrhyth/Pipox_set_A.pdf]

## Pir

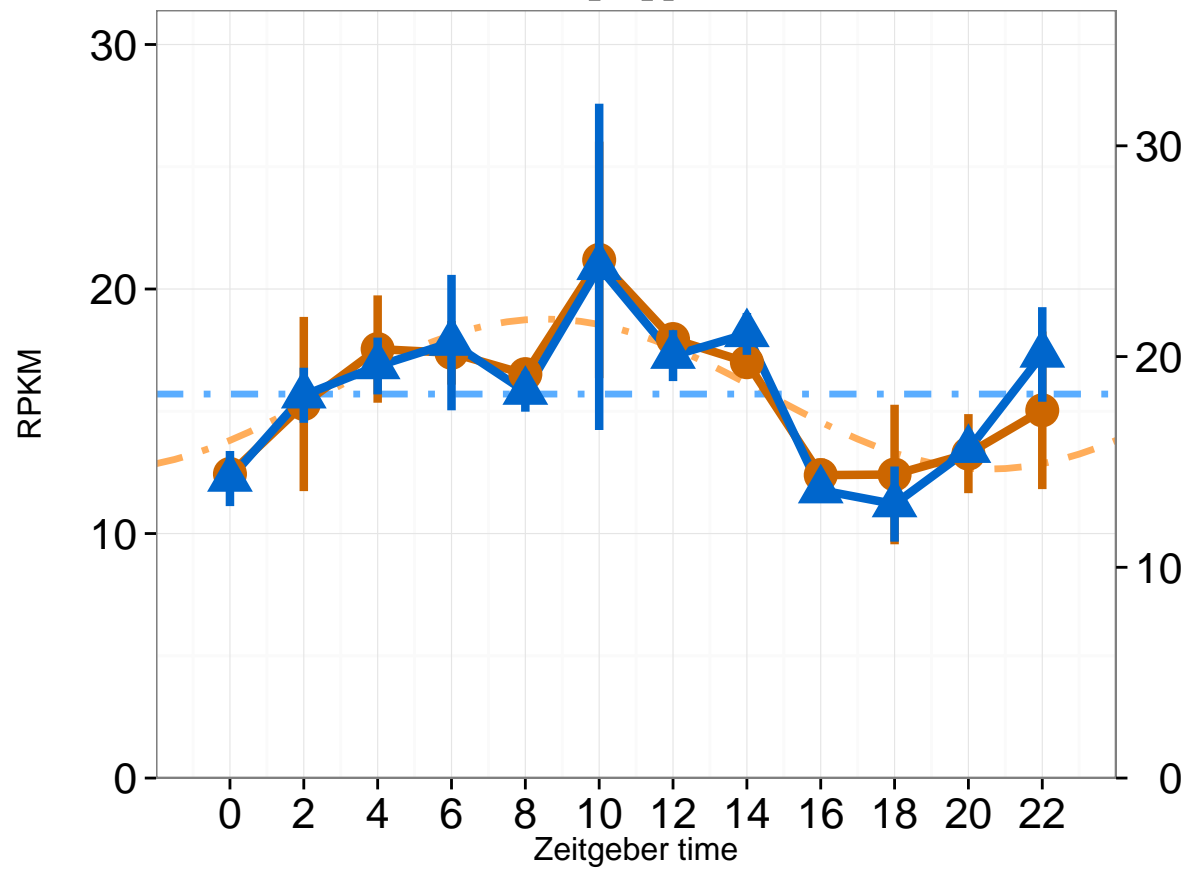

## Pir

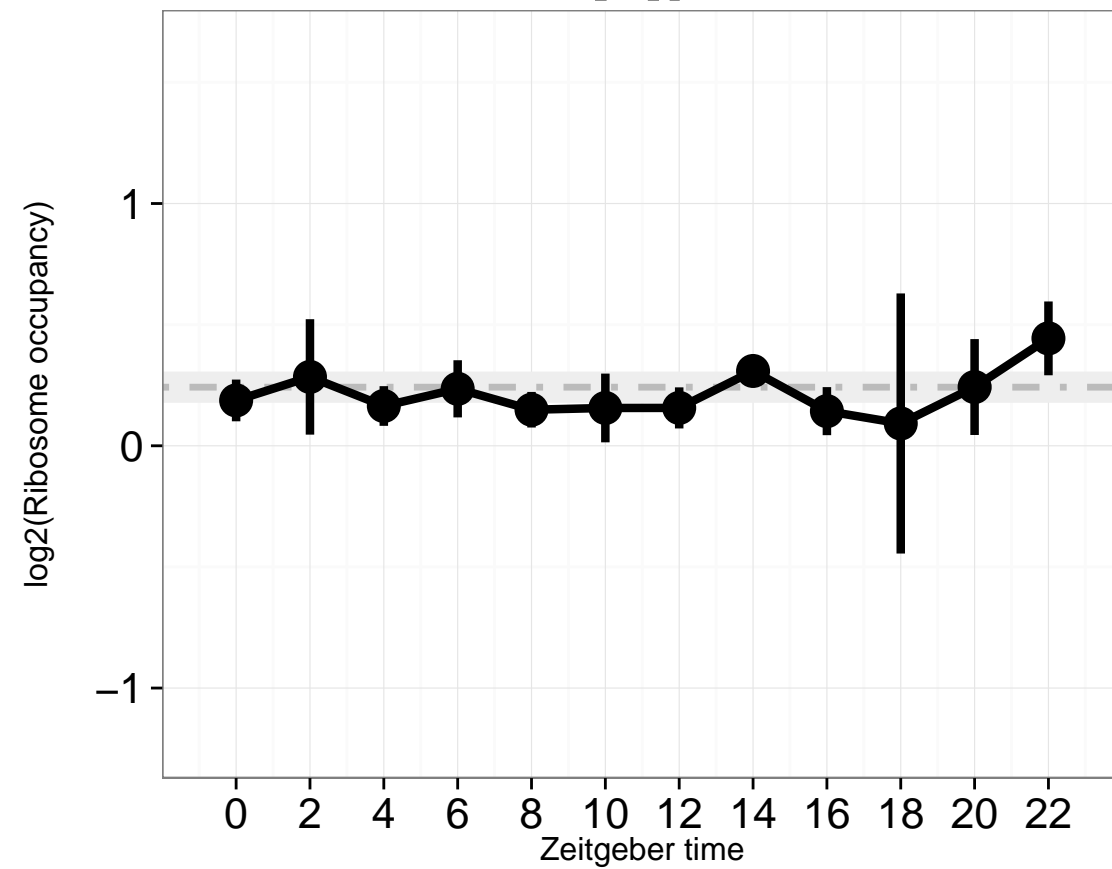

Supplement: SuppDataset_1.zip [file Pir_set_A.pdf › Supplemental Dataset 1/A-mRNA_nonrhyth_translation_nonrhyth/Pir_set_A.pdf]

## Pirb

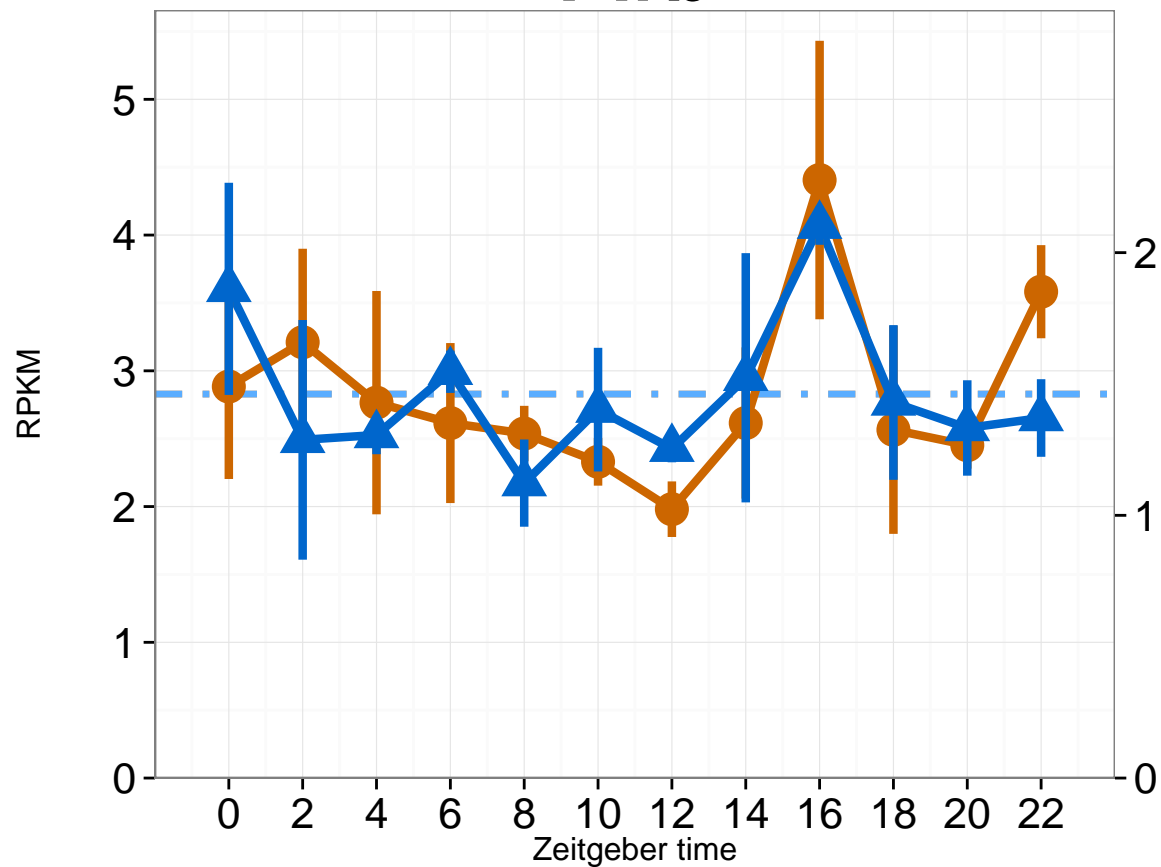

## Pirb

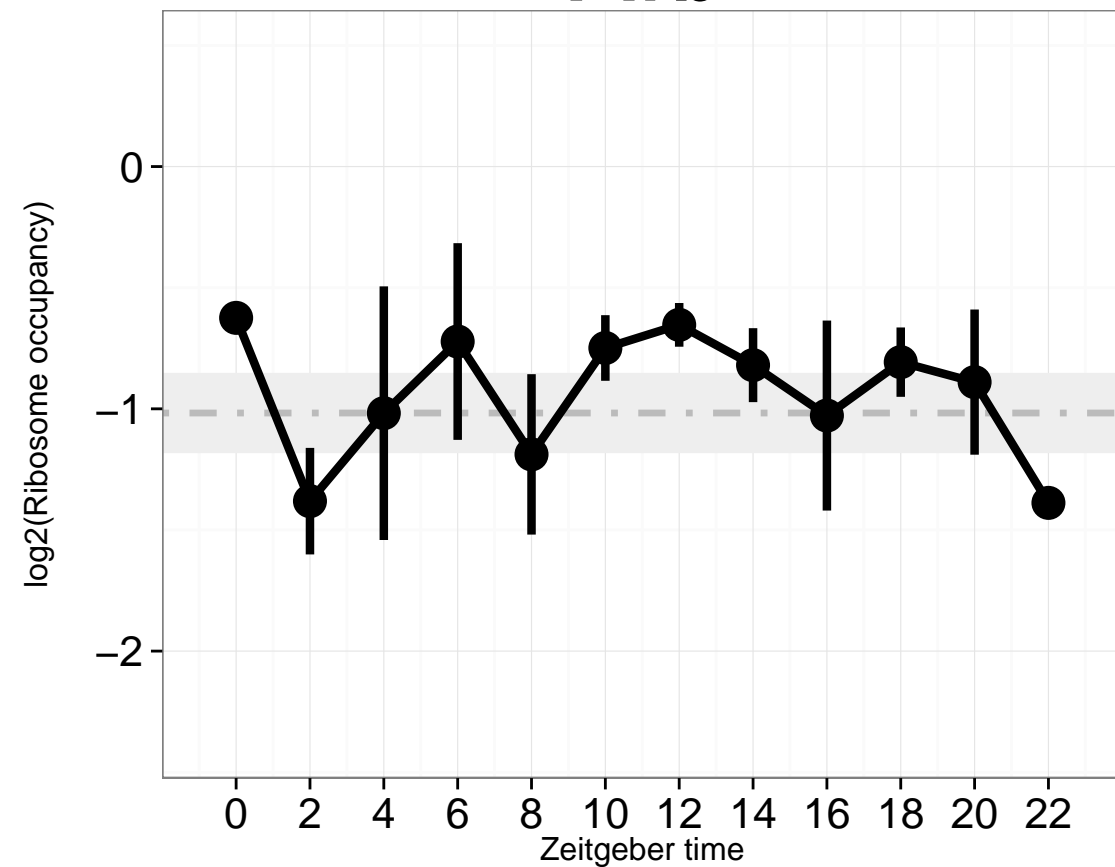

Supplement: SuppDataset_1.zip [file Pirb_set_A.pdf › Supplemental Dataset 1/A-mRNA_nonrhyth_translation_nonrhyth/Pirb_set_A.pdf]

## Pisd

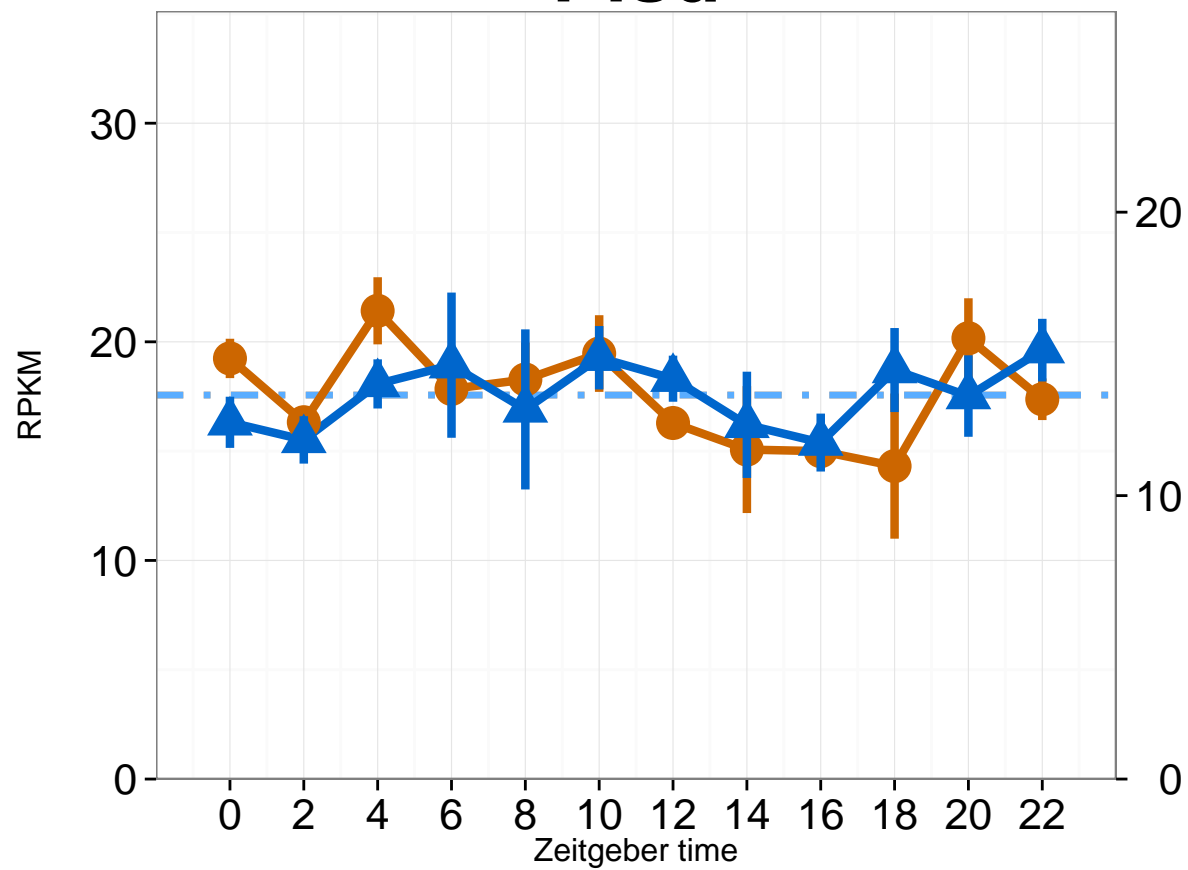

## Pisd

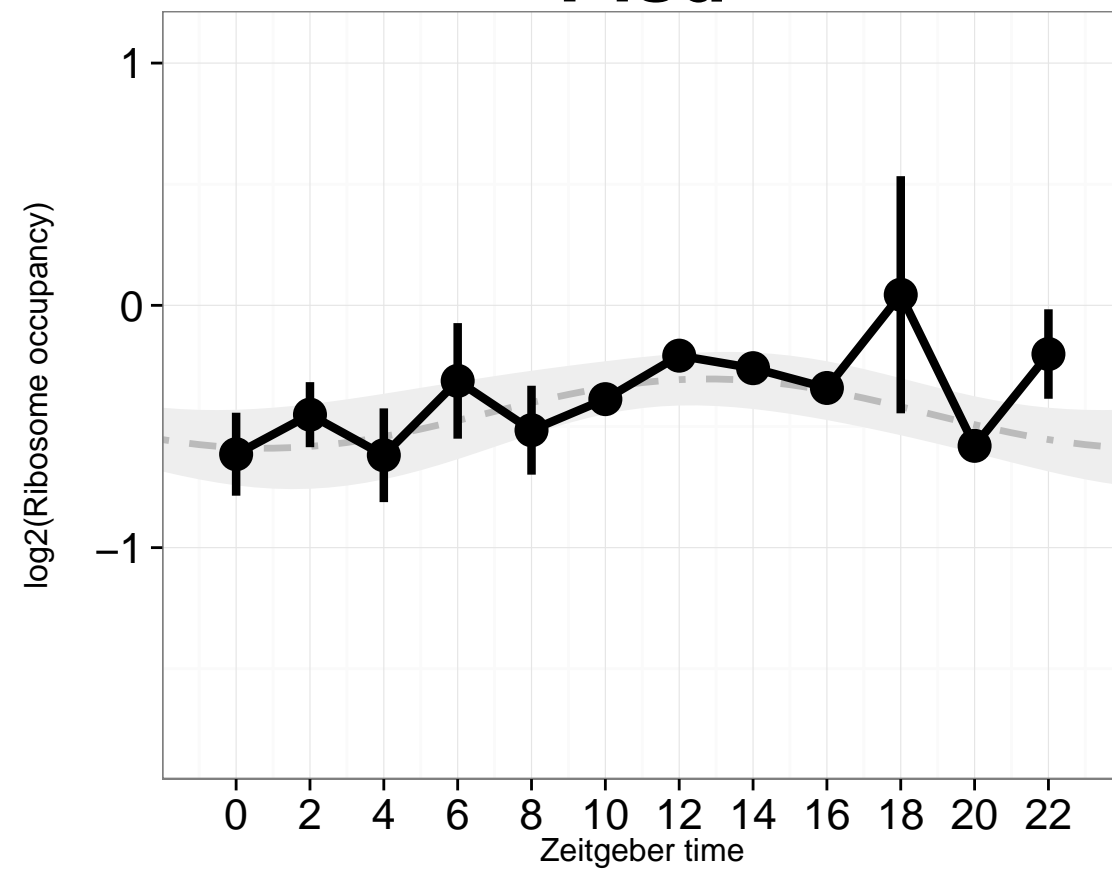

Supplement: SuppDataset_1.zip [file Pisd_set_A.pdf › Supplemental Dataset 1/A-mRNA_nonrhyth_translation_nonrhyth/Pisd_set_A.pdf]

## Pitpna

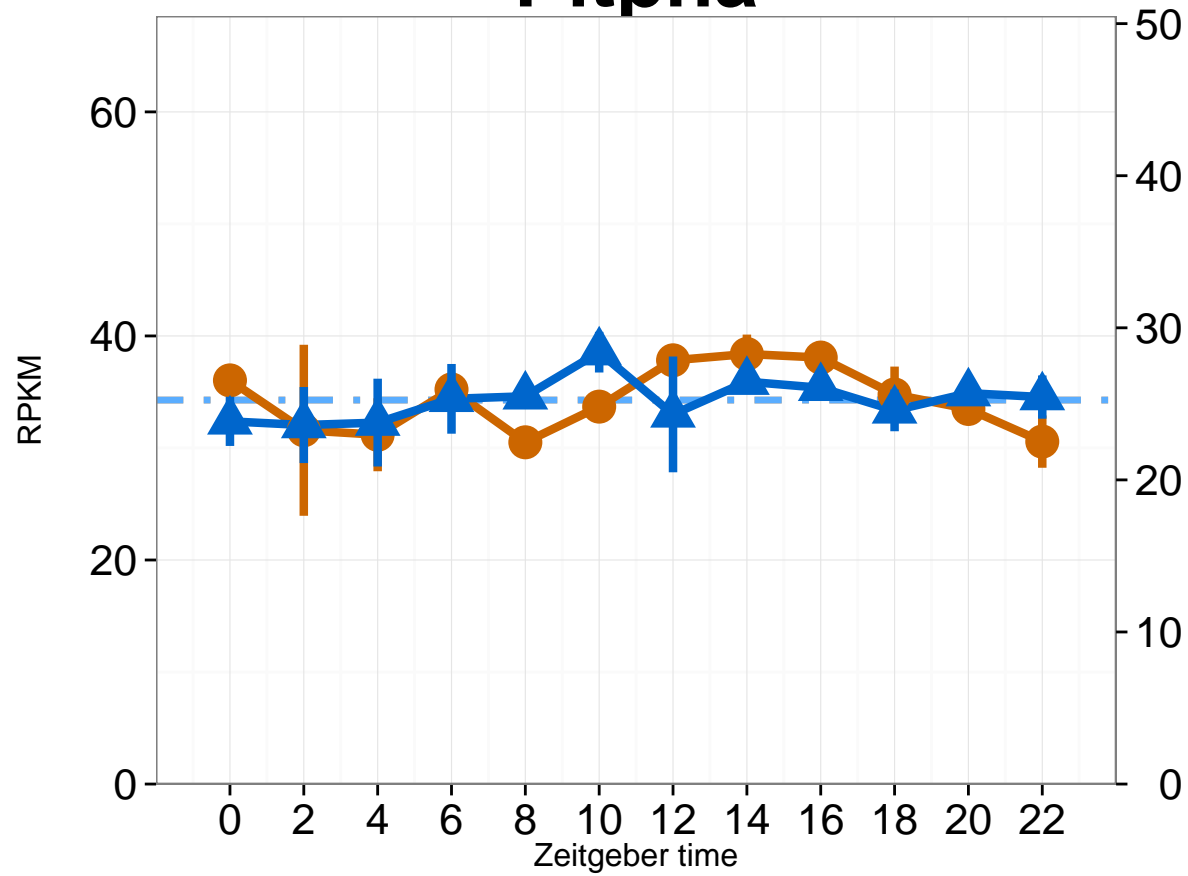

## Pitpna

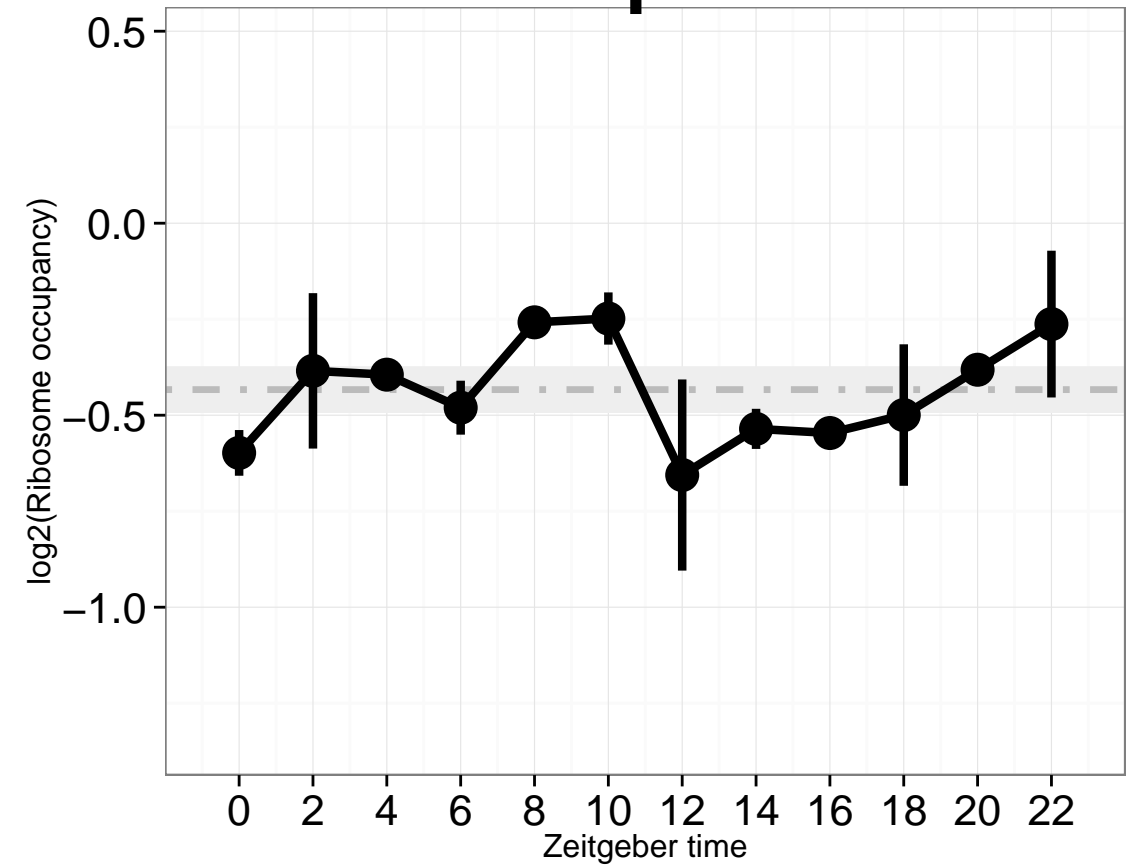

Supplement: SuppDataset_1.zip [file Pitpna_set_A.pdf › Supplemental Dataset 1/A-mRNA_nonrhyth_translation_nonrhyth/Pitpna_set_A.pdf]

## Pitpnb

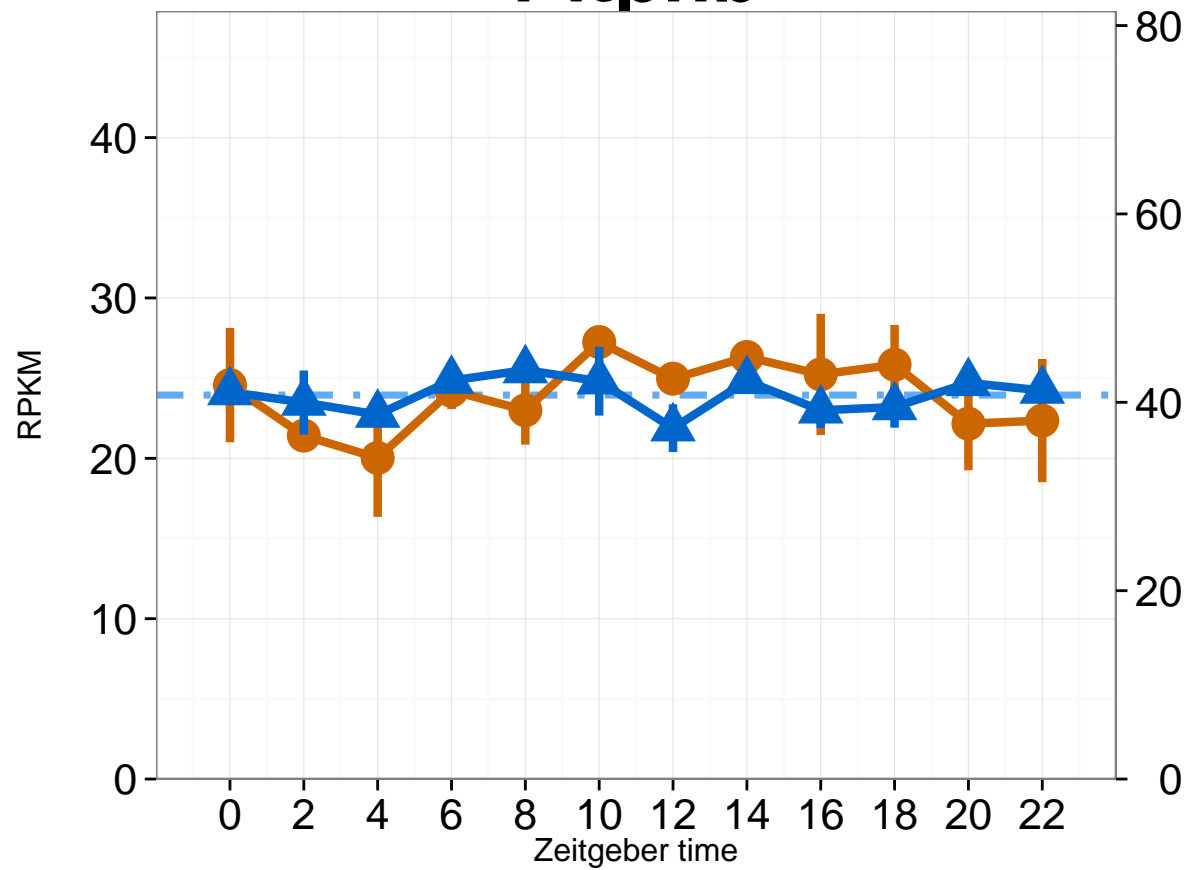

## Pitpnb

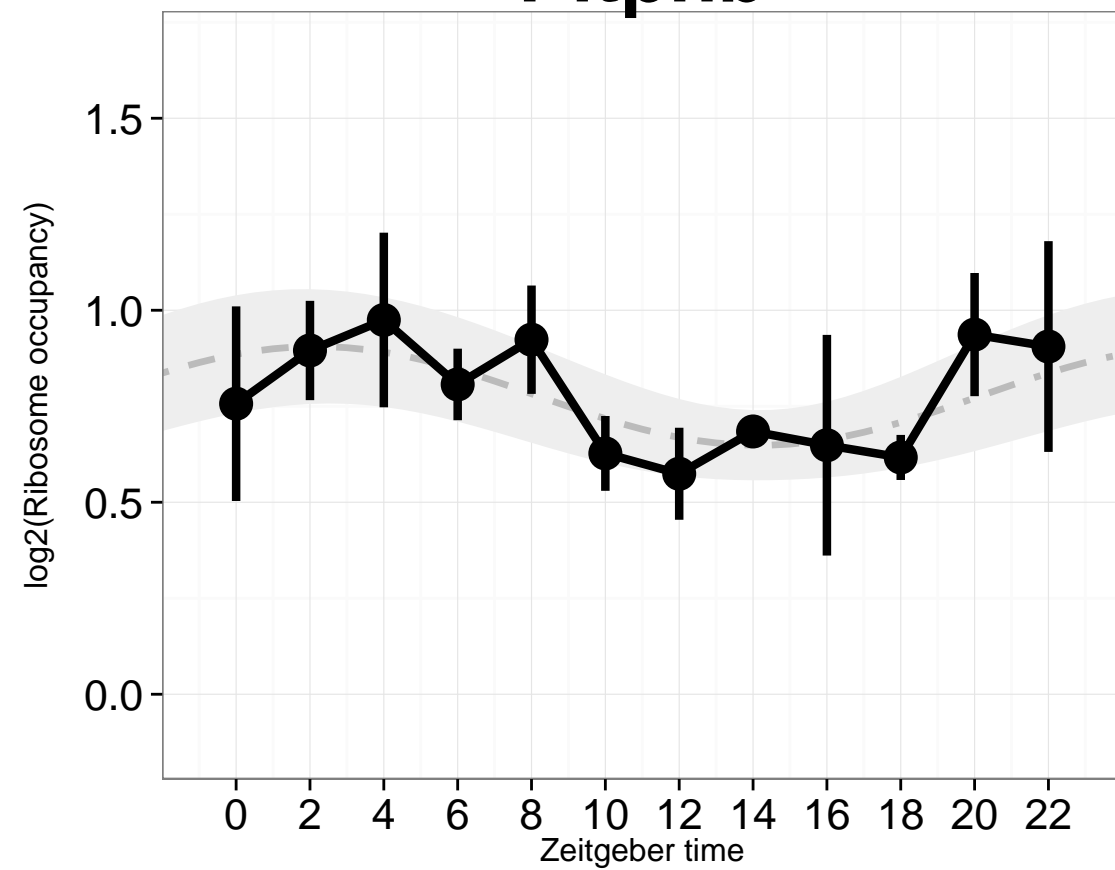

Supplement: SuppDataset_1.zip [file Pitpnb_set_A.pdf › Supplemental Dataset 1/A-mRNA_nonrhyth_translation_nonrhyth/Pitpnb_set_A.pdf]

# Pitpnm2

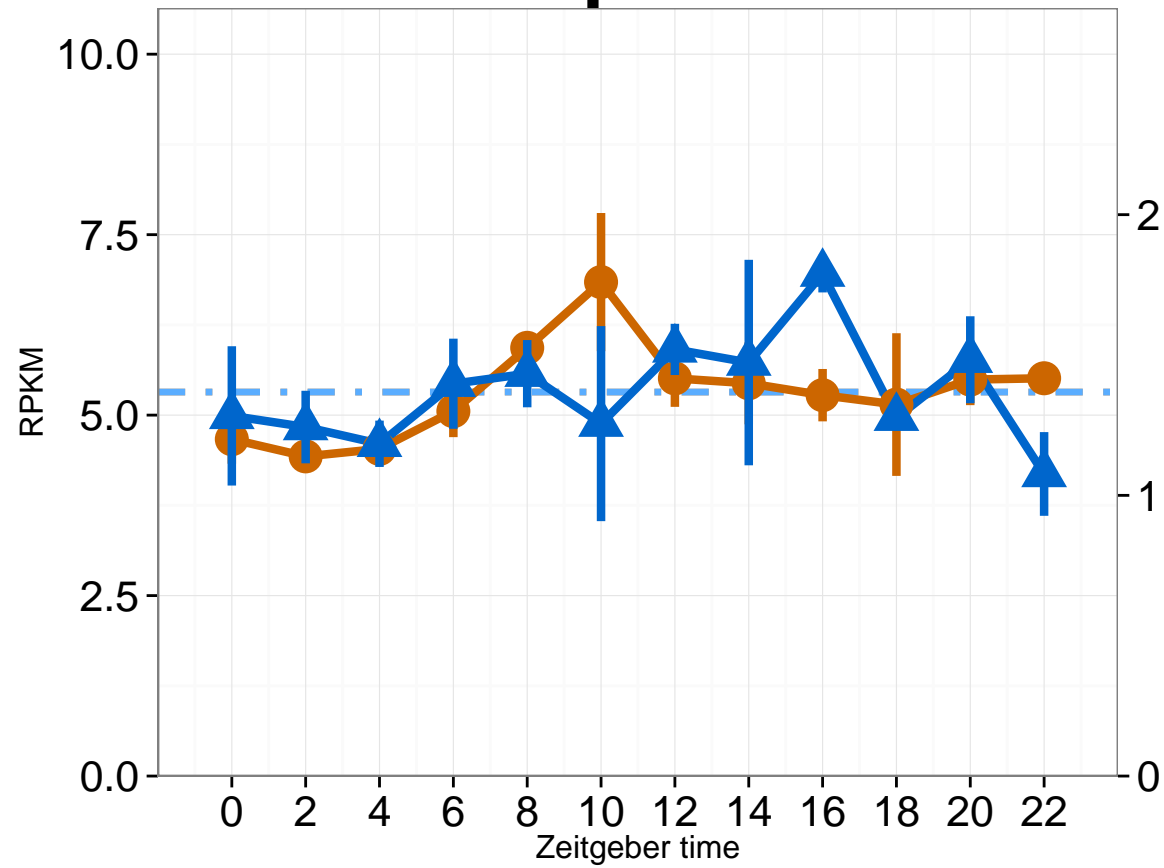

# Pitpnm2

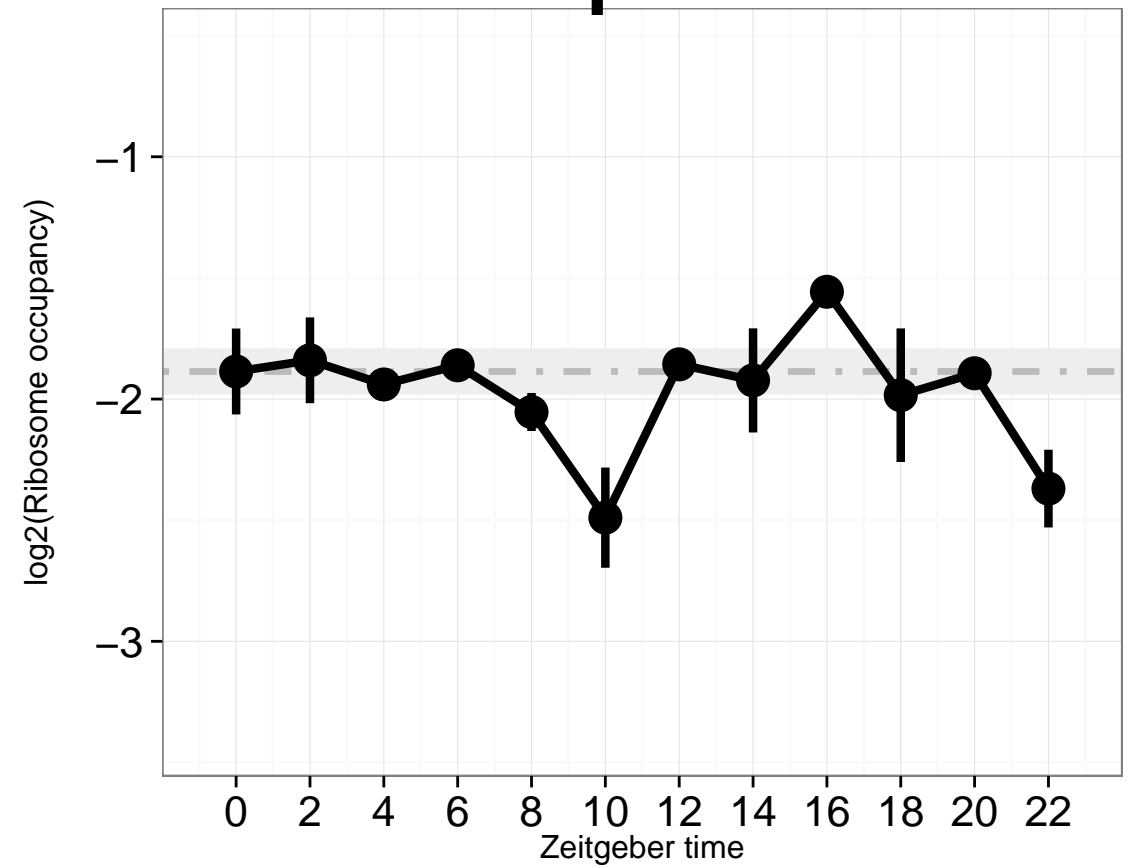

Supplement: SuppDataset_1.zip [file Pitpnm2_set_A.pdf › Supplemental Dataset 1/A-mRNA_nonrhyth_translation_nonrhyth/Pitpnm2_set_A.pdf]

# Pitrm1

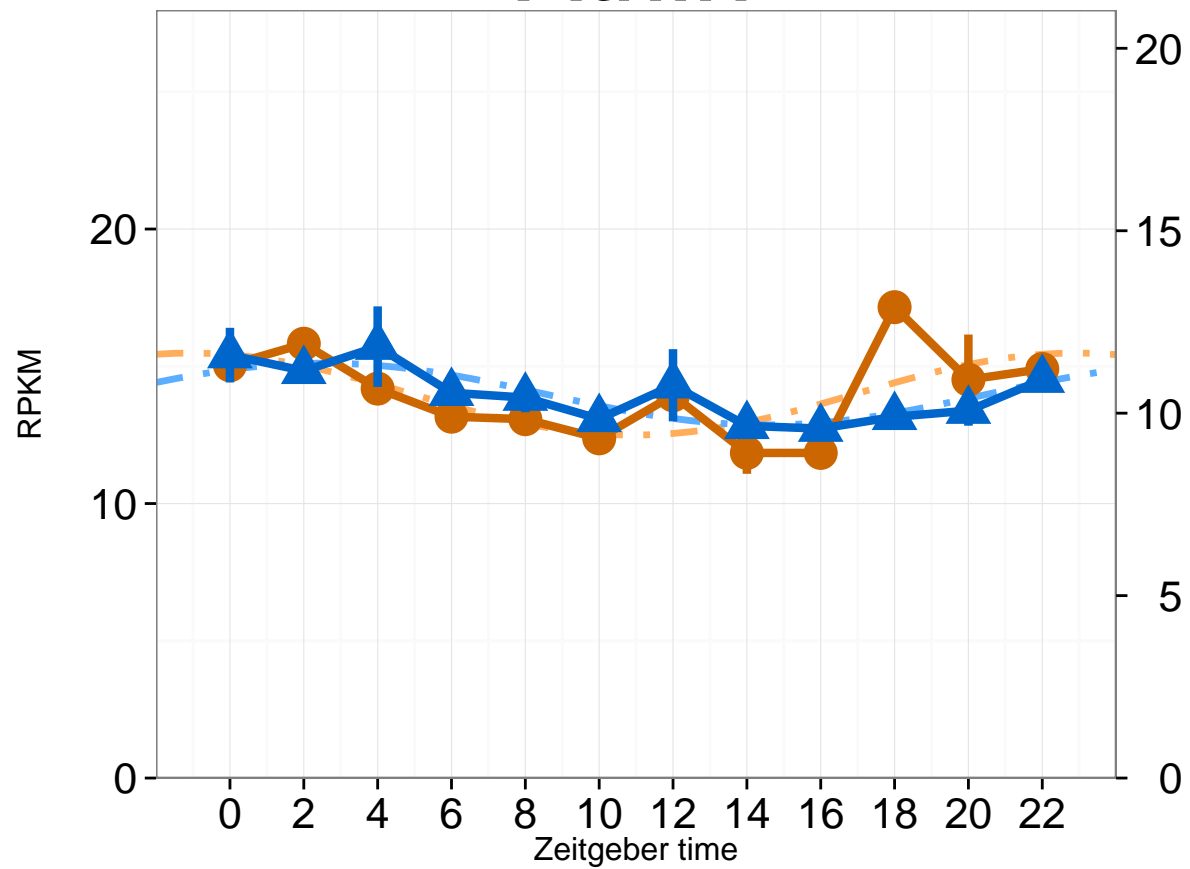

# Pitrm1

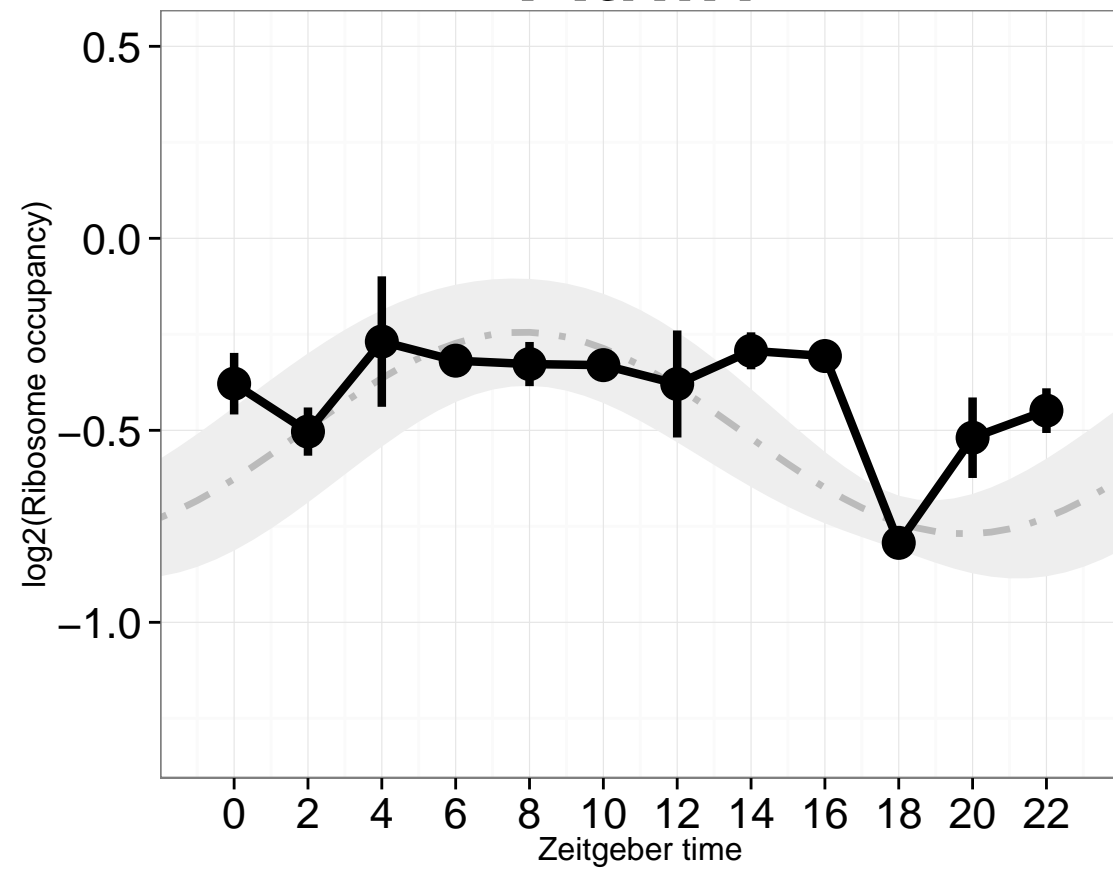

Supplement: SuppDataset_1.zip [file Pitrm1_set_A.pdf › Supplemental Dataset 1/A-mRNA_nonrhyth_translation_nonrhyth/Pitrm1_set_A.pdf]

# Pja1

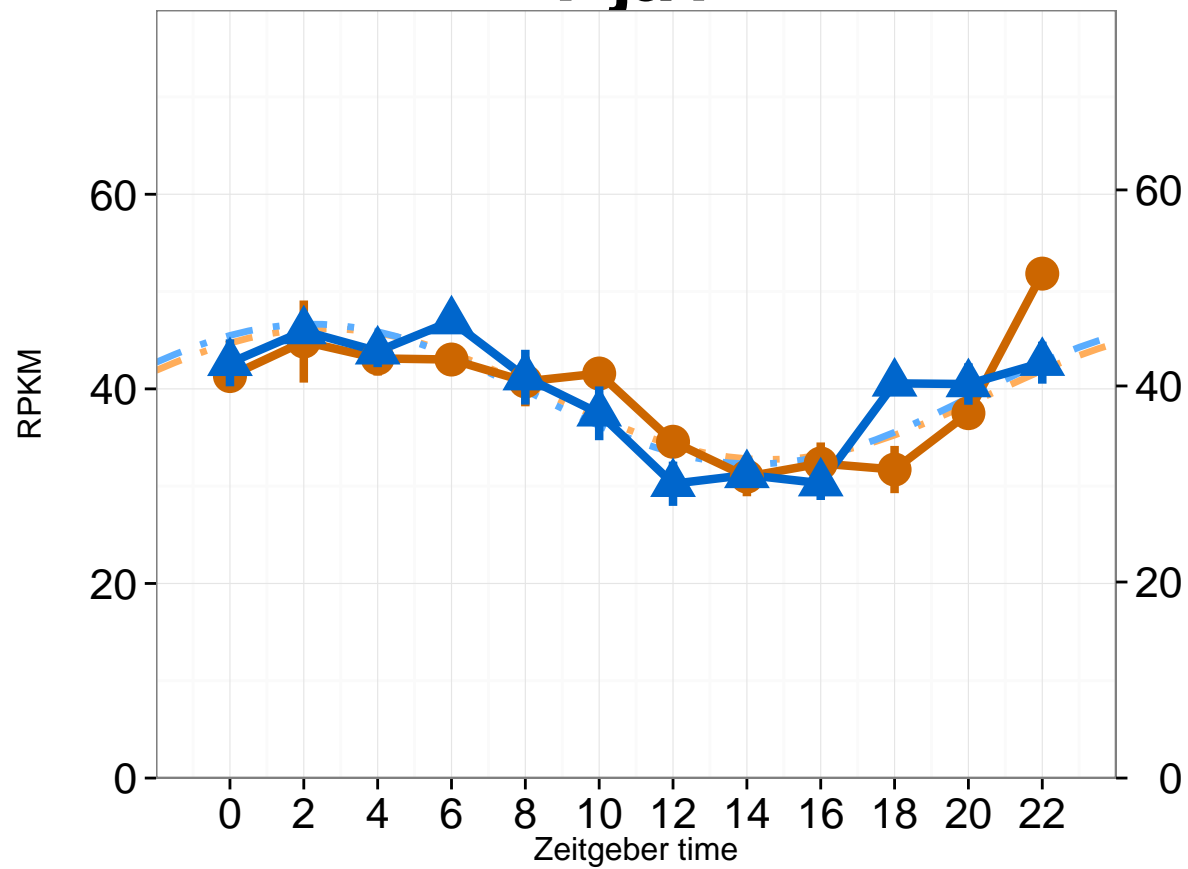

# Pja1

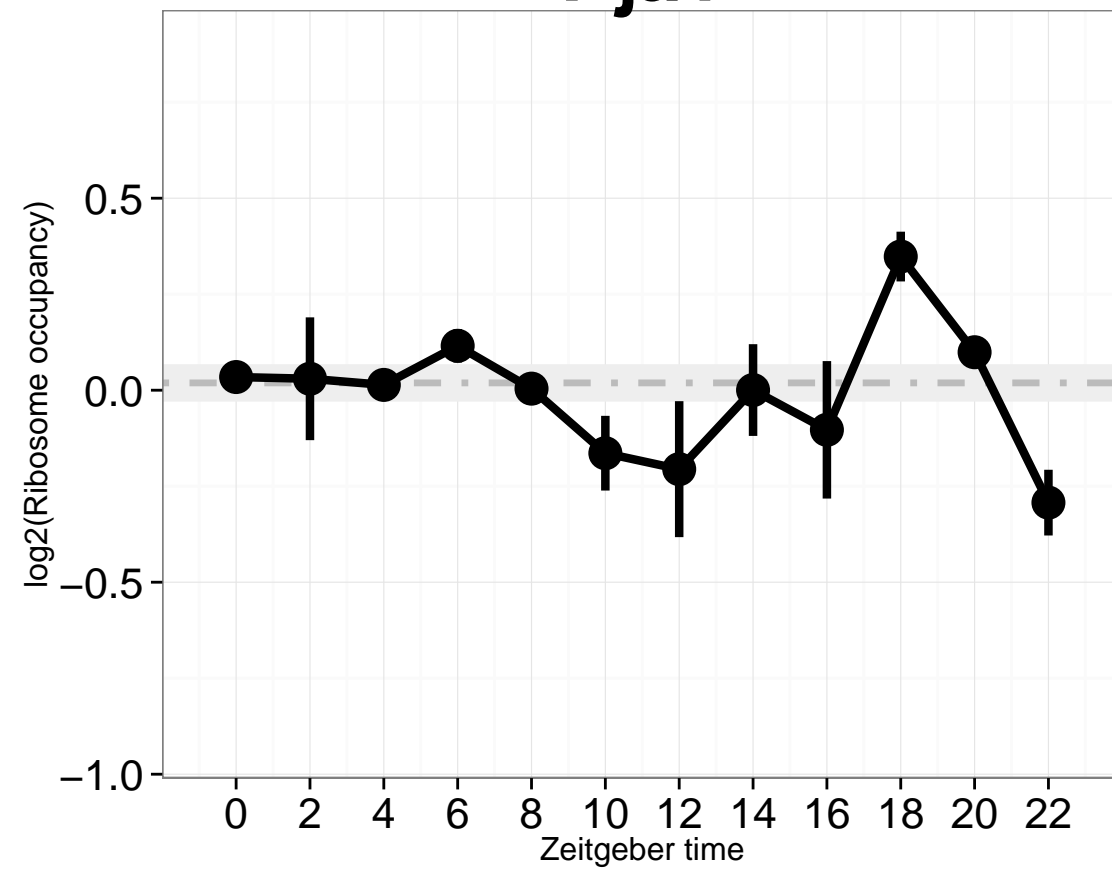

Supplement: SuppDataset_1.zip [file Pja1_set_A.pdf › Supplemental Dataset 1/A-mRNA_nonrhyth_translation_nonrhyth/Pja1_set_A.pdf]

## Pja2

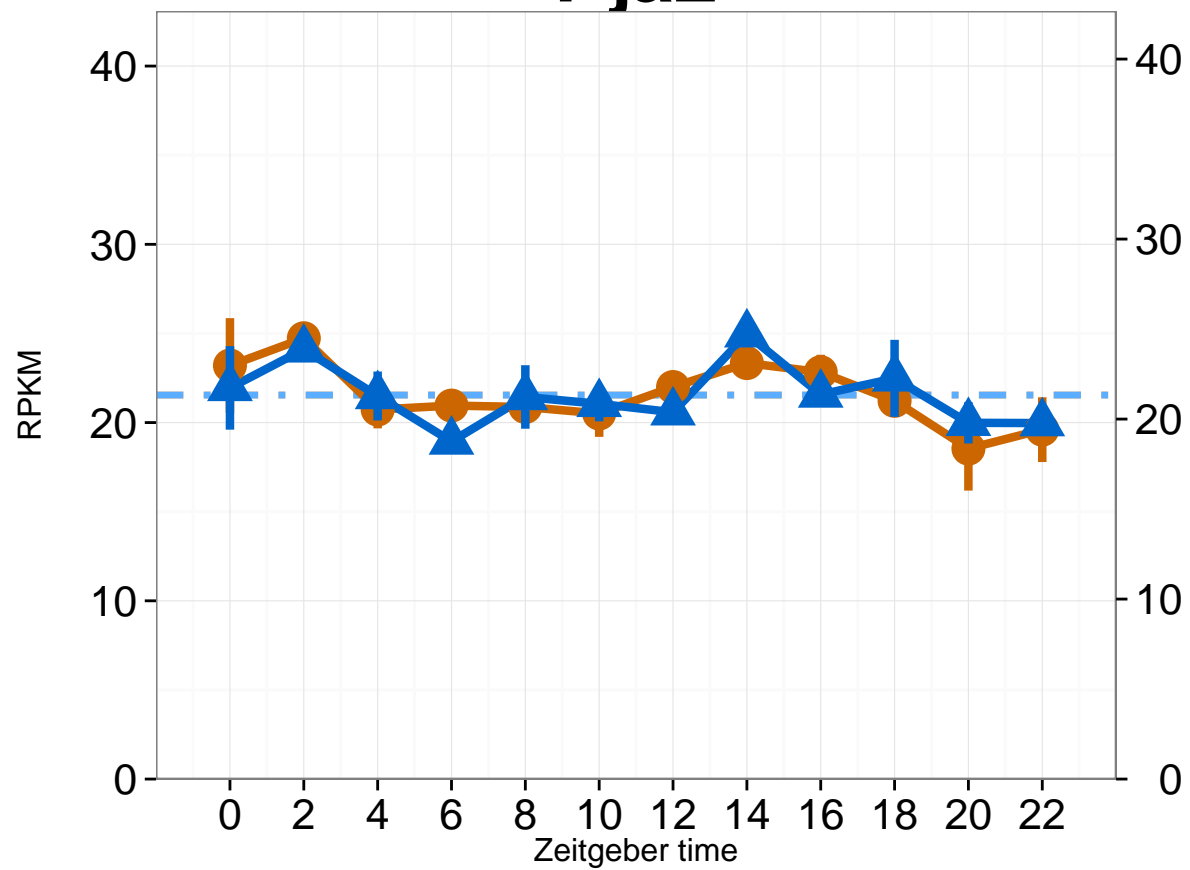

## Pja2

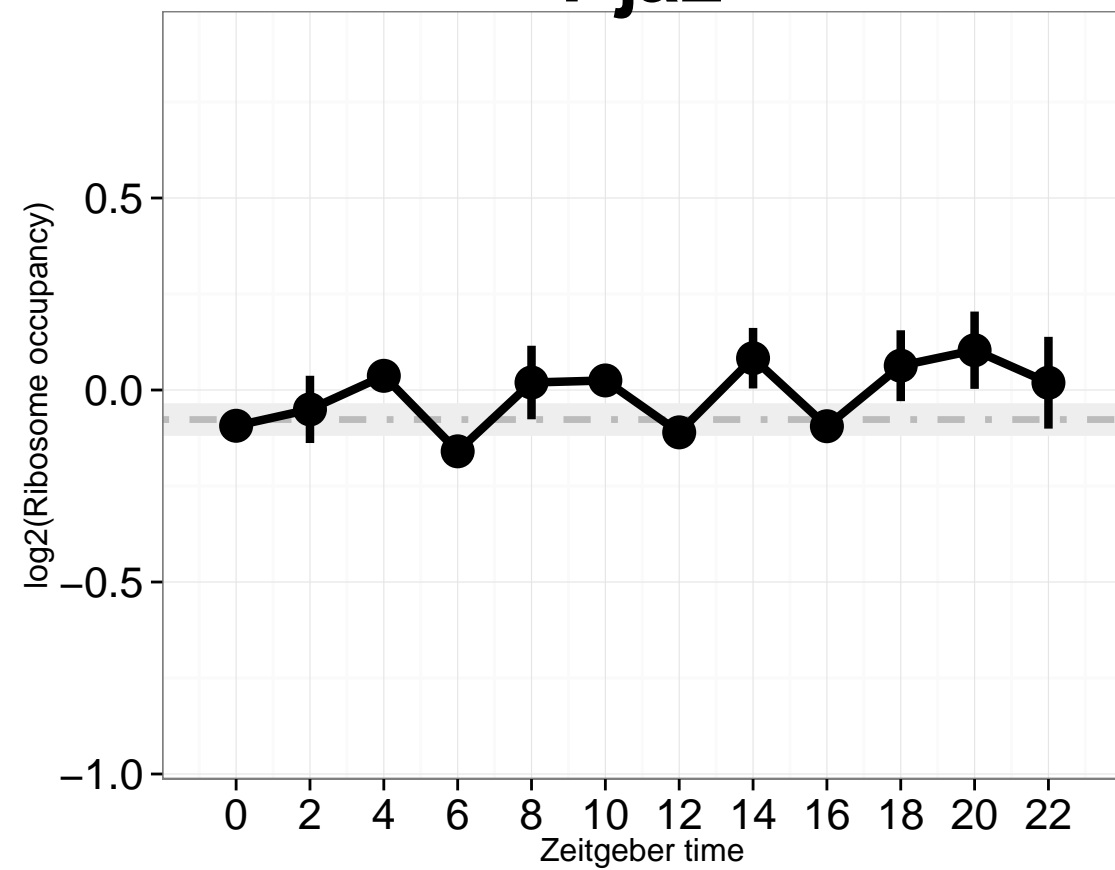

Supplement: SuppDataset_1.zip [file Pja2_set_A.pdf › Supplemental Dataset 1/A-mRNA_nonrhyth_translation_nonrhyth/Pja2_set_A.pdf]

## Pkd1

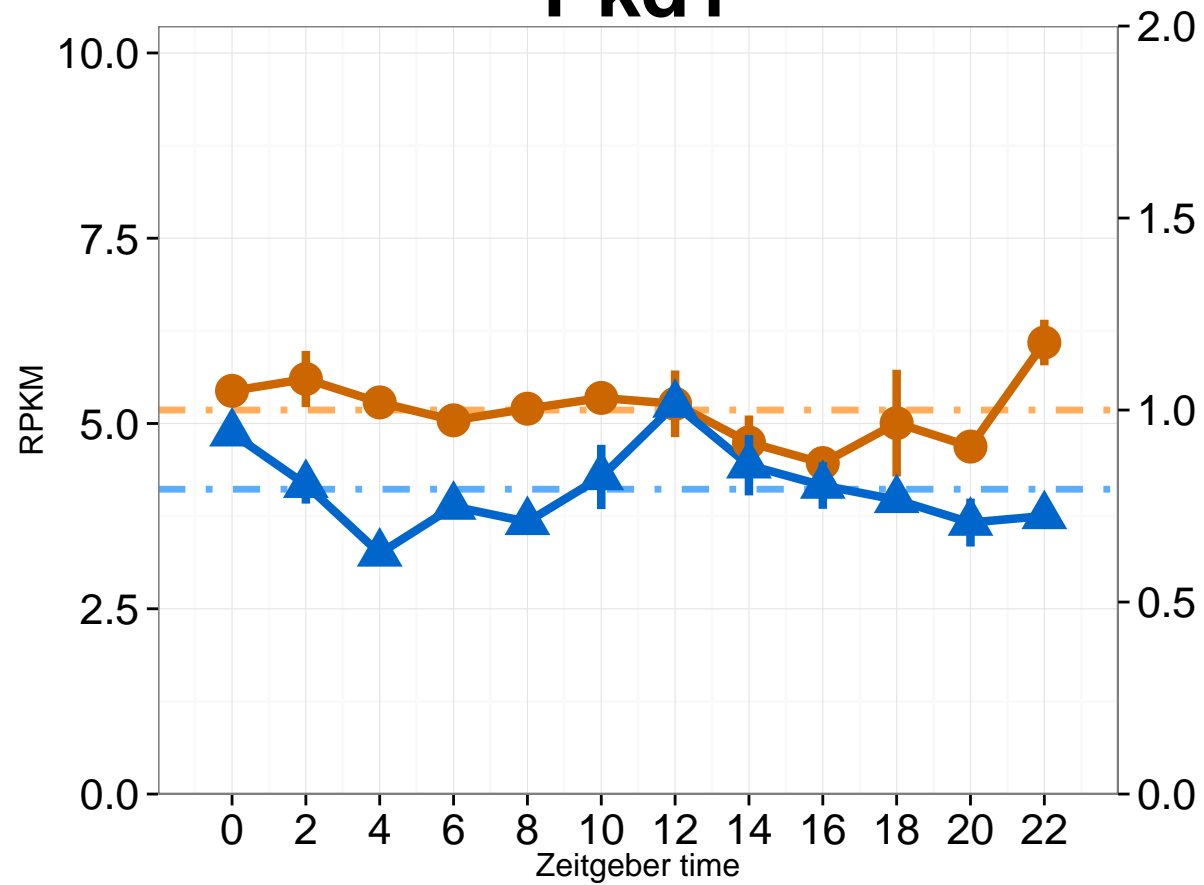

## Pkd1

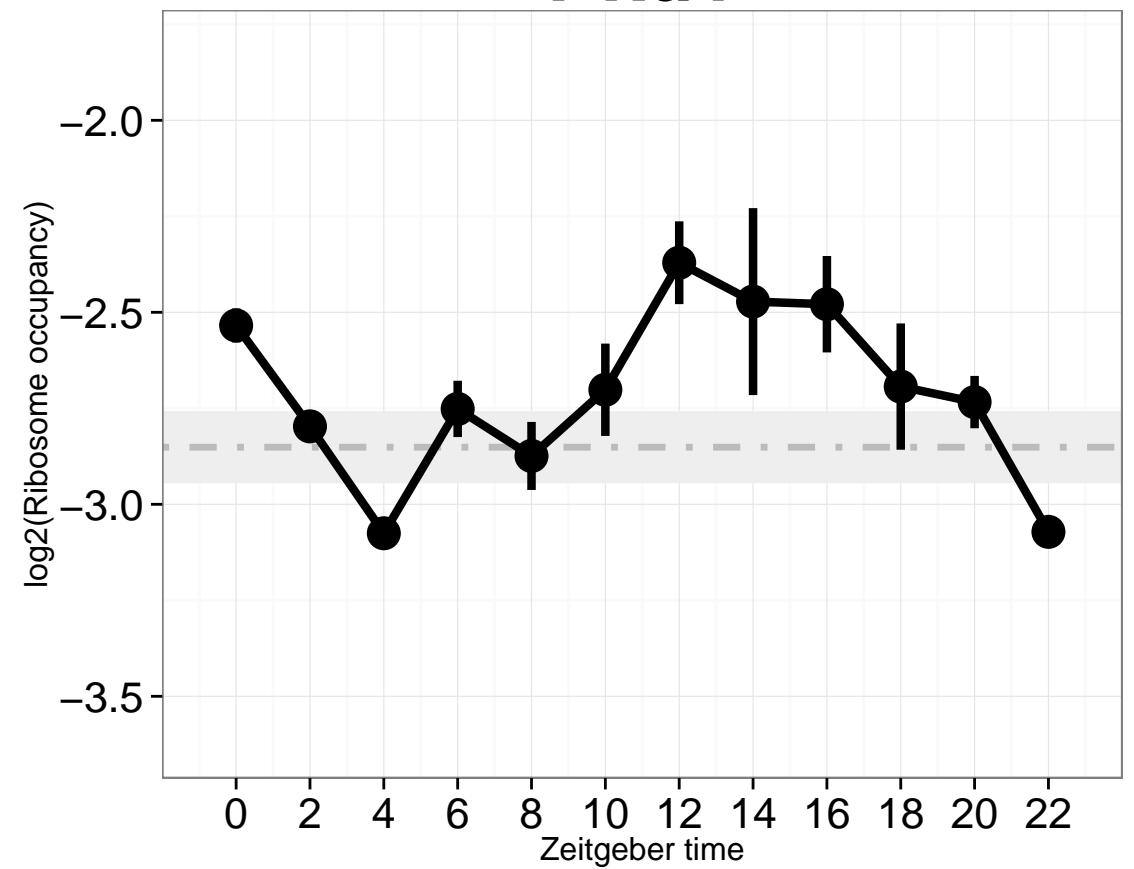

Supplement: SuppDataset_1.zip [file Pkd1_set_A.pdf › Supplemental Dataset 1/A-mRNA_nonrhyth_translation_nonrhyth/Pkd1_set_A.pdf]

# Pkd2

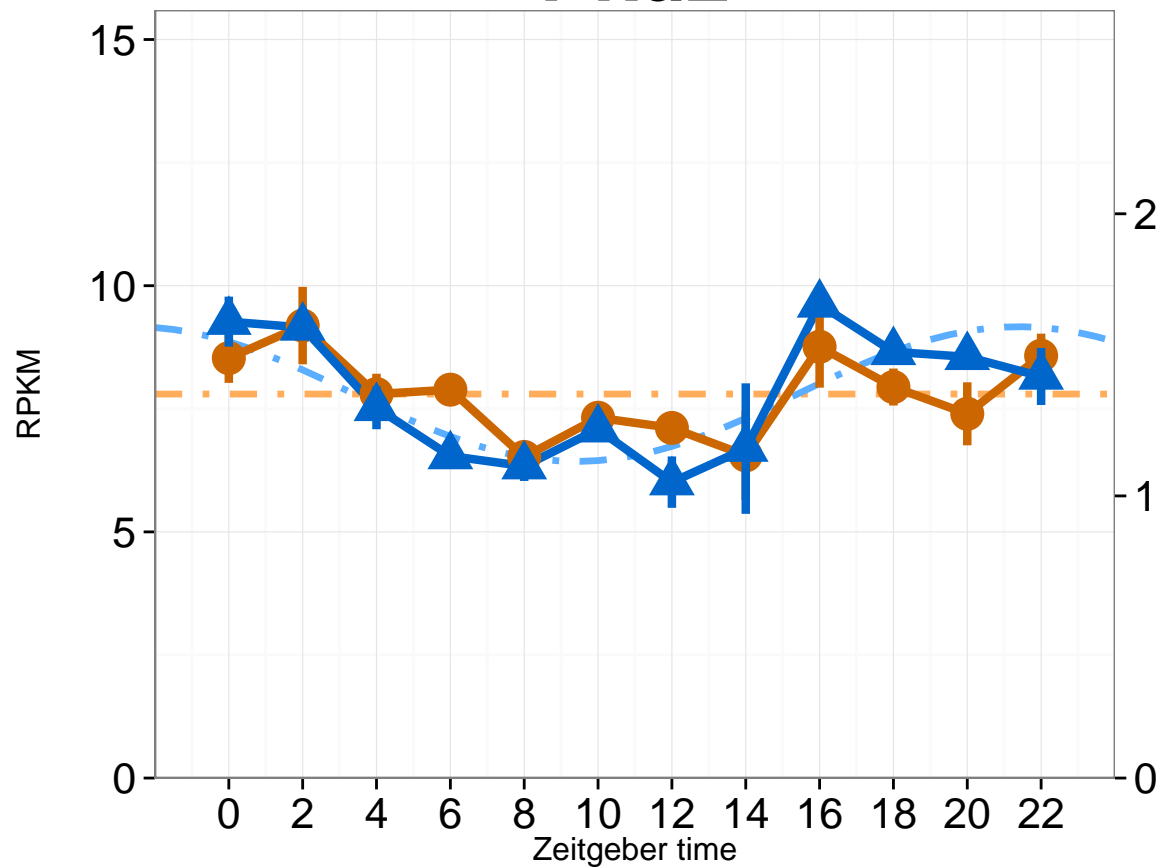

# Pkd2

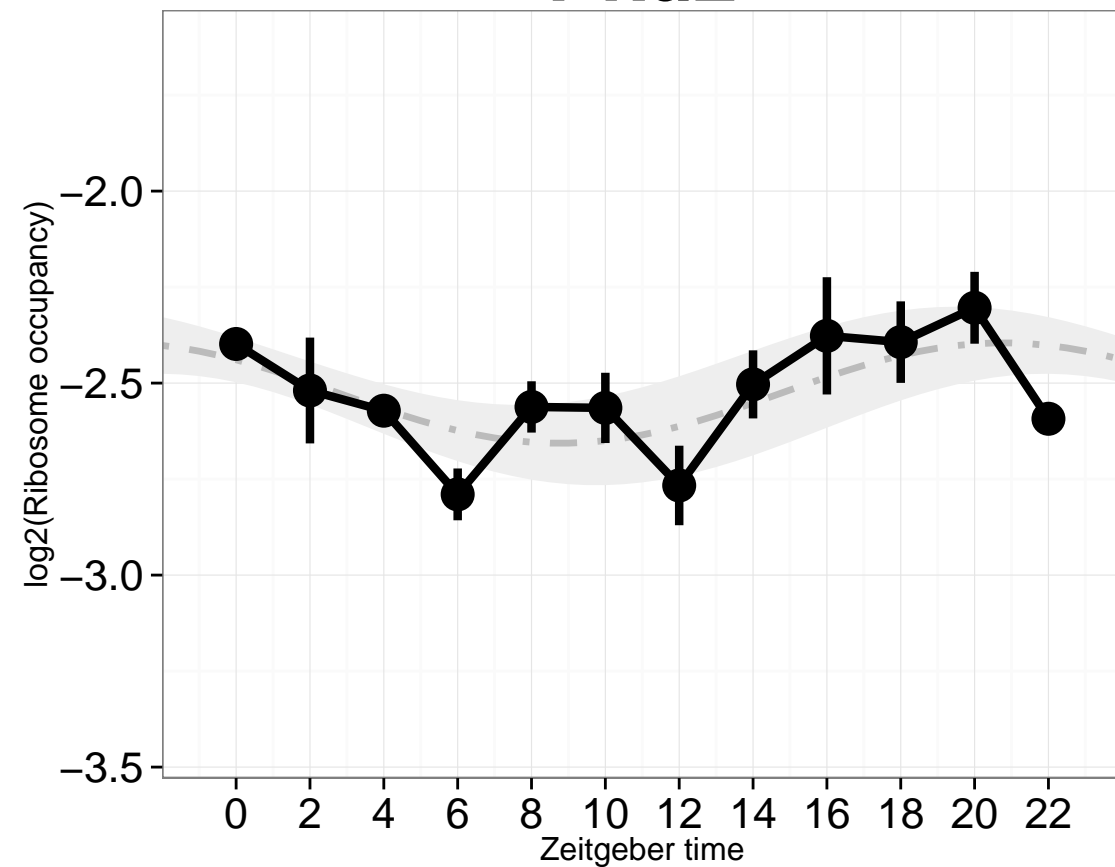

Supplement: SuppDataset_1.zip [file Pkd2_set_A.pdf › Supplemental Dataset 1/A-mRNA_nonrhyth_translation_nonrhyth/Pkd2_set_A.pdf]

# Pkdcc

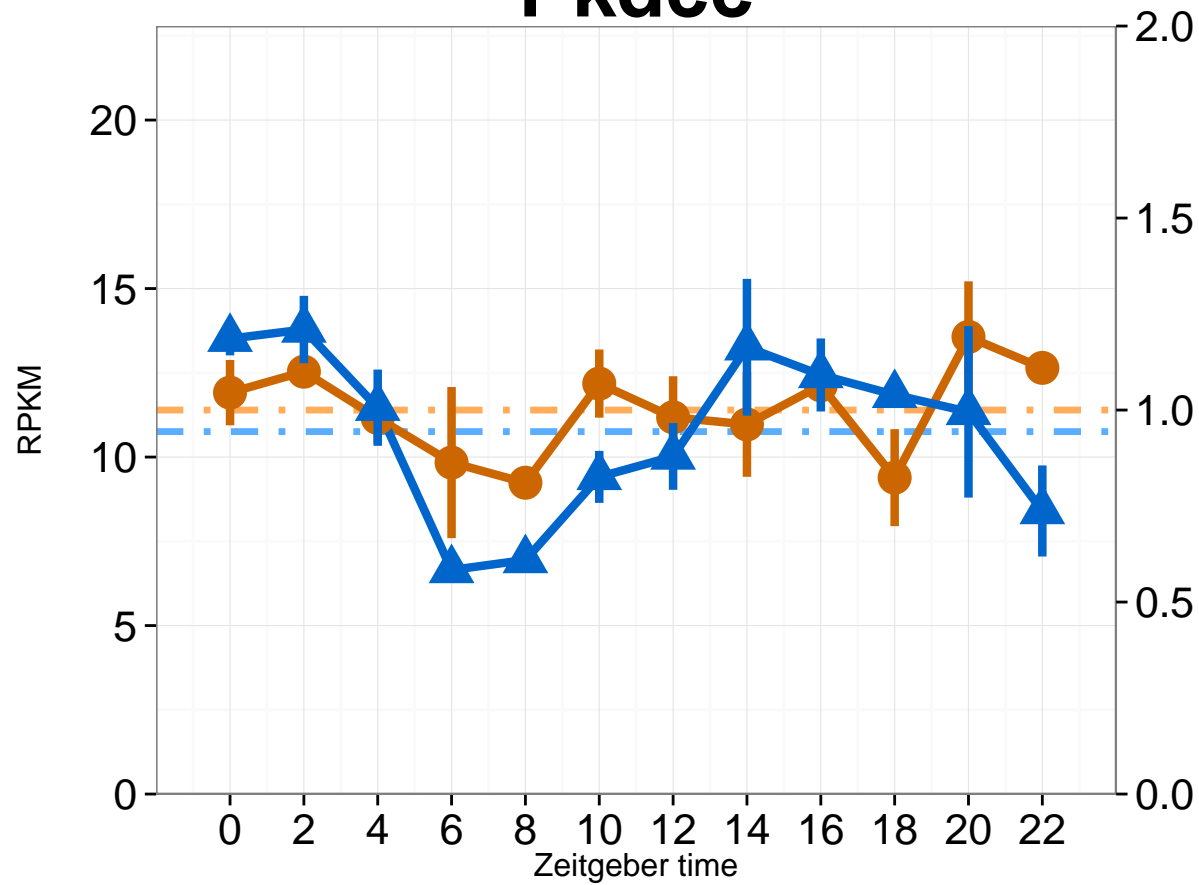

# Pkdcc

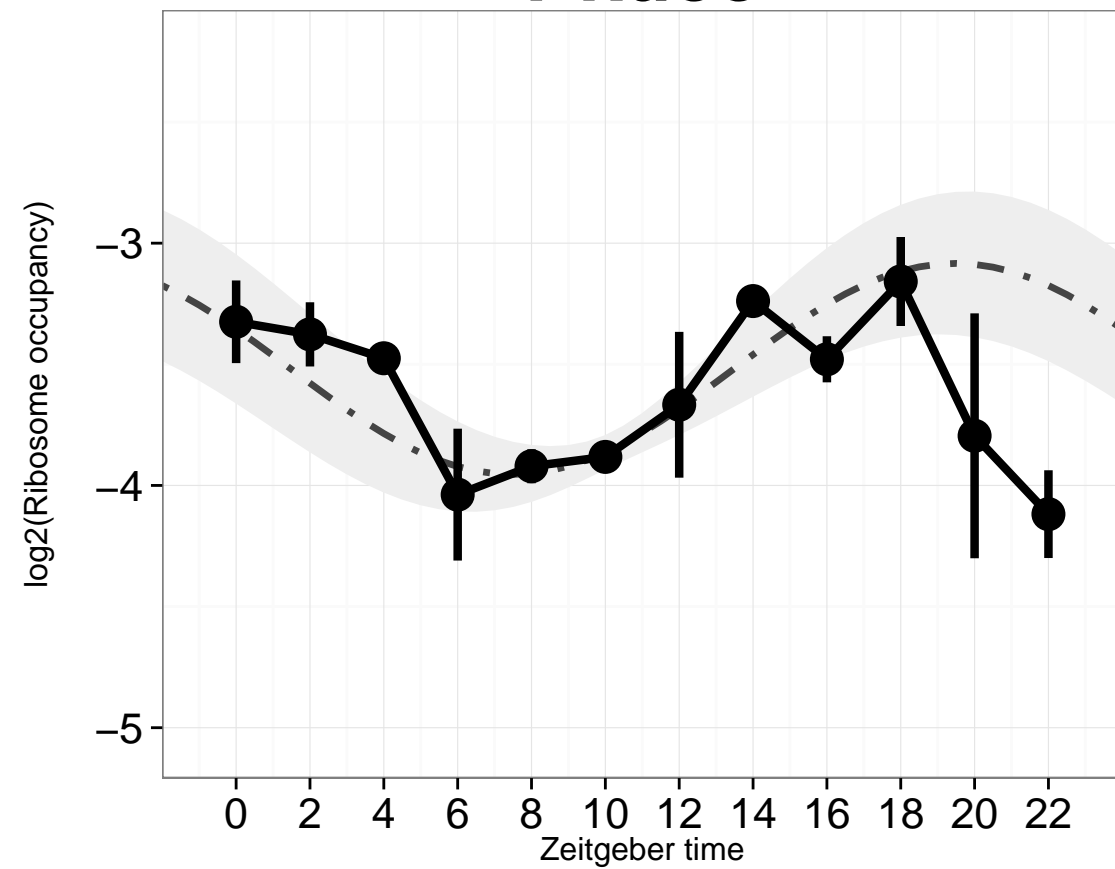

Supplement: SuppDataset_1.zip [file Pkdcc_set_A.pdf › Supplemental Dataset 1/A-mRNA_nonrhyth_translation_nonrhyth/Pkdcc_set_A.pdf]

## Pkig

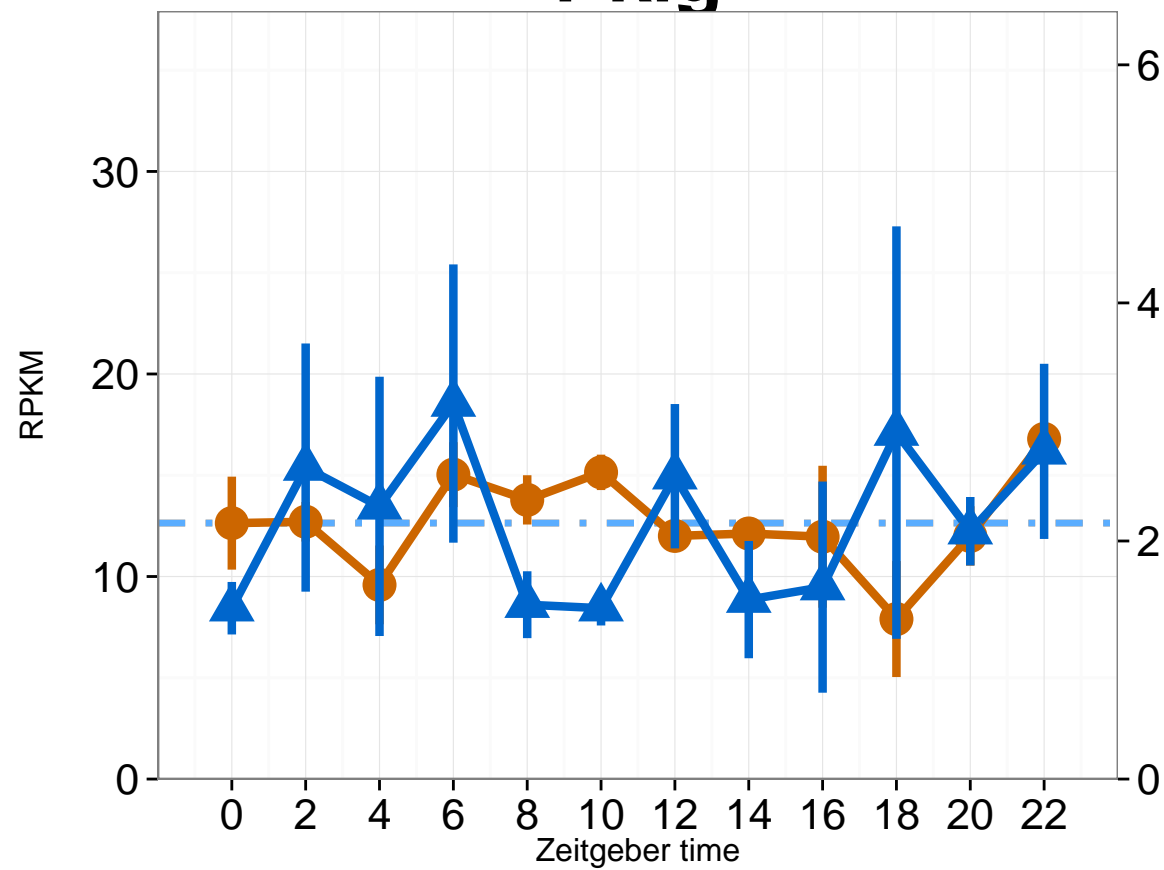

## Pkig

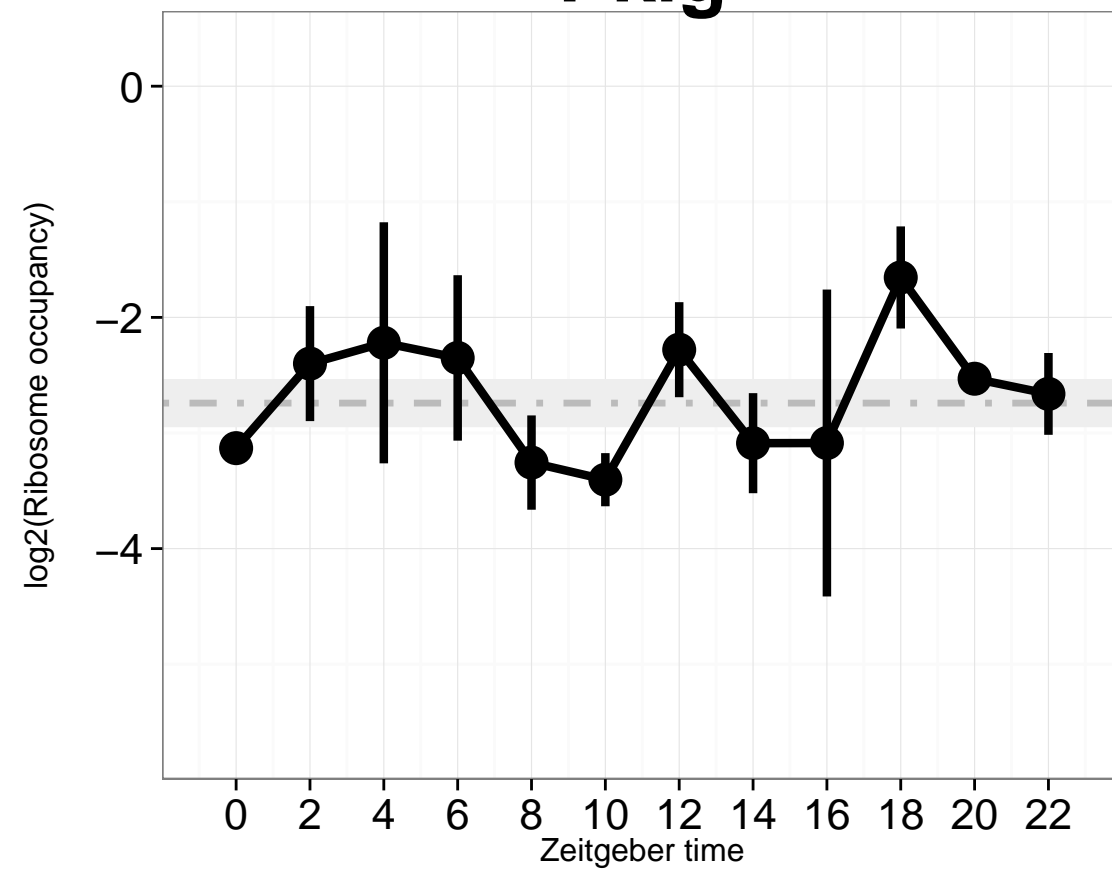

Supplement: SuppDataset_1.zip [file Pkig_set_A.pdf › Supplemental Dataset 1/A-mRNA_nonrhyth_translation_nonrhyth/Pkig_set_A.pdf]

## Pkm

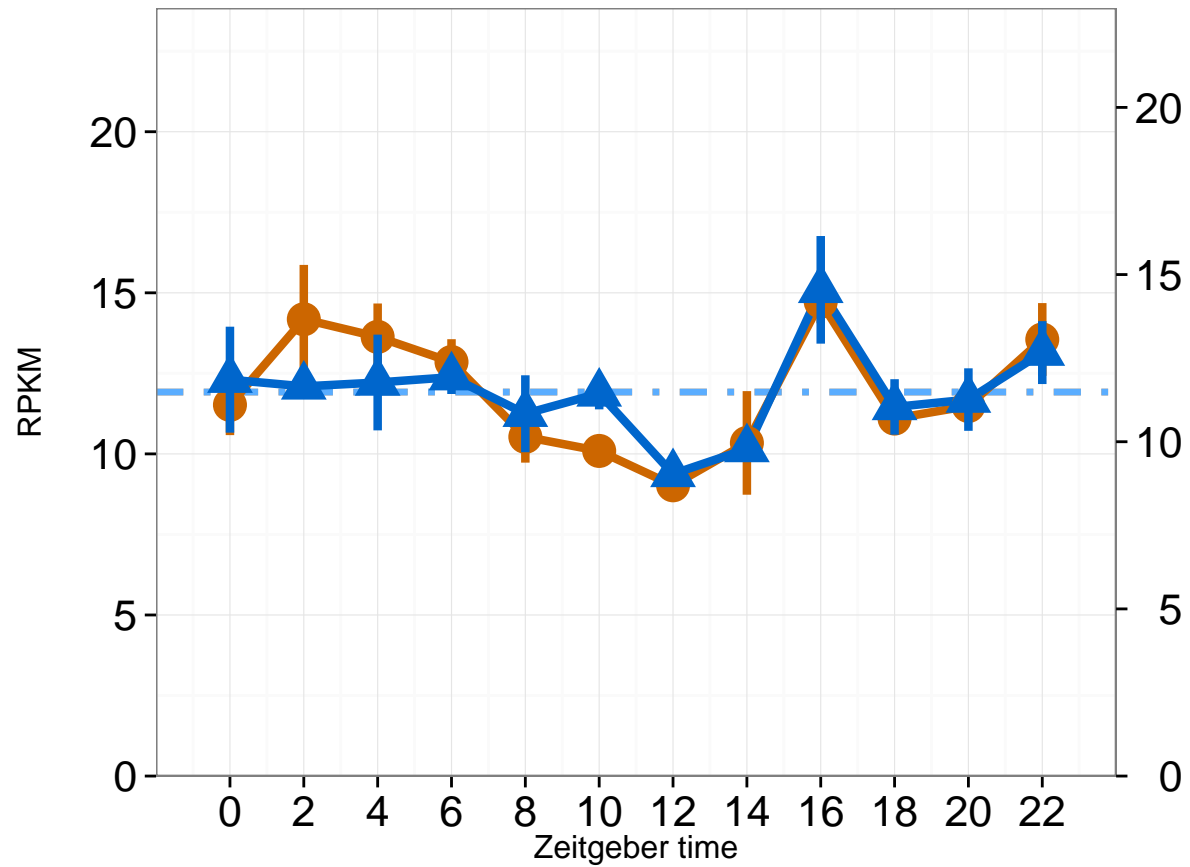

## Pkm

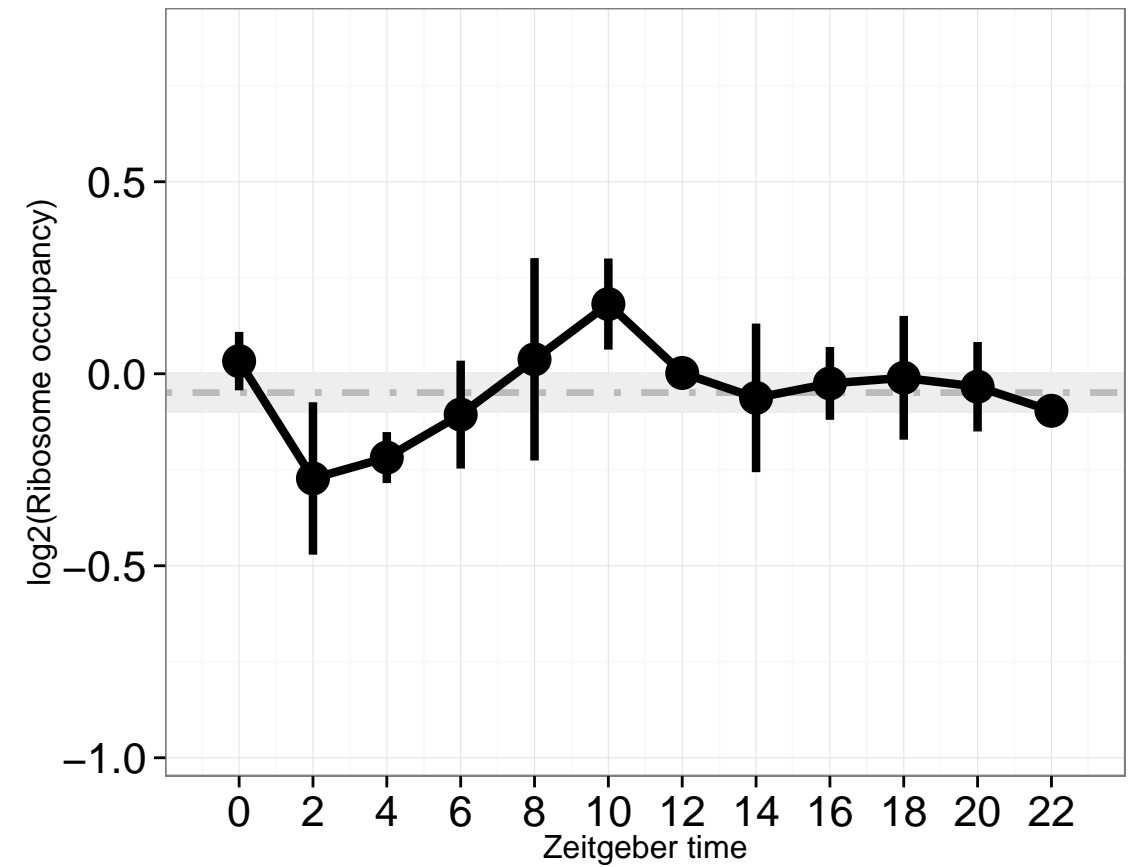

Supplement: SuppDataset_1.zip [file Pkm_set_A.pdf › Supplemental Dataset 1/A-mRNA_nonrhyth_translation_nonrhyth/Pkm_set_A.pdf]

# Pkmyt1

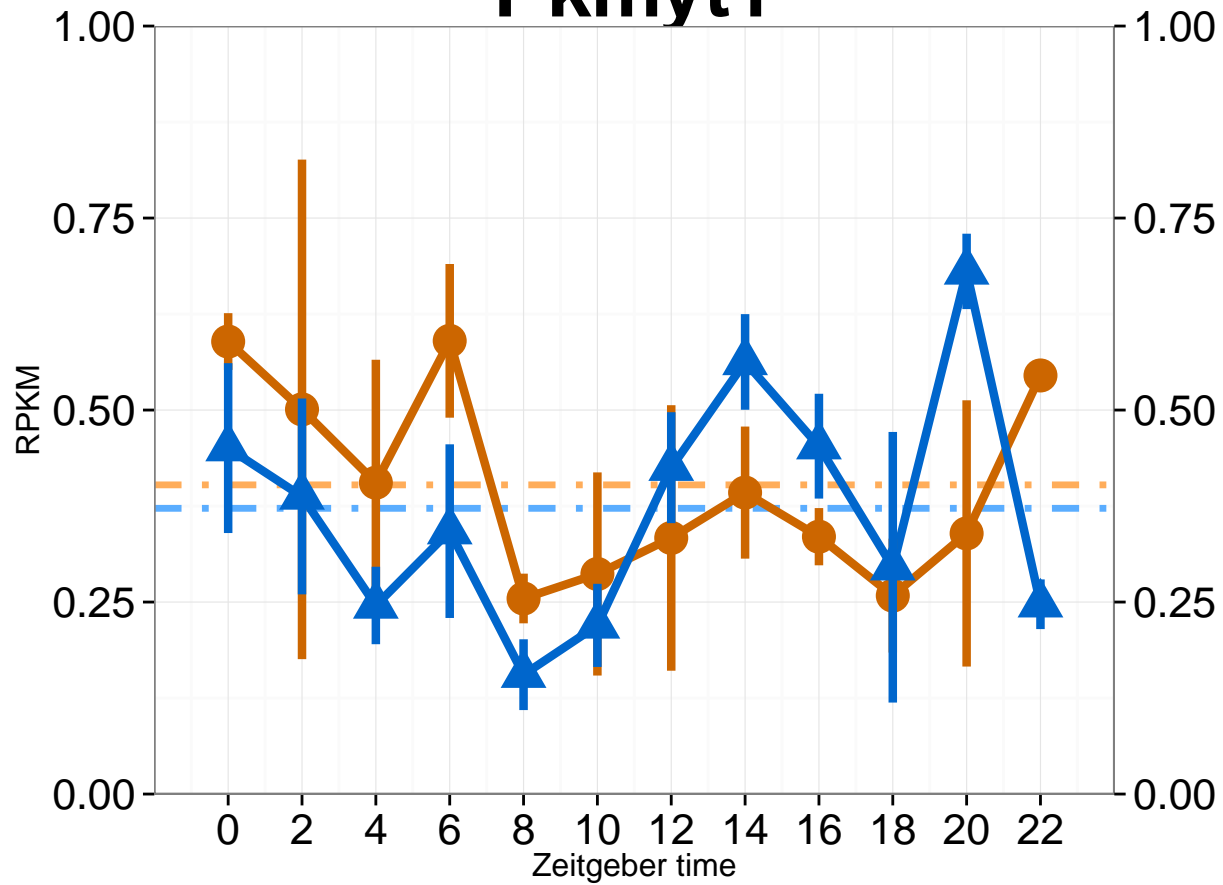

# Pkmyt1

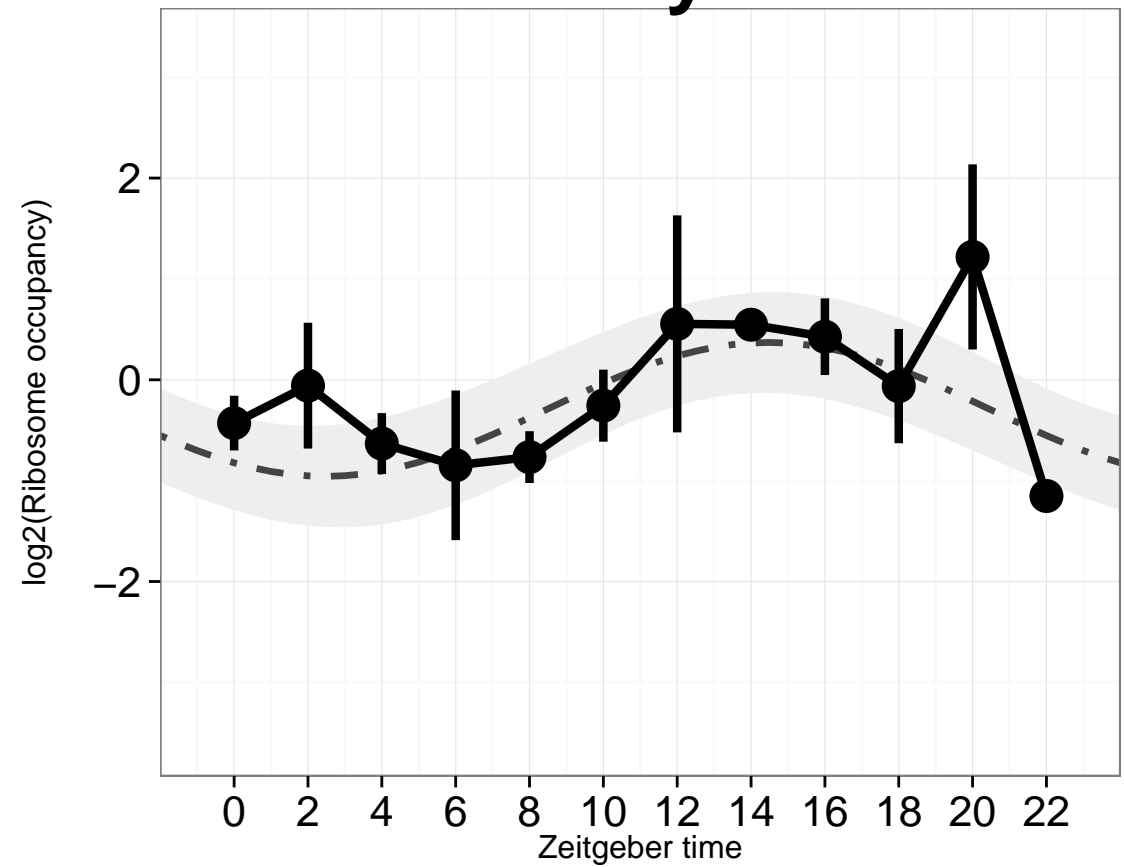

Supplement: SuppDataset_1.zip [file Pkmyt1_set_A.pdf › Supplemental Dataset 1/A-mRNA_nonrhyth_translation_nonrhyth/Pkmyt1_set_A.pdf]

# Pkn1

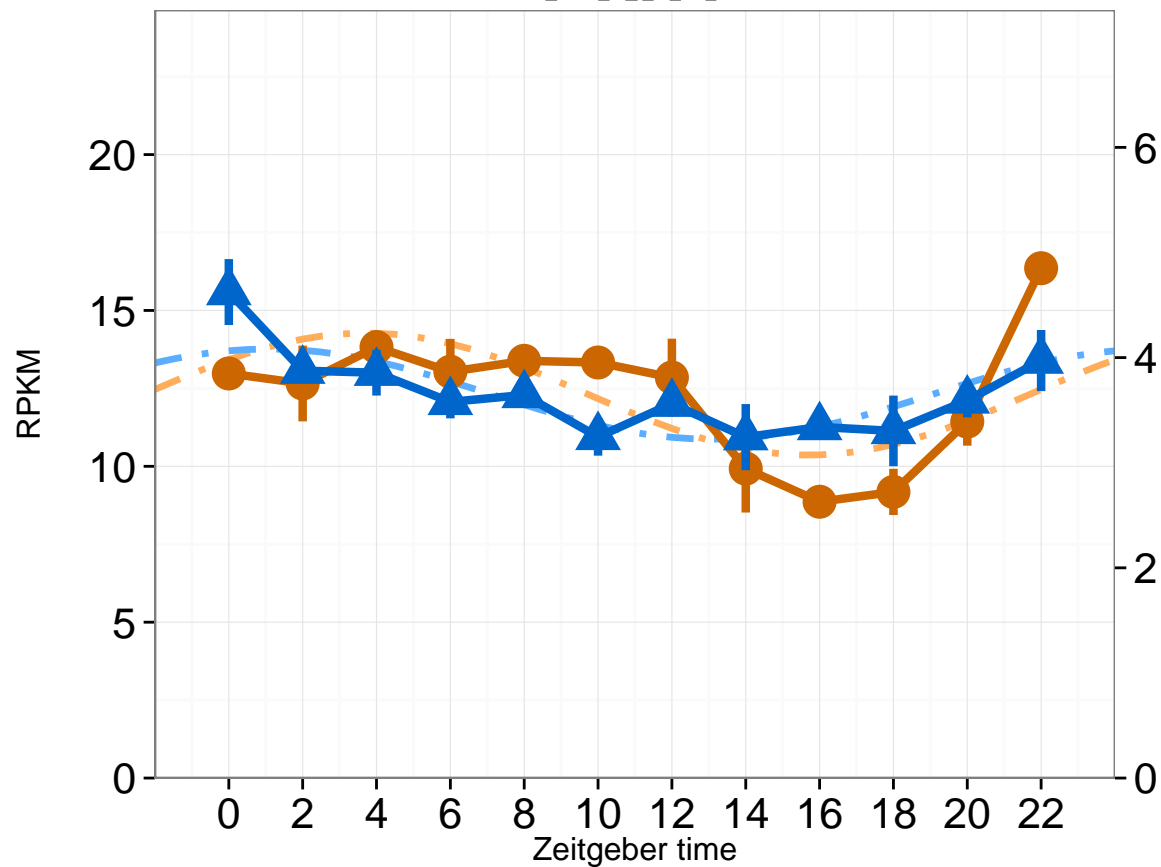

# Pkn1

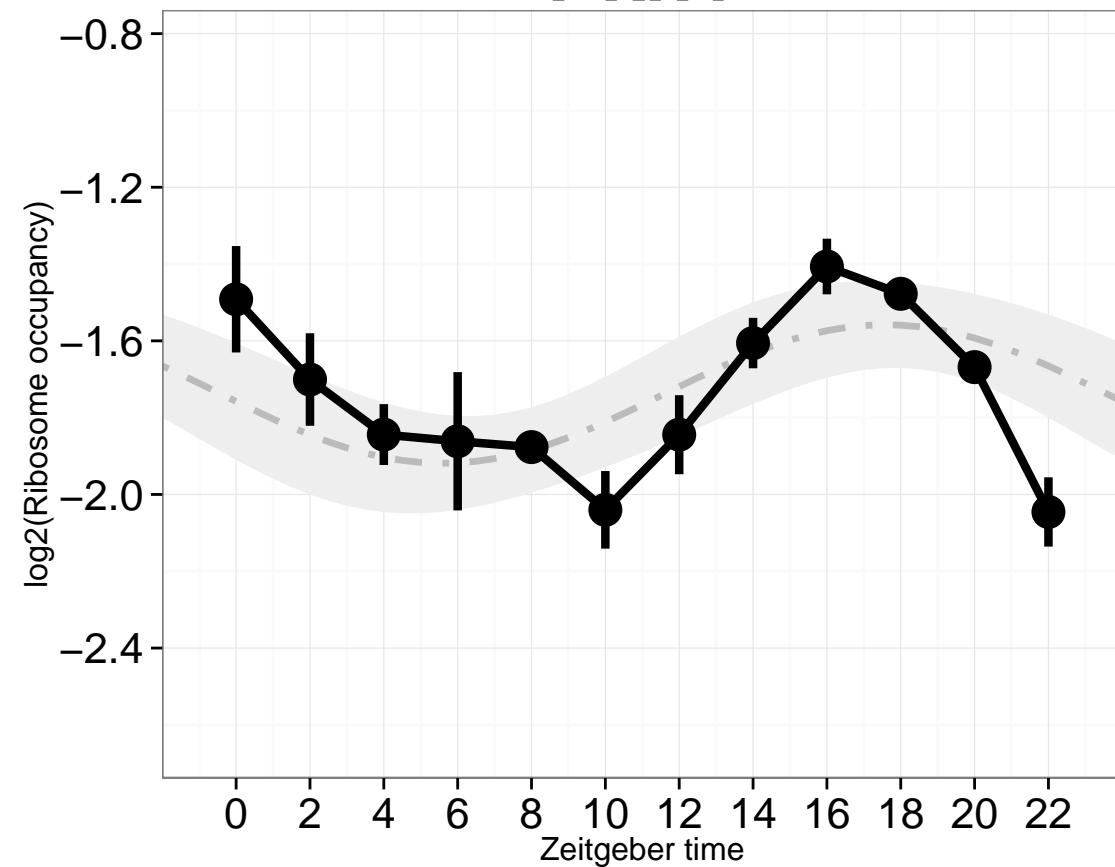

Supplement: SuppDataset_1.zip [file Pkn1_set_A.pdf › Supplemental Dataset 1/A-mRNA_nonrhyth_translation_nonrhyth/Pkn1_set_A.pdf]

## Pkn2

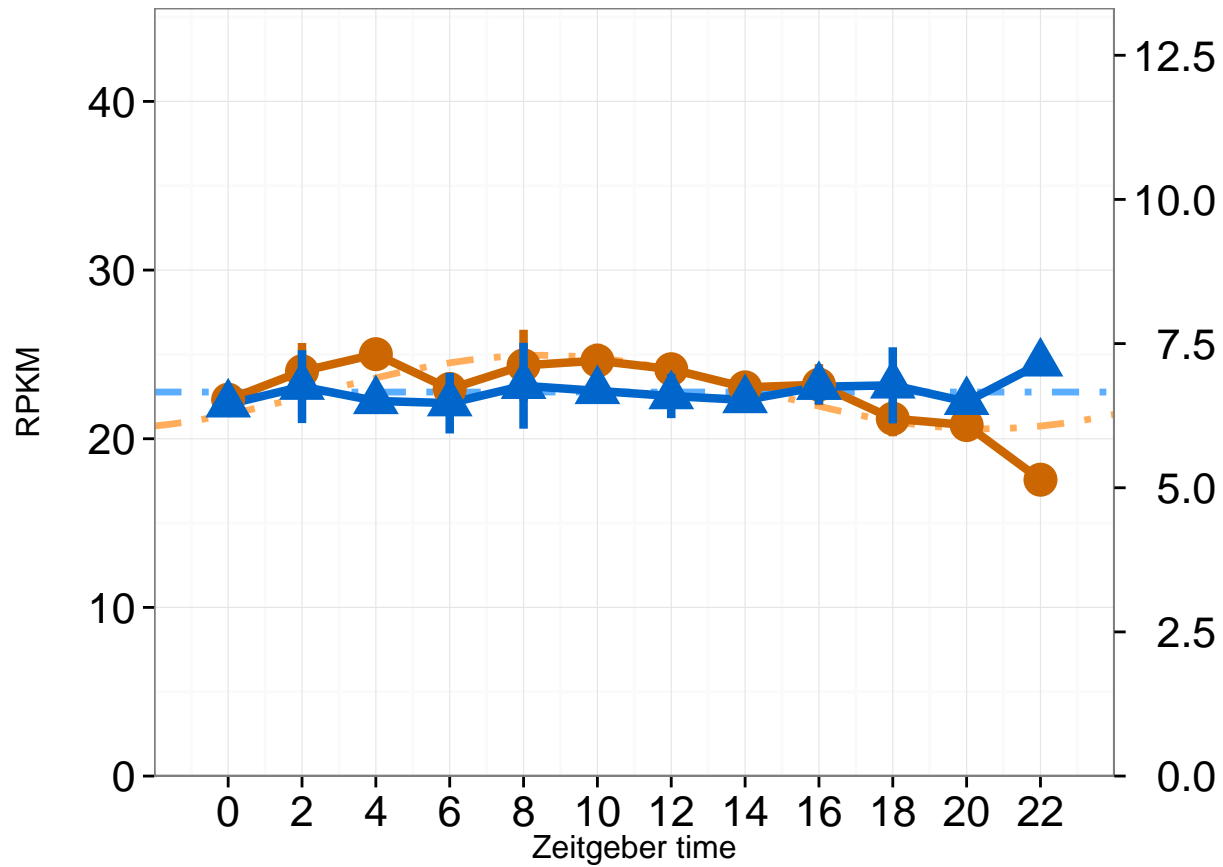

## Pkn2

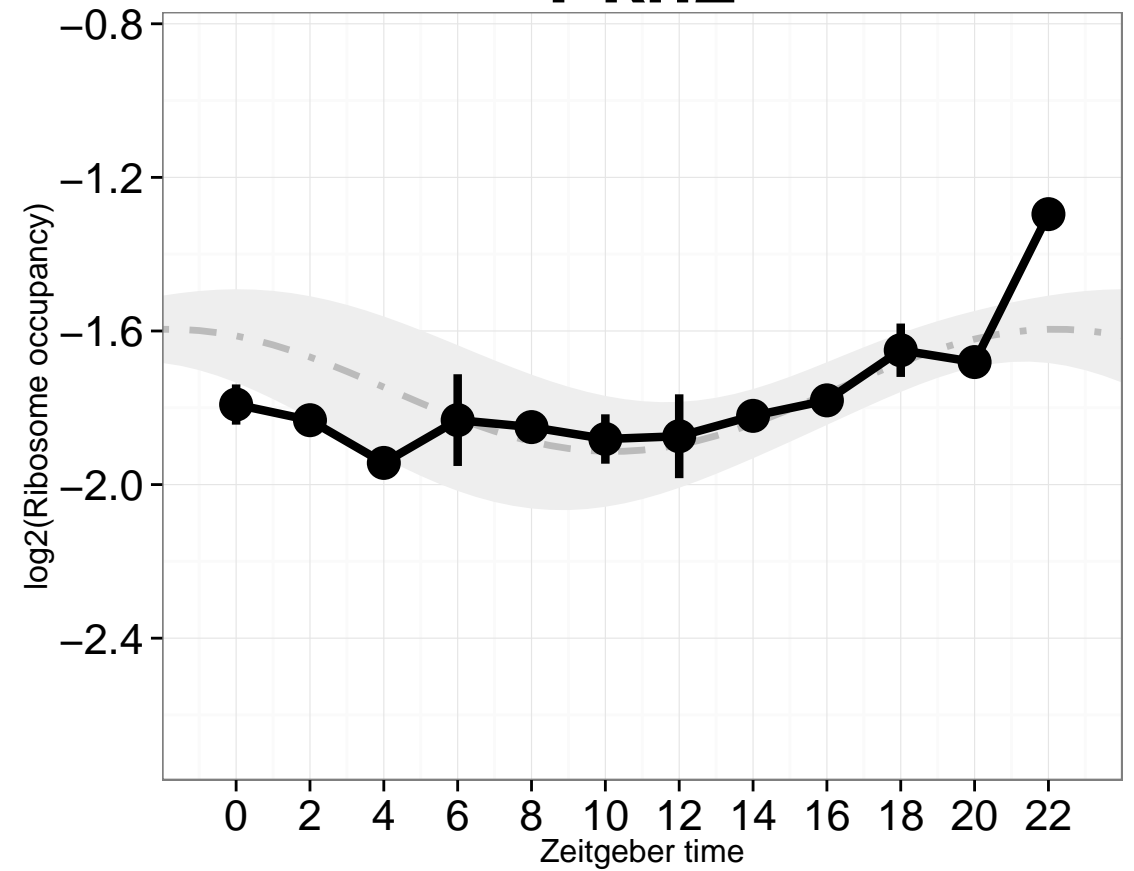

Supplement: SuppDataset_1.zip [file Pkn2_set_A.pdf › Supplemental Dataset 1/A-mRNA_nonrhyth_translation_nonrhyth/Pkn2_set_A.pdf]

## Pknox1

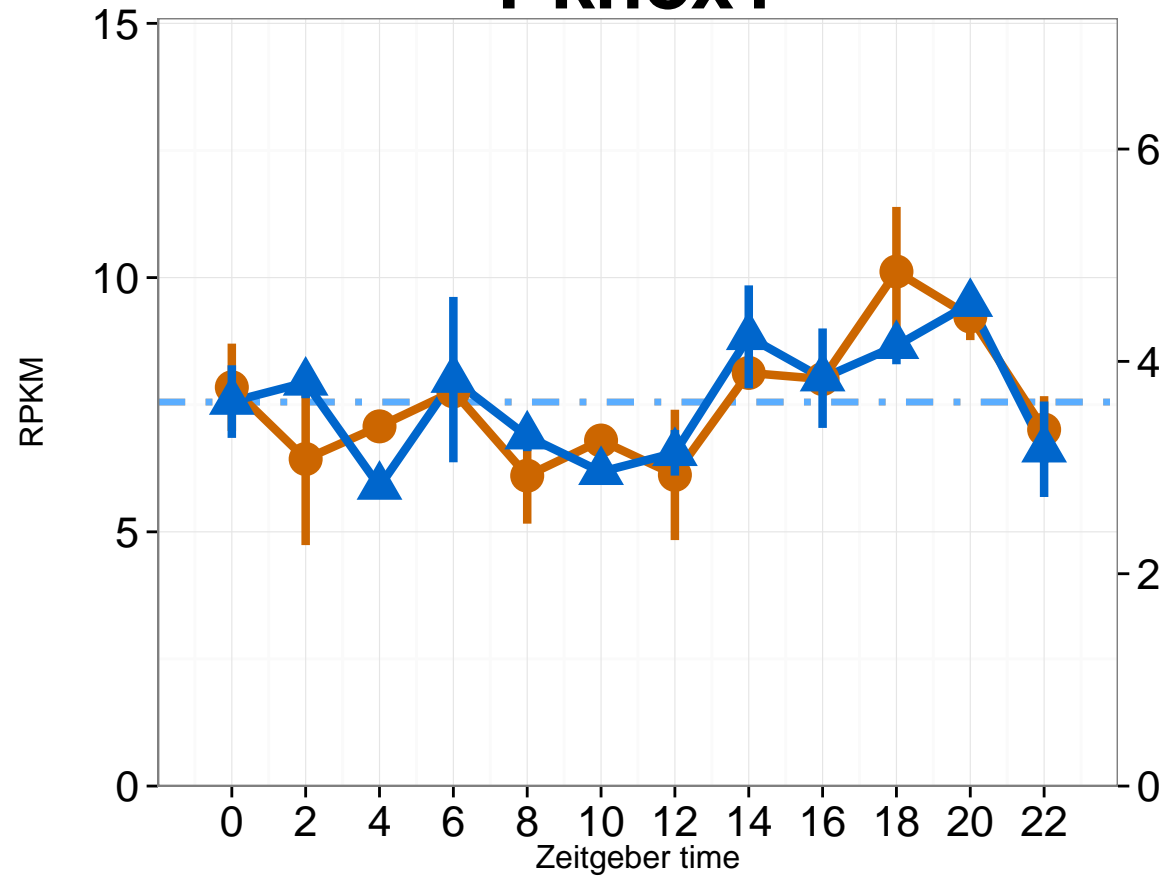

## Pknox1

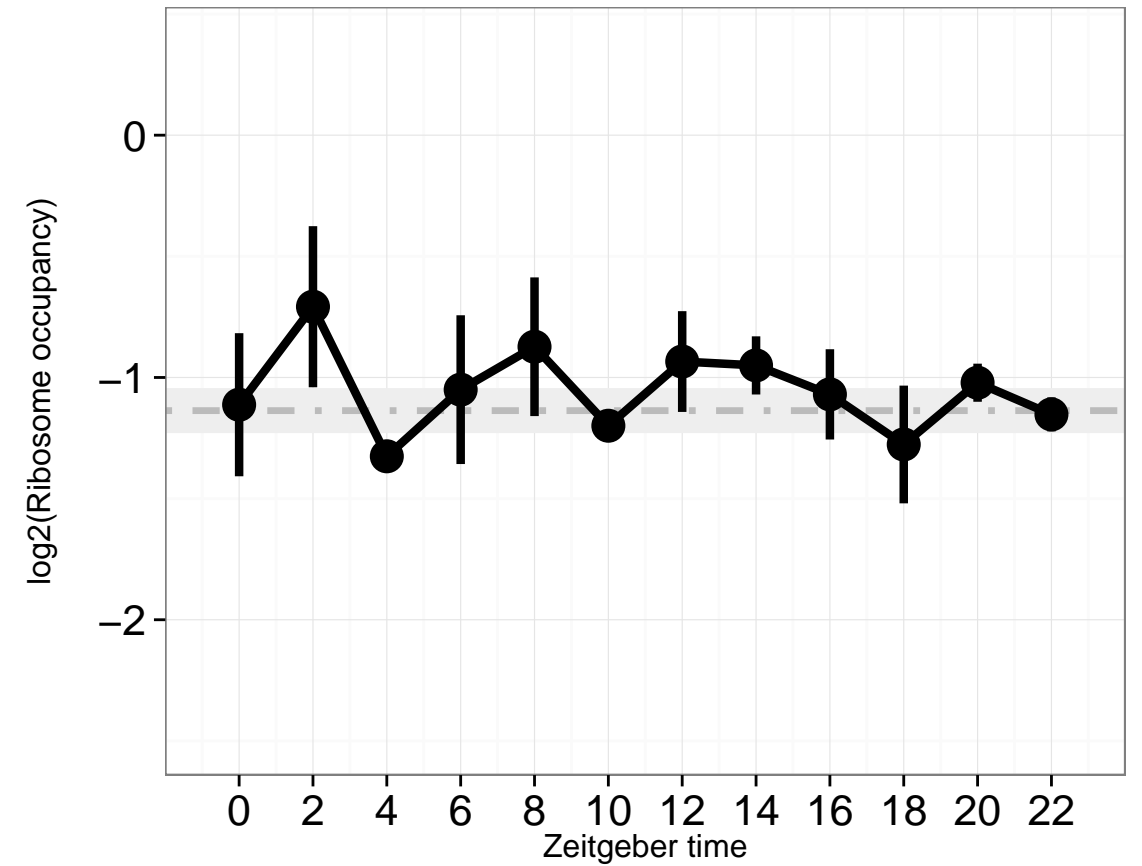

Supplement: SuppDataset_1.zip [file Pknox1_set_A.pdf › Supplemental Dataset 1/A-mRNA_nonrhyth_translation_nonrhyth/Pknox1_set_A.pdf]

## Pkp2

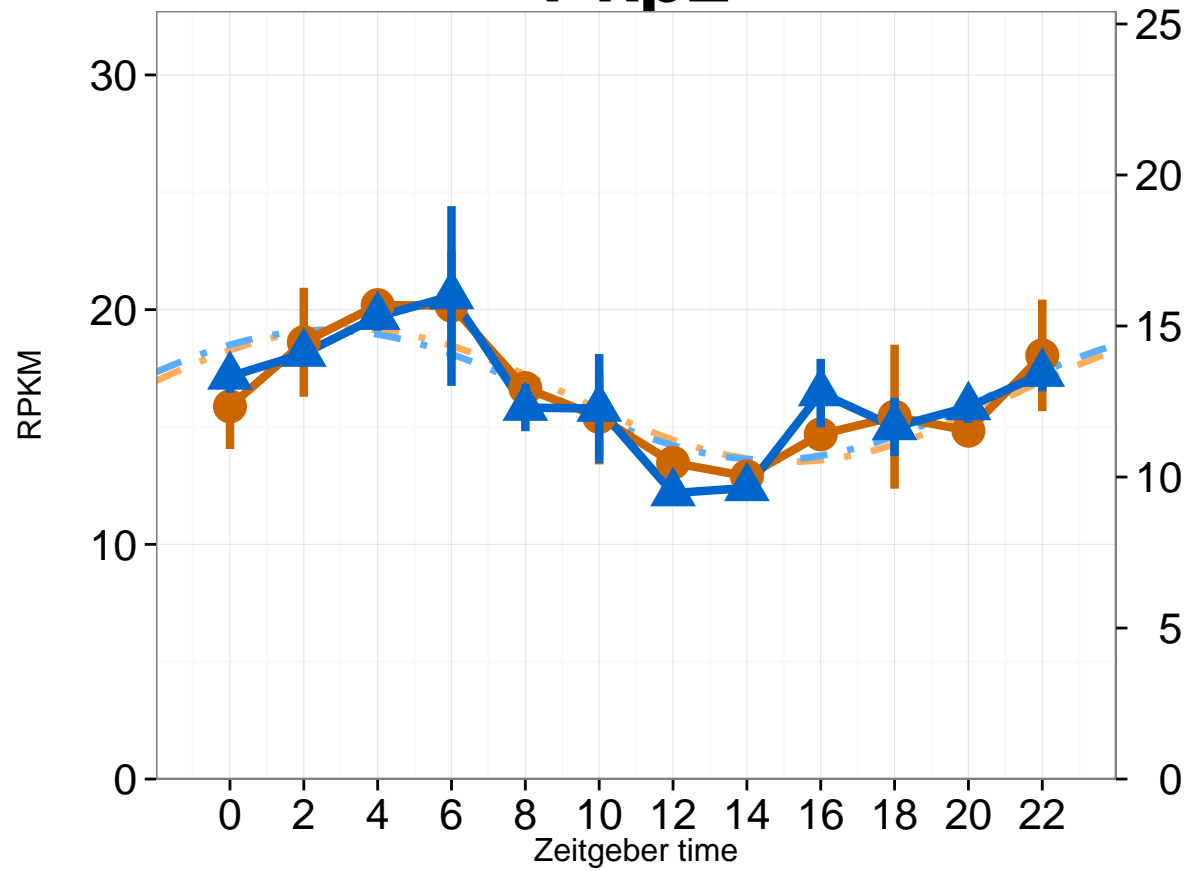

## Pkp2

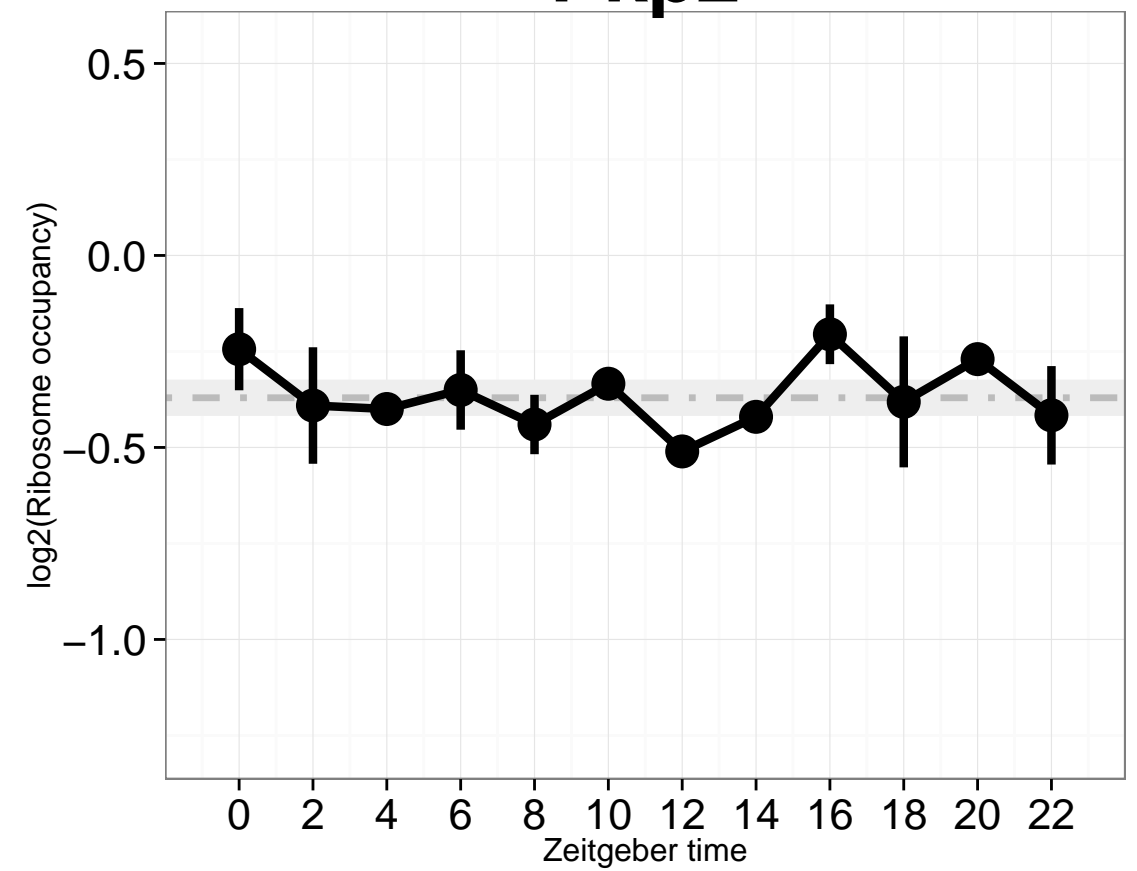

Supplement: SuppDataset_1.zip [file Pkp2_set_A.pdf › Supplemental Dataset 1/A-mRNA_nonrhyth_translation_nonrhyth/Pkp2_set_A.pdf]

## Pkp4

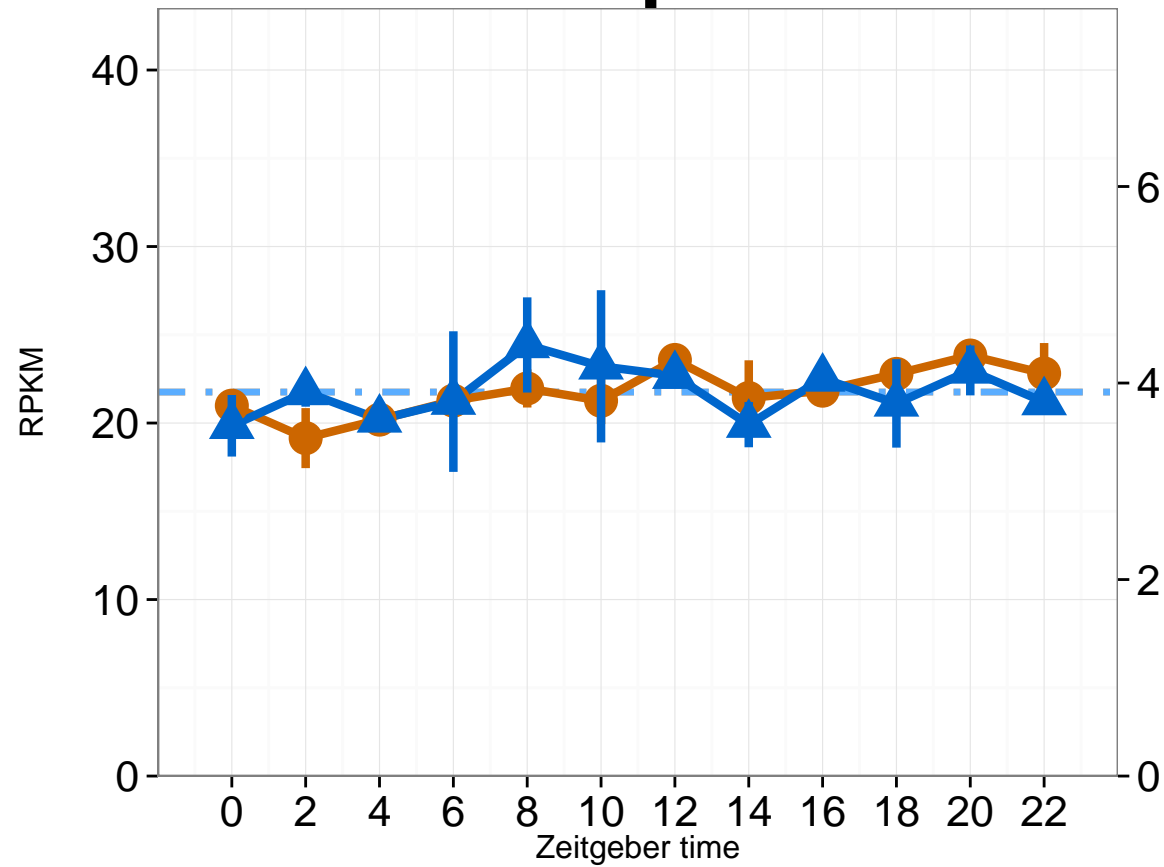

## Pkp4

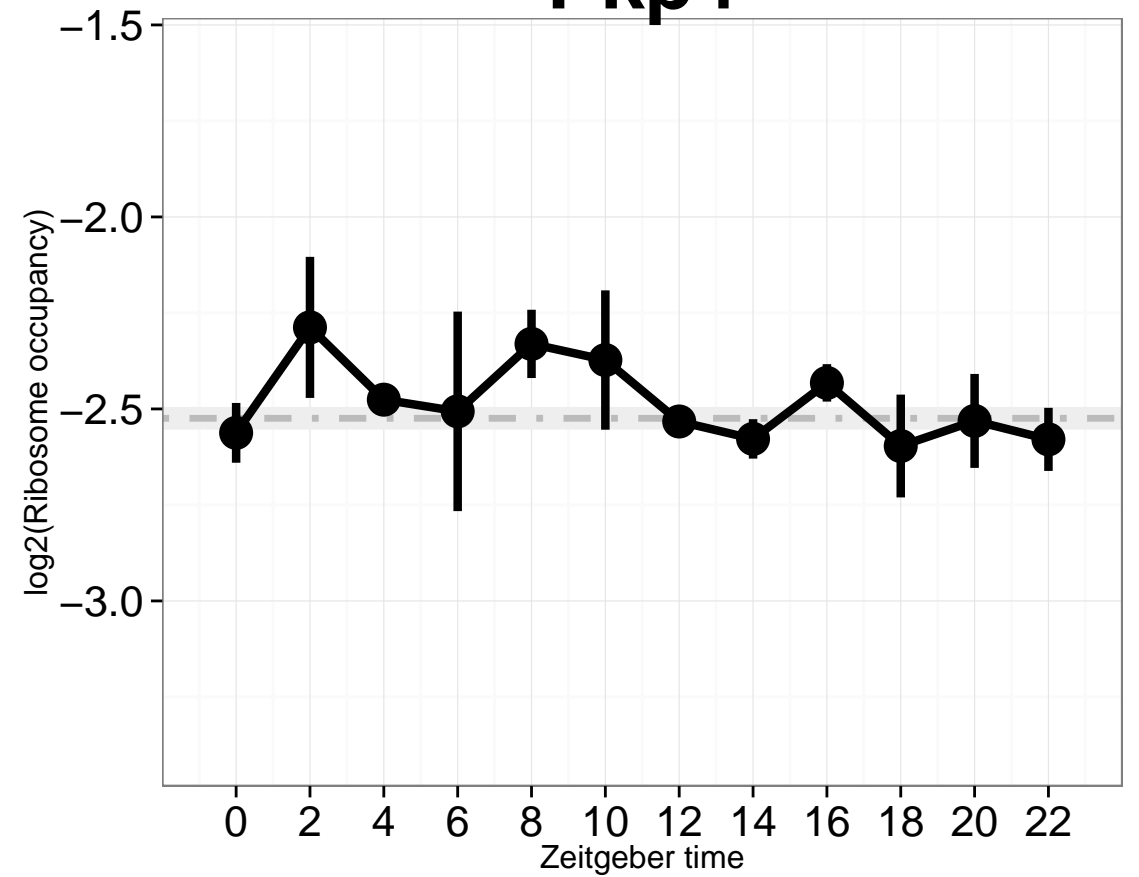

Supplement: SuppDataset_1.zip [file Pkp4_set_A.pdf › Supplemental Dataset 1/A-mRNA_nonrhyth_translation_nonrhyth/Pkp4_set_A.pdf]

# Pla1a

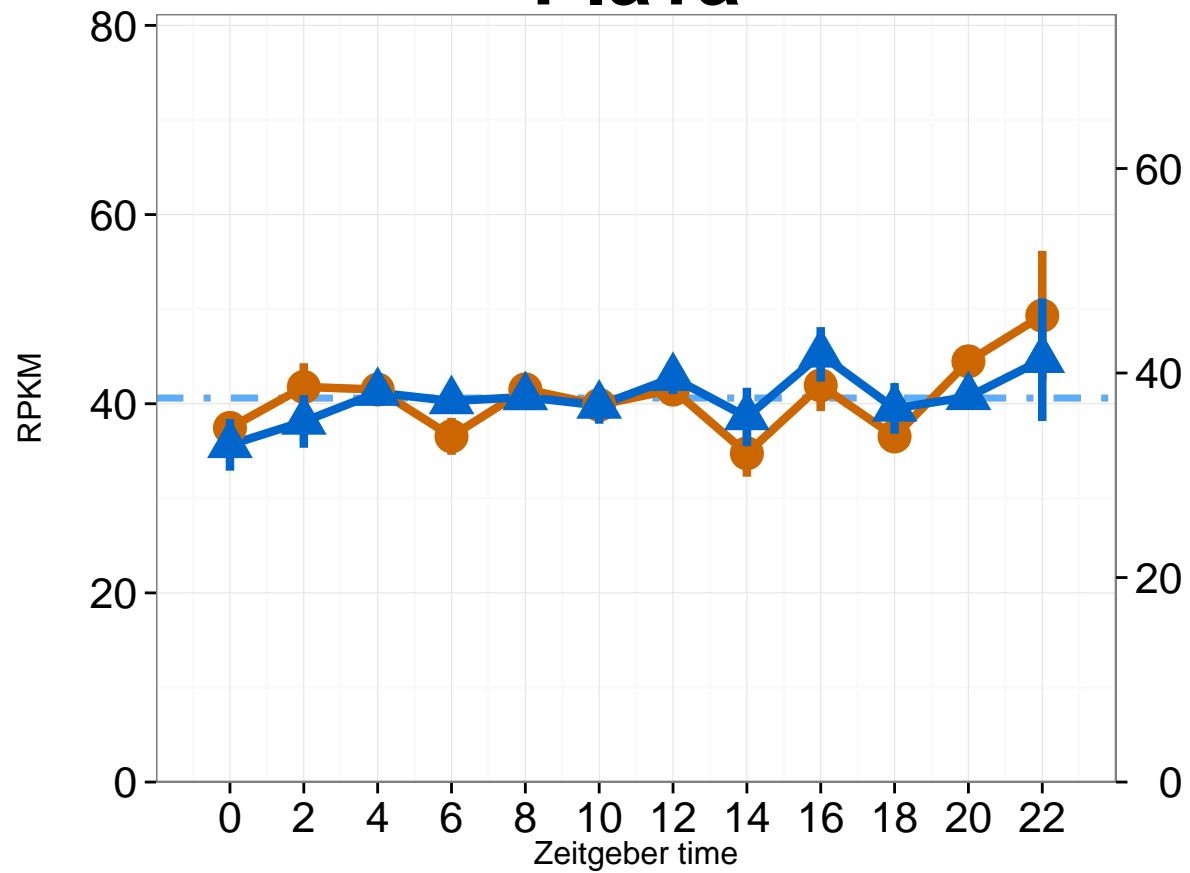

# Pla1a

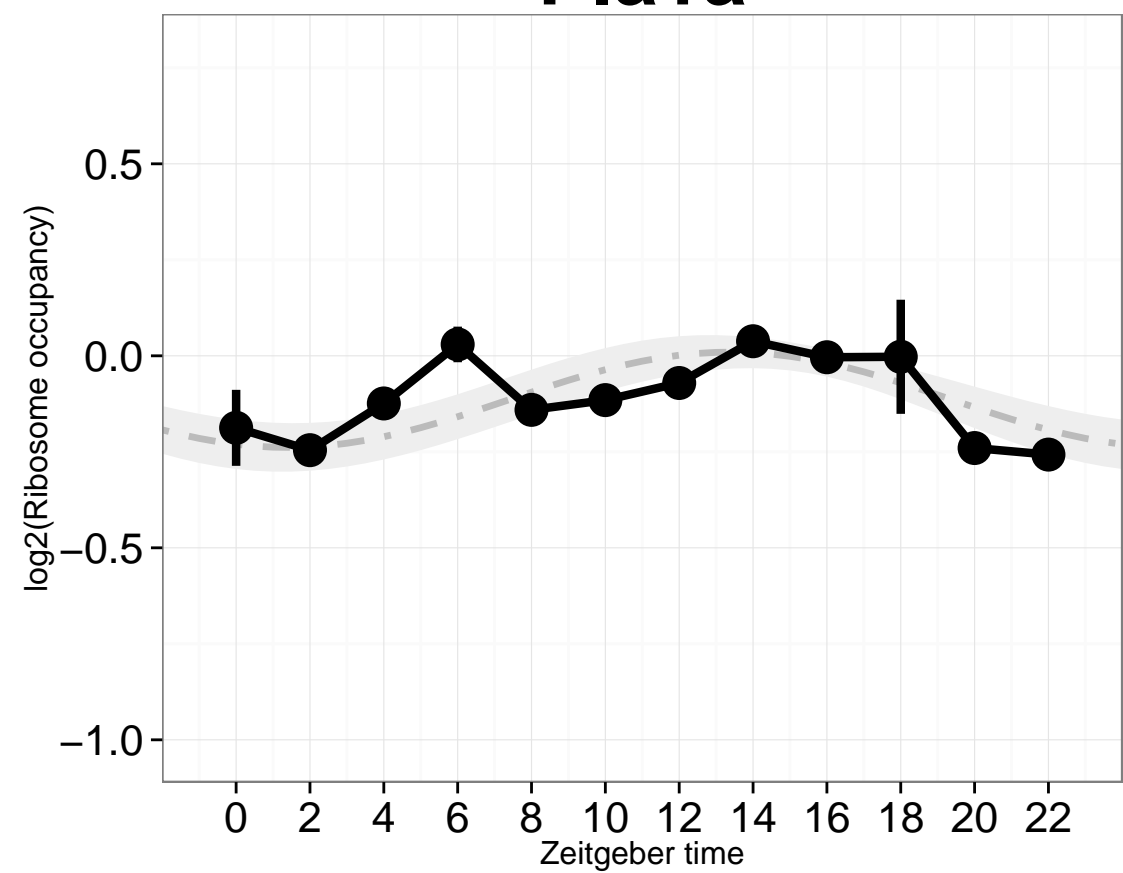

Supplement: SuppDataset_1.zip [file Pla1a_set_A.pdf › Supplemental Dataset 1/A-mRNA_nonrhyth_translation_nonrhyth/Pla1a_set_A.pdf]

# Pla2g15

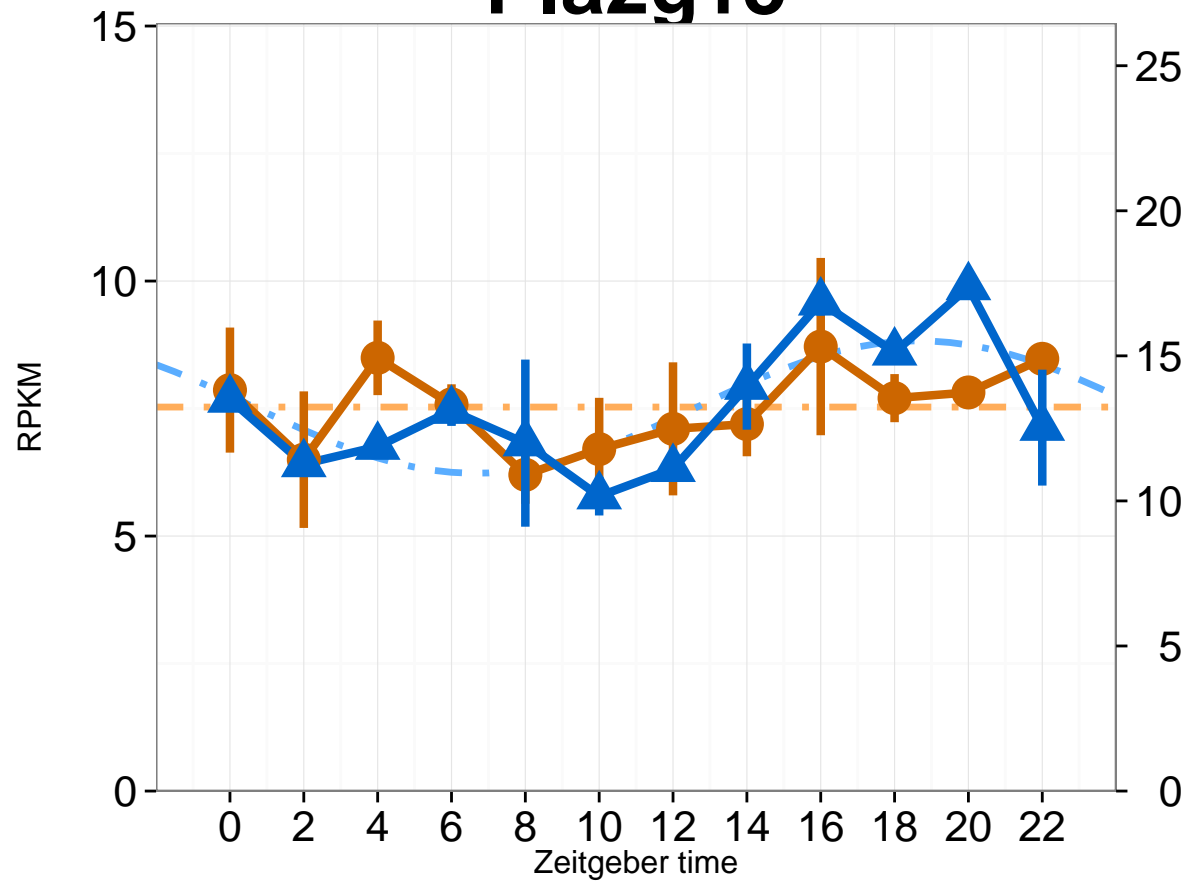

# Pla2g15

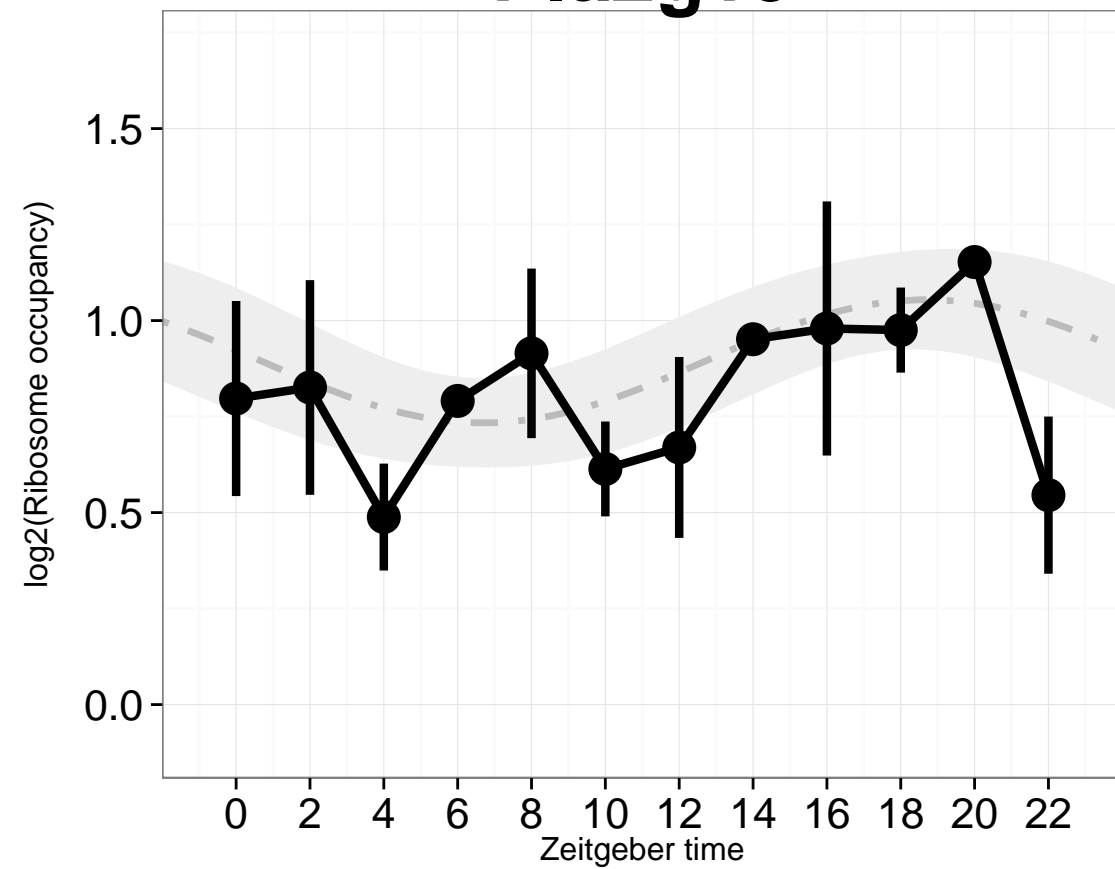

Supplement: SuppDataset_1.zip [file Pla2g15_set_A.pdf › Supplemental Dataset 1/A-mRNA_nonrhyth_translation_nonrhyth/Pla2g15_set_A.pdf]

# Pla2g16

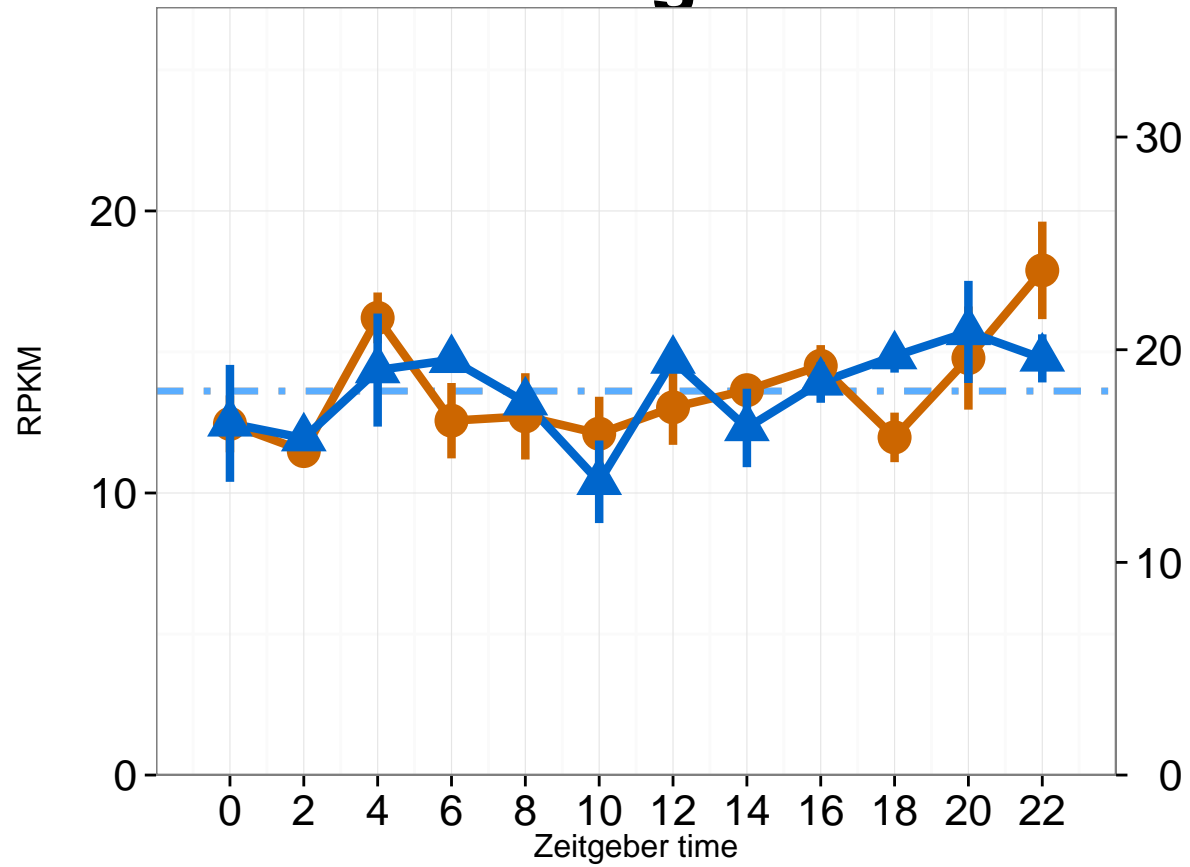

# Pla2g16

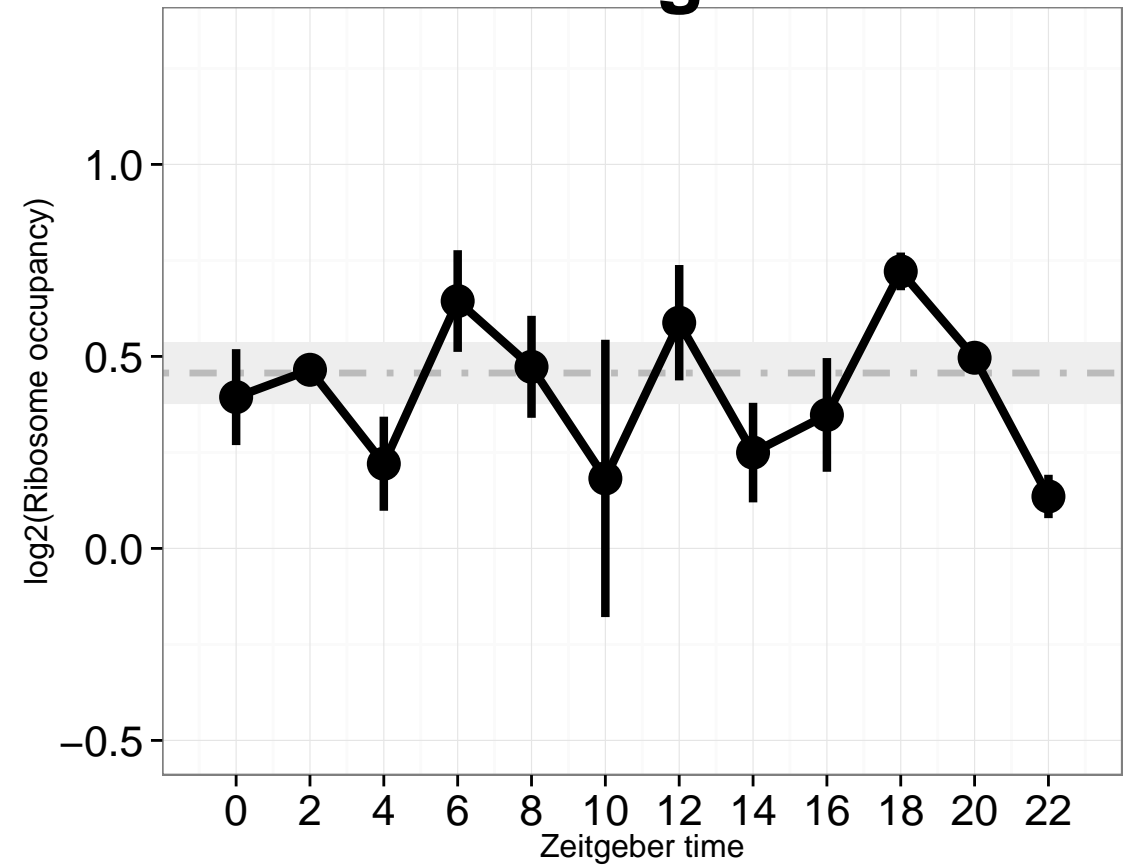

Supplement: SuppDataset_1.zip [file Pla2g16_set_A.pdf › Supplemental Dataset 1/A-mRNA_nonrhyth_translation_nonrhyth/Pla2g16_set_A.pdf]

# Pla2g4a

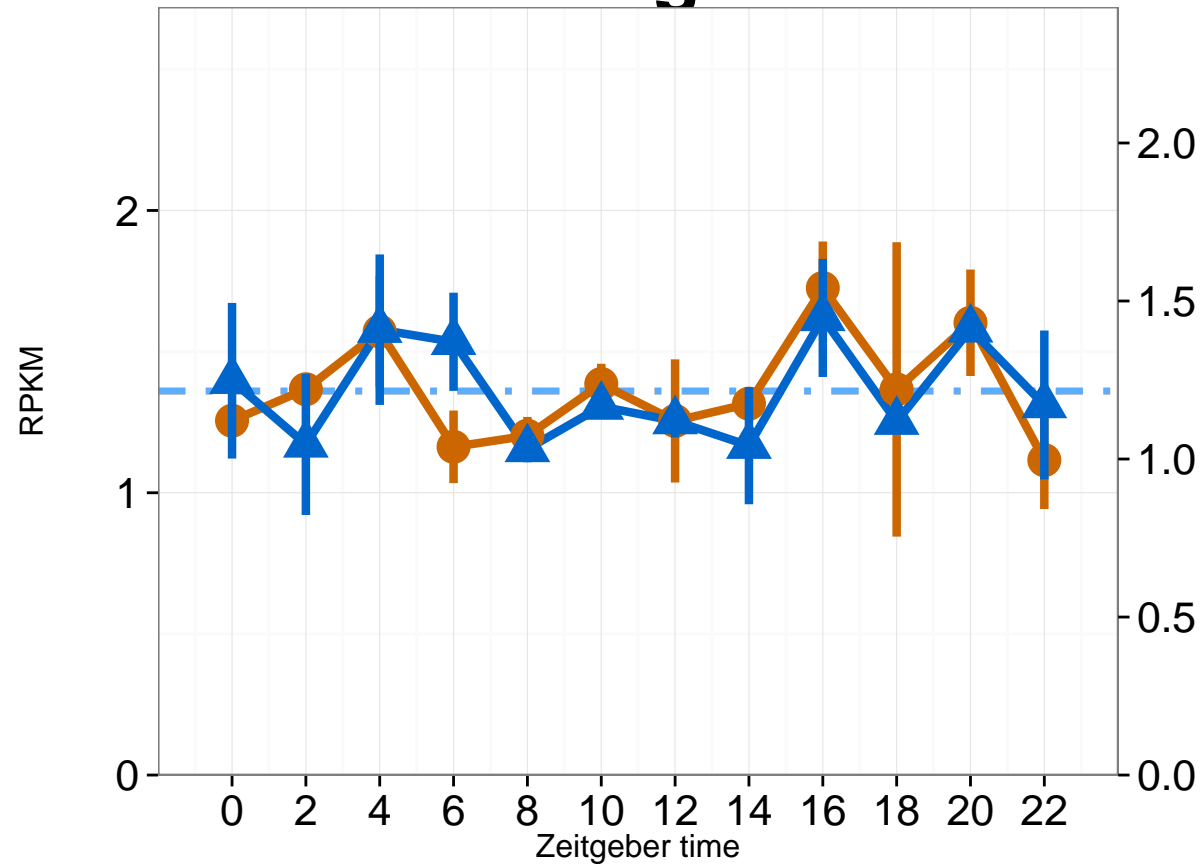

# Pla2g4a

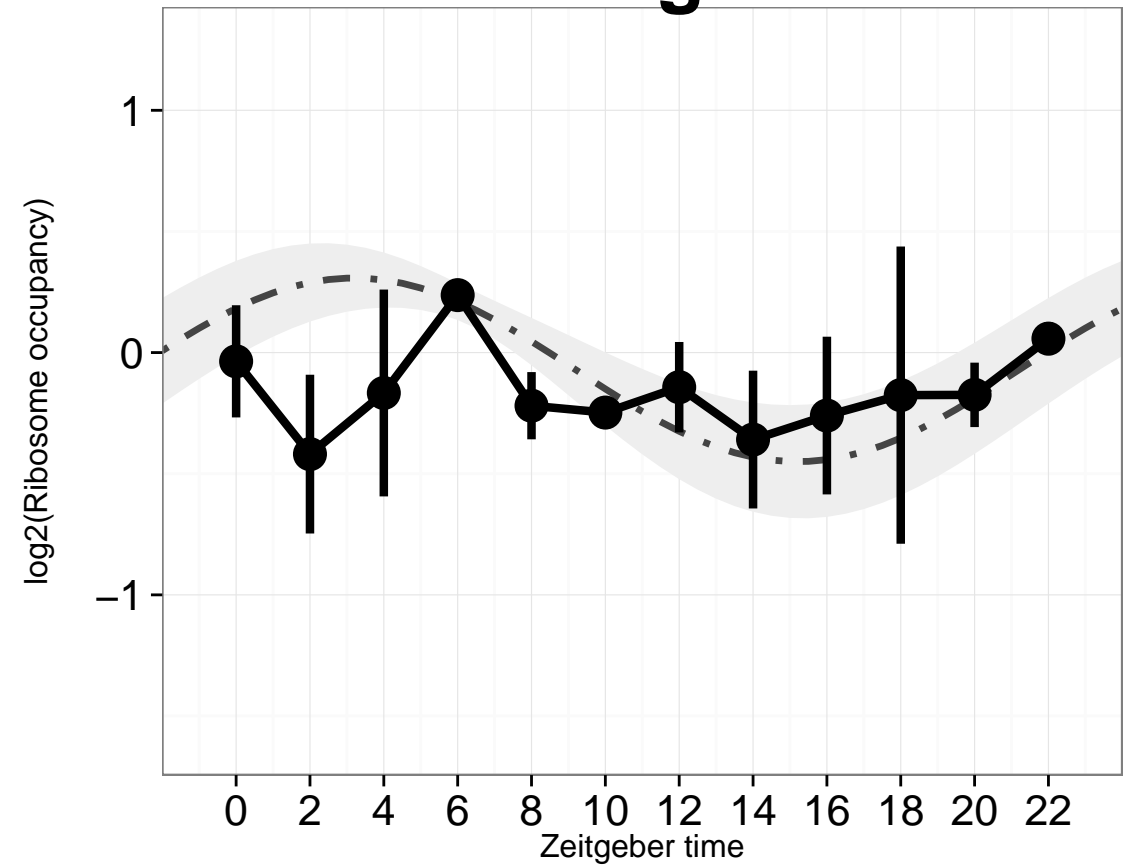

Supplement: SuppDataset_1.zip [file Pla2g4a_set_A.pdf › Supplemental Dataset 1/A-mRNA_nonrhyth_translation_nonrhyth/Pla2g4a_set_A.pdf]

# Pla2g6

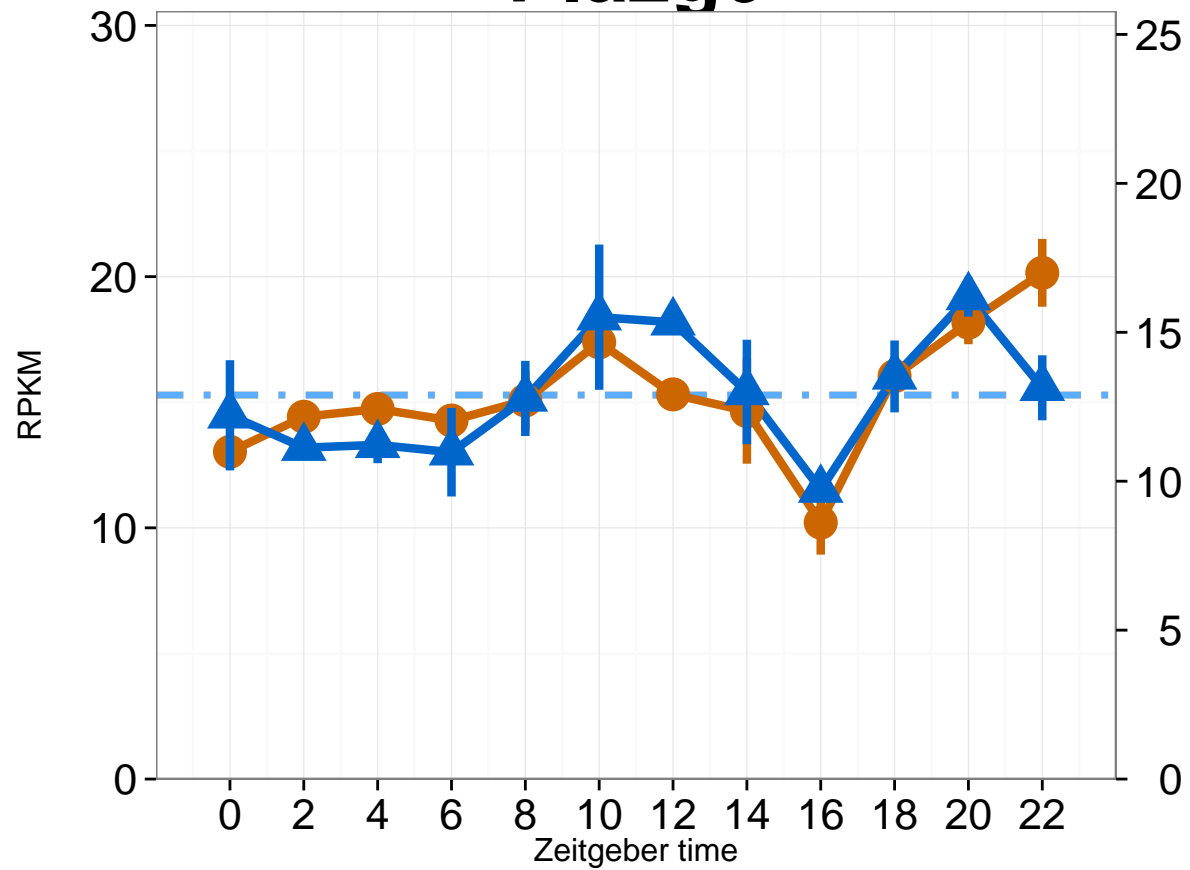

# Pla2g6

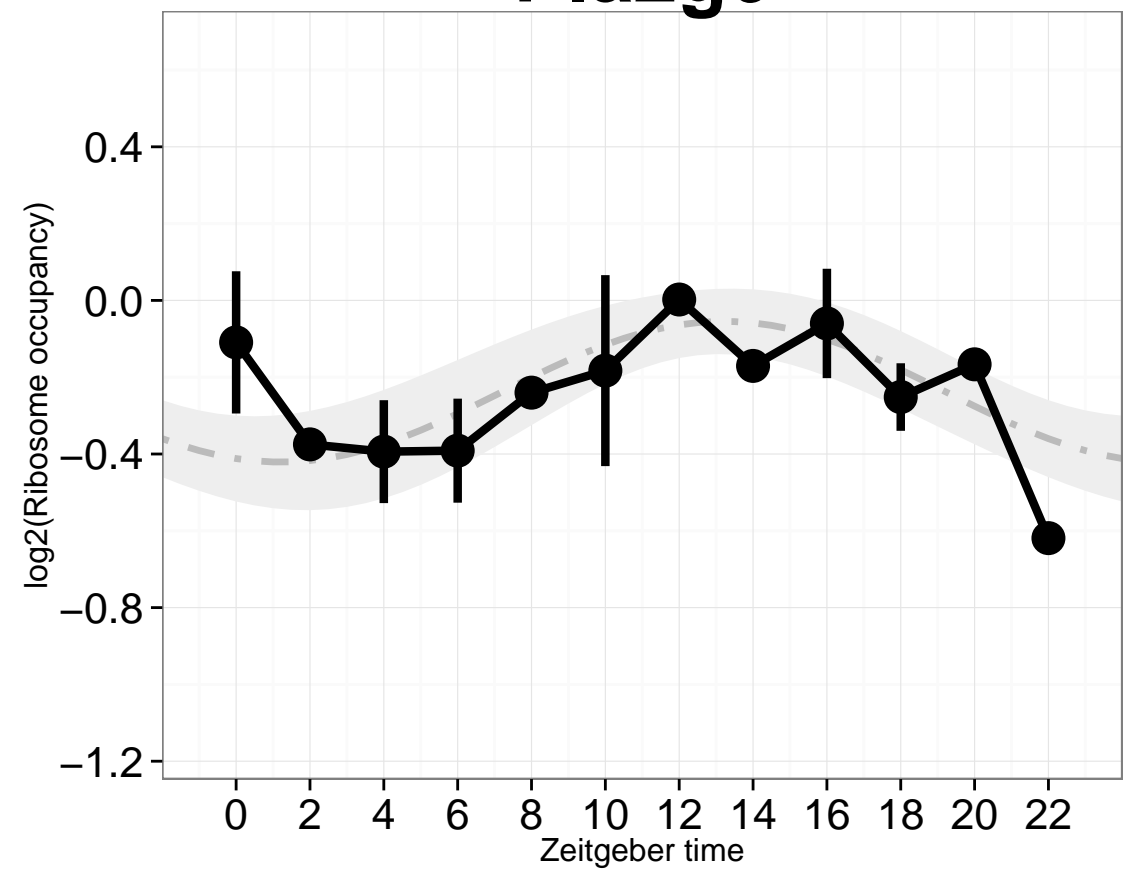

Supplement: SuppDataset_1.zip [file Pla2g6_set_A.pdf › Supplemental Dataset 1/A-mRNA_nonrhyth_translation_nonrhyth/Pla2g6_set_A.pdf]

# Pla2r1

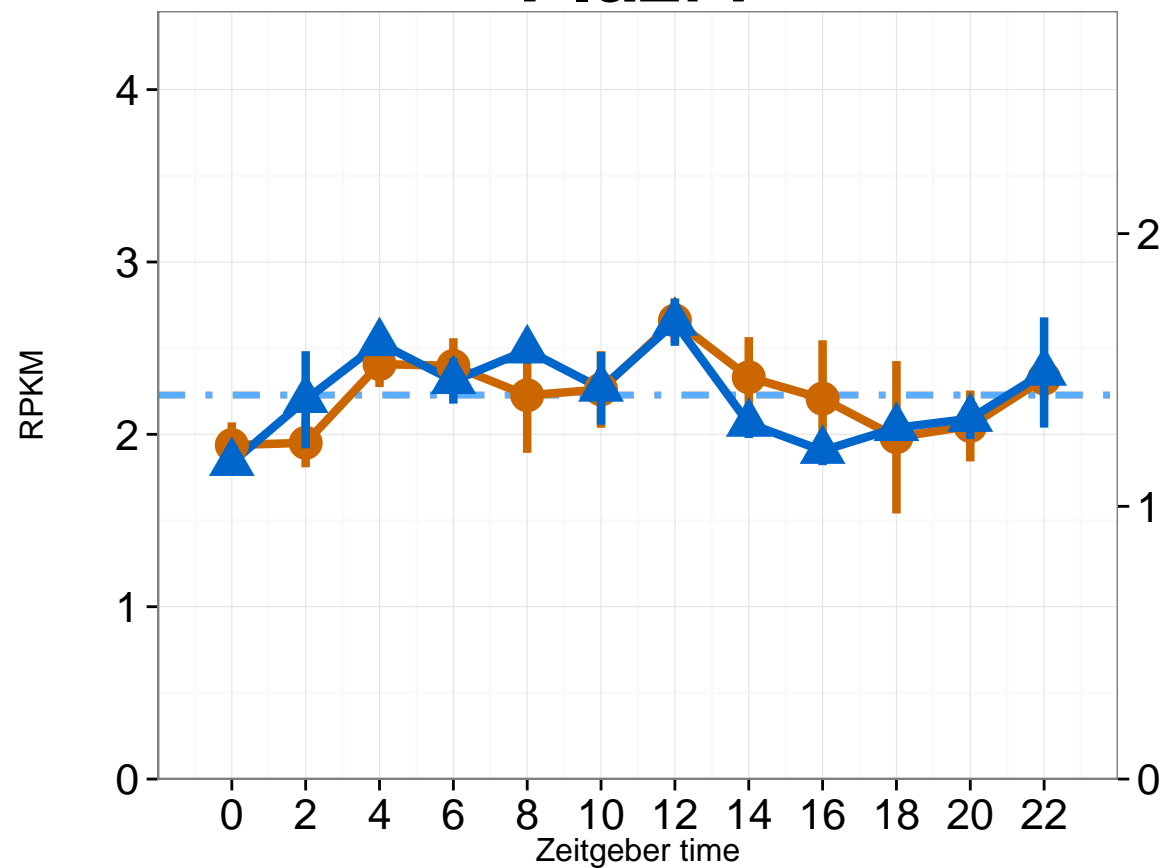

# Pla2r1

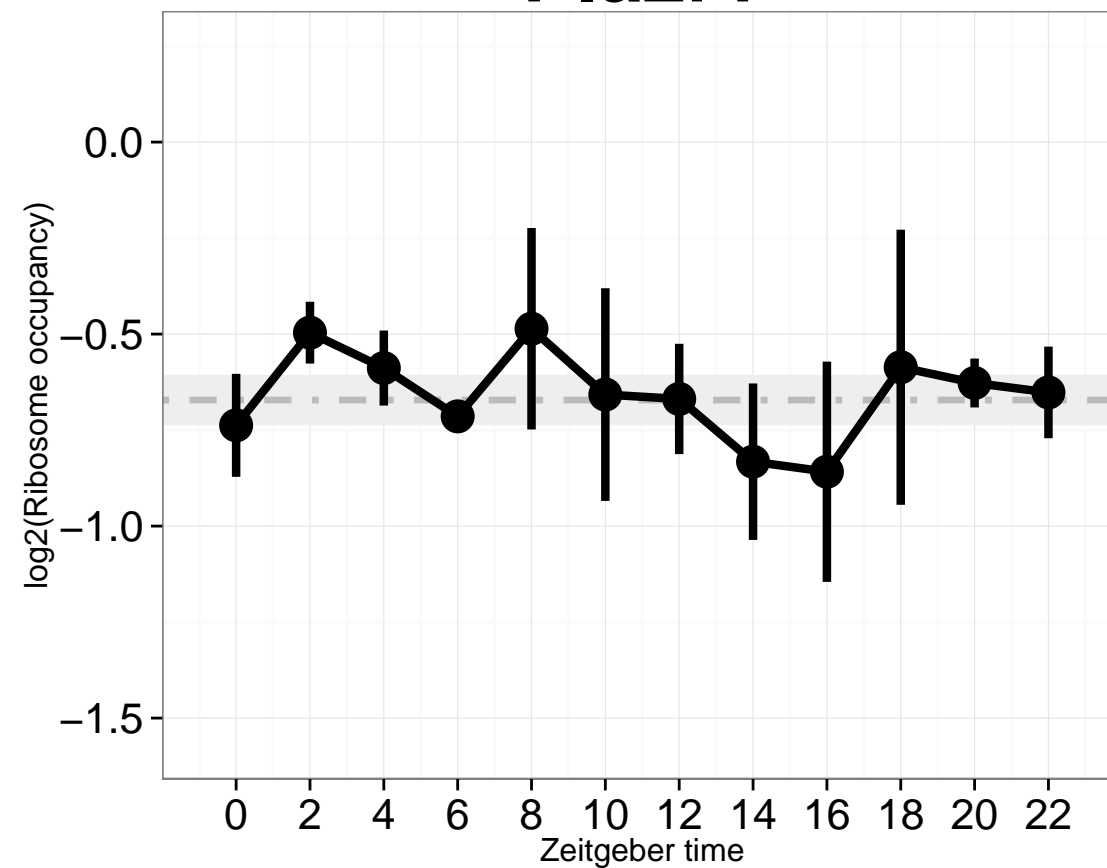

Supplement: SuppDataset_1.zip [file Pla2r1_set_A.pdf › Supplemental Dataset 1/A-mRNA_nonrhyth_translation_nonrhyth/Pla2r1_set_A.pdf]

# Plaa

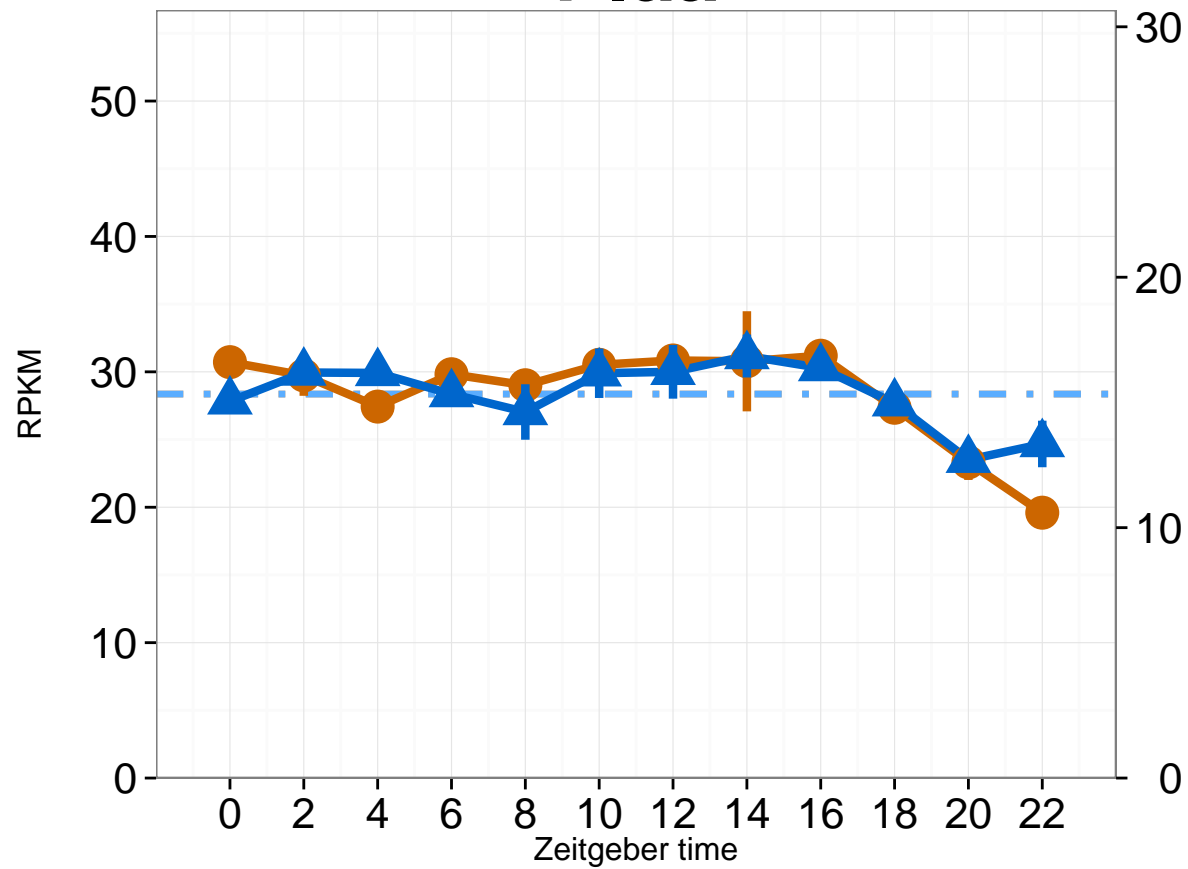

# Plaa

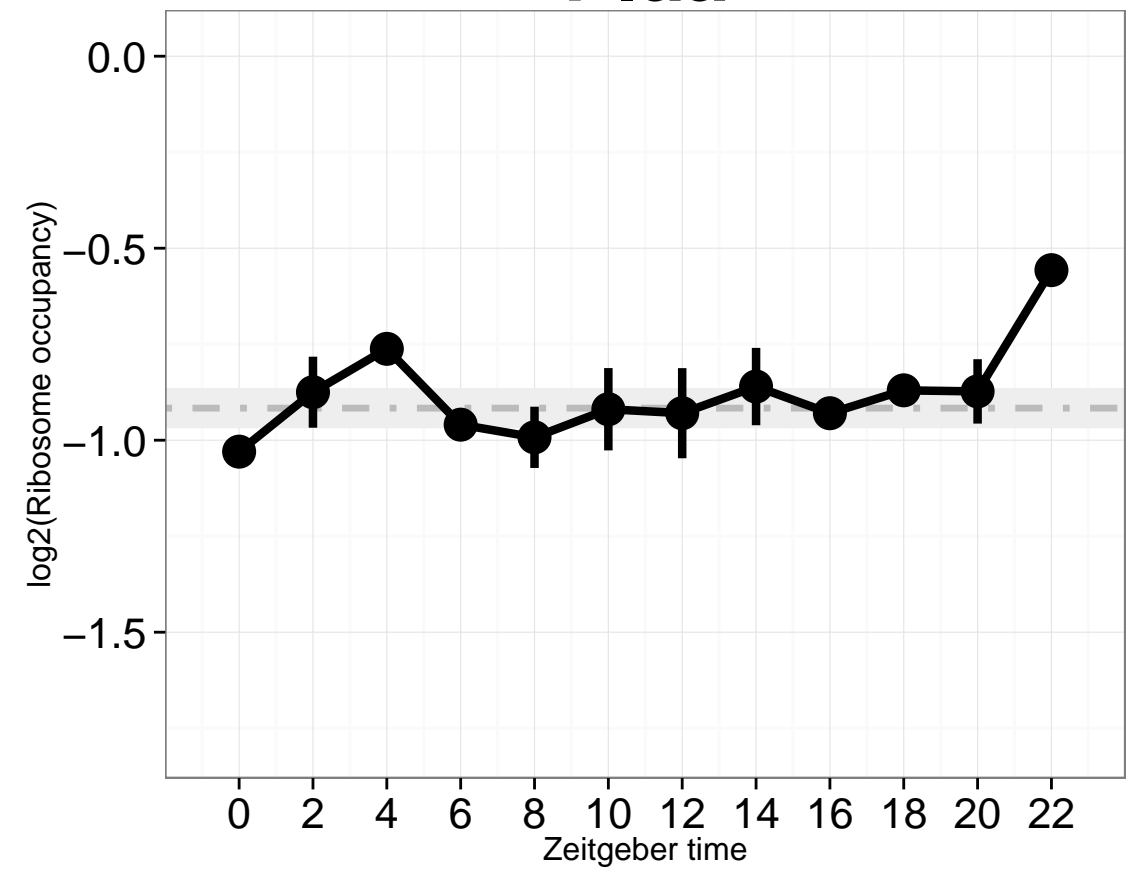

Supplement: SuppDataset_1.zip [file Plaa_set_A.pdf › Supplemental Dataset 1/A-mRNA_nonrhyth_translation_nonrhyth/Plaa_set_A.pdf]

## Plac8

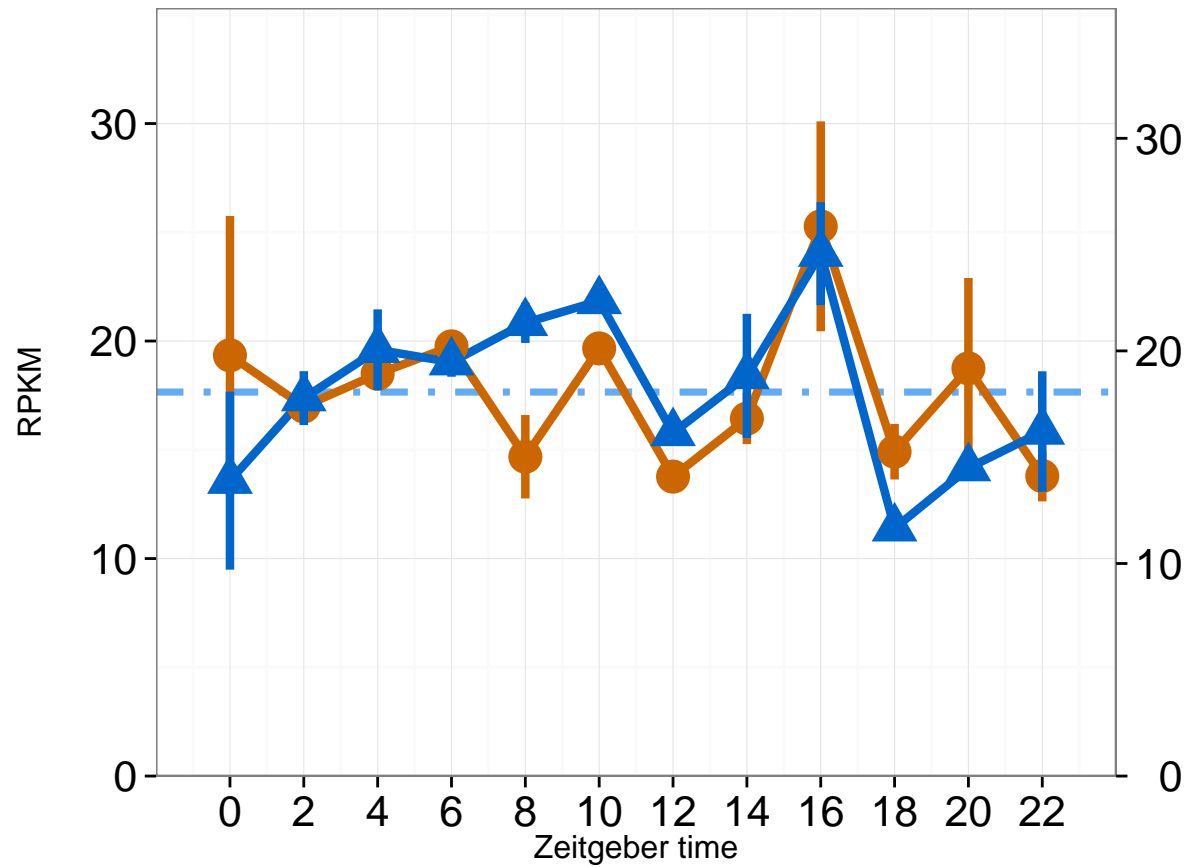

## Plac8

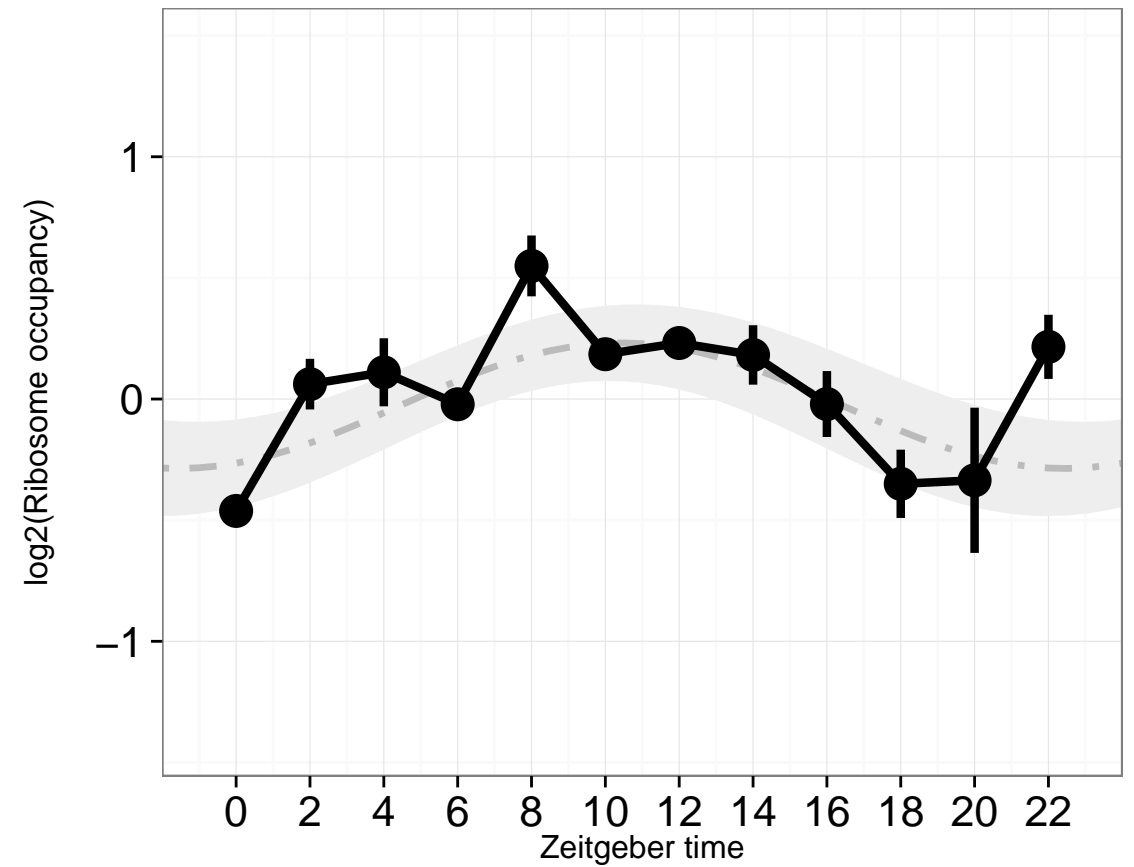

Supplement: SuppDataset_1.zip [file Plac8_set_A.pdf › Supplemental Dataset 1/A-mRNA_nonrhyth_translation_nonrhyth/Plac8_set_A.pdf]

## Plagl2

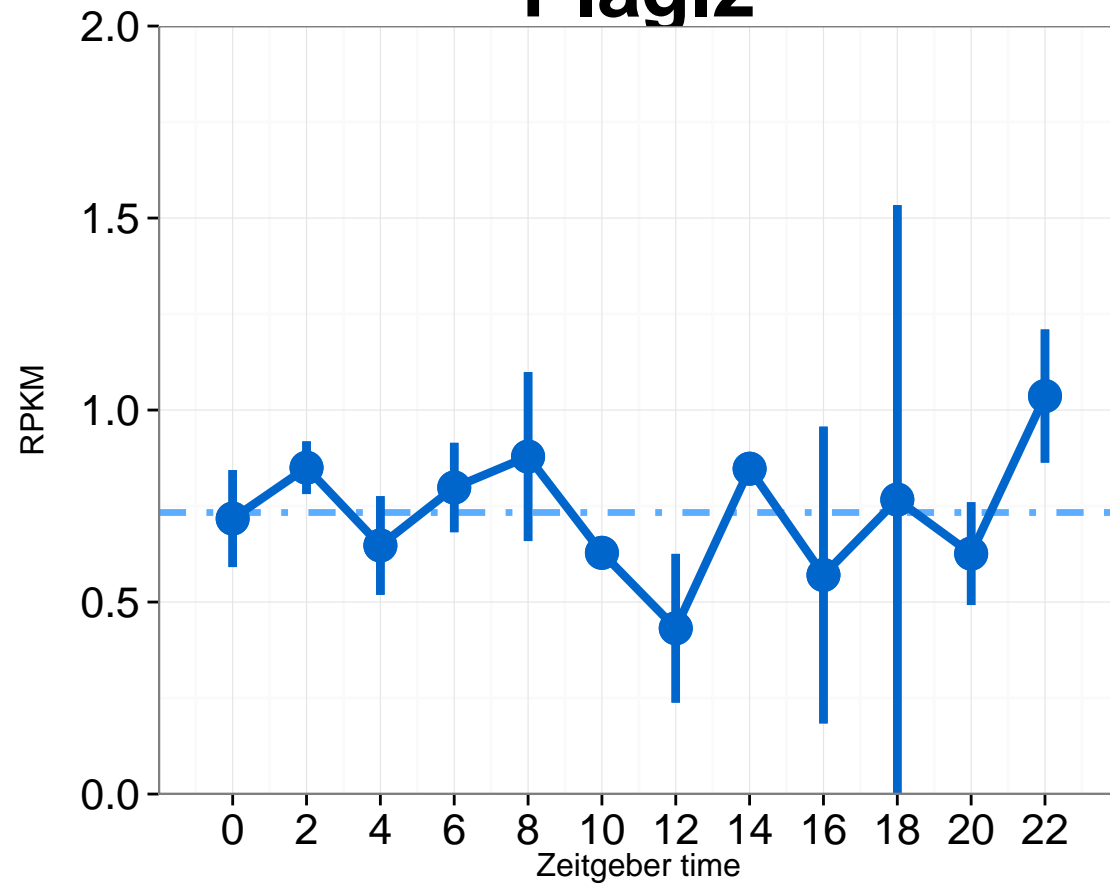

## Plagl2 log2(Ribosome occupancy

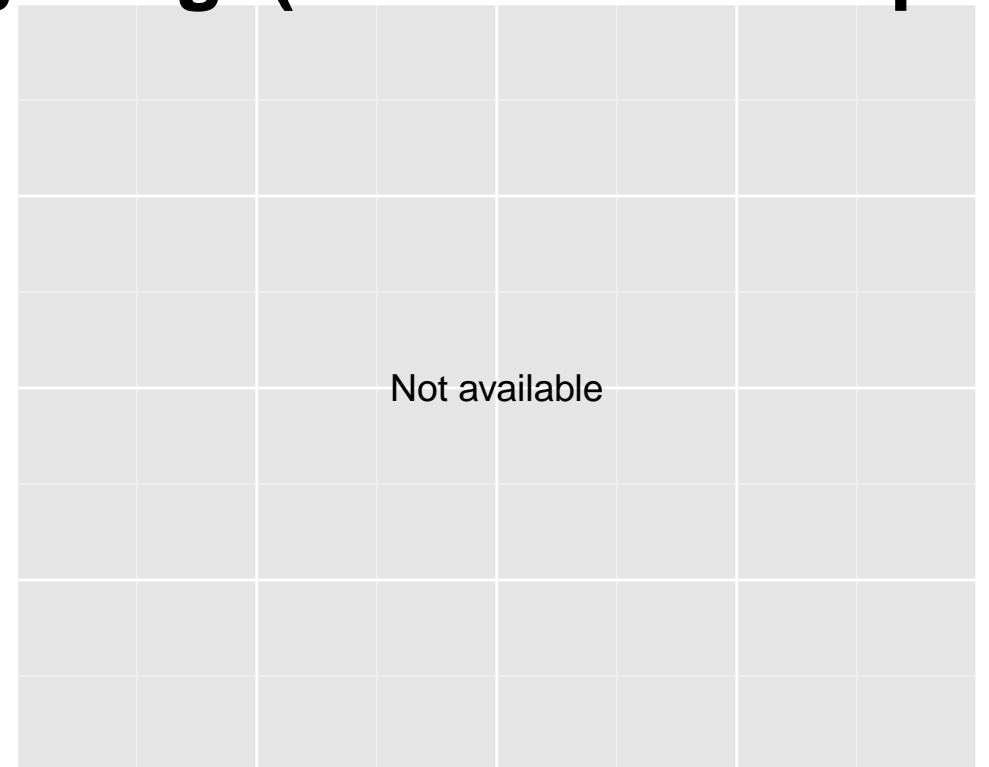

Supplement: SuppDataset_1.zip [file Plagl2_set_A.pdf › Supplemental Dataset 1/A-mRNA_nonrhyth_translation_nonrhyth/Plagl2_set_A.pdf]

## Plat

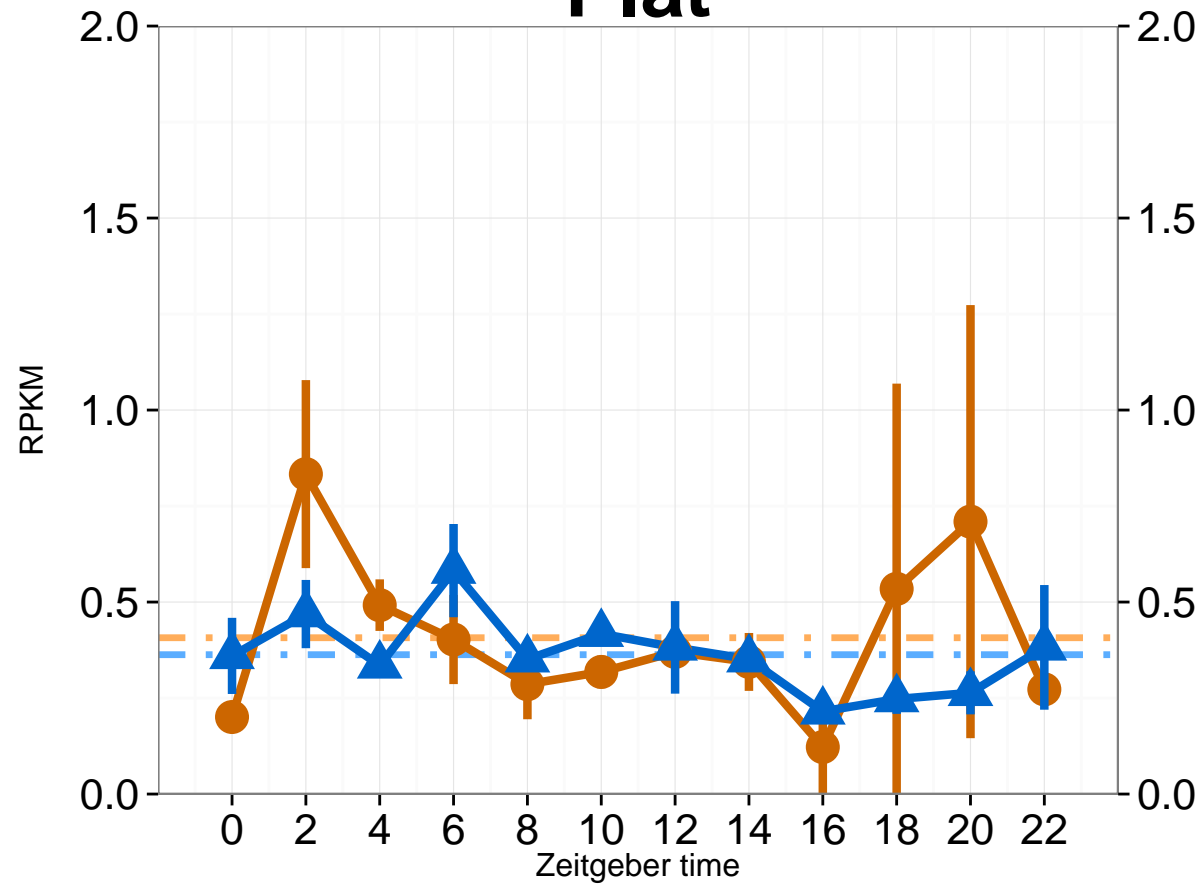

## Plat

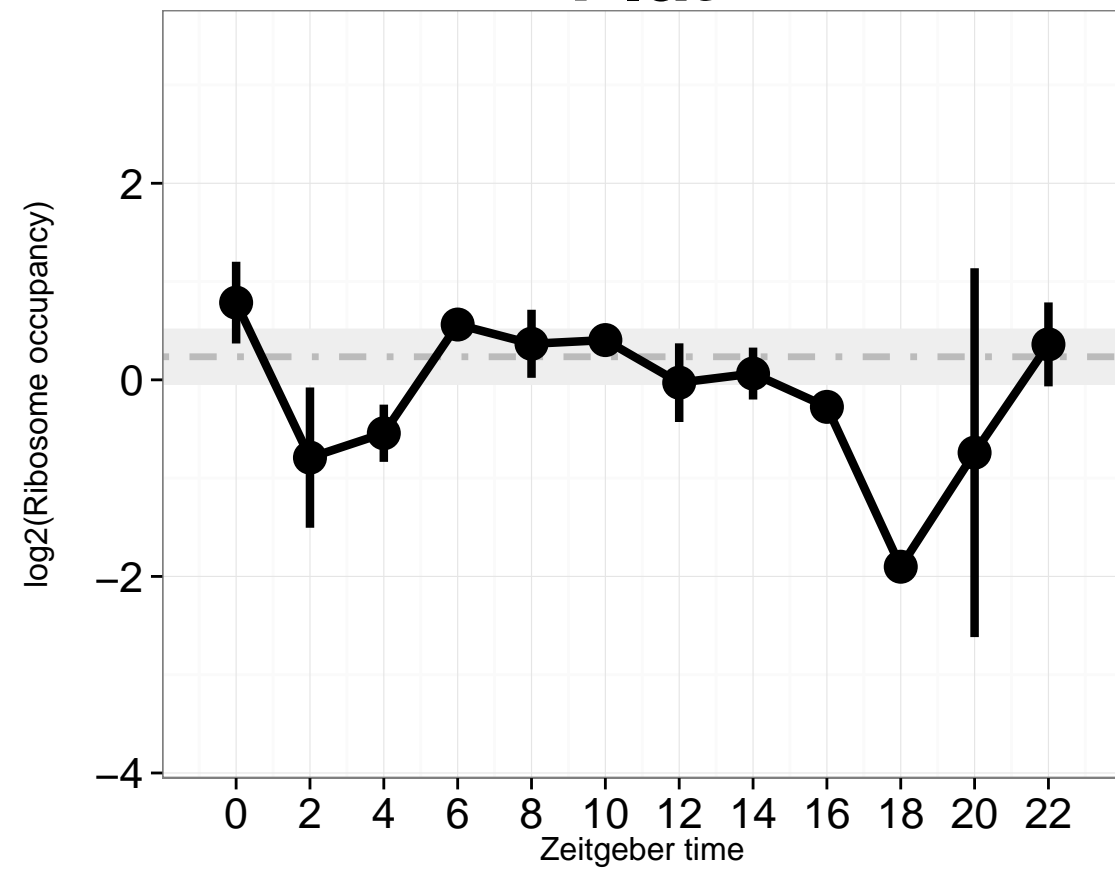

Supplement: SuppDataset_1.zip [file Plat_set_A.pdf › Supplemental Dataset 1/A-mRNA_nonrhyth_translation_nonrhyth/Plat_set_A.pdf]

## Plbd1

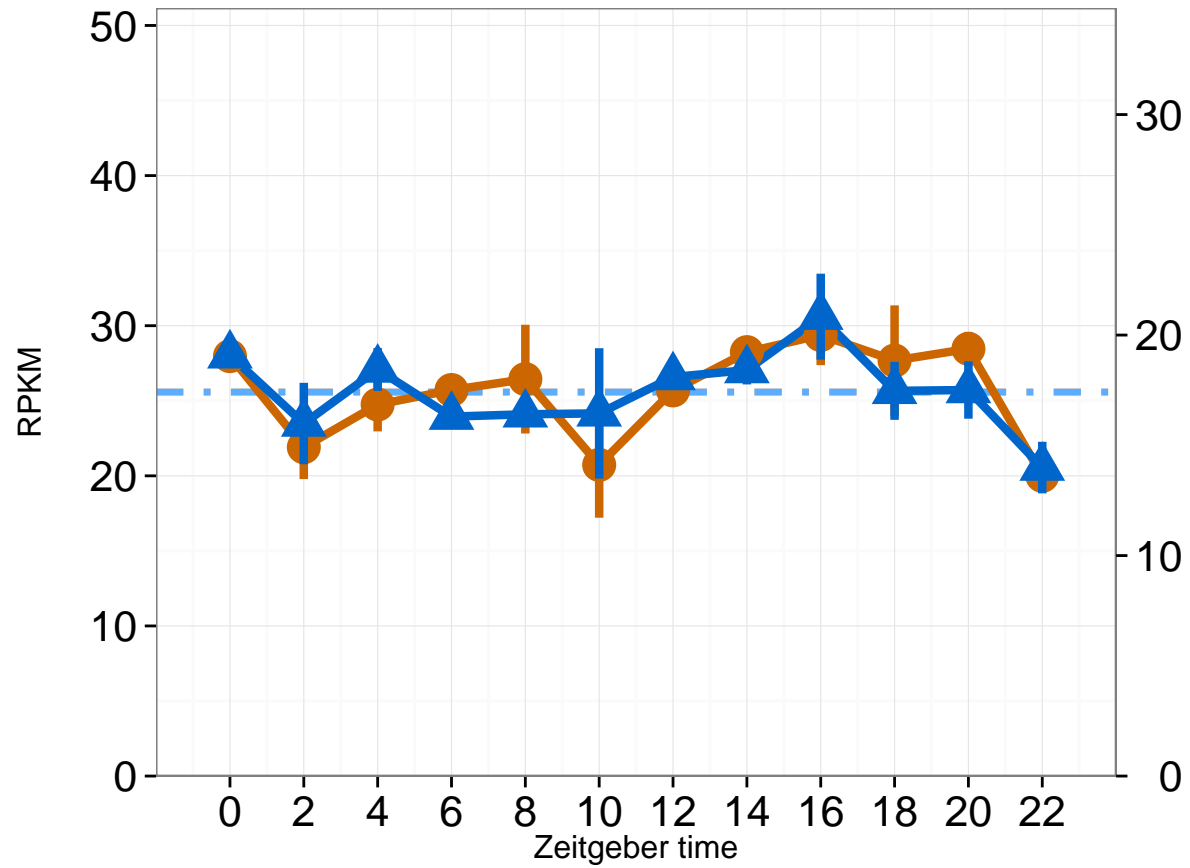

## Plbd1

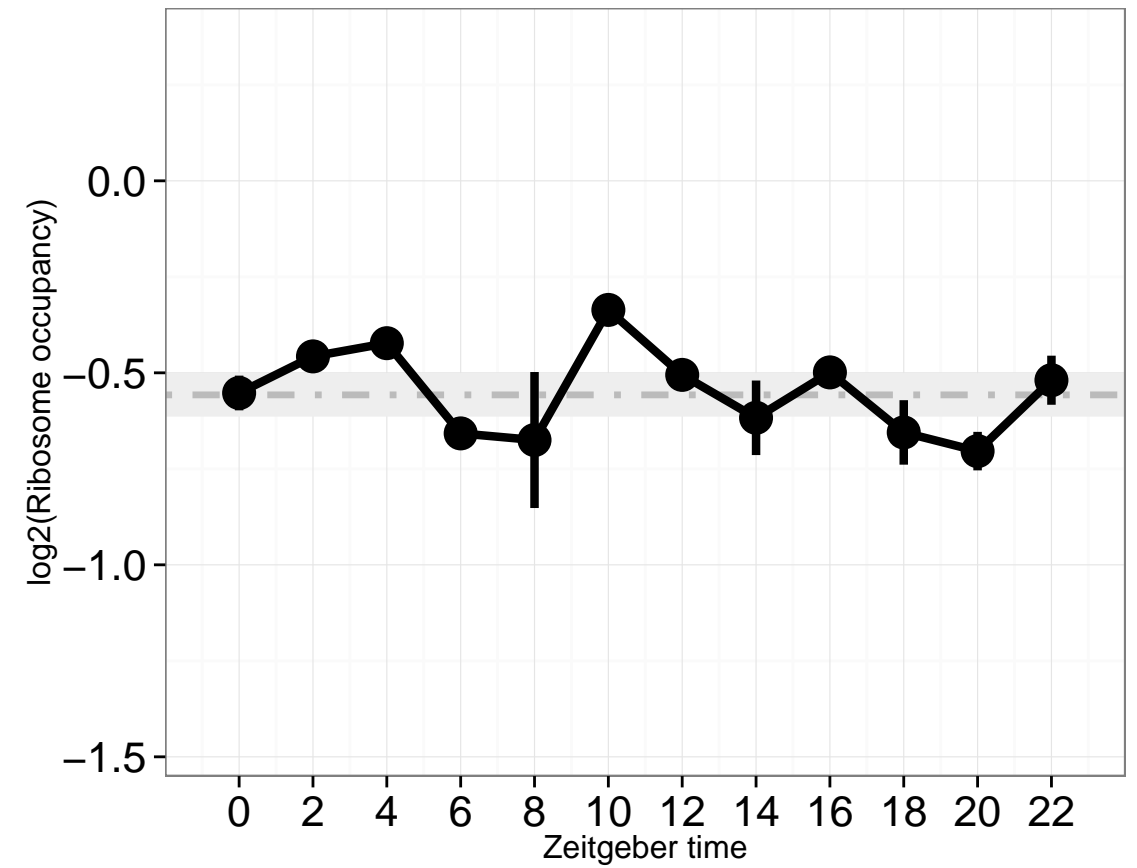

Supplement: SuppDataset_1.zip [file Plbd1_set_A.pdf › Supplemental Dataset 1/A-mRNA_nonrhyth_translation_nonrhyth/Plbd1_set_A.pdf]

## Plbd2

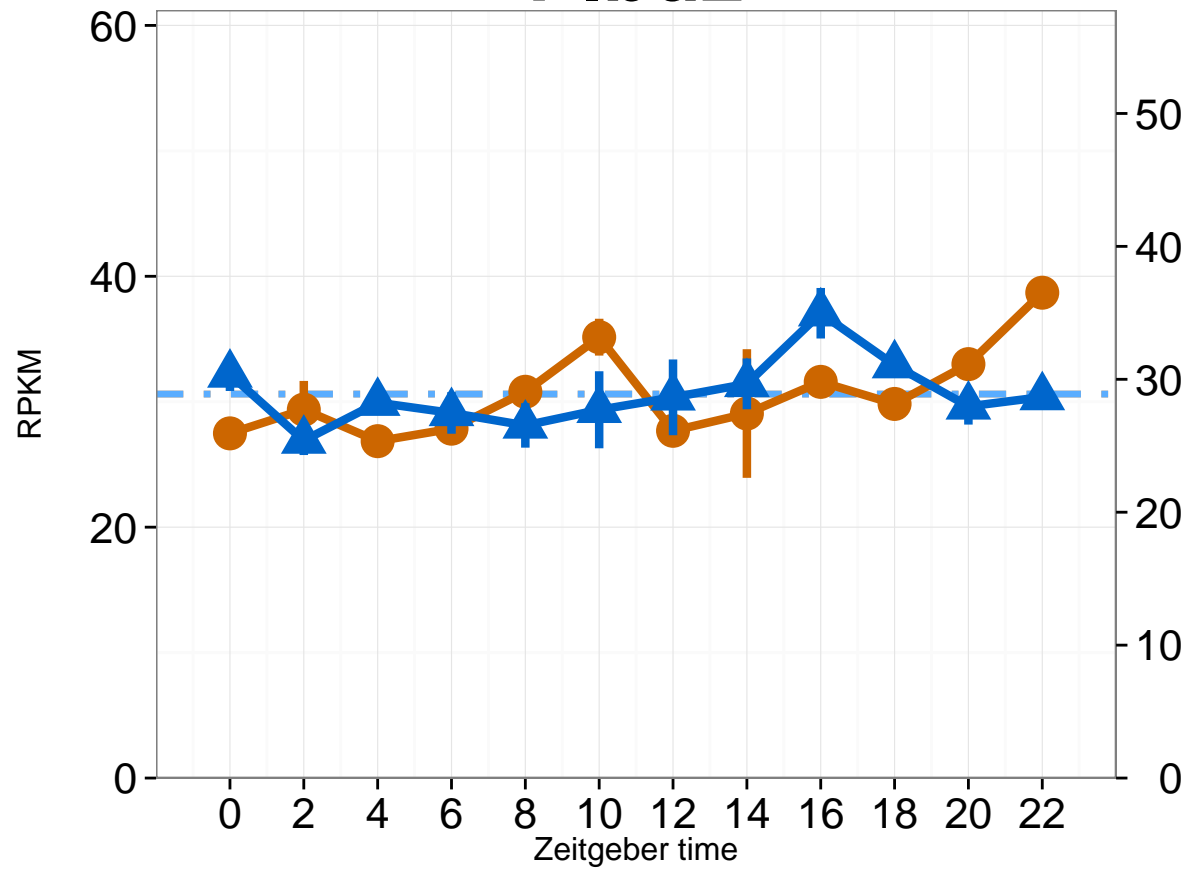

## Plbd2

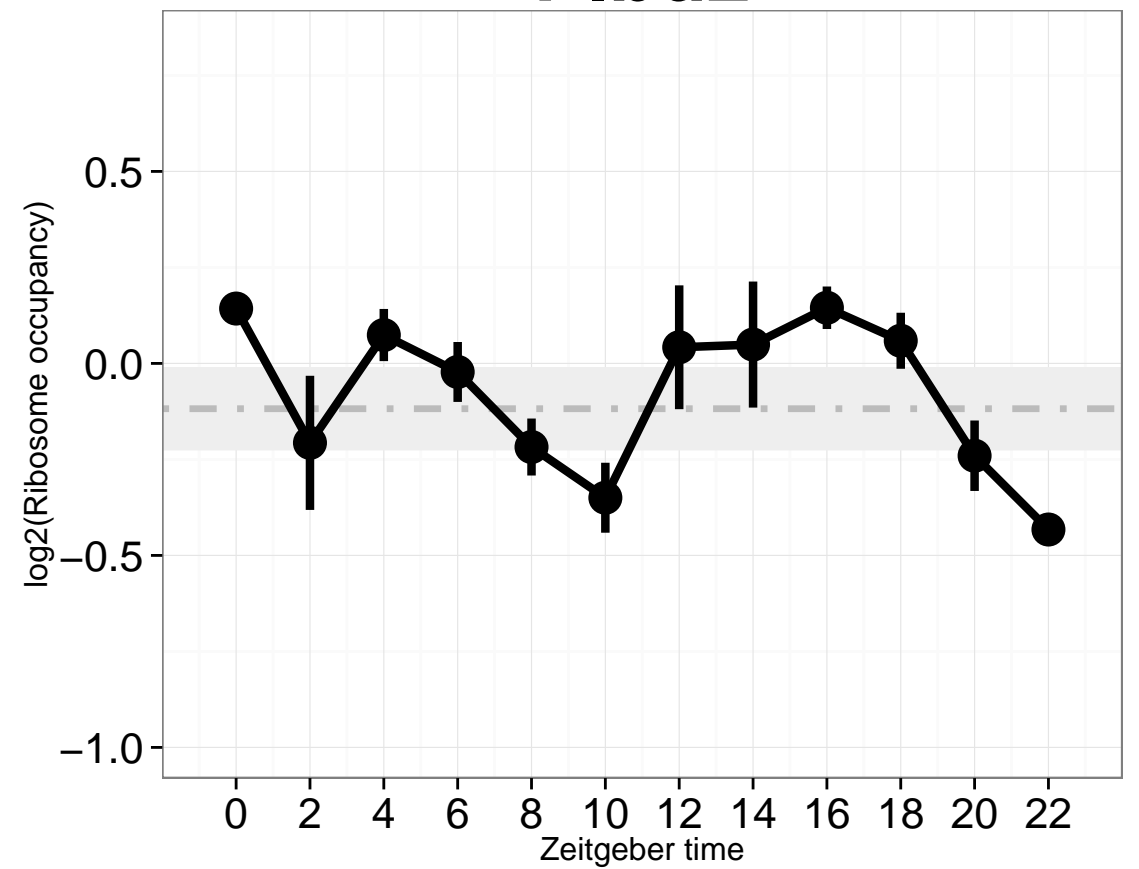

Supplement: SuppDataset_1.zip [file Plbd2_set_A.pdf › Supplemental Dataset 1/A-mRNA_nonrhyth_translation_nonrhyth/Plbd2_set_A.pdf]

# Plcb1

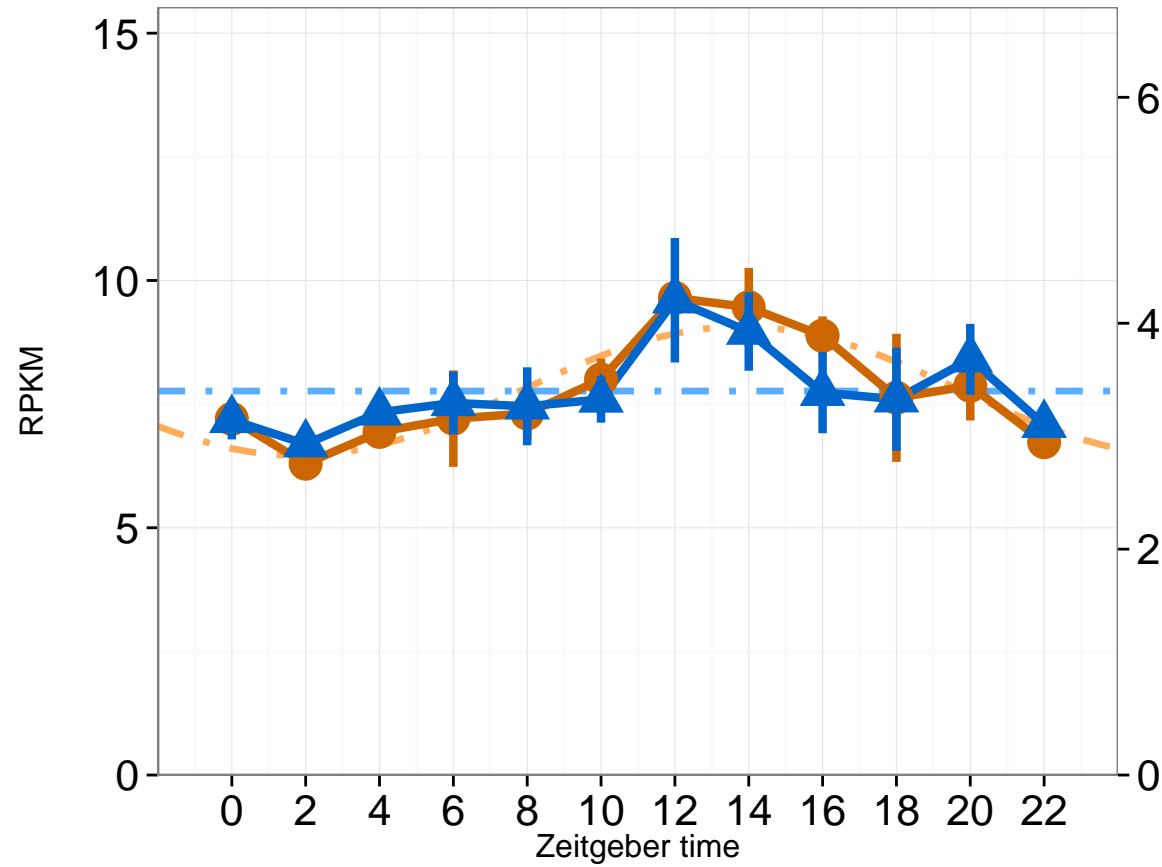

# Plcb1

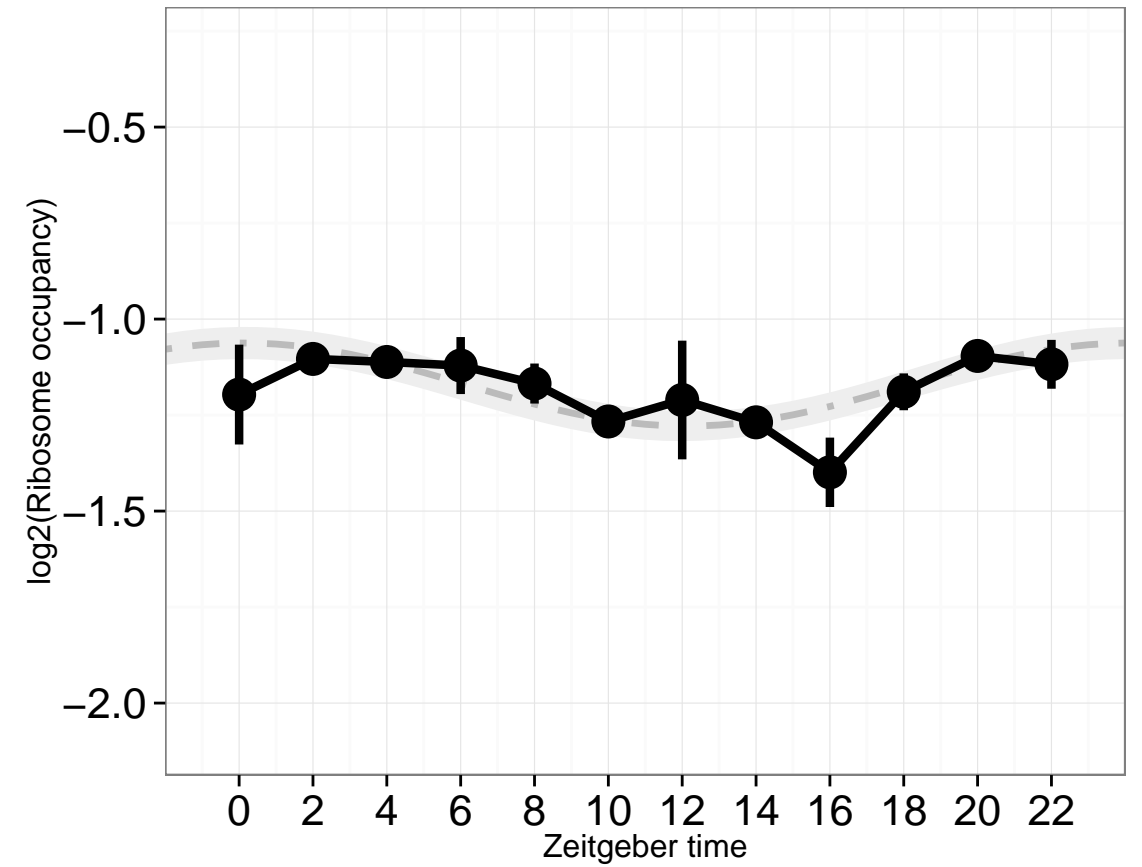

Supplement: SuppDataset_1.zip [file Plcb1_set_A.pdf › Supplemental Dataset 1/A-mRNA_nonrhyth_translation_nonrhyth/Plcb1_set_A.pdf]

## Plcb3

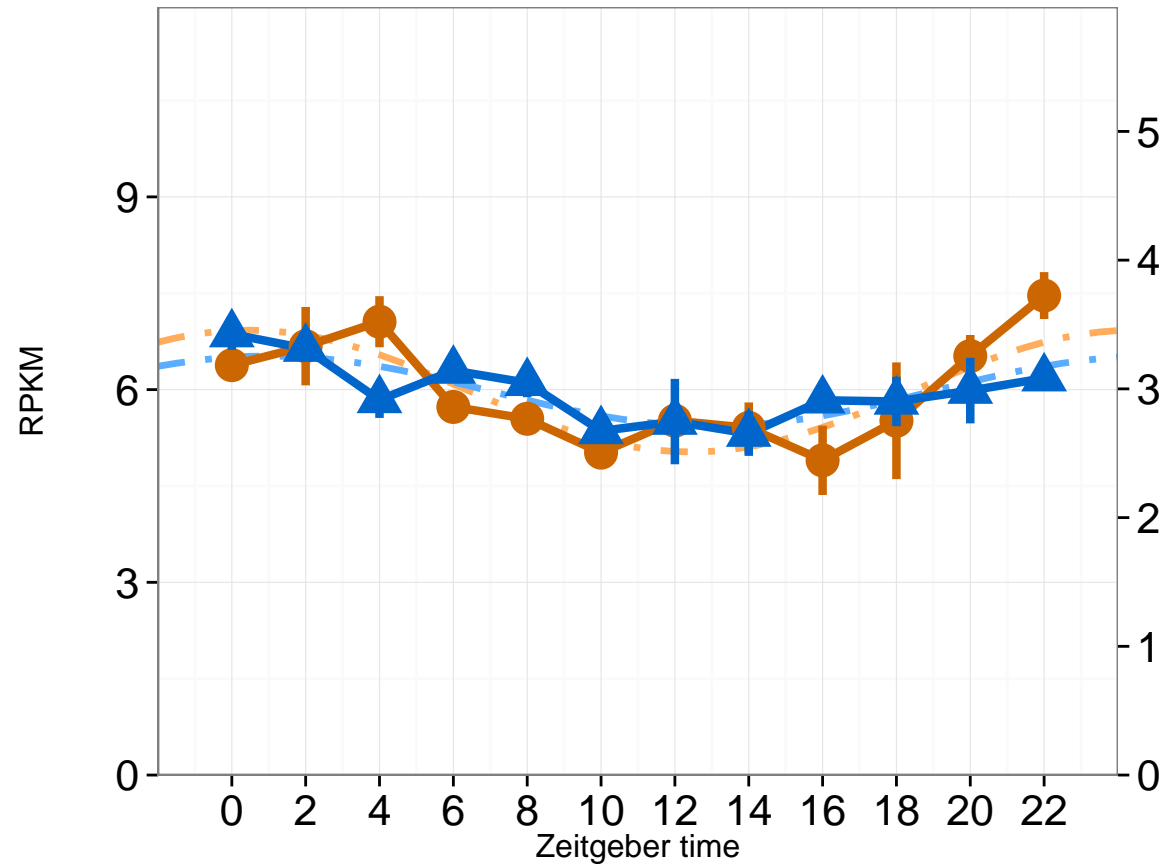

## Plcb3

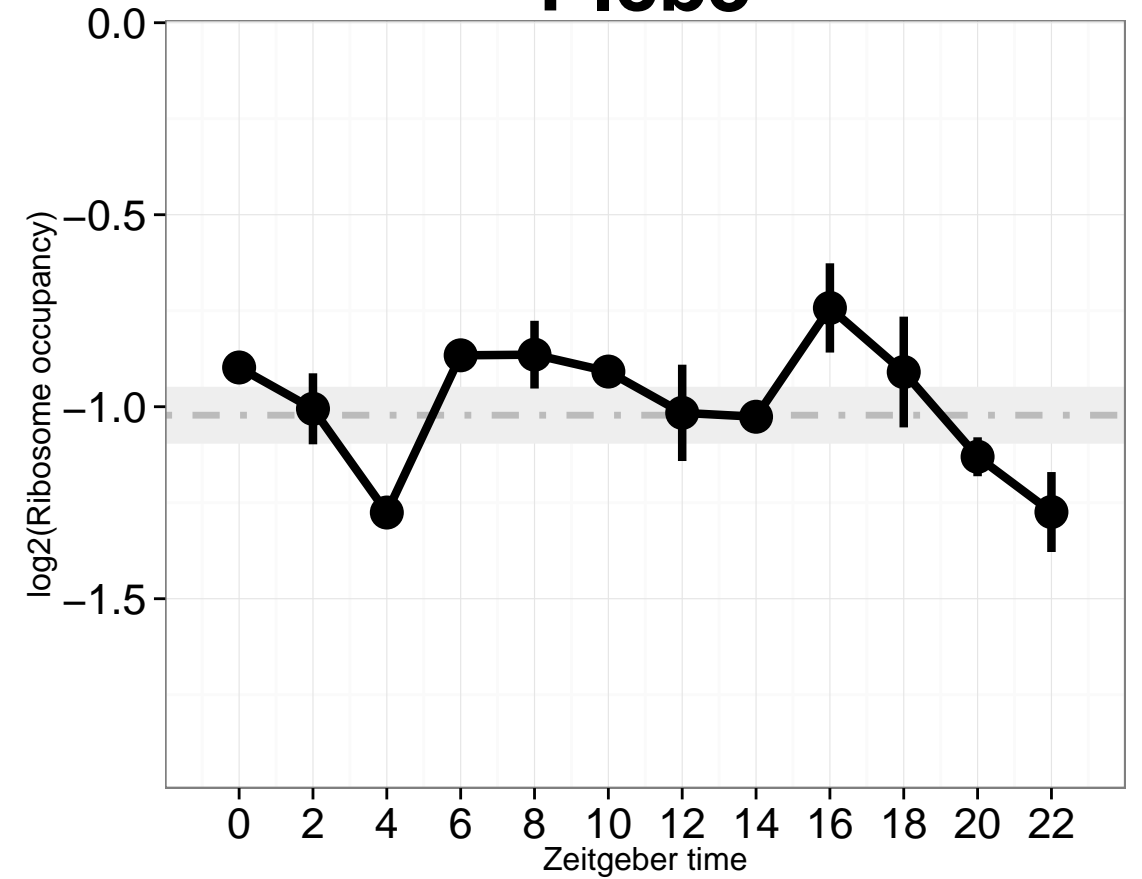

Supplement: SuppDataset_1.zip [file Plcb3_set_A.pdf › Supplemental Dataset 1/A-mRNA_nonrhyth_translation_nonrhyth/Plcb3_set_A.pdf]
