# Supplementary figures and images for: Ribosome profiling reveals the rhythmic liver translatome and circadian clock regulation by upstream open reading frames (part 55 of 113)
Source: HighWire-hosted journal article supplement (doi:10.1101/gr.195404.115), 2015-10-20

## Plcb4

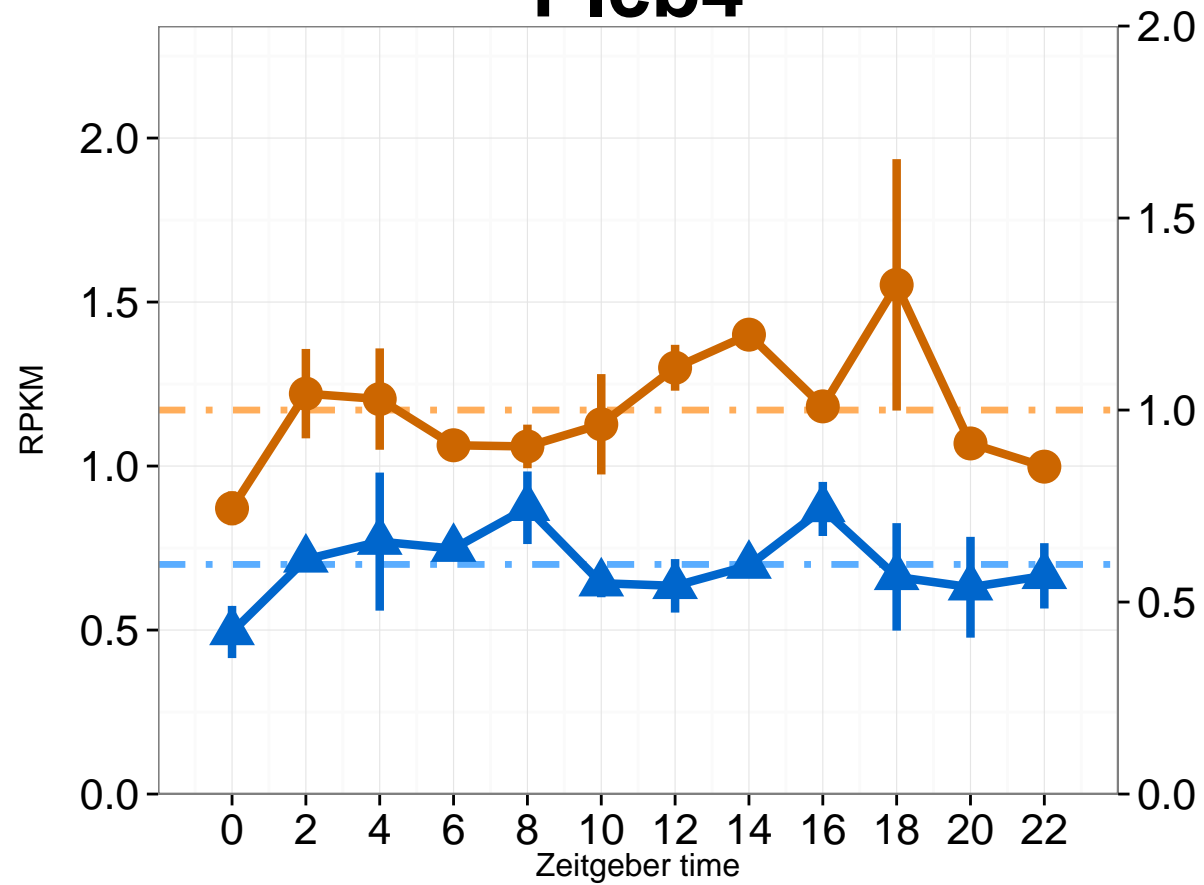

## Plcb4

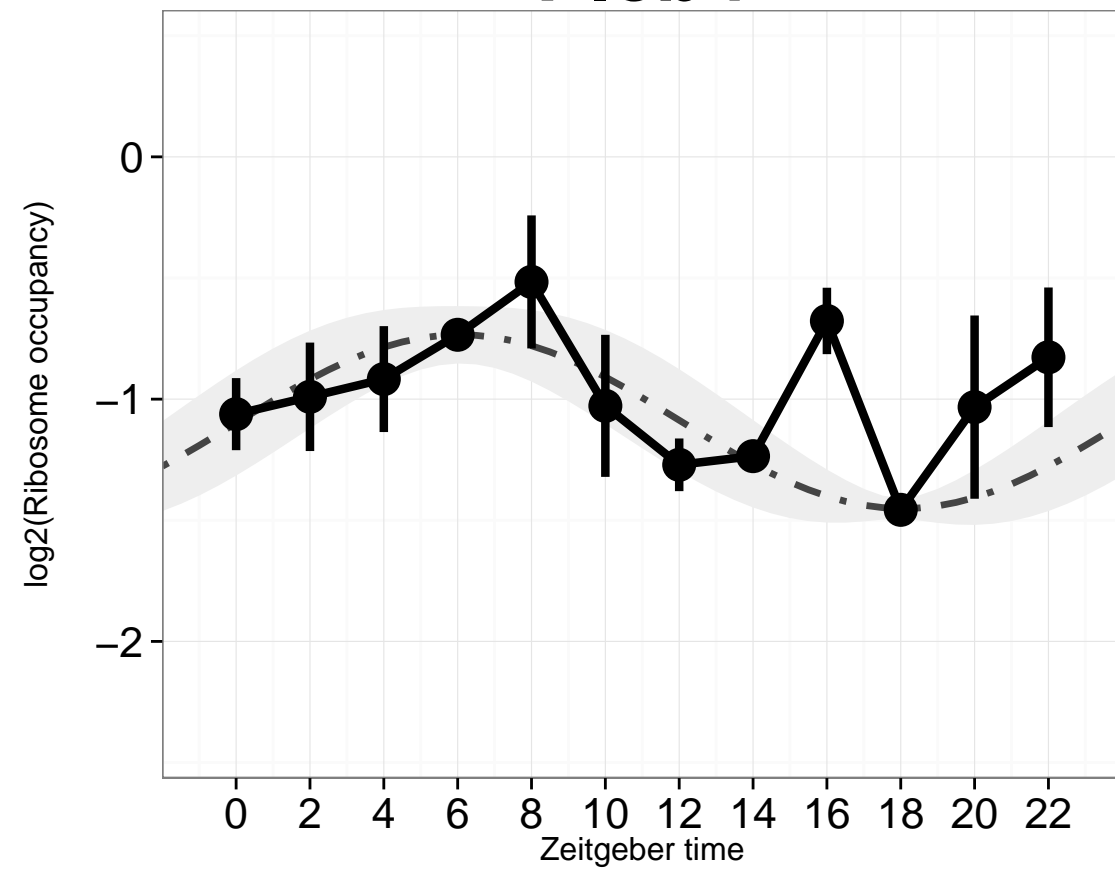

Supplement: SuppDataset_1.zip [file Plcb4_set_A.pdf › Supplemental Dataset 1/A-mRNA_nonrhyth_translation_nonrhyth/Plcb4_set_A.pdf]

## Plcd1

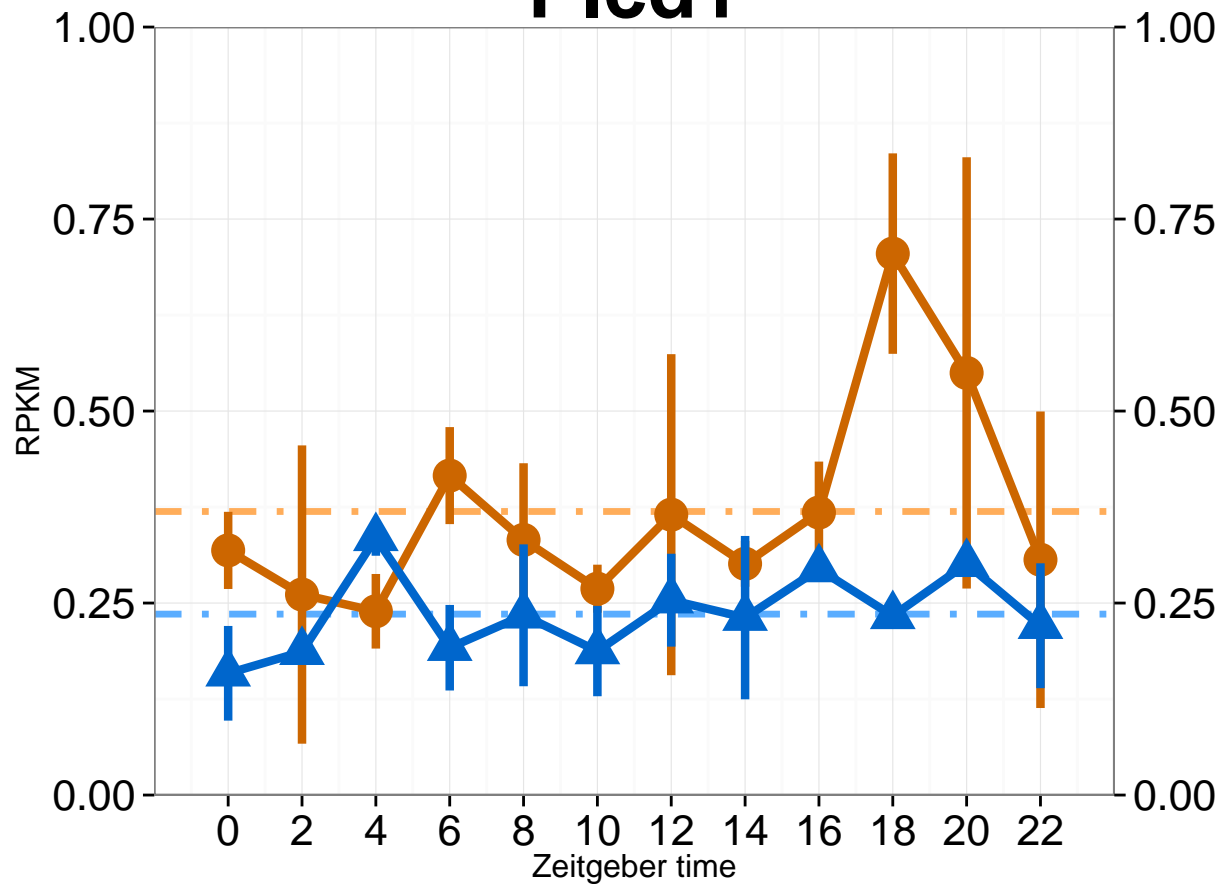

## Plcd1

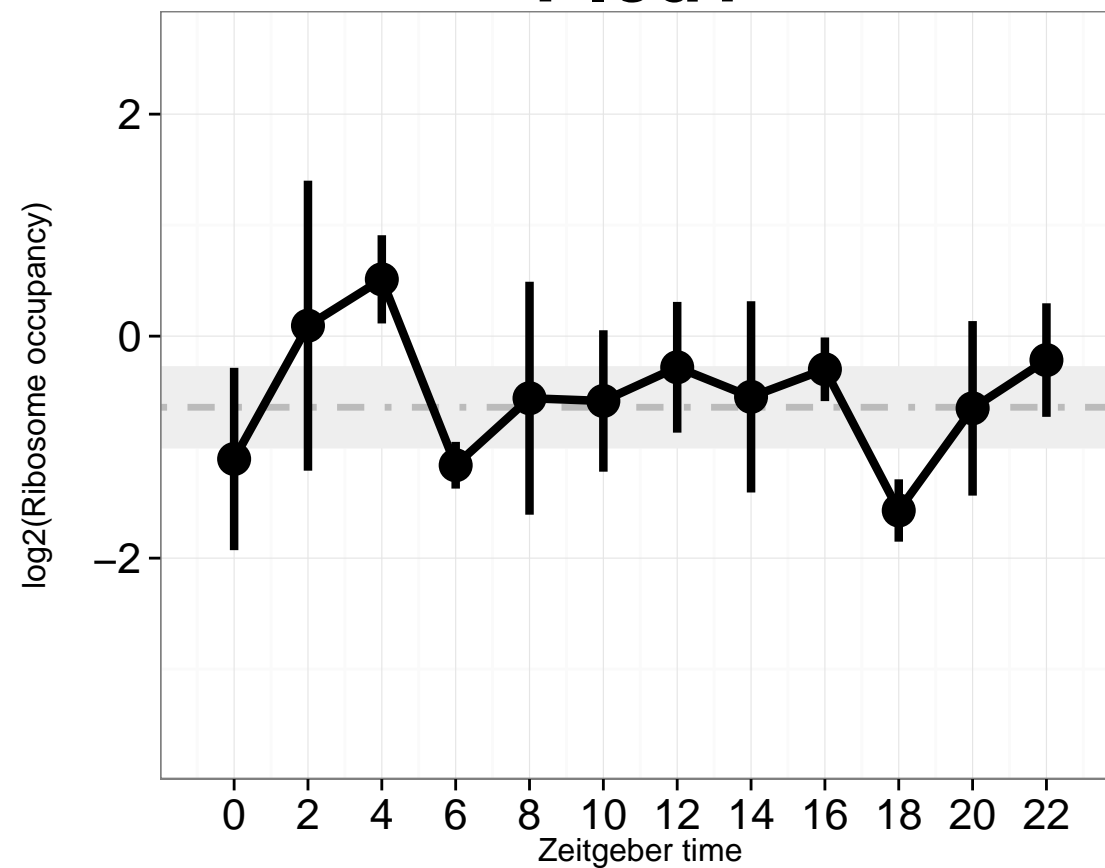

Supplement: SuppDataset_1.zip [file Plcd1_set_A.pdf › Supplemental Dataset 1/A-mRNA_nonrhyth_translation_nonrhyth/Plcd1_set_A.pdf]

## Plcg2

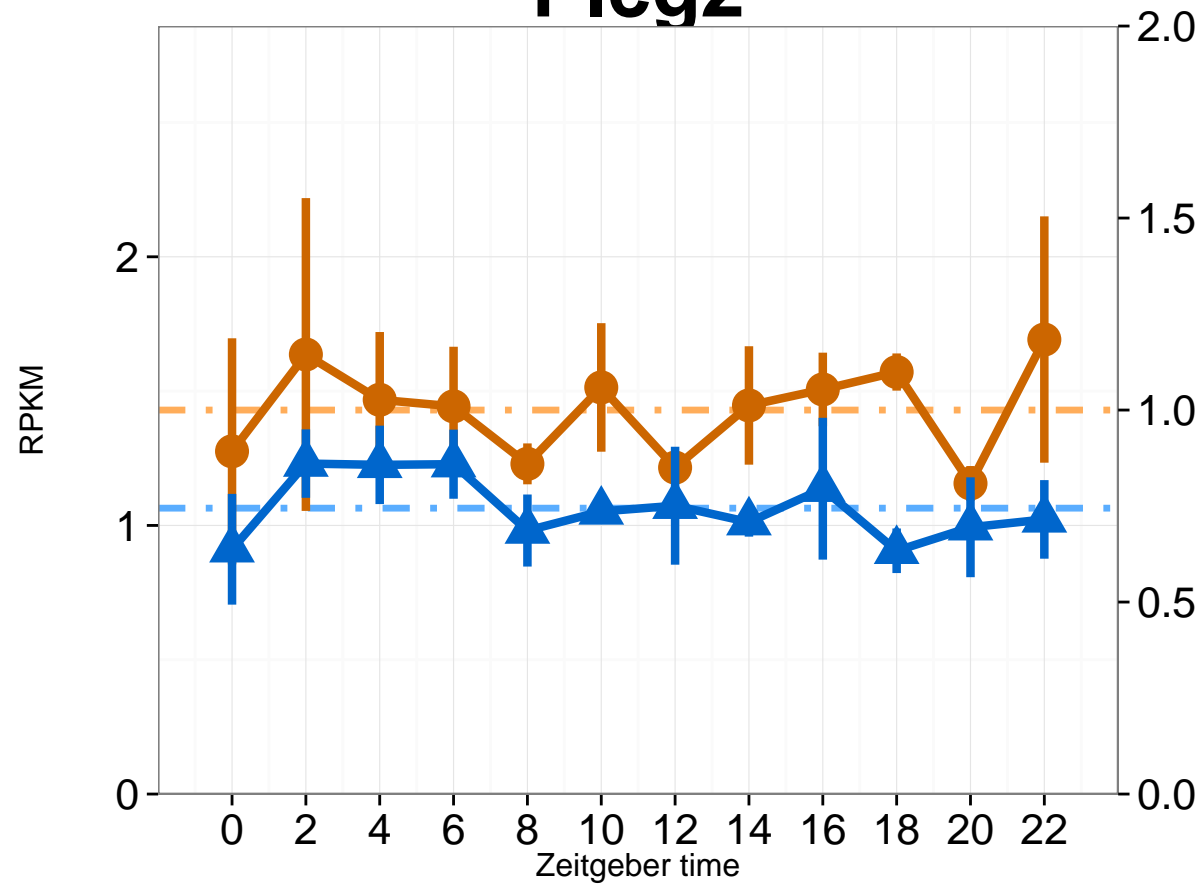

## Plcg2

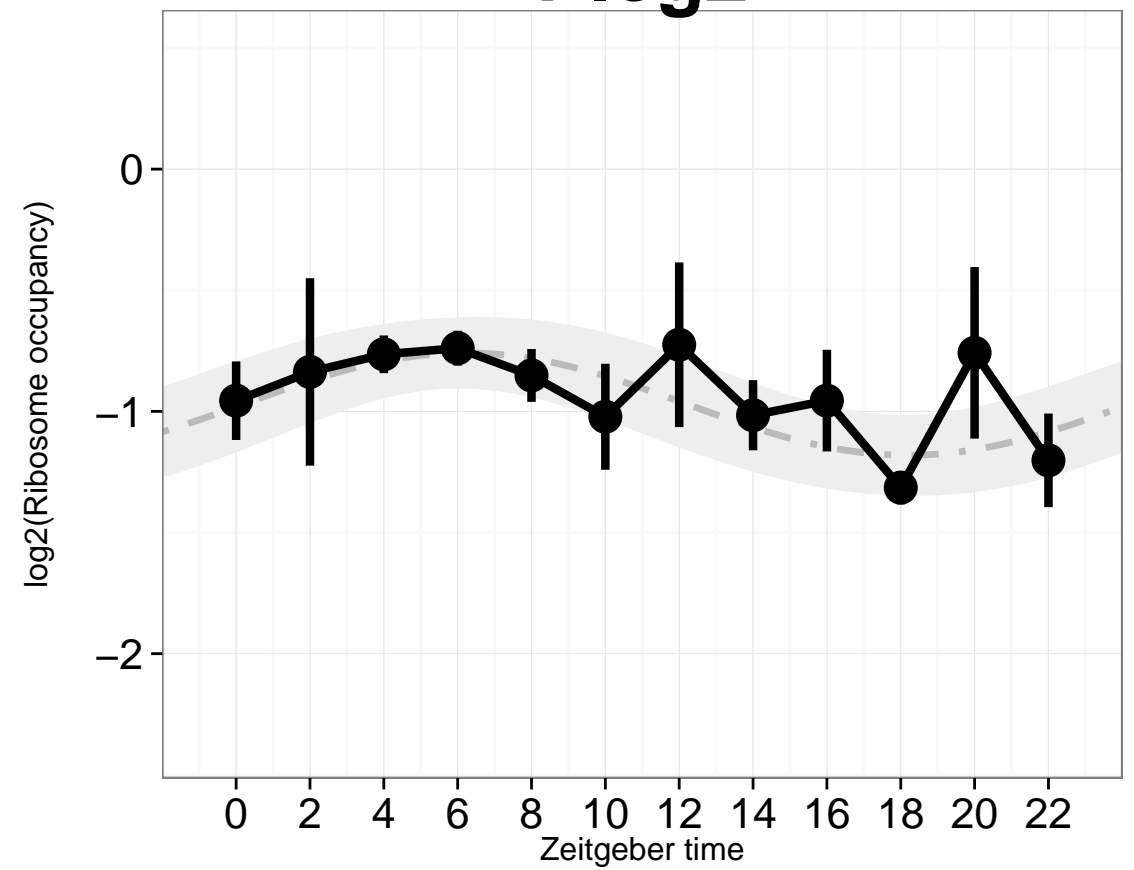

Supplement: SuppDataset_1.zip [file Plcg2_set_A.pdf › Supplemental Dataset 1/A-mRNA_nonrhyth_translation_nonrhyth/Plcg2_set_A.pdf]

## Plcl2

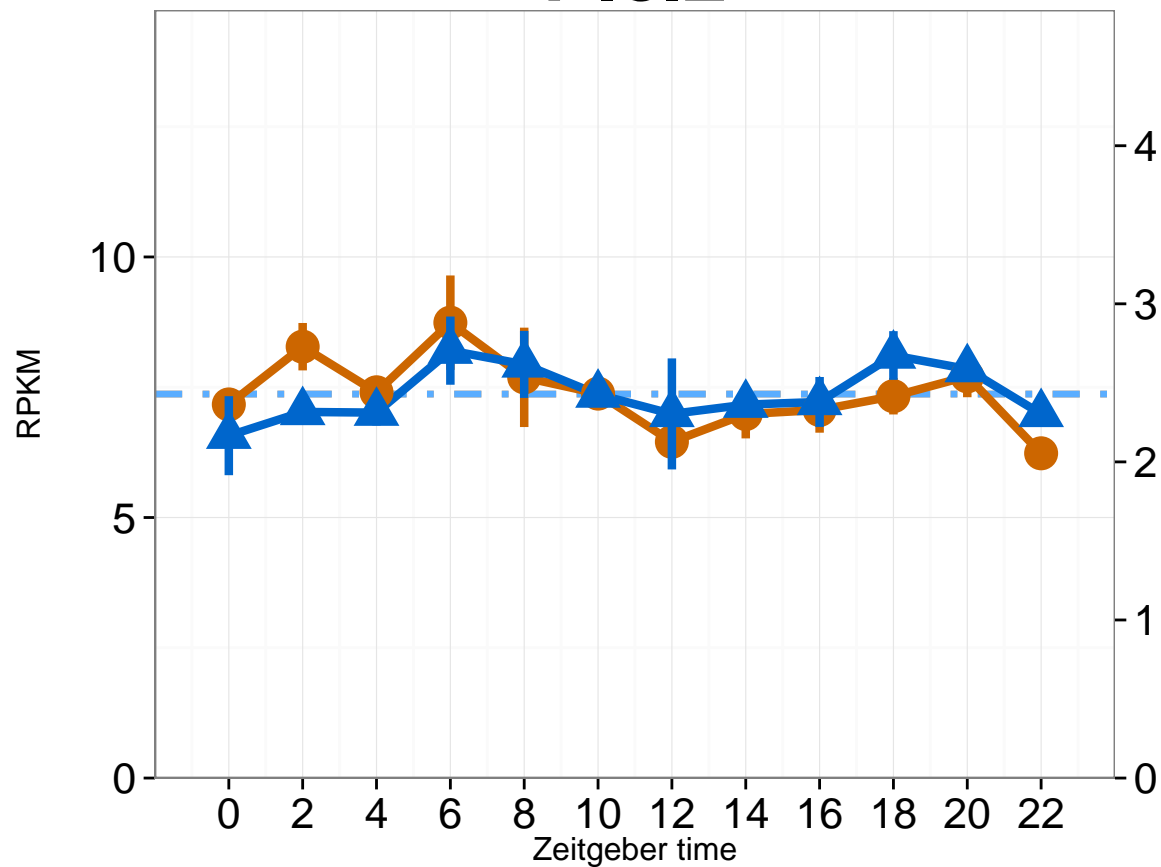

## Plcl2

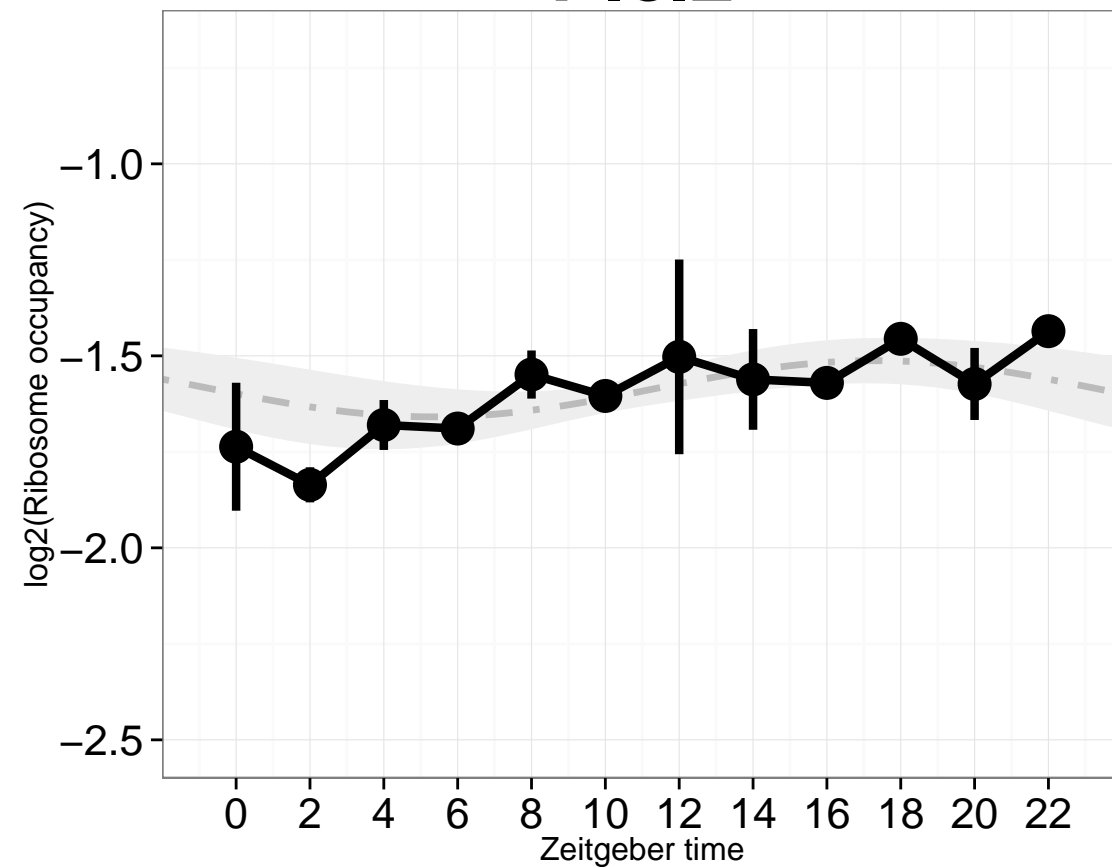

Supplement: SuppDataset_1.zip [file Plcl2_set_A.pdf › Supplemental Dataset 1/A-mRNA_nonrhyth_translation_nonrhyth/Plcl2_set_A.pdf]

## Pld2

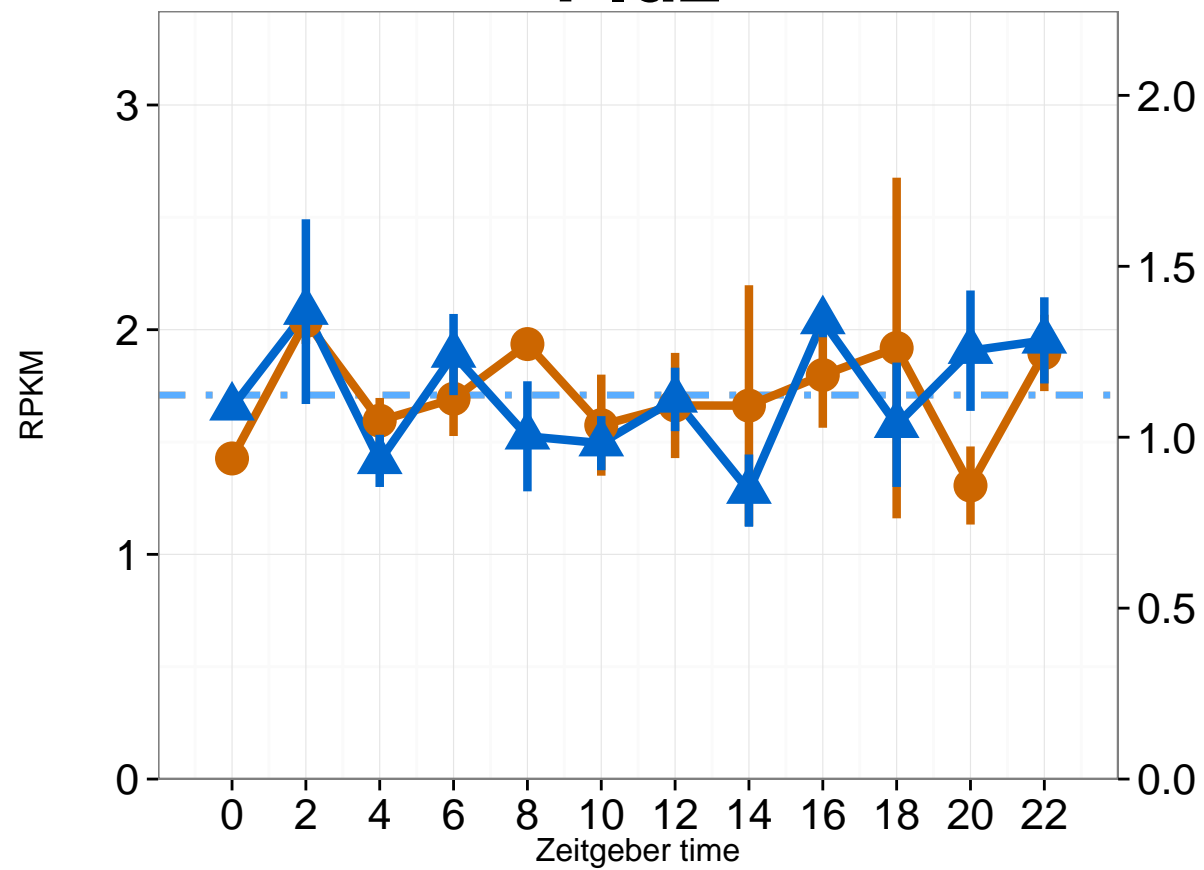

## Pld2

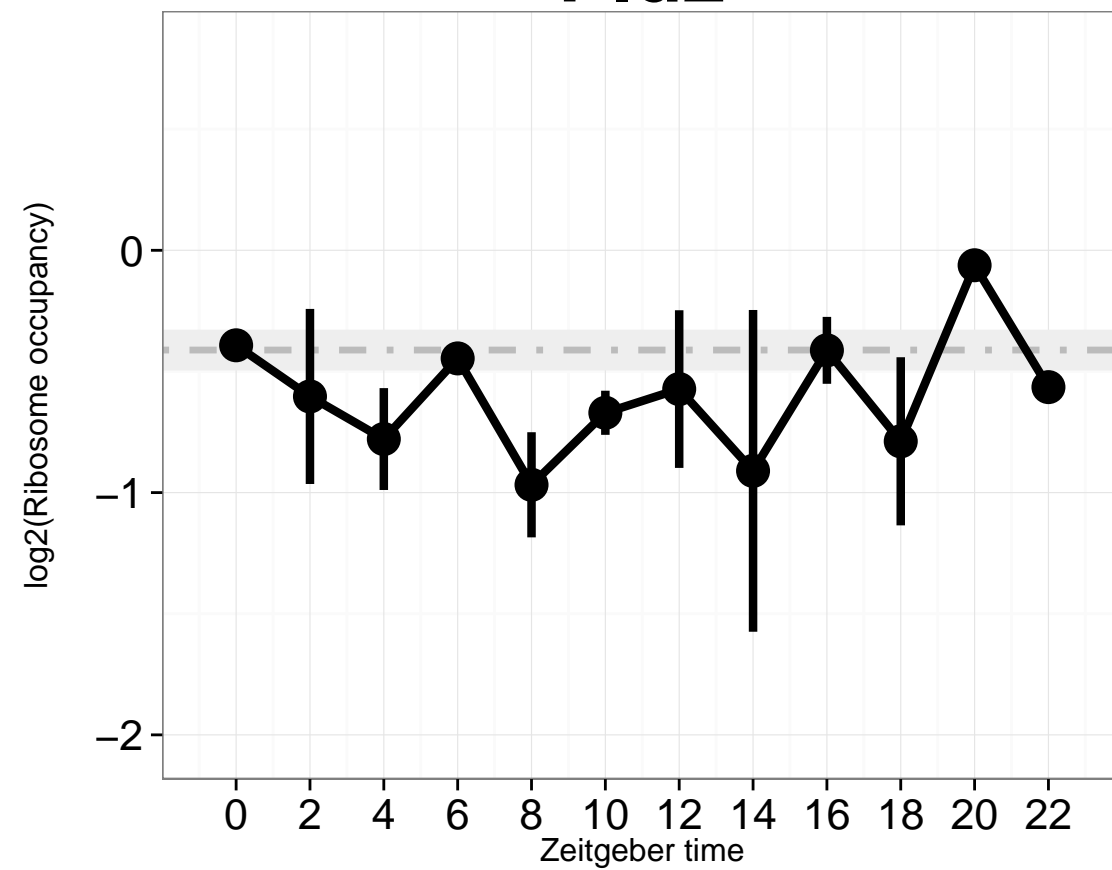

Supplement: SuppDataset_1.zip [file Pld2_set_A.pdf › Supplemental Dataset 1/A-mRNA_nonrhyth_translation_nonrhyth/Pld2_set_A.pdf]

## Pld3

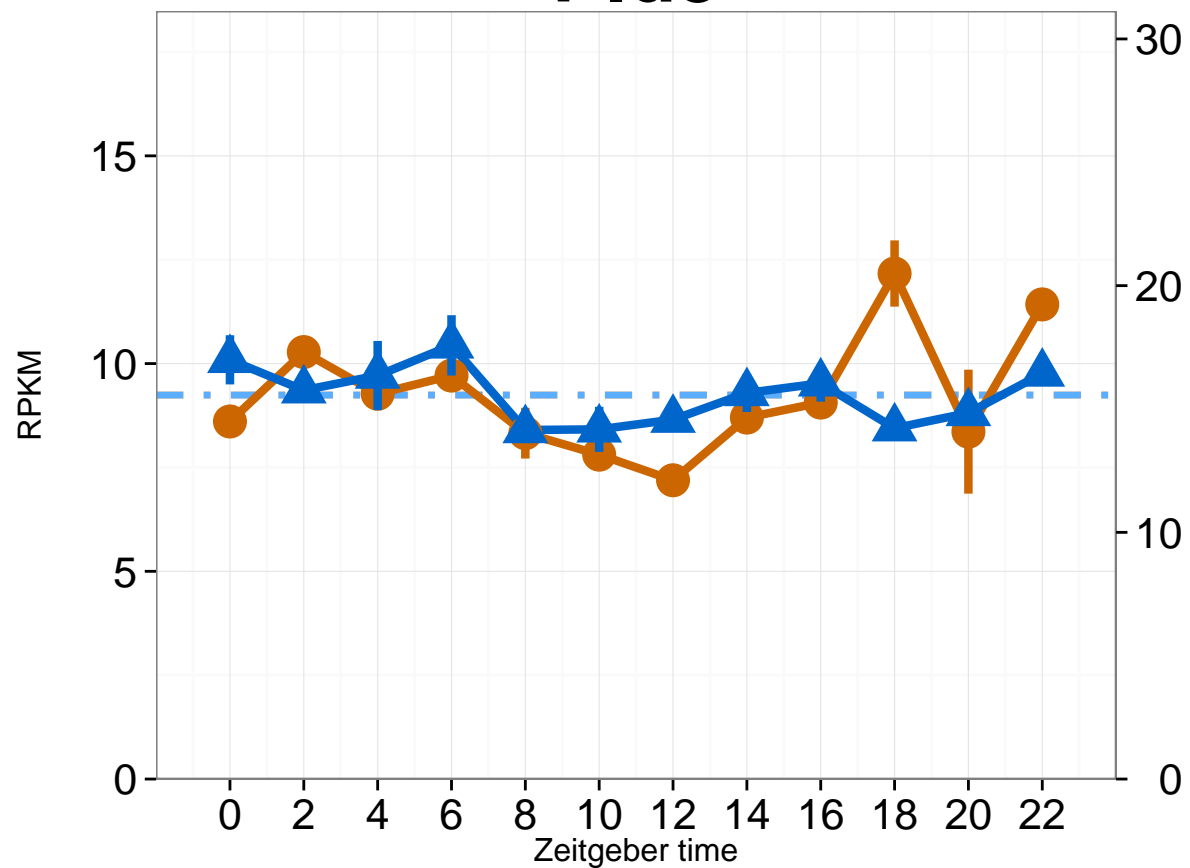

## Pld3

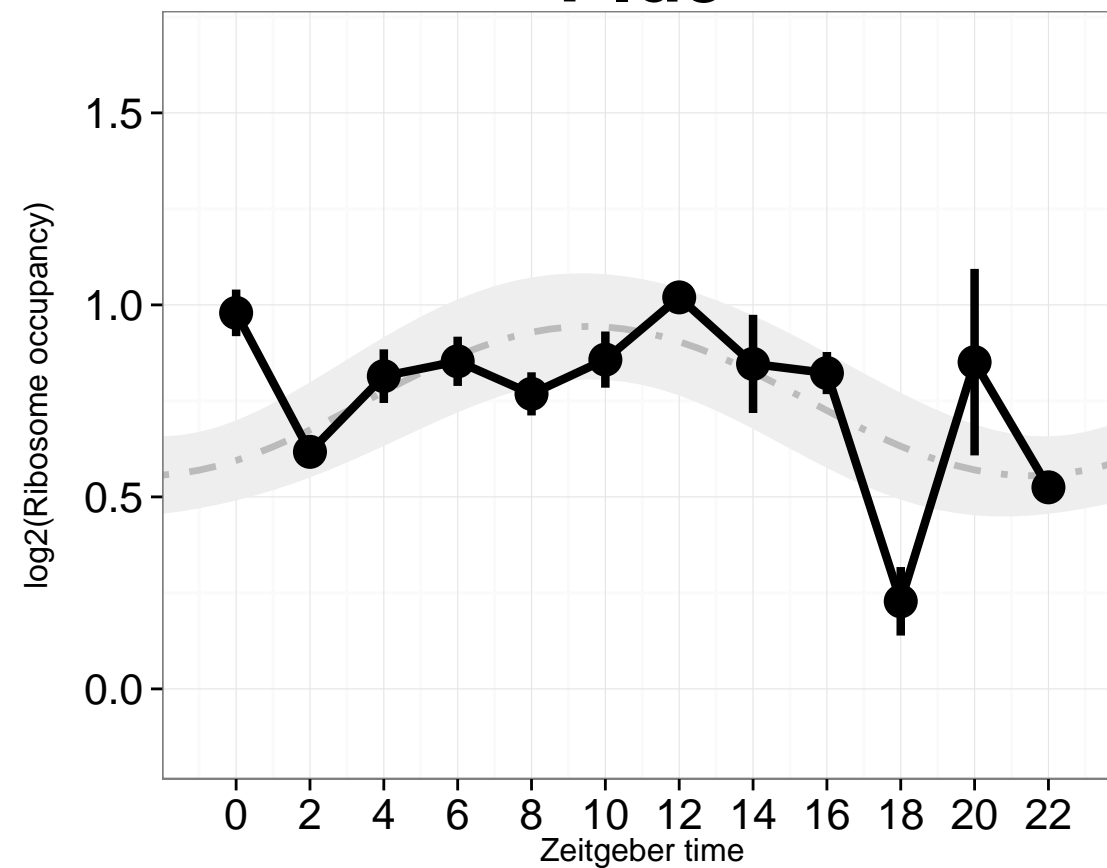

Supplement: SuppDataset_1.zip [file Pld3_set_A.pdf › Supplemental Dataset 1/A-mRNA_nonrhyth_translation_nonrhyth/Pld3_set_A.pdf]

## Pld4

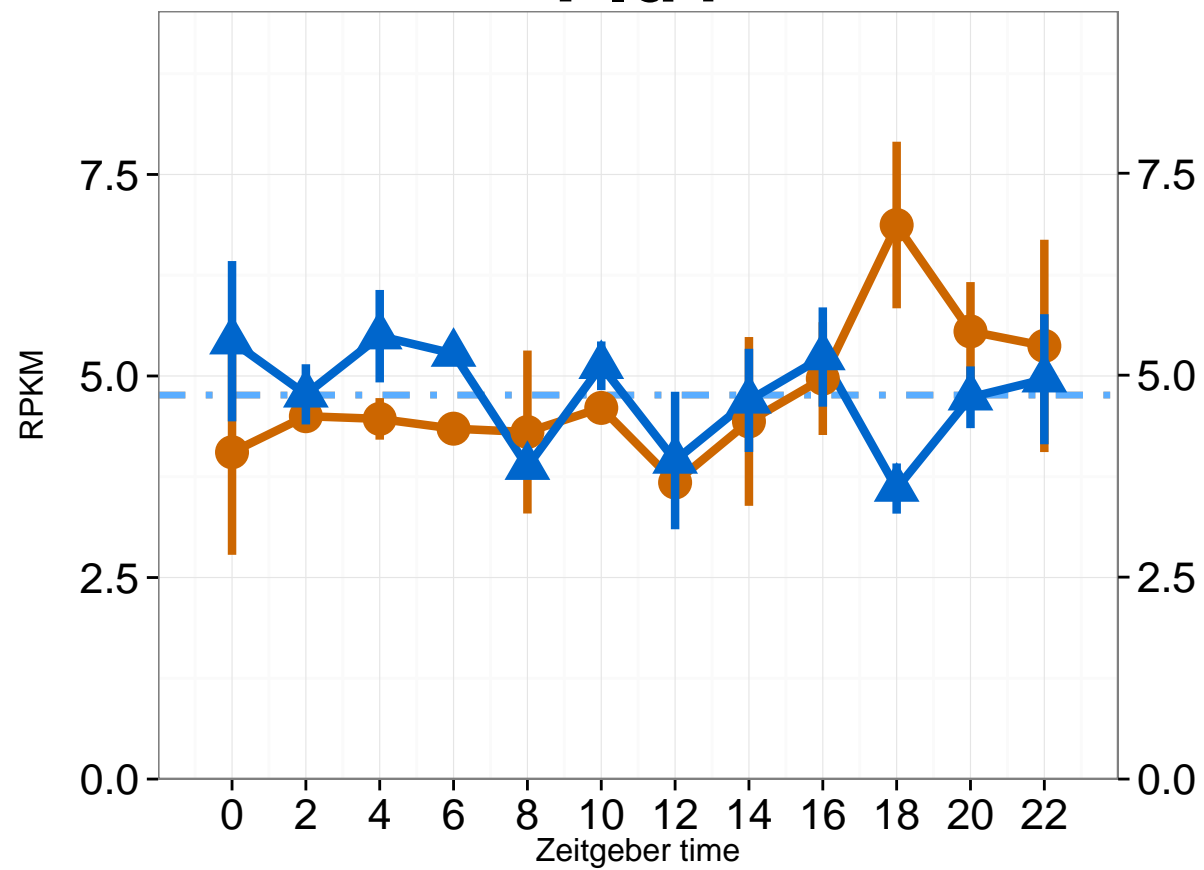

## Pld4

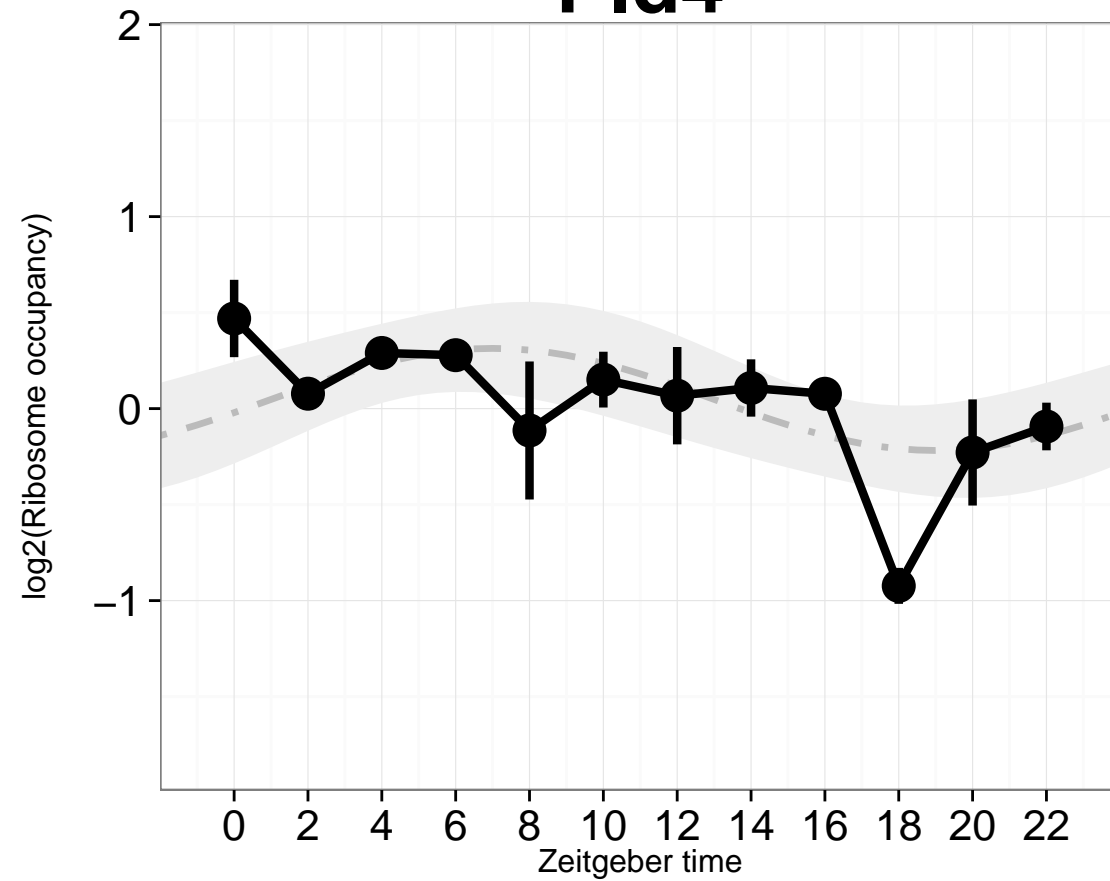

Supplement: SuppDataset_1.zip [file Pld4_set_A.pdf › Supplemental Dataset 1/A-mRNA_nonrhyth_translation_nonrhyth/Pld4_set_A.pdf]

## Plec

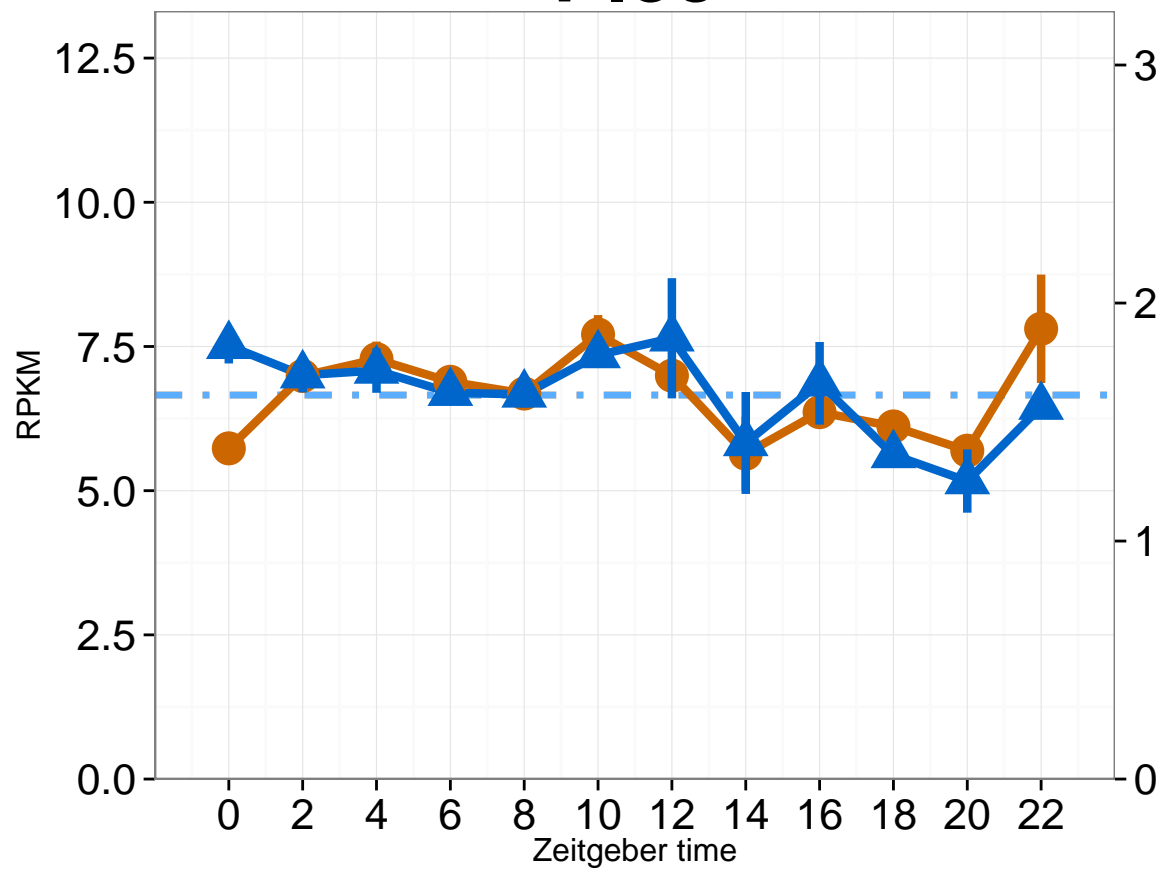

## Plec

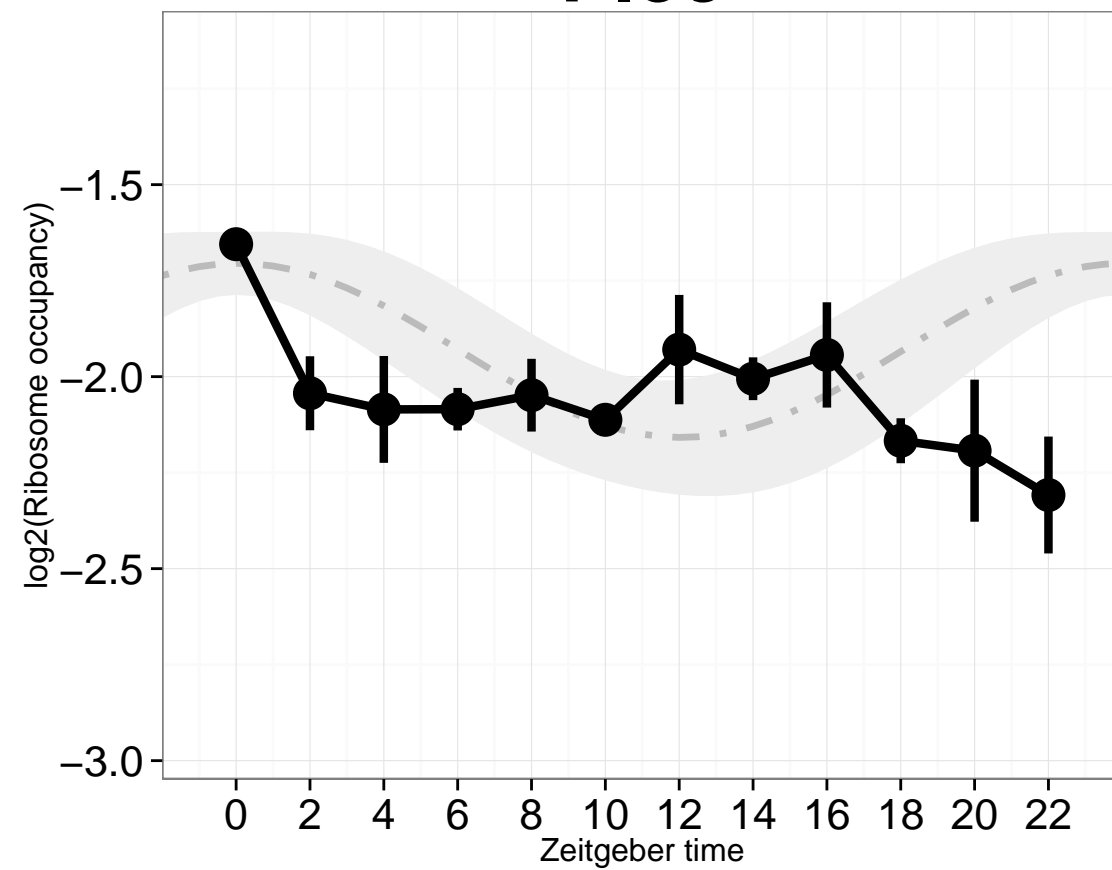

Supplement: SuppDataset_1.zip [file Plec_set_A.pdf › Supplemental Dataset 1/A-mRNA_nonrhyth_translation_nonrhyth/Plec_set_A.pdf]

## Plek

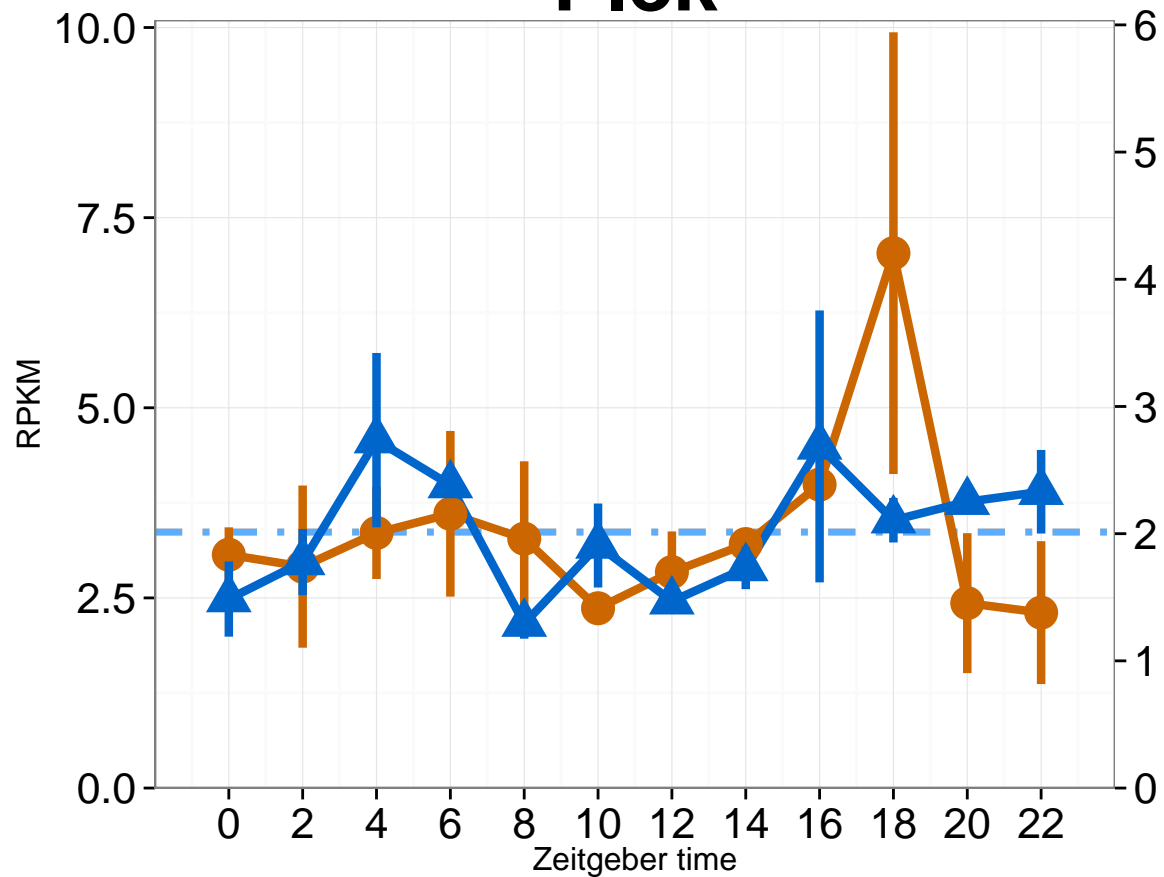

## Plek

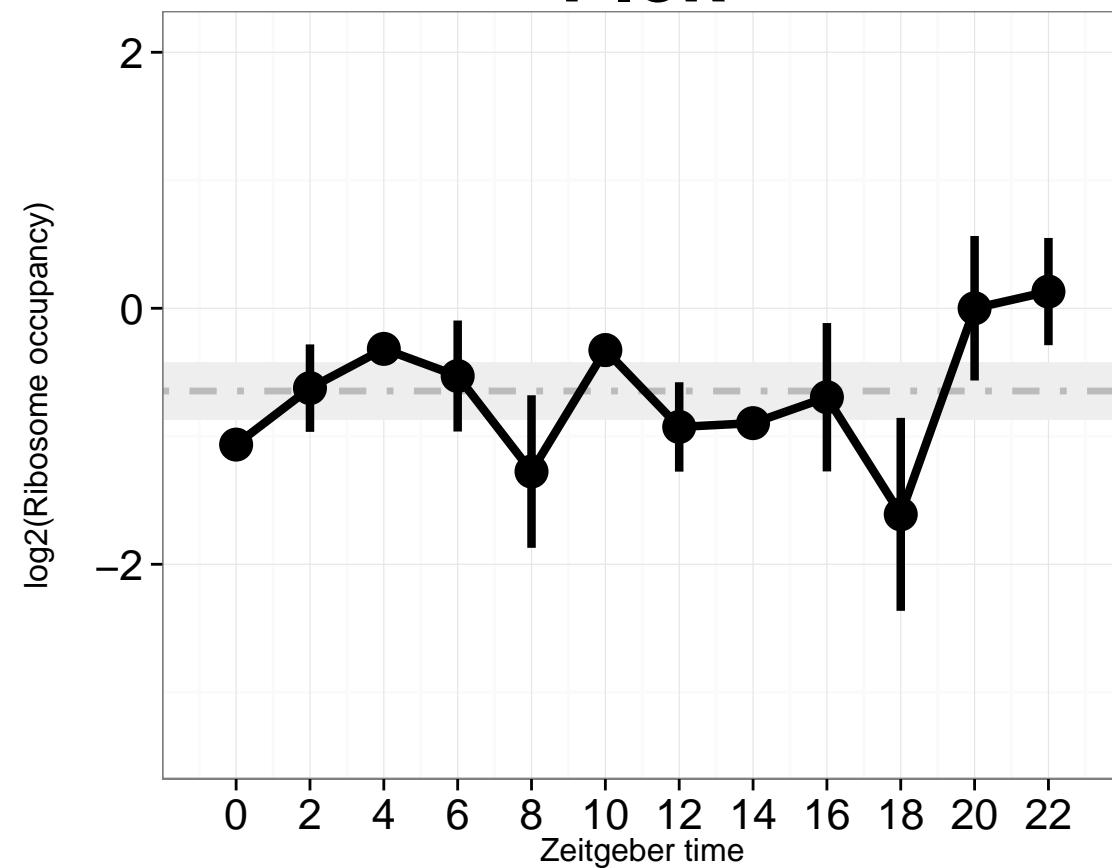

Supplement: SuppDataset_1.zip [file Plek_set_A.pdf › Supplemental Dataset 1/A-mRNA_nonrhyth_translation_nonrhyth/Plek_set_A.pdf]

## Plekha1

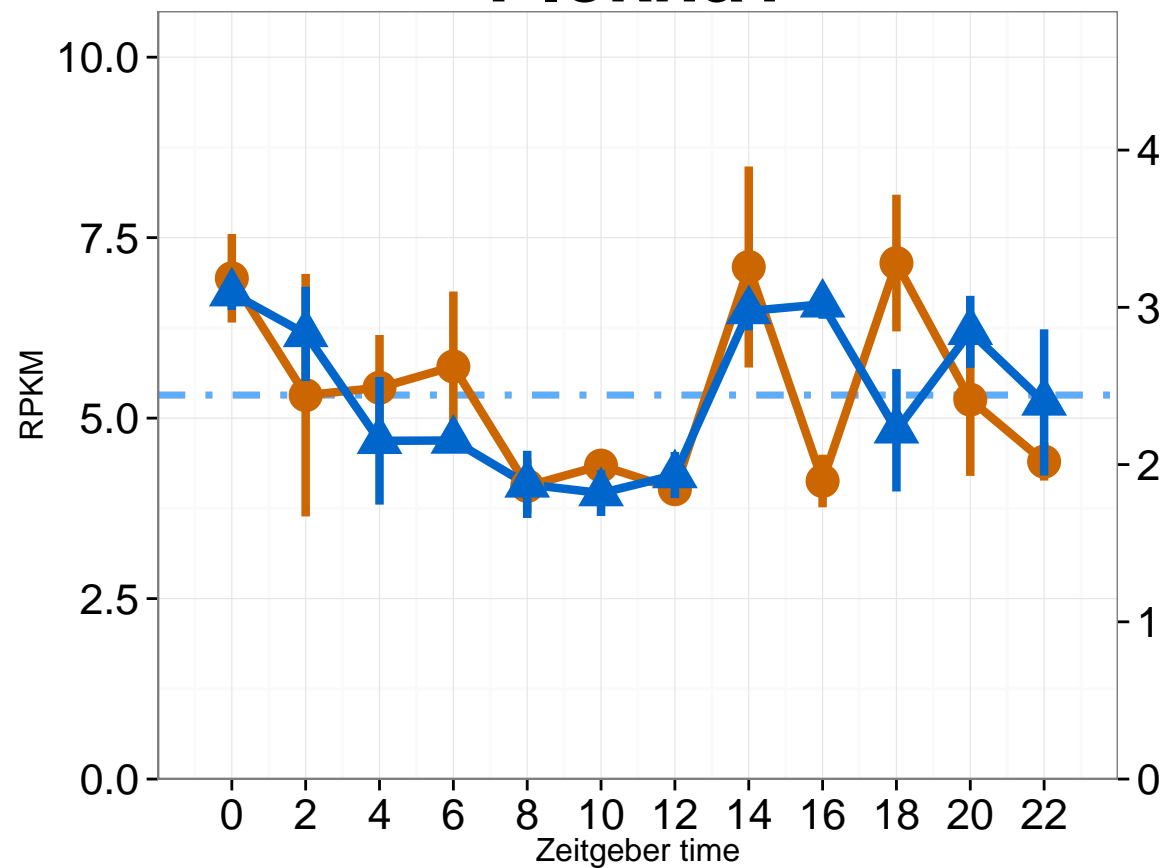

## Plekha1

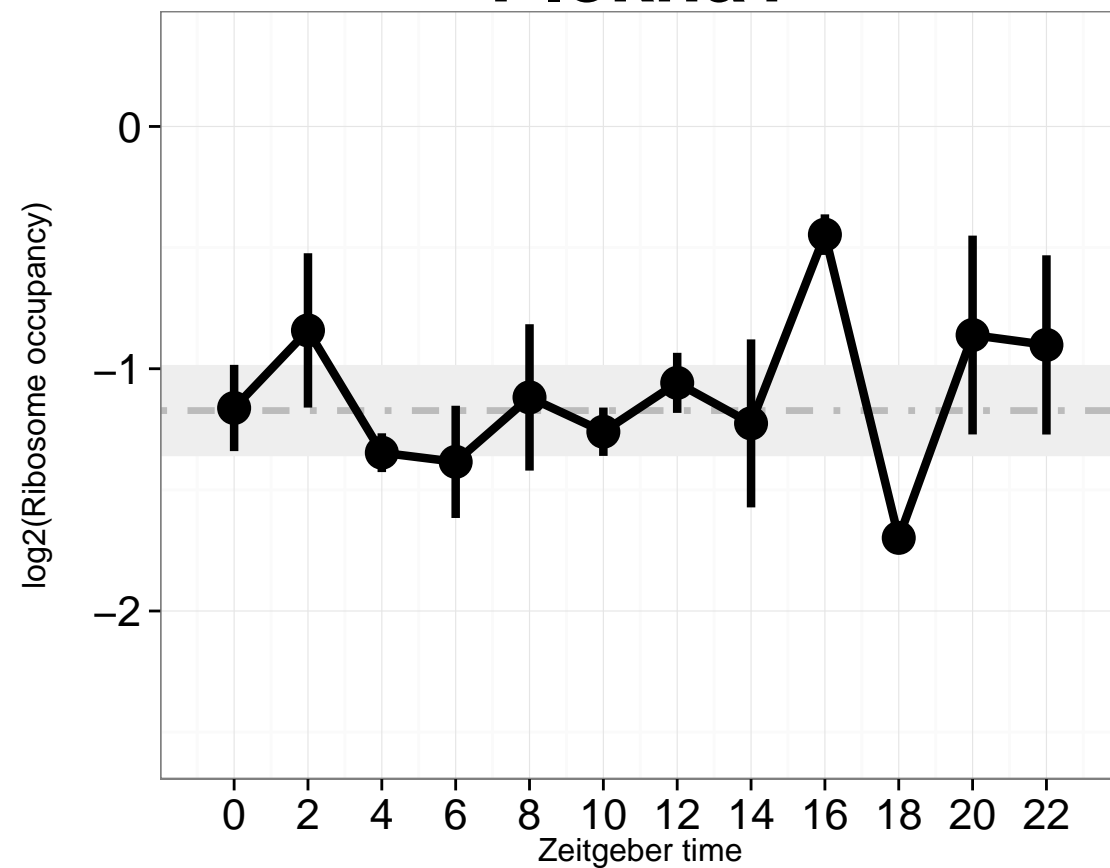

Supplement: SuppDataset_1.zip [file Plekha1_set_A.pdf › Supplemental Dataset 1/A-mRNA_nonrhyth_translation_nonrhyth/Plekha1_set_A.pdf]

## Plekha2

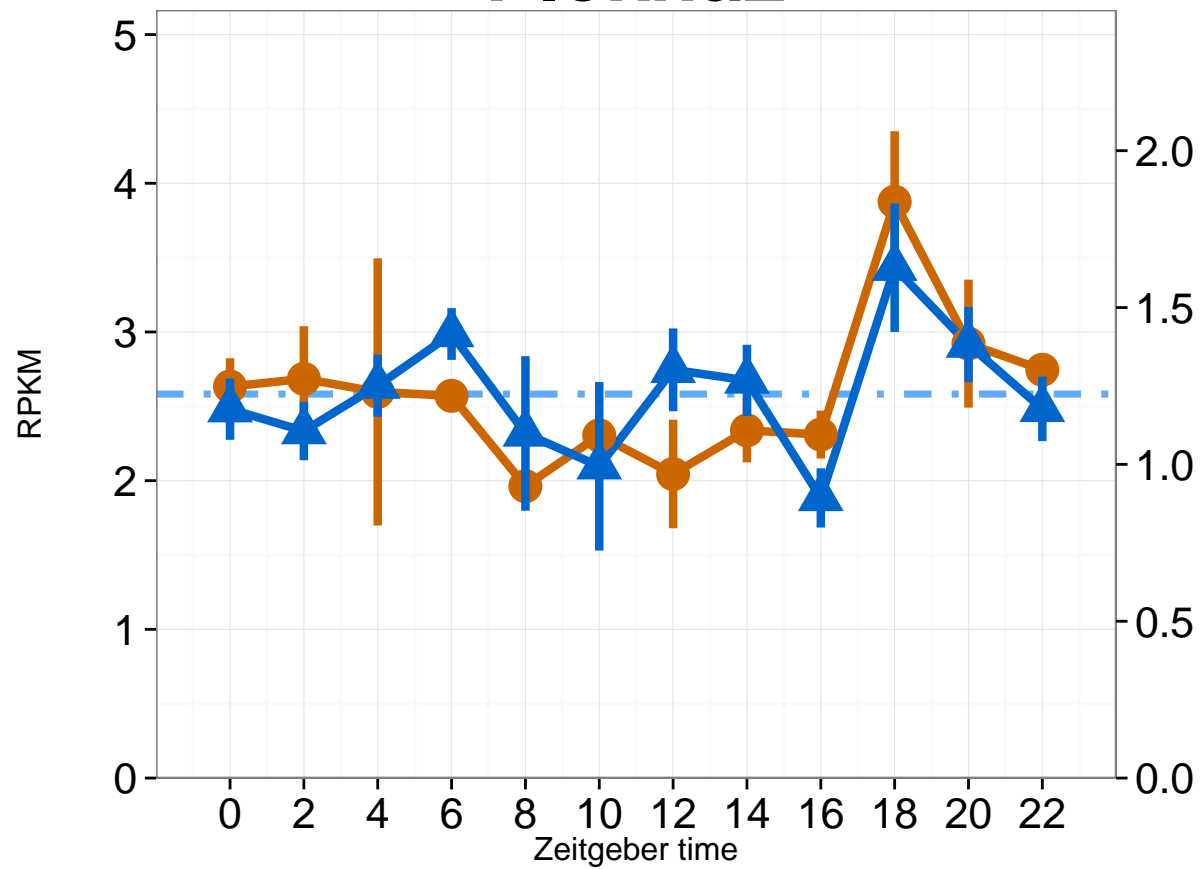

## Plekha2

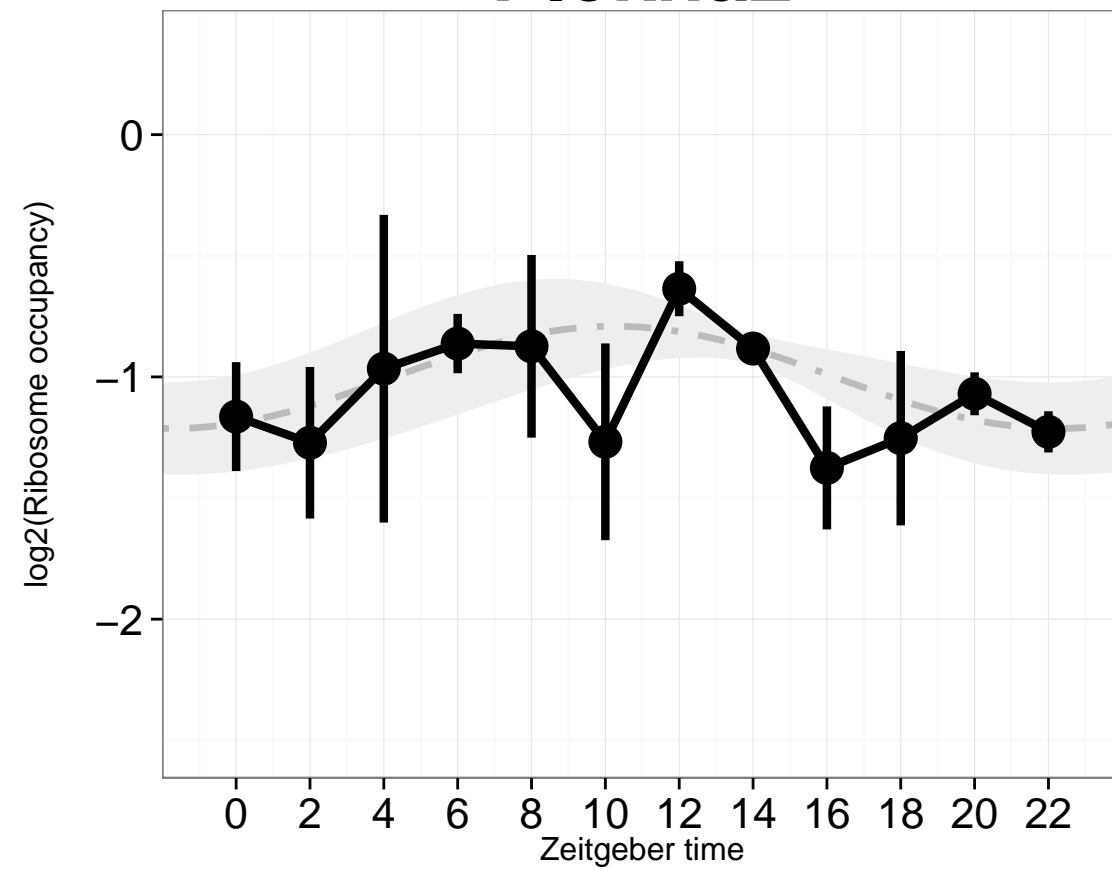

Supplement: SuppDataset_1.zip [file Plekha2_set_A.pdf › Supplemental Dataset 1/A-mRNA_nonrhyth_translation_nonrhyth/Plekha2_set_A.pdf]

## Plekha3

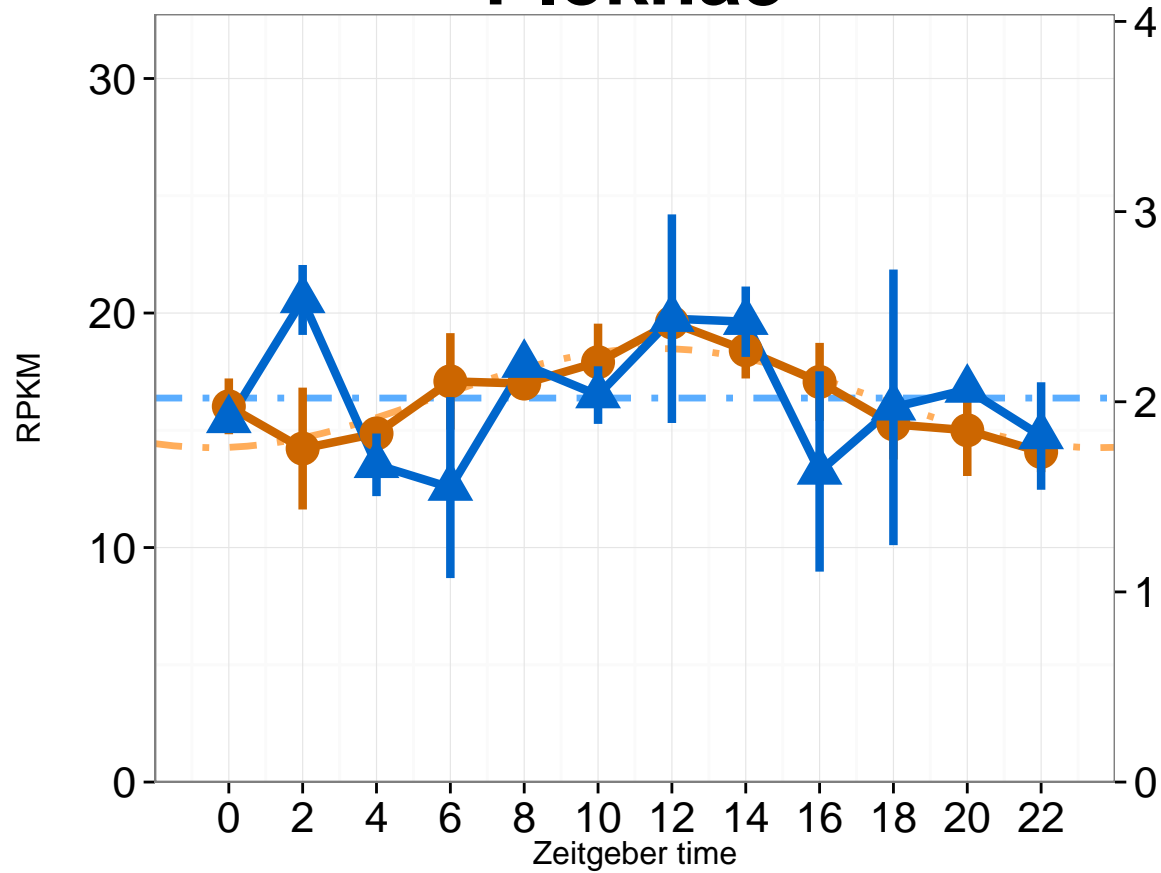

## Plekha3

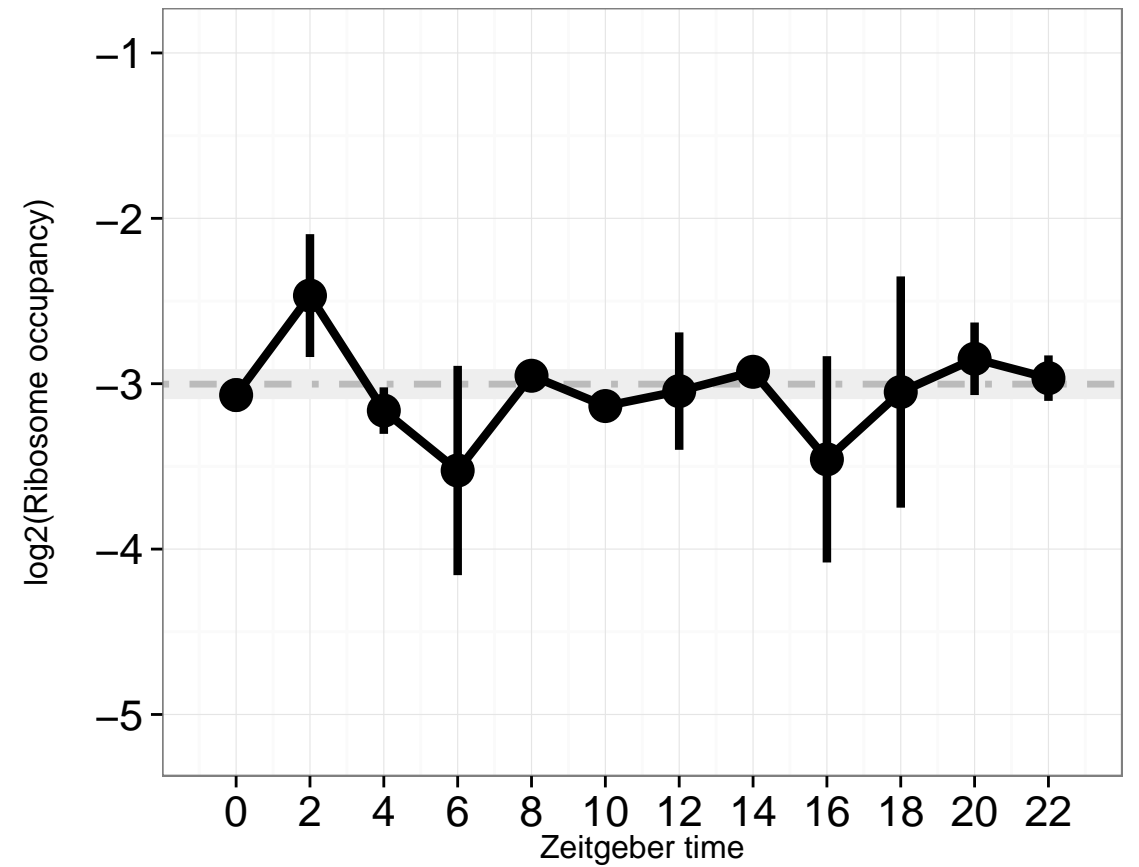

Supplement: SuppDataset_1.zip [file Plekha3_set_A.pdf › Supplemental Dataset 1/A-mRNA_nonrhyth_translation_nonrhyth/Plekha3_set_A.pdf]

## Plekha5

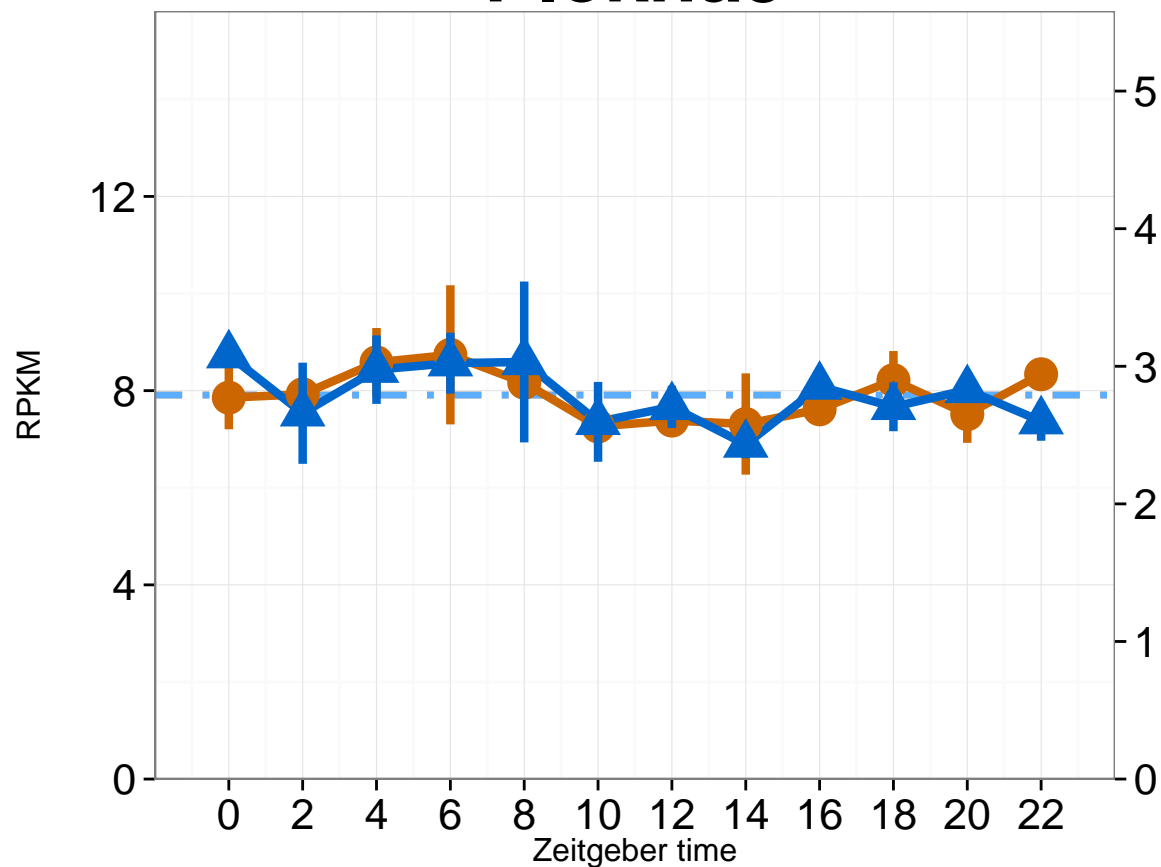

## Plekha5

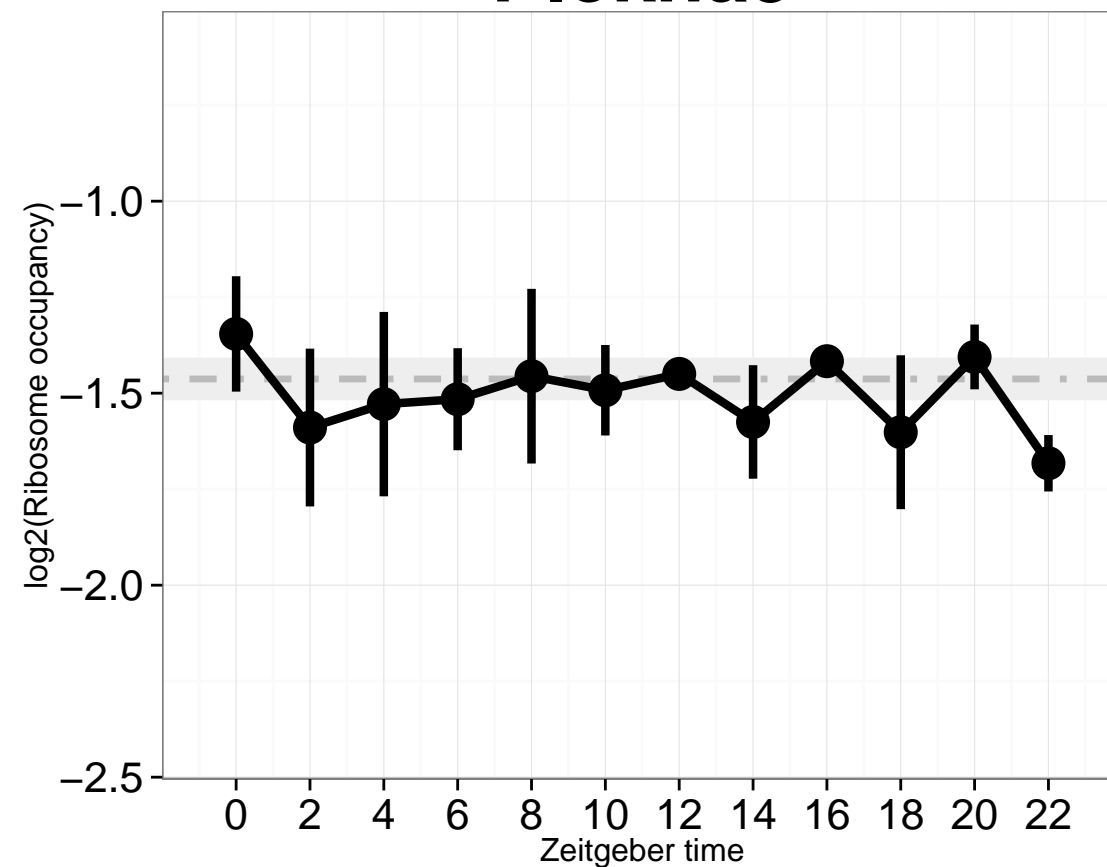

Supplement: SuppDataset_1.zip [file Plekha5_set_A.pdf › Supplemental Dataset 1/A-mRNA_nonrhyth_translation_nonrhyth/Plekha5_set_A.pdf]

## Plekha6

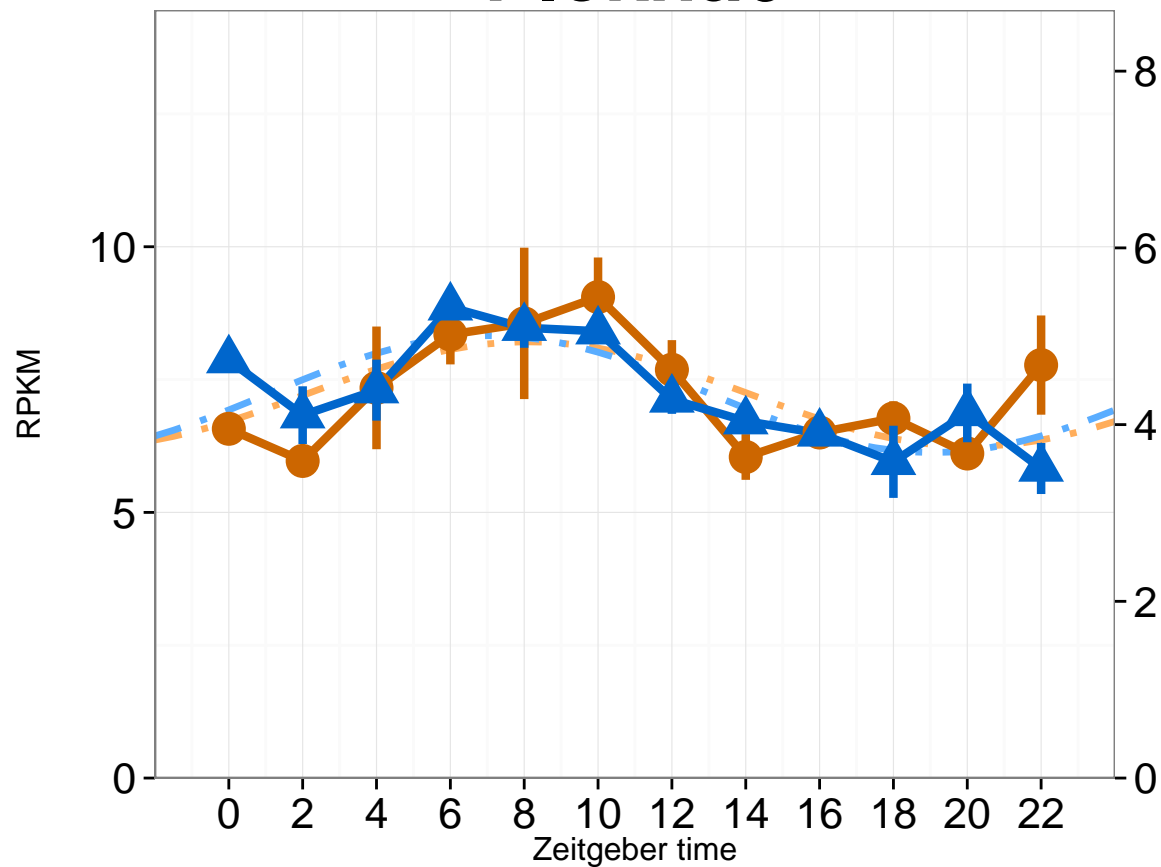

## Plekha6

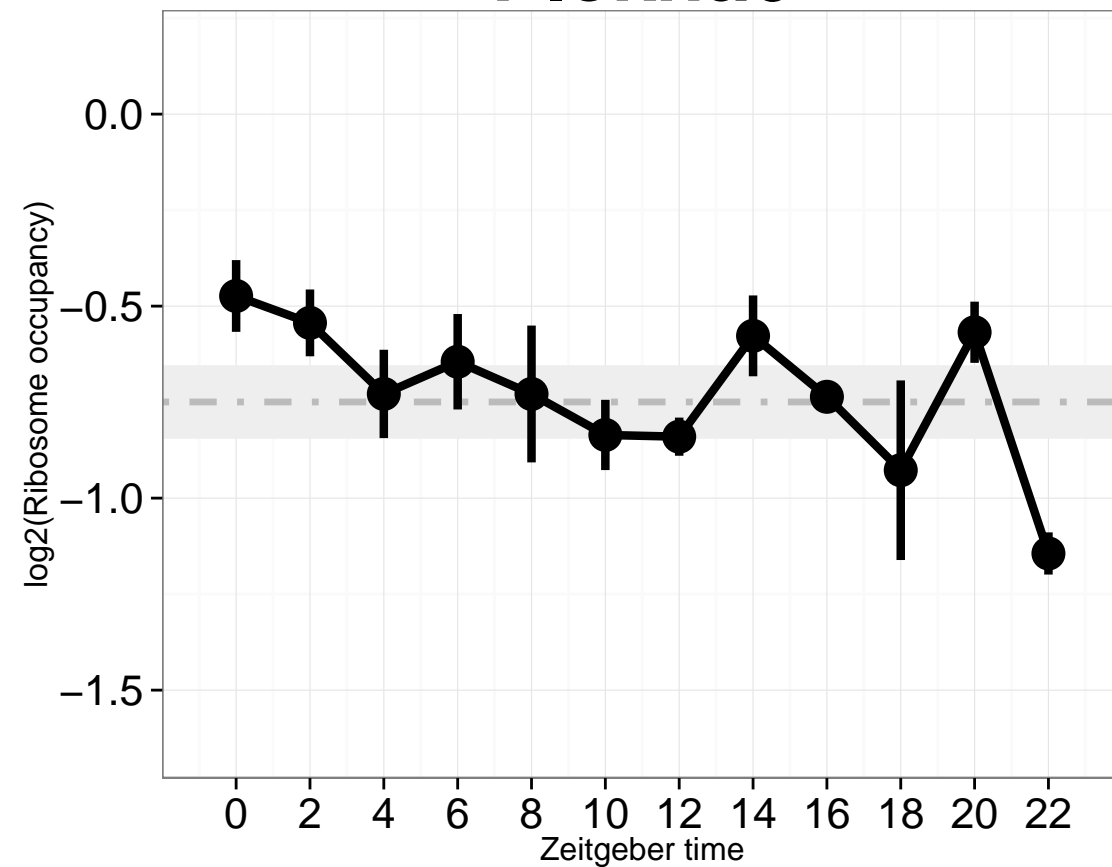

Supplement: SuppDataset_1.zip [file Plekha6_set_A.pdf › Supplemental Dataset 1/A-mRNA_nonrhyth_translation_nonrhyth/Plekha6_set_A.pdf]

# Plekha7

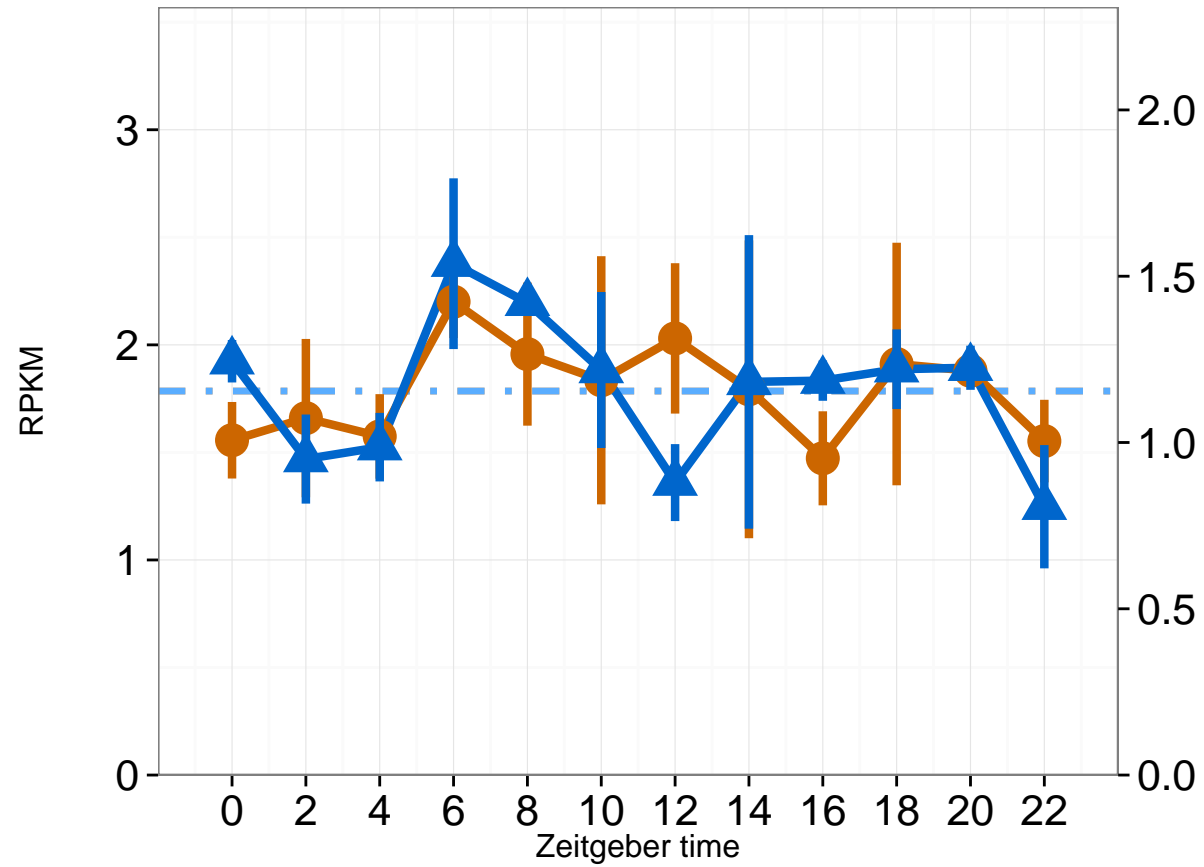

# Plekha7

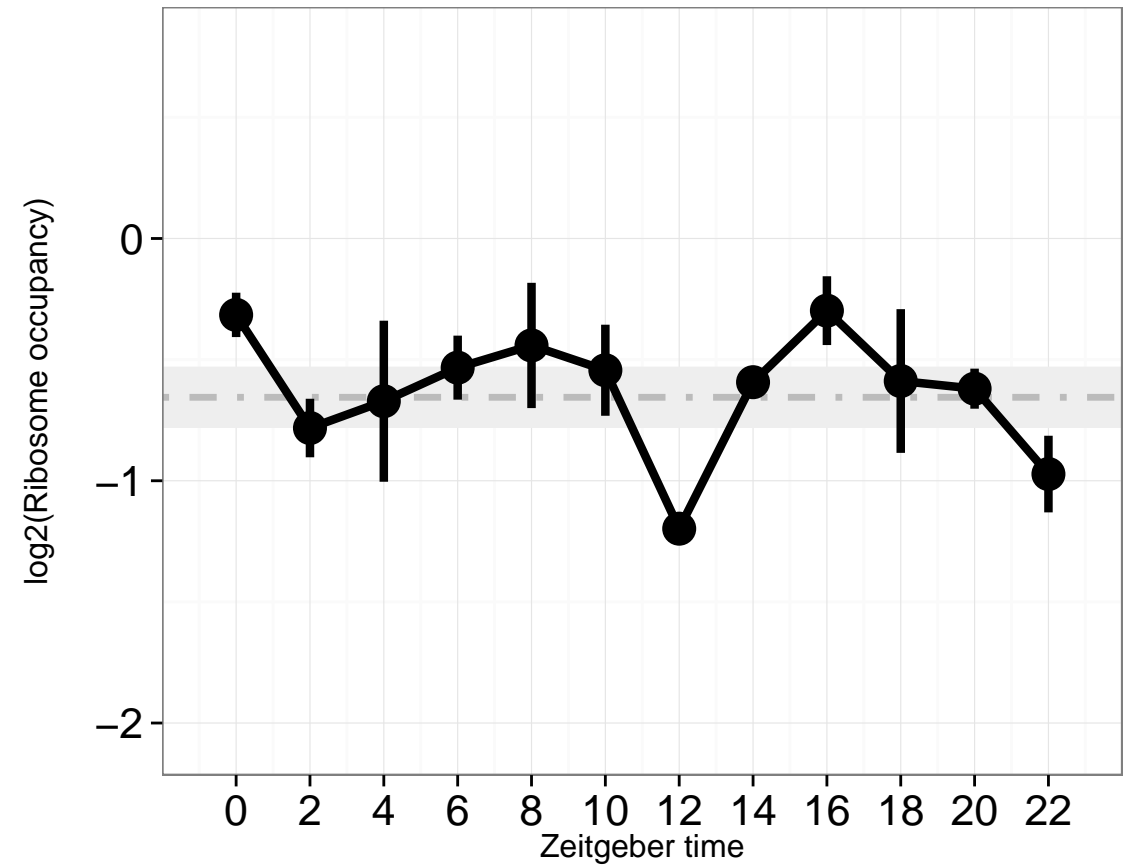

Supplement: SuppDataset_1.zip [file Plekha7_set_A.pdf › Supplemental Dataset 1/A-mRNA_nonrhyth_translation_nonrhyth/Plekha7_set_A.pdf]

# Plekhb1

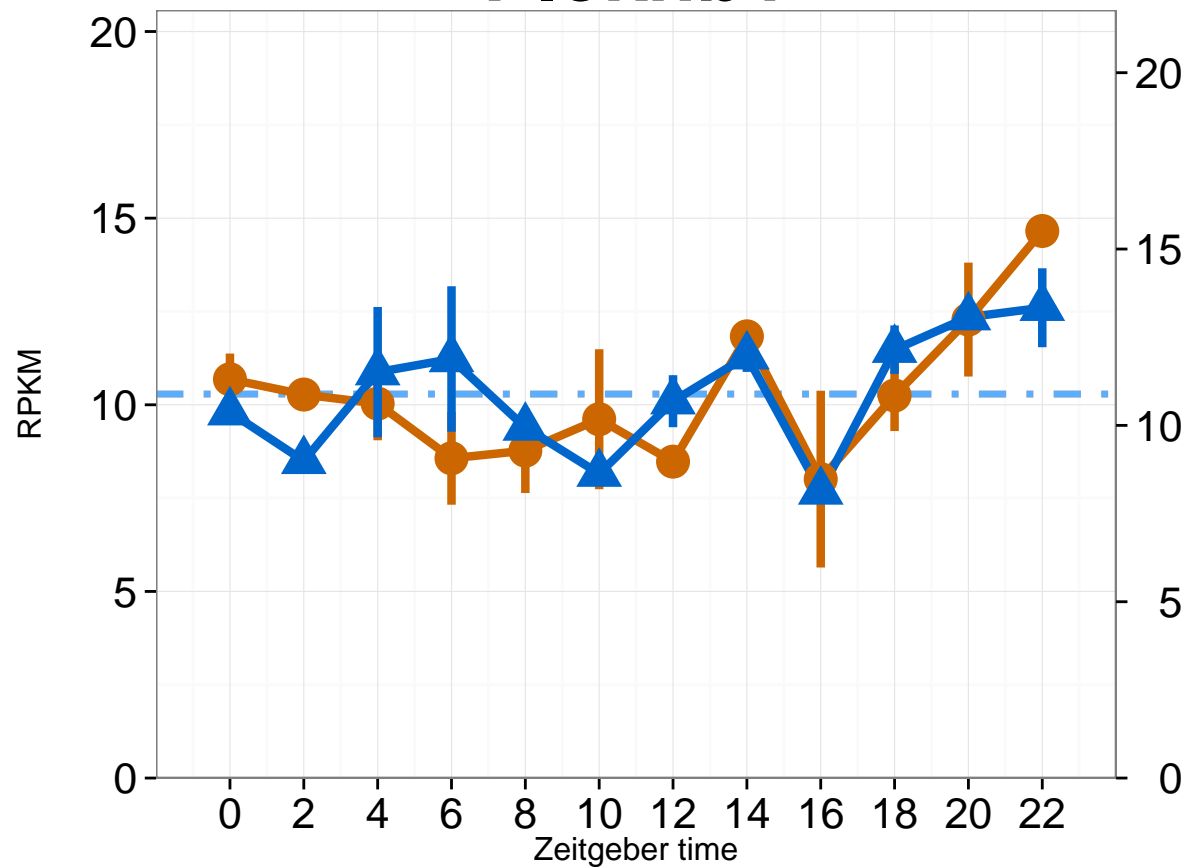

# Plekhb1

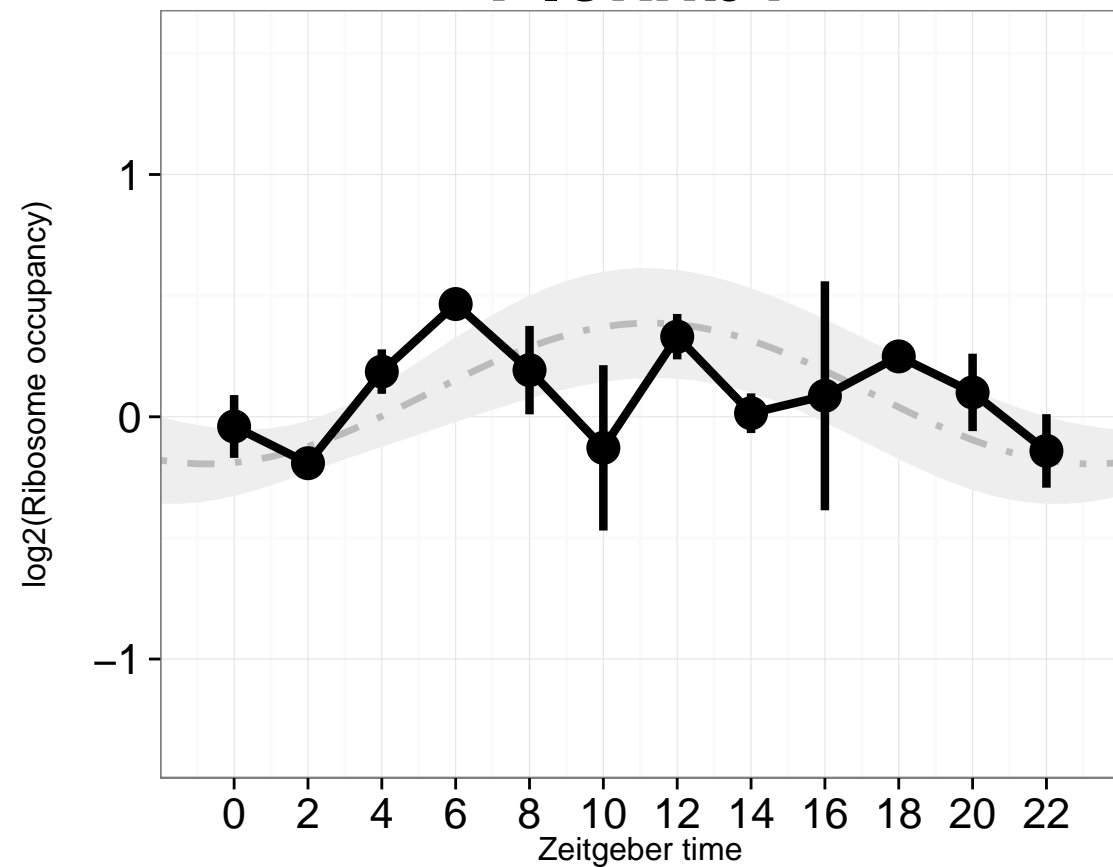

Supplement: SuppDataset_1.zip [file Plekhb1_set_A.pdf › Supplemental Dataset 1/A-mRNA_nonrhyth_translation_nonrhyth/Plekhb1_set_A.pdf]

## Plekhf2

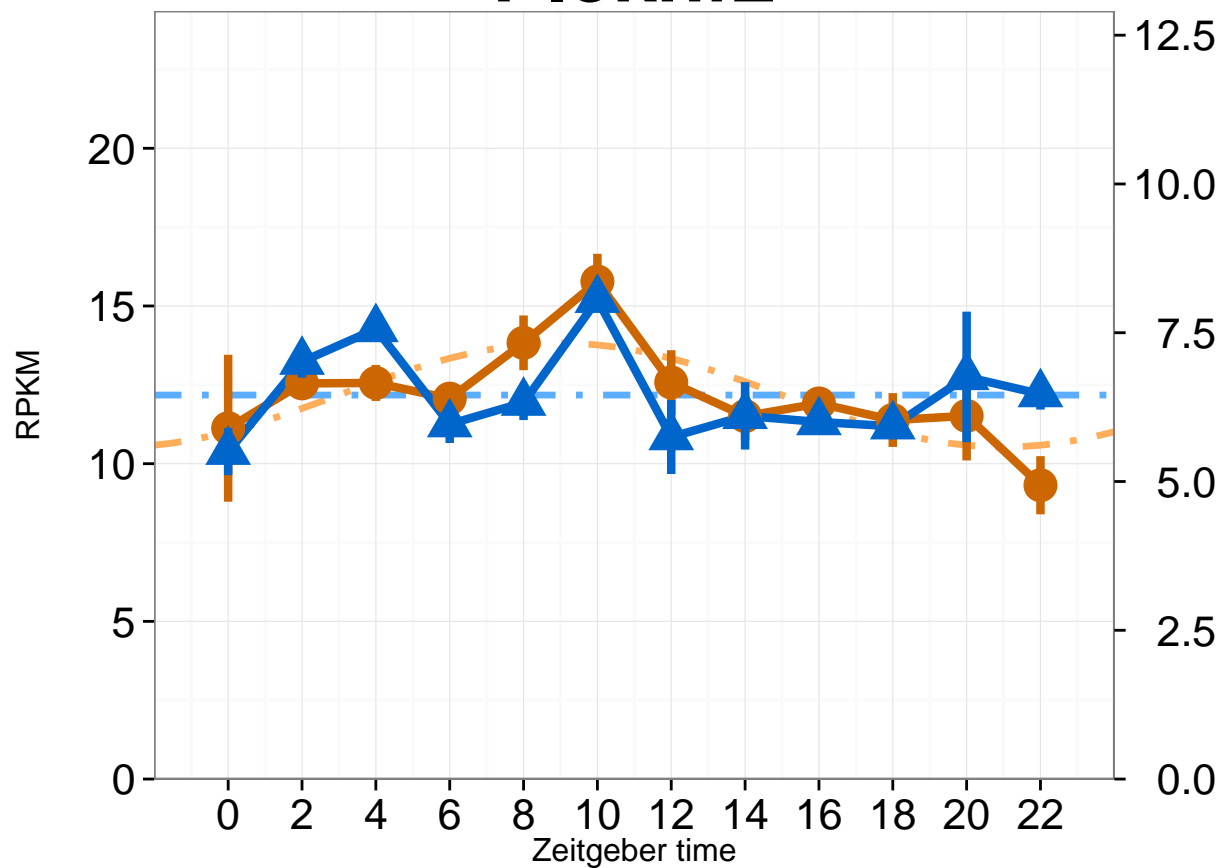

## Plekhf2

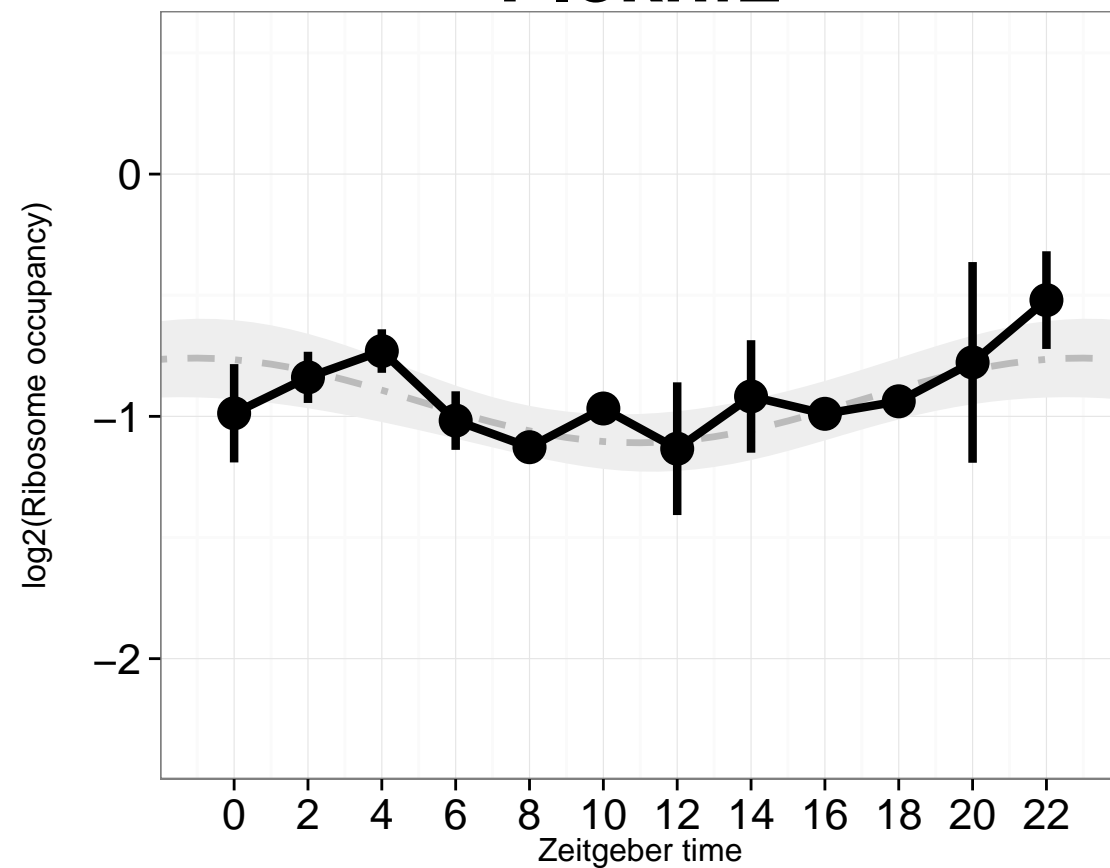

Supplement: SuppDataset_1.zip [file Plekhf2_set_A.pdf › Supplemental Dataset 1/A-mRNA_nonrhyth_translation_nonrhyth/Plekhf2_set_A.pdf]

## Plekhhg2

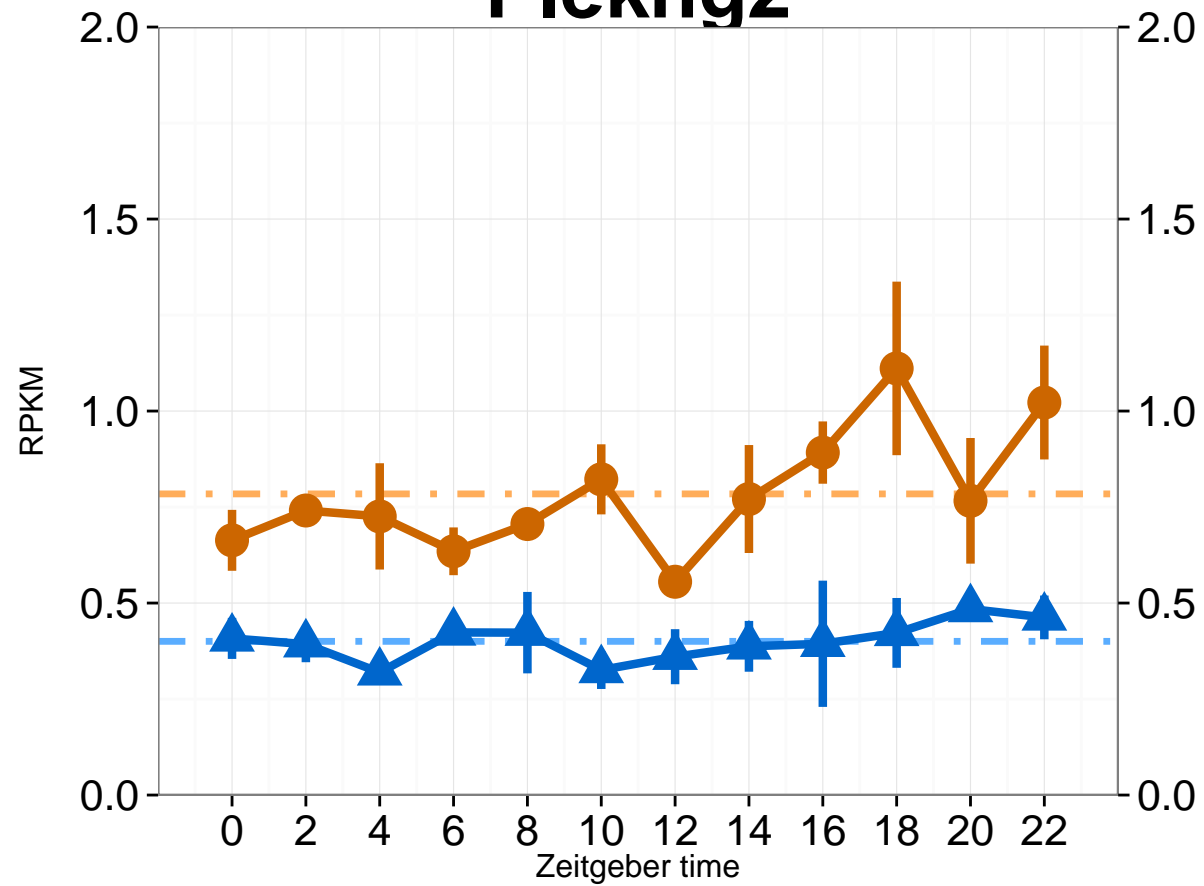

## Plekhhg2

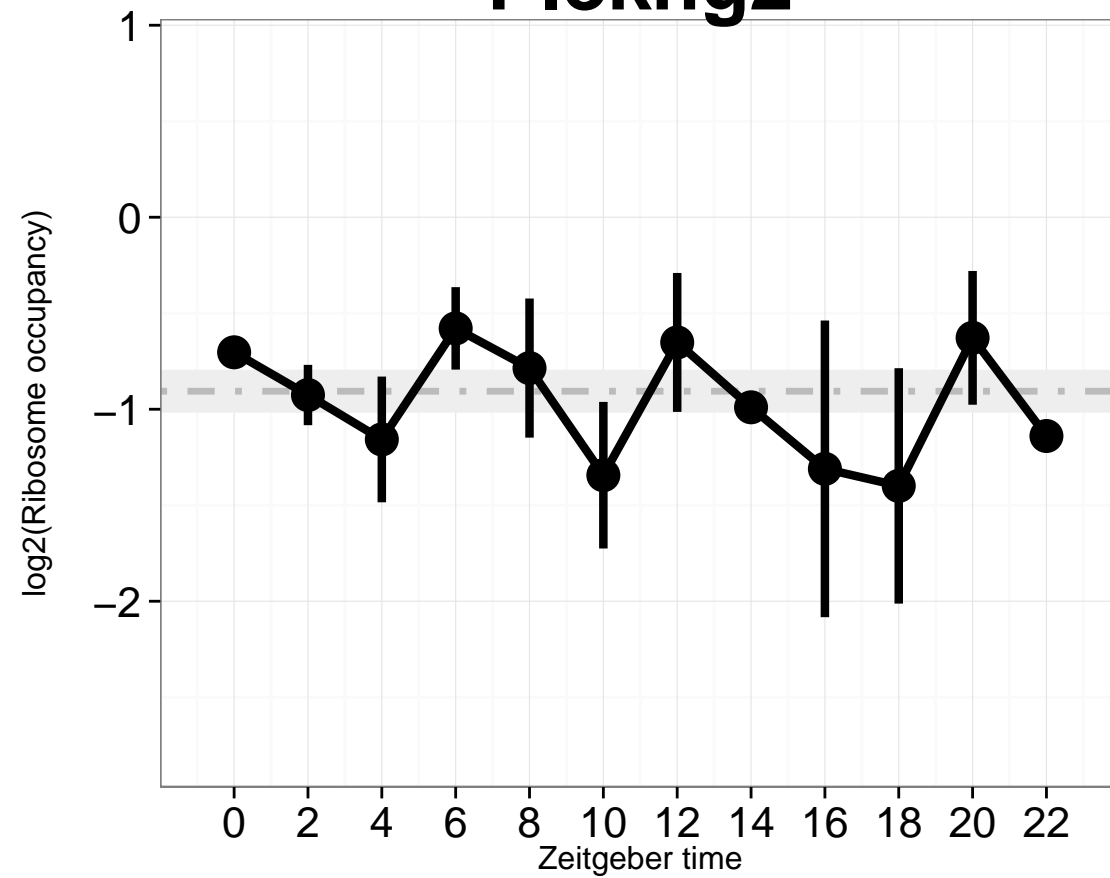

Supplement: SuppDataset_1.zip [file Plekhg2_set_A.pdf › Supplemental Dataset 1/A-mRNA_nonrhyth_translation_nonrhyth/Plekhg2_set_A.pdf]

## Plekhhg3

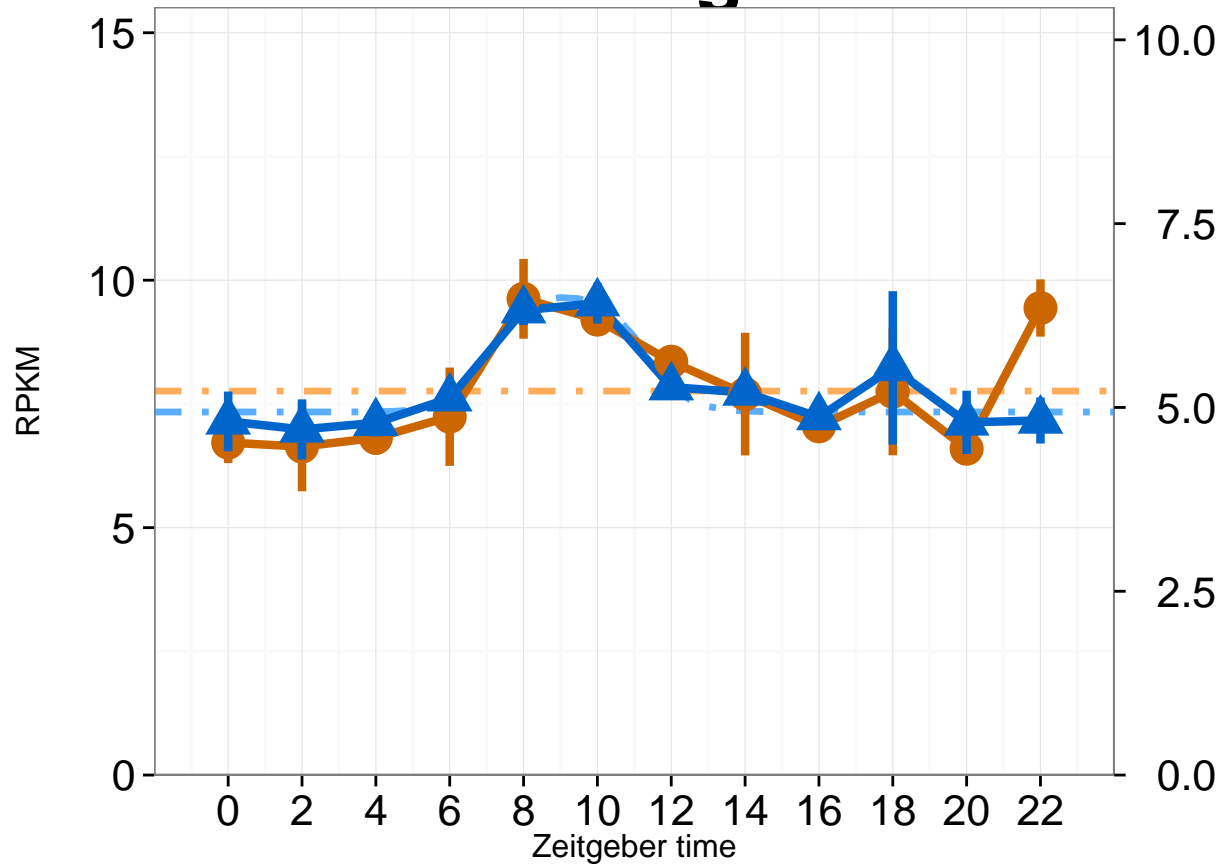

## Plekhhg3

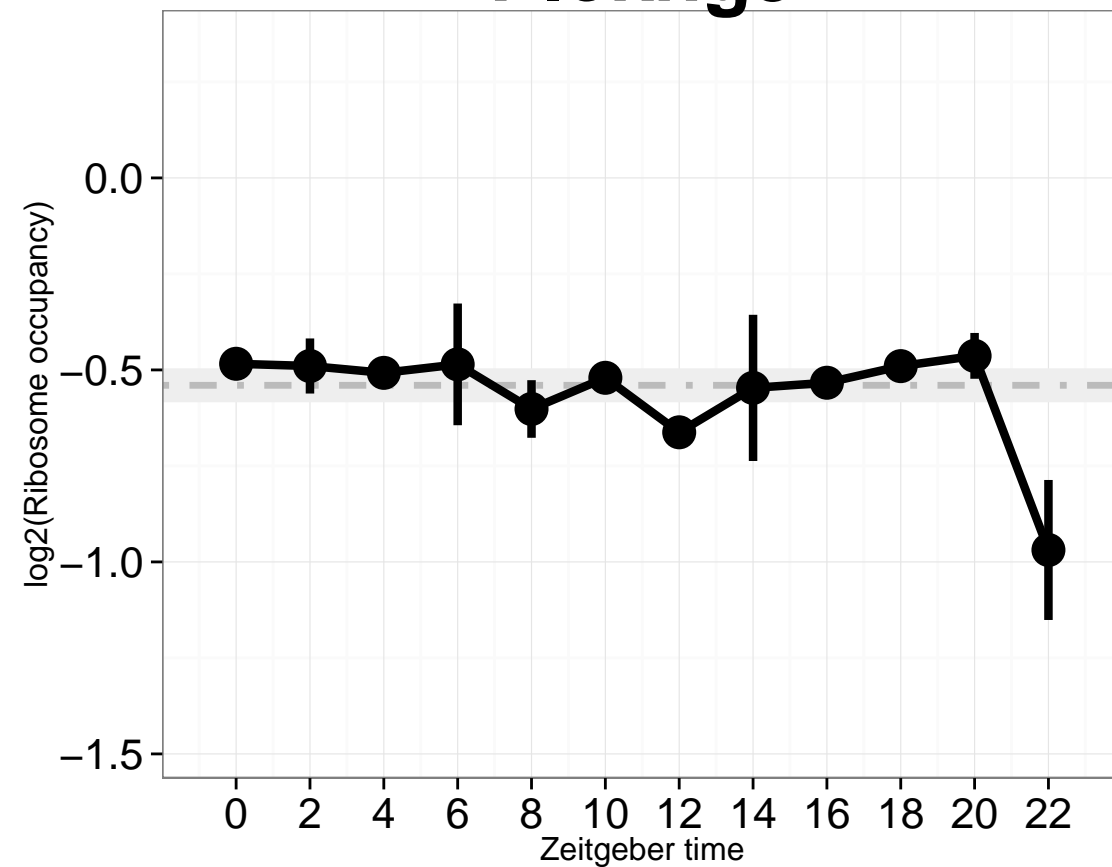

Supplement: SuppDataset_1.zip [file Plekhg3_set_A.pdf › Supplemental Dataset 1/A-mRNA_nonrhyth_translation_nonrhyth/Plekhg3_set_A.pdf]

# Plekhg6

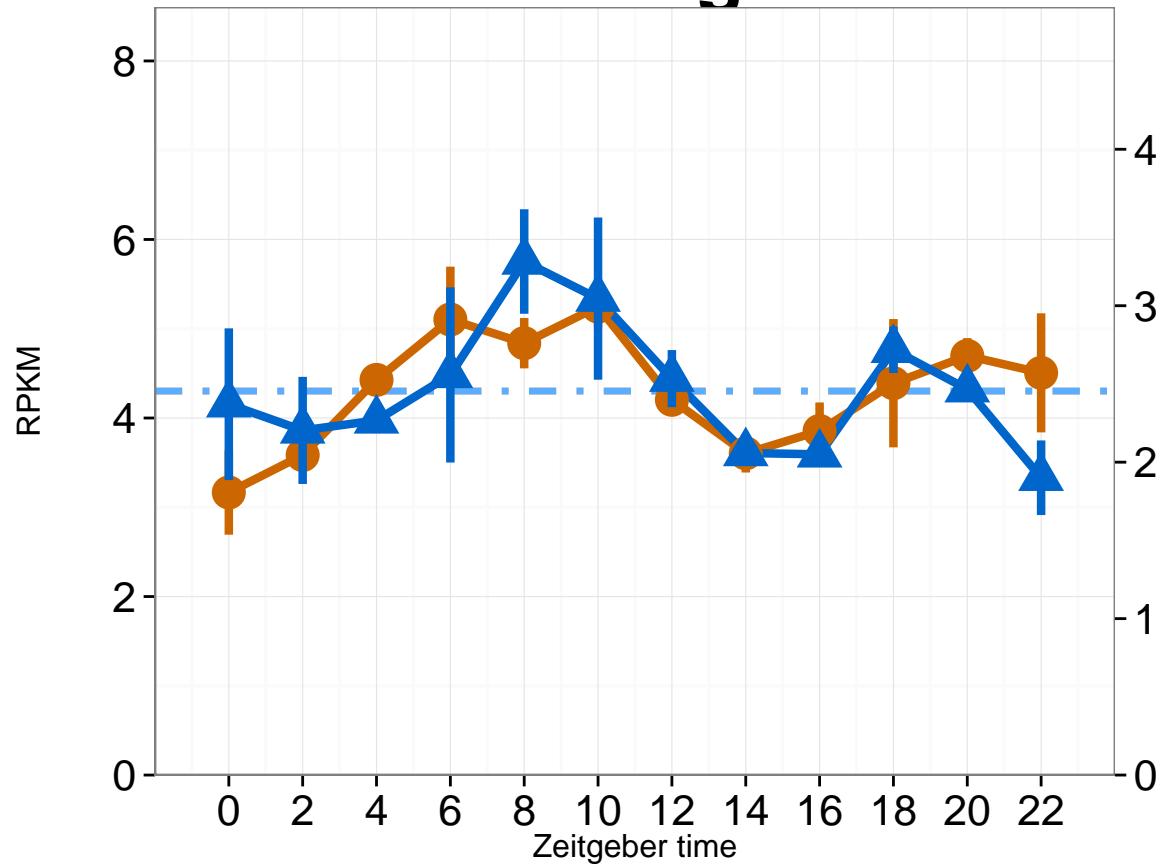

# Plekhg6

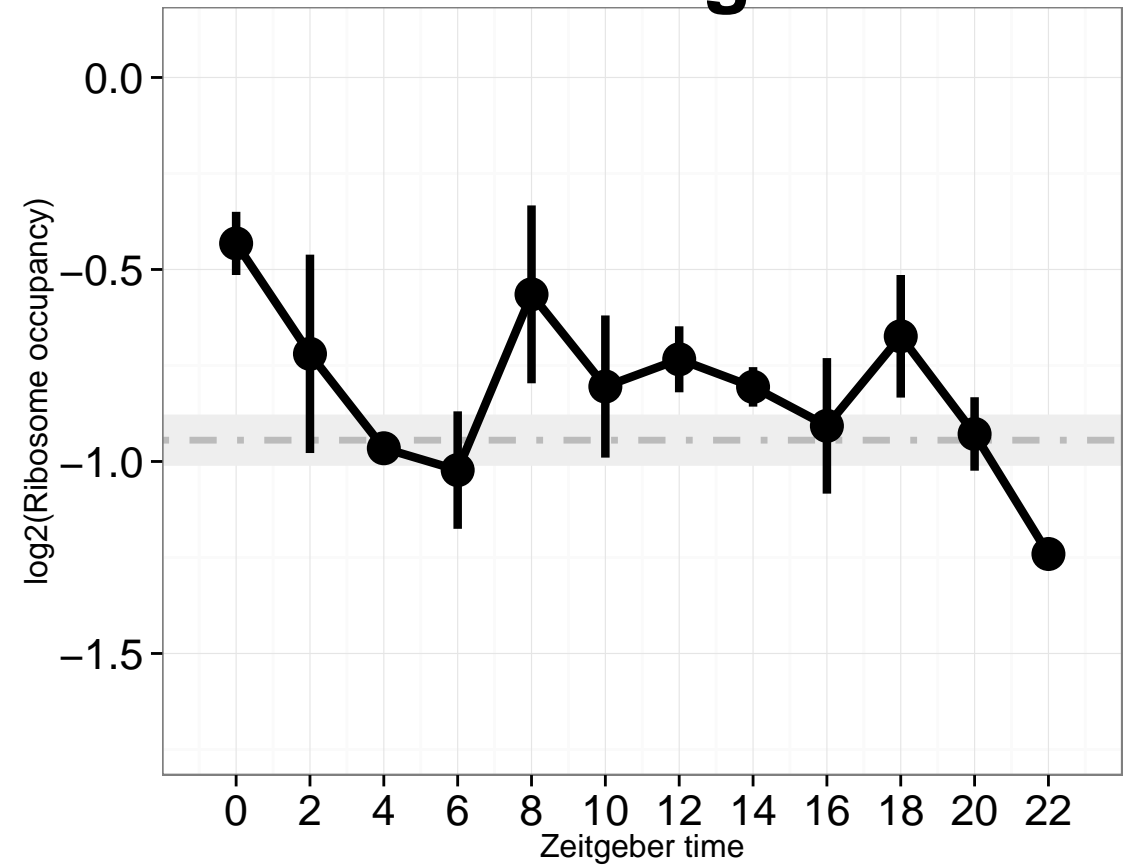

Supplement: SuppDataset_1.zip [file Plekhg6_set_A.pdf › Supplemental Dataset 1/A-mRNA_nonrhyth_translation_nonrhyth/Plekhg6_set_A.pdf]

## Plekhh3

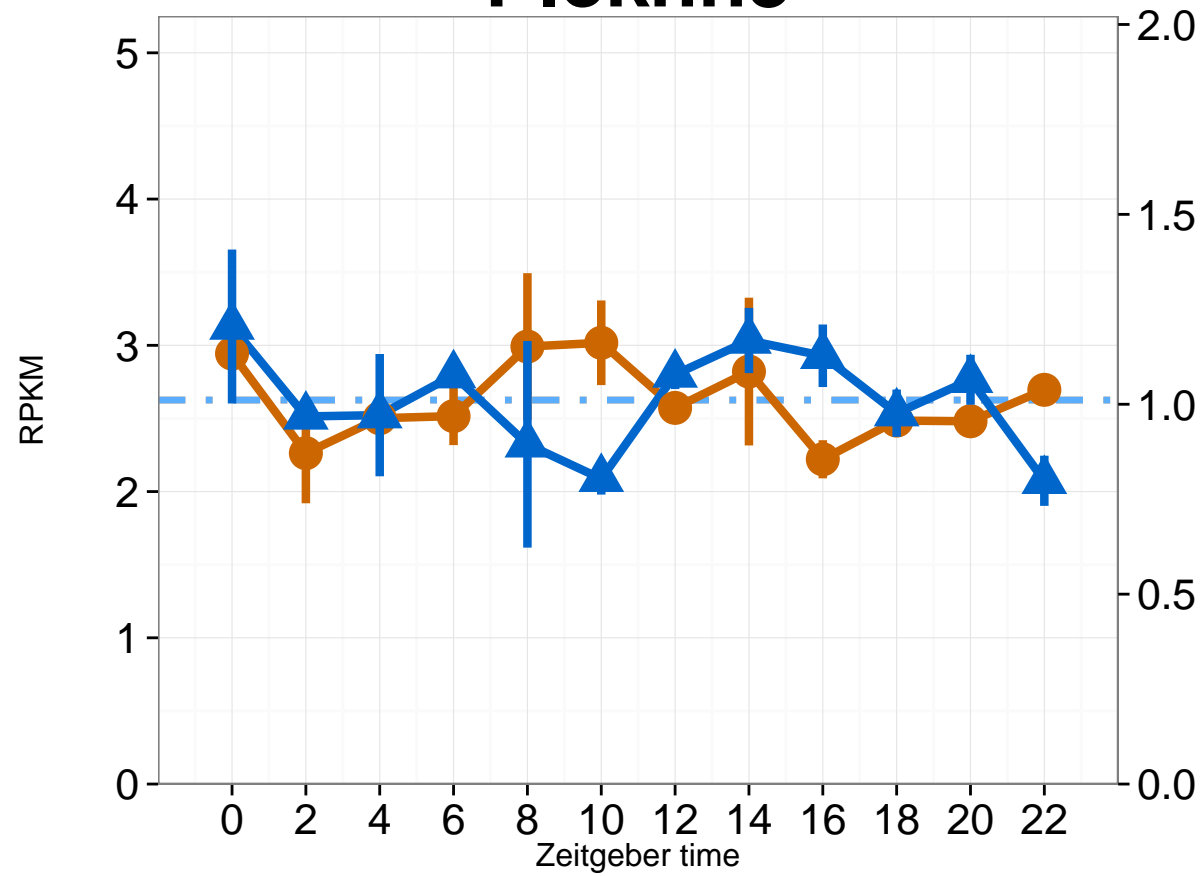

## Plekhh3

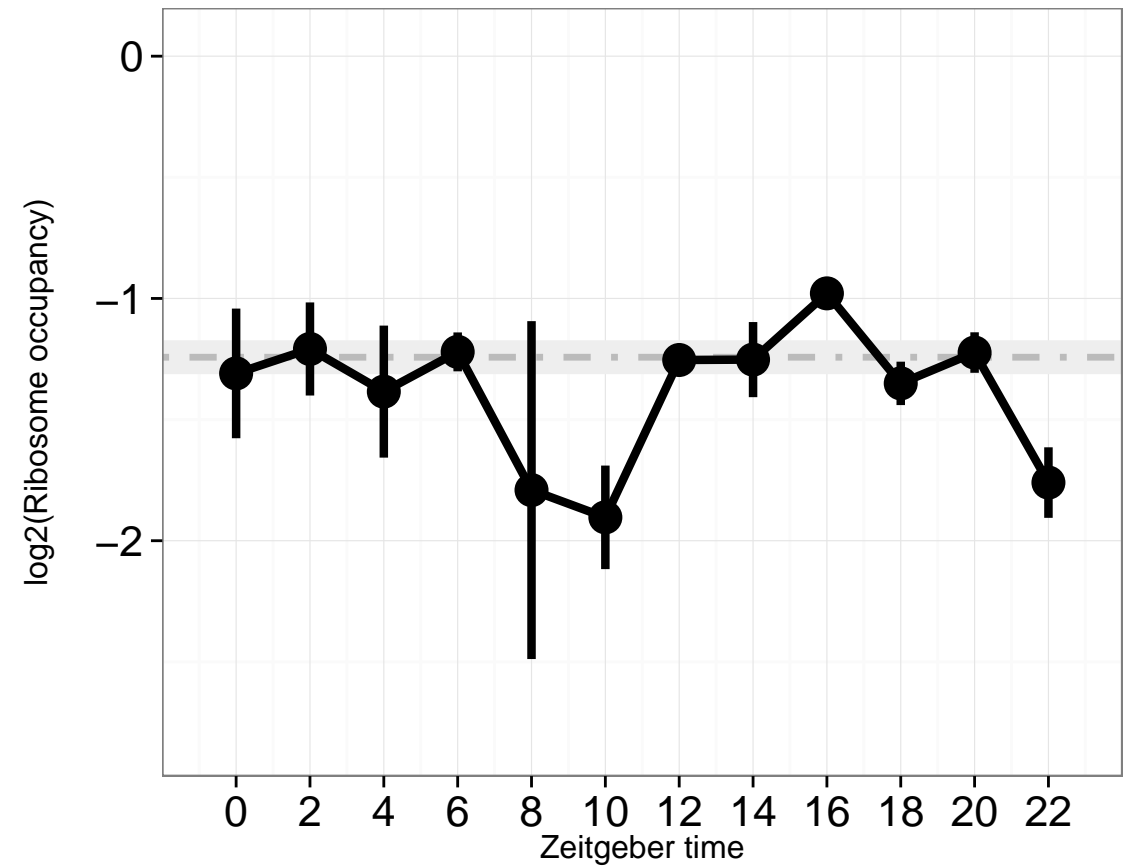

Supplement: SuppDataset_1.zip [file Plekhh3_set_A.pdf › Supplemental Dataset 1/A-mRNA_nonrhyth_translation_nonrhyth/Plekhh3_set_A.pdf]

# Plekhj1

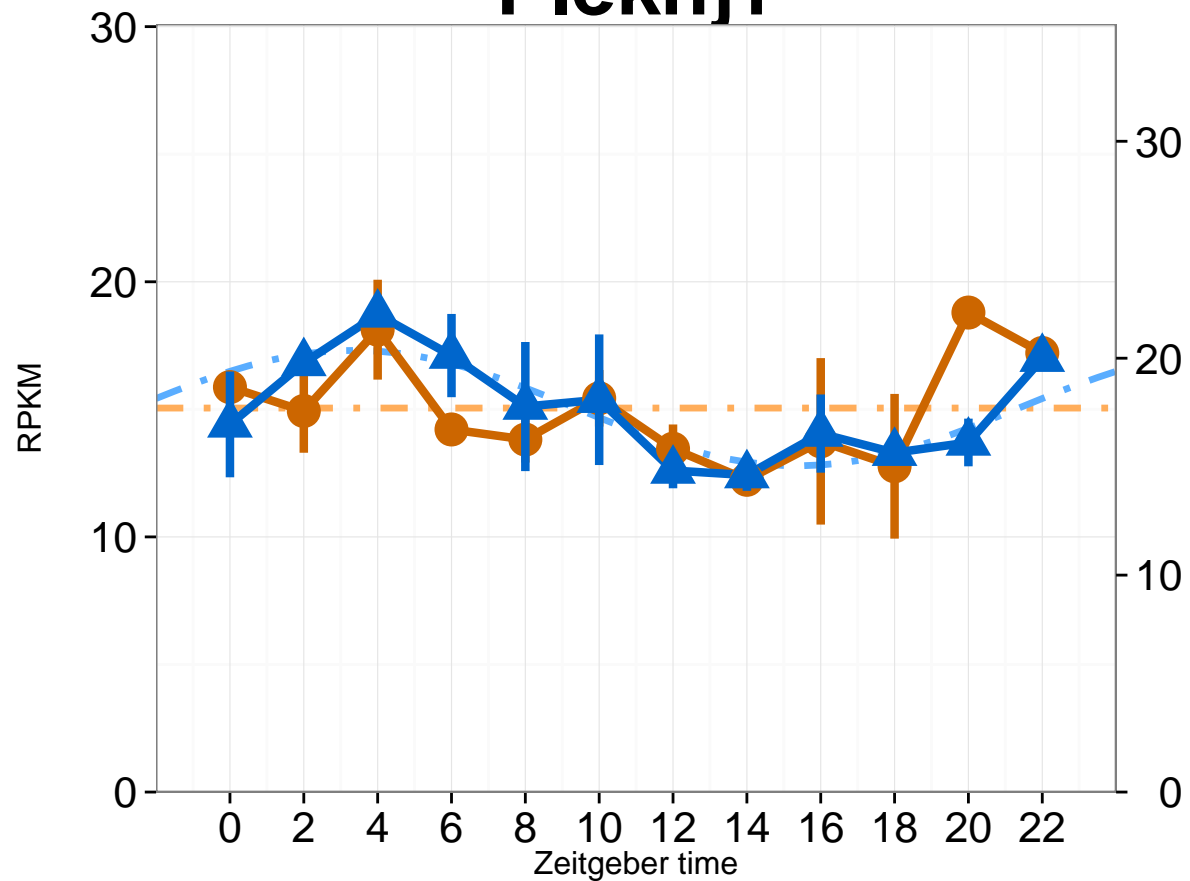

# Plekhj1

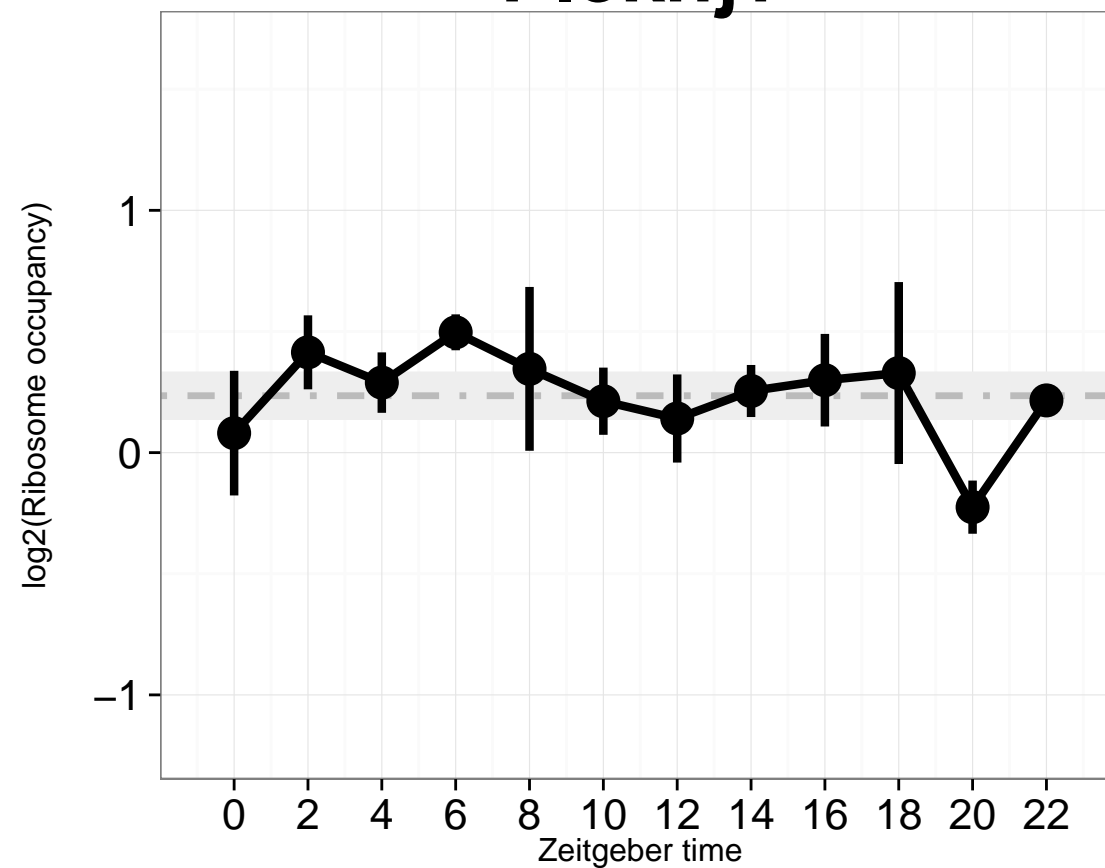

Supplement: SuppDataset_1.zip [file Plekhj1_set_A.pdf › Supplemental Dataset 1/A-mRNA_nonrhyth_translation_nonrhyth/Plekhj1_set_A.pdf]

## Plekhm1

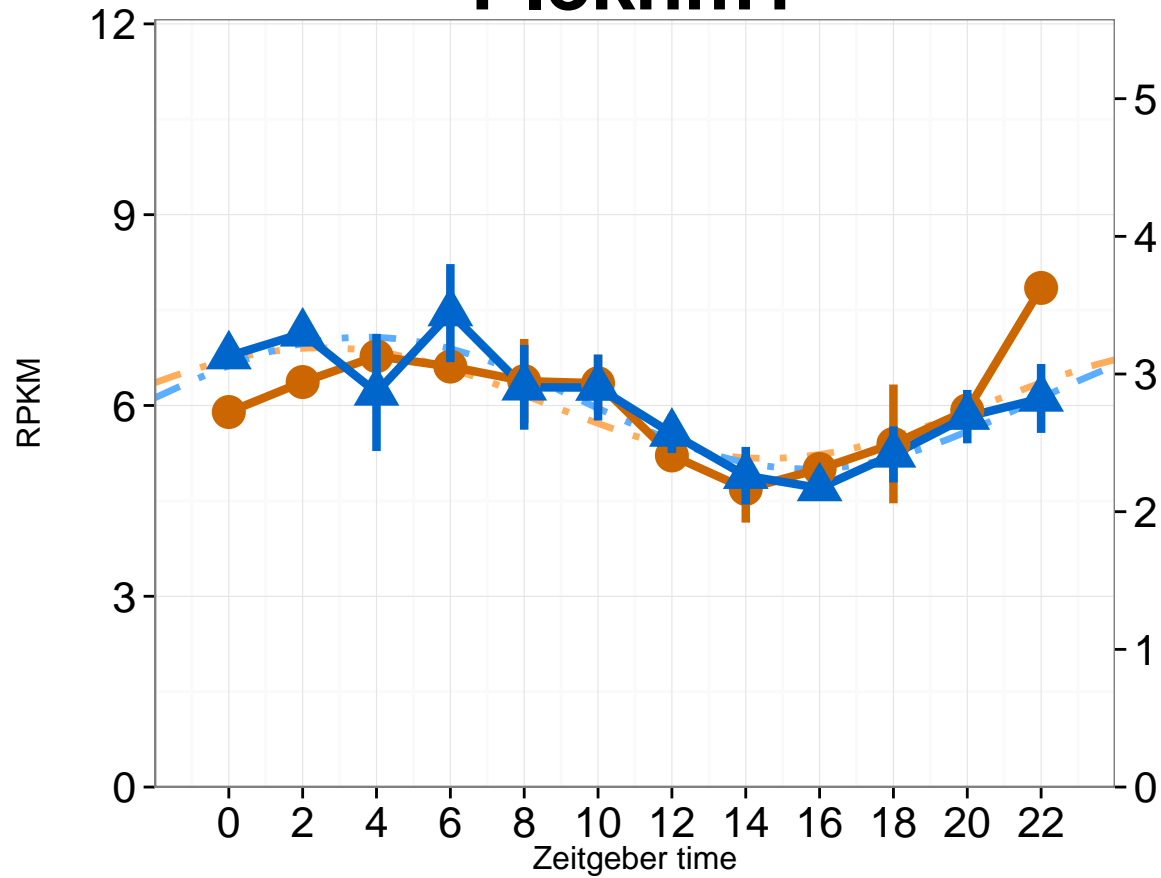

## Plekhm1

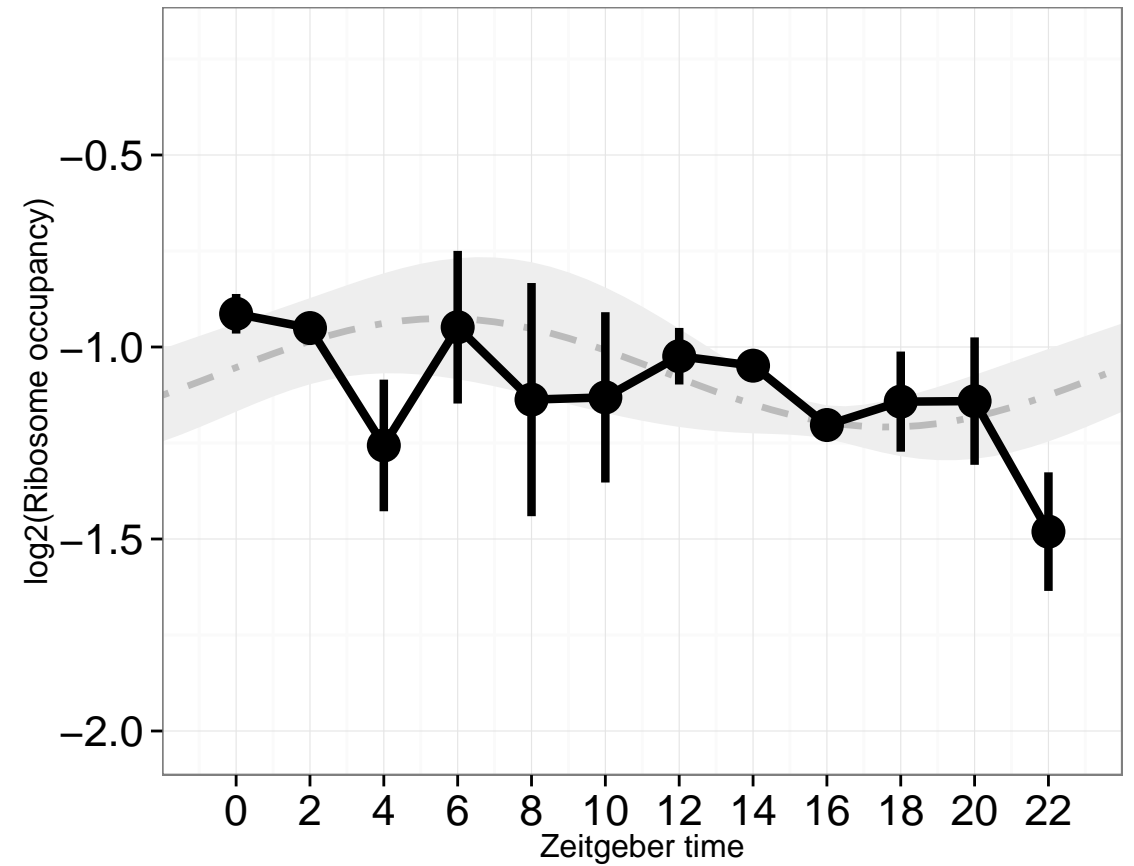

Supplement: SuppDataset_1.zip [file Plekhm1_set_A.pdf › Supplemental Dataset 1/A-mRNA_nonrhyth_translation_nonrhyth/Plekhm1_set_A.pdf]

## Plekhm3

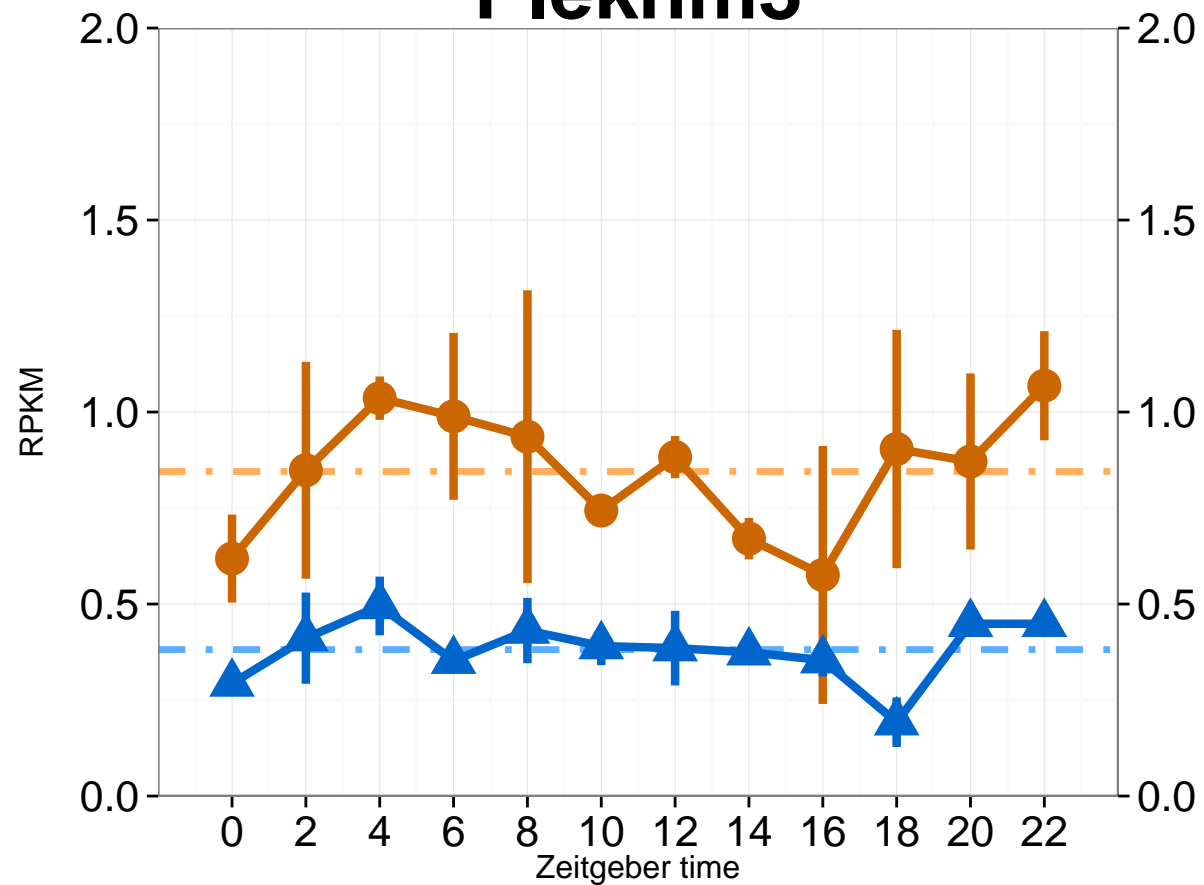

## Plekhm3

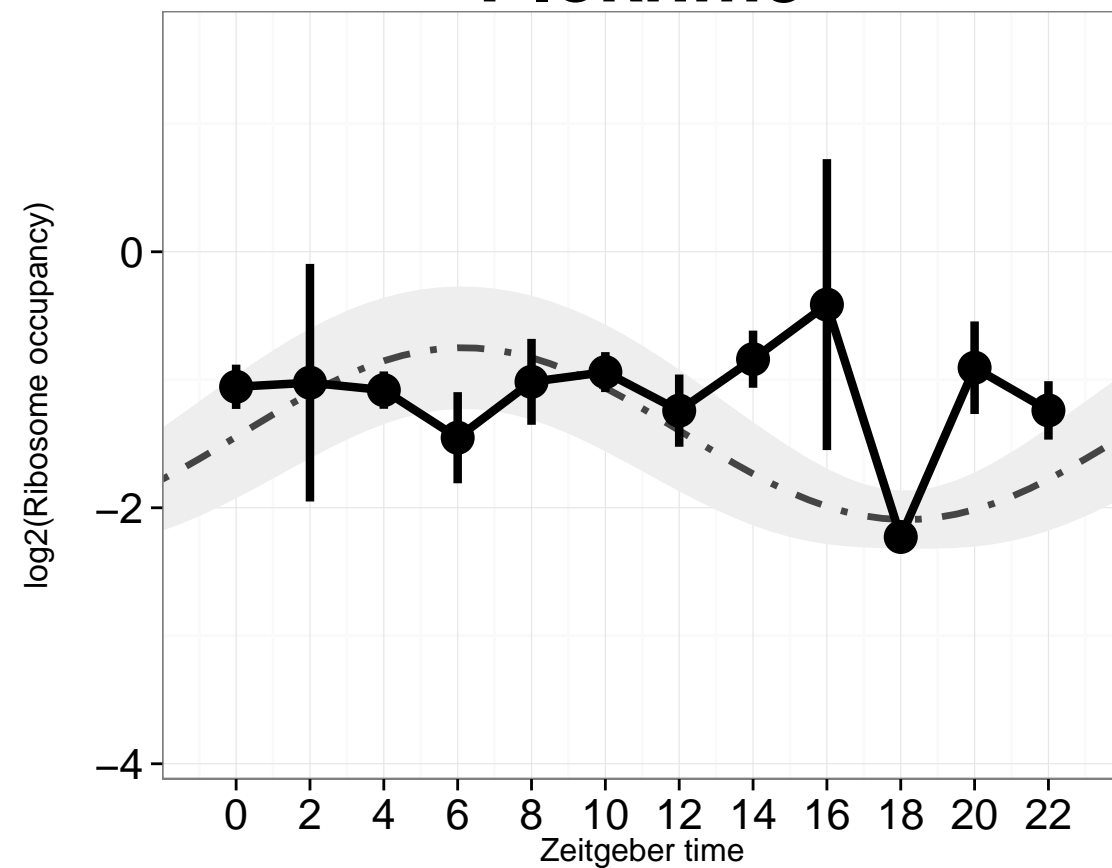

Supplement: SuppDataset_1.zip [file Plekhm3_set_A.pdf › Supplemental Dataset 1/A-mRNA_nonrhyth_translation_nonrhyth/Plekhm3_set_A.pdf]

## Plekho1

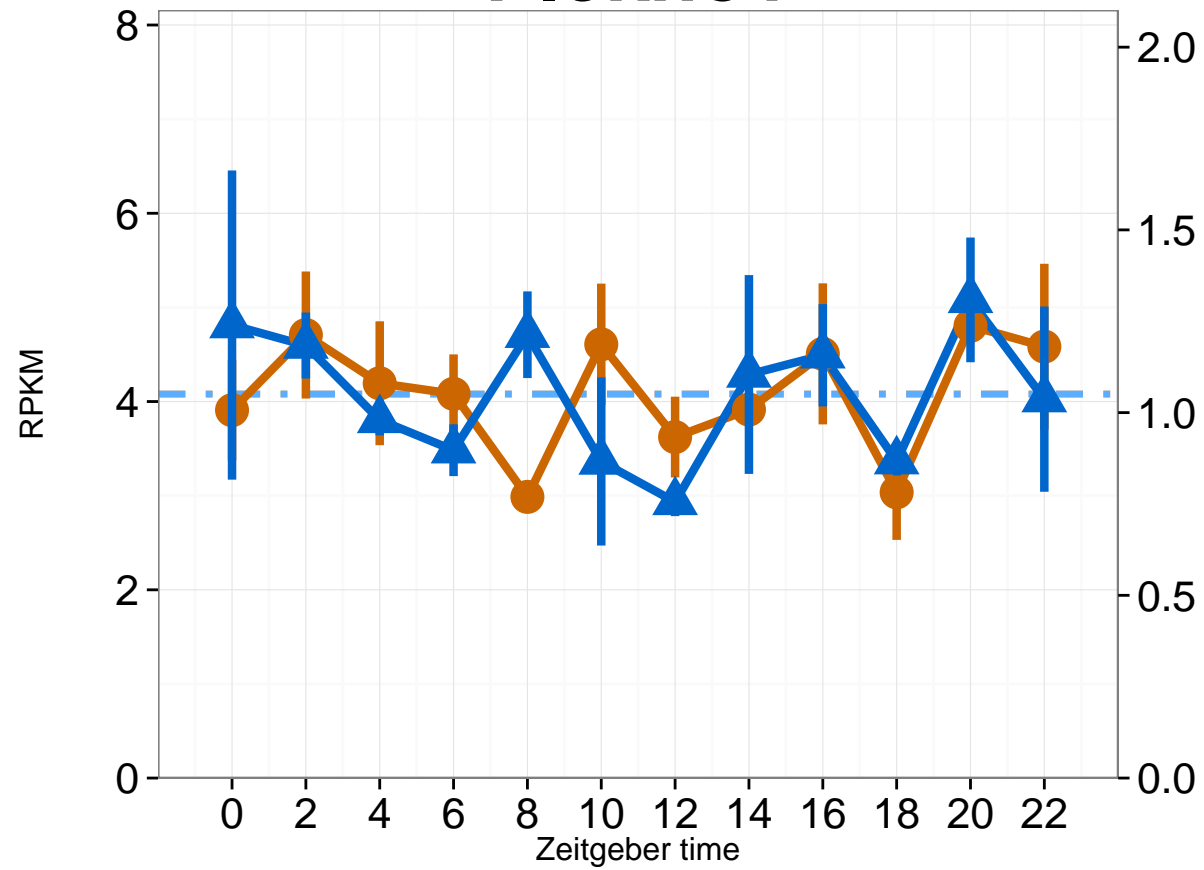

## Plekho1

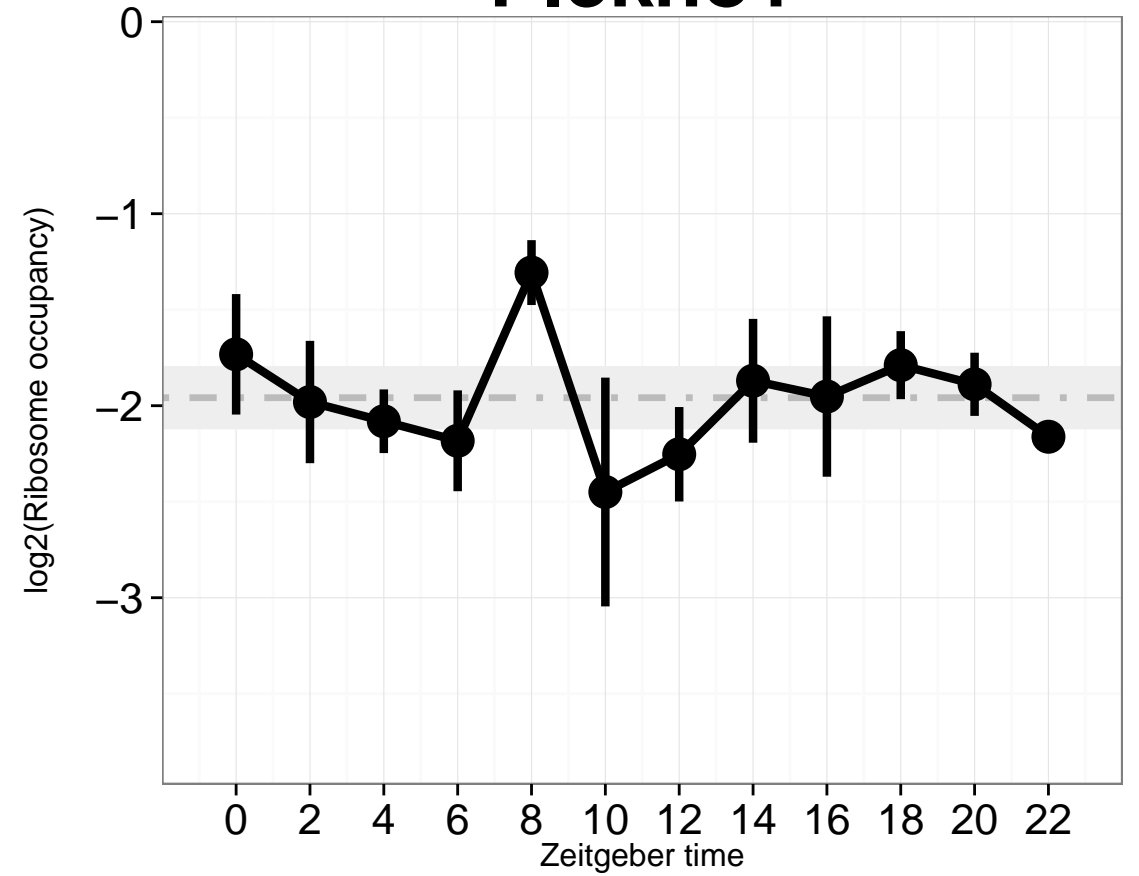

Supplement: SuppDataset_1.zip [file Plekho1_set_A.pdf › Supplemental Dataset 1/A-mRNA_nonrhyth_translation_nonrhyth/Plekho1_set_A.pdf]

## Plekho2

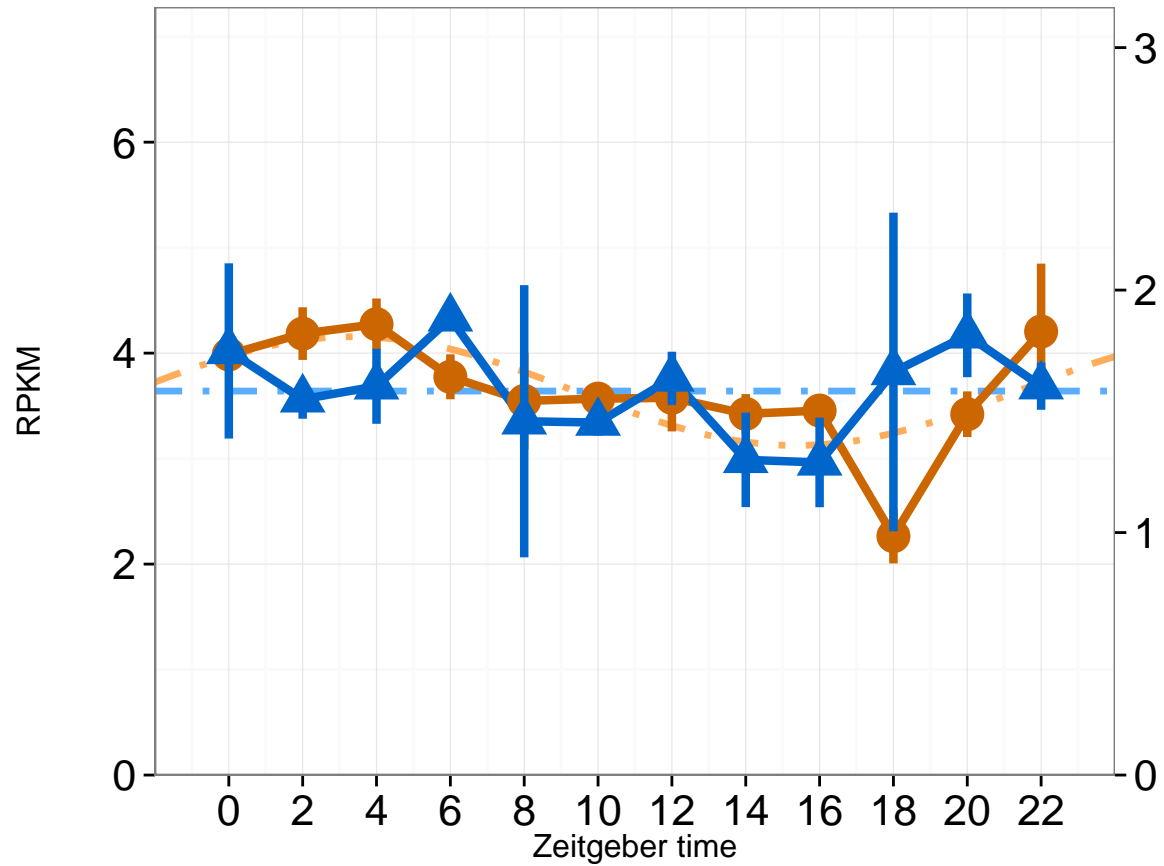

## Plekho2

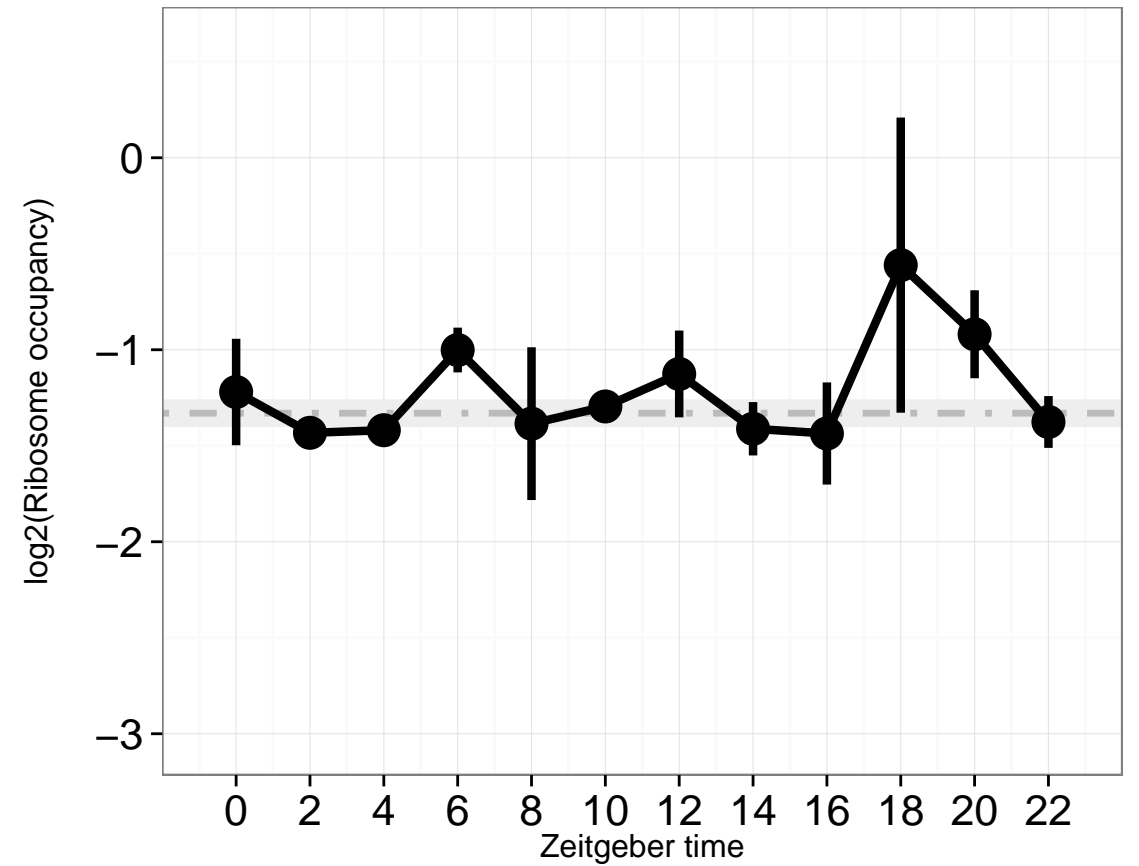

Supplement: SuppDataset_1.zip [file Plekho2_set_A.pdf › Supplemental Dataset 1/A-mRNA_nonrhyth_translation_nonrhyth/Plekho2_set_A.pdf]

**Plg**

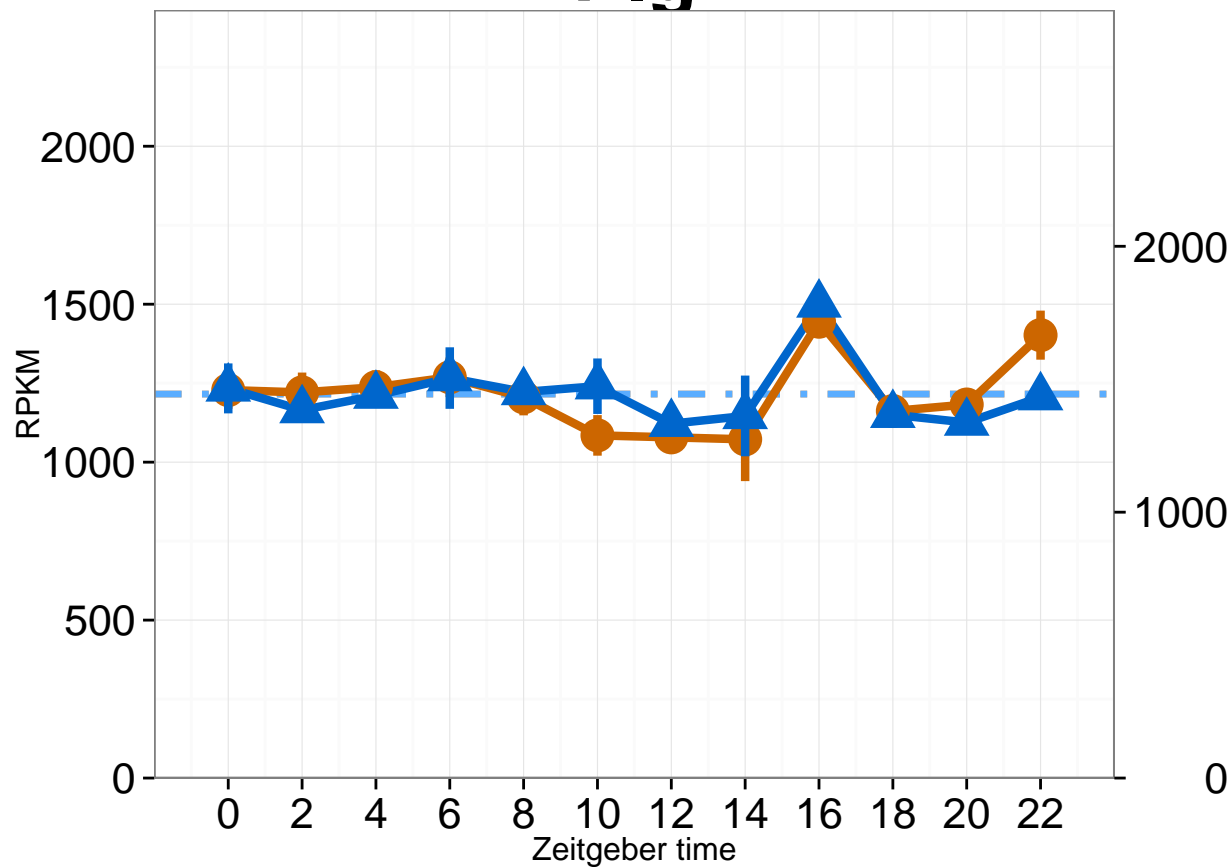

**Plg**

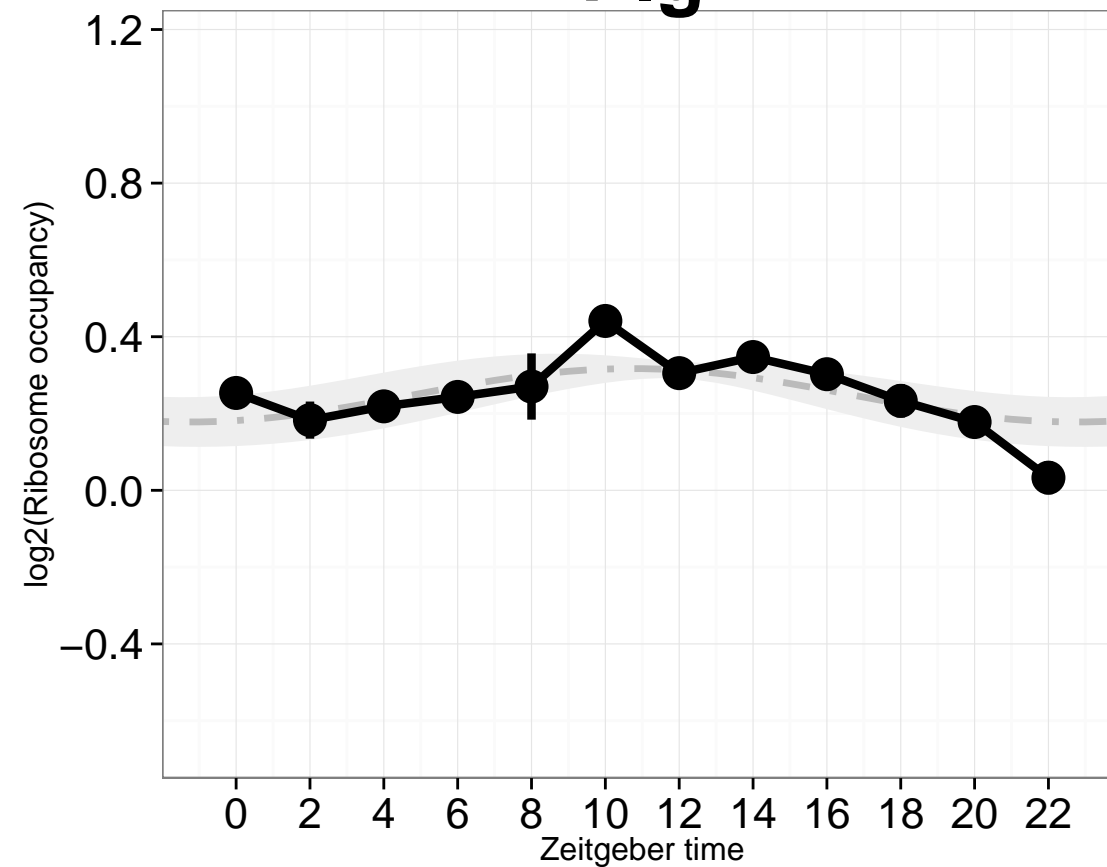

Supplement: SuppDataset_1.zip [file Plg_set_A.pdf › Supplemental Dataset 1/A-mRNA_nonrhyth_translation_nonrhyth/Plg_set_A.pdf]

## Plgrkt

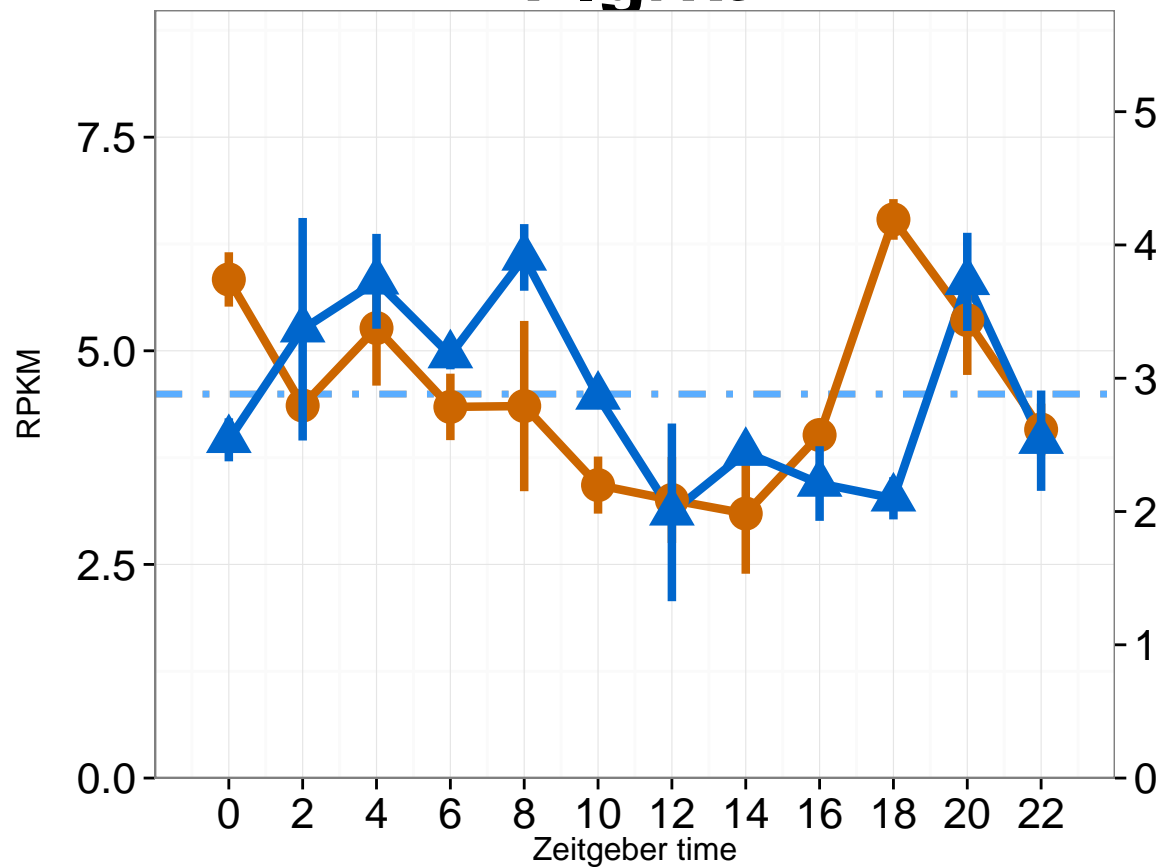

## Plgrkt

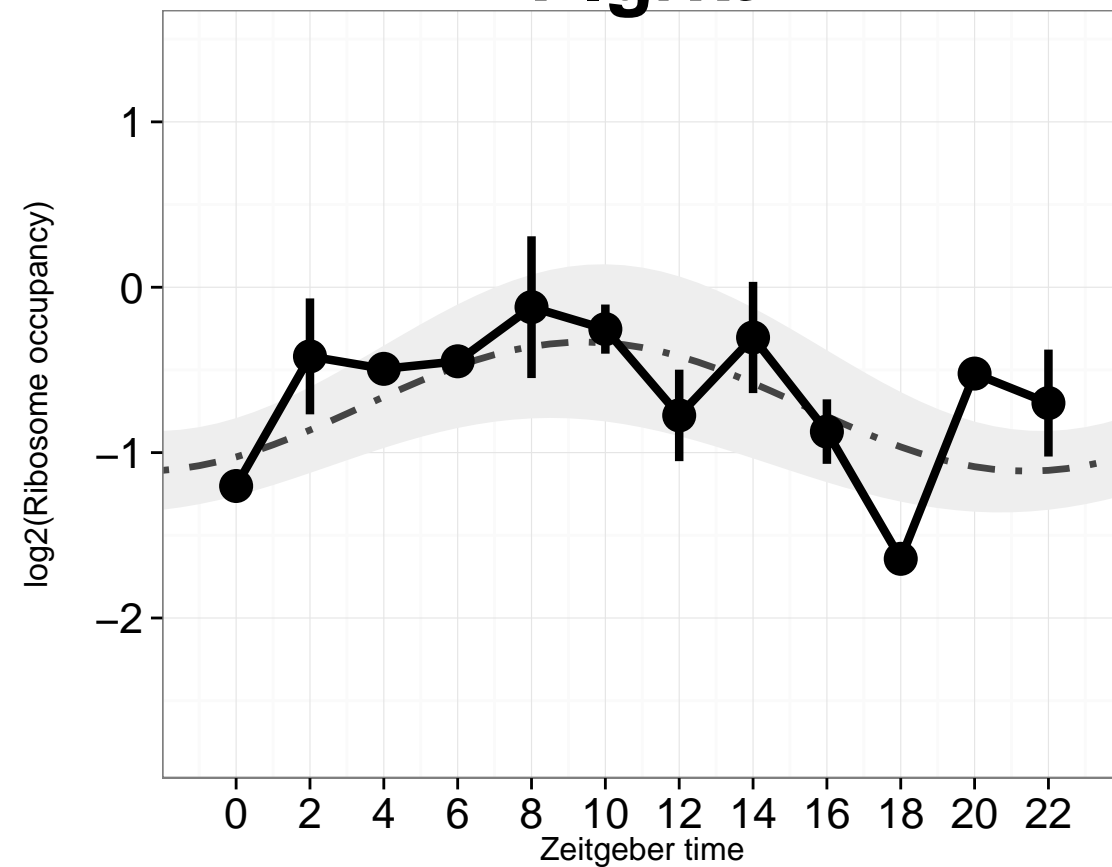

Supplement: SuppDataset_1.zip [file Plgrkt_set_A.pdf › Supplemental Dataset 1/A-mRNA_nonrhyth_translation_nonrhyth/Plgrkt_set_A.pdf]

## Plin3

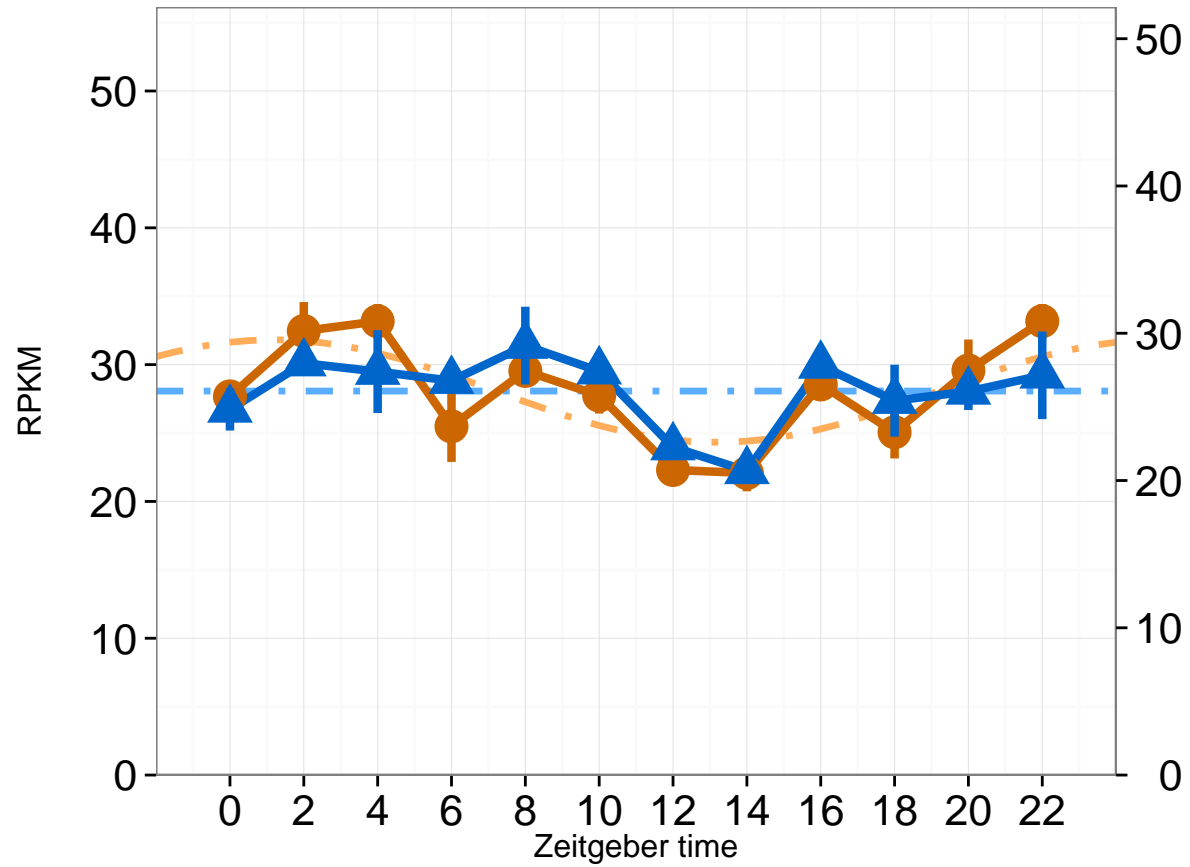

## Plin3

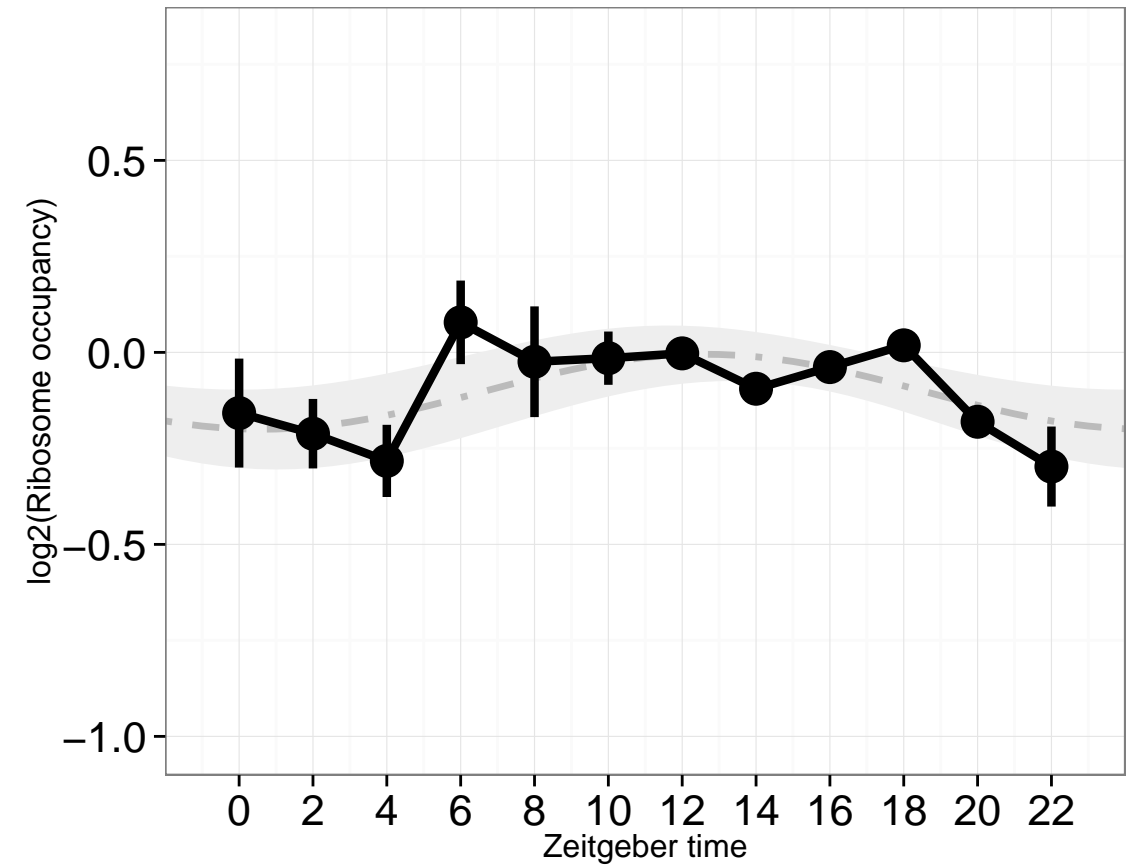

Supplement: SuppDataset_1.zip [file Plin3_set_A.pdf › Supplemental Dataset 1/A-mRNA_nonrhyth_translation_nonrhyth/Plin3_set_A.pdf]

# PIK1 TR

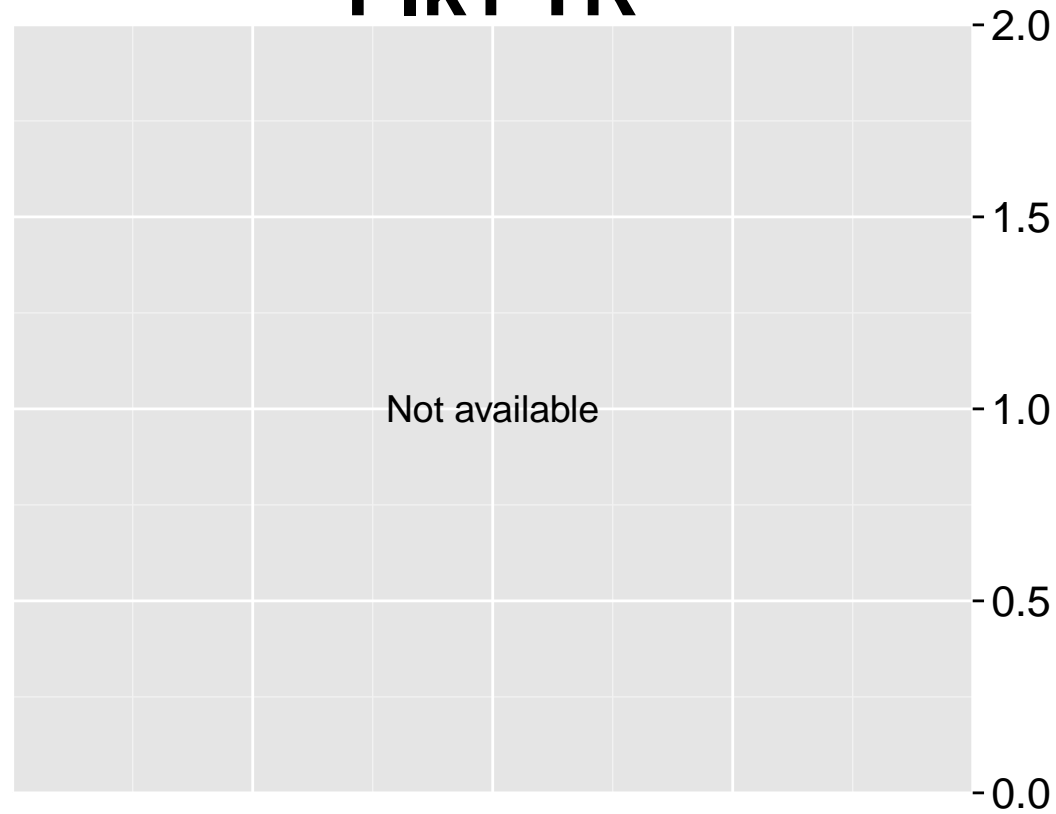

# Plk1 $\log_2$ (Ribosome occupancy)

Supplement: SuppDataset_1.zip [file Plk1_set_A.pdf › Supplemental Dataset 1/A-mRNA_nonrhyth_translation_nonrhyth/Plk1_set_A.pdf]

# Plk1s1

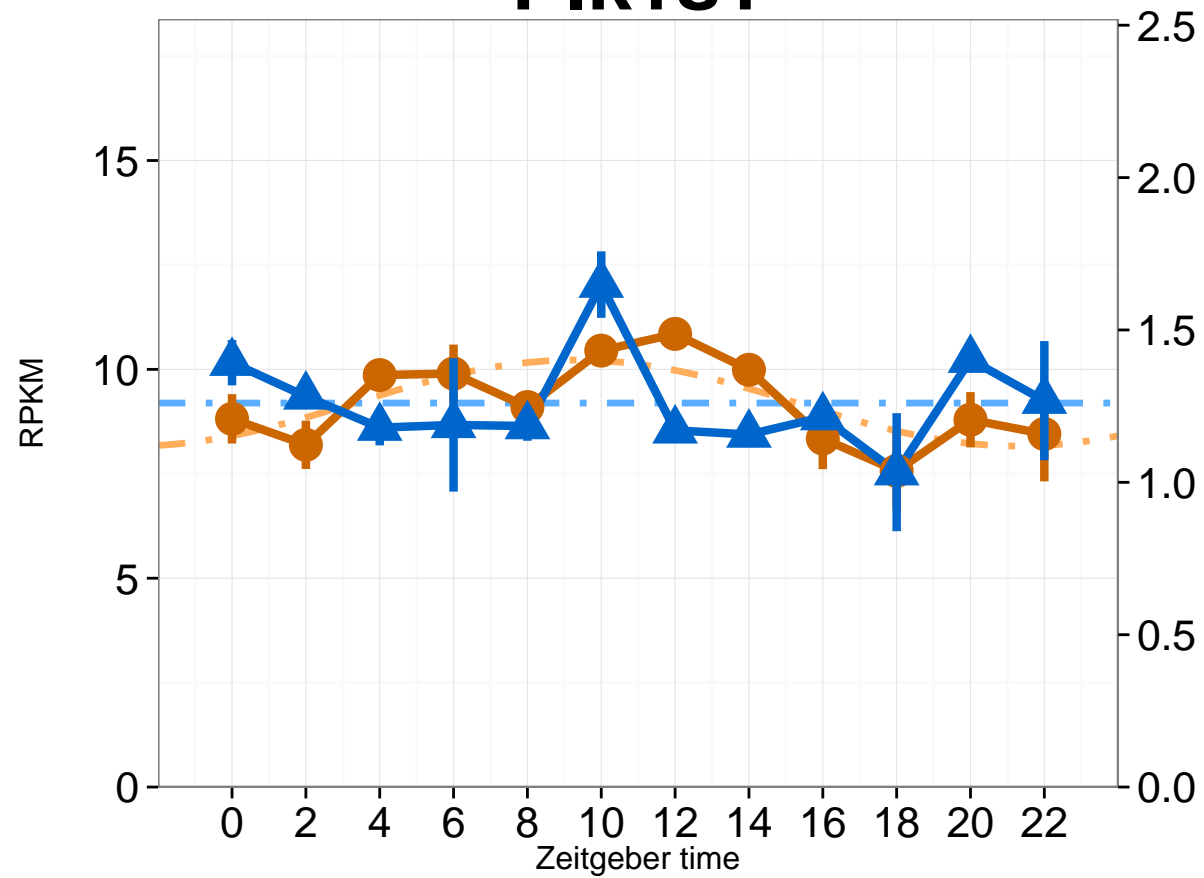

# Plk1s1

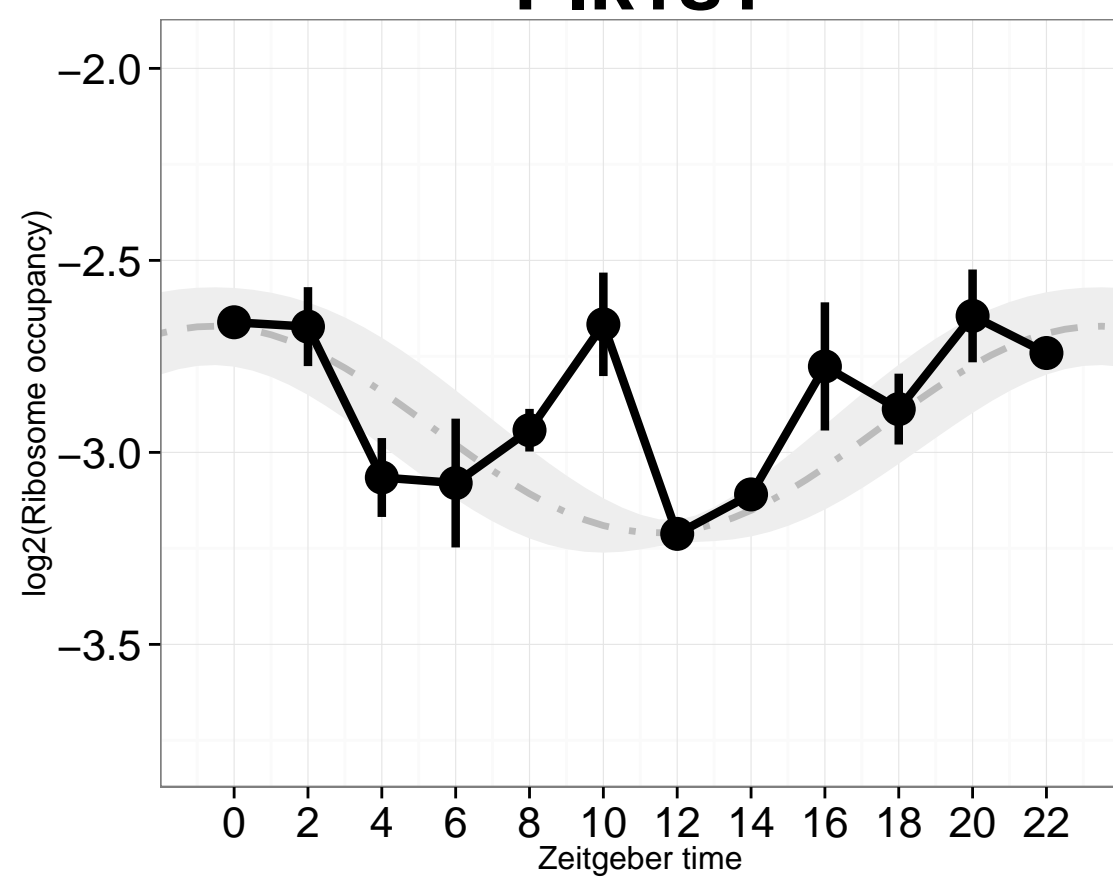

Supplement: SuppDataset_1.zip [file Plk1s1_set_A.pdf › Supplemental Dataset 1/A-mRNA_nonrhyth_translation_nonrhyth/Plk1s1_set_A.pdf]

## PIk2

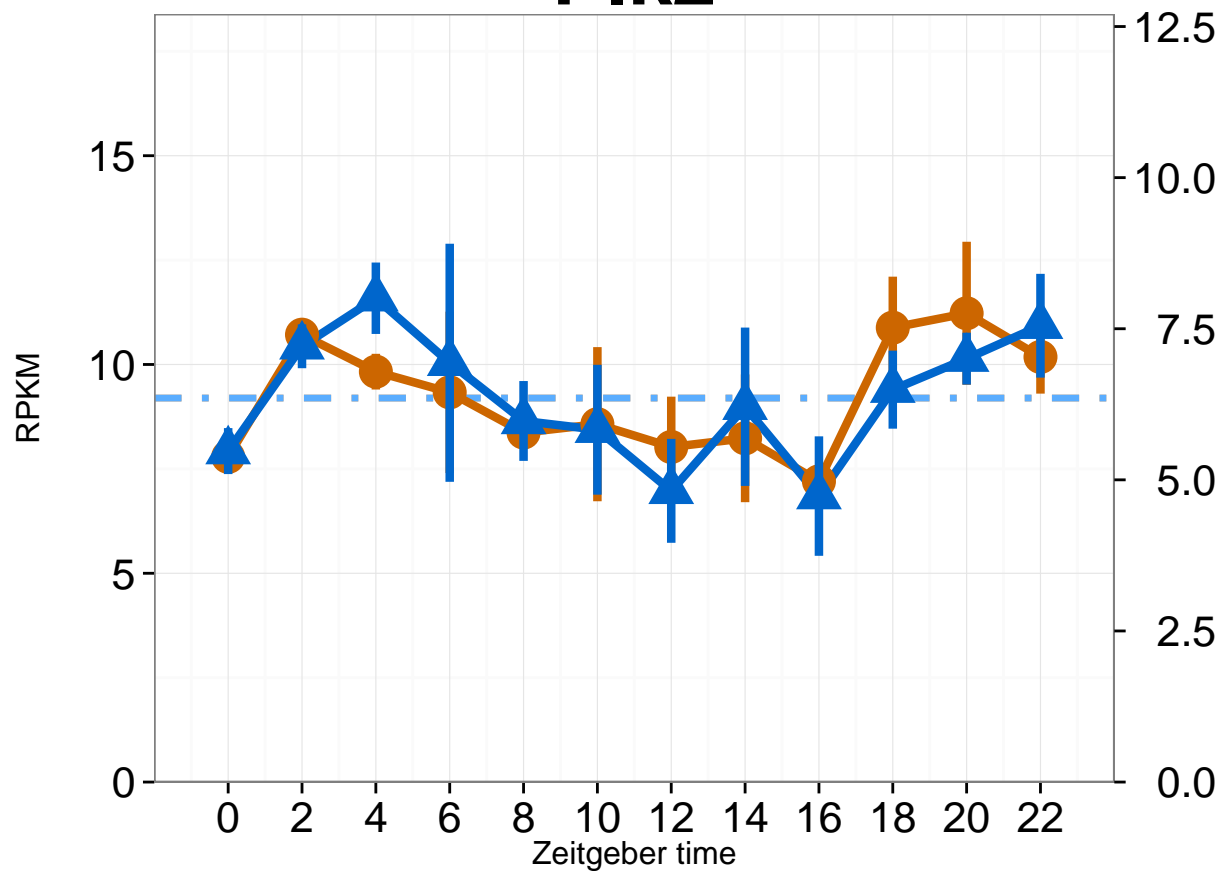

## PIk2

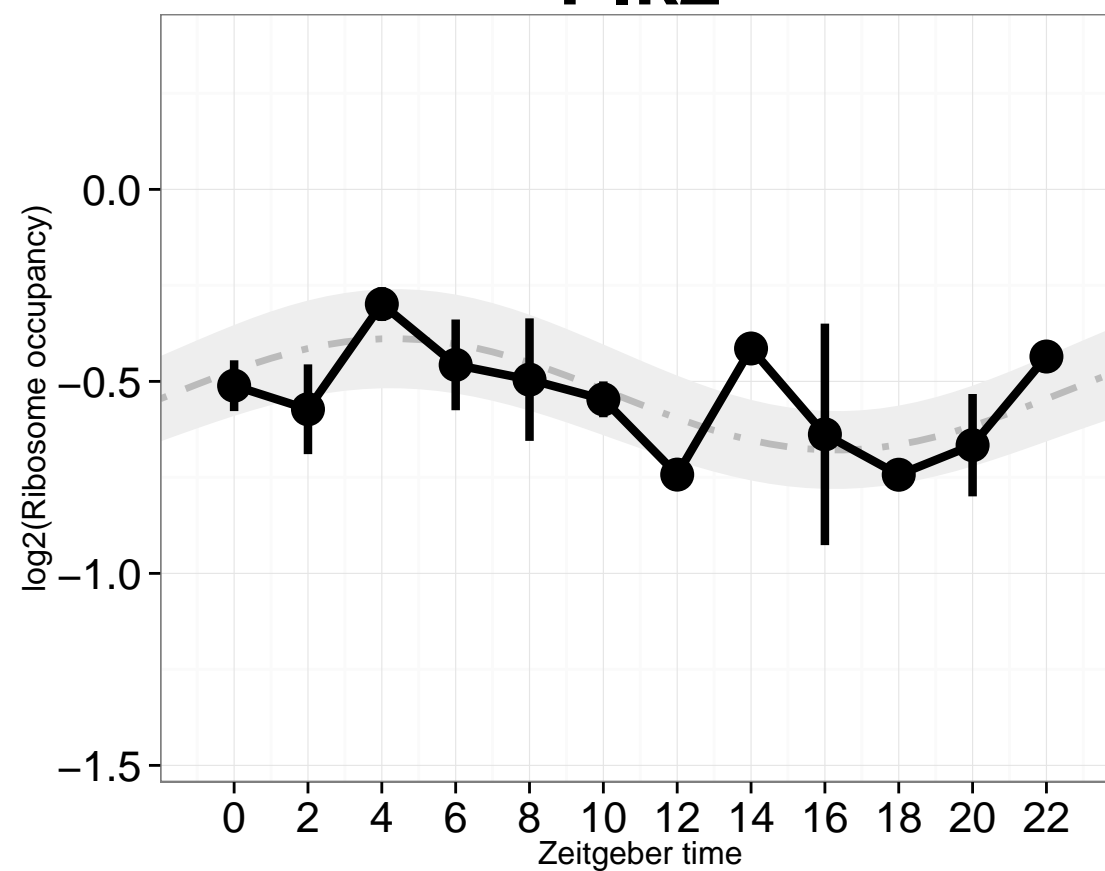

Supplement: SuppDataset_1.zip [file Plk2_set_A.pdf › Supplemental Dataset 1/A-mRNA_nonrhyth_translation_nonrhyth/Plk2_set_A.pdf]

## PIK3

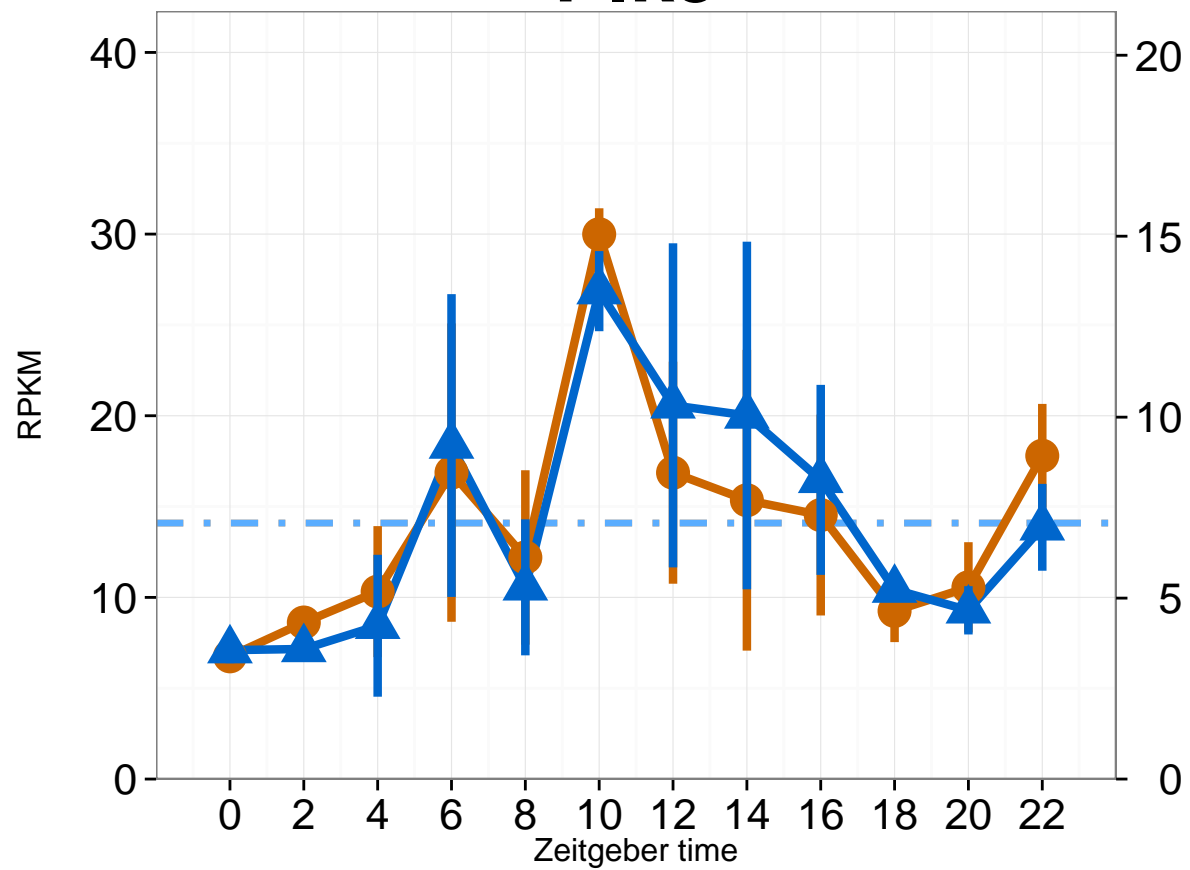

## PIK3

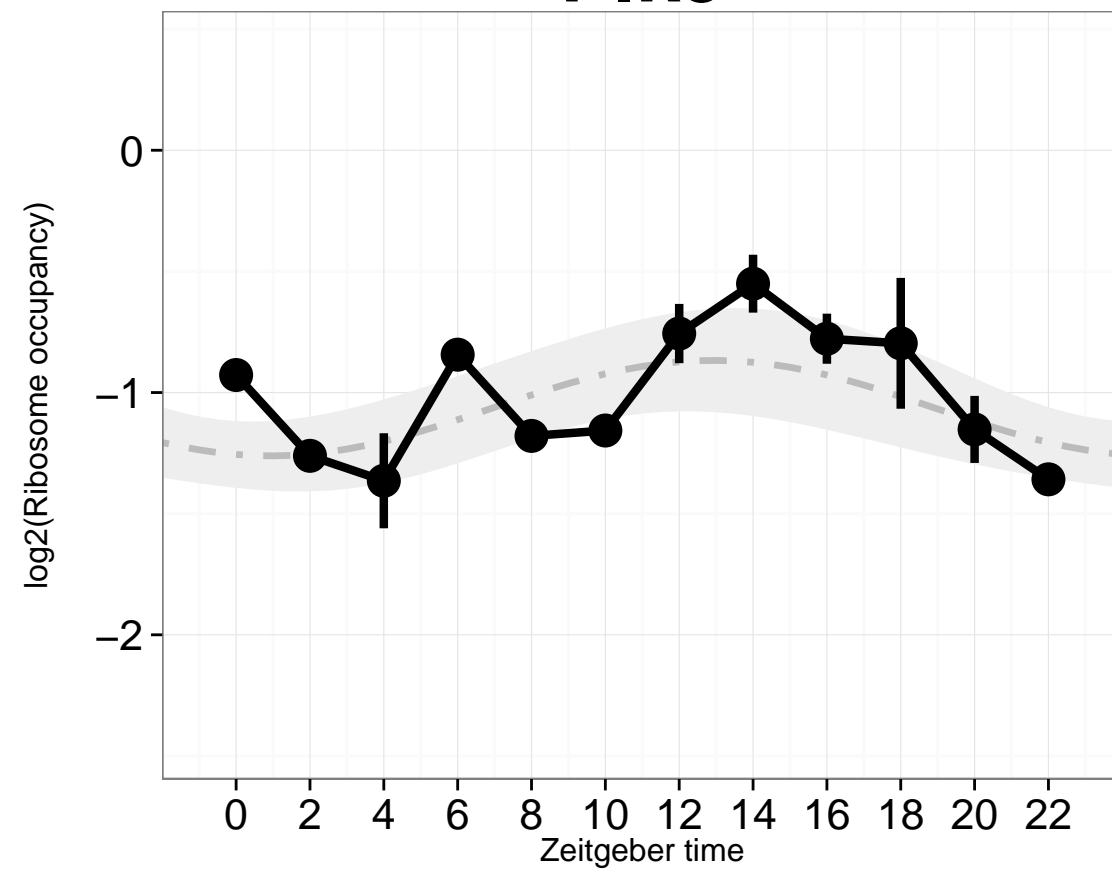

Supplement: SuppDataset_1.zip [file Plk3_set_A.pdf › Supplemental Dataset 1/A-mRNA_nonrhyth_translation_nonrhyth/Plk3_set_A.pdf]

# Plk4

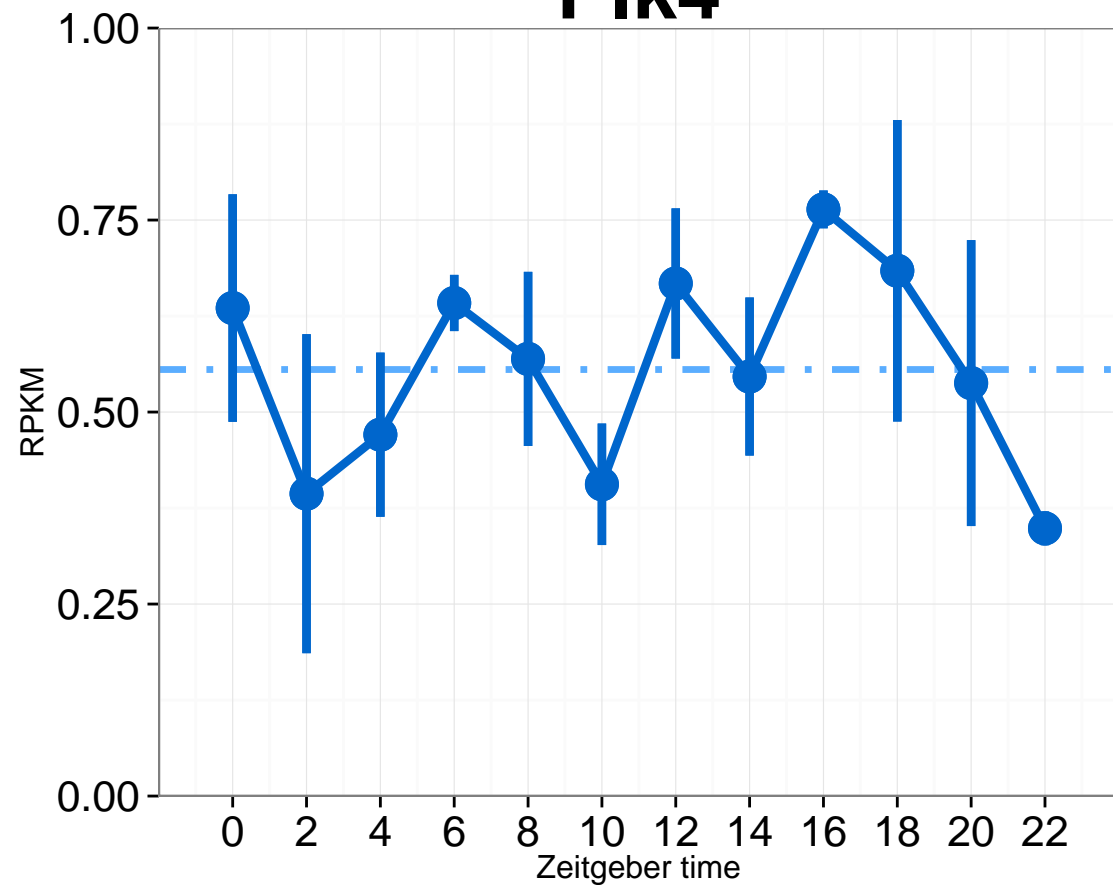

# Plk4 log2(Ribosome occupancy)

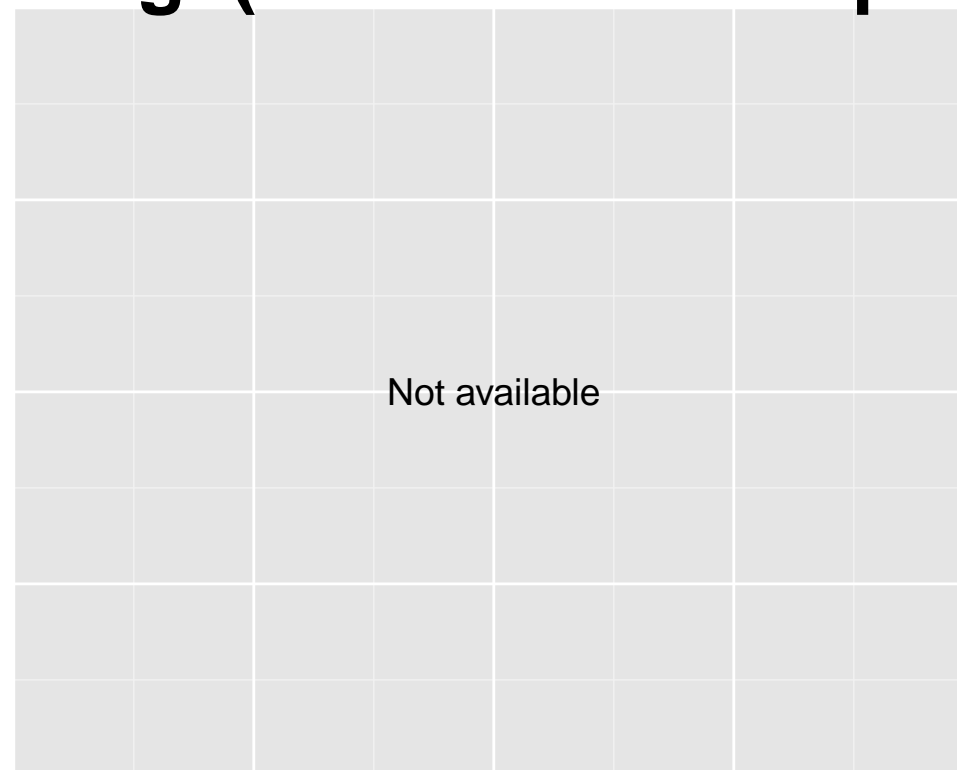

Supplement: SuppDataset_1.zip [file Plk4_set_A.pdf › Supplemental Dataset 1/A-mRNA_nonrhyth_translation_nonrhyth/Plk4_set_A.pdf]

## PIIp

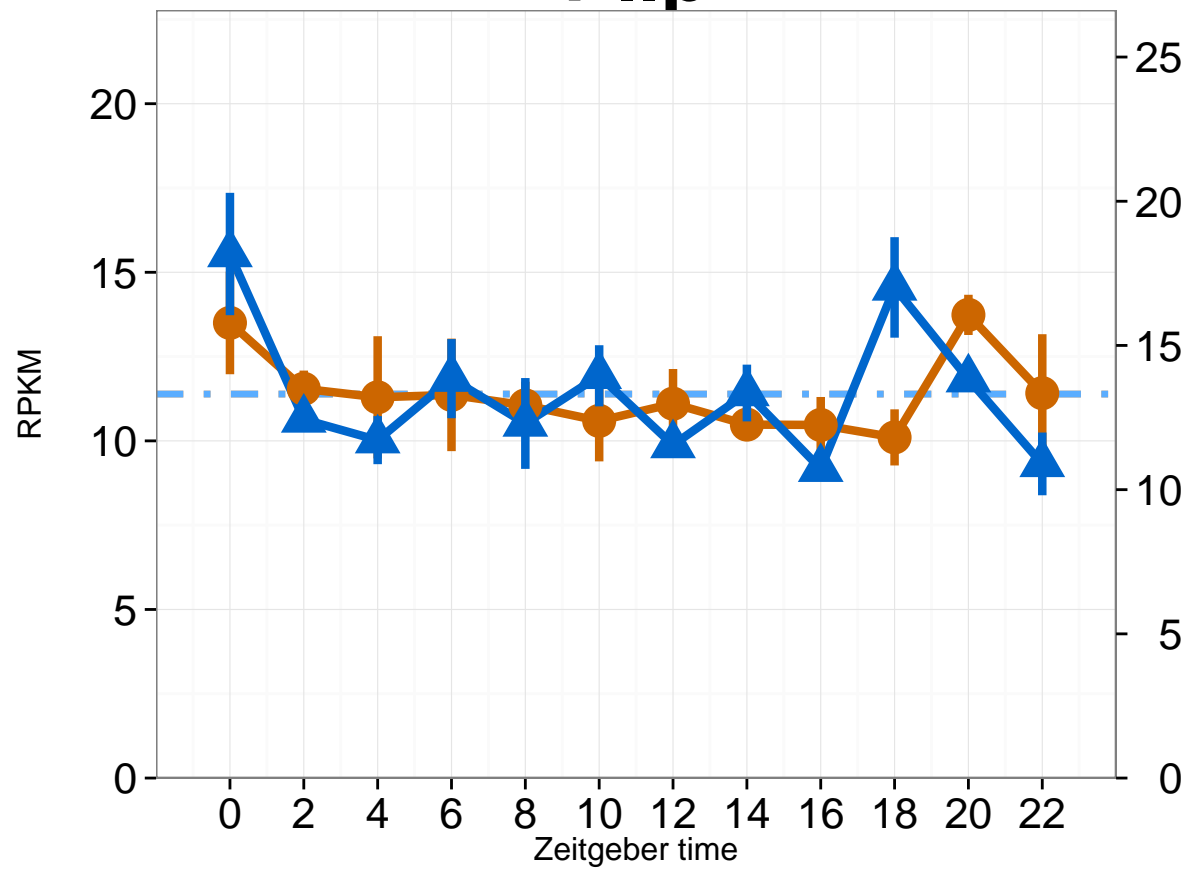

## PIIp

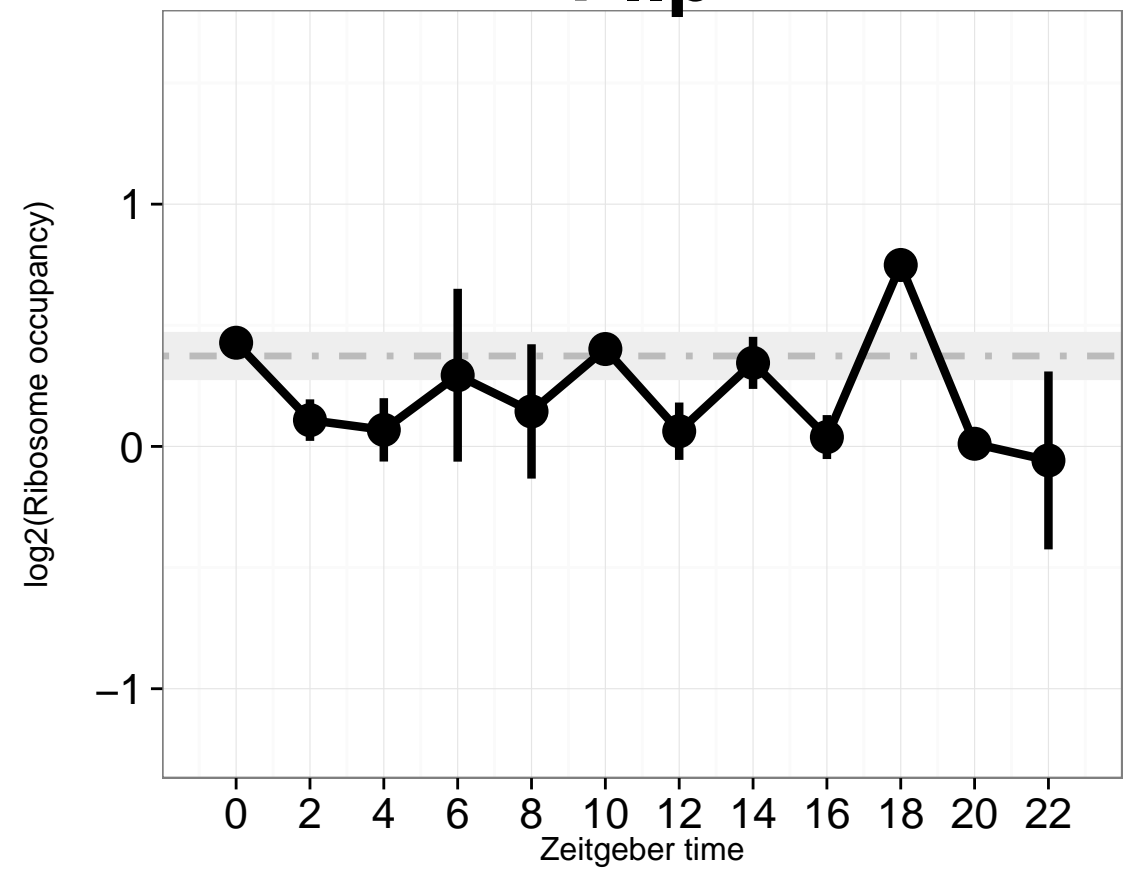

Supplement: SuppDataset_1.zip [file Pllp_set_A.pdf › Supplemental Dataset 1/A-mRNA_nonrhyth_translation_nonrhyth/Pllp_set_A.pdf]

# Plod1

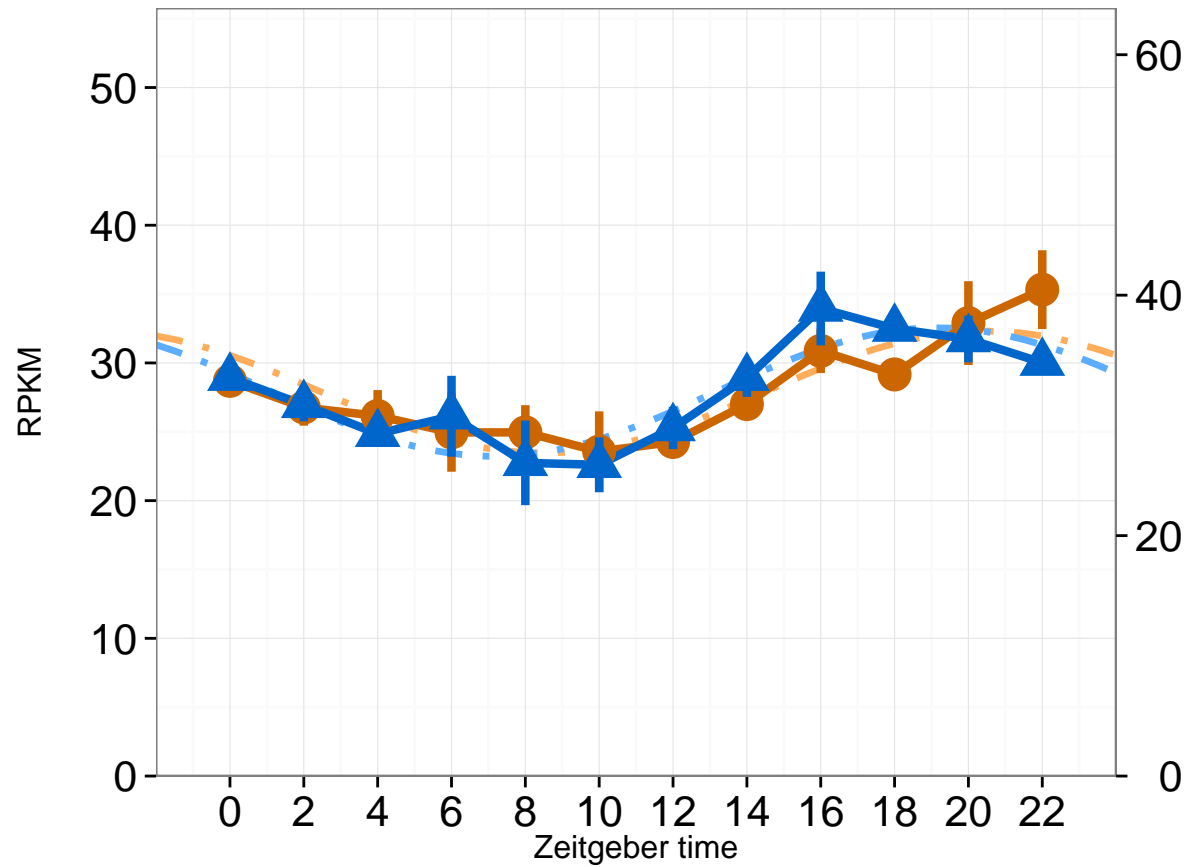

# Plod1

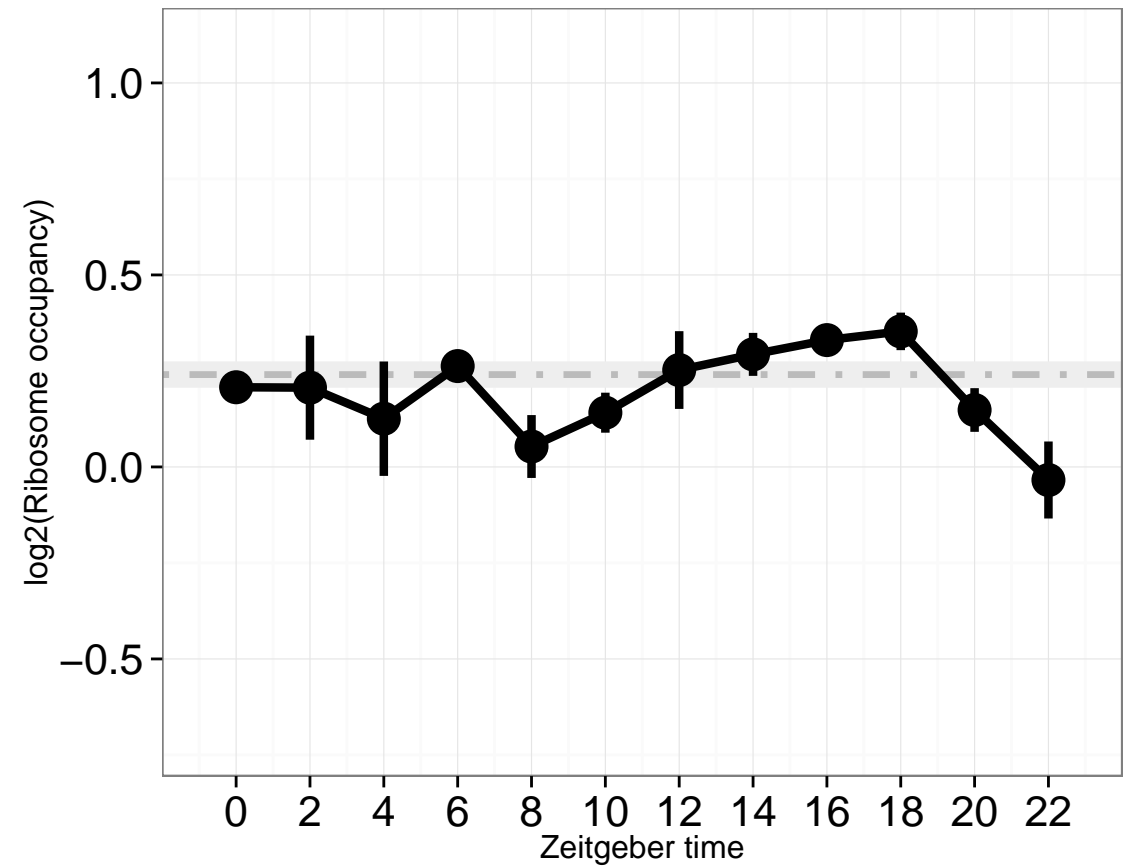

Supplement: SuppDataset_1.zip [file Plod1_set_A.pdf › Supplemental Dataset 1/A-mRNA_nonrhyth_translation_nonrhyth/Plod1_set_A.pdf]

# Plod3

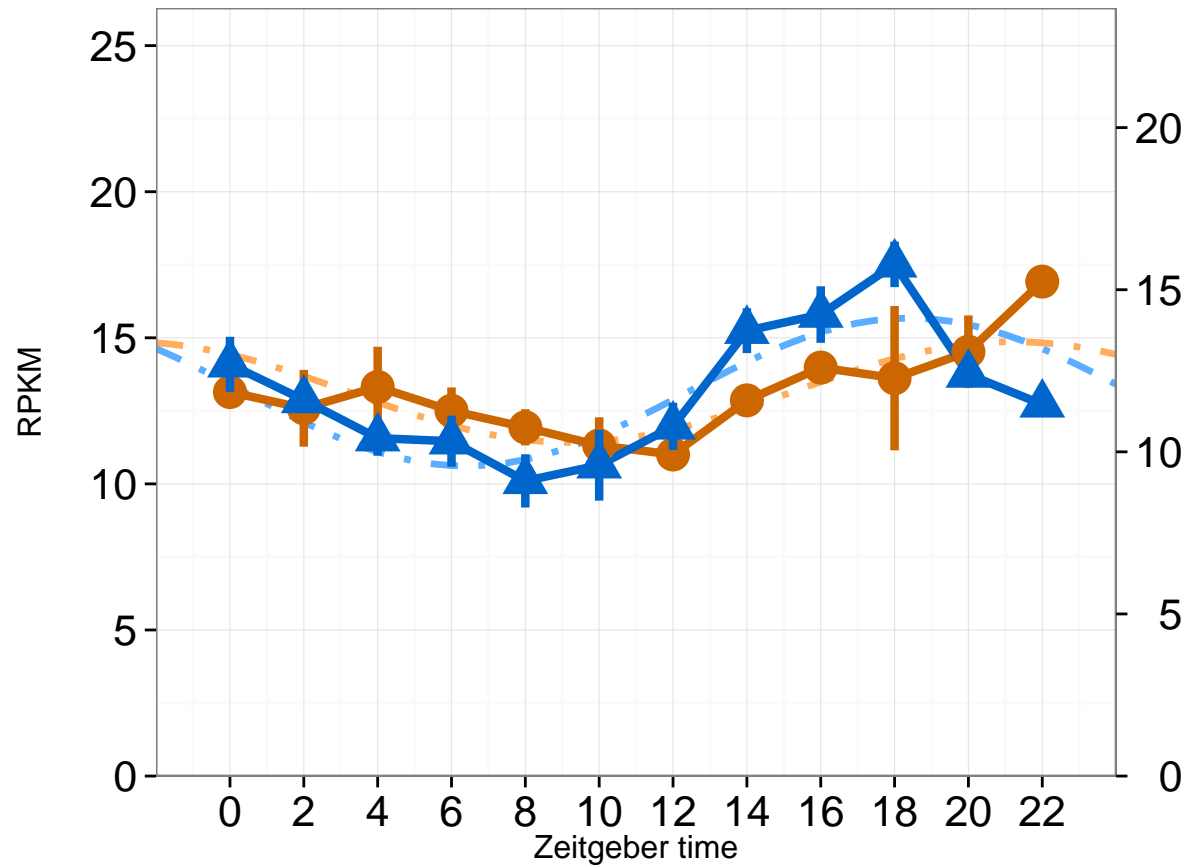

# Plod3

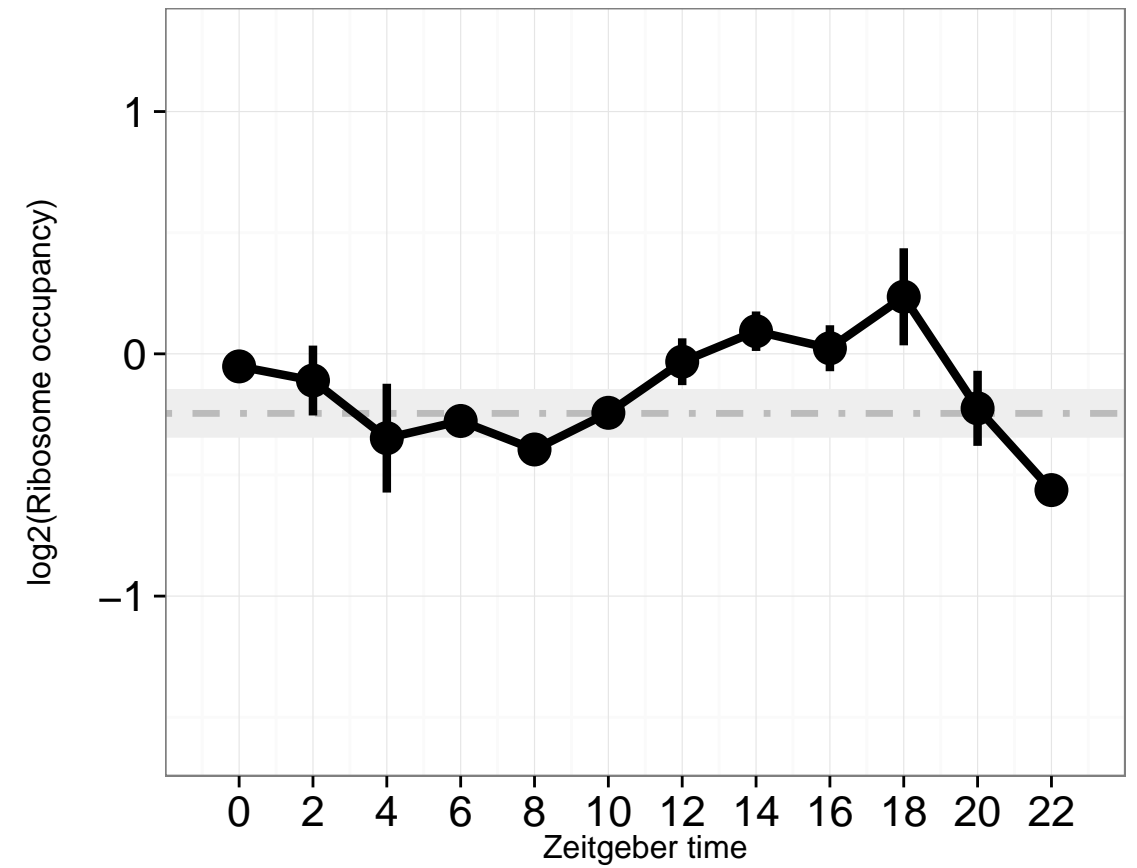

Supplement: SuppDataset_1.zip [file Plod3_set_A.pdf › Supplemental Dataset 1/A-mRNA_nonrhyth_translation_nonrhyth/Plod3_set_A.pdf]

## Plrg1

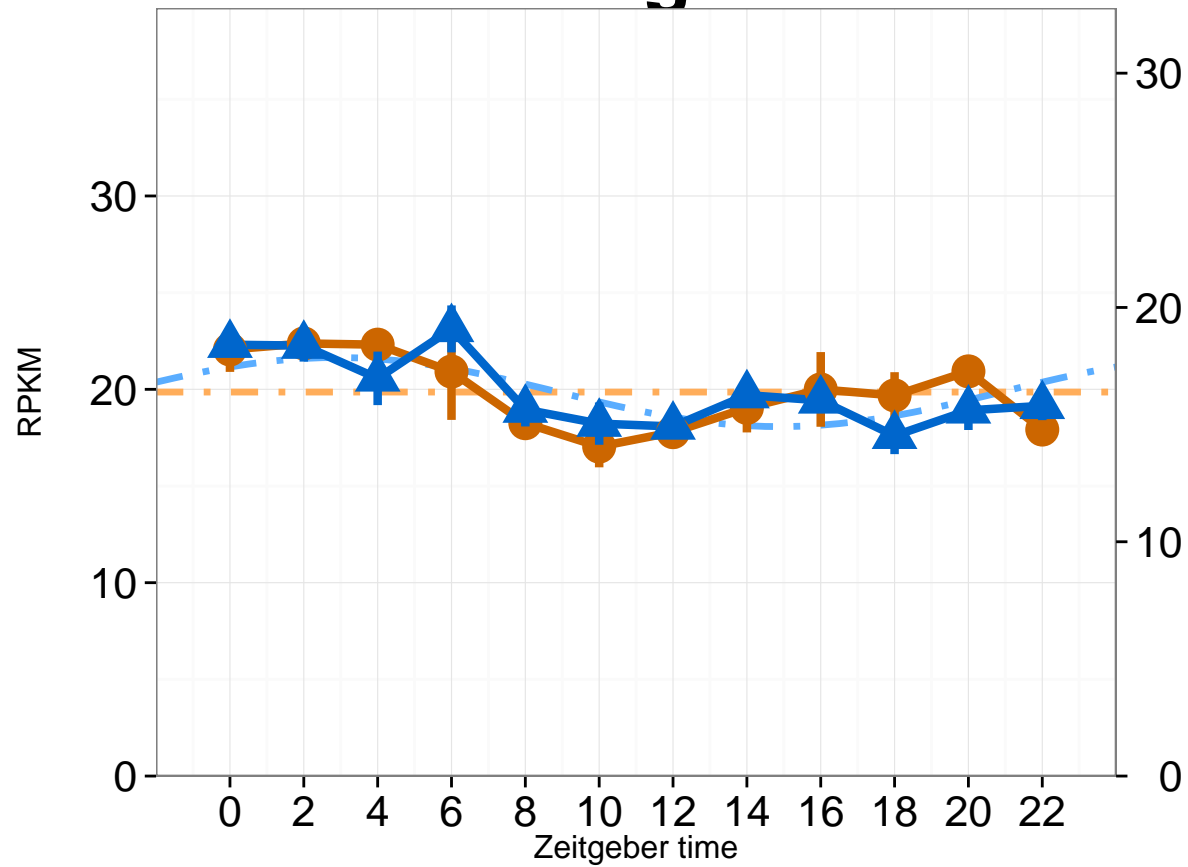

## Plrg1

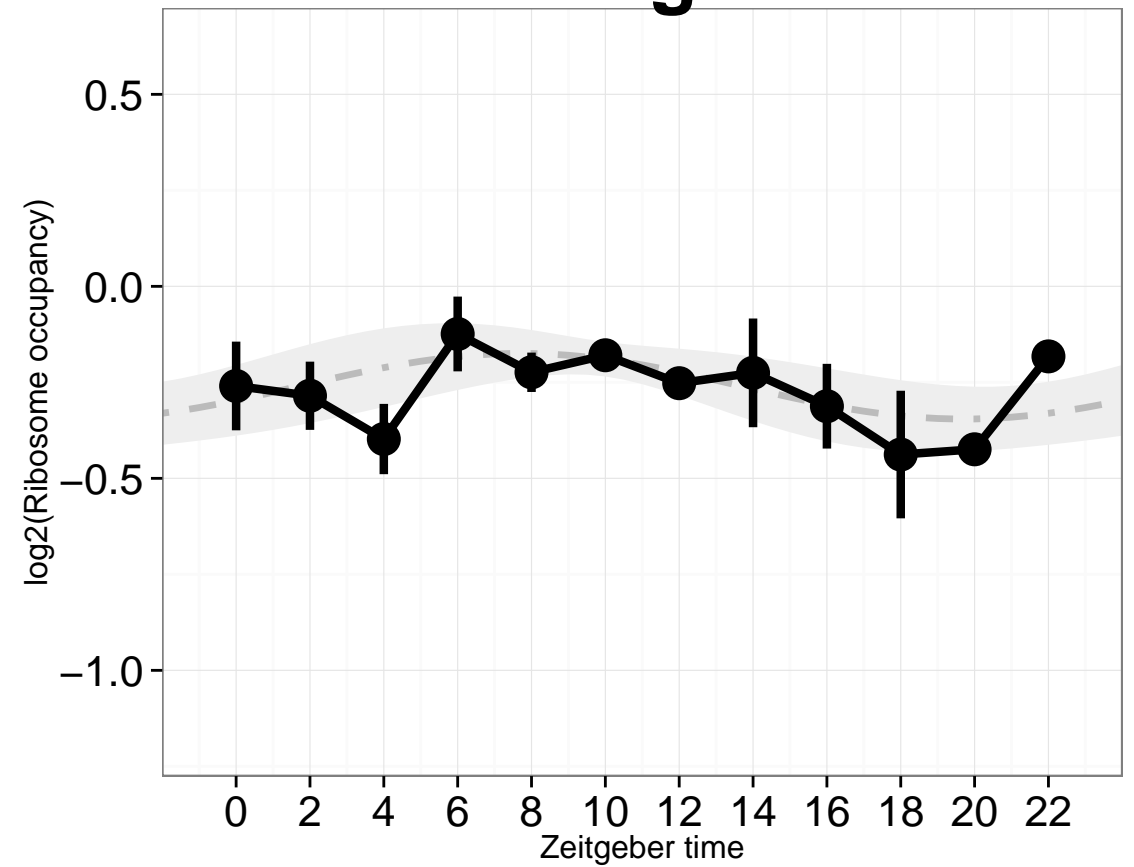

Supplement: SuppDataset_1.zip [file Plrg1_set_A.pdf › Supplemental Dataset 1/A-mRNA_nonrhyth_translation_nonrhyth/Plrg1_set_A.pdf]

## Pls3

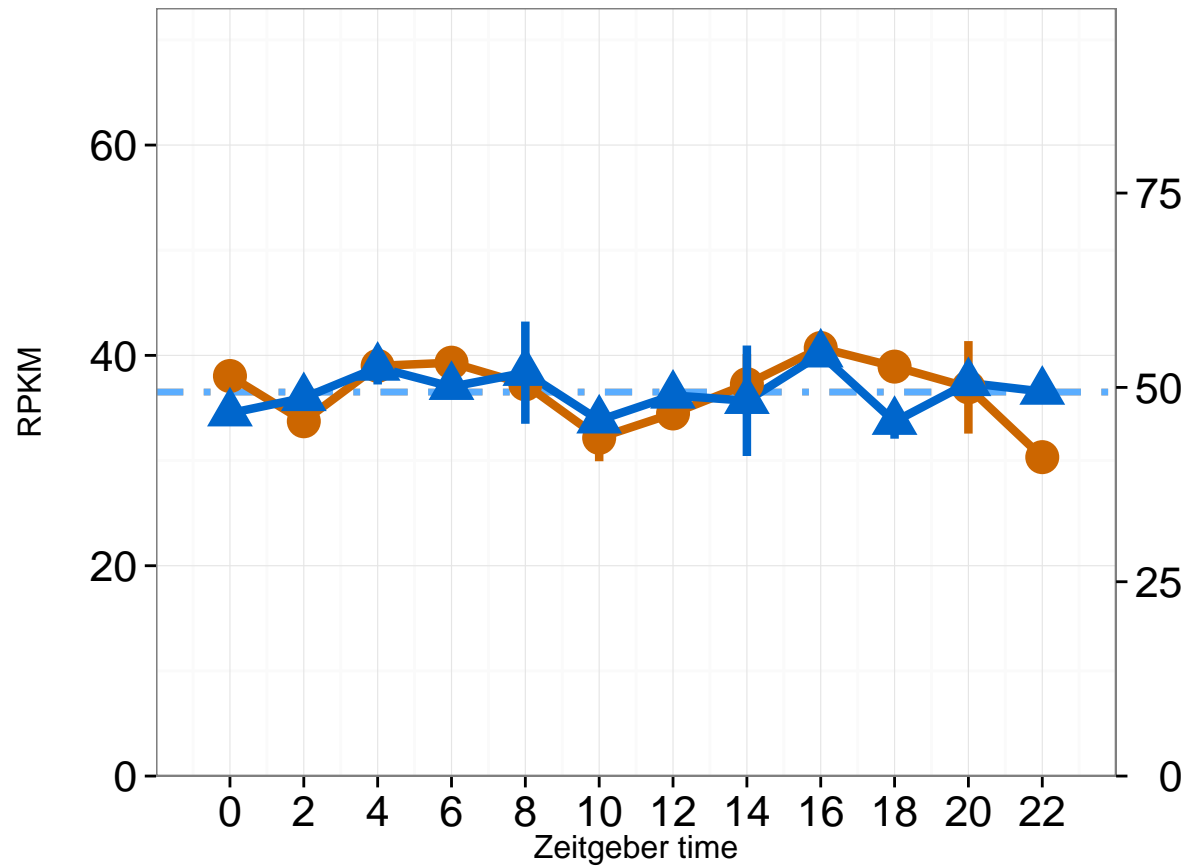

## Pls3

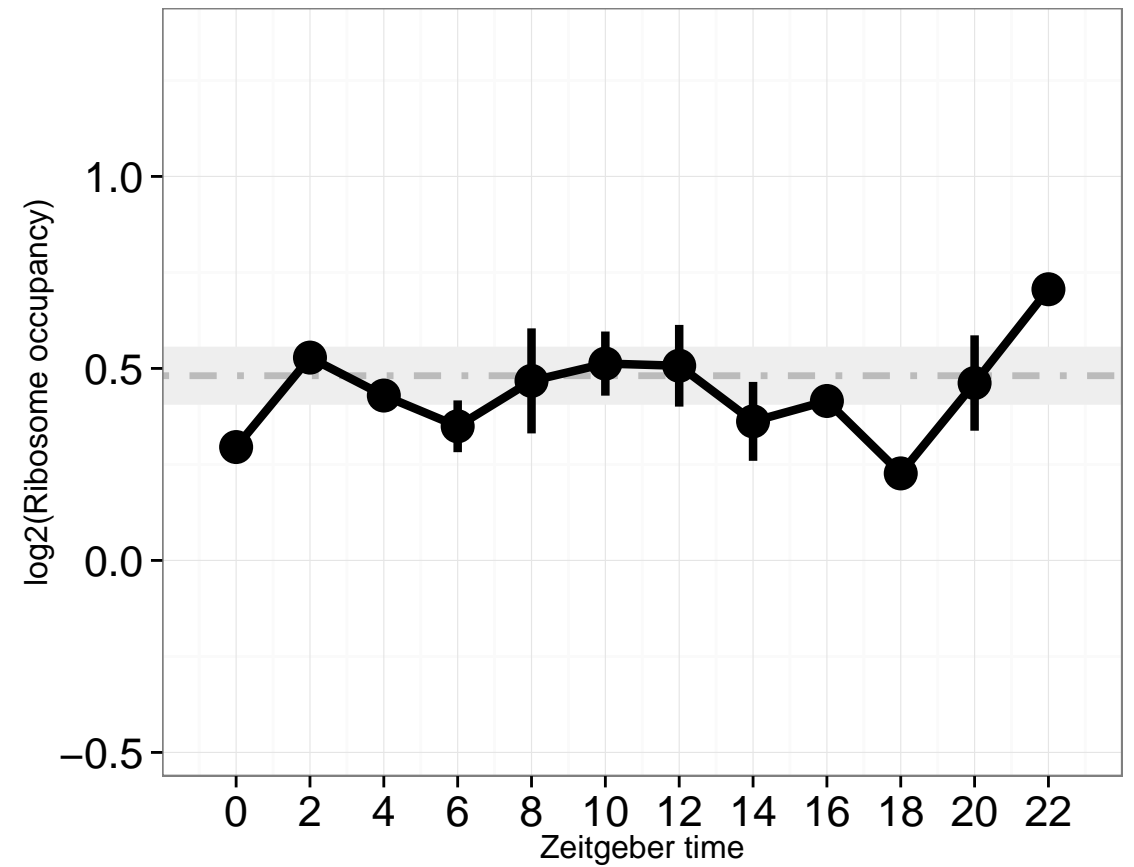

Supplement: SuppDataset_1.zip [file Pls3_set_A.pdf › Supplemental Dataset 1/A-mRNA_nonrhyth_translation_nonrhyth/Pls3_set_A.pdf]

# Plscr1

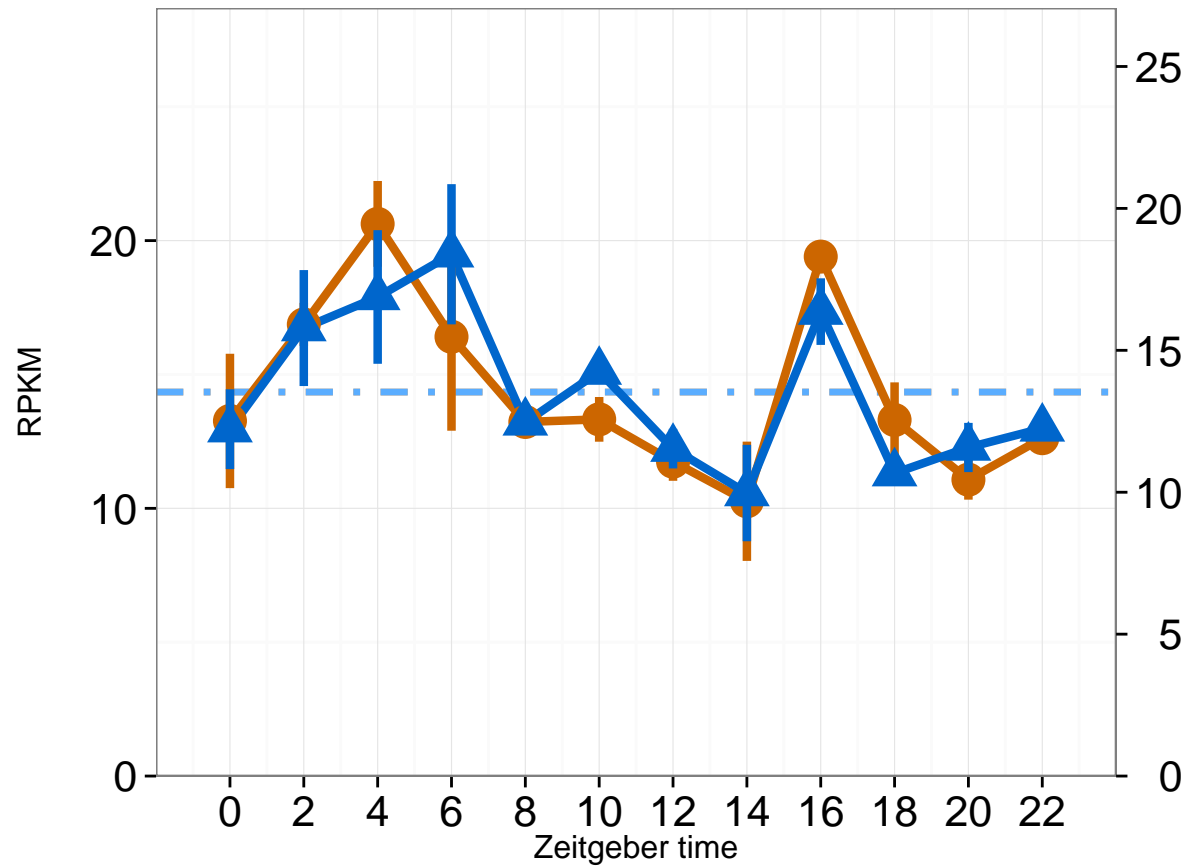

# Plscr1

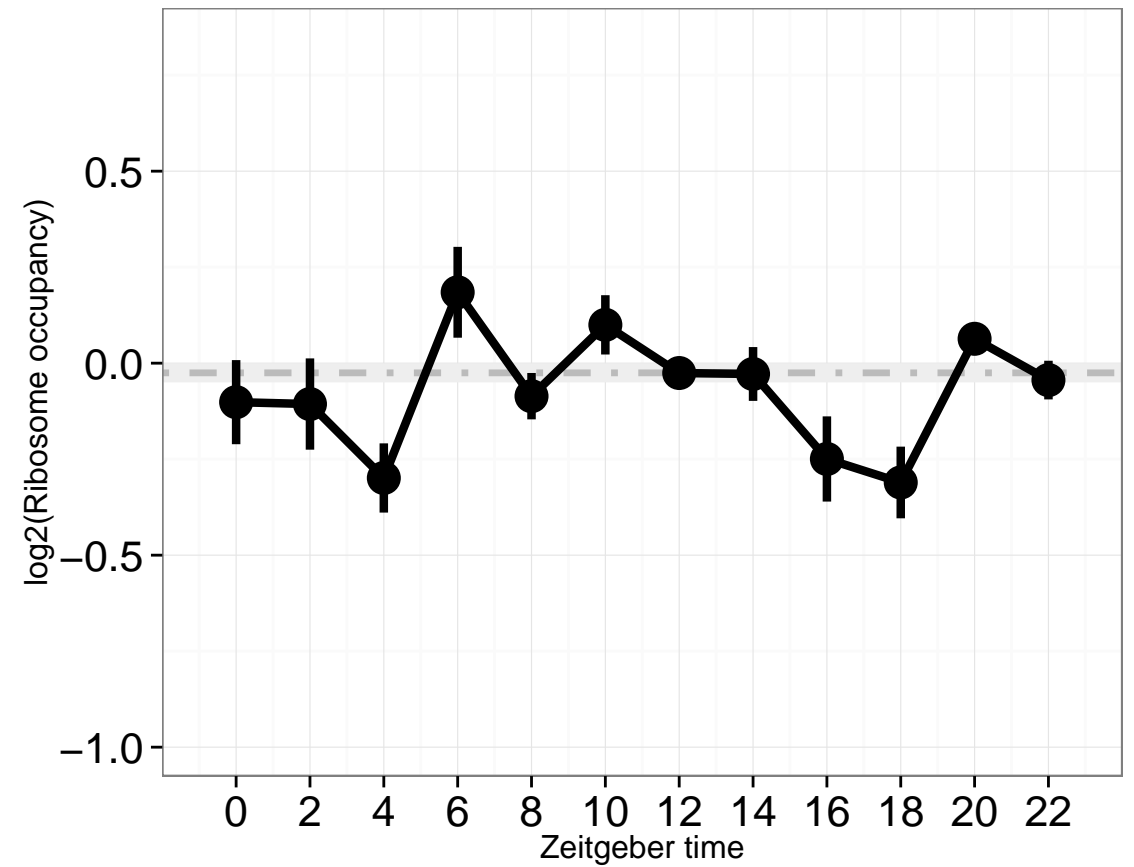

Supplement: SuppDataset_1.zip [file Plscr1_set_A.pdf › Supplemental Dataset 1/A-mRNA_nonrhyth_translation_nonrhyth/Plscr1_set_A.pdf]

# Plscr2

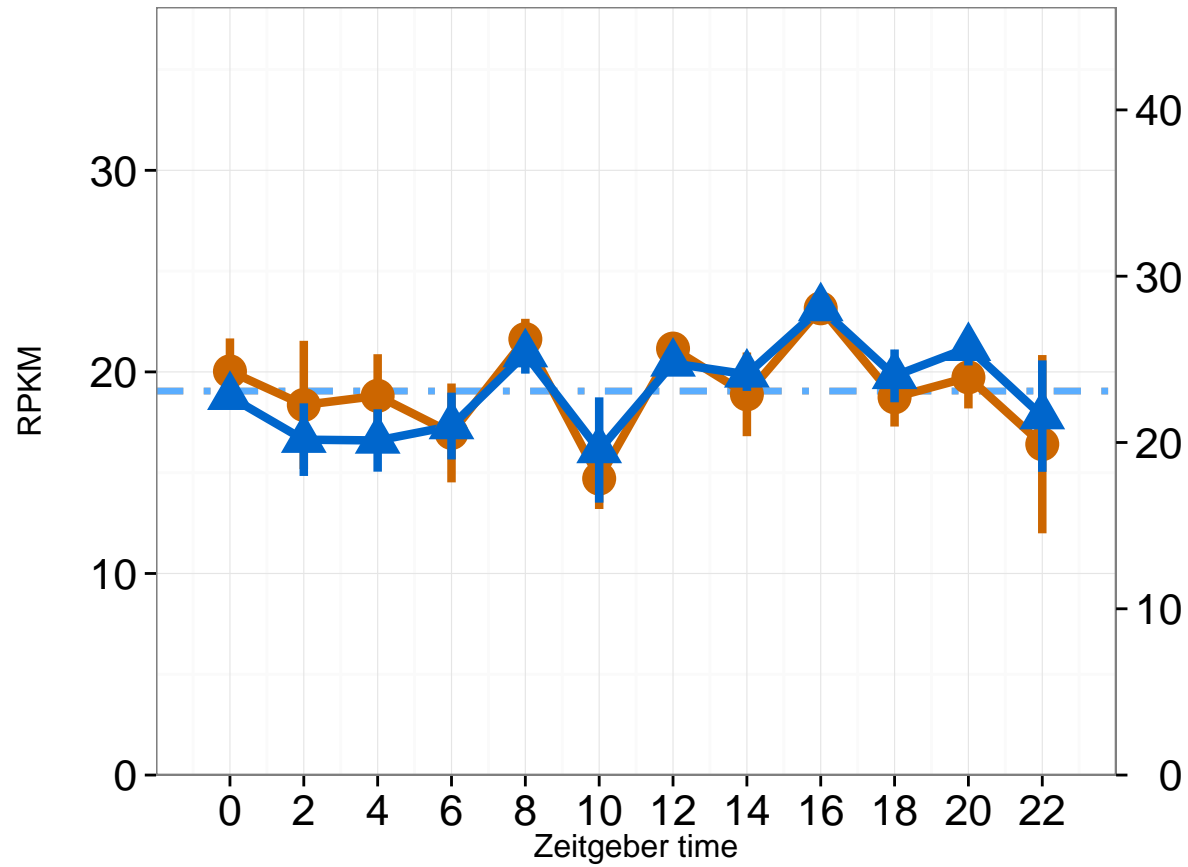

# Plscr2

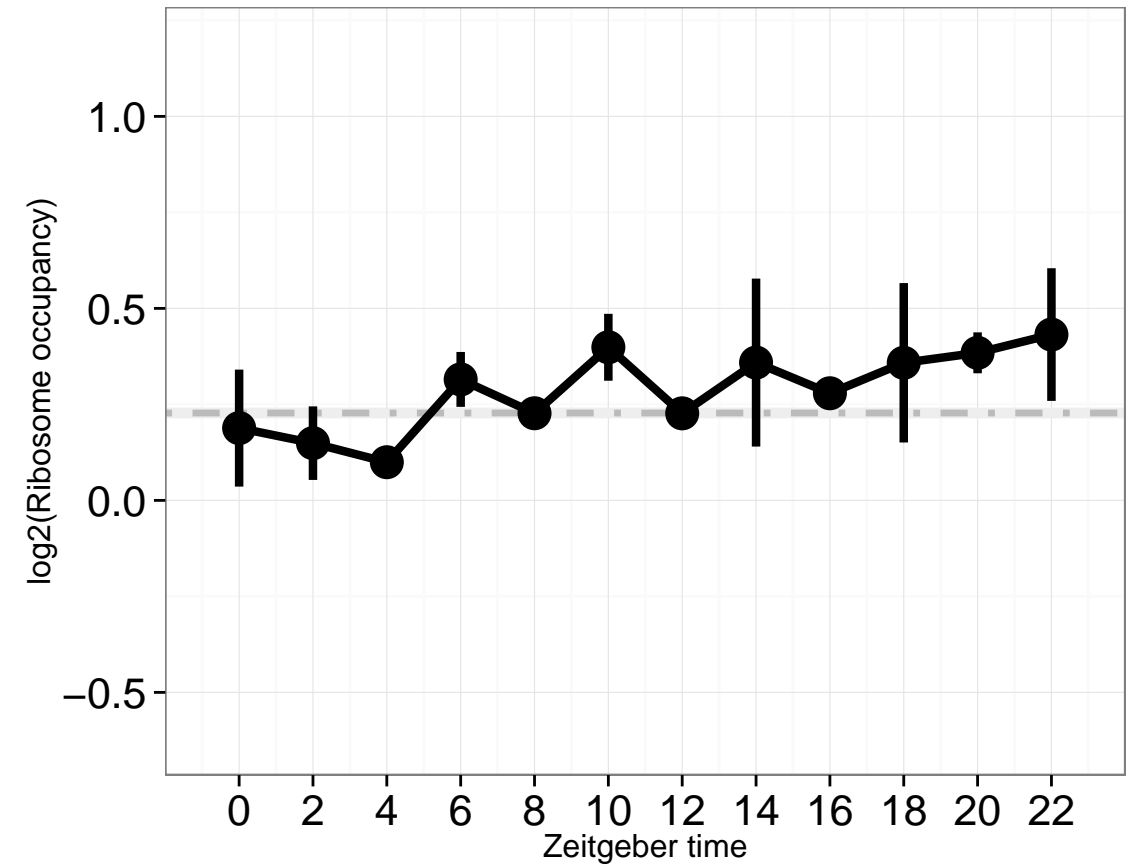

Supplement: SuppDataset_1.zip [file Plscr2_set_A.pdf › Supplemental Dataset 1/A-mRNA_nonrhyth_translation_nonrhyth/Plscr2_set_A.pdf]

# Plscr3

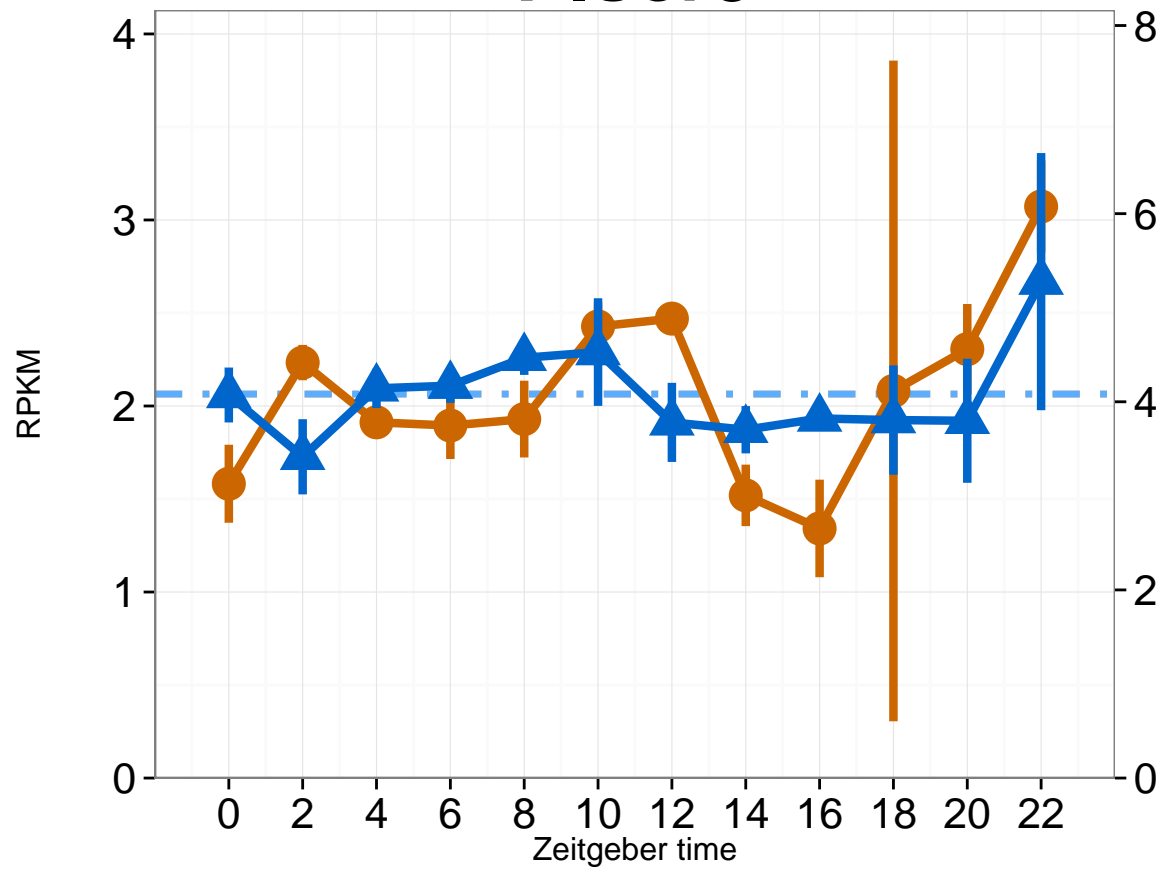

# Plscr3

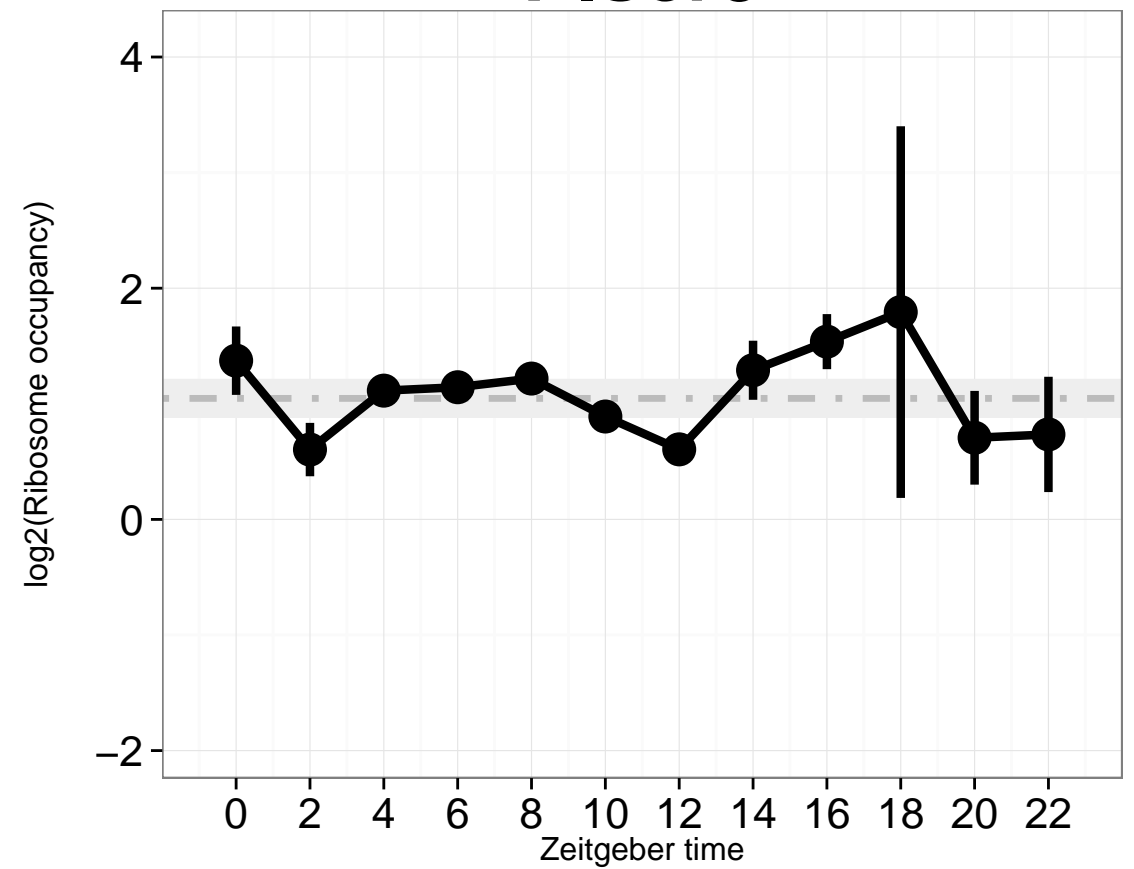

Supplement: SuppDataset_1.zip [file Plscr3_set_A.pdf › Supplemental Dataset 1/A-mRNA_nonrhyth_translation_nonrhyth/Plscr3_set_A.pdf]

# Plvap

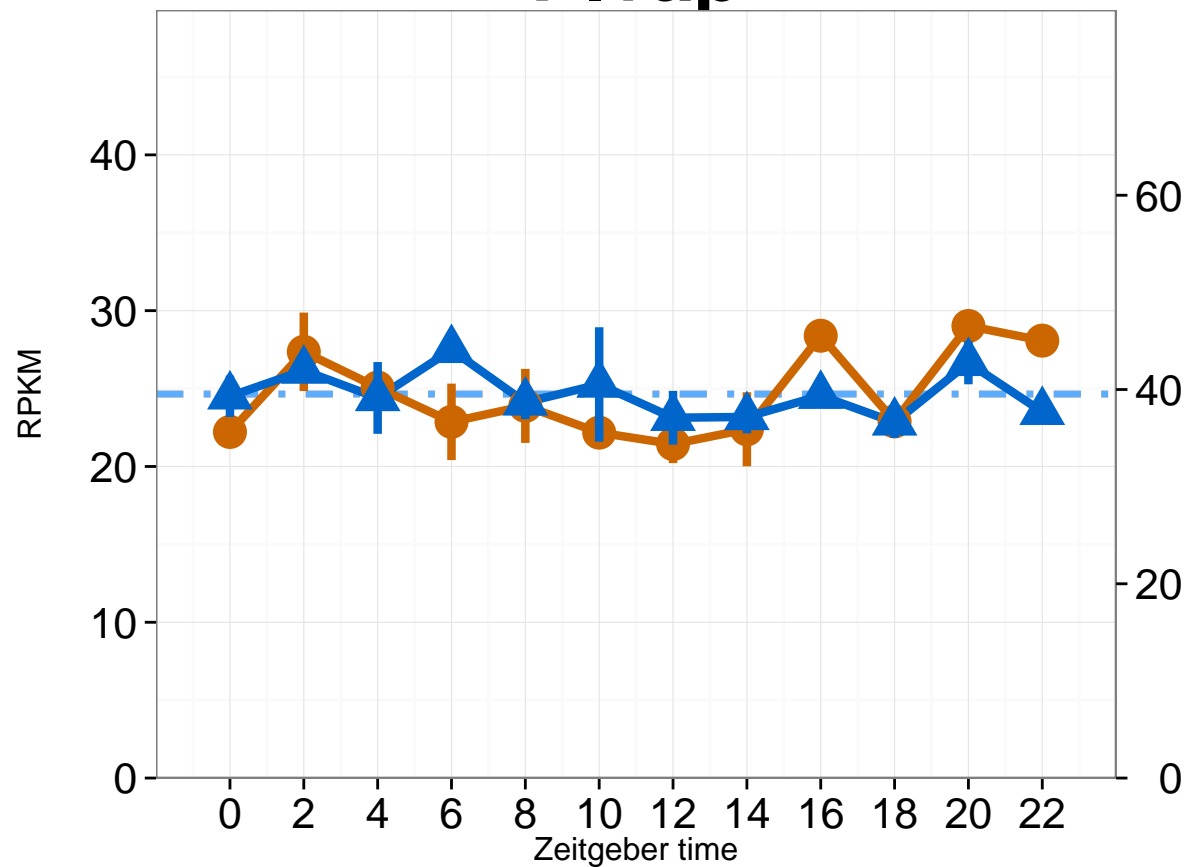

# Plvap

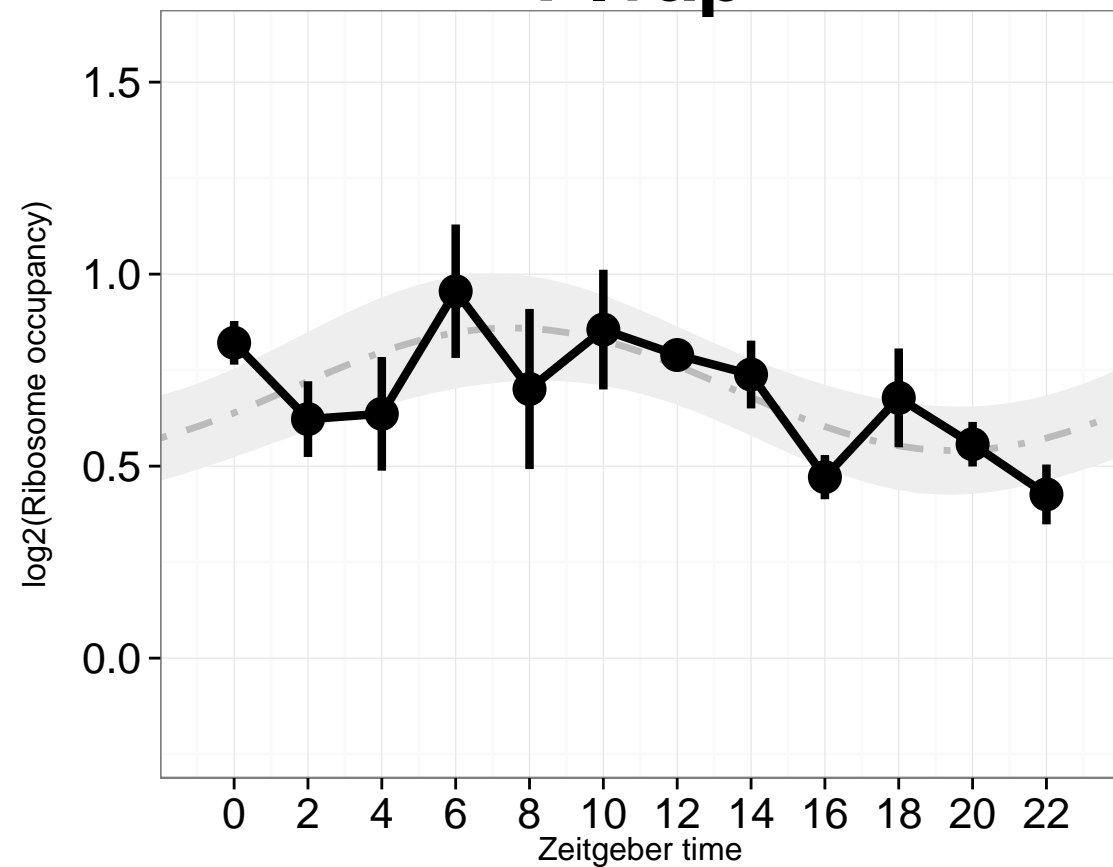

Supplement: SuppDataset_1.zip [file Plvap_set_A.pdf › Supplemental Dataset 1/A-mRNA_nonrhyth_translation_nonrhyth/Plvap_set_A.pdf]

## Plxna1

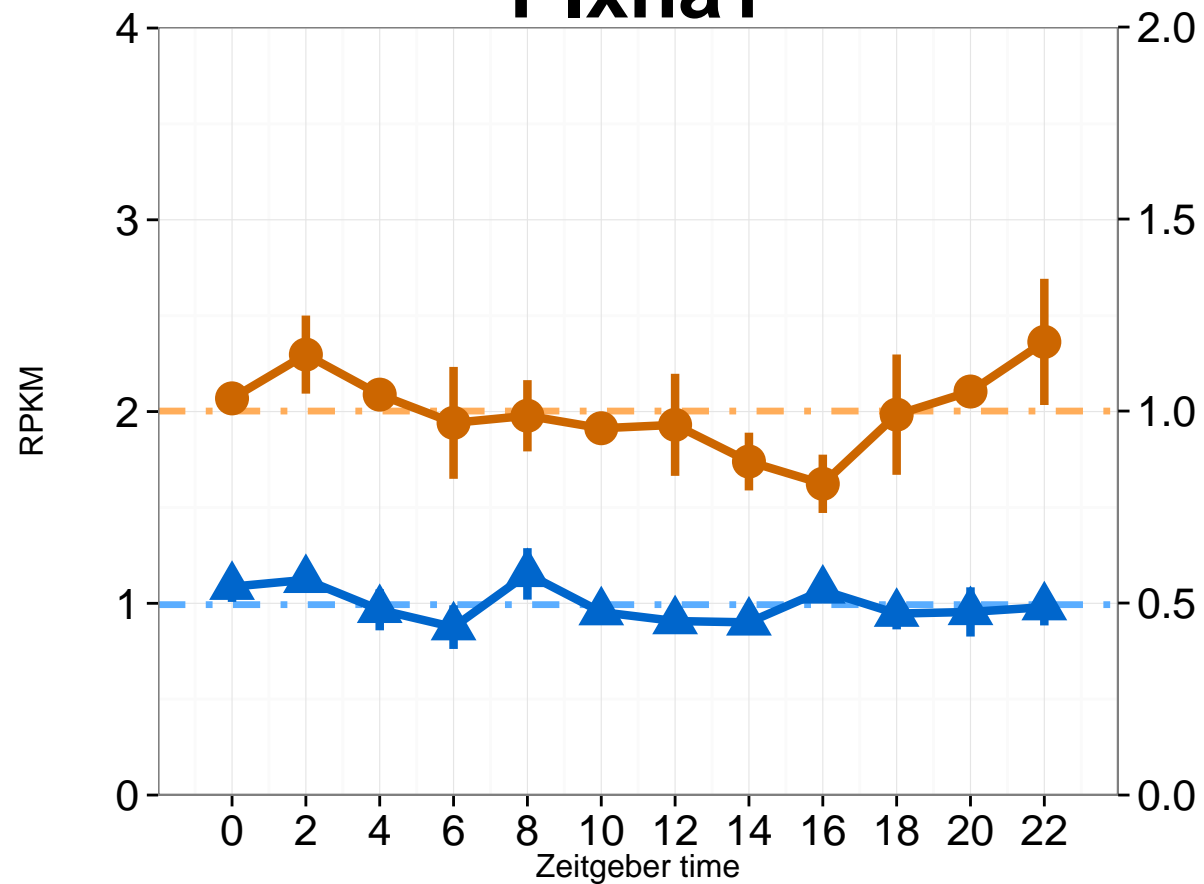

## Plxna1

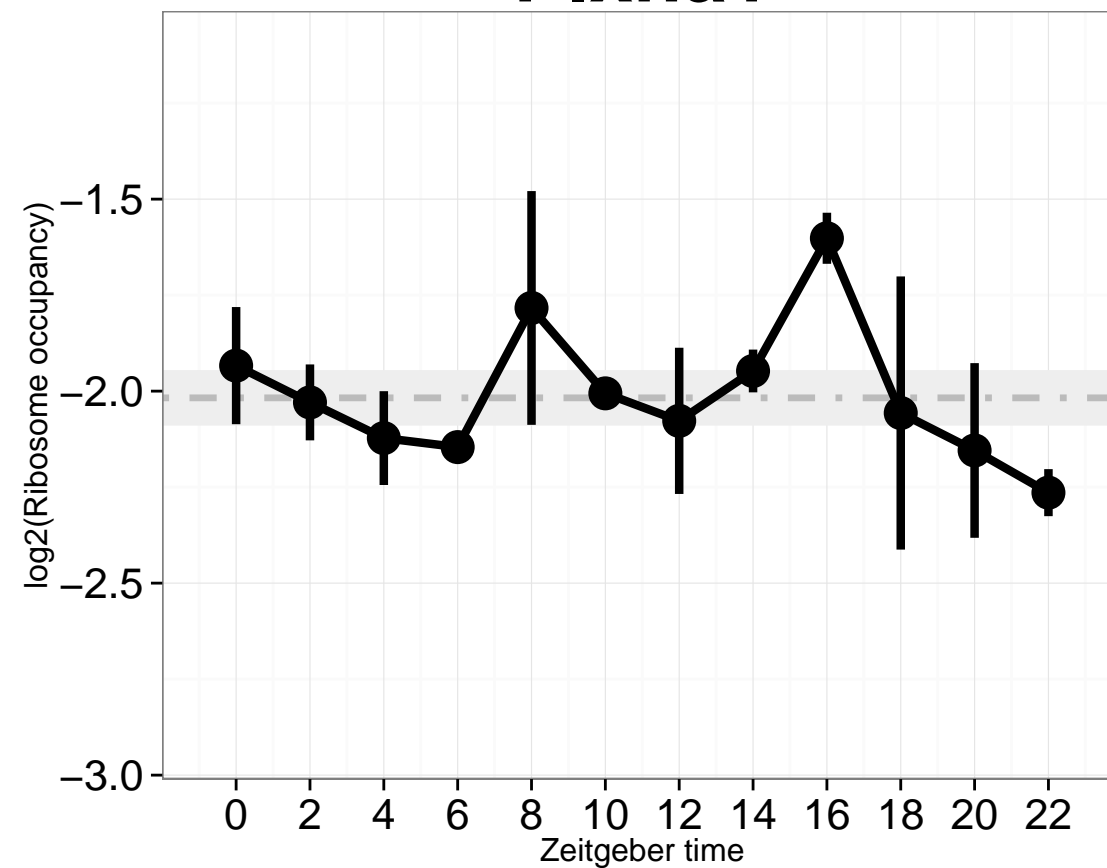

Supplement: SuppDataset_1.zip [file Plxna1_set_A.pdf › Supplemental Dataset 1/A-mRNA_nonrhyth_translation_nonrhyth/Plxna1_set_A.pdf]

## Plxna4

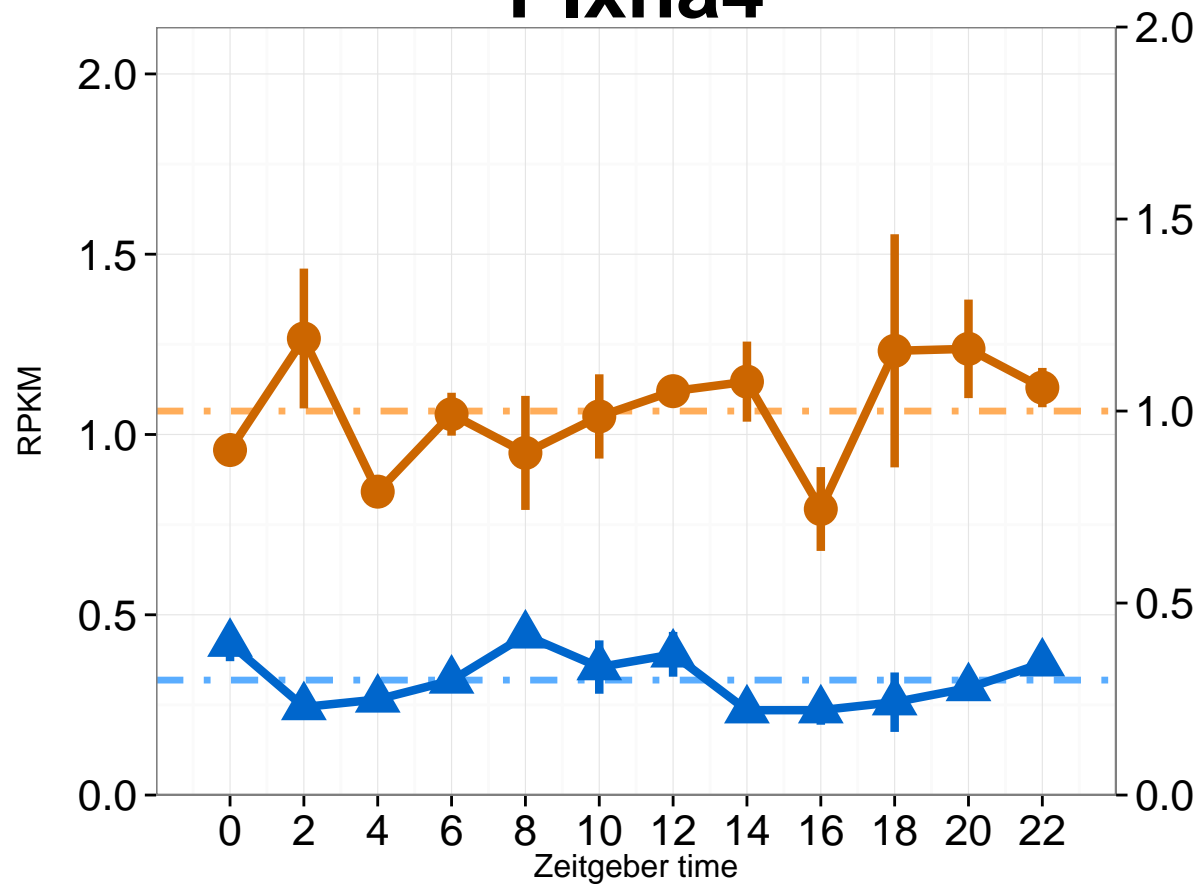

## Plxna4

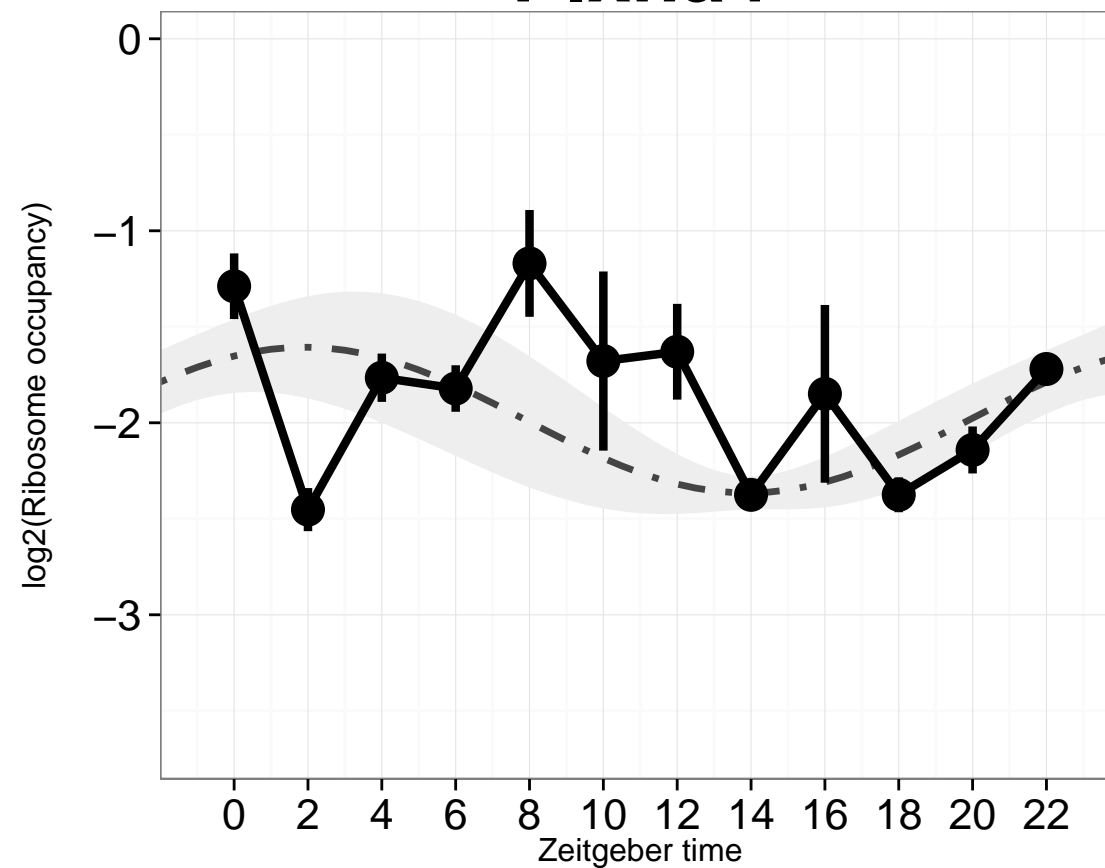

Supplement: SuppDataset_1.zip [file Plxna4_set_A.pdf › Supplemental Dataset 1/A-mRNA_nonrhyth_translation_nonrhyth/Plxna4_set_A.pdf]

## Plxnb1

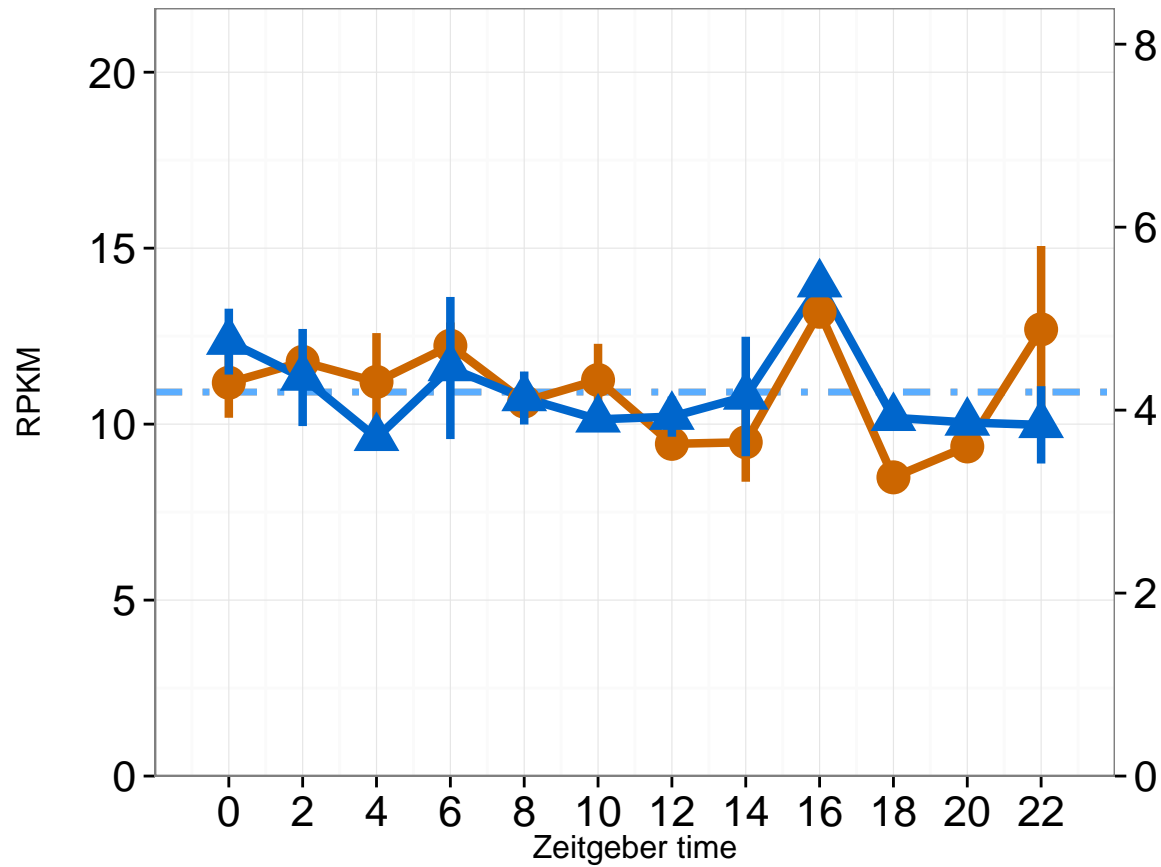

## Plxnb1

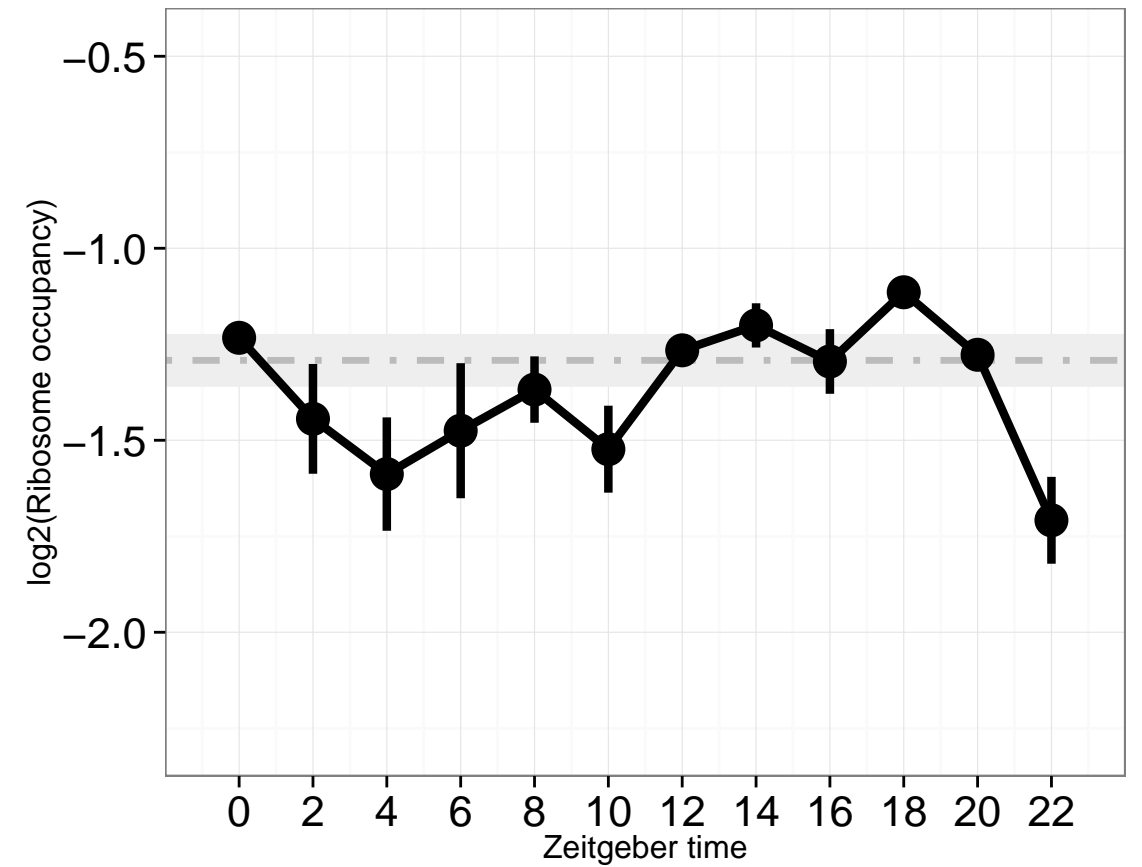

Supplement: SuppDataset_1.zip [file Plxnb1_set_A.pdf › Supplemental Dataset 1/A-mRNA_nonrhyth_translation_nonrhyth/Plxnb1_set_A.pdf]

## Plxnb2

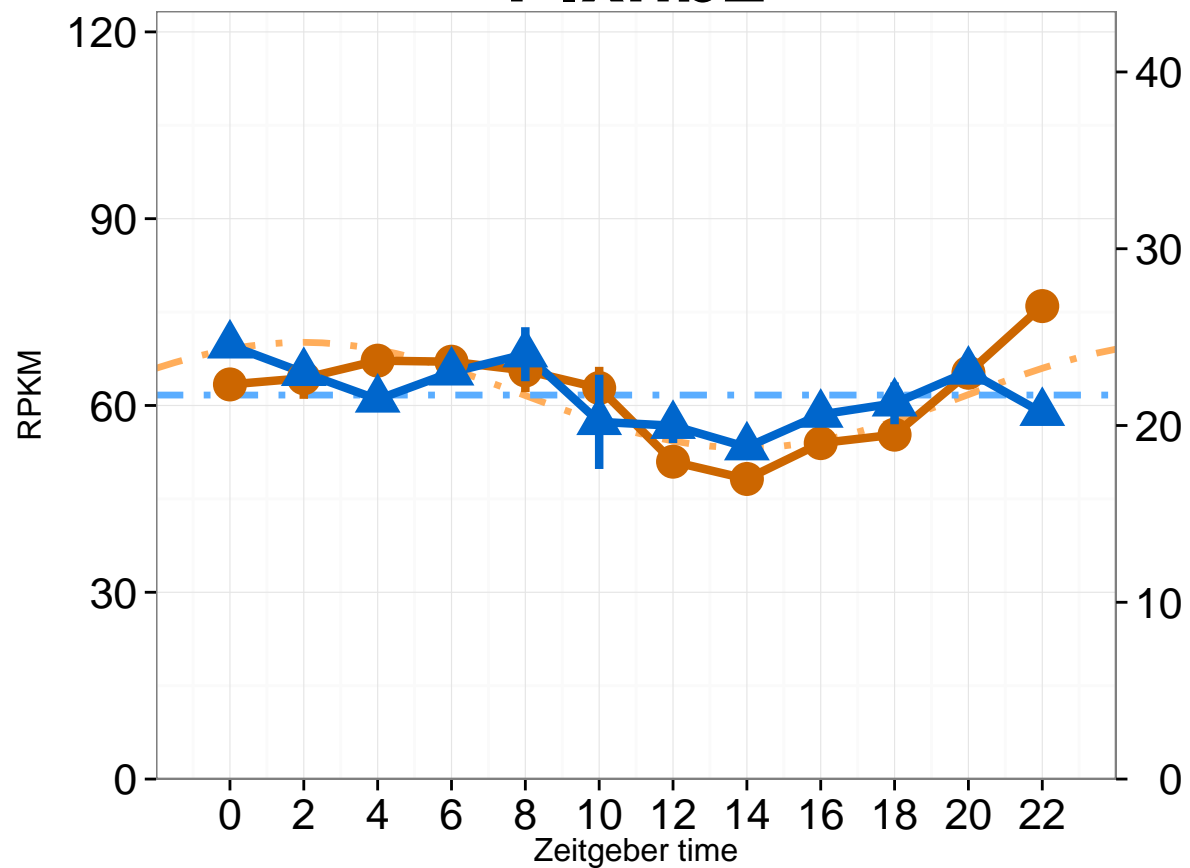

## Plxnb2

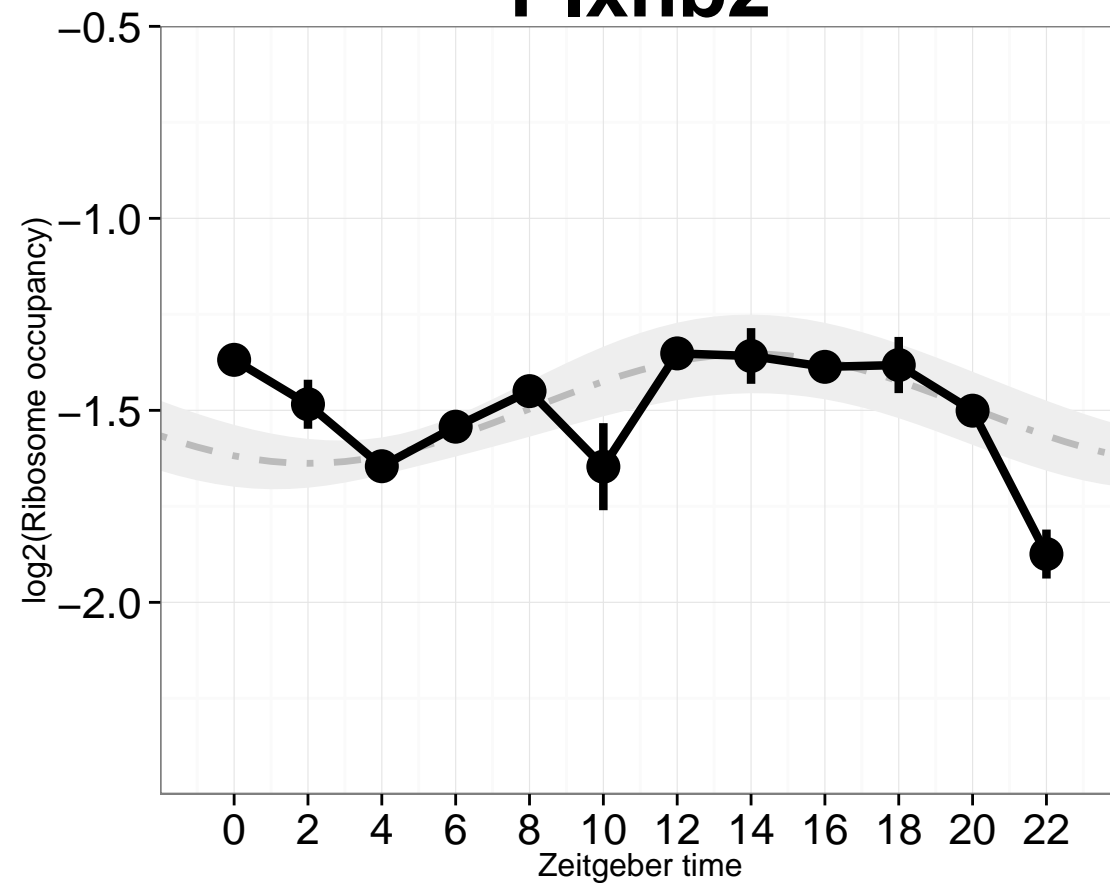

Supplement: SuppDataset_1.zip [file Plxnb2_set_A.pdf › Supplemental Dataset 1/A-mRNA_nonrhyth_translation_nonrhyth/Plxnb2_set_A.pdf]

# Plxnc1

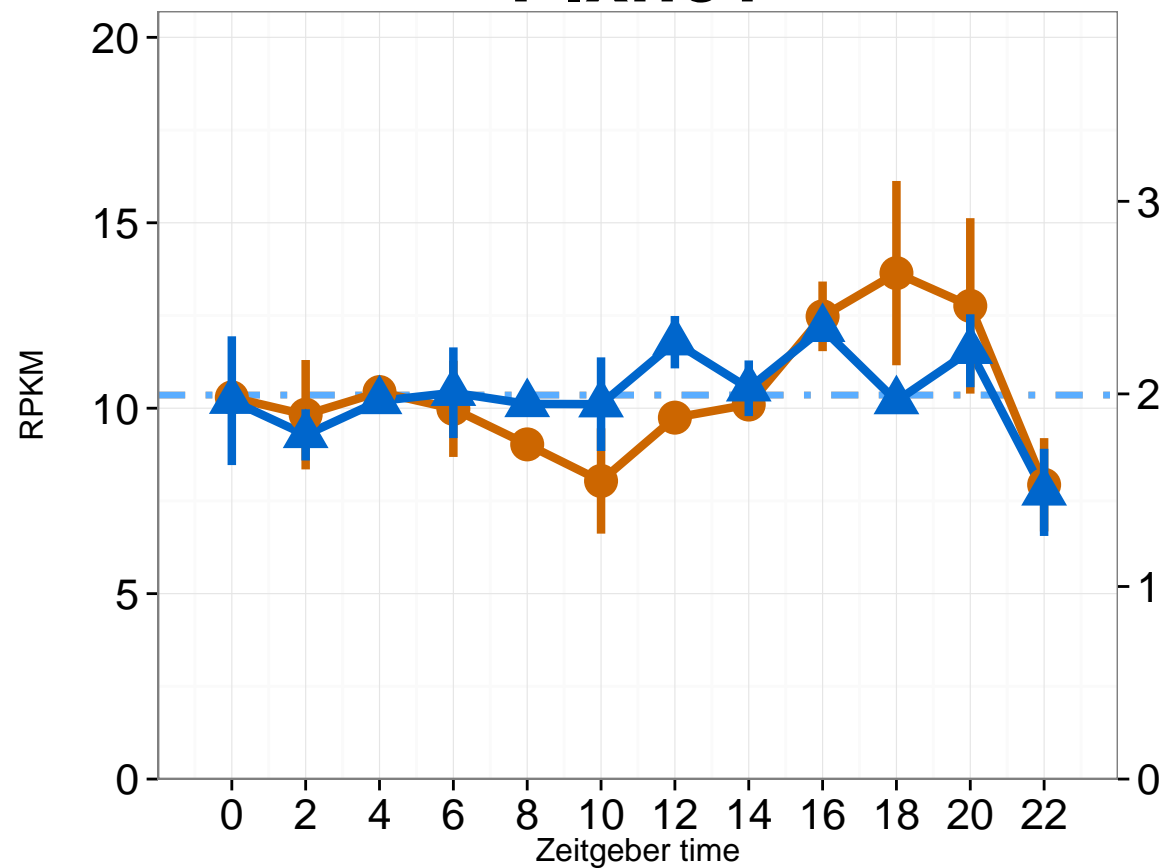

# Plxnc1

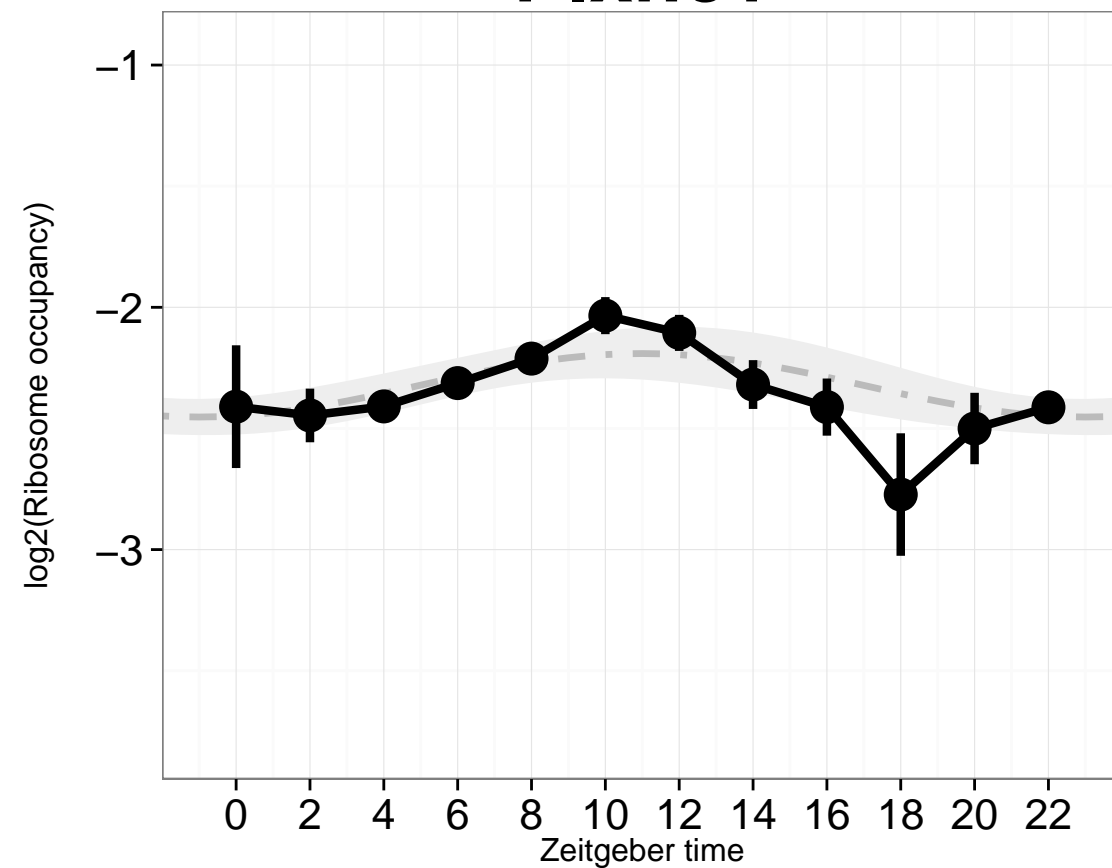

Supplement: SuppDataset_1.zip [file Plxnc1_set_A.pdf › Supplemental Dataset 1/A-mRNA_nonrhyth_translation_nonrhyth/Plxnc1_set_A.pdf]

# Plxnd1

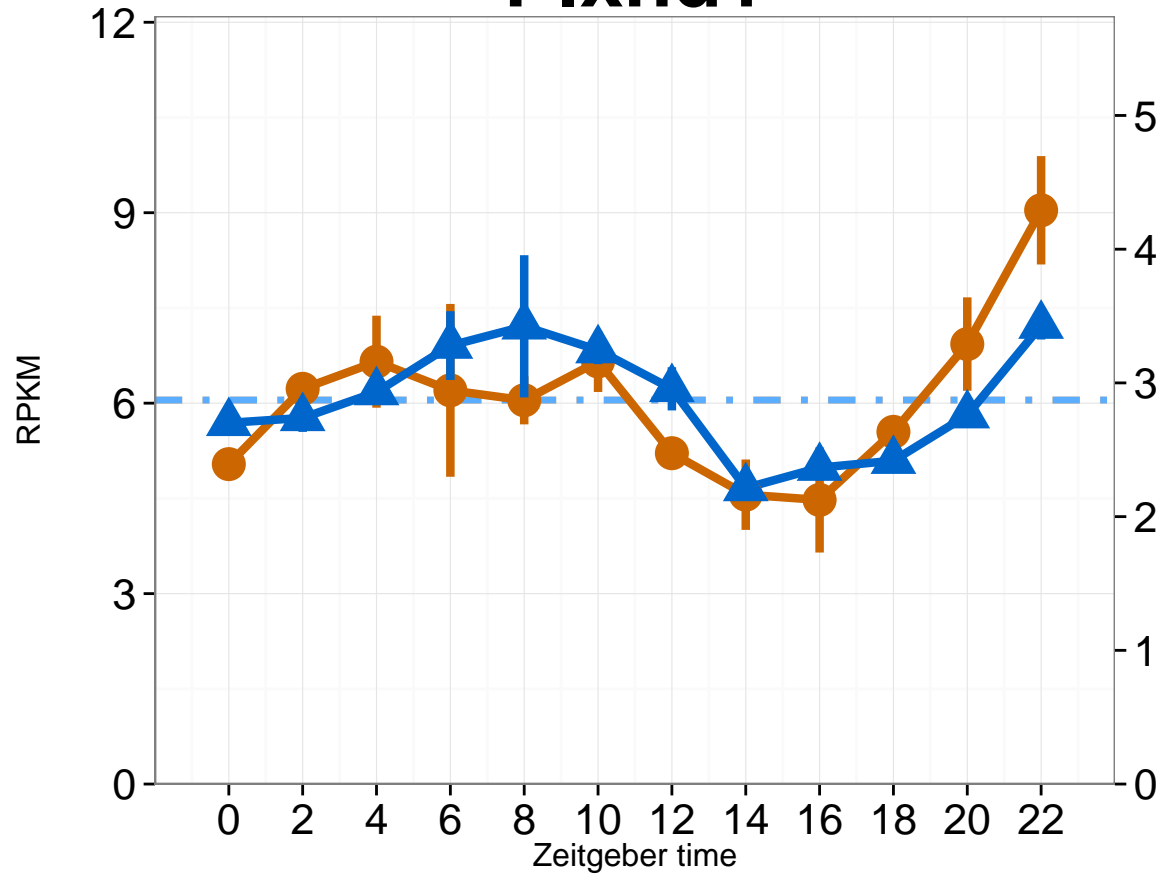

# Plxnd1

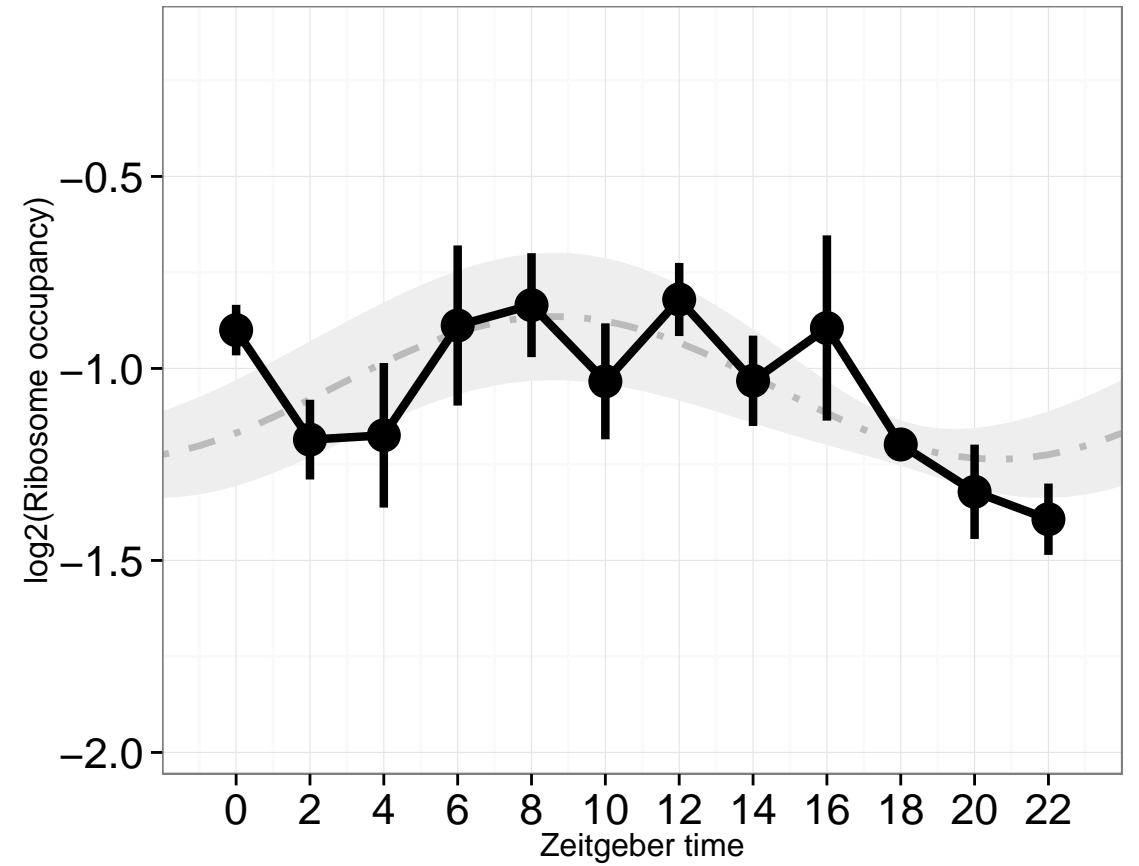

Supplement: SuppDataset_1.zip [file Plxnd1_set_A.pdf › Supplemental Dataset 1/A-mRNA_nonrhyth_translation_nonrhyth/Plxnd1_set_A.pdf]

# Pm20d1

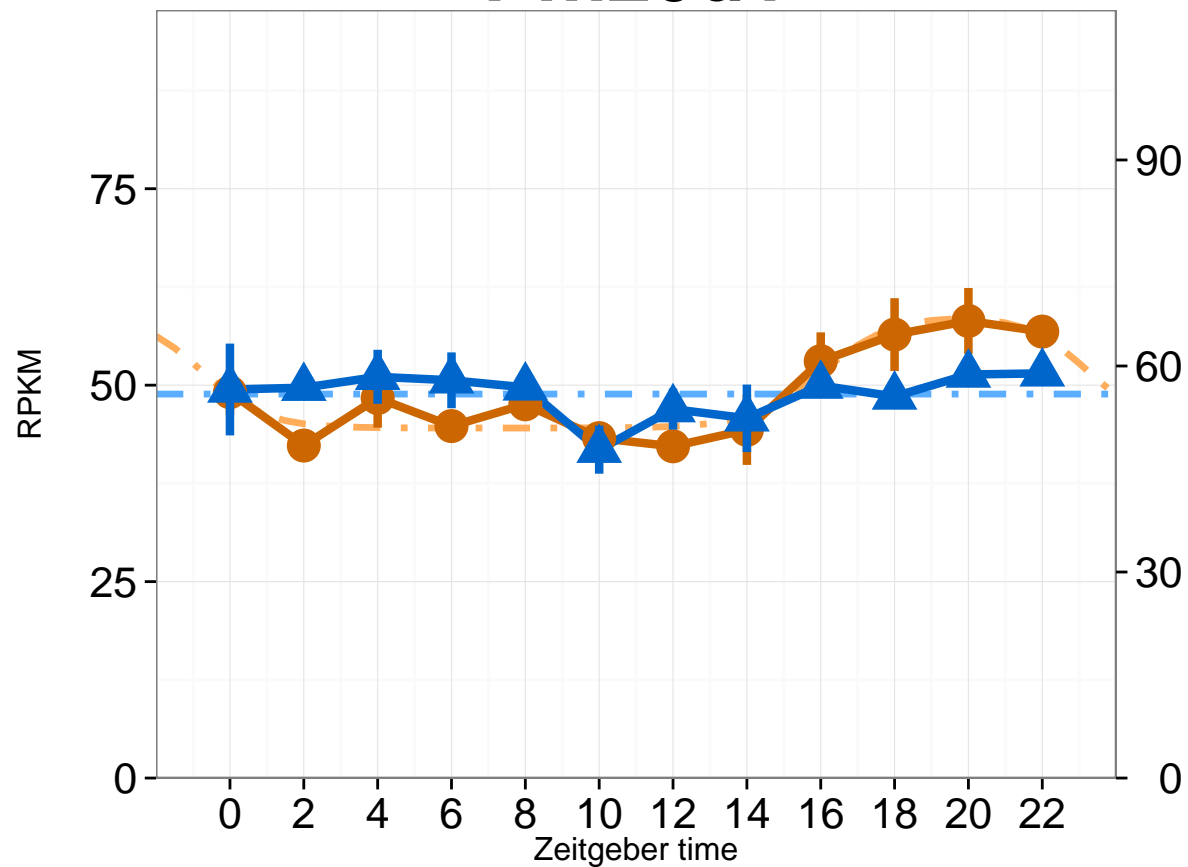

# Pm20d1

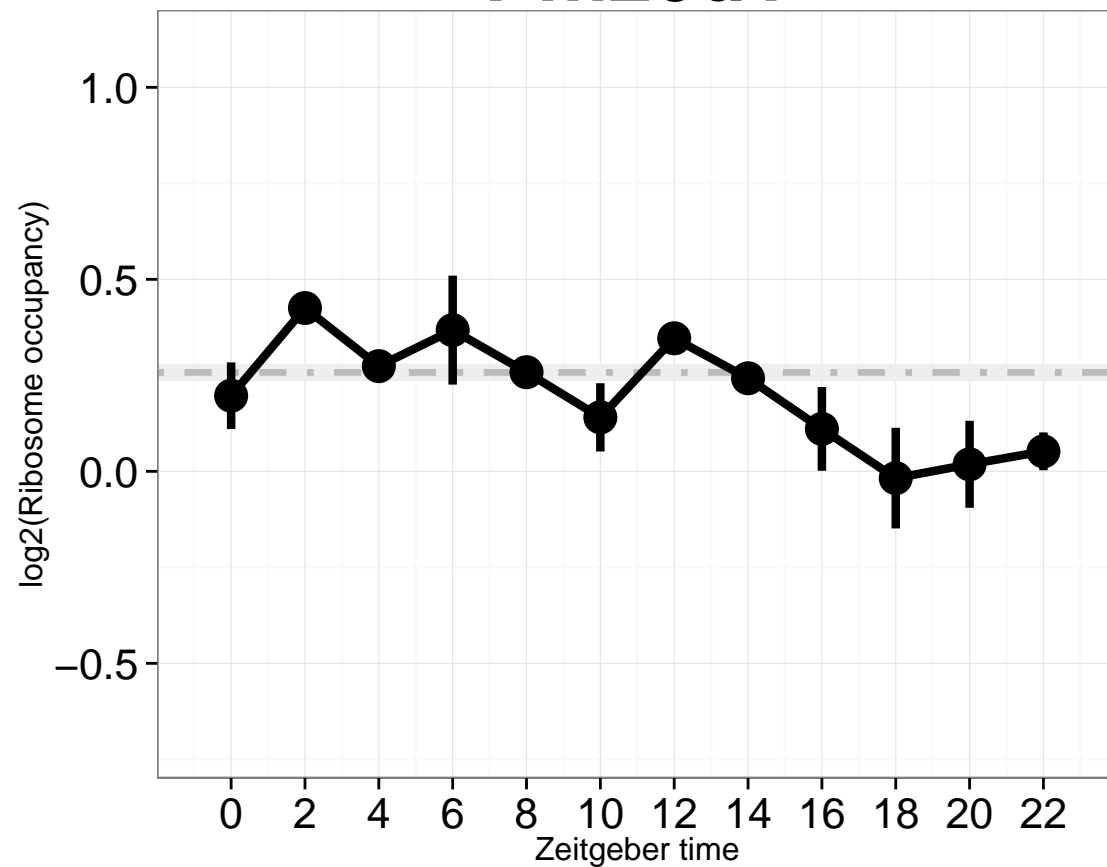

Supplement: SuppDataset_1.zip [file Pm20d1_set_A.pdf › Supplemental Dataset 1/A-mRNA_nonrhyth_translation_nonrhyth/Pm20d1_set_A.pdf]

Pmepa1

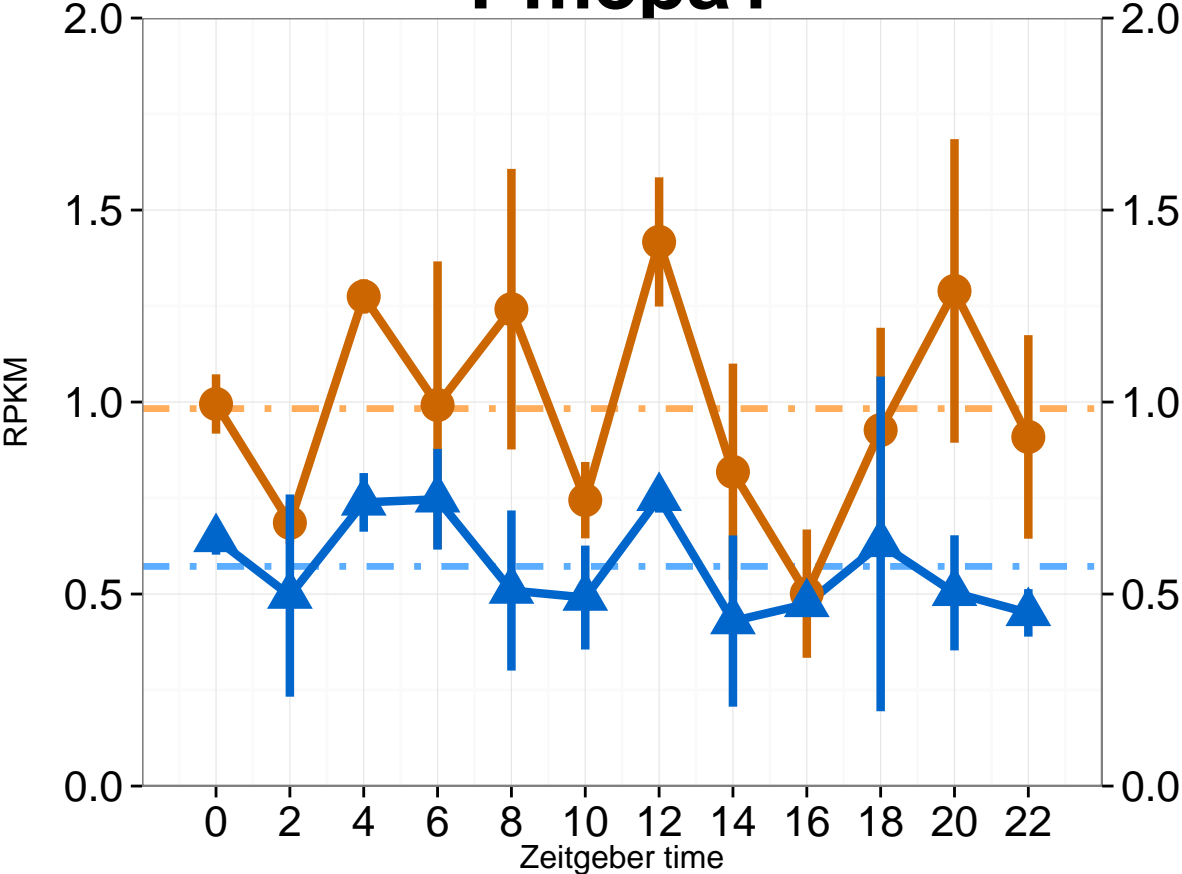

Pmepa1

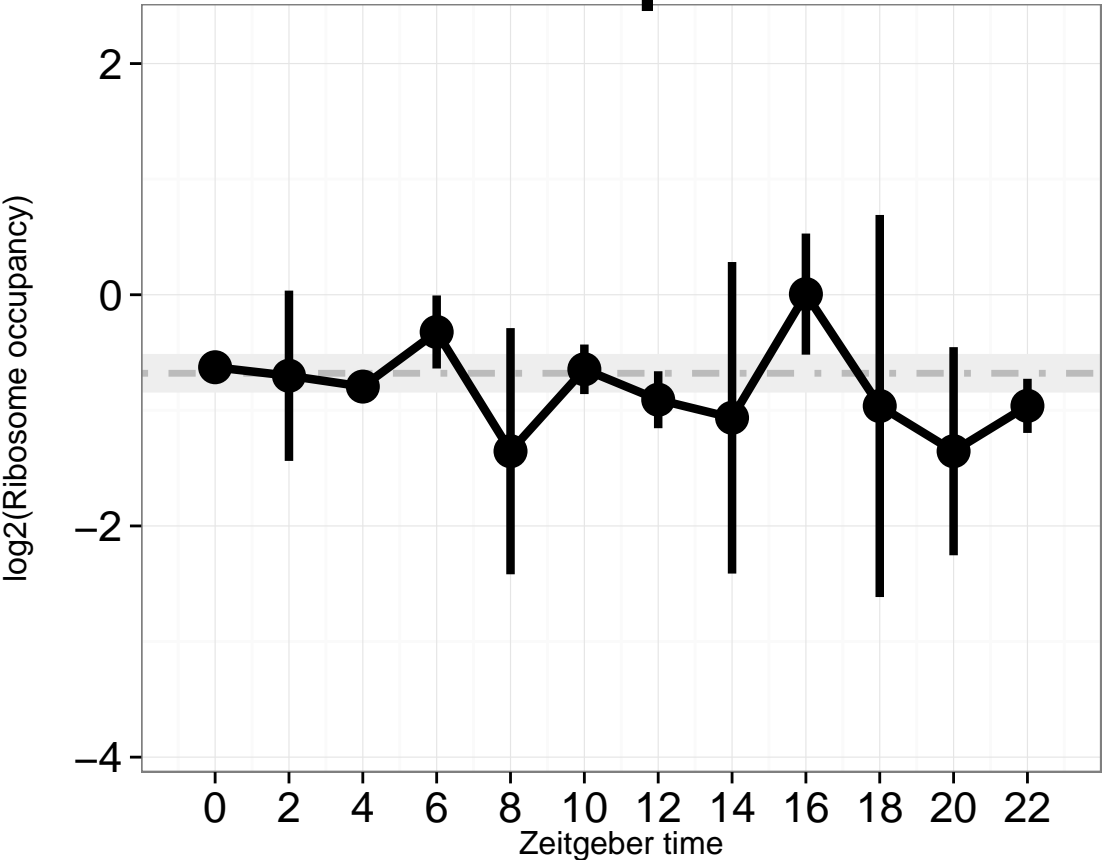

Supplement: SuppDataset_1.zip [file Pmepa1_set_A.pdf › Supplemental Dataset 1/A-mRNA_nonrhyth_translation_nonrhyth/Pmepa1_set_A.pdf]

## Pmm2

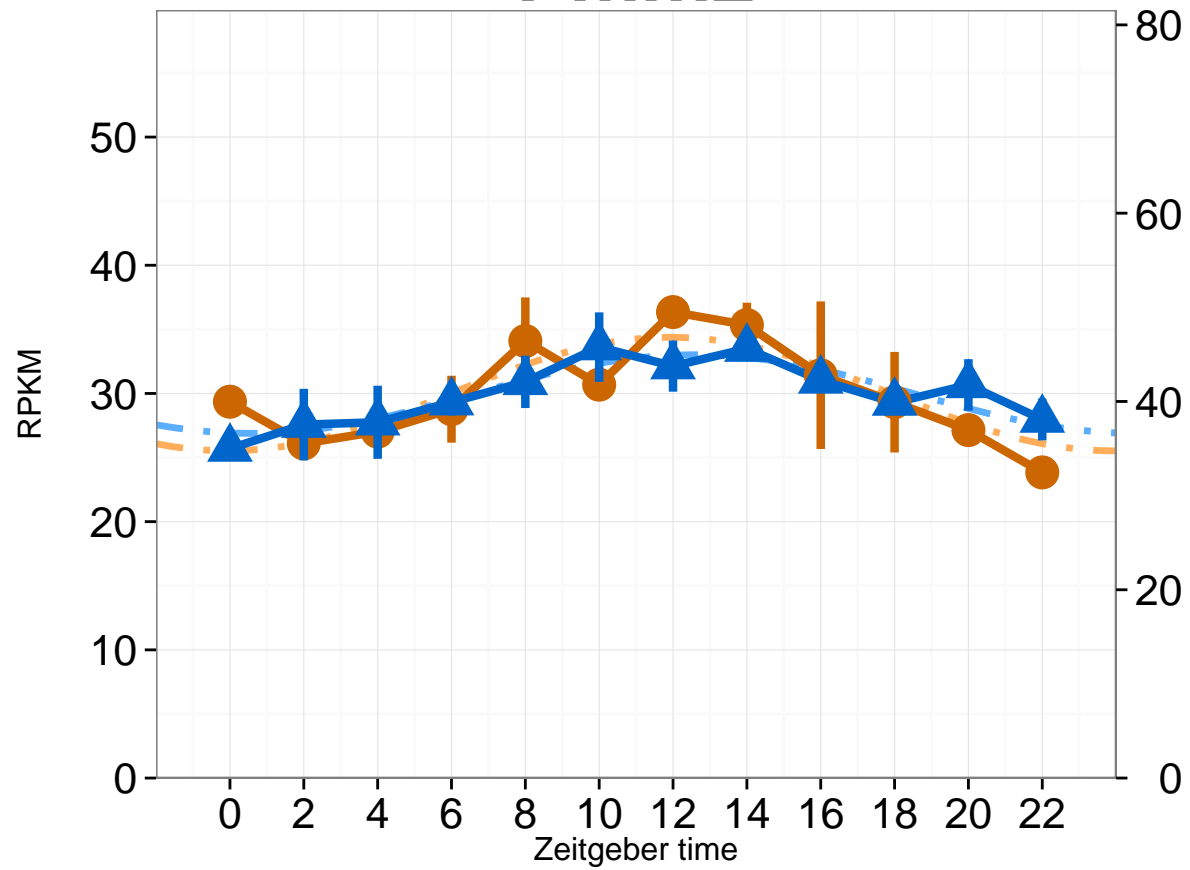

## Pmm2

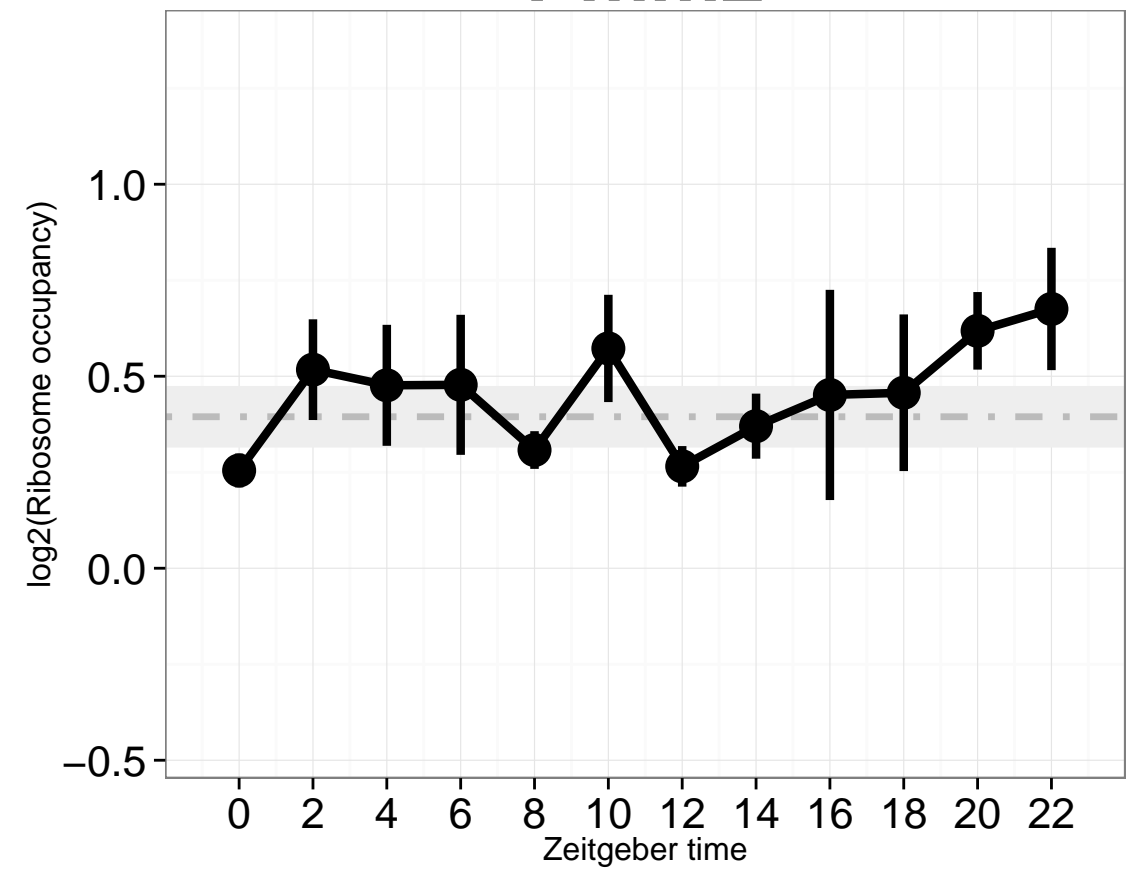

Supplement: SuppDataset_1.zip [file Pmm2_set_A.pdf › Supplemental Dataset 1/A-mRNA_nonrhyth_translation_nonrhyth/Pmm2_set_A.pdf]

# Pmp22

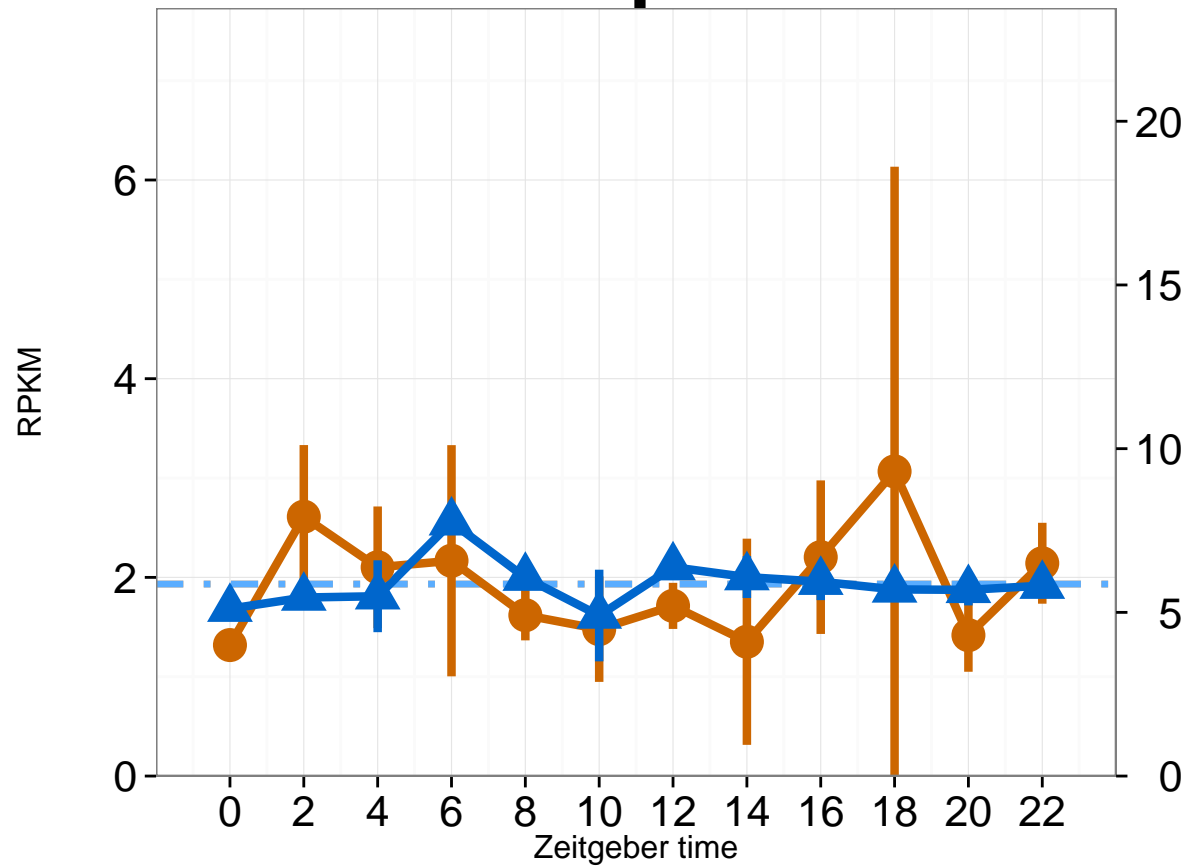

# Pmp22

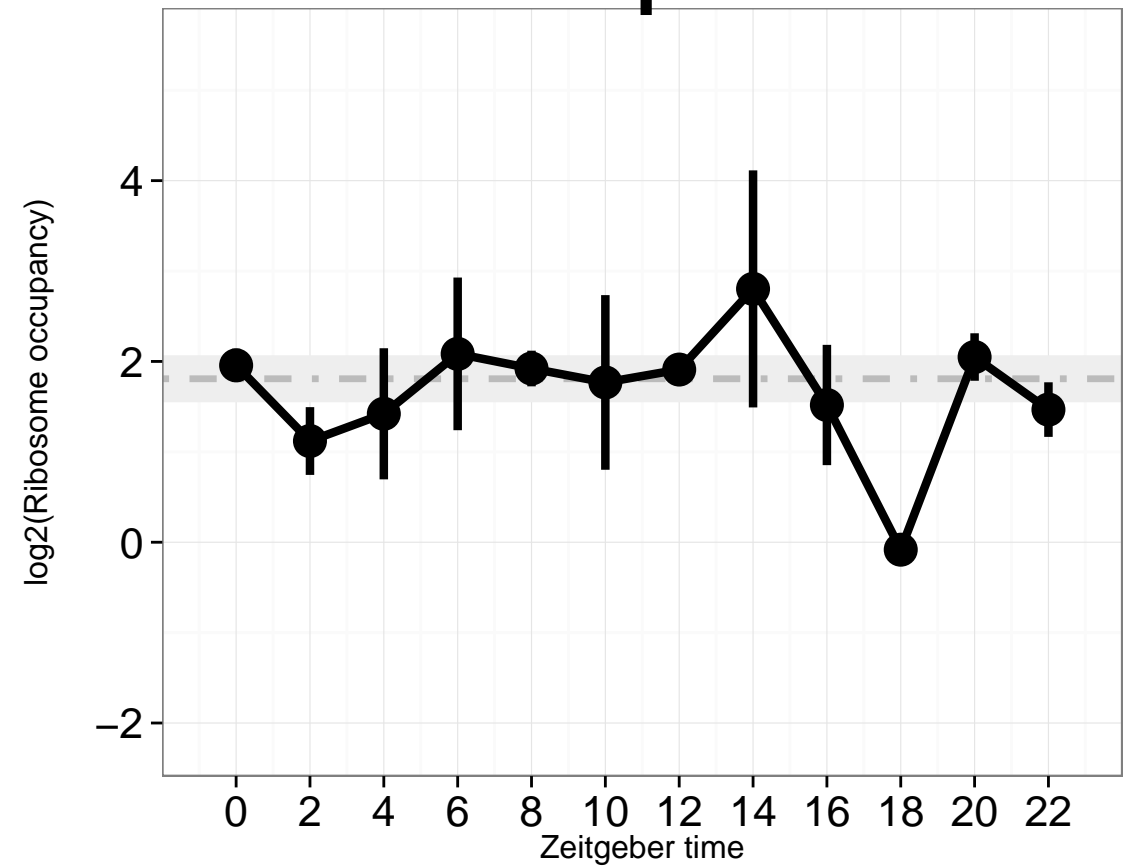

Supplement: SuppDataset_1.zip [file Pmp22_set_A.pdf › Supplemental Dataset 1/A-mRNA_nonrhyth_translation_nonrhyth/Pmp22_set_A.pdf]

# Pmpca

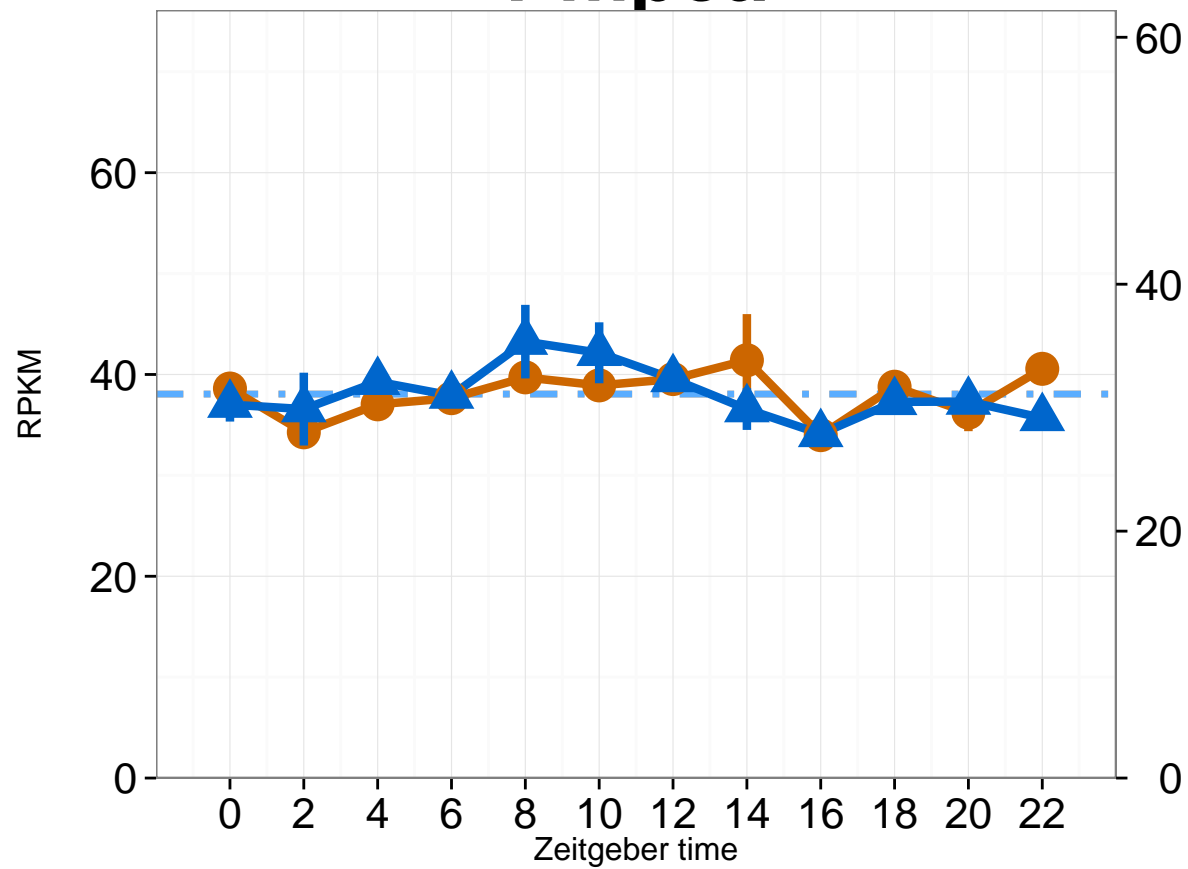

# Pmpca

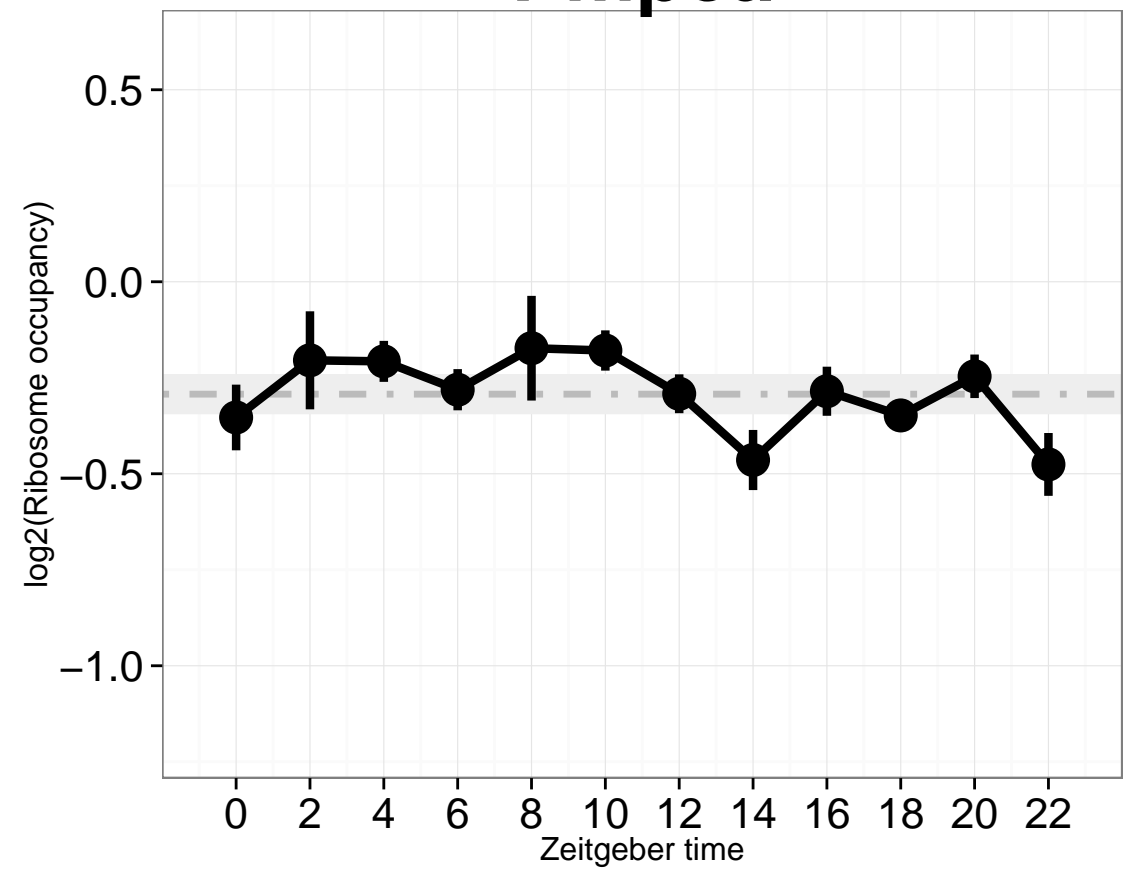

Supplement: SuppDataset_1.zip [file Pmpca_set_A.pdf › Supplemental Dataset 1/A-mRNA_nonrhyth_translation_nonrhyth/Pmpca_set_A.pdf]

# Pmpcb

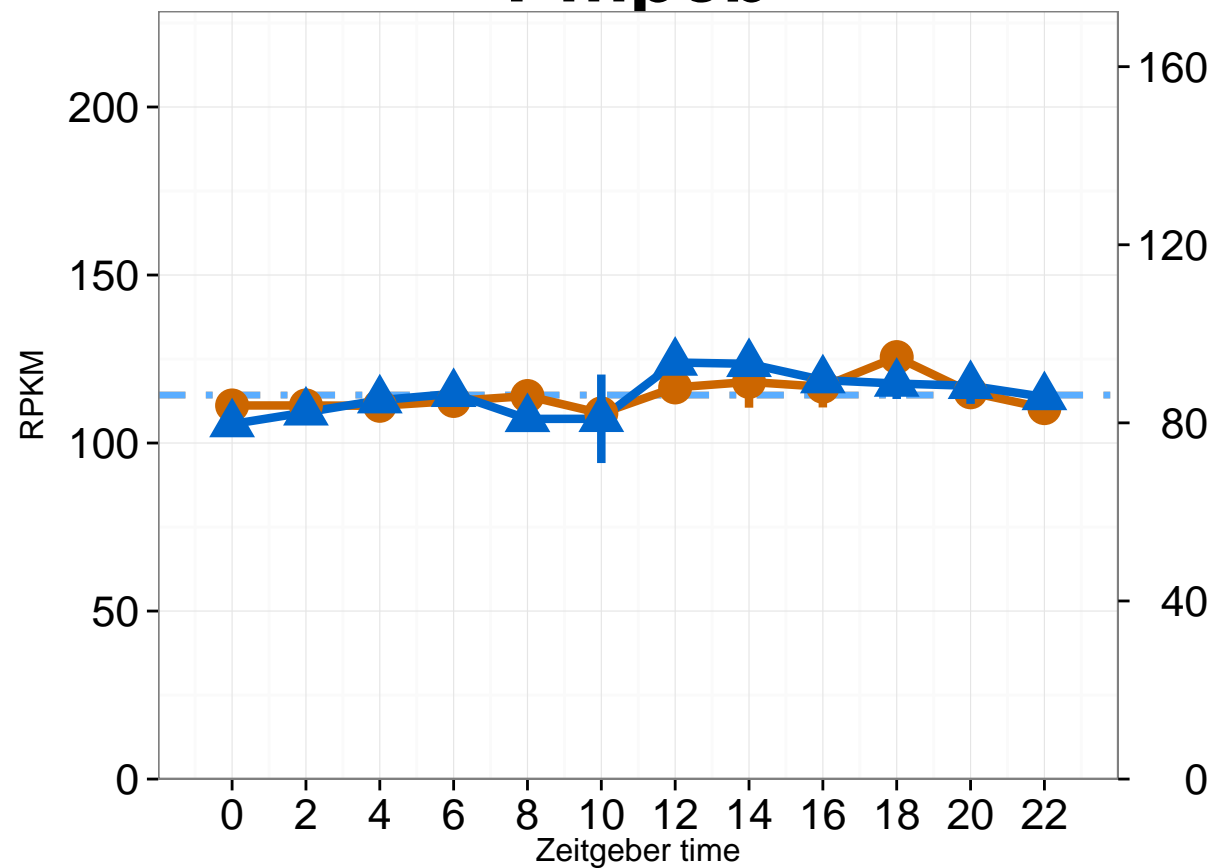

# Pmpcb

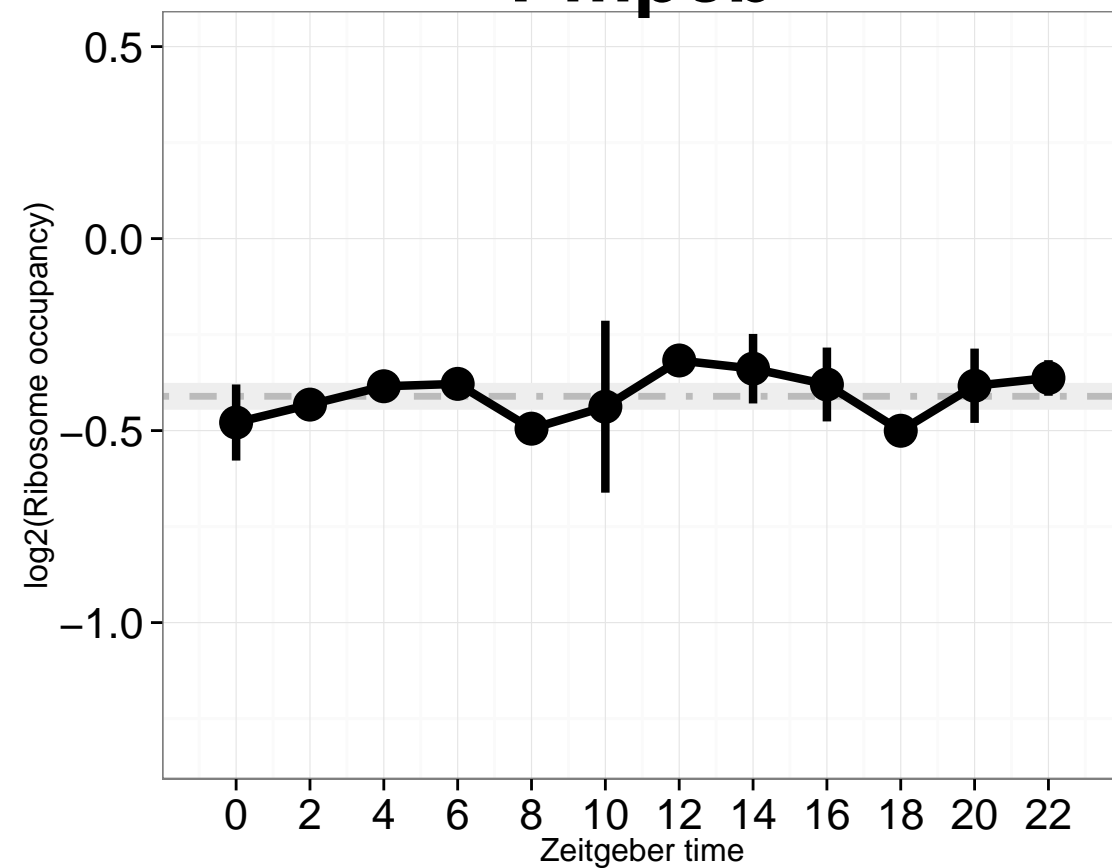

Supplement: SuppDataset_1.zip [file Pmpcb_set_A.pdf › Supplemental Dataset 1/A-mRNA_nonrhyth_translation_nonrhyth/Pmpcb_set_A.pdf]

# Pms1

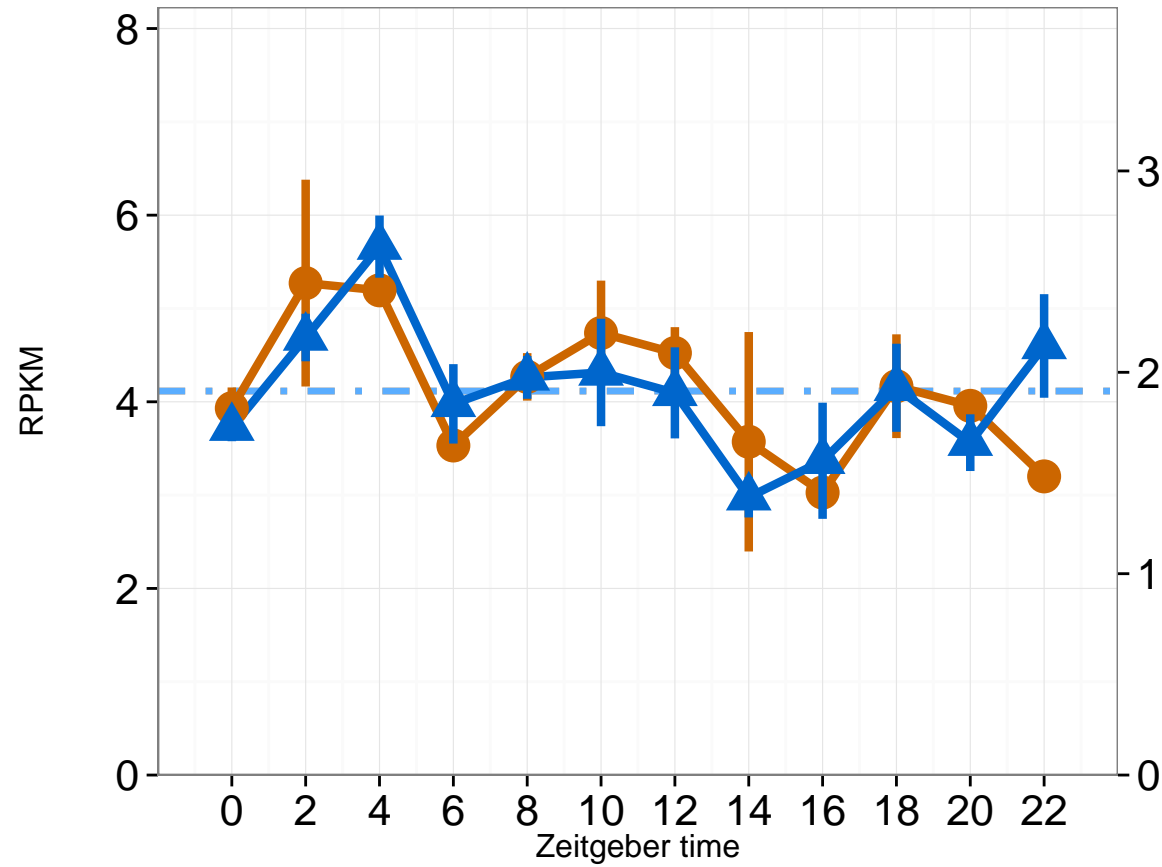

# Pms1

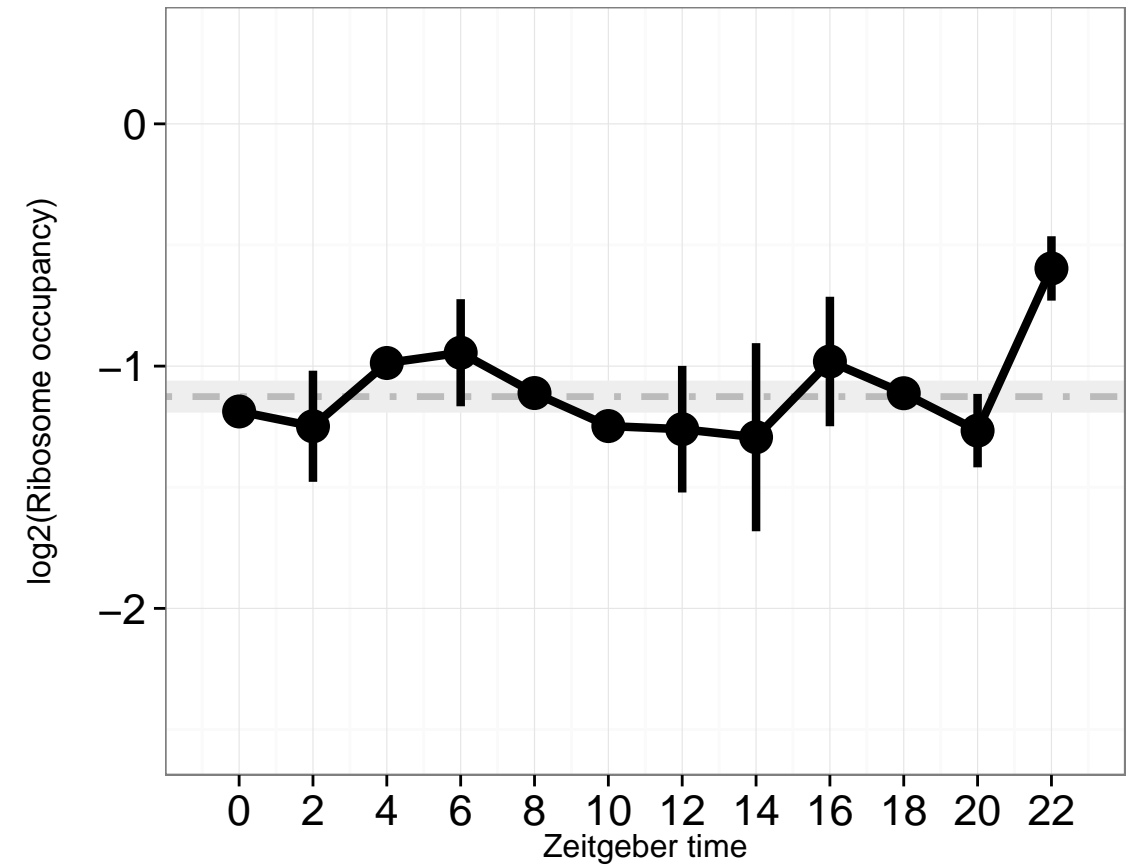

Supplement: SuppDataset_1.zip [file Pms1_set_A.pdf › Supplemental Dataset 1/A-mRNA_nonrhyth_translation_nonrhyth/Pms1_set_A.pdf]

## Pms2

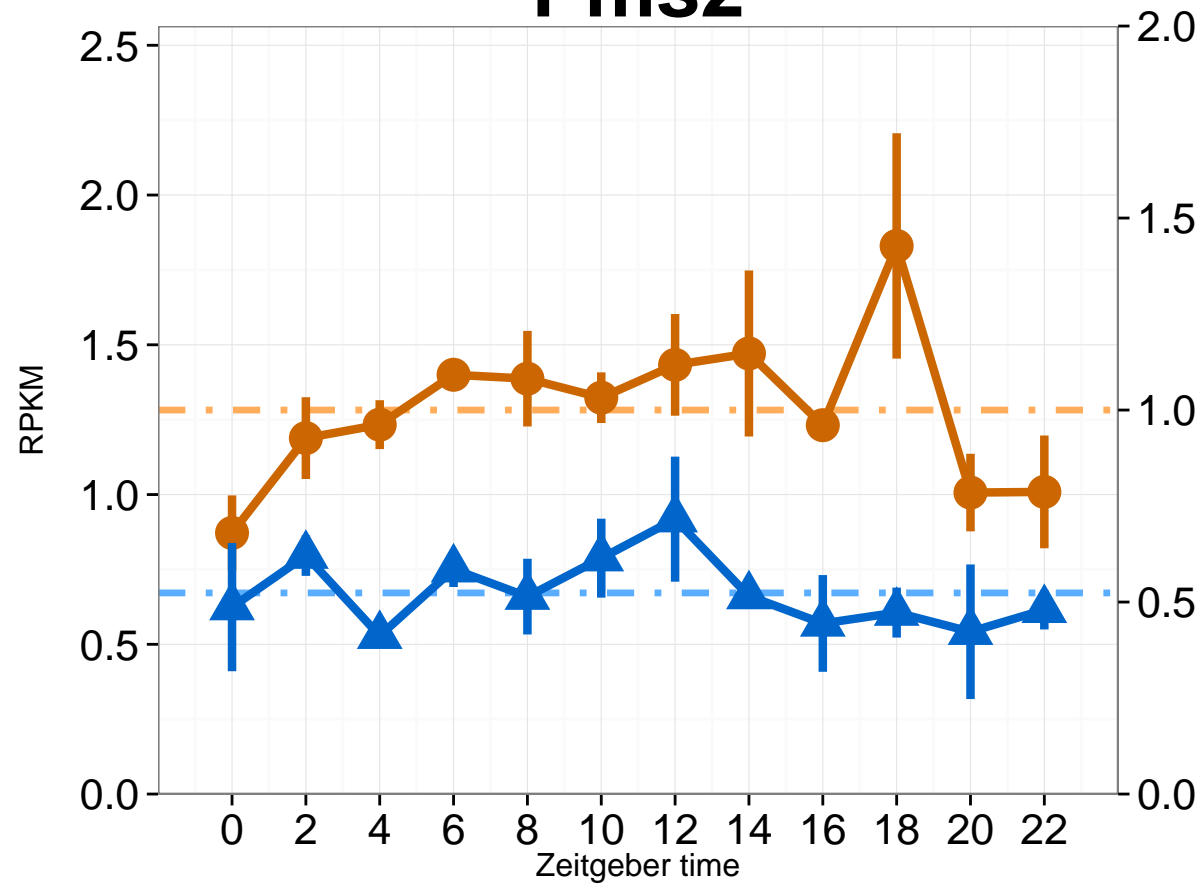

## Pms2

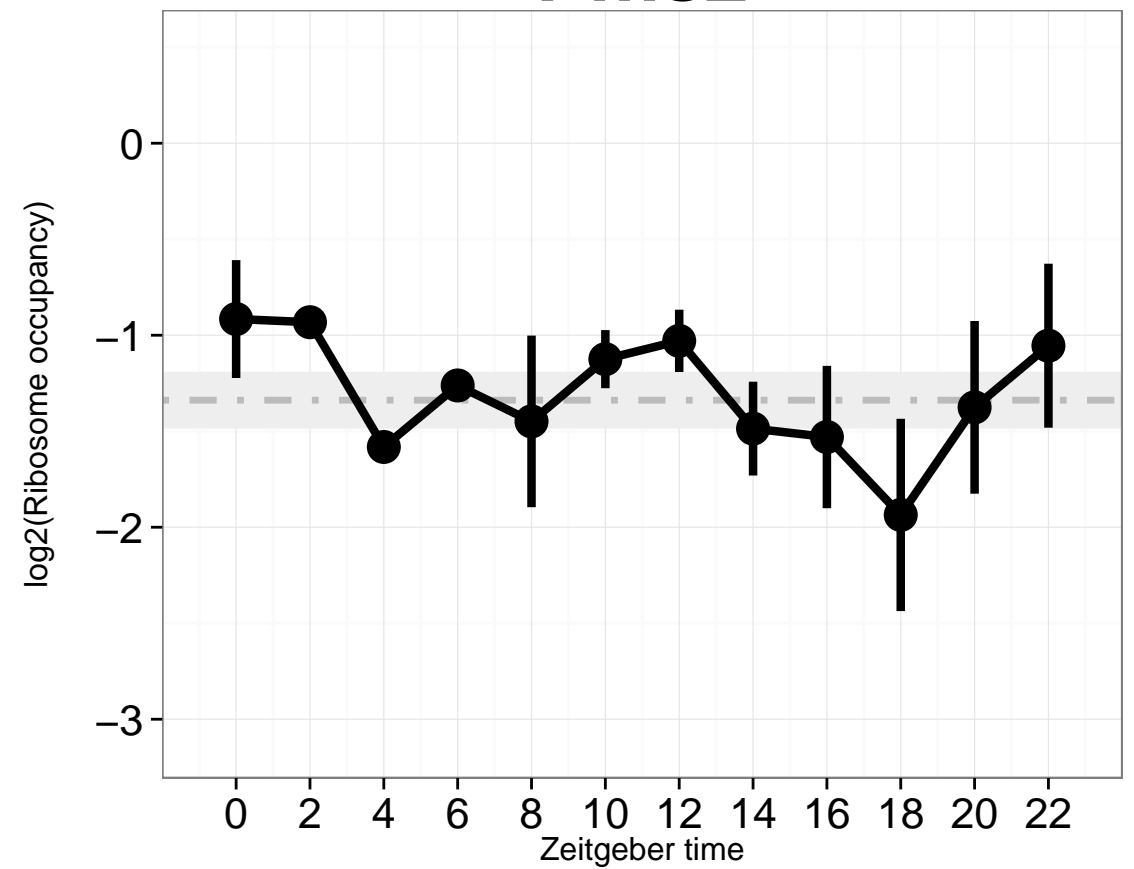

Supplement: SuppDataset_1.zip [file Pms2_set_A.pdf › Supplemental Dataset 1/A-mRNA_nonrhyth_translation_nonrhyth/Pms2_set_A.pdf]

## Pnlip

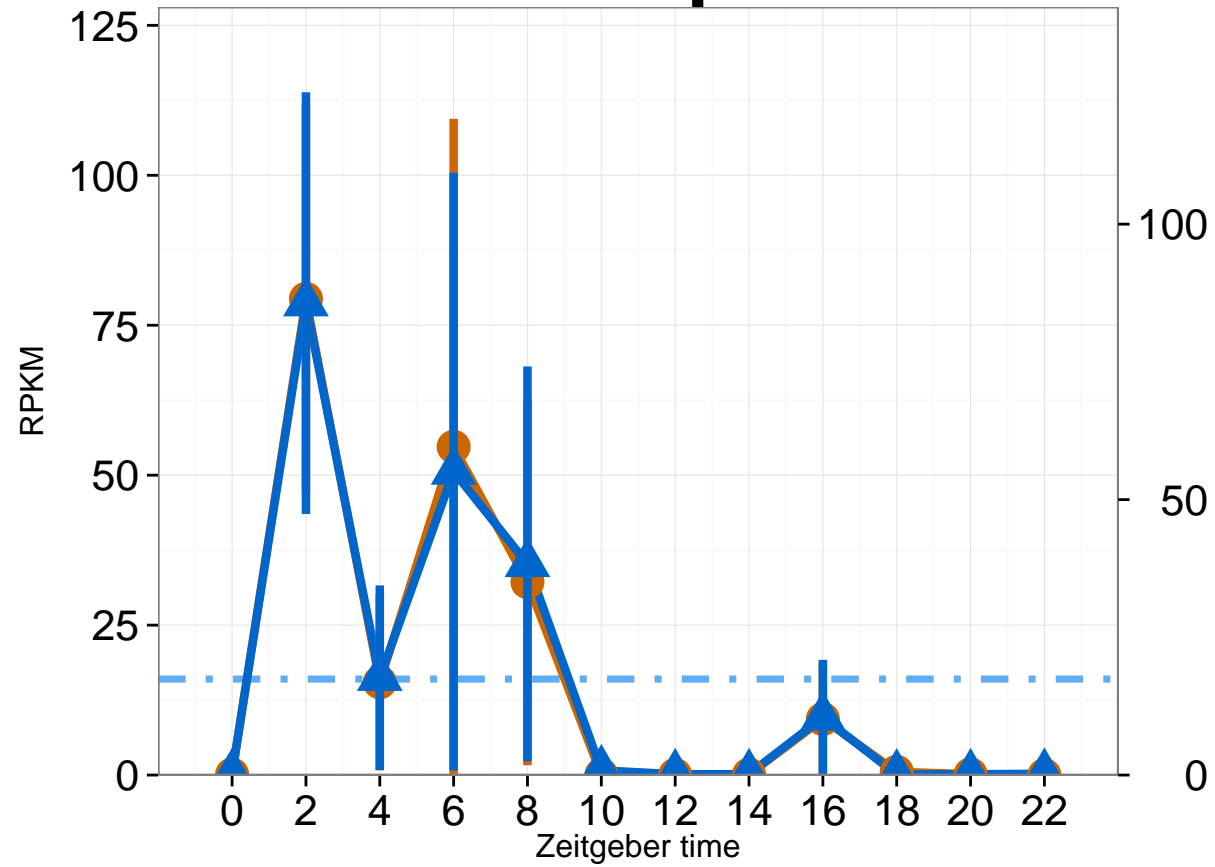

## Pnlip

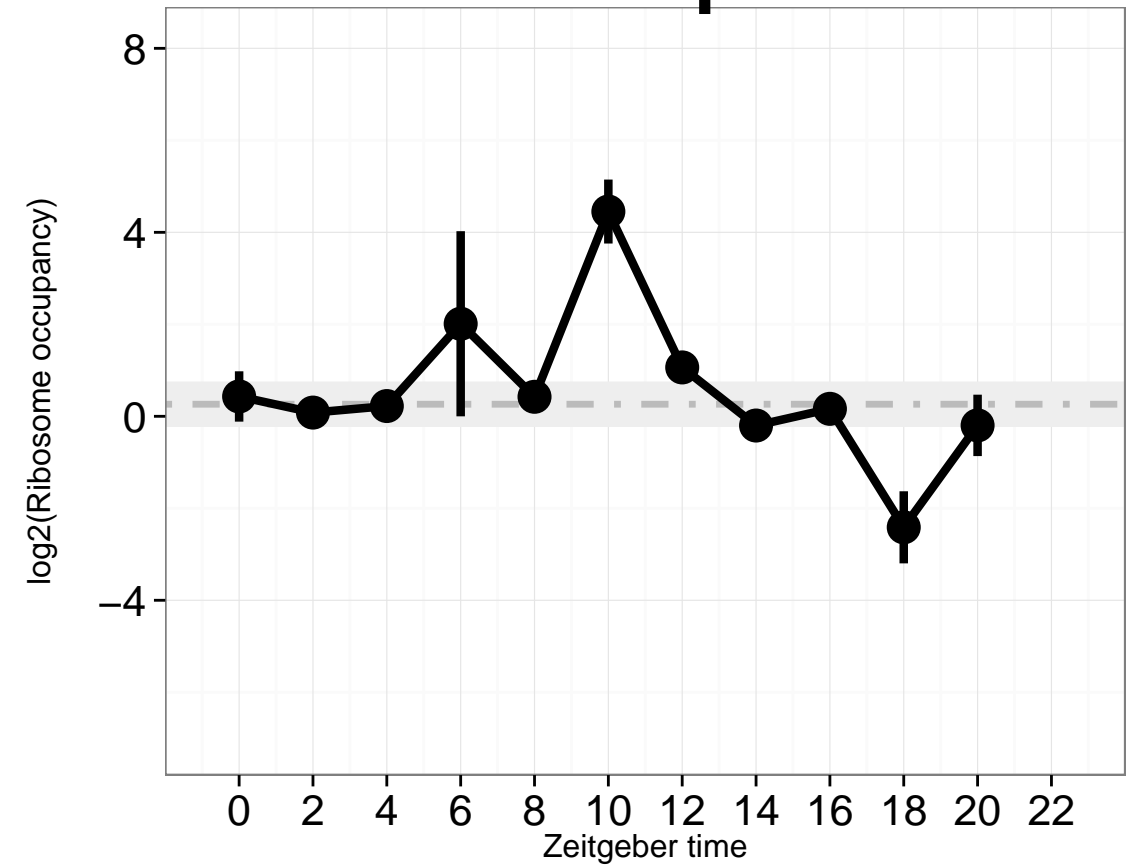

Supplement: SuppDataset_1.zip [file Pnlip_set_A.pdf › Supplemental Dataset 1/A-mRNA_nonrhyth_translation_nonrhyth/Pnlip_set_A.pdf]

## Pnliprp1

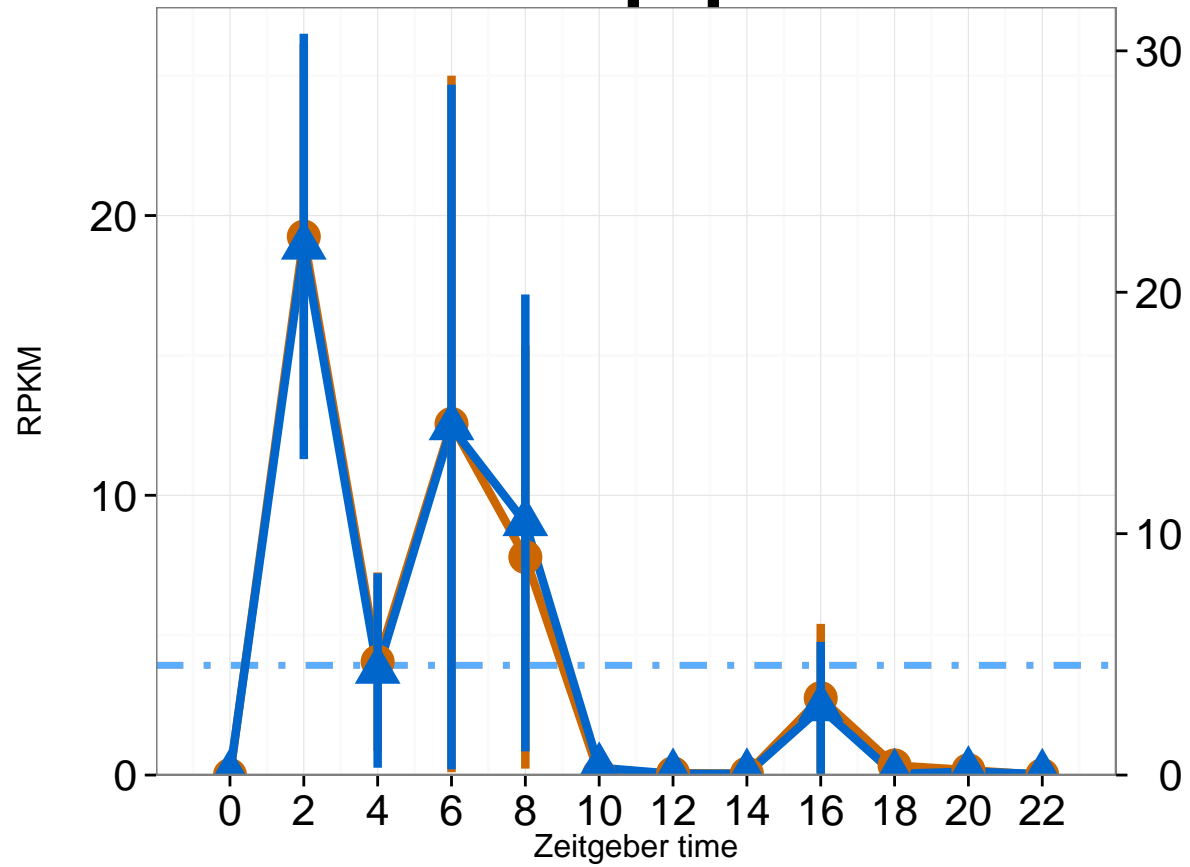

## Pnliprp1

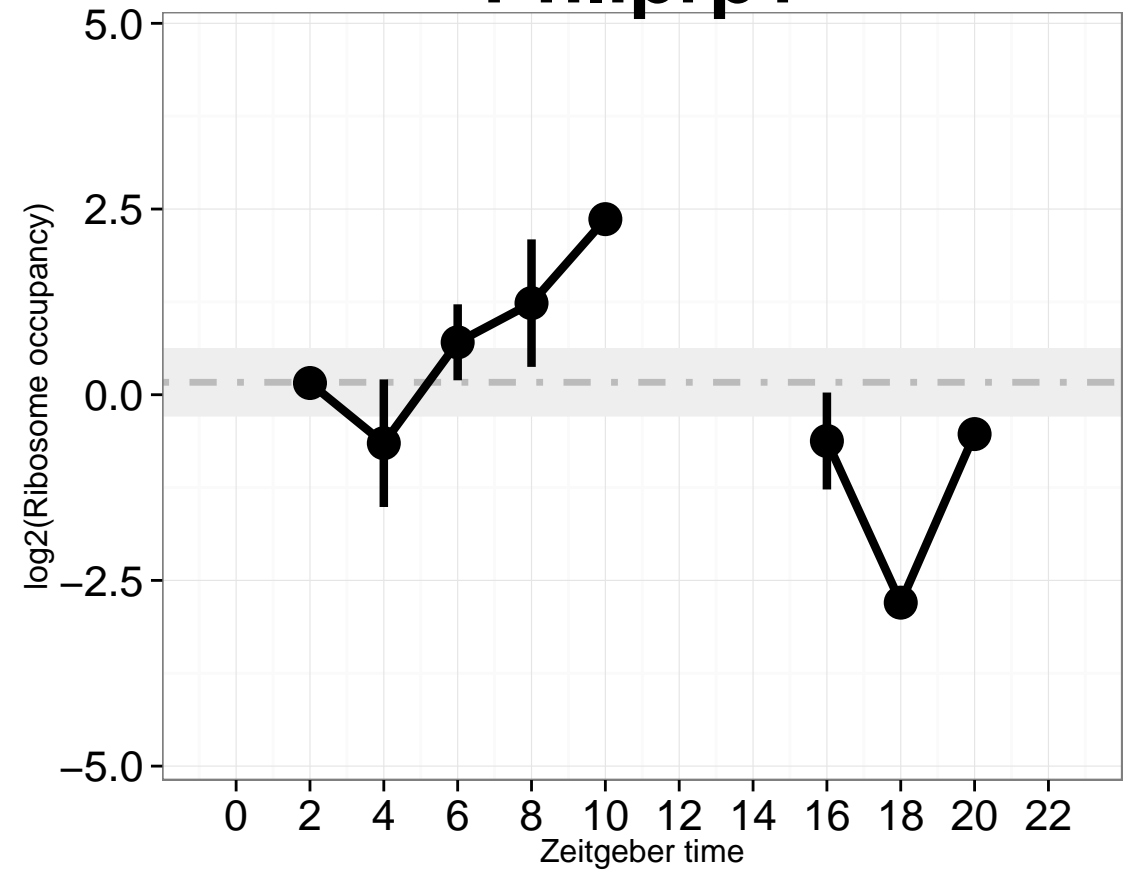

Supplement: SuppDataset_1.zip [file Pnliprp1_set_A.pdf › Supplemental Dataset 1/A-mRNA_nonrhyth_translation_nonrhyth/Pnliprp1_set_A.pdf]

## Pno1

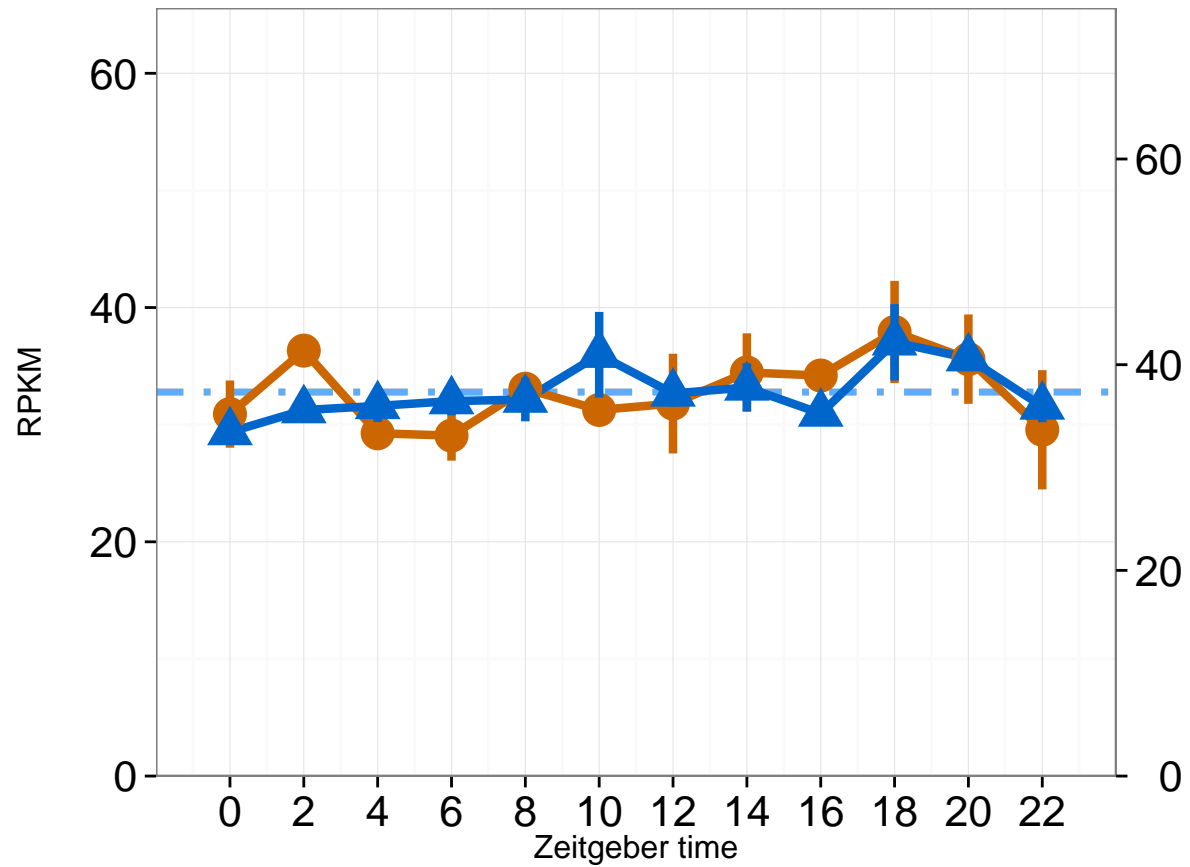

## Pno1

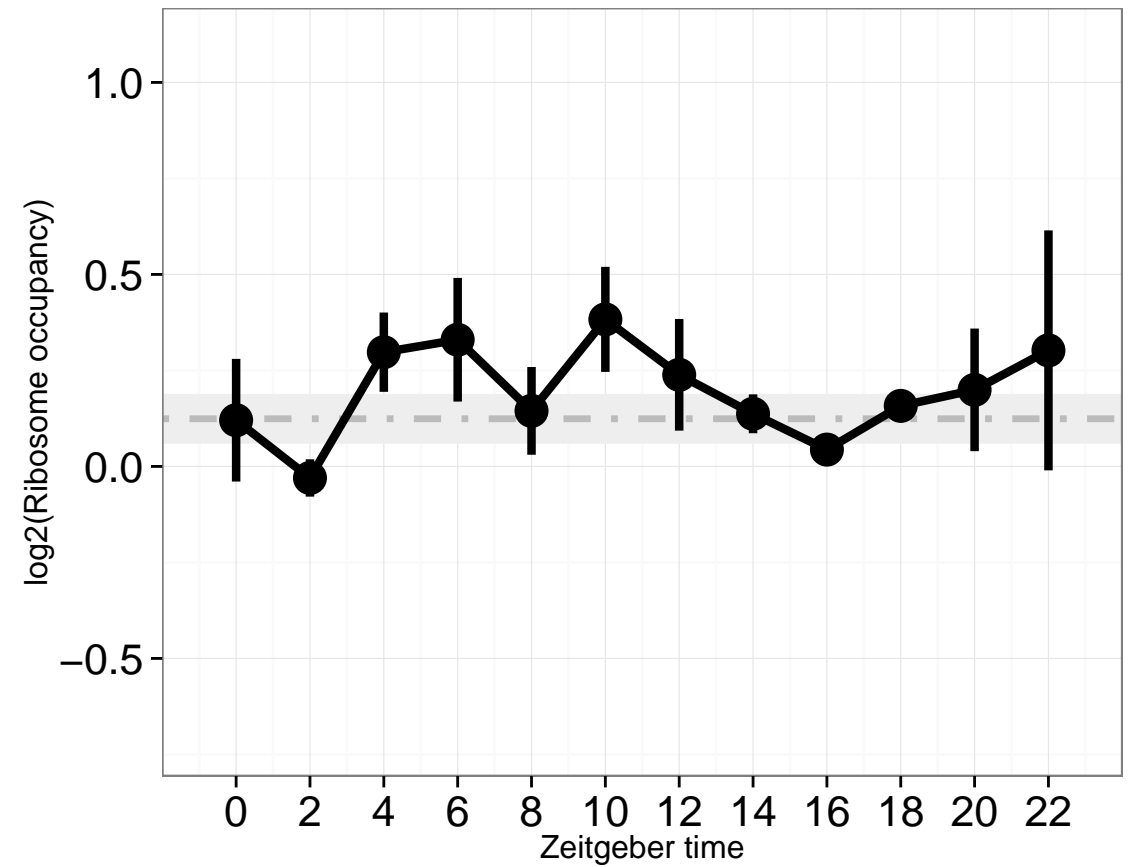

Supplement: SuppDataset_1.zip [file Pno1_set_A.pdf › Supplemental Dataset 1/A-mRNA_nonrhyth_translation_nonrhyth/Pno1_set_A.pdf]

# Pnpla6

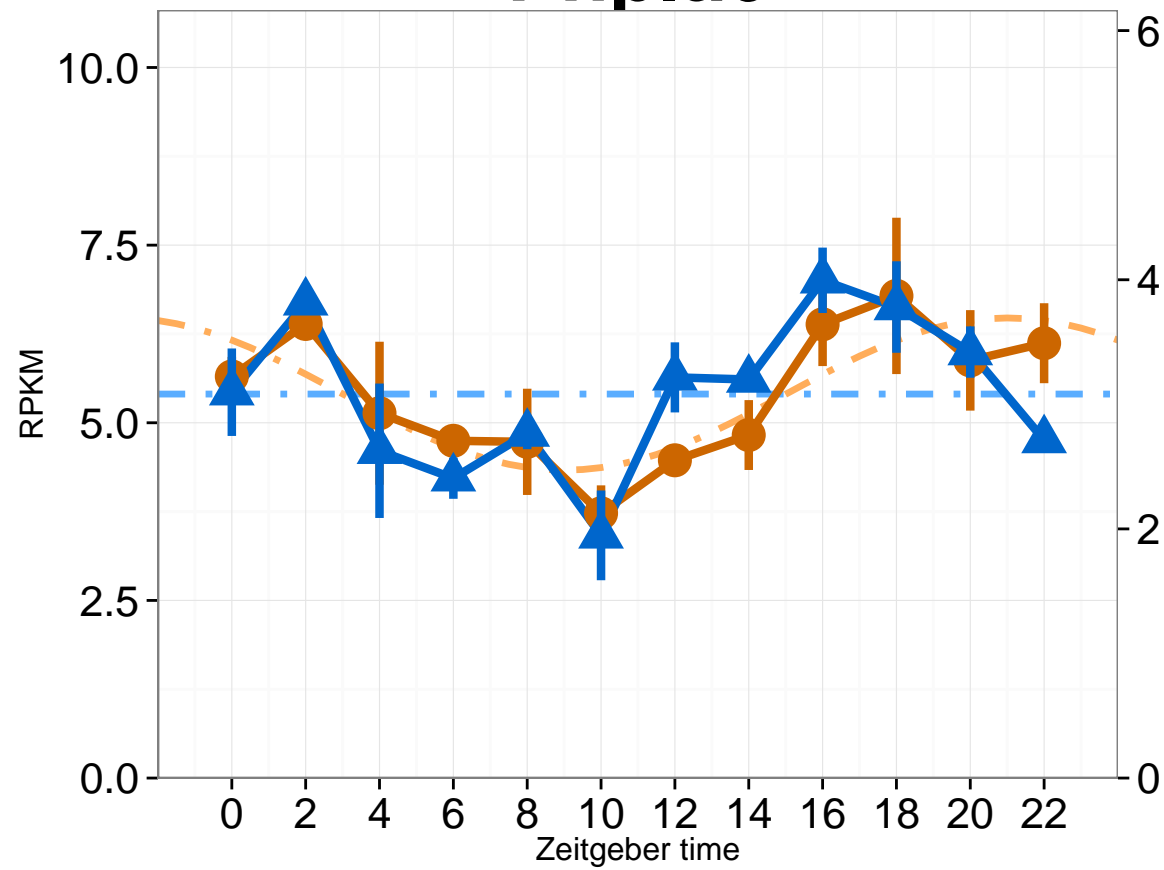

# Pnpla6

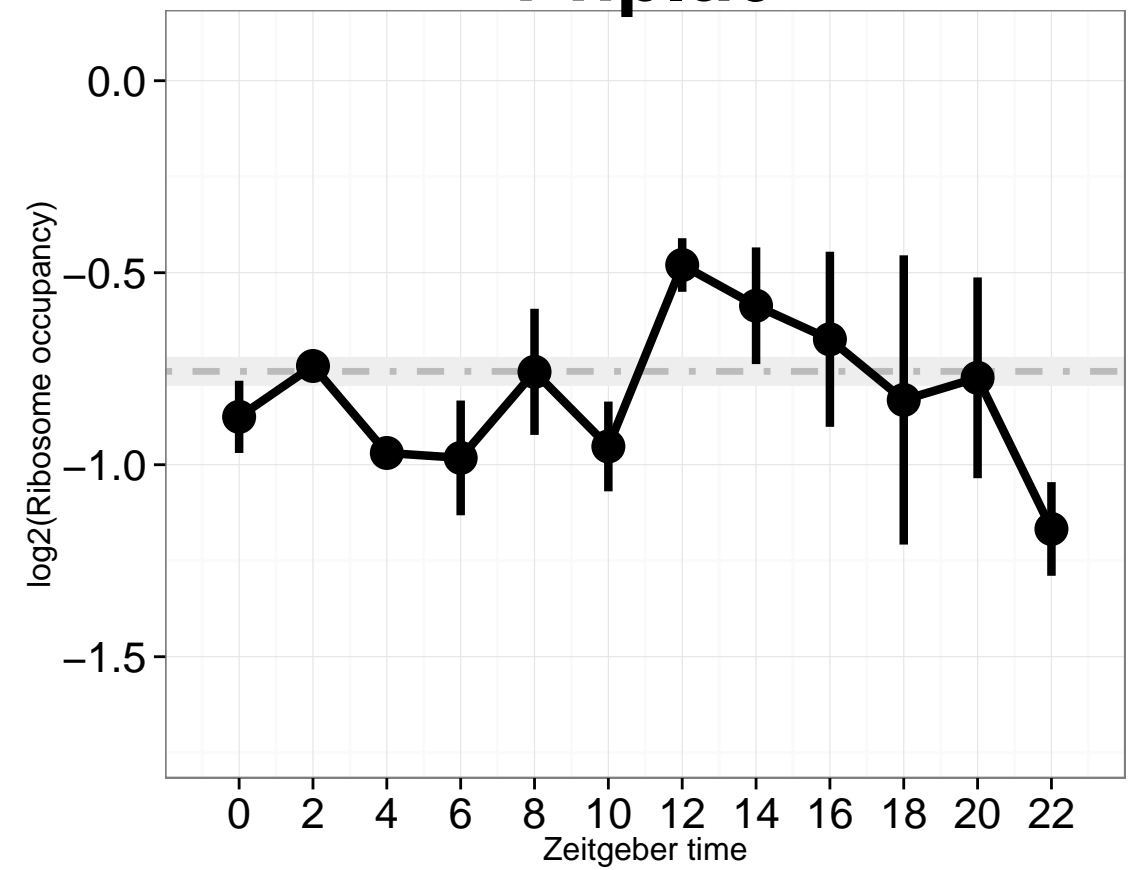

Supplement: SuppDataset_1.zip [file Pnpla6_set_A.pdf › Supplemental Dataset 1/A-mRNA_nonrhyth_translation_nonrhyth/Pnpla6_set_A.pdf]

## Pnpla7

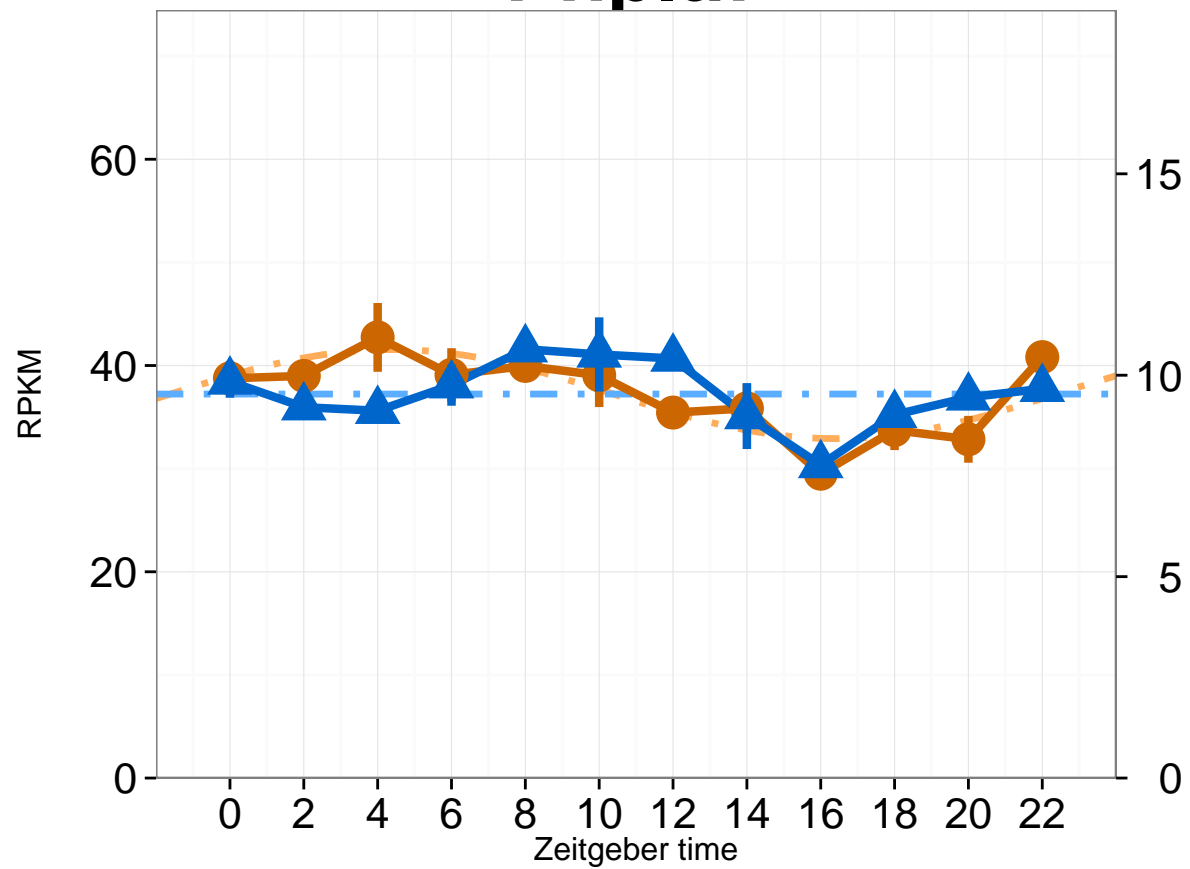

## Pnpla7

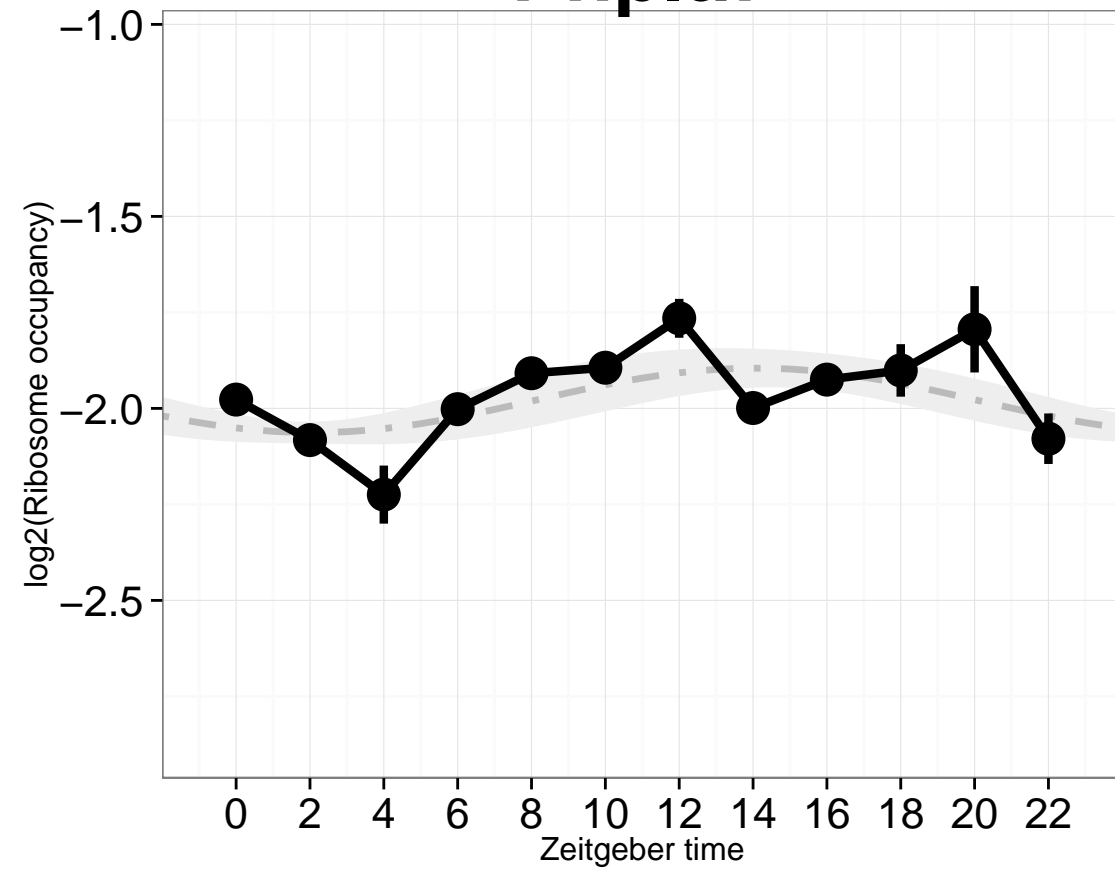

Supplement: SuppDataset_1.zip [file Pnpla7_set_A.pdf › Supplemental Dataset 1/A-mRNA_nonrhyth_translation_nonrhyth/Pnpla7_set_A.pdf]

# Pnpla8

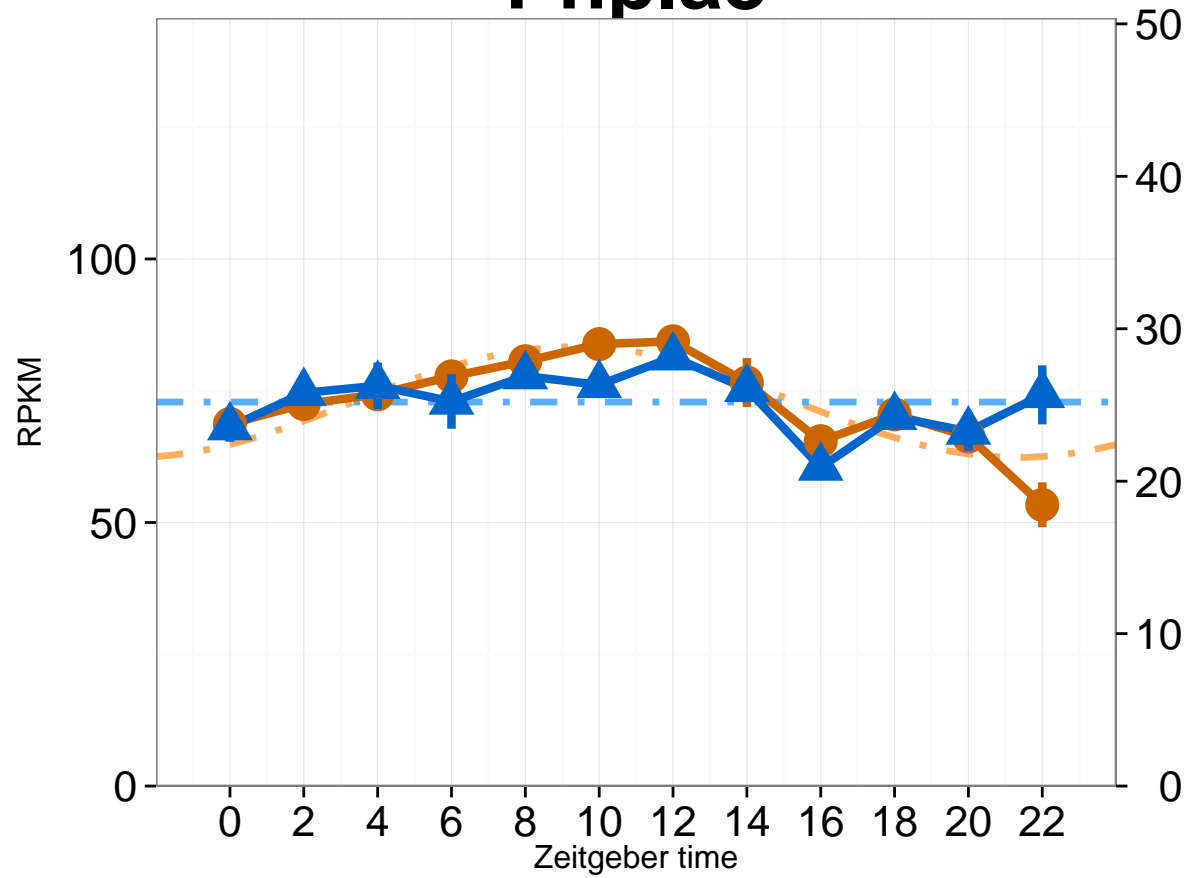

# Pnpla8

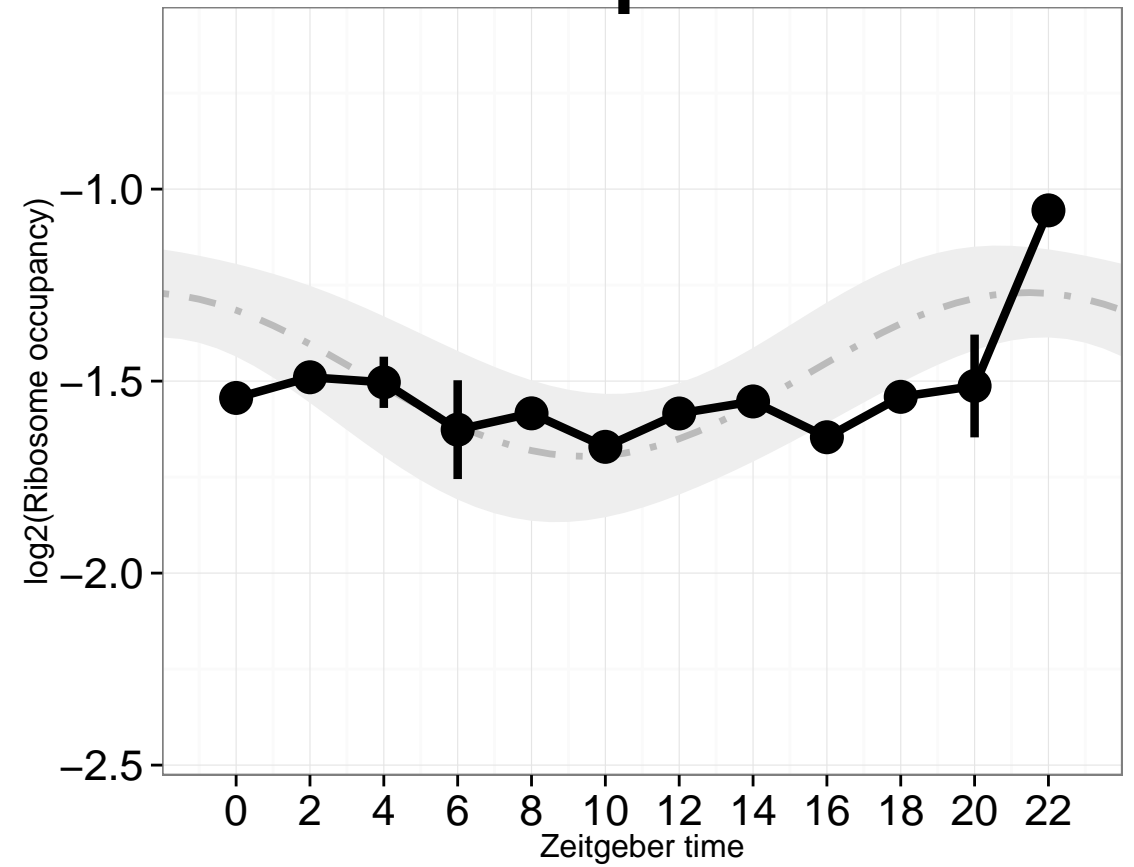

Supplement: SuppDataset_1.zip [file Pnpla8_set_A.pdf › Supplemental Dataset 1/A-mRNA_nonrhyth_translation_nonrhyth/Pnpla8_set_A.pdf]

## Pnpo

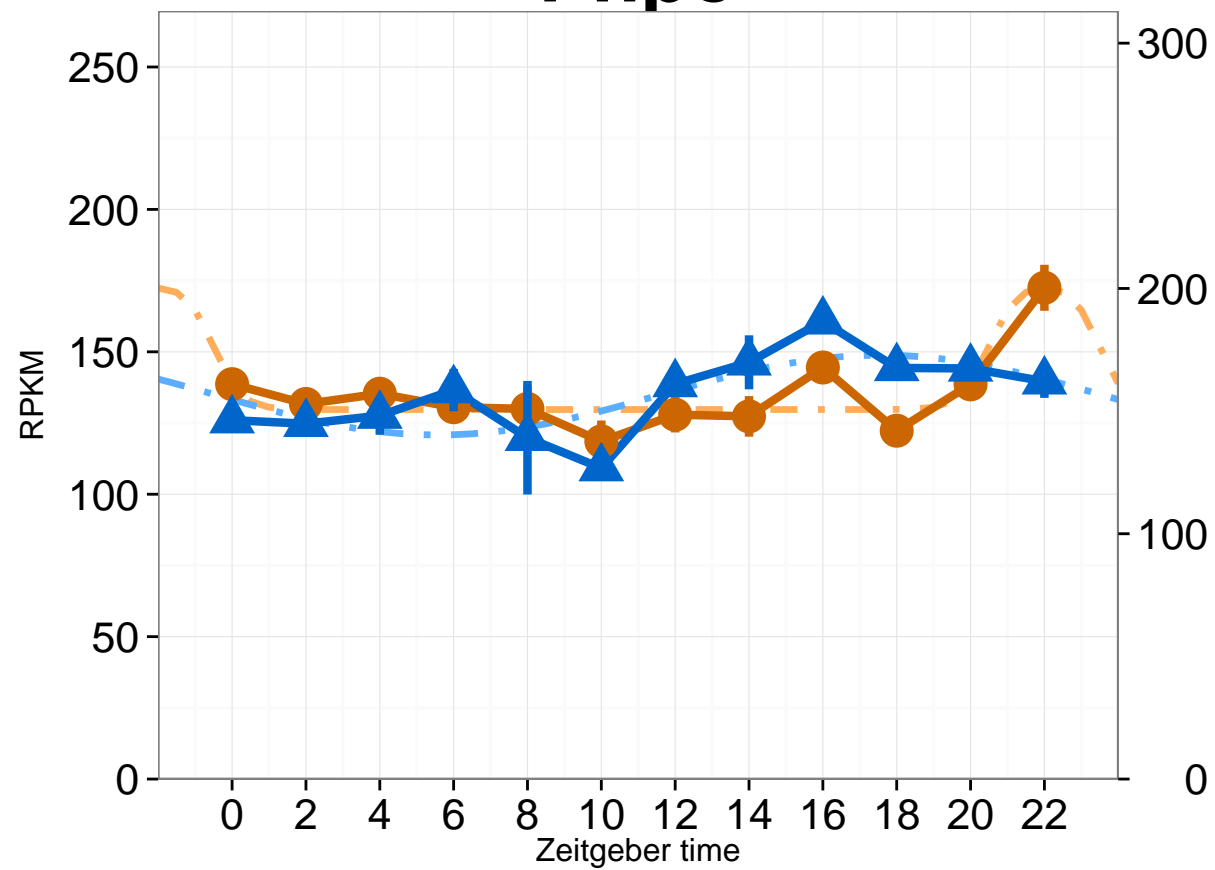

## Pnpo

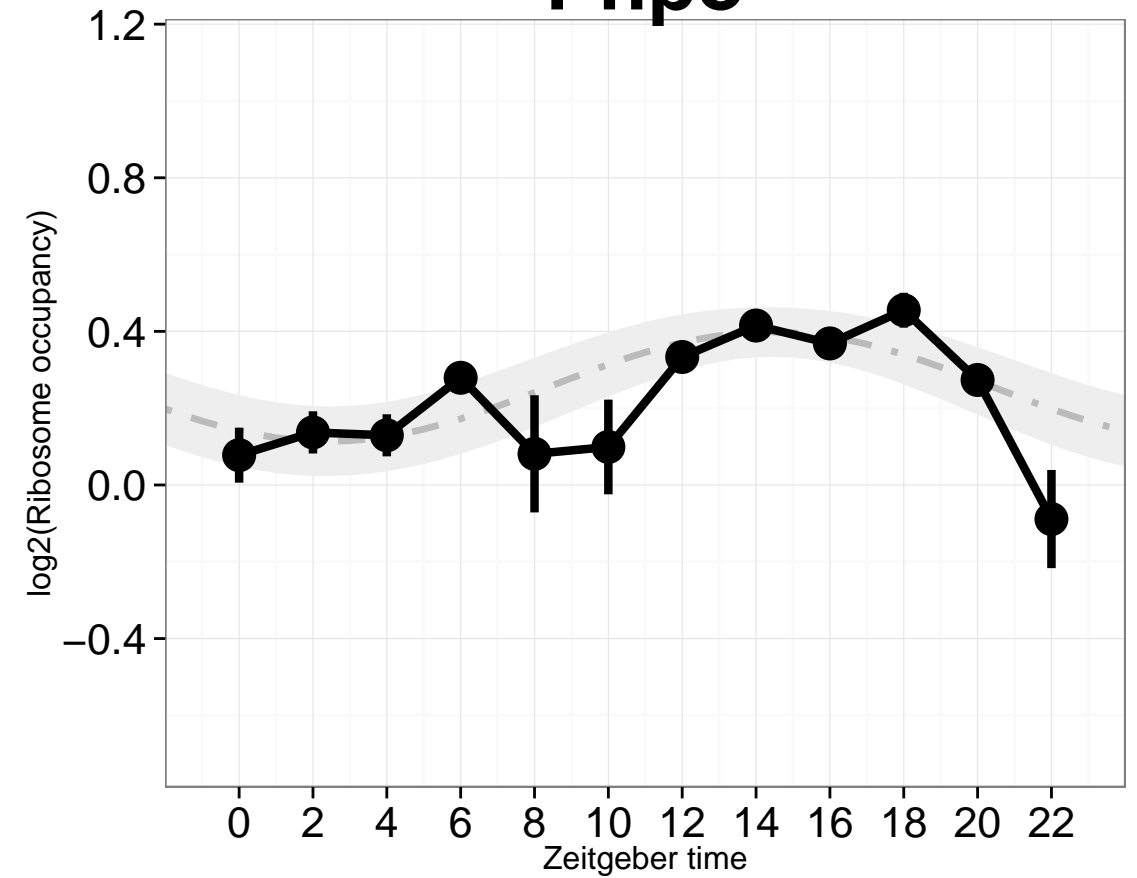

Supplement: SuppDataset_1.zip [file Pnpo_set_A.pdf › Supplemental Dataset 1/A-mRNA_nonrhyth_translation_nonrhyth/Pnpo_set_A.pdf]

# Pnpt1

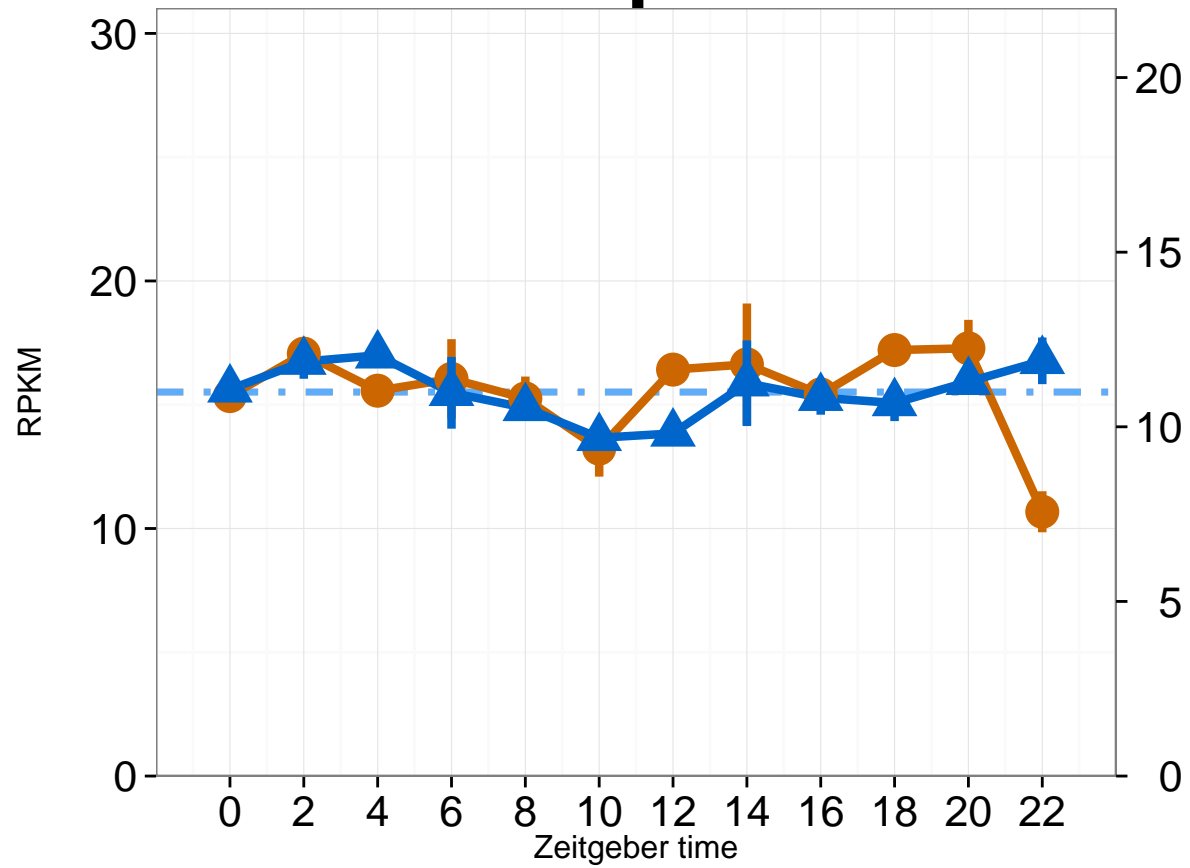

# Pnpt1

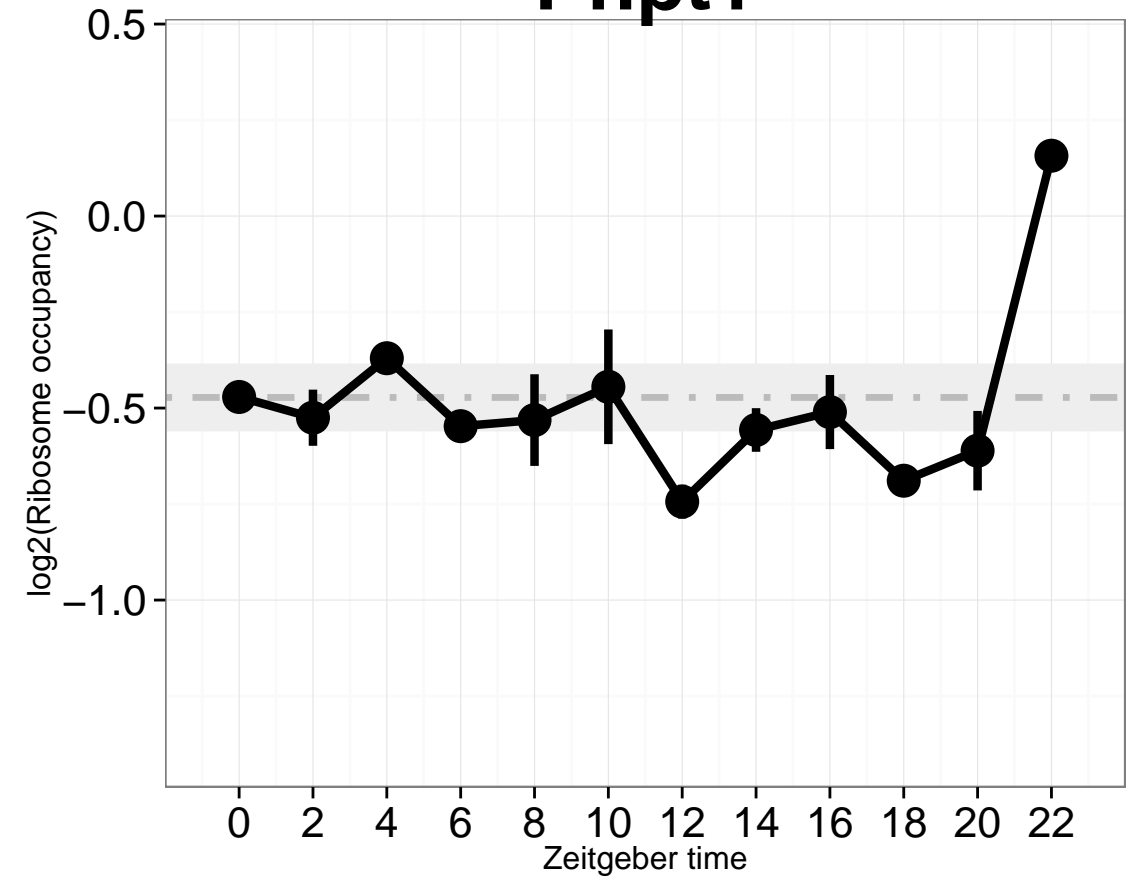

Supplement: SuppDataset_1.zip [file Pnpt1_set_A.pdf › Supplemental Dataset 1/A-mRNA_nonrhyth_translation_nonrhyth/Pnpt1_set_A.pdf]

# Pnrc2

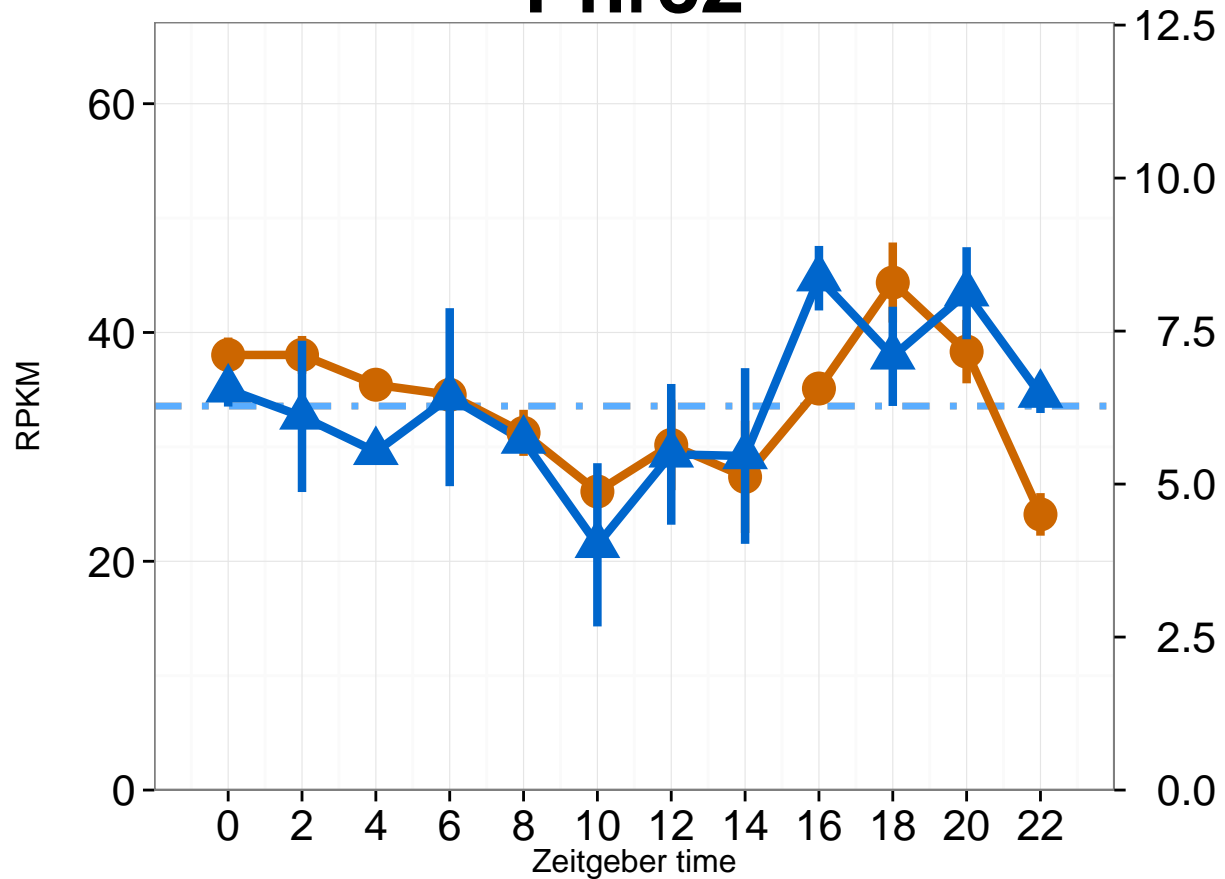

# Pnrc2

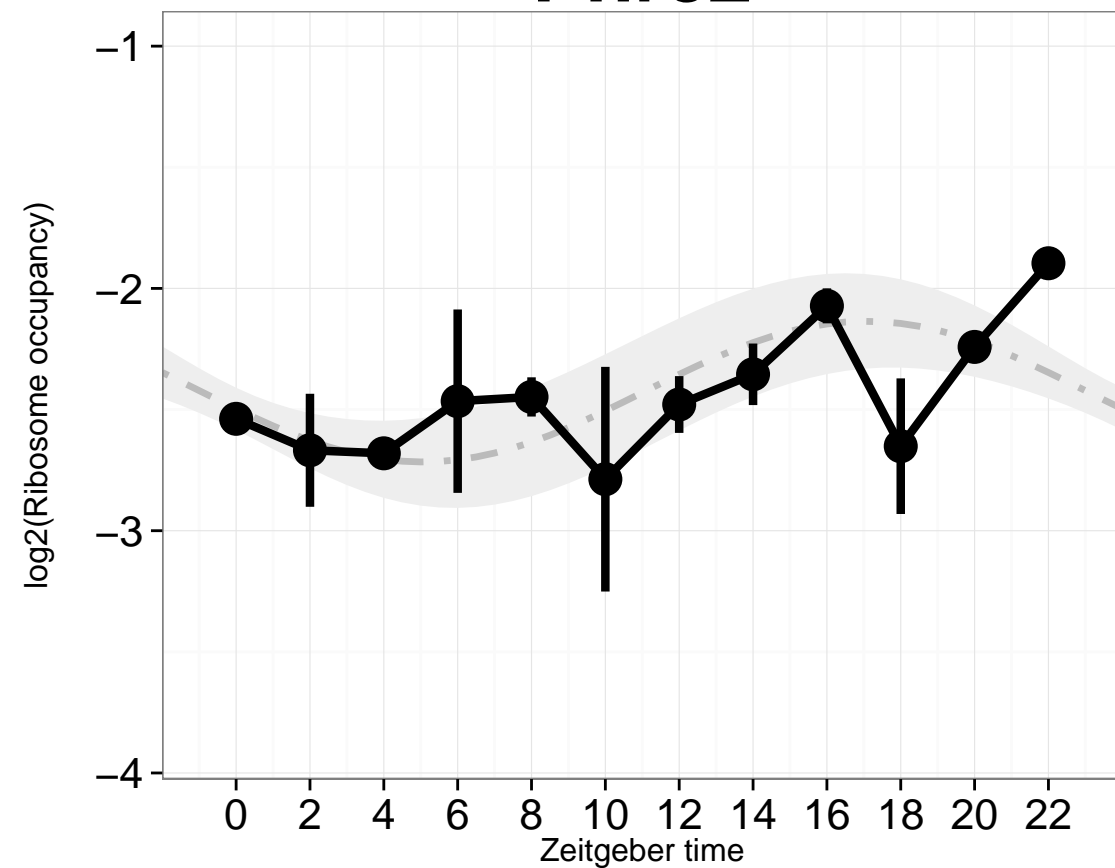

Supplement: SuppDataset_1.zip [file Pnrc2_set_A.pdf › Supplemental Dataset 1/A-mRNA_nonrhyth_translation_nonrhyth/Pnrc2_set_A.pdf]

# Poc1b

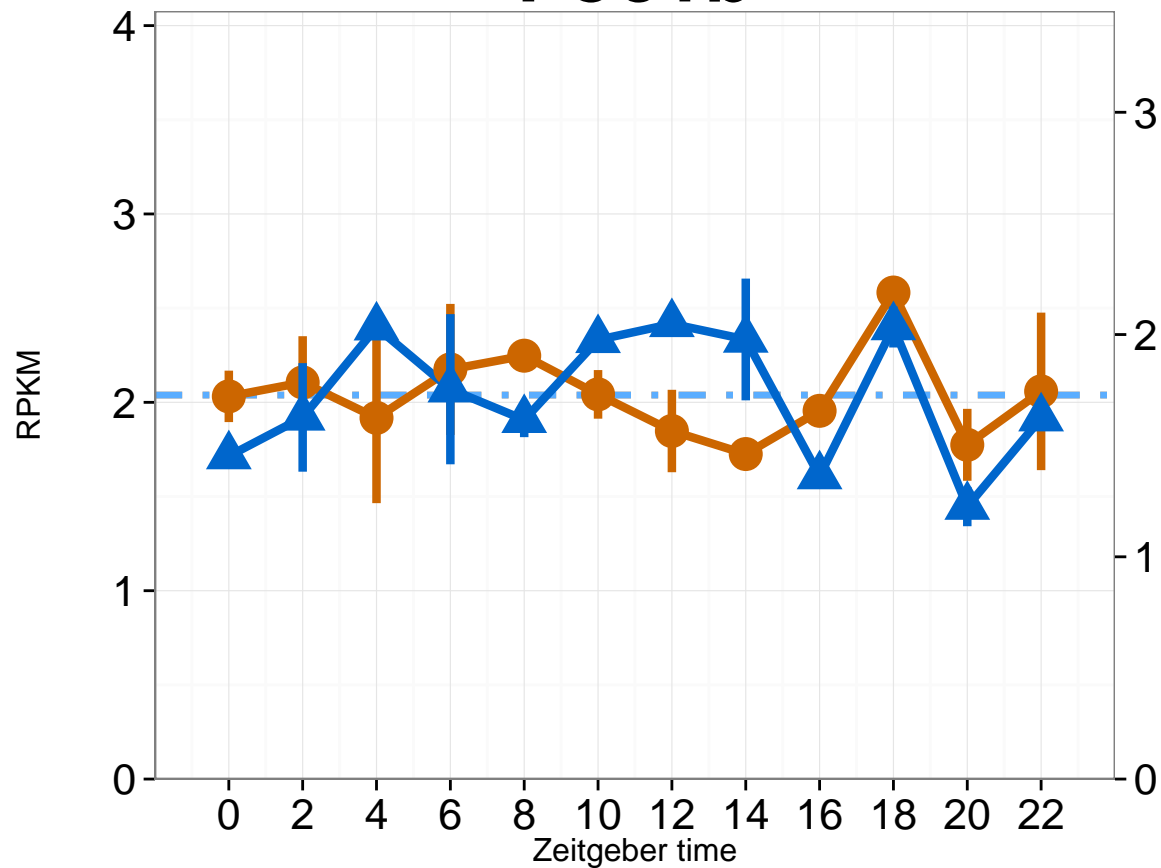

# Poc1b

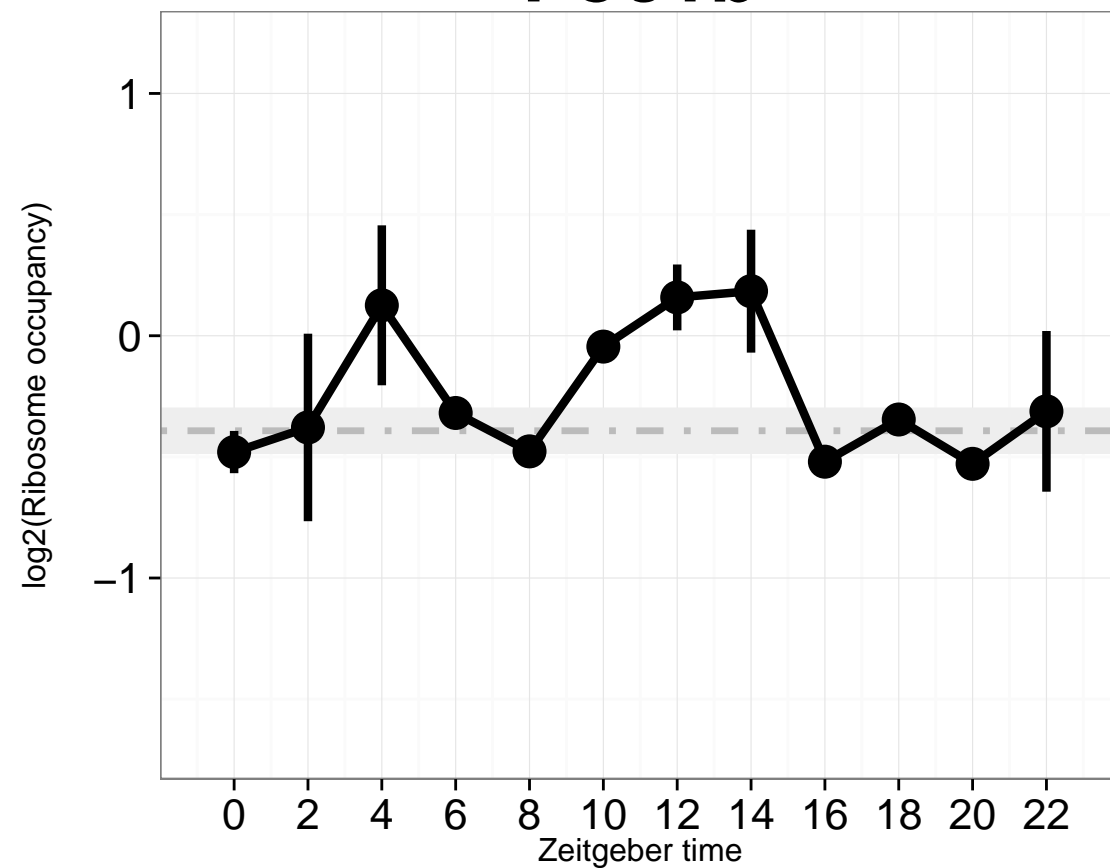

Supplement: SuppDataset_1.zip [file Poc1b_set_A.pdf › Supplemental Dataset 1/A-mRNA_nonrhyth_translation_nonrhyth/Poc1b_set_A.pdf]

# Poc5

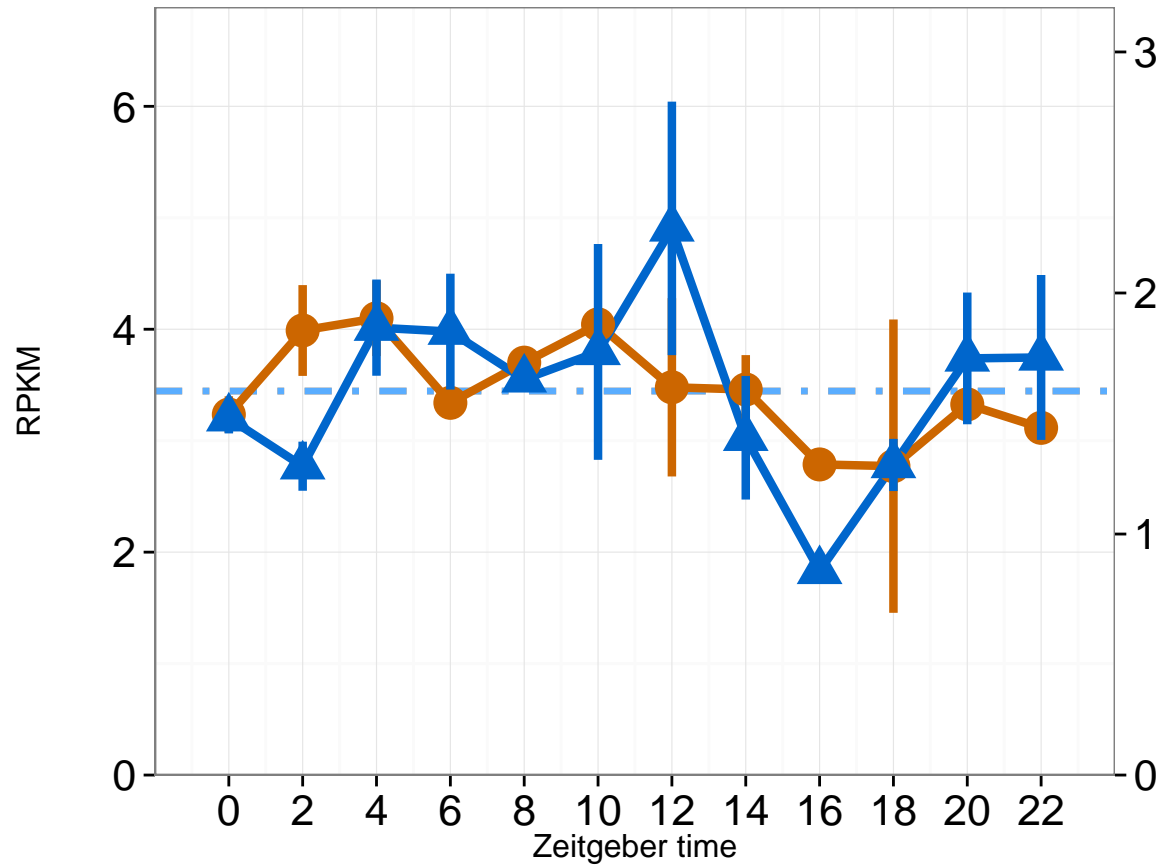

# Poc5

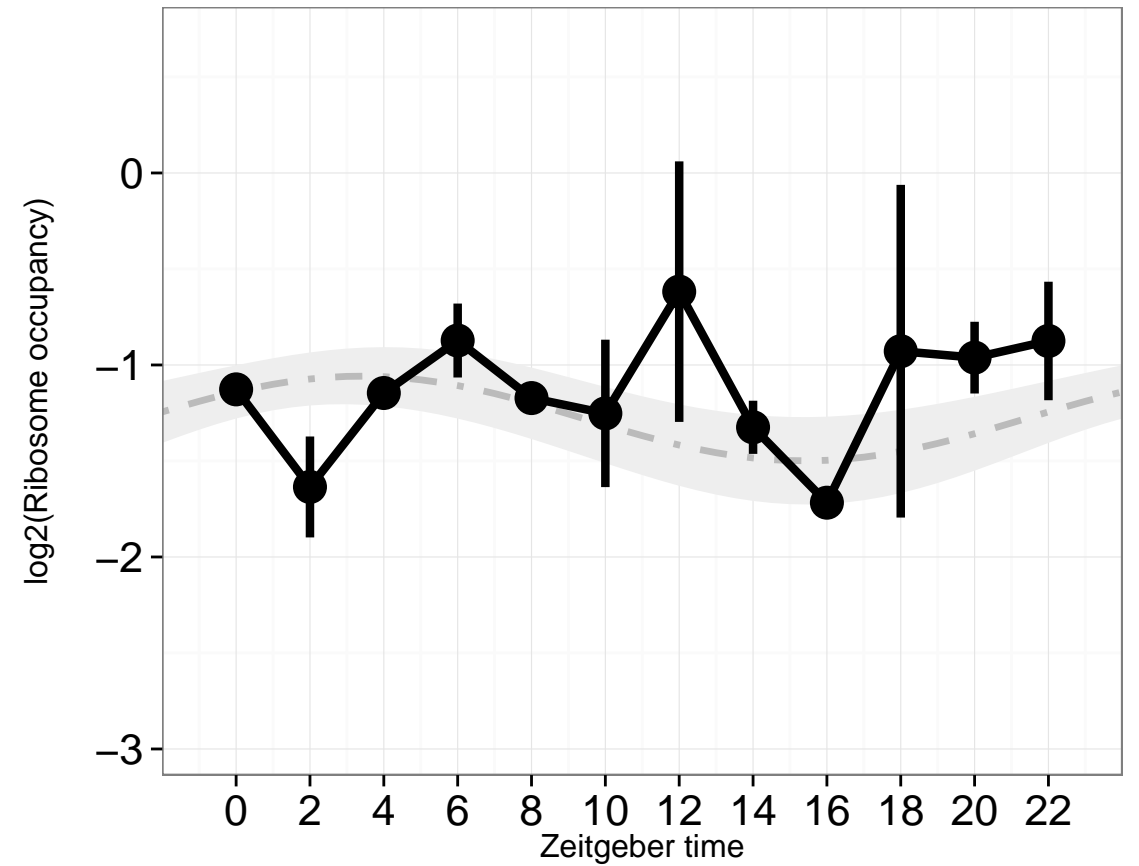

Supplement: SuppDataset_1.zip [file Poc5_set_A.pdf › Supplemental Dataset 1/A-mRNA_nonrhyth_translation_nonrhyth/Poc5_set_A.pdf]

## Podxl

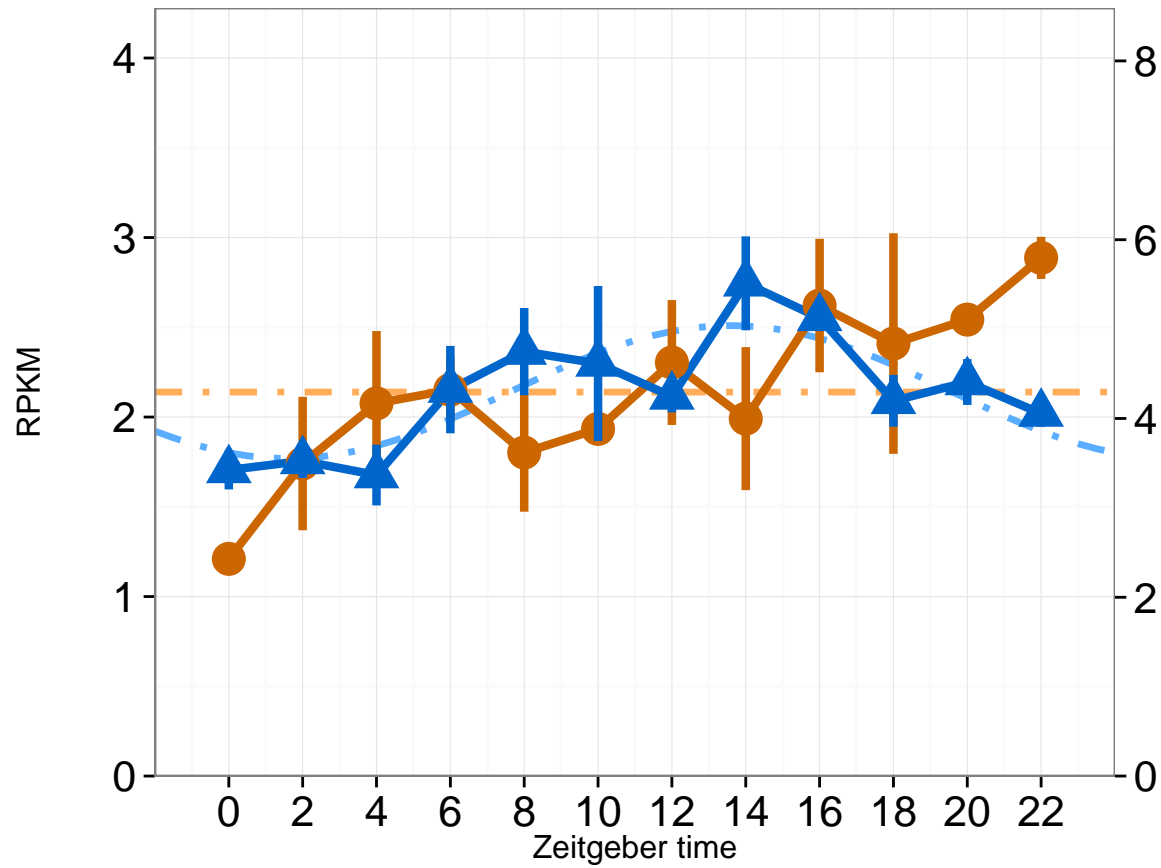

## Podxl

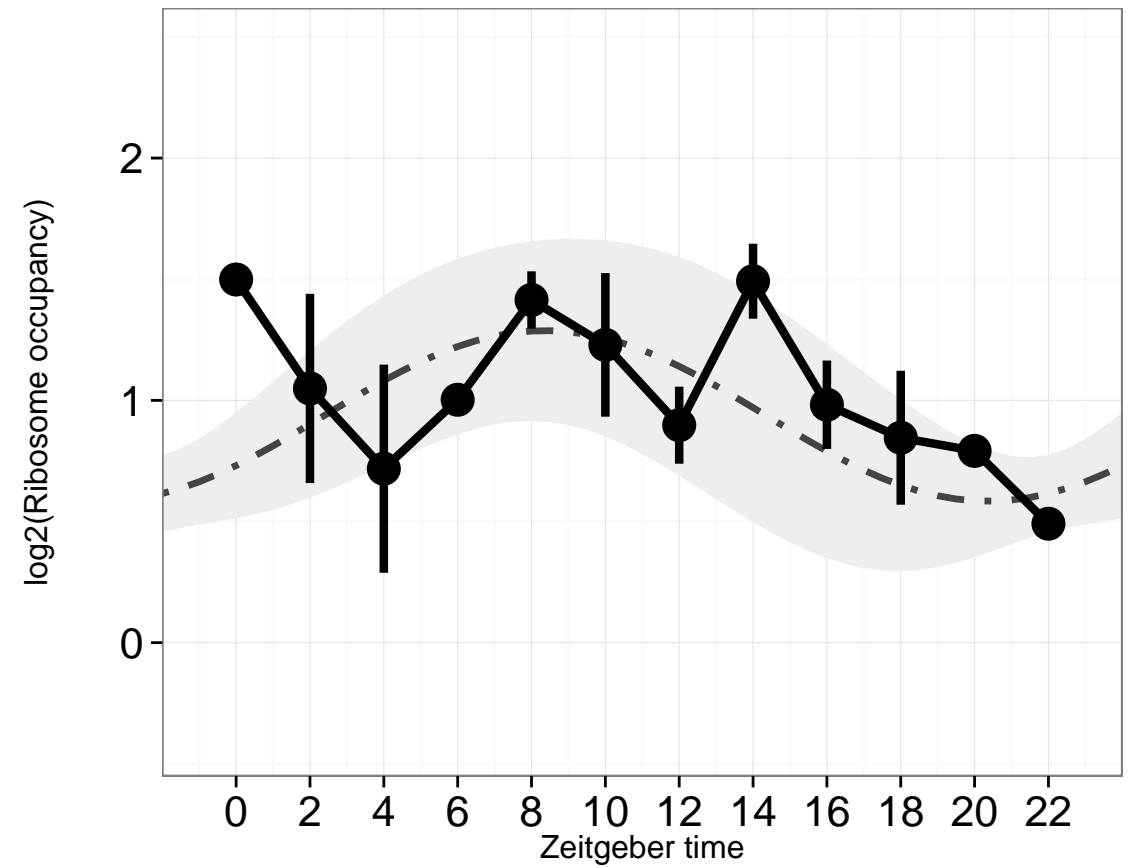

Supplement: SuppDataset_1.zip [file Podxl_set_A.pdf › Supplemental Dataset 1/A-mRNA_nonrhyth_translation_nonrhyth/Podxl_set_A.pdf]

## Pofut2

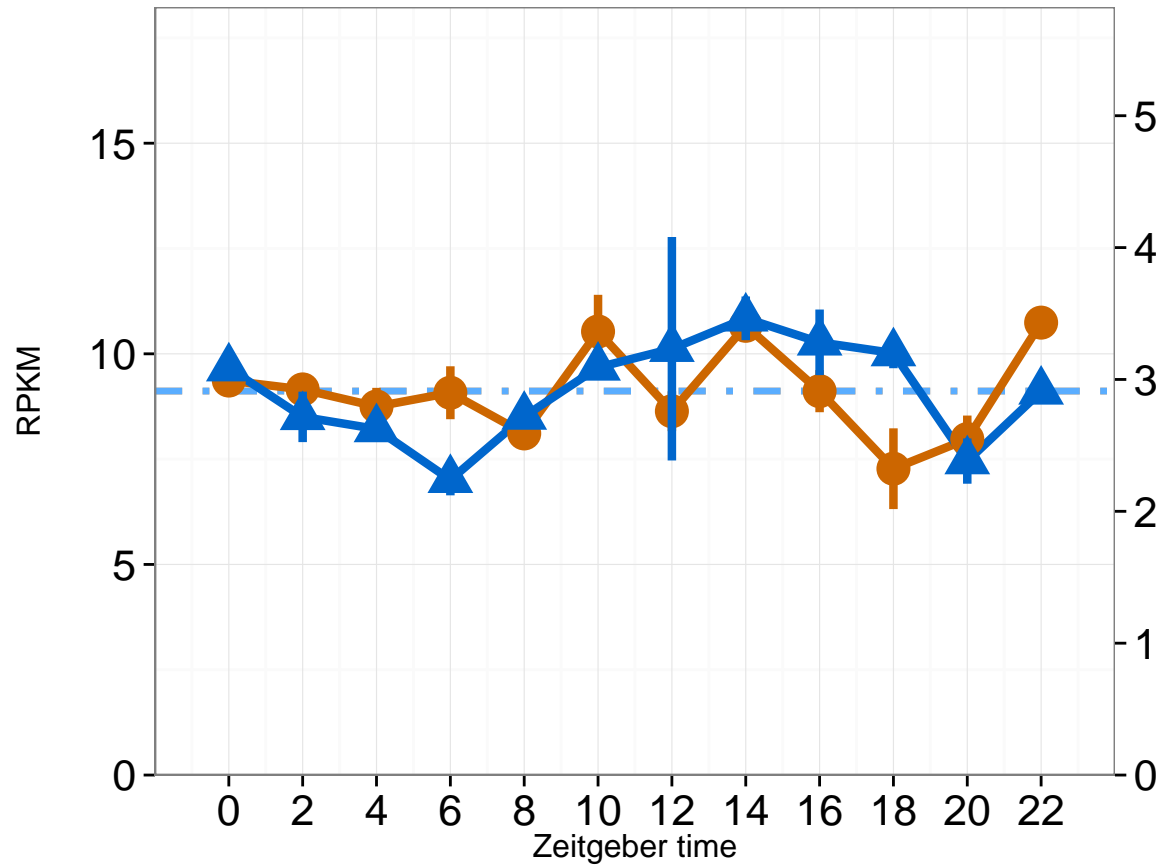

## Pofut2

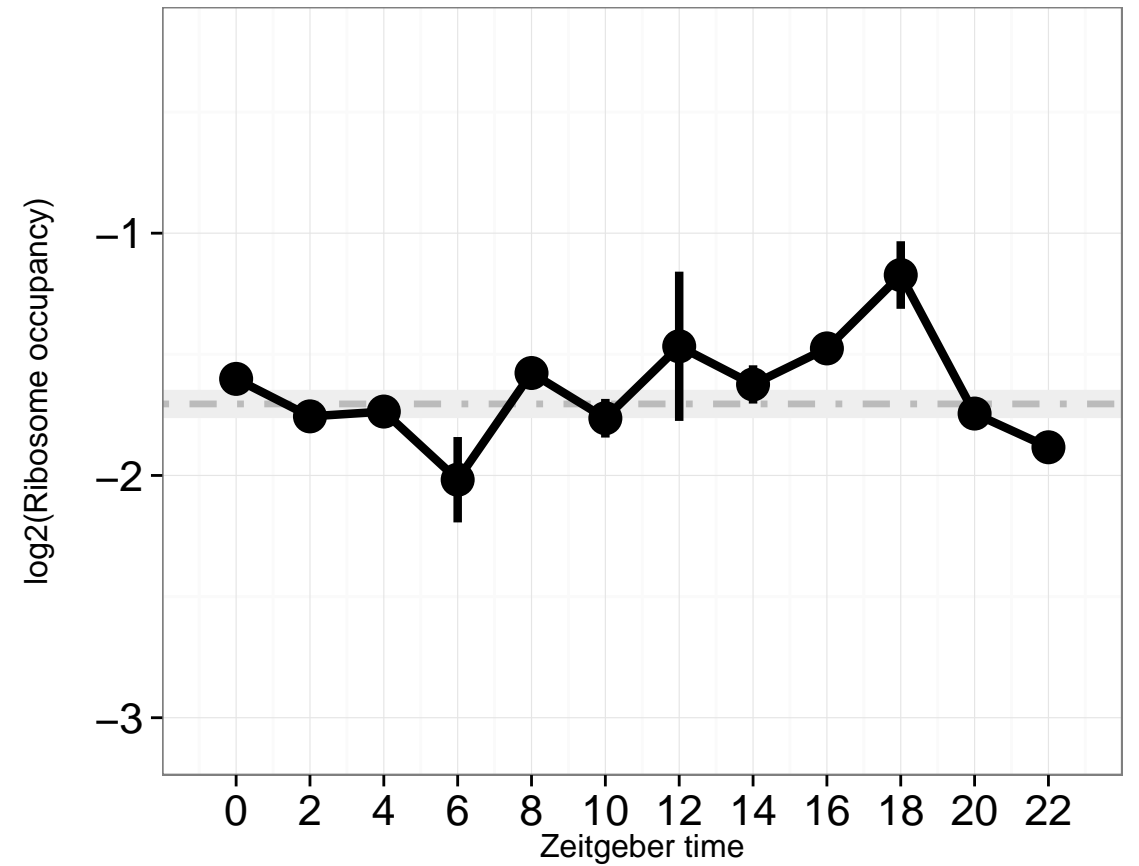

Supplement: SuppDataset_1.zip [file Pofut2_set_A.pdf › Supplemental Dataset 1/A-mRNA_nonrhyth_translation_nonrhyth/Pofut2_set_A.pdf]

## Pogk

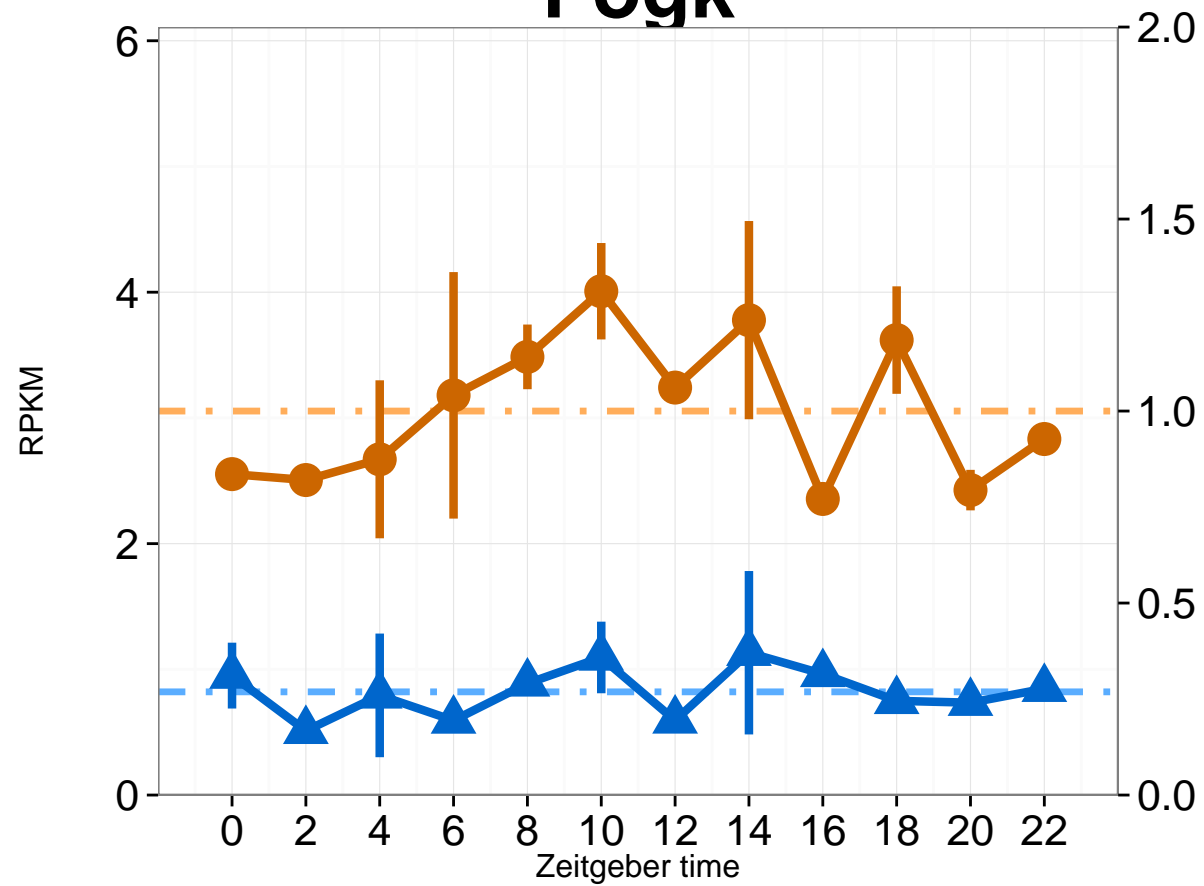

## Pogk

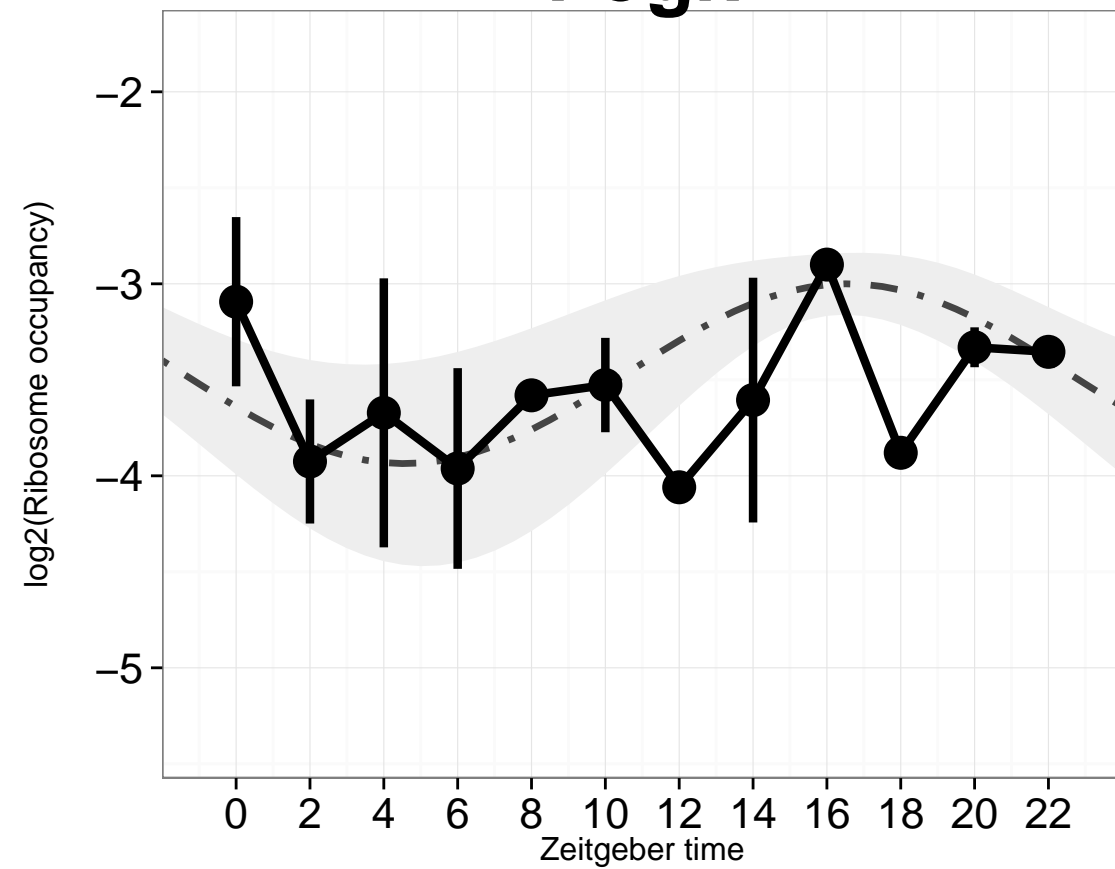

Supplement: SuppDataset_1.zip [file Pogk_set_A.pdf › Supplemental Dataset 1/A-mRNA_nonrhyth_translation_nonrhyth/Pogk_set_A.pdf]

# Poglut1

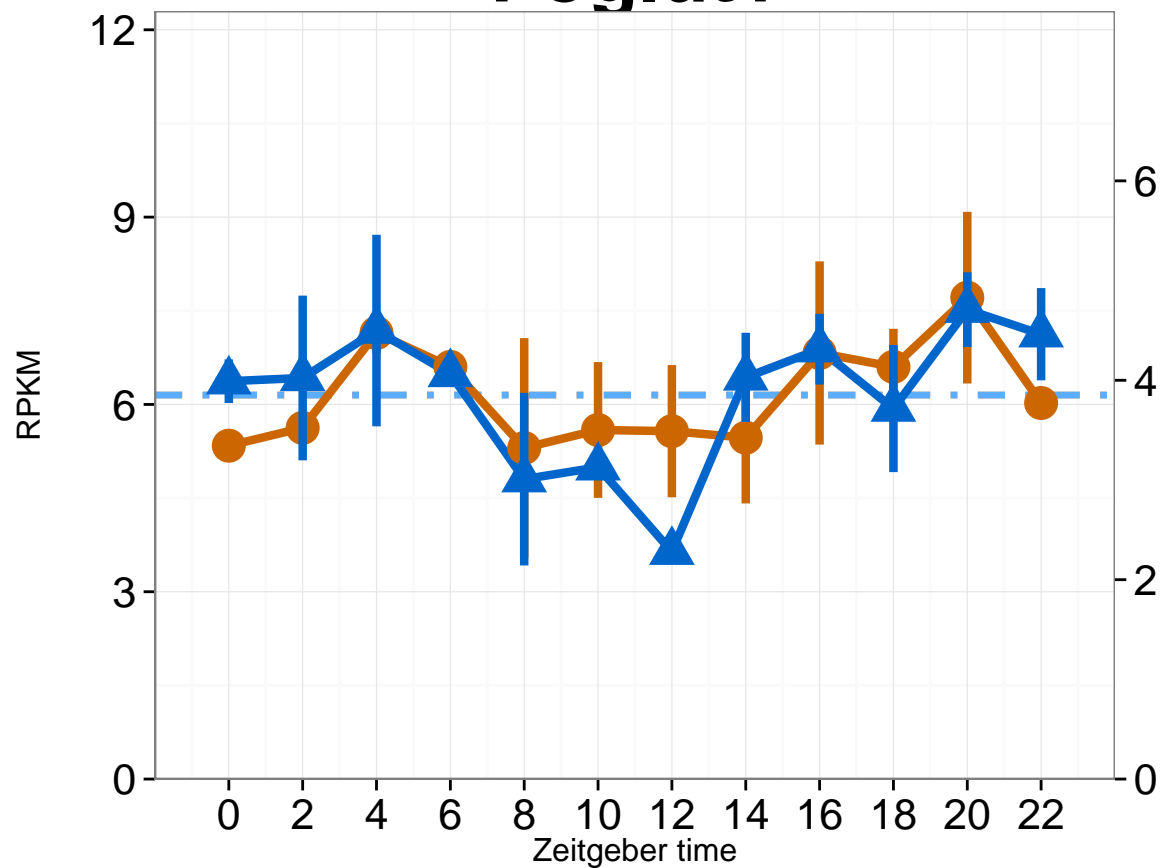

# Poglut1

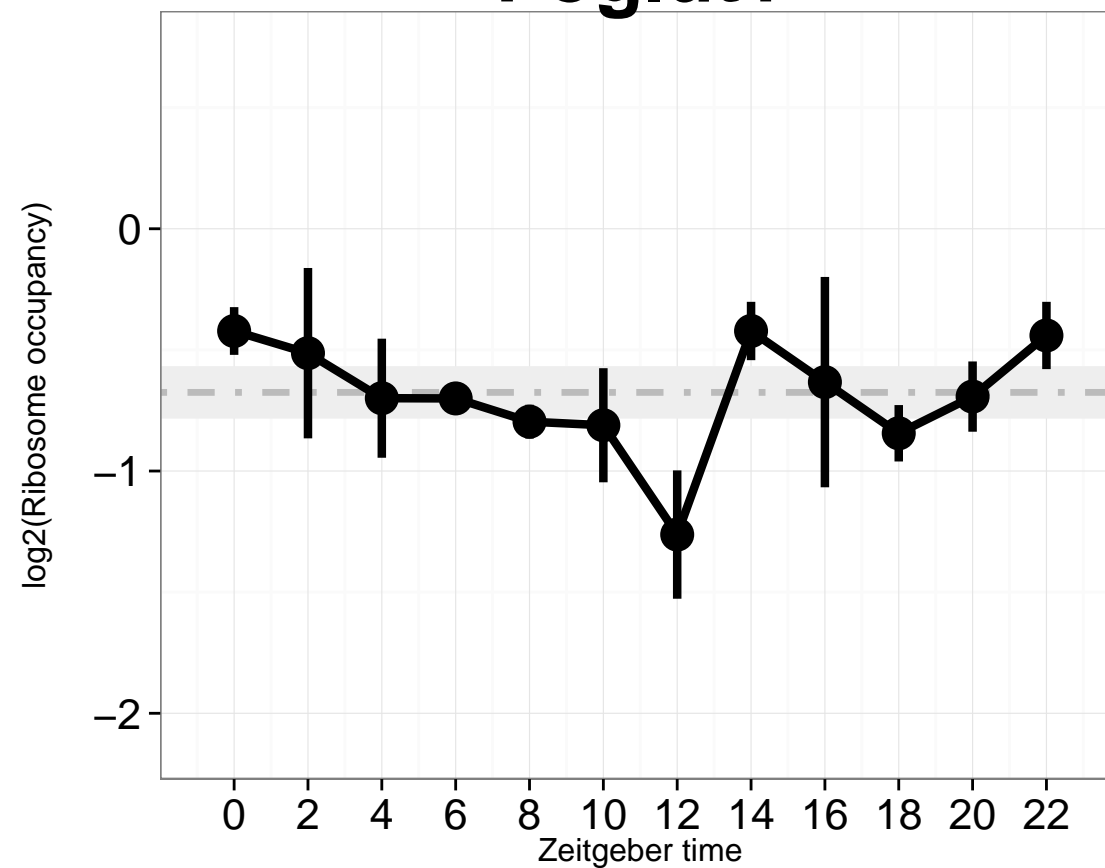

Supplement: SuppDataset_1.zip [file Poglut1_set_A.pdf › Supplemental Dataset 1/A-mRNA_nonrhyth_translation_nonrhyth/Poglut1_set_A.pdf]

## Pogz

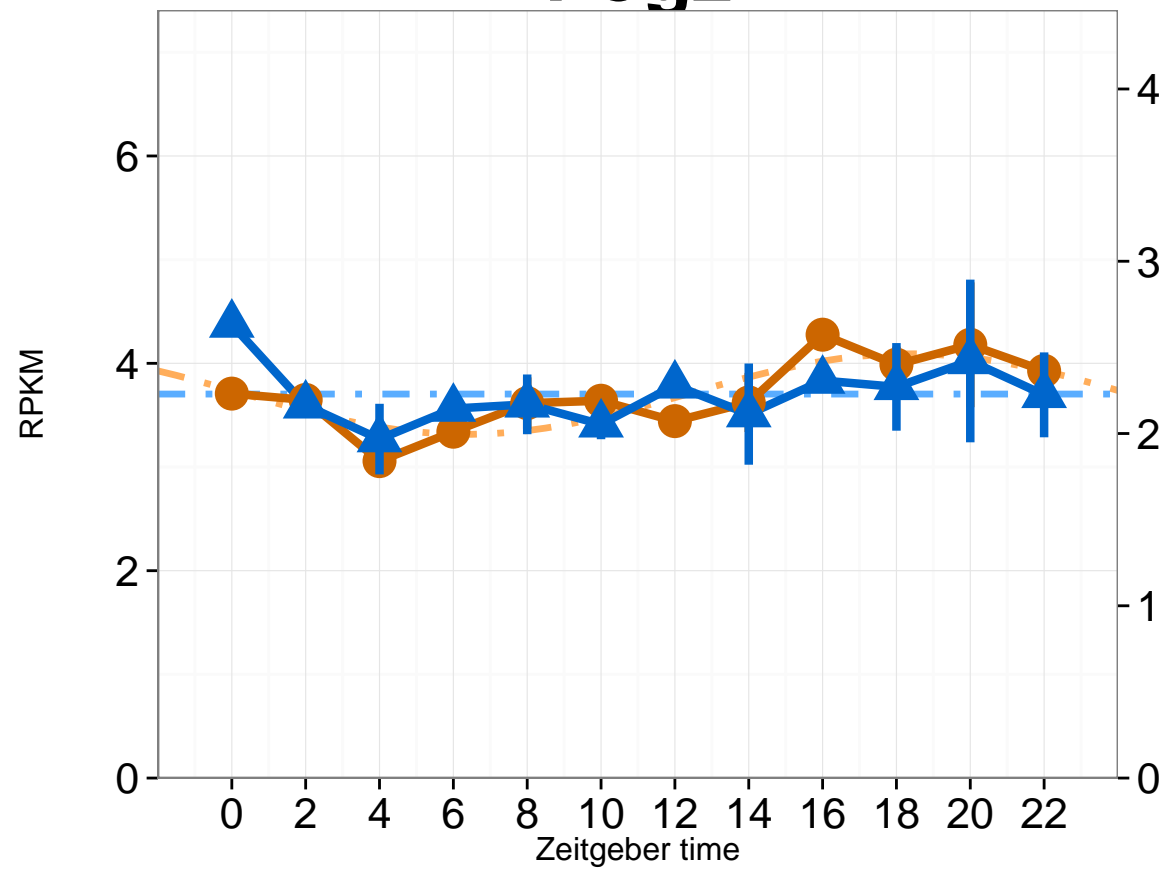

## Pogz

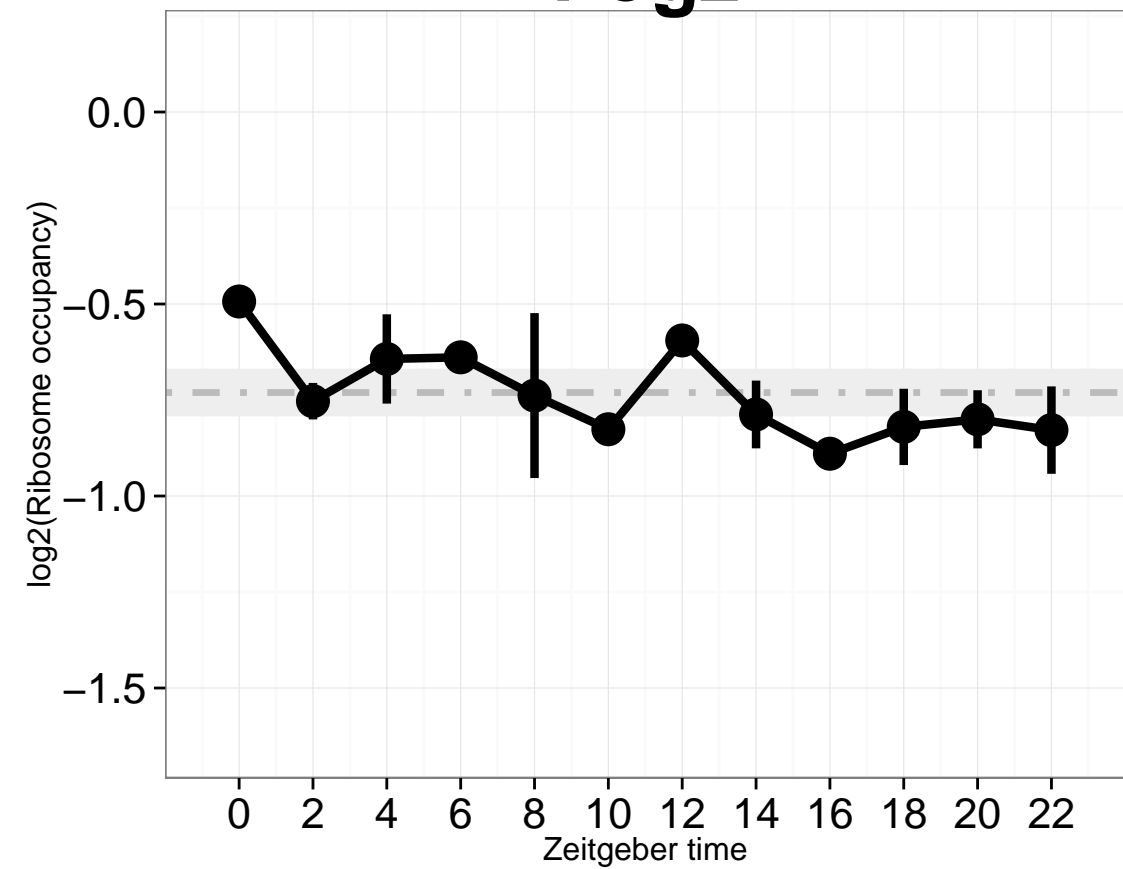

Supplement: SuppDataset_1.zip [file Pogz_set_A.pdf › Supplemental Dataset 1/A-mRNA_nonrhyth_translation_nonrhyth/Pogz_set_A.pdf]

## Pola1

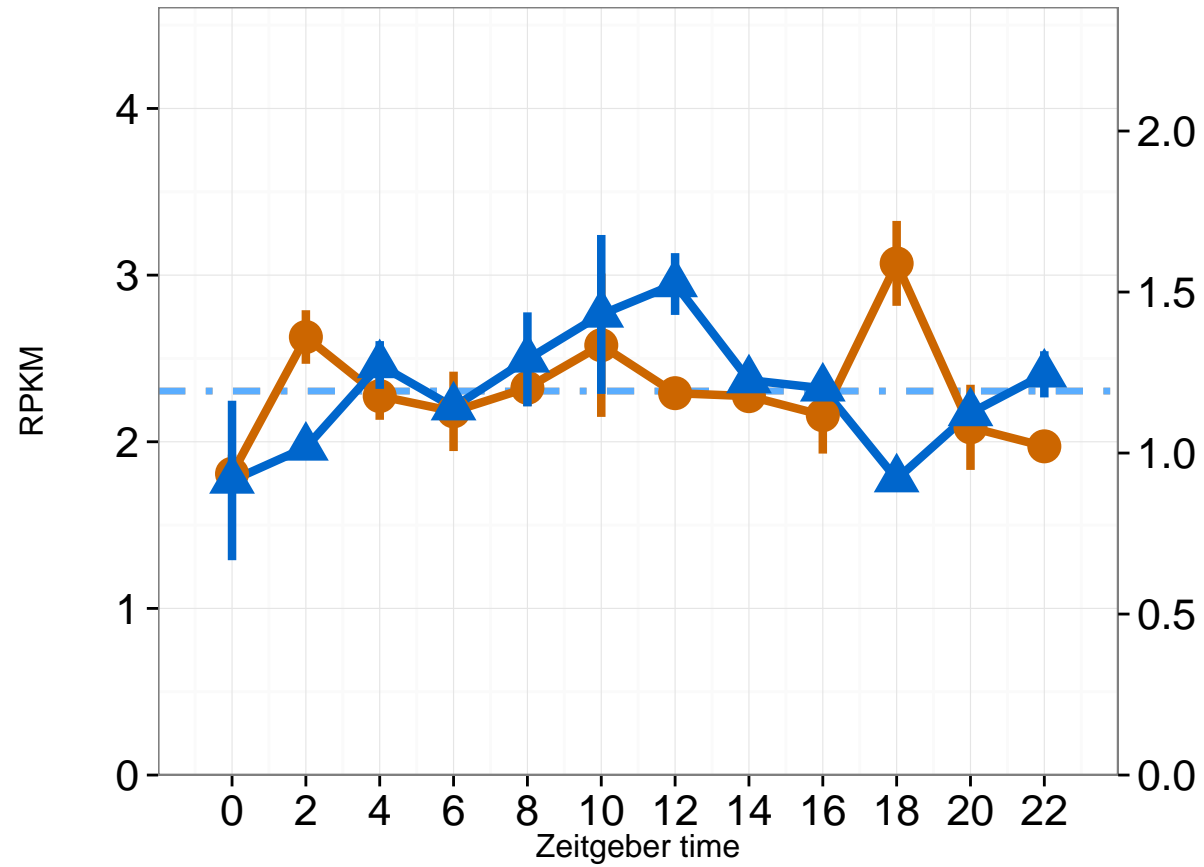

## Pola1

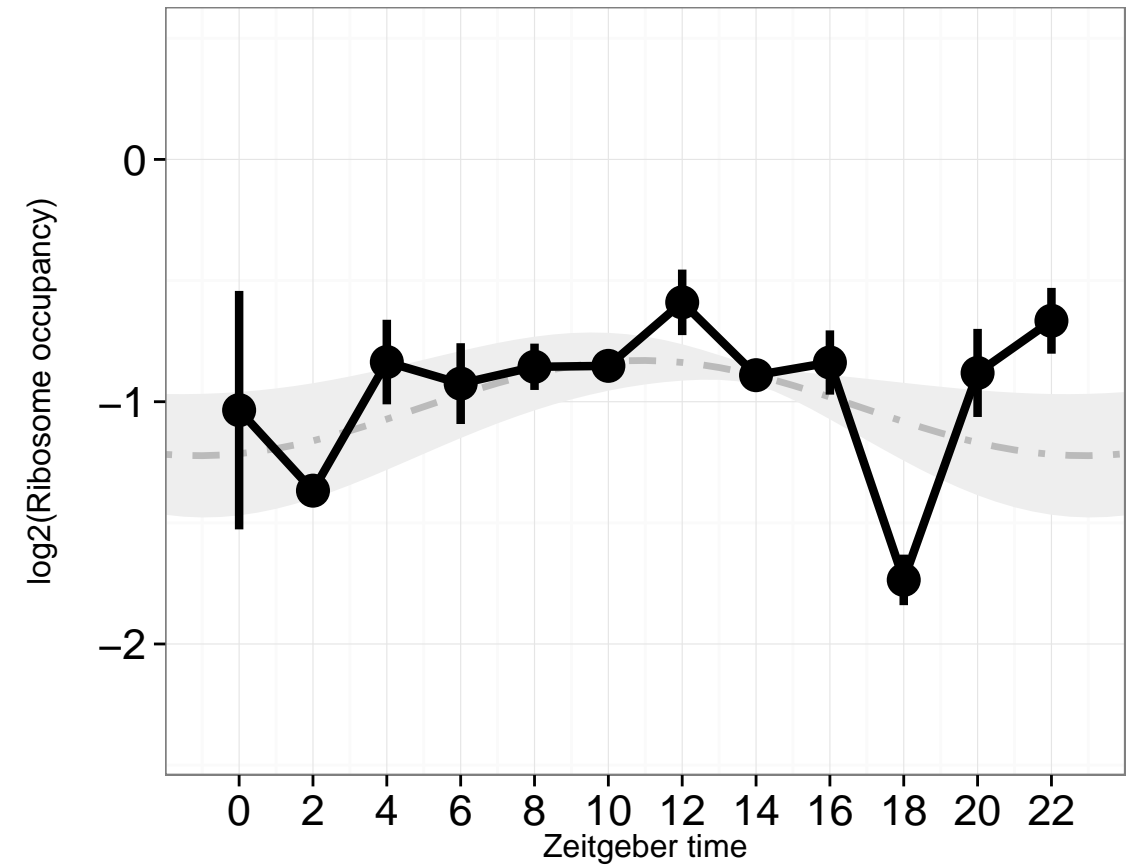

Supplement: SuppDataset_1.zip [file Pola1_set_A.pdf › Supplemental Dataset 1/A-mRNA_nonrhyth_translation_nonrhyth/Pola1_set_A.pdf]

## Pola2

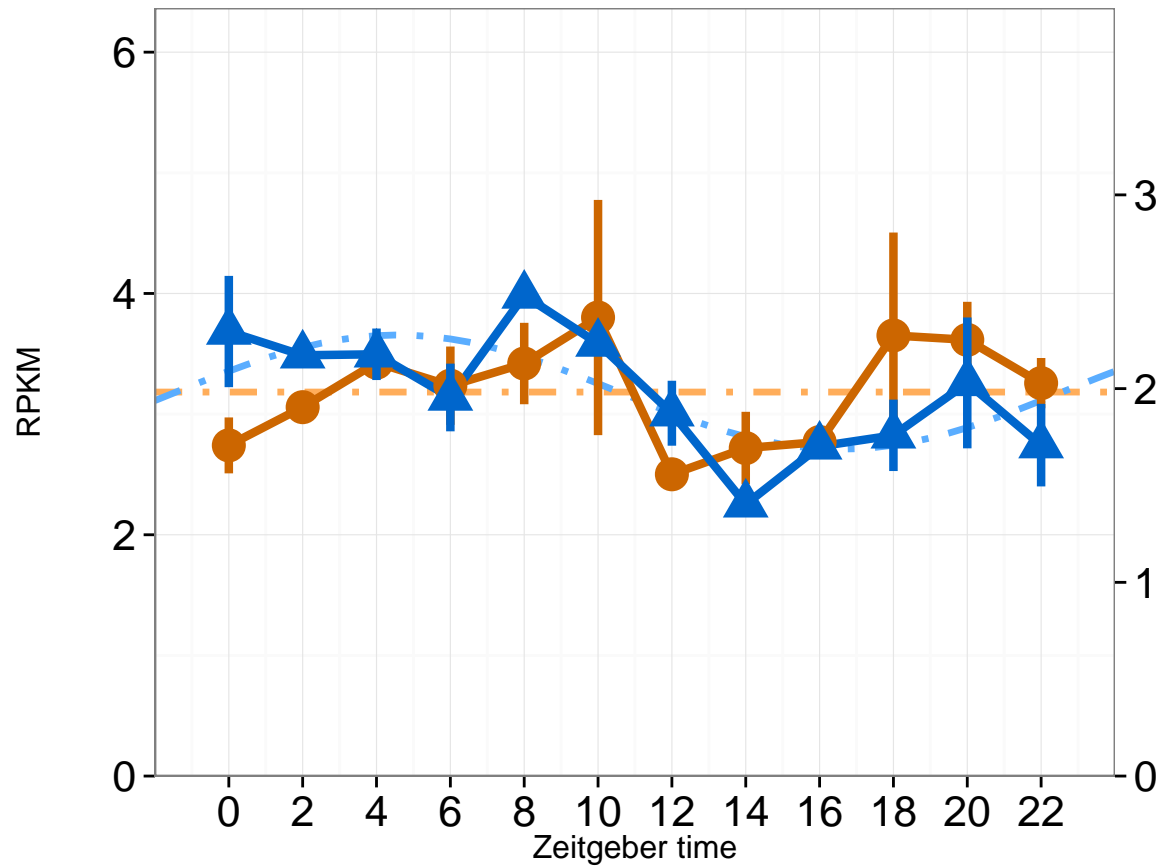

## Pola2

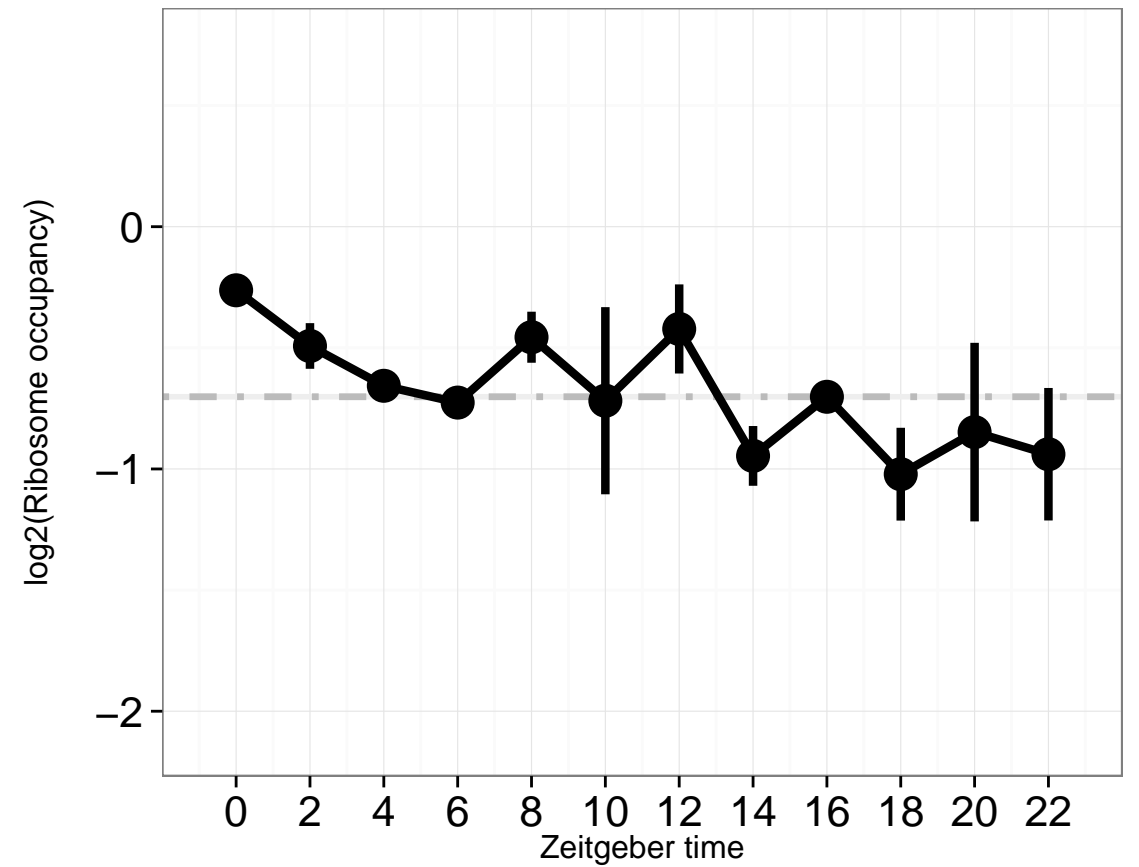

Supplement: SuppDataset_1.zip [file Pola2_set_A.pdf › Supplemental Dataset 1/A-mRNA_nonrhyth_translation_nonrhyth/Pola2_set_A.pdf]

## Polb

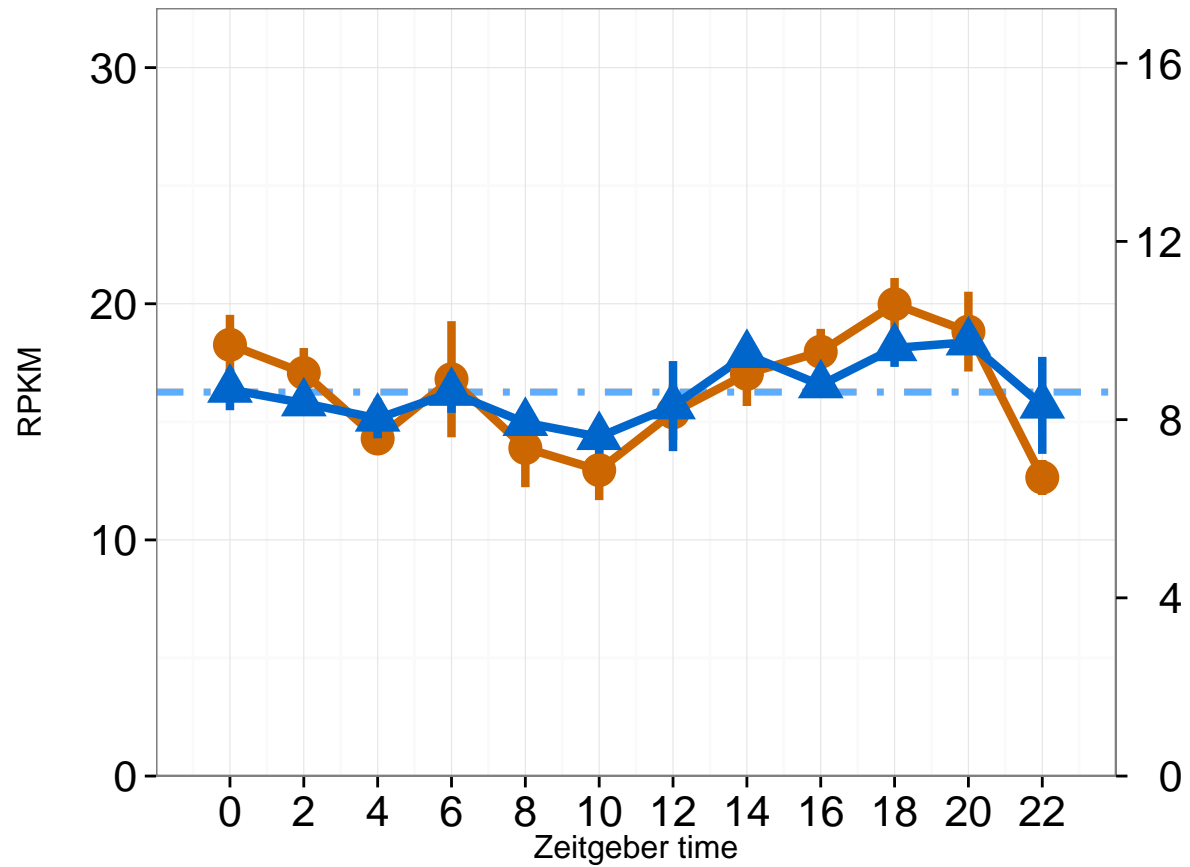

## Polb

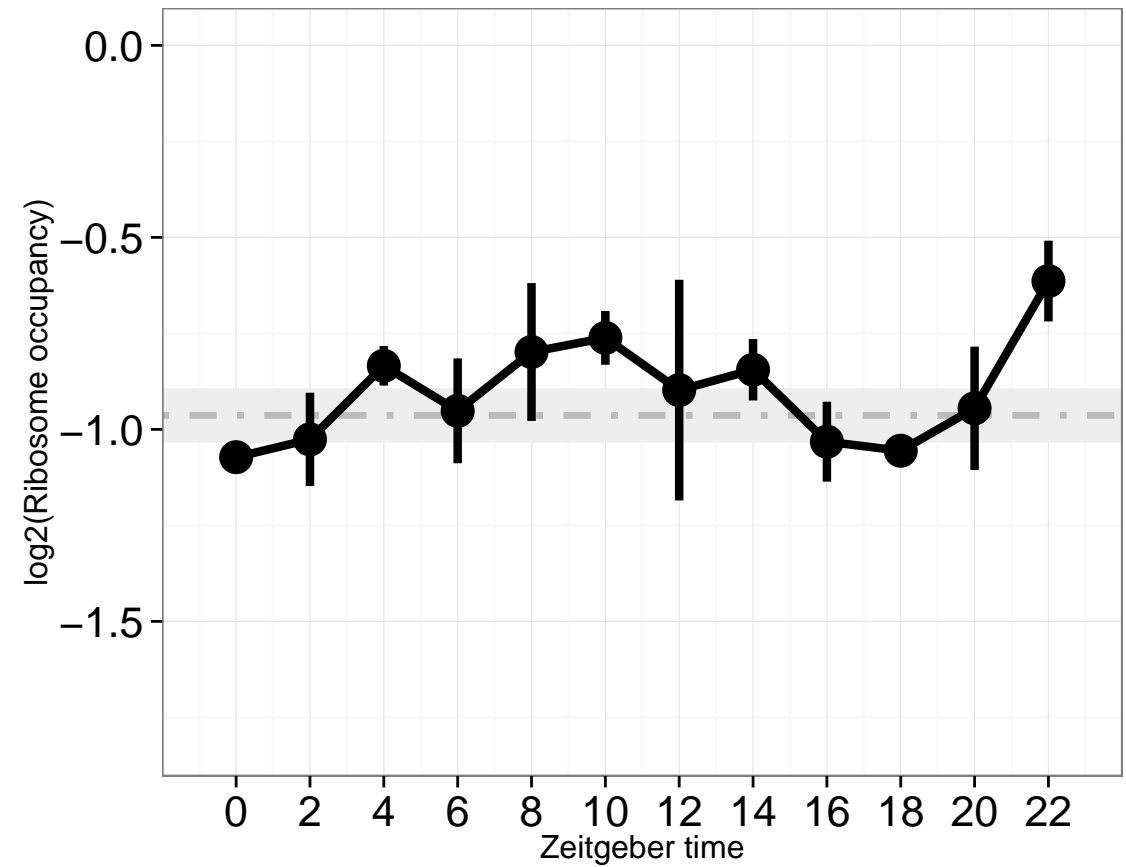

Supplement: SuppDataset_1.zip [file Polb_set_A.pdf › Supplemental Dataset 1/A-mRNA_nonrhyth_translation_nonrhyth/Polb_set_A.pdf]

## Pold2

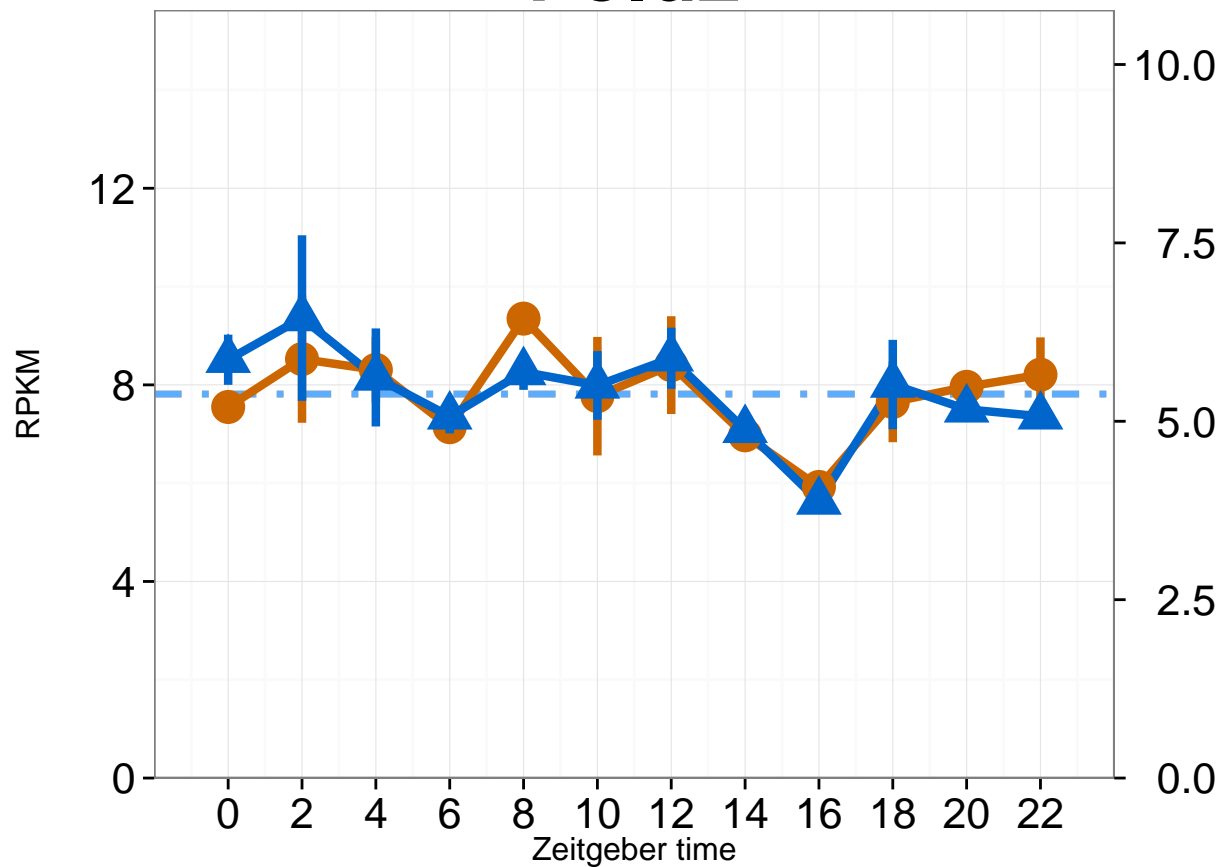

## Pold2

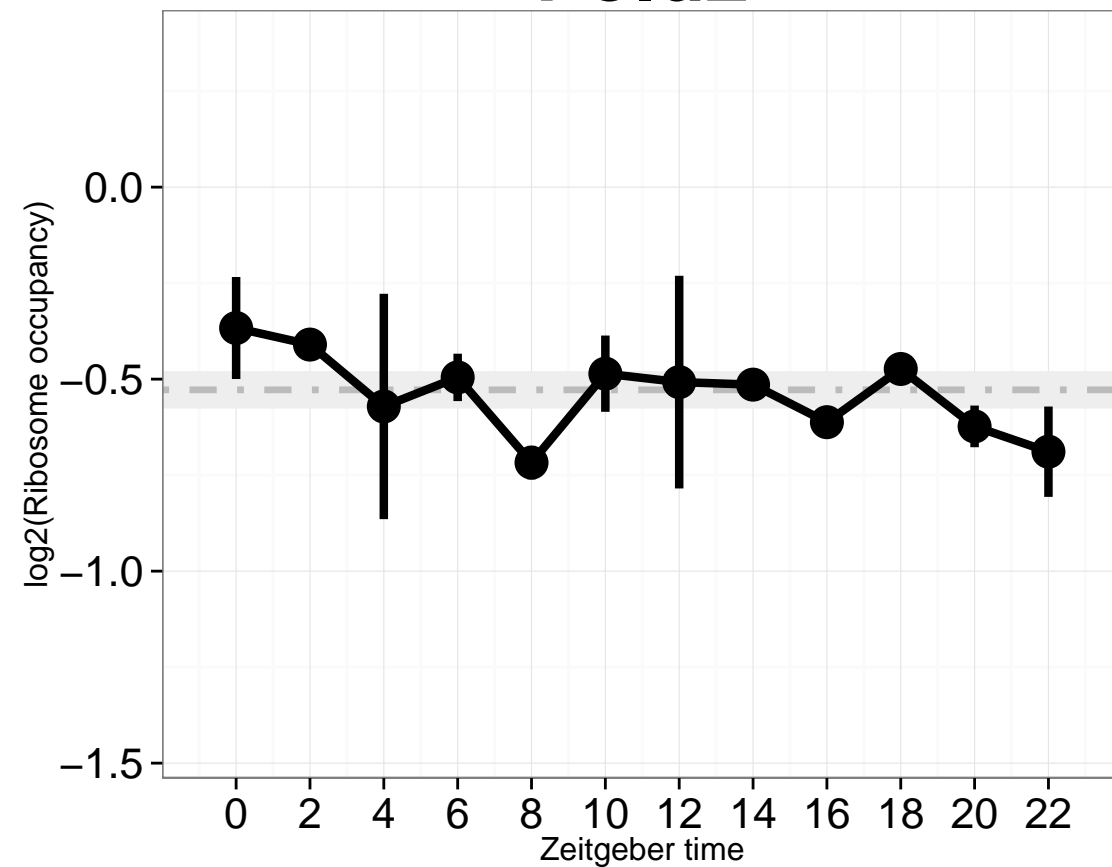

Supplement: SuppDataset_1.zip [file Pold2_set_A.pdf › Supplemental Dataset 1/A-mRNA_nonrhyth_translation_nonrhyth/Pold2_set_A.pdf]

## Pold3

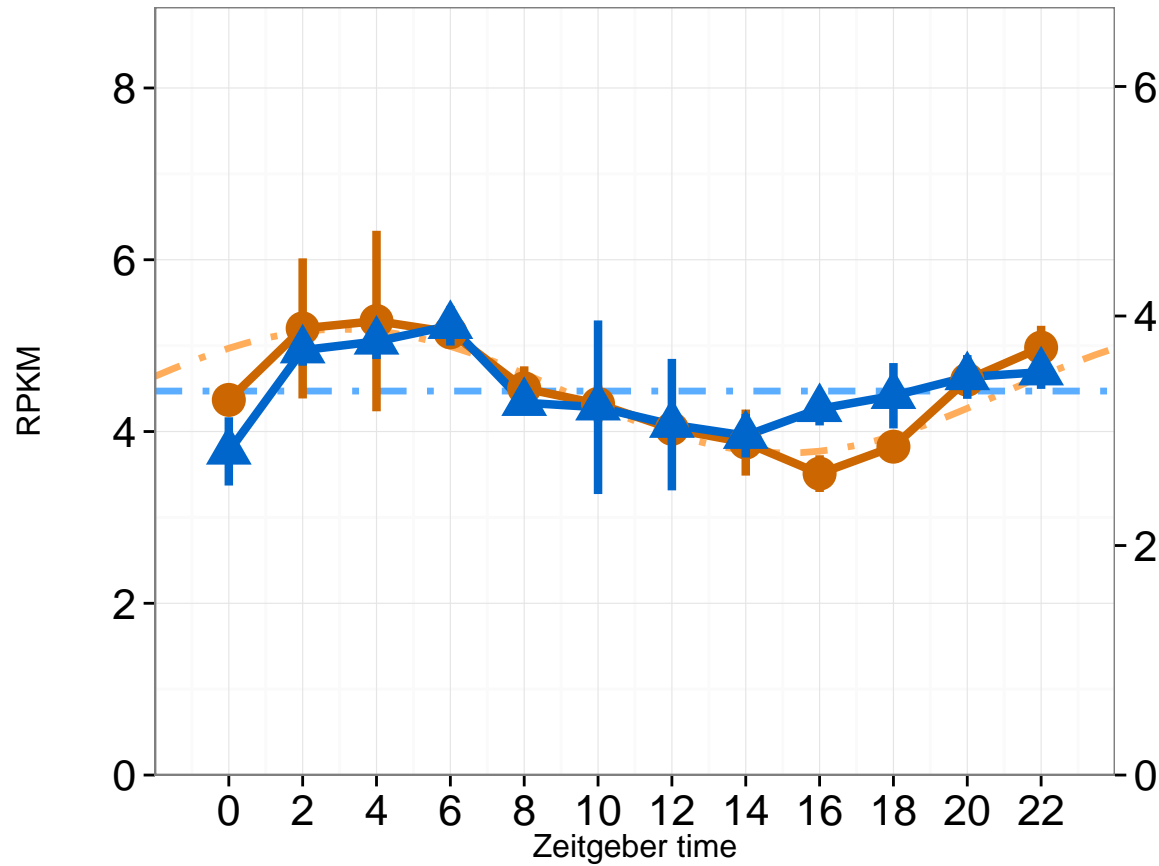

## Pold3

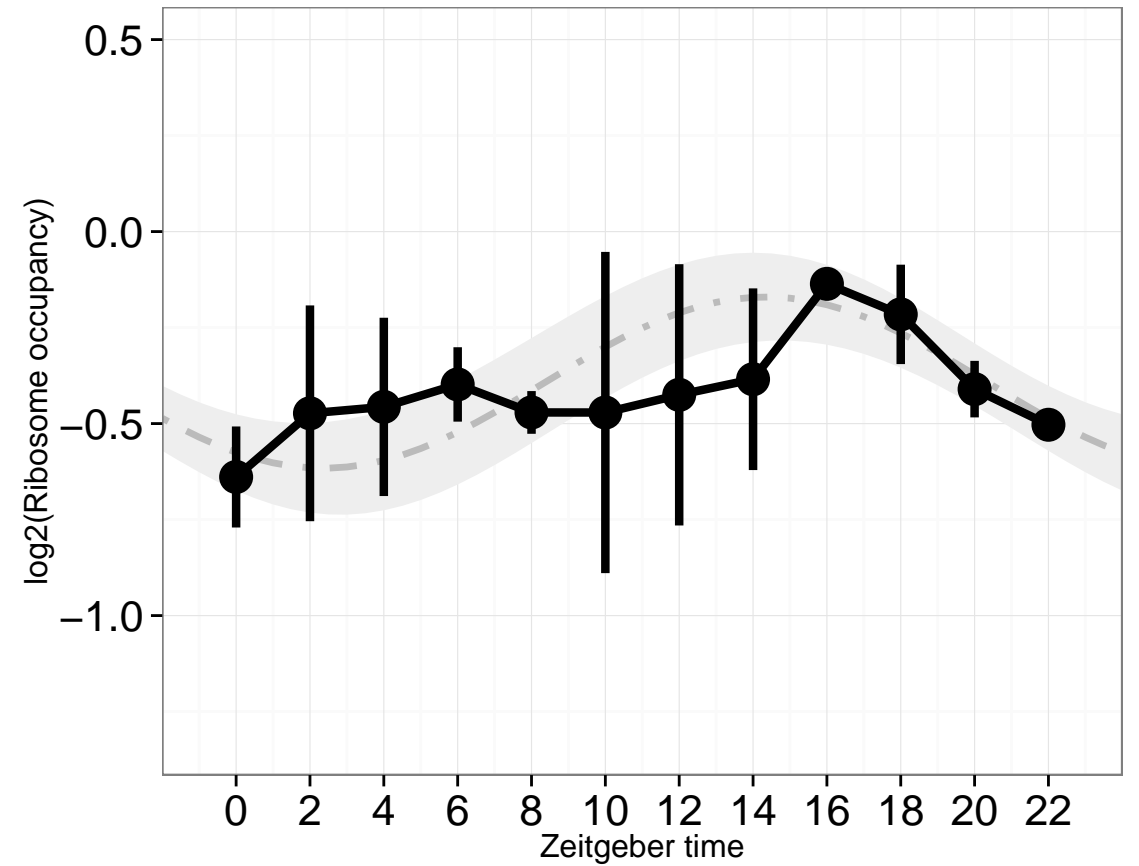

Supplement: SuppDataset_1.zip [file Pold3_set_A.pdf › Supplemental Dataset 1/A-mRNA_nonrhyth_translation_nonrhyth/Pold3_set_A.pdf]

## Poldip2

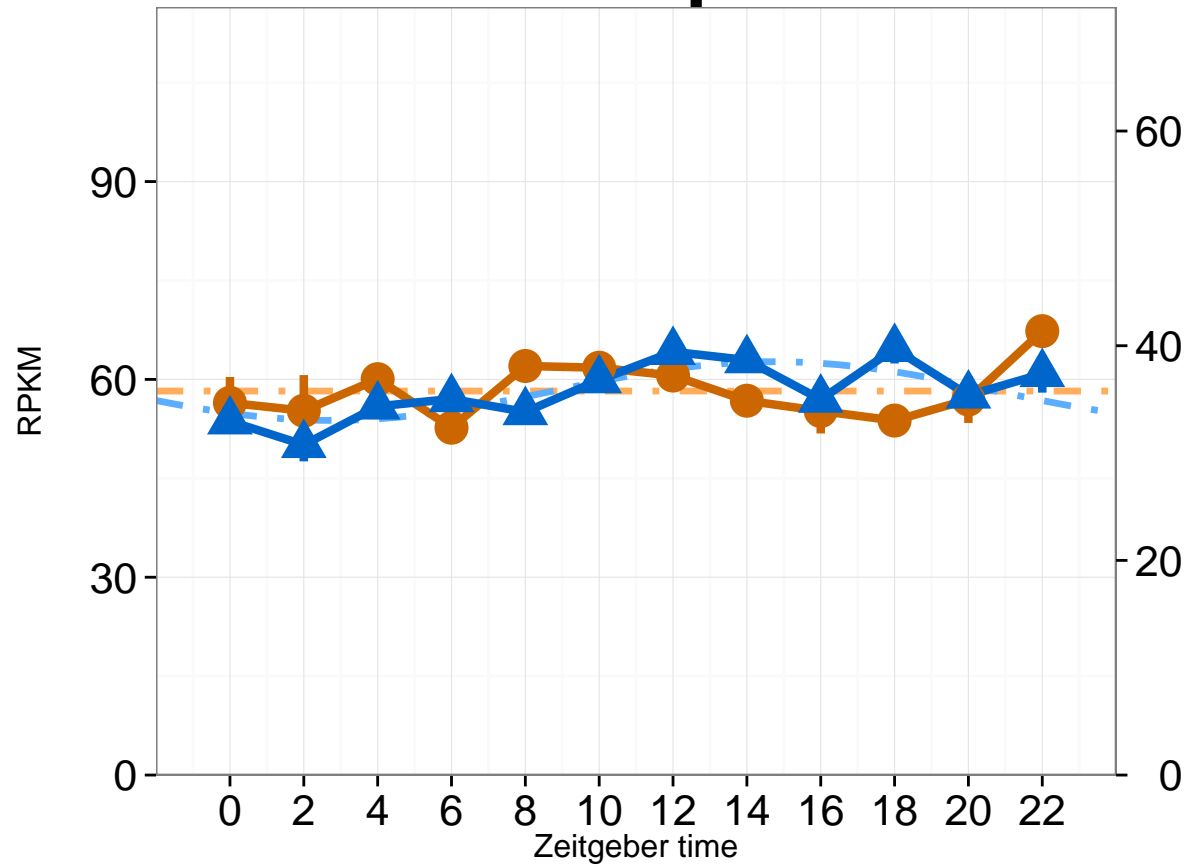

## Poldip2

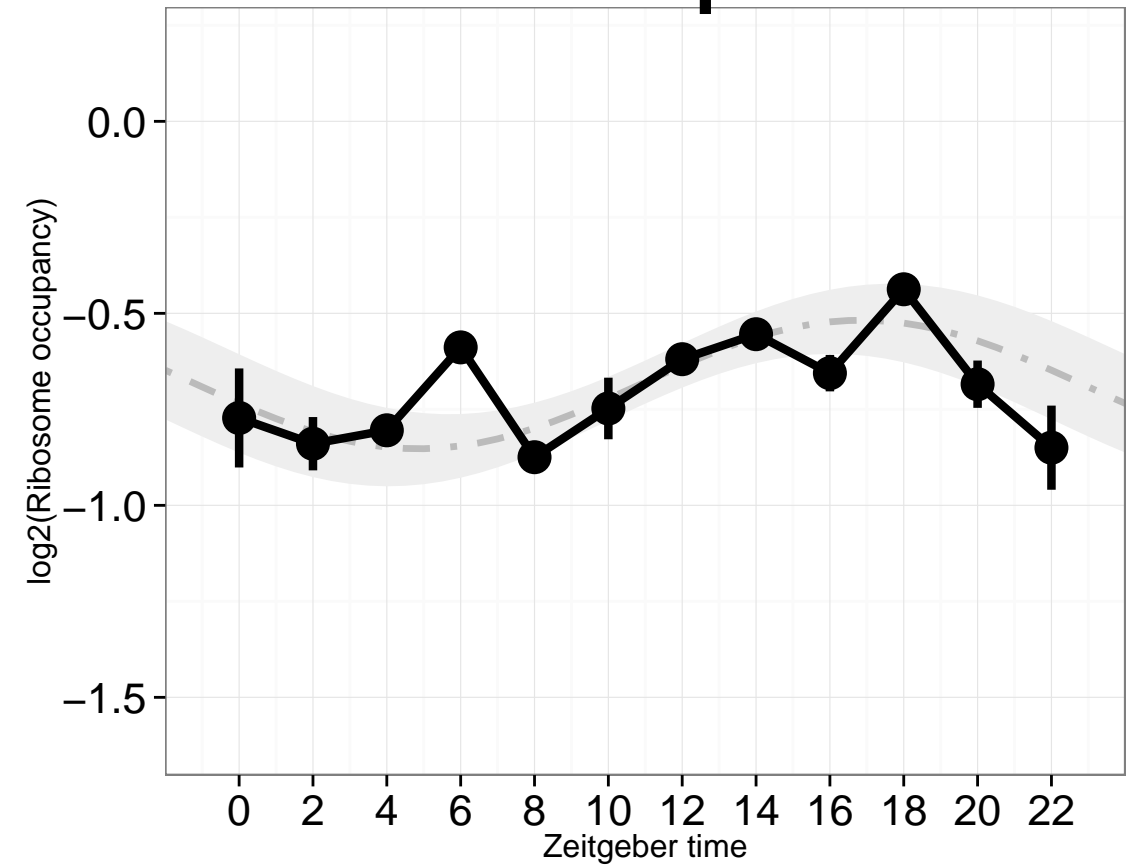

Supplement: SuppDataset_1.zip [file Poldip2_set_A.pdf › Supplemental Dataset 1/A-mRNA_nonrhyth_translation_nonrhyth/Poldip2_set_A.pdf]

## Poldip3

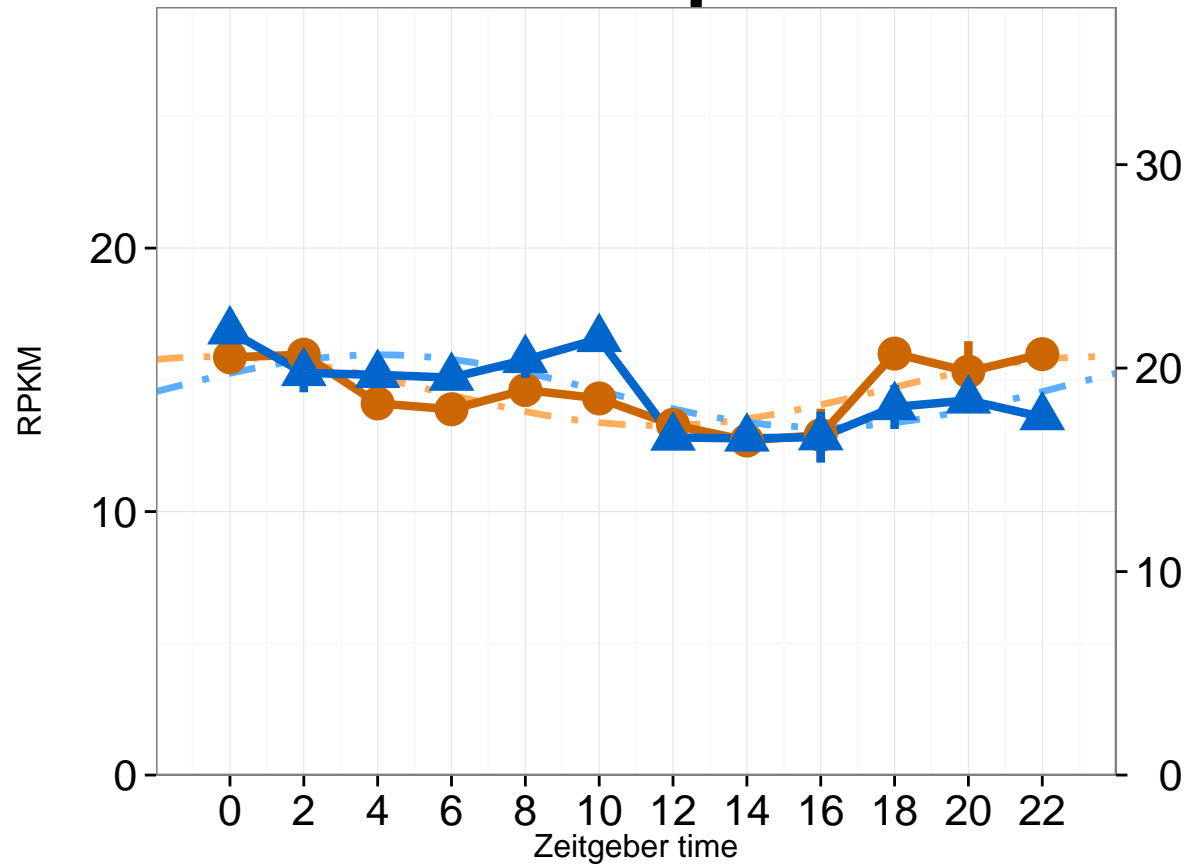

## Poldip3

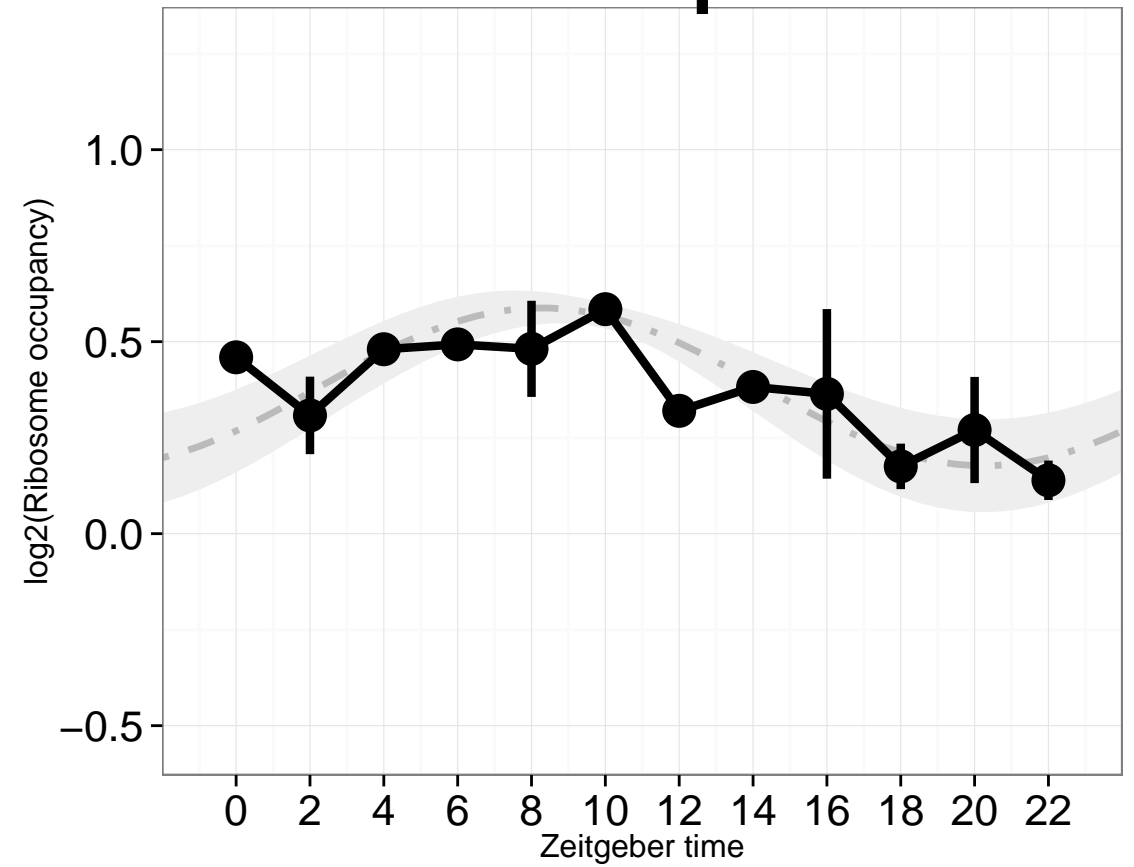

Supplement: SuppDataset_1.zip [file Poldip3_set_A.pdf › Supplemental Dataset 1/A-mRNA_nonrhyth_translation_nonrhyth/Poldip3_set_A.pdf]

## Pole2

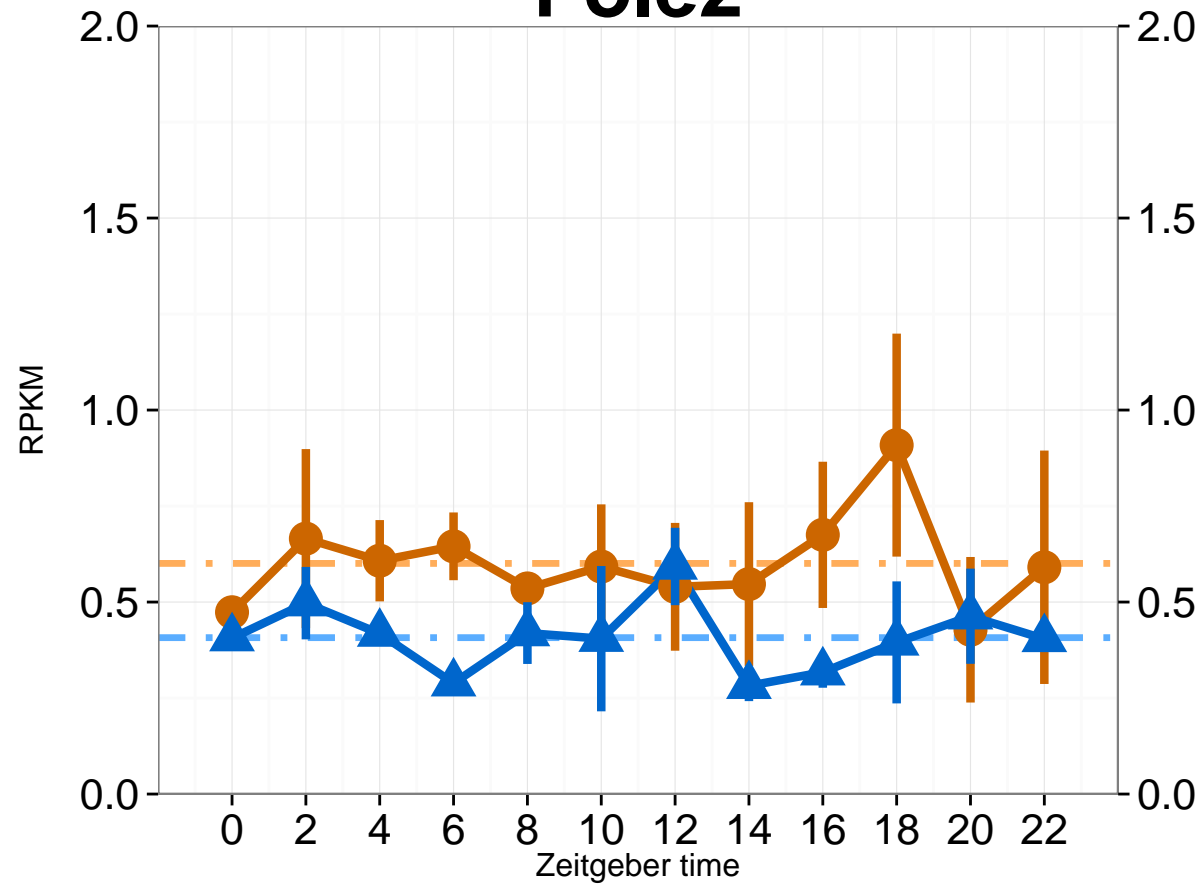

## Pole2

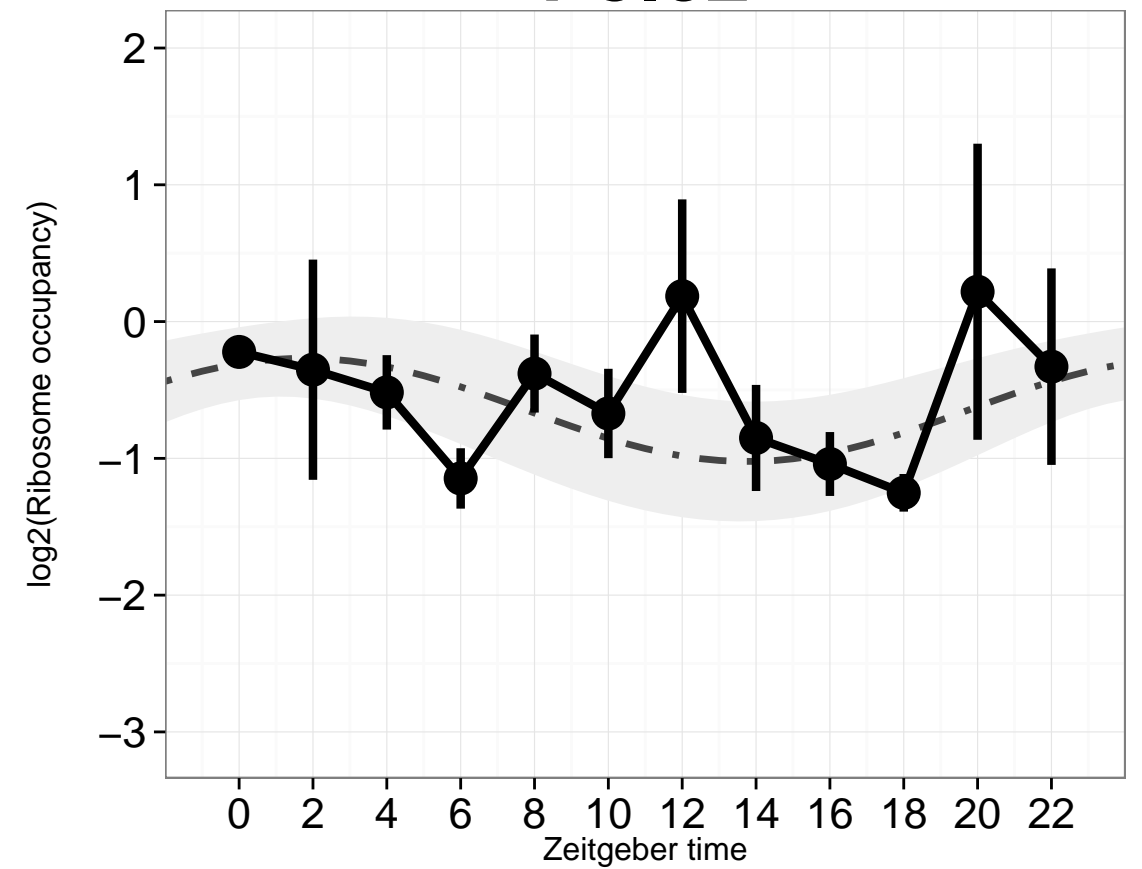

Supplement: SuppDataset_1.zip [file Pole2_set_A.pdf › Supplemental Dataset 1/A-mRNA_nonrhyth_translation_nonrhyth/Pole2_set_A.pdf]

## Pole3

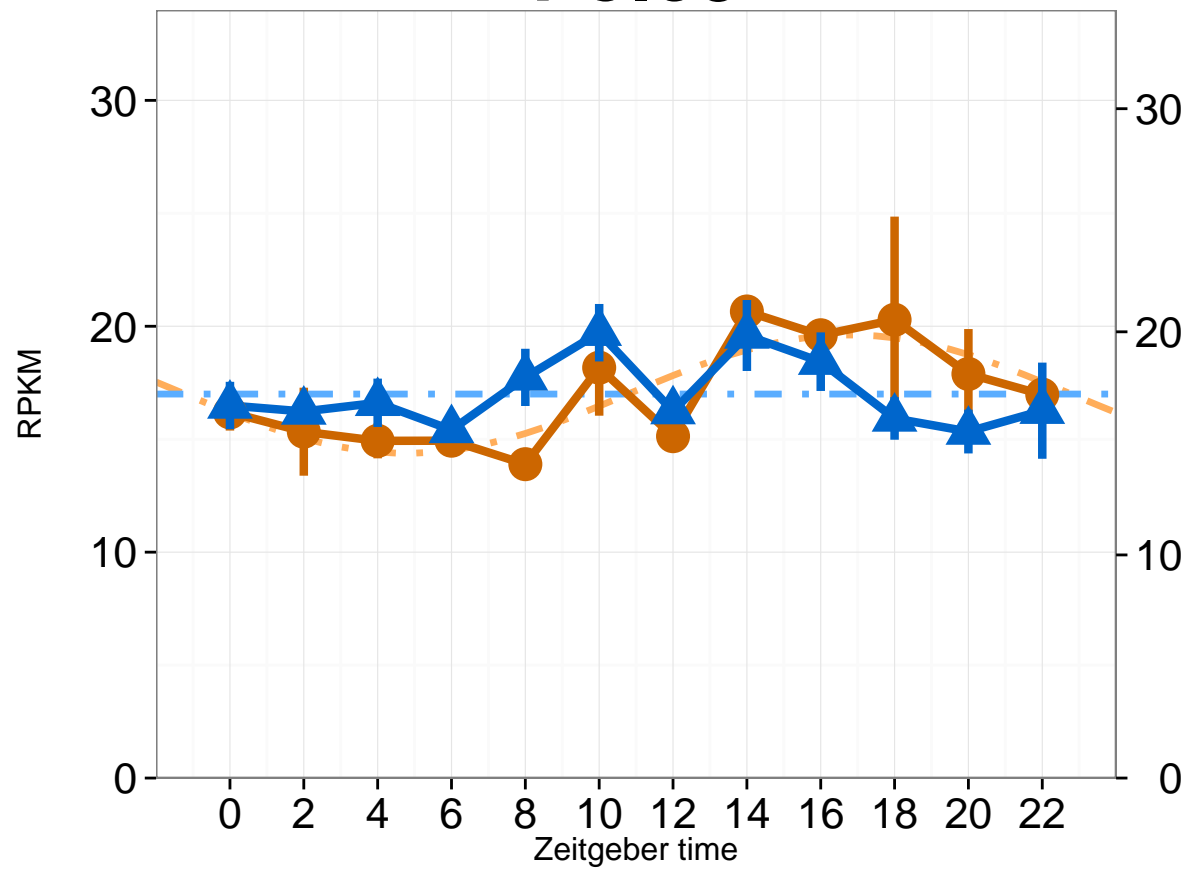

## Pole3

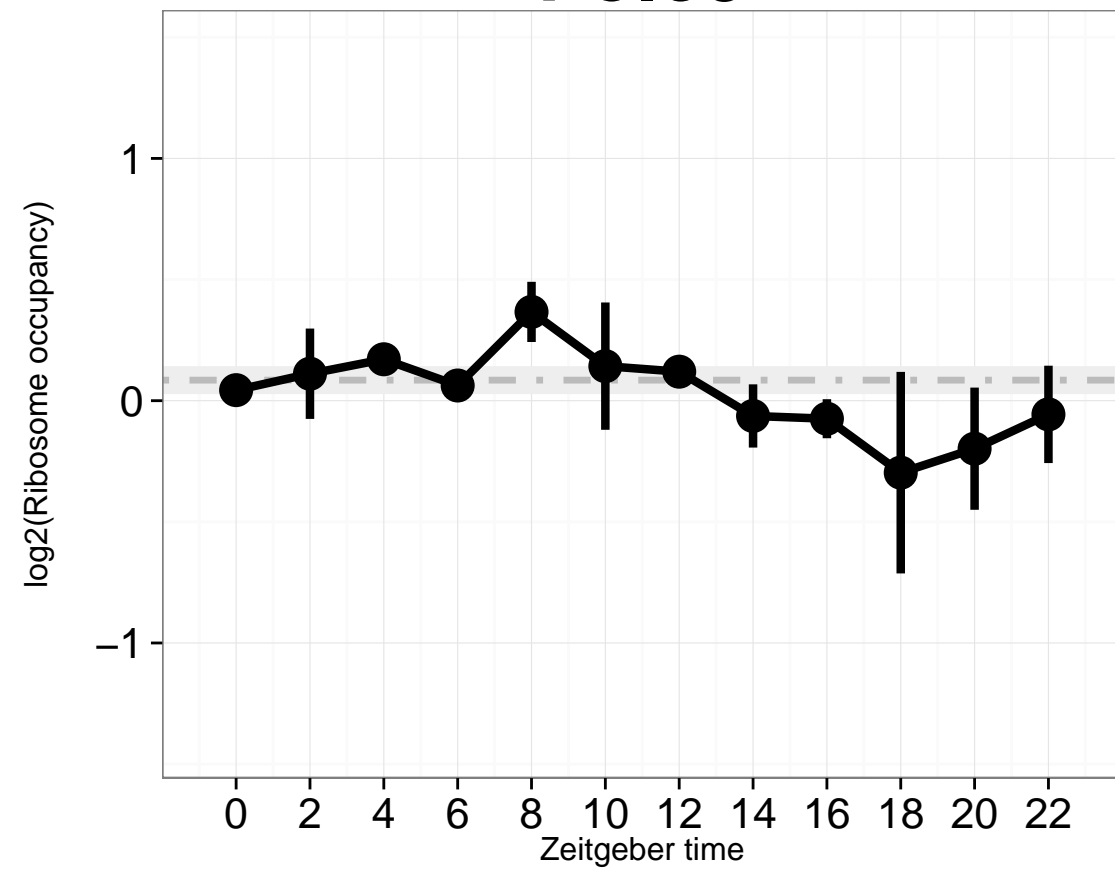

Supplement: SuppDataset_1.zip [file Pole3_set_A.pdf › Supplemental Dataset 1/A-mRNA_nonrhyth_translation_nonrhyth/Pole3_set_A.pdf]

## Pole

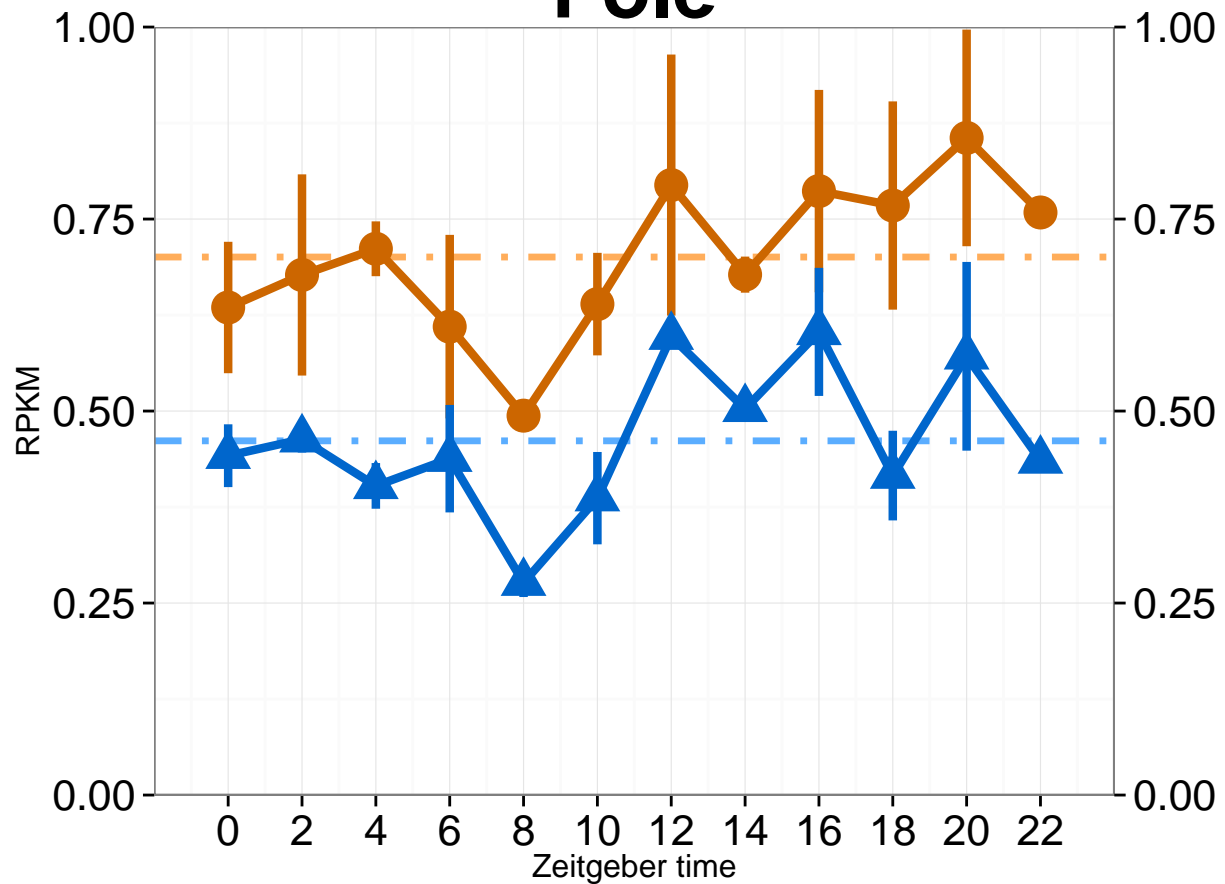

## Pole

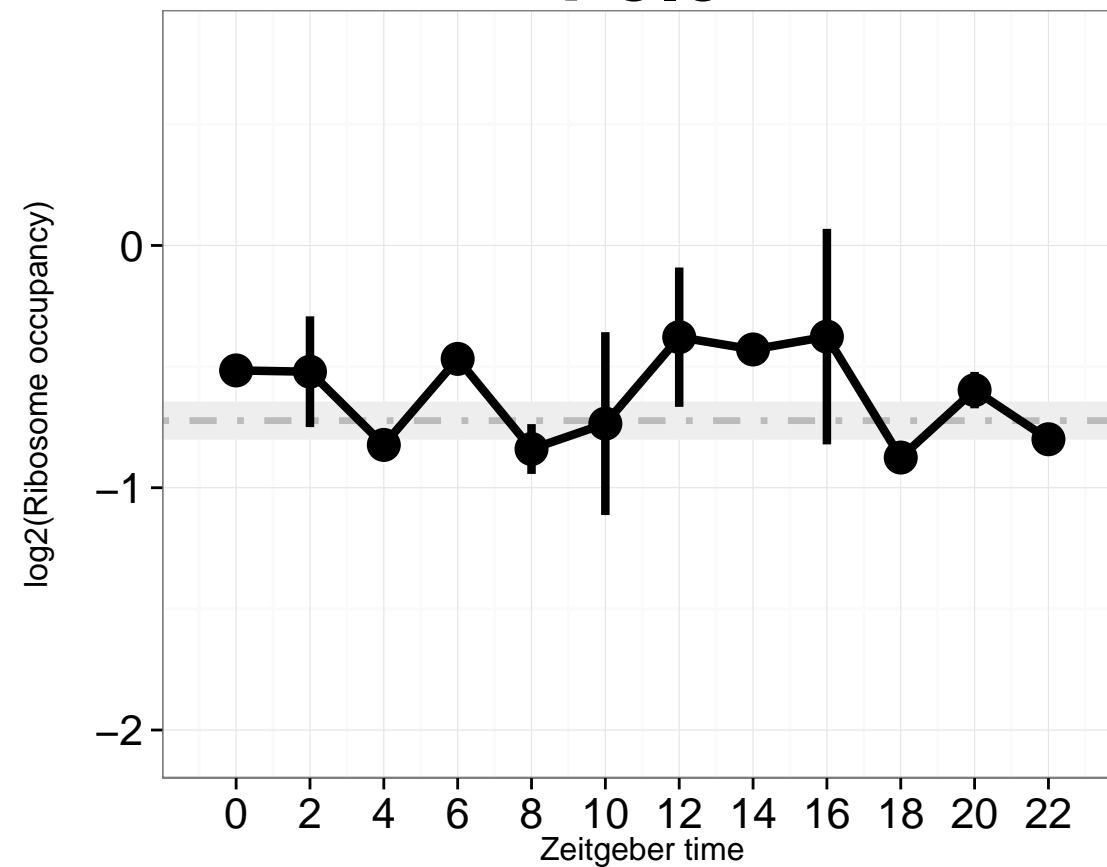

Supplement: SuppDataset_1.zip [file Pole_set_A.pdf › Supplemental Dataset 1/A-mRNA_nonrhyth_translation_nonrhyth/Pole_set_A.pdf]

# Polg2

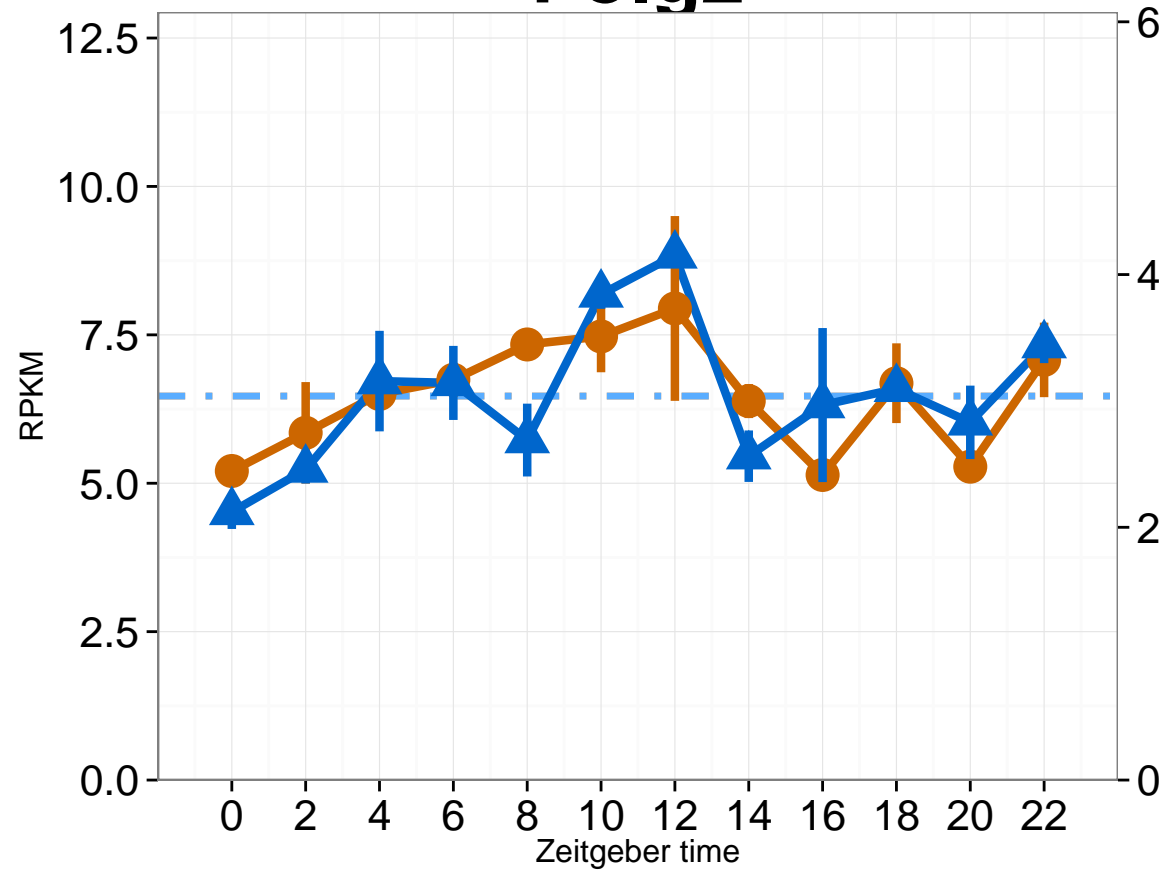

# Polg2

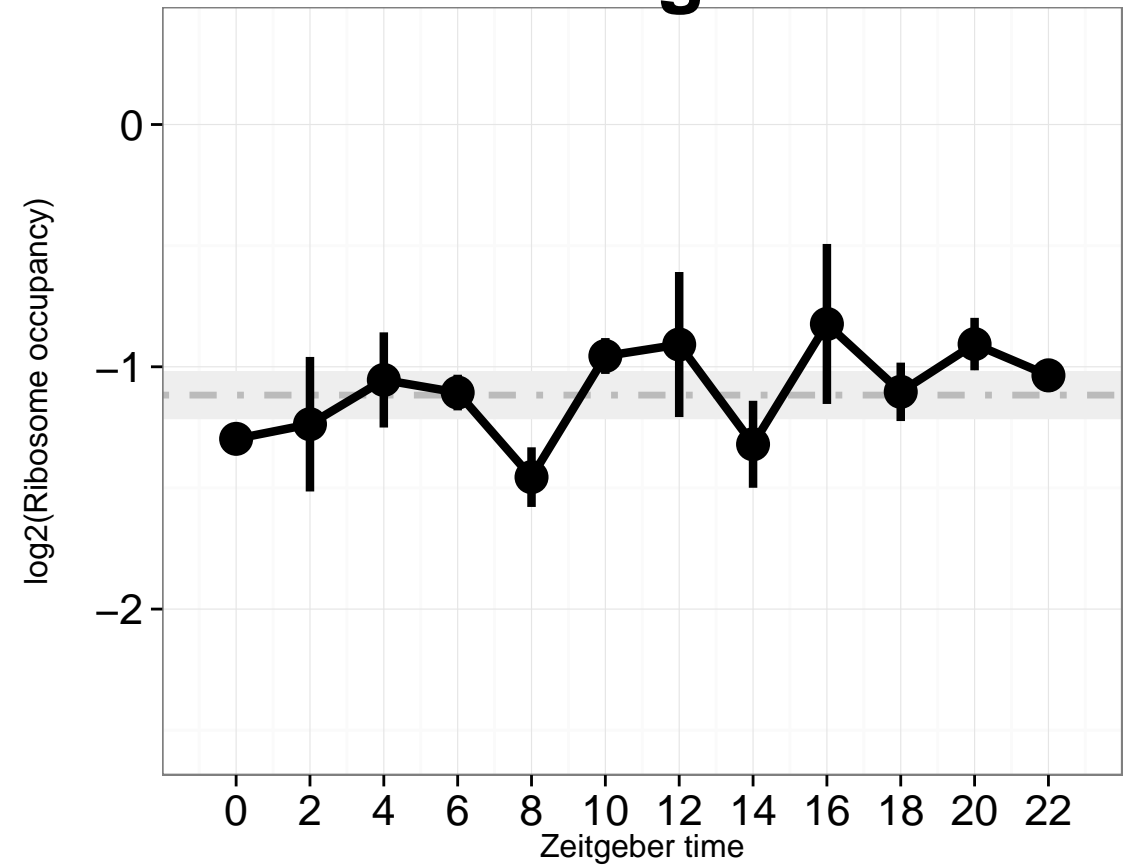

Supplement: SuppDataset_1.zip [file Polg2_set_A.pdf › Supplemental Dataset 1/A-mRNA_nonrhyth_translation_nonrhyth/Polg2_set_A.pdf]

## Polg

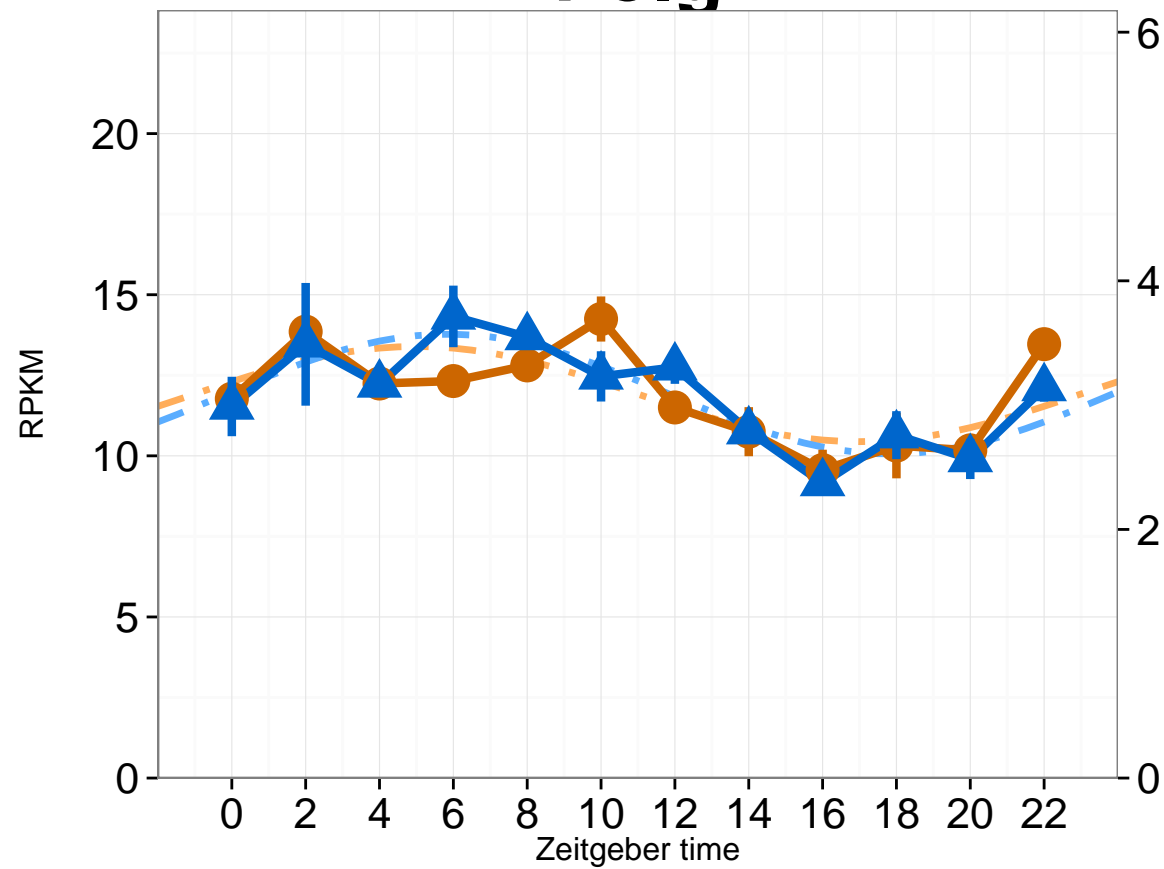

## Polg

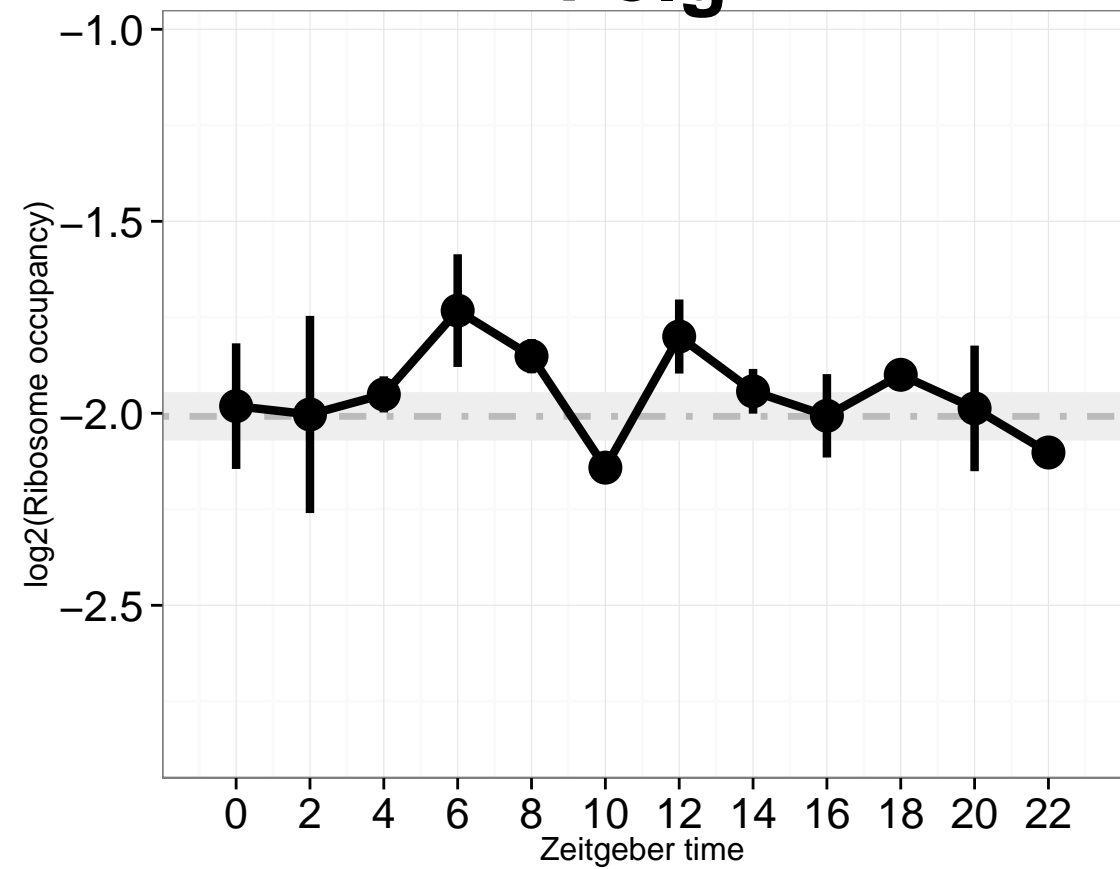

Supplement: SuppDataset_1.zip [file Polg_set_A.pdf › Supplemental Dataset 1/A-mRNA_nonrhyth_translation_nonrhyth/Polg_set_A.pdf]

## Polh

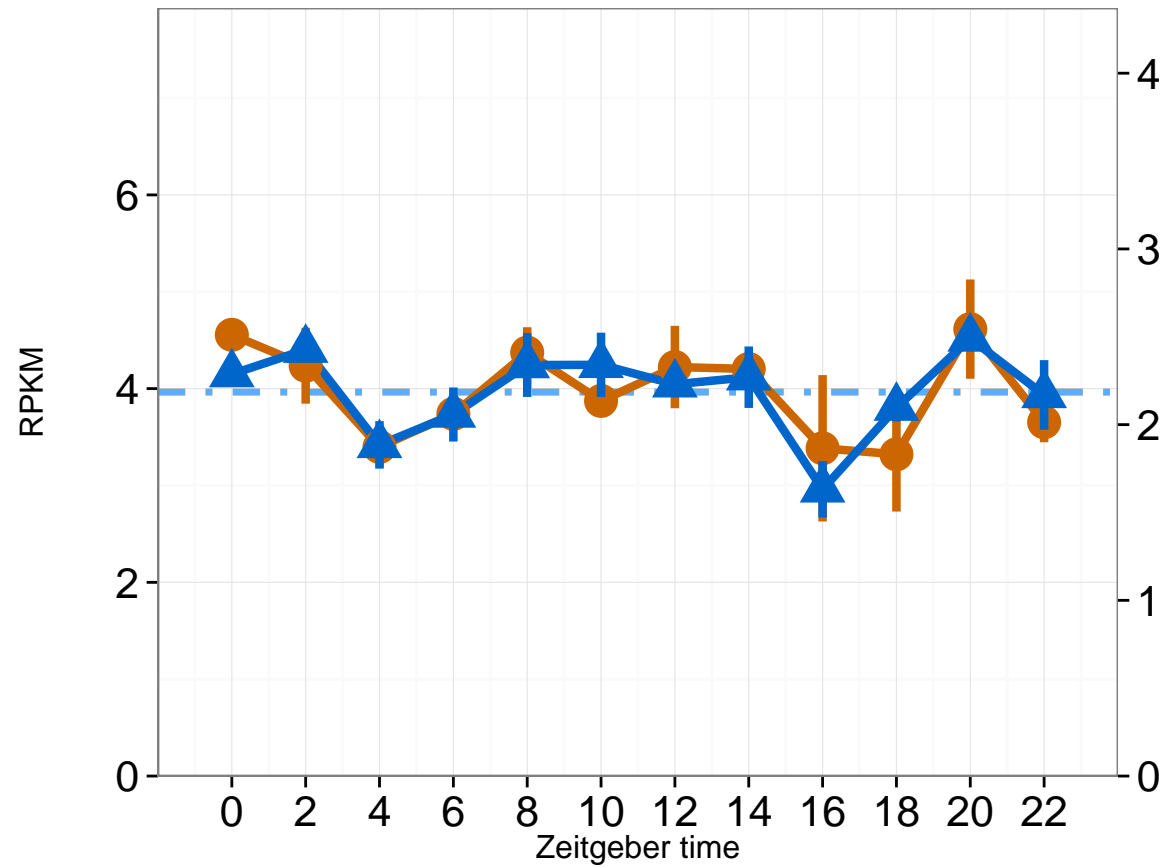

## Polh

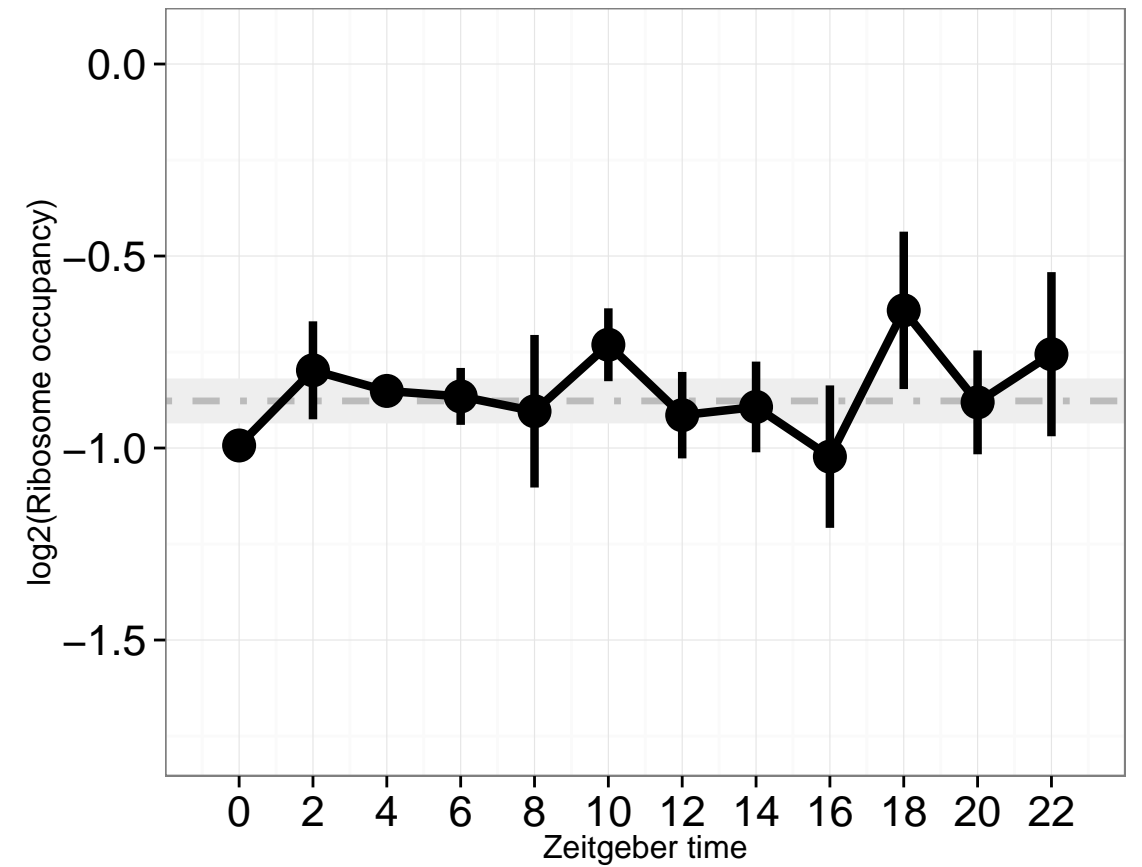

Supplement: SuppDataset_1.zip [file Polh_set_A.pdf › Supplemental Dataset 1/A-mRNA_nonrhyth_translation_nonrhyth/Polh_set_A.pdf]

## Poli

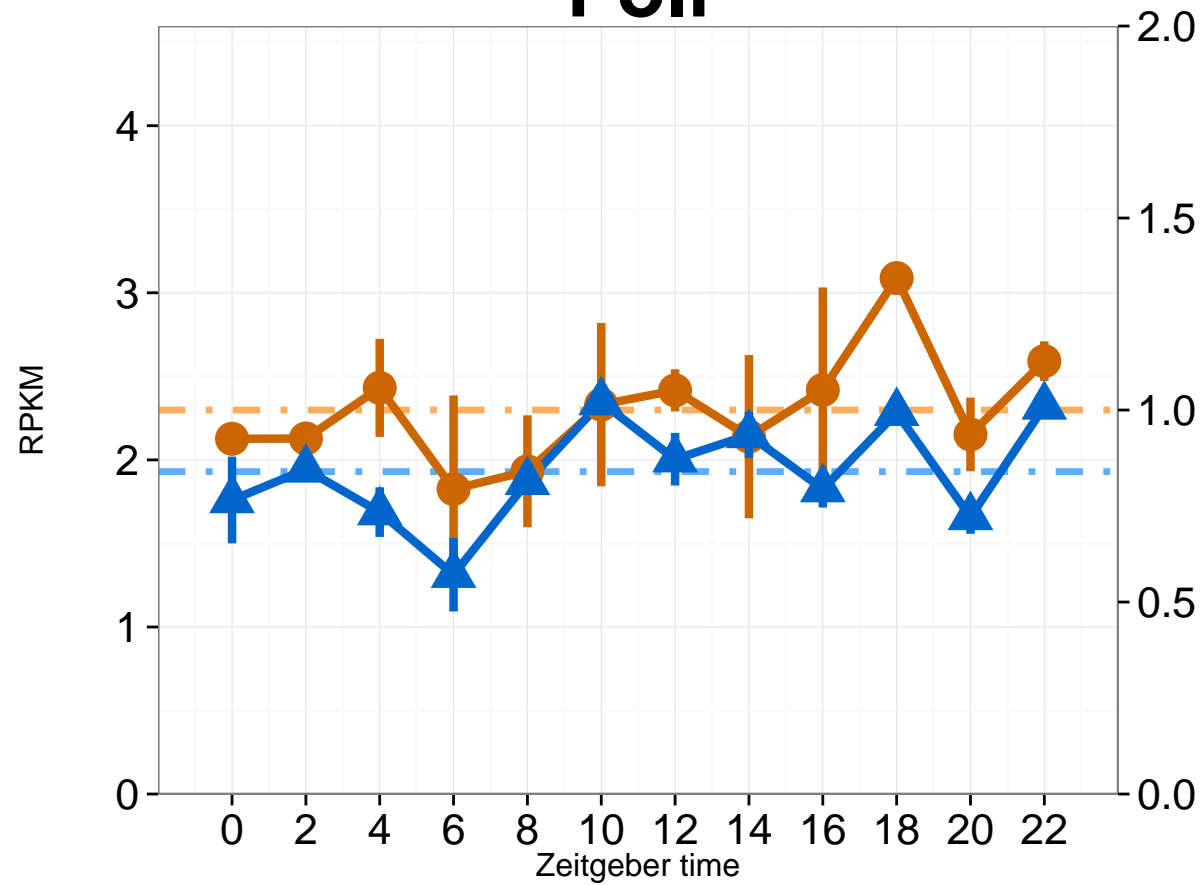

## Poli

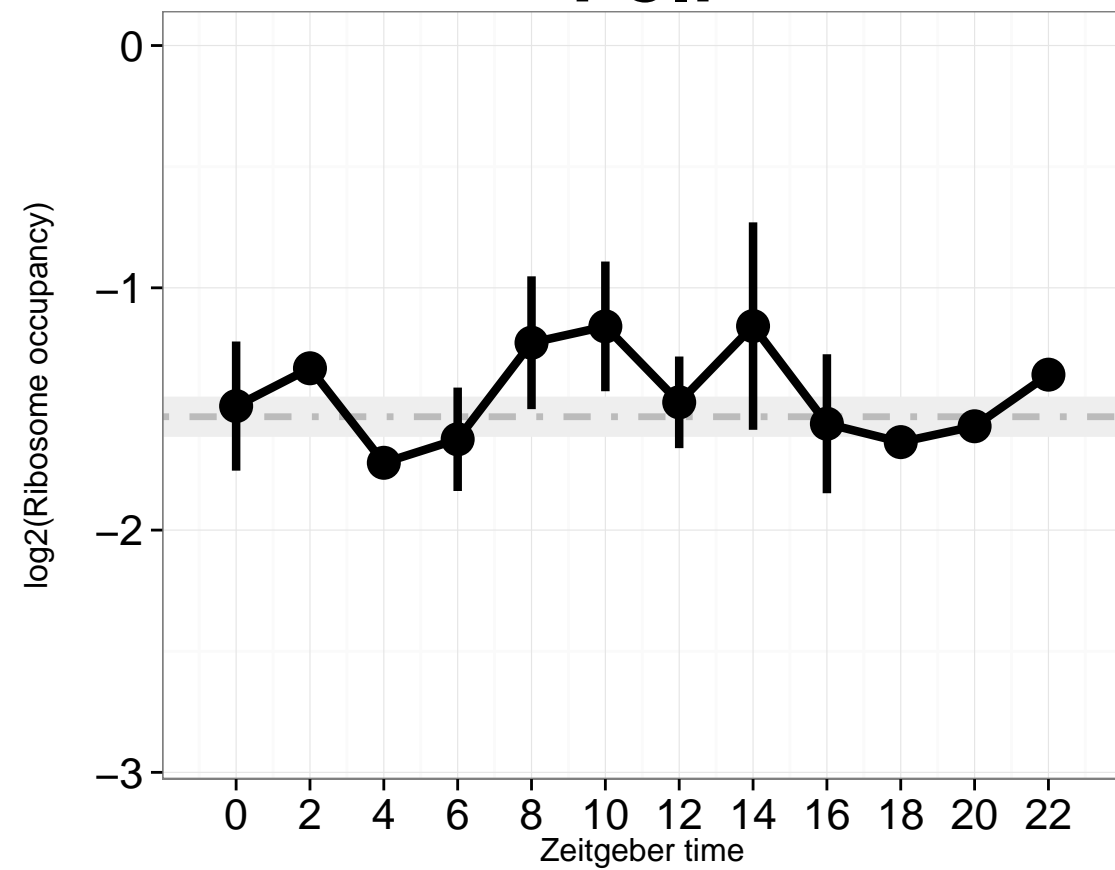

Supplement: SuppDataset_1.zip [file Poli_set_A.pdf › Supplemental Dataset 1/A-mRNA_nonrhyth_translation_nonrhyth/Poli_set_A.pdf]

## Polk

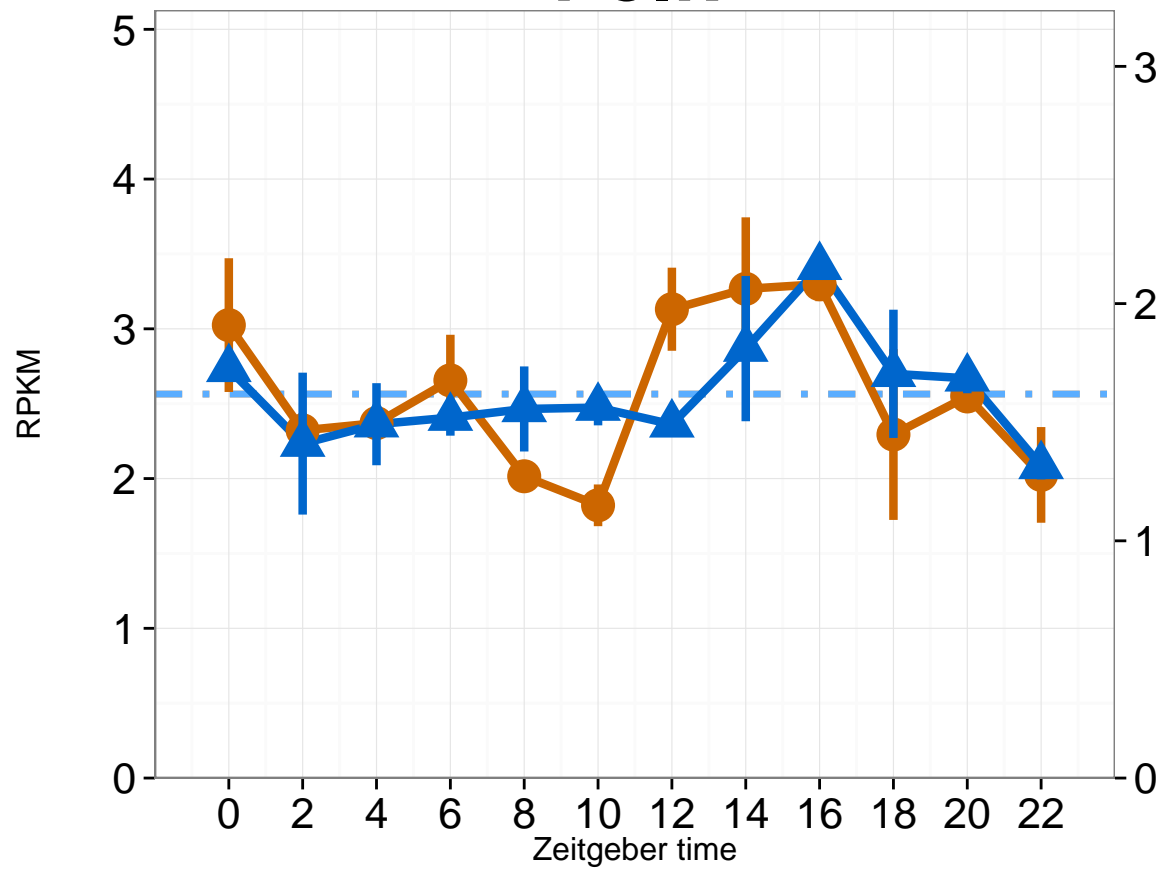

## Polk

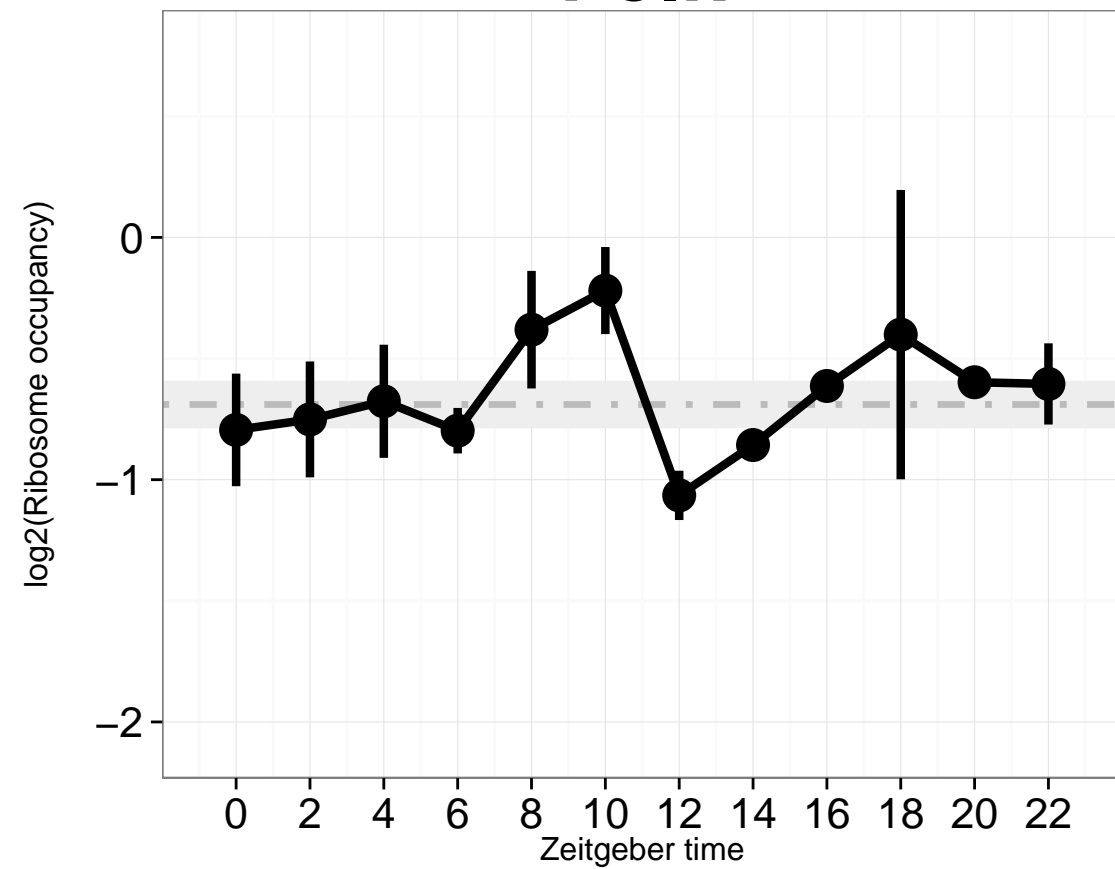

Supplement: SuppDataset_1.zip [file Polk_set_A.pdf › Supplemental Dataset 1/A-mRNA_nonrhyth_translation_nonrhyth/Polk_set_A.pdf]

## Polm

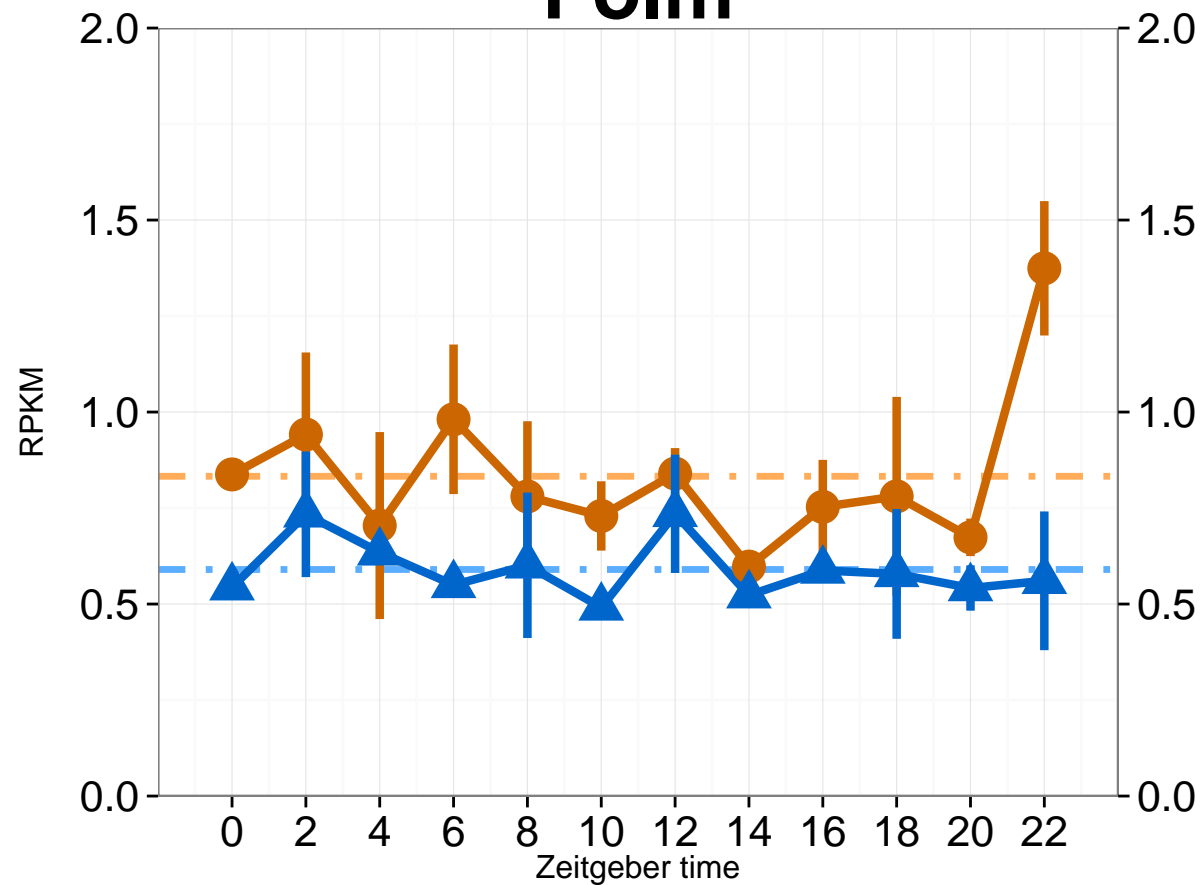

## Polm

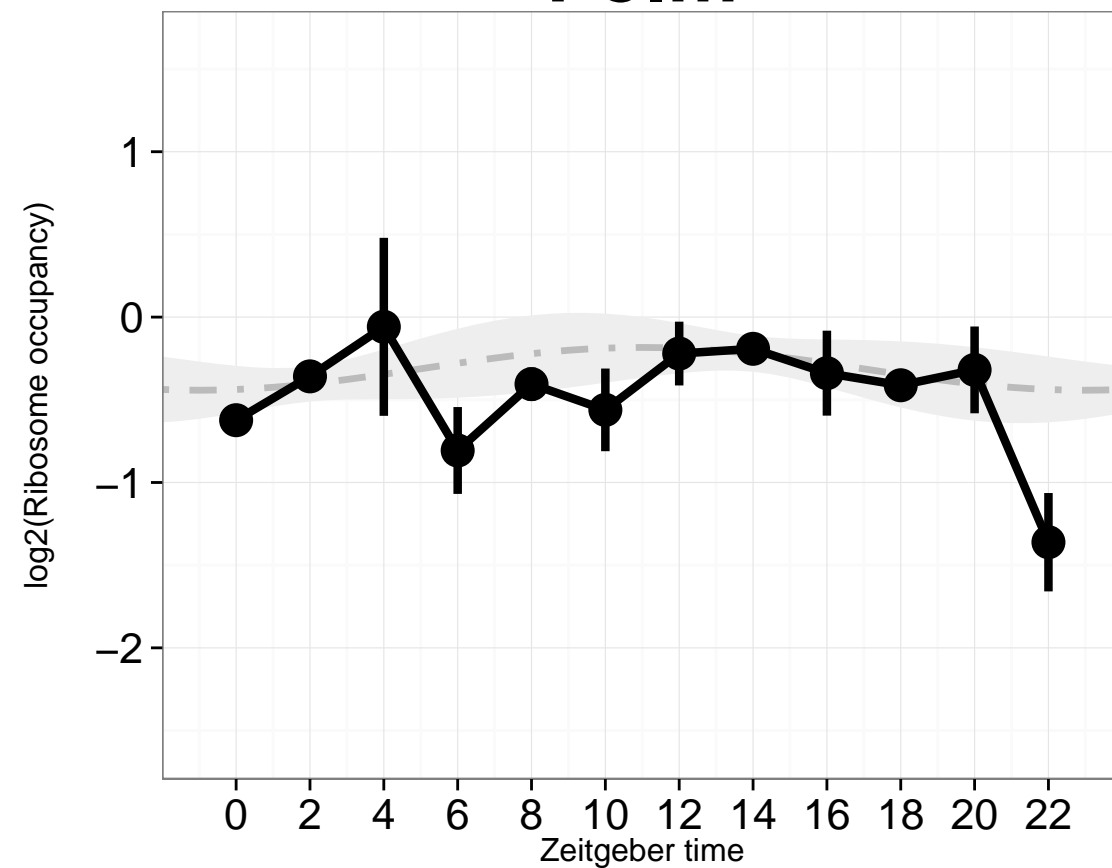

Supplement: SuppDataset_1.zip [file Polm_set_A.pdf › Supplemental Dataset 1/A-mRNA_nonrhyth_translation_nonrhyth/Polm_set_A.pdf]

# Polr1b

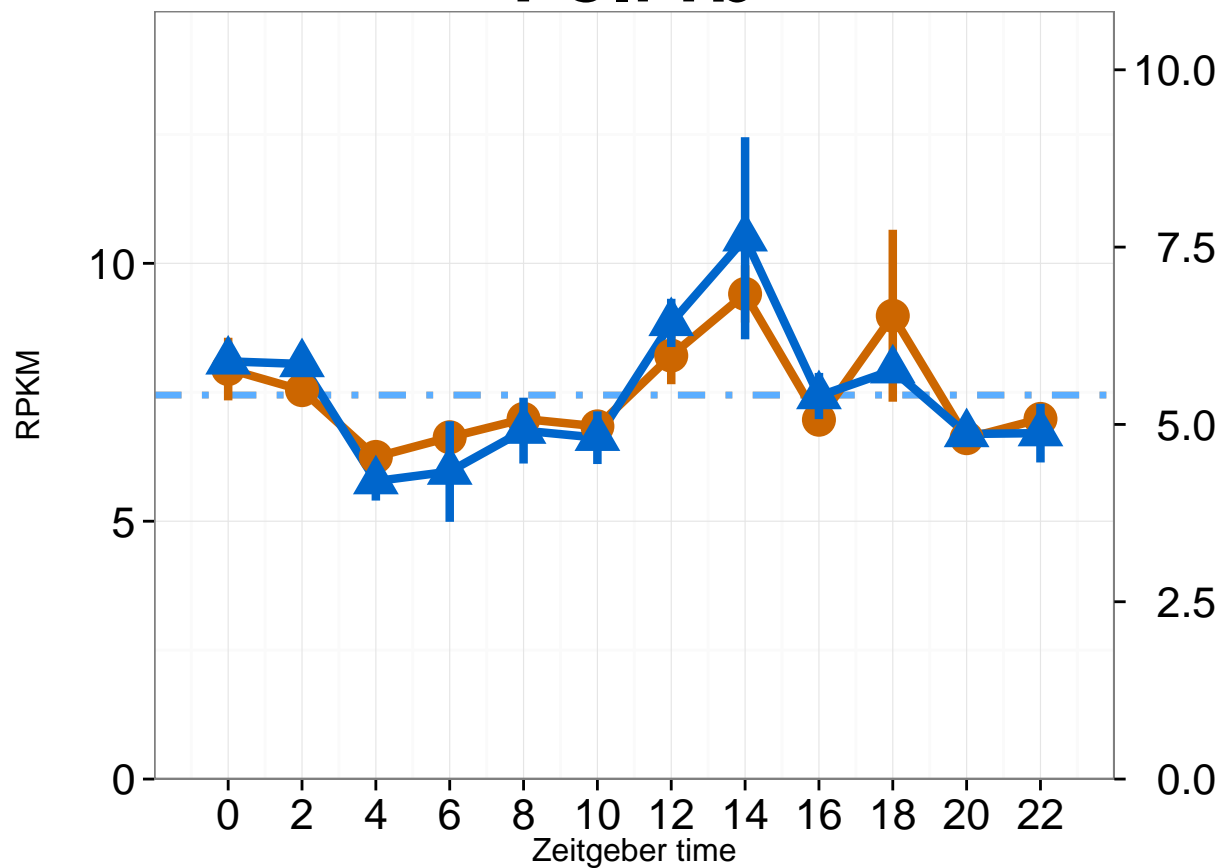

# Polr1b

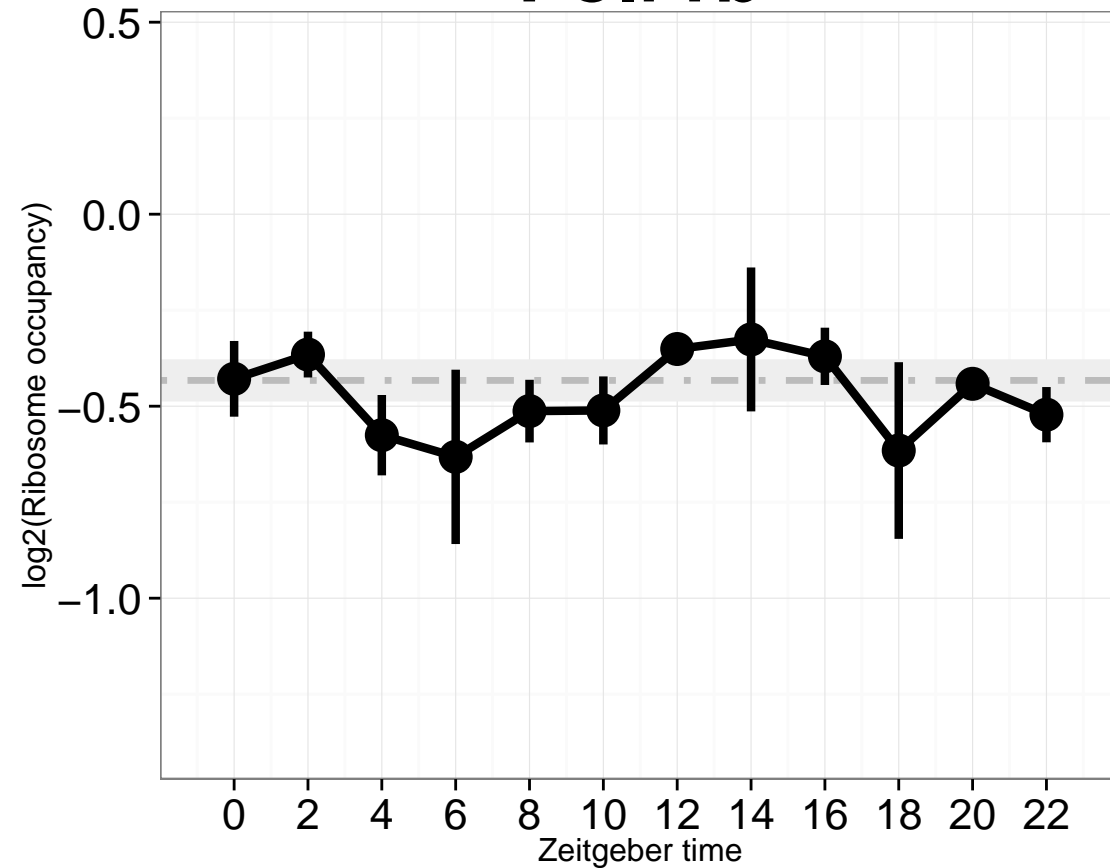

Supplement: SuppDataset_1.zip [file Polr1b_set_A.pdf › Supplemental Dataset 1/A-mRNA_nonrhyth_translation_nonrhyth/Polr1b_set_A.pdf]

## Polr1c

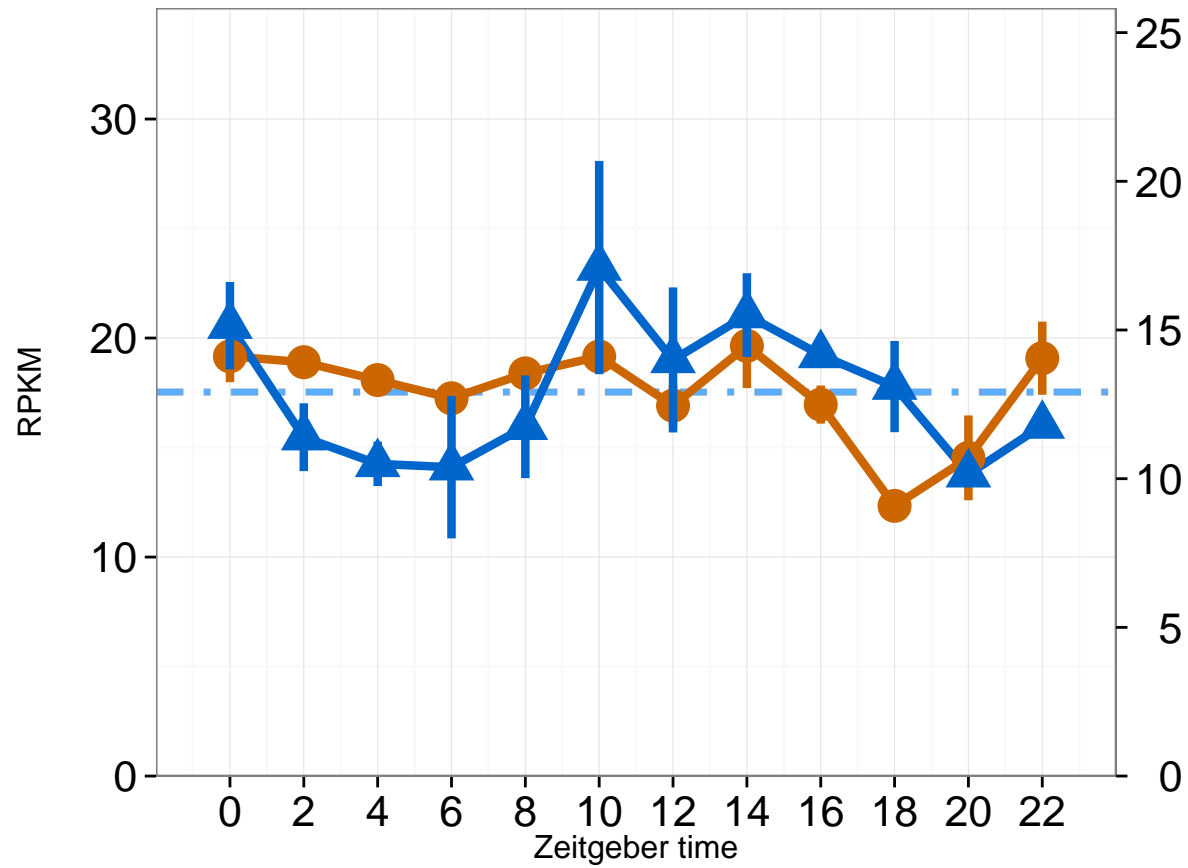

## Polr1c

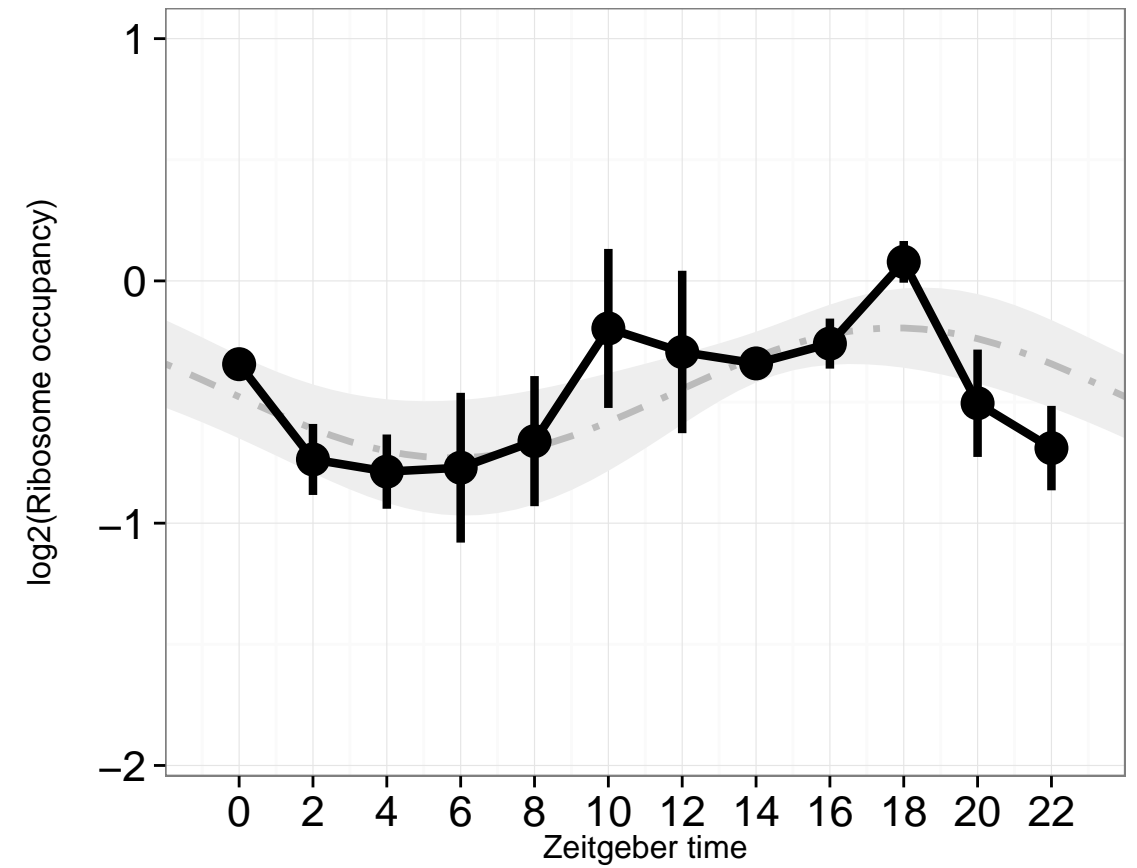

Supplement: SuppDataset_1.zip [file Polr1c_set_A.pdf › Supplemental Dataset 1/A-mRNA_nonrhyth_translation_nonrhyth/Polr1c_set_A.pdf]

# Polr1d

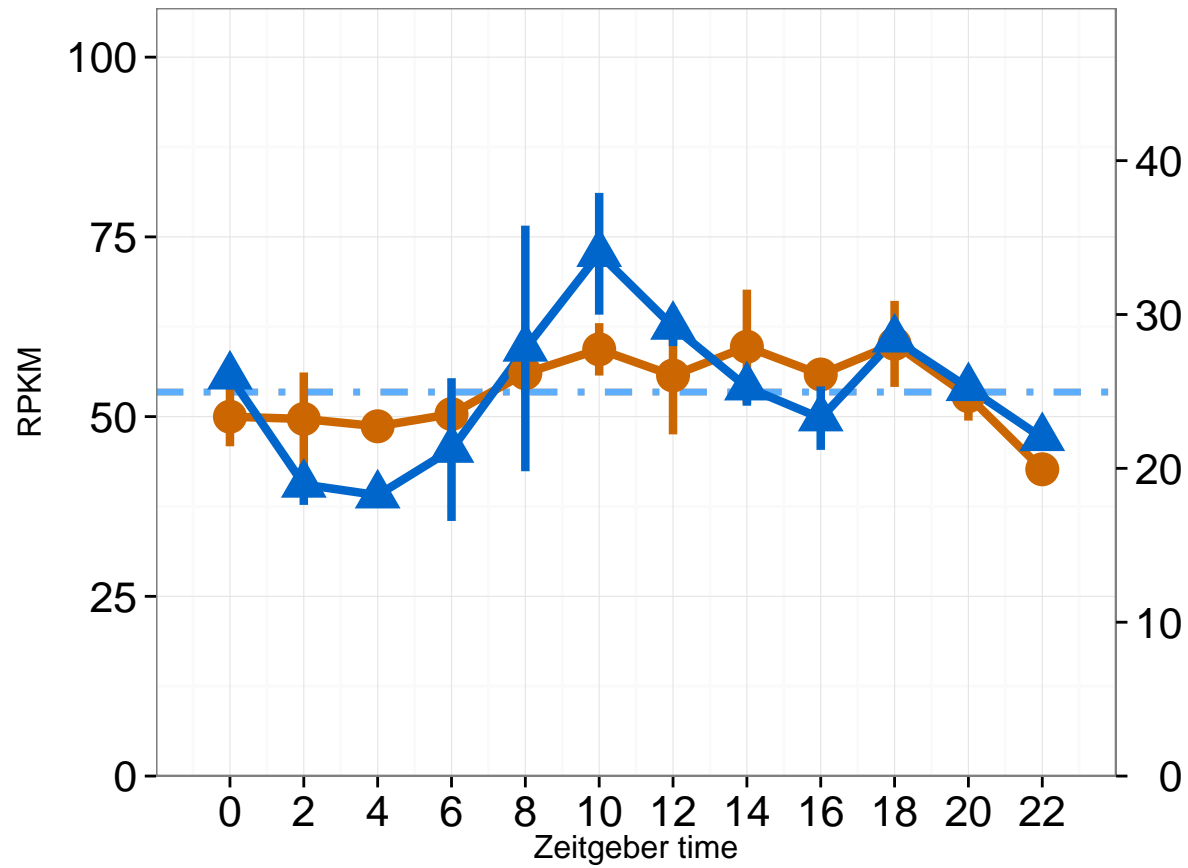

# Polr1d

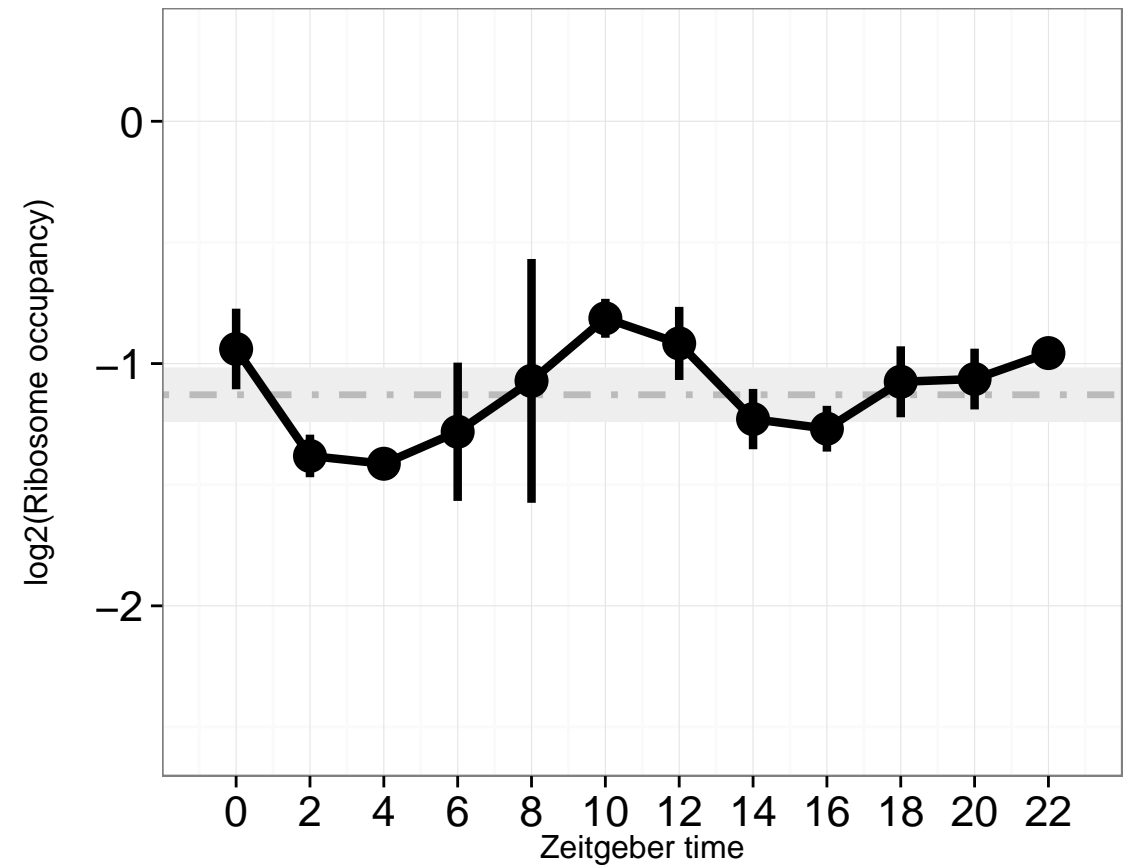

Supplement: SuppDataset_1.zip [file Polr1d_set_A.pdf › Supplemental Dataset 1/A-mRNA_nonrhyth_translation_nonrhyth/Polr1d_set_A.pdf]

# Polr1e

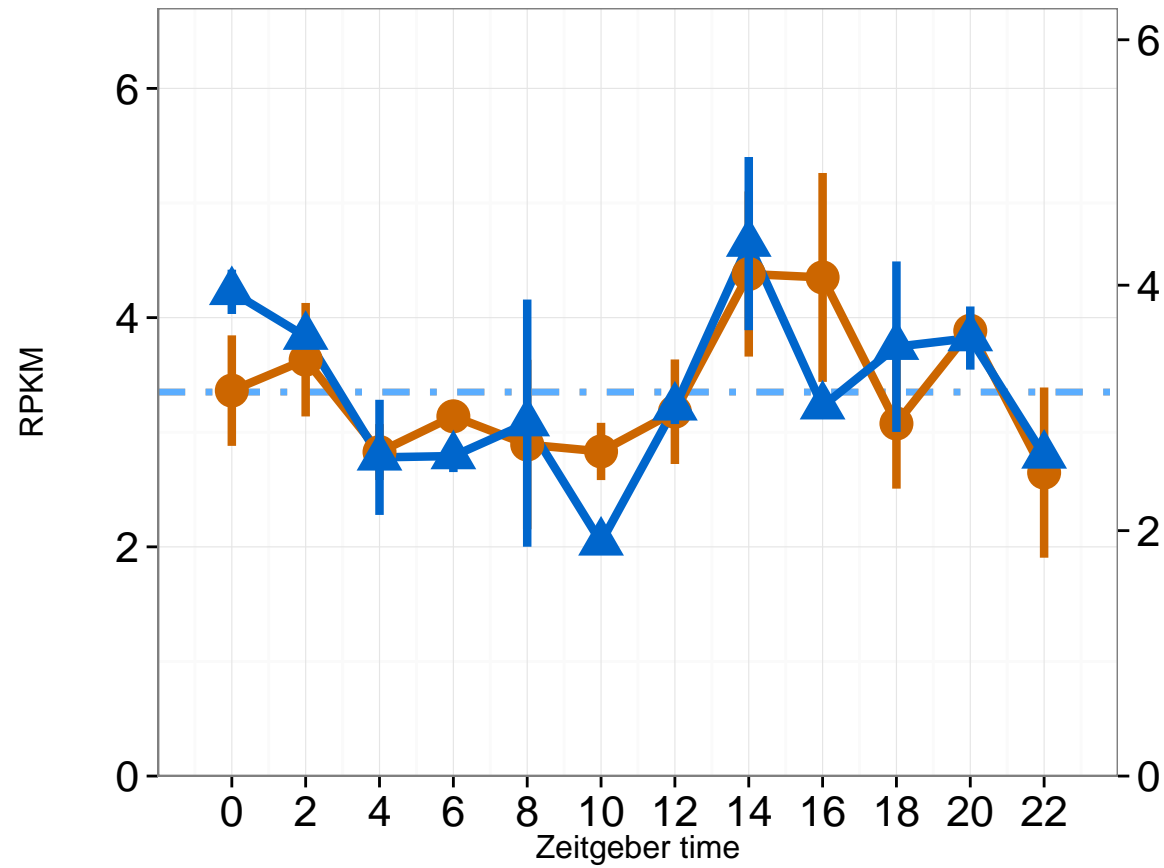

# Polr1e

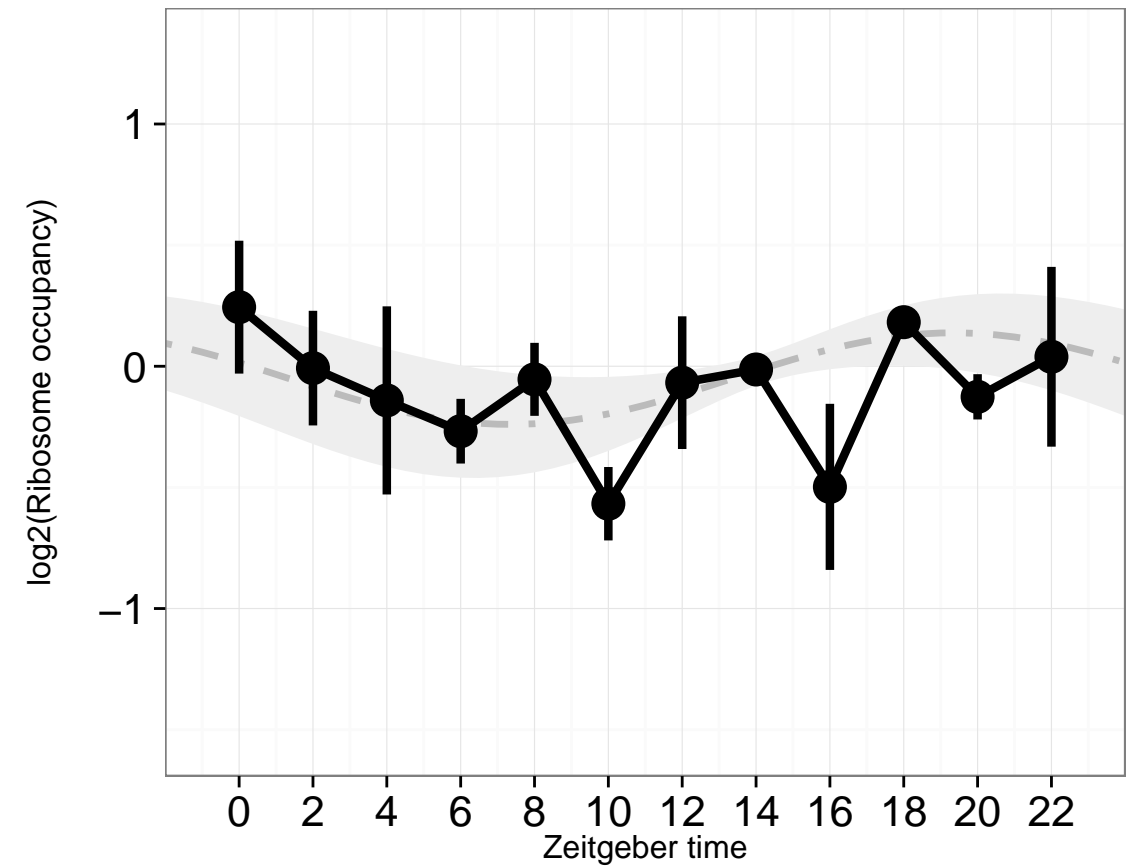

Supplement: SuppDataset_1.zip [file Polr1e_set_A.pdf › Supplemental Dataset 1/A-mRNA_nonrhyth_translation_nonrhyth/Polr1e_set_A.pdf]

# Polr2a

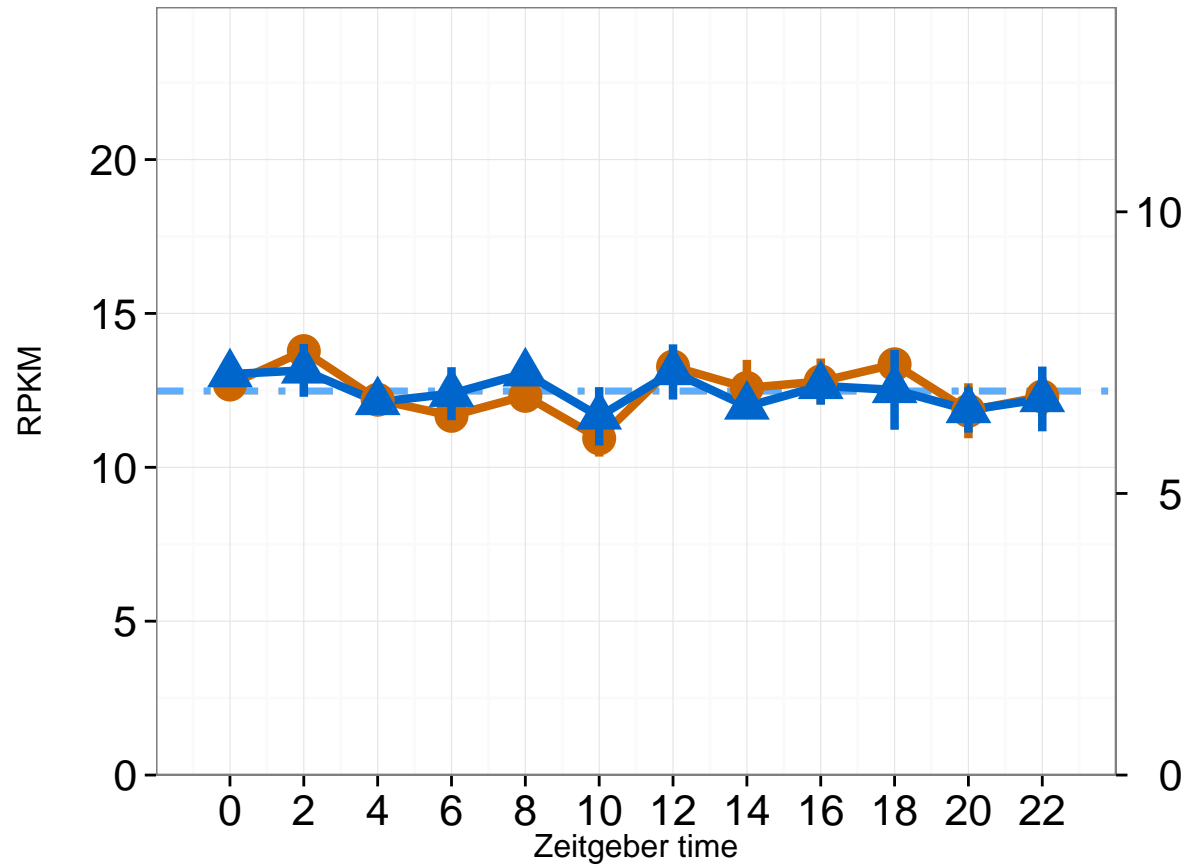

# Polr2a

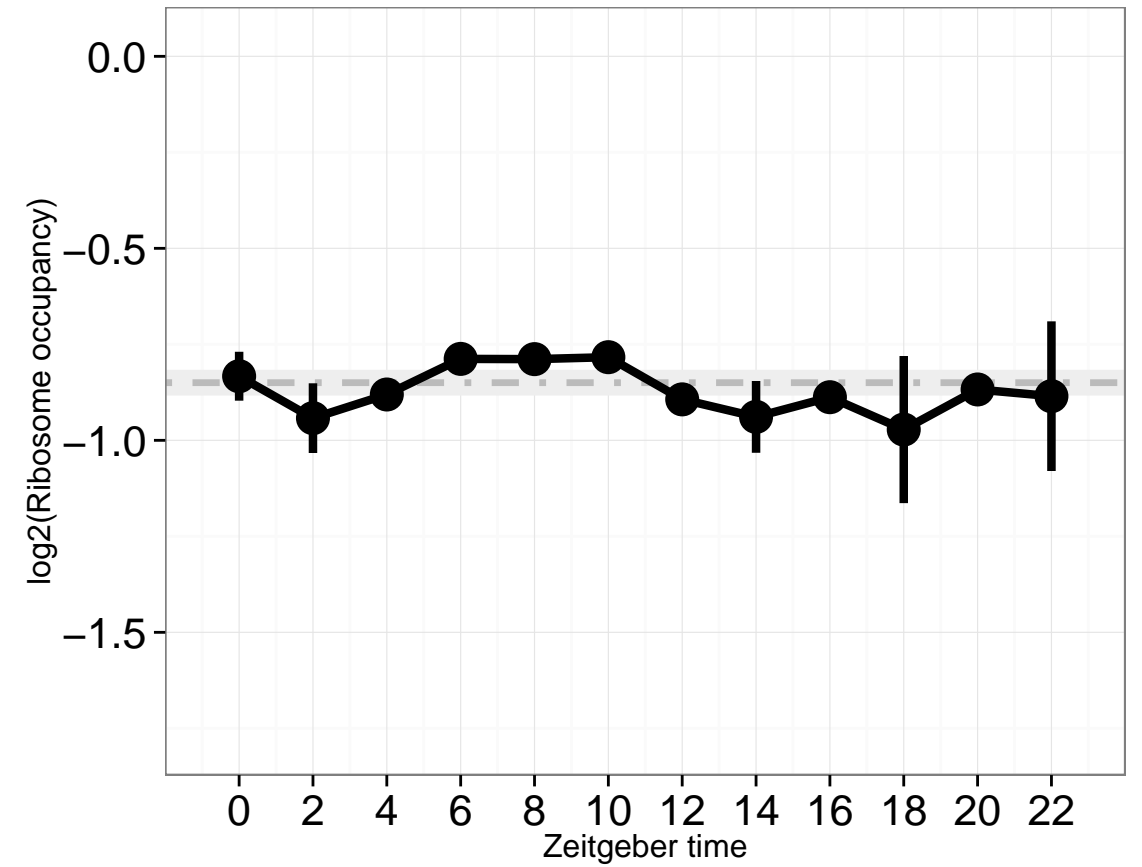

Supplement: SuppDataset_1.zip [file Polr2a_set_A.pdf › Supplemental Dataset 1/A-mRNA_nonrhyth_translation_nonrhyth/Polr2a_set_A.pdf]

## Polr2b

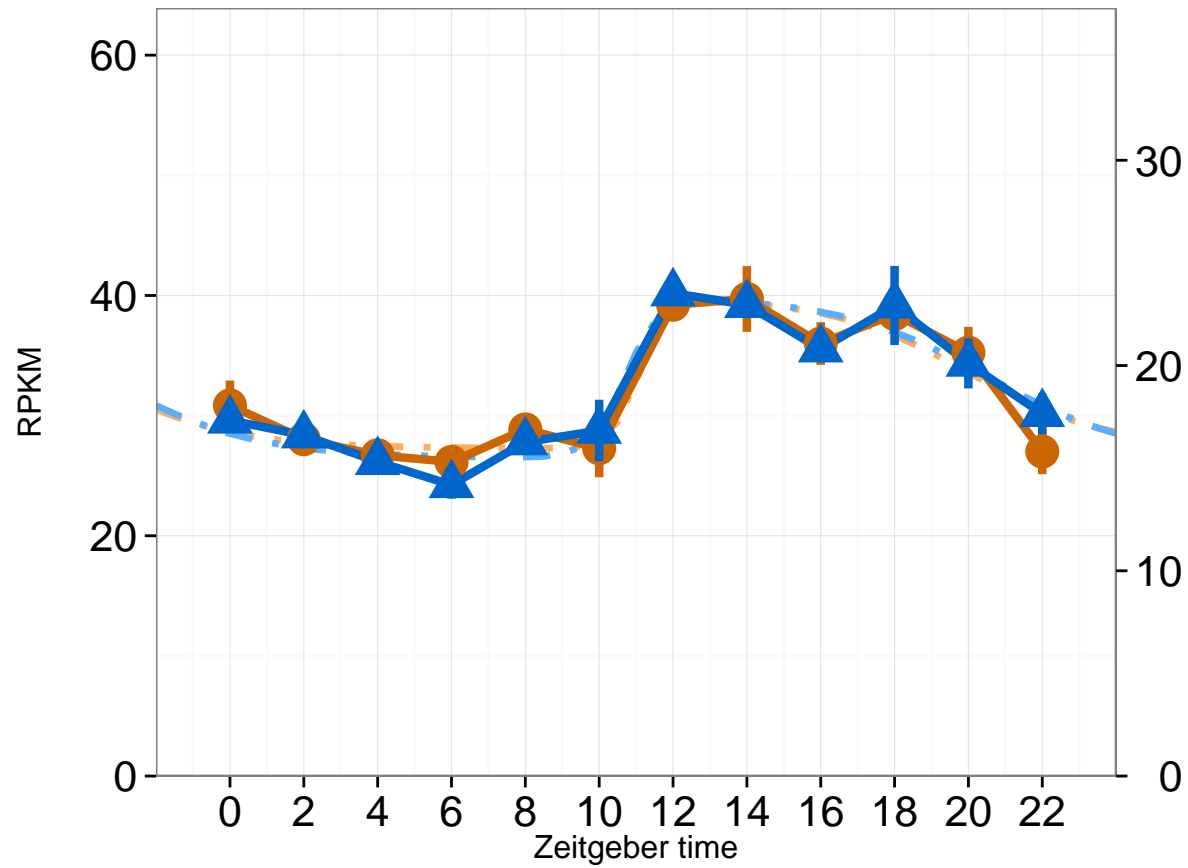

## Polr2b

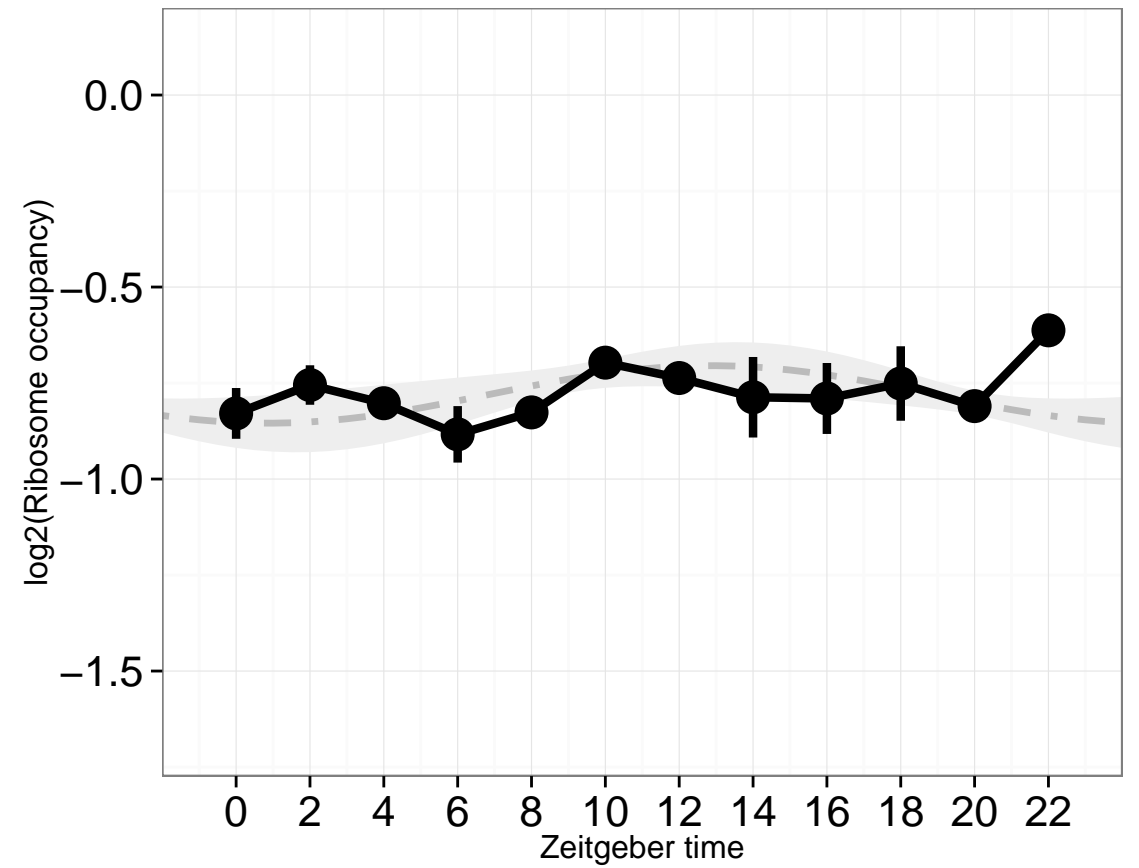

Supplement: SuppDataset_1.zip [file Polr2b_set_A.pdf › Supplemental Dataset 1/A-mRNA_nonrhyth_translation_nonrhyth/Polr2b_set_A.pdf]

## Polr2c

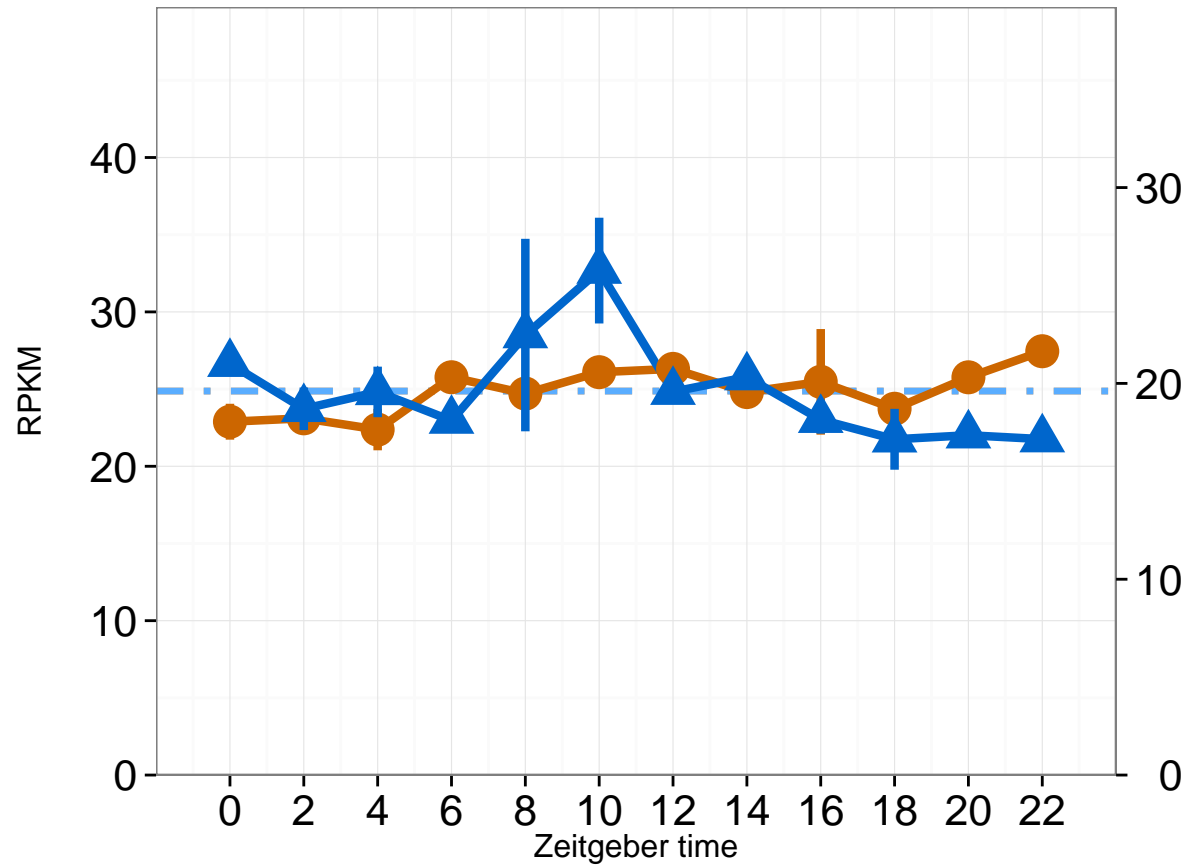

## Polr2c

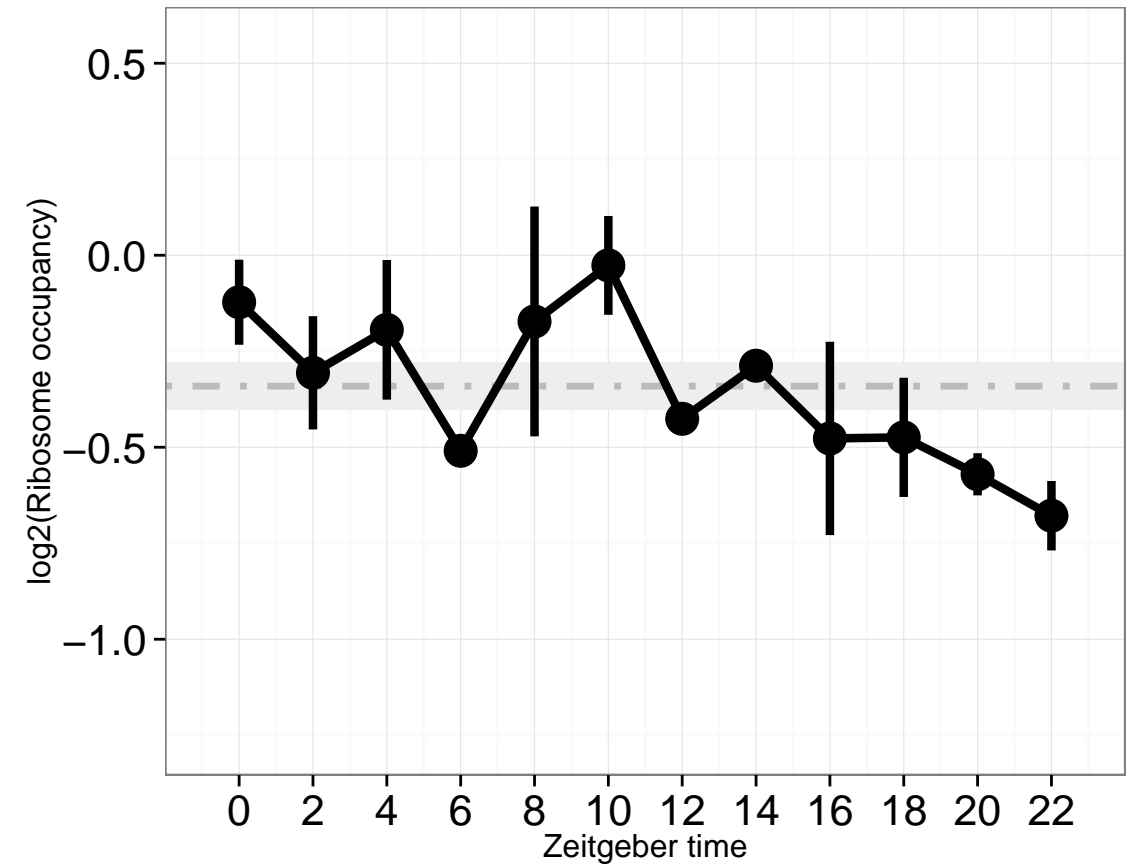

Supplement: SuppDataset_1.zip [file Polr2c_set_A.pdf › Supplemental Dataset 1/A-mRNA_nonrhyth_translation_nonrhyth/Polr2c_set_A.pdf]

## Polr2d

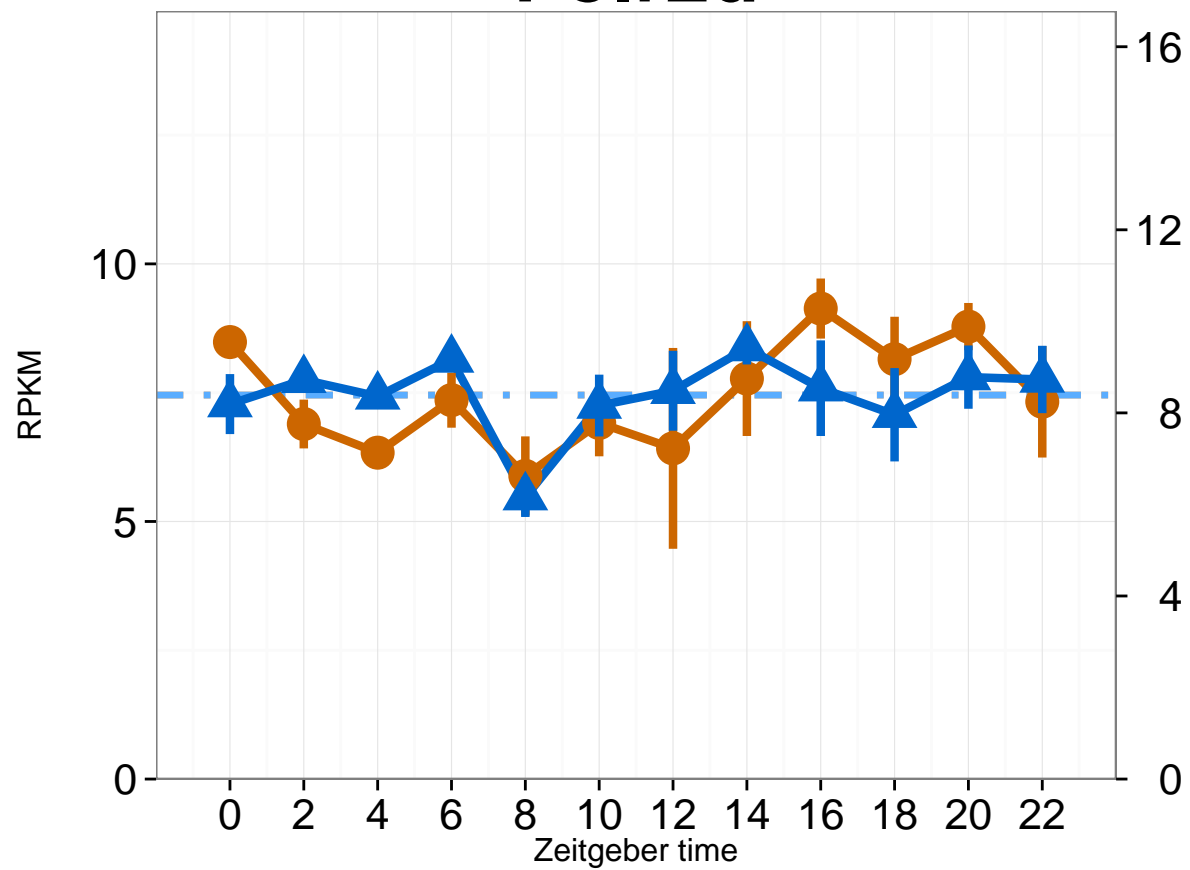

## Polr2d

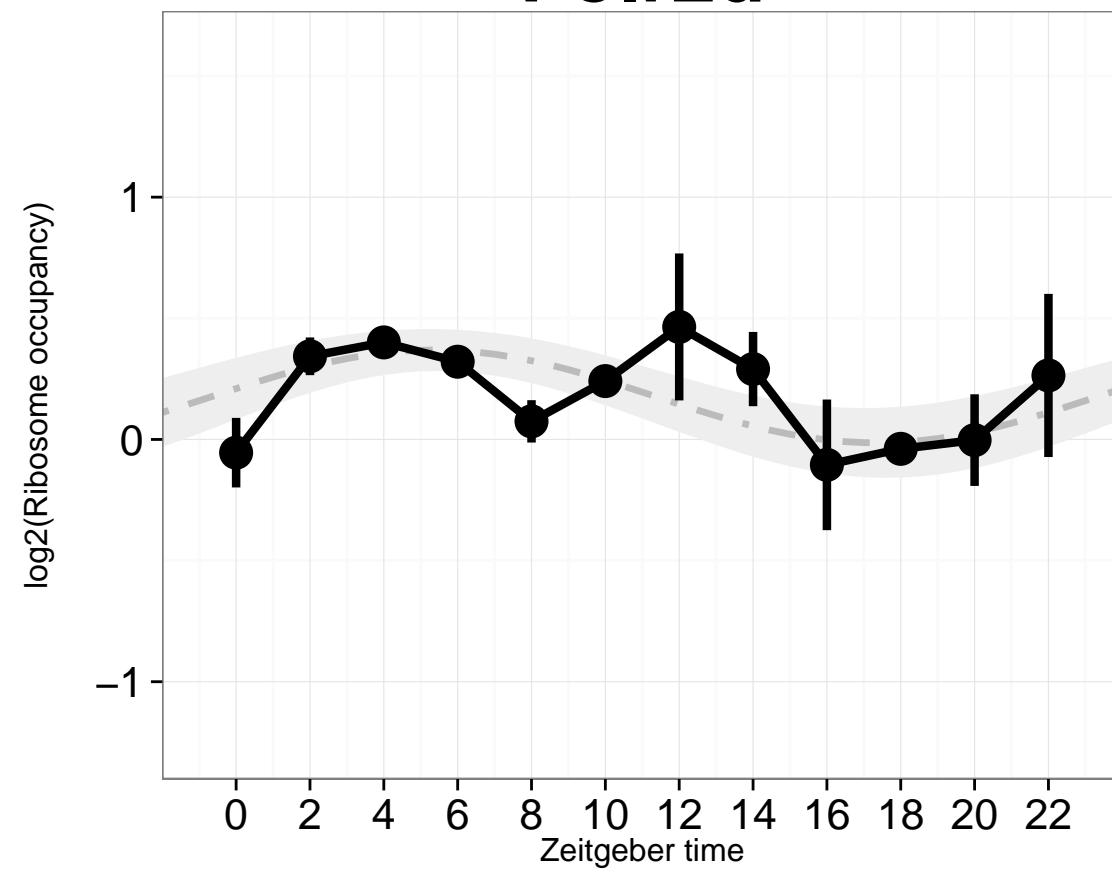

Supplement: SuppDataset_1.zip [file Polr2d_set_A.pdf › Supplemental Dataset 1/A-mRNA_nonrhyth_translation_nonrhyth/Polr2d_set_A.pdf]

## Polr2e

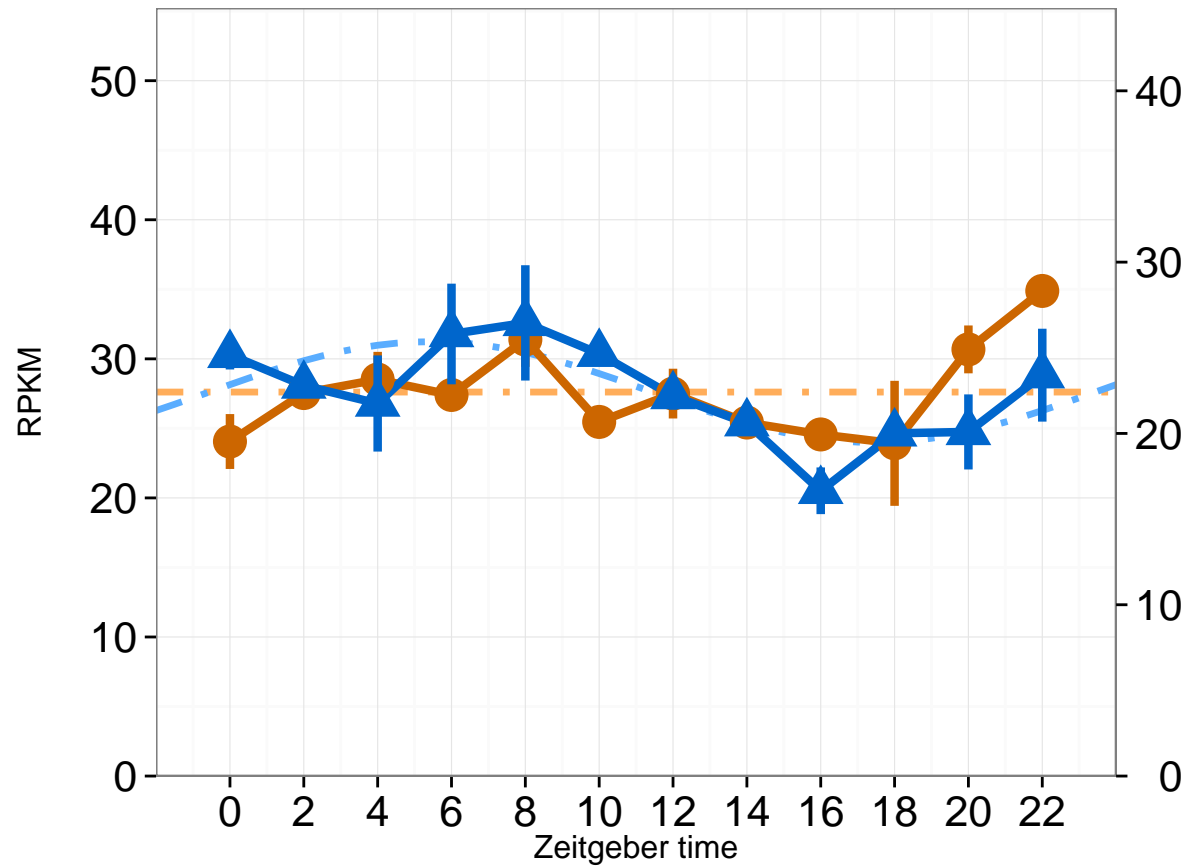

## Polr2e

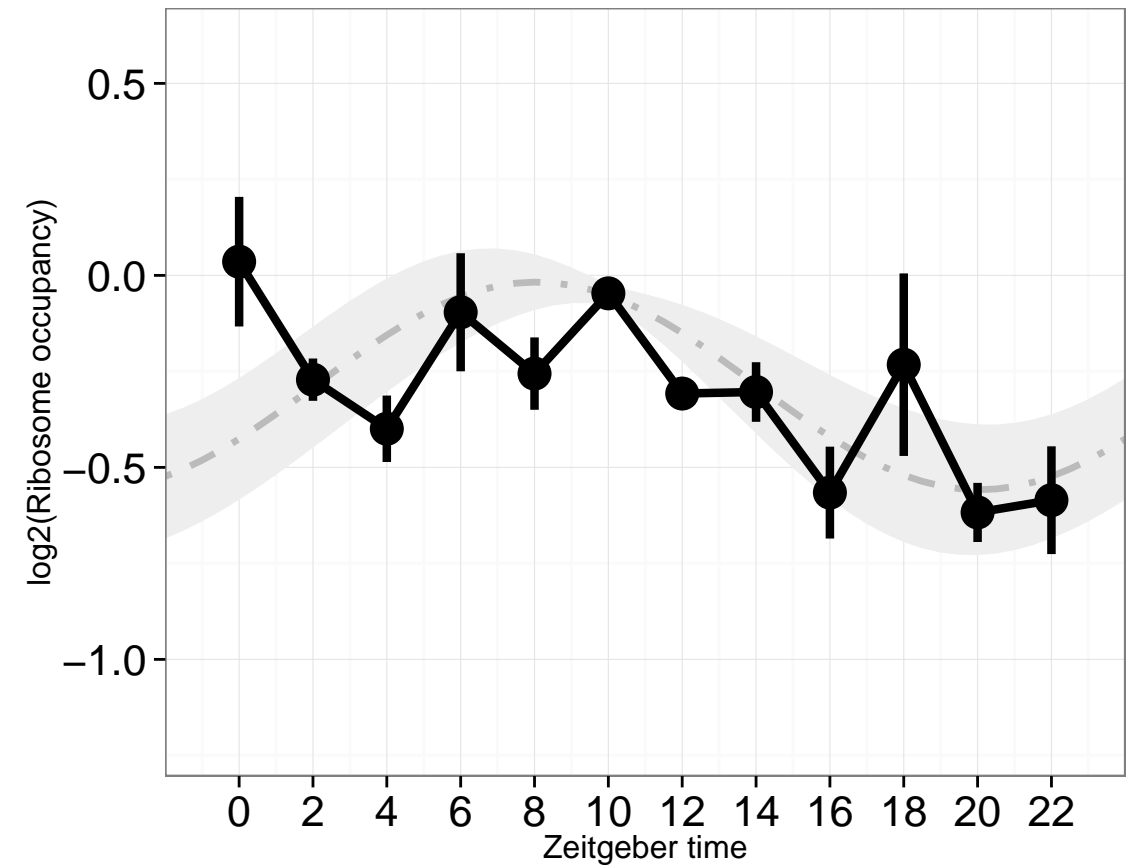

Supplement: SuppDataset_1.zip [file Polr2e_set_A.pdf › Supplemental Dataset 1/A-mRNA_nonrhyth_translation_nonrhyth/Polr2e_set_A.pdf]

## Polr2f

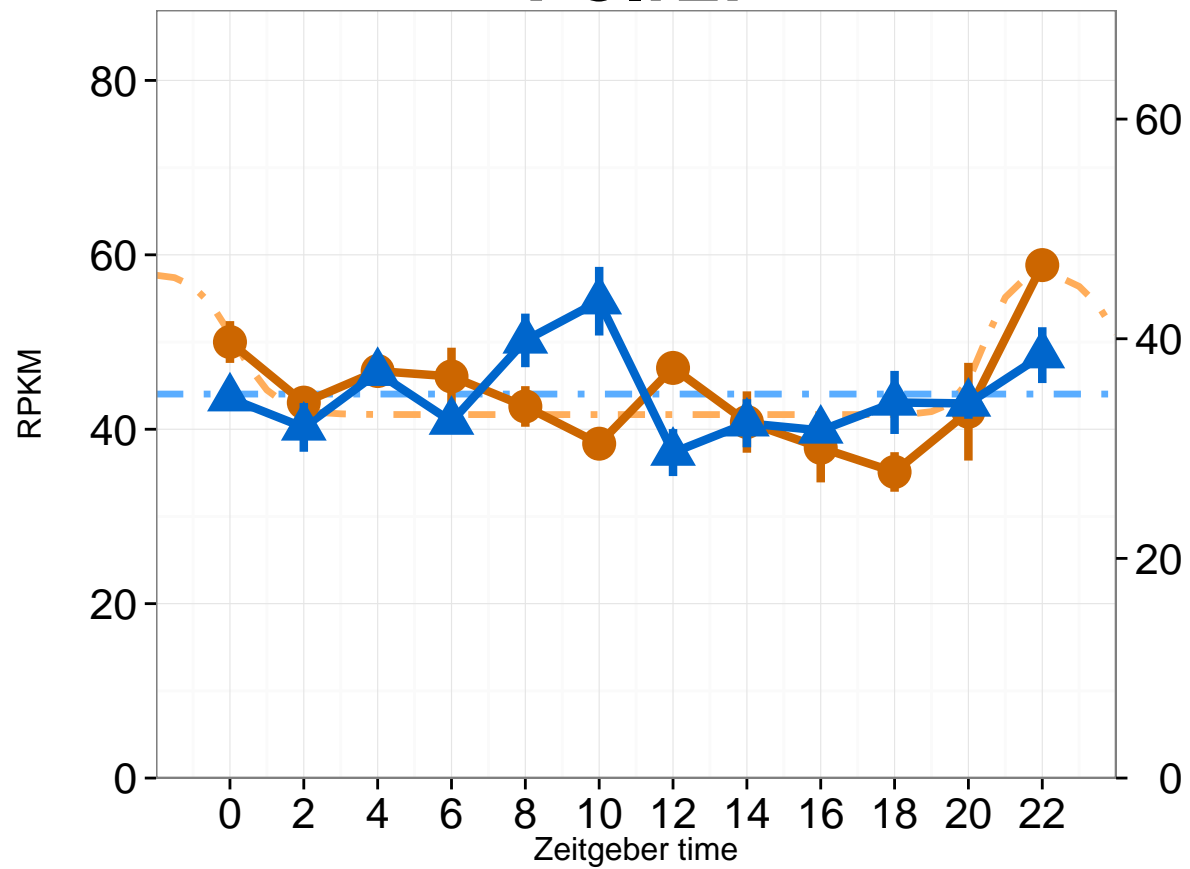

## Polr2f

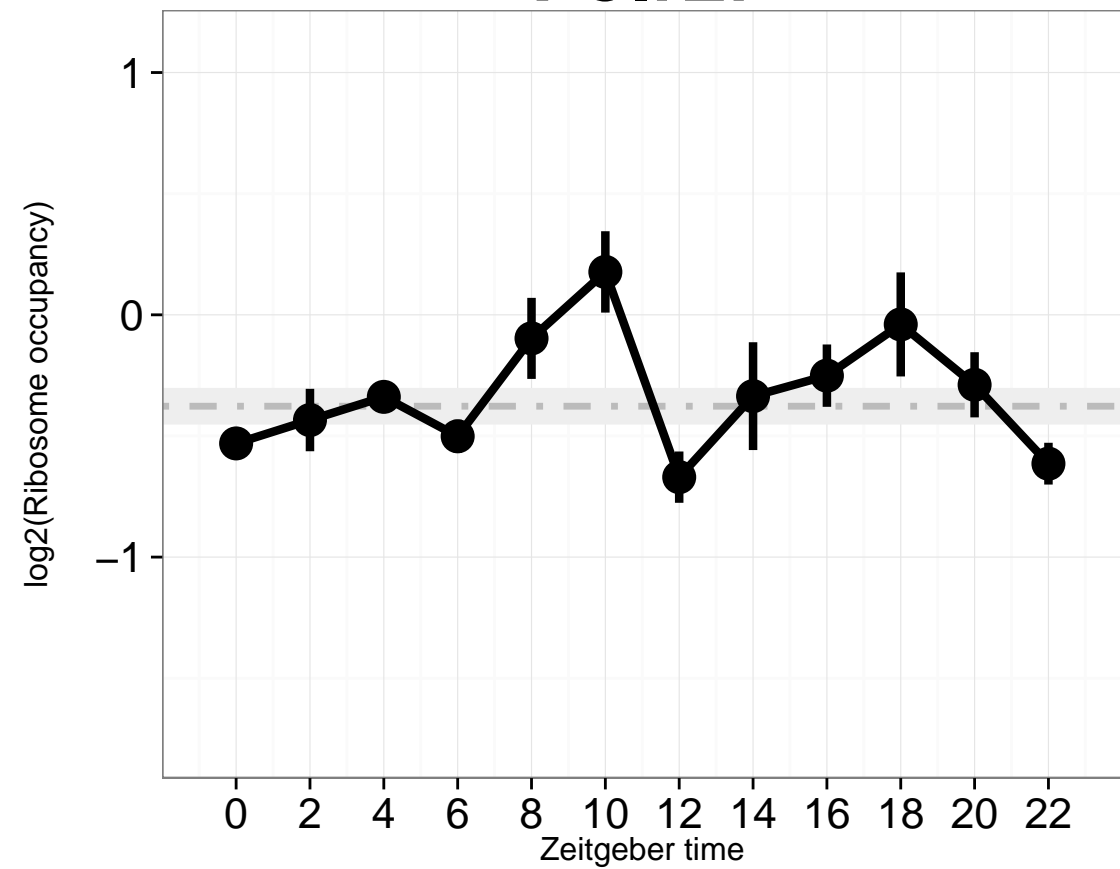

Supplement: SuppDataset_1.zip [file Polr2f_set_A.pdf › Supplemental Dataset 1/A-mRNA_nonrhyth_translation_nonrhyth/Polr2f_set_A.pdf]

## Polr2g

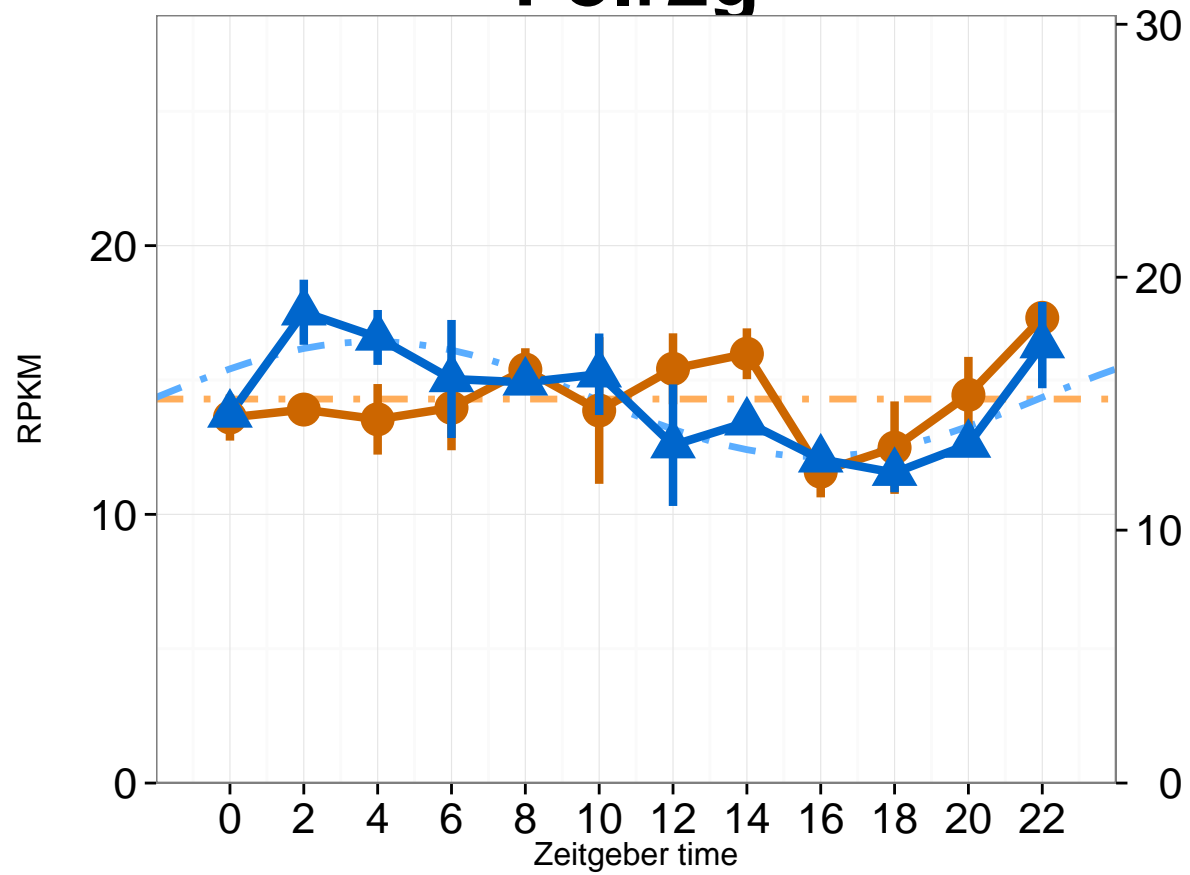

## Polr2g

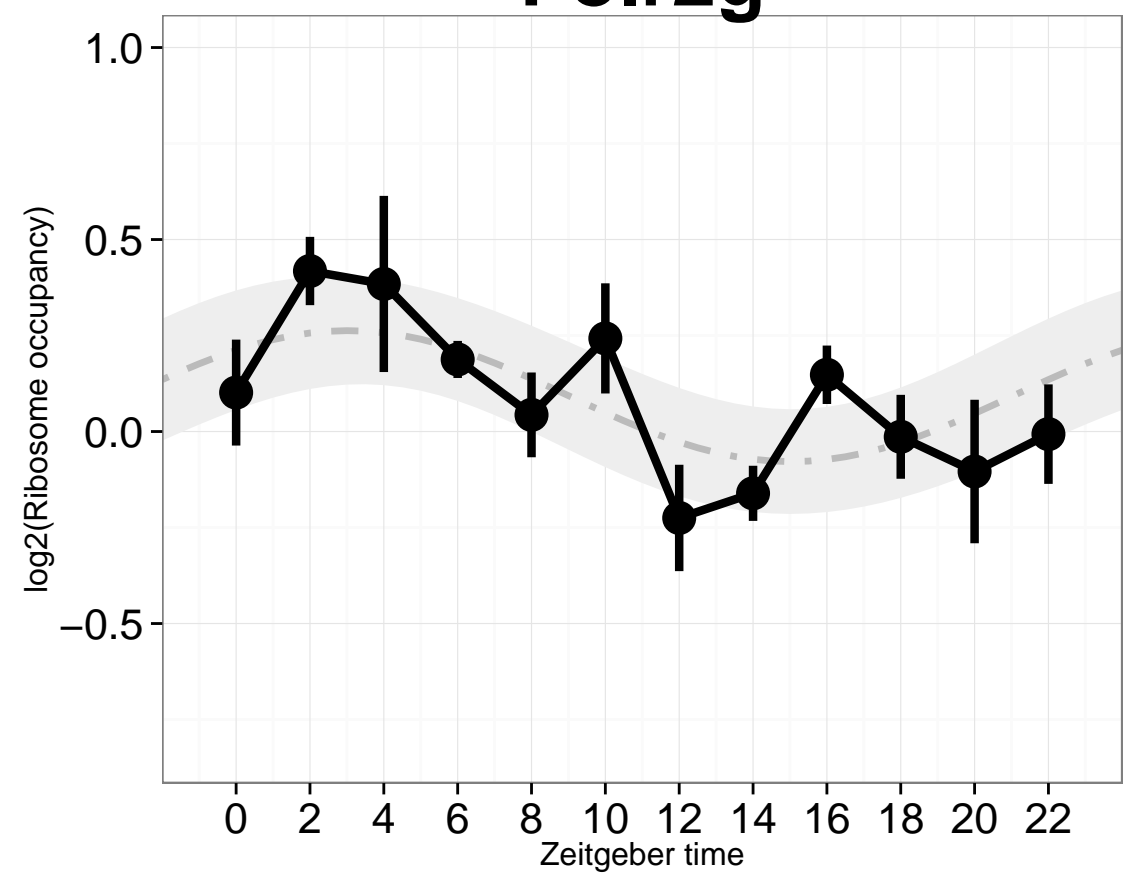

Supplement: SuppDataset_1.zip [file Polr2g_set_A.pdf › Supplemental Dataset 1/A-mRNA_nonrhyth_translation_nonrhyth/Polr2g_set_A.pdf]
