# Supplementary figures and images for: Ribosome profiling reveals the rhythmic liver translatome and circadian clock regulation by upstream open reading frames (part 99 of 113)
Source: HighWire-hosted journal article supplement (doi:10.1101/gr.195404.115), 2015-10-20

# Pmf1

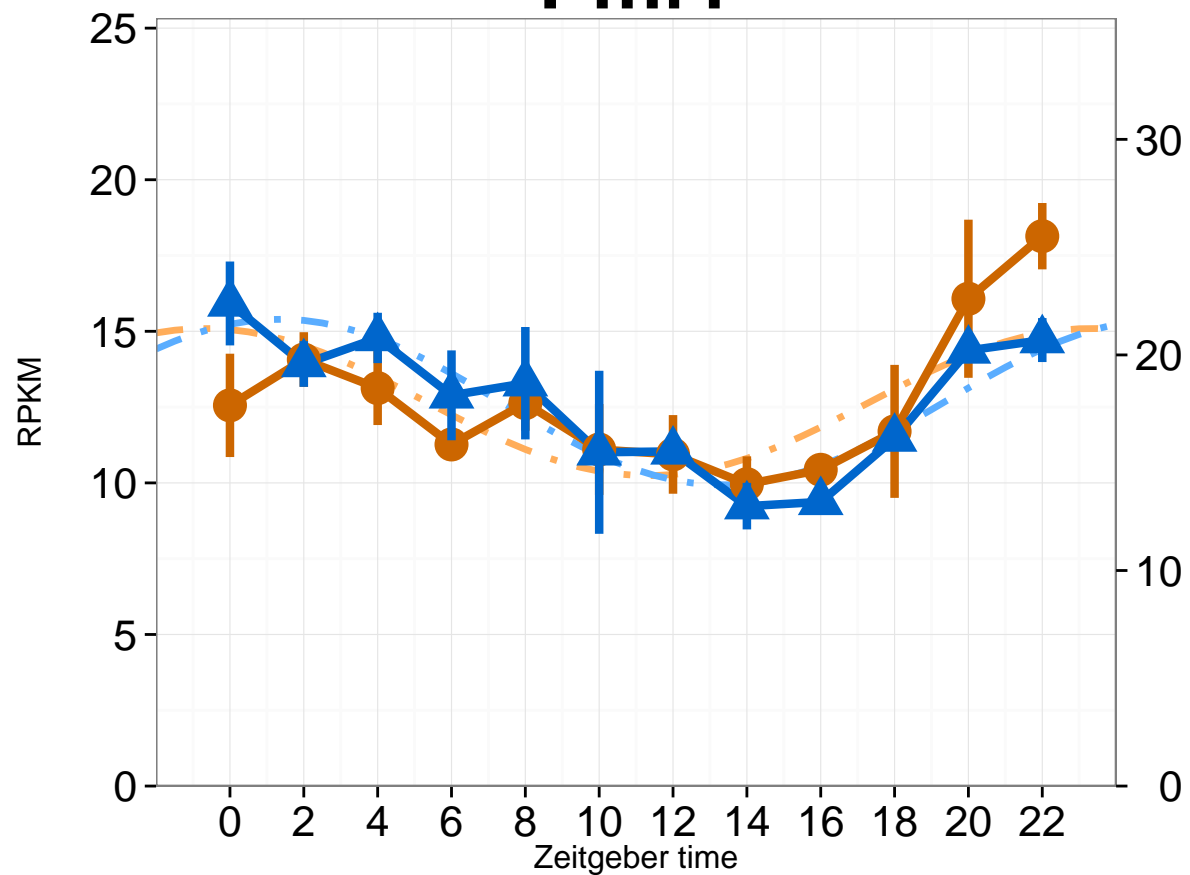

# Pmf1

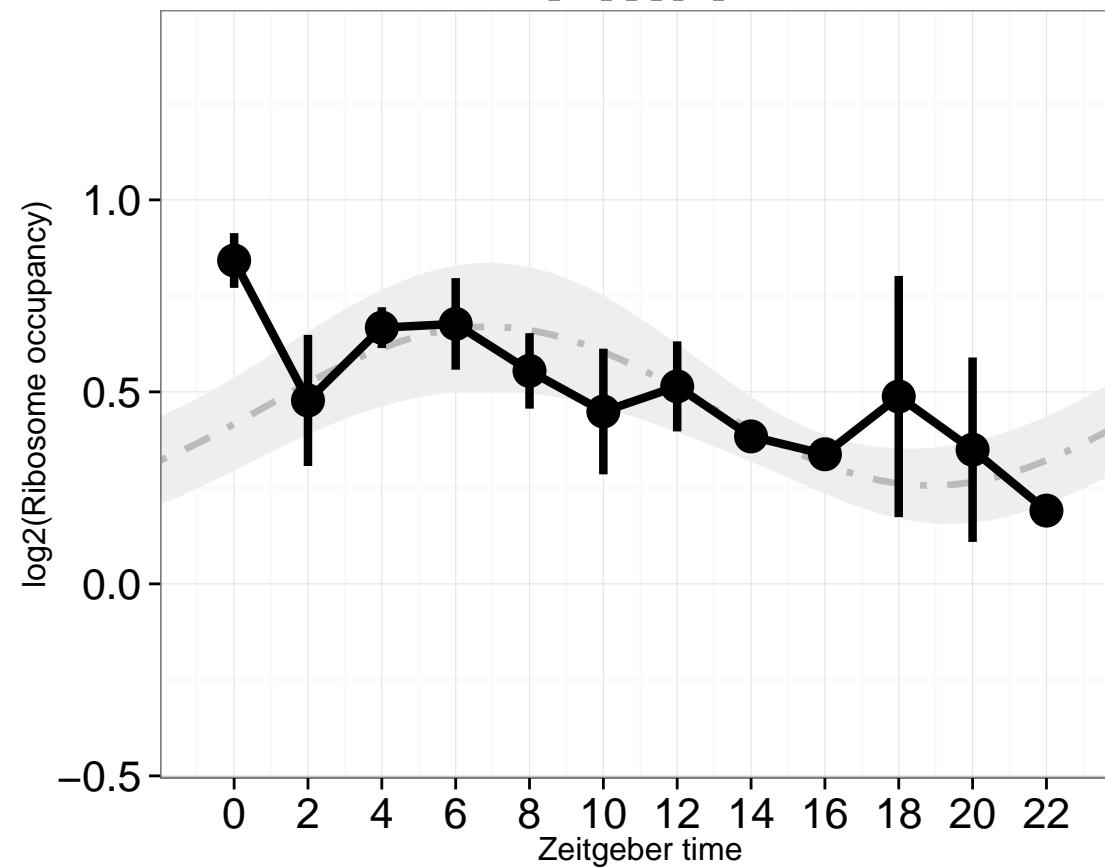

Supplement: SuppDataset_1.zip [file Pmf1_set_C.pdf › Supplemental Dataset 1/C-mRNA_nonrhythm_translation_rhyth/Pmf1_set_C.pdf]

## Pmm1

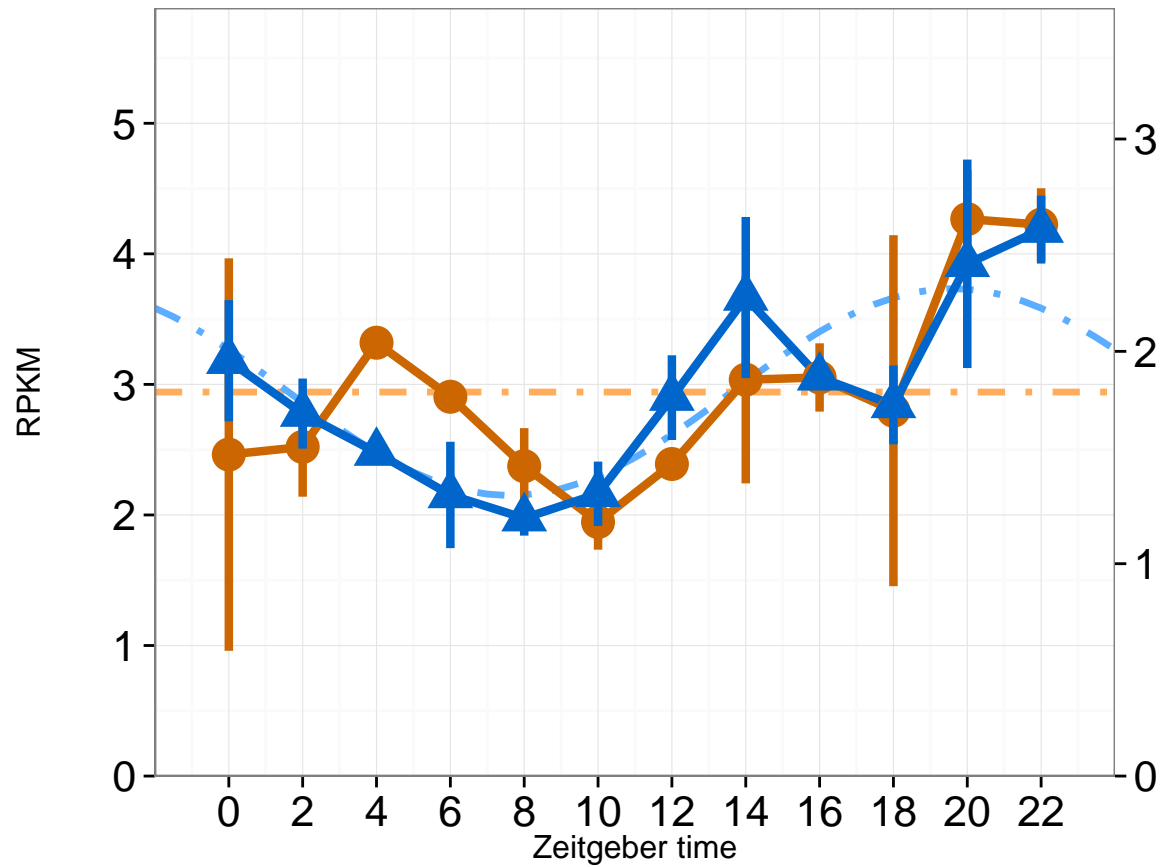

## Pmm1

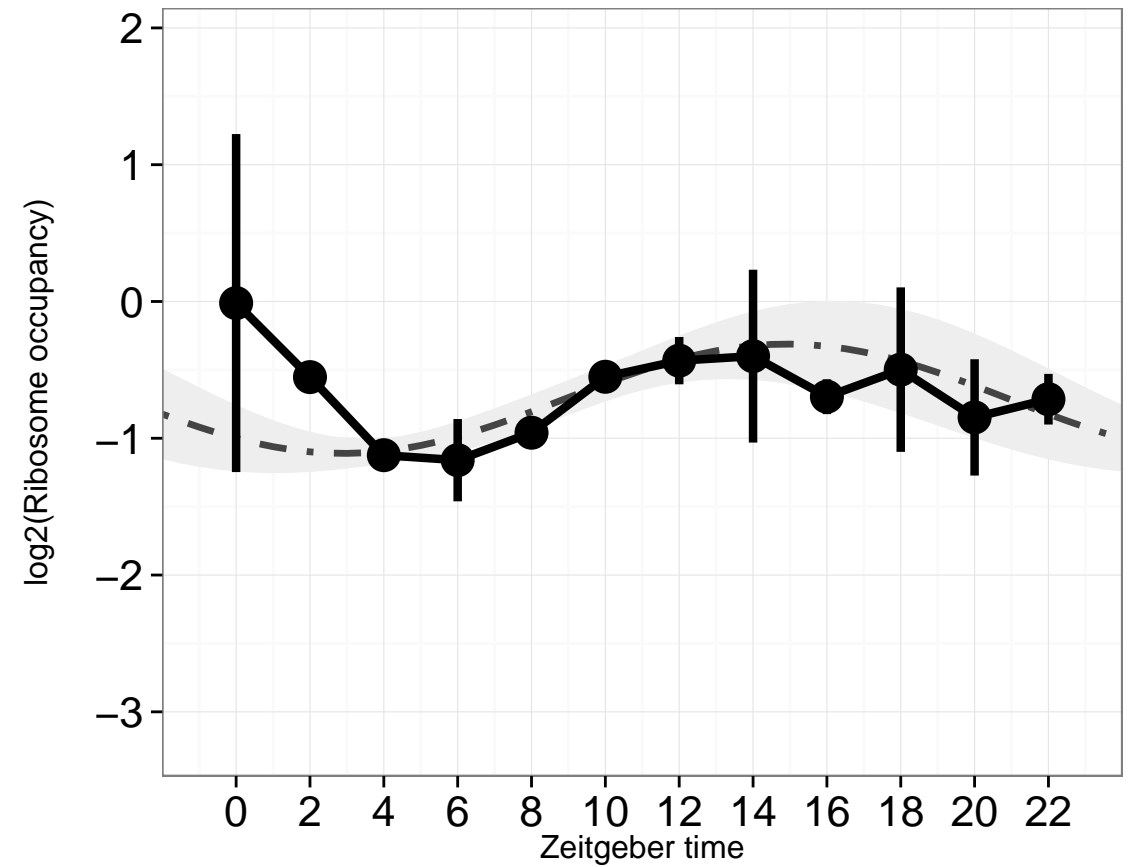

Supplement: SuppDataset_1.zip [file Pmm1_set_C.pdf › Supplemental Dataset 1/C-mRNA_nonrhythm_translation_rhyth/Pmm1_set_C.pdf]

## Pnn

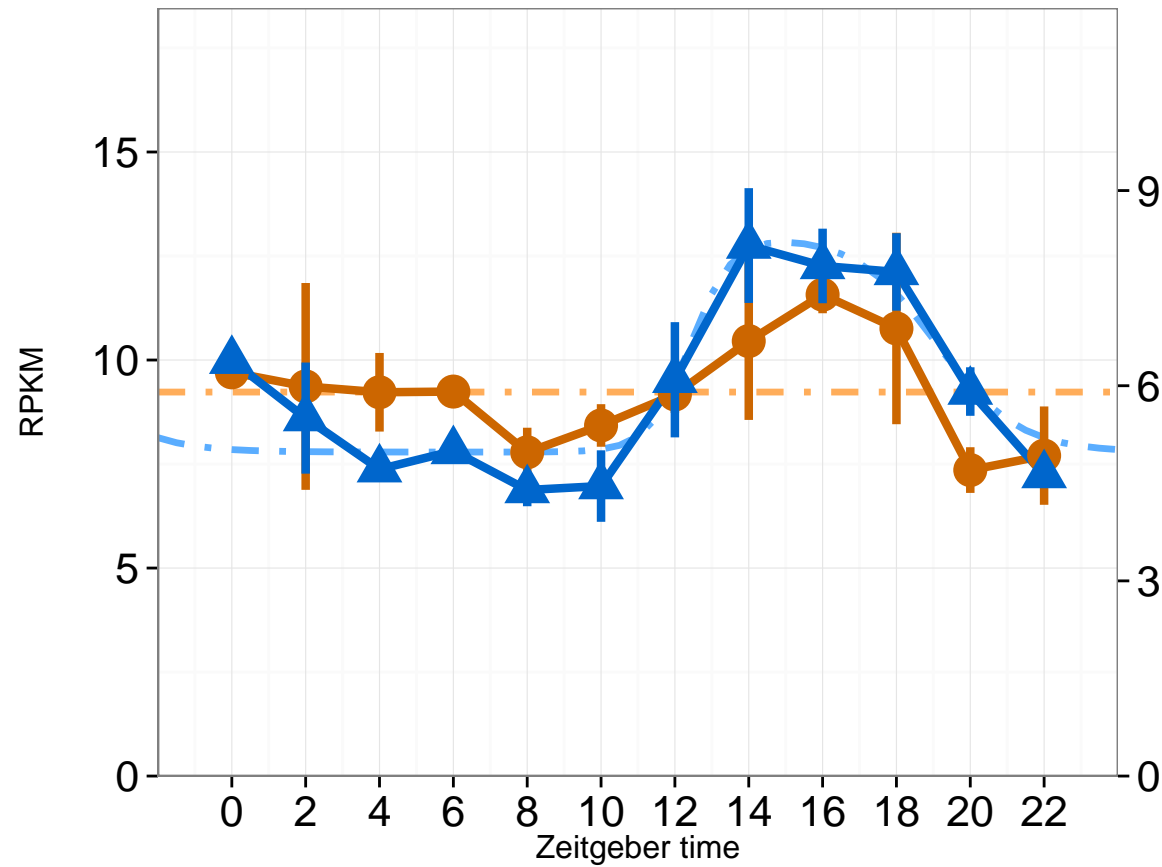

## Pnn

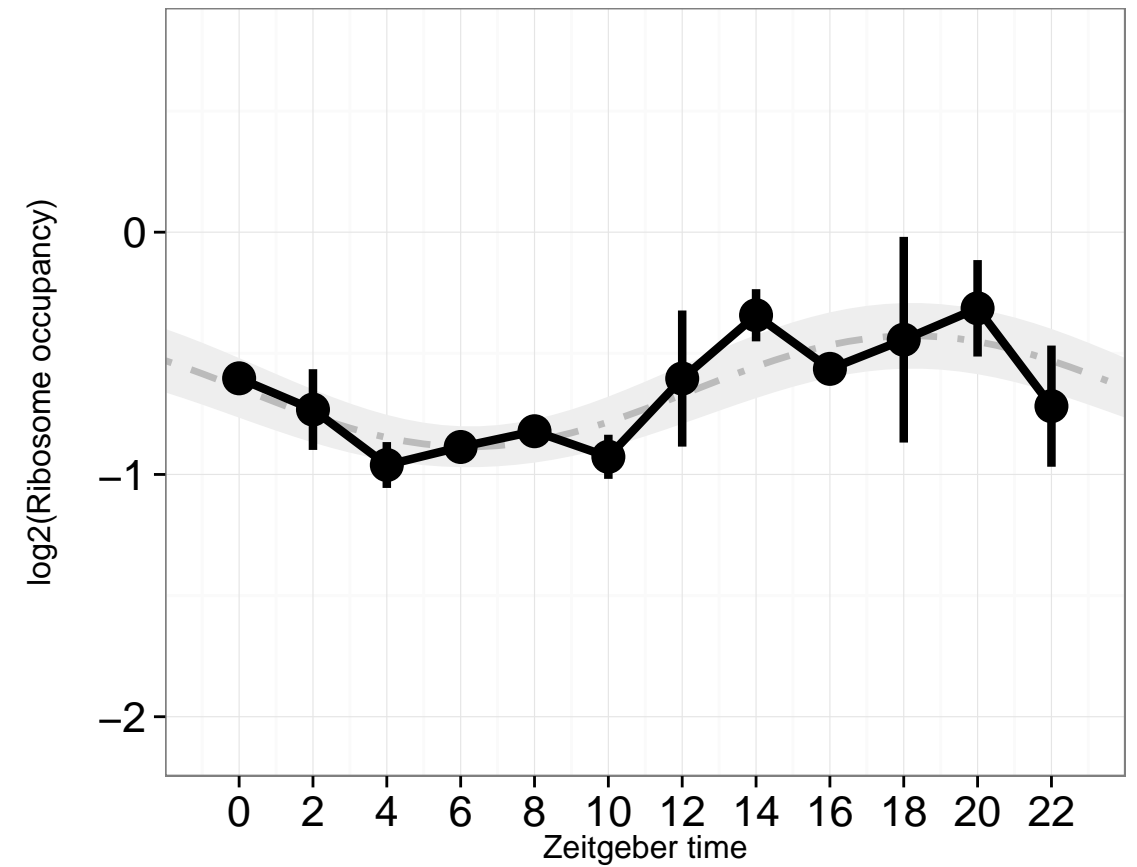

Supplement: SuppDataset_1.zip [file Pnn_set_C.pdf › Supplemental Dataset 1/C-mRNA_nonrhythm_translation_rhyth/Pnn_set_C.pdf]

## Pole4

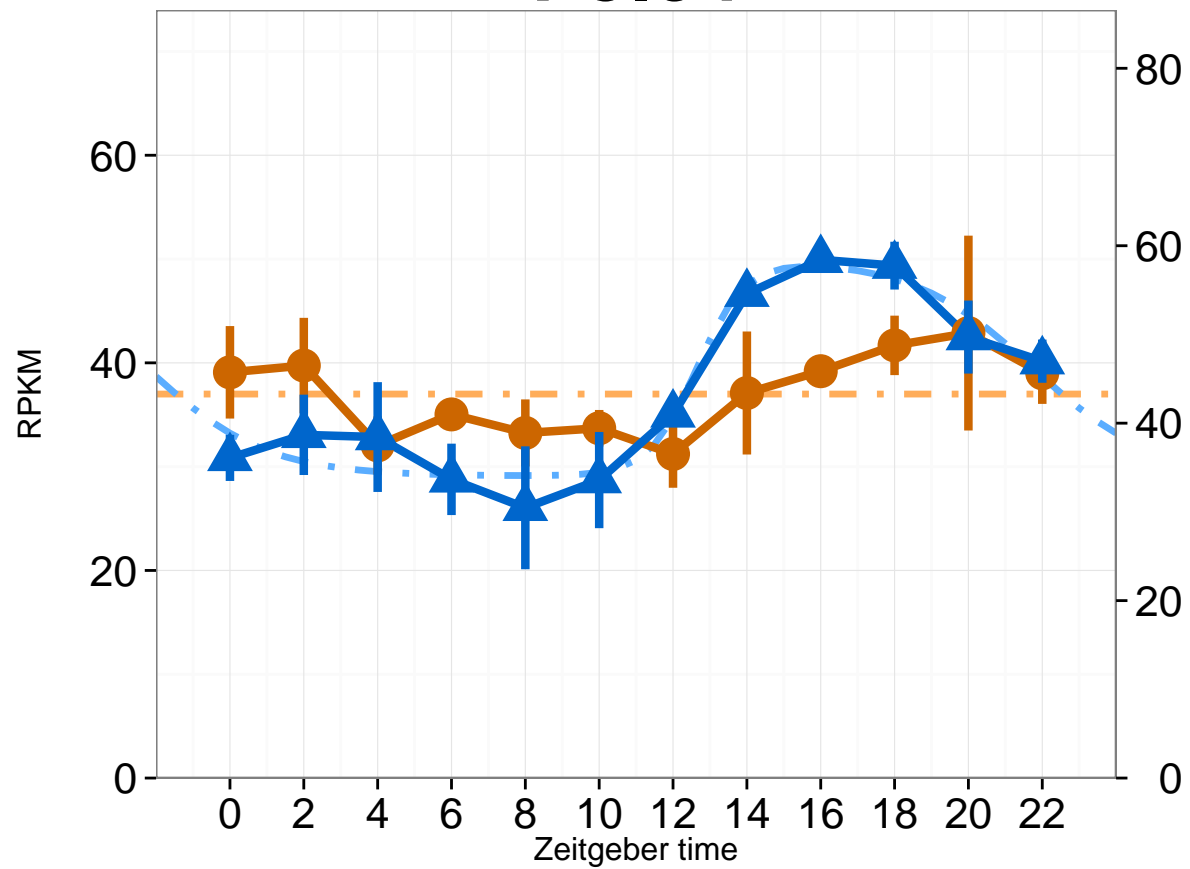

## Pole4

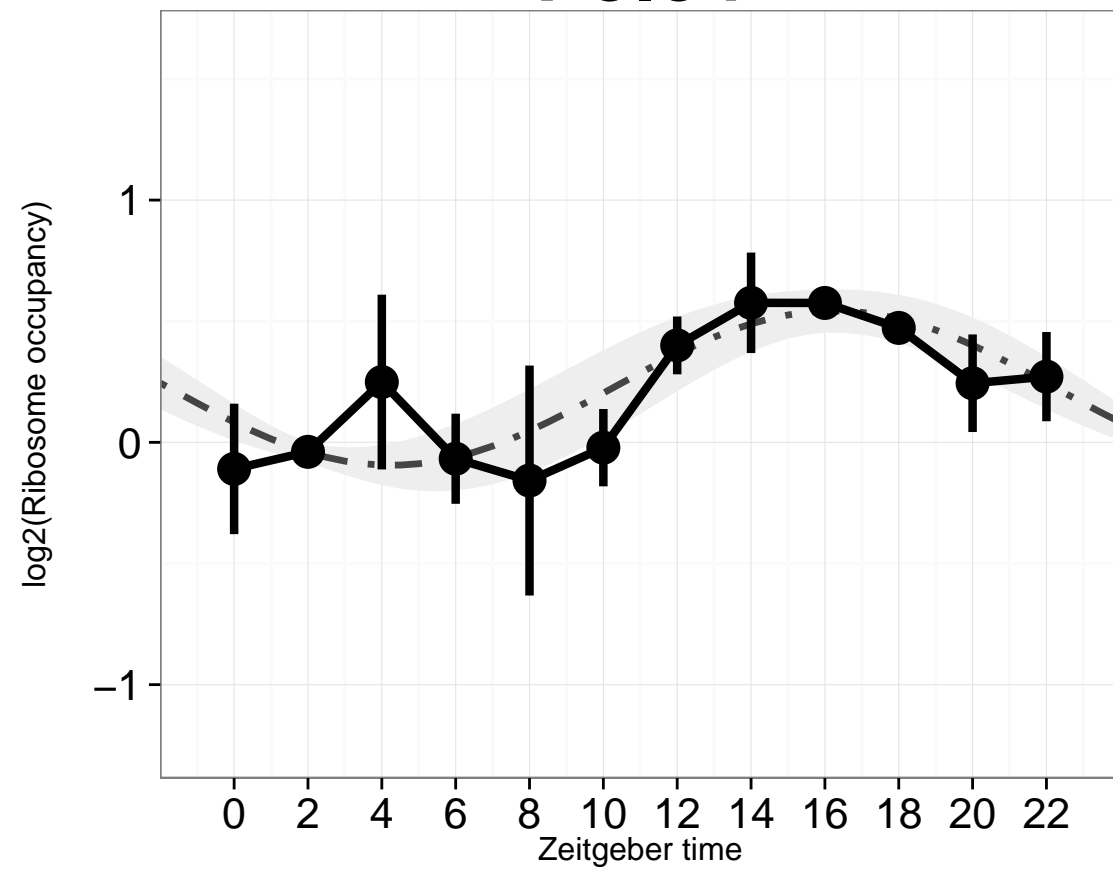

Supplement: SuppDataset_1.zip [file Pole4_set_C.pdf › Supplemental Dataset 1/C-mRNA_nonrhythm_translation_rhyth/Pole4_set_C.pdf]

# Polr1a

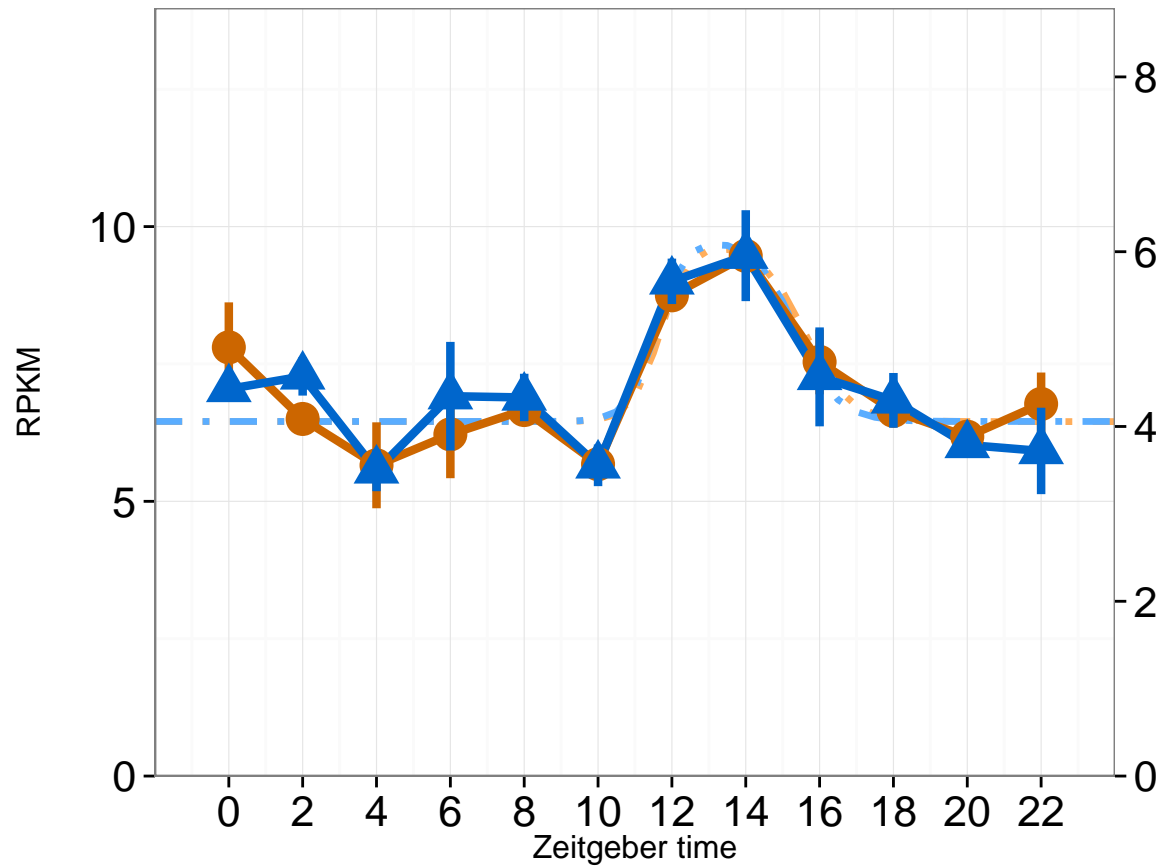

# Polr1a

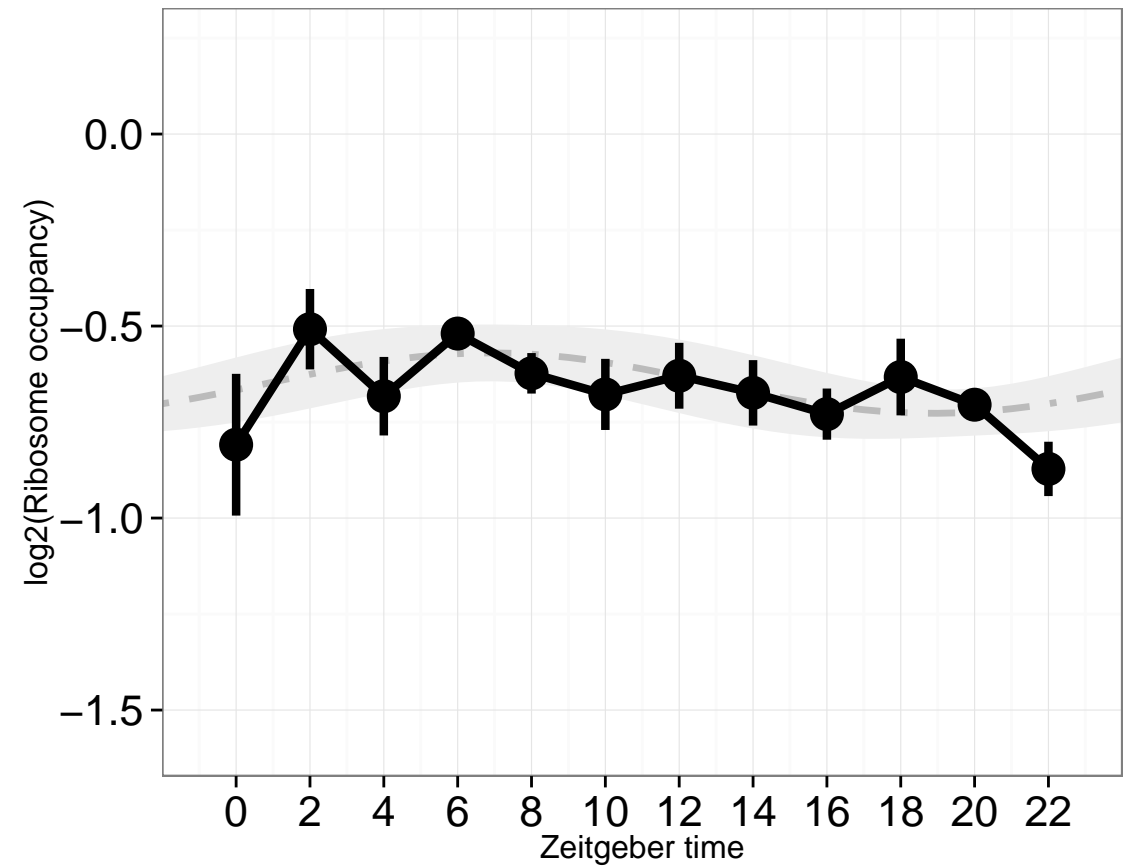

Supplement: SuppDataset_1.zip [file Polr1a_set_C.pdf › Supplemental Dataset 1/C-mRNA_nonrhythm_translation_rhyth/Polr1a_set_C.pdf]

## Porcn

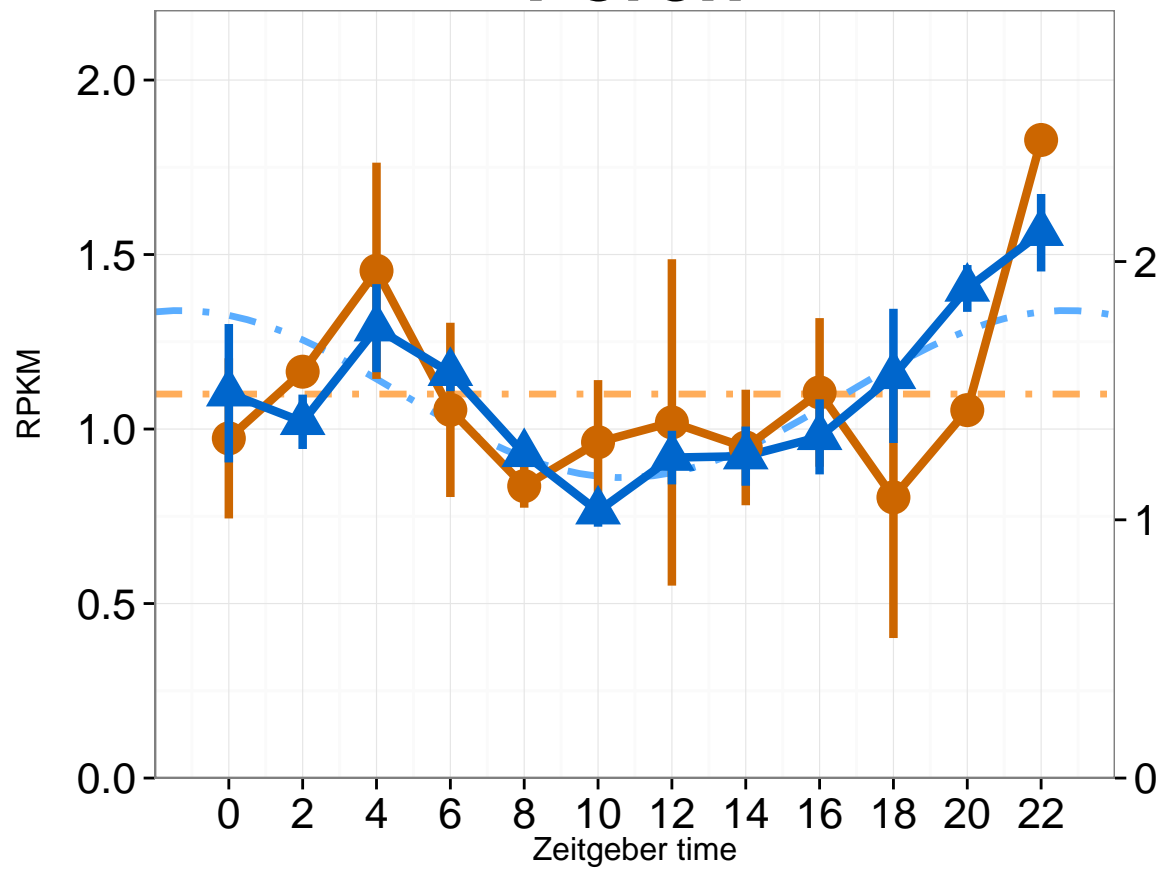

## Porcn

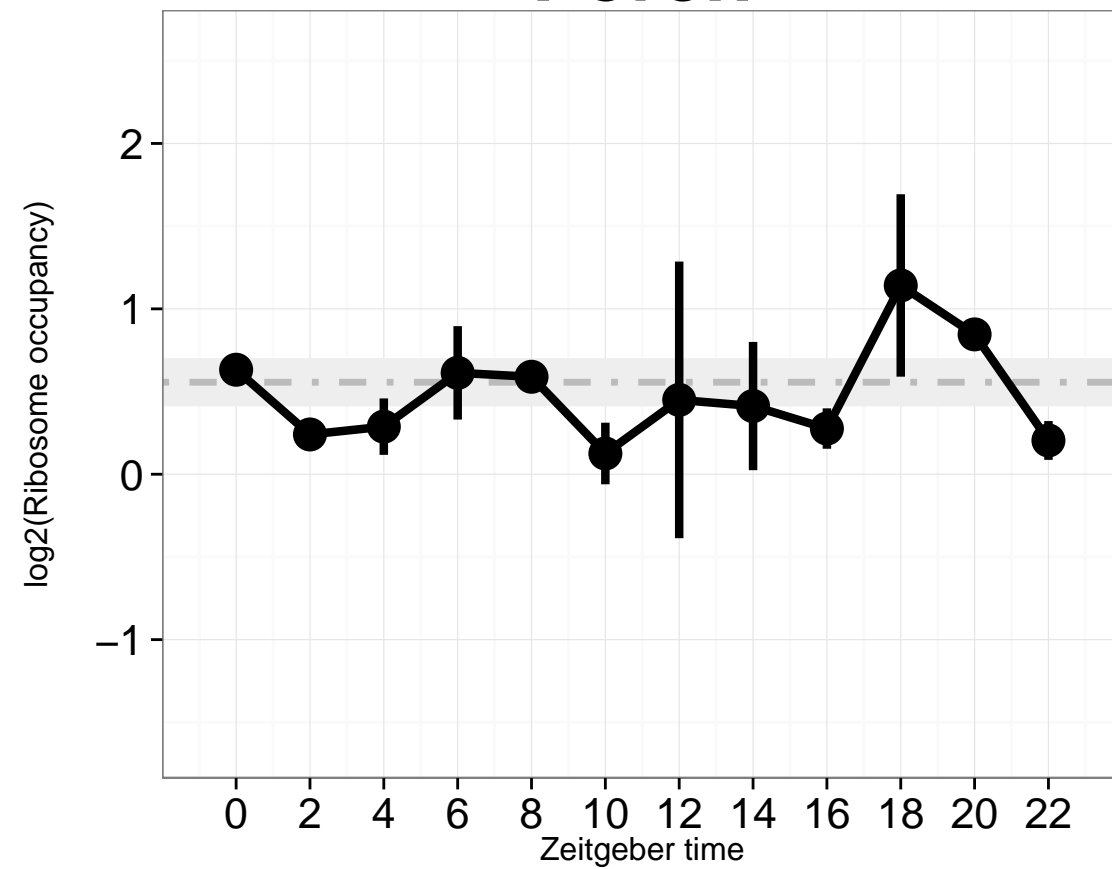

Supplement: SuppDataset_1.zip [file Porcn_set_C.pdf › Supplemental Dataset 1/C-mRNA_nonrhythm_translation_rhyth/Porcn_set_C.pdf]

# Ppap2c

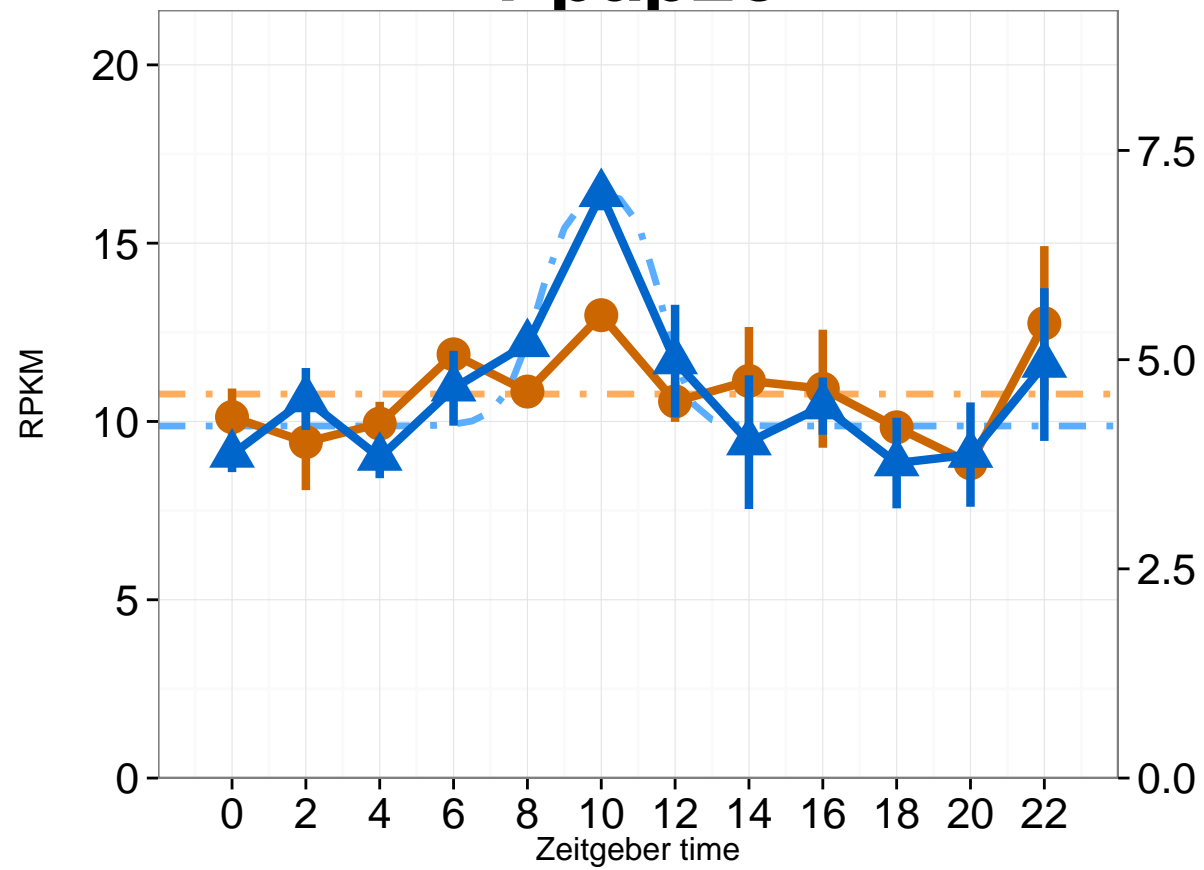

# Ppap2c

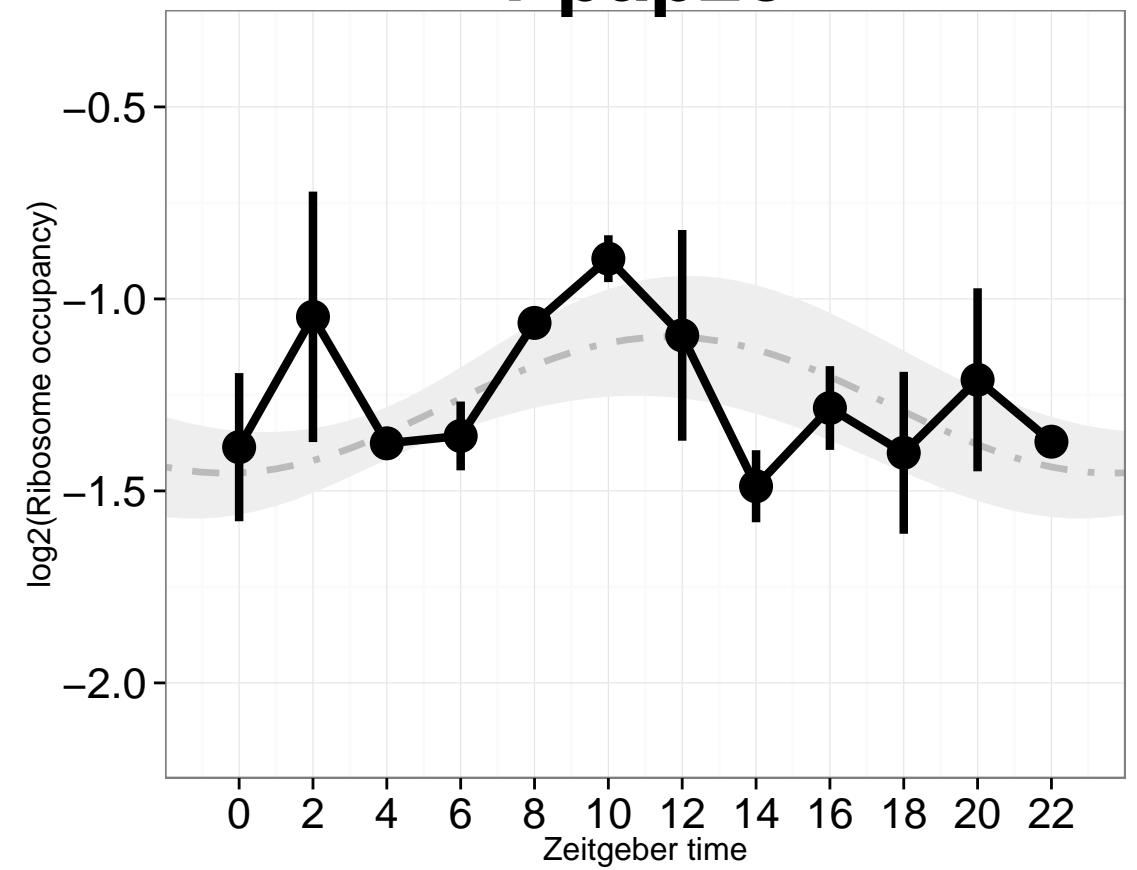

Supplement: SuppDataset_1.zip [file Ppap2c_set_C.pdf › Supplemental Dataset 1/C-mRNA_nonrhythm_translation_rhyth/Ppap2c_set_C.pdf]

## Ppara

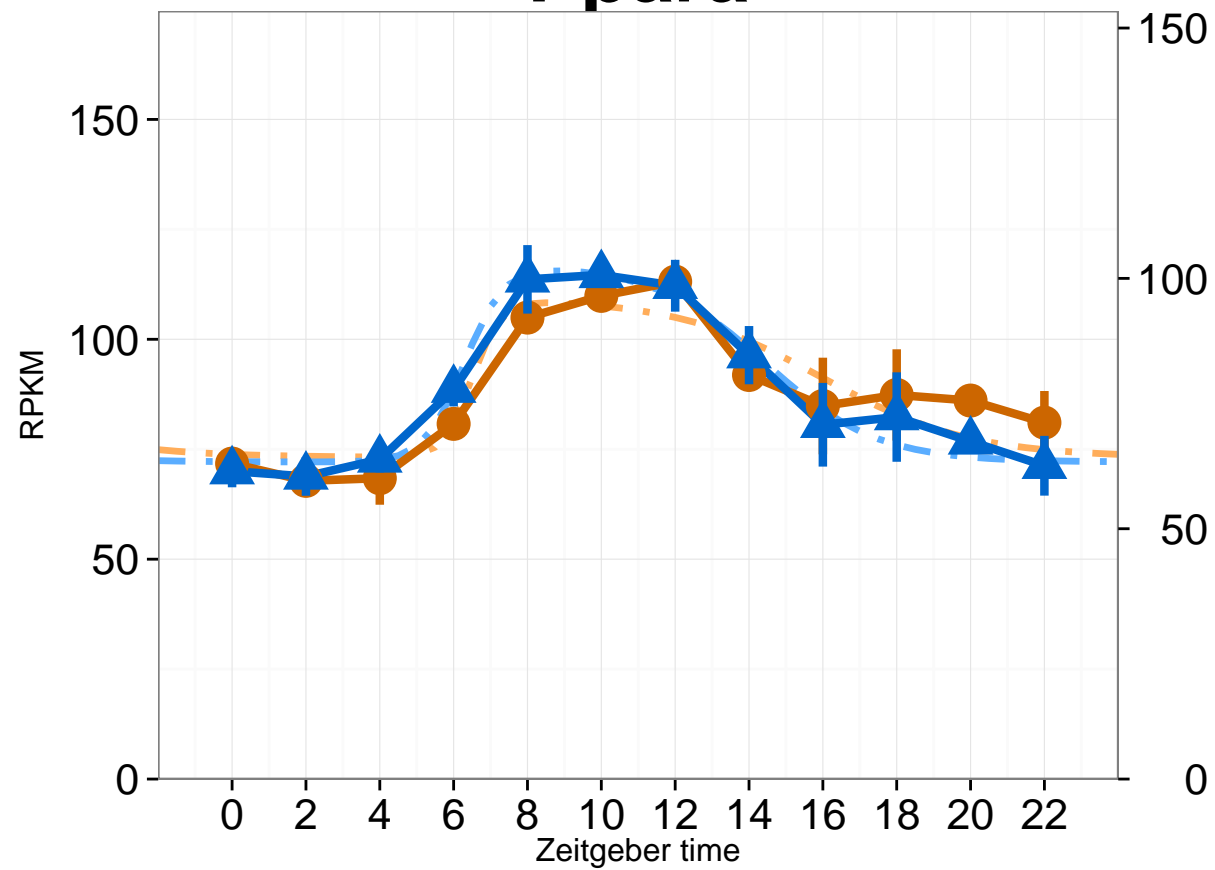

## Ppara

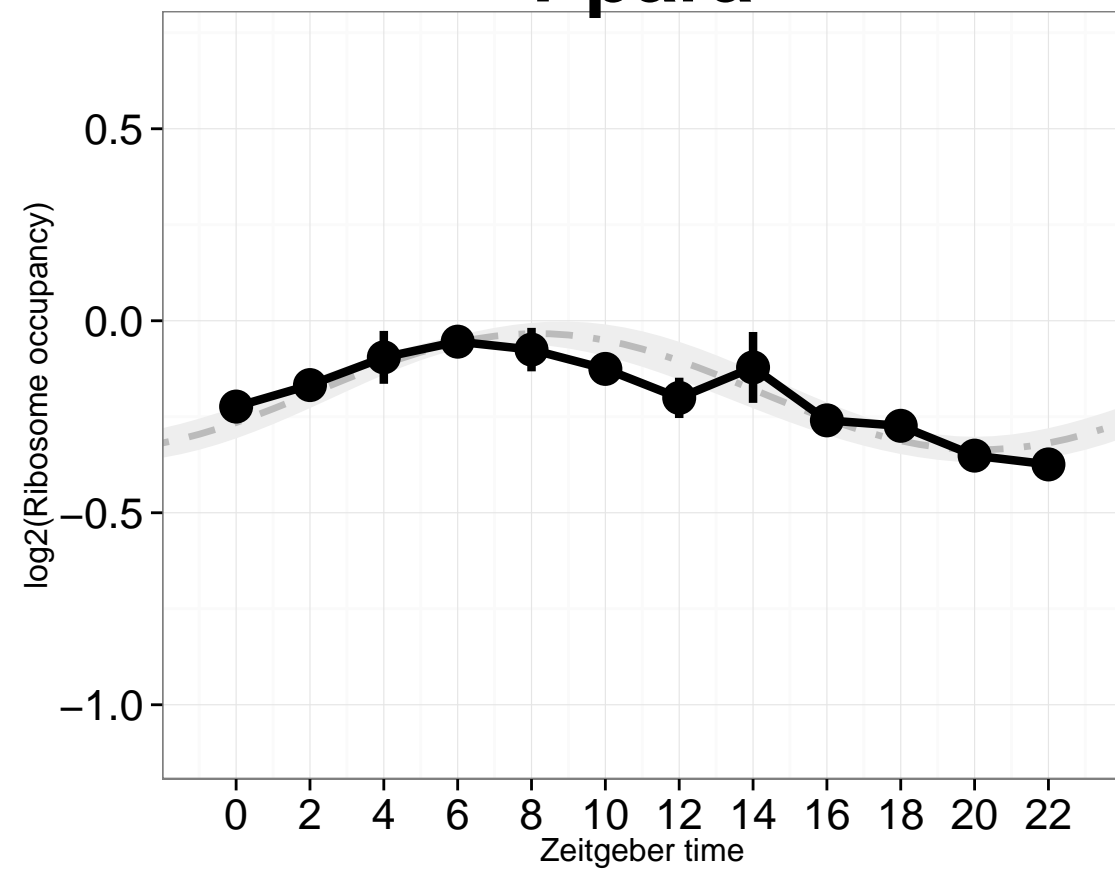

Supplement: SuppDataset_1.zip [file Ppara_set_C.pdf › Supplemental Dataset 1/C-mRNA_nonrhythm_translation_rhyth/Ppara_set_C.pdf]

## Ppcdc

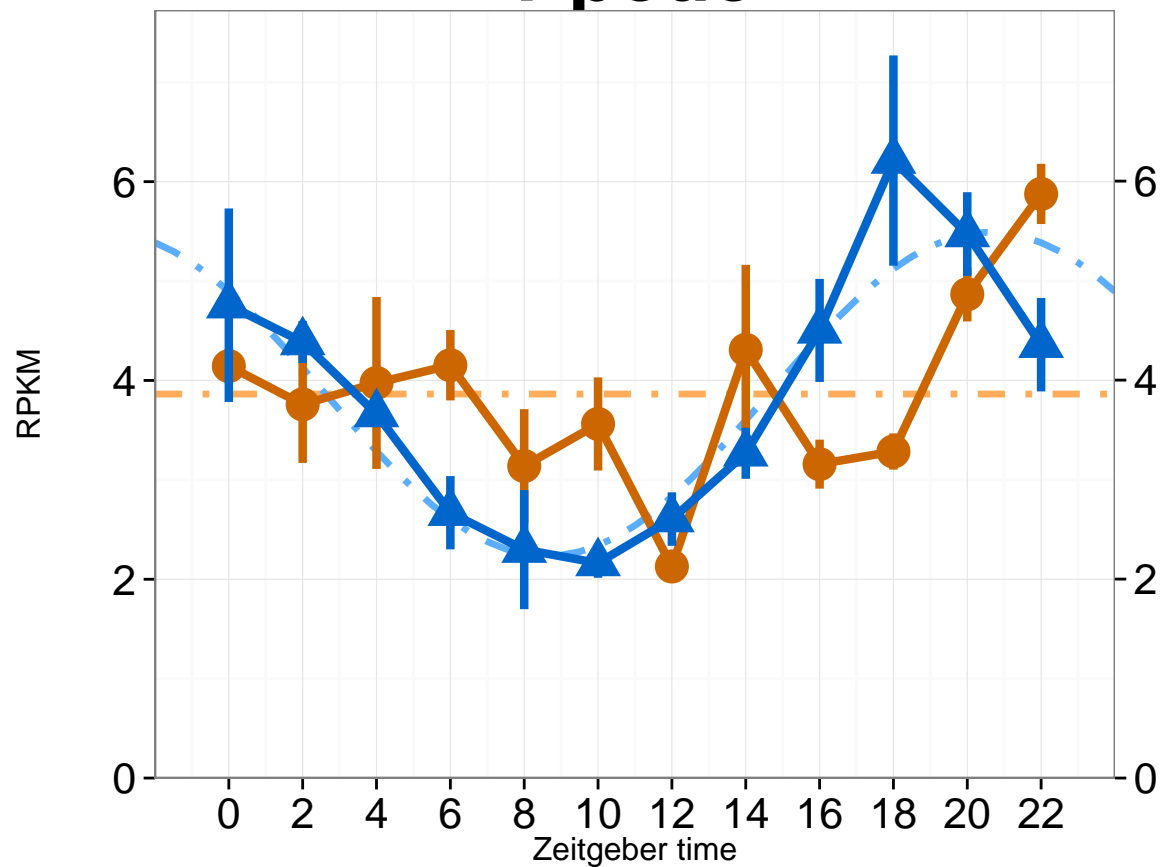

## Ppcdc

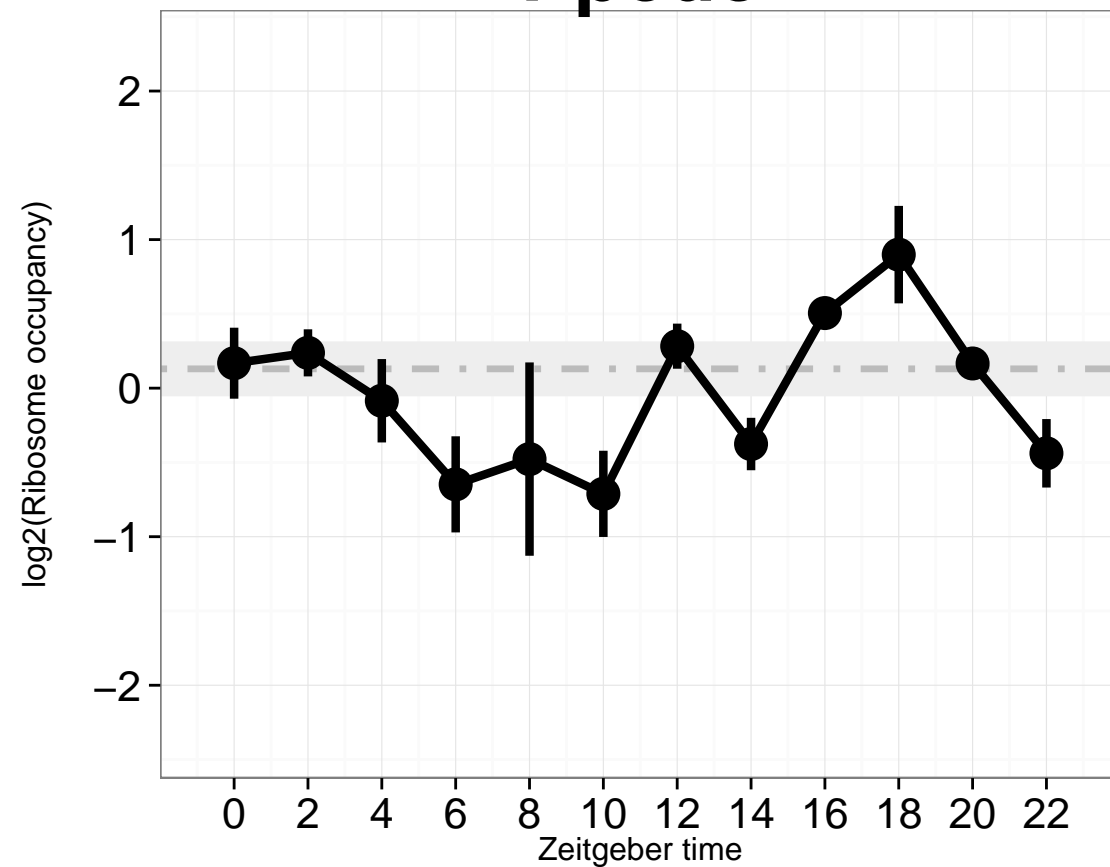

Supplement: SuppDataset_1.zip [file Ppcdc_set_C.pdf › Supplemental Dataset 1/C-mRNA_nonrhythm_translation_rhyth/Ppcdc_set_C.pdf]

## Ppfibp2

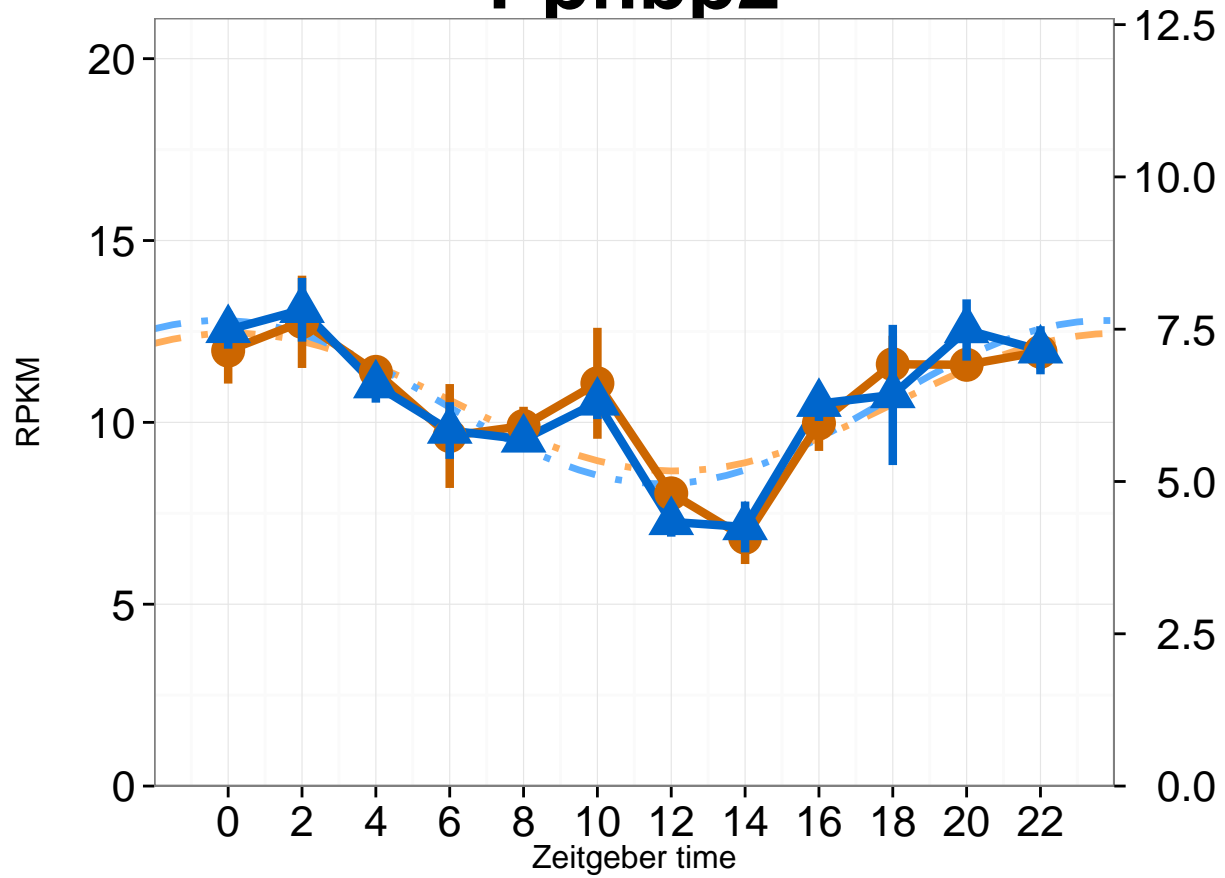

## Ppfibp2

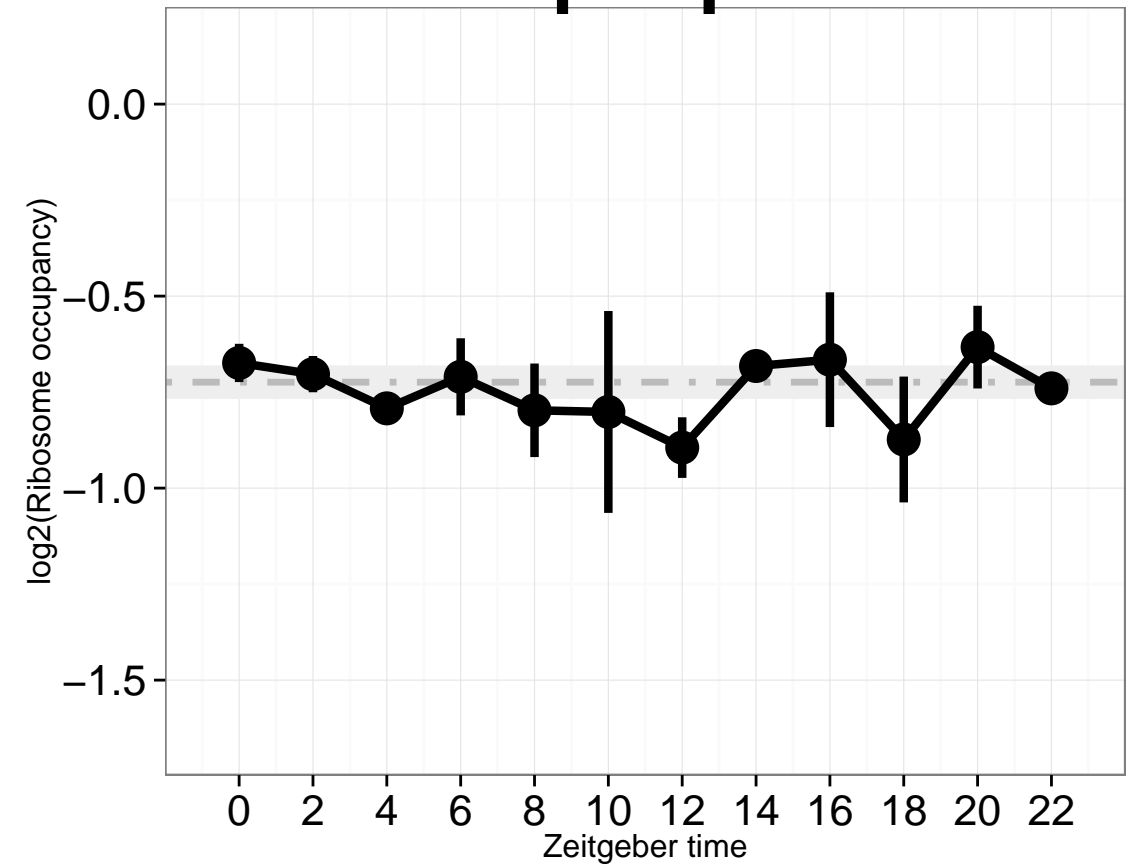

Supplement: SuppDataset_1.zip [file Ppfibp2_set_C.pdf › Supplemental Dataset 1/C-mRNA_nonrhythm_translation_rhyth/Ppfibp2_set_C.pdf]

# Ppp1r3e

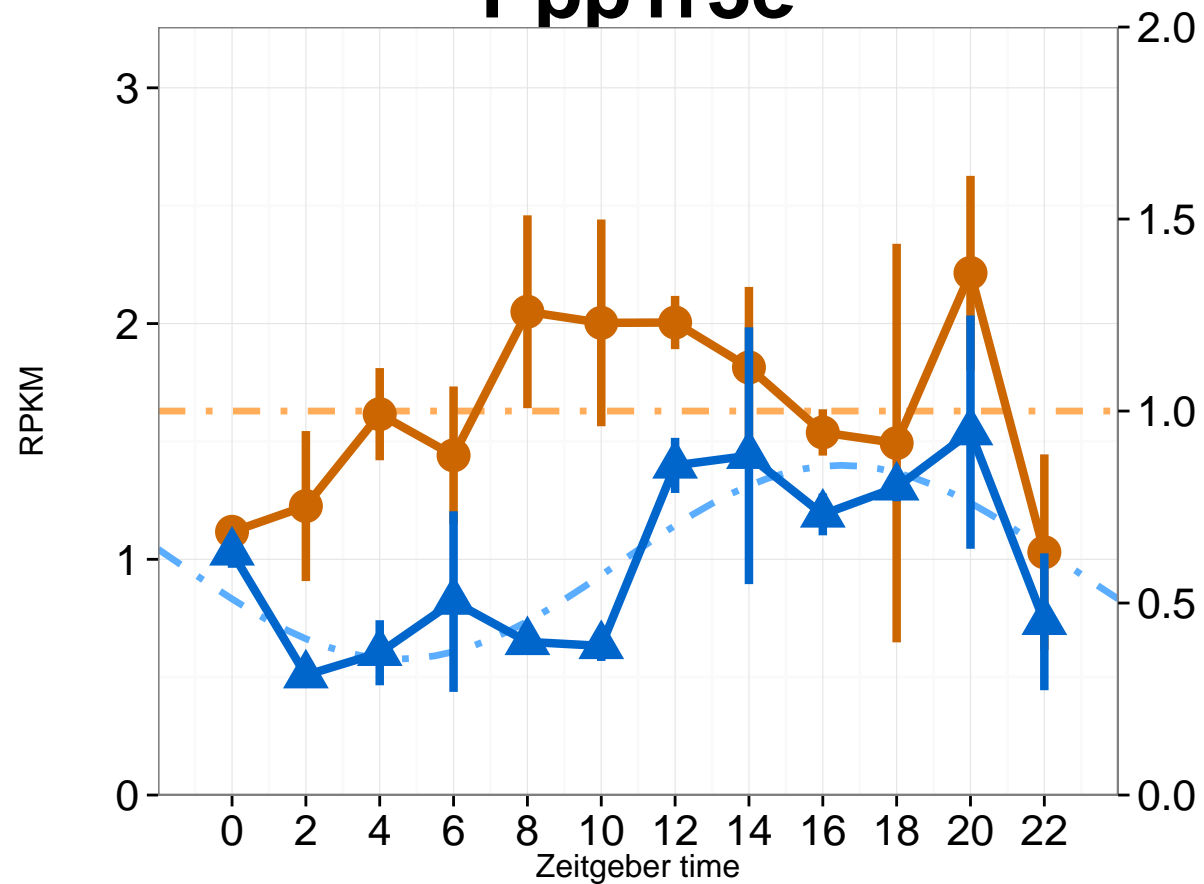

# Ppp1r3e

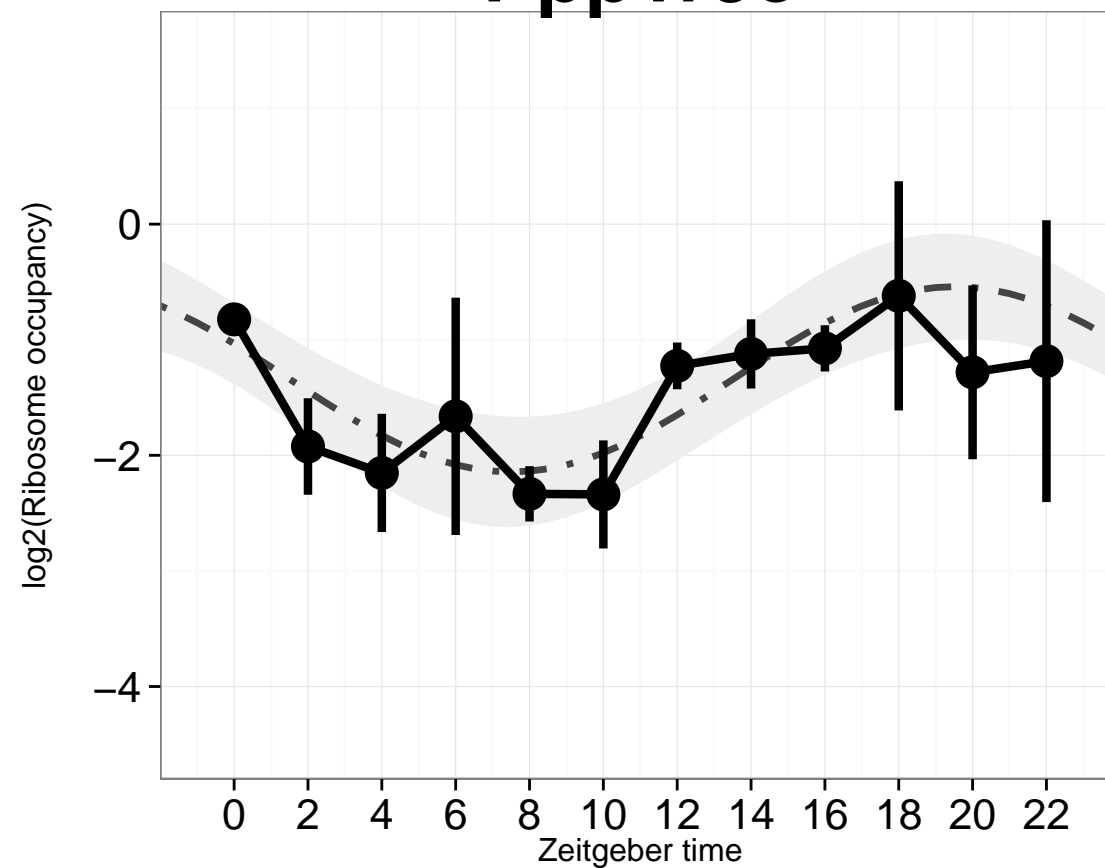

Supplement: SuppDataset_1.zip [file Ppp1r3e_set_C.pdf › Supplemental Dataset 1/C-mRNA_nonrhythm_translation_rhyth/Ppp1r3e_set_C.pdf]

# Ppp2r2d

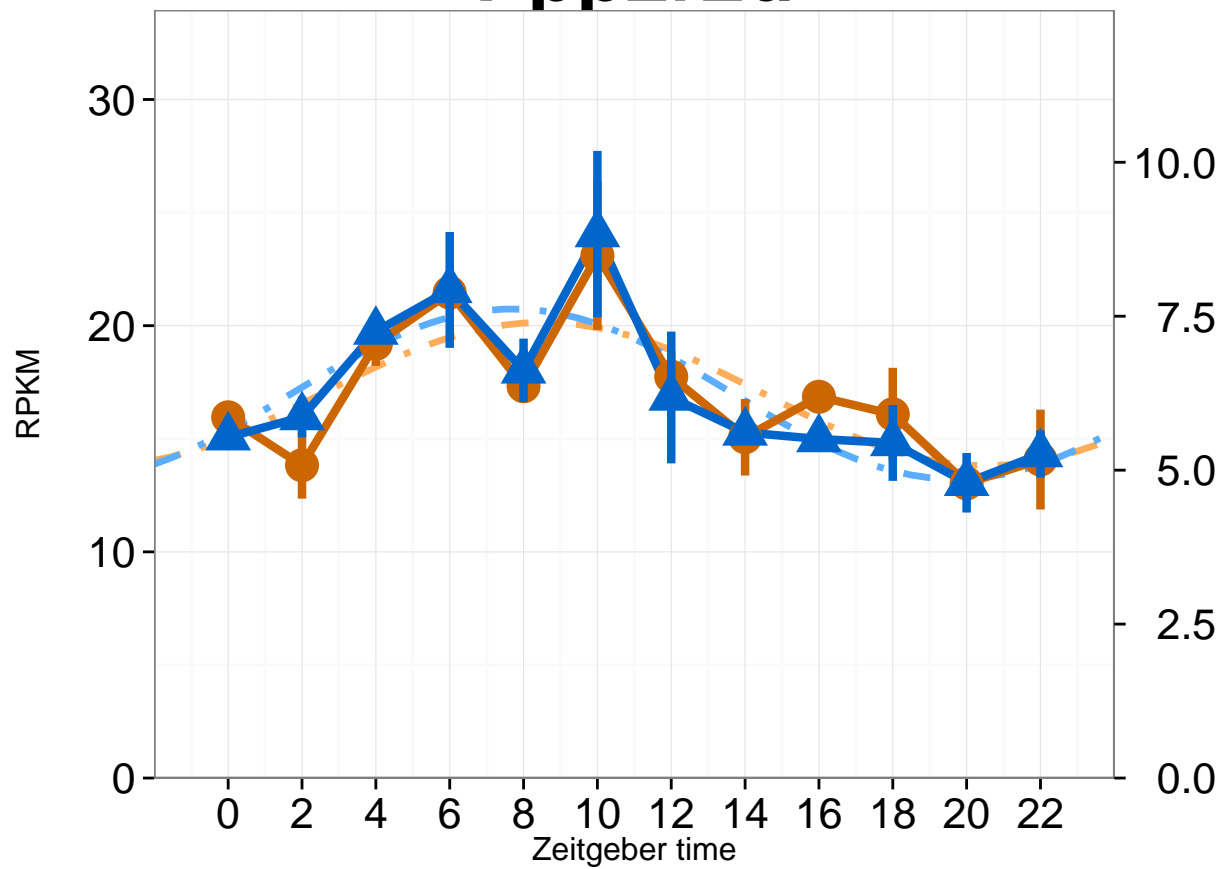

# Ppp2r2d

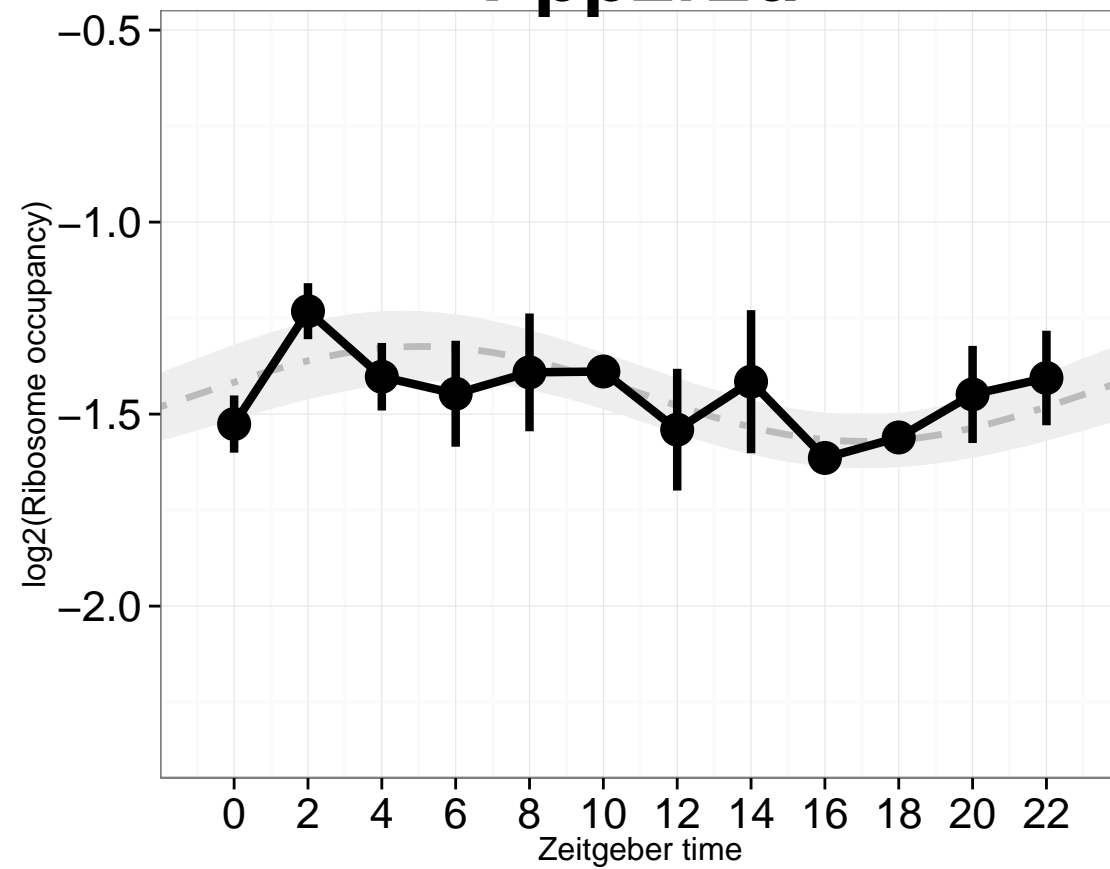

Supplement: SuppDataset_1.zip [file Ppp2r2d_set_C.pdf › Supplemental Dataset 1/C-mRNA_nonrhythm_translation_rhyth/Ppp2r2d_set_C.pdf]

# Pptc7

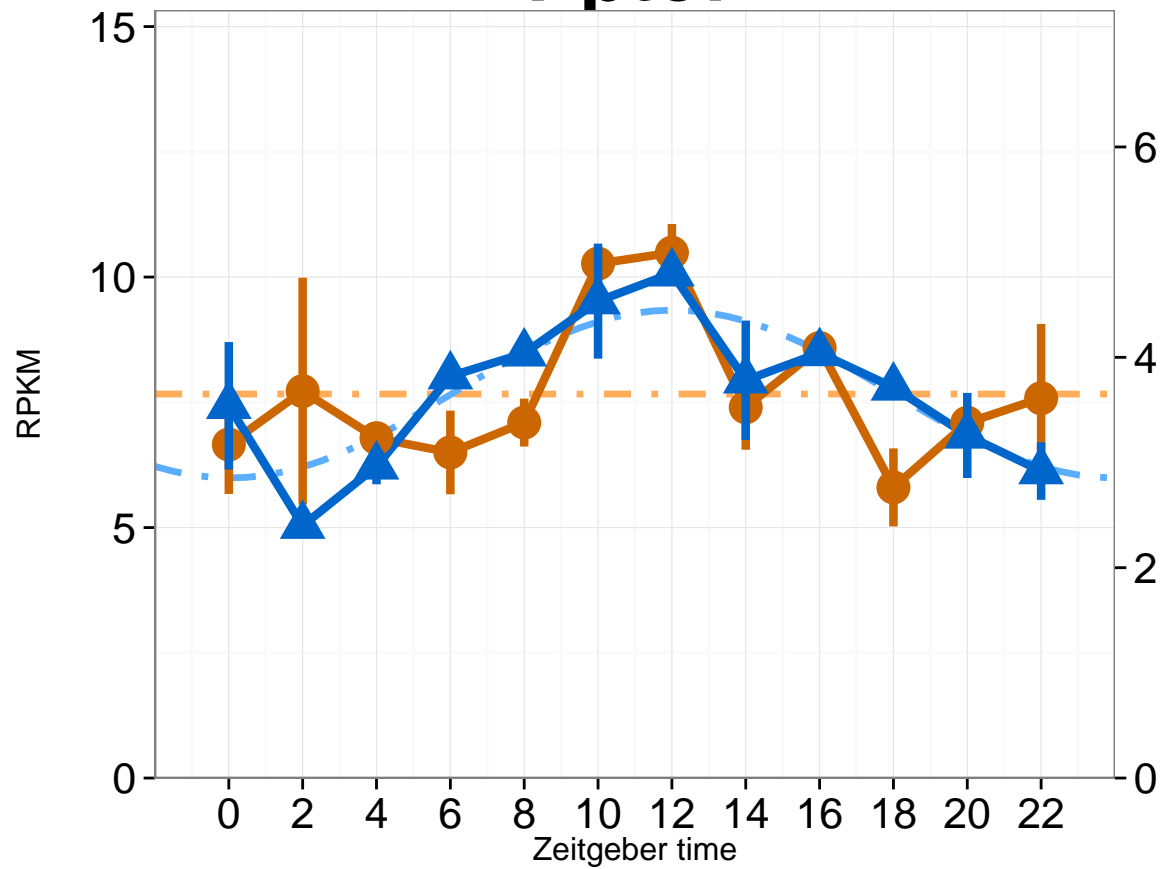

# Pptc7

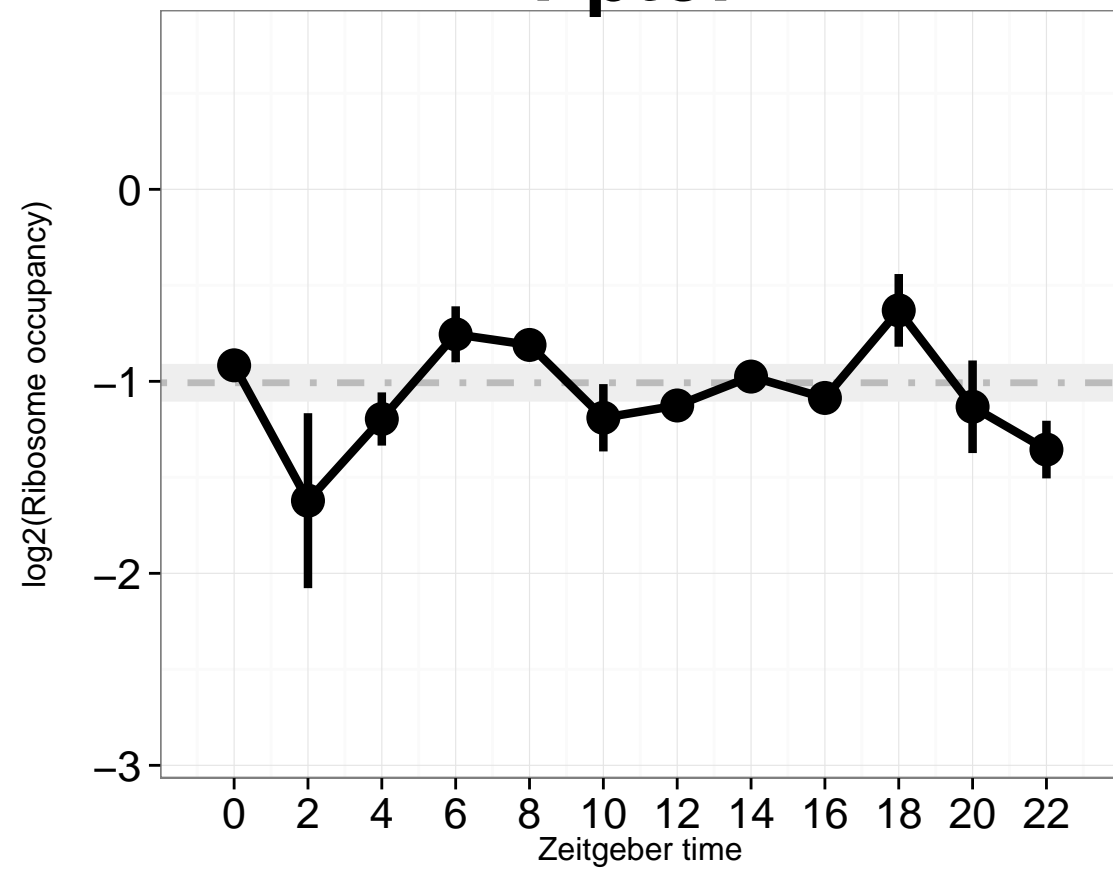

Supplement: SuppDataset_1.zip [file Pptc7_set_C.pdf › Supplemental Dataset 1/C-mRNA_nonrhythm_translation_rhyth/Pptc7_set_C.pdf]

# Pq1c2

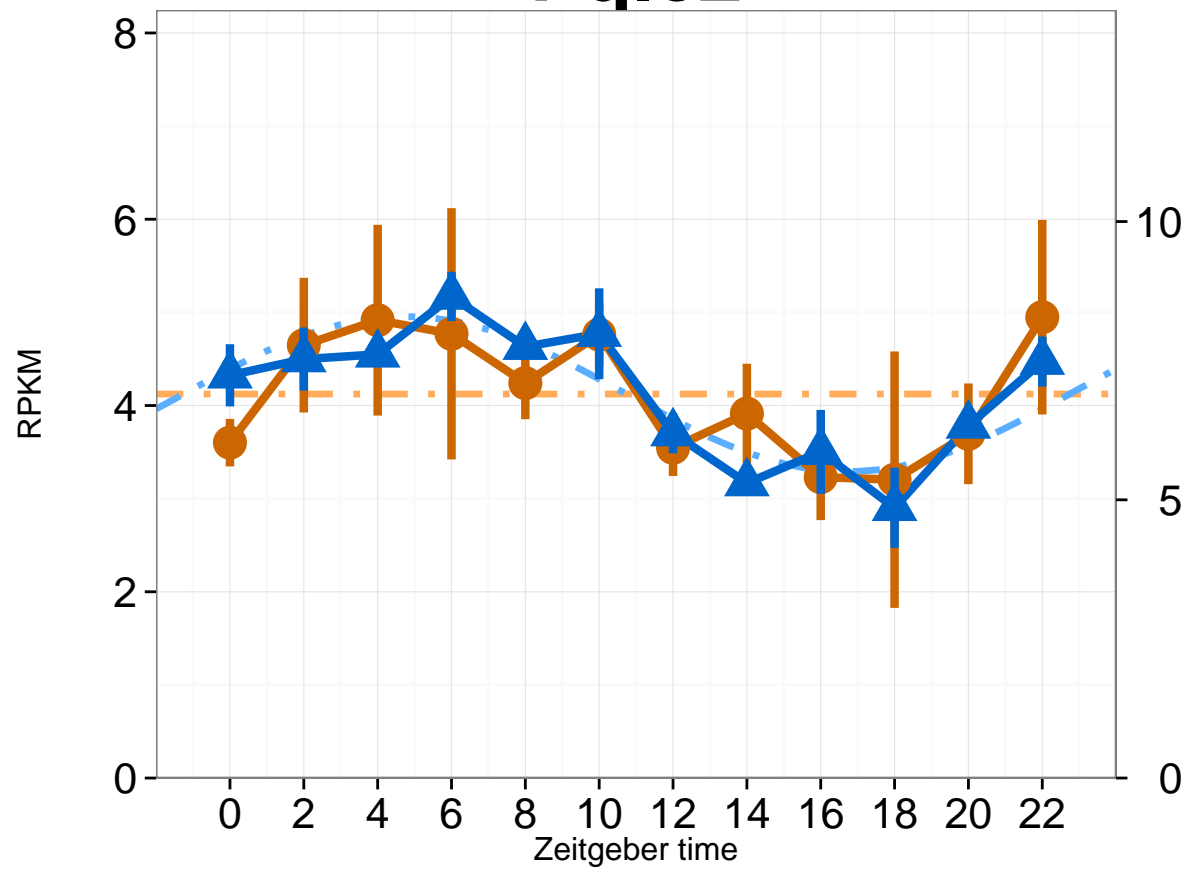

# Pq1c2

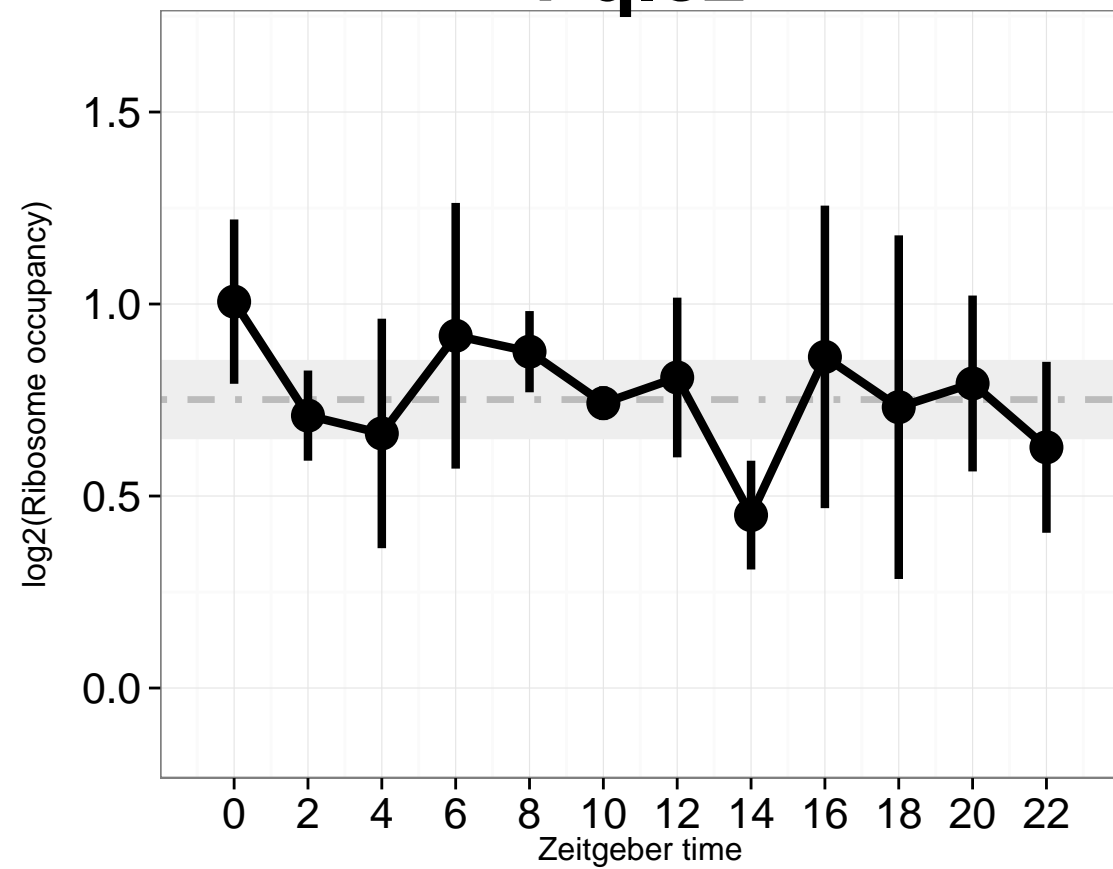

Supplement: SuppDataset_1.zip [file Pqlc2_set_C.pdf › Supplemental Dataset 1/C-mRNA_nonrhythm_translation_rhyth/Pqlc2_set_C.pdf]

## Prkar2a

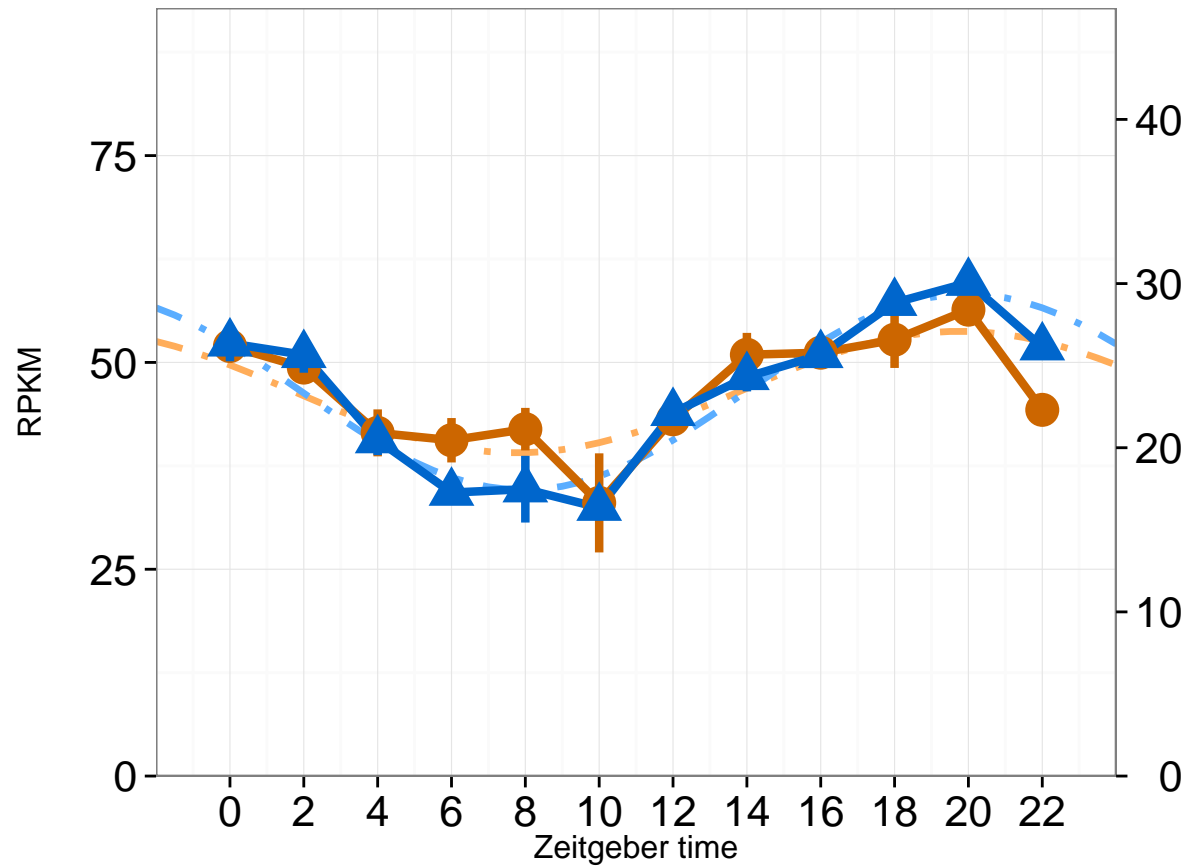

## Prkar2a

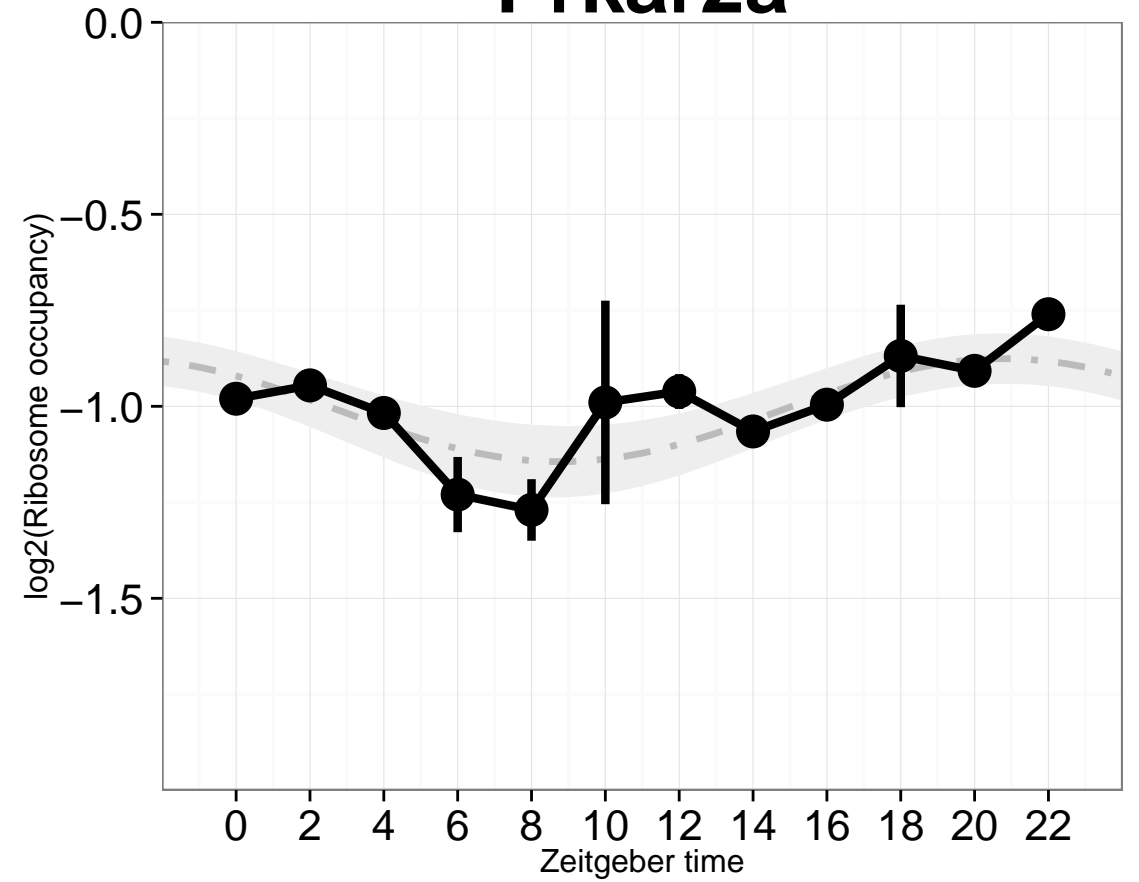

Supplement: SuppDataset_1.zip [file Prkar2a_set_C.pdf › Supplemental Dataset 1/C-mRNA_nonrhythm_translation_rhyth/Prkar2a_set_C.pdf]

# Prodh

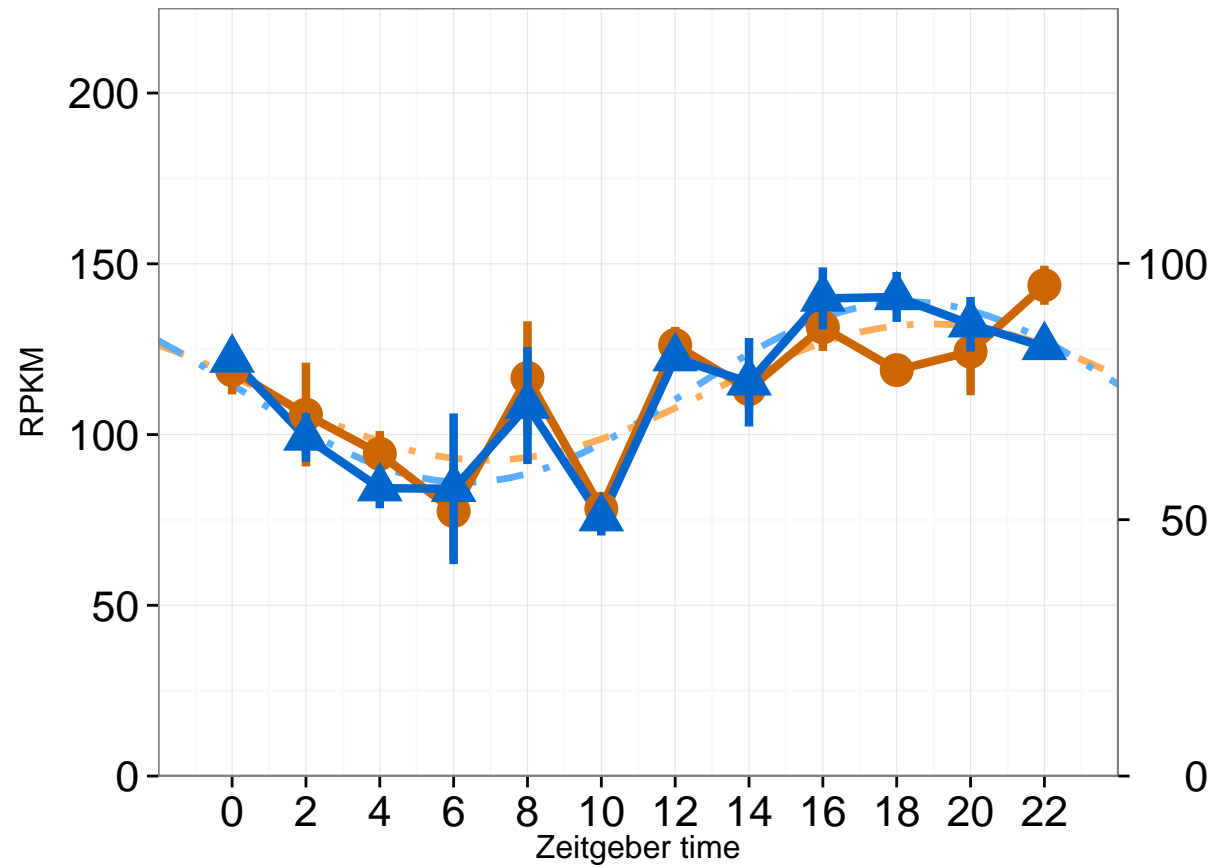

# Prodh

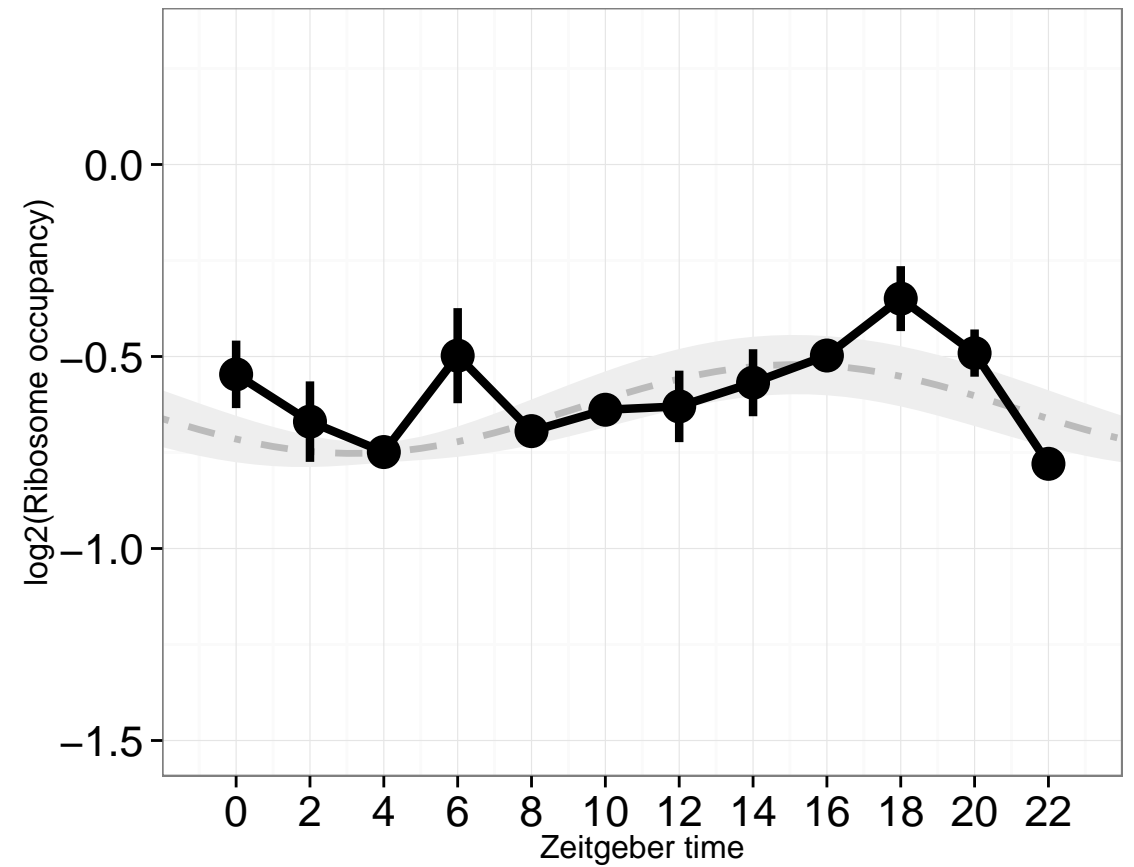

Supplement: SuppDataset_1.zip [file Prodh_set_C.pdf › Supplemental Dataset 1/C-mRNA_nonrhythm_translation_rhyth/Prodh_set_C.pdf]

# Psat1

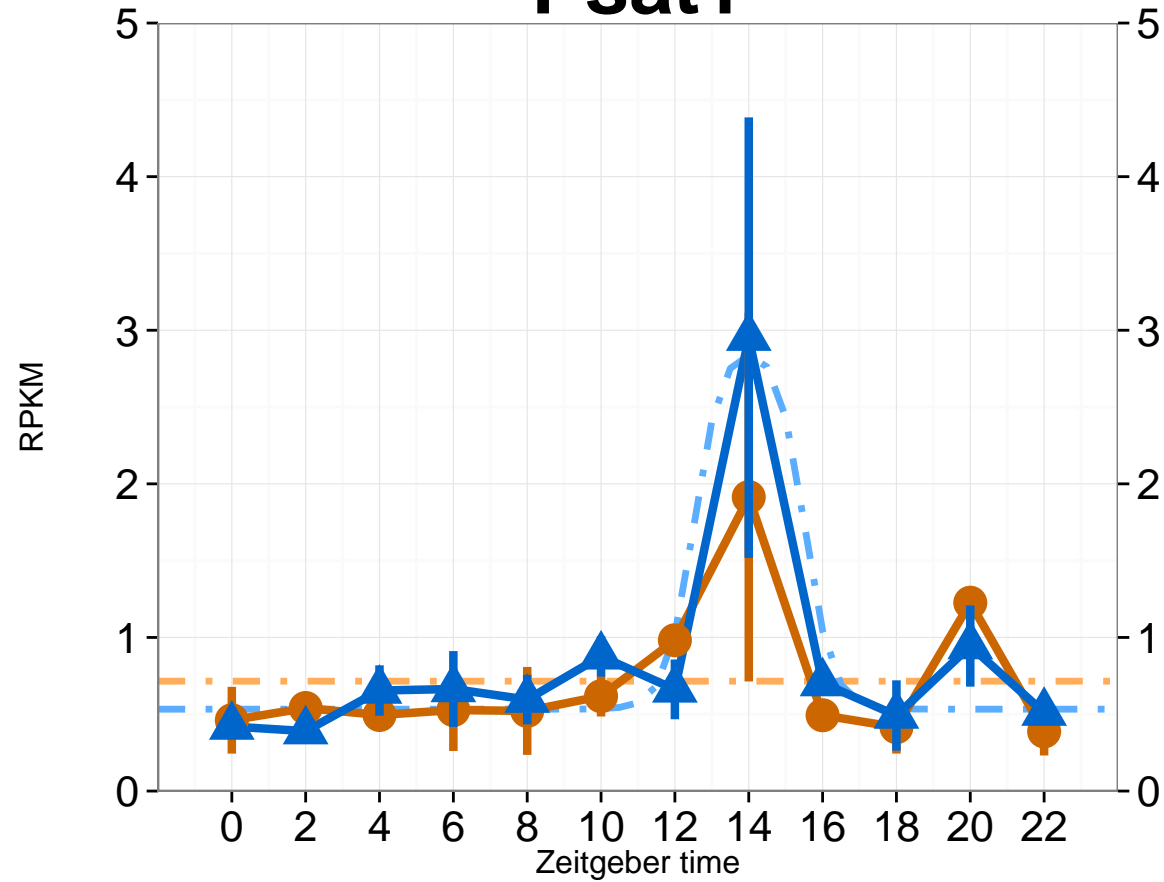

# Psat1

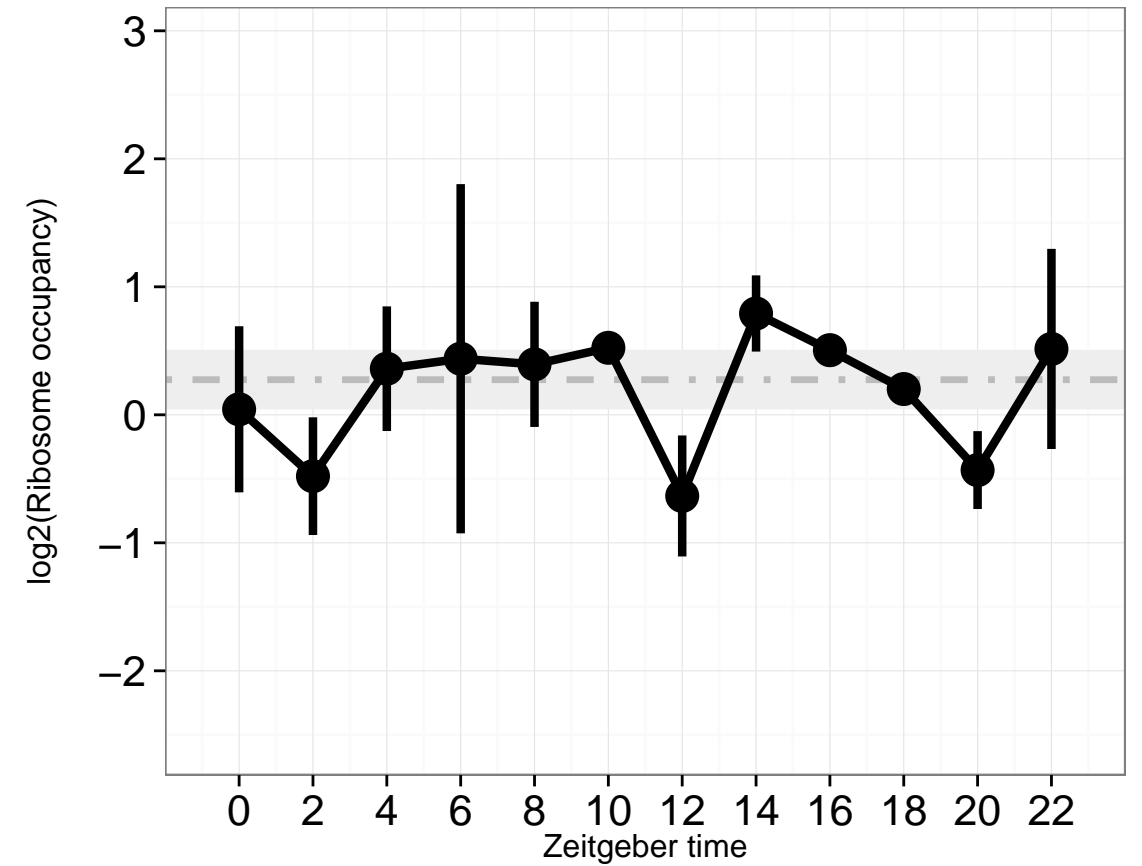

Supplement: SuppDataset_1.zip [file Psat1_set_C.pdf › Supplemental Dataset 1/C-mRNA_nonrhythm_translation_rhyth/Psat1_set_C.pdf]

# Psmb9

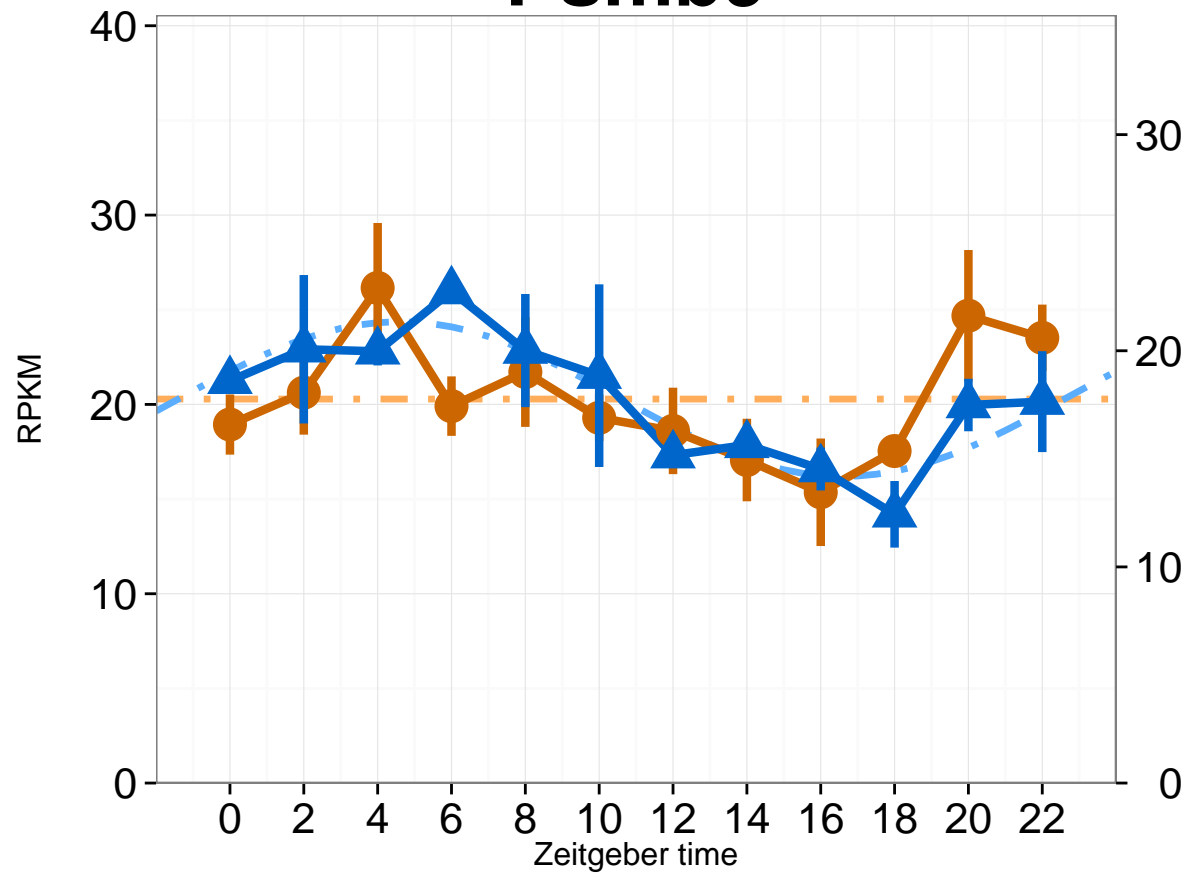

# Psmb9

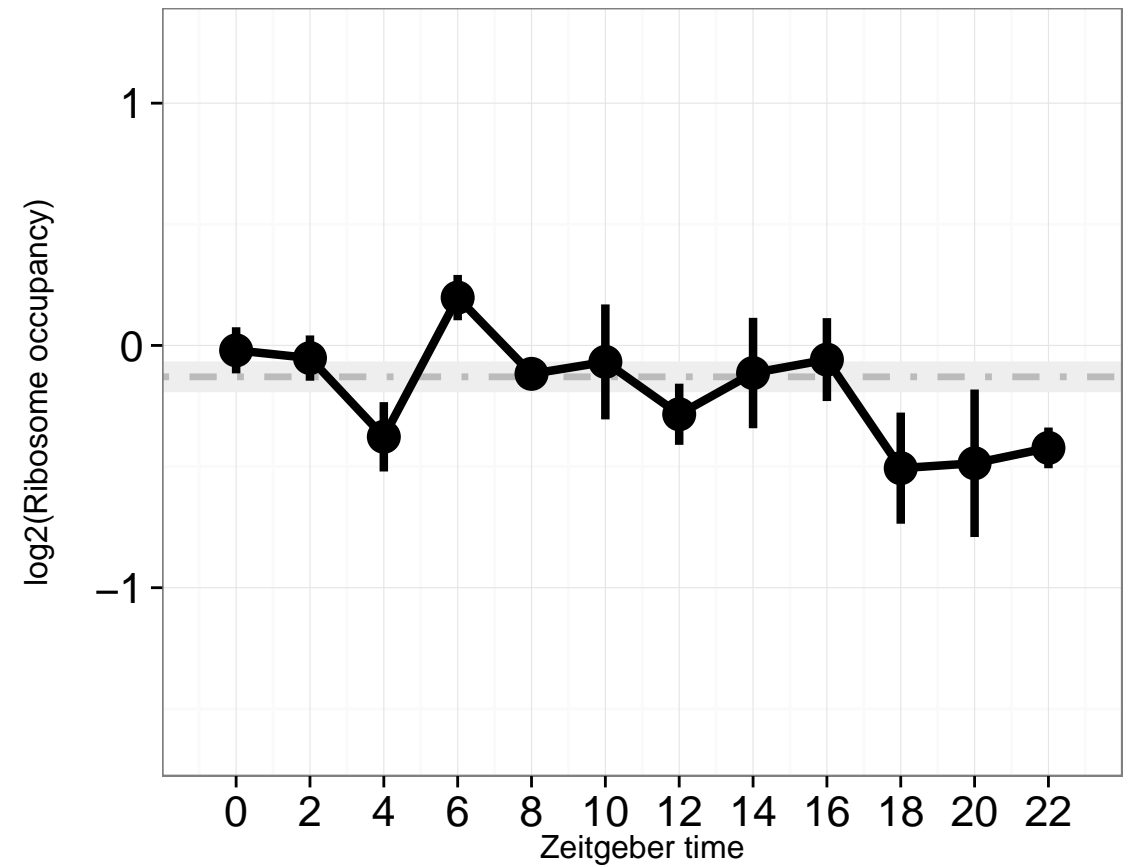

Supplement: SuppDataset_1.zip [file Psmb9_set_C.pdf › Supplemental Dataset 1/C-mRNA_nonrhythm_translation_rhyth/Psmb9_set_C.pdf]

## Psph

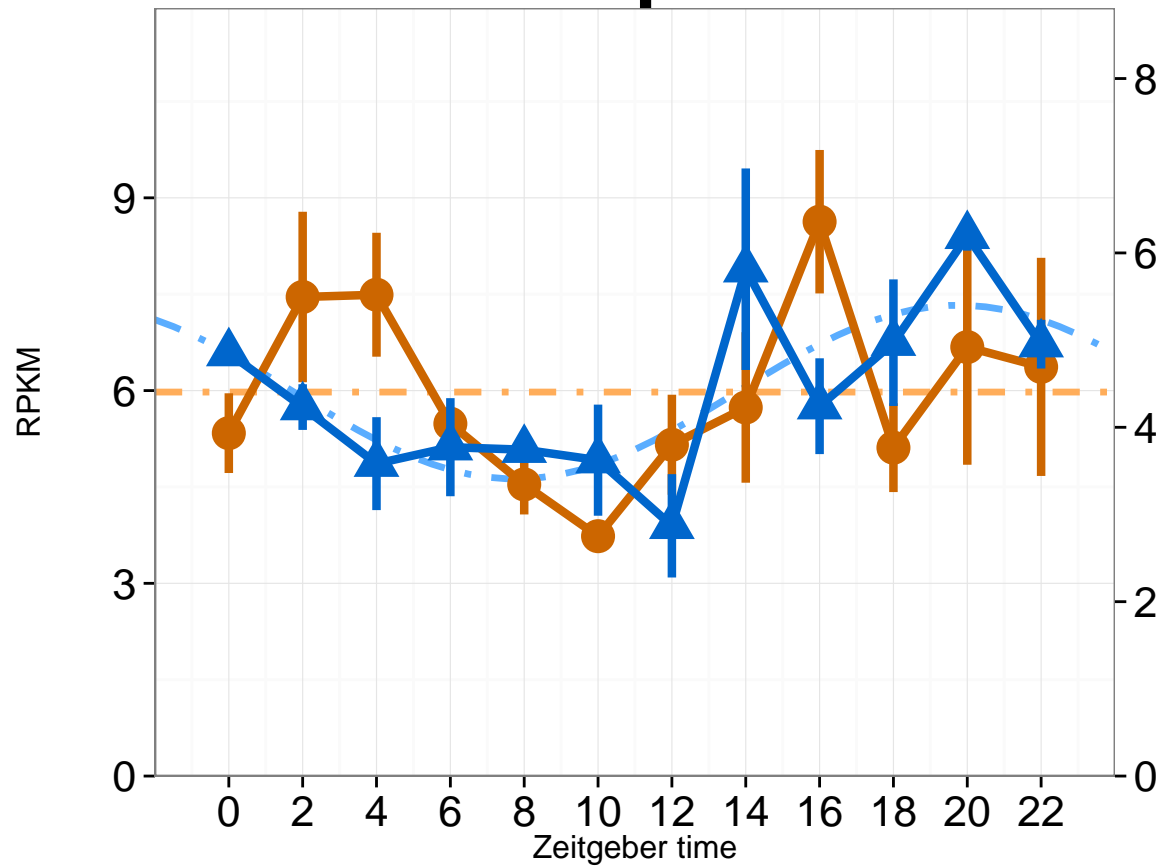

## Psph

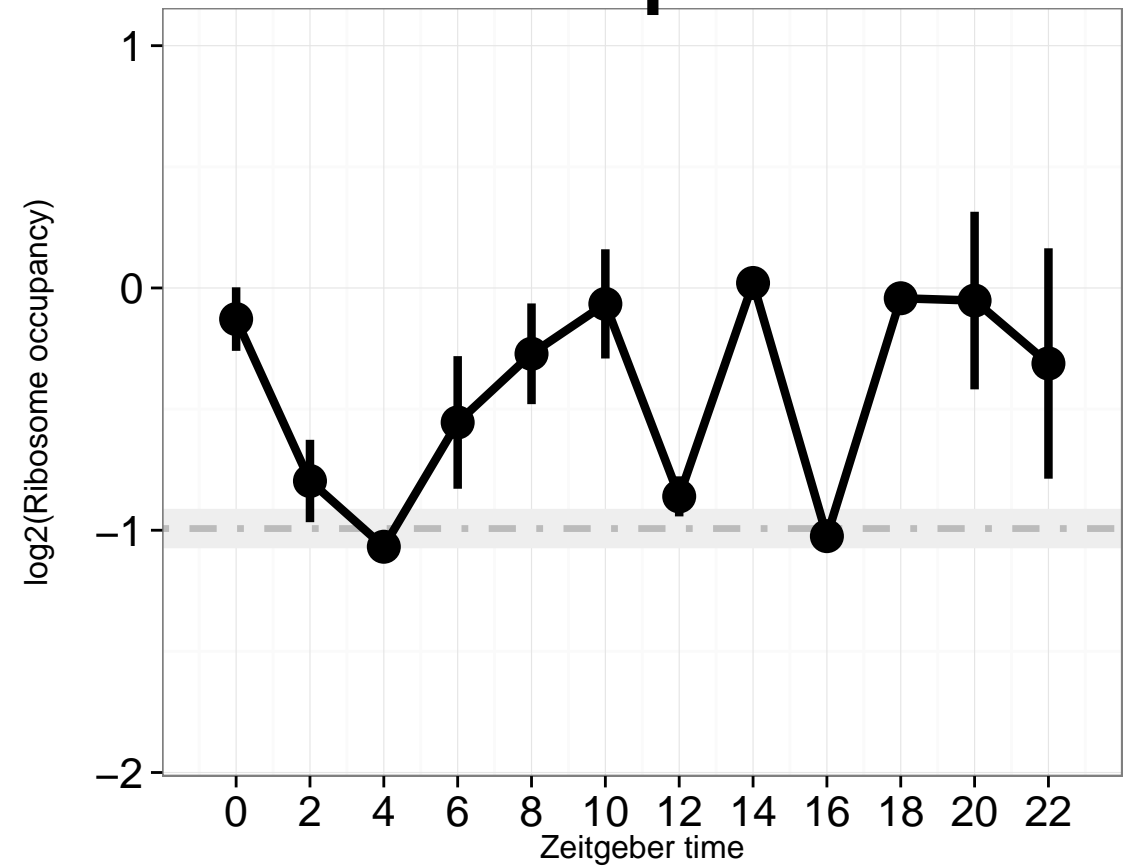

Supplement: SuppDataset_1.zip [file Psph_set_C.pdf › Supplemental Dataset 1/C-mRNA_nonrhythm_translation_rhyth/Psph_set_C.pdf]

# Ptbp2

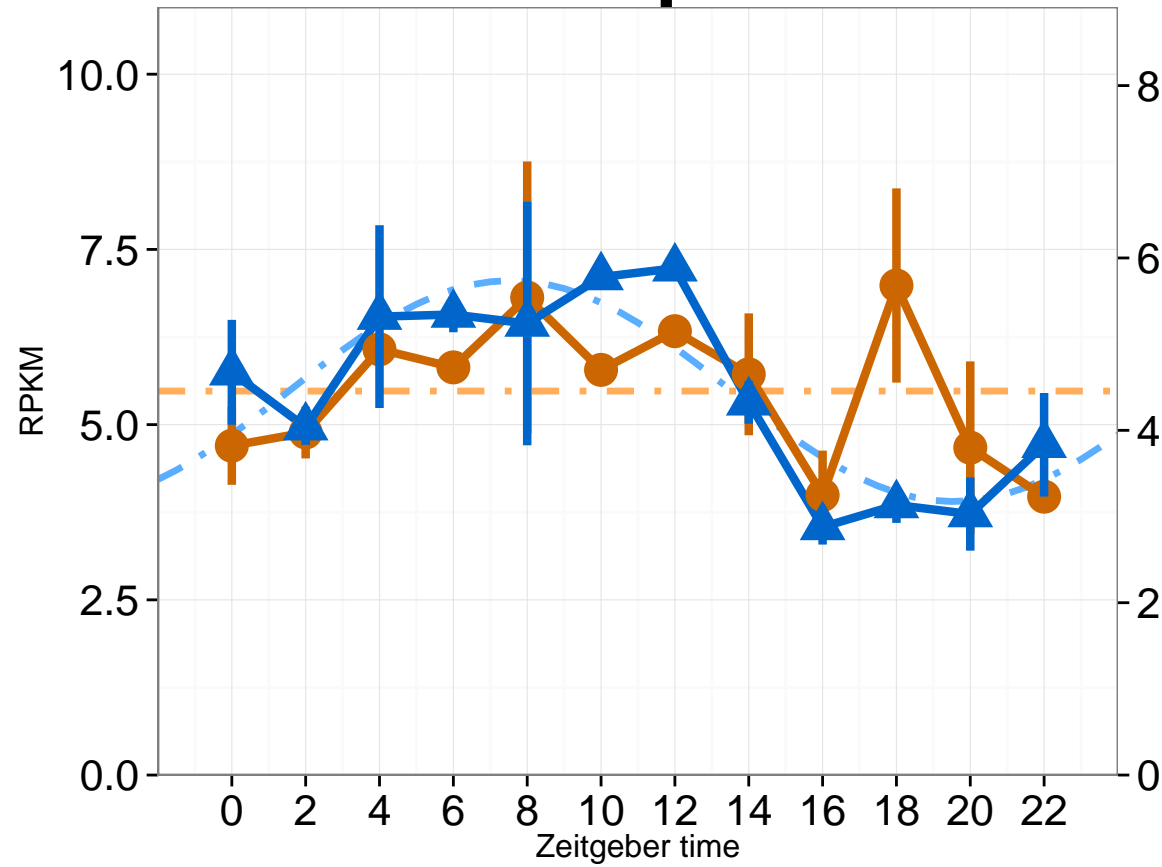

# Ptbp2

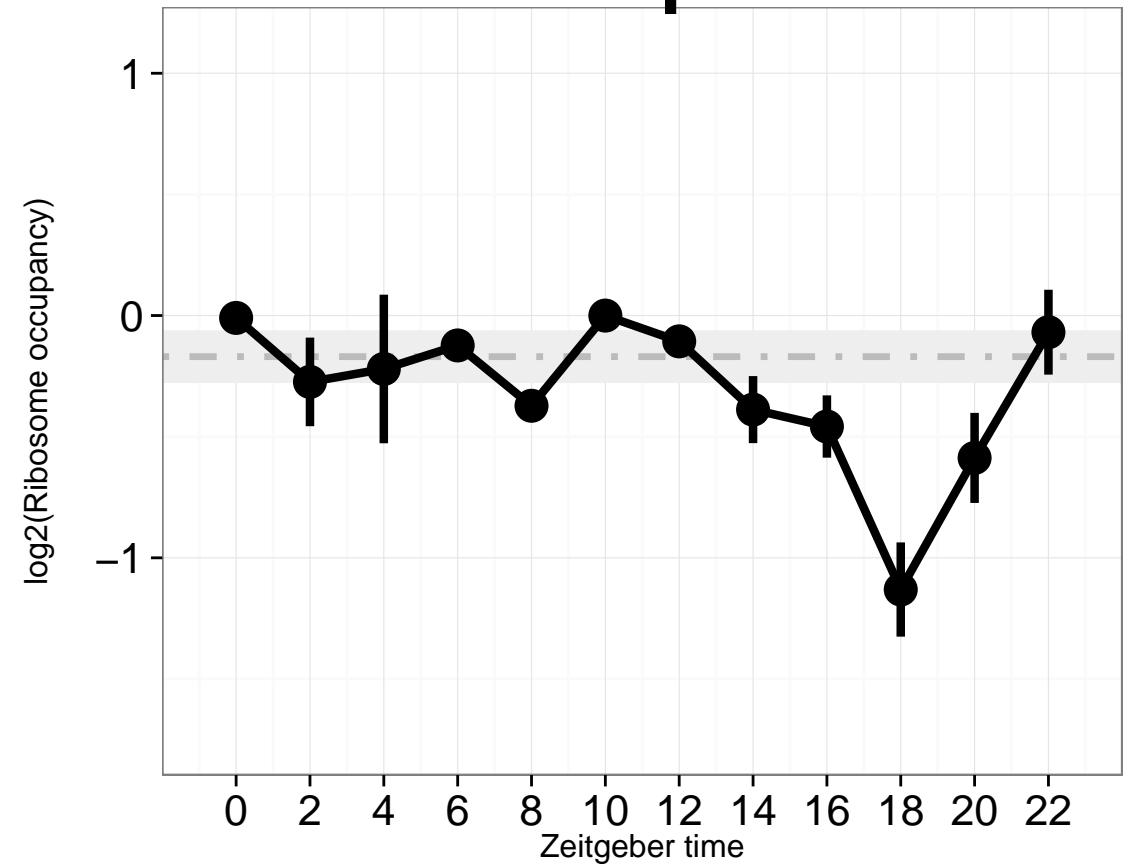

Supplement: SuppDataset_1.zip [file Ptbp2_set_C.pdf › Supplemental Dataset 1/C-mRNA_nonrhythm_translation_rhyth/Ptbp2_set_C.pdf]

# Ptpla

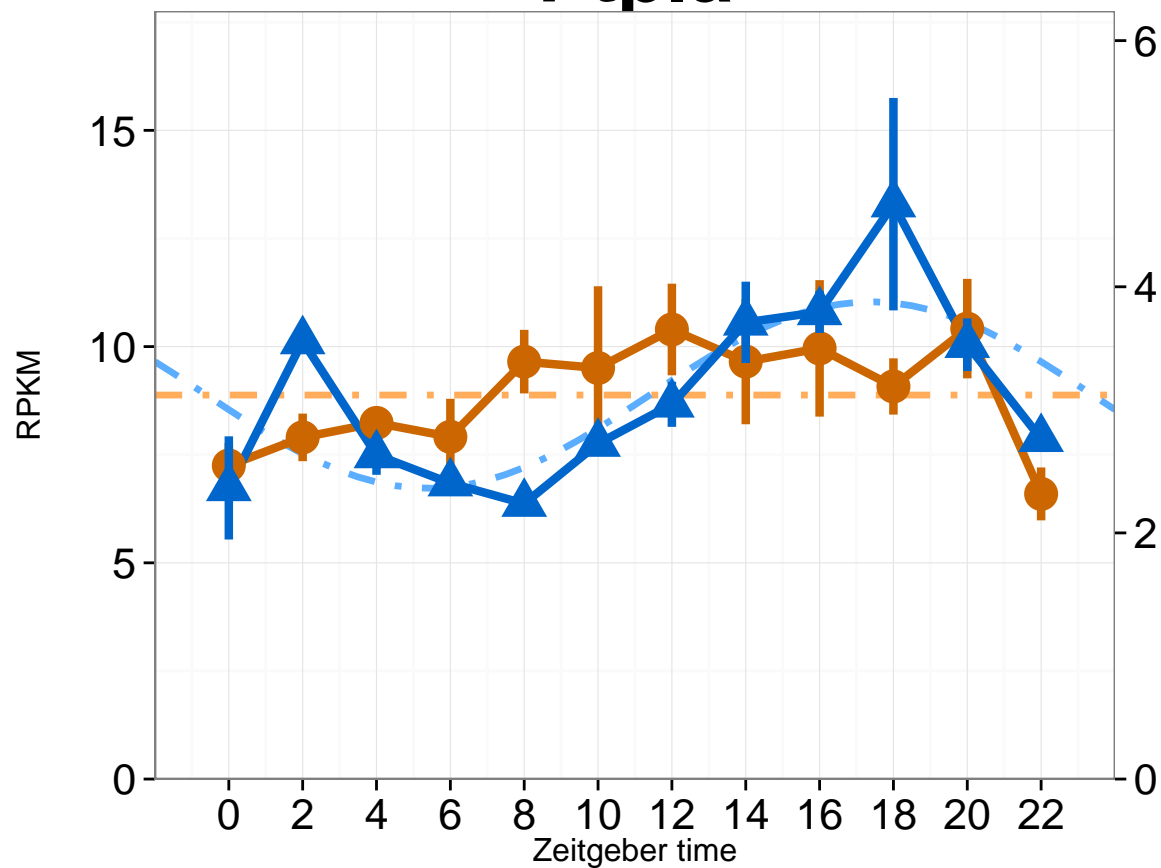

# Ptpla

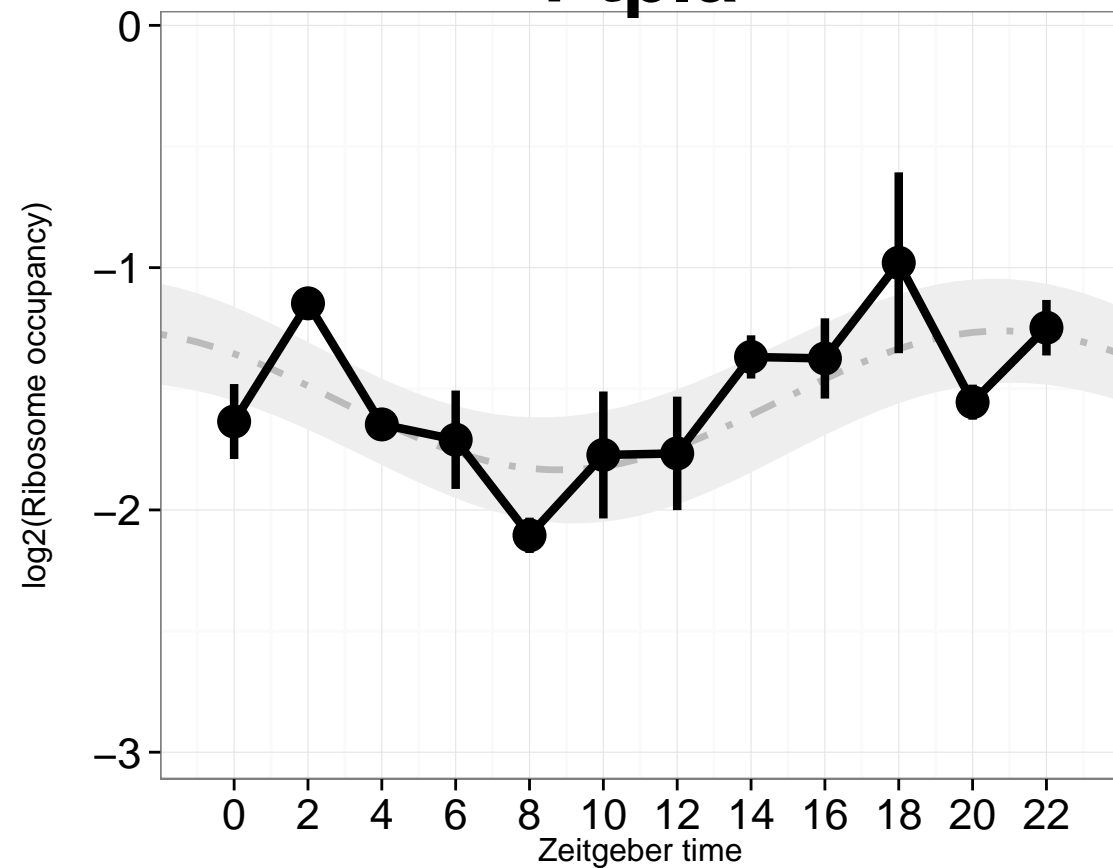

Supplement: SuppDataset_1.zip [file Ptpla_set_C.pdf › Supplemental Dataset 1/C-mRNA_nonrhythm_translation_rhyth/Ptpla_set_C.pdf]

# Ptpn1

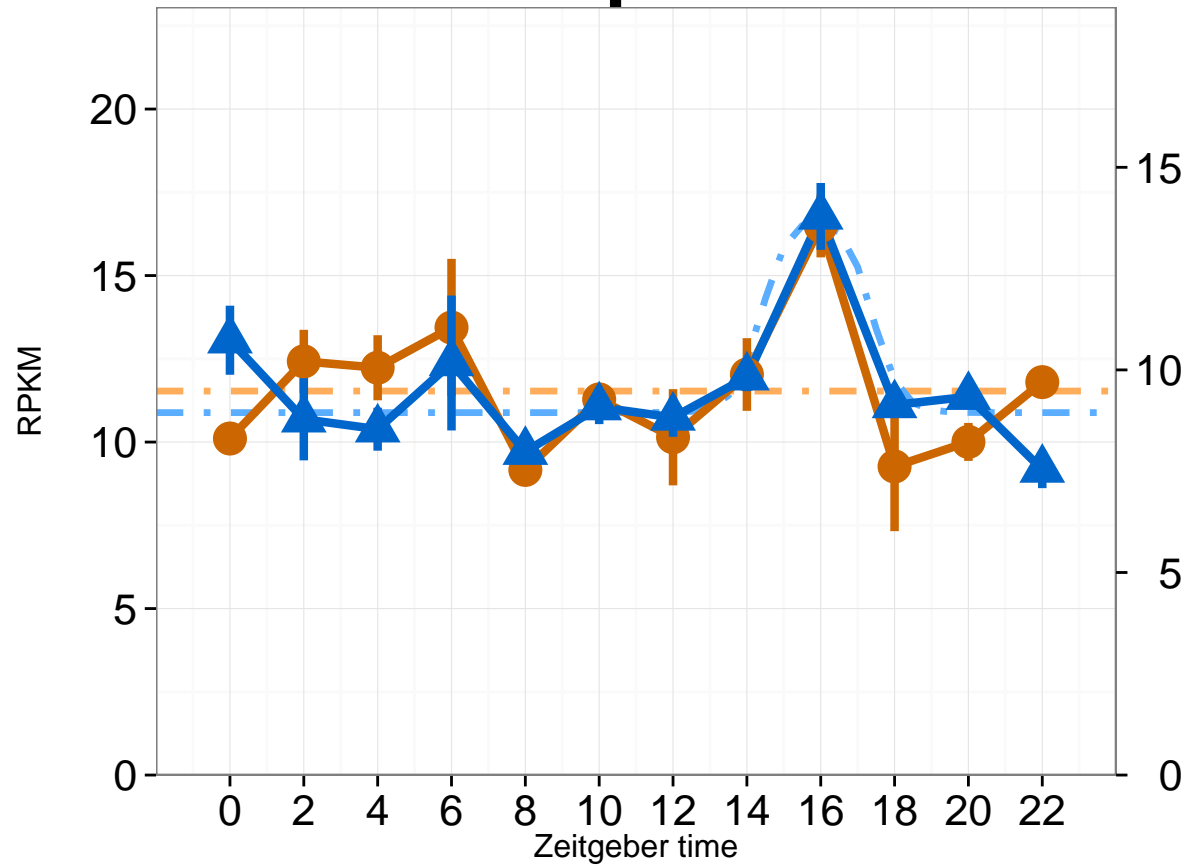

# Ptpn1

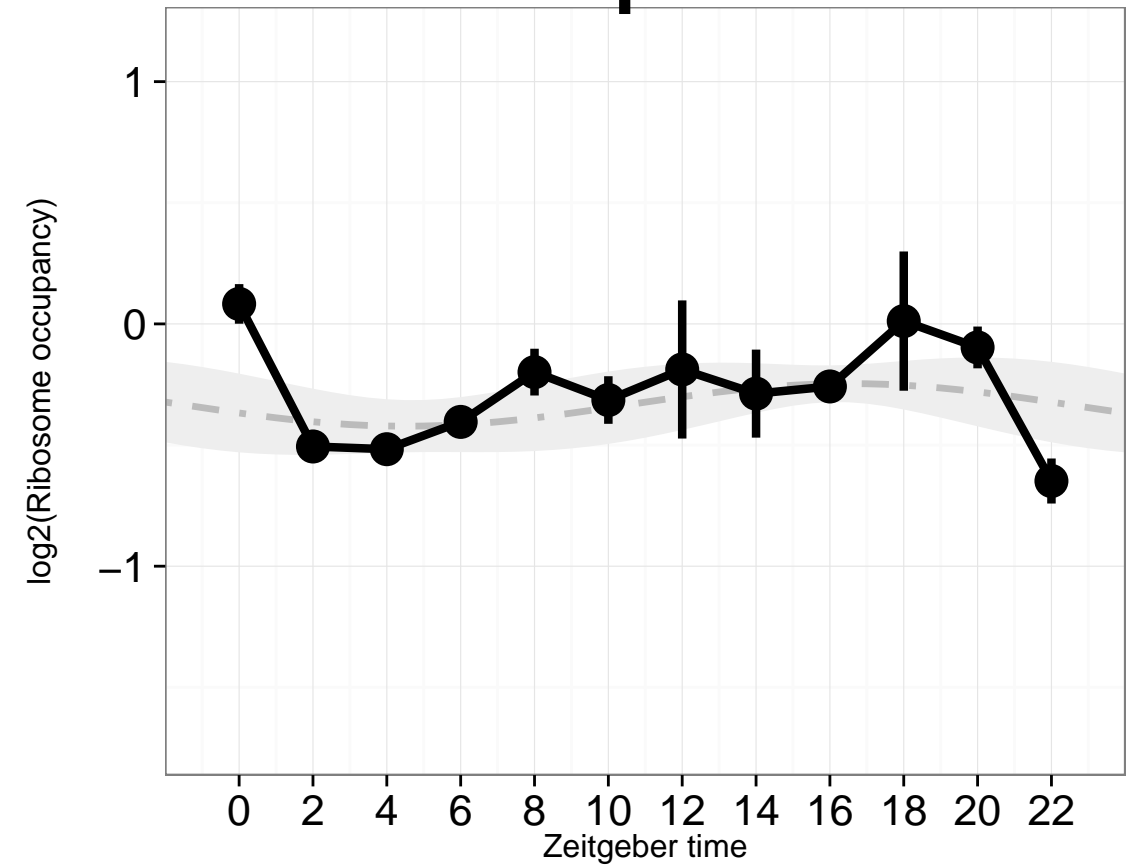

Supplement: SuppDataset_1.zip [file Ptpn1_set_C.pdf › Supplemental Dataset 1/C-mRNA_nonrhythm_translation_rhyth/Ptpn1_set_C.pdf]

# Pus7l

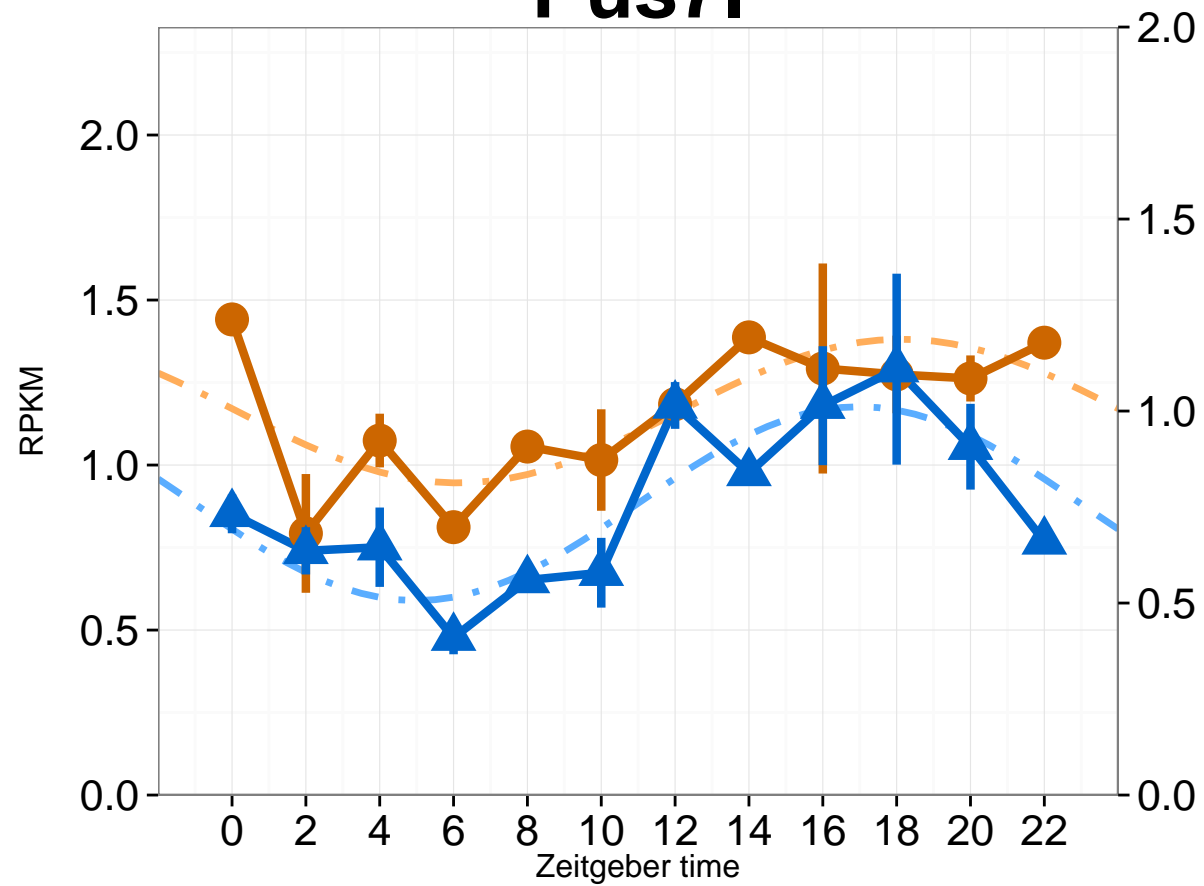

# Pus7l

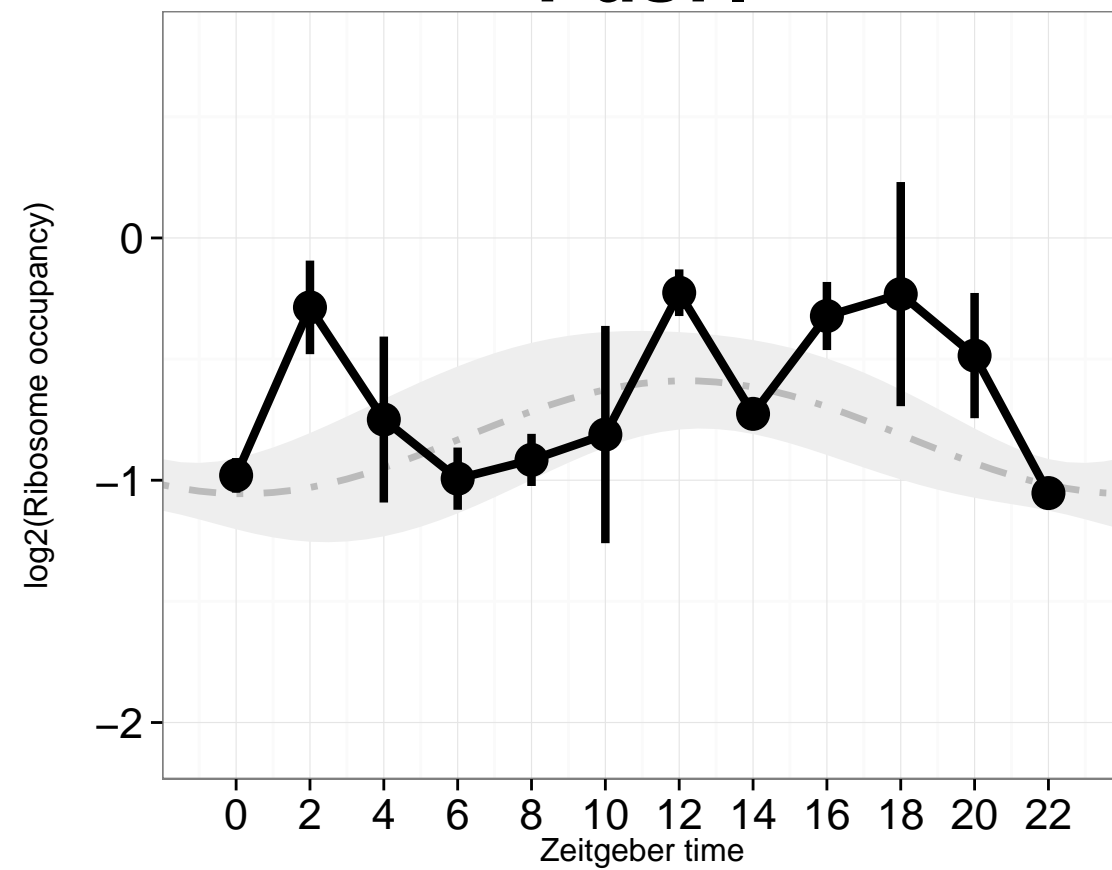

Supplement: SuppDataset_1.zip [file Pus7l_set_C.pdf › Supplemental Dataset 1/C-mRNA_nonrhythm_translation_rhyth/Pus7l_set_C.pdf]

## Pvr

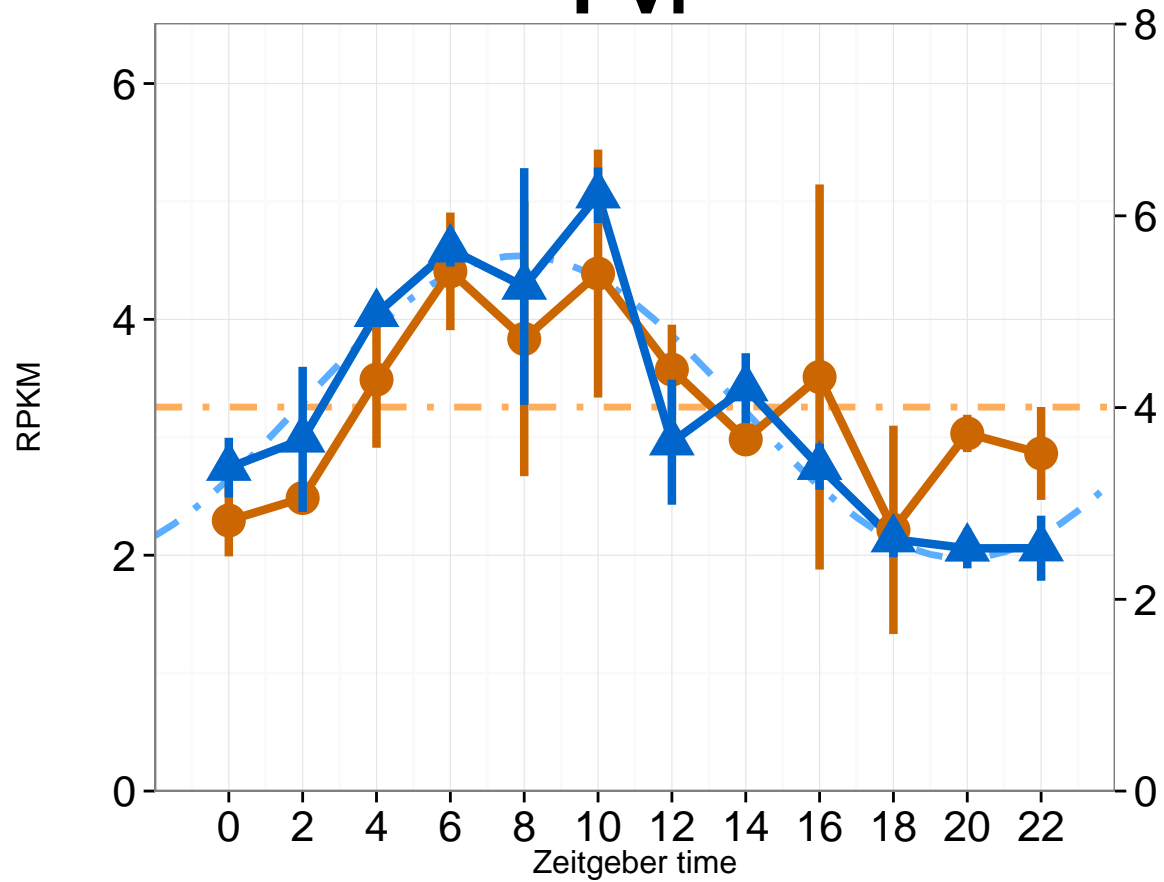

## Pvr

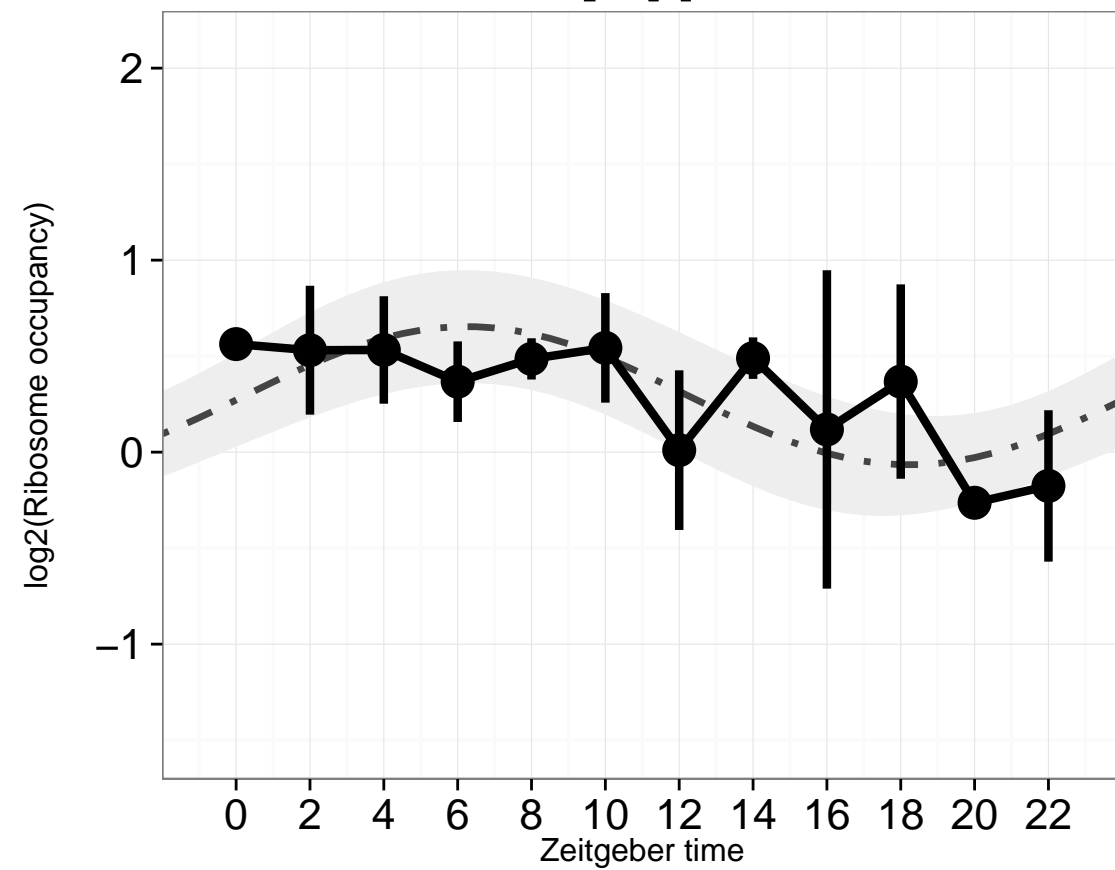

Supplement: SuppDataset_1.zip [file Pvr_set_C.pdf › Supplemental Dataset 1/C-mRNA_nonrhythm_translation_rhyth/Pvr_set_C.pdf]

# Pydc3

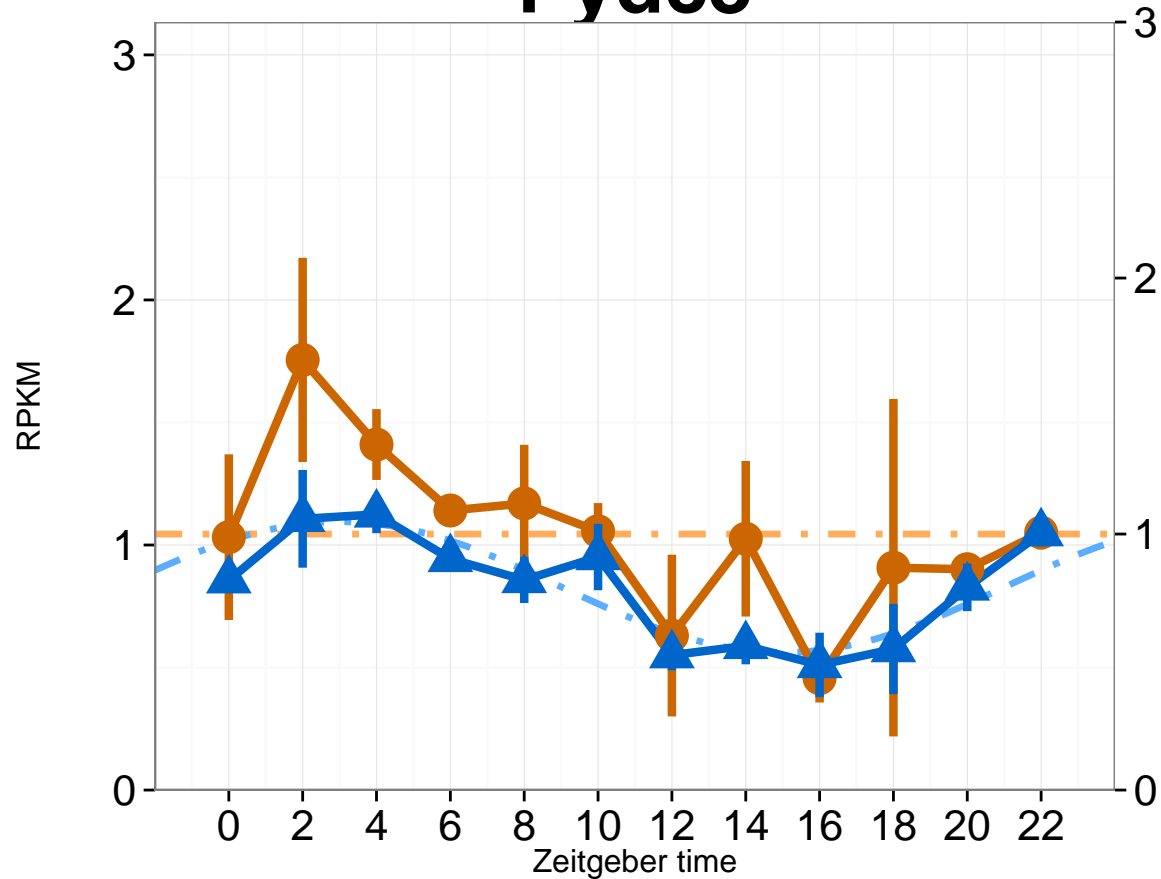

# Pydc3

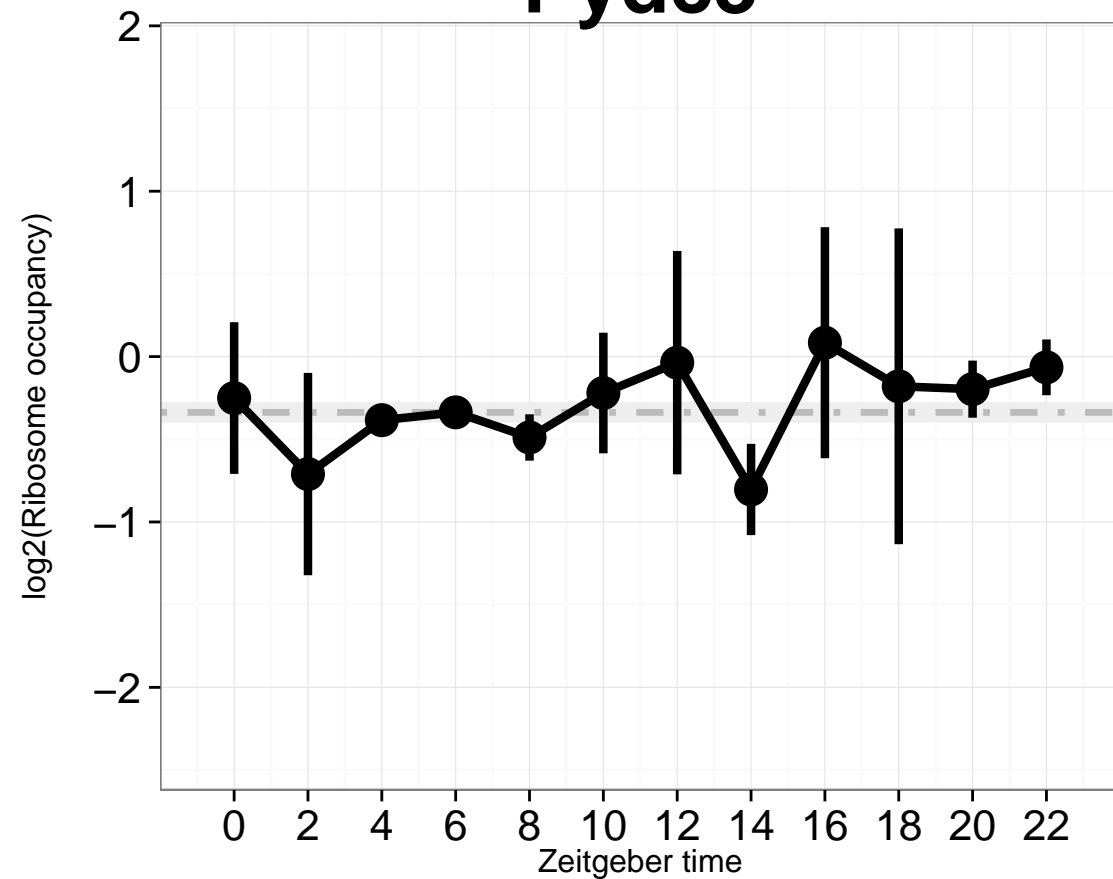

Supplement: SuppDataset_1.zip [file Pydc3_set_C.pdf › Supplemental Dataset 1/C-mRNA_nonrhythm_translation_rhyth/Pydc3_set_C.pdf]

# Qdpr

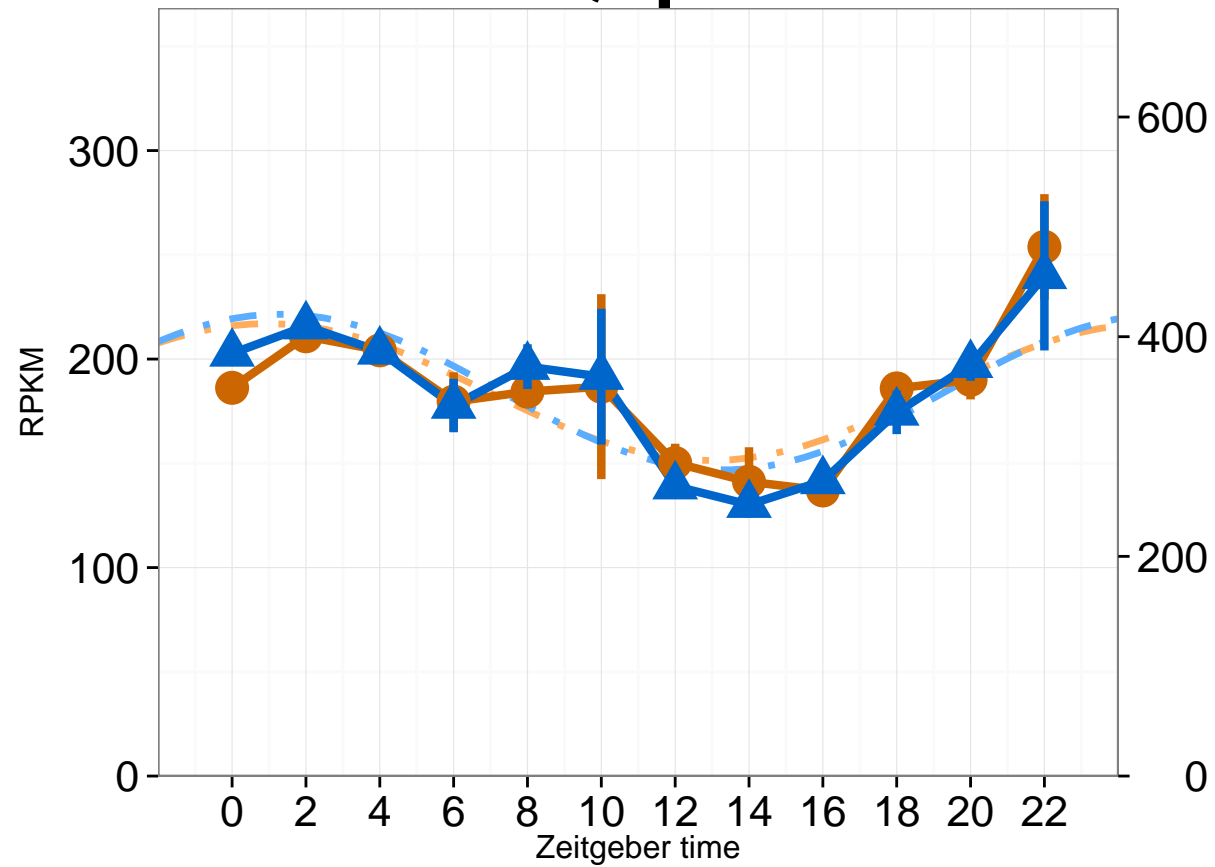

# Qdpr

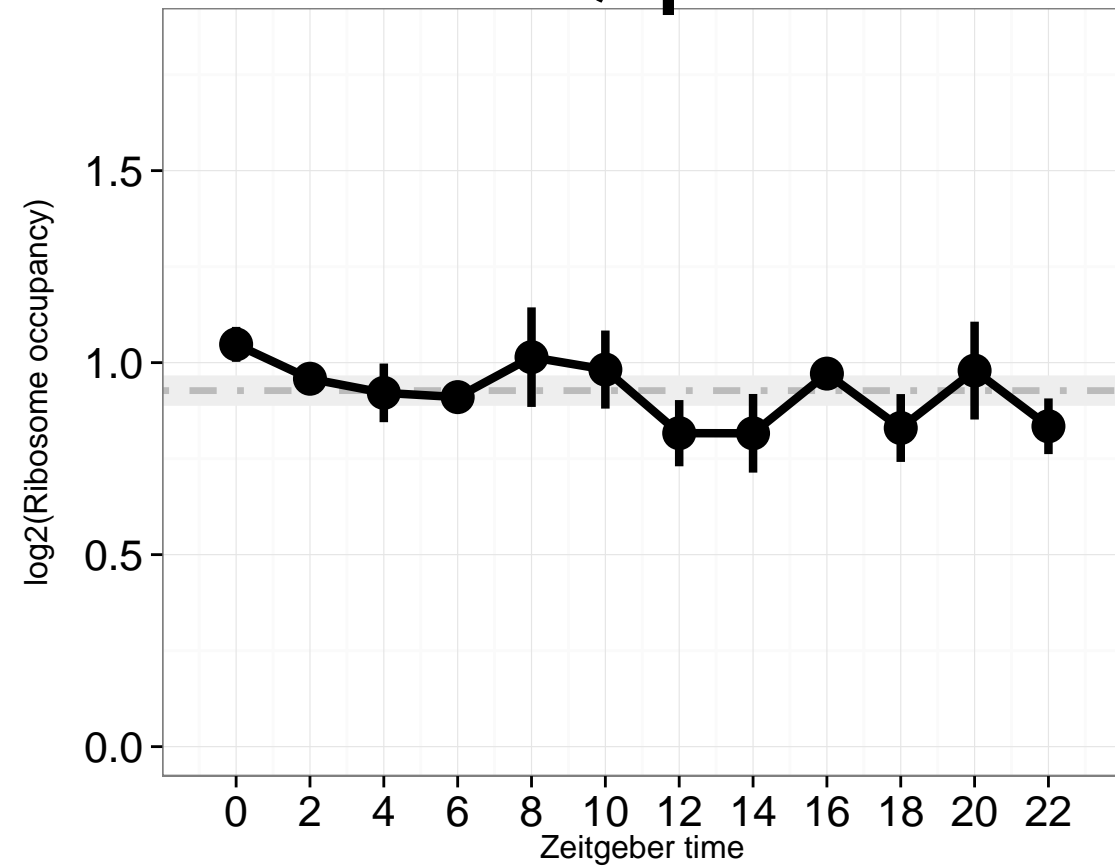

Supplement: SuppDataset_1.zip [file Qdpr_set_C.pdf › Supplemental Dataset 1/C-mRNA_nonrhythm_translation_rhyth/Qdpr_set_C.pdf]

## RPL24

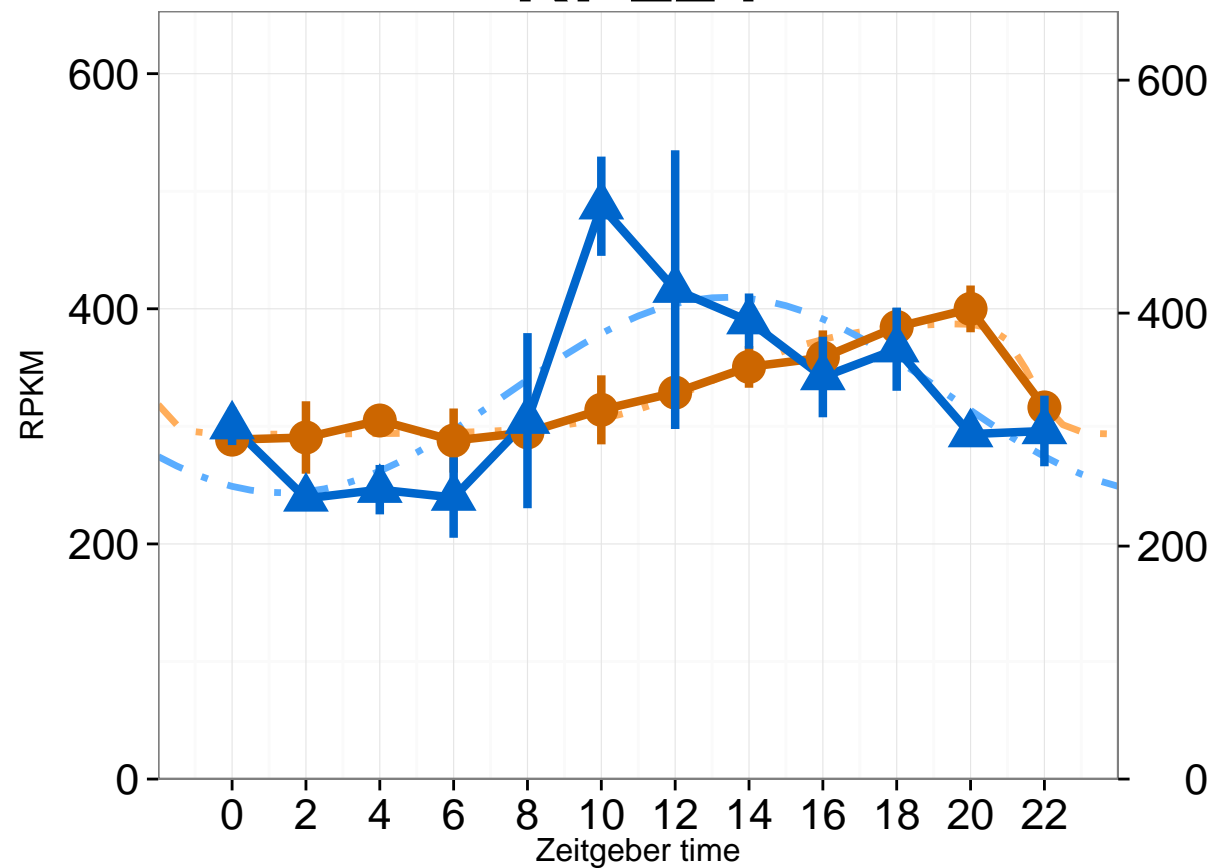

## RPL24

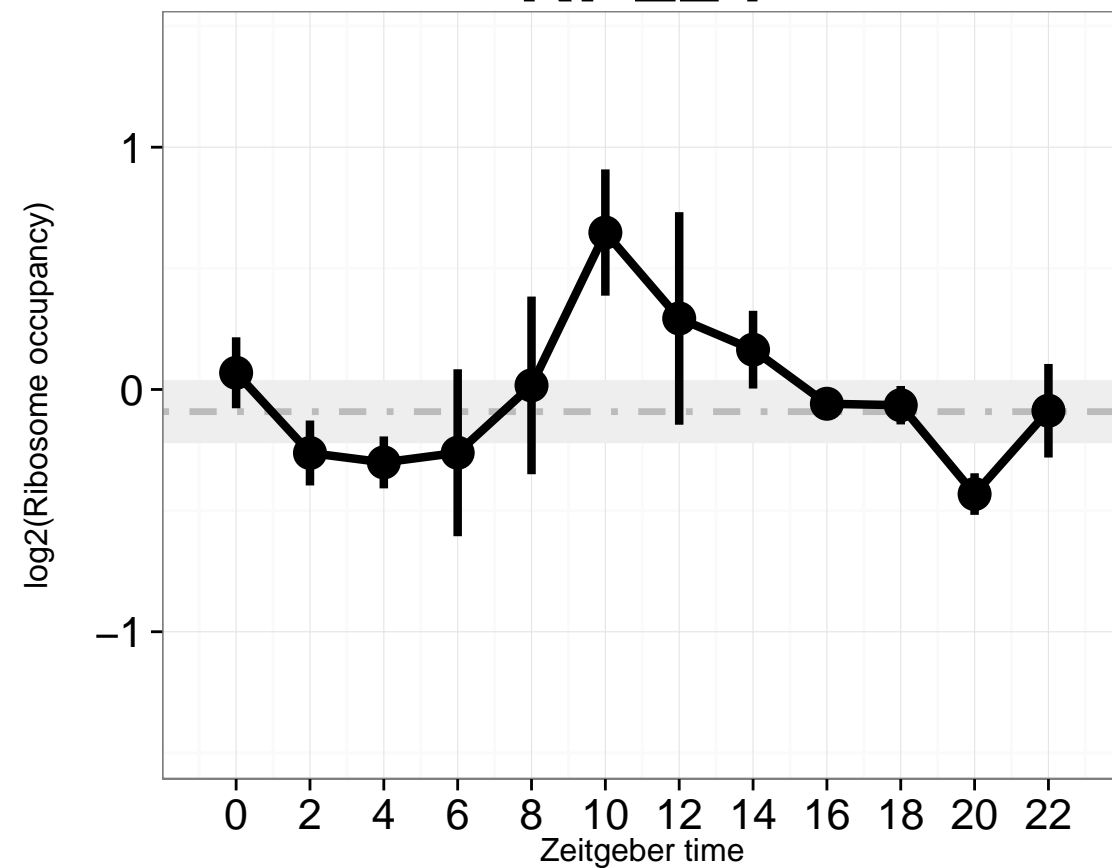

Supplement: SuppDataset_1.zip [file RPL24_set_C.pdf › Supplemental Dataset 1/C-mRNA_nonrhythm_translation_rhyth/RPL24_set_C.pdf]

# Rab11fip3

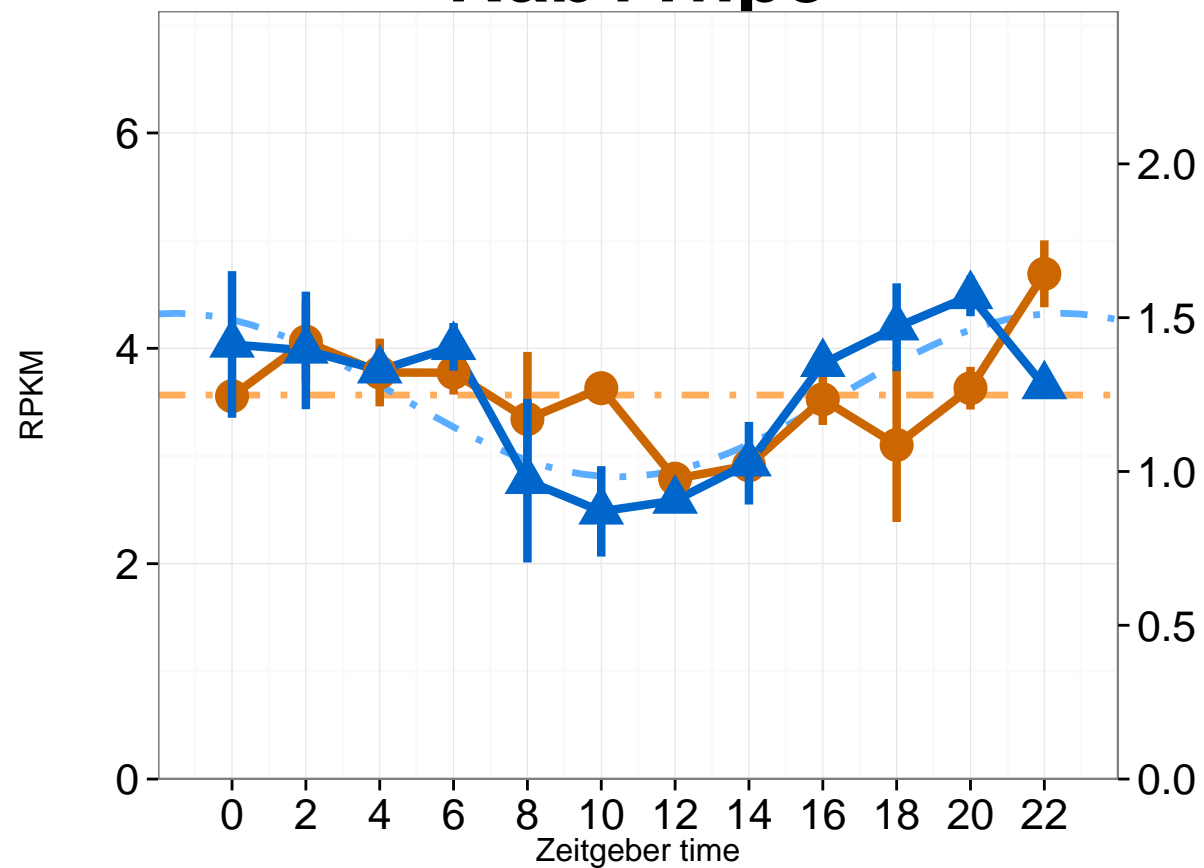

# Rab11fip3

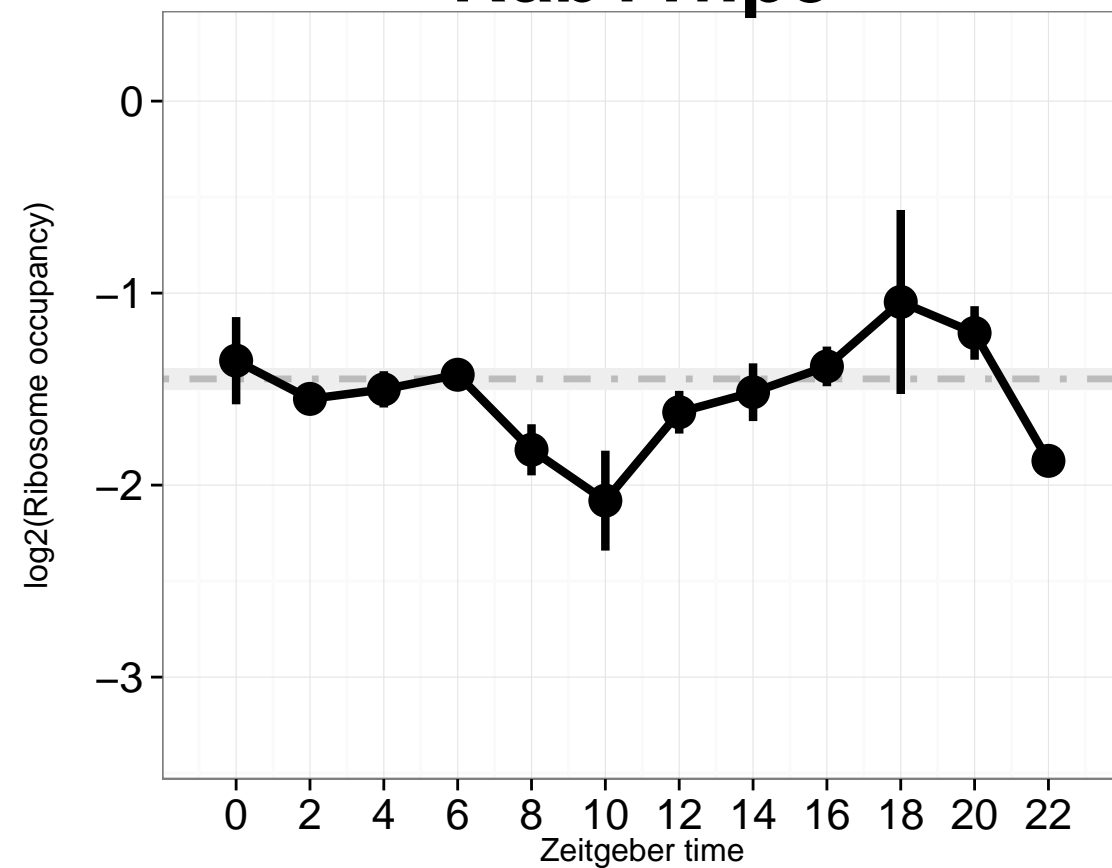

Supplement: SuppDataset_1.zip [file Rab11fip3_set_C.pdf › Supplemental Dataset 1/C-mRNA_nonrhythm_translation_rhyth/Rab11fip3_set_C.pdf]

## Rab32

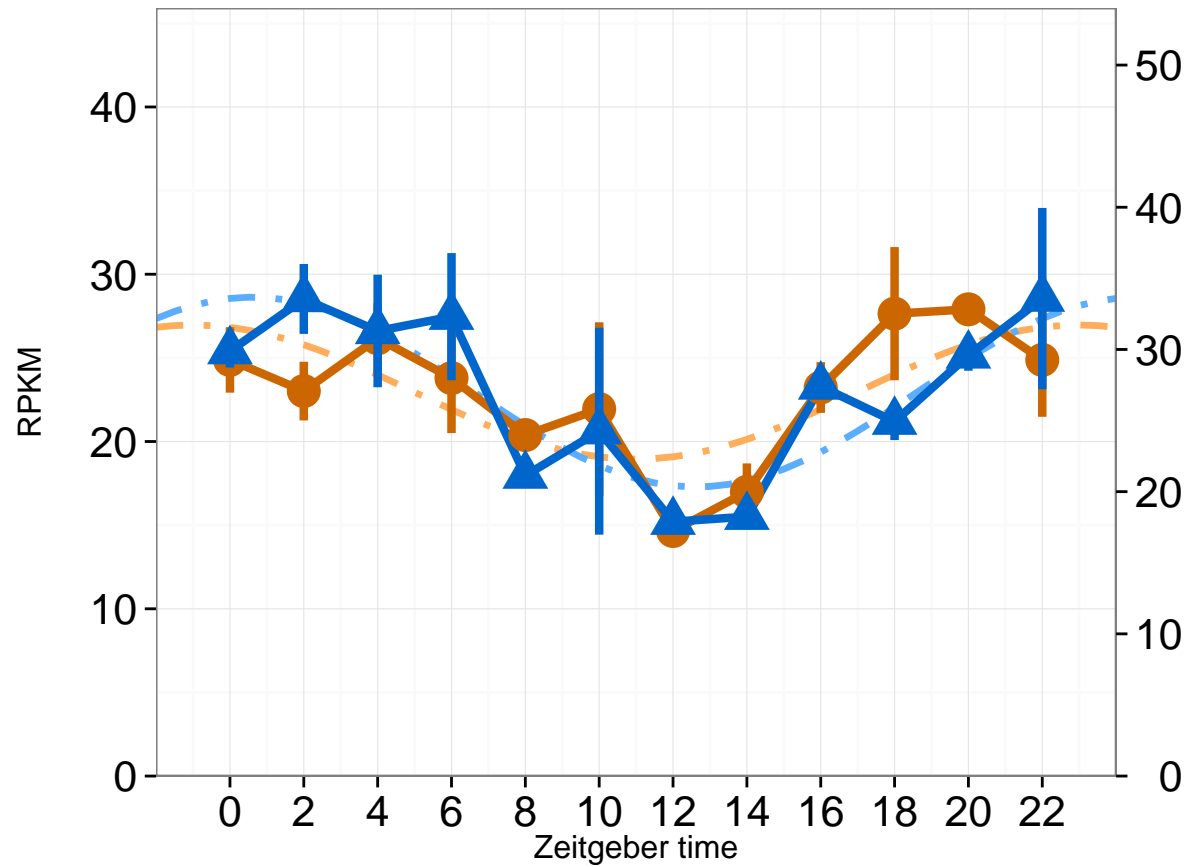

## Rab32

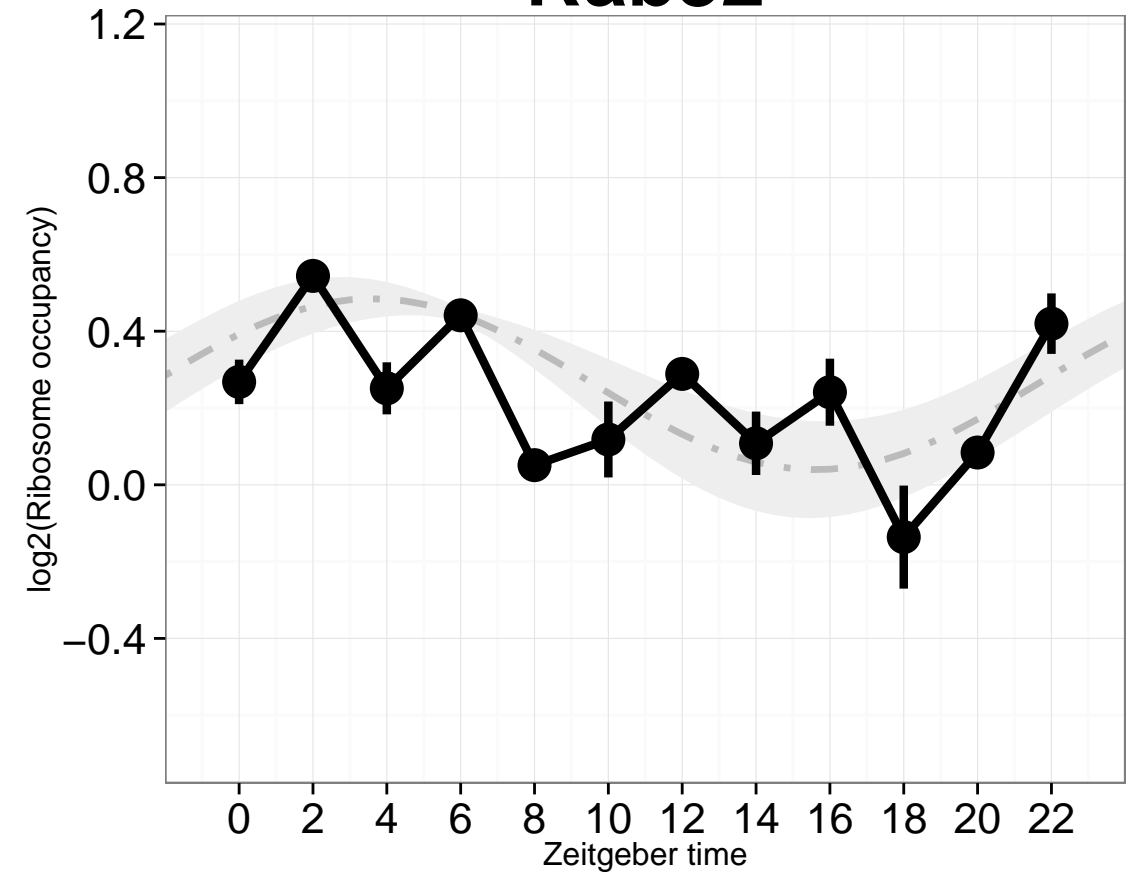

Supplement: SuppDataset_1.zip [file Rab32_set_C.pdf › Supplemental Dataset 1/C-mRNA_nonrhythm_translation_rhyth/Rab32_set_C.pdf]

## Rai14

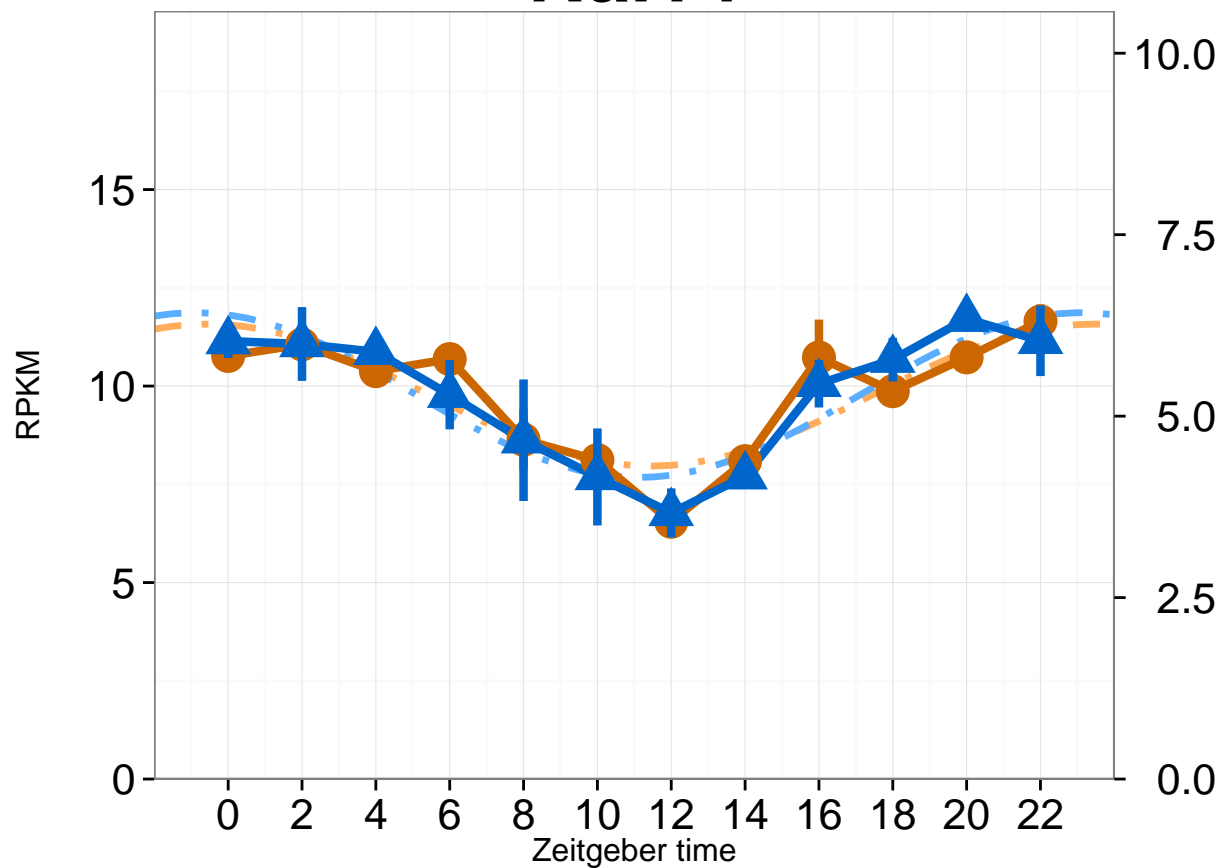

## Rai14

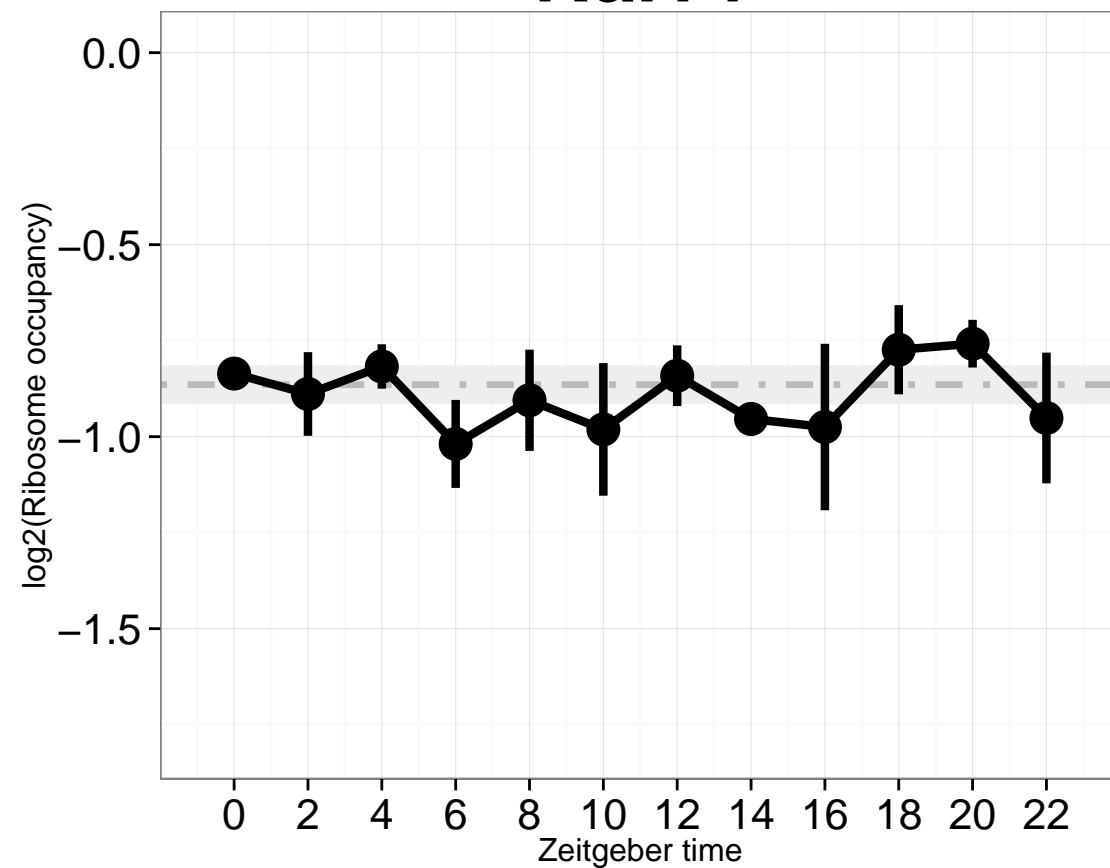

Supplement: SuppDataset_1.zip [file Rai14_set_C.pdf › Supplemental Dataset 1/C-mRNA_nonrhythm_translation_rhyth/Rai14_set_C.pdf]

## Ralgapa2

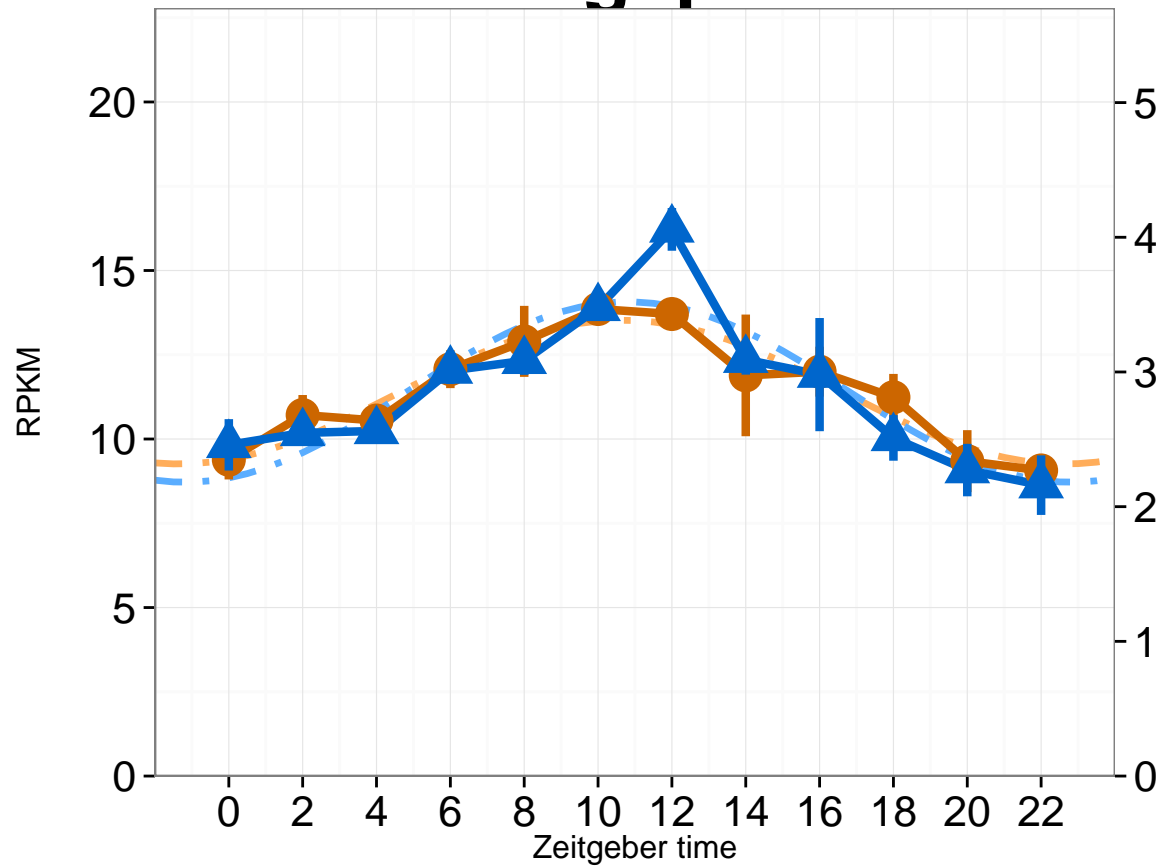

## Ralgapa2

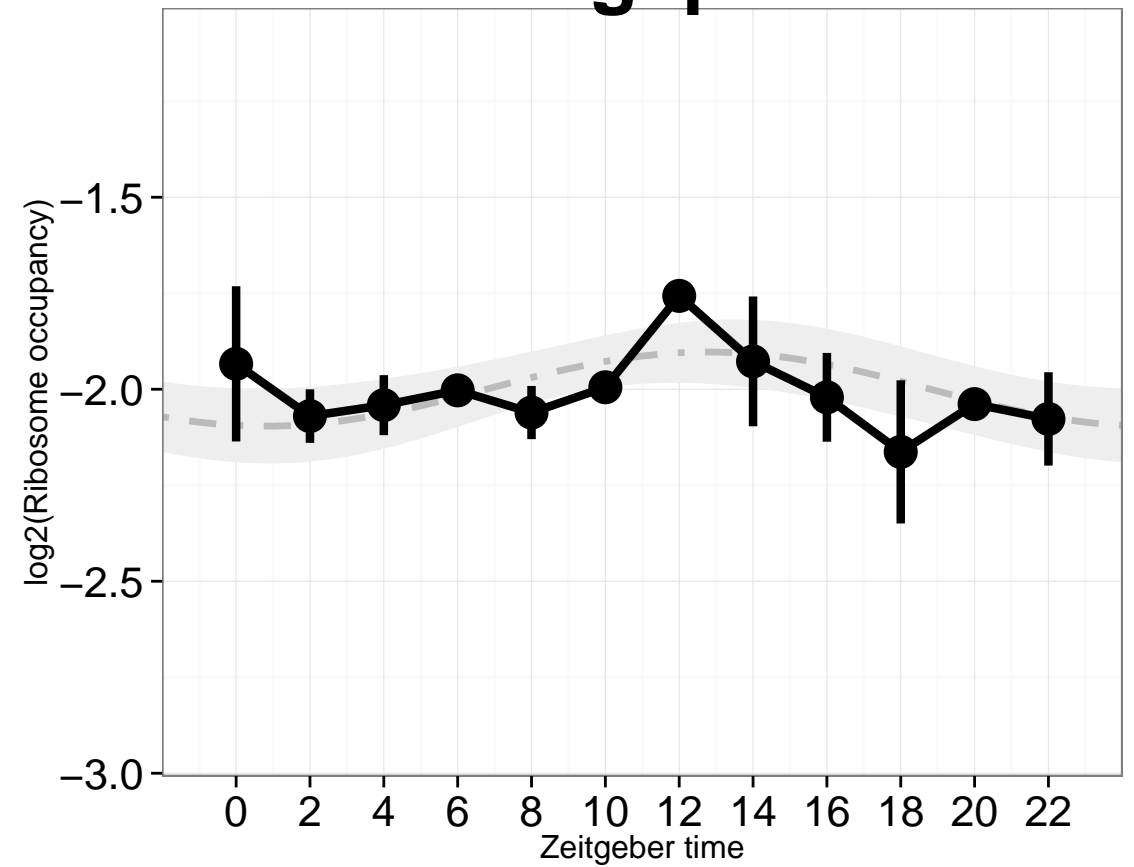

Supplement: SuppDataset_1.zip [file Ralgapa2_set_C.pdf › Supplemental Dataset 1/C-mRNA_nonrhythm_translation_rhyth/Ralgapa2_set_C.pdf]

# Ralgps1

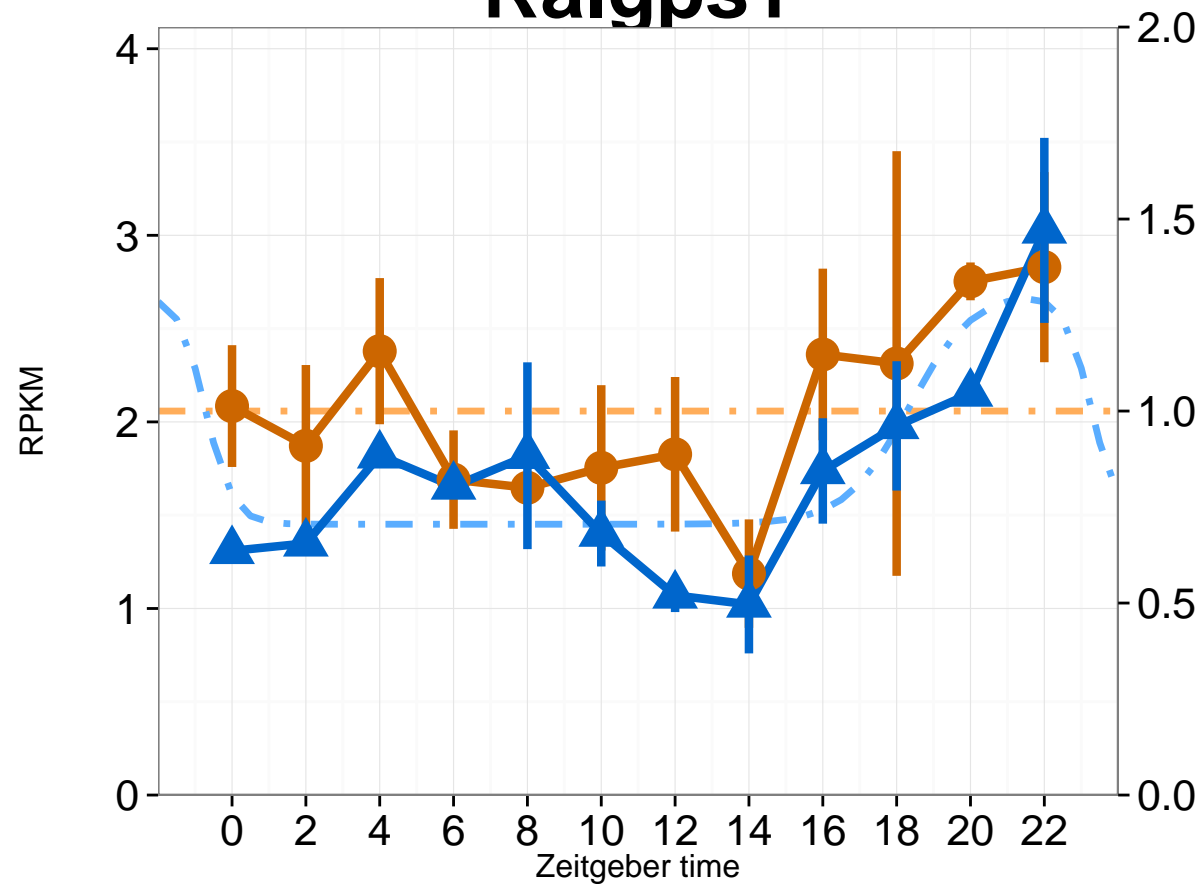

# Ralgps1

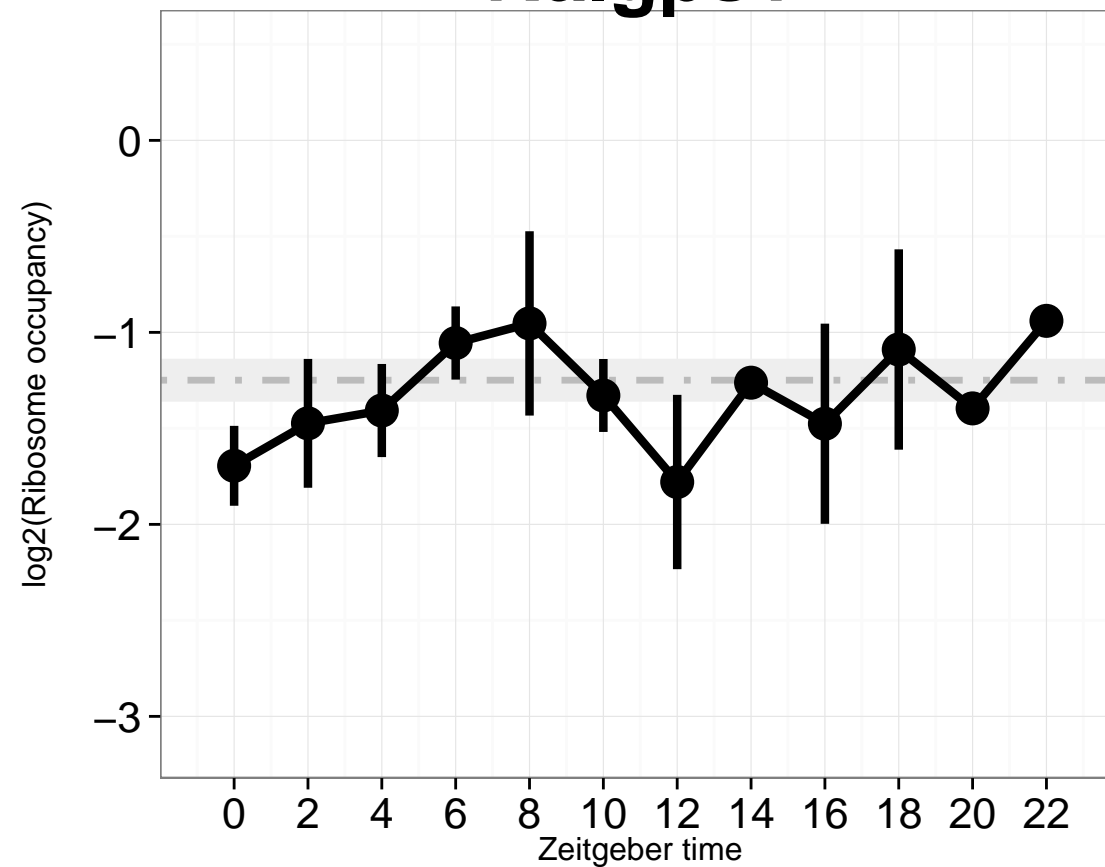

Supplement: SuppDataset_1.zip [file Ralgps1_set_C.pdf › Supplemental Dataset 1/C-mRNA_nonrhythm_translation_rhyth/Ralgps1_set_C.pdf]

# Ranbp10

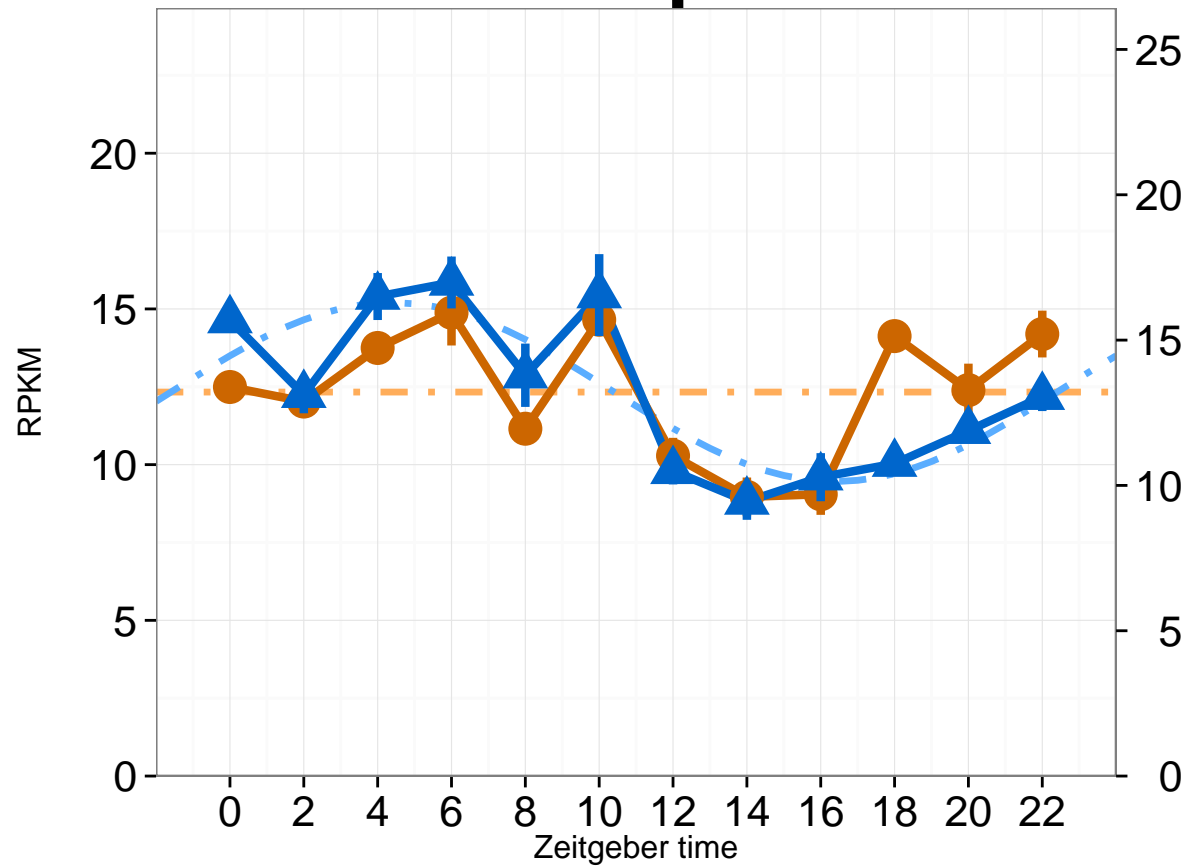

# Ranbp10

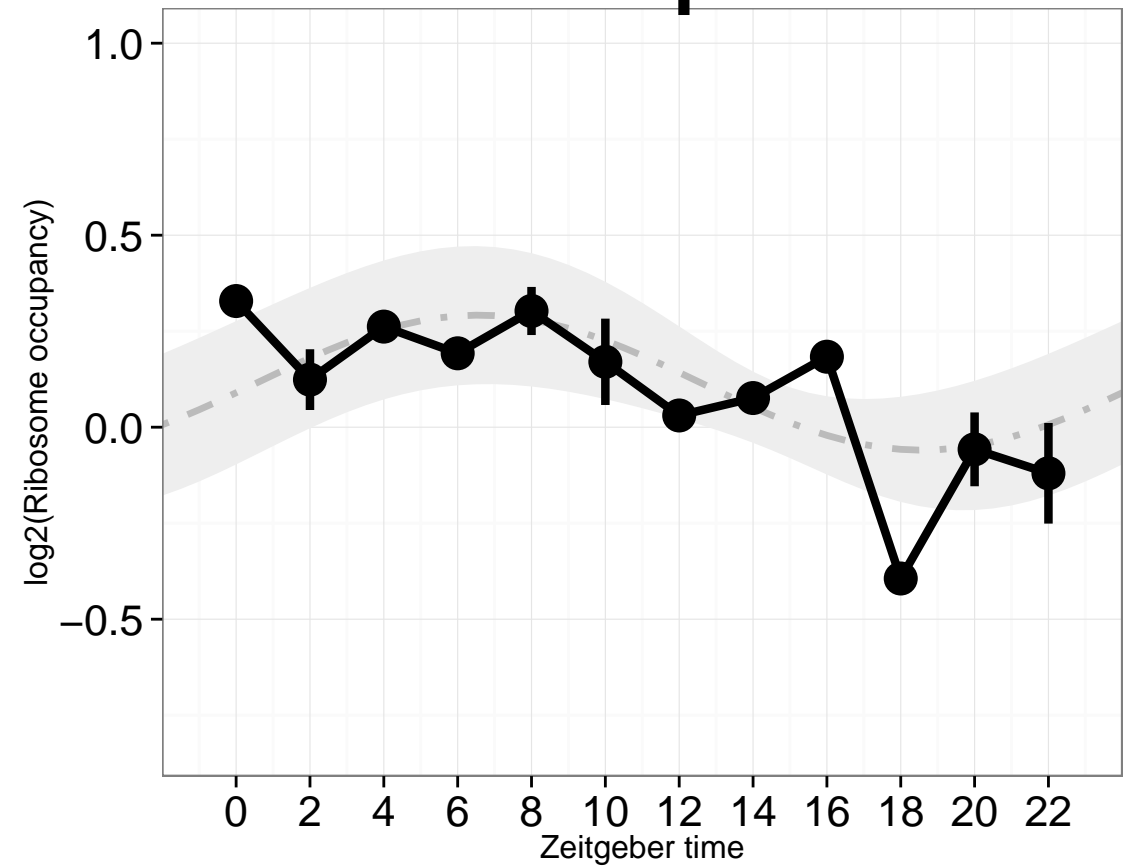

Supplement: SuppDataset_1.zip [file Ranbp10_set_C.pdf › Supplemental Dataset 1/C-mRNA_nonrhythm_translation_rhyth/Ranbp10_set_C.pdf]

# Ranbp3l

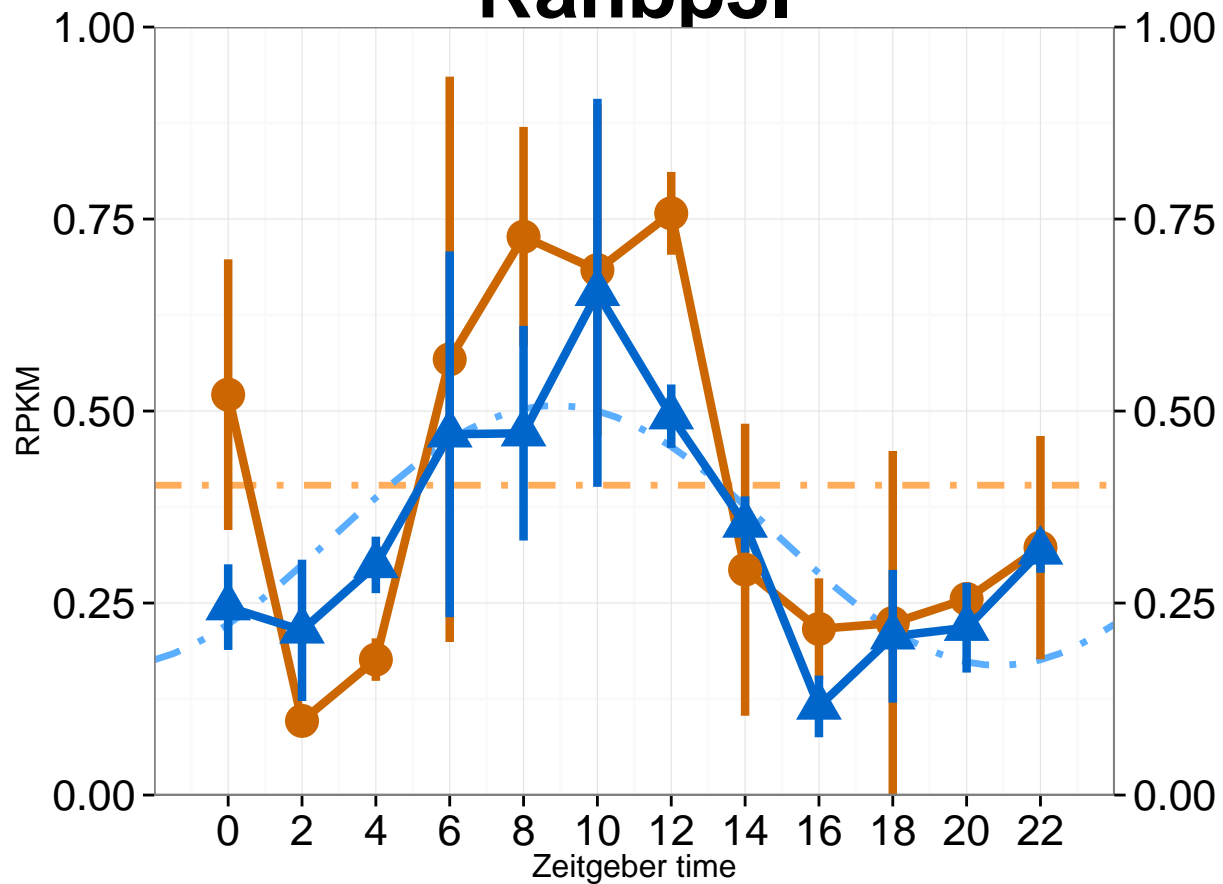

# Ranbp3l

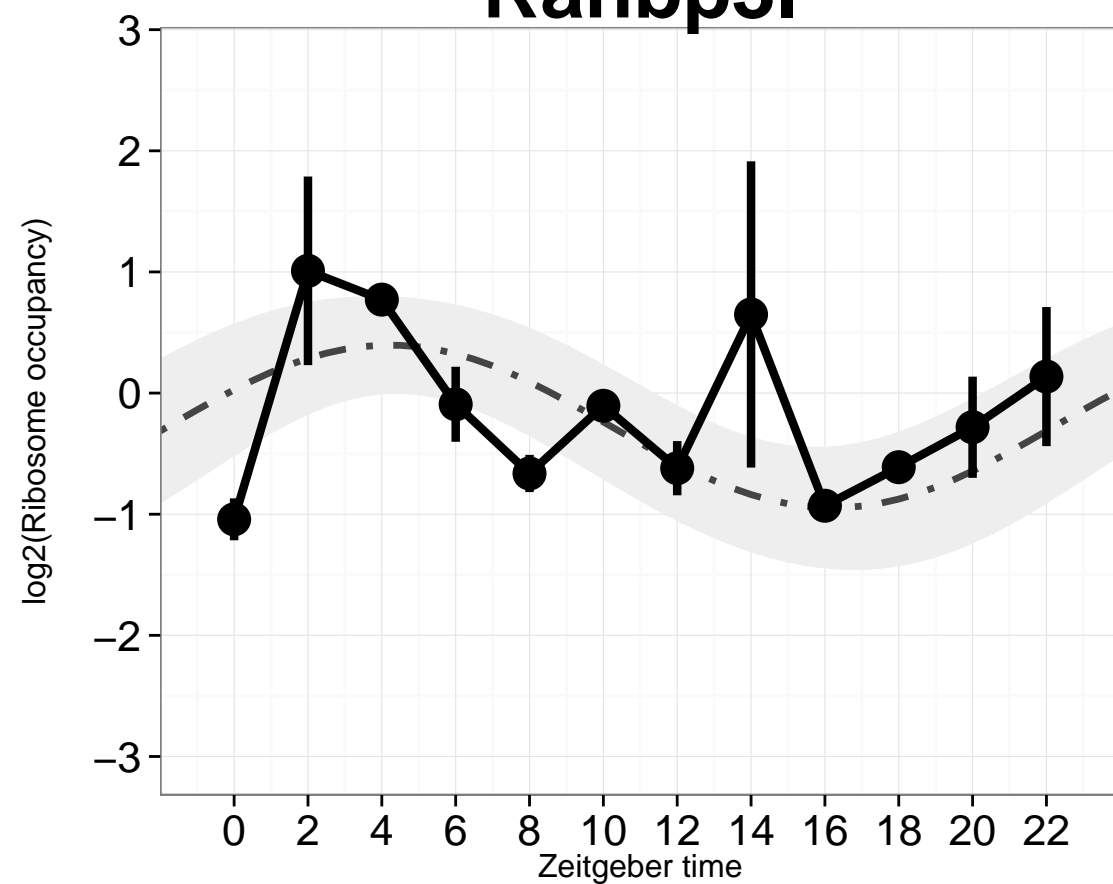

Supplement: SuppDataset_1.zip [file Ranbp3l_set_C.pdf › Supplemental Dataset 1/C-mRNA_nonrhythm_translation_rhyth/Ranbp3l_set_C.pdf]

# Rangrf

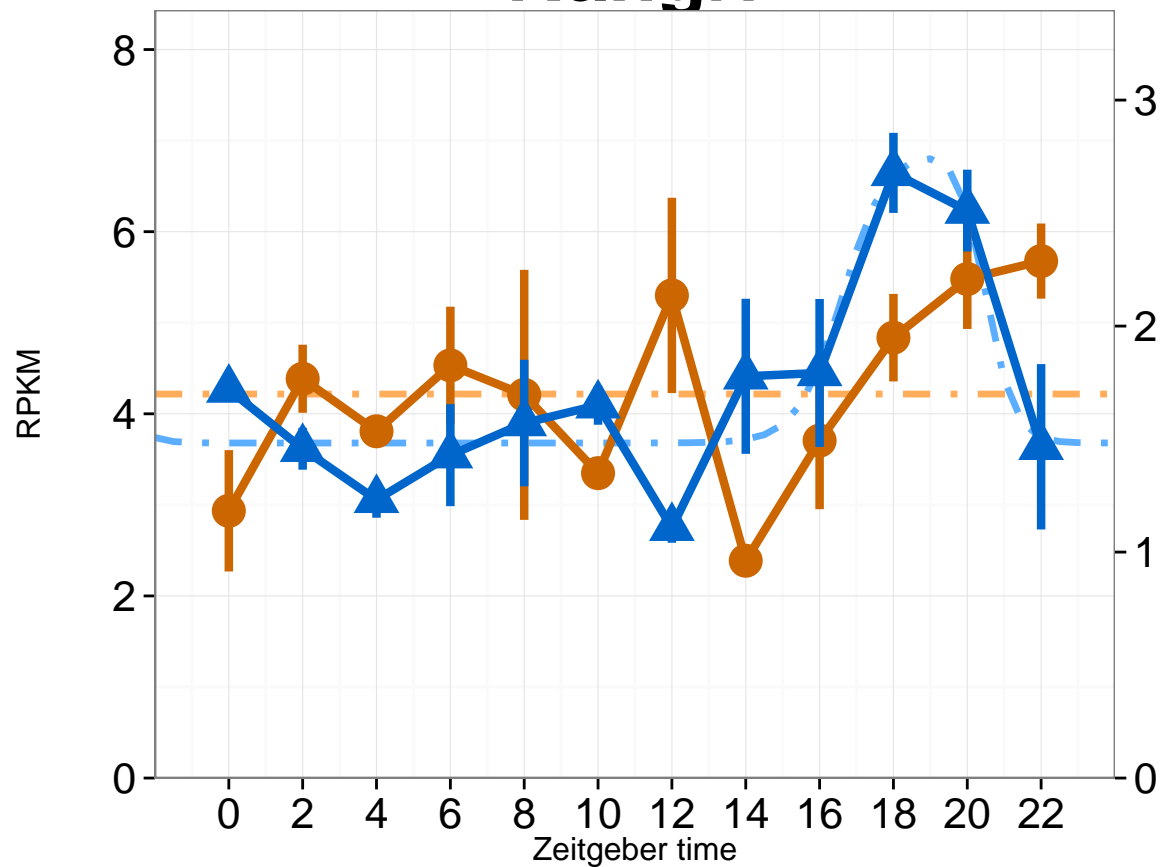

# Rangrf

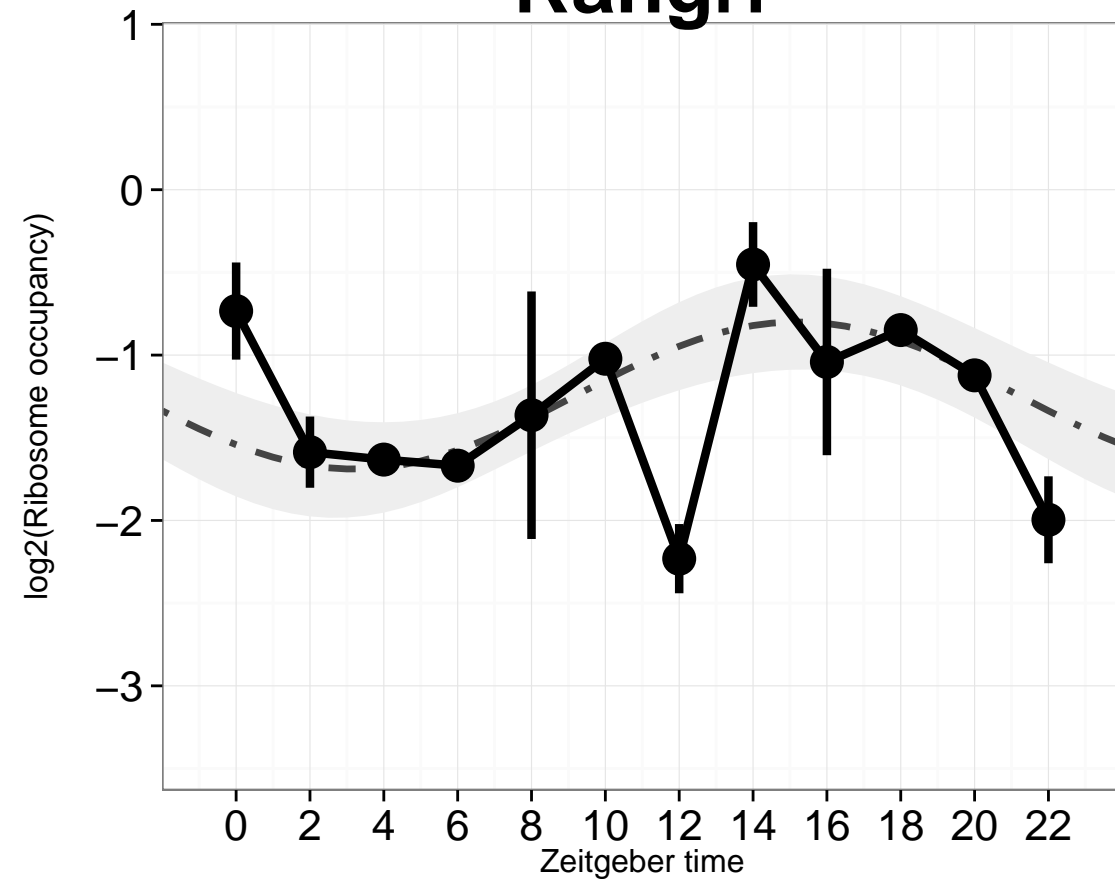

Supplement: SuppDataset_1.zip [file Rangrf_set_C.pdf › Supplemental Dataset 1/C-mRNA_nonrhythm_translation_rhyth/Rangrf_set_C.pdf]

## Rapgef3

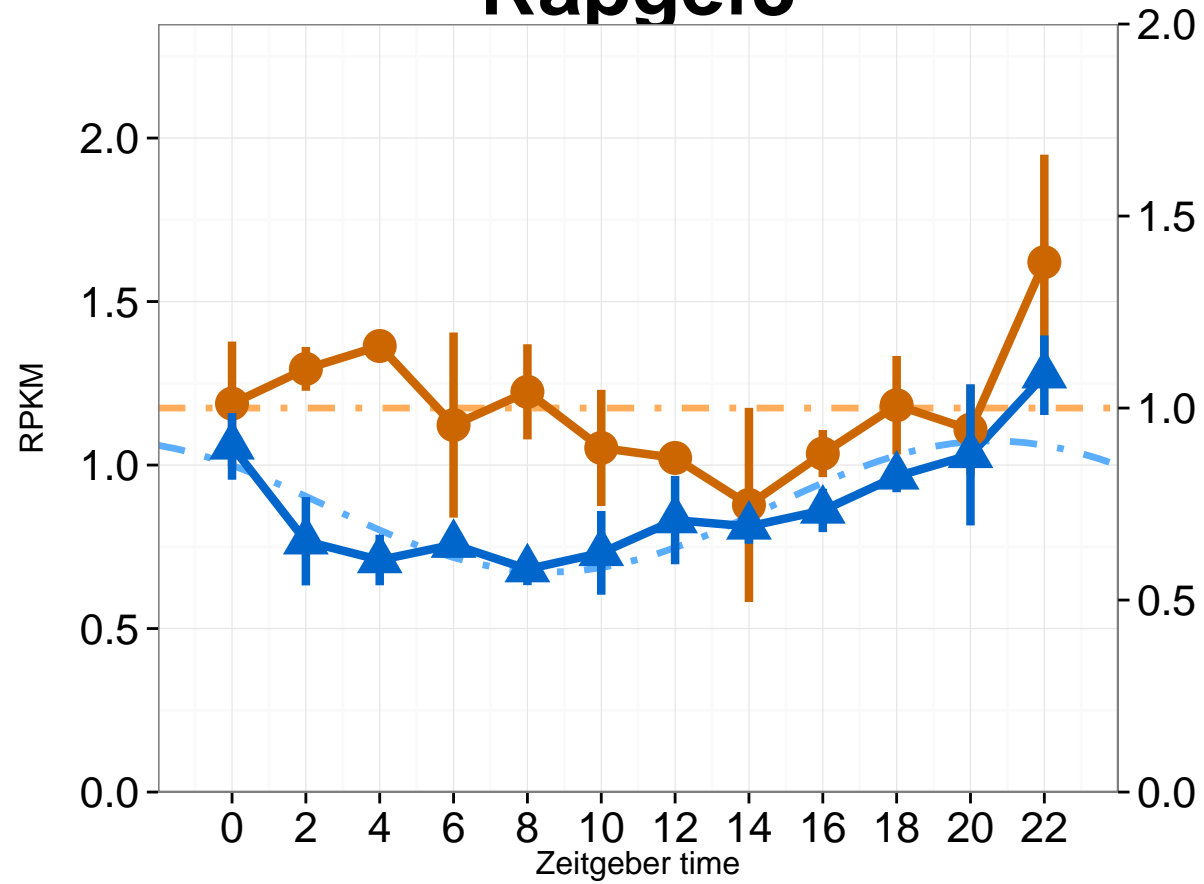

## Rapgef3

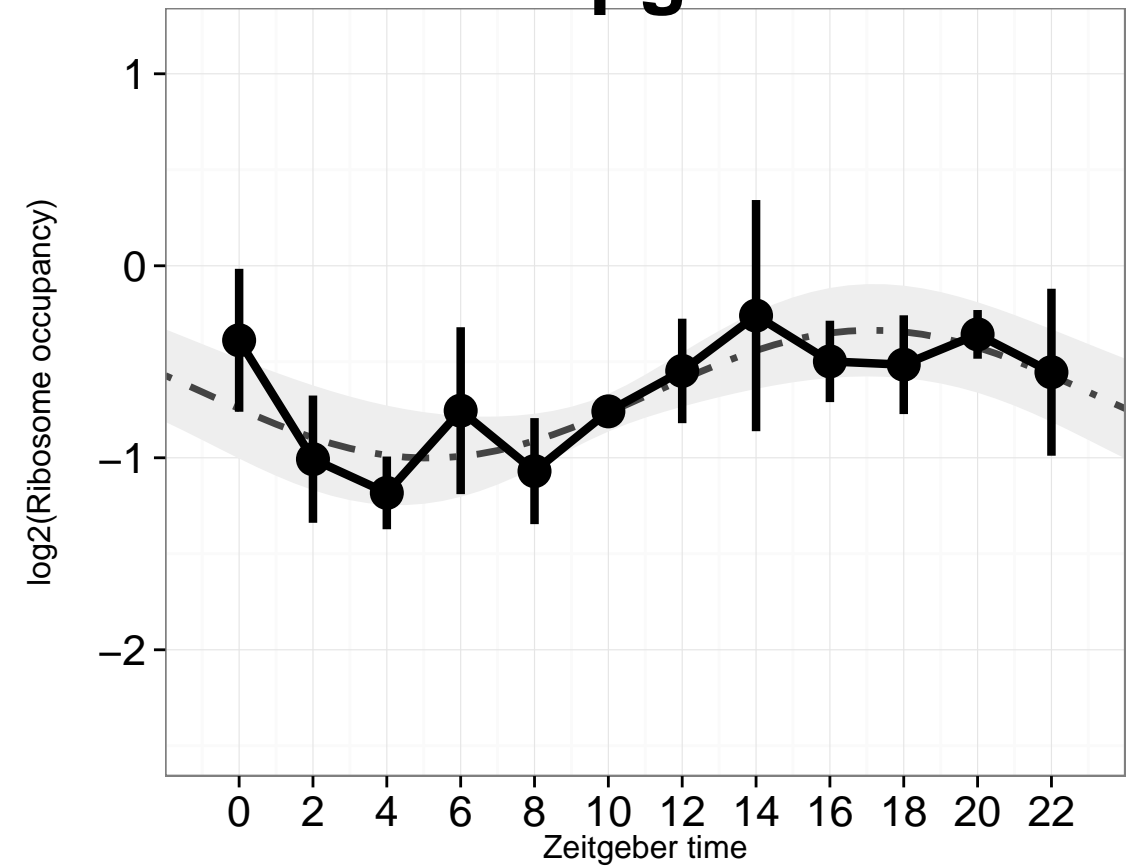

Supplement: SuppDataset_1.zip [file Rapgef3_set_C.pdf › Supplemental Dataset 1/C-mRNA_nonrhythm_translation_rhyth/Rapgef3_set_C.pdf]

# Rasgef1b

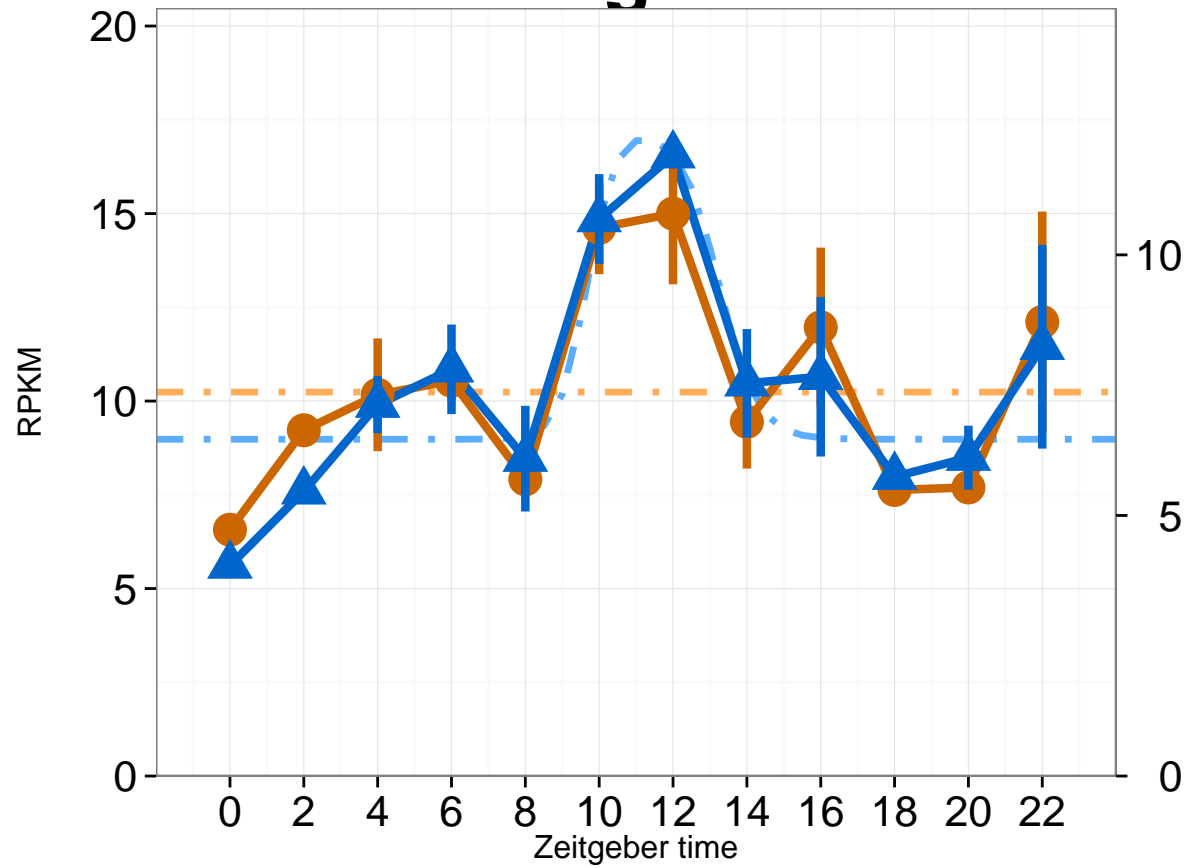

# Rasgef1b

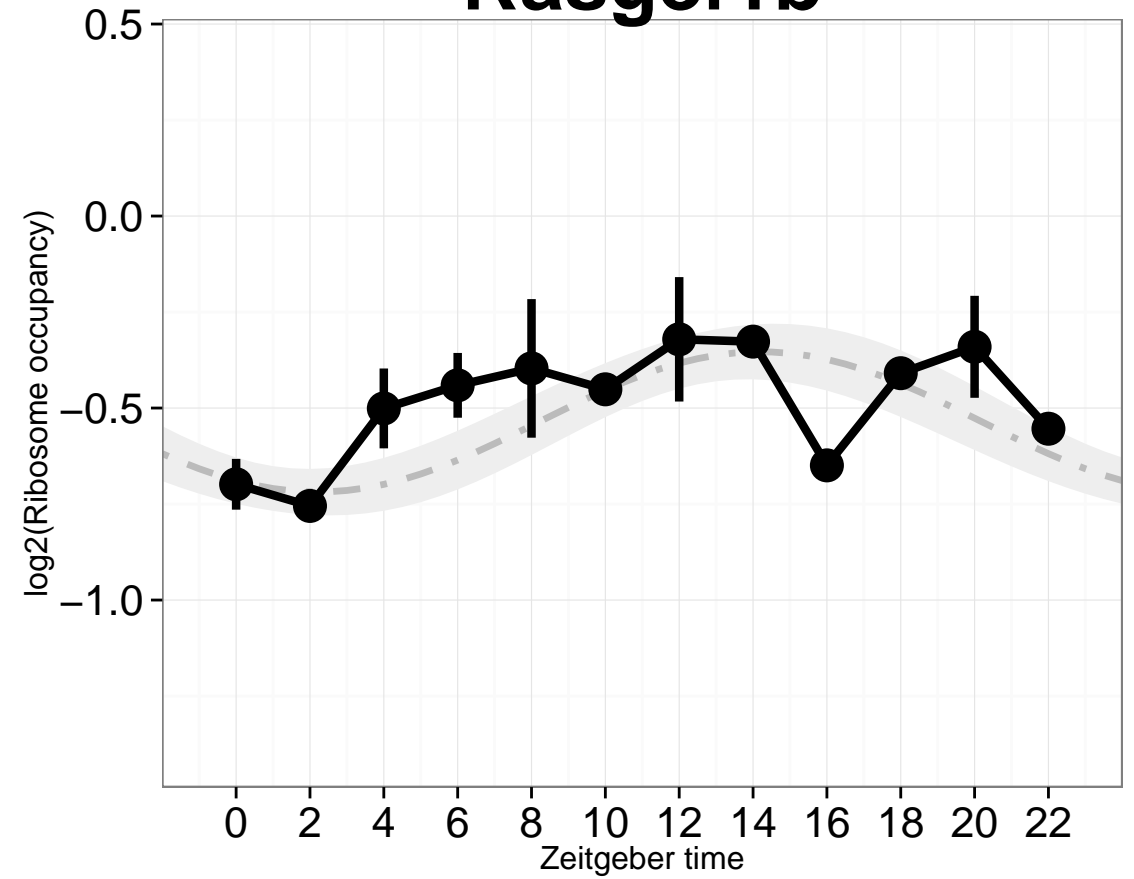

Supplement: SuppDataset_1.zip [file Rasgef1b_set_C.pdf › Supplemental Dataset 1/C-mRNA_nonrhythm_translation_rhyth/Rasgef1b_set_C.pdf]

**Rasl11a TR**

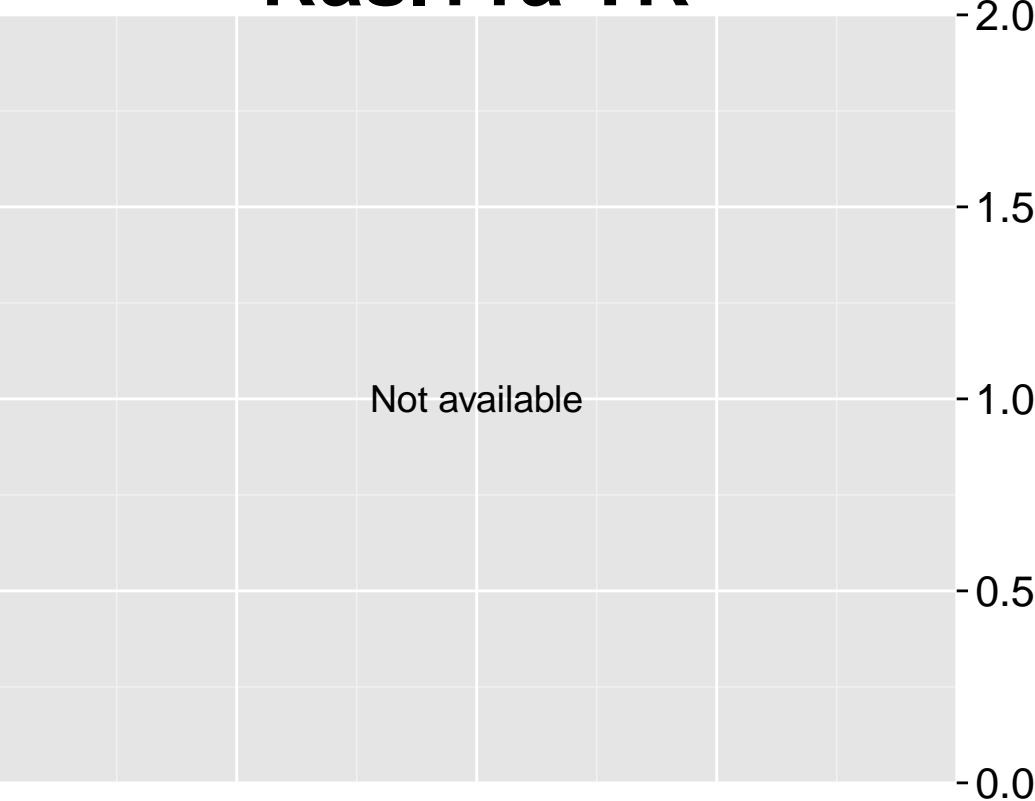

**Rasl11a log2(Ribosome occupancy**

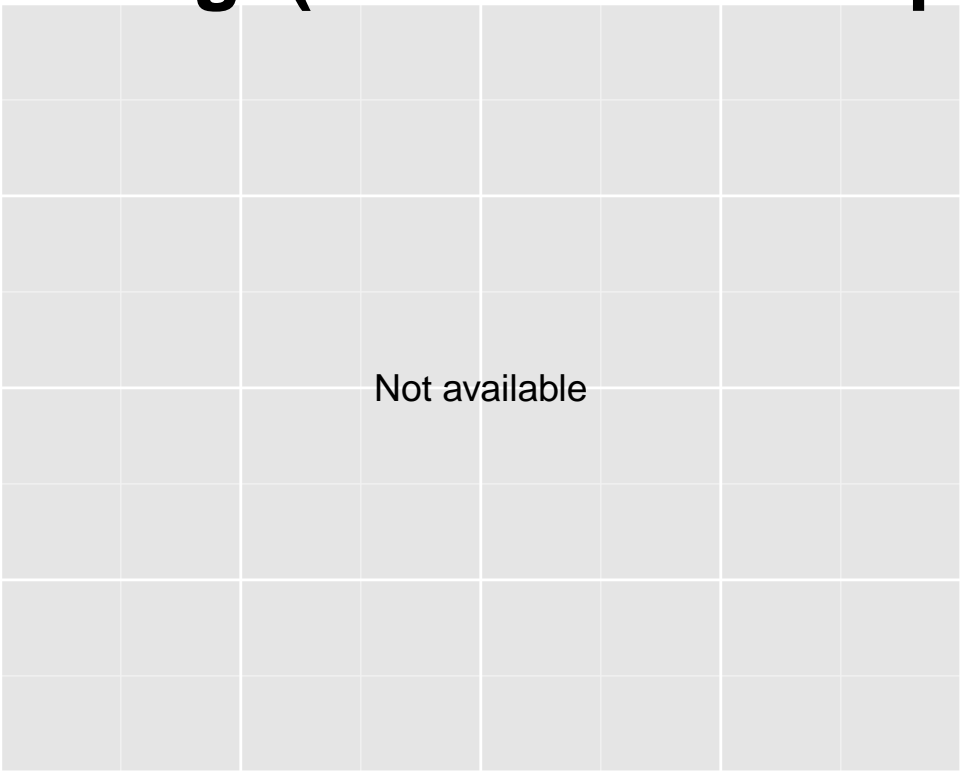

Supplement: SuppDataset_1.zip [file Rasl11a_set_C.pdf › Supplemental Dataset 1/C-mRNA_nonrhythm_translation_rhyth/Rasl11a_set_C.pdf]

# Rasl11b

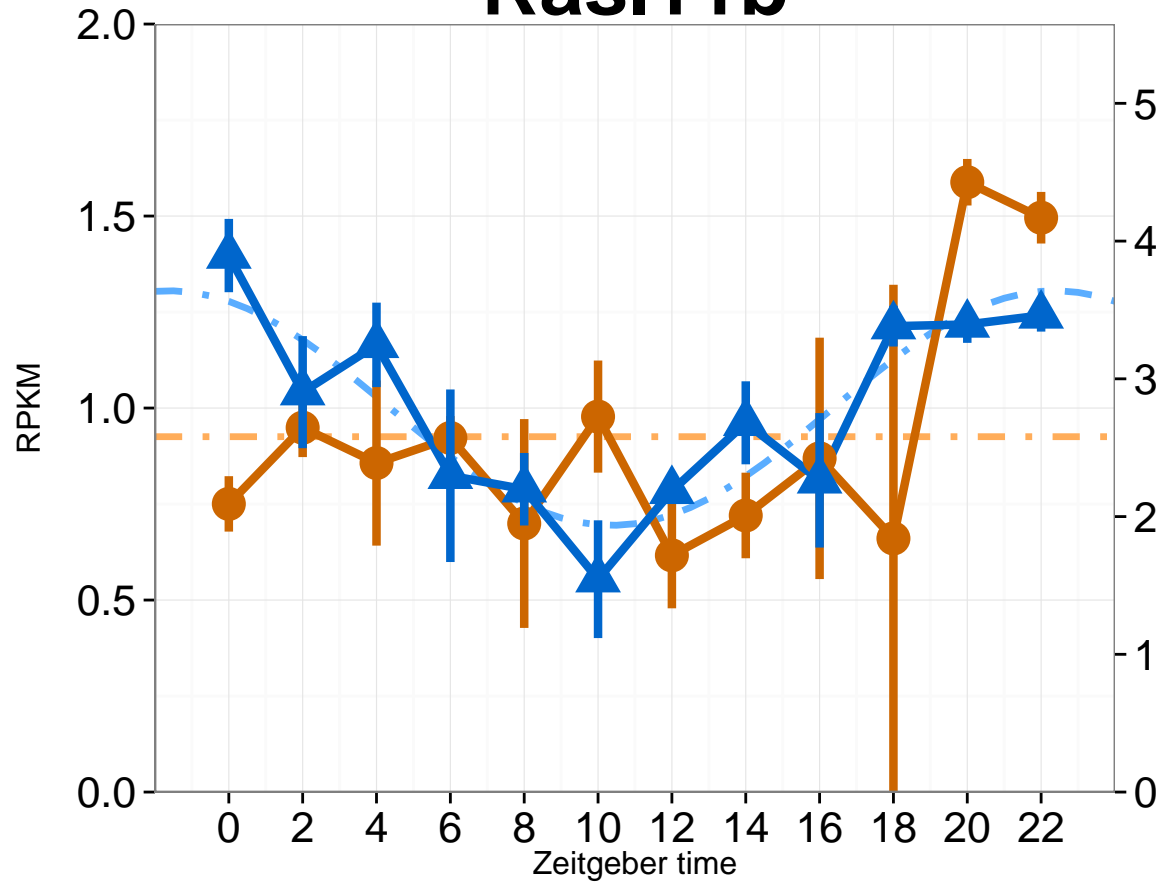

# Rasl11b

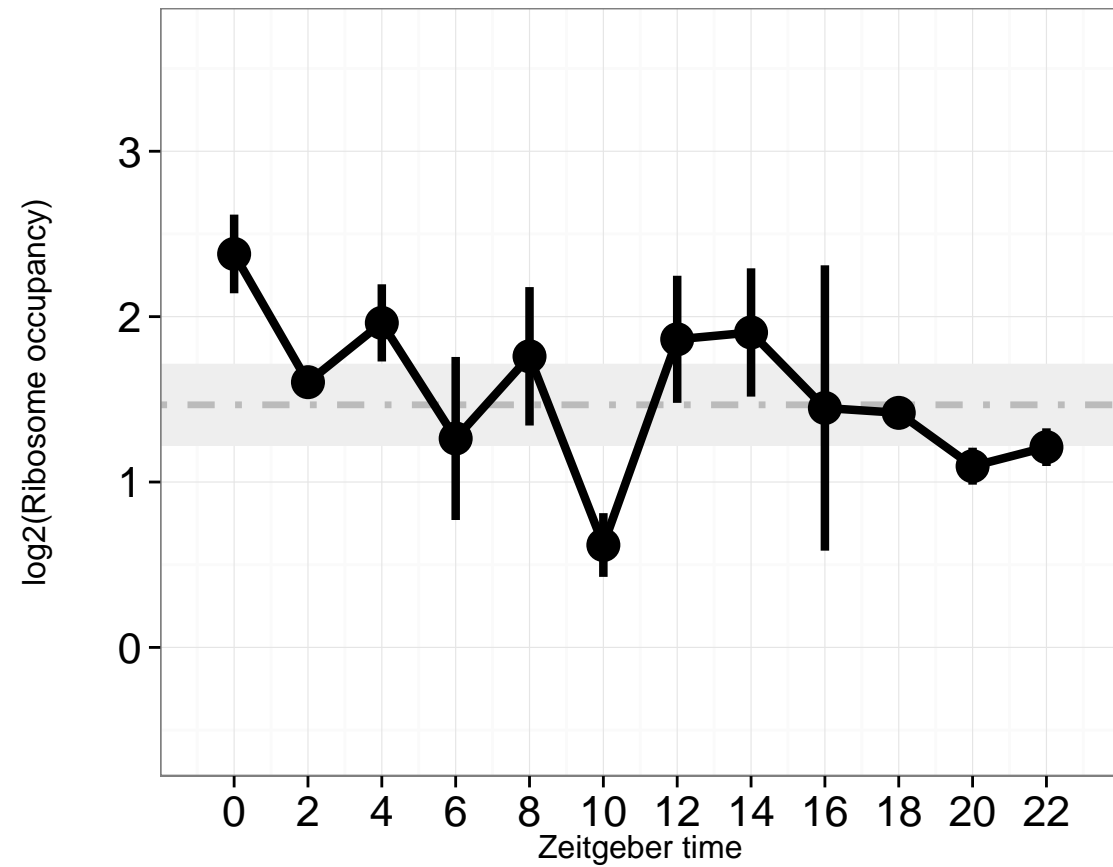

Supplement: SuppDataset_1.zip [file Rasl11b_set_C.pdf › Supplemental Dataset 1/C-mRNA_nonrhythm_translation_rhyth/Rasl11b_set_C.pdf]

## Rassf3

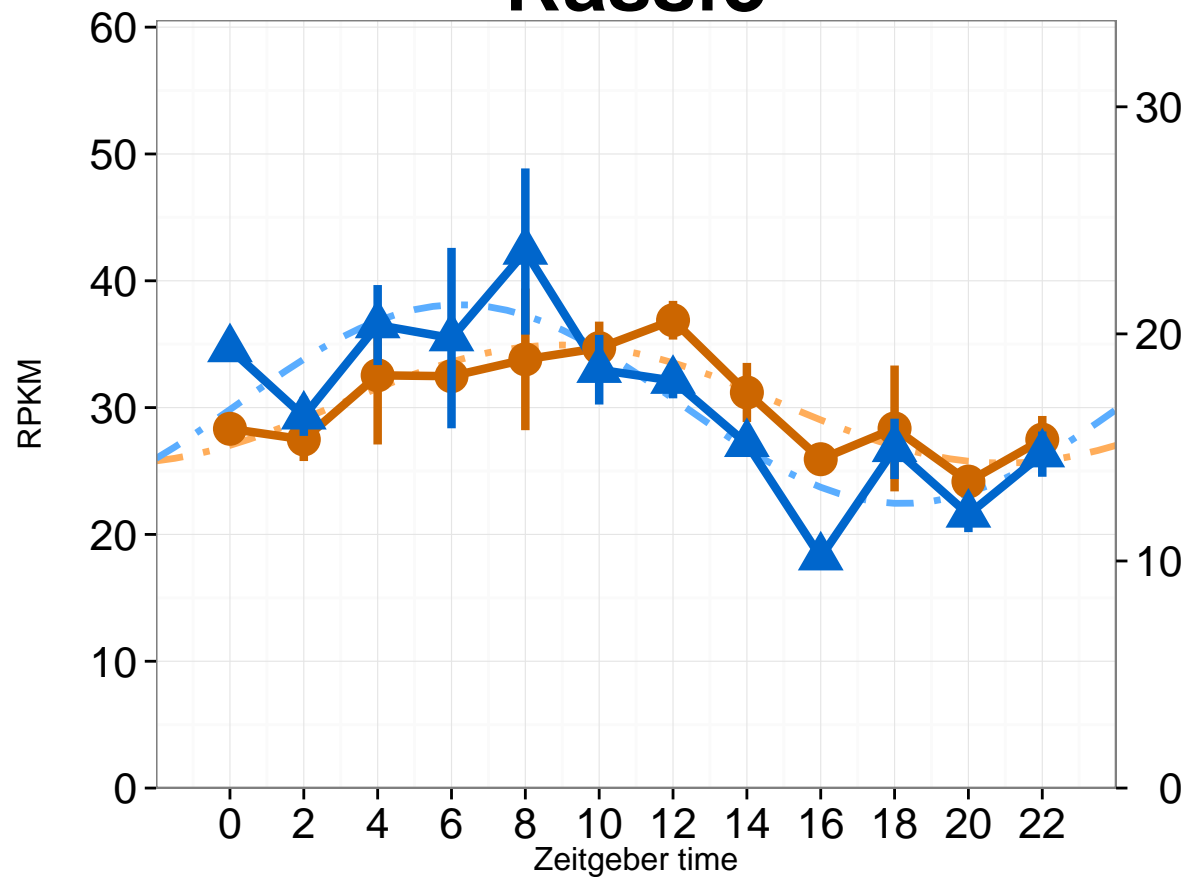

## Rassf3

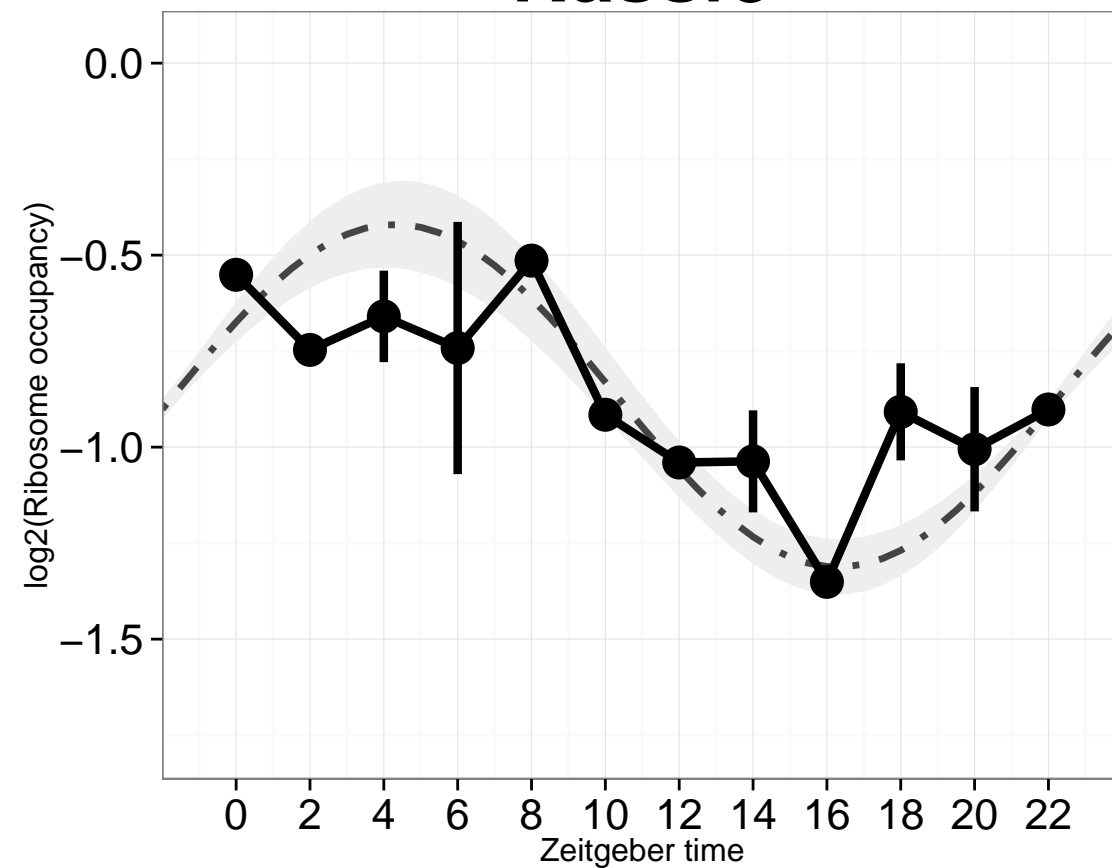

Supplement: SuppDataset_1.zip [file Rassf3_set_C.pdf › Supplemental Dataset 1/C-mRNA_nonrhythm_translation_rhyth/Rassf3_set_C.pdf]

# Rbm12b2

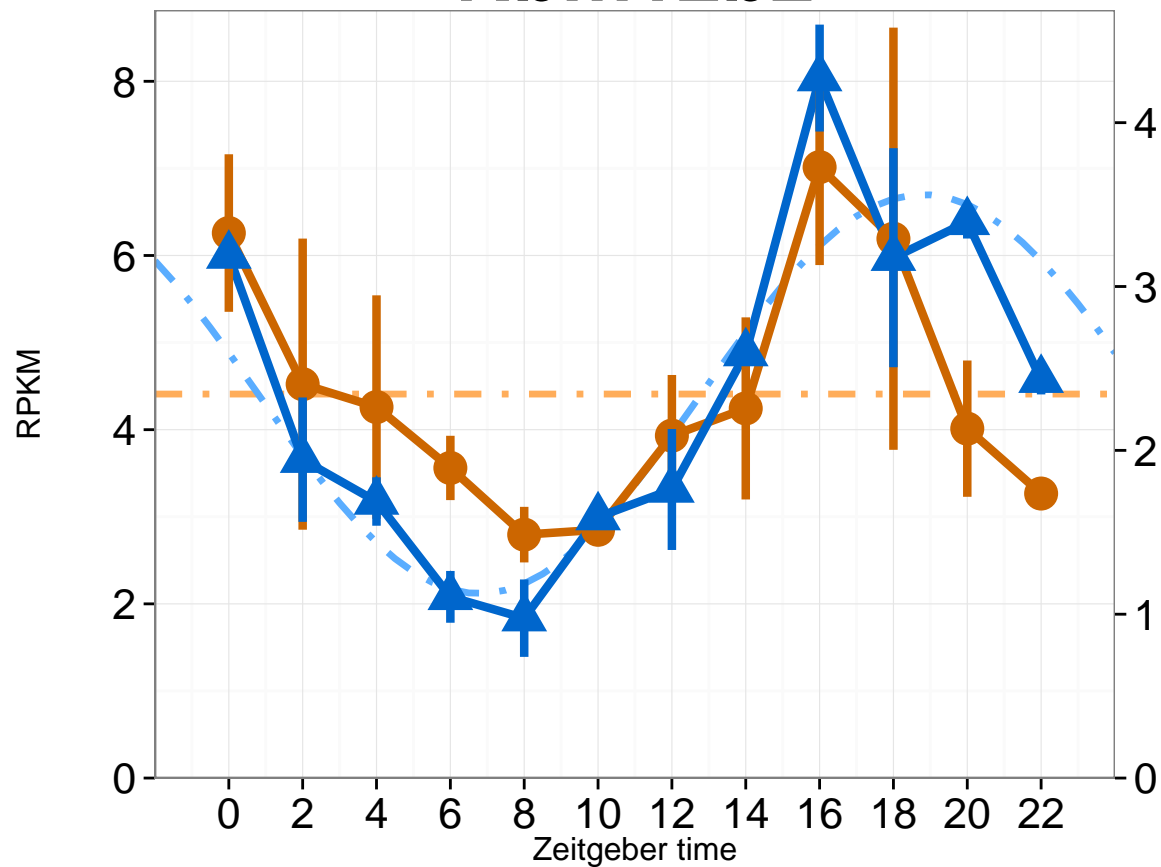

# Rbm12b2

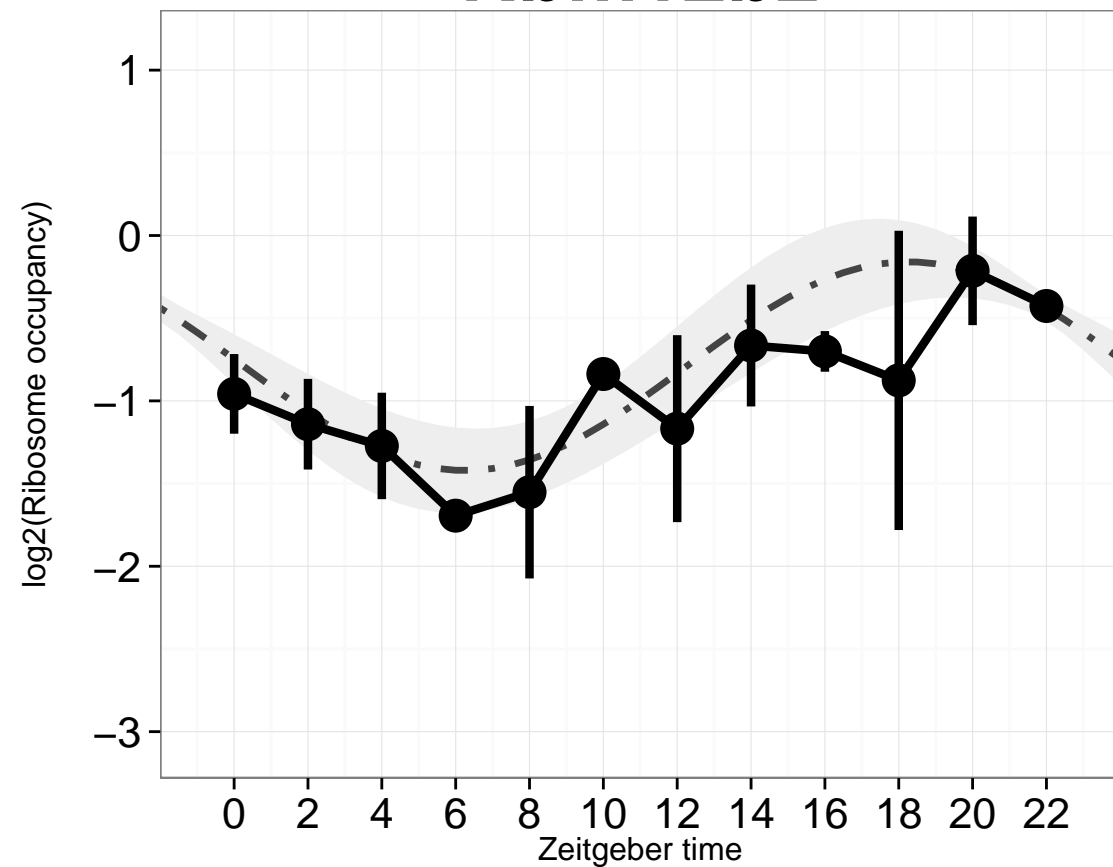

Supplement: SuppDataset_1.zip [file Rbm12b2_set_C.pdf › Supplemental Dataset 1/C-mRNA_nonrhythm_translation_rhyth/Rbm12b2_set_C.pdf]

# Rbm14

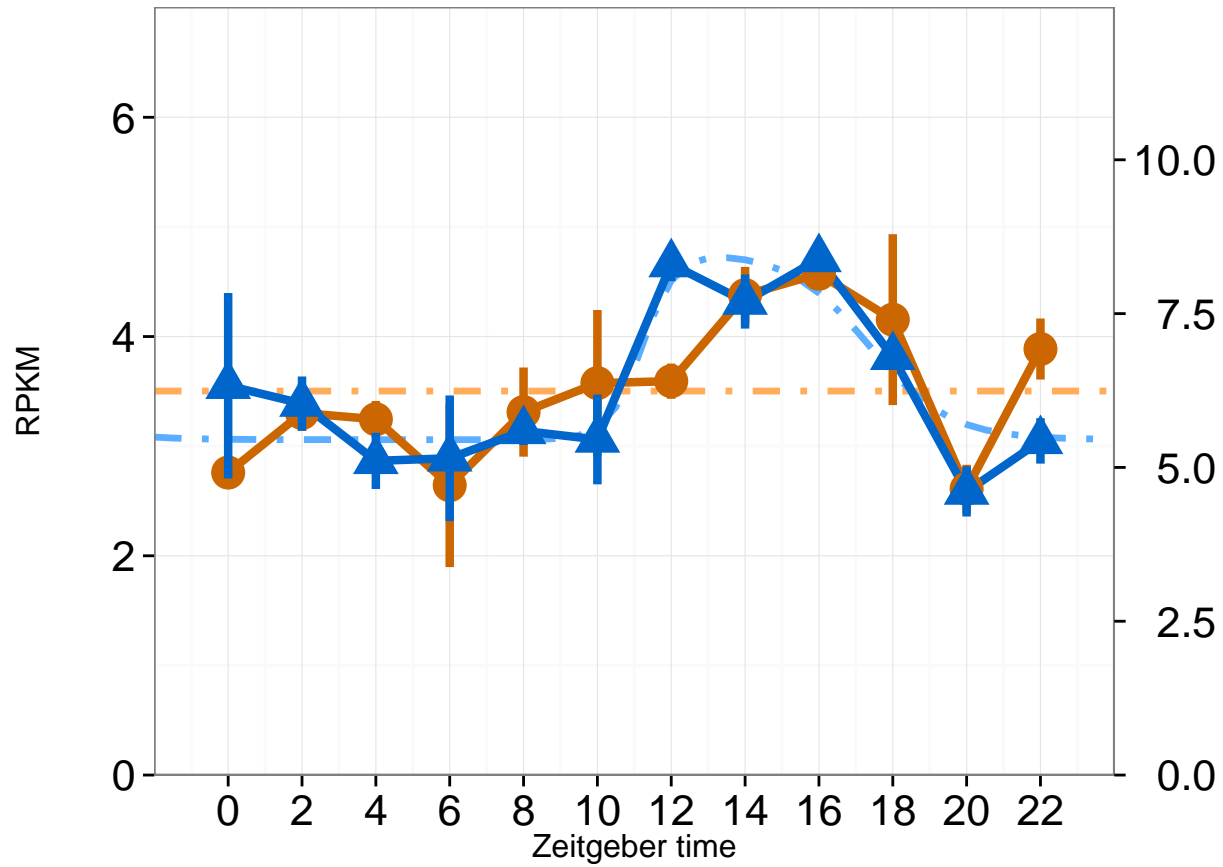

# Rbm14

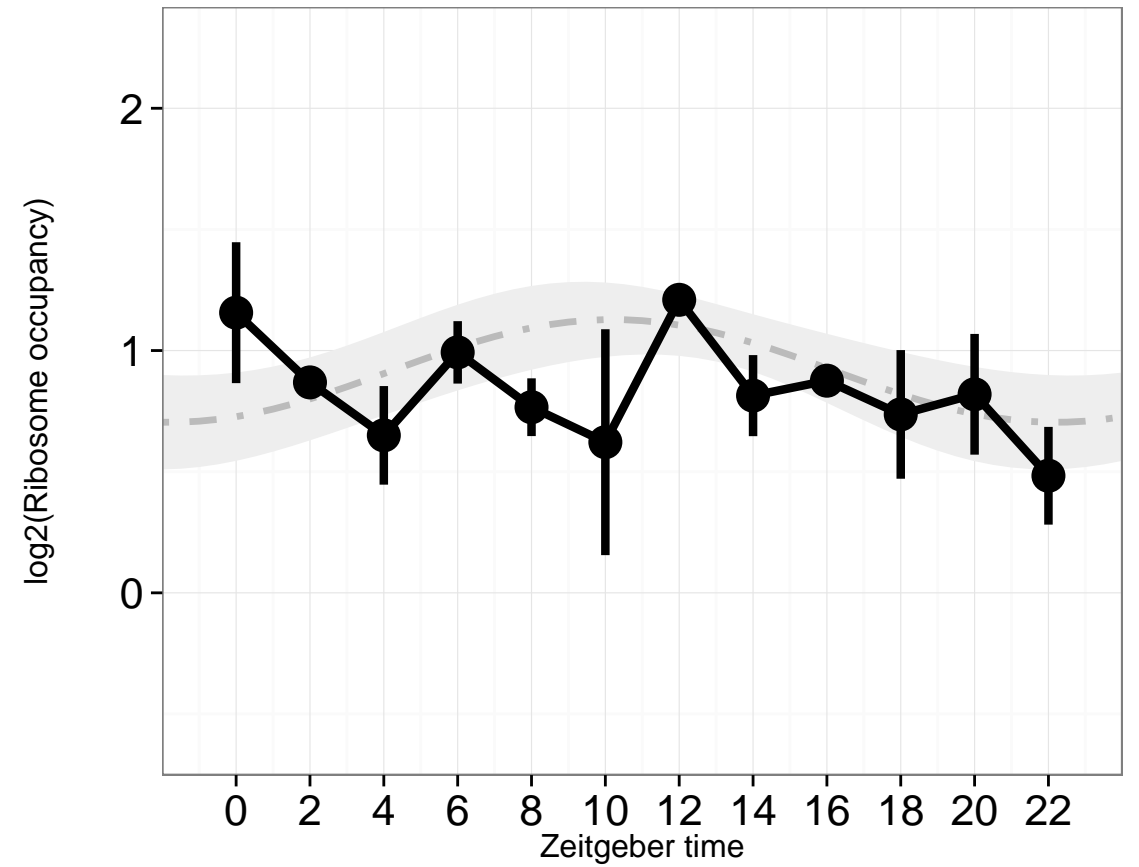

Supplement: SuppDataset_1.zip [file Rbm14_set_C.pdf › Supplemental Dataset 1/C-mRNA_nonrhythm_translation_rhyth/Rbm14_set_C.pdf]

## Rbm43

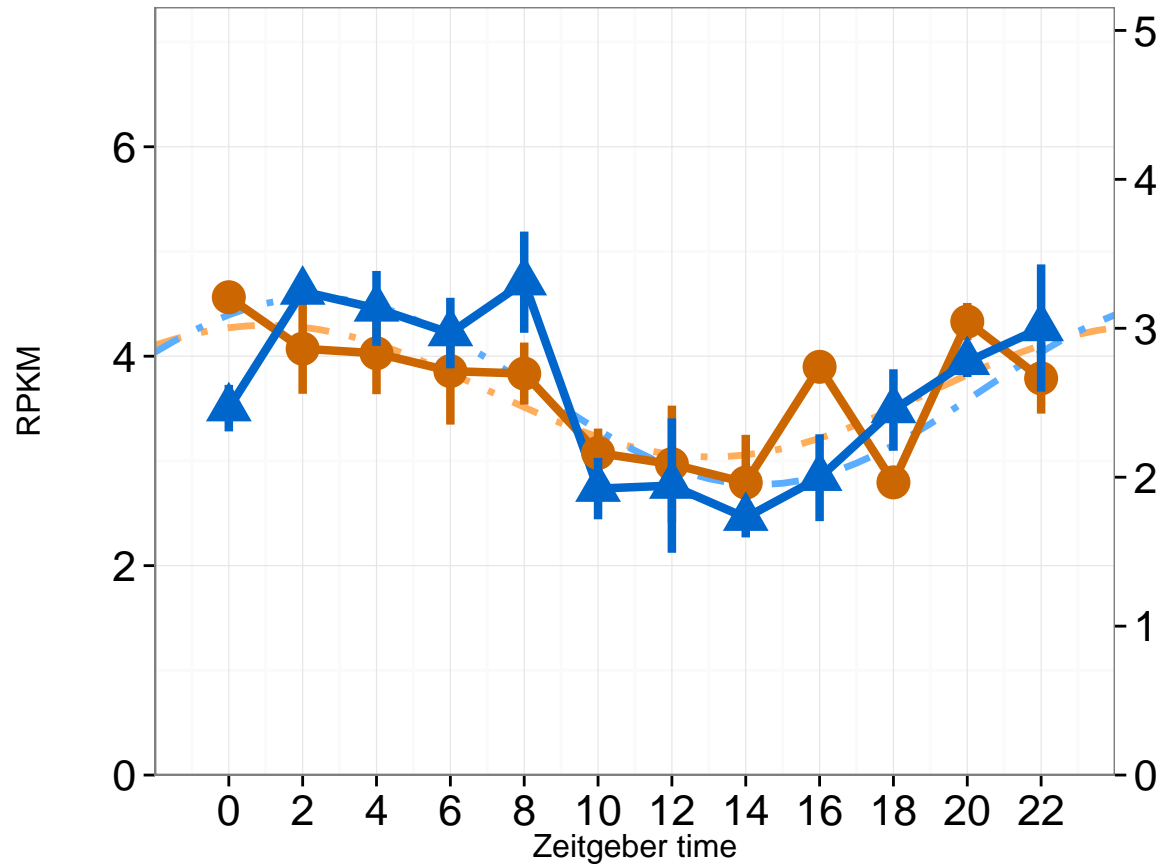

## Rbm43

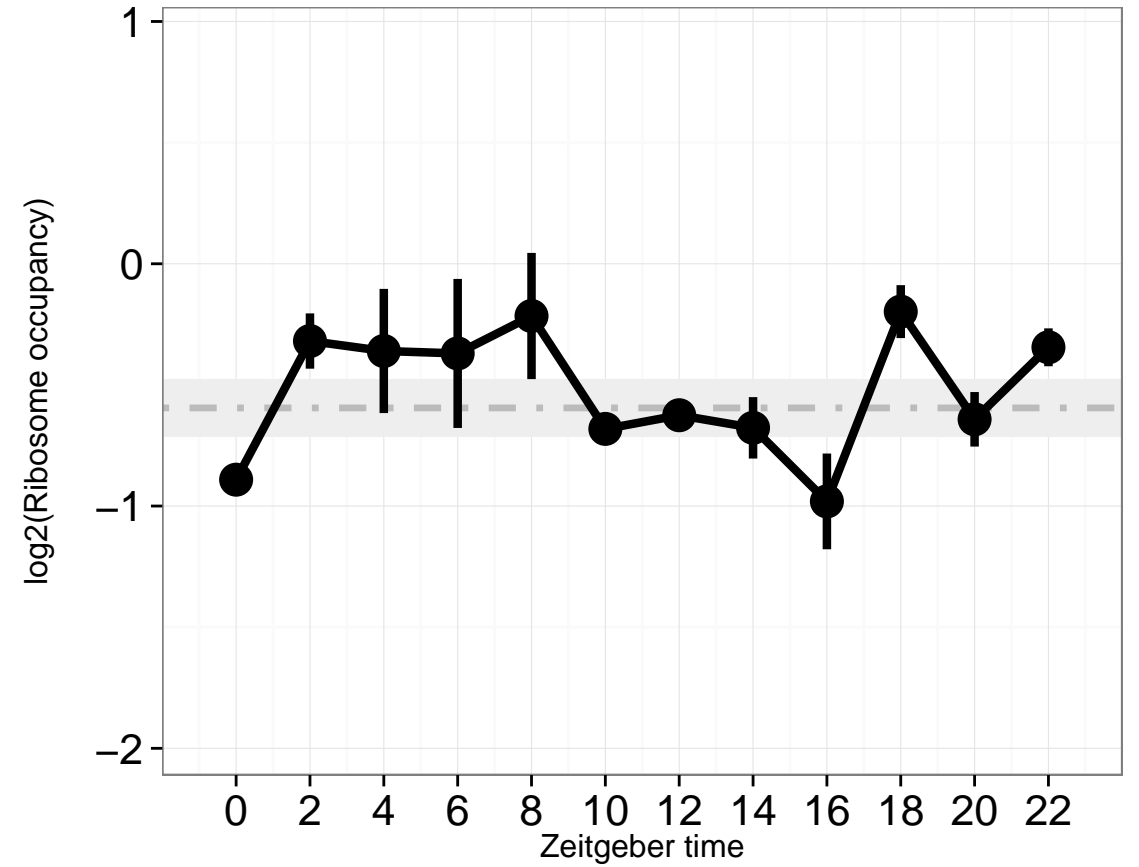

Supplement: SuppDataset_1.zip [file Rbm43_set_C.pdf › Supplemental Dataset 1/C-mRNA_nonrhythm_translation_rhyth/Rbm43_set_C.pdf]

## RbmX2

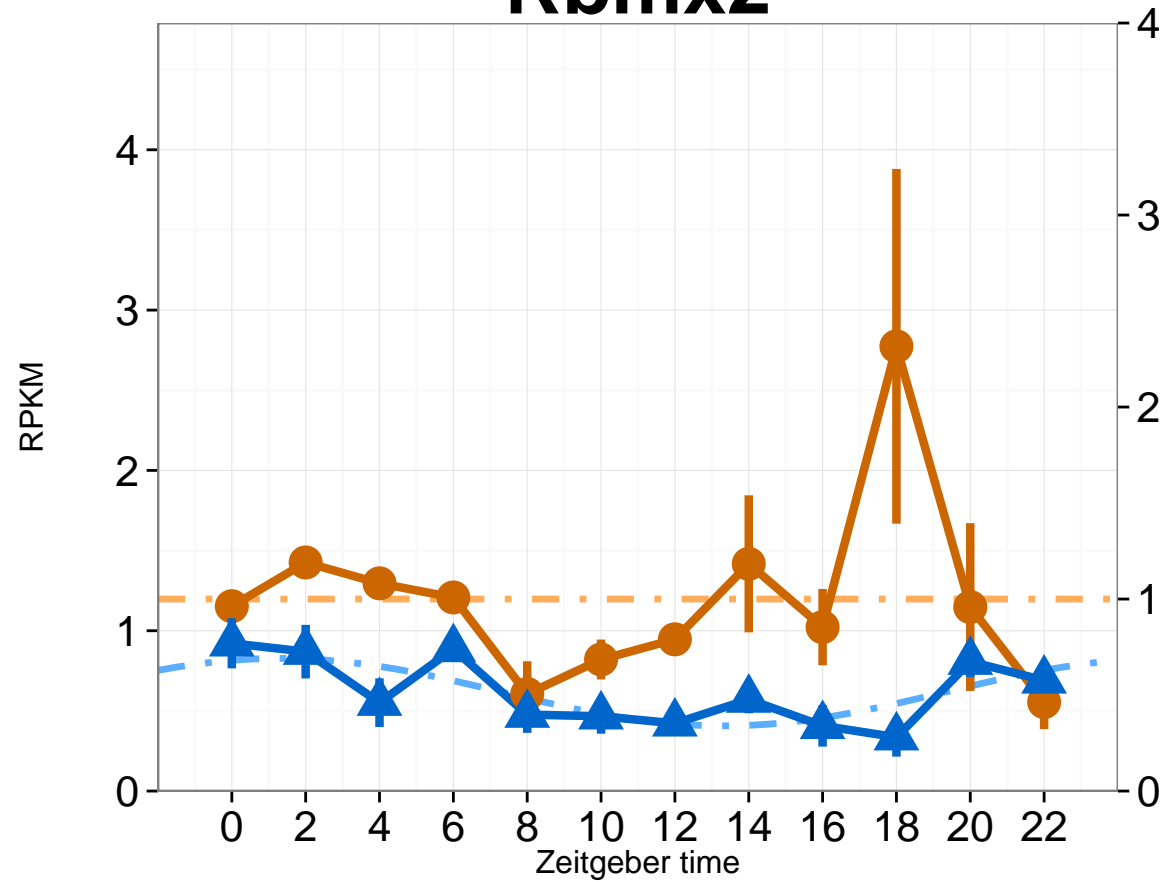

## RbmX2

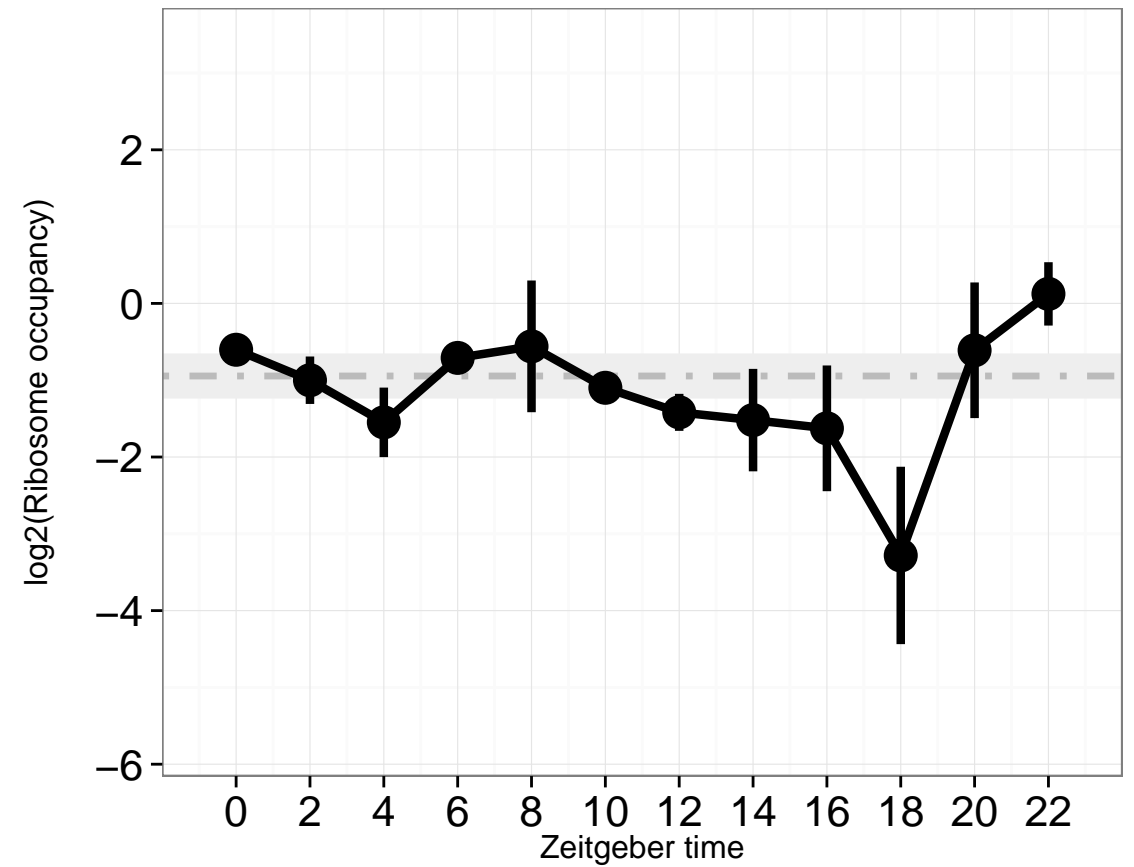

Supplement: SuppDataset_1.zip [file Rbmx2_set_C.pdf › Supplemental Dataset 1/C-mRNA_nonrhythm_translation_rhyth/Rbmx2_set_C.pdf]

## Rbpms

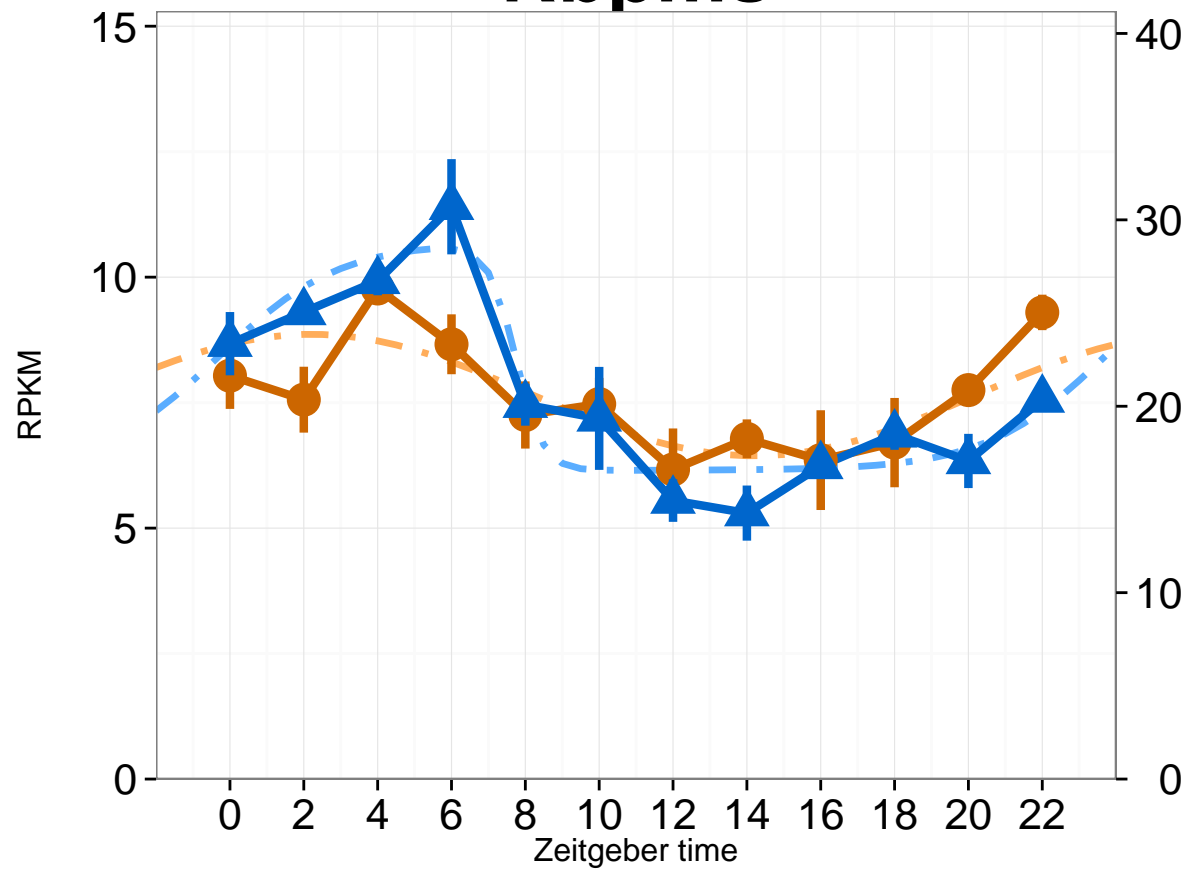

## Rbpms

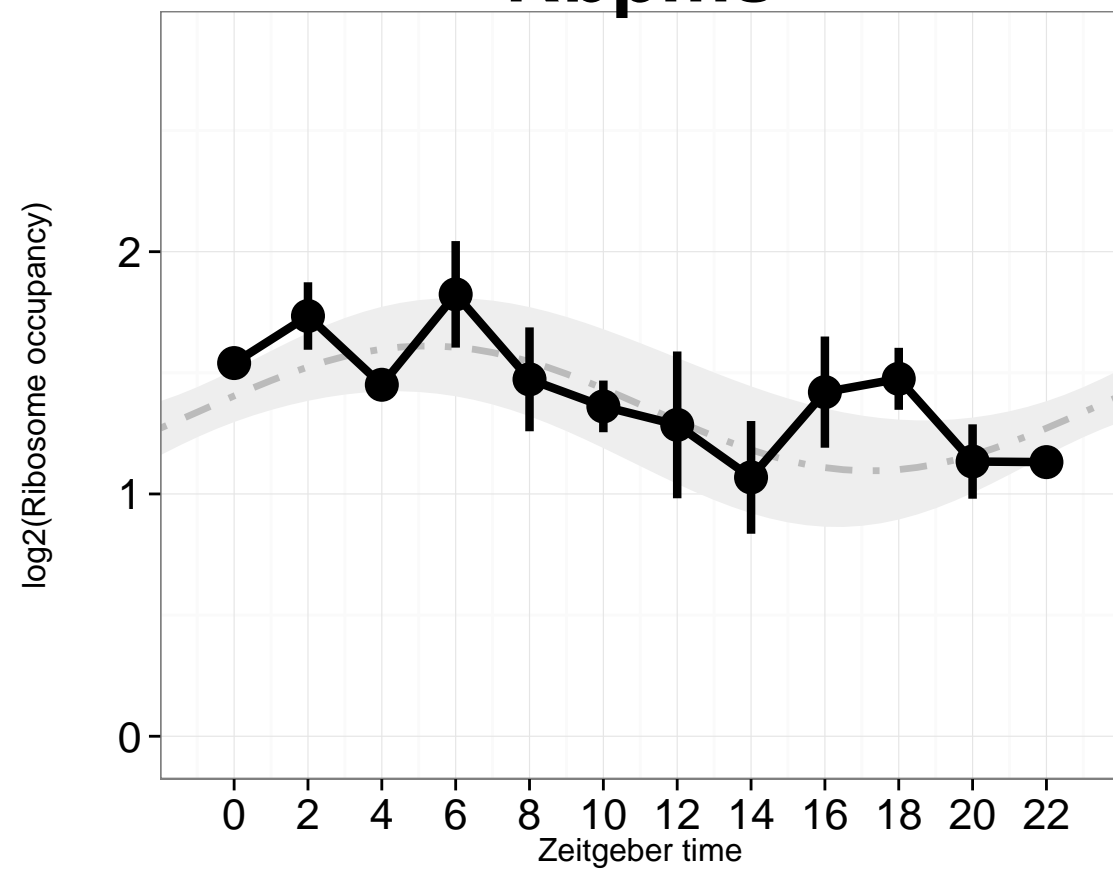

Supplement: SuppDataset_1.zip [file Rbpms_set_C.pdf › Supplemental Dataset 1/C-mRNA_nonrhythm_translation_rhyth/Rbpms_set_C.pdf]

**Retnlg TR**

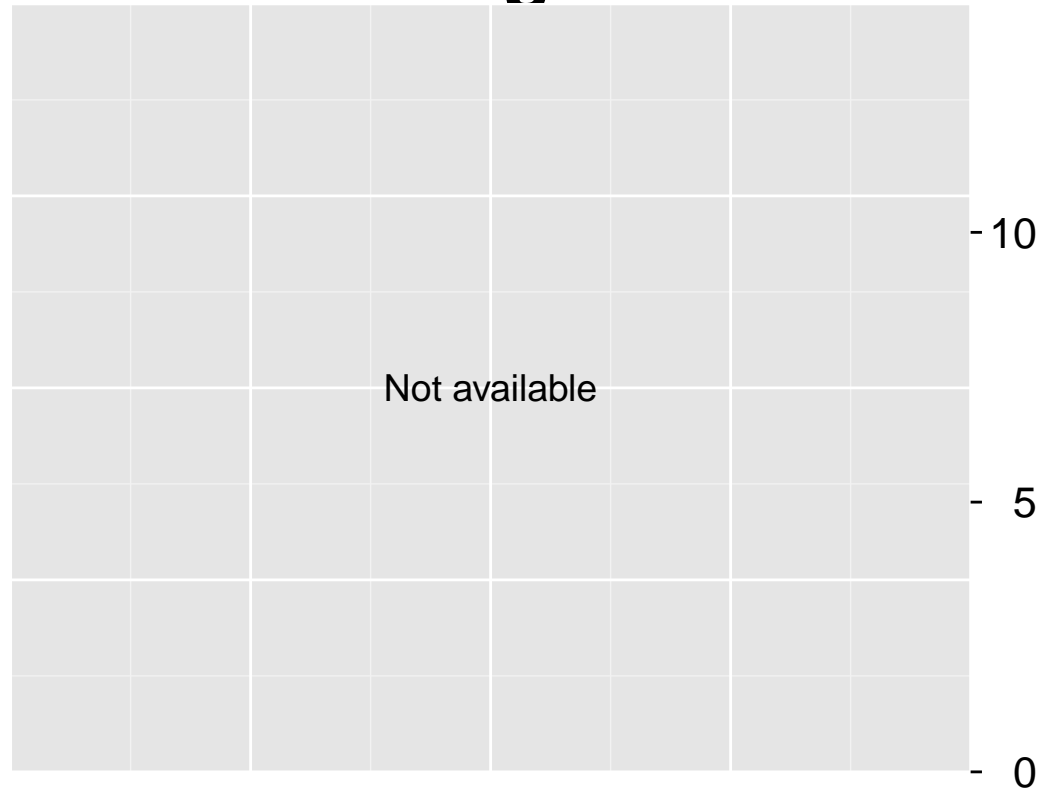

**Retnlg log2(Ribosome occupancy**

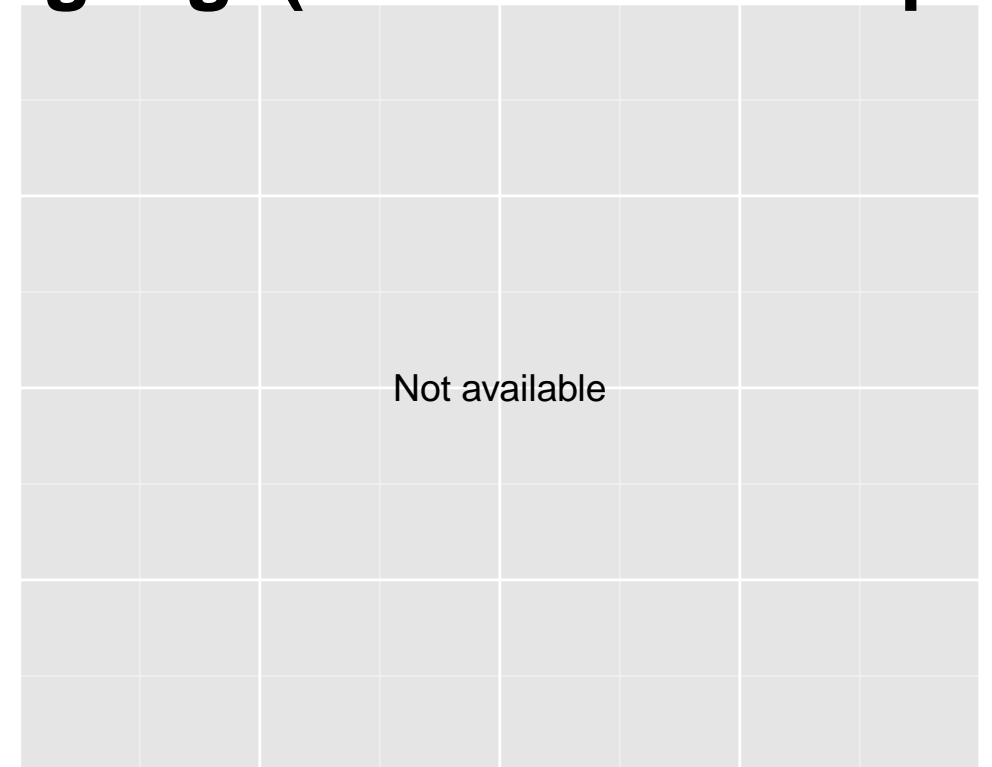

Supplement: SuppDataset_1.zip [file Retnlg_set_C.pdf › Supplemental Dataset 1/C-mRNA_nonrhythm_translation_rhyth/Retnlg_set_C.pdf]

## Rexo2

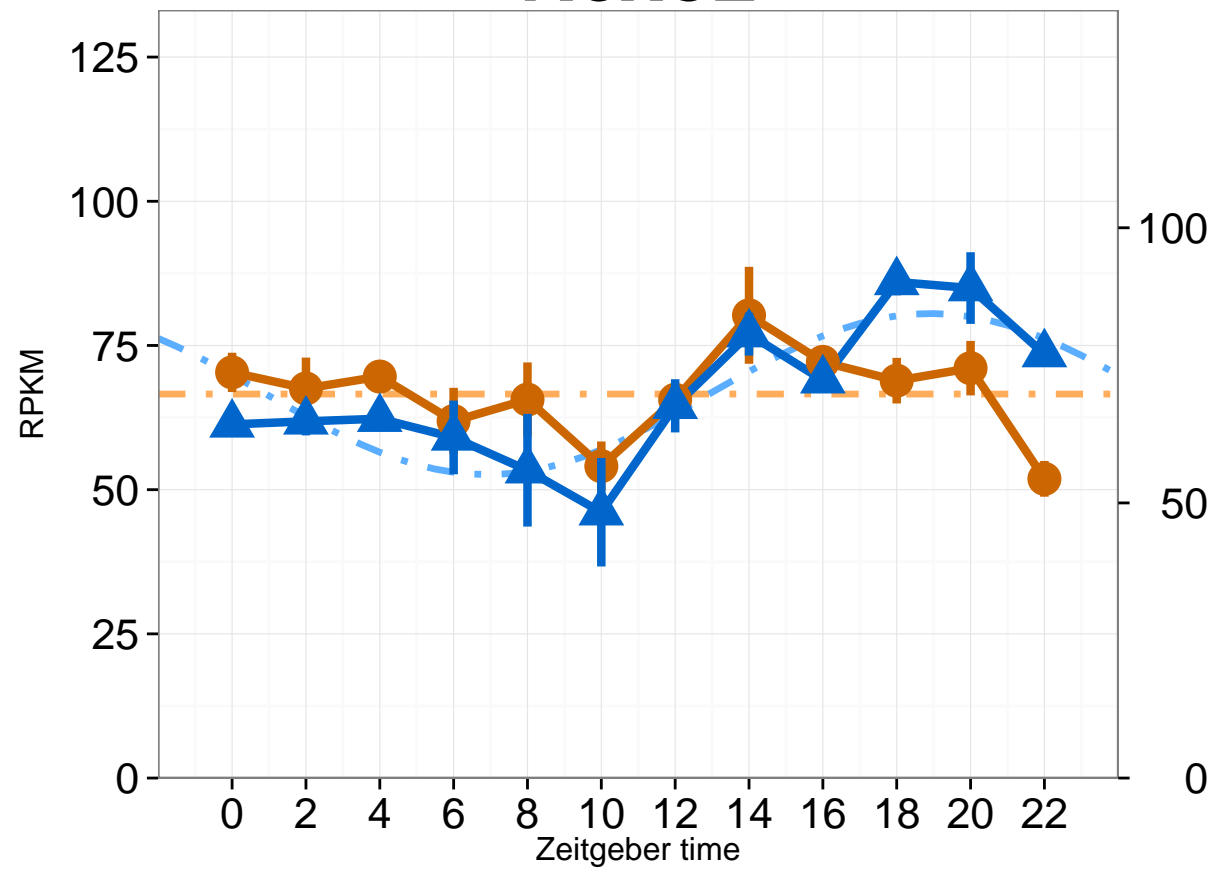

## Rexo2

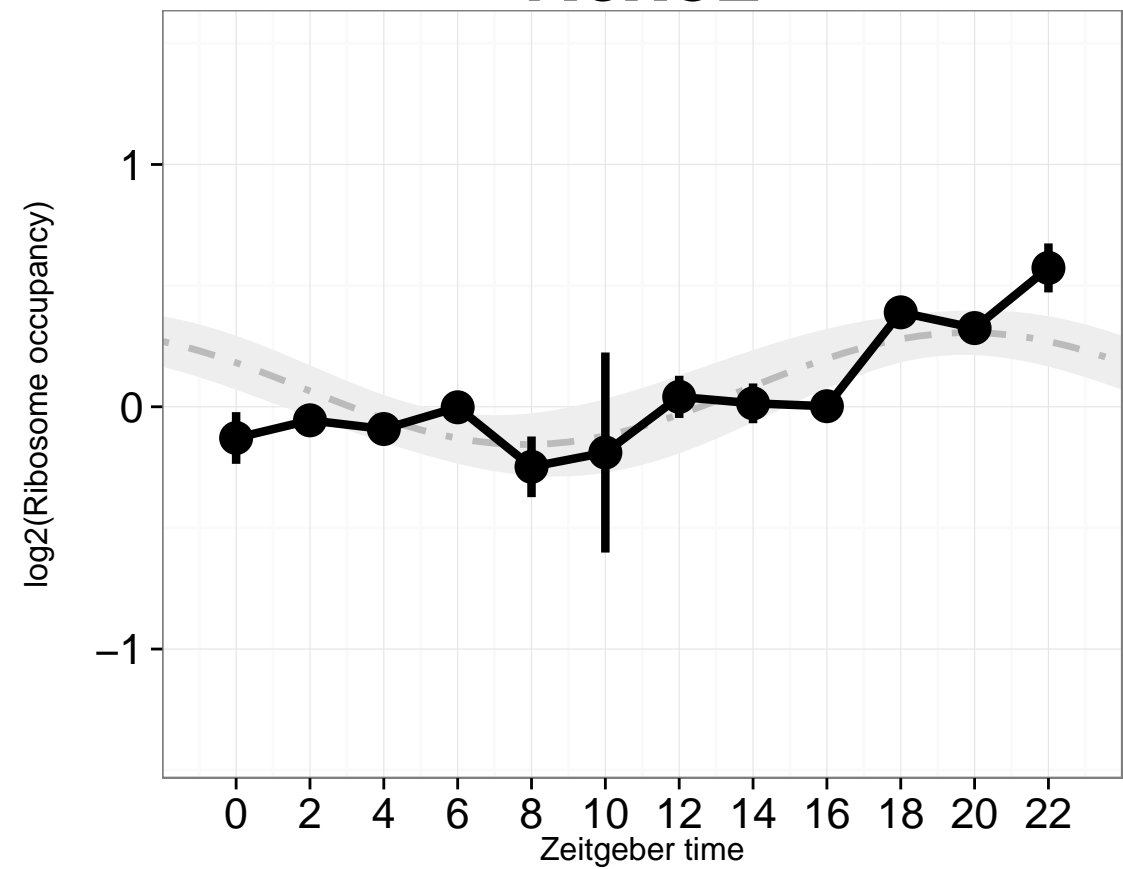

Supplement: SuppDataset_1.zip [file Rexo2_set_C.pdf › Supplemental Dataset 1/C-mRNA_nonrhythm_translation_rhyth/Rexo2_set_C.pdf]

## Rfc3

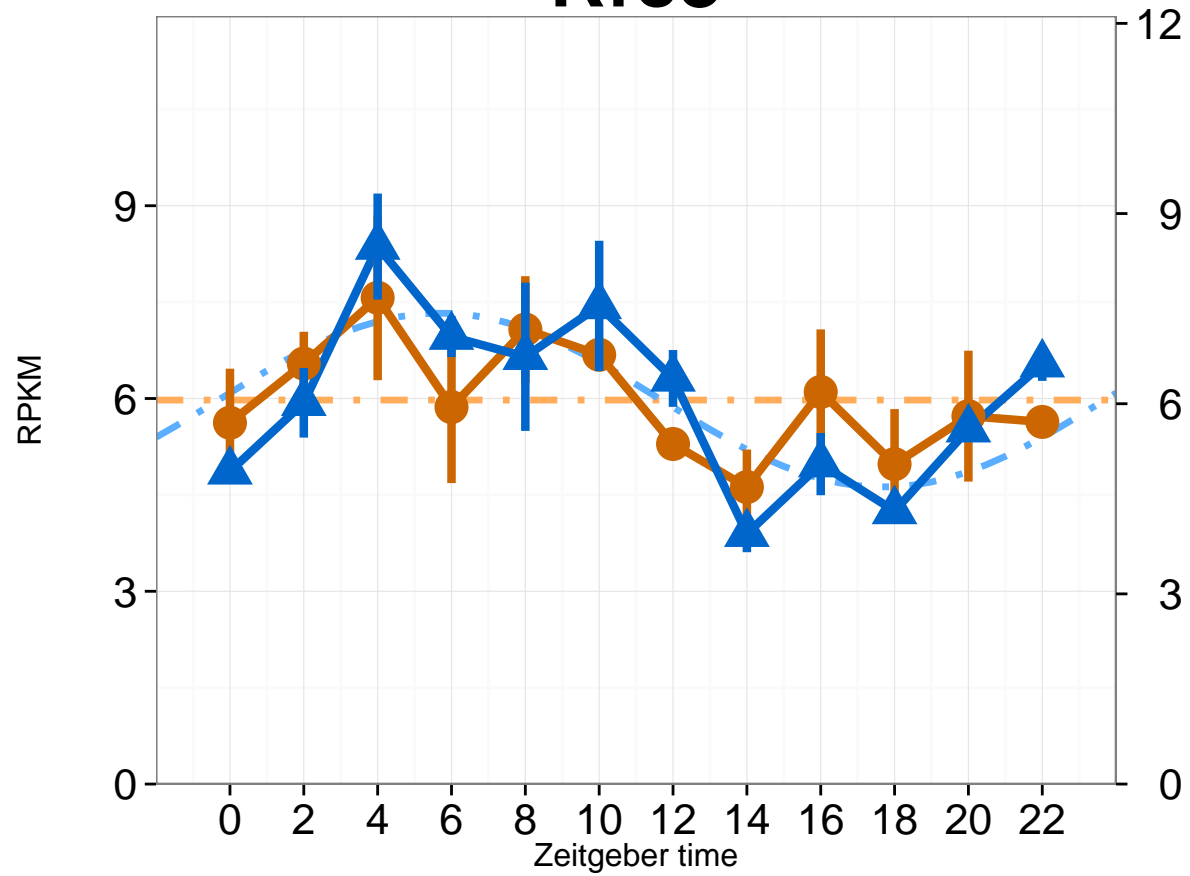

## Rfc3

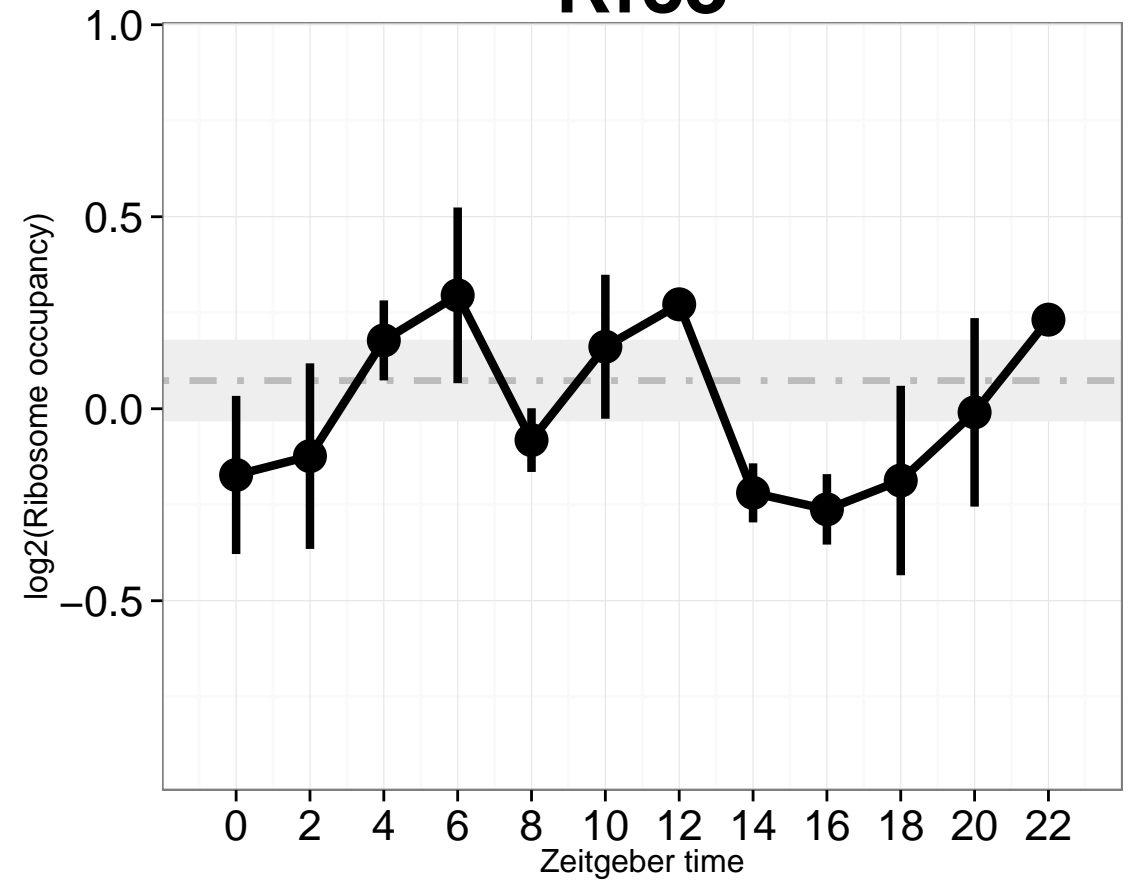

Supplement: SuppDataset_1.zip [file Rfc3_set_C.pdf › Supplemental Dataset 1/C-mRNA_nonrhythm_translation_rhyth/Rfc3_set_C.pdf]

# Rfx3

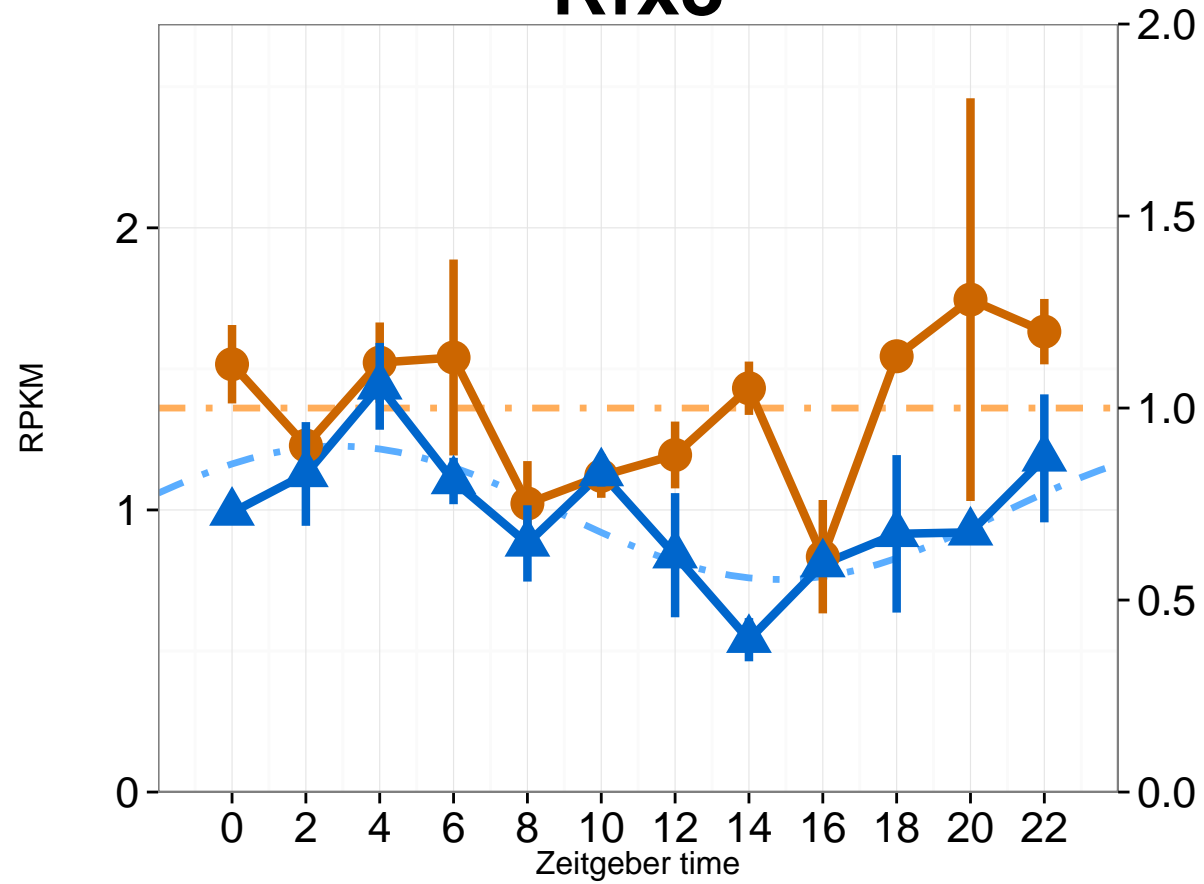

# Rfx3

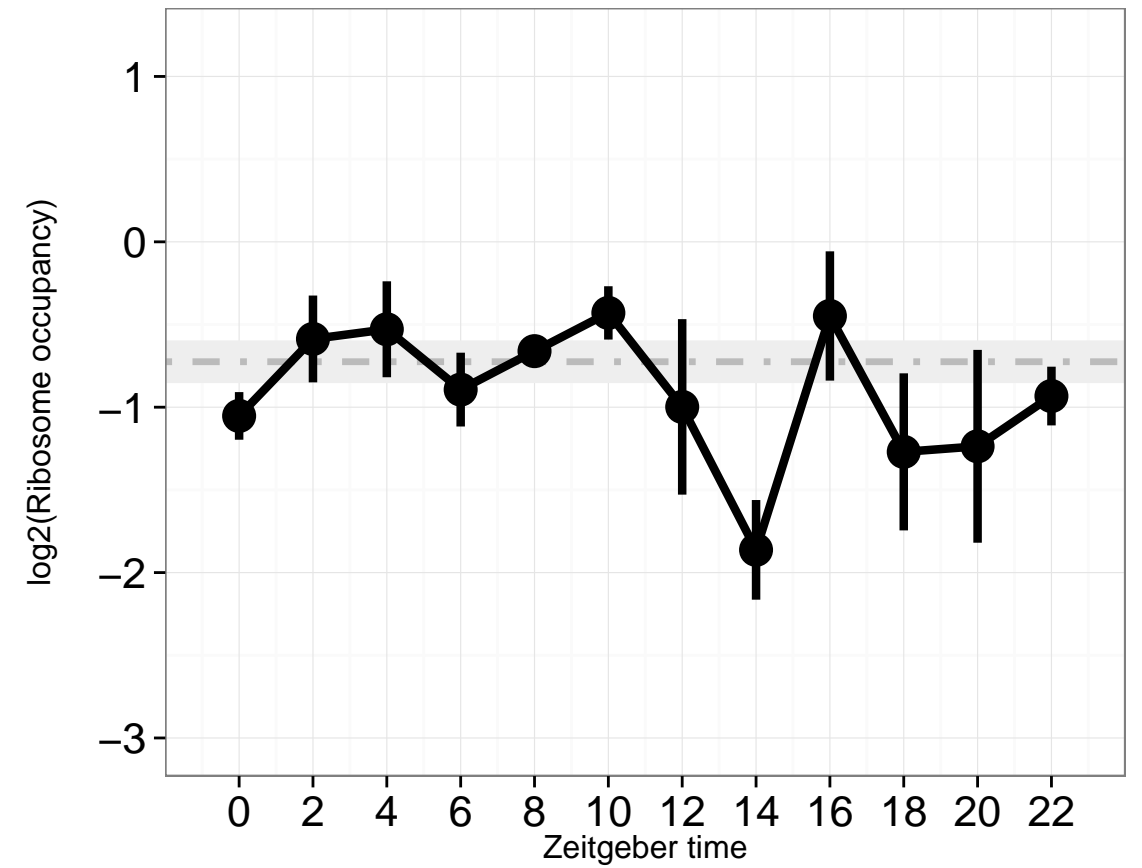

Supplement: SuppDataset_1.zip [file Rfx3_set_C.pdf › Supplemental Dataset 1/C-mRNA_nonrhythm_translation_rhyth/Rfx3_set_C.pdf]

## Rictor

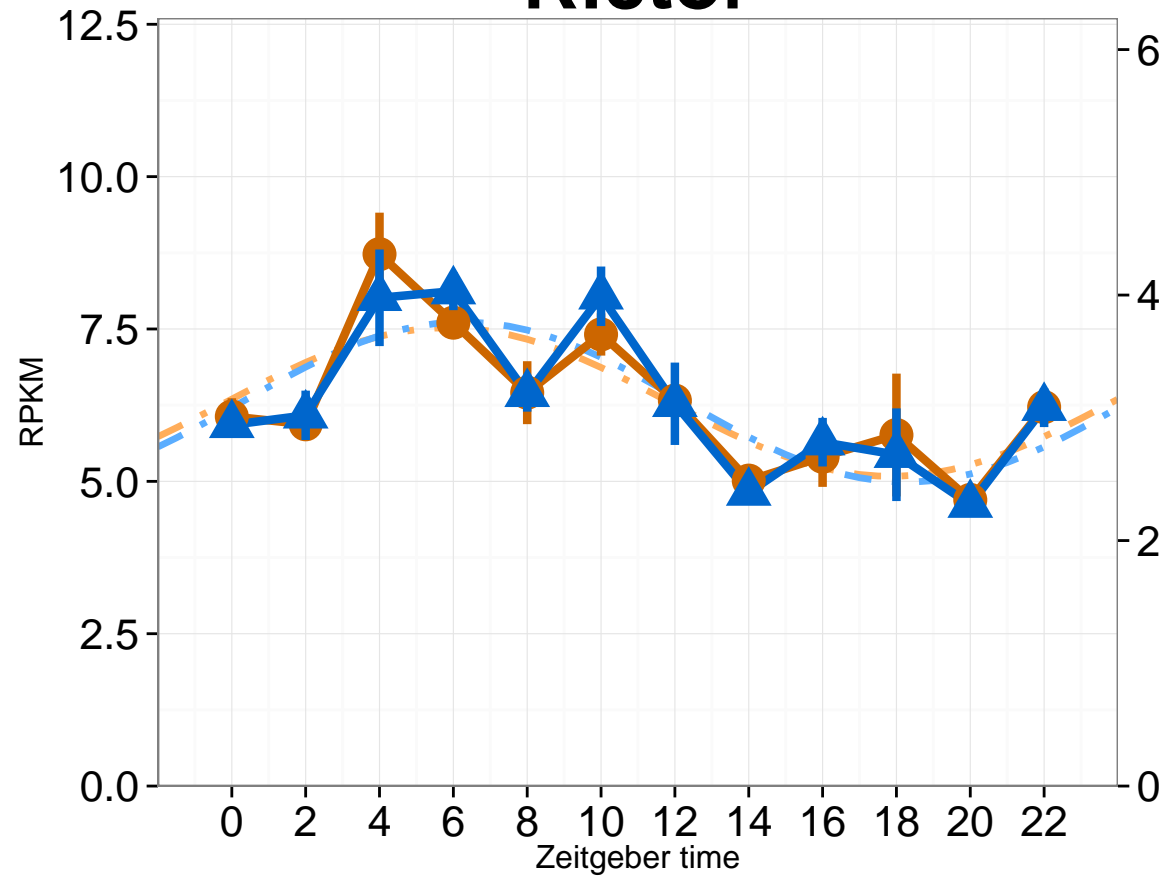

## Rictor

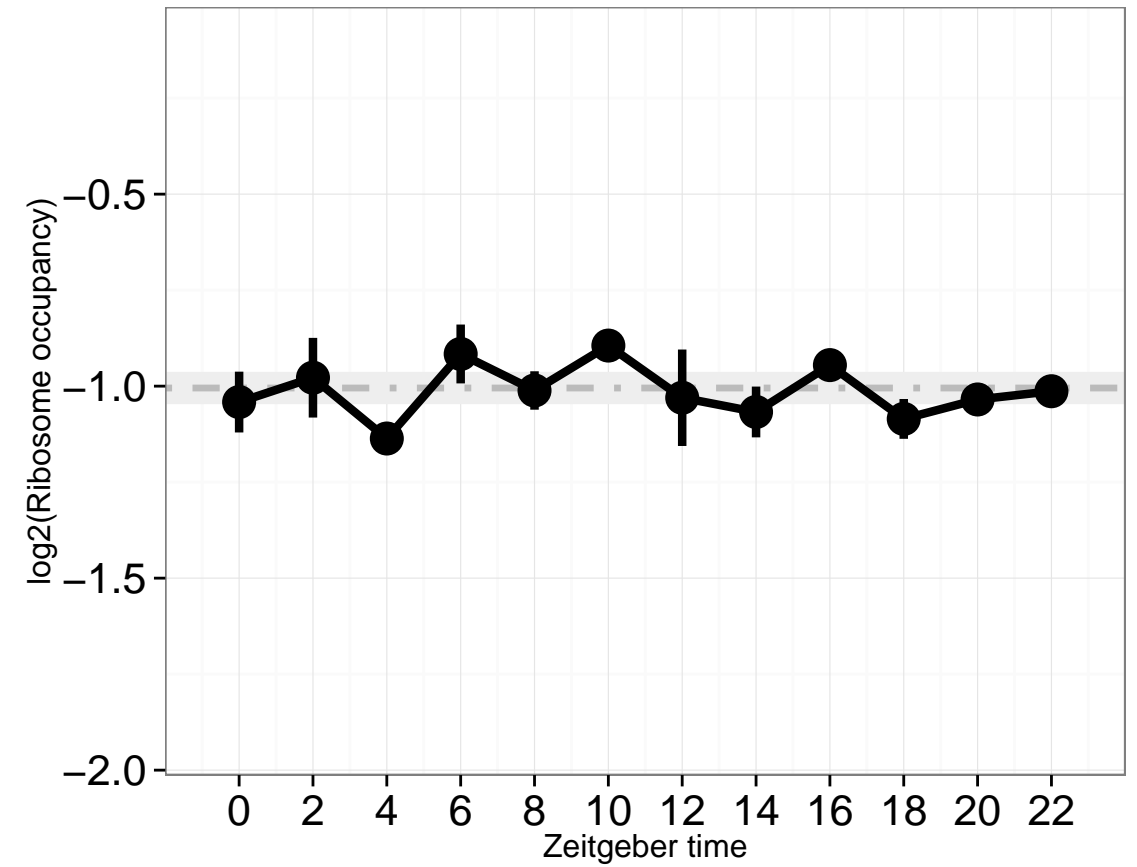

Supplement: SuppDataset_1.zip [file Rictor_set_C.pdf › Supplemental Dataset 1/C-mRNA_nonrhythm_translation_rhyth/Rictor_set_C.pdf]

## Ripk4

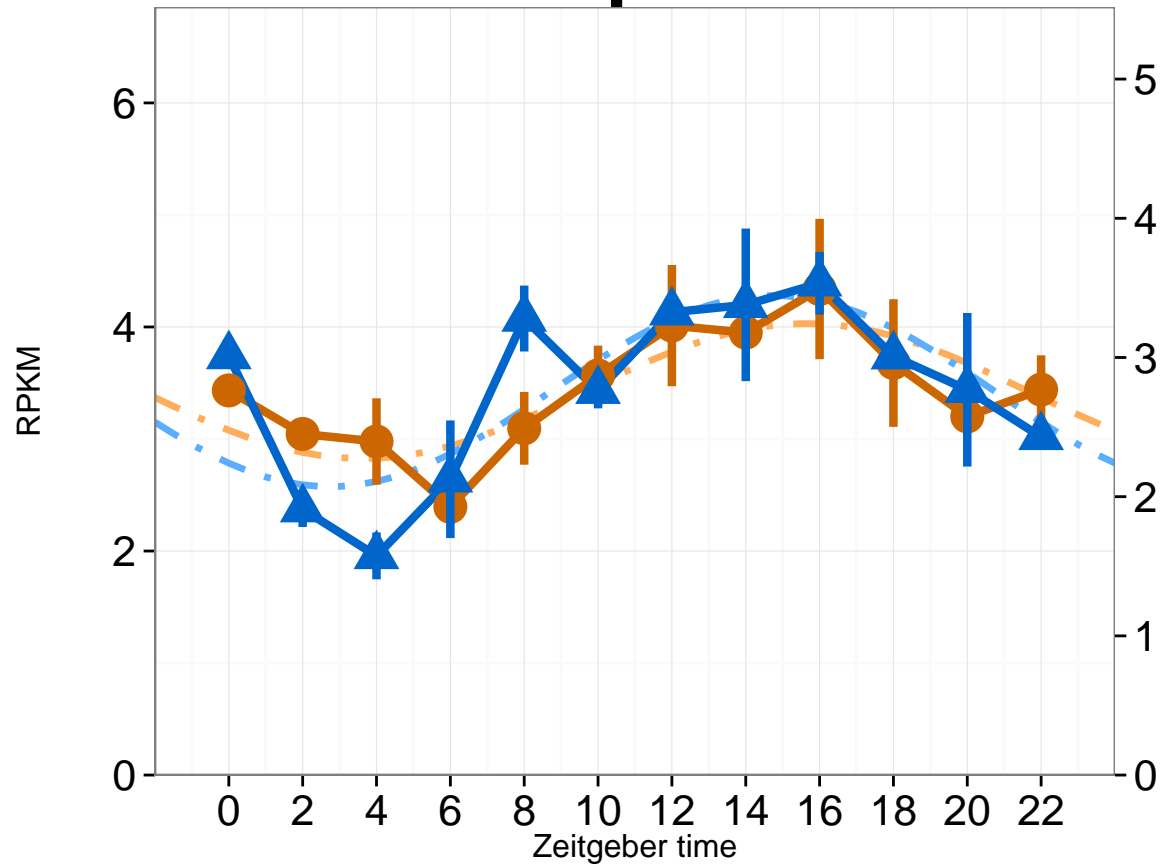

## Ripk4

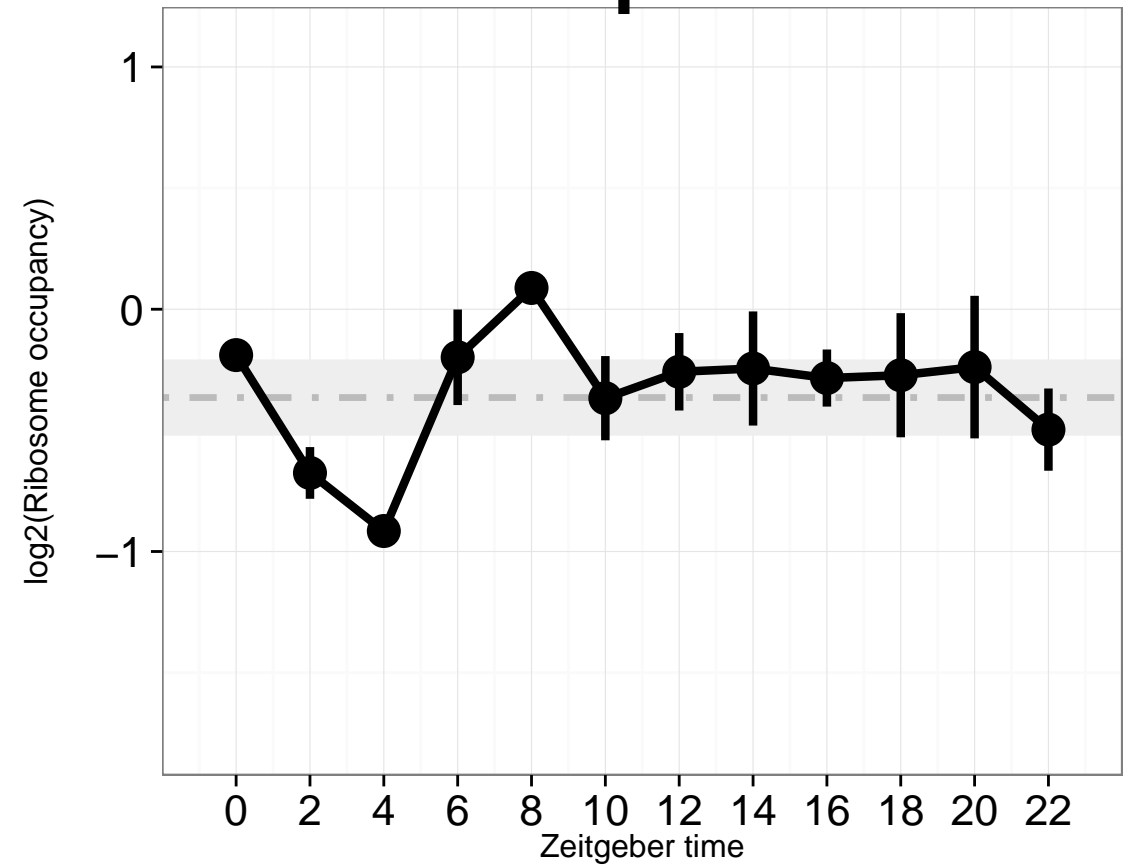

Supplement: SuppDataset_1.zip [file Ripk4_set_C.pdf › Supplemental Dataset 1/C-mRNA_nonrhythm_translation_rhyth/Ripk4_set_C.pdf]

## Rit1

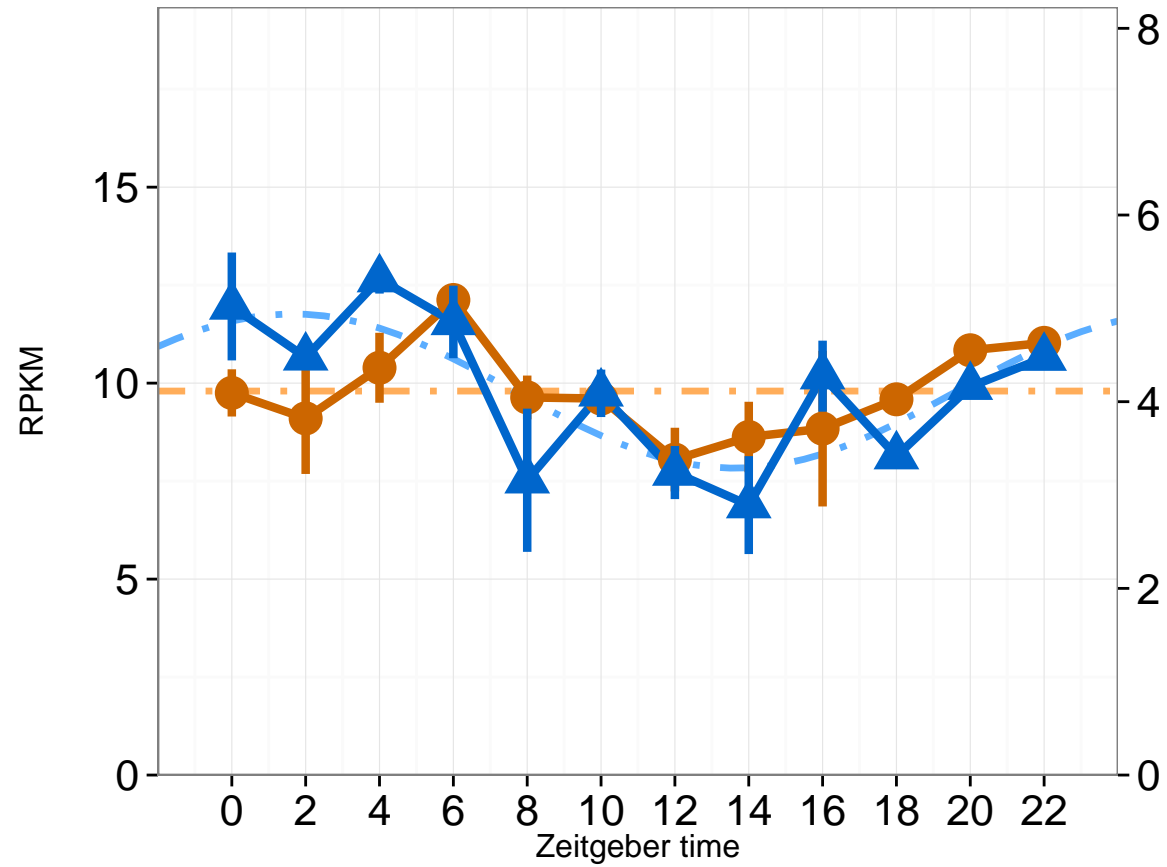

## Rit1

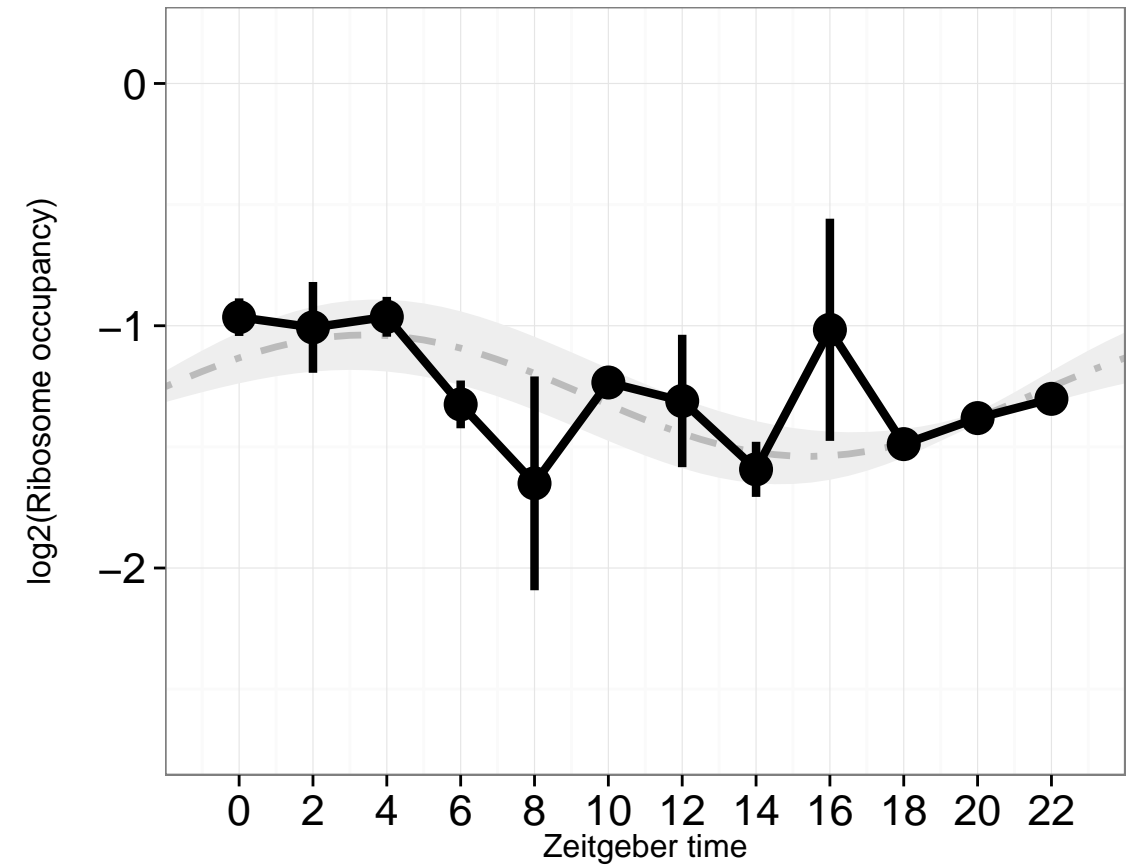

Supplement: SuppDataset_1.zip [file Rit1_set_C.pdf › Supplemental Dataset 1/C-mRNA_nonrhythm_translation_rhyth/Rit1_set_C.pdf]

# Rnf141

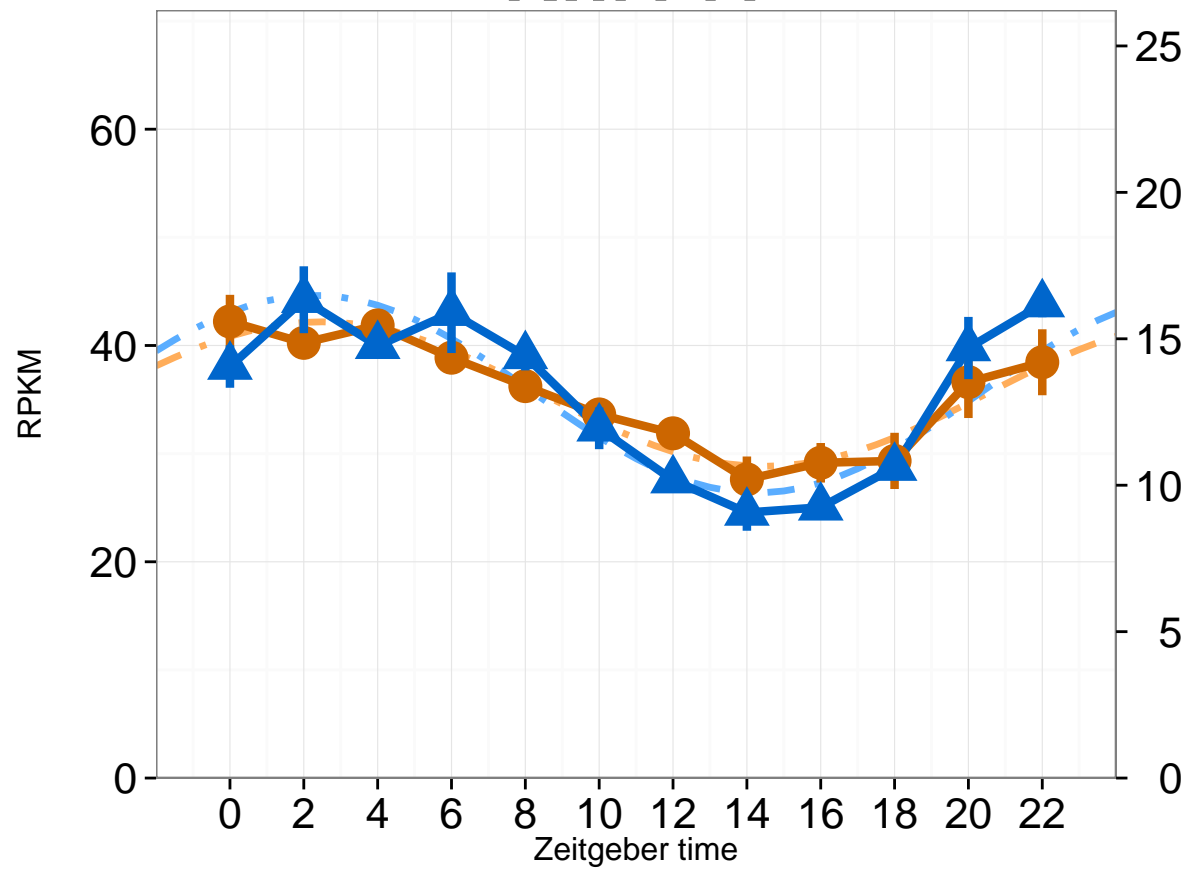

# Rnf141

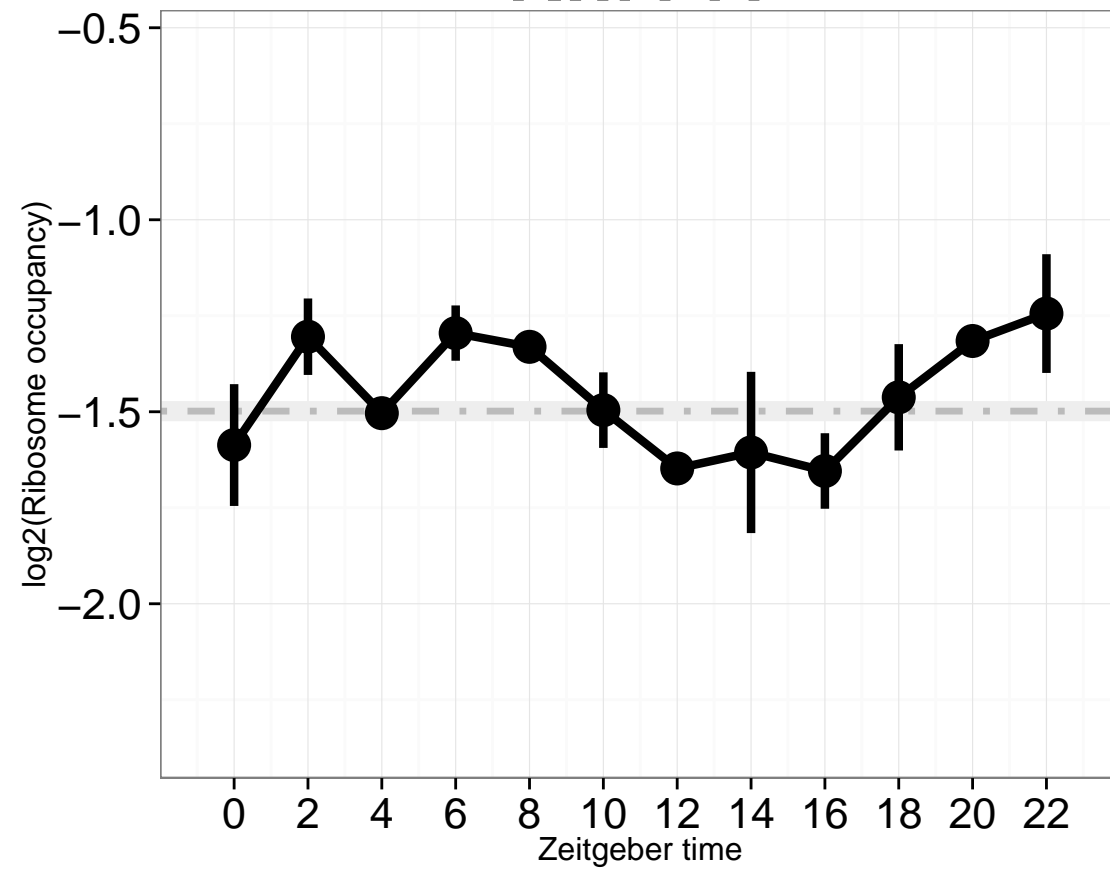

Supplement: SuppDataset_1.zip [file Rnf141_set_C.pdf › Supplemental Dataset 1/C-mRNA_nonrhythm_translation_rhyth/Rnf141_set_C.pdf]

## Rnf213

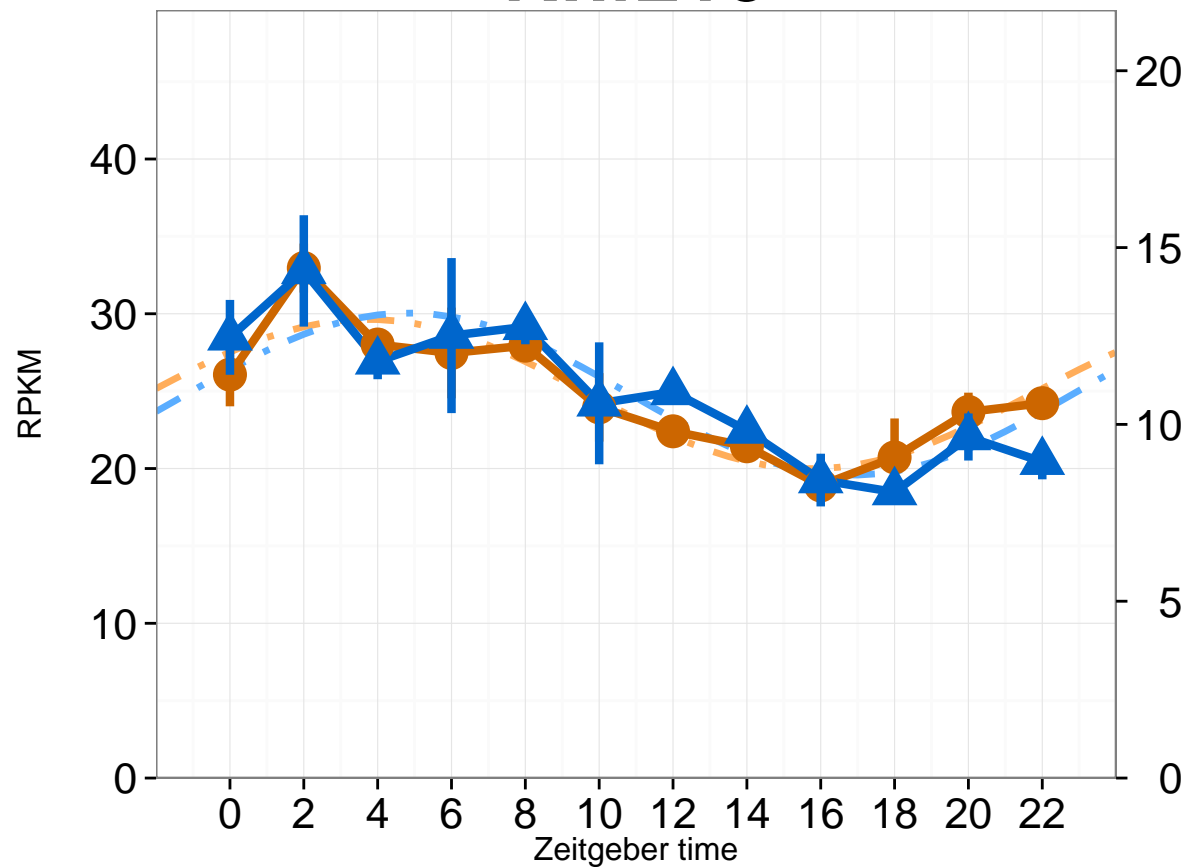

## Rnf213

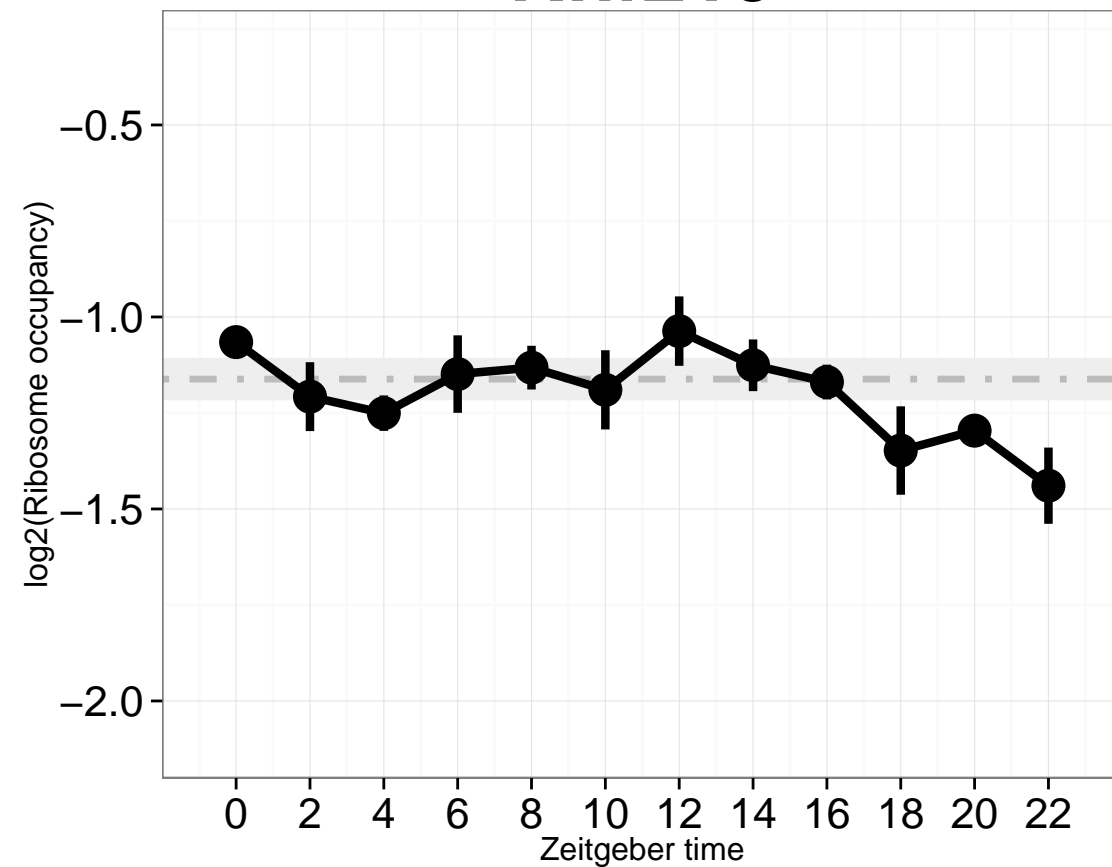

Supplement: SuppDataset_1.zip [file Rnf213_set_C.pdf › Supplemental Dataset 1/C-mRNA_nonrhythm_translation_rhyth/Rnf213_set_C.pdf]

## Robo4

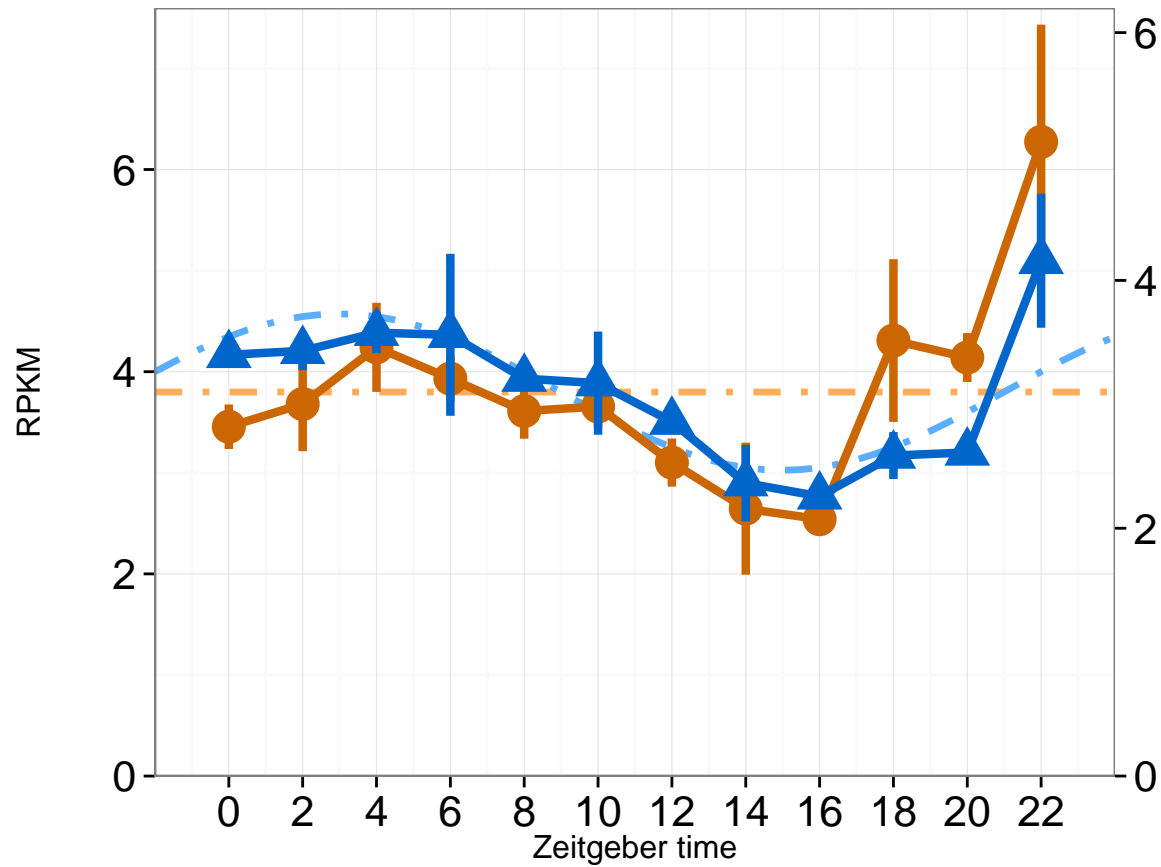

## Robo4

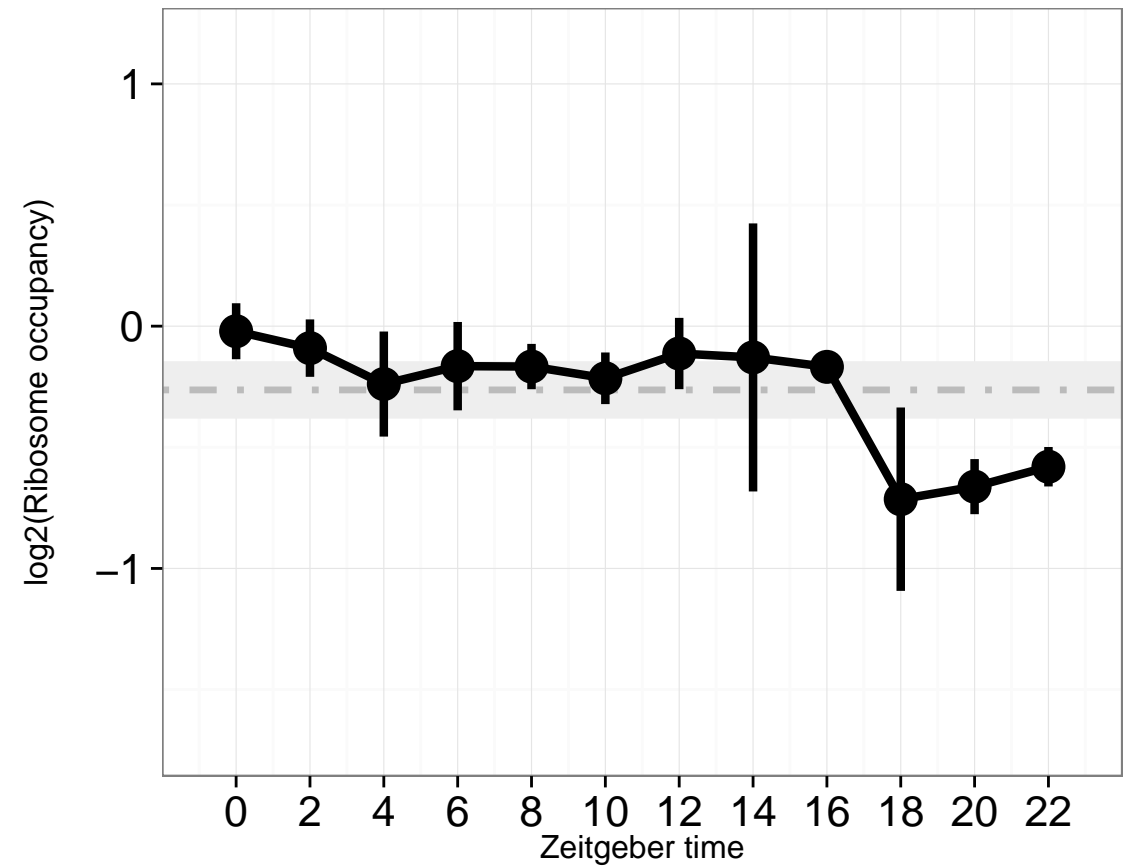

Supplement: SuppDataset_1.zip [file Robo4_set_C.pdf › Supplemental Dataset 1/C-mRNA_nonrhythm_translation_rhyth/Robo4_set_C.pdf]

## Rpl10

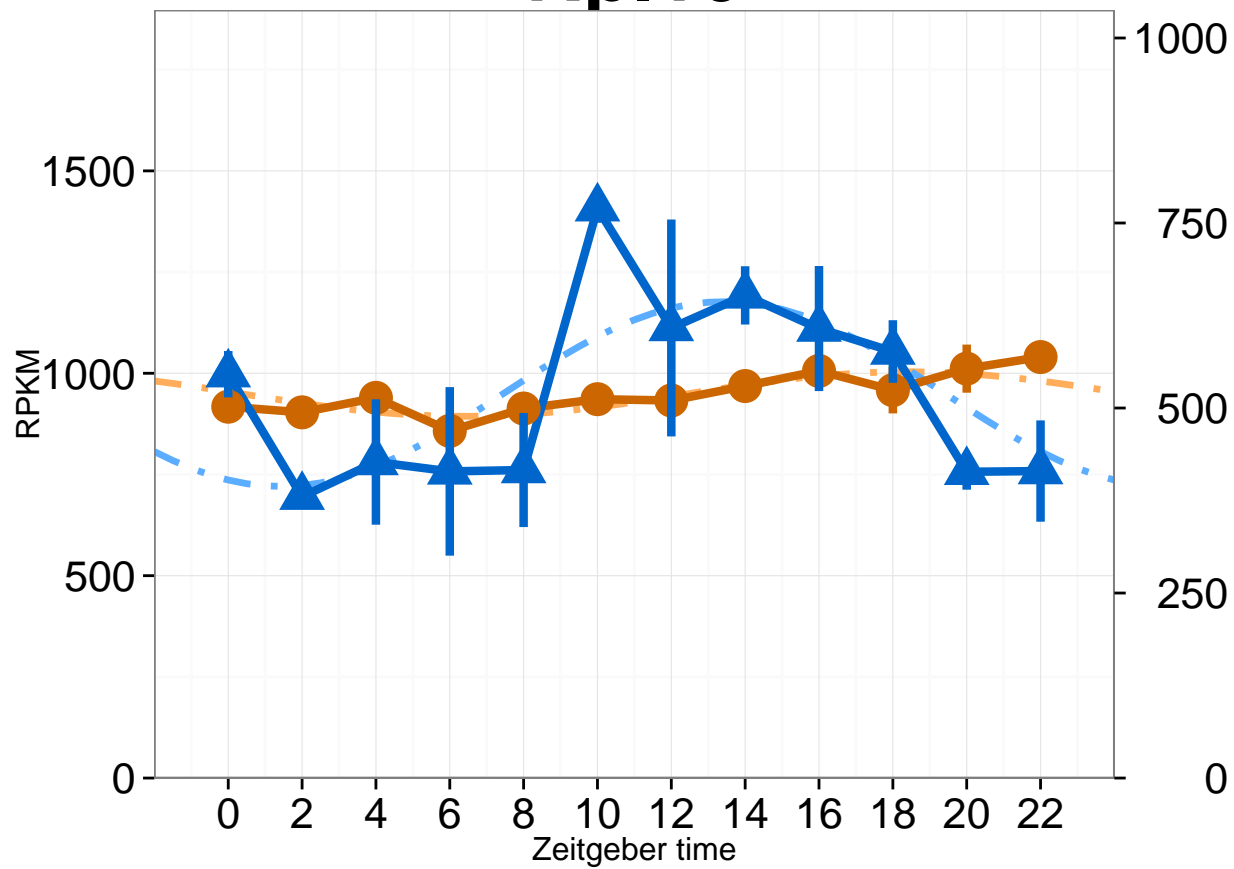

## Rpl10

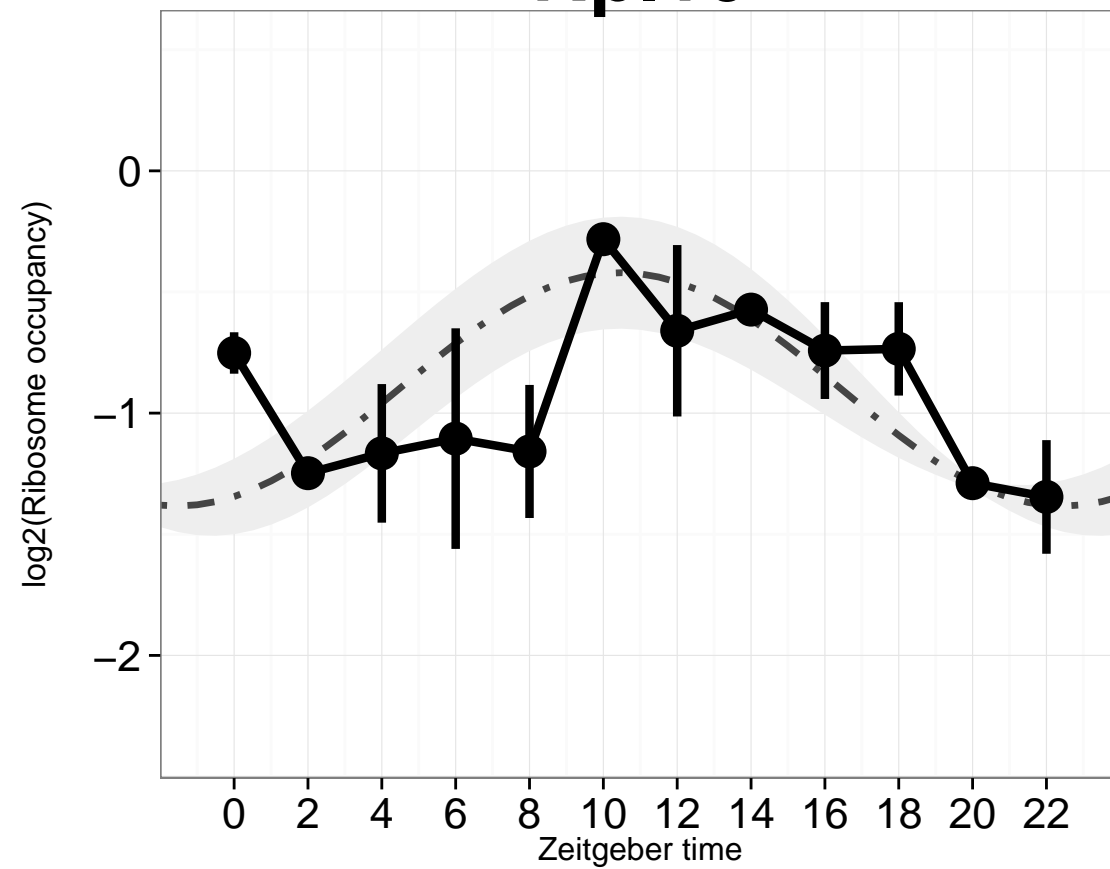

Supplement: SuppDataset_1.zip [file Rpl10_set_C.pdf › Supplemental Dataset 1/C-mRNA_nonrhythm_translation_rhyth/Rpl10_set_C.pdf]

## Rpl11

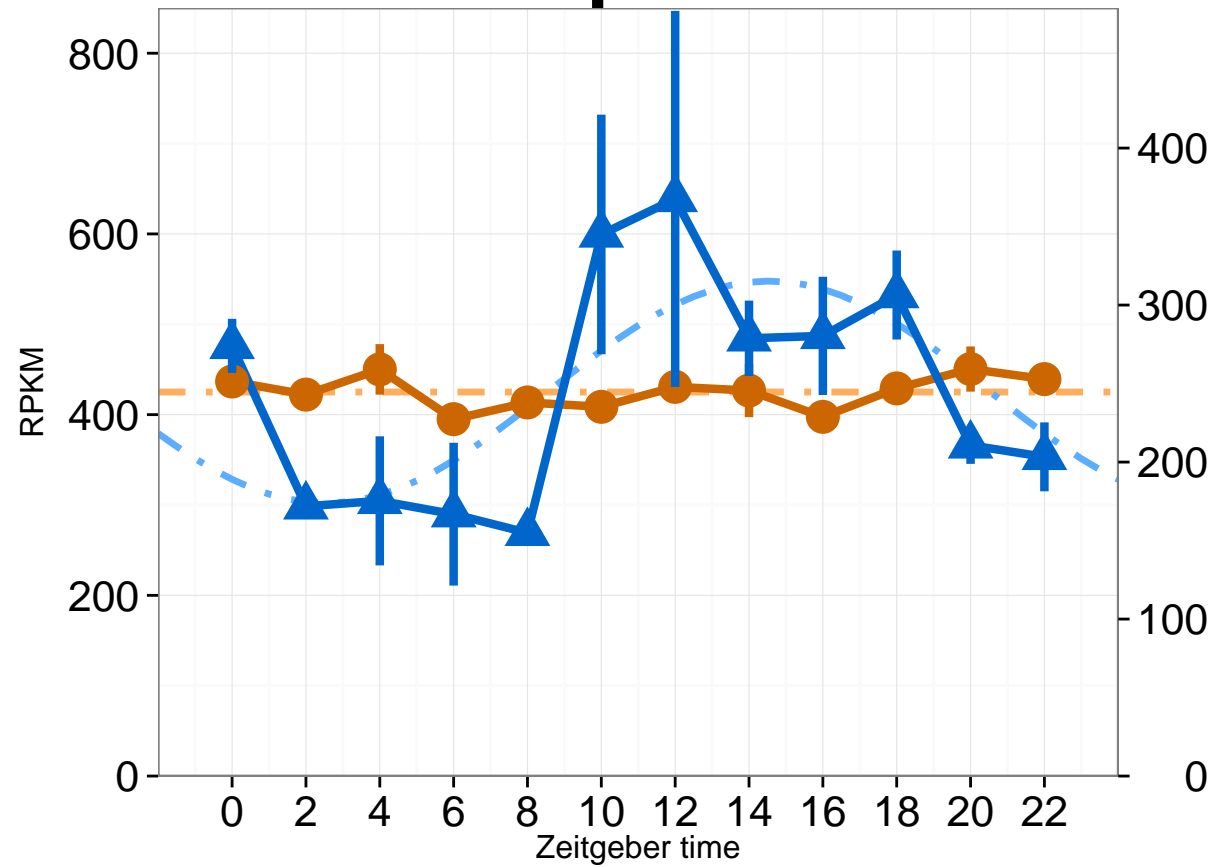

## Rpl11

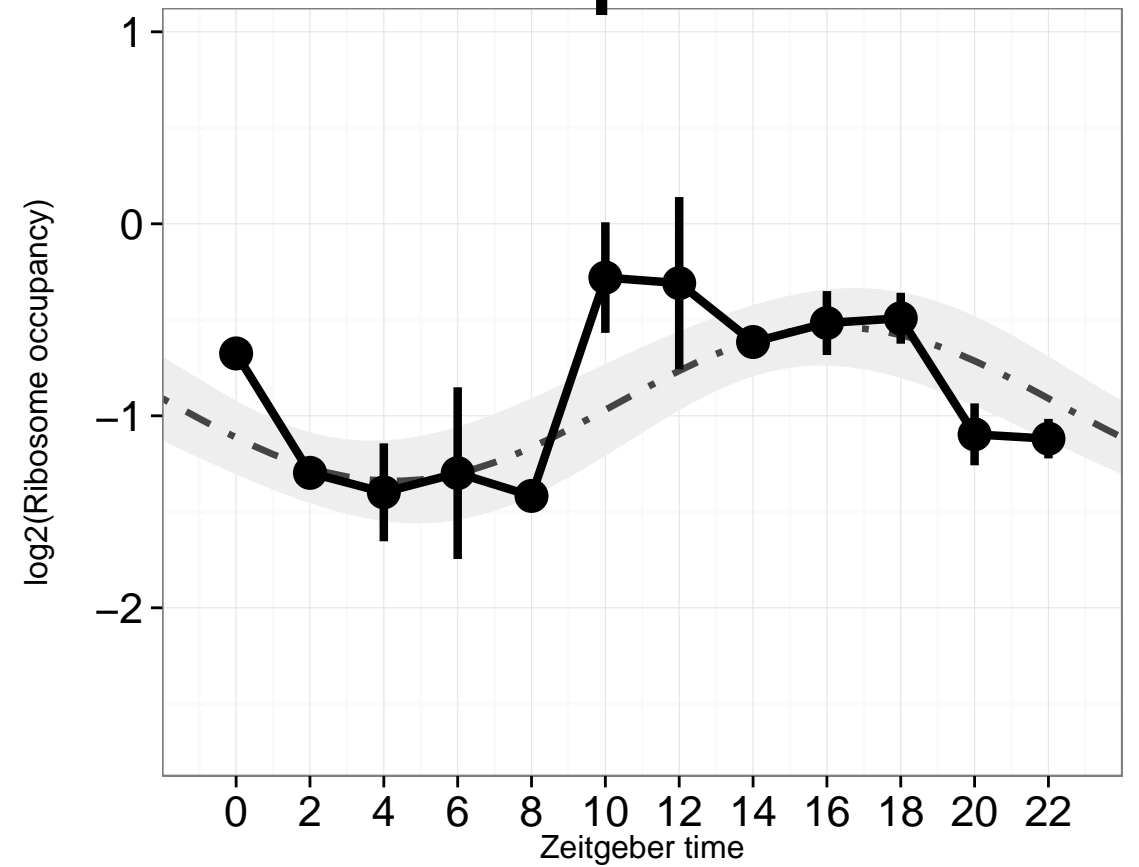

Supplement: SuppDataset_1.zip [file Rpl11_set_C.pdf › Supplemental Dataset 1/C-mRNA_nonrhythm_translation_rhyth/Rpl11_set_C.pdf]

# Rpl22

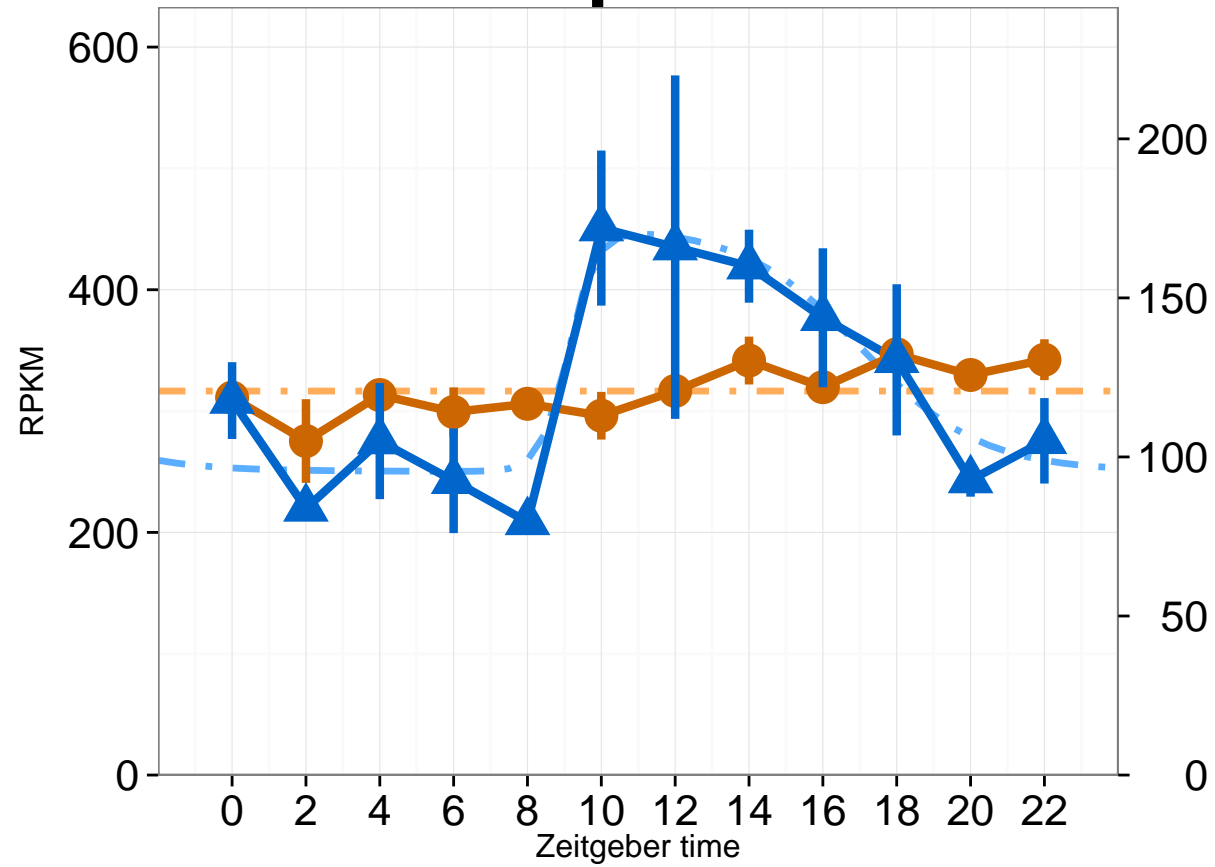

# Rpl22

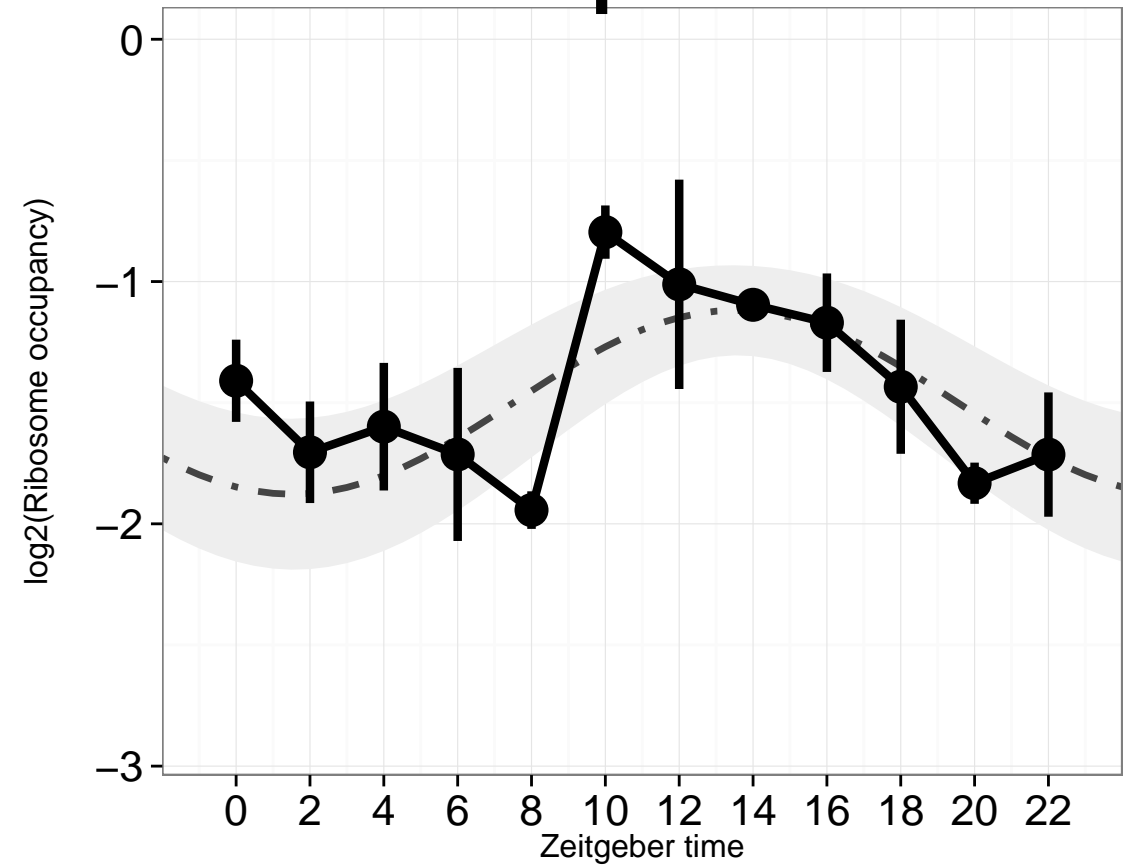

Supplement: SuppDataset_1.zip [file Rpl22_set_C.pdf › Supplemental Dataset 1/C-mRNA_nonrhythm_translation_rhyth/Rpl22_set_C.pdf]

# Rpl23

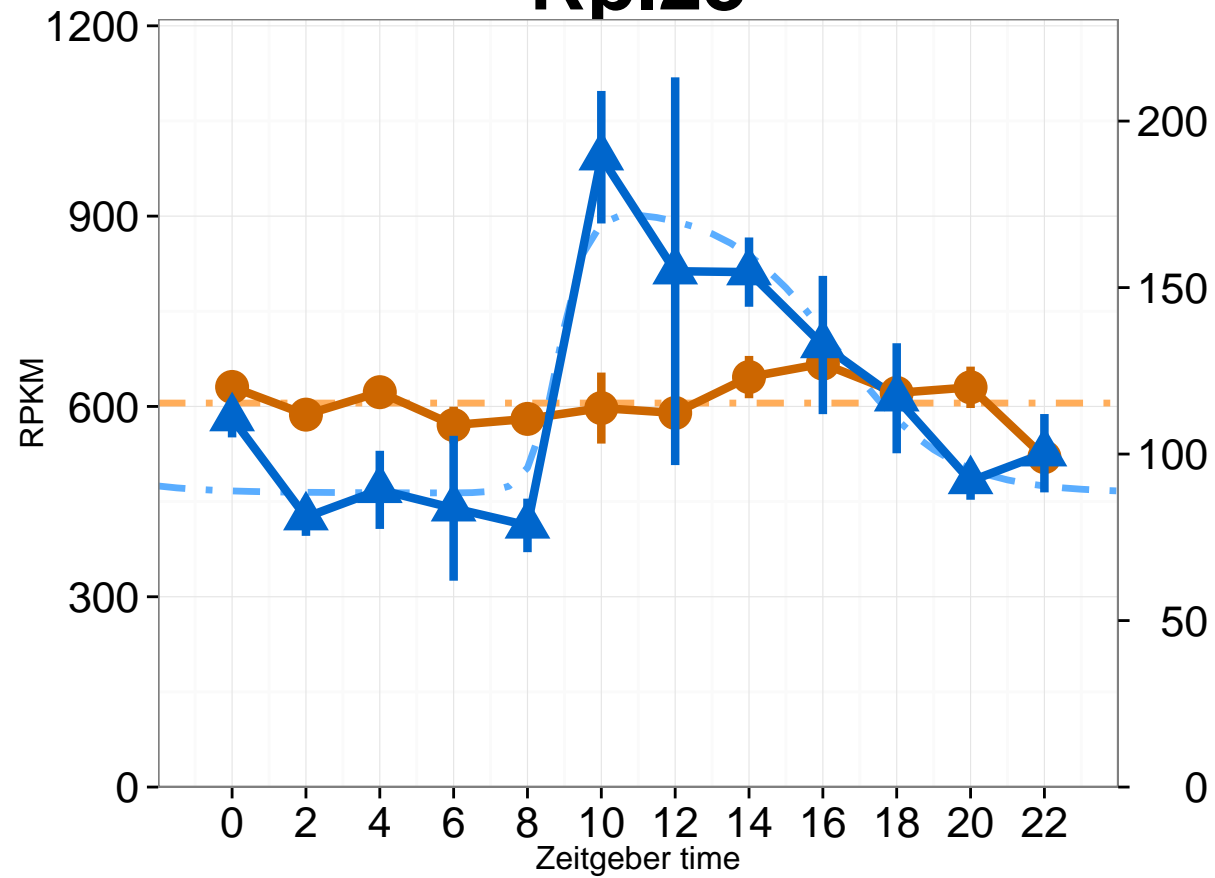

# Rpl23

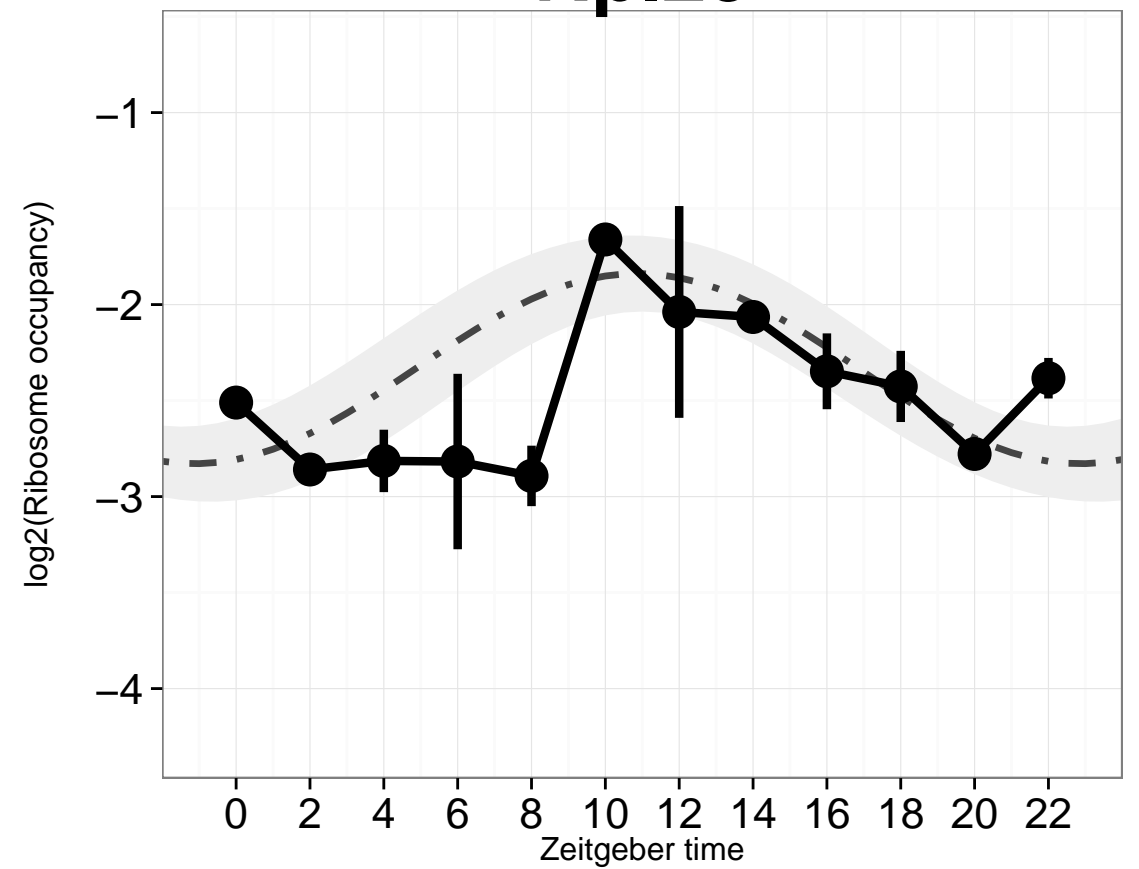

Supplement: SuppDataset_1.zip [file Rpl23_set_C.pdf › Supplemental Dataset 1/C-mRNA_nonrhythm_translation_rhyth/Rpl23_set_C.pdf]

# Rpl23a

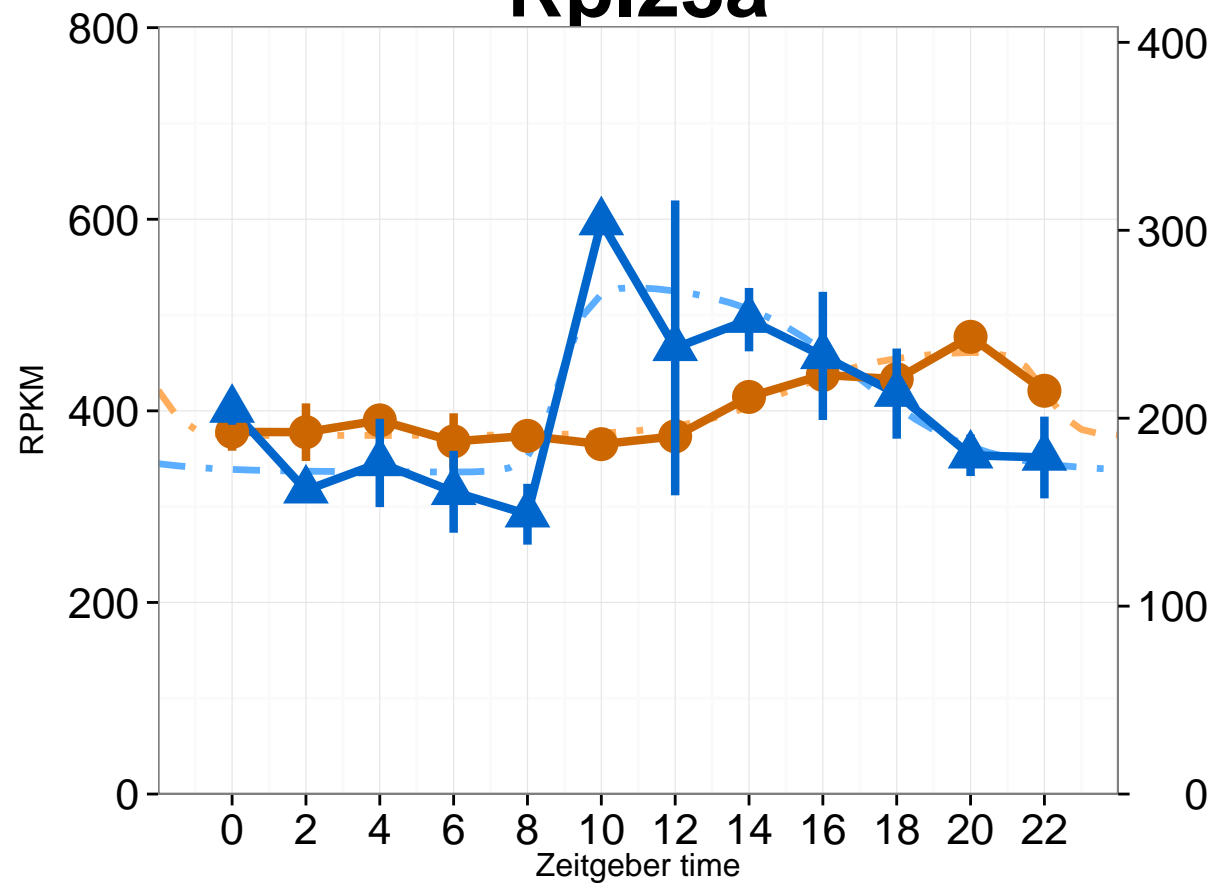

# Rpl23a

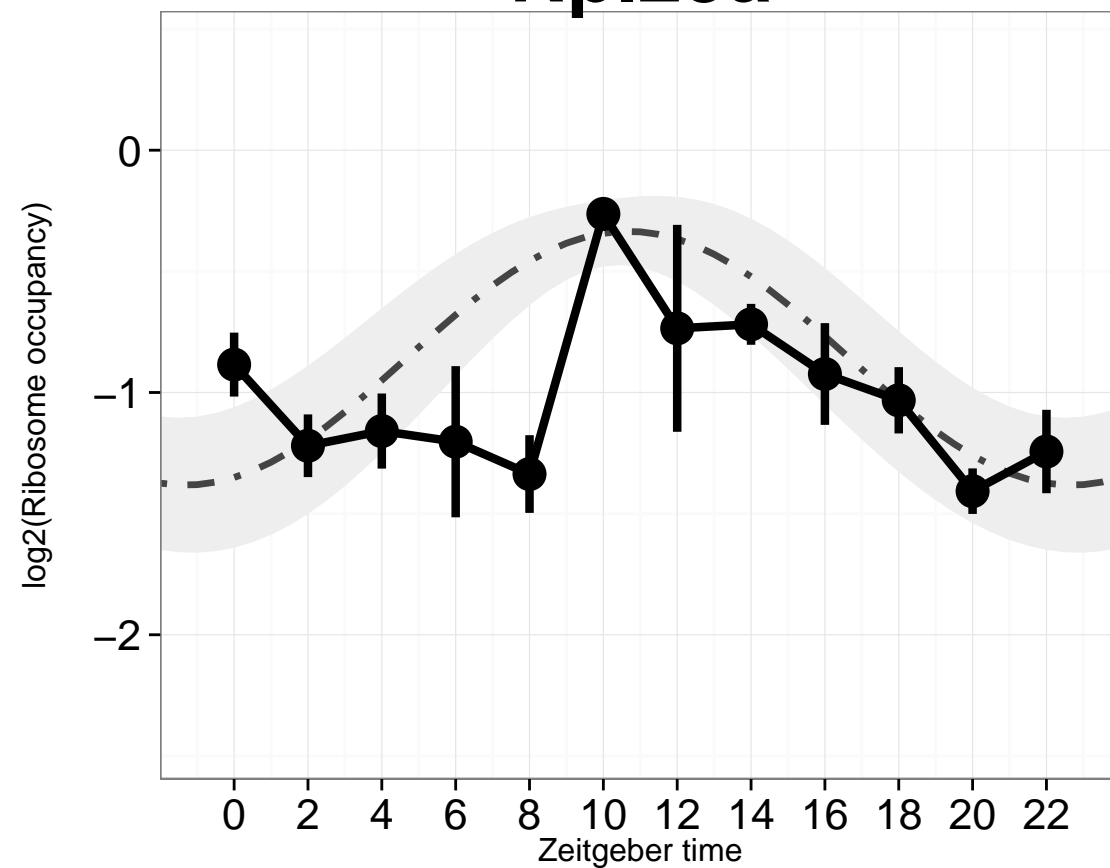

Supplement: SuppDataset_1.zip [file Rpl23a_set_C.pdf › Supplemental Dataset 1/C-mRNA_nonrhythm_translation_rhyth/Rpl23a_set_C.pdf]

# Rpl26

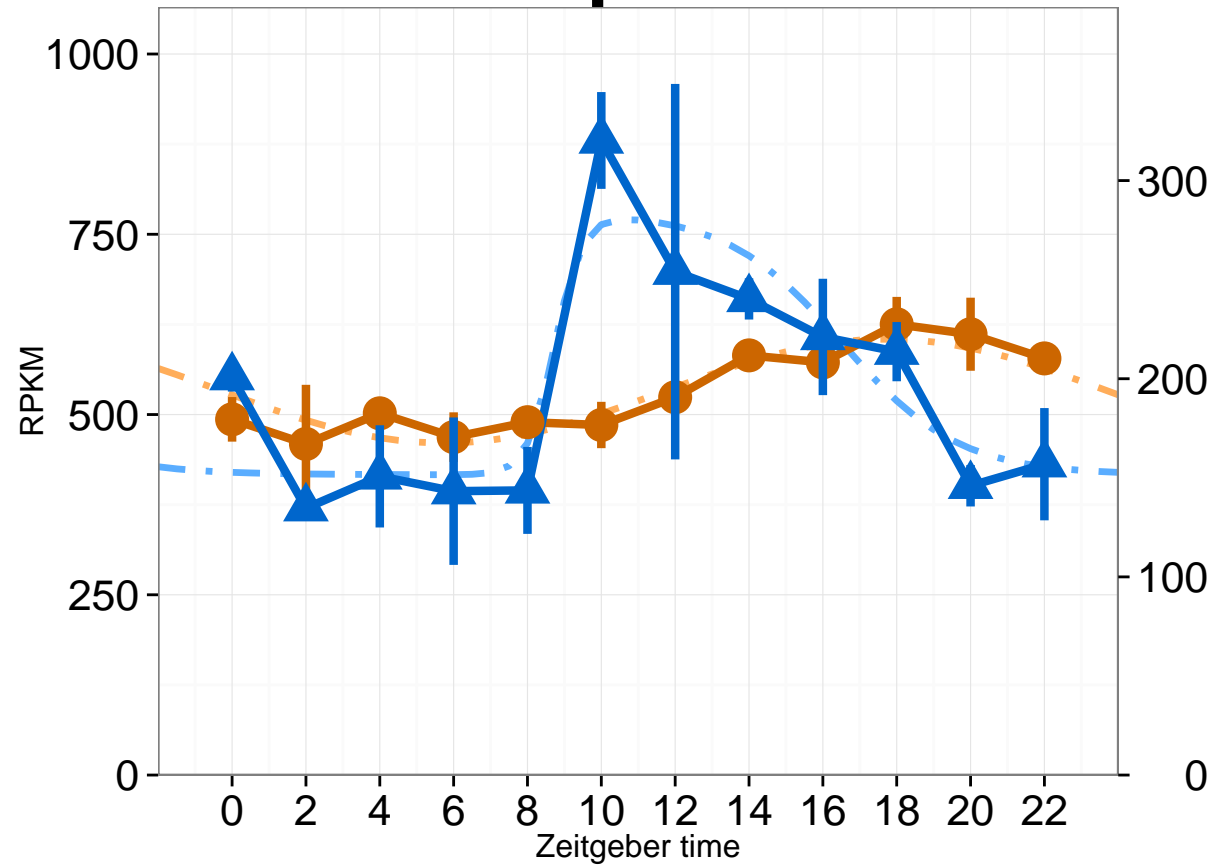

# Rpl26

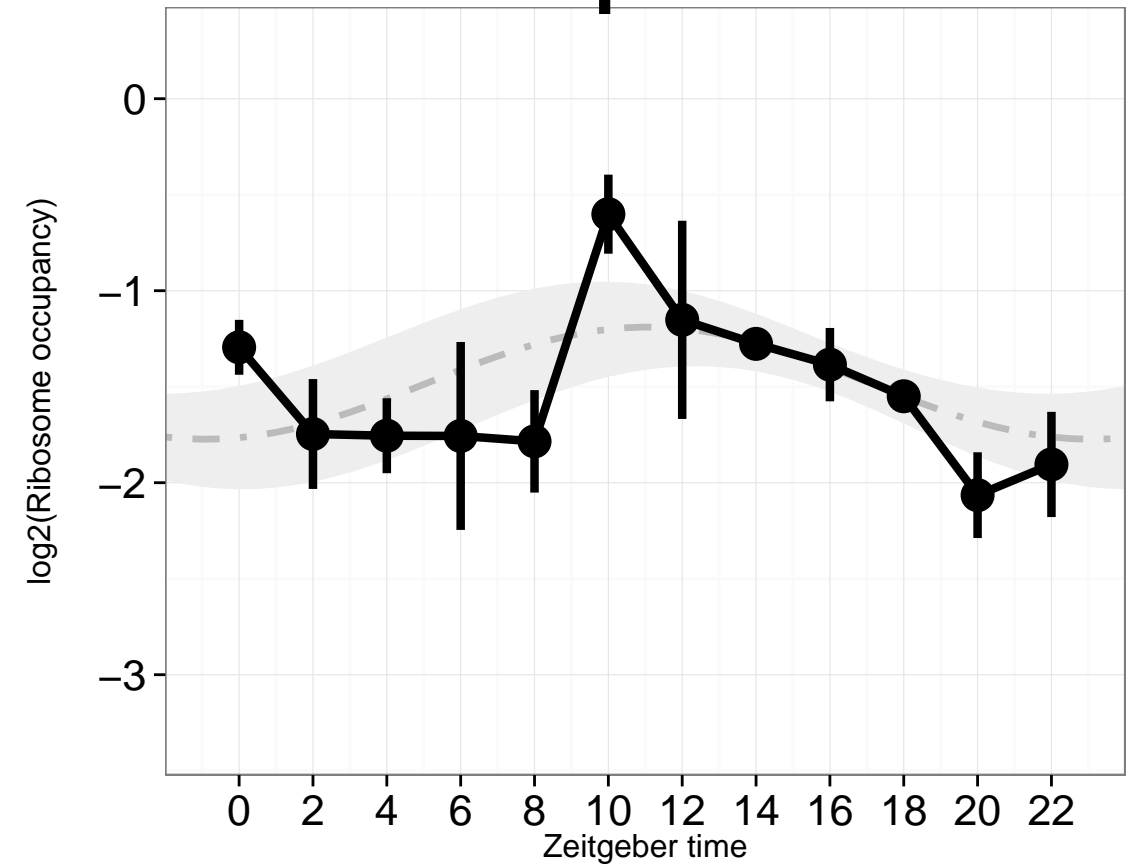

Supplement: SuppDataset_1.zip [file Rpl26_set_C.pdf › Supplemental Dataset 1/C-mRNA_nonrhythm_translation_rhyth/Rpl26_set_C.pdf]

# Rpl27a

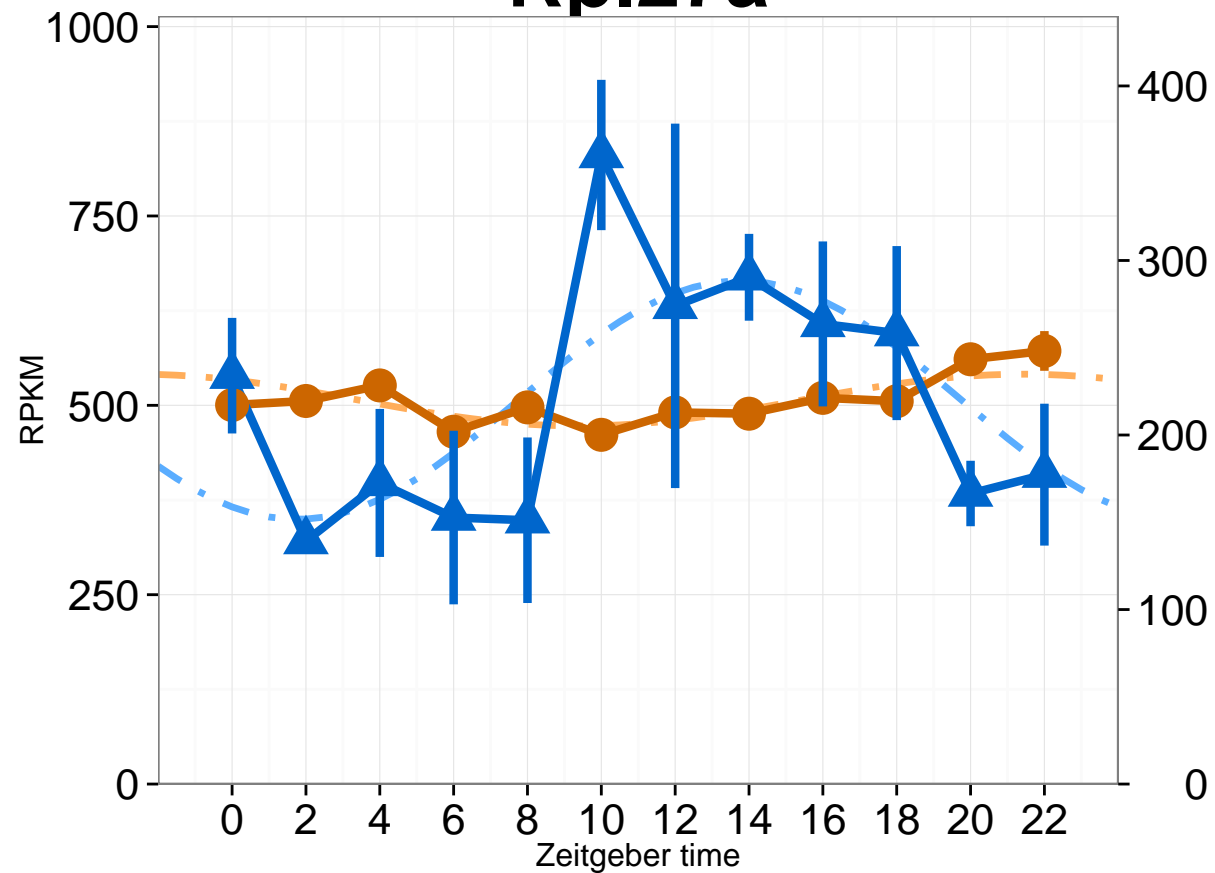

# Rpl27a

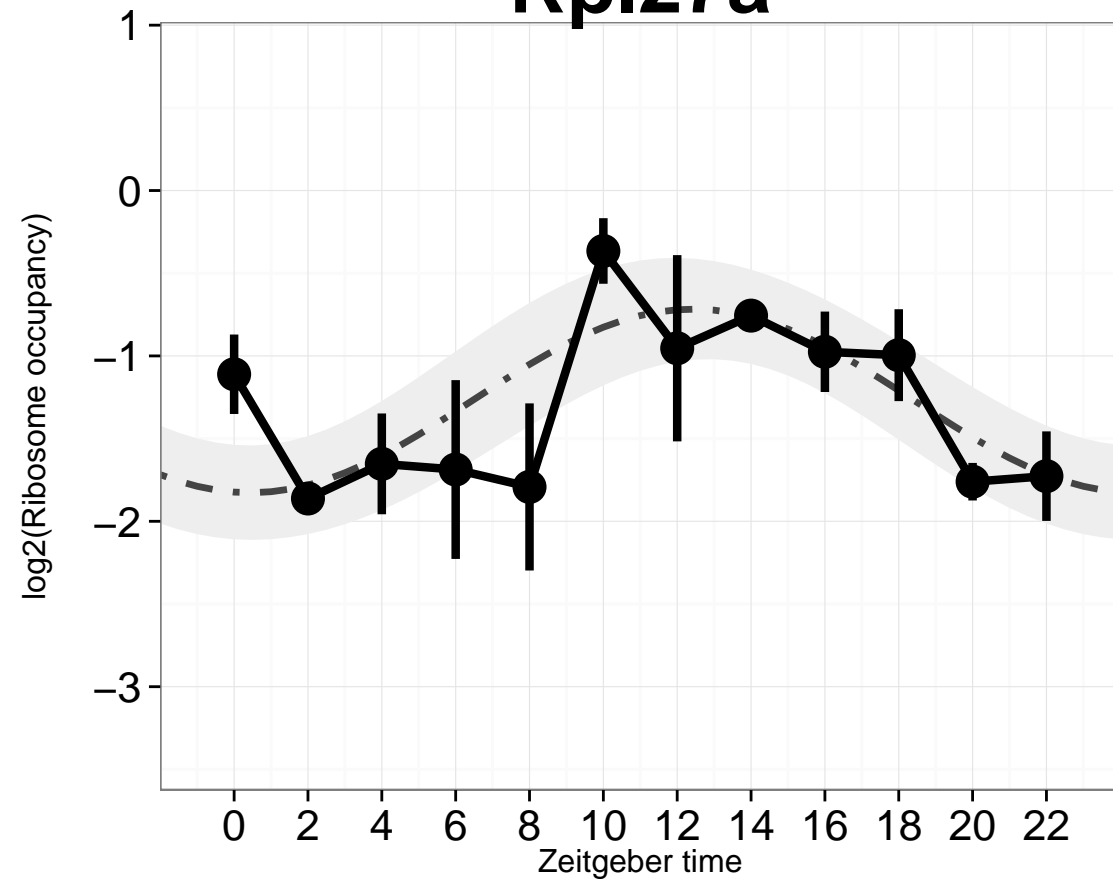

Supplement: SuppDataset_1.zip [file Rpl27a_set_C.pdf › Supplemental Dataset 1/C-mRNA_nonrhythm_translation_rhyth/Rpl27a_set_C.pdf]

## Rpl28

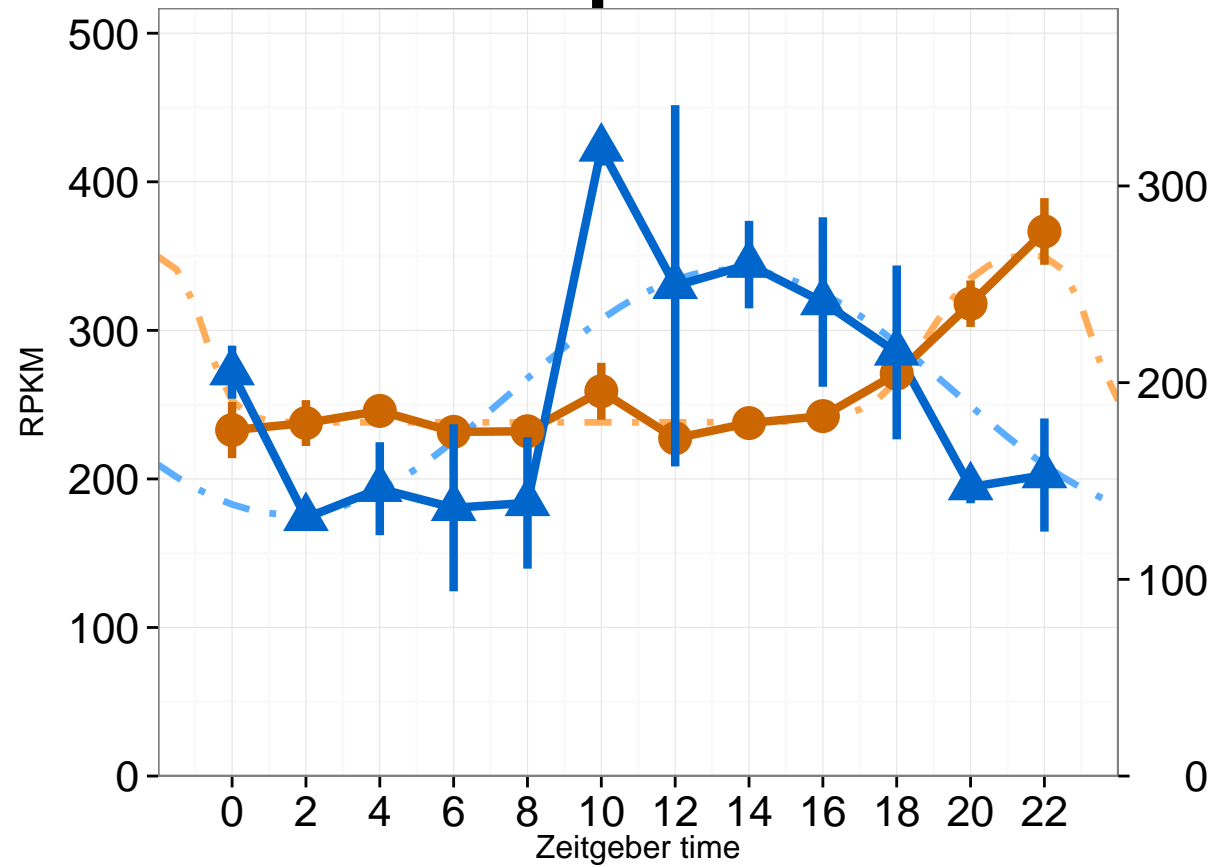

## Rpl28

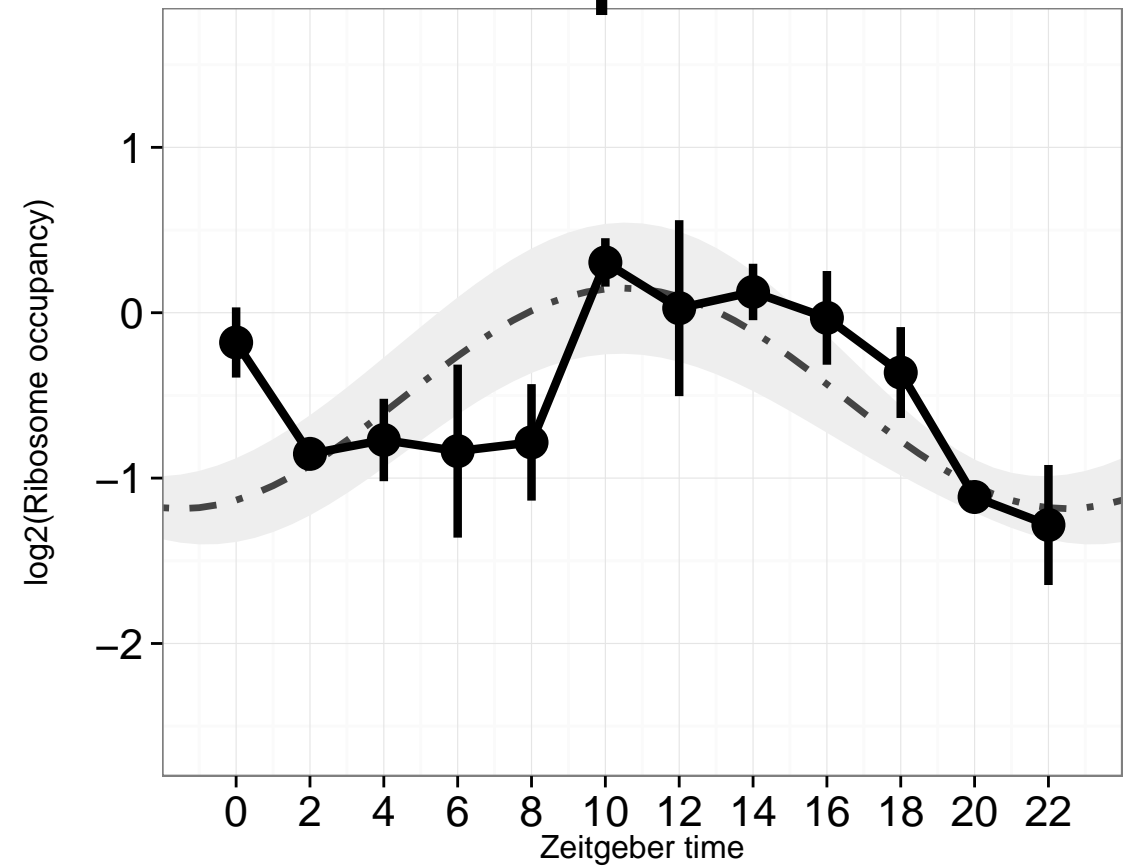

Supplement: SuppDataset_1.zip [file Rpl28_set_C.pdf › Supplemental Dataset 1/C-mRNA_nonrhythm_translation_rhyth/Rpl28_set_C.pdf]

## Rpl30

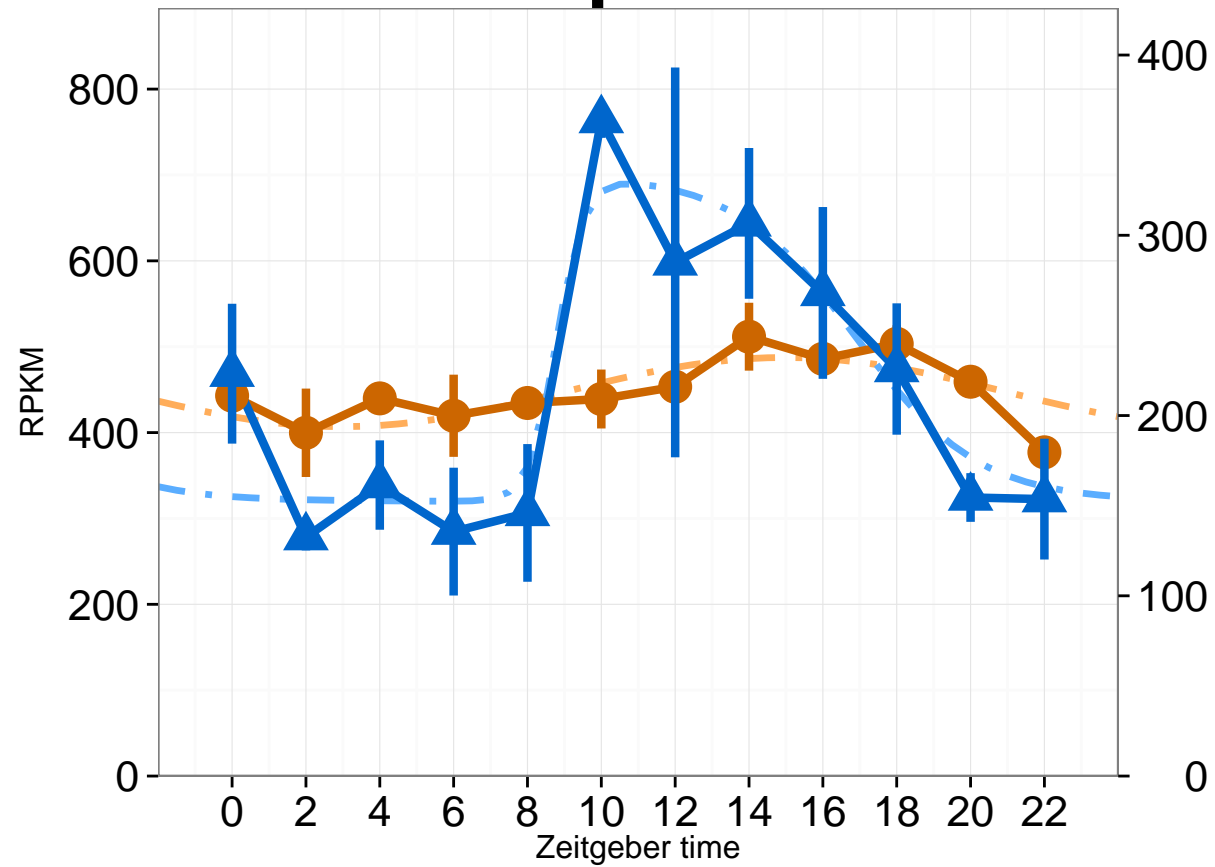

## Rpl30

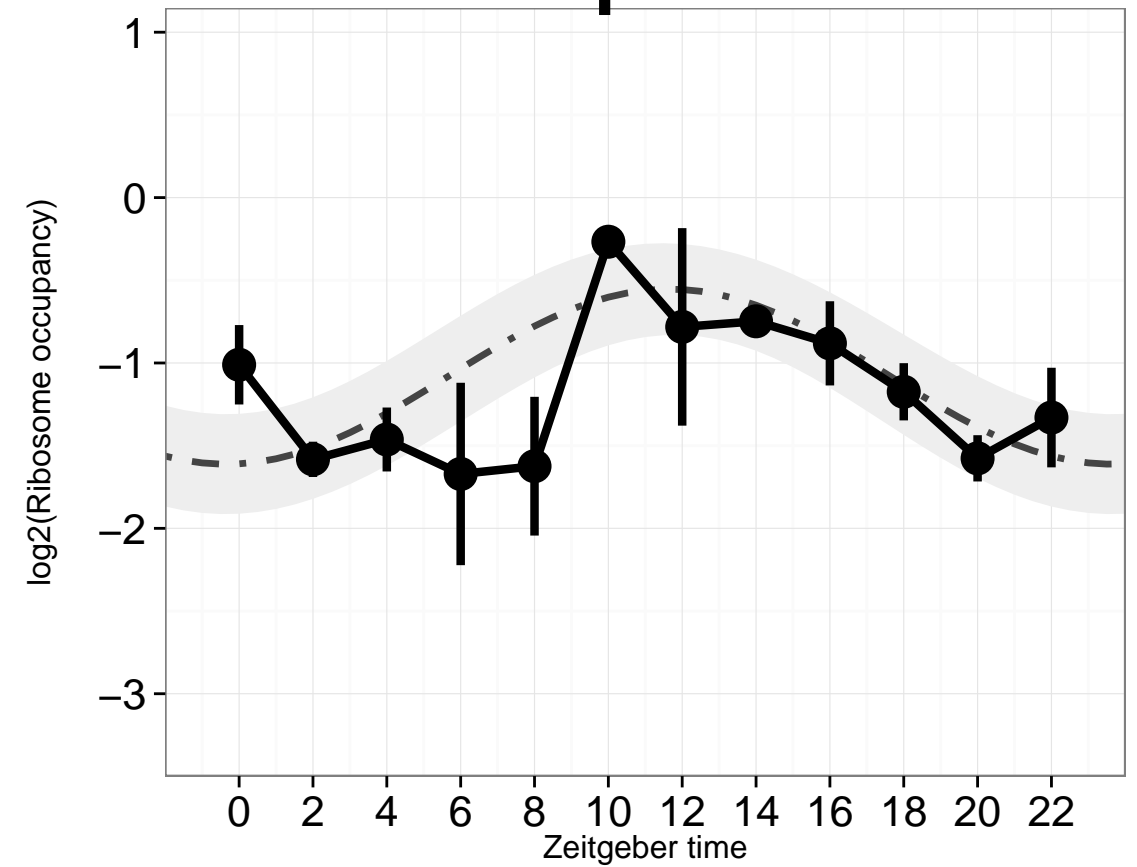

Supplement: SuppDataset_1.zip [file Rpl30_set_C.pdf › Supplemental Dataset 1/C-mRNA_nonrhythm_translation_rhyth/Rpl30_set_C.pdf]

# Rpl31

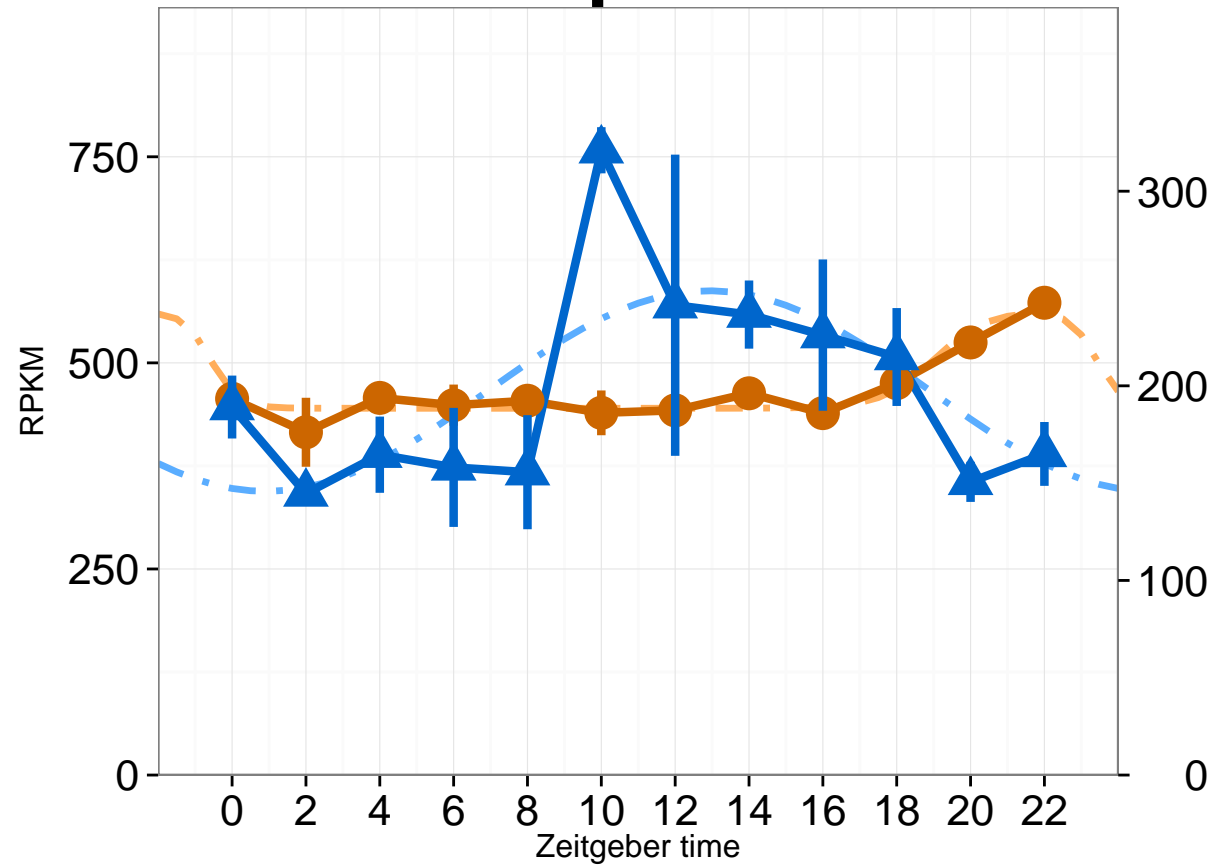

# Rpl31

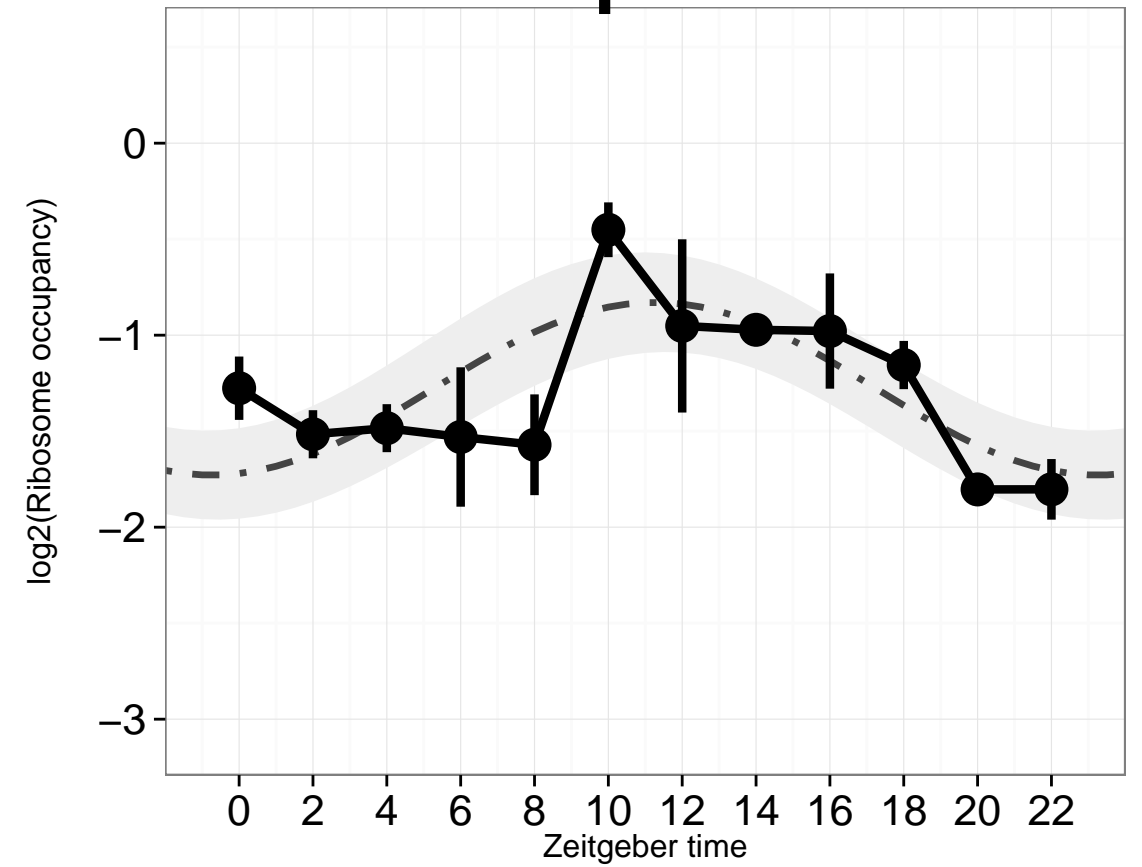

Supplement: SuppDataset_1.zip [file Rpl31_set_C.pdf › Supplemental Dataset 1/C-mRNA_nonrhythm_translation_rhyth/Rpl31_set_C.pdf]

## Rpl32

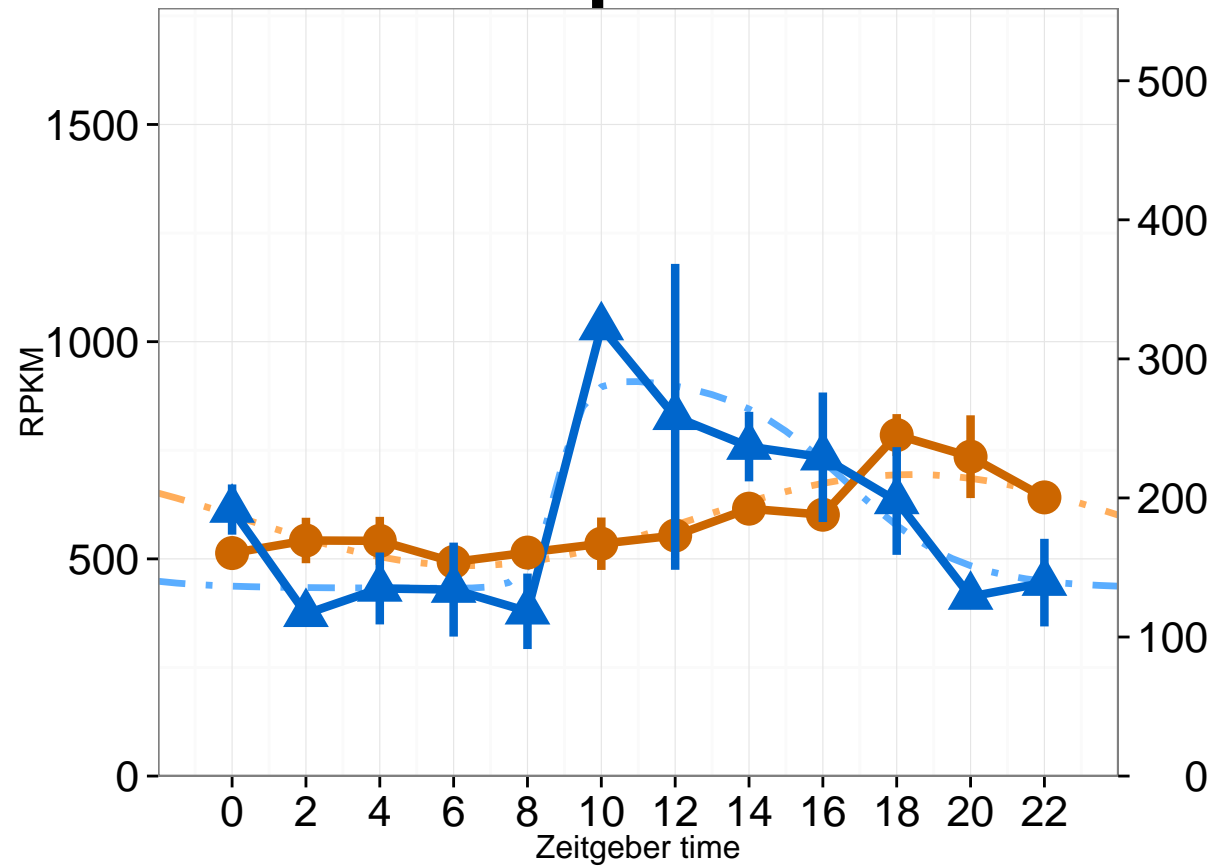

## Rpl32

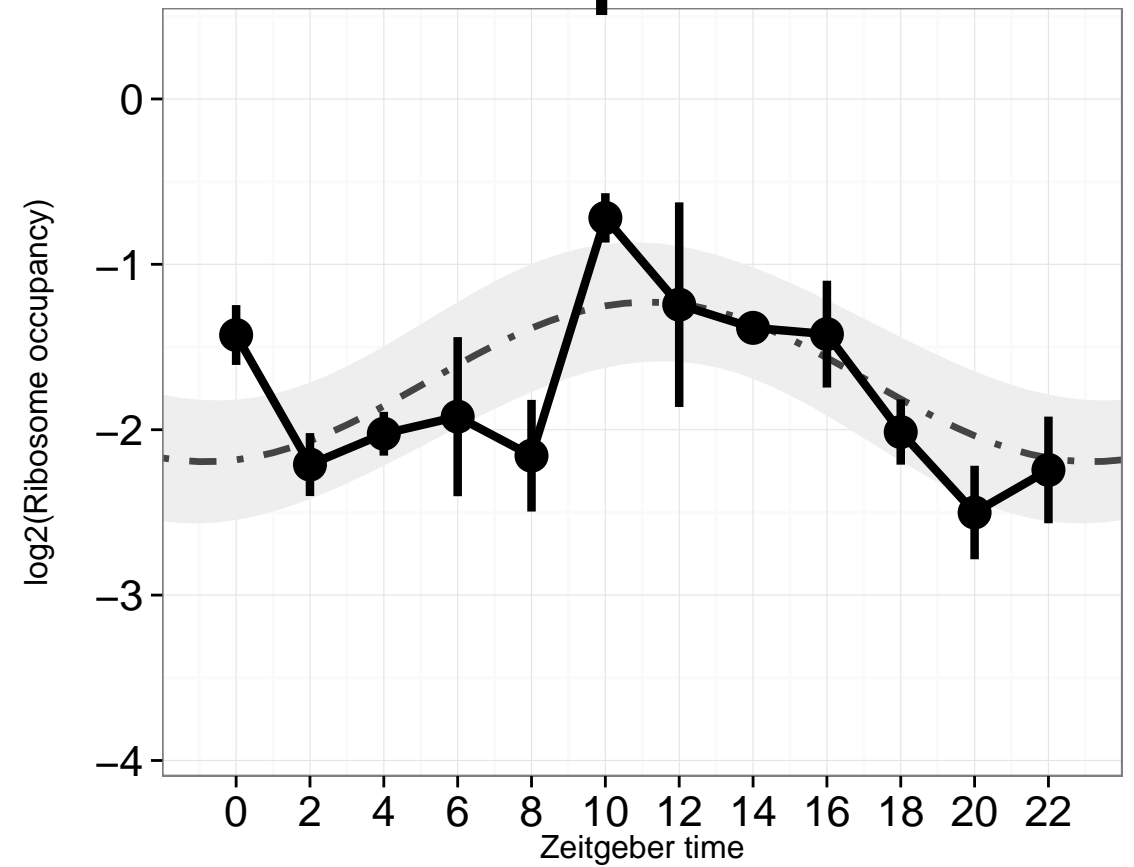

Supplement: SuppDataset_1.zip [file Rpl32_set_C.pdf › Supplemental Dataset 1/C-mRNA_nonrhythm_translation_rhyth/Rpl32_set_C.pdf]

# Rpl36a

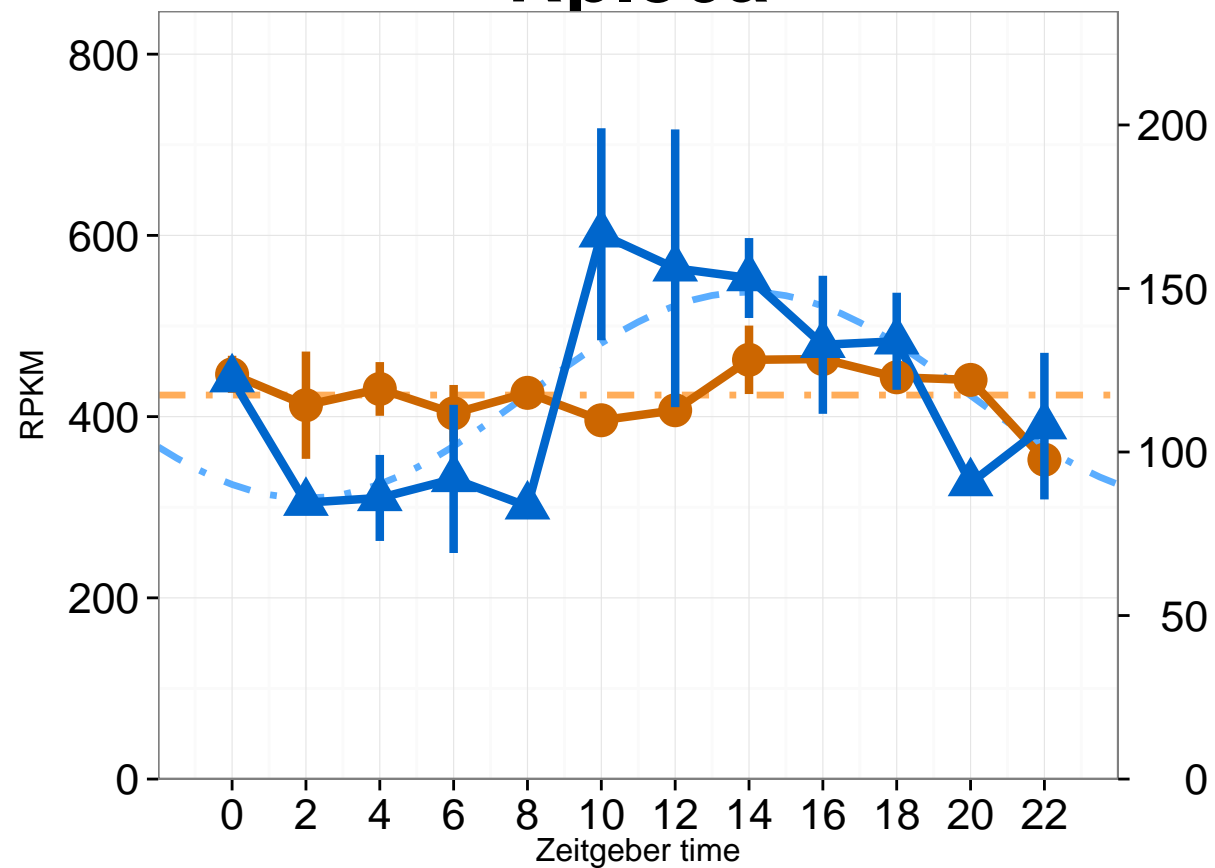

# Rpl36a

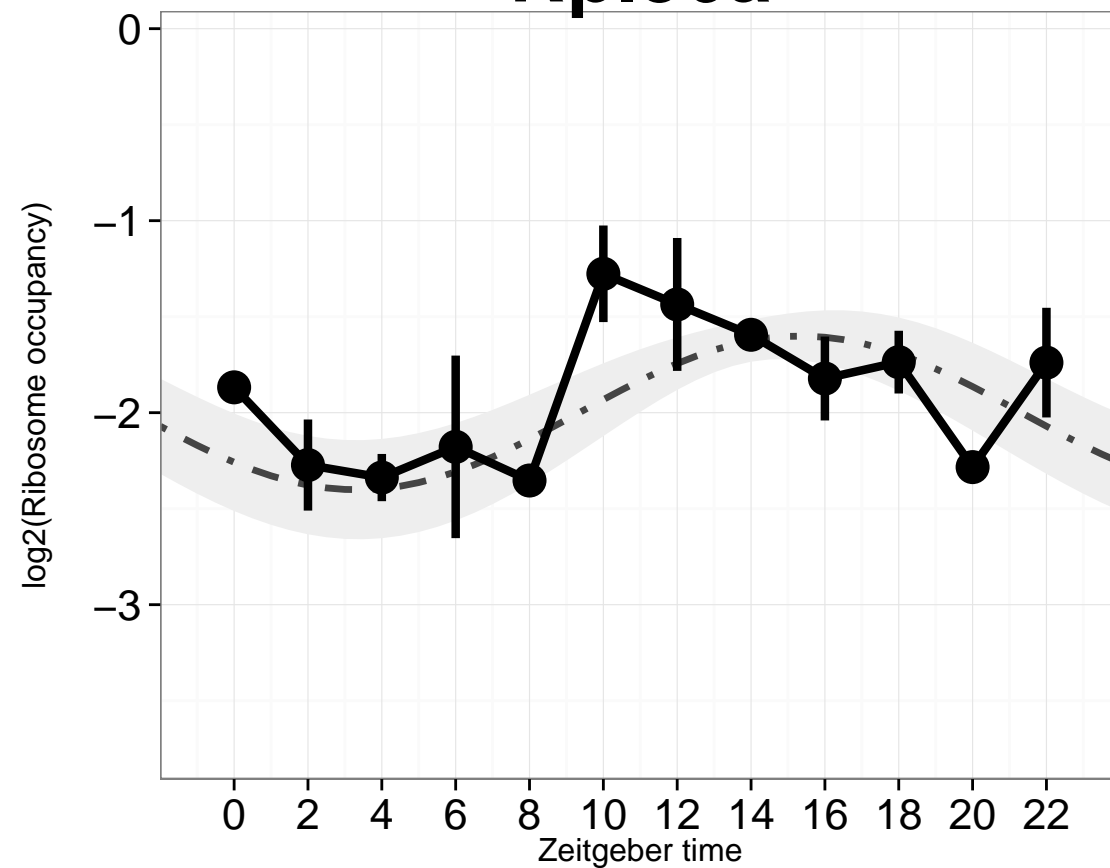

Supplement: SuppDataset_1.zip [file Rpl36a_set_C.pdf › Supplemental Dataset 1/C-mRNA_nonrhythm_translation_rhyth/Rpl36a_set_C.pdf]

# Rpl37

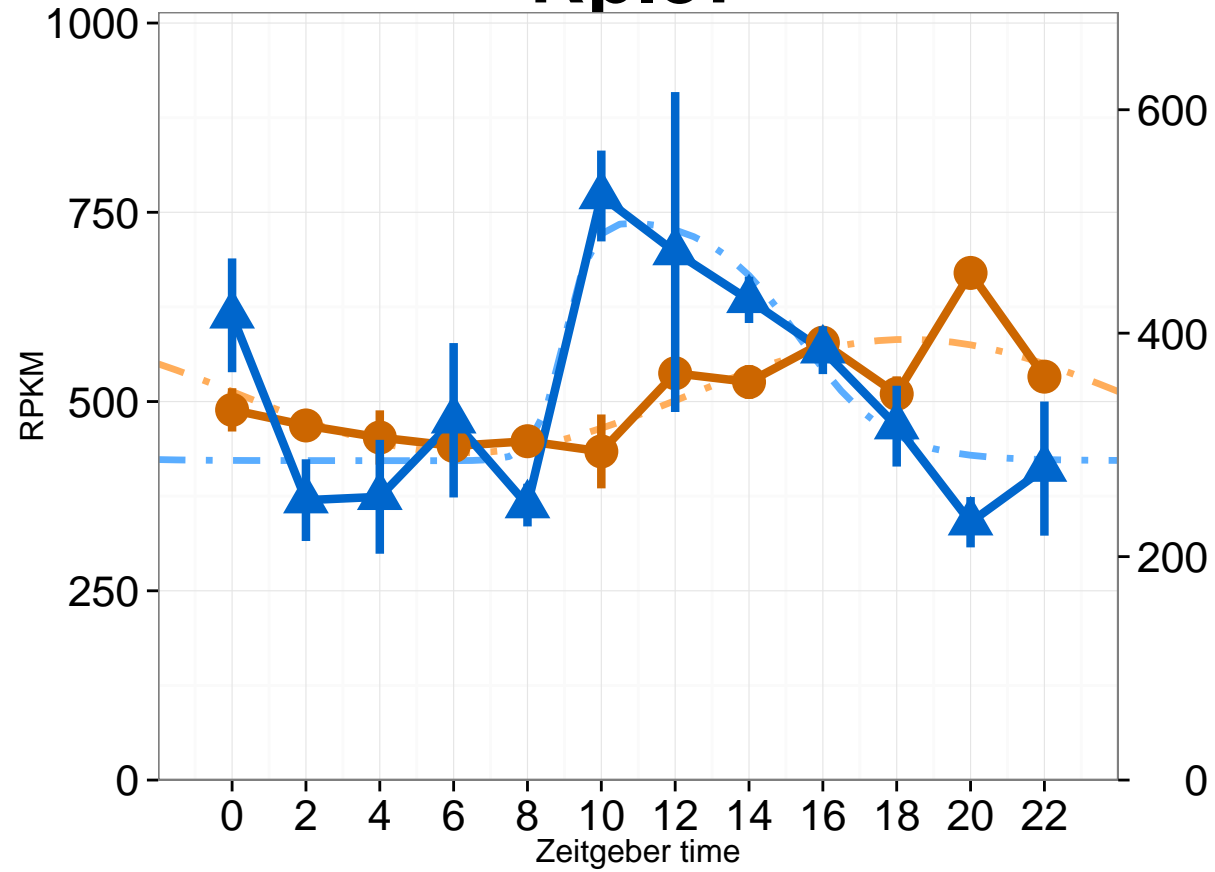

# Rpl37

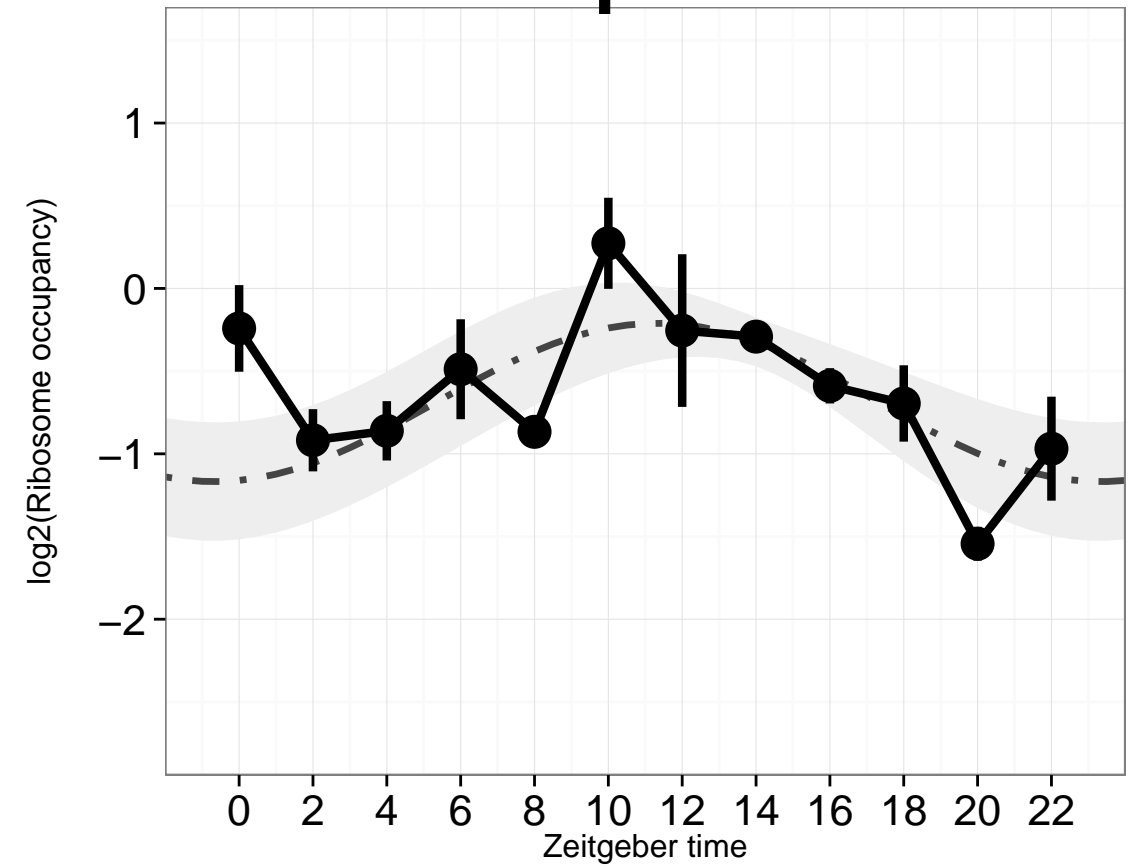

Supplement: SuppDataset_1.zip [file Rpl37_set_C.pdf › Supplemental Dataset 1/C-mRNA_nonrhythm_translation_rhyth/Rpl37_set_C.pdf]

## Rpl4

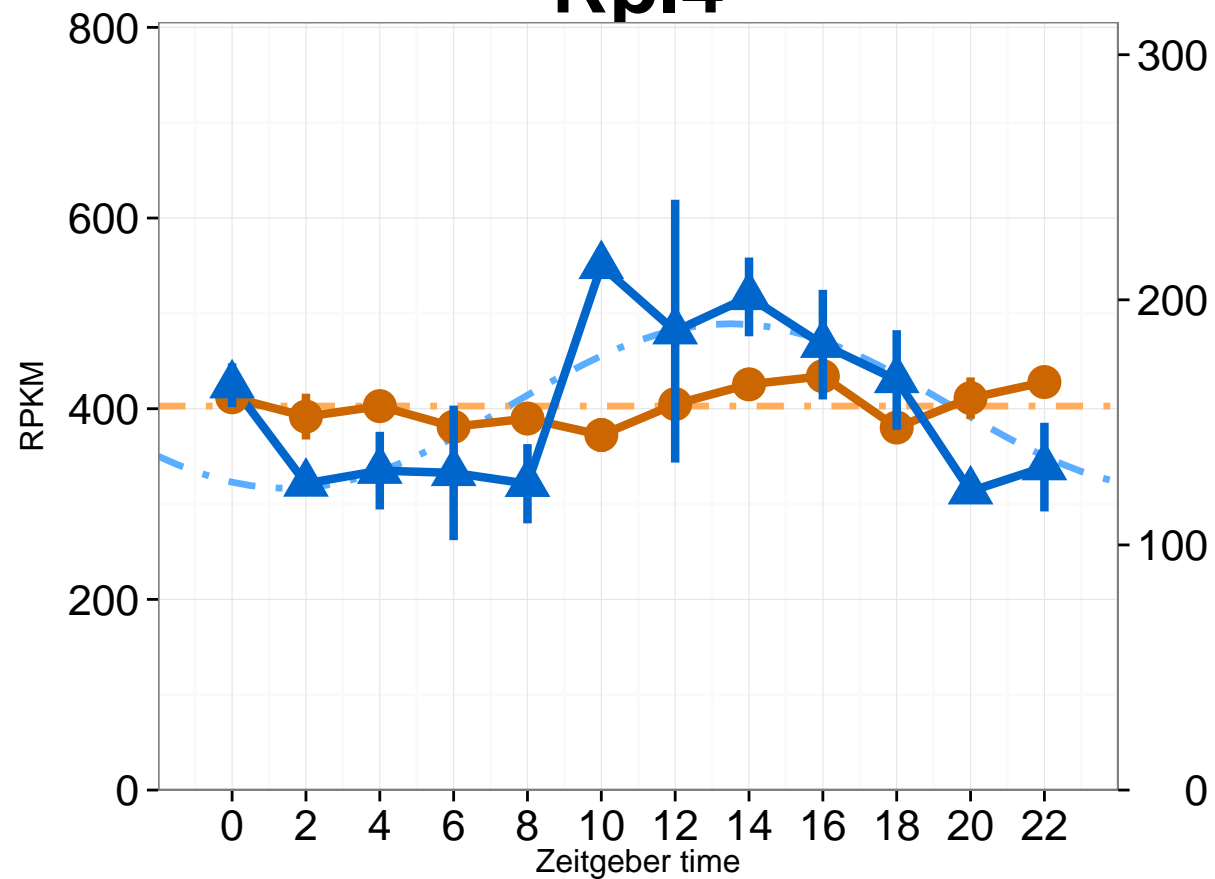

## Rpl4

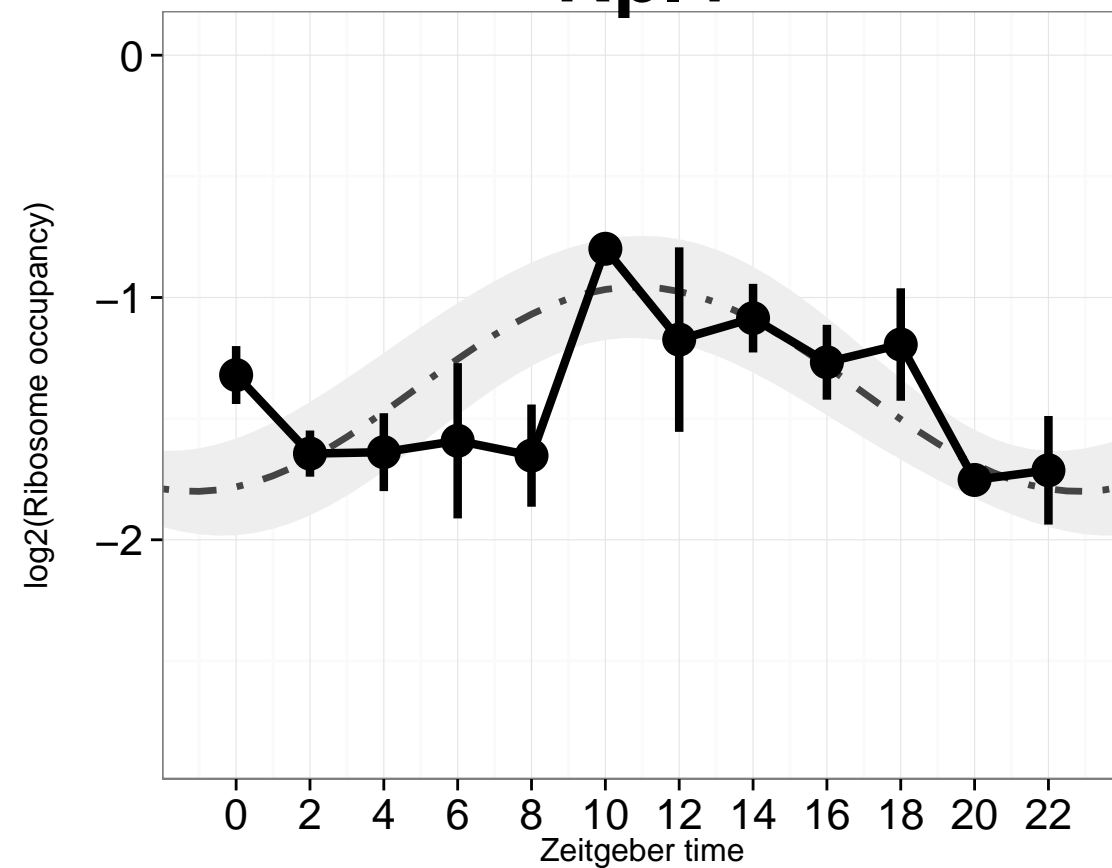

Supplement: SuppDataset_1.zip [file Rpl4_set_C.pdf › Supplemental Dataset 1/C-mRNA_nonrhythm_translation_rhyth/Rpl4_set_C.pdf]

# Rpl5

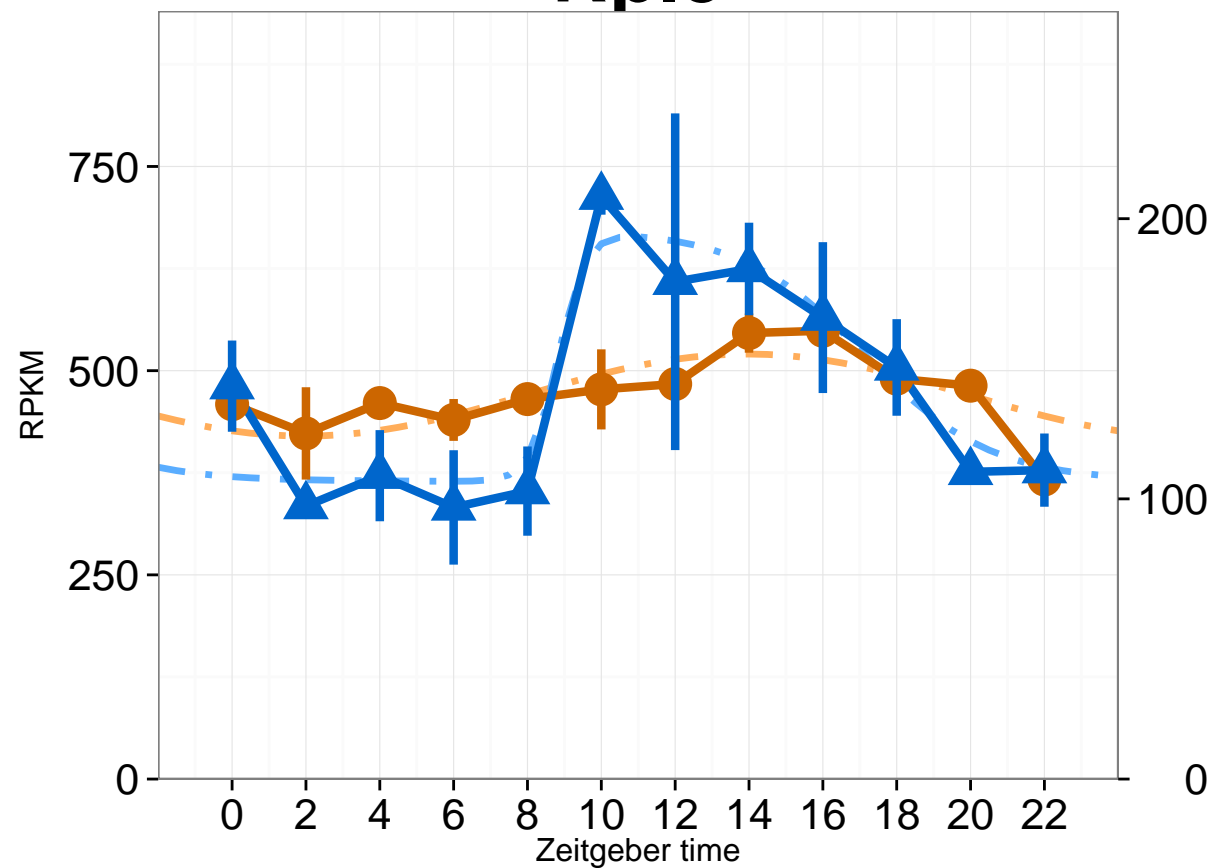

# Rpl5

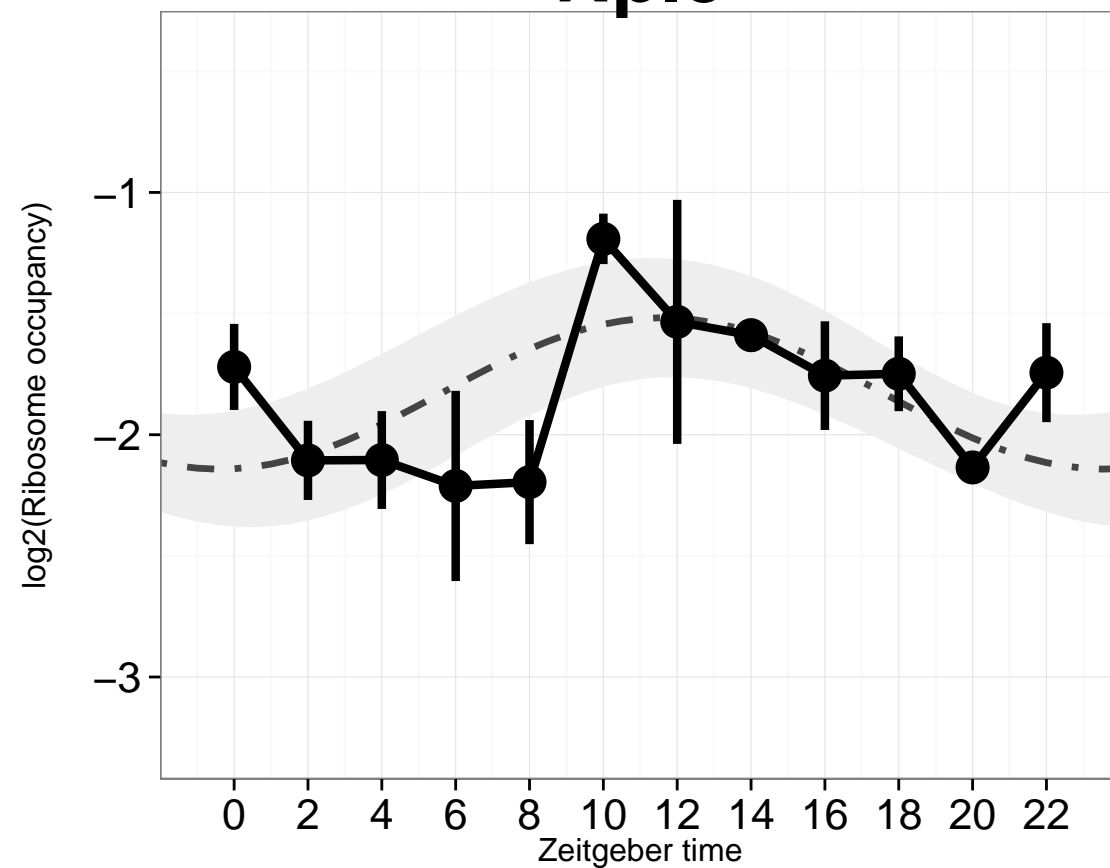

Supplement: SuppDataset_1.zip [file Rpl5_set_C.pdf › Supplemental Dataset 1/C-mRNA_nonrhythm_translation_rhyth/Rpl5_set_C.pdf]

# Rpl6

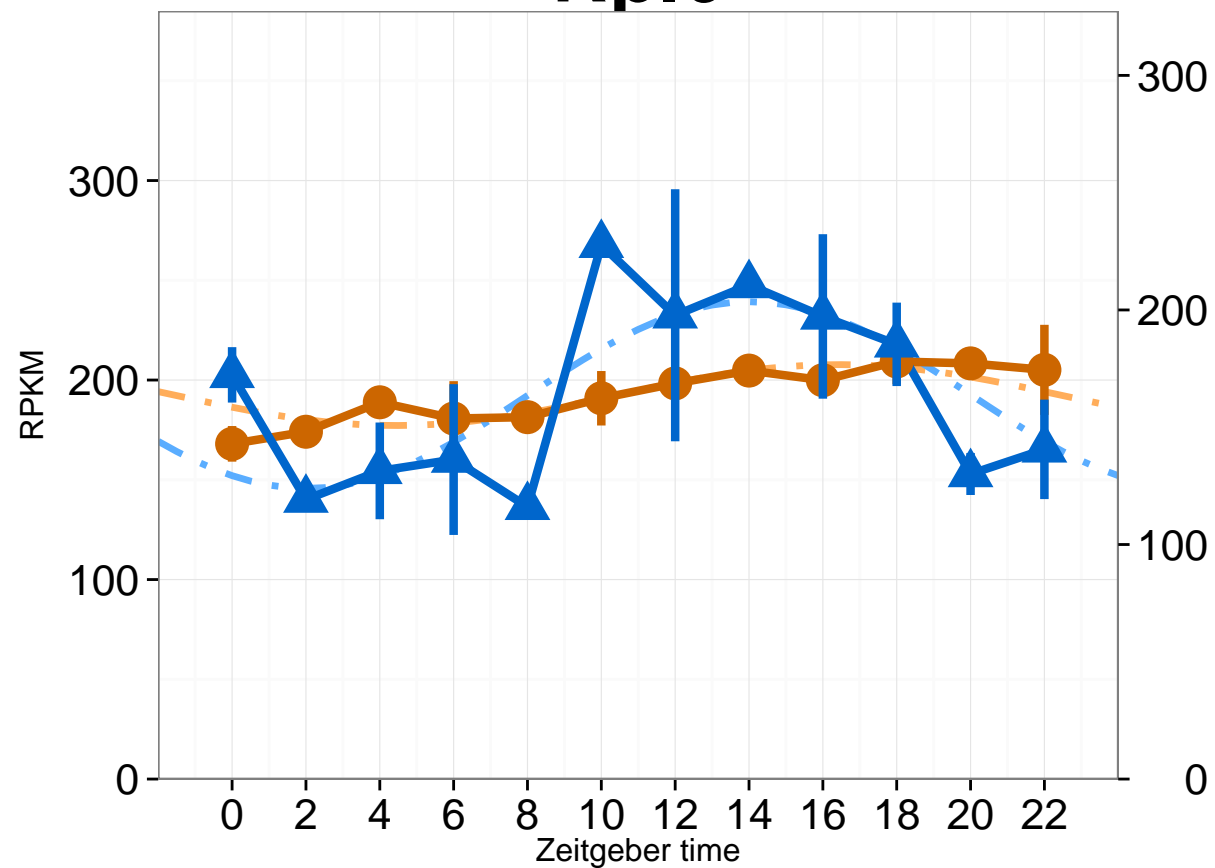

# Rpl6

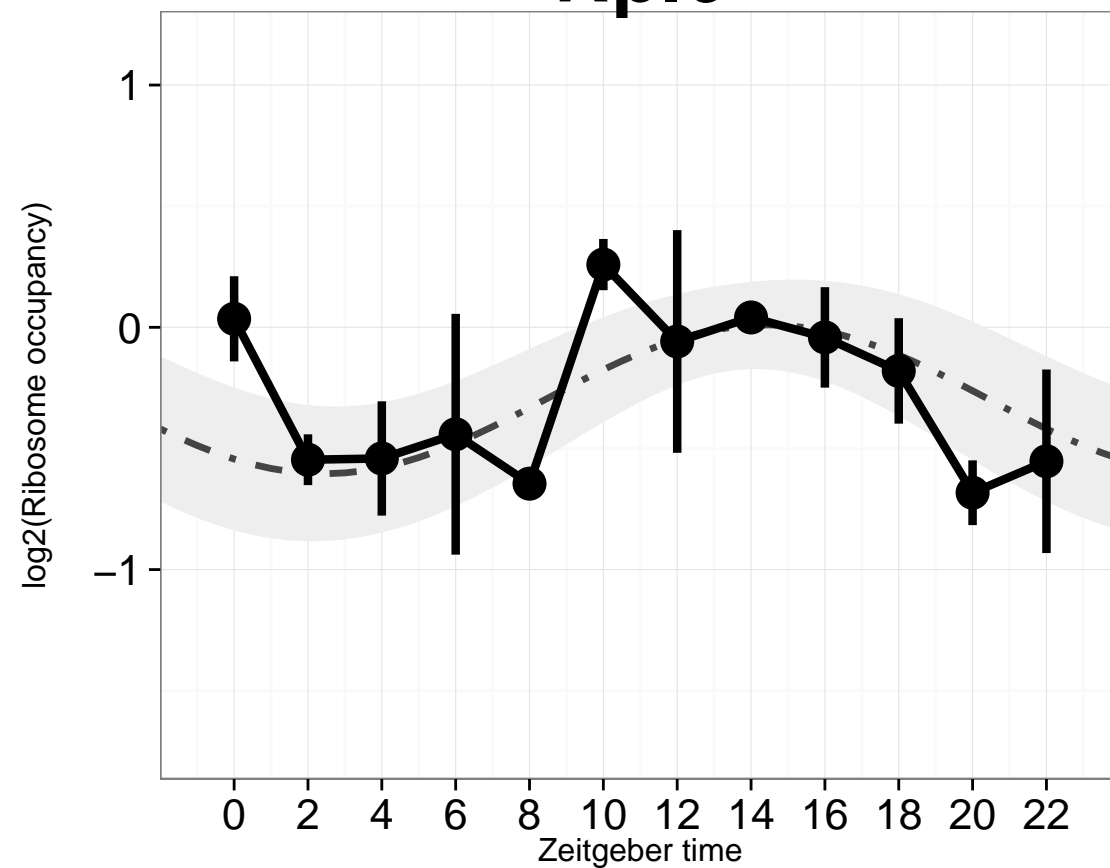

Supplement: SuppDataset_1.zip [file Rpl6_set_C.pdf › Supplemental Dataset 1/C-mRNA_nonrhythm_translation_rhyth/Rpl6_set_C.pdf]

# Rpl7

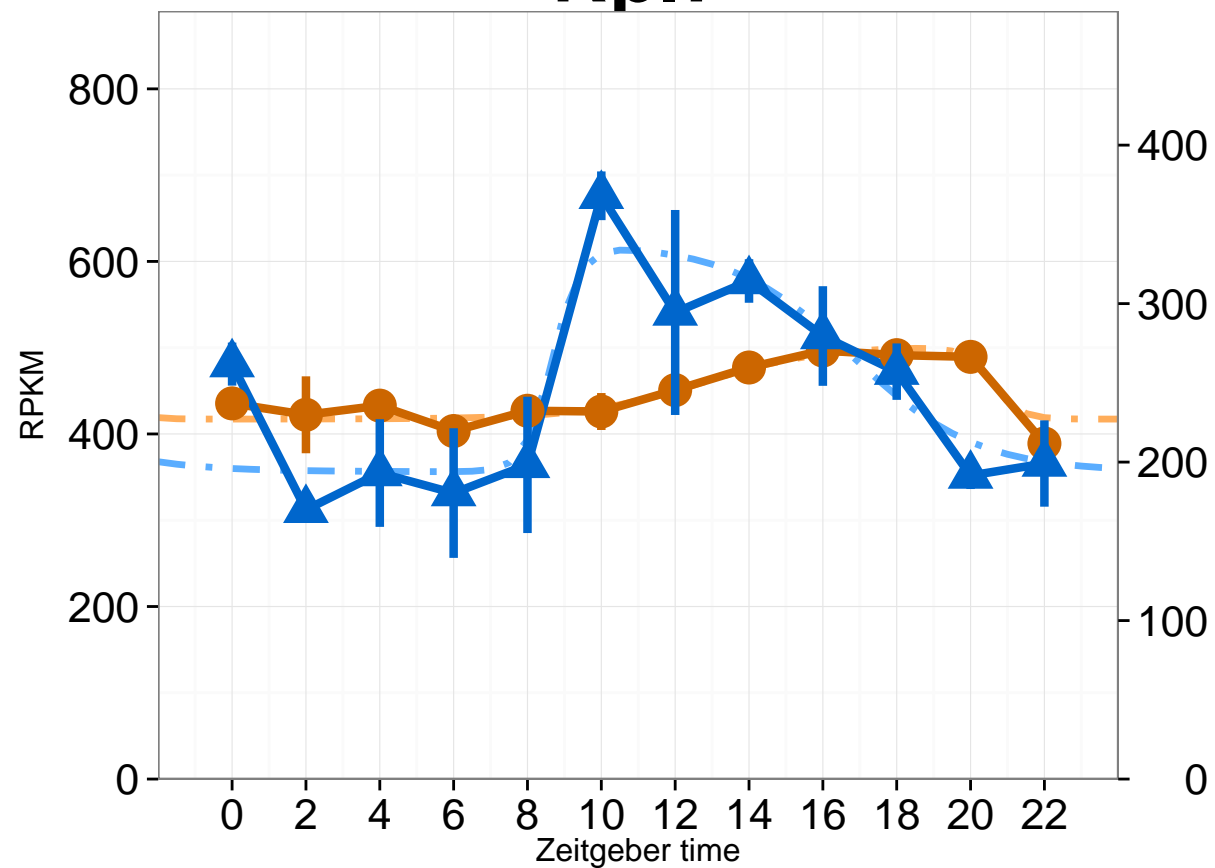

# Rpl7

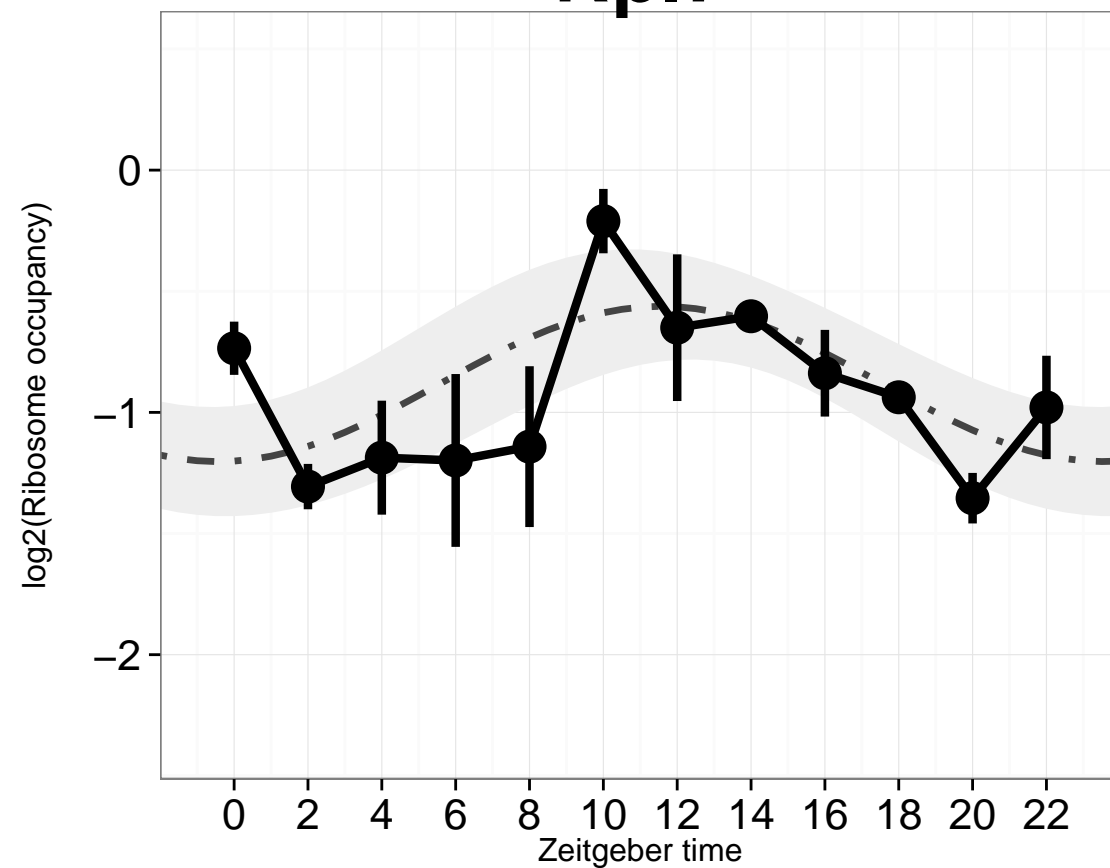

Supplement: SuppDataset_1.zip [file Rpl7_set_C.pdf › Supplemental Dataset 1/C-mRNA_nonrhythm_translation_rhyth/Rpl7_set_C.pdf]

# Rpl7a

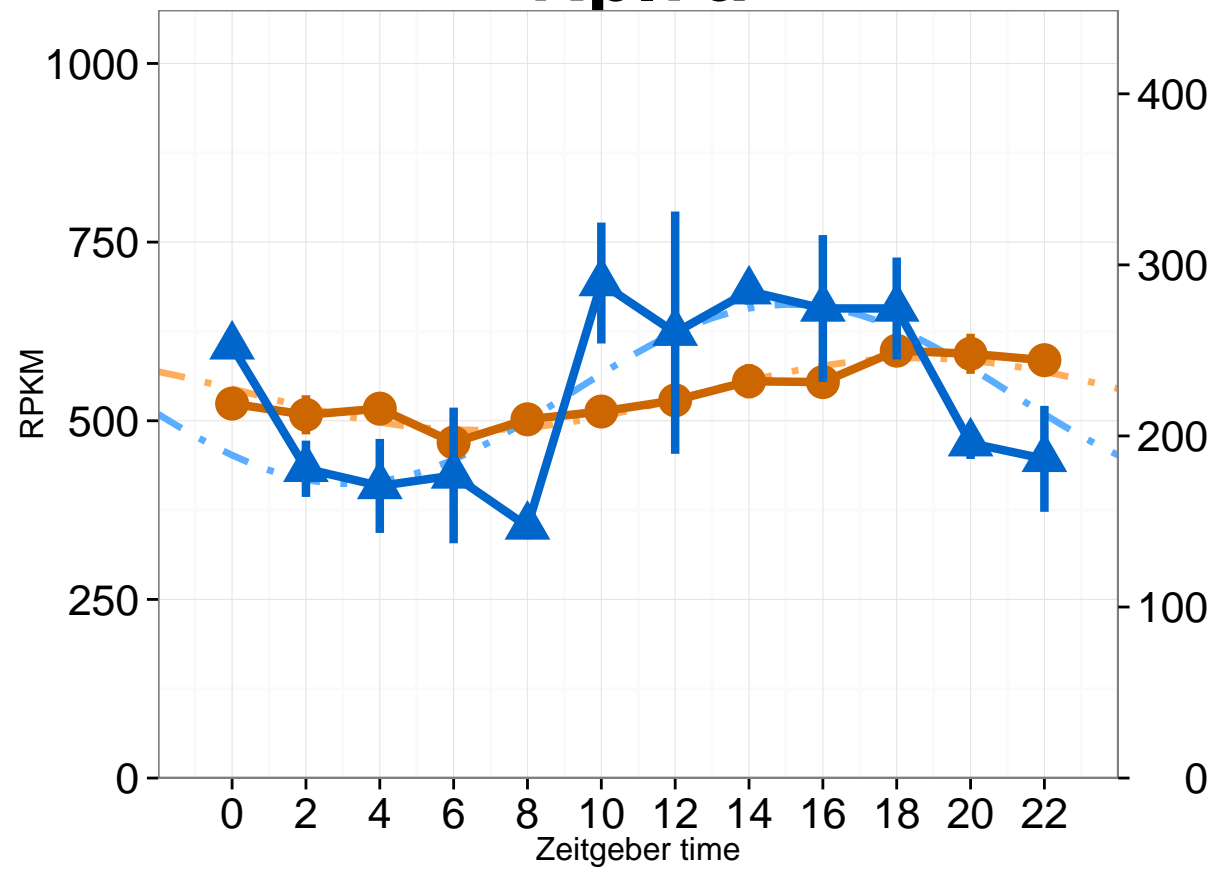

# Rpl7a

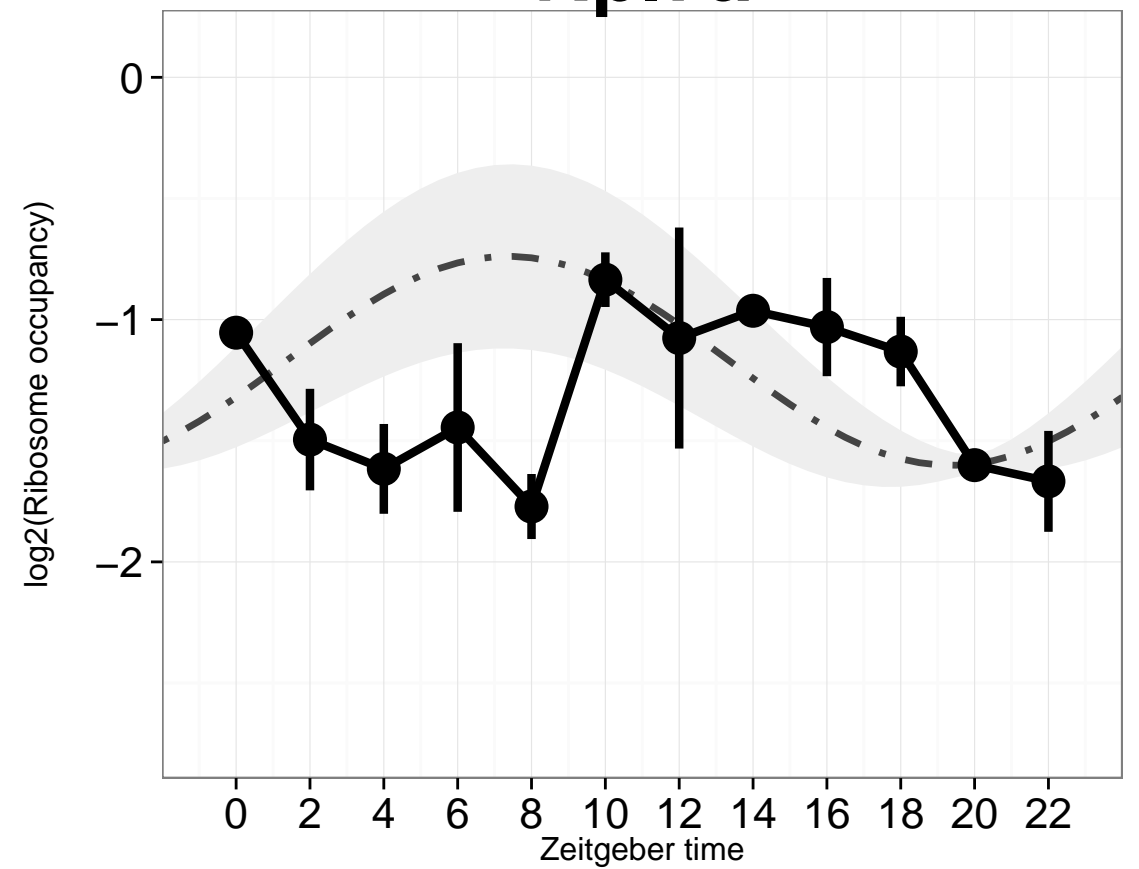

Supplement: SuppDataset_1.zip [file Rpl7a_set_C.pdf › Supplemental Dataset 1/C-mRNA_nonrhythm_translation_rhyth/Rpl7a_set_C.pdf]

## Rpl9

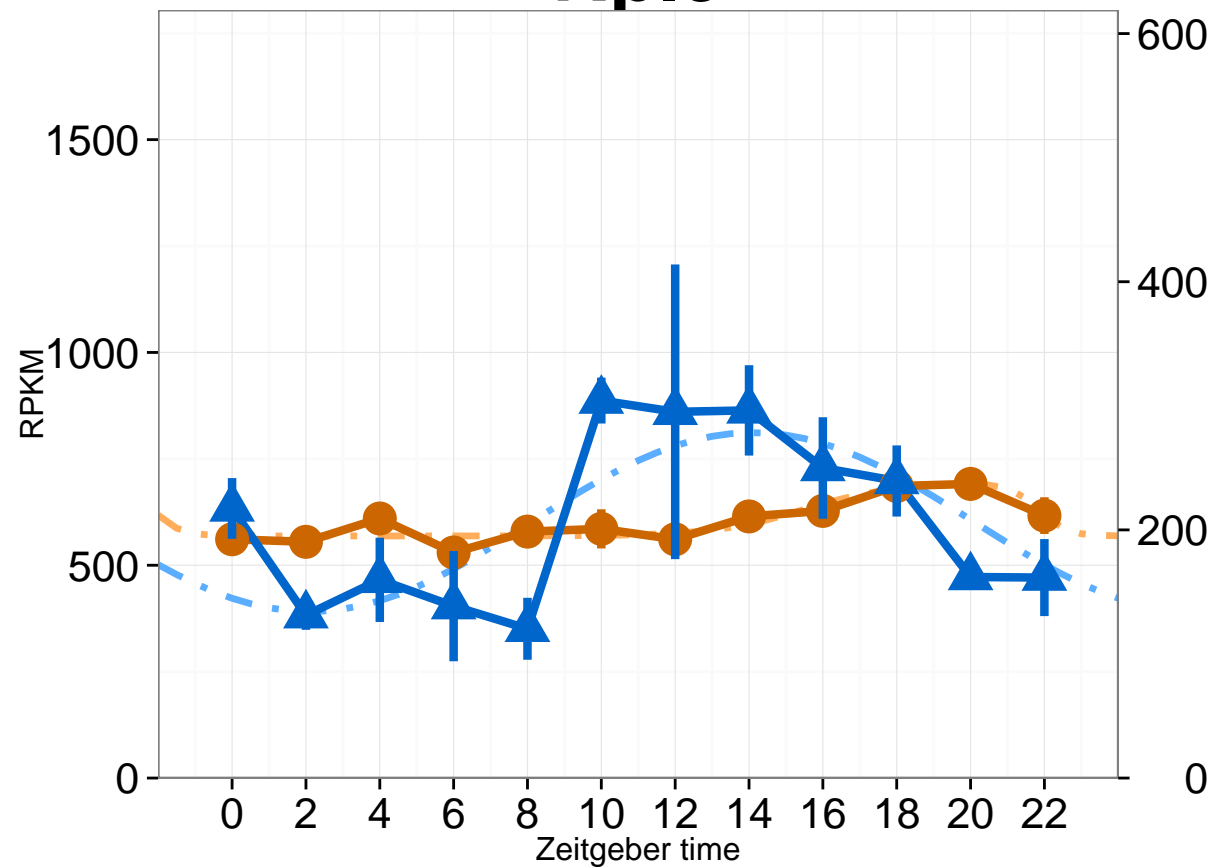

## Rpl9

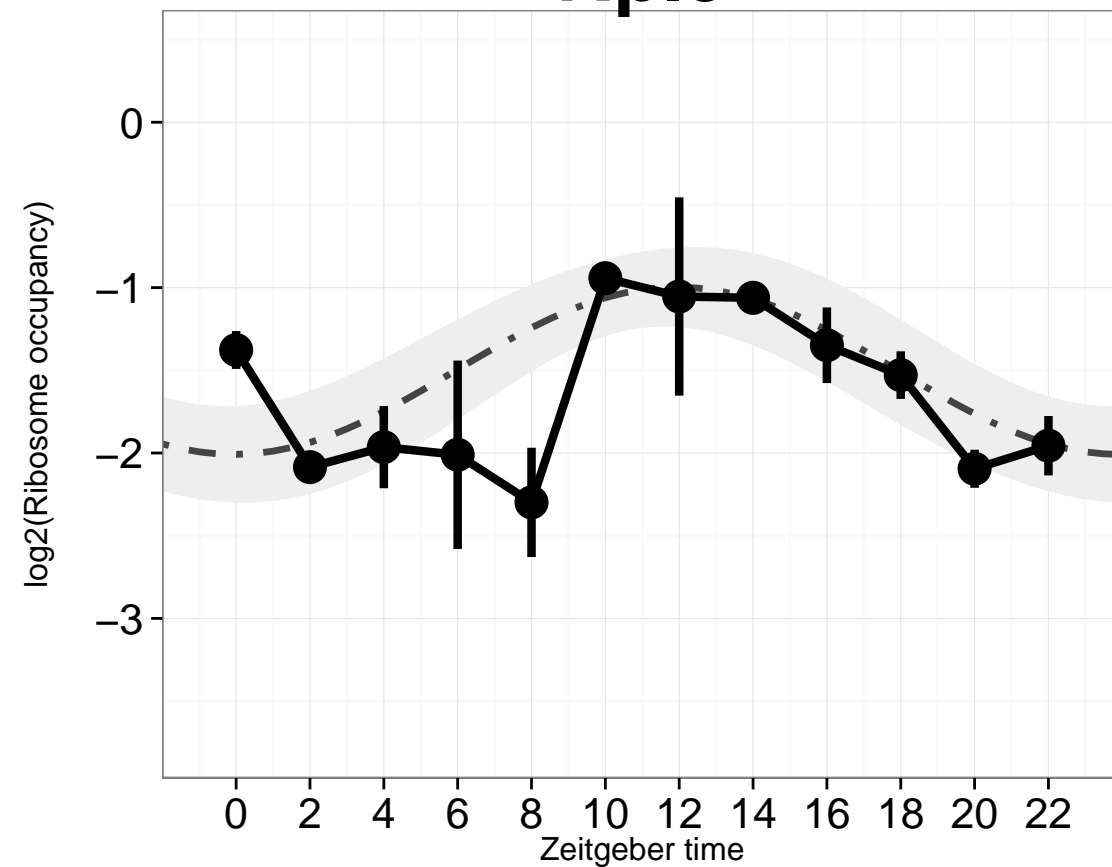

Supplement: SuppDataset_1.zip [file Rpl9_set_C.pdf › Supplemental Dataset 1/C-mRNA_nonrhythm_translation_rhyth/Rpl9_set_C.pdf]

# Rplp2

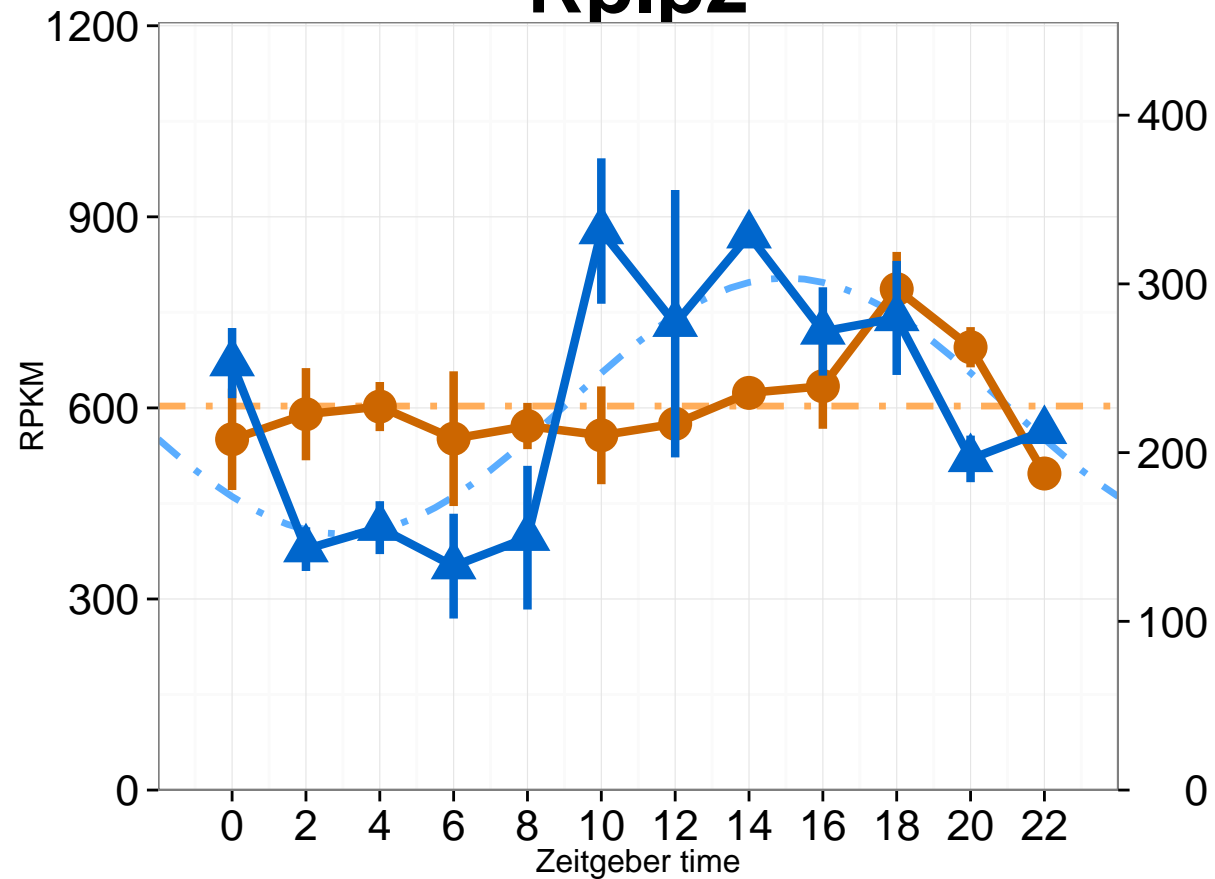

# Rplp2

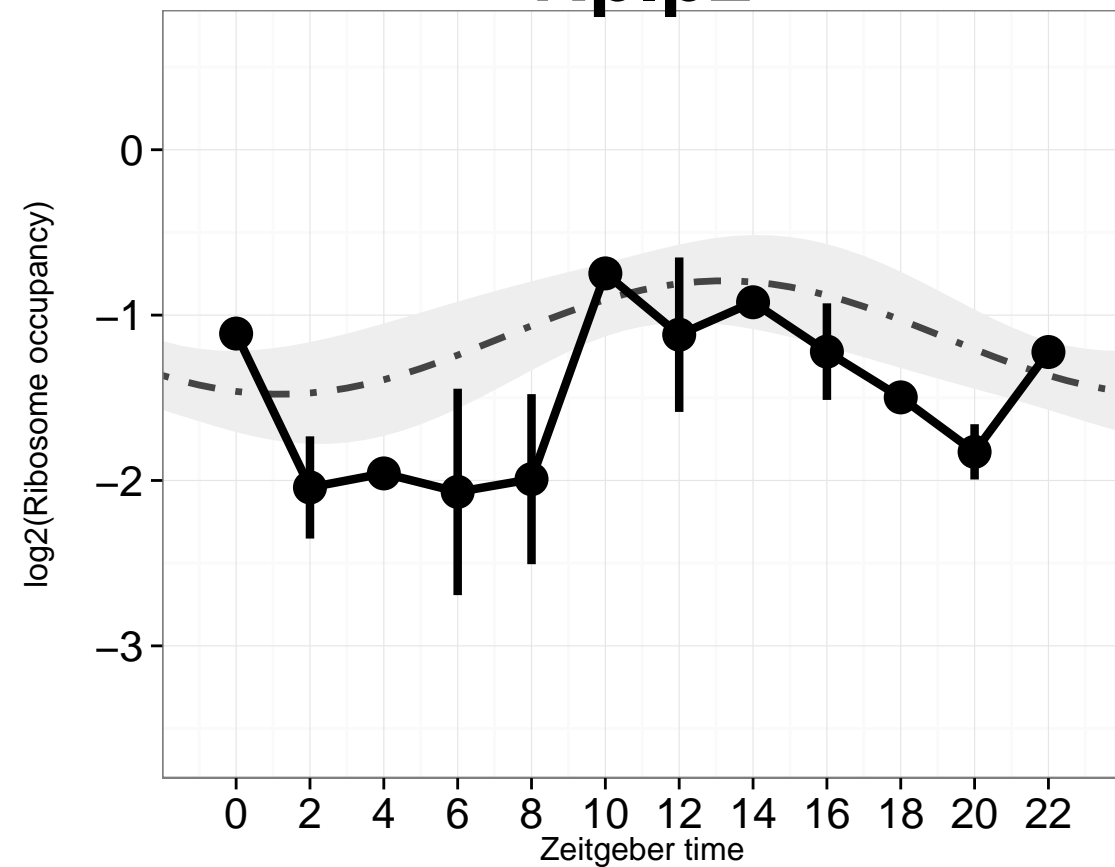

Supplement: SuppDataset_1.zip [file Rplp2_set_C.pdf › Supplemental Dataset 1/C-mRNA_nonrhythm_translation_rhyth/Rplp2_set_C.pdf]

# Rpp14

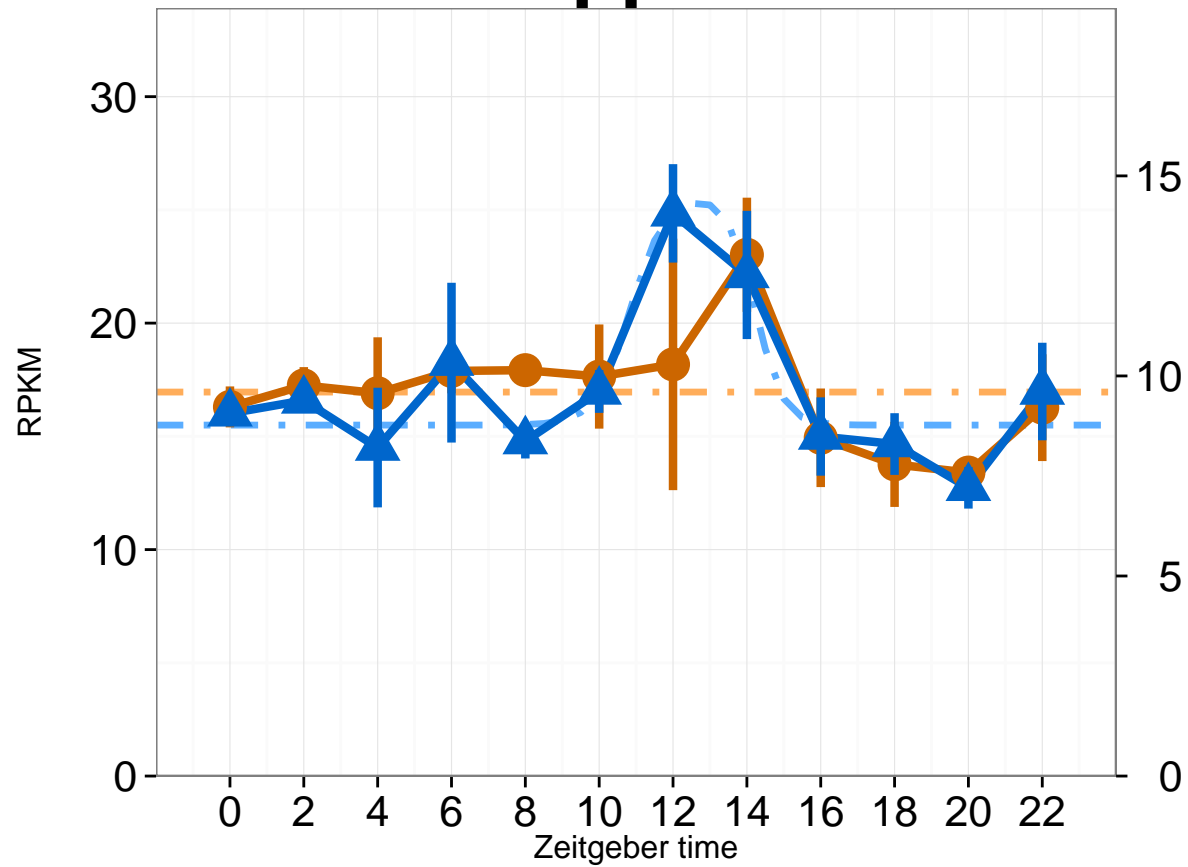

# Rpp14

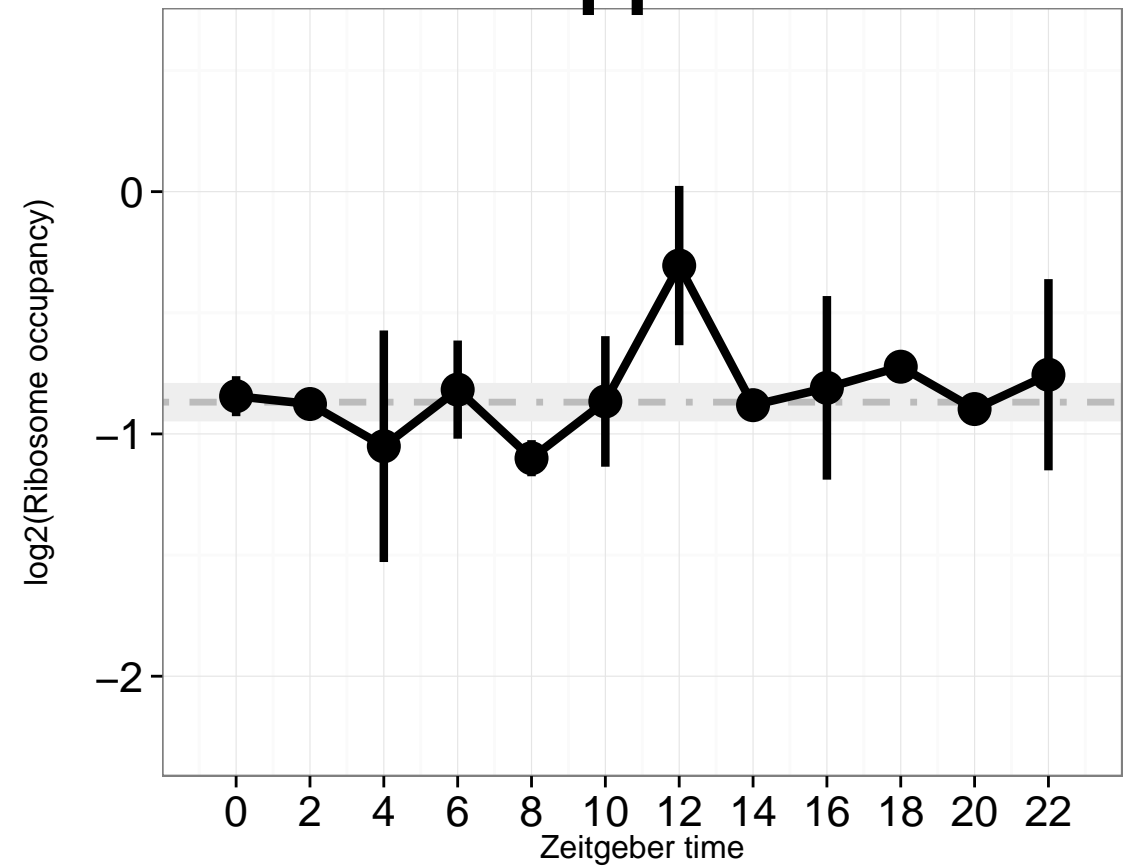

Supplement: SuppDataset_1.zip [file Rpp14_set_C.pdf › Supplemental Dataset 1/C-mRNA_nonrhythm_translation_rhyth/Rpp14_set_C.pdf]

# Rpp38

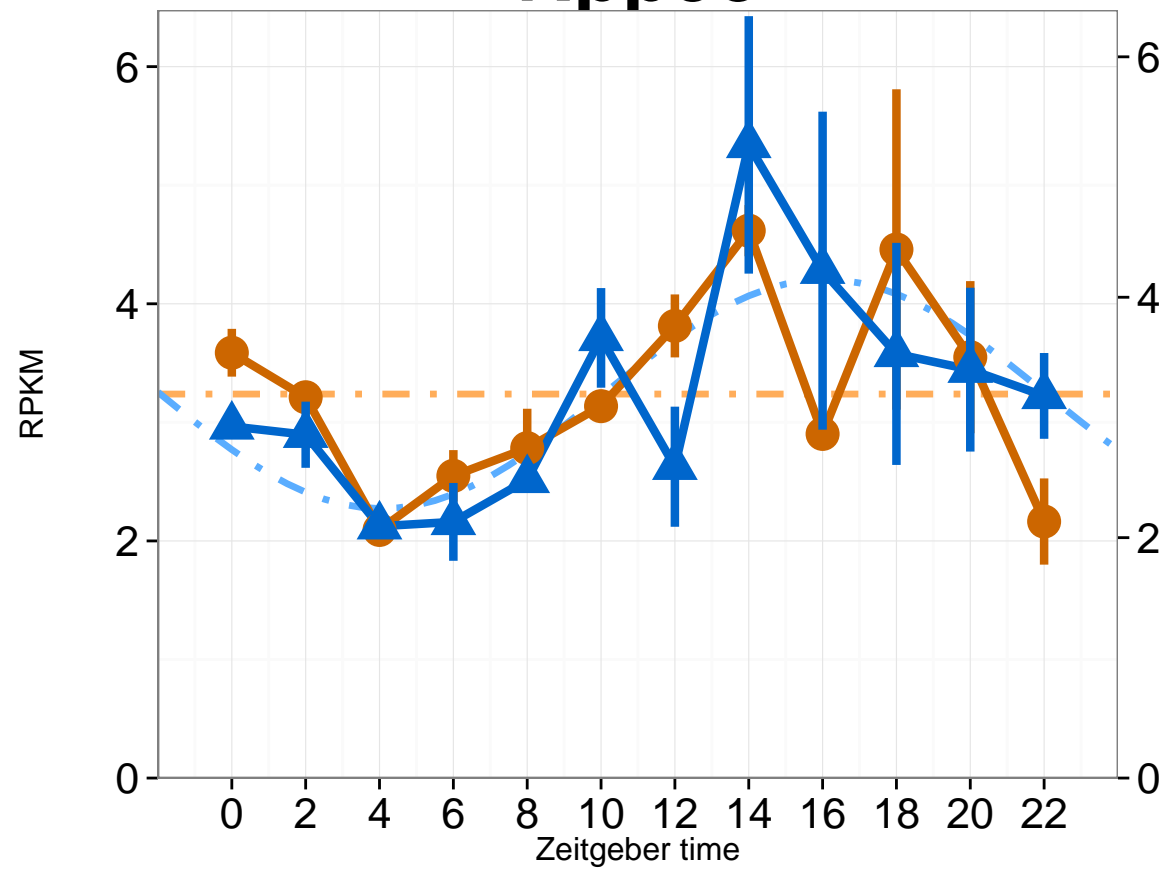

# Rpp38

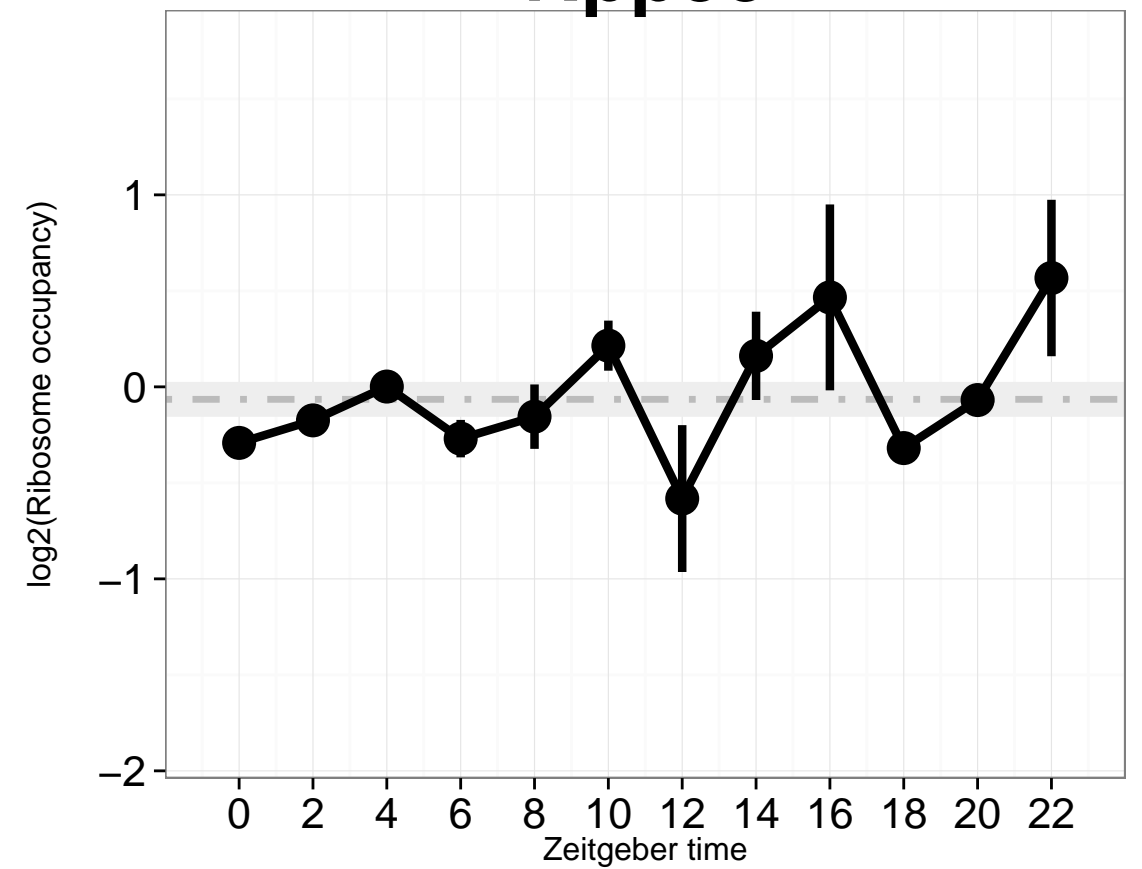

Supplement: SuppDataset_1.zip [file Rpp38_set_C.pdf › Supplemental Dataset 1/C-mRNA_nonrhythm_translation_rhyth/Rpp38_set_C.pdf]

## Rps10

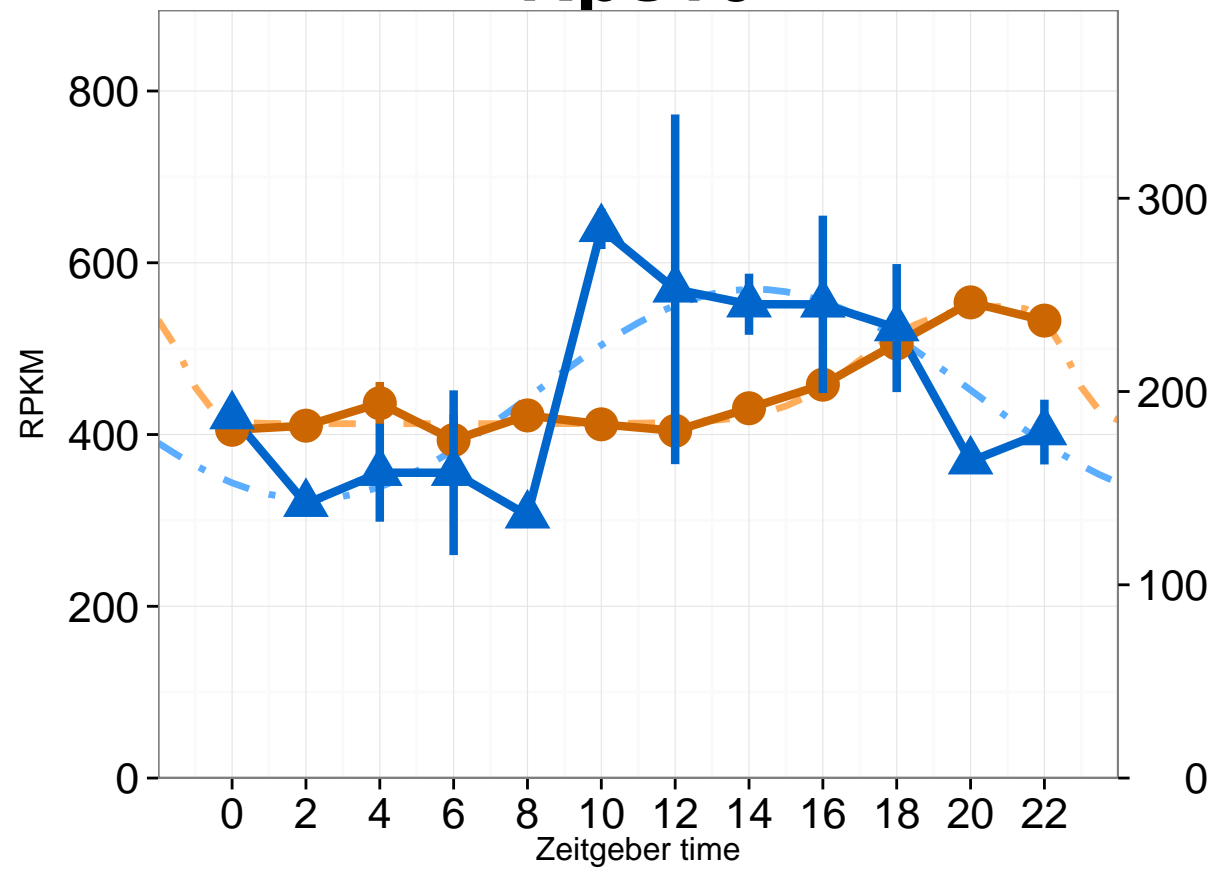

## Rps10

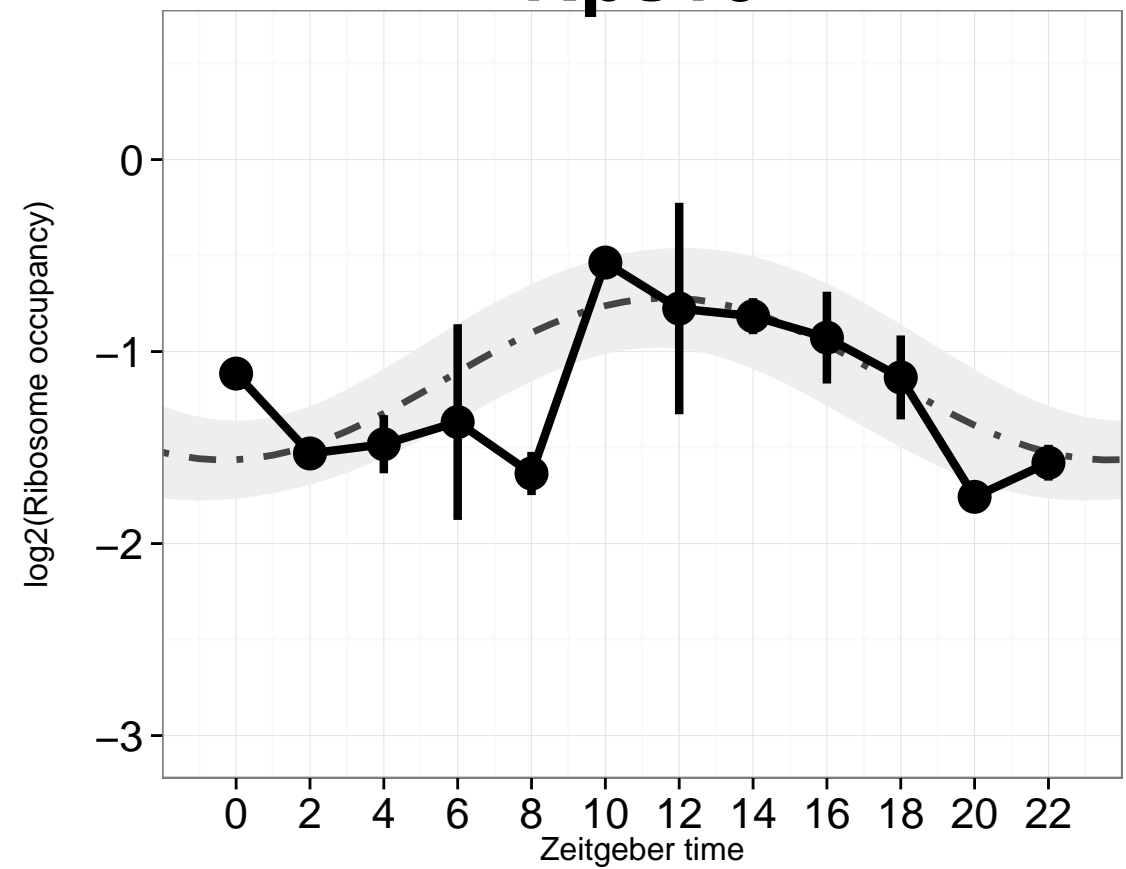

Supplement: SuppDataset_1.zip [file Rps10_set_C.pdf › Supplemental Dataset 1/C-mRNA_nonrhythm_translation_rhyth/Rps10_set_C.pdf]

# Rps11

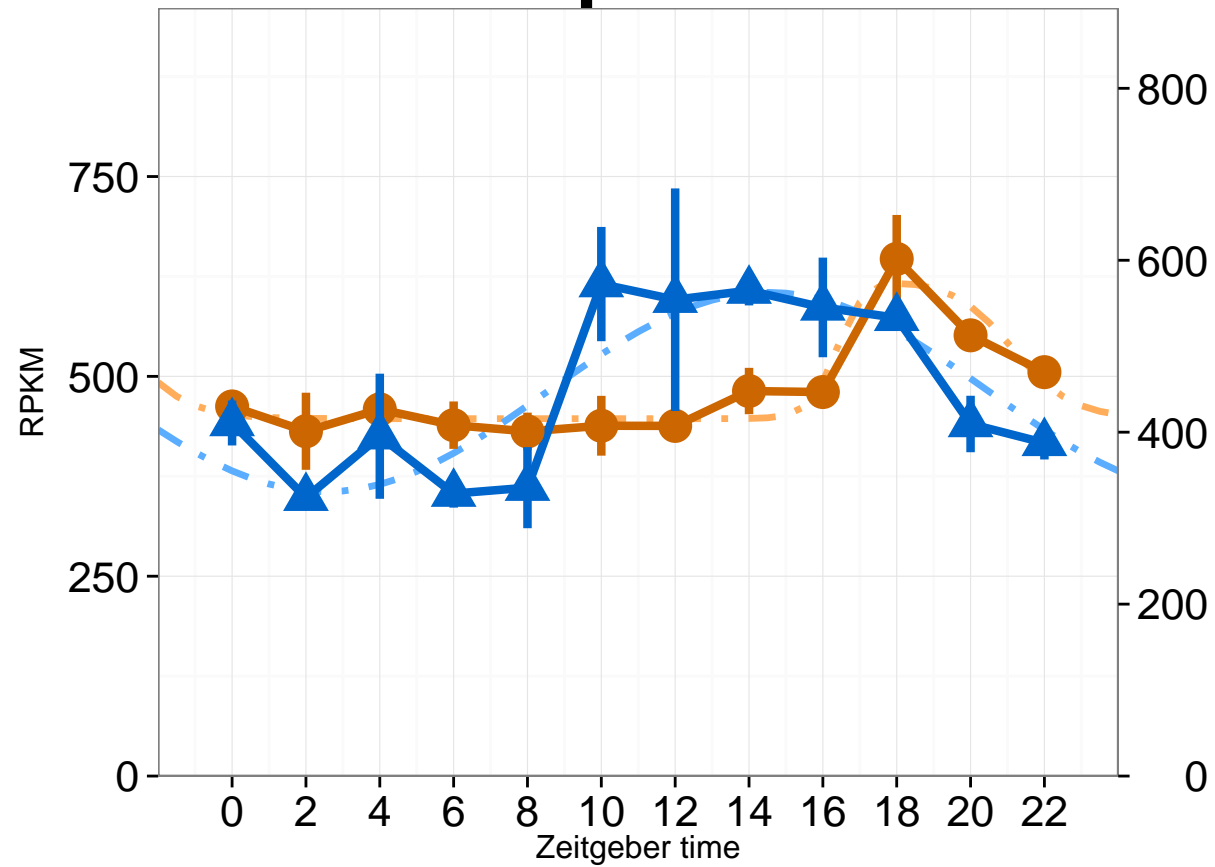

# Rps11

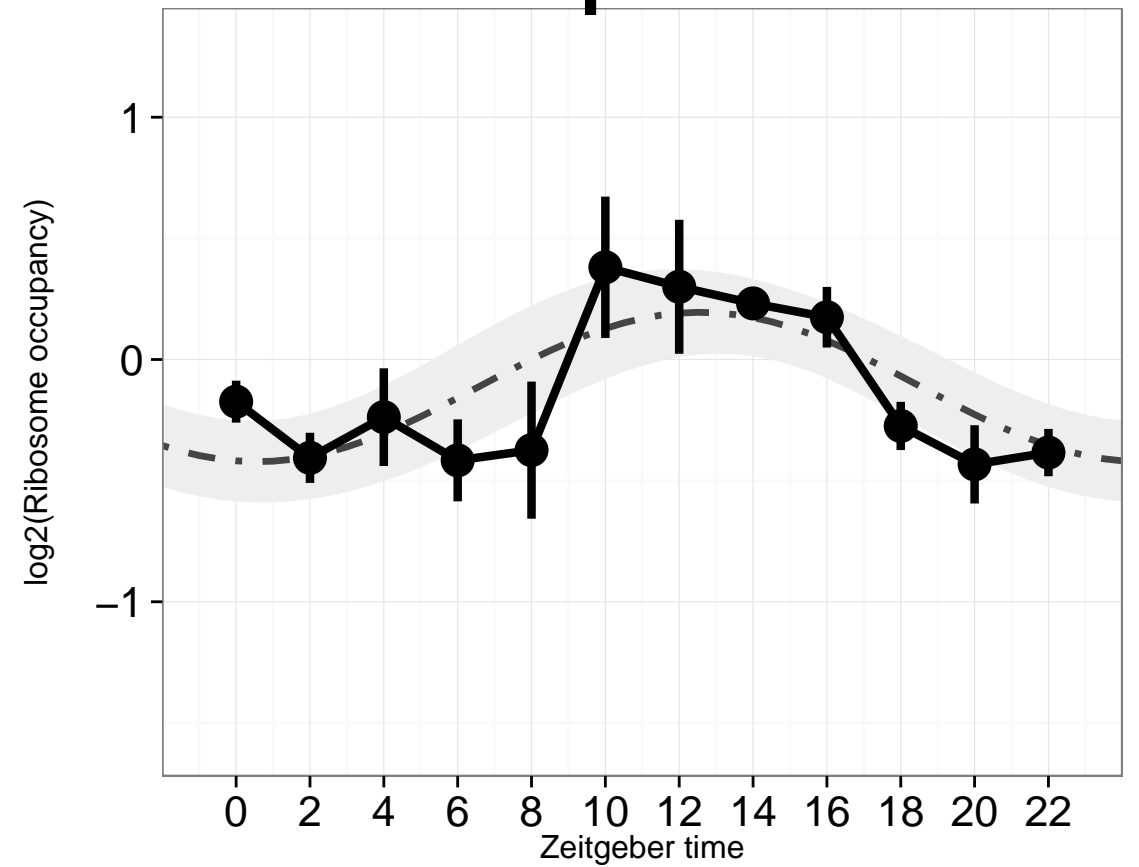

Supplement: SuppDataset_1.zip [file Rps11_set_C.pdf › Supplemental Dataset 1/C-mRNA_nonrhythm_translation_rhyth/Rps11_set_C.pdf]

## Rps12

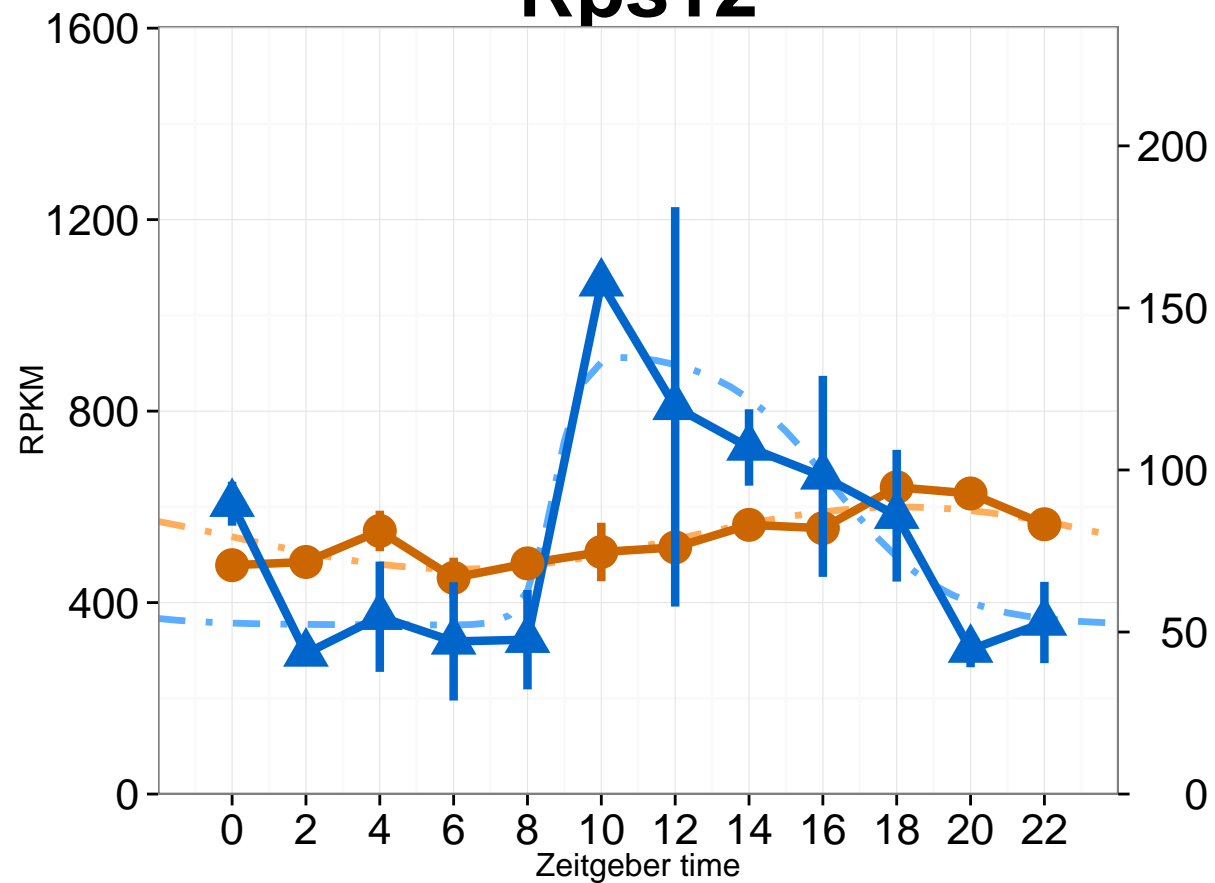

## Rps12

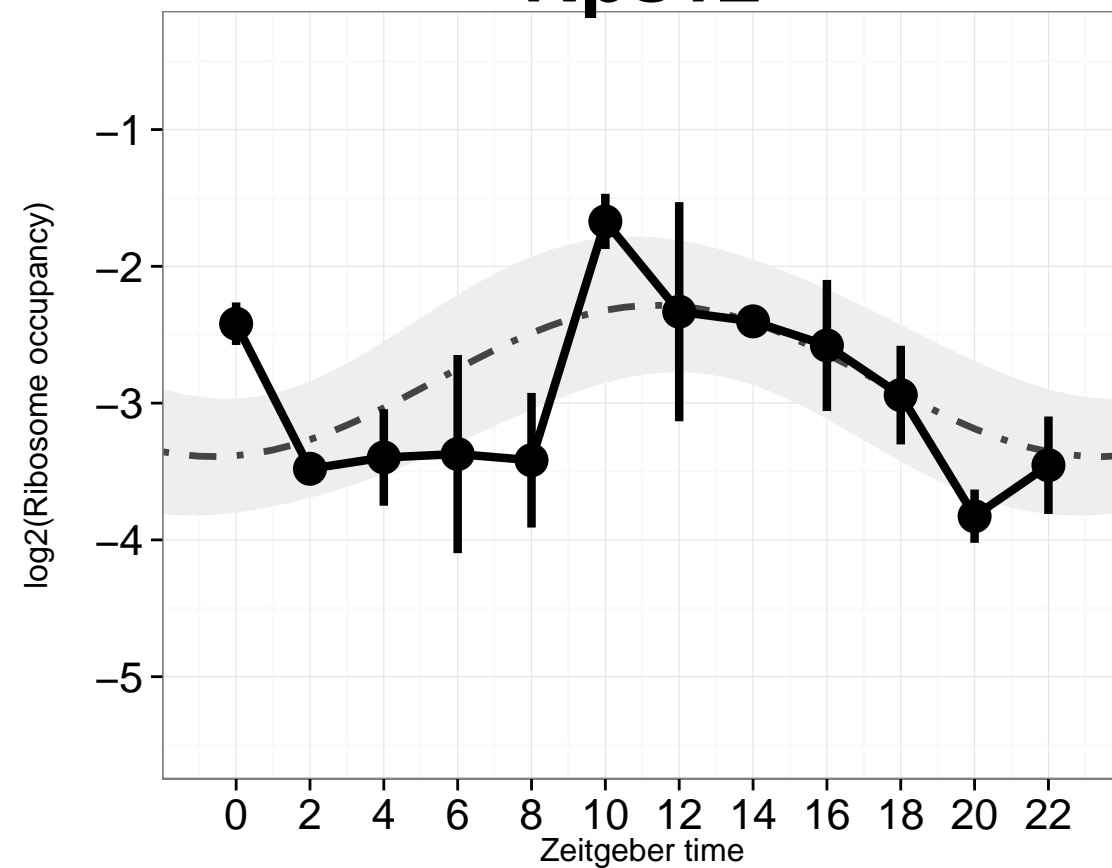

Supplement: SuppDataset_1.zip [file Rps12_set_C.pdf › Supplemental Dataset 1/C-mRNA_nonrhythm_translation_rhyth/Rps12_set_C.pdf]

# Rps16

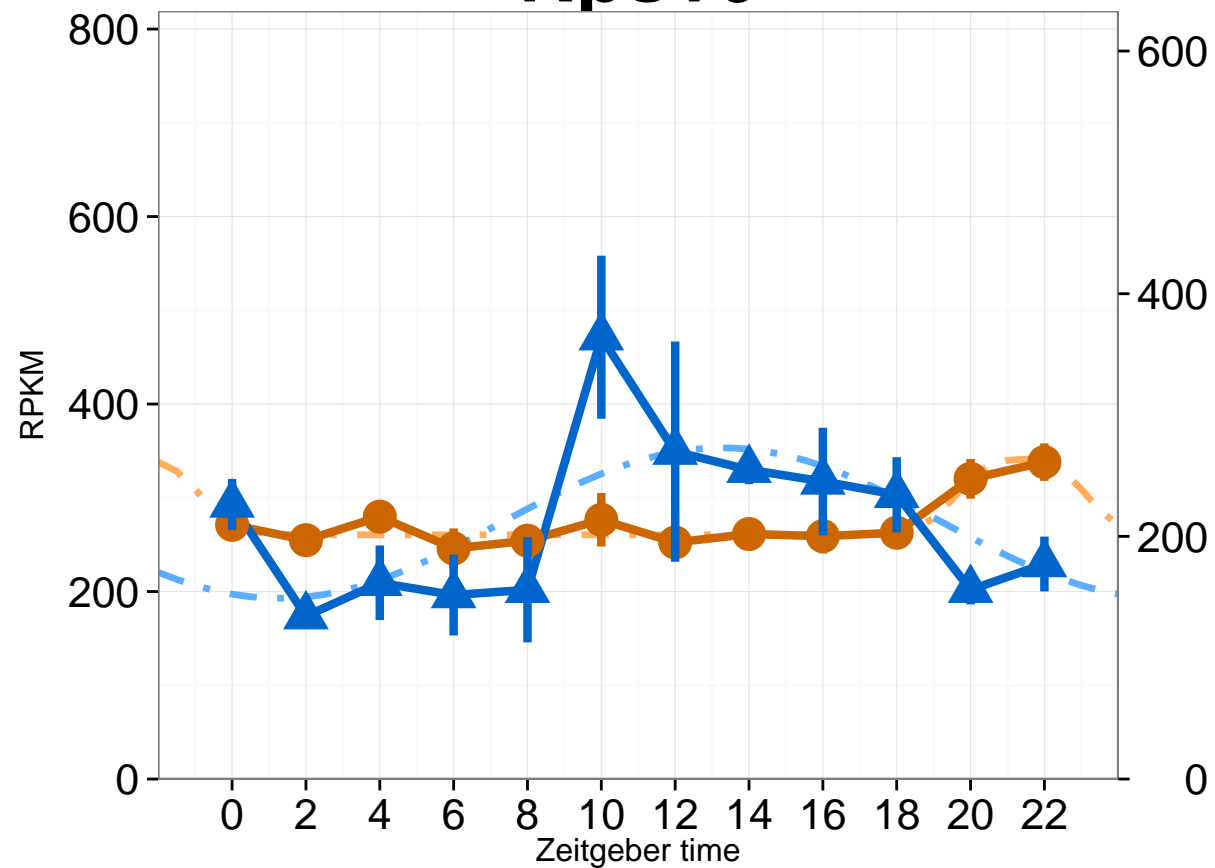

# Rps16

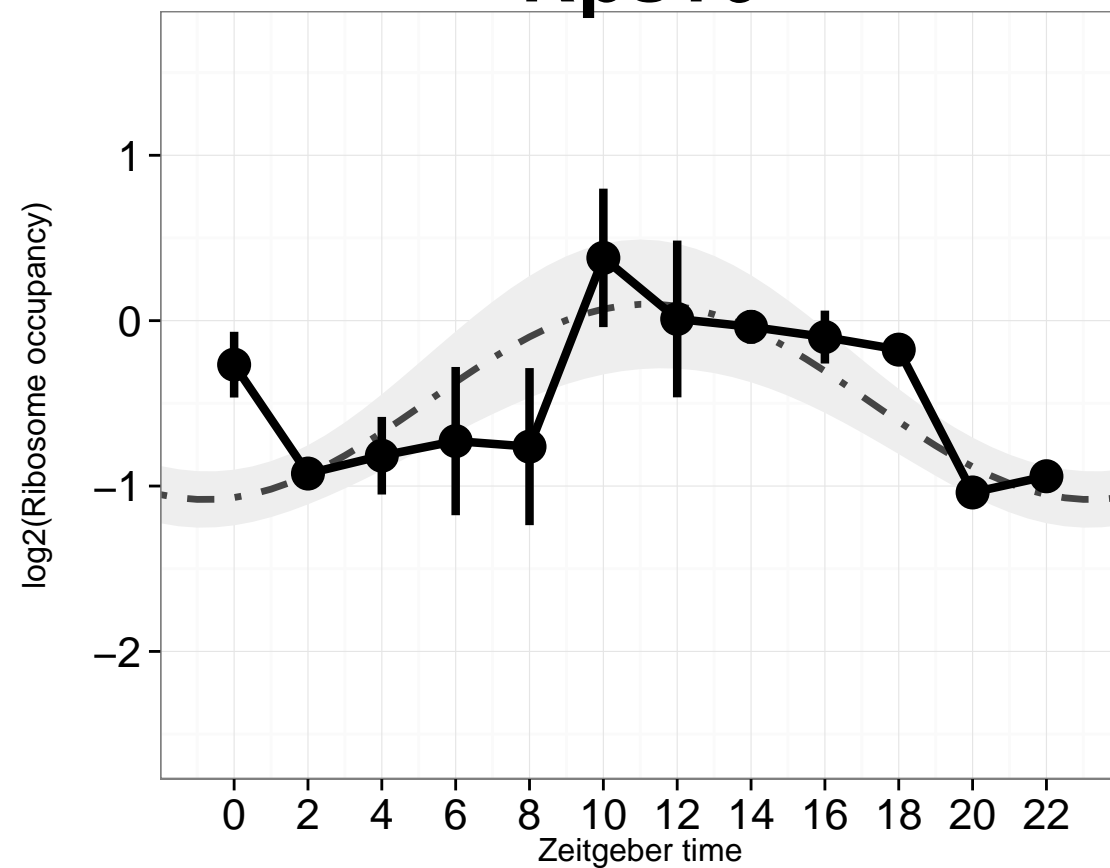

Supplement: SuppDataset_1.zip [file Rps16_set_C.pdf › Supplemental Dataset 1/C-mRNA_nonrhythm_translation_rhyth/Rps16_set_C.pdf]

# Rps17

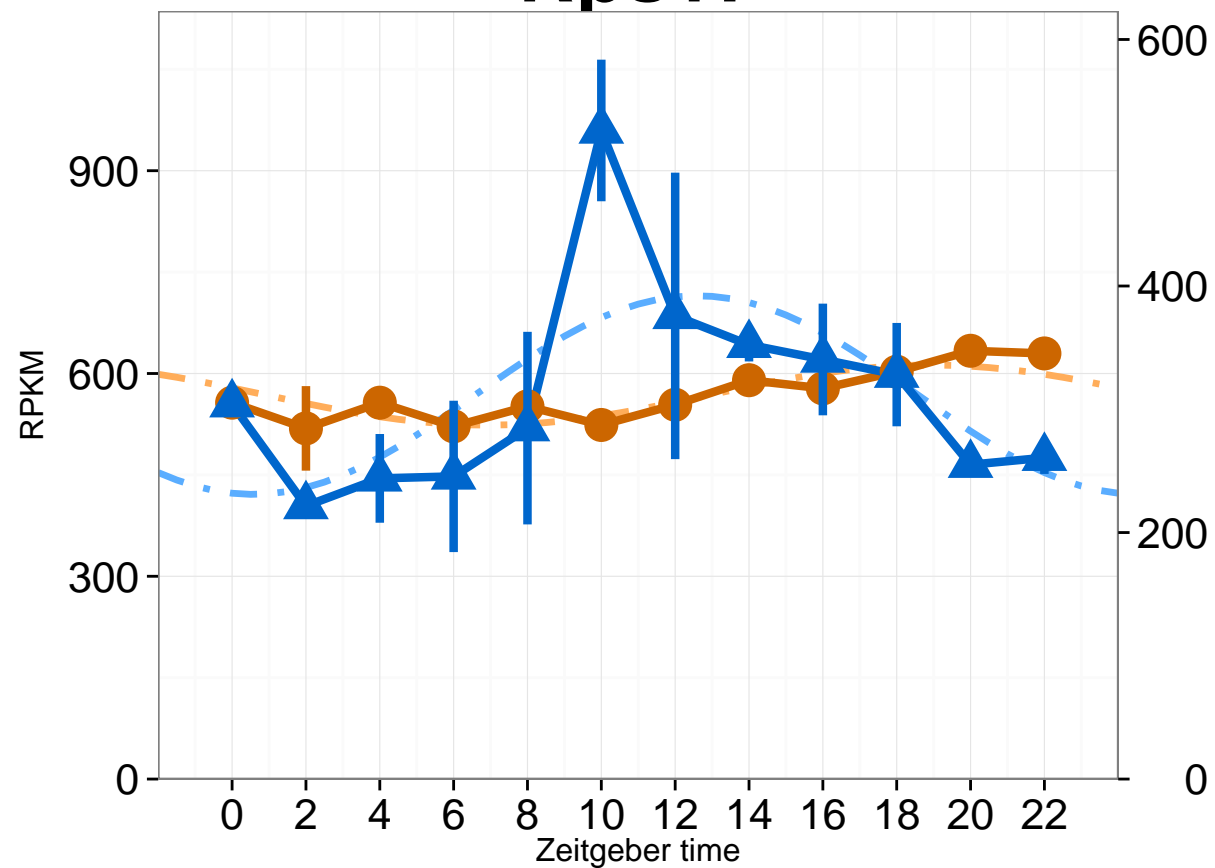

# Rps17

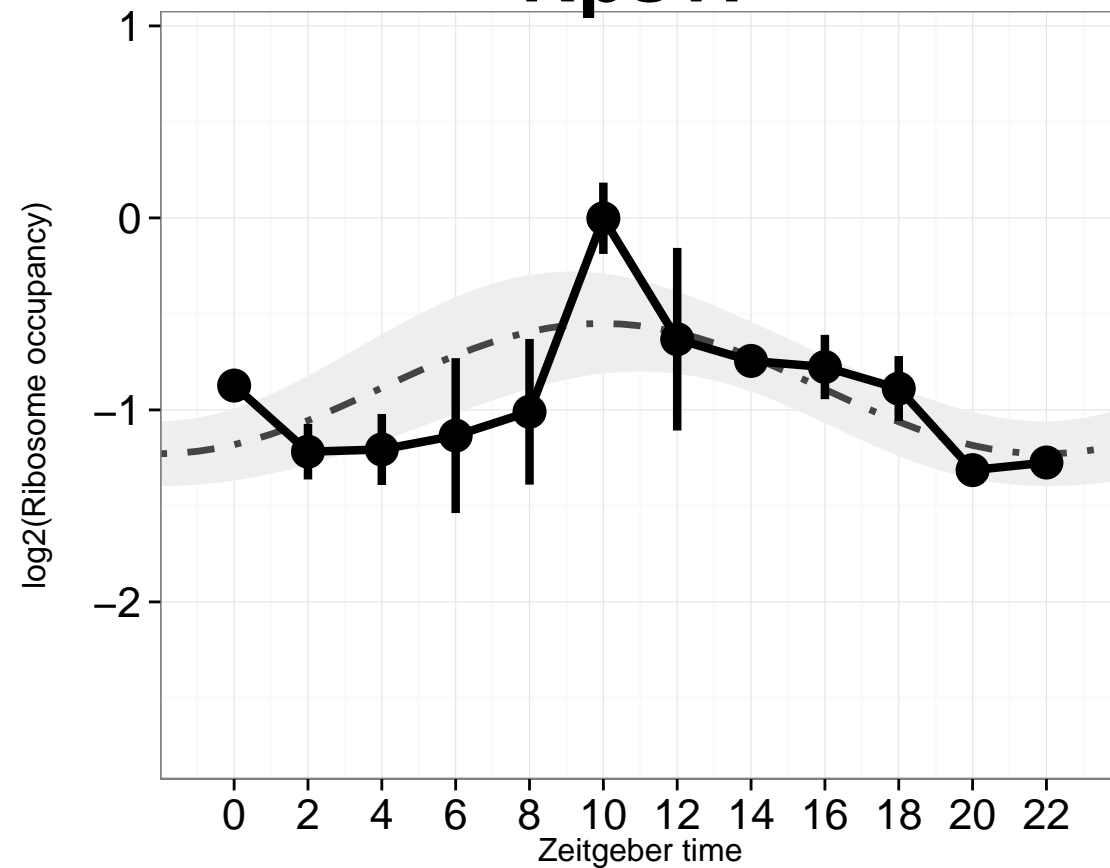

Supplement: SuppDataset_1.zip [file Rps17_set_C.pdf › Supplemental Dataset 1/C-mRNA_nonrhythm_translation_rhyth/Rps17_set_C.pdf]

# Rps18

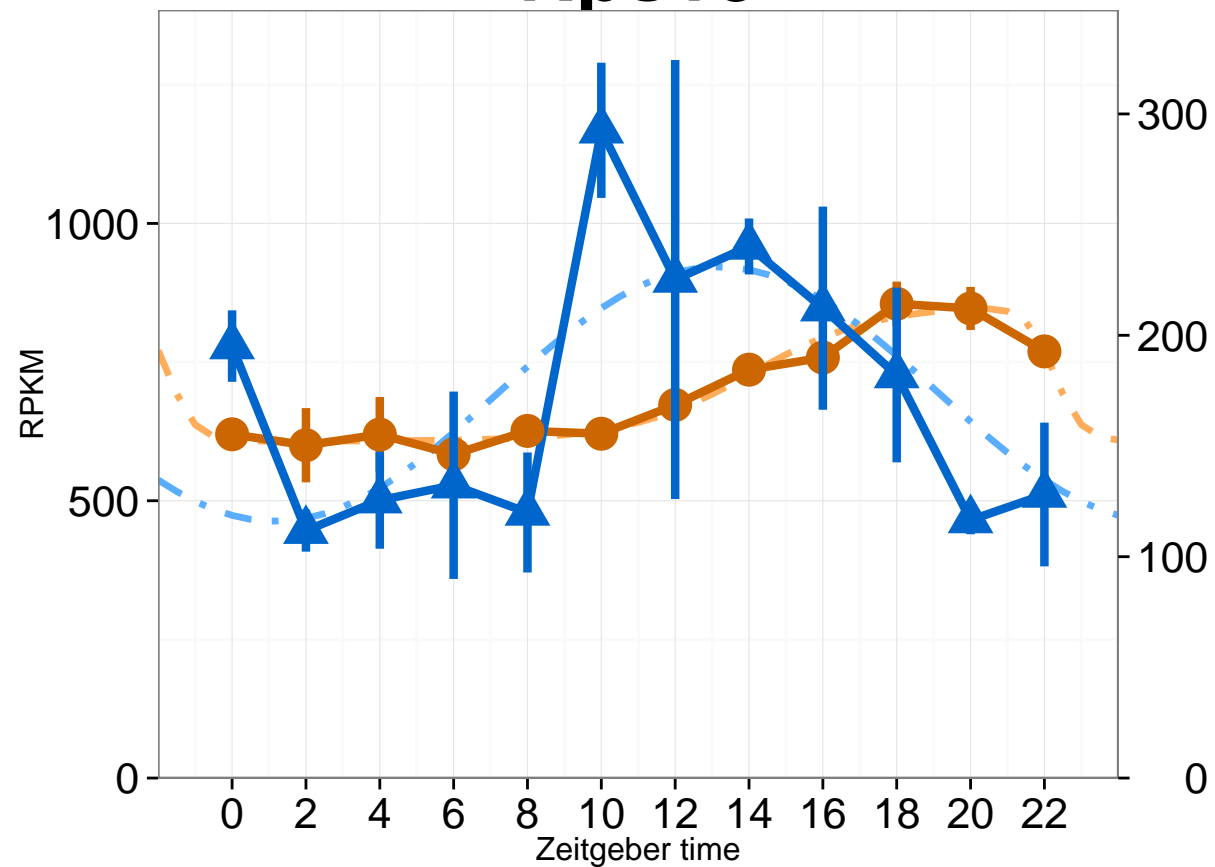

# Rps18

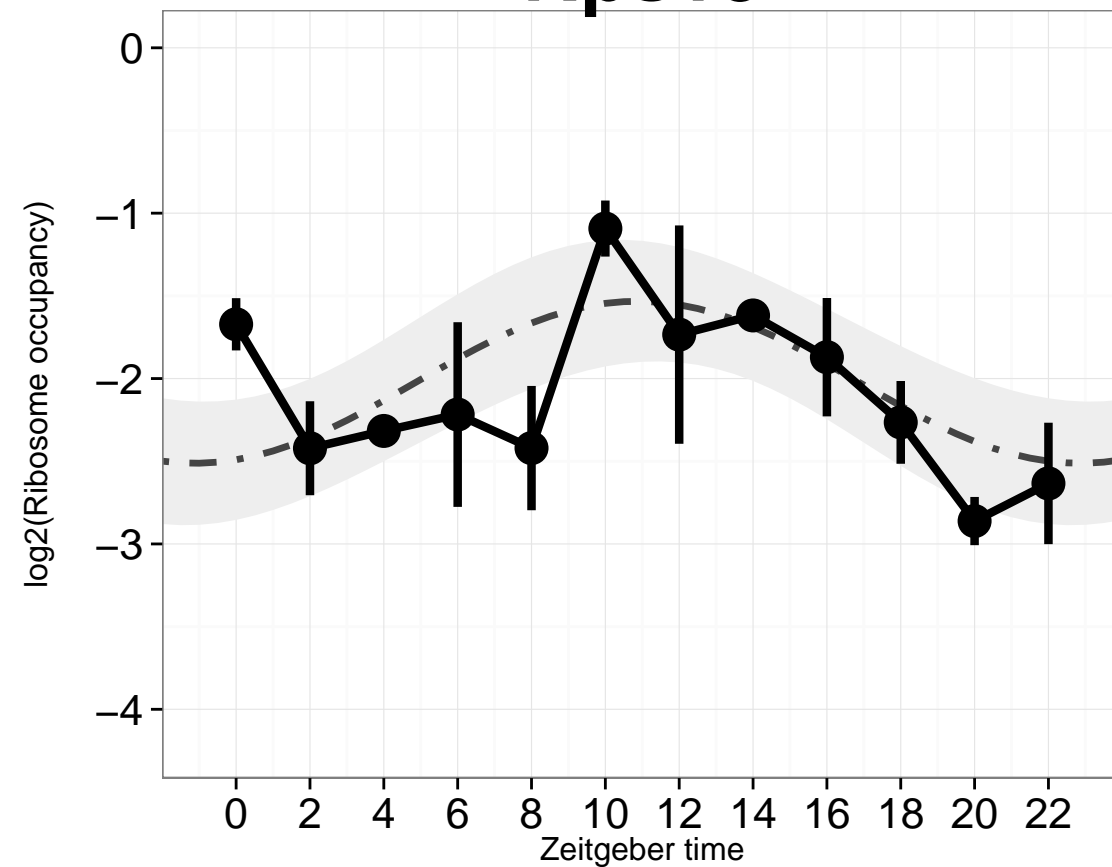

Supplement: SuppDataset_1.zip [file Rps18_set_C.pdf › Supplemental Dataset 1/C-mRNA_nonrhythm_translation_rhyth/Rps18_set_C.pdf]

## Rps19

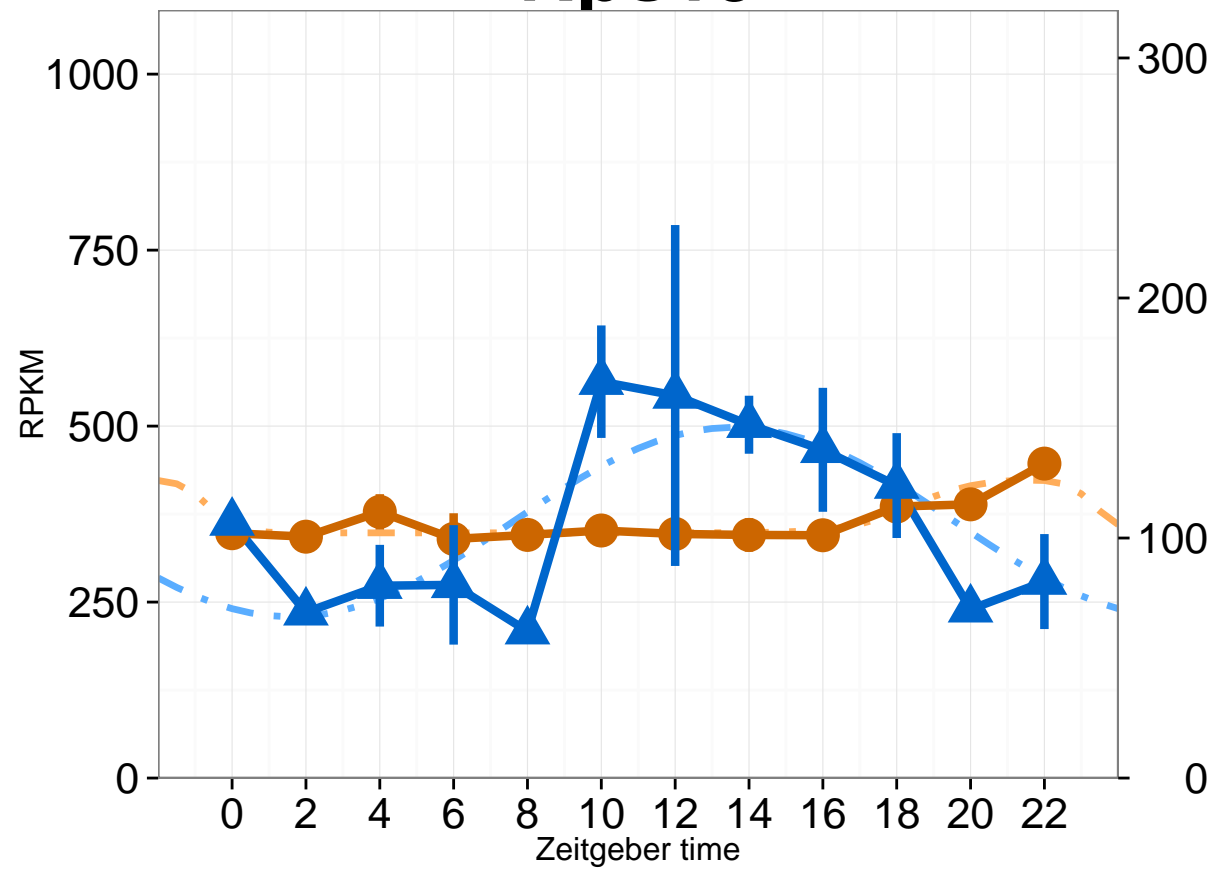

## Rps19

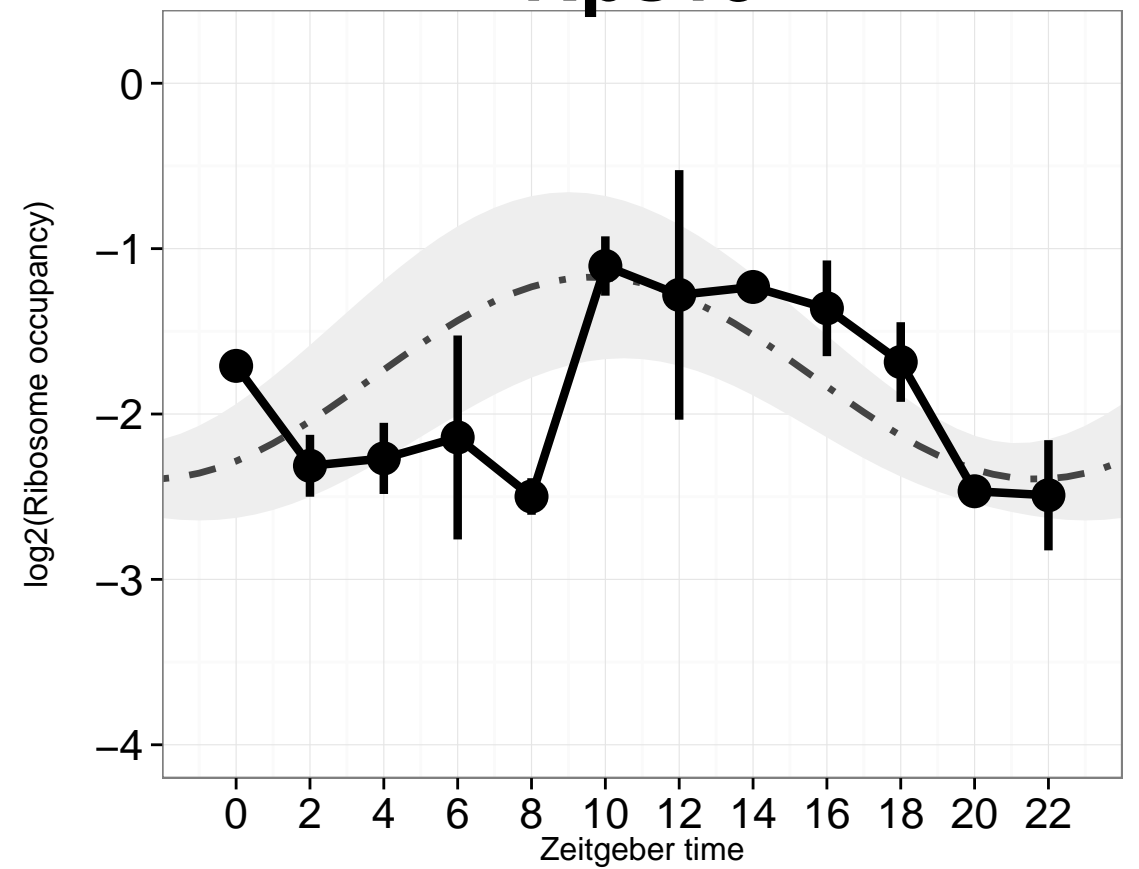

Supplement: SuppDataset_1.zip [file Rps19_set_C.pdf › Supplemental Dataset 1/C-mRNA_nonrhythm_translation_rhyth/Rps19_set_C.pdf]

# Rps20

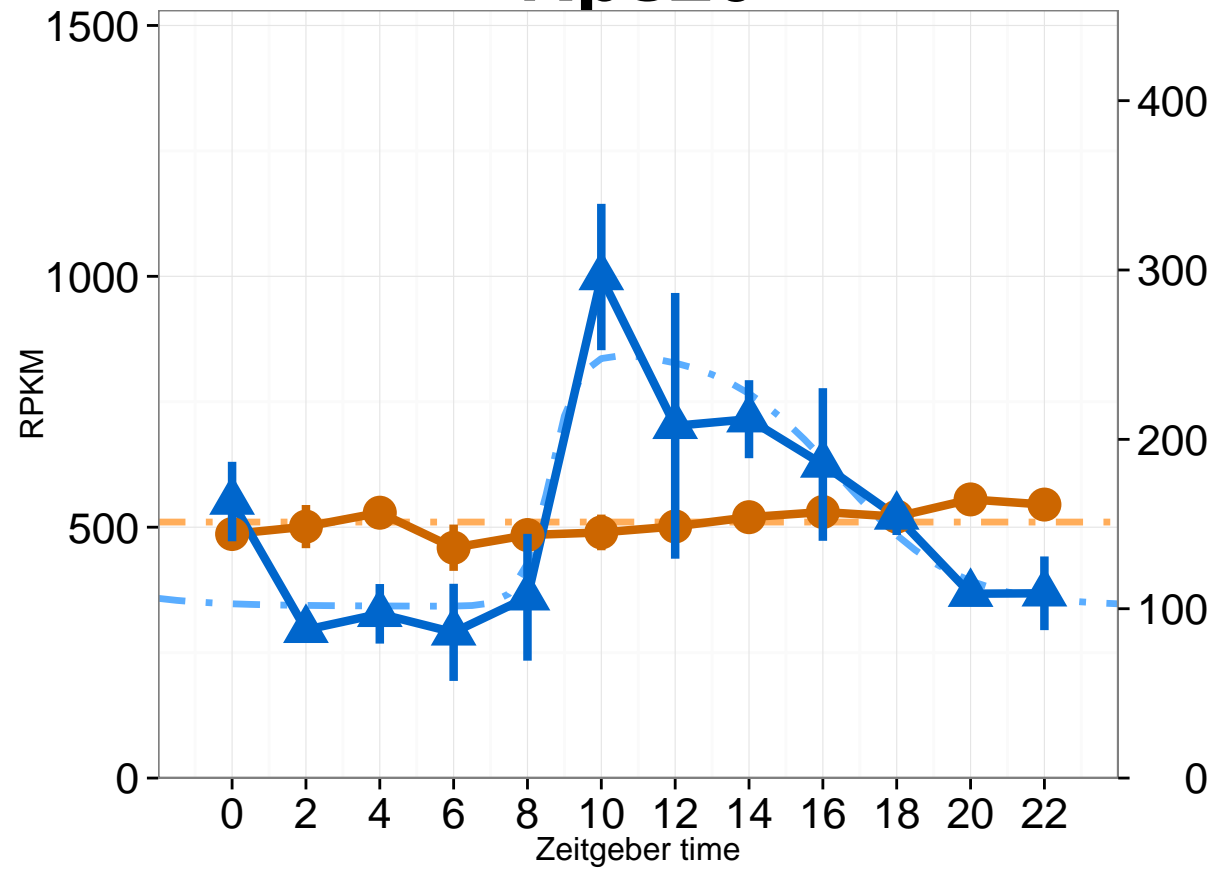

# Rps20

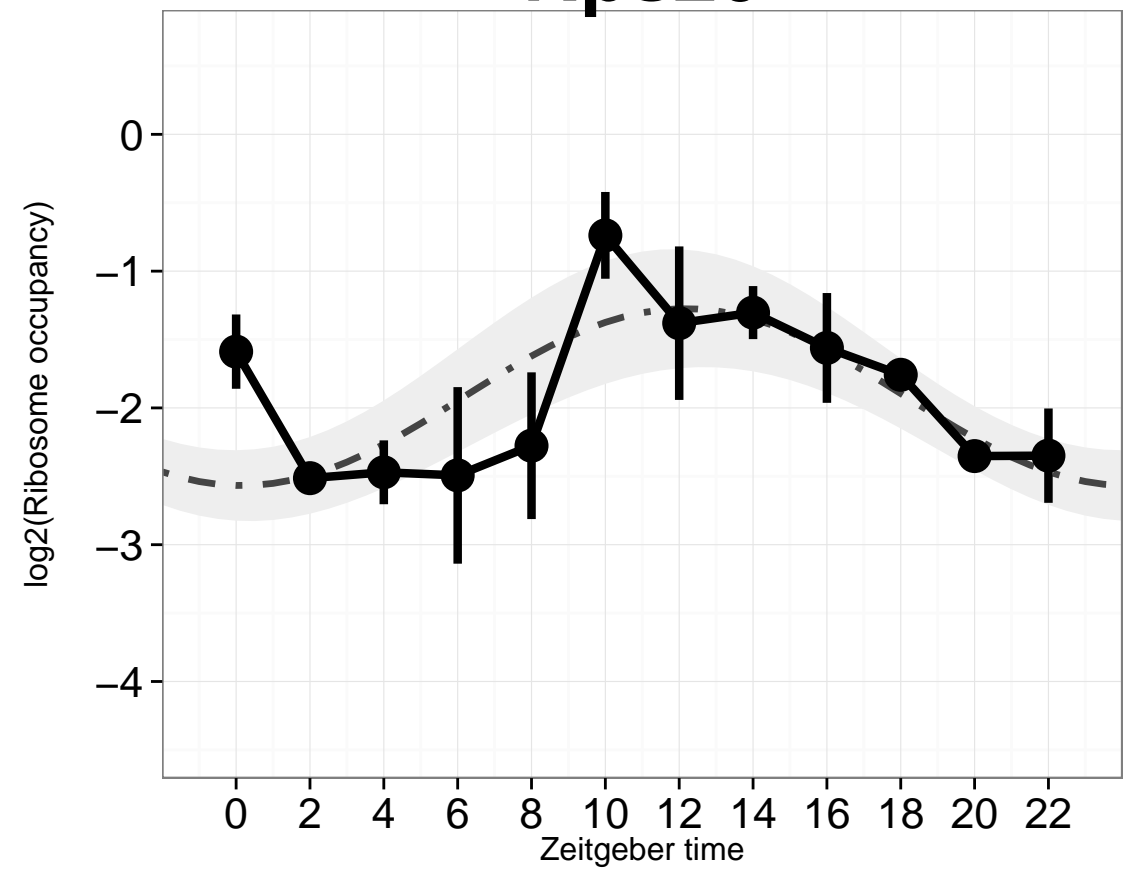

Supplement: SuppDataset_1.zip [file Rps20_set_C.pdf › Supplemental Dataset 1/C-mRNA_nonrhythm_translation_rhyth/Rps20_set_C.pdf]

## Rps24

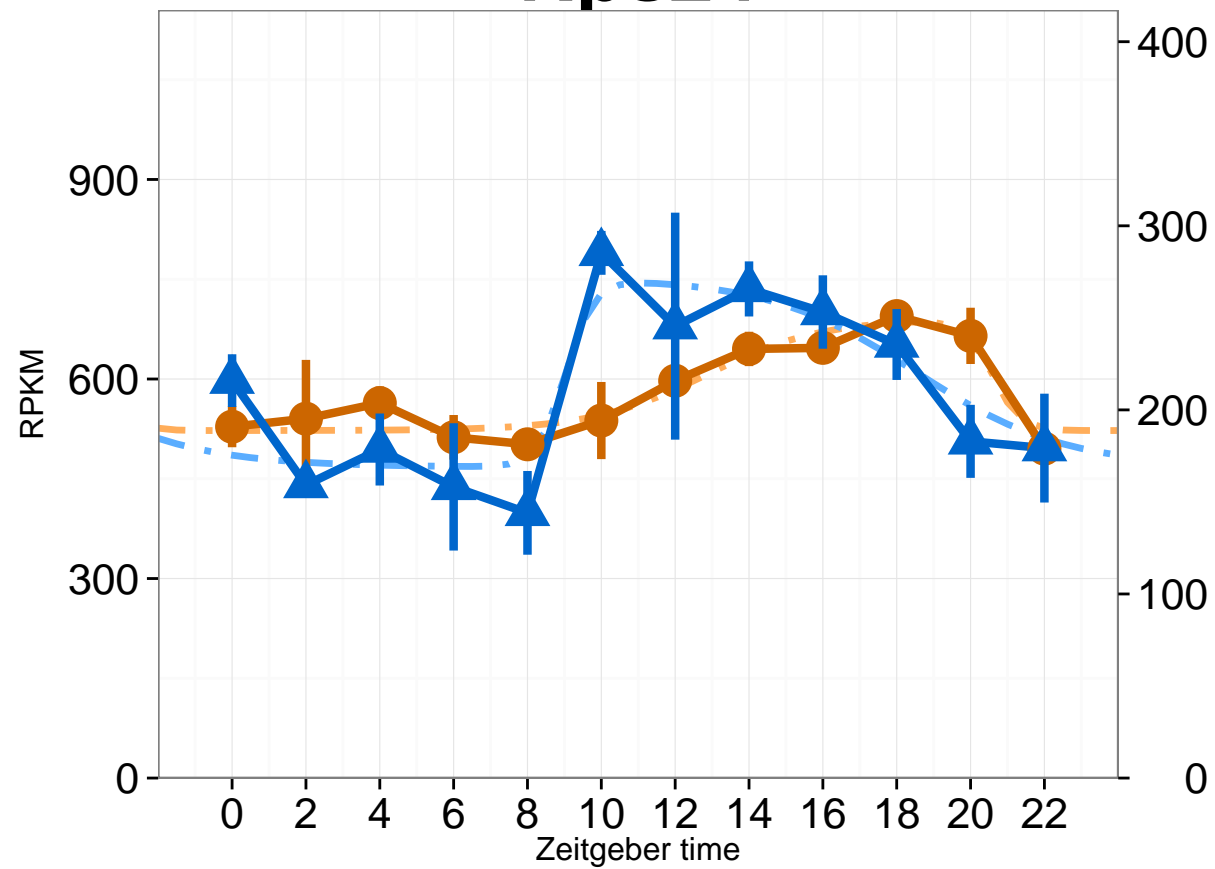

## Rps24

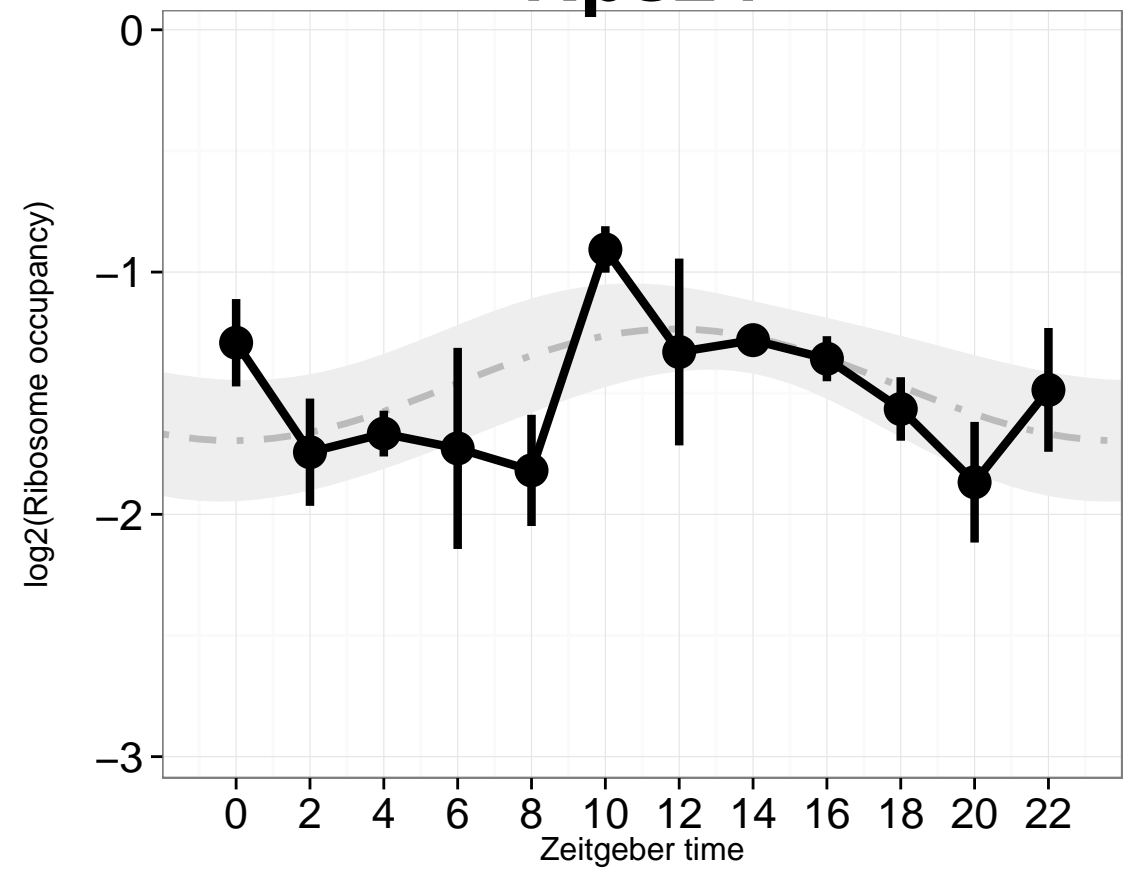

Supplement: SuppDataset_1.zip [file Rps24_set_C.pdf › Supplemental Dataset 1/C-mRNA_nonrhythm_translation_rhyth/Rps24_set_C.pdf]

## Rps25

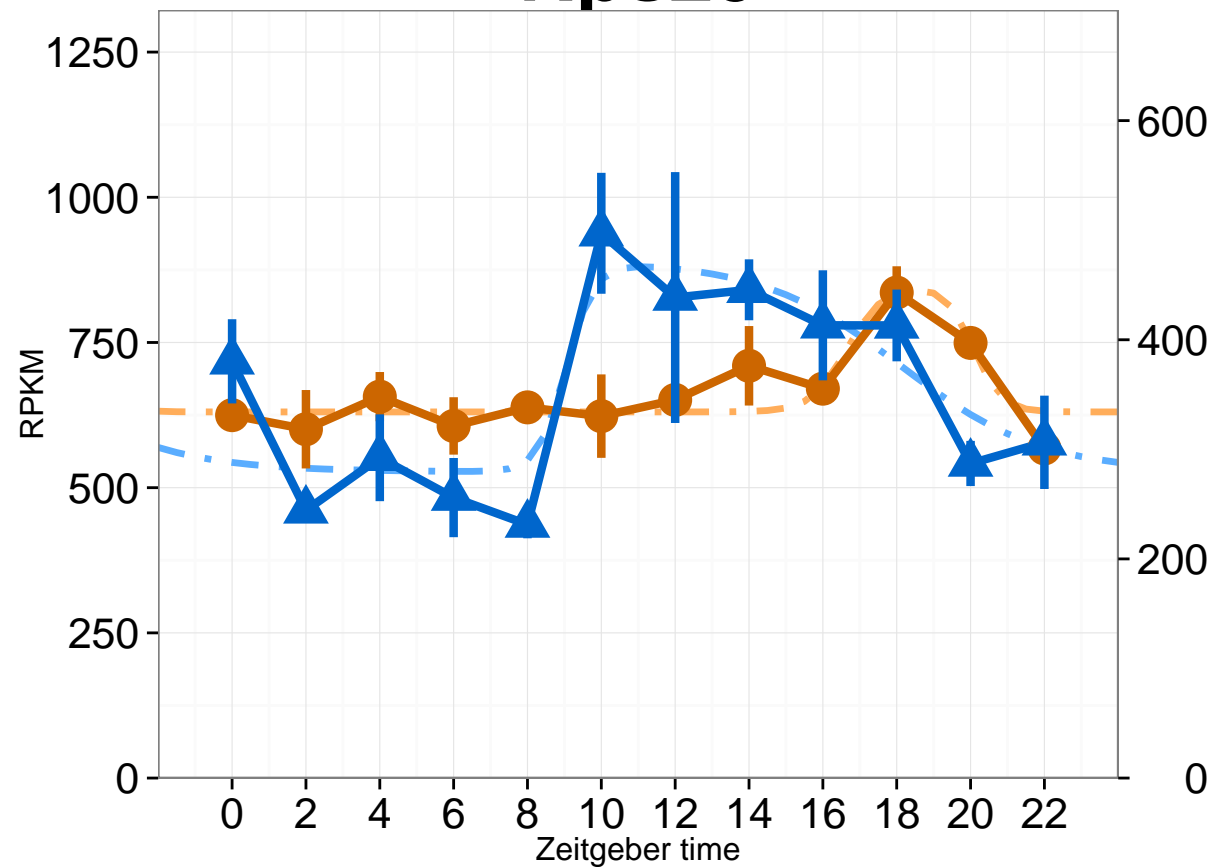

## Rps25

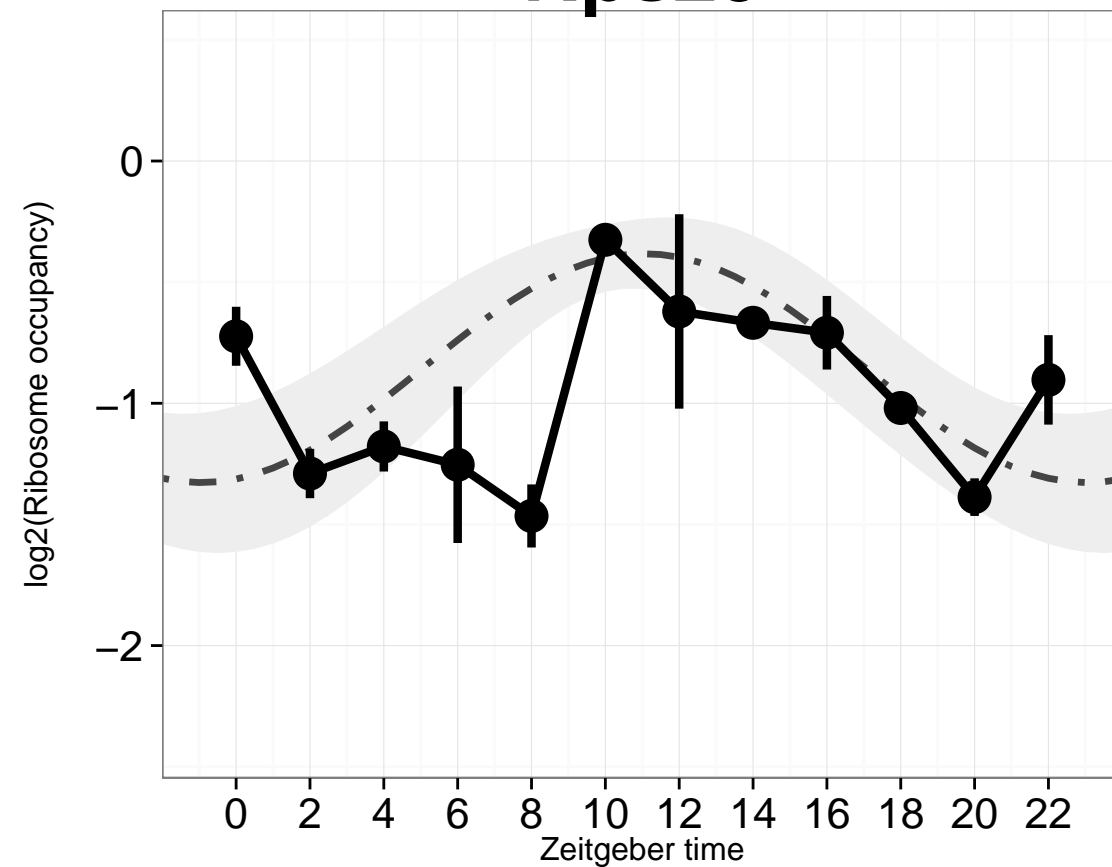

Supplement: SuppDataset_1.zip [file Rps25_set_C.pdf › Supplemental Dataset 1/C-mRNA_nonrhythm_translation_rhyth/Rps25_set_C.pdf]

# Rps27a

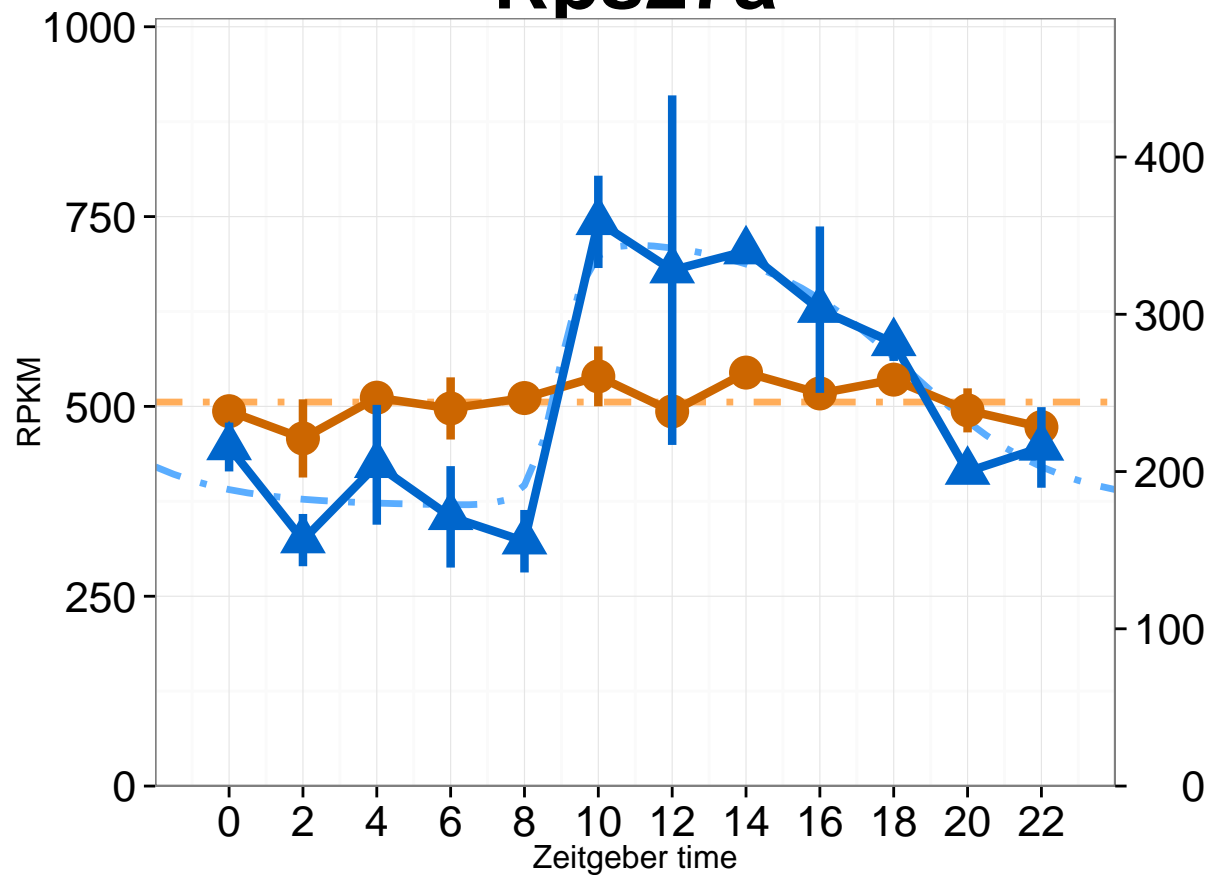

# Rps27a

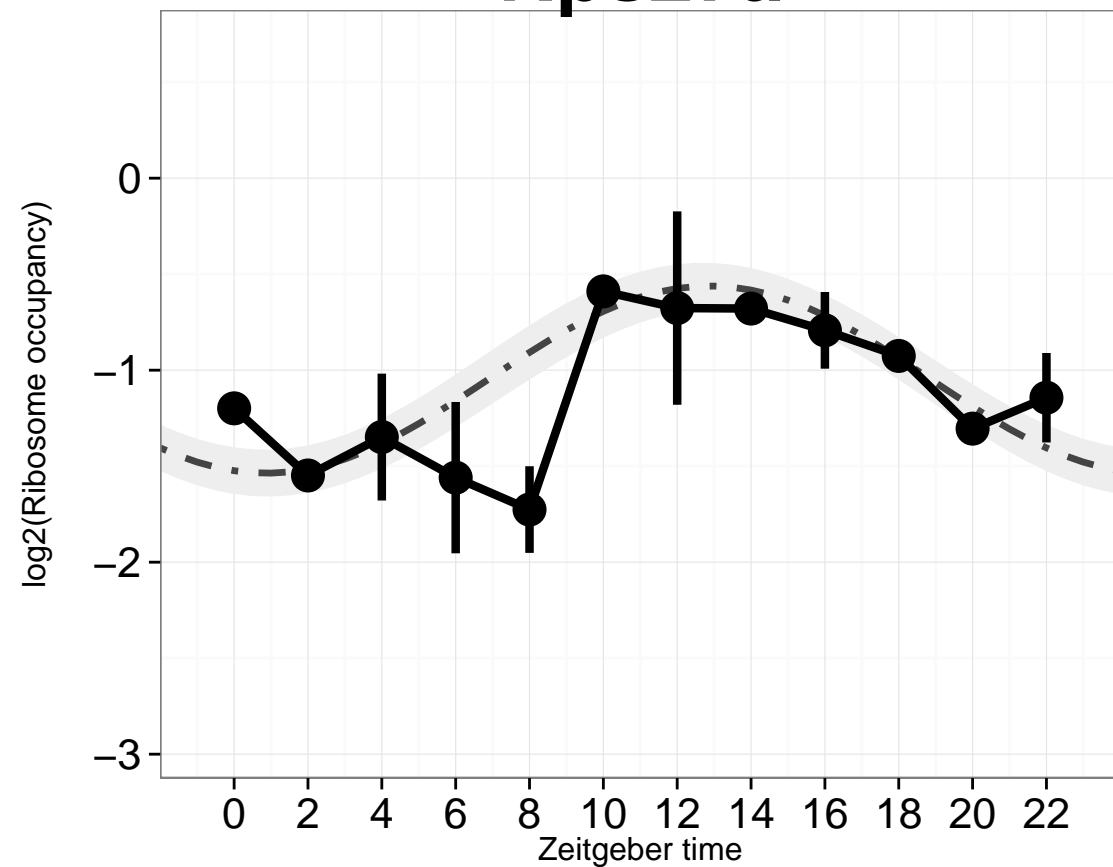

Supplement: SuppDataset_1.zip [file Rps27a_set_C.pdf › Supplemental Dataset 1/C-mRNA_nonrhythm_translation_rhyth/Rps27a_set_C.pdf]

# Rps28

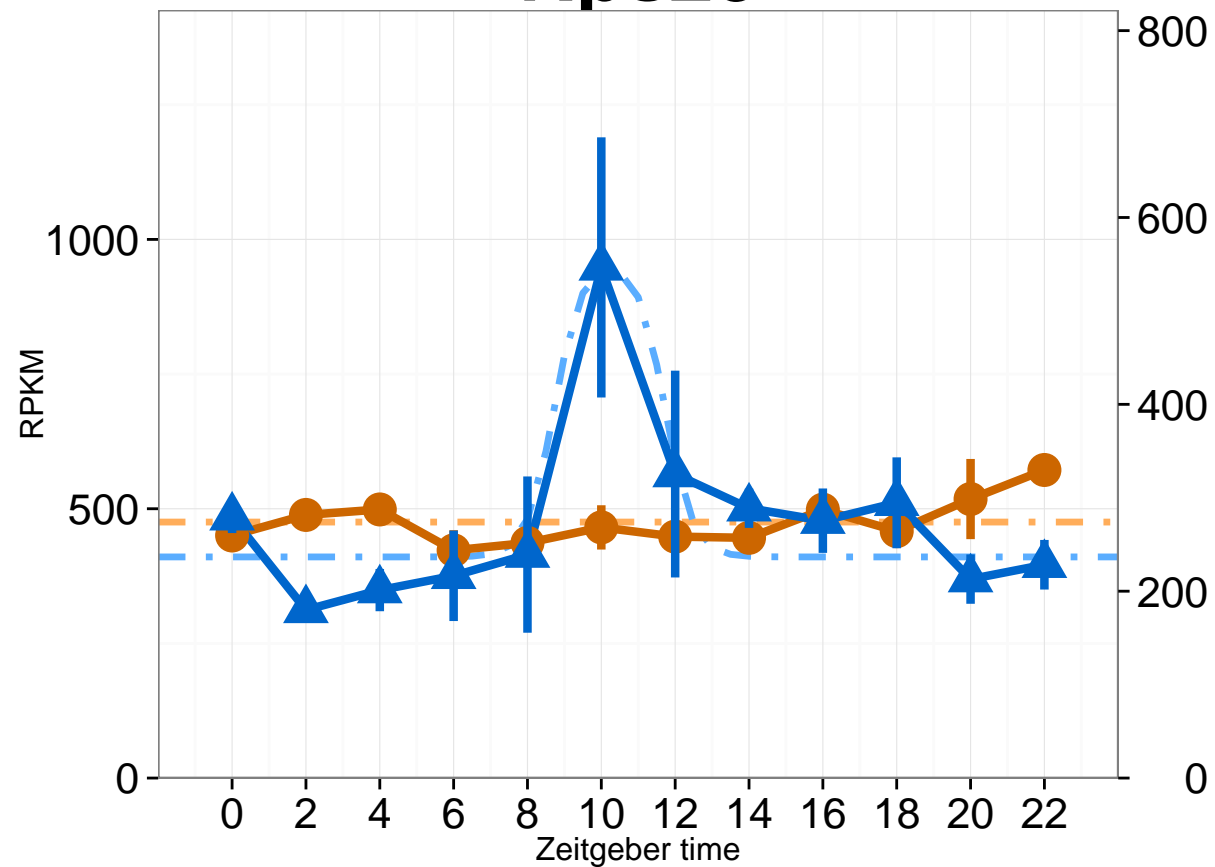

# Rps28

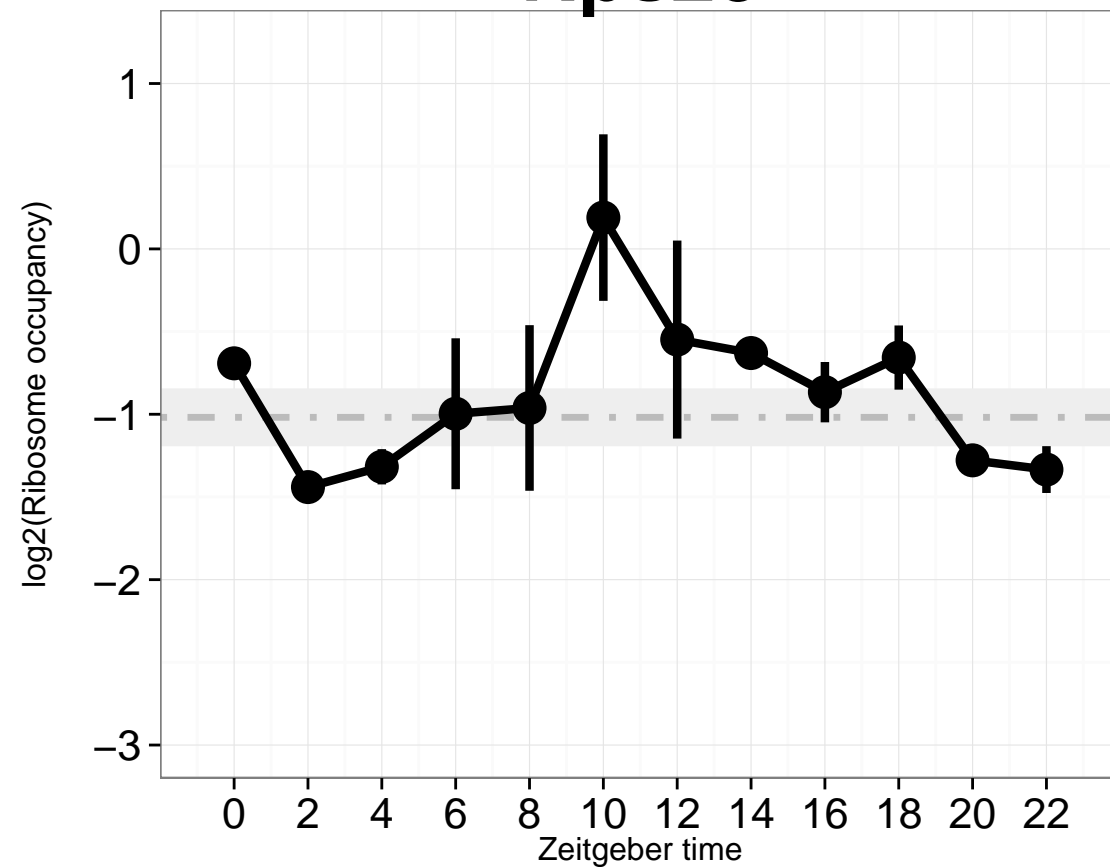

Supplement: SuppDataset_1.zip [file Rps28_set_C.pdf › Supplemental Dataset 1/C-mRNA_nonrhythm_translation_rhyth/Rps28_set_C.pdf]

# Rps3a1

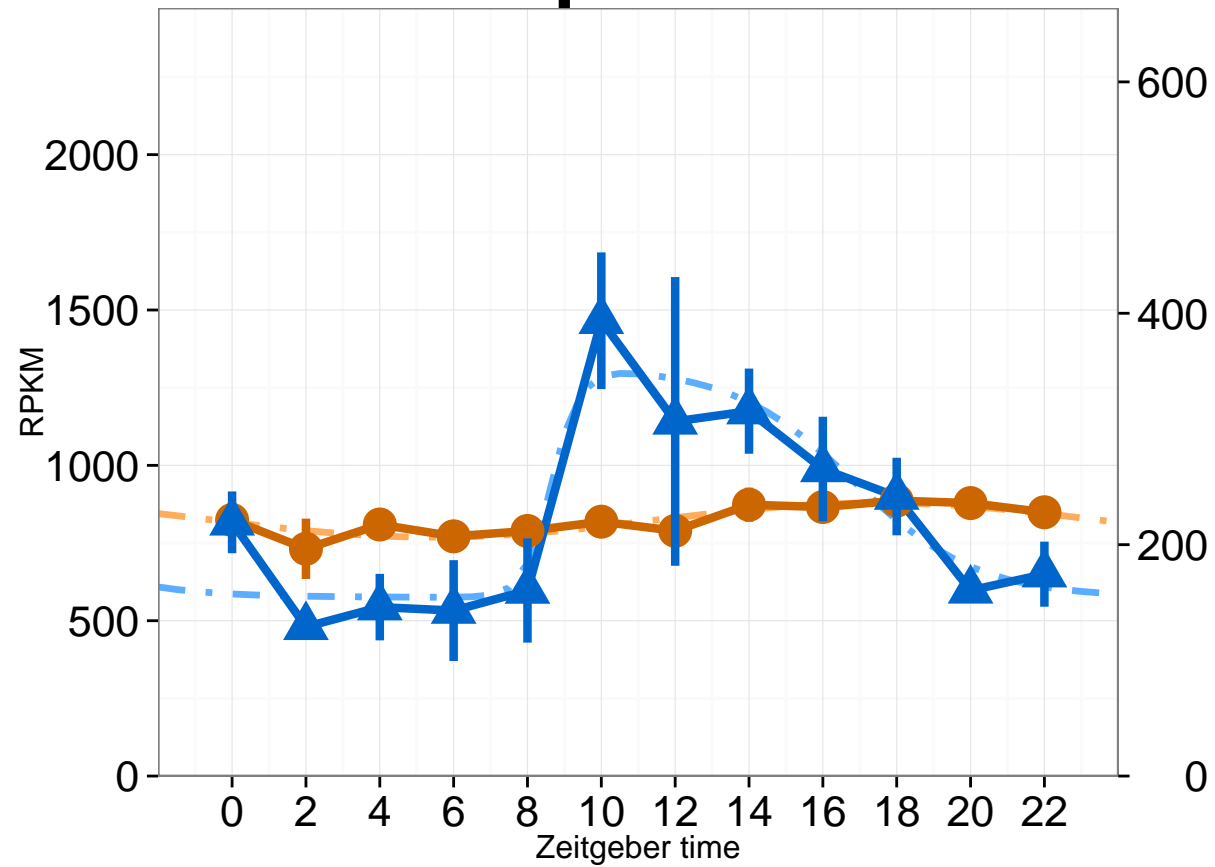

# Rps3a1

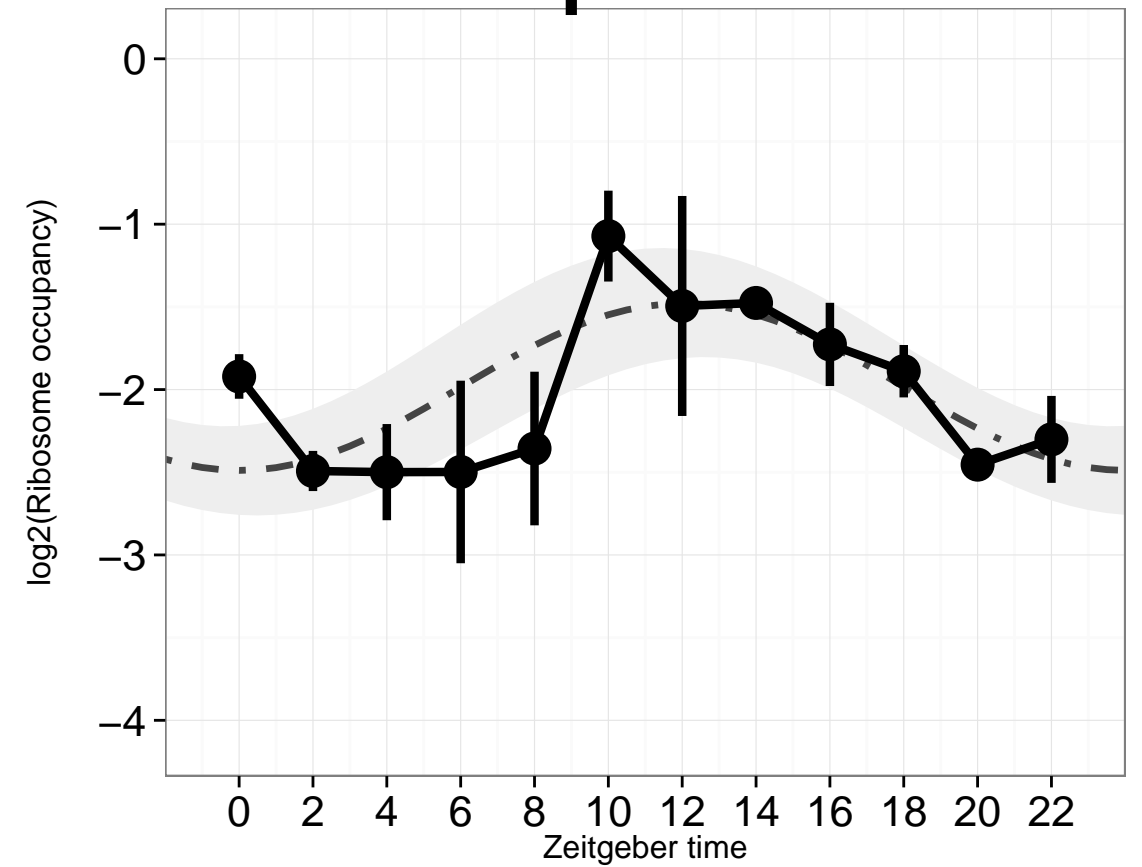

Supplement: SuppDataset_1.zip [file Rps3a1_set_C.pdf › Supplemental Dataset 1/C-mRNA_nonrhythm_translation_rhyth/Rps3a1_set_C.pdf]

# Rps4x

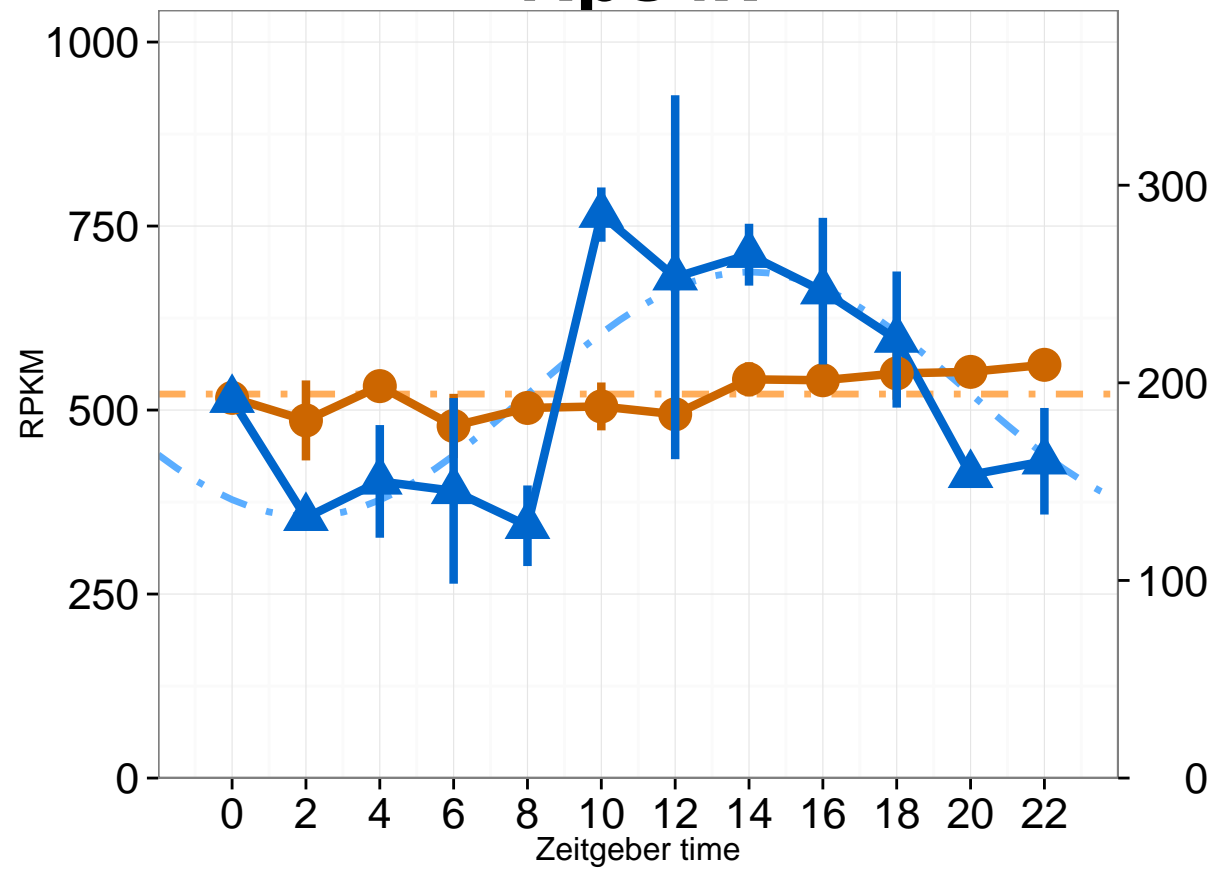

# Rps4x

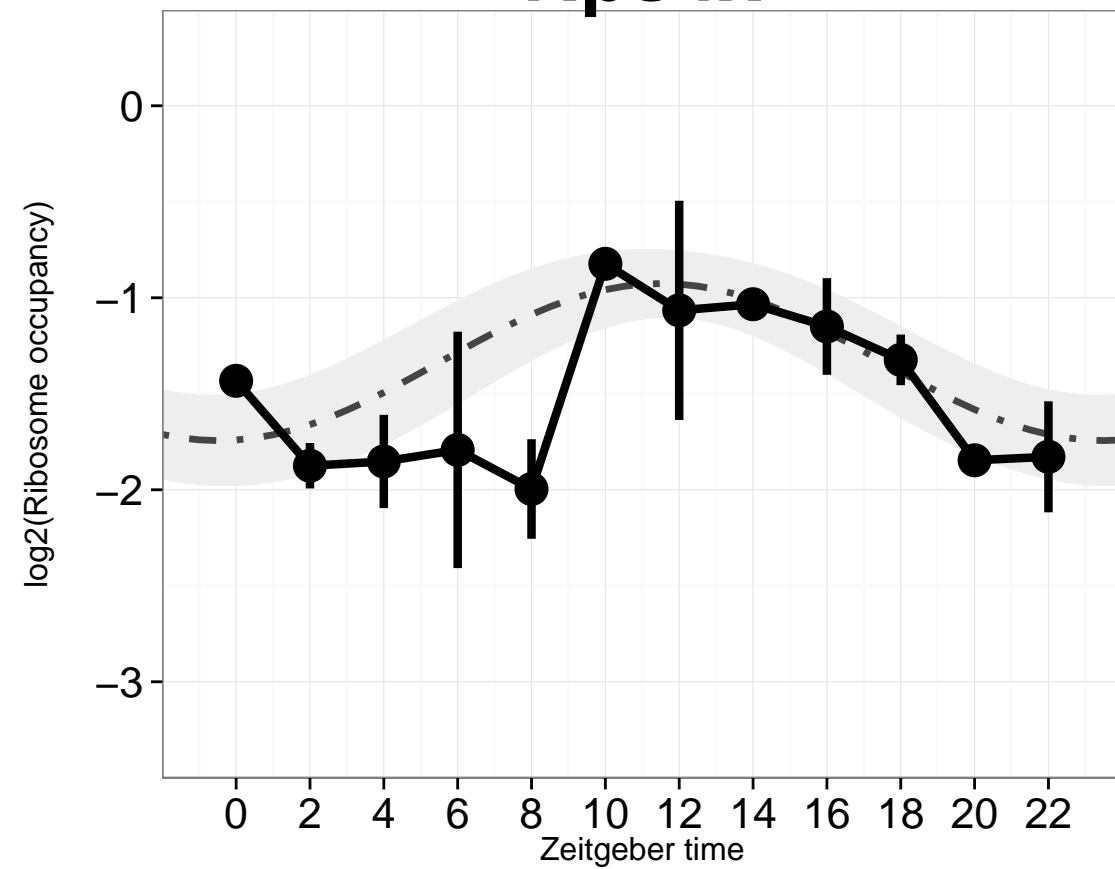

Supplement: SuppDataset_1.zip [file Rps4x_set_C.pdf › Supplemental Dataset 1/C-mRNA_nonrhythm_translation_rhyth/Rps4x_set_C.pdf]

# Rps5

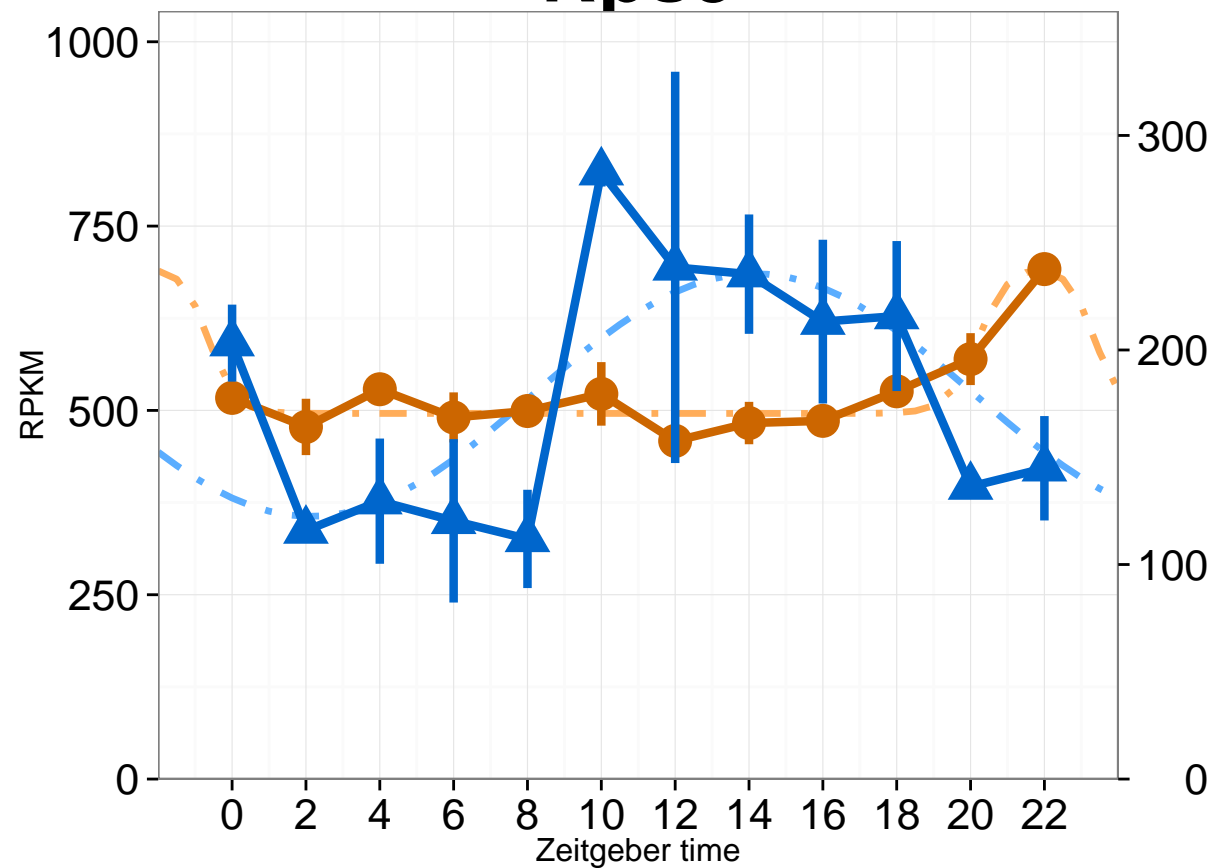

# Rps5

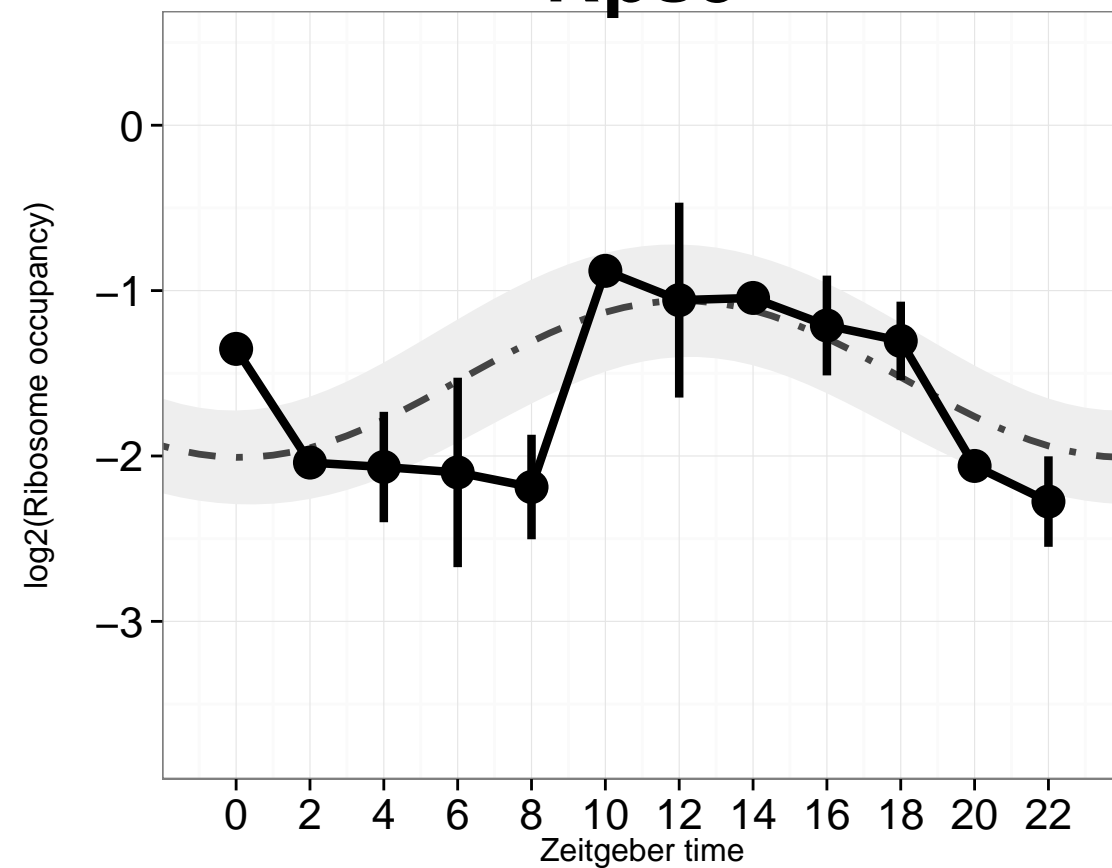

Supplement: SuppDataset_1.zip [file Rps5_set_C.pdf › Supplemental Dataset 1/C-mRNA_nonrhythm_translation_rhyth/Rps5_set_C.pdf]

# Rps6

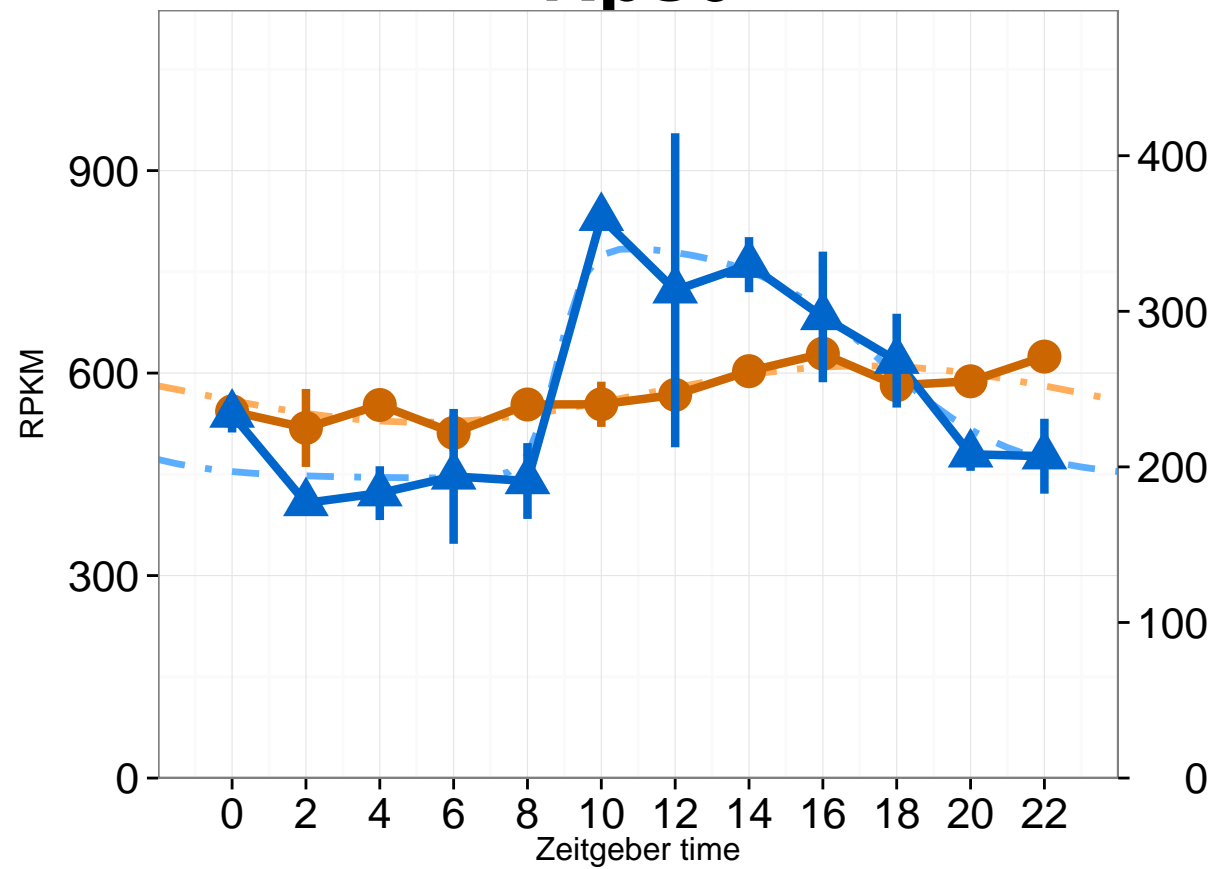

# Rps6

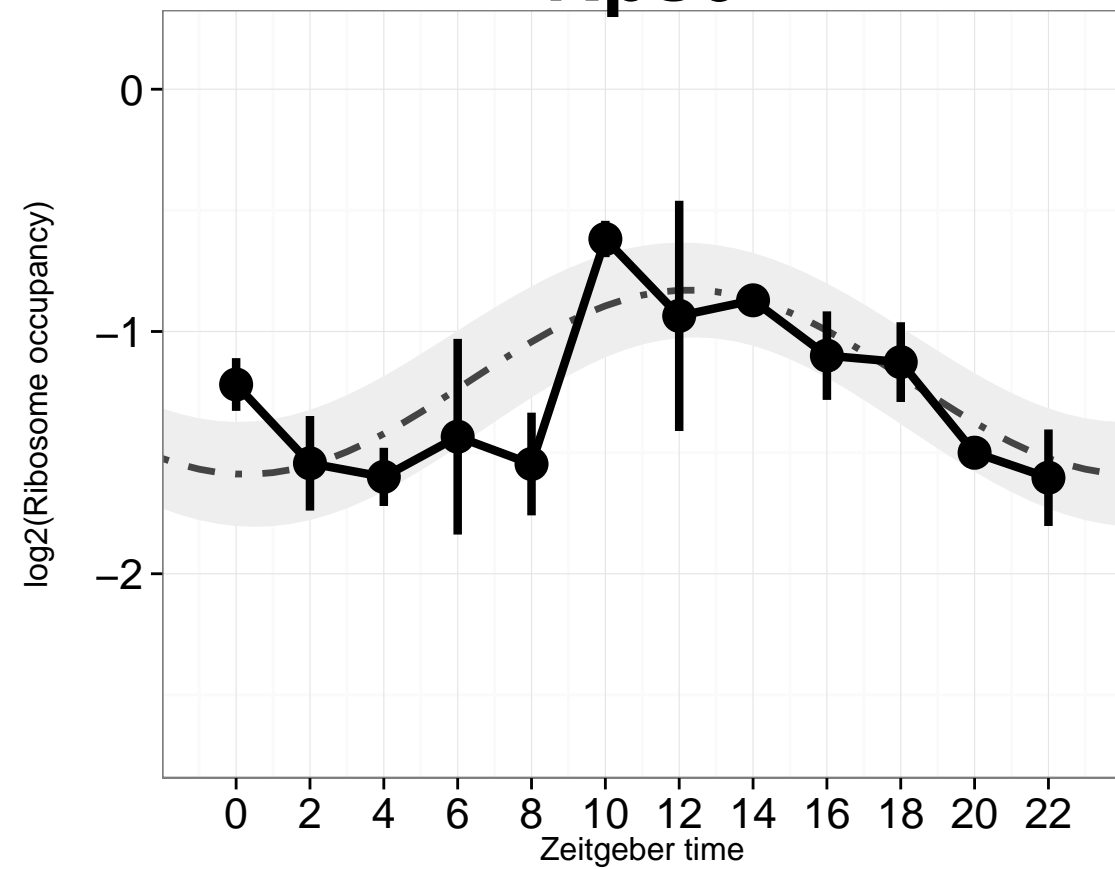

Supplement: SuppDataset_1.zip [file Rps6_set_C.pdf › Supplemental Dataset 1/C-mRNA_nonrhythm_translation_rhyth/Rps6_set_C.pdf]

# Rps6ka5

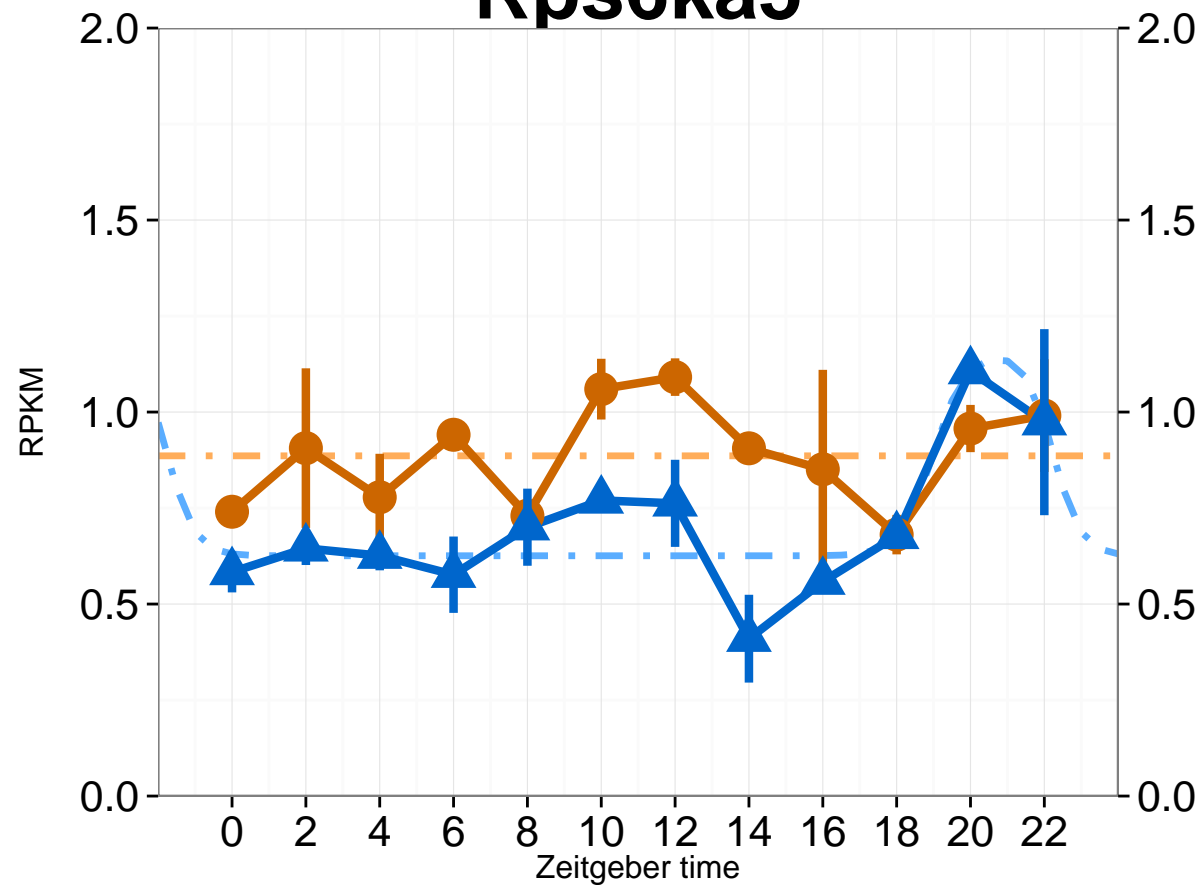

# Rps6ka5

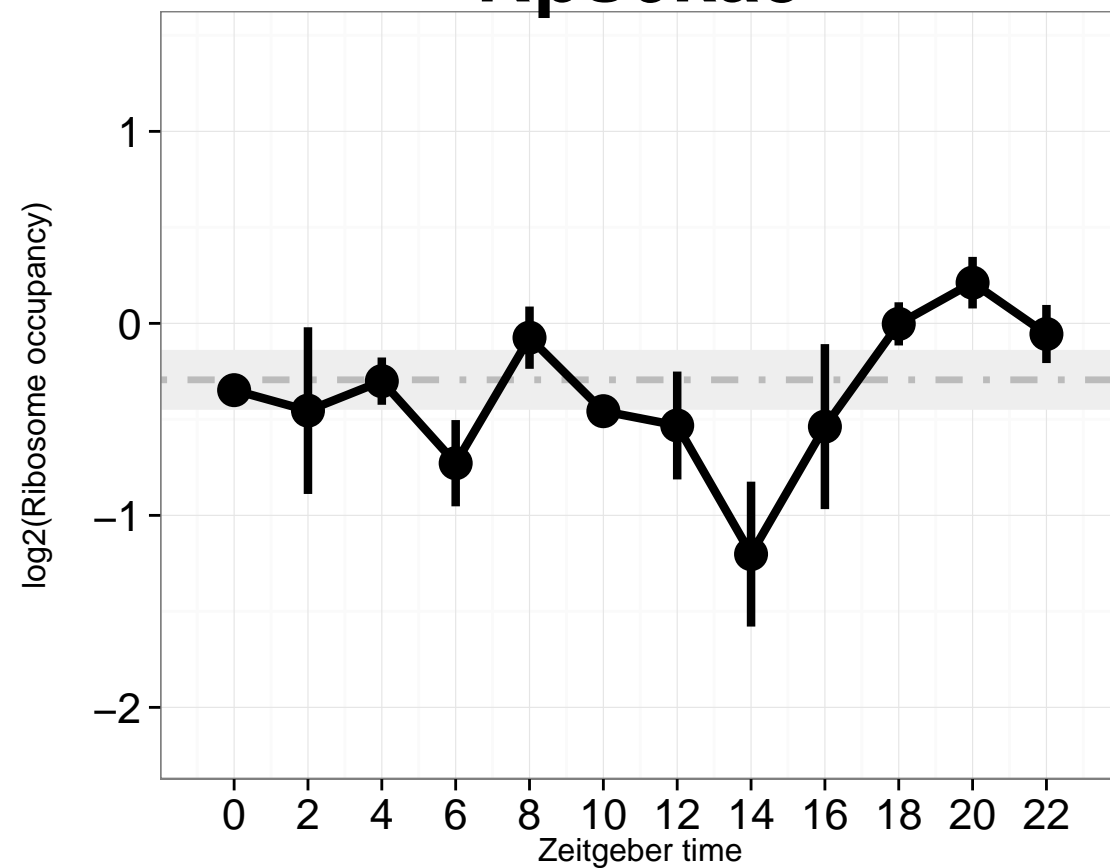

Supplement: SuppDataset_1.zip [file Rps6ka5_set_C.pdf › Supplemental Dataset 1/C-mRNA_nonrhythm_translation_rhyth/Rps6ka5_set_C.pdf]

# Rps8

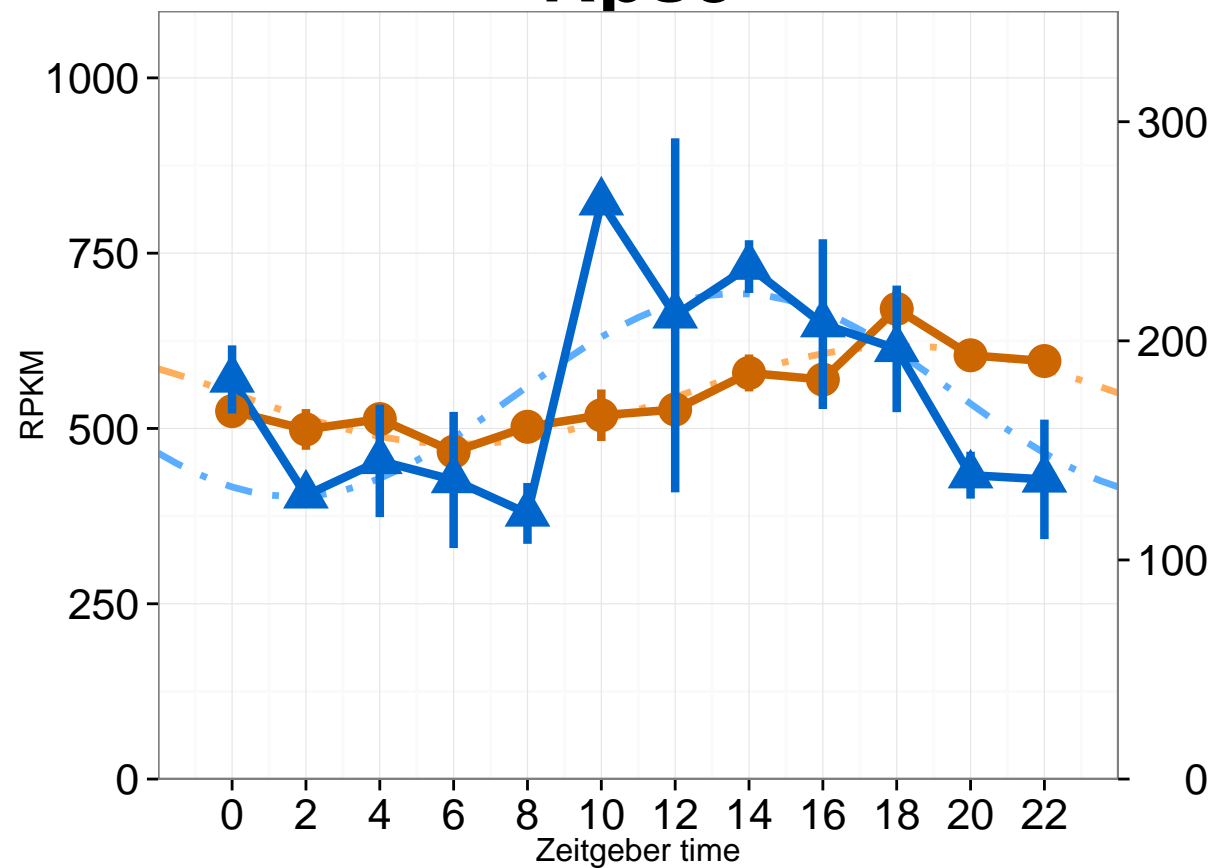

# Rps8

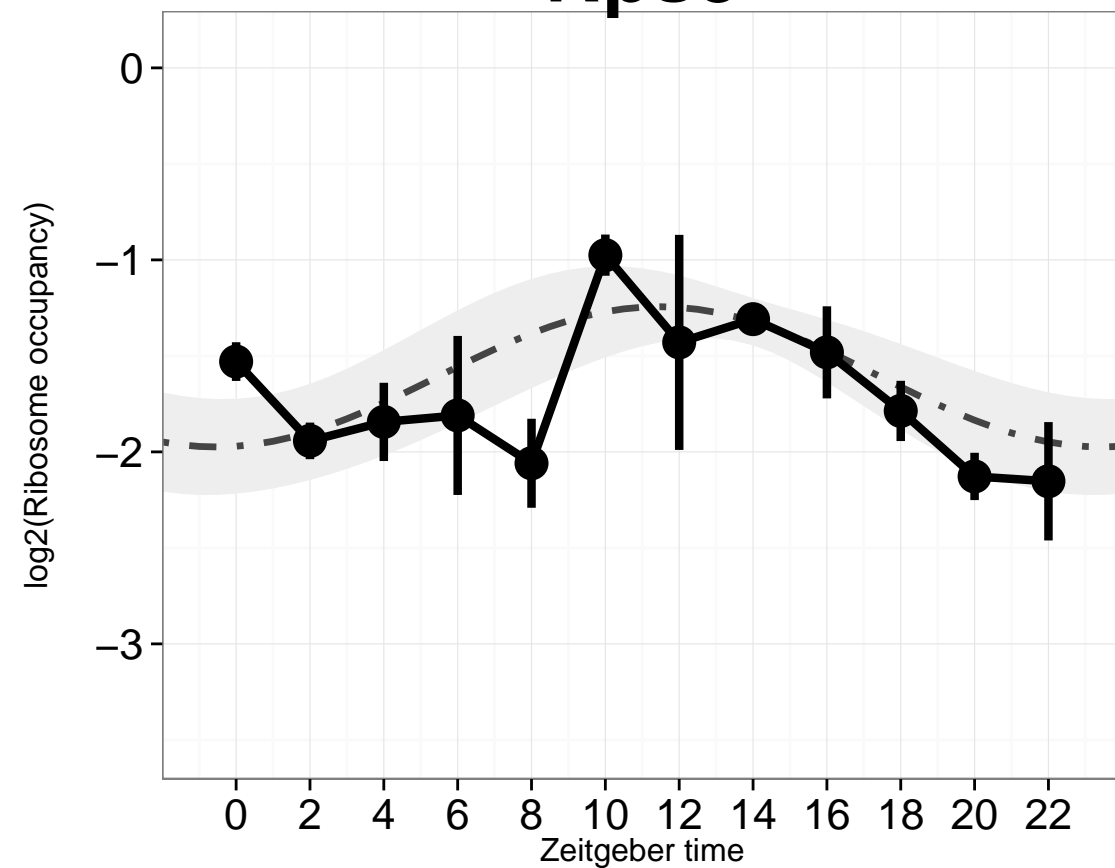

Supplement: SuppDataset_1.zip [file Rps8_set_C.pdf › Supplemental Dataset 1/C-mRNA_nonrhythm_translation_rhyth/Rps8_set_C.pdf]

## Rpusd4

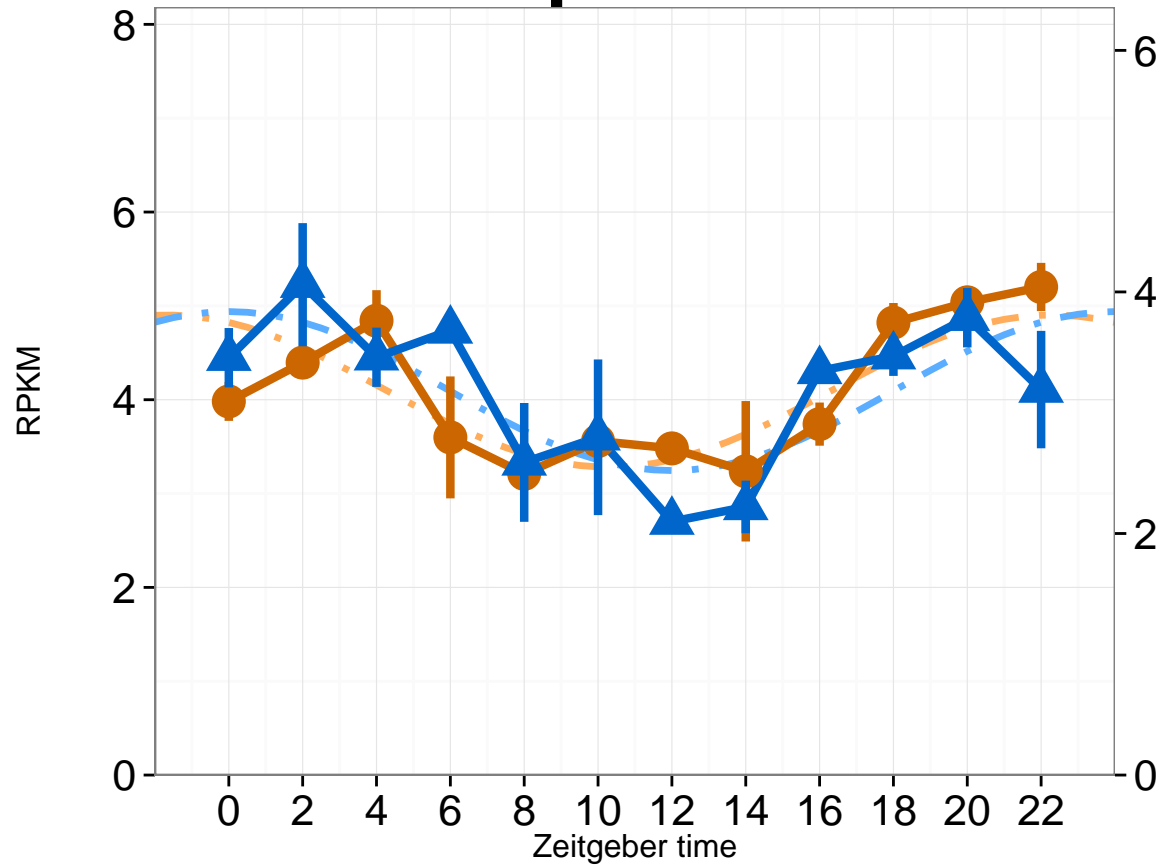

## Rpusd4

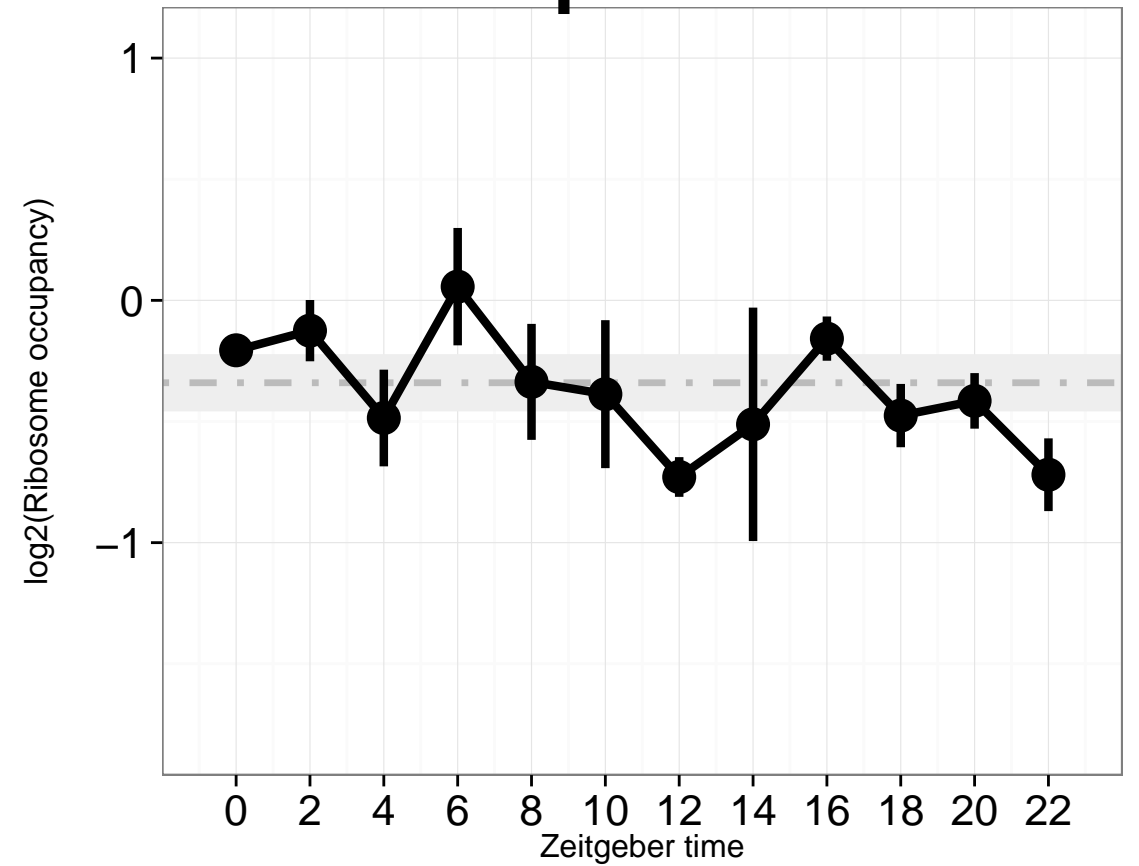

Supplement: SuppDataset_1.zip [file Rpusd4_set_C.pdf › Supplemental Dataset 1/C-mRNA_nonrhythm_translation_rhyth/Rpusd4_set_C.pdf]

# Rrp9

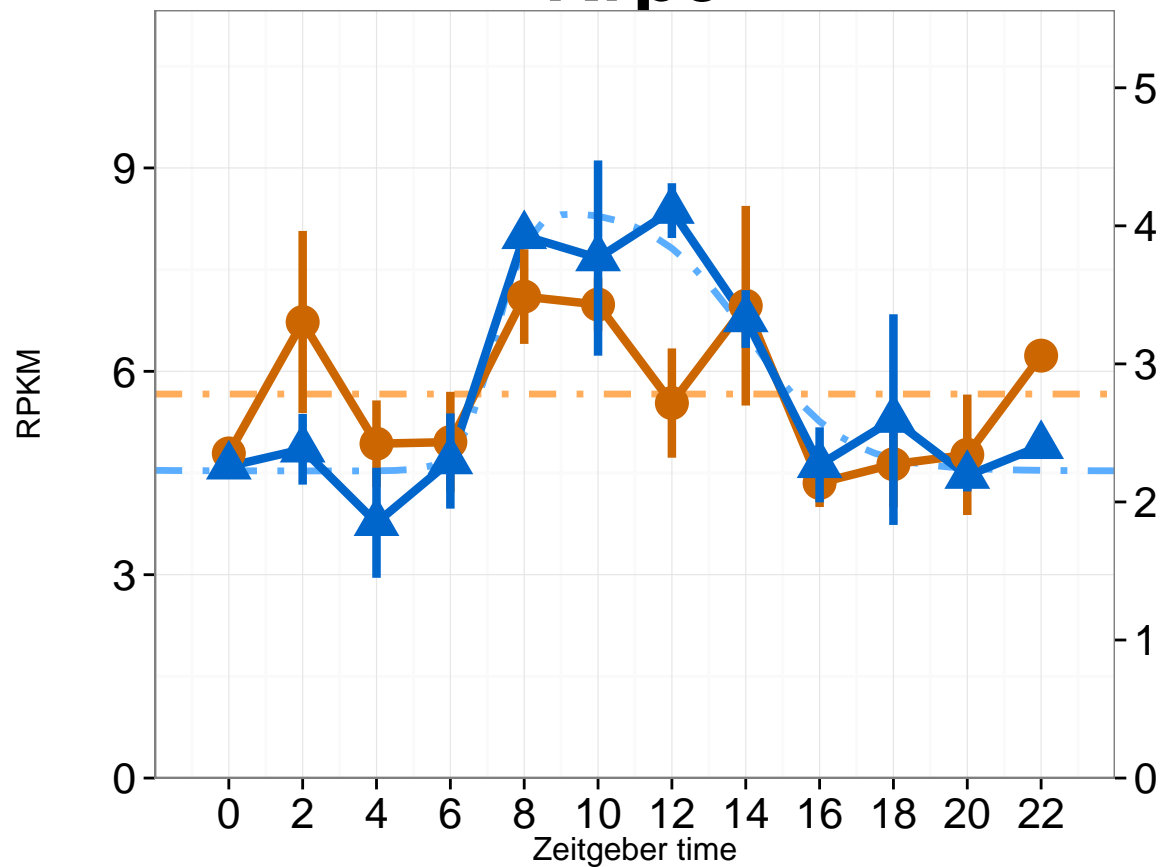

# Rrp9

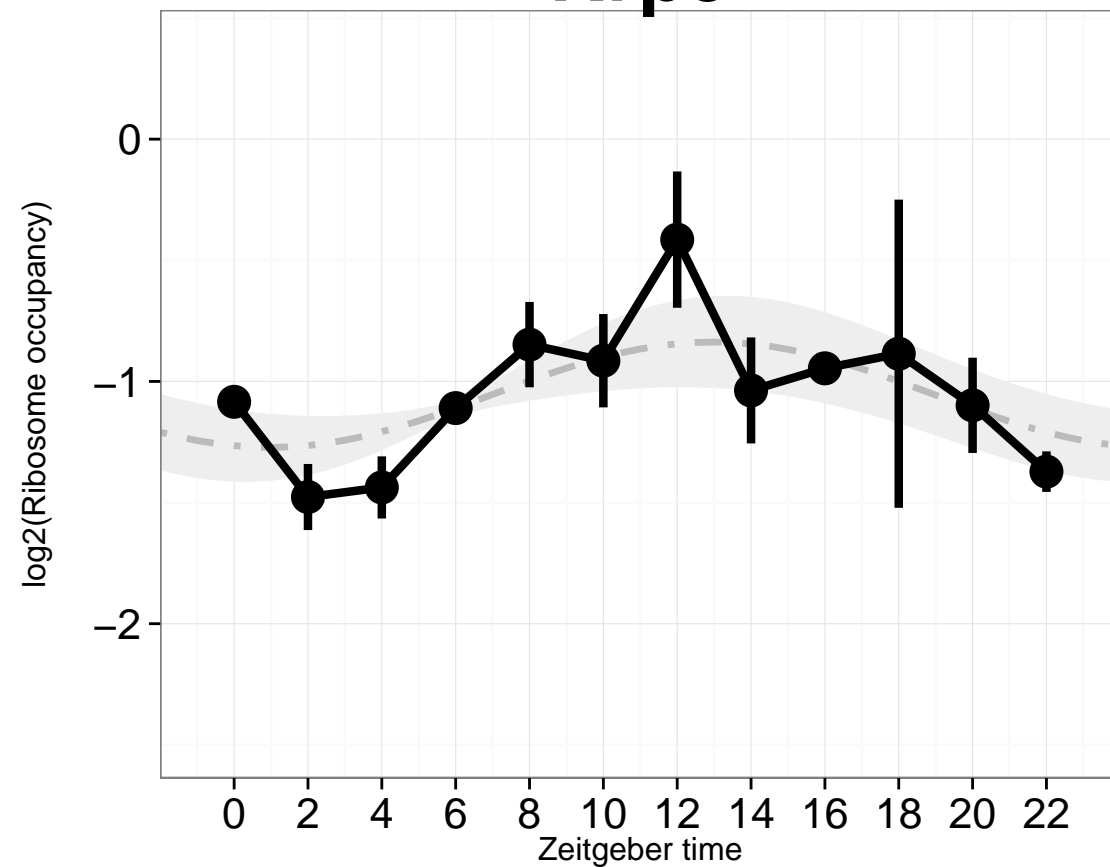

Supplement: SuppDataset_1.zip [file Rrp9_set_C.pdf › Supplemental Dataset 1/C-mRNA_nonrhythm_translation_rhyth/Rrp9_set_C.pdf]

## Rsbn1

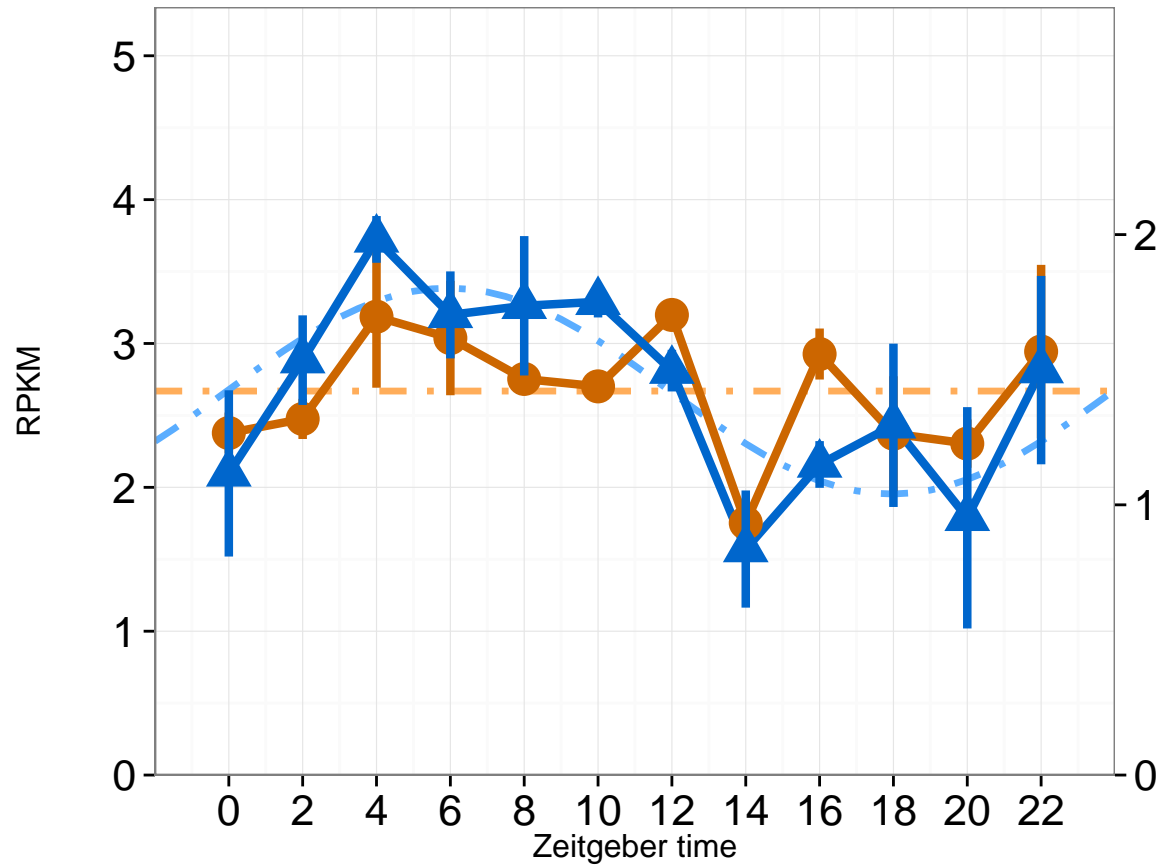

## Rsbn1

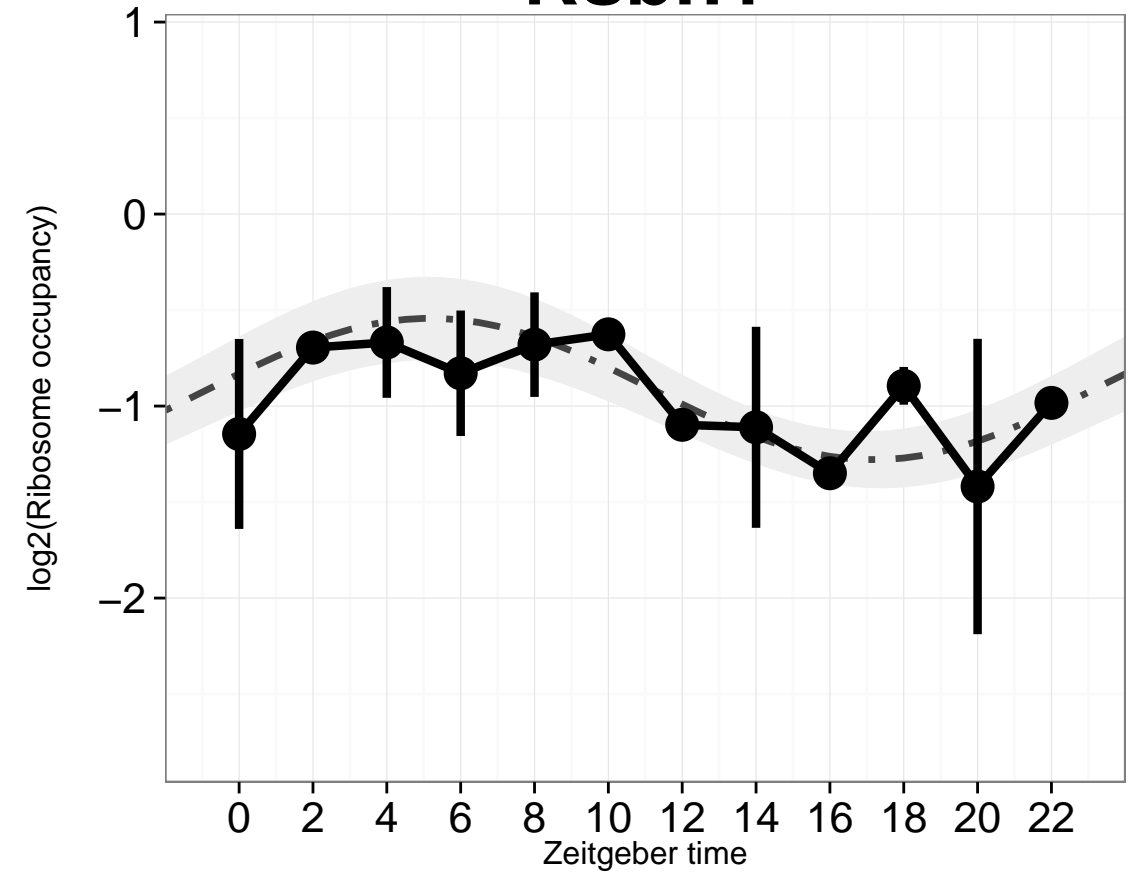

Supplement: SuppDataset_1.zip [file Rsbn1_set_C.pdf › Supplemental Dataset 1/C-mRNA_nonrhythm_translation_rhyth/Rsbn1_set_C.pdf]

## Rtel1

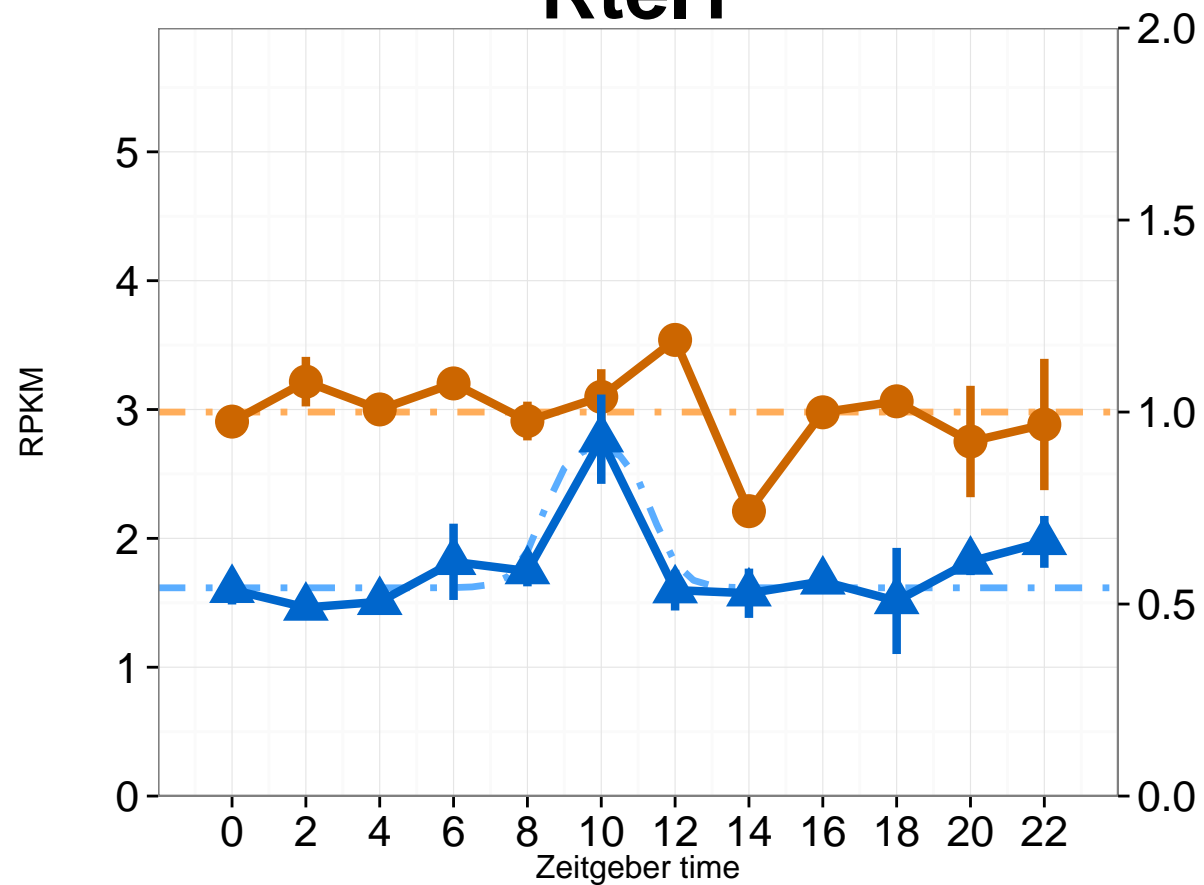

## Rtel1

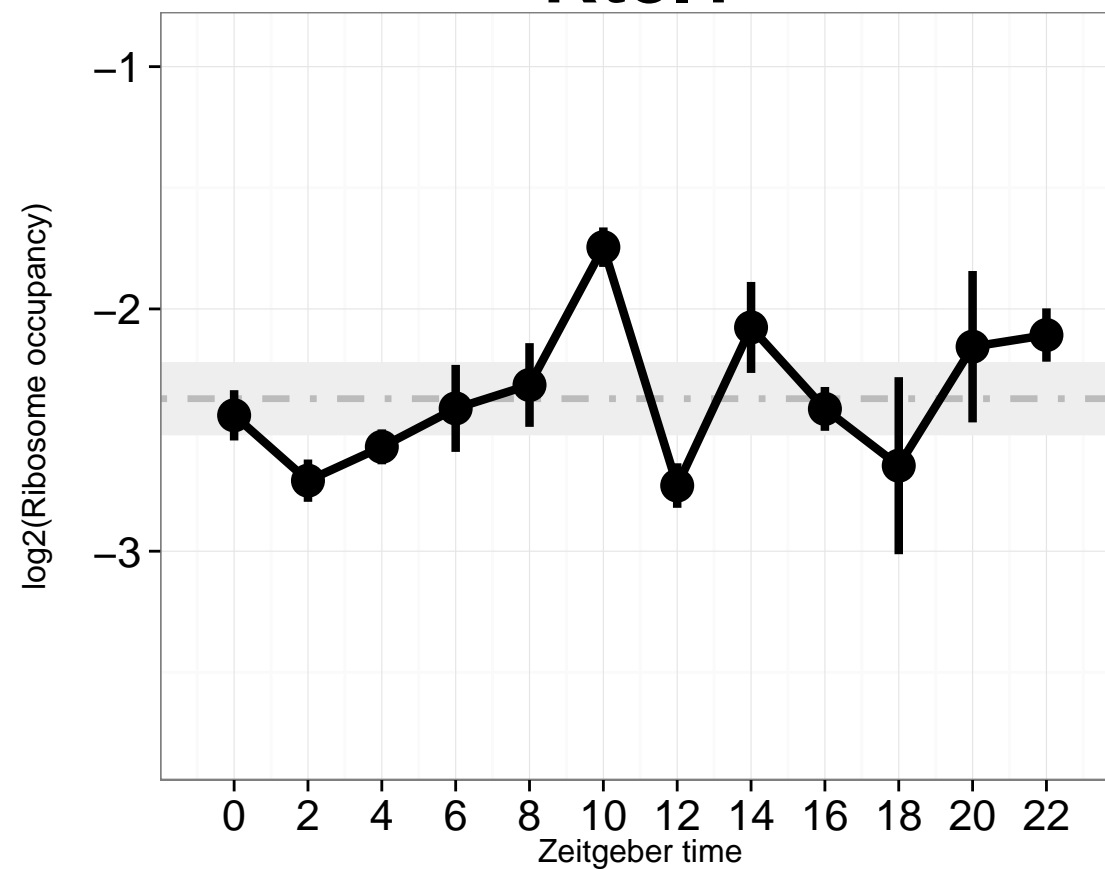

Supplement: SuppDataset_1.zip [file Rtel1_set_C.pdf › Supplemental Dataset 1/C-mRNA_nonrhythm_translation_rhyth/Rtel1_set_C.pdf]

# S100a13

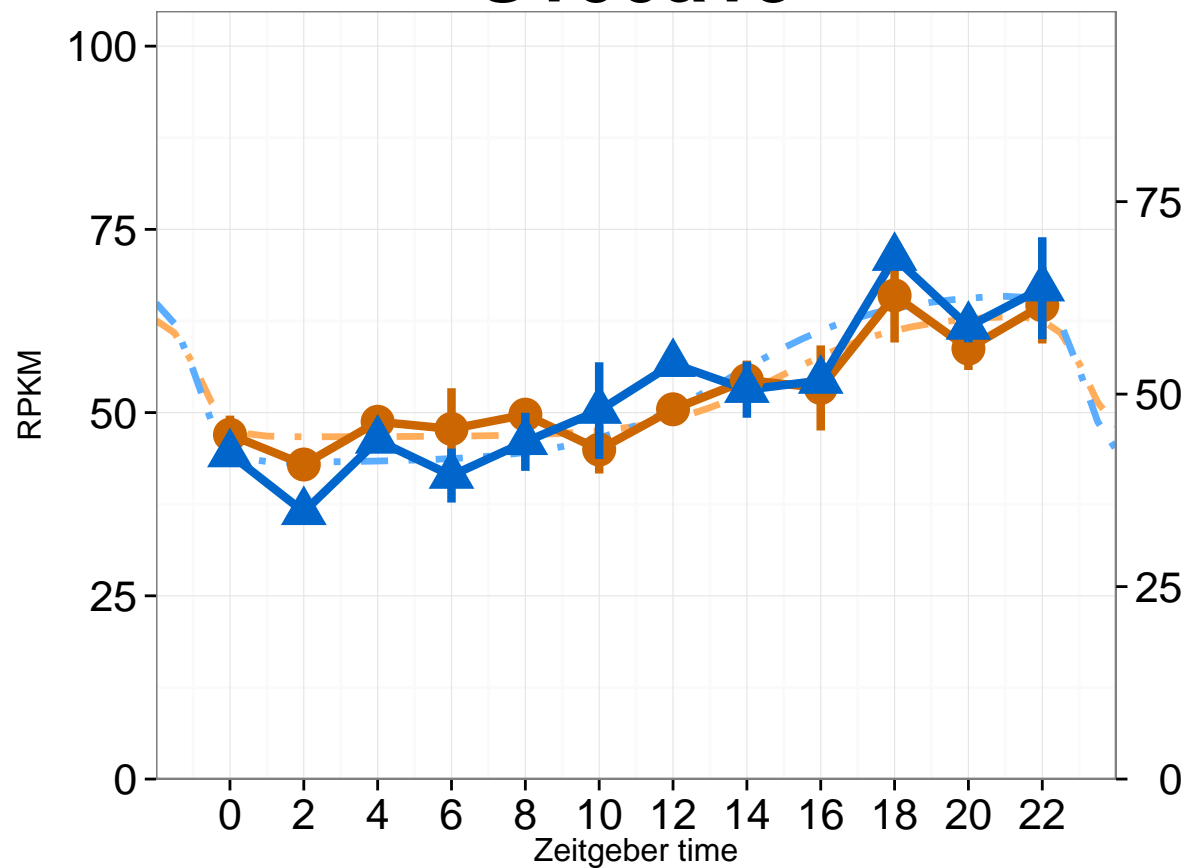

# S100a13

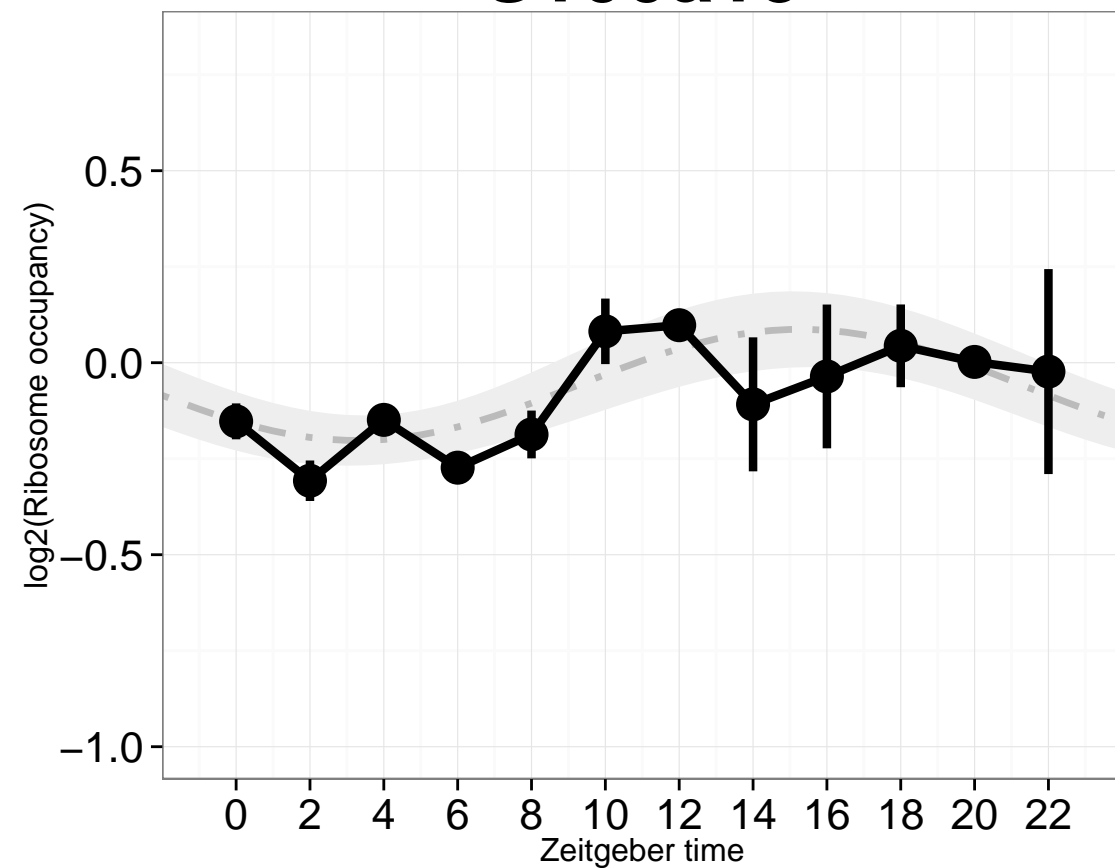

Supplement: SuppDataset_1.zip [file S100a13_set_C.pdf › Supplemental Dataset 1/C-mRNA_nonrhythm_translation_rhyth/S100a13_set_C.pdf]
