# Supplementary figures and images for: Ribosome profiling reveals the rhythmic liver translatome and circadian clock regulation by upstream open reading frames (part 56 of 113)
Source: HighWire-hosted journal article supplement (doi:10.1101/gr.195404.115), 2015-10-20

## Polr2i

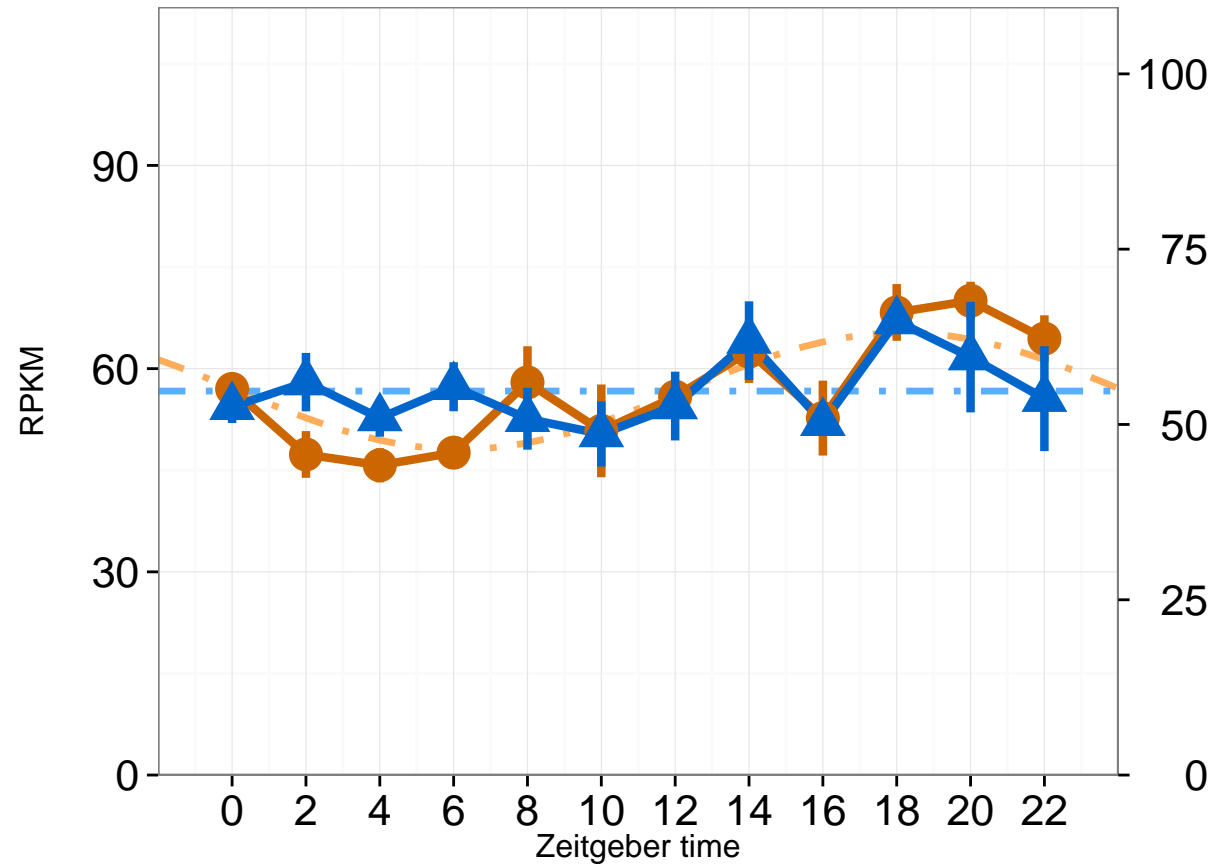

## Polr2i

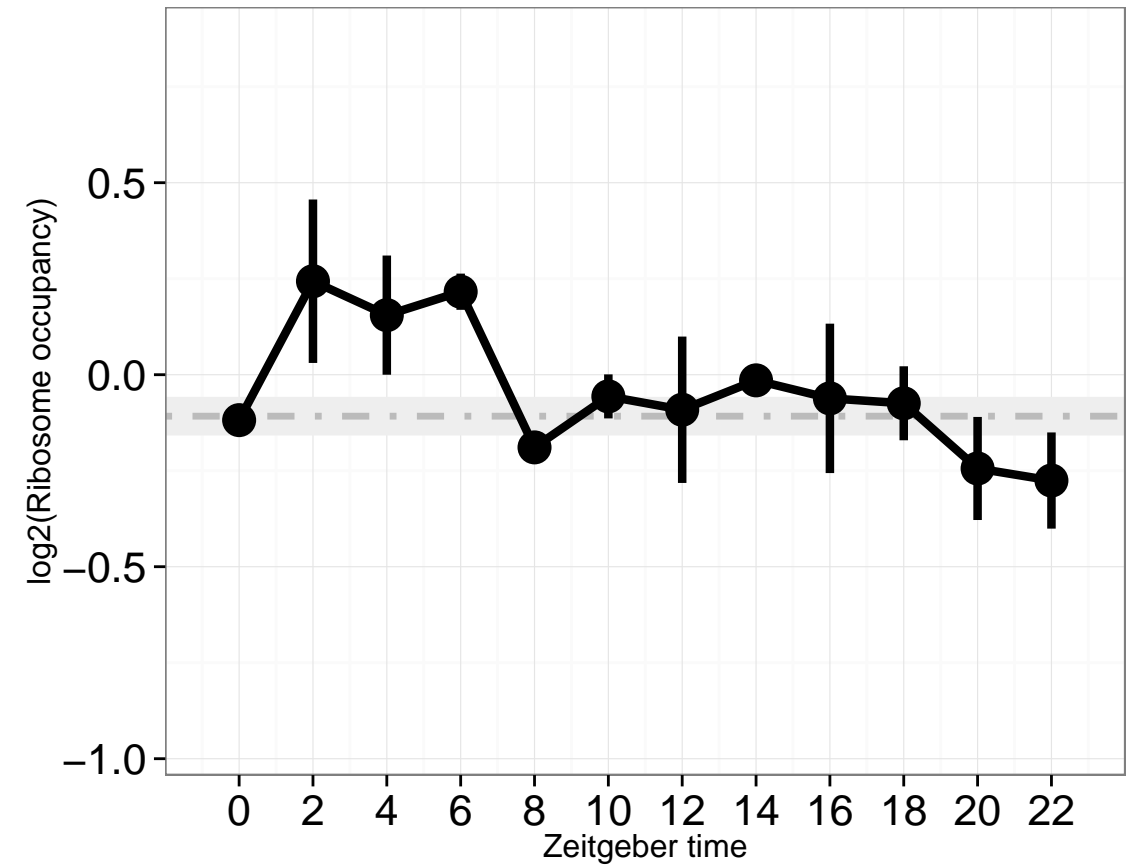

Supplement: SuppDataset_1.zip [file Polr2i_set_A.pdf › Supplemental Dataset 1/A-mRNA_nonrhyth_translation_nonrhyth/Polr2i_set_A.pdf]

## Polr2j

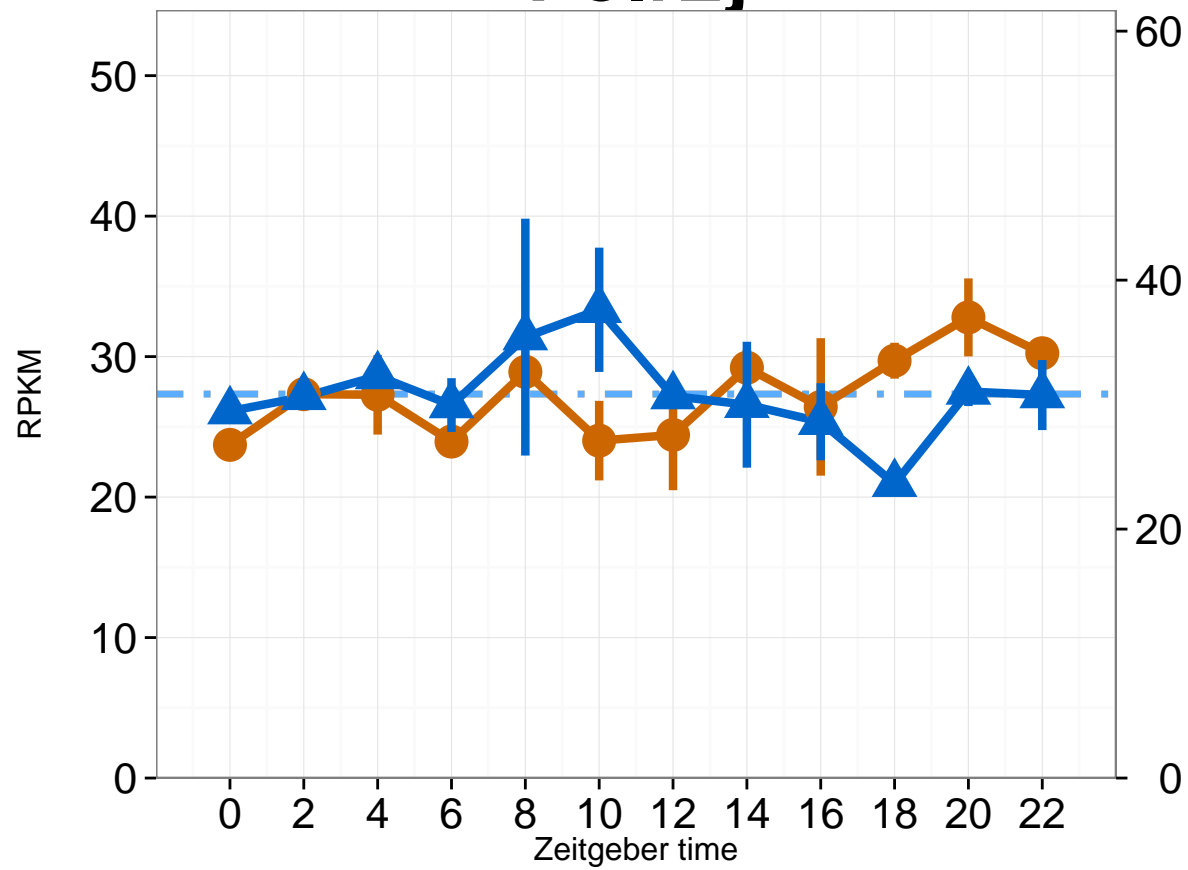

## Polr2j

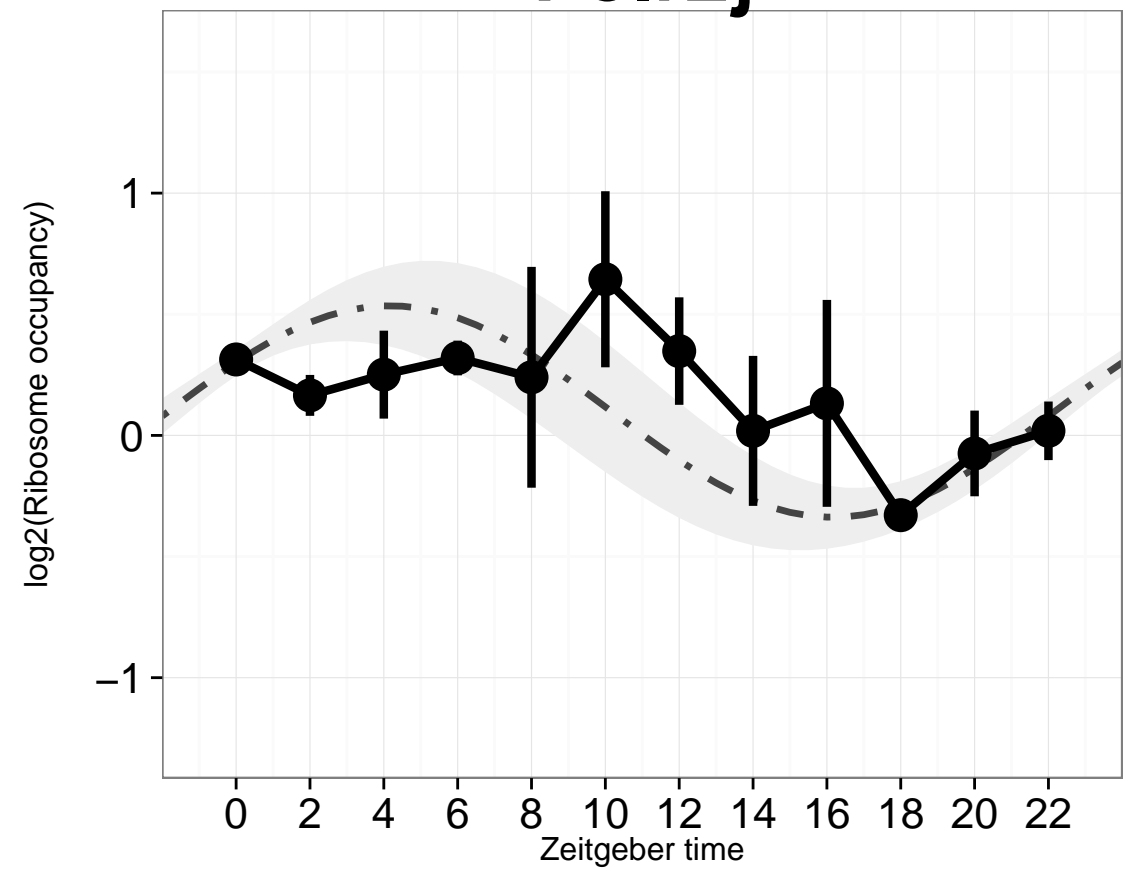

Supplement: SuppDataset_1.zip [file Polr2j_set_A.pdf › Supplemental Dataset 1/A-mRNA_nonrhyth_translation_nonrhyth/Polr2j_set_A.pdf]

## Polr2k

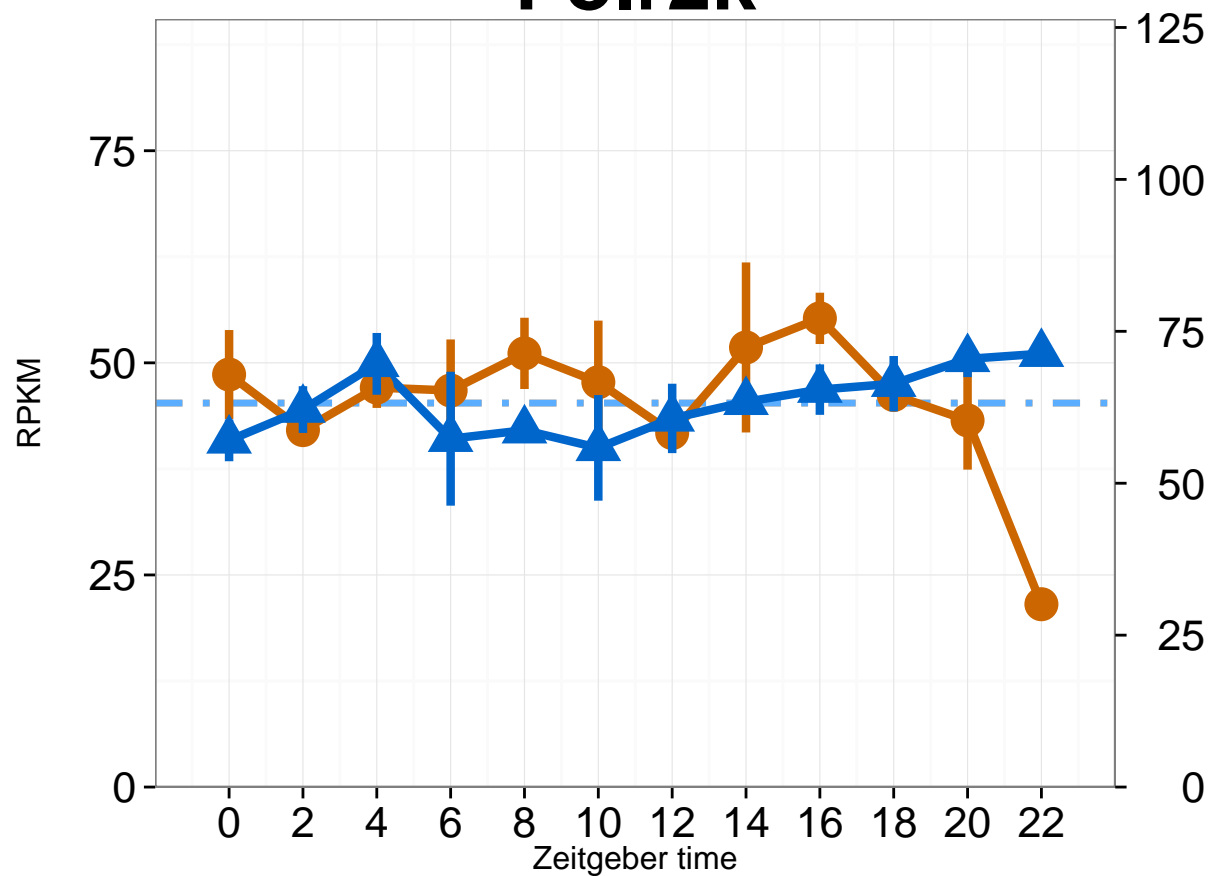

## Polr2k

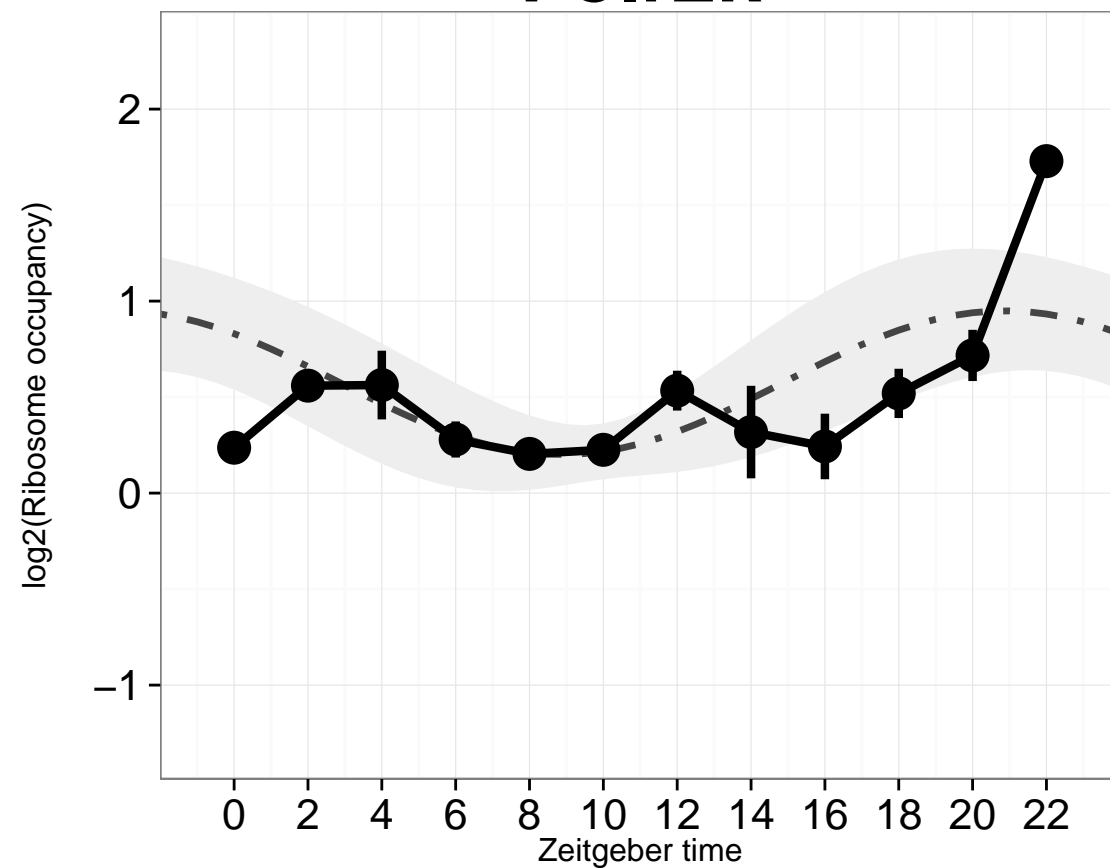

Supplement: SuppDataset_1.zip [file Polr2k_set_A.pdf › Supplemental Dataset 1/A-mRNA_nonrhyth_translation_nonrhyth/Polr2k_set_A.pdf]

## Polr2l

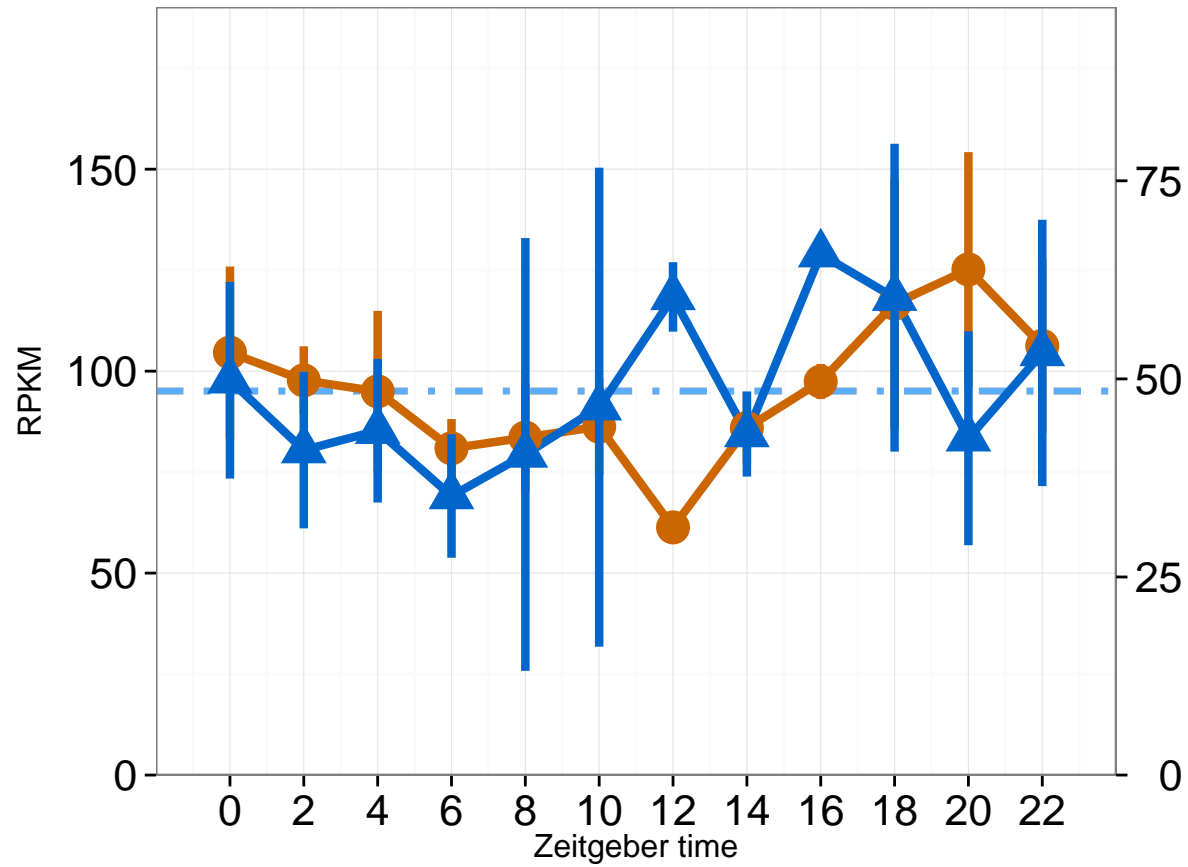

## Polr2l

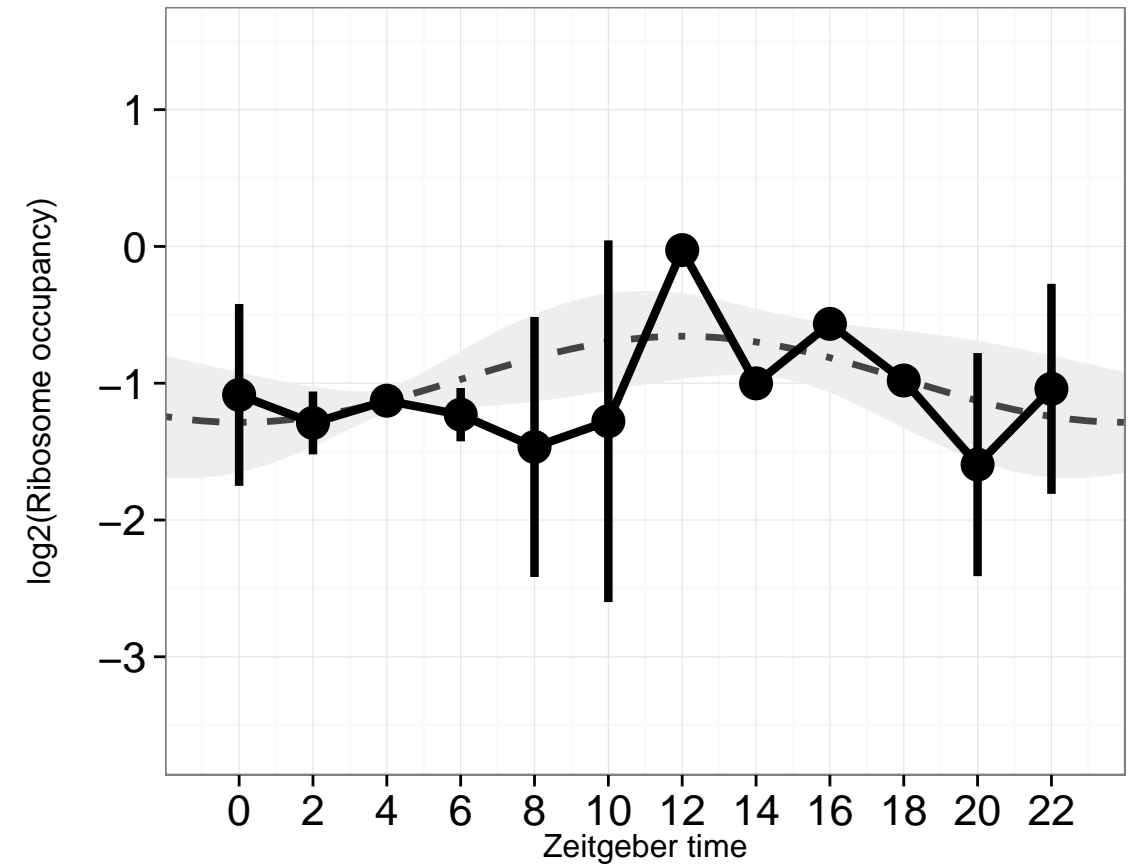

Supplement: SuppDataset_1.zip [file Polr2l_set_A.pdf › Supplemental Dataset 1/A-mRNA_nonrhyth_translation_nonrhyth/Polr2l_set_A.pdf]

# Polr2m

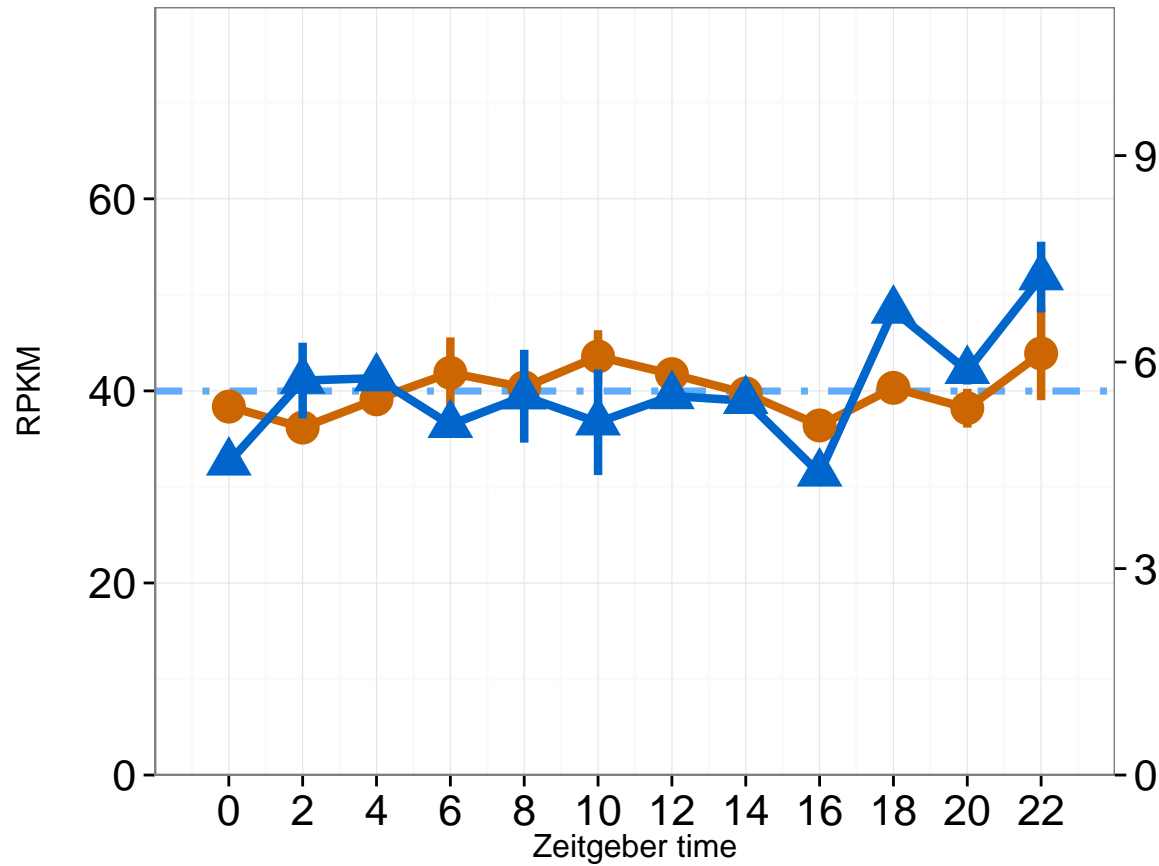

# Polr2m

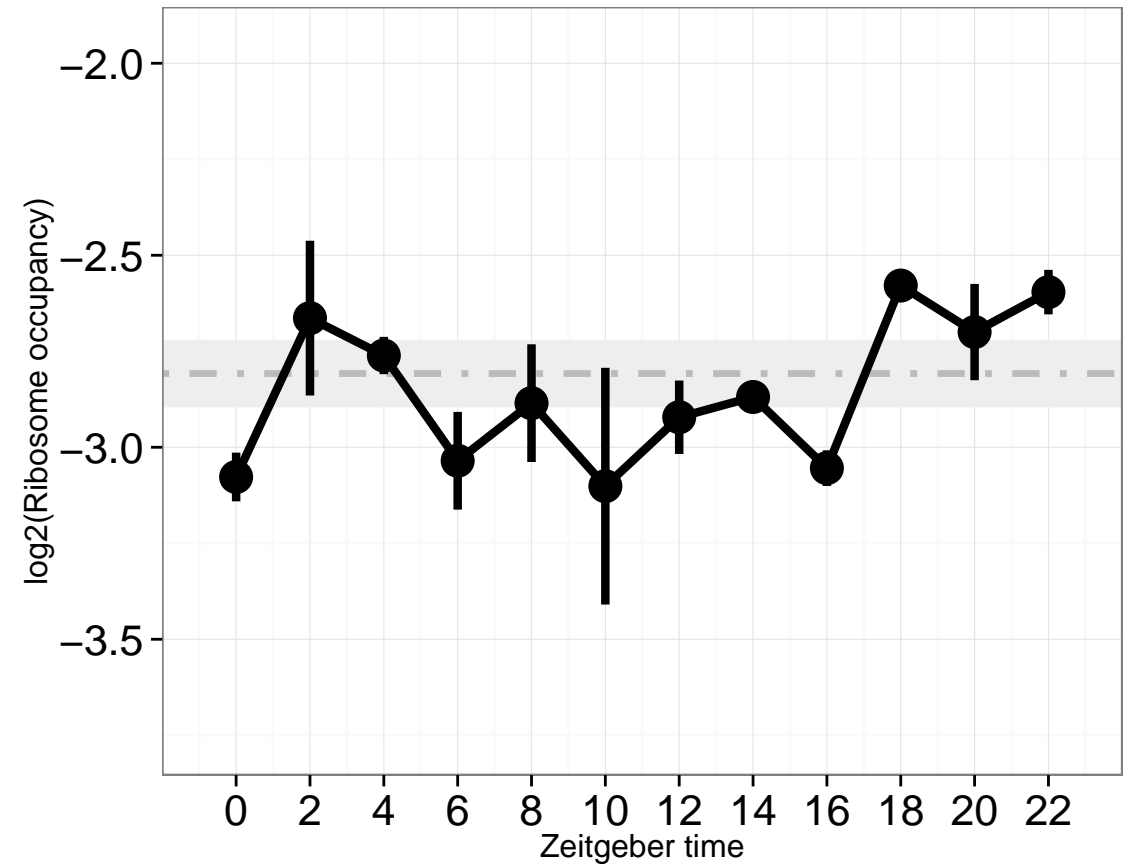

Supplement: SuppDataset_1.zip [file Polr2m_set_A.pdf › Supplemental Dataset 1/A-mRNA_nonrhyth_translation_nonrhyth/Polr2m_set_A.pdf]

# Polr3a

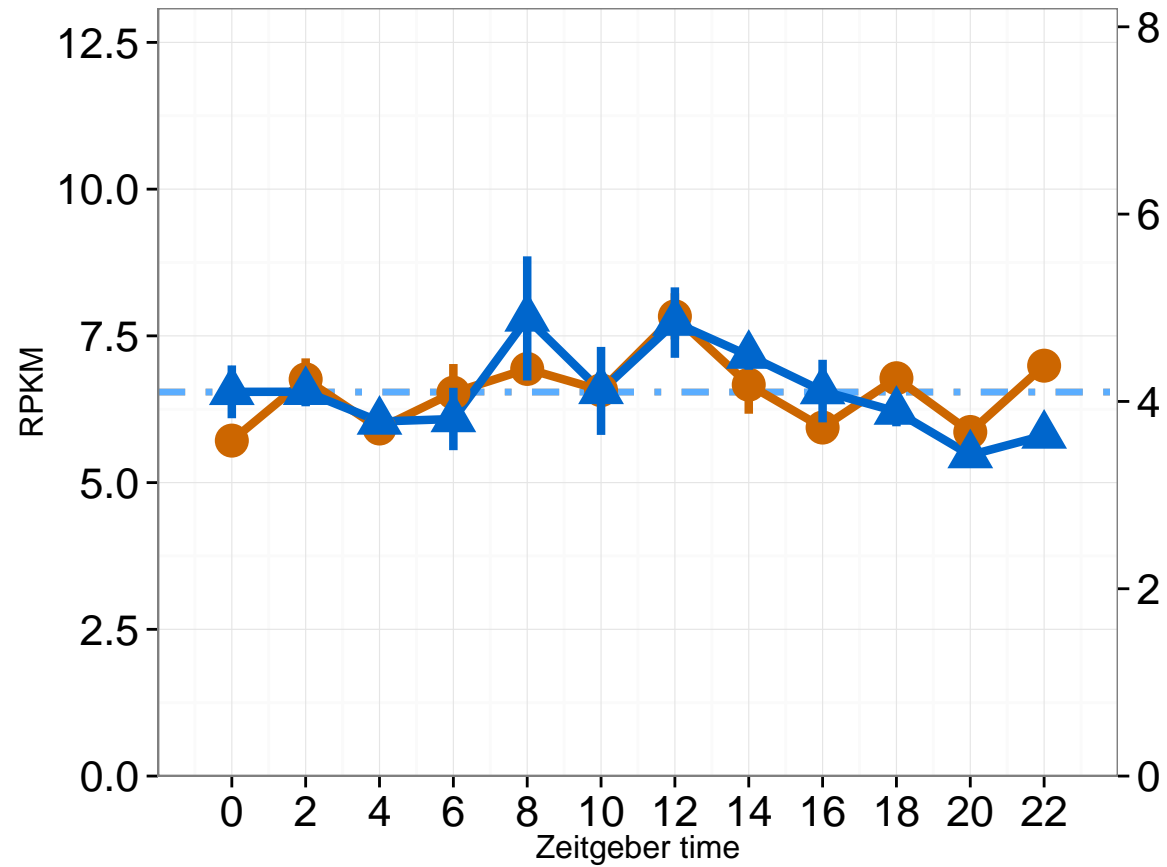

# Polr3a

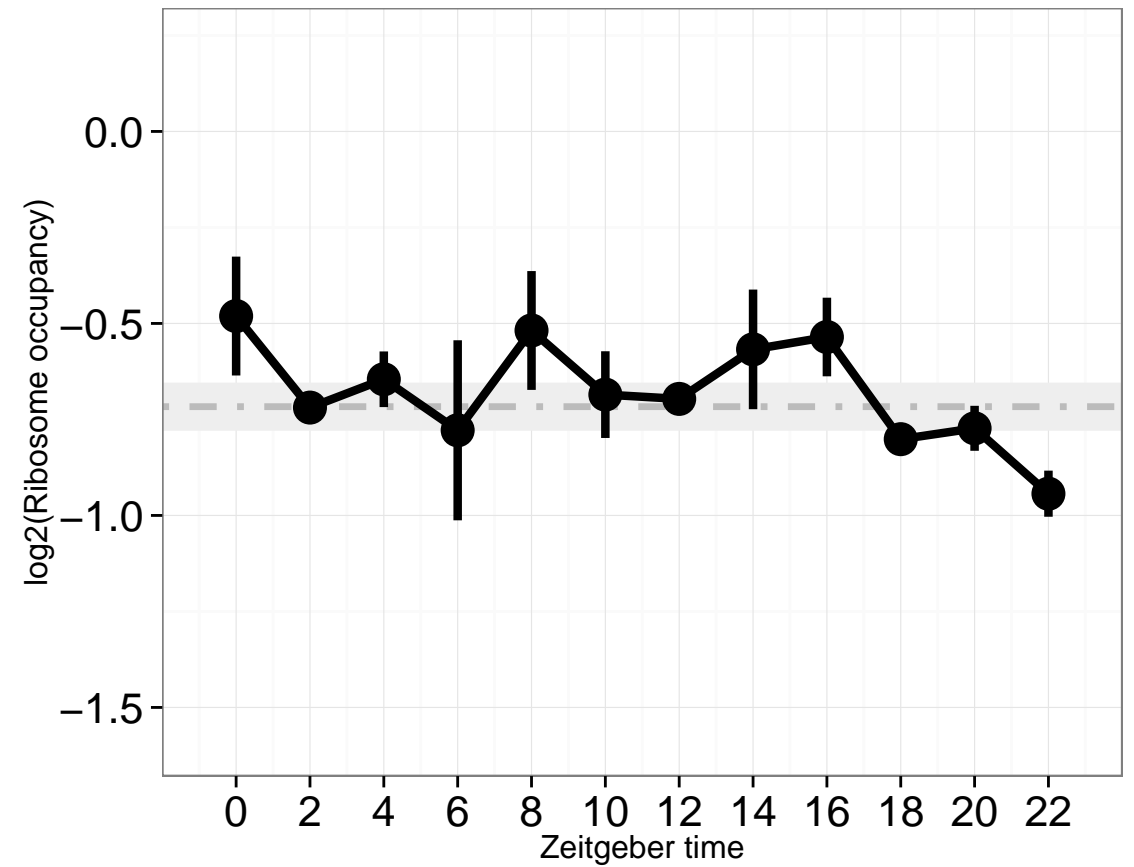

Supplement: SuppDataset_1.zip [file Polr3a_set_A.pdf › Supplemental Dataset 1/A-mRNA_nonrhyth_translation_nonrhyth/Polr3a_set_A.pdf]

# Polr3b

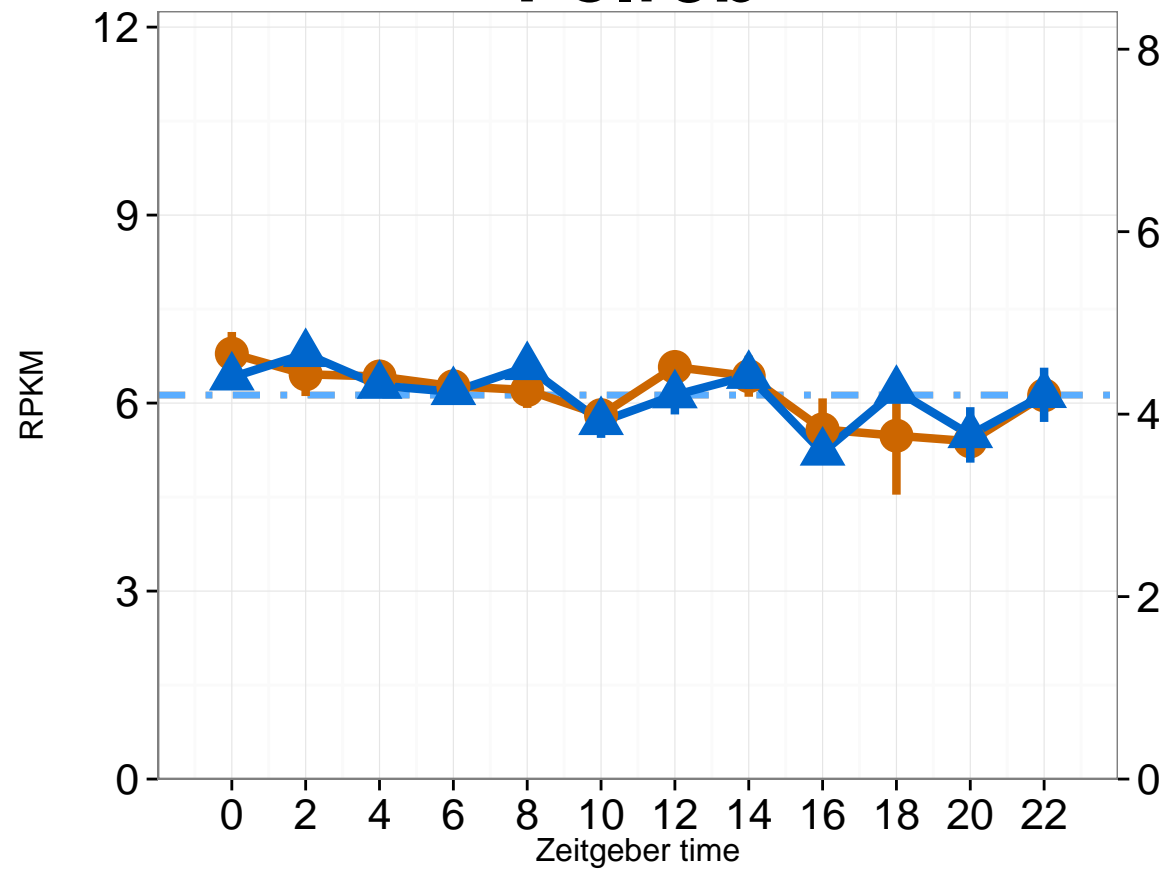

# Polr3b

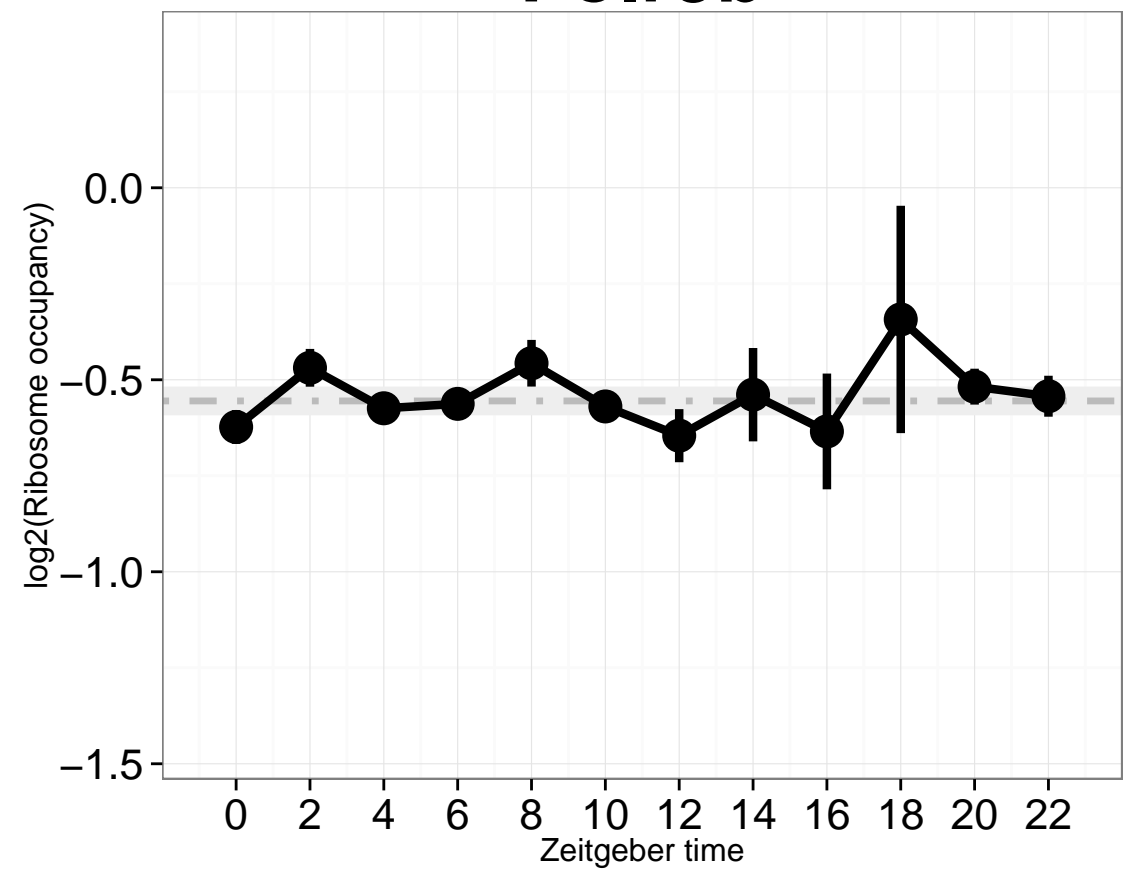

Supplement: SuppDataset_1.zip [file Polr3b_set_A.pdf › Supplemental Dataset 1/A-mRNA_nonrhyth_translation_nonrhyth/Polr3b_set_A.pdf]

## Polr3c

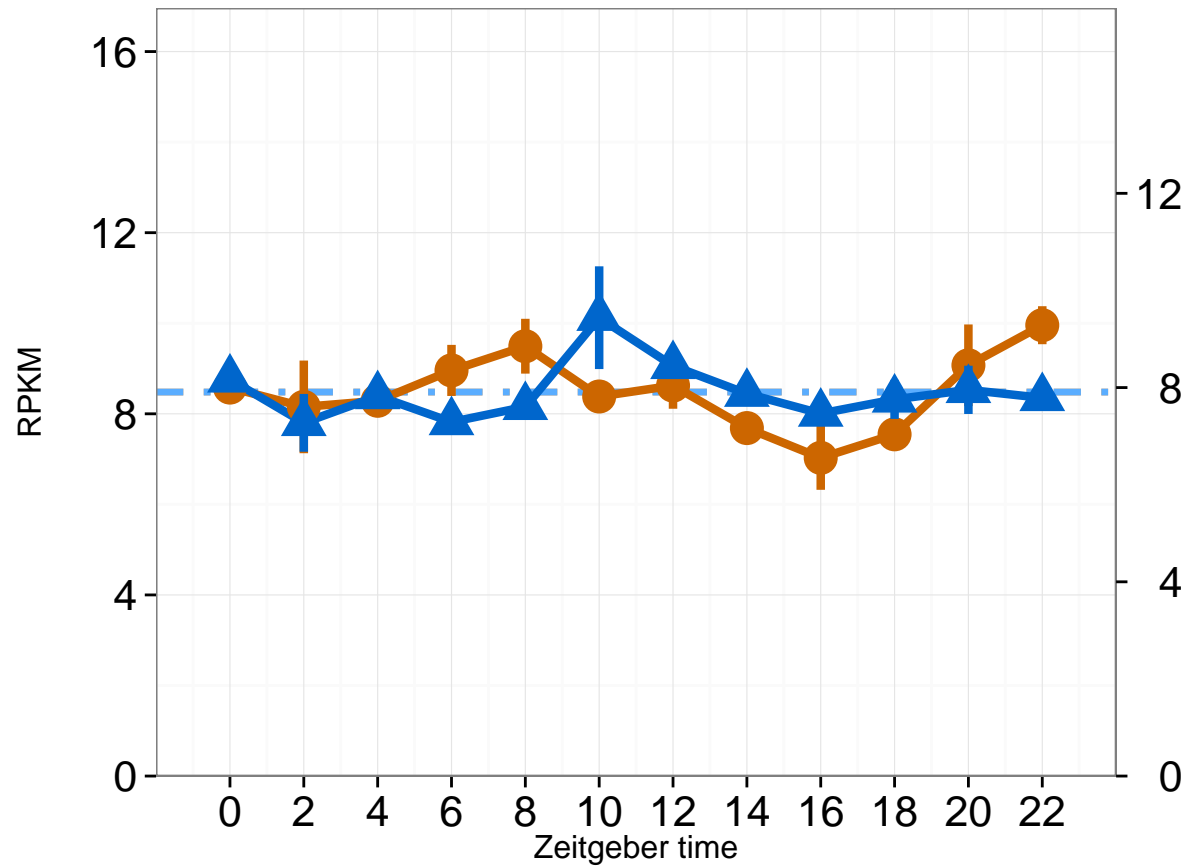

## Polr3c

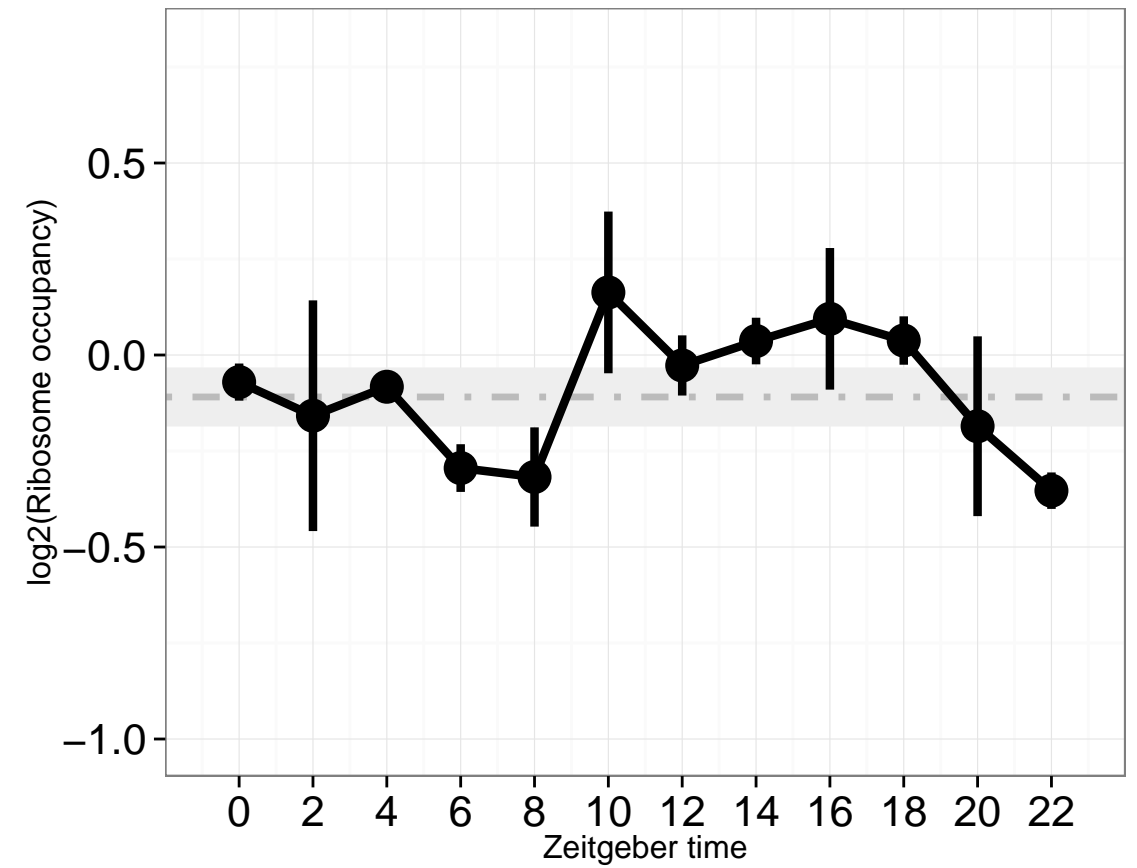

Supplement: SuppDataset_1.zip [file Polr3c_set_A.pdf › Supplemental Dataset 1/A-mRNA_nonrhyth_translation_nonrhyth/Polr3c_set_A.pdf]

# Polr3d

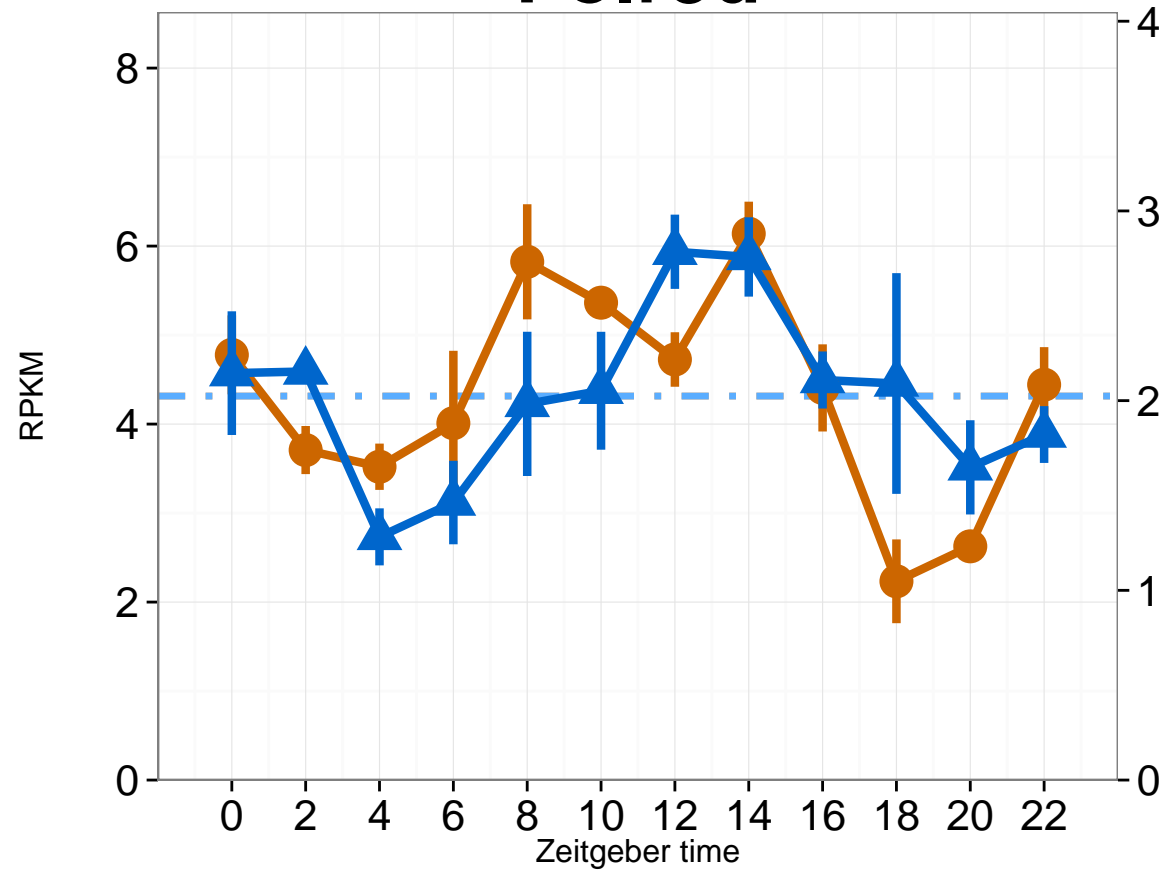

# Polr3d

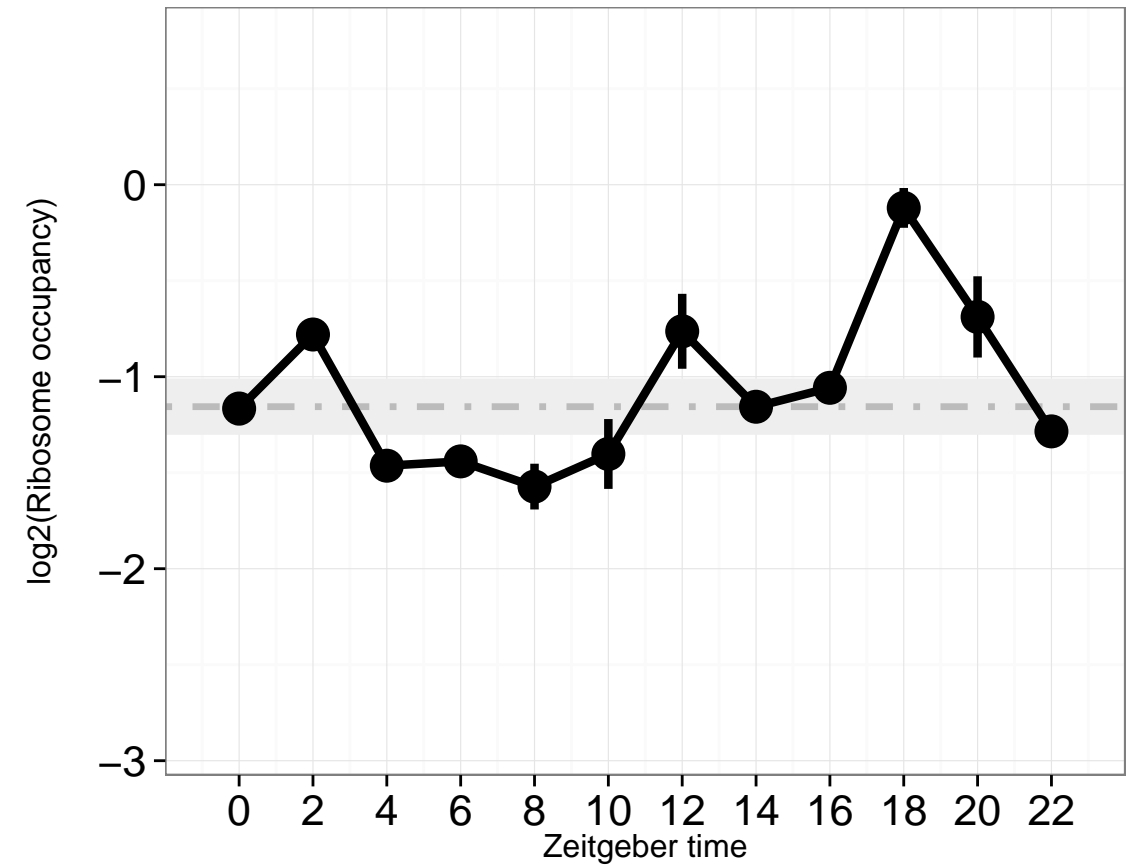

Supplement: SuppDataset_1.zip [file Polr3d_set_A.pdf › Supplemental Dataset 1/A-mRNA_nonrhyth_translation_nonrhyth/Polr3d_set_A.pdf]

# Polr3e

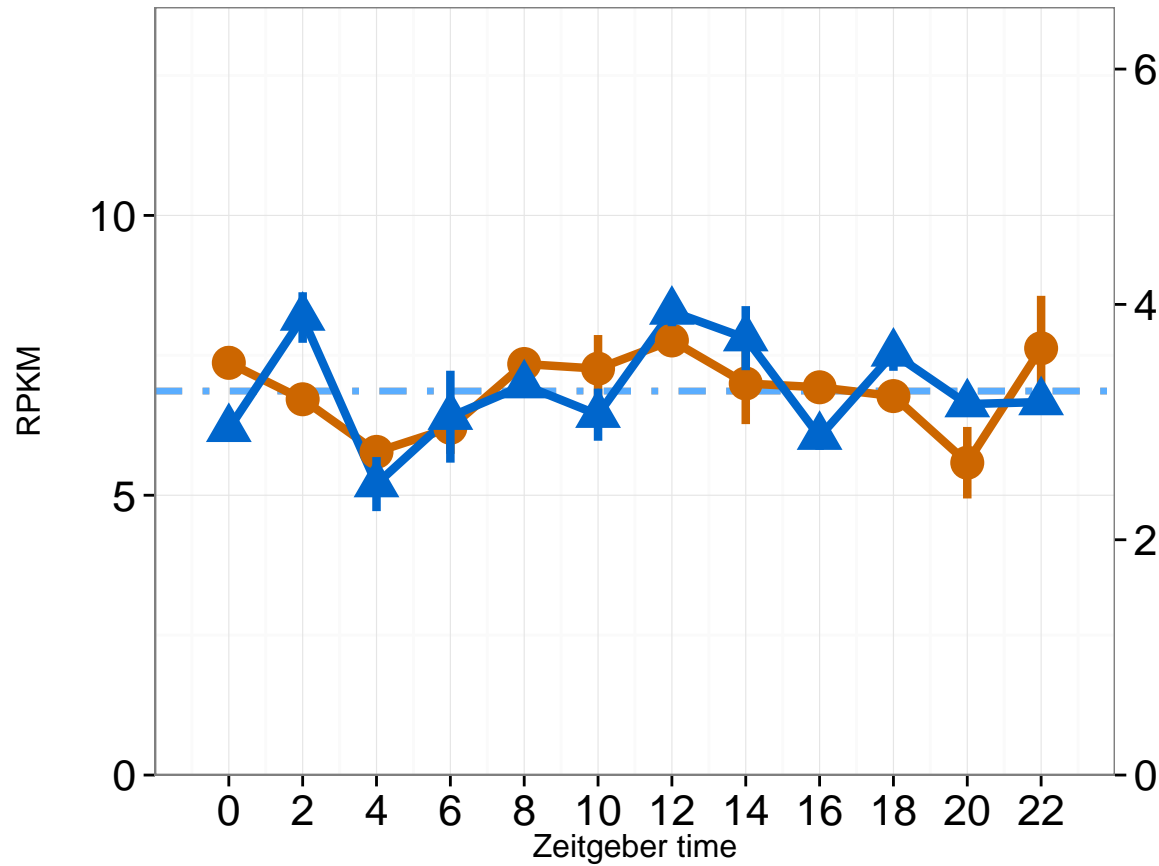

# Polr3e

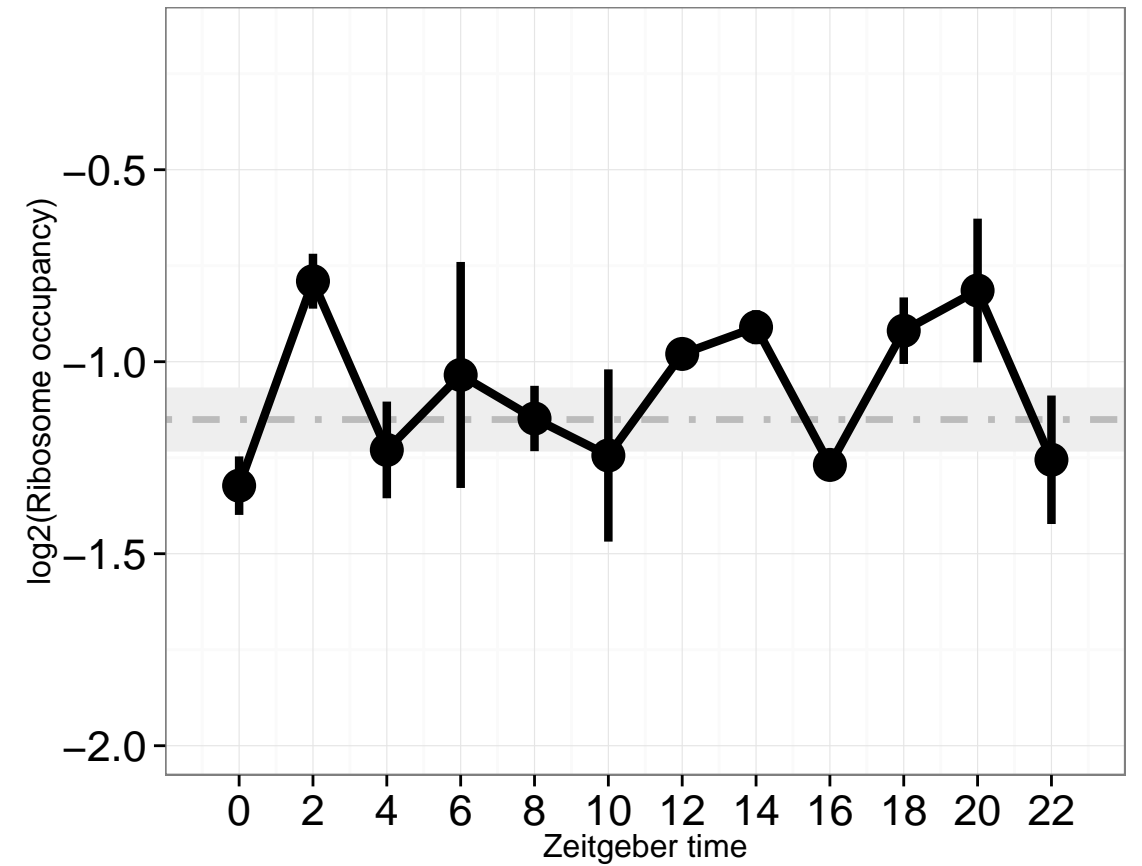

Supplement: SuppDataset_1.zip [file Polr3e_set_A.pdf › Supplemental Dataset 1/A-mRNA_nonrhyth_translation_nonrhyth/Polr3e_set_A.pdf]

## Polr3f

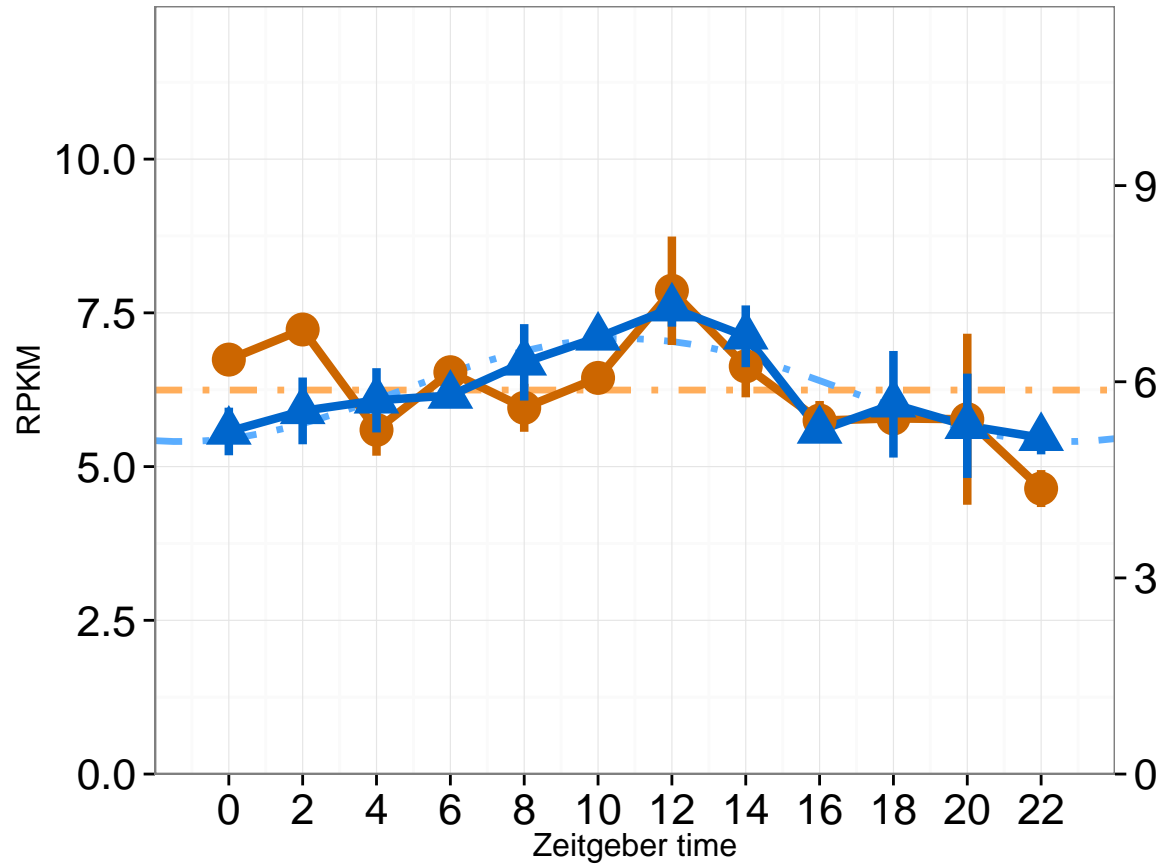

## Polr3f

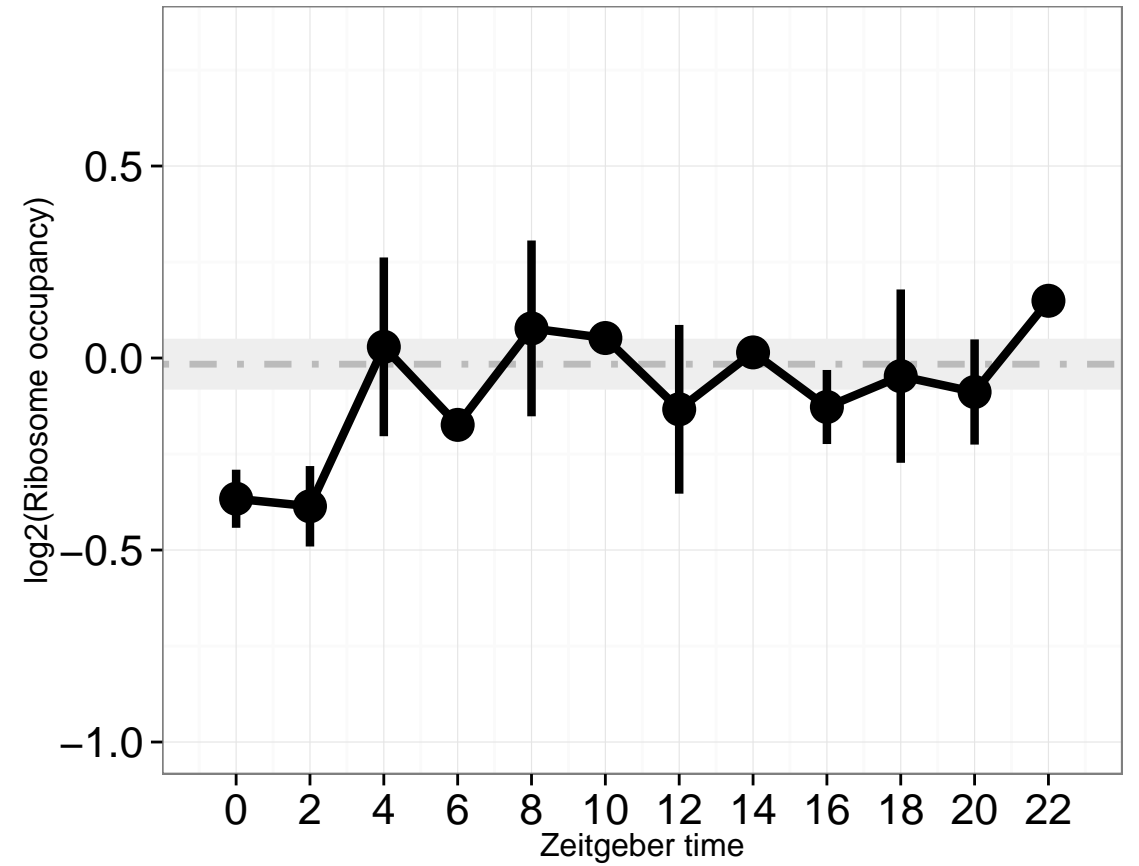

Supplement: SuppDataset_1.zip [file Polr3f_set_A.pdf › Supplemental Dataset 1/A-mRNA_nonrhyth_translation_nonrhyth/Polr3f_set_A.pdf]

# Polr3g

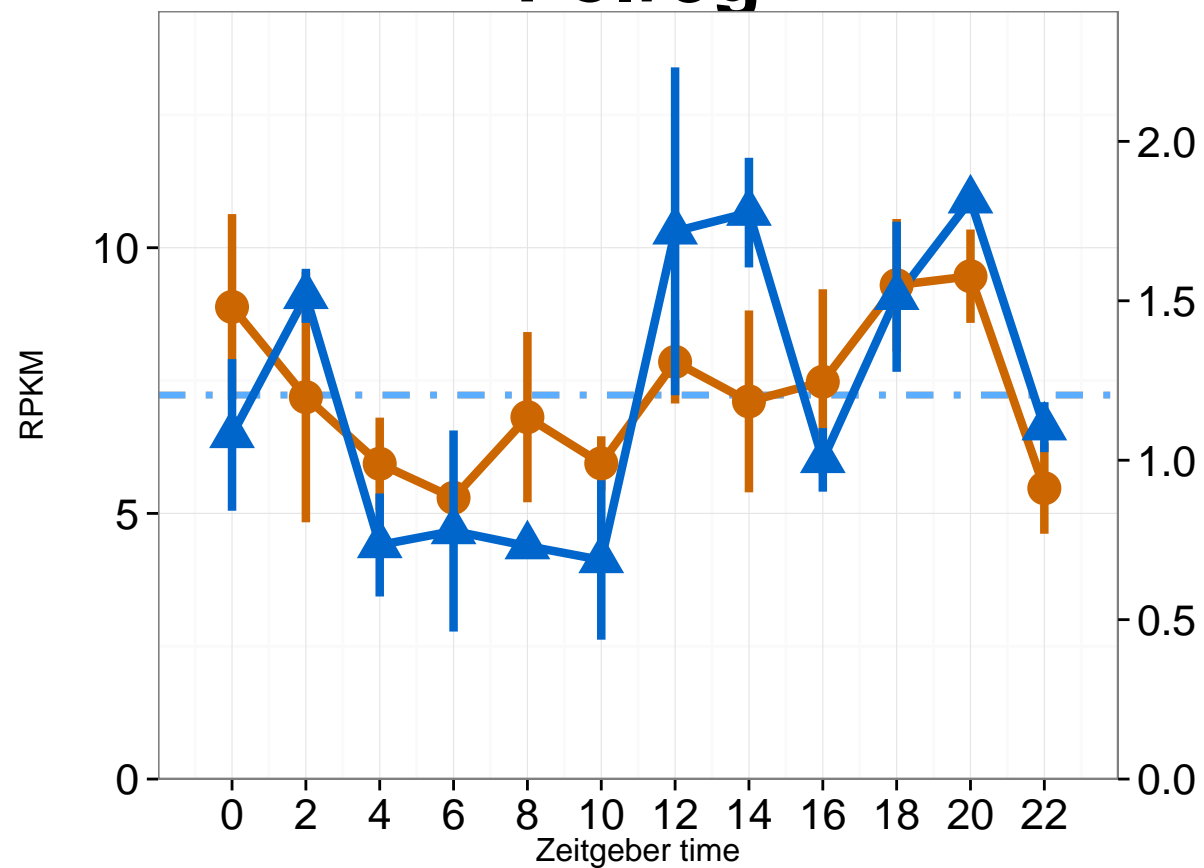

# Polr3g

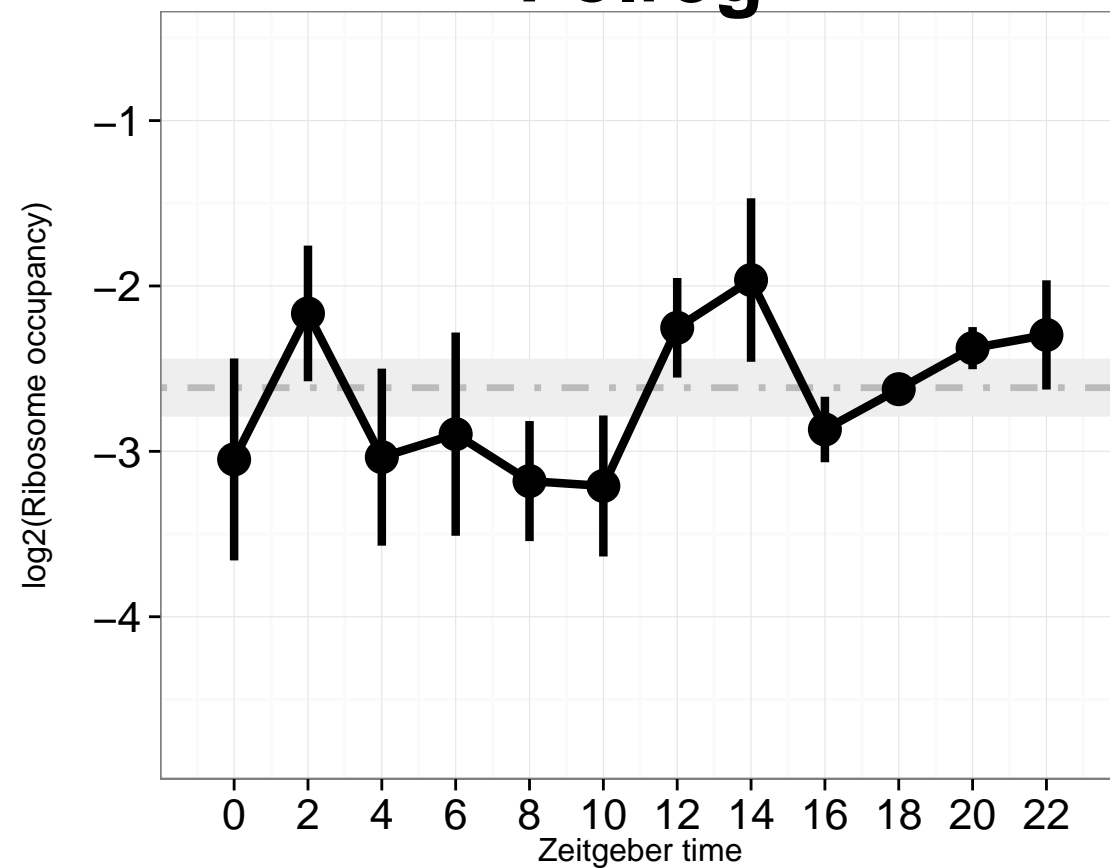

Supplement: SuppDataset_1.zip [file Polr3g_set_A.pdf › Supplemental Dataset 1/A-mRNA_nonrhyth_translation_nonrhyth/Polr3g_set_A.pdf]

## Polr3gl

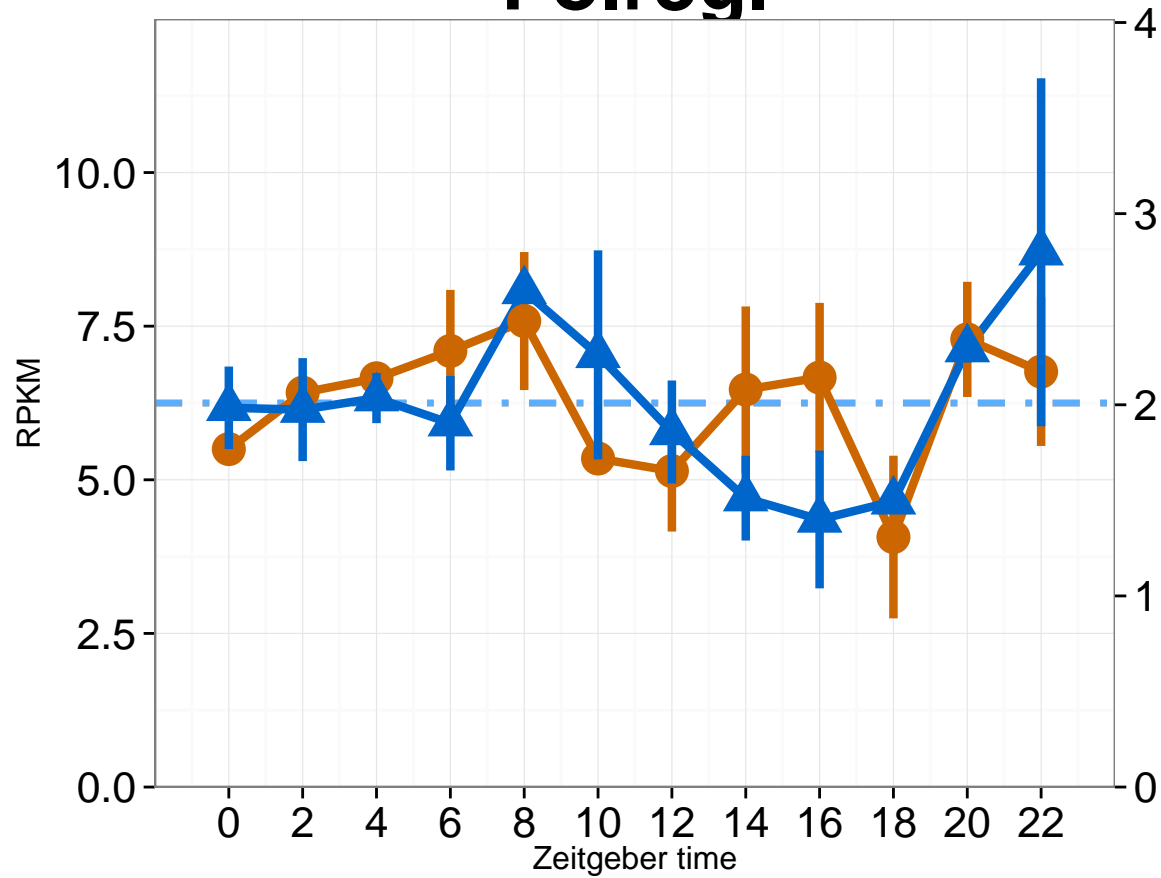

## Polr3gl

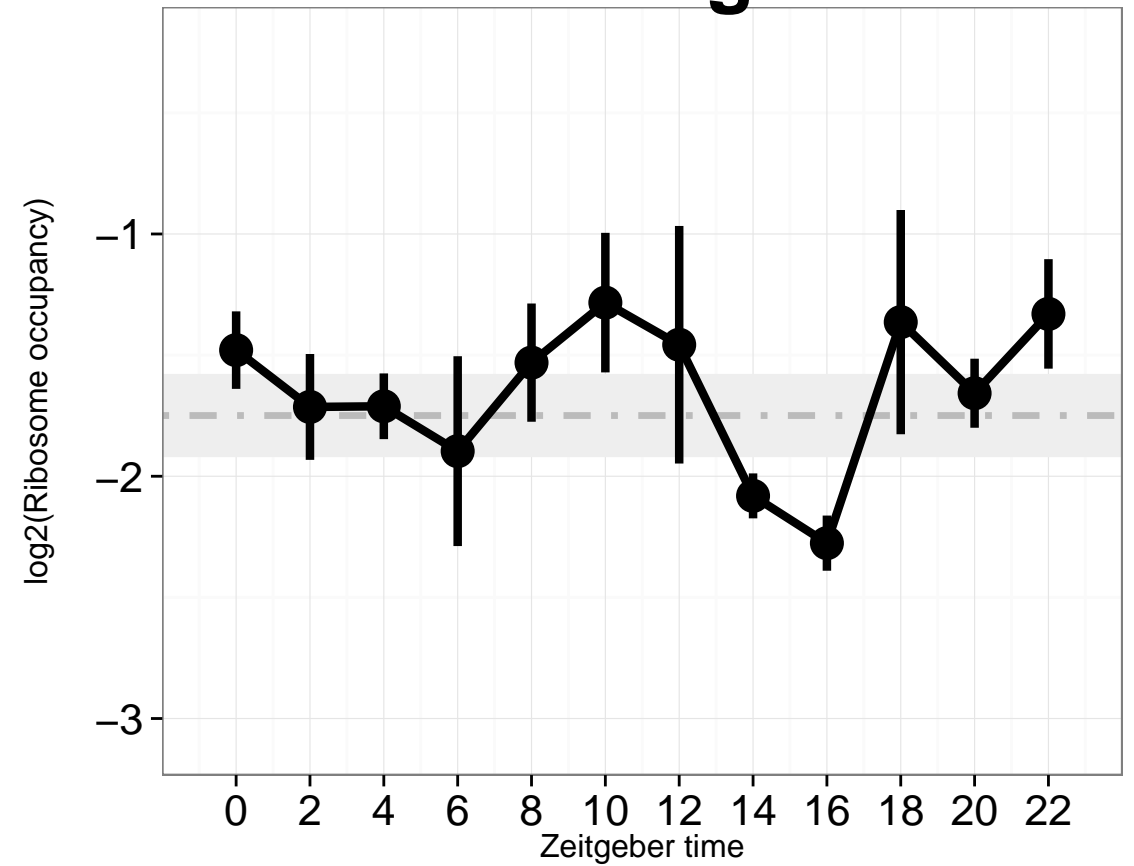

Supplement: SuppDataset_1.zip [file Polr3gl_set_A.pdf › Supplemental Dataset 1/A-mRNA_nonrhyth_translation_nonrhyth/Polr3gl_set_A.pdf]

# Polr3h

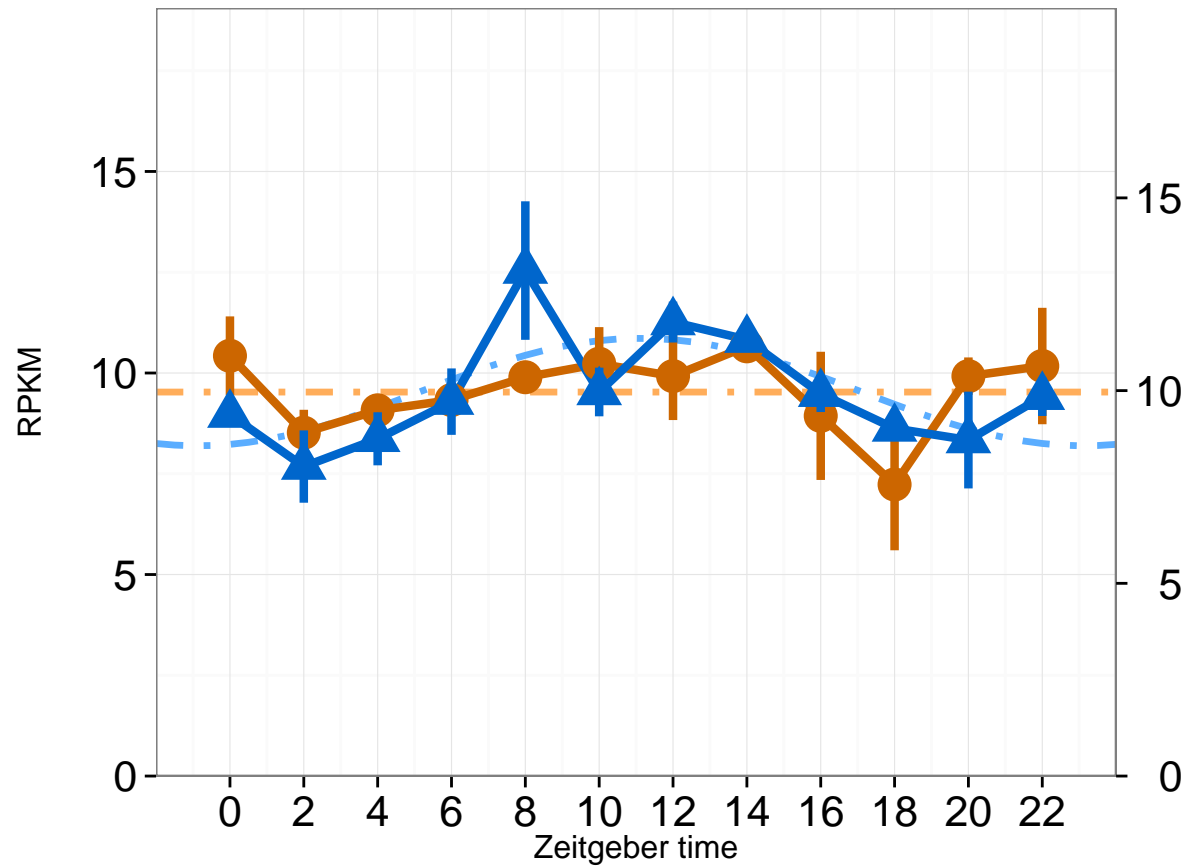

# Polr3h

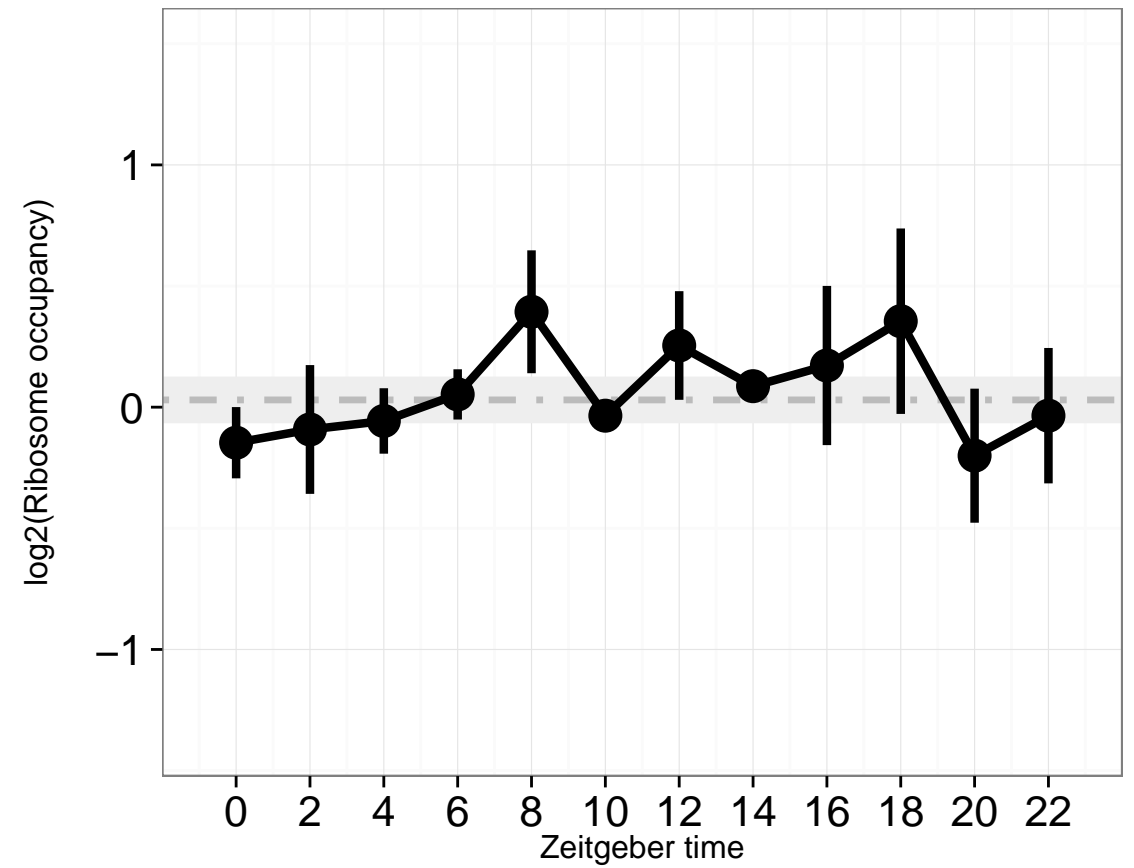

Supplement: SuppDataset_1.zip [file Polr3h_set_A.pdf › Supplemental Dataset 1/A-mRNA_nonrhyth_translation_nonrhyth/Polr3h_set_A.pdf]

## Polrmt

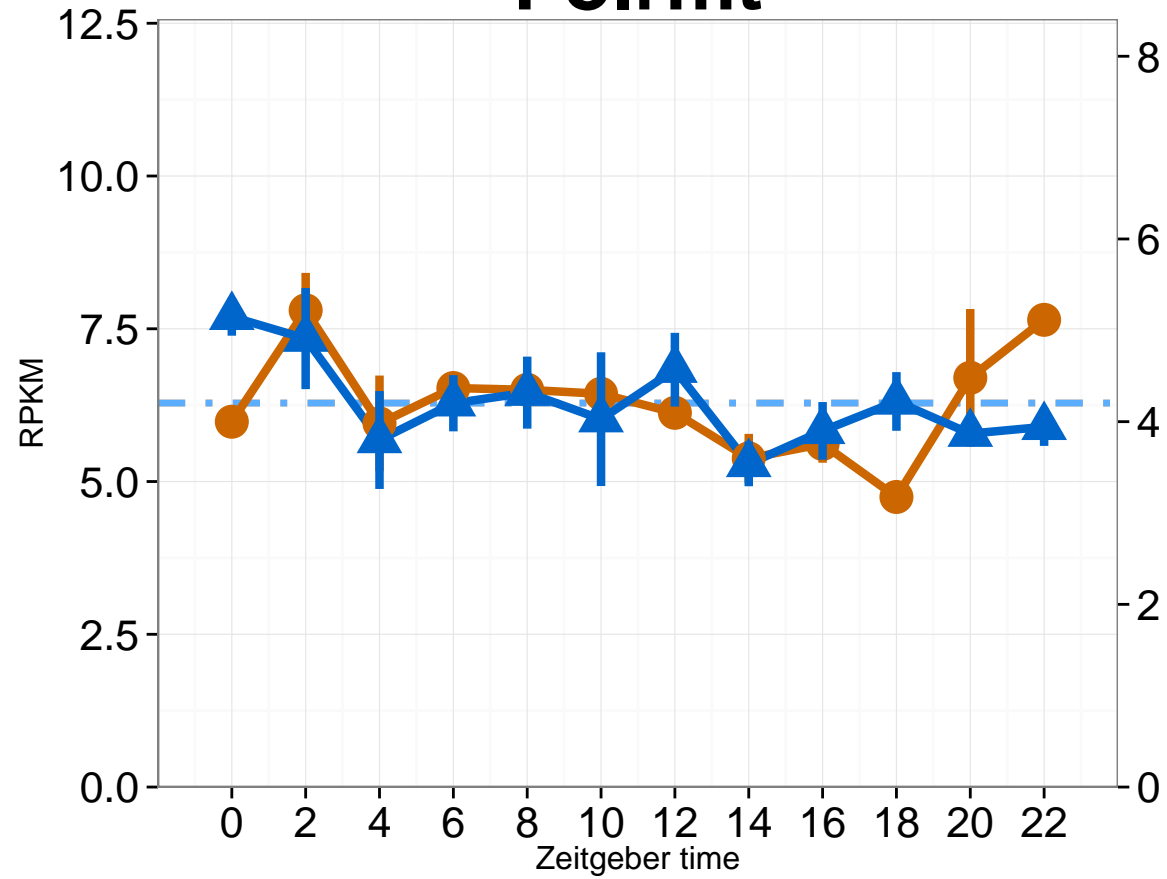

## Polrmt

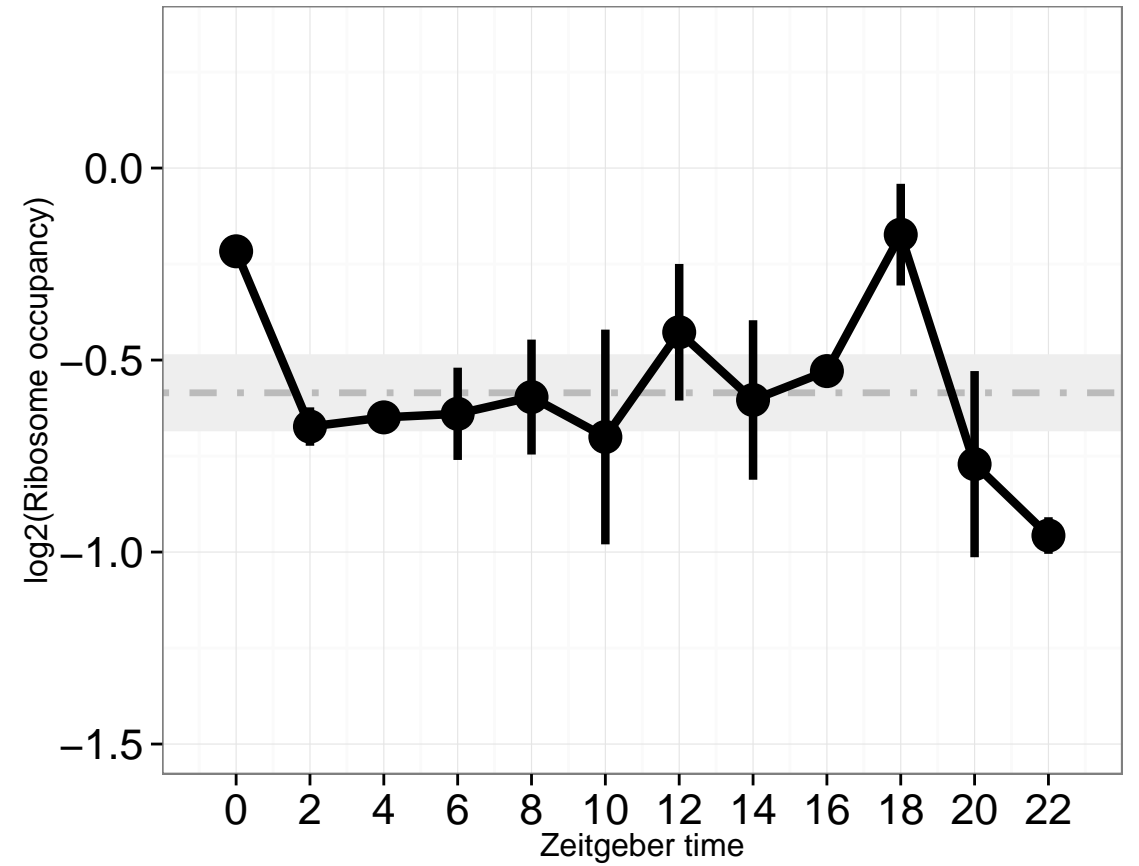

Supplement: SuppDataset_1.zip [file Polrmt_set_A.pdf › Supplemental Dataset 1/A-mRNA_nonrhyth_translation_nonrhyth/Polrmt_set_A.pdf]

# Pom121

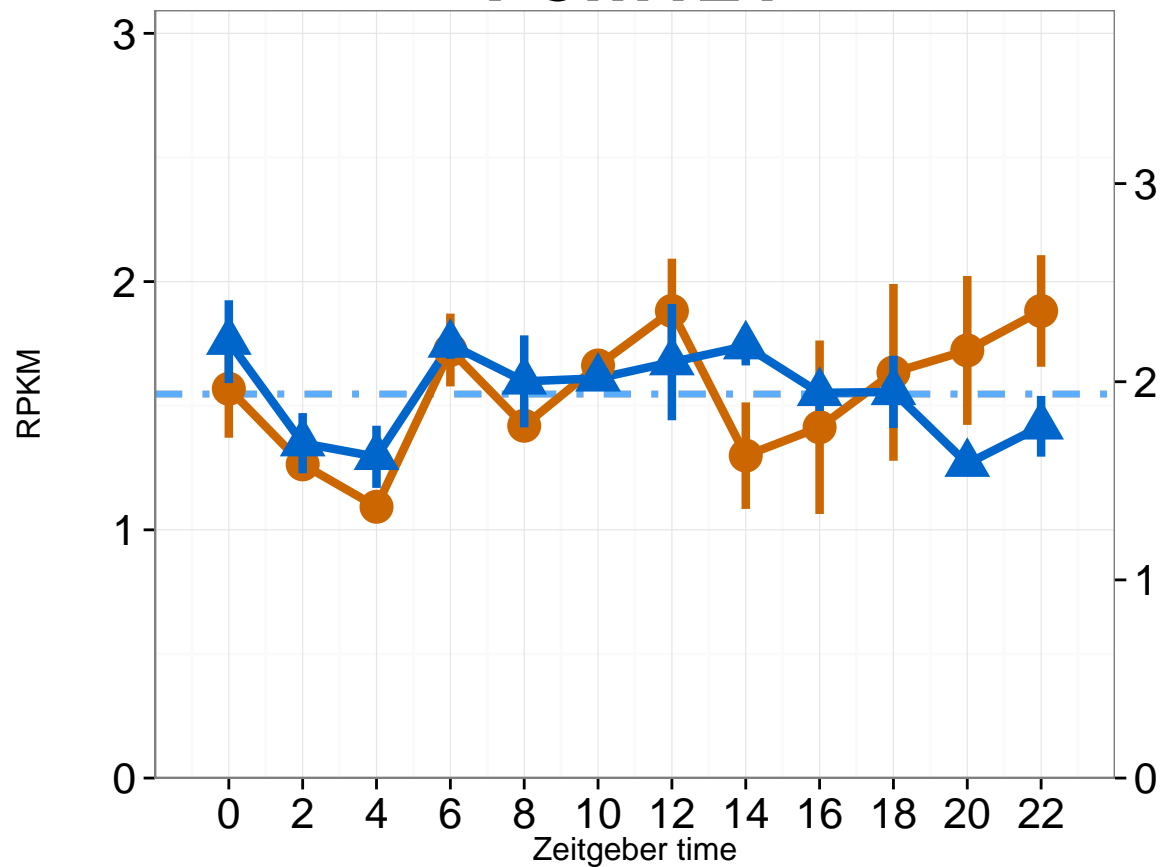

# Pom121

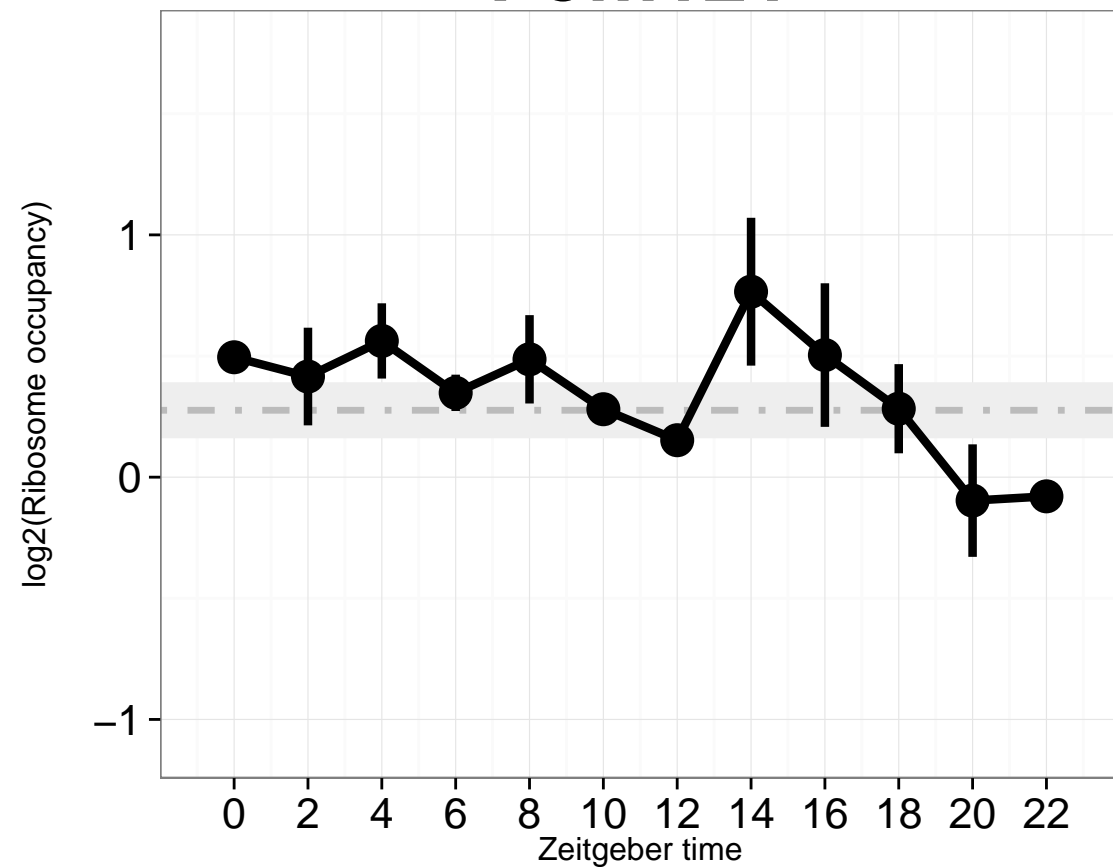

Supplement: SuppDataset_1.zip [file Pom121_set_A.pdf › Supplemental Dataset 1/A-mRNA_nonrhyth_translation_nonrhyth/Pom121_set_A.pdf]

# Pomgnt1

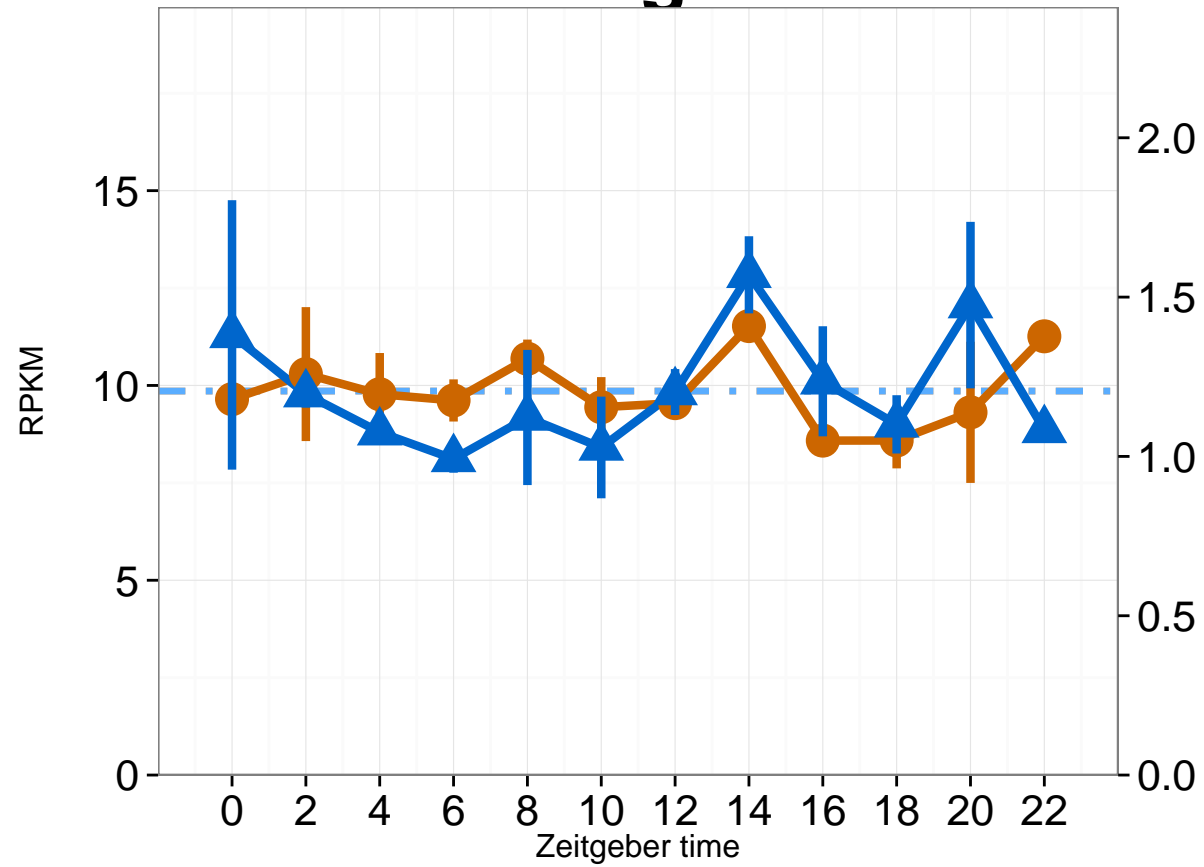

# Pomgnt1

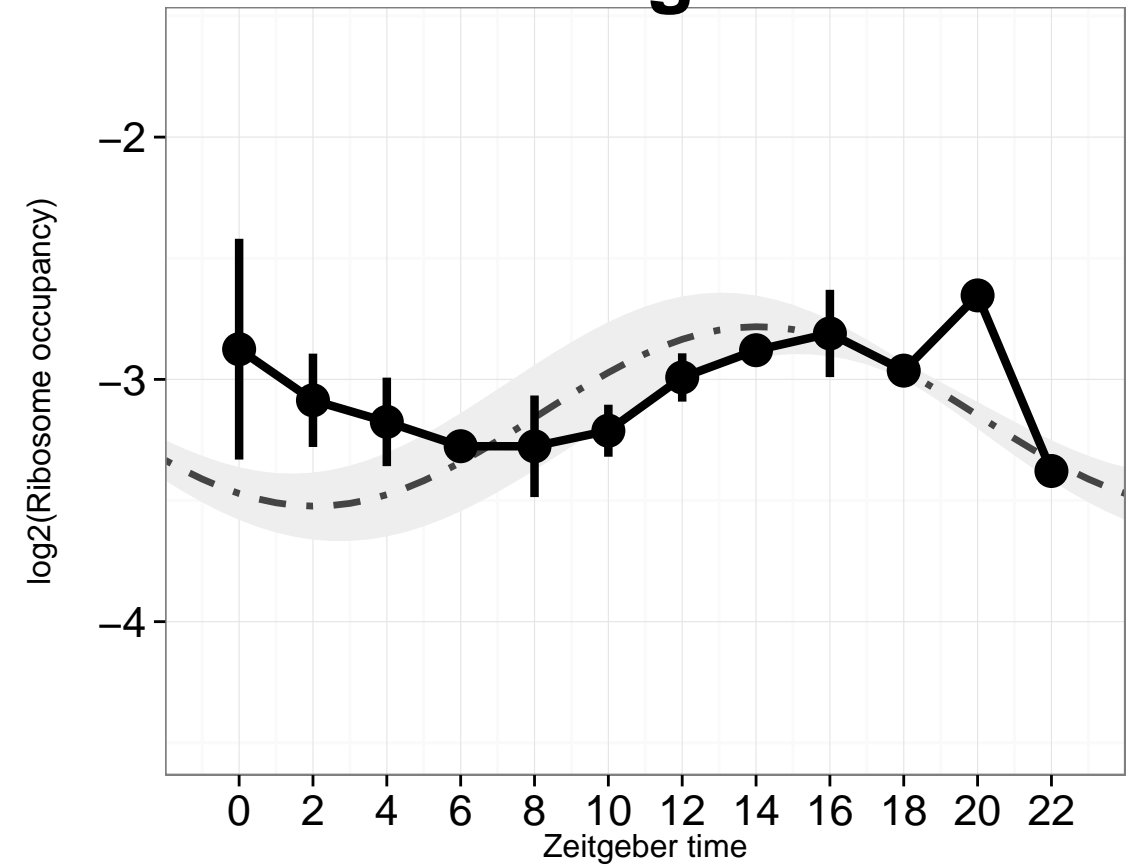

Supplement: SuppDataset_1.zip [file Pomgnt1_set_A.pdf › Supplemental Dataset 1/A-mRNA_nonrhyth_translation_nonrhyth/Pomgnt1_set_A.pdf]

## Pomp

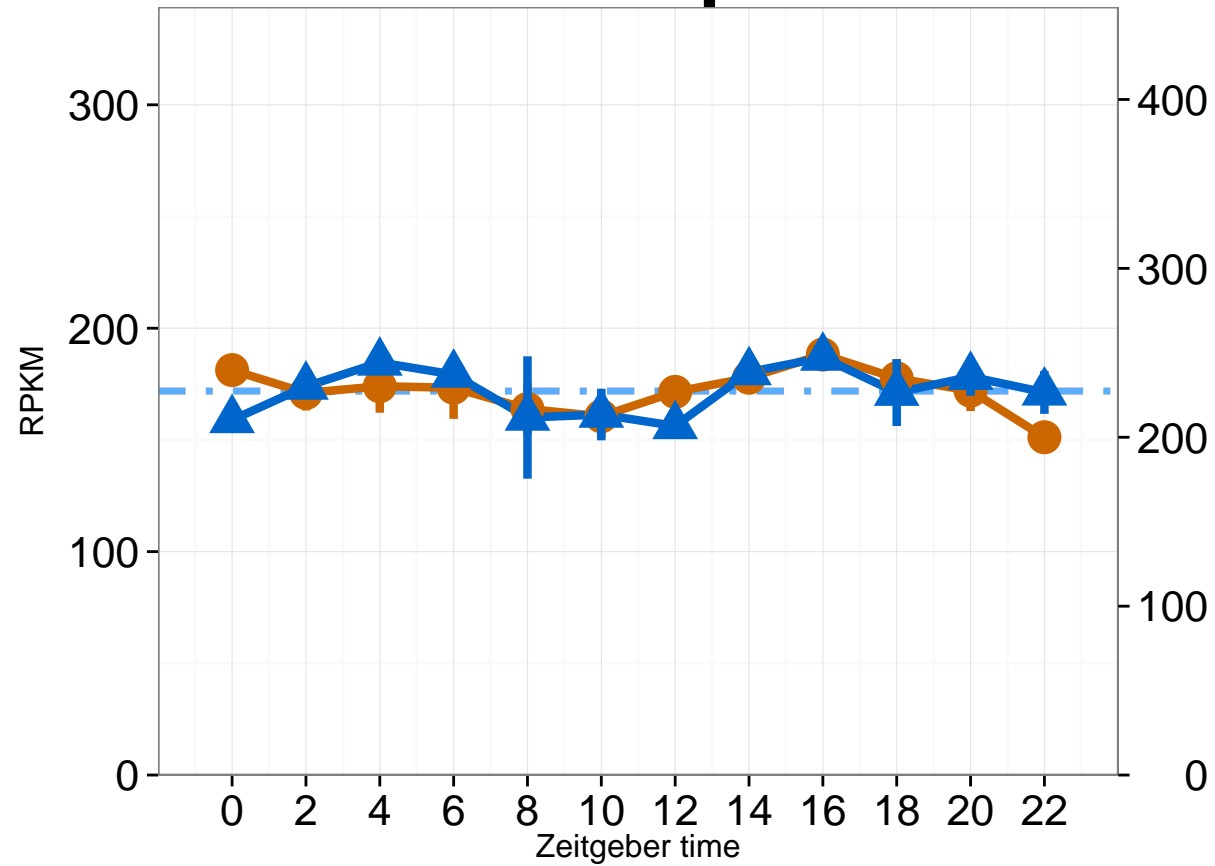

## Pomp

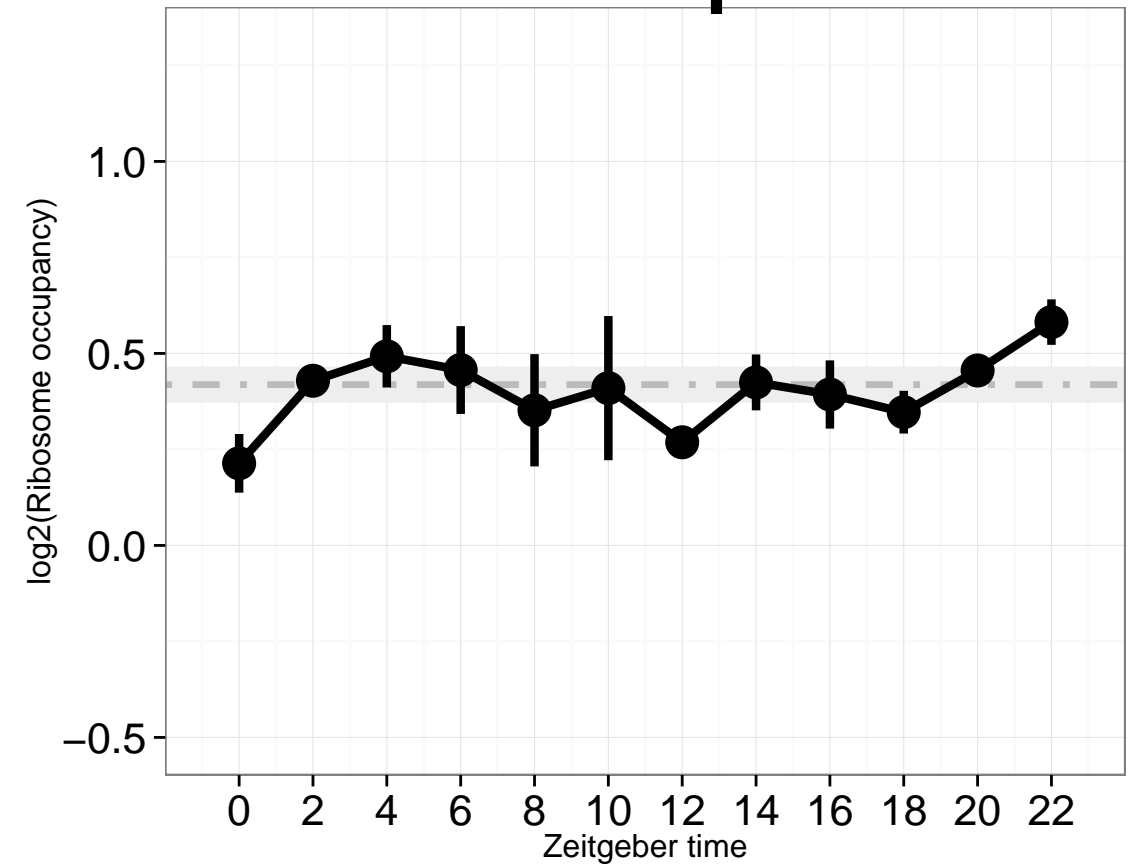

Supplement: SuppDataset_1.zip [file Pomp_set_A.pdf › Supplemental Dataset 1/A-mRNA_nonrhyth_translation_nonrhyth/Pomp_set_A.pdf]

## Pomt2

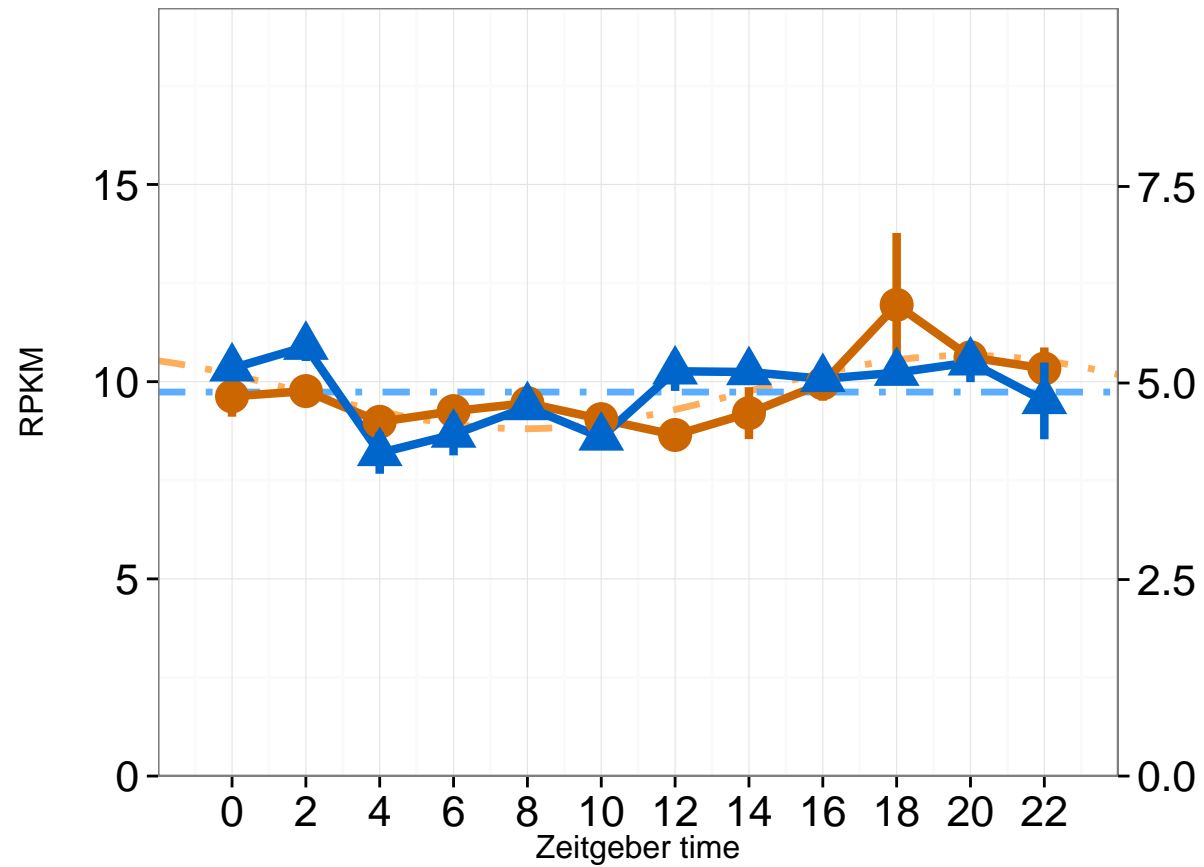

## Pomt2

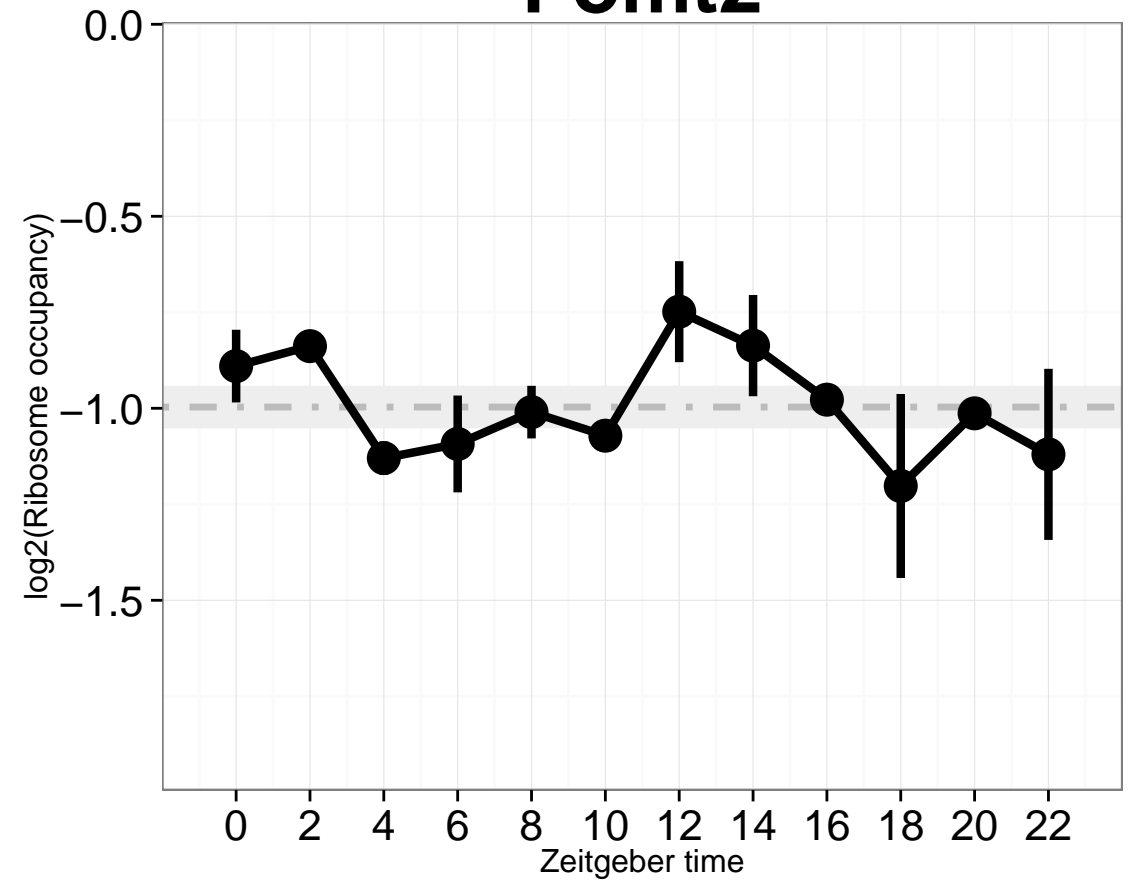

Supplement: SuppDataset_1.zip [file Pomt2_set_A.pdf › Supplemental Dataset 1/A-mRNA_nonrhyth_translation_nonrhyth/Pomt2_set_A.pdf]

## Pon1

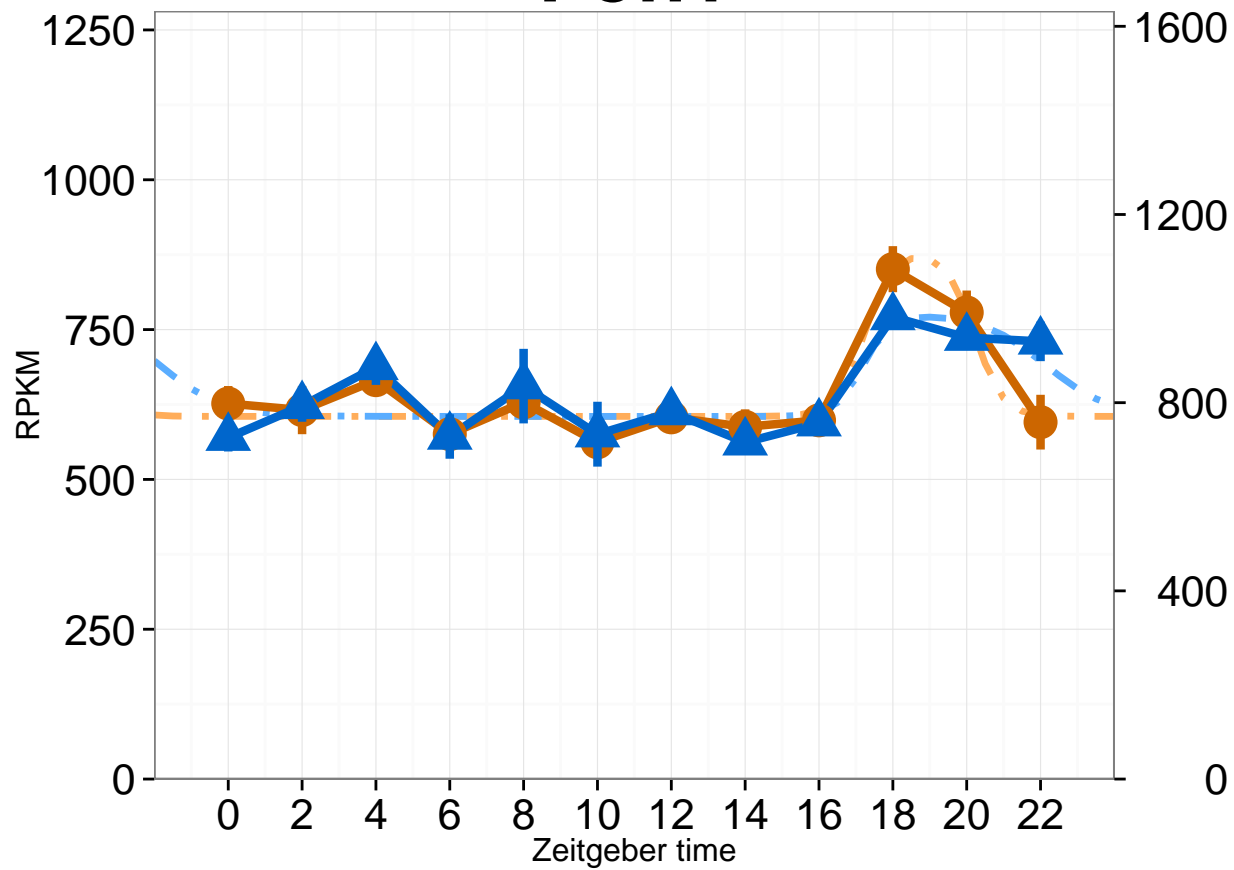

## Pon1

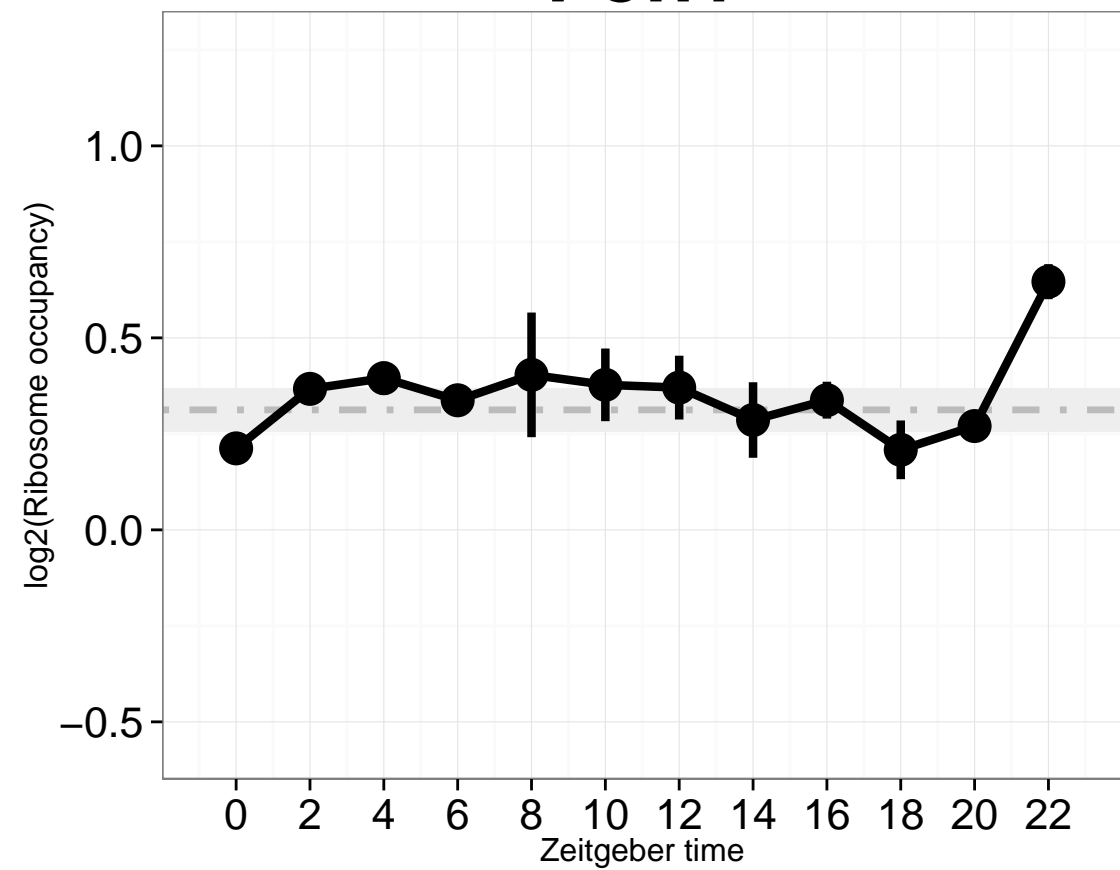

Supplement: SuppDataset_1.zip [file Pon1_set_A.pdf › Supplemental Dataset 1/A-mRNA_nonrhyth_translation_nonrhyth/Pon1_set_A.pdf]

## Pon2

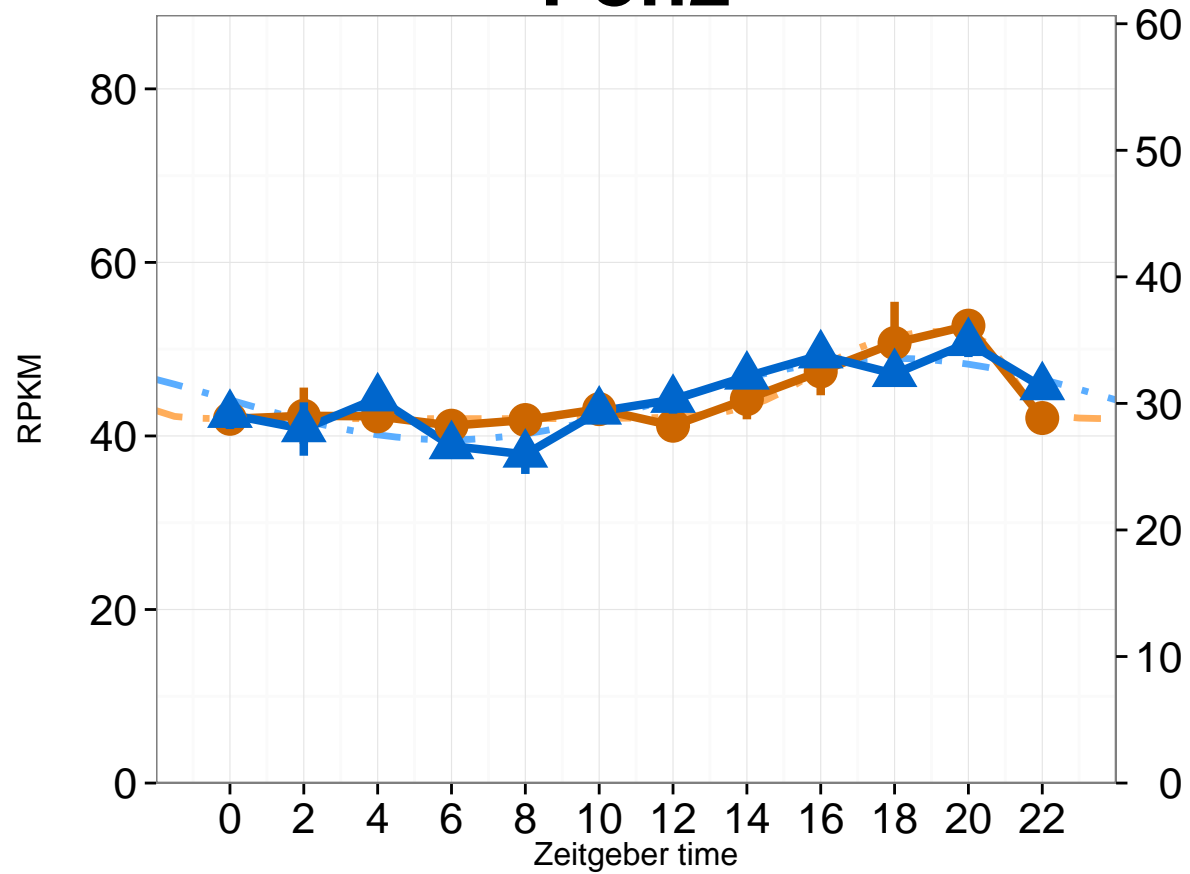

## Pon2

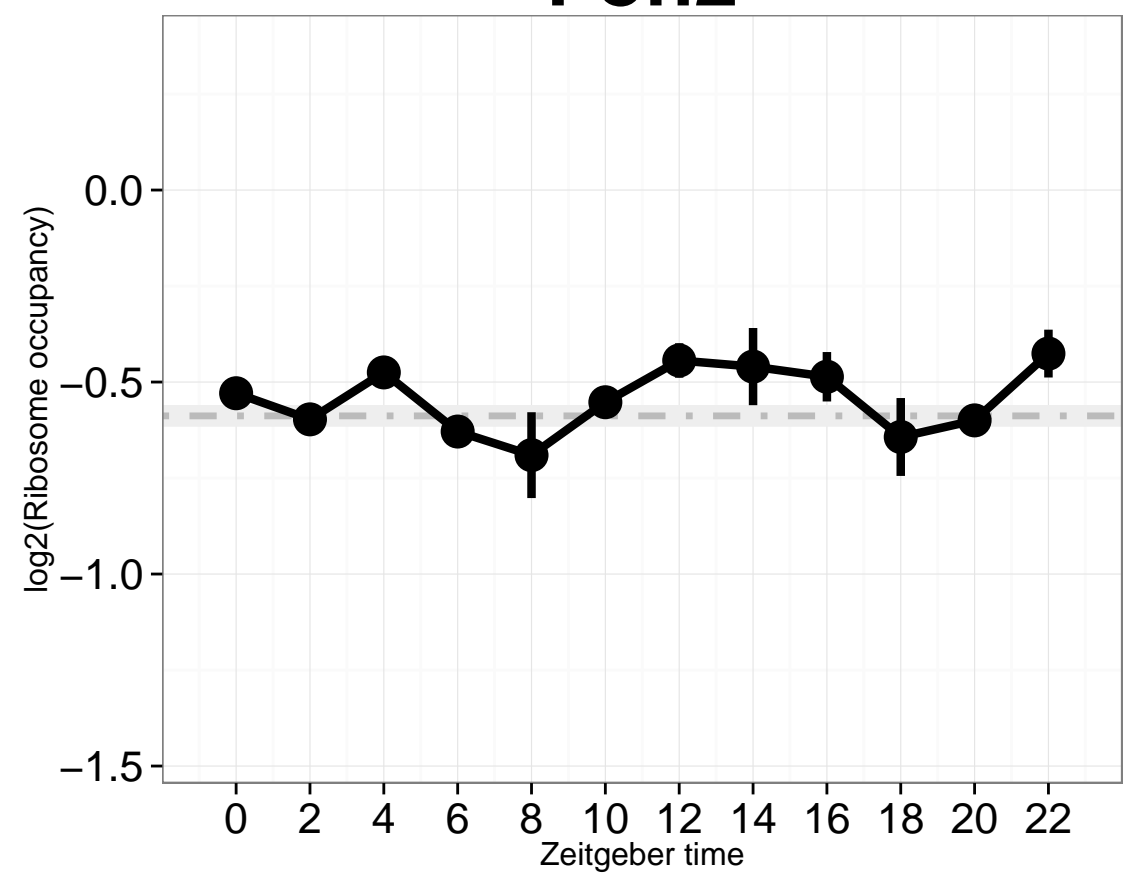

Supplement: SuppDataset_1.zip [file Pon2_set_A.pdf › Supplemental Dataset 1/A-mRNA_nonrhyth_translation_nonrhyth/Pon2_set_A.pdf]

## Pon3

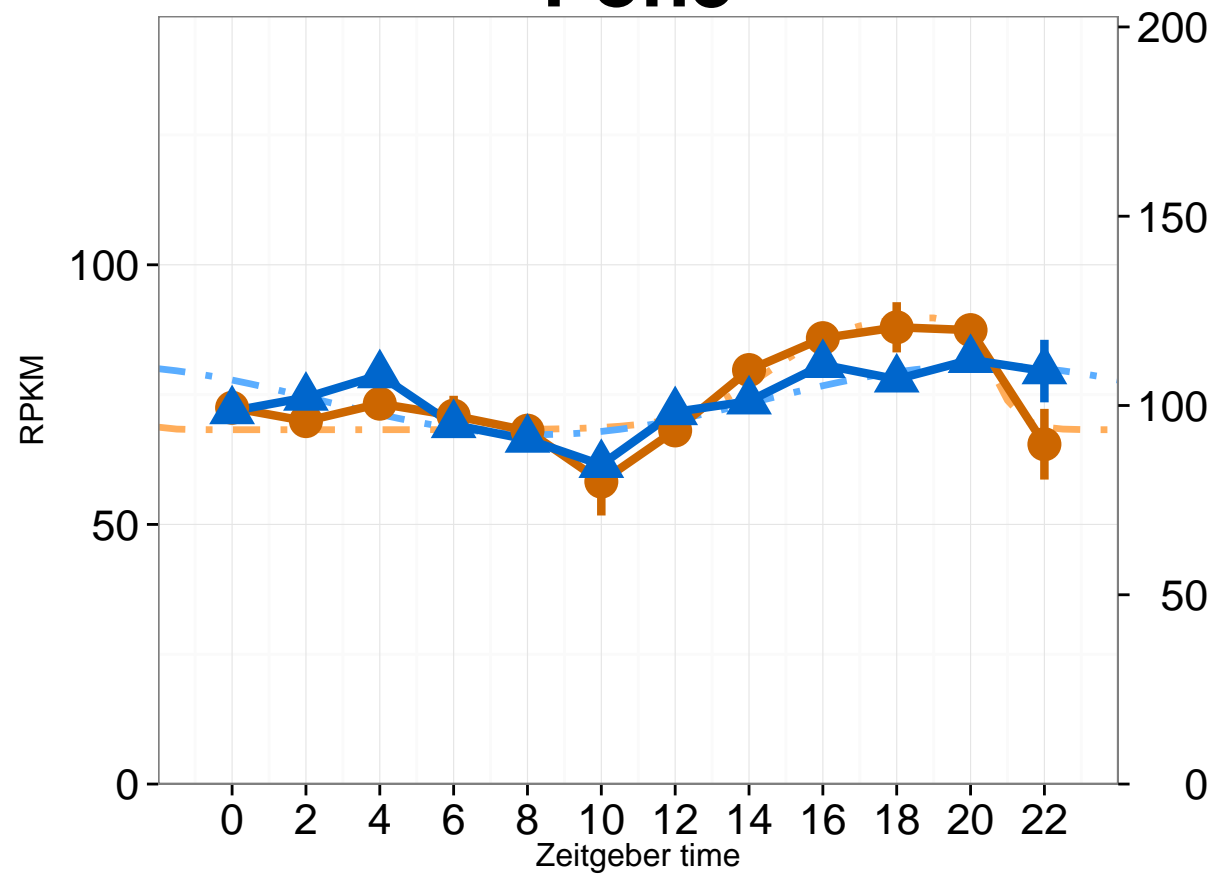

## Pon3

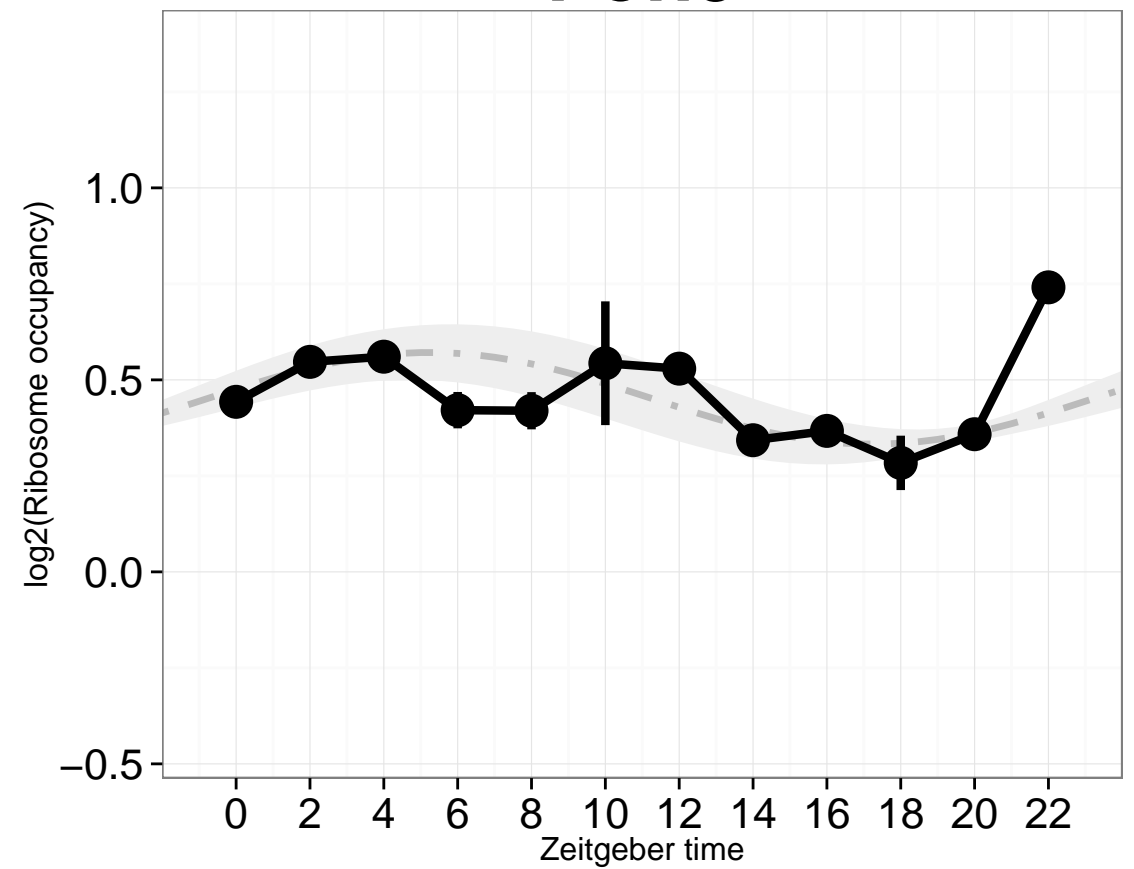

Supplement: SuppDataset_1.zip [file Pon3_set_A.pdf › Supplemental Dataset 1/A-mRNA_nonrhyth_translation_nonrhyth/Pon3_set_A.pdf]

## Pop4

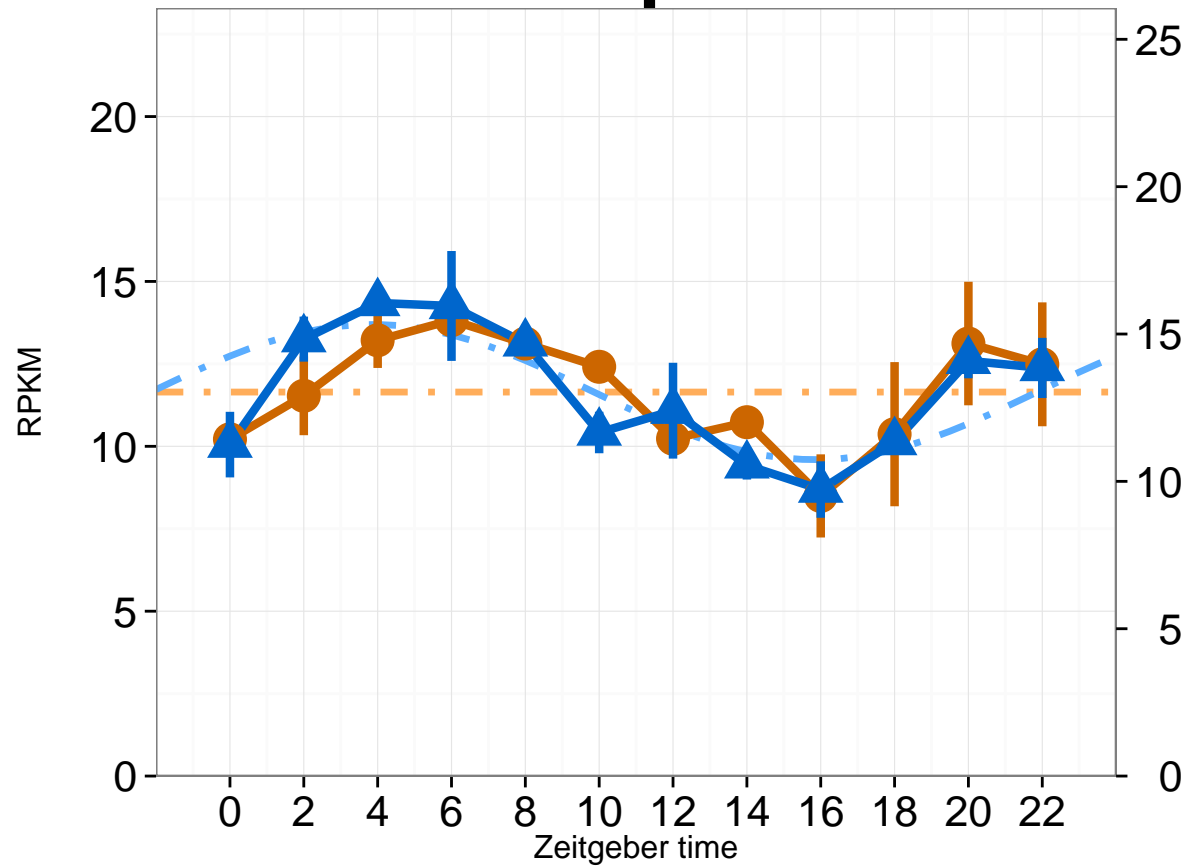

## Pop4

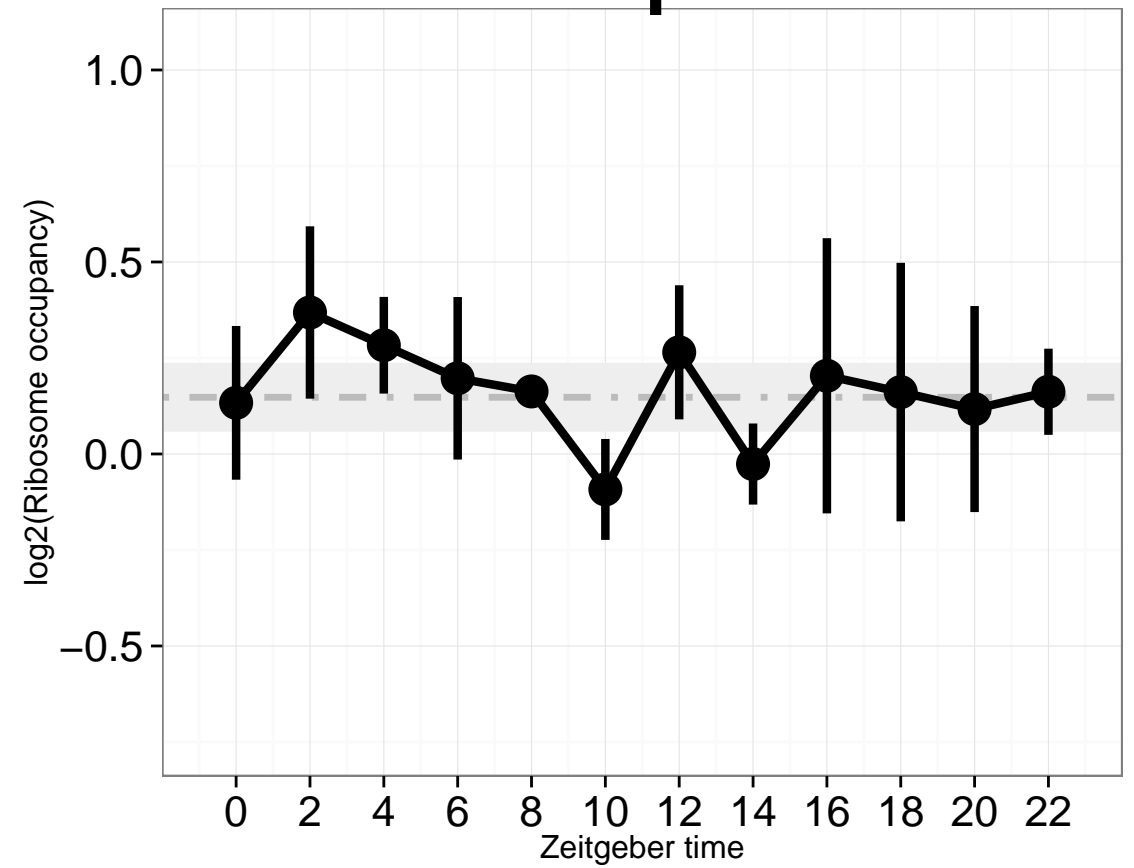

Supplement: SuppDataset_1.zip [file Pop4_set_A.pdf › Supplemental Dataset 1/A-mRNA_nonrhyth_translation_nonrhyth/Pop4_set_A.pdf]

# Pop5

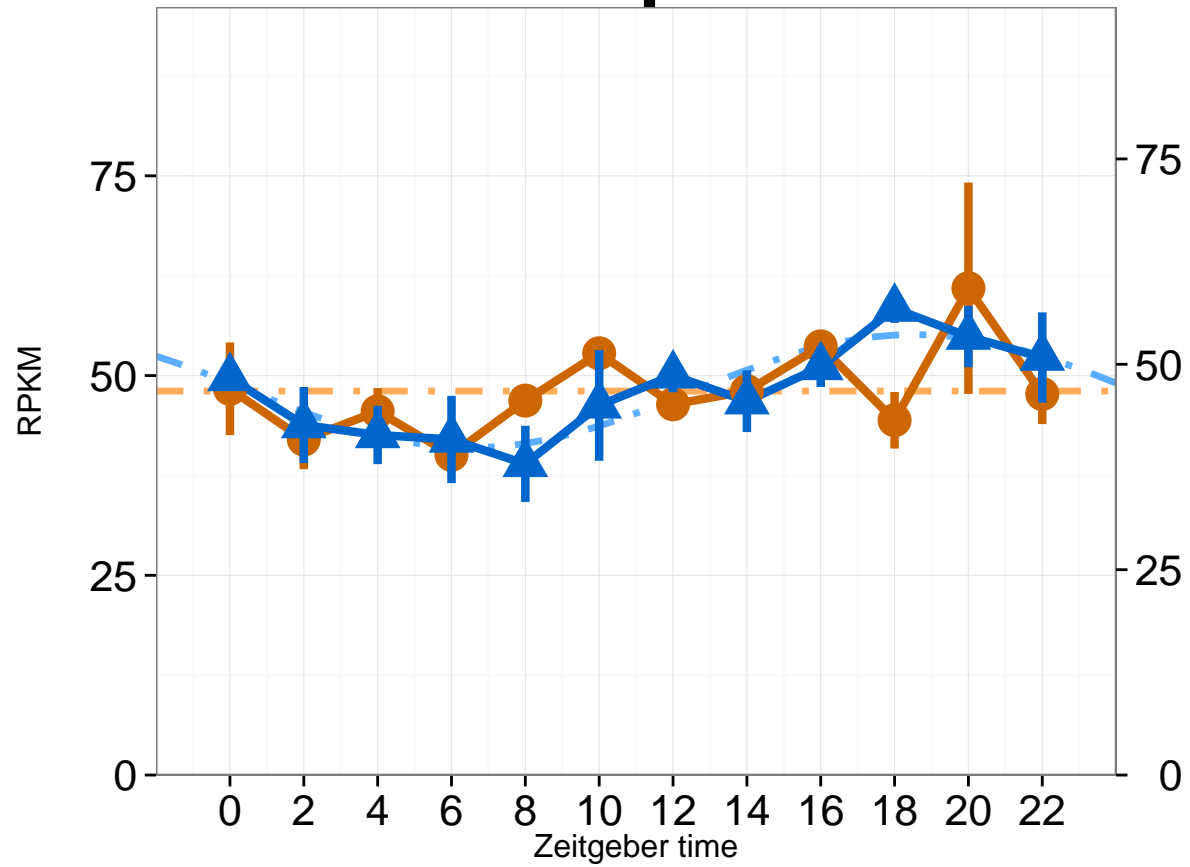

# Pop5

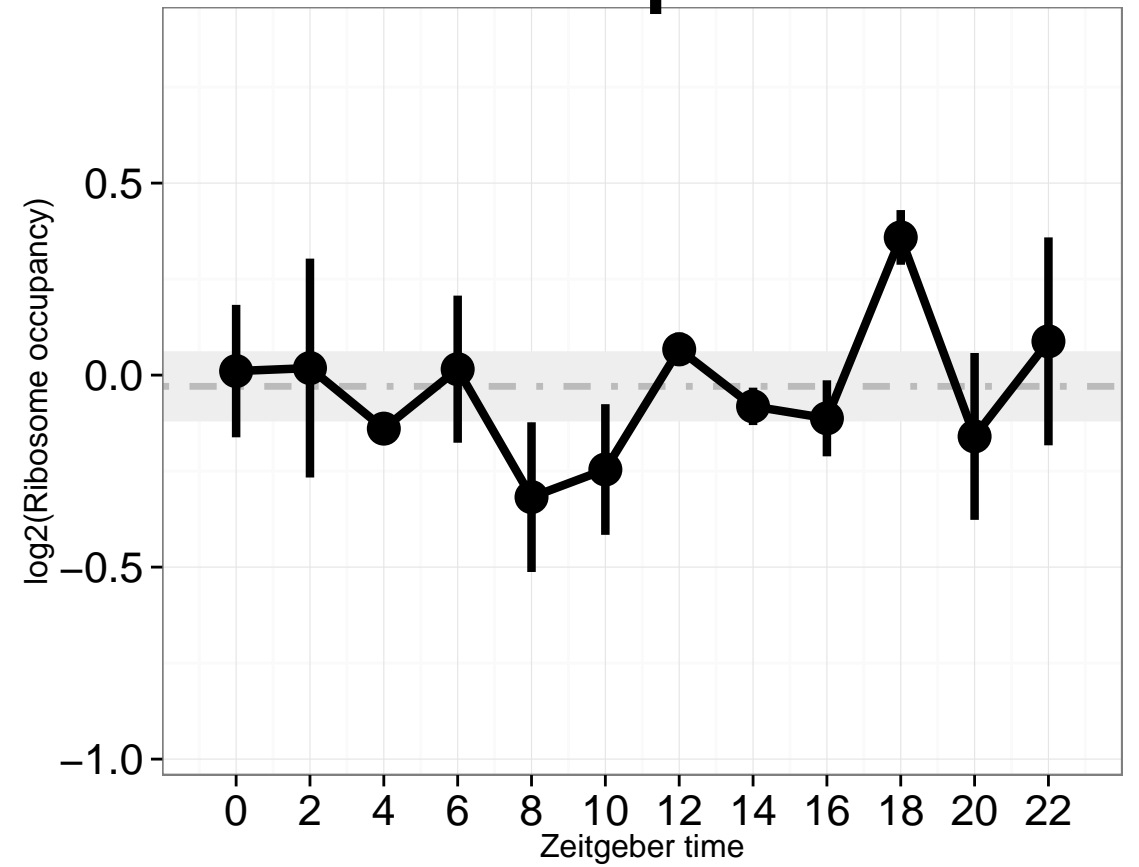

Supplement: SuppDataset_1.zip [file Pop5_set_A.pdf › Supplemental Dataset 1/A-mRNA_nonrhyth_translation_nonrhyth/Pop5_set_A.pdf]

# Pop7

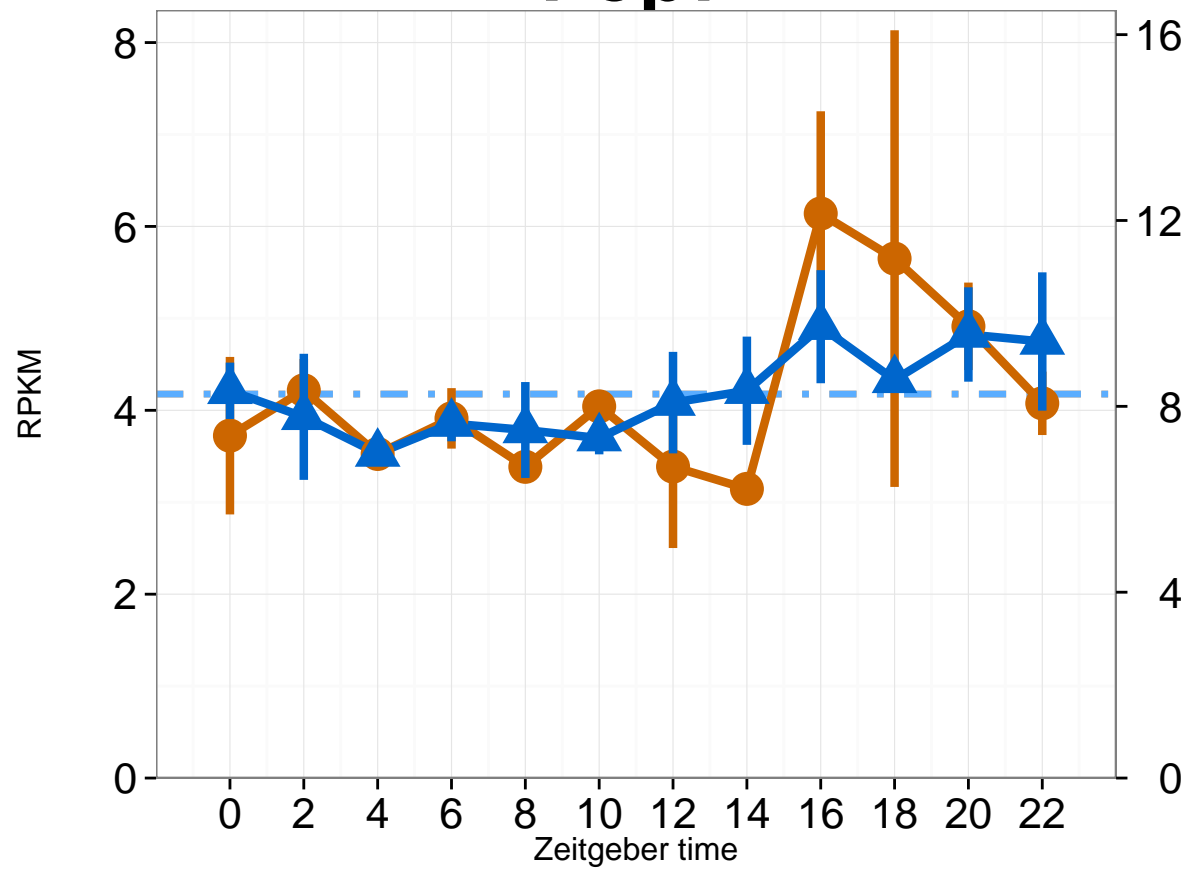

# Pop7

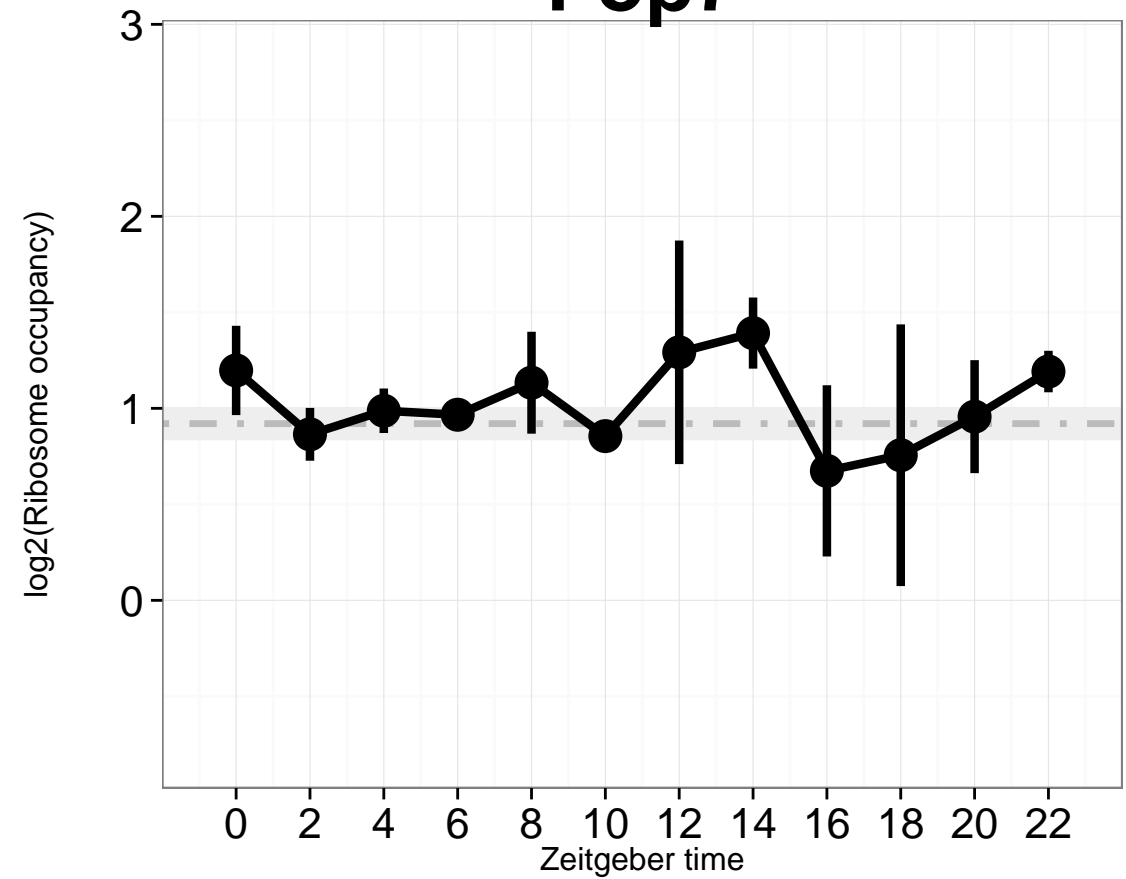

Supplement: SuppDataset_1.zip [file Pop7_set_A.pdf › Supplemental Dataset 1/A-mRNA_nonrhyth_translation_nonrhyth/Pop7_set_A.pdf]

## Postn

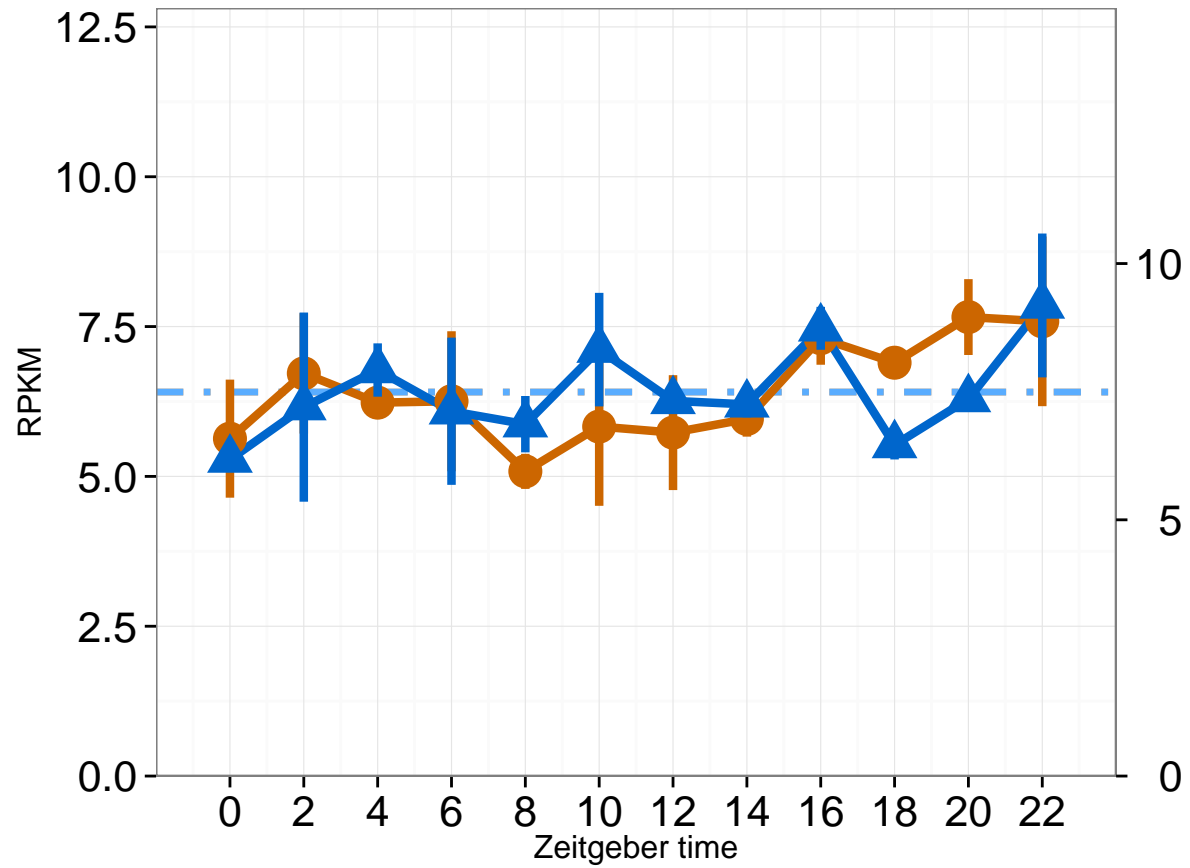

## Postn

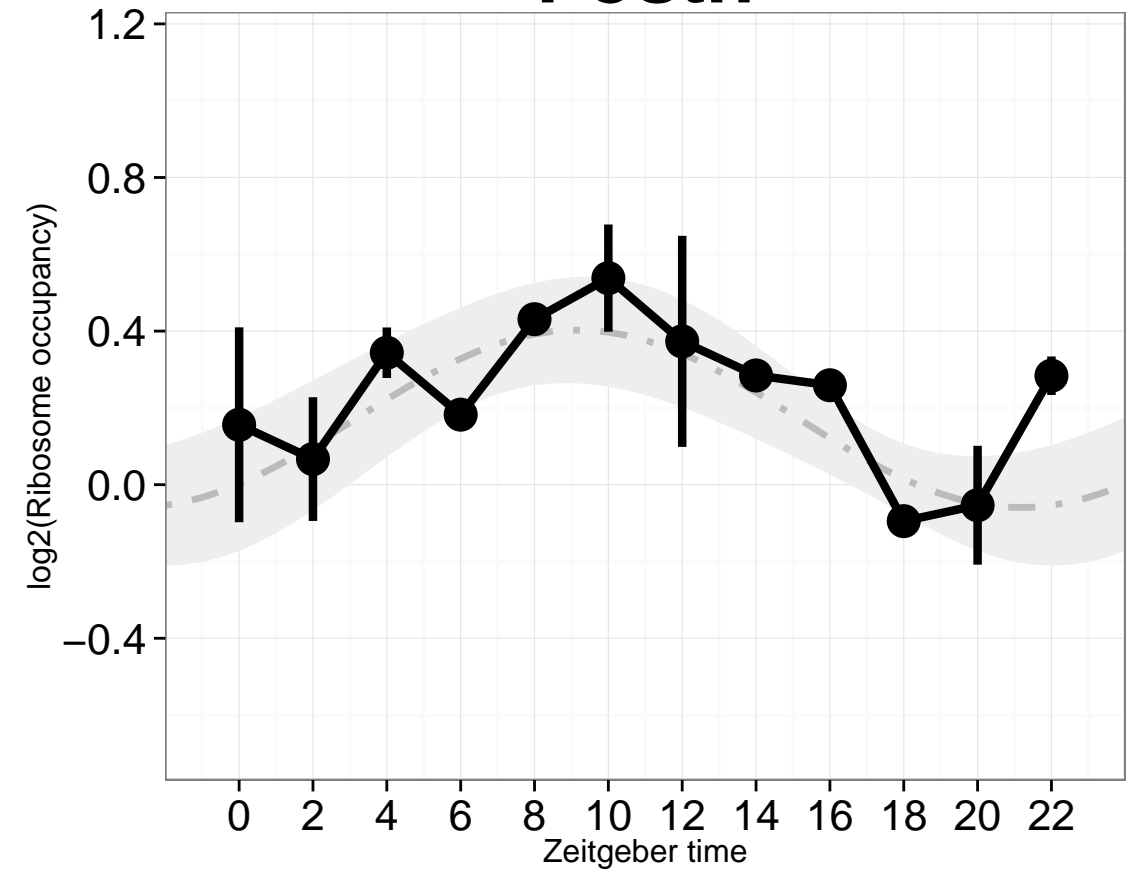

Supplement: SuppDataset_1.zip [file Postn_set_A.pdf › Supplemental Dataset 1/A-mRNA_nonrhyth_translation_nonrhyth/Postn_set_A.pdf]

# Pot1a

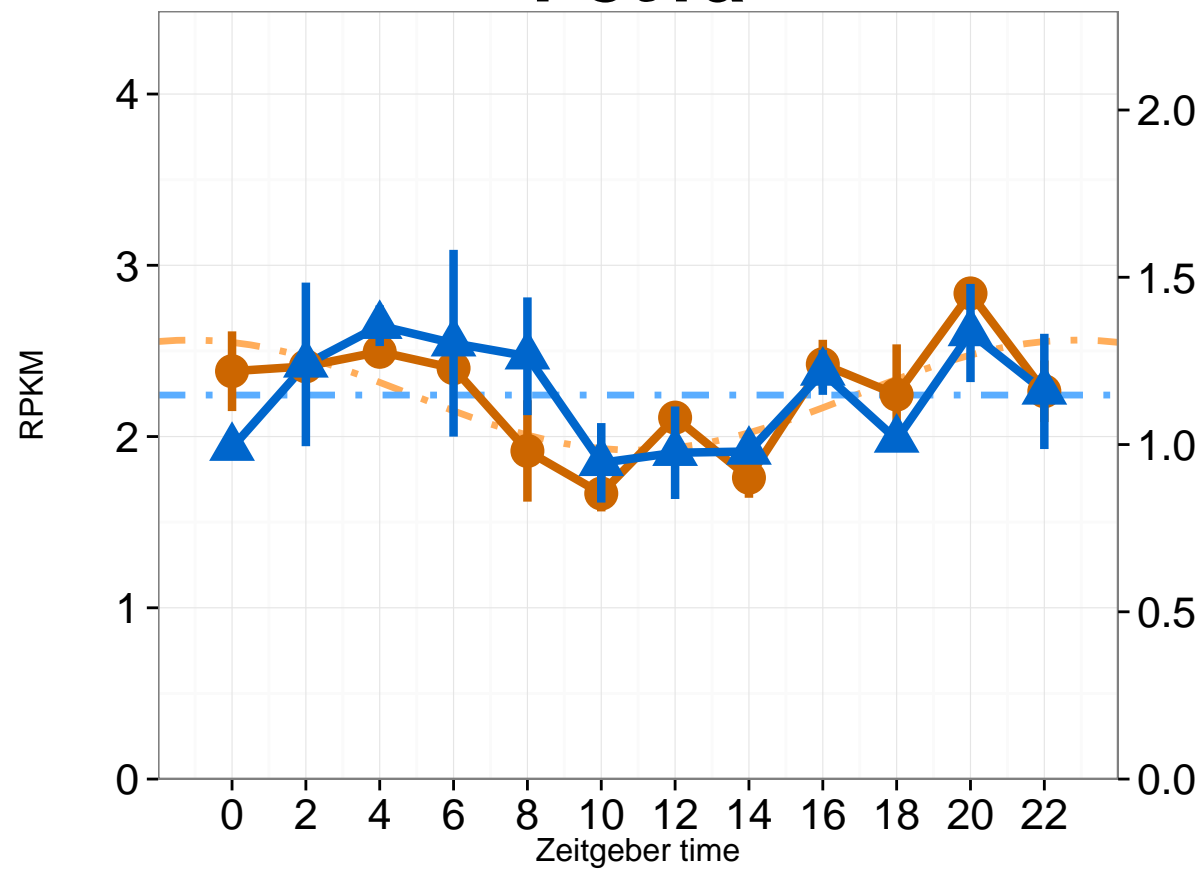

# Pot1a

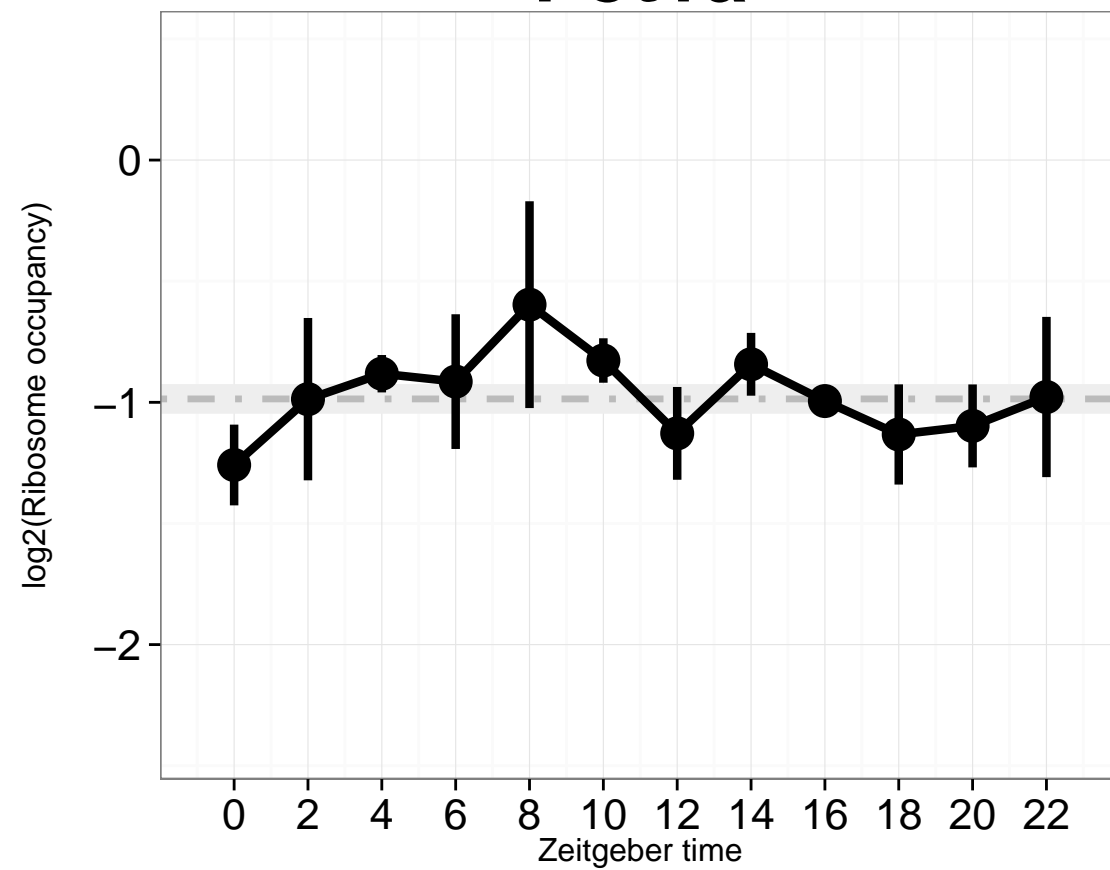

Supplement: SuppDataset_1.zip [file Pot1a_set_A.pdf › Supplemental Dataset 1/A-mRNA_nonrhyth_translation_nonrhyth/Pot1a_set_A.pdf]

# Pou2f1

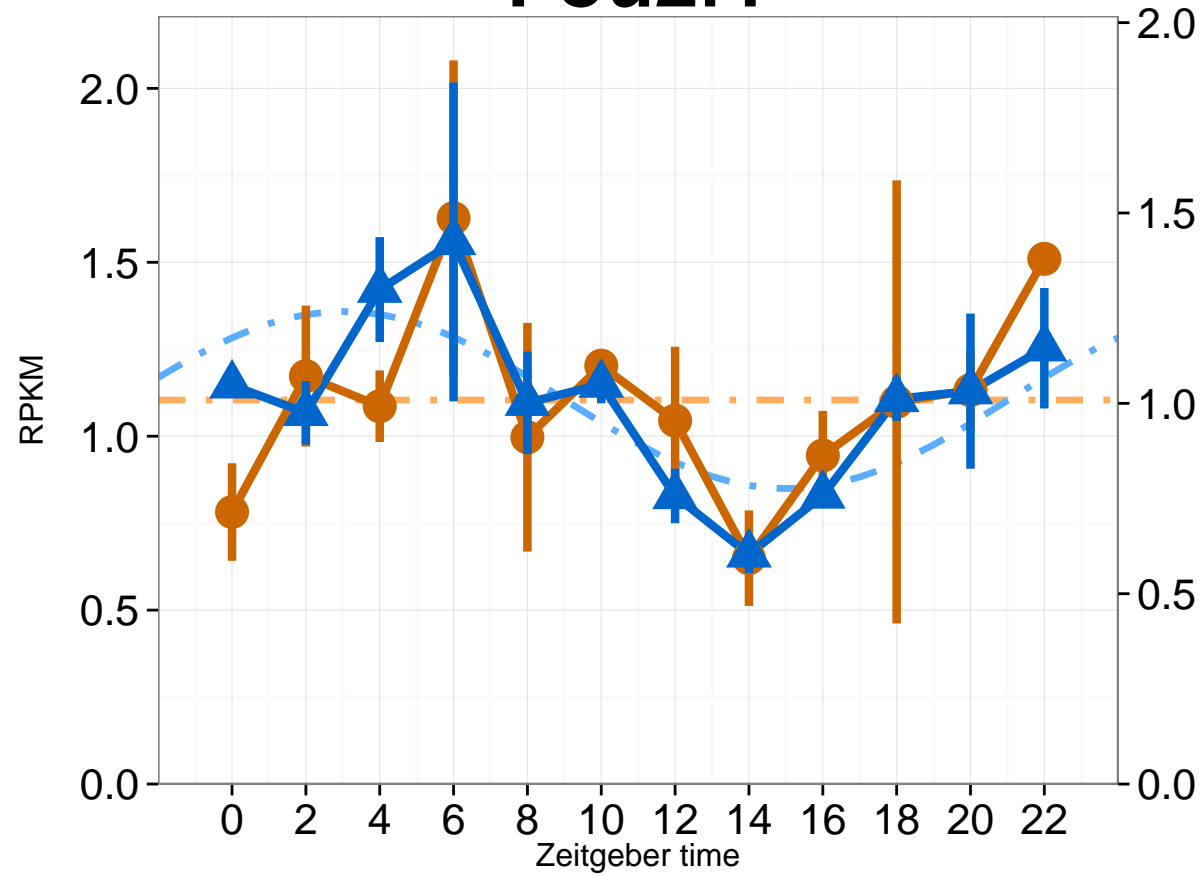

# Pou2f1

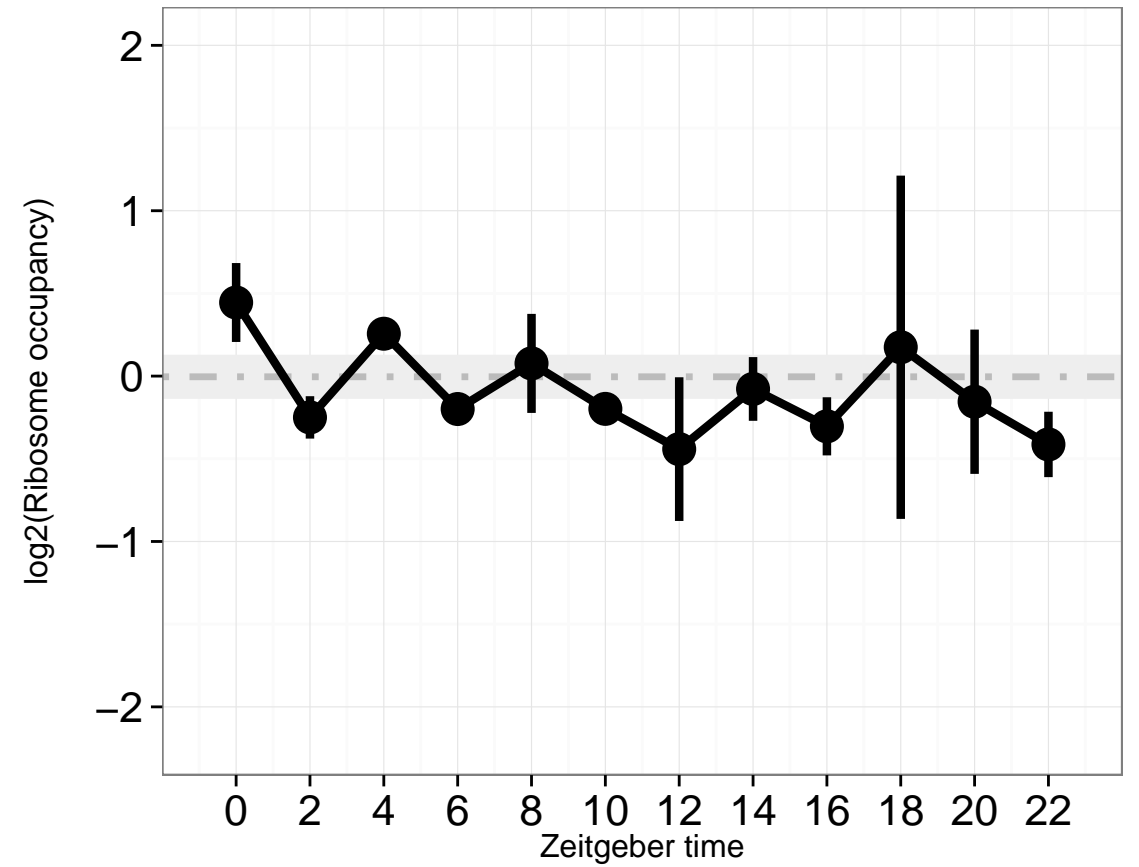

Supplement: SuppDataset_1.zip [file Pou2f1_set_A.pdf › Supplemental Dataset 1/A-mRNA_nonrhyth_translation_nonrhyth/Pou2f1_set_A.pdf]

# Ppa1

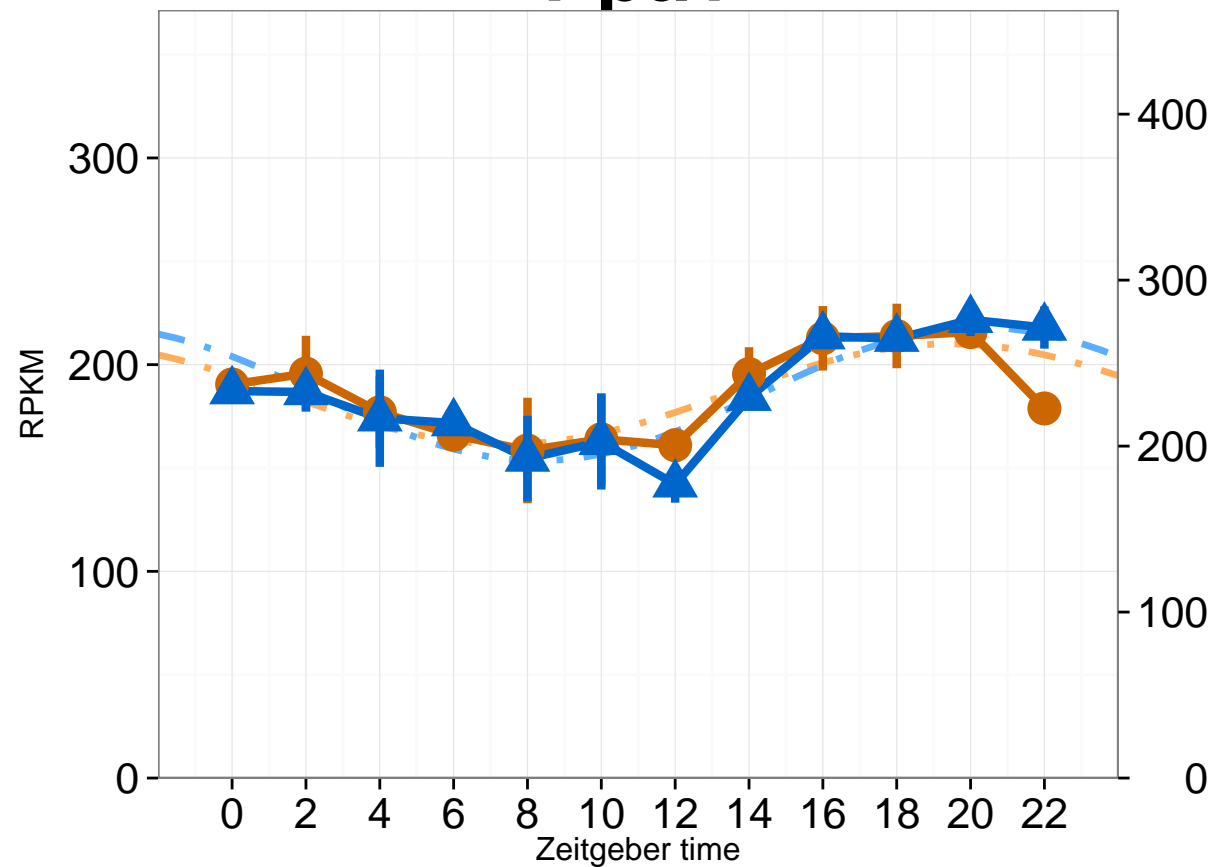

# Ppa1

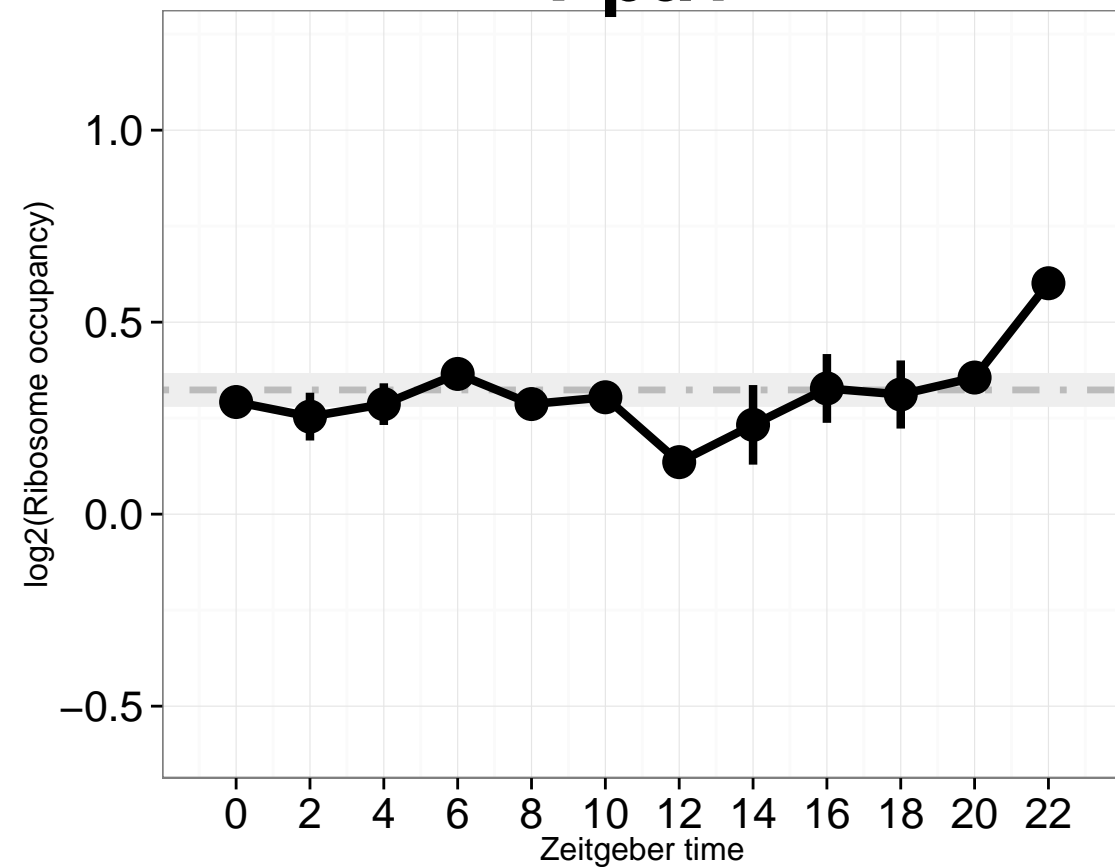

Supplement: SuppDataset_1.zip [file Ppa1_set_A.pdf › Supplemental Dataset 1/A-mRNA_nonrhyth_translation_nonrhyth/Ppa1_set_A.pdf]

## Ppa2

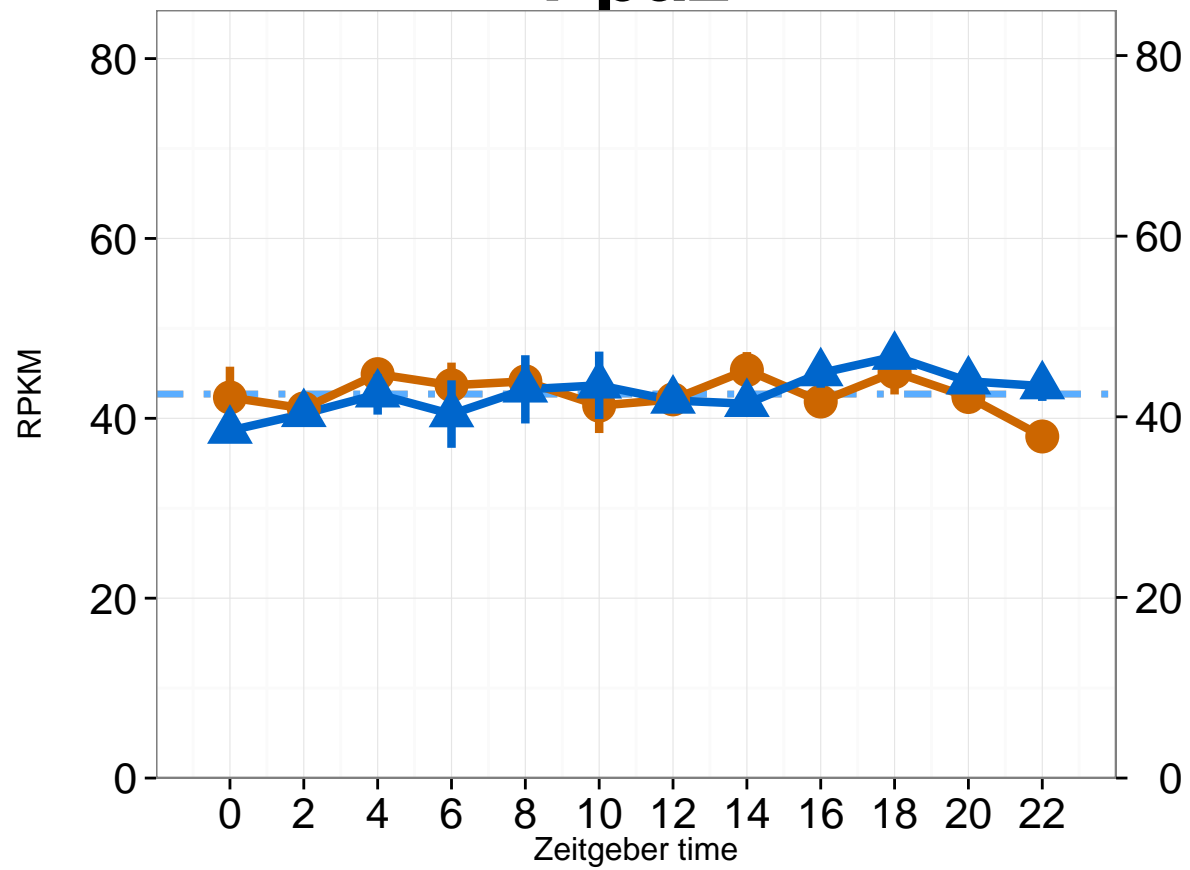

## Ppa2

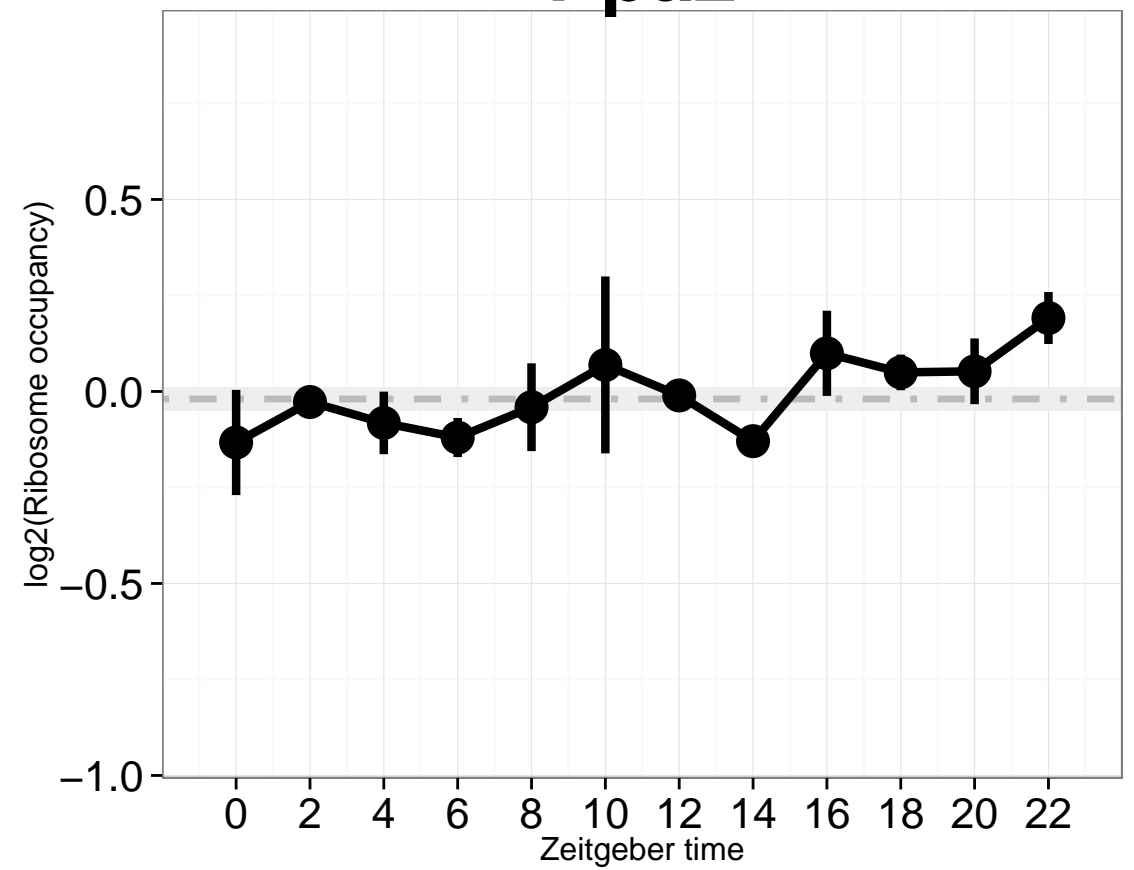

Supplement: SuppDataset_1.zip [file Ppa2_set_A.pdf › Supplemental Dataset 1/A-mRNA_nonrhyth_translation_nonrhyth/Ppa2_set_A.pdf]

## Ppan

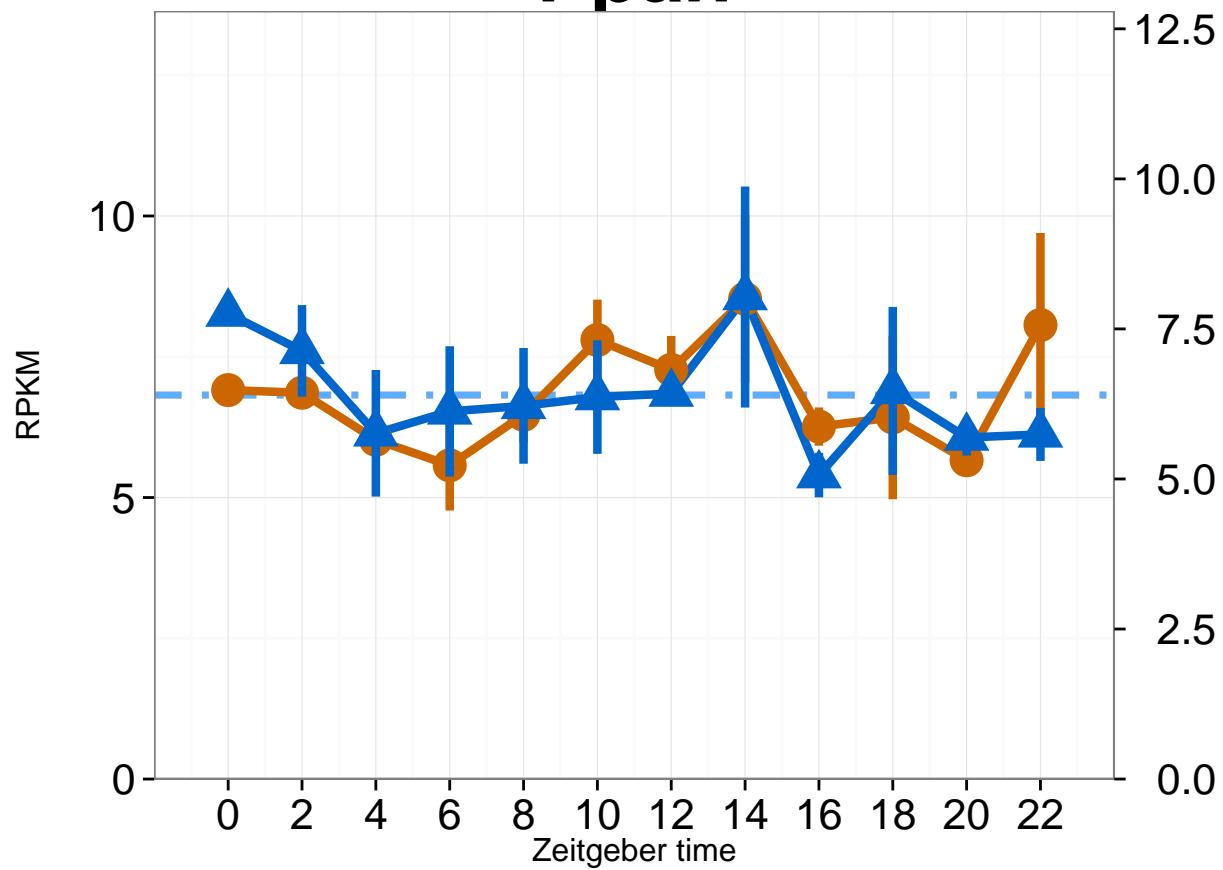

## Ppan

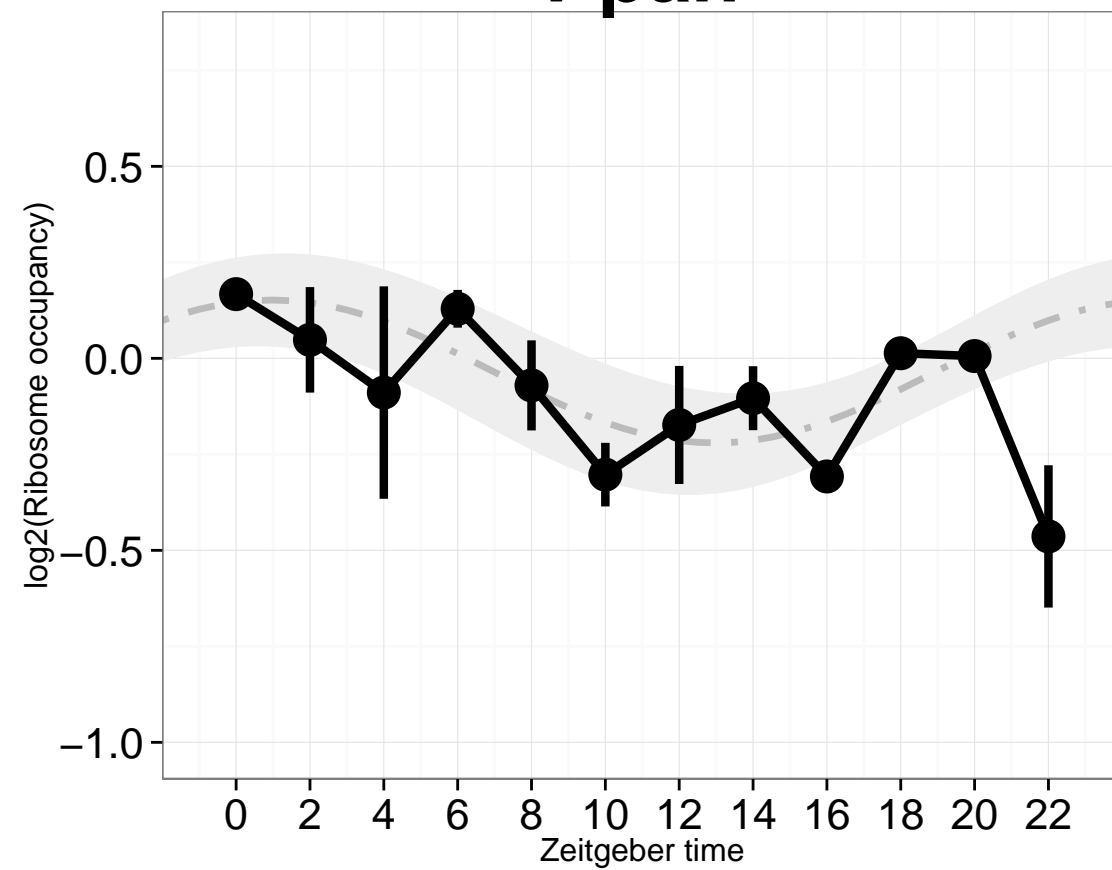

Supplement: SuppDataset_1.zip [file Ppan_set_A.pdf › Supplemental Dataset 1/A-mRNA_nonrhyth_translation_nonrhyth/Ppan_set_A.pdf]

# Ppap2a

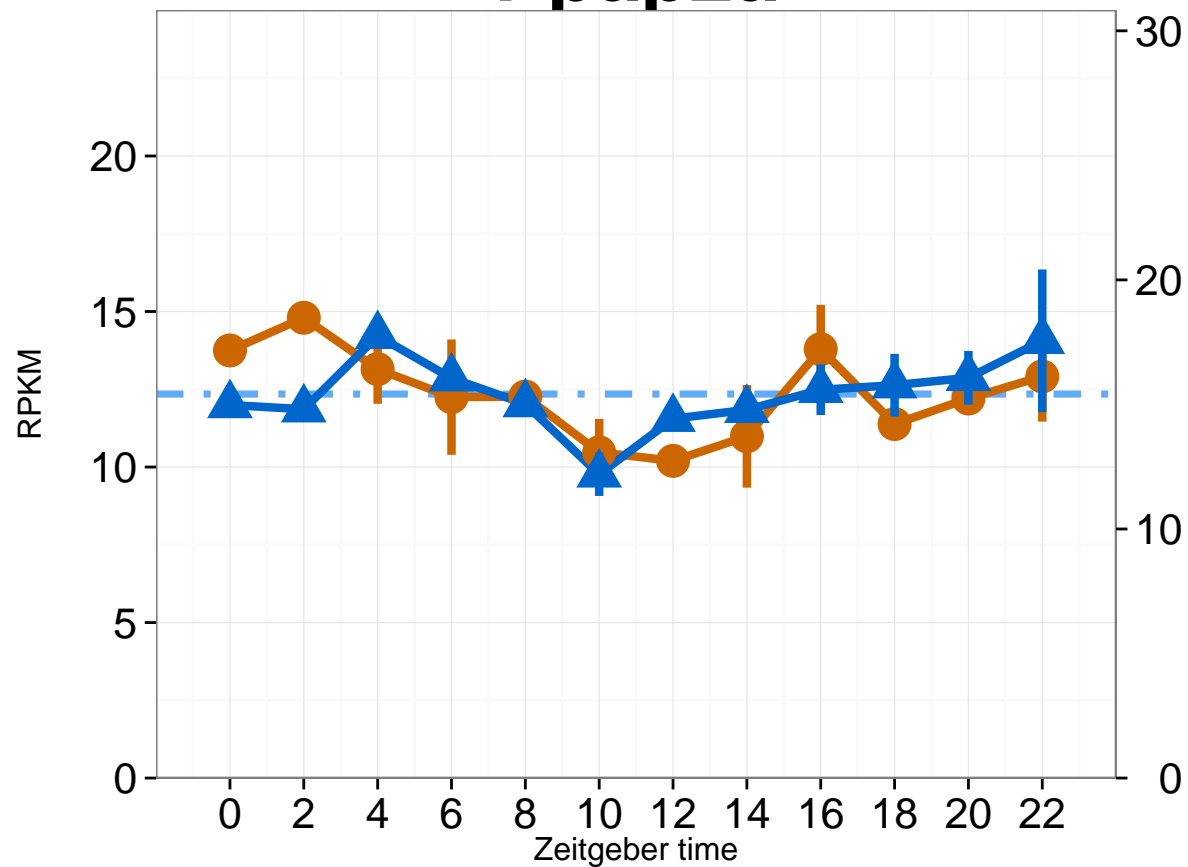

# Ppap2a

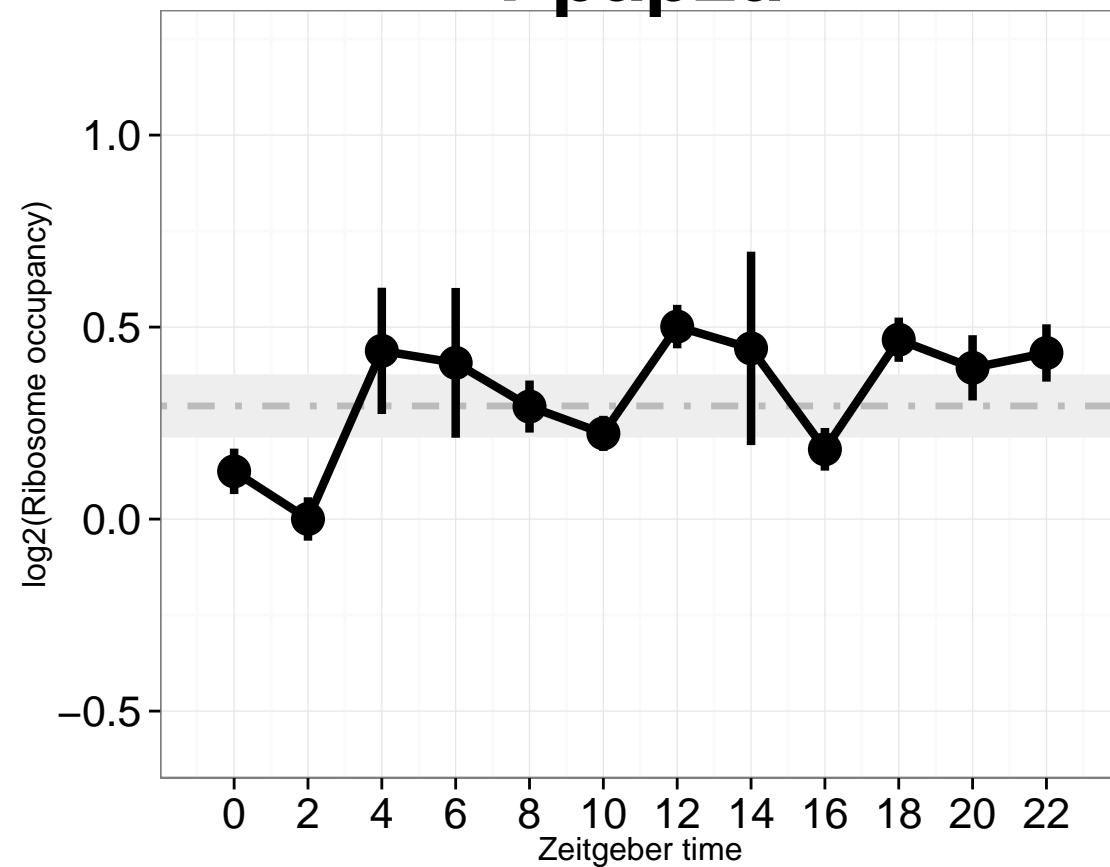

Supplement: SuppDataset_1.zip [file Ppap2a_set_A.pdf › Supplemental Dataset 1/A-mRNA_nonrhyth_translation_nonrhyth/Ppap2a_set_A.pdf]

# Ppap2b

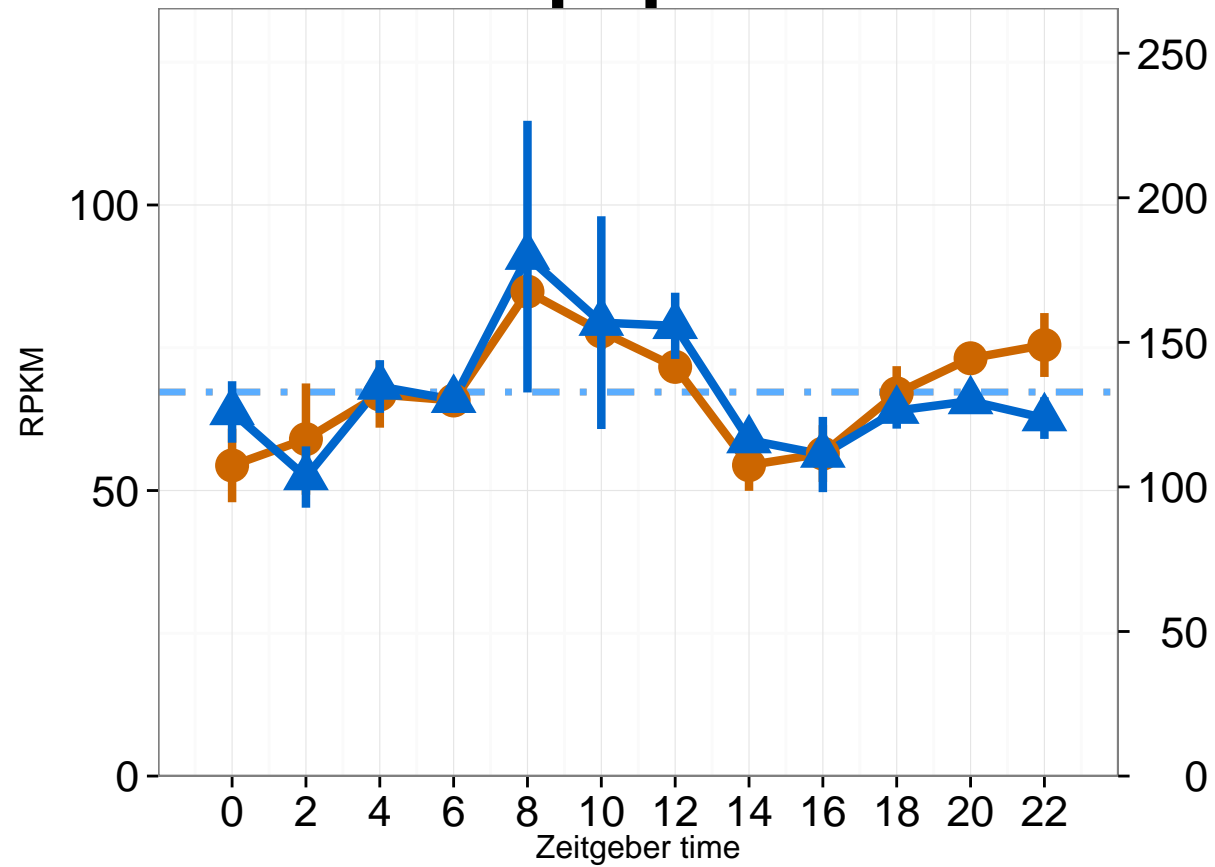

# Ppap2b

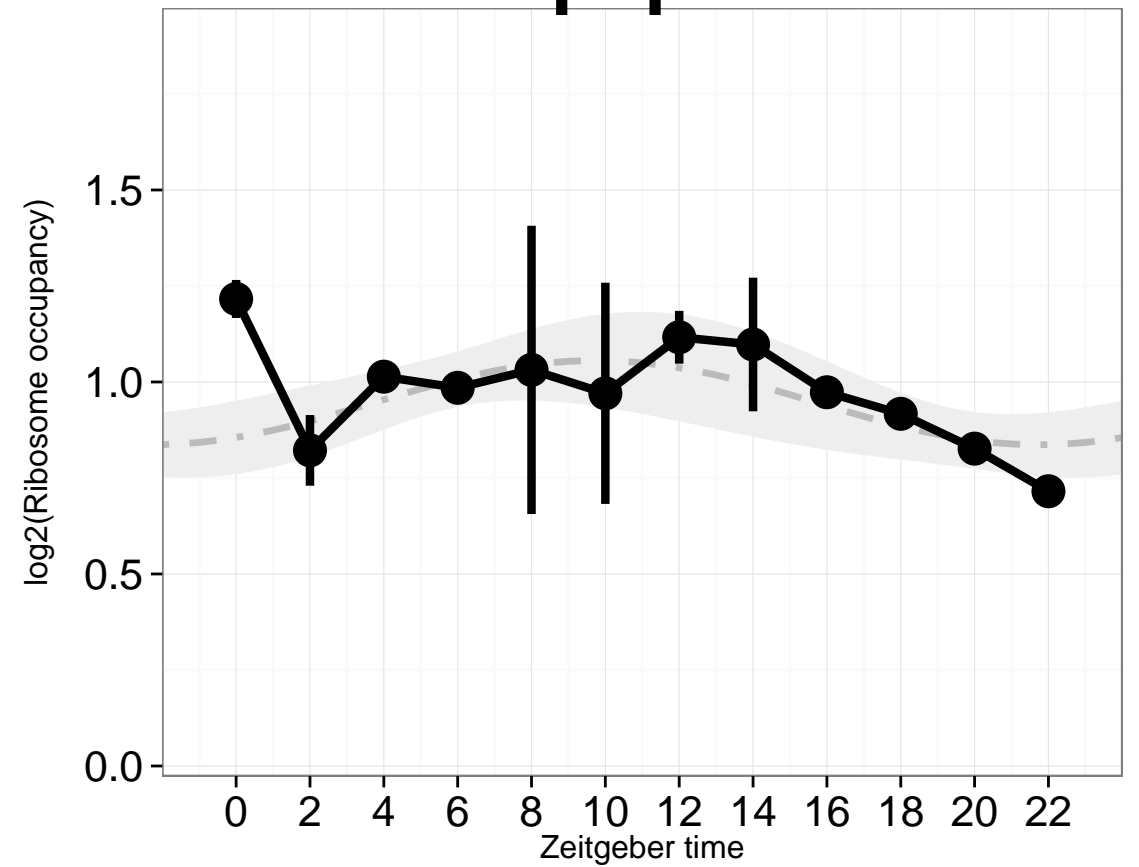

Supplement: SuppDataset_1.zip [file Ppap2b_set_A.pdf › Supplemental Dataset 1/A-mRNA_nonrhyth_translation_nonrhyth/Ppap2b_set_A.pdf]

# Ppapdc1b

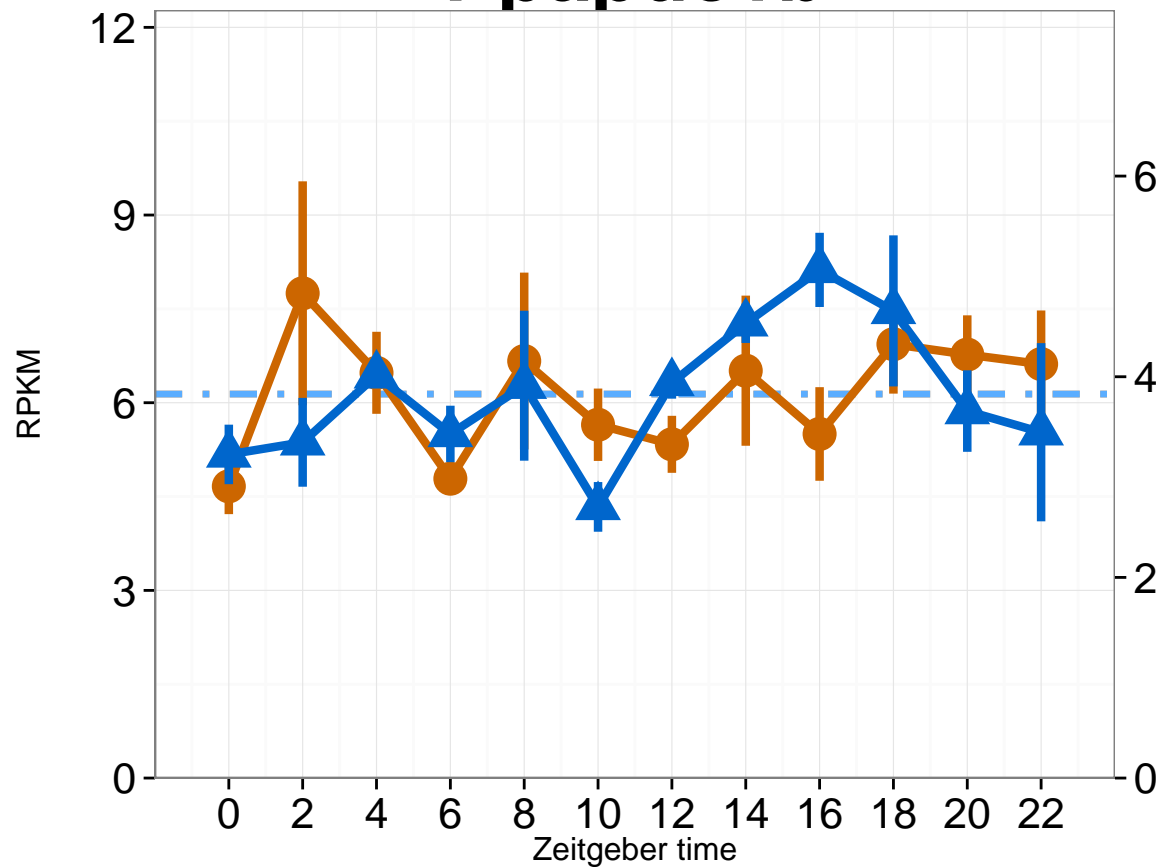

# Ppapdc1b

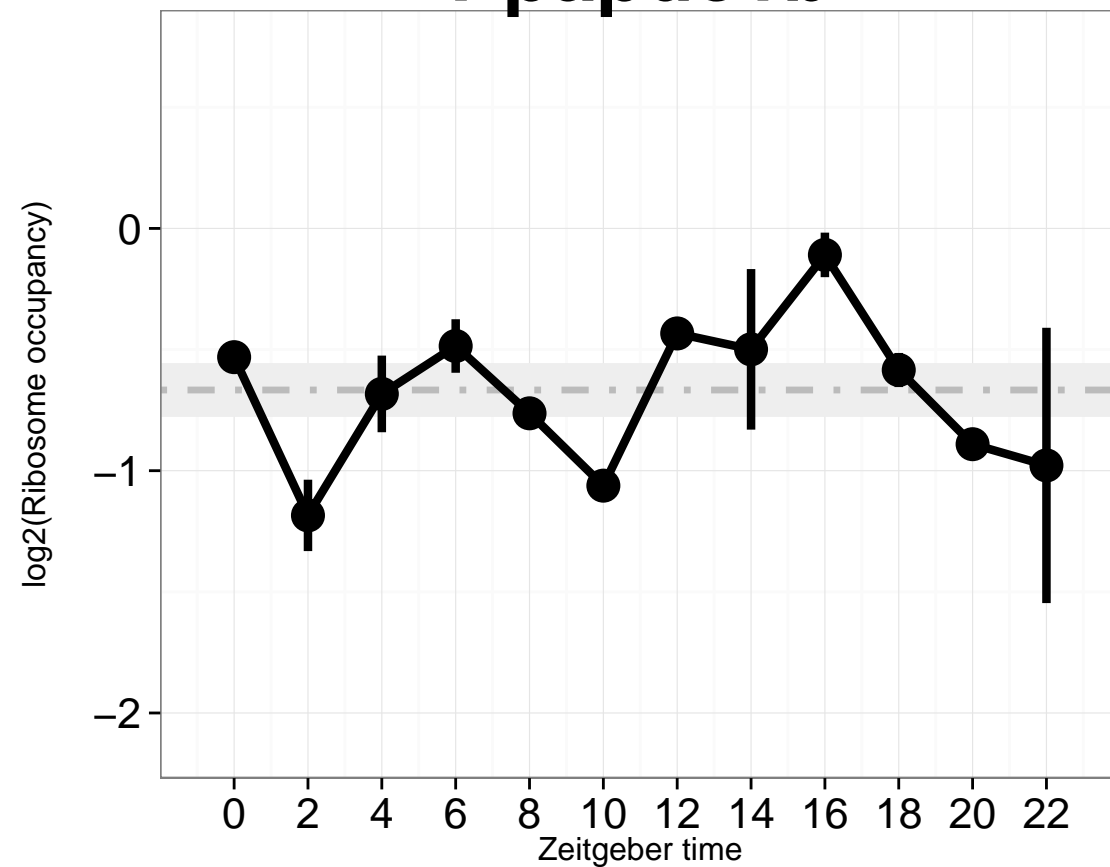

Supplement: SuppDataset_1.zip [file Ppapdc1b_set_A.pdf › Supplemental Dataset 1/A-mRNA_nonrhyth_translation_nonrhyth/Ppapdc1b_set_A.pdf]

## Pparg

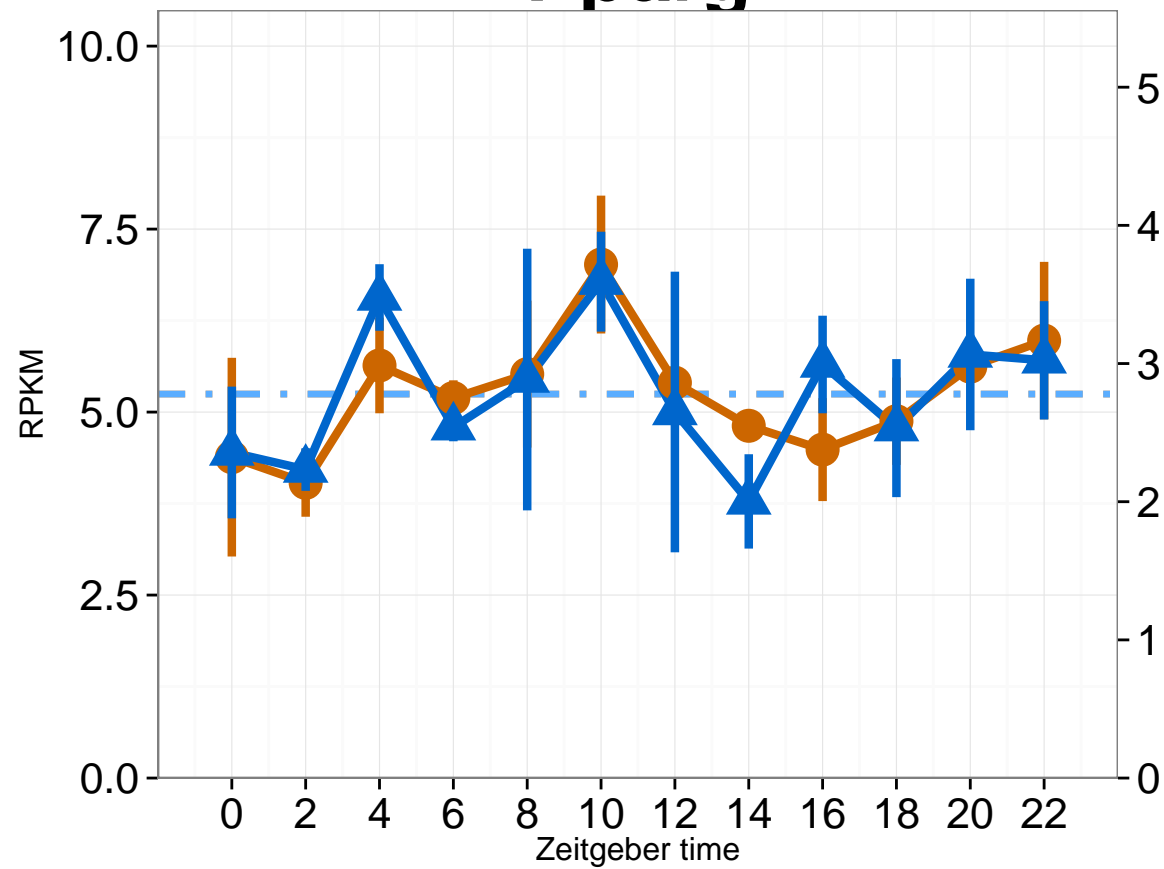

## Pparg

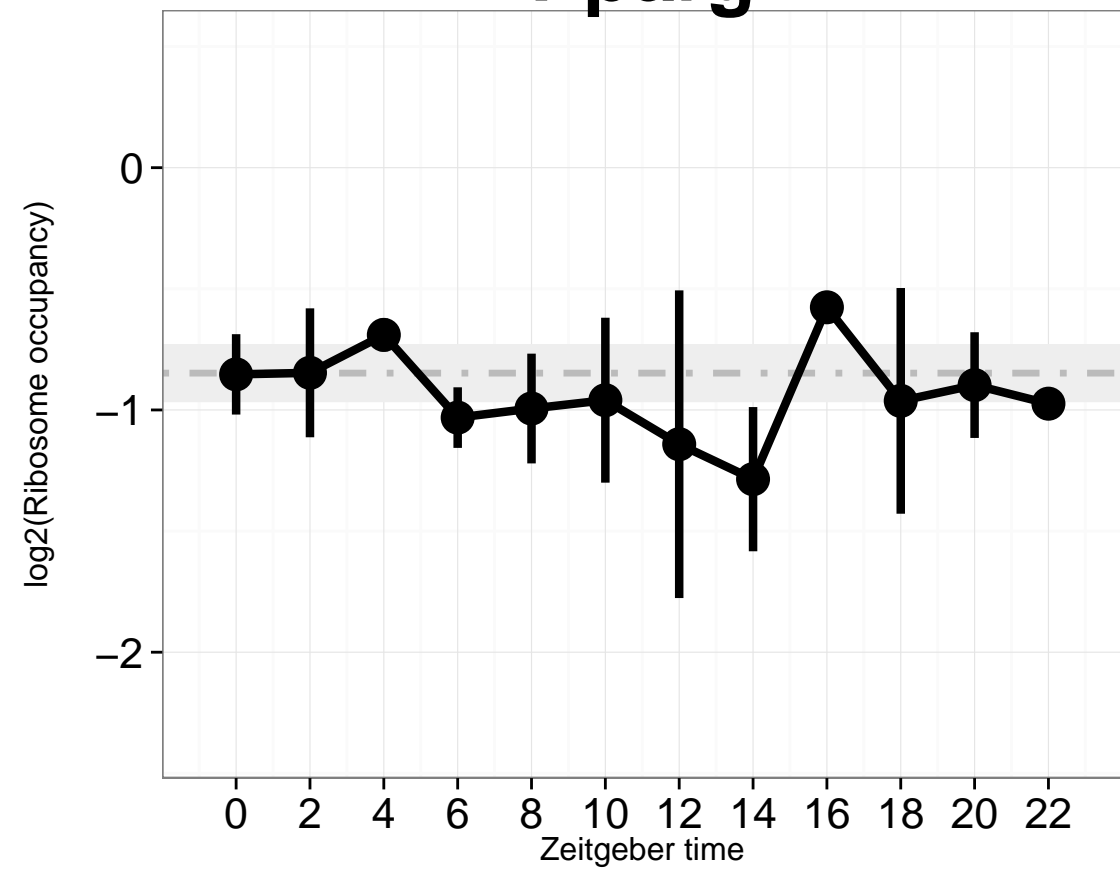

Supplement: SuppDataset_1.zip [file Pparg_set_A.pdf › Supplemental Dataset 1/A-mRNA_nonrhyth_translation_nonrhyth/Pparg_set_A.pdf]

# Ppargc1a

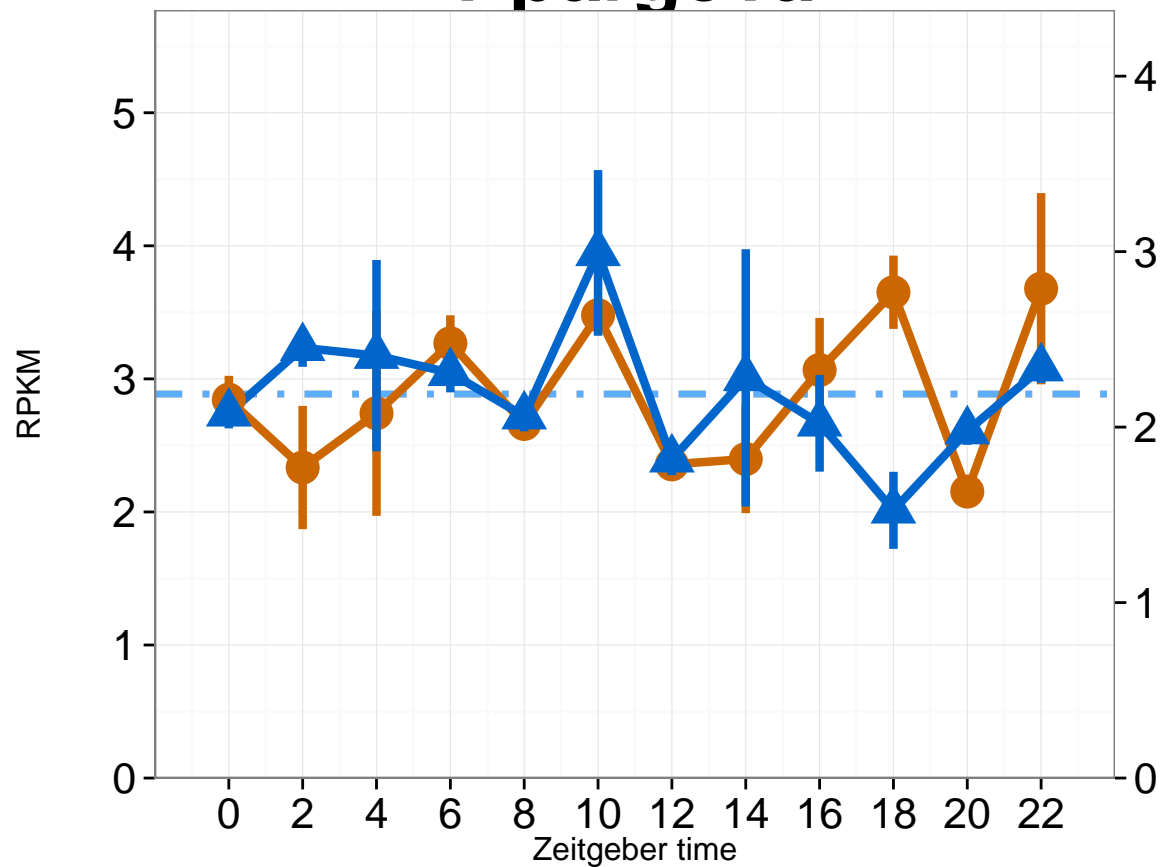

# Ppargc1a

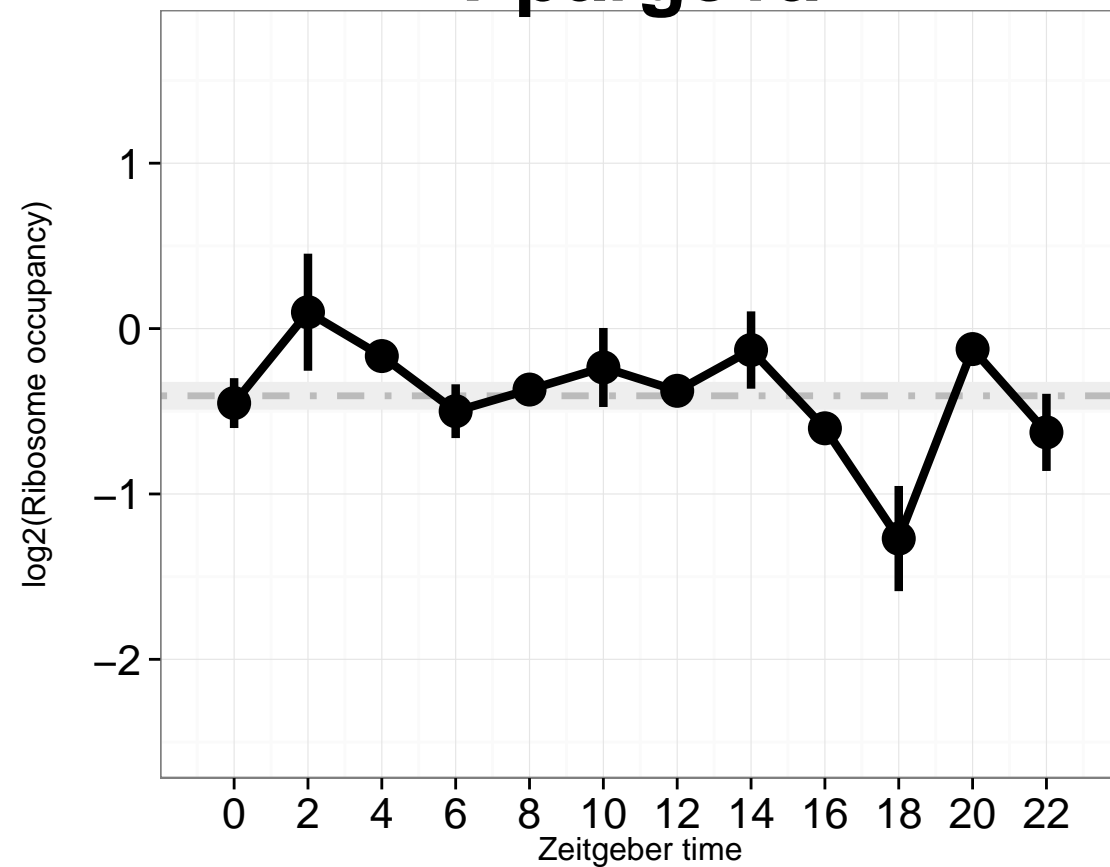

Supplement: SuppDataset_1.zip [file Ppargc1a_set_A.pdf › Supplemental Dataset 1/A-mRNA_nonrhyth_translation_nonrhyth/Ppargc1a_set_A.pdf]

## Ppcs

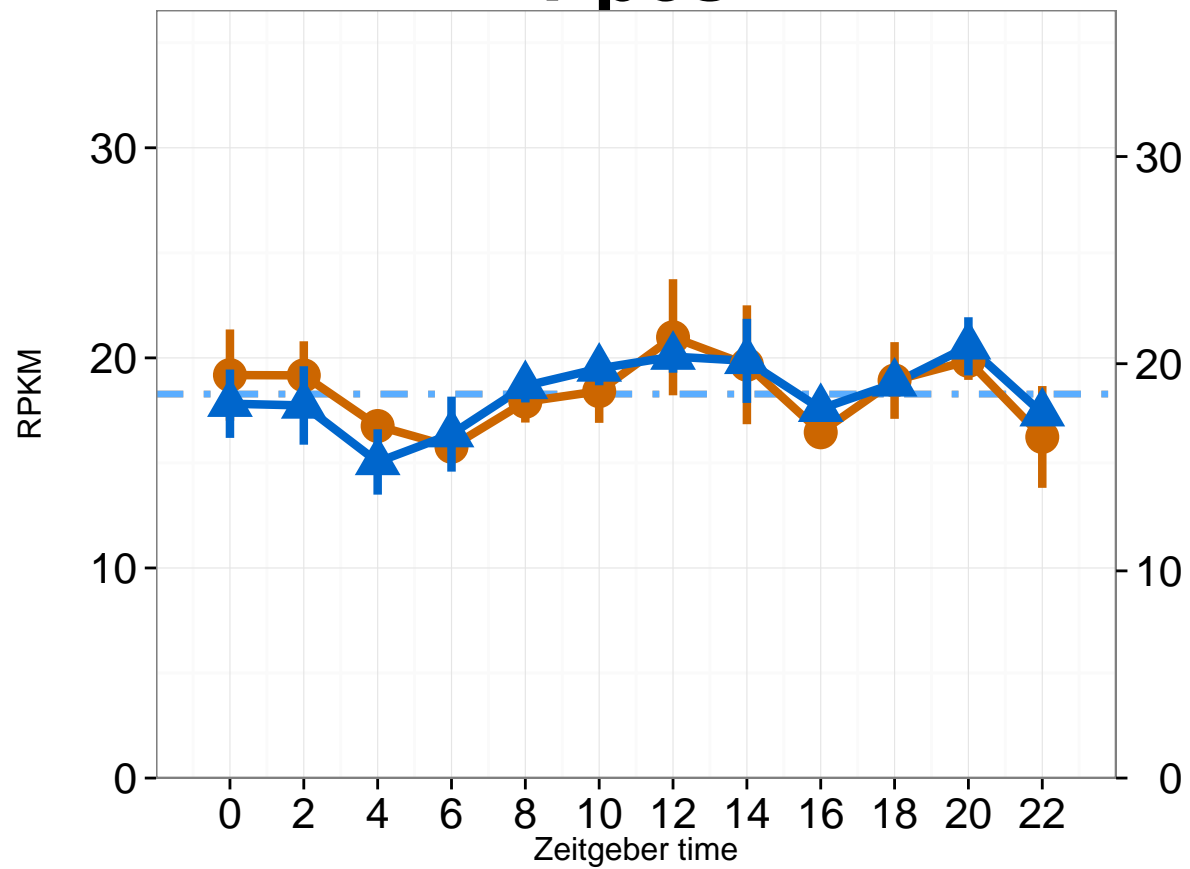

## Ppcs

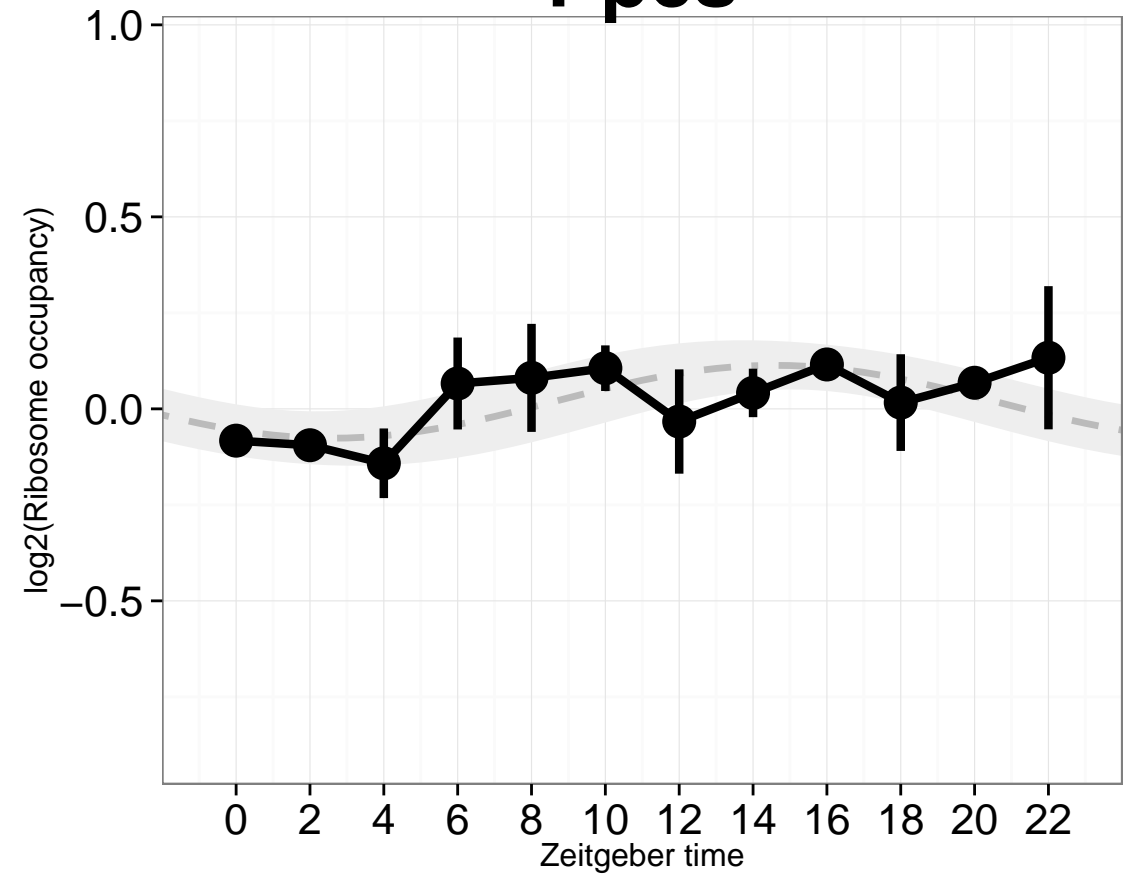

Supplement: SuppDataset_1.zip [file Ppcs_set_A.pdf › Supplemental Dataset 1/A-mRNA_nonrhyth_translation_nonrhyth/Ppcs_set_A.pdf]

# Ppfia1

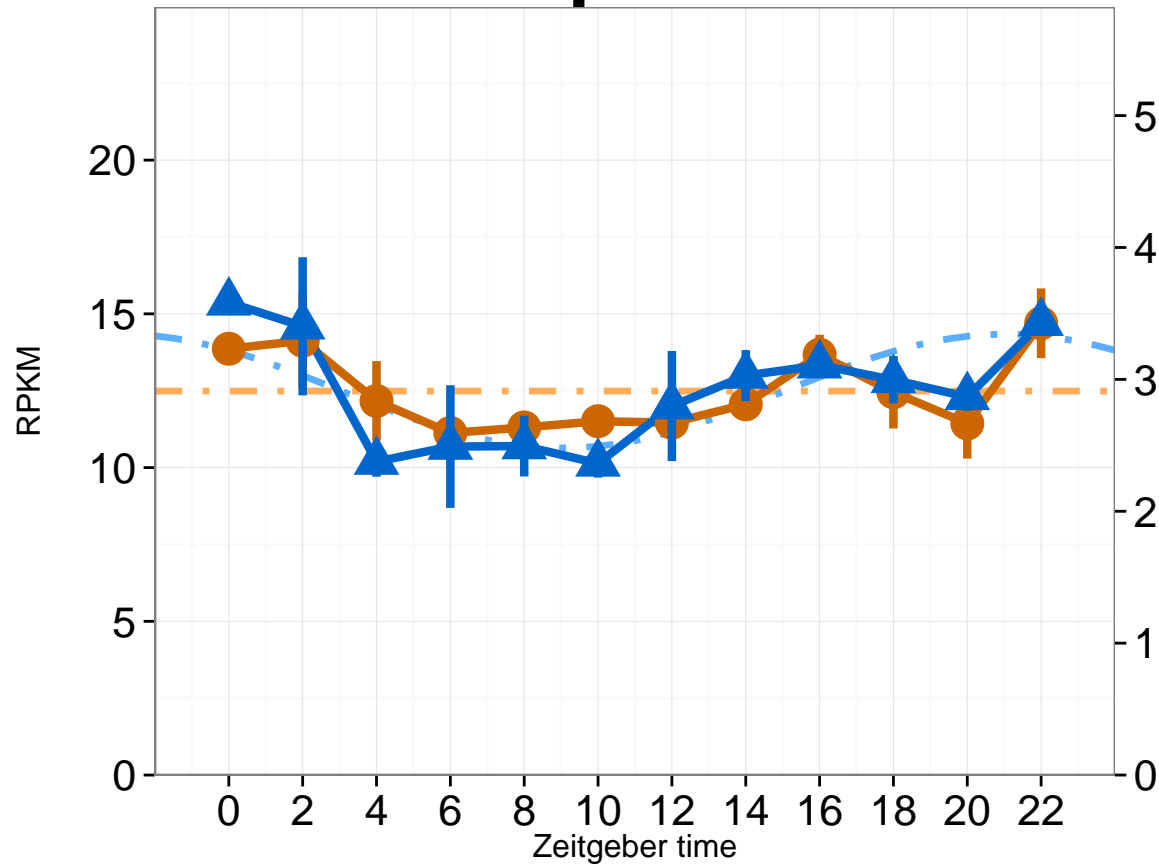

# Ppfia1

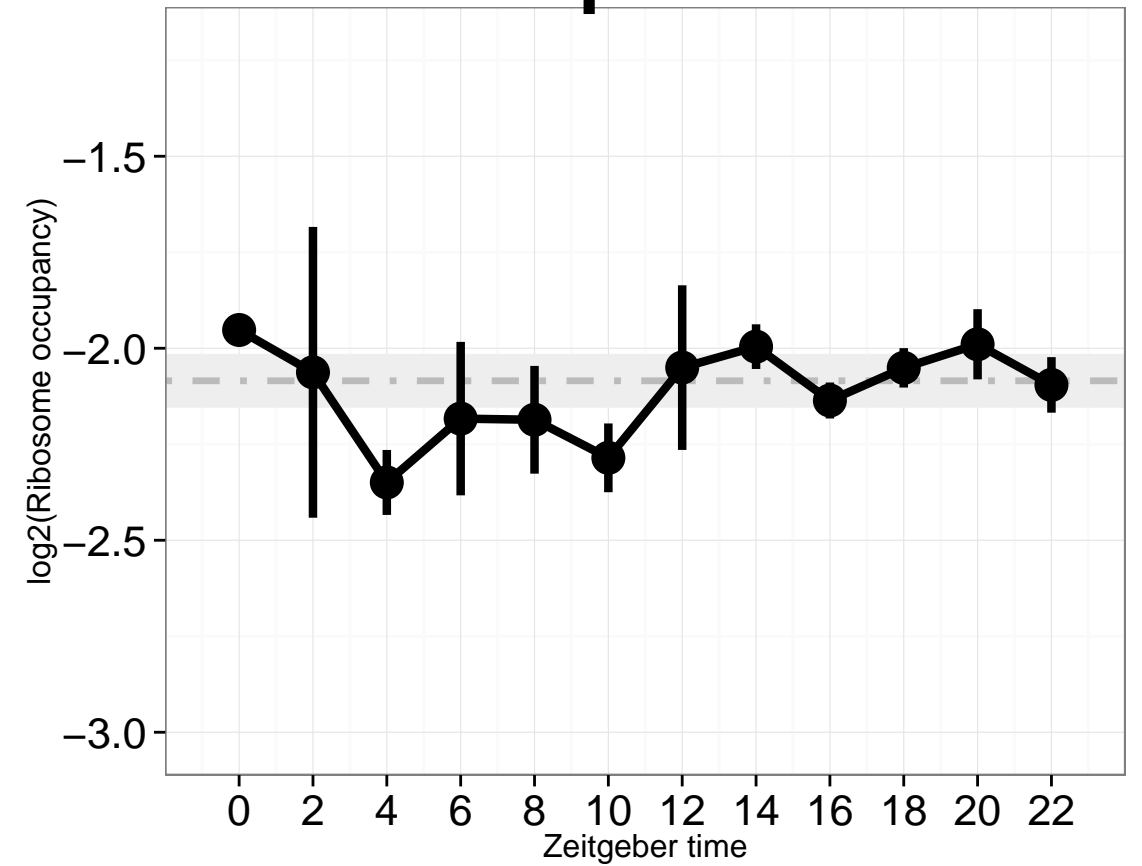

Supplement: SuppDataset_1.zip [file Ppfia1_set_A.pdf › Supplemental Dataset 1/A-mRNA_nonrhyth_translation_nonrhyth/Ppfia1_set_A.pdf]

# PphIn1

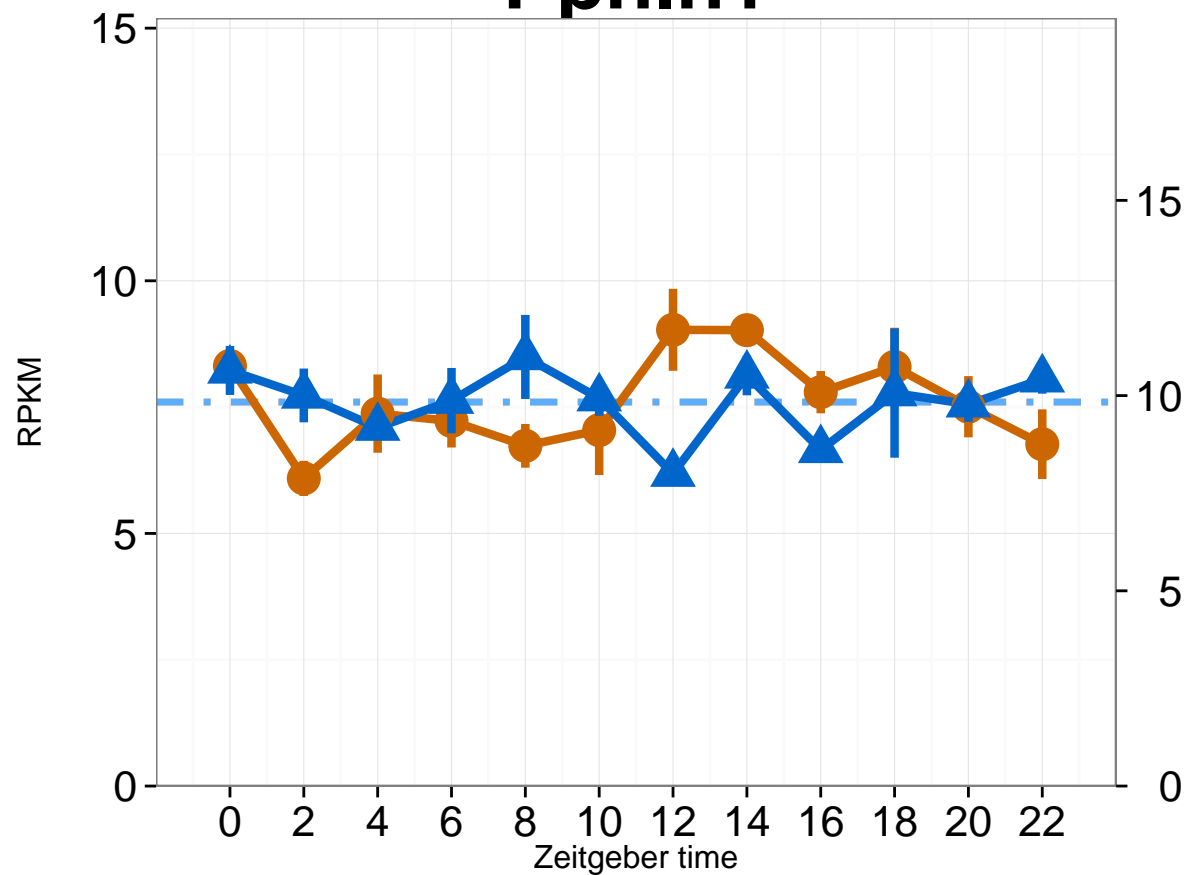

# PphIn1

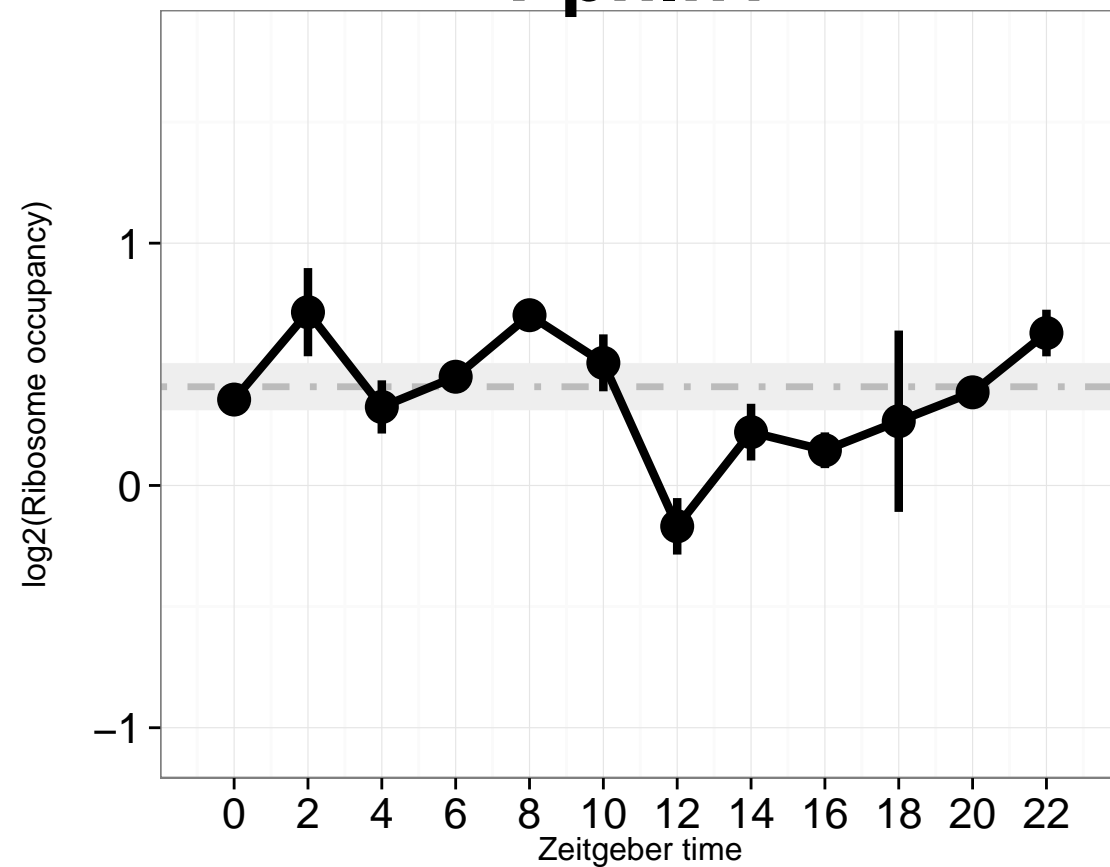

Supplement: SuppDataset_1.zip [file Pphln1_set_A.pdf › Supplemental Dataset 1/A-mRNA_nonrhyth_translation_nonrhyth/Pphln1_set_A.pdf]

## Ppia

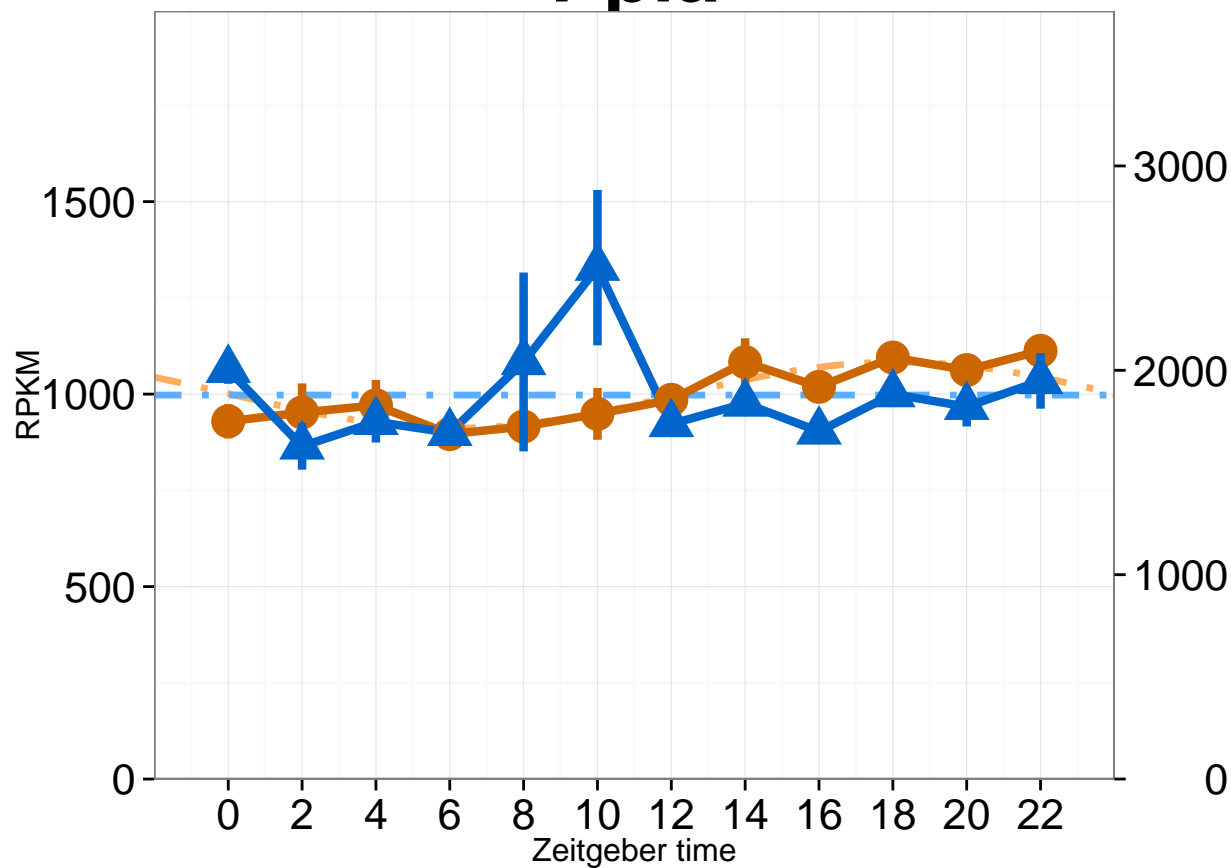

## Ppia

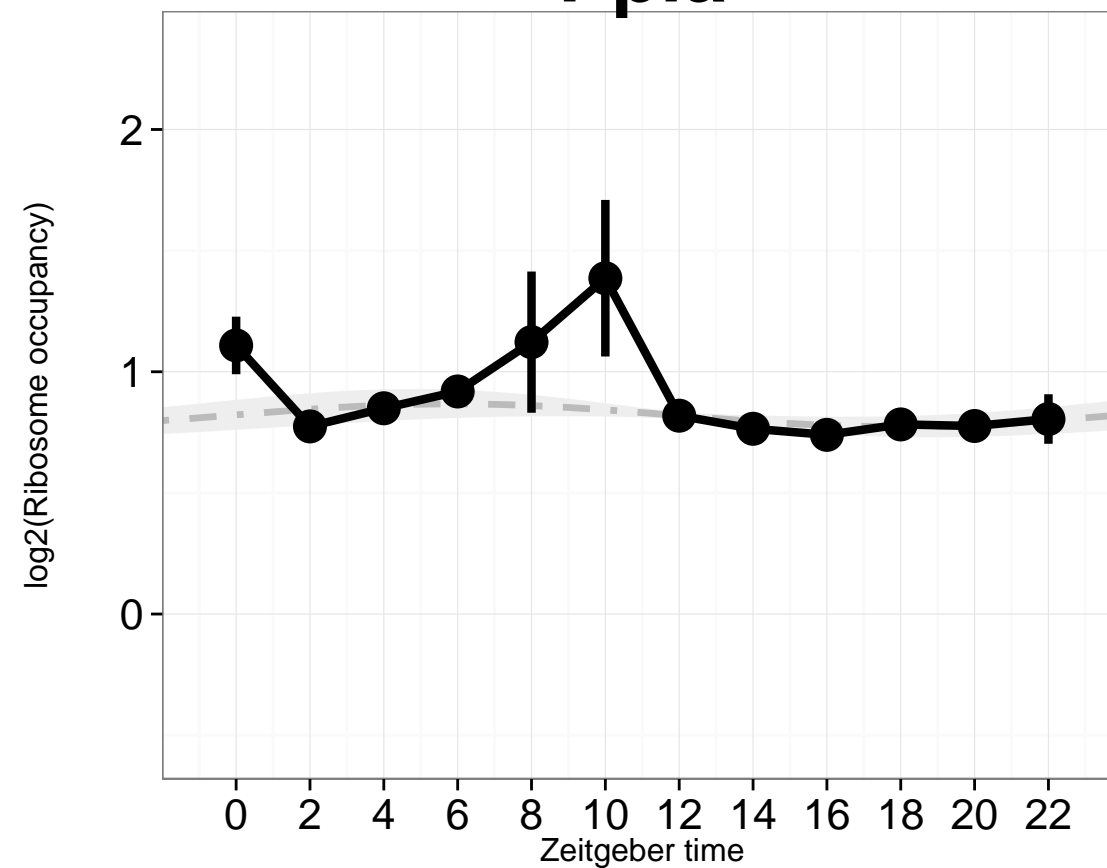

Supplement: SuppDataset_1.zip [file Ppia_set_A.pdf › Supplemental Dataset 1/A-mRNA_nonrhyth_translation_nonrhyth/Ppia_set_A.pdf]

## Ppib

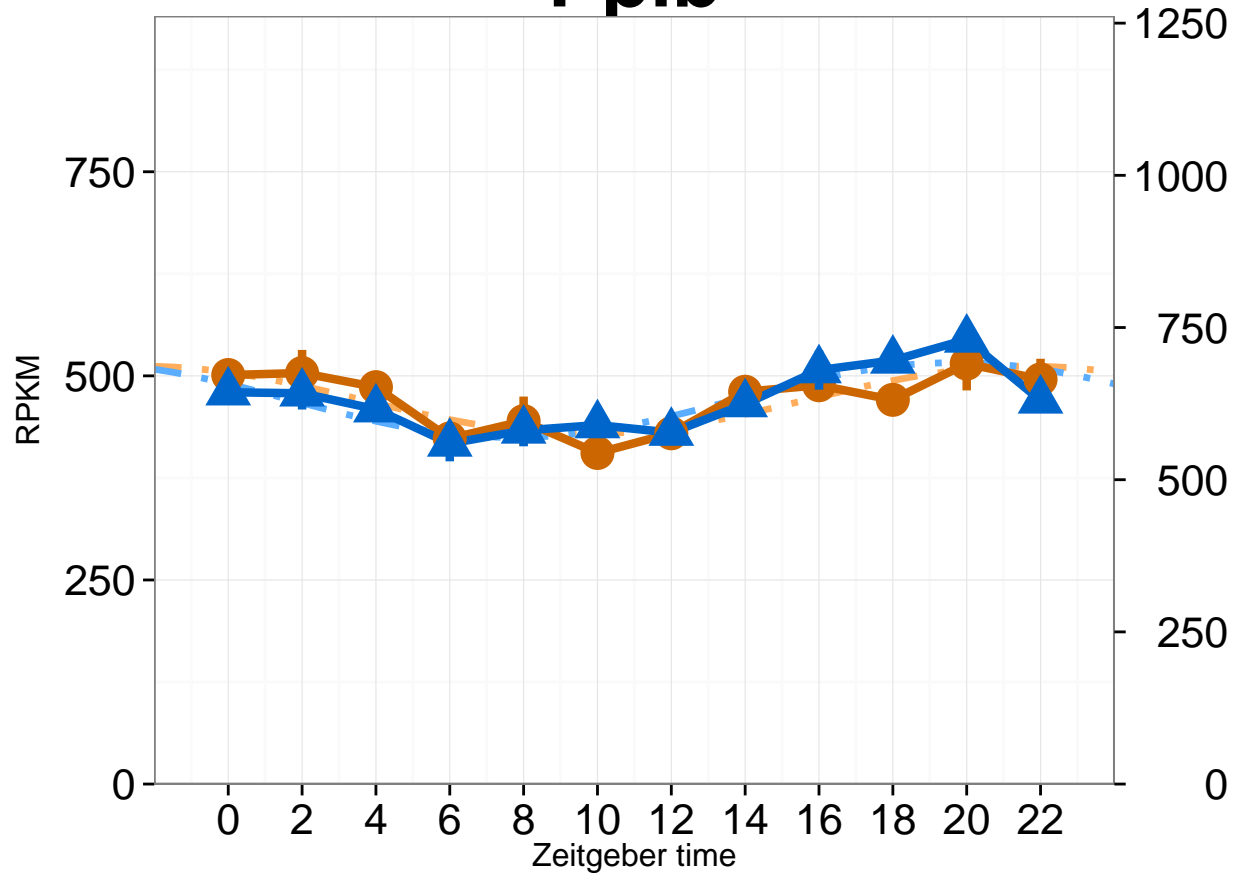

## Ppib

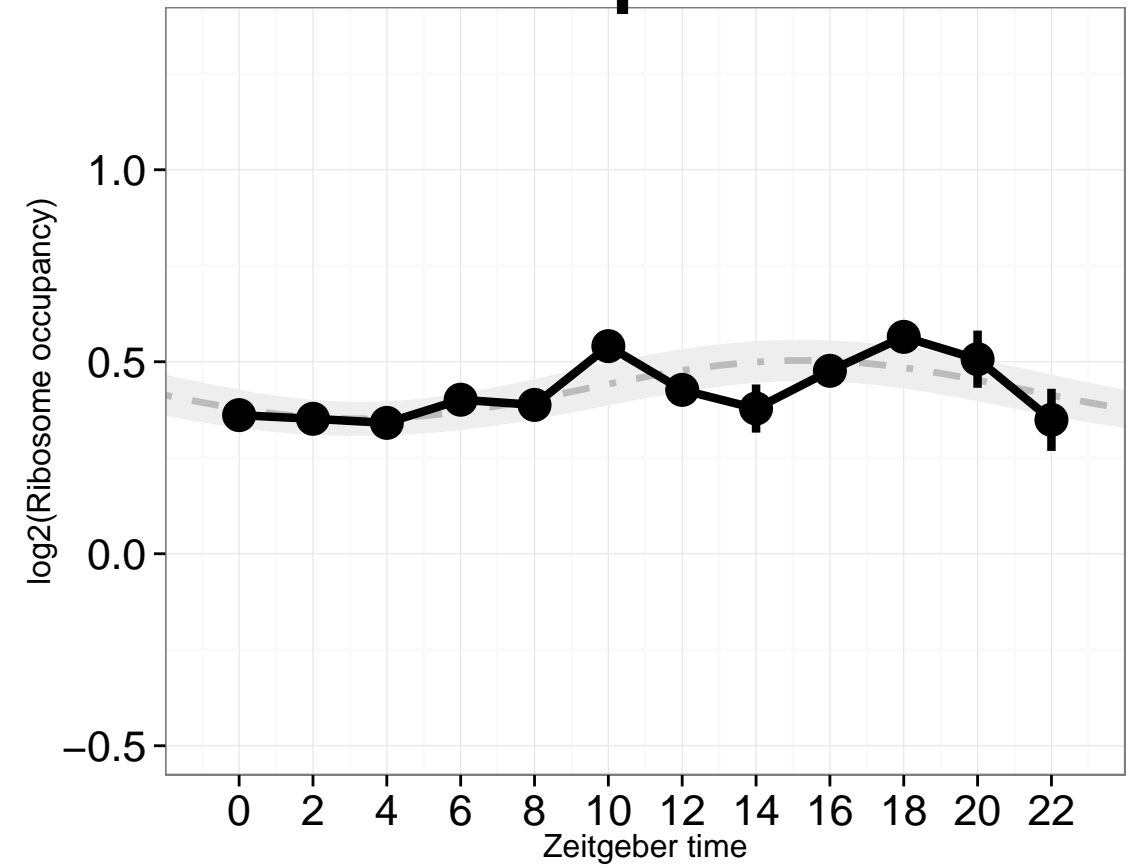

Supplement: SuppDataset_1.zip [file Ppib_set_A.pdf › Supplemental Dataset 1/A-mRNA_nonrhyth_translation_nonrhyth/Ppib_set_A.pdf]

## Ppic

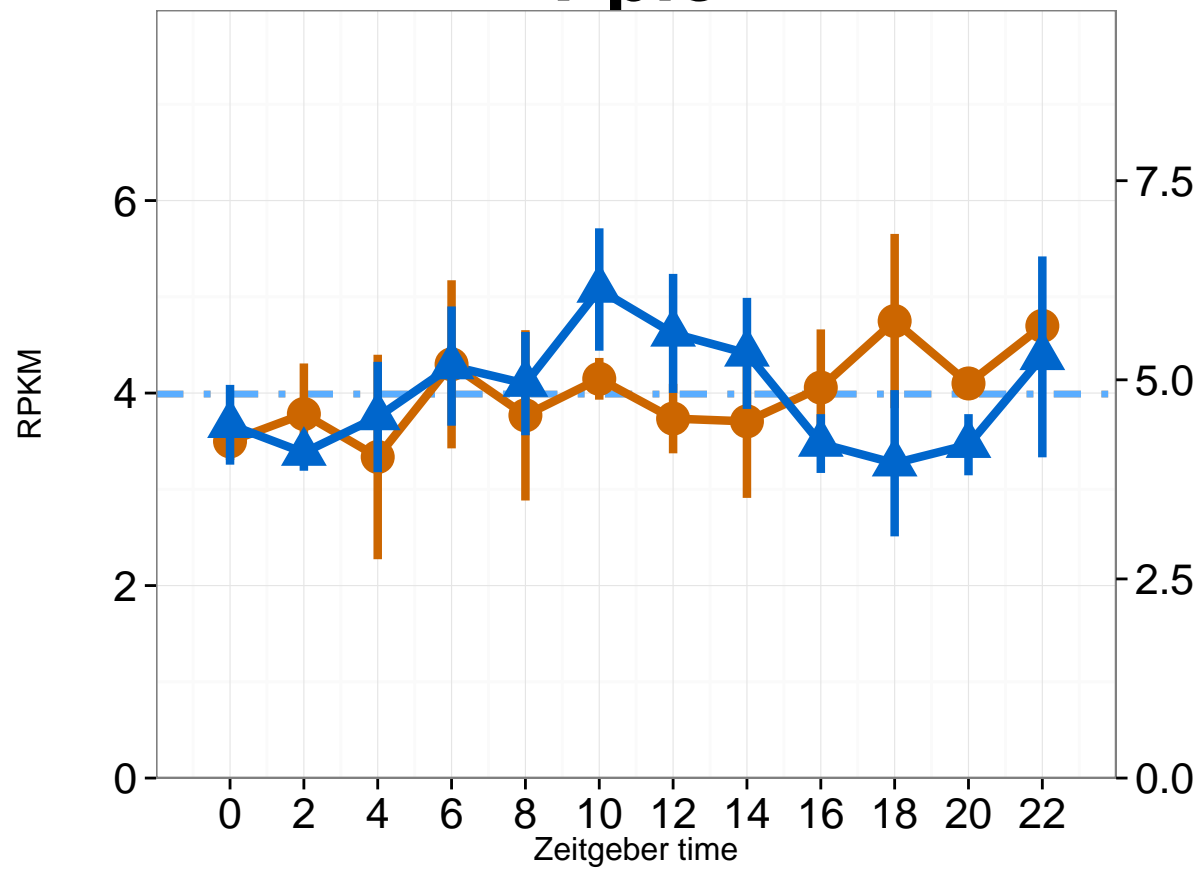

## Ppic

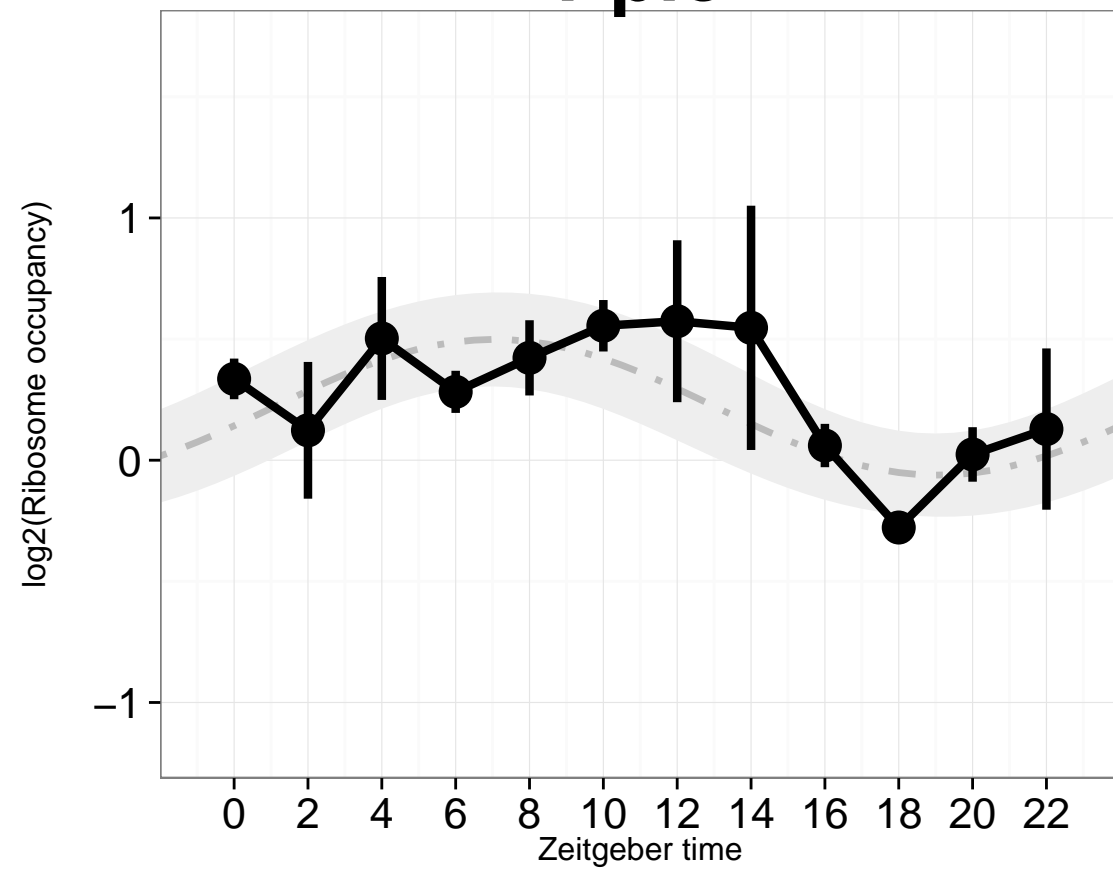

Supplement: SuppDataset_1.zip [file Ppic_set_A.pdf › Supplemental Dataset 1/A-mRNA_nonrhyth_translation_nonrhyth/Ppic_set_A.pdf]

## Ppid

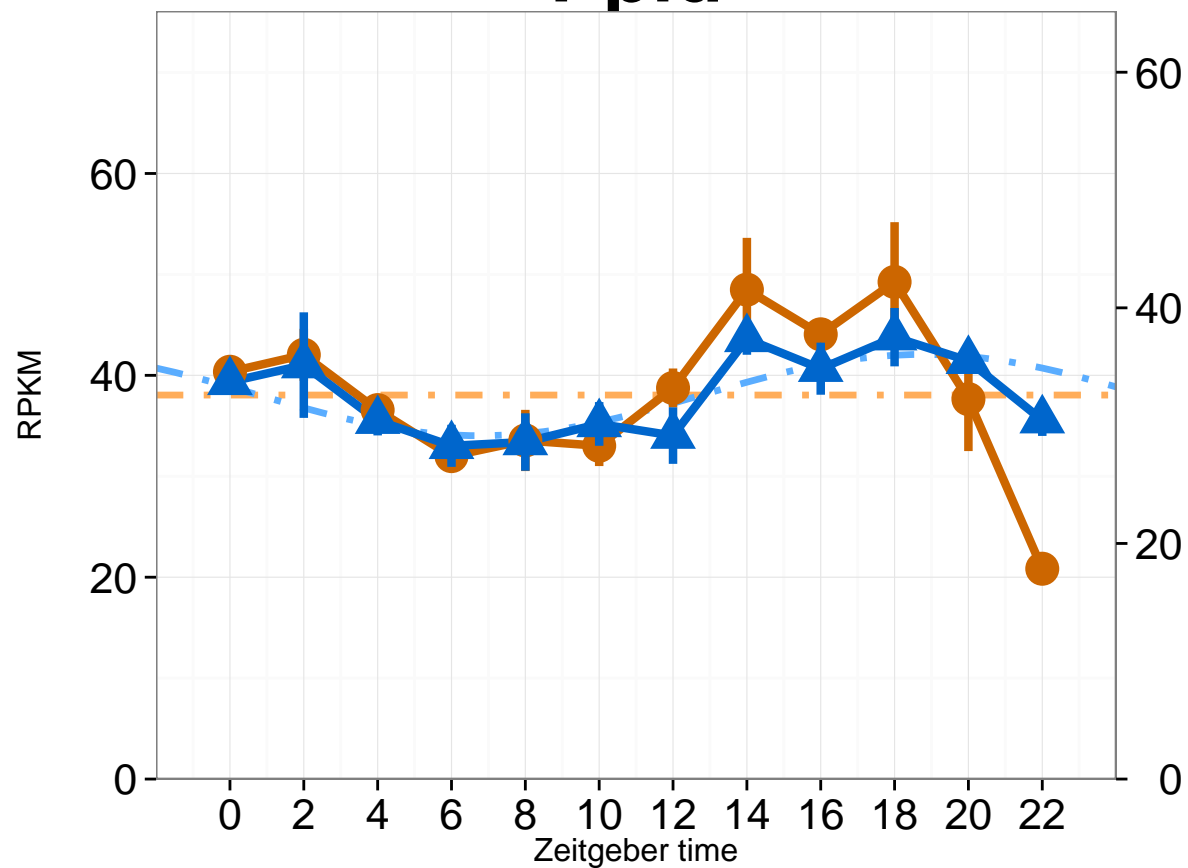

## Ppid

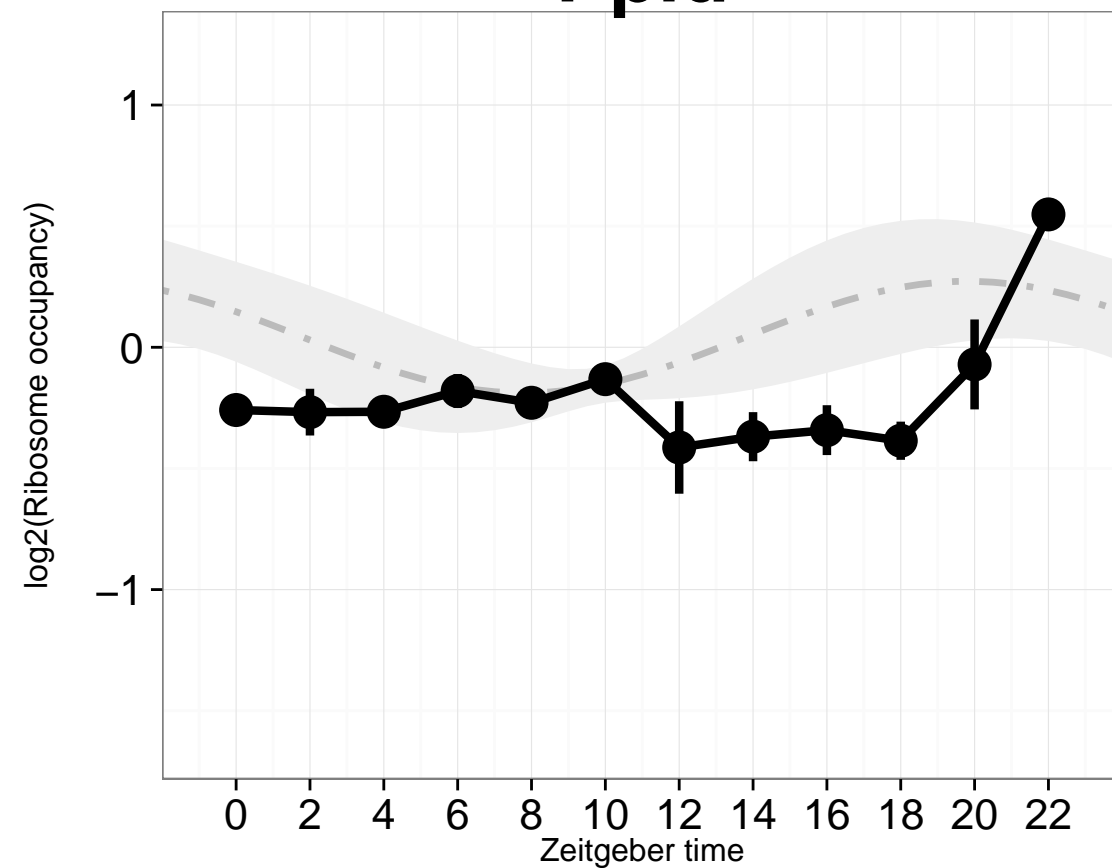

Supplement: SuppDataset_1.zip [file Ppid_set_A.pdf › Supplemental Dataset 1/A-mRNA_nonrhyth_translation_nonrhyth/Ppid_set_A.pdf]

## Ppie

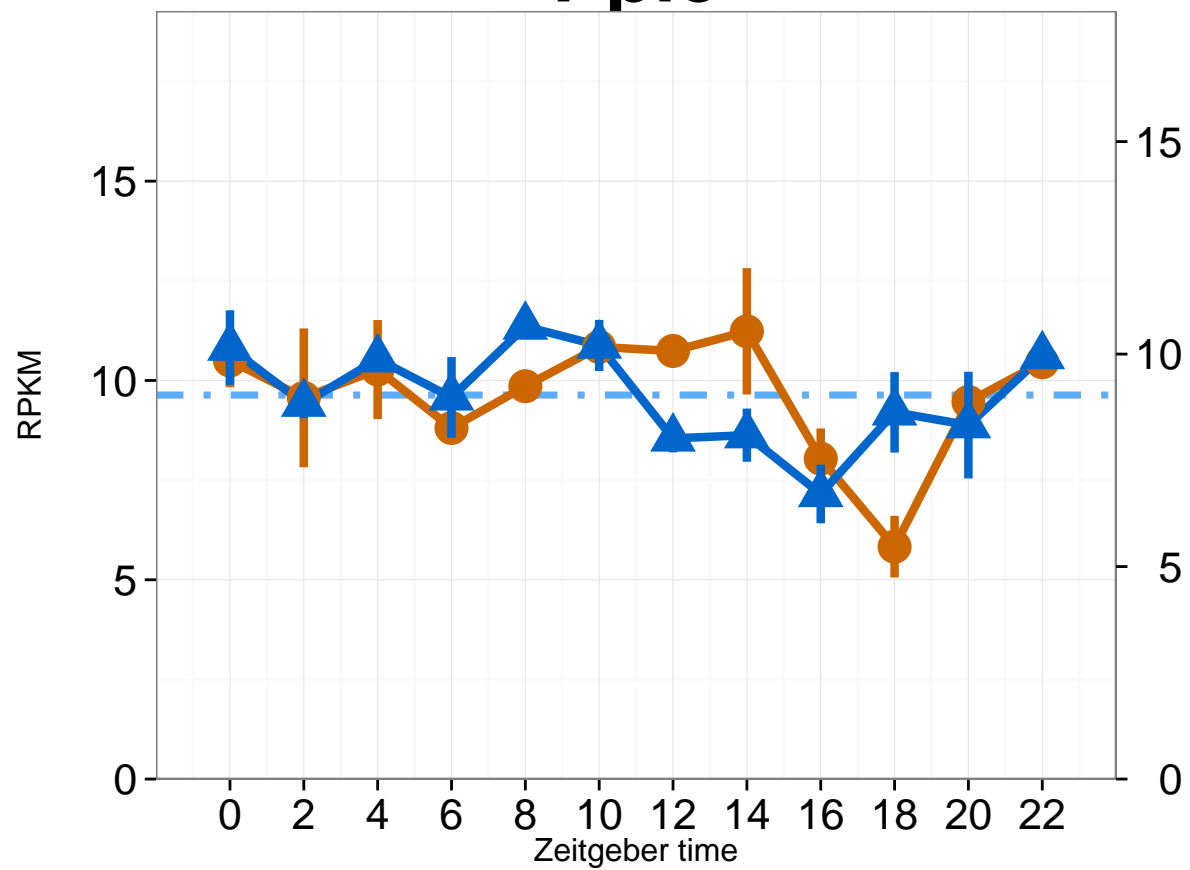

## Ppie

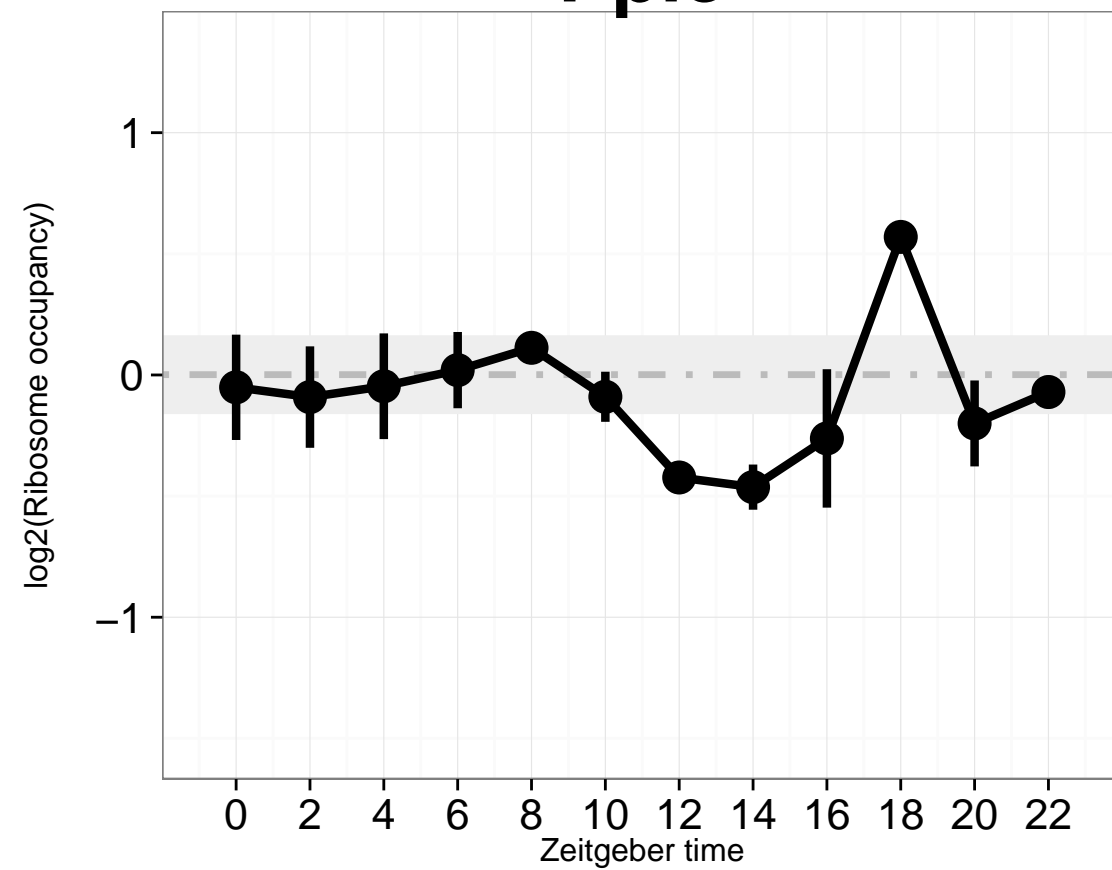

Supplement: SuppDataset_1.zip [file Ppie_set_A.pdf › Supplemental Dataset 1/A-mRNA_nonrhyth_translation_nonrhyth/Ppie_set_A.pdf]

## Ppig

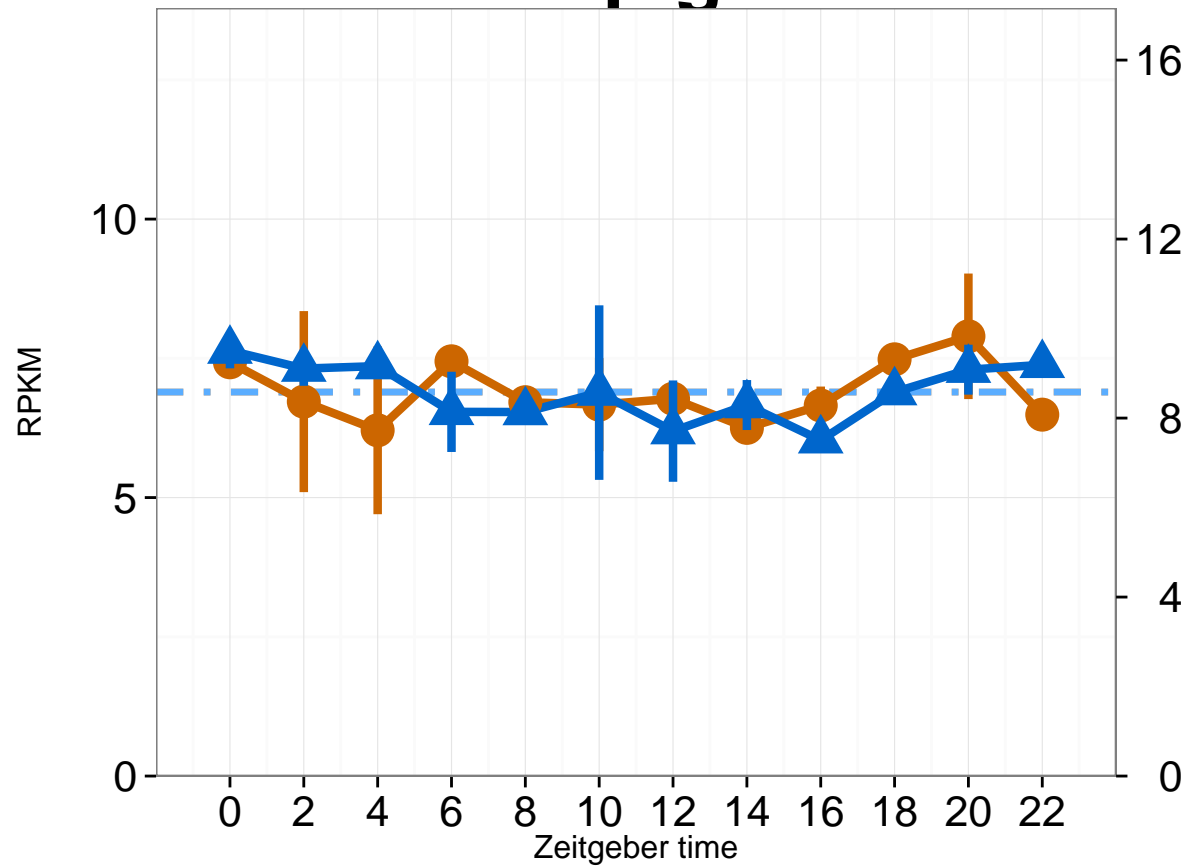

## Ppig

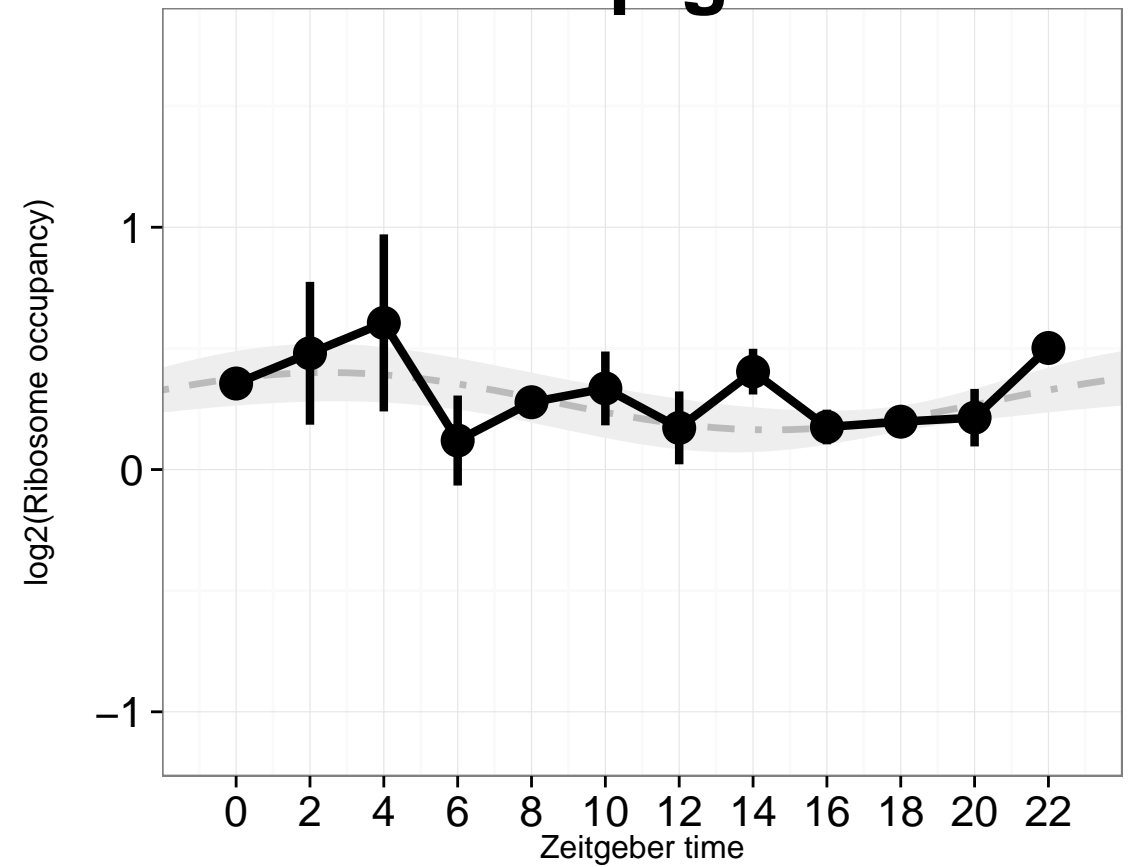

Supplement: SuppDataset_1.zip [file Ppig_set_A.pdf › Supplemental Dataset 1/A-mRNA_nonrhyth_translation_nonrhyth/Ppig_set_A.pdf]

## Ppih

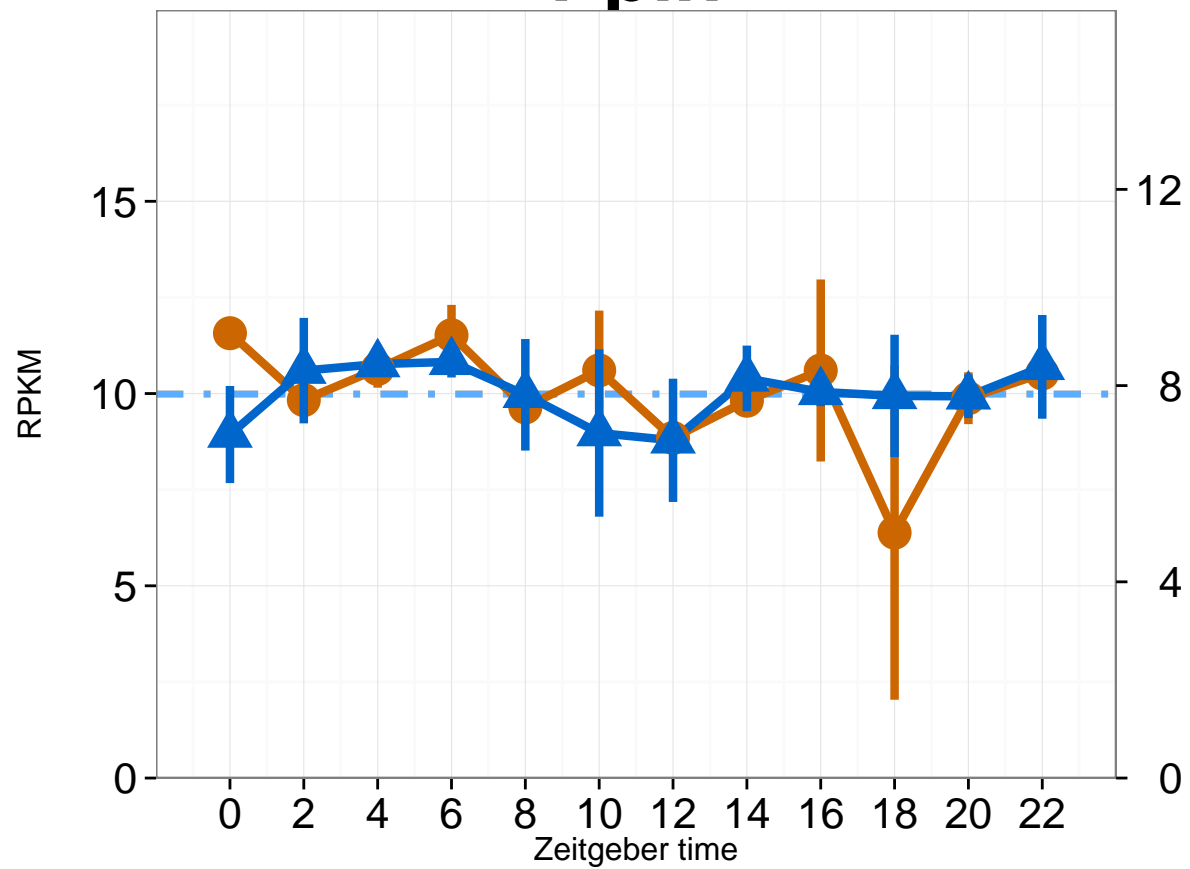

## Ppih

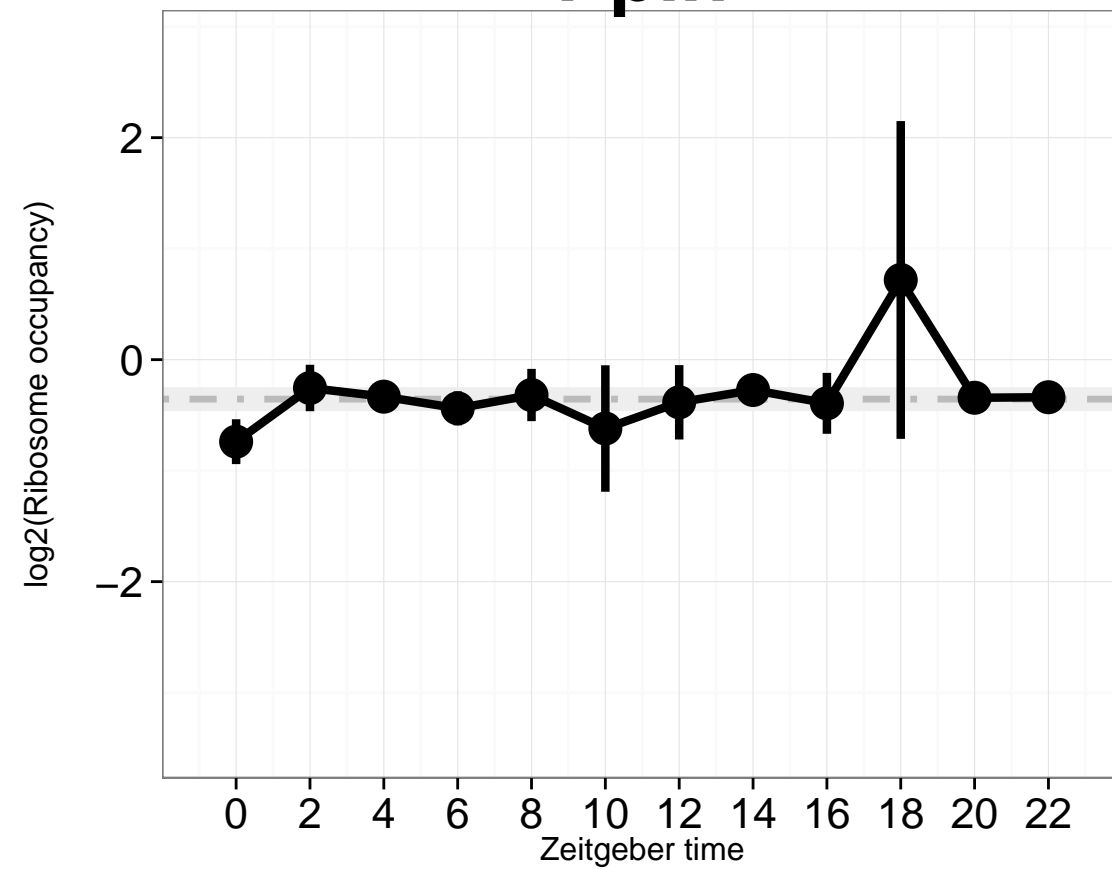

Supplement: SuppDataset_1.zip [file Ppih_set_A.pdf › Supplemental Dataset 1/A-mRNA_nonrhyth_translation_nonrhyth/Ppih_set_A.pdf]

## Ppil2

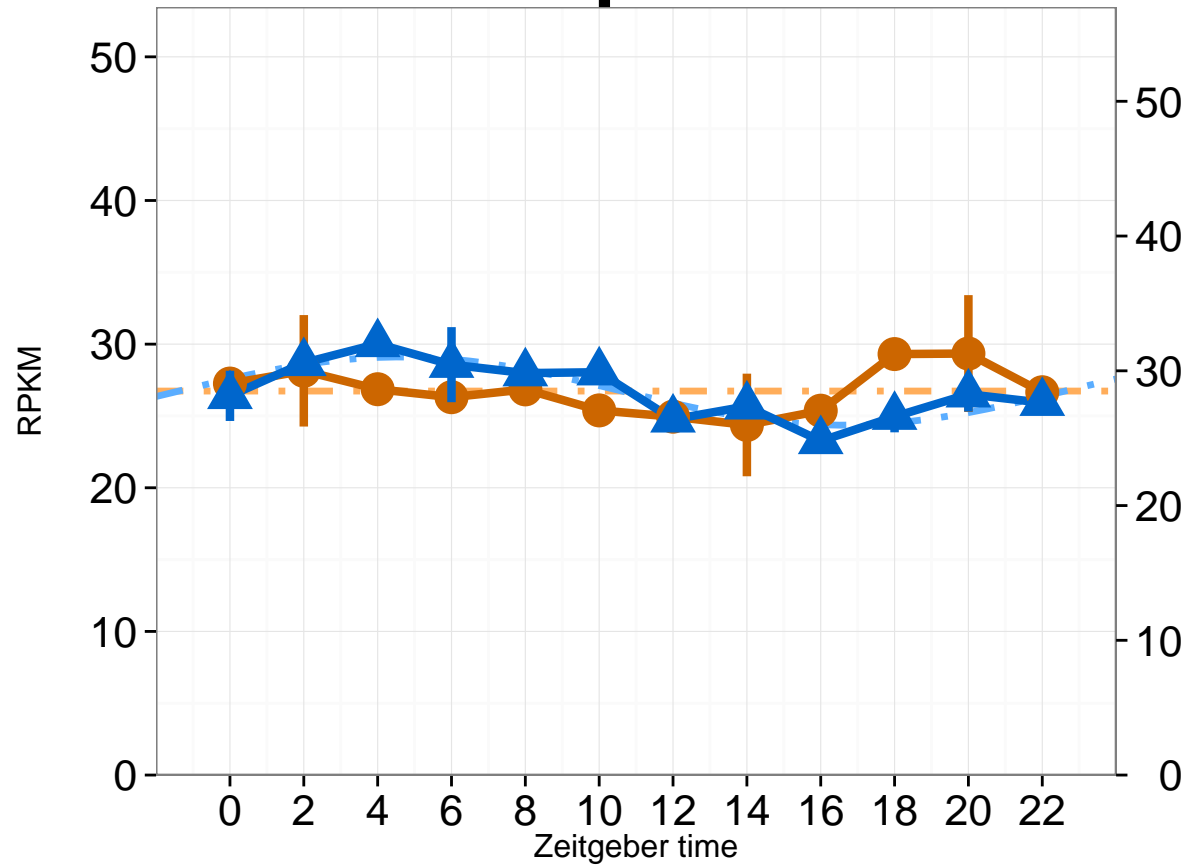

## Ppil2

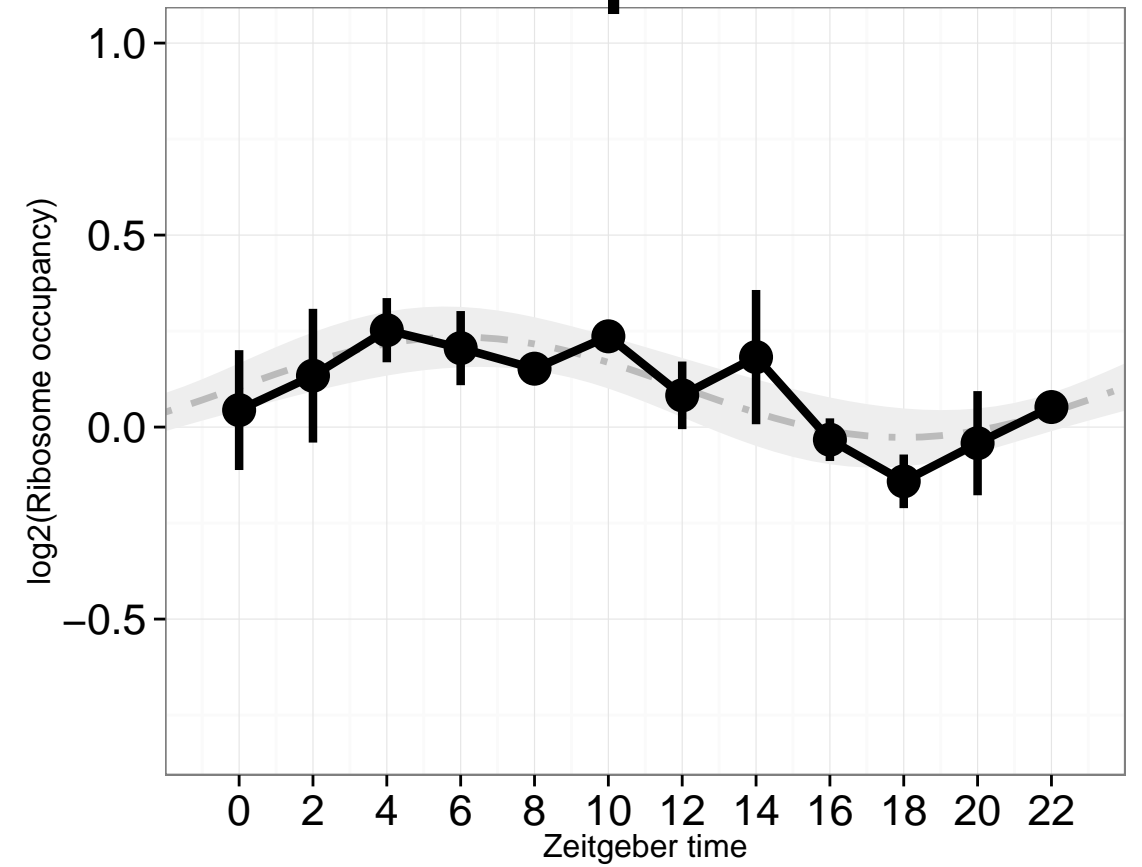

Supplement: SuppDataset_1.zip [file Ppil2_set_A.pdf › Supplemental Dataset 1/A-mRNA_nonrhyth_translation_nonrhyth/Ppil2_set_A.pdf]

## Ppil3

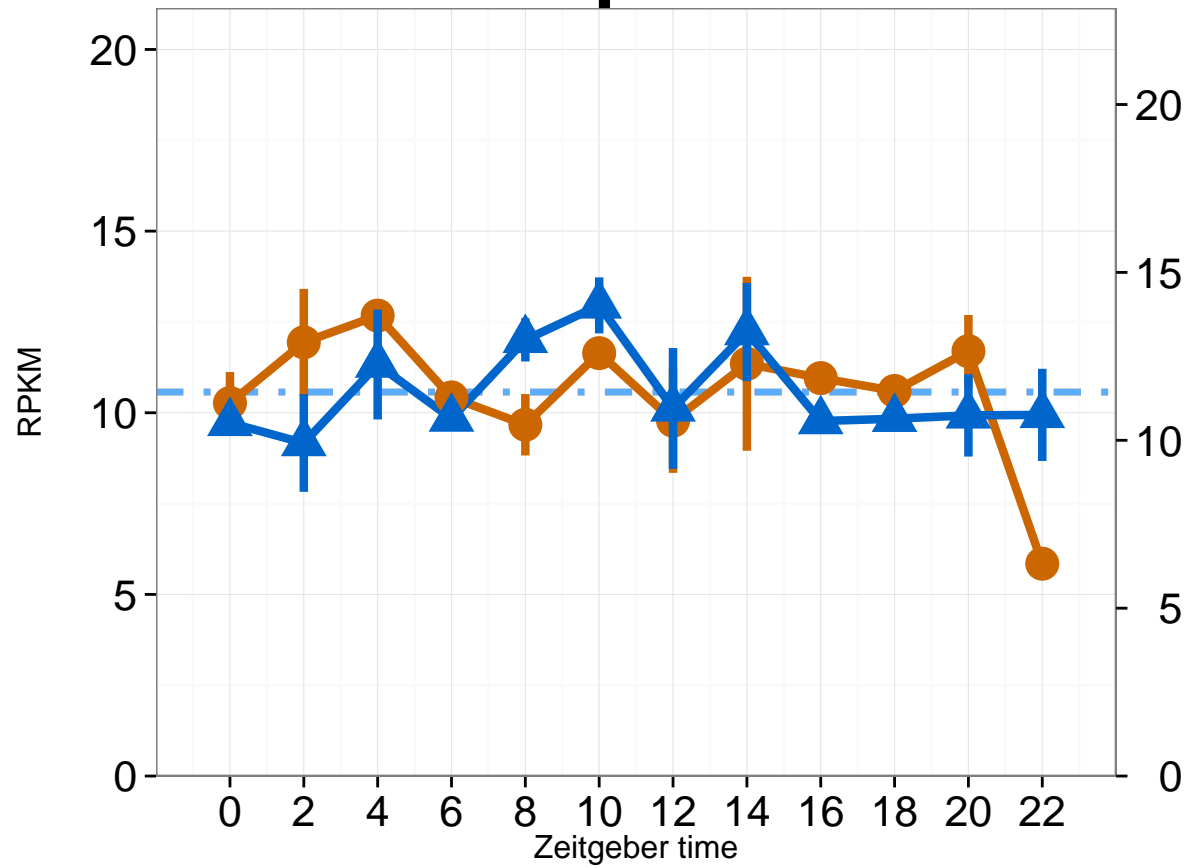

## Ppil3

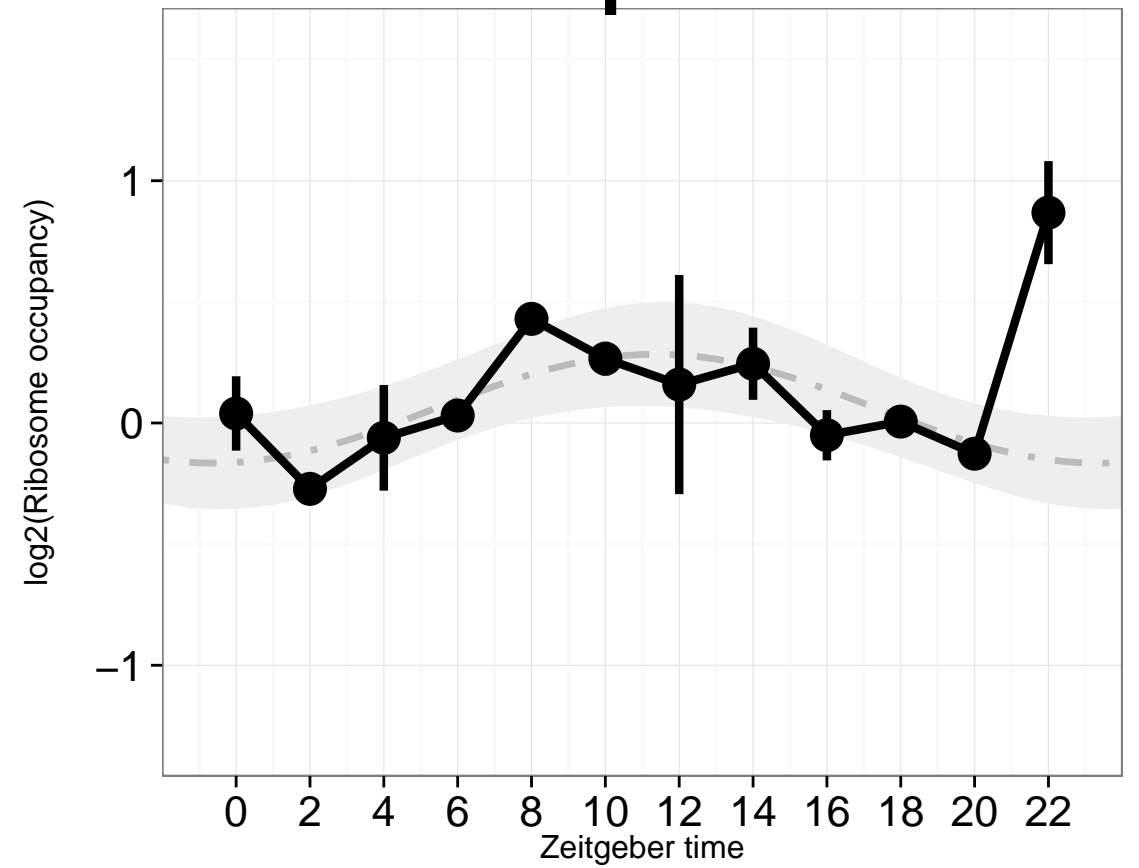

Supplement: SuppDataset_1.zip [file Ppil3_set_A.pdf › Supplemental Dataset 1/A-mRNA_nonrhyth_translation_nonrhyth/Ppil3_set_A.pdf]

## Ppil4

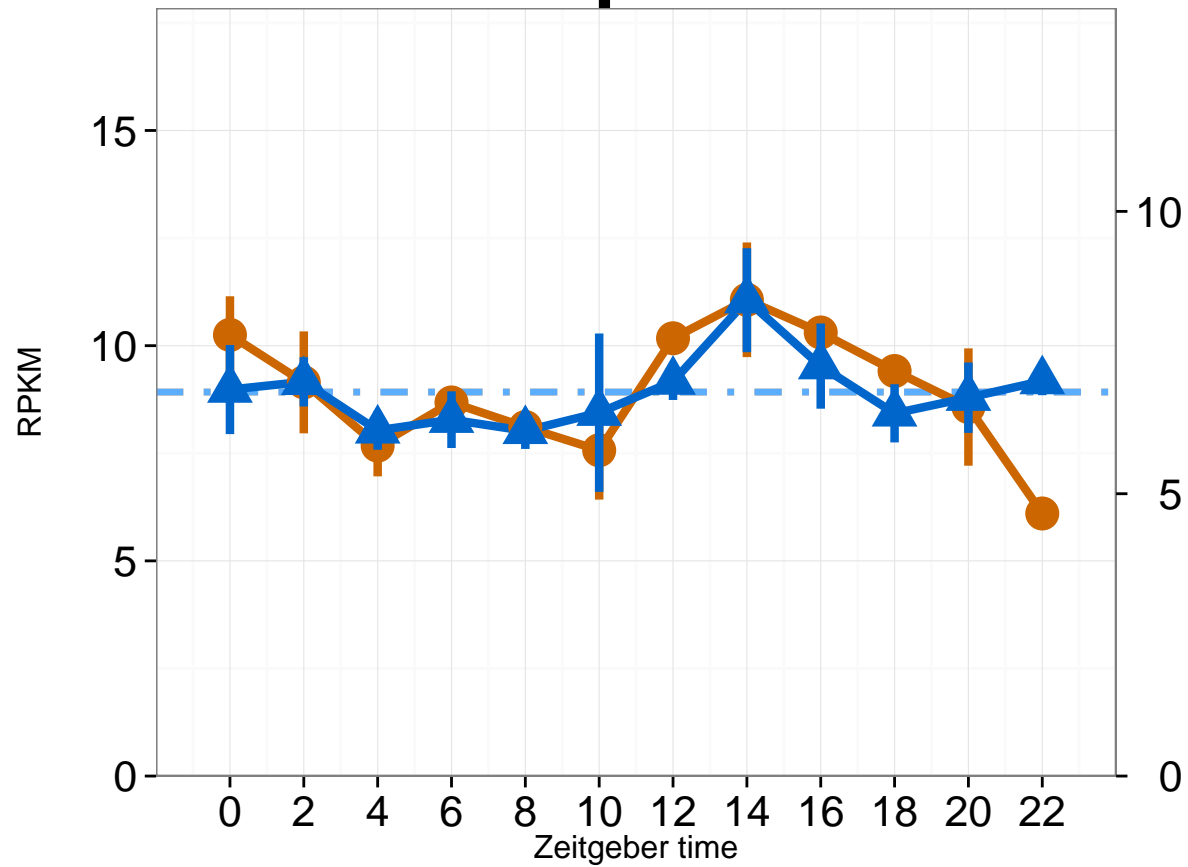

## Ppil4

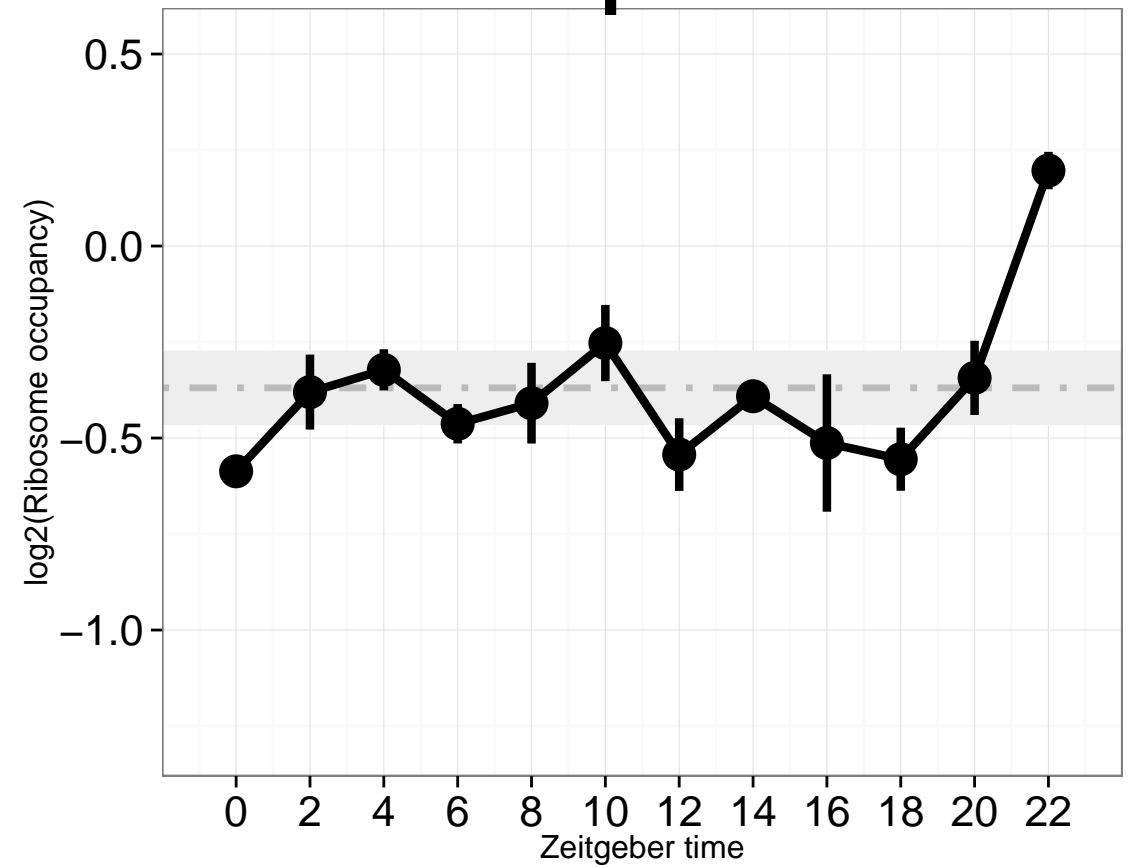

Supplement: SuppDataset_1.zip [file Ppil4_set_A.pdf › Supplemental Dataset 1/A-mRNA_nonrhyth_translation_nonrhyth/Ppil4_set_A.pdf]

# Ppip5k1

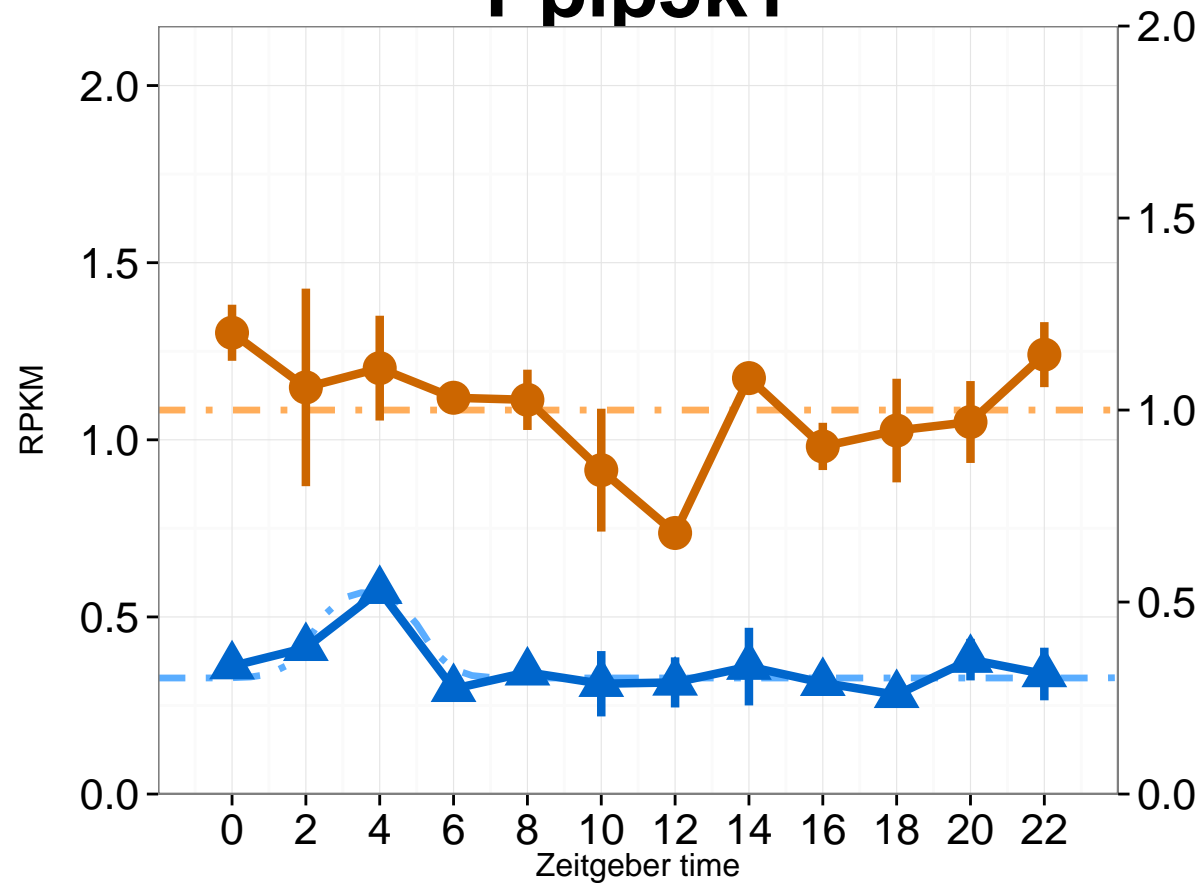

# Ppip5k1

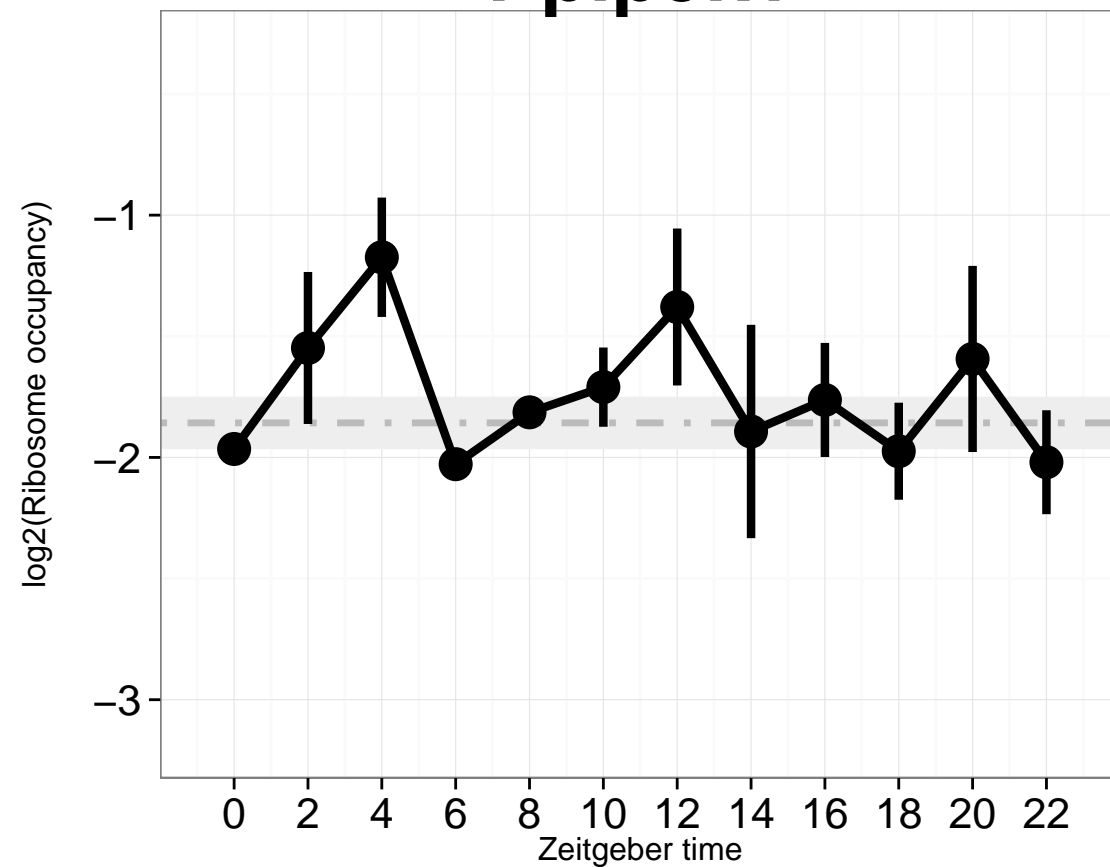

Supplement: SuppDataset_1.zip [file Ppip5k1_set_A.pdf › Supplemental Dataset 1/A-mRNA_nonrhyth_translation_nonrhyth/Ppip5k1_set_A.pdf]

**Ppip5k2**

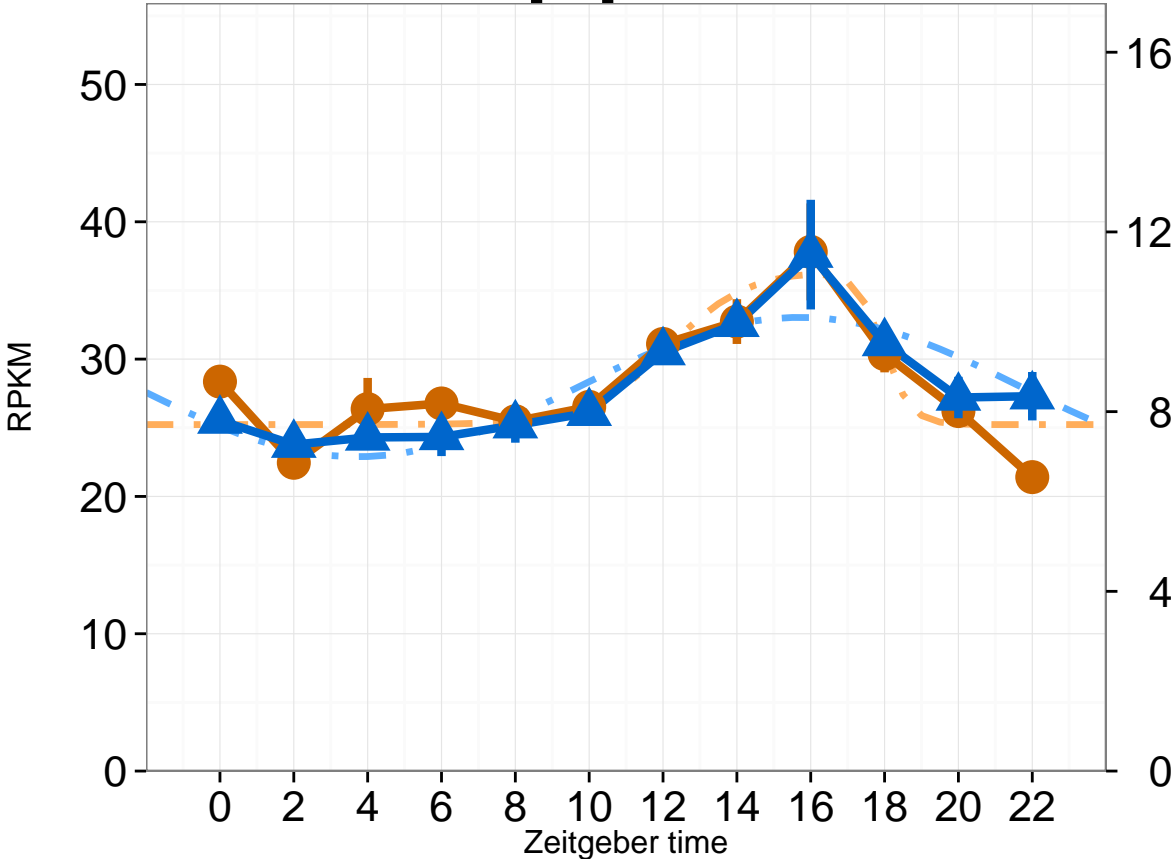

**Ppip5k2**

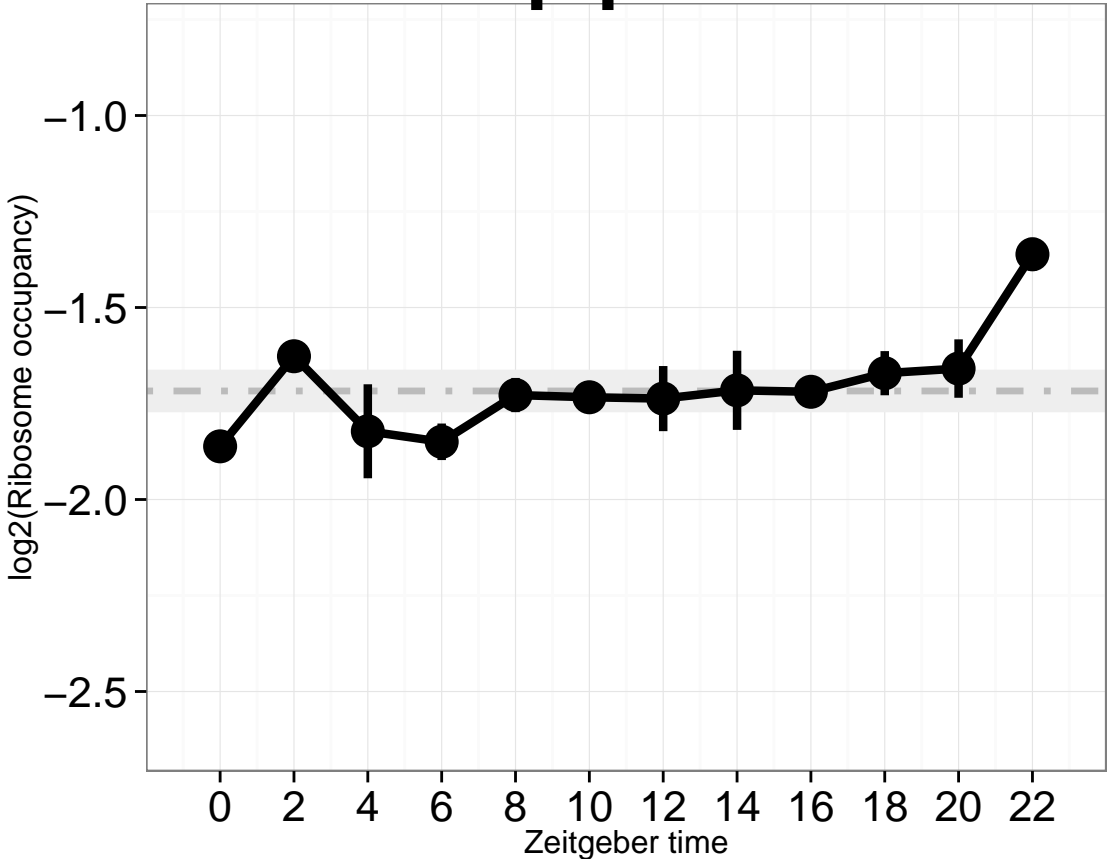

Supplement: SuppDataset_1.zip [file Ppip5k2_set_A.pdf › Supplemental Dataset 1/A-mRNA_nonrhyth_translation_nonrhyth/Ppip5k2_set_A.pdf]

**Ppl**

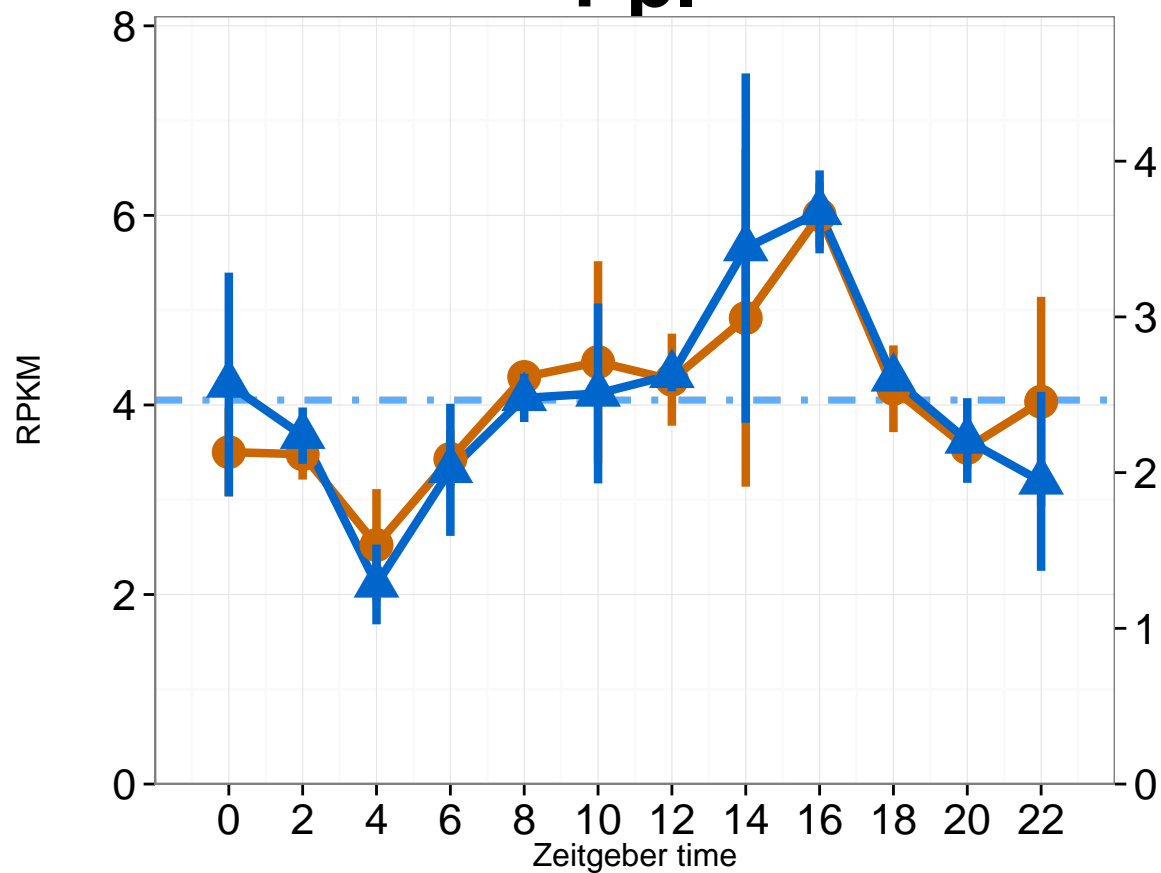

**Ppl**

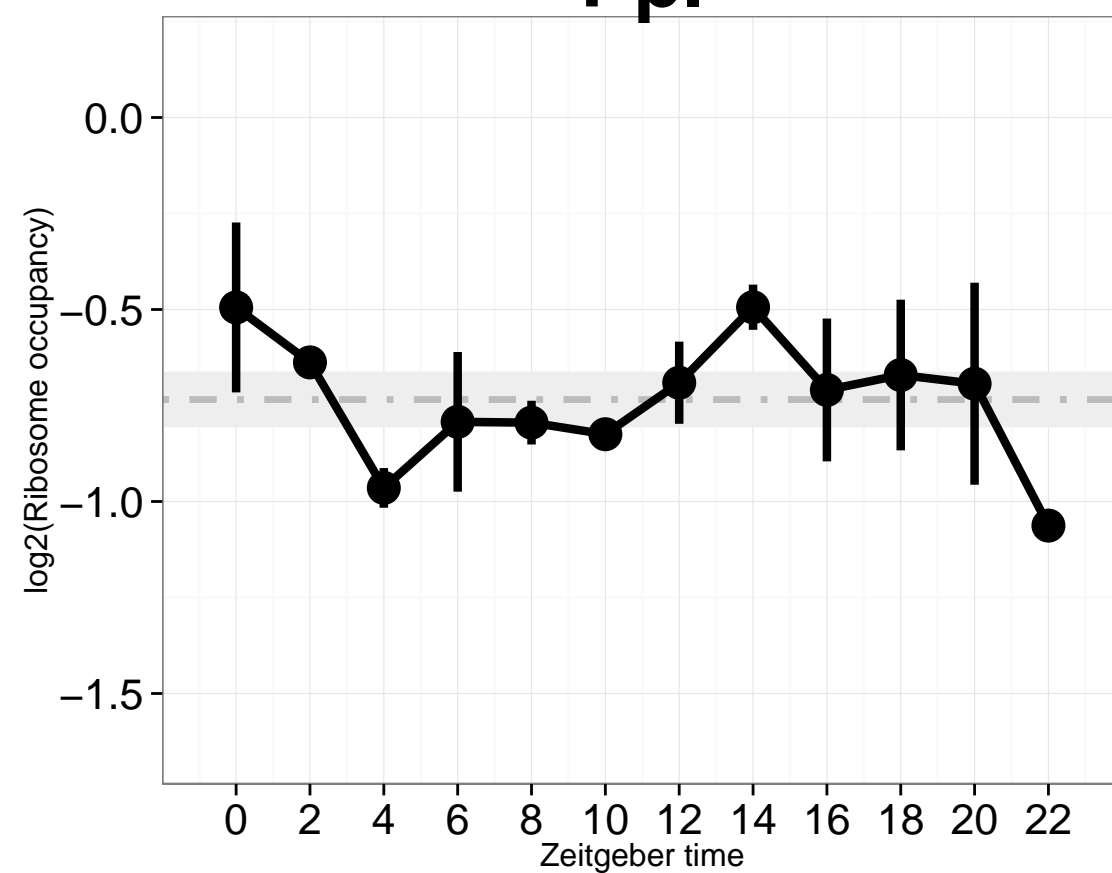

Supplement: SuppDataset_1.zip [file Ppl_set_A.pdf › Supplemental Dataset 1/A-mRNA_nonrhyth_translation_nonrhyth/Ppl_set_A.pdf]

# Ppm1a

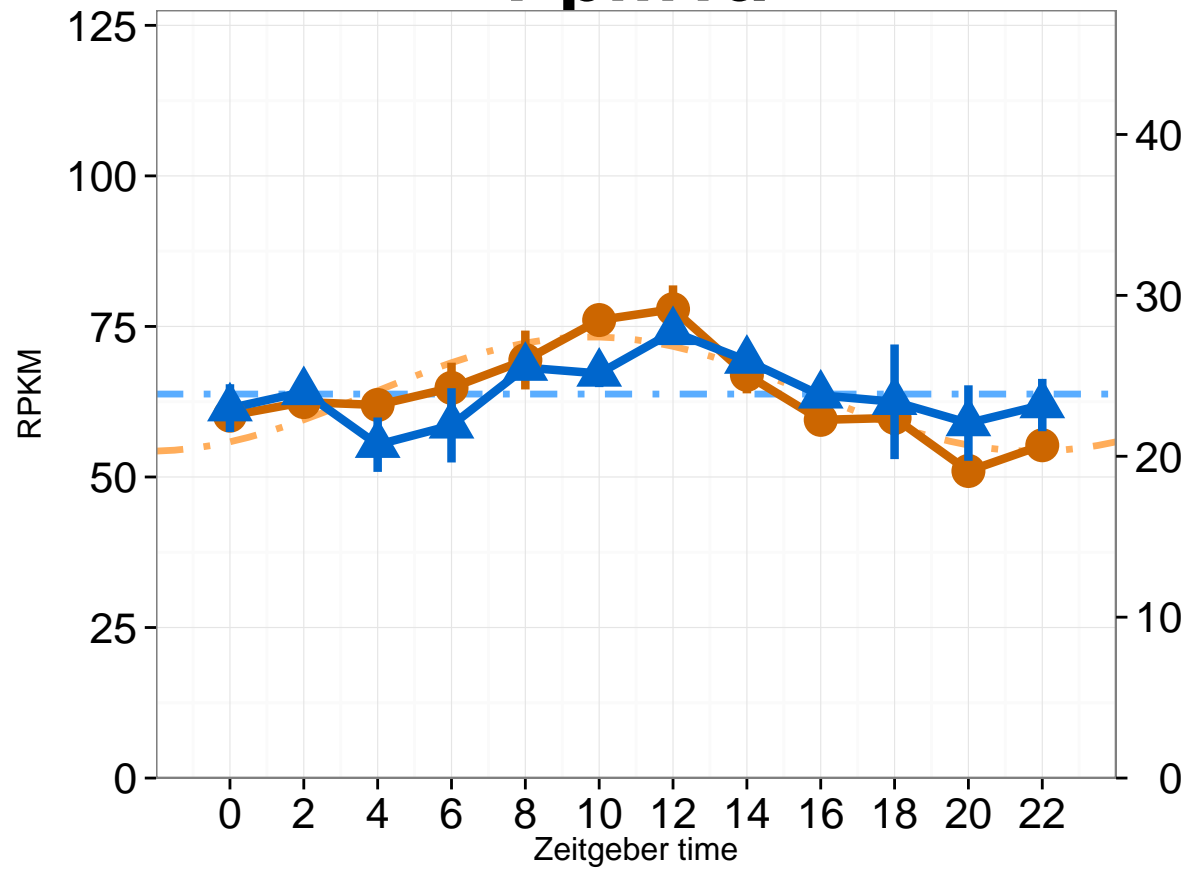

# Ppm1a

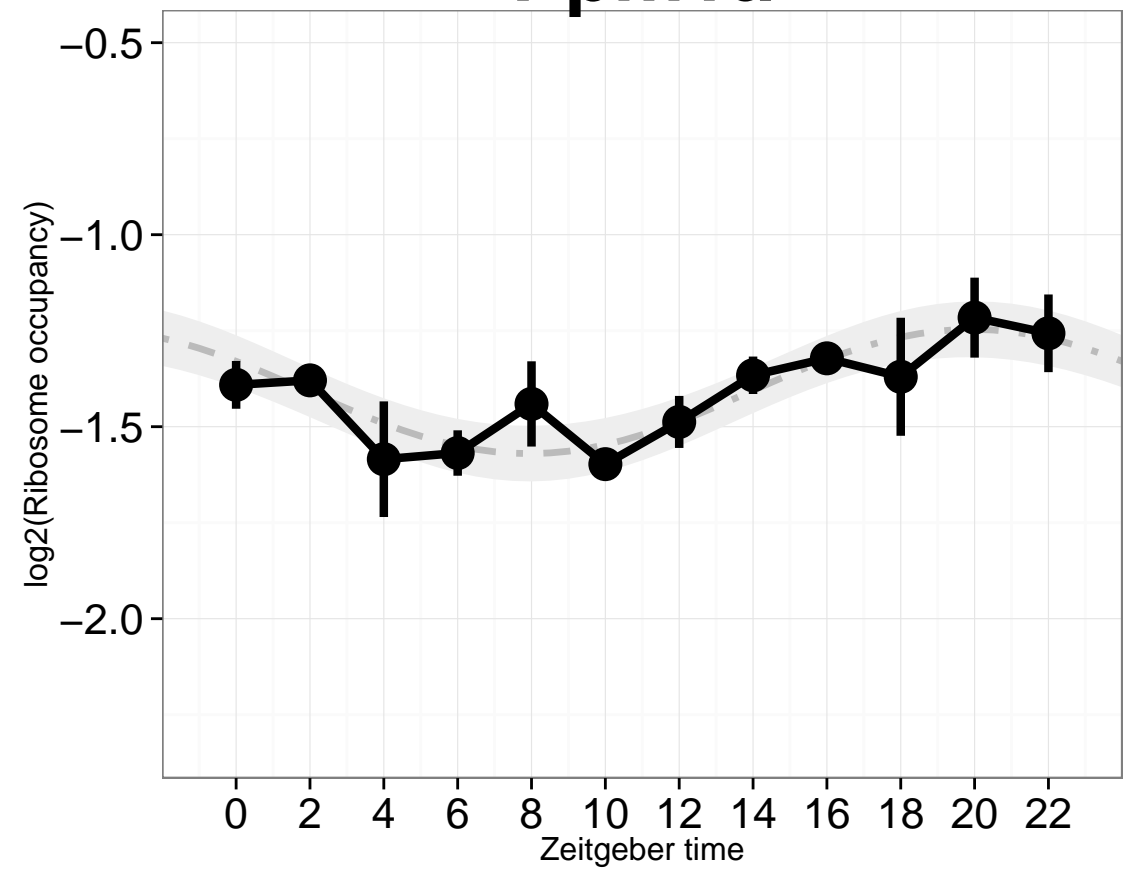

Supplement: SuppDataset_1.zip [file Ppm1a_set_A.pdf › Supplemental Dataset 1/A-mRNA_nonrhyth_translation_nonrhyth/Ppm1a_set_A.pdf]

# Ppm1b

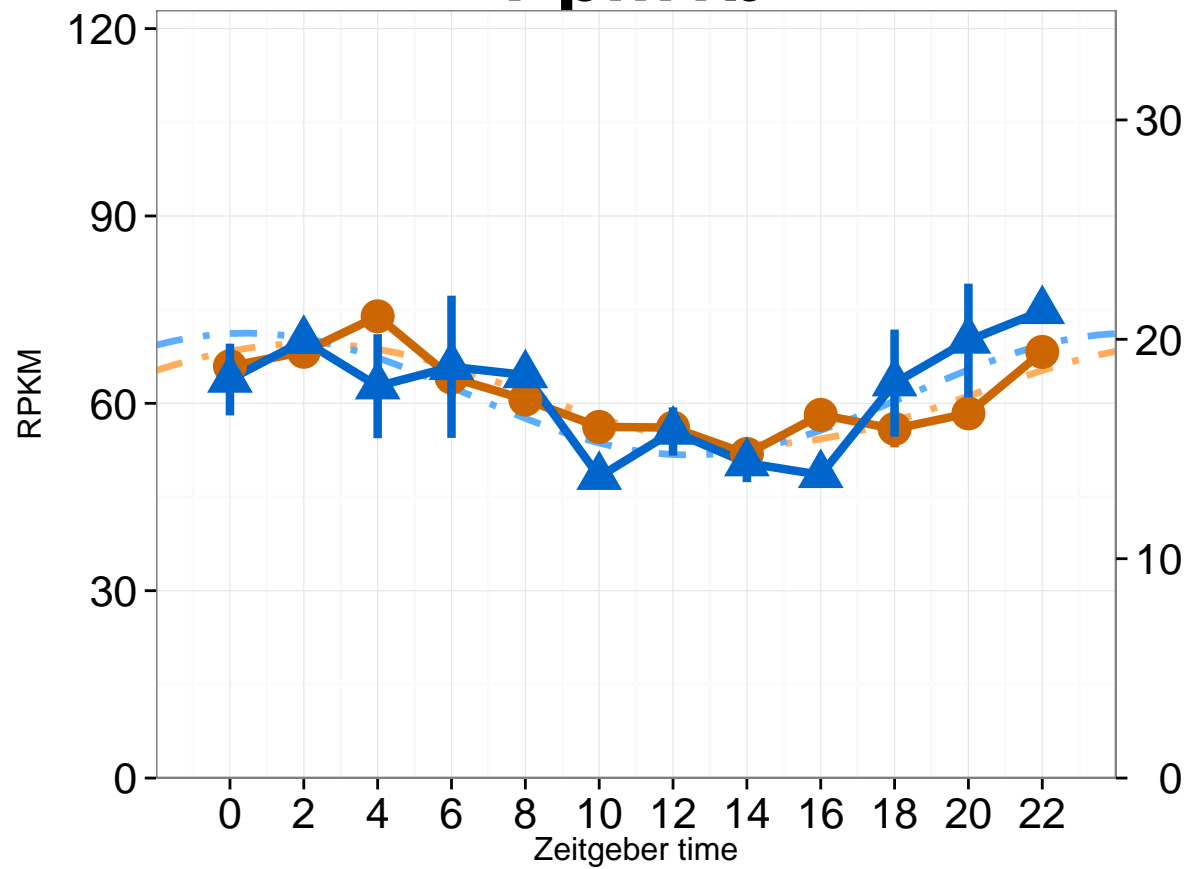

# Ppm1b

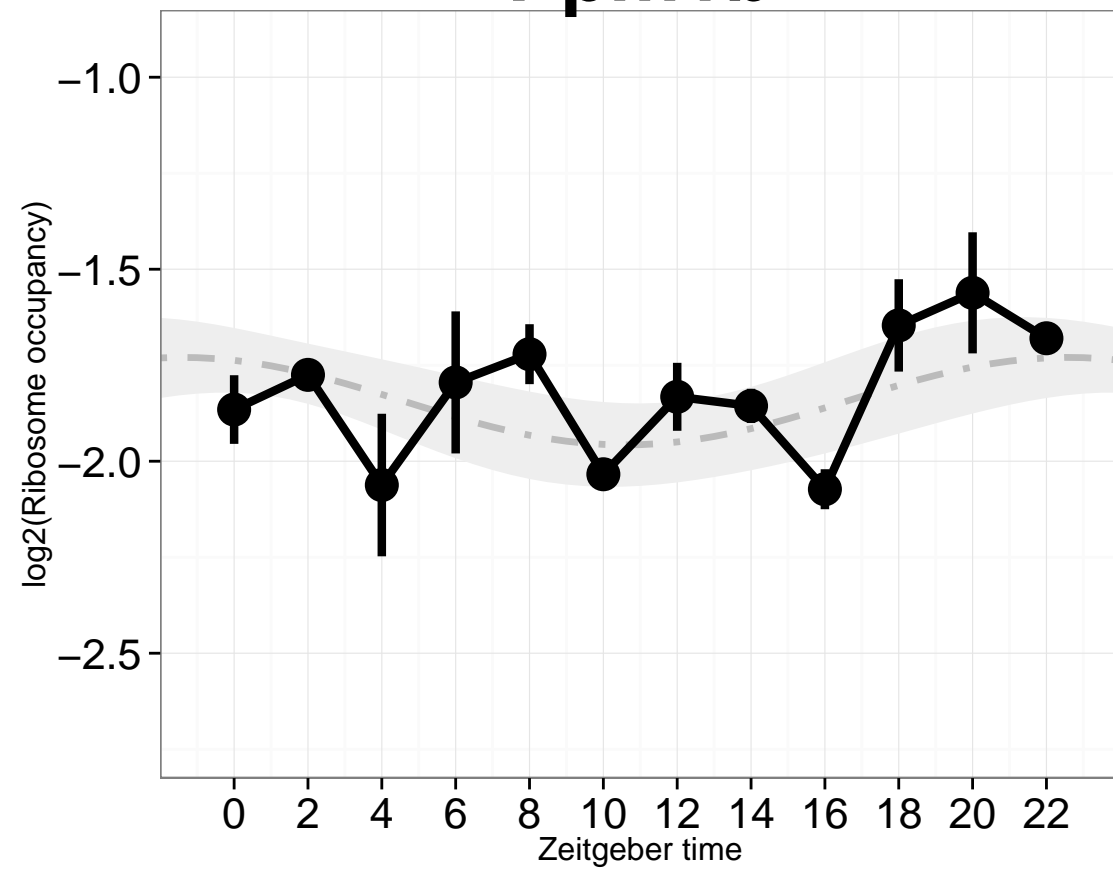

Supplement: SuppDataset_1.zip [file Ppm1b_set_A.pdf › Supplemental Dataset 1/A-mRNA_nonrhyth_translation_nonrhyth/Ppm1b_set_A.pdf]

# Ppm1d

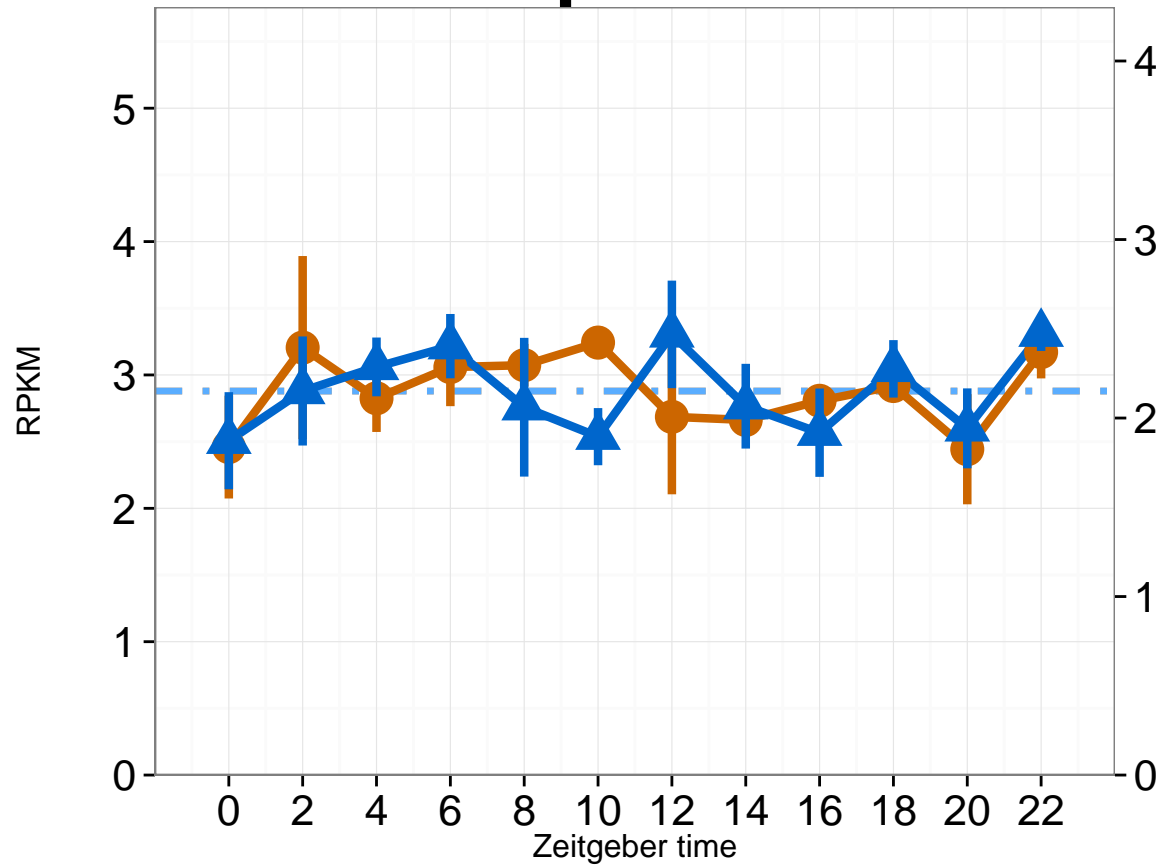

# Ppm1d

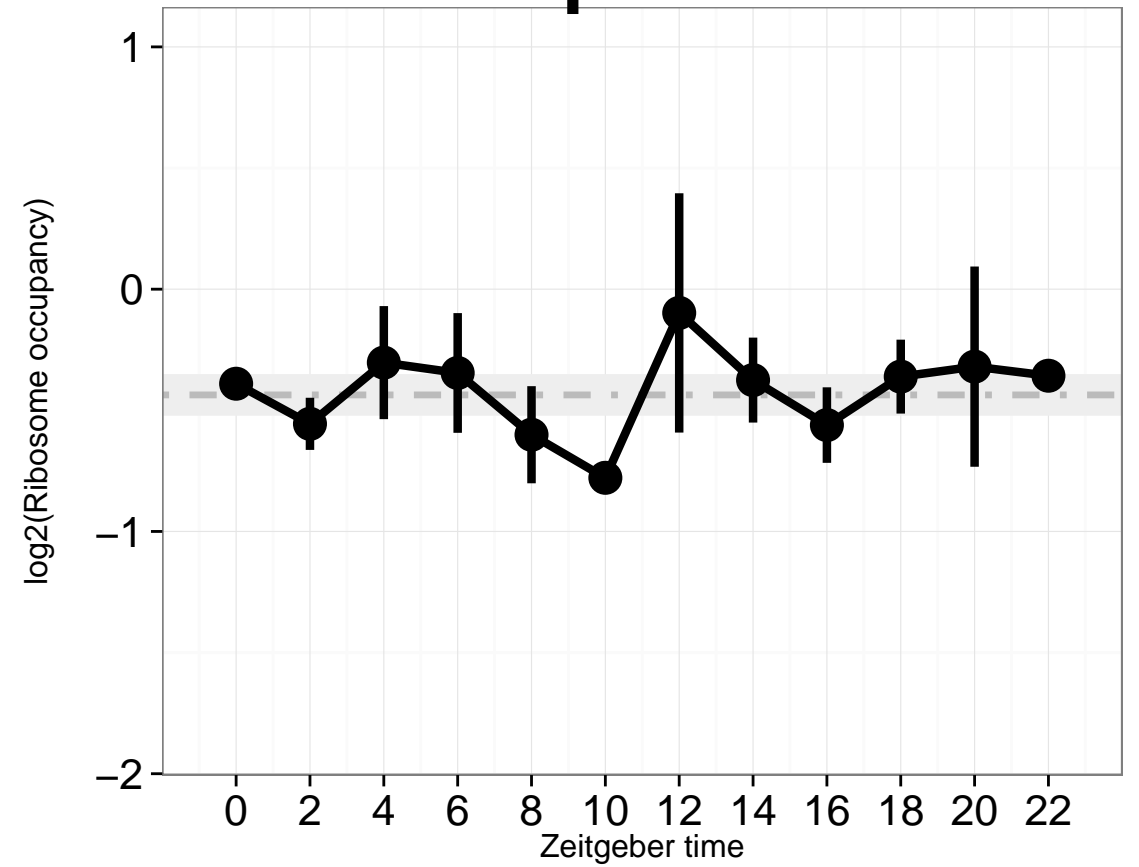

Supplement: SuppDataset_1.zip [file Ppm1d_set_A.pdf › Supplemental Dataset 1/A-mRNA_nonrhyth_translation_nonrhyth/Ppm1d_set_A.pdf]

# Ppm1f

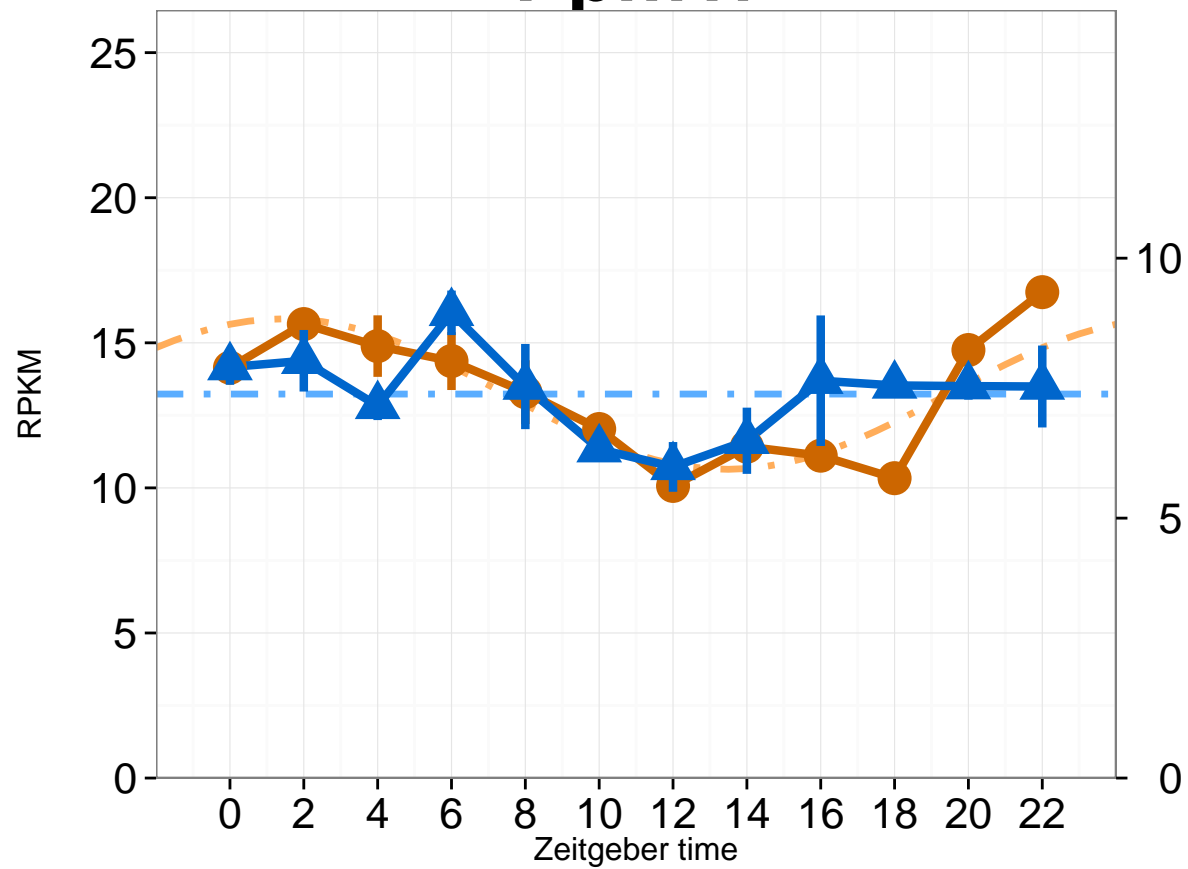

# Ppm1f

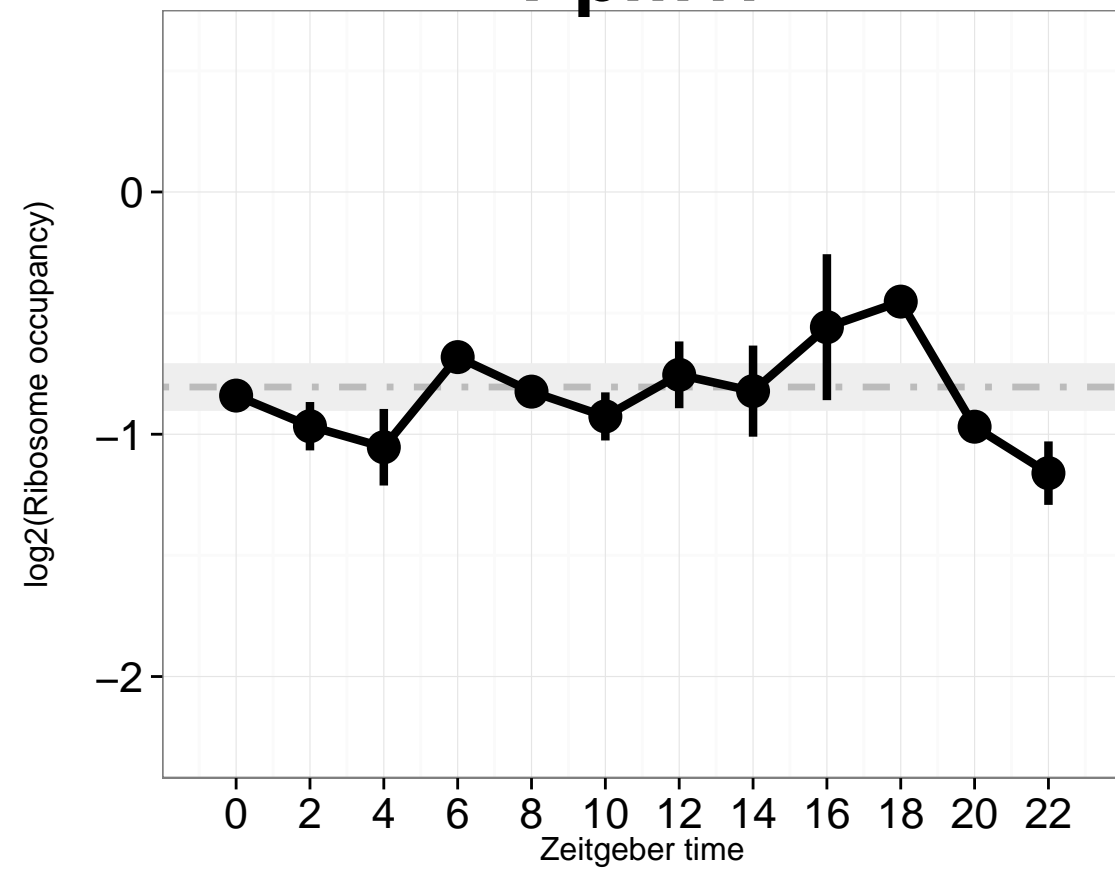

Supplement: SuppDataset_1.zip [file Ppm1f_set_A.pdf › Supplemental Dataset 1/A-mRNA_nonrhyth_translation_nonrhyth/Ppm1f_set_A.pdf]

# Ppm1g

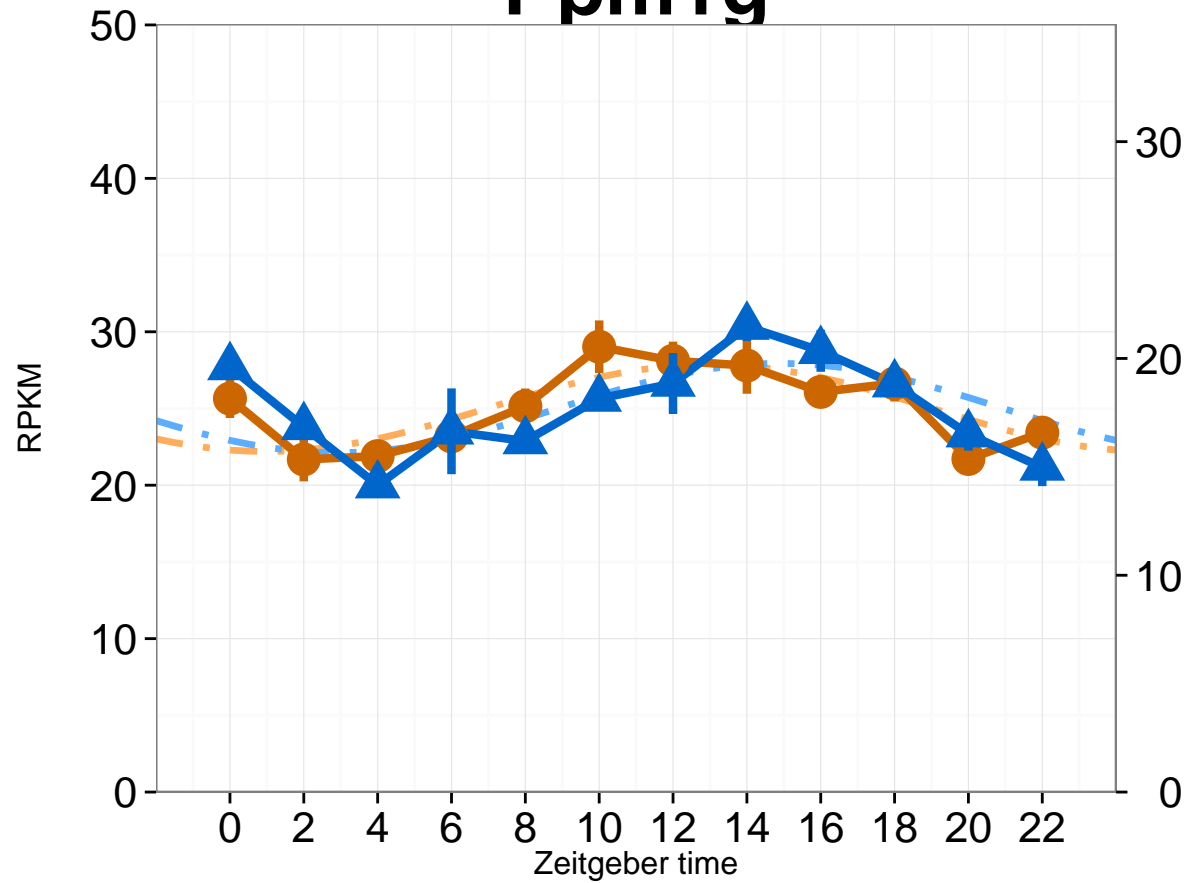

# Ppm1g

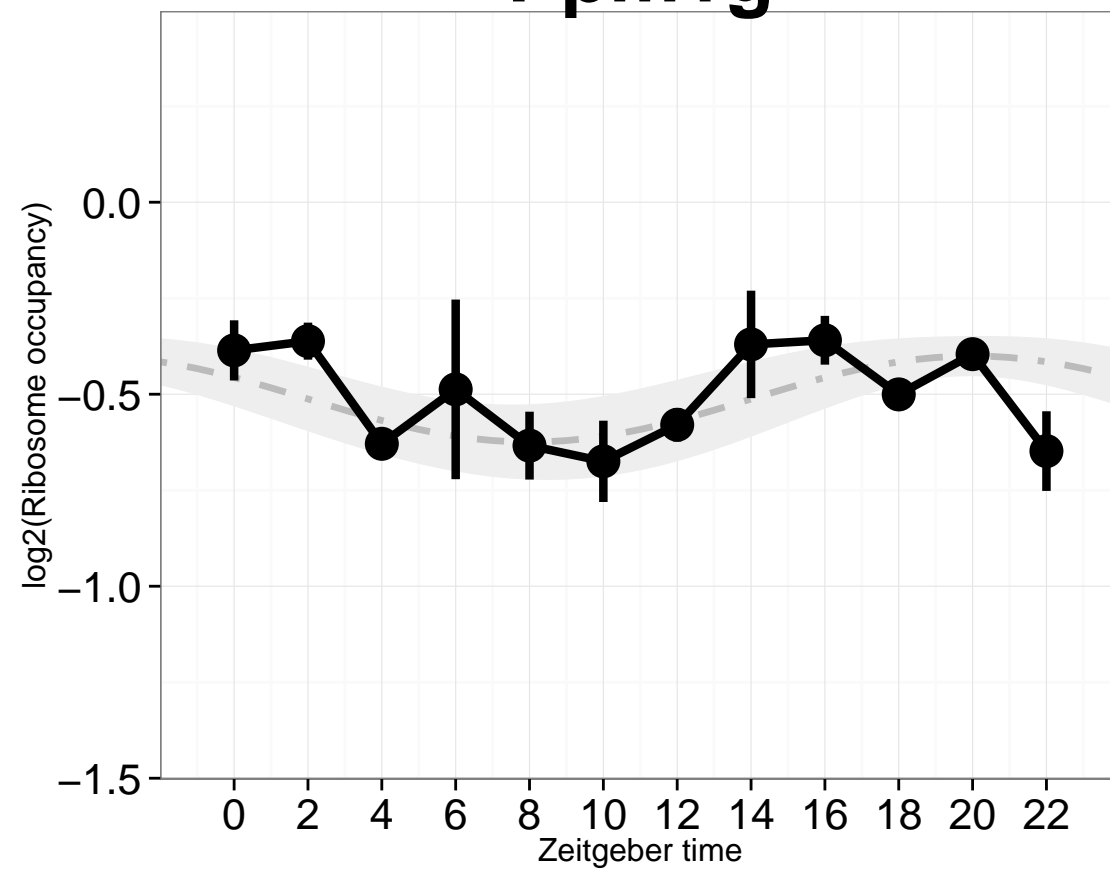

Supplement: SuppDataset_1.zip [file Ppm1g_set_A.pdf › Supplemental Dataset 1/A-mRNA_nonrhyth_translation_nonrhyth/Ppm1g_set_A.pdf]

**Ppm1h**

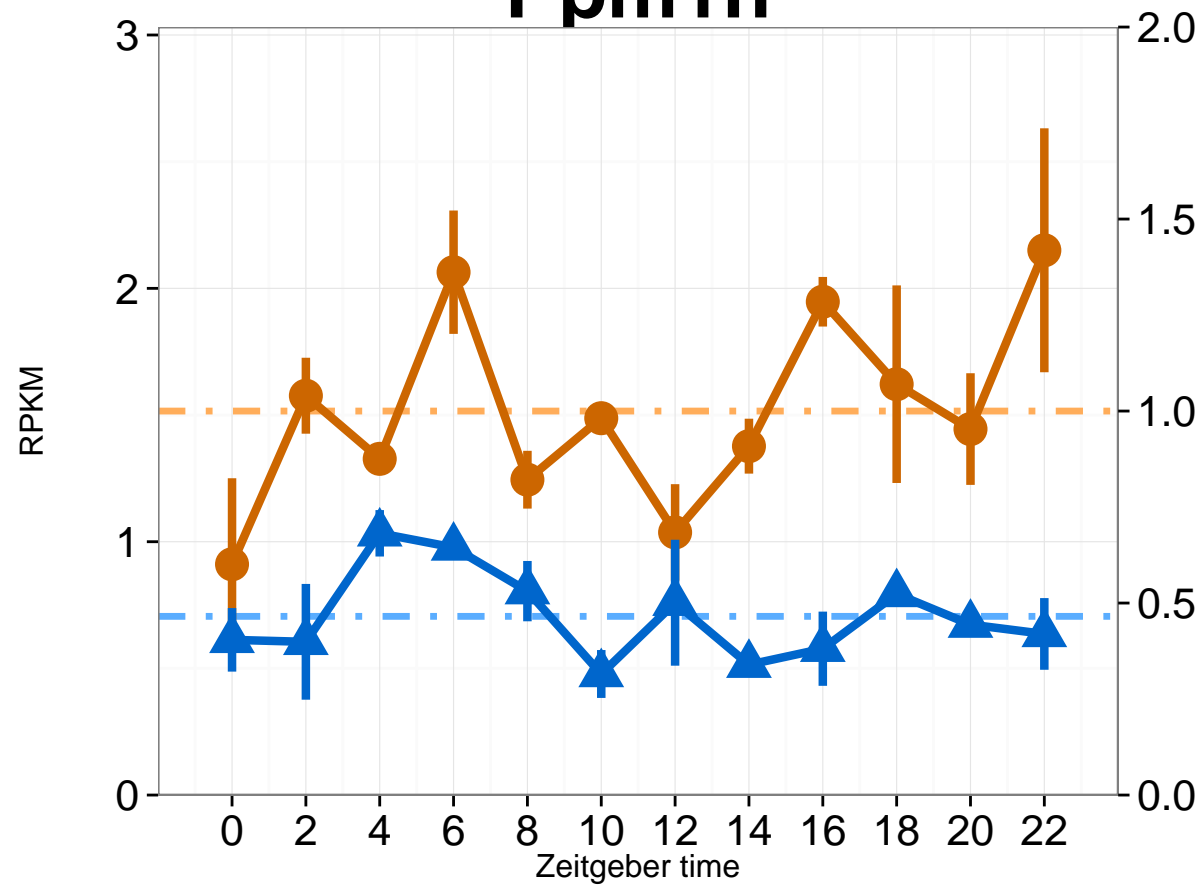

**Ppm1h**

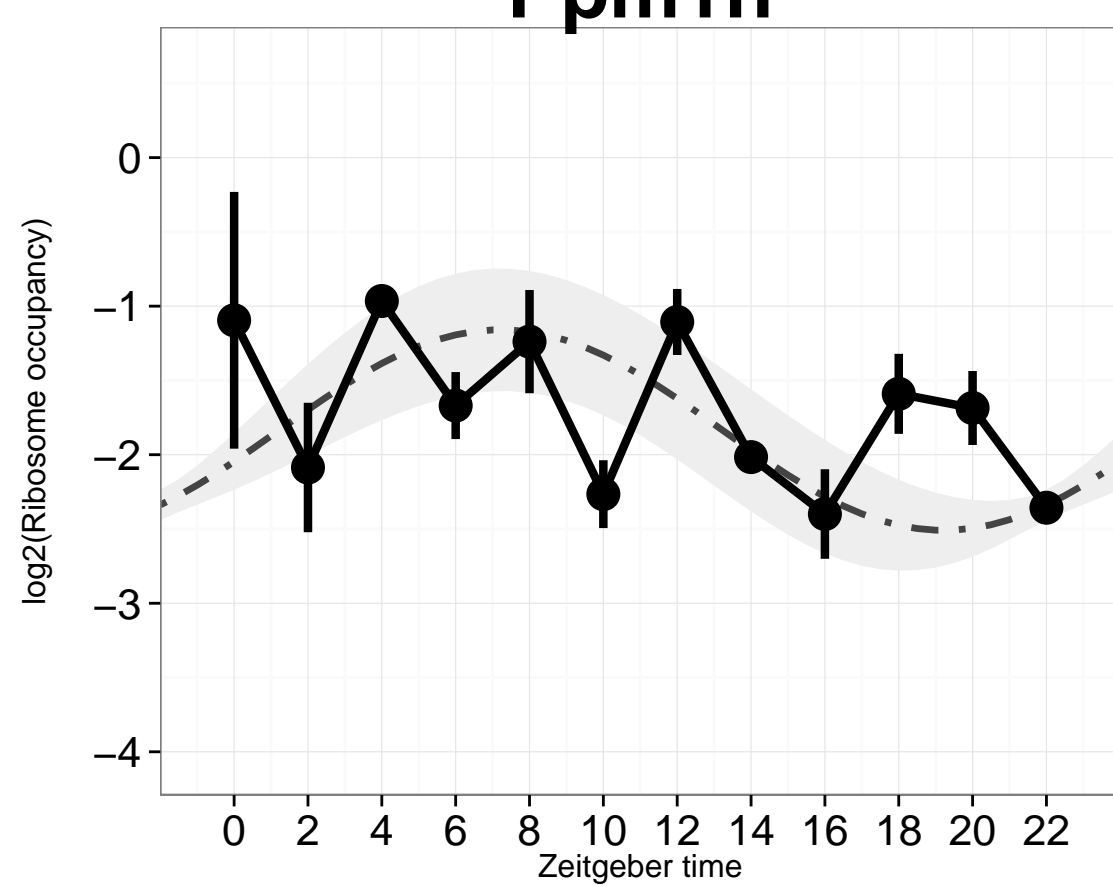

Supplement: SuppDataset_1.zip [file Ppm1h_set_A.pdf › Supplemental Dataset 1/A-mRNA_nonrhyth_translation_nonrhyth/Ppm1h_set_A.pdf]

# Ppm1l

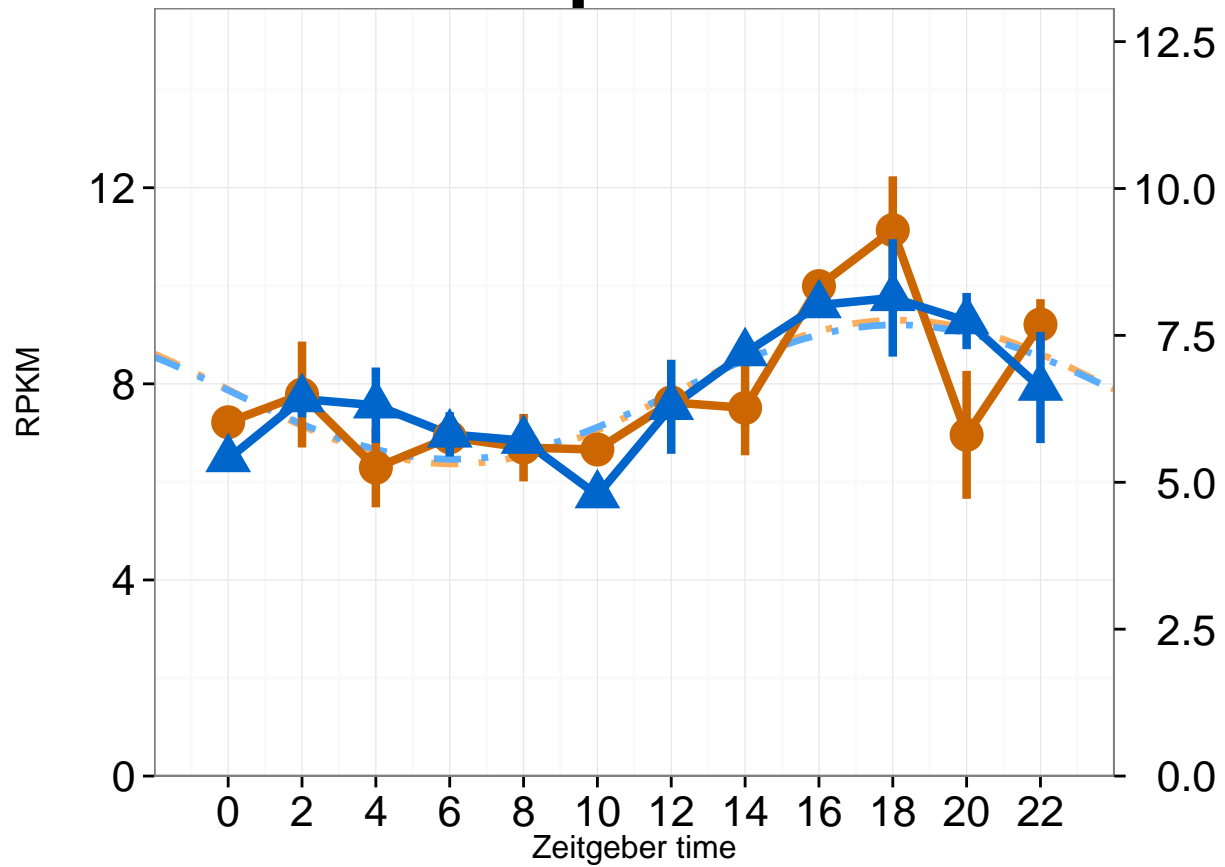

# Ppm1l

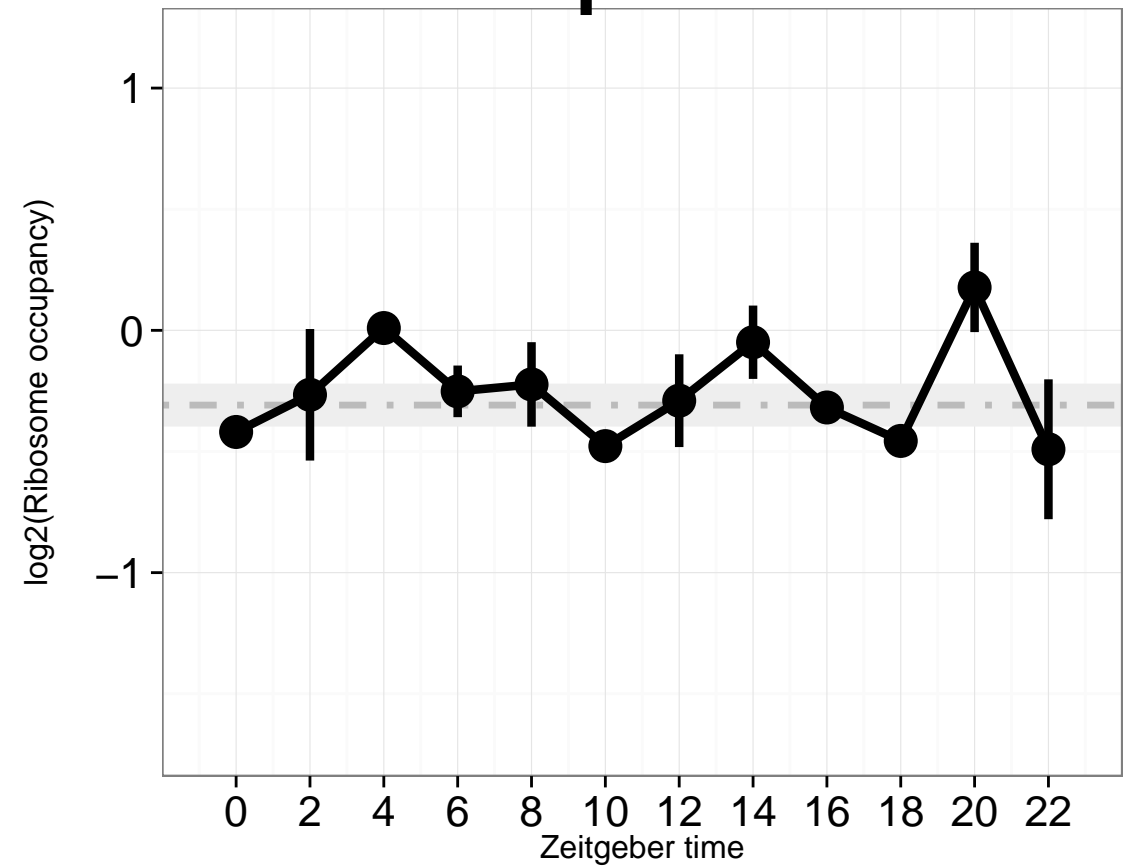

Supplement: SuppDataset_1.zip [file Ppm1l_set_A.pdf › Supplemental Dataset 1/A-mRNA_nonrhyth_translation_nonrhyth/Ppm1l_set_A.pdf]

# Ppm1m

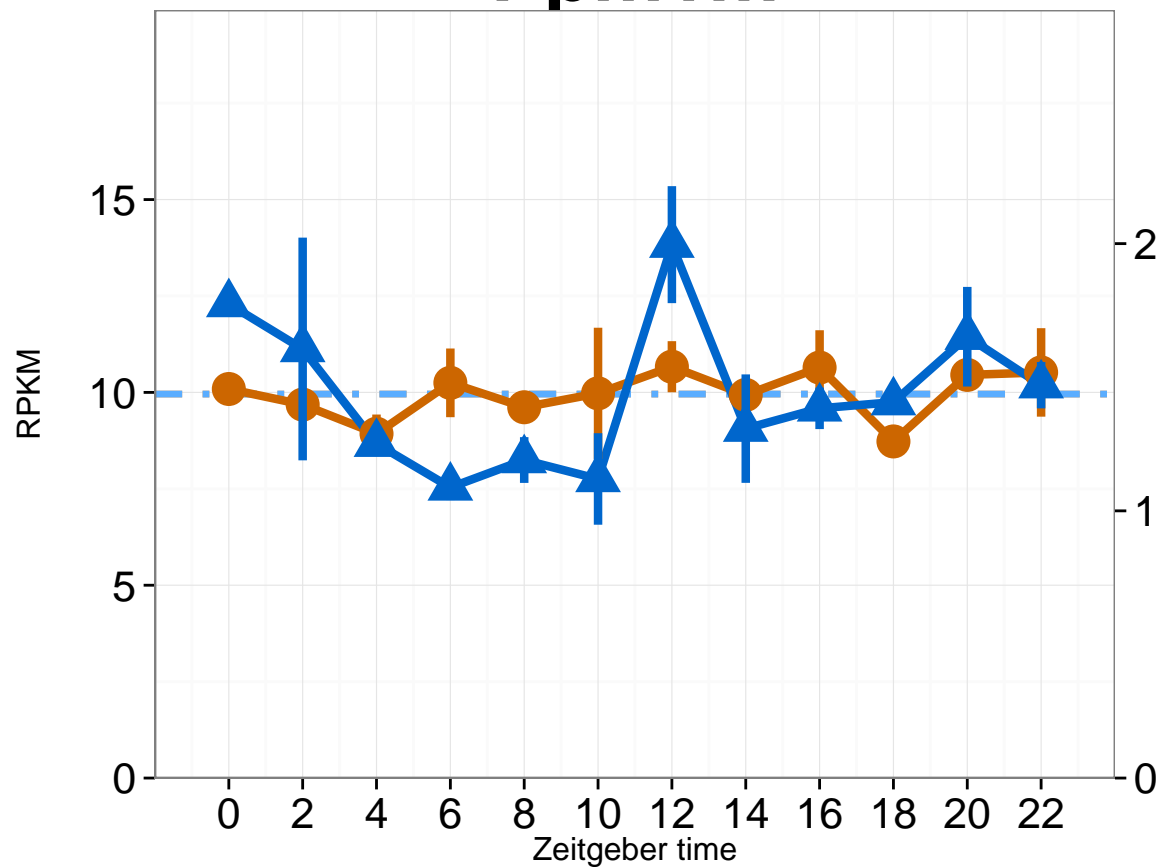

# Ppm1m

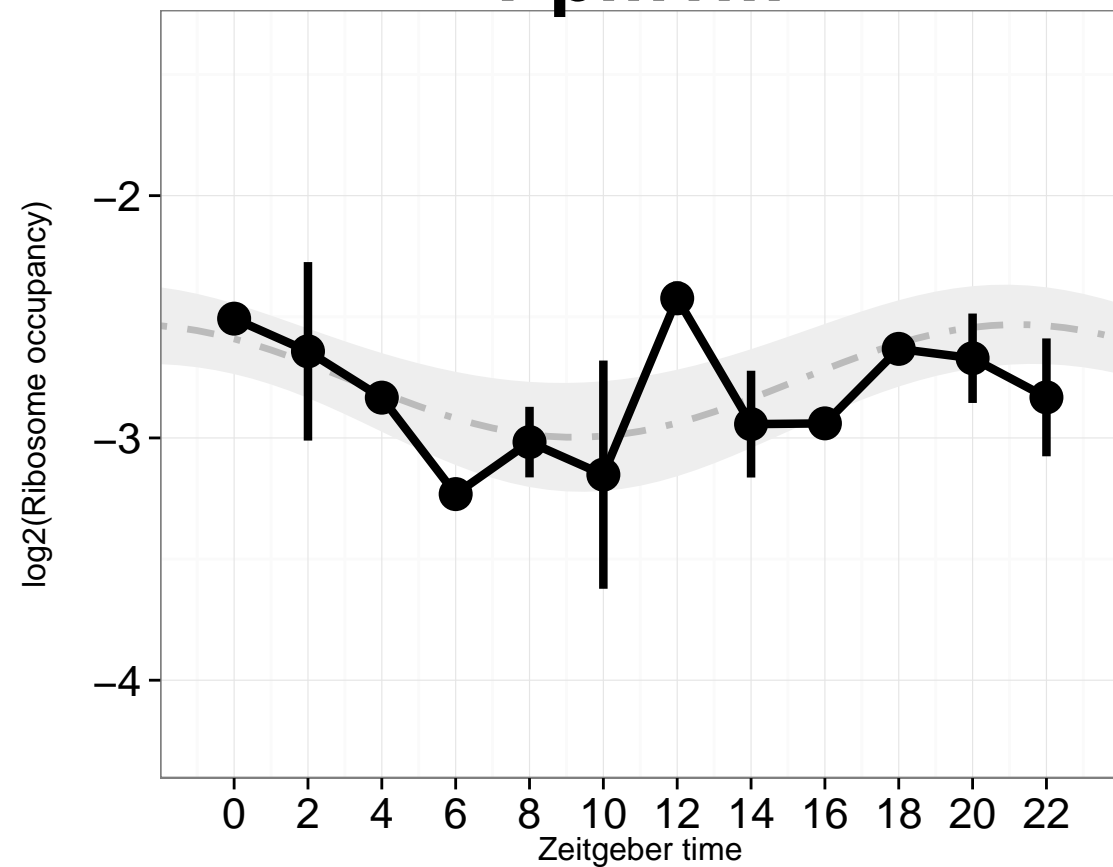

Supplement: SuppDataset_1.zip [file Ppm1m_set_A.pdf › Supplemental Dataset 1/A-mRNA_nonrhyth_translation_nonrhyth/Ppm1m_set_A.pdf]

# Ppme1

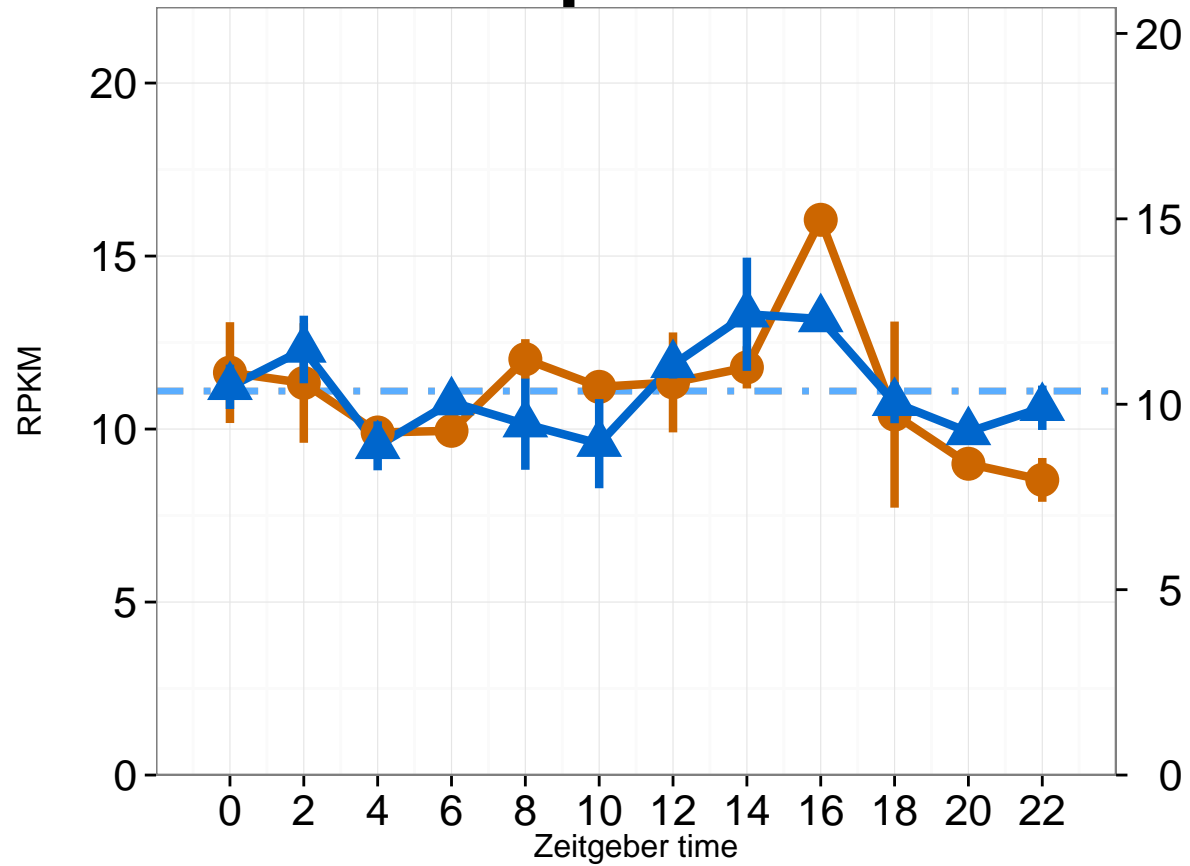

# Ppme1

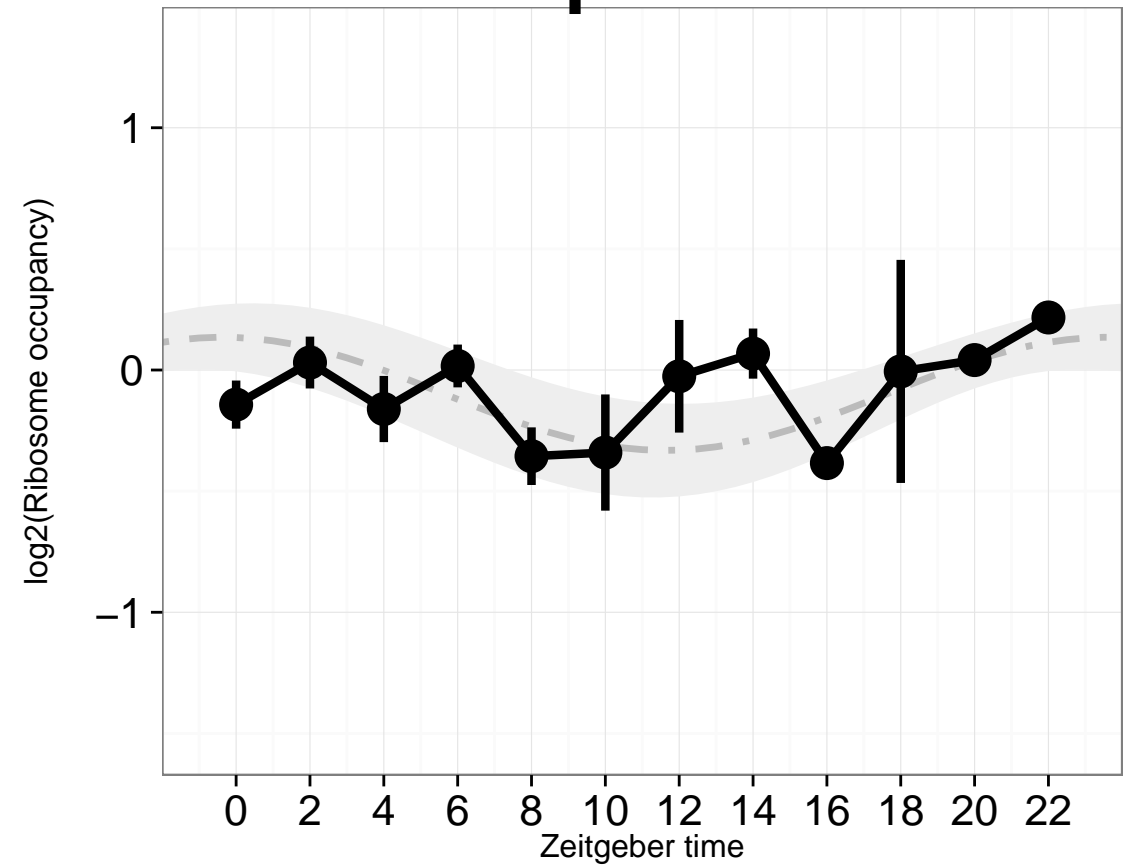

Supplement: SuppDataset_1.zip [file Ppme1_set_A.pdf › Supplemental Dataset 1/A-mRNA_nonrhyth_translation_nonrhyth/Ppme1_set_A.pdf]

# Ppp1cb

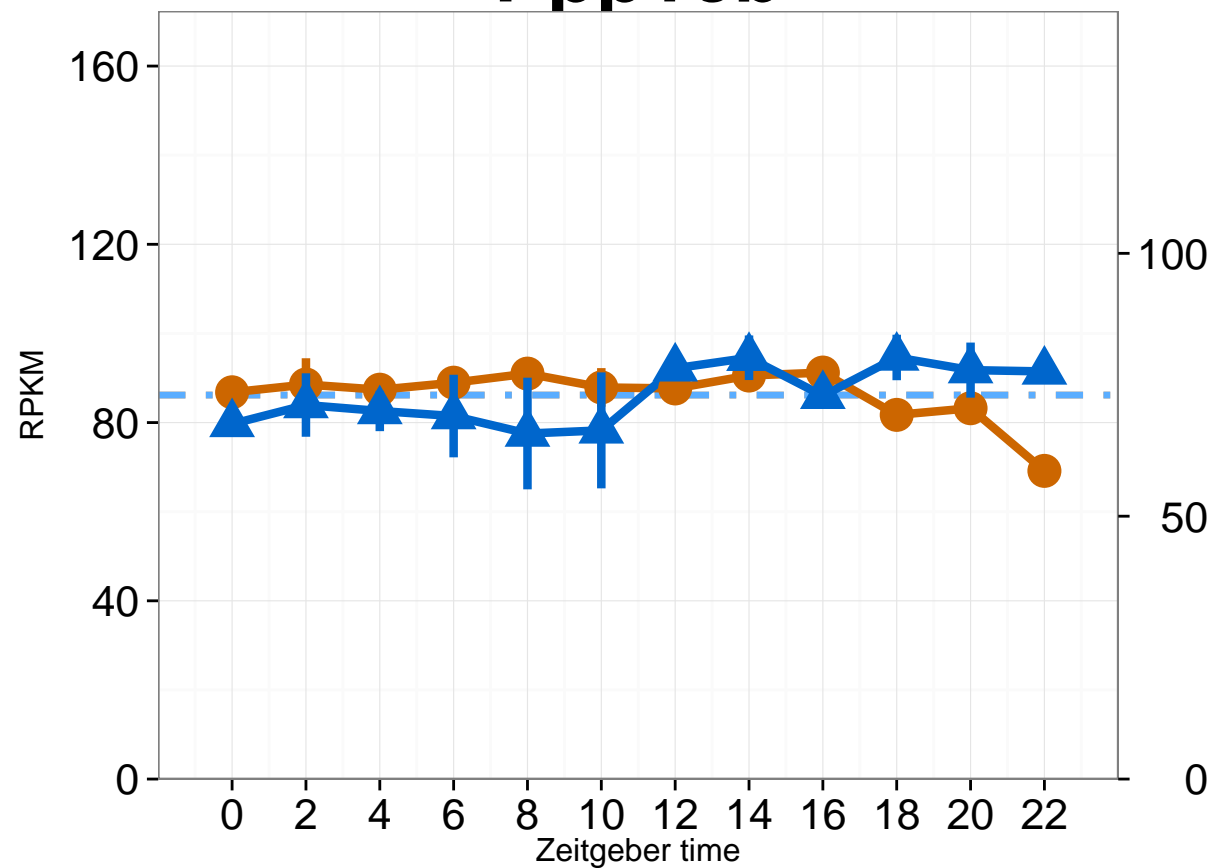

# Ppp1cb

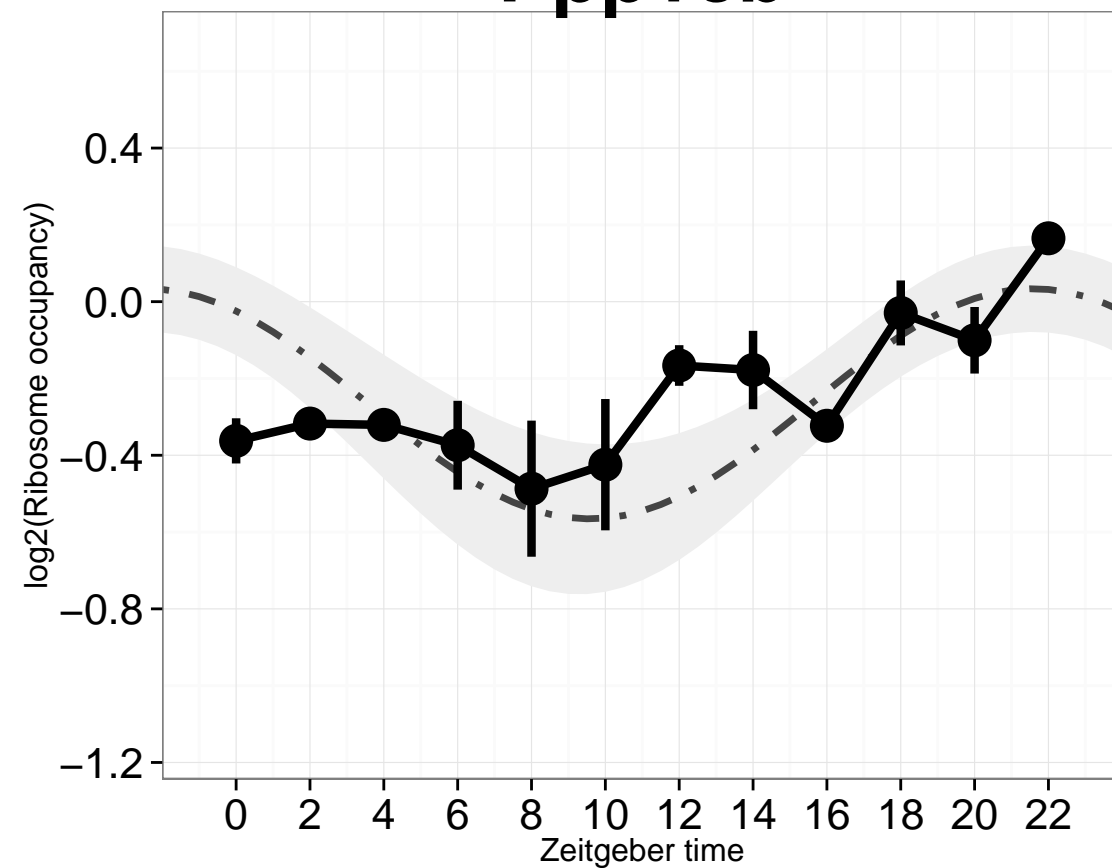

Supplement: SuppDataset_1.zip [file Ppp1cb_set_A.pdf › Supplemental Dataset 1/A-mRNA_nonrhyth_translation_nonrhyth/Ppp1cb_set_A.pdf]

# Ppp1cc

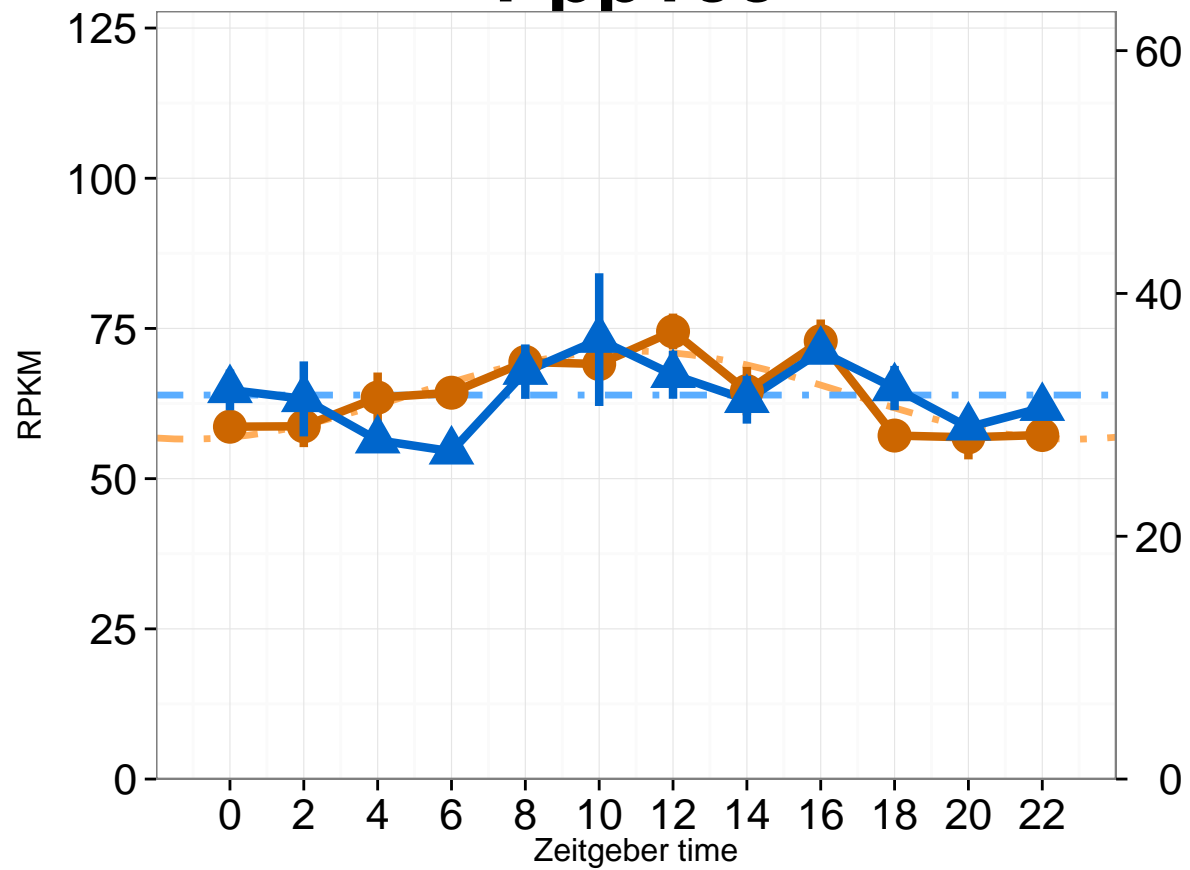

# Ppp1cc

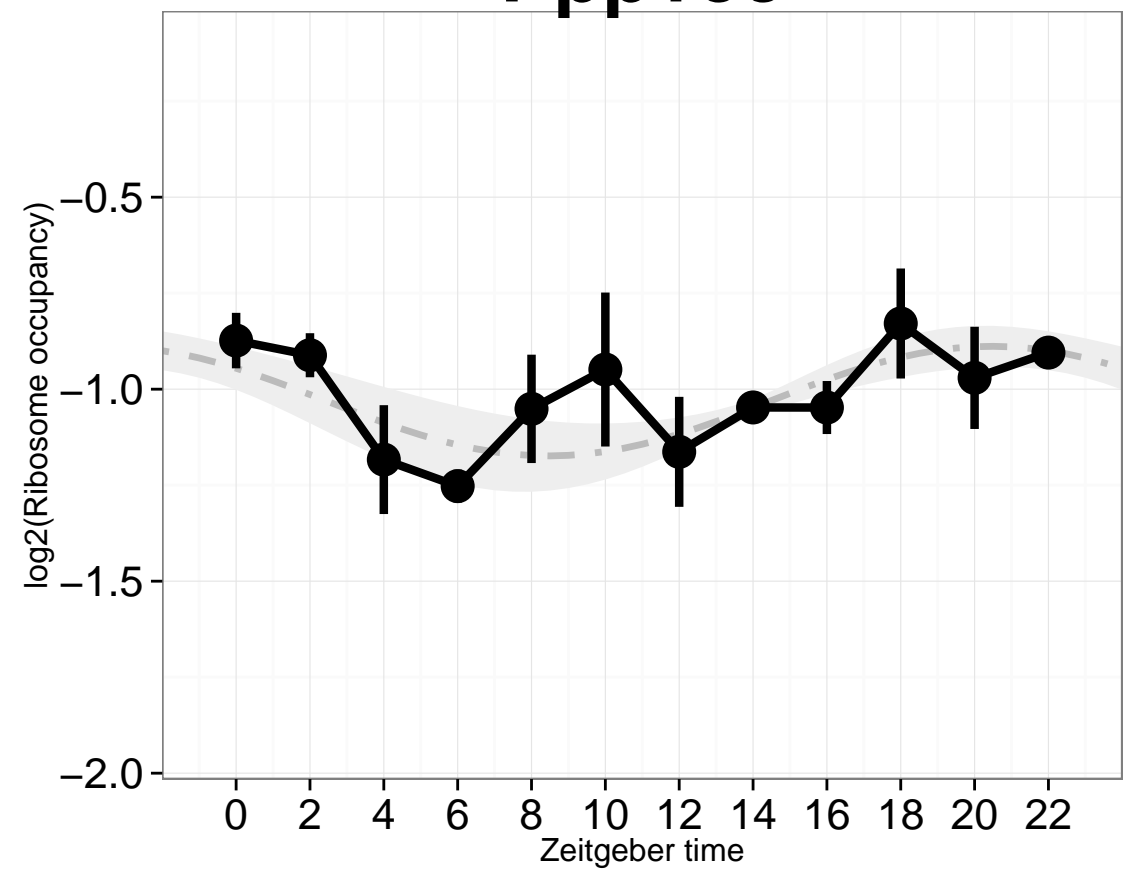

Supplement: SuppDataset_1.zip [file Ppp1cc_set_A.pdf › Supplemental Dataset 1/A-mRNA_nonrhyth_translation_nonrhyth/Ppp1cc_set_A.pdf]

## Ppp1r11

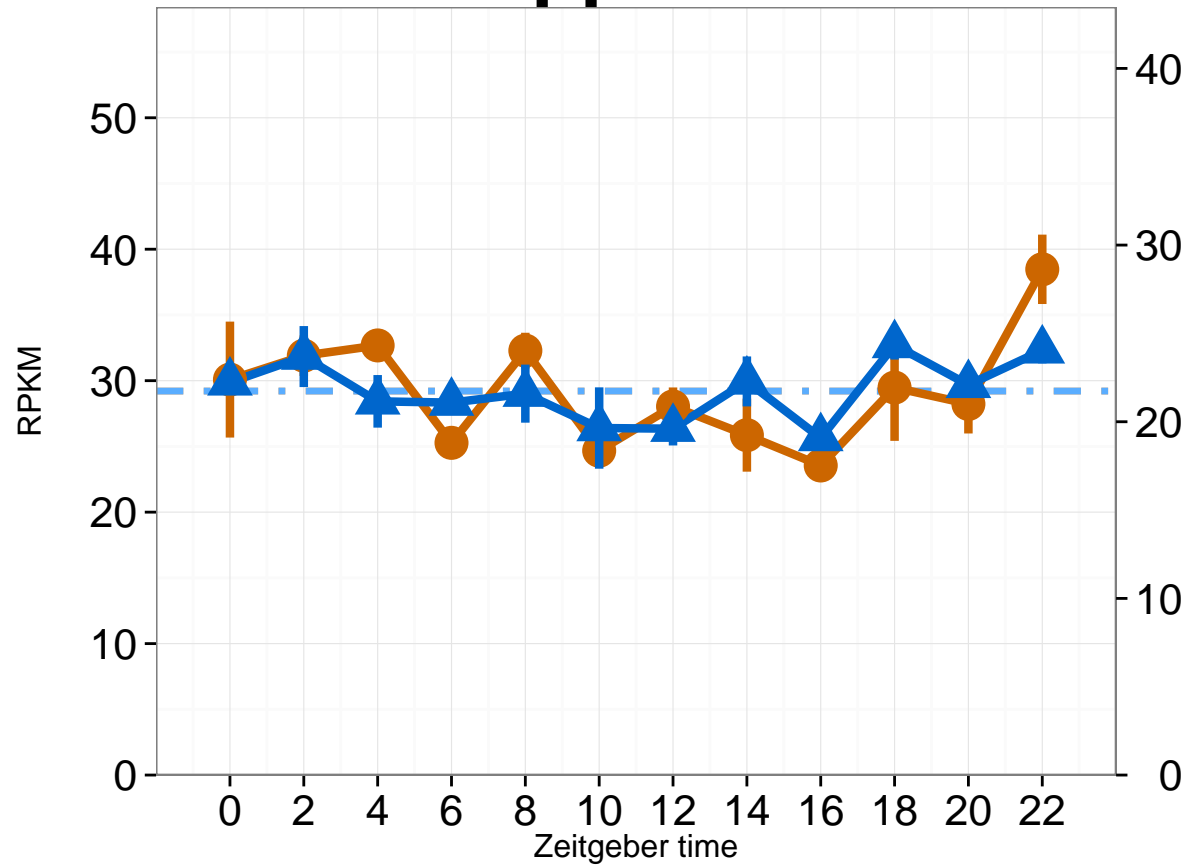

## Ppp1r11

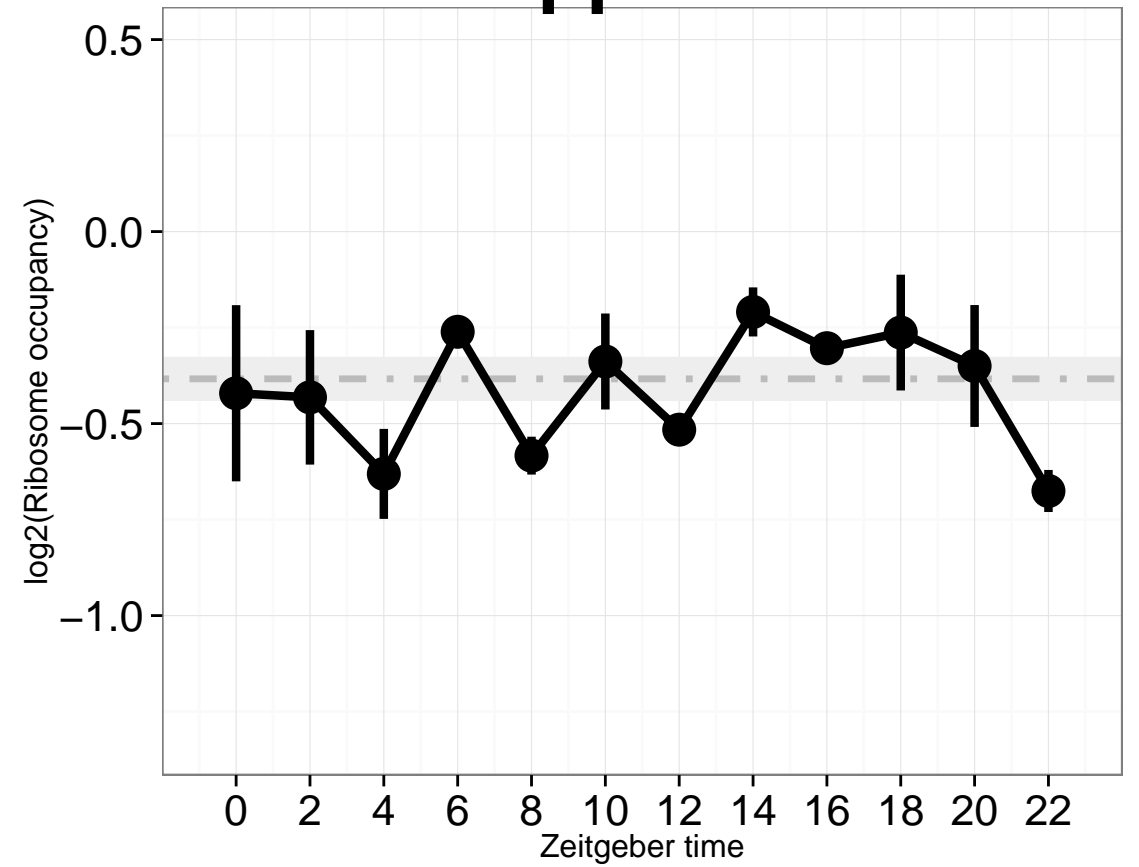

Supplement: SuppDataset_1.zip [file Ppp1r11_set_A.pdf › Supplemental Dataset 1/A-mRNA_nonrhyth_translation_nonrhyth/Ppp1r11_set_A.pdf]

# Ppp1r12a

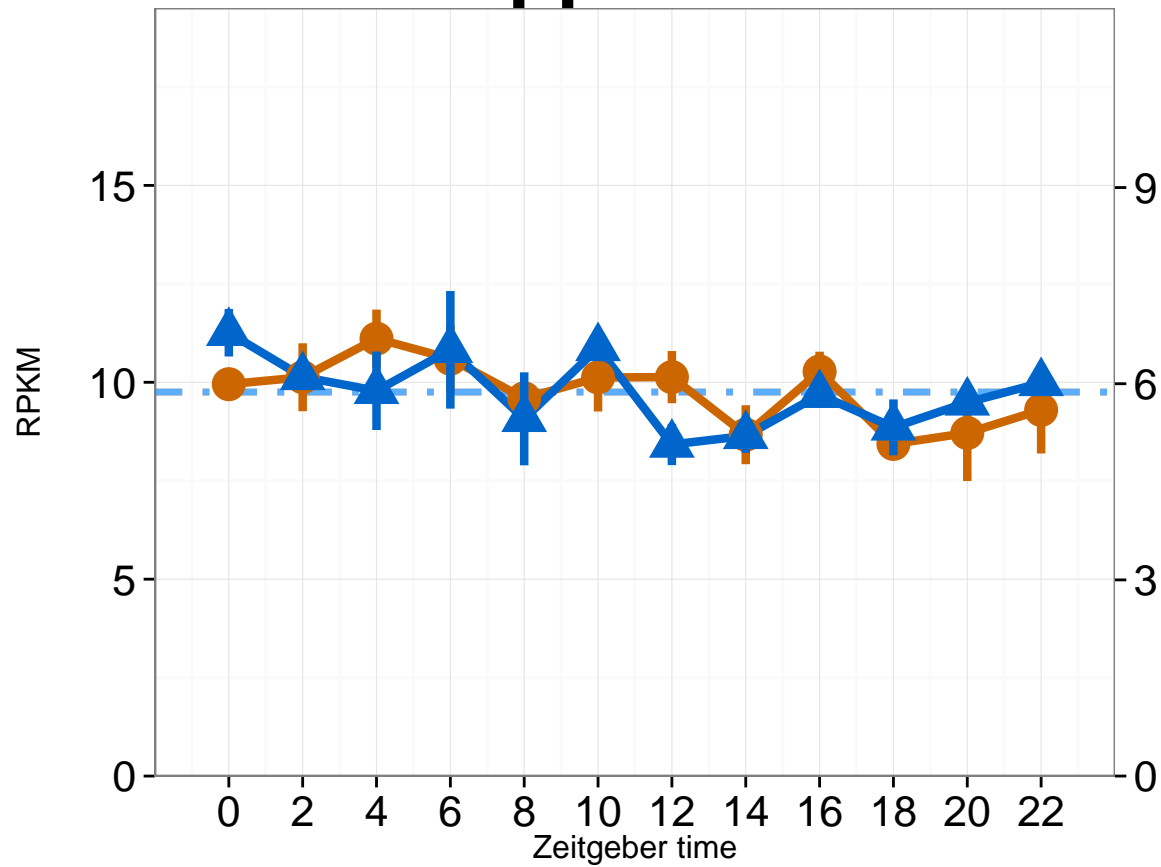

# Ppp1r12a

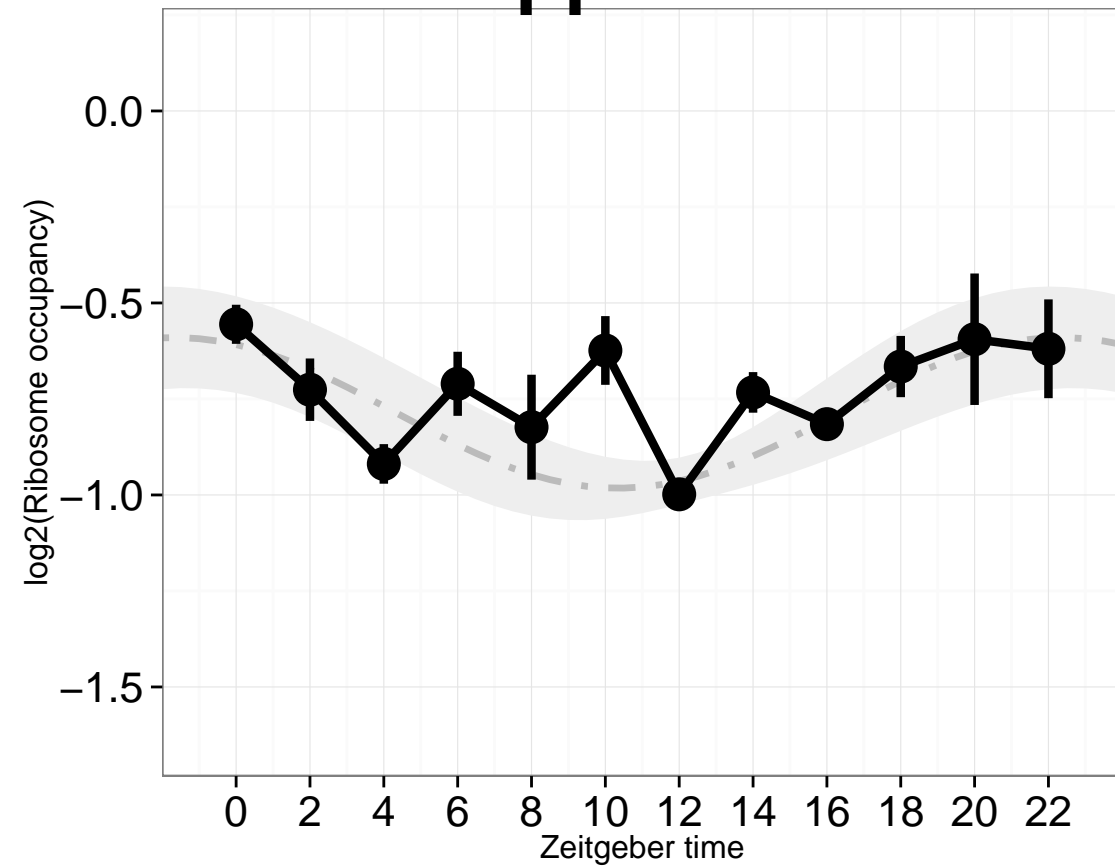

Supplement: SuppDataset_1.zip [file Ppp1r12a_set_A.pdf › Supplemental Dataset 1/A-mRNA_nonrhyth_translation_nonrhyth/Ppp1r12a_set_A.pdf]

# Ppp1r13b

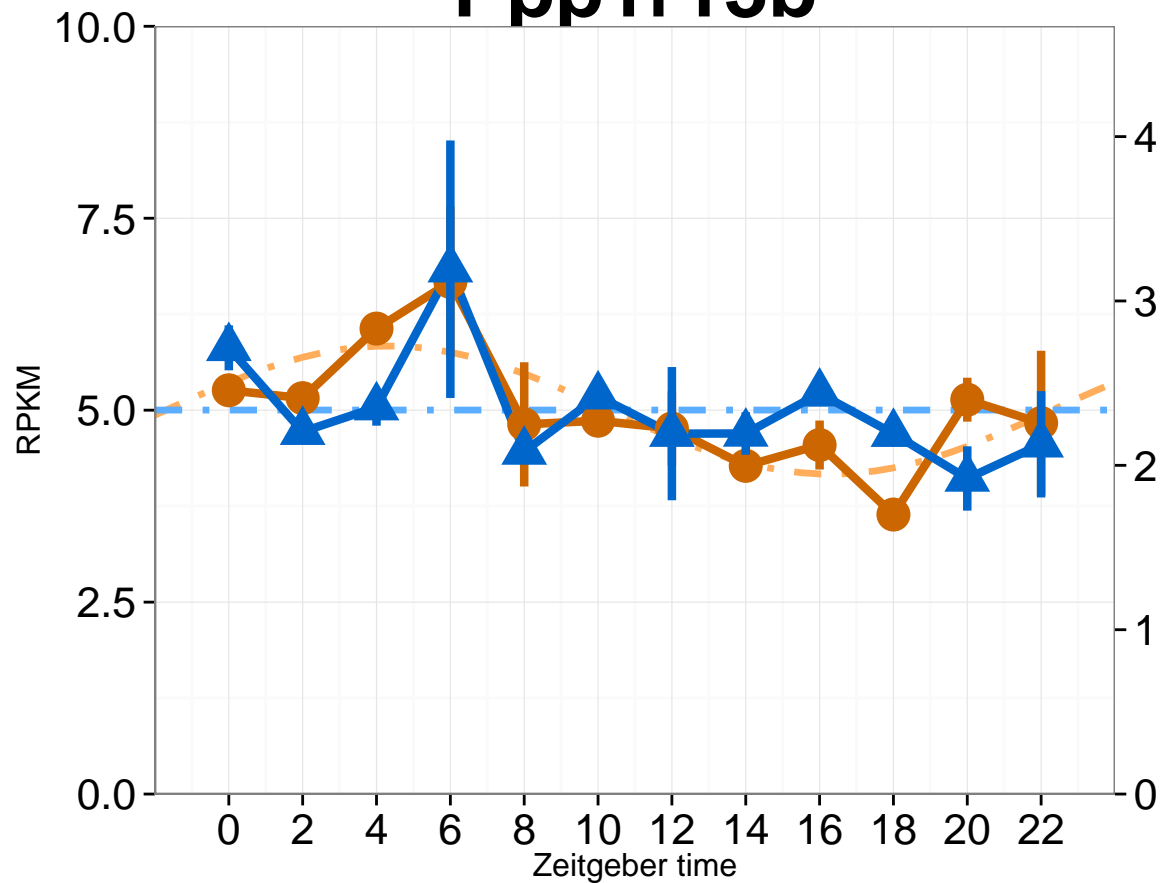

# Ppp1r13b

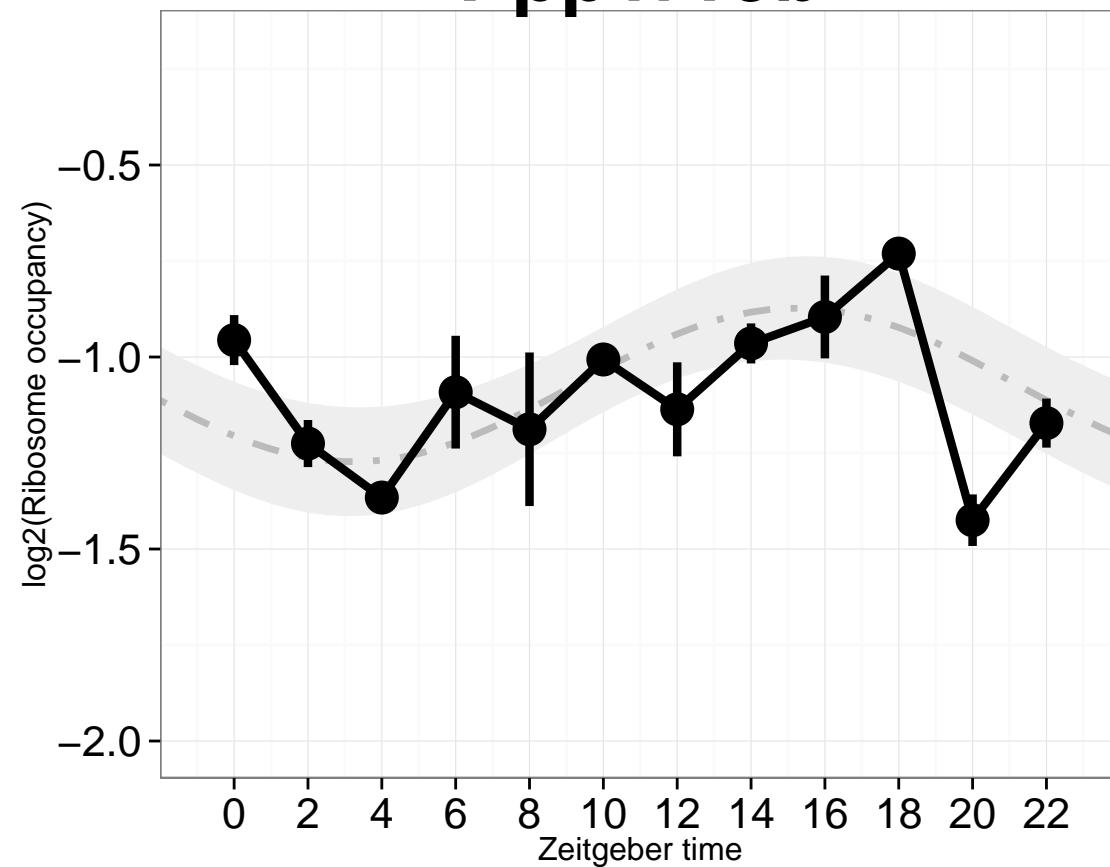

Supplement: SuppDataset_1.zip [file Ppp1r13b_set_A.pdf › Supplemental Dataset 1/A-mRNA_nonrhyth_translation_nonrhyth/Ppp1r13b_set_A.pdf]

# Ppp1r13l

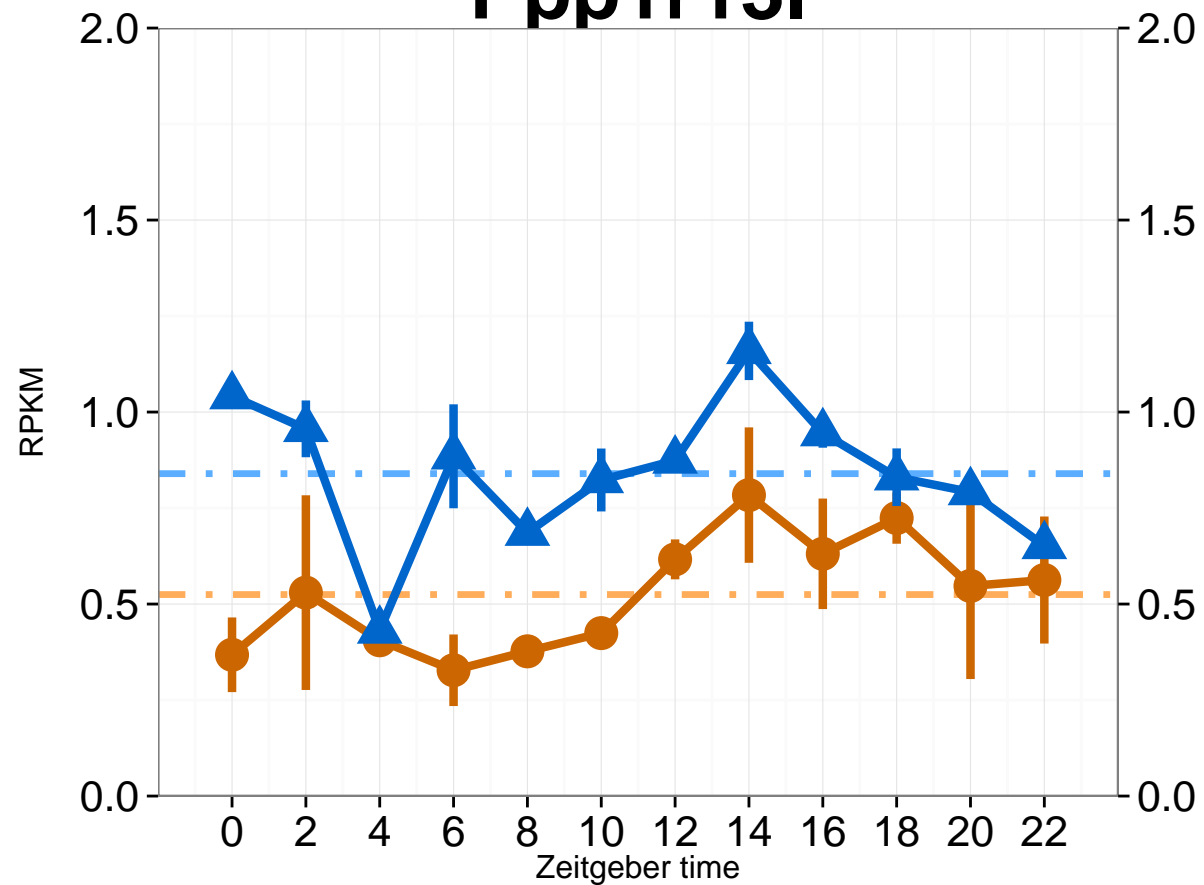

# Ppp1r13l

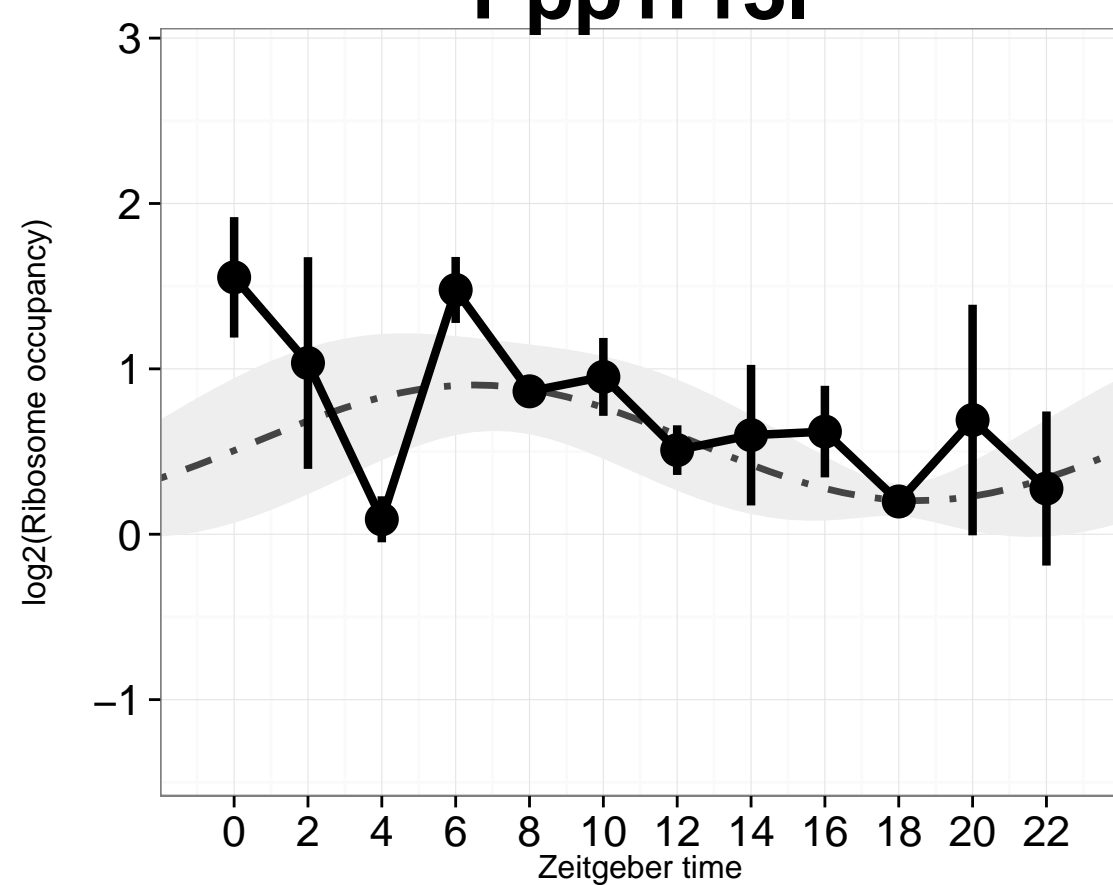

Supplement: SuppDataset_1.zip [file Ppp1r13l_set_A.pdf › Supplemental Dataset 1/A-mRNA_nonrhyth_translation_nonrhyth/Ppp1r13l_set_A.pdf]

# Ppp1r14a

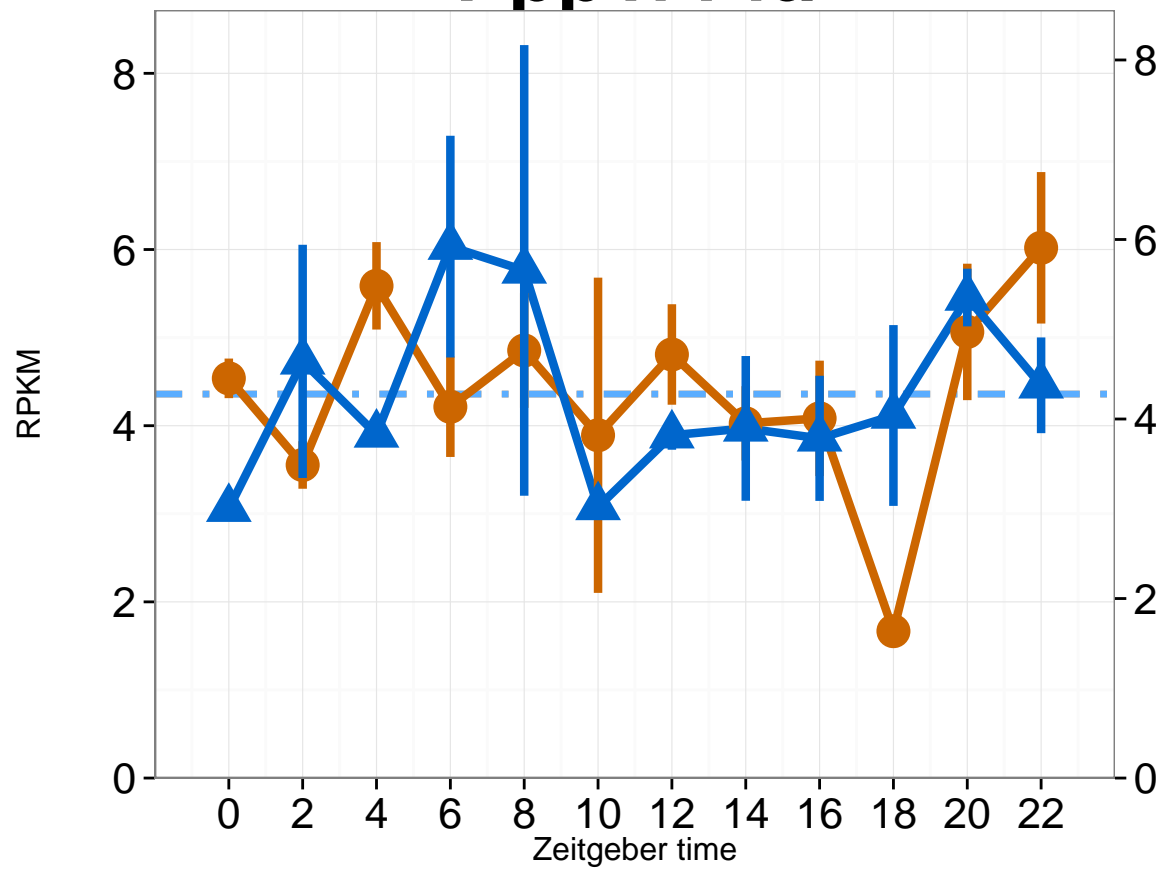

# Ppp1r14a

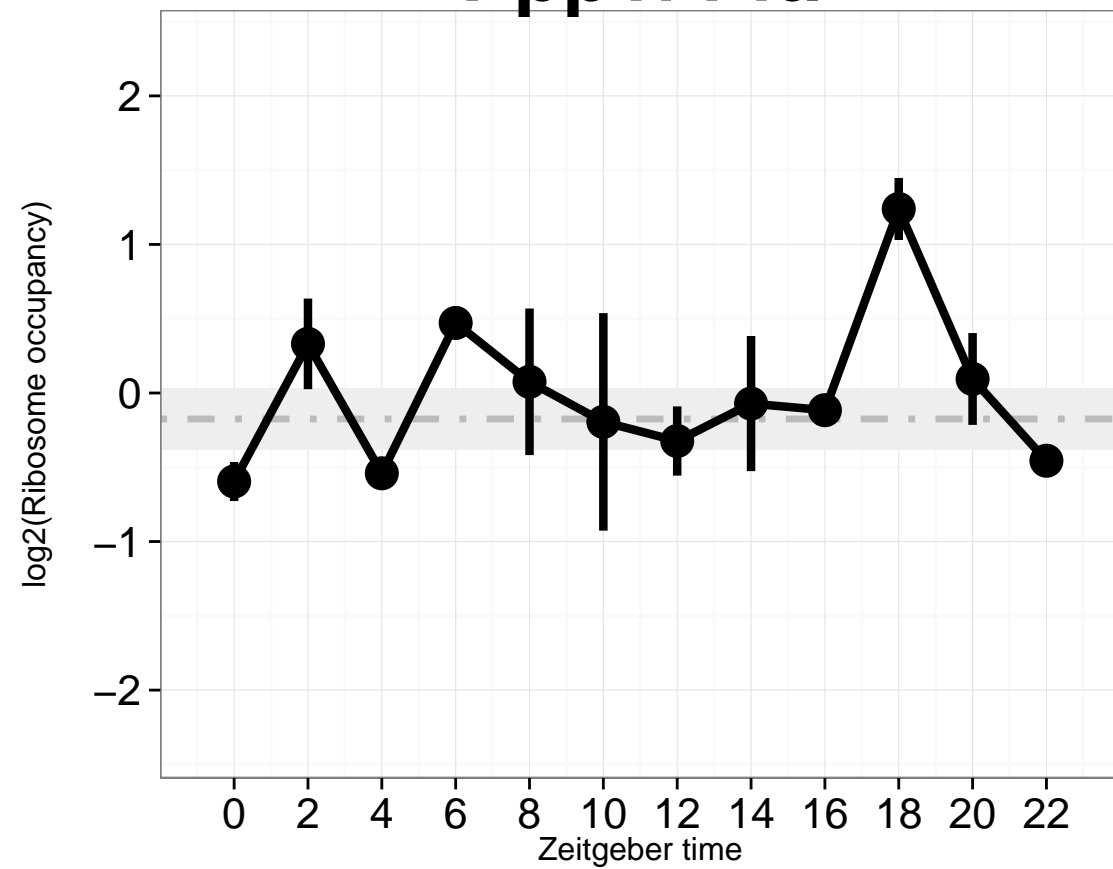

Supplement: SuppDataset_1.zip [file Ppp1r14a_set_A.pdf › Supplemental Dataset 1/A-mRNA_nonrhyth_translation_nonrhyth/Ppp1r14a_set_A.pdf]

# Ppp1r14b

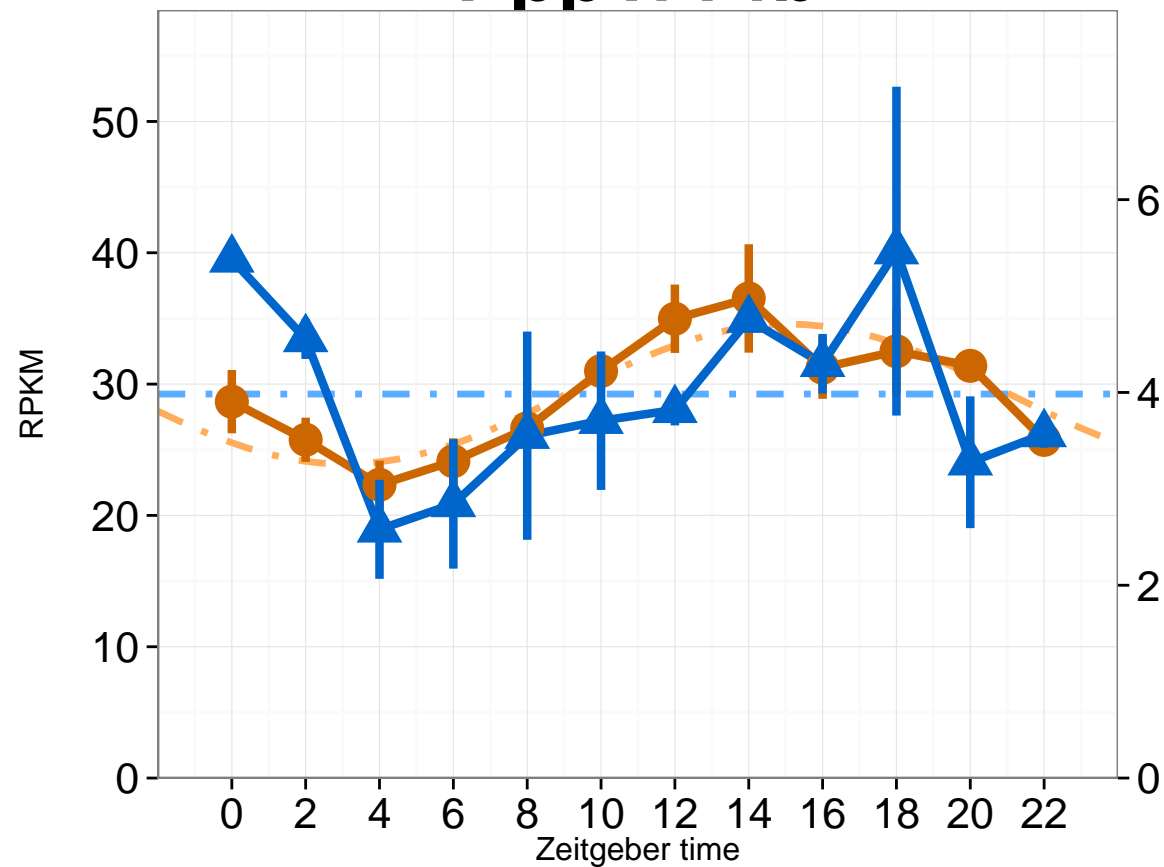

# Ppp1r14b

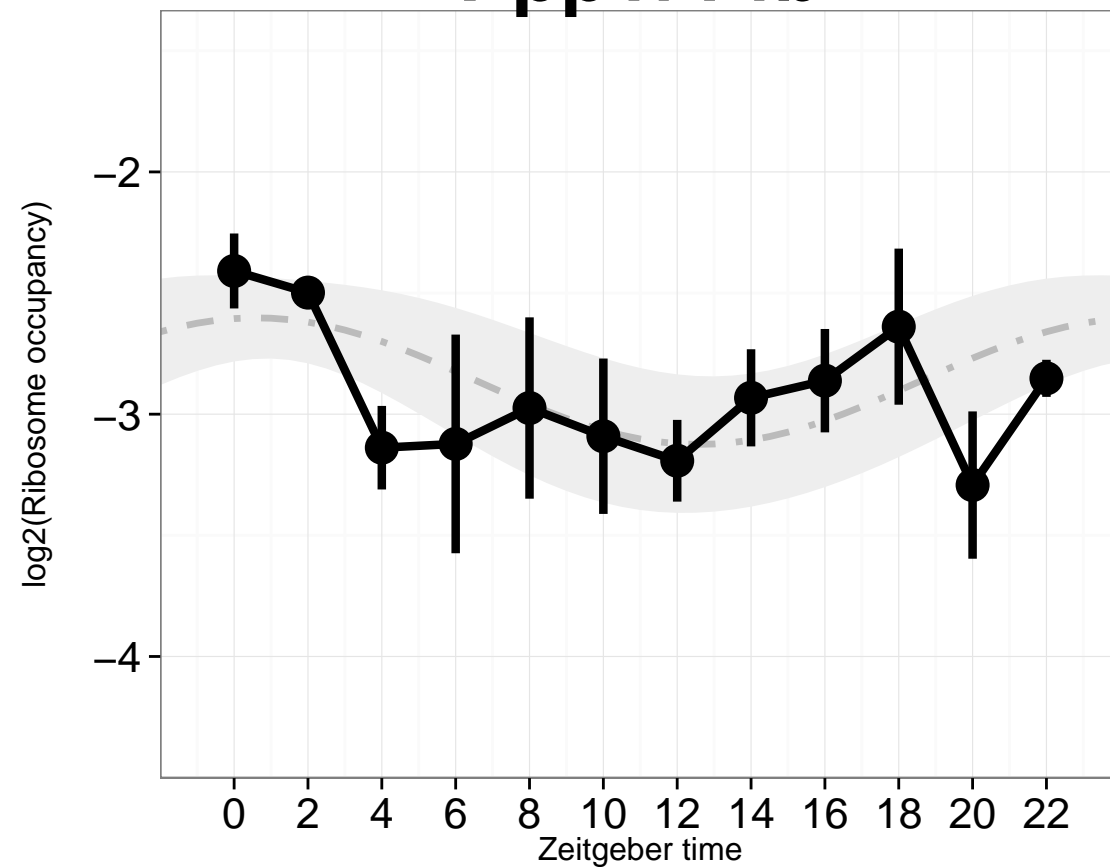

Supplement: SuppDataset_1.zip [file Ppp1r14b_set_A.pdf › Supplemental Dataset 1/A-mRNA_nonrhyth_translation_nonrhyth/Ppp1r14b_set_A.pdf]

# Ppp1r15a

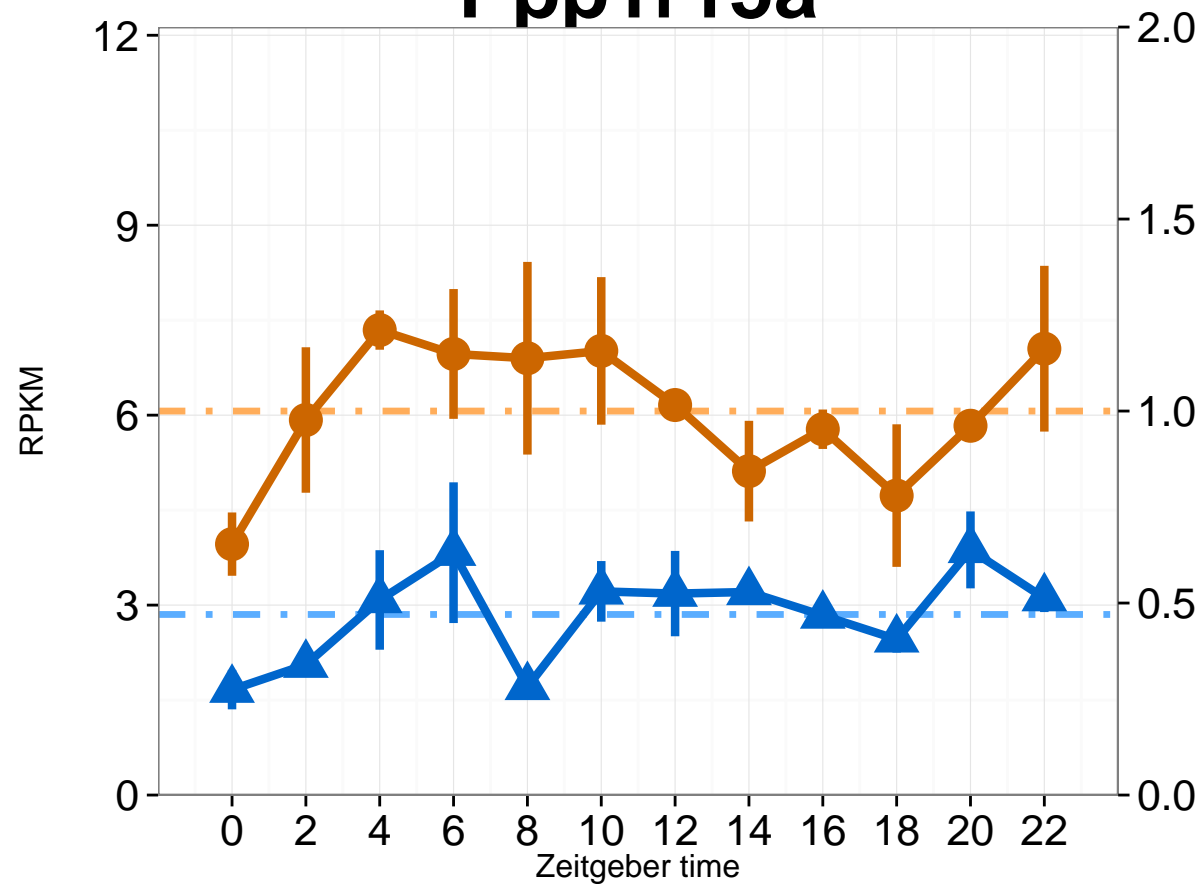

# Ppp1r15a

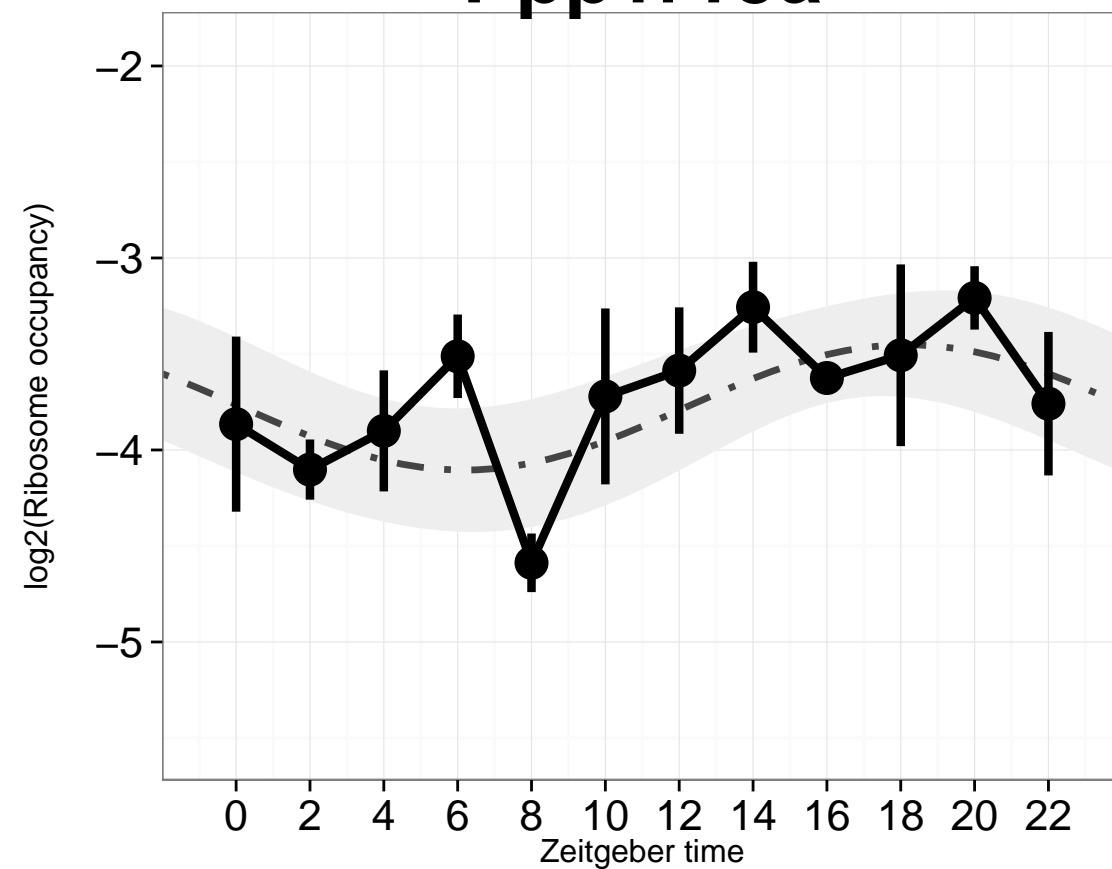

Supplement: SuppDataset_1.zip [file Ppp1r15a_set_A.pdf › Supplemental Dataset 1/A-mRNA_nonrhyth_translation_nonrhyth/Ppp1r15a_set_A.pdf]

# Ppp1r15b

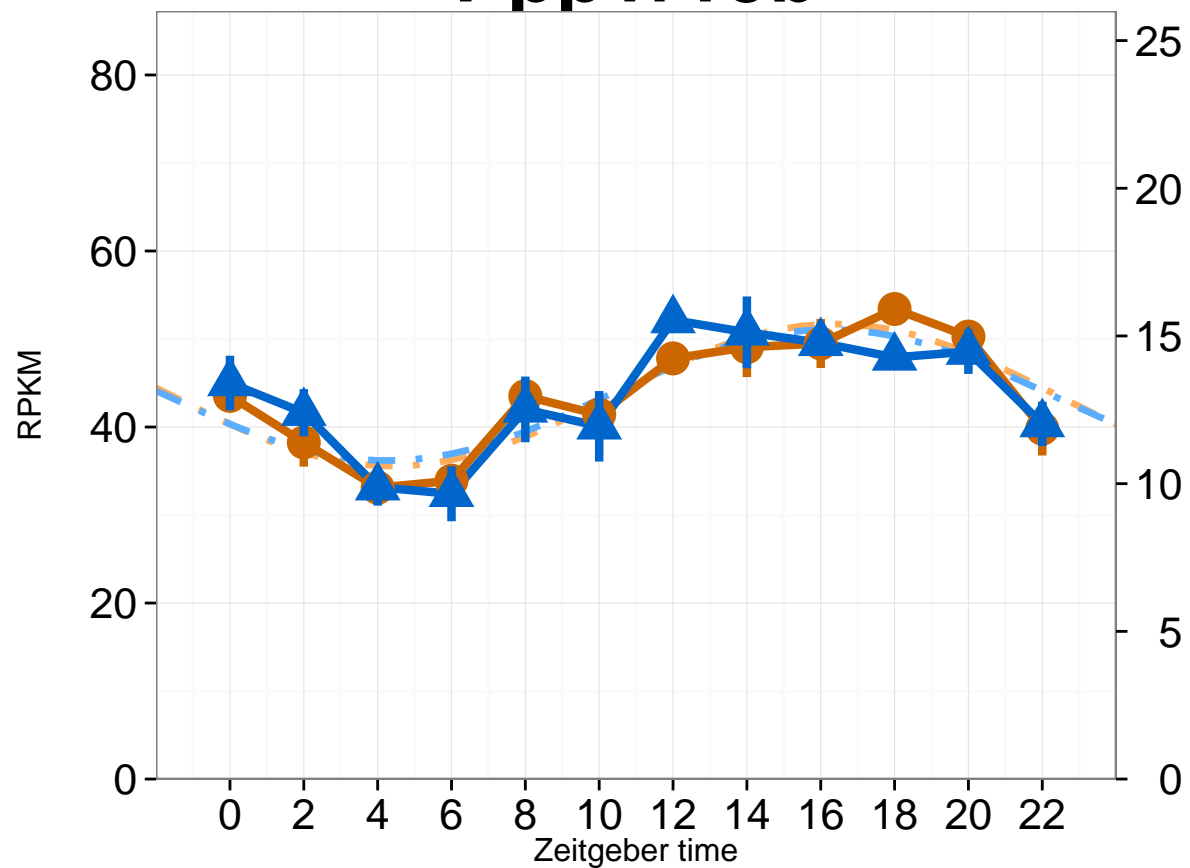

# Ppp1r15b

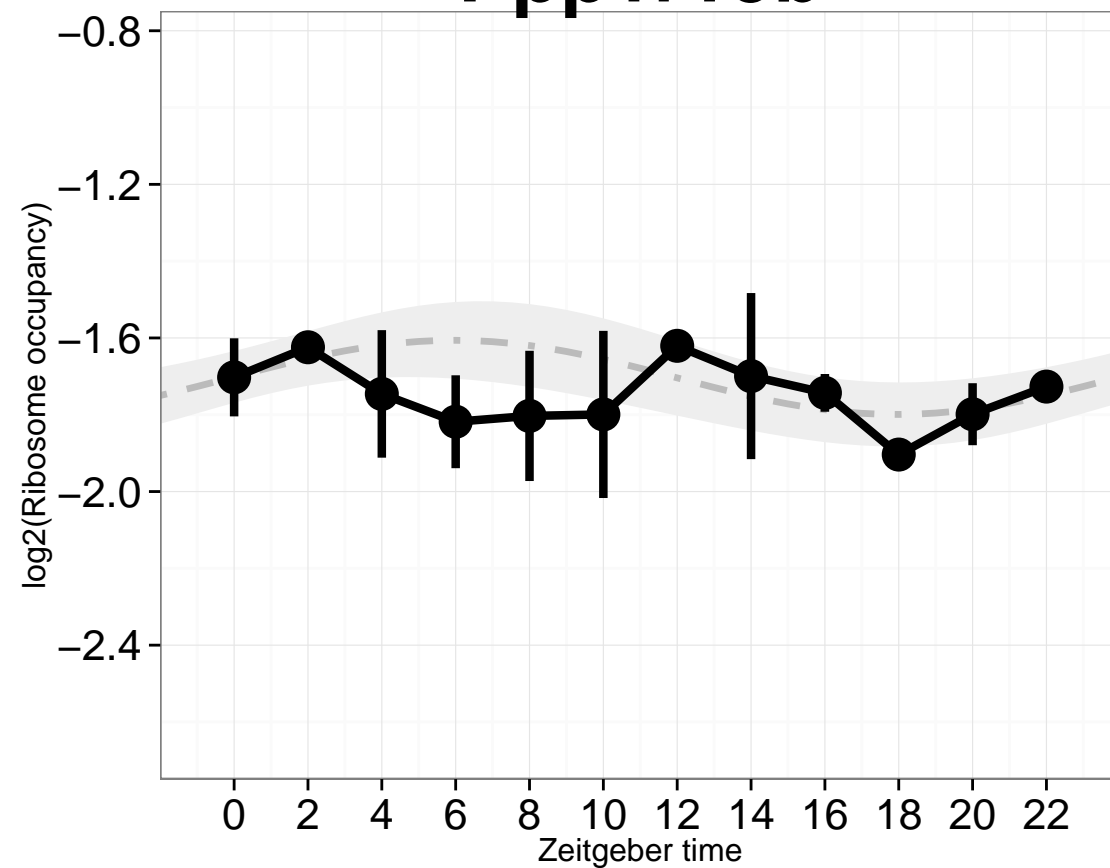

Supplement: SuppDataset_1.zip [file Ppp1r15b_set_A.pdf › Supplemental Dataset 1/A-mRNA_nonrhyth_translation_nonrhyth/Ppp1r15b_set_A.pdf]

# Ppp1r16a

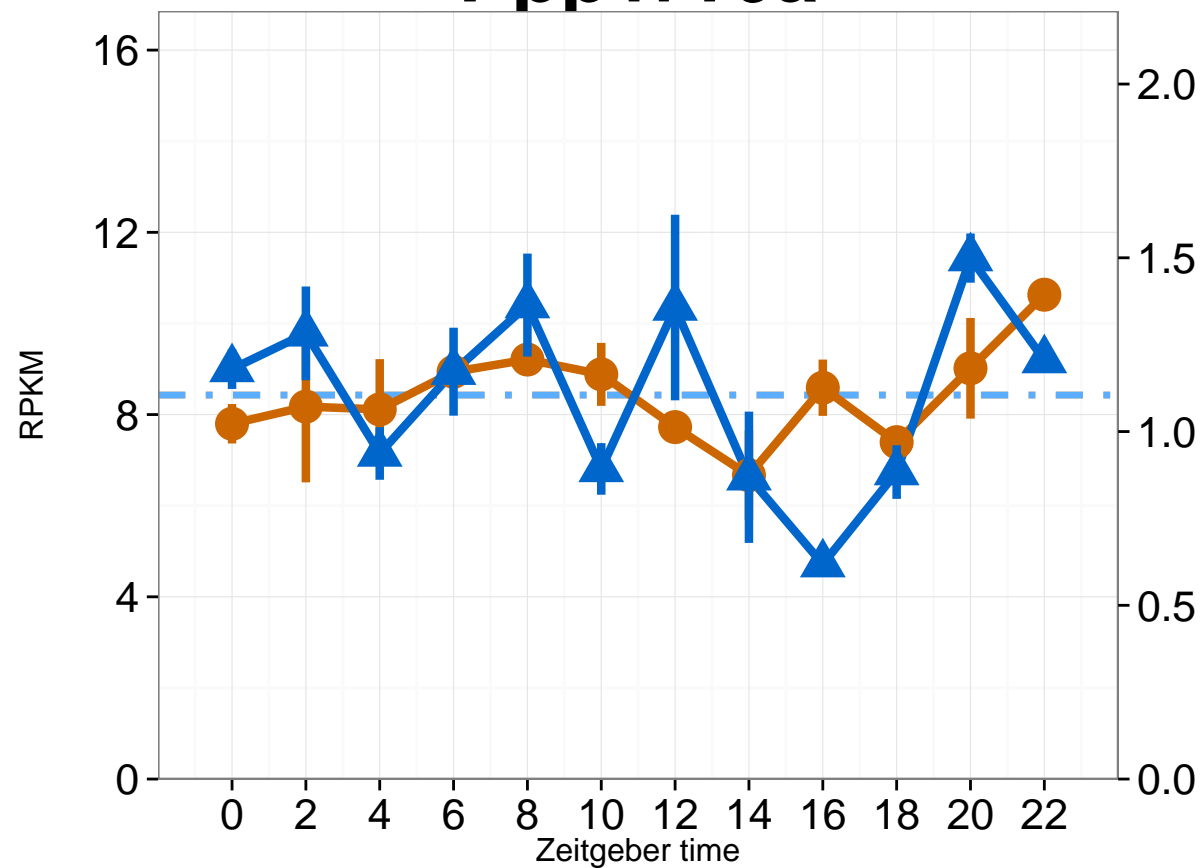

# Ppp1r16a

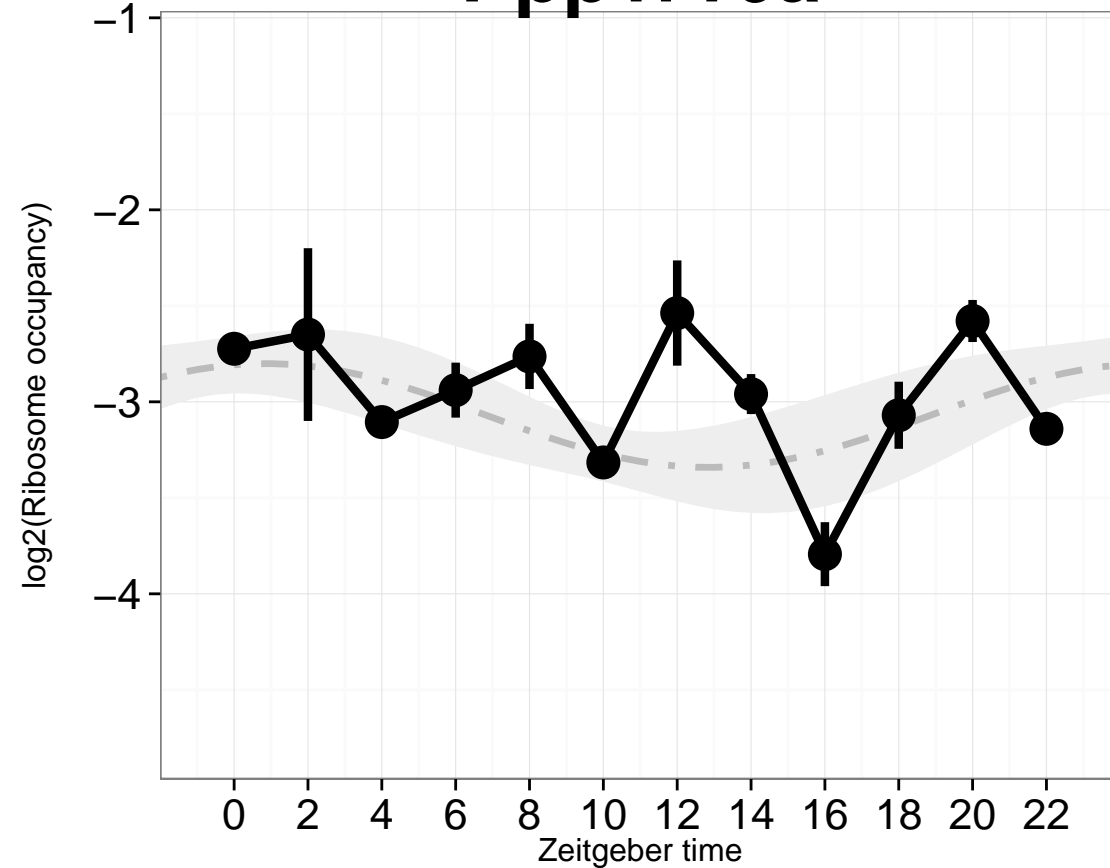

Supplement: SuppDataset_1.zip [file Ppp1r16a_set_A.pdf › Supplemental Dataset 1/A-mRNA_nonrhyth_translation_nonrhyth/Ppp1r16a_set_A.pdf]

## Ppp1r16b

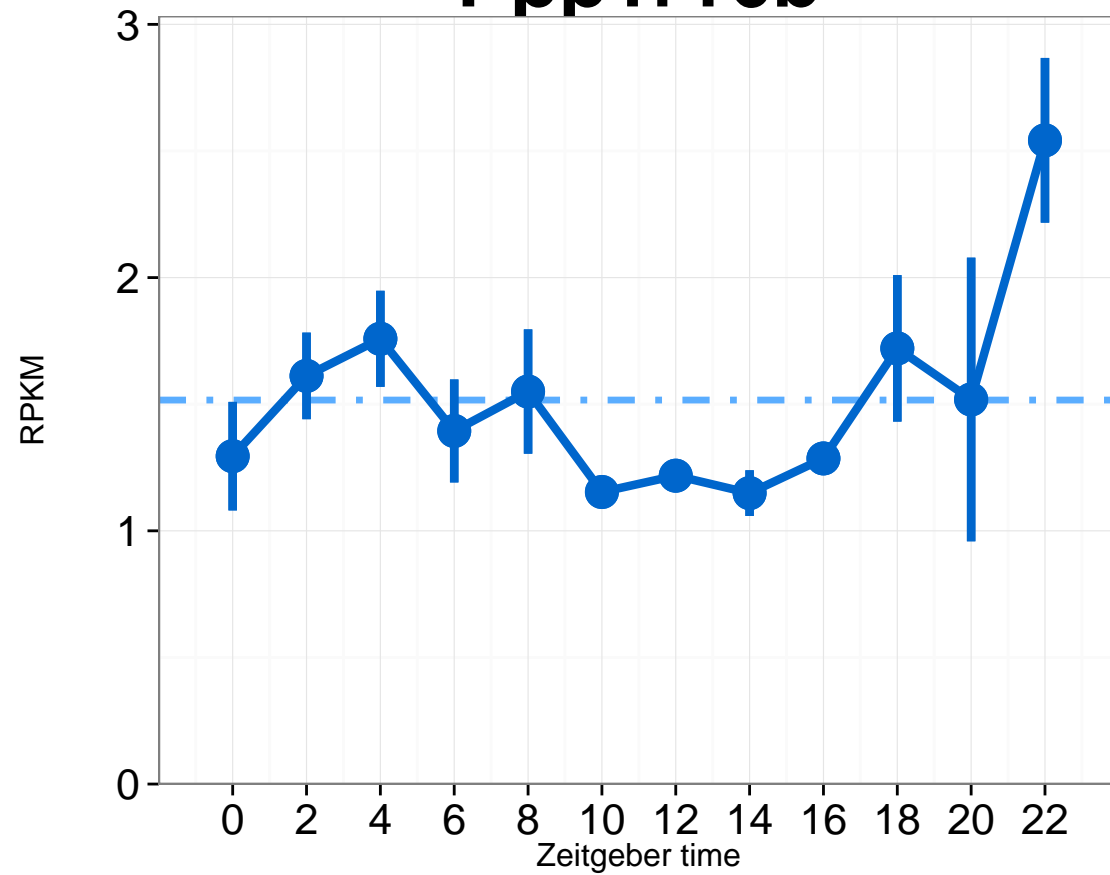

## Ppp1r16b log2(Ribosome occupancy)

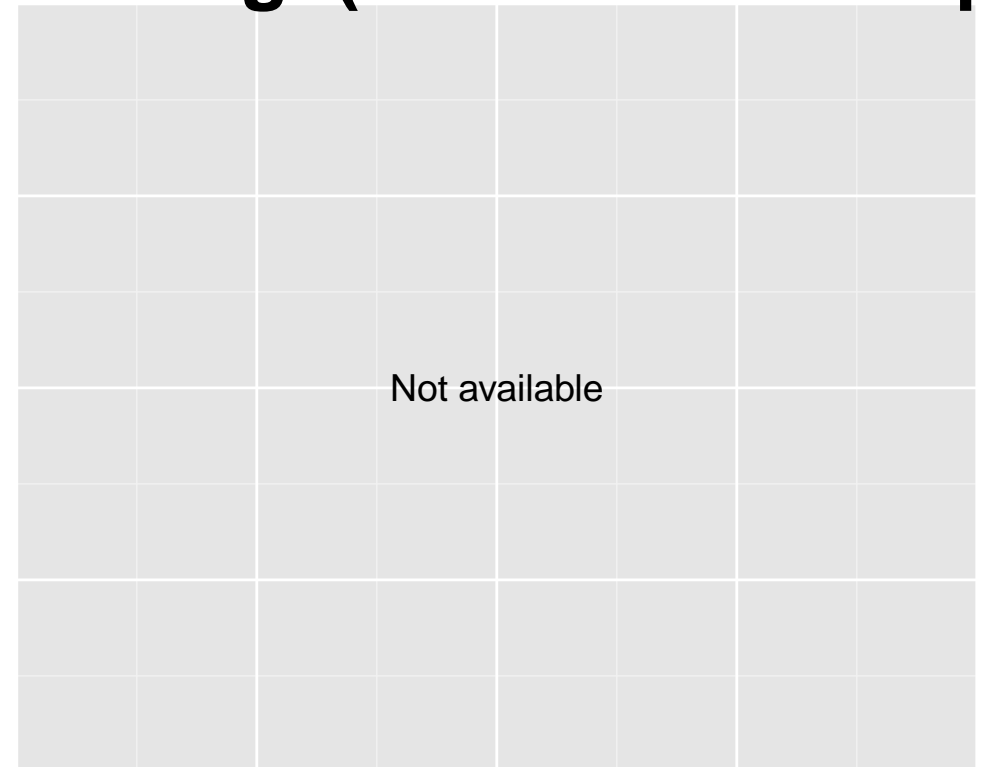

Supplement: SuppDataset_1.zip [file Ppp1r16b_set_A.pdf › Supplemental Dataset 1/A-mRNA_nonrhyth_translation_nonrhyth/Ppp1r16b_set_A.pdf]

# Ppp1r18

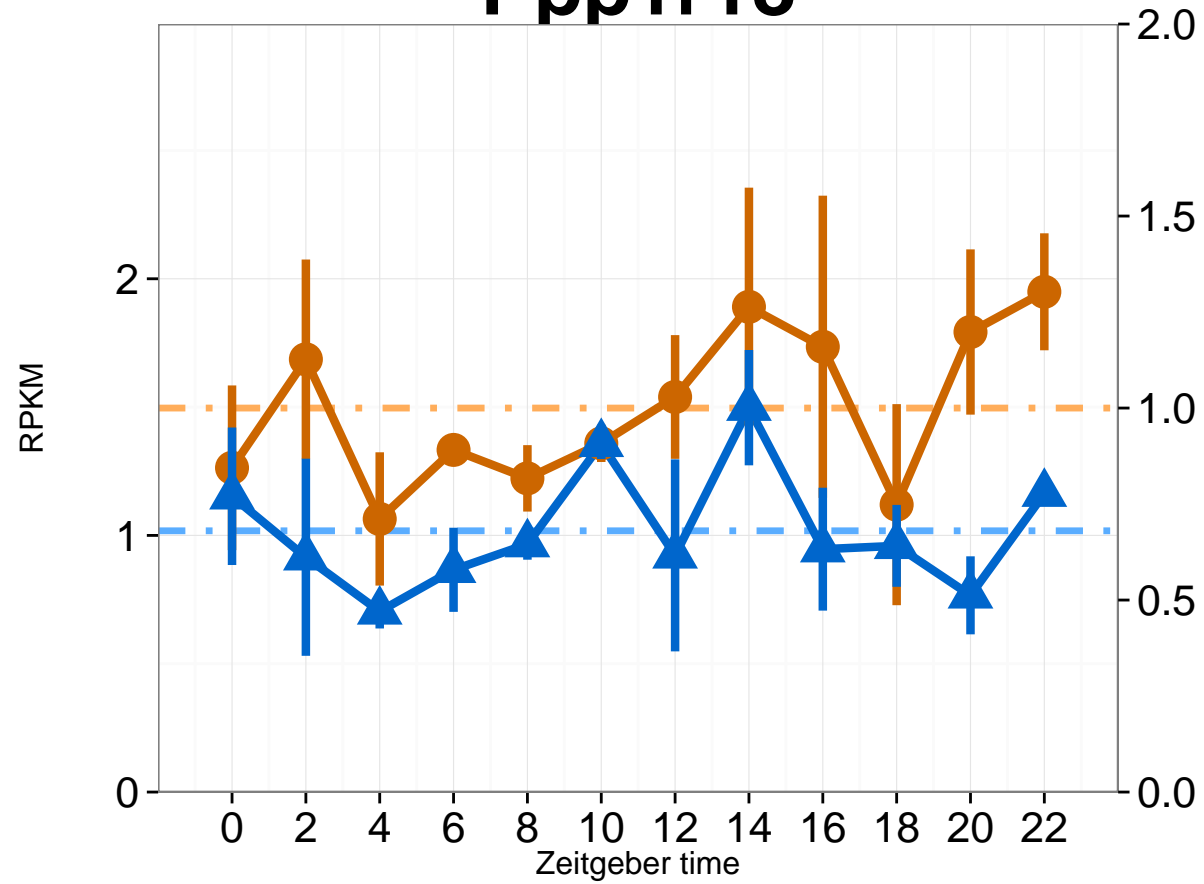

# Ppp1r18

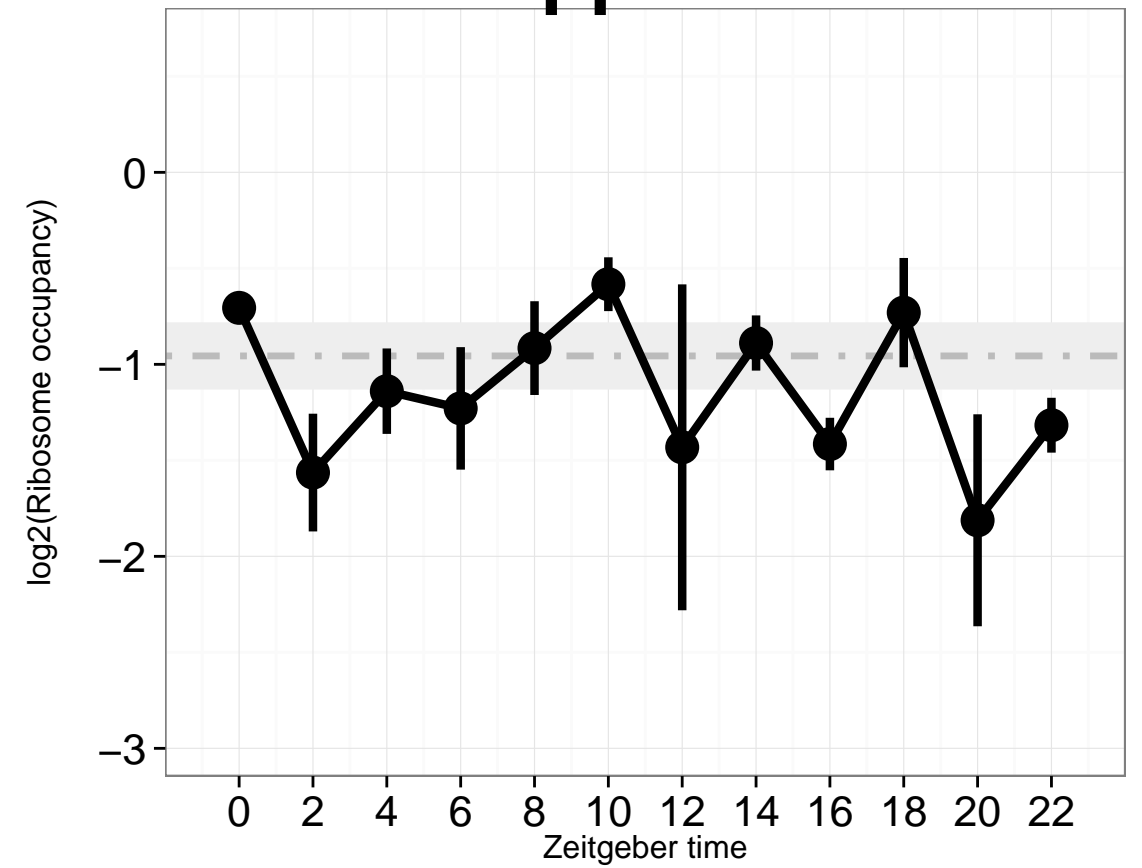

Supplement: SuppDataset_1.zip [file Ppp1r18_set_A.pdf › Supplemental Dataset 1/A-mRNA_nonrhyth_translation_nonrhyth/Ppp1r18_set_A.pdf]

# Ppp1r21

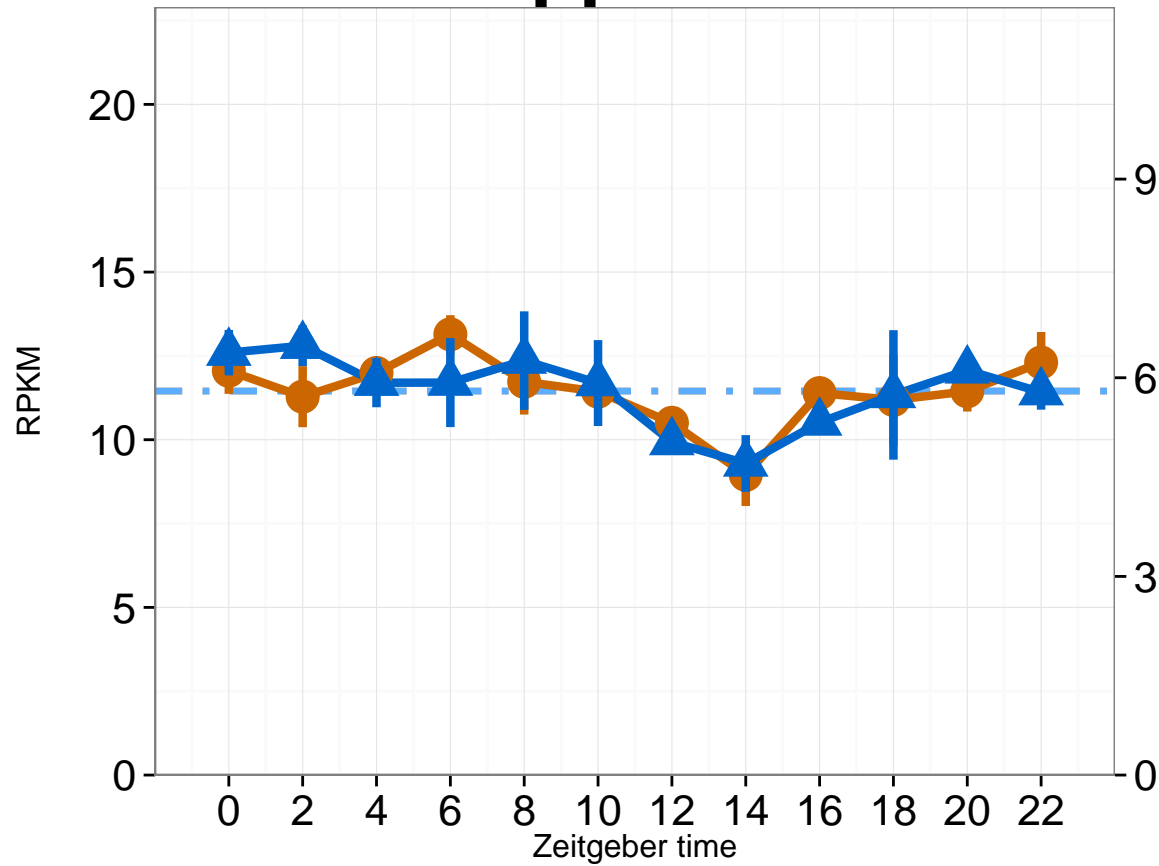

# Ppp1r21

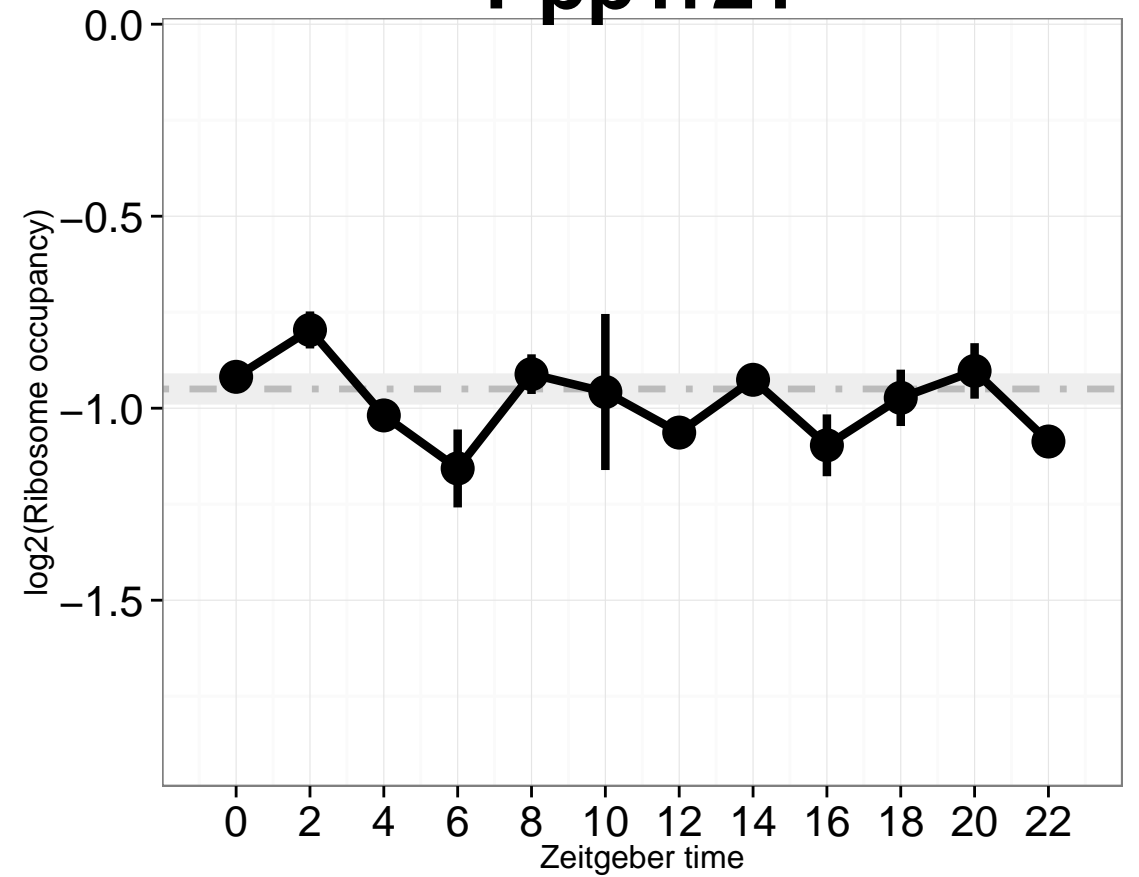

Supplement: SuppDataset_1.zip [file Ppp1r21_set_A.pdf › Supplemental Dataset 1/A-mRNA_nonrhyth_translation_nonrhyth/Ppp1r21_set_A.pdf]

# Ppp1r2

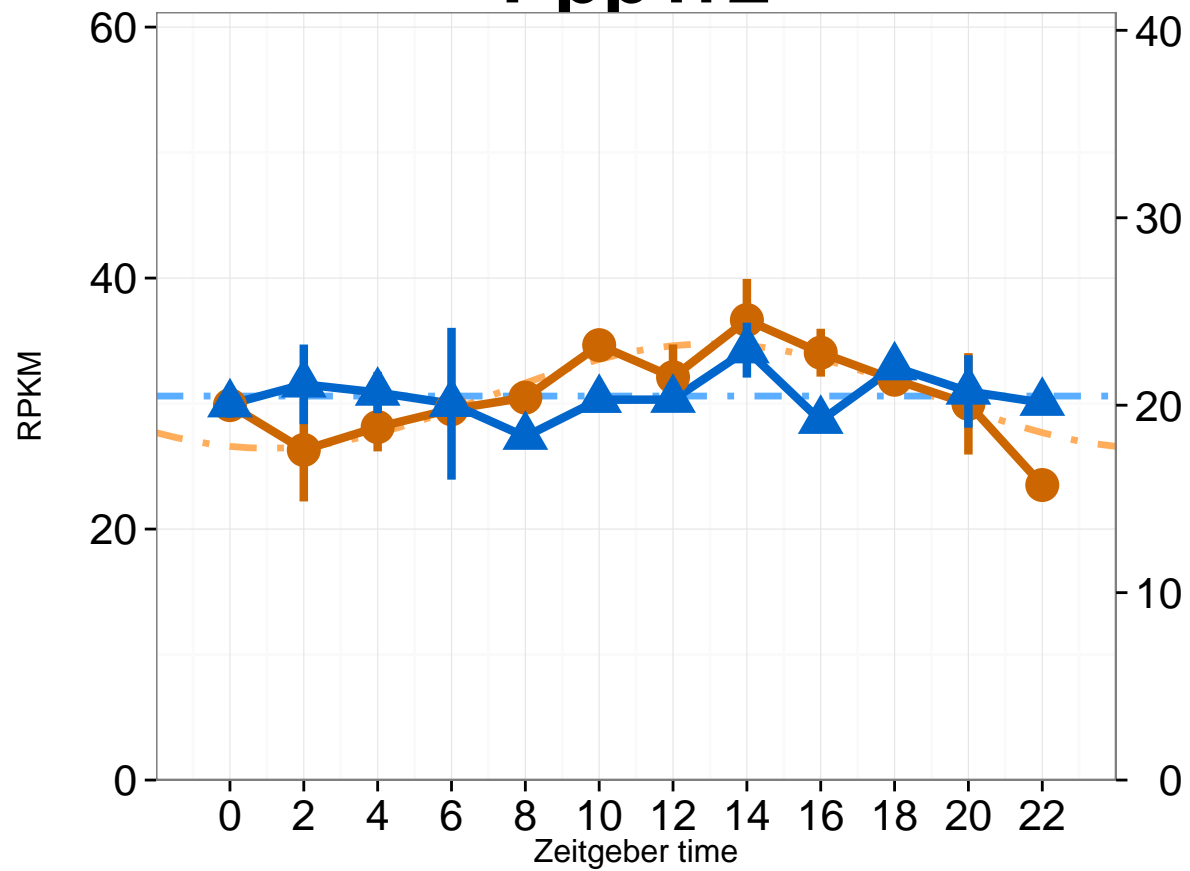

# Ppp1r2

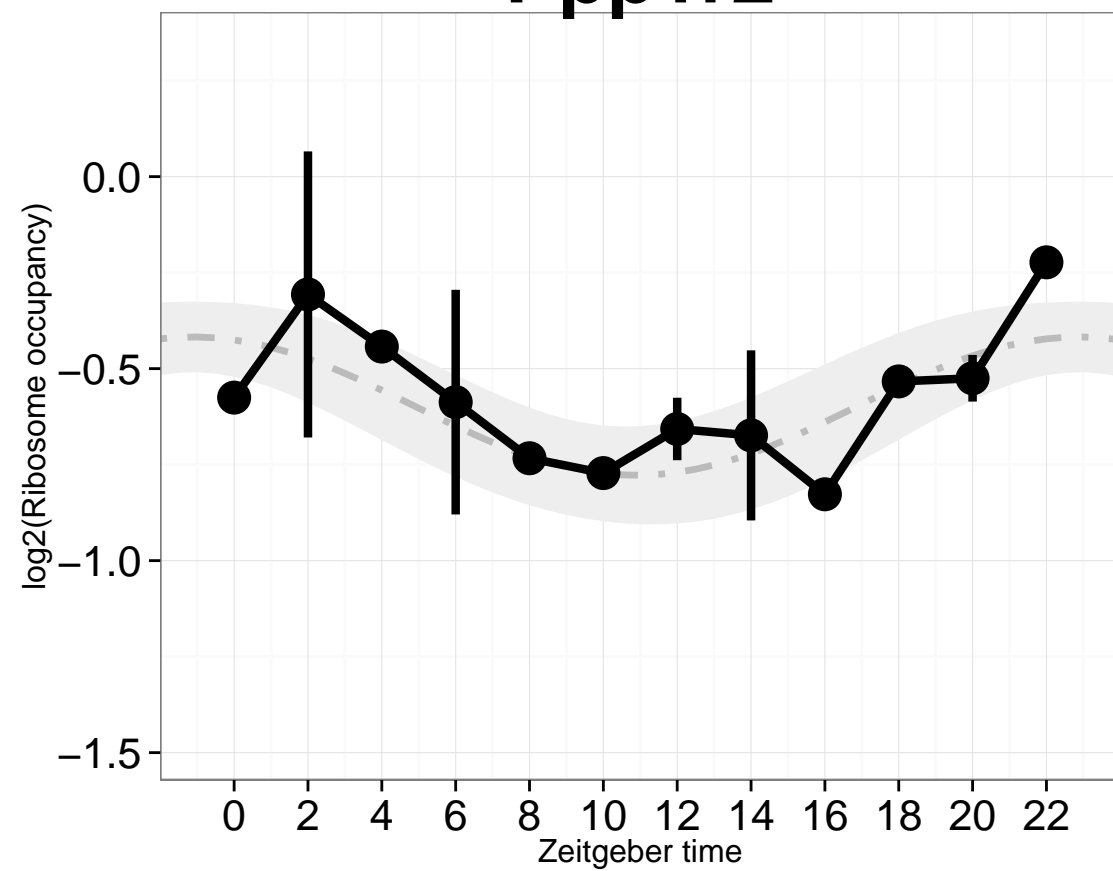

Supplement: SuppDataset_1.zip [file Ppp1r2_set_A.pdf › Supplemental Dataset 1/A-mRNA_nonrhyth_translation_nonrhyth/Ppp1r2_set_A.pdf]

# Ppp1r37

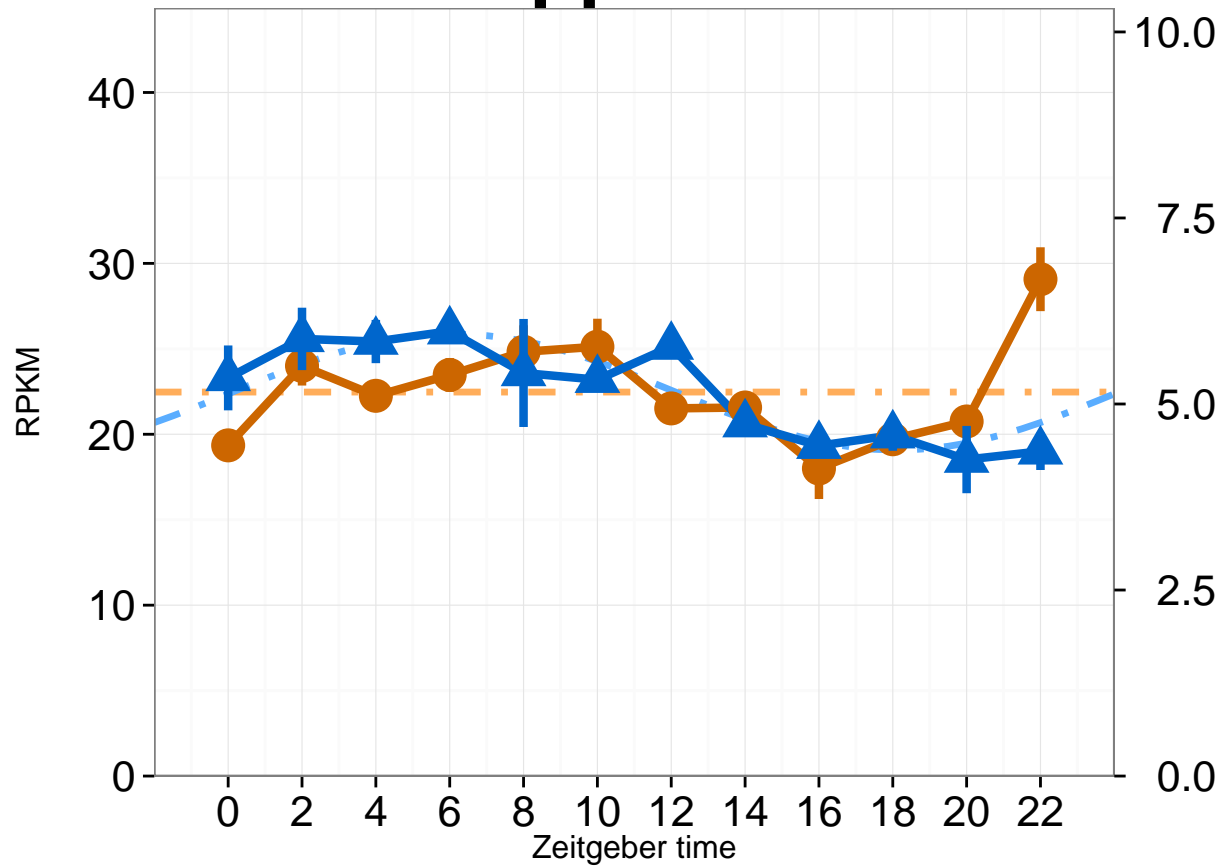

# Ppp1r37

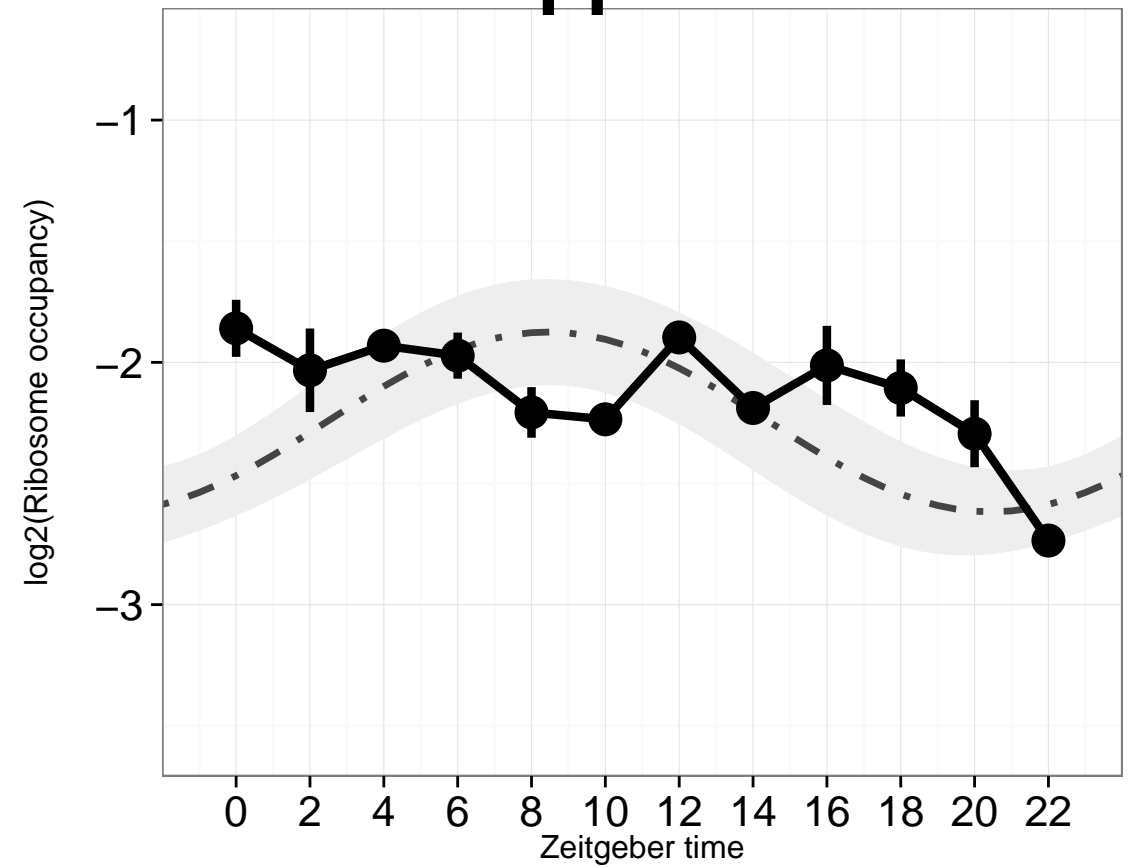

Supplement: SuppDataset_1.zip [file Ppp1r37_set_A.pdf › Supplemental Dataset 1/A-mRNA_nonrhyth_translation_nonrhyth/Ppp1r37_set_A.pdf]

## Ppp1r7

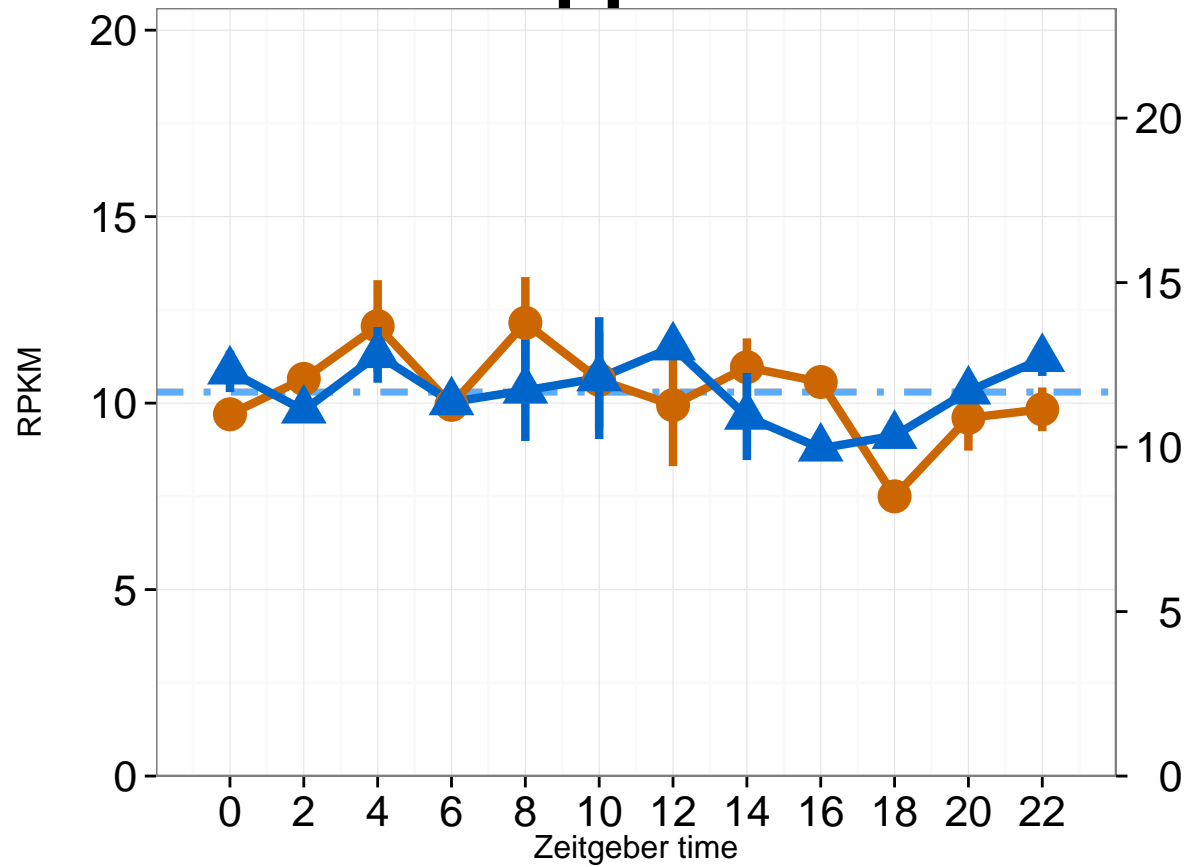

## Ppp1r7

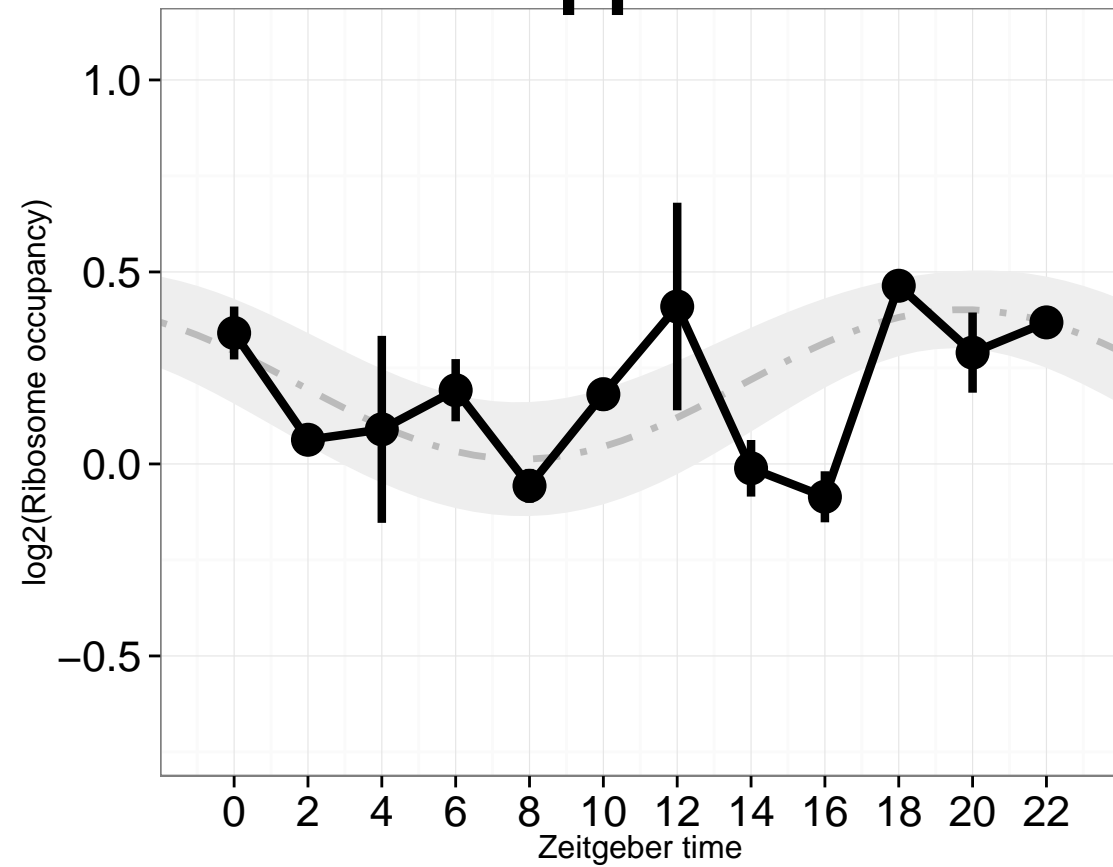

Supplement: SuppDataset_1.zip [file Ppp1r7_set_A.pdf › Supplemental Dataset 1/A-mRNA_nonrhyth_translation_nonrhyth/Ppp1r7_set_A.pdf]

## Ppp1r8

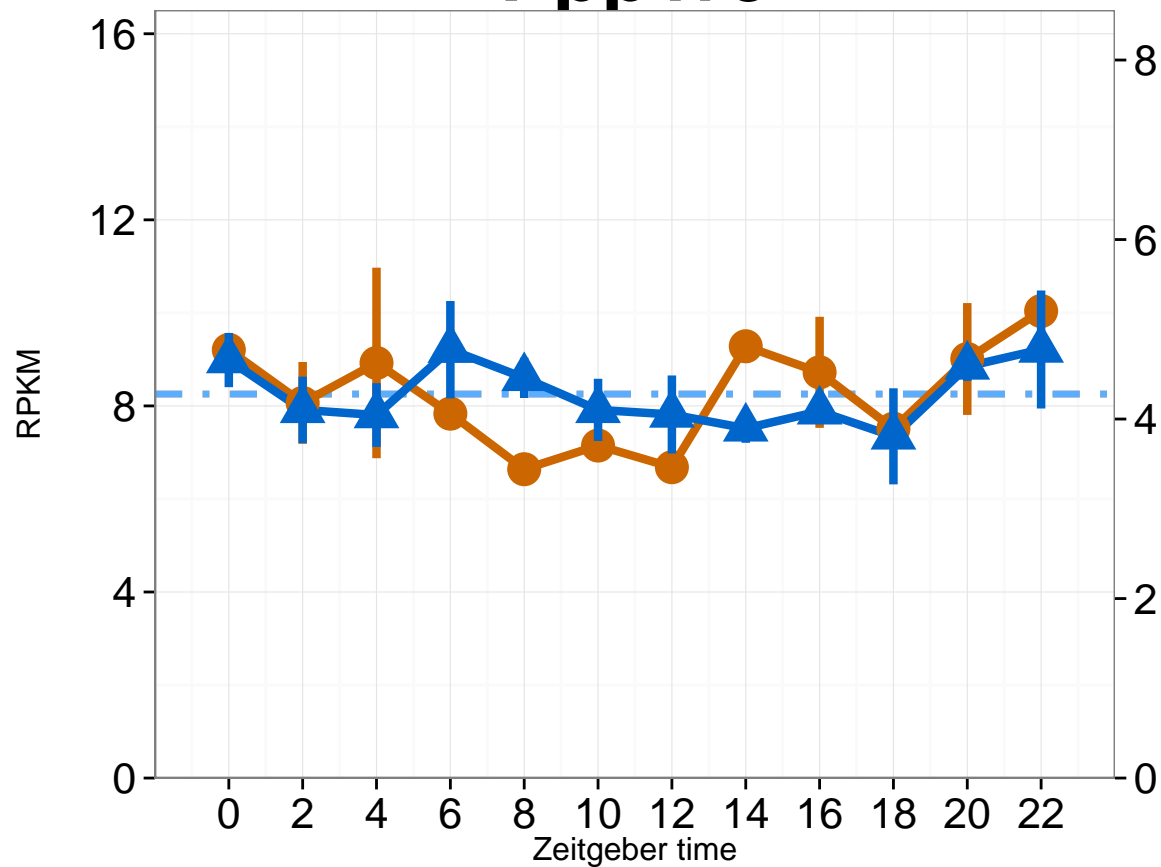

## Ppp1r8

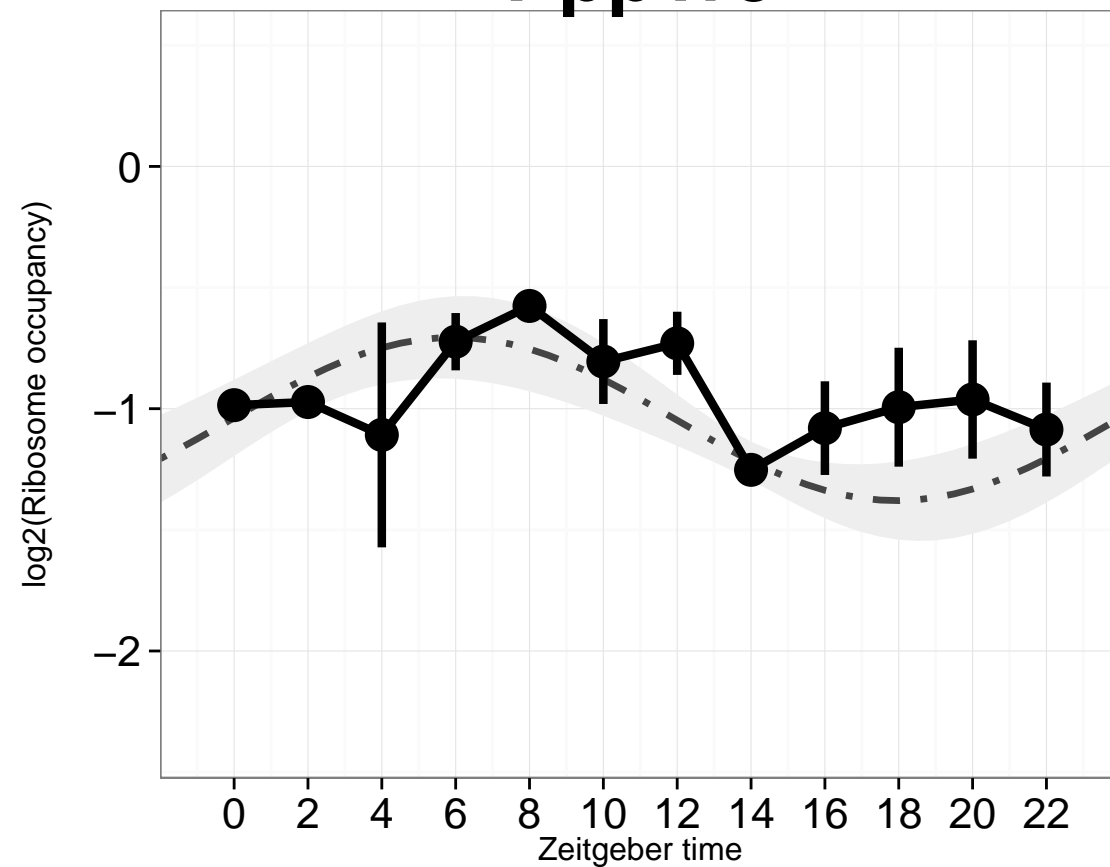

Supplement: SuppDataset_1.zip [file Ppp1r8_set_A.pdf › Supplemental Dataset 1/A-mRNA_nonrhyth_translation_nonrhyth/Ppp1r8_set_A.pdf]

# Ppp1r9a

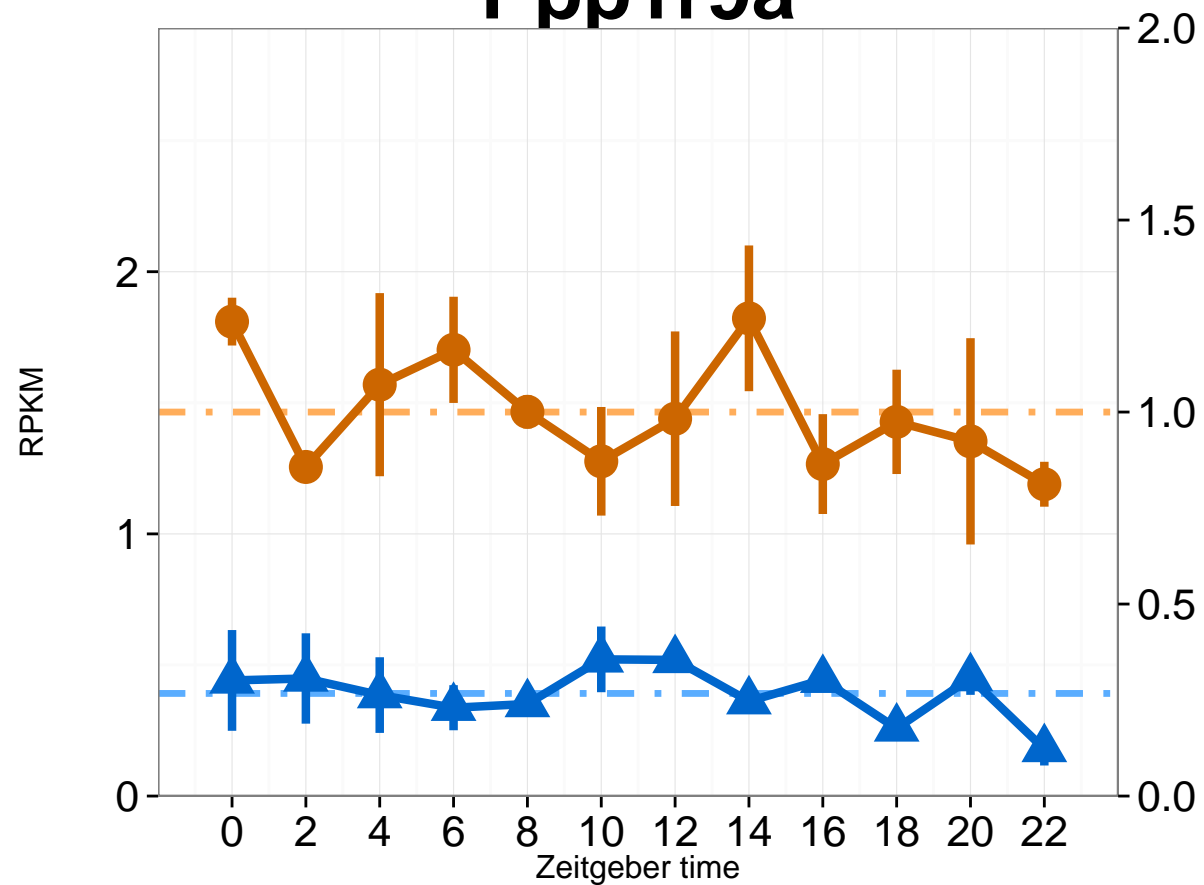

# Ppp1r9a

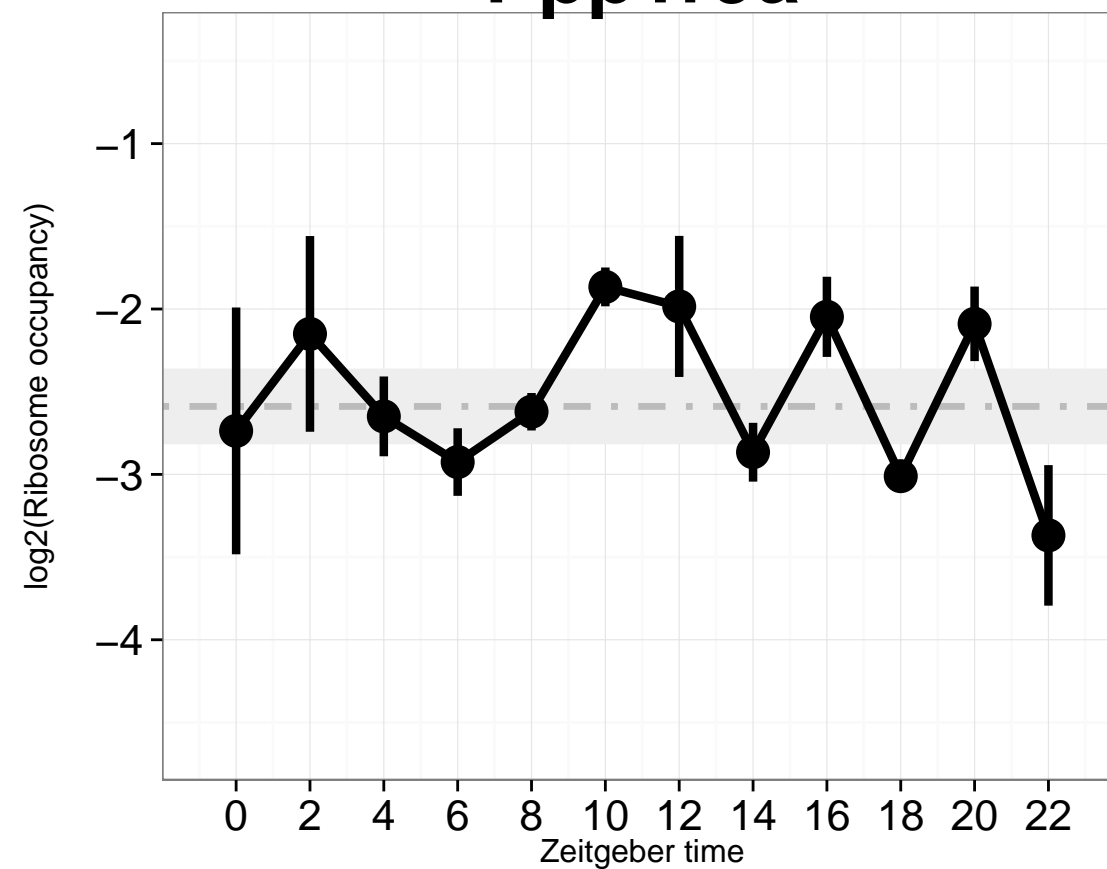

Supplement: SuppDataset_1.zip [file Ppp1r9a_set_A.pdf › Supplemental Dataset 1/A-mRNA_nonrhyth_translation_nonrhyth/Ppp1r9a_set_A.pdf]

# Ppp1r9b

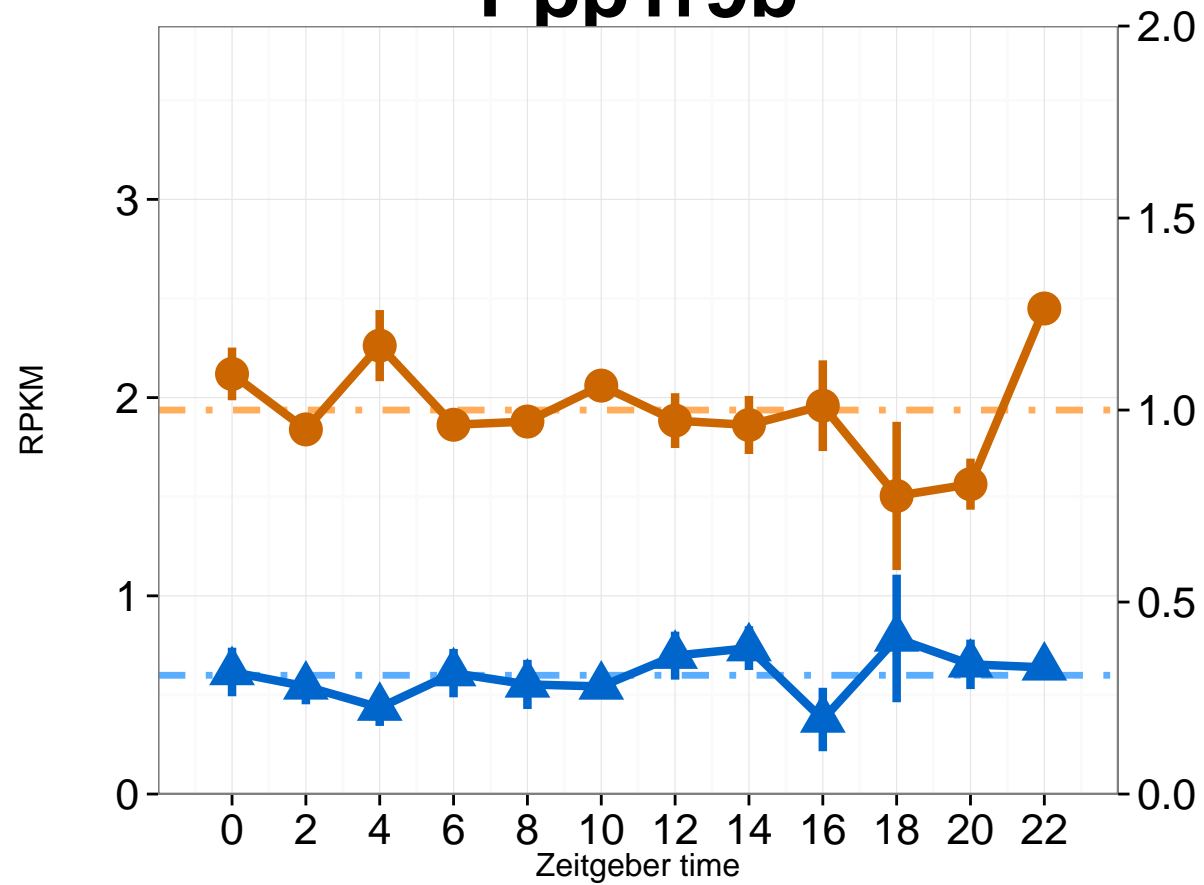

# Ppp1r9b

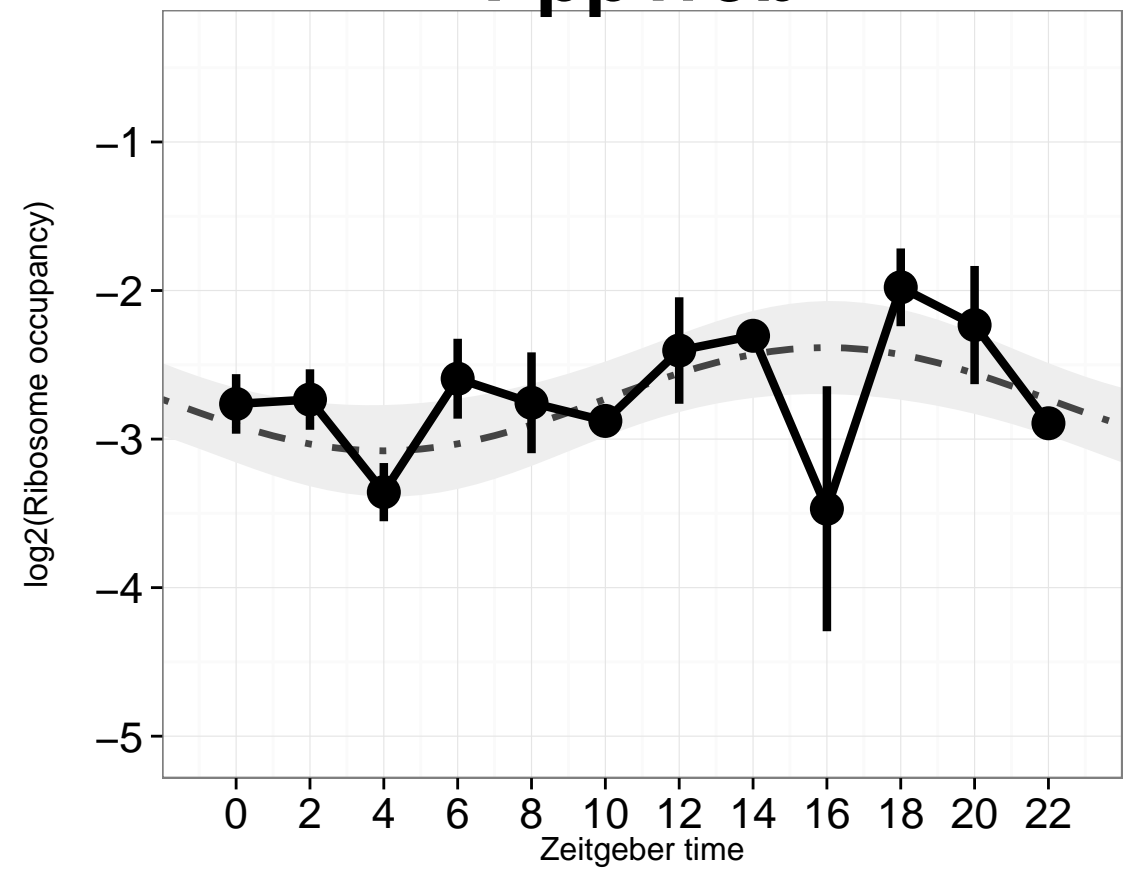

Supplement: SuppDataset_1.zip [file Ppp1r9b_set_A.pdf › Supplemental Dataset 1/A-mRNA_nonrhyth_translation_nonrhyth/Ppp1r9b_set_A.pdf]

# Ppp2ca

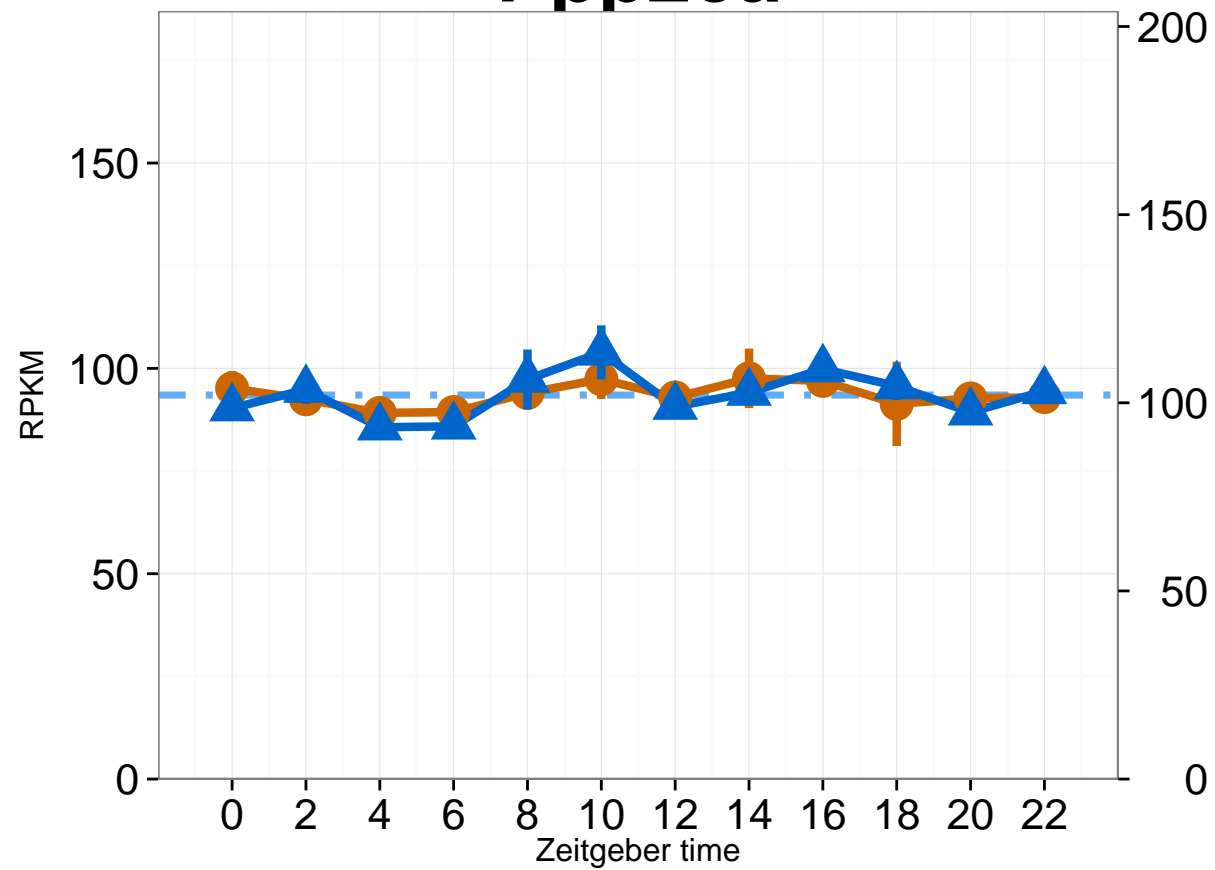

# Ppp2ca

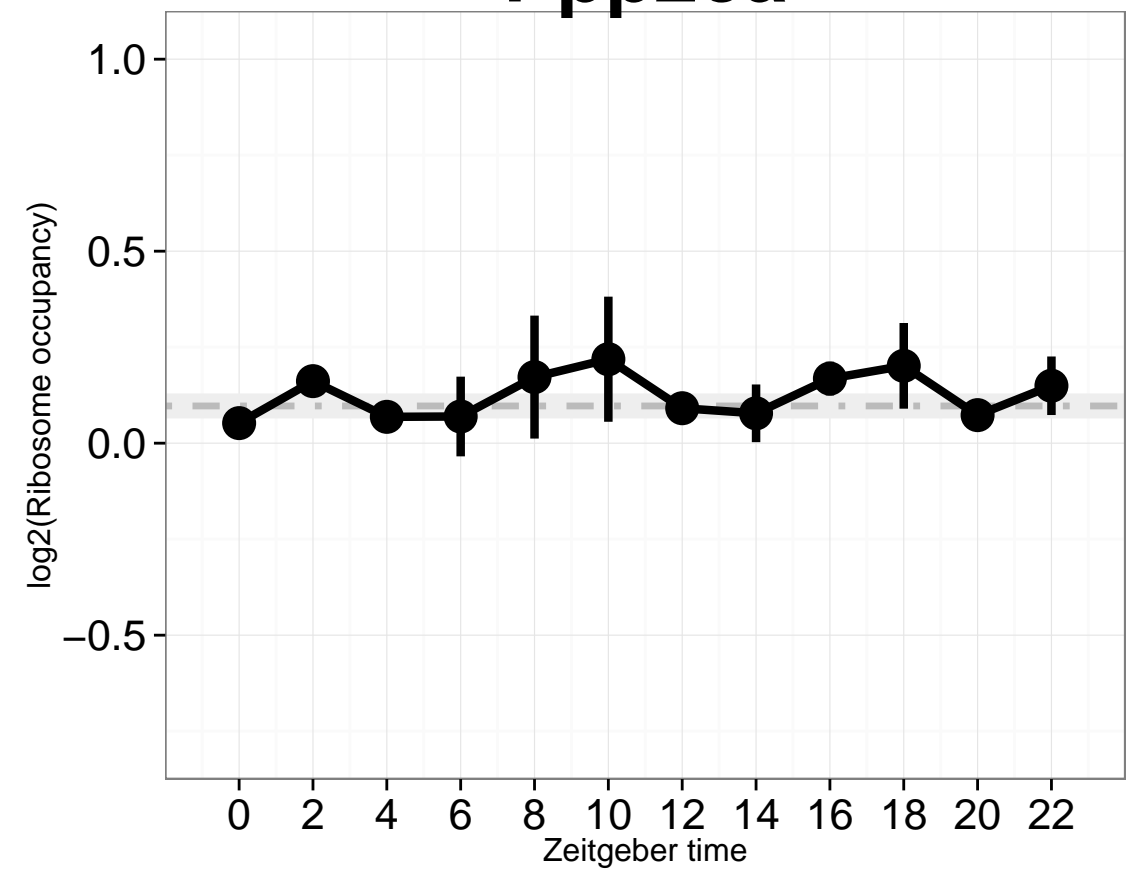

Supplement: SuppDataset_1.zip [file Ppp2ca_set_A.pdf › Supplemental Dataset 1/A-mRNA_nonrhyth_translation_nonrhyth/Ppp2ca_set_A.pdf]

# Ppp2cb

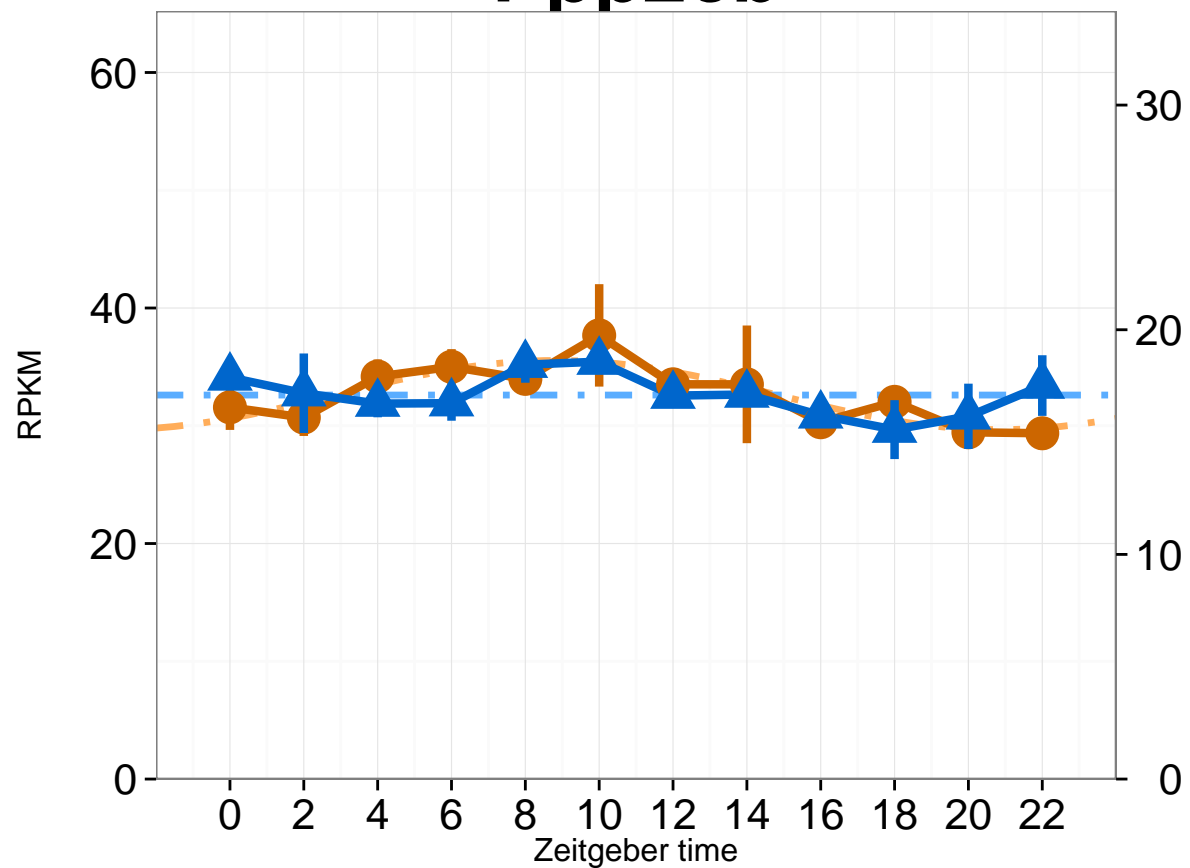

# Ppp2cb

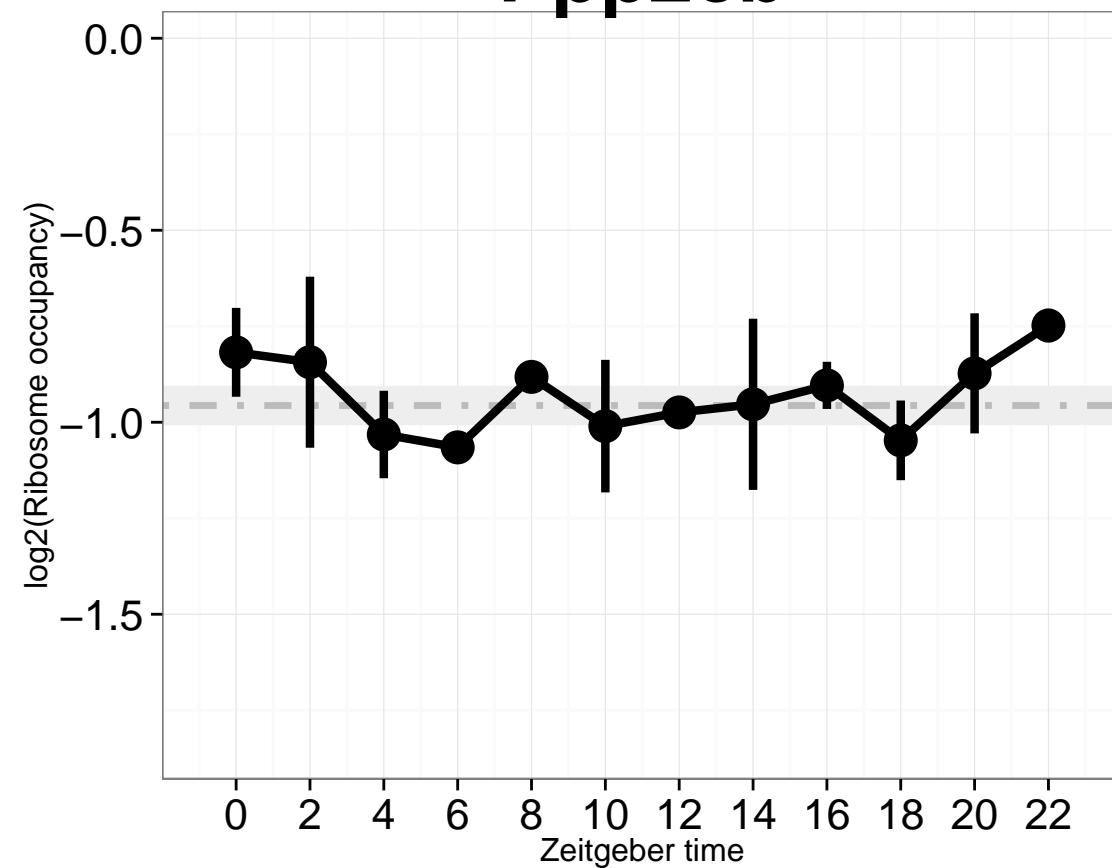

Supplement: SuppDataset_1.zip [file Ppp2cb_set_A.pdf › Supplemental Dataset 1/A-mRNA_nonrhyth_translation_nonrhyth/Ppp2cb_set_A.pdf]

# Ppp2r1a

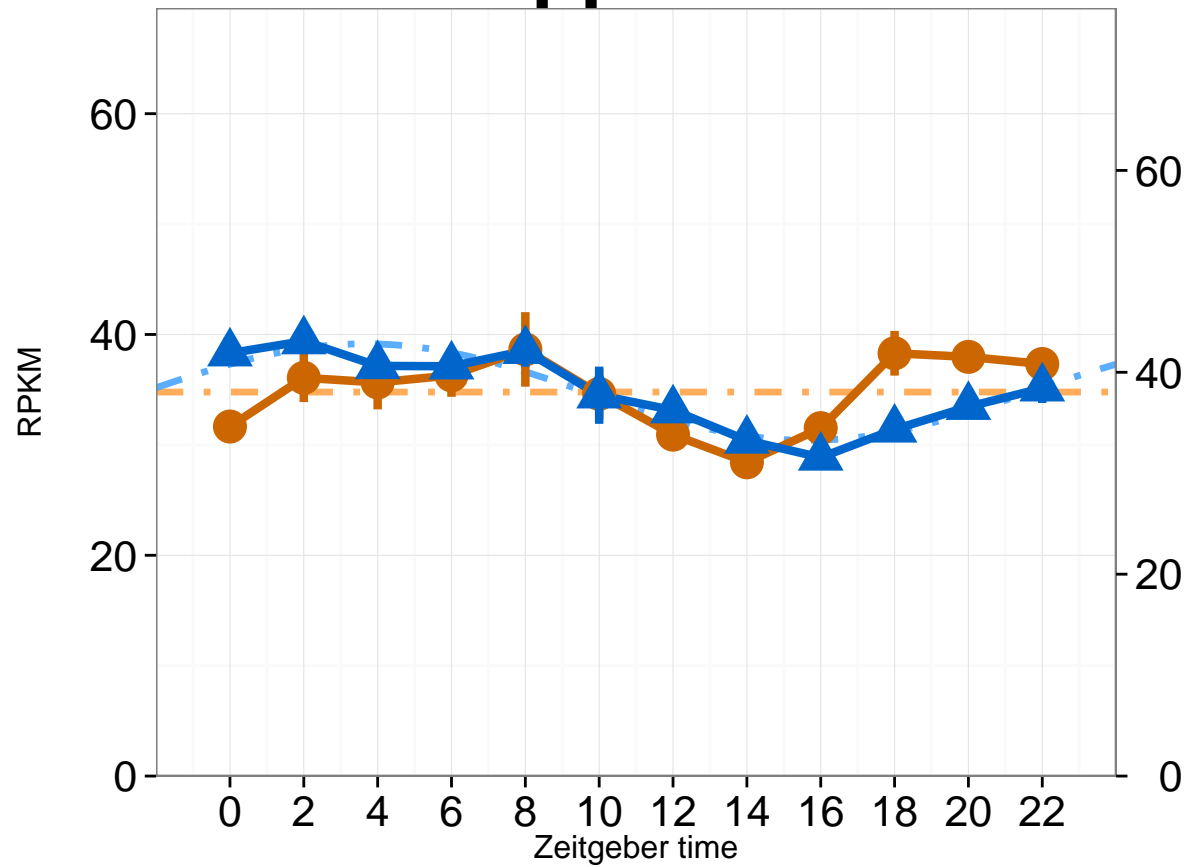

# Ppp2r1a

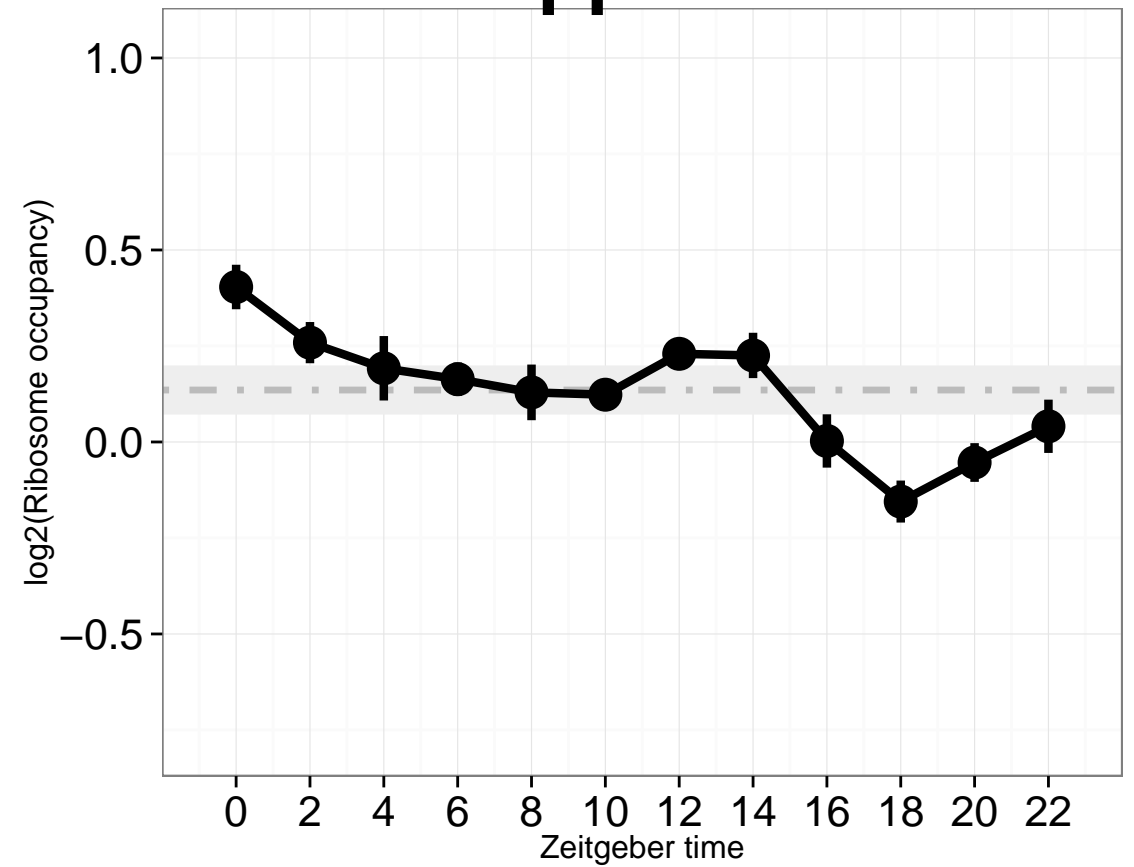

Supplement: SuppDataset_1.zip [file Ppp2r1a_set_A.pdf › Supplemental Dataset 1/A-mRNA_nonrhyth_translation_nonrhyth/Ppp2r1a_set_A.pdf]

# Ppp2r1b

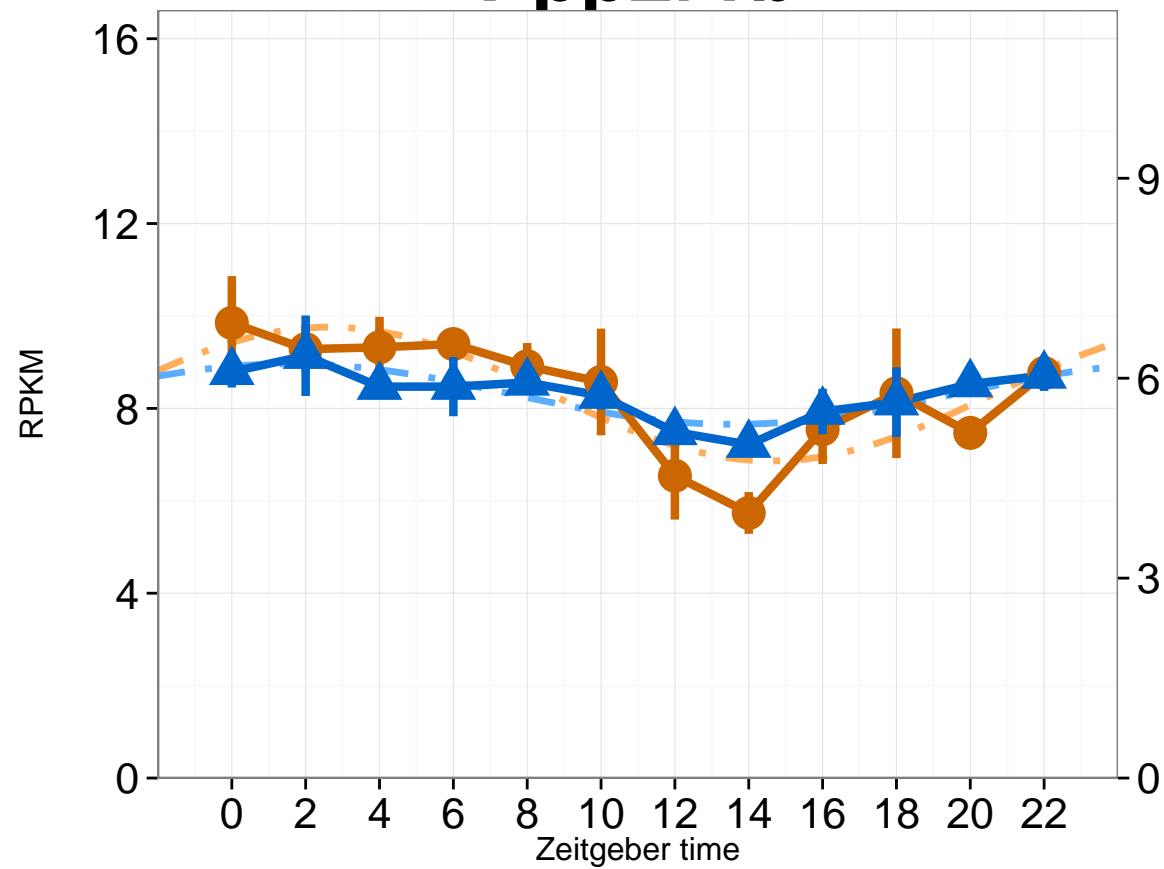

# Ppp2r1b

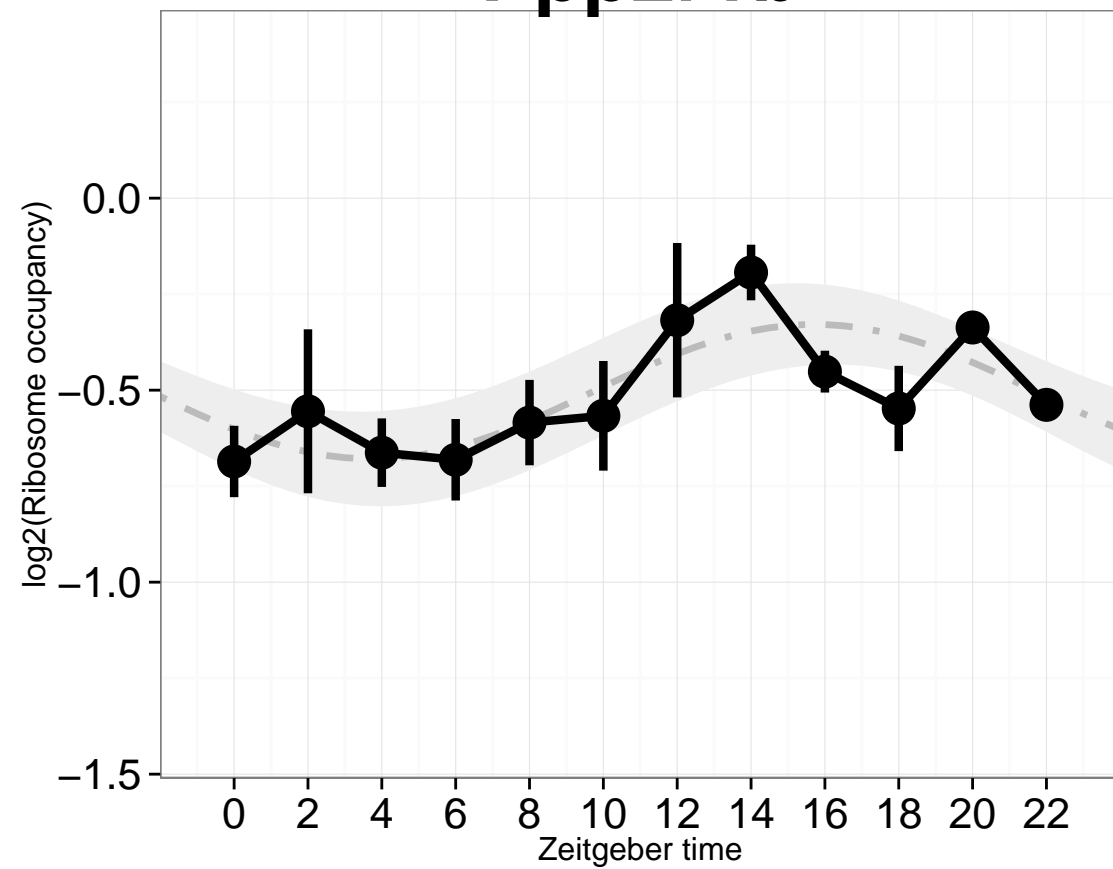

Supplement: SuppDataset_1.zip [file Ppp2r1b_set_A.pdf › Supplemental Dataset 1/A-mRNA_nonrhyth_translation_nonrhyth/Ppp2r1b_set_A.pdf]

# Ppp2r2a

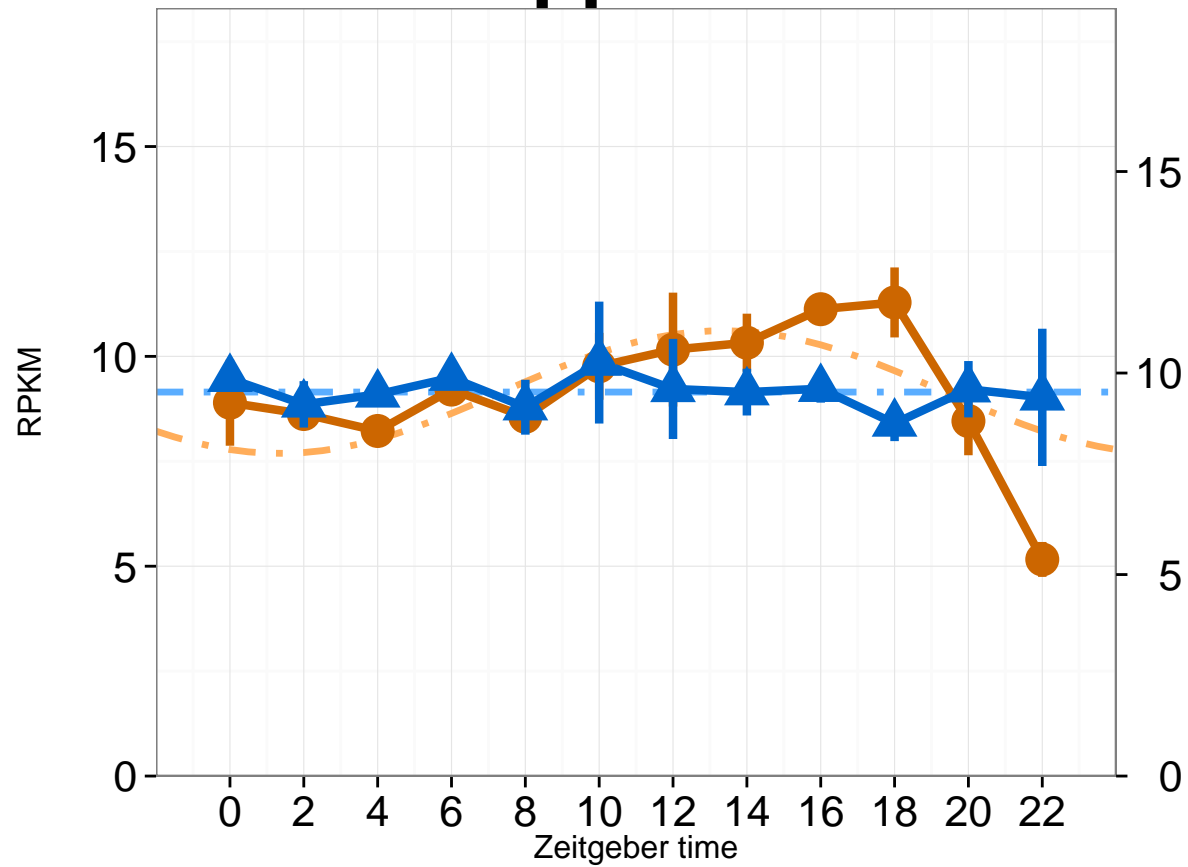

# Ppp2r2a

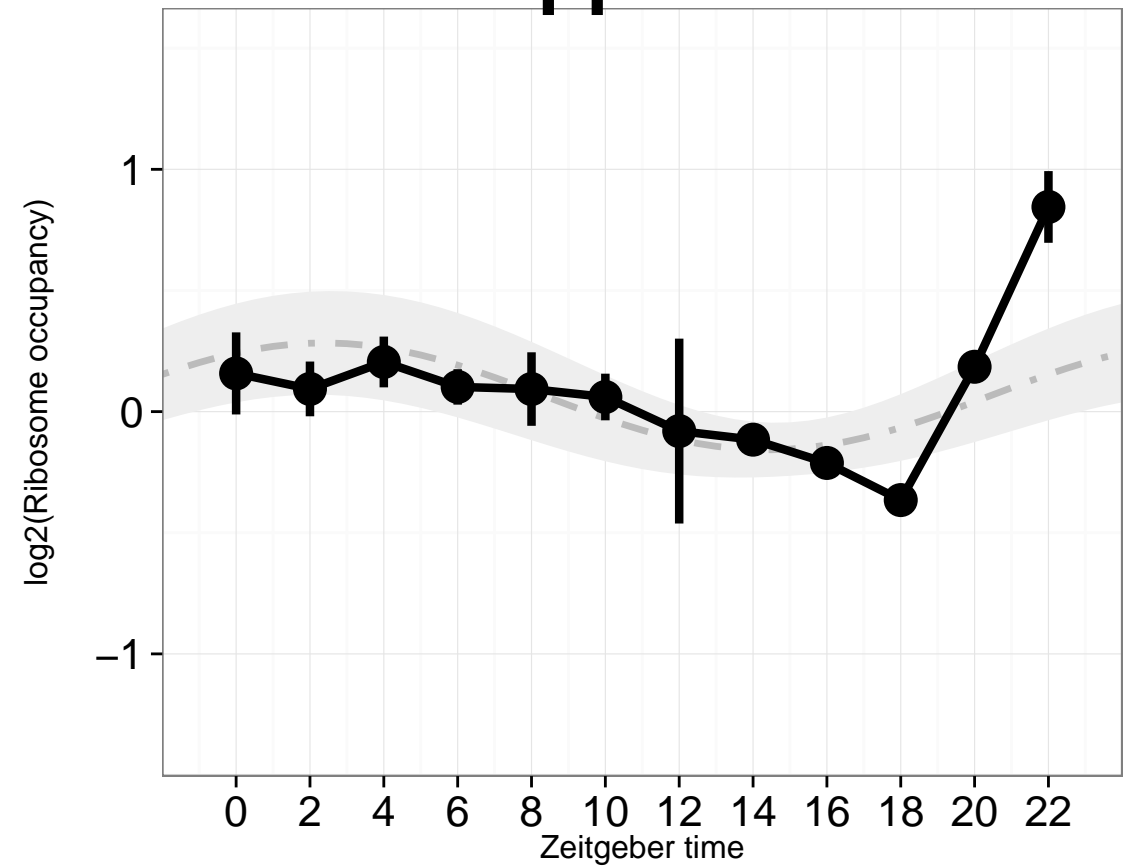

Supplement: SuppDataset_1.zip [file Ppp2r2a_set_A.pdf › Supplemental Dataset 1/A-mRNA_nonrhyth_translation_nonrhyth/Ppp2r2a_set_A.pdf]

# Ppp2r3a

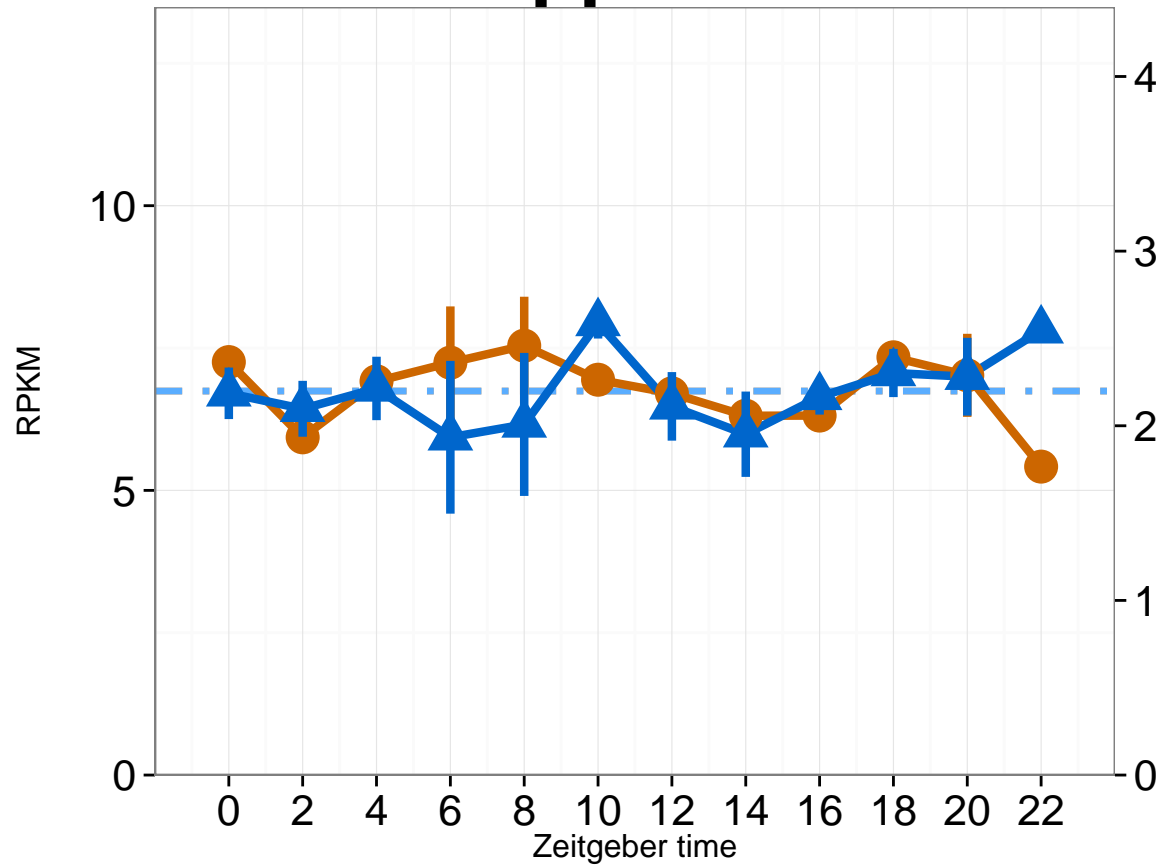

# Ppp2r3a

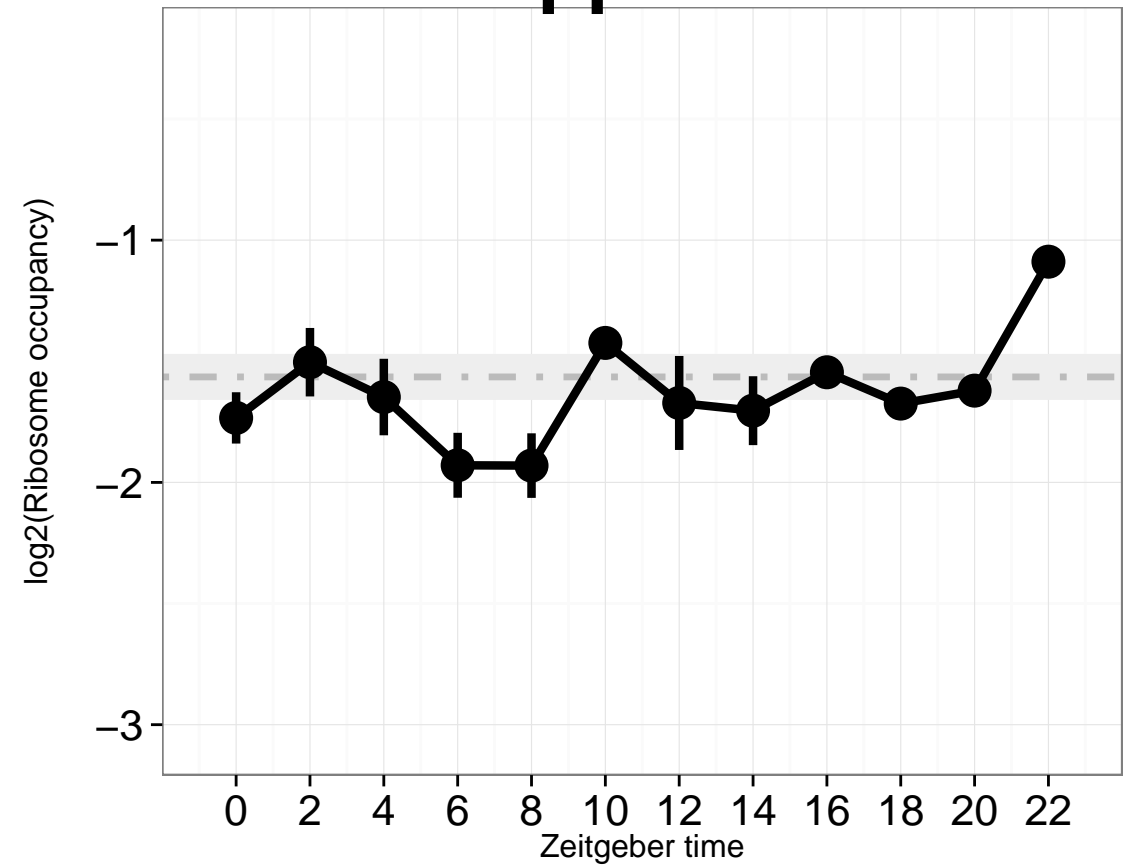

Supplement: SuppDataset_1.zip [file Ppp2r3a_set_A.pdf › Supplemental Dataset 1/A-mRNA_nonrhyth_translation_nonrhyth/Ppp2r3a_set_A.pdf]

# Ppp2r3c

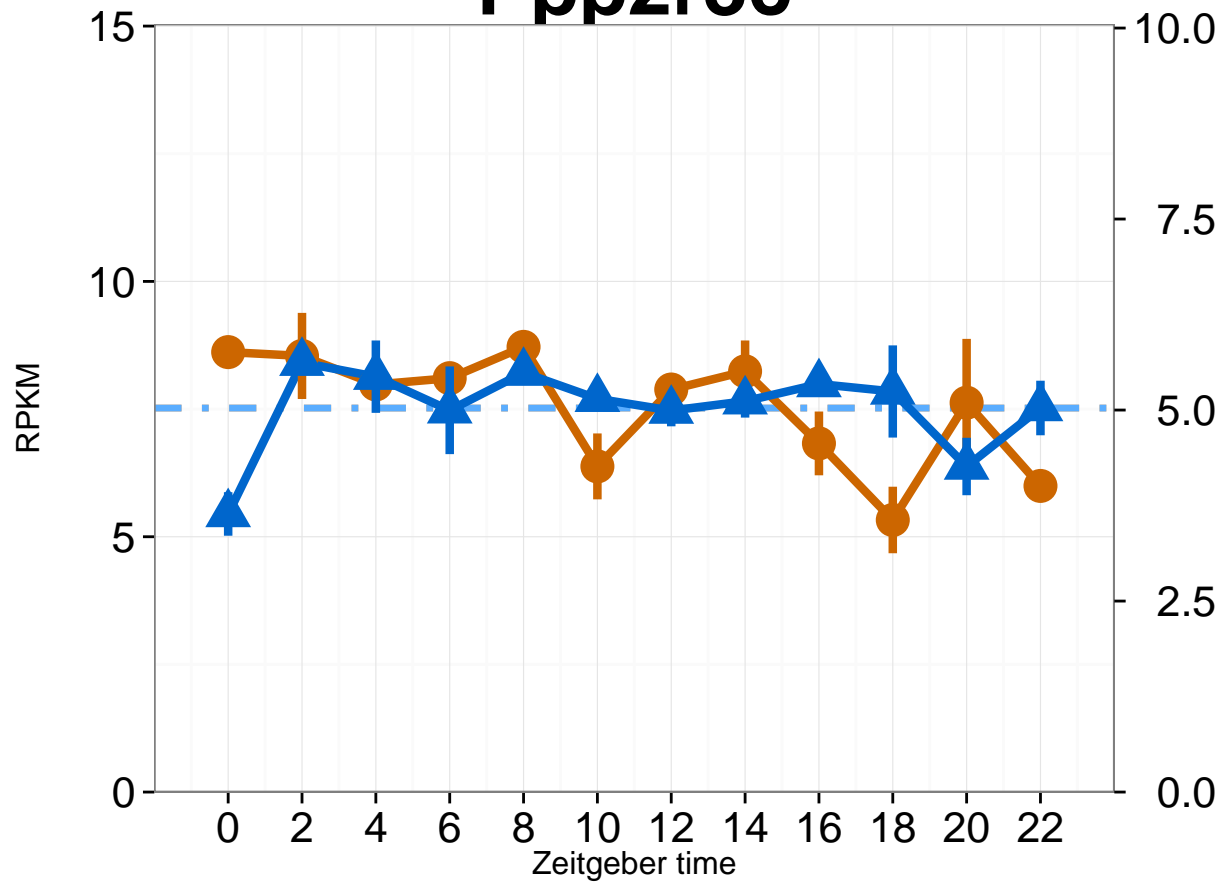

# Ppp2r3c

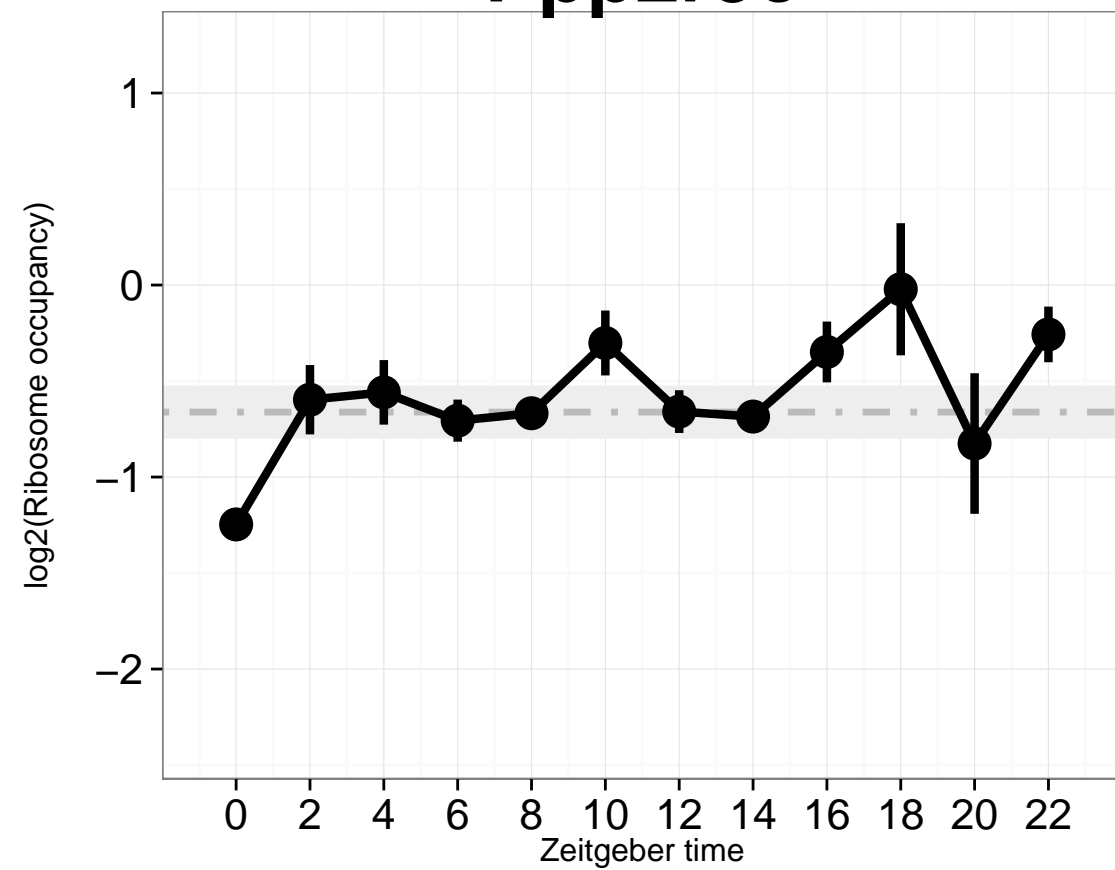

Supplement: SuppDataset_1.zip [file Ppp2r3c_set_A.pdf › Supplemental Dataset 1/A-mRNA_nonrhyth_translation_nonrhyth/Ppp2r3c_set_A.pdf]

# Ppp2r4

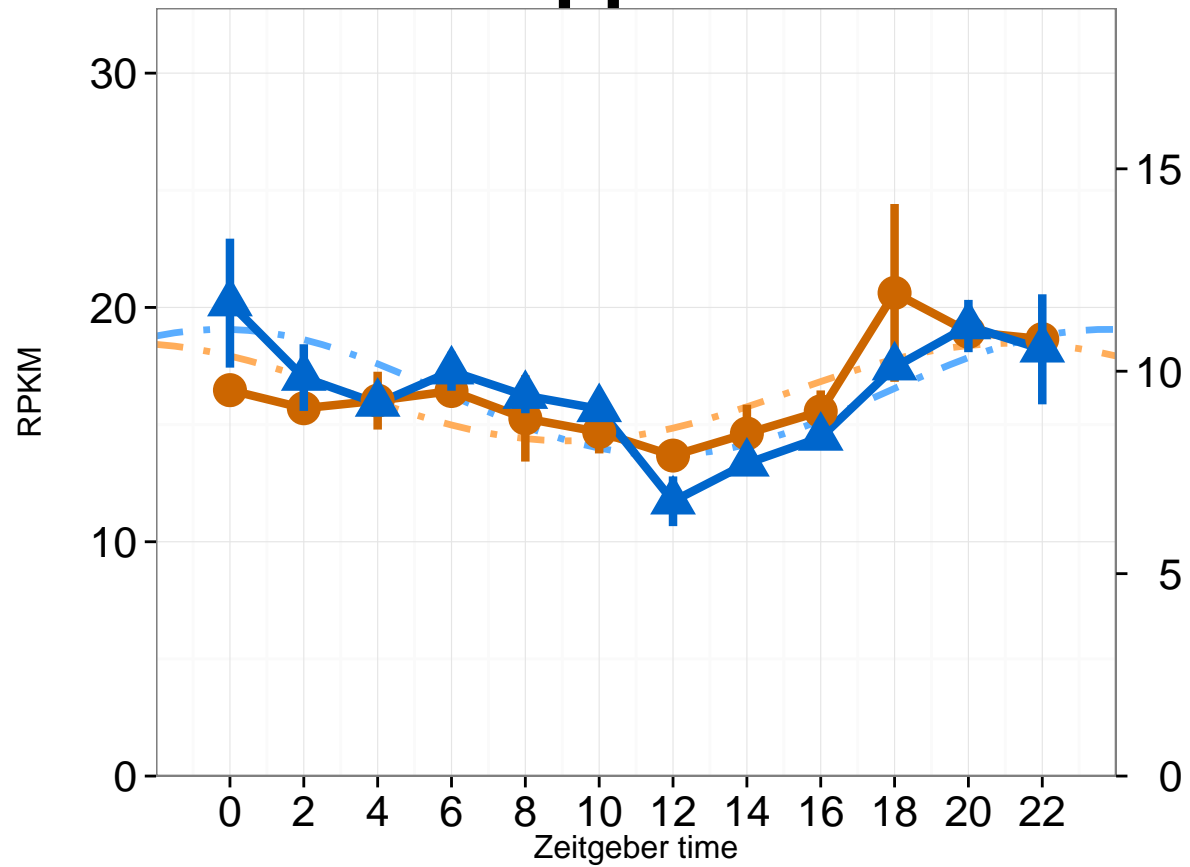

# Ppp2r4

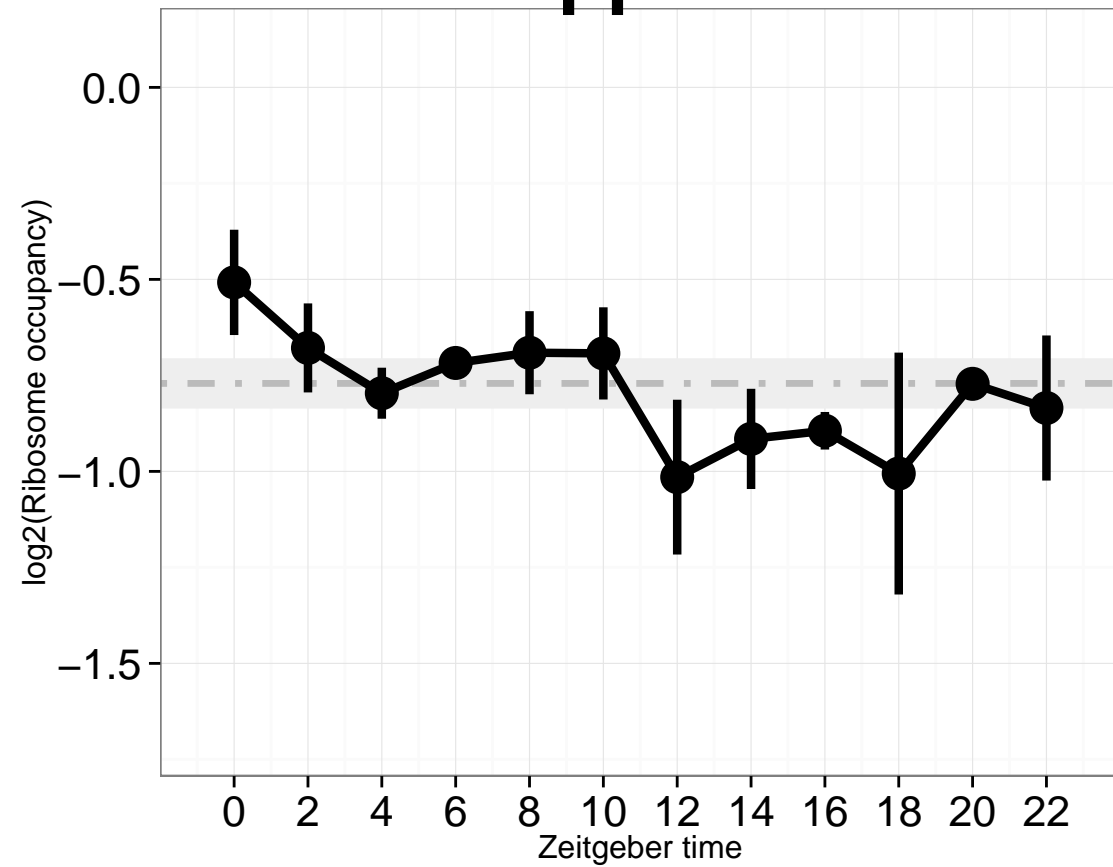

Supplement: SuppDataset_1.zip [file Ppp2r4_set_A.pdf › Supplemental Dataset 1/A-mRNA_nonrhyth_translation_nonrhyth/Ppp2r4_set_A.pdf]

# Ppp2r5a

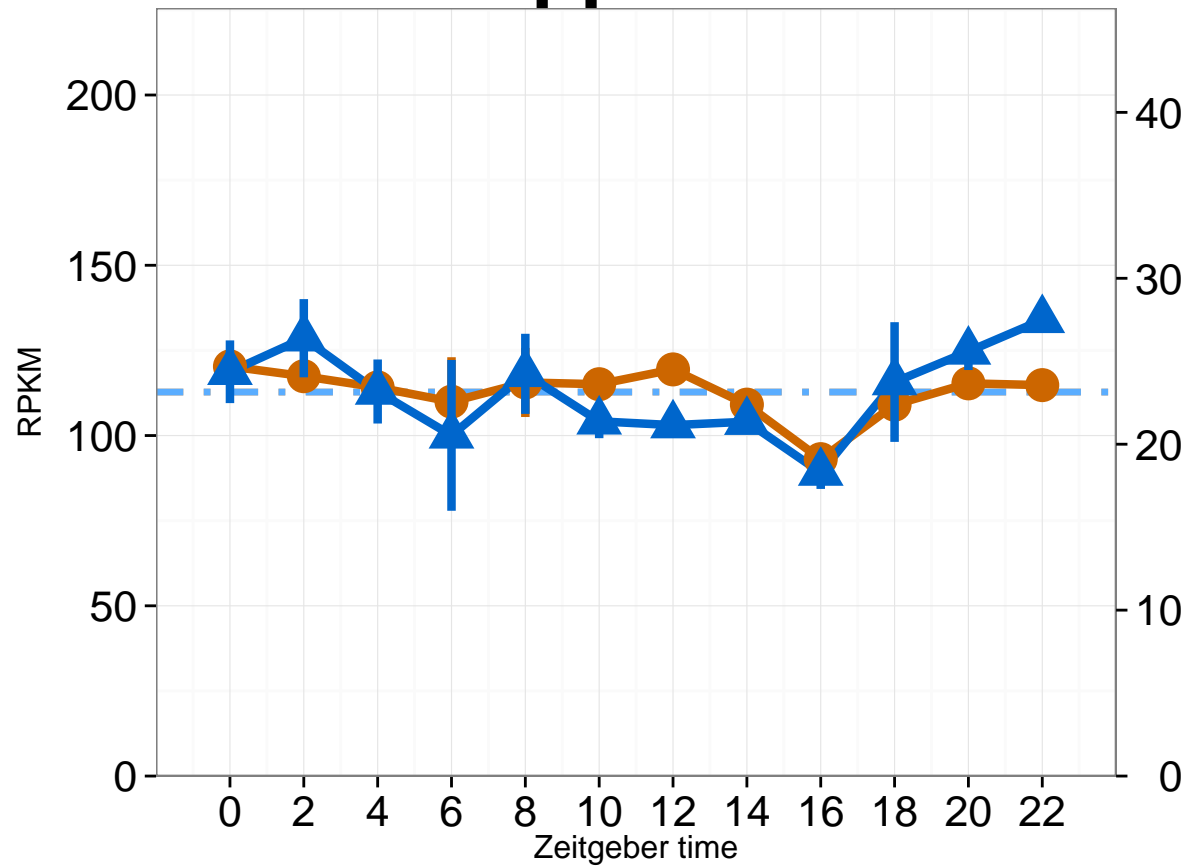

# Ppp2r5a

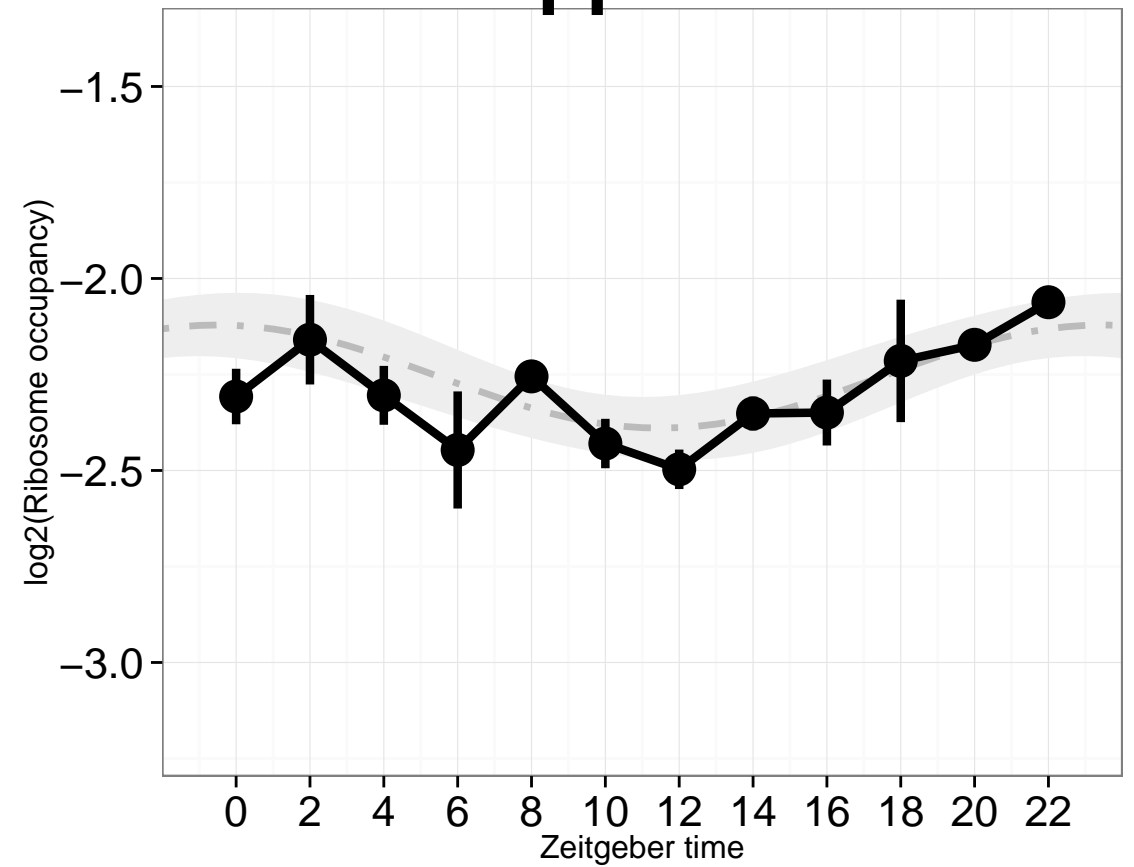

Supplement: SuppDataset_1.zip [file Ppp2r5a_set_A.pdf › Supplemental Dataset 1/A-mRNA_nonrhyth_translation_nonrhyth/Ppp2r5a_set_A.pdf]

# Ppp2r5b

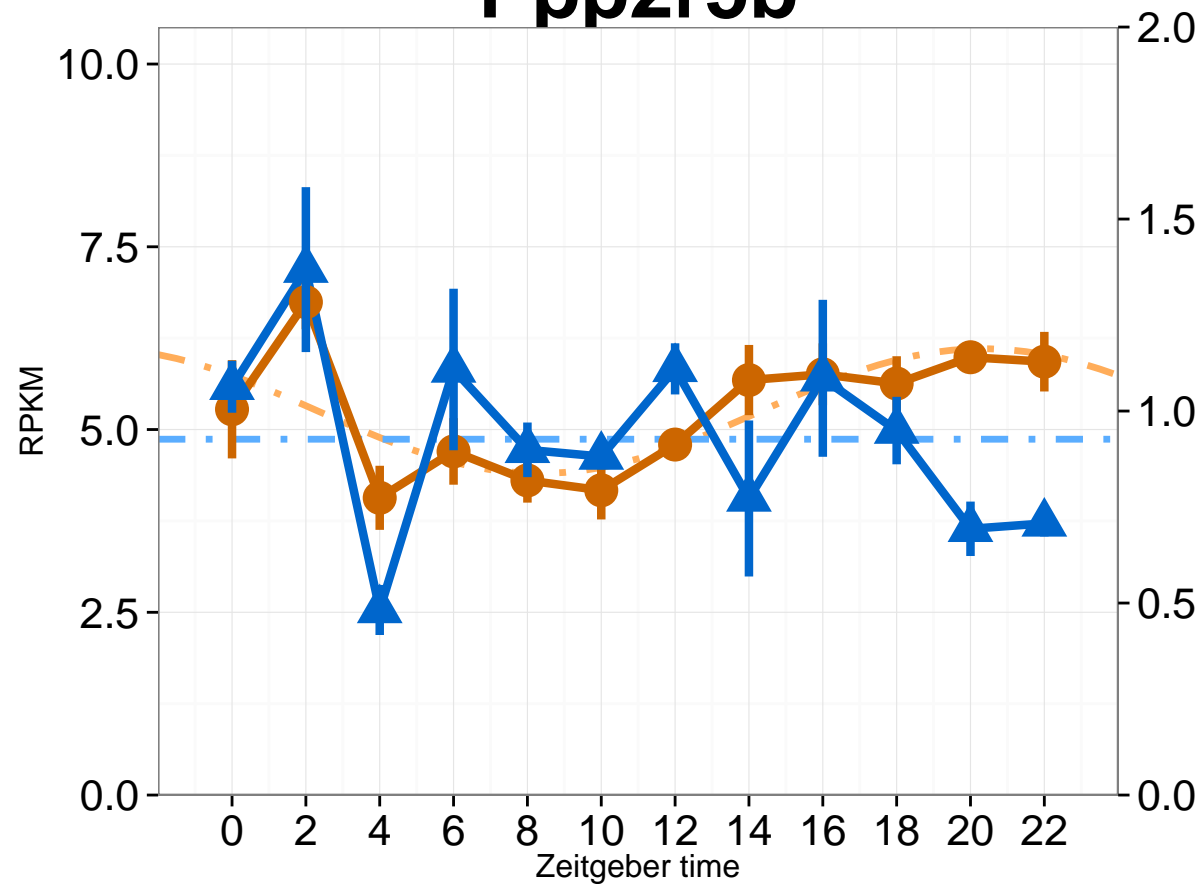

# Ppp2r5b

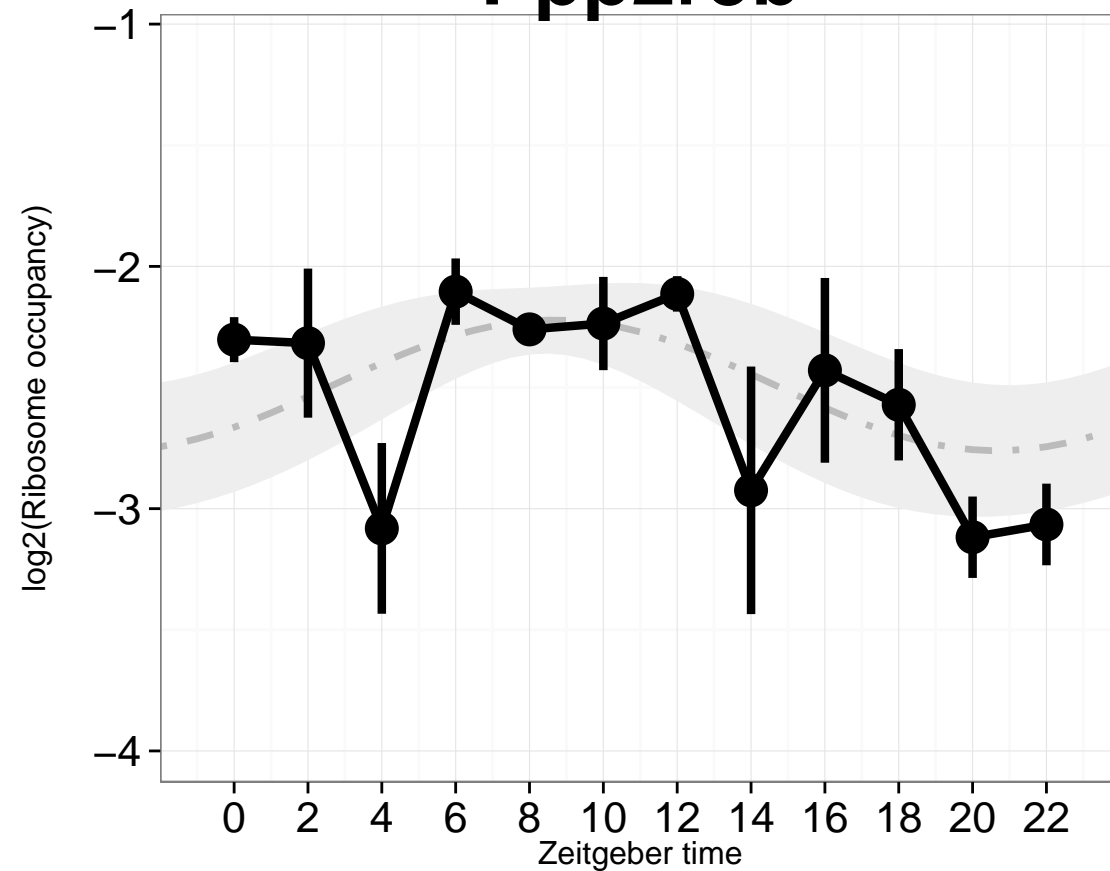

Supplement: SuppDataset_1.zip [file Ppp2r5b_set_A.pdf › Supplemental Dataset 1/A-mRNA_nonrhyth_translation_nonrhyth/Ppp2r5b_set_A.pdf]

# Ppp2r5c

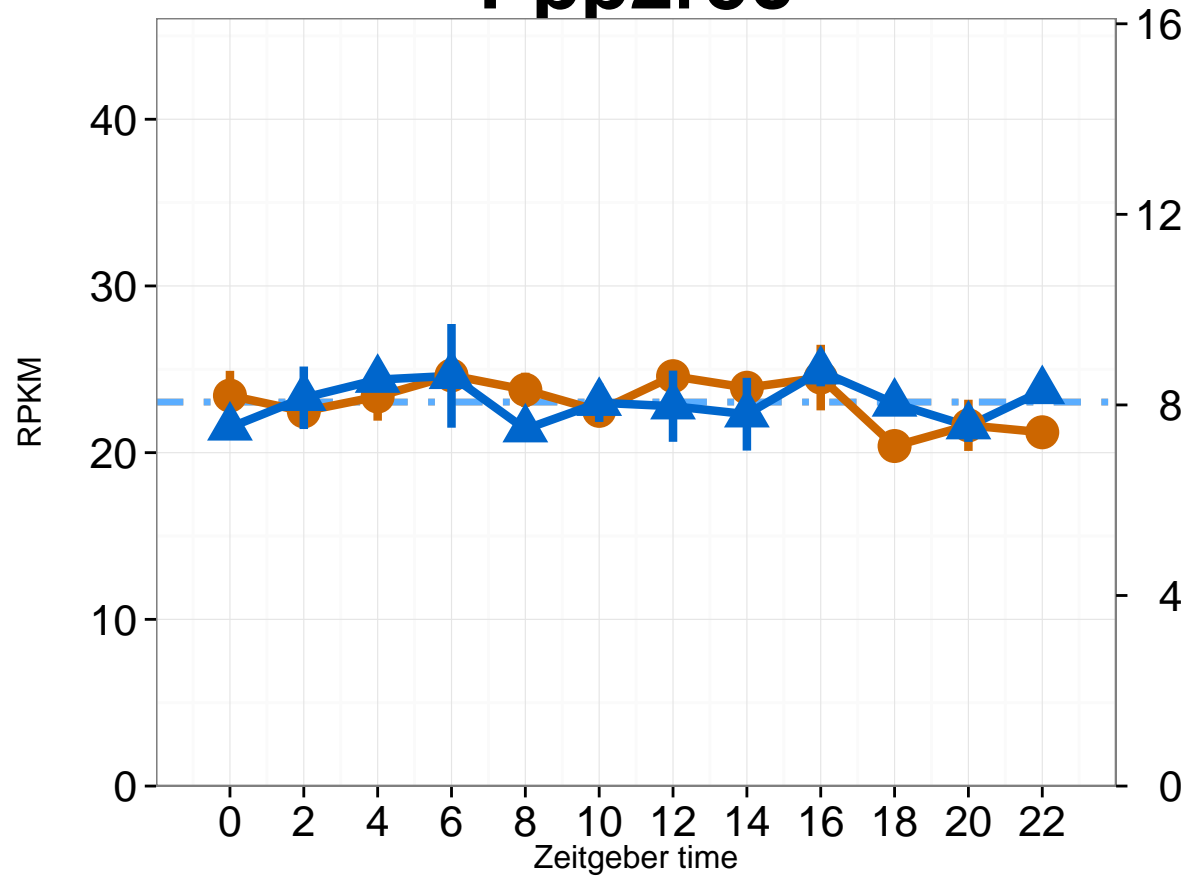

# Ppp2r5c

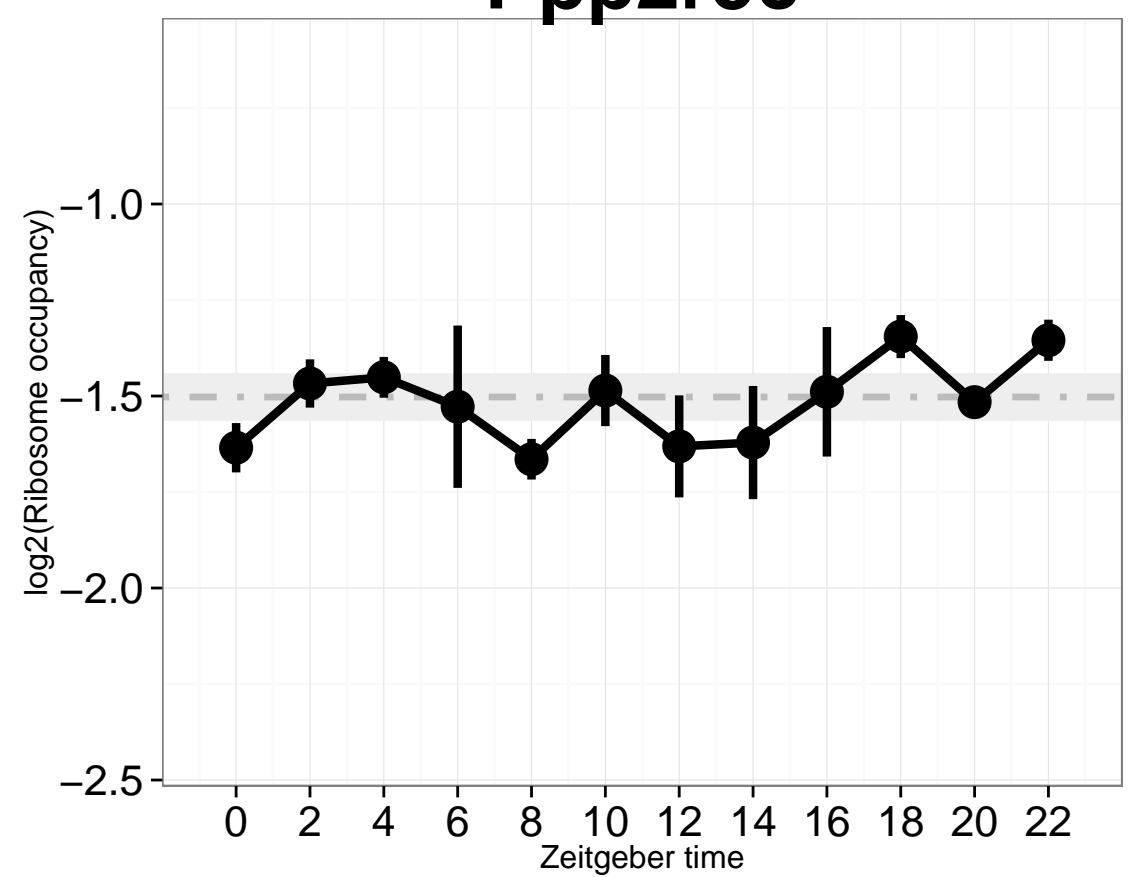

Supplement: SuppDataset_1.zip [file Ppp2r5c_set_A.pdf › Supplemental Dataset 1/A-mRNA_nonrhyth_translation_nonrhyth/Ppp2r5c_set_A.pdf]

# Ppp2r5d

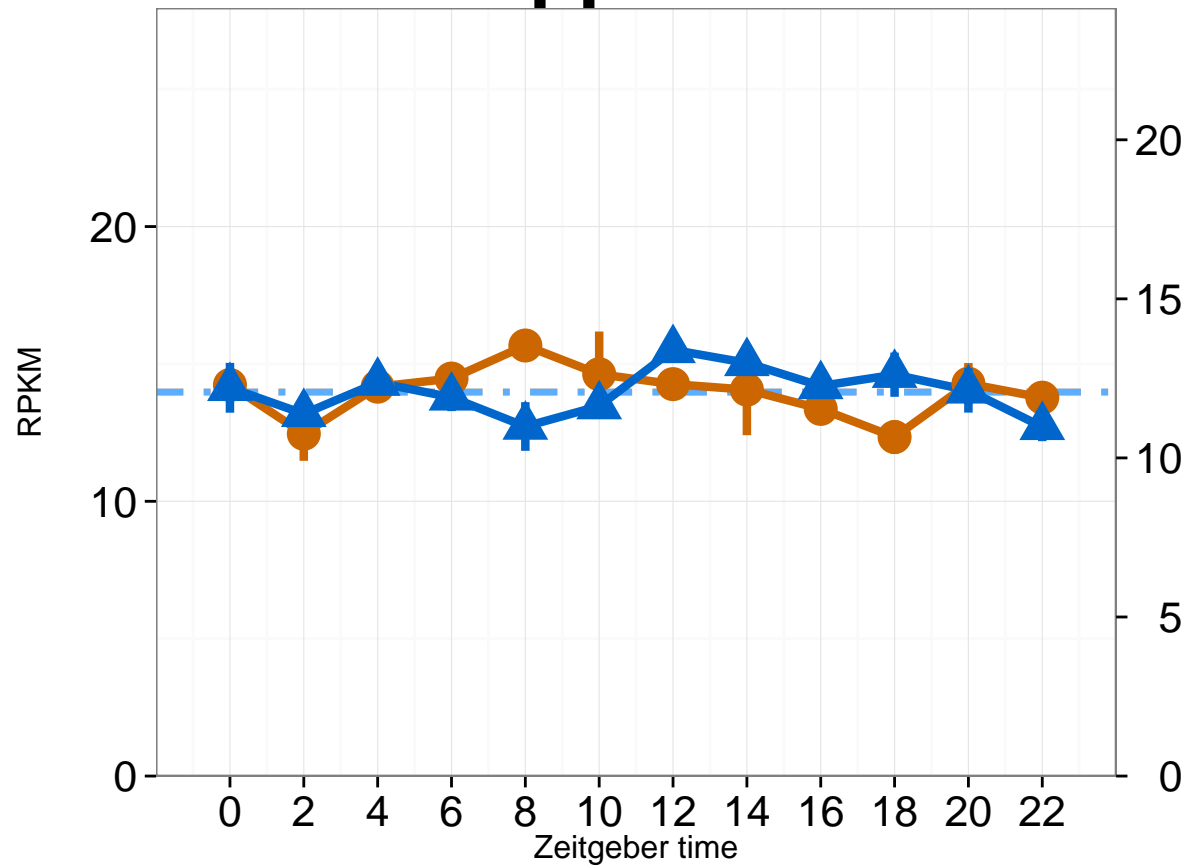

# Ppp2r5d

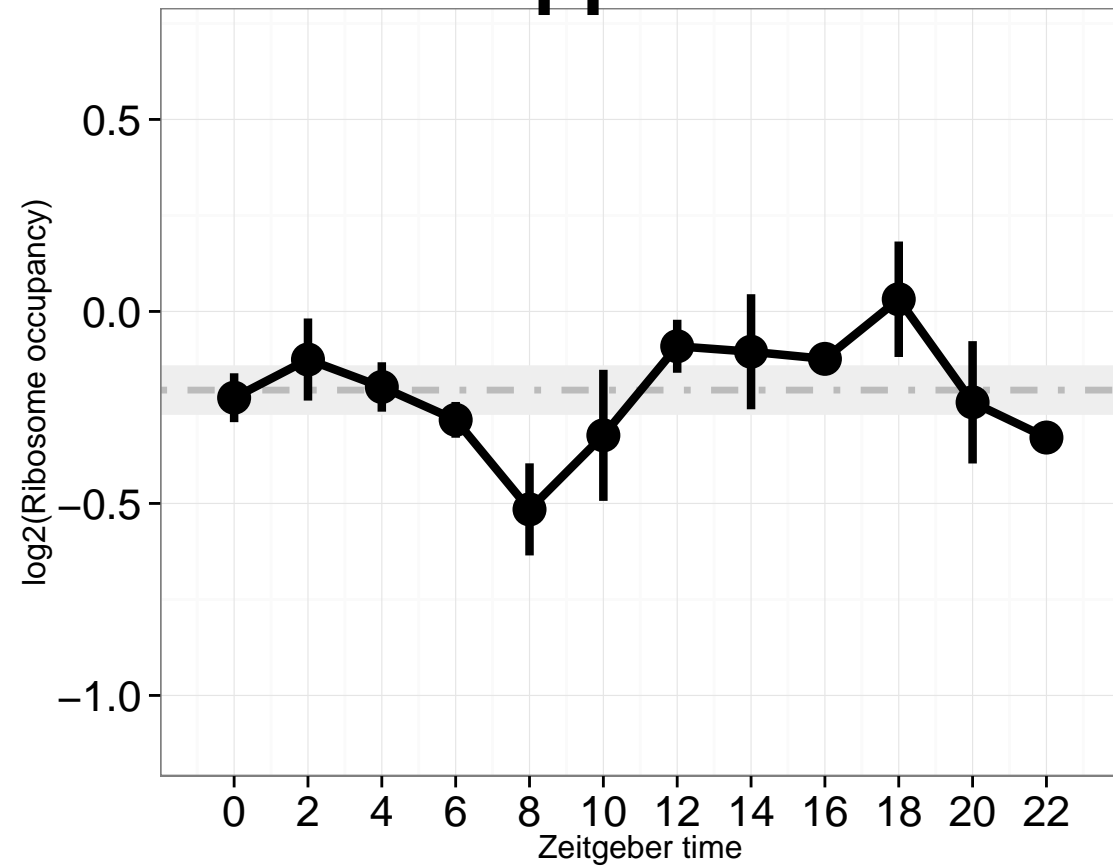

Supplement: SuppDataset_1.zip [file Ppp2r5d_set_A.pdf › Supplemental Dataset 1/A-mRNA_nonrhyth_translation_nonrhyth/Ppp2r5d_set_A.pdf]

# Ppp3ca

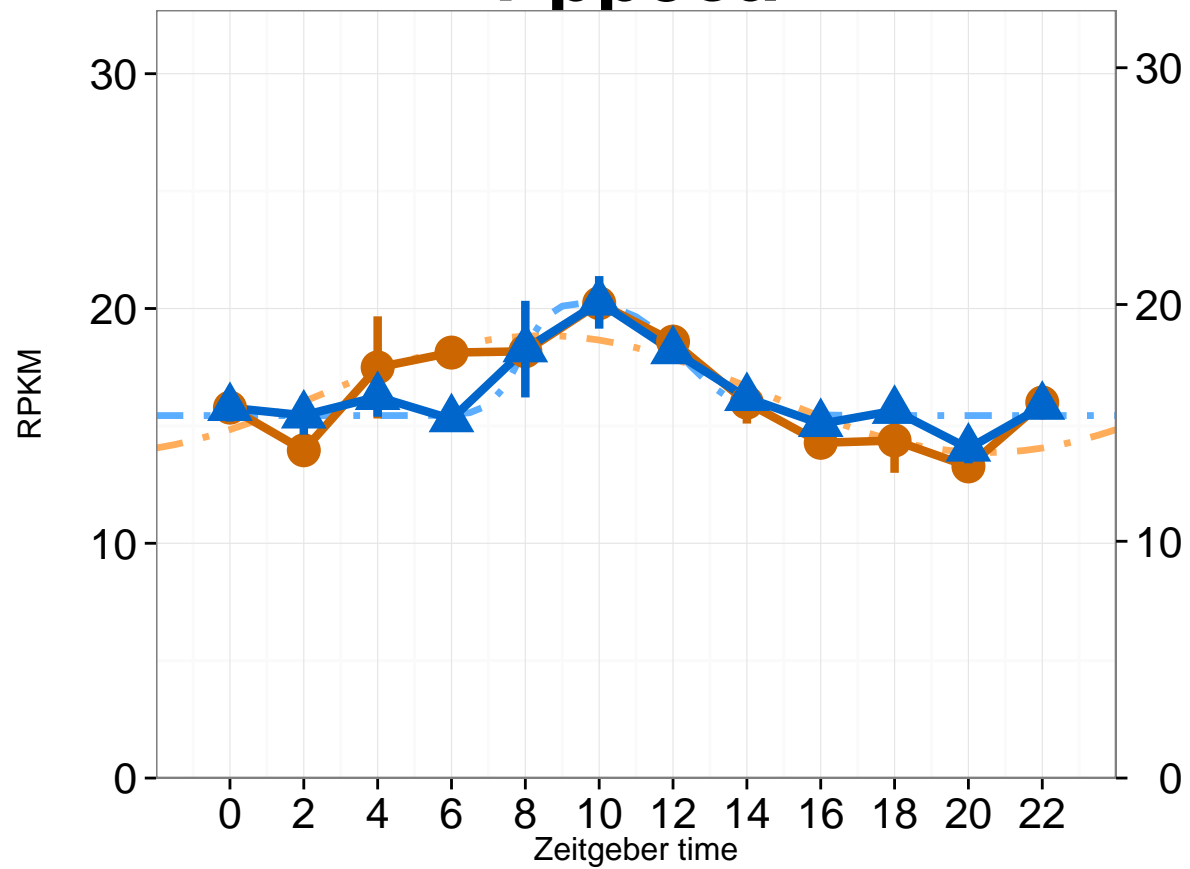

# Ppp3ca

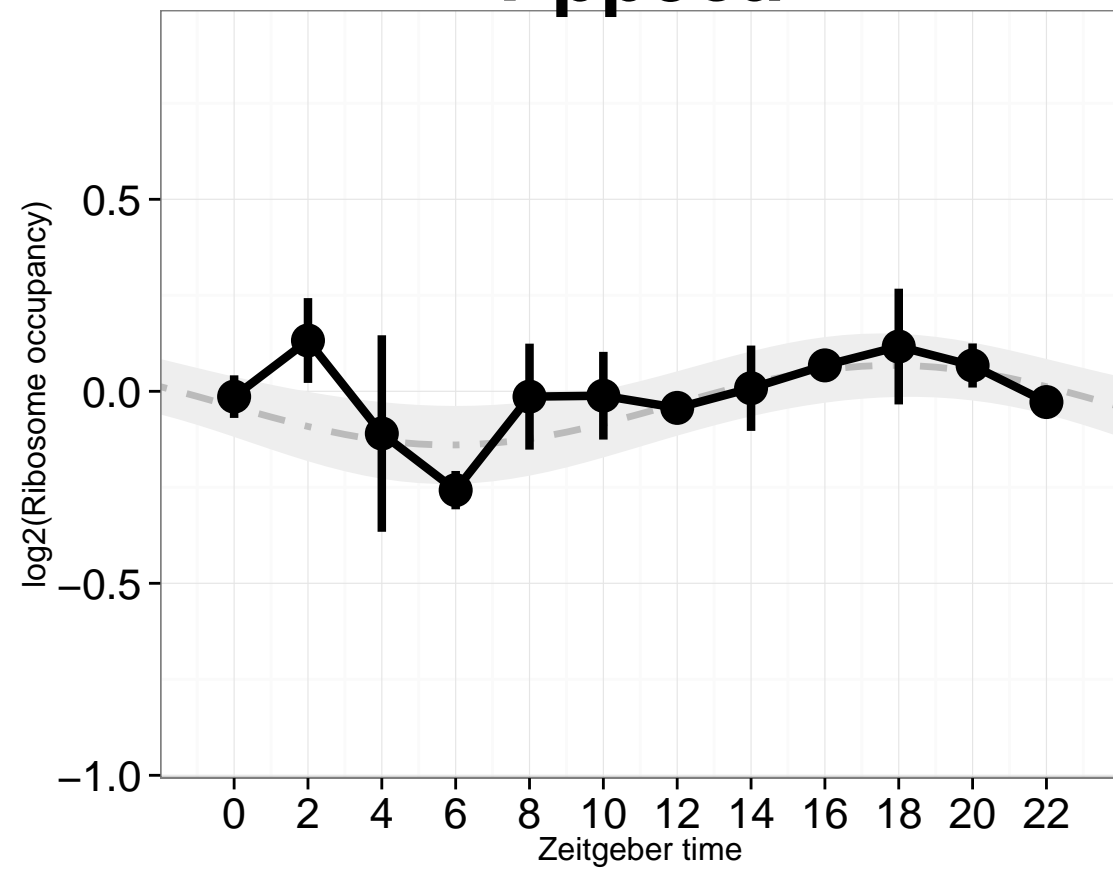

Supplement: SuppDataset_1.zip [file Ppp3ca_set_A.pdf › Supplemental Dataset 1/A-mRNA_nonrhyth_translation_nonrhyth/Ppp3ca_set_A.pdf]

# Ppp3cb

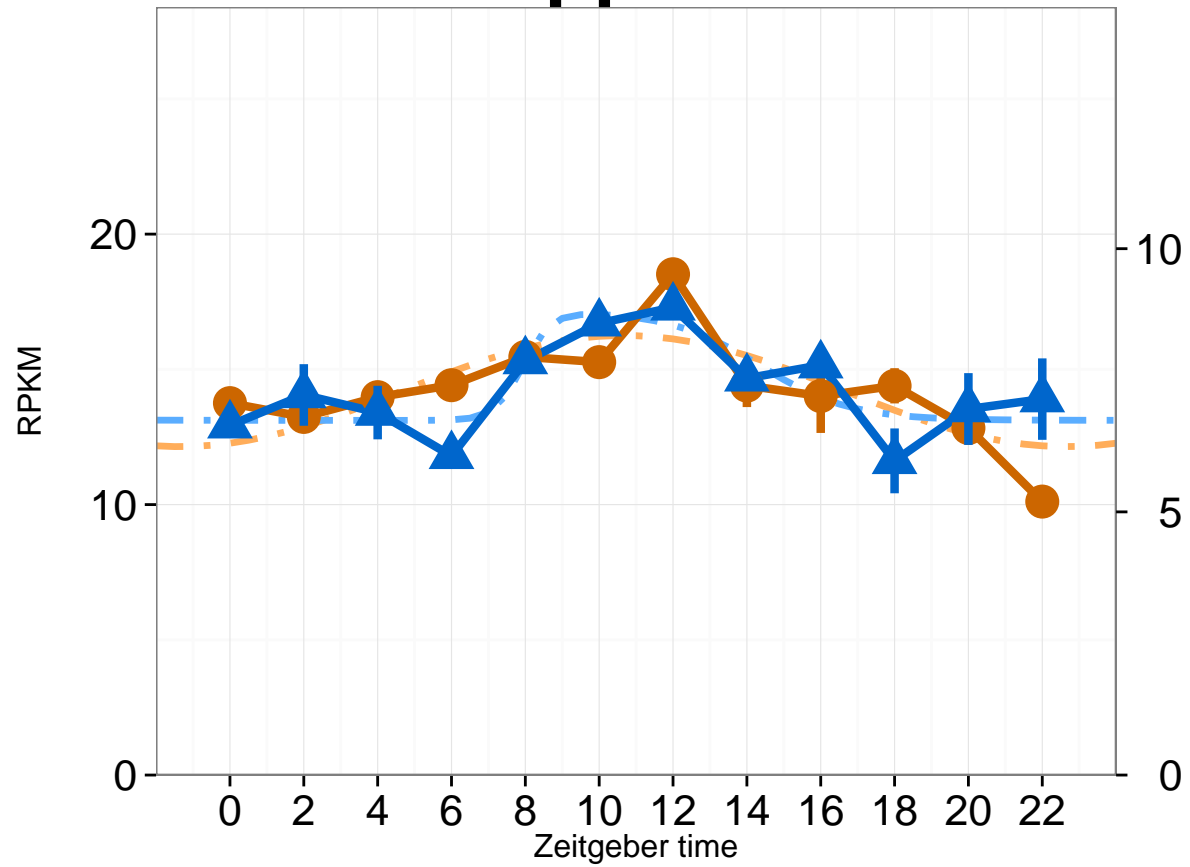

# Ppp3cb

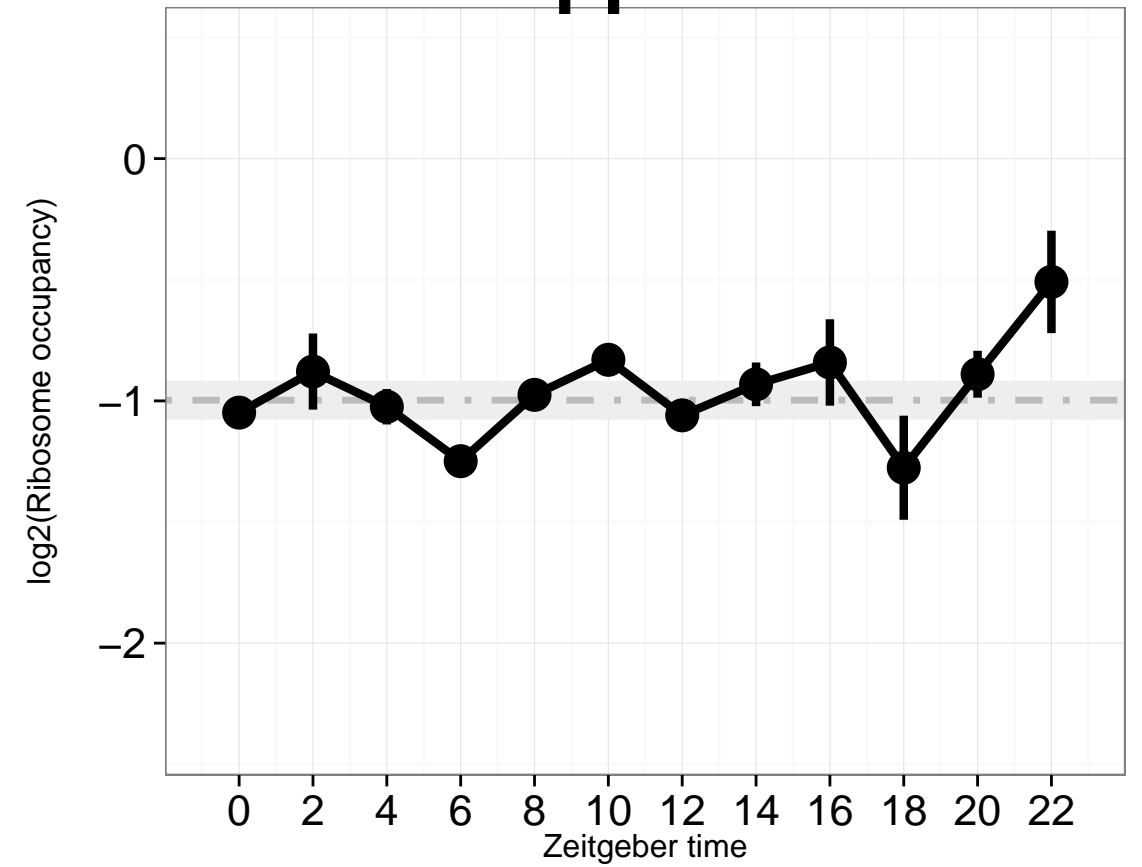

Supplement: SuppDataset_1.zip [file Ppp3cb_set_A.pdf › Supplemental Dataset 1/A-mRNA_nonrhyth_translation_nonrhyth/Ppp3cb_set_A.pdf]

## Ppp3cc

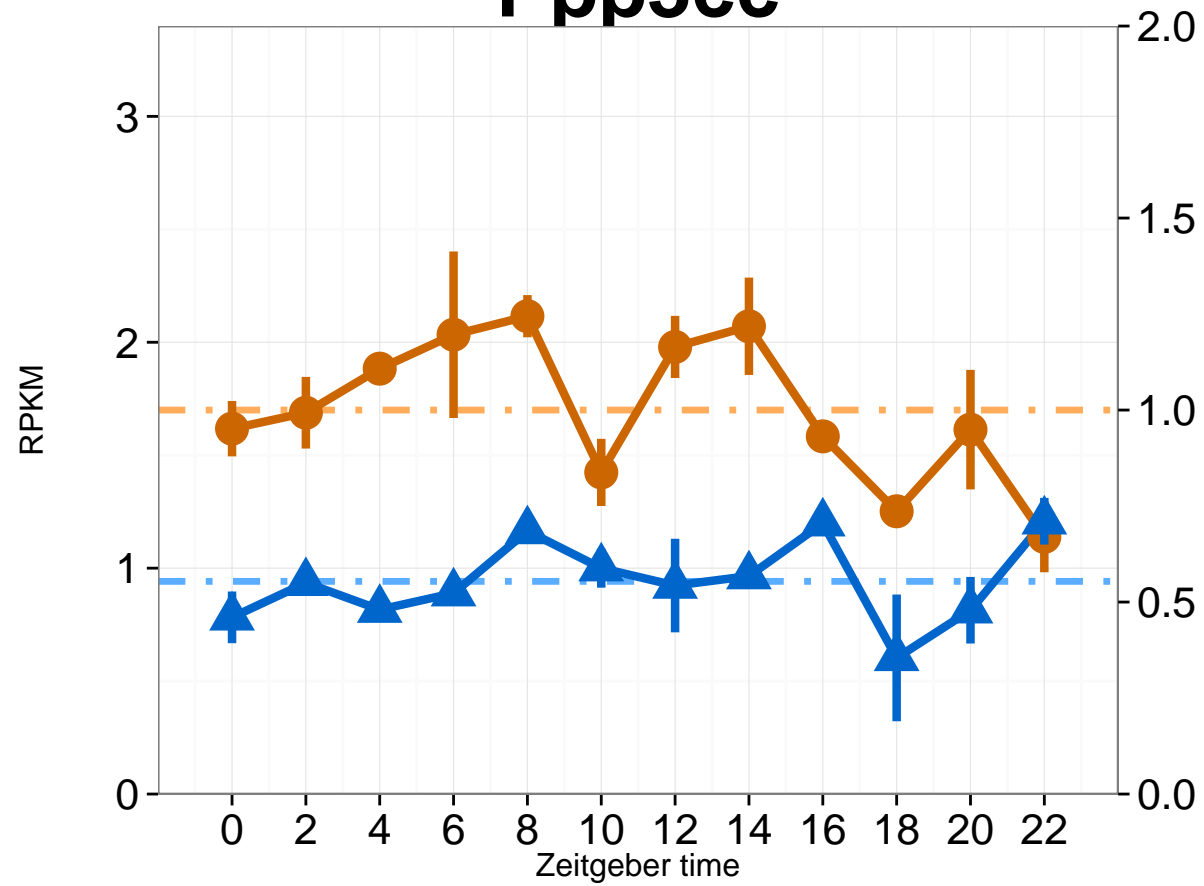

## Ppp3cc

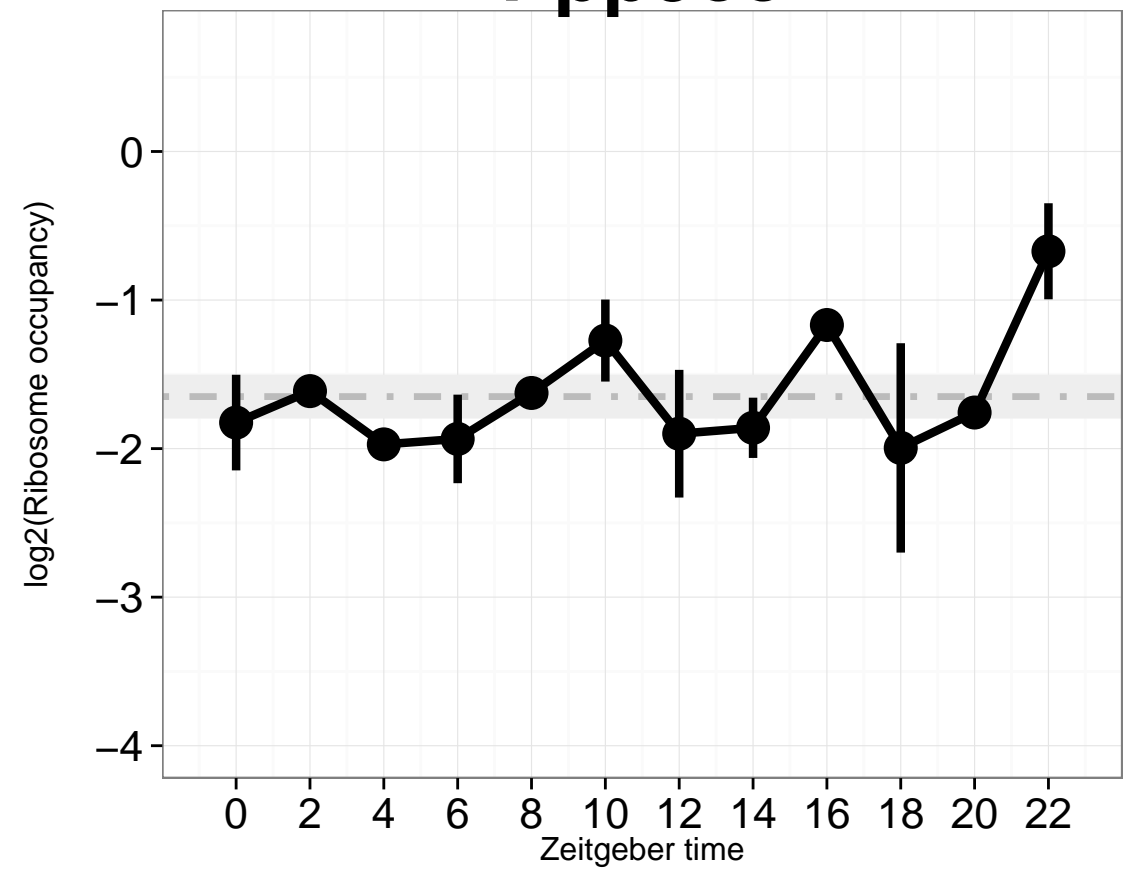

Supplement: SuppDataset_1.zip [file Ppp3cc_set_A.pdf › Supplemental Dataset 1/A-mRNA_nonrhyth_translation_nonrhyth/Ppp3cc_set_A.pdf]

# Ppp3r1

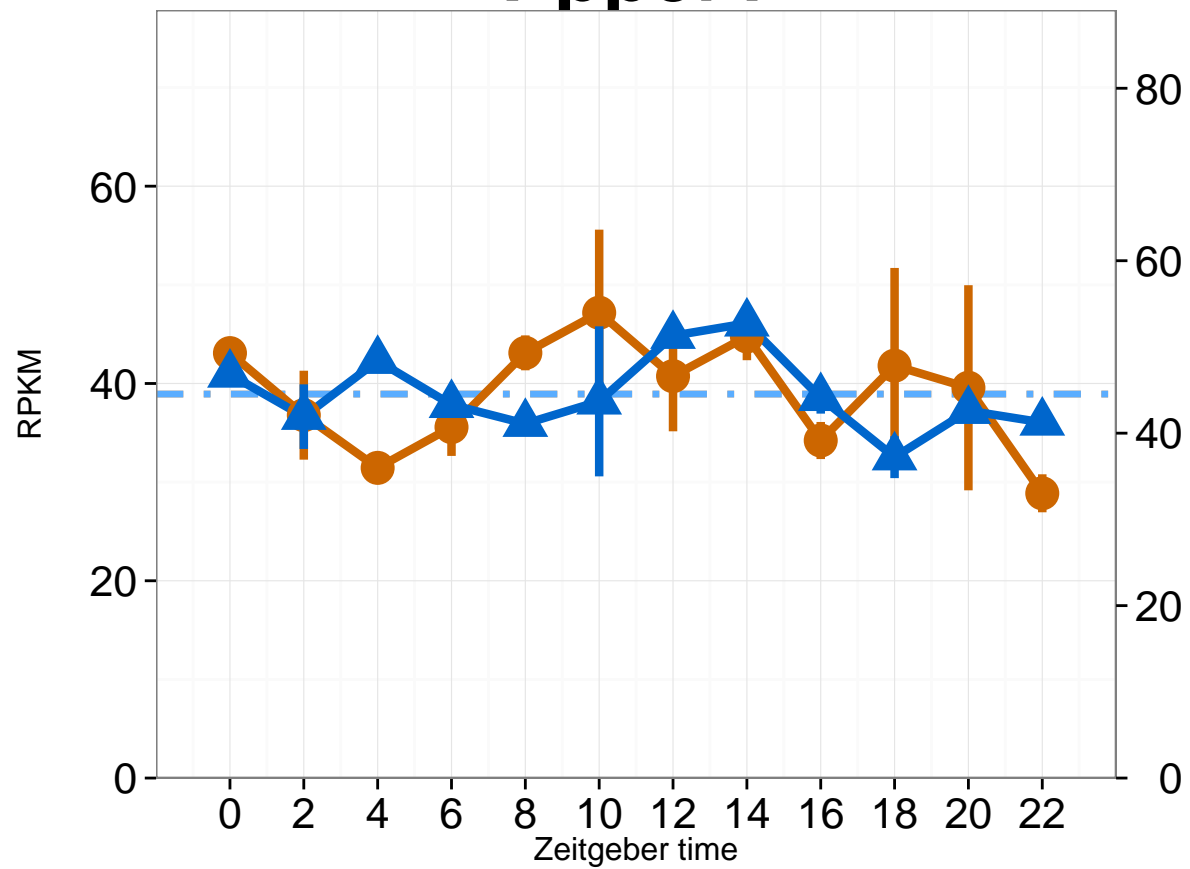

# Ppp3r1

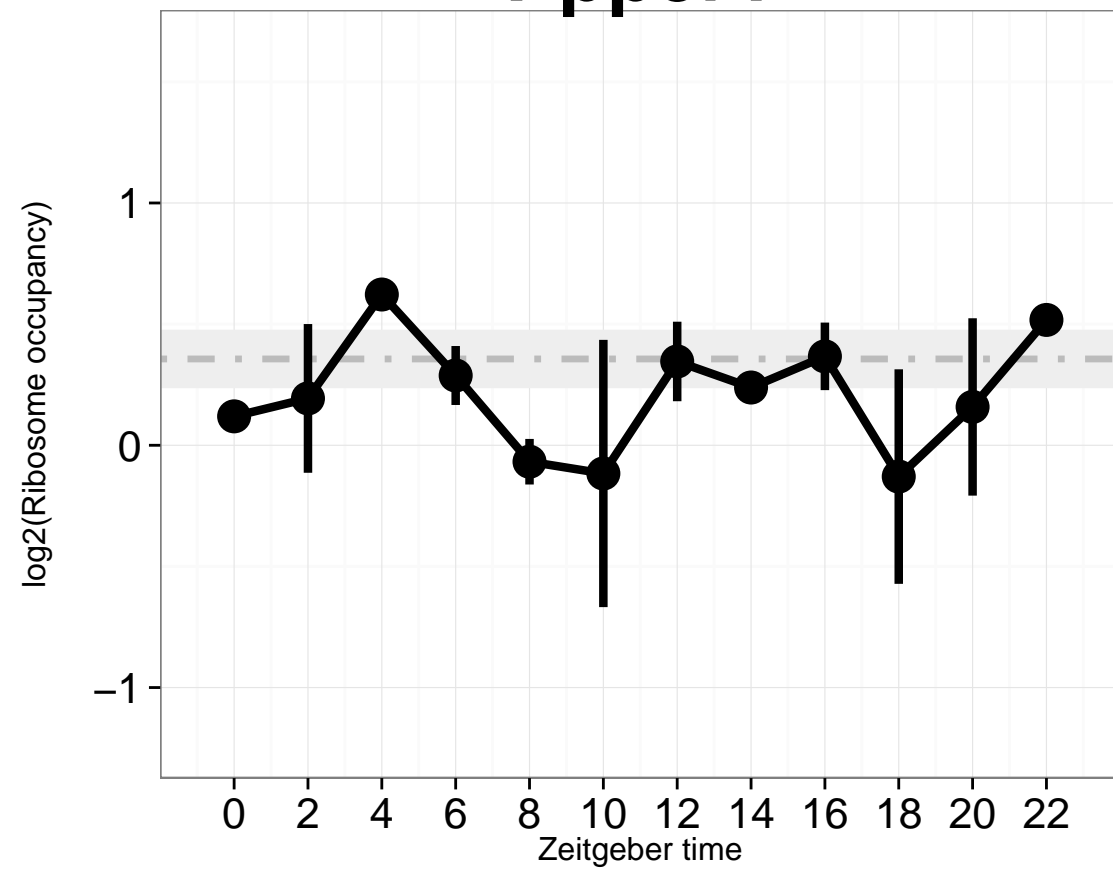

Supplement: SuppDataset_1.zip [file Ppp3r1_set_A.pdf › Supplemental Dataset 1/A-mRNA_nonrhyth_translation_nonrhyth/Ppp3r1_set_A.pdf]

# Ppp4c

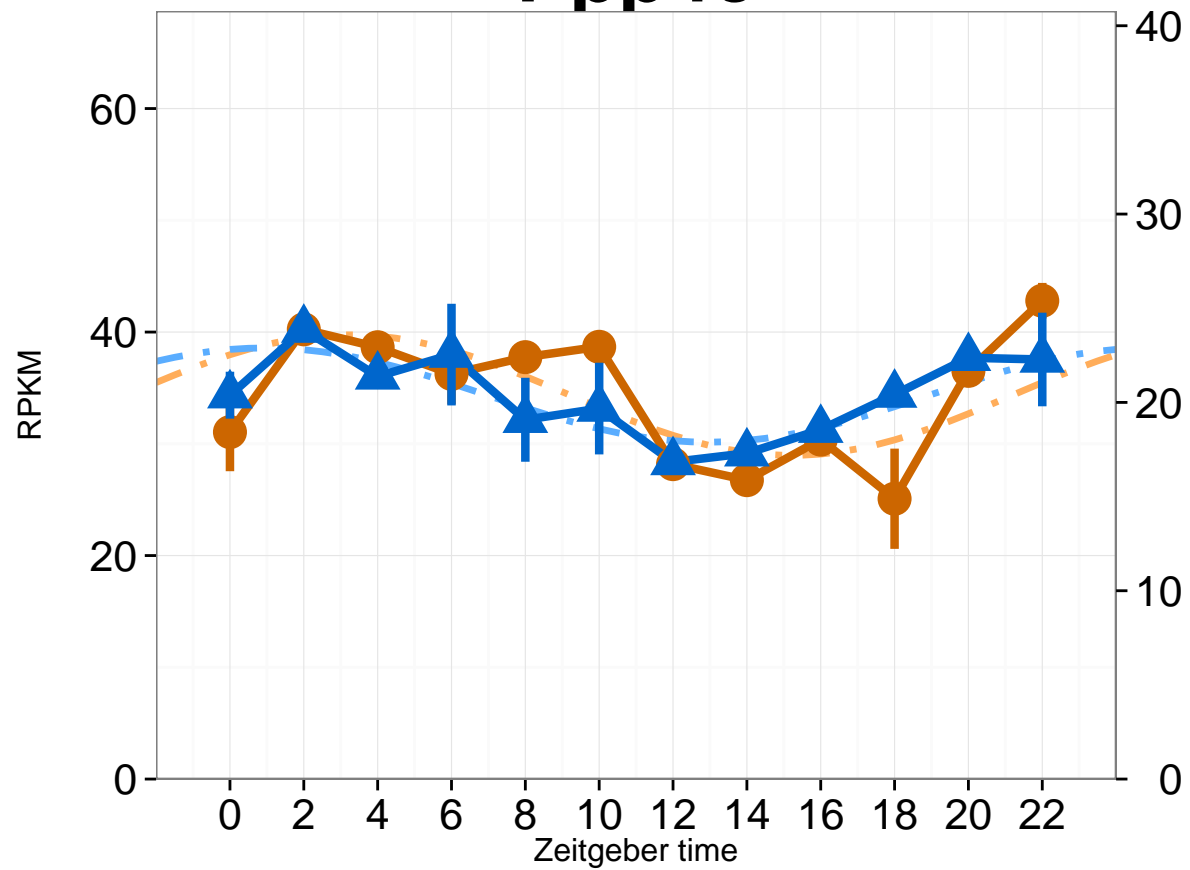

# Ppp4c

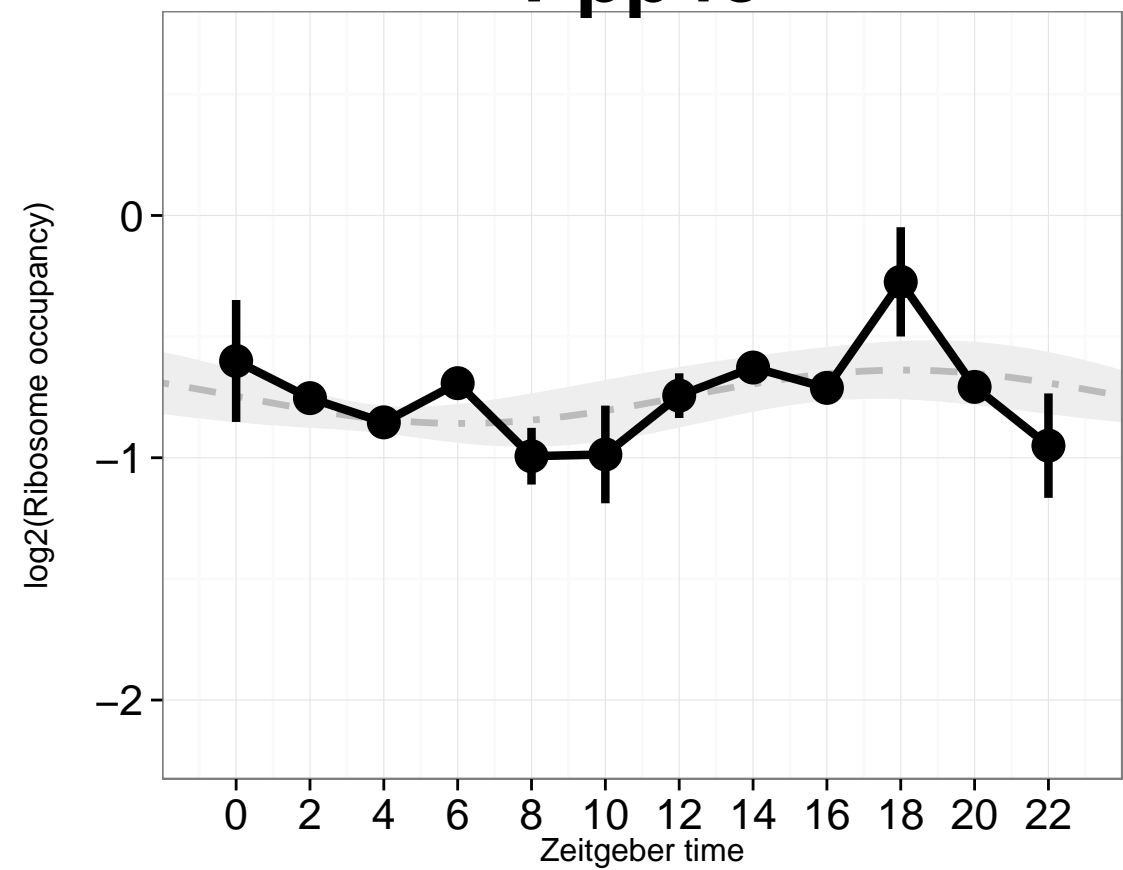

Supplement: SuppDataset_1.zip [file Ppp4c_set_A.pdf › Supplemental Dataset 1/A-mRNA_nonrhyth_translation_nonrhyth/Ppp4c_set_A.pdf]

## Ppp4r1

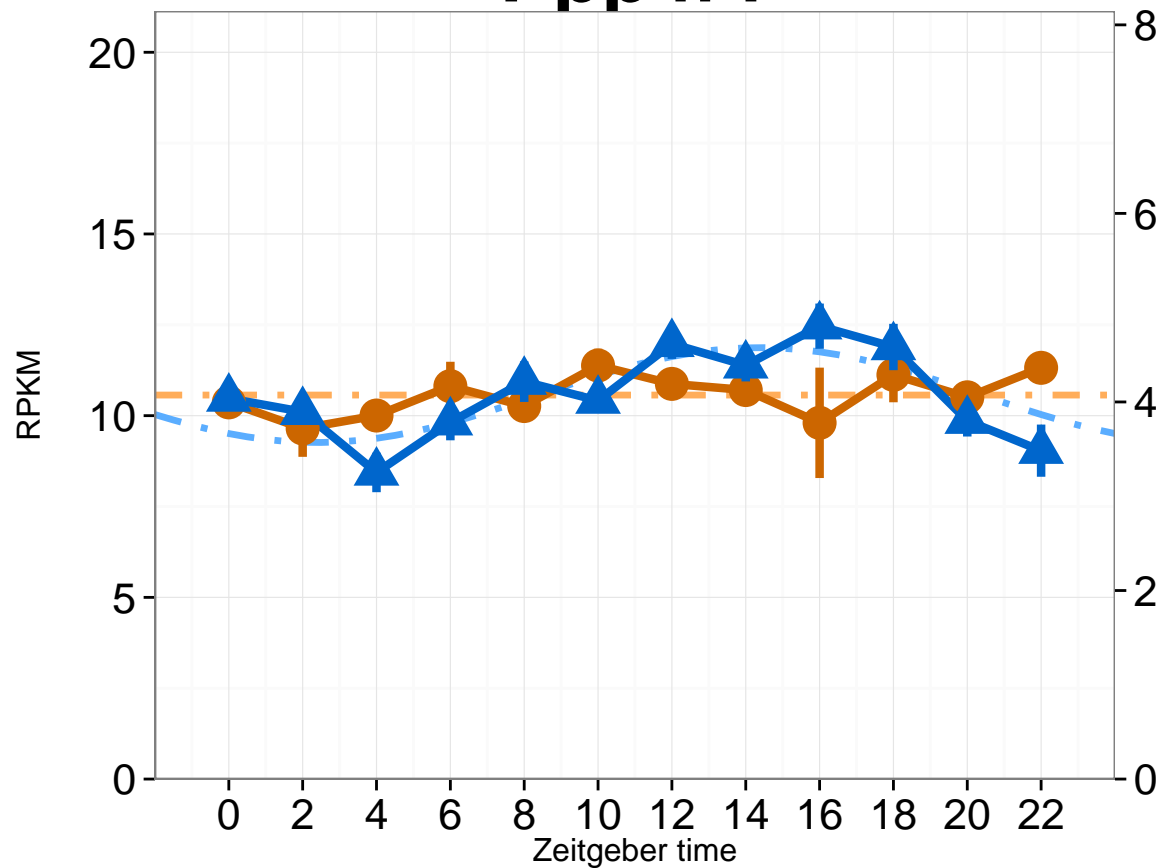

## Ppp4r1

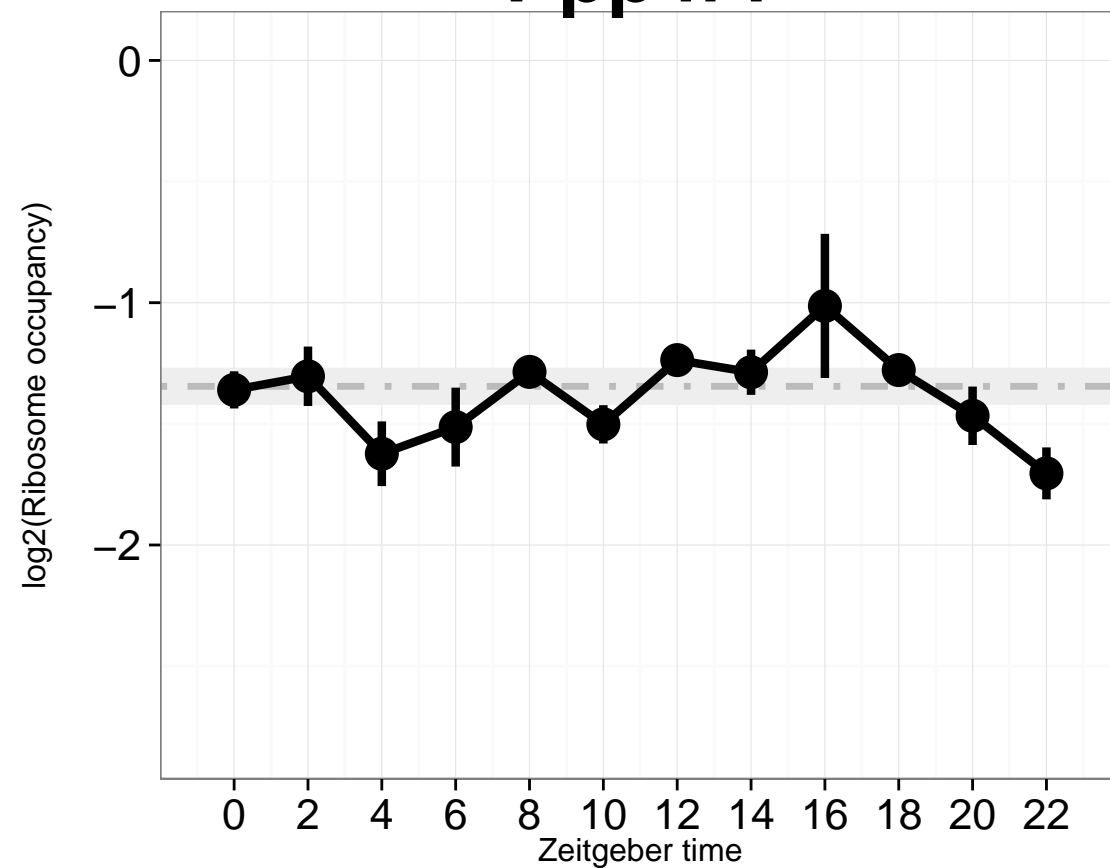

Supplement: SuppDataset_1.zip [file Ppp4r1_set_A.pdf › Supplemental Dataset 1/A-mRNA_nonrhyth_translation_nonrhyth/Ppp4r1_set_A.pdf]

# Ppp4r2

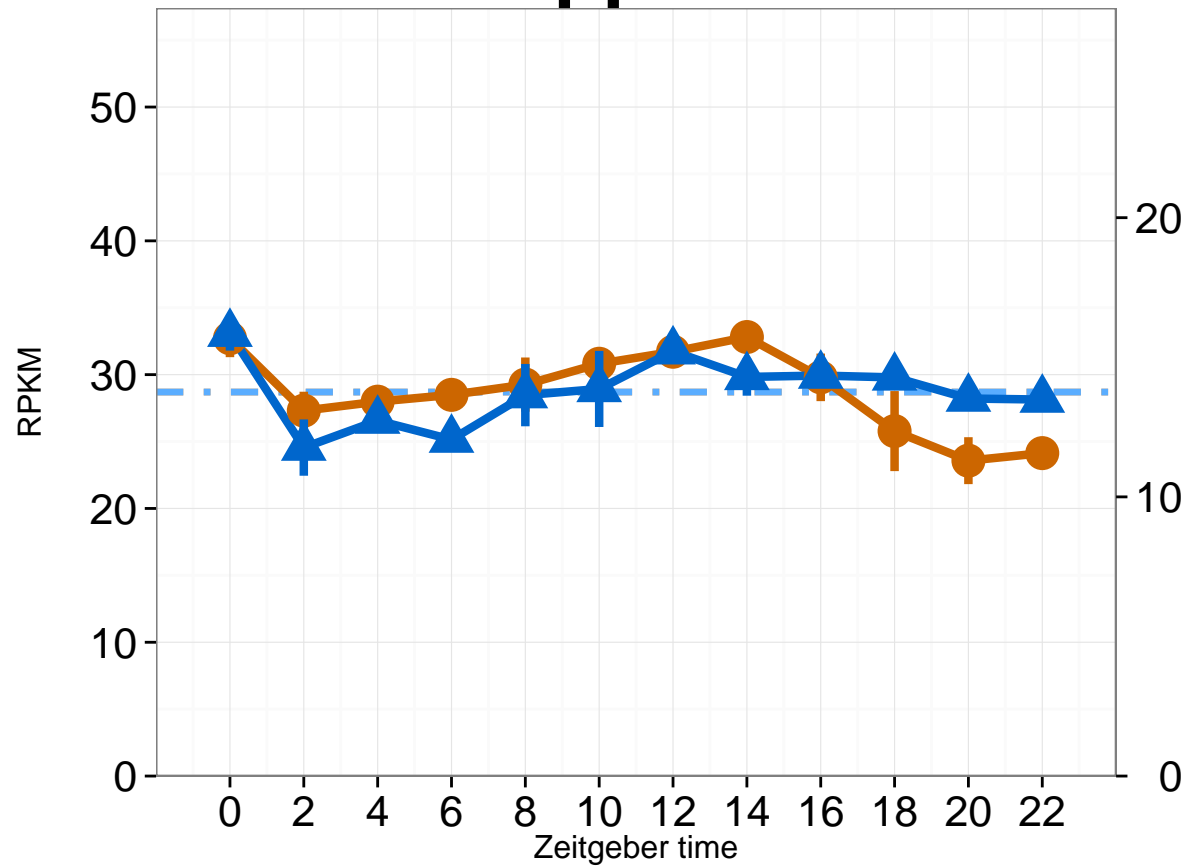

# Ppp4r2

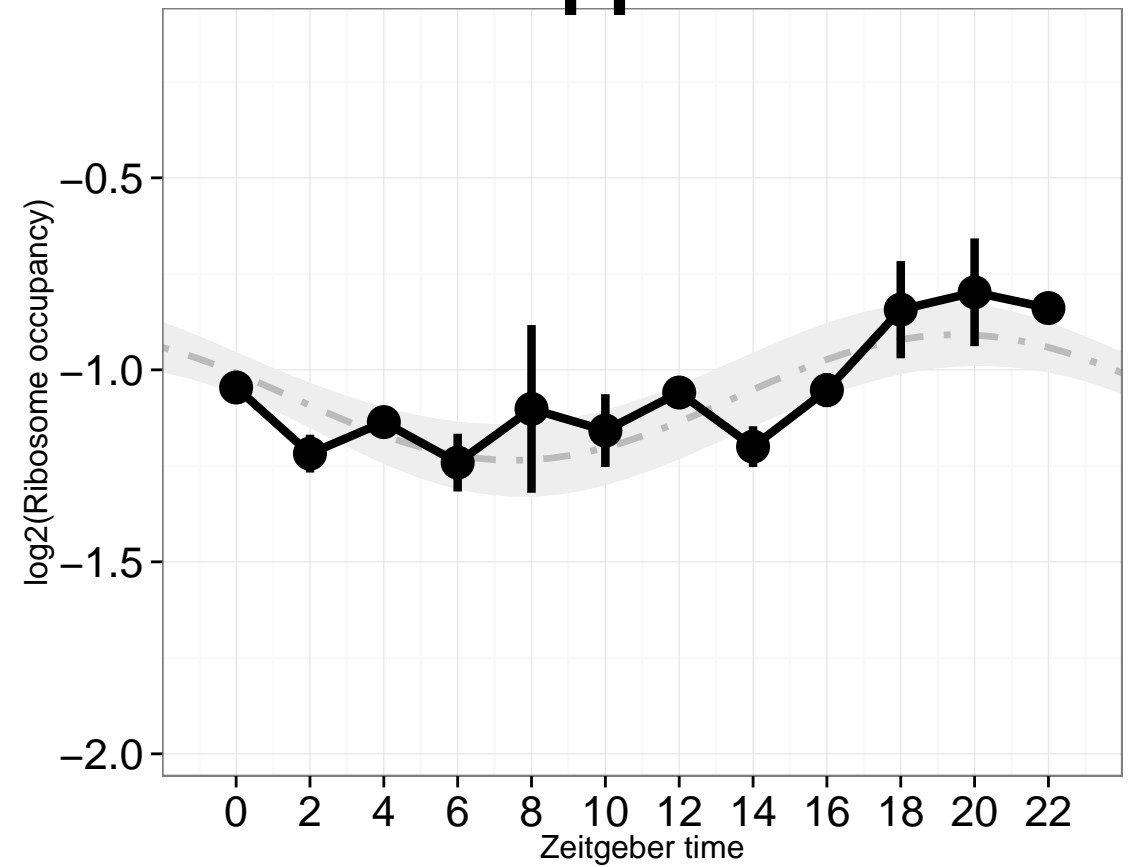

Supplement: SuppDataset_1.zip [file Ppp4r2_set_A.pdf › Supplemental Dataset 1/A-mRNA_nonrhyth_translation_nonrhyth/Ppp4r2_set_A.pdf]
