# Supplementary figures and images for: Ribosome profiling reveals the rhythmic liver translatome and circadian clock regulation by upstream open reading frames (part 57 of 113)
Source: HighWire-hosted journal article supplement (doi:10.1101/gr.195404.115), 2015-10-20

# Ppp4r4

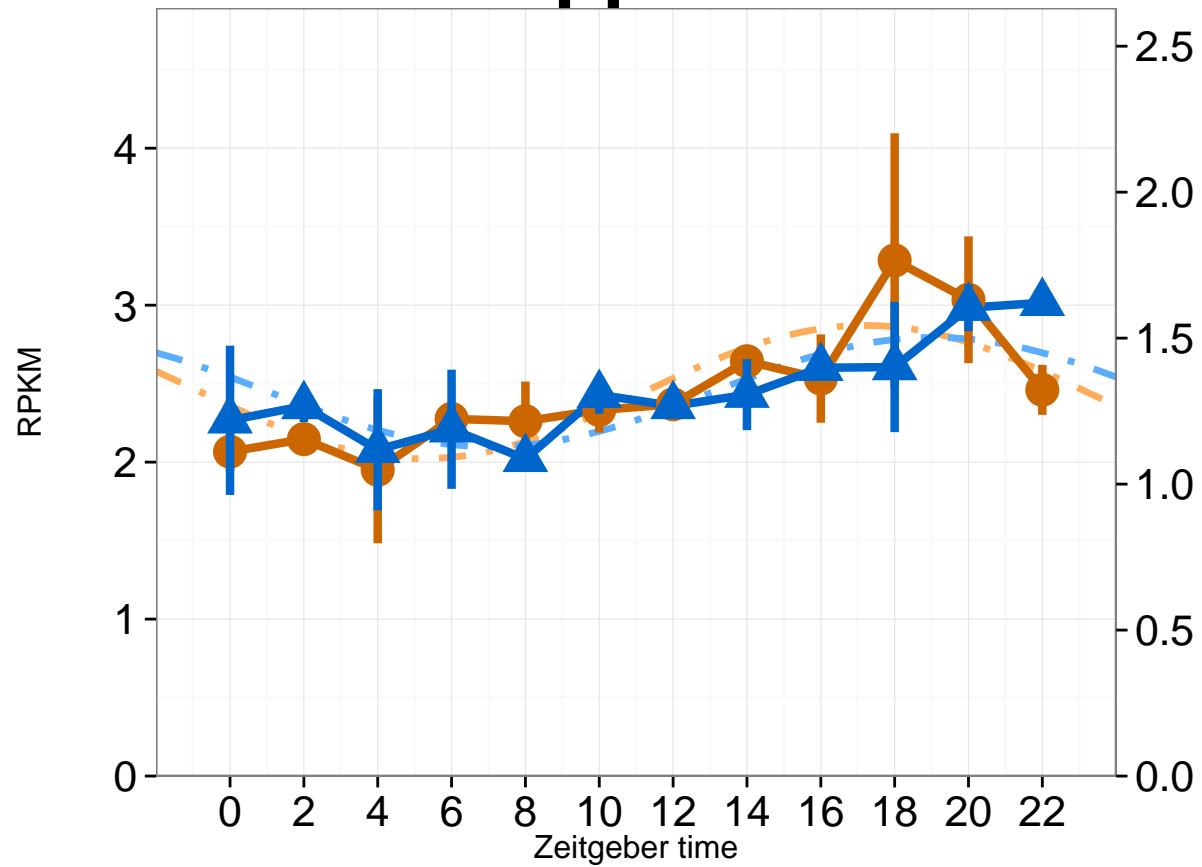

# Ppp4r4

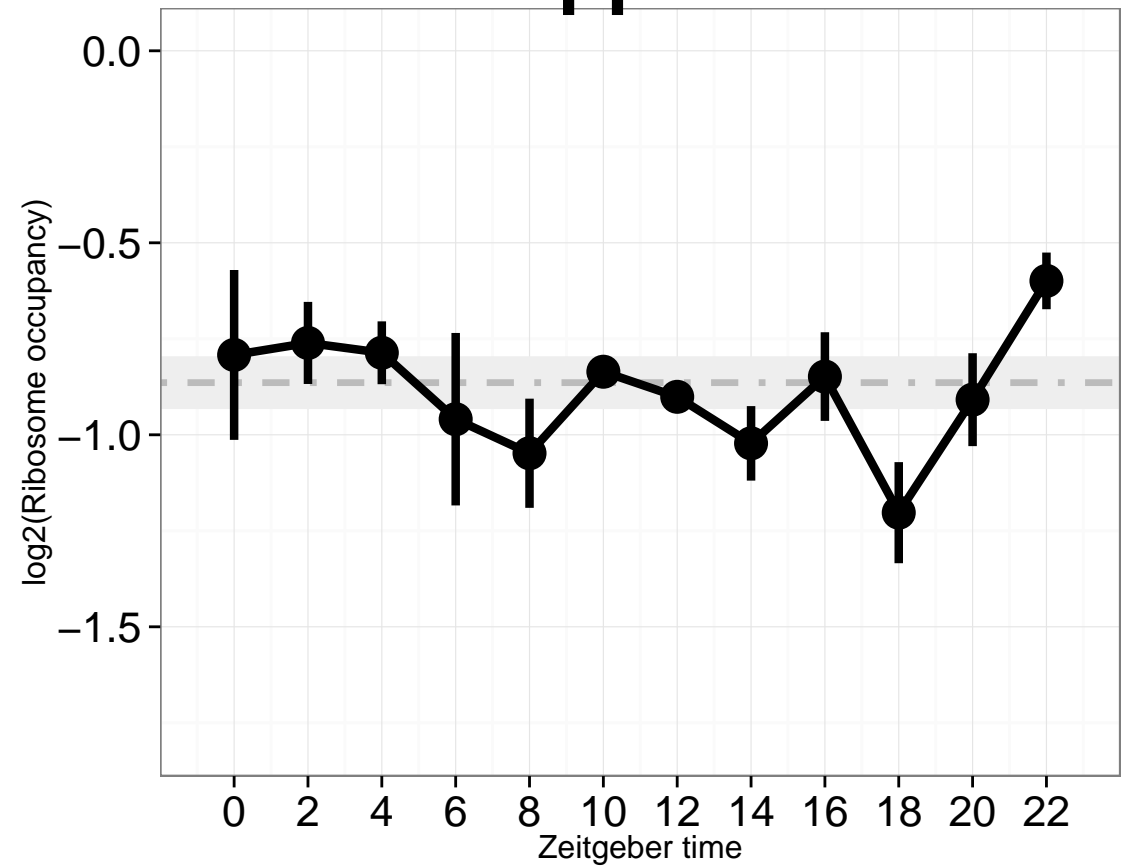

Supplement: SuppDataset_1.zip [file Ppp4r4_set_A.pdf › Supplemental Dataset 1/A-mRNA_nonrhyth_translation_nonrhyth/Ppp4r4_set_A.pdf]

# Ppp5c

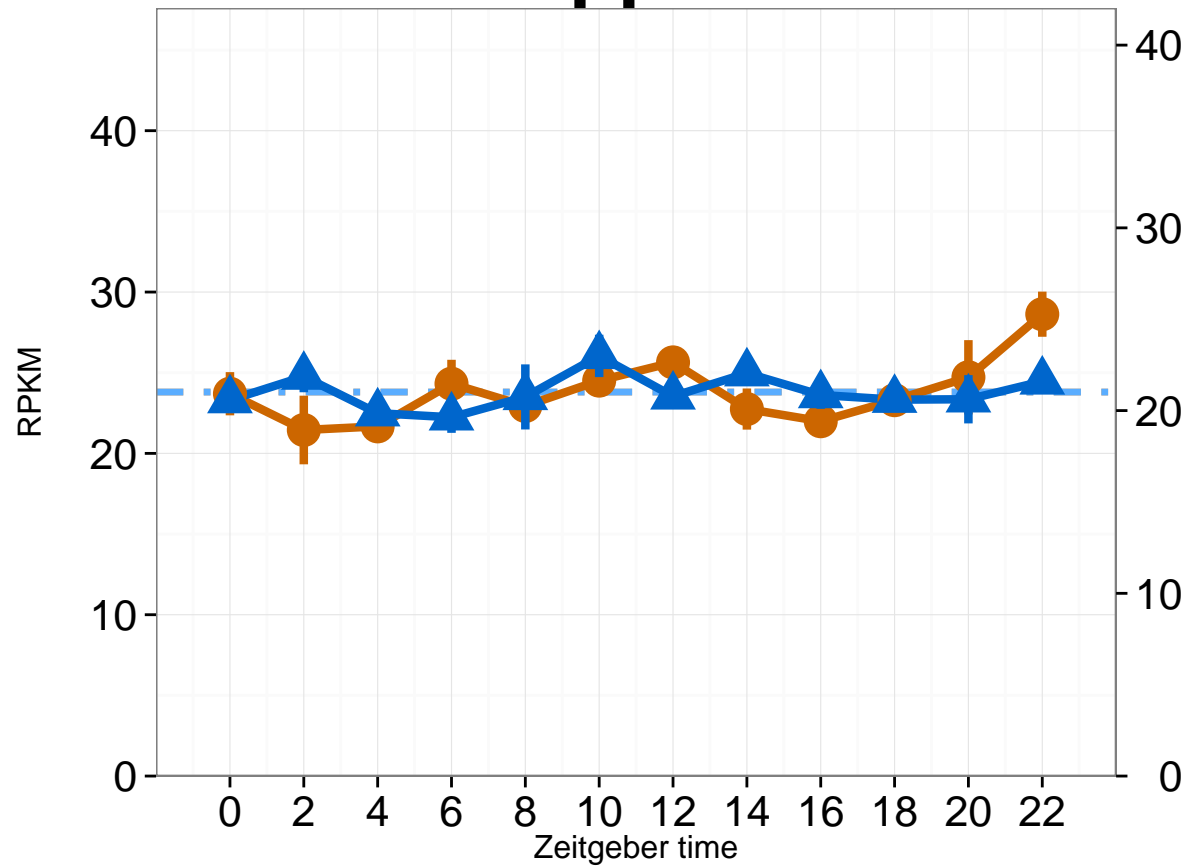

# Ppp5c

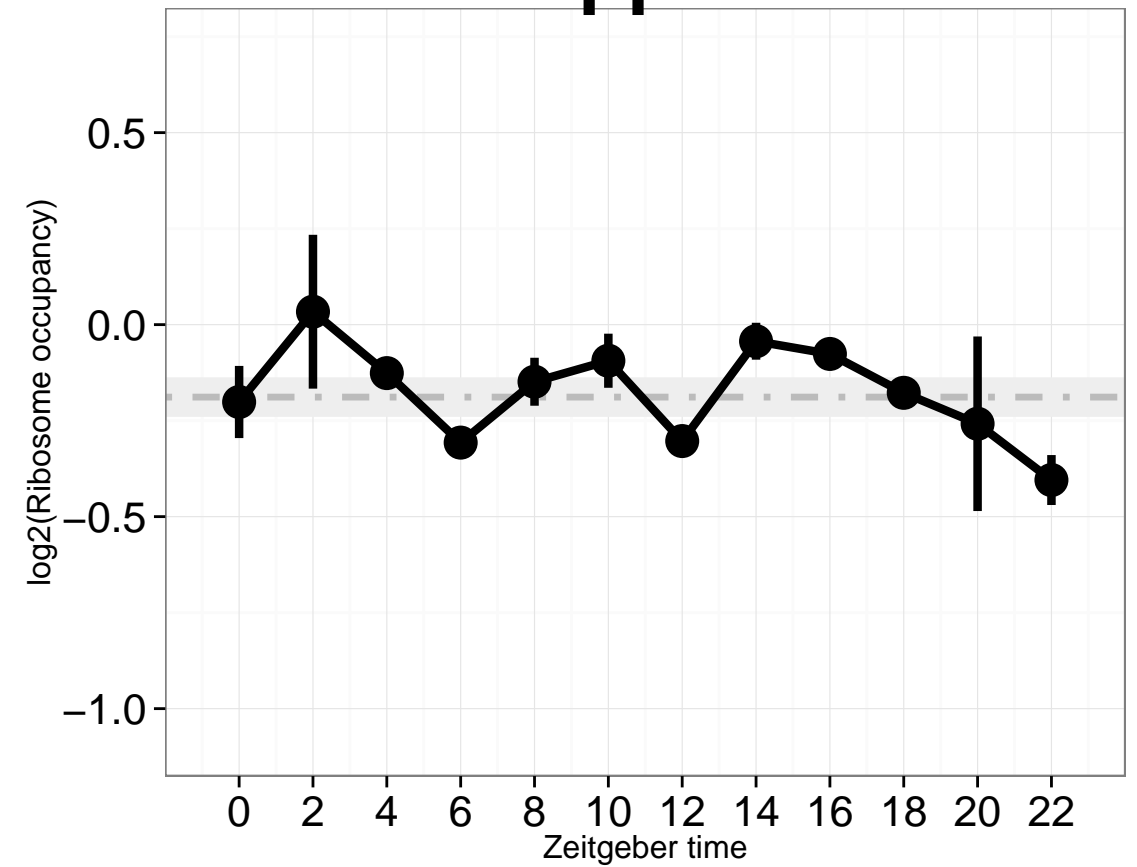

Supplement: SuppDataset_1.zip [file Ppp5c_set_A.pdf › Supplemental Dataset 1/A-mRNA_nonrhyth_translation_nonrhyth/Ppp5c_set_A.pdf]

# Ppp6c

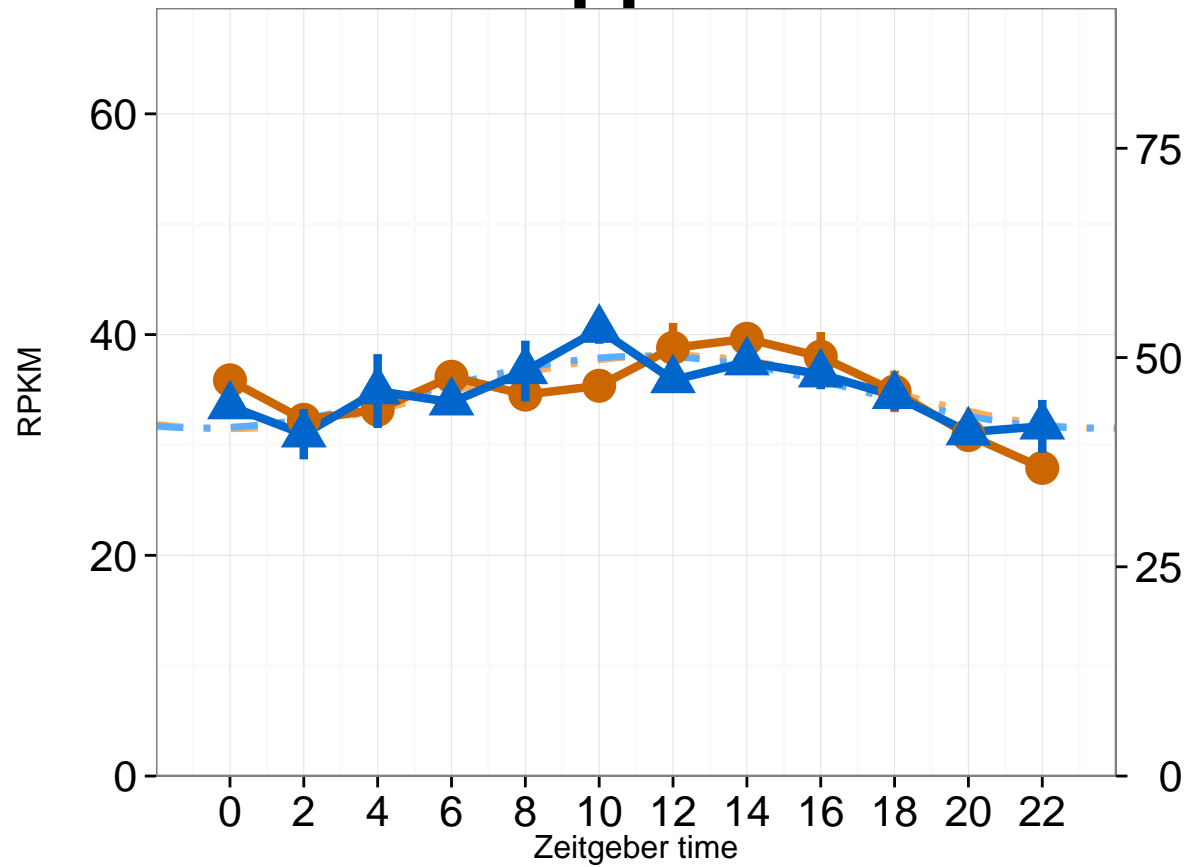

# Ppp6c

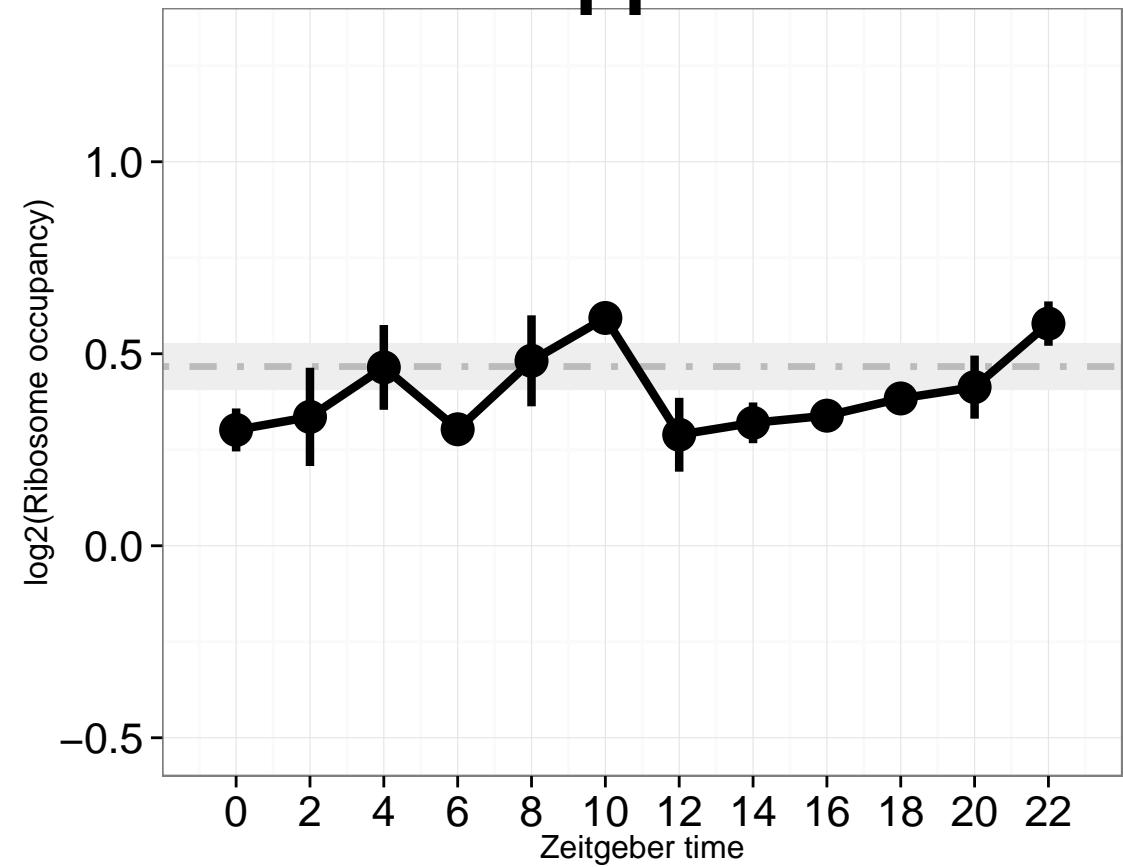

Supplement: SuppDataset_1.zip [file Ppp6c_set_A.pdf › Supplemental Dataset 1/A-mRNA_nonrhyth_translation_nonrhyth/Ppp6c_set_A.pdf]

# Ppp6r1

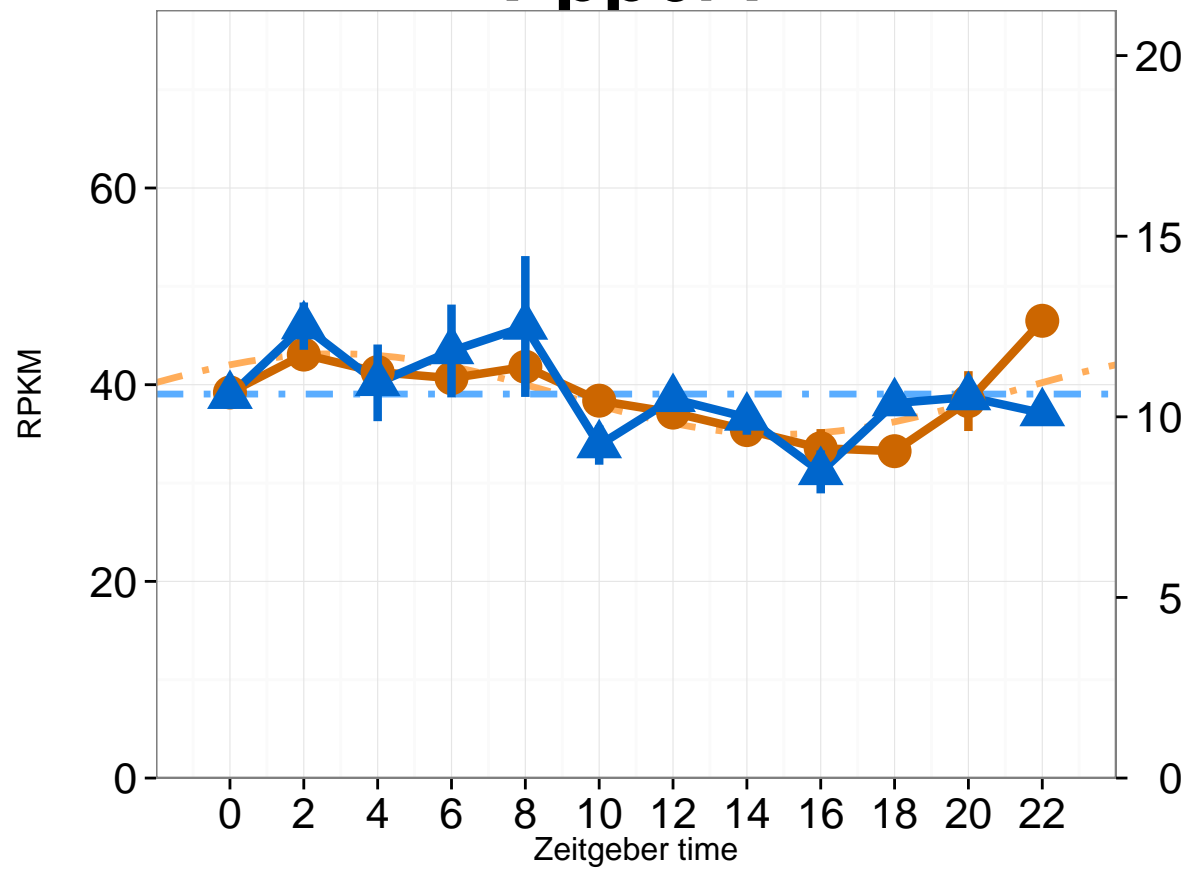

# Ppp6r1

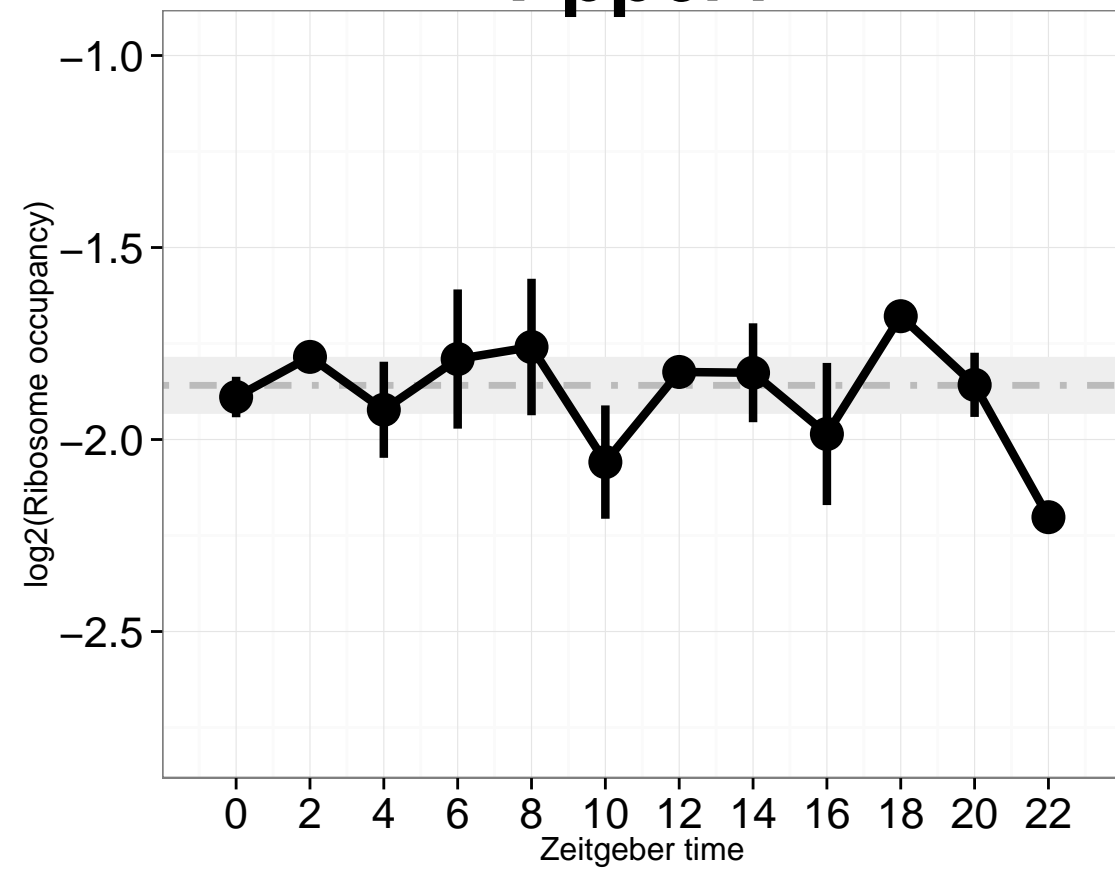

Supplement: SuppDataset_1.zip [file Ppp6r1_set_A.pdf › Supplemental Dataset 1/A-mRNA_nonrhyth_translation_nonrhyth/Ppp6r1_set_A.pdf]

# Ppp6r2

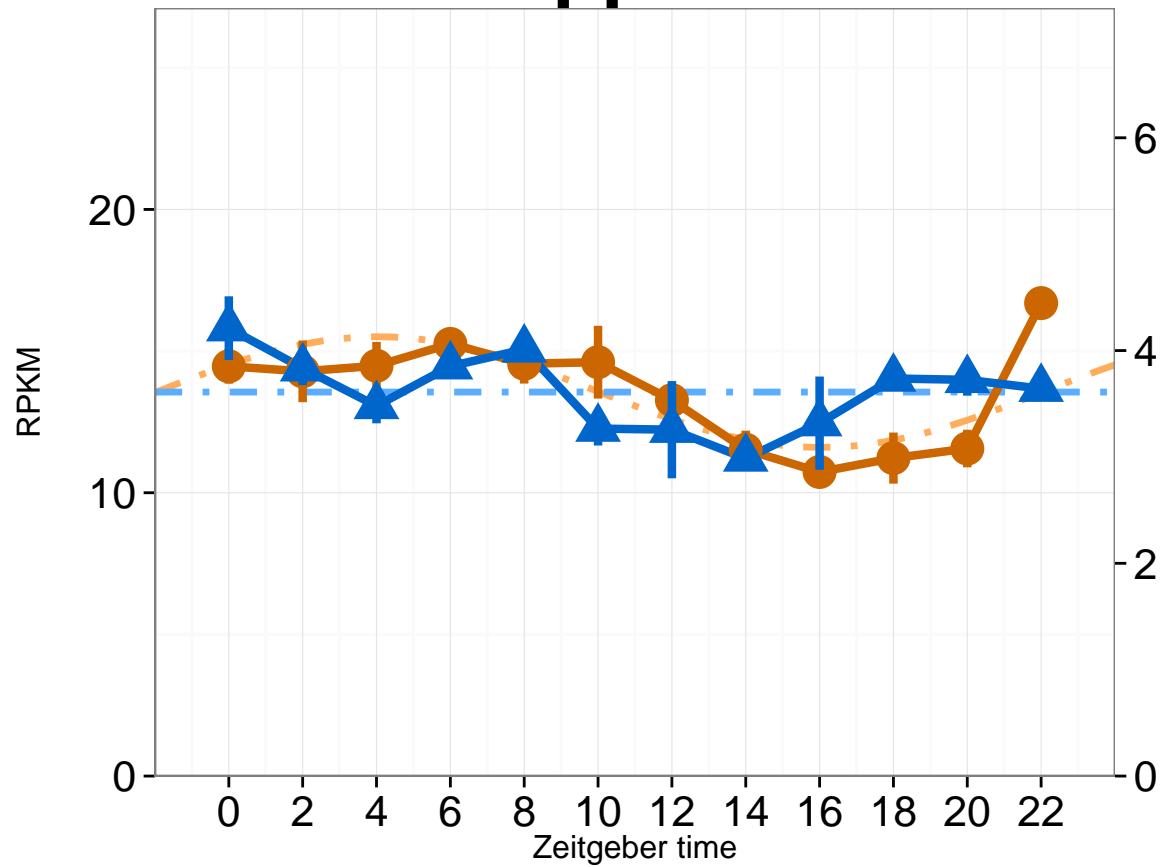

# Ppp6r2

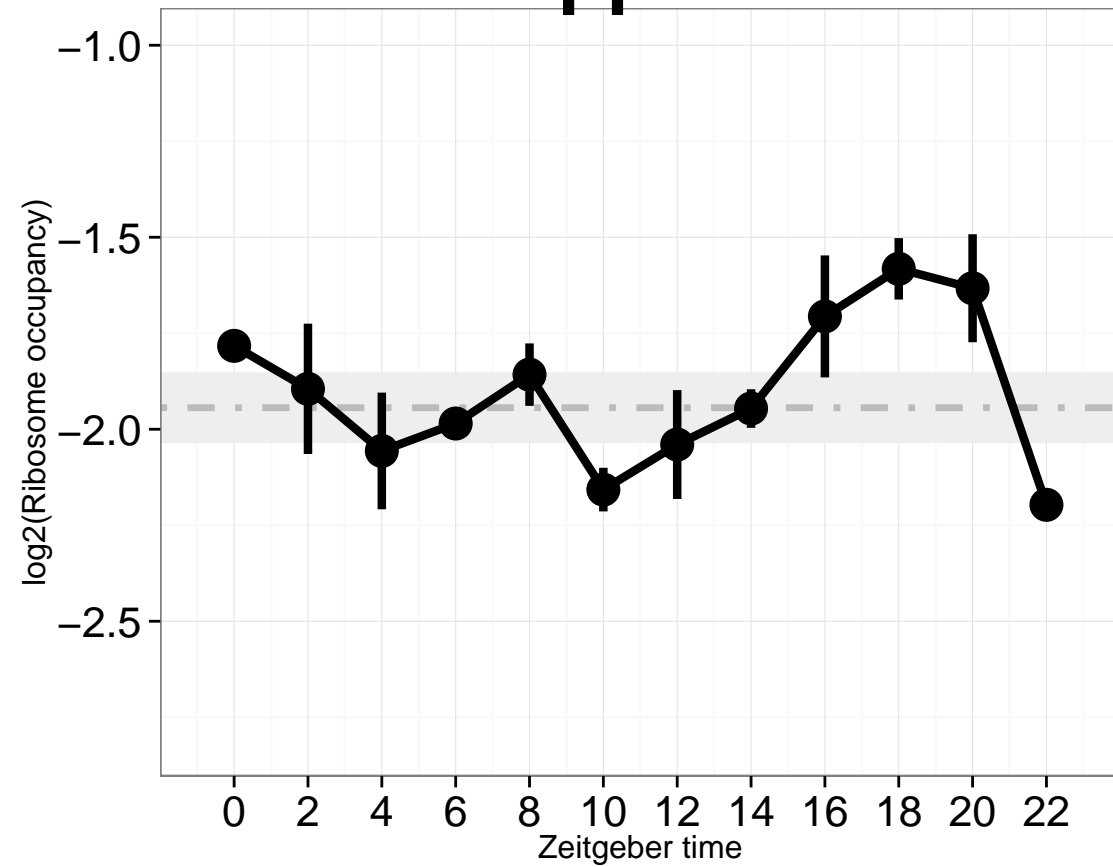

Supplement: SuppDataset_1.zip [file Ppp6r2_set_A.pdf › Supplemental Dataset 1/A-mRNA_nonrhyth_translation_nonrhyth/Ppp6r2_set_A.pdf]

# Ppp6r3

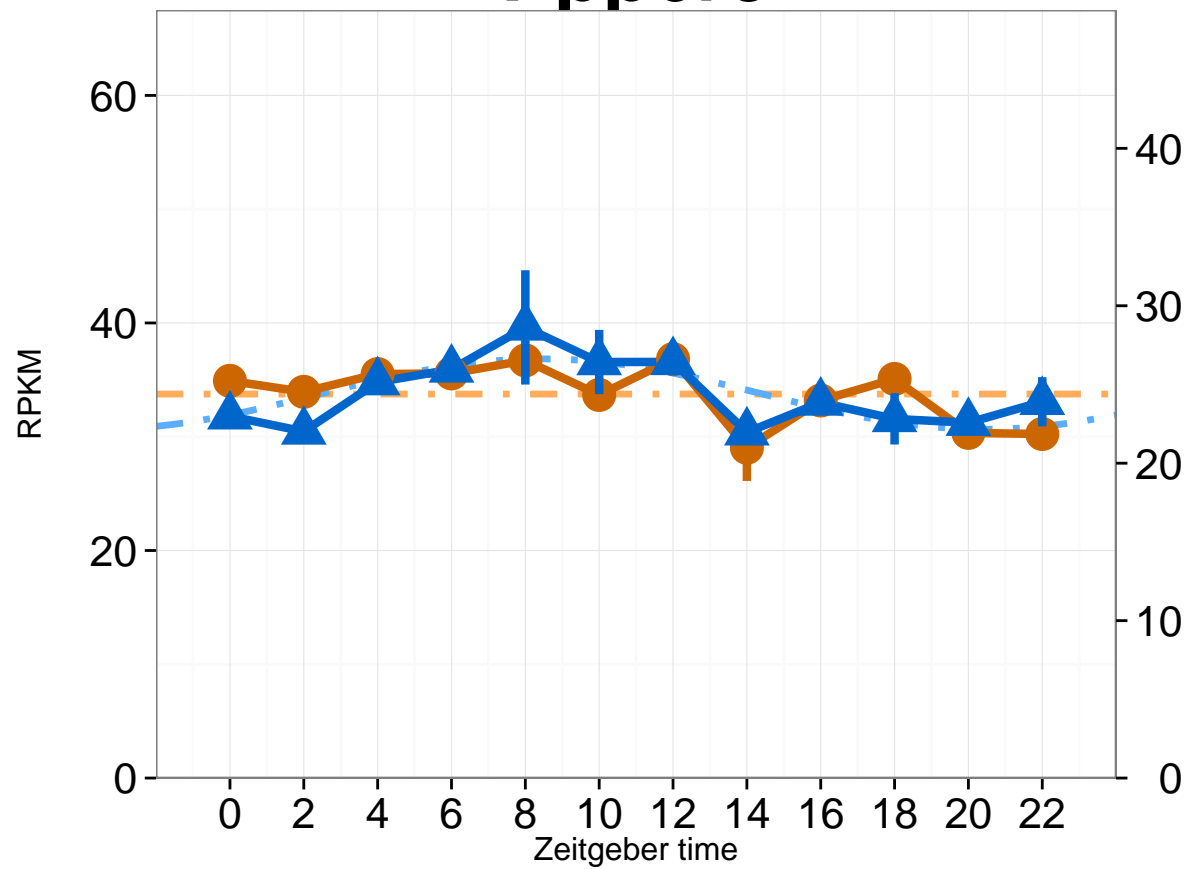

# Ppp6r3

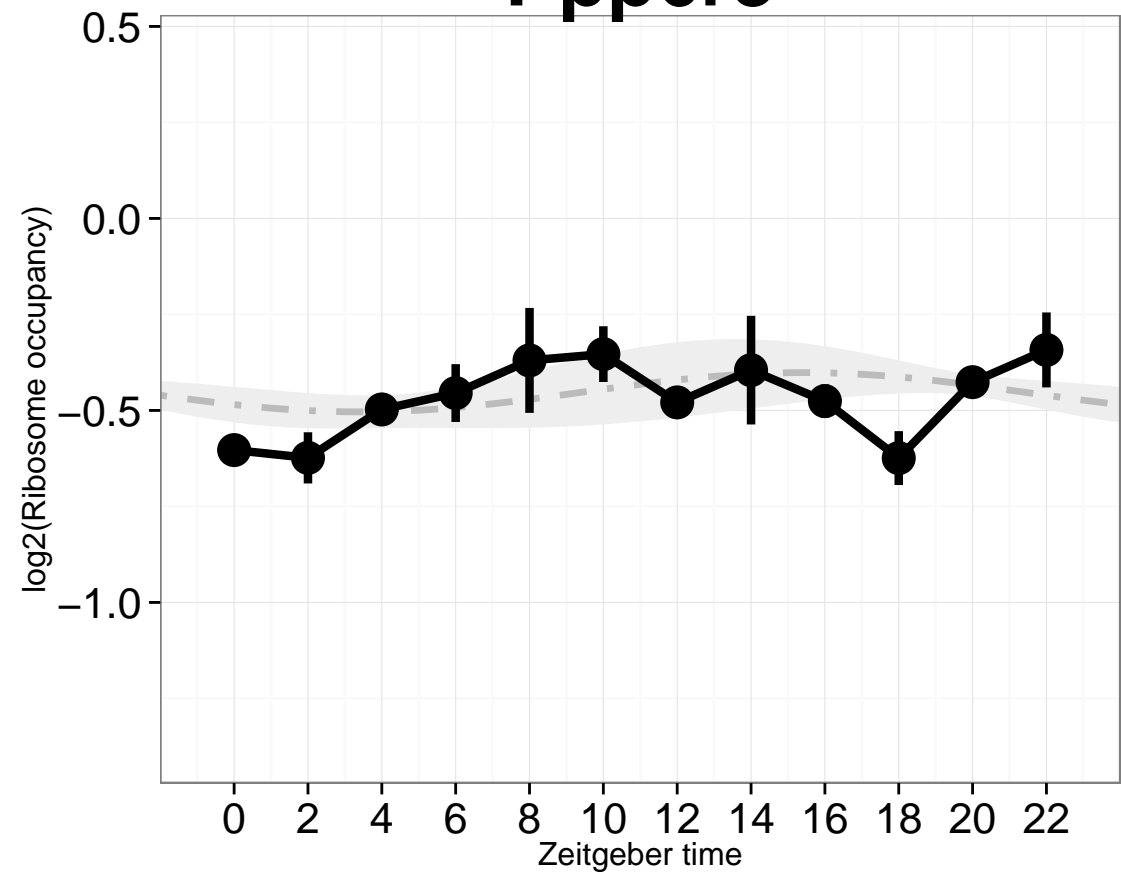

Supplement: SuppDataset_1.zip [file Ppp6r3_set_A.pdf › Supplemental Dataset 1/A-mRNA_nonrhyth_translation_nonrhyth/Ppp6r3_set_A.pdf]

**Ppt1**

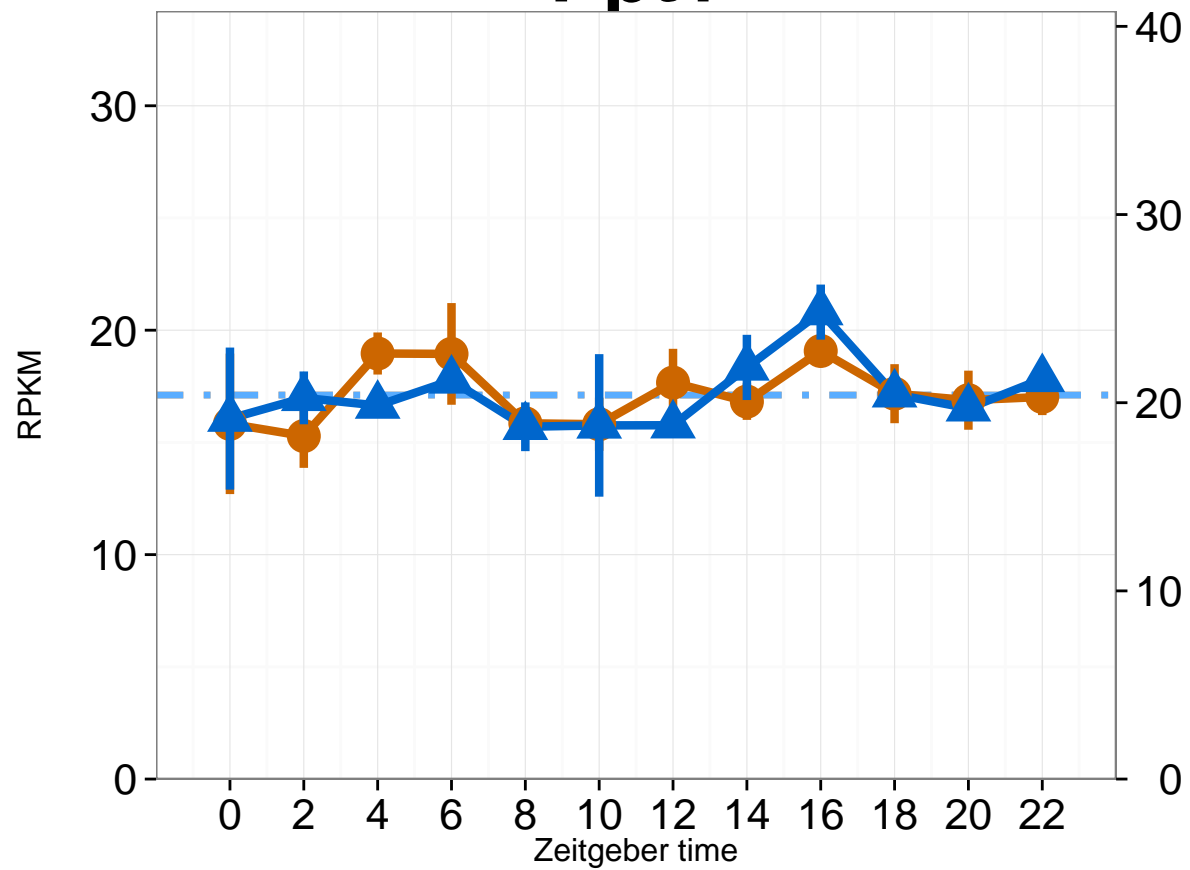

**Ppt1**

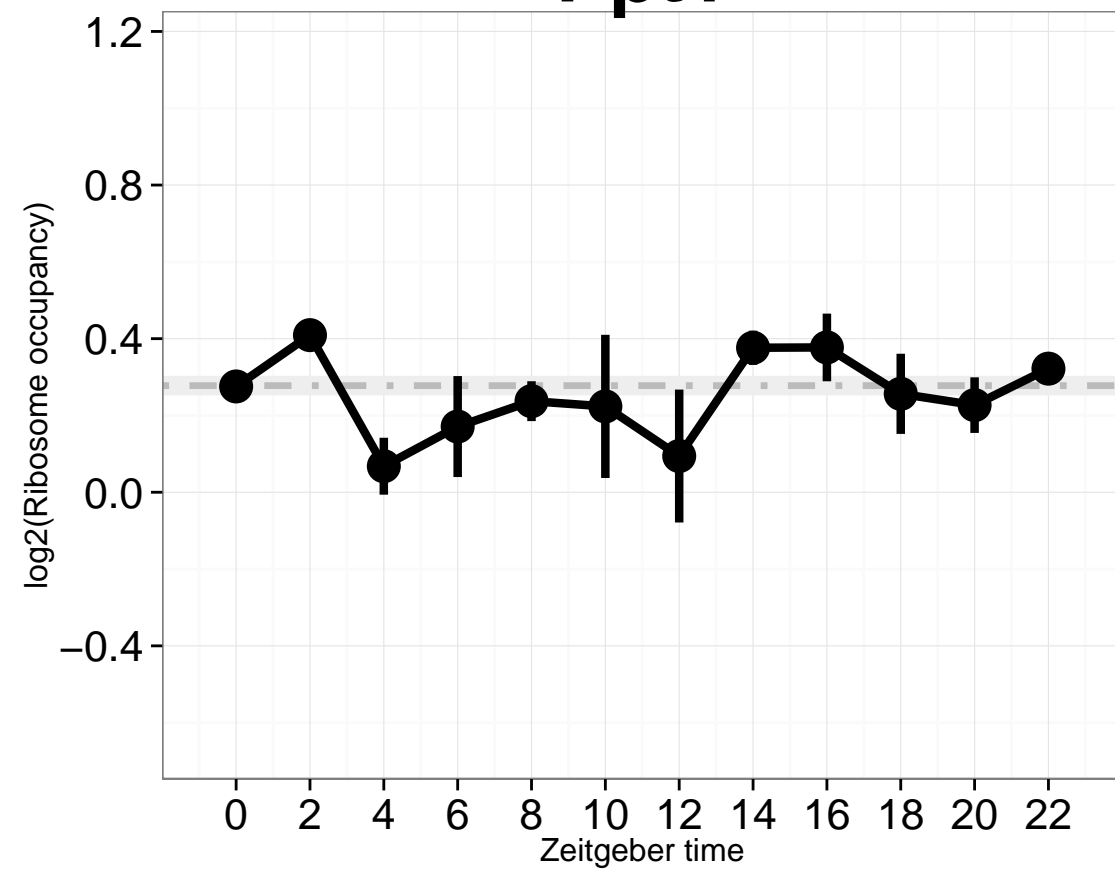

Supplement: SuppDataset_1.zip [file Ppt1_set_A.pdf › Supplemental Dataset 1/A-mRNA_nonrhyth_translation_nonrhyth/Ppt1_set_A.pdf]

# Ppt2

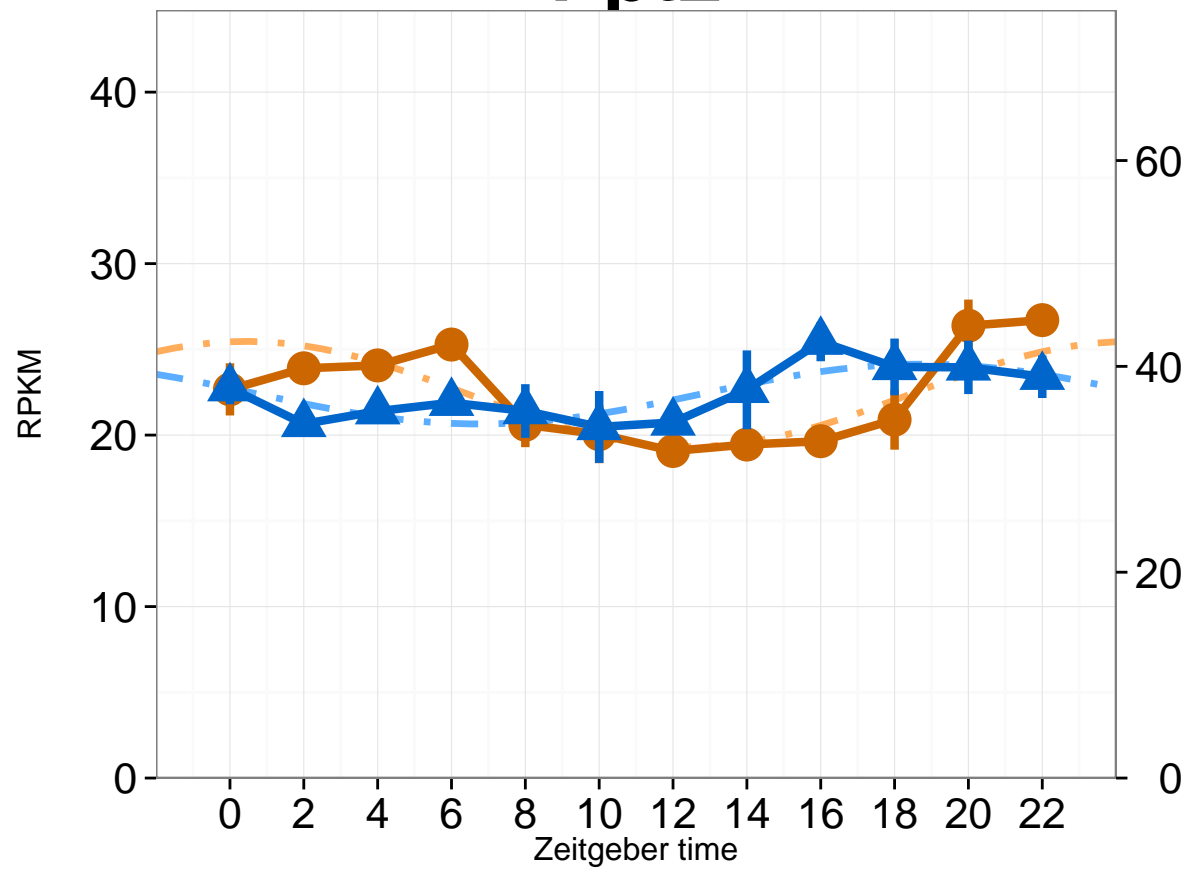

# Ppt2

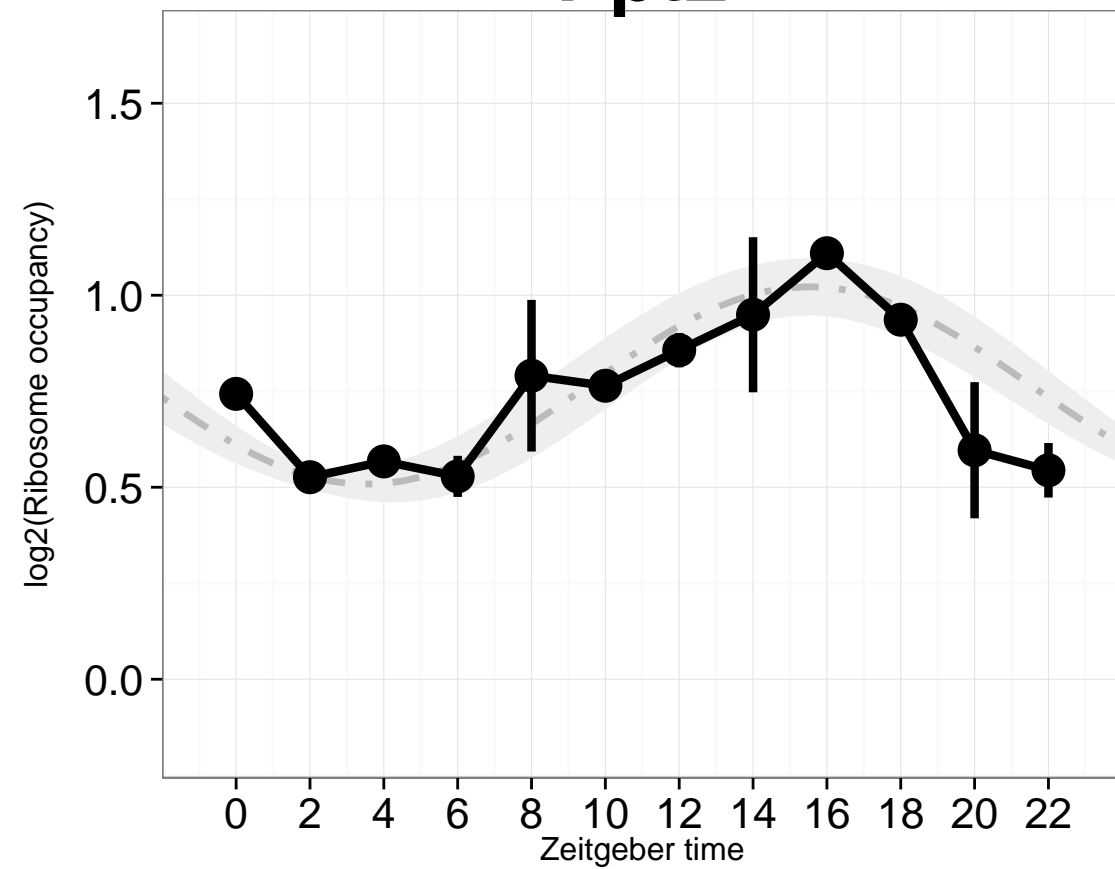

Supplement: SuppDataset_1.zip [file Ppt2_set_A.pdf › Supplemental Dataset 1/A-mRNA_nonrhyth_translation_nonrhyth/Ppt2_set_A.pdf]

# Ppwd1

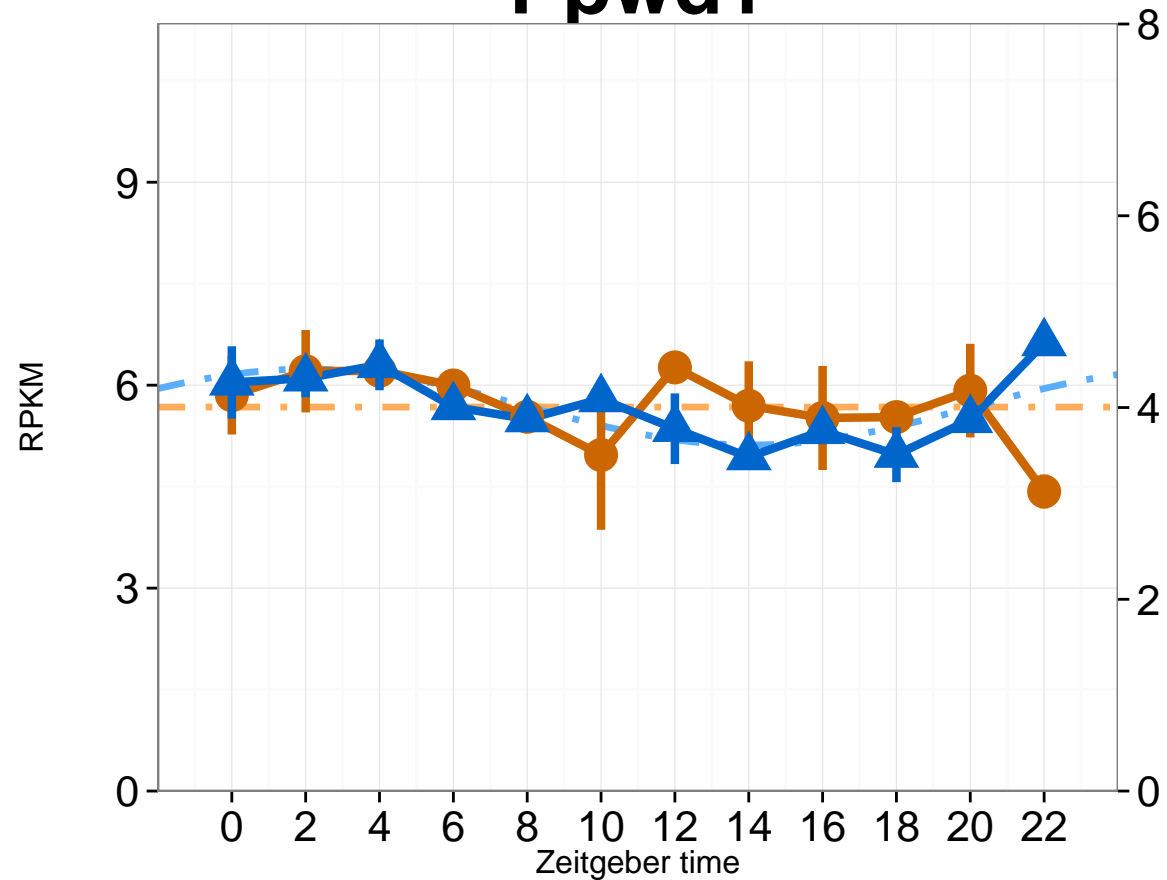

# Ppwd1

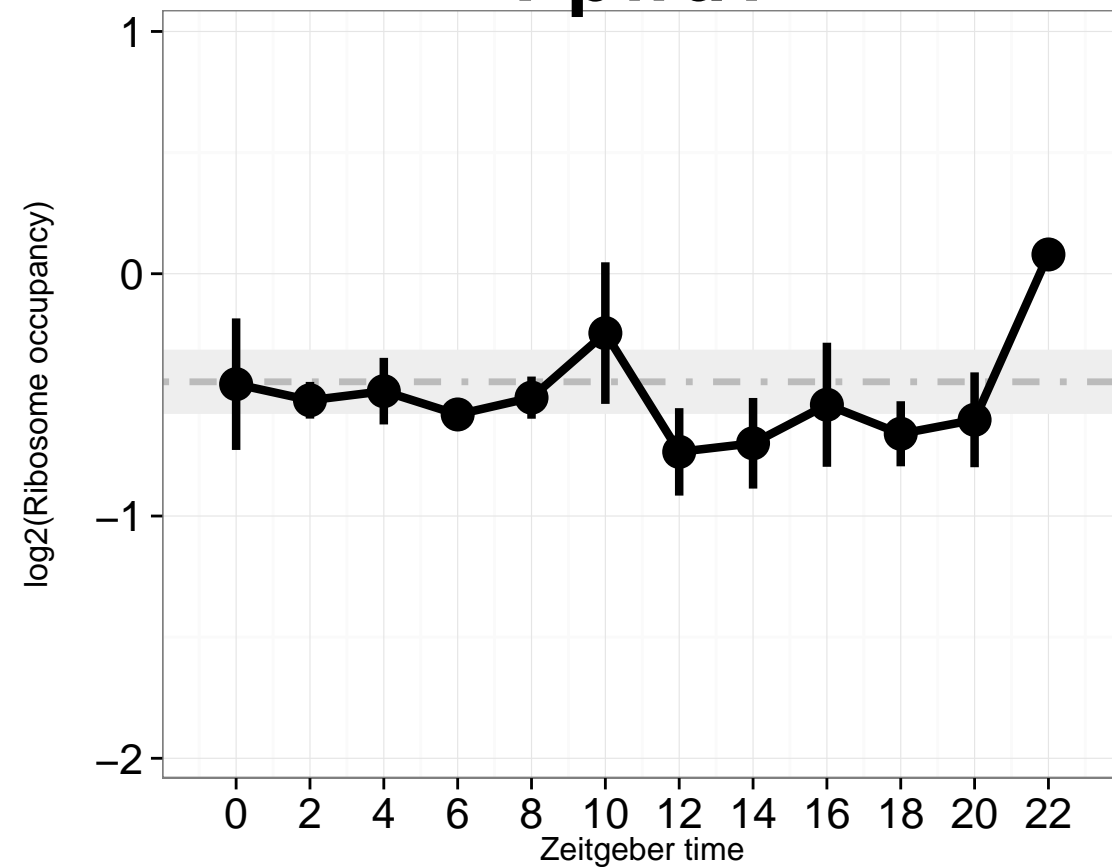

Supplement: SuppDataset_1.zip [file Ppwd1_set_A.pdf › Supplemental Dataset 1/A-mRNA_nonrhyth_translation_nonrhyth/Ppwd1_set_A.pdf]

# Pqbp1

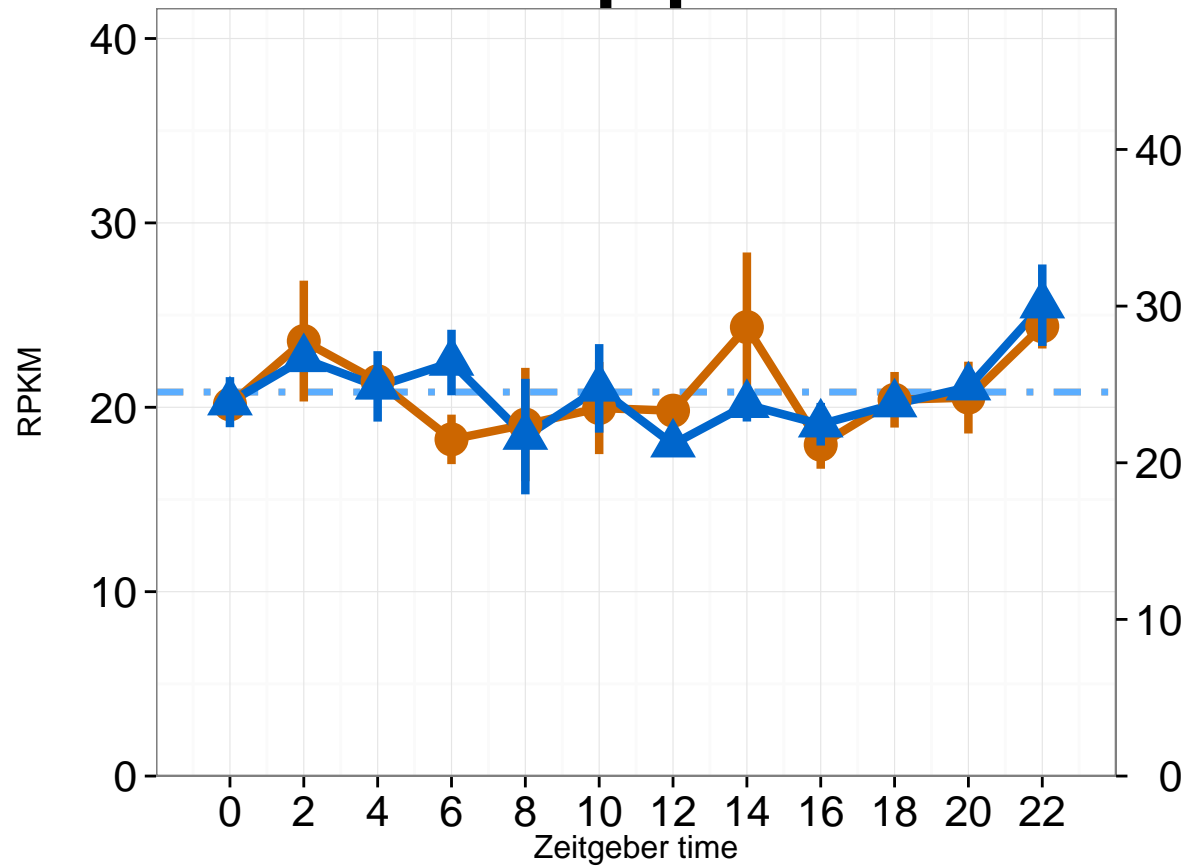

# Pqbp1

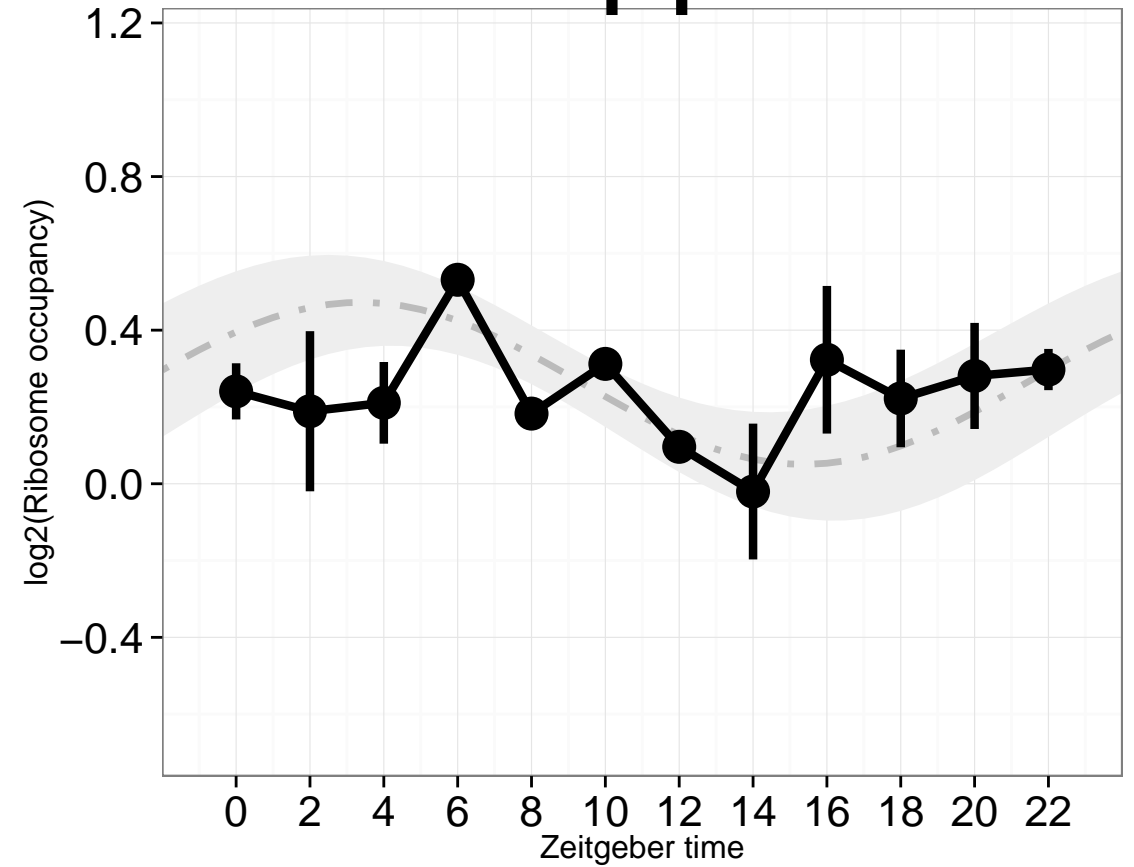

Supplement: SuppDataset_1.zip [file Pqbp1_set_A.pdf › Supplemental Dataset 1/A-mRNA_nonrhyth_translation_nonrhyth/Pqbp1_set_A.pdf]

# Pq1c1

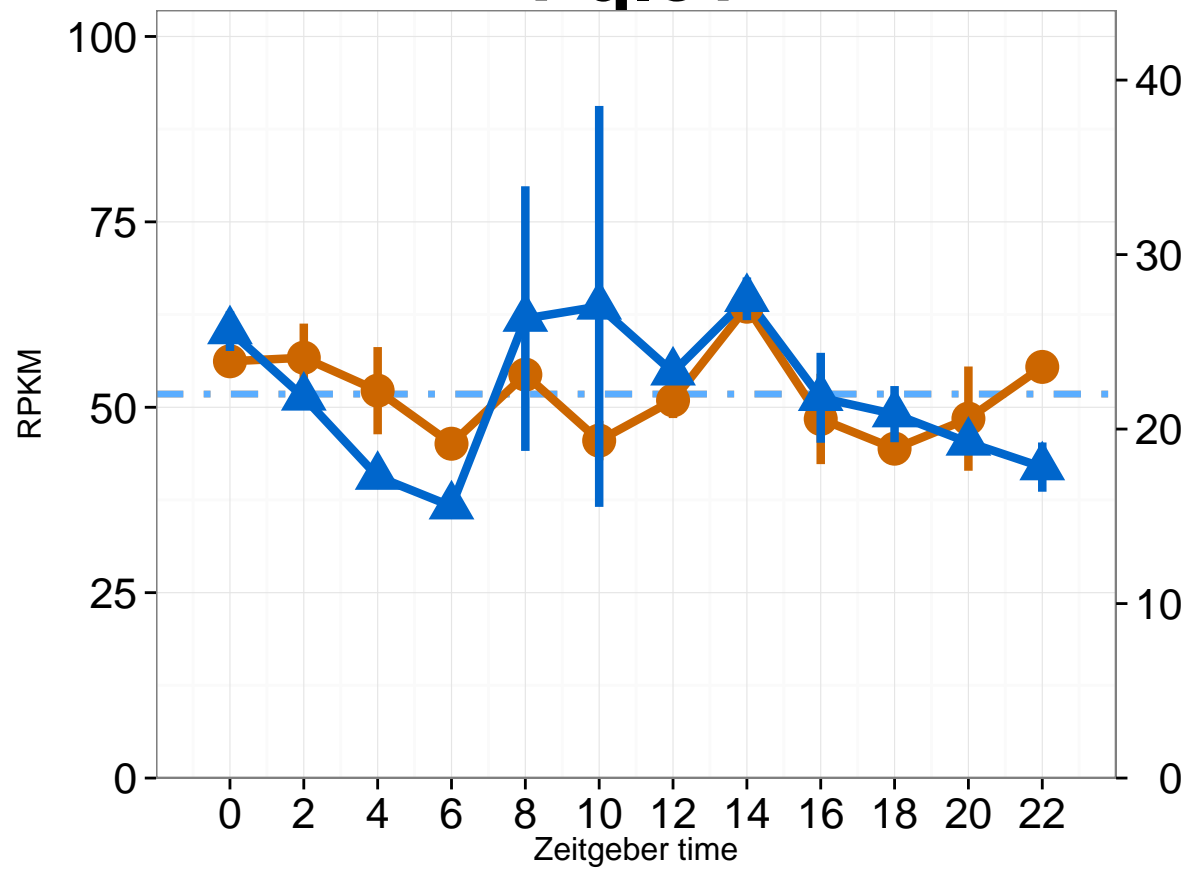

# Pq1c1

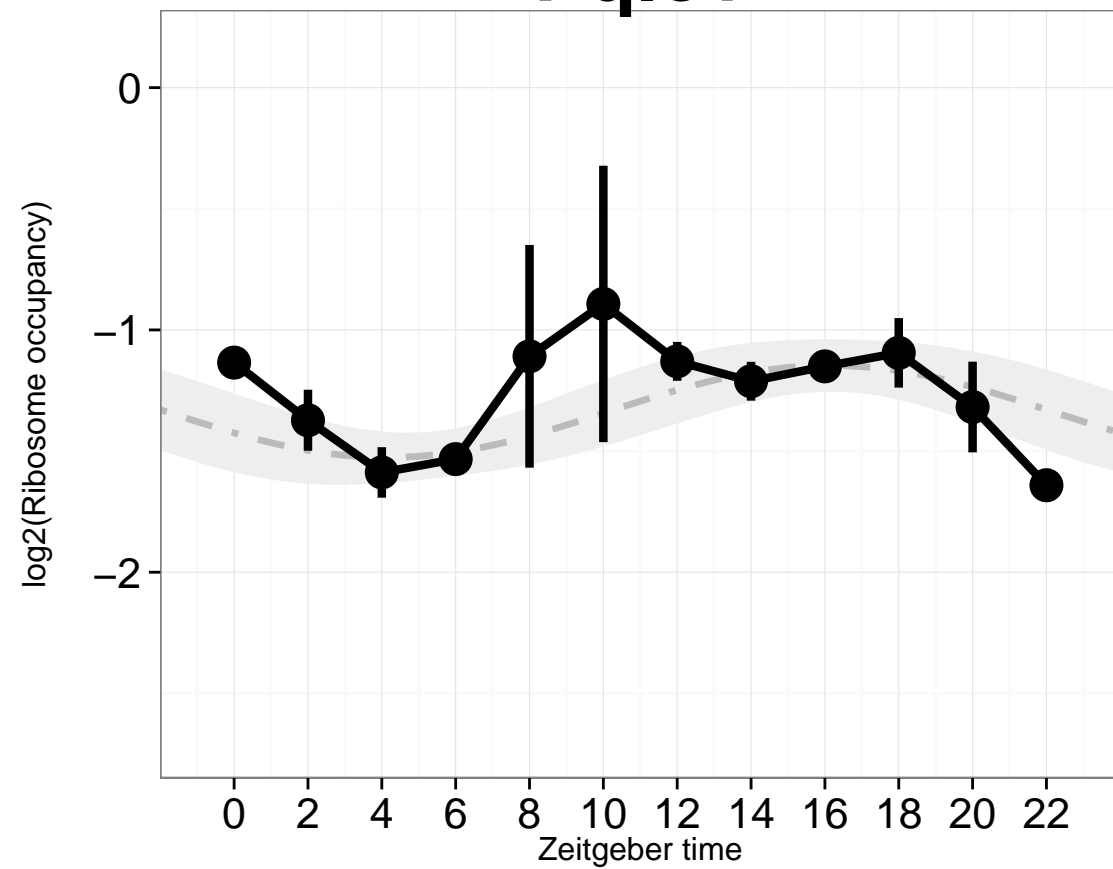

Supplement: SuppDataset_1.zip [file Pqlc1_set_A.pdf › Supplemental Dataset 1/A-mRNA_nonrhyth_translation_nonrhyth/Pqlc1_set_A.pdf]

# Pradc1

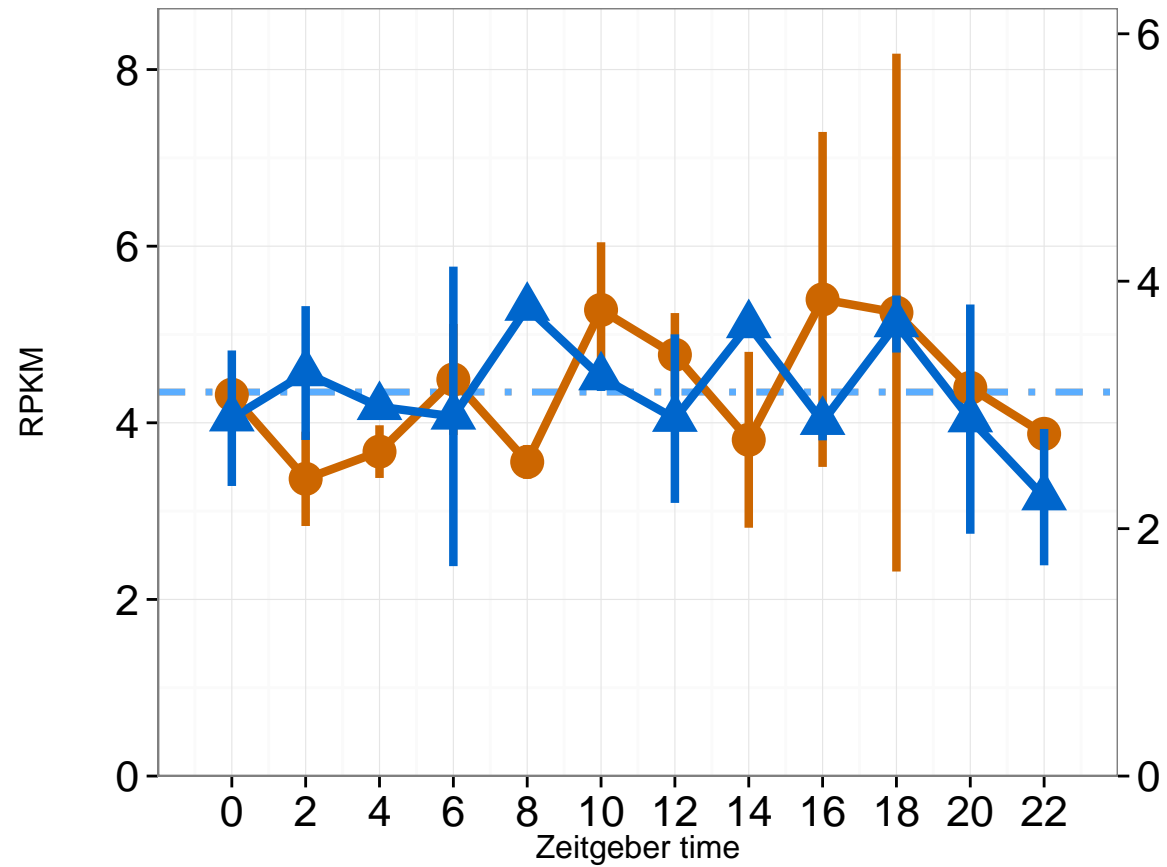

# Pradc1

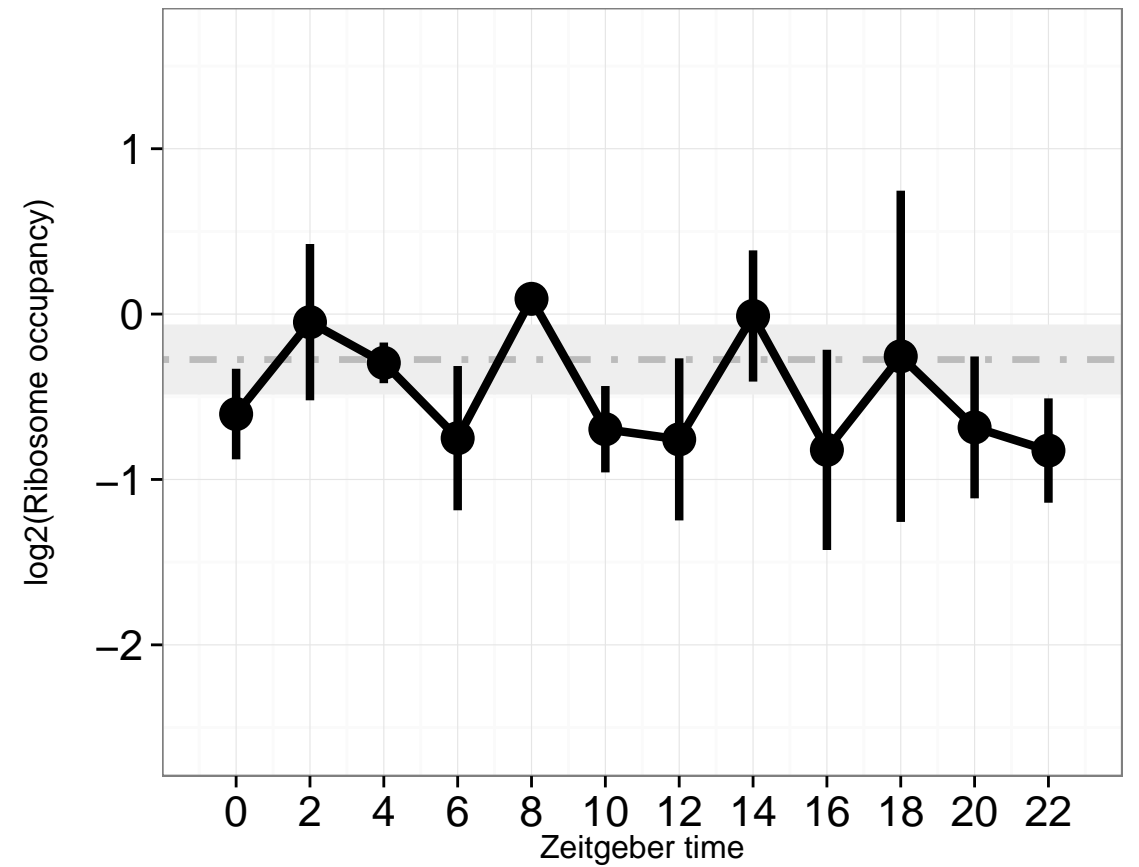

Supplement: SuppDataset_1.zip [file Pradc1_set_A.pdf › Supplemental Dataset 1/A-mRNA_nonrhyth_translation_nonrhyth/Pradc1_set_A.pdf]

## Praf2

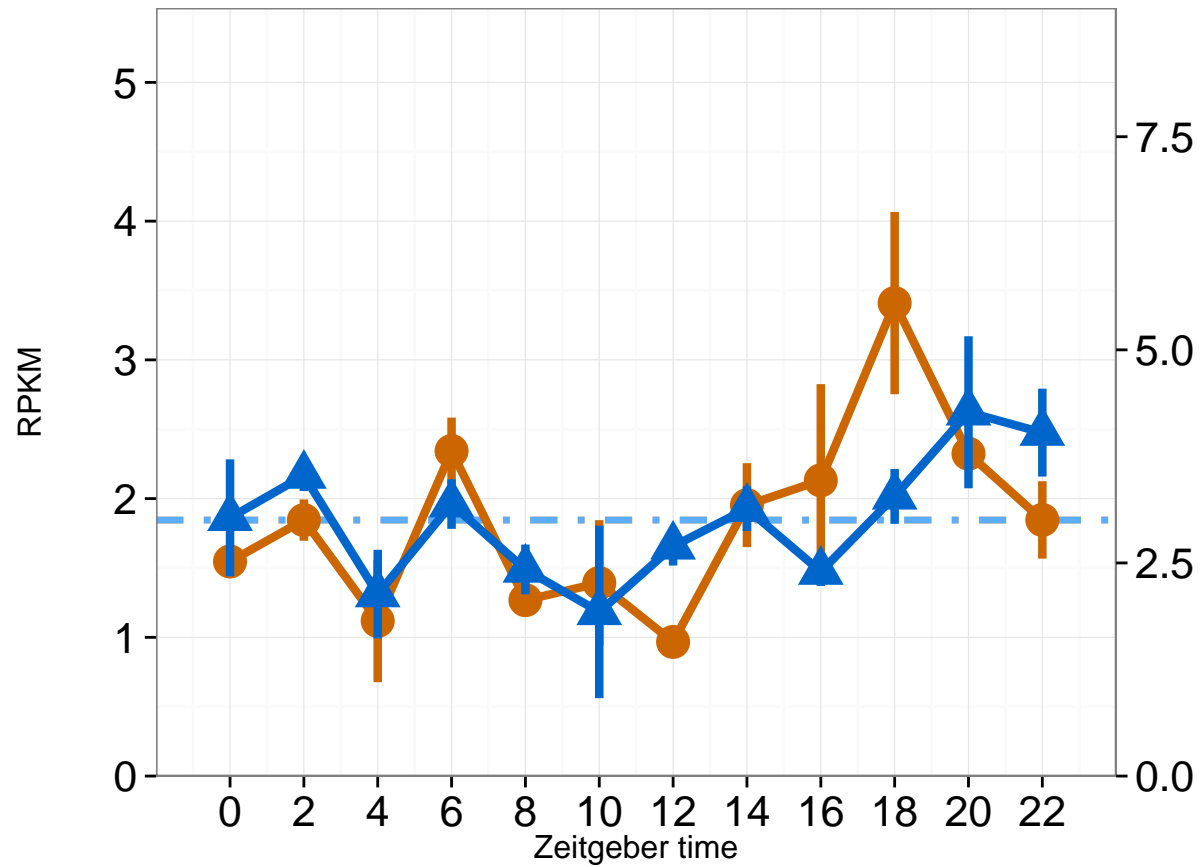

## Praf2

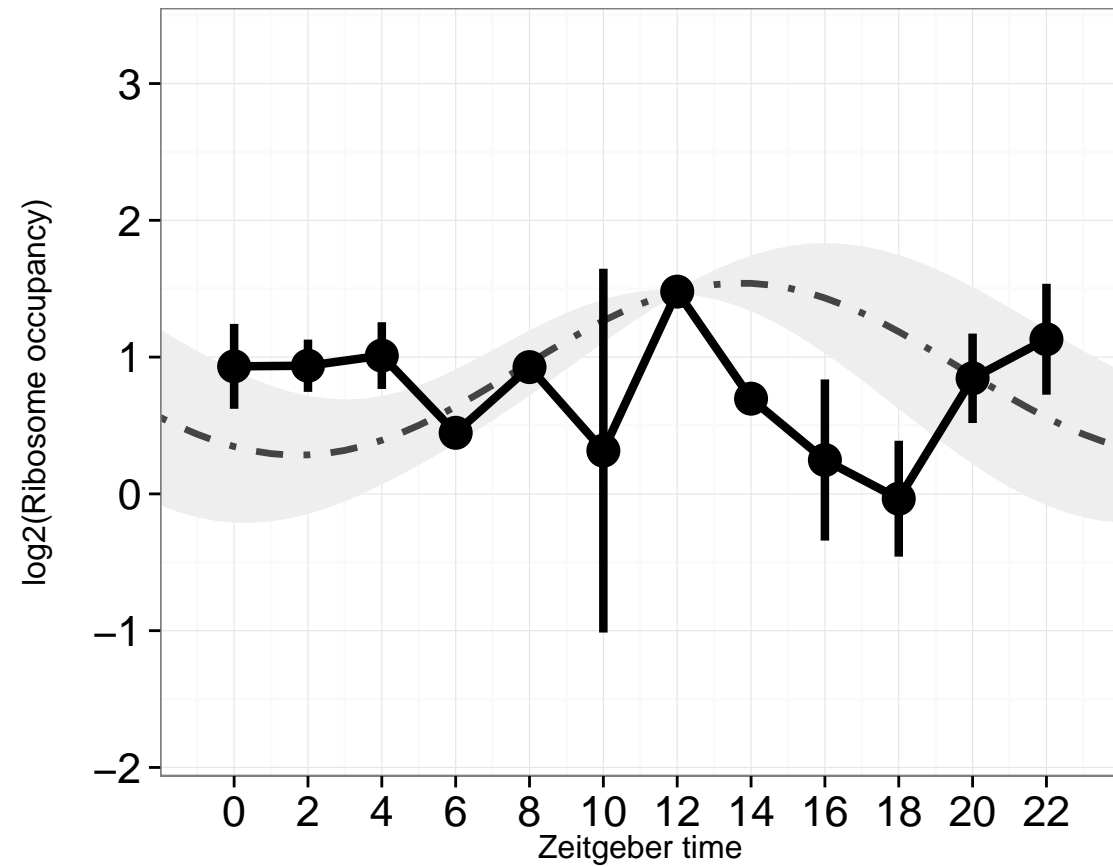

Supplement: SuppDataset_1.zip [file Praf2_set_A.pdf › Supplemental Dataset 1/A-mRNA_nonrhyth_translation_nonrhyth/Praf2_set_A.pdf]

# Prcc

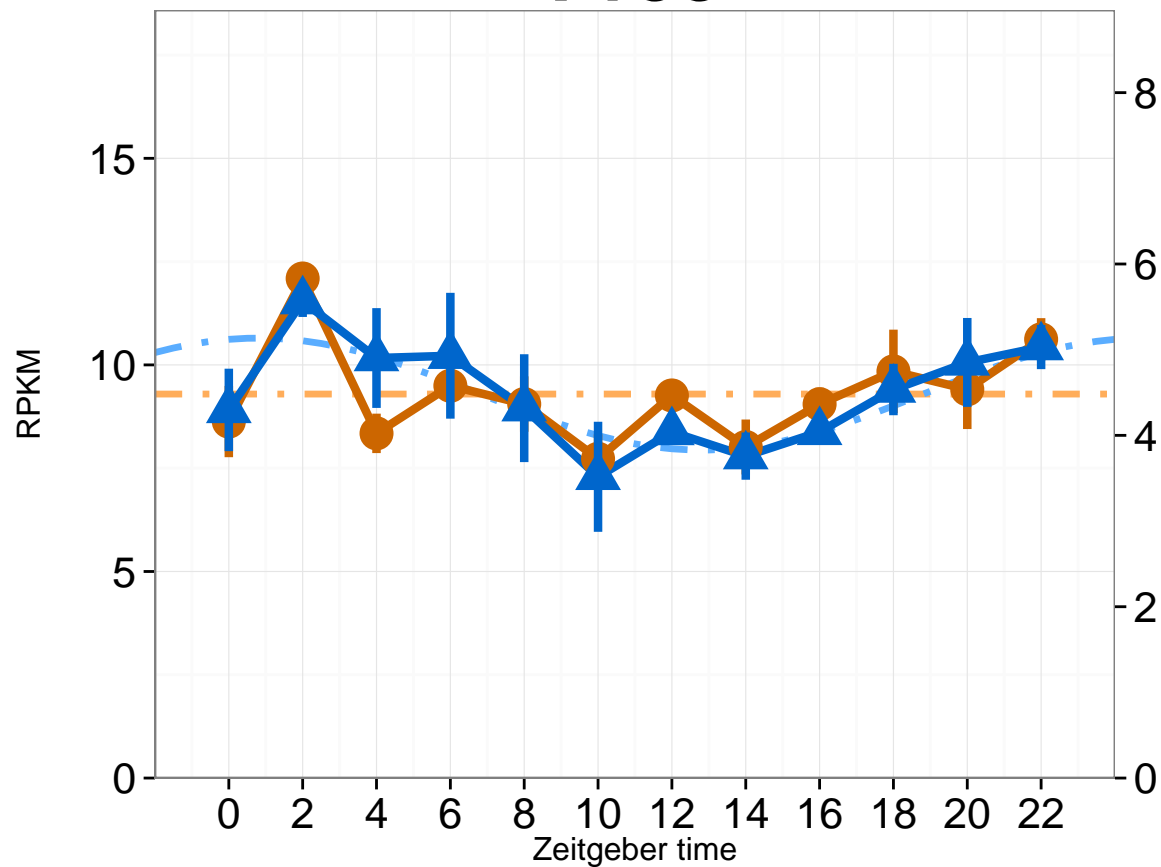

# Prcc

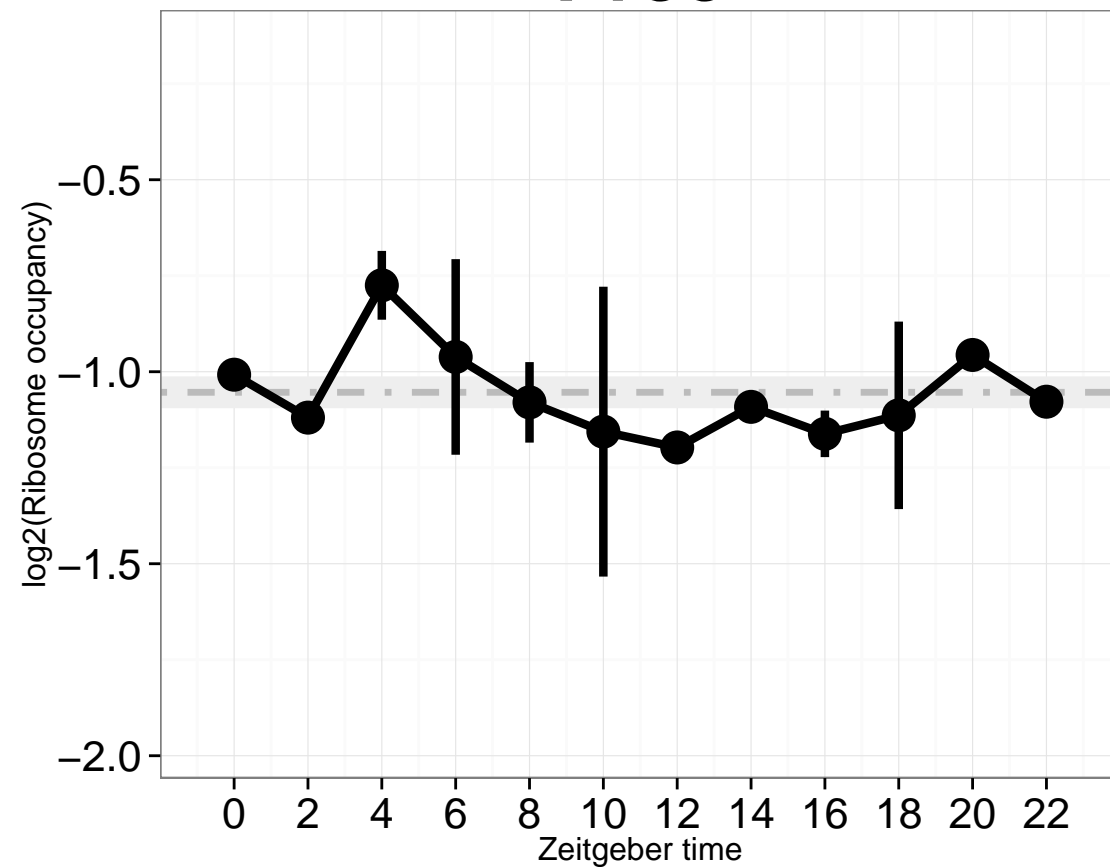

Supplement: SuppDataset_1.zip [file Prcc_set_A.pdf › Supplemental Dataset 1/A-mRNA_nonrhyth_translation_nonrhyth/Prcc_set_A.pdf]

# Prcp

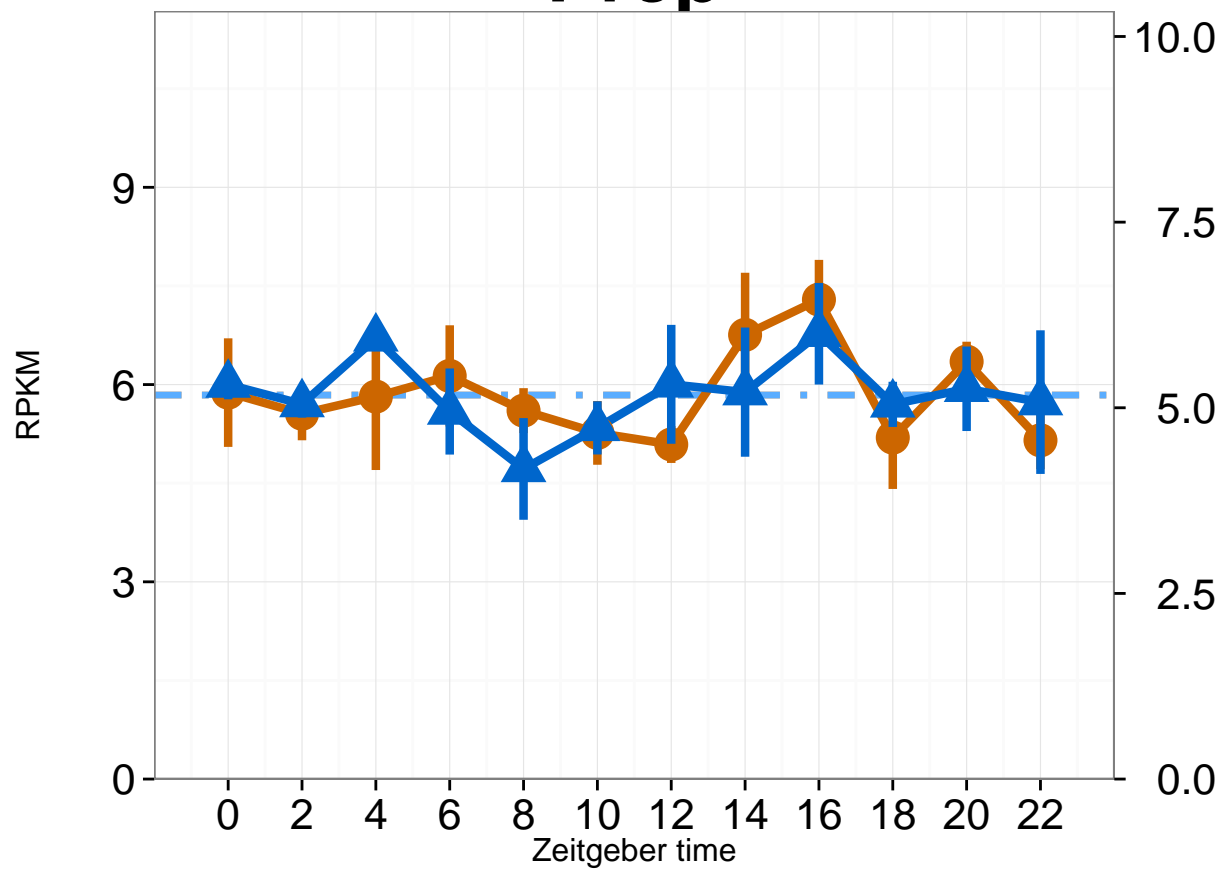

# Prcp

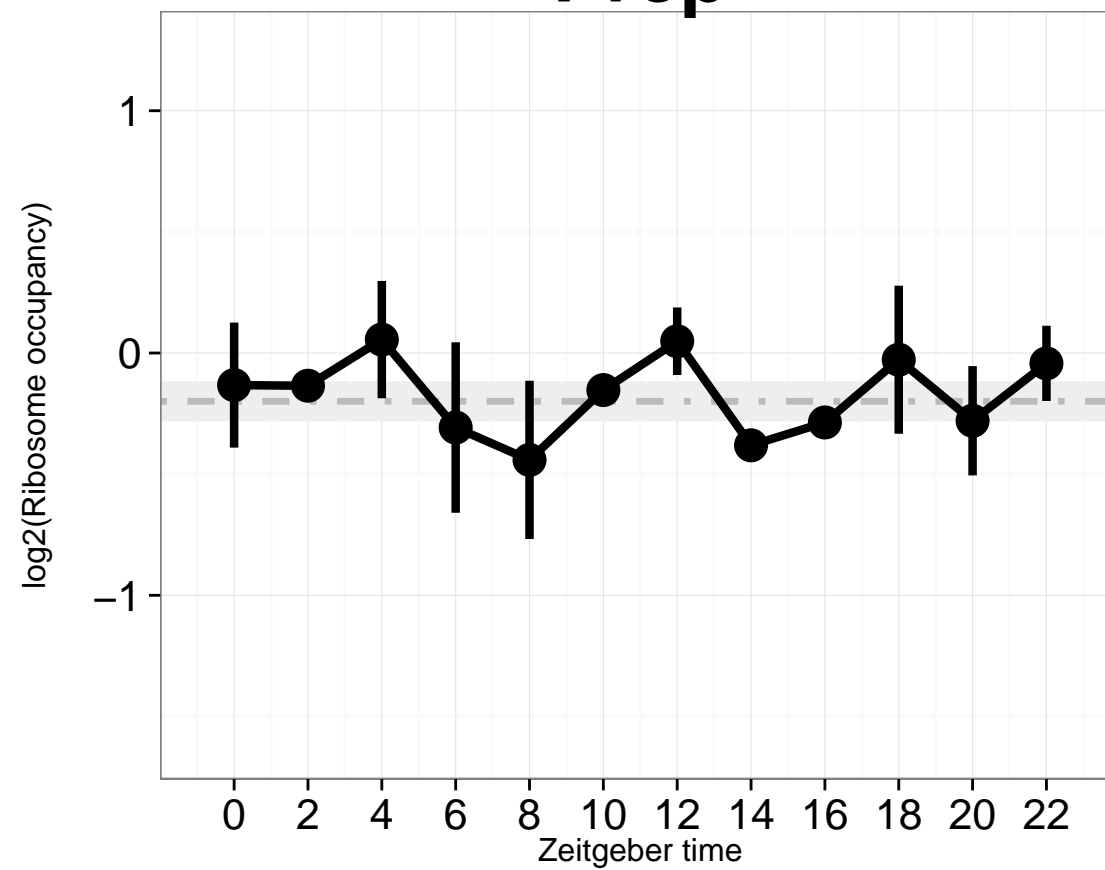

Supplement: SuppDataset_1.zip [file Prcp_set_A.pdf › Supplemental Dataset 1/A-mRNA_nonrhyth_translation_nonrhyth/Prcp_set_A.pdf]

# Prdm10

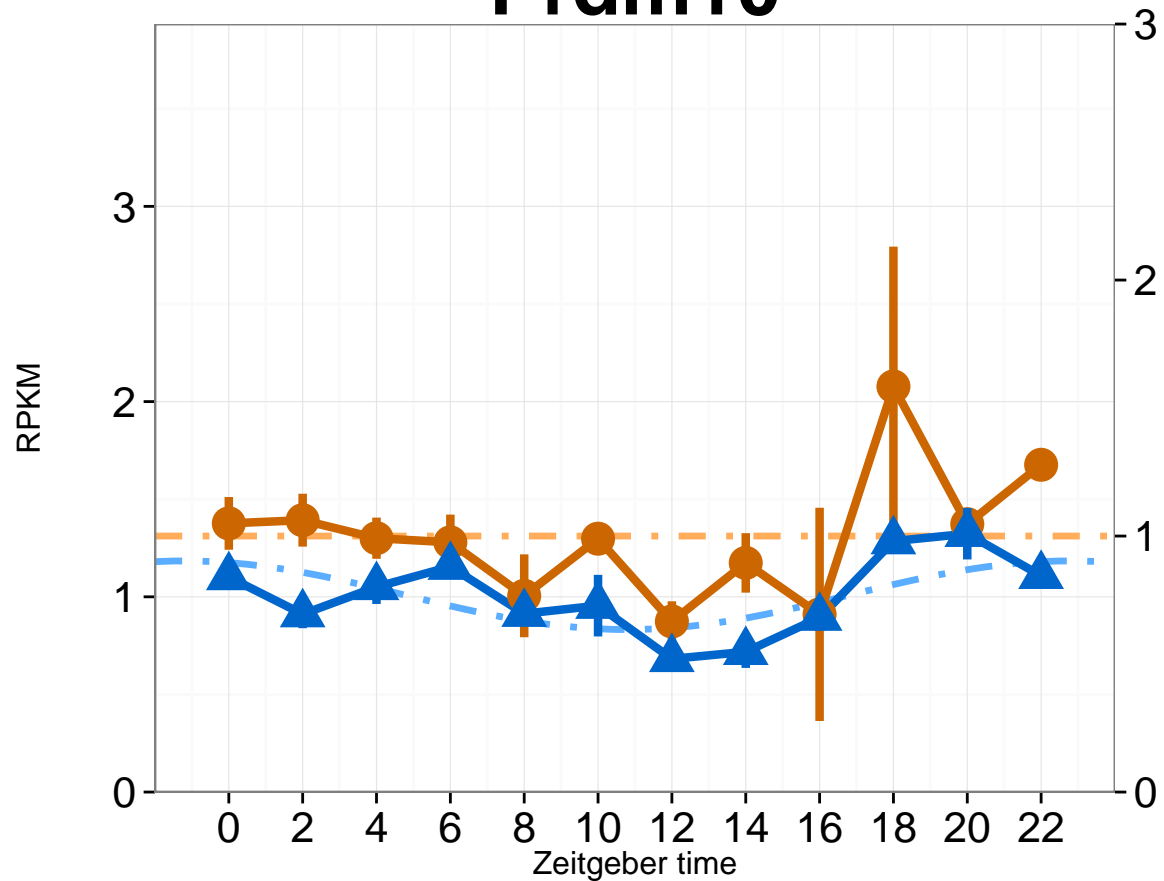

# Prdm10

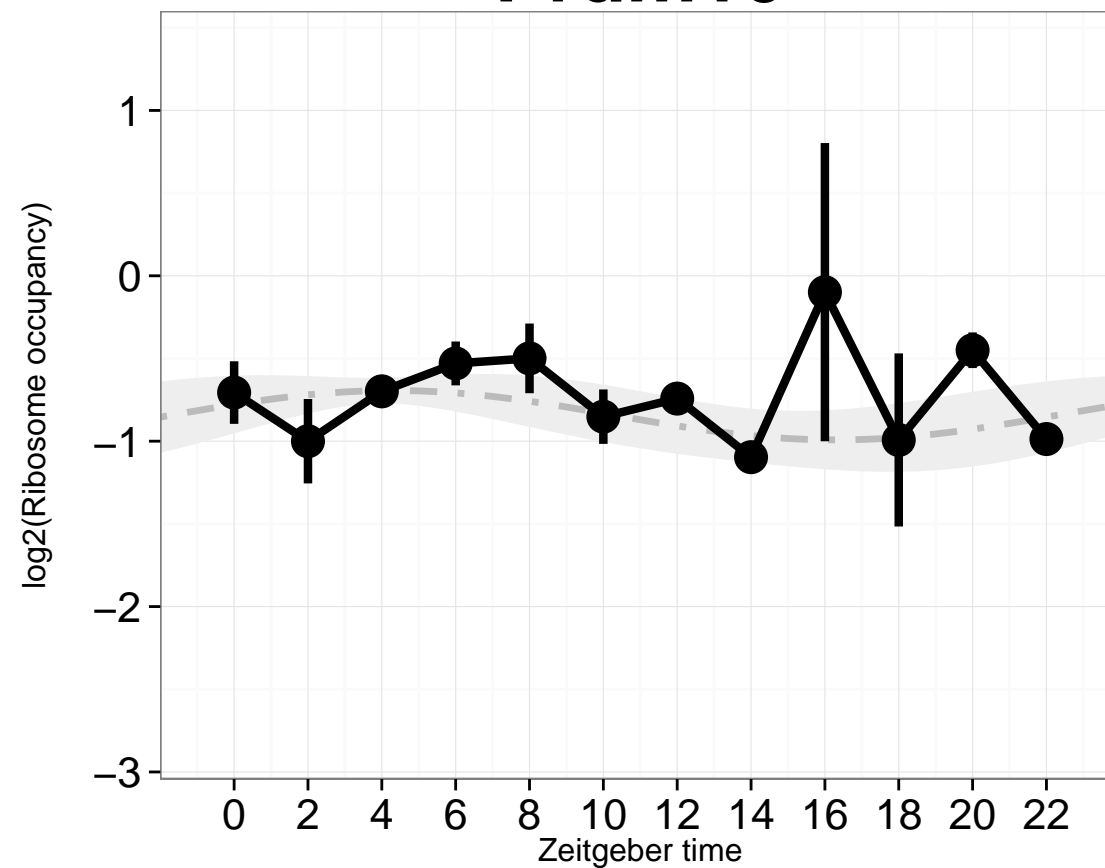

Supplement: SuppDataset_1.zip [file Prdm10_set_A.pdf › Supplemental Dataset 1/A-mRNA_nonrhyth_translation_nonrhyth/Prdm10_set_A.pdf]

# Prdm15

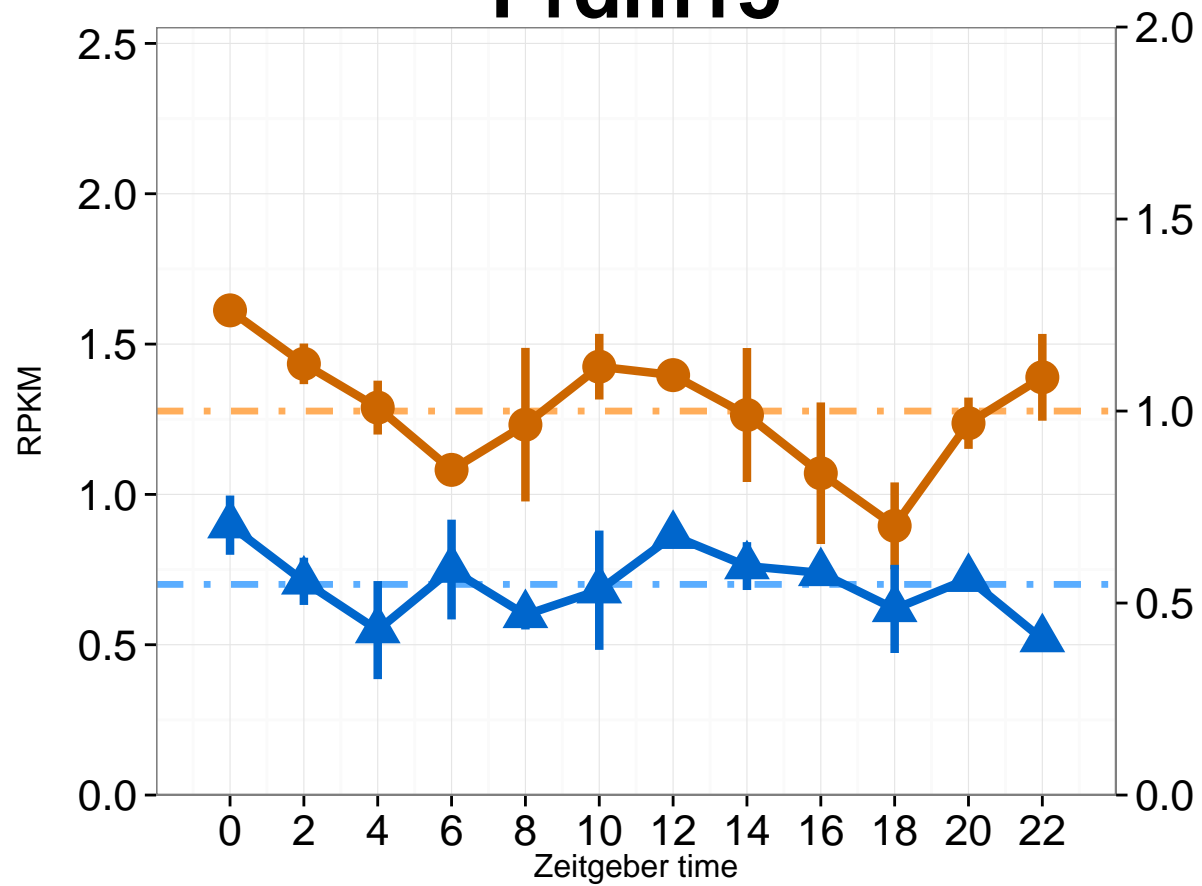

# Prdm15

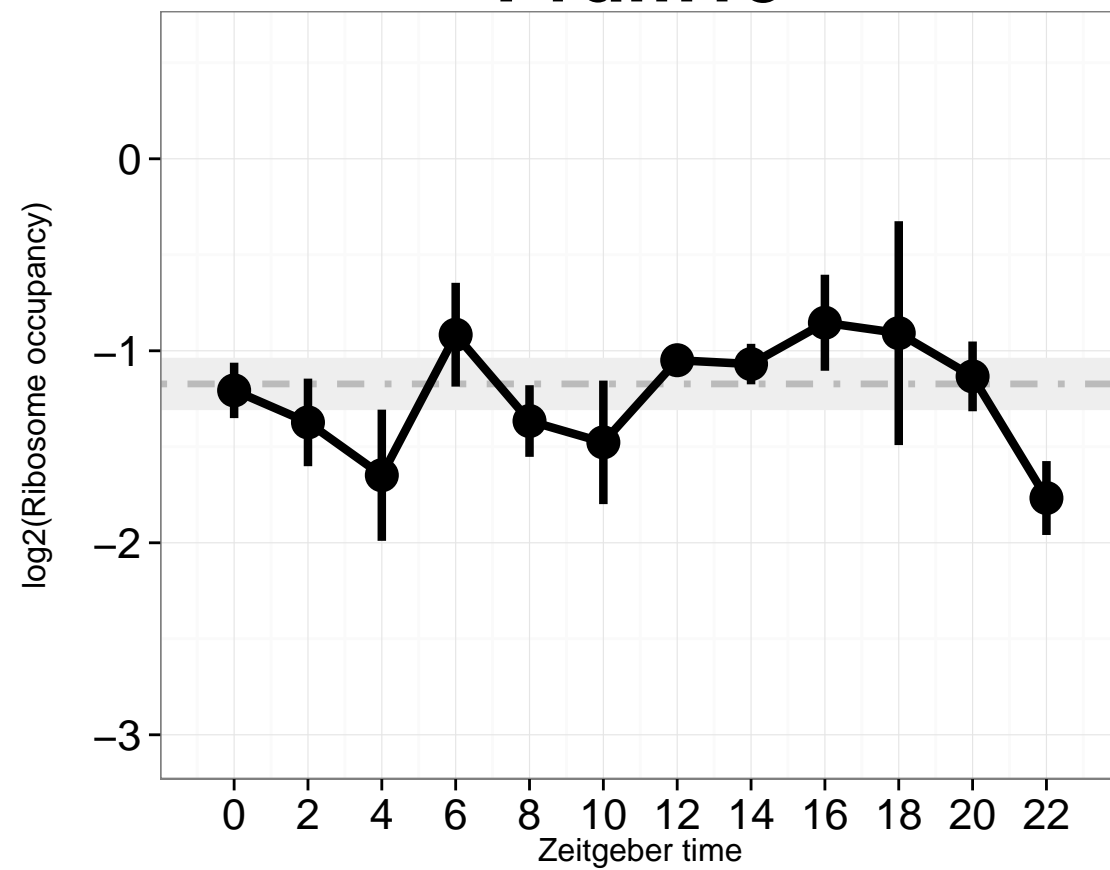

Supplement: SuppDataset_1.zip [file Prdm15_set_A.pdf › Supplemental Dataset 1/A-mRNA_nonrhyth_translation_nonrhyth/Prdm15_set_A.pdf]

## Prdm2

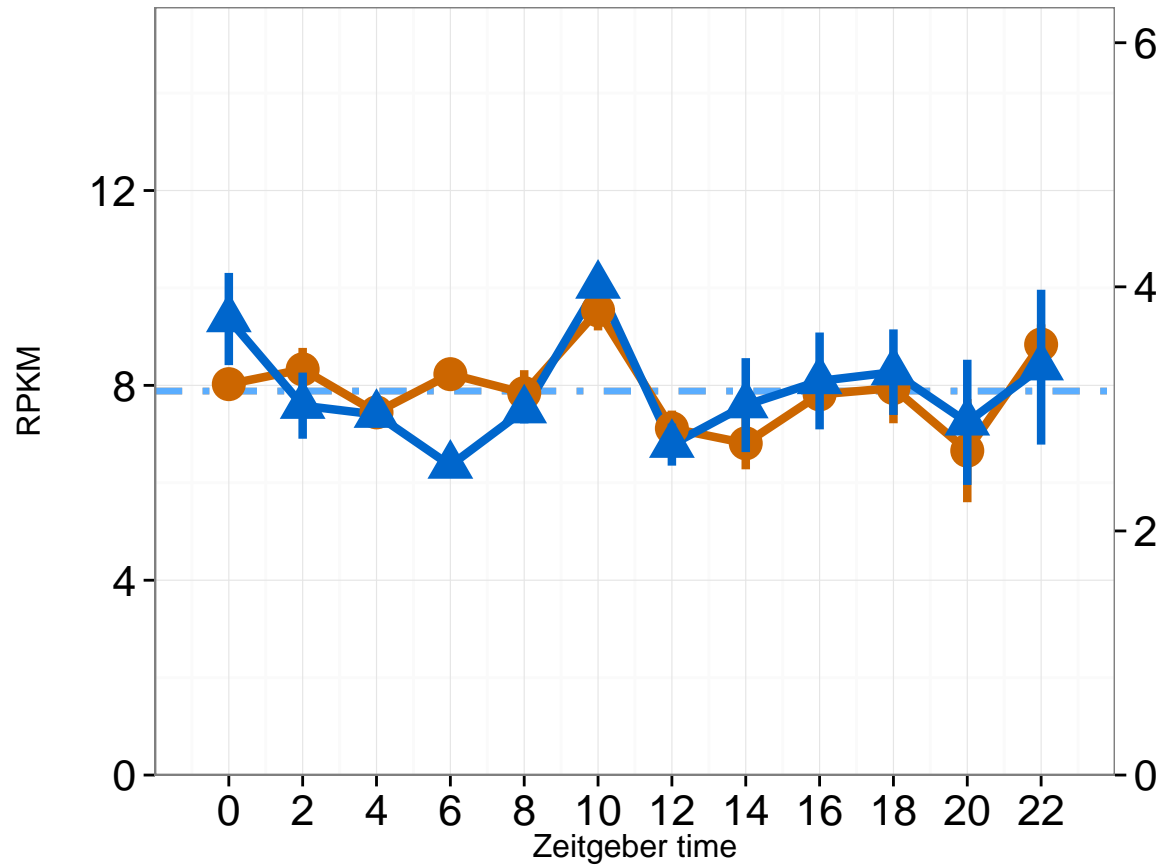

## Prdm2

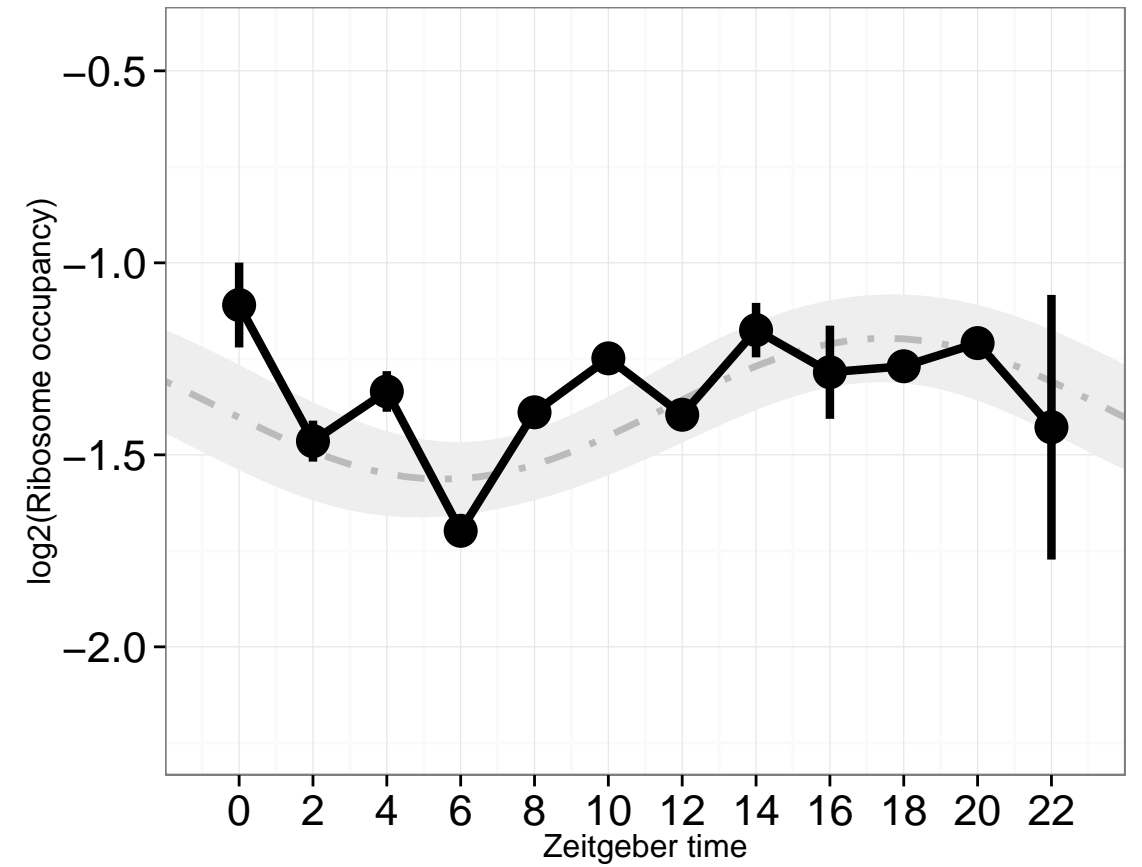

Supplement: SuppDataset_1.zip [file Prdm2_set_A.pdf › Supplemental Dataset 1/A-mRNA_nonrhyth_translation_nonrhyth/Prdm2_set_A.pdf]

## Prdm4

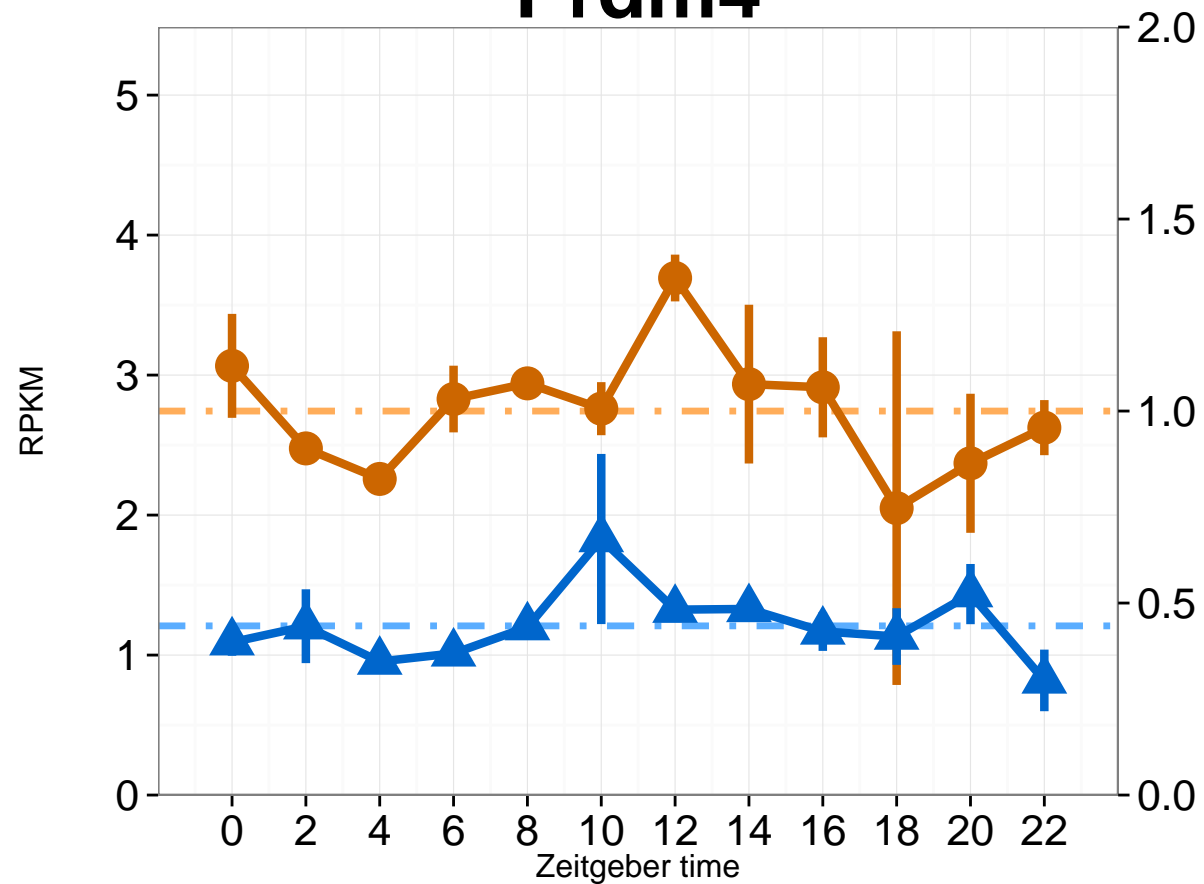

## Prdm4

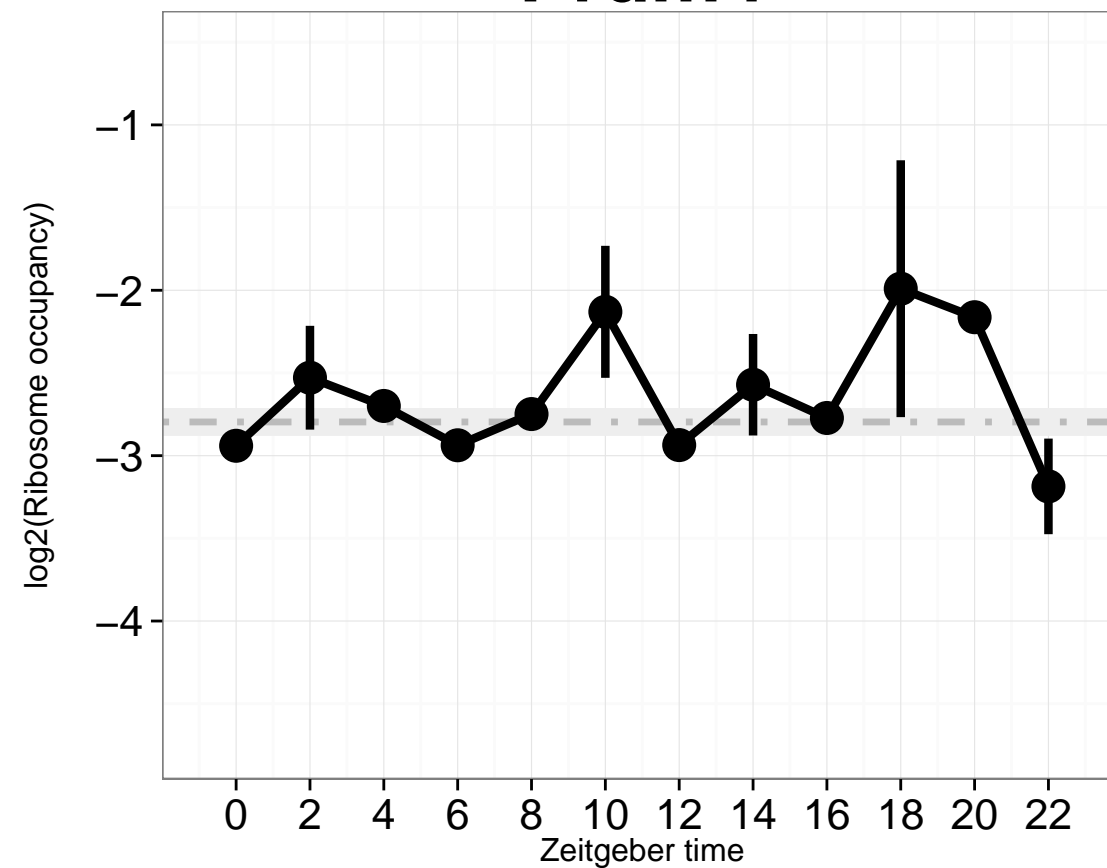

Supplement: SuppDataset_1.zip [file Prdm4_set_A.pdf › Supplemental Dataset 1/A-mRNA_nonrhyth_translation_nonrhyth/Prdm4_set_A.pdf]

# Prdm9

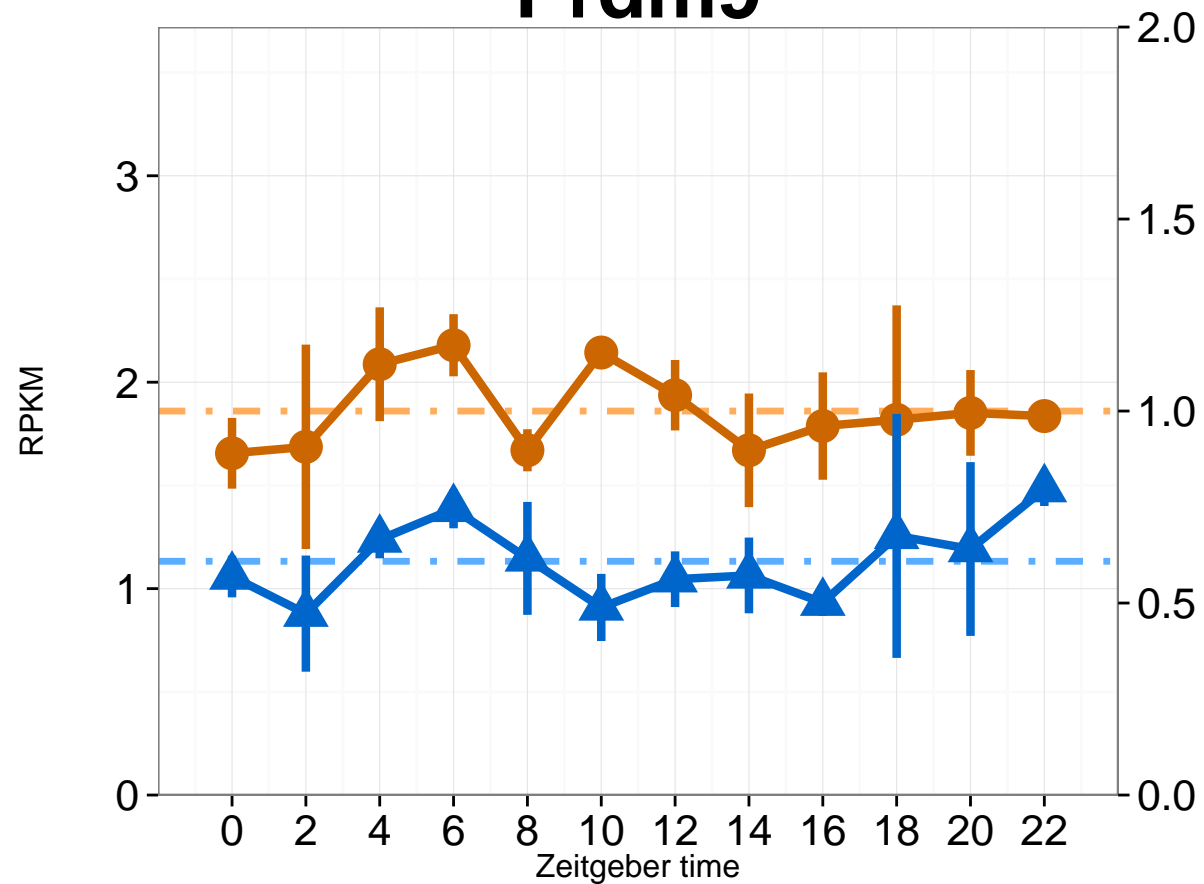

# Prdm9

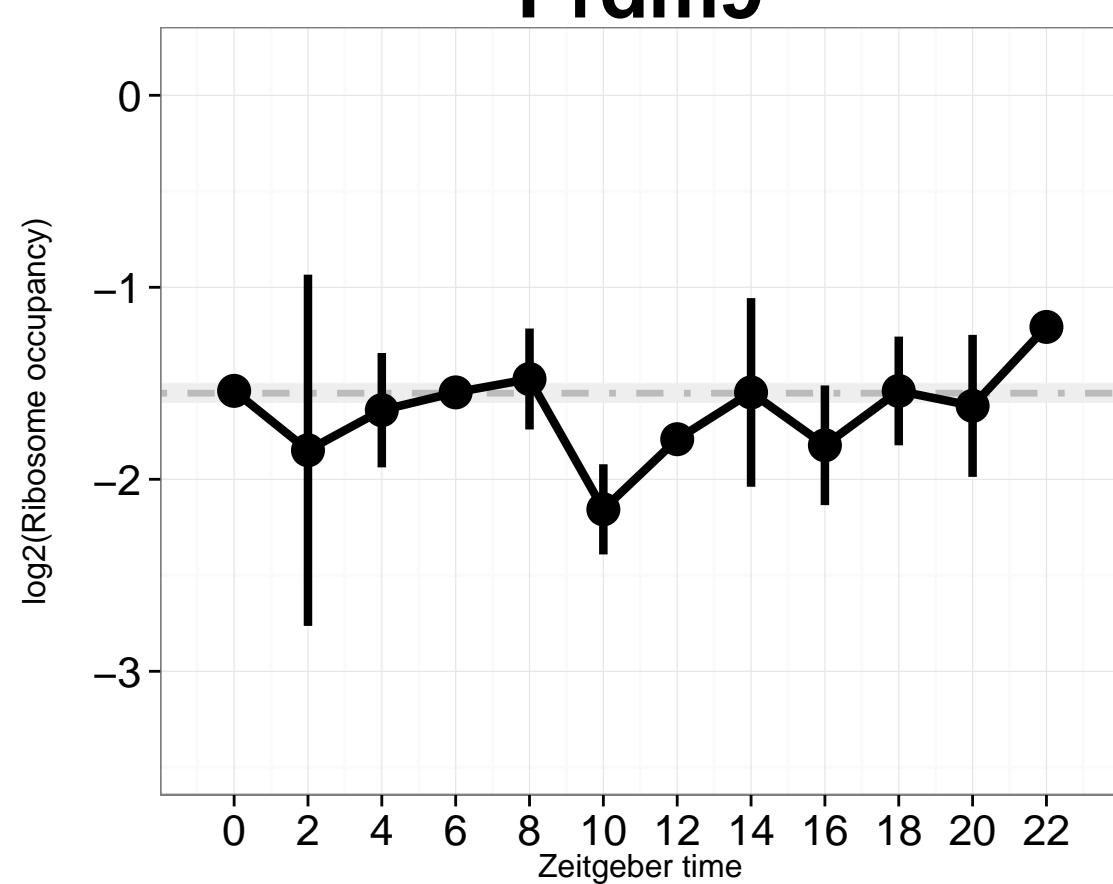

Supplement: SuppDataset_1.zip [file Prdm9_set_A.pdf › Supplemental Dataset 1/A-mRNA_nonrhyth_translation_nonrhyth/Prdm9_set_A.pdf]

## Prdx1

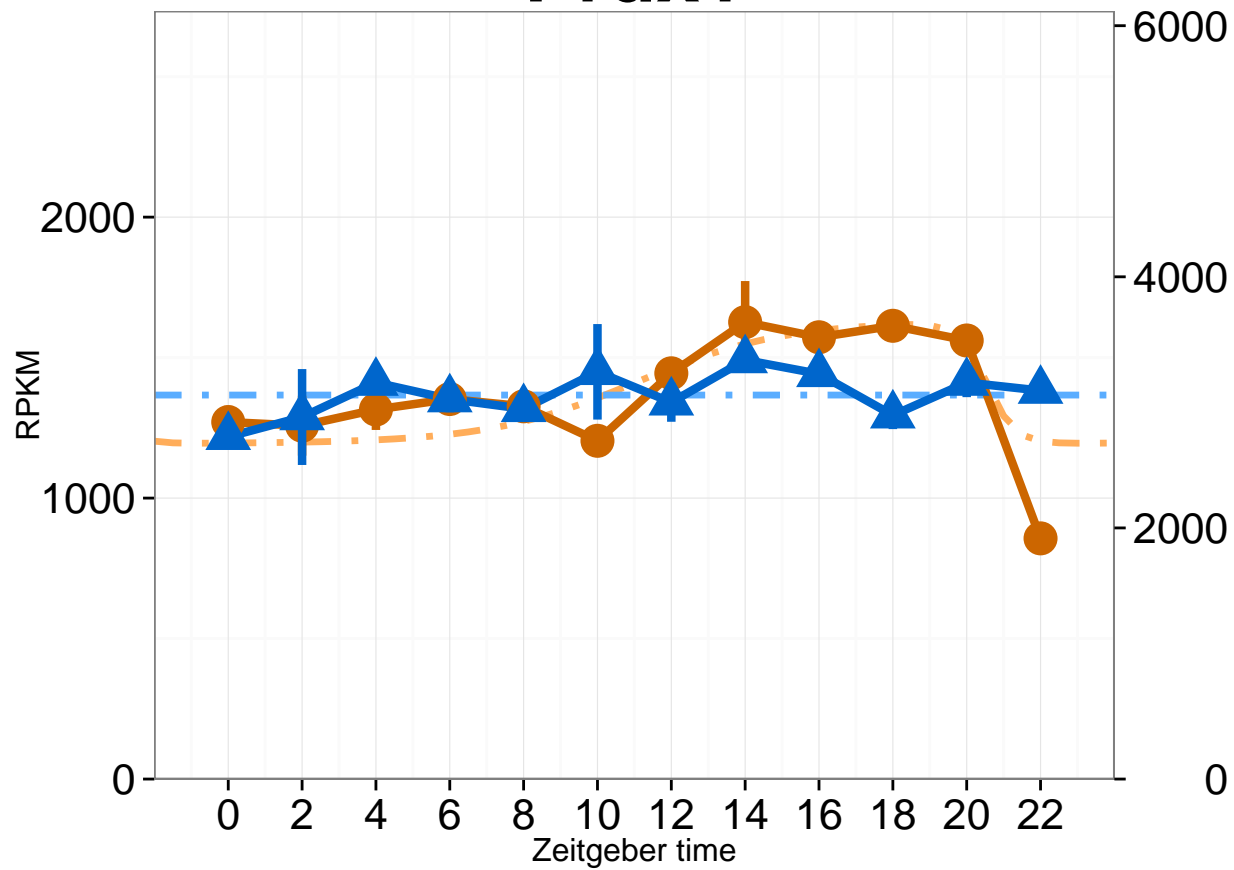

## Prdx1

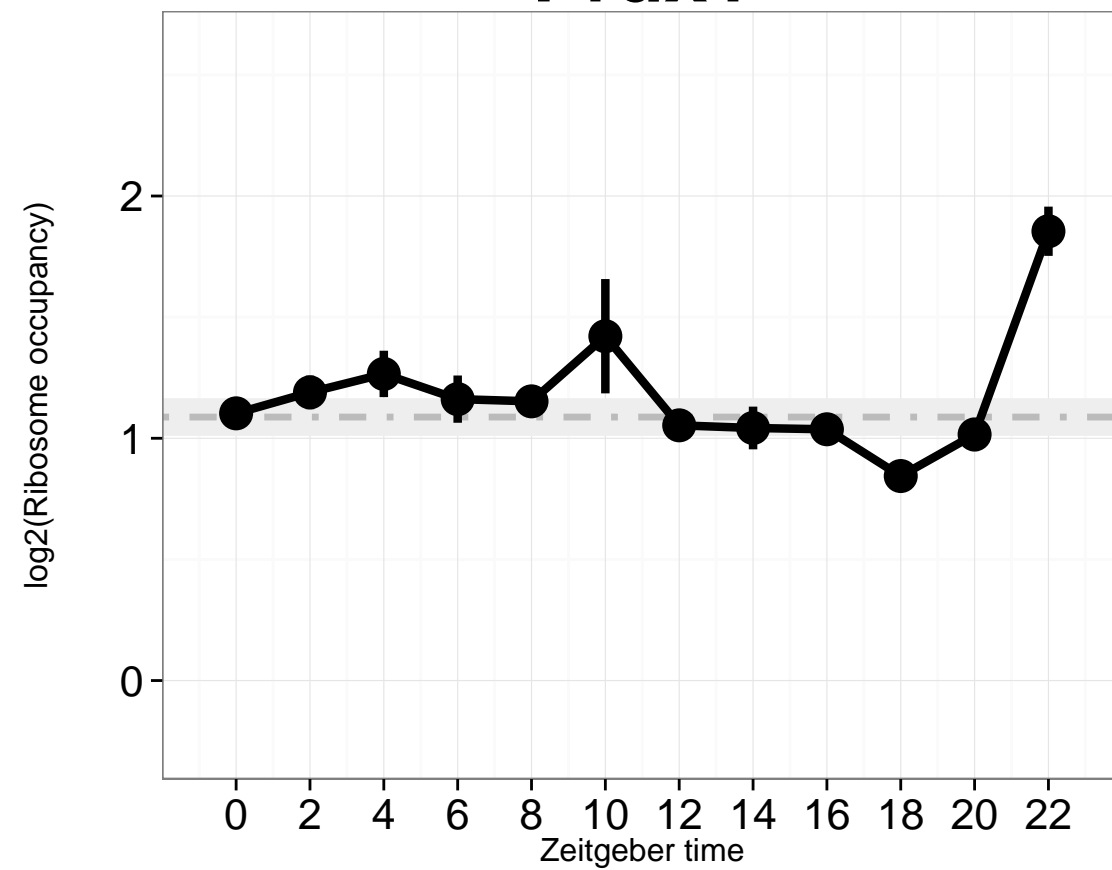

Supplement: SuppDataset_1.zip [file Prdx1_set_A.pdf › Supplemental Dataset 1/A-mRNA_nonrhyth_translation_nonrhyth/Prdx1_set_A.pdf]

## Prdx2

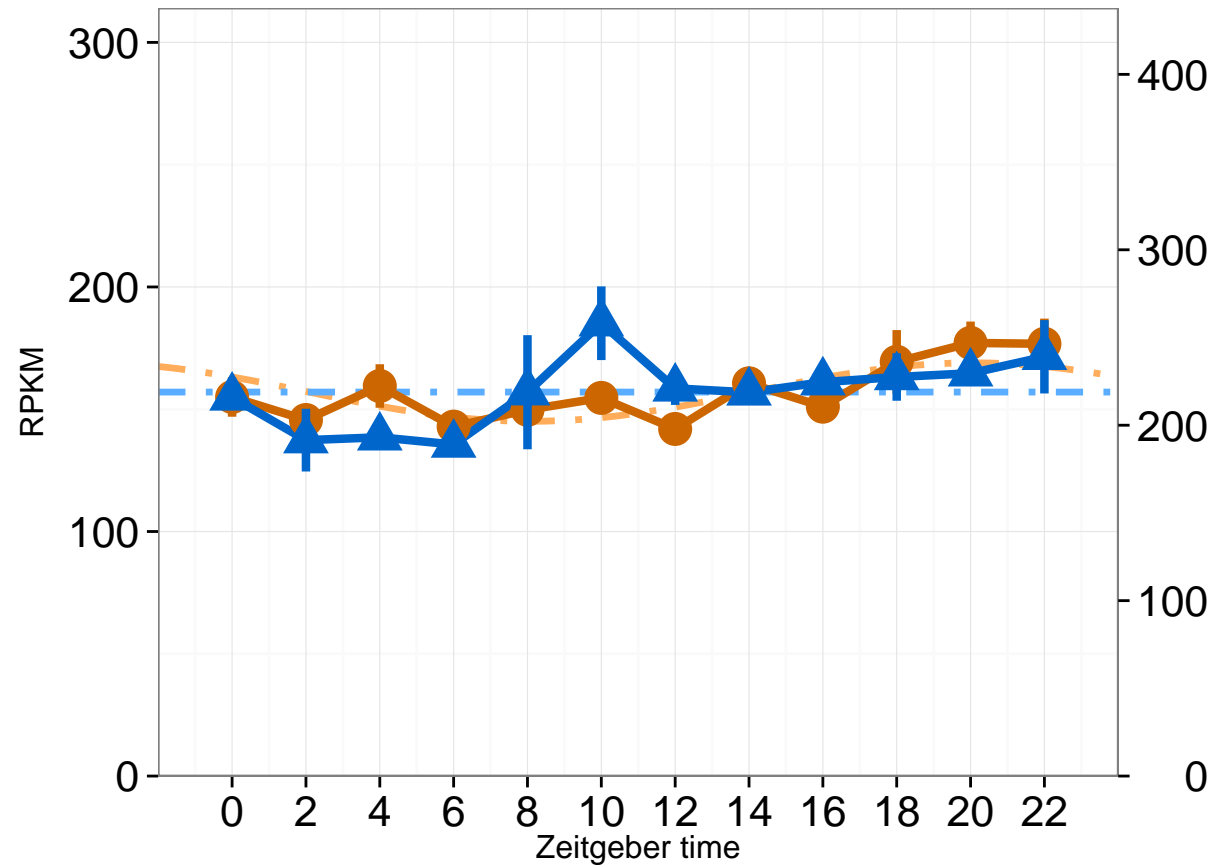

## Prdx2

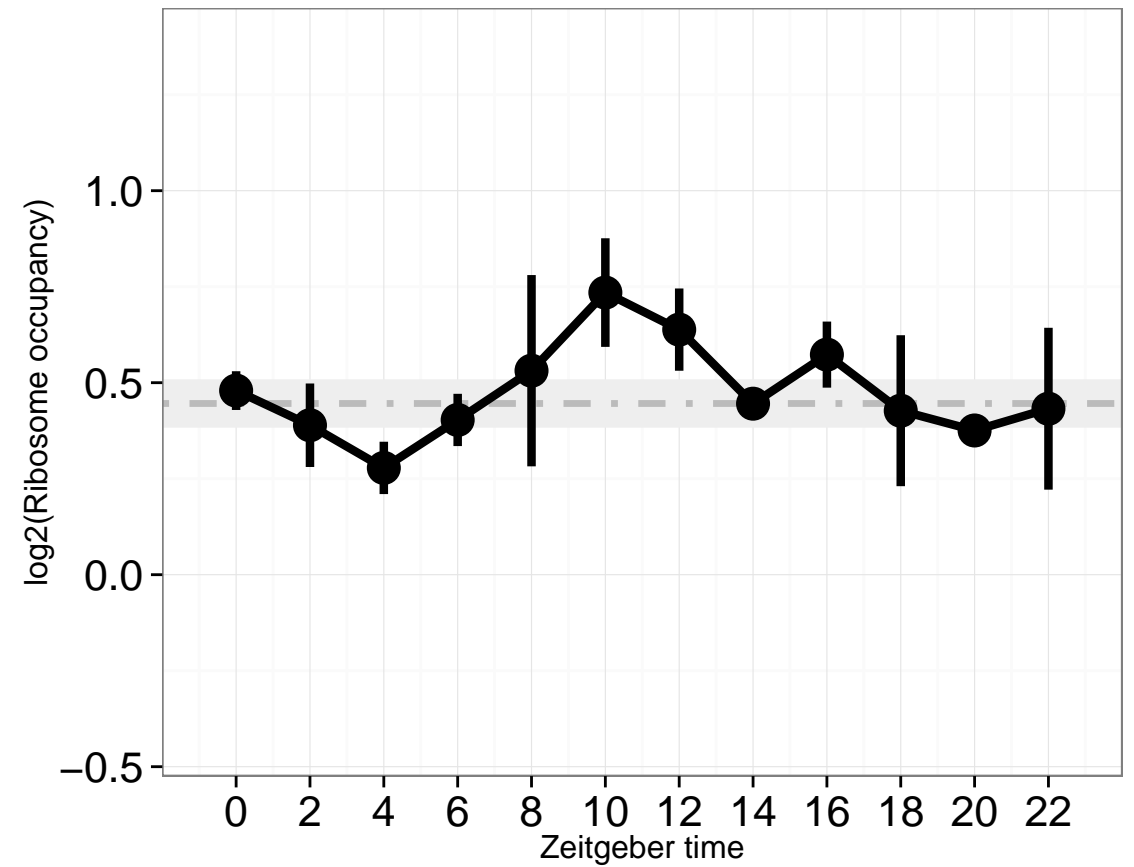

Supplement: SuppDataset_1.zip [file Prdx2_set_A.pdf › Supplemental Dataset 1/A-mRNA_nonrhyth_translation_nonrhyth/Prdx2_set_A.pdf]

## Prdx3

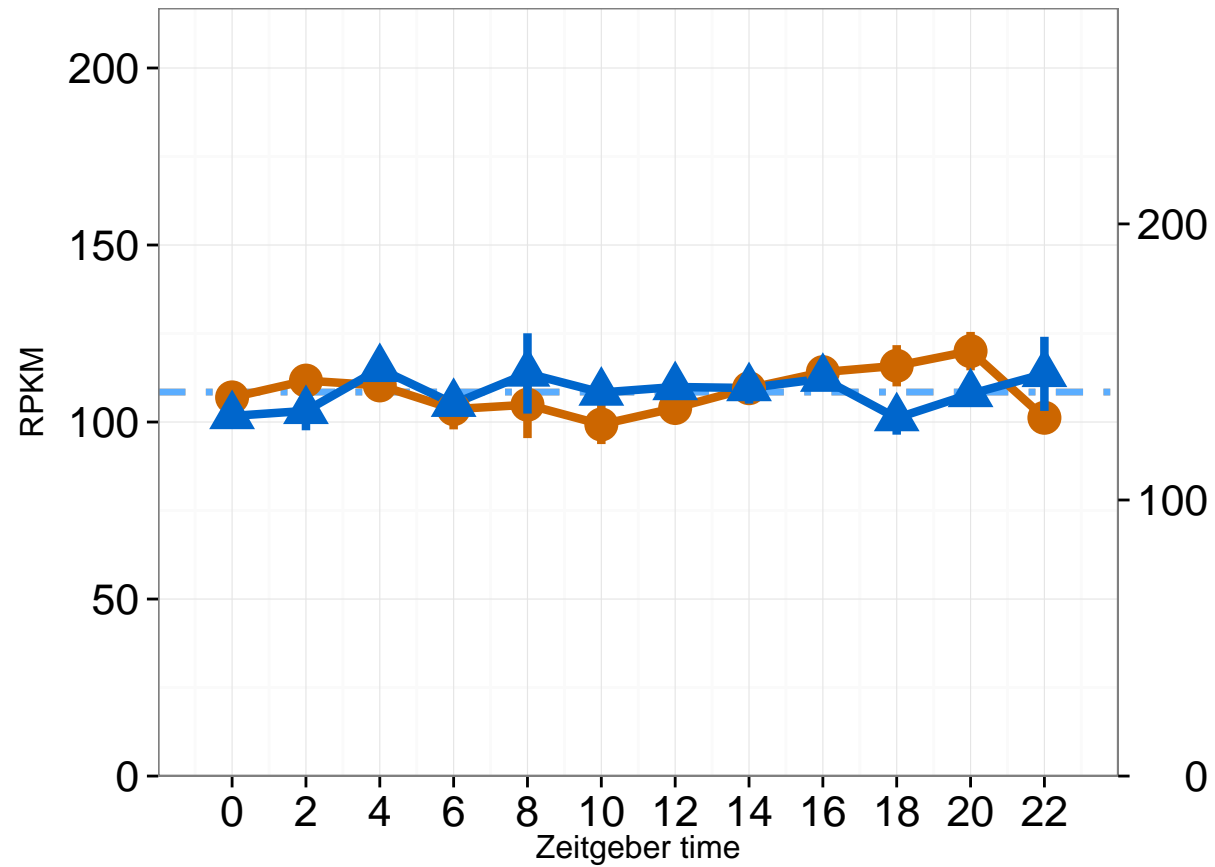

## Prdx3

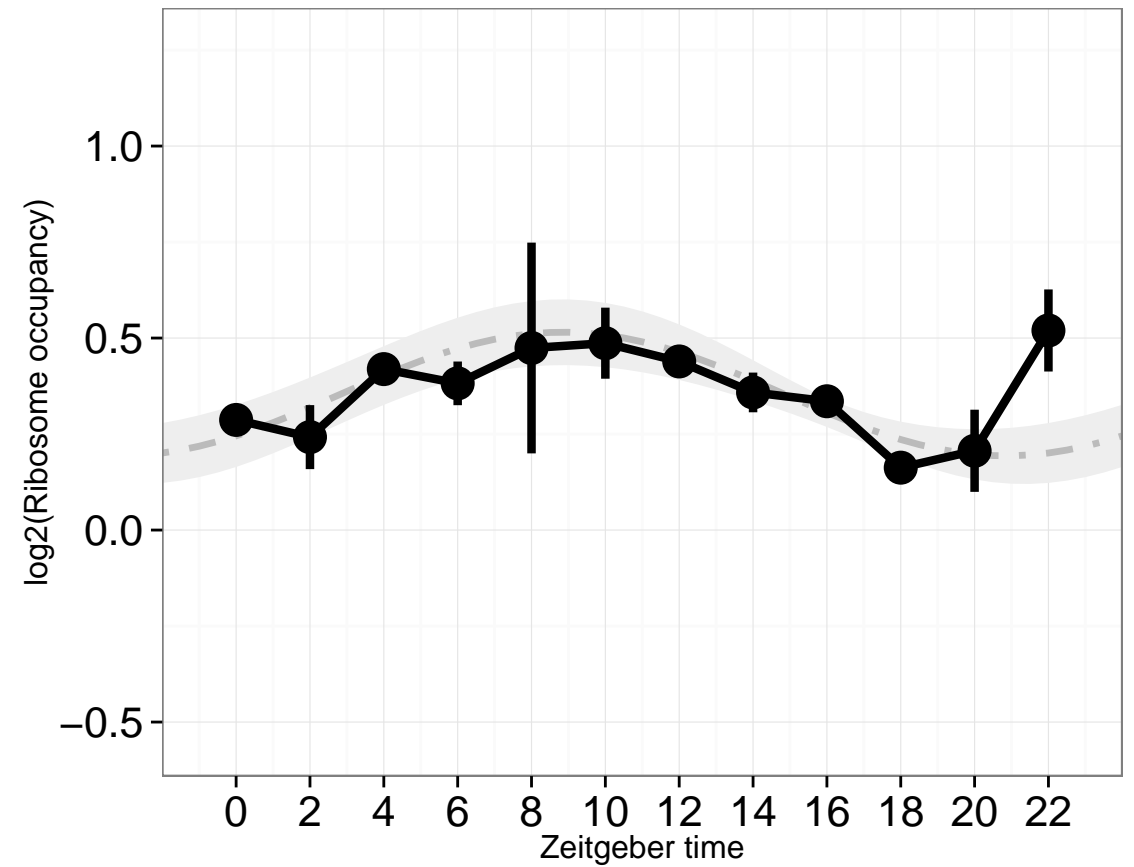

Supplement: SuppDataset_1.zip [file Prdx3_set_A.pdf › Supplemental Dataset 1/A-mRNA_nonrhyth_translation_nonrhyth/Prdx3_set_A.pdf]

## Prdx4

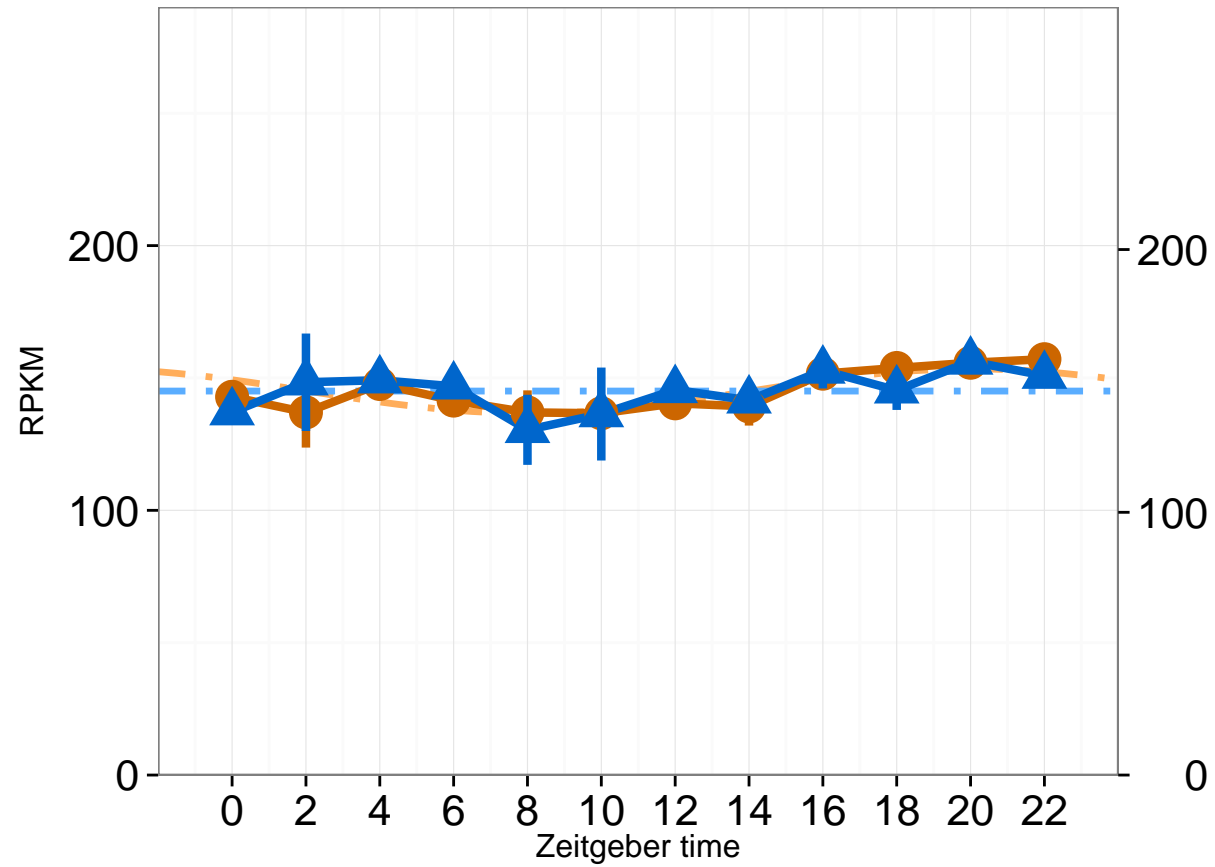

## Prdx4

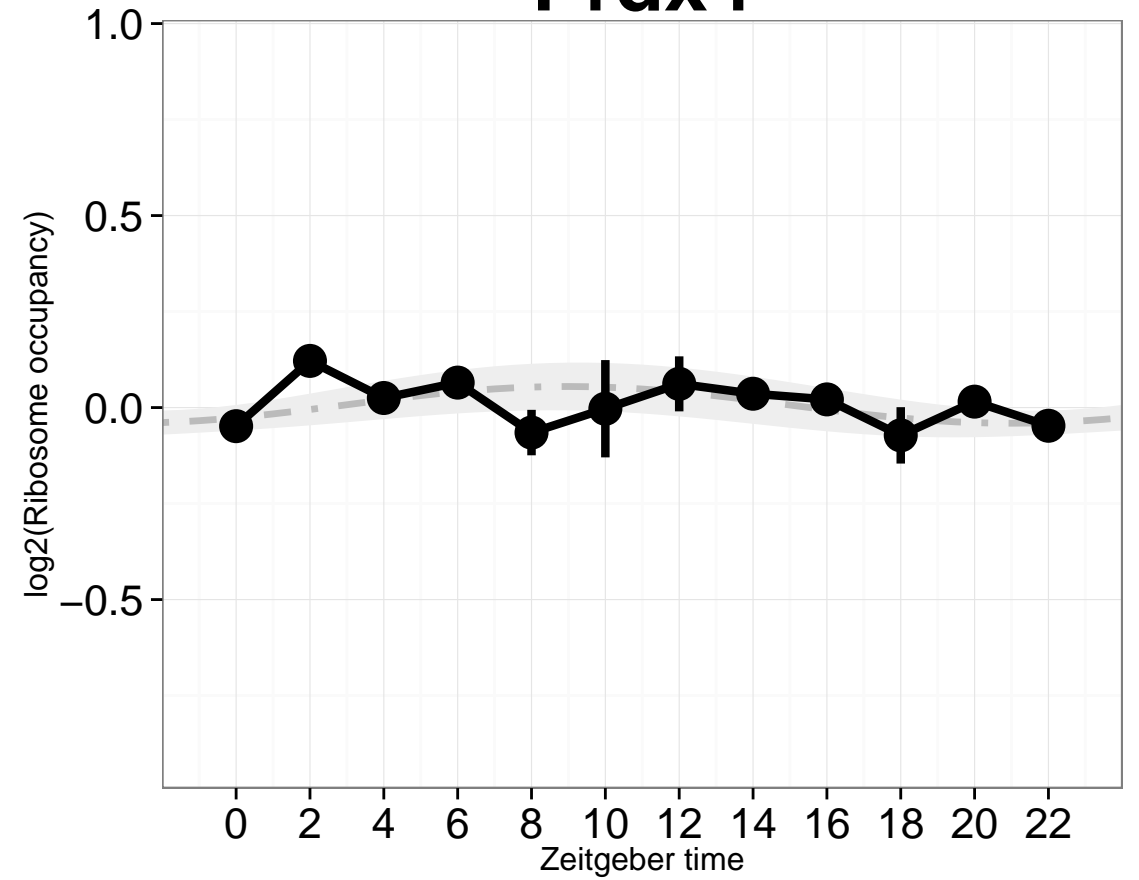

Supplement: SuppDataset_1.zip [file Prdx4_set_A.pdf › Supplemental Dataset 1/A-mRNA_nonrhyth_translation_nonrhyth/Prdx4_set_A.pdf]

# Prdx5

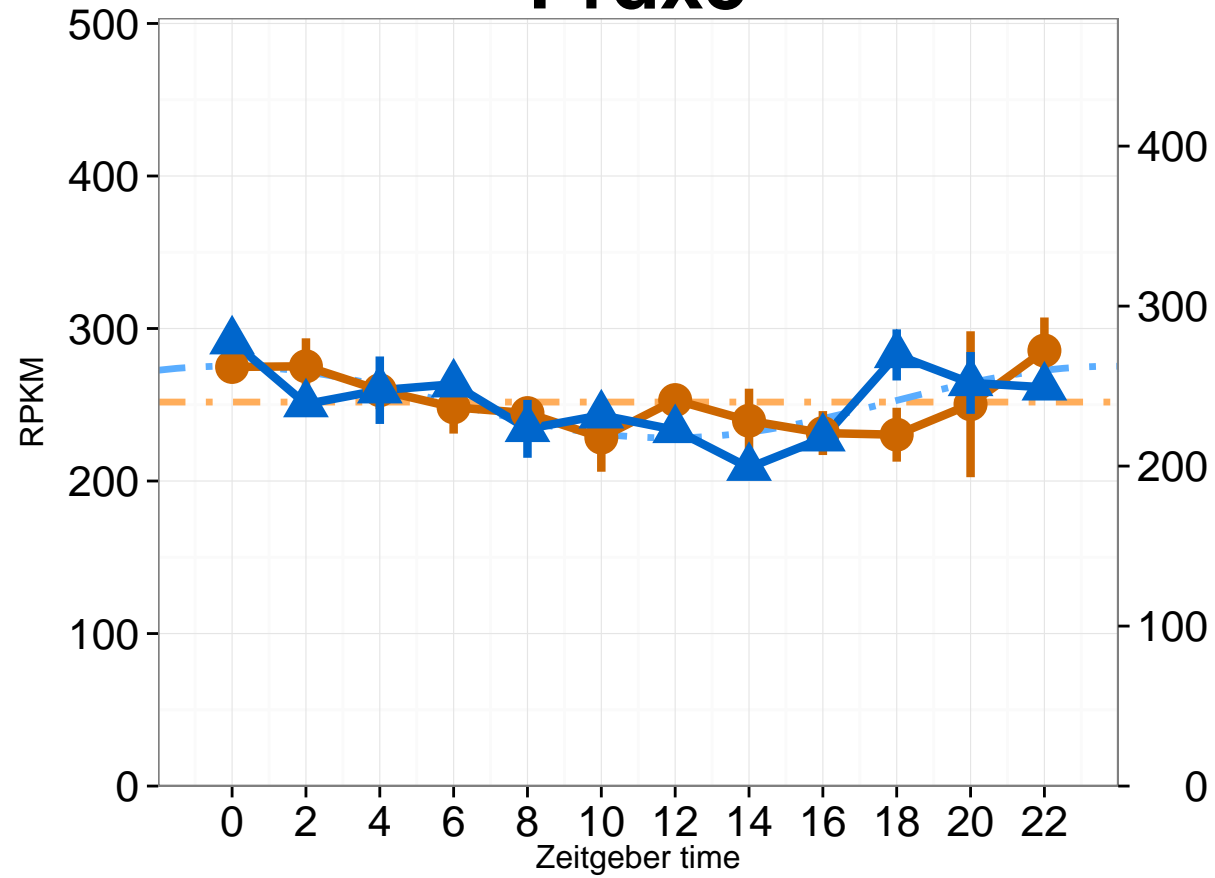

# Prdx5

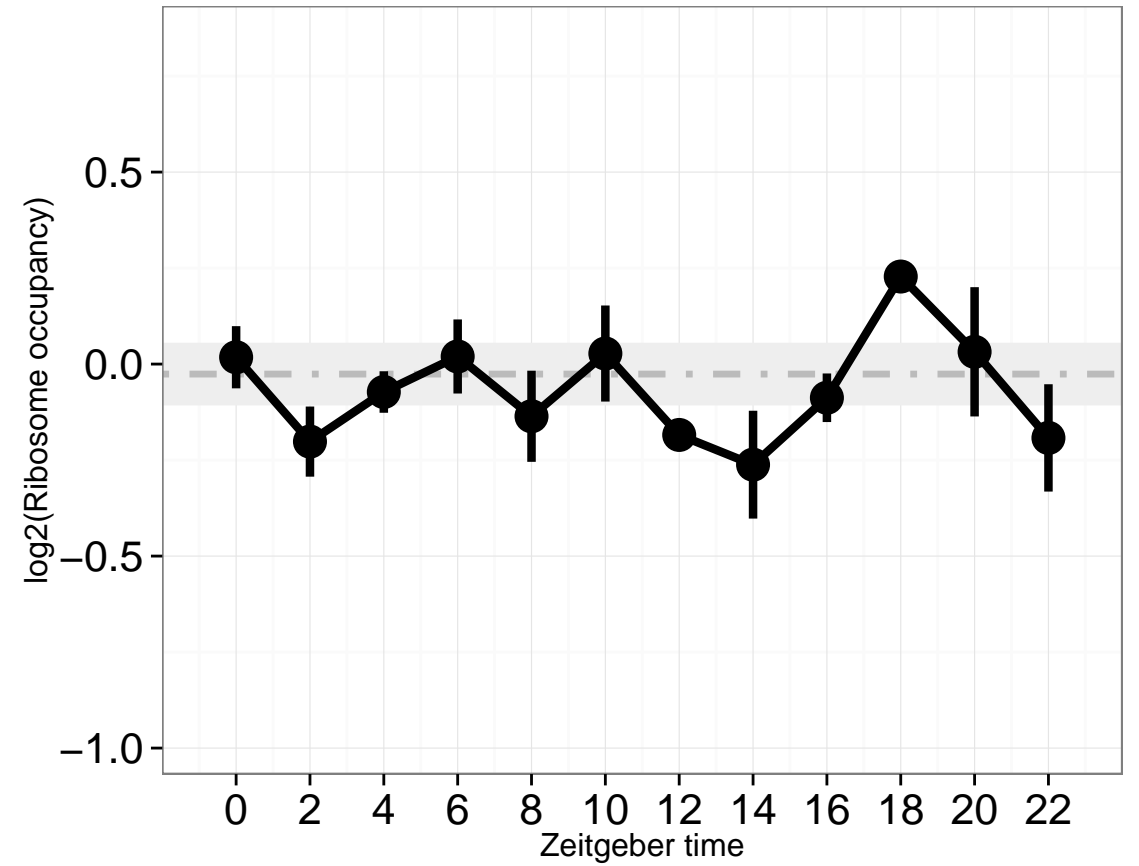

Supplement: SuppDataset_1.zip [file Prdx5_set_A.pdf › Supplemental Dataset 1/A-mRNA_nonrhyth_translation_nonrhyth/Prdx5_set_A.pdf]

## Prdx6

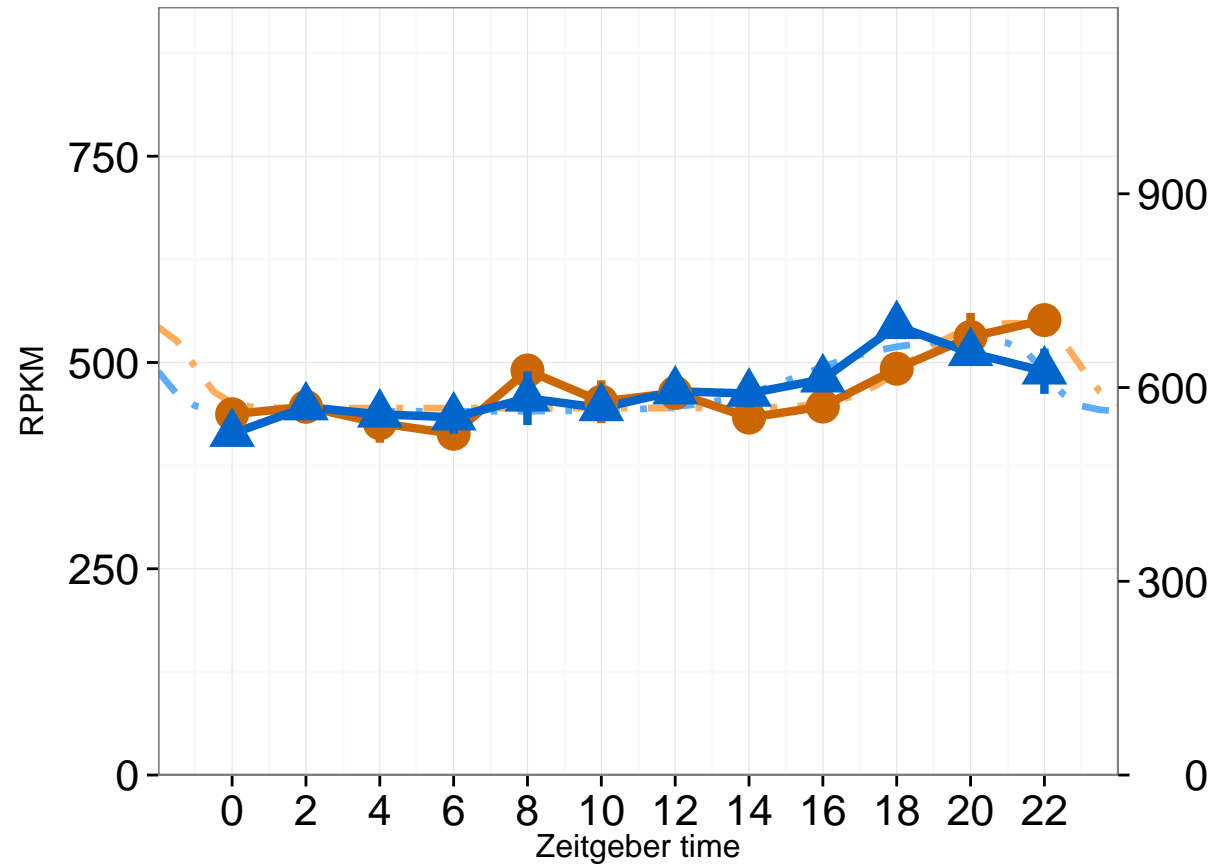

## Prdx6

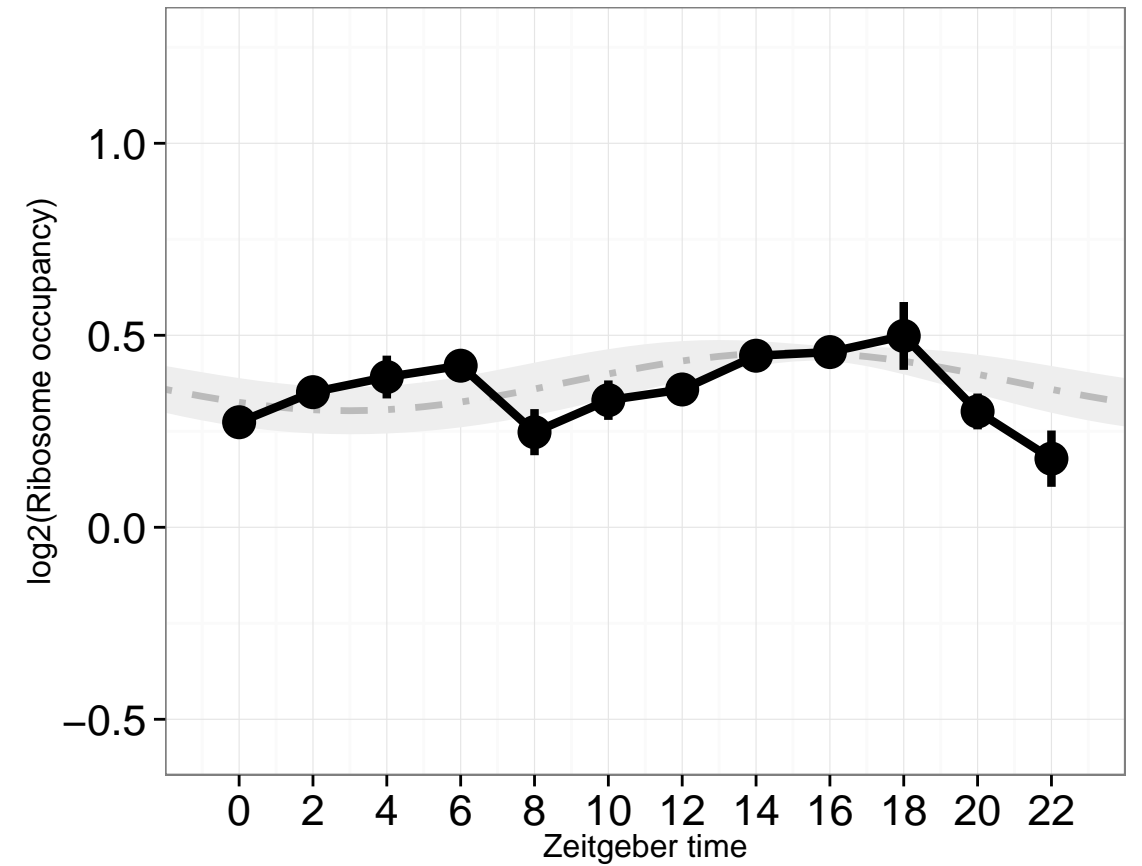

Supplement: SuppDataset_1.zip [file Prdx6_set_A.pdf › Supplemental Dataset 1/A-mRNA_nonrhyth_translation_nonrhyth/Prdx6_set_A.pdf]

## Preb

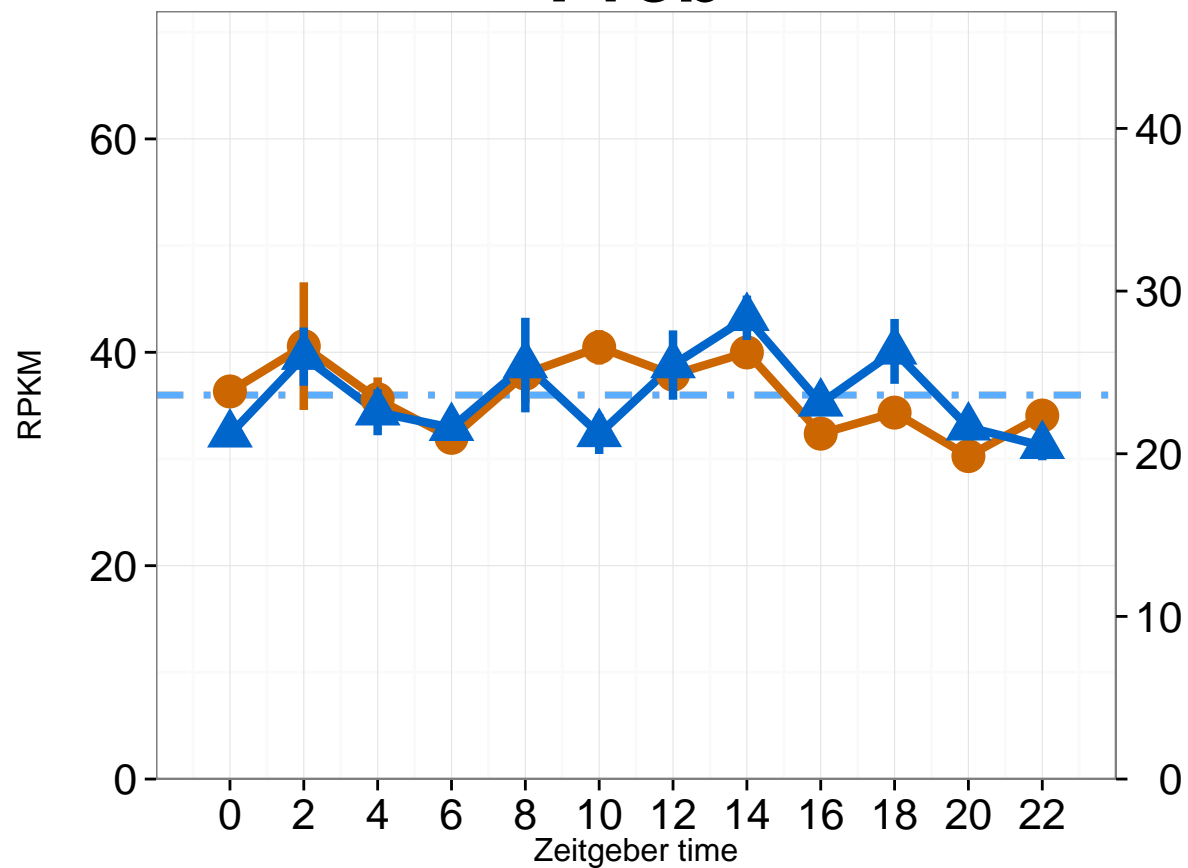

## Preb

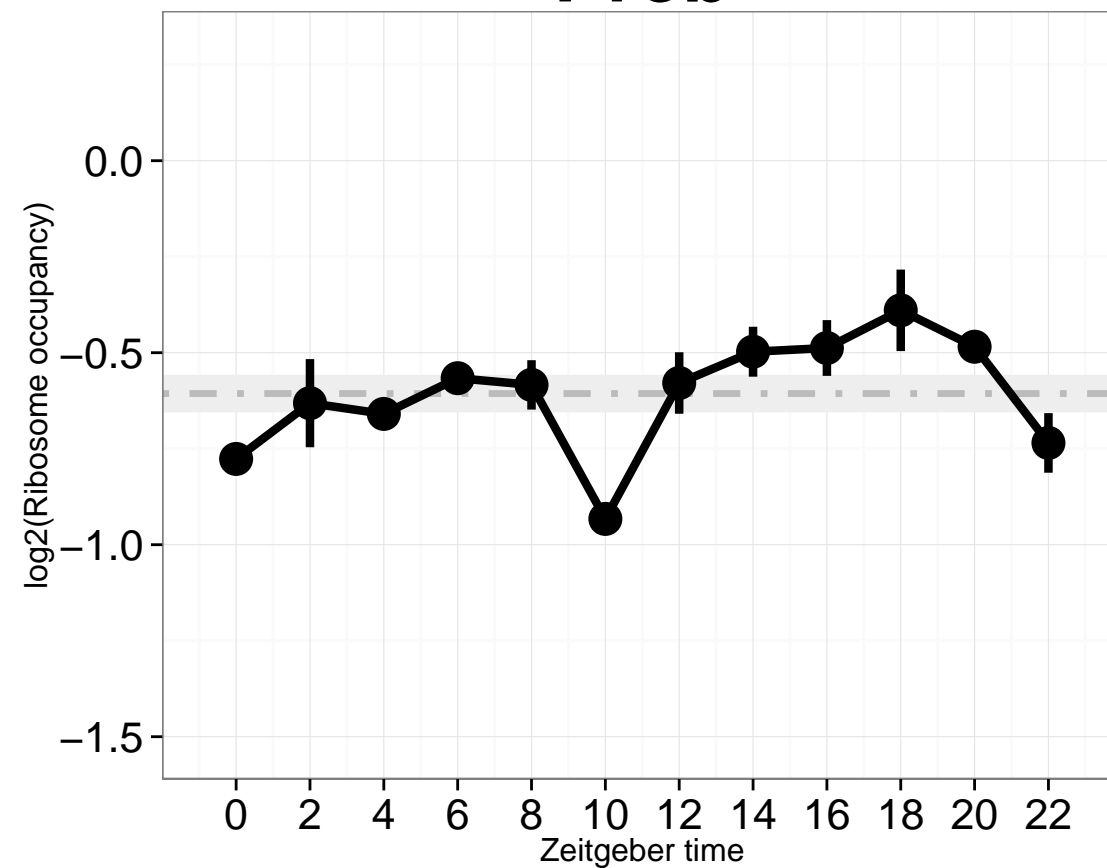

Supplement: SuppDataset_1.zip [file Preb_set_A.pdf › Supplemental Dataset 1/A-mRNA_nonrhyth_translation_nonrhyth/Preb_set_A.pdf]

# Prelid1

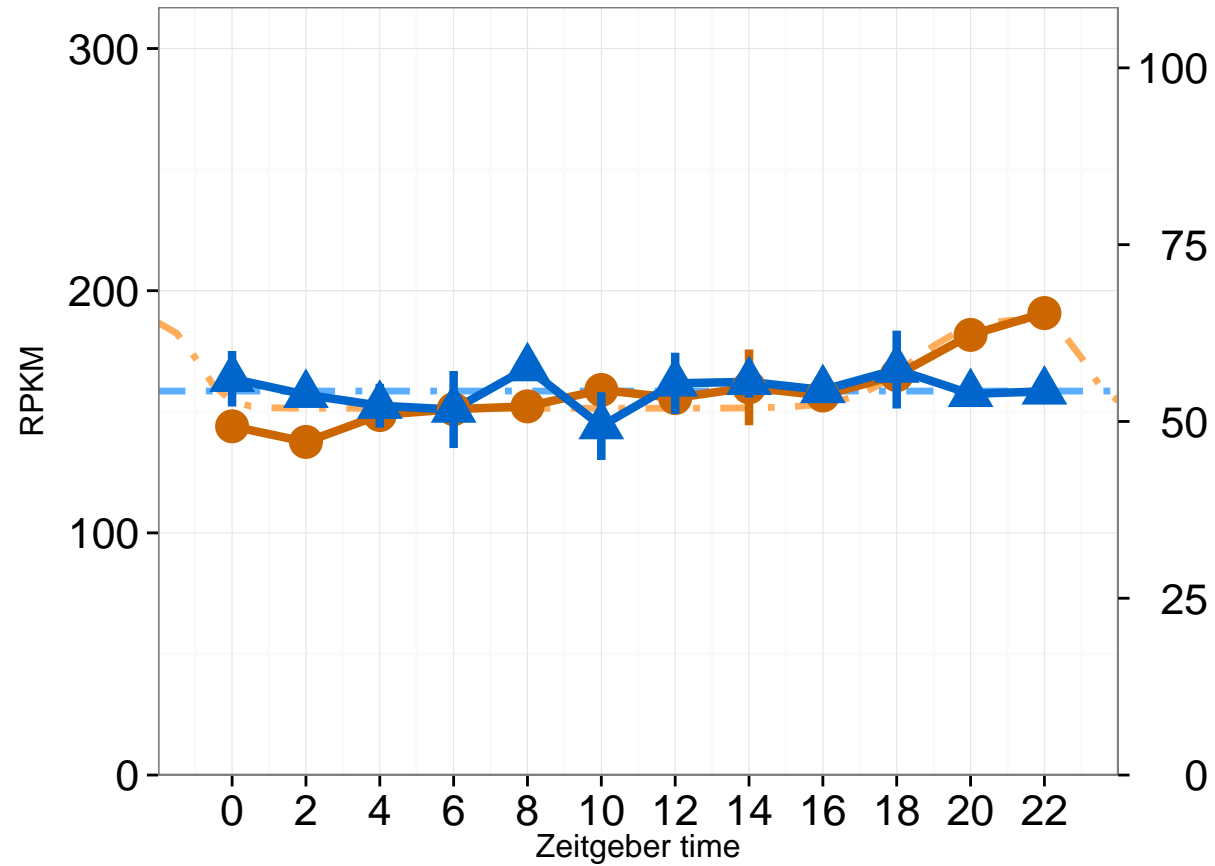

# Prelid1

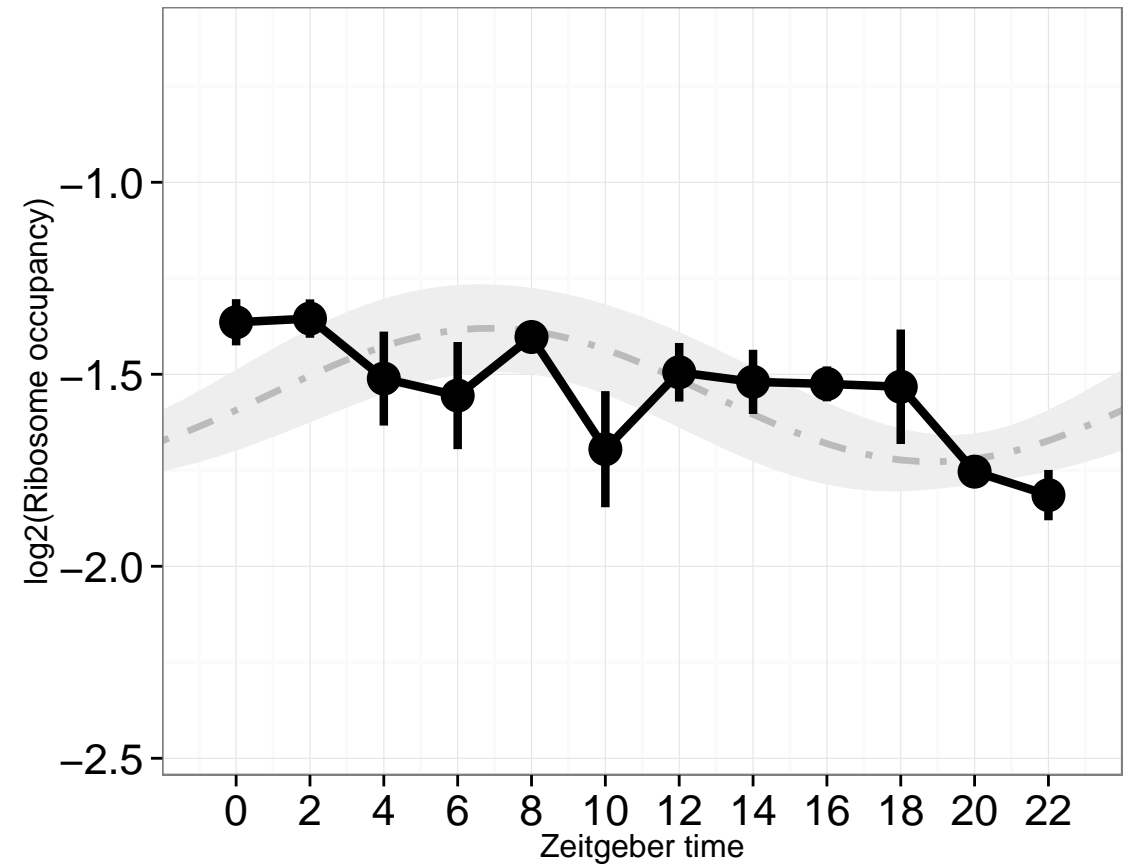

Supplement: SuppDataset_1.zip [file Prelid1_set_A.pdf › Supplemental Dataset 1/A-mRNA_nonrhyth_translation_nonrhyth/Prelid1_set_A.pdf]

## Prep

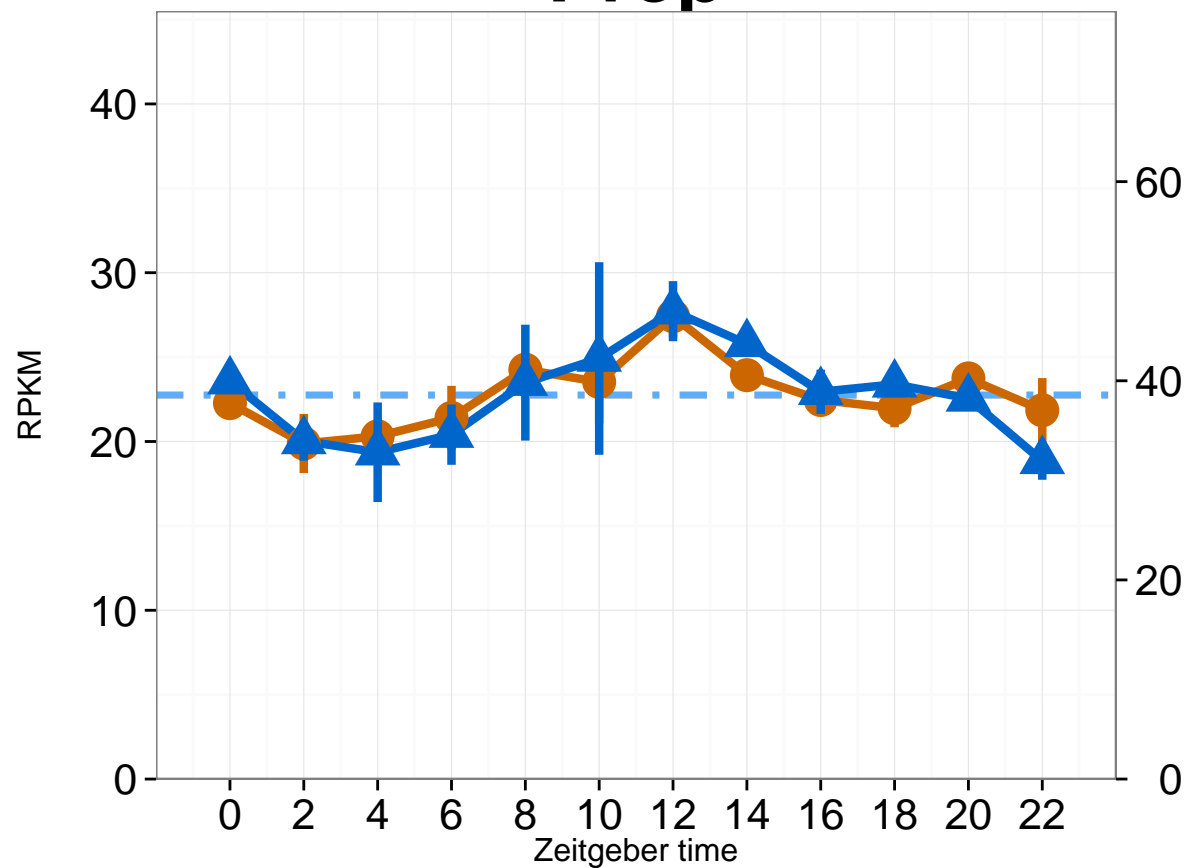

## Prep

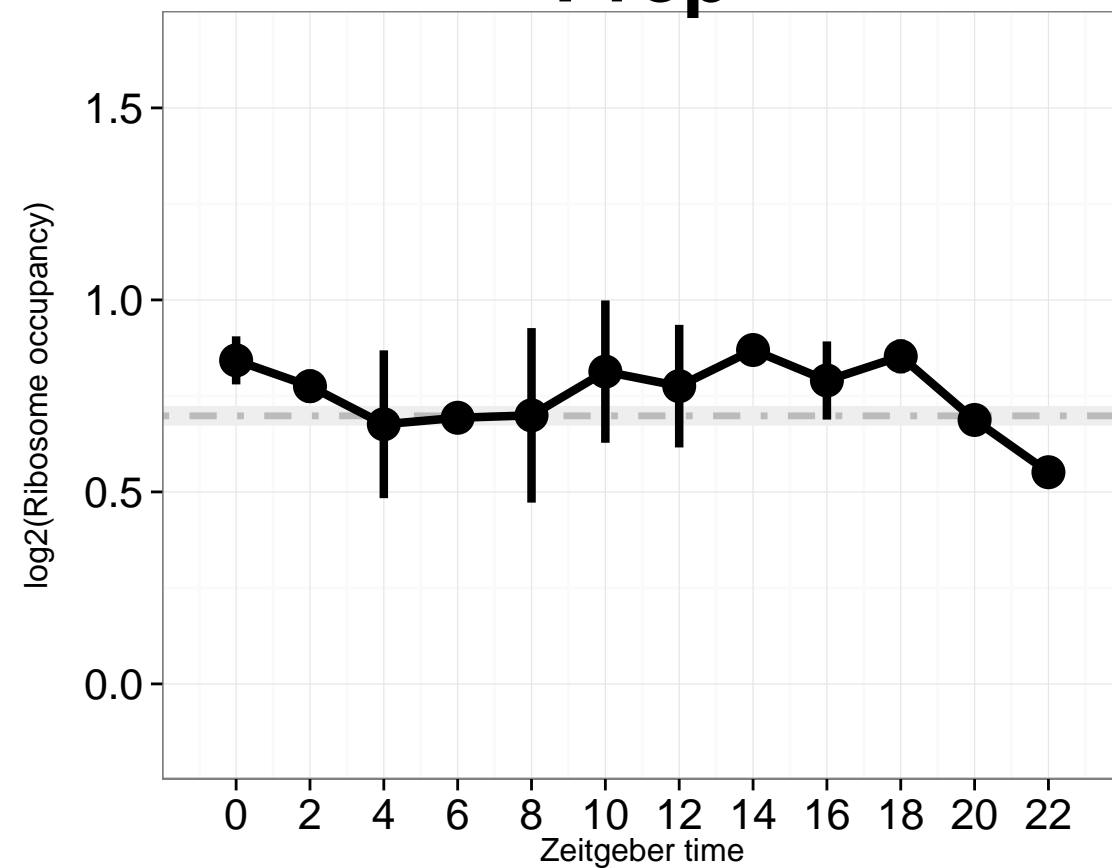

Supplement: SuppDataset_1.zip [file Prep_set_A.pdf › Supplemental Dataset 1/A-mRNA_nonrhyth_translation_nonrhyth/Prep_set_A.pdf]

## Prepl

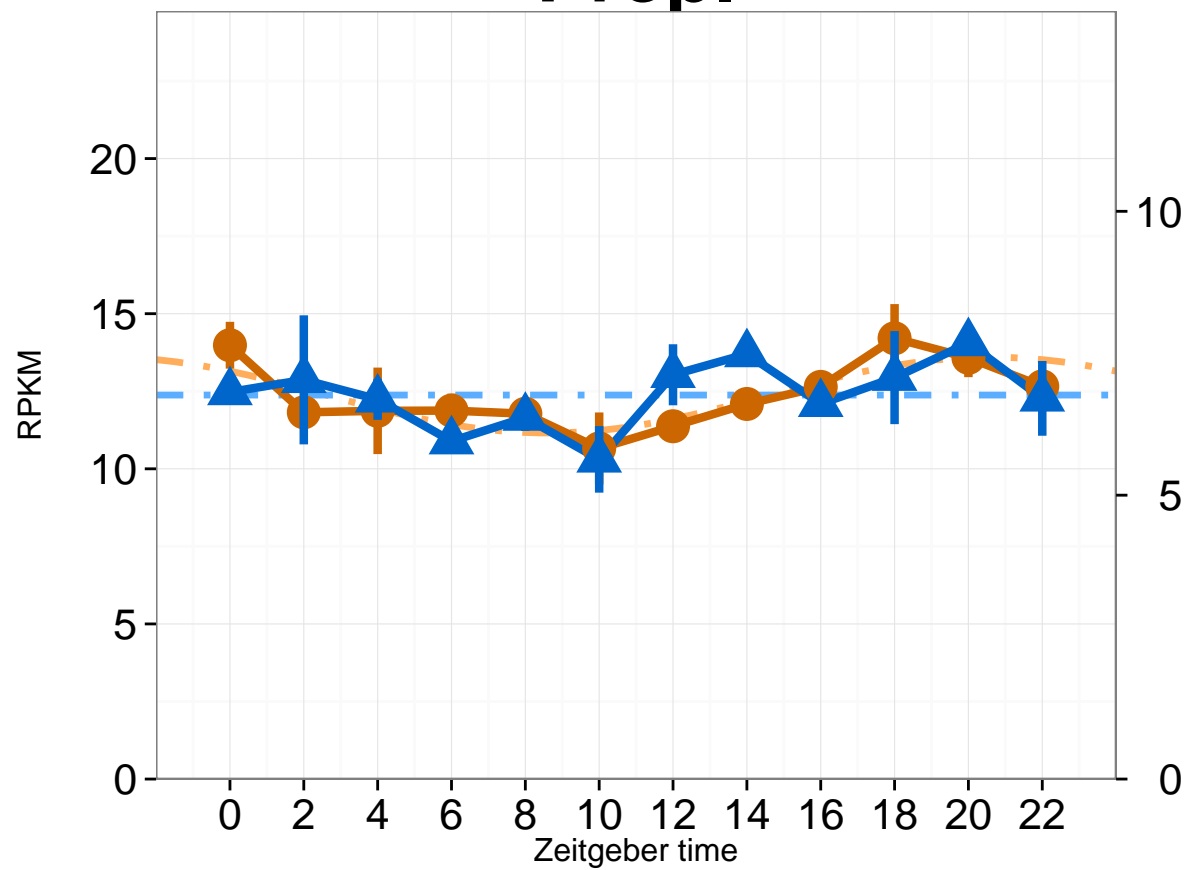

## Prepl

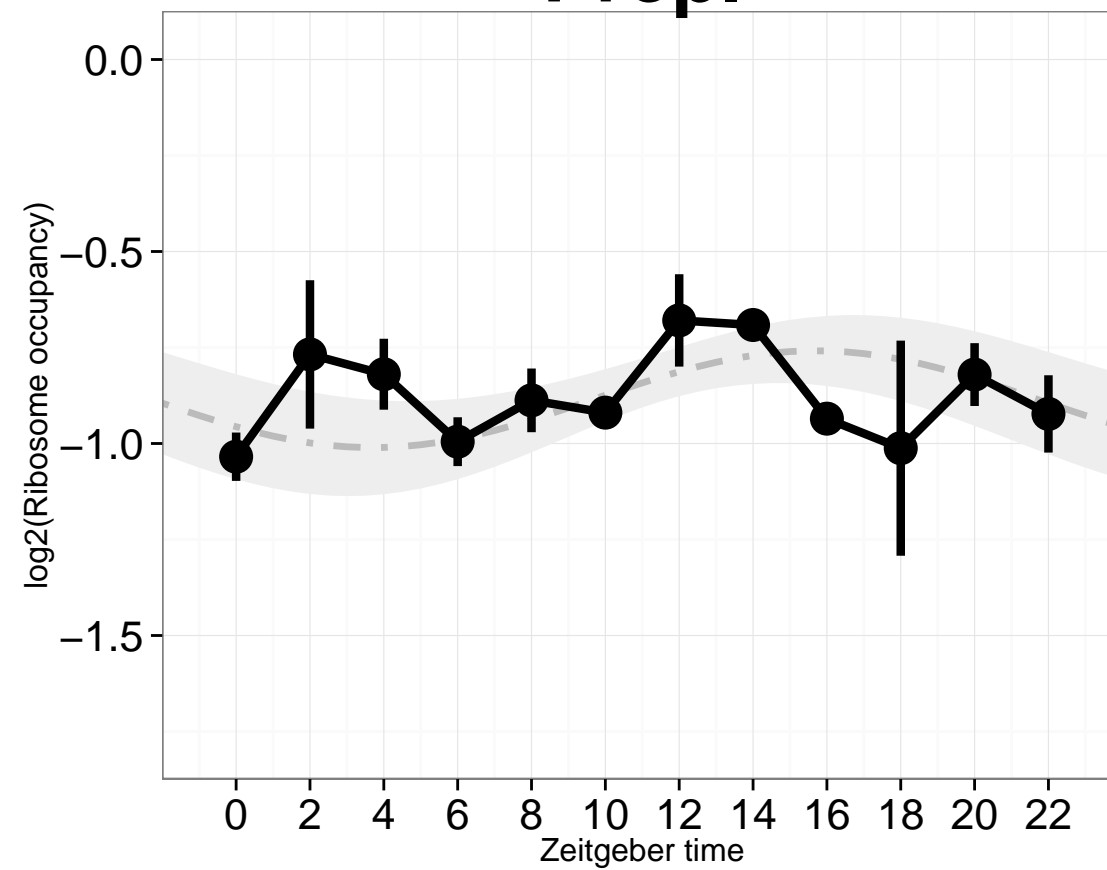

Supplement: SuppDataset_1.zip [file Prepl_set_A.pdf › Supplemental Dataset 1/A-mRNA_nonrhyth_translation_nonrhyth/Prepl_set_A.pdf]

## Prex1

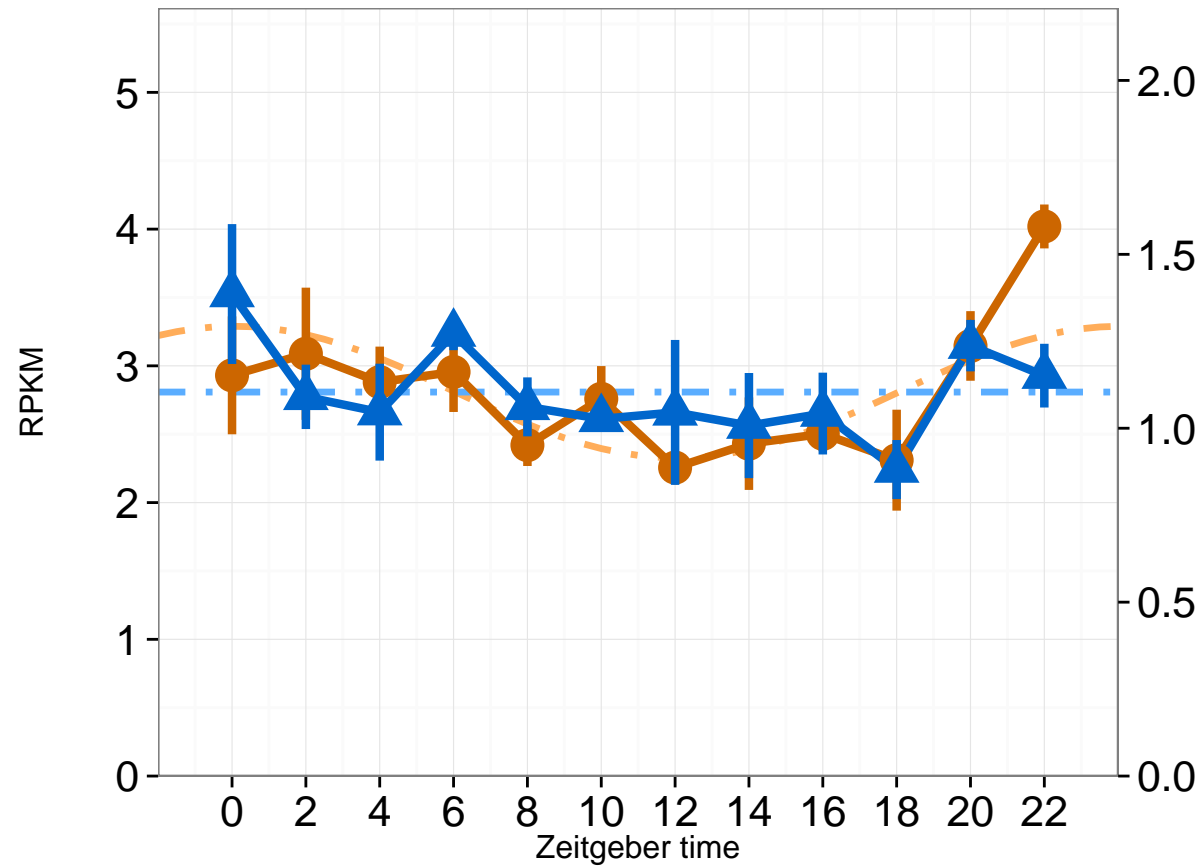

## Prex1

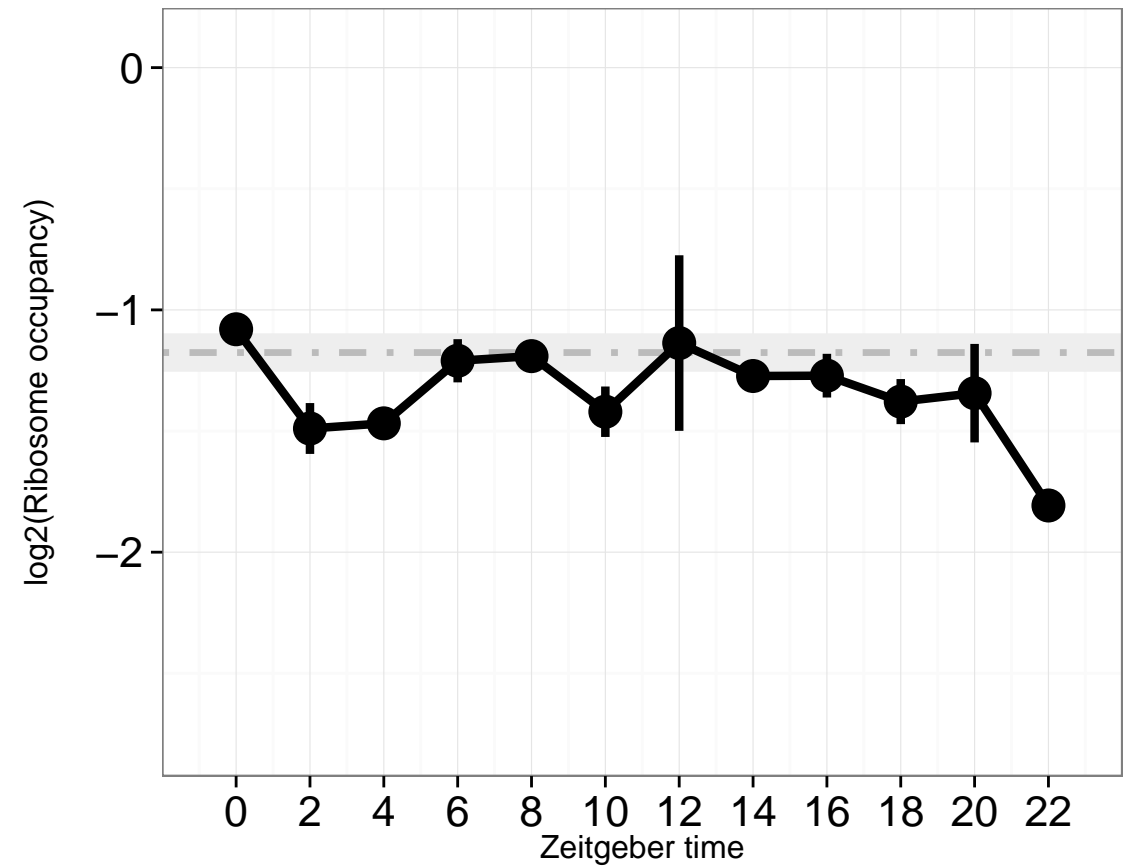

Supplement: SuppDataset_1.zip [file Prex1_set_A.pdf › Supplemental Dataset 1/A-mRNA_nonrhyth_translation_nonrhyth/Prex1_set_A.pdf]

# Prex2

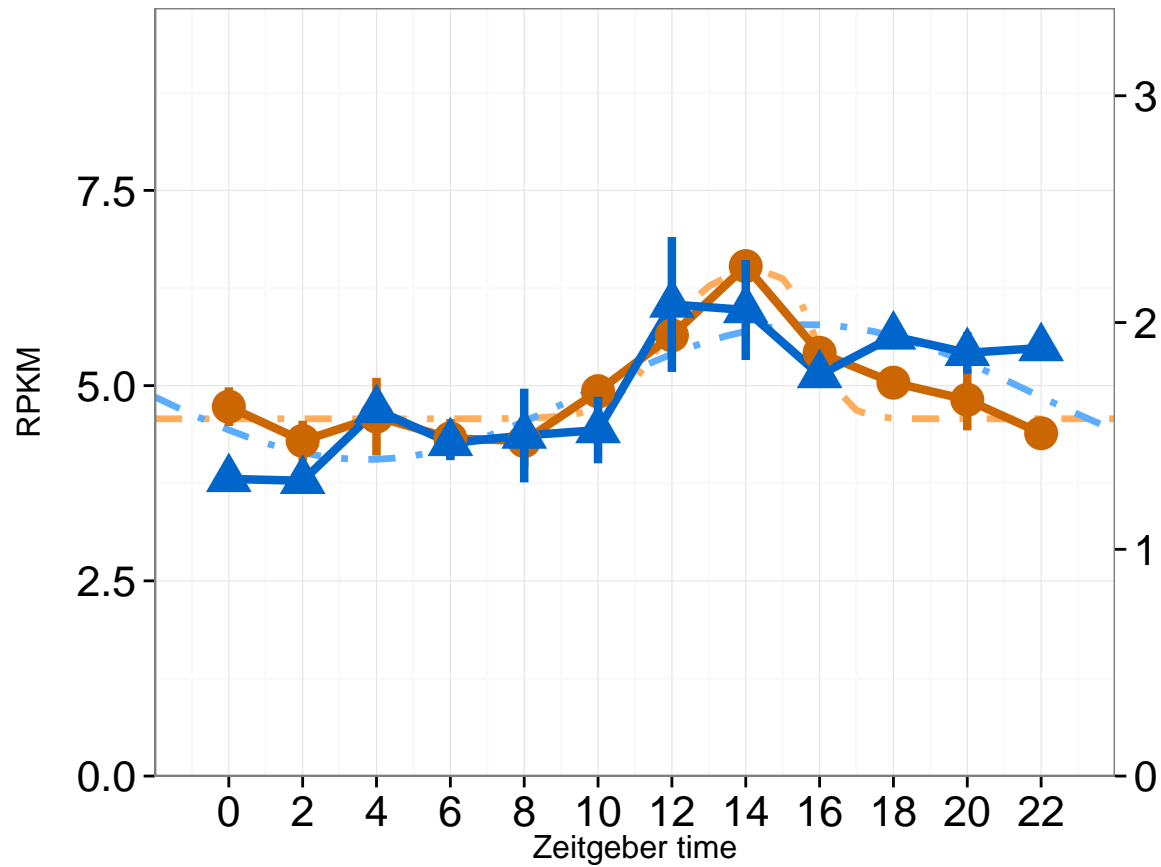

# Prex2

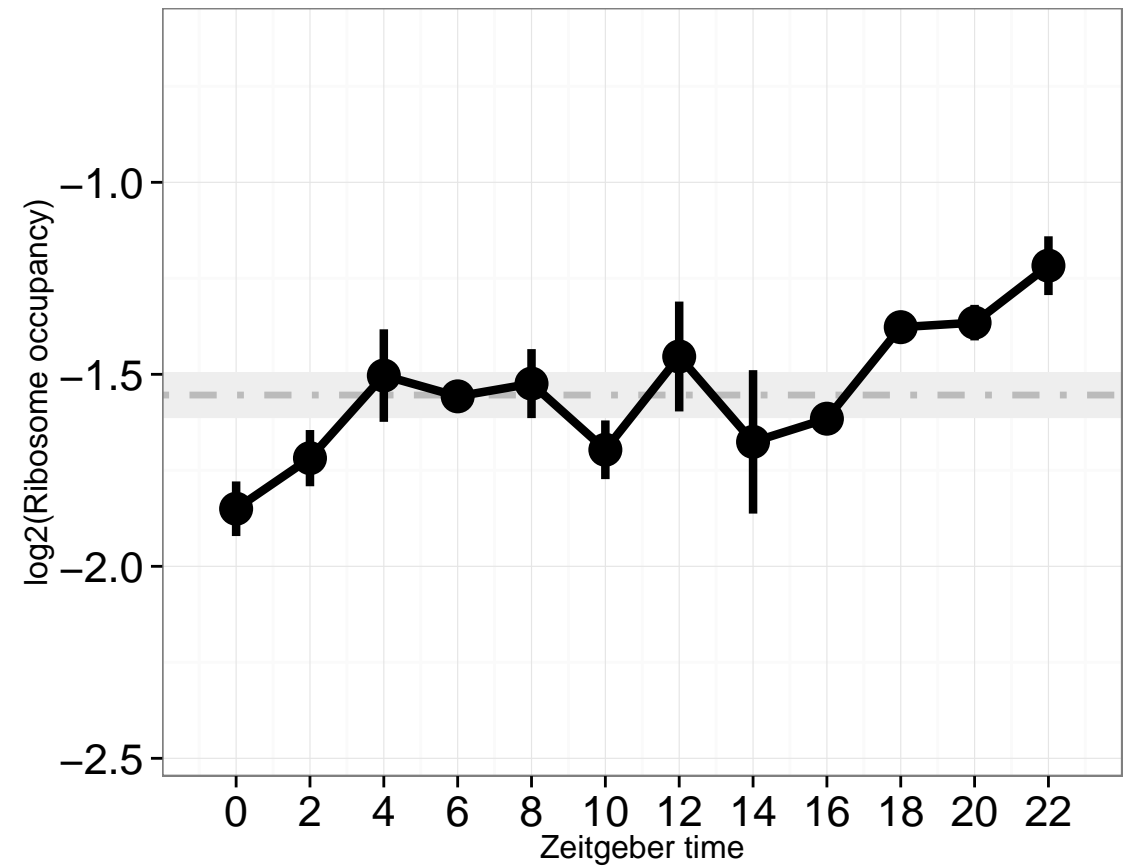

Supplement: SuppDataset_1.zip [file Prex2_set_A.pdf › Supplemental Dataset 1/A-mRNA_nonrhyth_translation_nonrhyth/Prex2_set_A.pdf]

## Prickle1

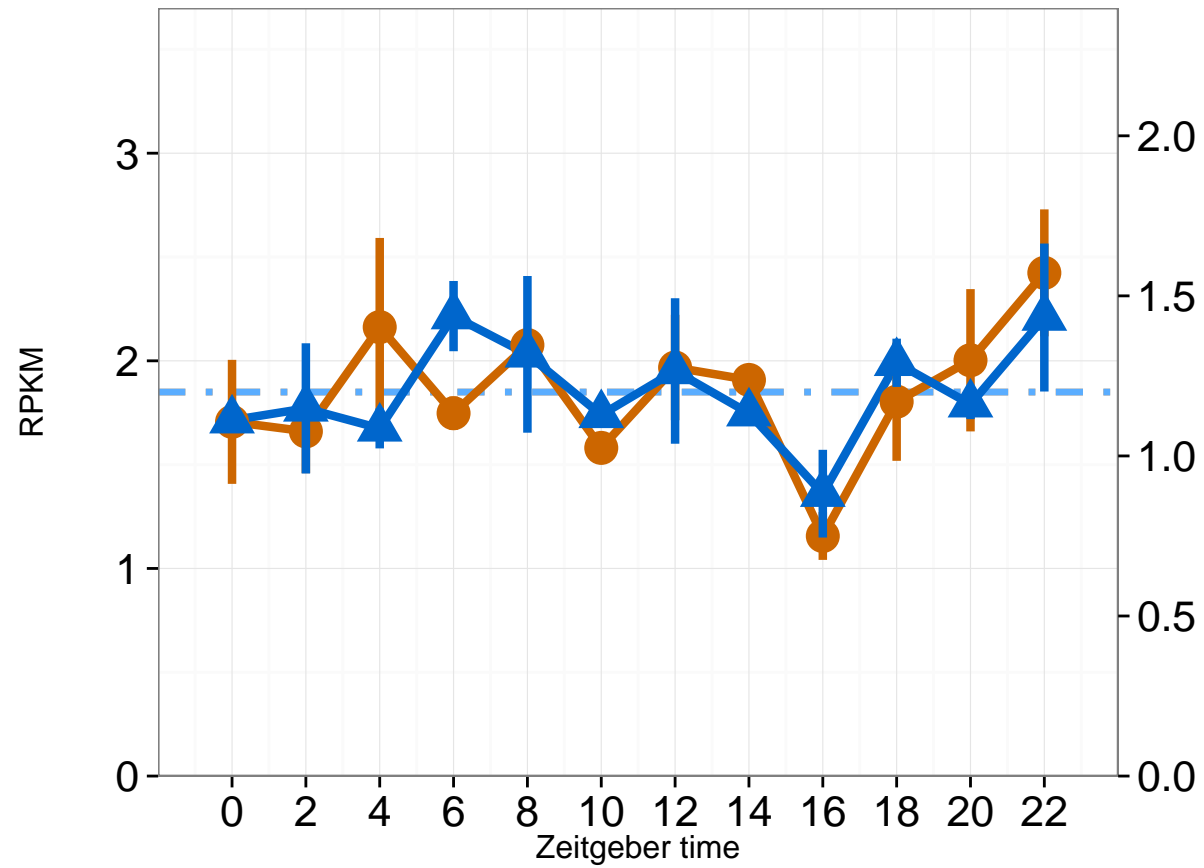

## Prickle1

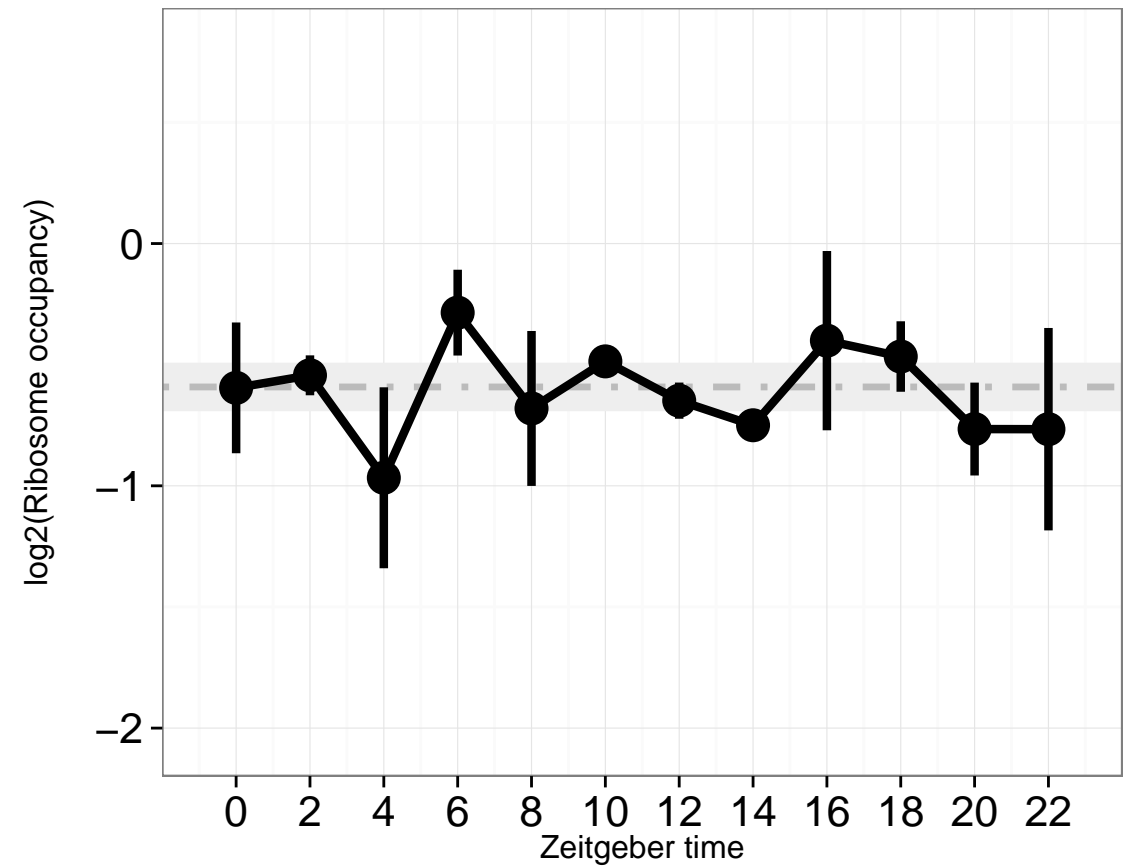

Supplement: SuppDataset_1.zip [file Prickle1_set_A.pdf › Supplemental Dataset 1/A-mRNA_nonrhyth_translation_nonrhyth/Prickle1_set_A.pdf]

## Prickle2

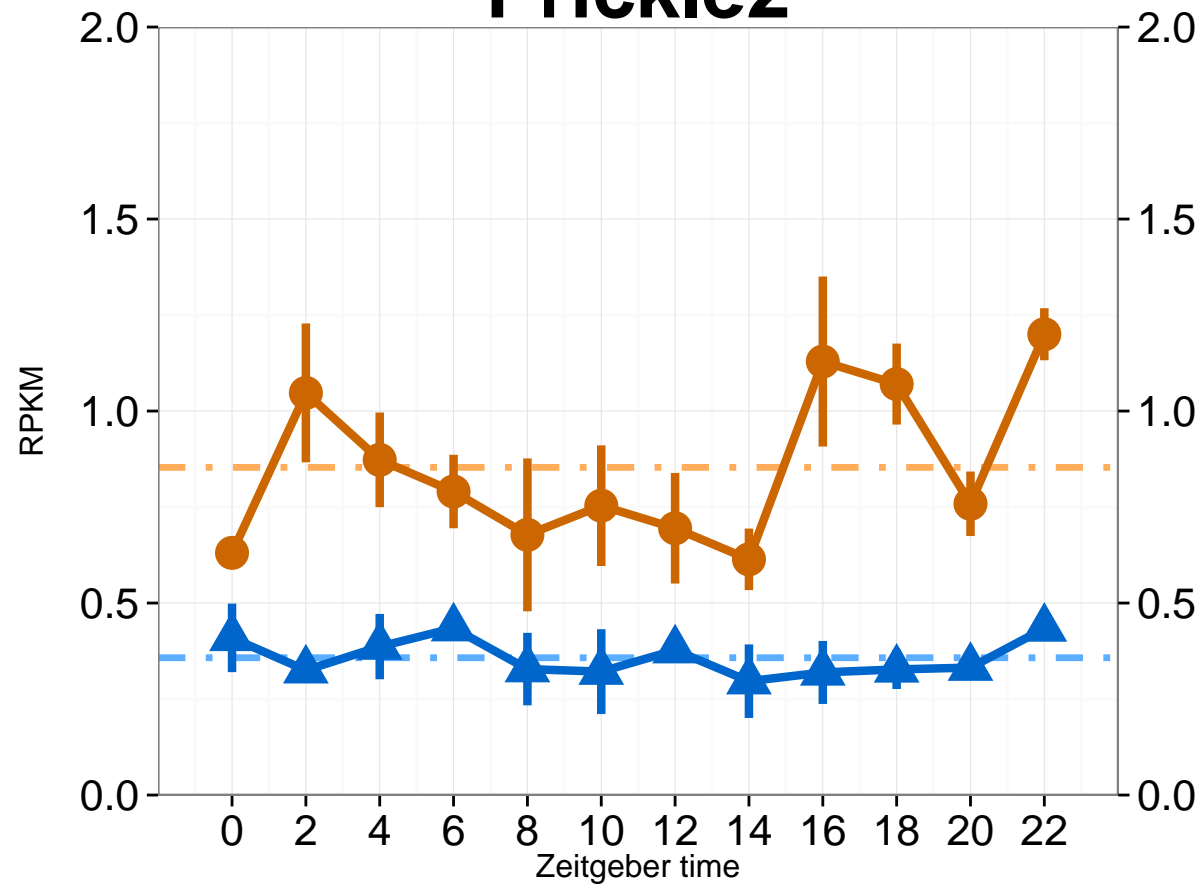

## Prickle2

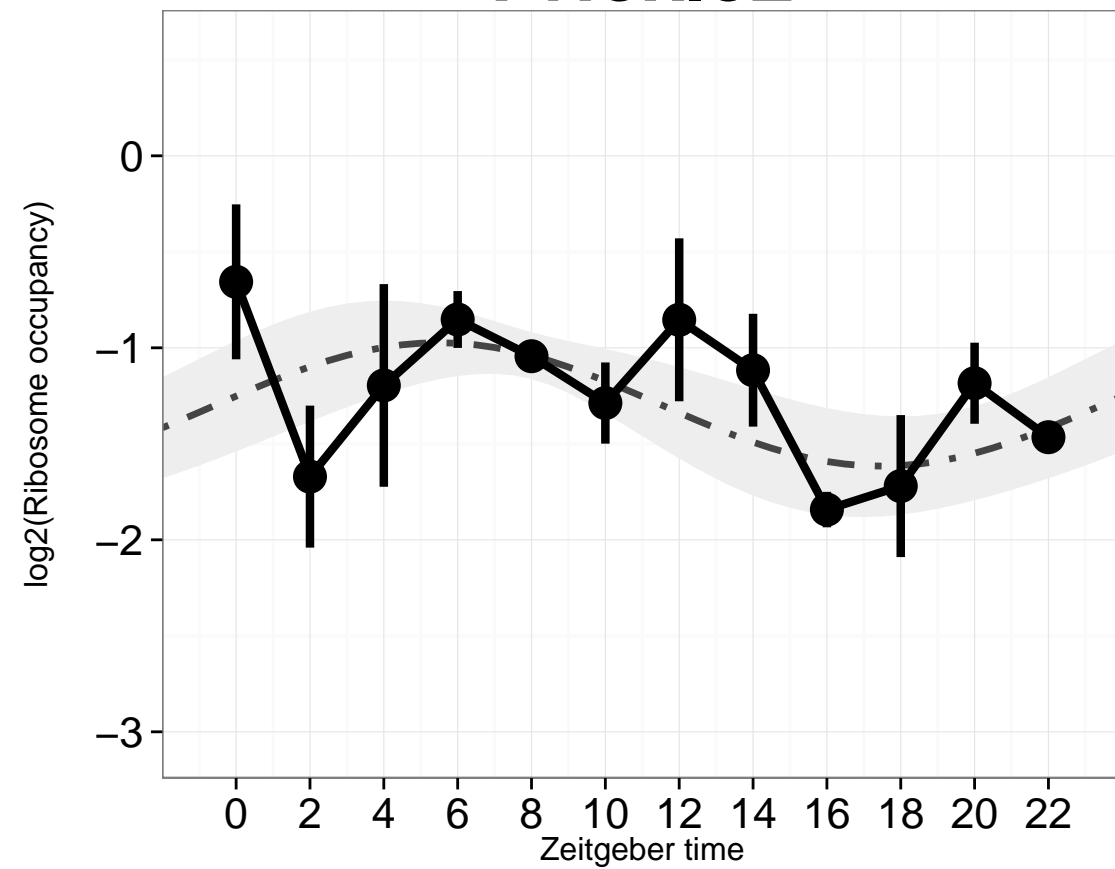

Supplement: SuppDataset_1.zip [file Prickle2_set_A.pdf › Supplemental Dataset 1/A-mRNA_nonrhyth_translation_nonrhyth/Prickle2_set_A.pdf]

## Prickle3

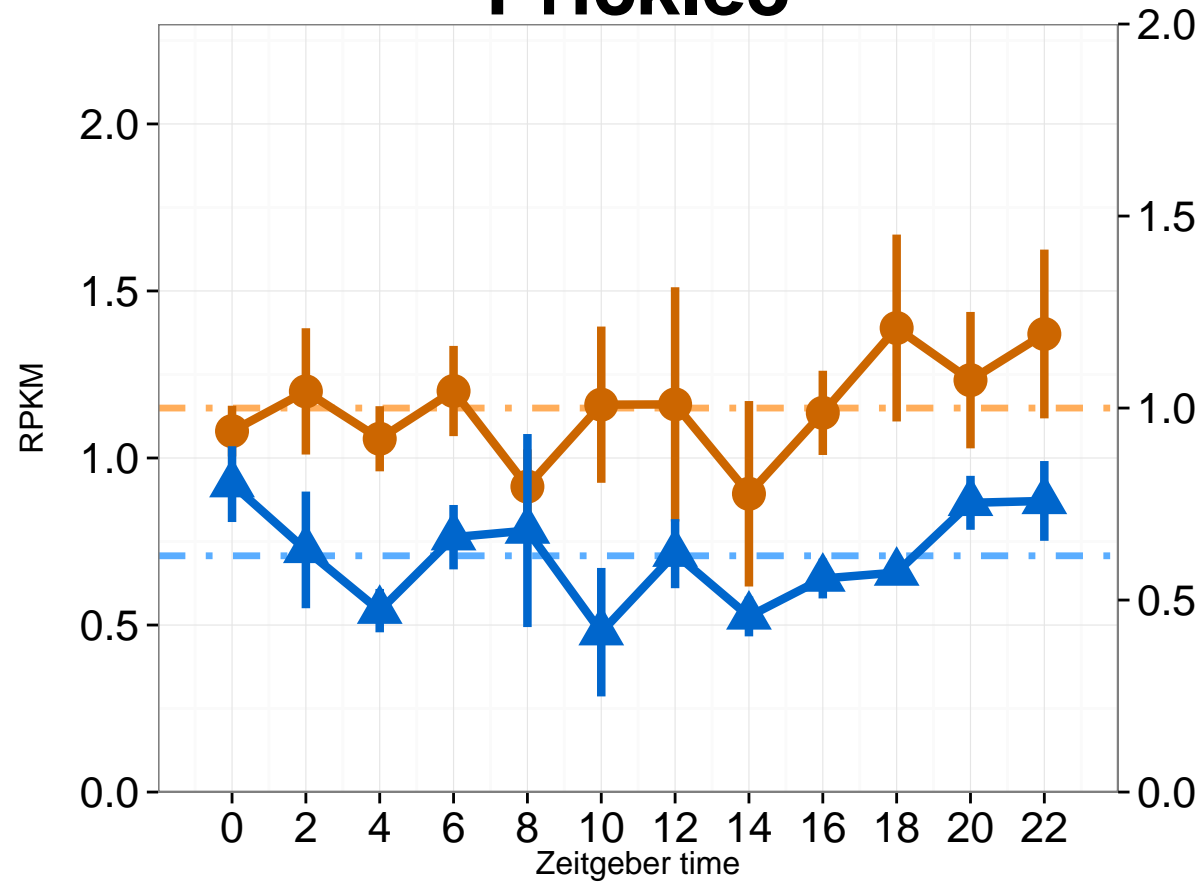

## Prickle3

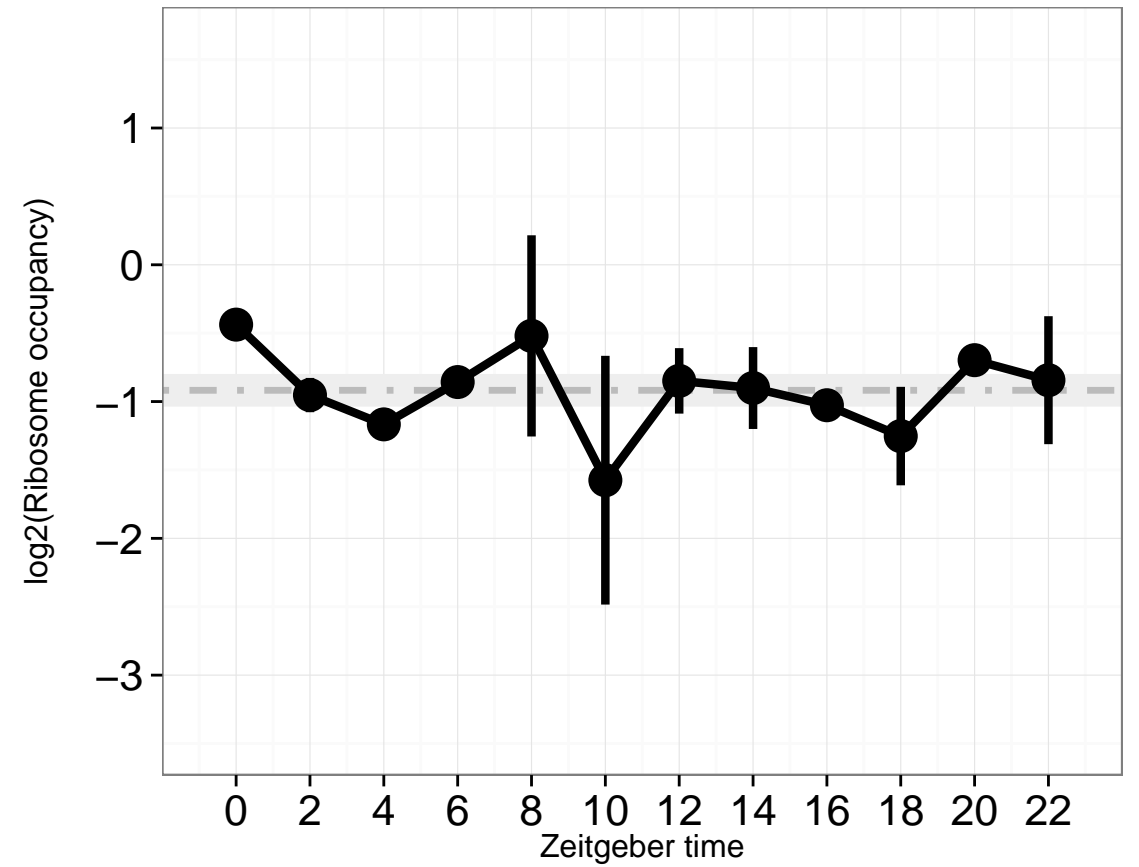

Supplement: SuppDataset_1.zip [file Prickle3_set_A.pdf › Supplemental Dataset 1/A-mRNA_nonrhyth_translation_nonrhyth/Prickle3_set_A.pdf]

## Prim2

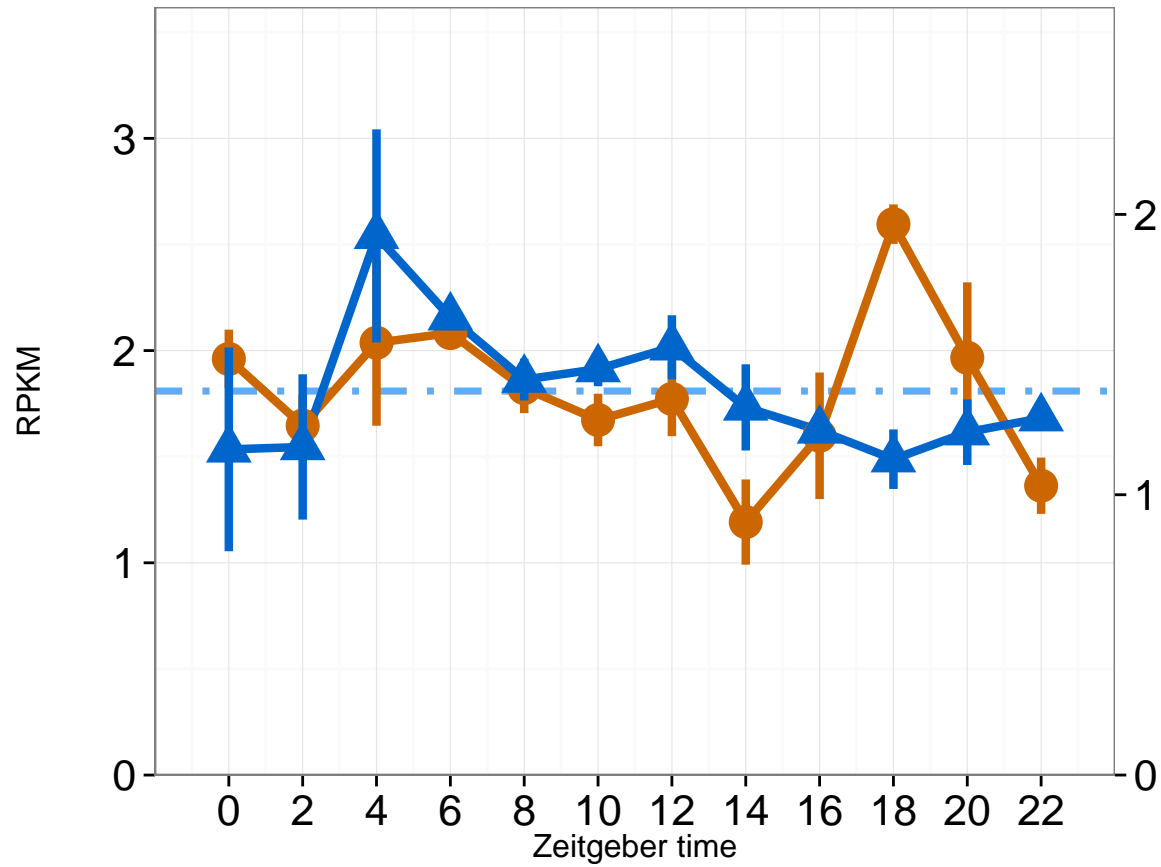

## Prim2

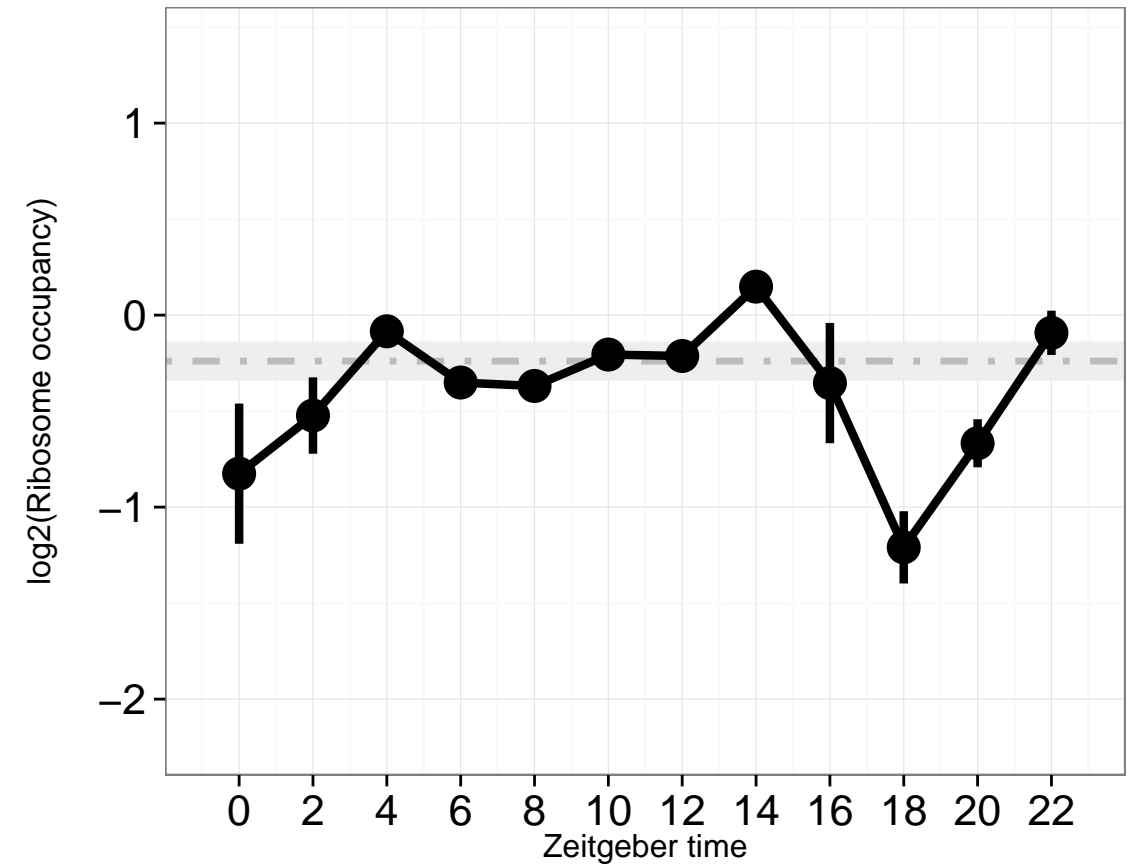

Supplement: SuppDataset_1.zip [file Prim2_set_A.pdf › Supplemental Dataset 1/A-mRNA_nonrhyth_translation_nonrhyth/Prim2_set_A.pdf]

# Prkaa1

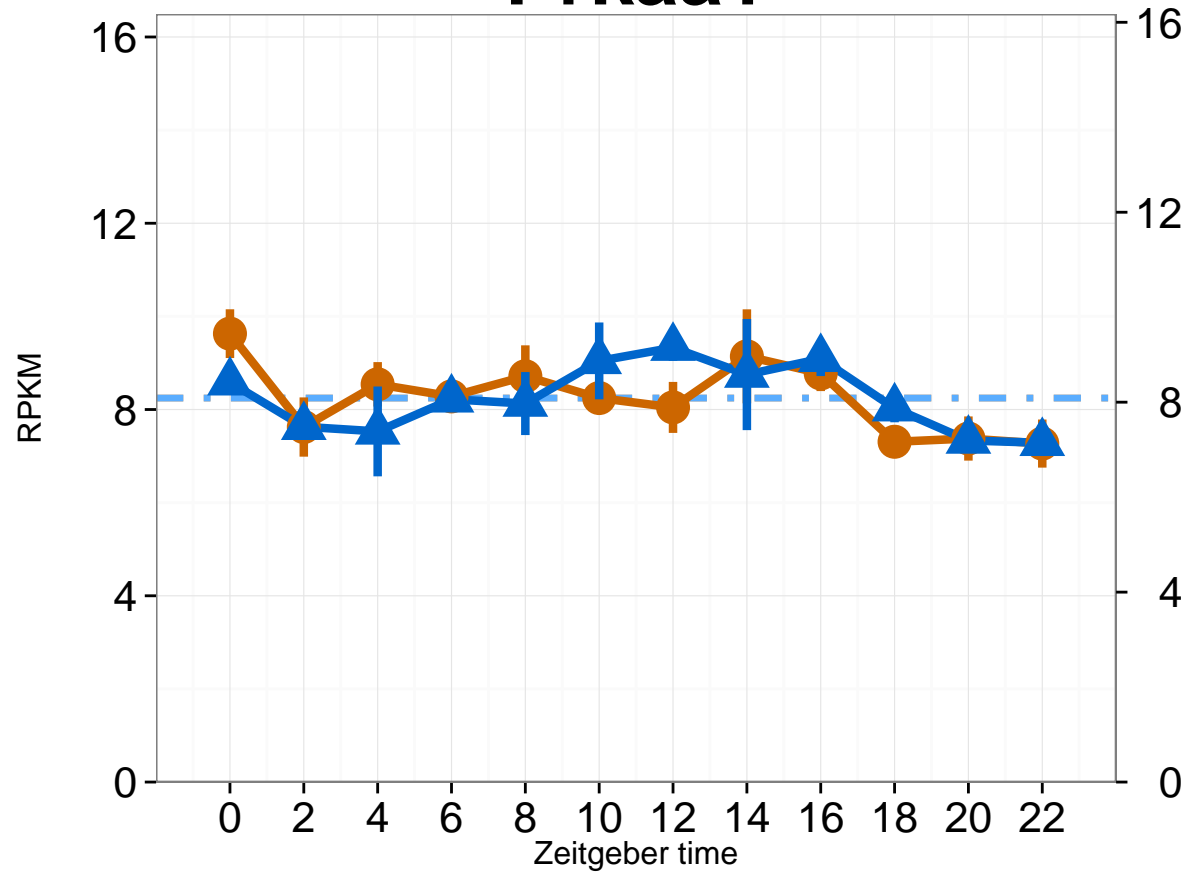

# Prkaa1

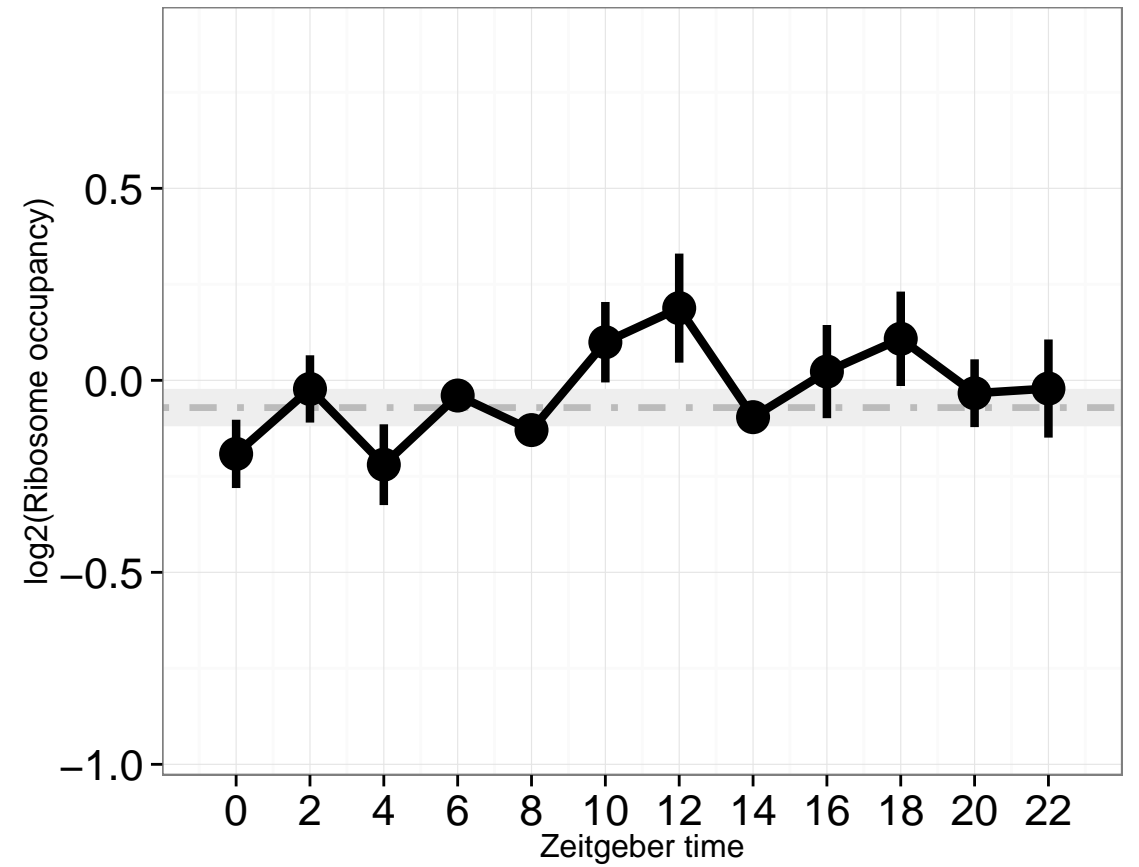

Supplement: SuppDataset_1.zip [file Prkaa1_set_A.pdf › Supplemental Dataset 1/A-mRNA_nonrhyth_translation_nonrhyth/Prkaa1_set_A.pdf]

## Prkaa2

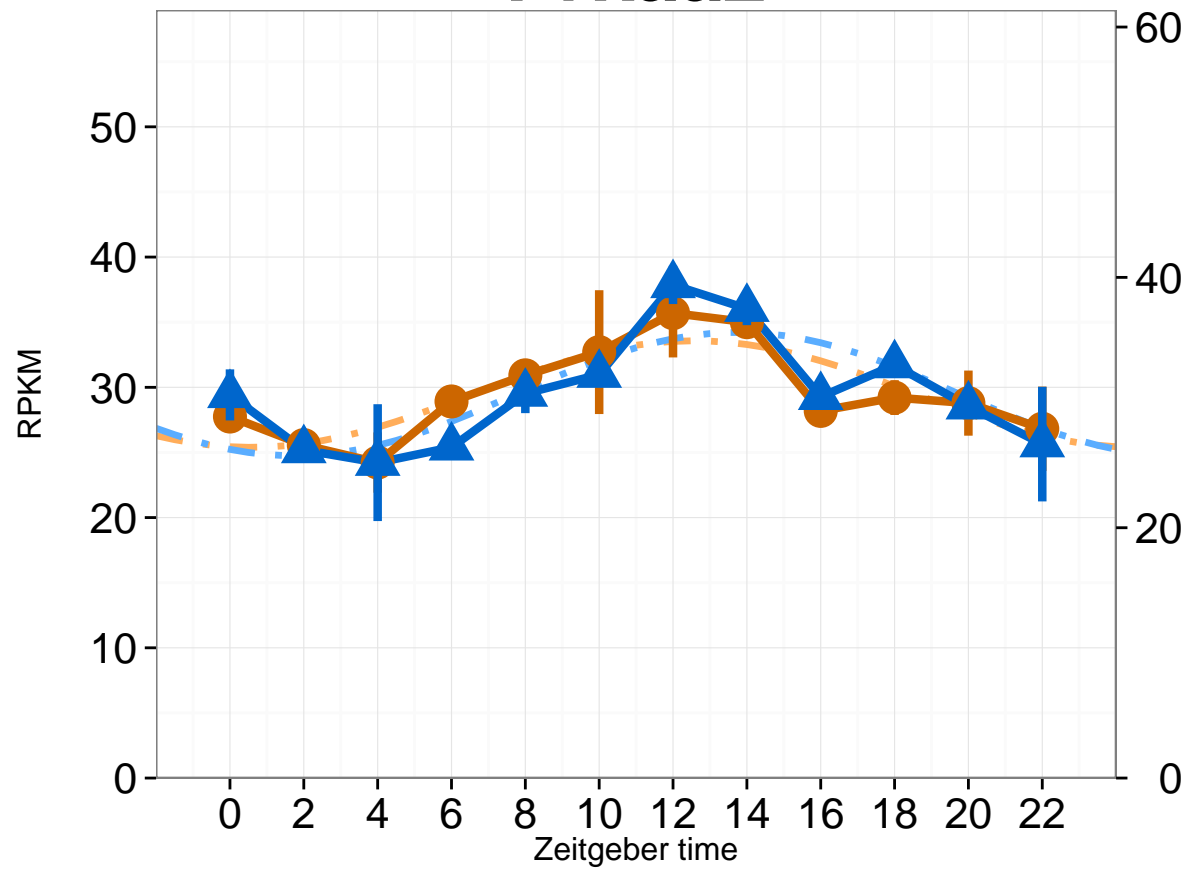

## Prkaa2

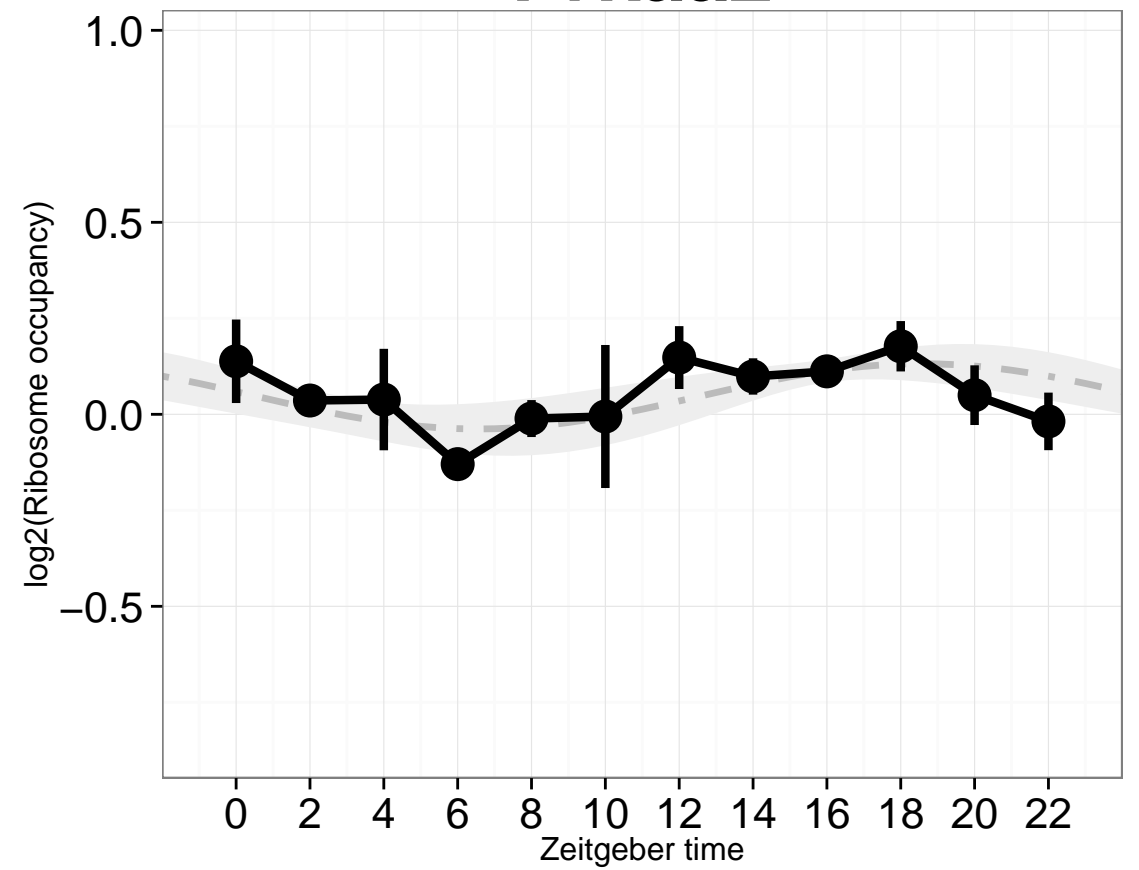

Supplement: SuppDataset_1.zip [file Prkaa2_set_A.pdf › Supplemental Dataset 1/A-mRNA_nonrhyth_translation_nonrhyth/Prkaa2_set_A.pdf]

# Prkab1

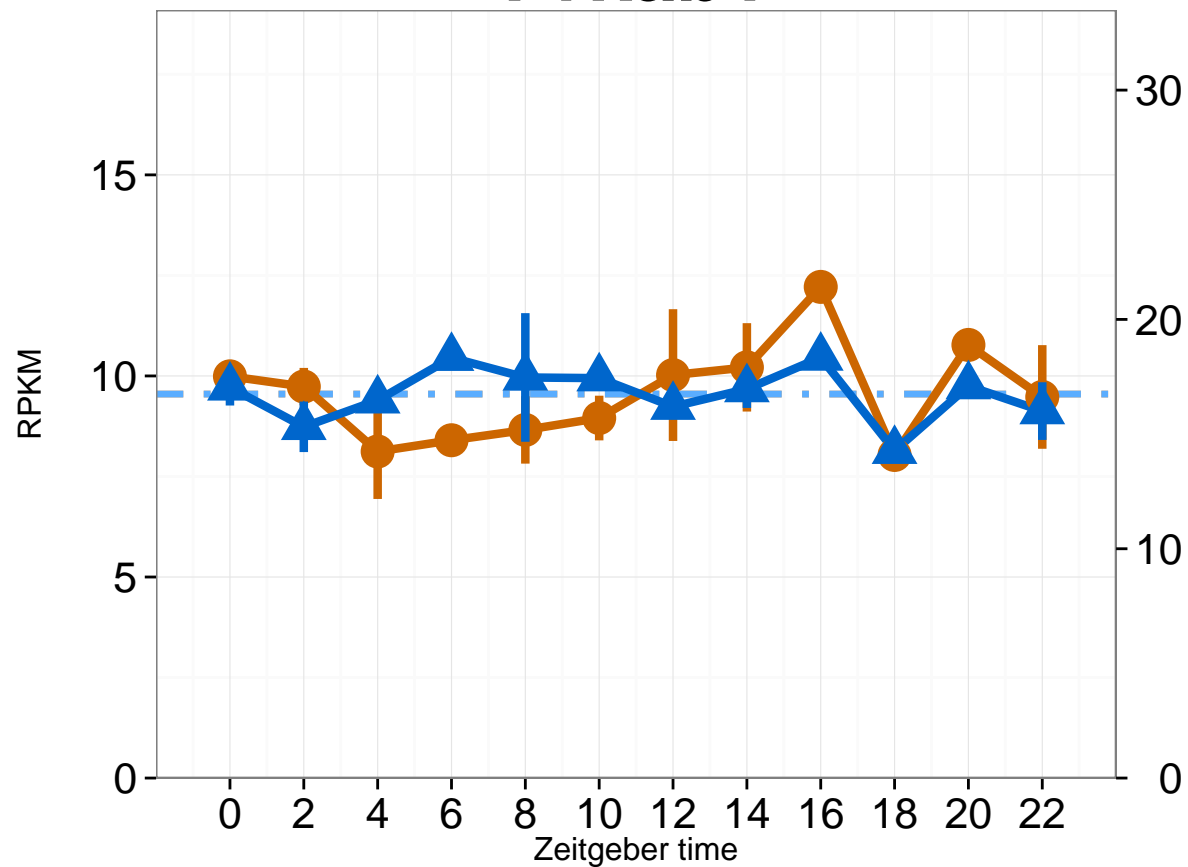

# Prkab1

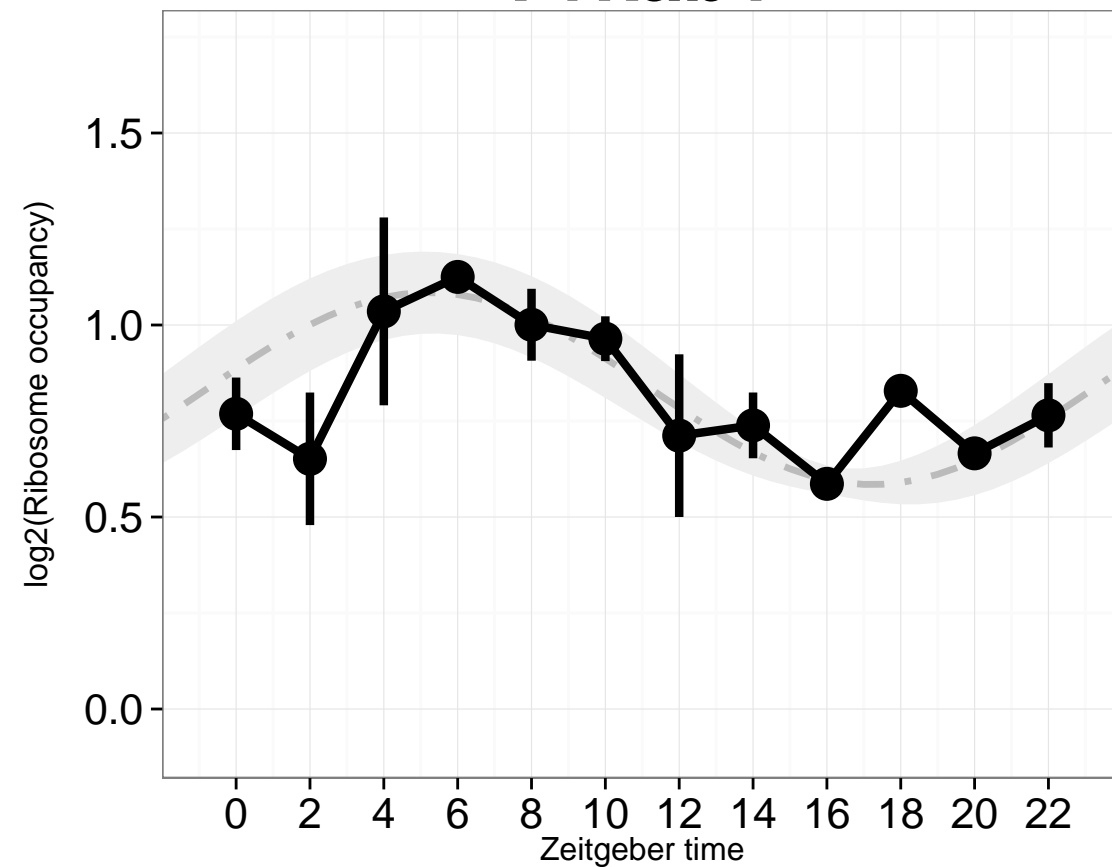

Supplement: SuppDataset_1.zip [file Prkab1_set_A.pdf › Supplemental Dataset 1/A-mRNA_nonrhyth_translation_nonrhyth/Prkab1_set_A.pdf]

## Prkaca

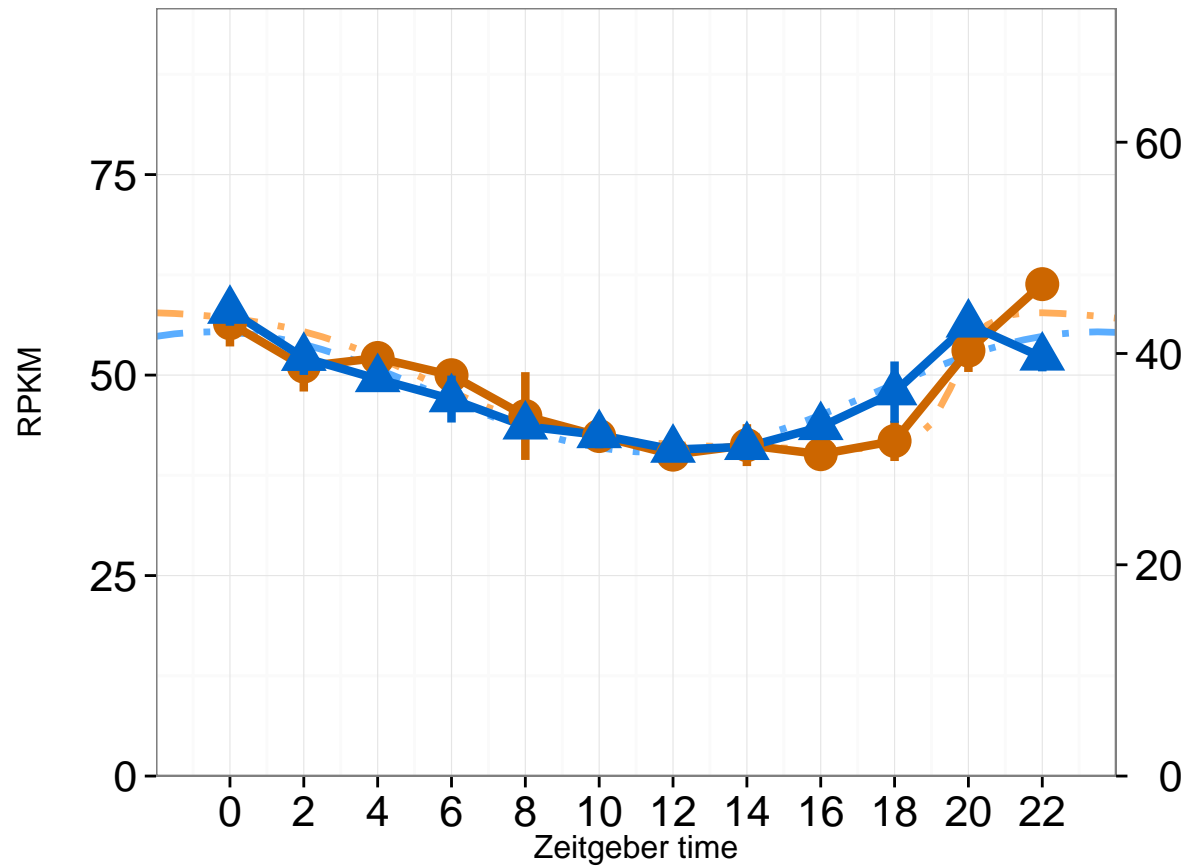

## Prkaca

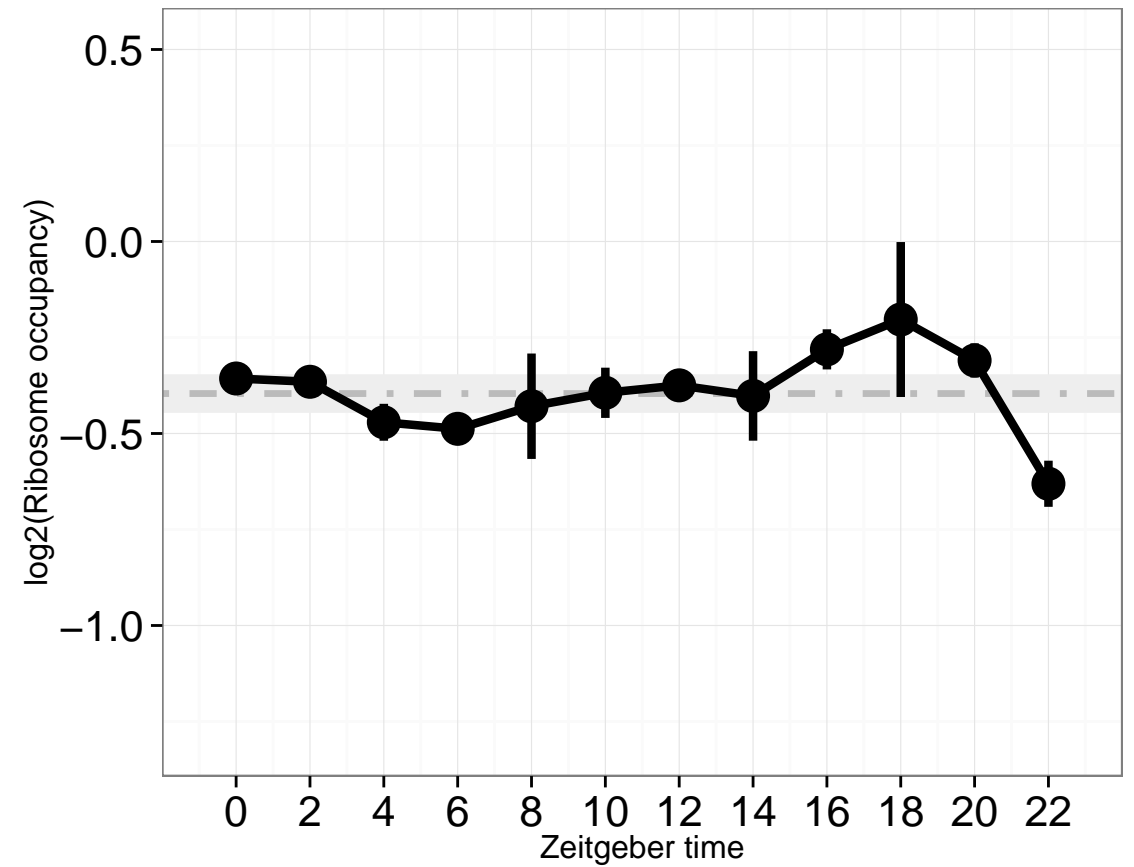

Supplement: SuppDataset_1.zip [file Prkaca_set_A.pdf › Supplemental Dataset 1/A-mRNA_nonrhyth_translation_nonrhyth/Prkaca_set_A.pdf]

## Prkacb

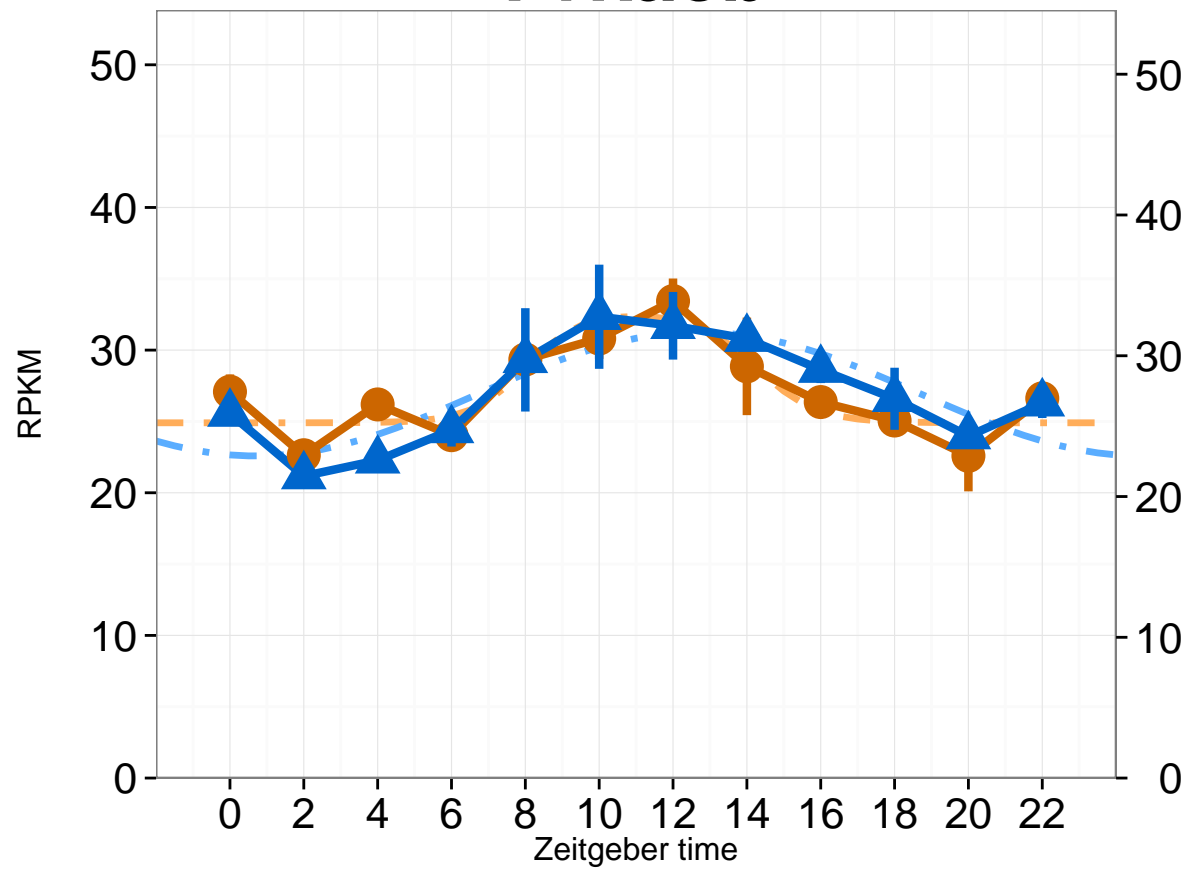

## Prkacb

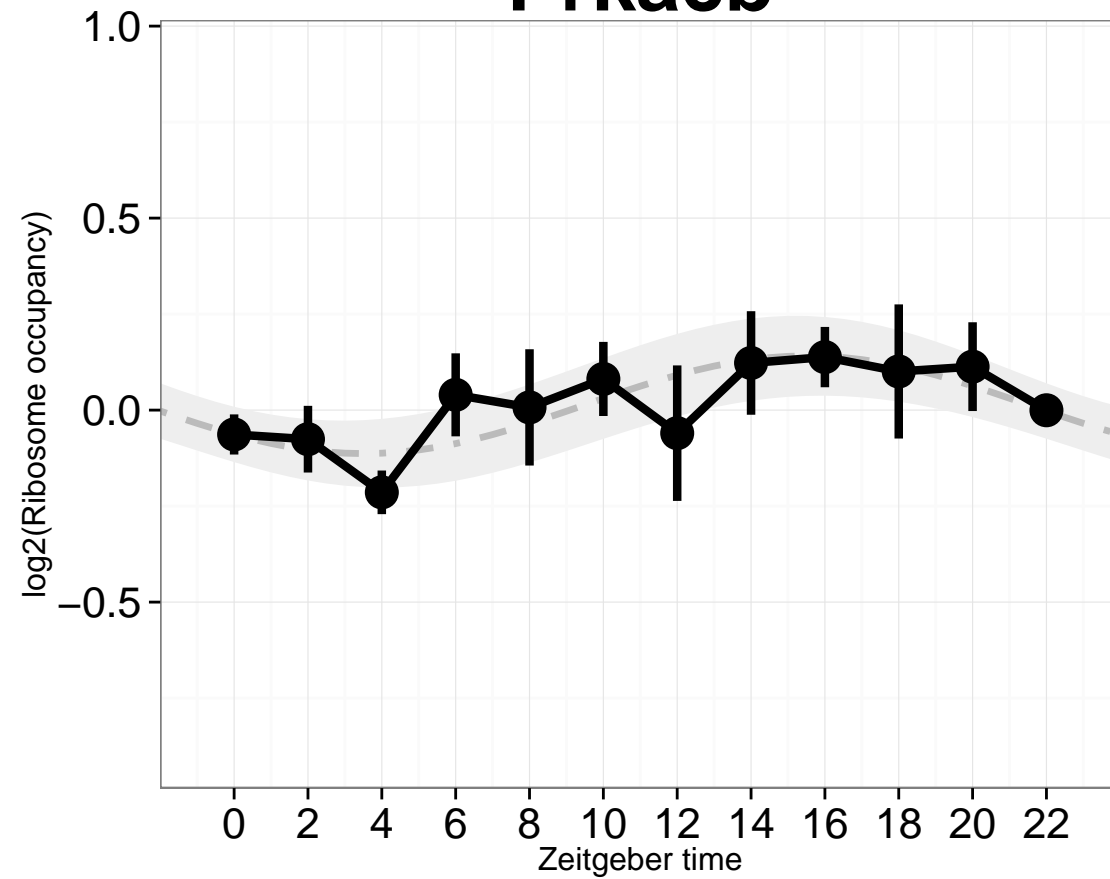

Supplement: SuppDataset_1.zip [file Prkacb_set_A.pdf › Supplemental Dataset 1/A-mRNA_nonrhyth_translation_nonrhyth/Prkacb_set_A.pdf]

# Prkag1

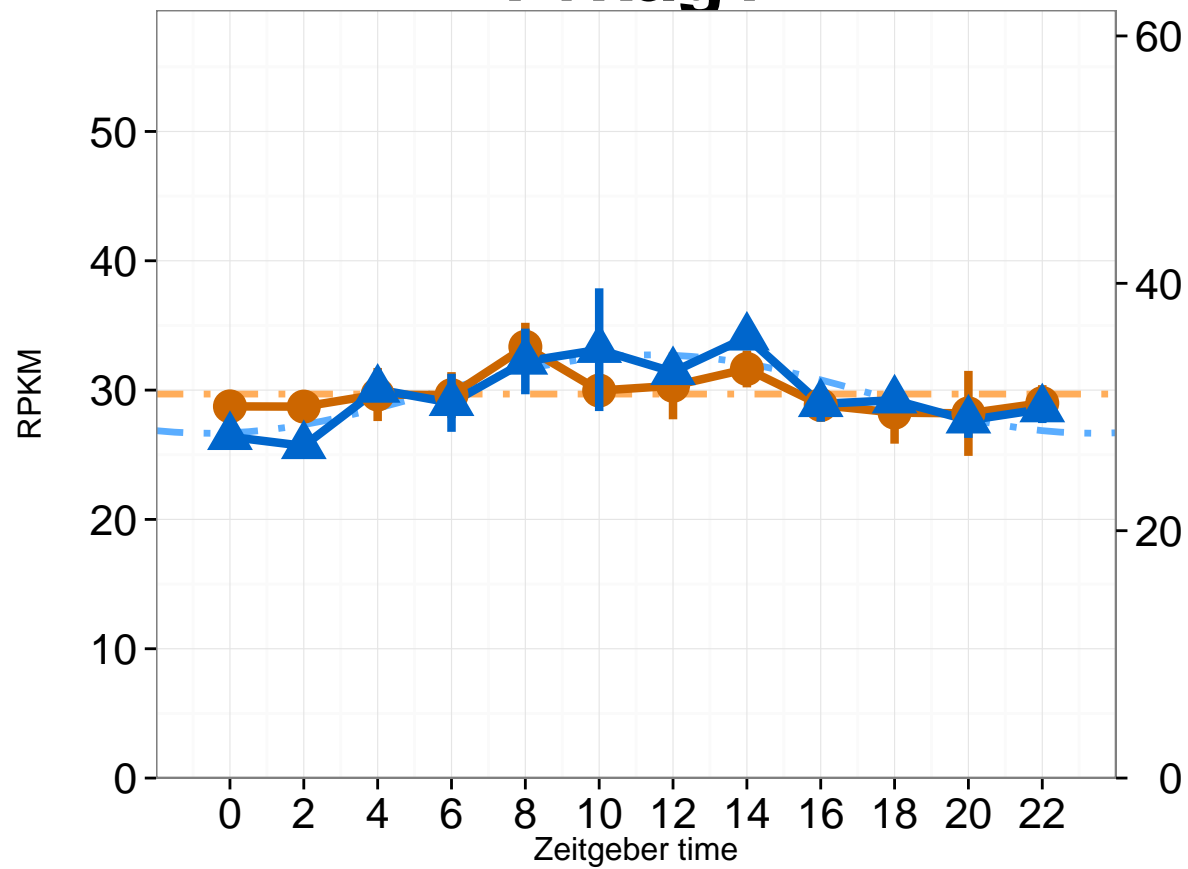

# Prkag1

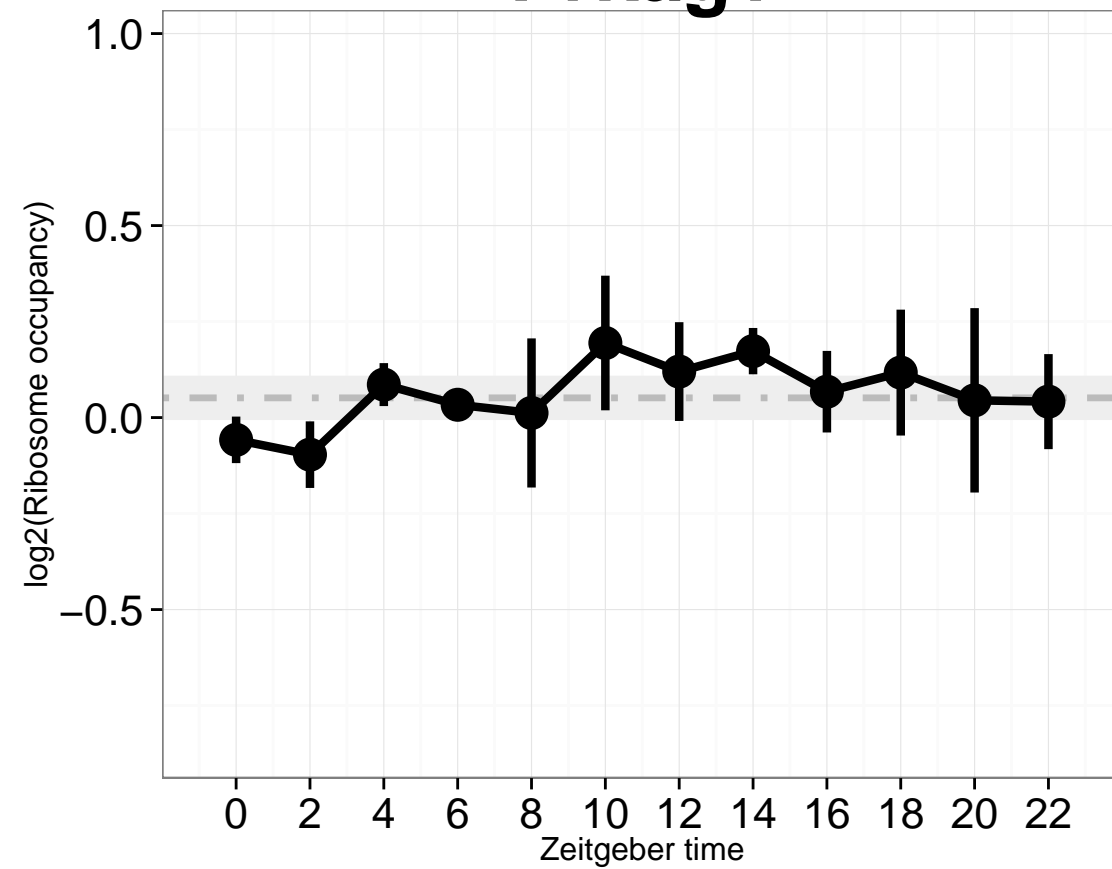

Supplement: SuppDataset_1.zip [file Prkag1_set_A.pdf › Supplemental Dataset 1/A-mRNA_nonrhyth_translation_nonrhyth/Prkag1_set_A.pdf]

# Prkag2

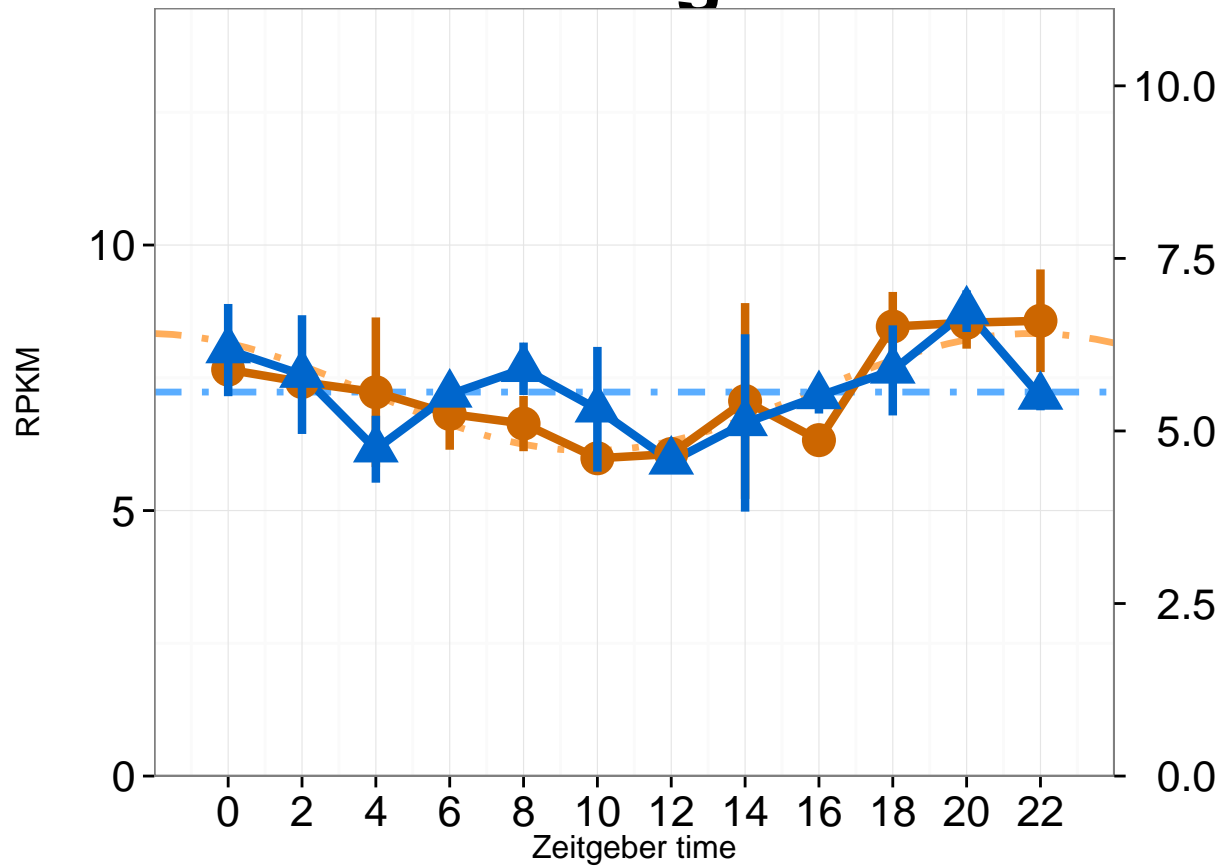

# Prkag2

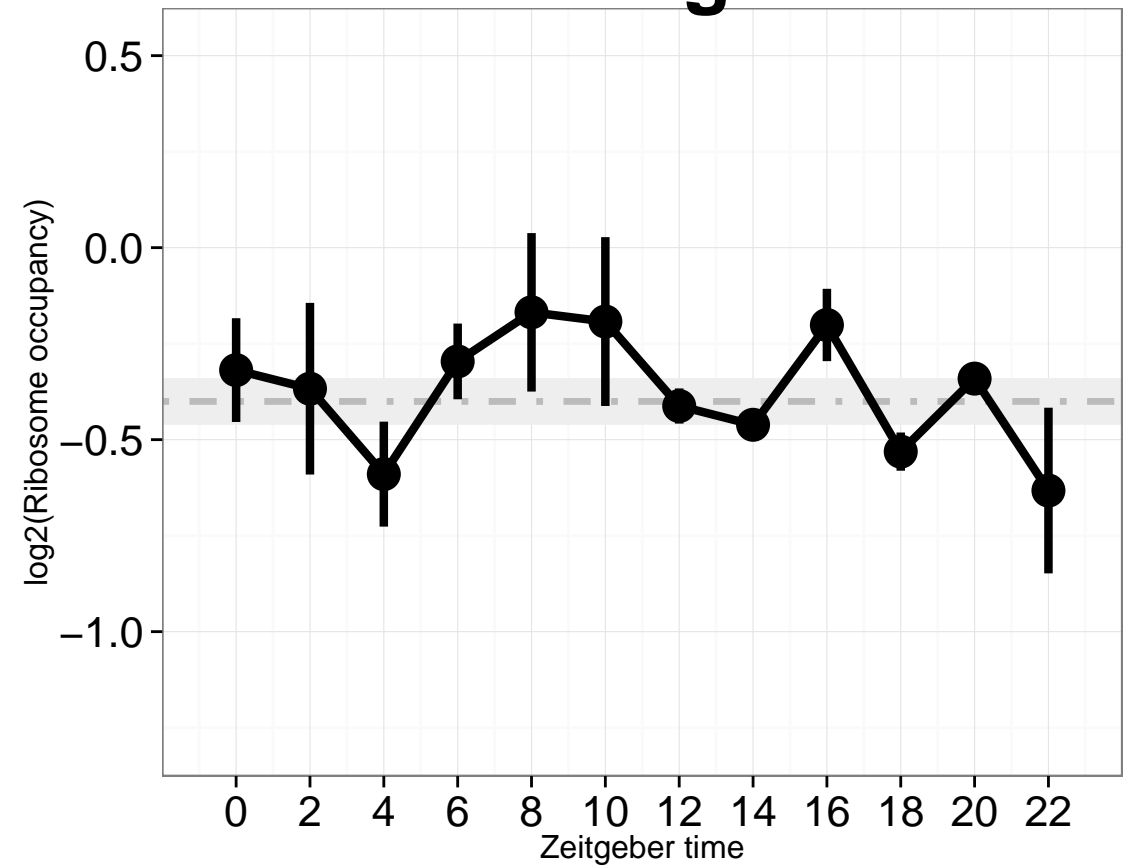

Supplement: SuppDataset_1.zip [file Prkag2_set_A.pdf › Supplemental Dataset 1/A-mRNA_nonrhyth_translation_nonrhyth/Prkag2_set_A.pdf]

# Prkar1a

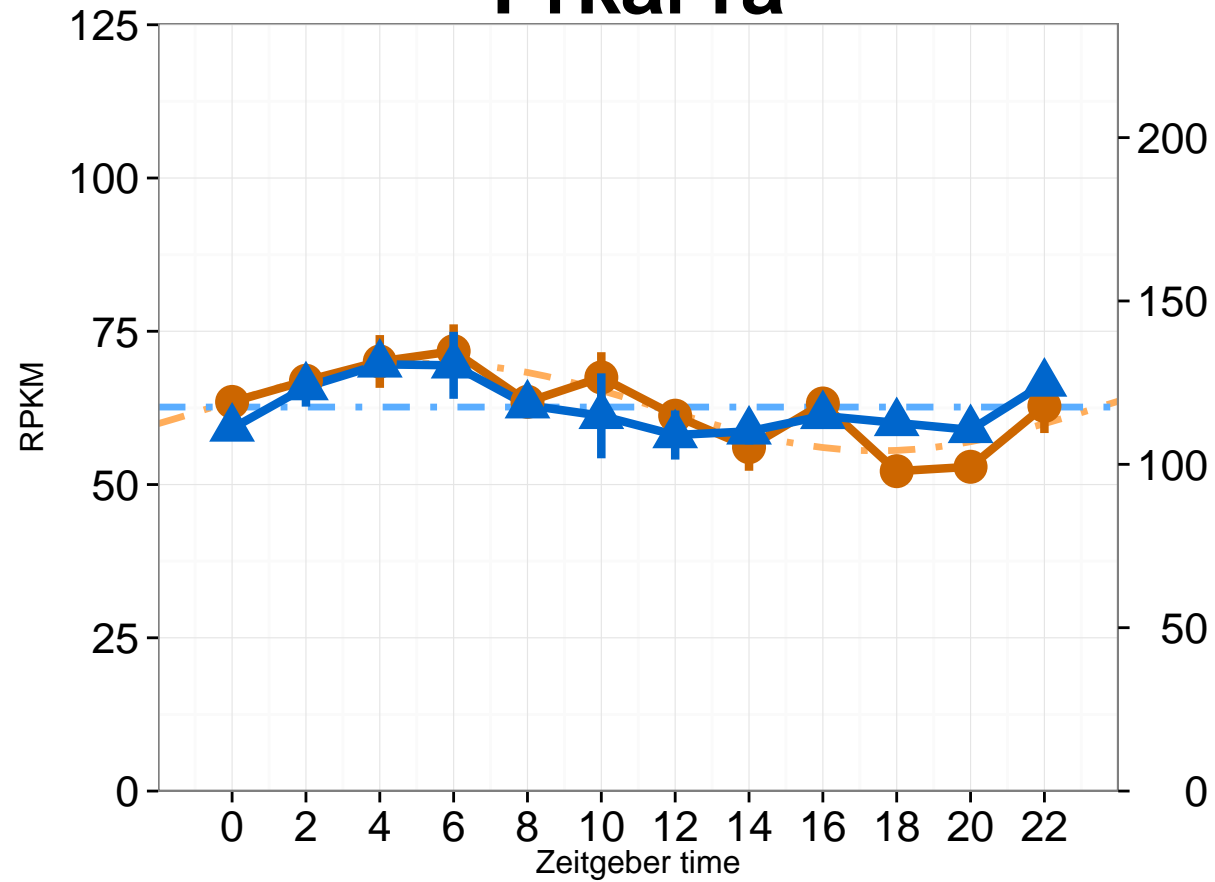

# Prkar1a

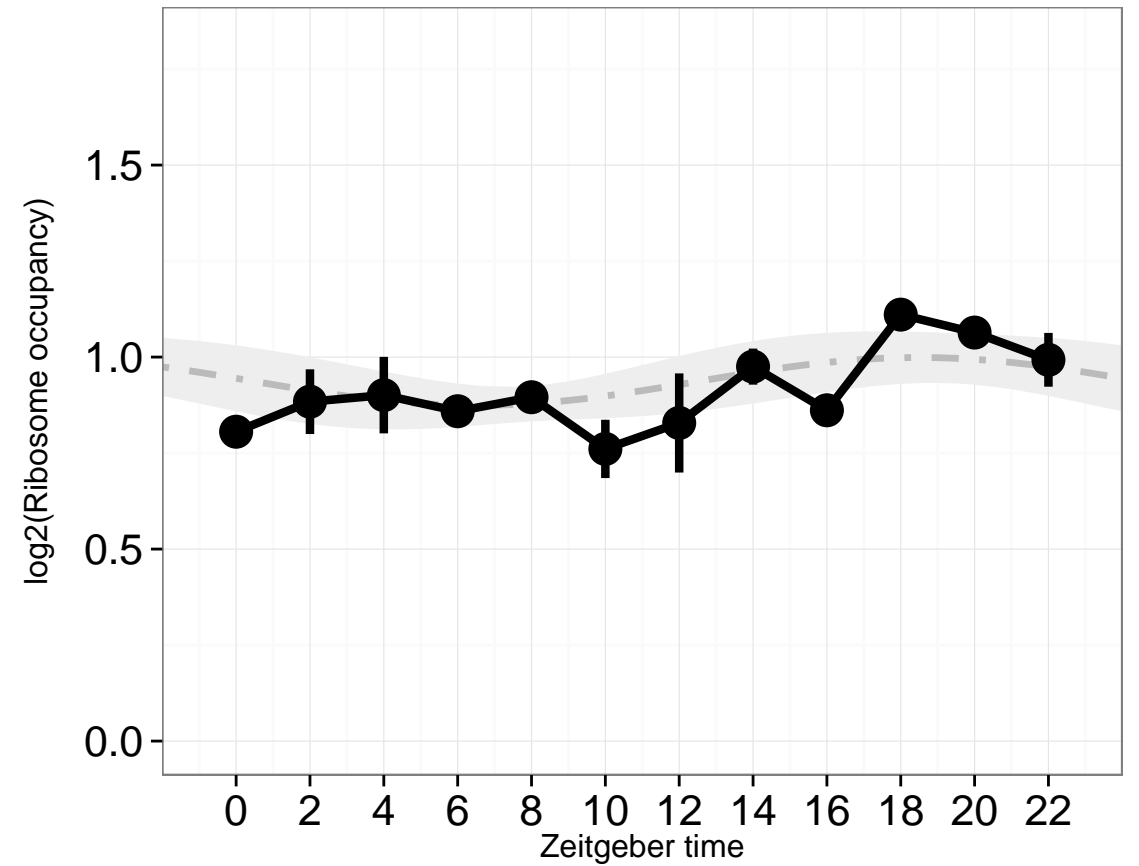

Supplement: SuppDataset_1.zip [file Prkar1a_set_A.pdf › Supplemental Dataset 1/A-mRNA_nonrhyth_translation_nonrhyth/Prkar1a_set_A.pdf]

# Prkca

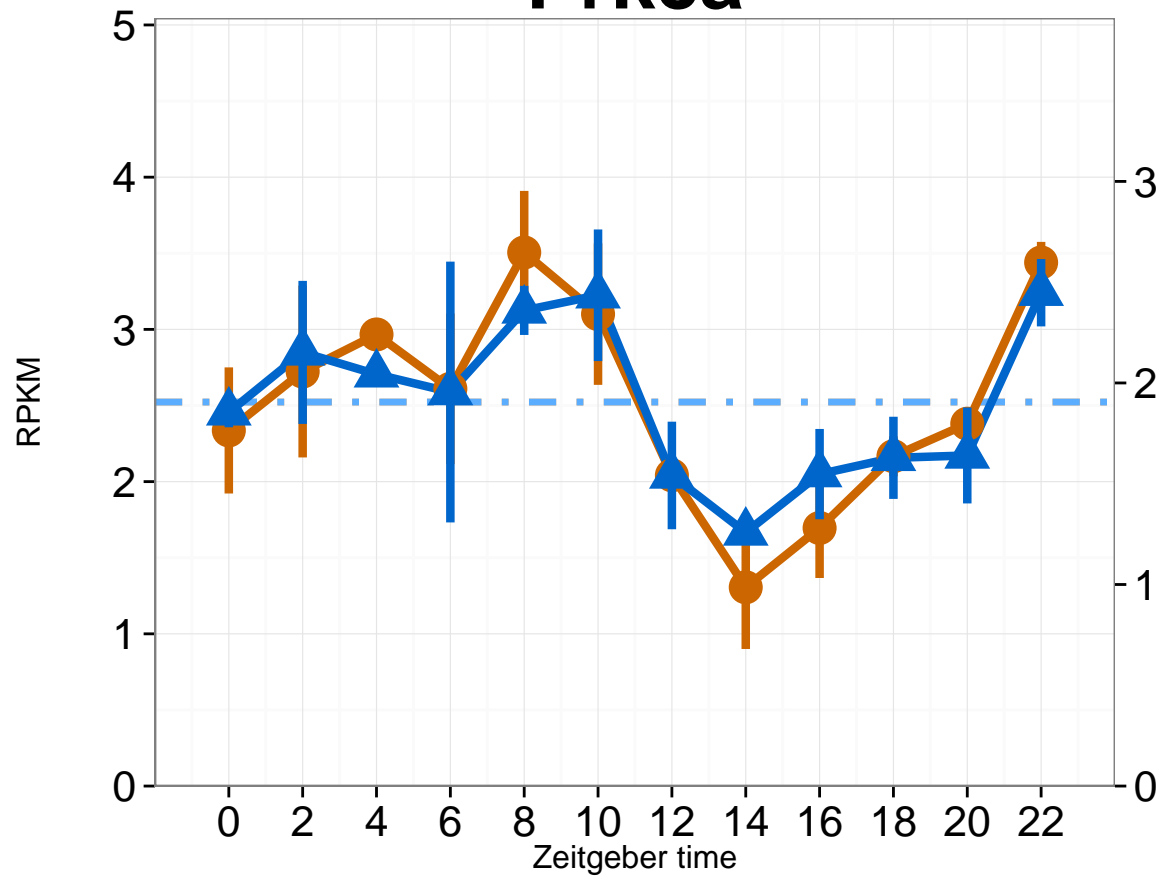

# Prkca

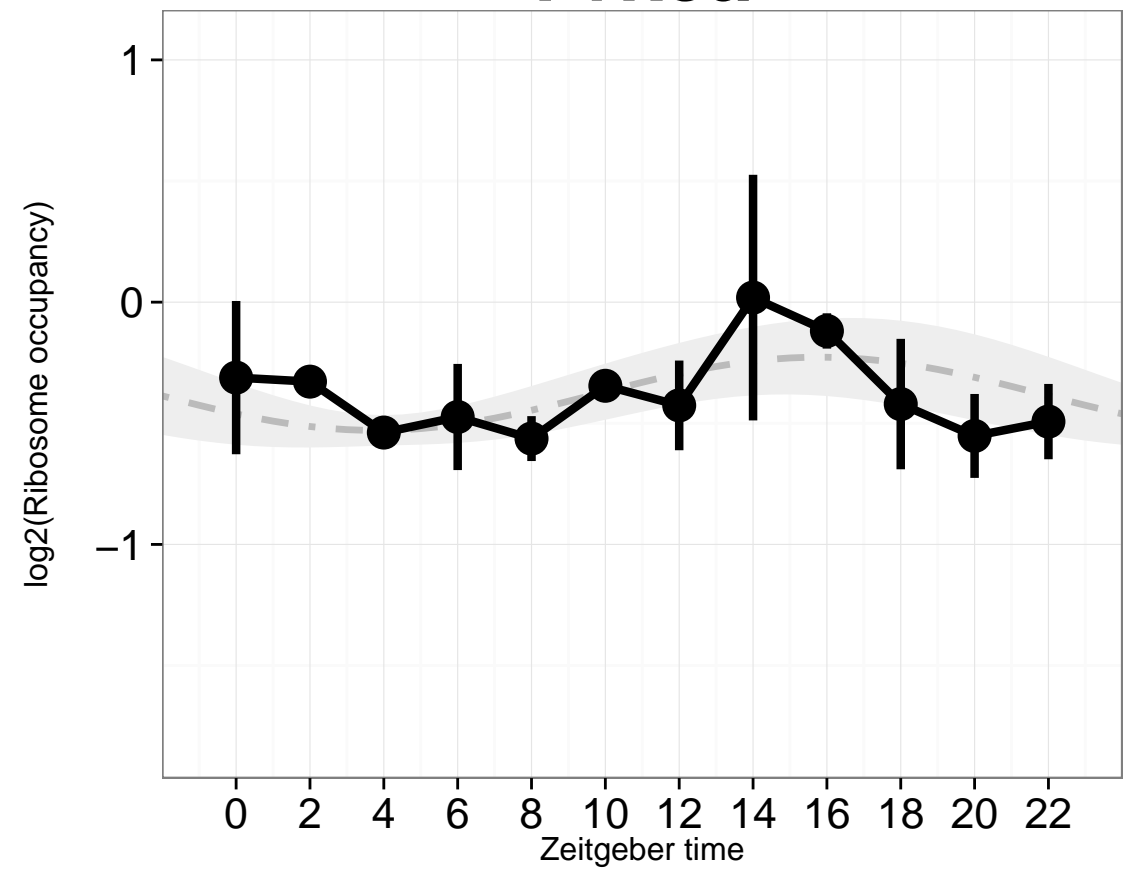

Supplement: SuppDataset_1.zip [file Prkca_set_A.pdf › Supplemental Dataset 1/A-mRNA_nonrhyth_translation_nonrhyth/Prkca_set_A.pdf]

## Prkcb

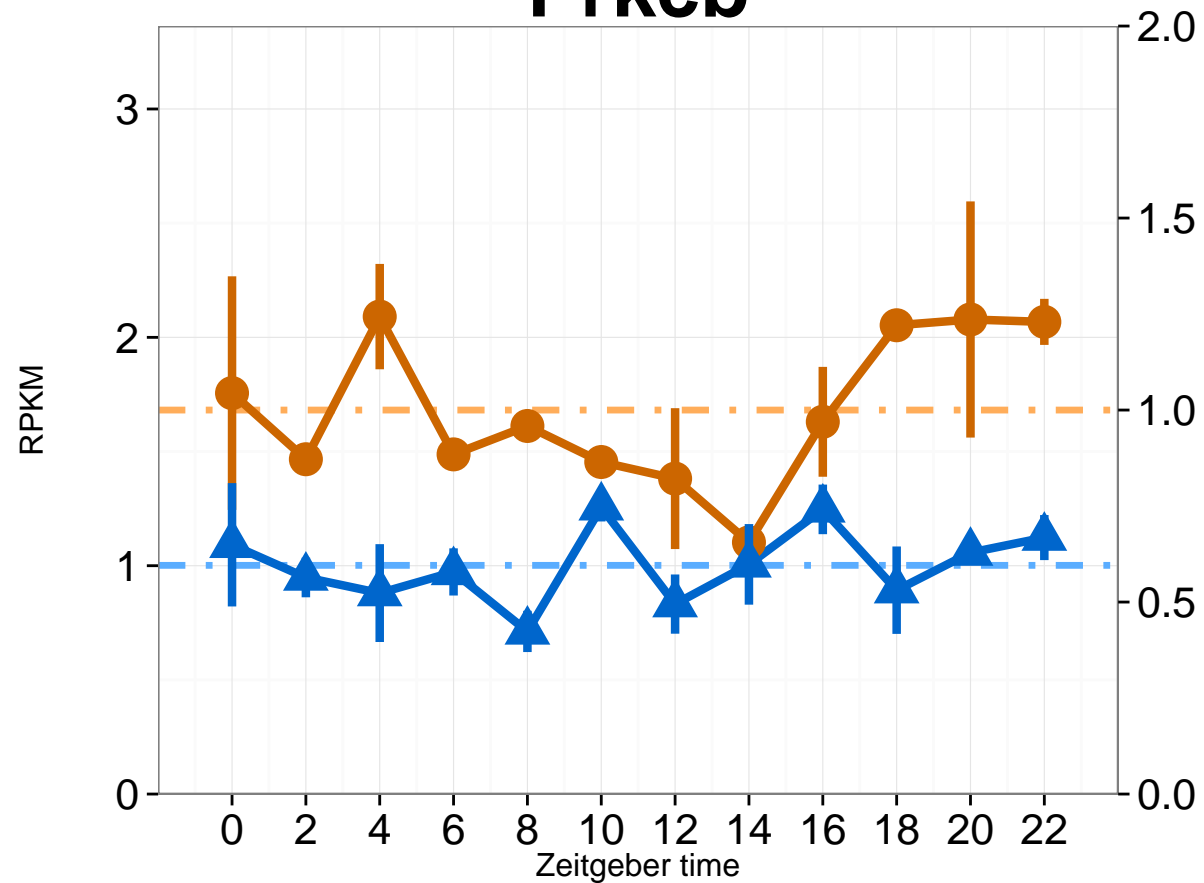

## Prkcb

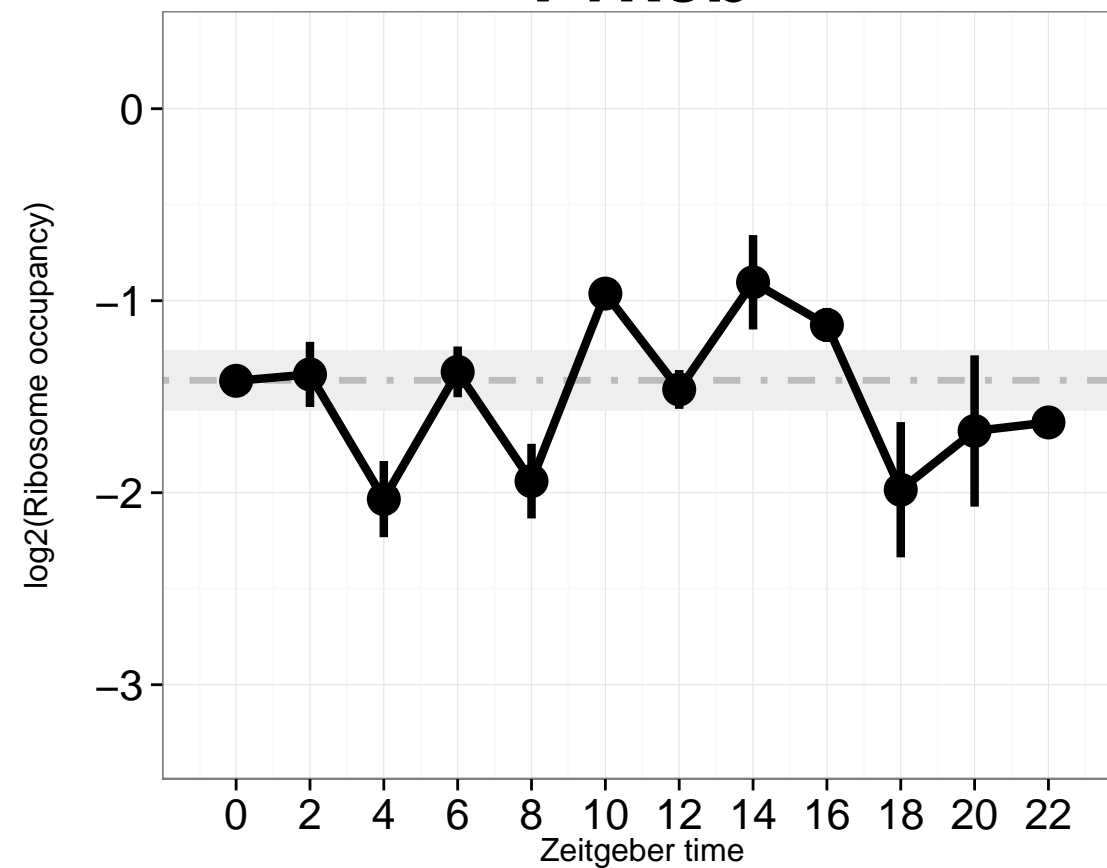

Supplement: SuppDataset_1.zip [file Prkcb_set_A.pdf › Supplemental Dataset 1/A-mRNA_nonrhyth_translation_nonrhyth/Prkcb_set_A.pdf]

## Prkcd

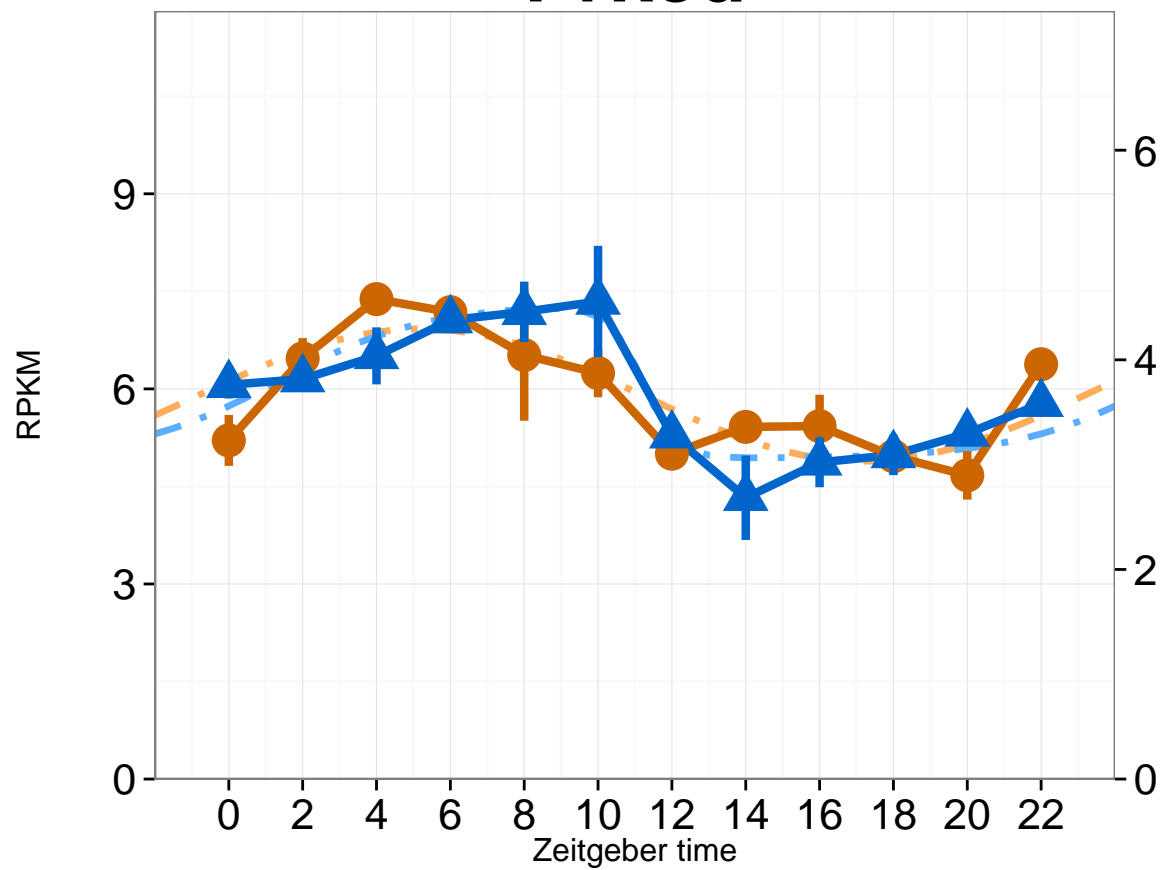

## Prkcd

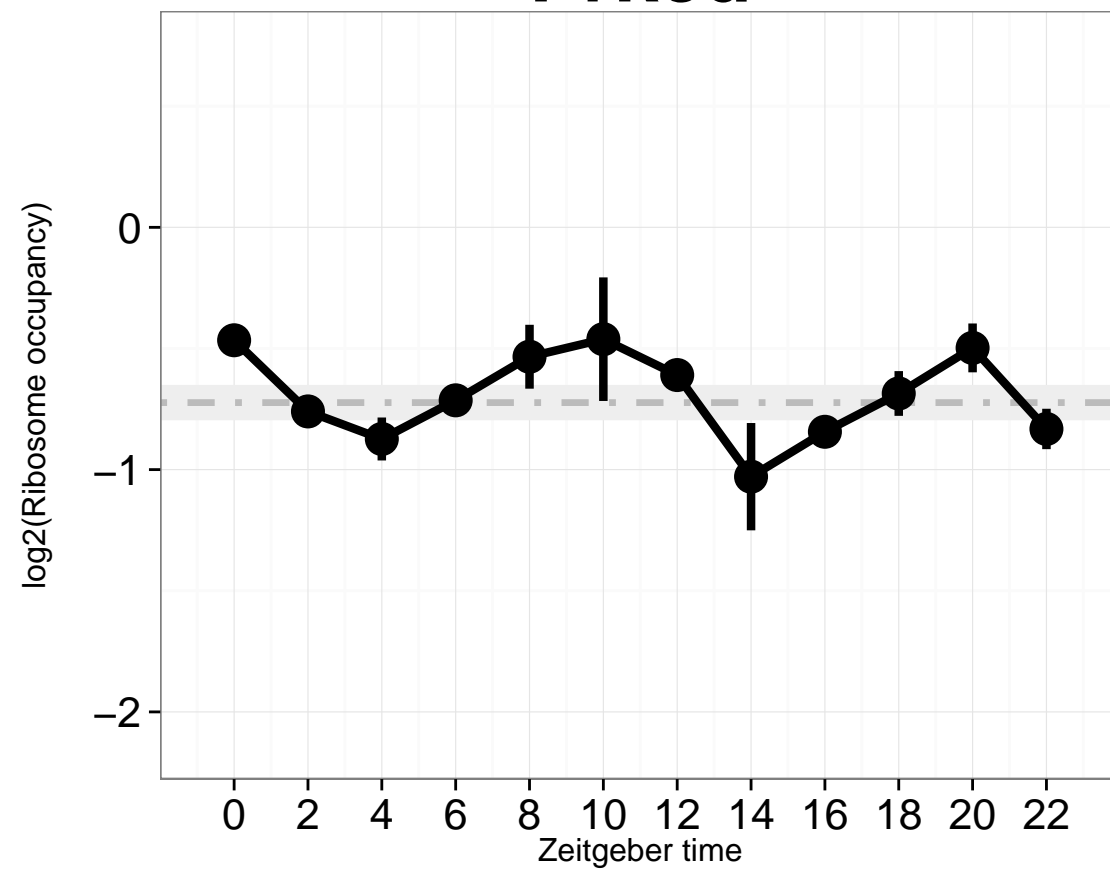

Supplement: SuppDataset_1.zip [file Prkcd_set_A.pdf › Supplemental Dataset 1/A-mRNA_nonrhyth_translation_nonrhyth/Prkcd_set_A.pdf]

# Prkcdbp

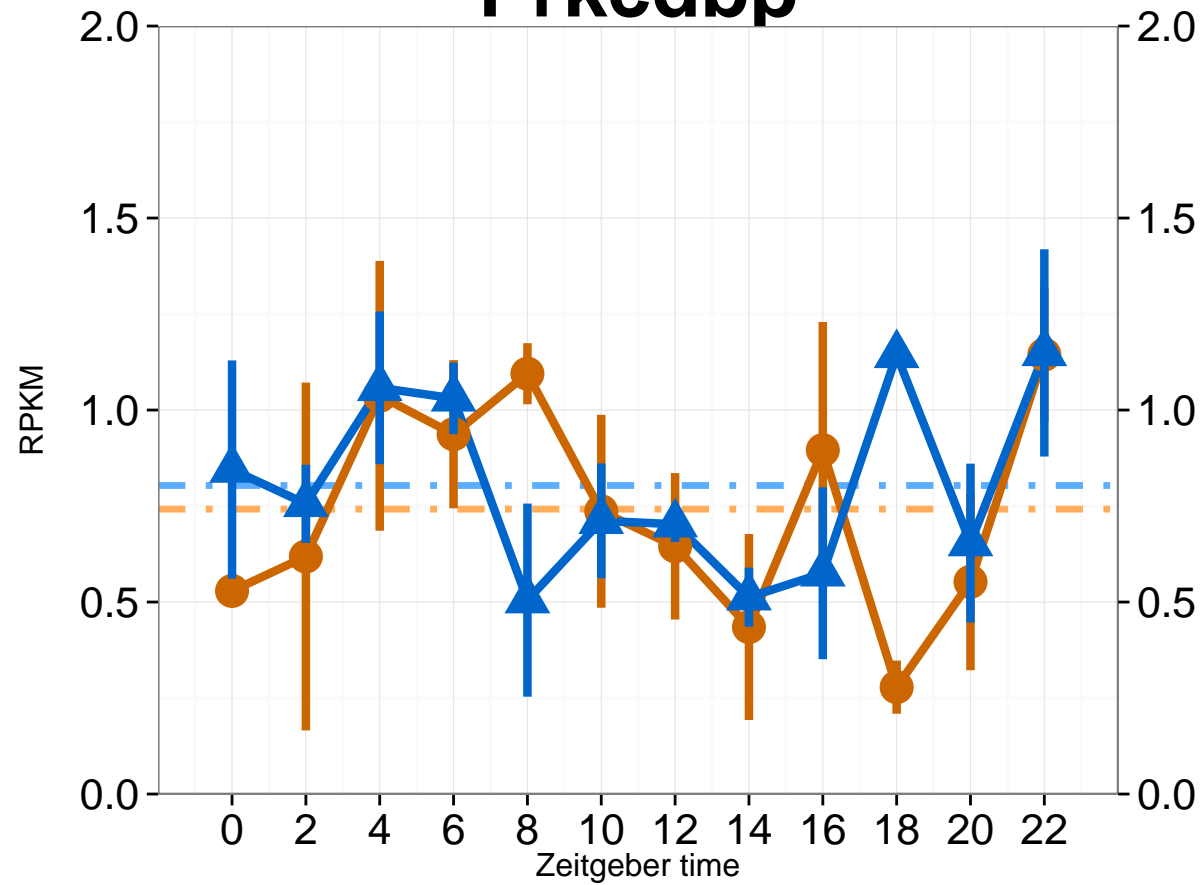

# Prkcdbp

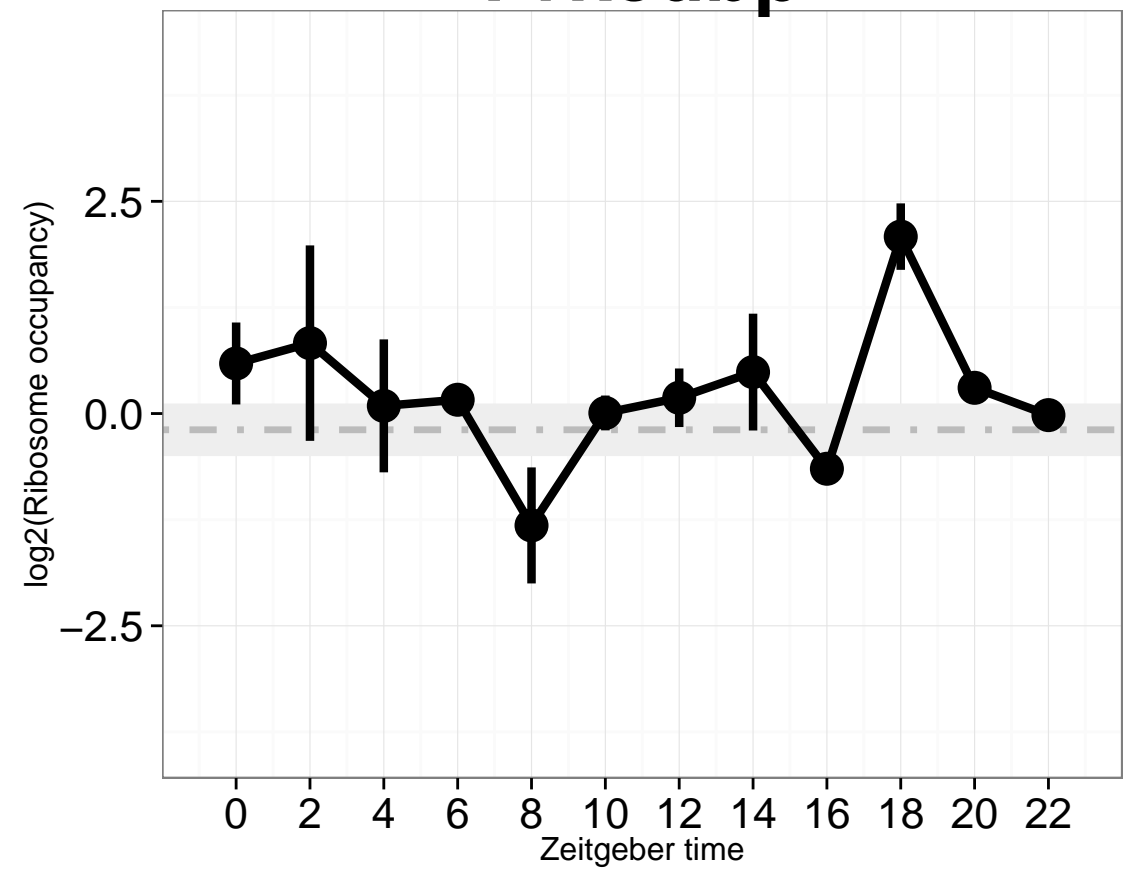

Supplement: SuppDataset_1.zip [file Prkcdbp_set_A.pdf › Supplemental Dataset 1/A-mRNA_nonrhyth_translation_nonrhyth/Prkcdbp_set_A.pdf]

# Prkce

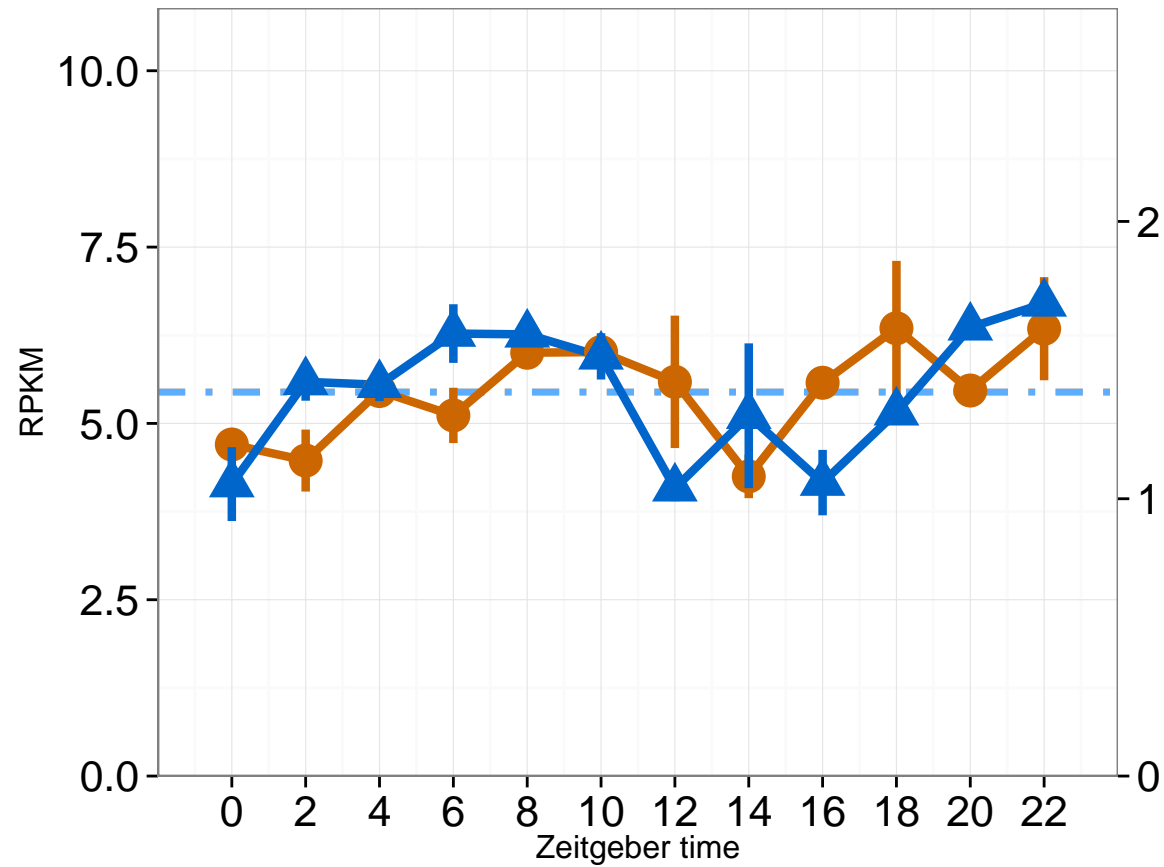

# Prkce

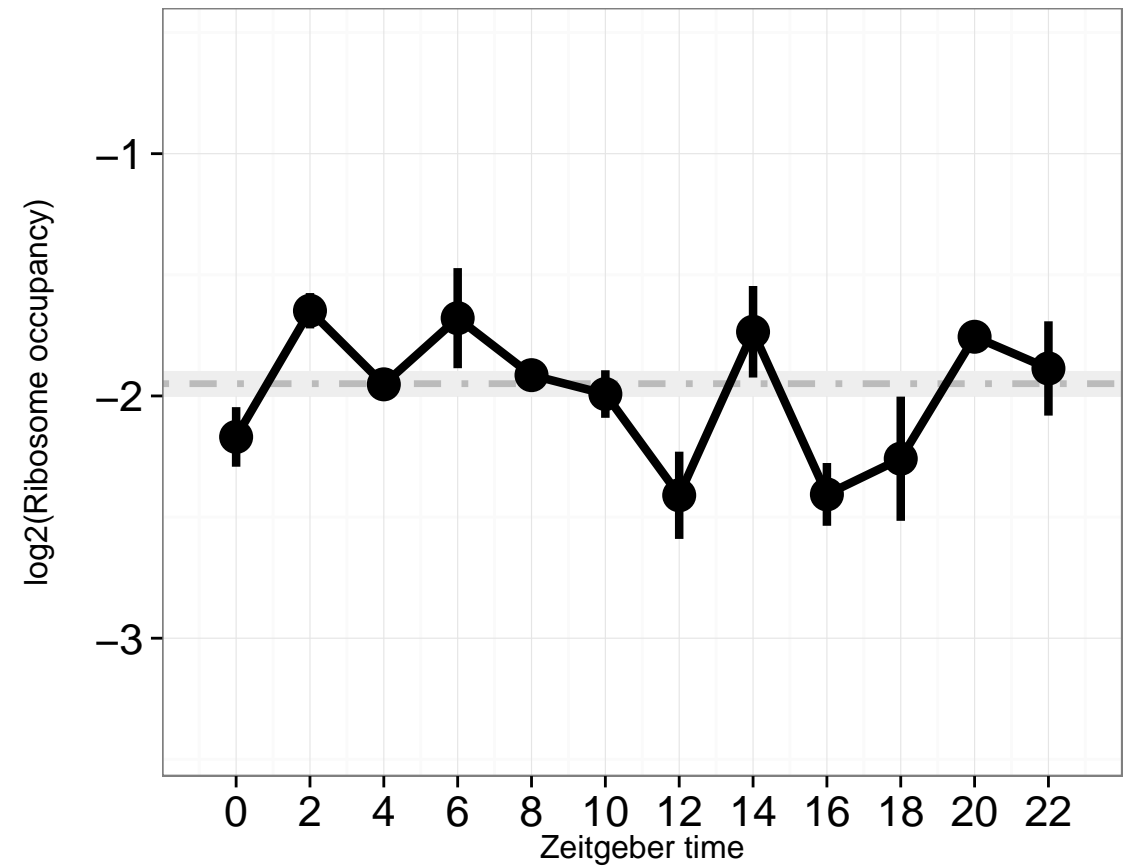

Supplement: SuppDataset_1.zip [file Prkce_set_A.pdf › Supplemental Dataset 1/A-mRNA_nonrhyth_translation_nonrhyth/Prkce_set_A.pdf]

## Prkch

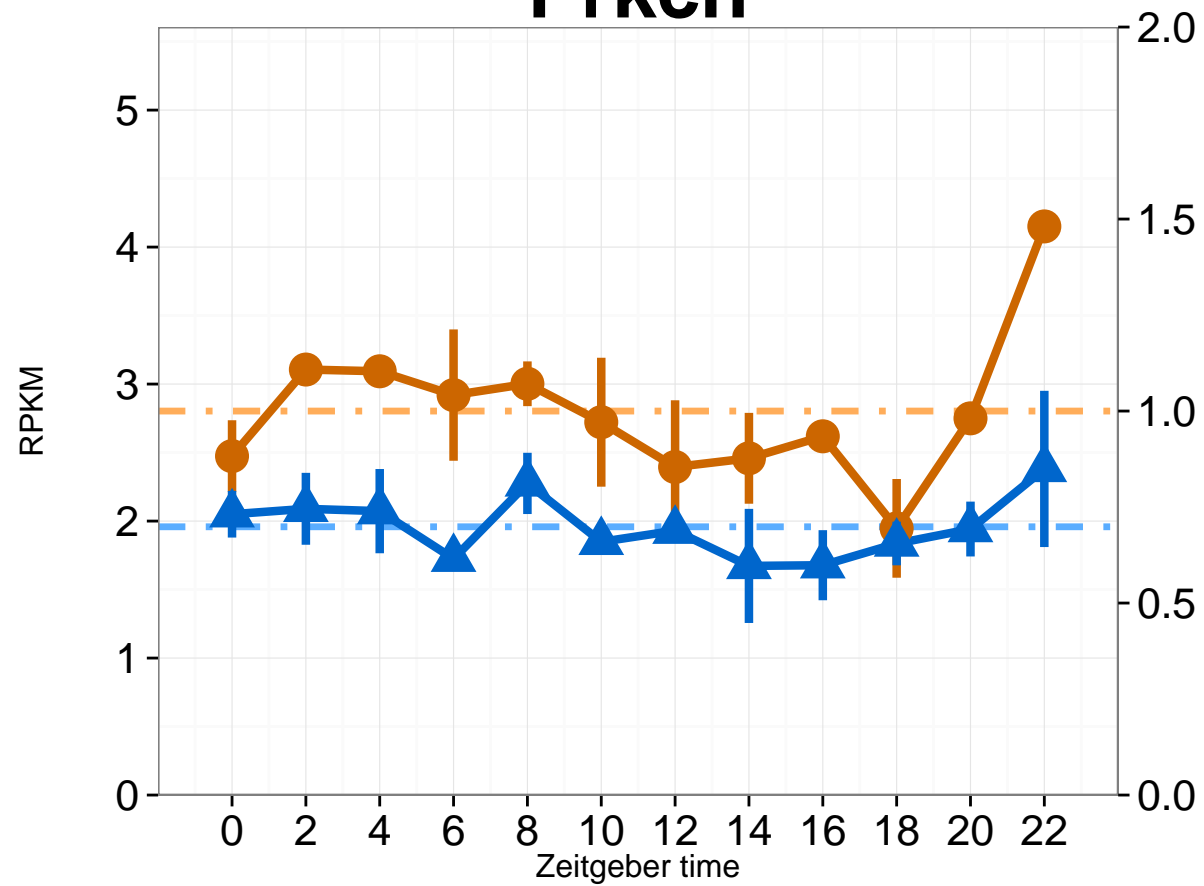

## Prkch

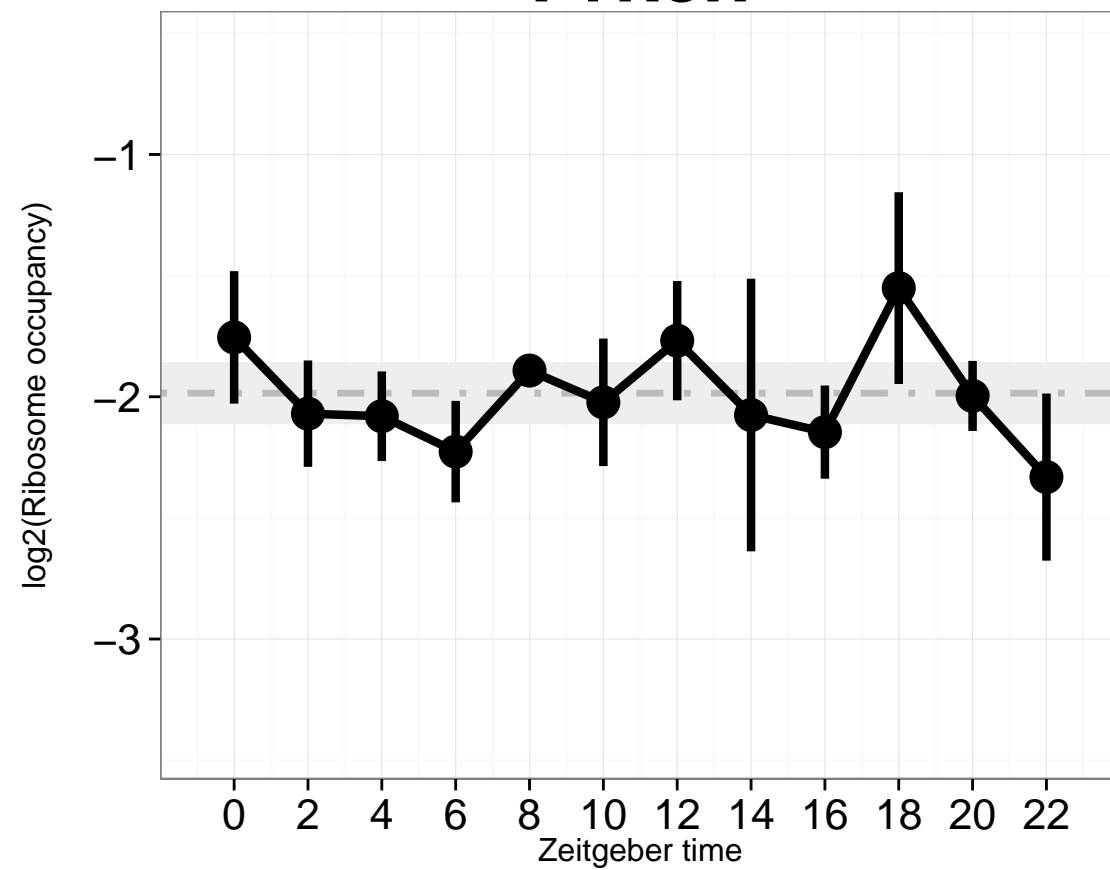

Supplement: SuppDataset_1.zip [file Prkch_set_A.pdf › Supplemental Dataset 1/A-mRNA_nonrhyth_translation_nonrhyth/Prkch_set_A.pdf]

## Prkci

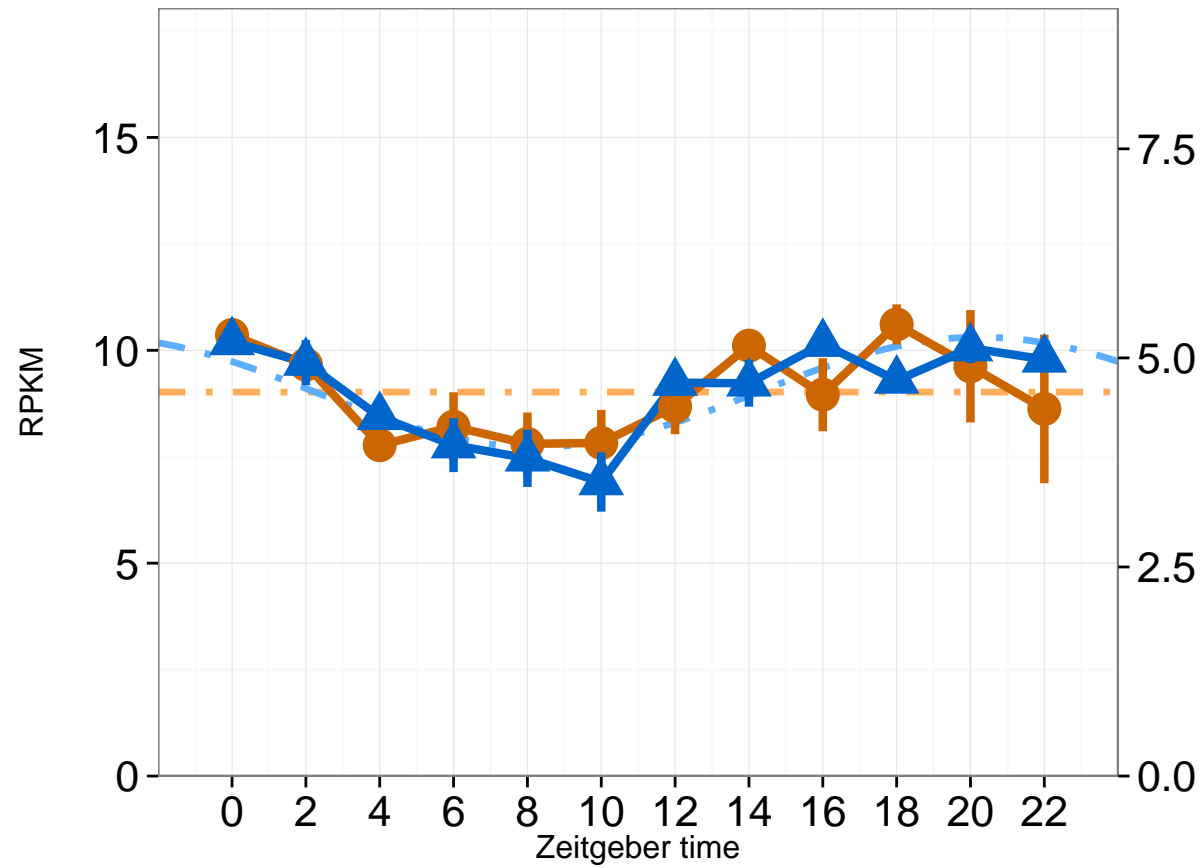

## Prkci

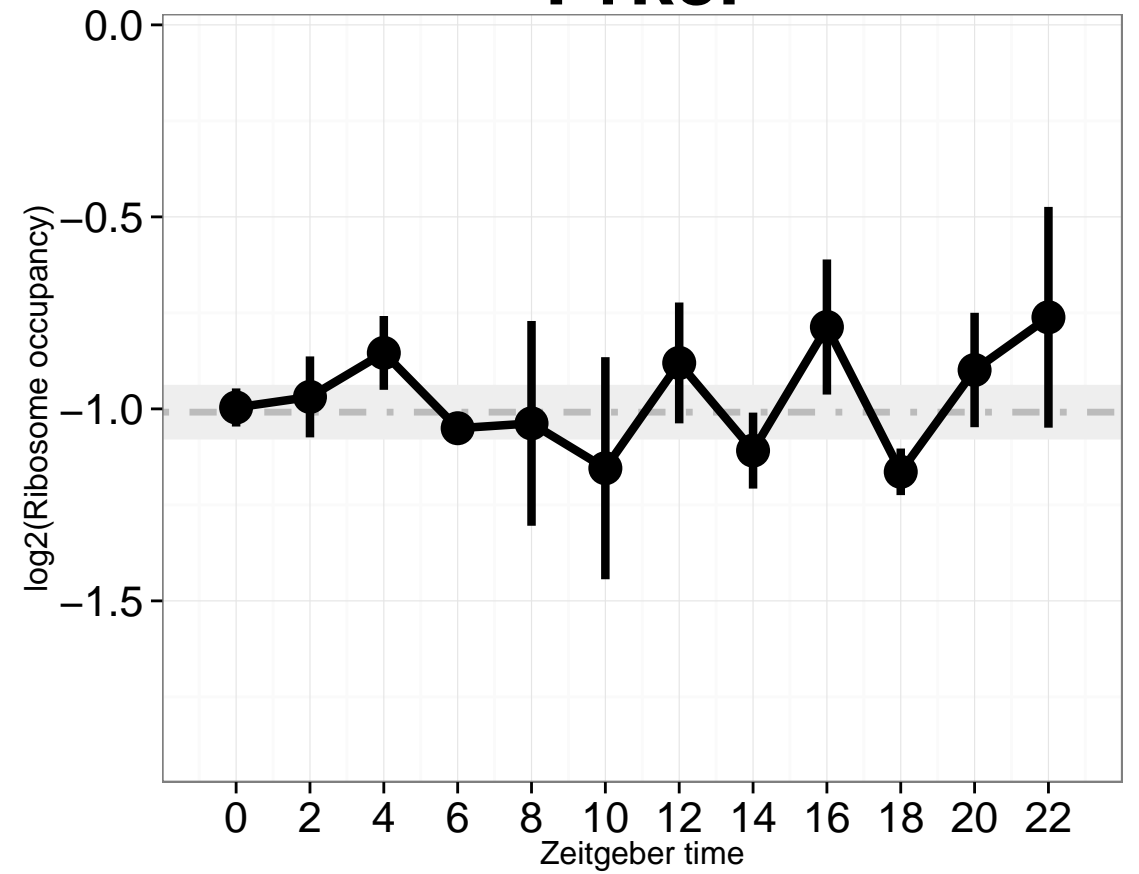

Supplement: SuppDataset_1.zip [file Prkci_set_A.pdf › Supplemental Dataset 1/A-mRNA_nonrhyth_translation_nonrhyth/Prkci_set_A.pdf]

# Prkcq

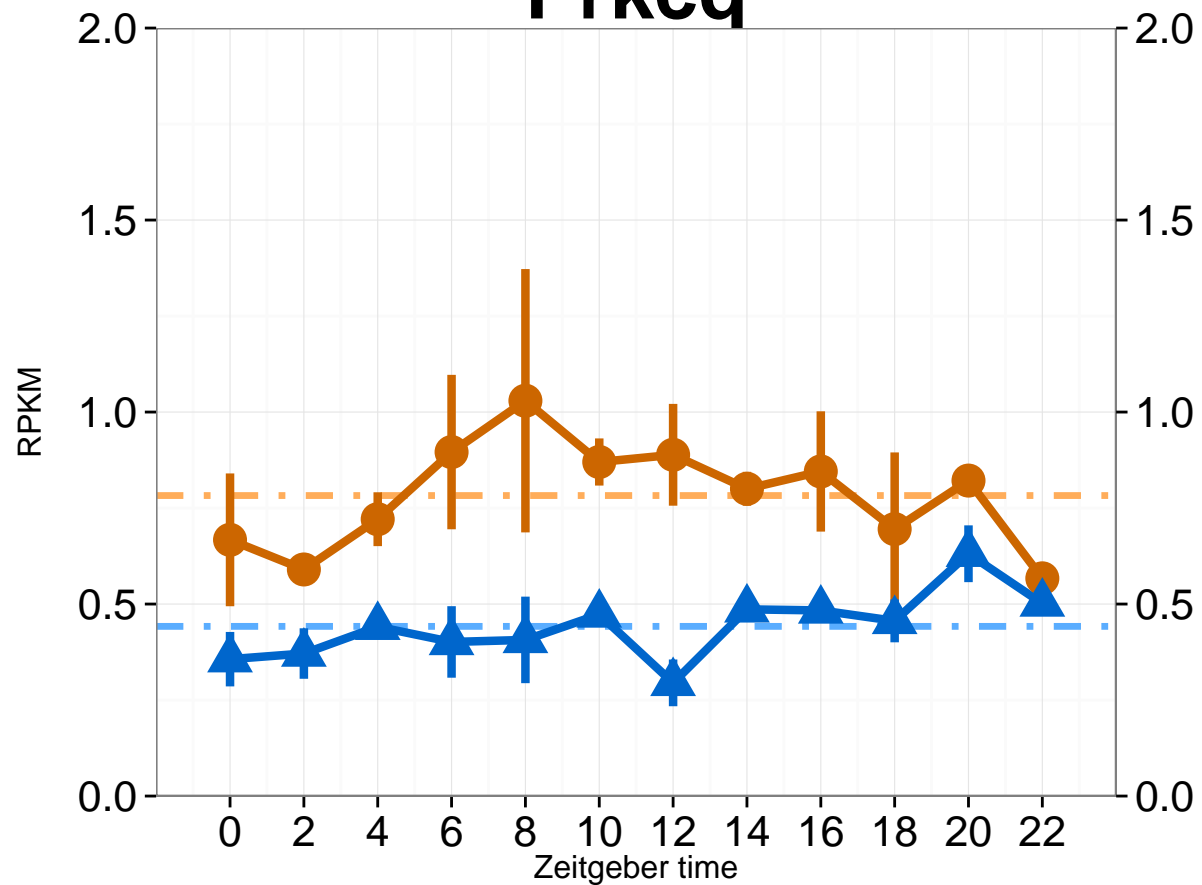

# Prkcq

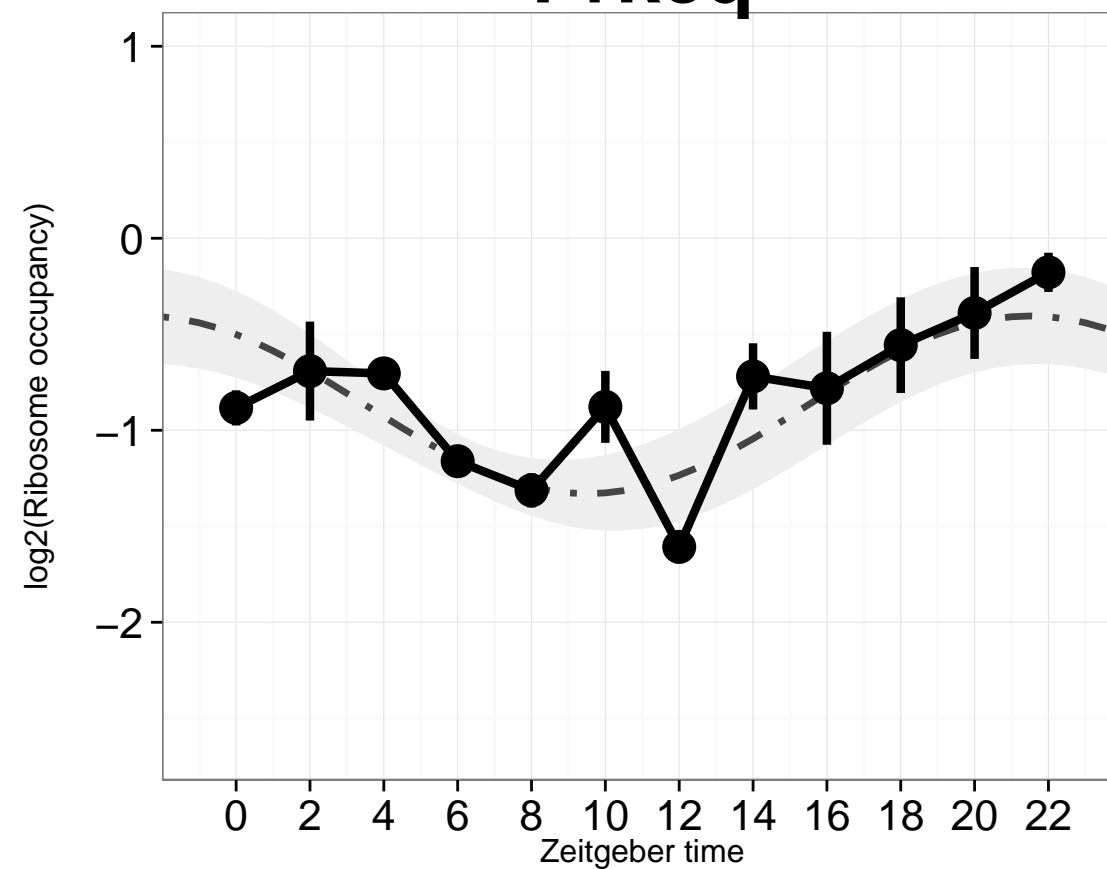

Supplement: SuppDataset_1.zip [file Prkcq_set_A.pdf › Supplemental Dataset 1/A-mRNA_nonrhyth_translation_nonrhyth/Prkcq_set_A.pdf]

## Prkcsh

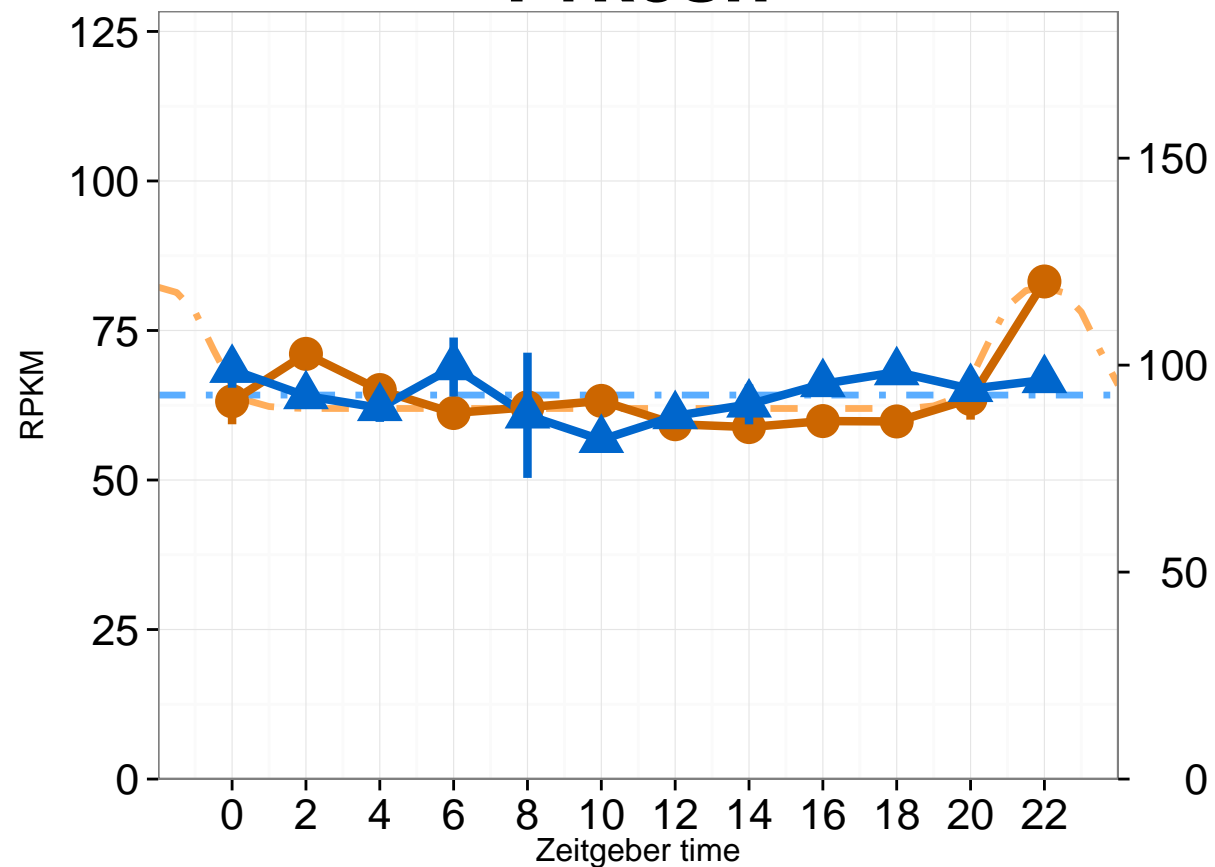

## Prkcsh

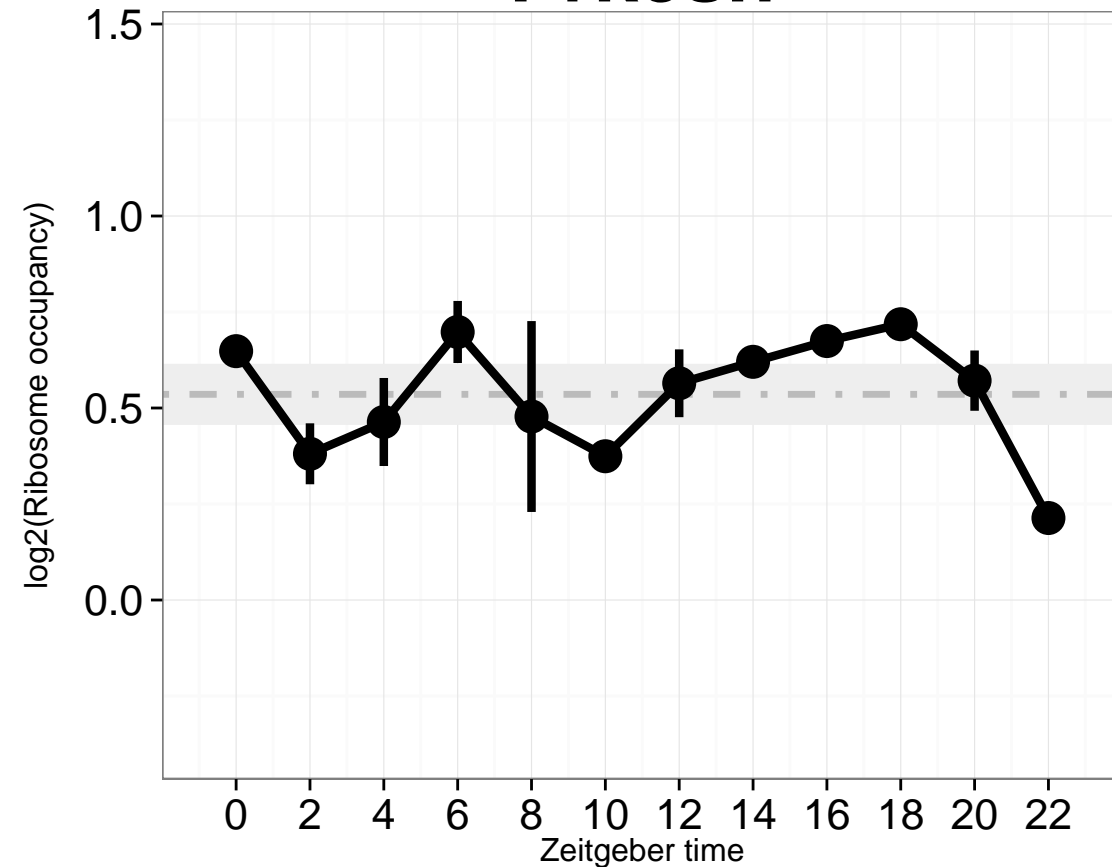

Supplement: SuppDataset_1.zip [file Prkcsh_set_A.pdf › Supplemental Dataset 1/A-mRNA_nonrhyth_translation_nonrhyth/Prkcsh_set_A.pdf]

## Prkcz

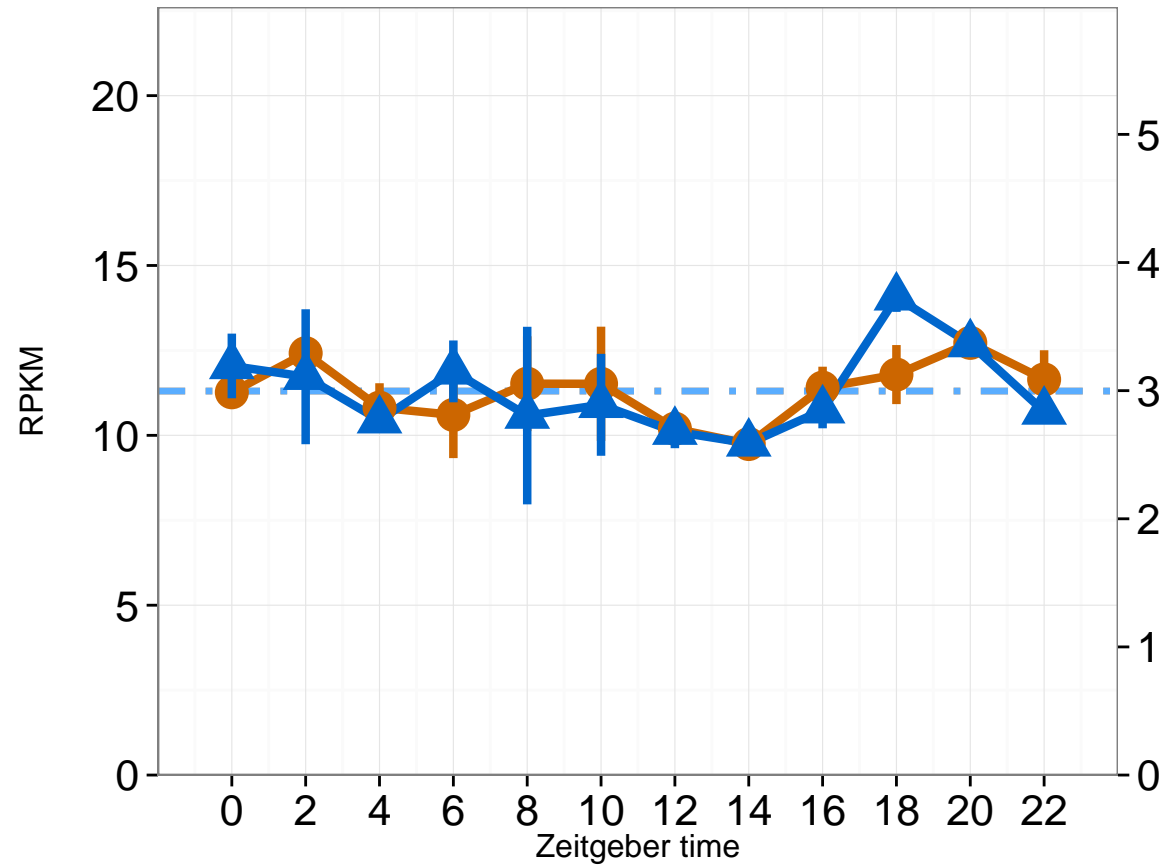

## Prkcz

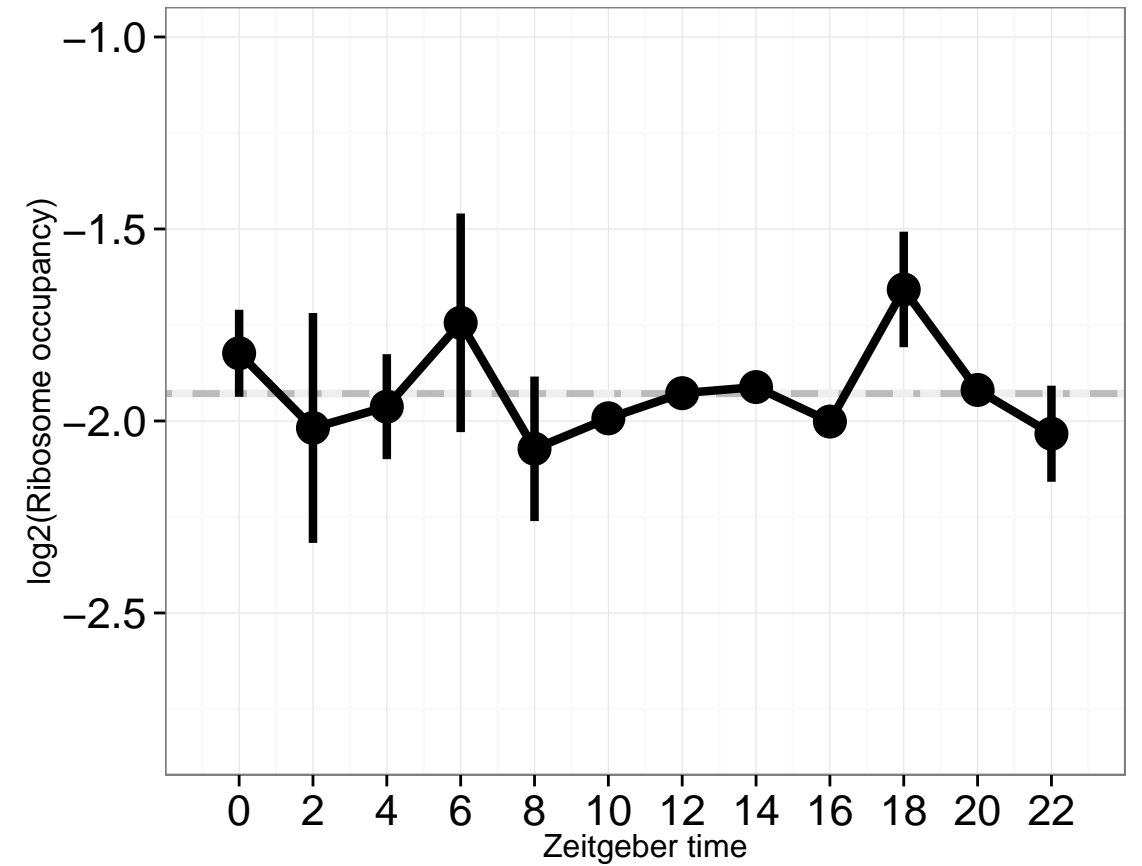

Supplement: SuppDataset_1.zip [file Prkcz_set_A.pdf › Supplemental Dataset 1/A-mRNA_nonrhyth_translation_nonrhyth/Prkcz_set_A.pdf]

# Prkd2

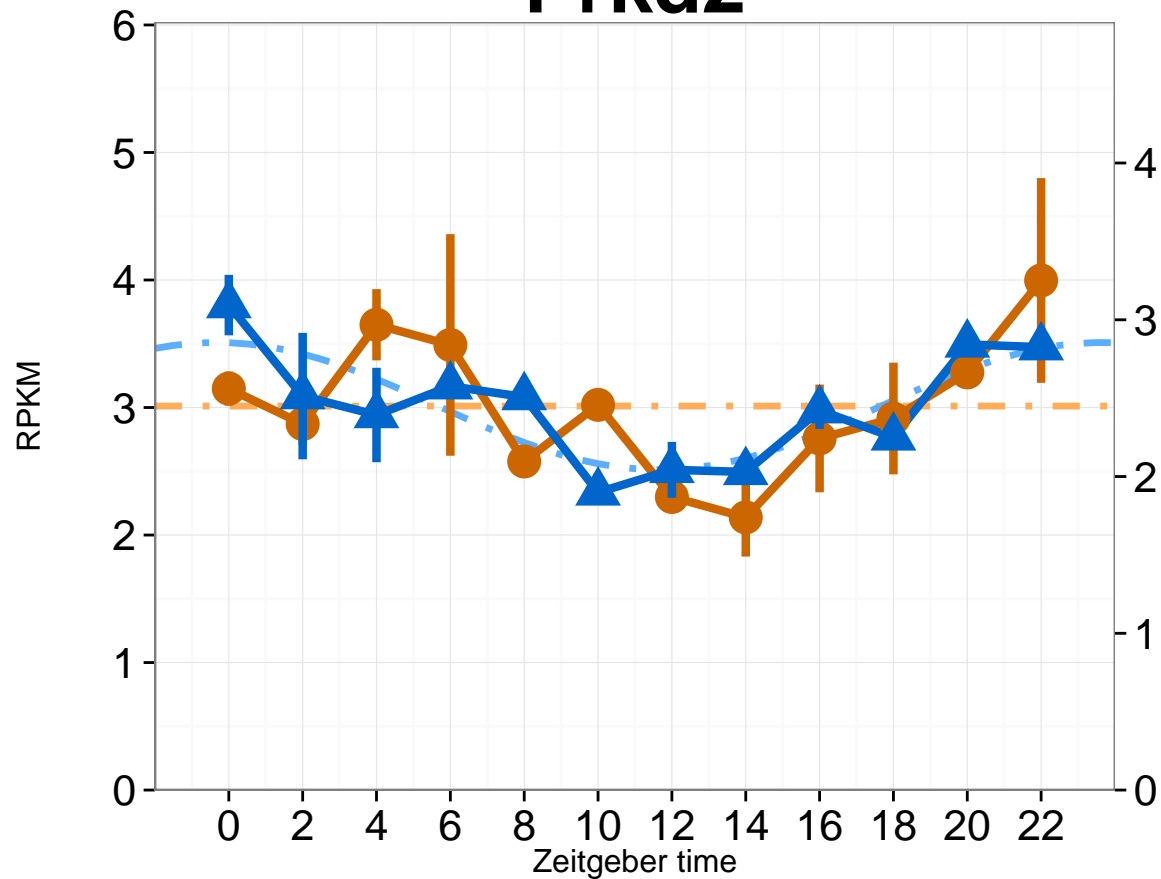

# Prkd2

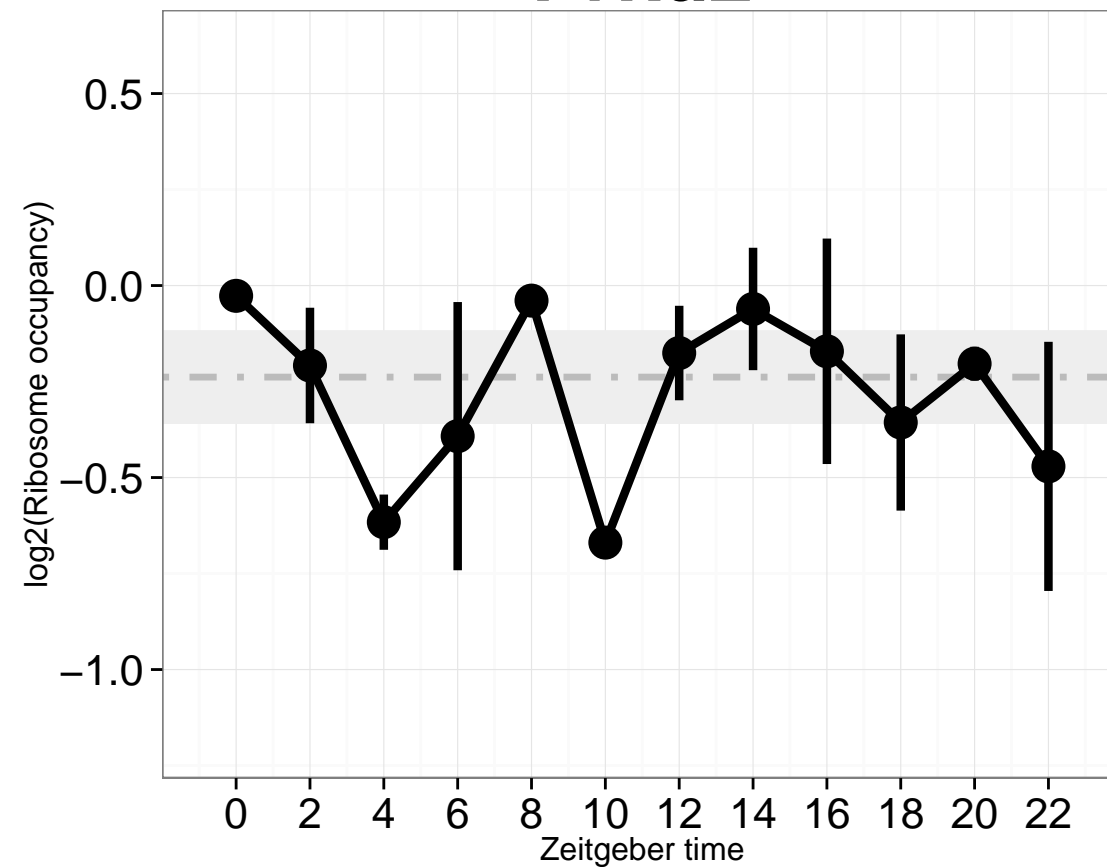

Supplement: SuppDataset_1.zip [file Prkd2_set_A.pdf › Supplemental Dataset 1/A-mRNA_nonrhyth_translation_nonrhyth/Prkd2_set_A.pdf]

# Prkdc

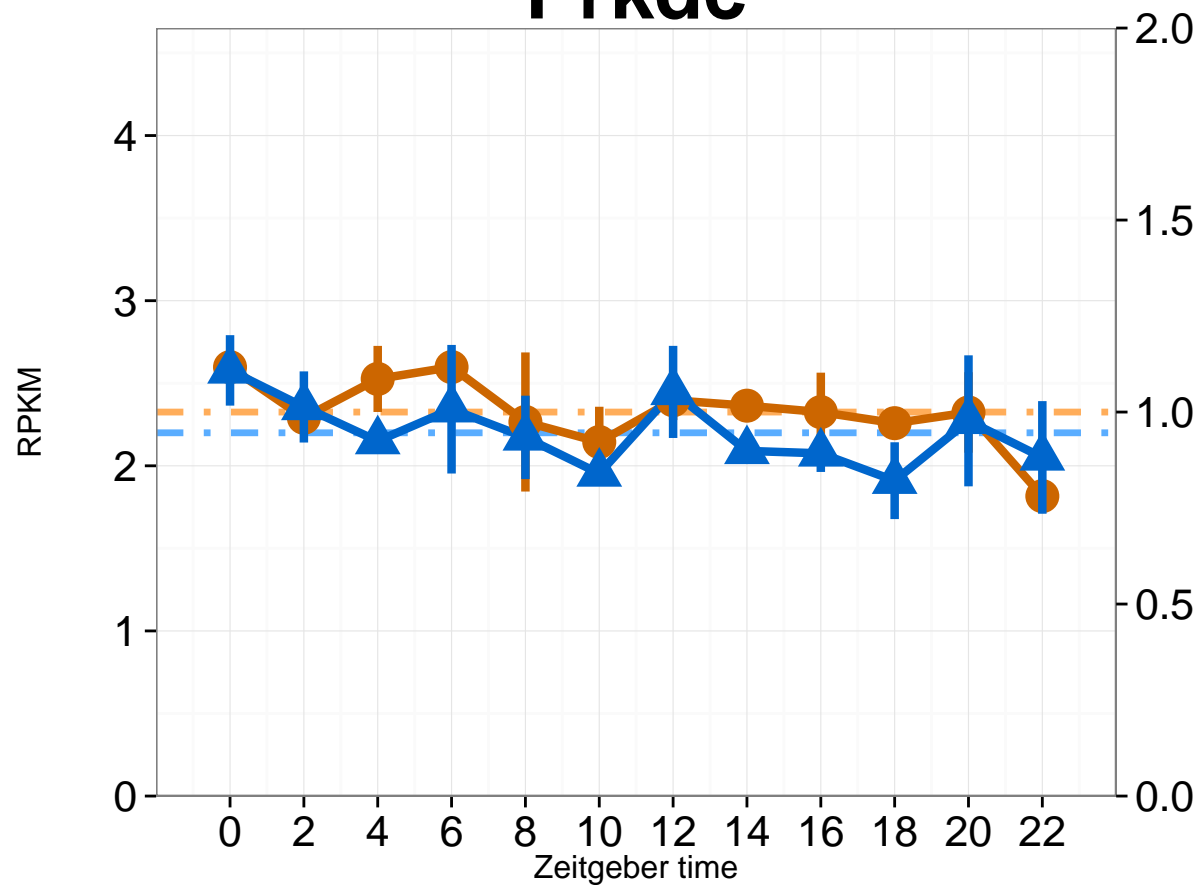

# Prkdc

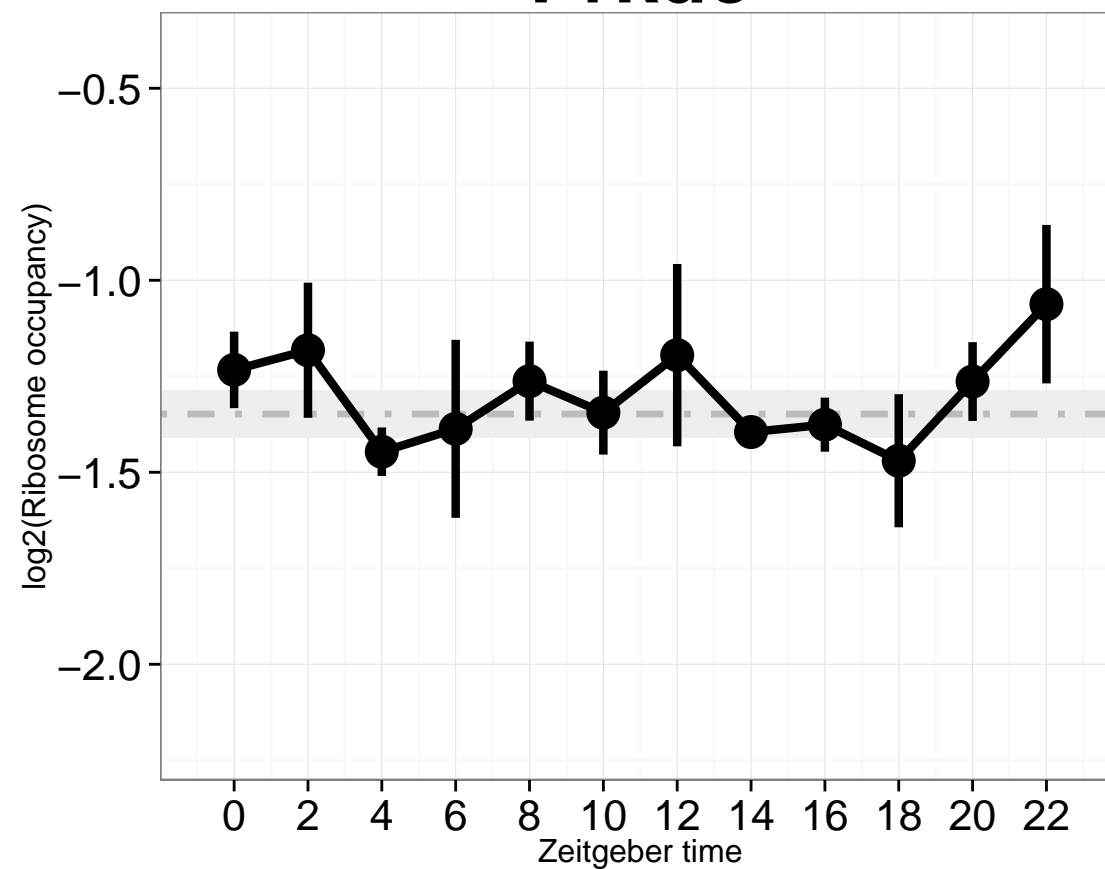

Supplement: SuppDataset_1.zip [file Prkdc_set_A.pdf › Supplemental Dataset 1/A-mRNA_nonrhyth_translation_nonrhyth/Prkdc_set_A.pdf]

# Prkg1

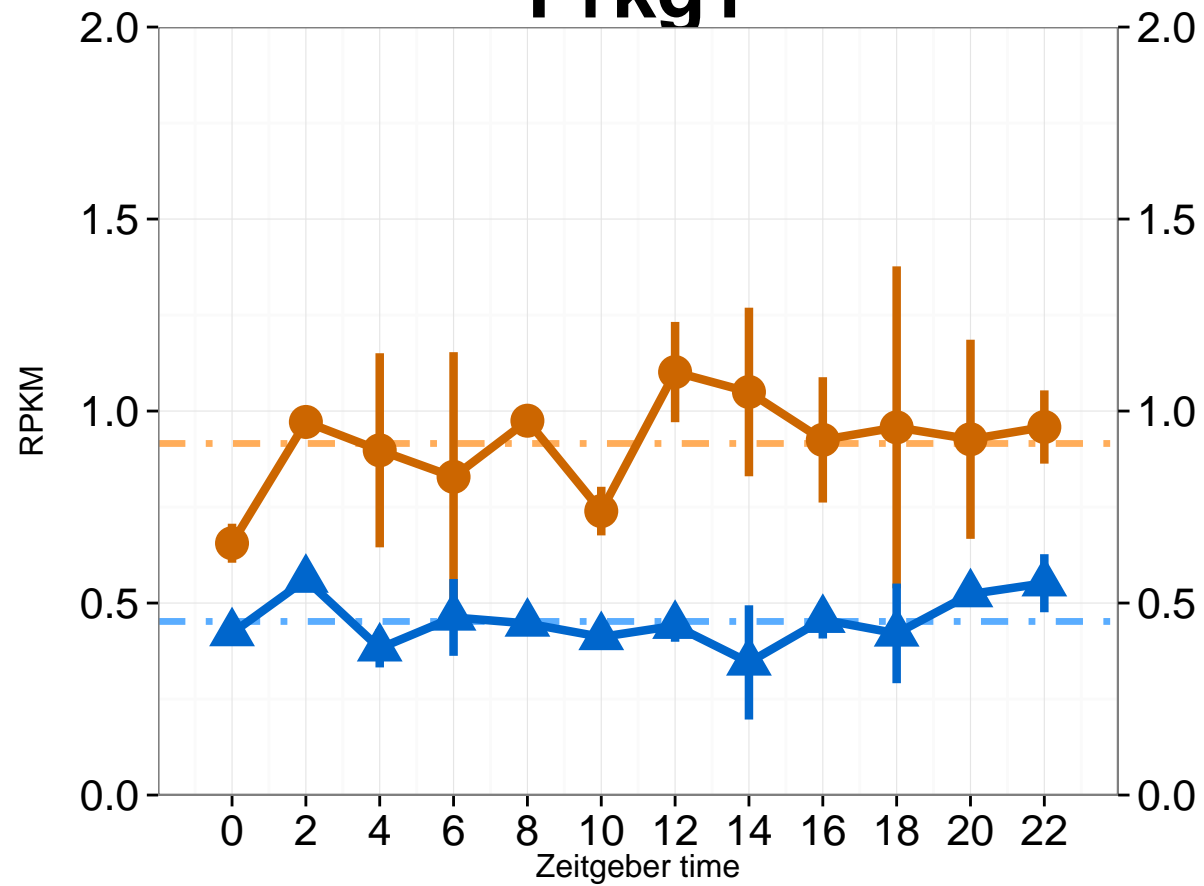

# Prkg1

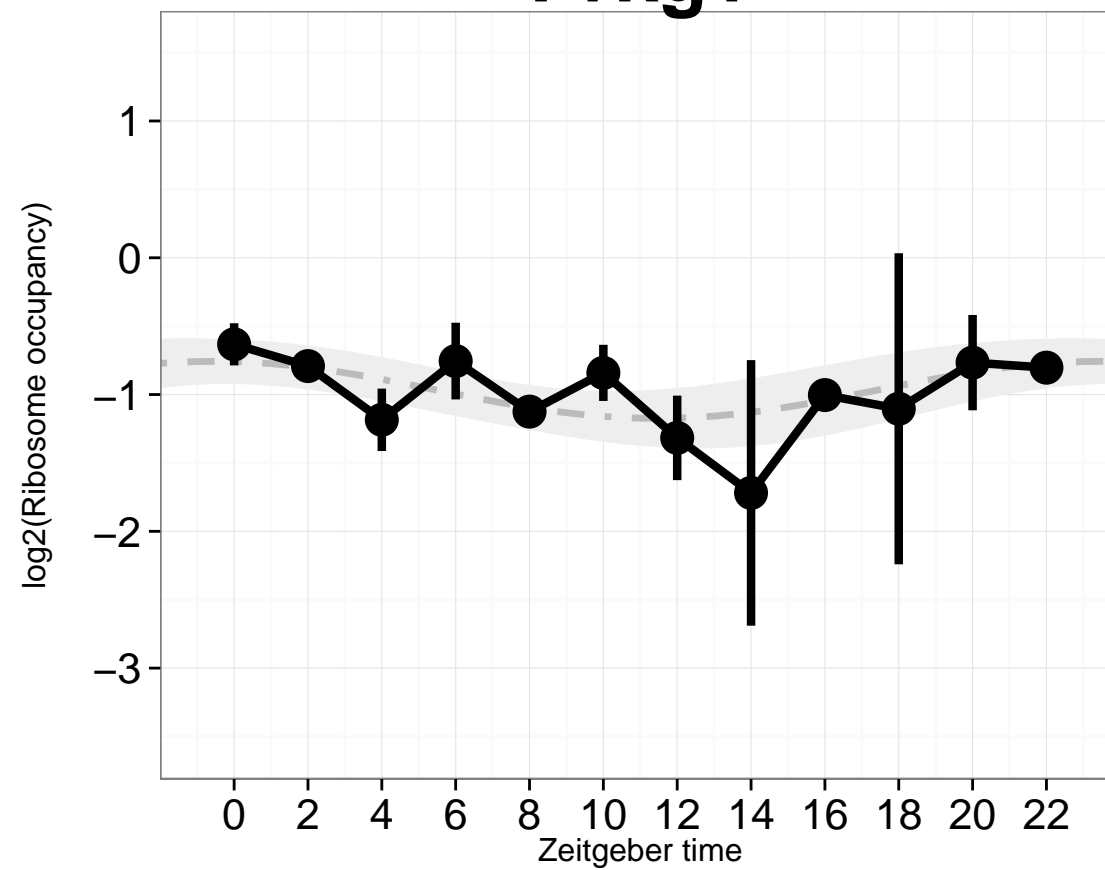

Supplement: SuppDataset_1.zip [file Prkg1_set_A.pdf › Supplemental Dataset 1/A-mRNA_nonrhyth_translation_nonrhyth/Prkg1_set_A.pdf]

## Prkra

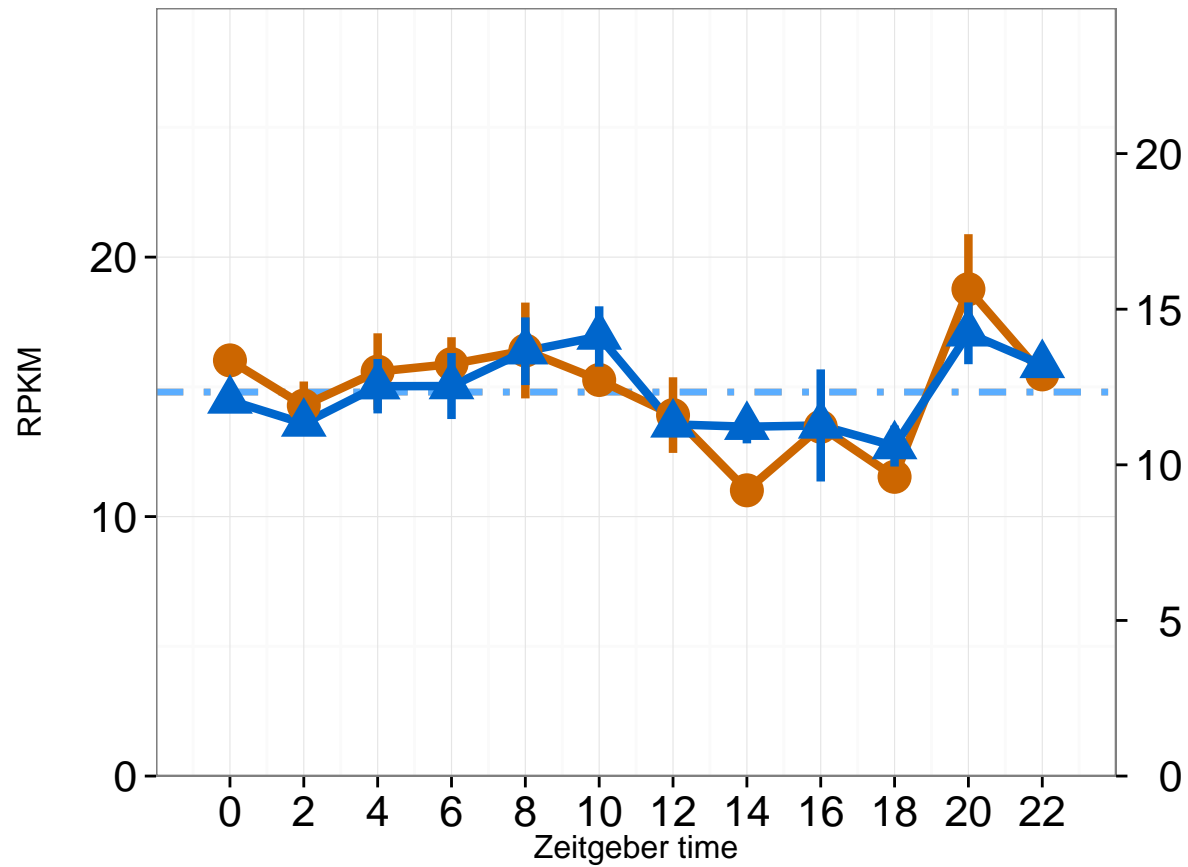

## Prkra

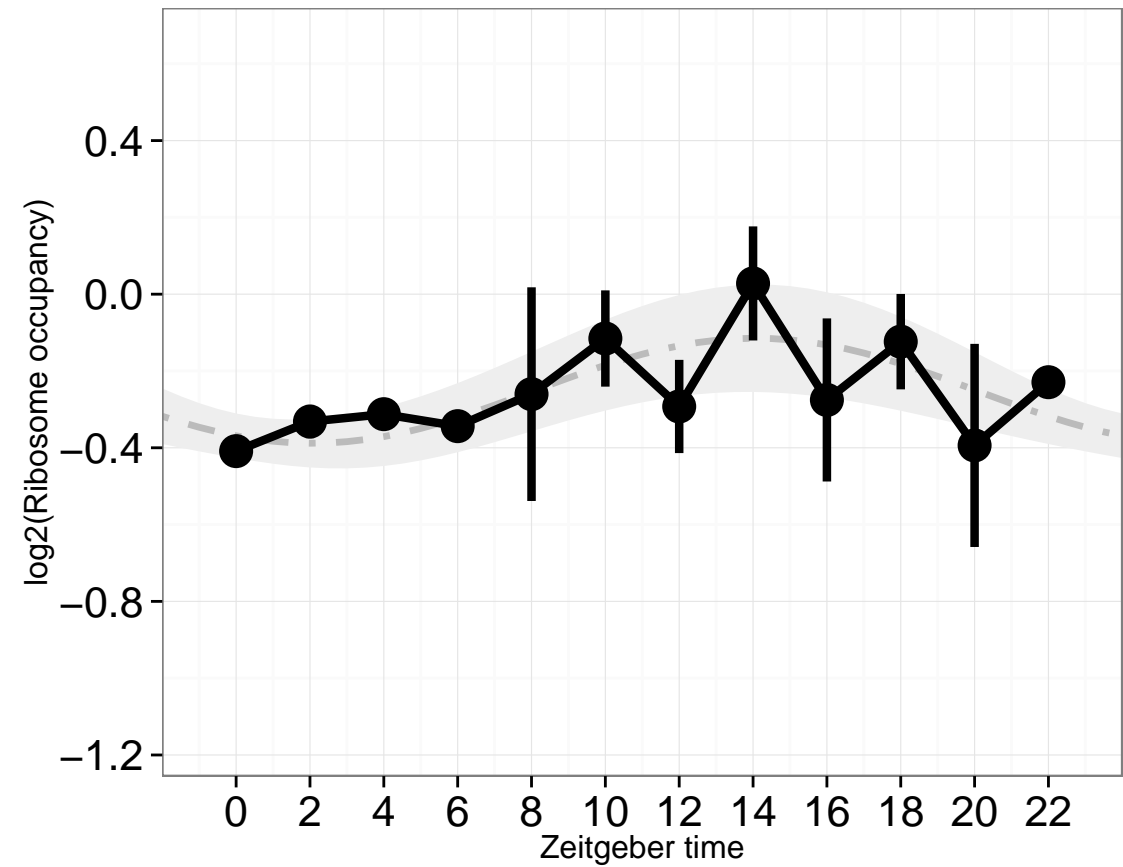

Supplement: SuppDataset_1.zip [file Prkra_set_A.pdf › Supplemental Dataset 1/A-mRNA_nonrhyth_translation_nonrhyth/Prkra_set_A.pdf]

# Prkrip1

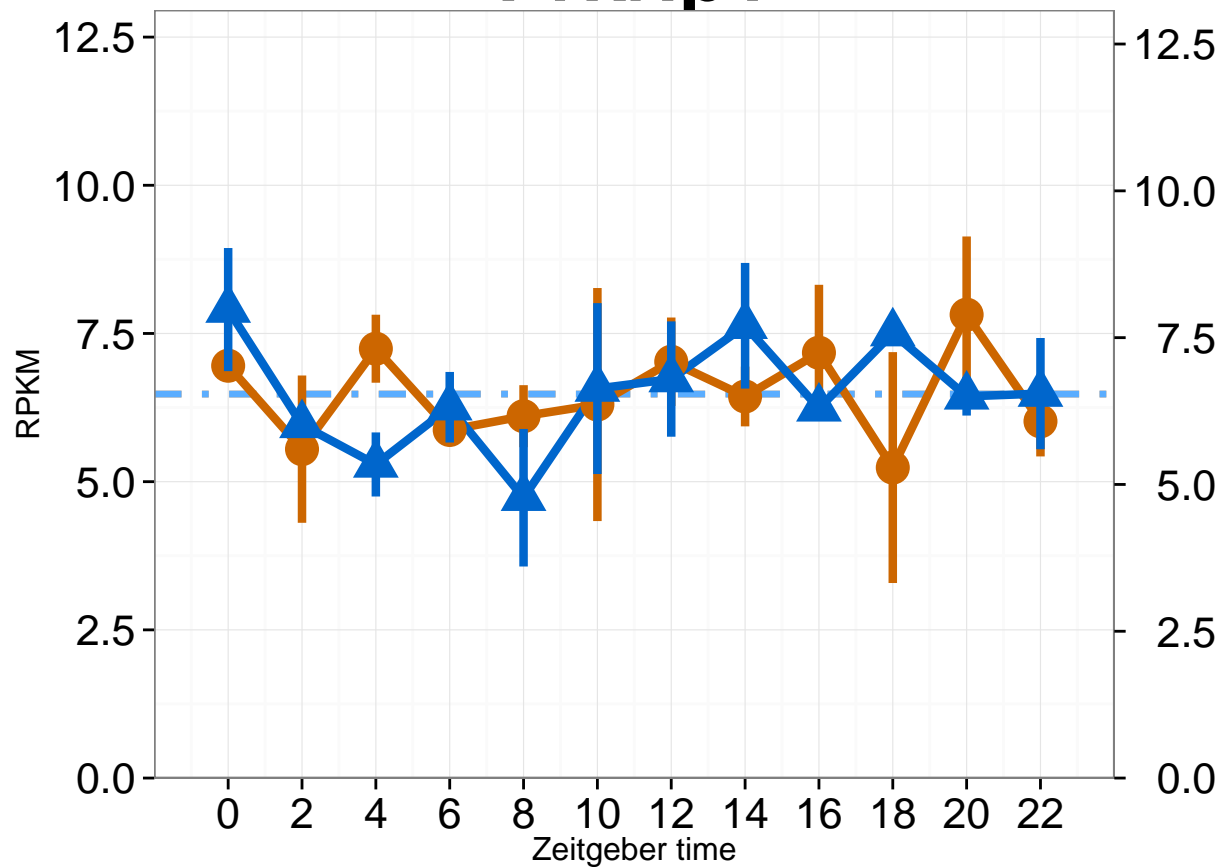

# Prkrip1

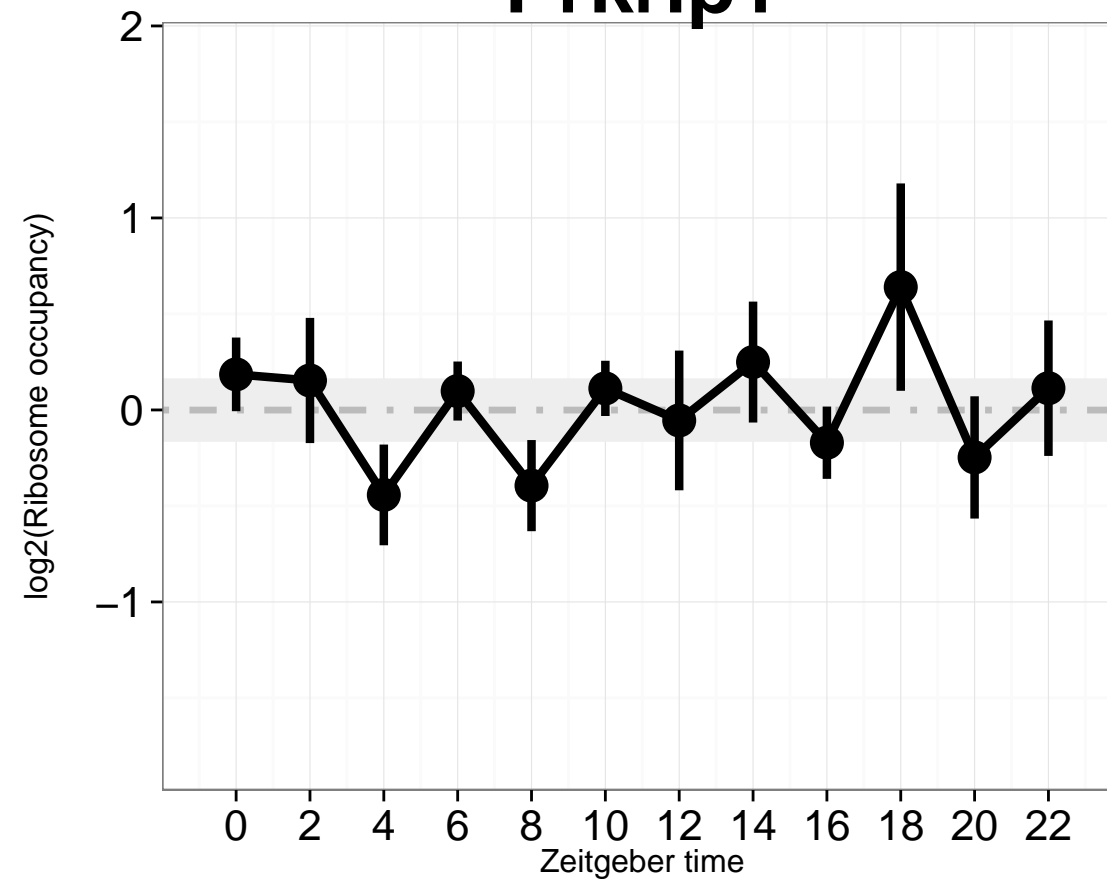

Supplement: SuppDataset_1.zip [file Prkrip1_set_A.pdf › Supplemental Dataset 1/A-mRNA_nonrhyth_translation_nonrhyth/Prkrip1_set_A.pdf]

## Prkrir

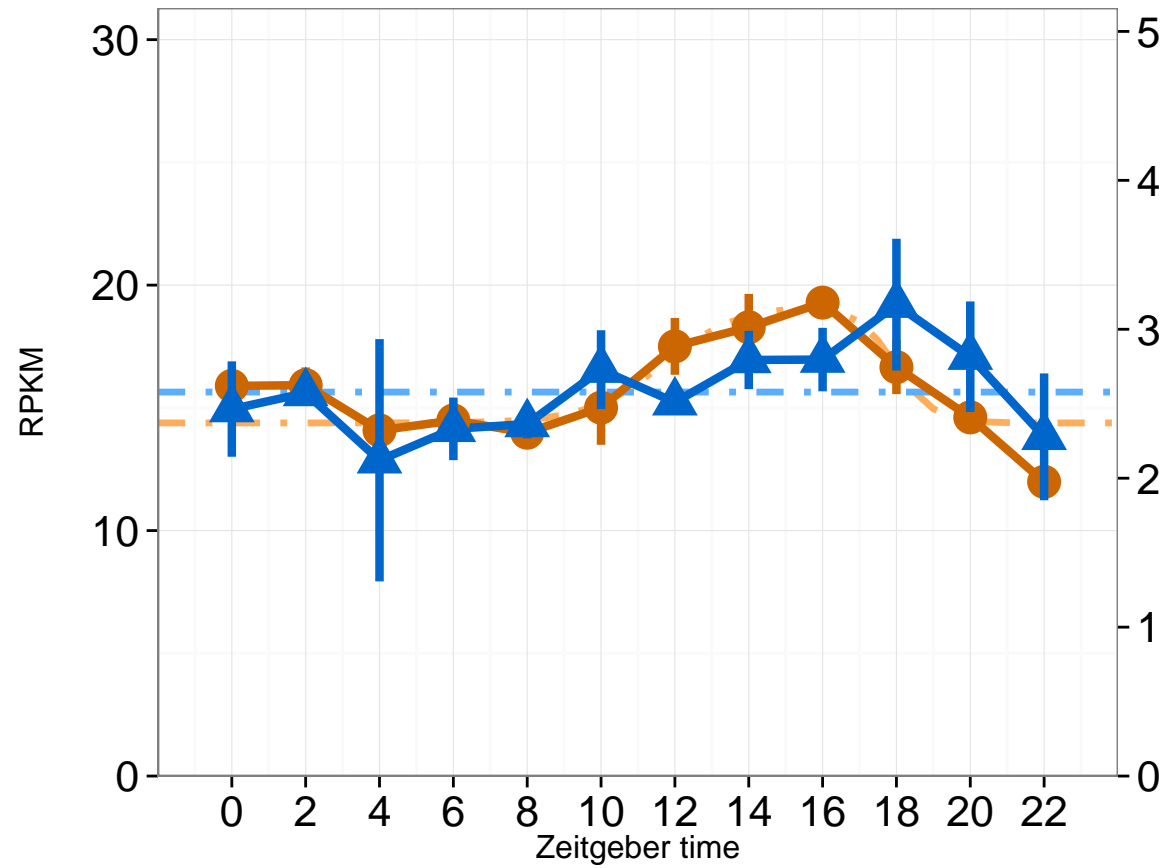

## Prkrir

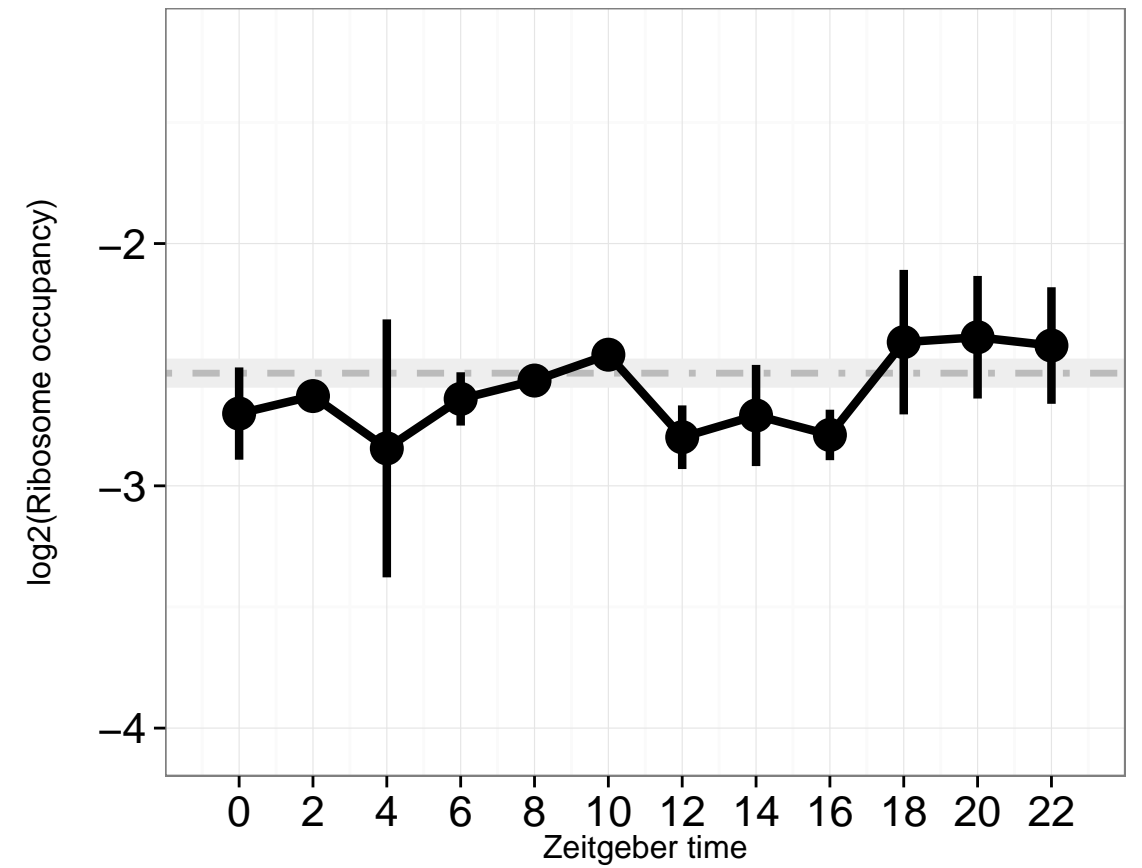

Supplement: SuppDataset_1.zip [file Prkrir_set_A.pdf › Supplemental Dataset 1/A-mRNA_nonrhyth_translation_nonrhyth/Prkrir_set_A.pdf]

## Prkx

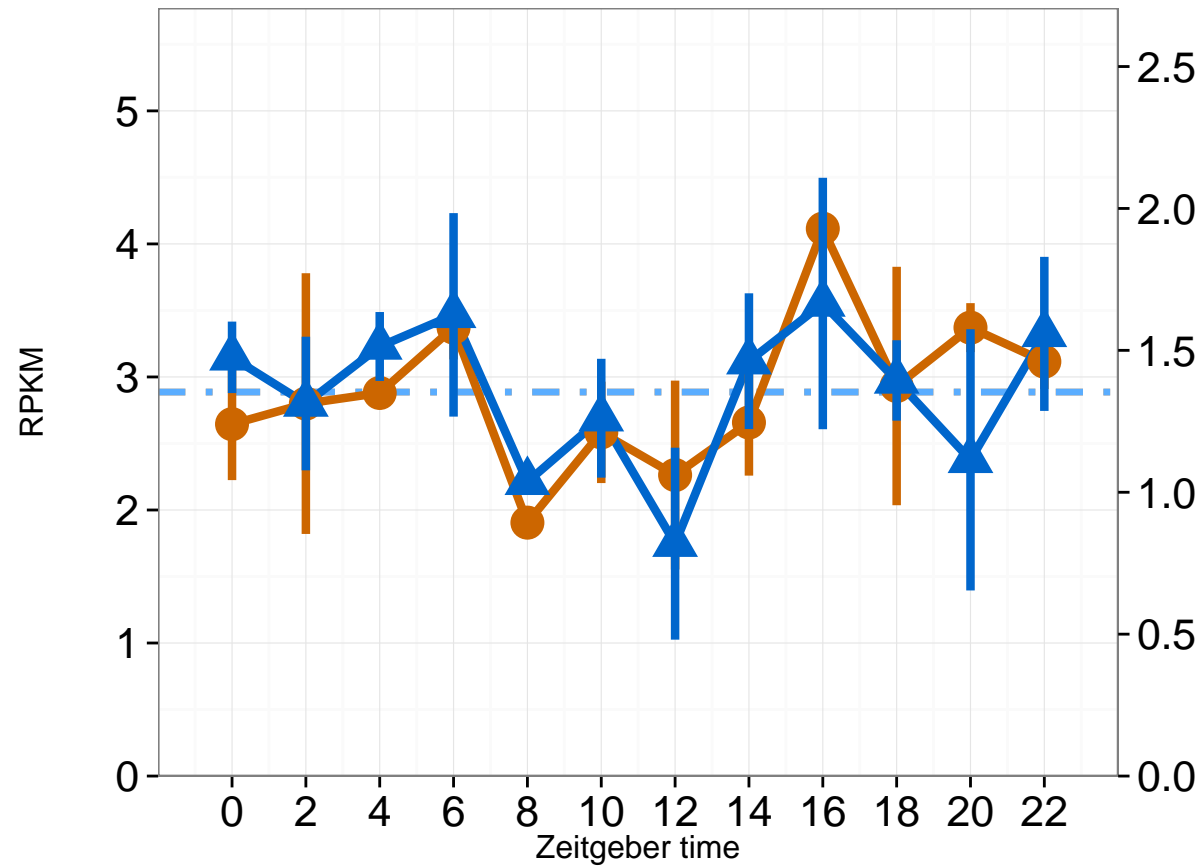

## Prkx

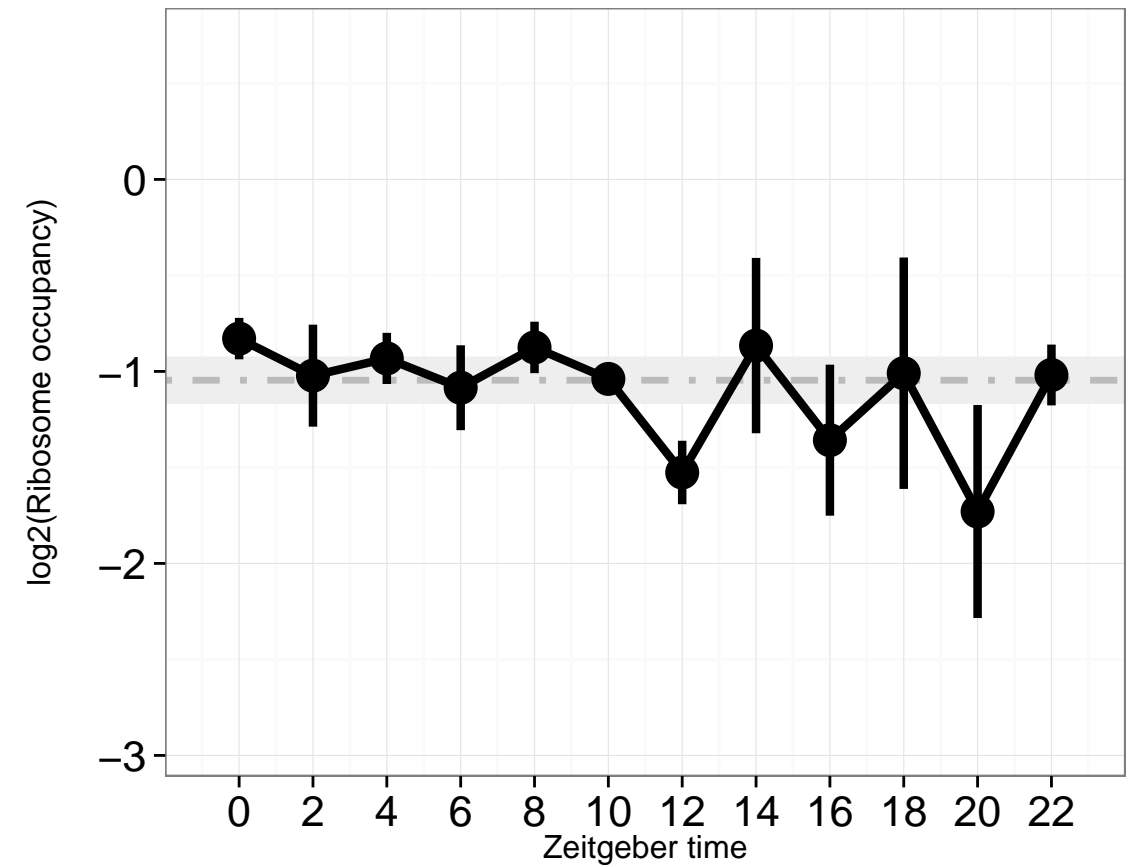

Supplement: SuppDataset_1.zip [file Prkx_set_A.pdf › Supplemental Dataset 1/A-mRNA_nonrhyth_translation_nonrhyth/Prkx_set_A.pdf]

## PrIr

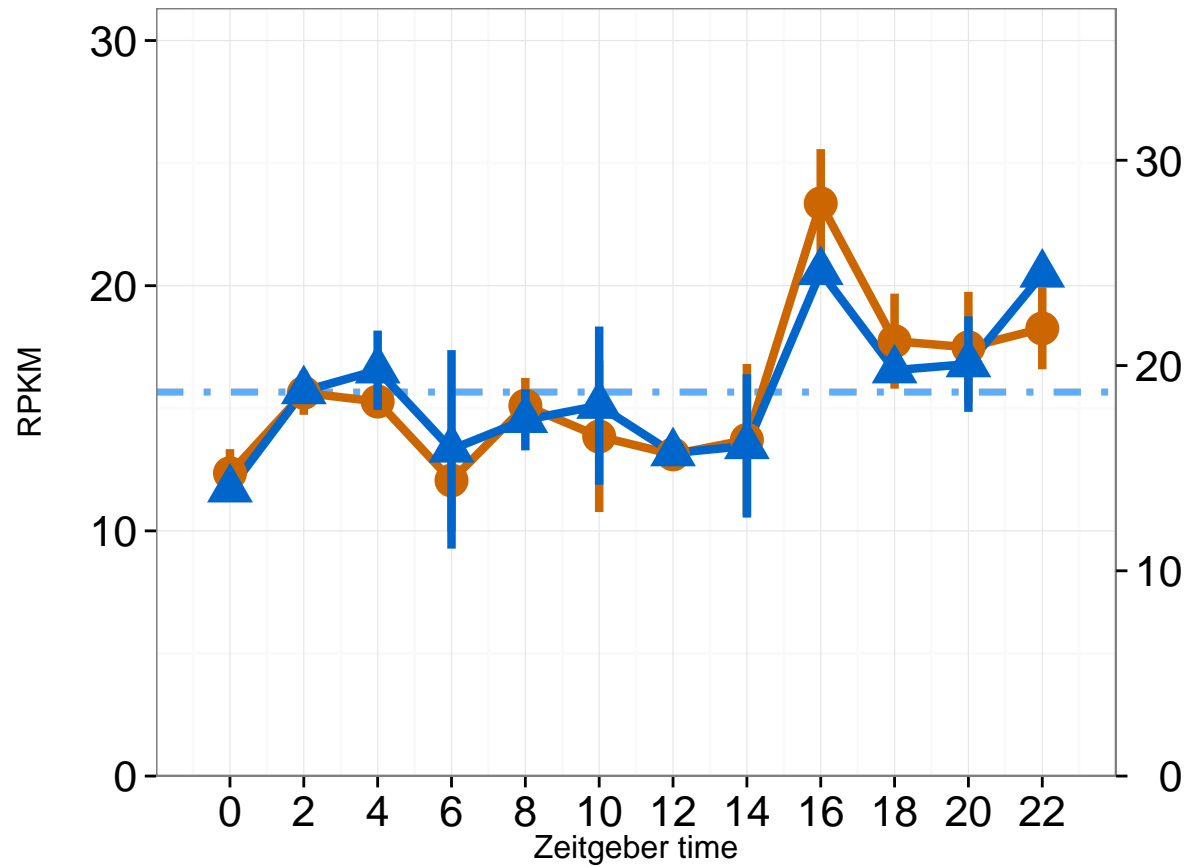

## PrIr

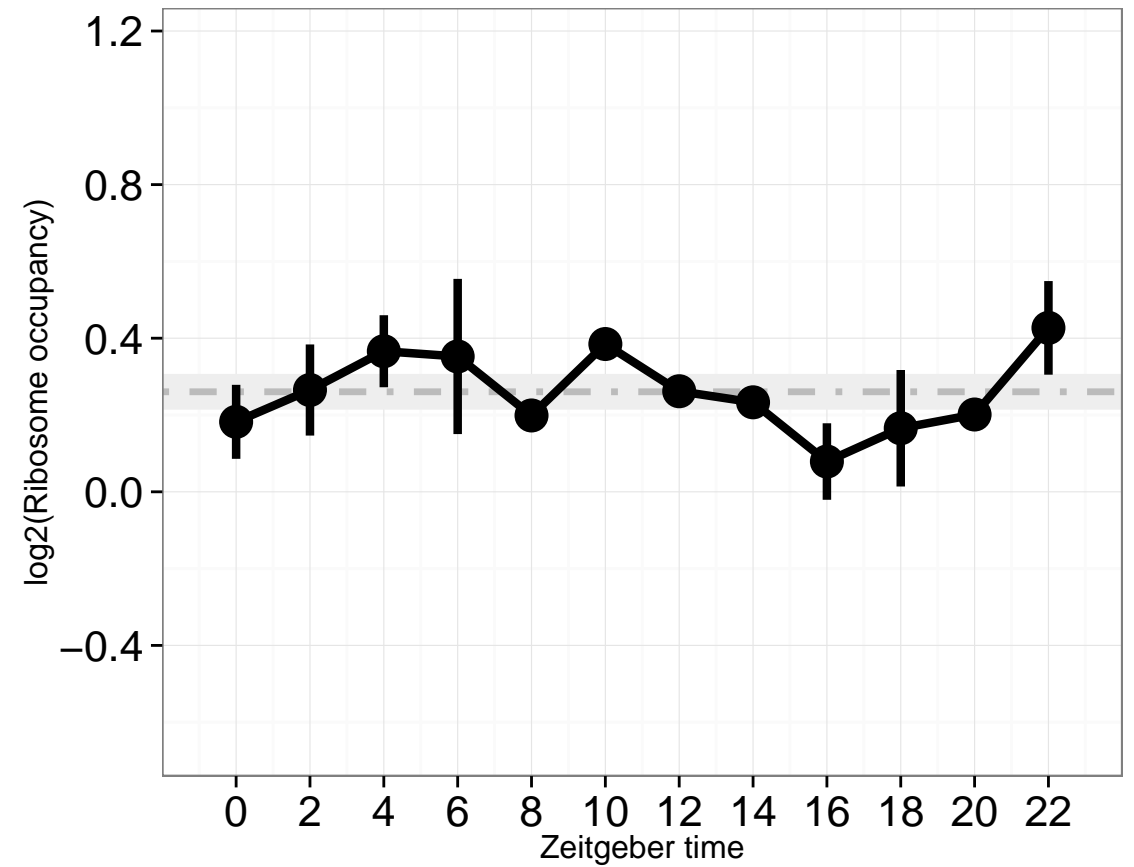

Supplement: SuppDataset_1.zip [file Prlr_set_A.pdf › Supplemental Dataset 1/A-mRNA_nonrhyth_translation_nonrhyth/Prlr_set_A.pdf]

# Prmt10

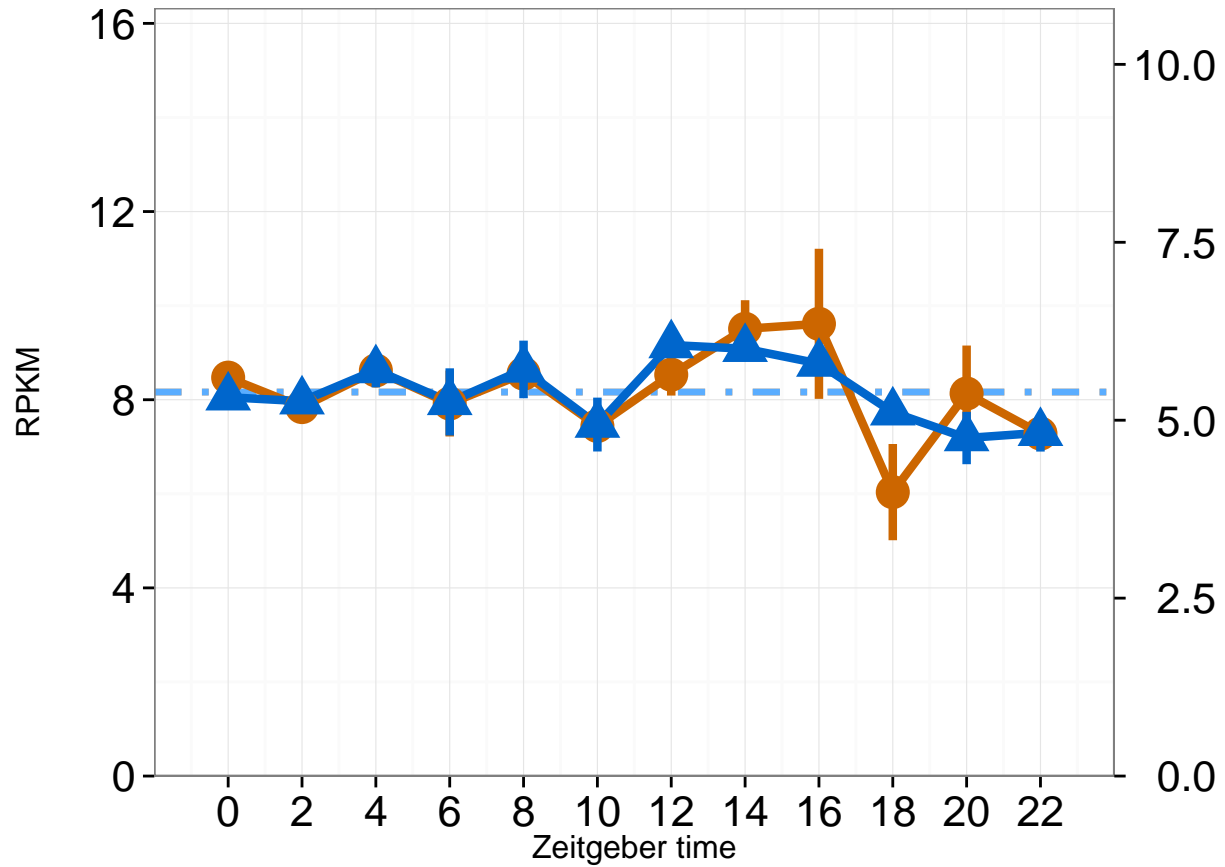

# Prmt10

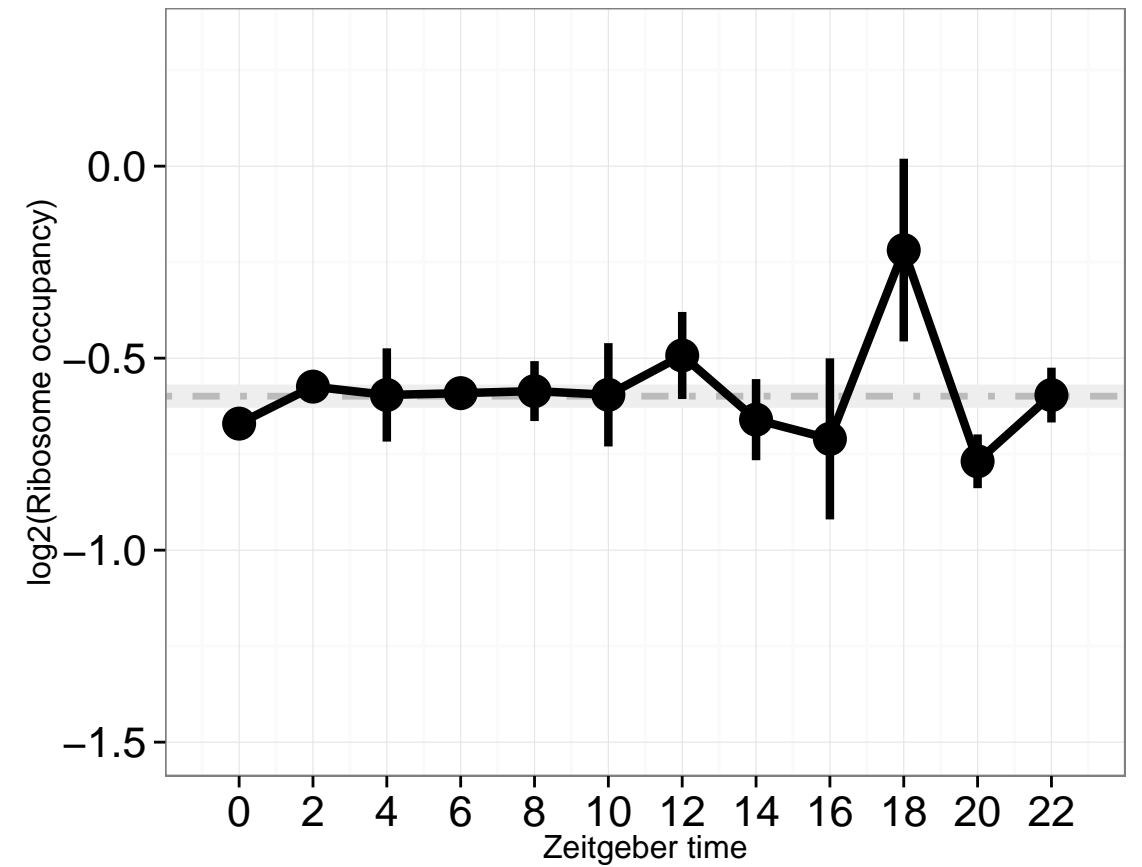

Supplement: SuppDataset_1.zip [file Prmt10_set_A.pdf › Supplemental Dataset 1/A-mRNA_nonrhyth_translation_nonrhyth/Prmt10_set_A.pdf]

# Prmt1

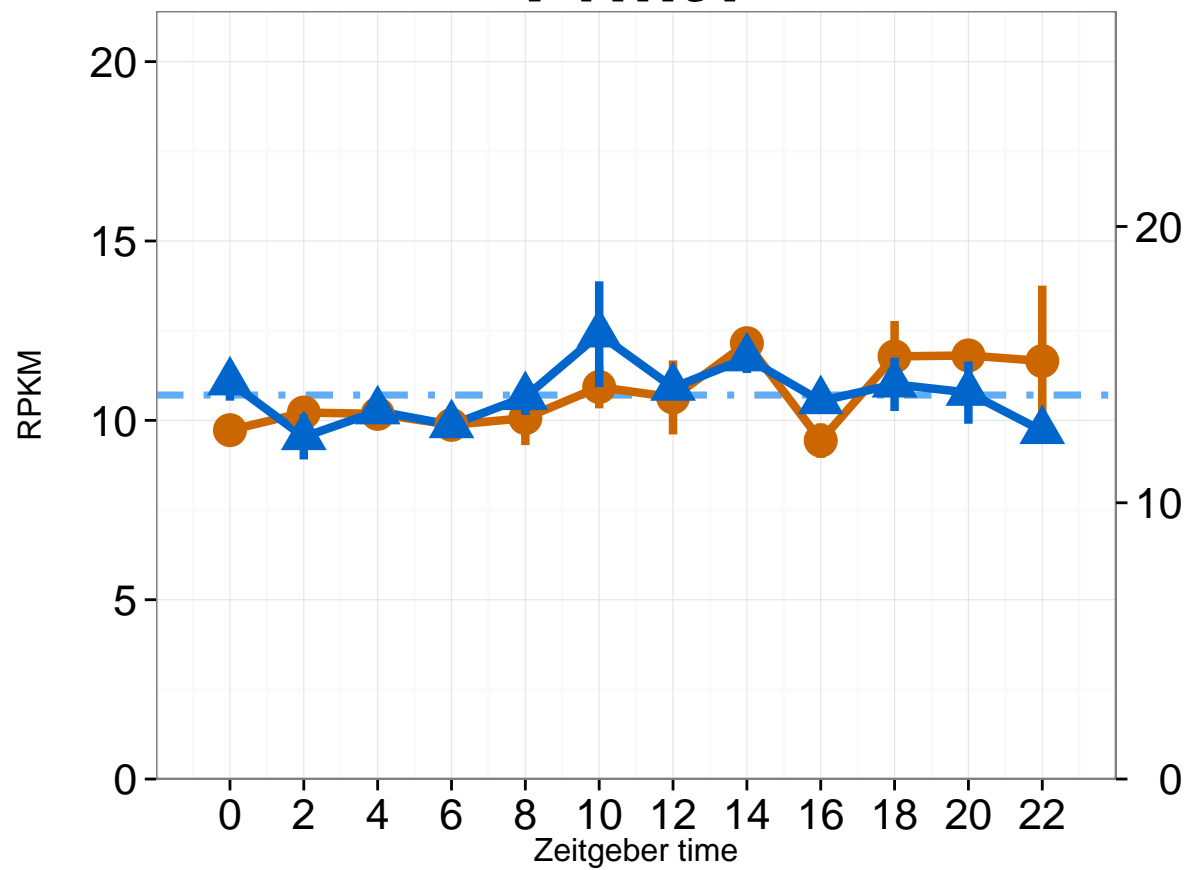

# Prmt1

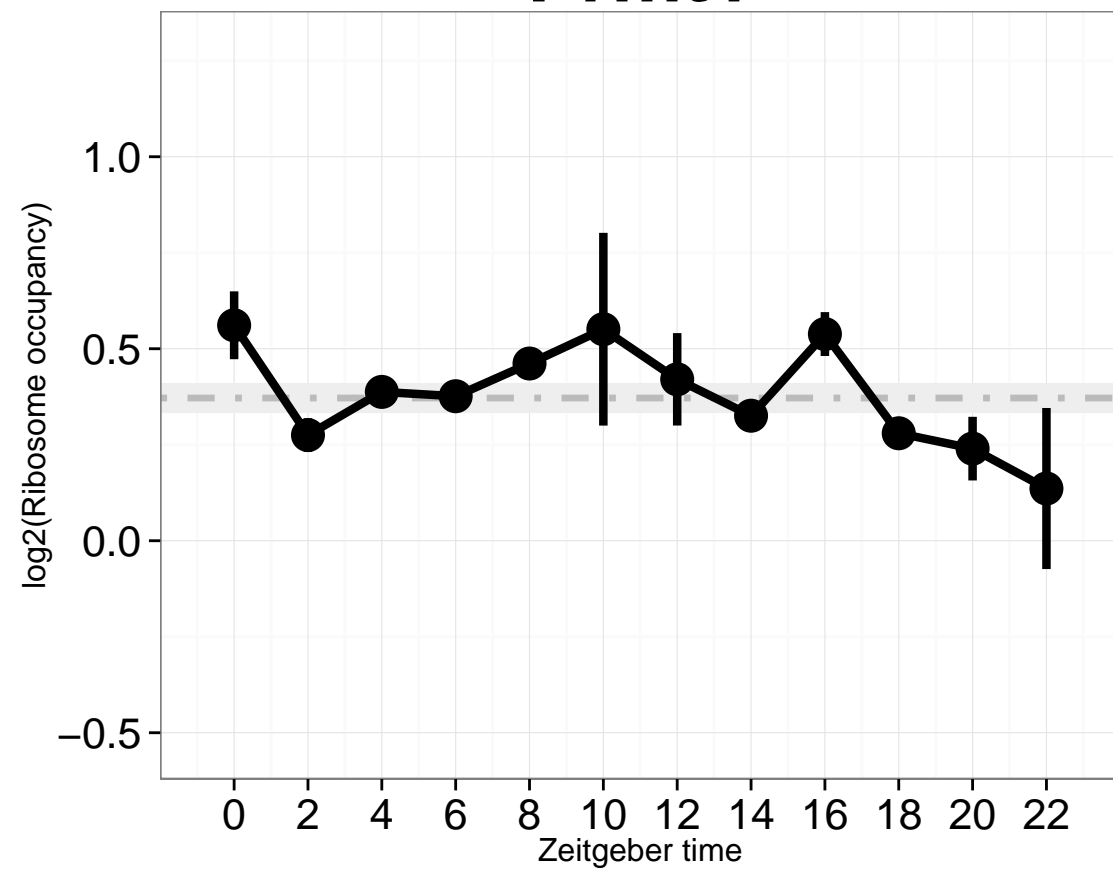

Supplement: SuppDataset_1.zip [file Prmt1_set_A.pdf › Supplemental Dataset 1/A-mRNA_nonrhyth_translation_nonrhyth/Prmt1_set_A.pdf]

## Prmt2

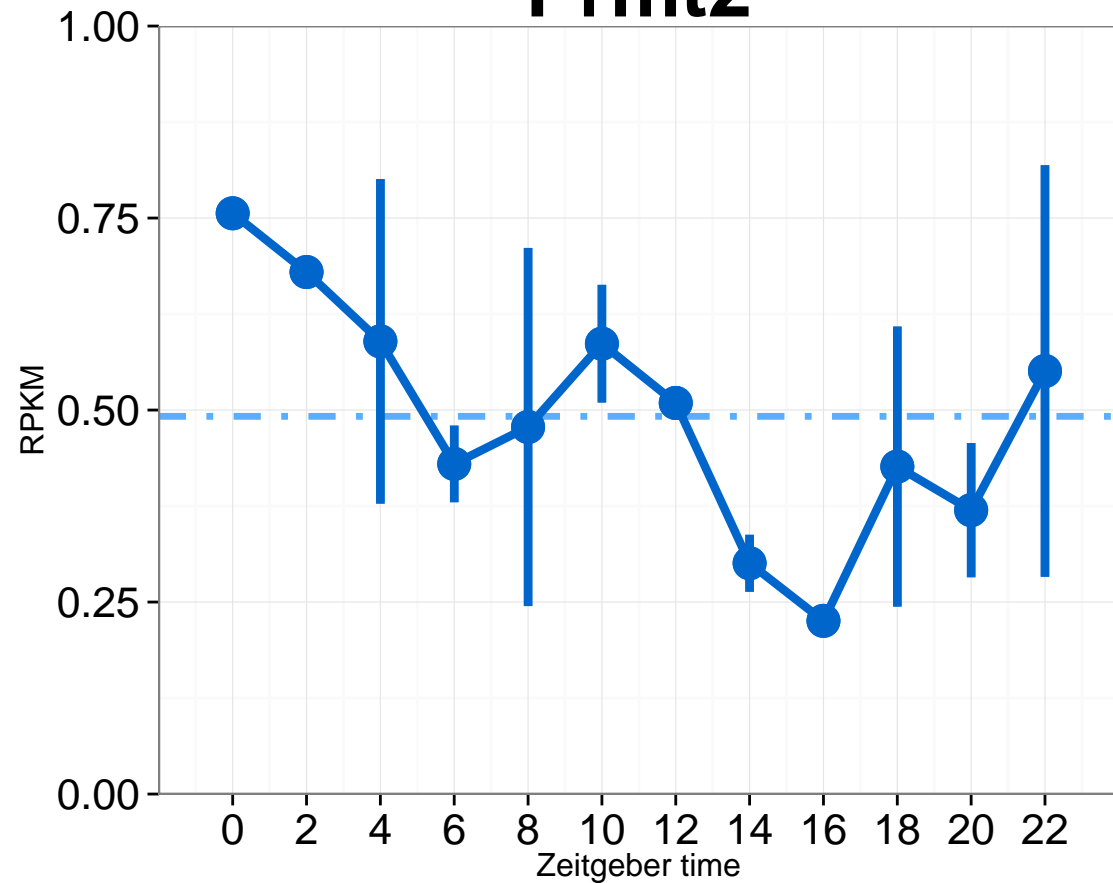

## Prmt2 log2(Ribosome occupancy

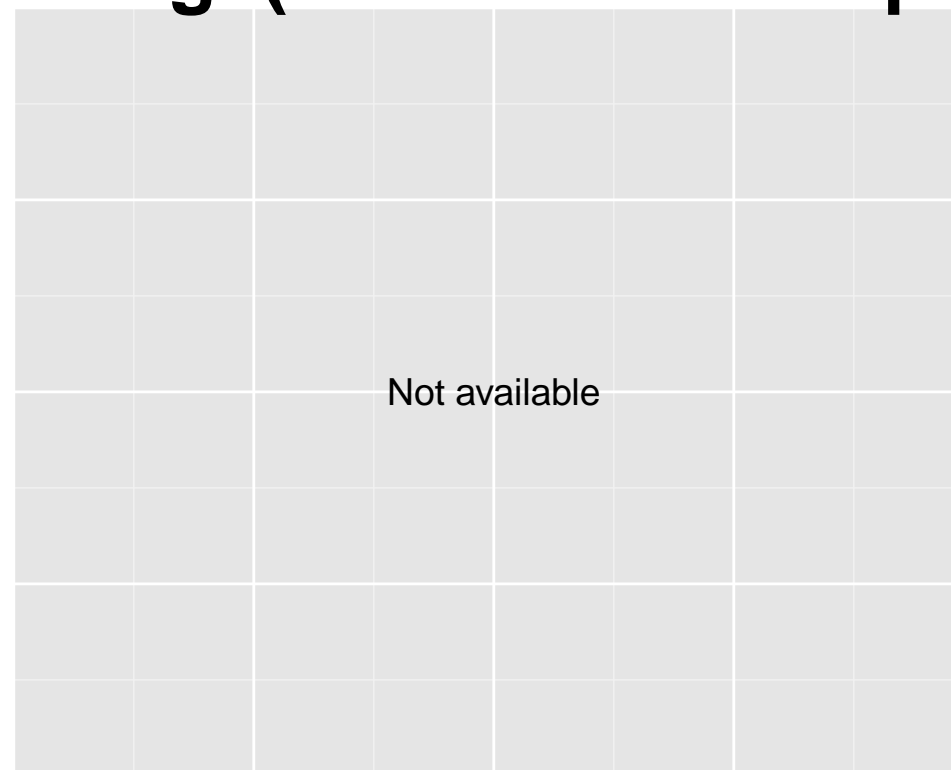

Supplement: SuppDataset_1.zip [file Prmt2_set_A.pdf › Supplemental Dataset 1/A-mRNA_nonrhyth_translation_nonrhyth/Prmt2_set_A.pdf]

## Prmt3

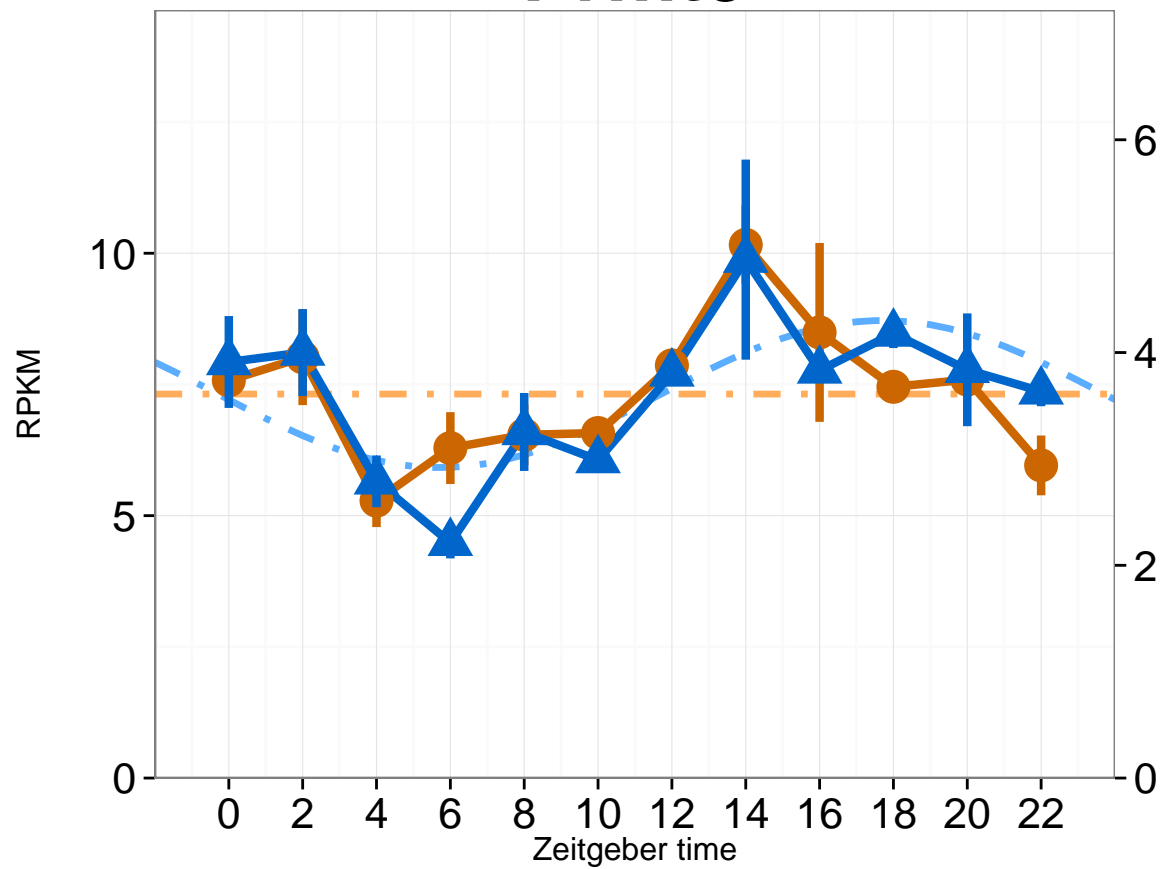

## Prmt3

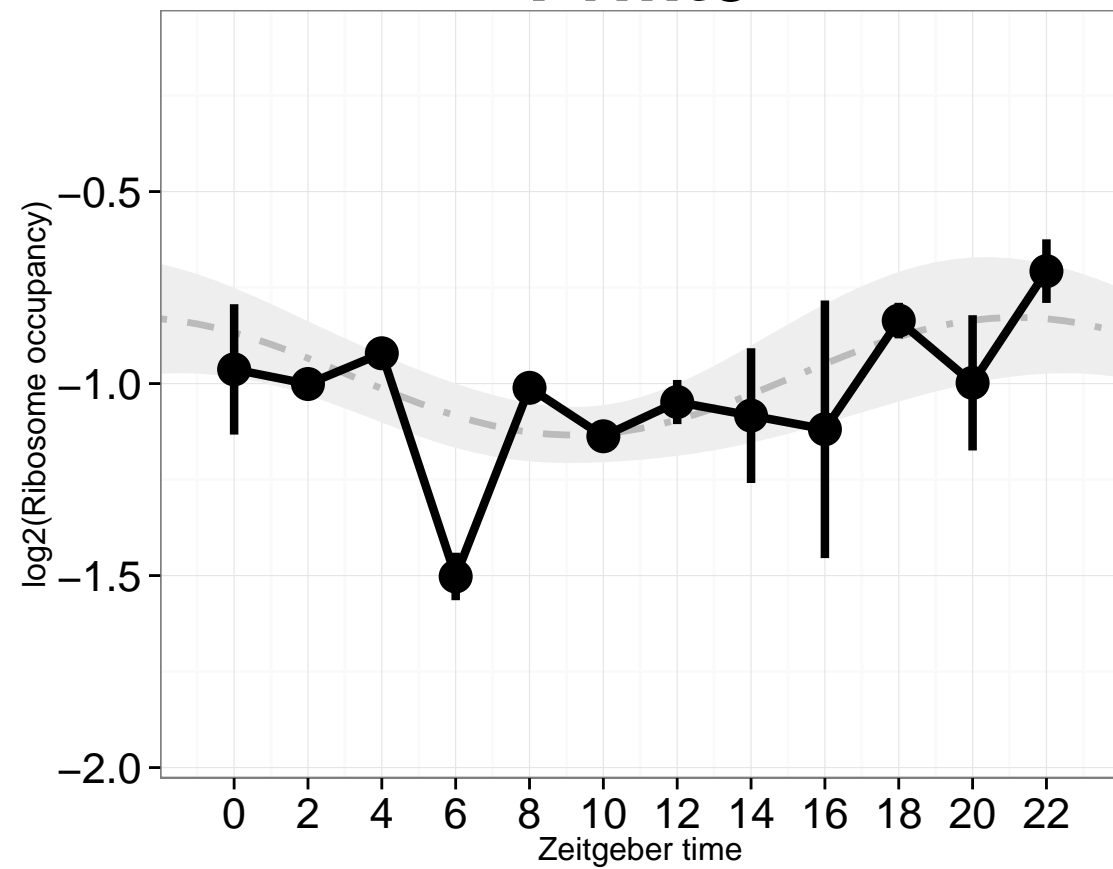

Supplement: SuppDataset_1.zip [file Prmt3_set_A.pdf › Supplemental Dataset 1/A-mRNA_nonrhyth_translation_nonrhyth/Prmt3_set_A.pdf]

## Prmt5

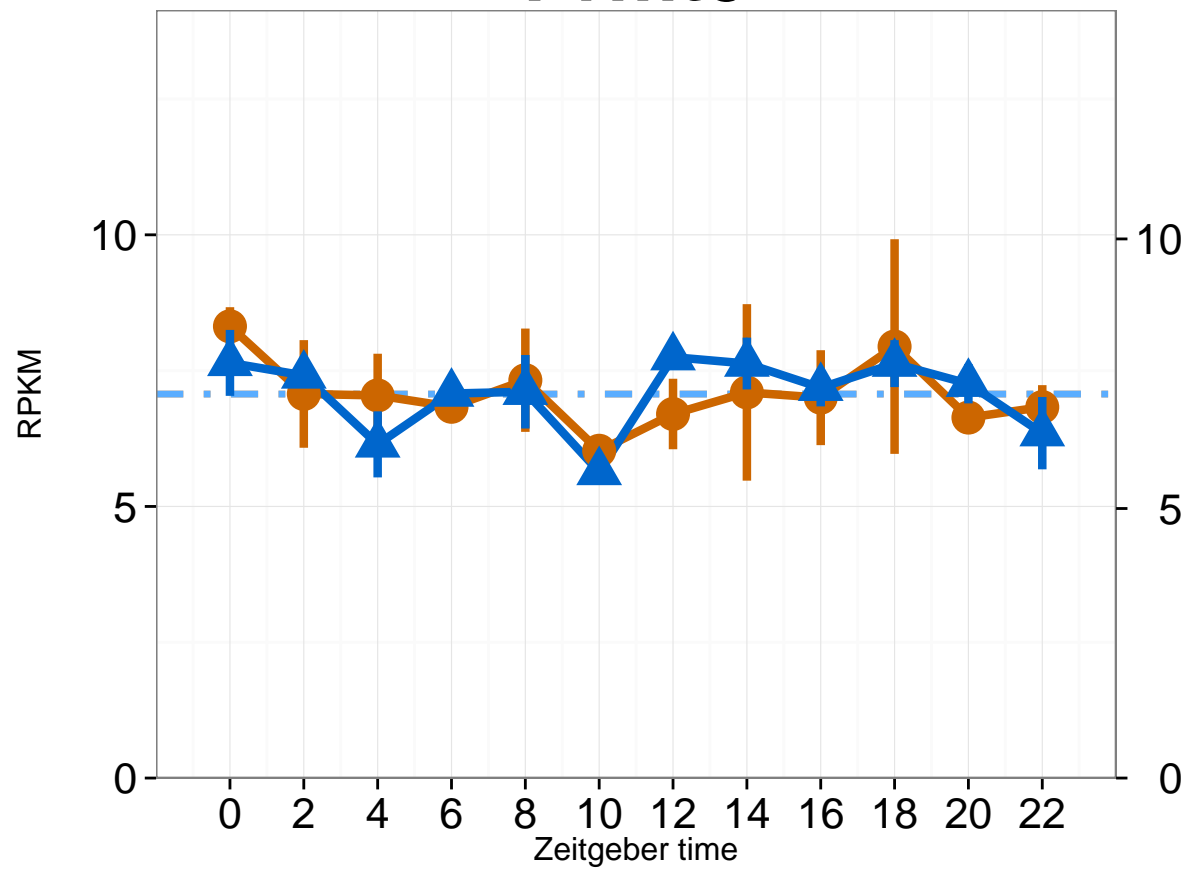

## Prmt5

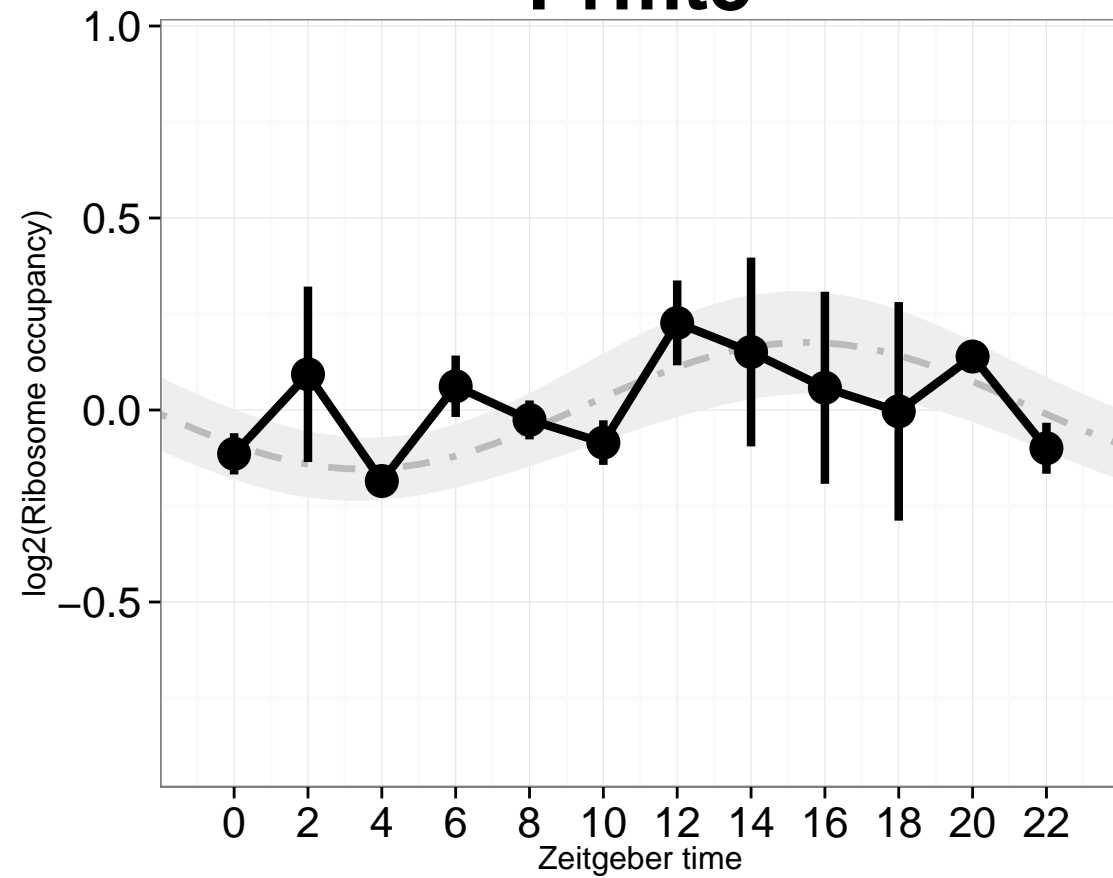

Supplement: SuppDataset_1.zip [file Prmt5_set_A.pdf › Supplemental Dataset 1/A-mRNA_nonrhyth_translation_nonrhyth/Prmt5_set_A.pdf]

## Prmt6

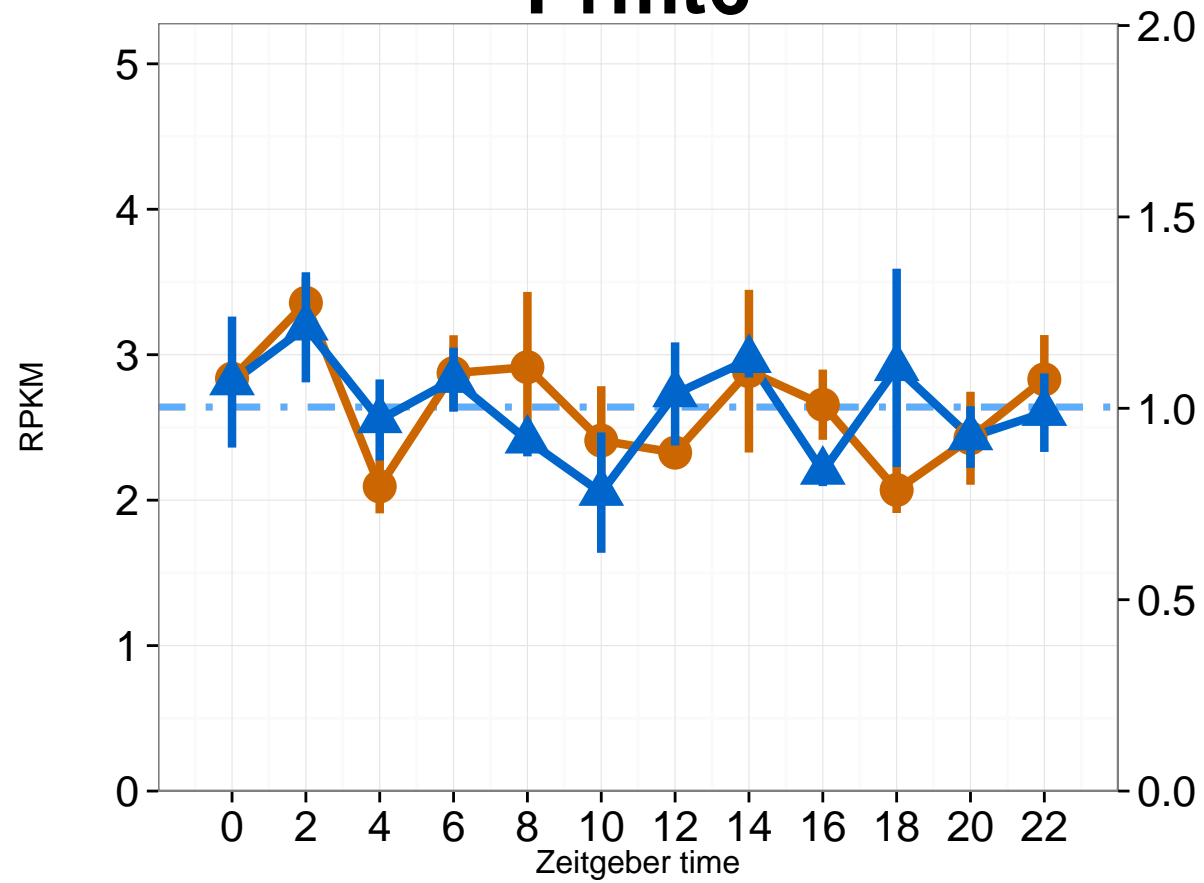

## Prmt6

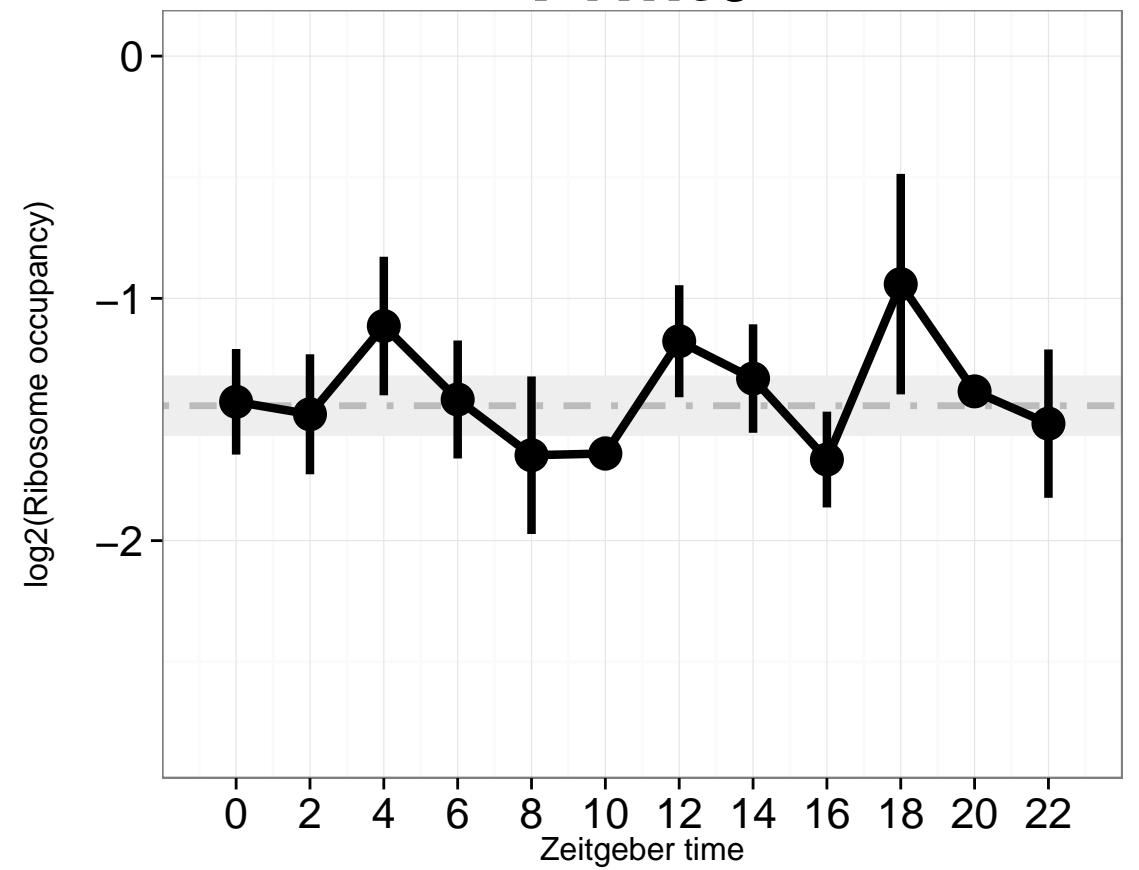

Supplement: SuppDataset_1.zip [file Prmt6_set_A.pdf › Supplemental Dataset 1/A-mRNA_nonrhyth_translation_nonrhyth/Prmt6_set_A.pdf]

# Prmt7

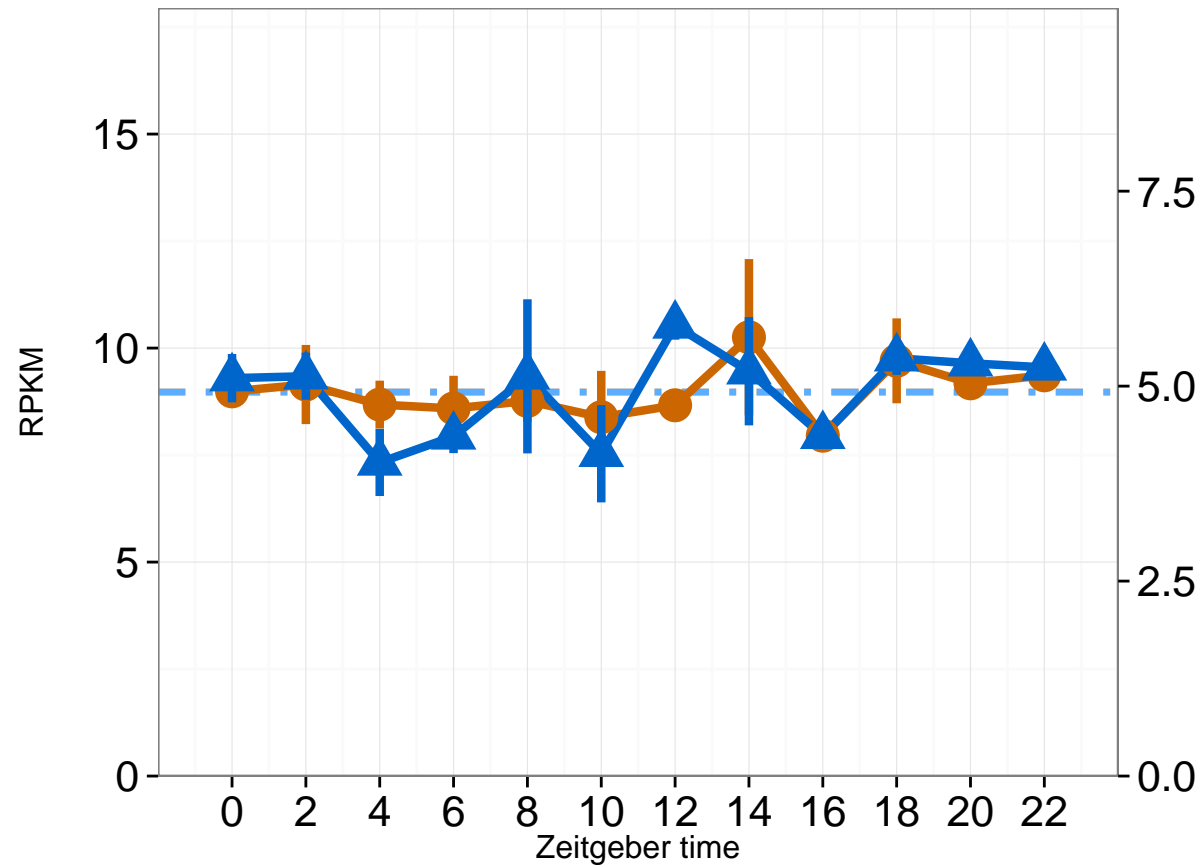

# Prmt7

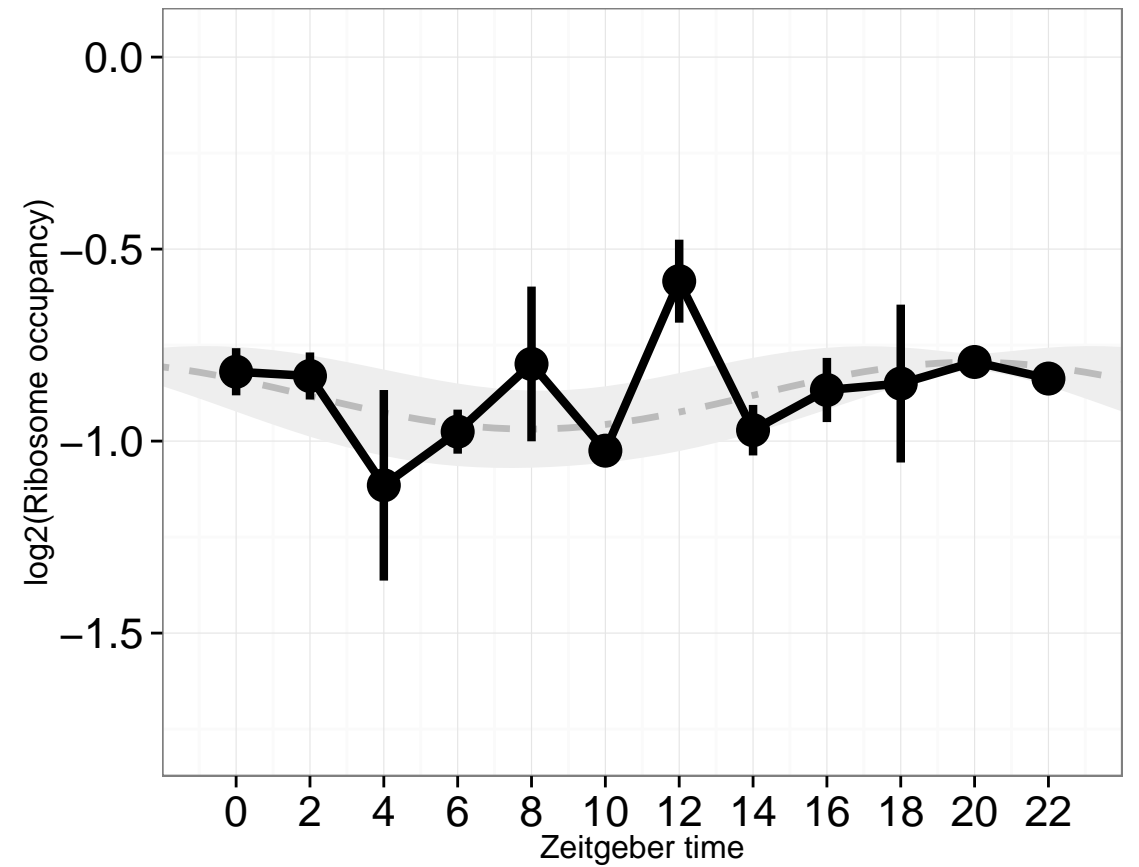

Supplement: SuppDataset_1.zip [file Prmt7_set_A.pdf › Supplemental Dataset 1/A-mRNA_nonrhyth_translation_nonrhyth/Prmt7_set_A.pdf]

# Prob1

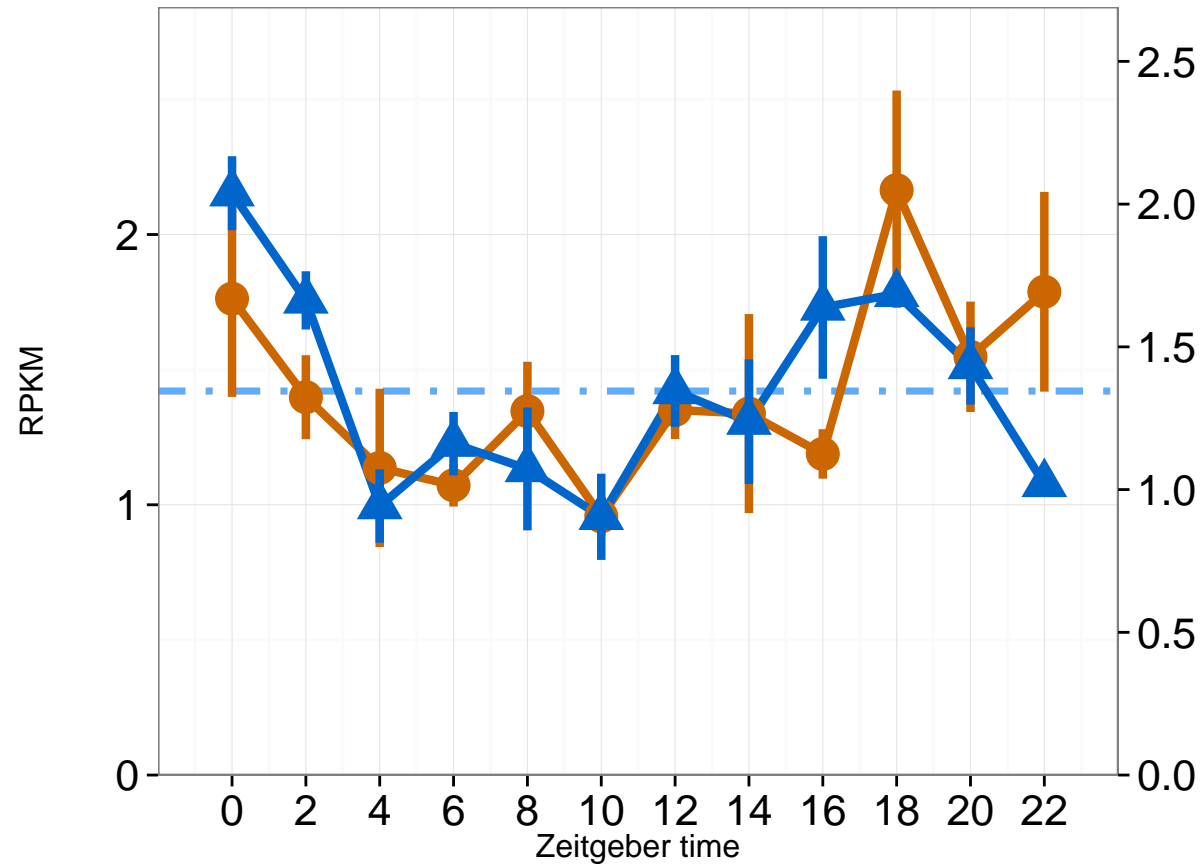

# Prob1

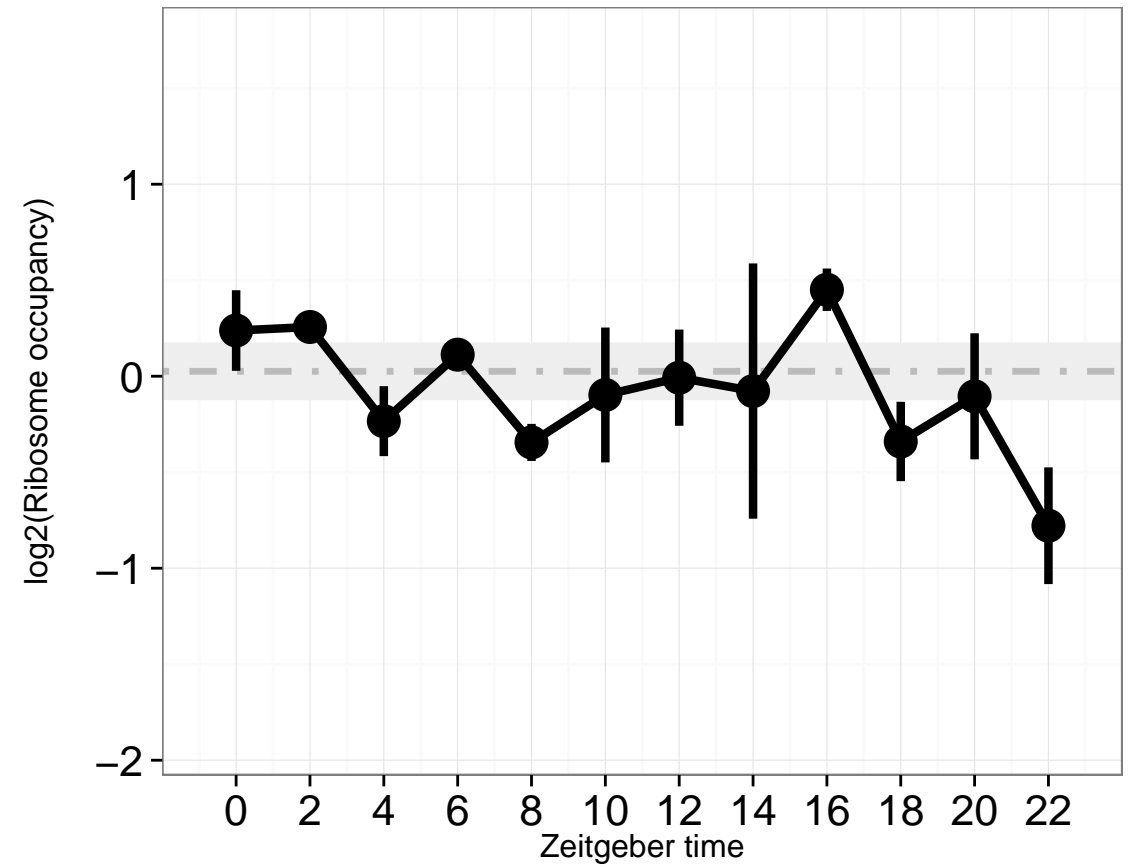

Supplement: SuppDataset_1.zip [file Prob1_set_A.pdf › Supplemental Dataset 1/A-mRNA_nonrhyth_translation_nonrhyth/Prob1_set_A.pdf]

## Proc

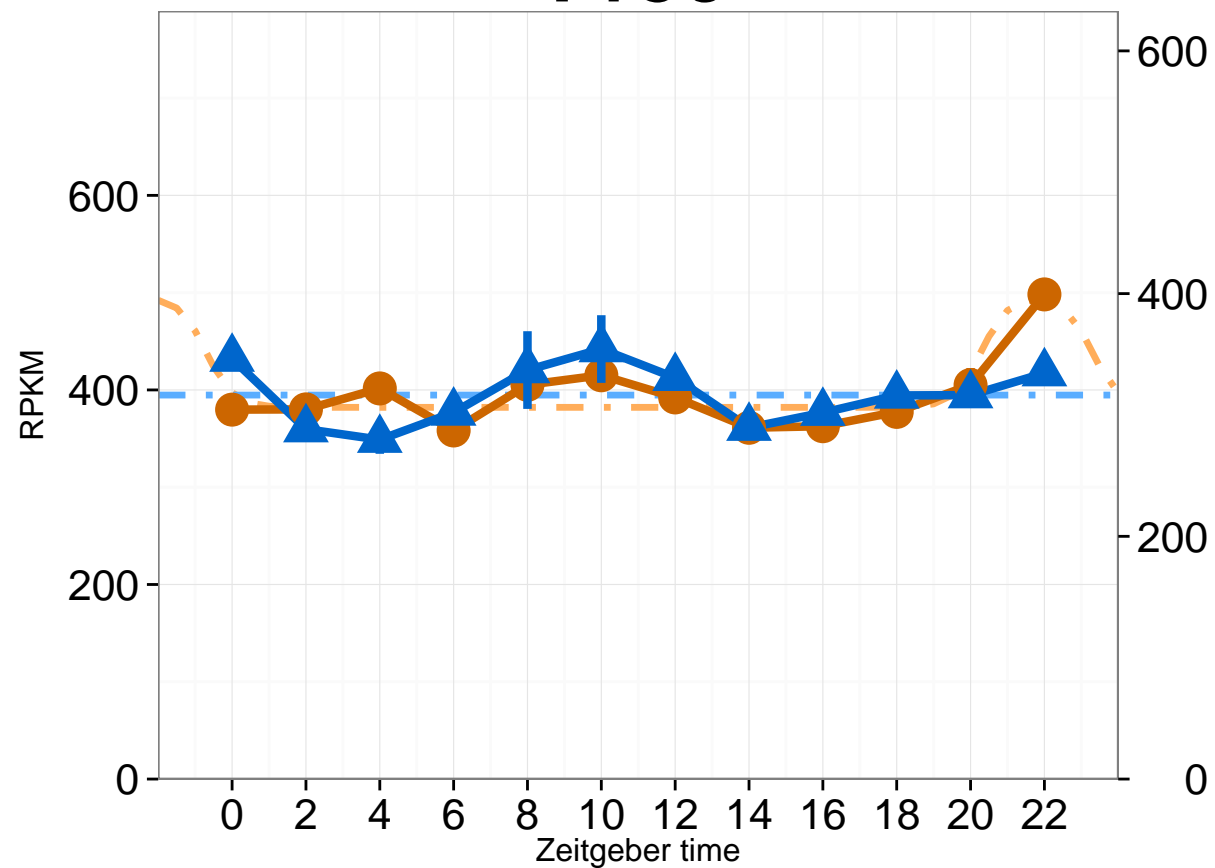

## Proc

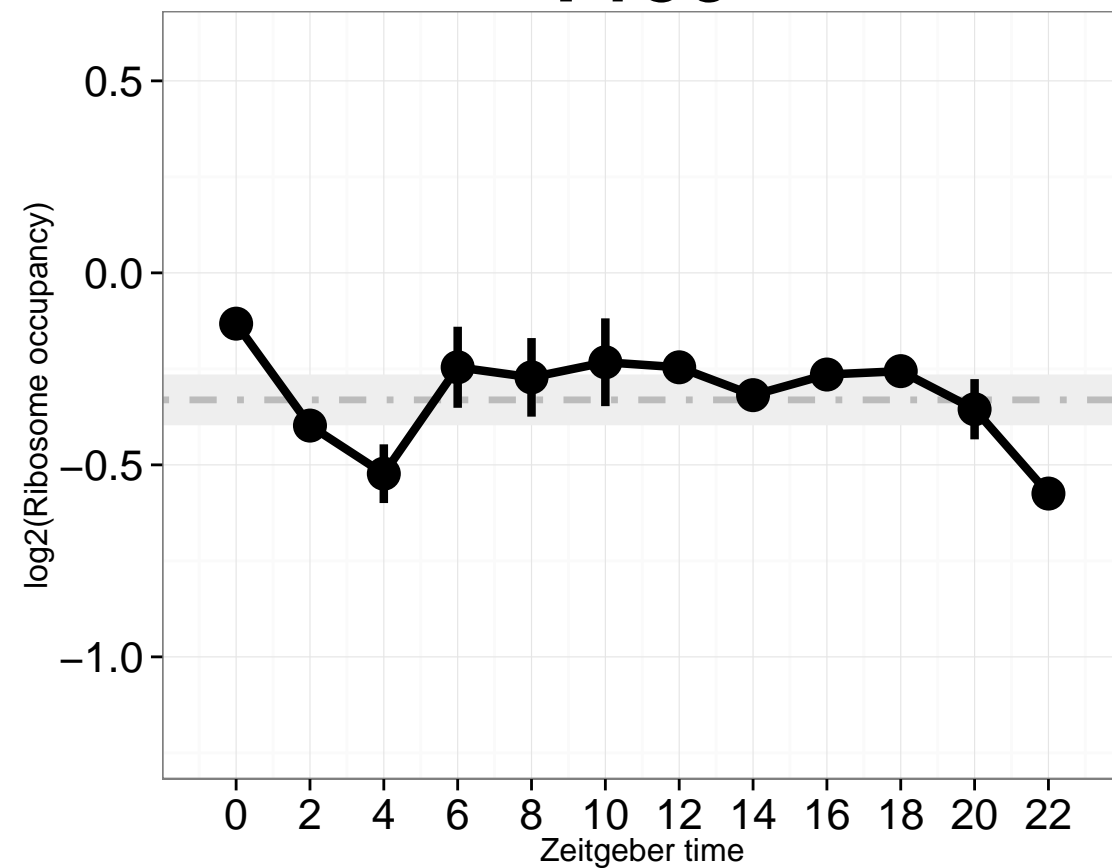

Supplement: SuppDataset_1.zip [file Proc_set_A.pdf › Supplemental Dataset 1/A-mRNA_nonrhyth_translation_nonrhyth/Proc_set_A.pdf]

## Procr TR

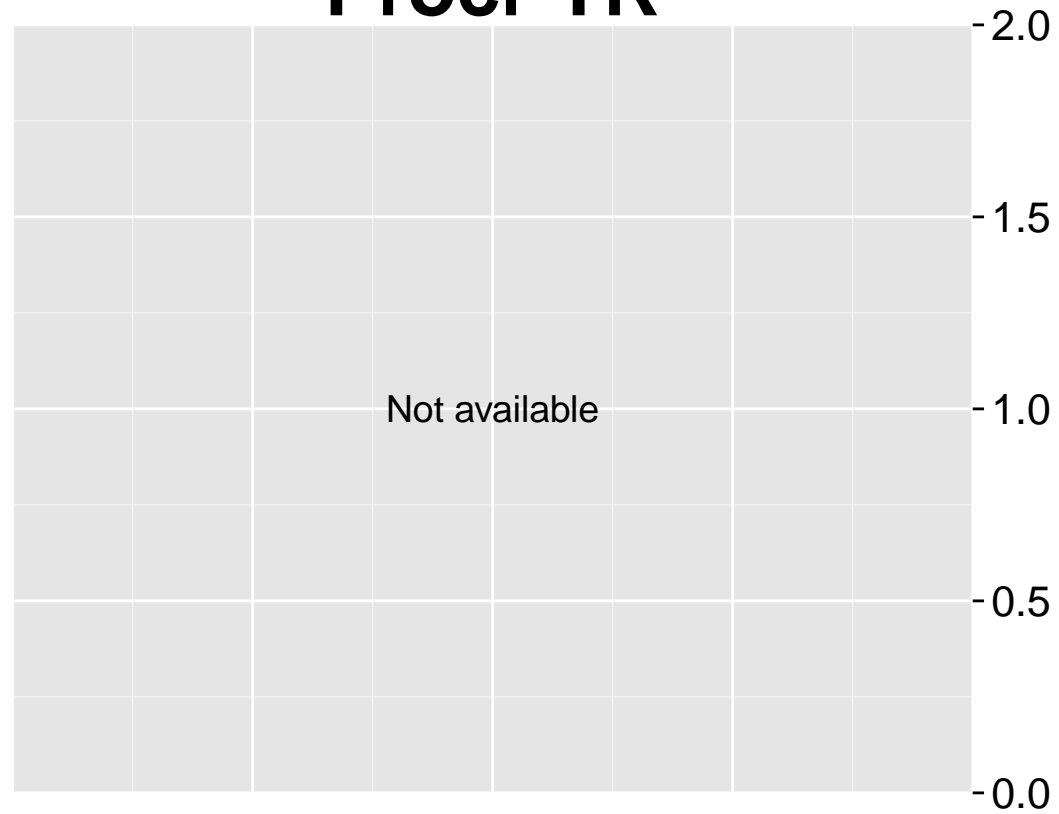

## Procr log2(Ribosome occupancy)

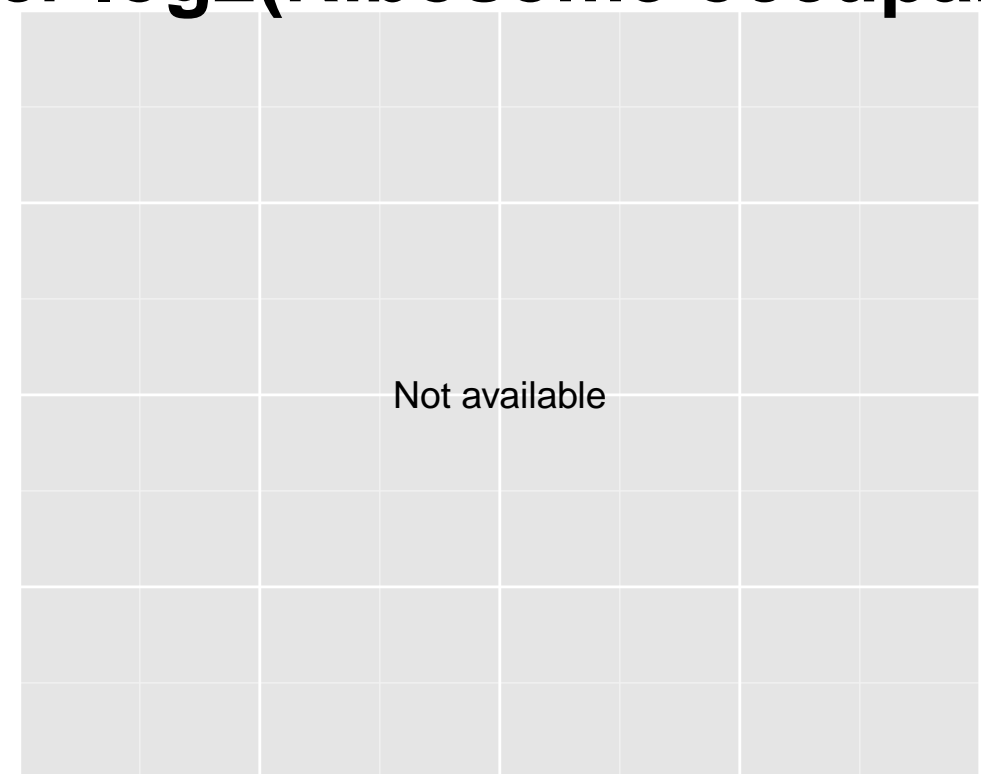

Supplement: SuppDataset_1.zip [file Procr_set_A.pdf › Supplemental Dataset 1/A-mRNA_nonrhyth_translation_nonrhyth/Procr_set_A.pdf]

# Prodh2

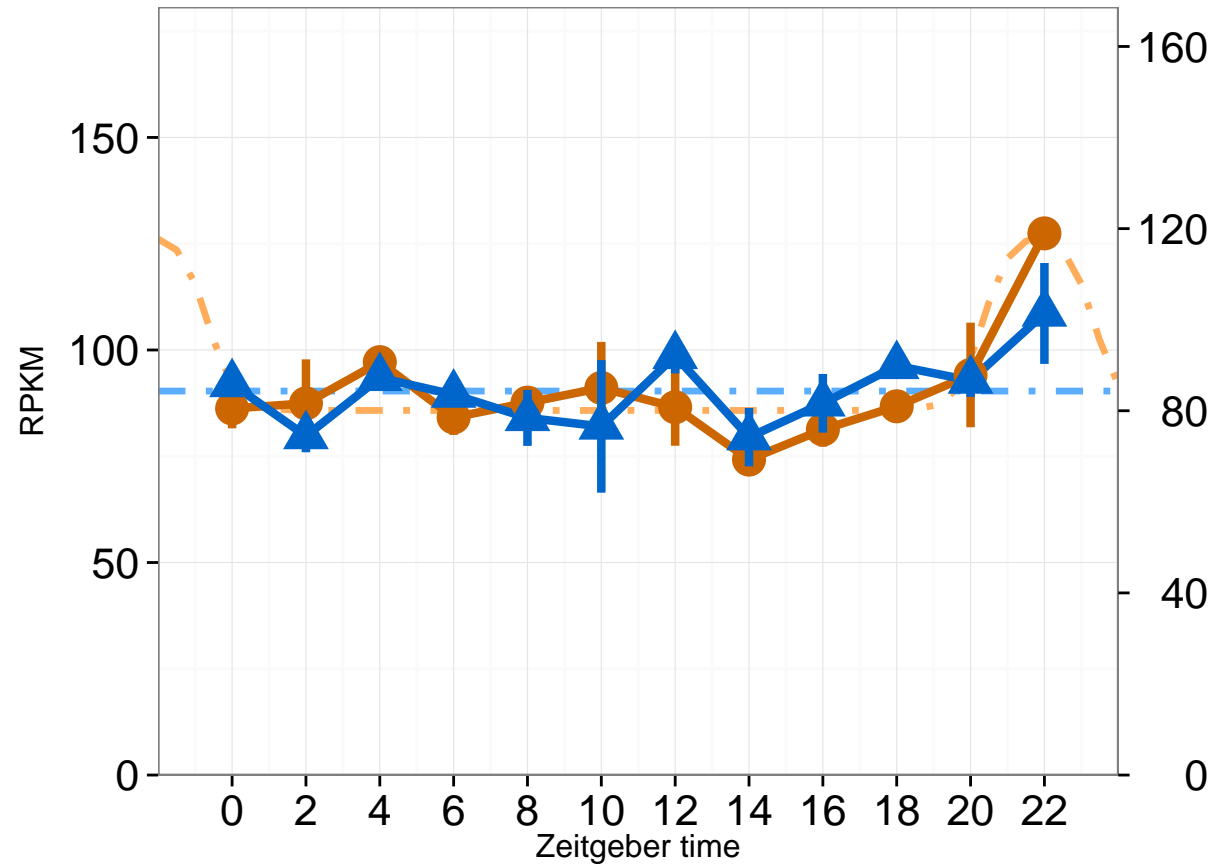

# Prodh2

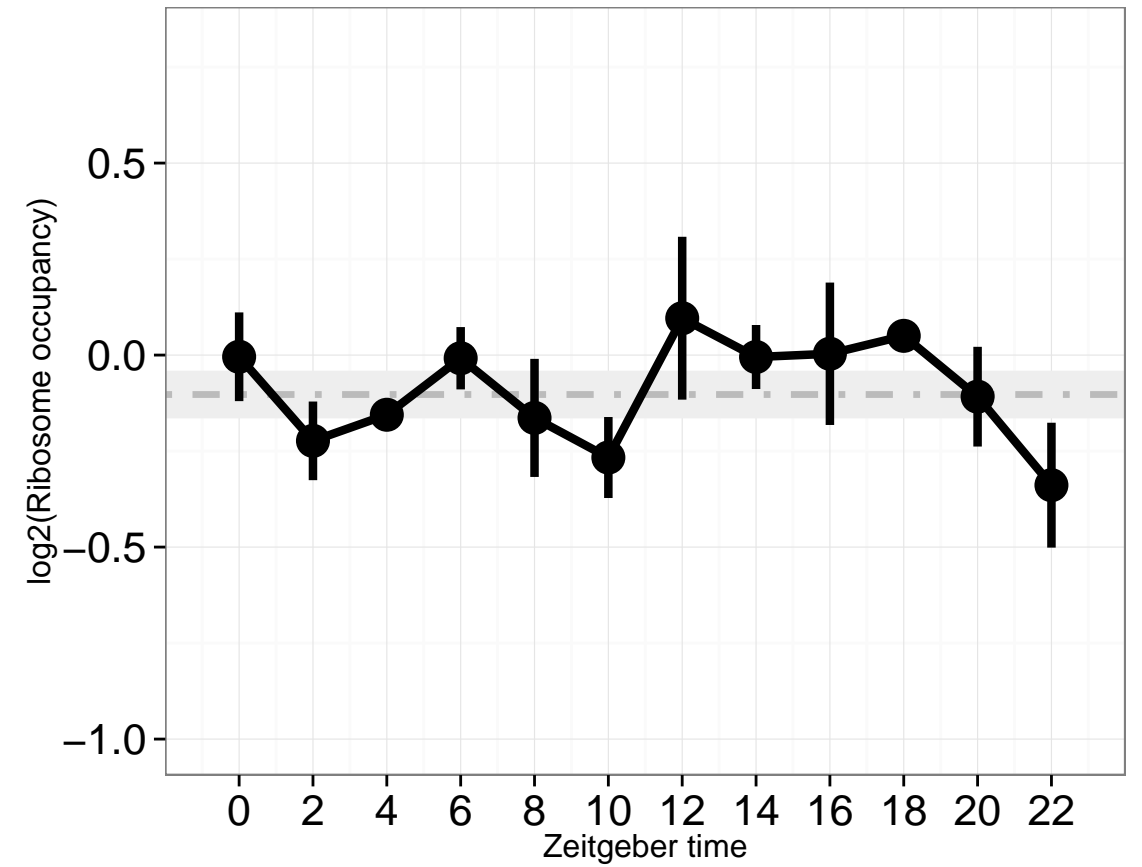

Supplement: SuppDataset_1.zip [file Prodh2_set_A.pdf › Supplemental Dataset 1/A-mRNA_nonrhyth_translation_nonrhyth/Prodh2_set_A.pdf]

## Prok1

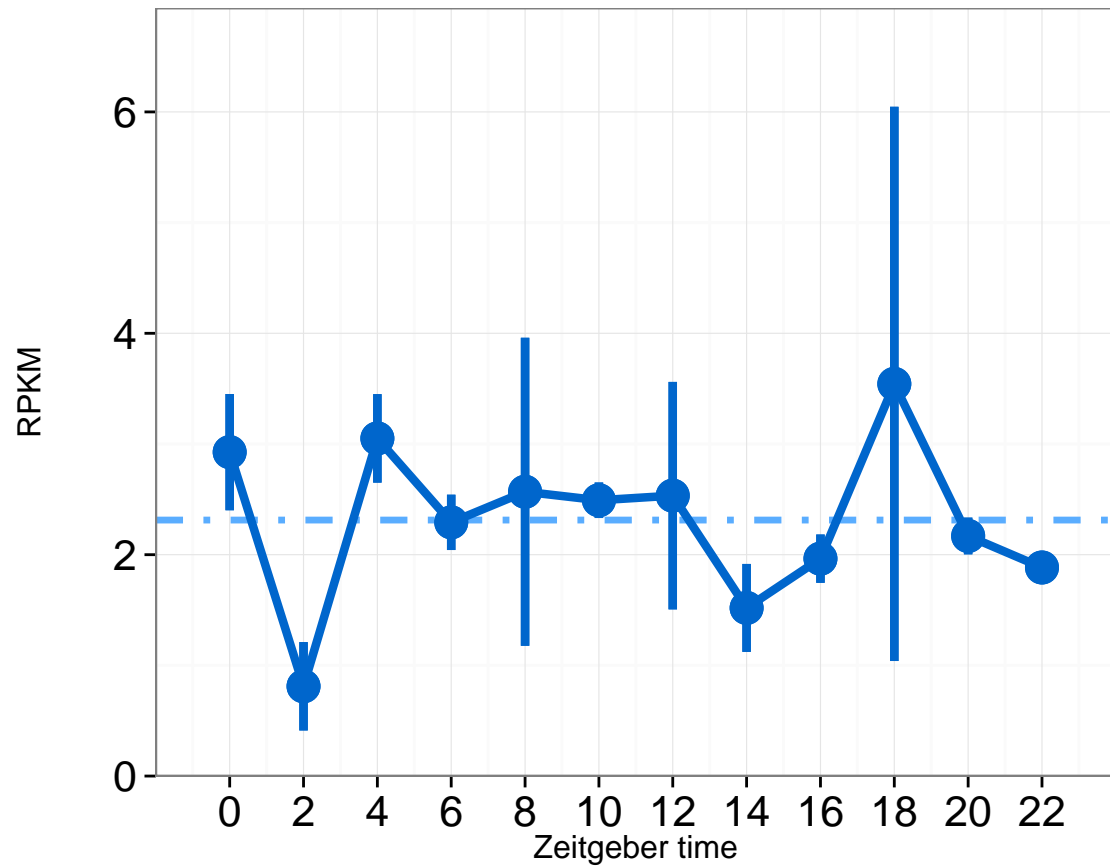

## Prok1 log2(Ribosome occupancy

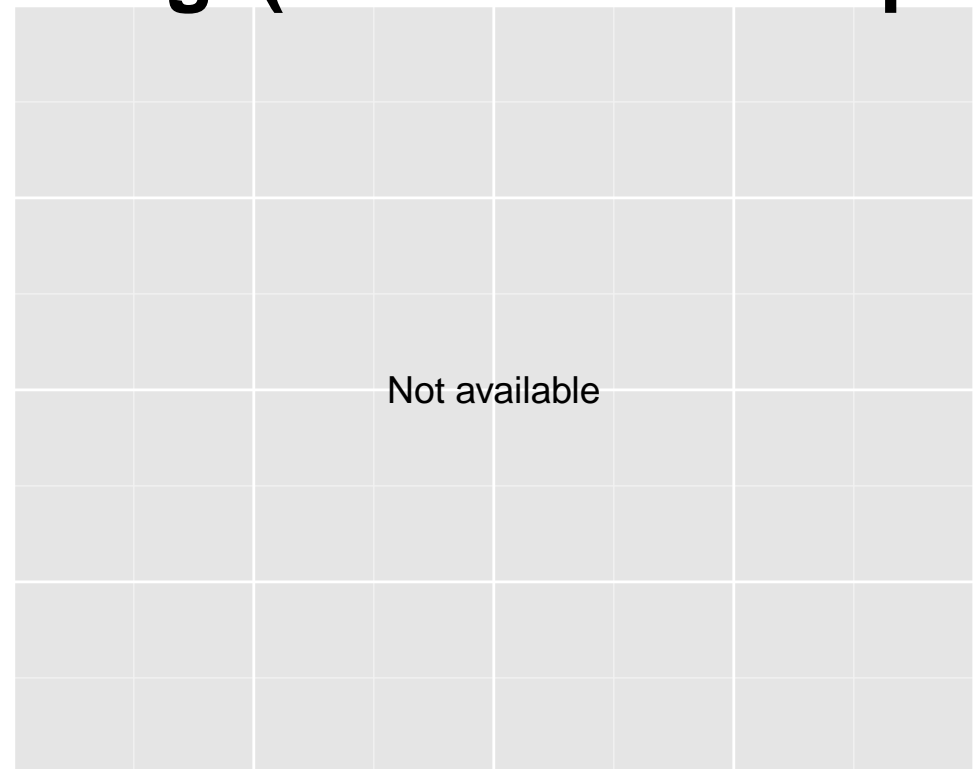

Supplement: SuppDataset_1.zip [file Prok1_set_A.pdf › Supplemental Dataset 1/A-mRNA_nonrhyth_translation_nonrhyth/Prok1_set_A.pdf]

# Prom1

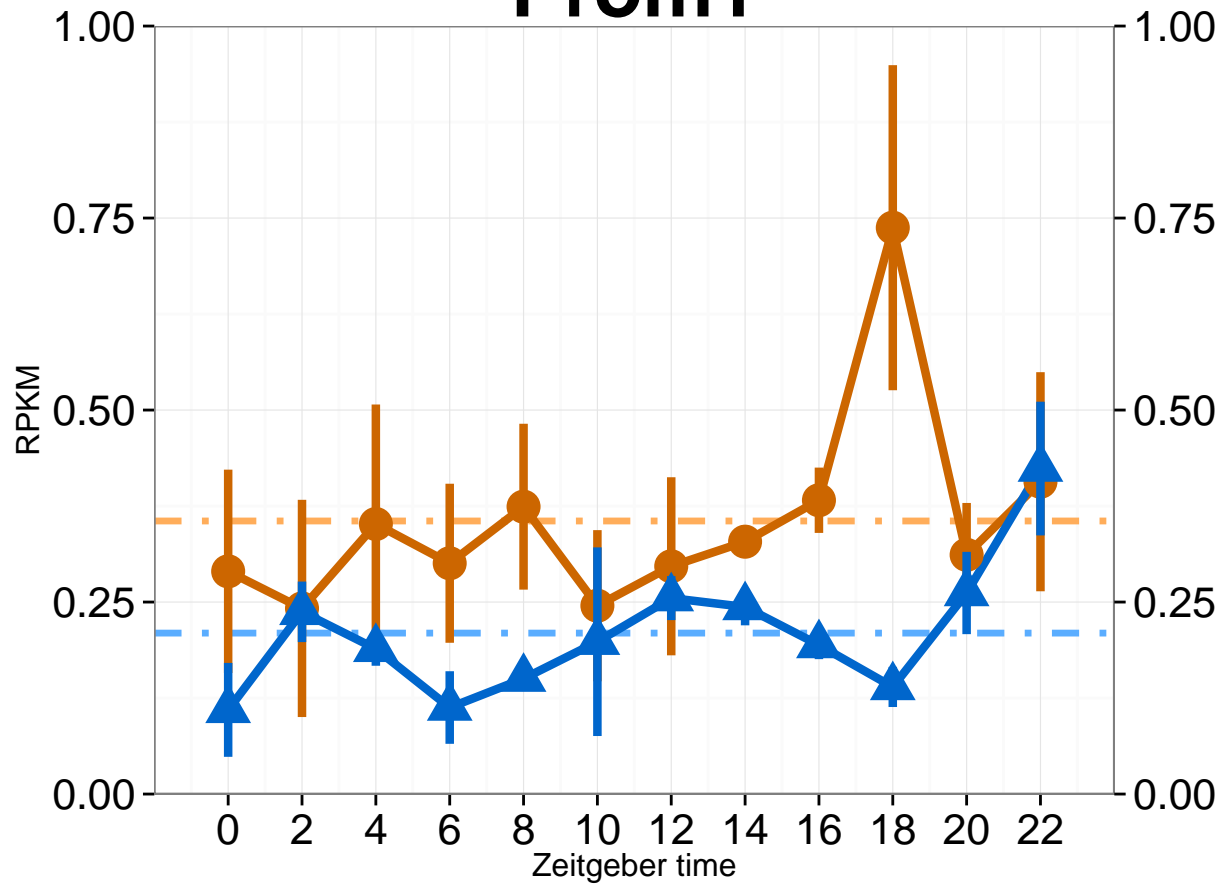

# Prom1

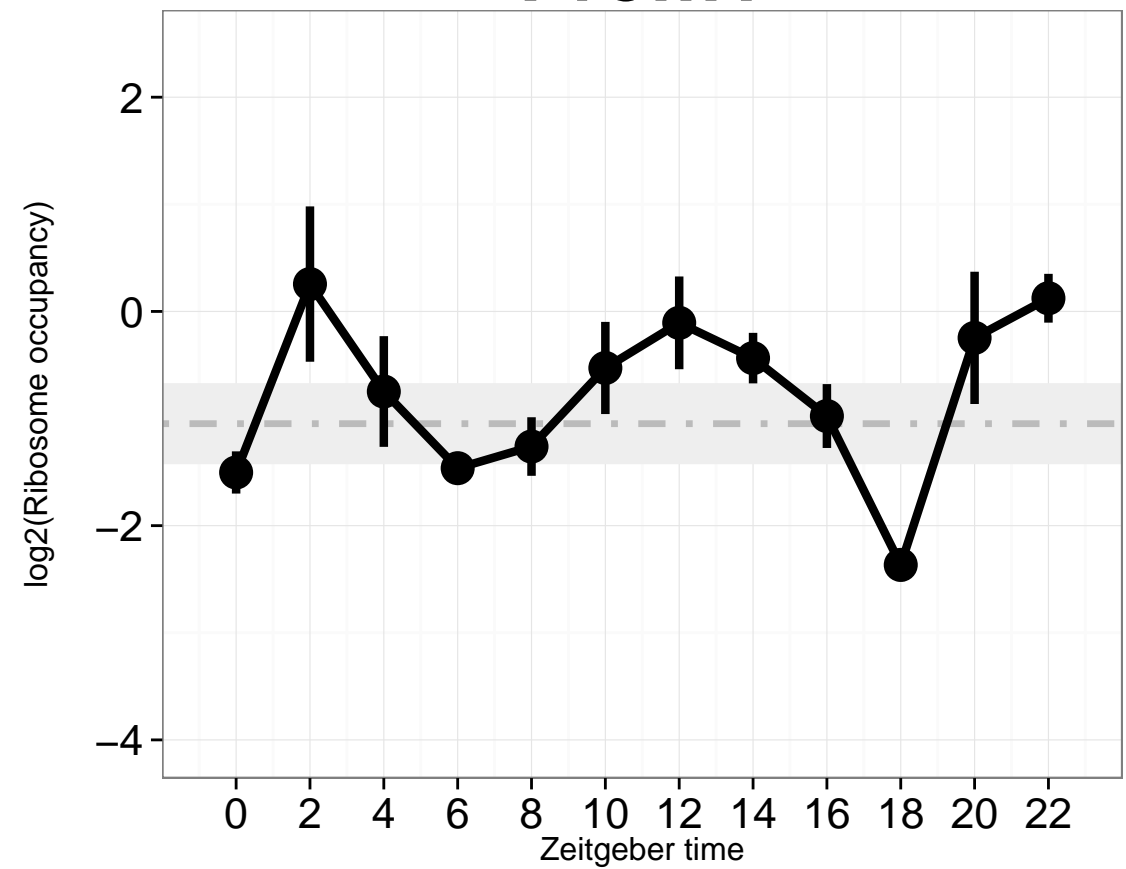

Supplement: SuppDataset_1.zip [file Prom1_set_A.pdf › Supplemental Dataset 1/A-mRNA_nonrhyth_translation_nonrhyth/Prom1_set_A.pdf]

# Prorsd1

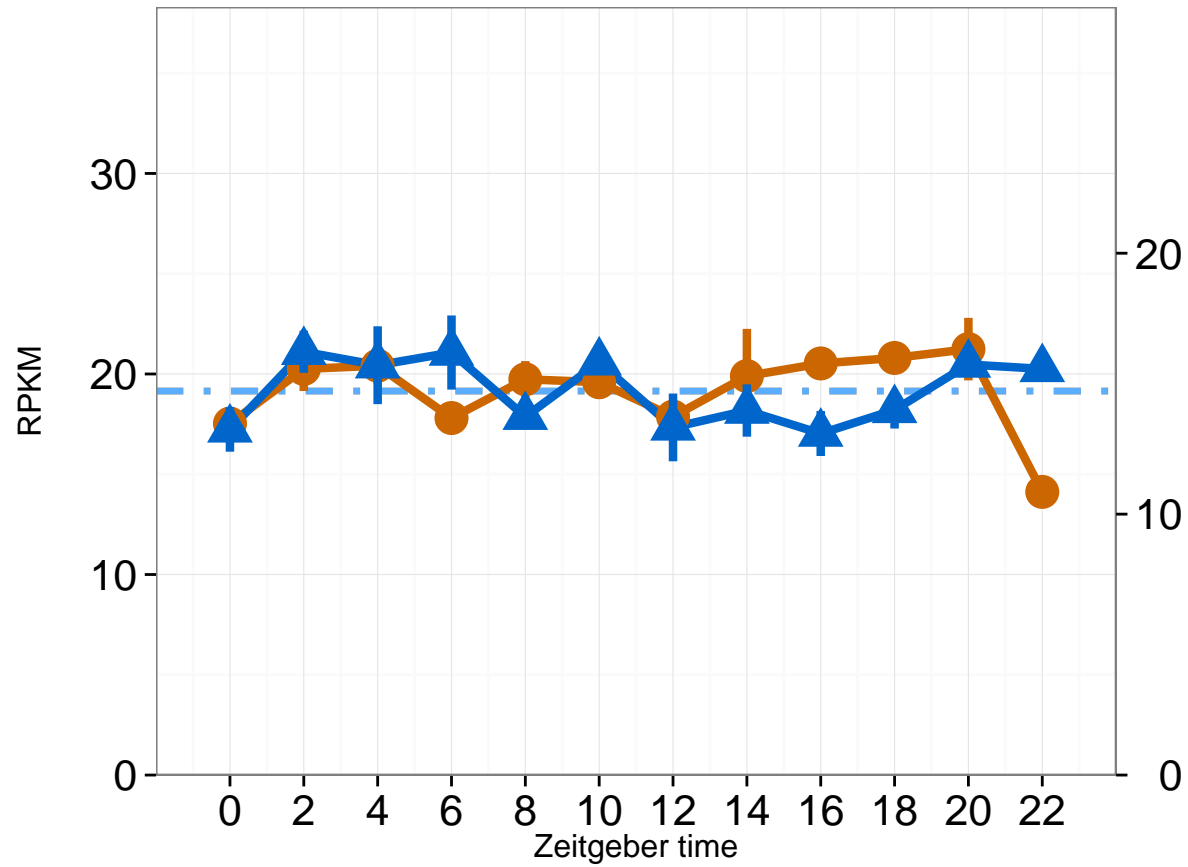

# Prorsd1

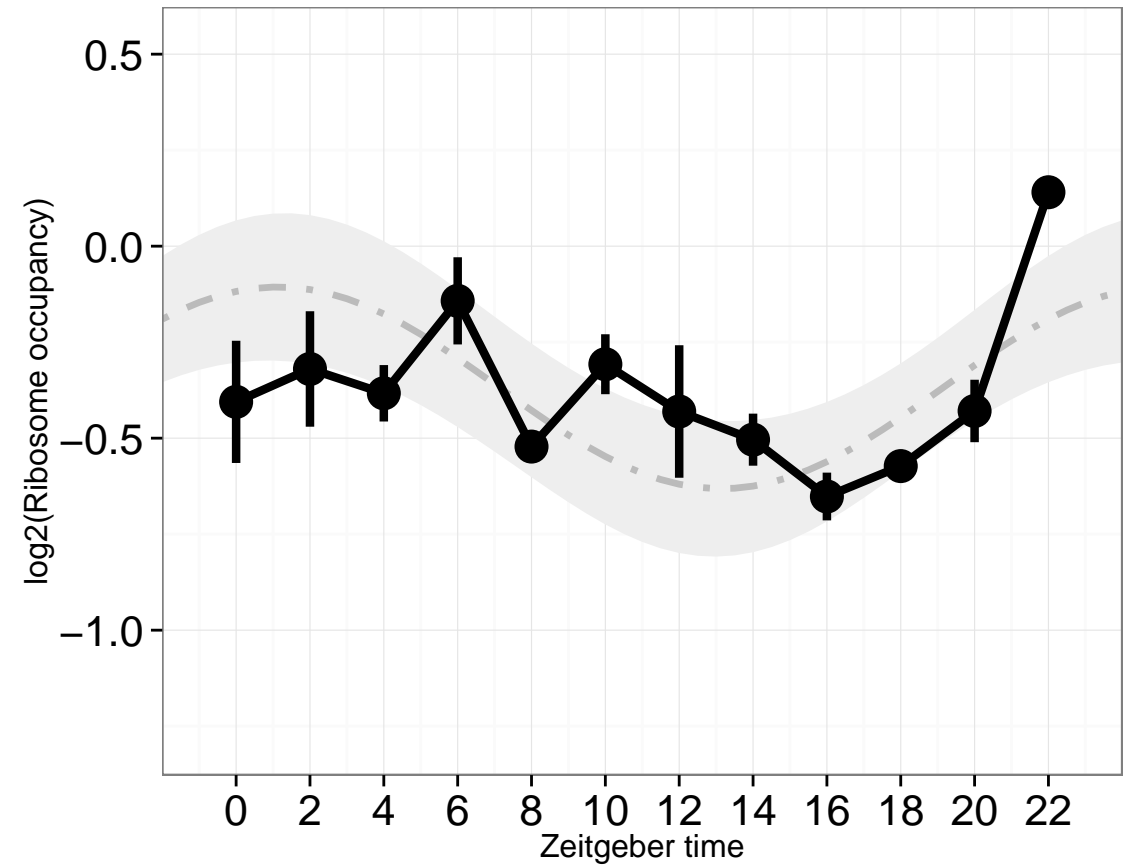

Supplement: SuppDataset_1.zip [file Prorsd1_set_A.pdf › Supplemental Dataset 1/A-mRNA_nonrhyth_translation_nonrhyth/Prorsd1_set_A.pdf]

## Prosc

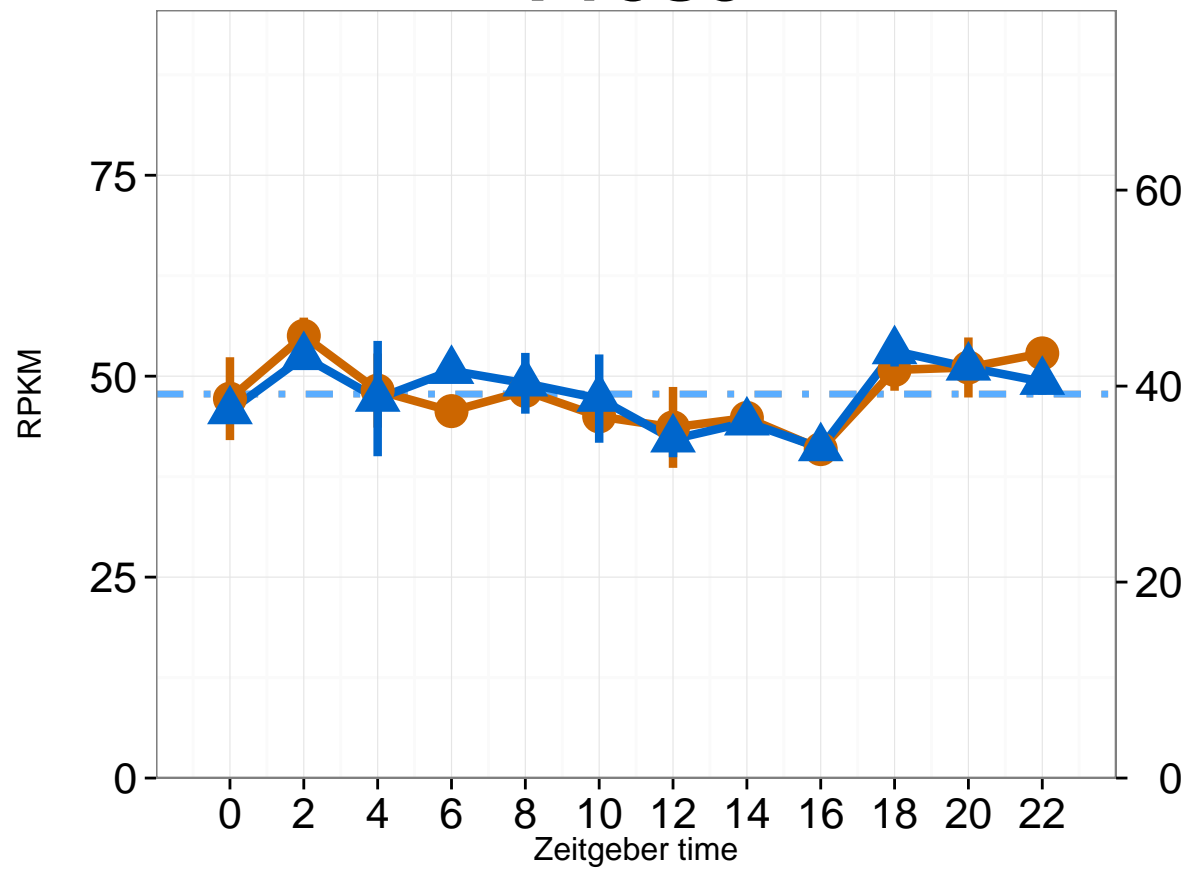

## Prosc

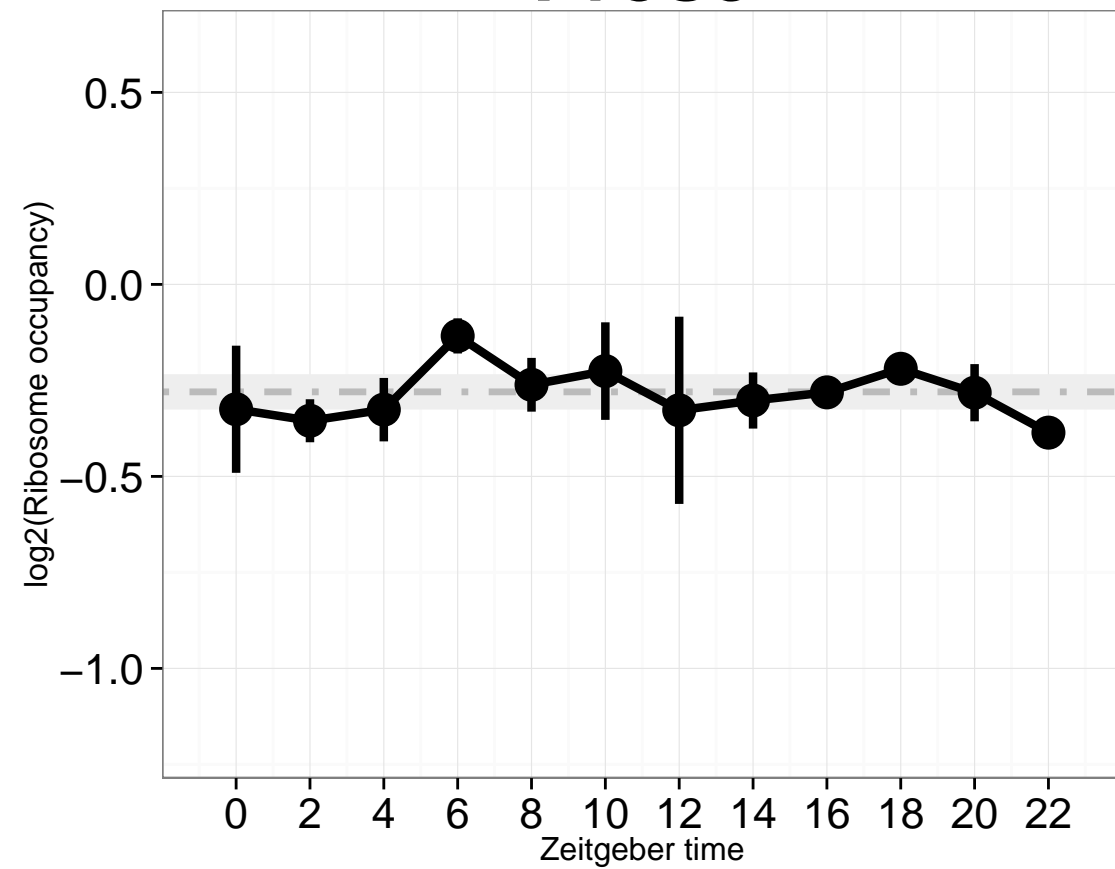

Supplement: SuppDataset_1.zip [file Prosc_set_A.pdf › Supplemental Dataset 1/A-mRNA_nonrhyth_translation_nonrhyth/Prosc_set_A.pdf]

# Proser1

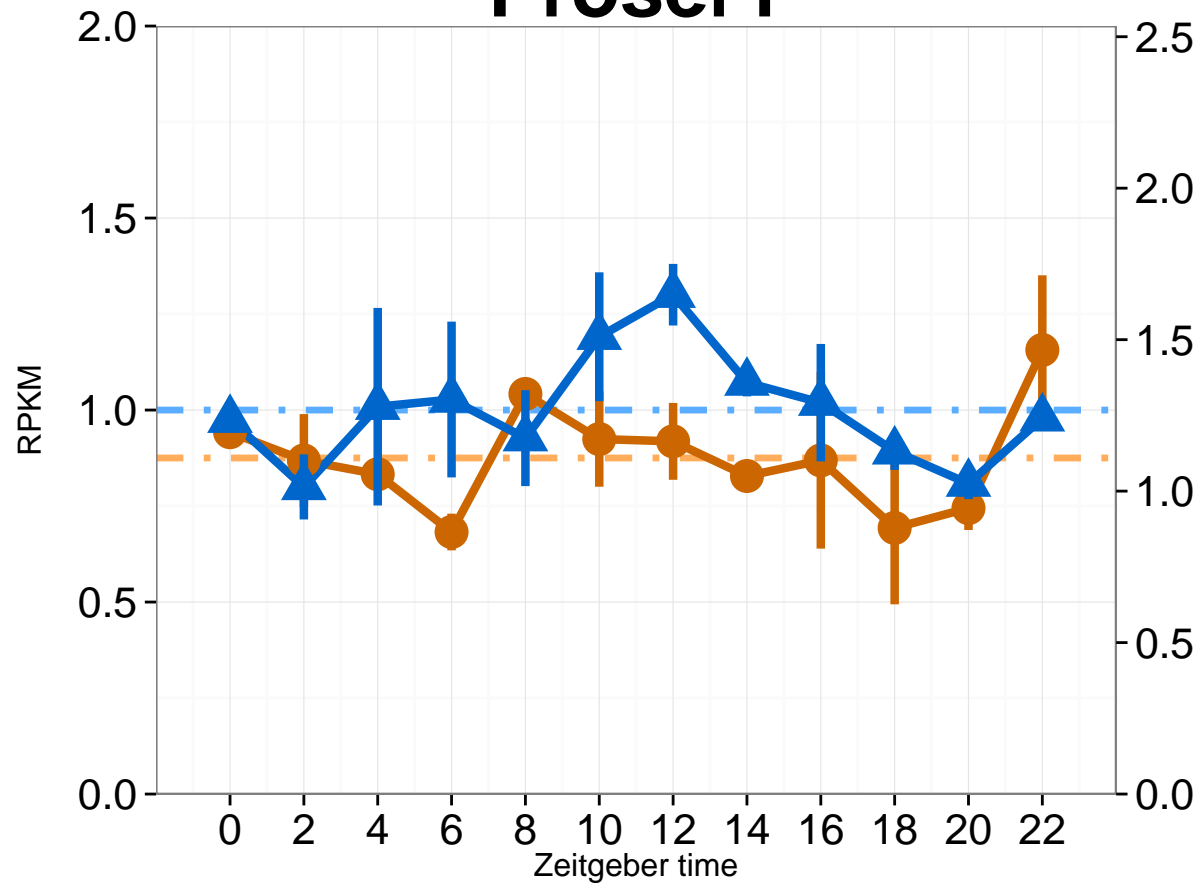

# Proser1

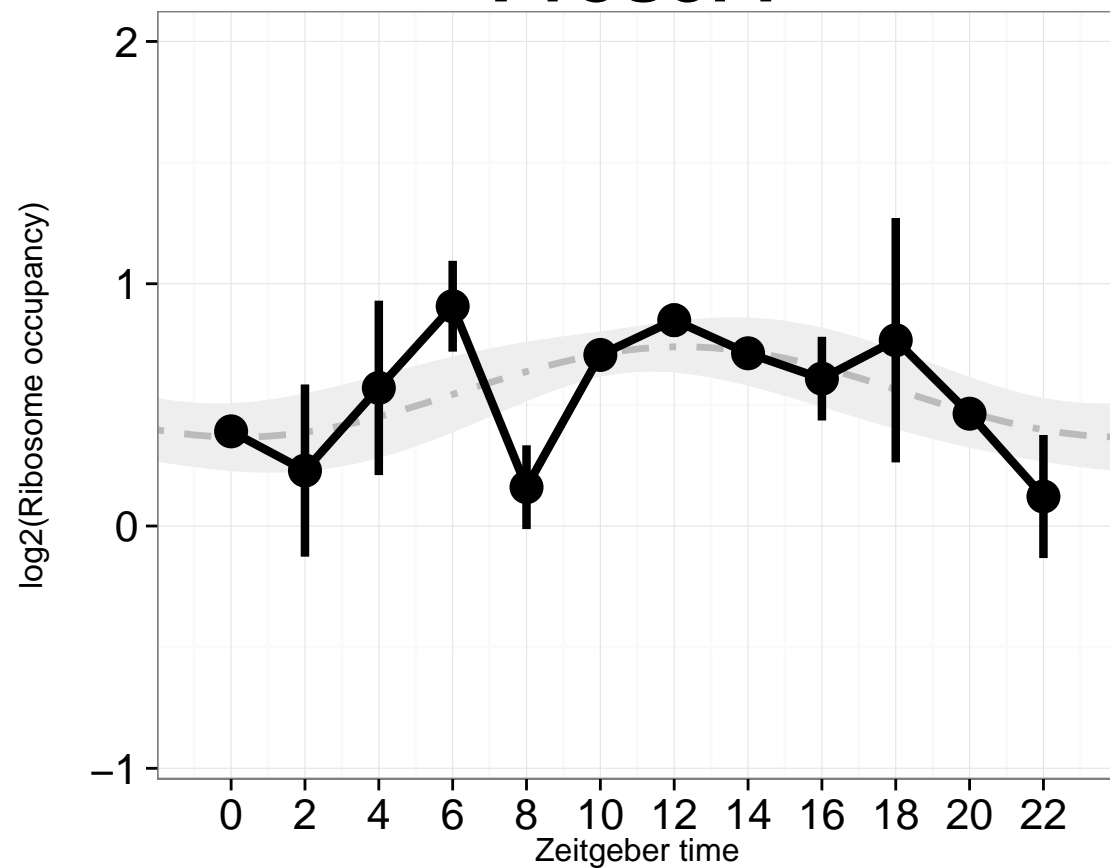

Supplement: SuppDataset_1.zip [file Proser1_set_A.pdf › Supplemental Dataset 1/A-mRNA_nonrhyth_translation_nonrhyth/Proser1_set_A.pdf]

## Prox1

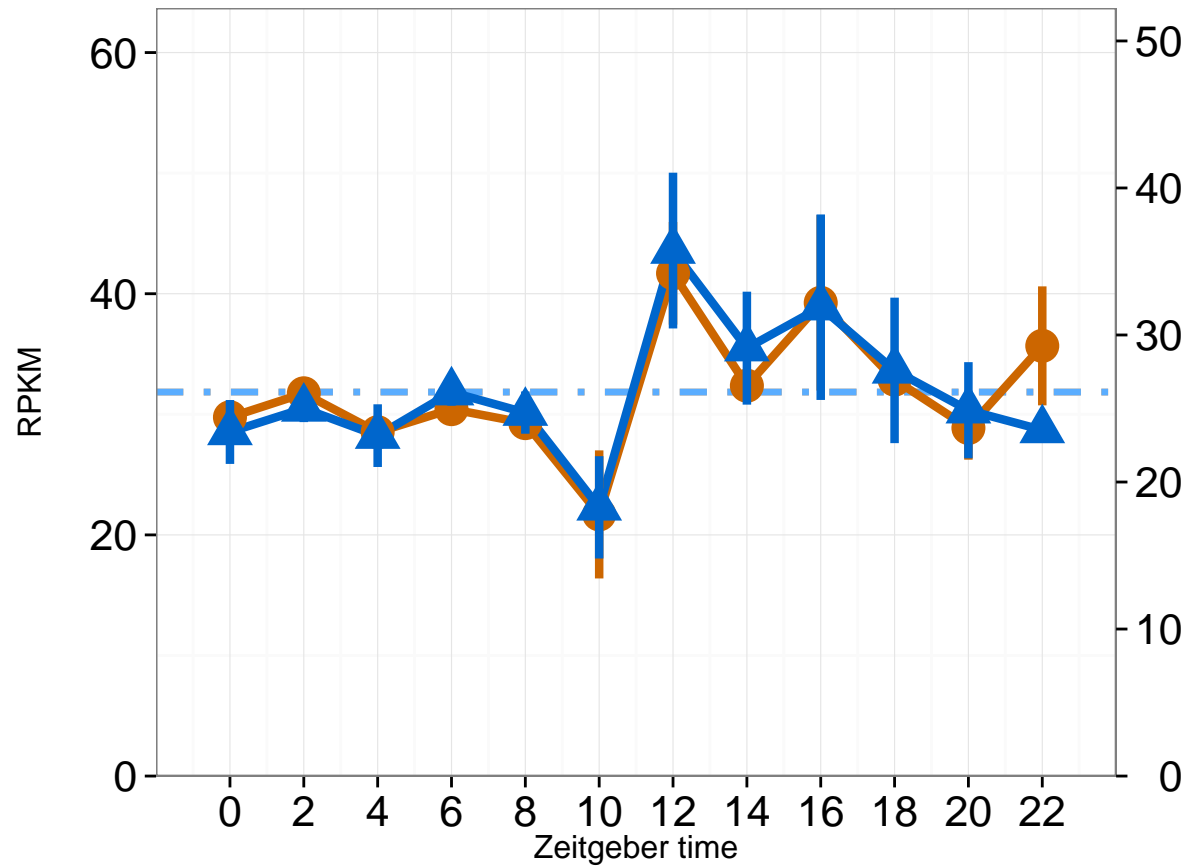

## Prox1

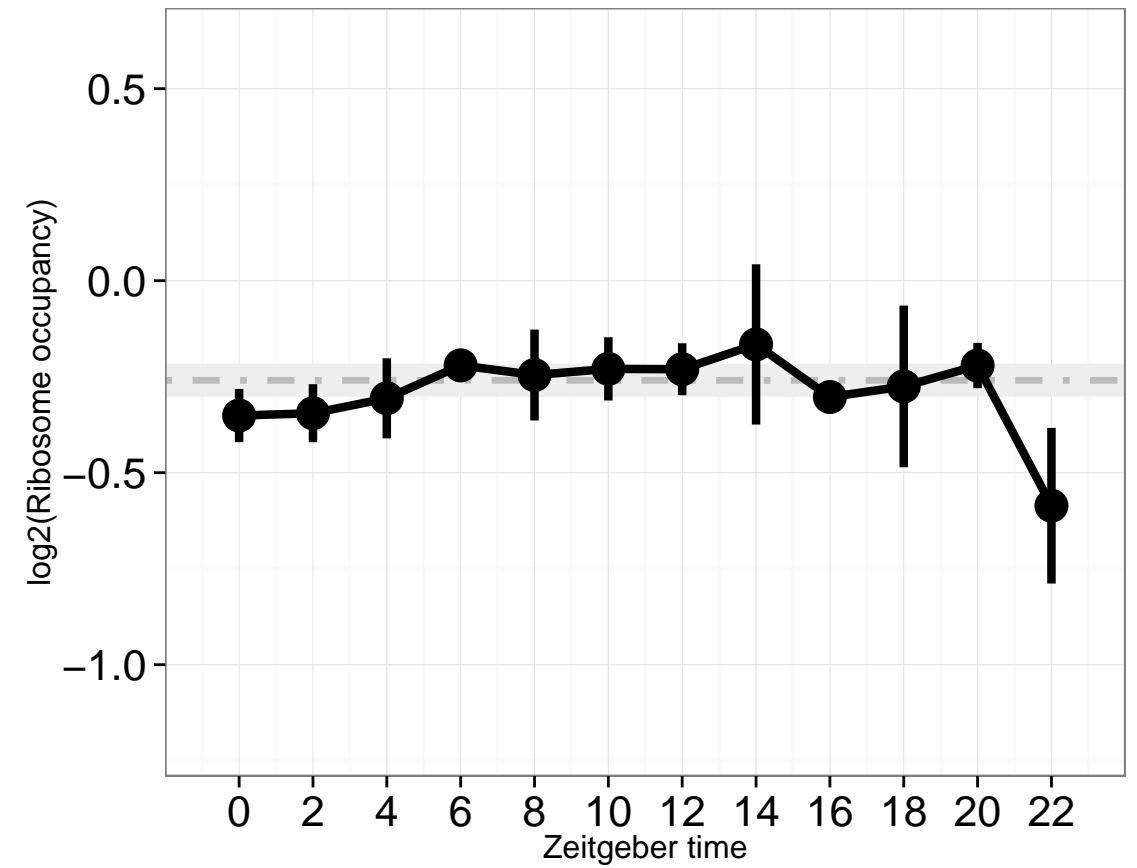

Supplement: SuppDataset_1.zip [file Prox1_set_A.pdf › Supplemental Dataset 1/A-mRNA_nonrhyth_translation_nonrhyth/Prox1_set_A.pdf]

## Proz

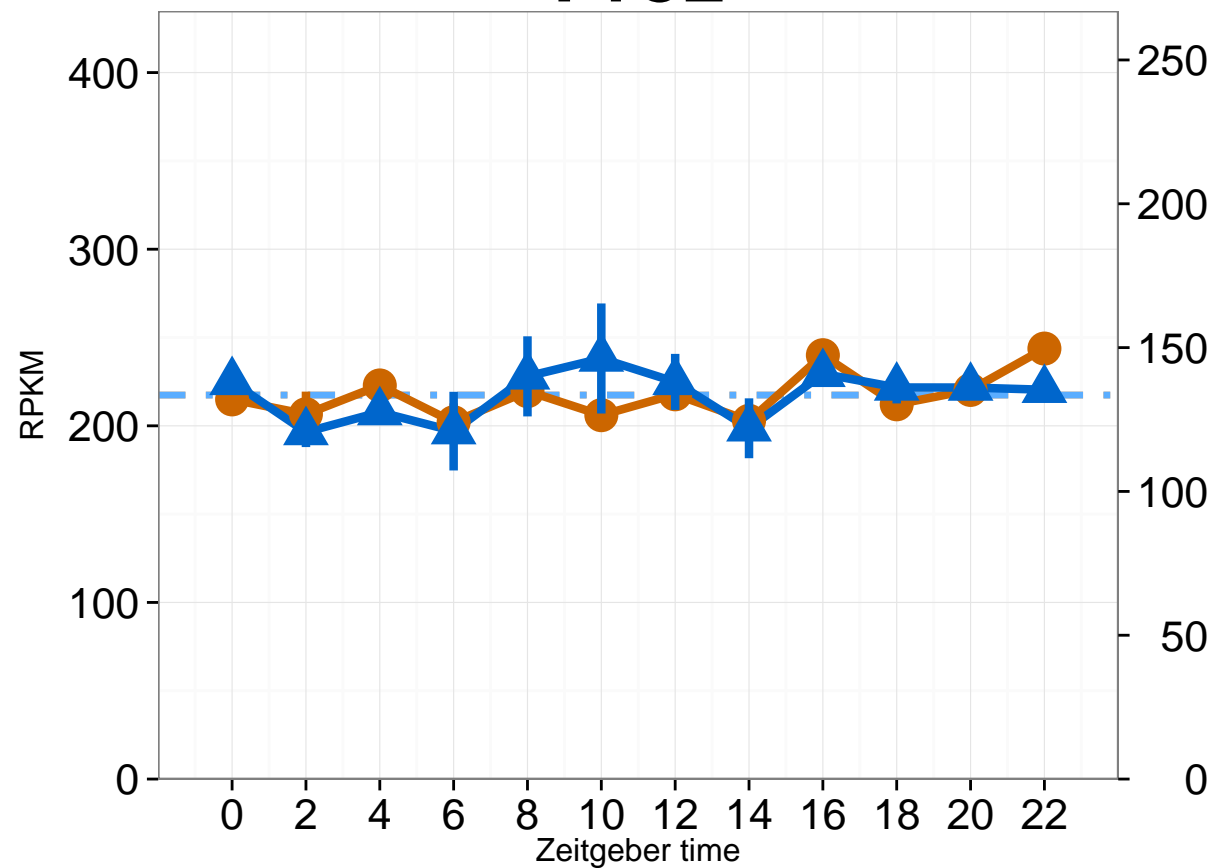

## Proz

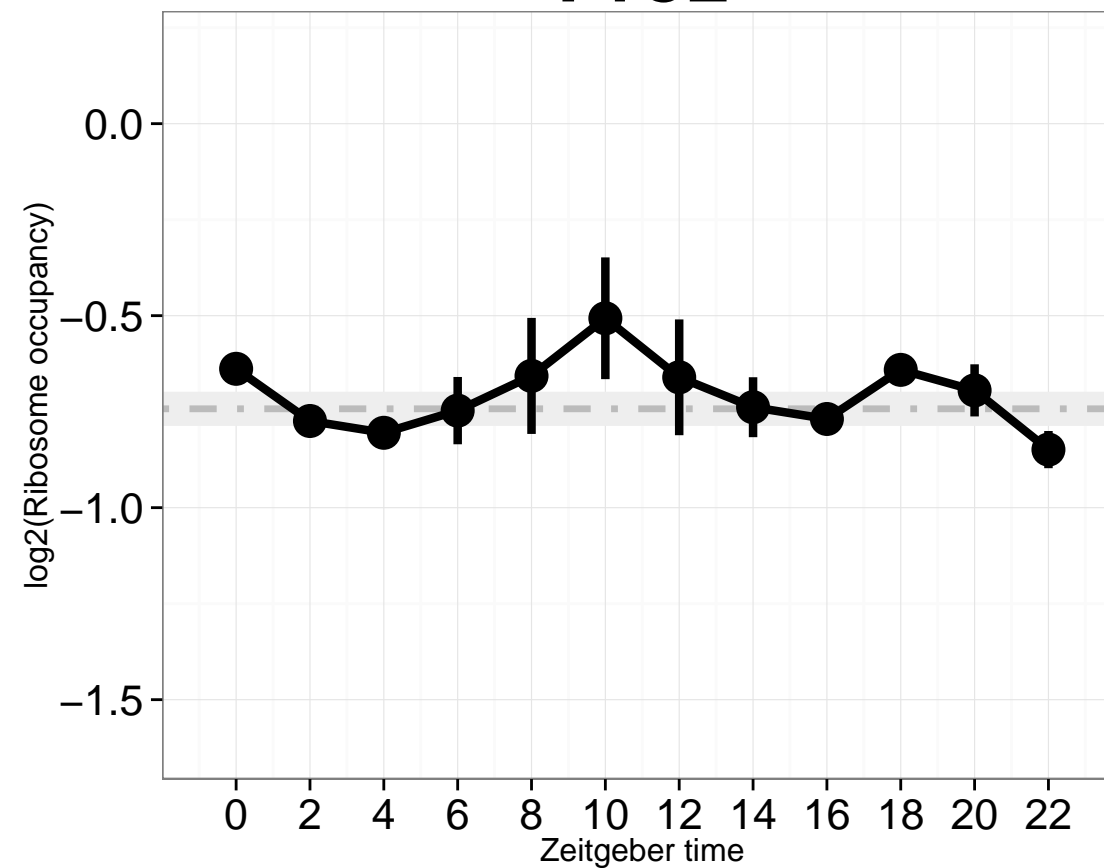

Supplement: SuppDataset_1.zip [file Proz_set_A.pdf › Supplemental Dataset 1/A-mRNA_nonrhyth_translation_nonrhyth/Proz_set_A.pdf]

# Prpf18

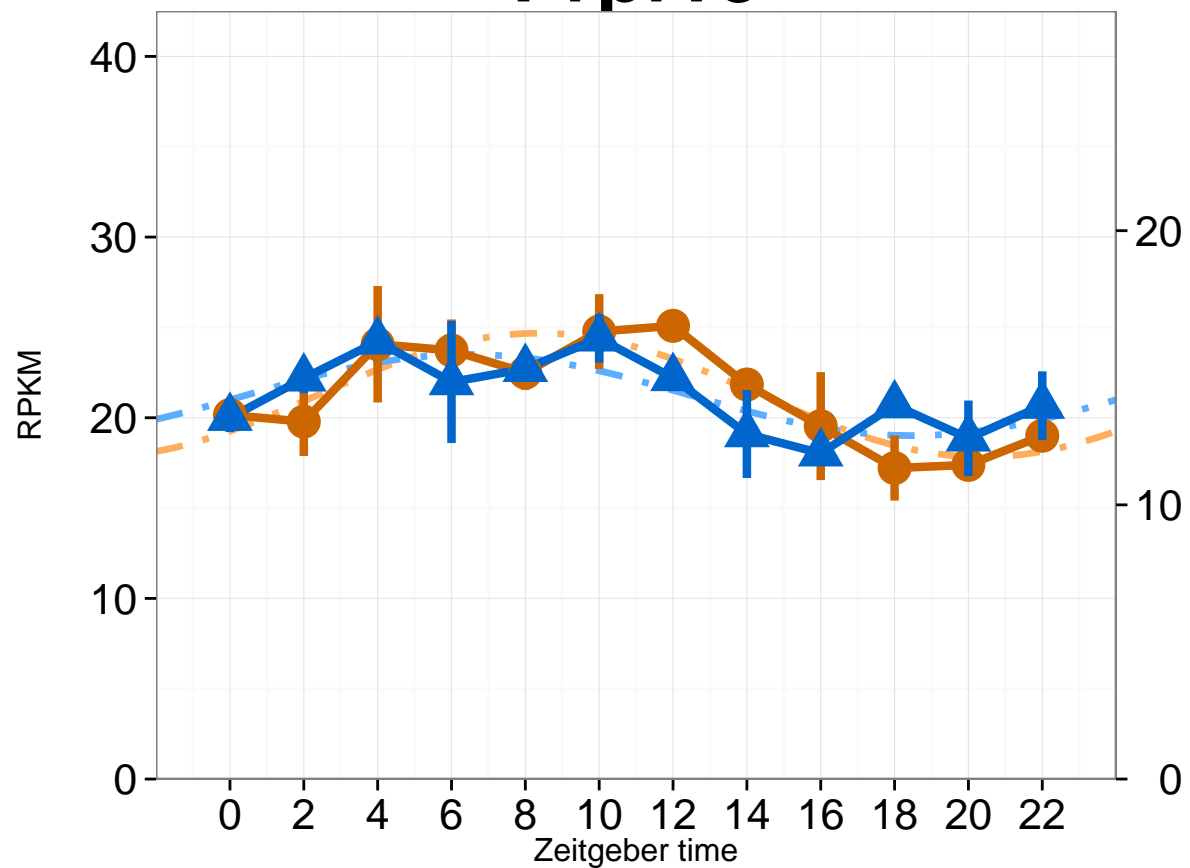

# Prpf18

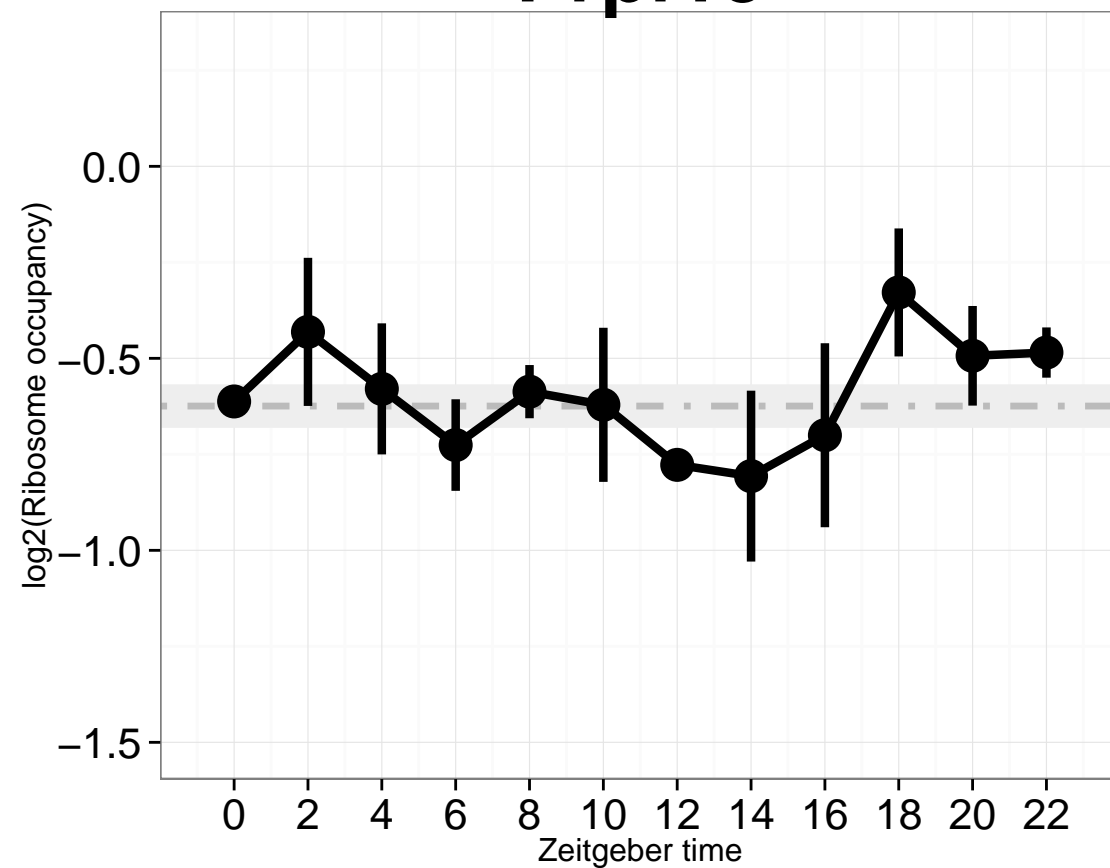

Supplement: SuppDataset_1.zip [file Prpf18_set_A.pdf › Supplemental Dataset 1/A-mRNA_nonrhyth_translation_nonrhyth/Prpf18_set_A.pdf]

# Prpf19

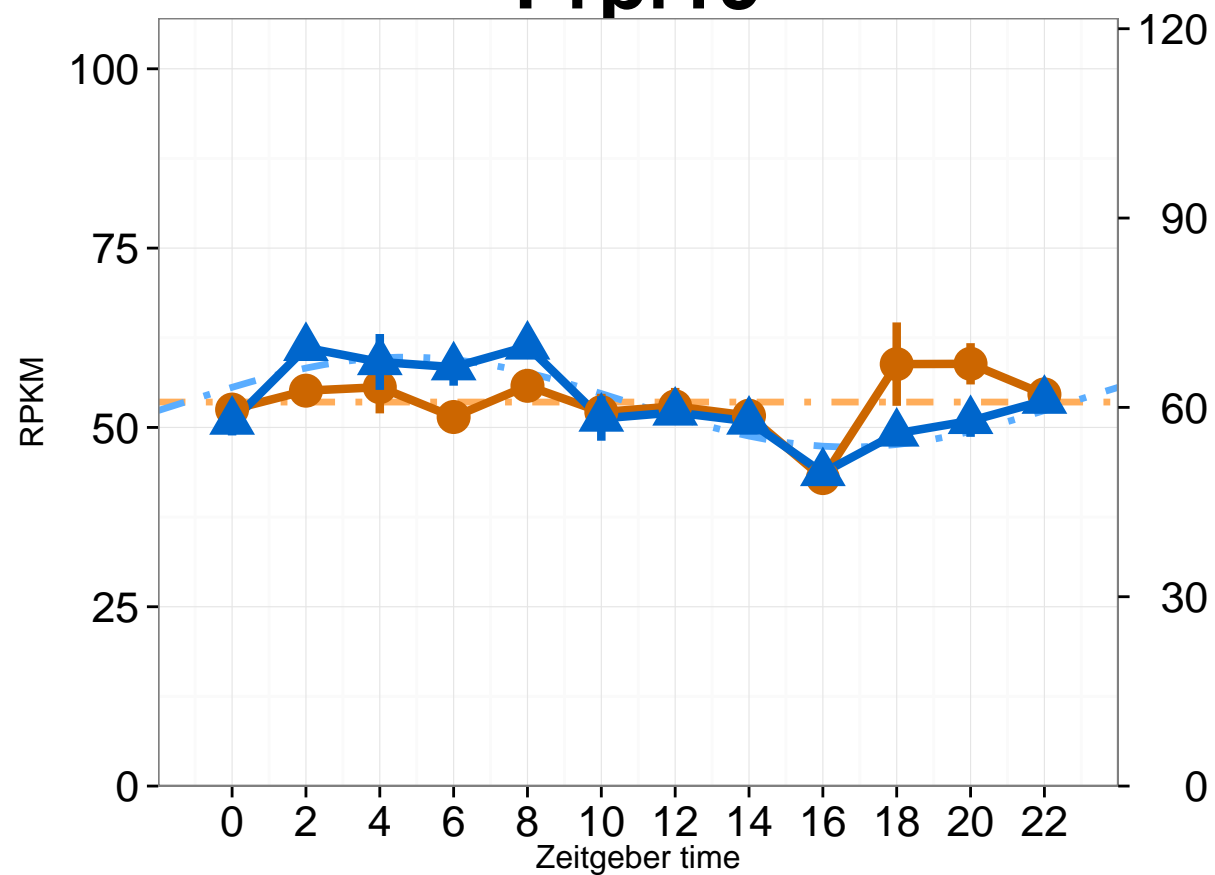

# Prpf19

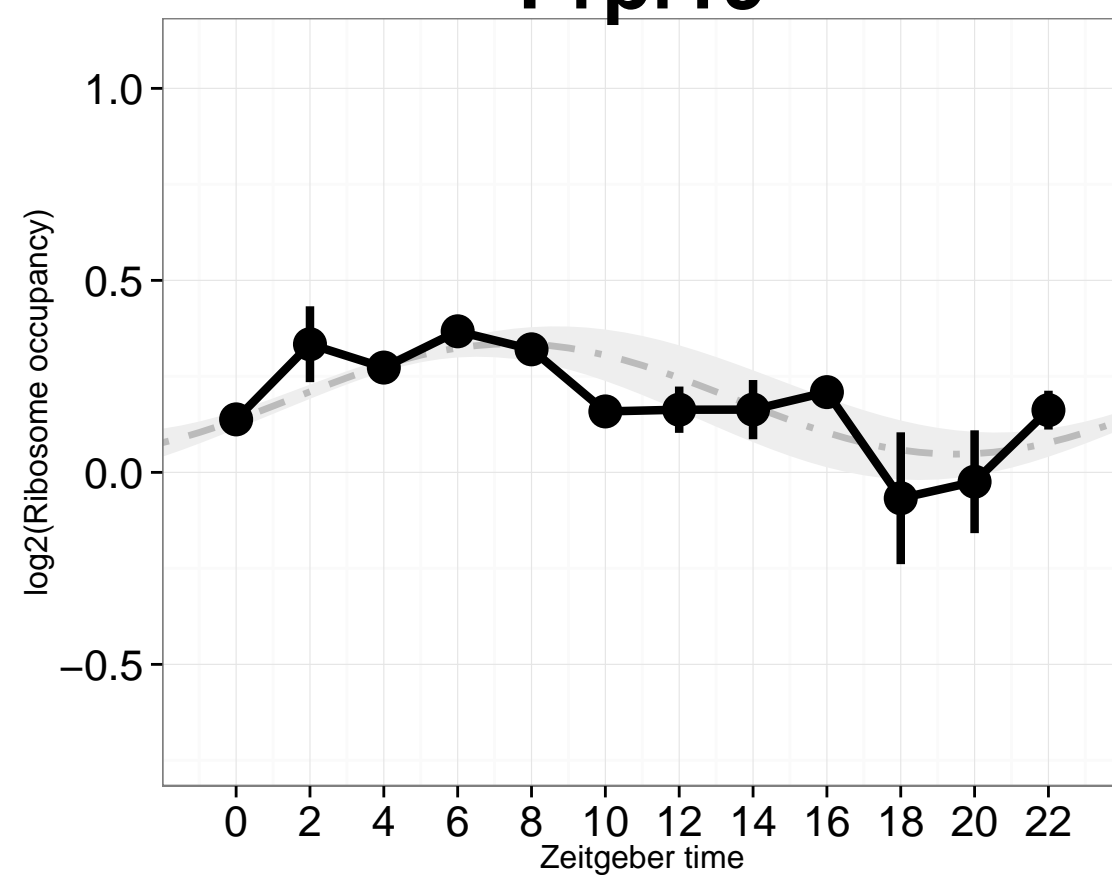

Supplement: SuppDataset_1.zip [file Prpf19_set_A.pdf › Supplemental Dataset 1/A-mRNA_nonrhyth_translation_nonrhyth/Prpf19_set_A.pdf]

# Prpf31

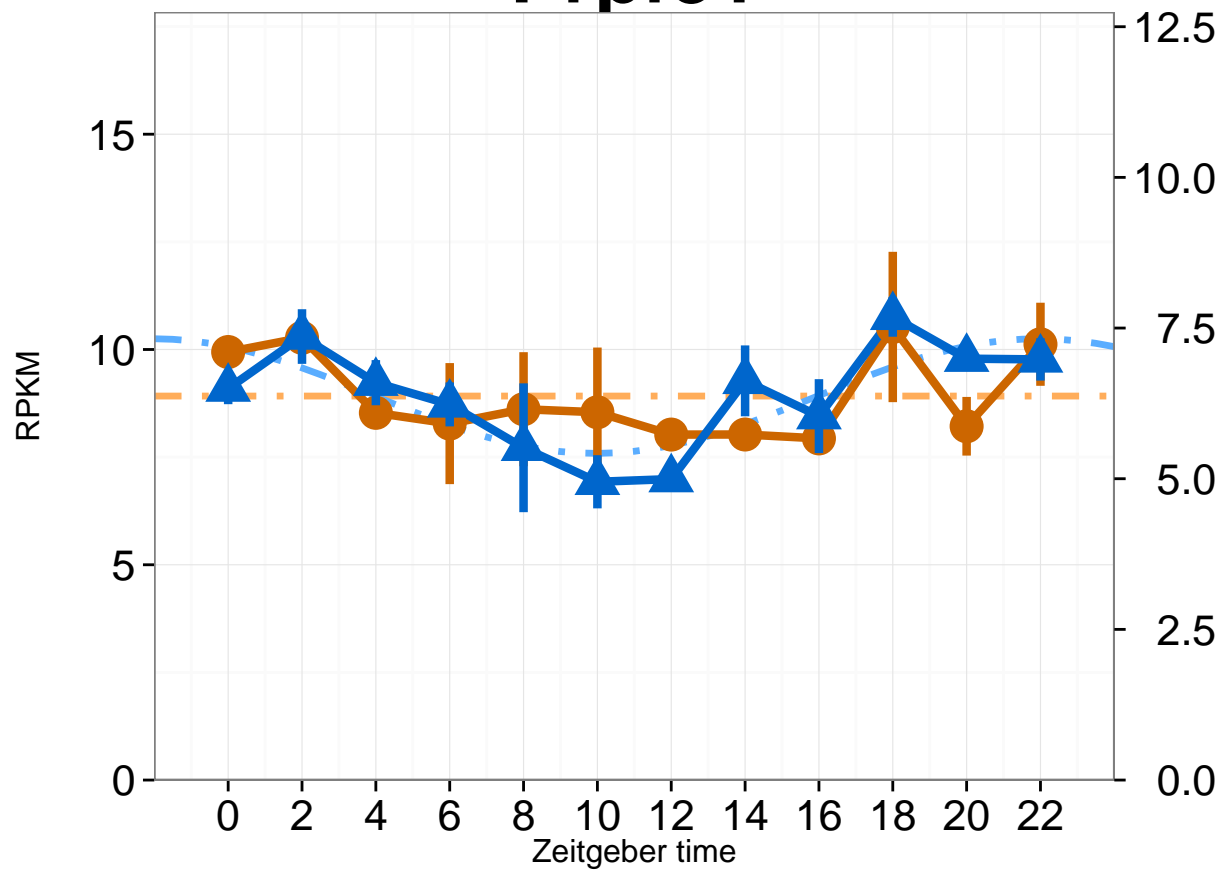

# Prpf31

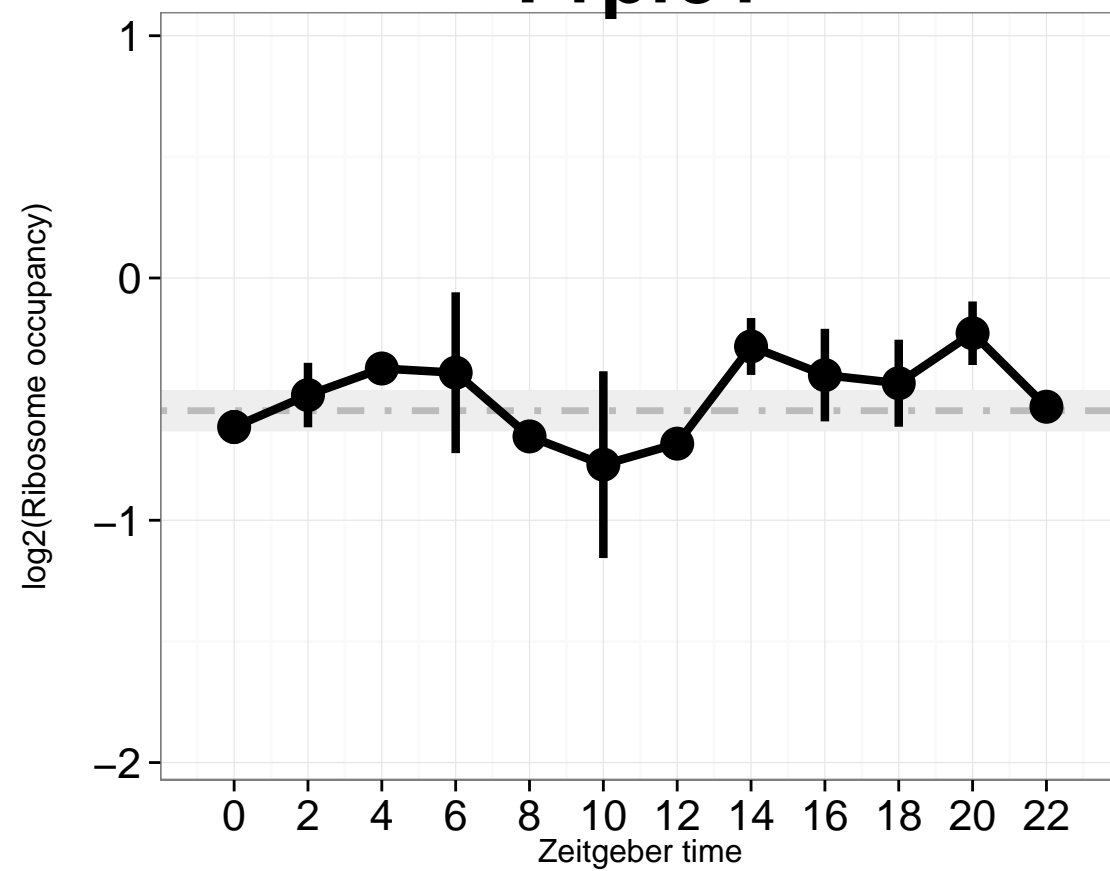

Supplement: SuppDataset_1.zip [file Prpf31_set_A.pdf › Supplemental Dataset 1/A-mRNA_nonrhyth_translation_nonrhyth/Prpf31_set_A.pdf]

# Prpf38a

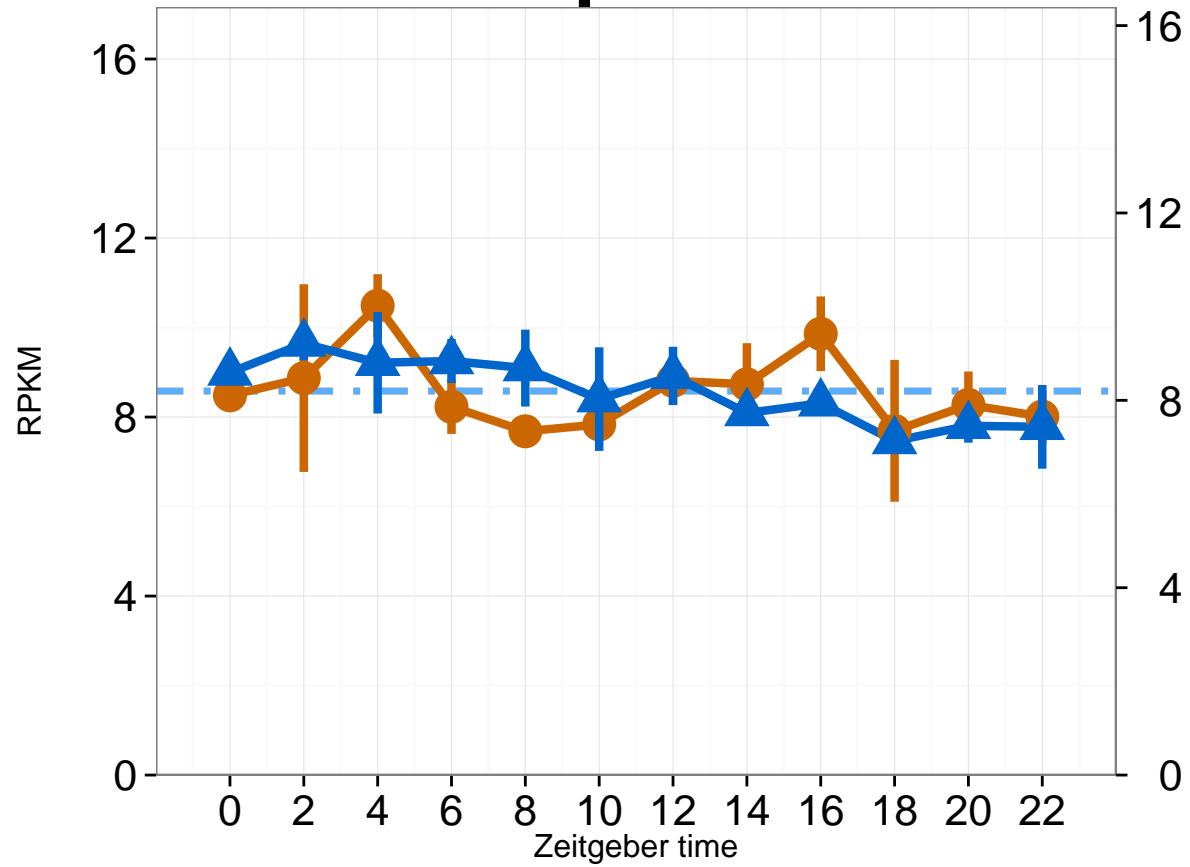

# Prpf38a

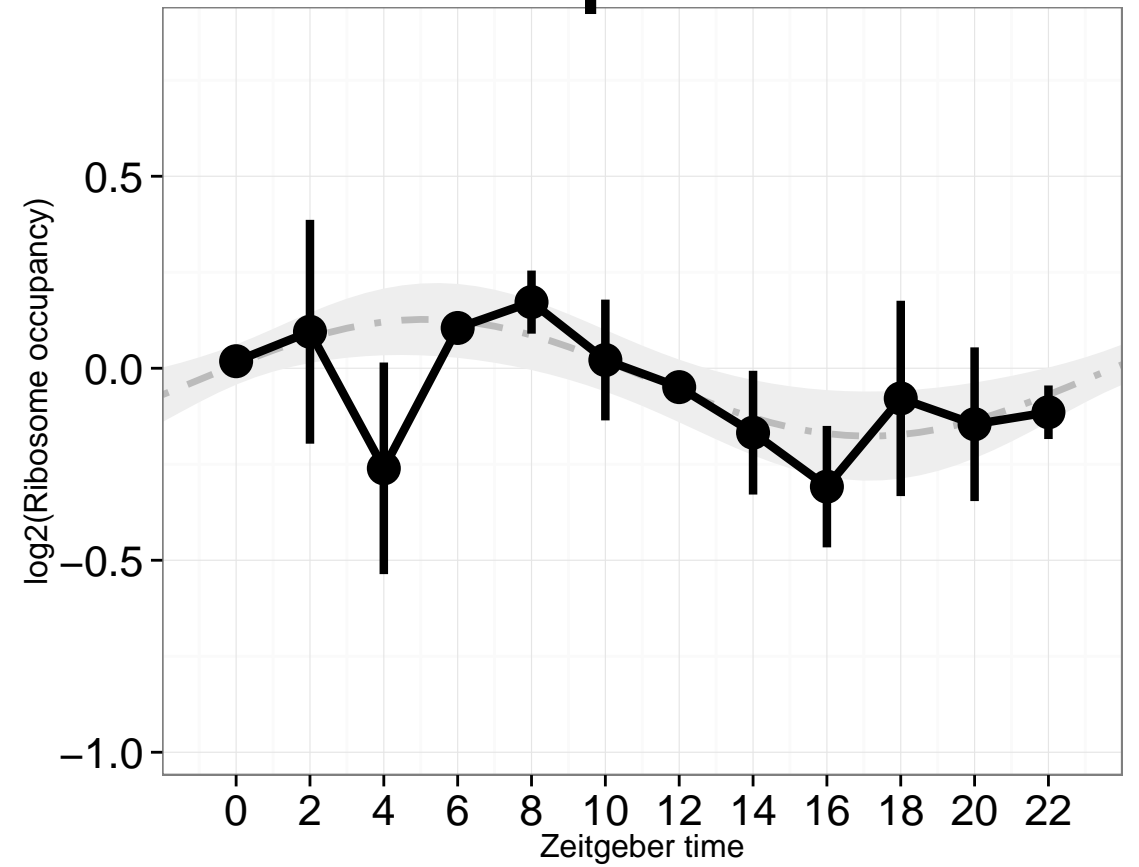

Supplement: SuppDataset_1.zip [file Prpf38a_set_A.pdf › Supplemental Dataset 1/A-mRNA_nonrhyth_translation_nonrhyth/Prpf38a_set_A.pdf]

# Prpf38b

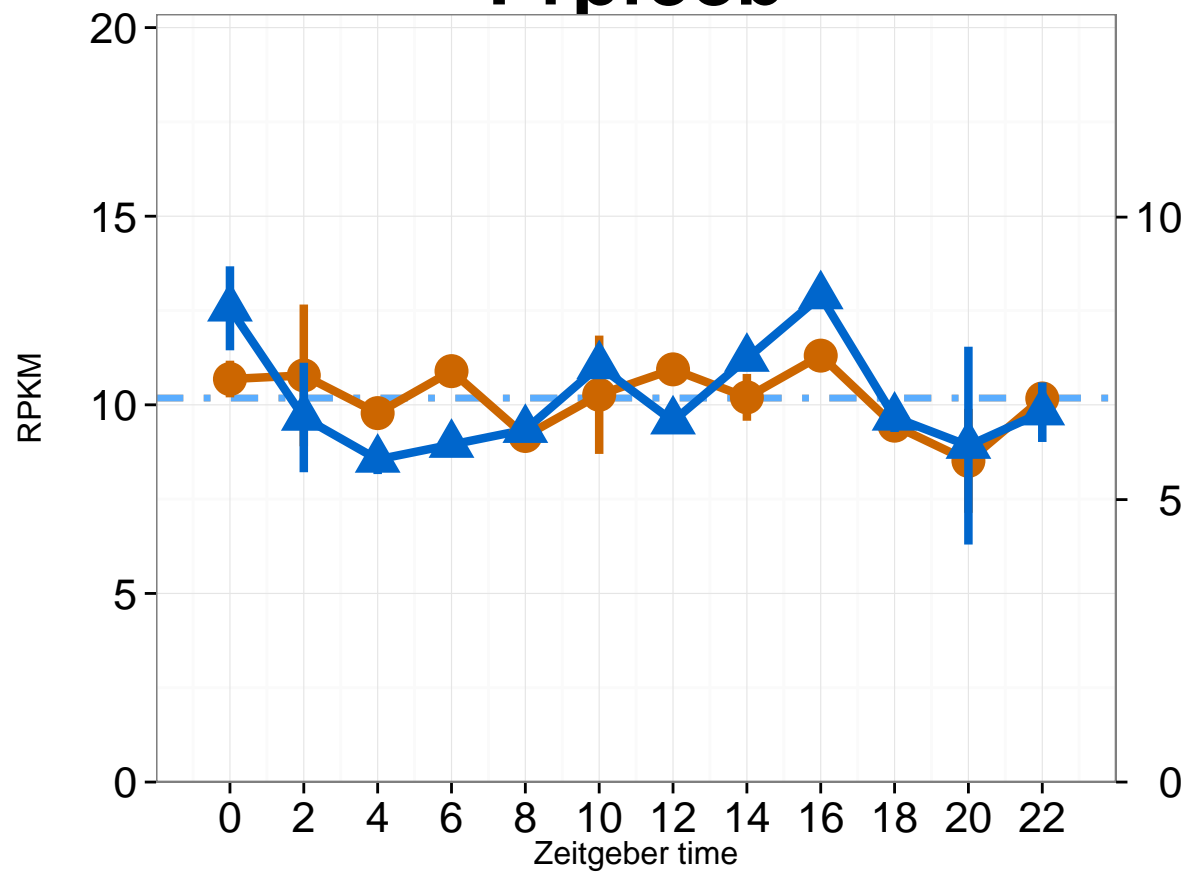

# Prpf38b

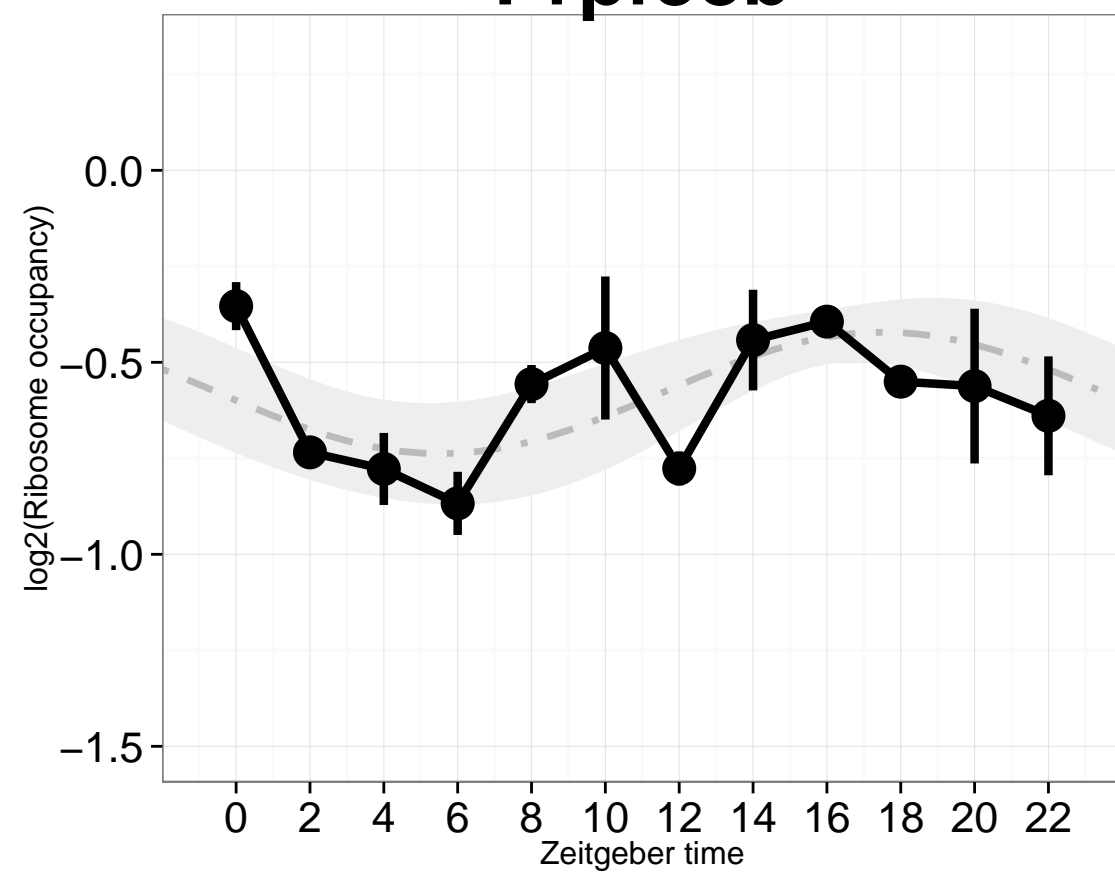

Supplement: SuppDataset_1.zip [file Prpf38b_set_A.pdf › Supplemental Dataset 1/A-mRNA_nonrhyth_translation_nonrhyth/Prpf38b_set_A.pdf]

# Prpf39

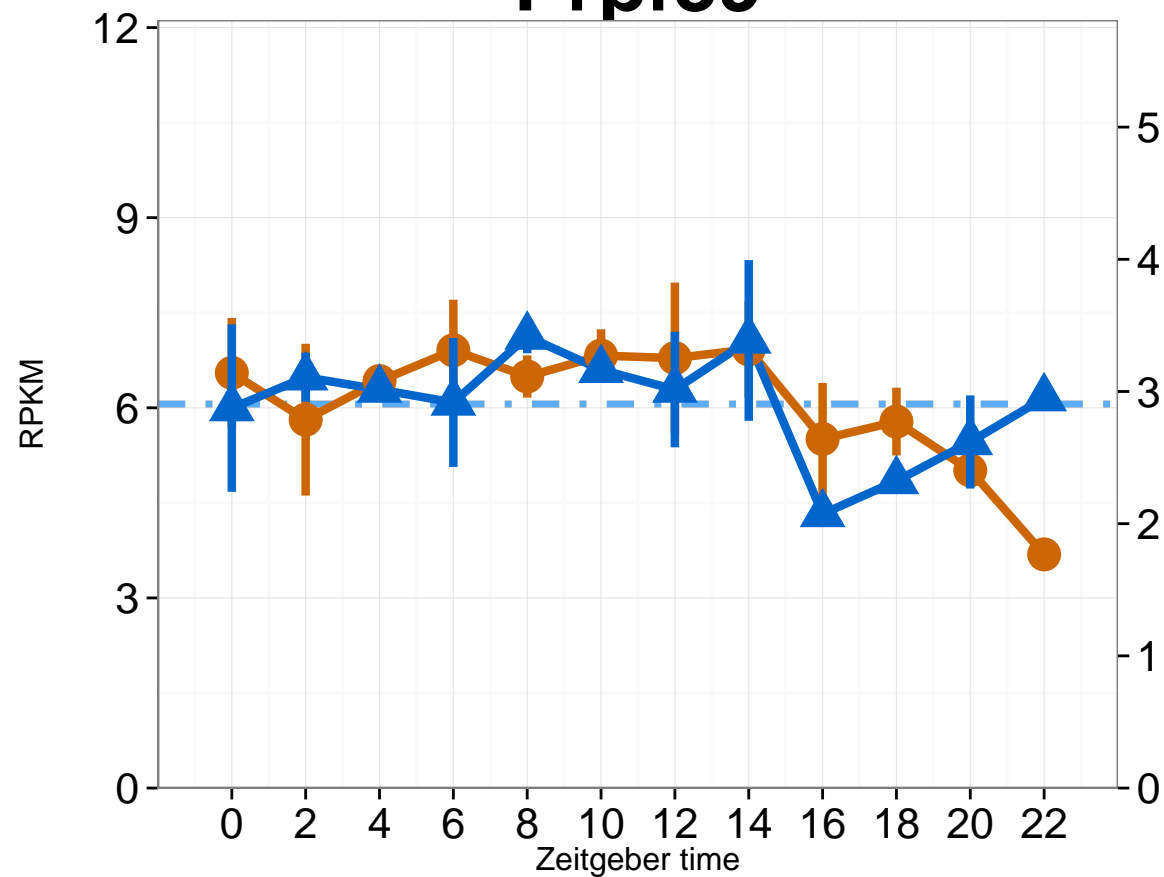

# Prpf39

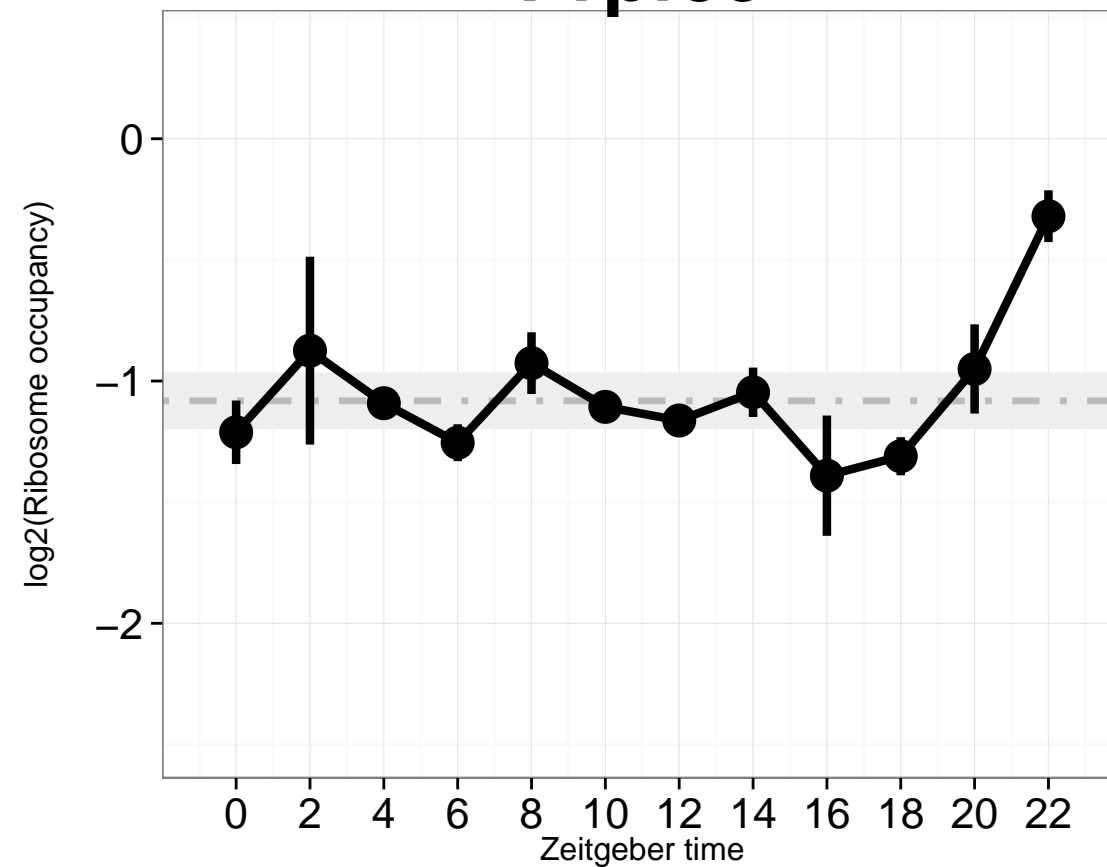

Supplement: SuppDataset_1.zip [file Prpf39_set_A.pdf › Supplemental Dataset 1/A-mRNA_nonrhyth_translation_nonrhyth/Prpf39_set_A.pdf]

# Prpf3

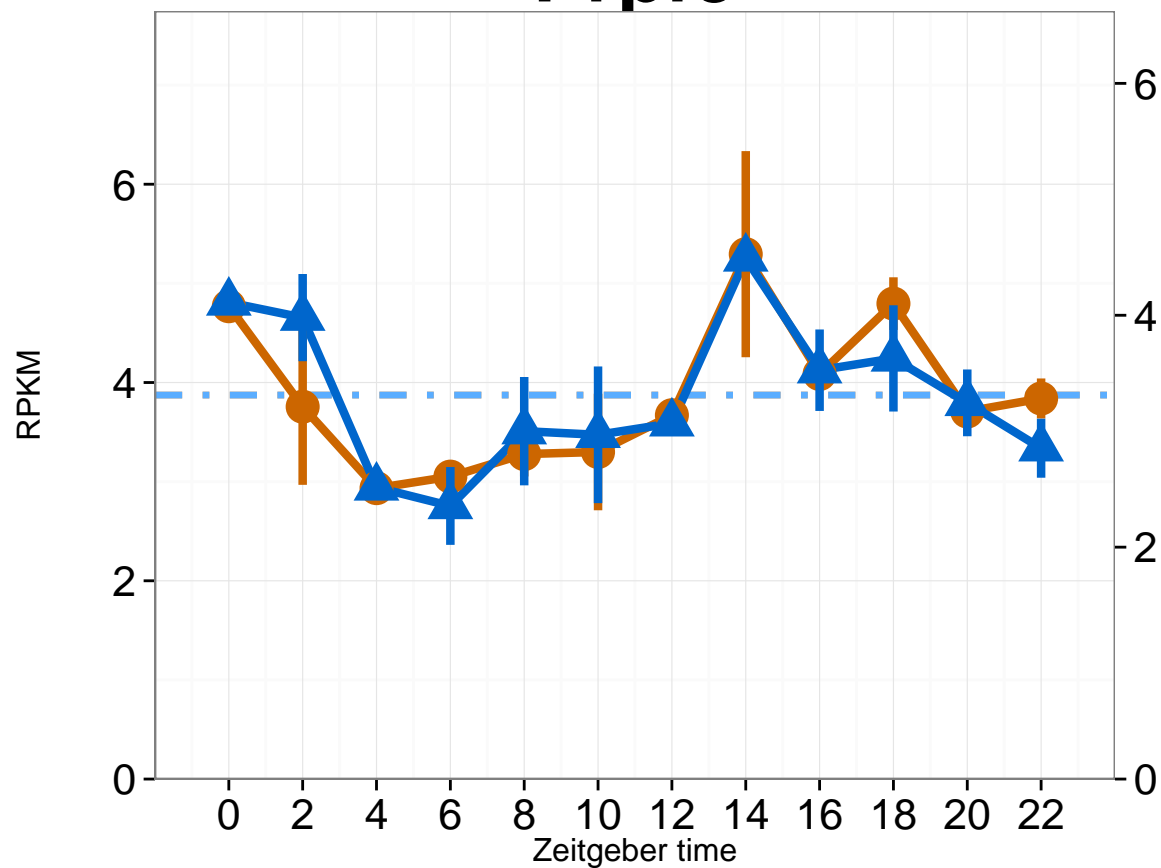

# Prpf3

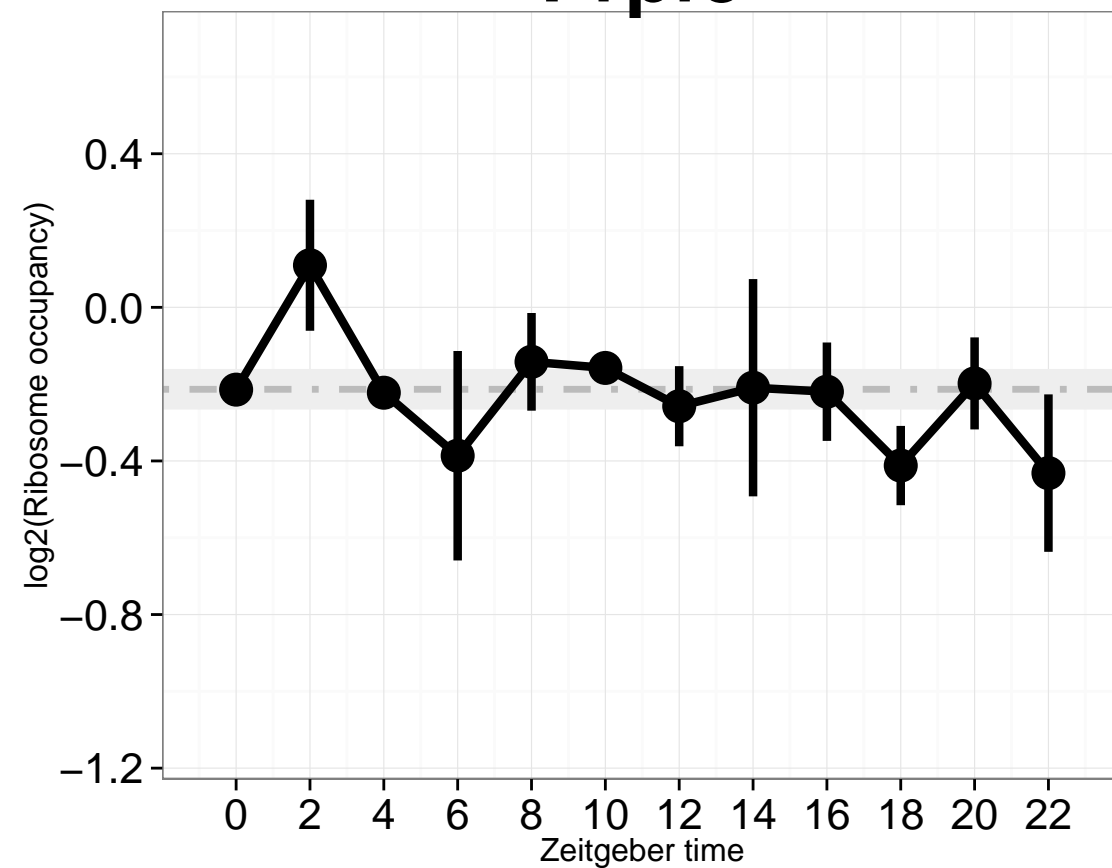

Supplement: SuppDataset_1.zip [file Prpf3_set_A.pdf › Supplemental Dataset 1/A-mRNA_nonrhyth_translation_nonrhyth/Prpf3_set_A.pdf]

# Prpf40a

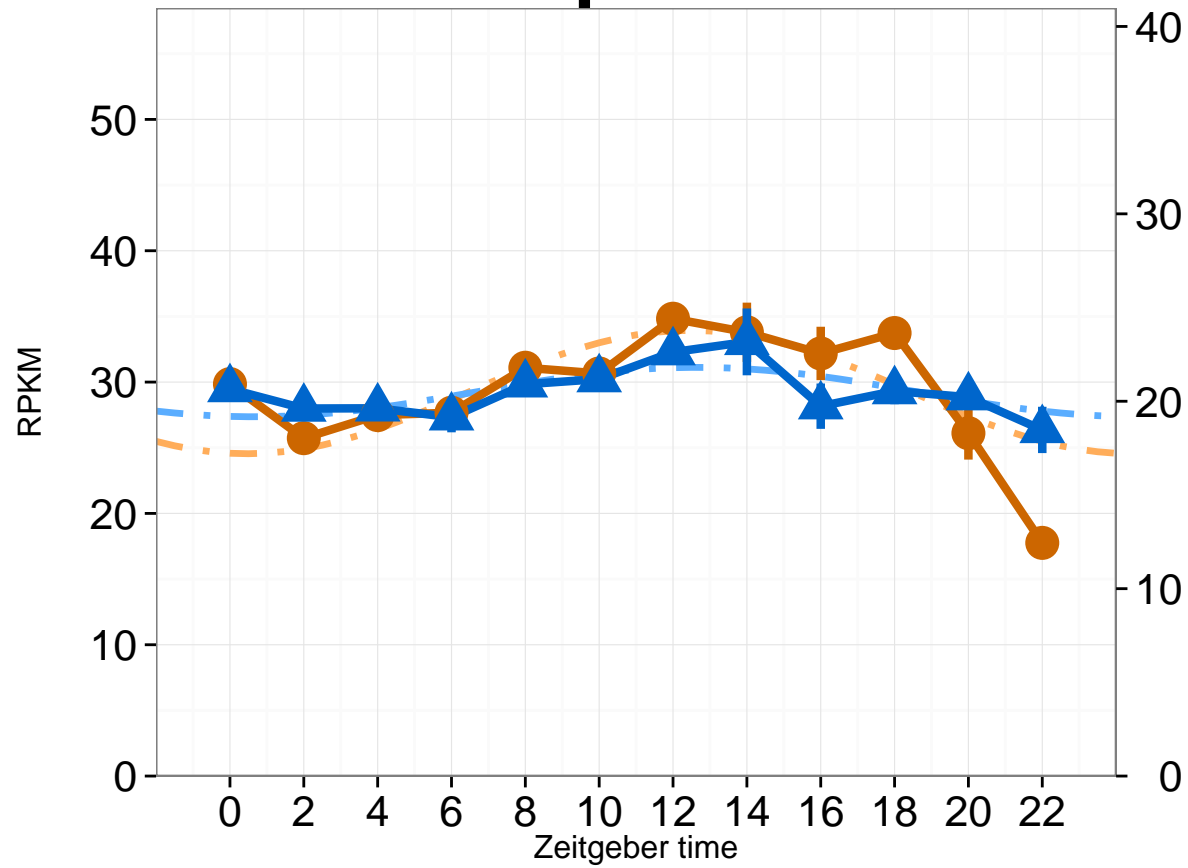

# Prpf40a

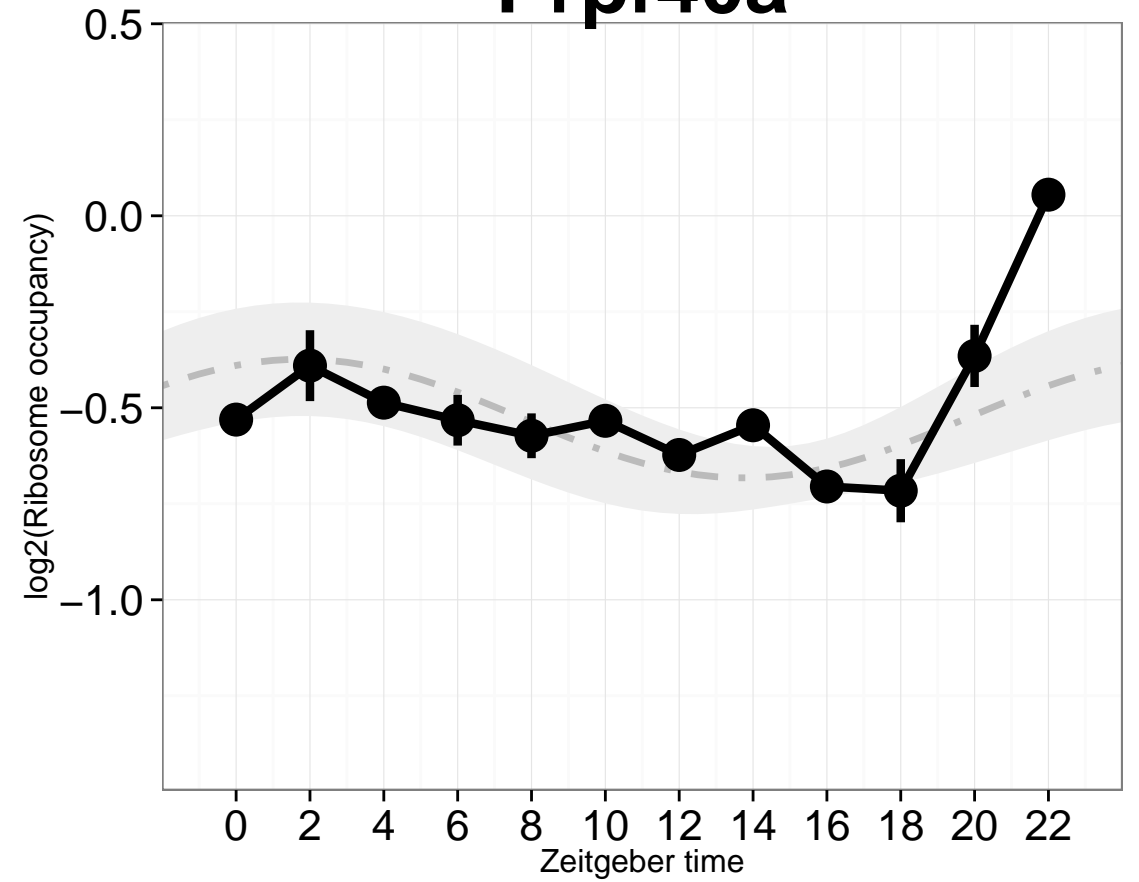

Supplement: SuppDataset_1.zip [file Prpf40a_set_A.pdf › Supplemental Dataset 1/A-mRNA_nonrhyth_translation_nonrhyth/Prpf40a_set_A.pdf]

# Prpf40b

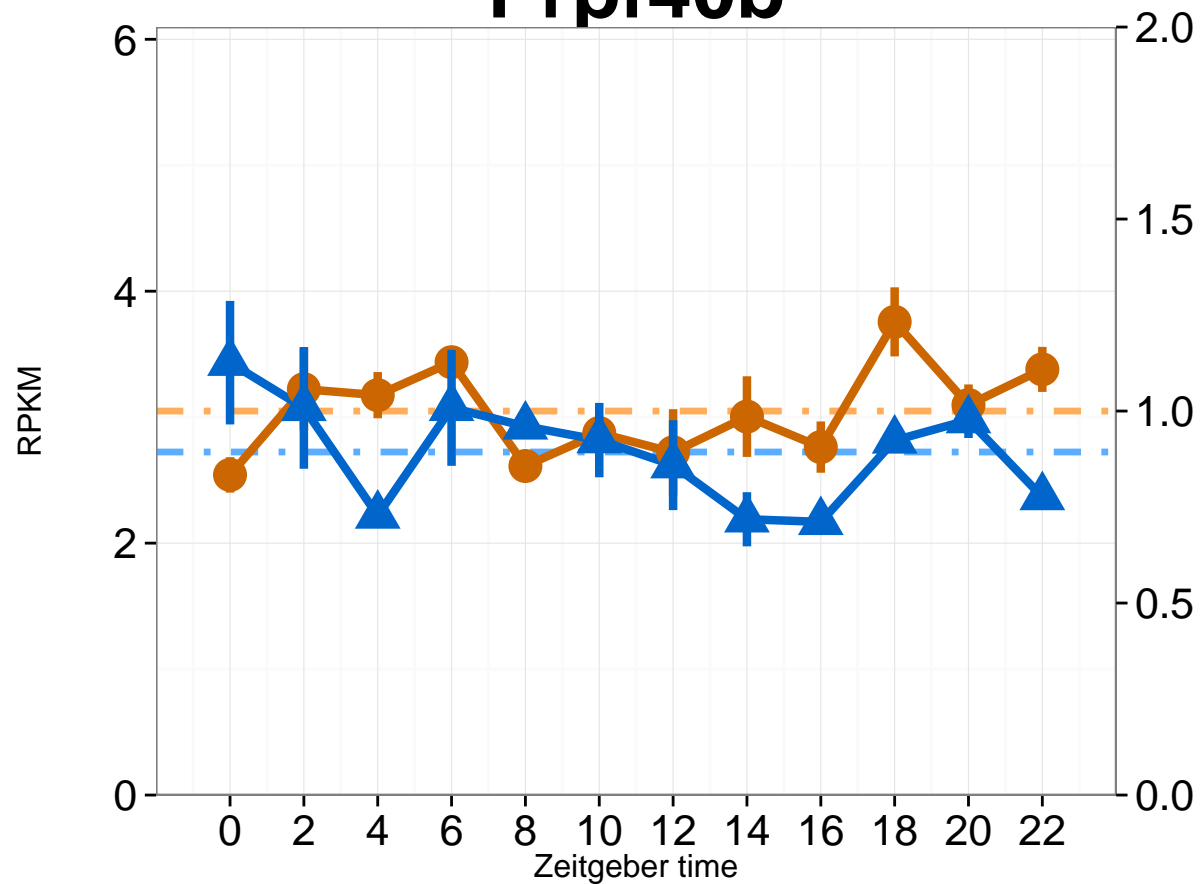

# Prpf40b

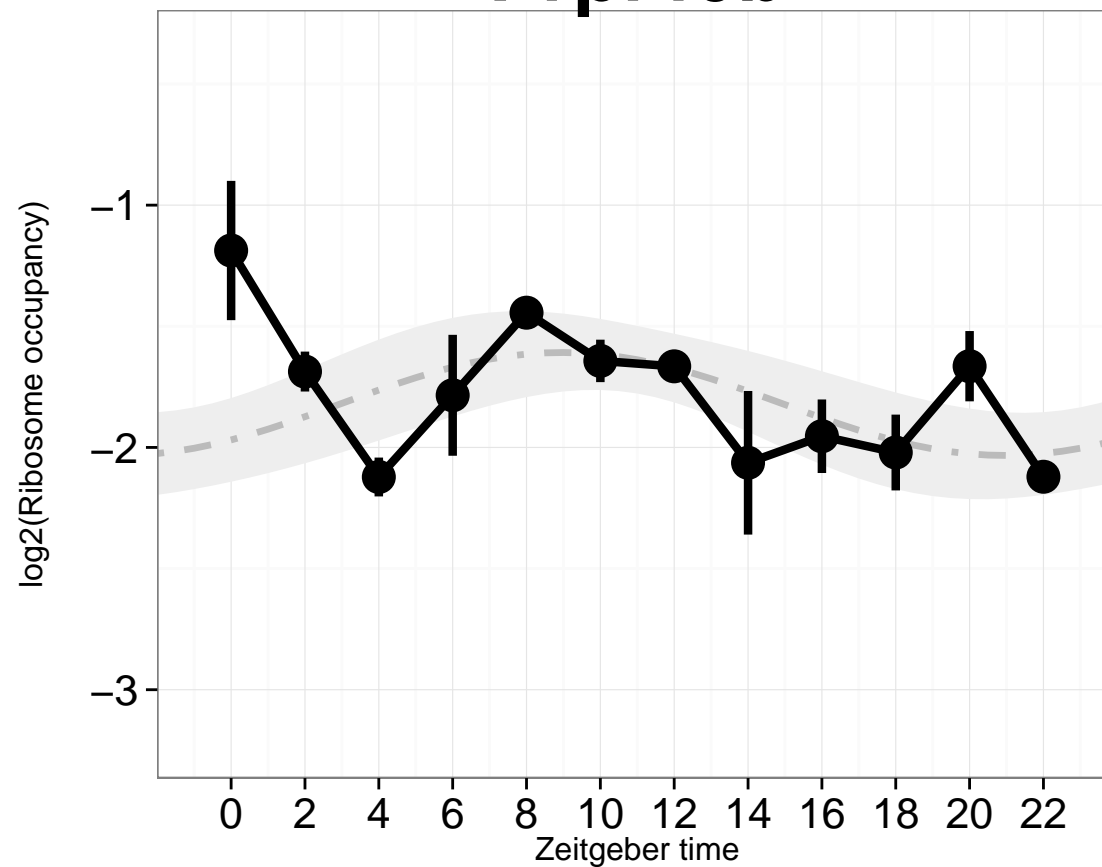

Supplement: SuppDataset_1.zip [file Prpf40b_set_A.pdf › Supplemental Dataset 1/A-mRNA_nonrhyth_translation_nonrhyth/Prpf40b_set_A.pdf]

# Prpf4

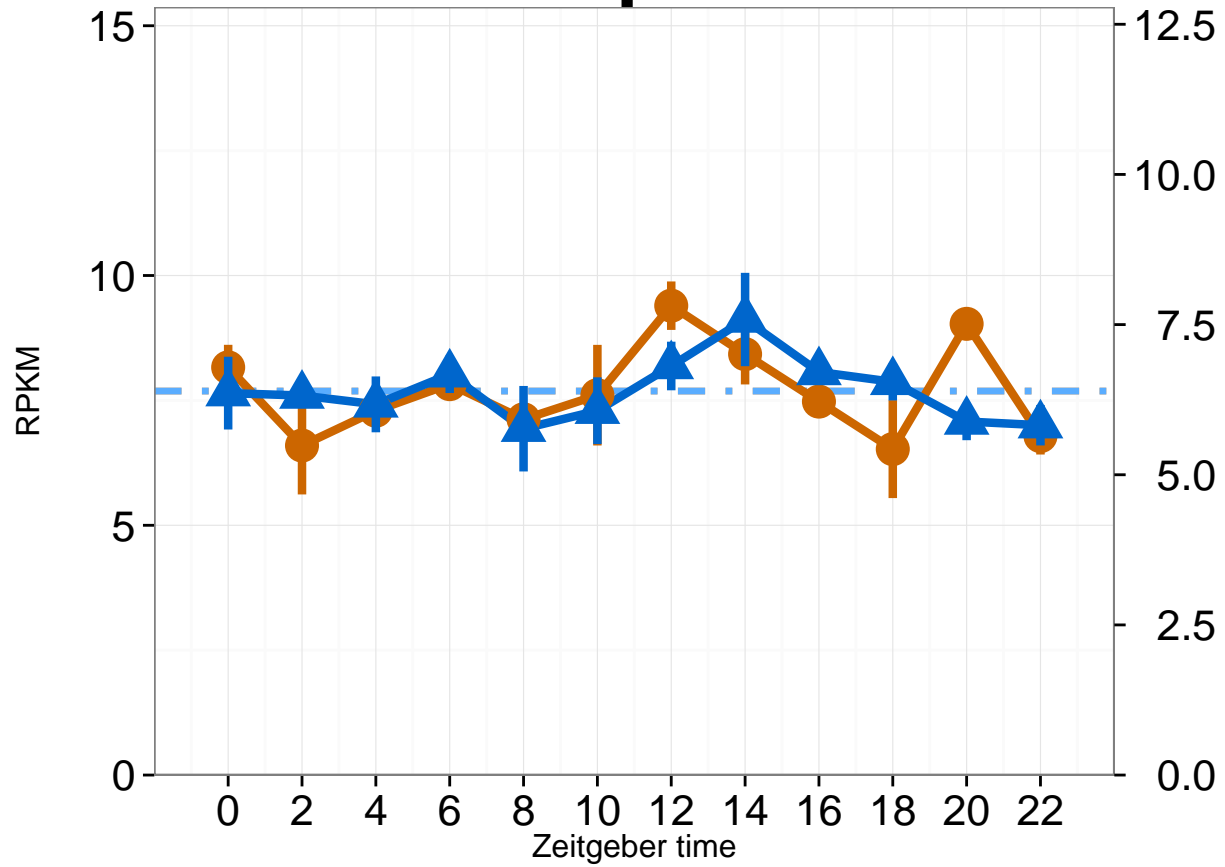

# Prpf4

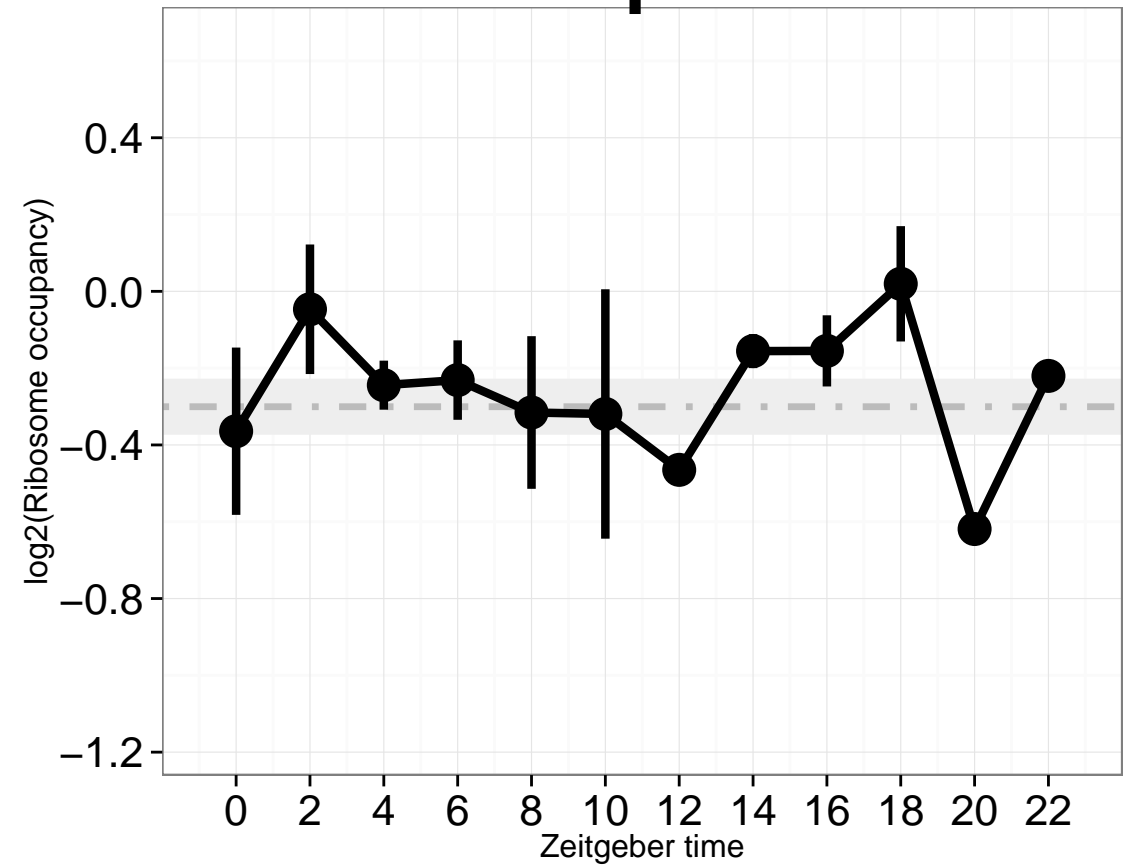

Supplement: SuppDataset_1.zip [file Prpf4_set_A.pdf › Supplemental Dataset 1/A-mRNA_nonrhyth_translation_nonrhyth/Prpf4_set_A.pdf]

# Prpf4b

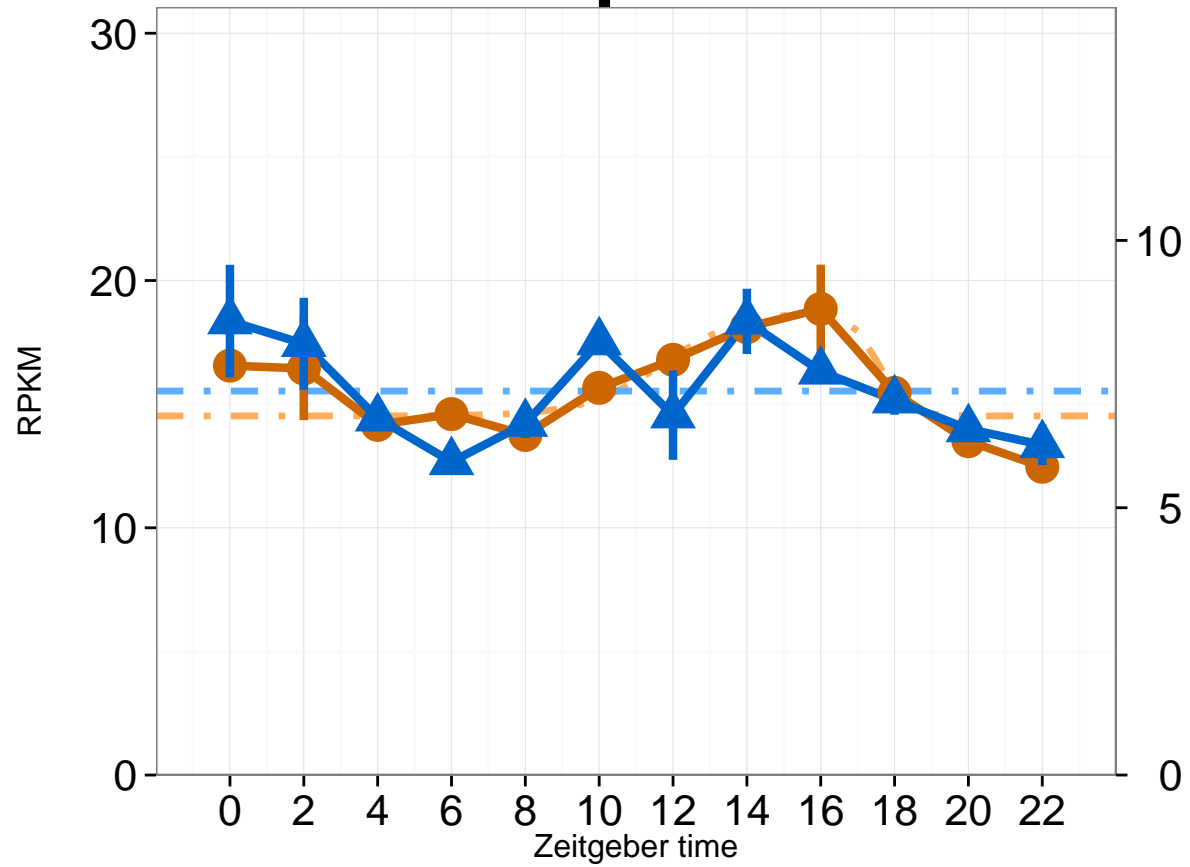

# Prpf4b

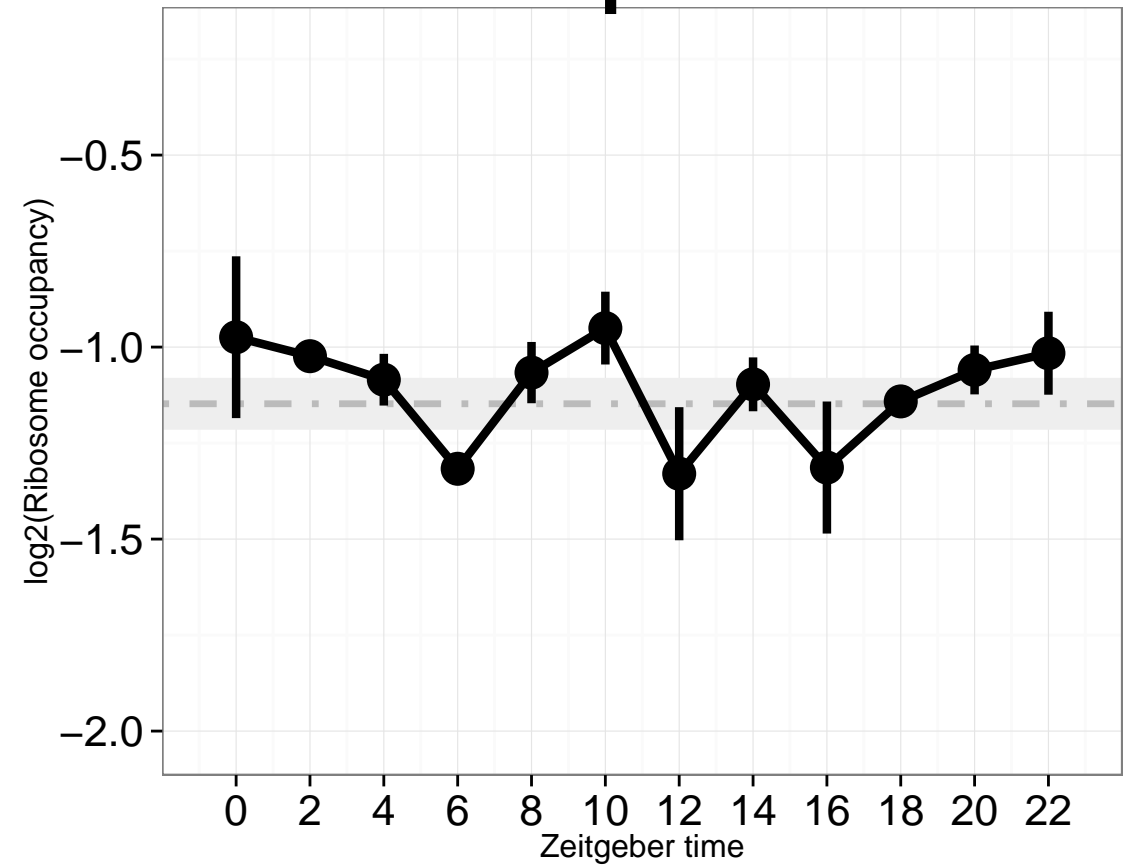

Supplement: SuppDataset_1.zip [file Prpf4b_set_A.pdf › Supplemental Dataset 1/A-mRNA_nonrhyth_translation_nonrhyth/Prpf4b_set_A.pdf]

# Prpf6

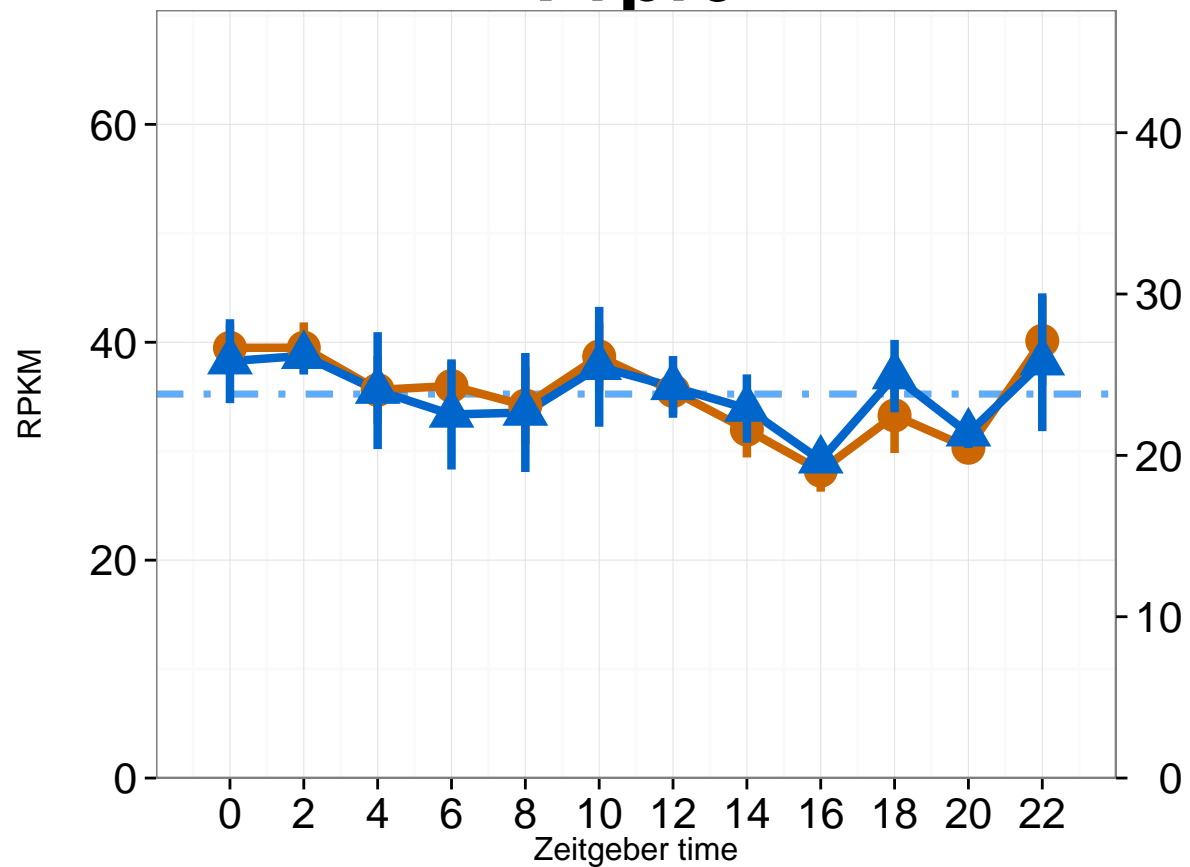

# Prpf6

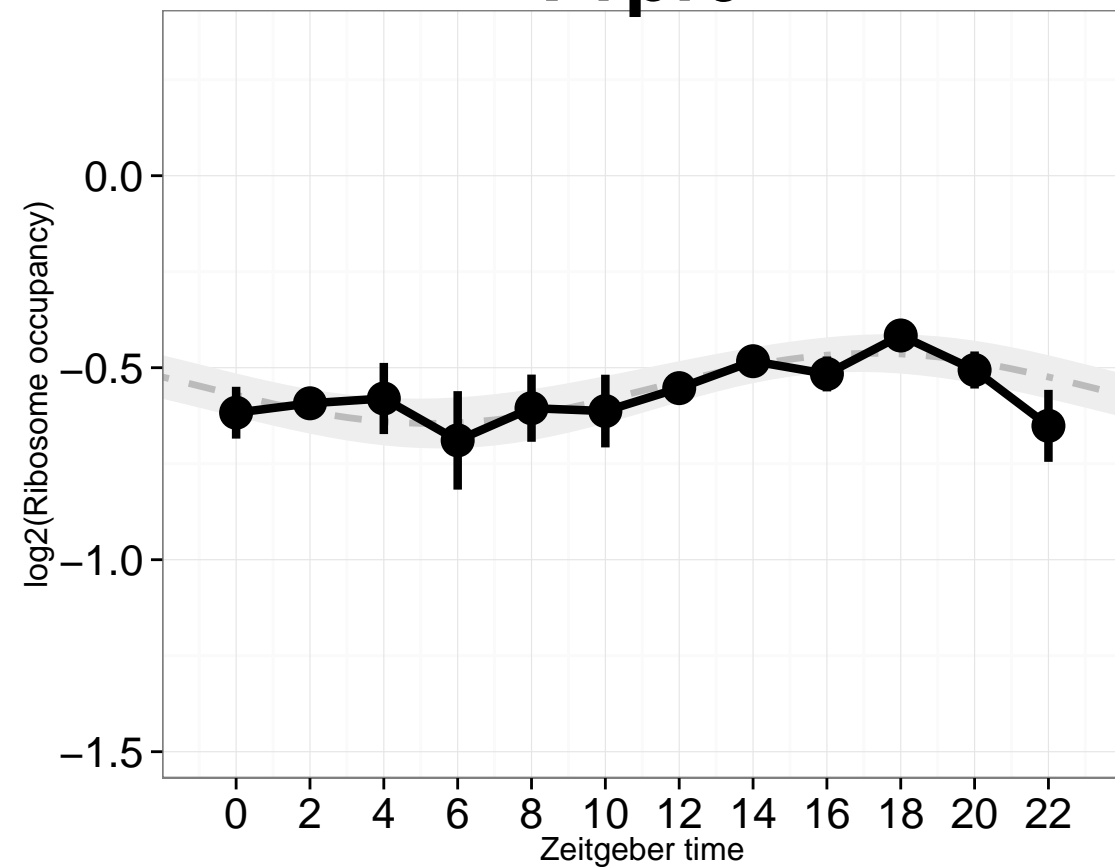

Supplement: SuppDataset_1.zip [file Prpf6_set_A.pdf › Supplemental Dataset 1/A-mRNA_nonrhyth_translation_nonrhyth/Prpf6_set_A.pdf]

# Prpf8

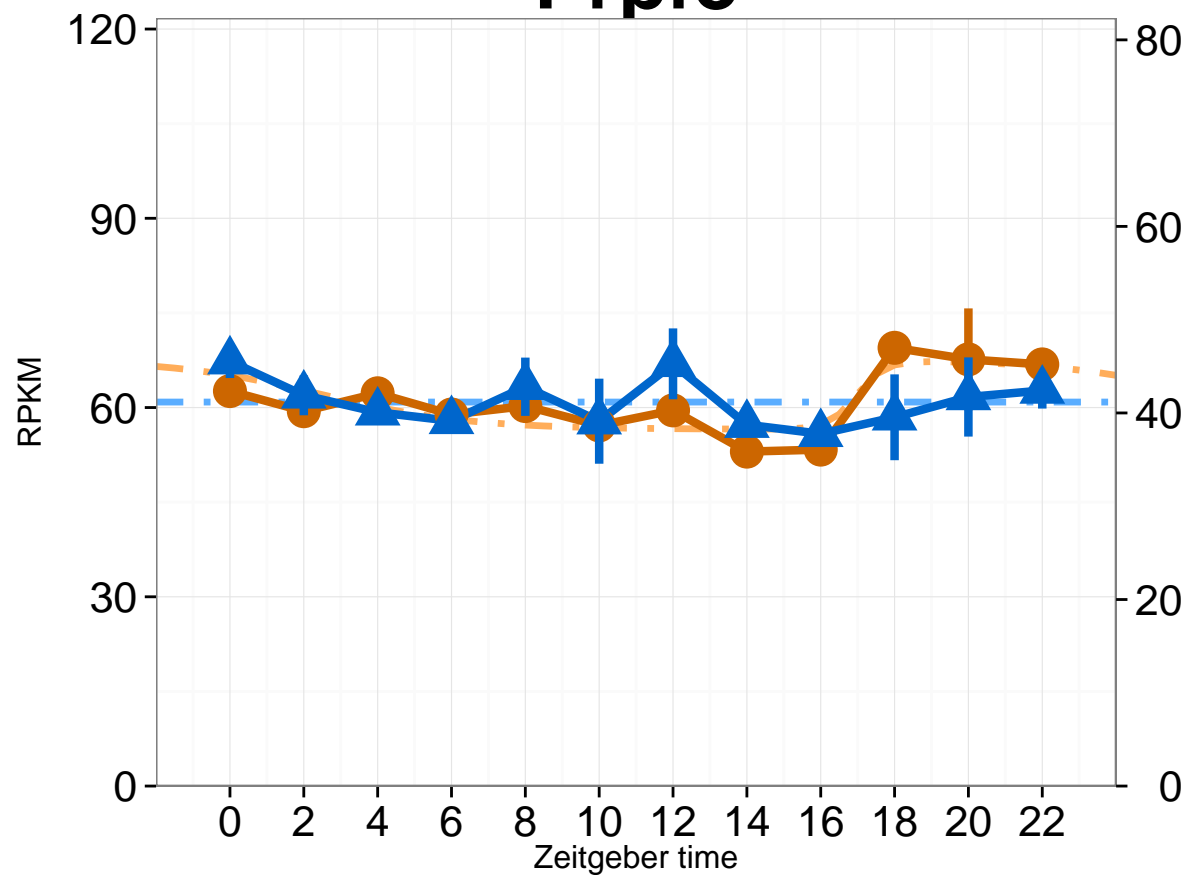

# Prpf8

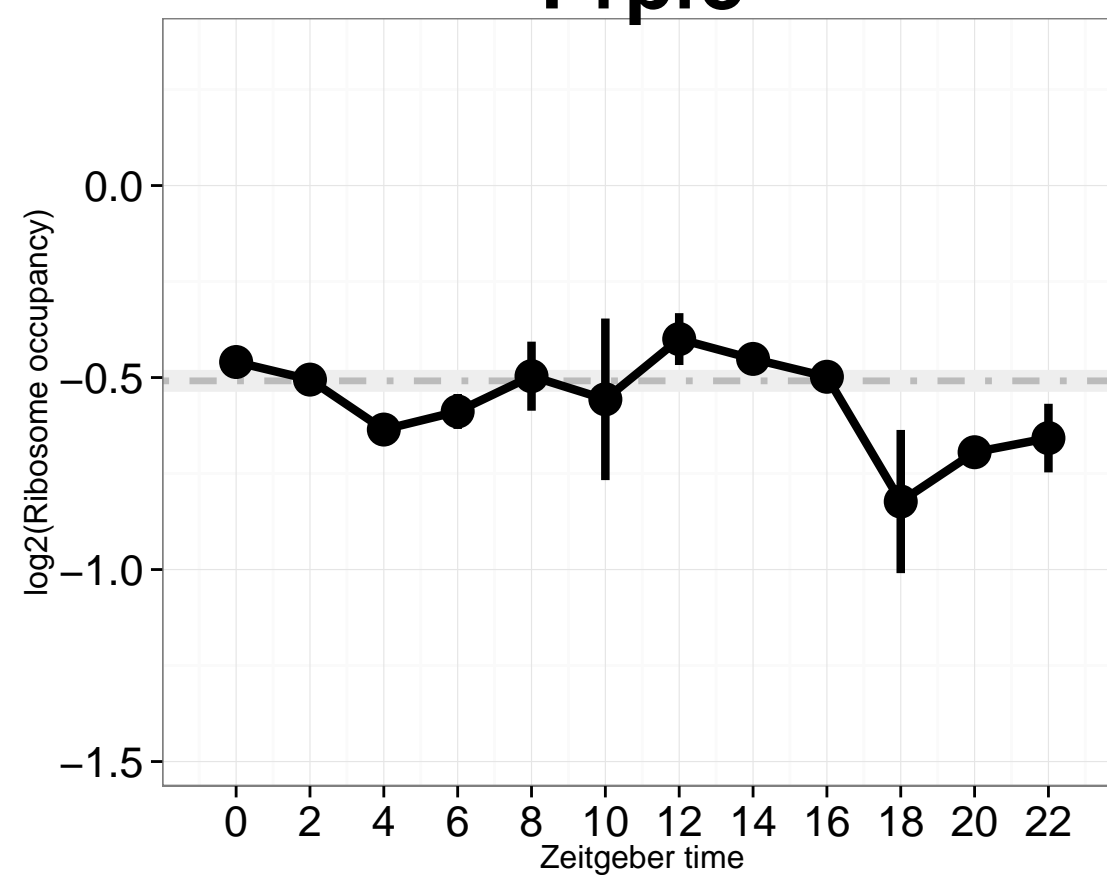

Supplement: SuppDataset_1.zip [file Prpf8_set_A.pdf › Supplemental Dataset 1/A-mRNA_nonrhyth_translation_nonrhyth/Prpf8_set_A.pdf]

# Prps1

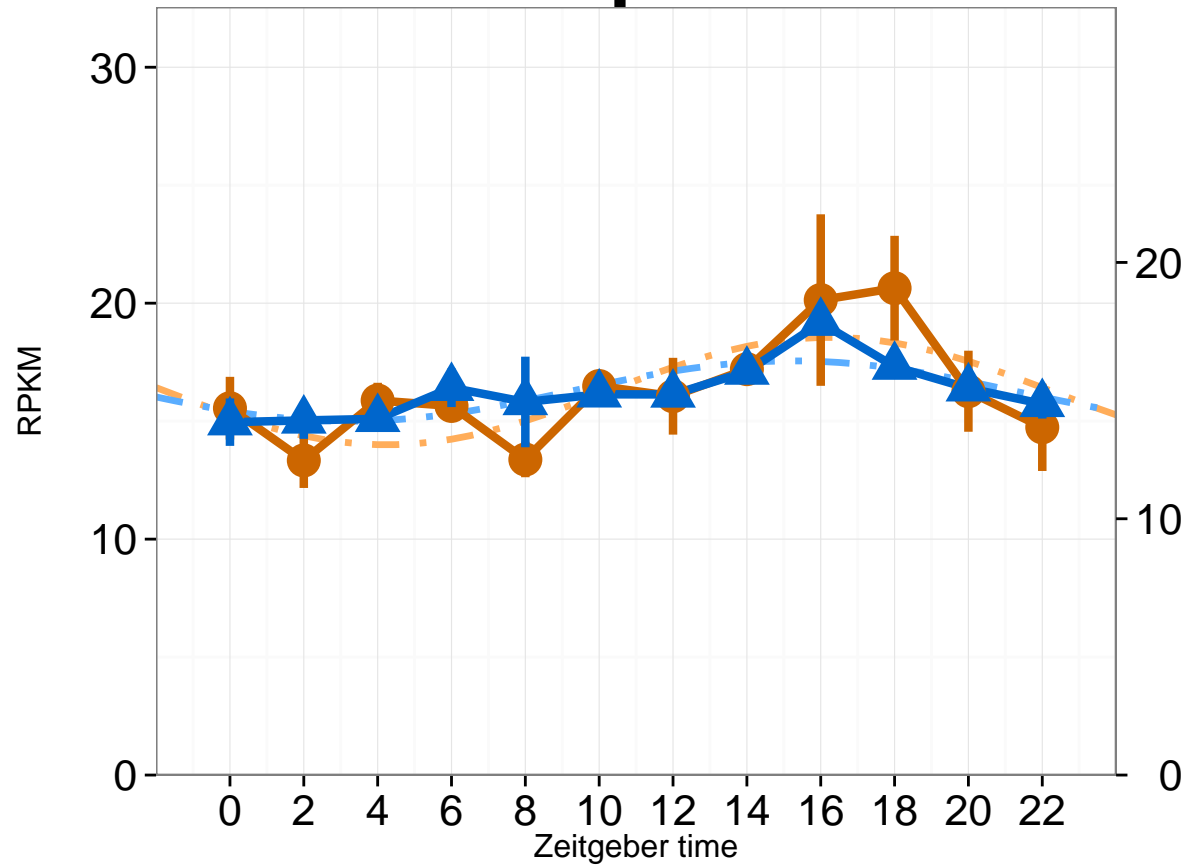

# Prps1

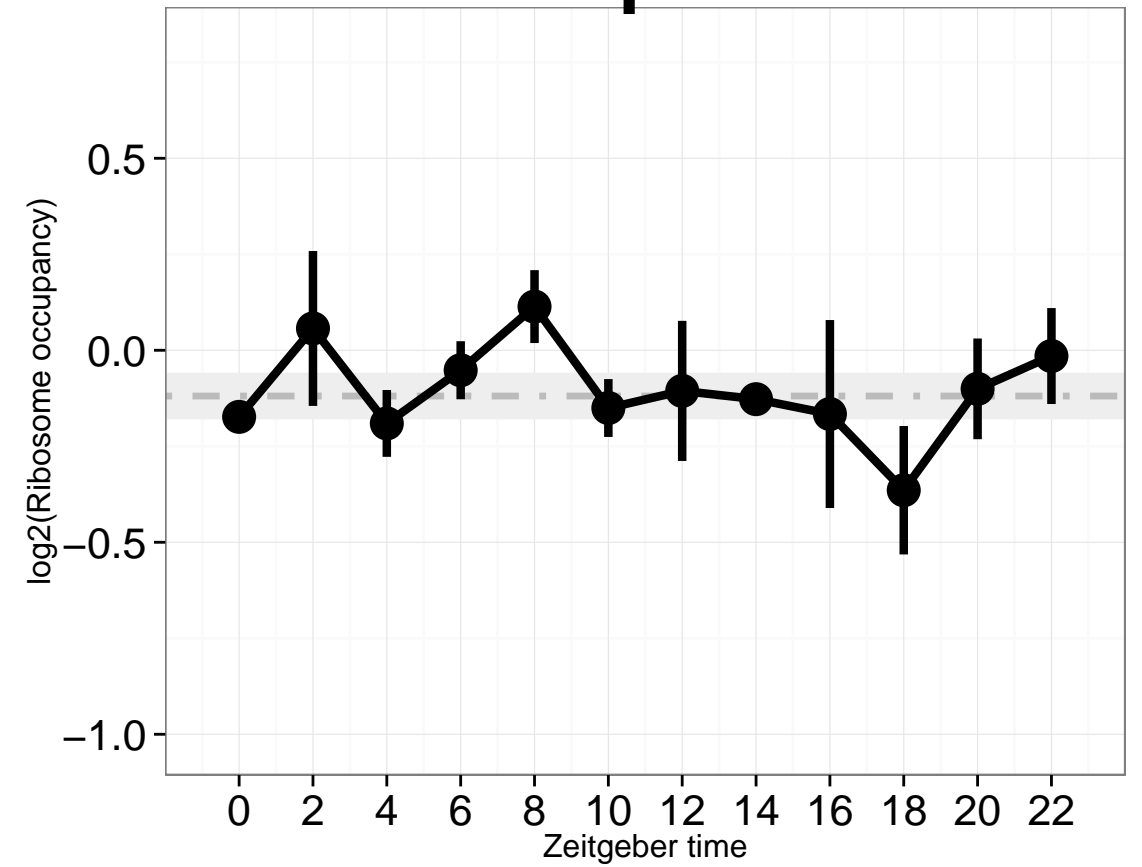

Supplement: SuppDataset_1.zip [file Prps1_set_A.pdf › Supplemental Dataset 1/A-mRNA_nonrhyth_translation_nonrhyth/Prps1_set_A.pdf]

# Prps1l3

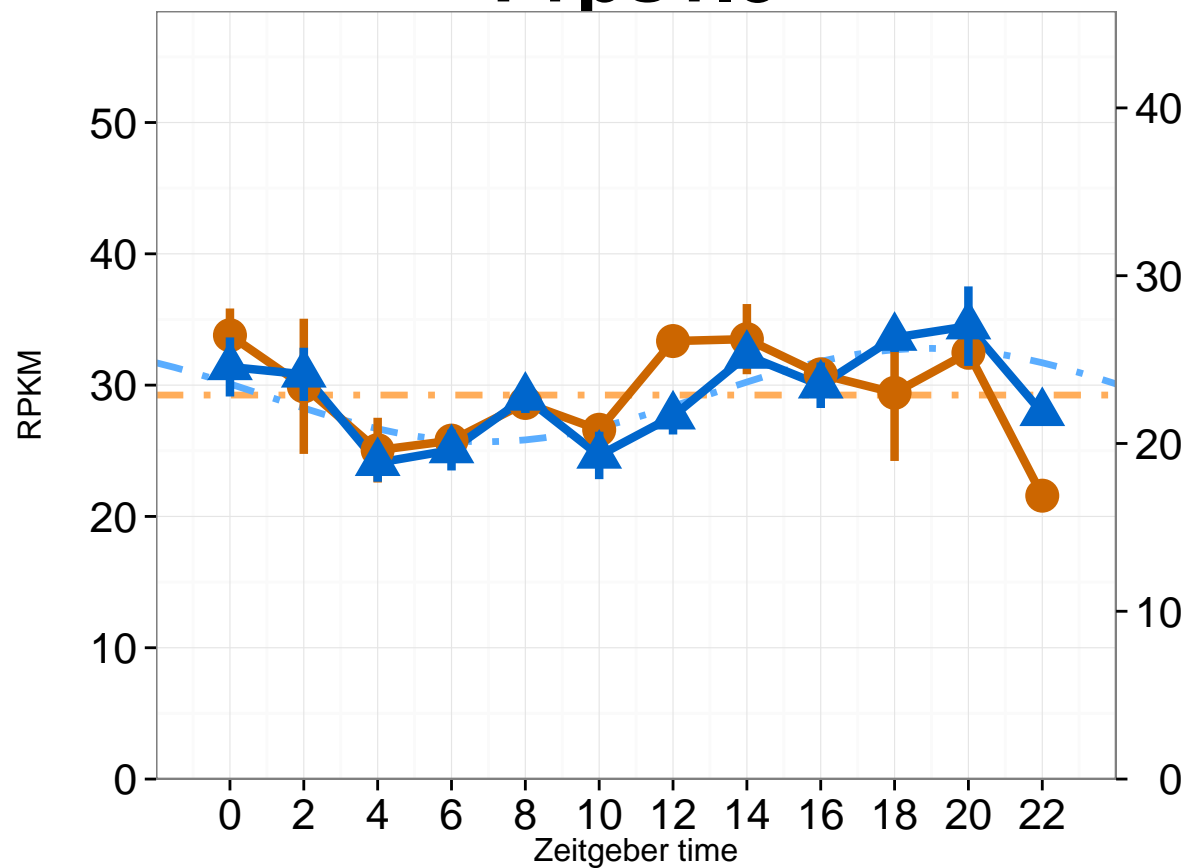

# Prps1l3

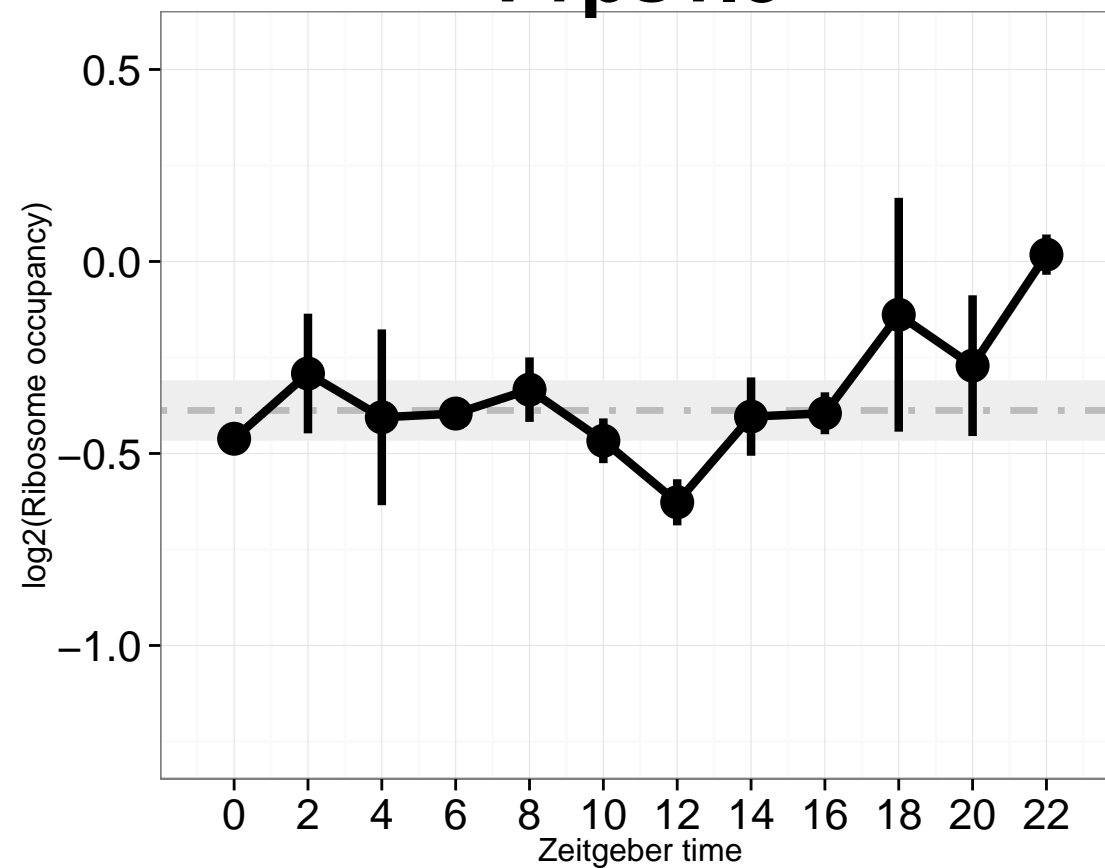

Supplement: SuppDataset_1.zip [file Prps1l3_set_A.pdf › Supplemental Dataset 1/A-mRNA_nonrhyth_translation_nonrhyth/Prps1l3_set_A.pdf]

# Prps2

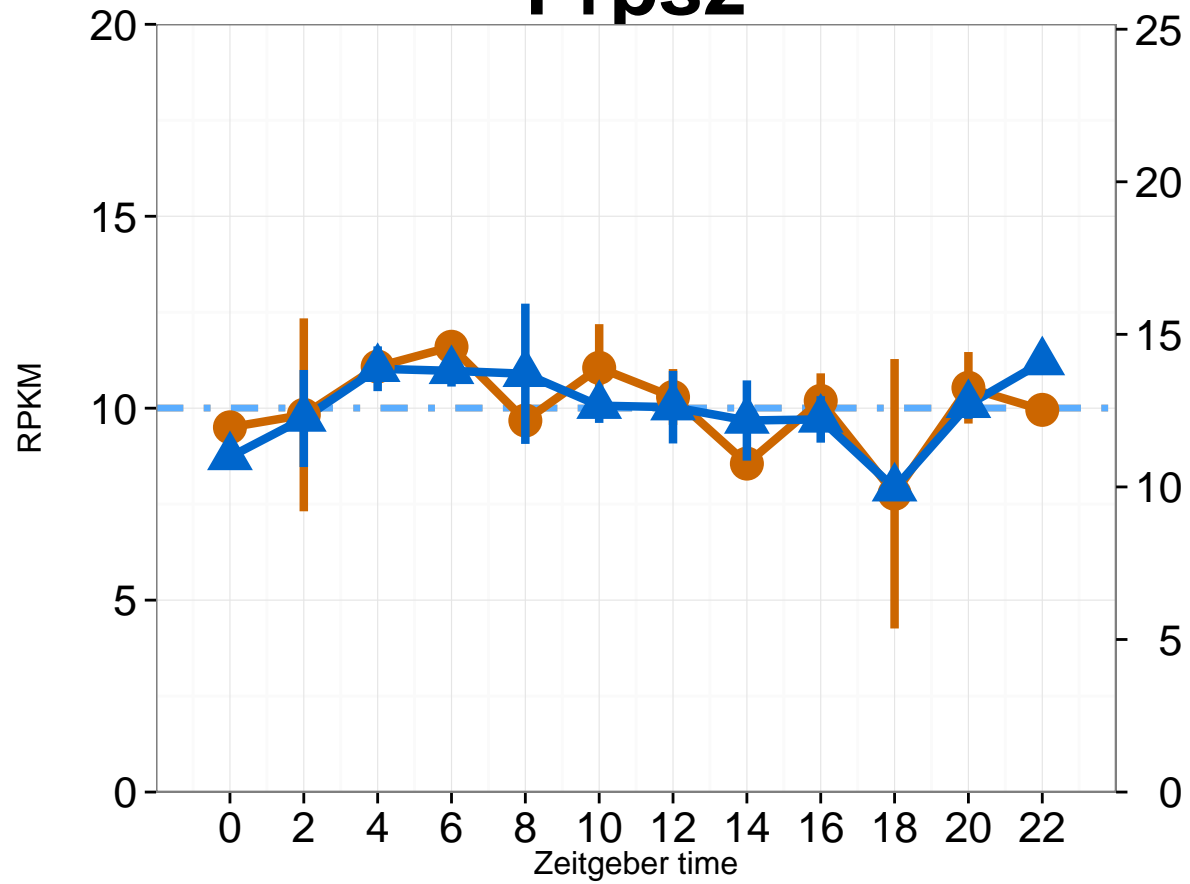

# Prps2

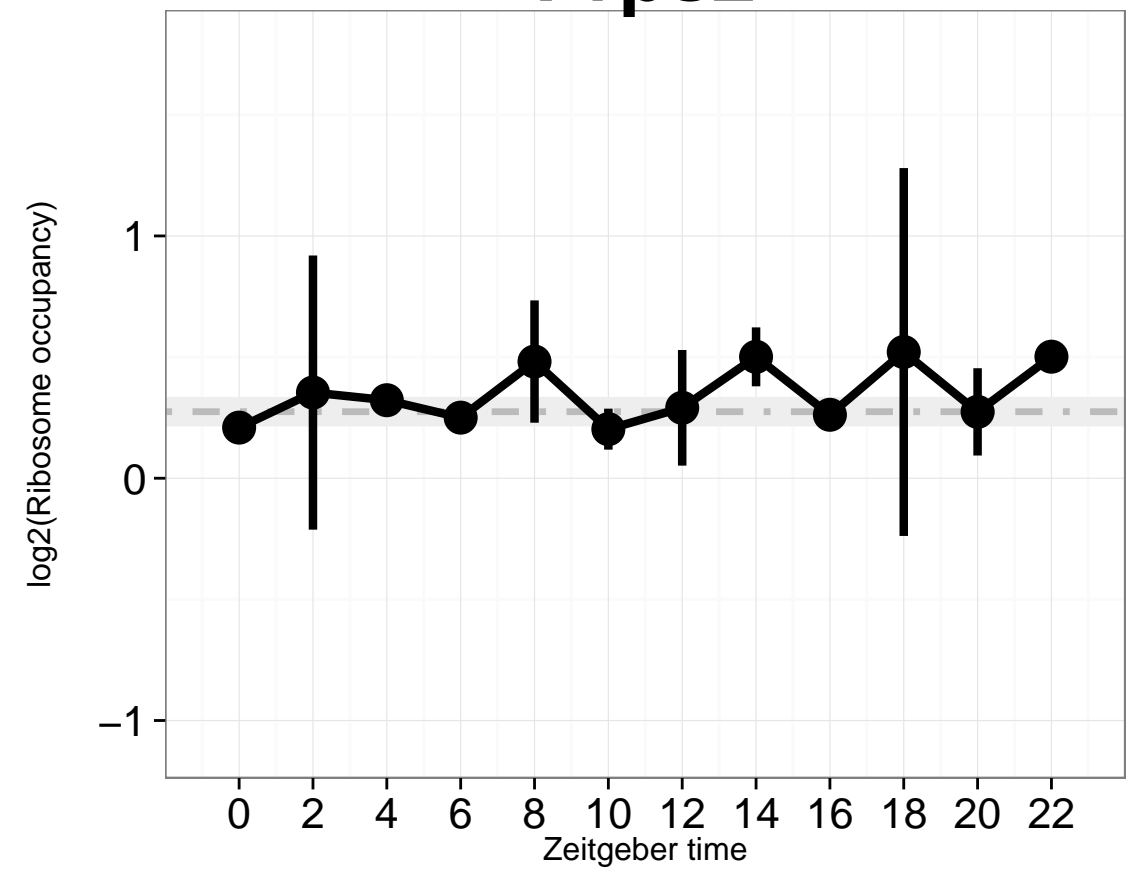

Supplement: SuppDataset_1.zip [file Prps2_set_A.pdf › Supplemental Dataset 1/A-mRNA_nonrhyth_translation_nonrhyth/Prps2_set_A.pdf]

# Prpsap1

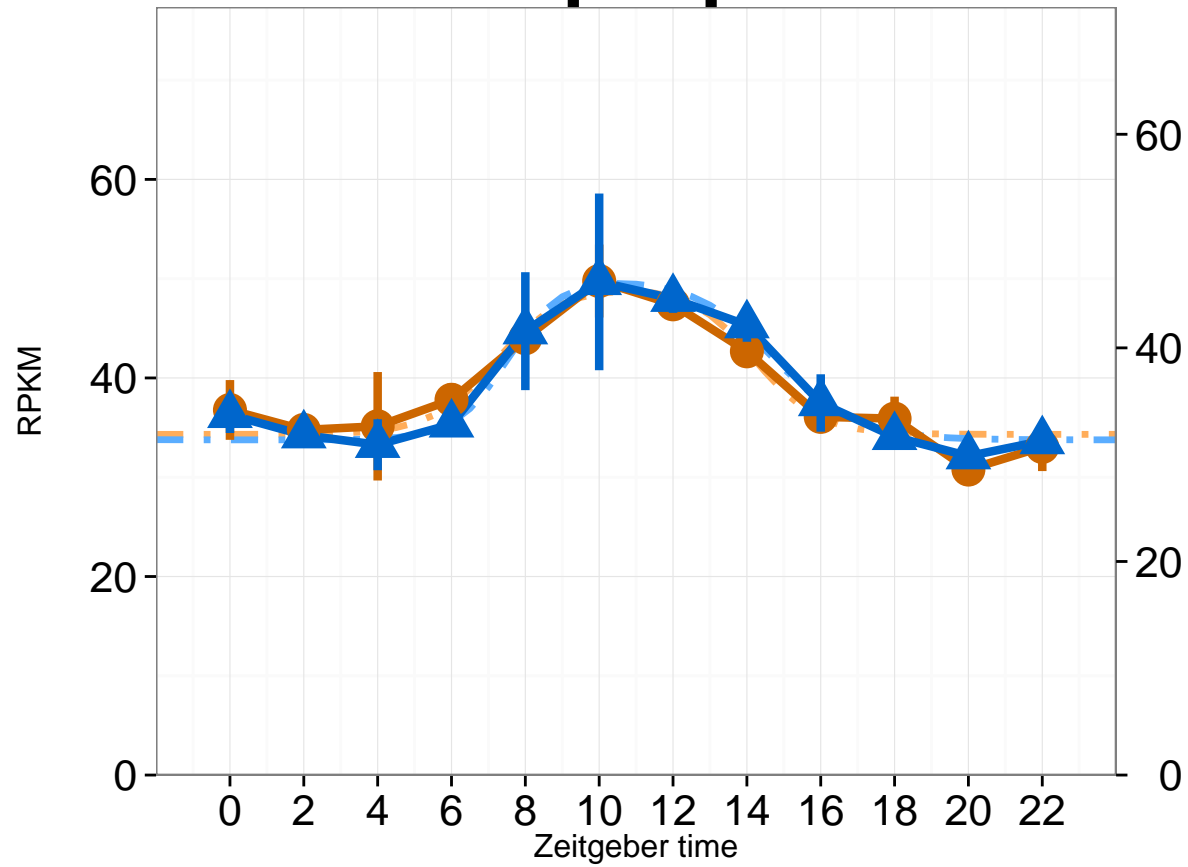

# Prpsap1

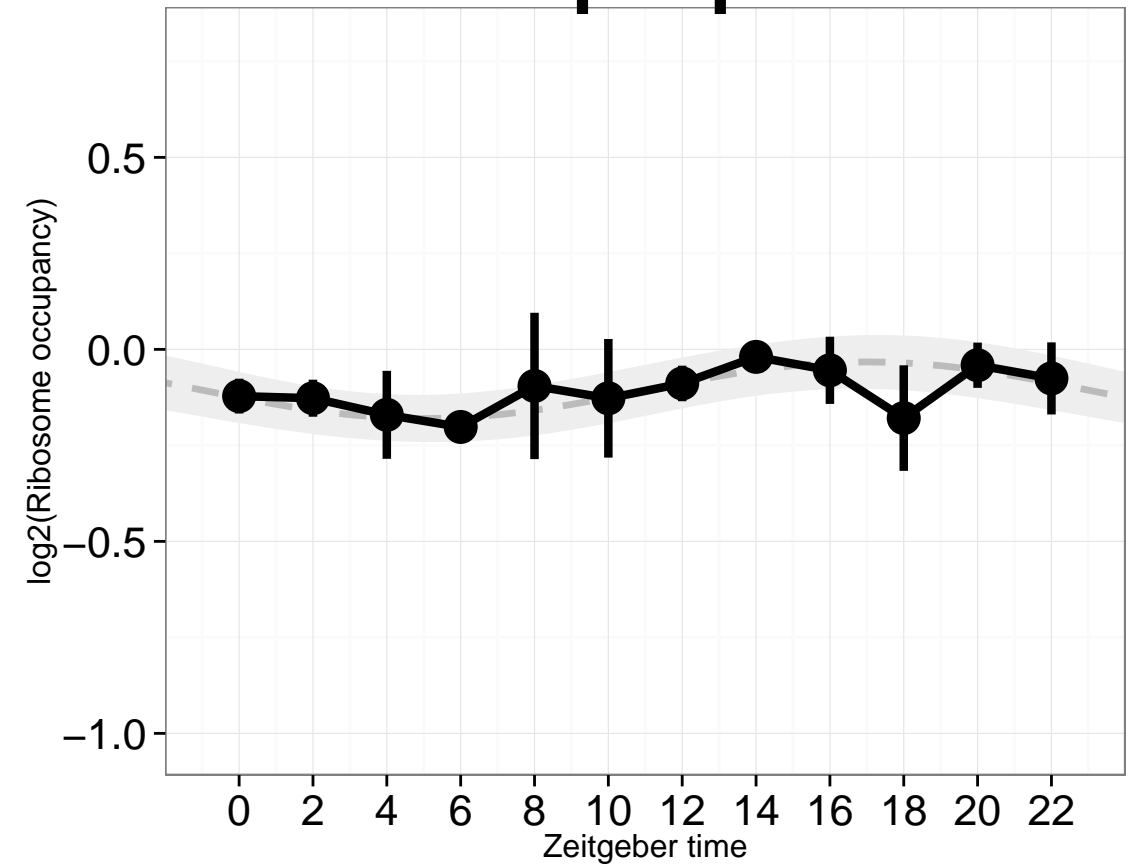

Supplement: SuppDataset_1.zip [file Prpsap1_set_A.pdf › Supplemental Dataset 1/A-mRNA_nonrhyth_translation_nonrhyth/Prpsap1_set_A.pdf]

# Prpsap2

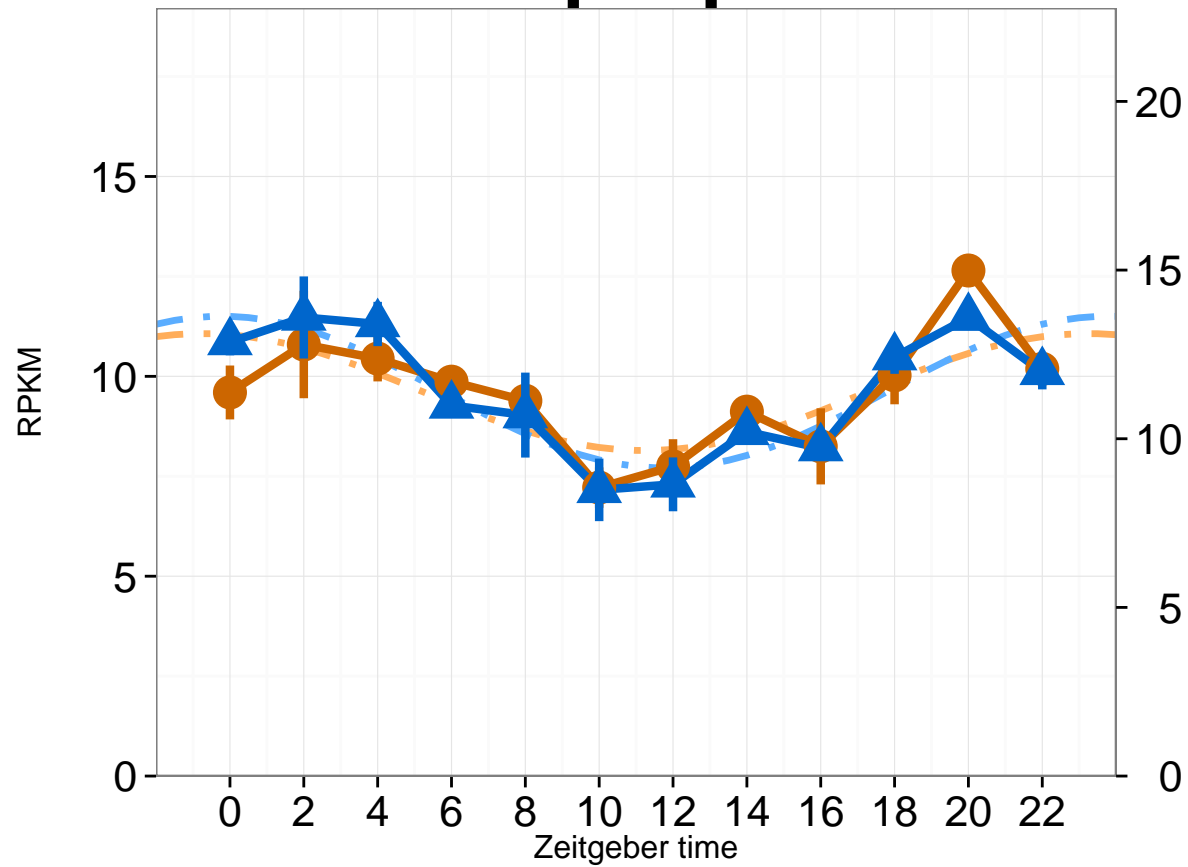

# Prpsap2

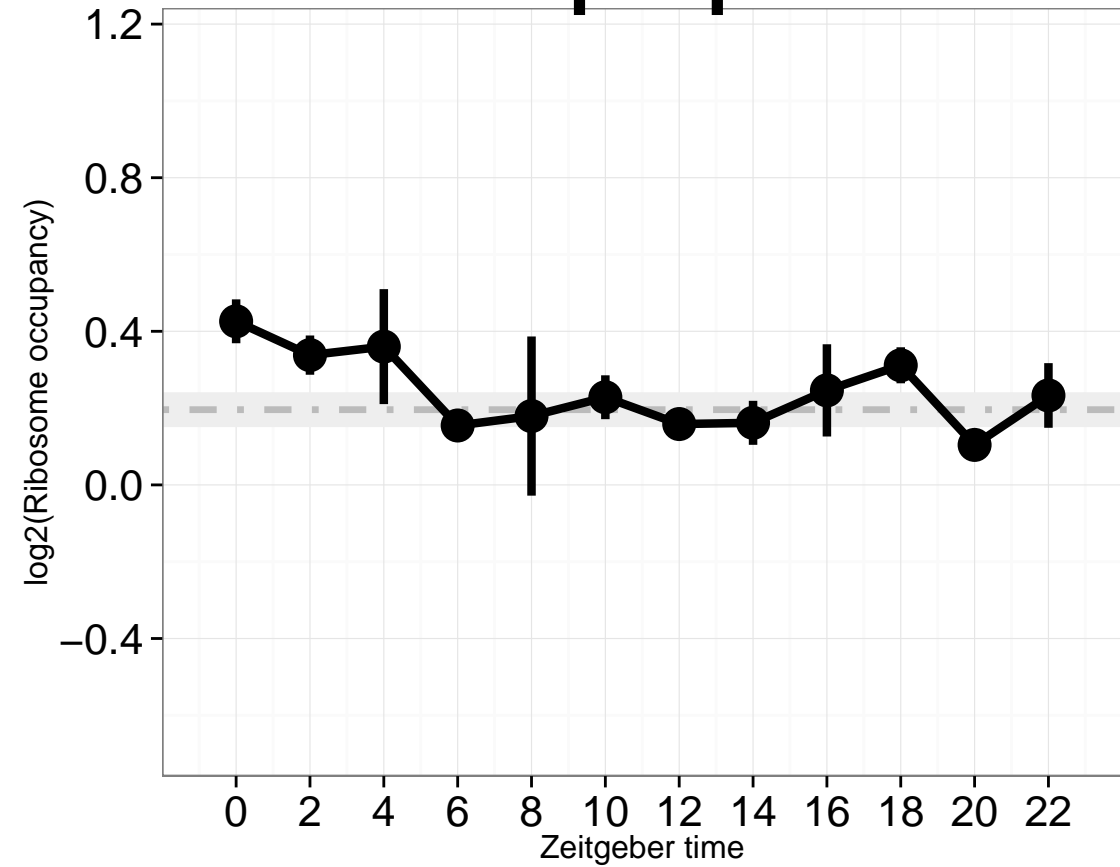

Supplement: SuppDataset_1.zip [file Prpsap2_set_A.pdf › Supplemental Dataset 1/A-mRNA_nonrhyth_translation_nonrhyth/Prpsap2_set_A.pdf]

## Prr12

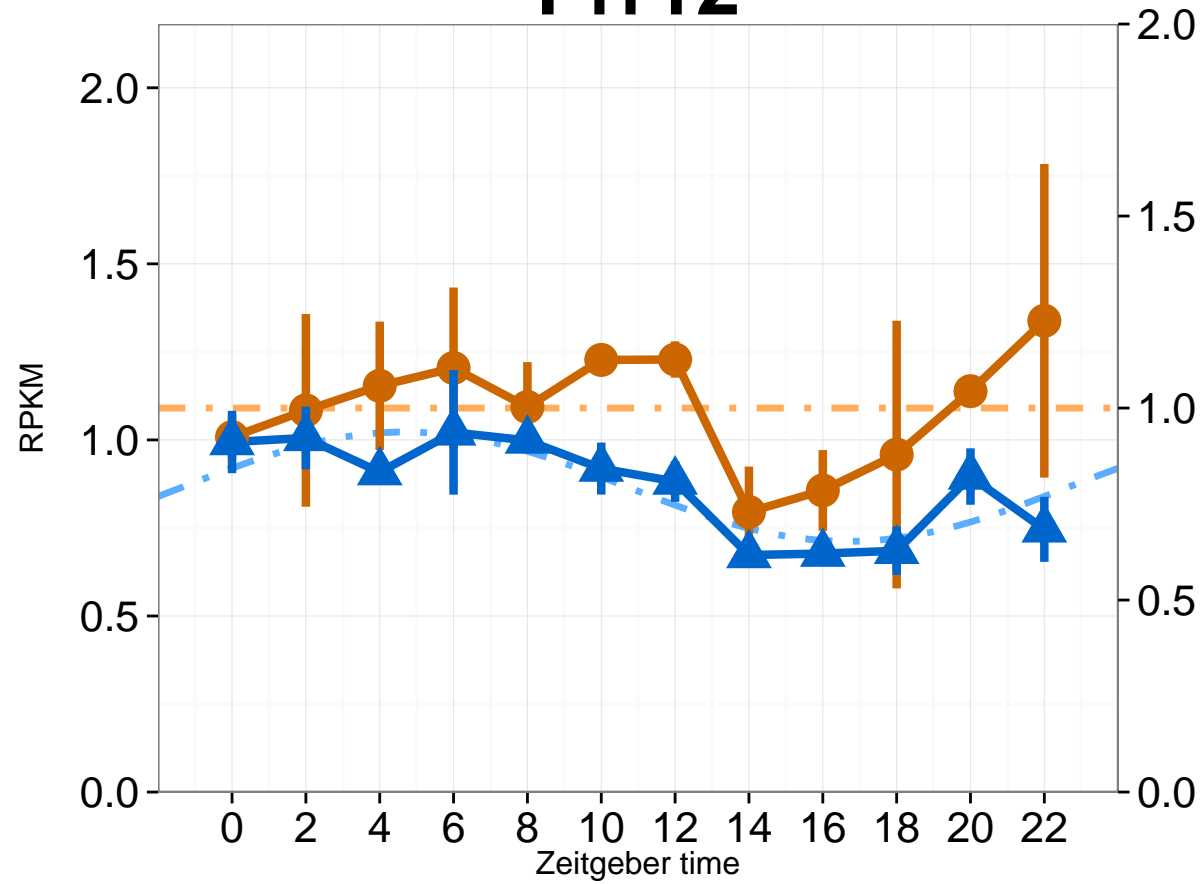

## Prr12

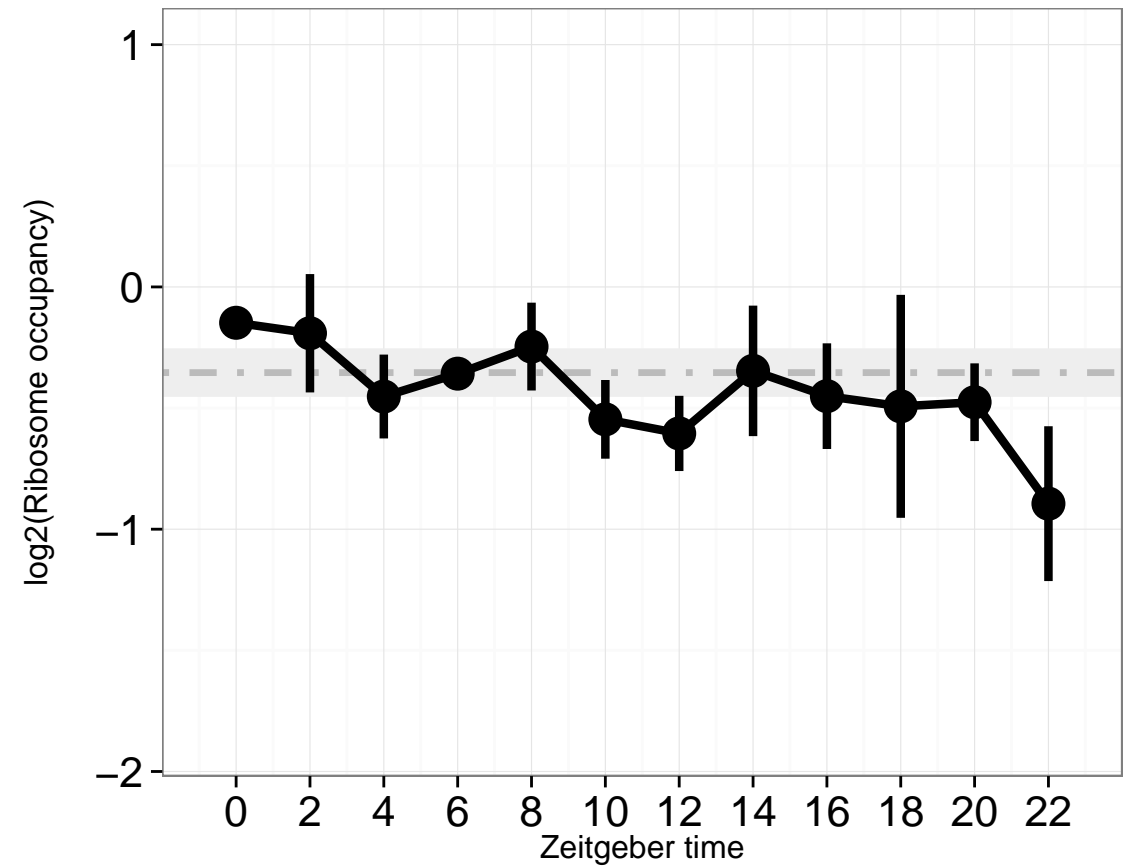

Supplement: SuppDataset_1.zip [file Prr12_set_A.pdf › Supplemental Dataset 1/A-mRNA_nonrhyth_translation_nonrhyth/Prr12_set_A.pdf]

## Prr14

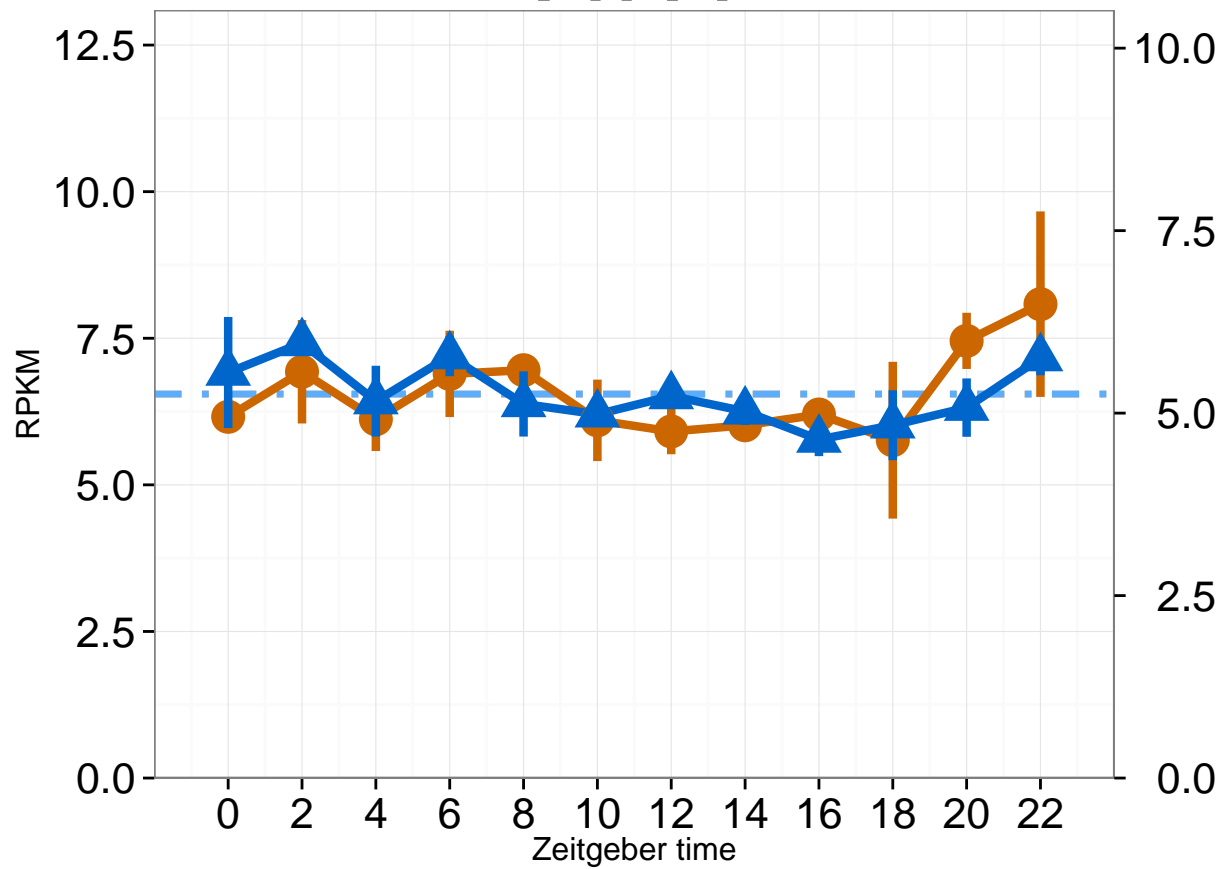

## Prr14

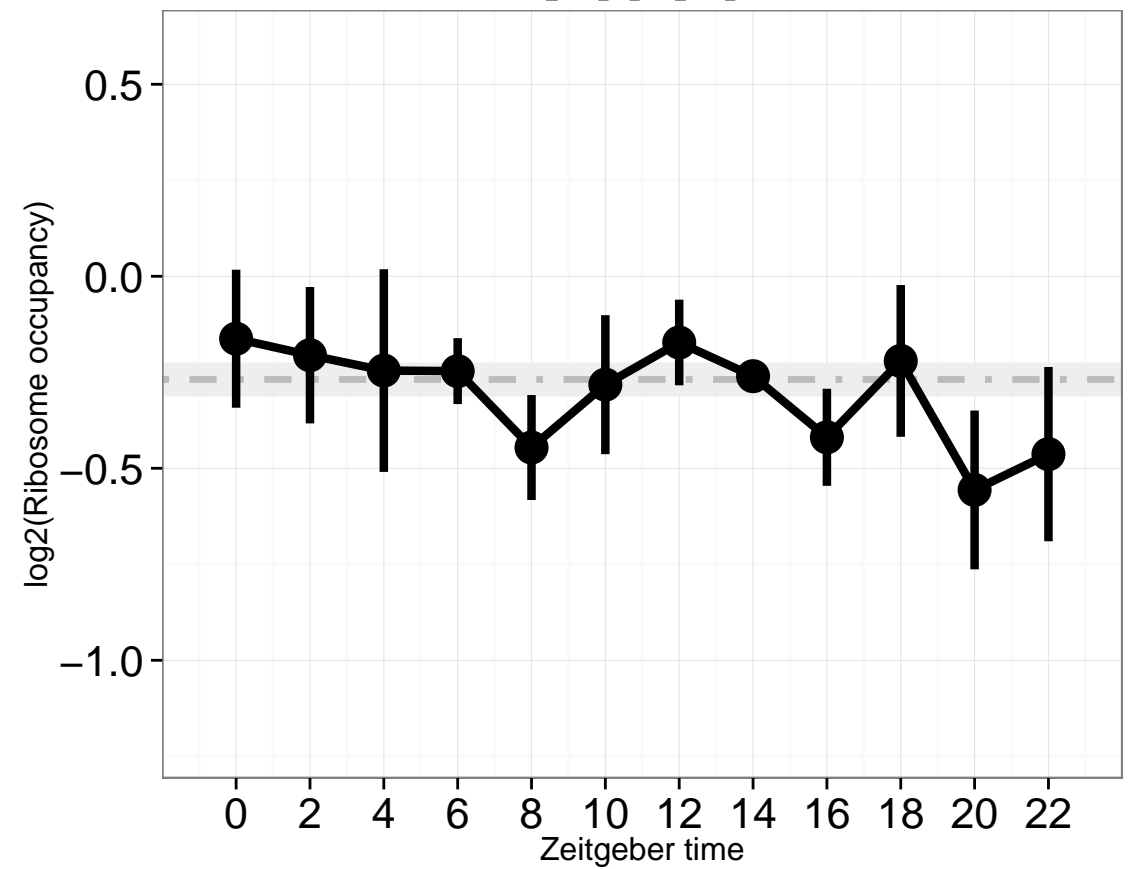

Supplement: SuppDataset_1.zip [file Prr14_set_A.pdf › Supplemental Dataset 1/A-mRNA_nonrhyth_translation_nonrhyth/Prr14_set_A.pdf]
