# Supplementary figures and images for: Ribosome profiling reveals the rhythmic liver translatome and circadian clock regulation by upstream open reading frames (part 110 of 113)
Source: HighWire-hosted journal article supplement (doi:10.1101/gr.195404.115), 2015-10-20

## Proser2

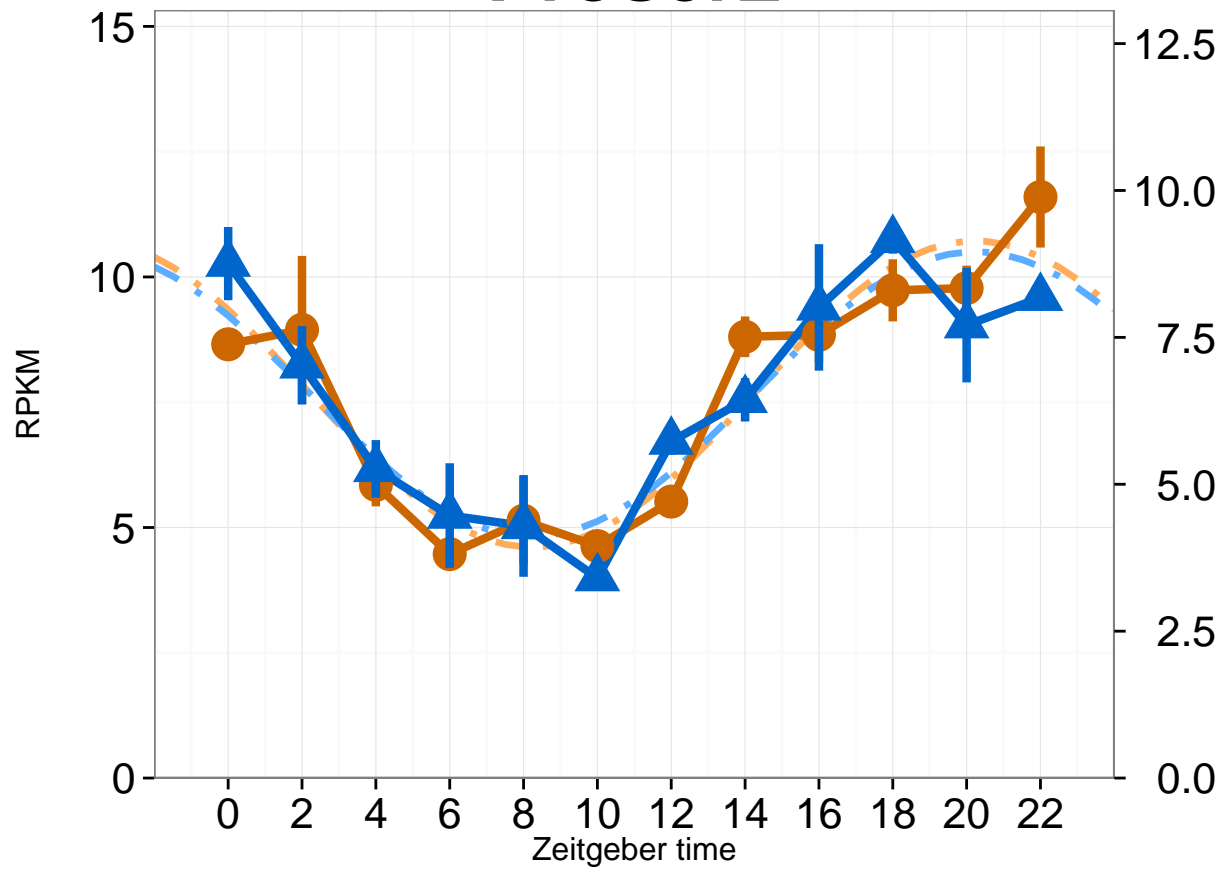

## Proser2

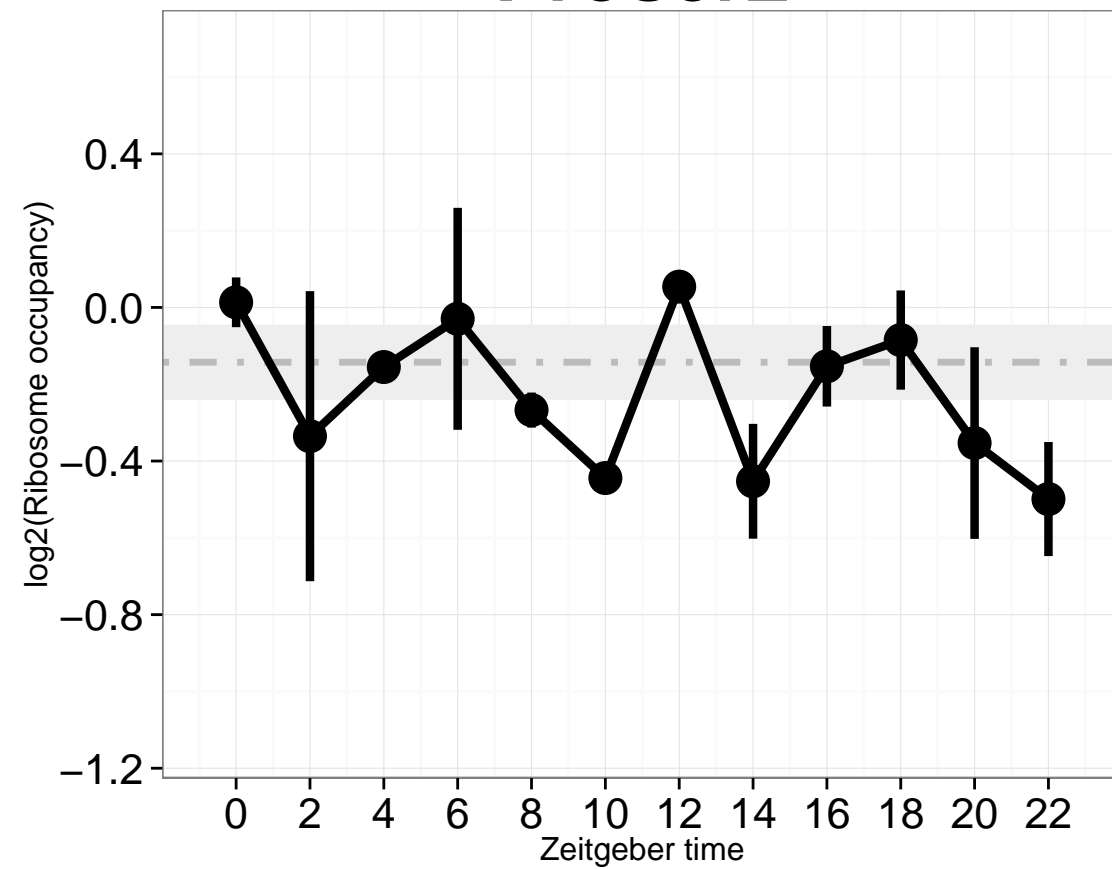

Supplement: SuppDataset_1.zip [file Proser2_set_D.pdf › Supplemental Dataset 1/D-mRNA_rhythm_translation_rhyth/Proser2_set_D.pdf]

# Prss23

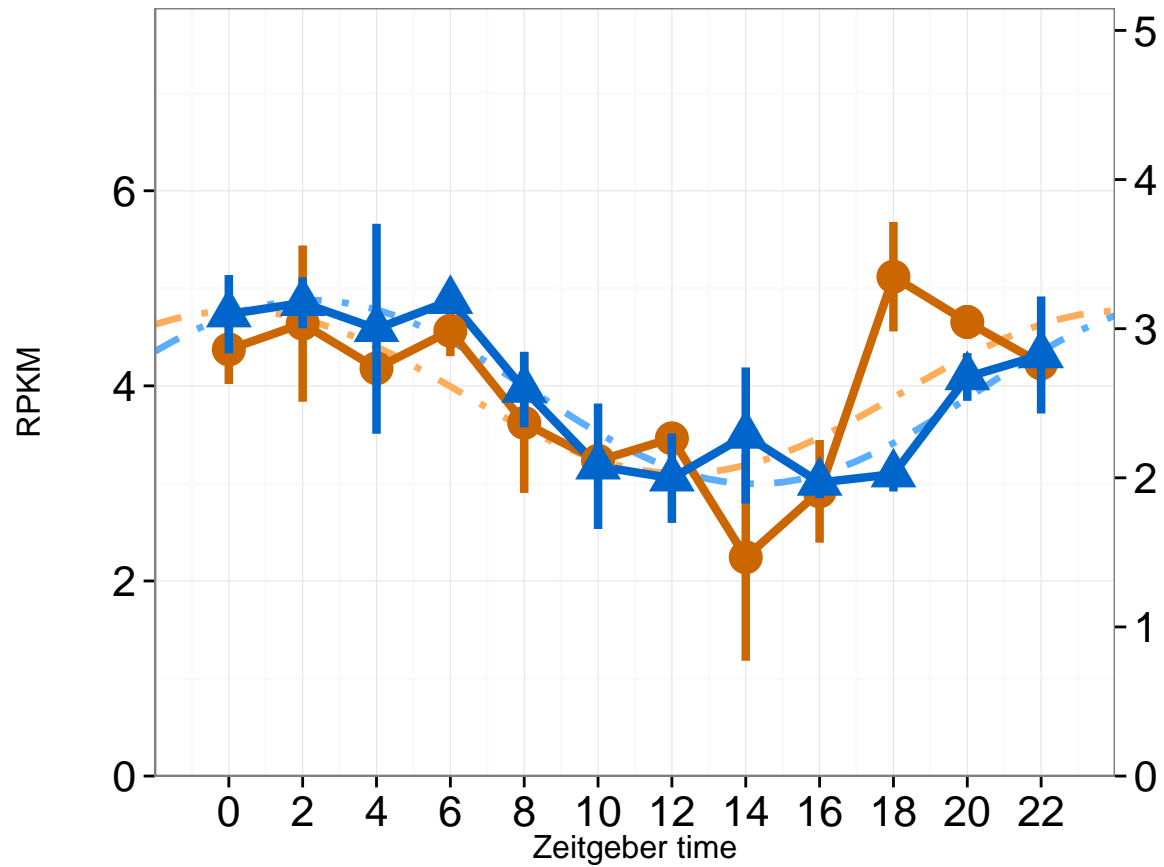

# Prss23

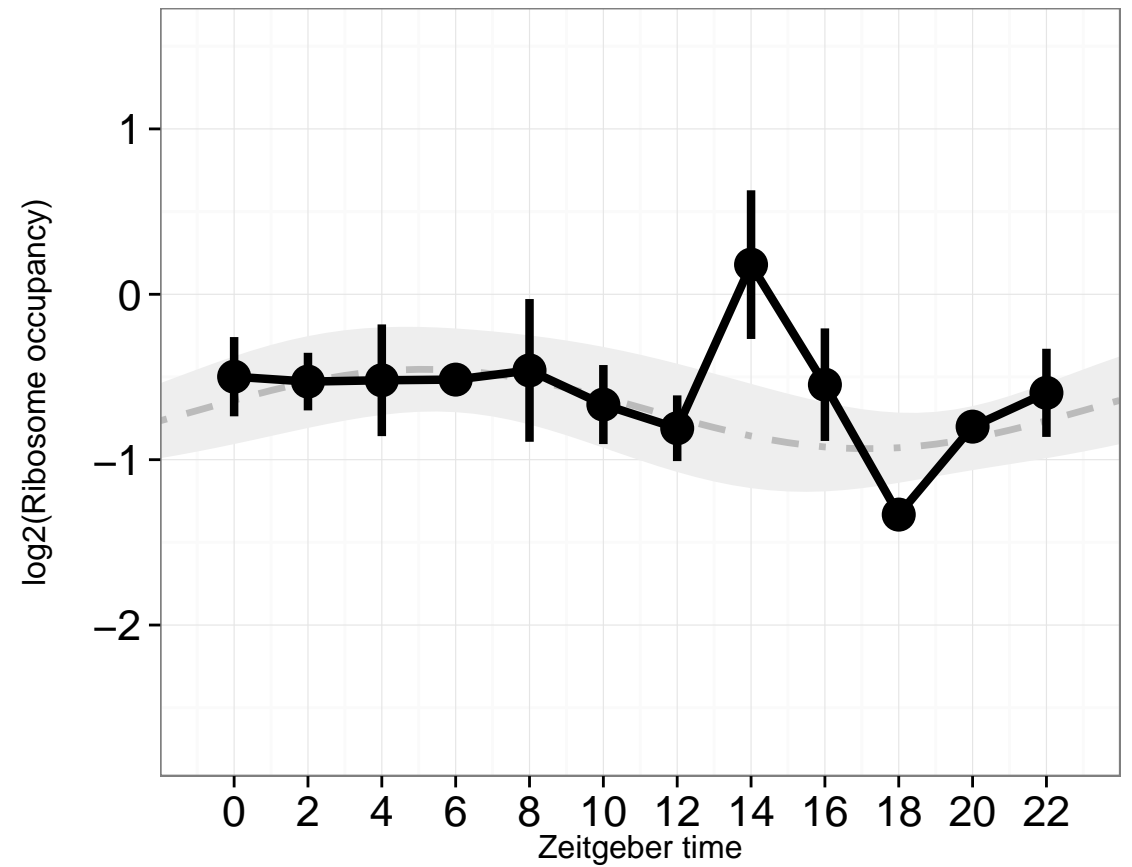

Supplement: SuppDataset_1.zip [file Prss23_set_D.pdf › Supplemental Dataset 1/D-mRNA_rhythm_translation_rhyth/Prss23_set_D.pdf]

## Psen2

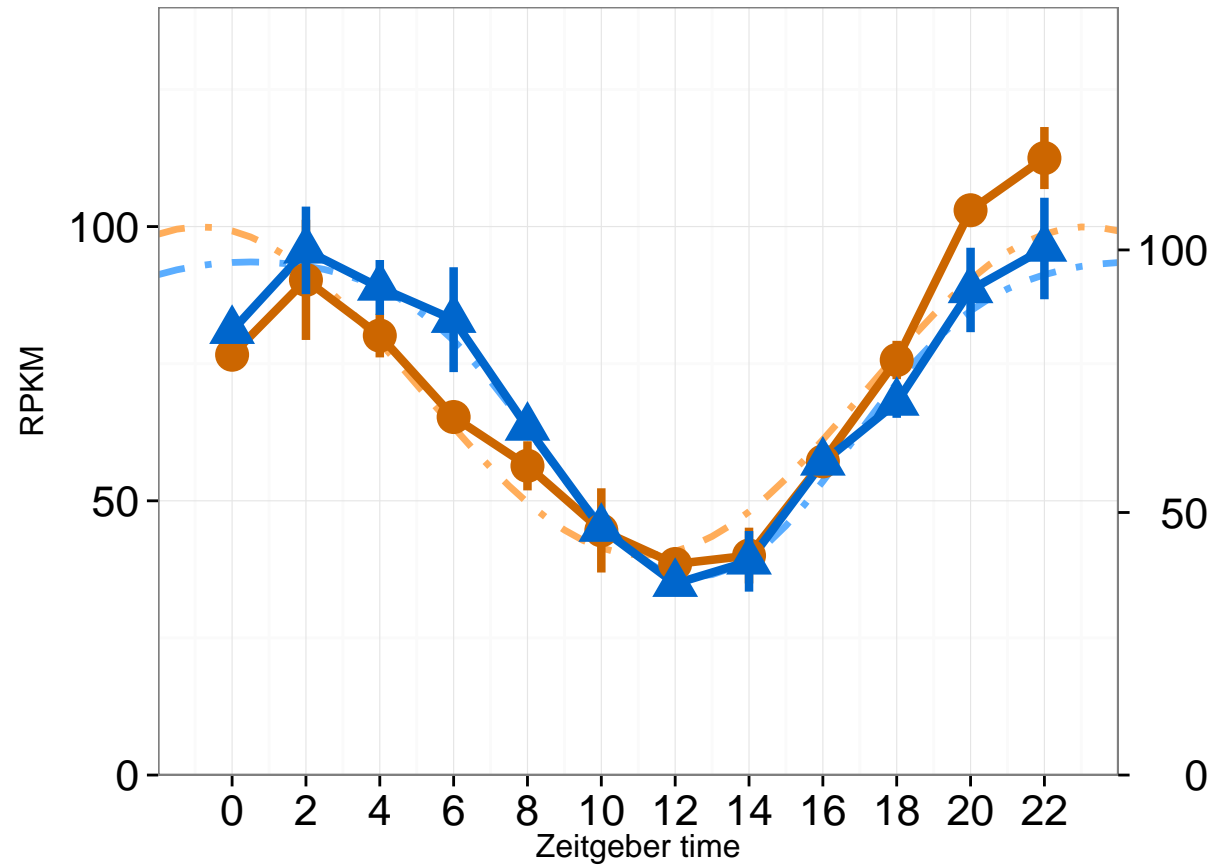

## Psen2

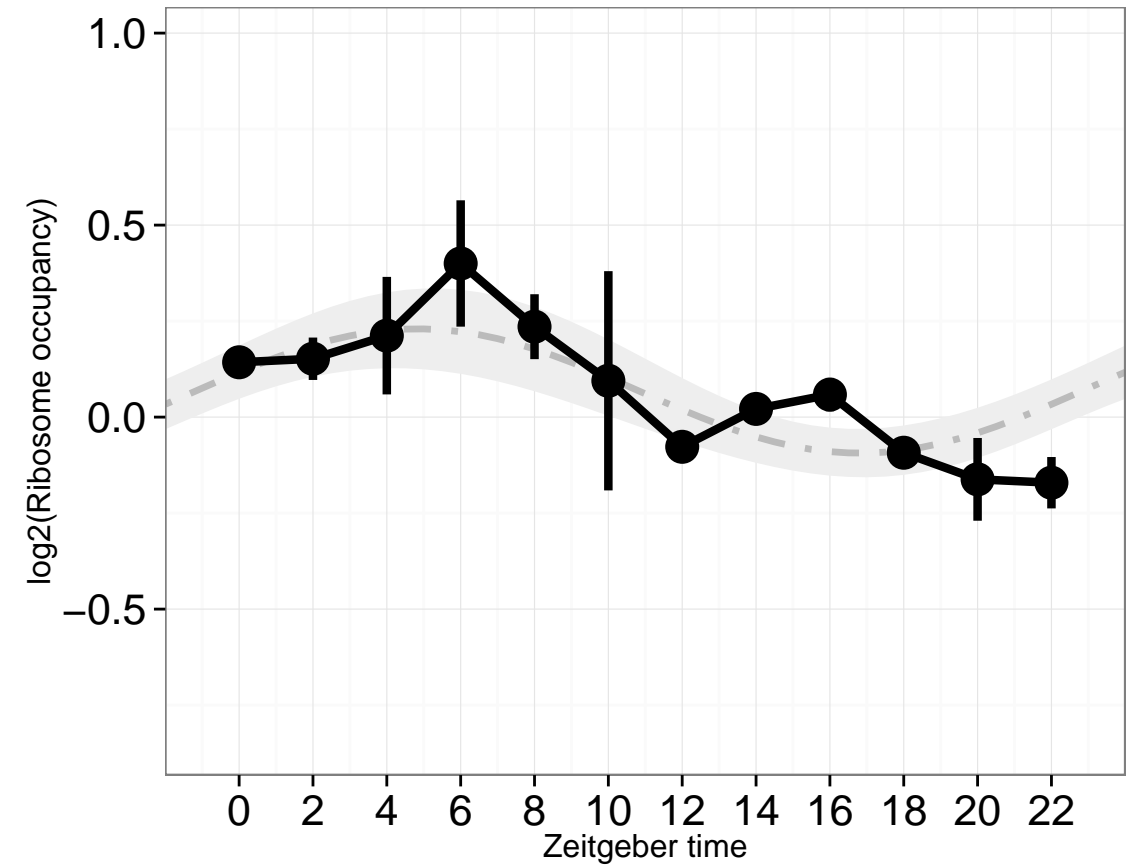

Supplement: SuppDataset_1.zip [file Psen2_set_D.pdf › Supplemental Dataset 1/D-mRNA_rhythm_translation_rhyth/Psen2_set_D.pdf]

# Ptk6

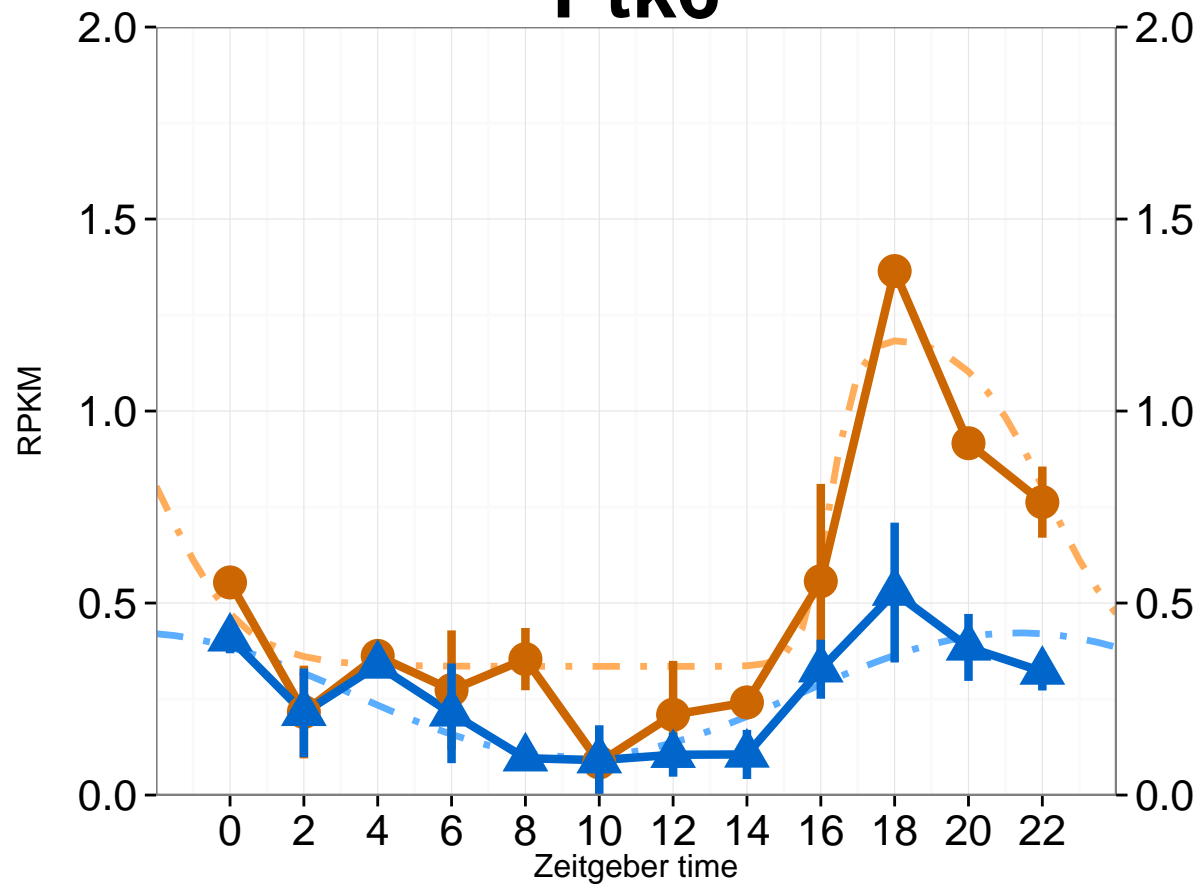

# Ptk6

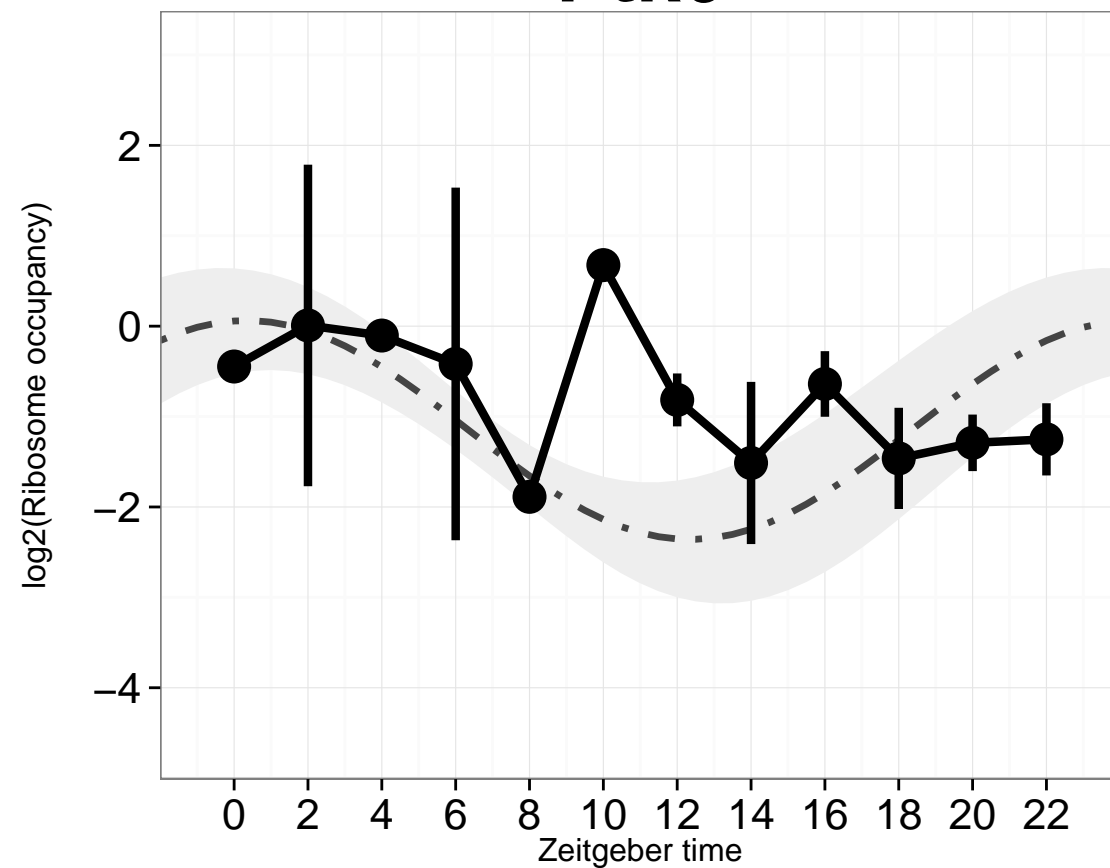

Supplement: SuppDataset_1.zip [file Ptk6_set_D.pdf › Supplemental Dataset 1/D-mRNA_rhythm_translation_rhyth/Ptk6_set_D.pdf]

# Ptpn9

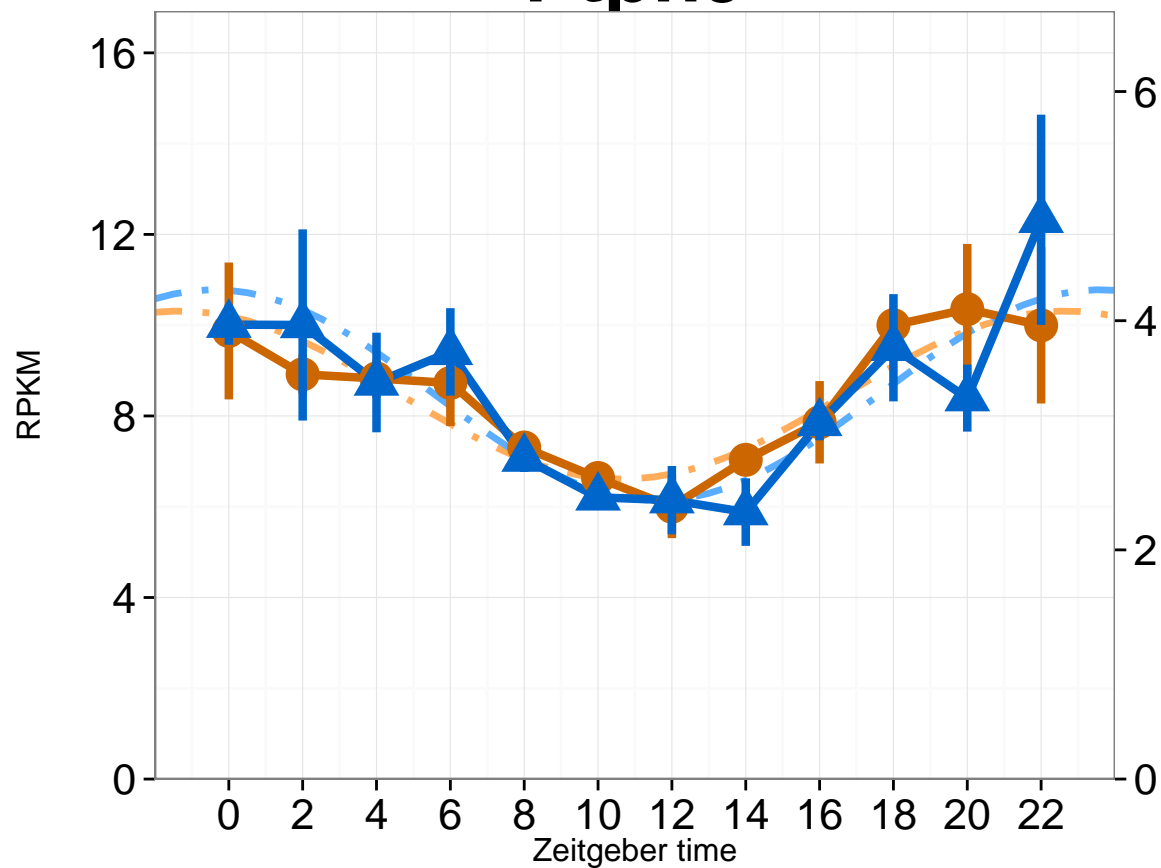

# Ptpn9

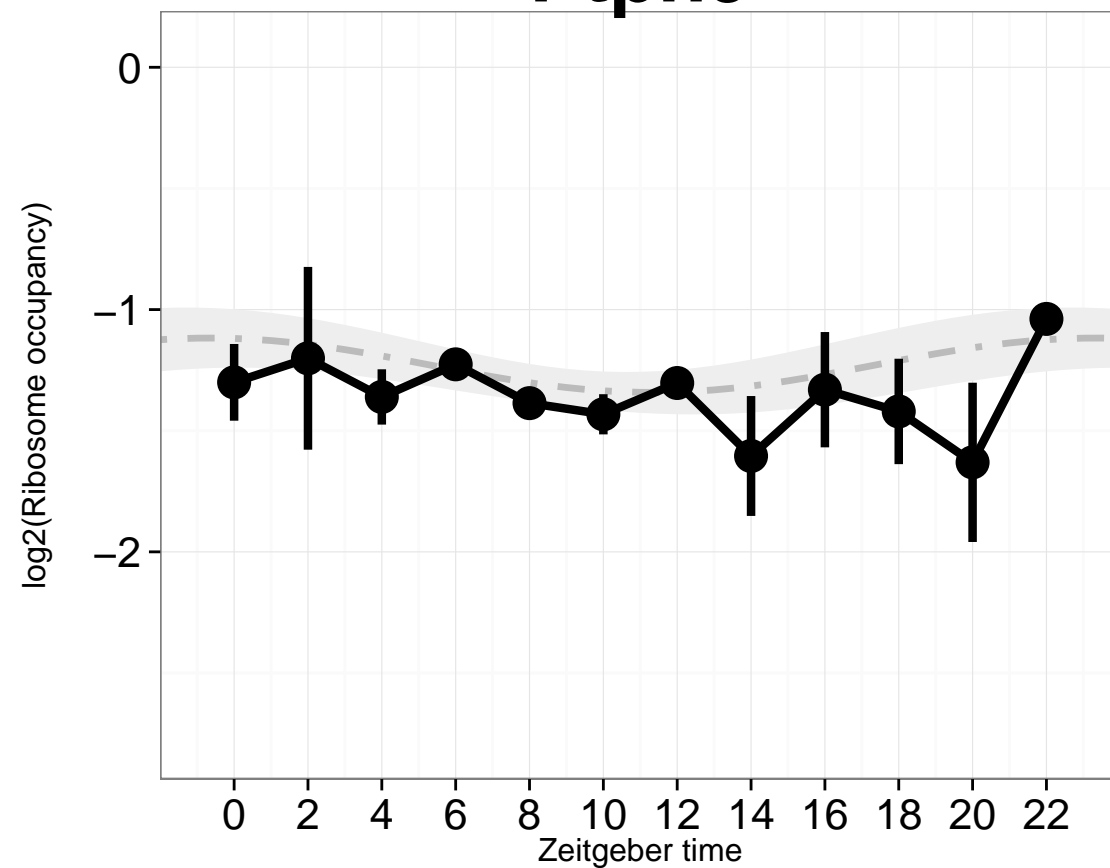

Supplement: SuppDataset_1.zip [file Ptpn9_set_D.pdf › Supplemental Dataset 1/D-mRNA_rhythm_translation_rhyth/Ptpn9_set_D.pdf]

## Ptrf

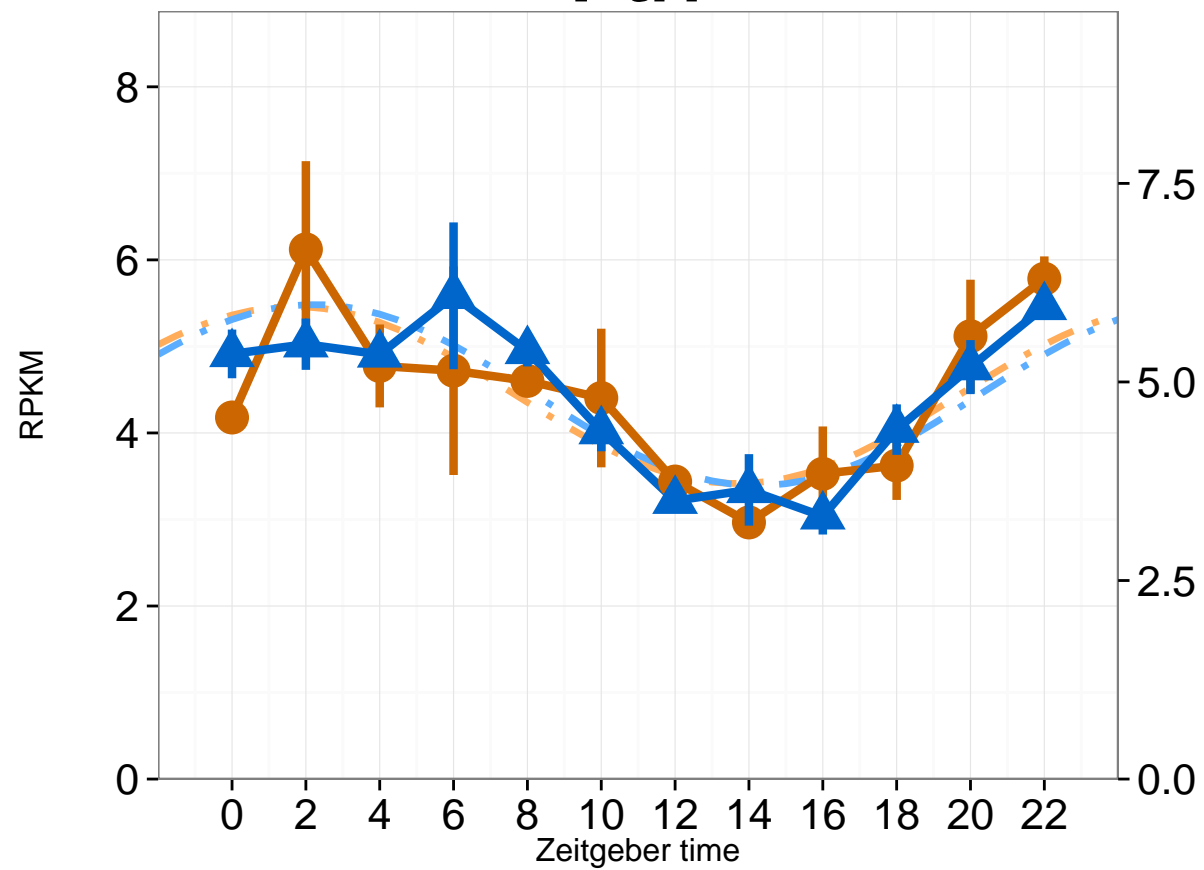

## Ptf

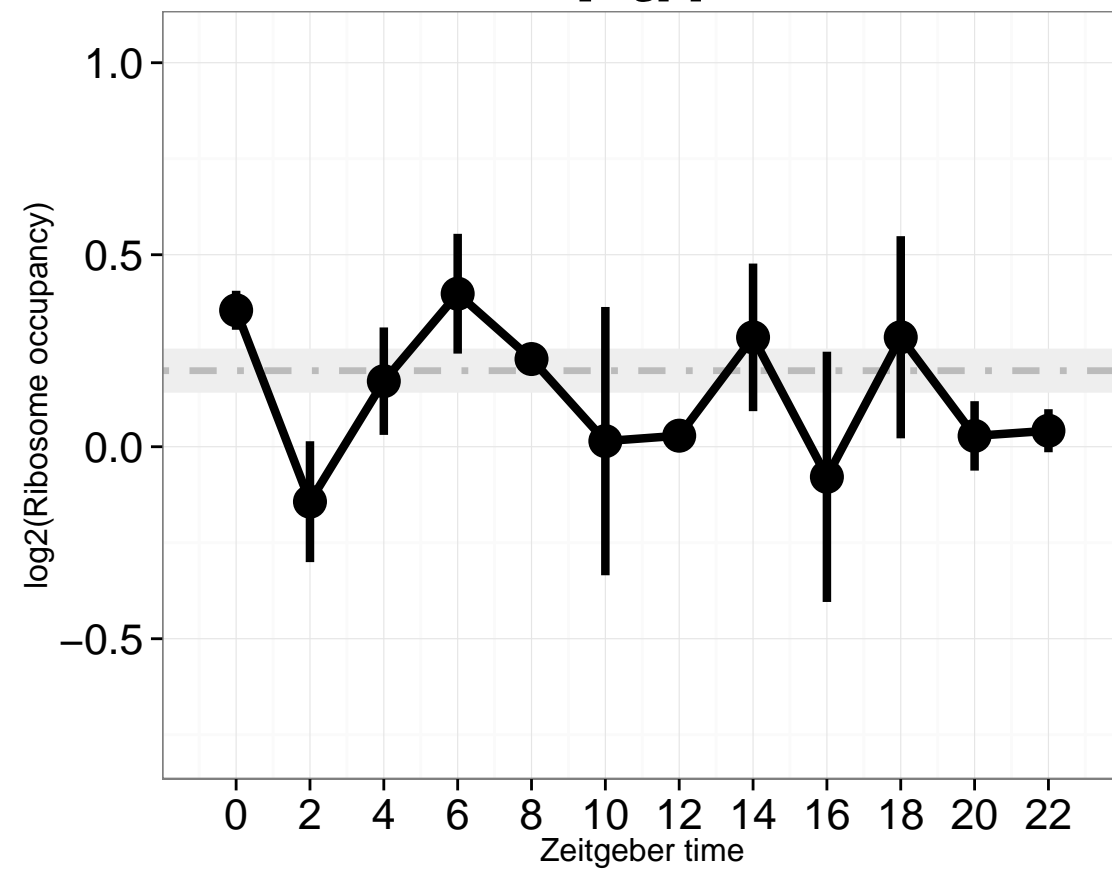

Supplement: SuppDataset_1.zip [file Ptrf_set_D.pdf › Supplemental Dataset 1/D-mRNA_rhythm_translation_rhyth/Ptrf_set_D.pdf]

## Pus7

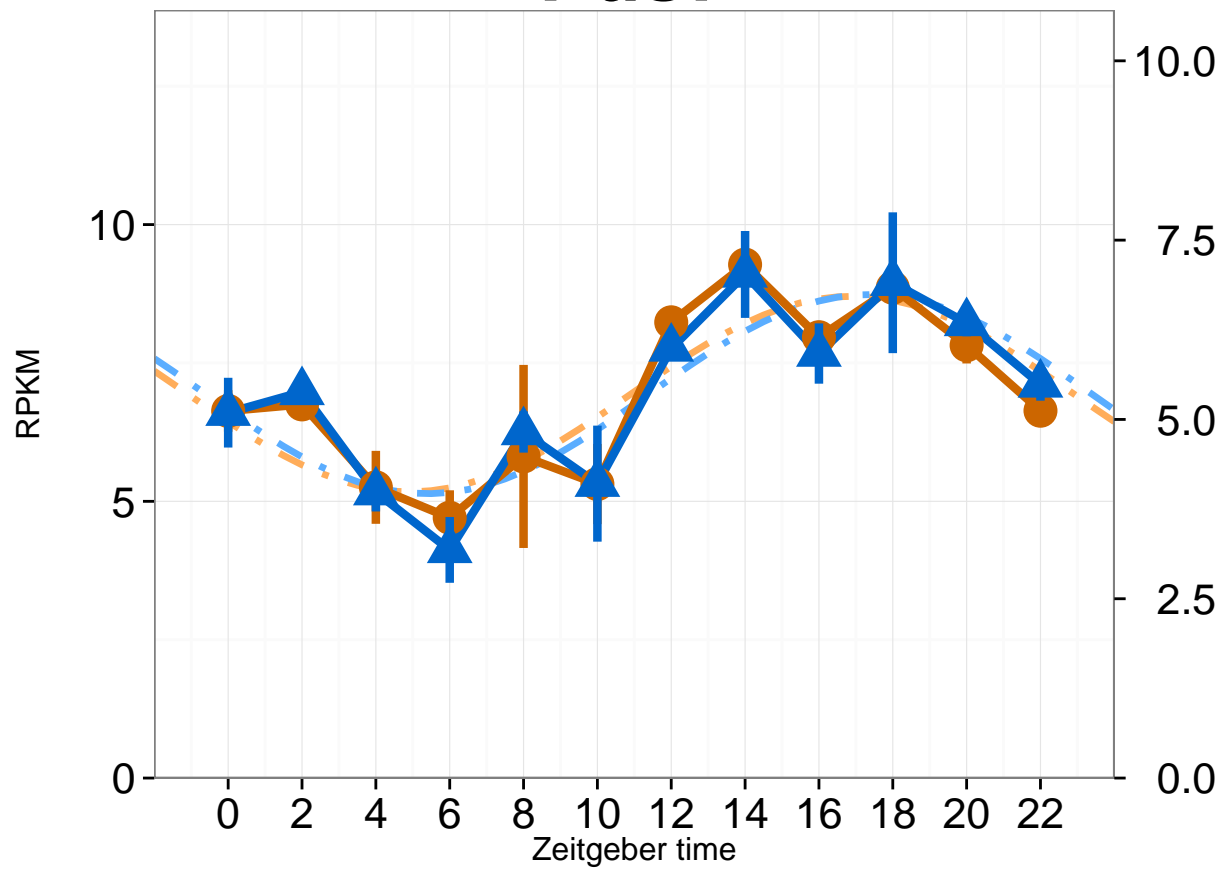

## Pus7

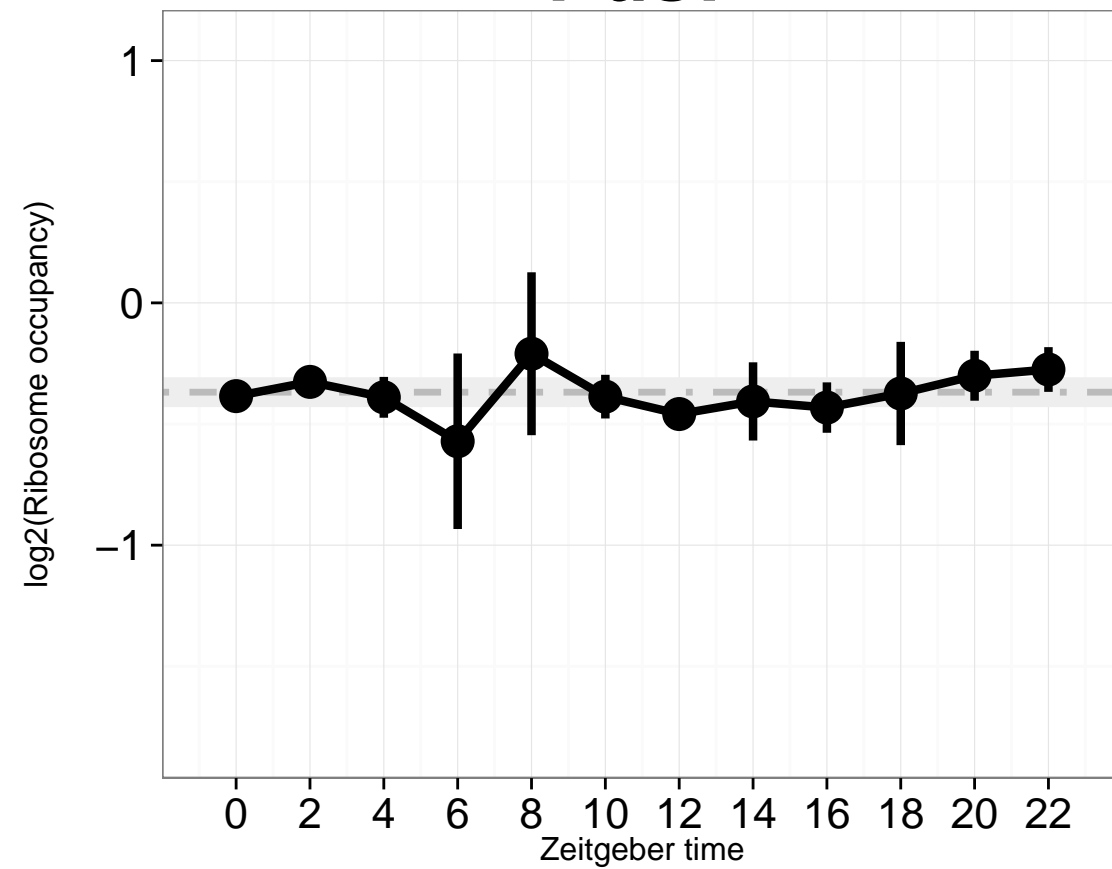

Supplement: SuppDataset_1.zip [file Pus7_set_D.pdf › Supplemental Dataset 1/D-mRNA_rhythm_translation_rhyth/Pus7_set_D.pdf]

## PvrI1

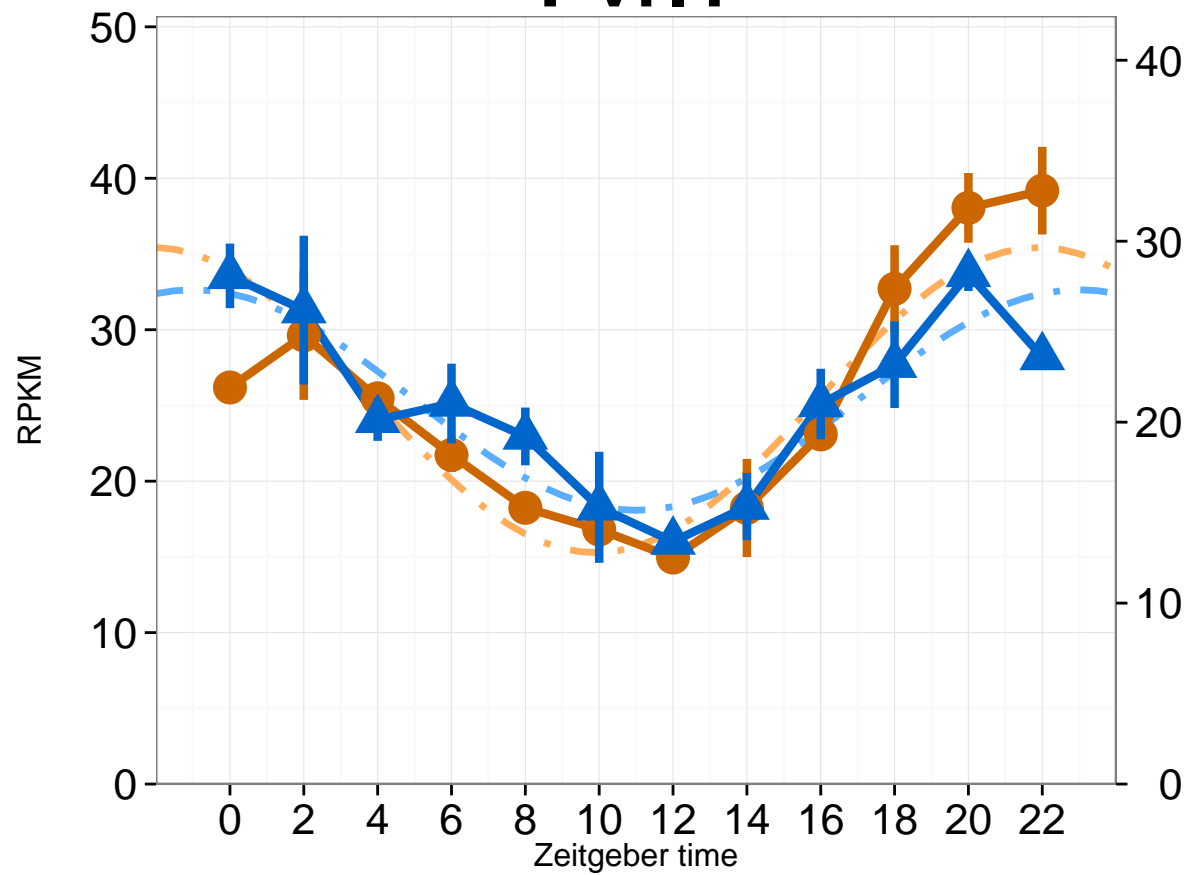

## PvrI1

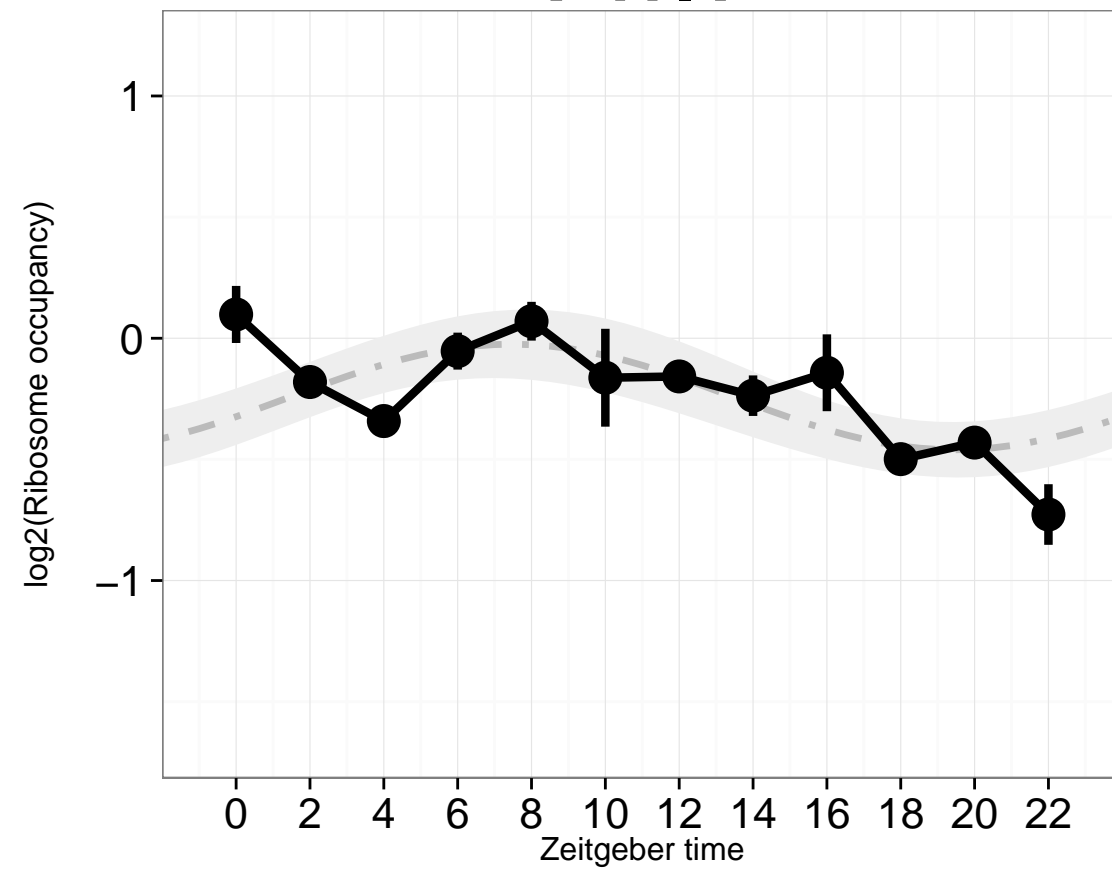

Supplement: SuppDataset_1.zip [file Pvrl1_set_D.pdf › Supplemental Dataset 1/D-mRNA_rhythm_translation_rhyth/Pvrl1_set_D.pdf]

# Pxdc1

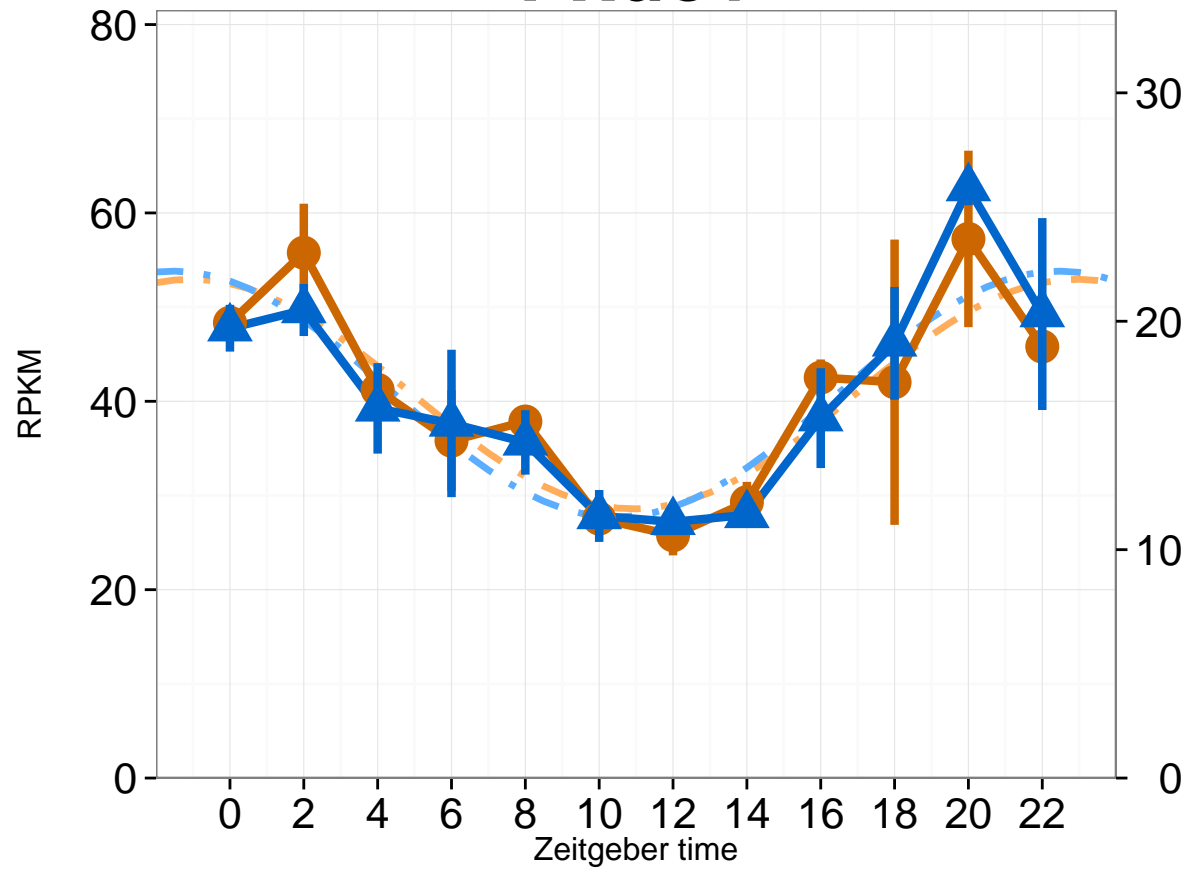

# Pxdc1

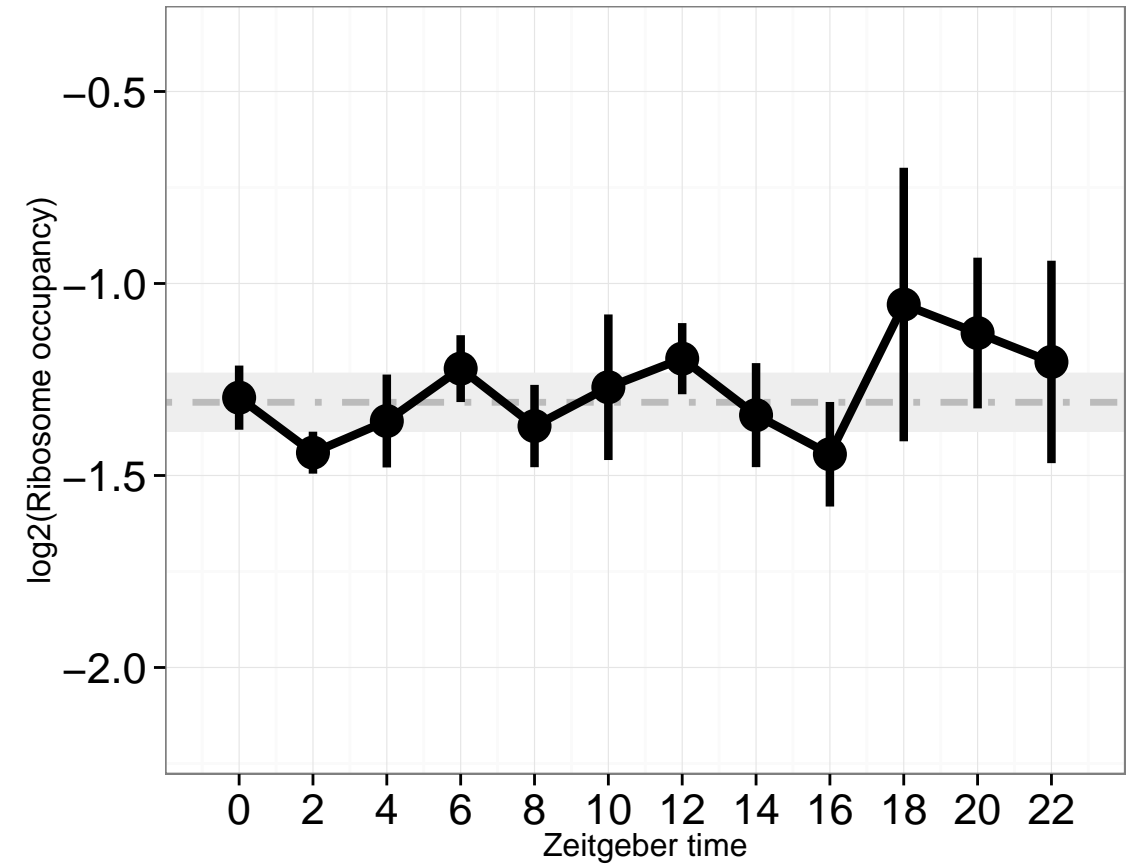

Supplement: SuppDataset_1.zip [file Pxdc1_set_D.pdf › Supplemental Dataset 1/D-mRNA_rhythm_translation_rhyth/Pxdc1_set_D.pdf]

## Pxdn

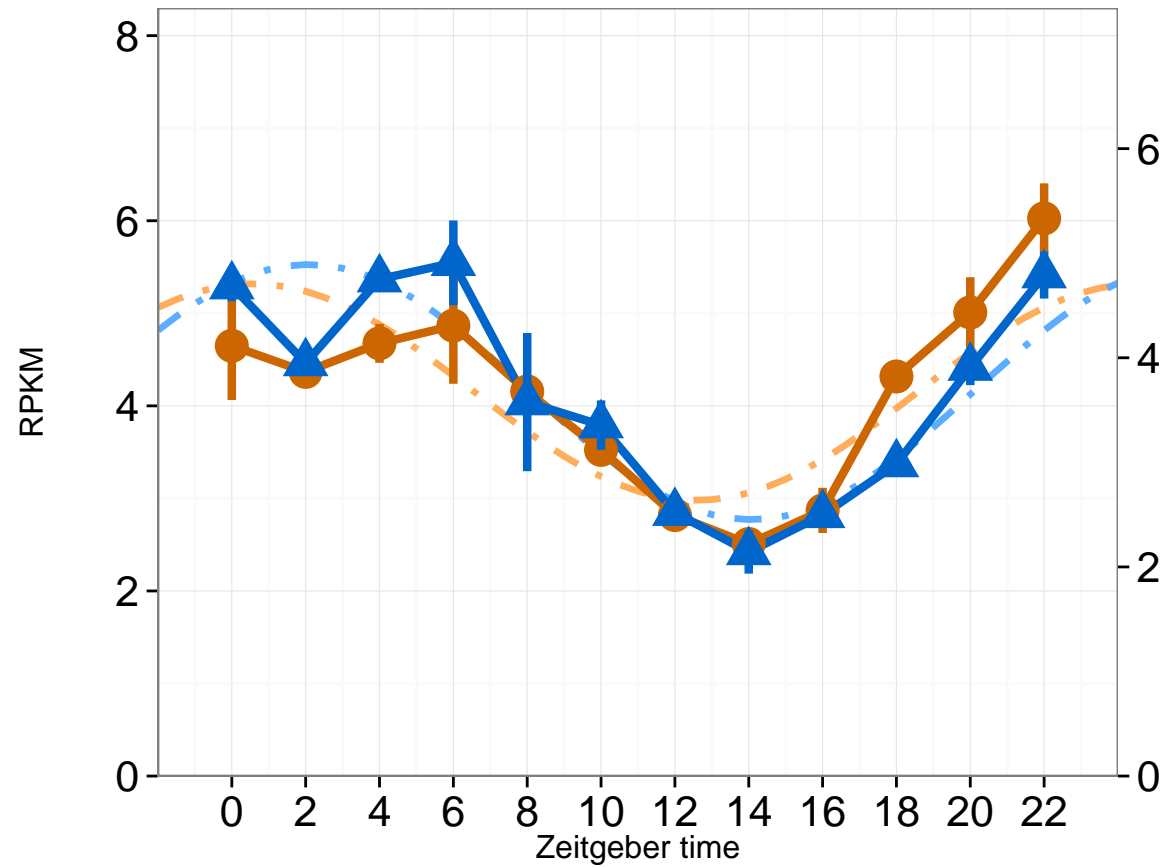

## Pxdn

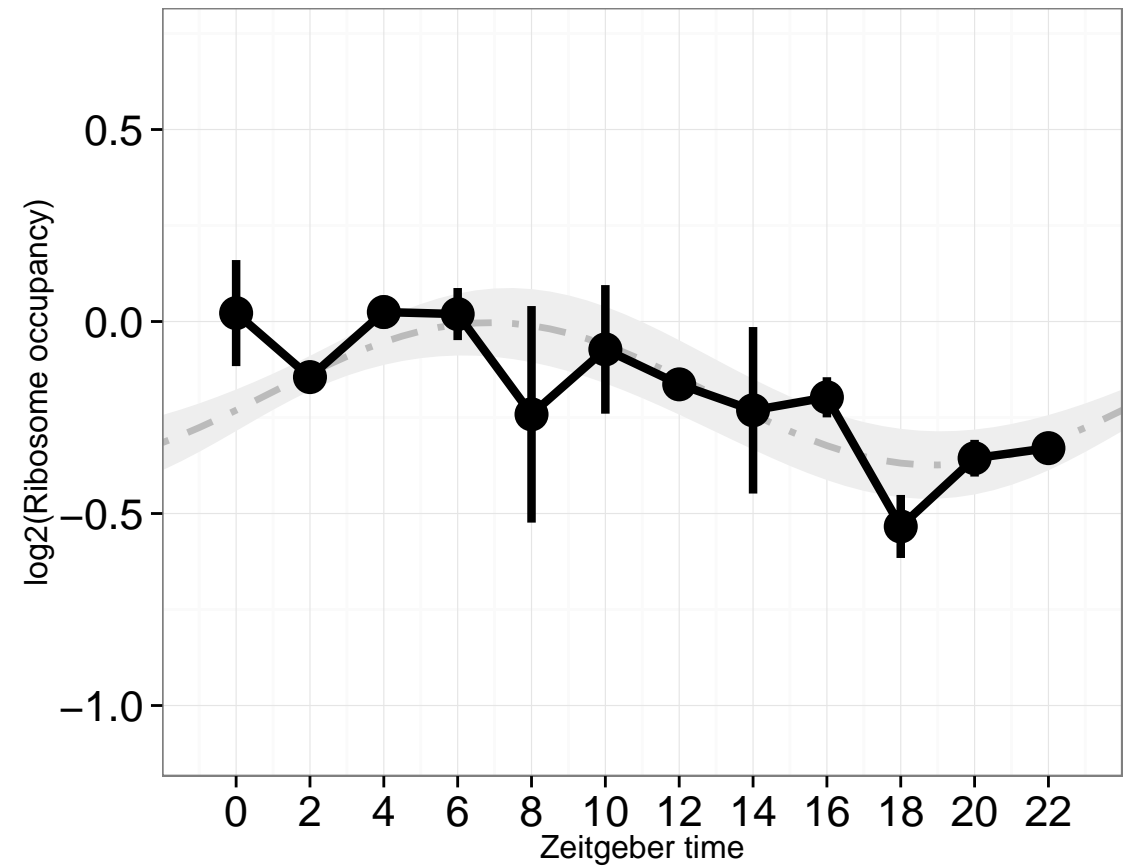

Supplement: SuppDataset_1.zip [file Pxdn_set_D.pdf › Supplemental Dataset 1/D-mRNA_rhythm_translation_rhyth/Pxdn_set_D.pdf]

## Pxmp4

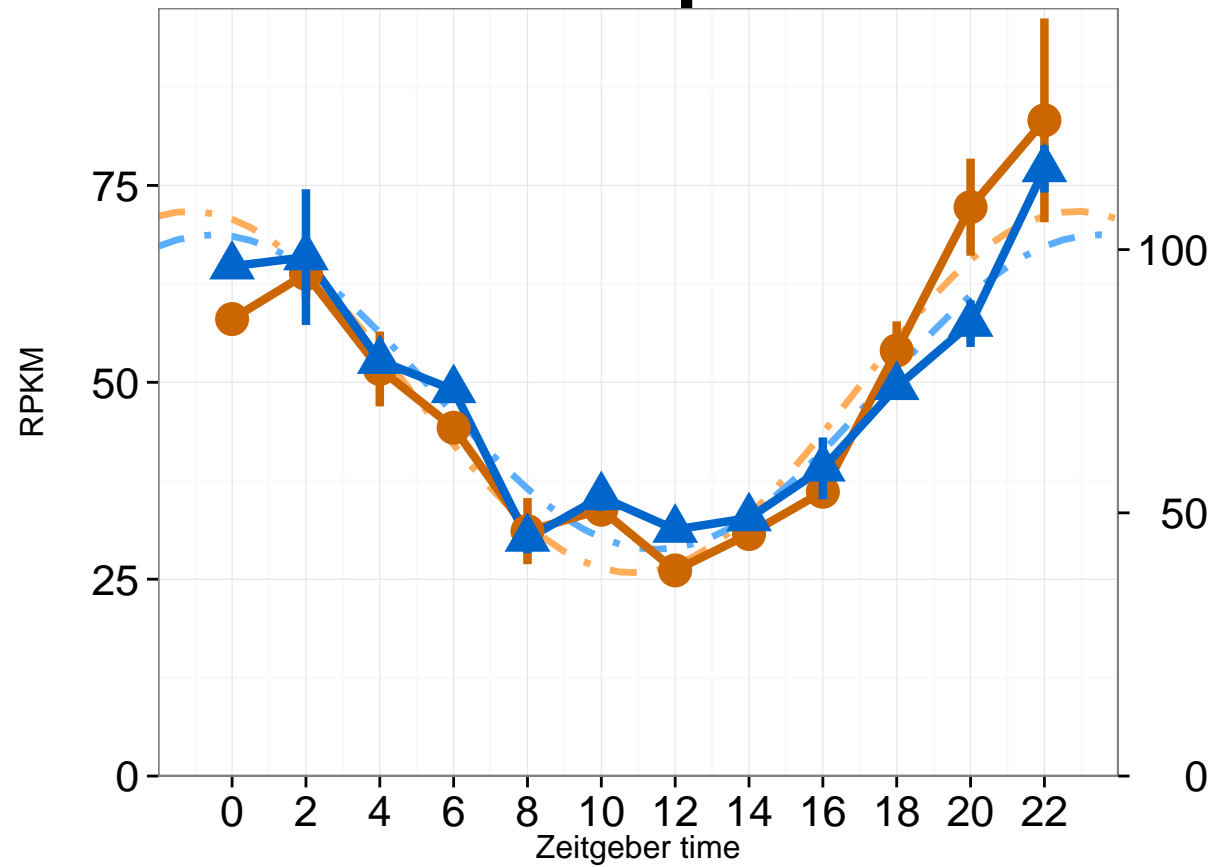

## Pxmp4

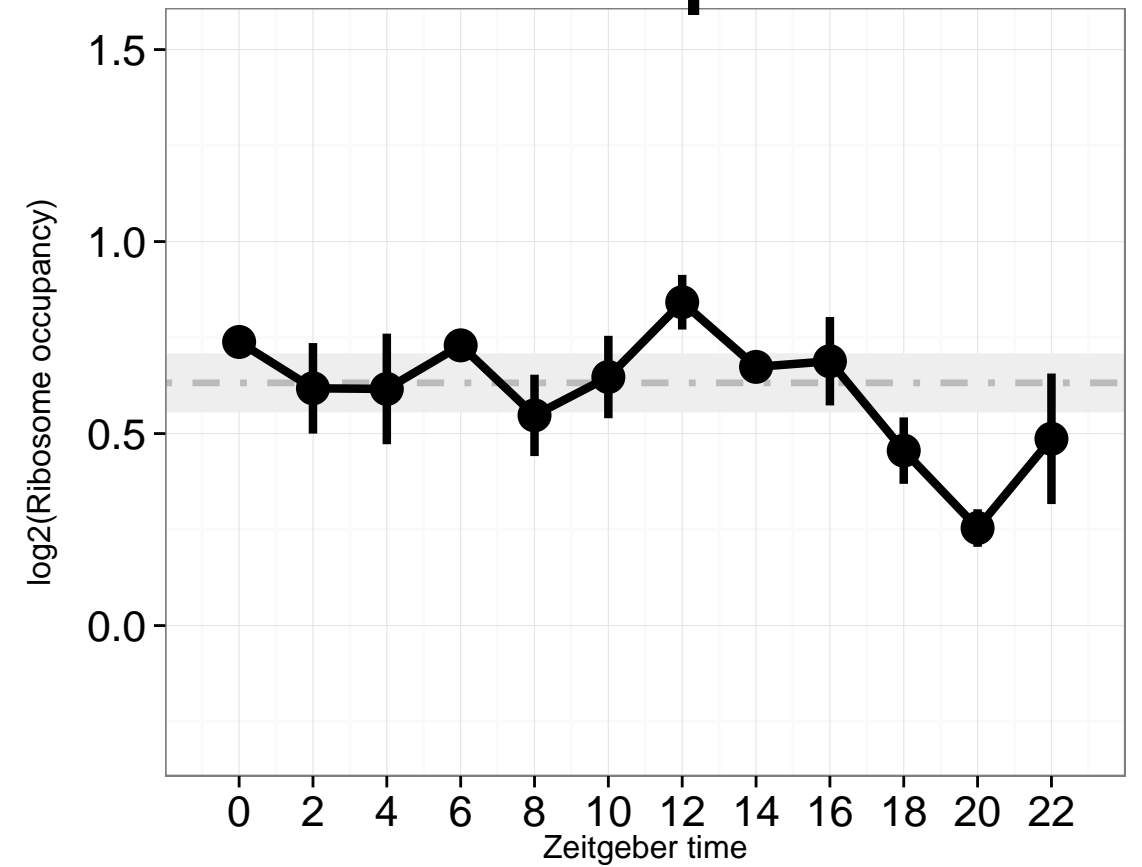

Supplement: SuppDataset_1.zip [file Pxmp4_set_D.pdf › Supplemental Dataset 1/D-mRNA_rhythm_translation_rhyth/Pxmp4_set_D.pdf]

# Rab11fip4

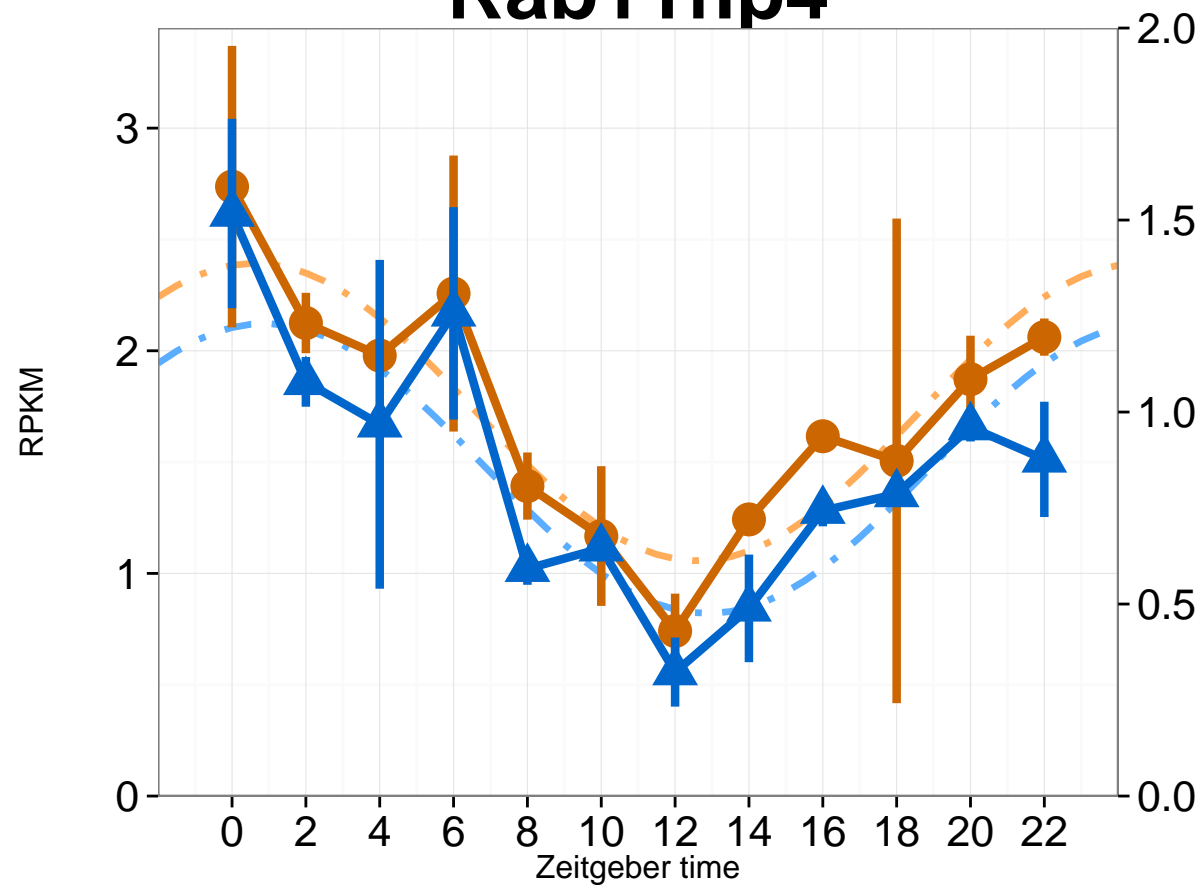

# Rab11fip4

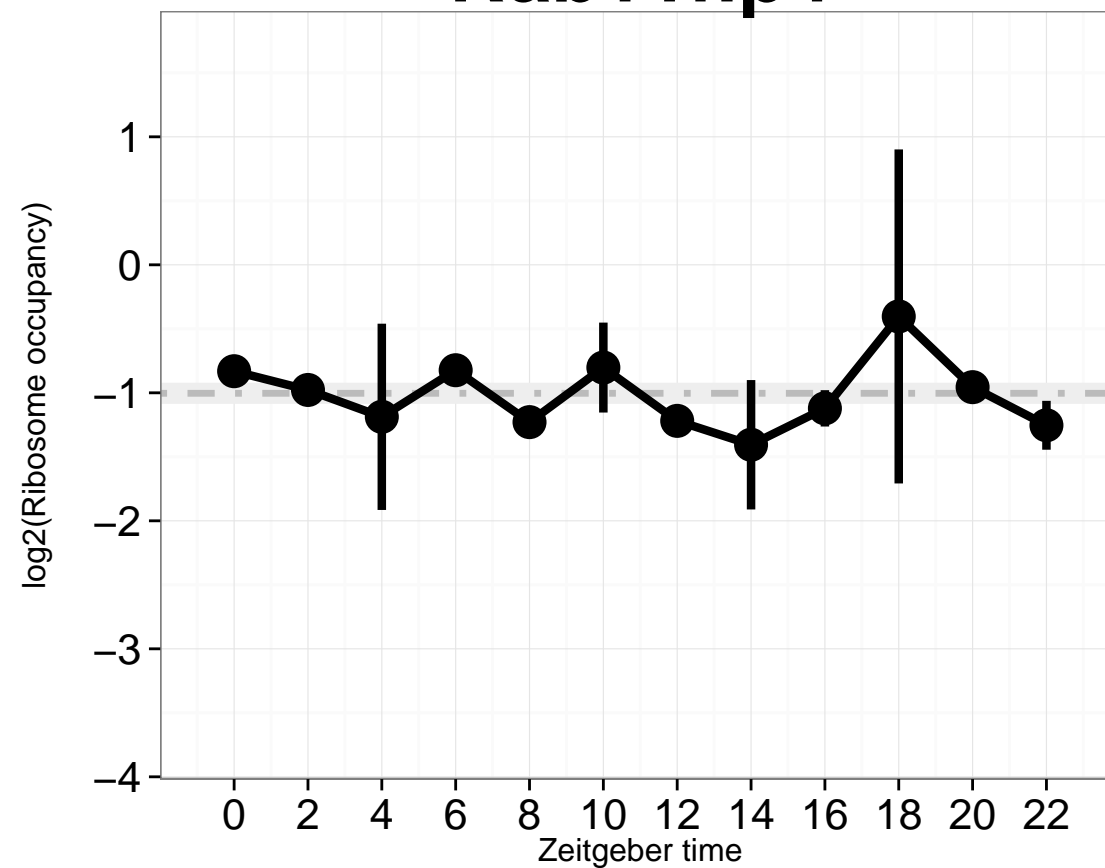

Supplement: SuppDataset_1.zip [file Rab11fip4_set_D.pdf › Supplemental Dataset 1/D-mRNA_rhythm_translation_rhyth/Rab11fip4_set_D.pdf]

## Rab17

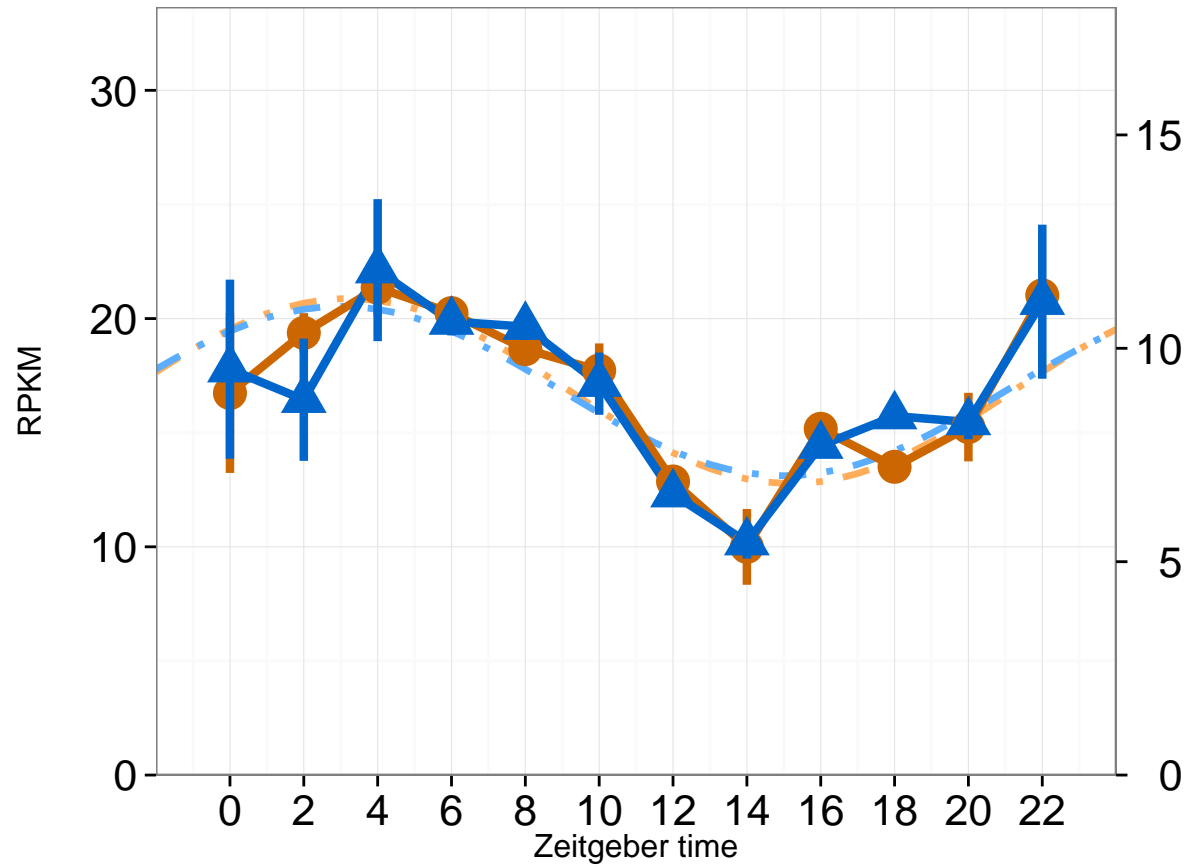

## Rab17

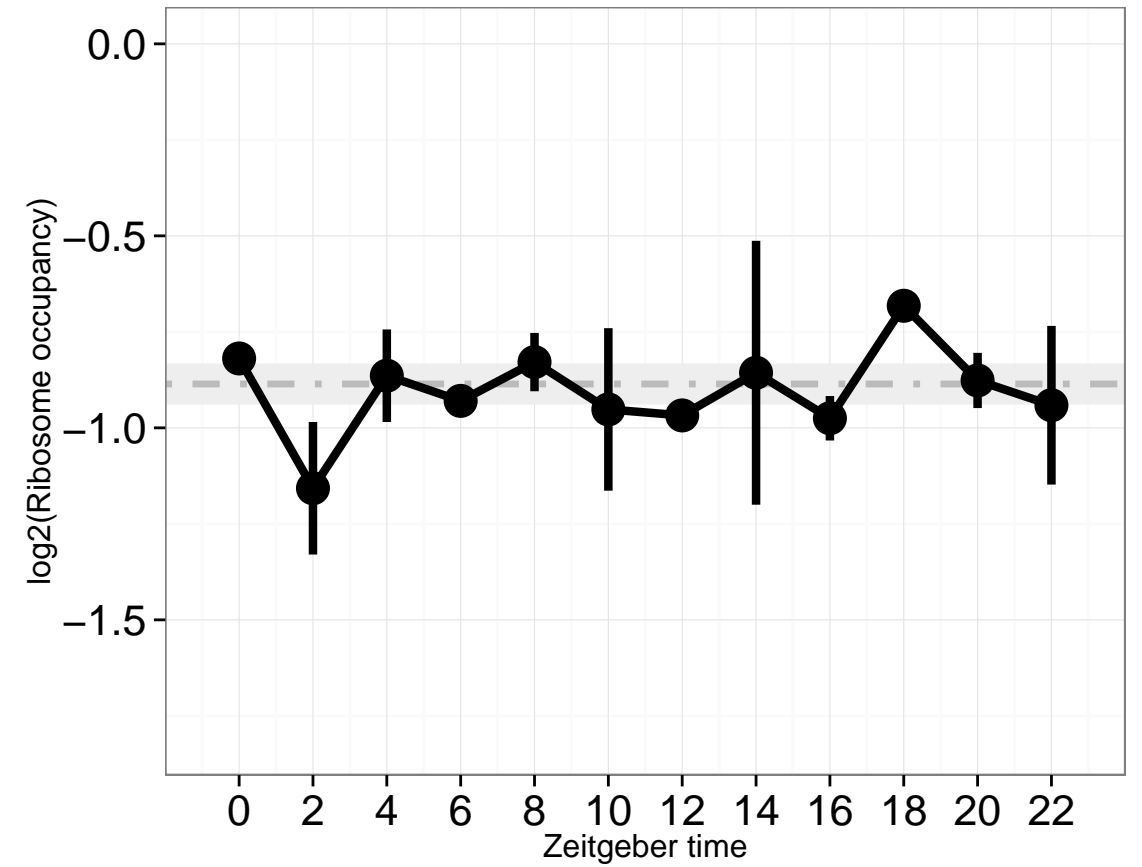

Supplement: SuppDataset_1.zip [file Rab17_set_D.pdf › Supplemental Dataset 1/D-mRNA_rhythm_translation_rhyth/Rab17_set_D.pdf]

# Rab12

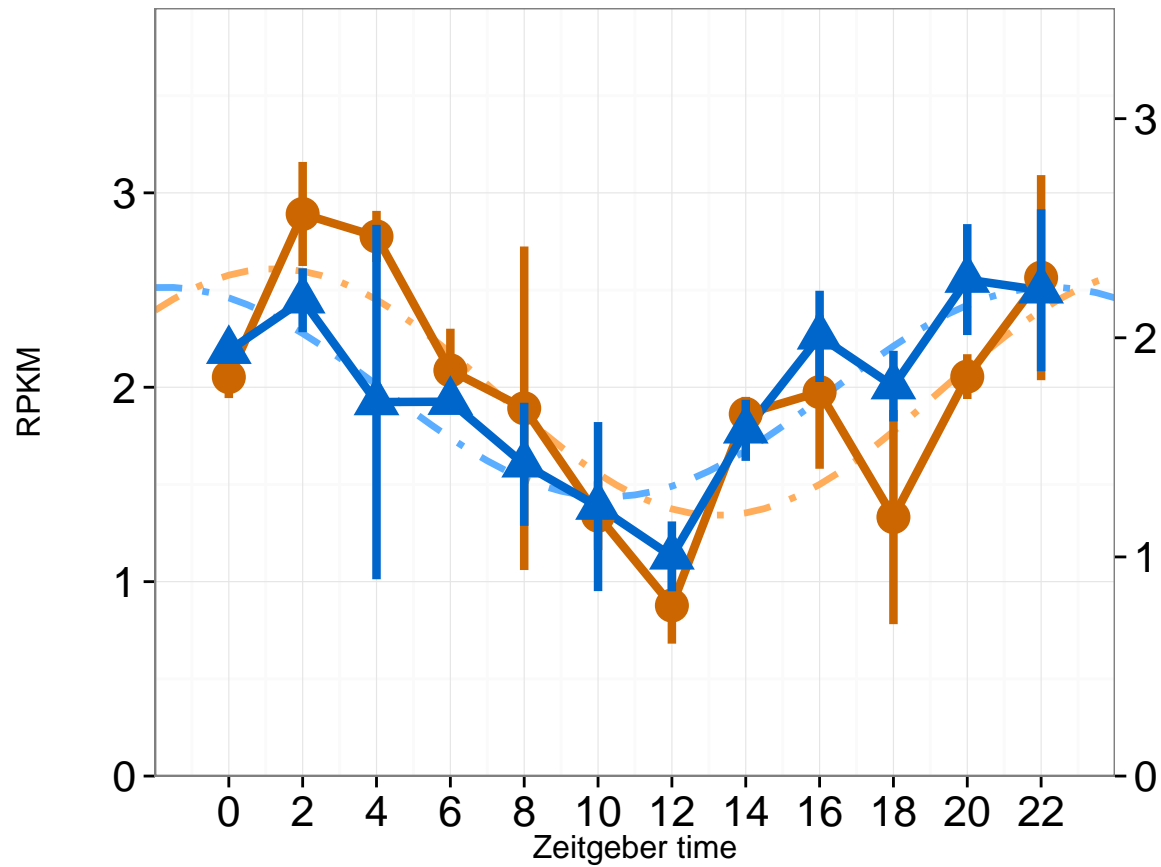

# Rab12

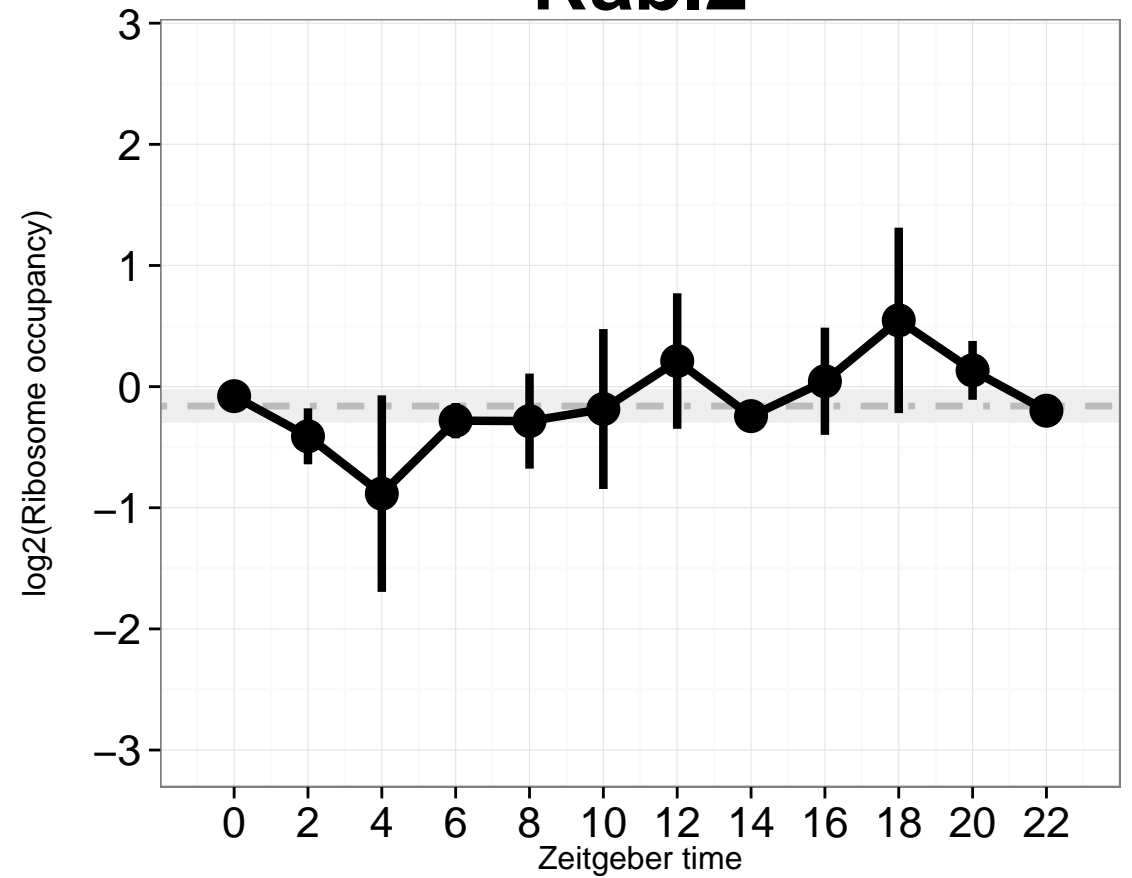

Supplement: SuppDataset_1.zip [file Rabl2_set_D.pdf › Supplemental Dataset 1/D-mRNA_rhythm_translation_rhyth/Rabl2_set_D.pdf]

## Rad51c

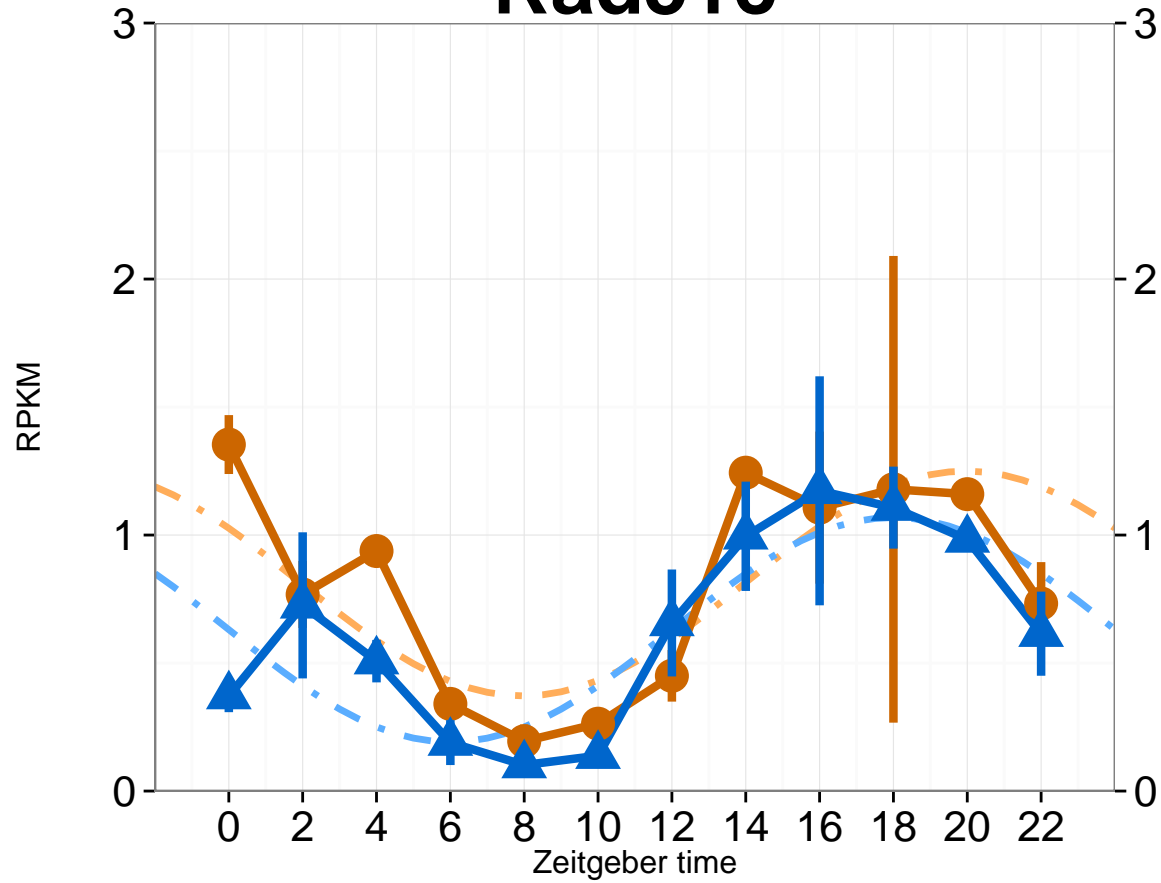

## Rad51c

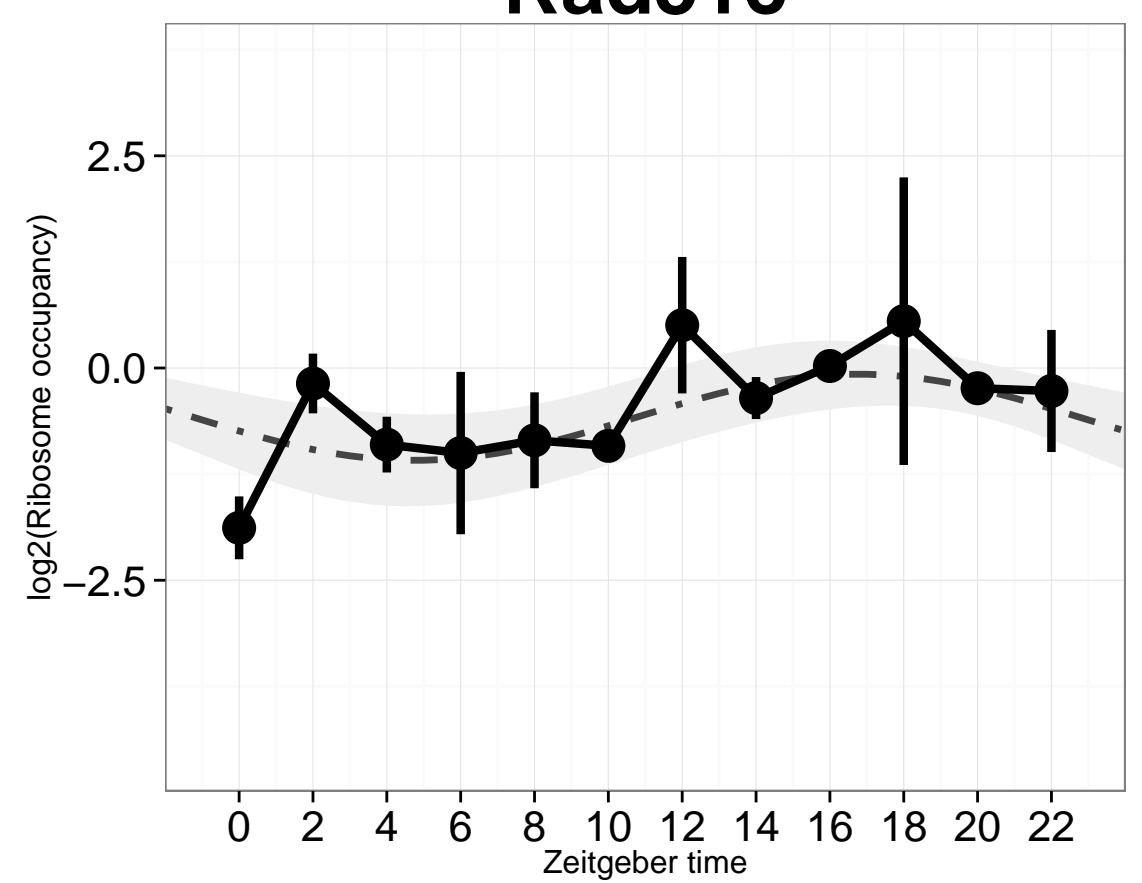

Supplement: SuppDataset_1.zip [file Rad51c_set_D.pdf › Supplemental Dataset 1/D-mRNA_rhythm_translation_rhyth/Rad51c_set_D.pdf]

# Raet1d

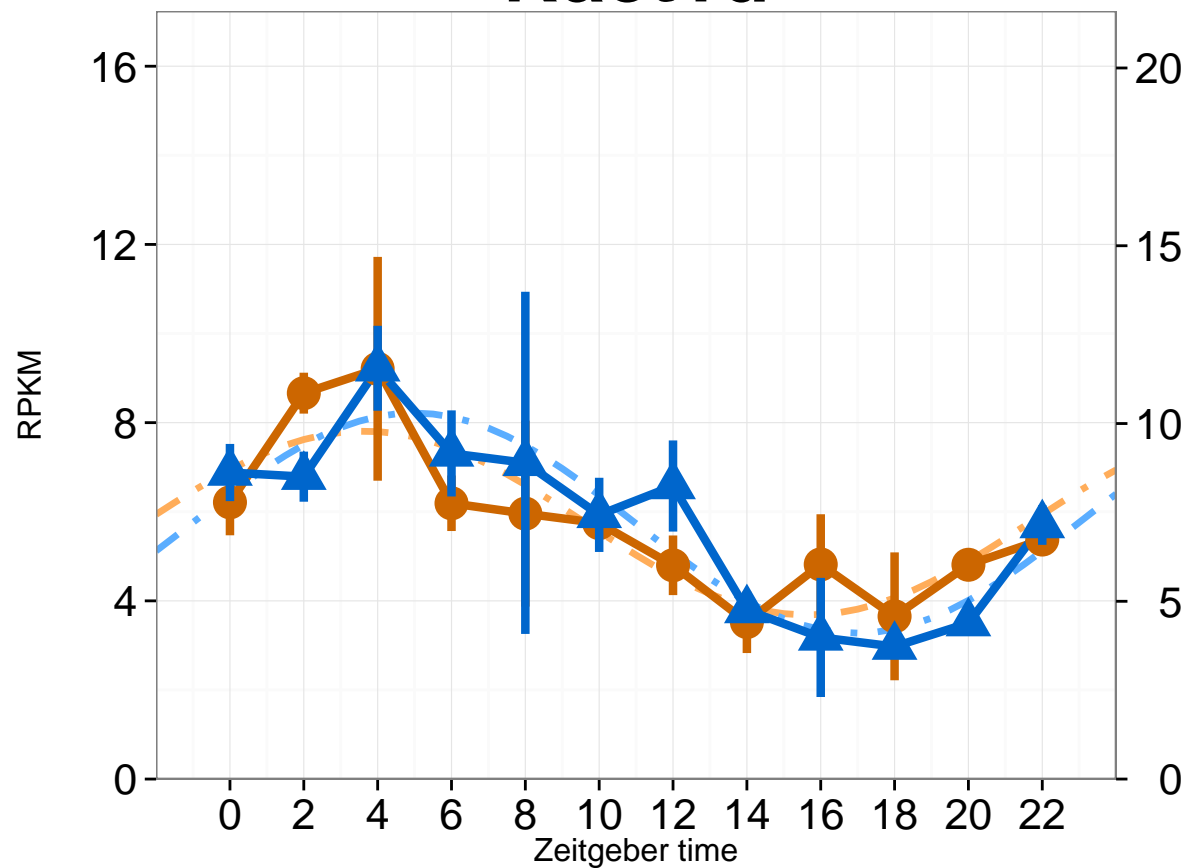

# Raet1d

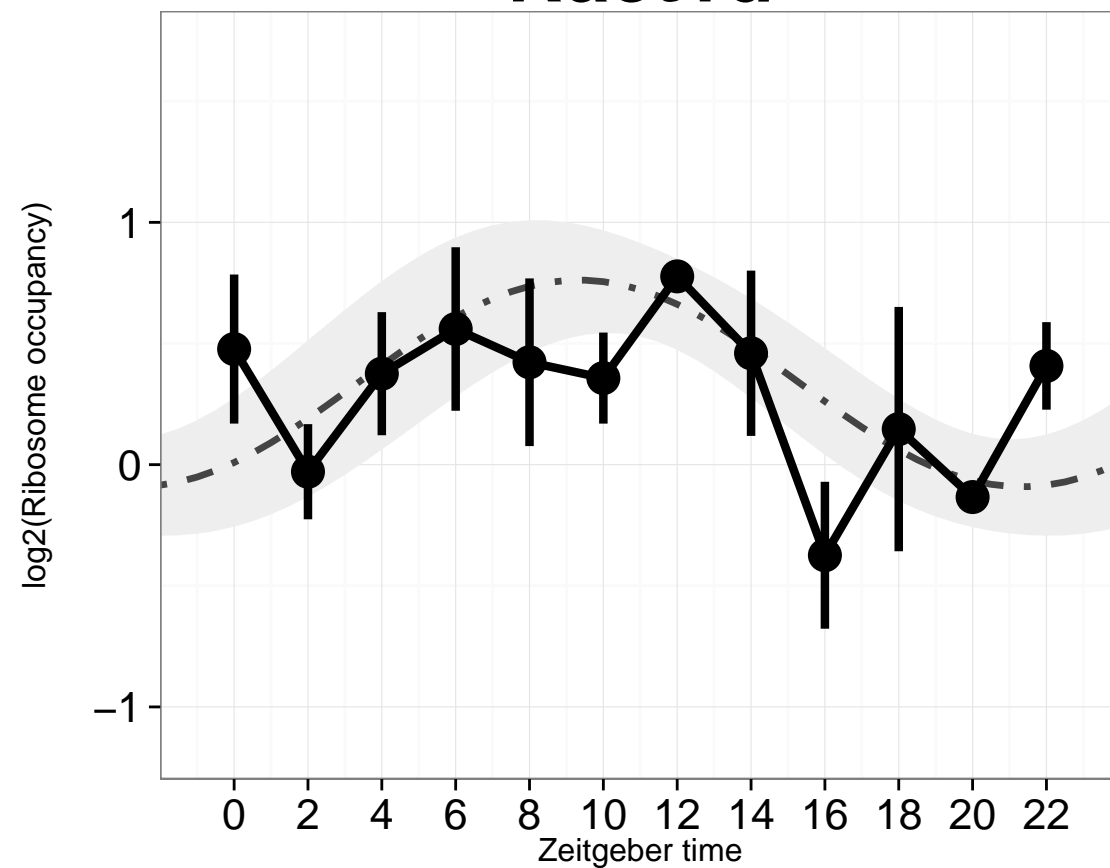

Supplement: SuppDataset_1.zip [file Raet1d_set_D.pdf › Supplemental Dataset 1/D-mRNA_rhythm_translation_rhyth/Raet1d_set_D.pdf]

# Rapgef5

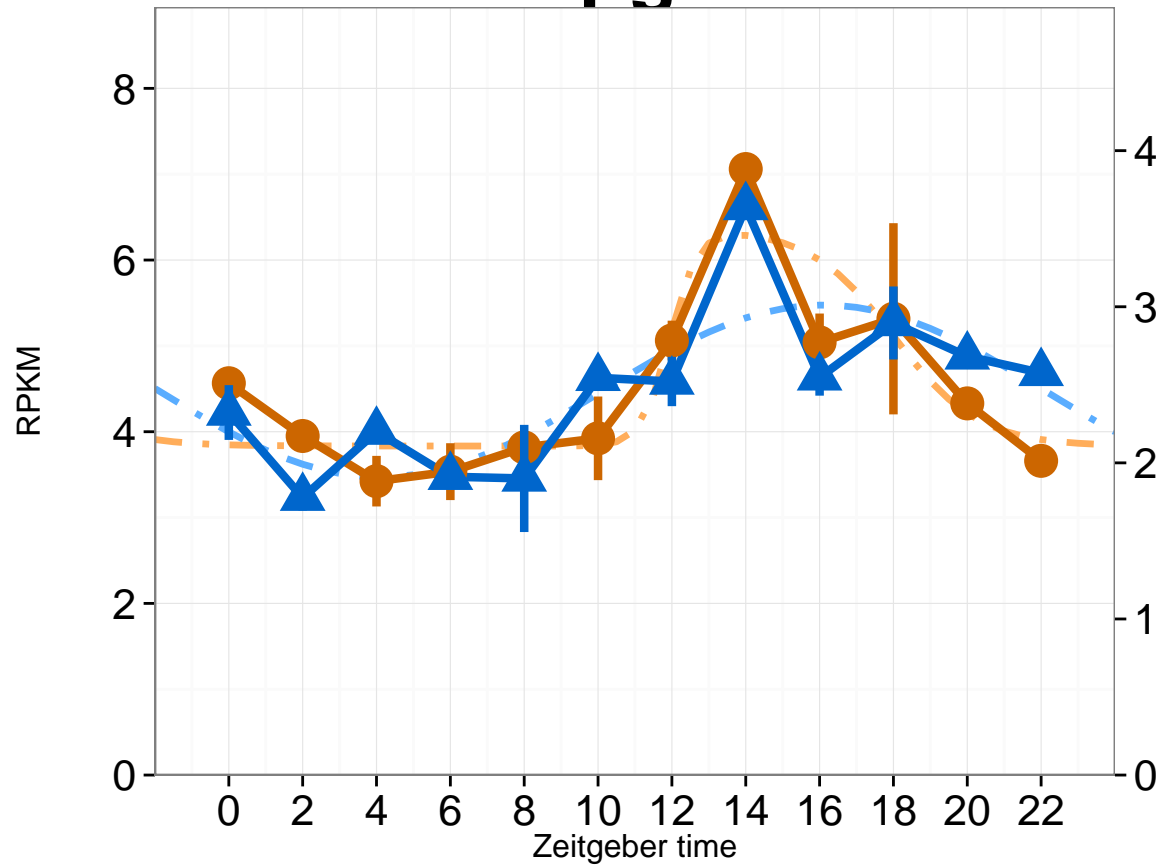

# Rapgef5

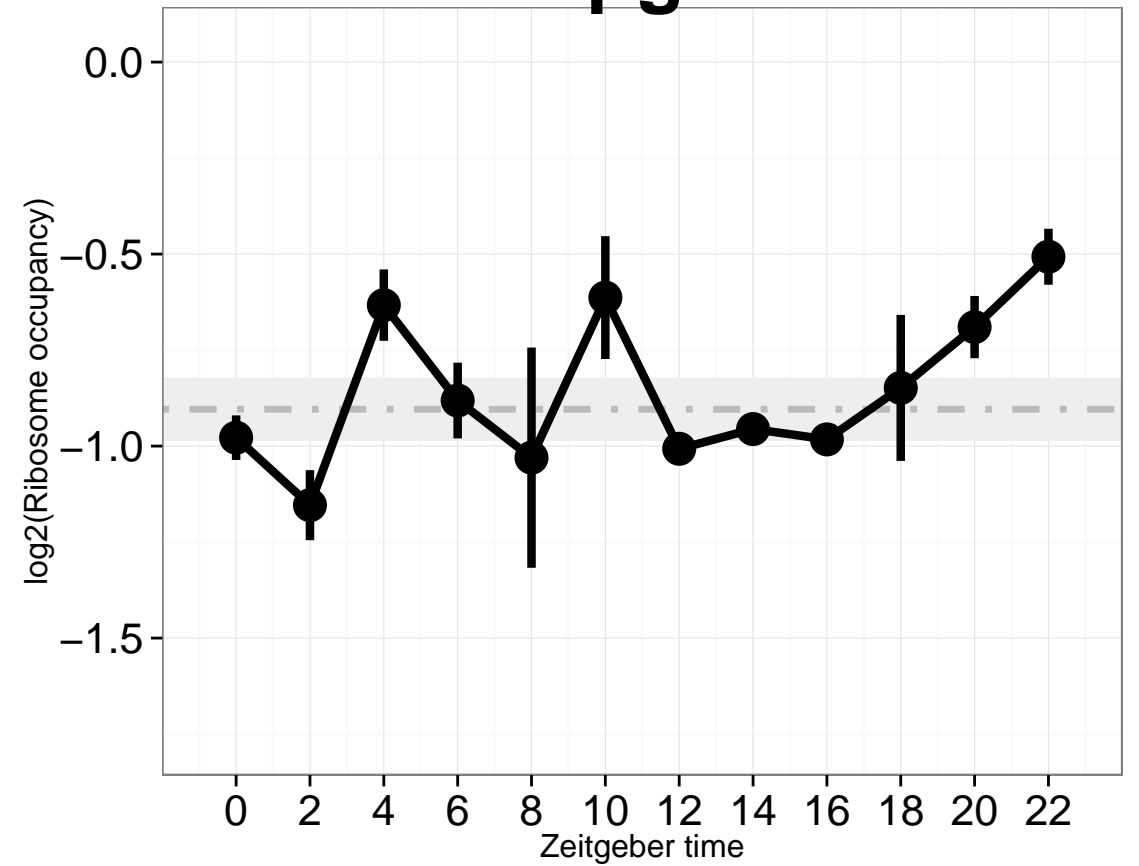

Supplement: SuppDataset_1.zip [file Rapgef5_set_D.pdf › Supplemental Dataset 1/D-mRNA_rhythm_translation_rhyth/Rapgef5_set_D.pdf]

# Raph1

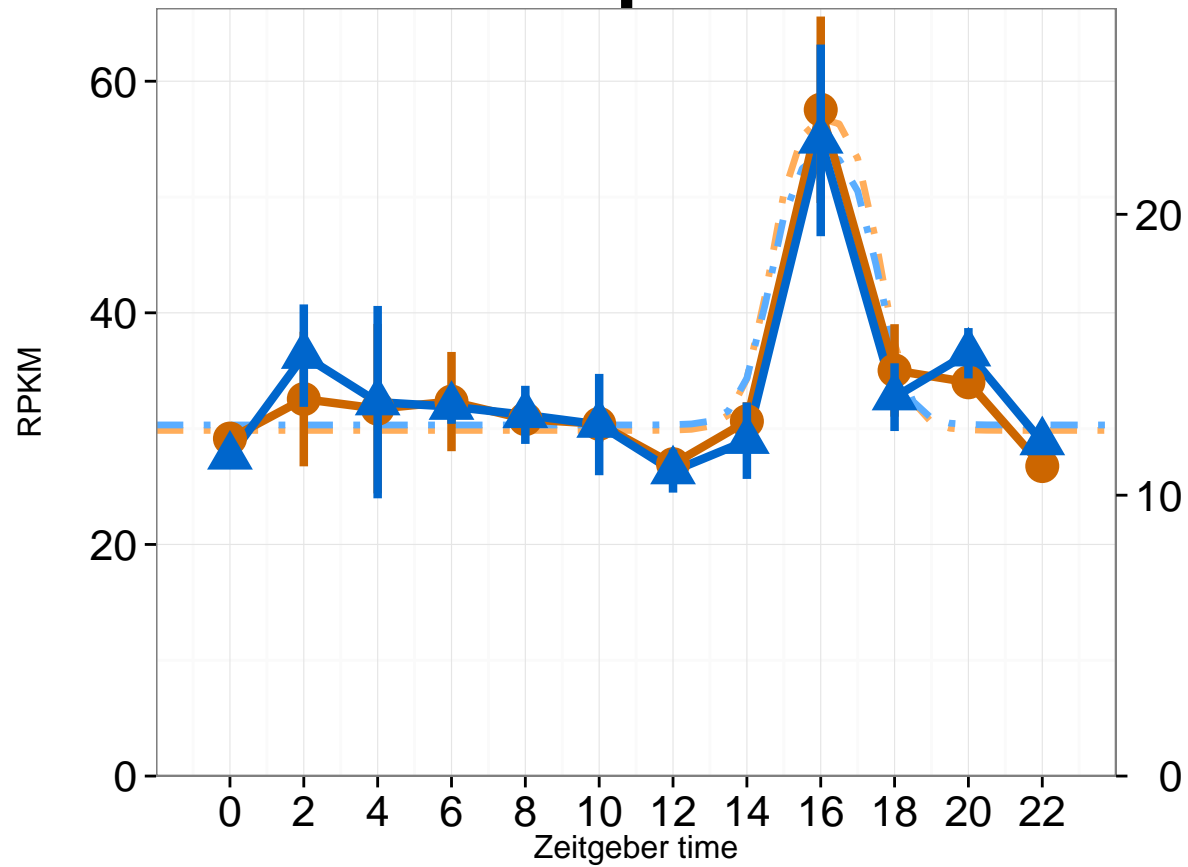

# Raph1

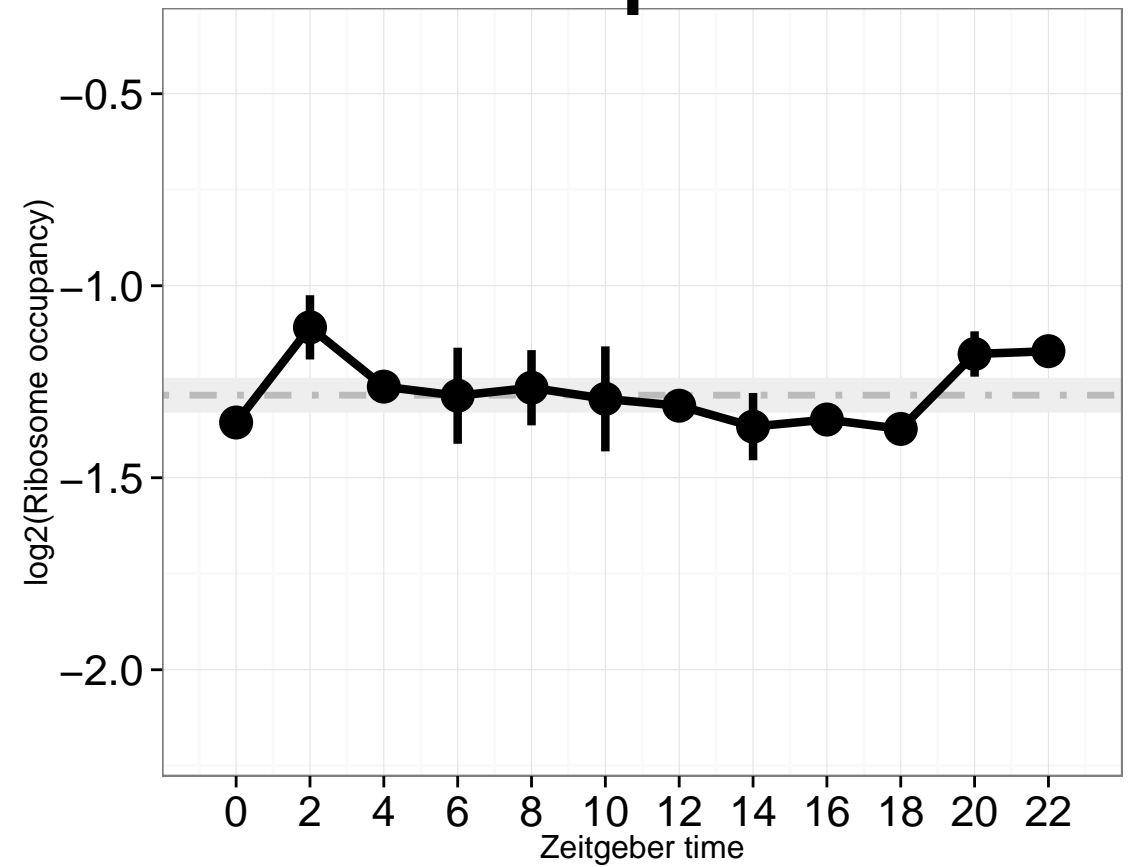

Supplement: SuppDataset_1.zip [file Raph1_set_D.pdf › Supplemental Dataset 1/D-mRNA_rhythm_translation_rhyth/Raph1_set_D.pdf]

## Rassf6

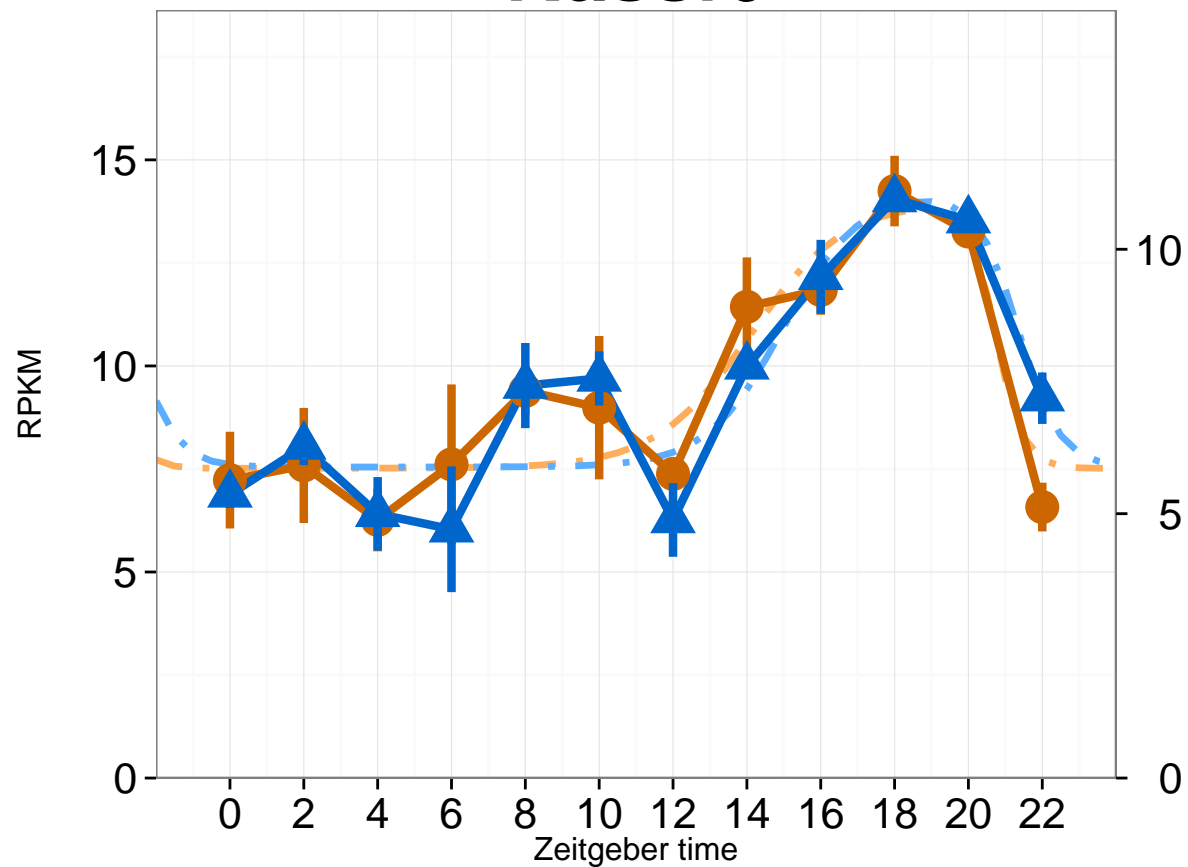

## Rassf6

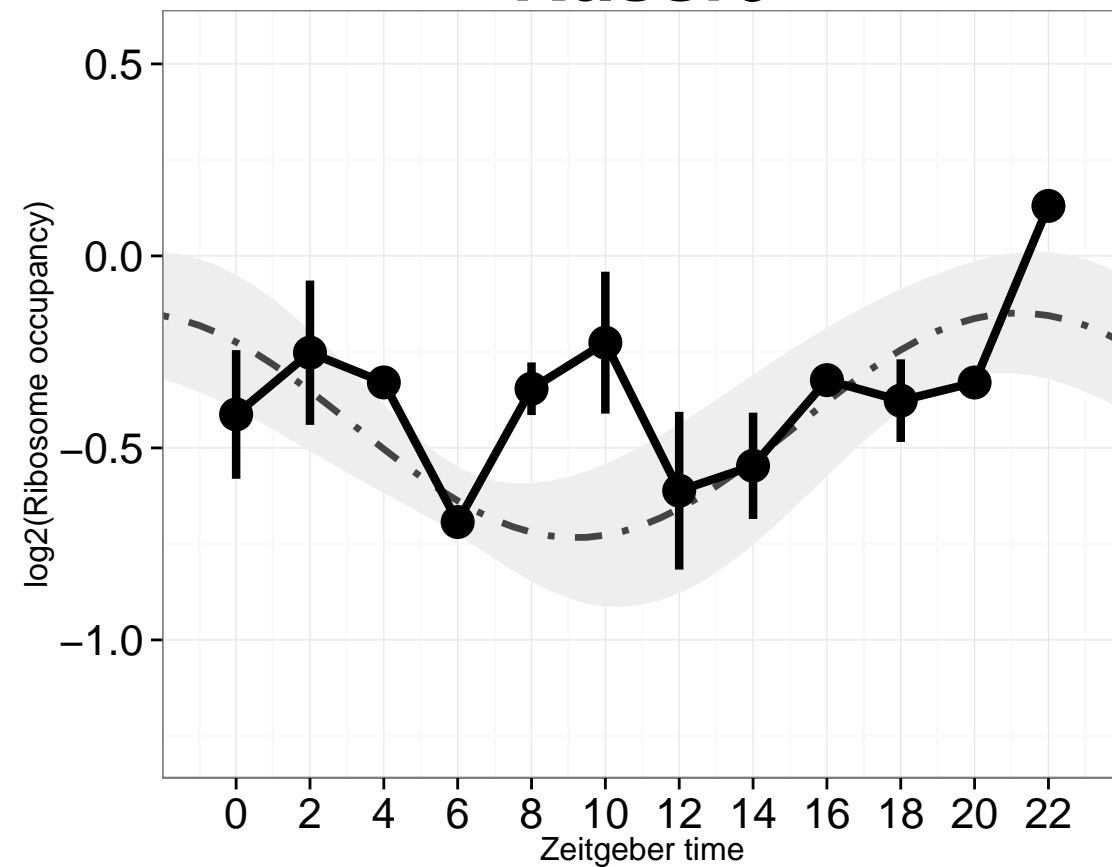

Supplement: SuppDataset_1.zip [file Rassf6_set_D.pdf › Supplemental Dataset 1/D-mRNA_rhythm_translation_rhyth/Rassf6_set_D.pdf]

# Rbm12b1

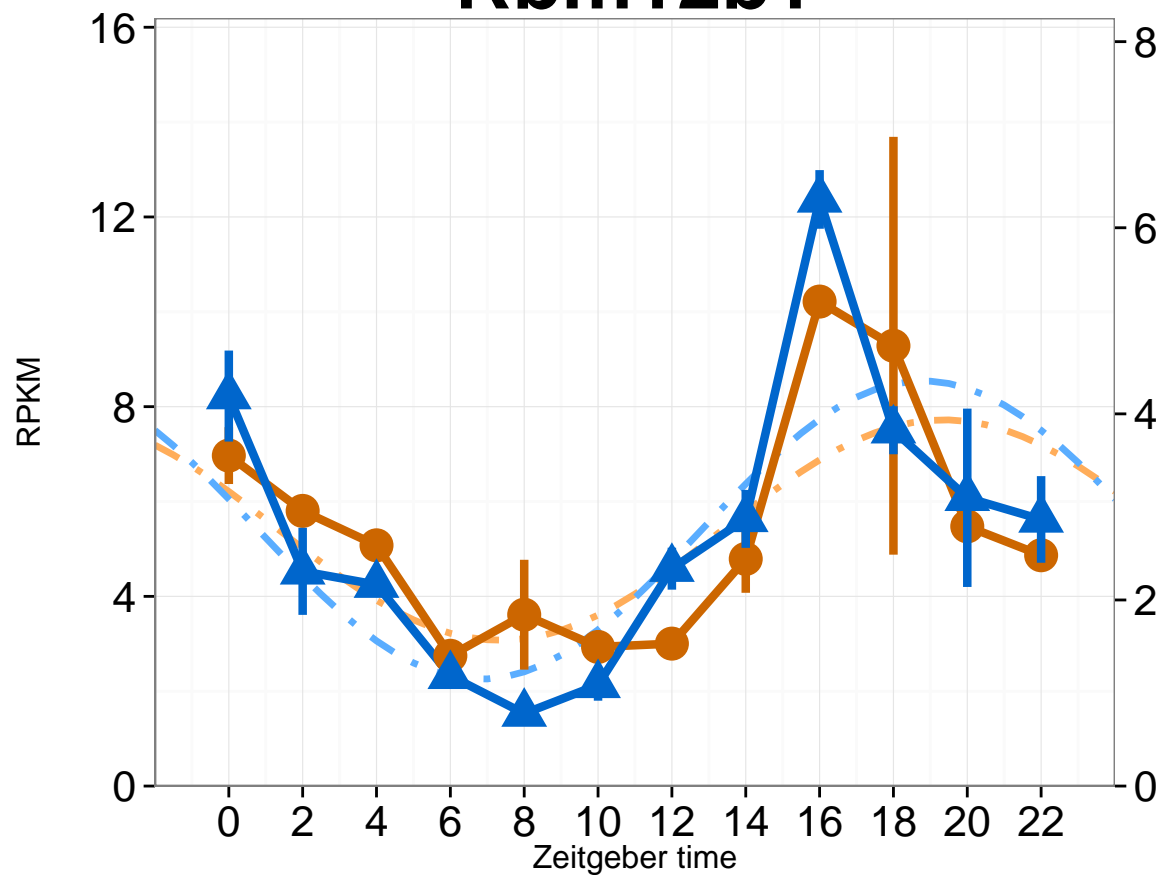

# Rbm12b1

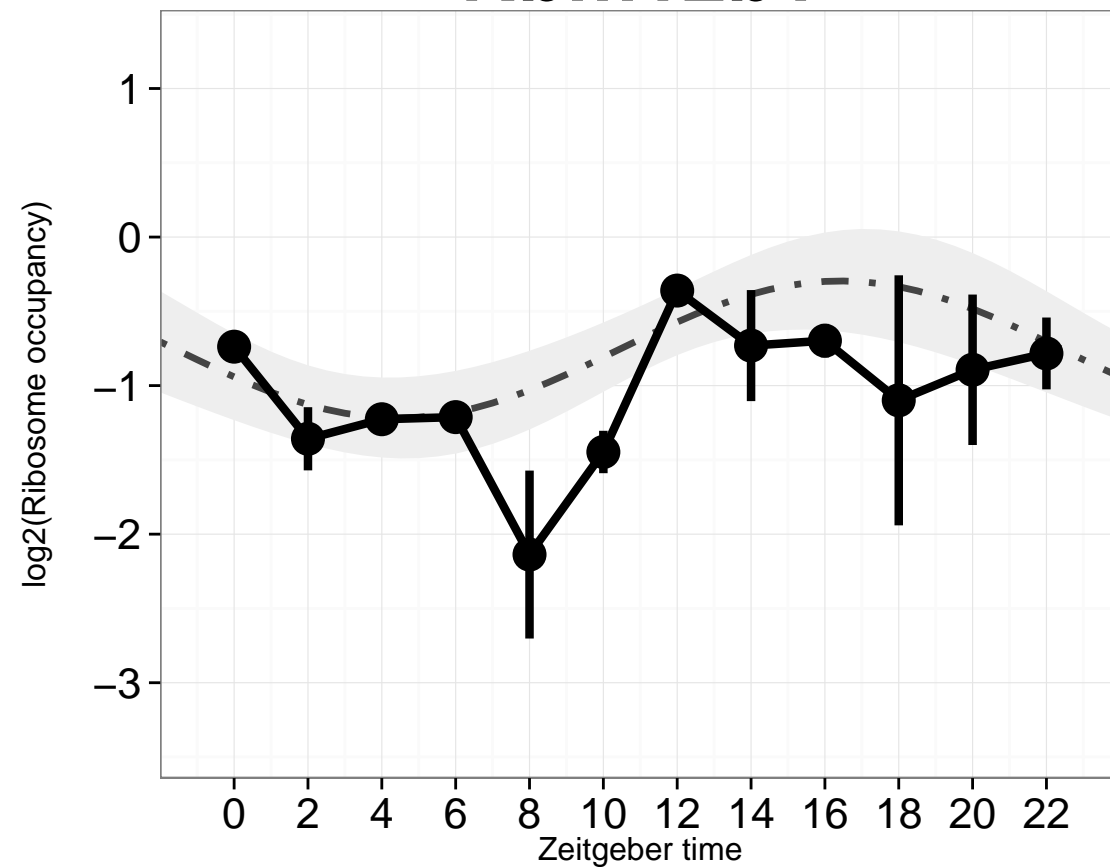

Supplement: SuppDataset_1.zip [file Rbm12b1_set_D.pdf › Supplemental Dataset 1/D-mRNA_rhythm_translation_rhyth/Rbm12b1_set_D.pdf]

# Rbm25

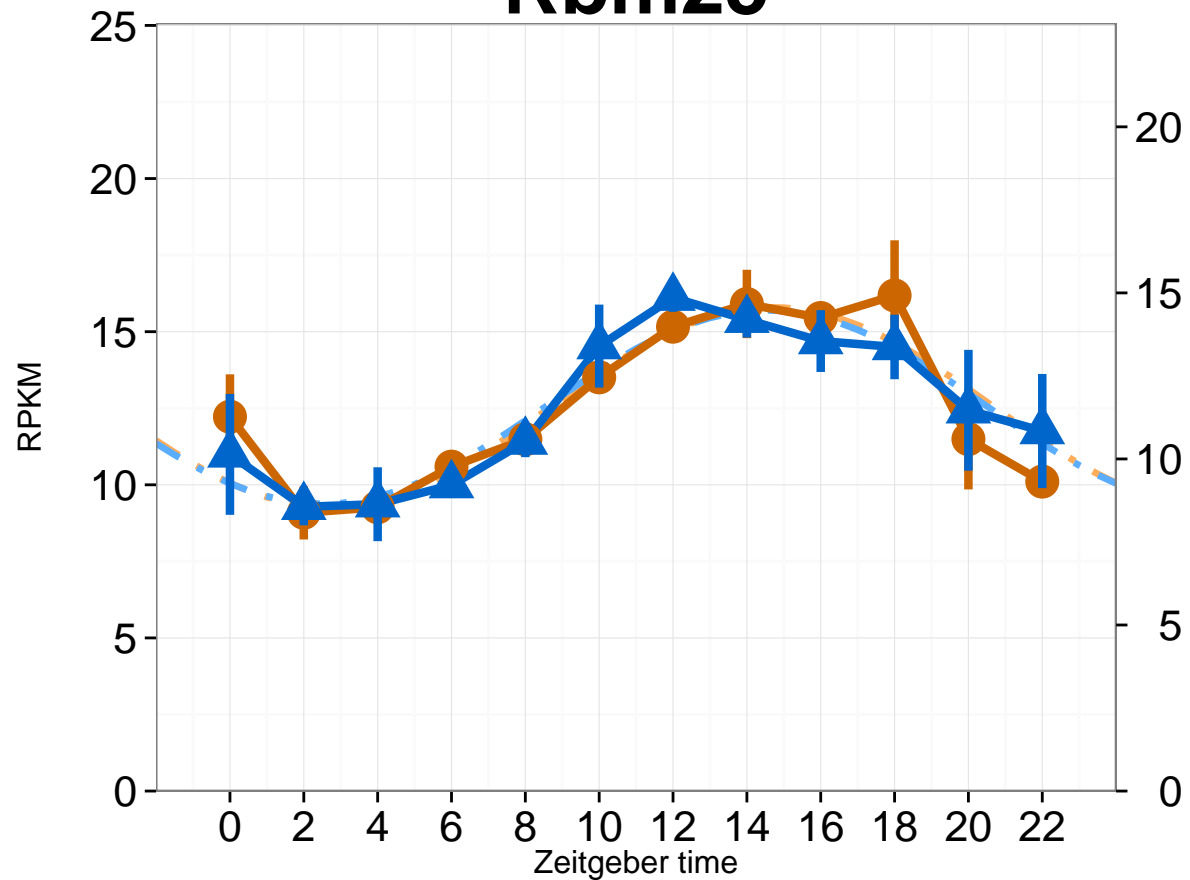

# Rbm25

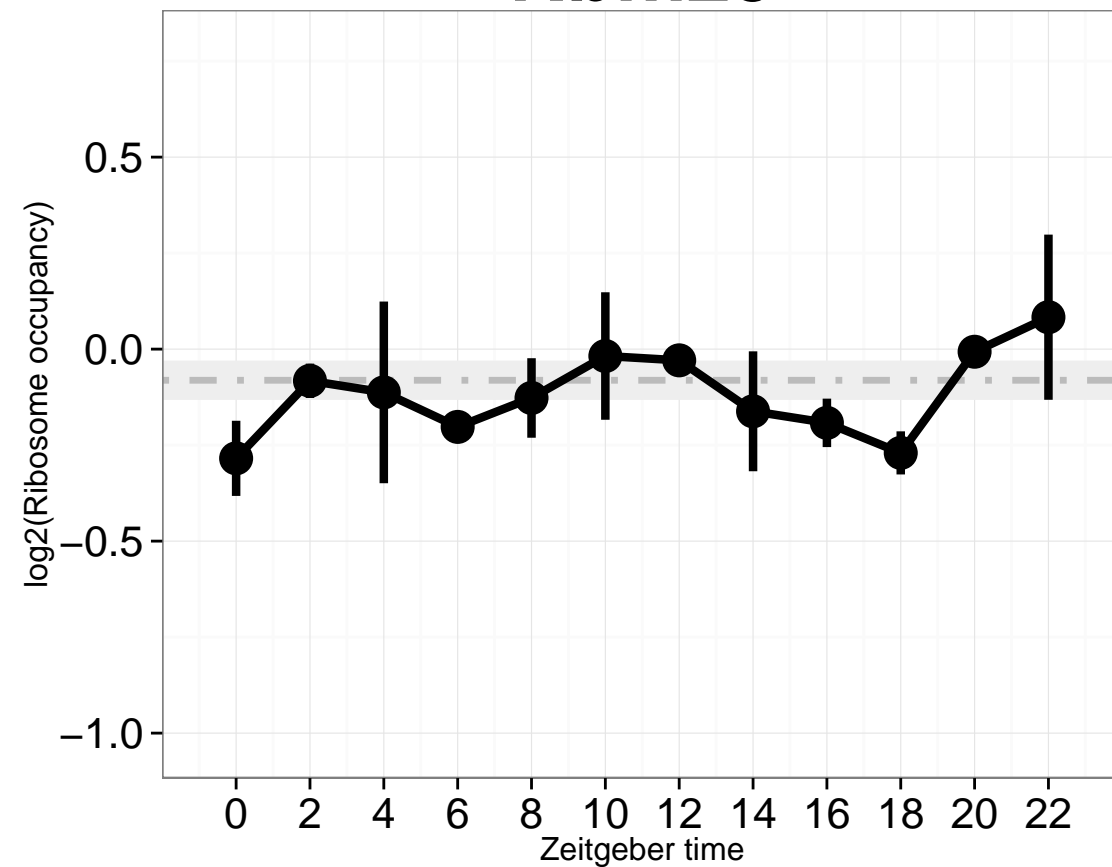

Supplement: SuppDataset_1.zip [file Rbm25_set_D.pdf › Supplemental Dataset 1/D-mRNA_rhythm_translation_rhyth/Rbm25_set_D.pdf]

## Rbm3

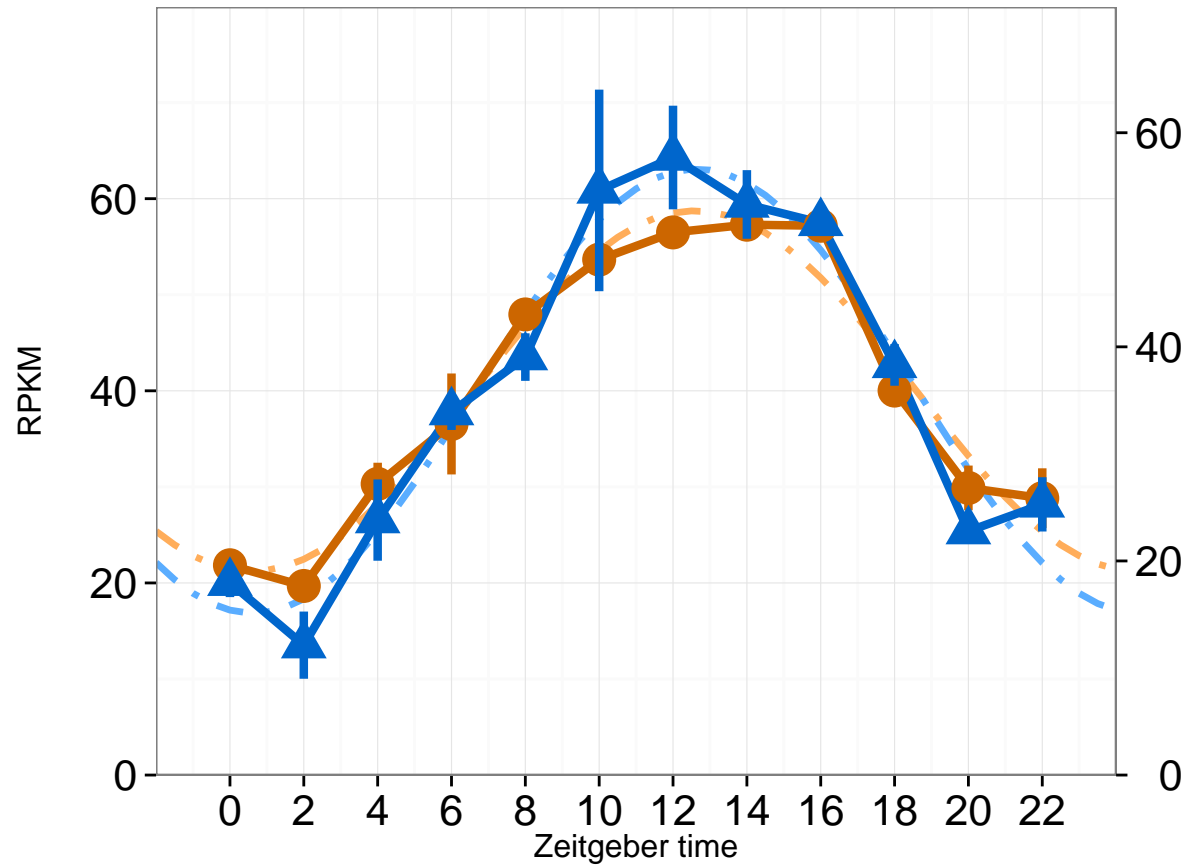

## Rbm3

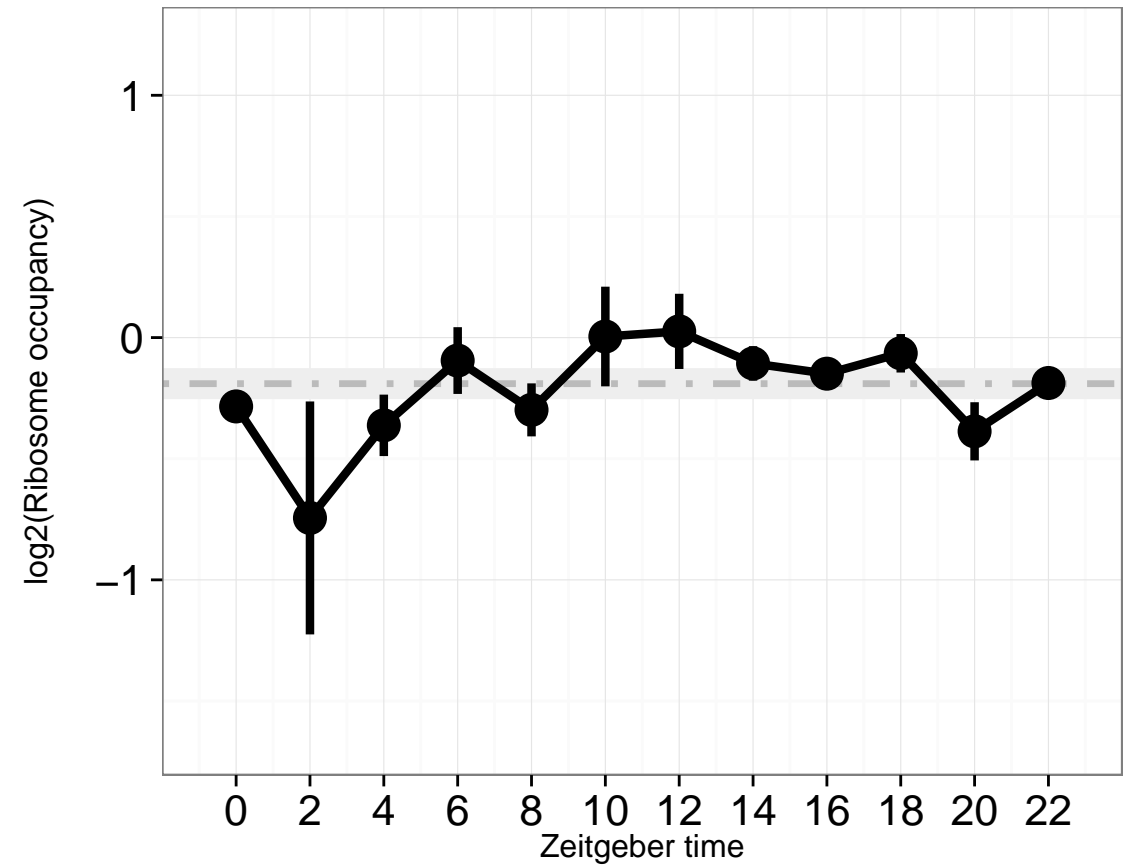

Supplement: SuppDataset_1.zip [file Rbm3_set_D.pdf › Supplemental Dataset 1/D-mRNA_rhythm_translation_rhyth/Rbm3_set_D.pdf]

## Rbms1

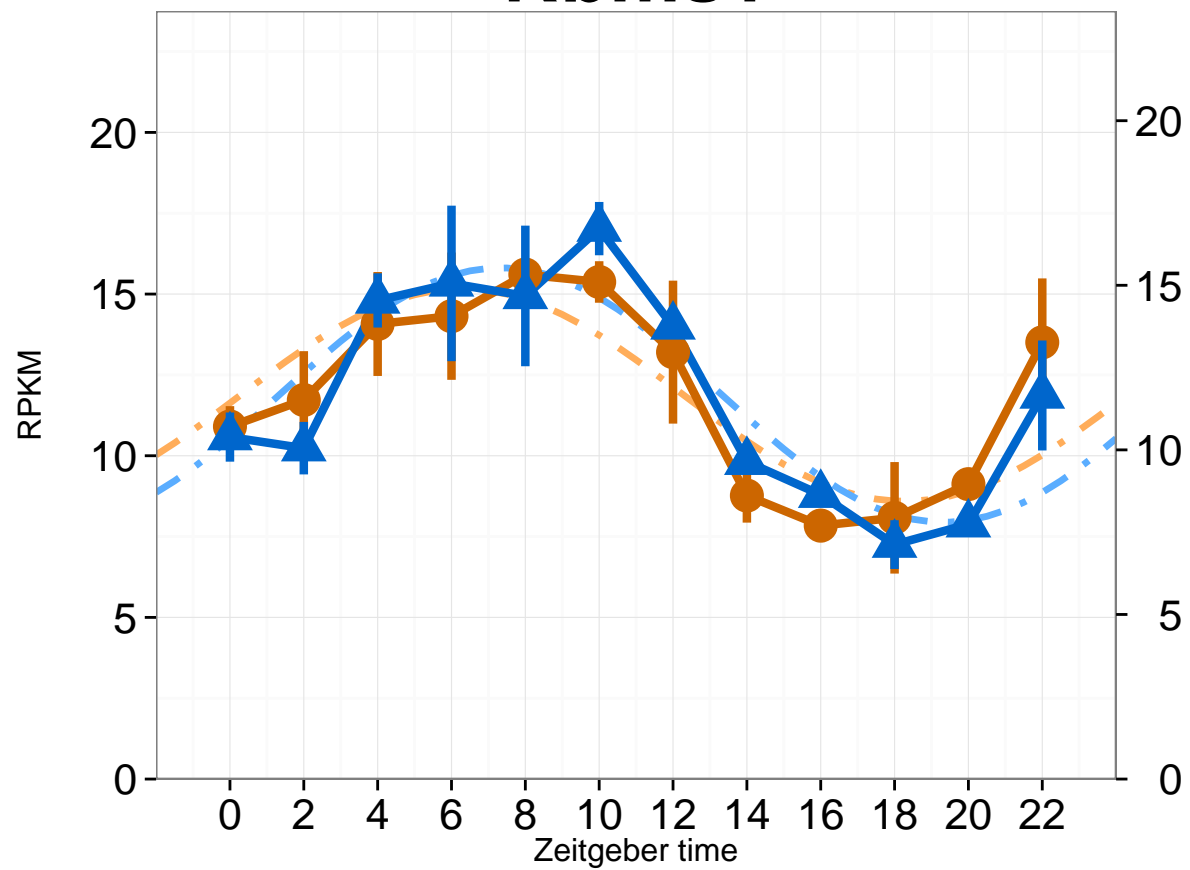

## Rbms1

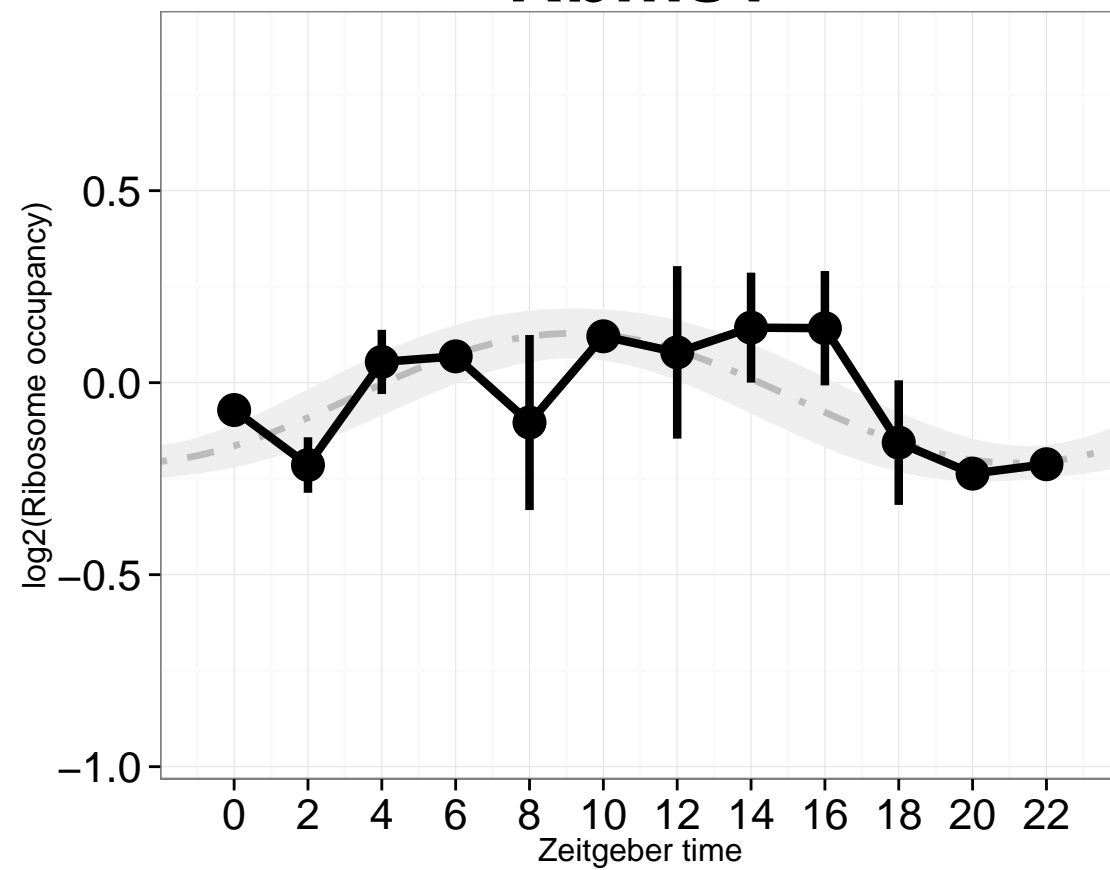

Supplement: SuppDataset_1.zip [file Rbms1_set_D.pdf › Supplemental Dataset 1/D-mRNA_rhythm_translation_rhyth/Rbms1_set_D.pdf]

# Rcan1

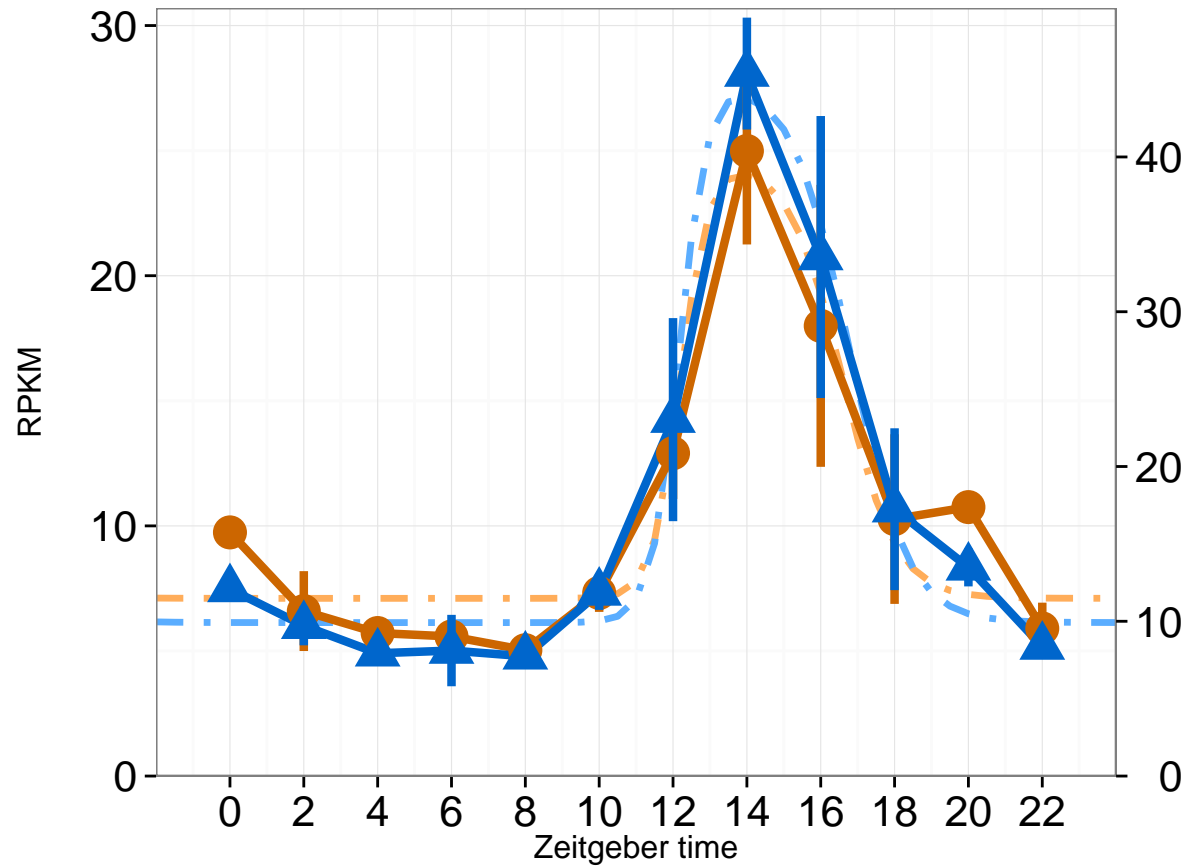

# Rcan1

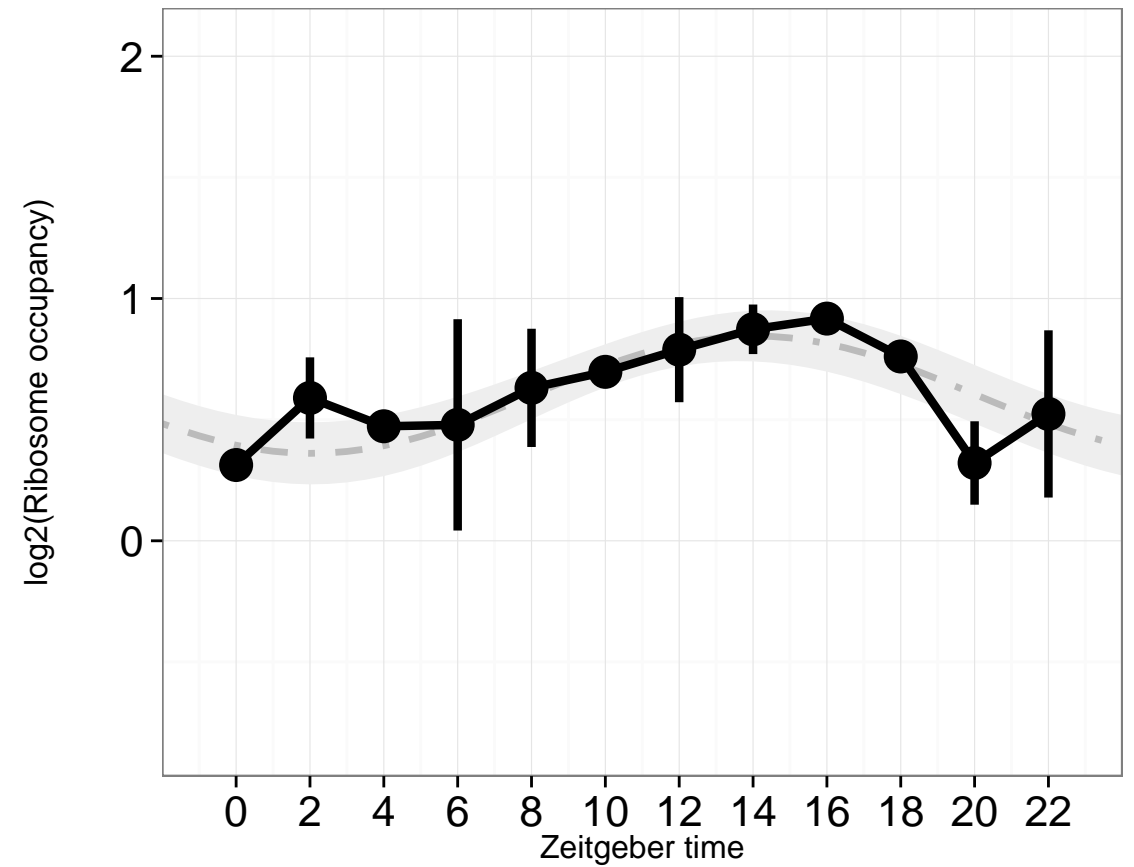

Supplement: SuppDataset_1.zip [file Rcan1_set_D.pdf › Supplemental Dataset 1/D-mRNA_rhythm_translation_rhyth/Rcan1_set_D.pdf]

## Rcl1

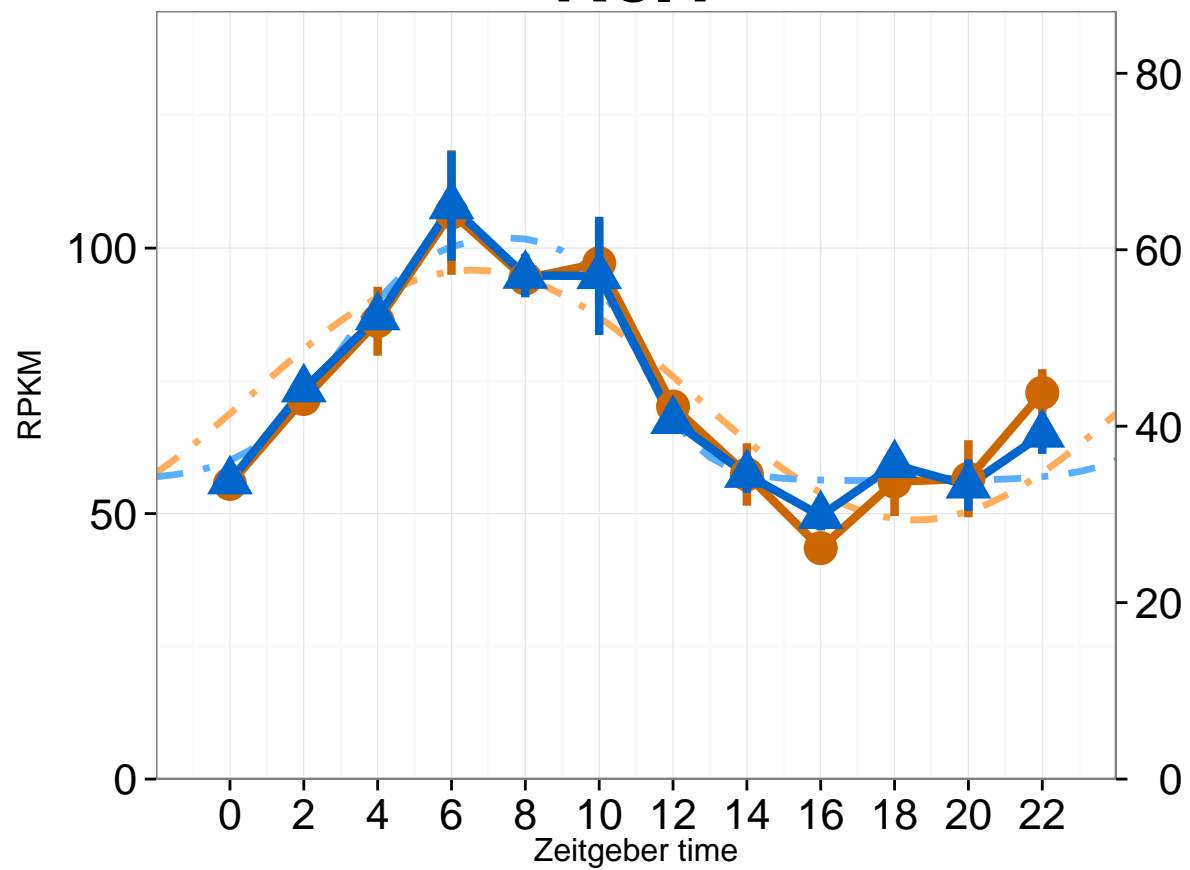

## Rcl1

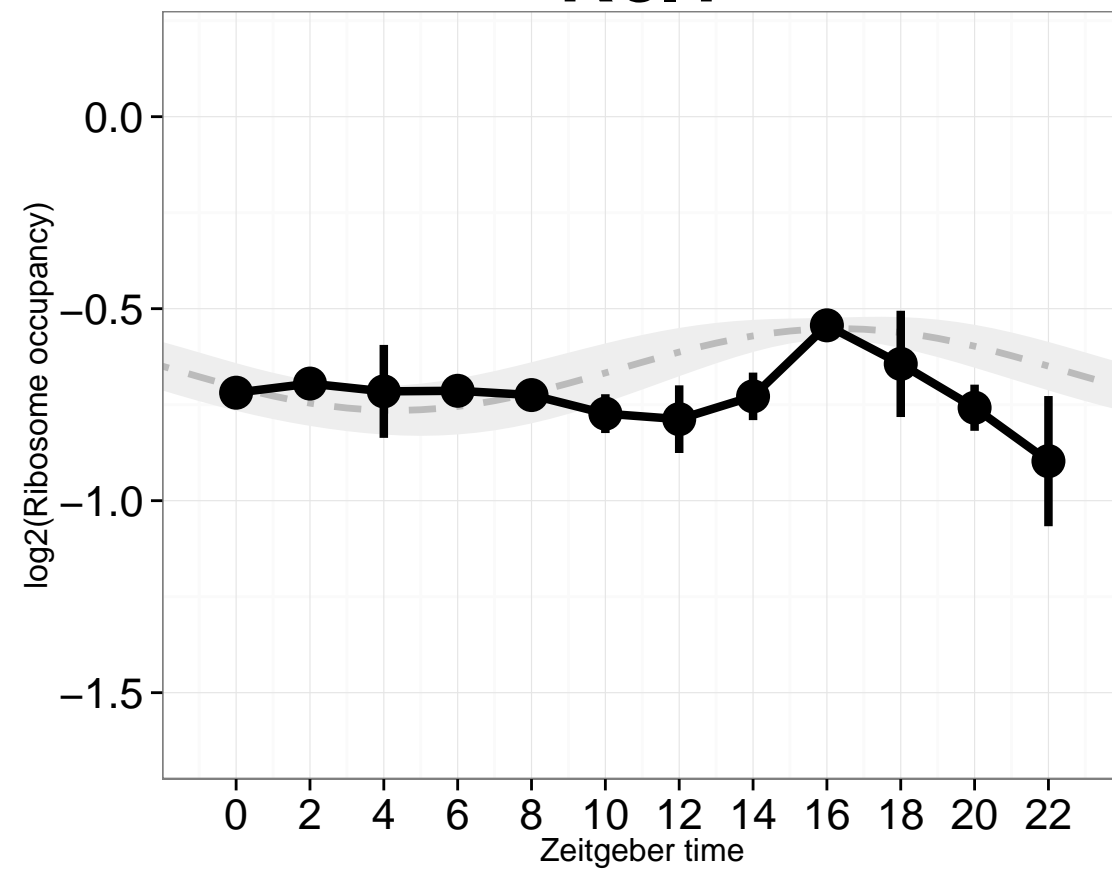

Supplement: SuppDataset_1.zip [file Rcl1_set_D.pdf › Supplemental Dataset 1/D-mRNA_rhythm_translation_rhyth/Rcl1_set_D.pdf]

## Rdh11

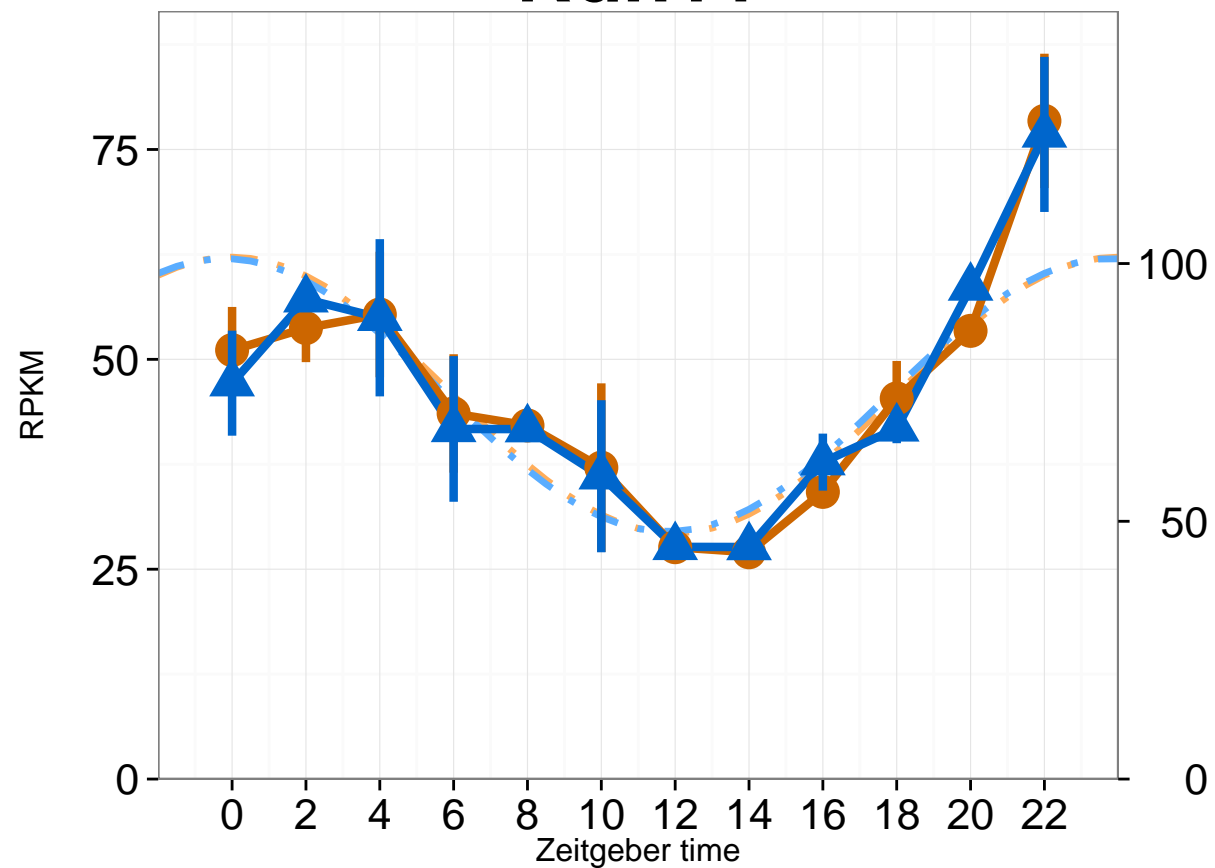

## Rdh11

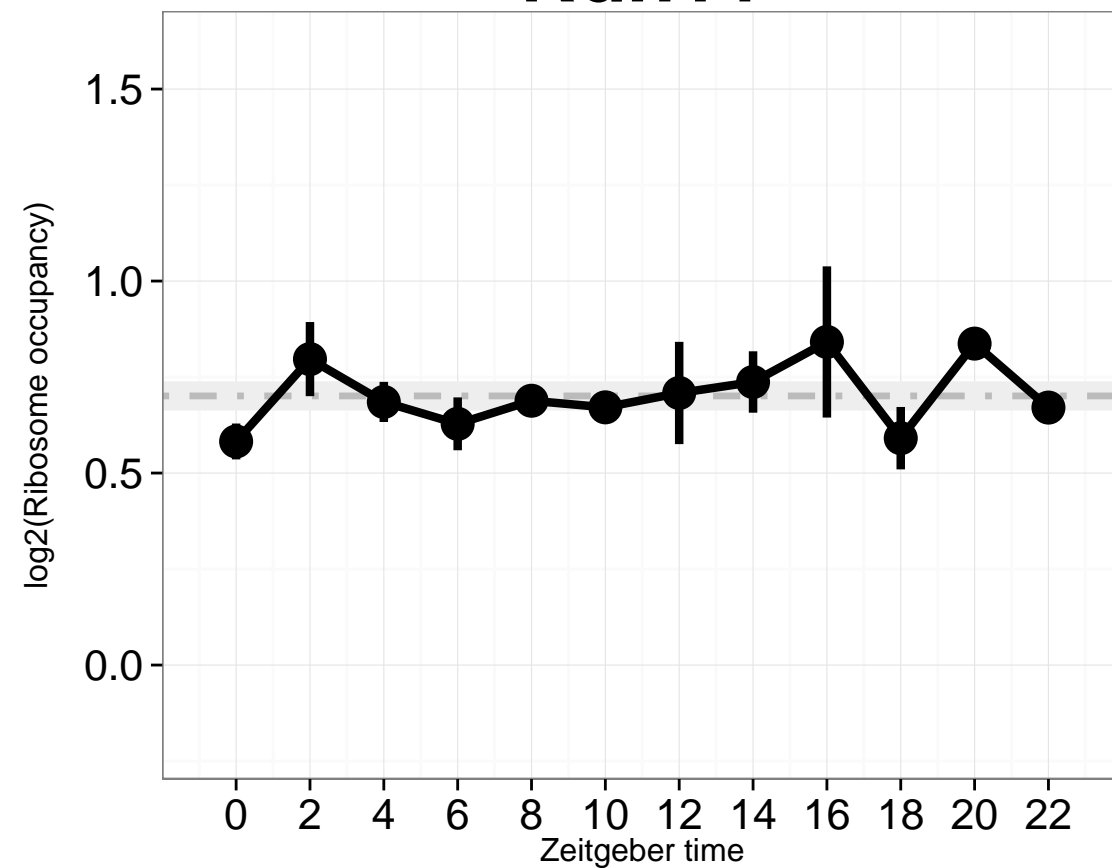

Supplement: SuppDataset_1.zip [file Rdh11_set_D.pdf › Supplemental Dataset 1/D-mRNA_rhythm_translation_rhyth/Rdh11_set_D.pdf]

# Rdh13

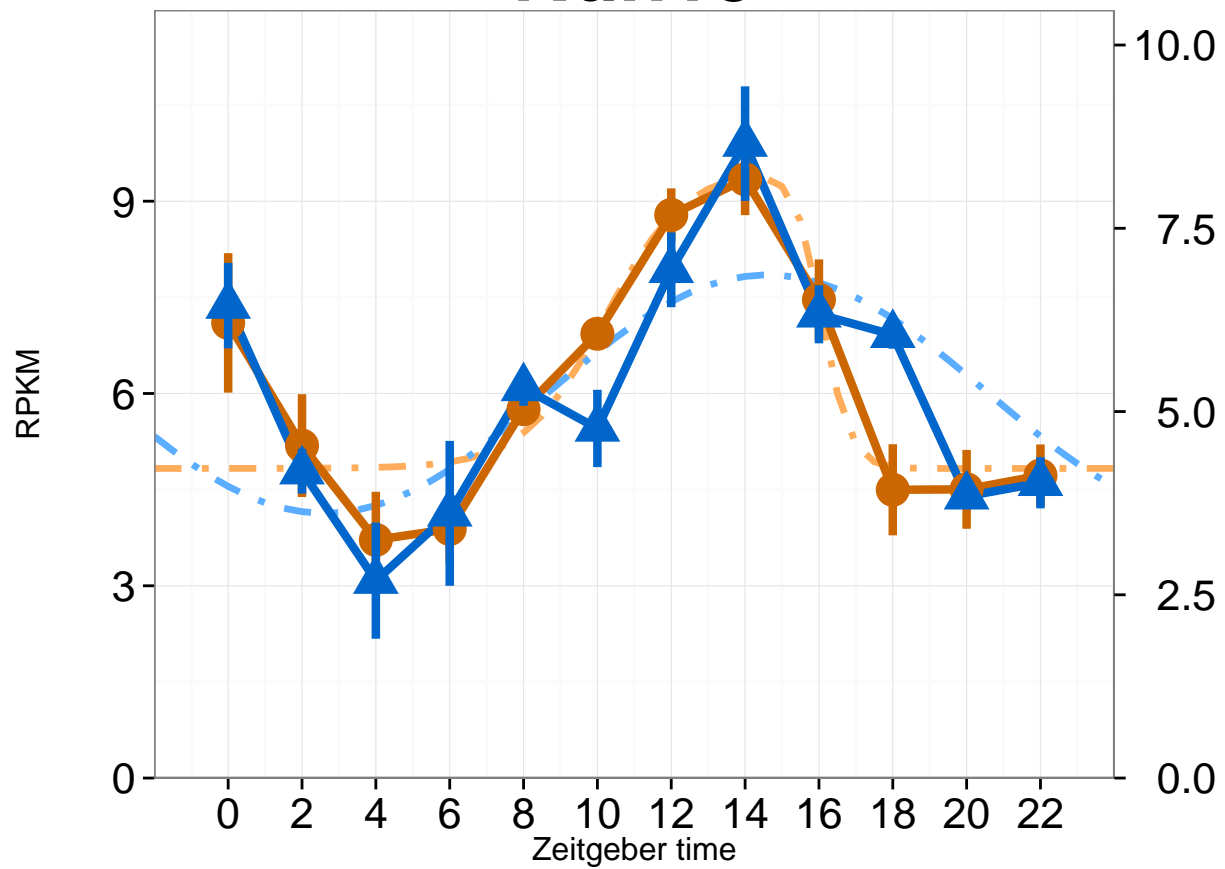

# Rdh13

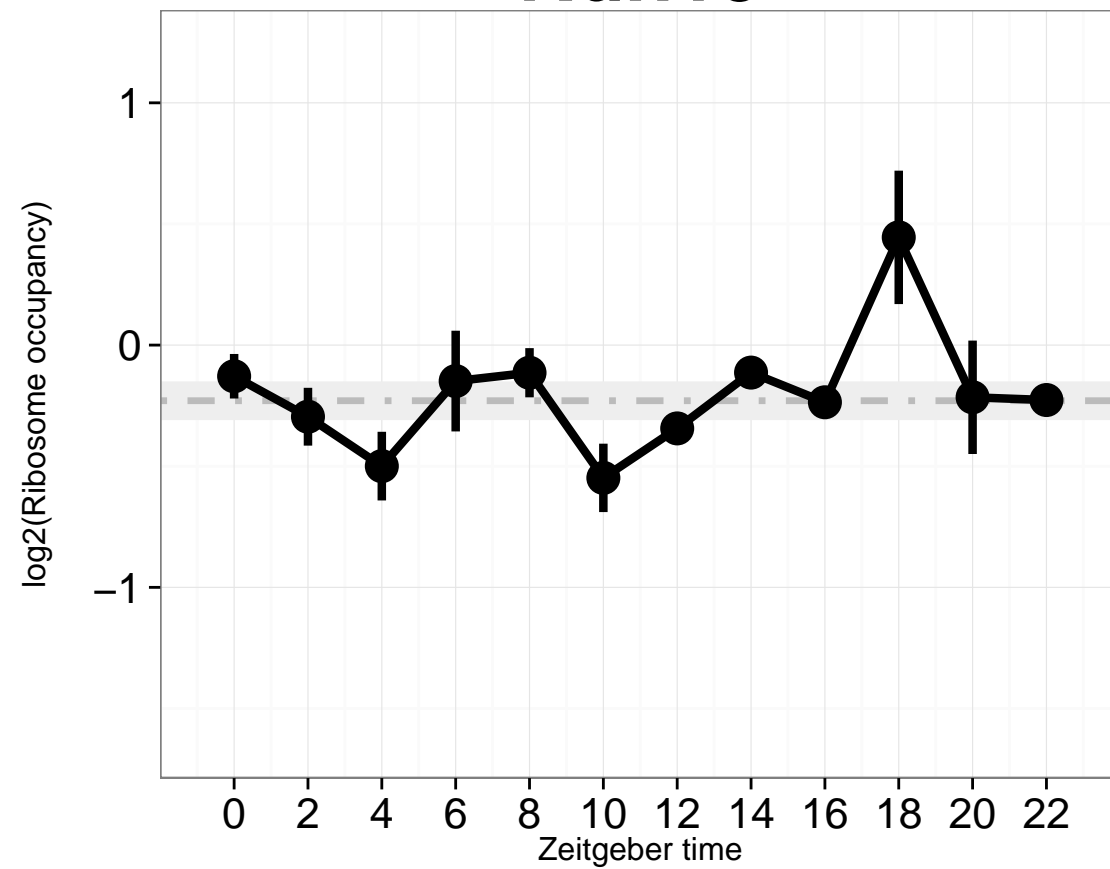

Supplement: SuppDataset_1.zip [file Rdh13_set_D.pdf › Supplemental Dataset 1/D-mRNA_rhythm_translation_rhyth/Rdh13_set_D.pdf]

# Rdh9

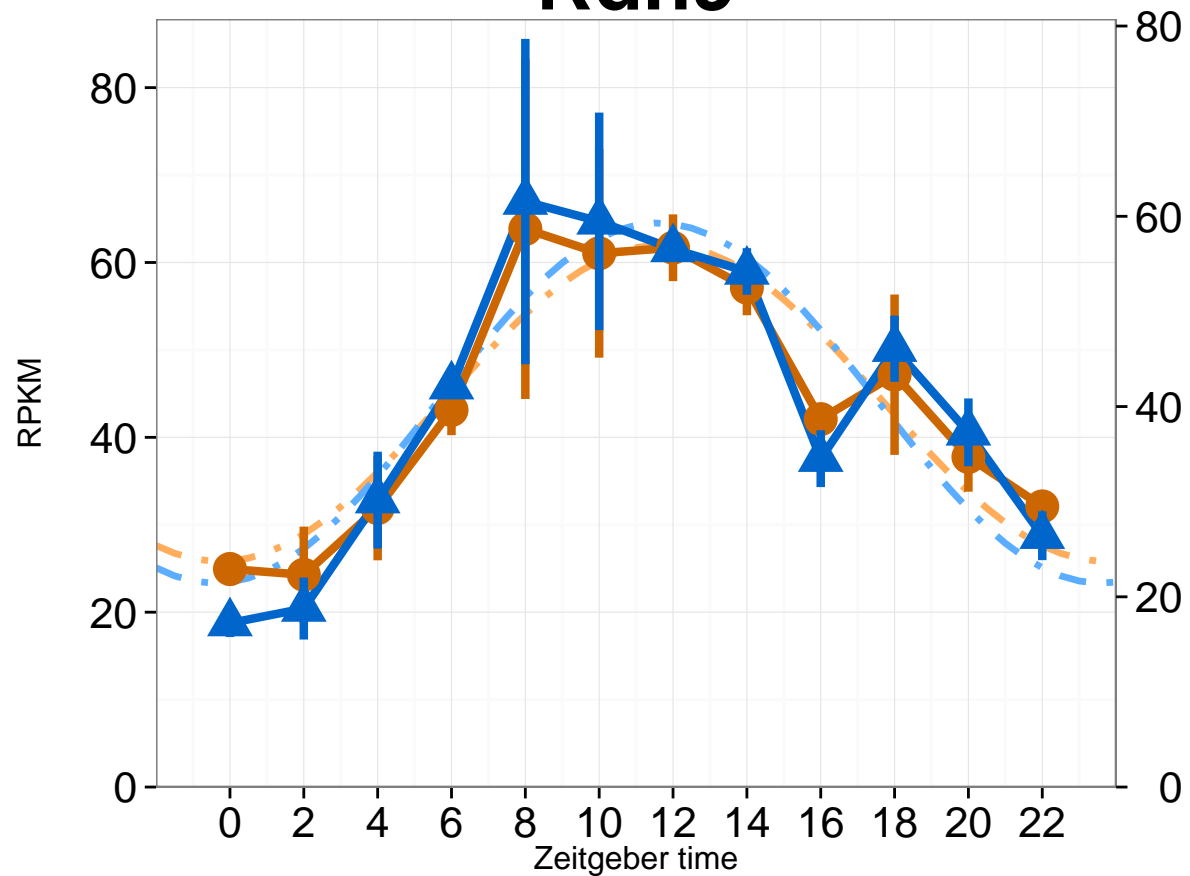

# Rdh9

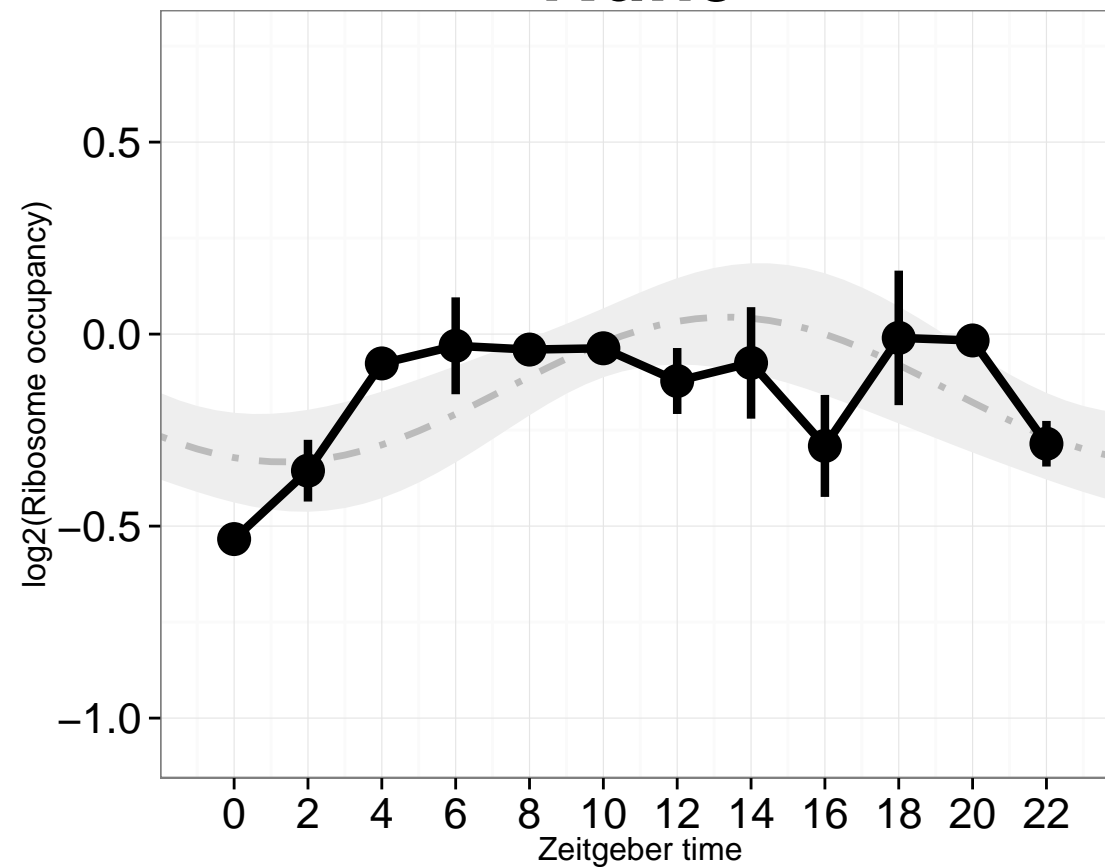

Supplement: SuppDataset_1.zip [file Rdh9_set_D.pdf › Supplemental Dataset 1/D-mRNA_rhythm_translation_rhyth/Rdh9_set_D.pdf]

## Reck

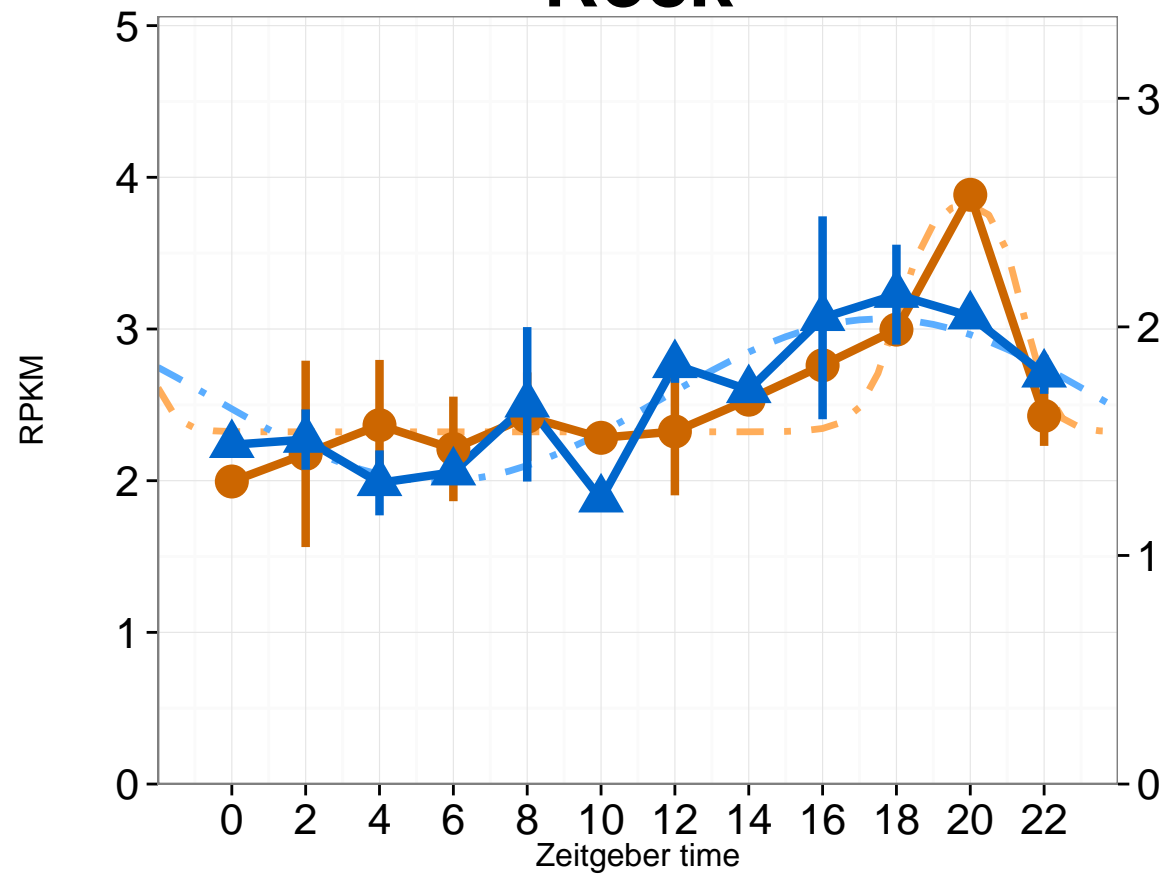

## Reck

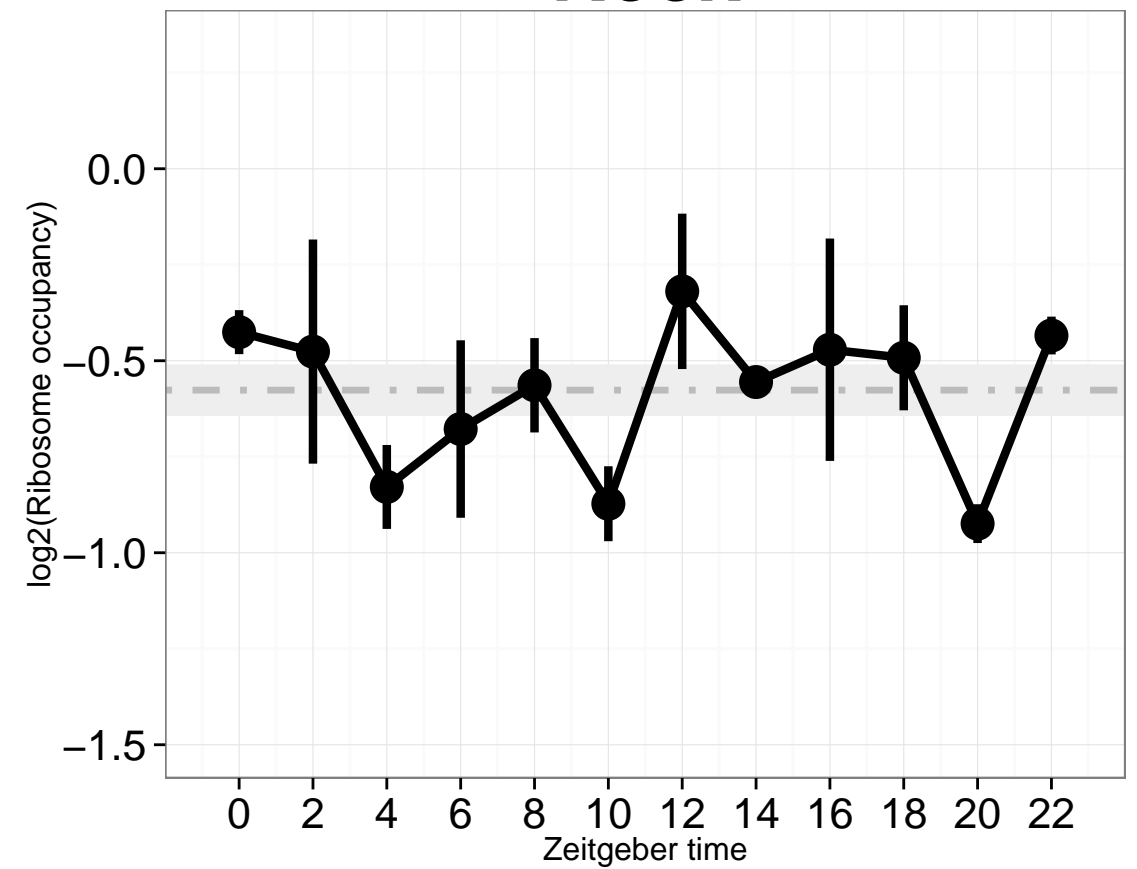

Supplement: SuppDataset_1.zip [file Reck_set_D.pdf › Supplemental Dataset 1/D-mRNA_rhythm_translation_rhyth/Reck_set_D.pdf]

# Recql4

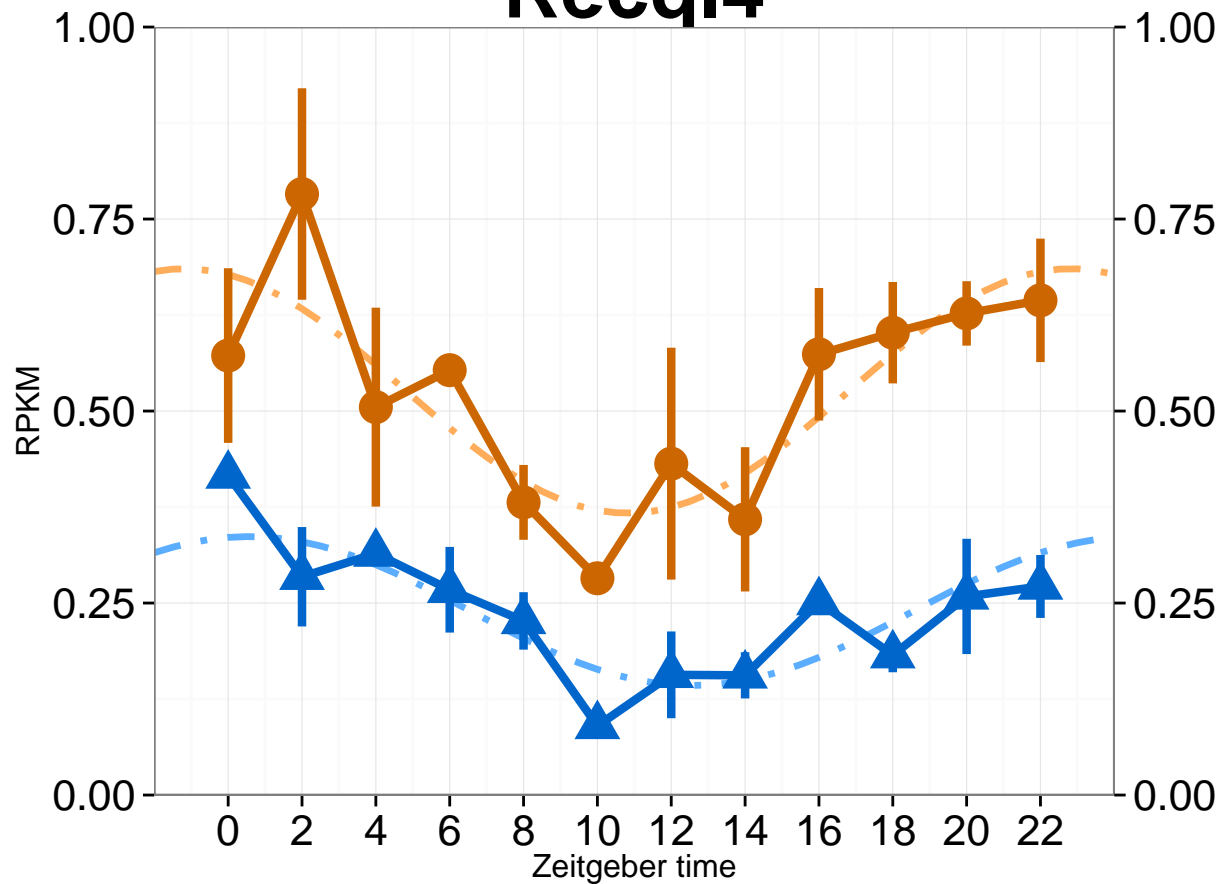

# Recql4

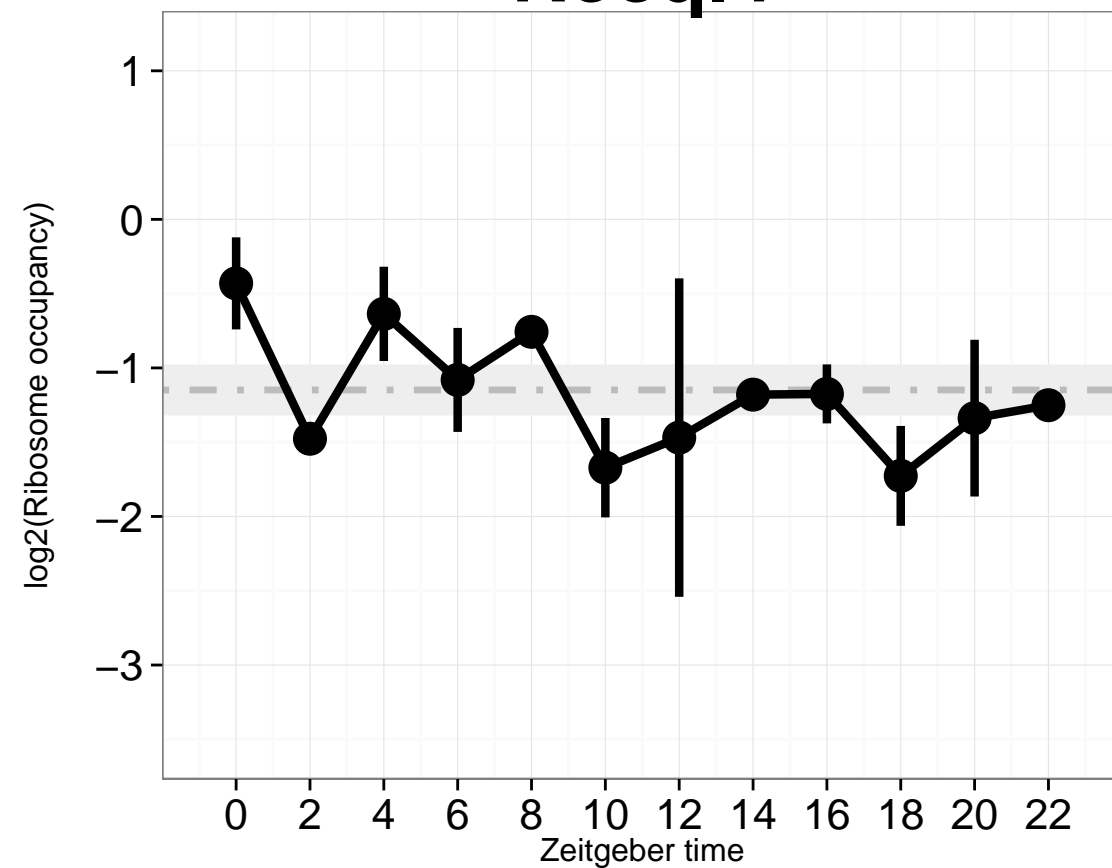

Supplement: SuppDataset_1.zip [file Recql4_set_D.pdf › Supplemental Dataset 1/D-mRNA_rhythm_translation_rhyth/Recql4_set_D.pdf]

## Rel1

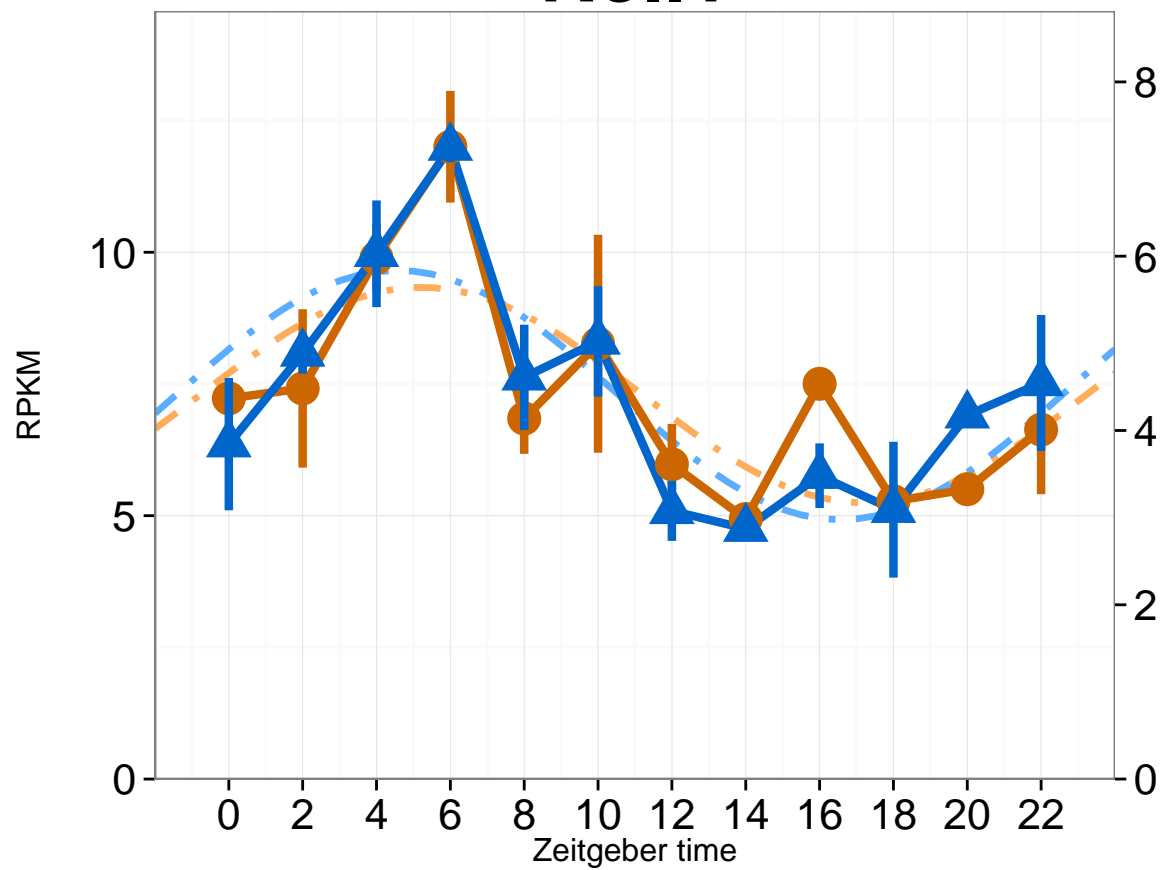

## Rel1

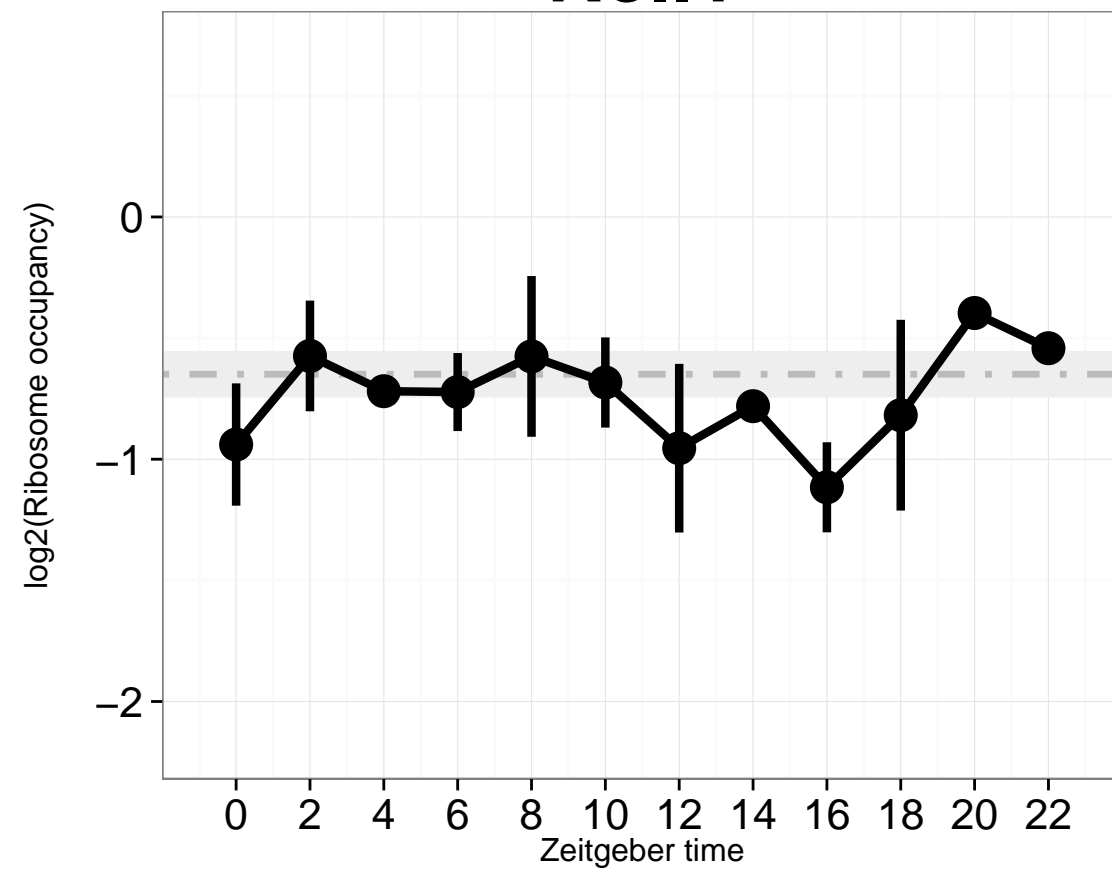

Supplement: SuppDataset_1.zip [file Rell1_set_D.pdf › Supplemental Dataset 1/D-mRNA_rhythm_translation_rhyth/Rell1_set_D.pdf]

## Repin1

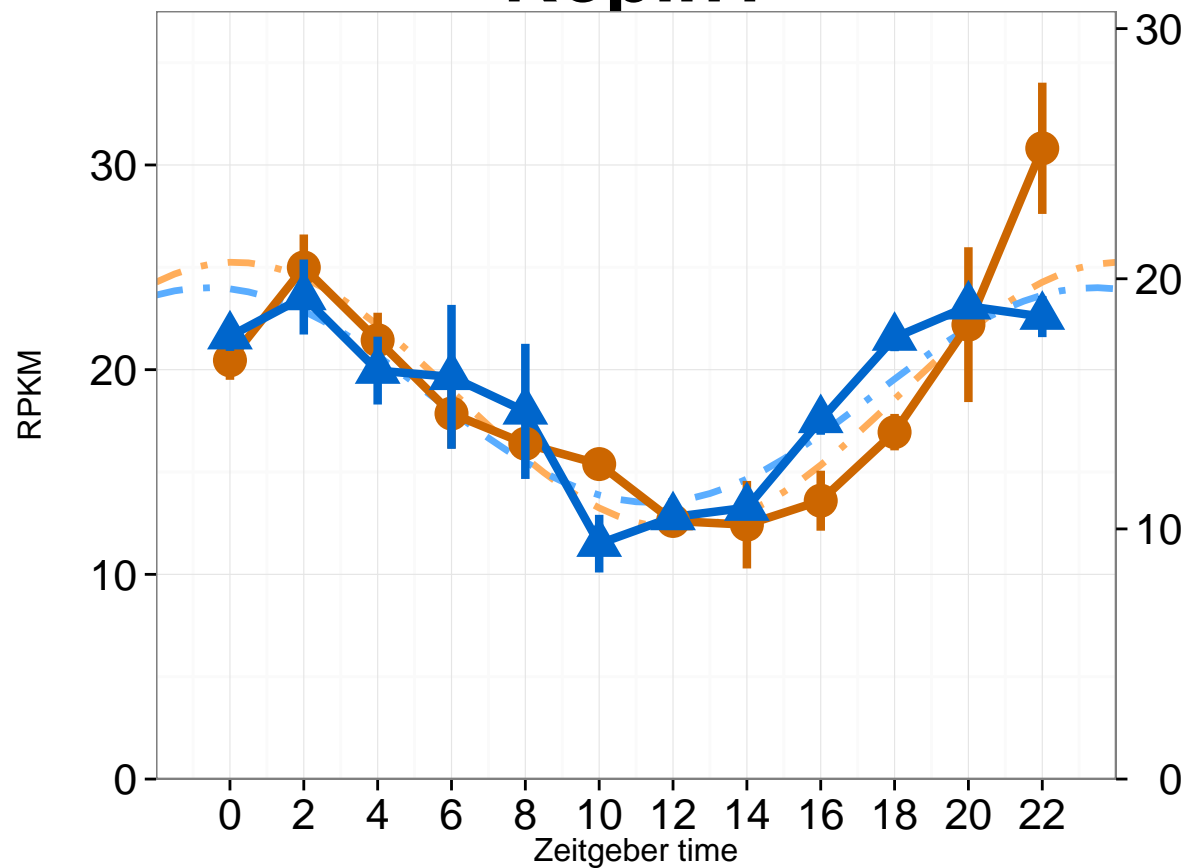

## Repin1

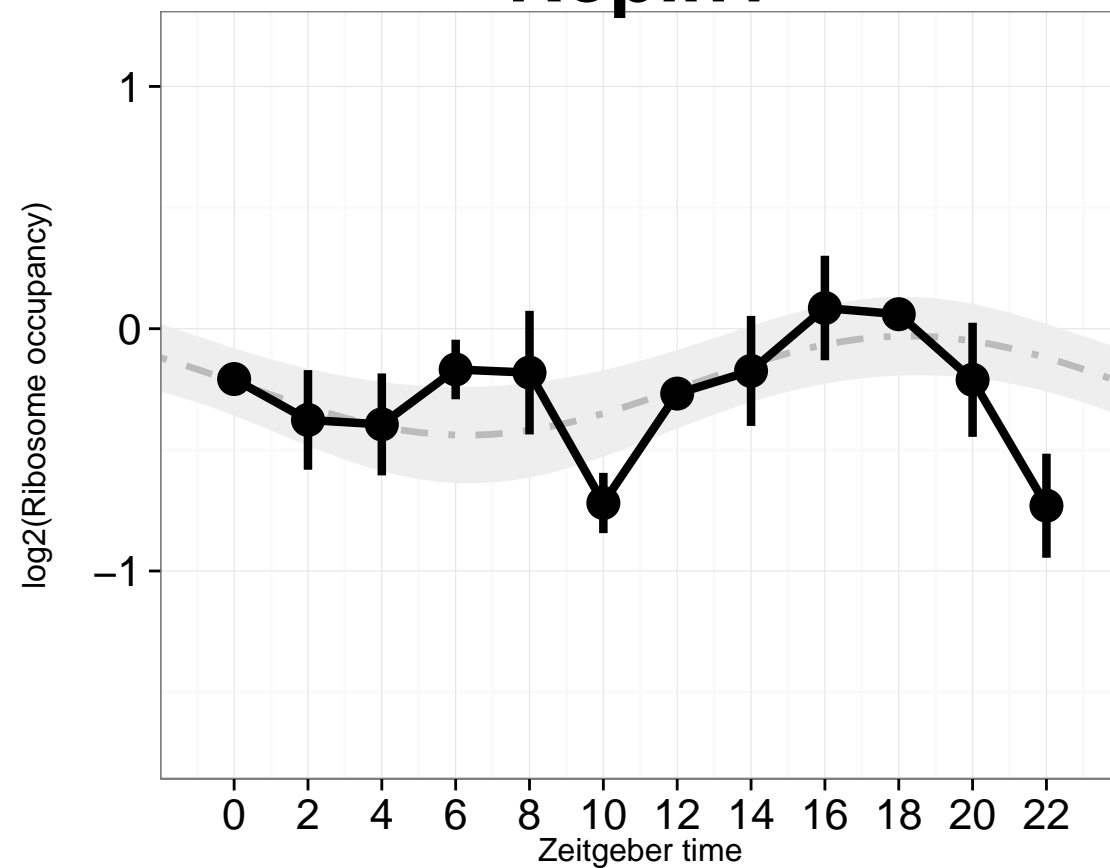

Supplement: SuppDataset_1.zip [file Repin1_set_D.pdf › Supplemental Dataset 1/D-mRNA_rhythm_translation_rhyth/Repin1_set_D.pdf]

## Rev1

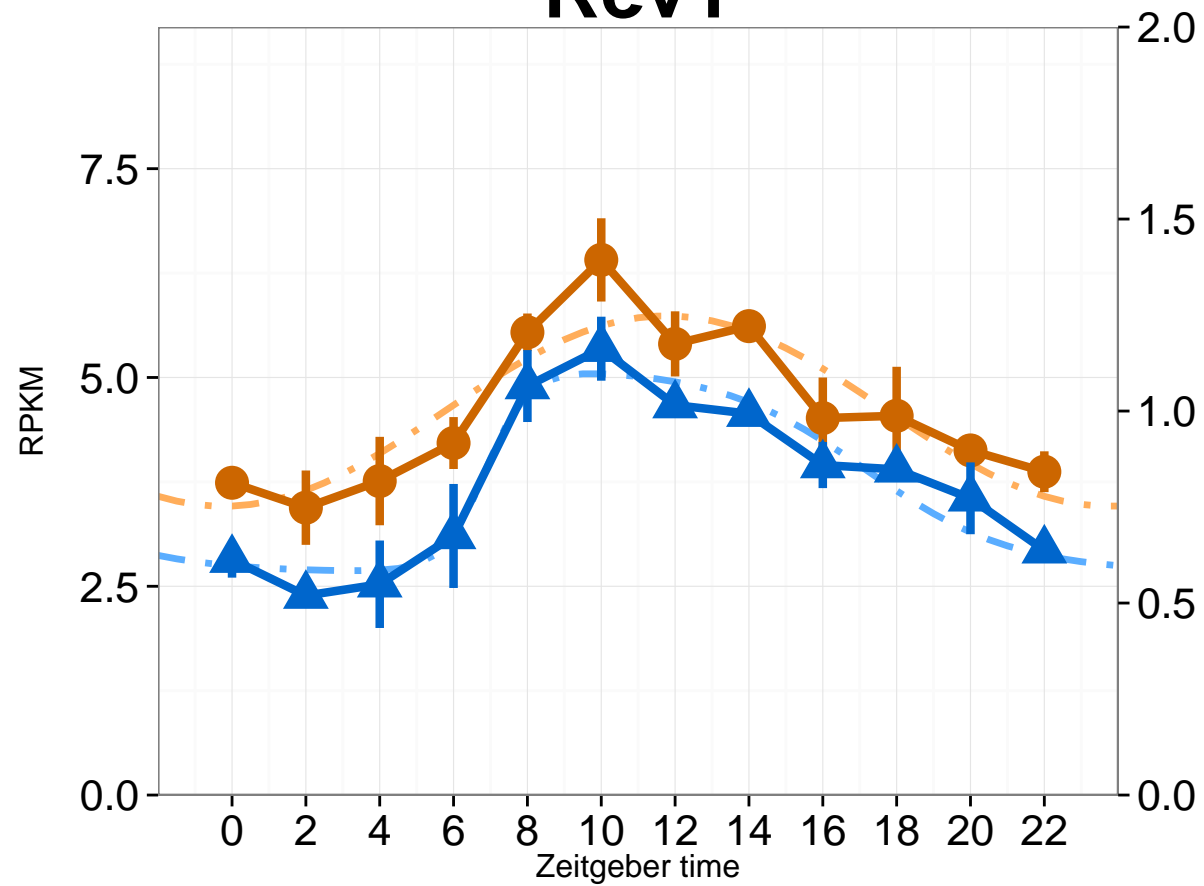

## Rev1

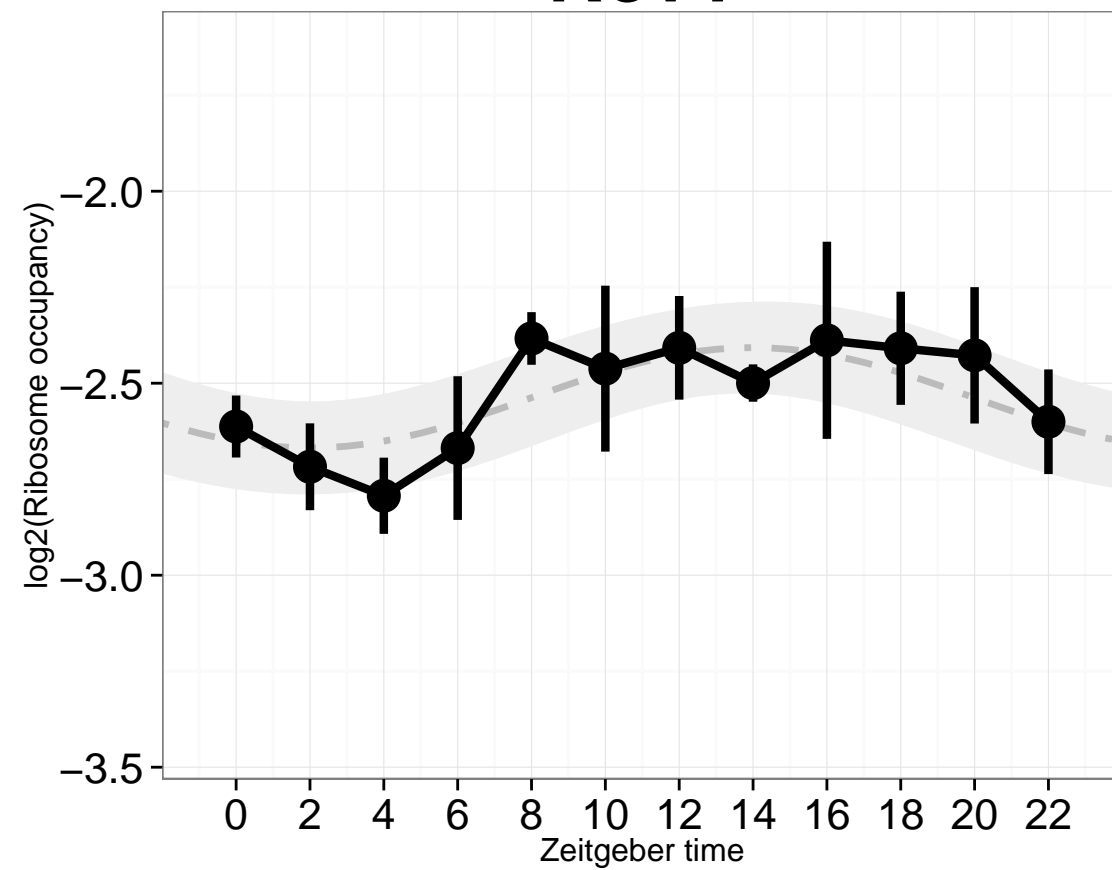

Supplement: SuppDataset_1.zip [file Rev1_set_D.pdf › Supplemental Dataset 1/D-mRNA_rhythm_translation_rhyth/Rev1_set_D.pdf]

# Rfx4

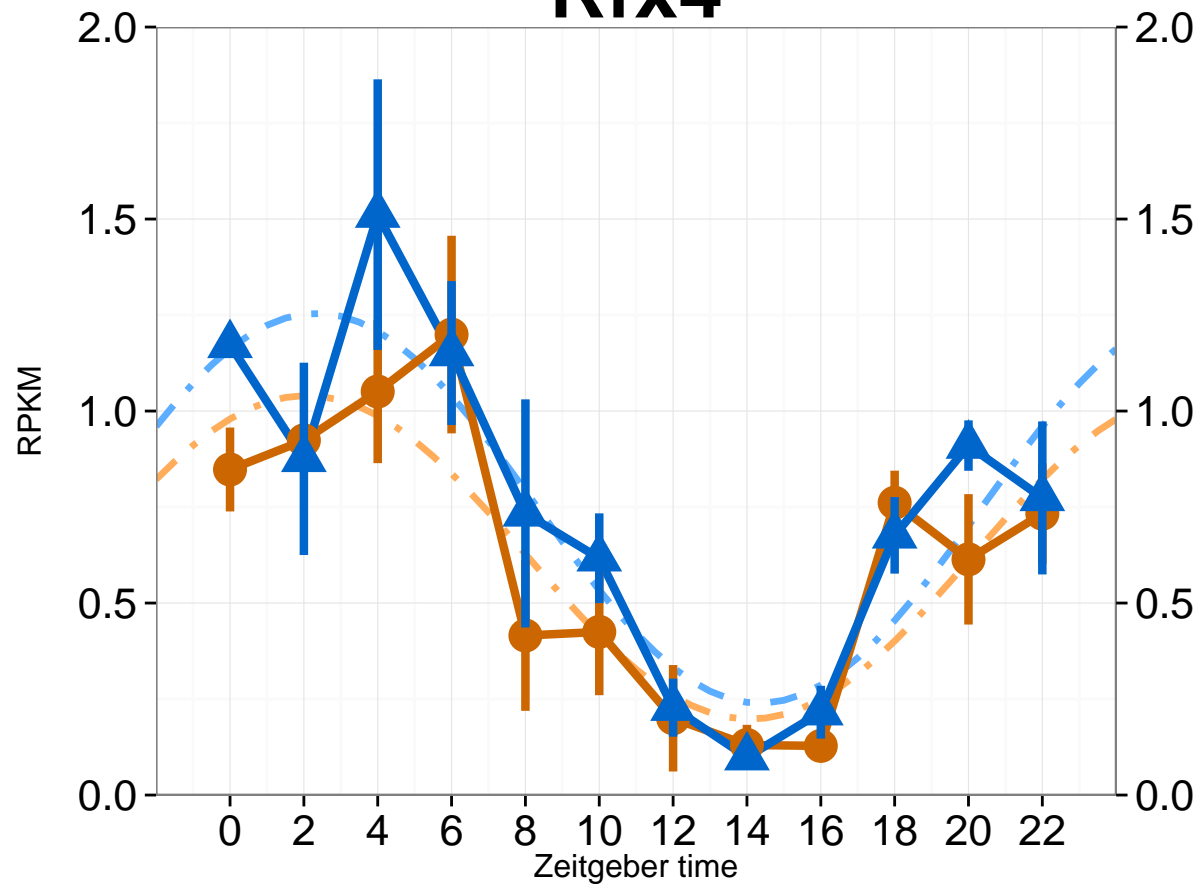

# Rfx4

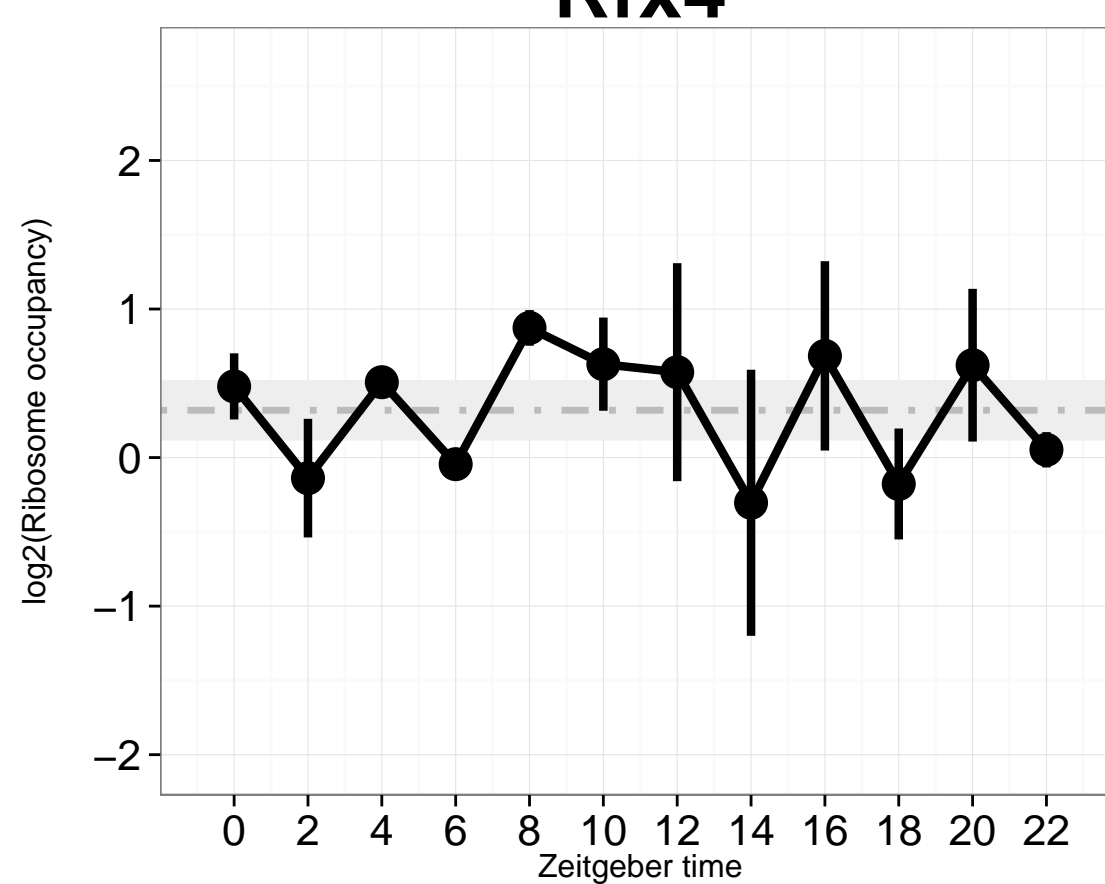

Supplement: SuppDataset_1.zip [file Rfx4_set_D.pdf › Supplemental Dataset 1/D-mRNA_rhythm_translation_rhyth/Rfx4_set_D.pdf]

# Rfx5

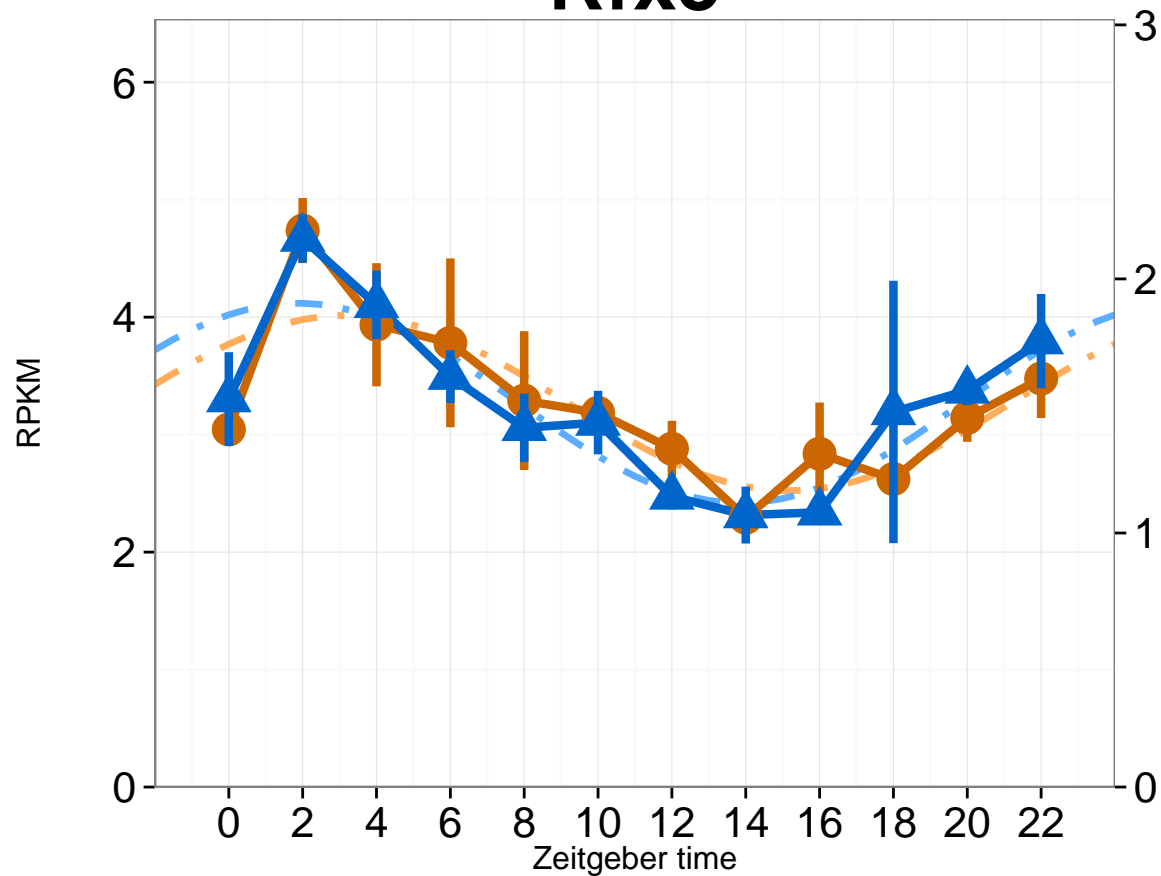

# Rfx5

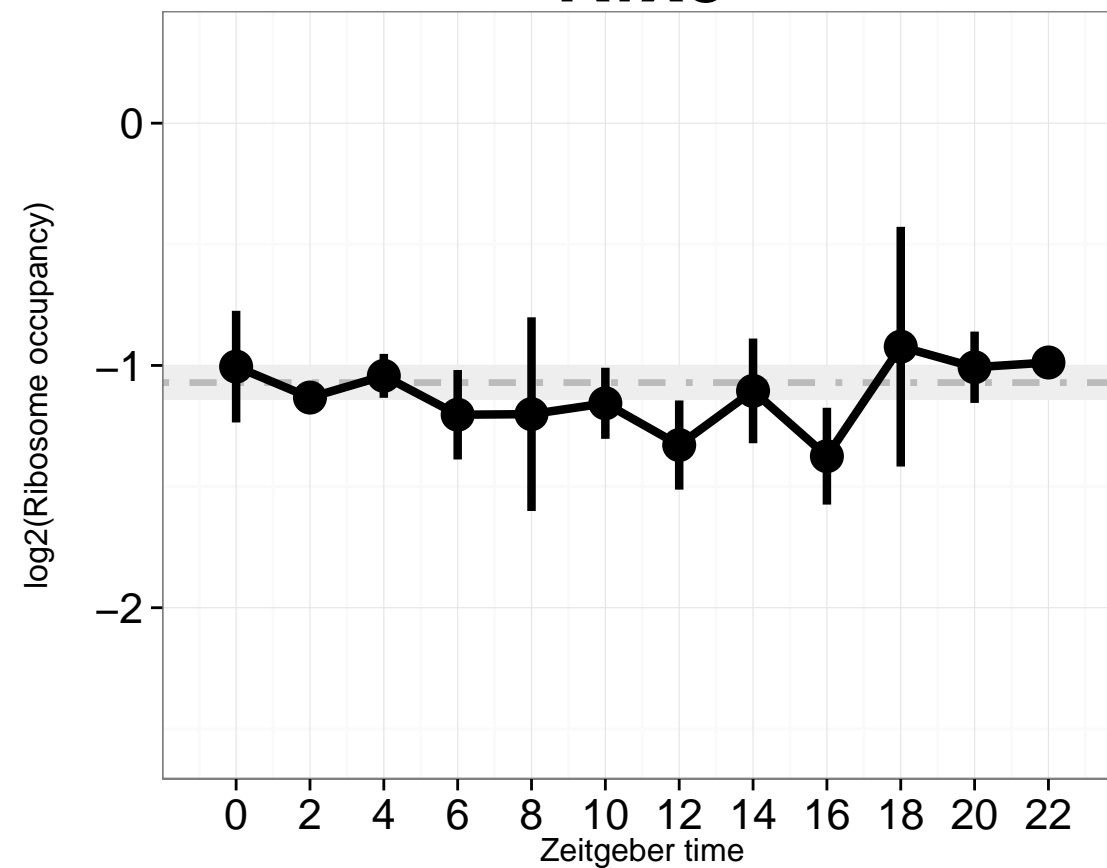

Supplement: SuppDataset_1.zip [file Rfx5_set_D.pdf › Supplemental Dataset 1/D-mRNA_rhythm_translation_rhyth/Rfx5_set_D.pdf]

## Rfxank

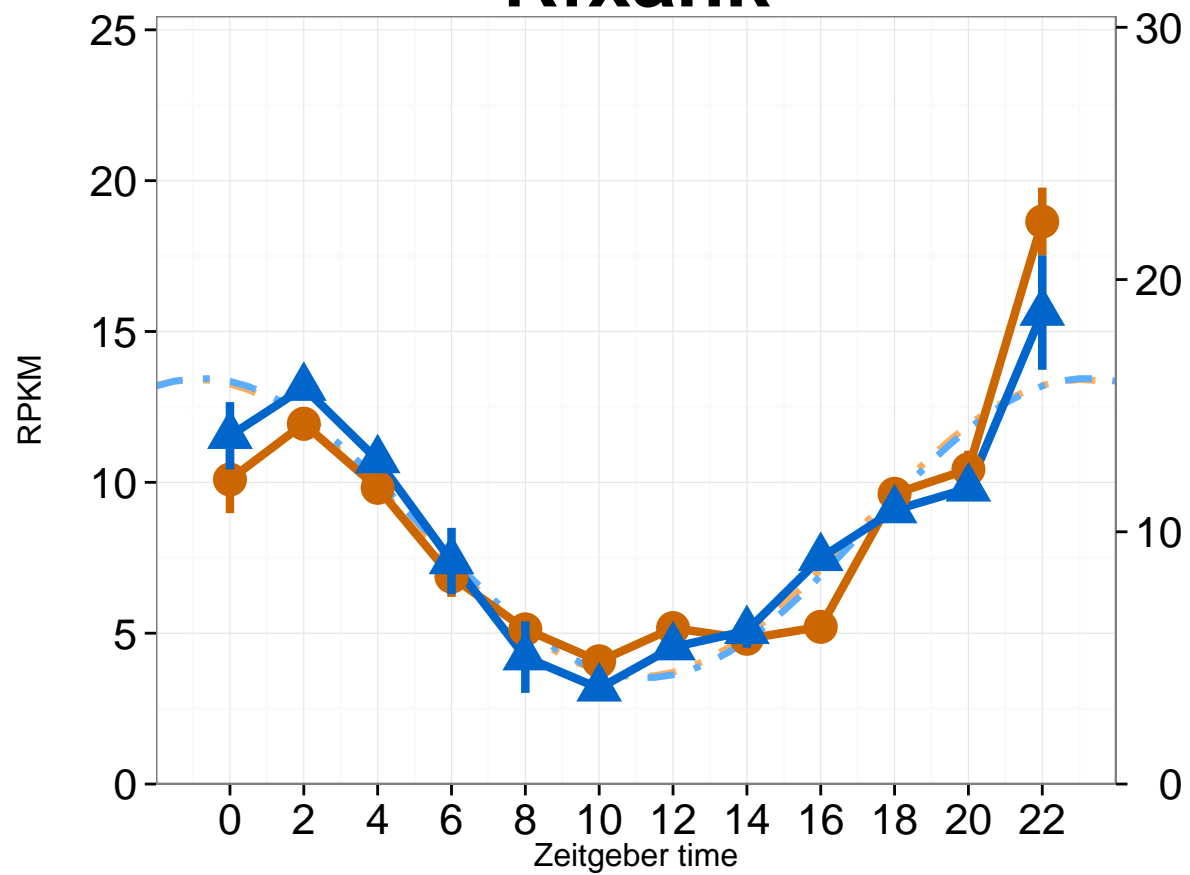

## Rfxank

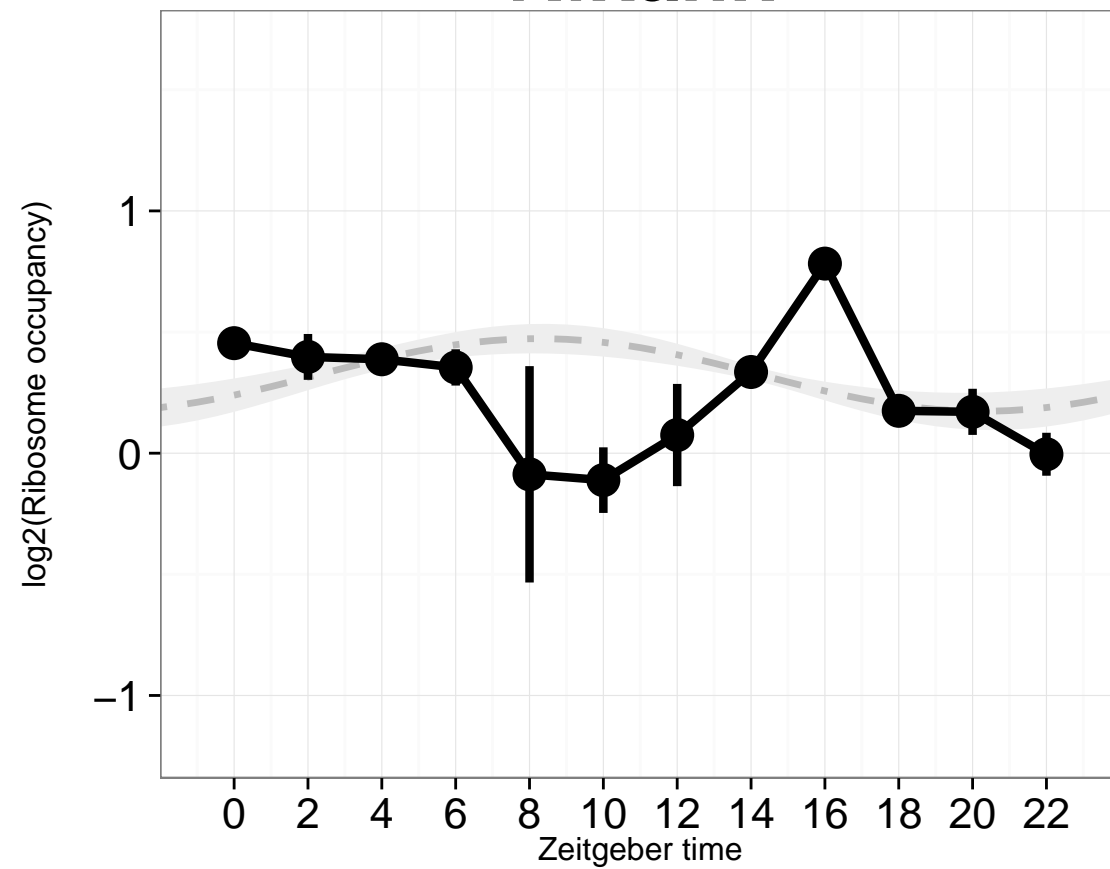

Supplement: SuppDataset_1.zip [file Rfxank_set_D.pdf › Supplemental Dataset 1/D-mRNA_rhythm_translation_rhyth/Rfxank_set_D.pdf]

# Rgs16

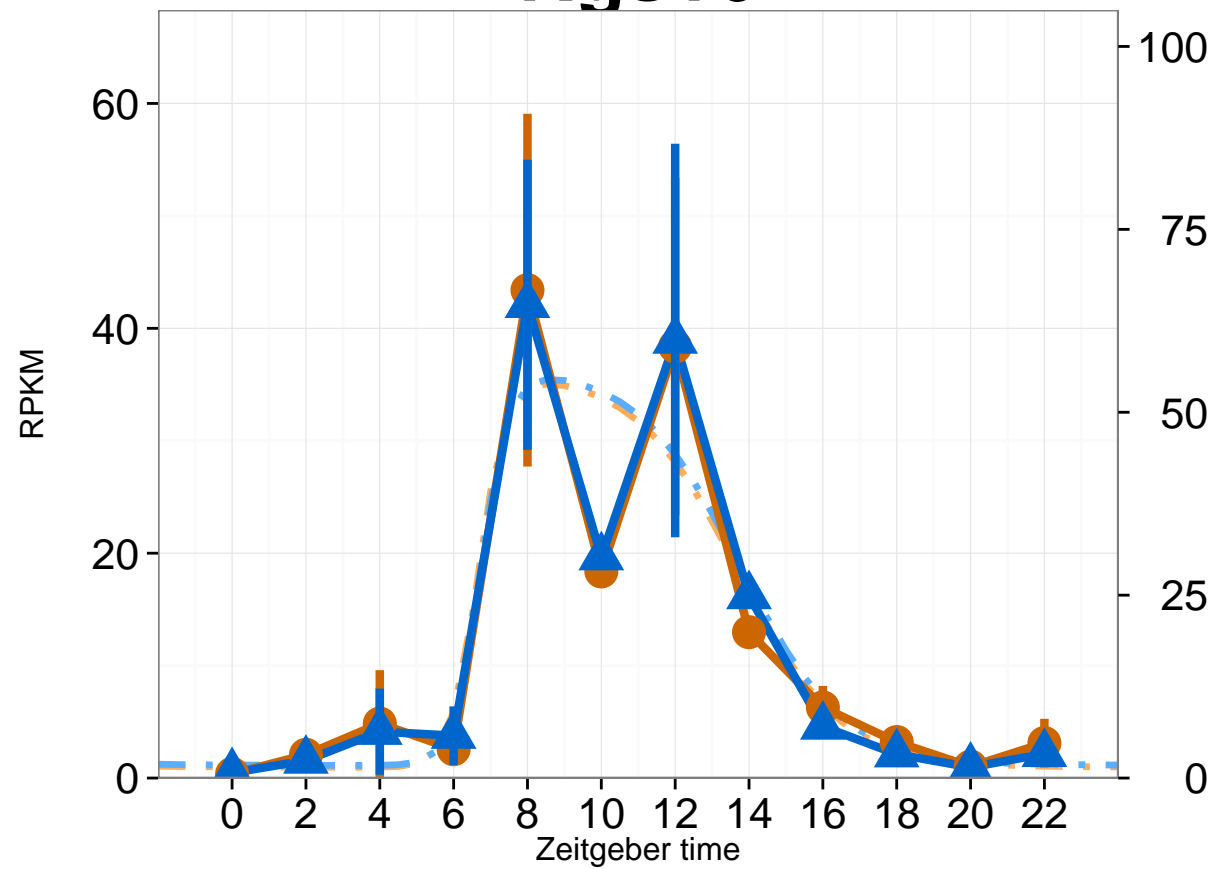

# Rgs16

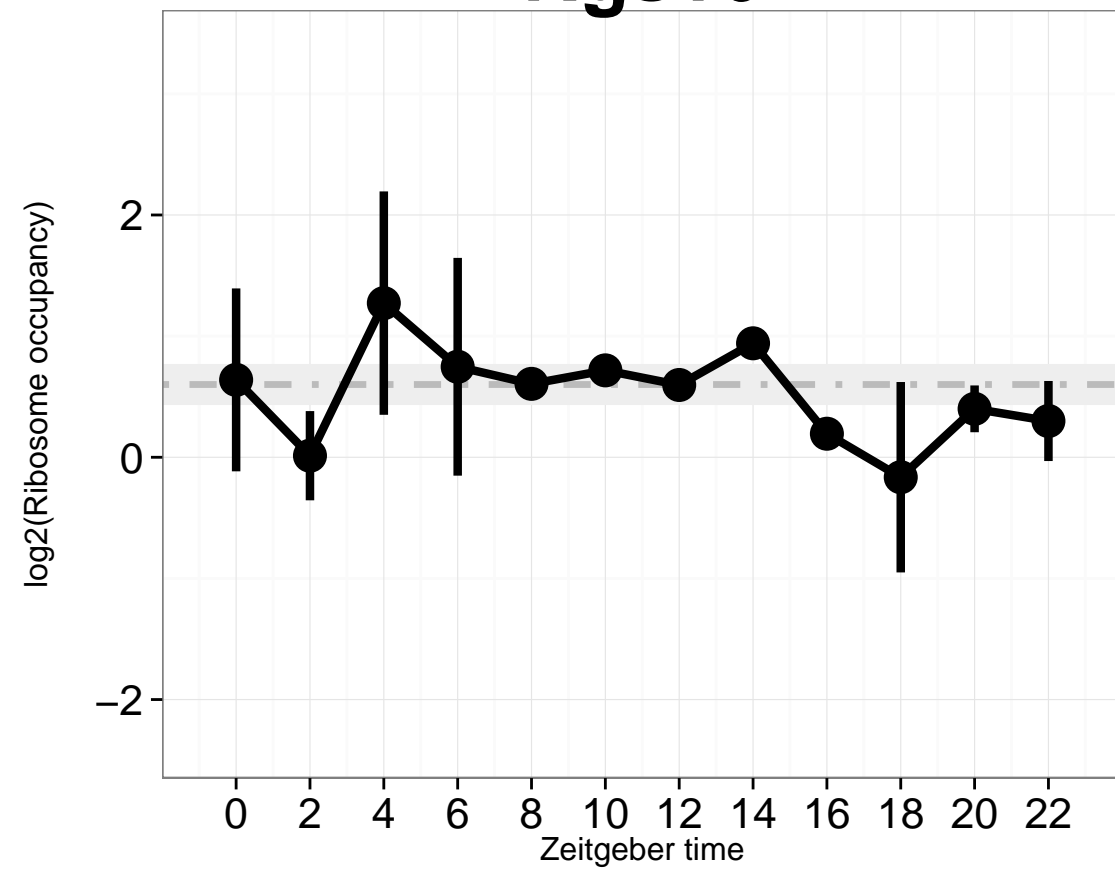

Supplement: SuppDataset_1.zip [file Rgs16_set_D.pdf › Supplemental Dataset 1/D-mRNA_rhythm_translation_rhyth/Rgs16_set_D.pdf]

## Rgs2

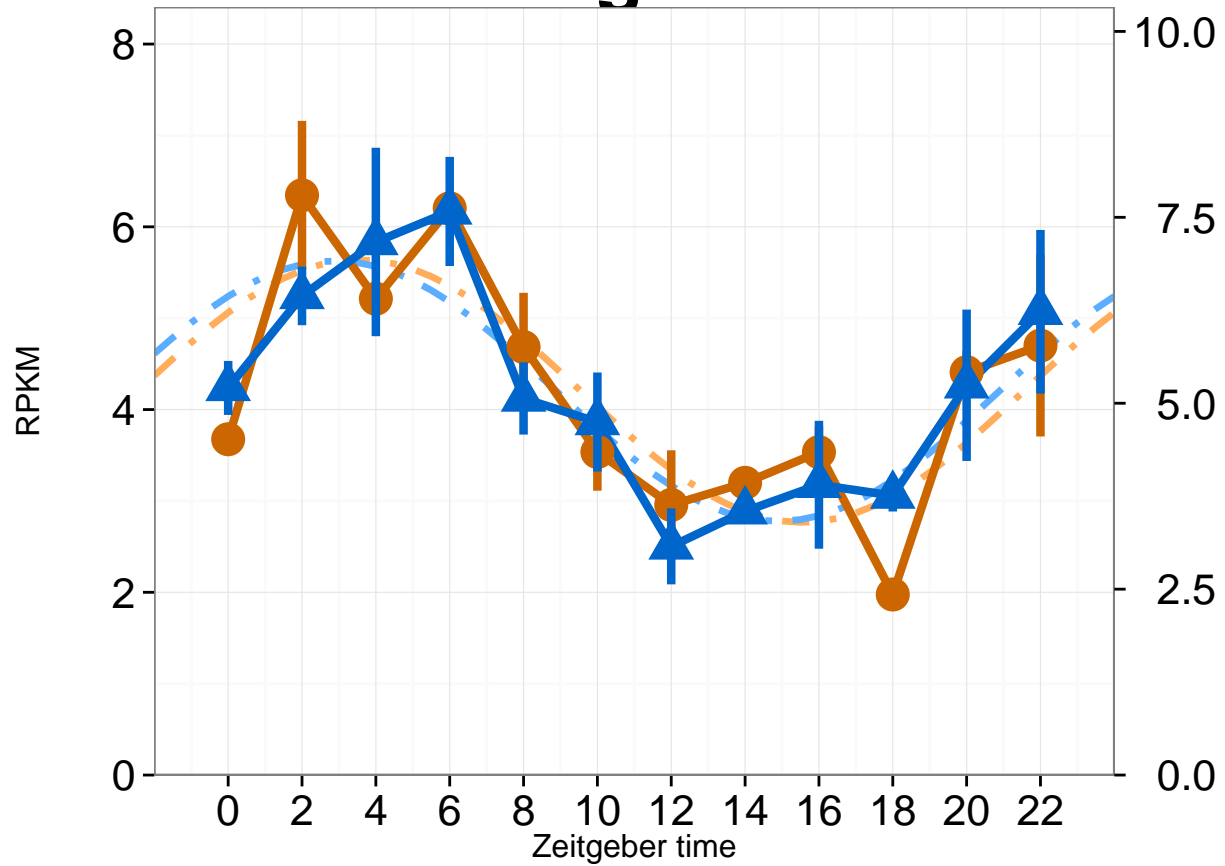

## Rgs2

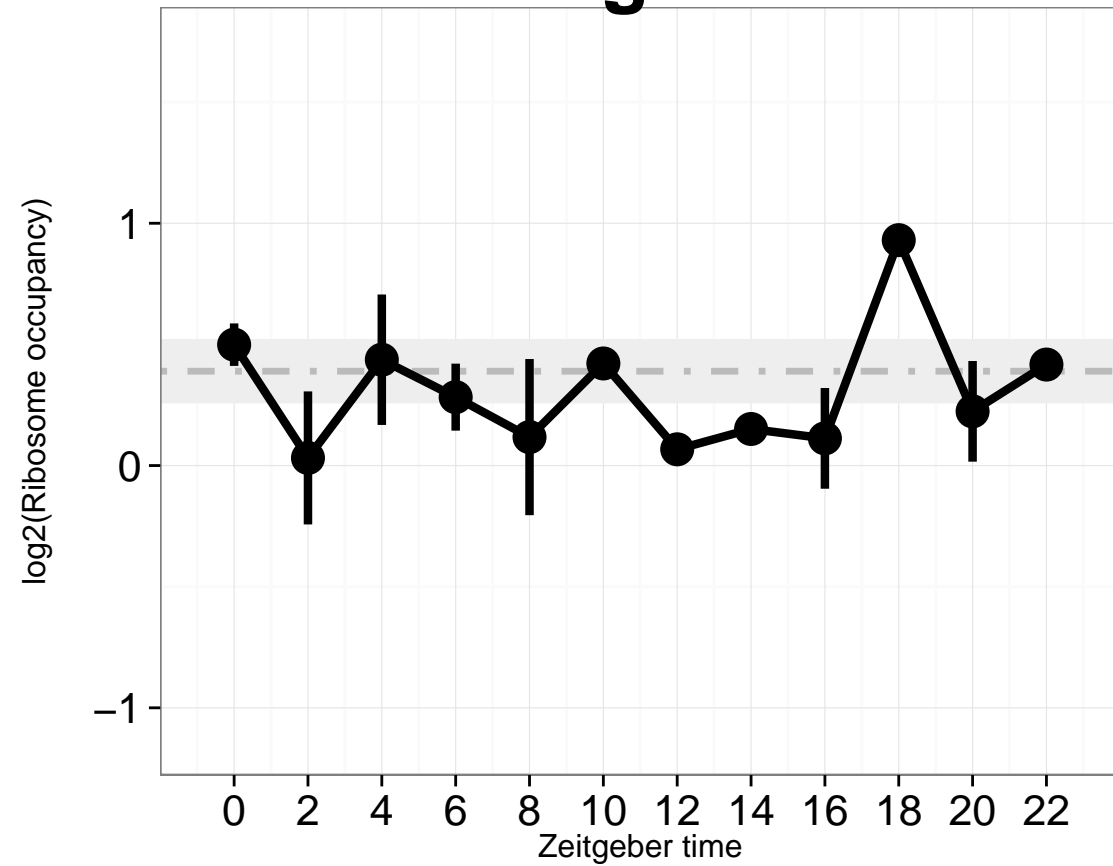

Supplement: SuppDataset_1.zip [file Rgs2_set_D.pdf › Supplemental Dataset 1/D-mRNA_rhythm_translation_rhyth/Rgs2_set_D.pdf]

## Rhbdd2

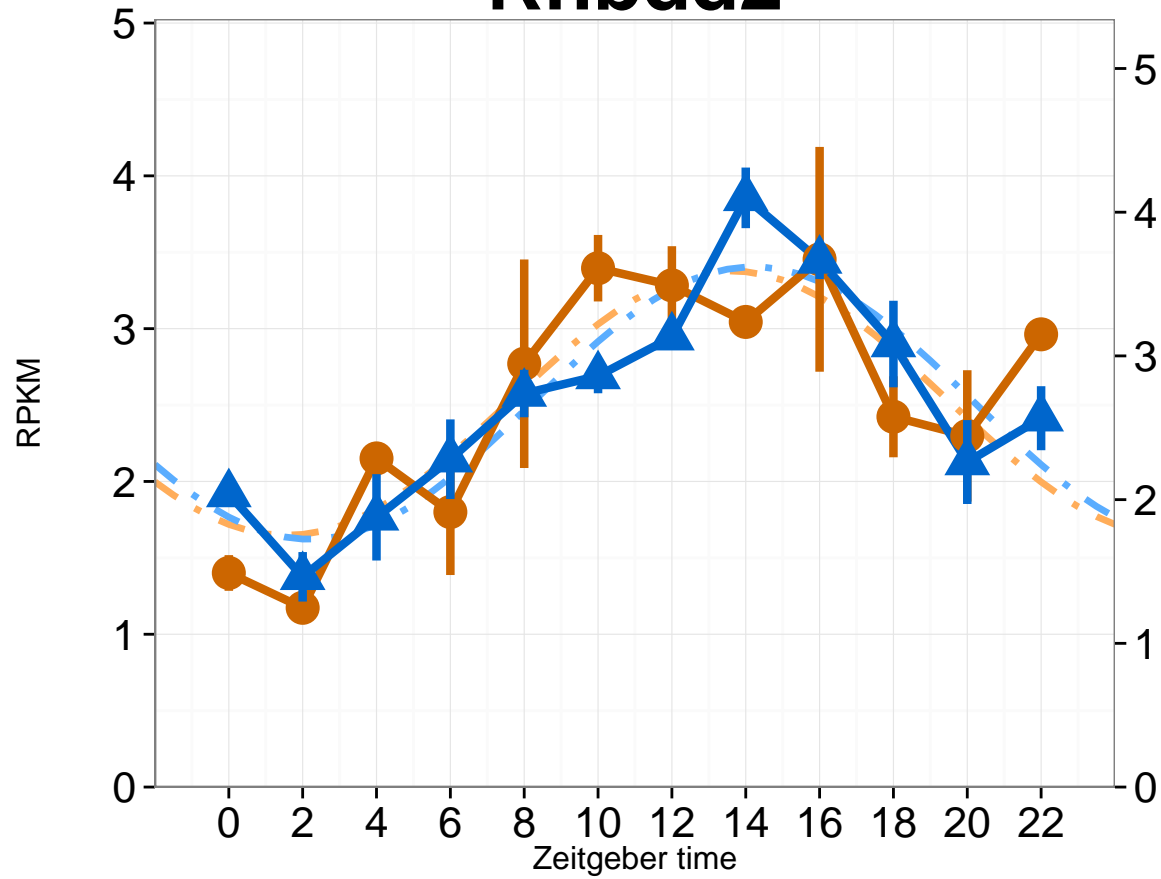

## Rhbdd2

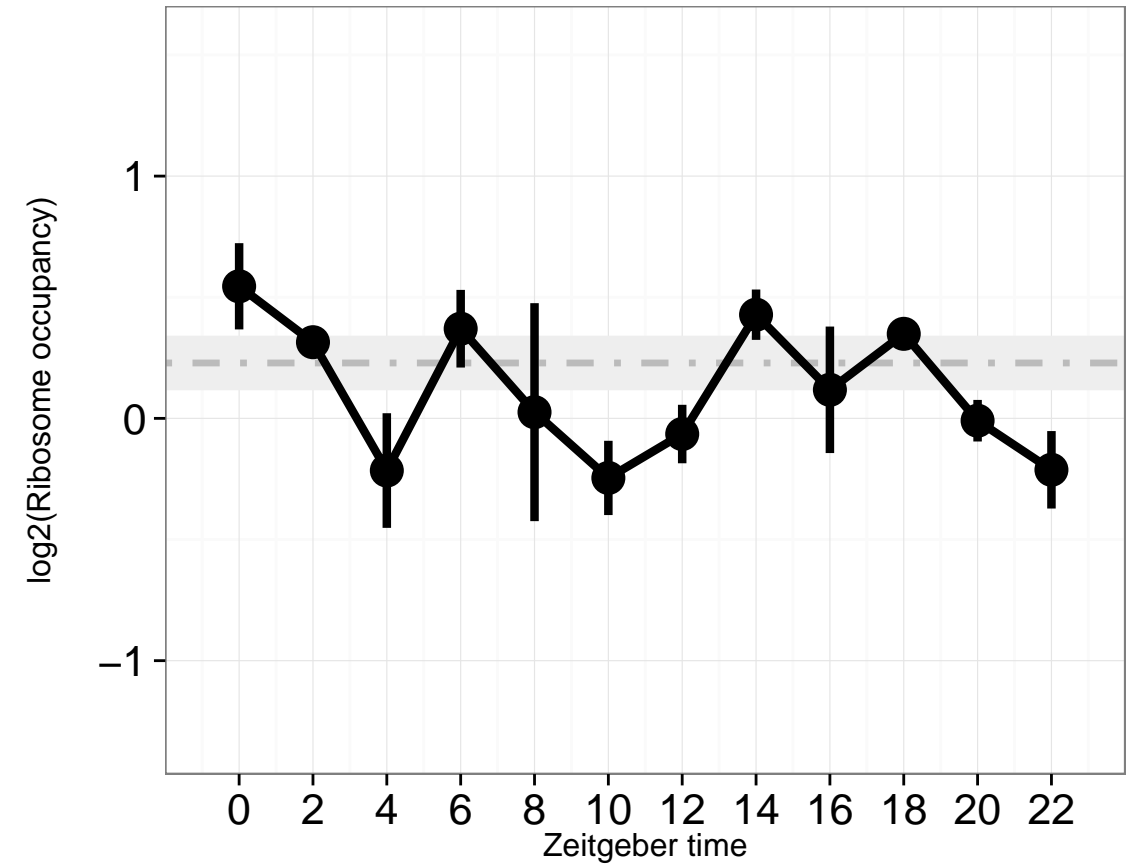

Supplement: SuppDataset_1.zip [file Rhbdd2_set_D.pdf › Supplemental Dataset 1/D-mRNA_rhythm_translation_rhyth/Rhbdd2_set_D.pdf]

## Rhod

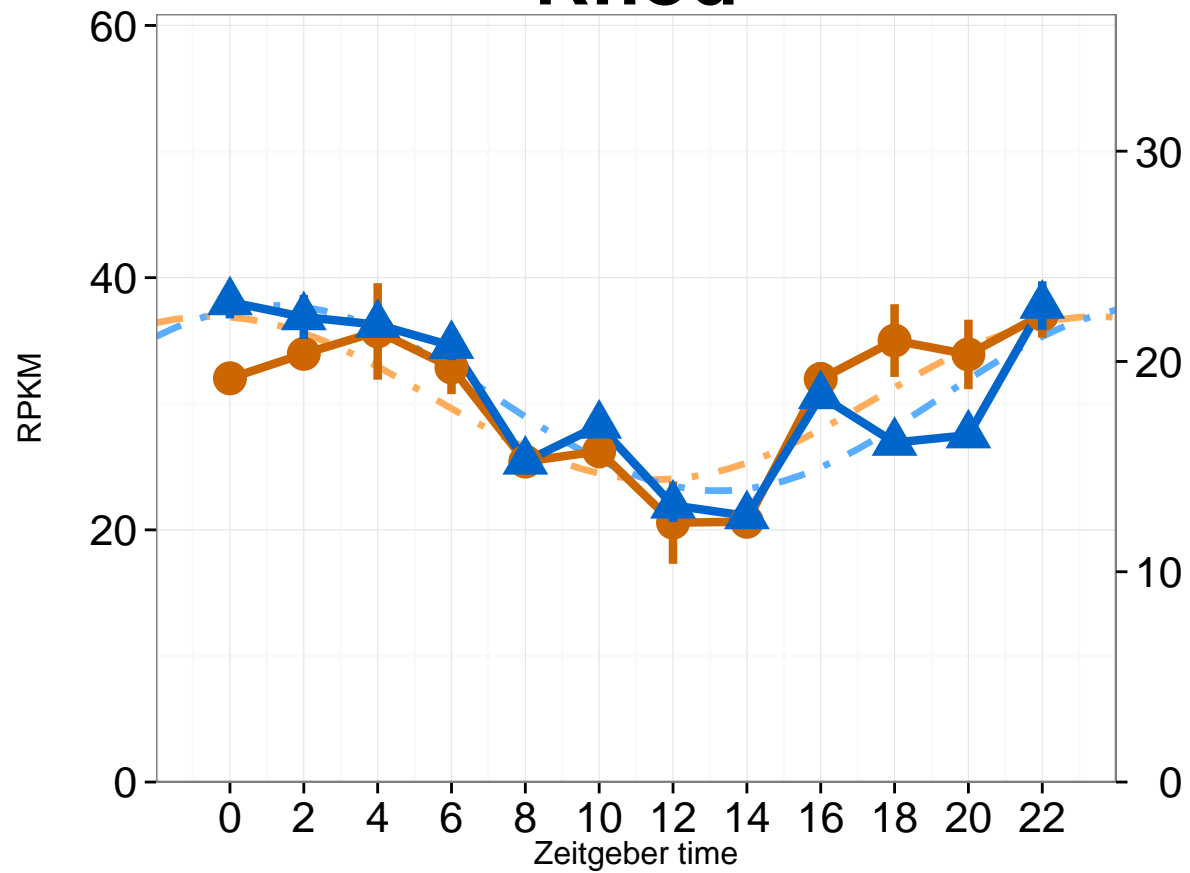

## Rhod

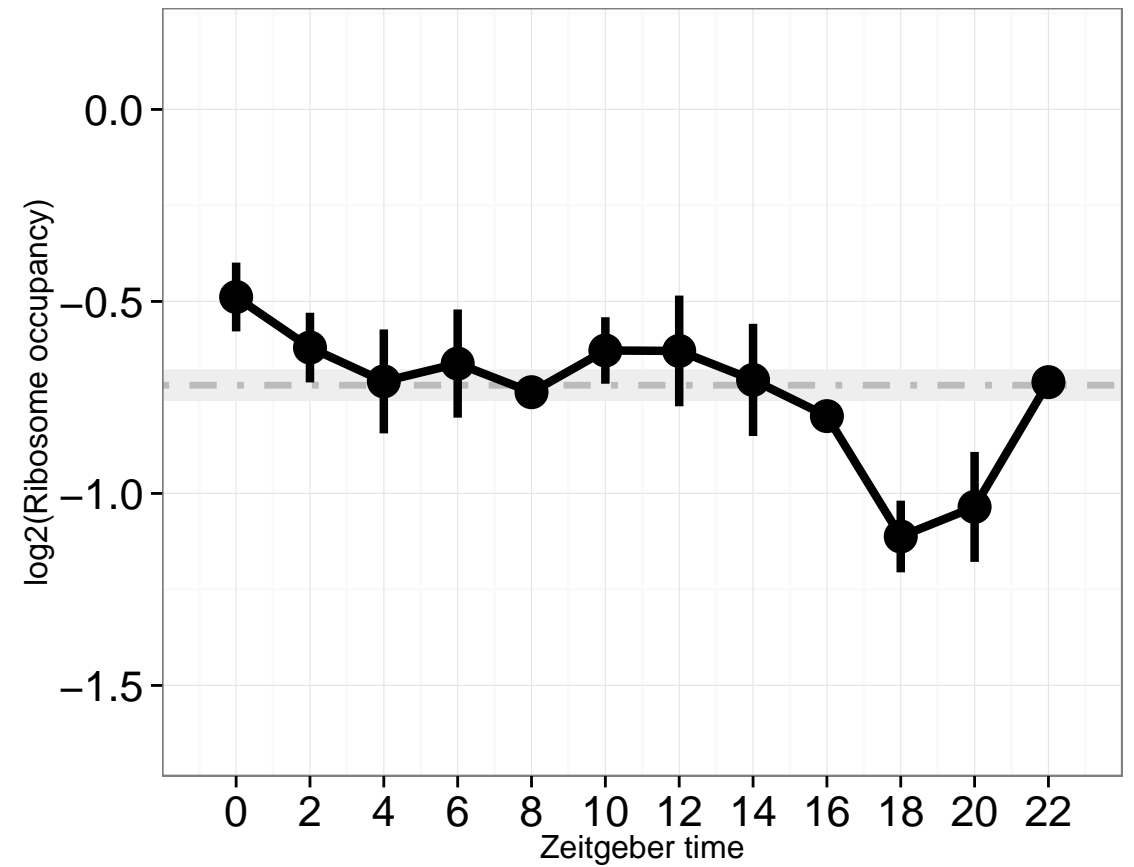

Supplement: SuppDataset_1.zip [file Rhod_set_D.pdf › Supplemental Dataset 1/D-mRNA_rhythm_translation_rhyth/Rhod_set_D.pdf]

## Ring1

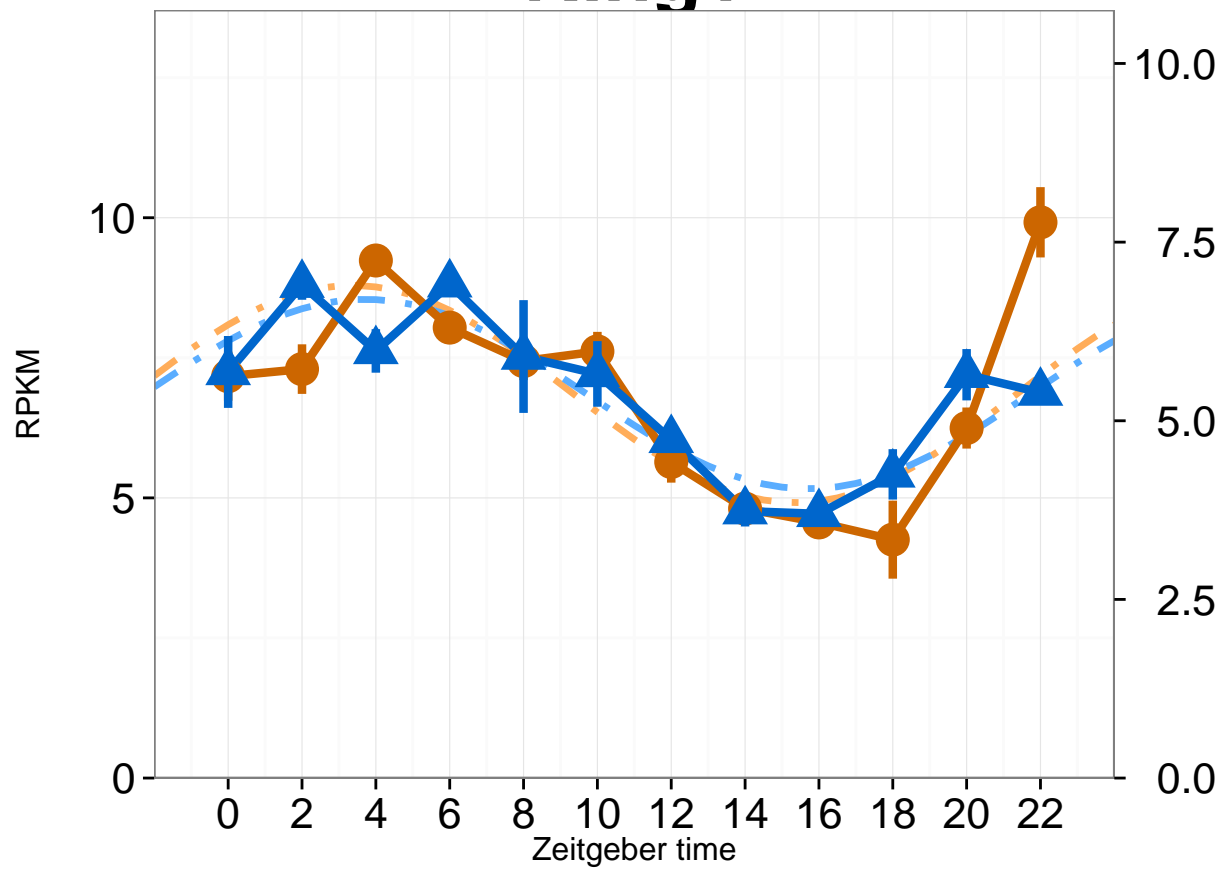

## Ring1

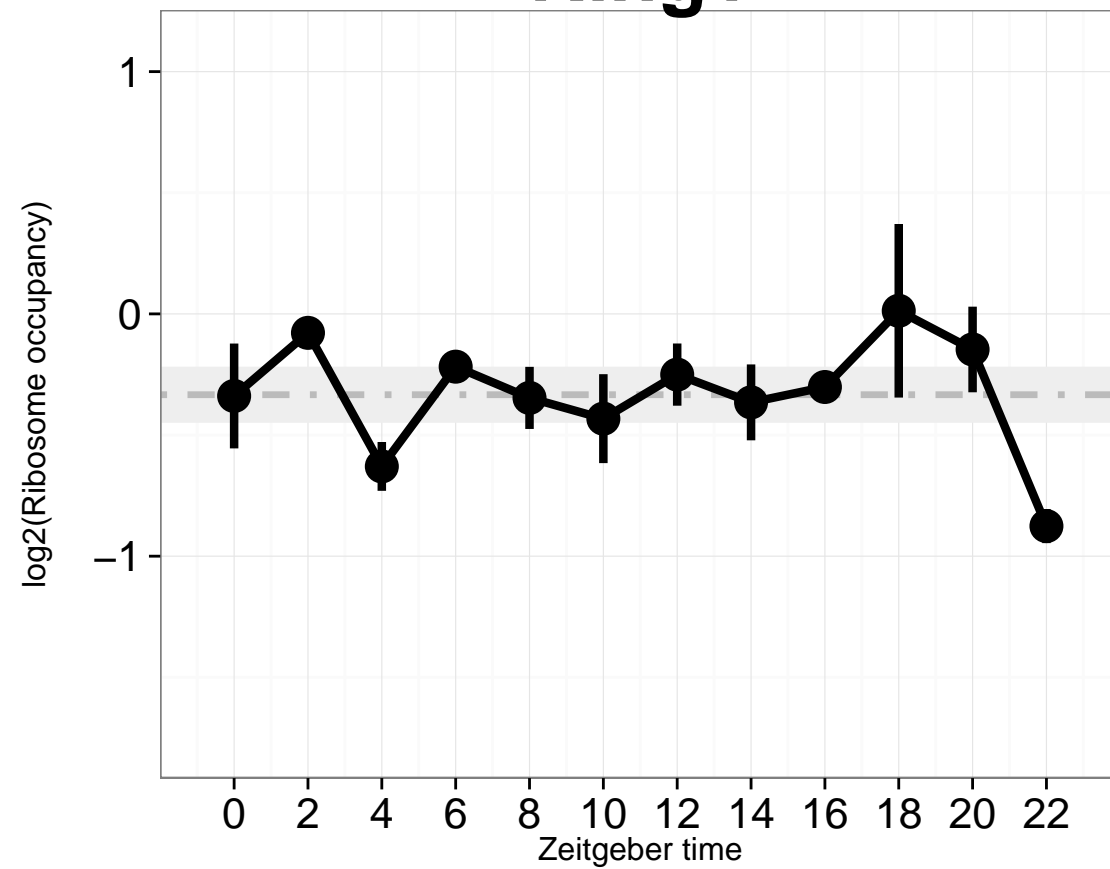

Supplement: SuppDataset_1.zip [file Ring1_set_D.pdf › Supplemental Dataset 1/D-mRNA_rhythm_translation_rhyth/Ring1_set_D.pdf]

## Riok2

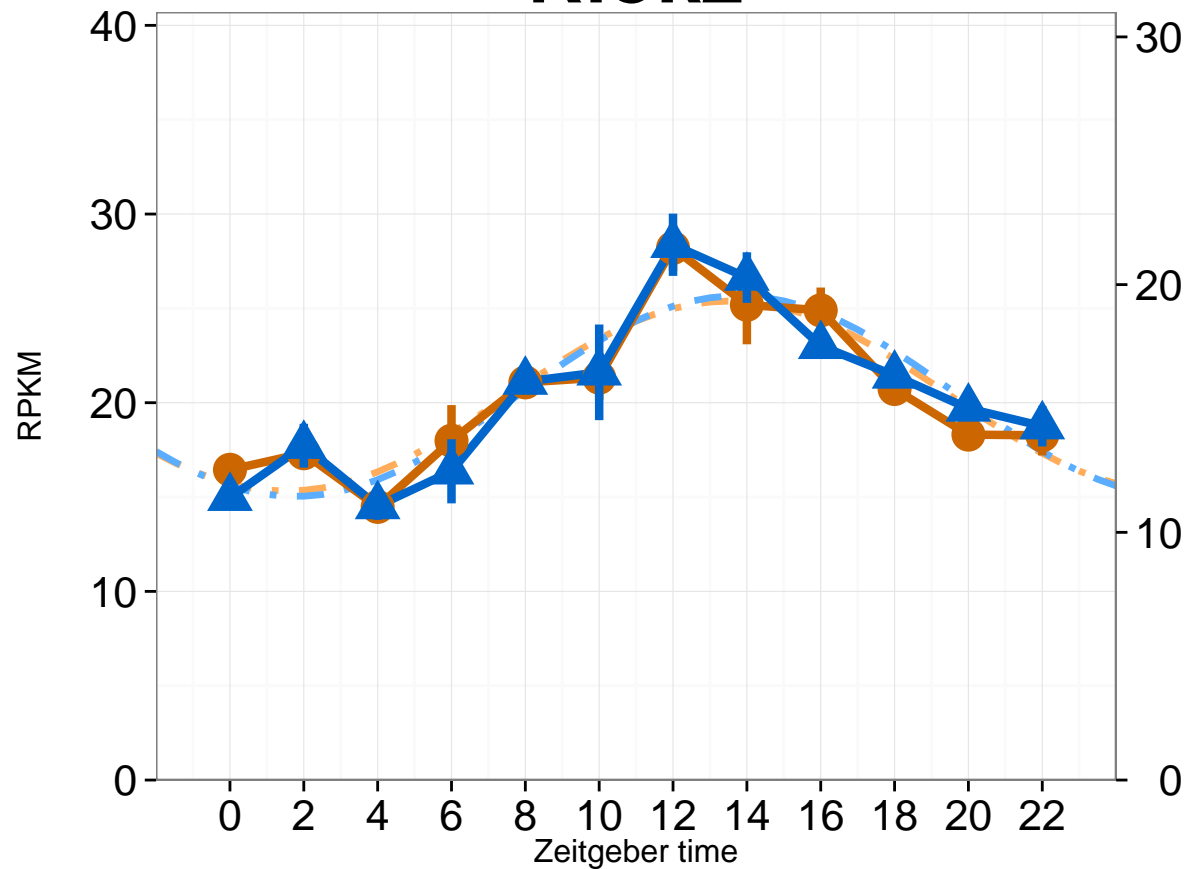

## Riok2

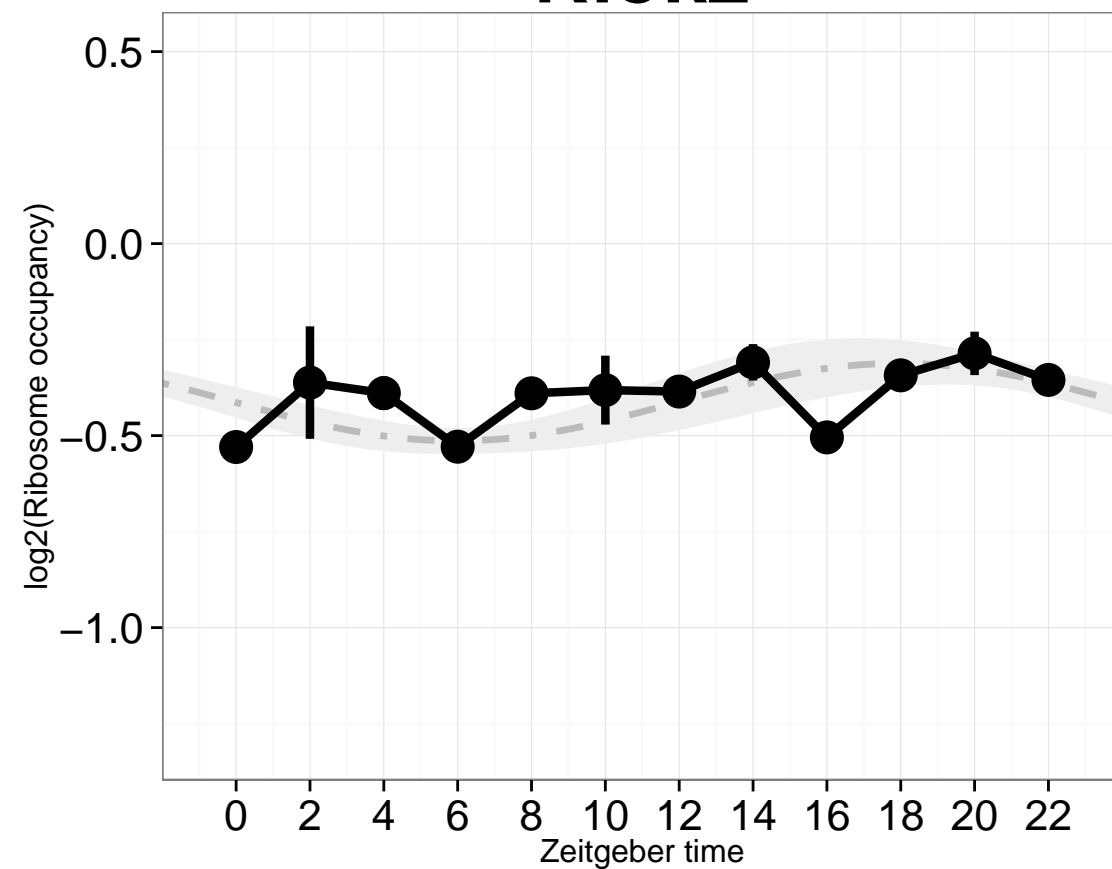

Supplement: SuppDataset_1.zip [file Riok2_set_D.pdf › Supplemental Dataset 1/D-mRNA_rhythm_translation_rhyth/Riok2_set_D.pdf]

## Ripk2

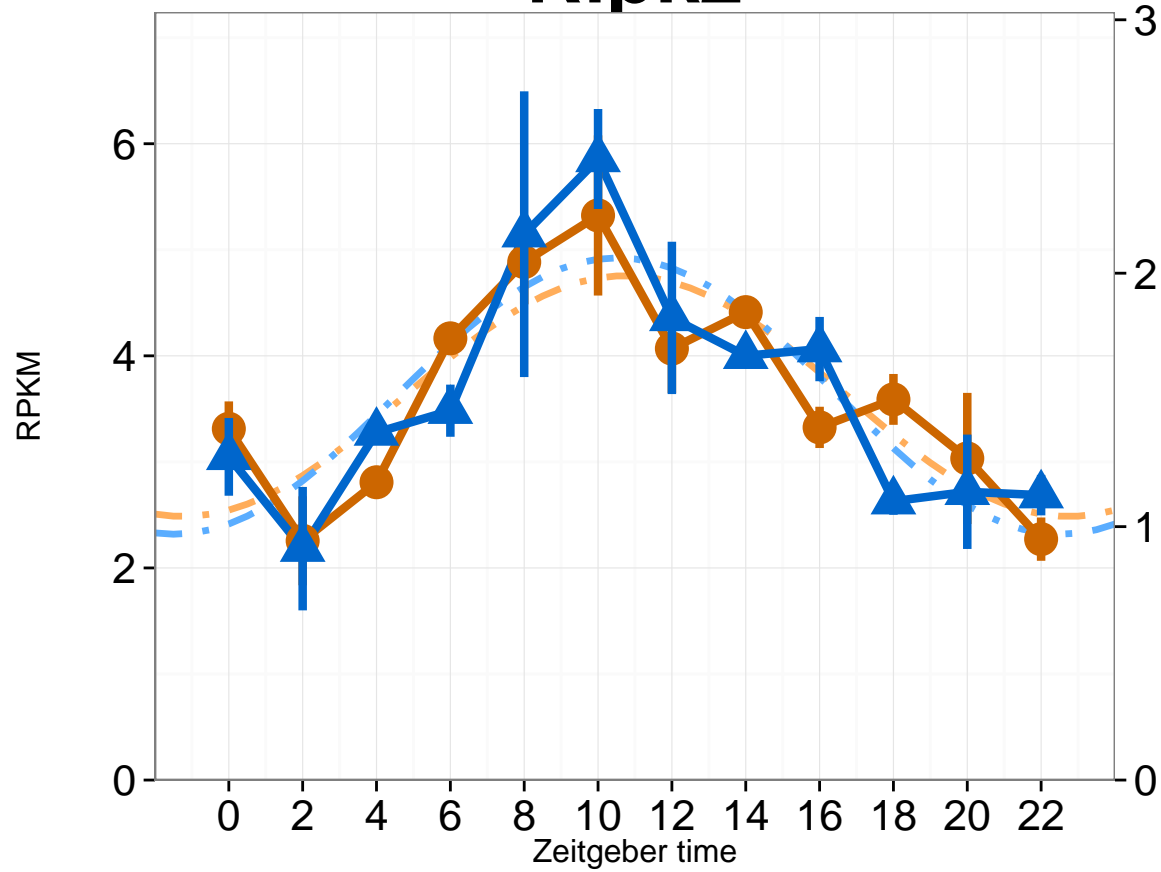

## Ripk2

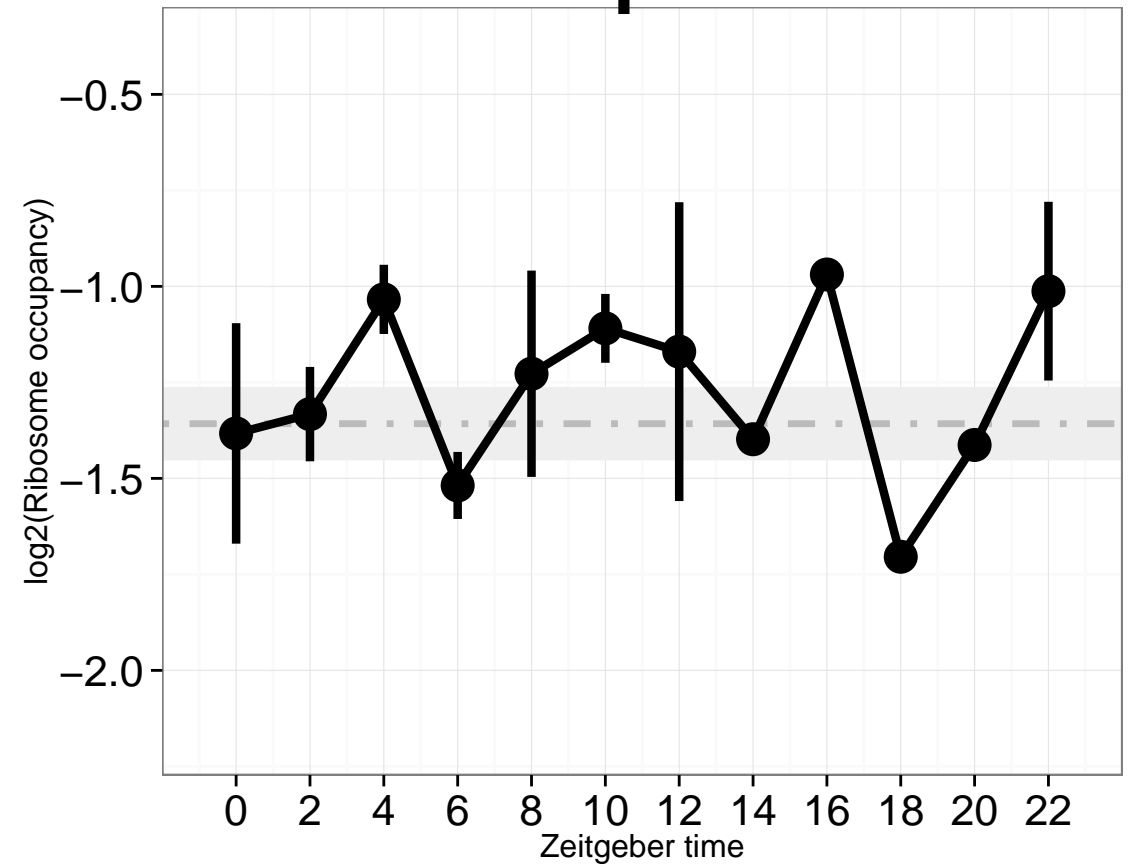

Supplement: SuppDataset_1.zip [file Ripk2_set_D.pdf › Supplemental Dataset 1/D-mRNA_rhythm_translation_rhyth/Ripk2_set_D.pdf]

## Rnase4

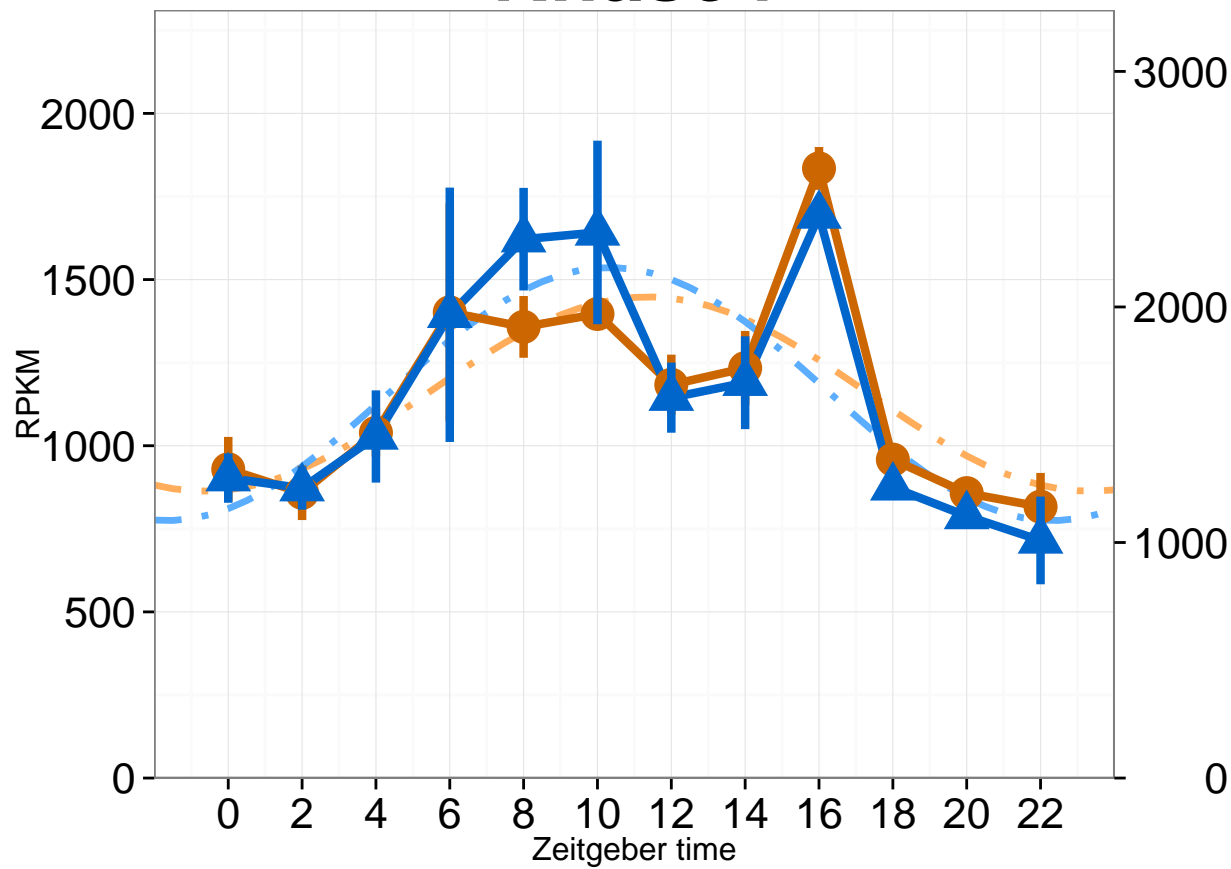

## Rnase4

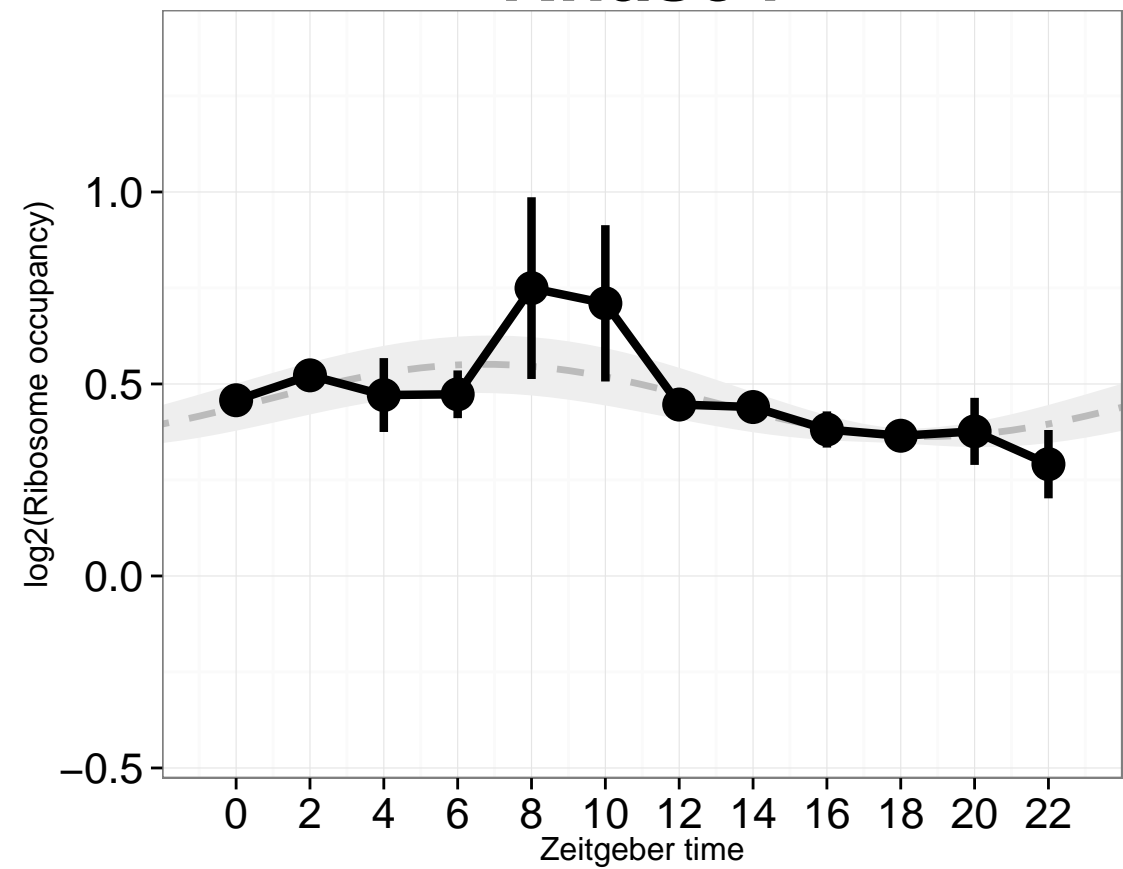

Supplement: SuppDataset_1.zip [file Rnase4_set_D.pdf › Supplemental Dataset 1/D-mRNA_rhythm_translation_rhyth/Rnase4_set_D.pdf]

# Rnaseh2b

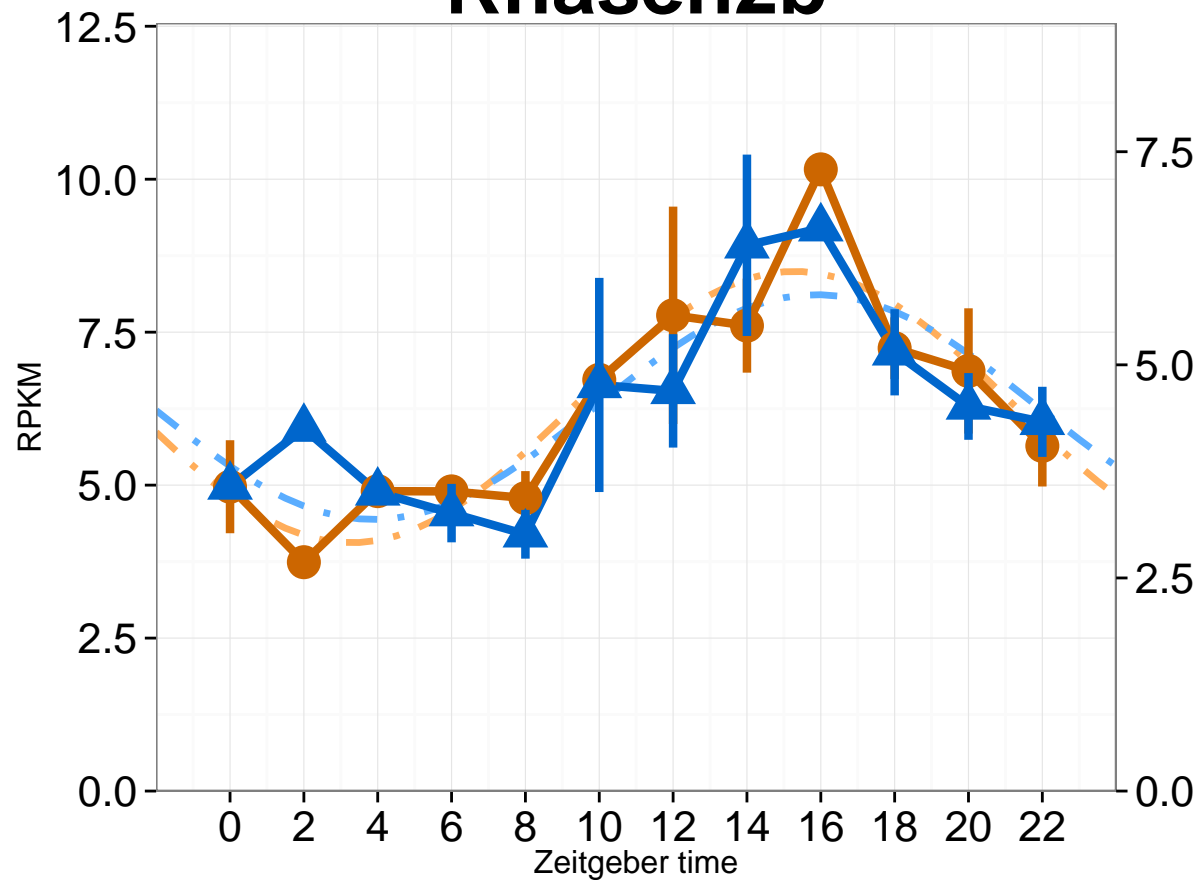

# Rnaseh2b

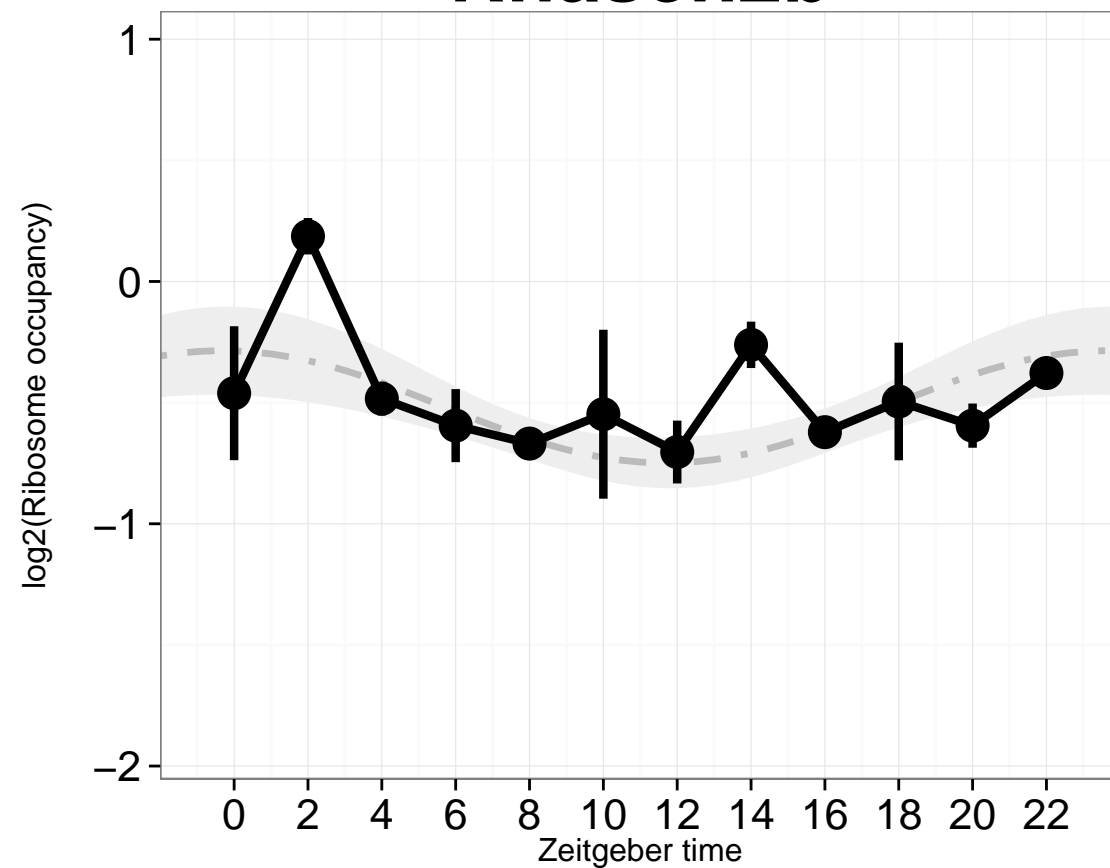

Supplement: SuppDataset_1.zip [file Rnaseh2b_set_D.pdf › Supplemental Dataset 1/D-mRNA_rhythm_translation_rhyth/Rnaseh2b_set_D.pdf]

## Rnd1

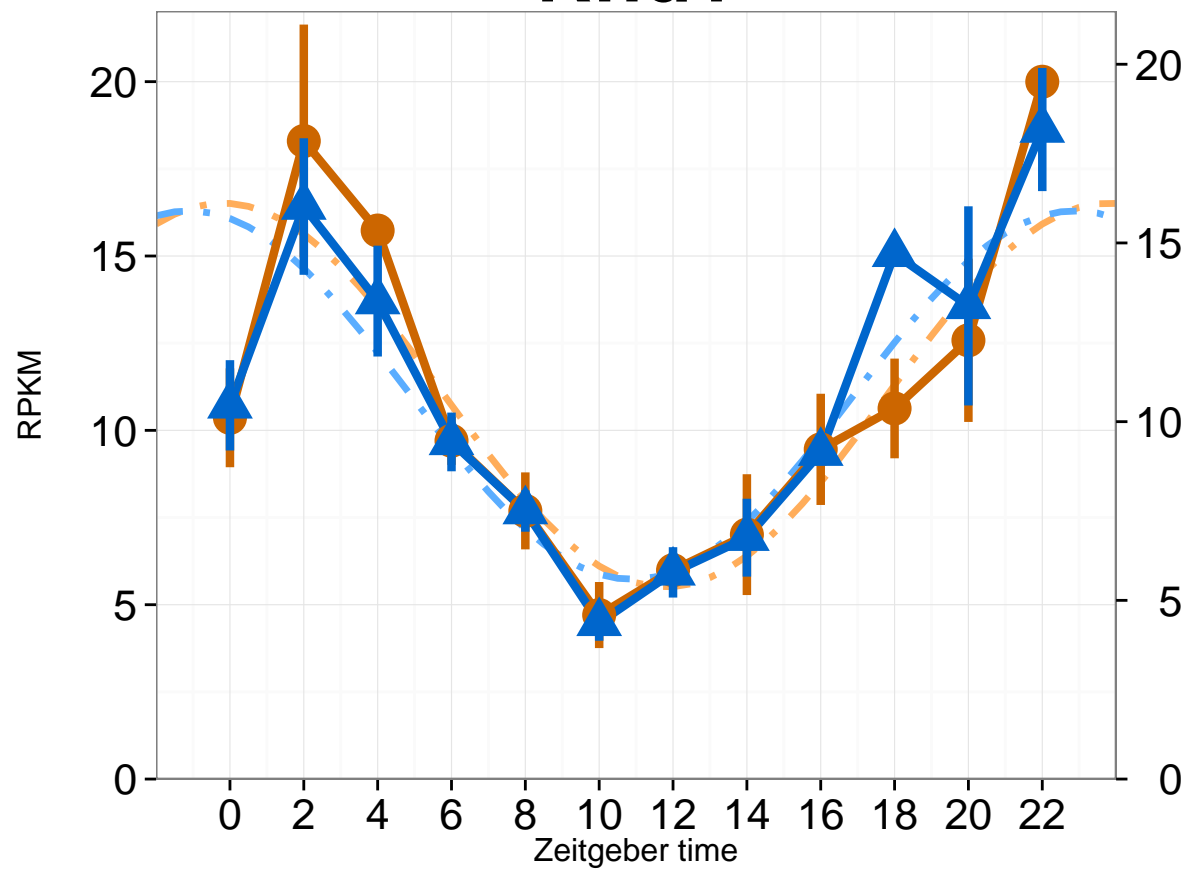

## Rnd1

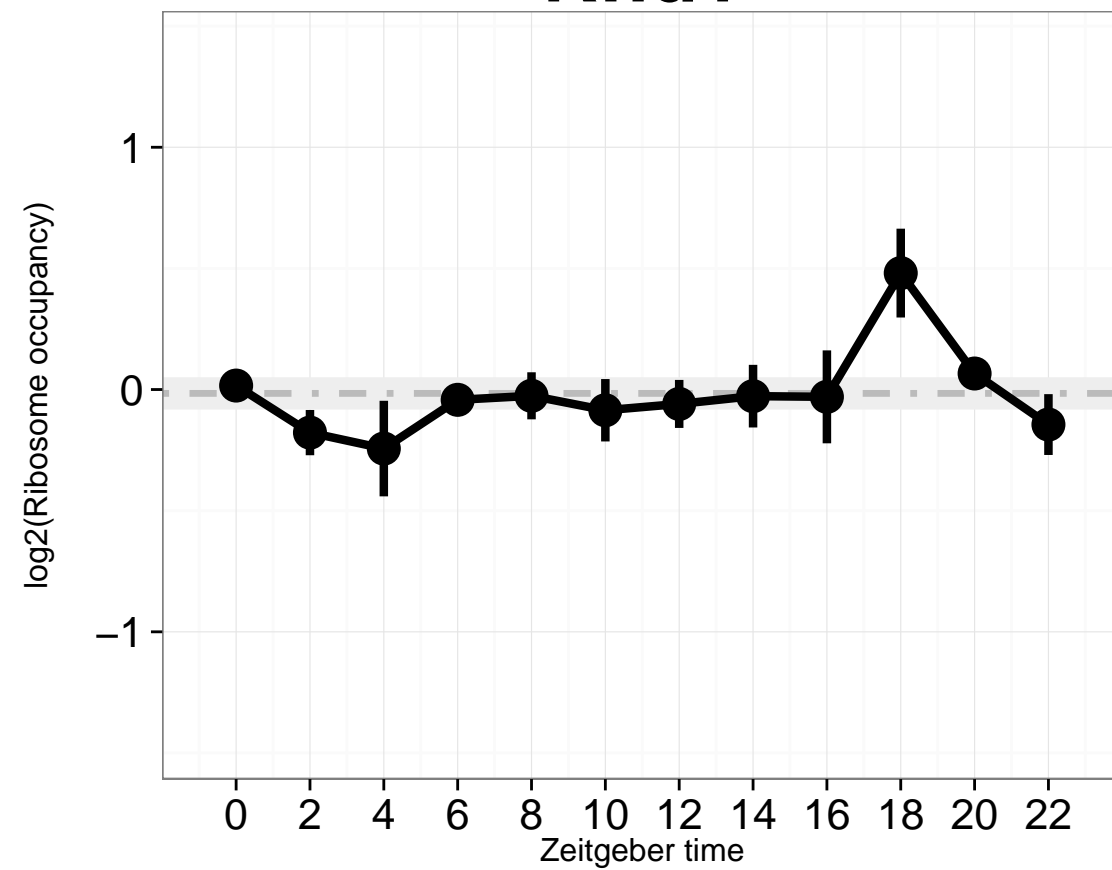

Supplement: SuppDataset_1.zip [file Rnd1_set_D.pdf › Supplemental Dataset 1/D-mRNA_rhythm_translation_rhyth/Rnd1_set_D.pdf]

# Rnf125

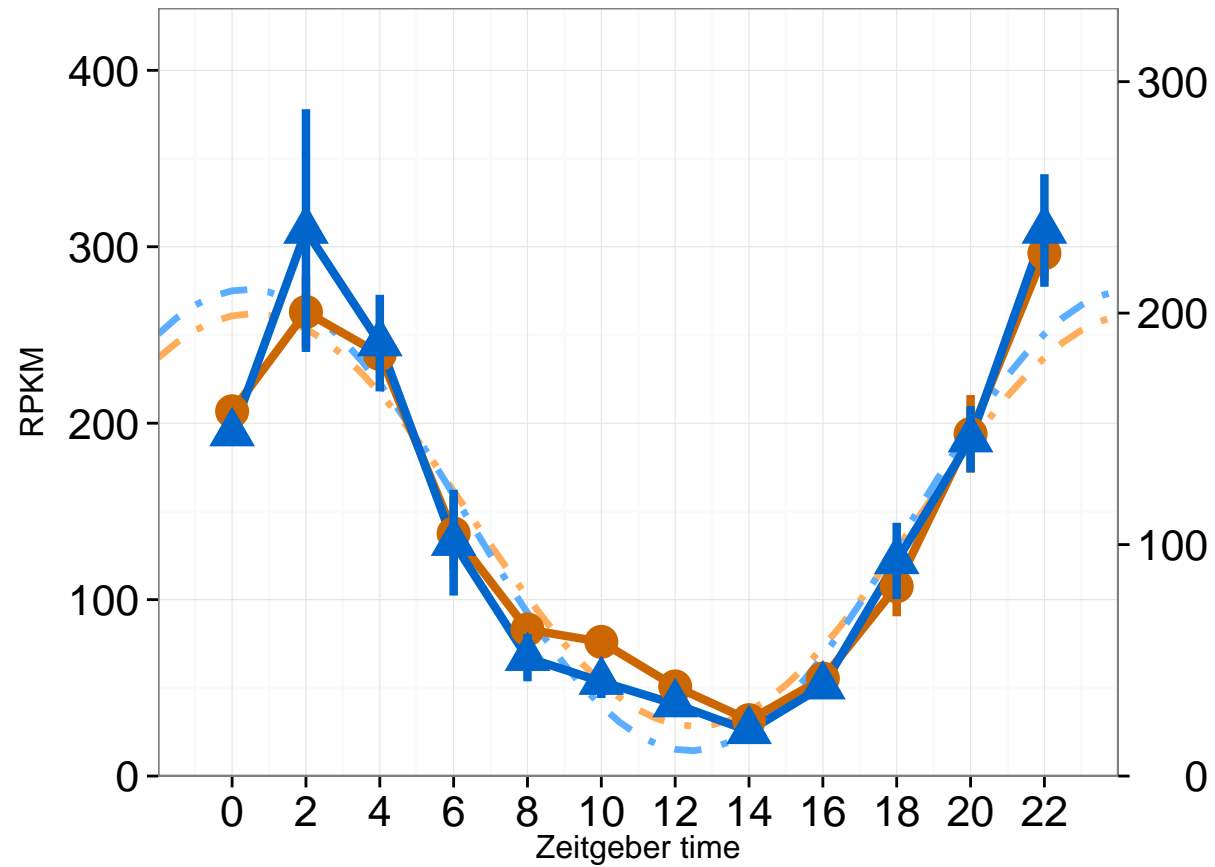

# Rnf125

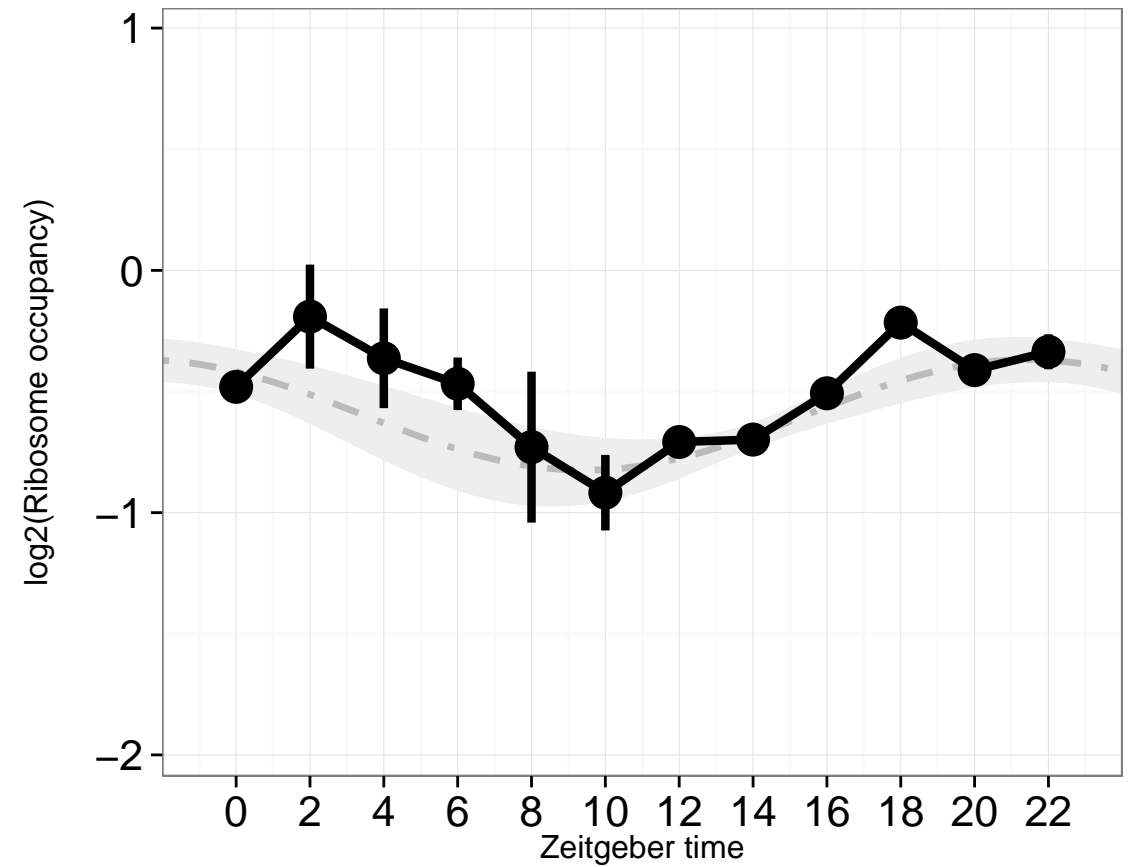

Supplement: SuppDataset_1.zip [file Rnf125_set_D.pdf › Supplemental Dataset 1/D-mRNA_rhythm_translation_rhyth/Rnf125_set_D.pdf]

# Rnf144a

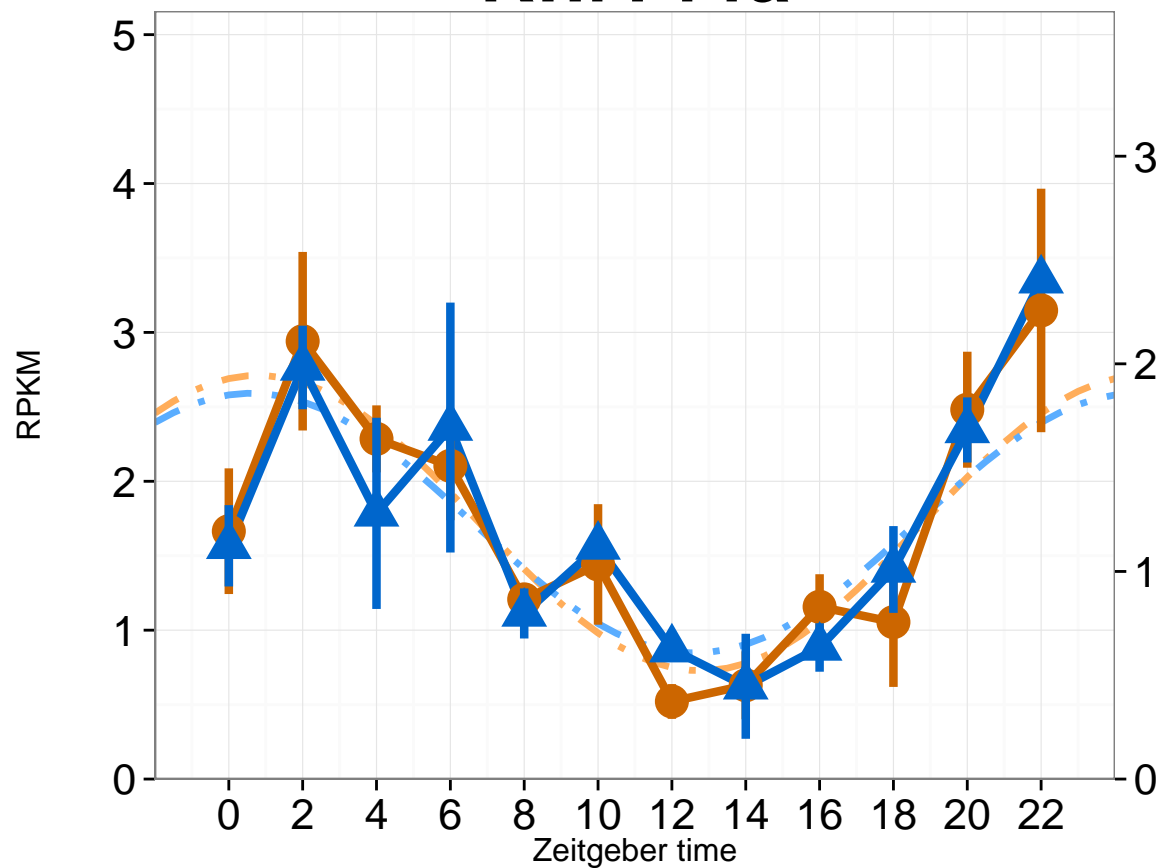

# Rnf144a

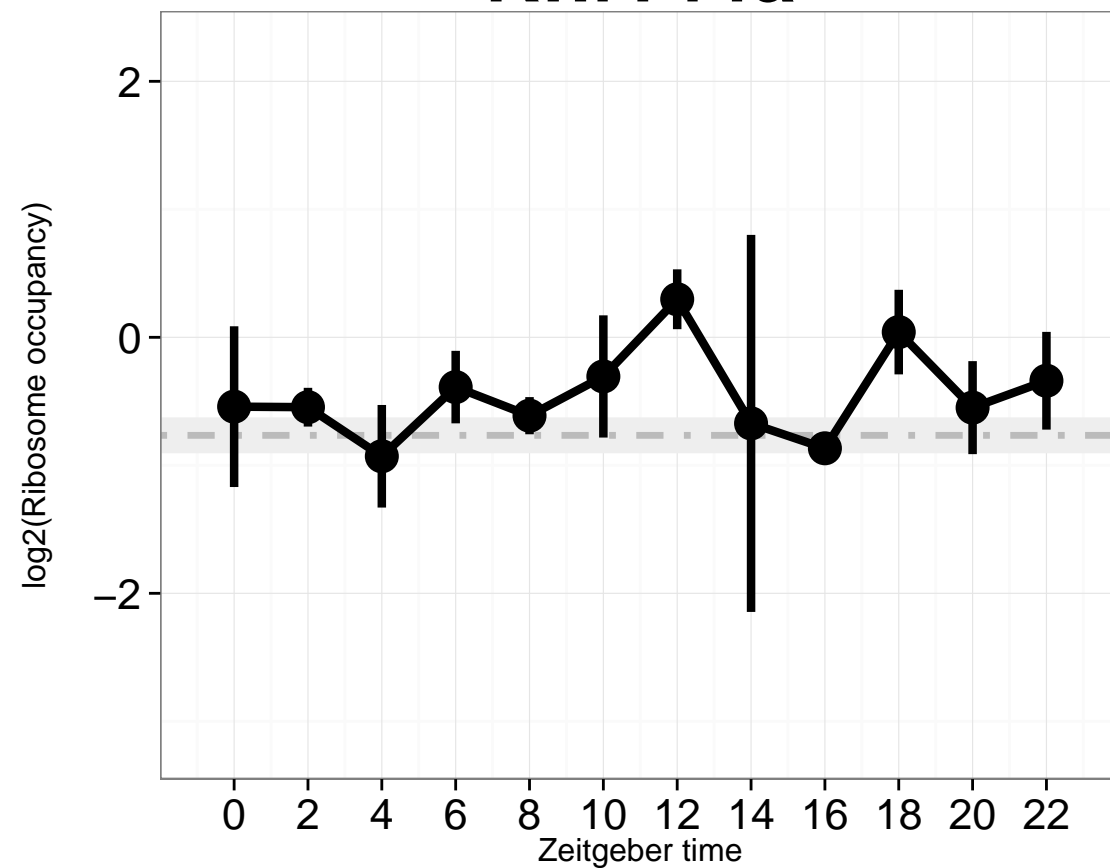

Supplement: SuppDataset_1.zip [file Rnf144a_set_D.pdf › Supplemental Dataset 1/D-mRNA_rhythm_translation_rhyth/Rnf144a_set_D.pdf]

## Rnf144b

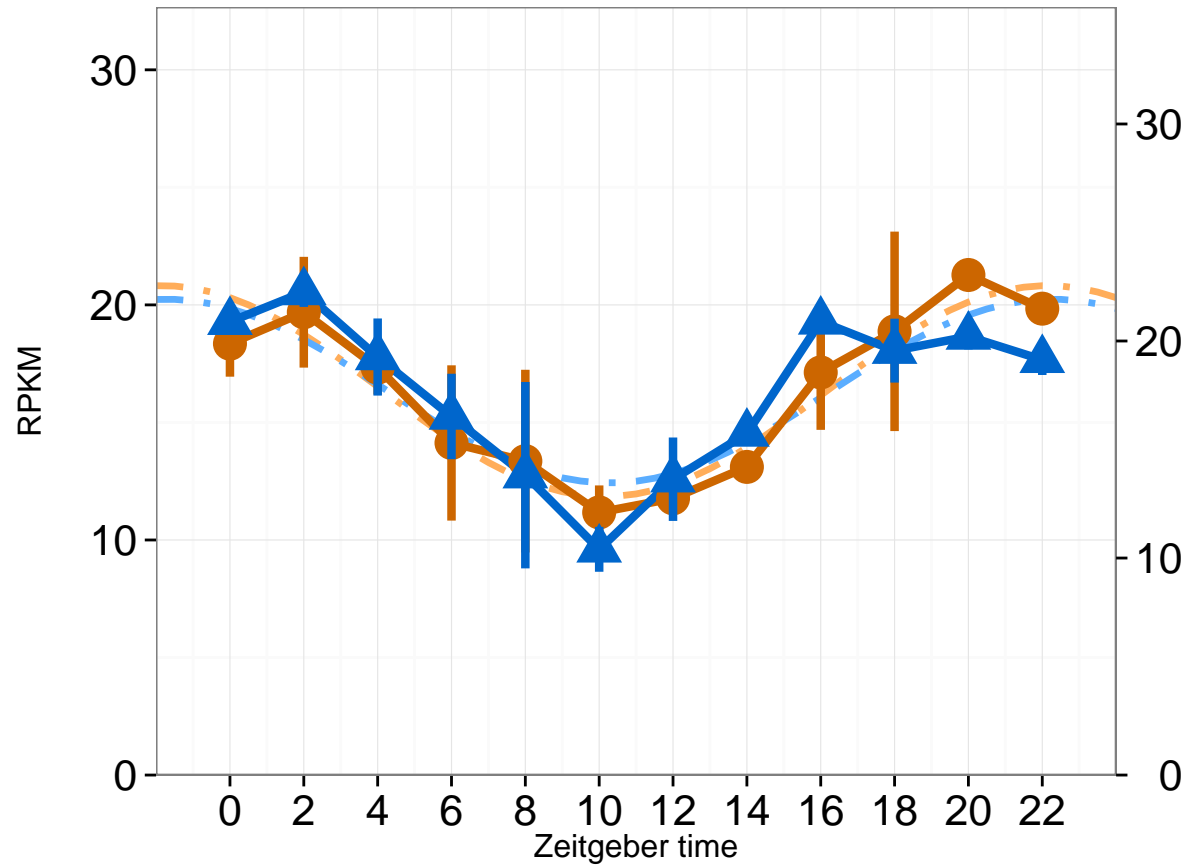

## Rnf144b

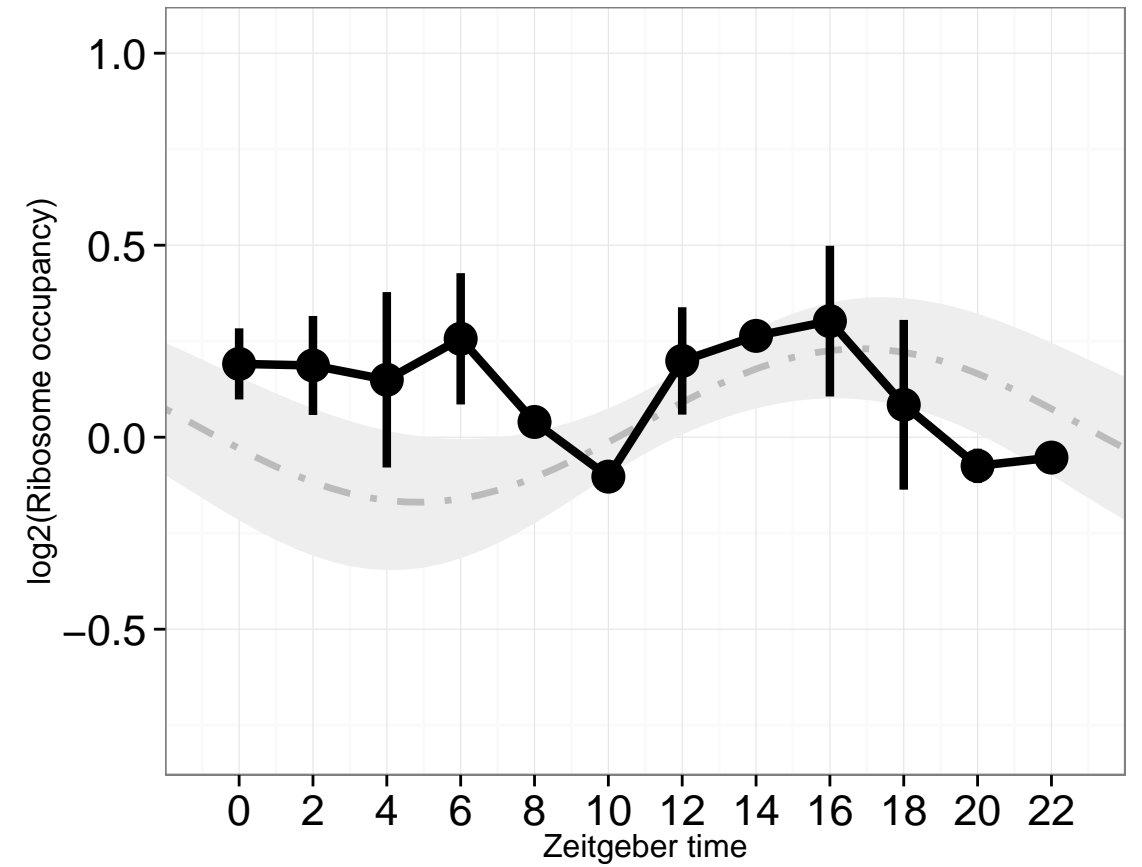

Supplement: SuppDataset_1.zip [file Rnf144b_set_D.pdf › Supplemental Dataset 1/D-mRNA_rhythm_translation_rhyth/Rnf144b_set_D.pdf]

## Rnf145

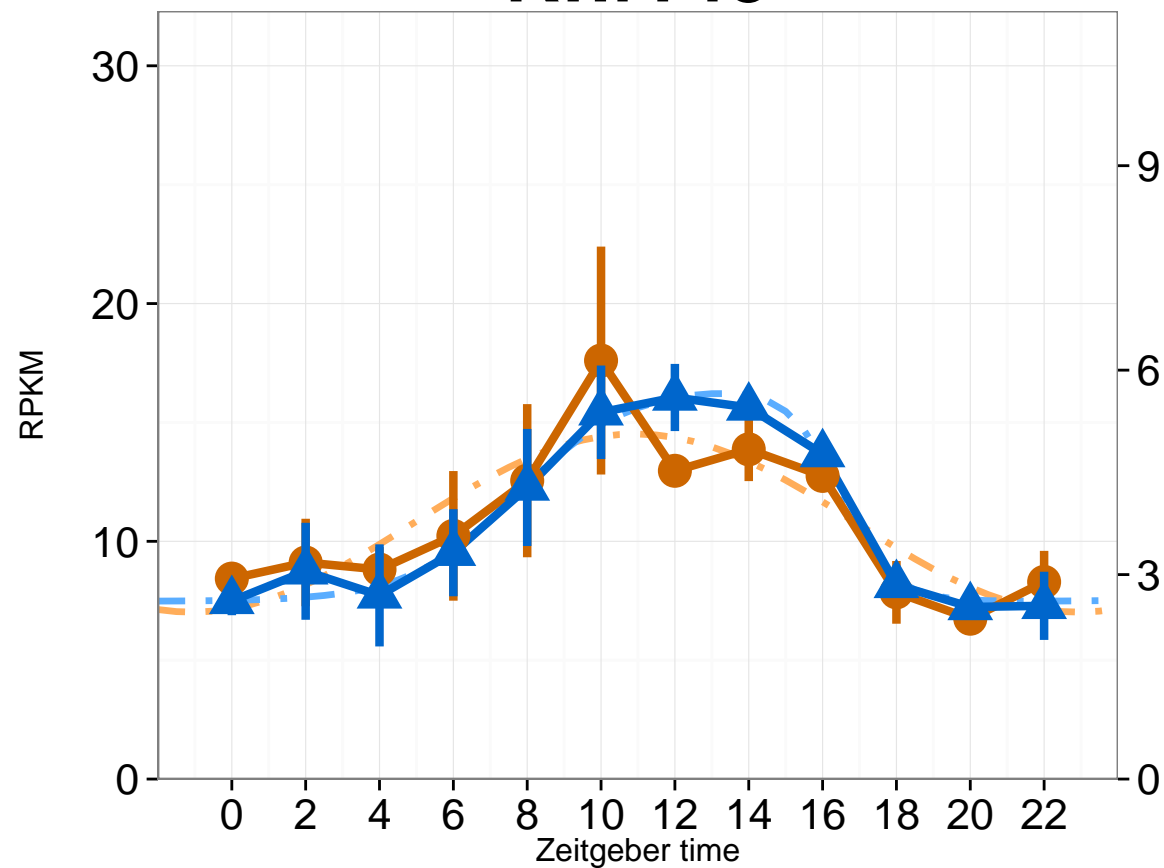

## Rnf145

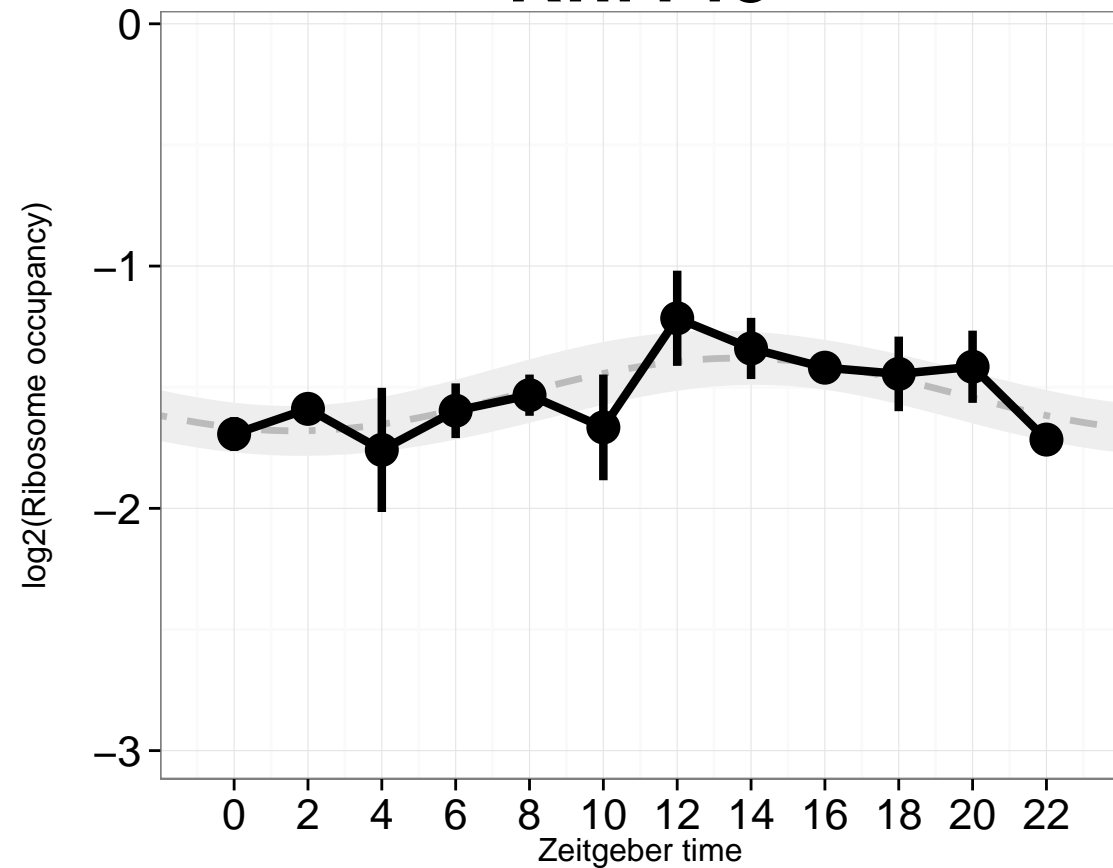

Supplement: SuppDataset_1.zip [file Rnf145_set_D.pdf › Supplemental Dataset 1/D-mRNA_rhythm_translation_rhyth/Rnf145_set_D.pdf]

# Rnf152

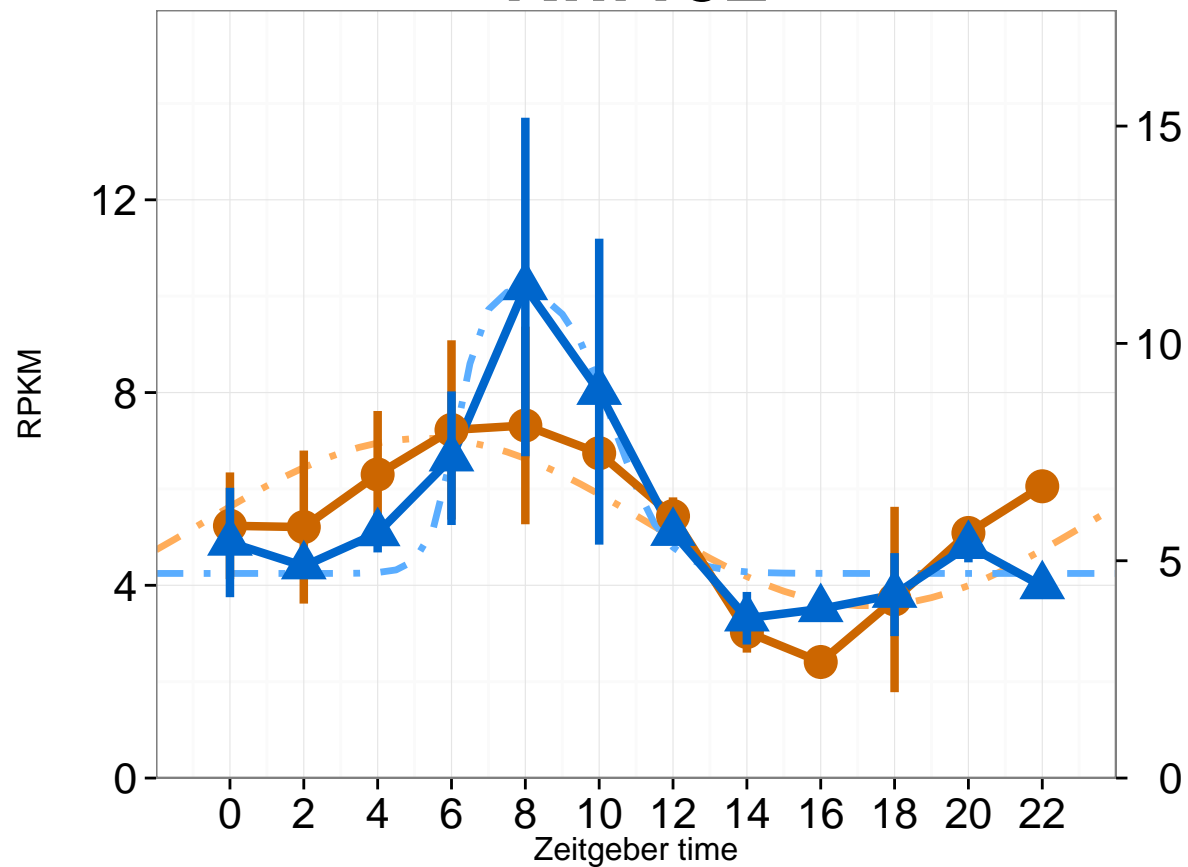

# Rnf152

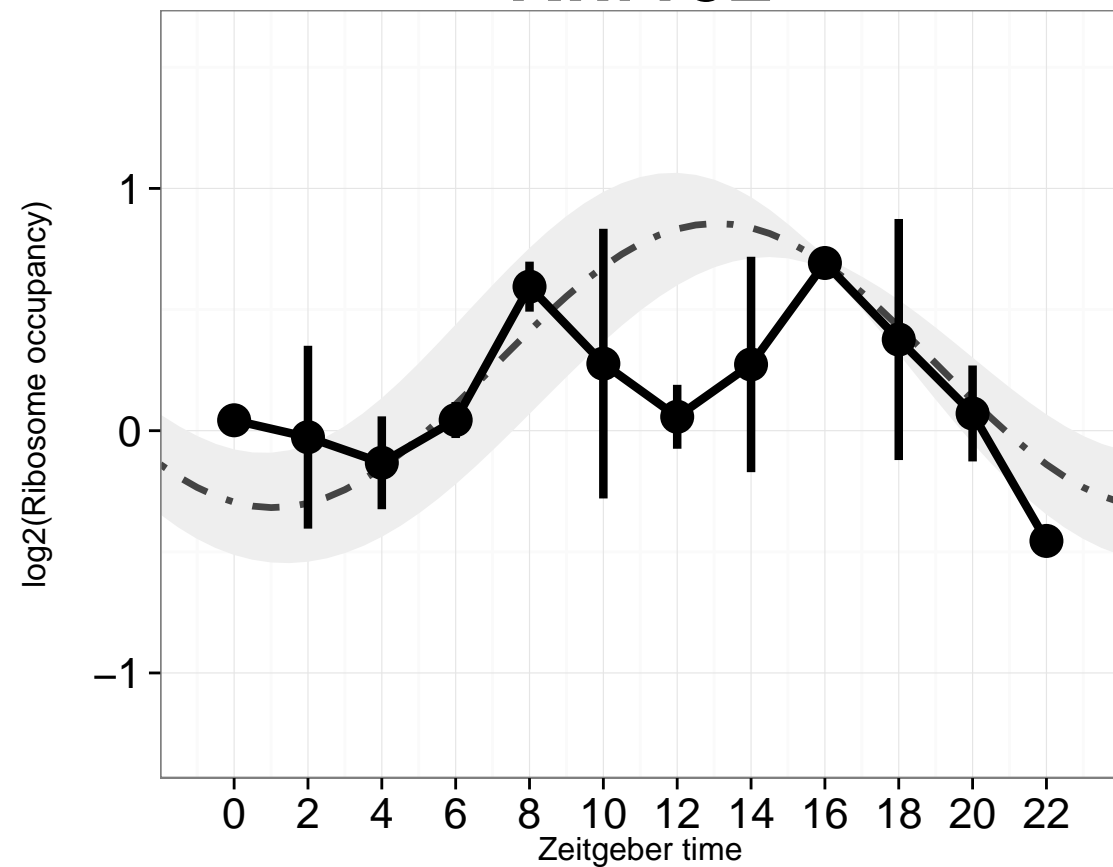

Supplement: SuppDataset_1.zip [file Rnf152_set_D.pdf › Supplemental Dataset 1/D-mRNA_rhythm_translation_rhyth/Rnf152_set_D.pdf]

# Robo1

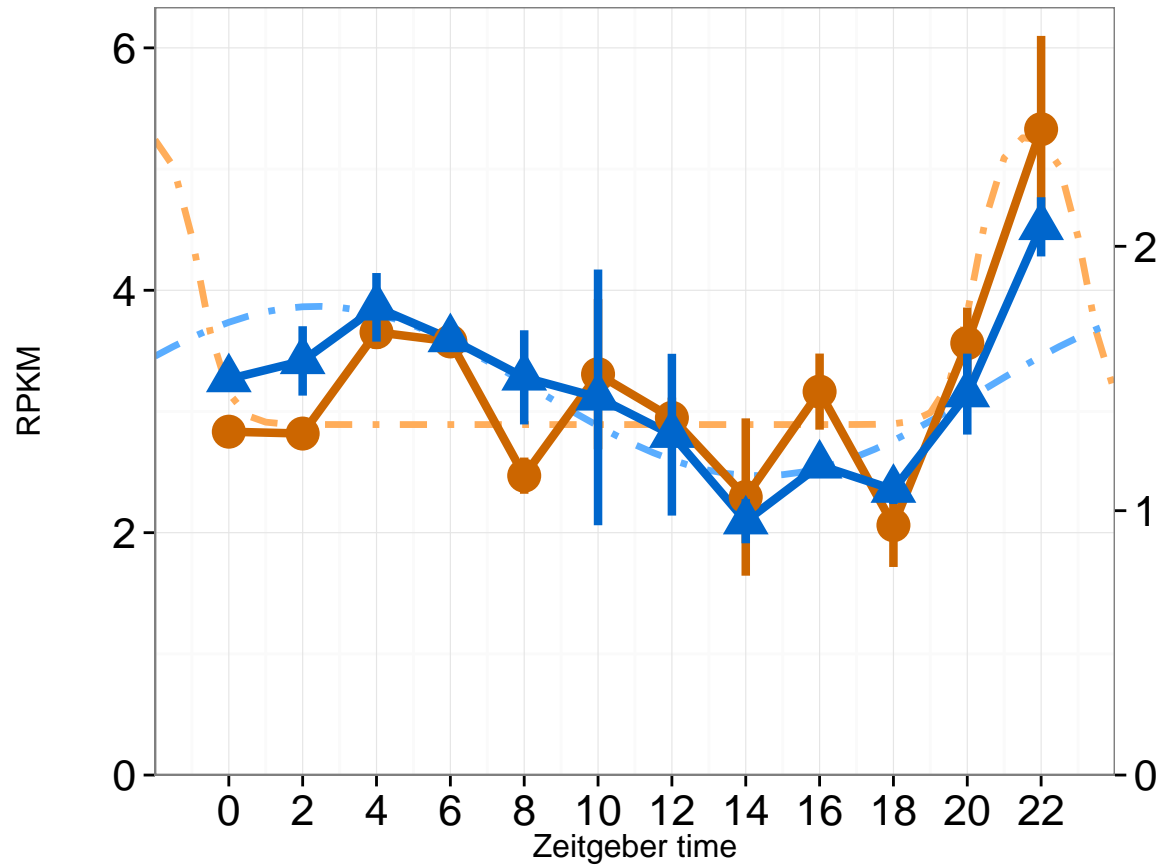

# Robo1

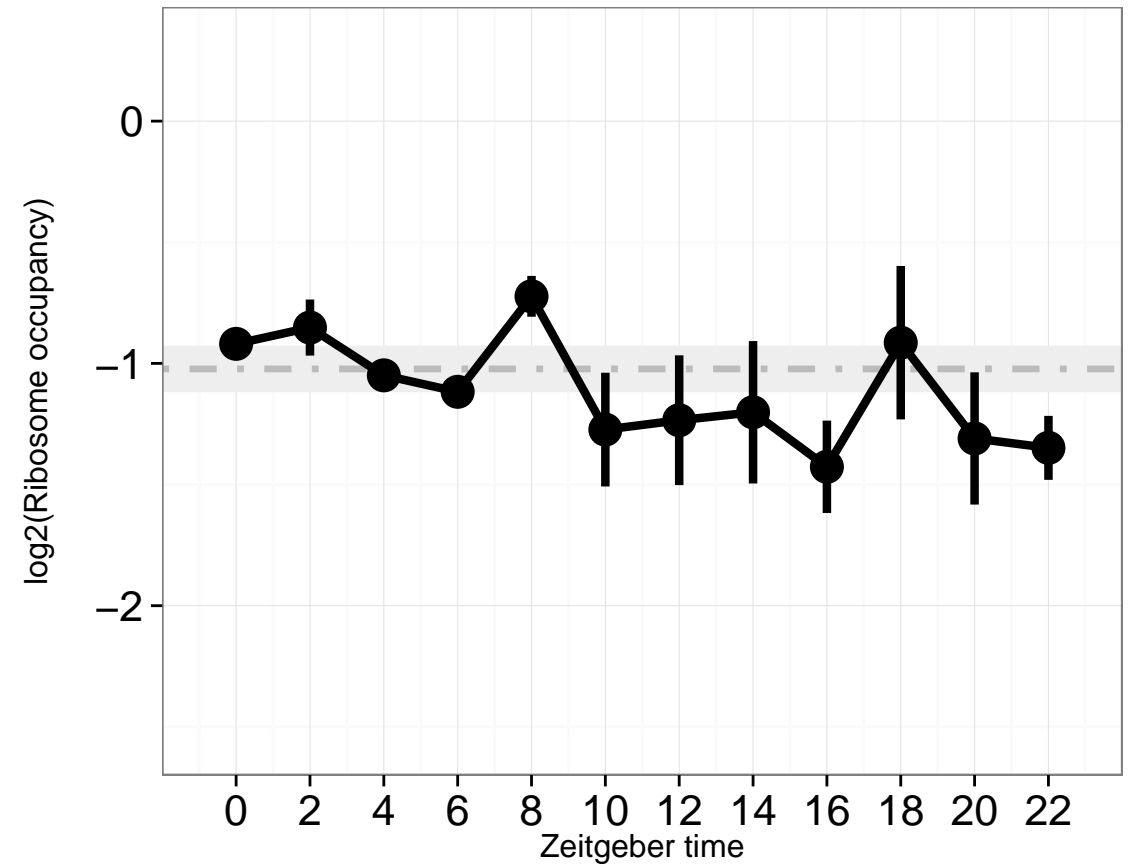

Supplement: SuppDataset_1.zip [file Robo1_set_D.pdf › Supplemental Dataset 1/D-mRNA_rhythm_translation_rhyth/Robo1_set_D.pdf]

## Rorc

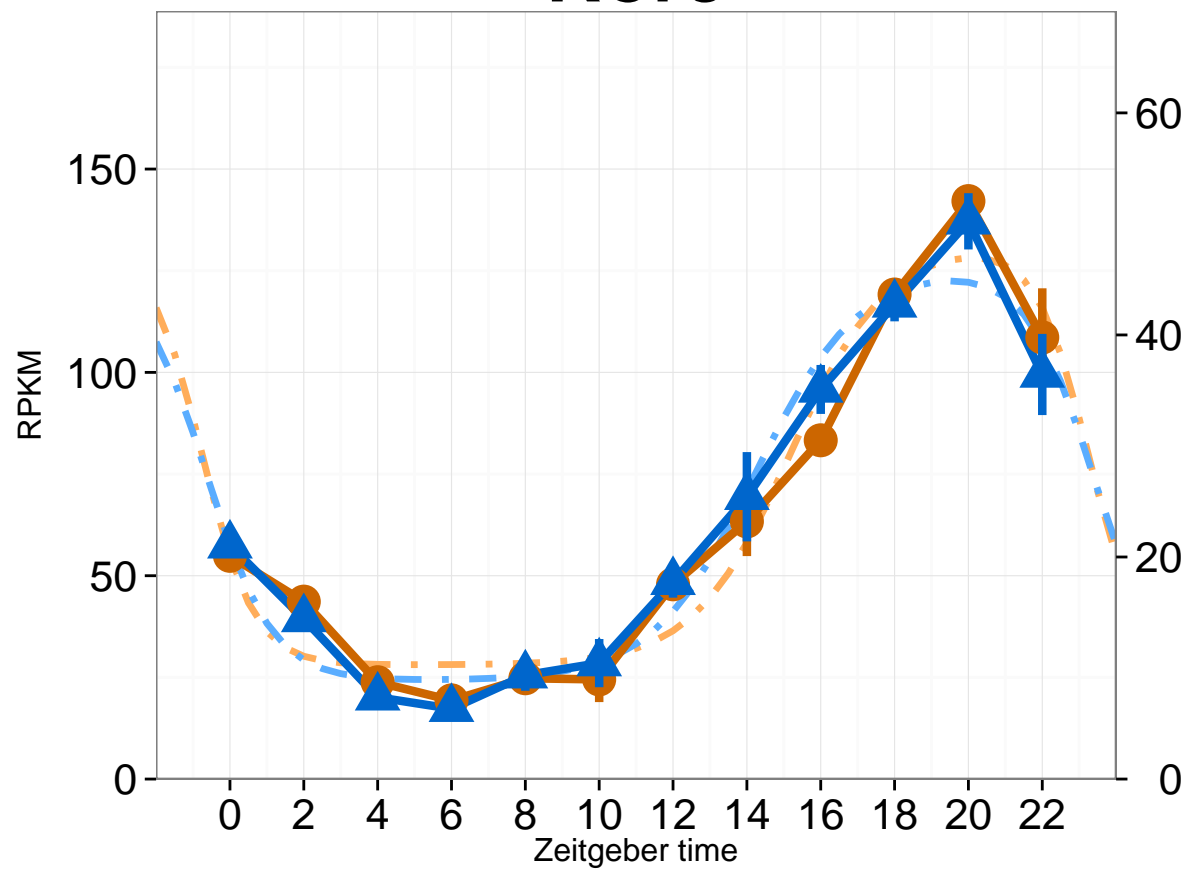

## Rorc

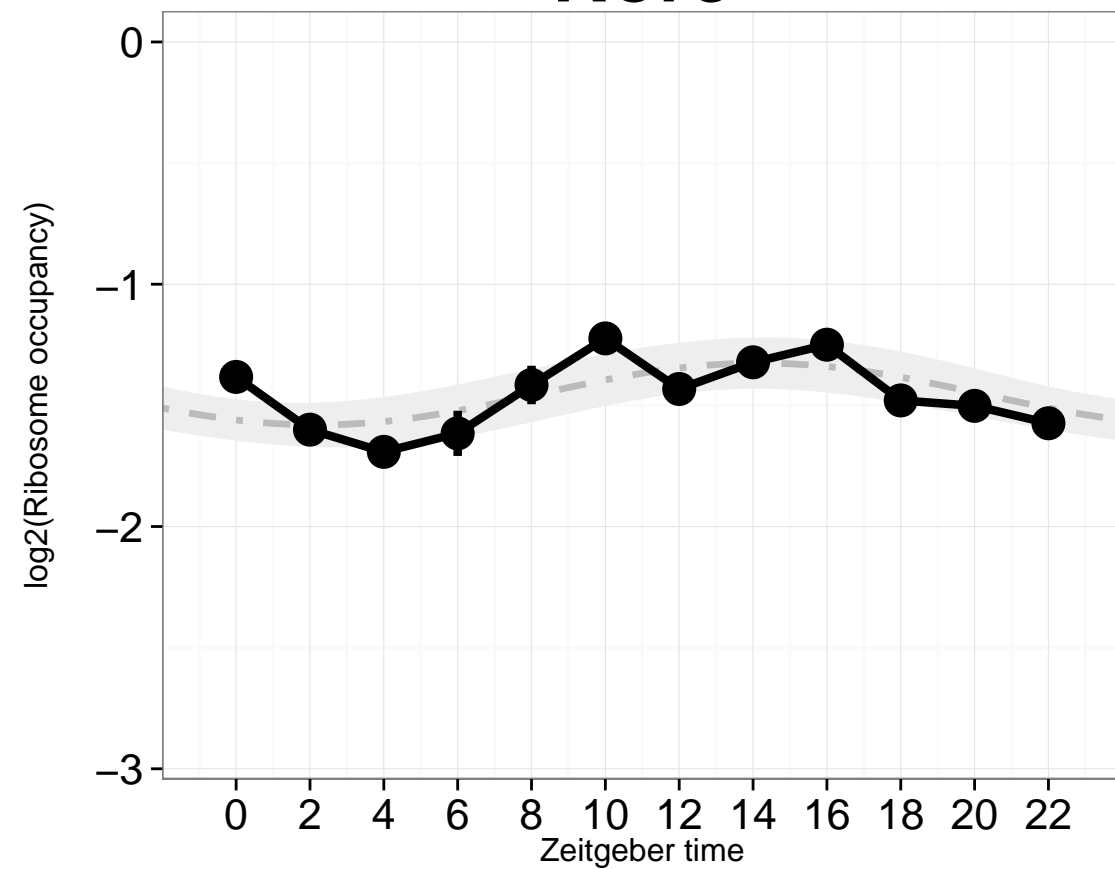

Supplement: SuppDataset_1.zip [file Rorc_set_D.pdf › Supplemental Dataset 1/D-mRNA_rhythm_translation_rhyth/Rorc_set_D.pdf]

## Rpl39

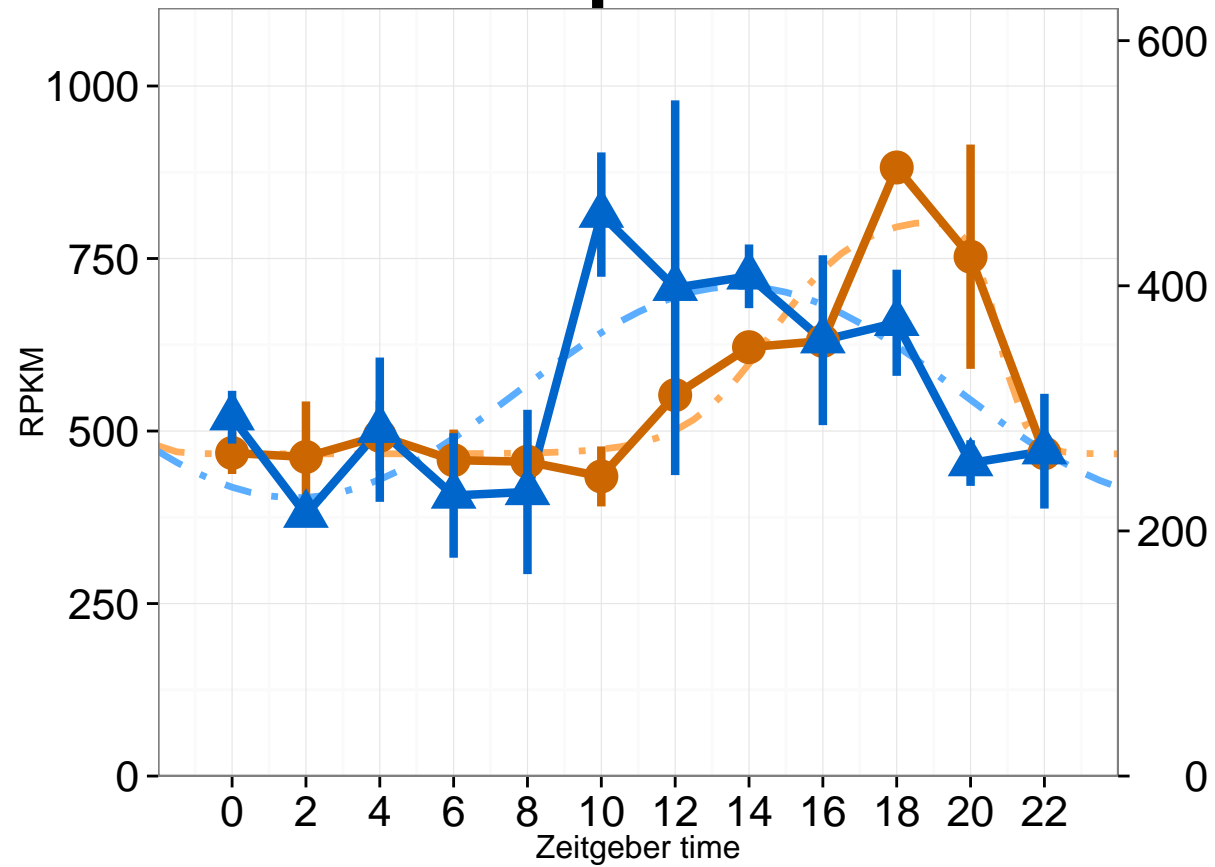

## Rpl39

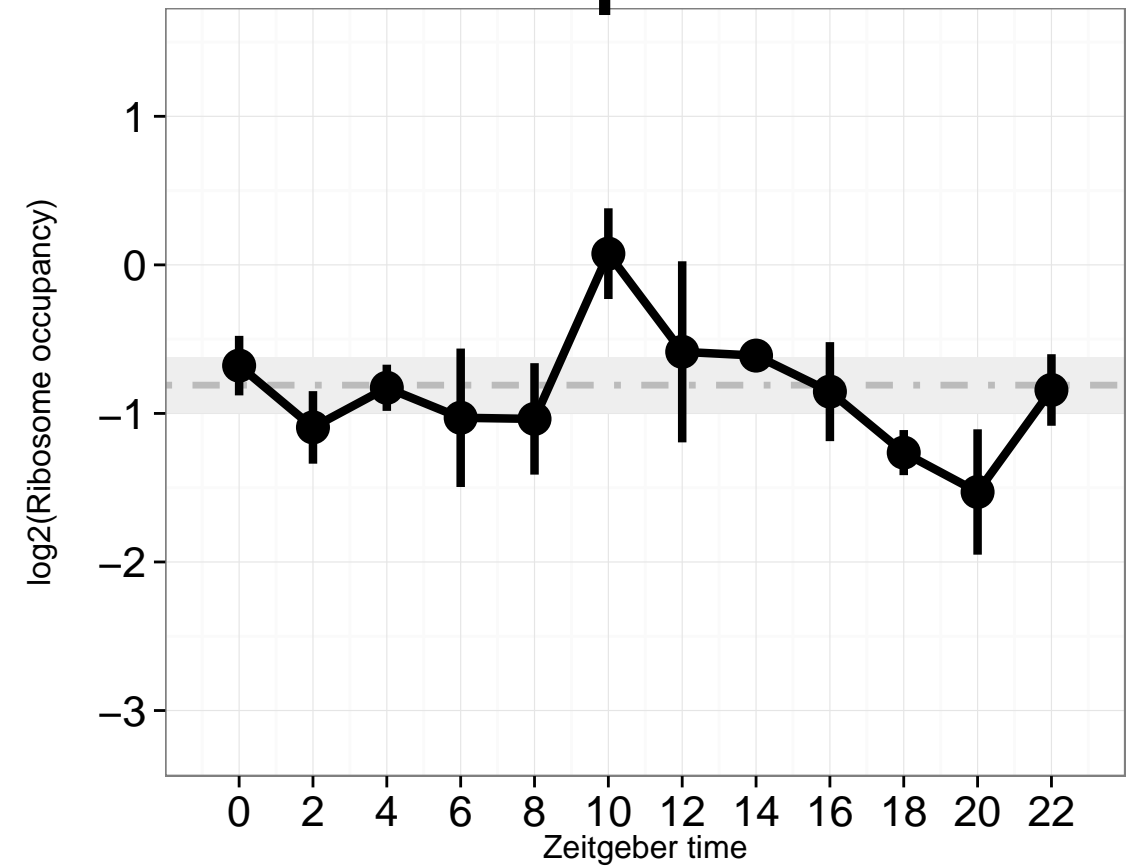

Supplement: SuppDataset_1.zip [file Rpl39_set_D.pdf › Supplemental Dataset 1/D-mRNA_rhythm_translation_rhyth/Rpl39_set_D.pdf]

# Rpl41

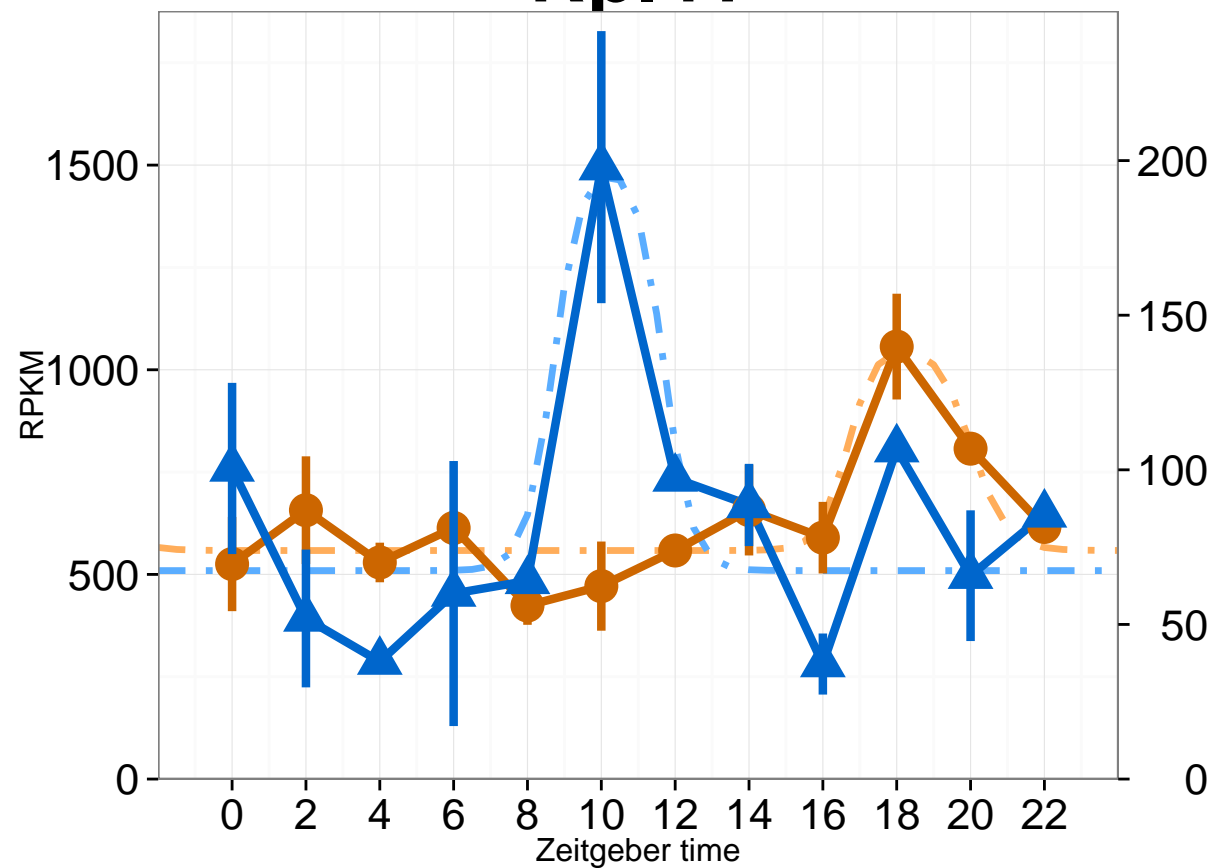

# Rpl41

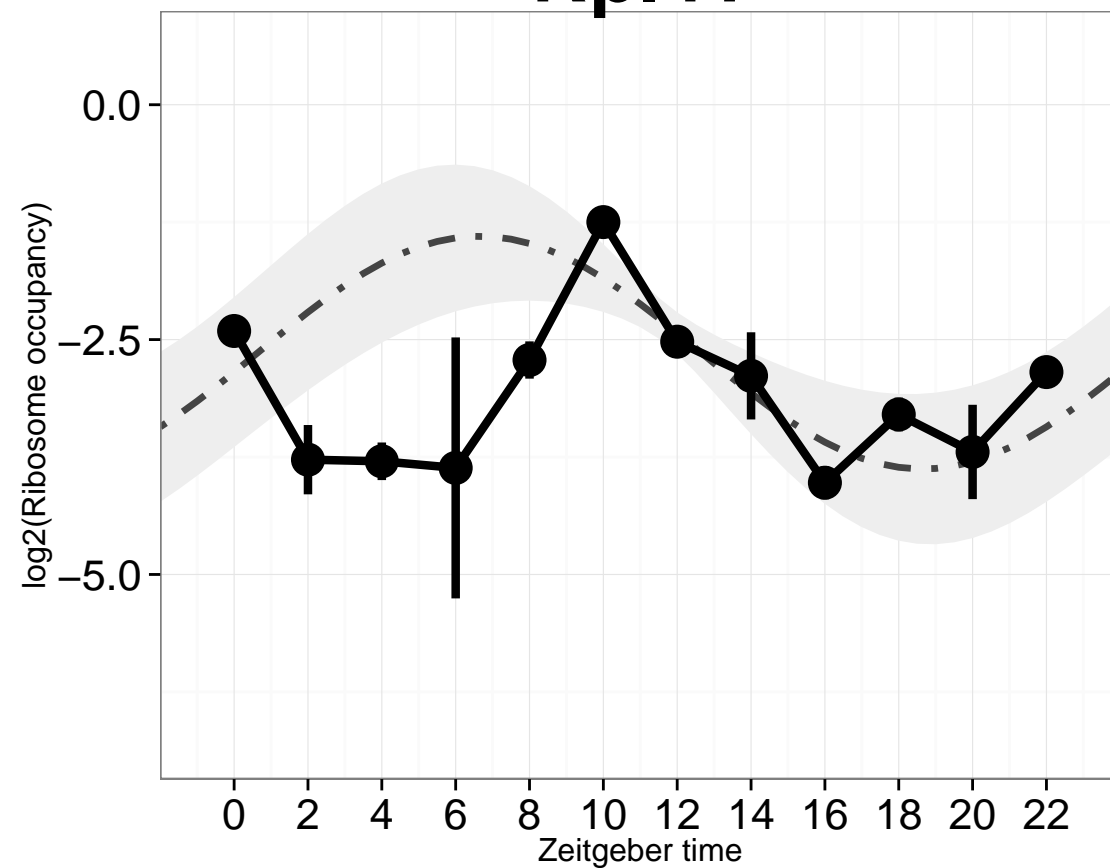

Supplement: SuppDataset_1.zip [file Rpl41_set_D.pdf › Supplemental Dataset 1/D-mRNA_rhythm_translation_rhyth/Rpl41_set_D.pdf]

# Rps13

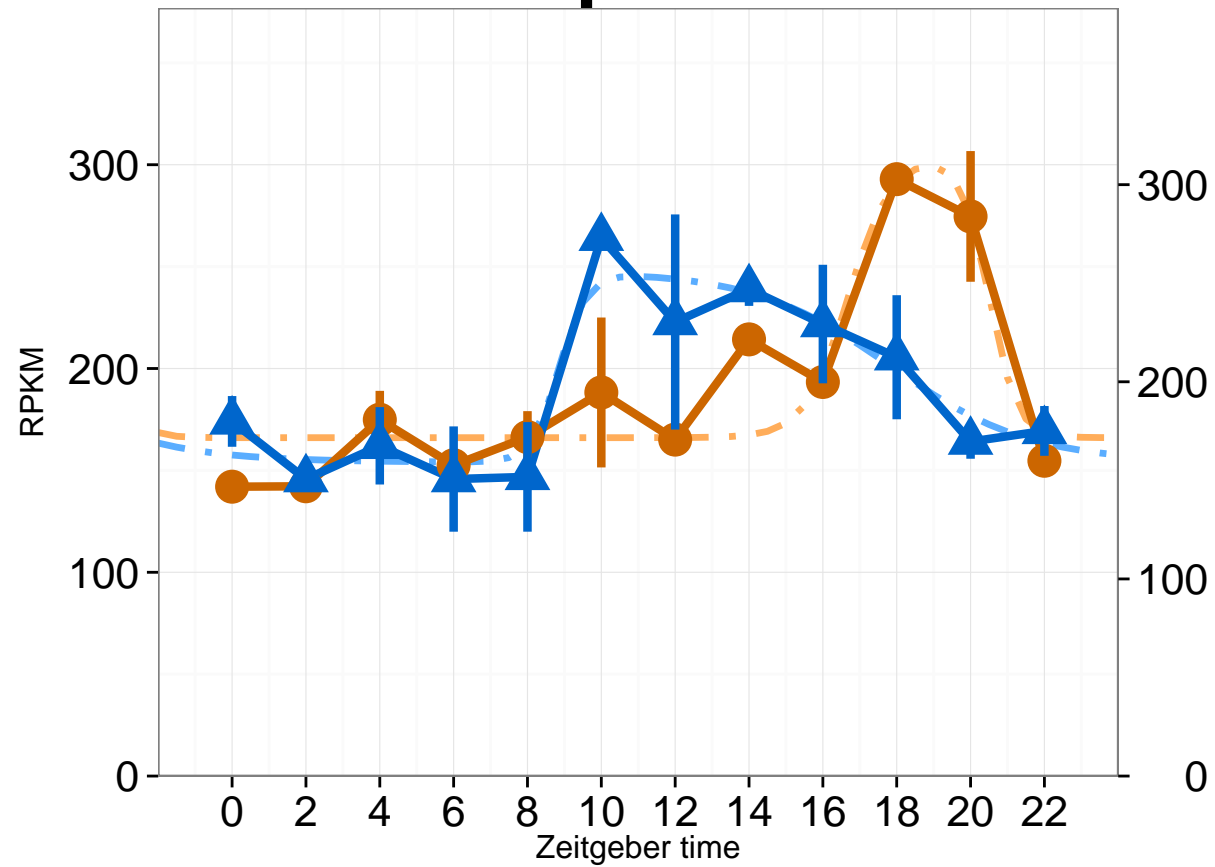

# Rps13

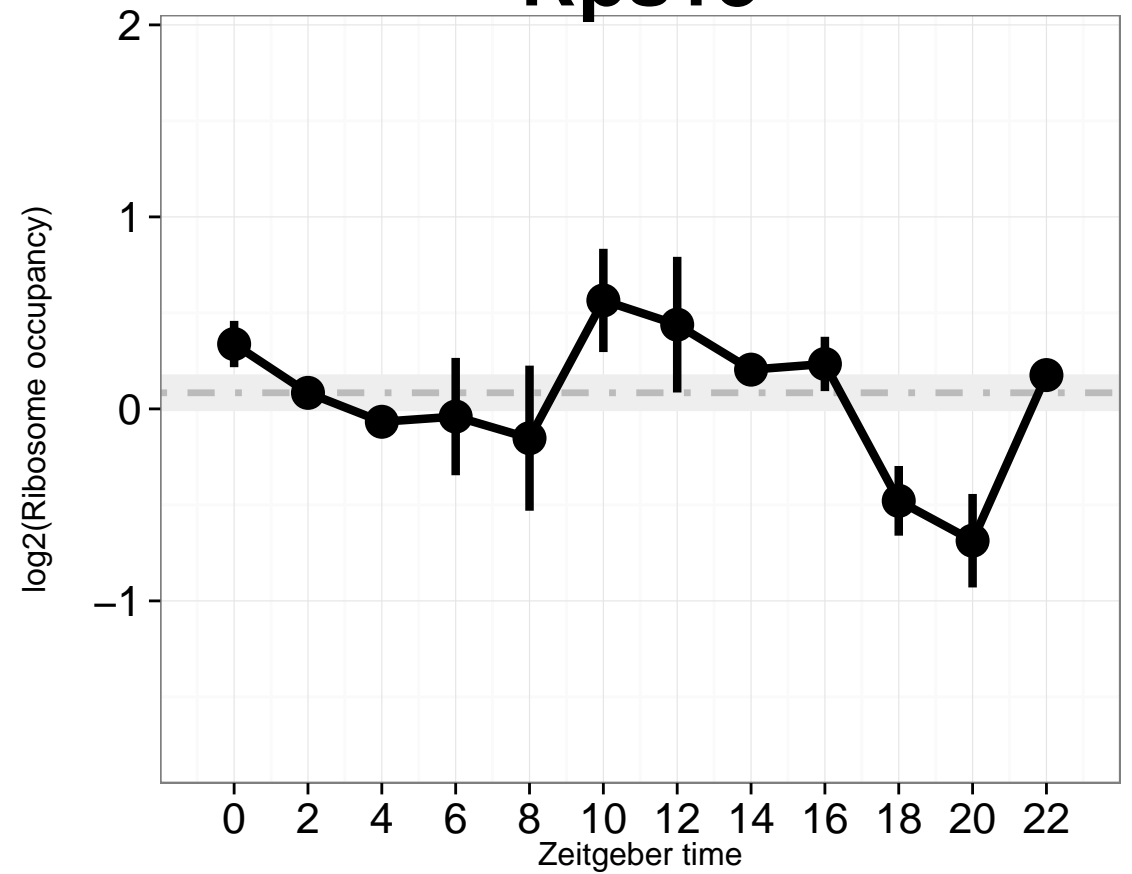

Supplement: SuppDataset_1.zip [file Rps13_set_D.pdf › Supplemental Dataset 1/D-mRNA_rhythm_translation_rhyth/Rps13_set_D.pdf]

# Rps15a

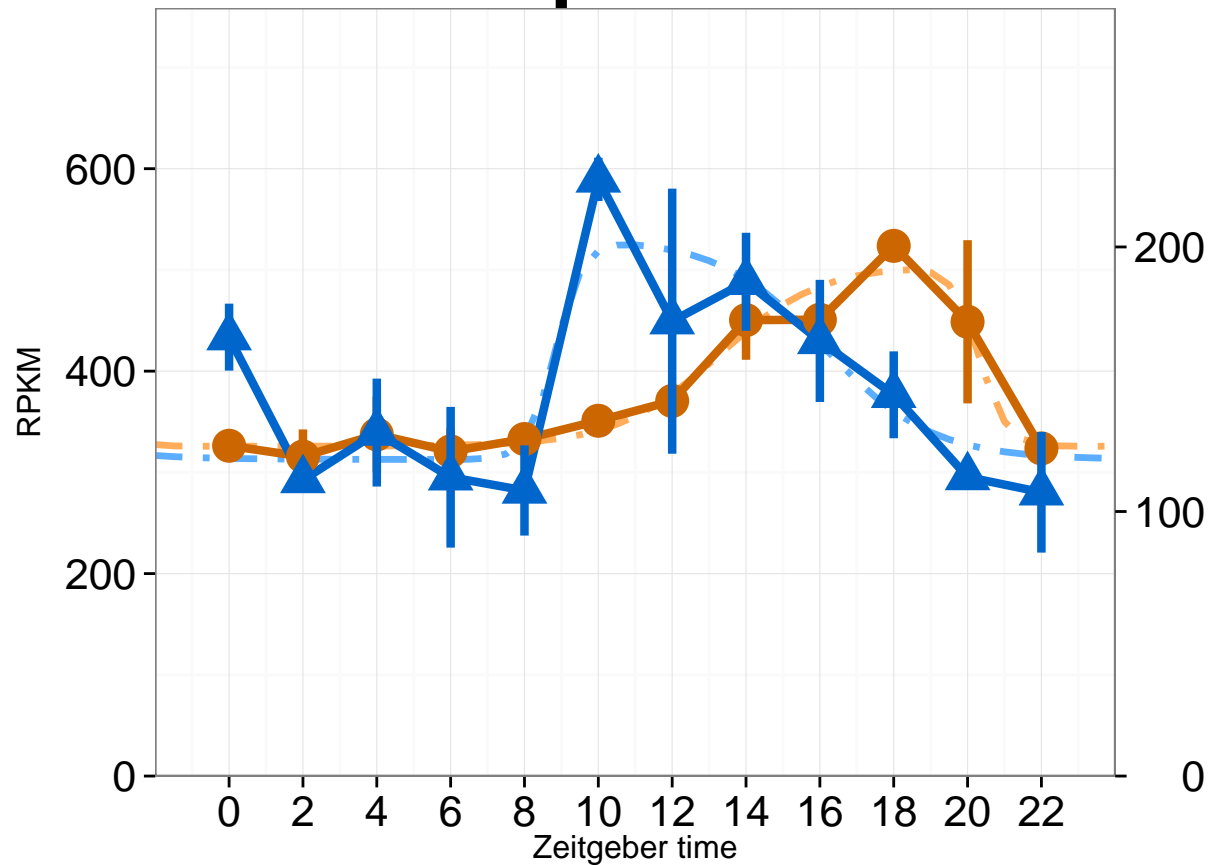

# Rps15a

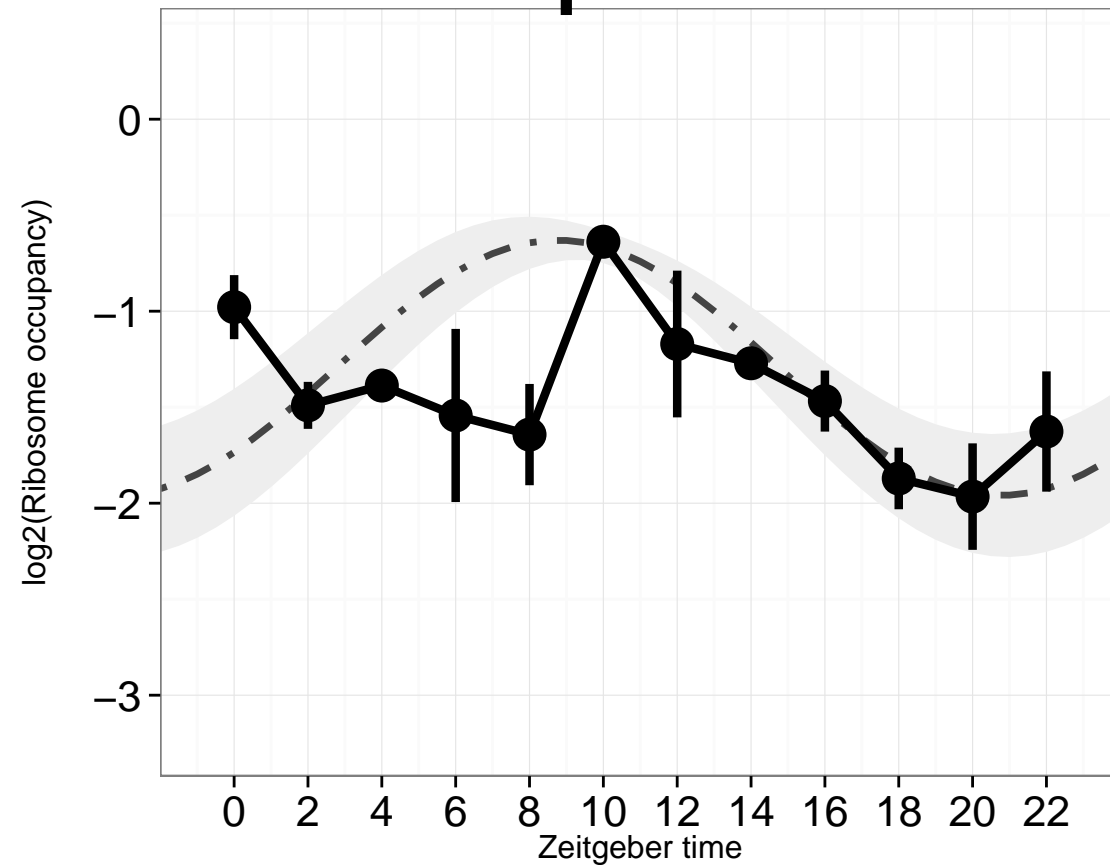

Supplement: SuppDataset_1.zip [file Rps15a_set_D.pdf › Supplemental Dataset 1/D-mRNA_rhythm_translation_rhyth/Rps15a_set_D.pdf]

## Rrm2

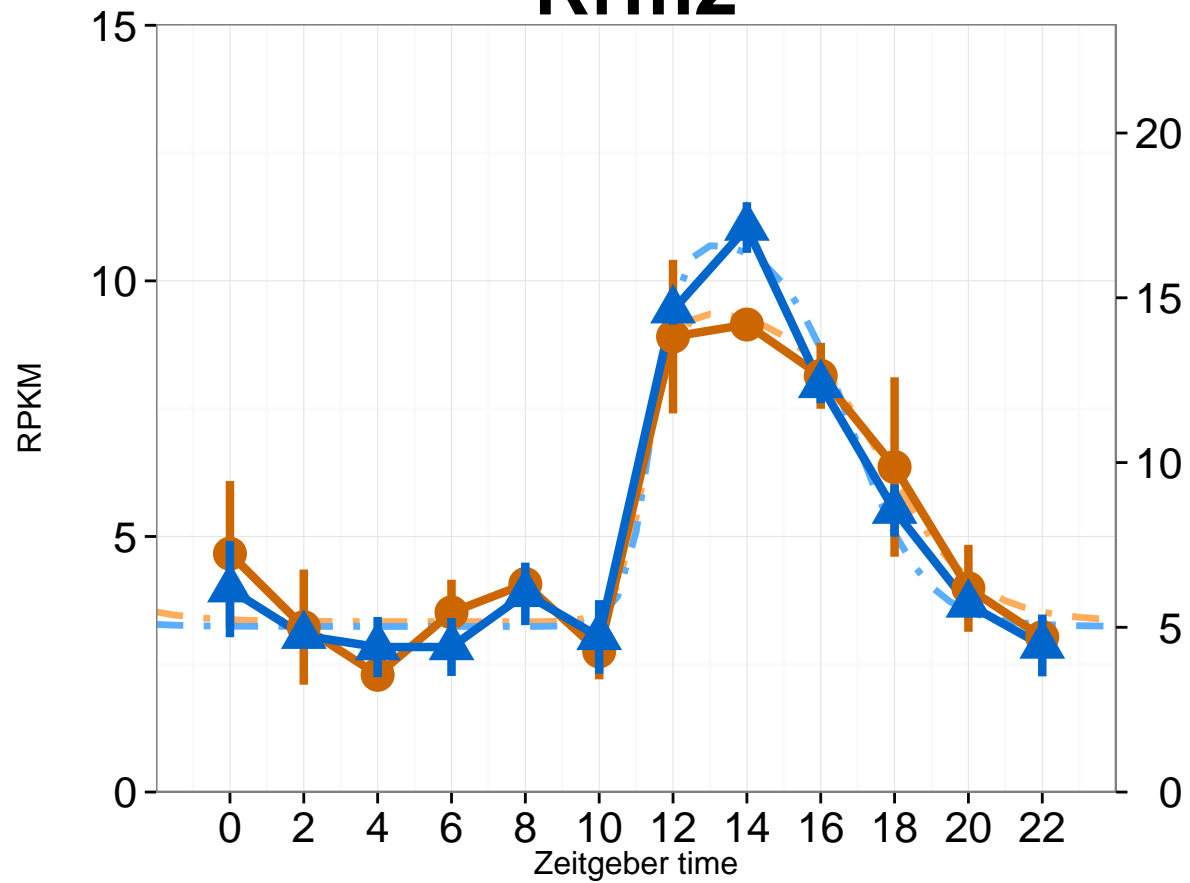

## Rrm2

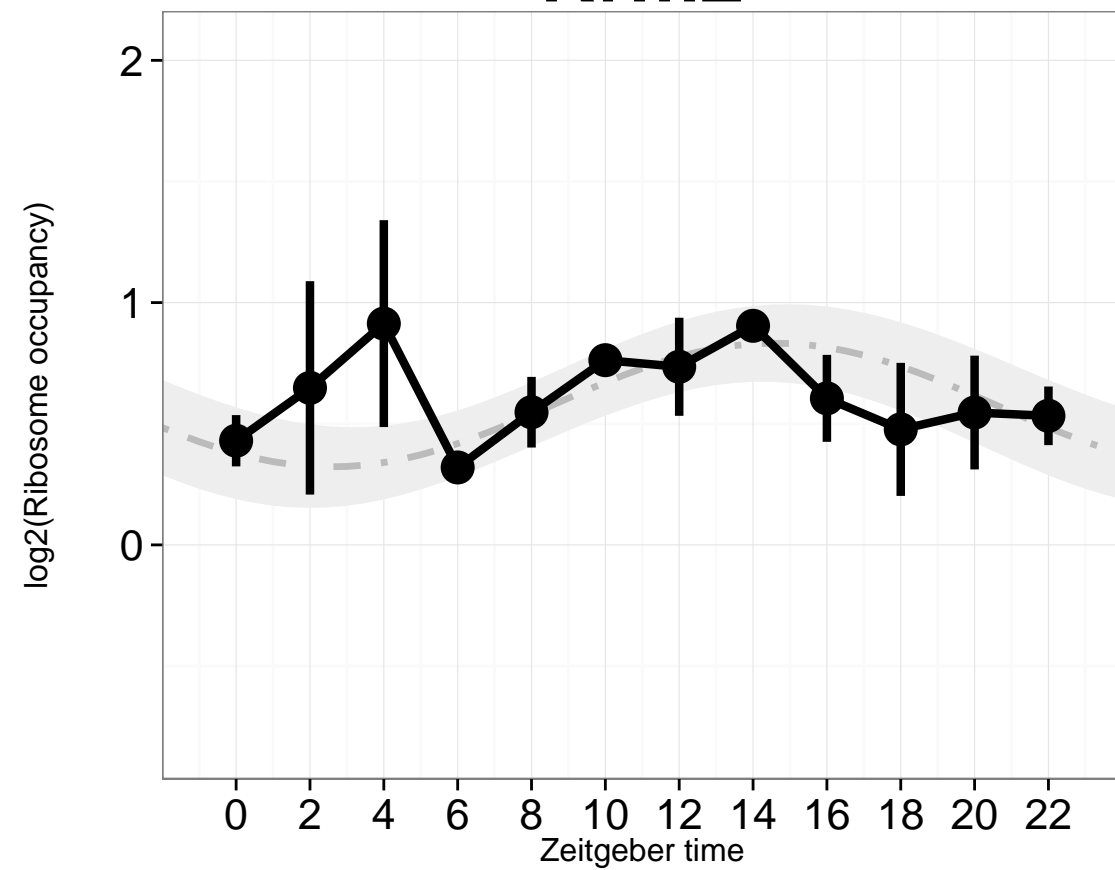

Supplement: SuppDataset_1.zip [file Rrm2_set_D.pdf › Supplemental Dataset 1/D-mRNA_rhythm_translation_rhyth/Rrm2_set_D.pdf]

# Rrn3

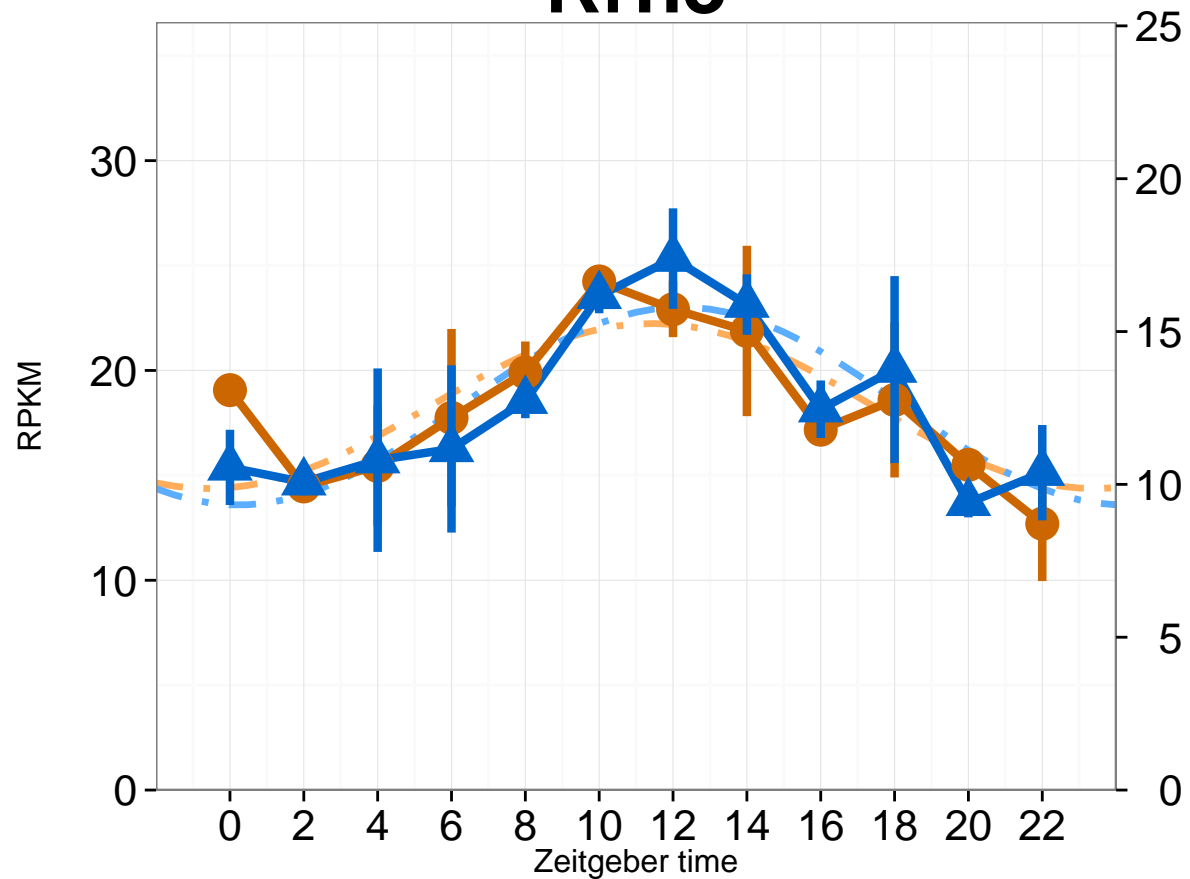

# Rrn3

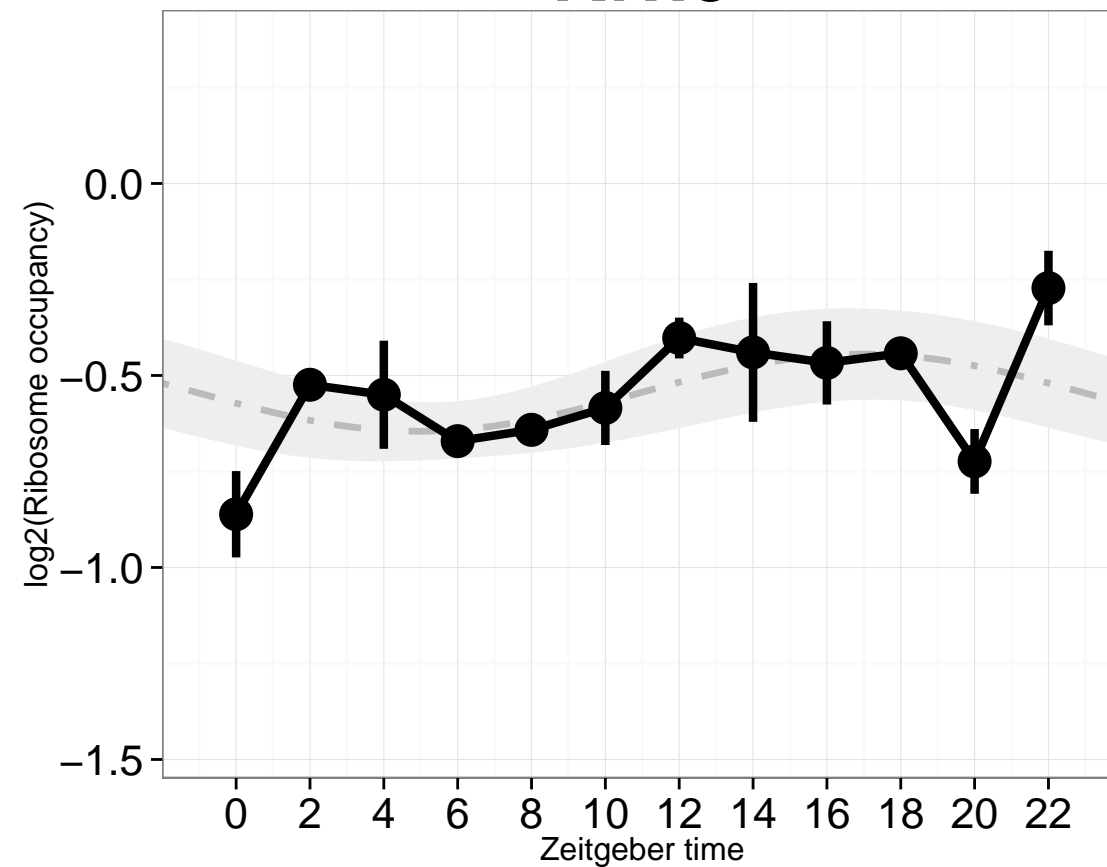

Supplement: SuppDataset_1.zip [file Rrn3_set_D.pdf › Supplemental Dataset 1/D-mRNA_rhythm_translation_rhyth/Rrn3_set_D.pdf]

## Rrp12

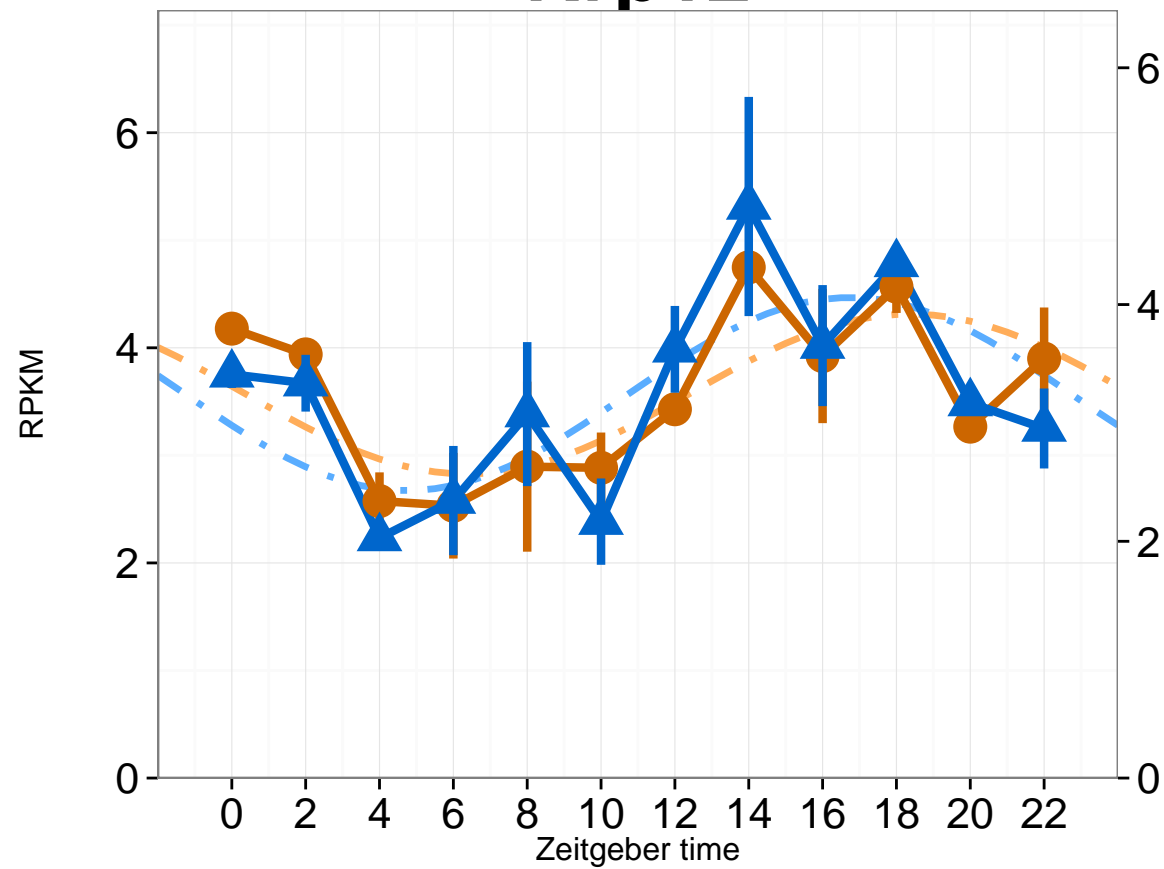

## Rrp12

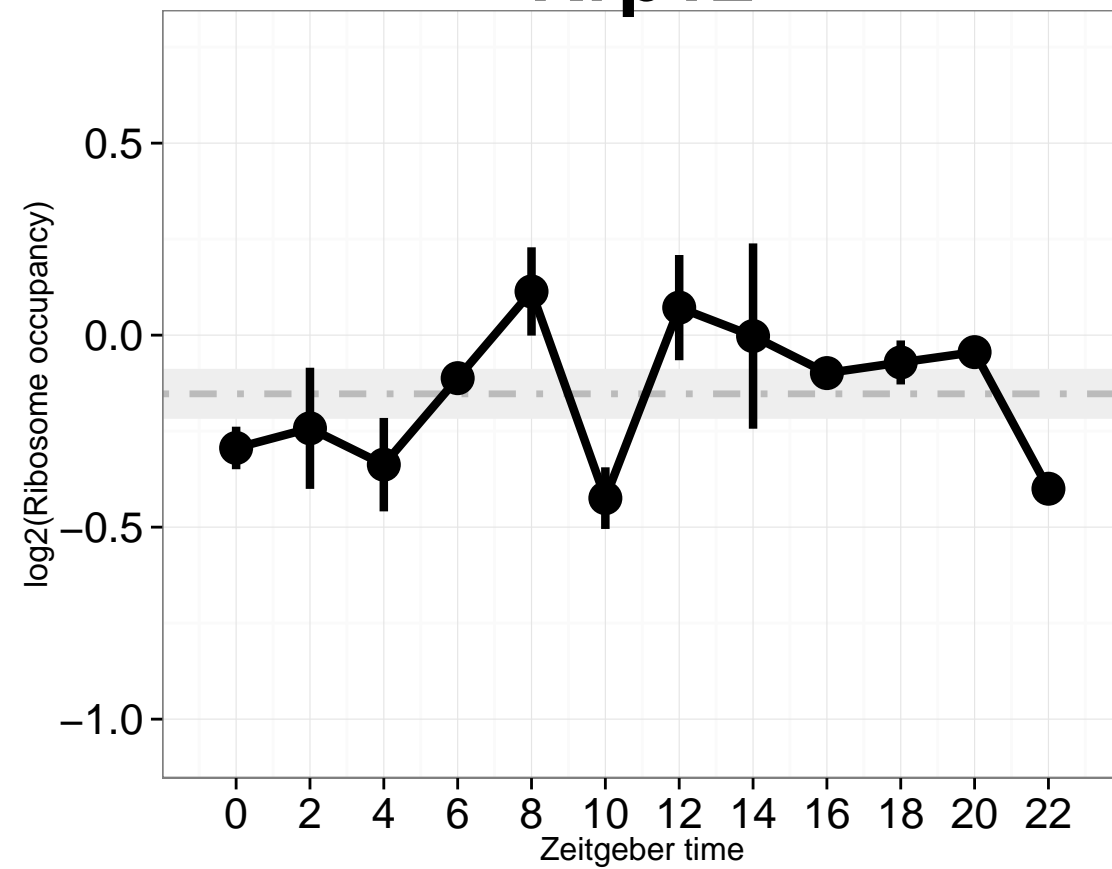

Supplement: SuppDataset_1.zip [file Rrp12_set_D.pdf › Supplemental Dataset 1/D-mRNA_rhythm_translation_rhyth/Rrp12_set_D.pdf]

# Rsad2

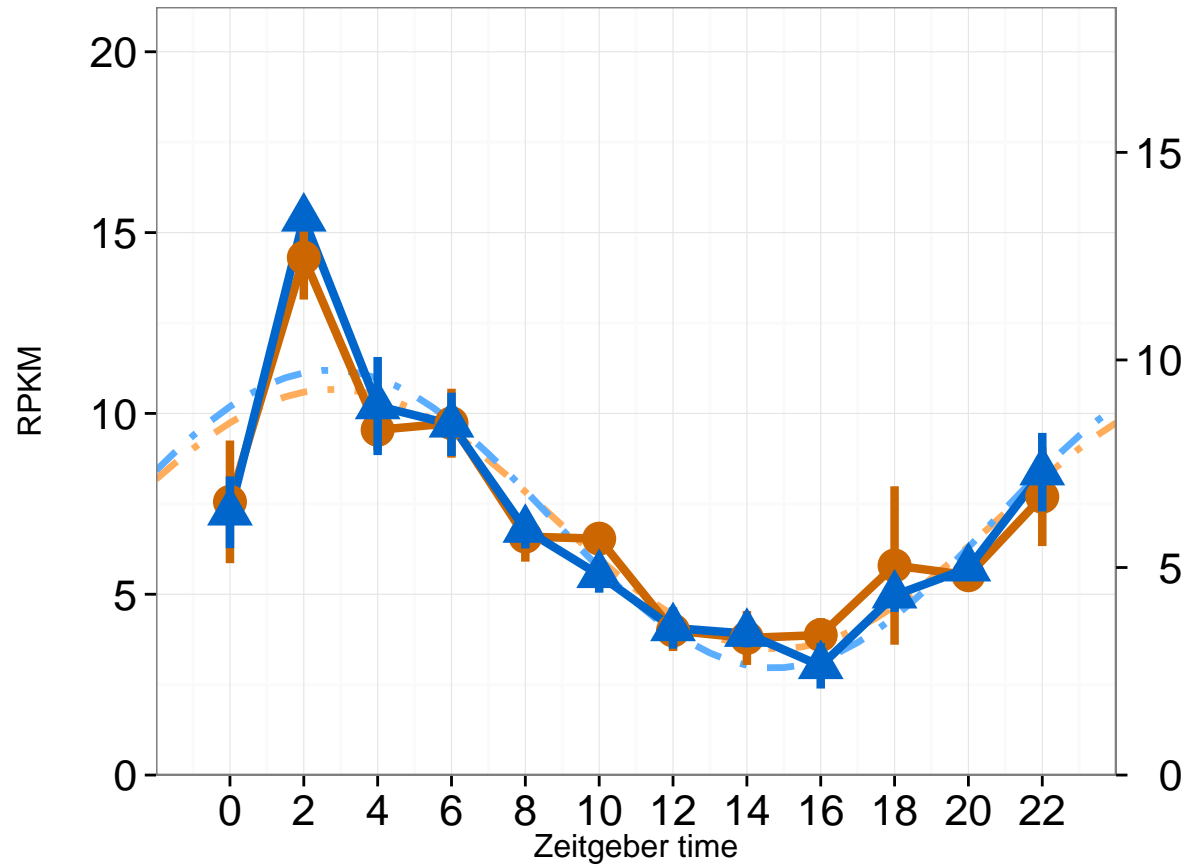

# Rsad2

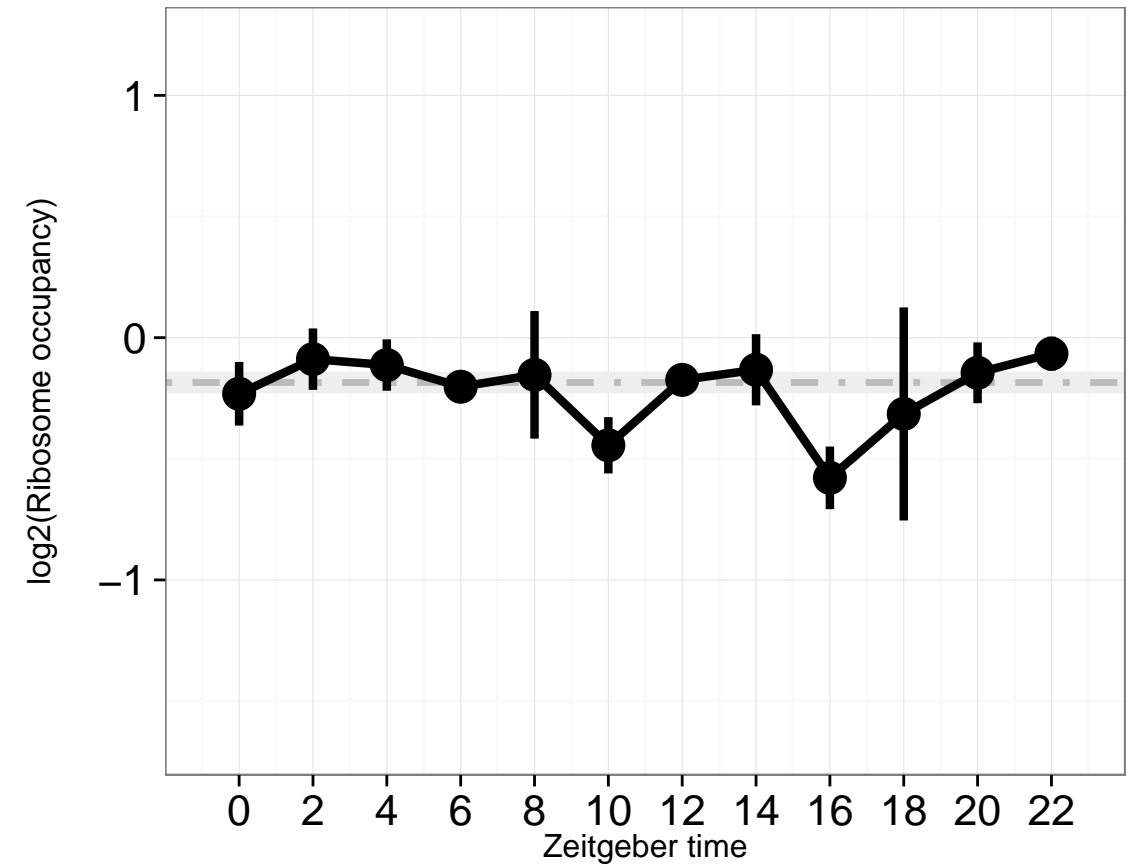

Supplement: SuppDataset_1.zip [file Rsad2_set_D.pdf › Supplemental Dataset 1/D-mRNA_rhythm_translation_rhyth/Rsad2_set_D.pdf]

# Rslcan18

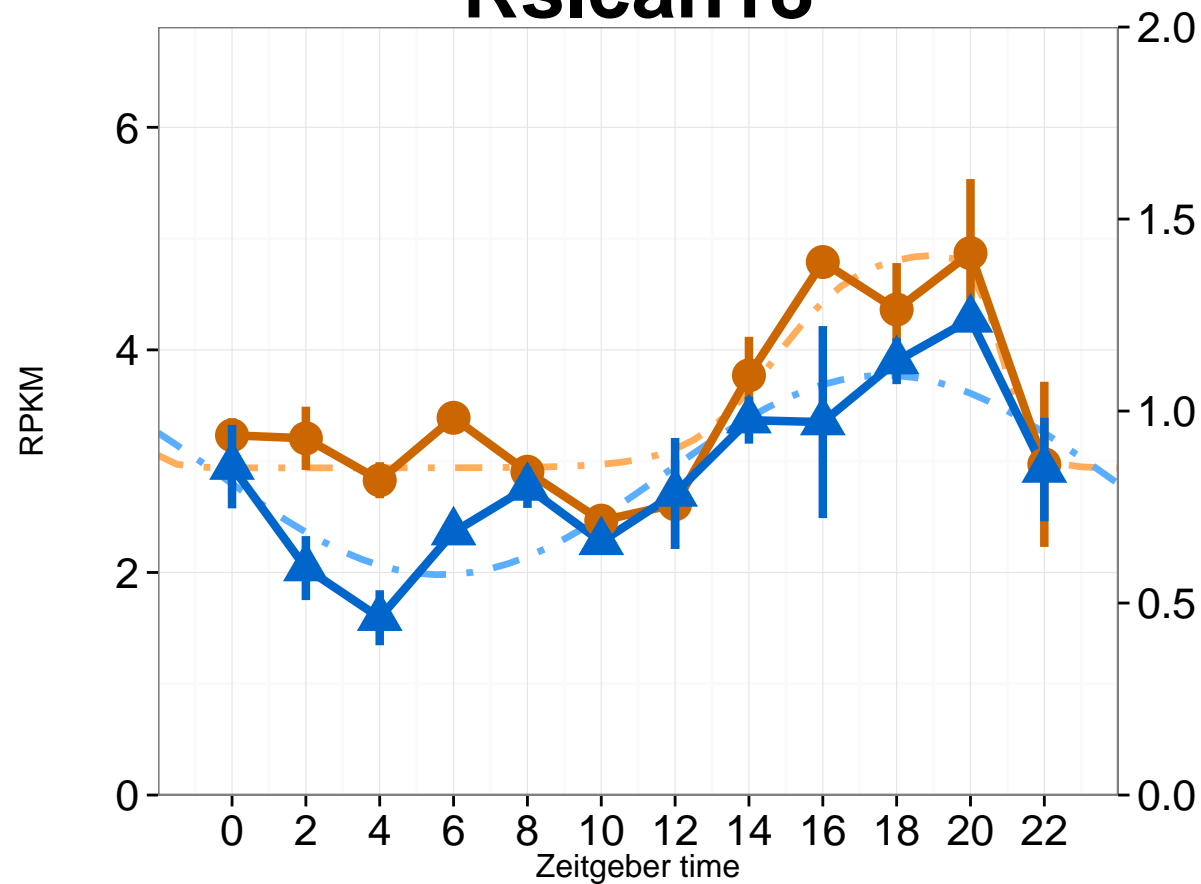

# Rslcan18

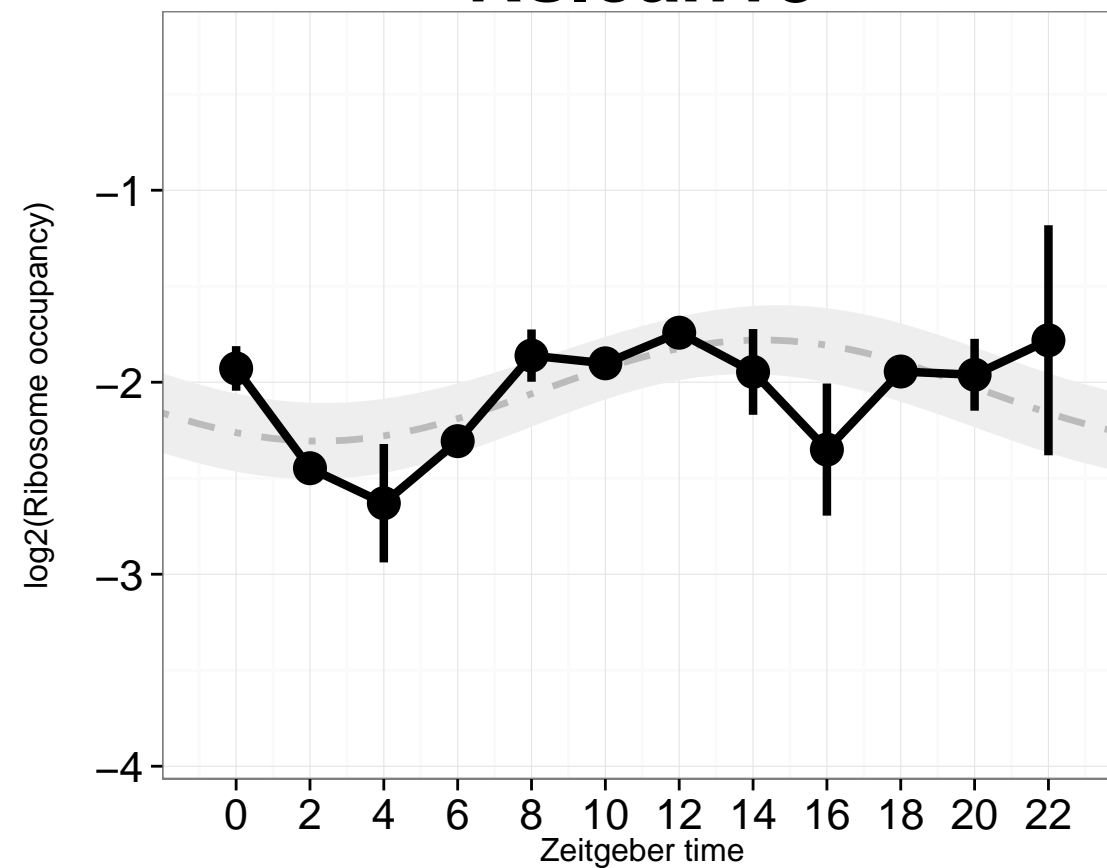

Supplement: SuppDataset_1.zip [file Rslcan18_set_D.pdf › Supplemental Dataset 1/D-mRNA_rhythm_translation_rhyth/Rslcan18_set_D.pdf]

# Rtn4rl1

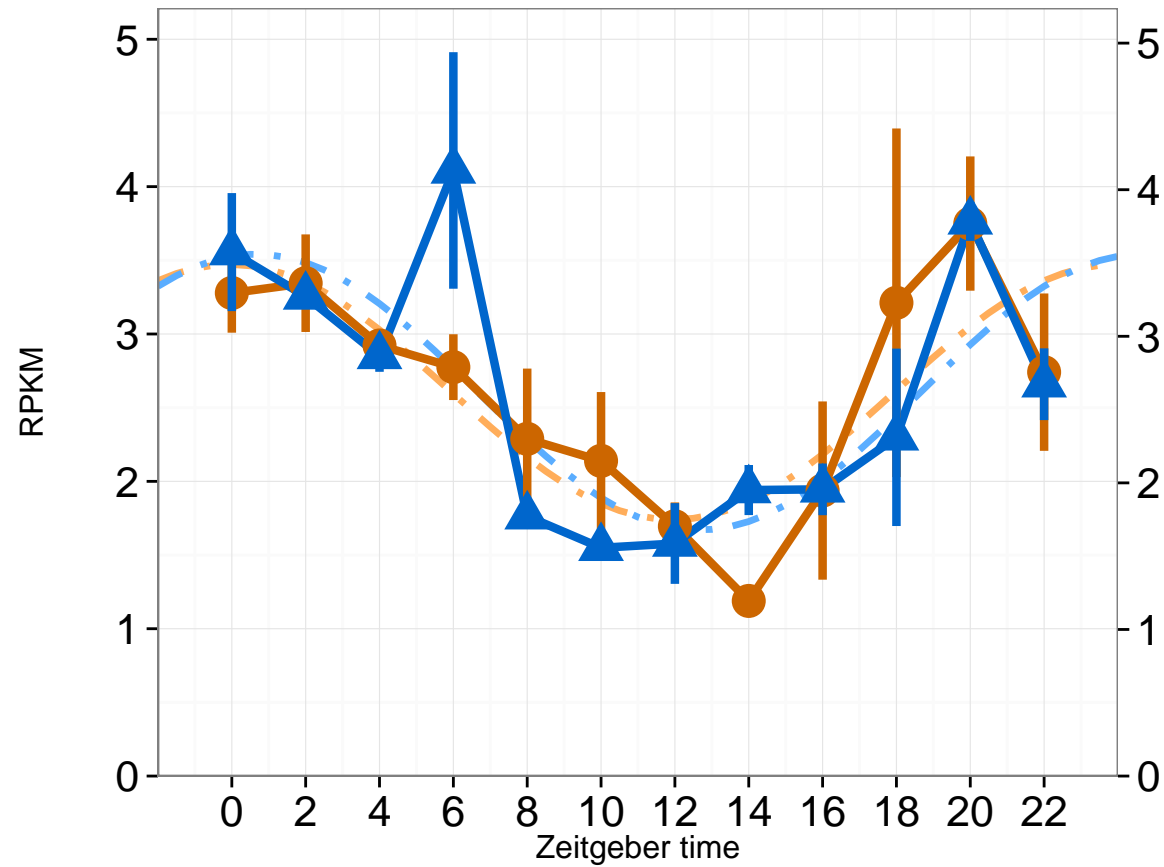

# Rtn4rl1

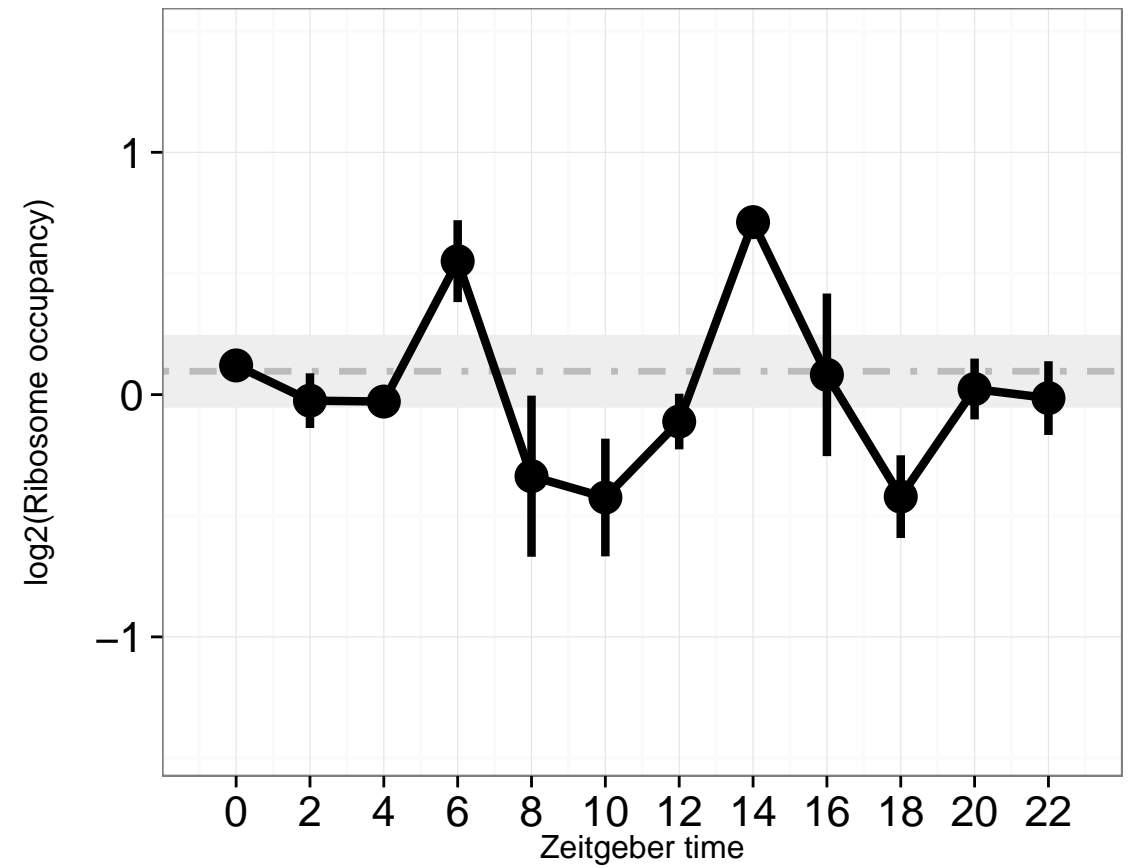

Supplement: SuppDataset_1.zip [file Rtn4rl1_set_D.pdf › Supplemental Dataset 1/D-mRNA_rhythm_translation_rhyth/Rtn4rl1_set_D.pdf]

## Rtp3

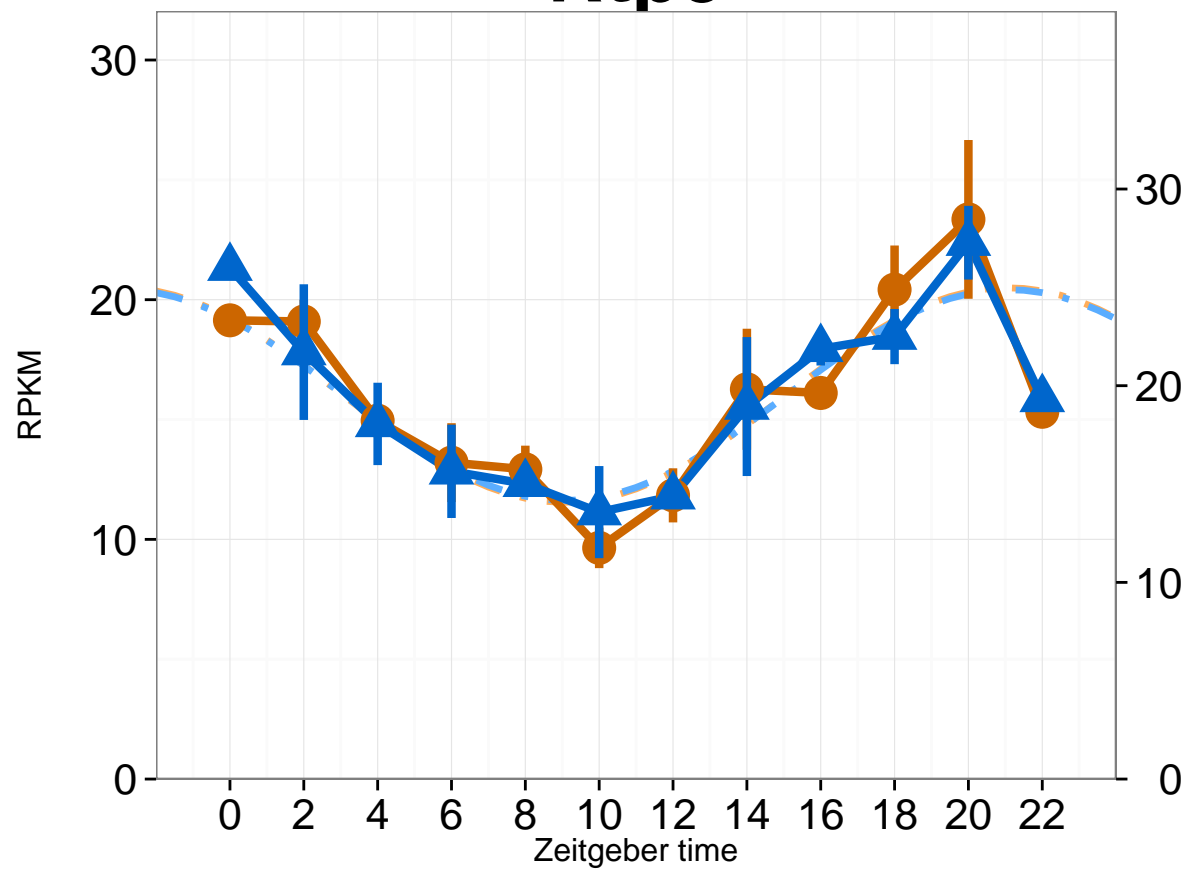

## Rtp3

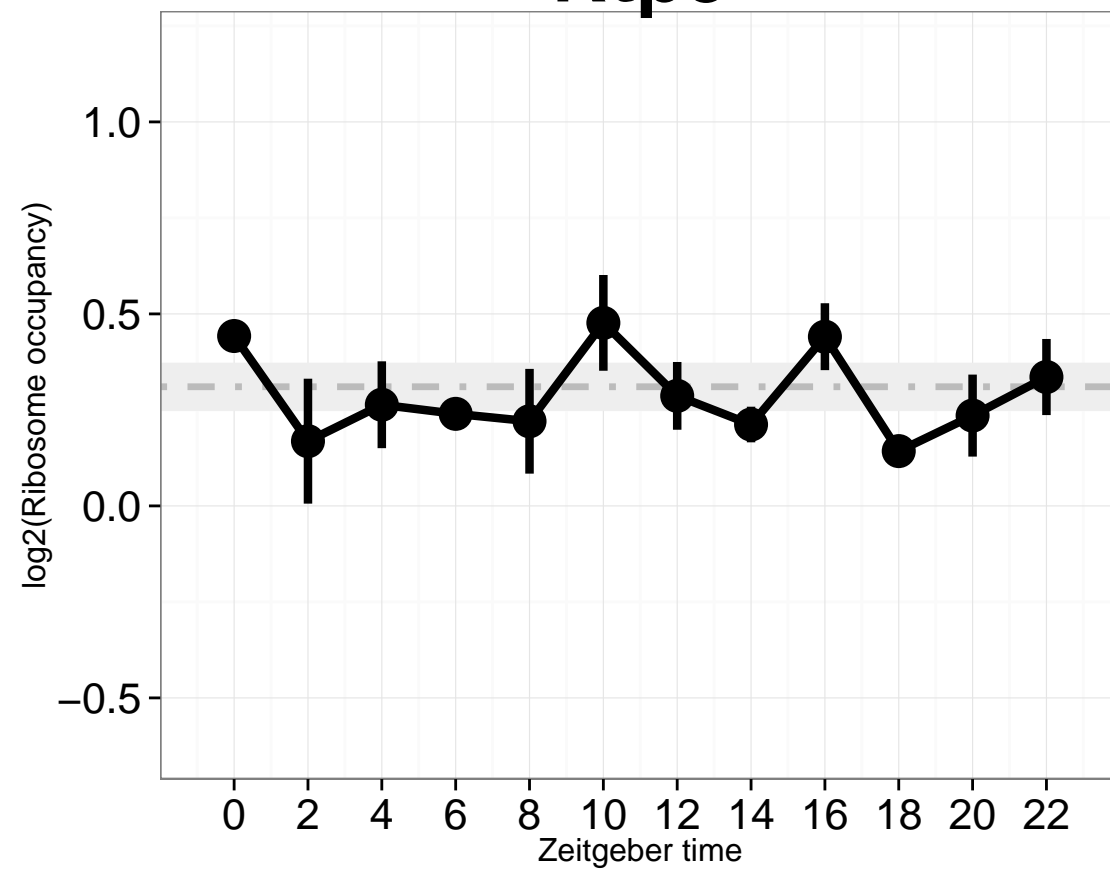

Supplement: SuppDataset_1.zip [file Rtp3_set_D.pdf › Supplemental Dataset 1/D-mRNA_rhythm_translation_rhyth/Rtp3_set_D.pdf]

## Rtp4

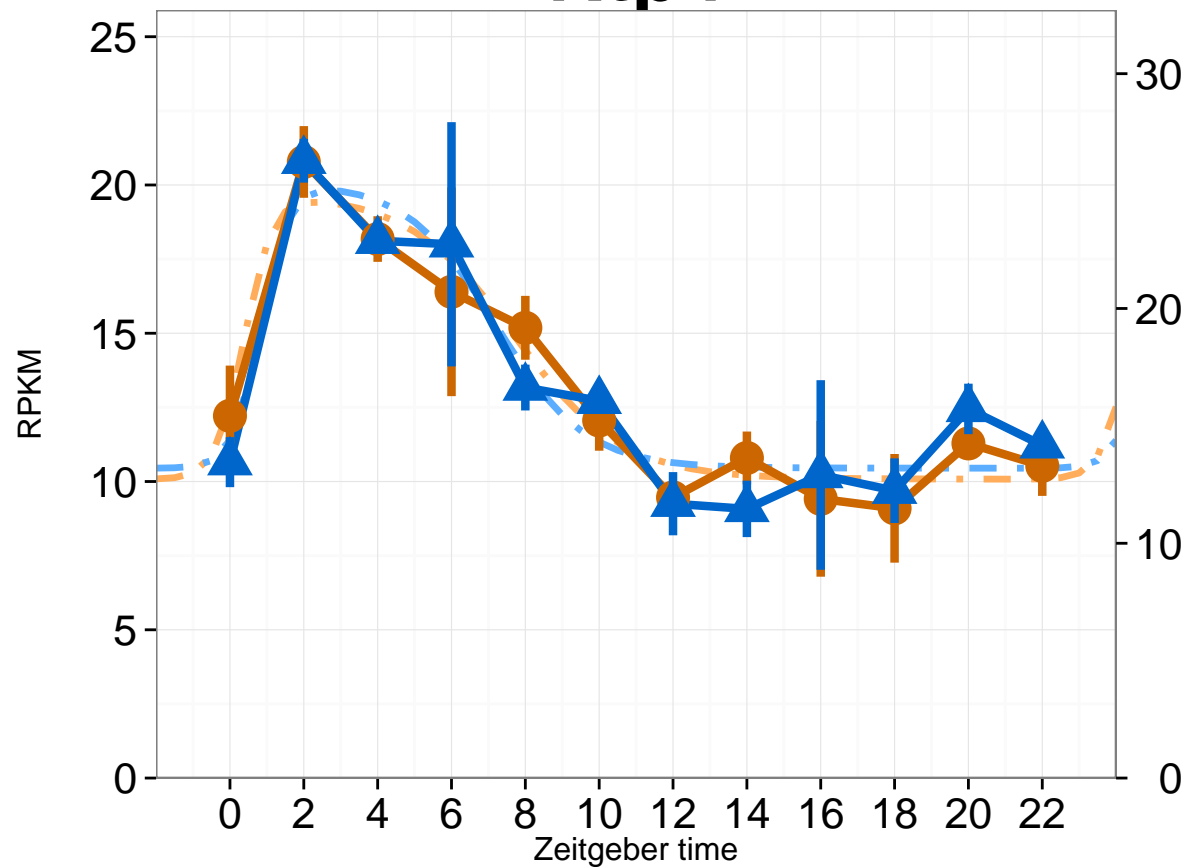

## Rtp4

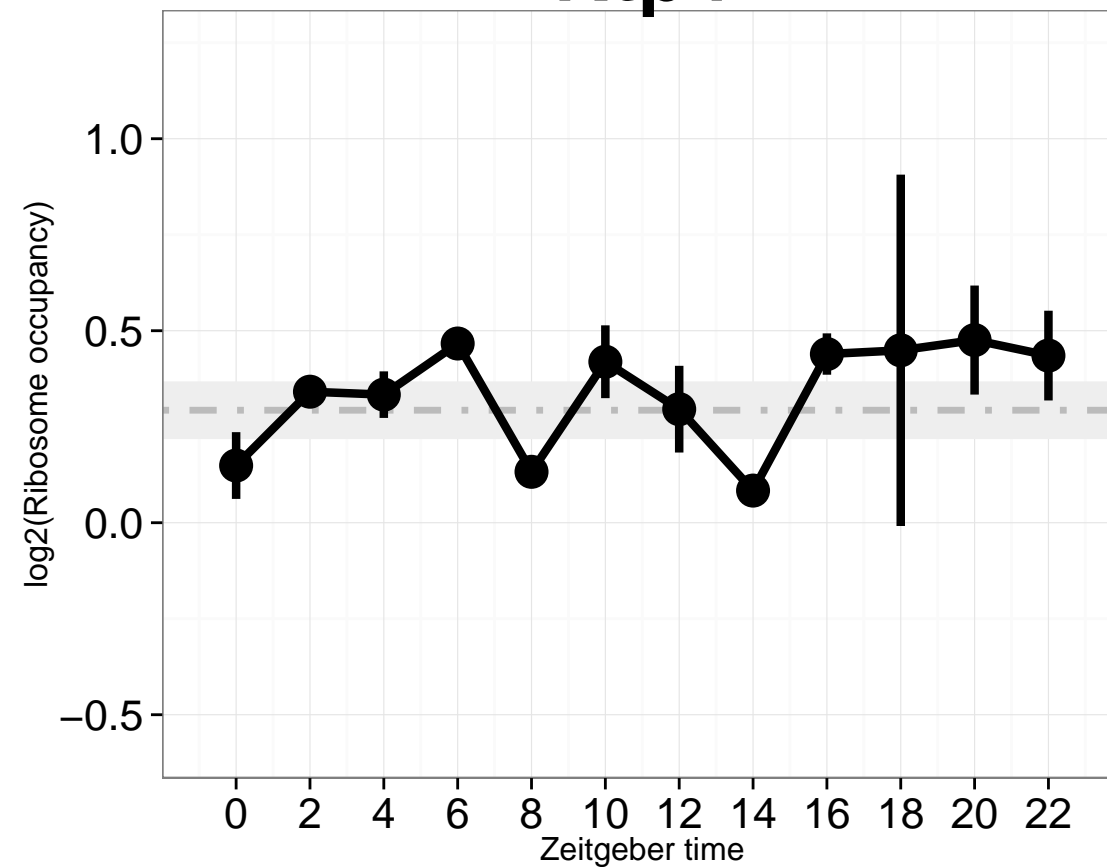

Supplement: SuppDataset_1.zip [file Rtp4_set_D.pdf › Supplemental Dataset 1/D-mRNA_rhythm_translation_rhyth/Rtp4_set_D.pdf]

## S100a10

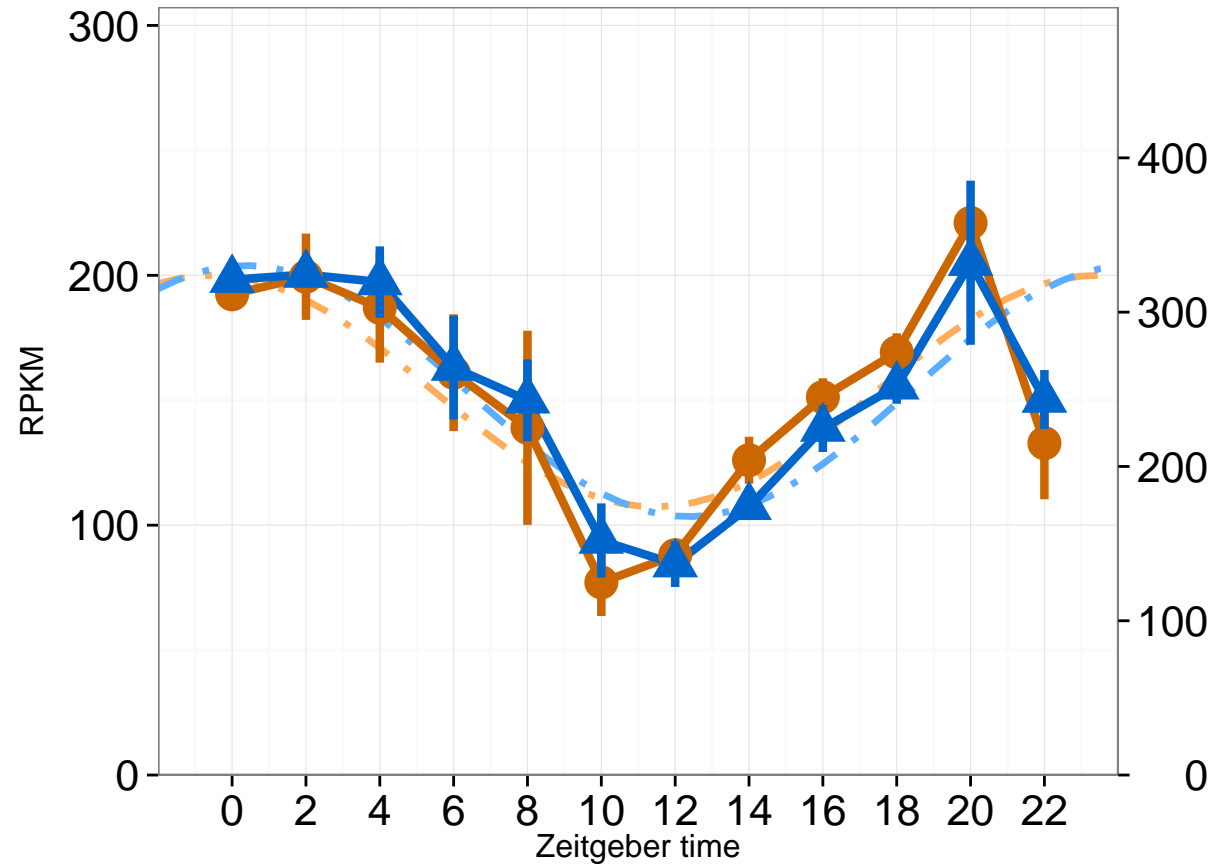

## S100a10

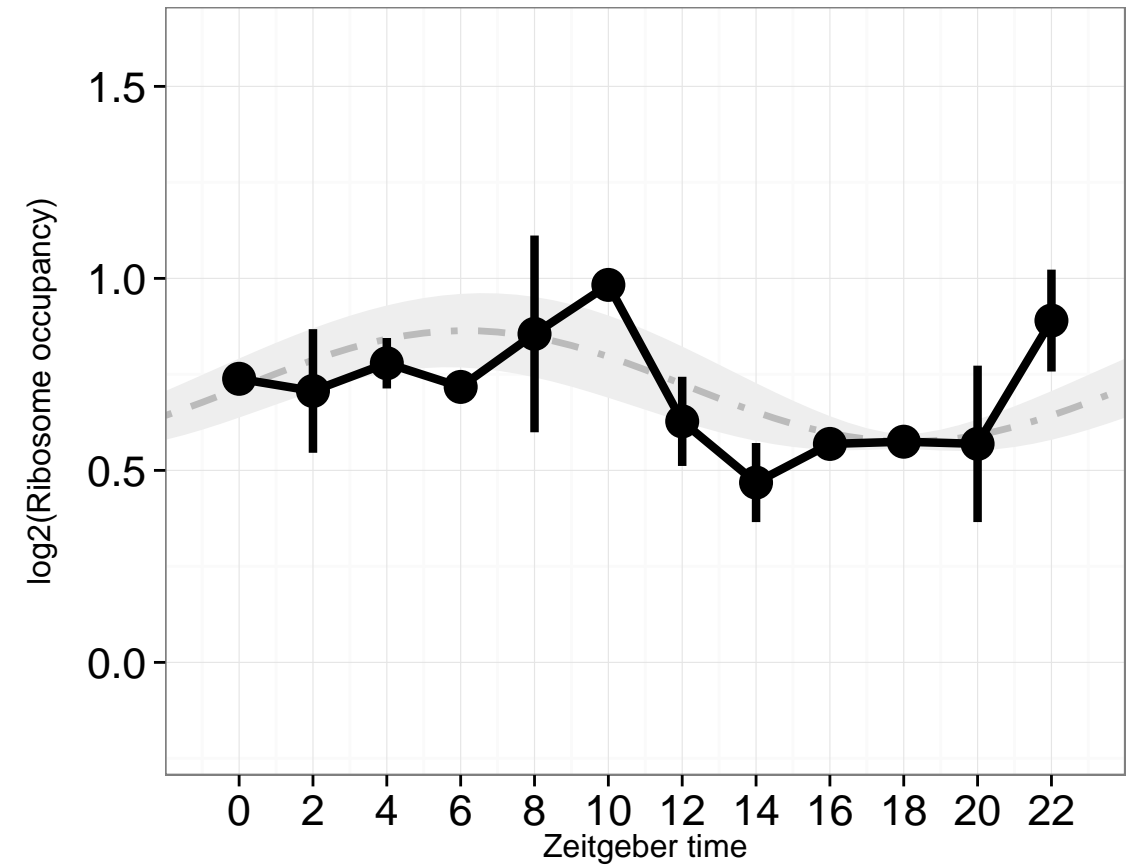

Supplement: SuppDataset_1.zip [file S100a10_set_D.pdf › Supplemental Dataset 1/D-mRNA_rhythm_translation_rhyth/S100a10_set_D.pdf]

# S100a8

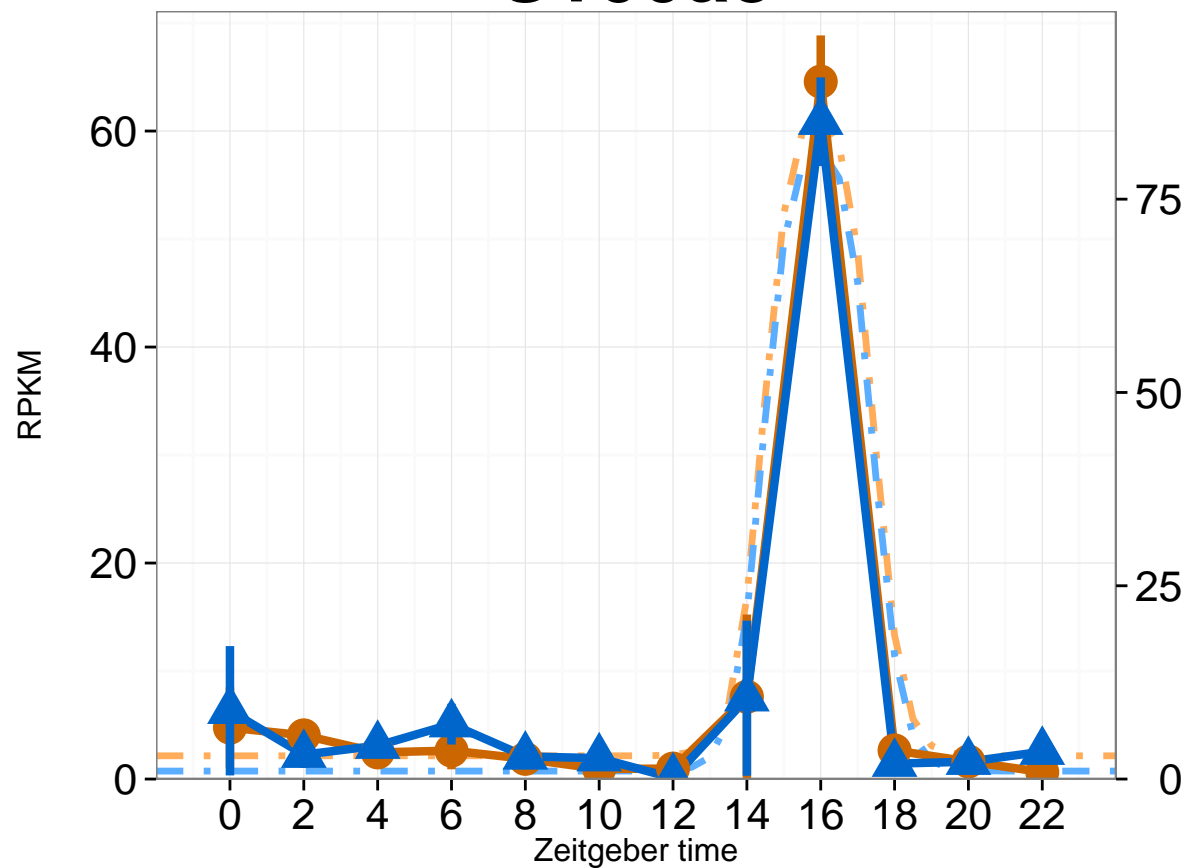

# S100a8

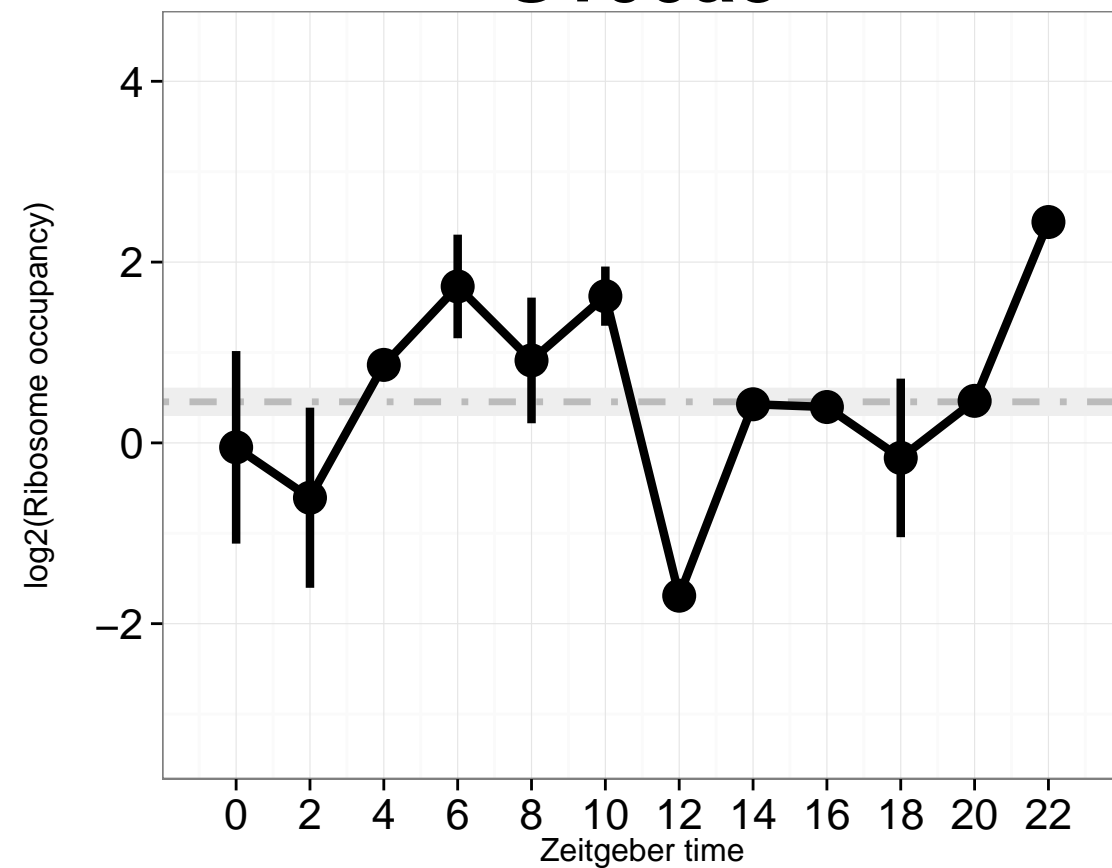

Supplement: SuppDataset_1.zip [file S100a8_set_D.pdf › Supplemental Dataset 1/D-mRNA_rhythm_translation_rhyth/S100a8_set_D.pdf]

# S100a9

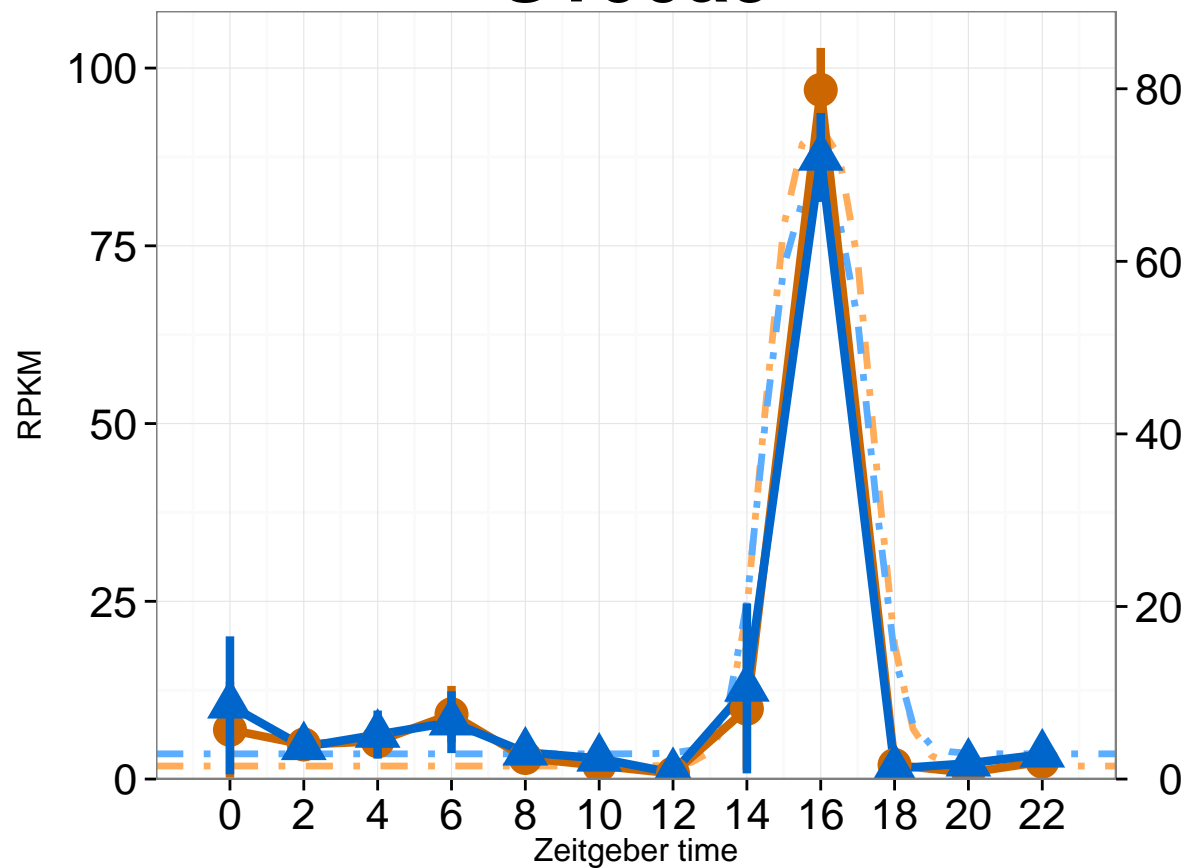

# S100a9

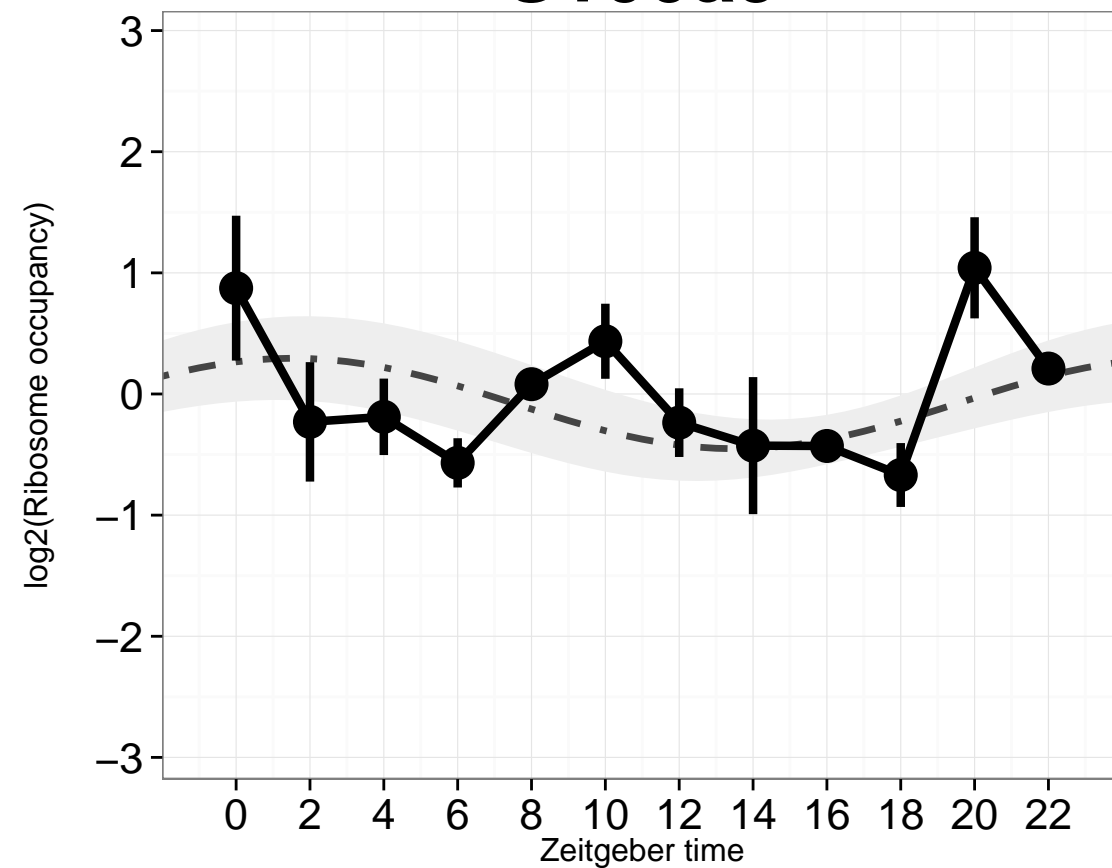

Supplement: SuppDataset_1.zip [file S100a9_set_D.pdf › Supplemental Dataset 1/D-mRNA_rhythm_translation_rhyth/S100a9_set_D.pdf]

# S1pr1

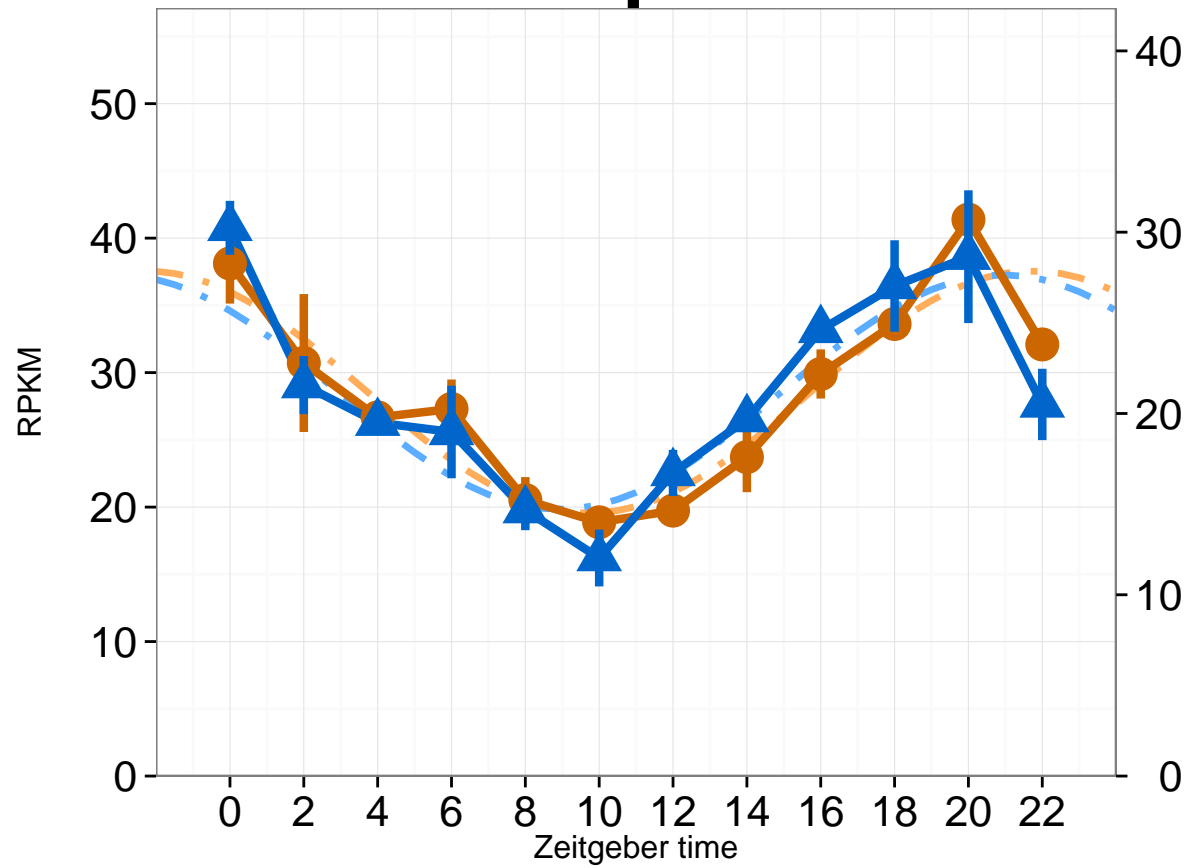

# S1pr1

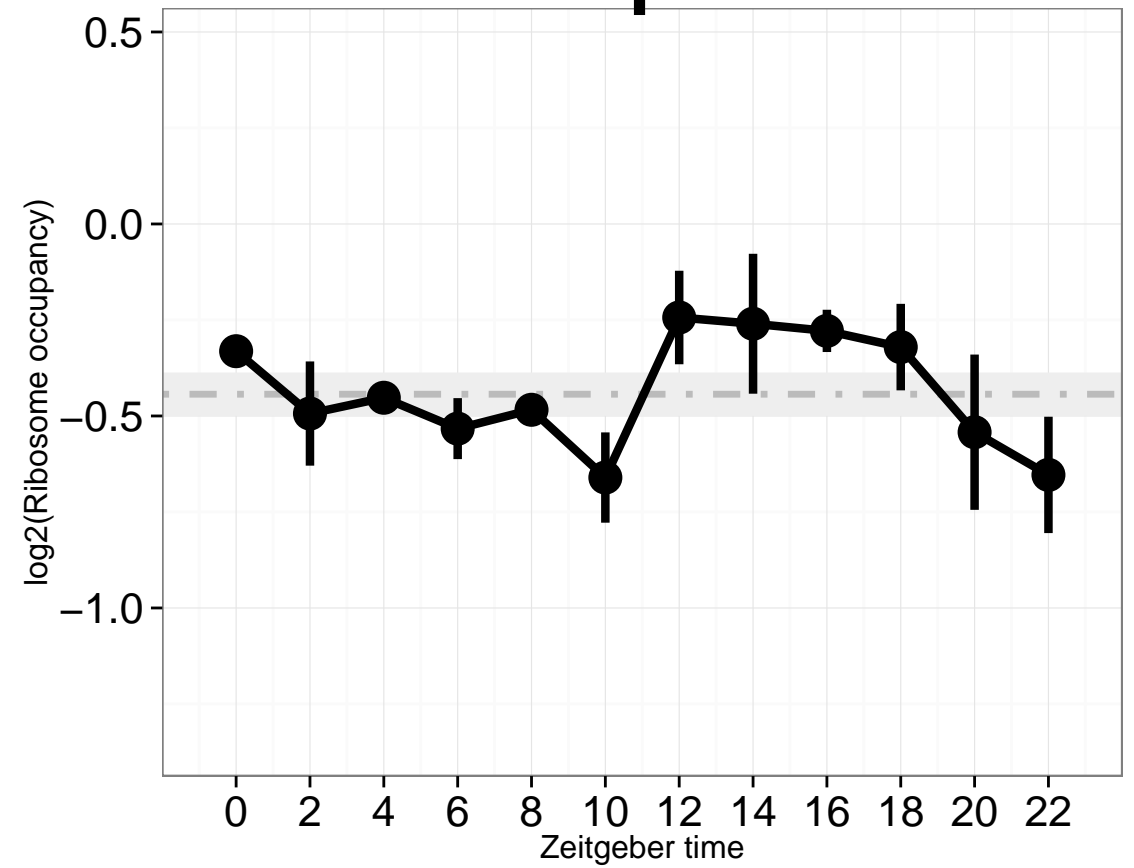

Supplement: SuppDataset_1.zip [file S1pr1_set_D.pdf › Supplemental Dataset 1/D-mRNA_rhythm_translation_rhyth/S1pr1_set_D.pdf]

## Saa1

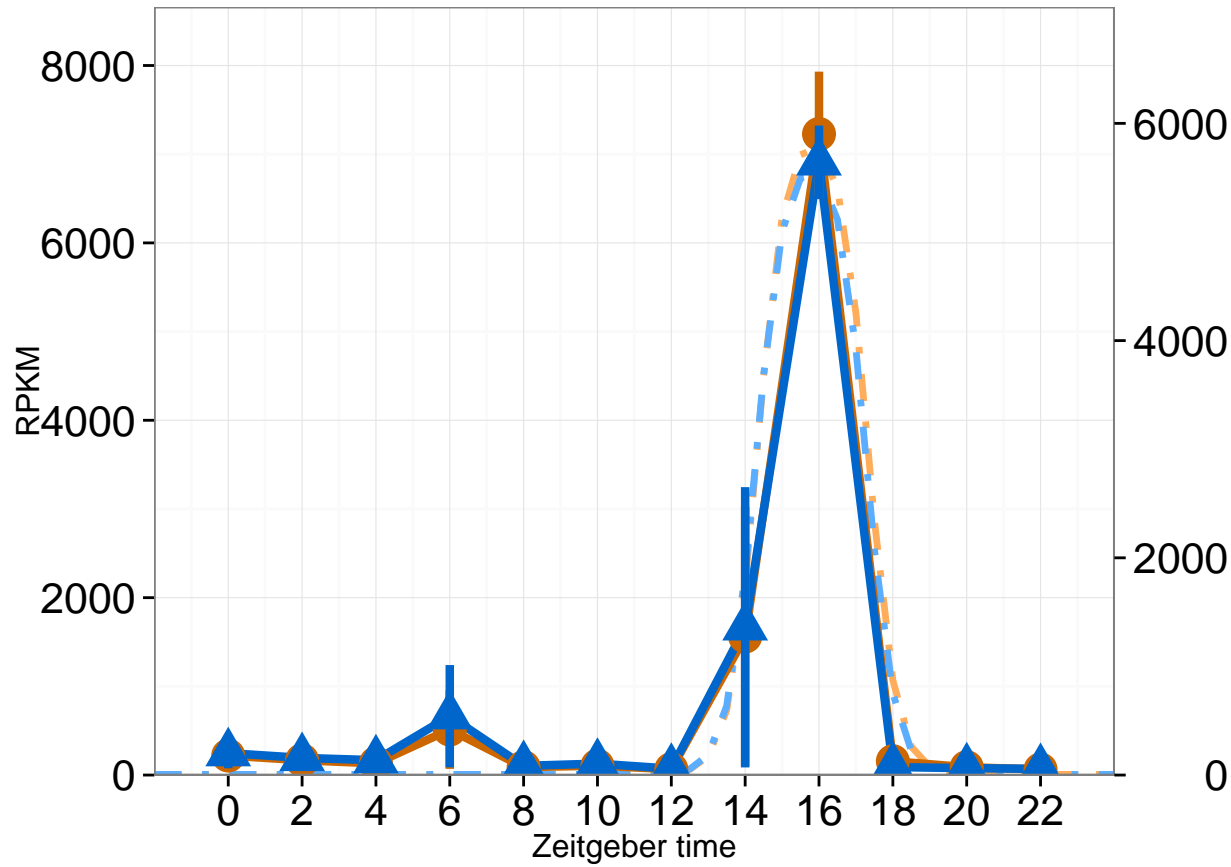

## Saa1

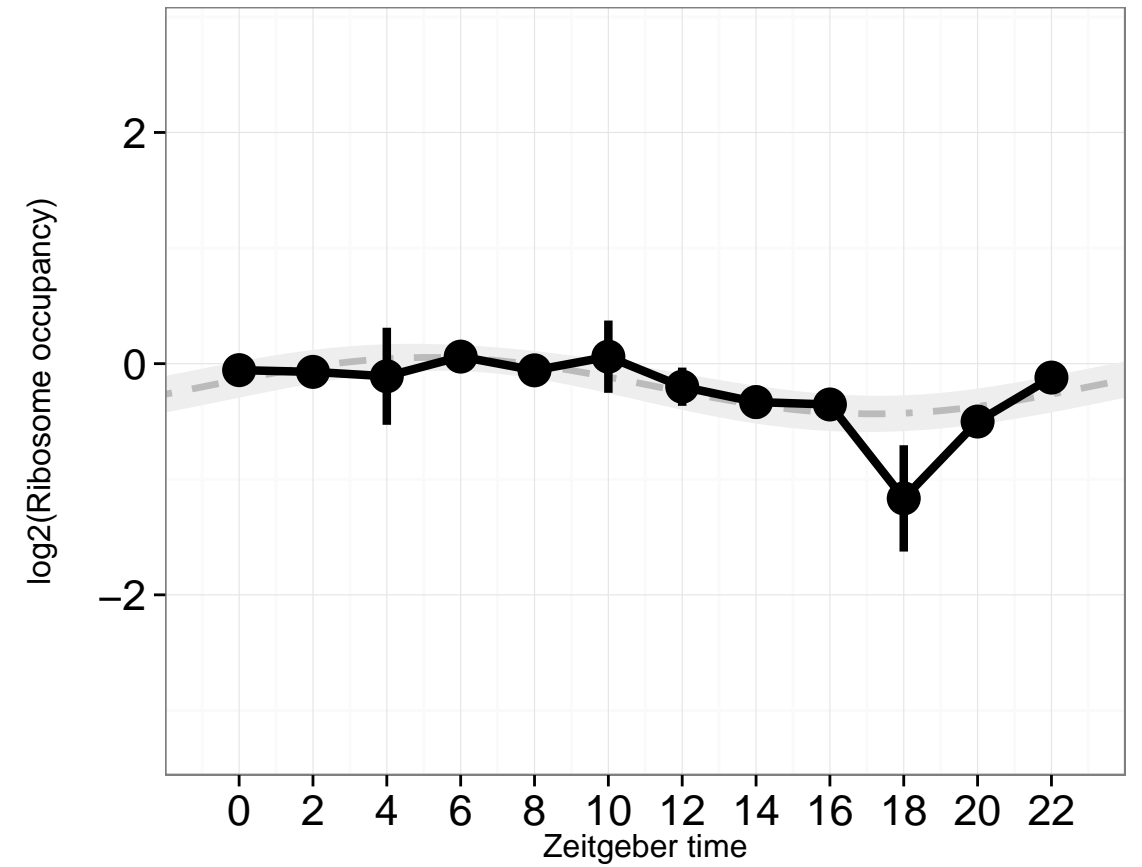

Supplement: SuppDataset_1.zip [file Saa1_set_D.pdf › Supplemental Dataset 1/D-mRNA_rhythm_translation_rhyth/Saa1_set_D.pdf]

## Saa2

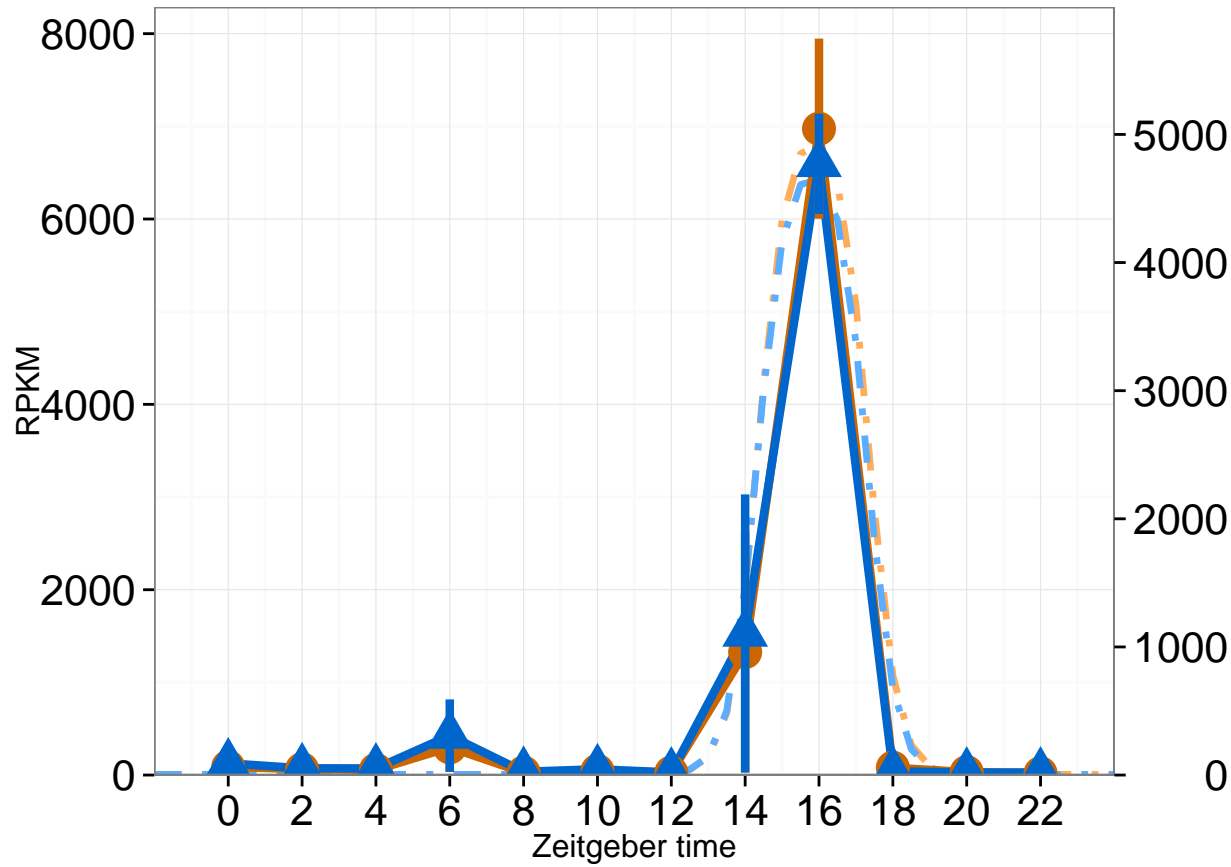

## Saa2

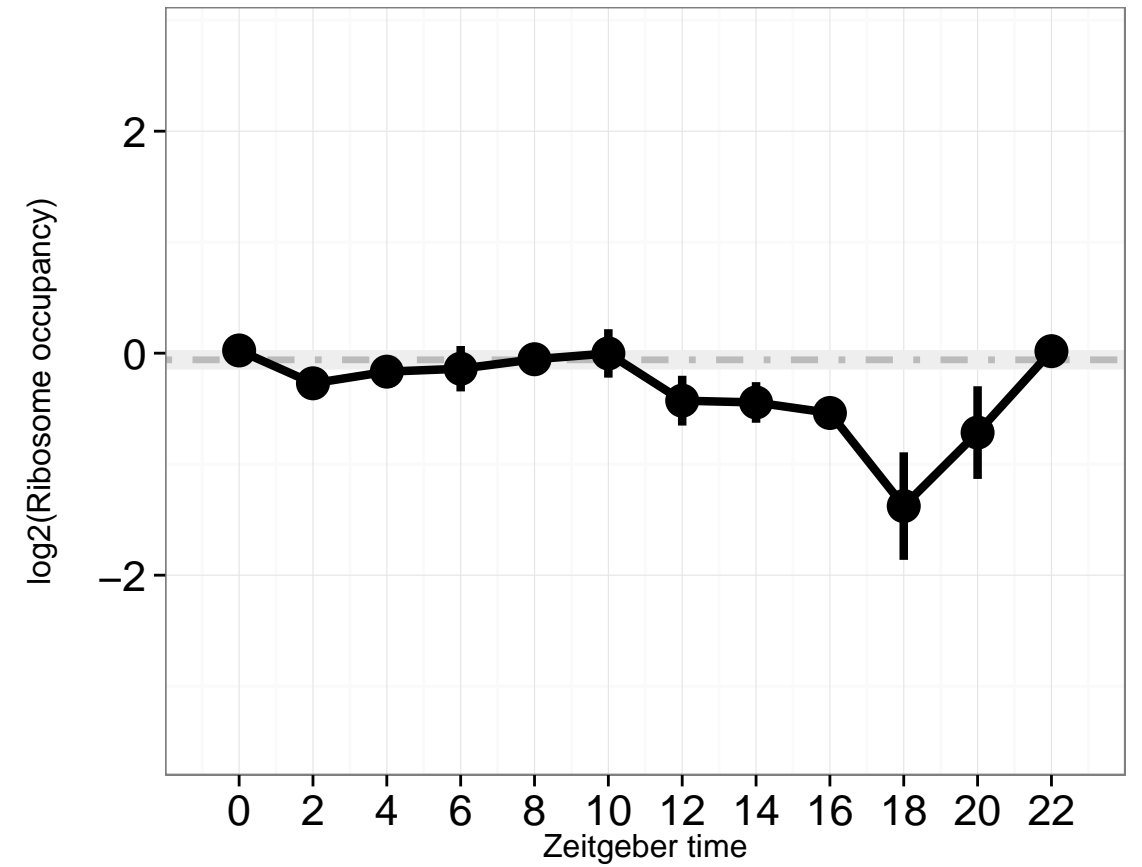

Supplement: SuppDataset_1.zip [file Saa2_set_D.pdf › Supplemental Dataset 1/D-mRNA_rhythm_translation_rhyth/Saa2_set_D.pdf]

## Saa4

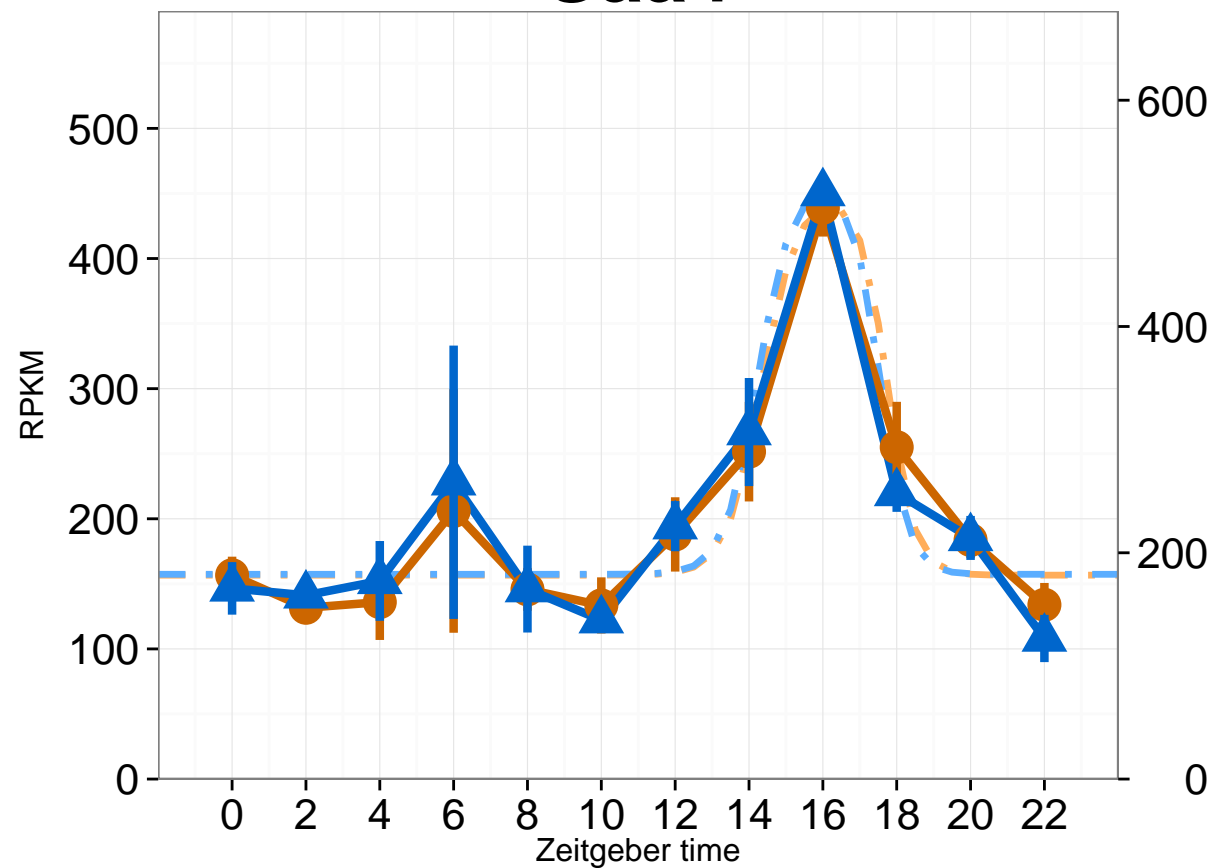

## Saa4

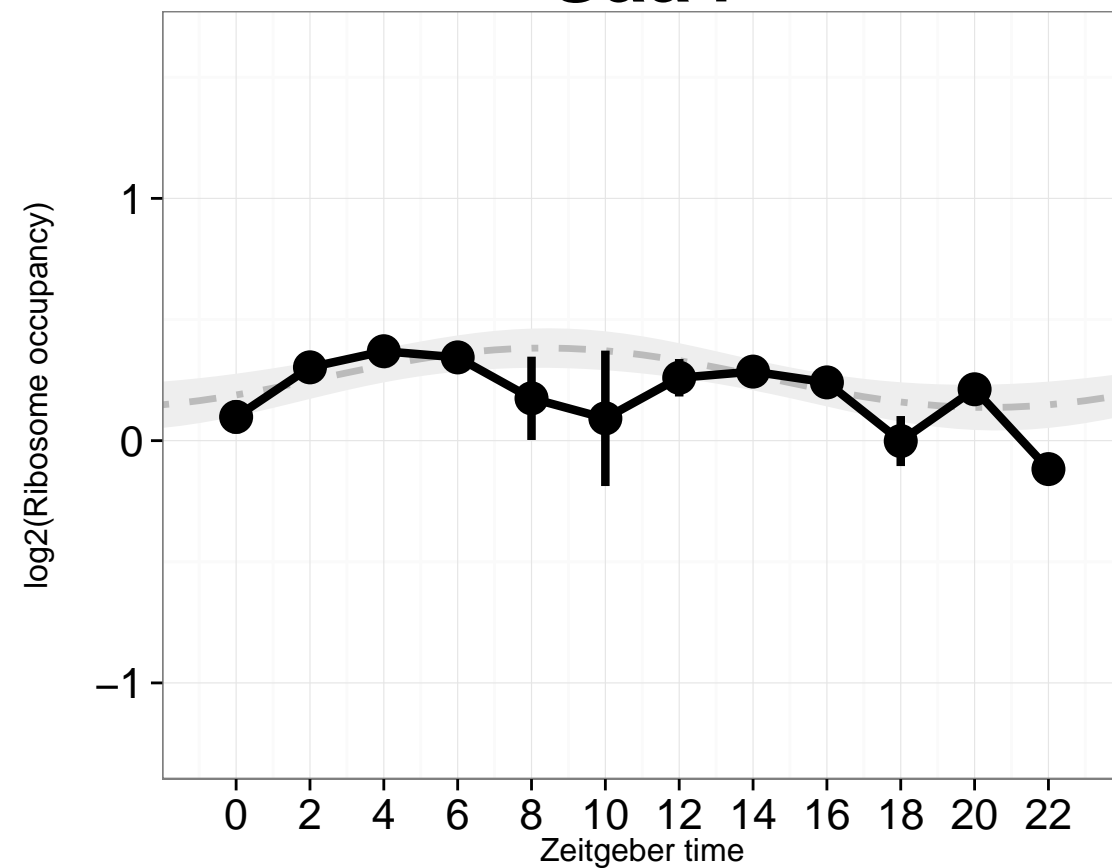

Supplement: SuppDataset_1.zip [file Saa4_set_D.pdf › Supplemental Dataset 1/D-mRNA_rhythm_translation_rhyth/Saa4_set_D.pdf]

## Sacs

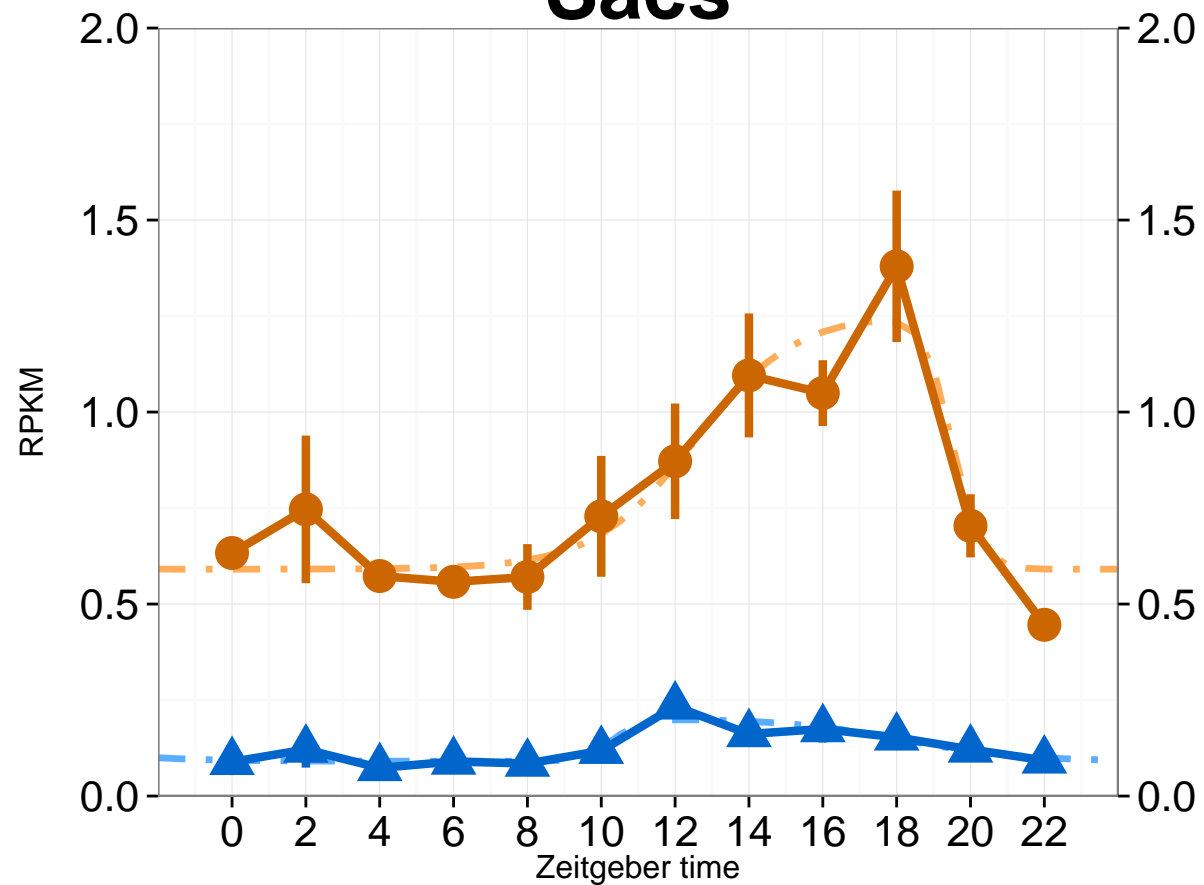

## Sacs

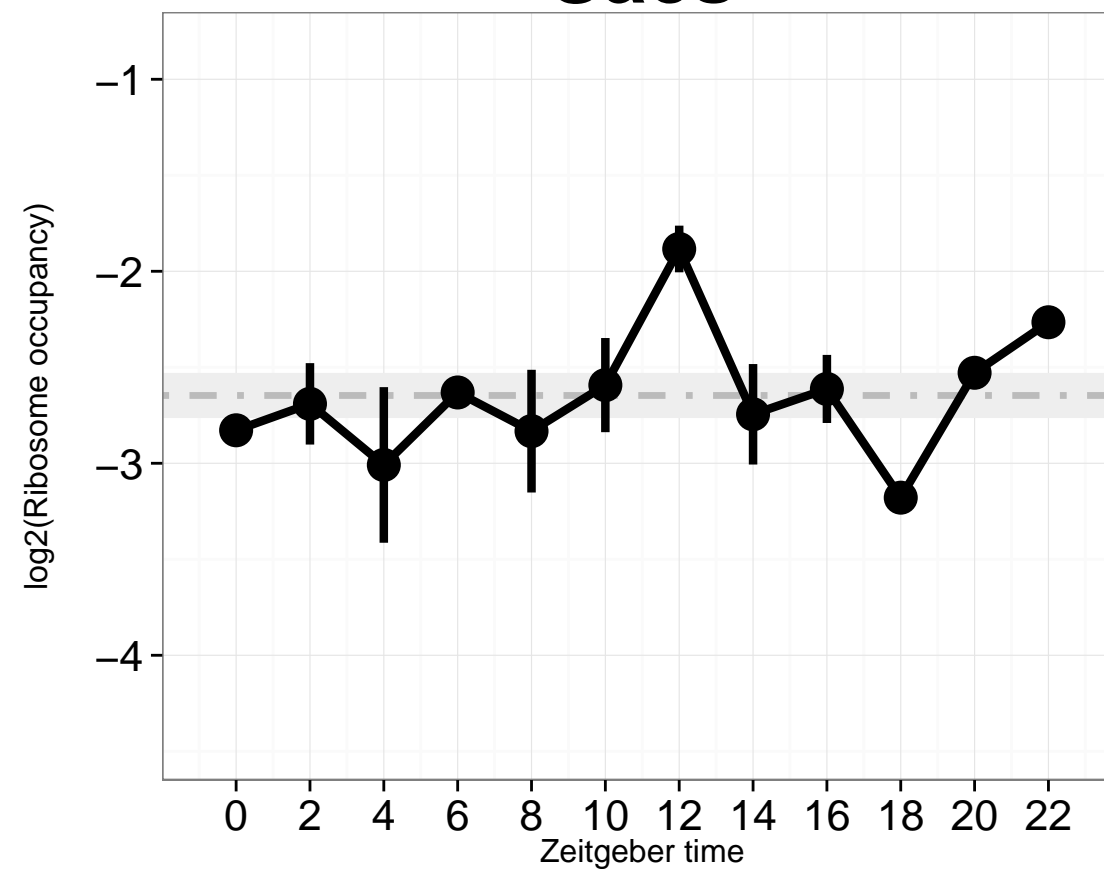

Supplement: SuppDataset_1.zip [file Sacs_set_D.pdf › Supplemental Dataset 1/D-mRNA_rhythm_translation_rhyth/Sacs_set_D.pdf]

# Sal1

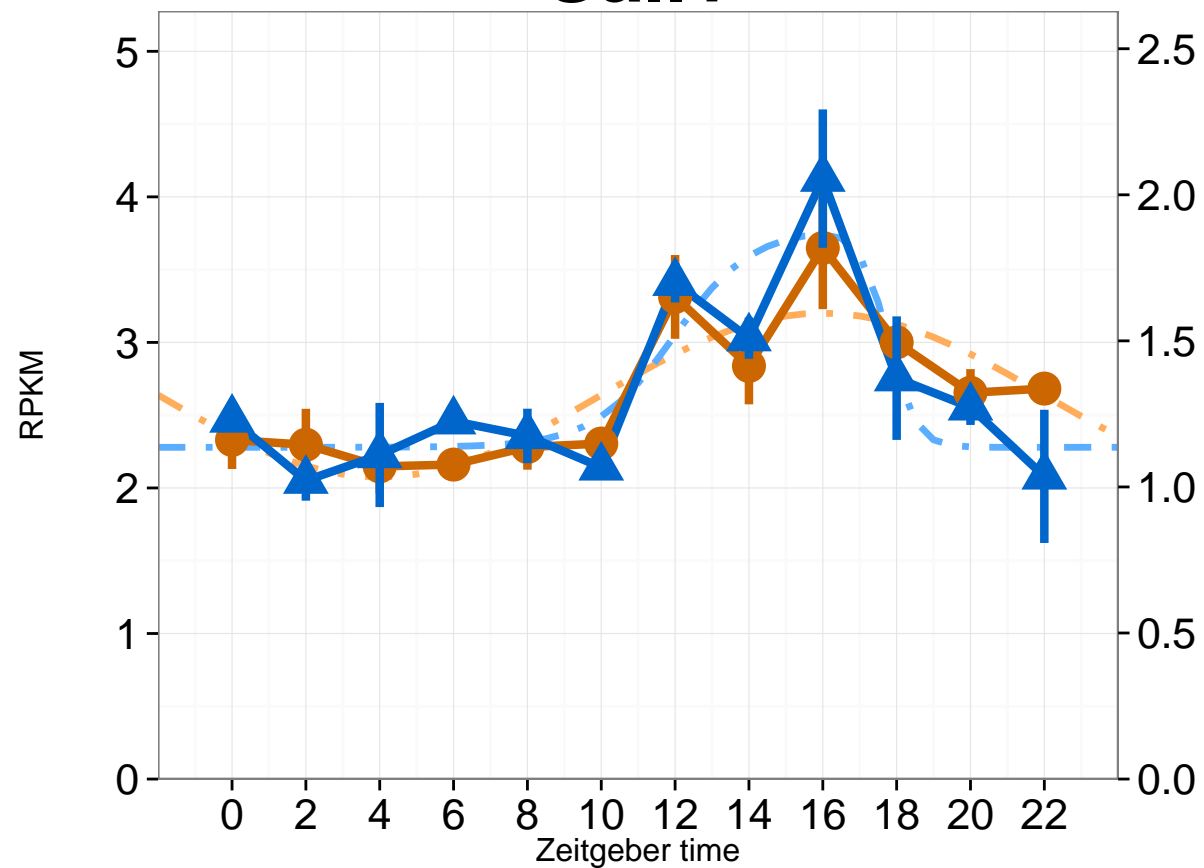

# Sal1

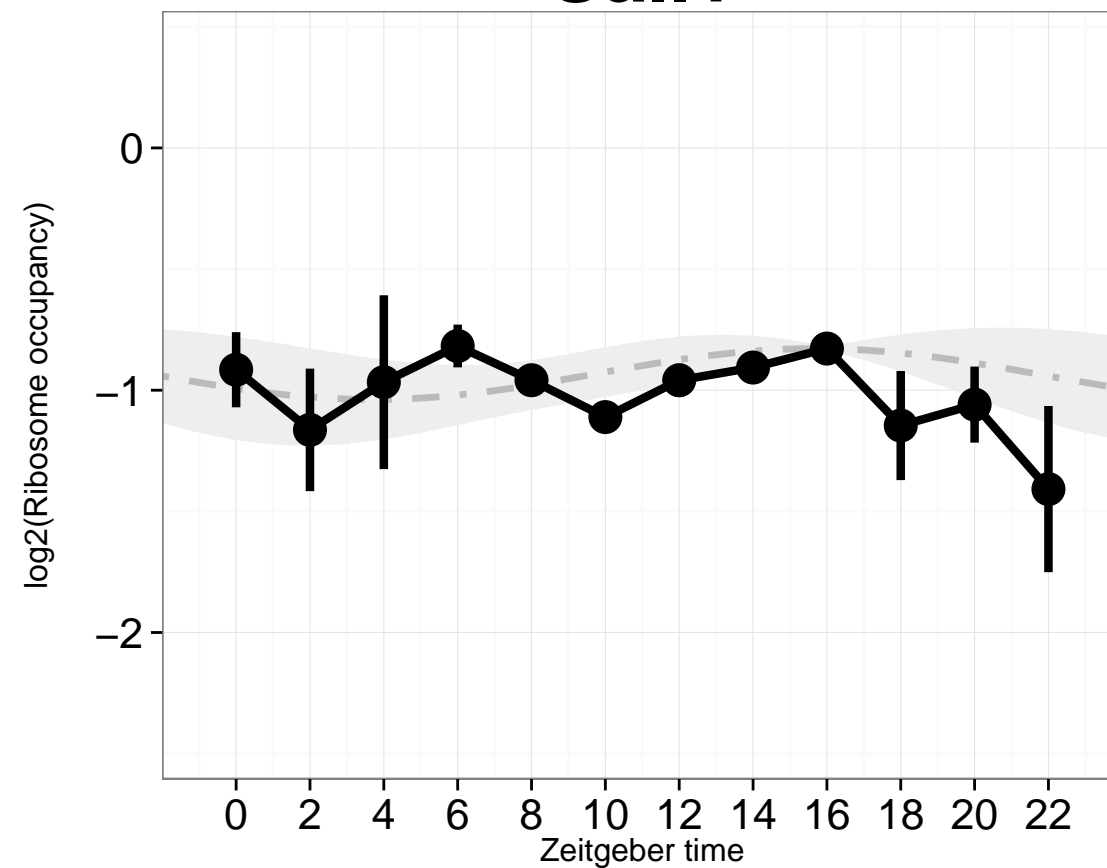

Supplement: SuppDataset_1.zip [file Sall1_set_D.pdf › Supplemental Dataset 1/D-mRNA_rhythm_translation_rhyth/Sall1_set_D.pdf]

## Sbk1

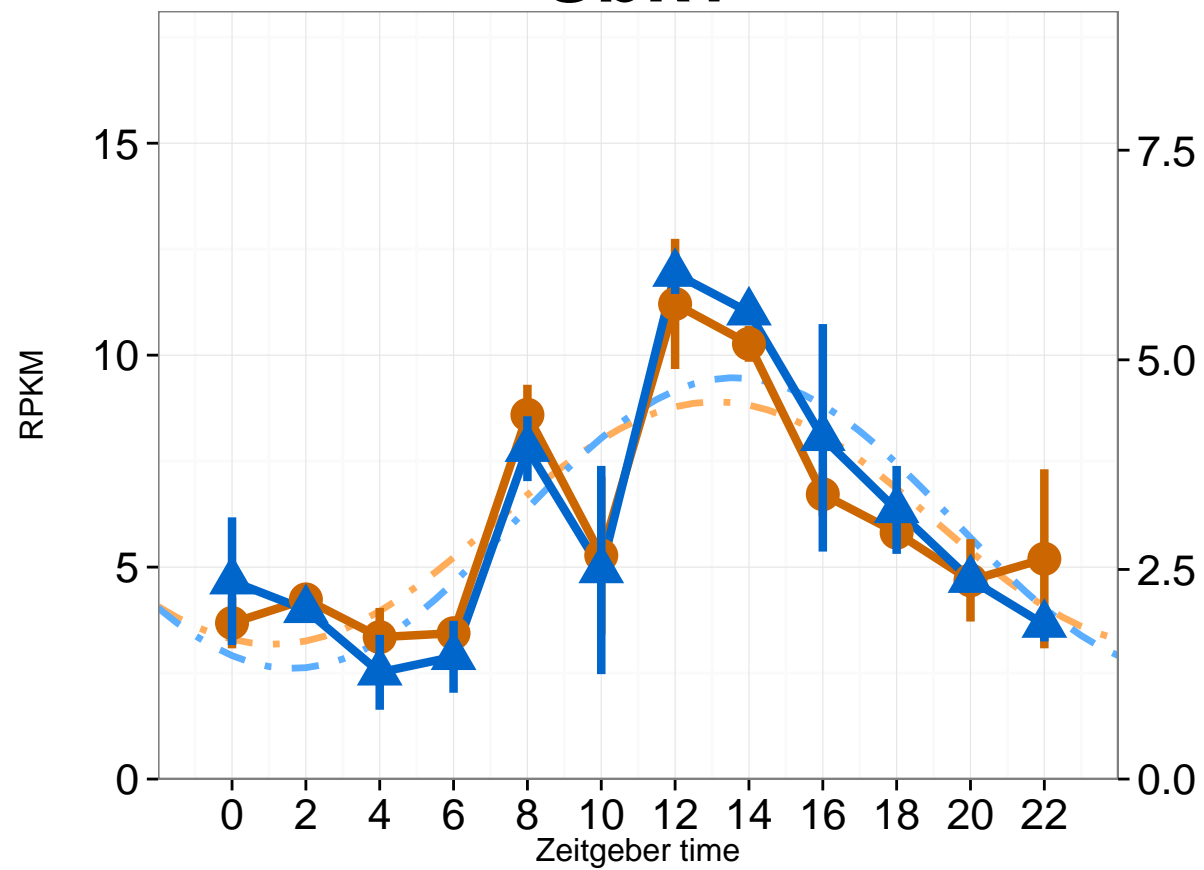

## Sbk1

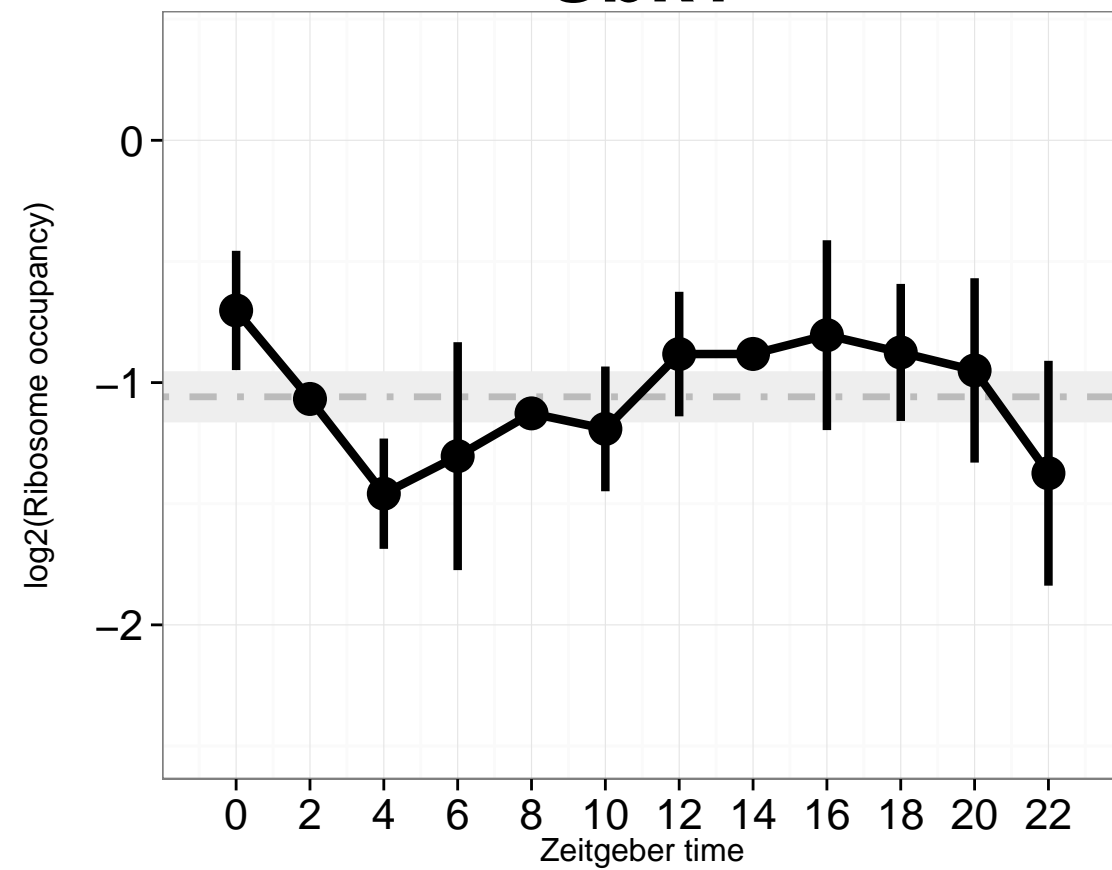

Supplement: SuppDataset_1.zip [file Sbk1_set_D.pdf › Supplemental Dataset 1/D-mRNA_rhythm_translation_rhyth/Sbk1_set_D.pdf]

# Scamp1

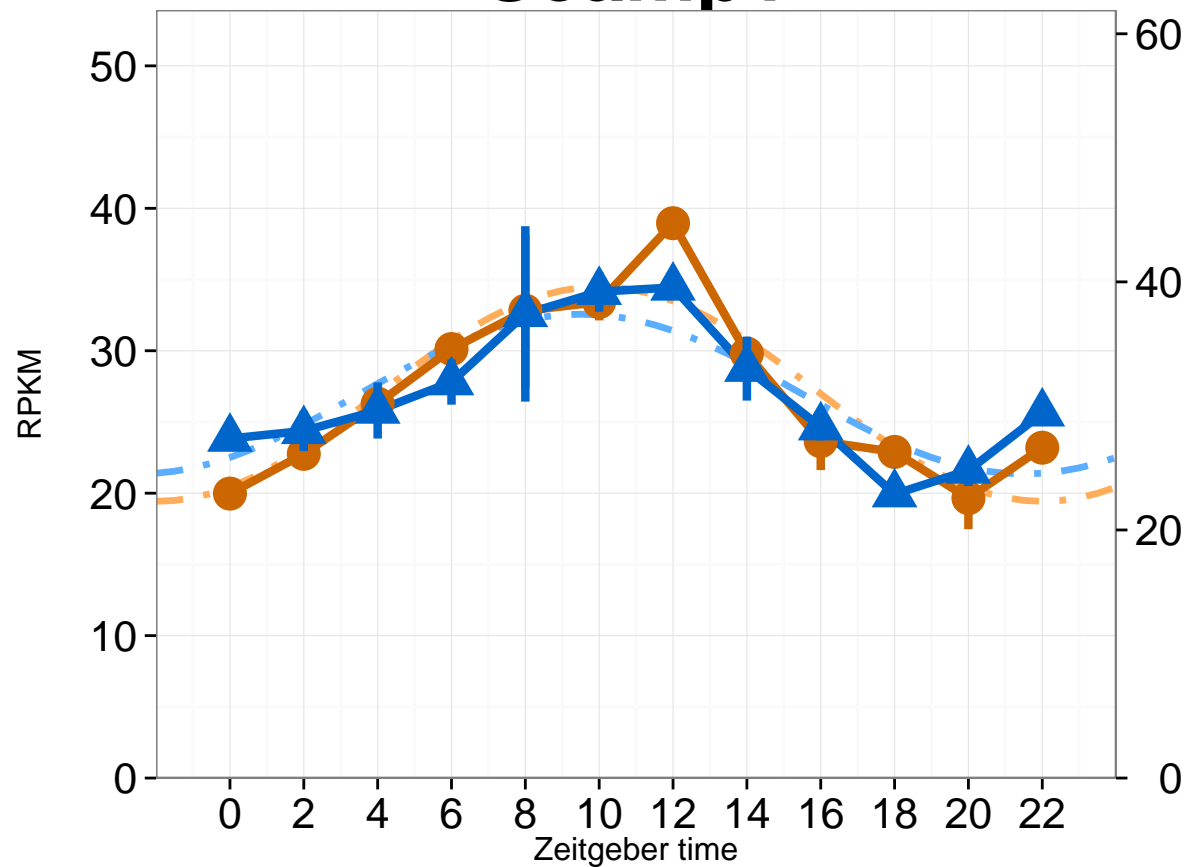

# Scamp1

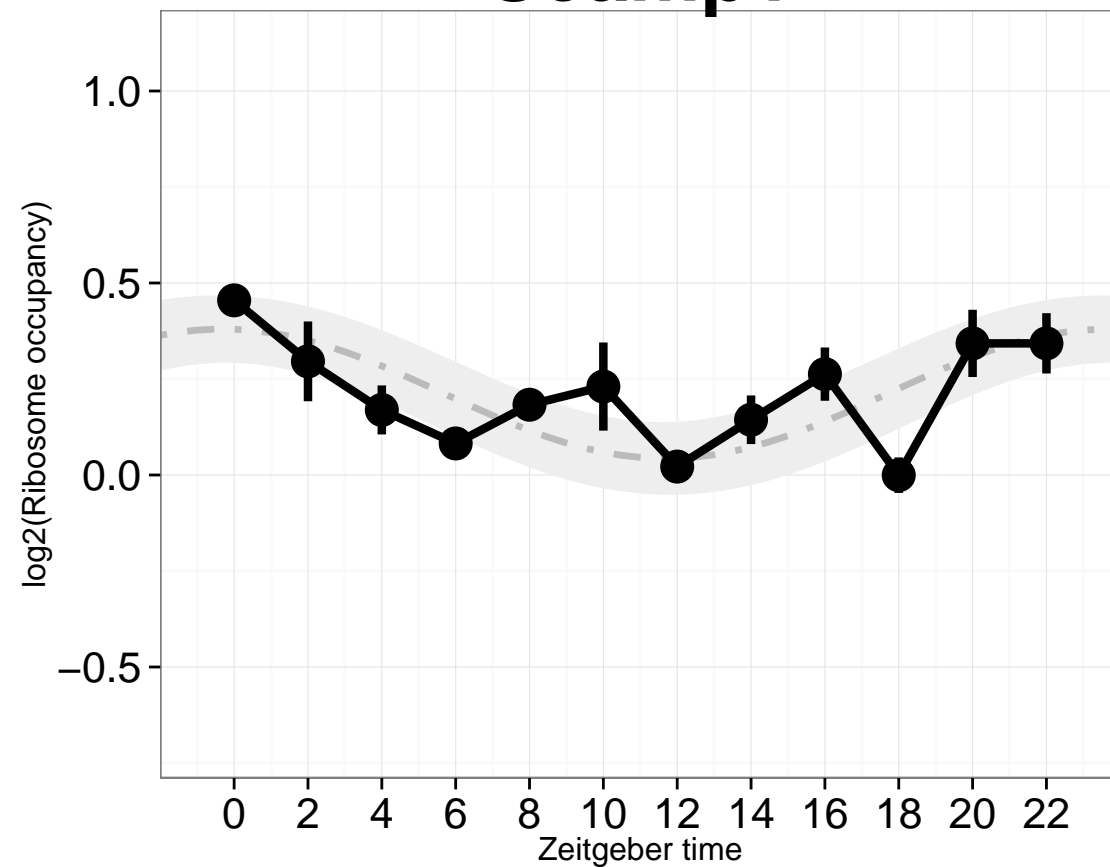

Supplement: SuppDataset_1.zip [file Scamp1_set_D.pdf › Supplemental Dataset 1/D-mRNA_rhythm_translation_rhyth/Scamp1_set_D.pdf]

## Scara5

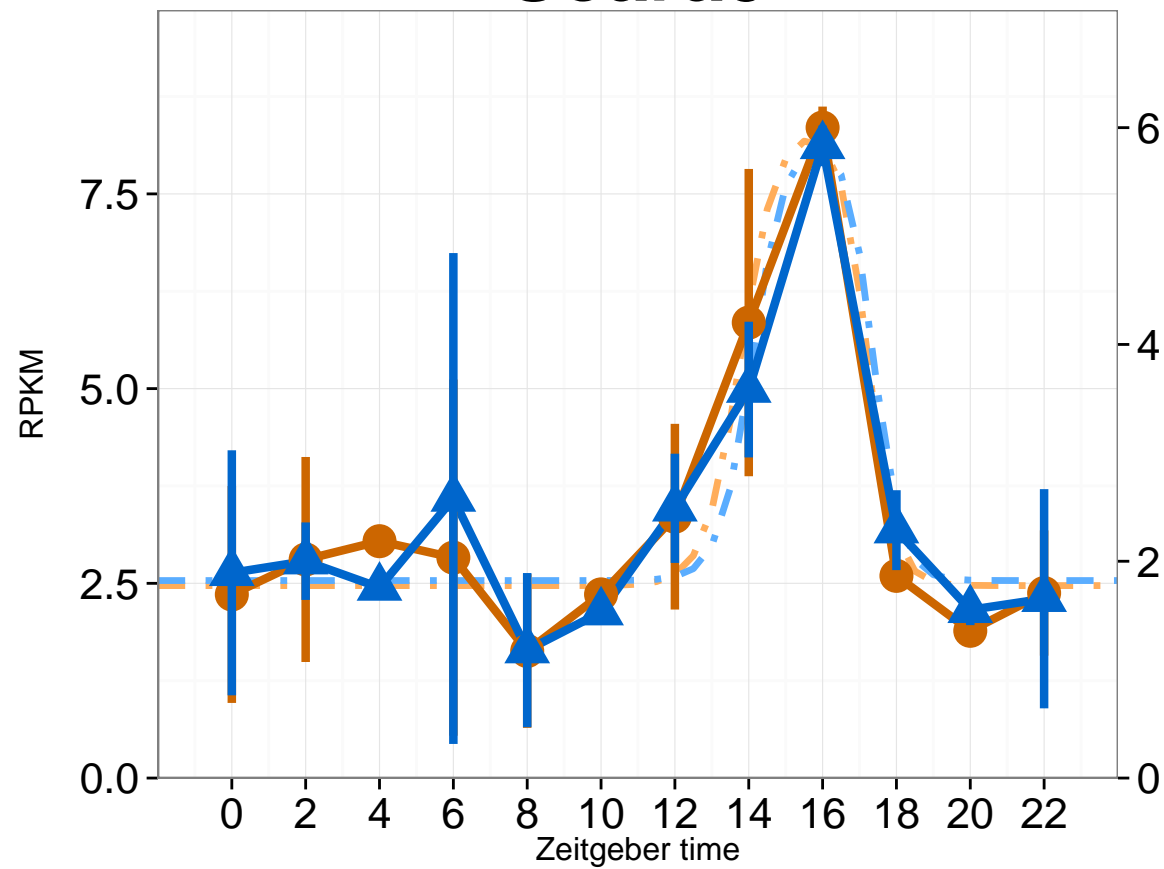

## Scara5

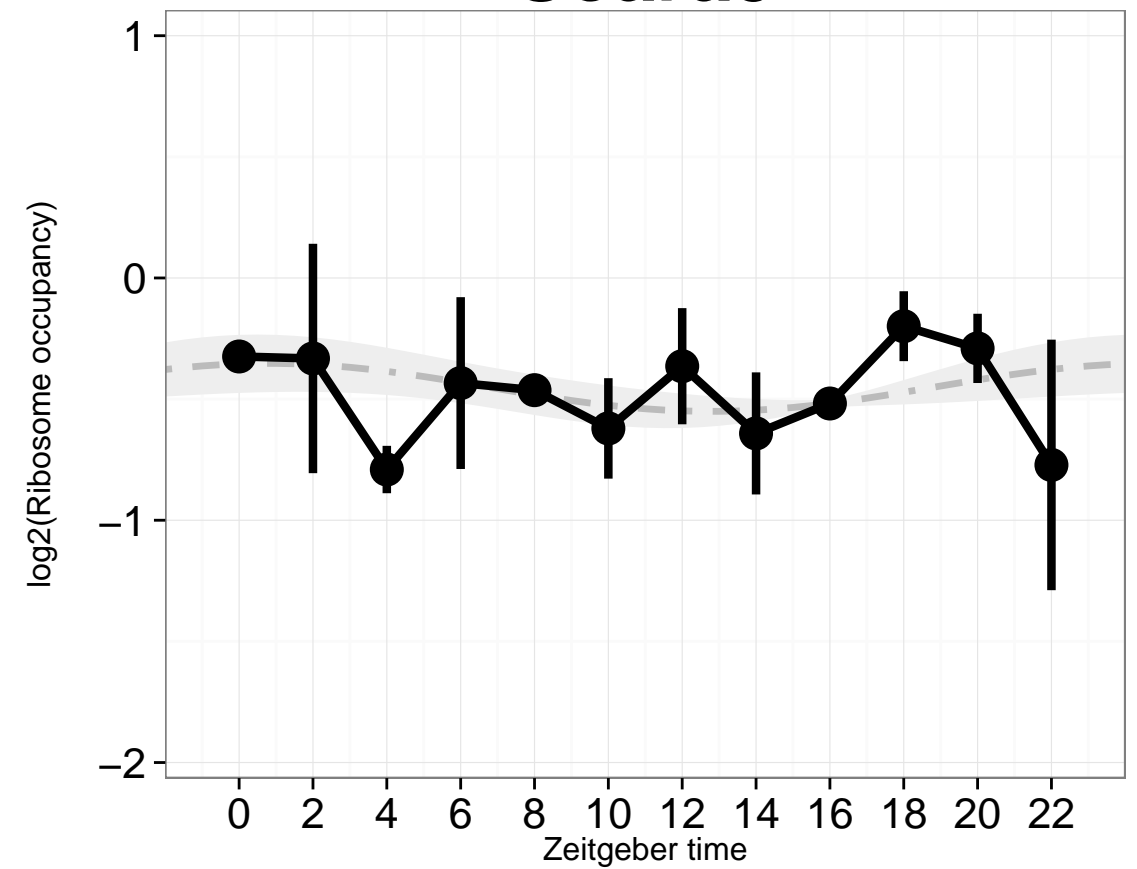

Supplement: SuppDataset_1.zip [file Scara5_set_D.pdf › Supplemental Dataset 1/D-mRNA_rhythm_translation_rhyth/Scara5_set_D.pdf]

## Sdc1

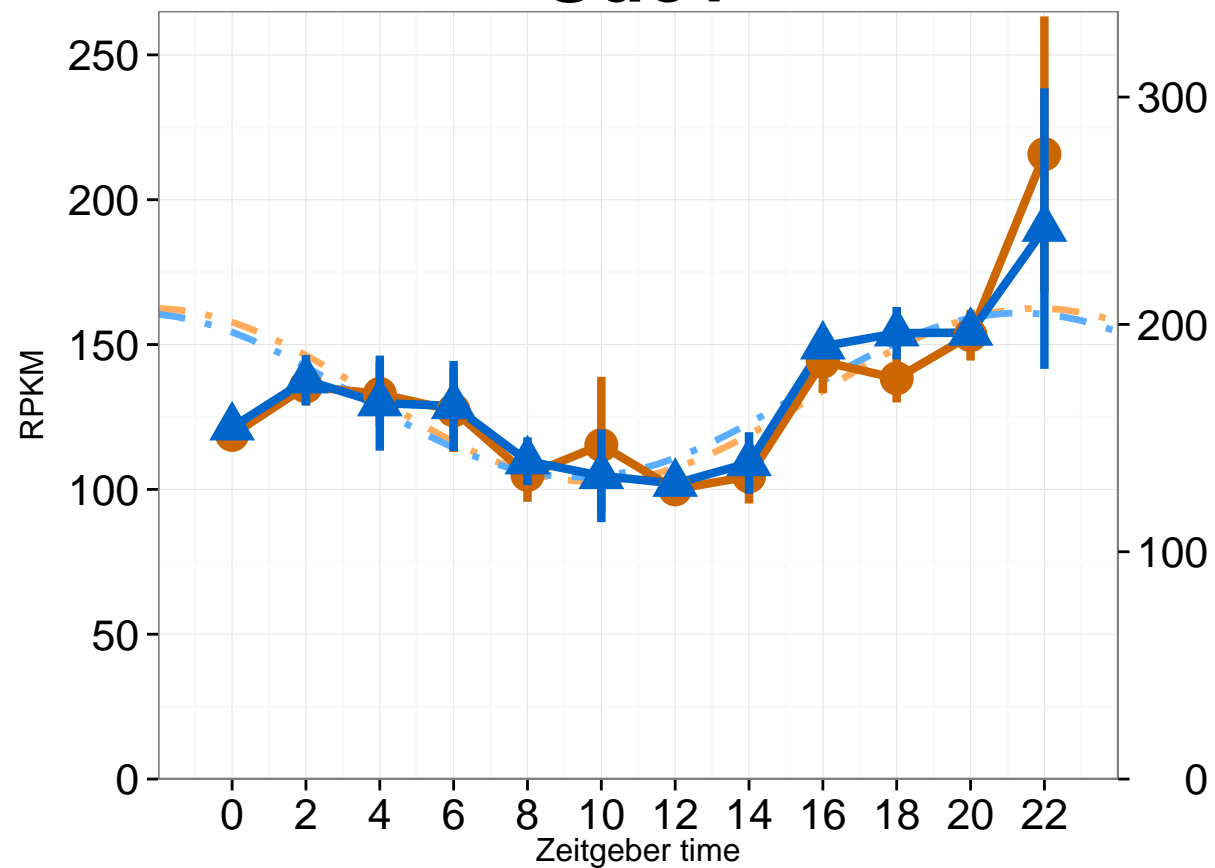

## Sdc1

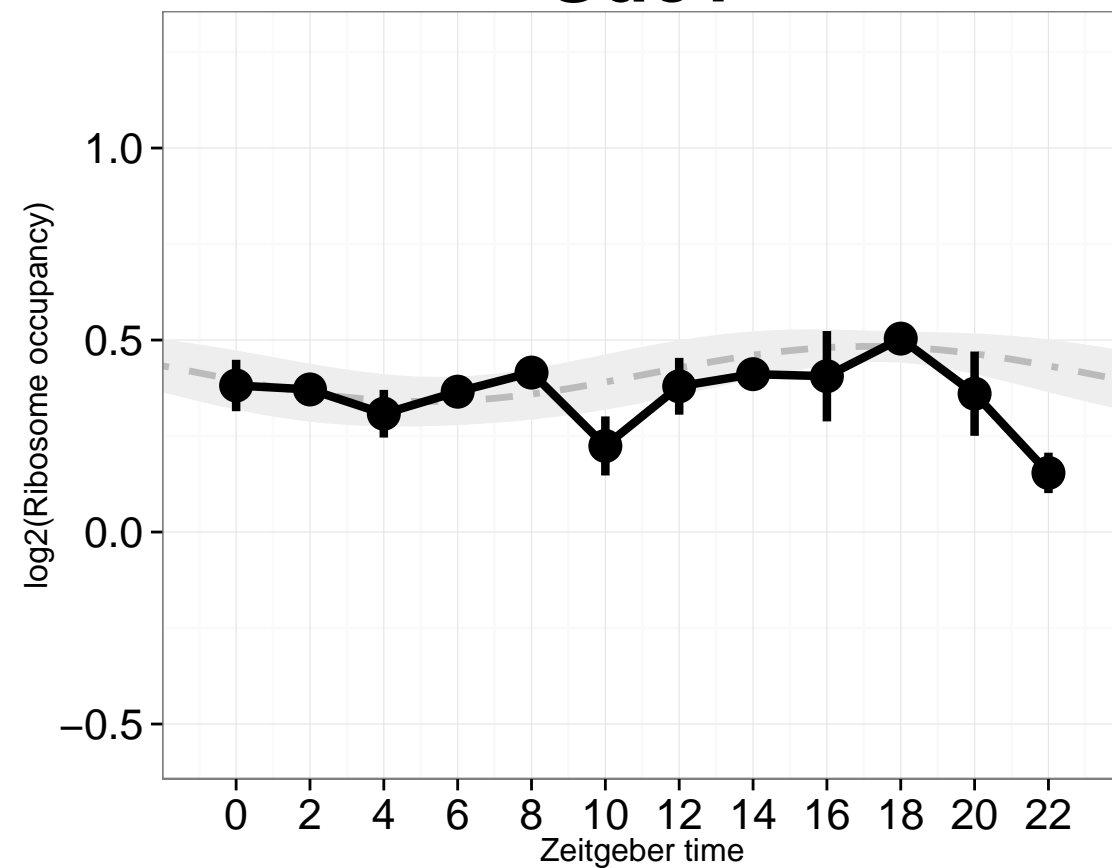

Supplement: SuppDataset_1.zip [file Sdc1_set_D.pdf › Supplemental Dataset 1/D-mRNA_rhythm_translation_rhyth/Sdc1_set_D.pdf]

# Sdf2l1

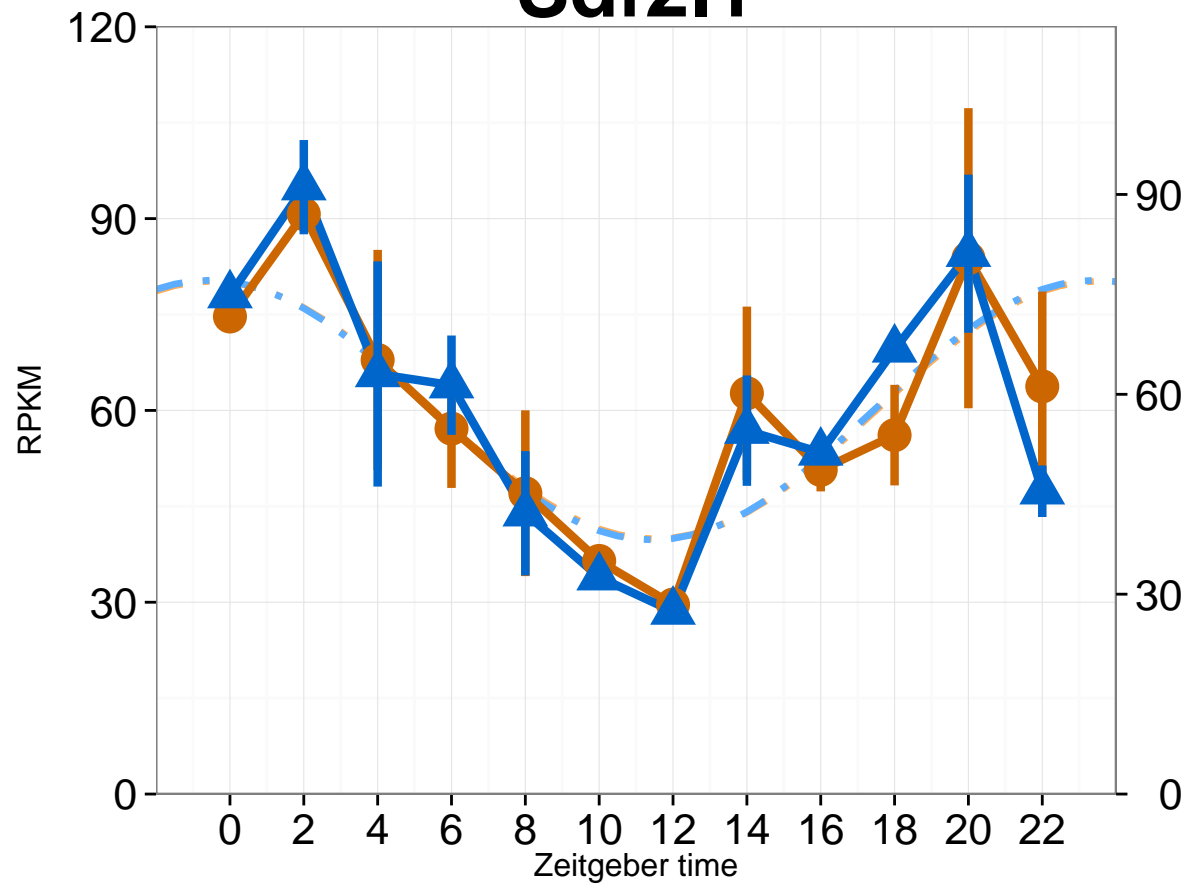

# Sdf2l1

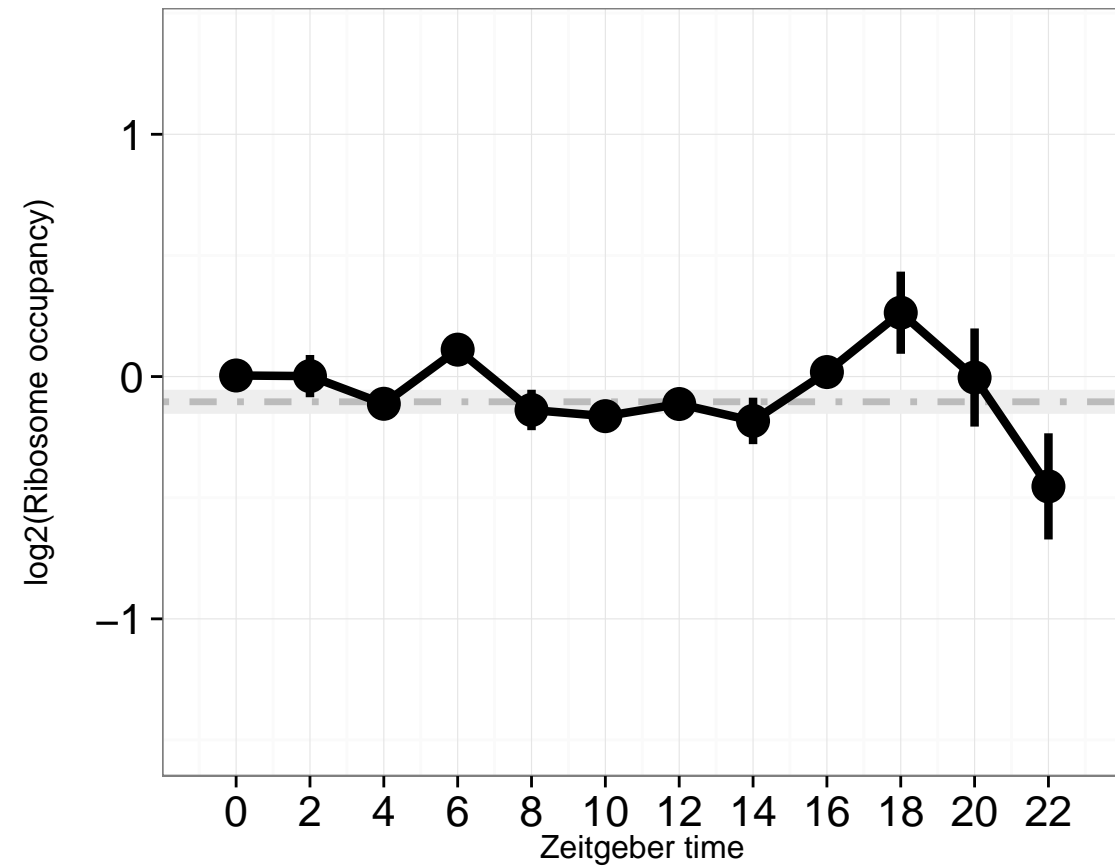

Supplement: SuppDataset_1.zip [file Sdf2l1_set_D.pdf › Supplemental Dataset 1/D-mRNA_rhythm_translation_rhyth/Sdf2l1_set_D.pdf]

# Sdr42e1

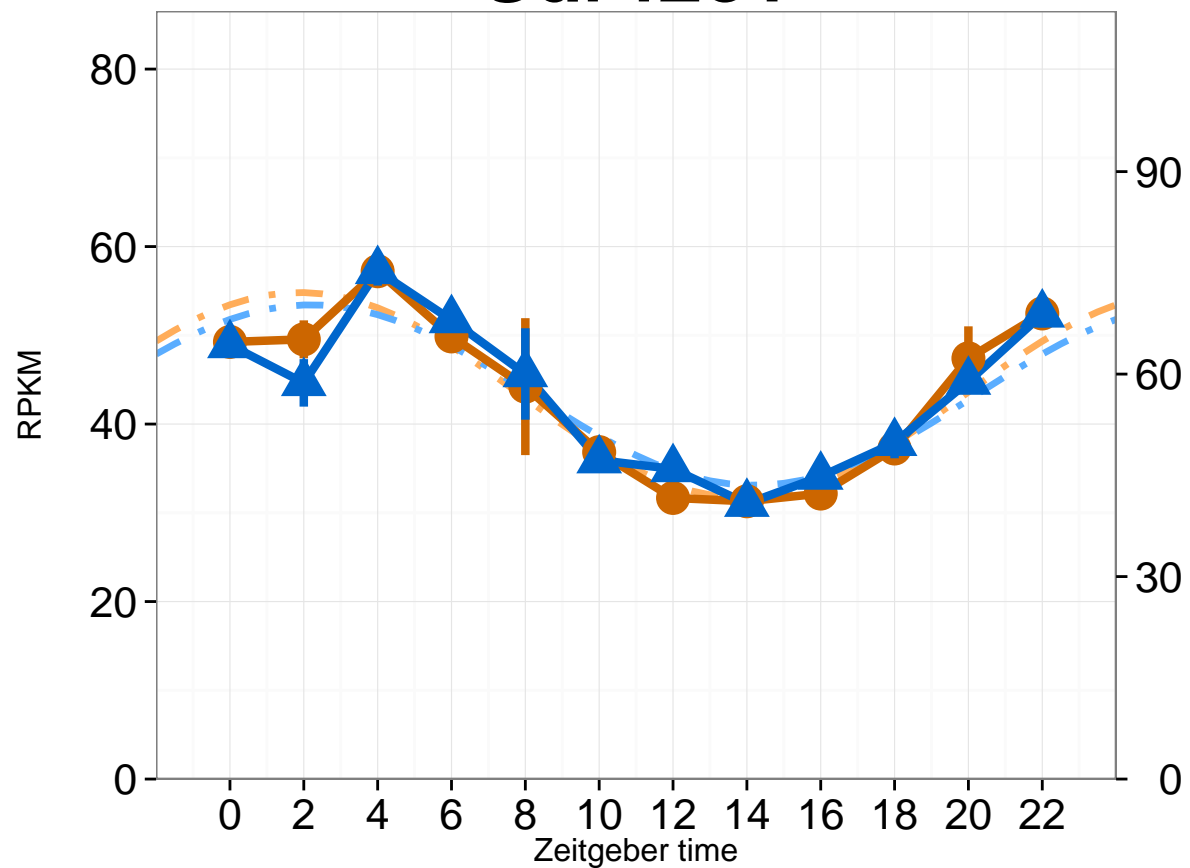

# Sdr42e1

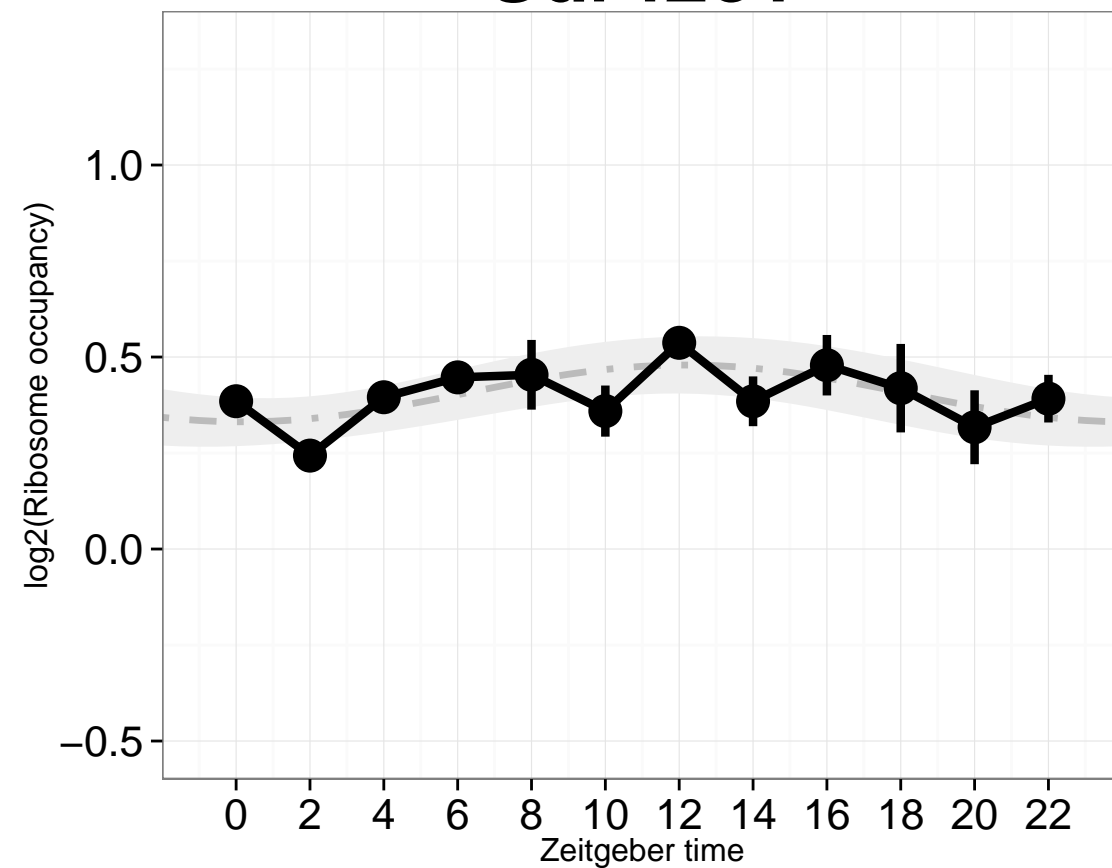

Supplement: SuppDataset_1.zip [file Sdr42e1_set_D.pdf › Supplemental Dataset 1/D-mRNA_rhythm_translation_rhyth/Sdr42e1_set_D.pdf]

## Sdr9c7

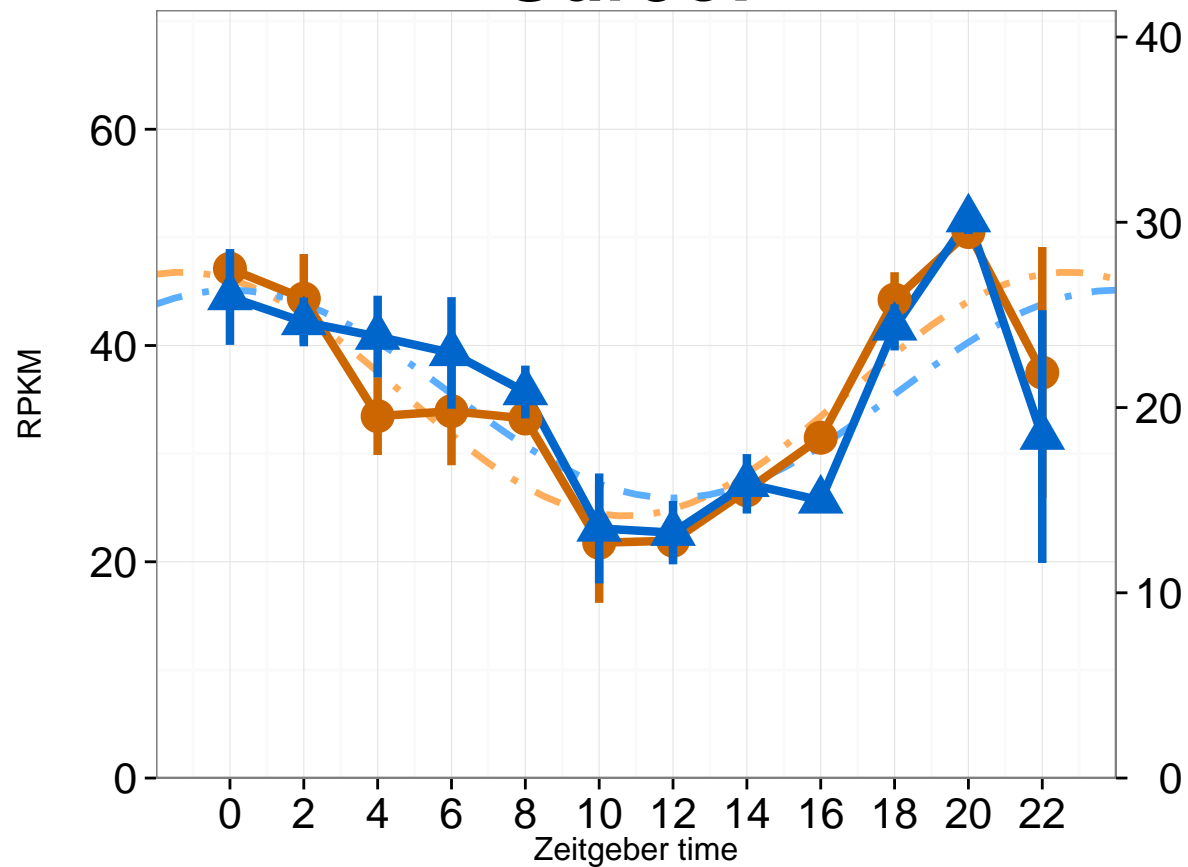

## Sdr9c7

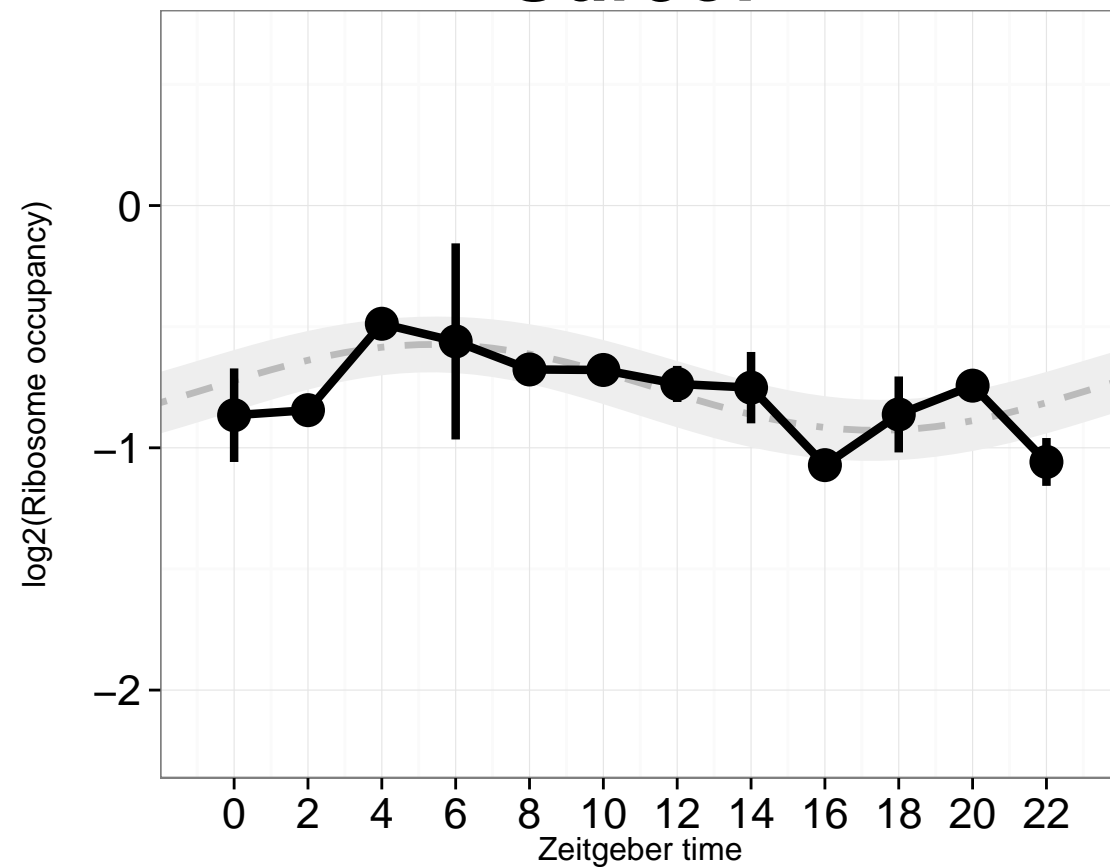

Supplement: SuppDataset_1.zip [file Sdr9c7_set_D.pdf › Supplemental Dataset 1/D-mRNA_rhythm_translation_rhyth/Sdr9c7_set_D.pdf]

## Sec14l1

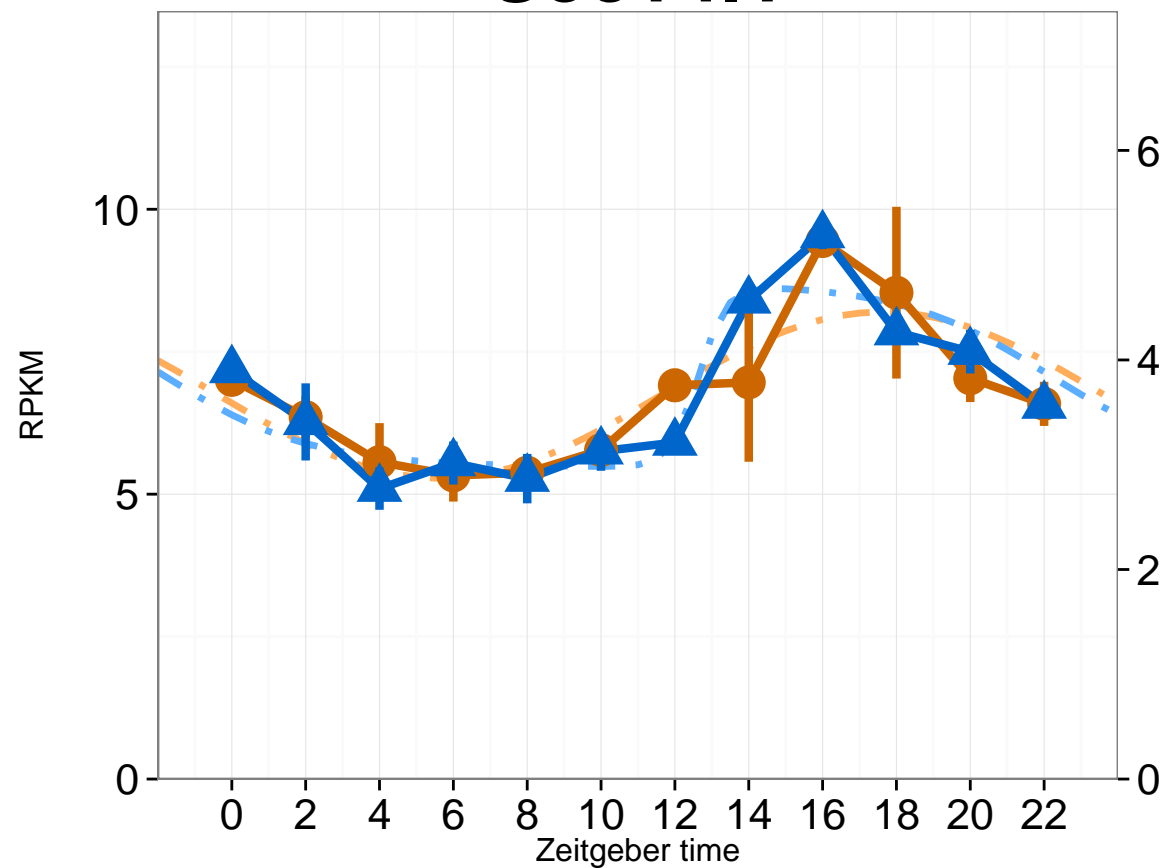

## Sec14l1

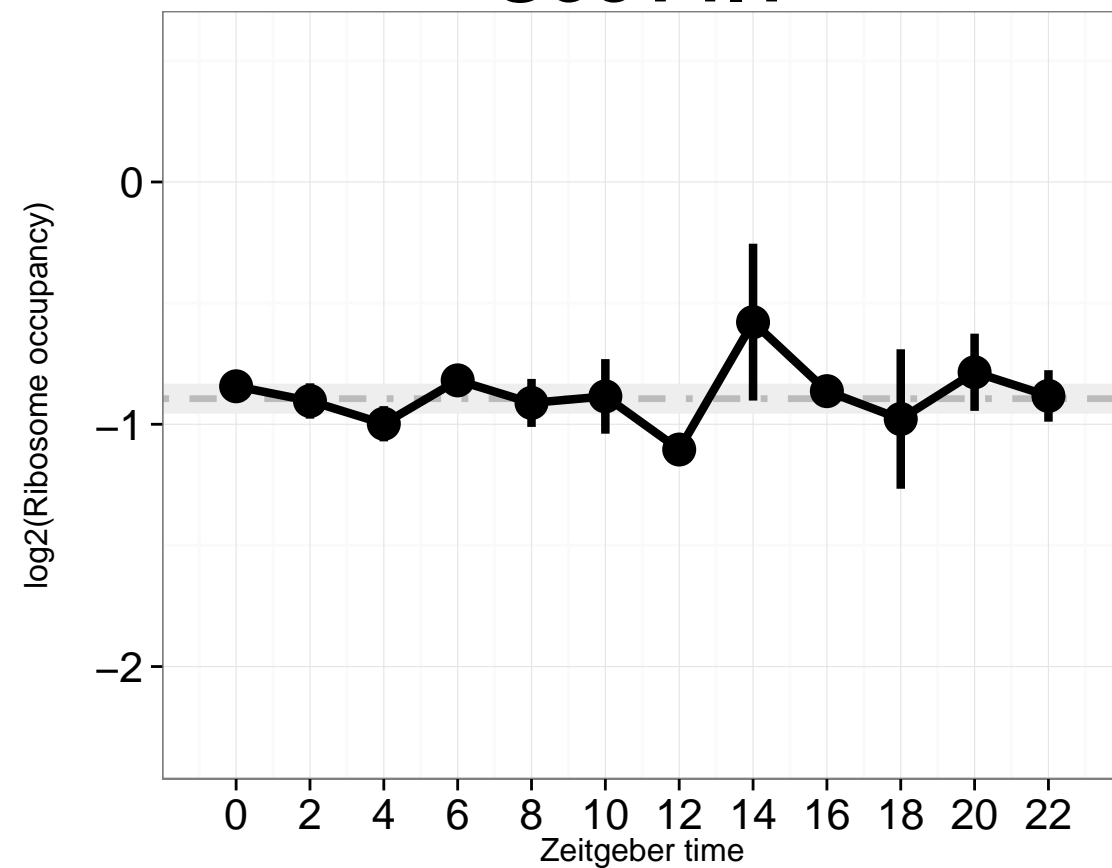

Supplement: SuppDataset_1.zip [file Sec14l1_set_D.pdf › Supplemental Dataset 1/D-mRNA_rhythm_translation_rhyth/Sec14l1_set_D.pdf]

**Sept11**

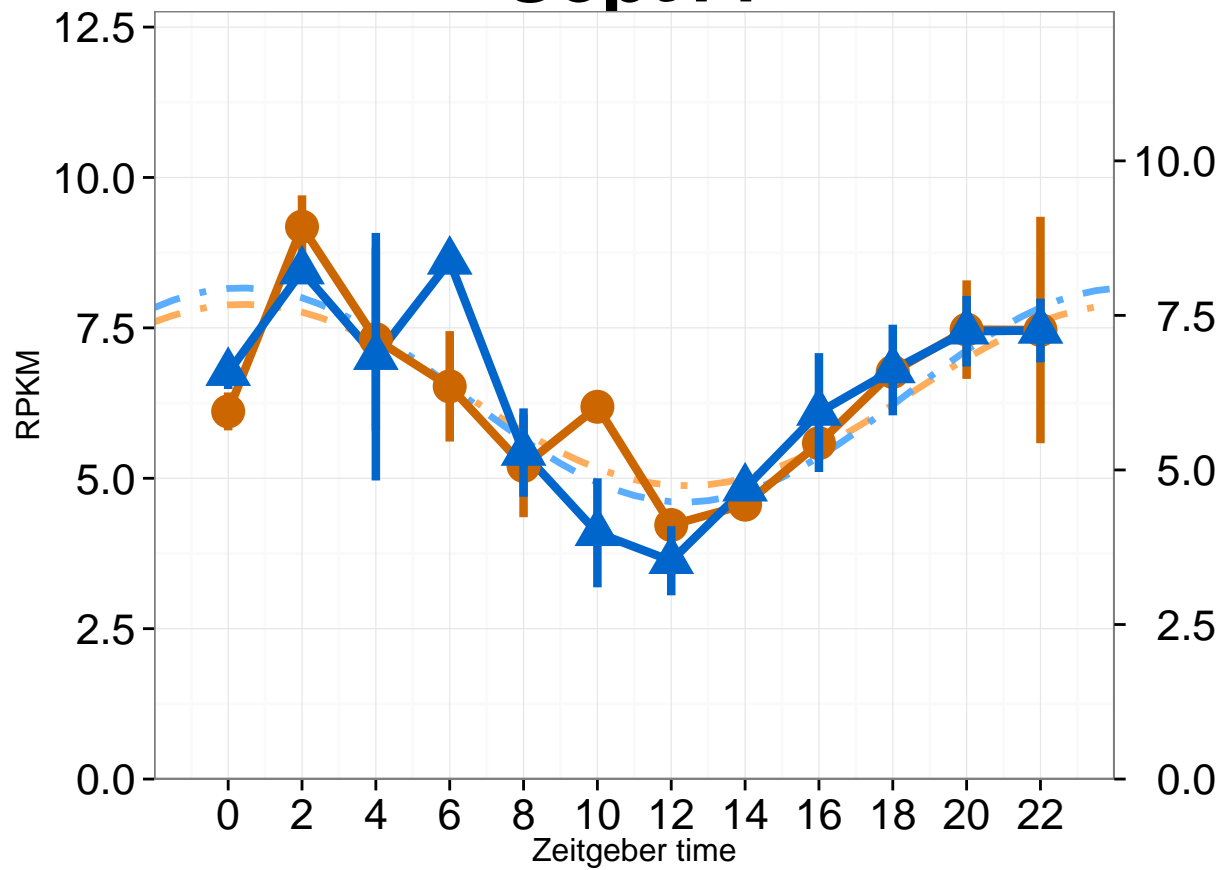

**Sept11**

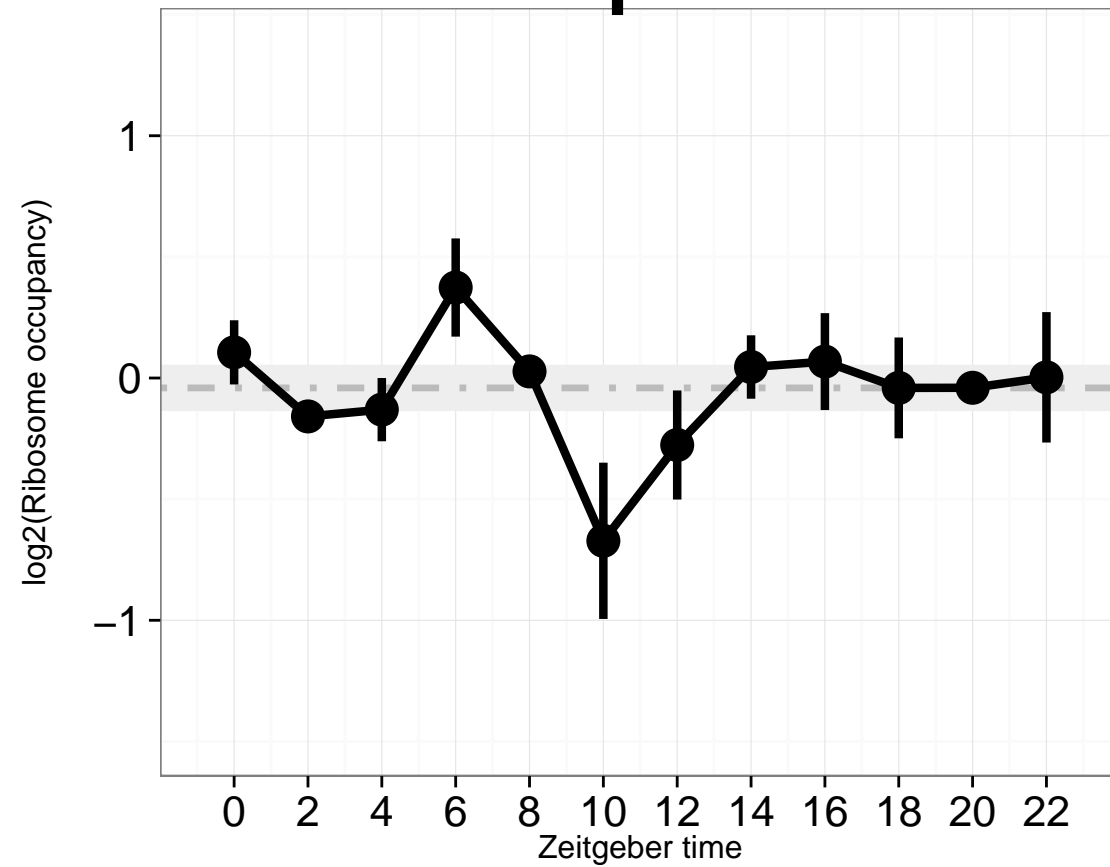

Supplement: SuppDataset_1.zip [file Sept11_set_D.pdf › Supplemental Dataset 1/D-mRNA_rhythm_translation_rhyth/Sept11_set_D.pdf]

**Sept9**

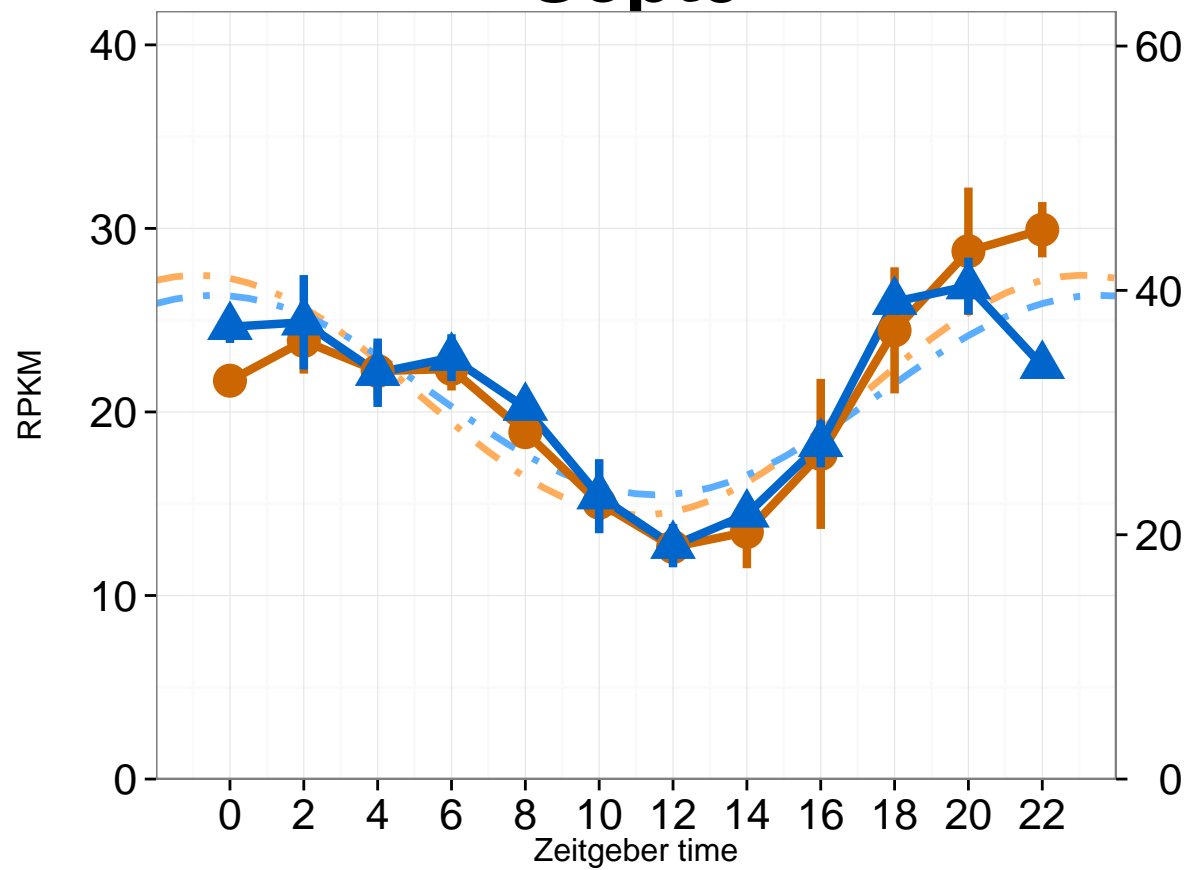

**Sept9**

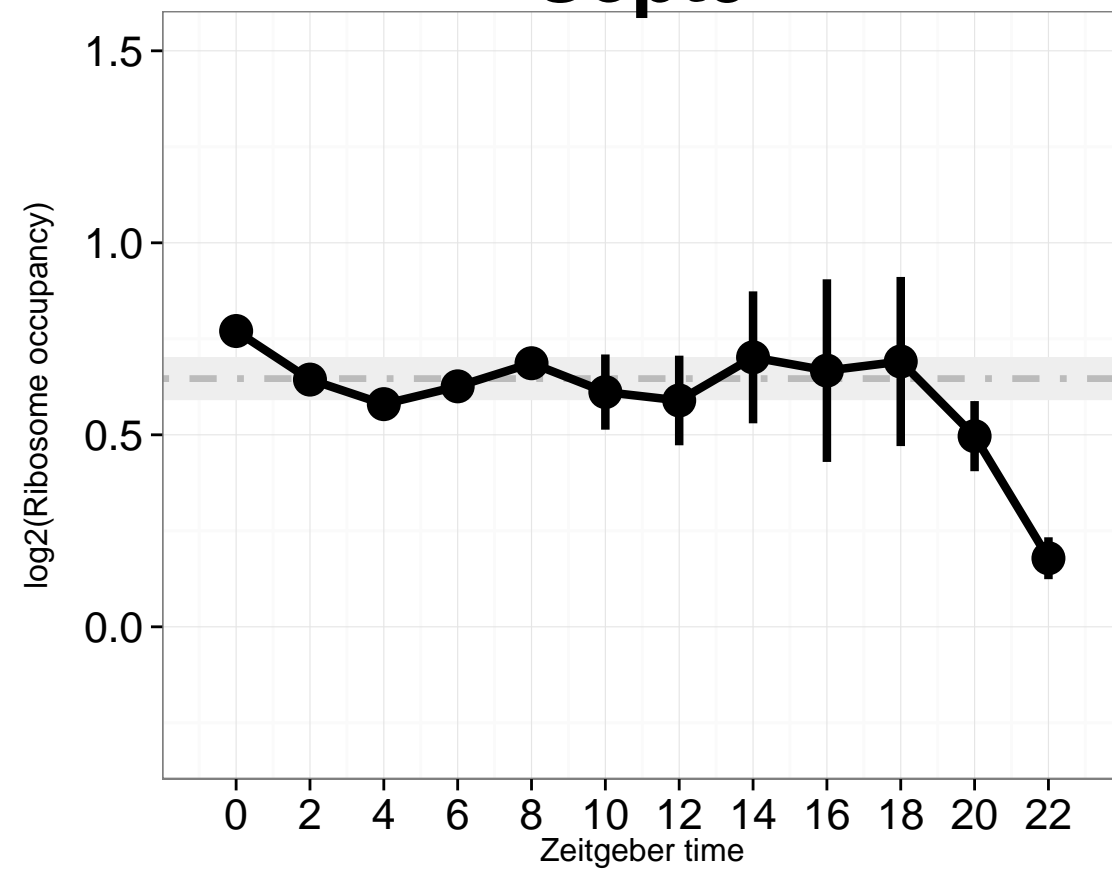

Supplement: SuppDataset_1.zip [file Sept9_set_D.pdf › Supplemental Dataset 1/D-mRNA_rhythm_translation_rhyth/Sept9_set_D.pdf]

## Serpina10

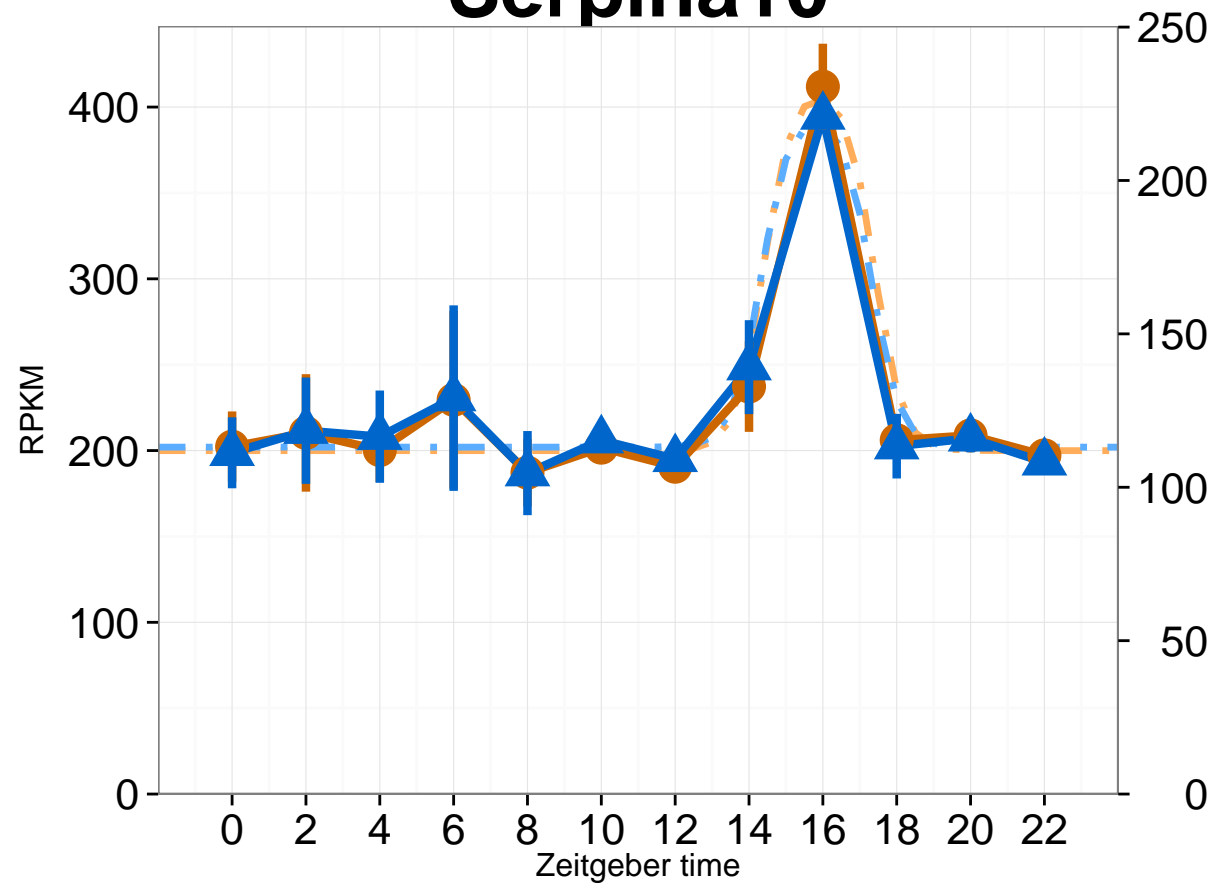

## Serpina10

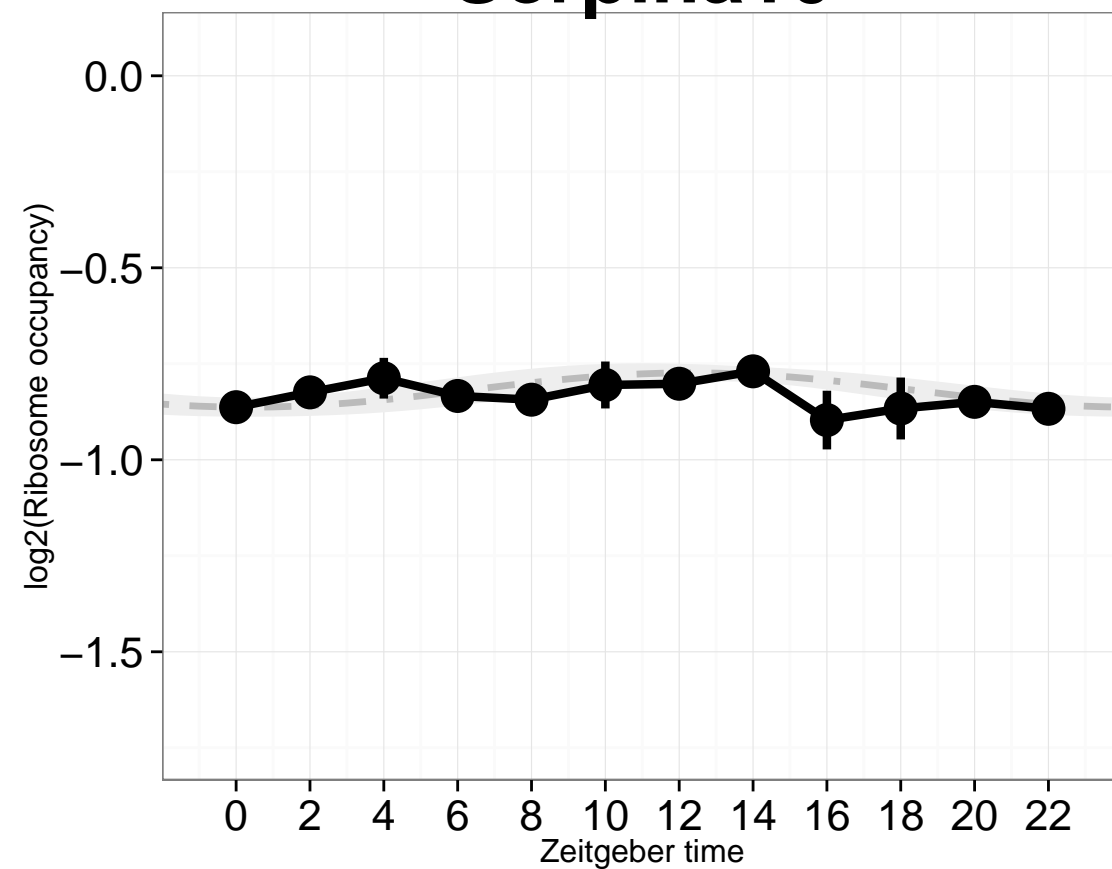

Supplement: SuppDataset_1.zip [file Serpina10_set_D.pdf › Supplemental Dataset 1/D-mRNA_rhythm_translation_rhyth/Serpina10_set_D.pdf]

# Serpina3b

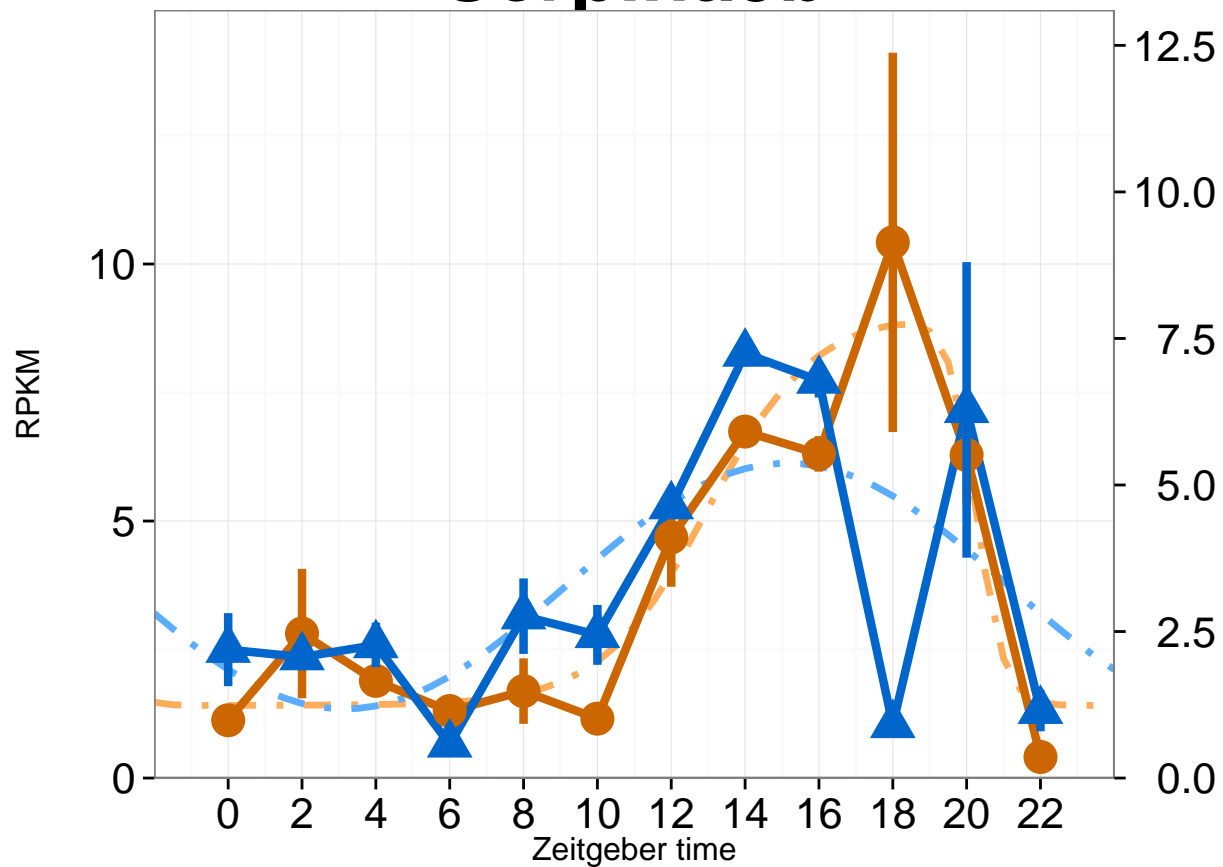

# Serpina3b

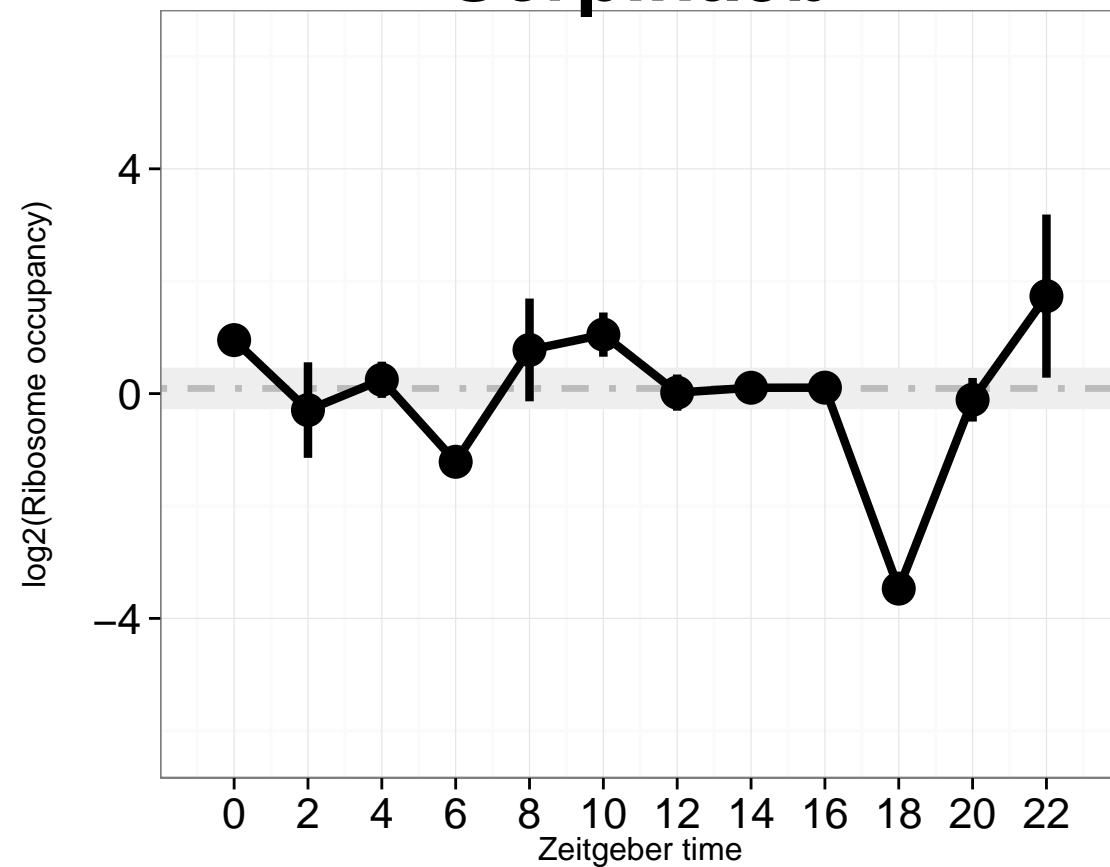

Supplement: SuppDataset_1.zip [file Serpina3b_set_D.pdf › Supplemental Dataset 1/D-mRNA_rhythm_translation_rhyth/Serpina3b_set_D.pdf]

# Serpina3g

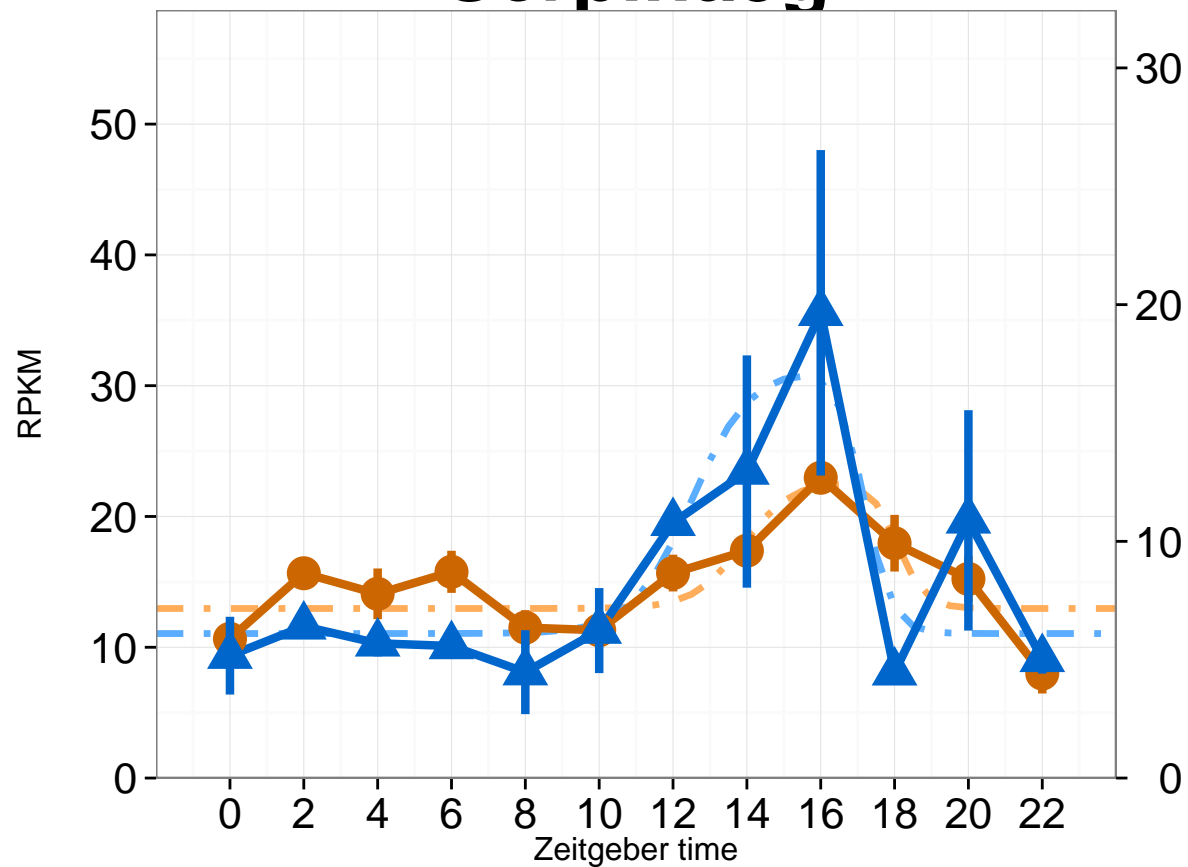

# Serpina3g

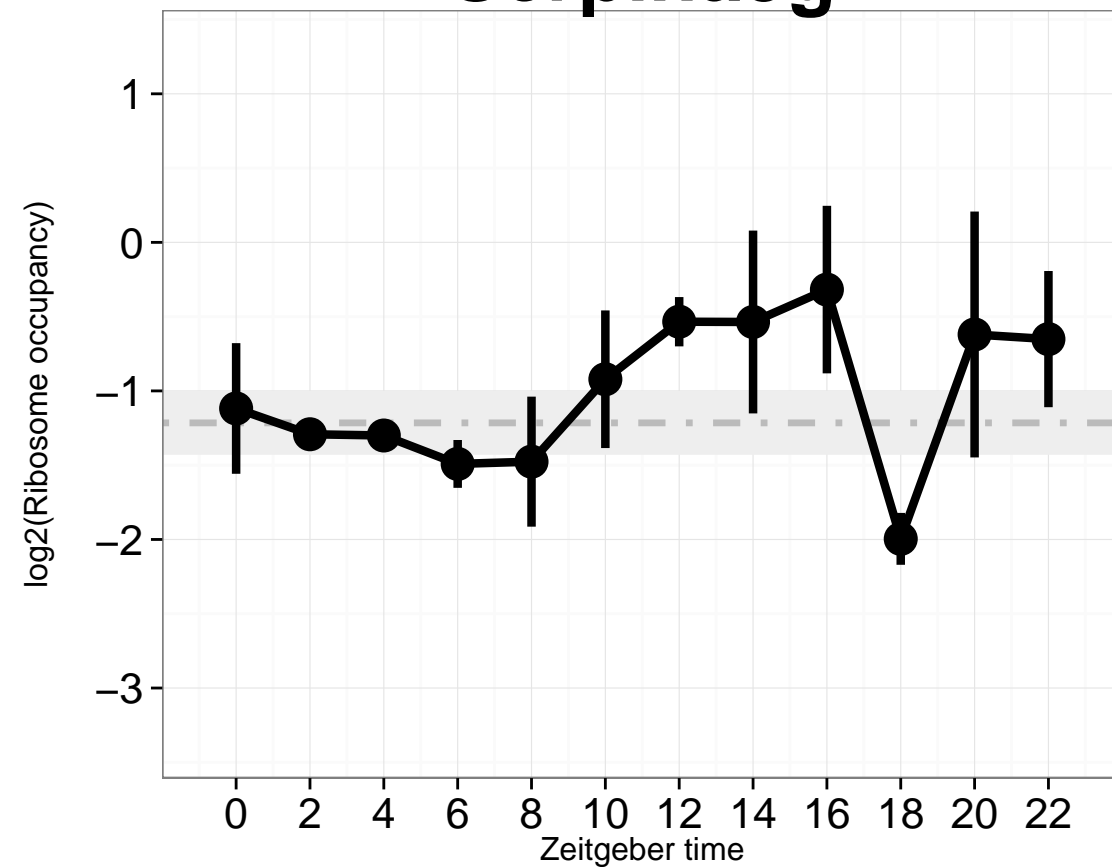

Supplement: SuppDataset_1.zip [file Serpina3g_set_D.pdf › Supplemental Dataset 1/D-mRNA_rhythm_translation_rhyth/Serpina3g_set_D.pdf]

# Serpina3n

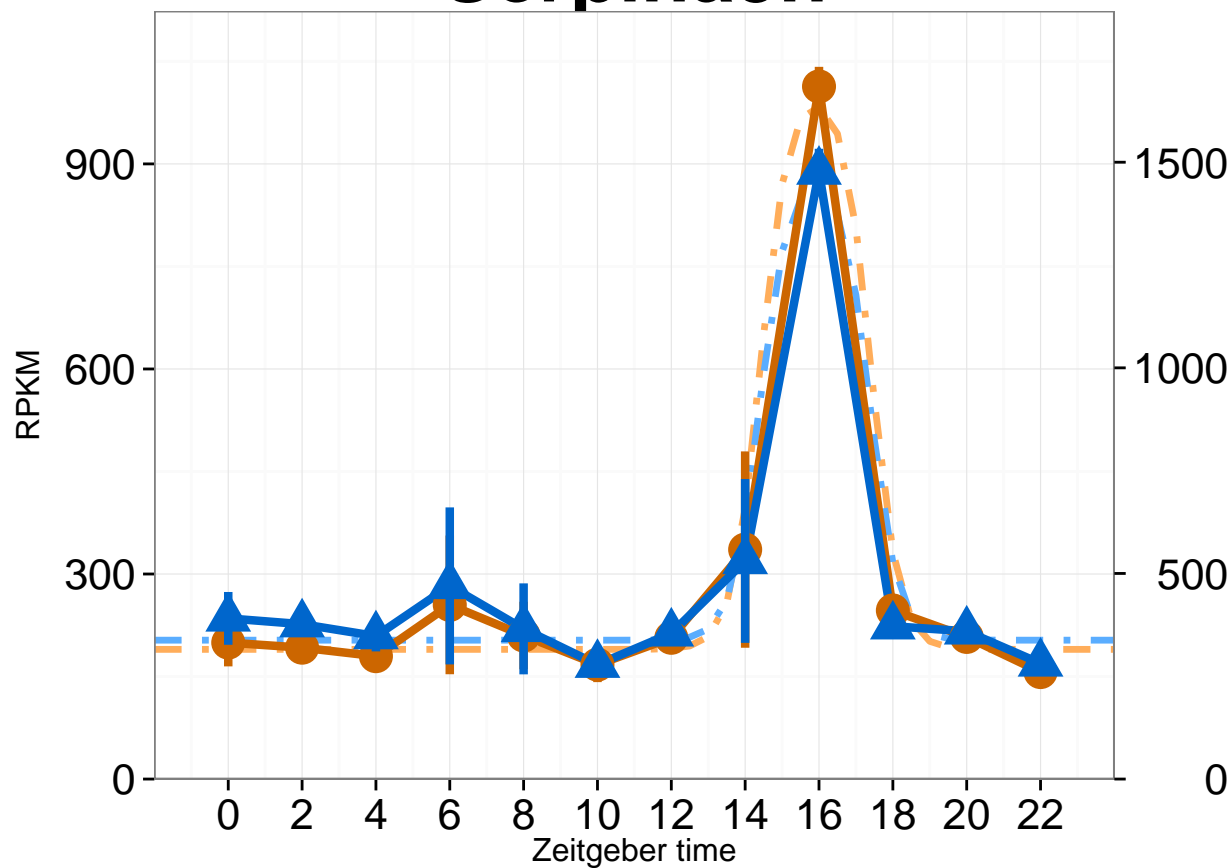

# Serpina3n

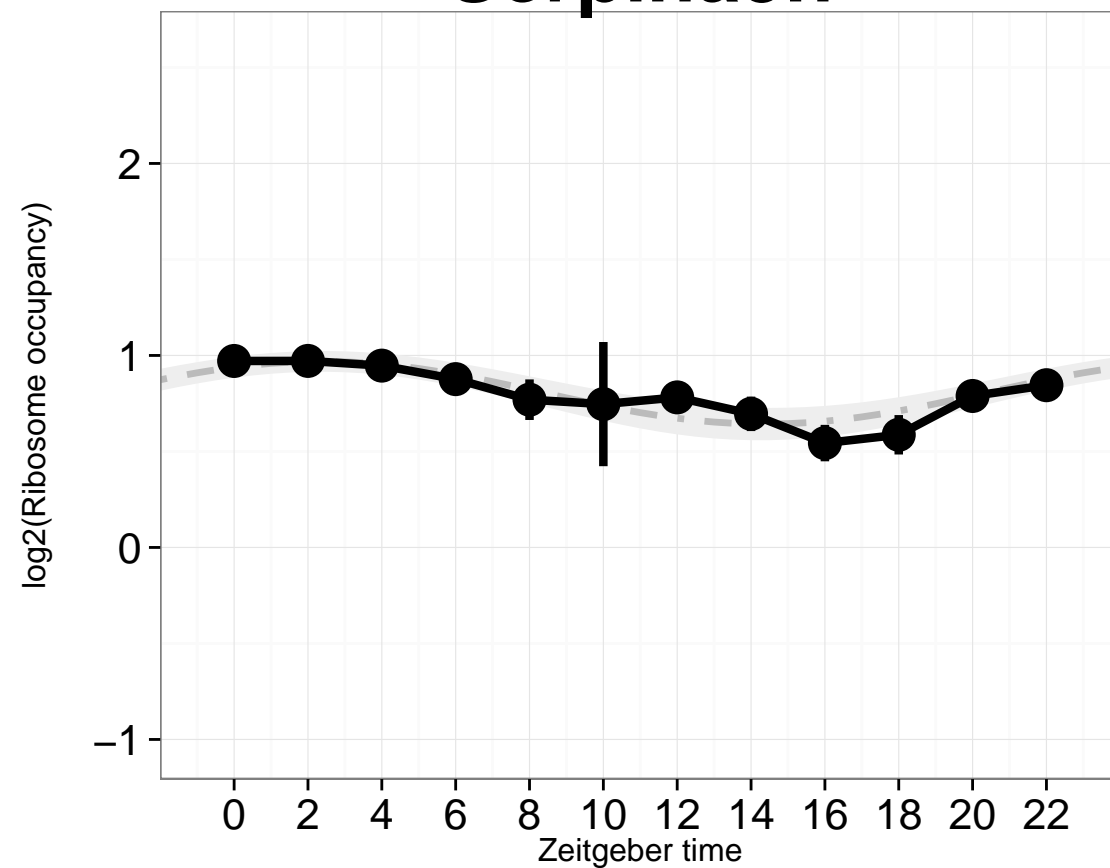

Supplement: SuppDataset_1.zip [file Serpina3n_set_D.pdf › Supplemental Dataset 1/D-mRNA_rhythm_translation_rhyth/Serpina3n_set_D.pdf]

## Serpina6

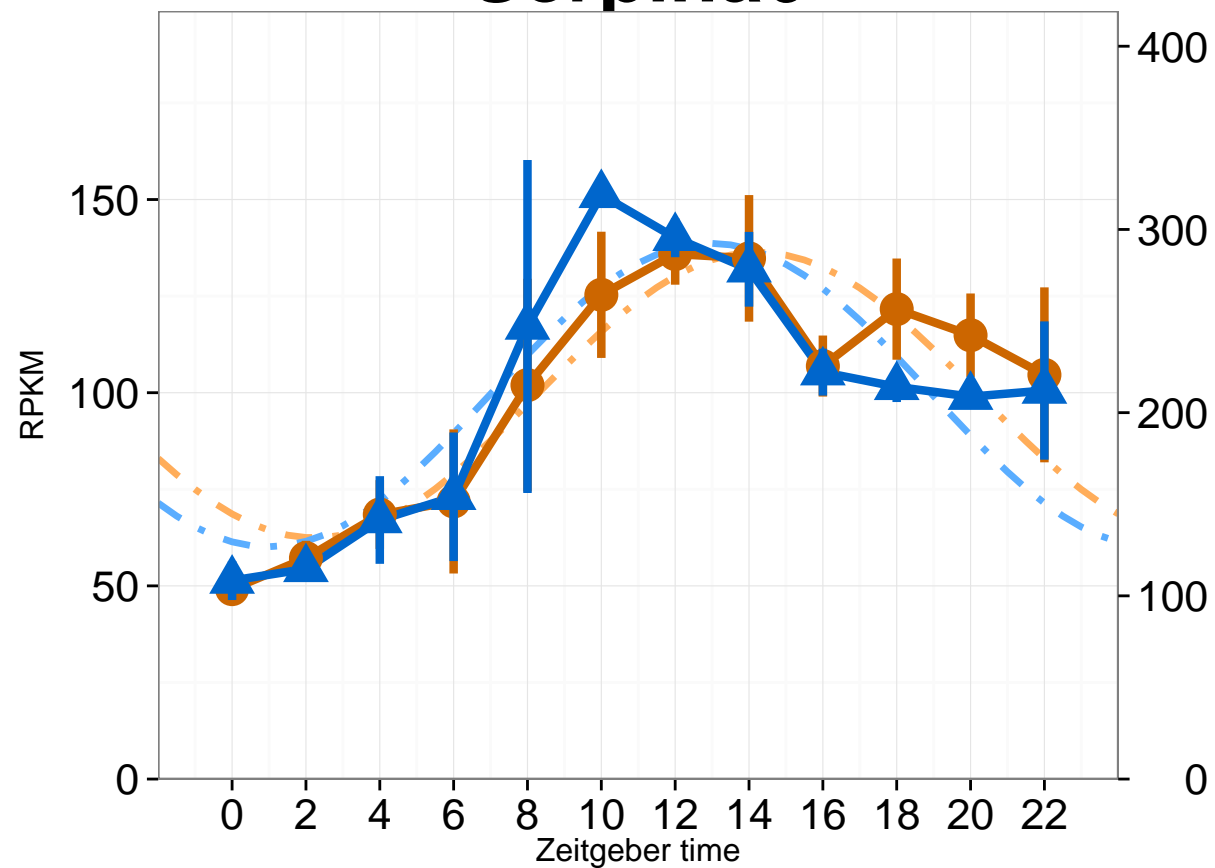

## Serpina6

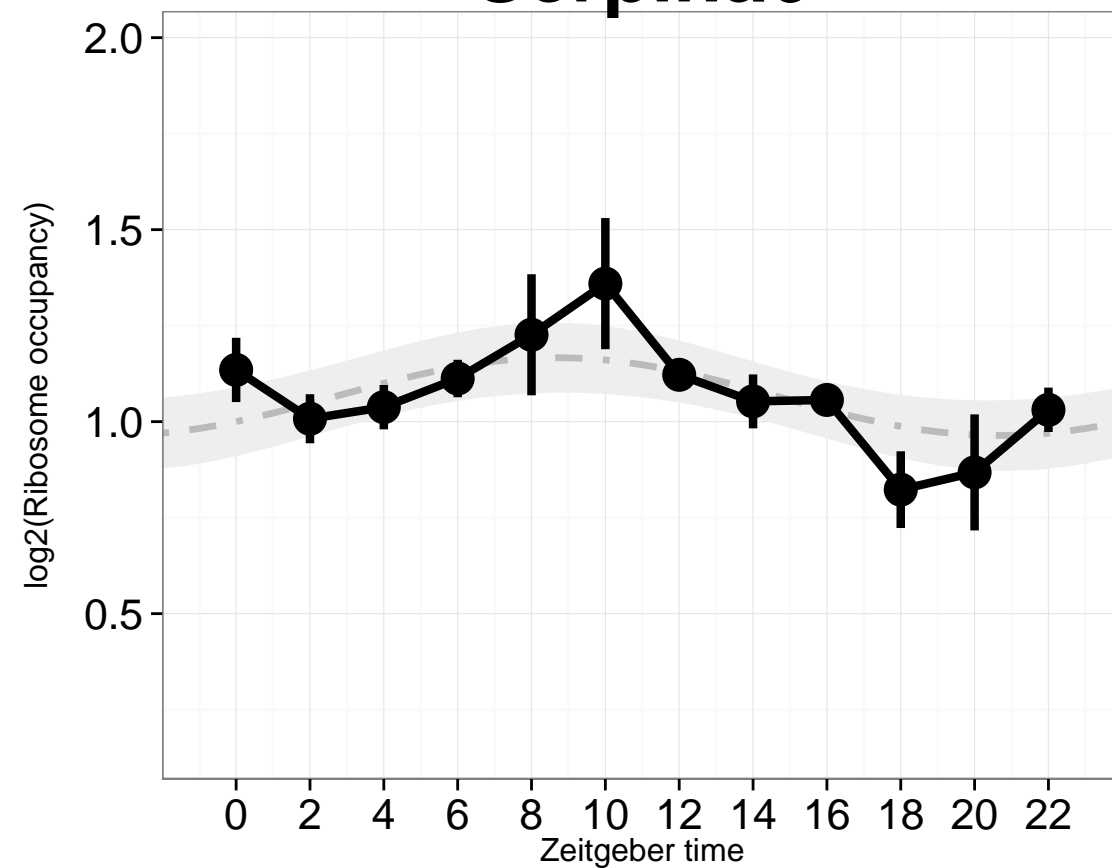

Supplement: SuppDataset_1.zip [file Serpina6_set_D.pdf › Supplemental Dataset 1/D-mRNA_rhythm_translation_rhyth/Serpina6_set_D.pdf]

# Serpina1a

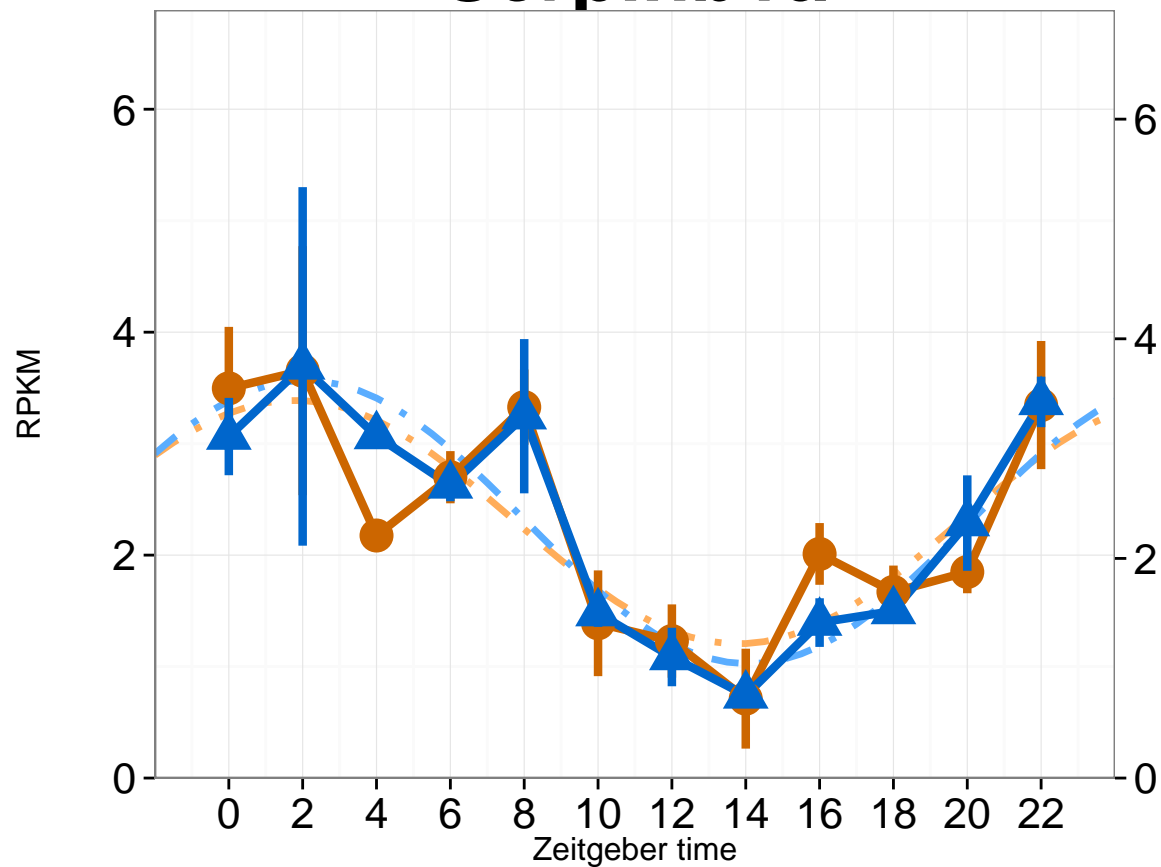

# Serpina1a

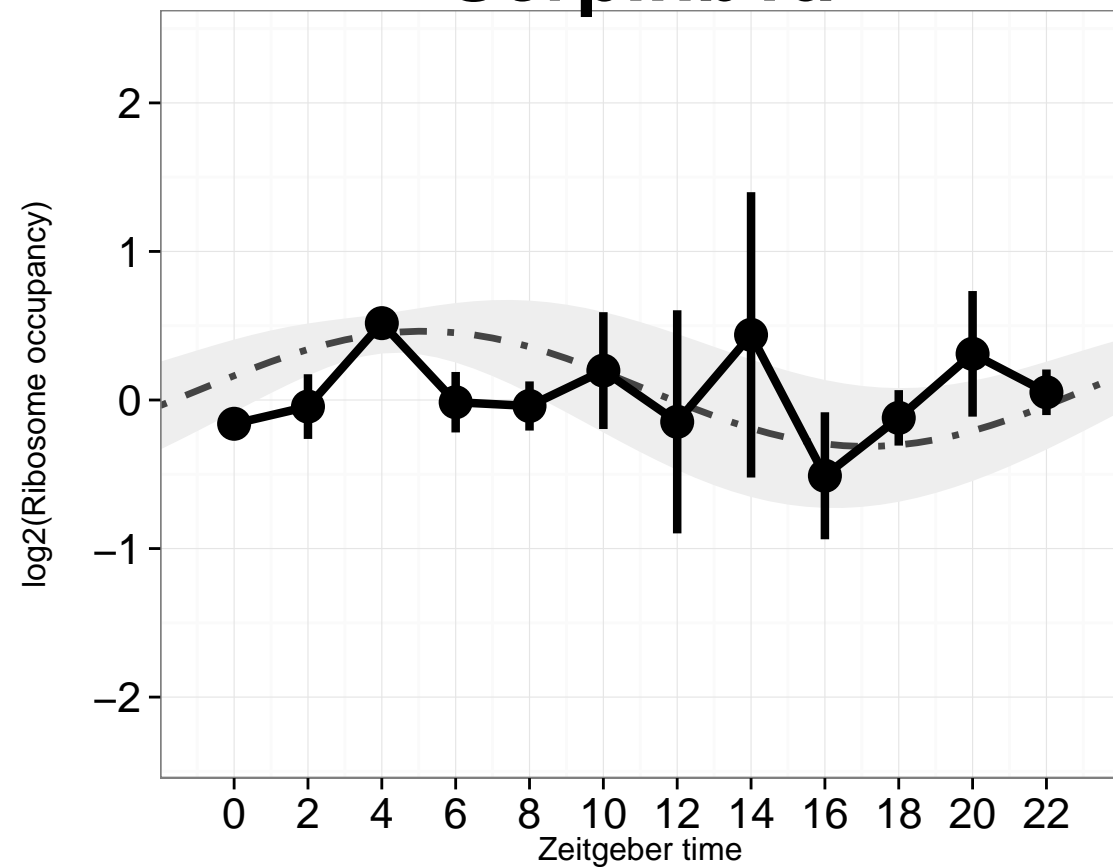

Supplement: SuppDataset_1.zip [file Serpinb1a_set_D.pdf › Supplemental Dataset 1/D-mRNA_rhythm_translation_rhyth/Serpinb1a_set_D.pdf]

# Serpina6b

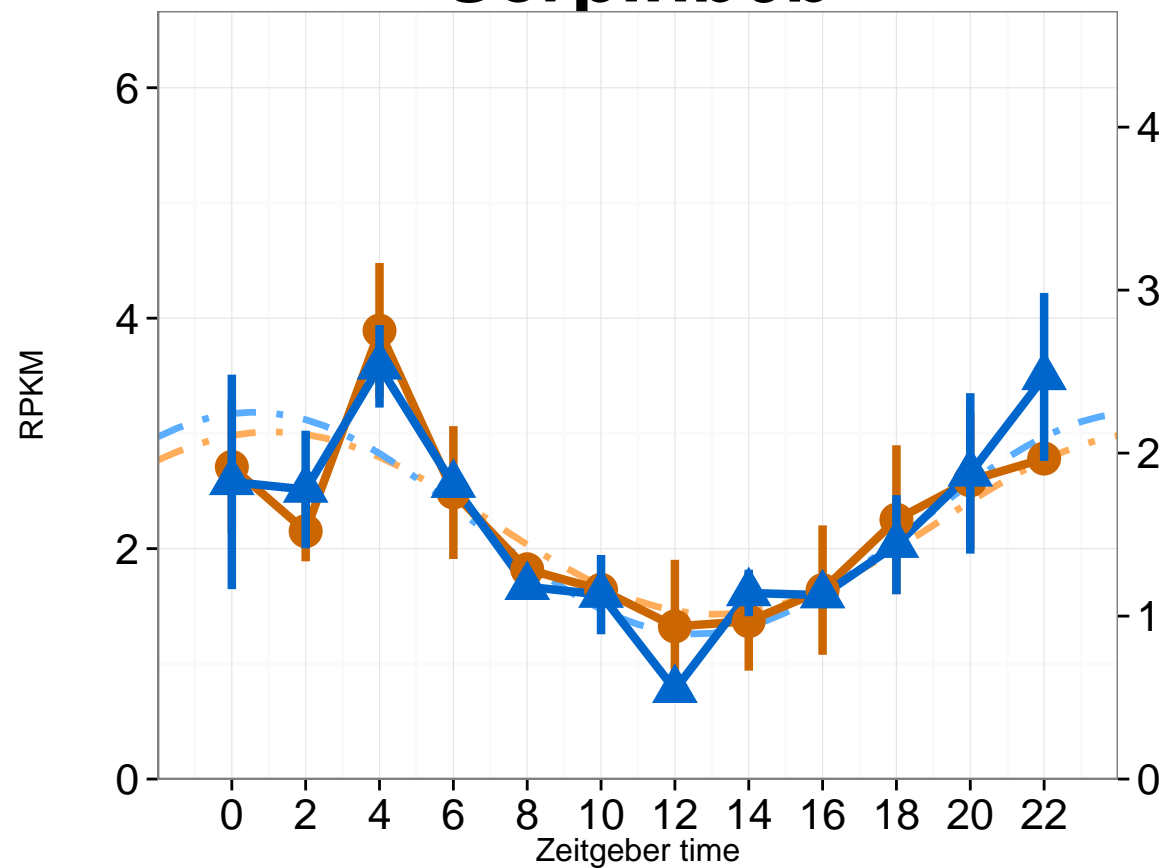

# Serpina6b

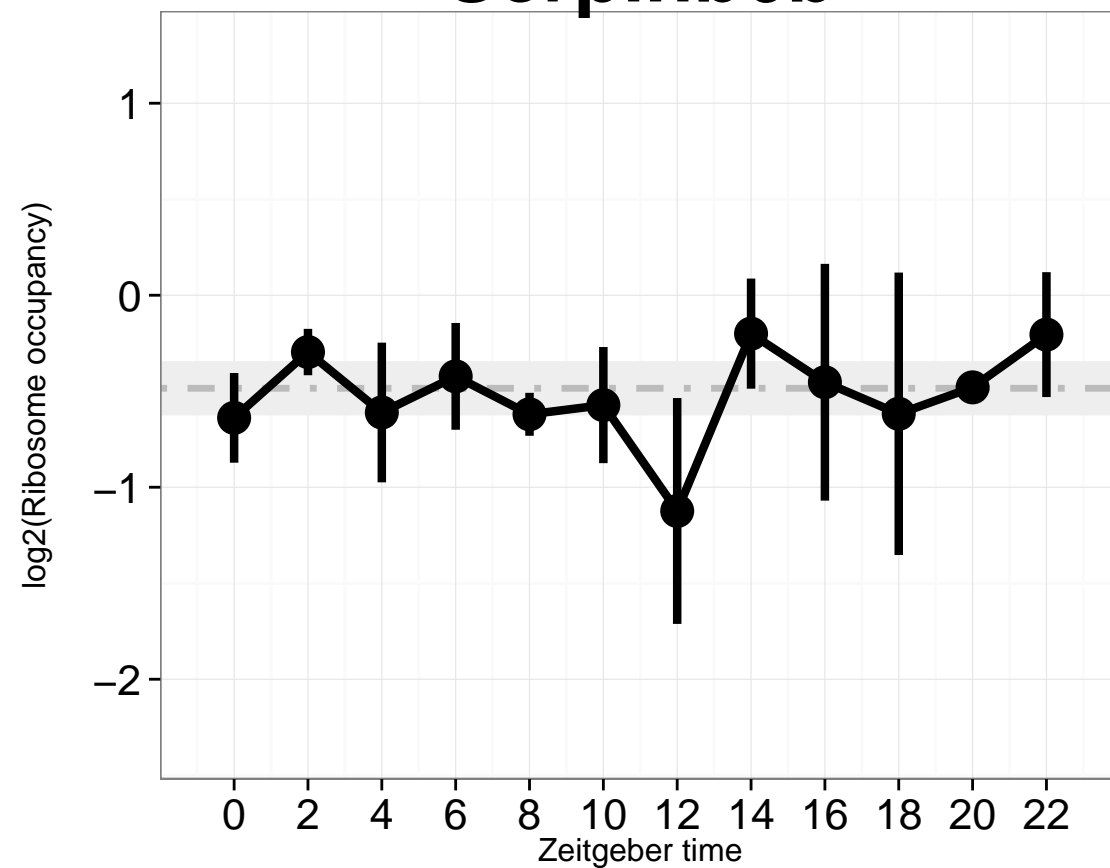

Supplement: SuppDataset_1.zip [file Serpinb6b_set_D.pdf › Supplemental Dataset 1/D-mRNA_rhythm_translation_rhyth/Serpinb6b_set_D.pdf]

# Serpinb9

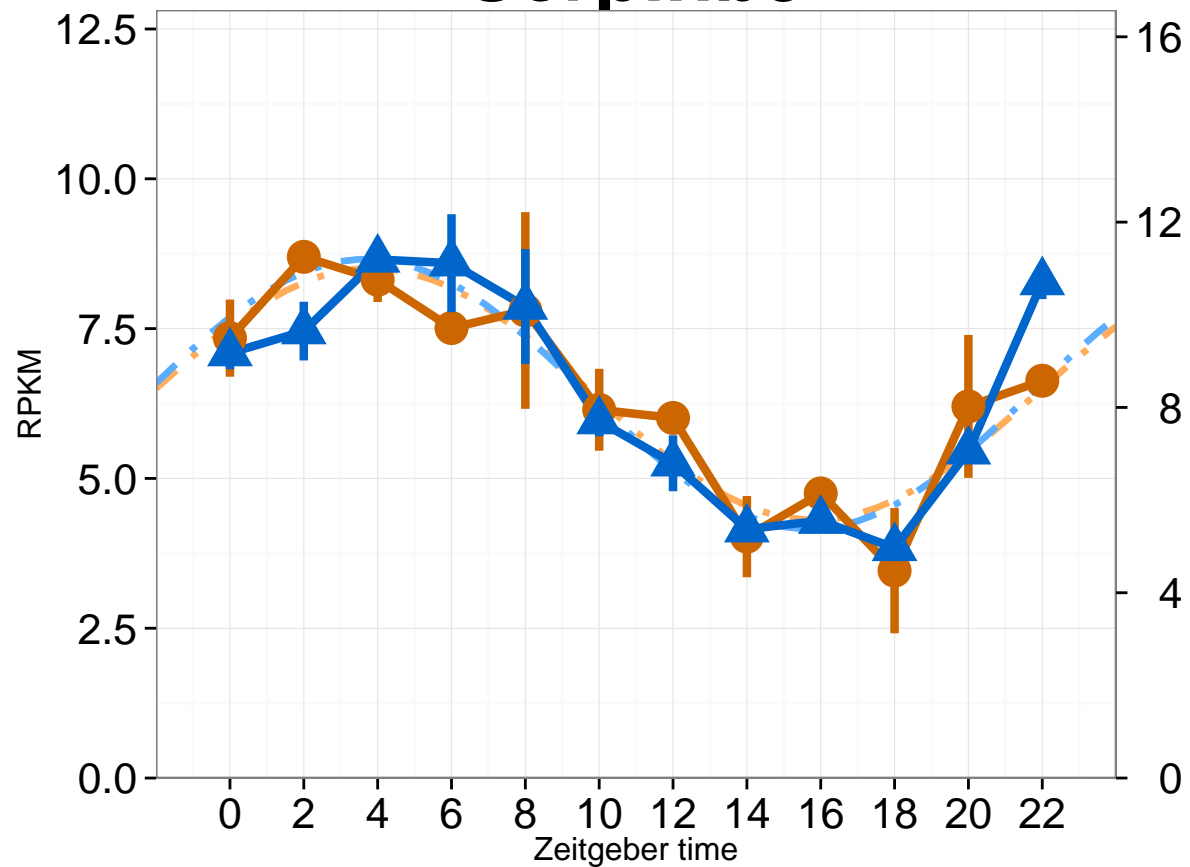

# Serpinb9

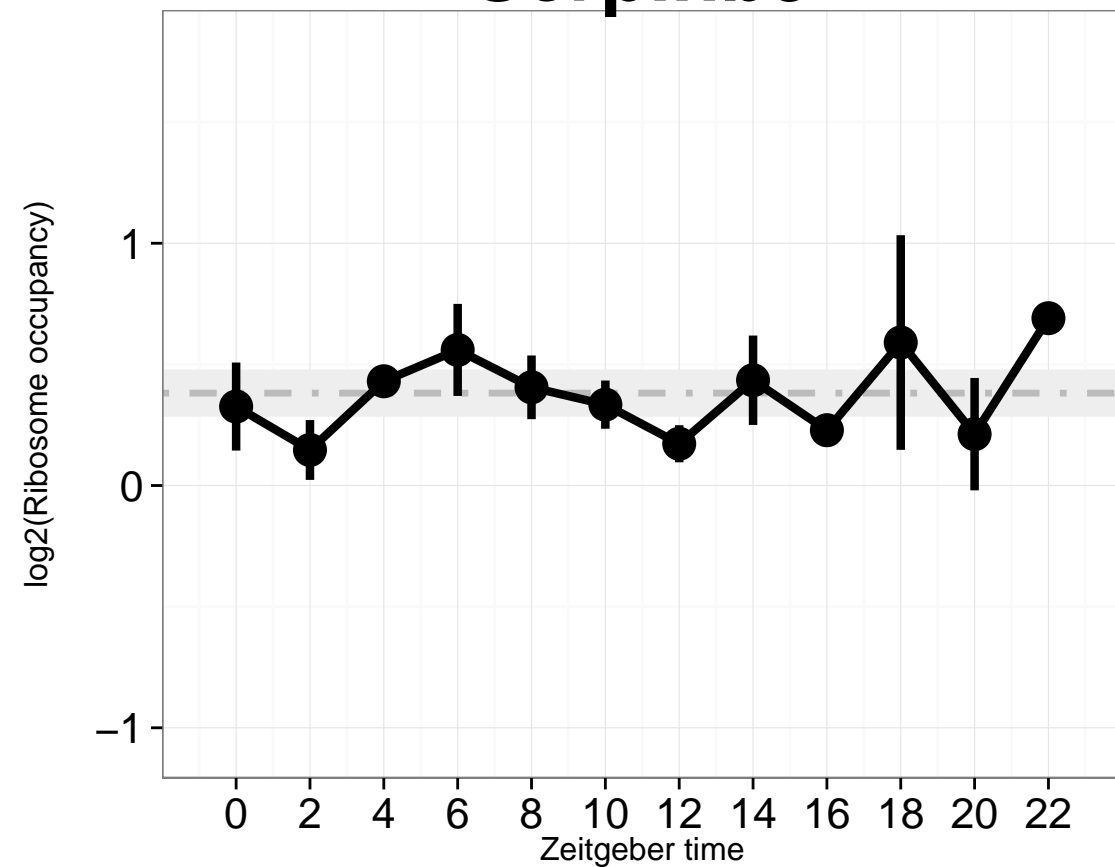

Supplement: SuppDataset_1.zip [file Serpinb9_set_D.pdf › Supplemental Dataset 1/D-mRNA_rhythm_translation_rhyth/Serpinb9_set_D.pdf]

## Serpine2

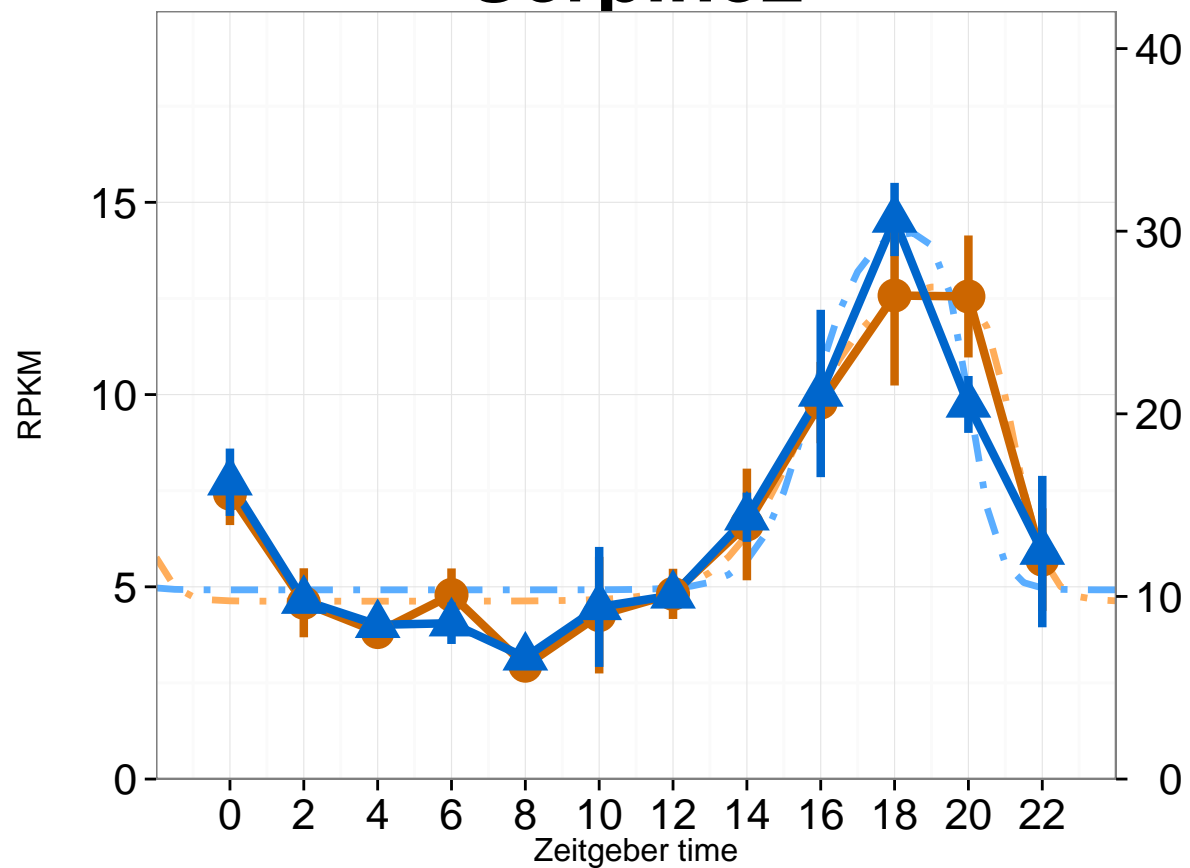

## Serpine2

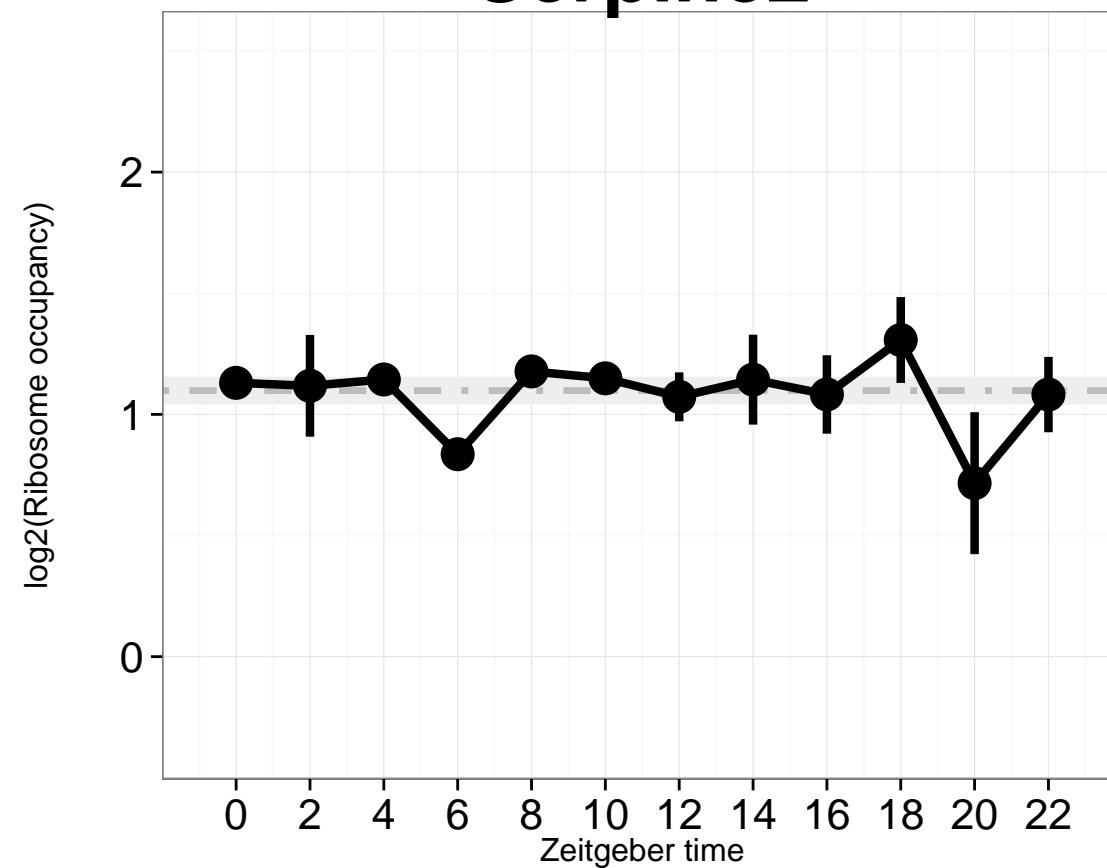

Supplement: SuppDataset_1.zip [file Serpine2_set_D.pdf › Supplemental Dataset 1/D-mRNA_rhythm_translation_rhyth/Serpine2_set_D.pdf]

## Serpinf2

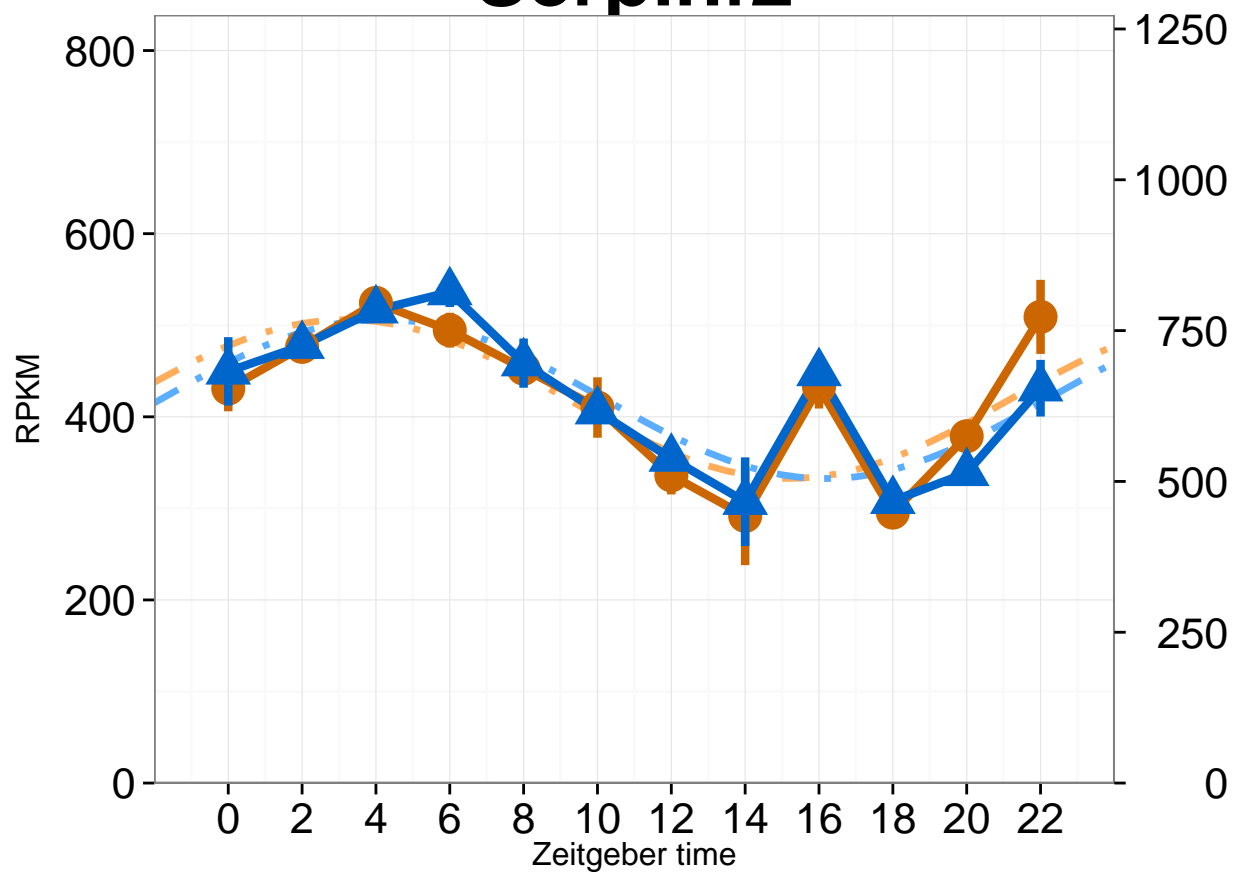

## Serpinf2

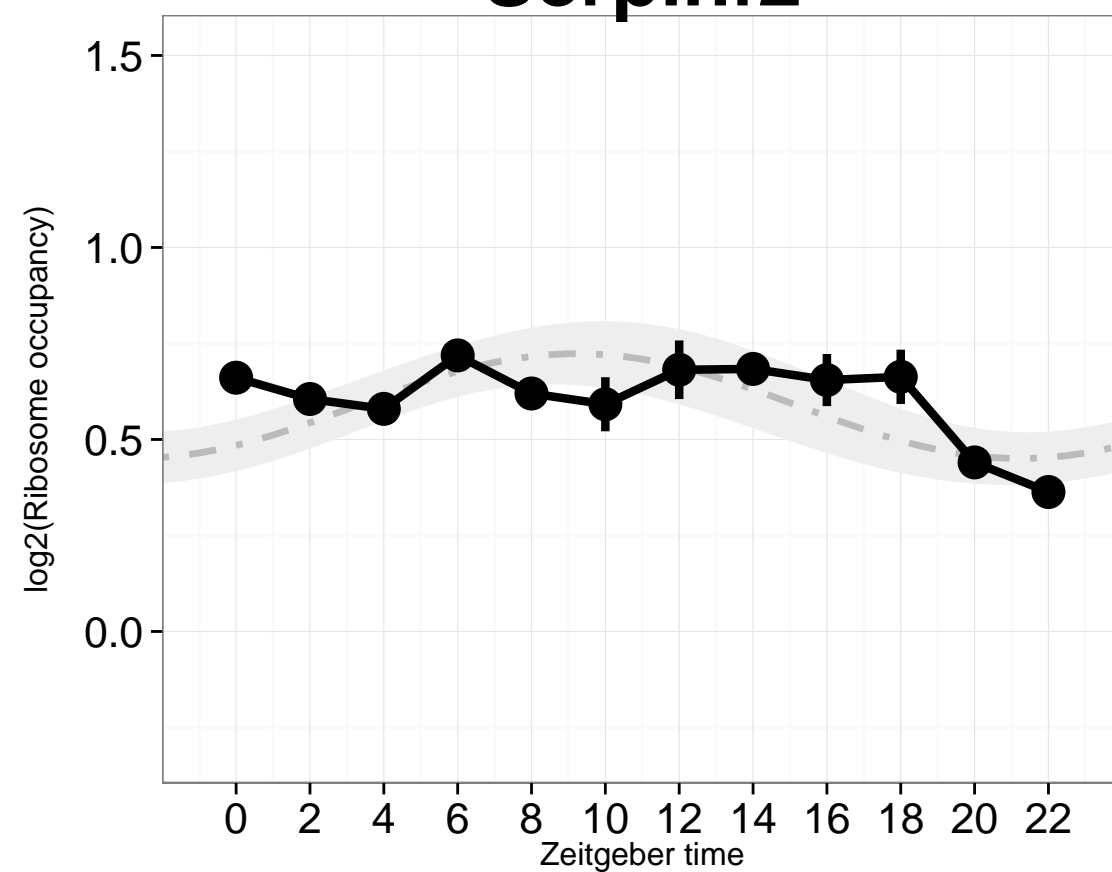

Supplement: SuppDataset_1.zip [file Serpinf2_set_D.pdf › Supplemental Dataset 1/D-mRNA_rhythm_translation_rhyth/Serpinf2_set_D.pdf]

## Serpinh1

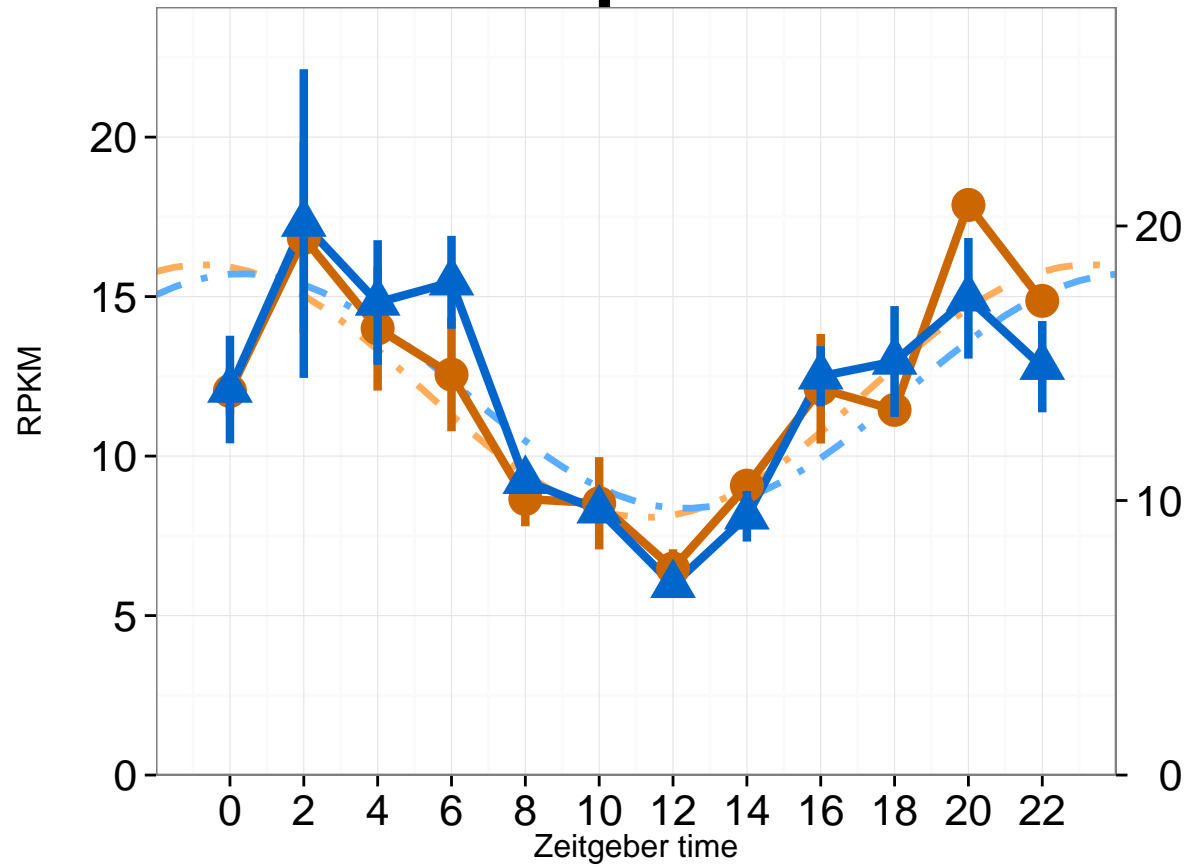

## Serpinh1

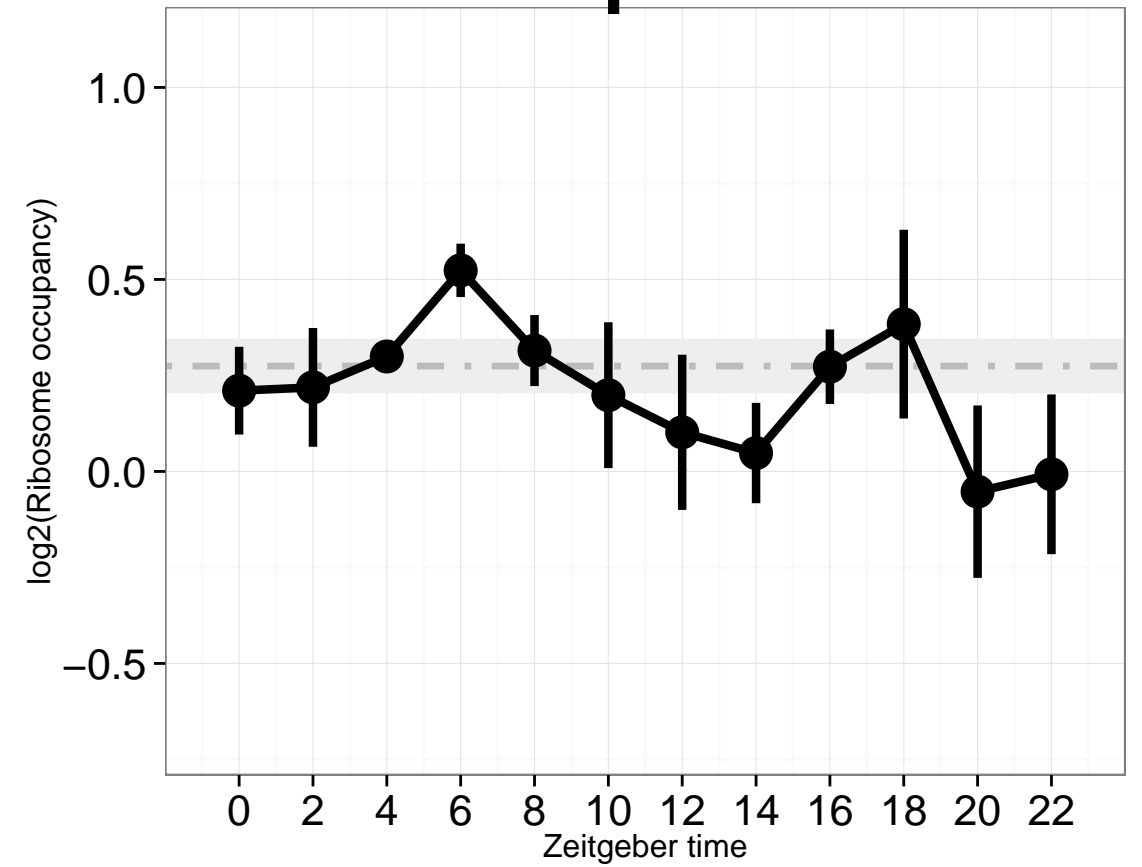

Supplement: SuppDataset_1.zip [file Serpinh1_set_D.pdf › Supplemental Dataset 1/D-mRNA_rhythm_translation_rhyth/Serpinh1_set_D.pdf]

# Setd1b

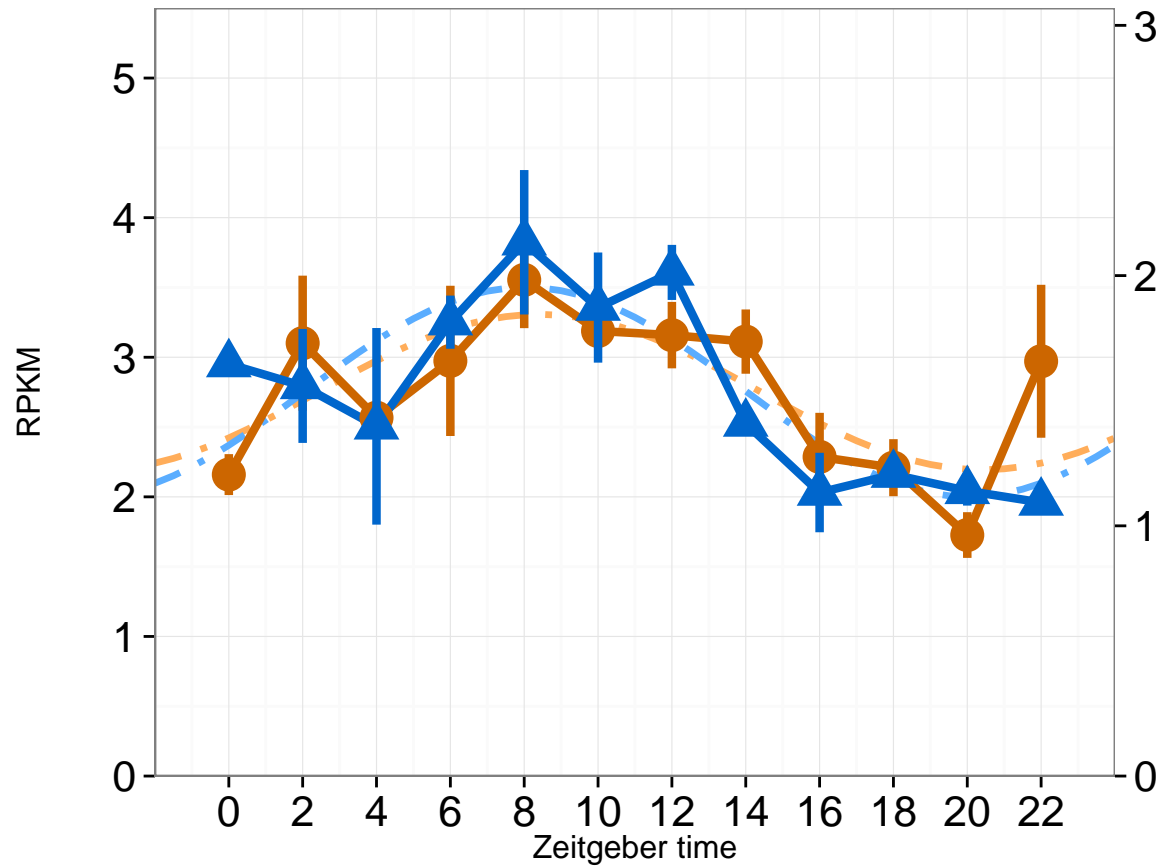

# Setd1b

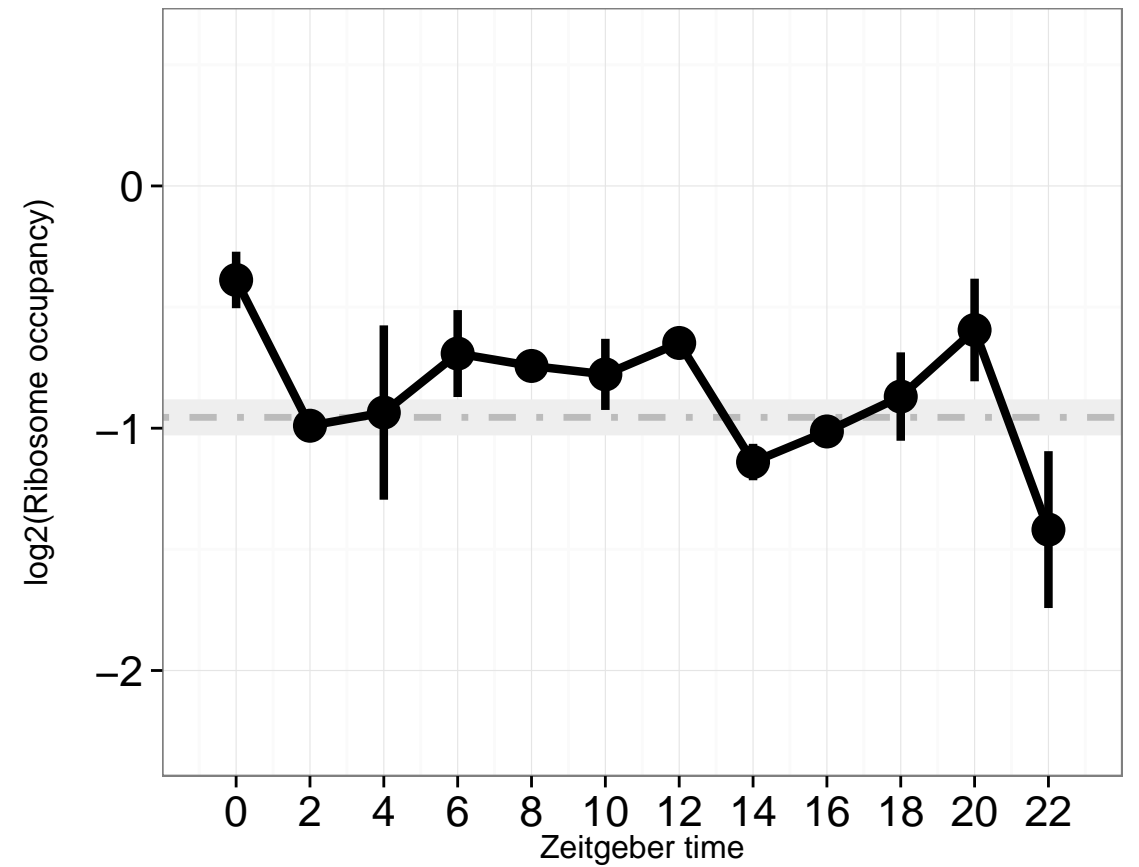

Supplement: SuppDataset_1.zip [file Setd1b_set_D.pdf › Supplemental Dataset 1/D-mRNA_rhythm_translation_rhyth/Setd1b_set_D.pdf]

## Sfpq

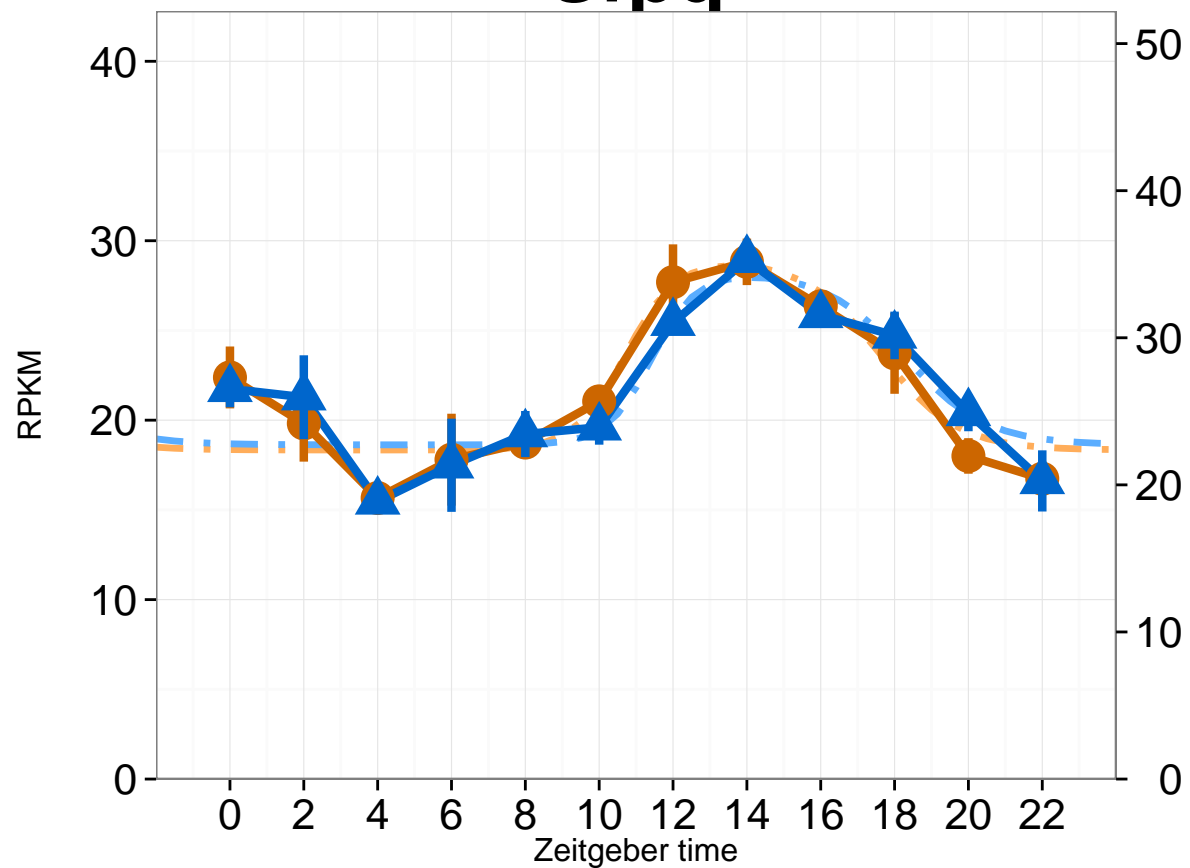

## Sfpq

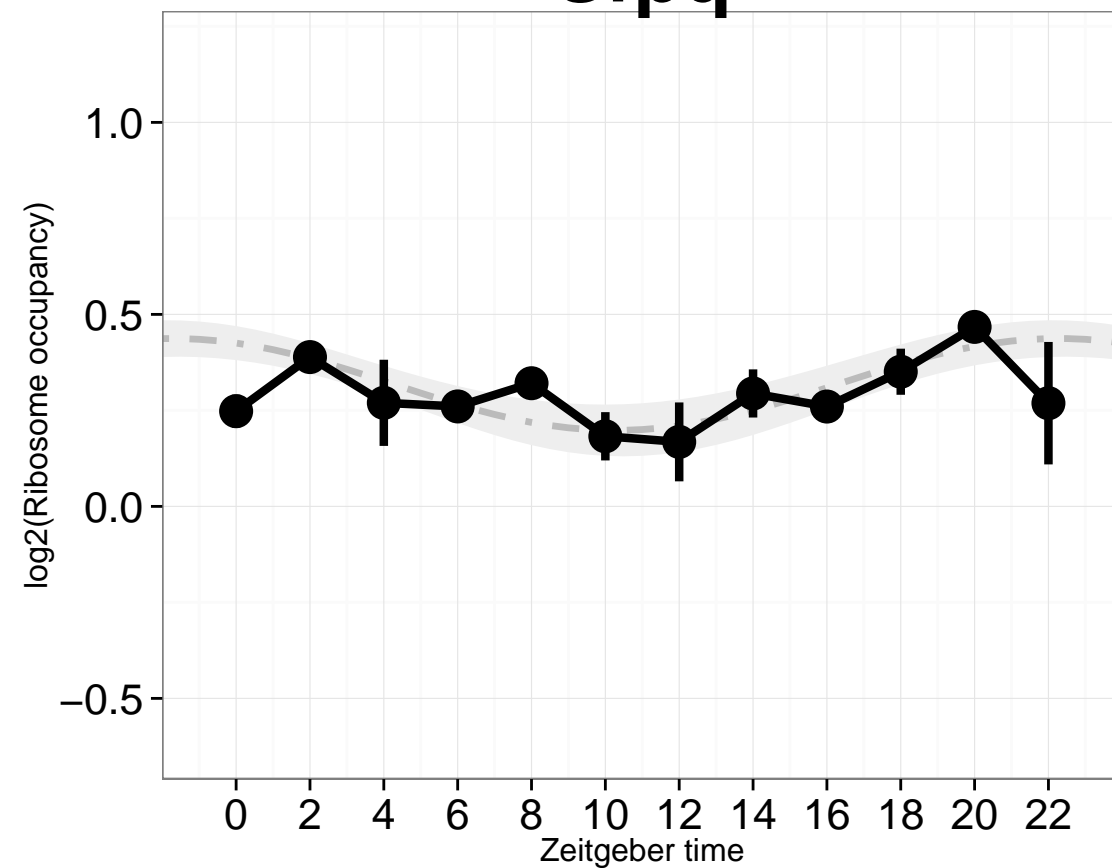

Supplement: SuppDataset_1.zip [file Sfpq_set_D.pdf › Supplemental Dataset 1/D-mRNA_rhythm_translation_rhyth/Sfpq_set_D.pdf]

## Sgk2

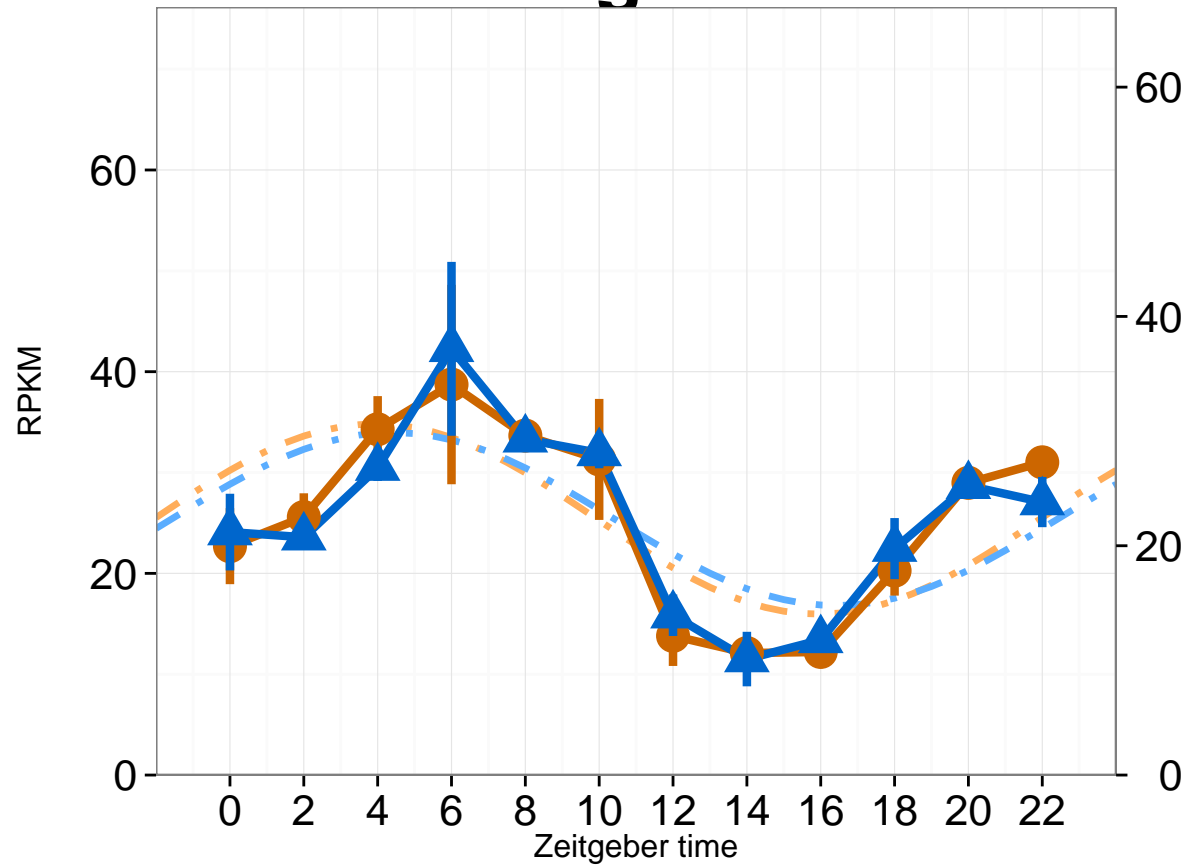

## Sgk2

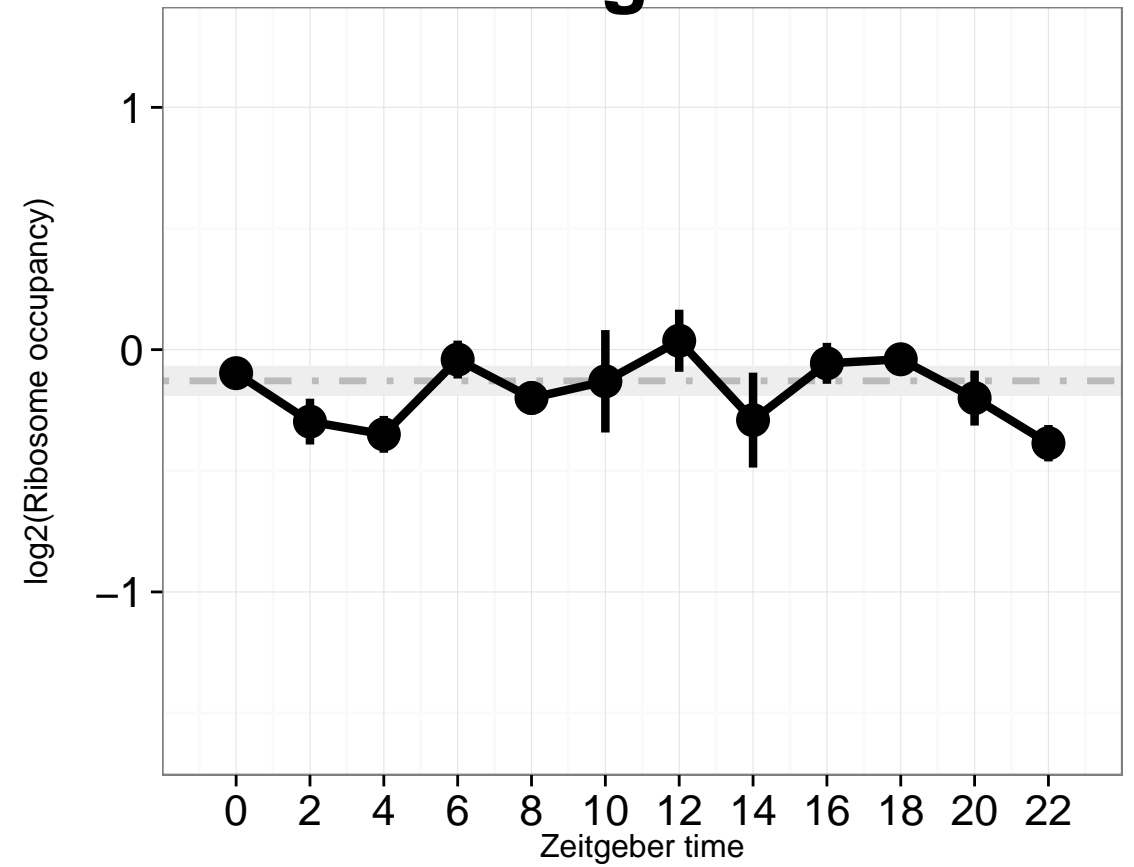

Supplement: SuppDataset_1.zip [file Sgk2_set_D.pdf › Supplemental Dataset 1/D-mRNA_rhythm_translation_rhyth/Sgk2_set_D.pdf]

## Sgms2

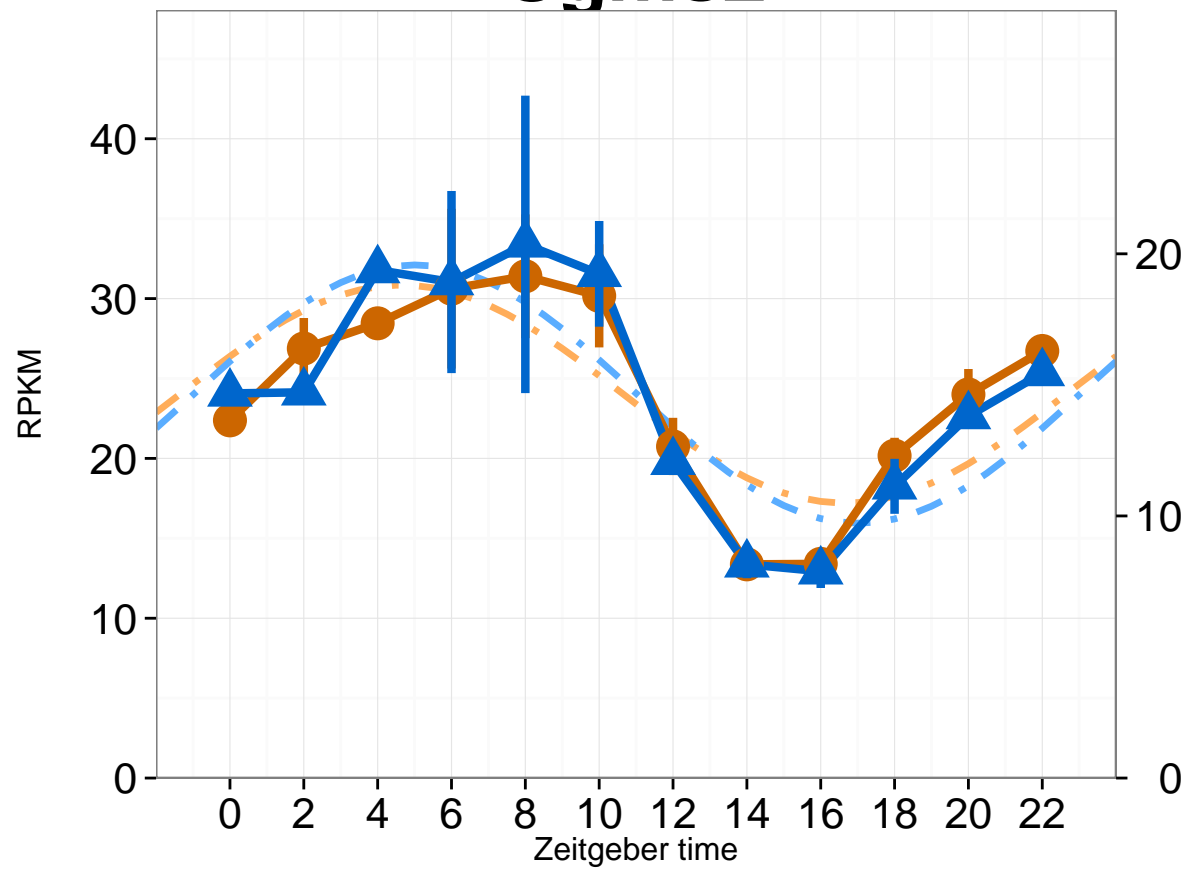

## Sgms2

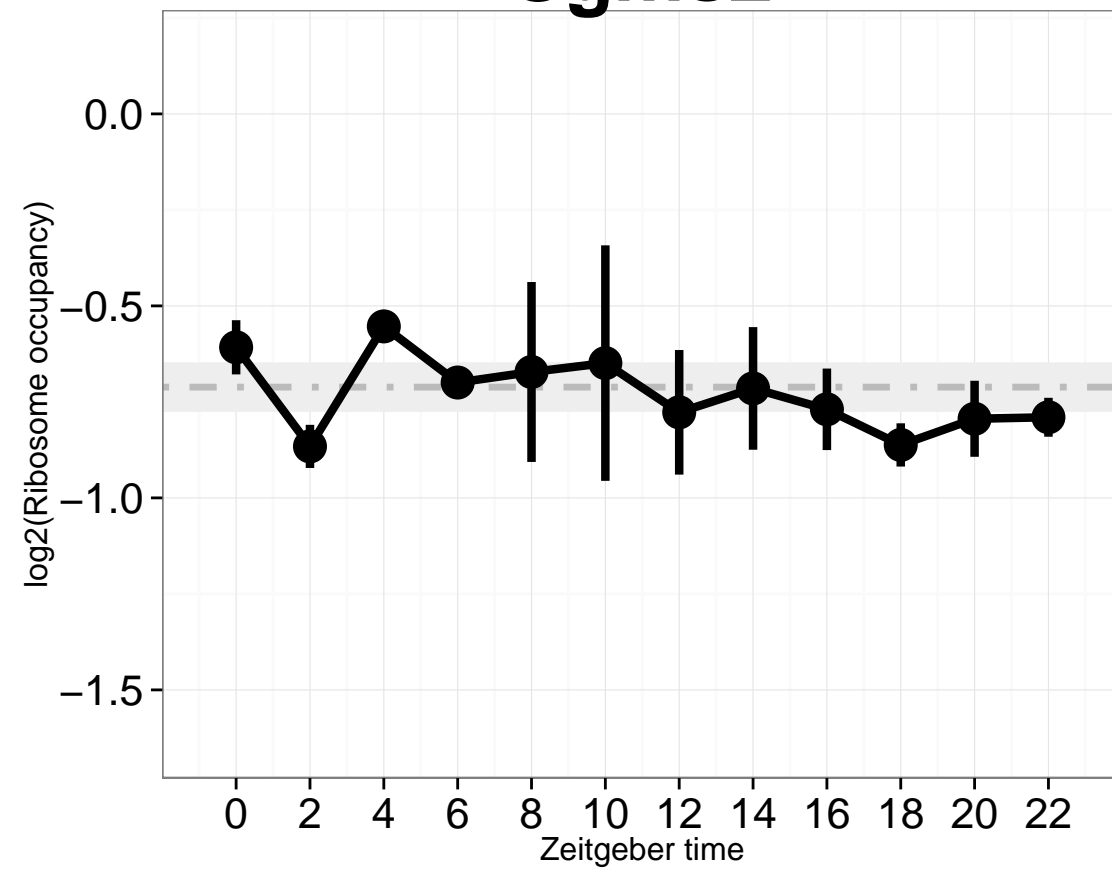

Supplement: SuppDataset_1.zip [file Sgms2_set_D.pdf › Supplemental Dataset 1/D-mRNA_rhythm_translation_rhyth/Sgms2_set_D.pdf]

## Sgpl1

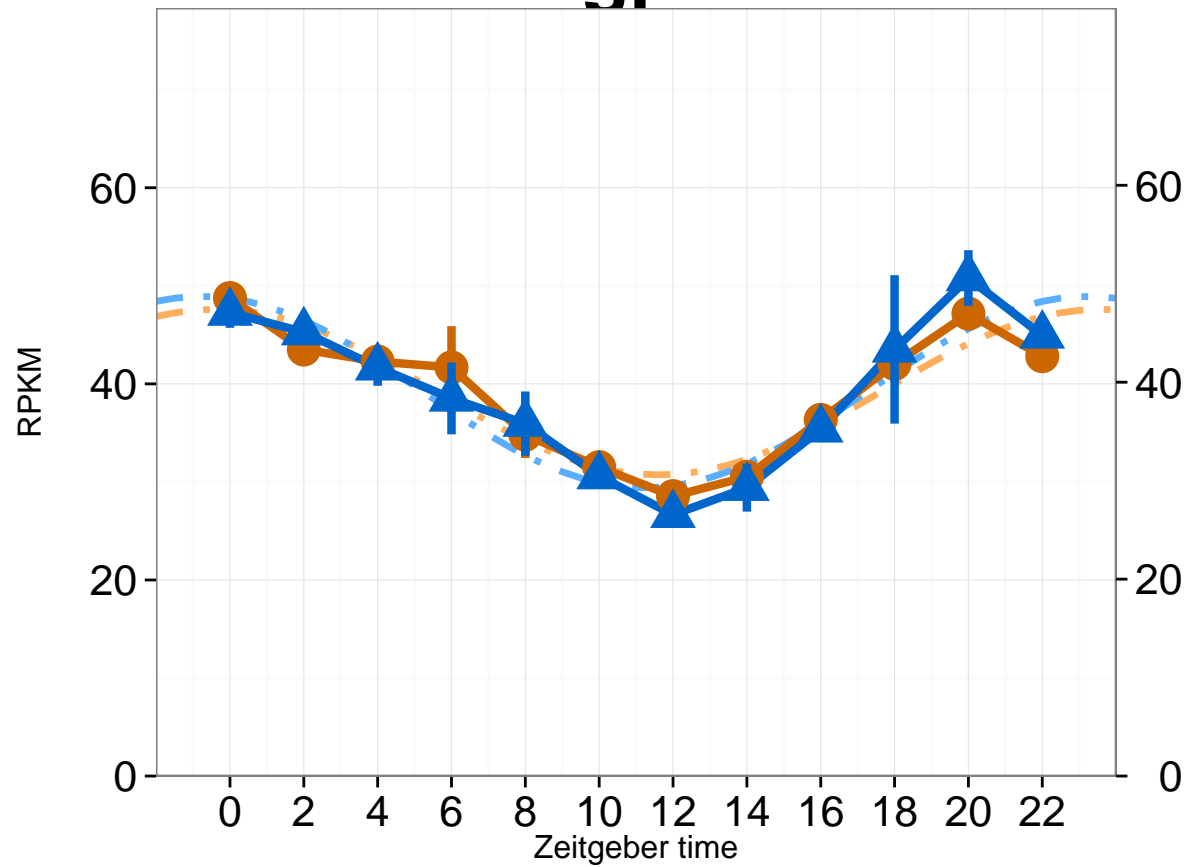

## Sgpl1

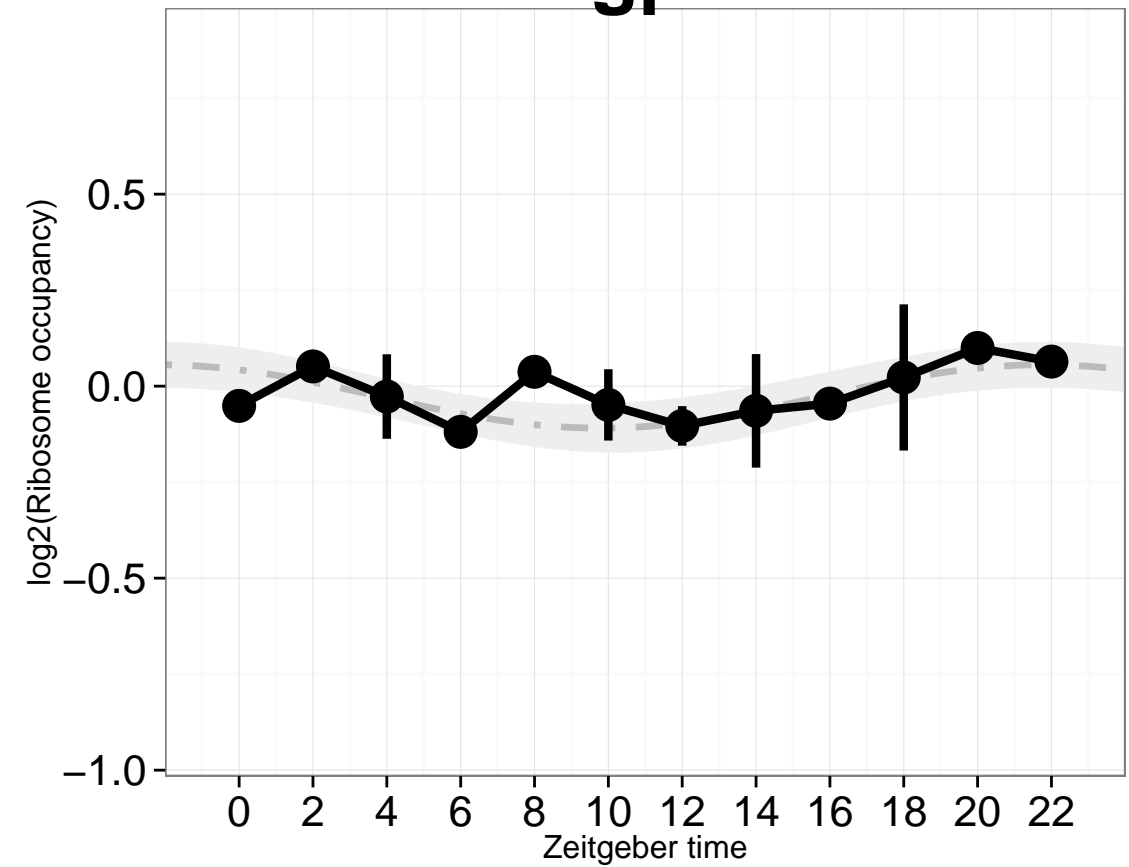

Supplement: SuppDataset_1.zip [file Sgpl1_set_D.pdf › Supplemental Dataset 1/D-mRNA_rhythm_translation_rhyth/Sgpl1_set_D.pdf]
