# Supplementary figures and images for: Ribosome profiling reveals the rhythmic liver translatome and circadian clock regulation by upstream open reading frames (part 58 of 113)
Source: HighWire-hosted journal article supplement (doi:10.1101/gr.195404.115), 2015-10-20

# Prr14I

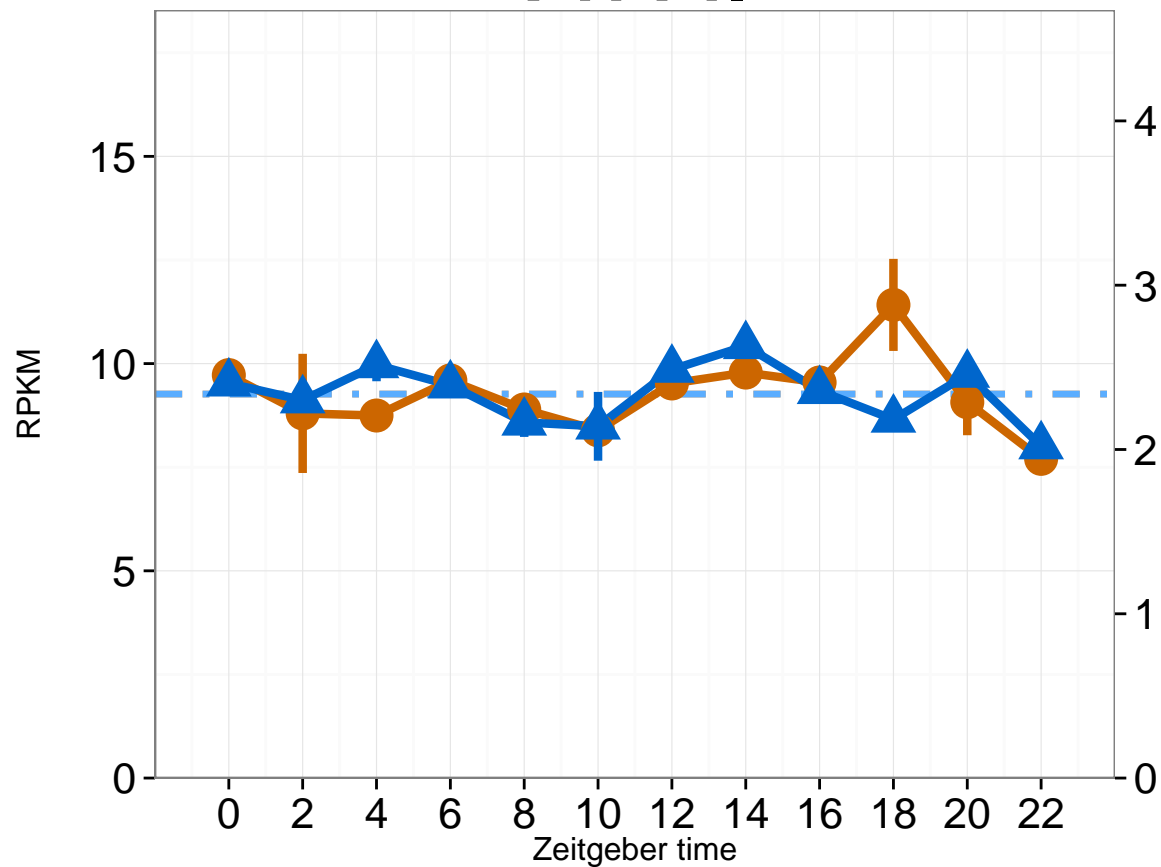

# Prr14I

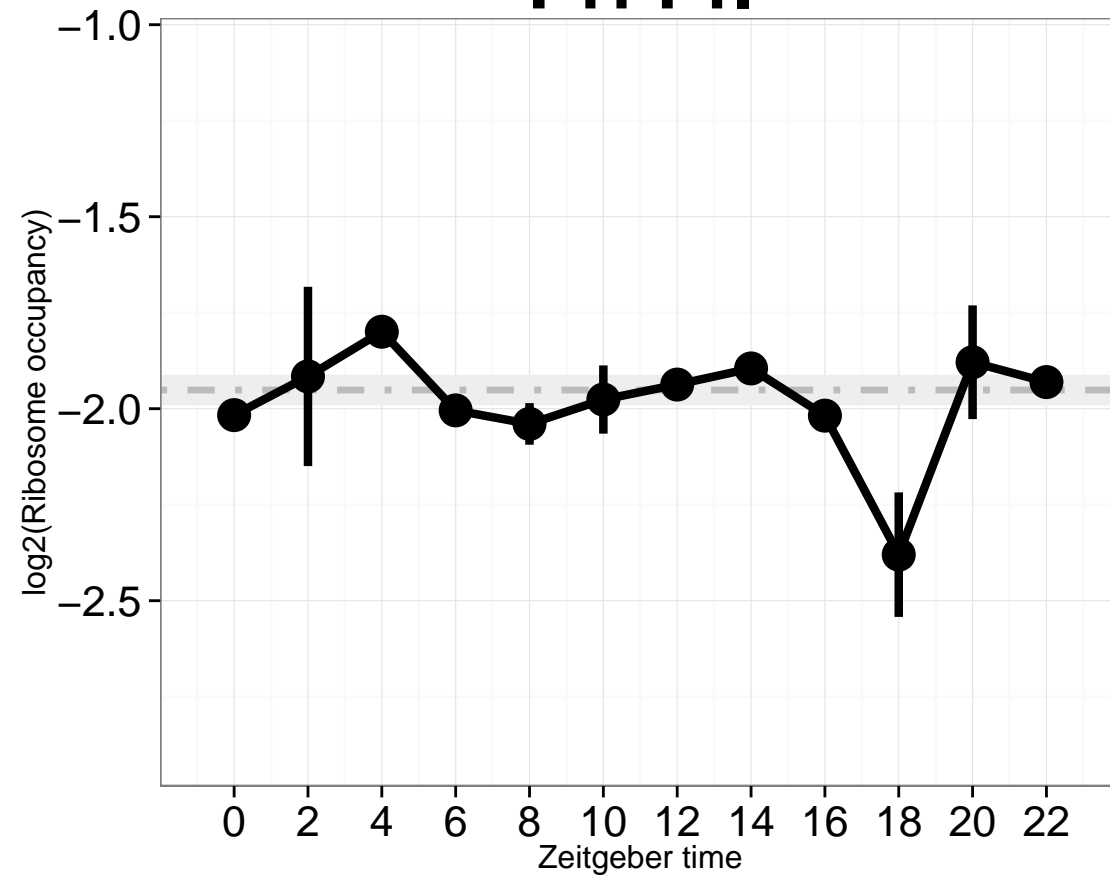

Supplement: SuppDataset_1.zip [file Prr14l_set_A.pdf › Supplemental Dataset 1/A-mRNA_nonrhyth_translation_nonrhyth/Prr14l_set_A.pdf]

## Prr16

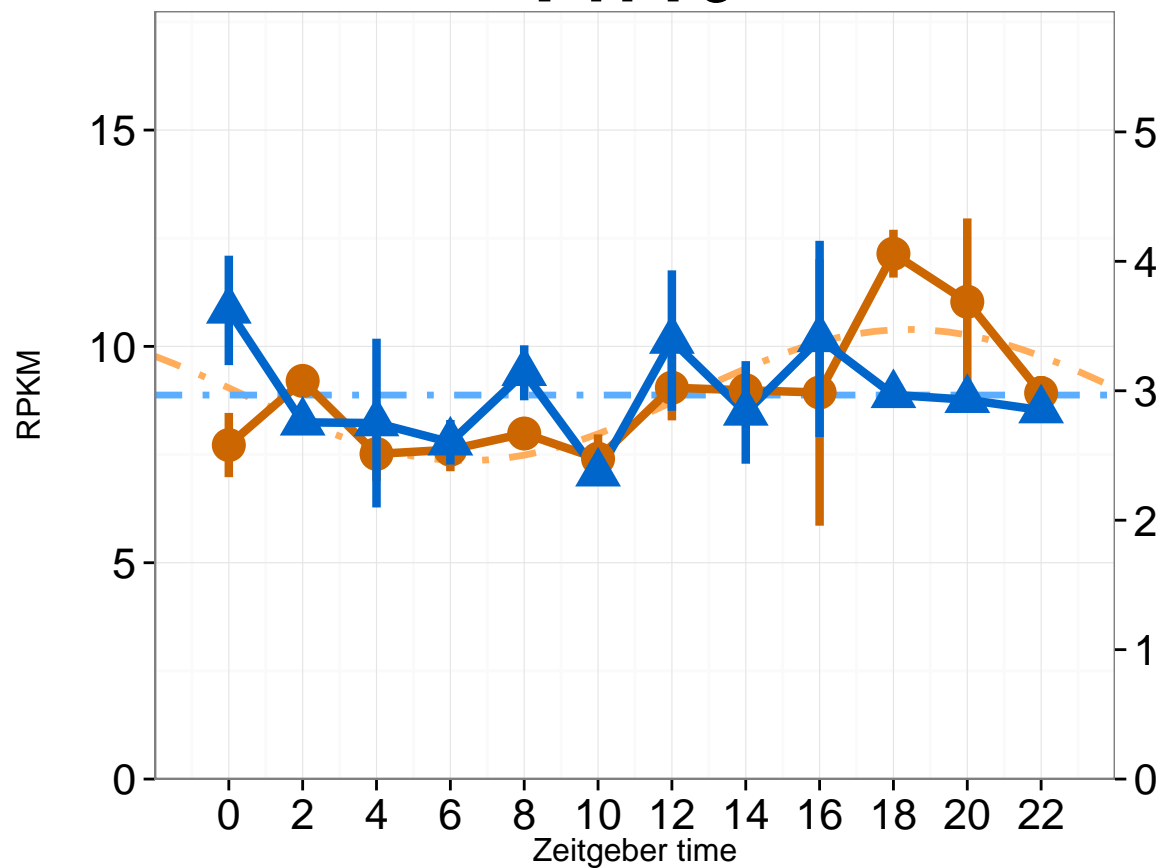

## Prr16

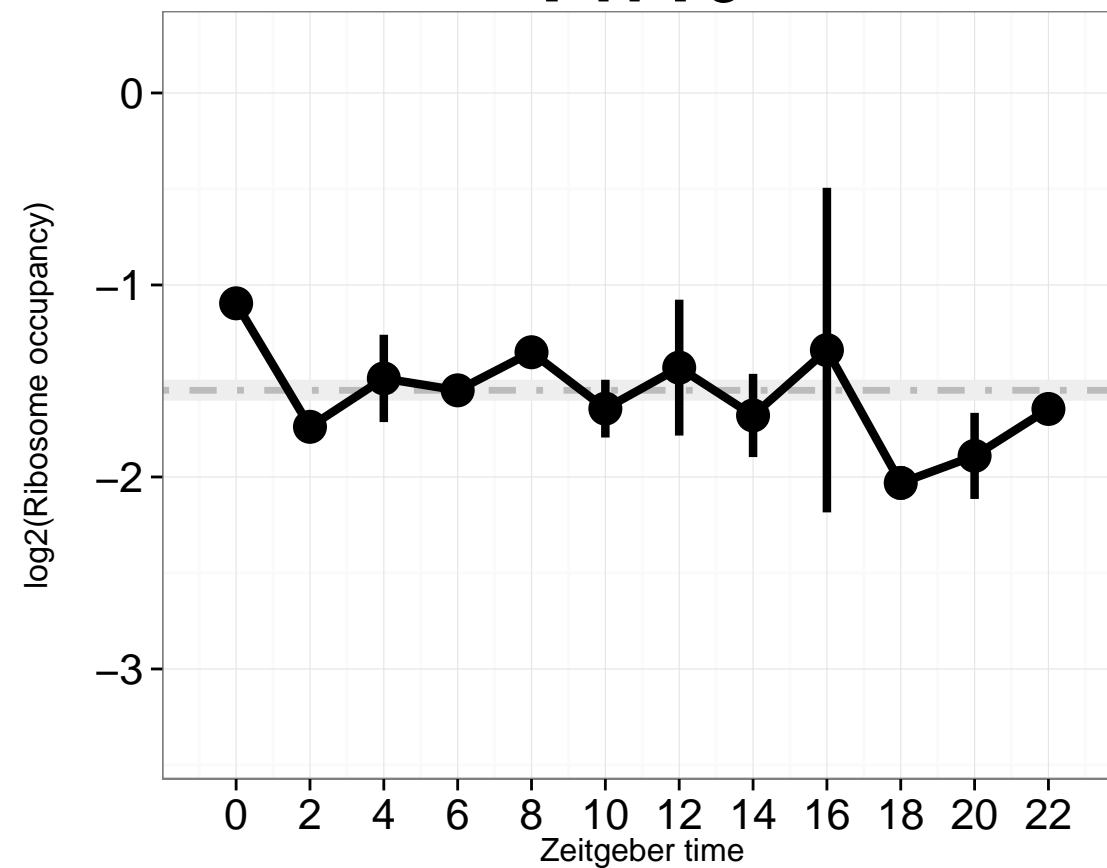

Supplement: SuppDataset_1.zip [file Prr16_set_A.pdf › Supplemental Dataset 1/A-mRNA_nonrhyth_translation_nonrhyth/Prr16_set_A.pdf]

## Prr24

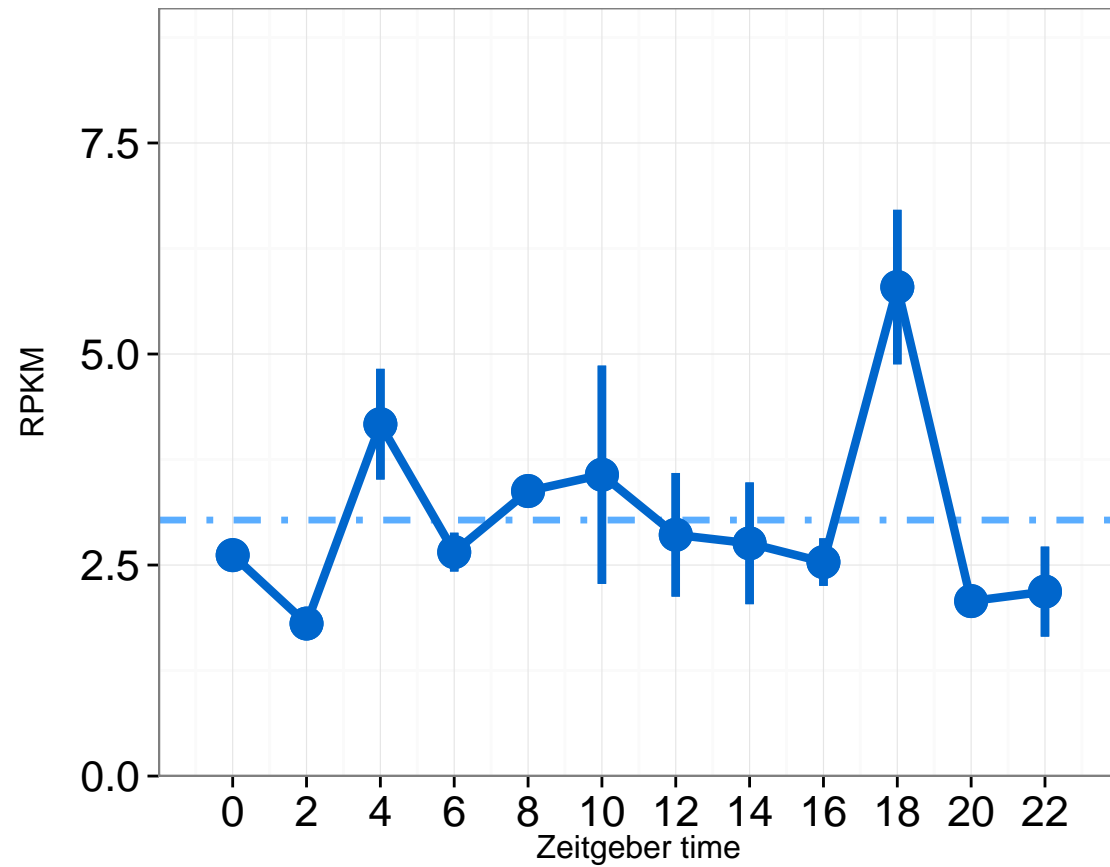

## Prr24 log2(Ribosome occupancy)

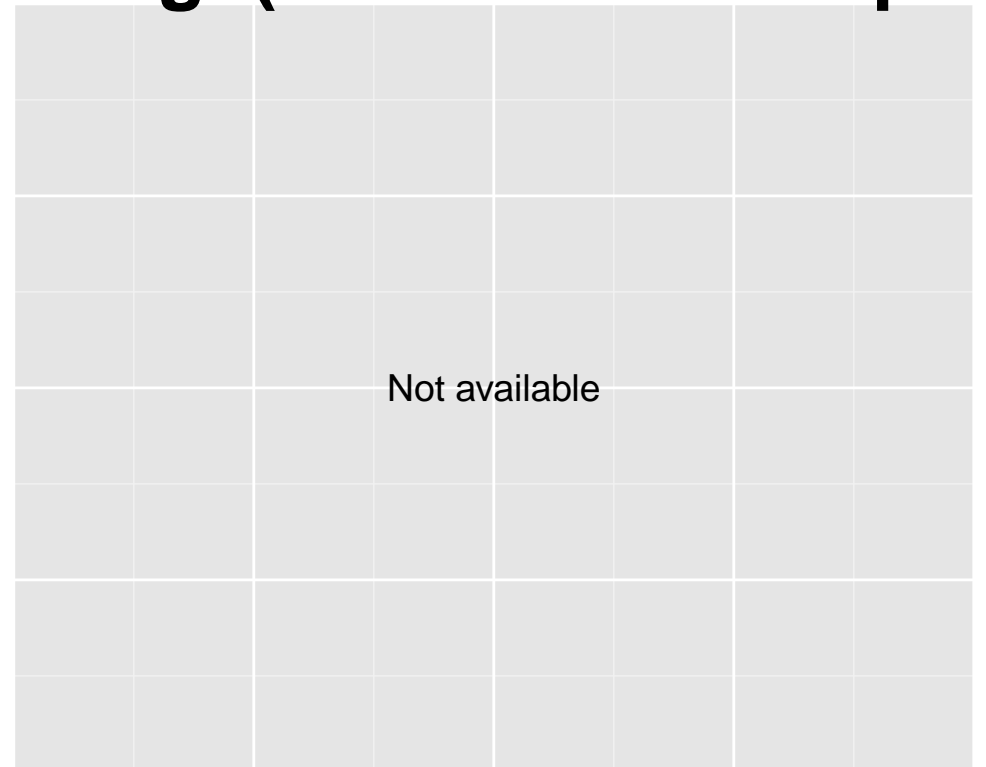

Supplement: SuppDataset_1.zip [file Prr24_set_A.pdf › Supplemental Dataset 1/A-mRNA_nonrhyth_translation_nonrhyth/Prr24_set_A.pdf]

## Prr5

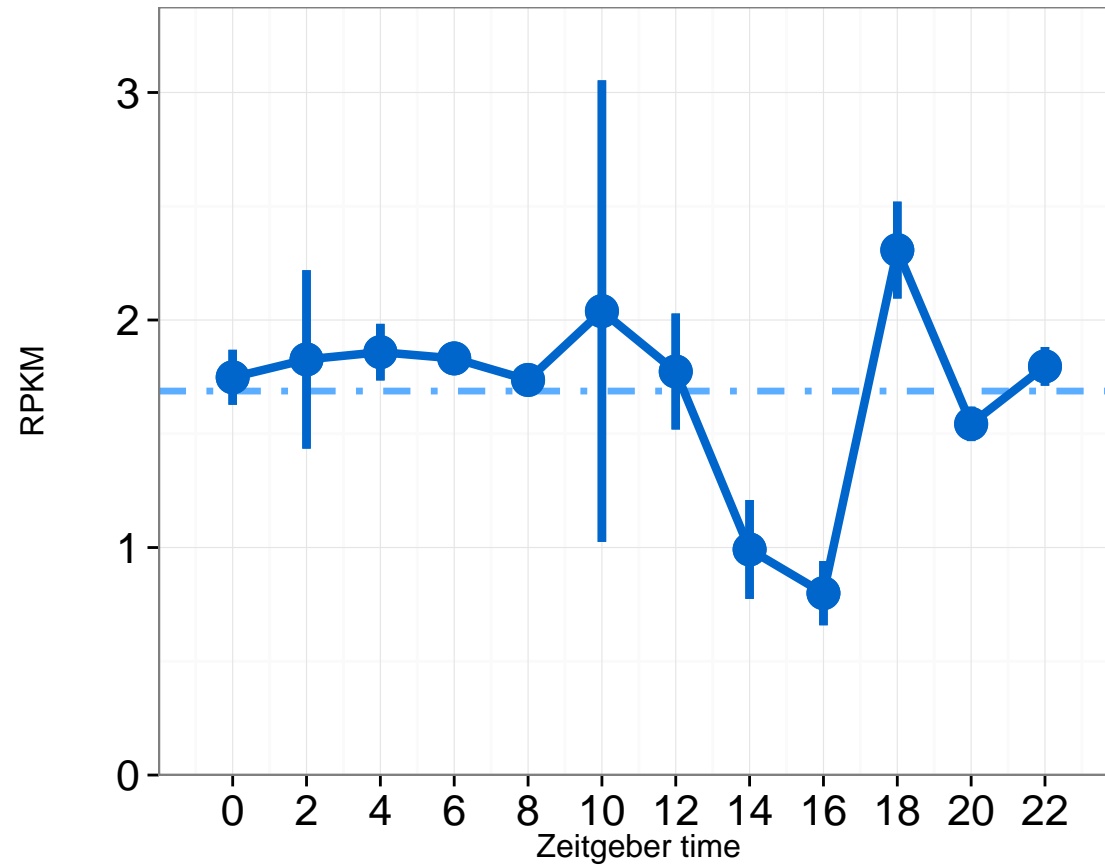

## Prr5 log2(Ribosome occupancy)

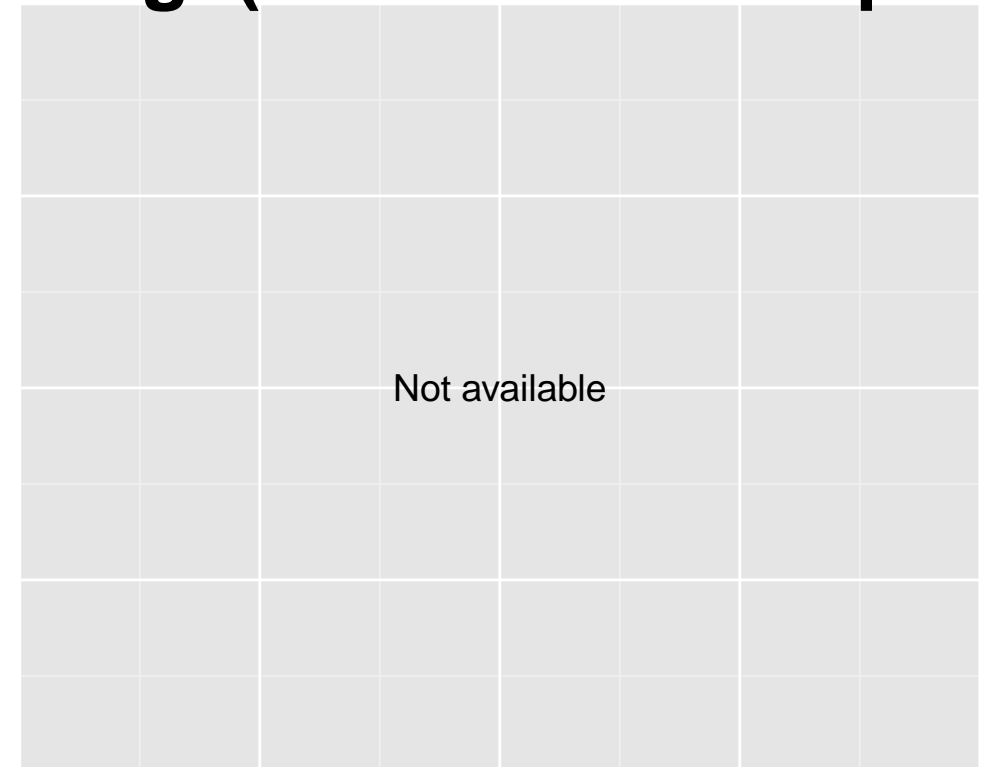

Supplement: SuppDataset_1.zip [file Prr5_set_A.pdf › Supplemental Dataset 1/A-mRNA_nonrhyth_translation_nonrhyth/Prr5_set_A.pdf]

# Prr5l

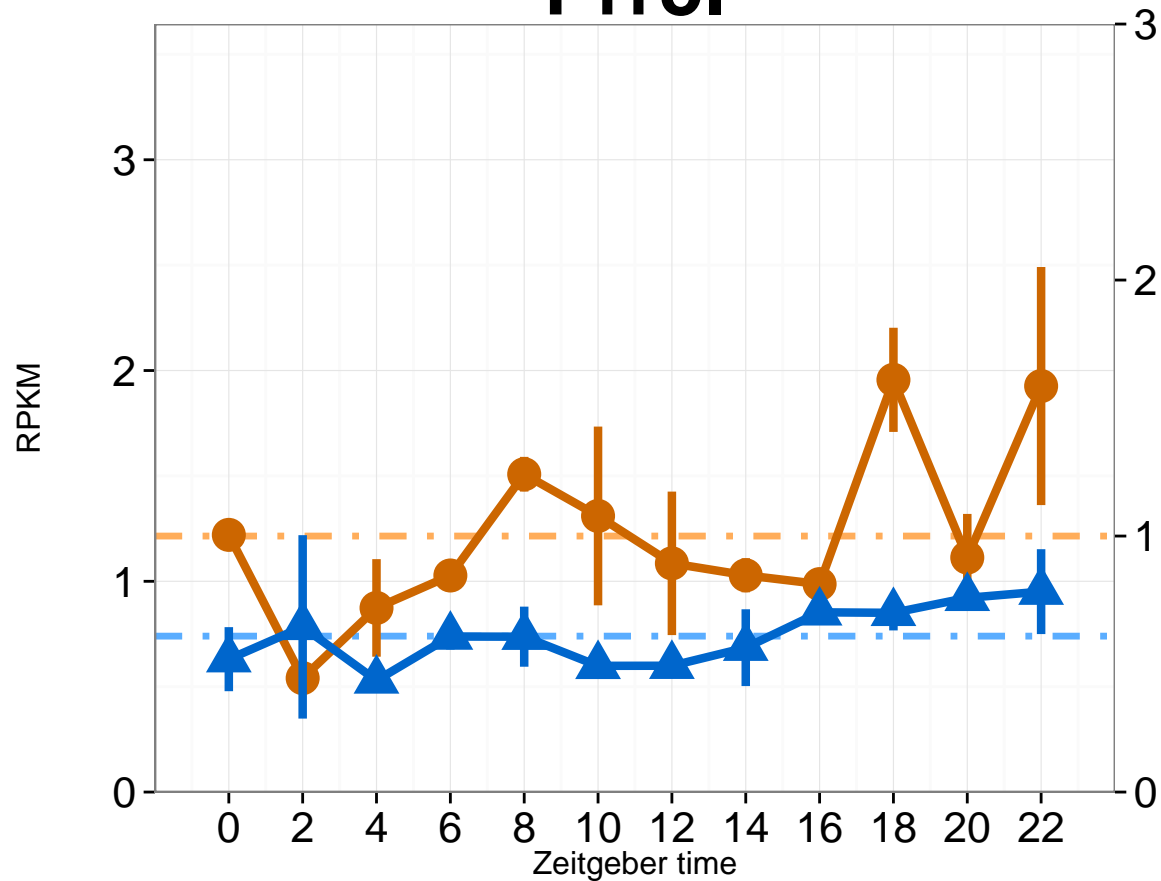

# Prr5l

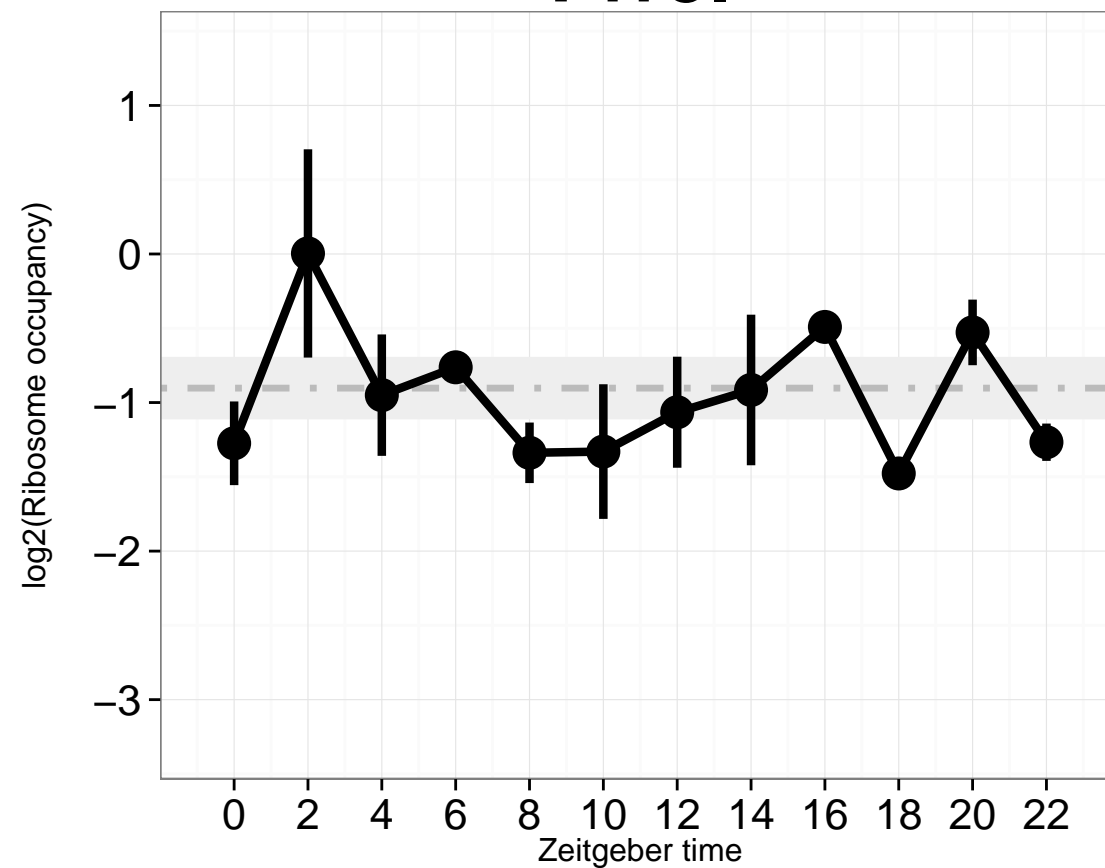

Supplement: SuppDataset_1.zip [file Prr5l_set_A.pdf › Supplemental Dataset 1/A-mRNA_nonrhyth_translation_nonrhyth/Prr5l_set_A.pdf]

# Prrc1

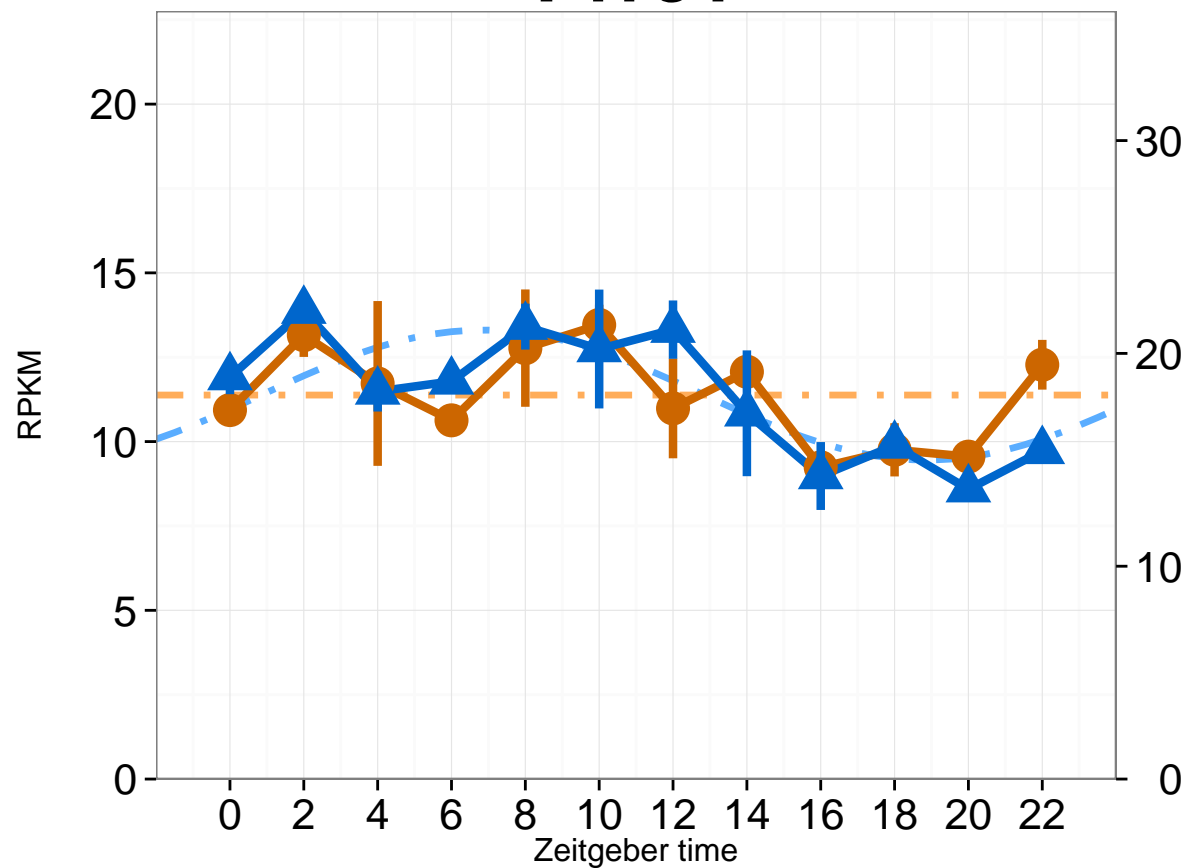

# Prrc1

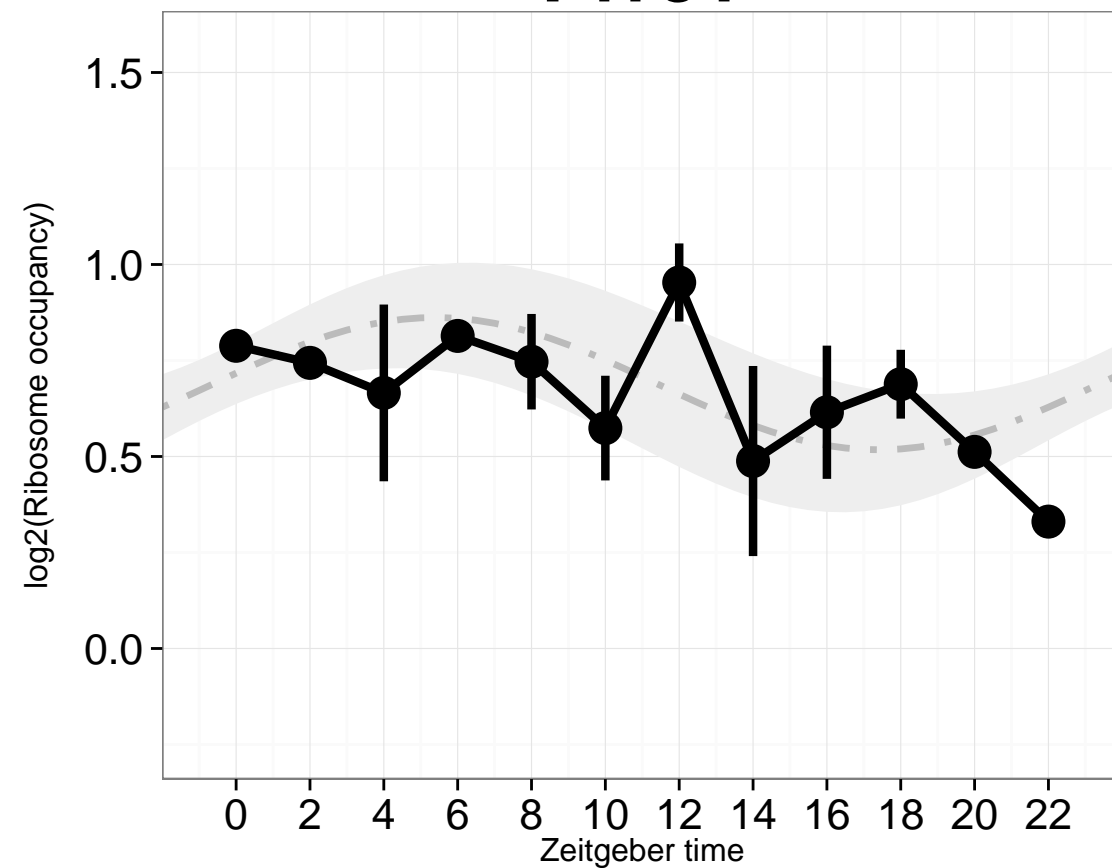

Supplement: SuppDataset_1.zip [file Prrc1_set_A.pdf › Supplemental Dataset 1/A-mRNA_nonrhyth_translation_nonrhyth/Prrc1_set_A.pdf]

# Prrc2a

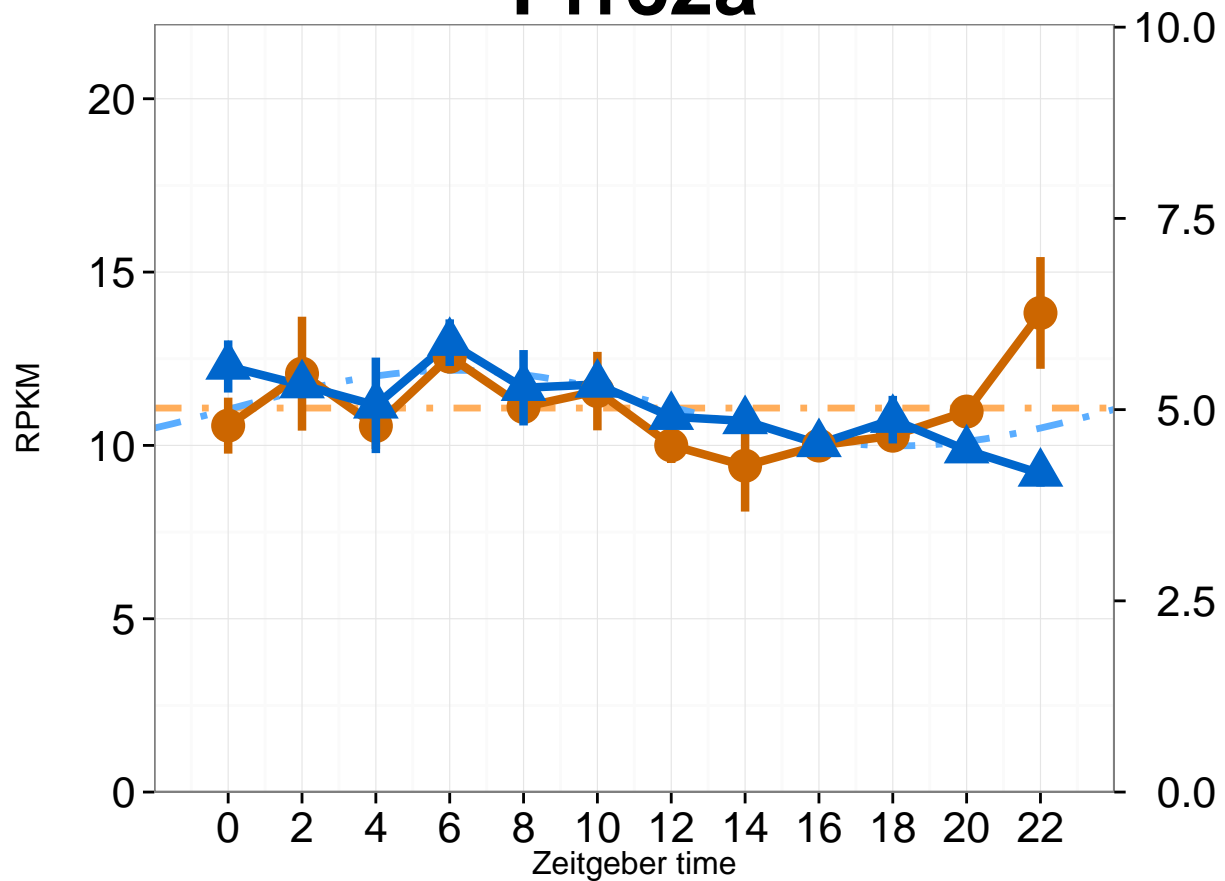

# Prrc2a

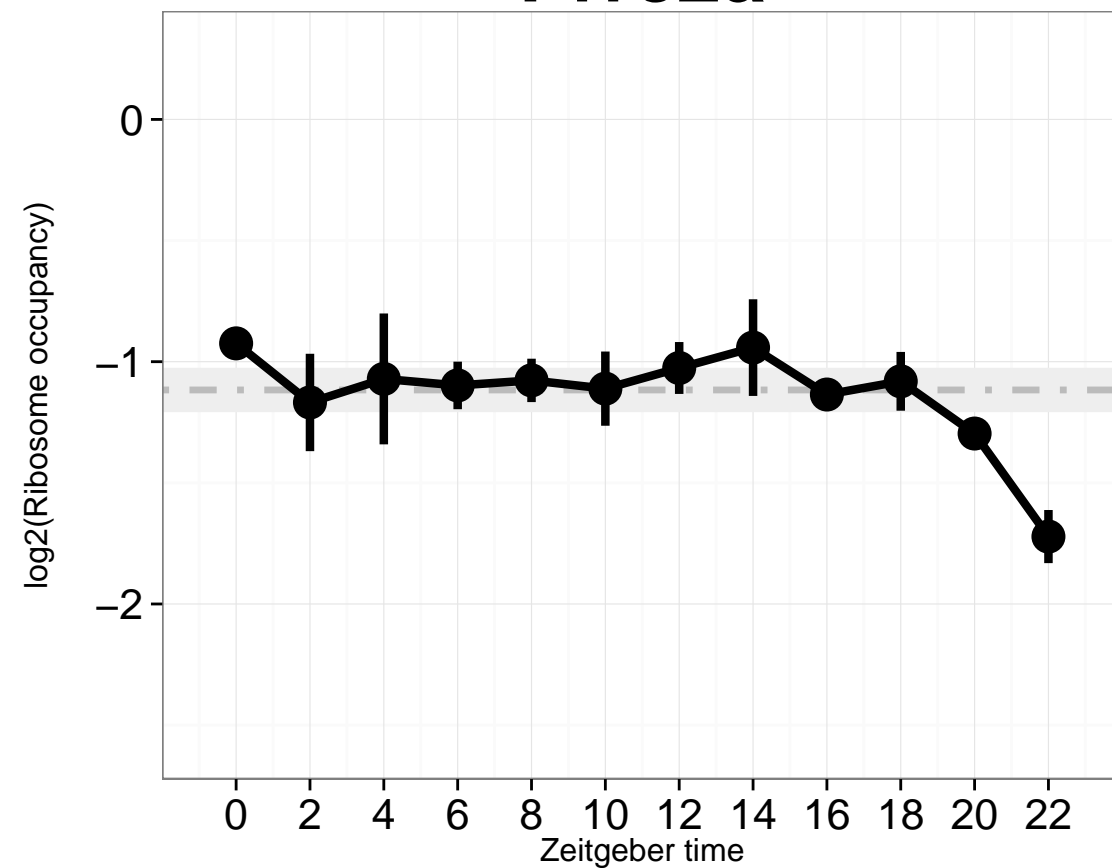

Supplement: SuppDataset_1.zip [file Prrc2a_set_A.pdf › Supplemental Dataset 1/A-mRNA_nonrhyth_translation_nonrhyth/Prrc2a_set_A.pdf]

# Prrc2b

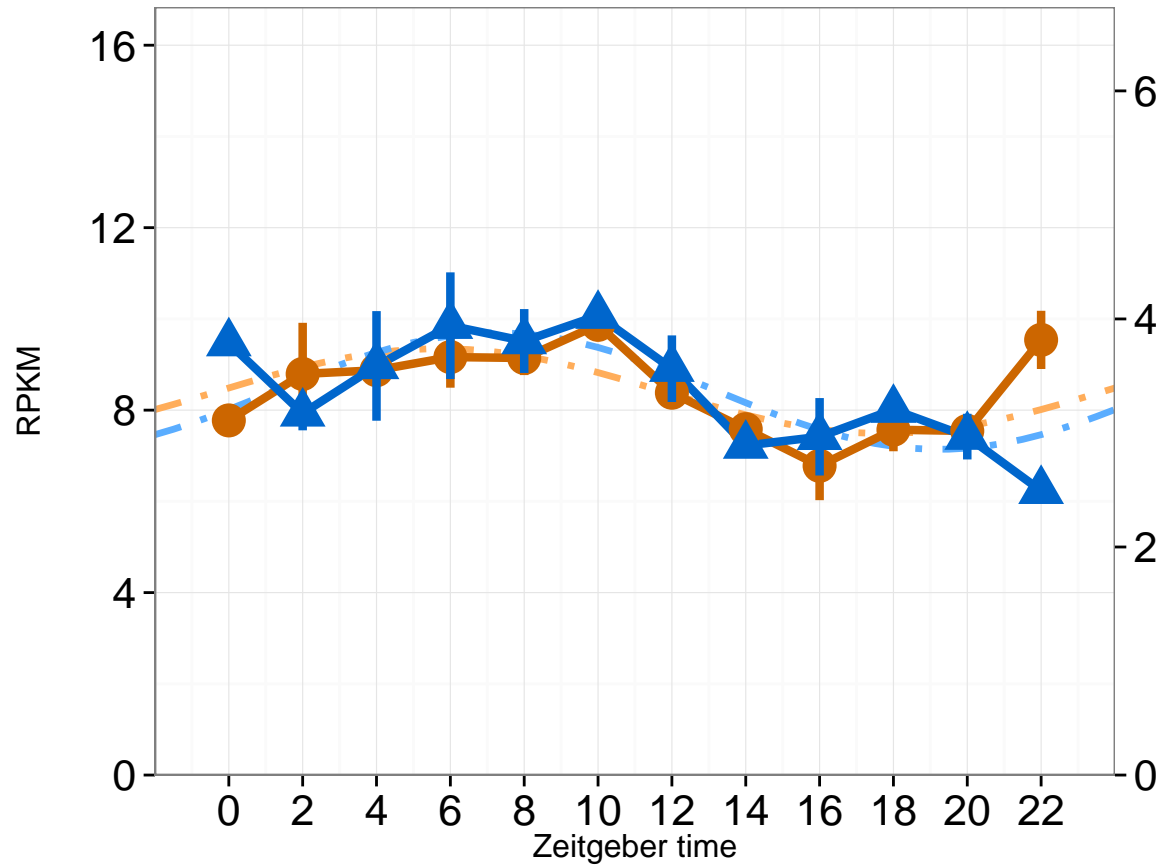

# Prrc2b

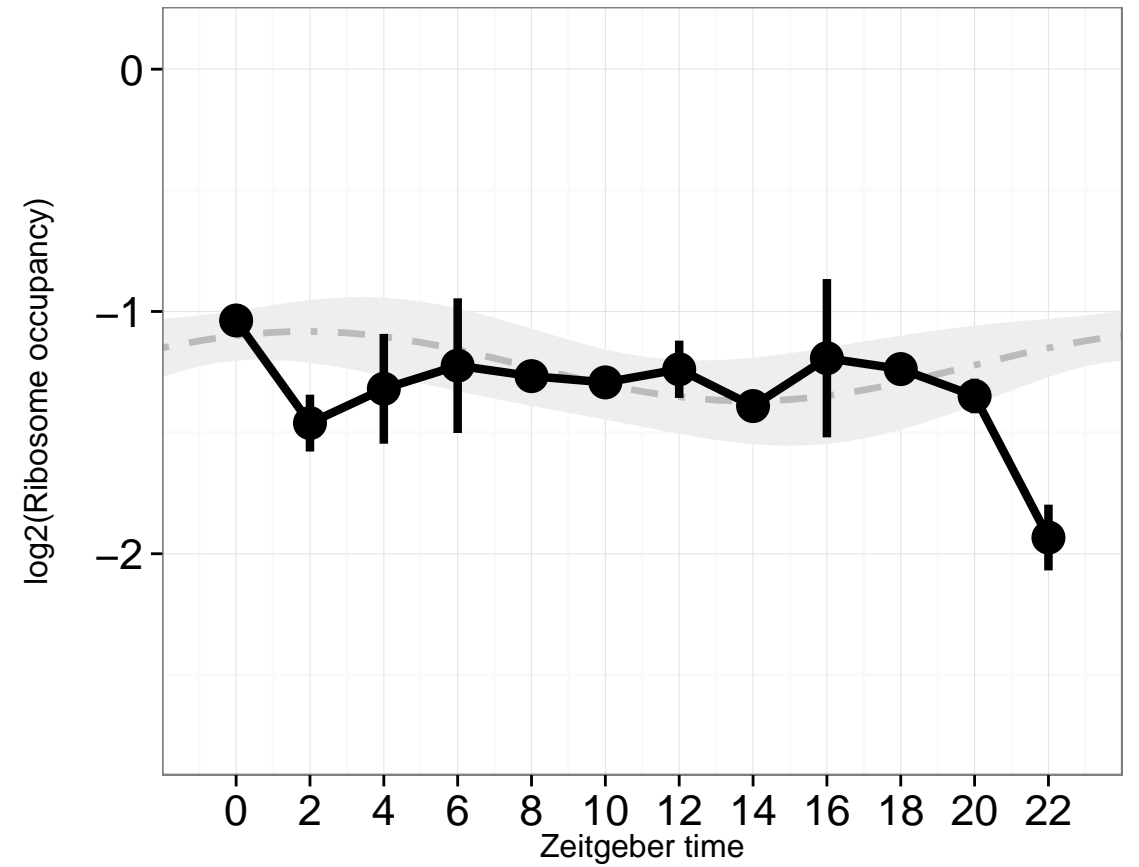

Supplement: SuppDataset_1.zip [file Prrc2b_set_A.pdf › Supplemental Dataset 1/A-mRNA_nonrhyth_translation_nonrhyth/Prrc2b_set_A.pdf]

# Prrc2c

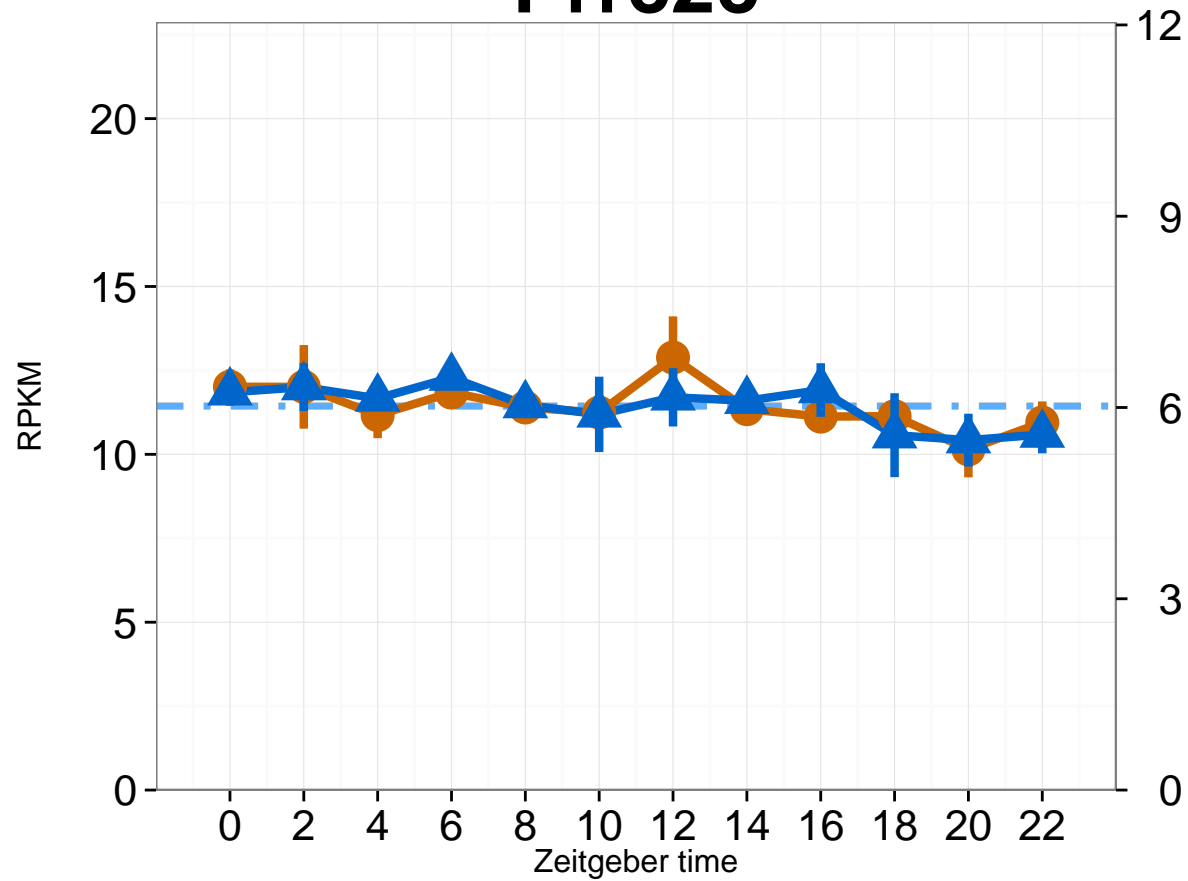

# Prrc2c

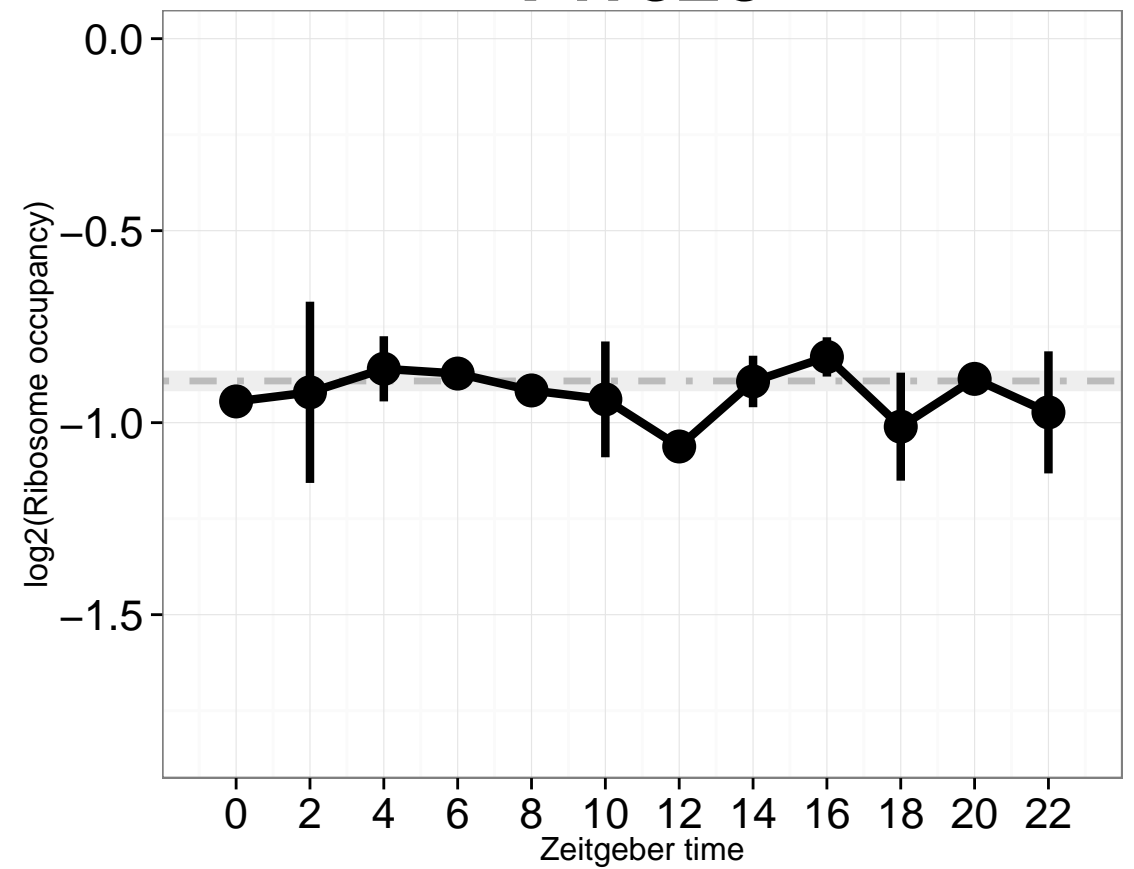

Supplement: SuppDataset_1.zip [file Prrc2c_set_A.pdf › Supplemental Dataset 1/A-mRNA_nonrhyth_translation_nonrhyth/Prrc2c_set_A.pdf]

# Prrg2

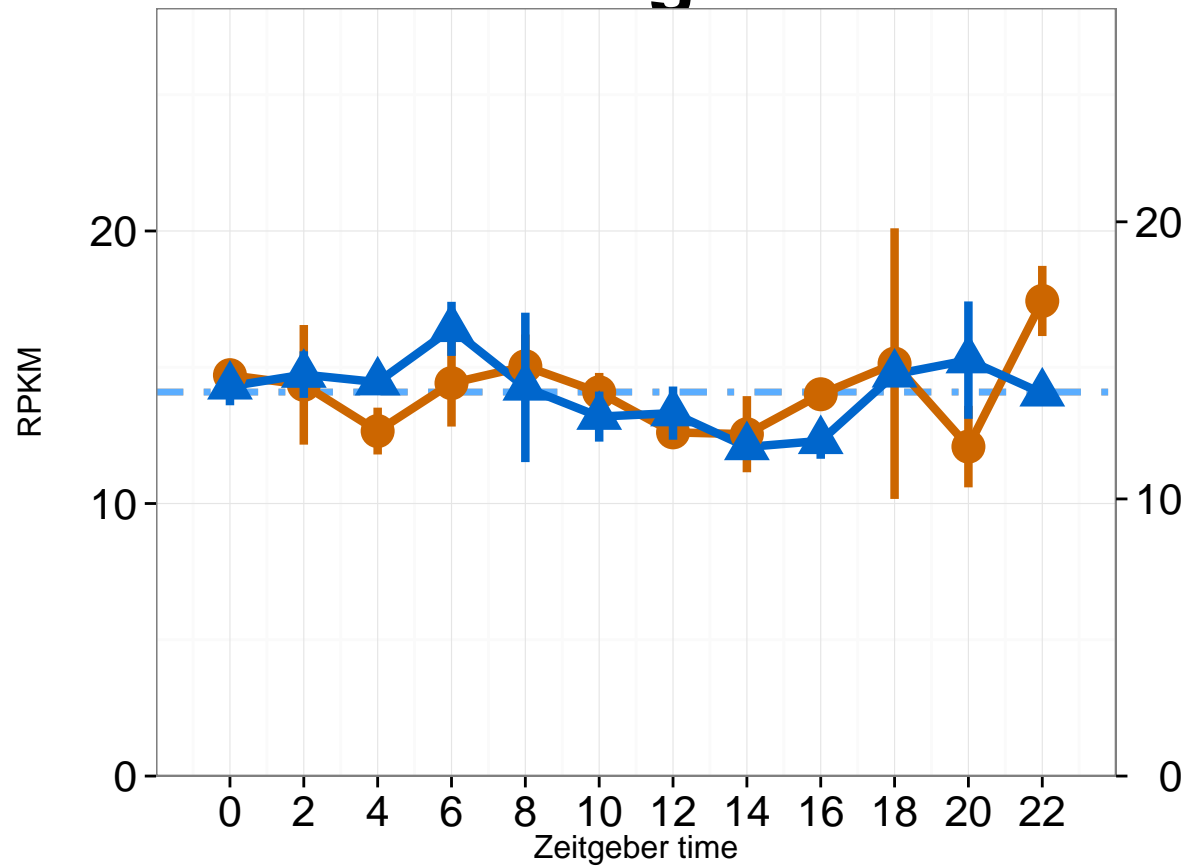

# Prrg2

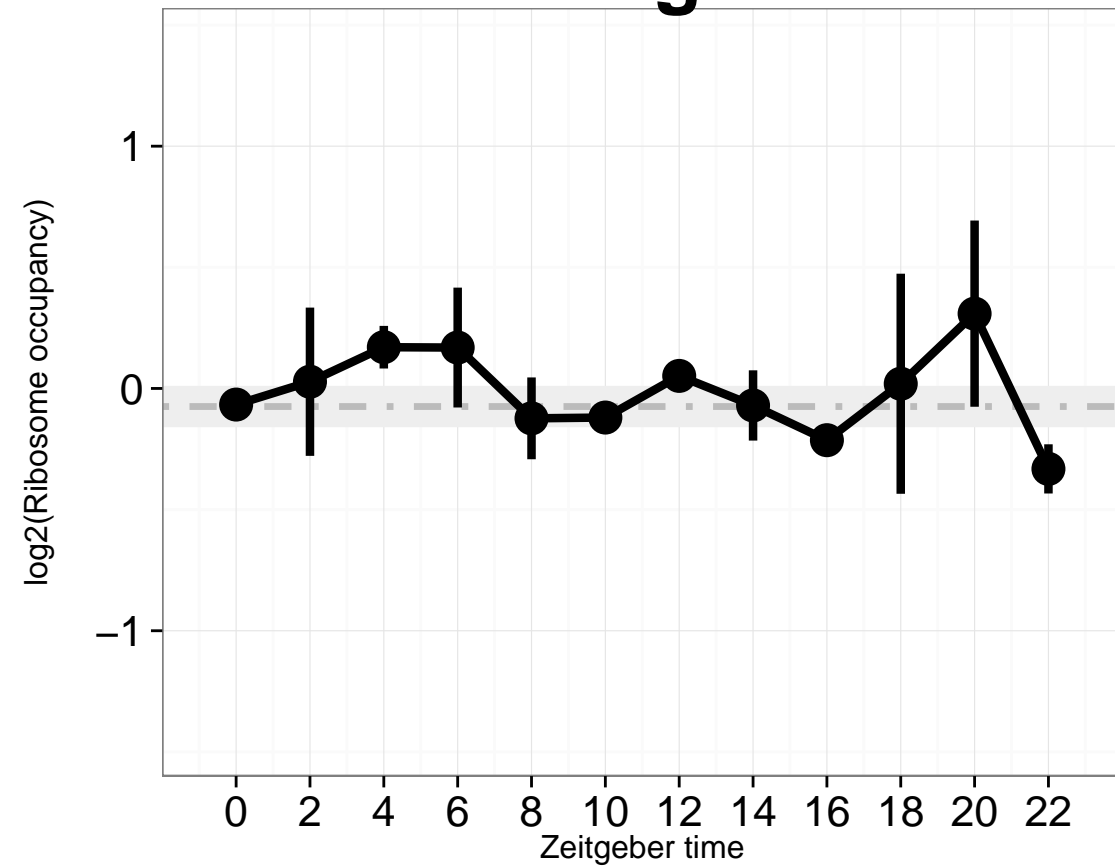

Supplement: SuppDataset_1.zip [file Prrg2_set_A.pdf › Supplemental Dataset 1/A-mRNA_nonrhyth_translation_nonrhyth/Prrg2_set_A.pdf]

**Prss2 TR**

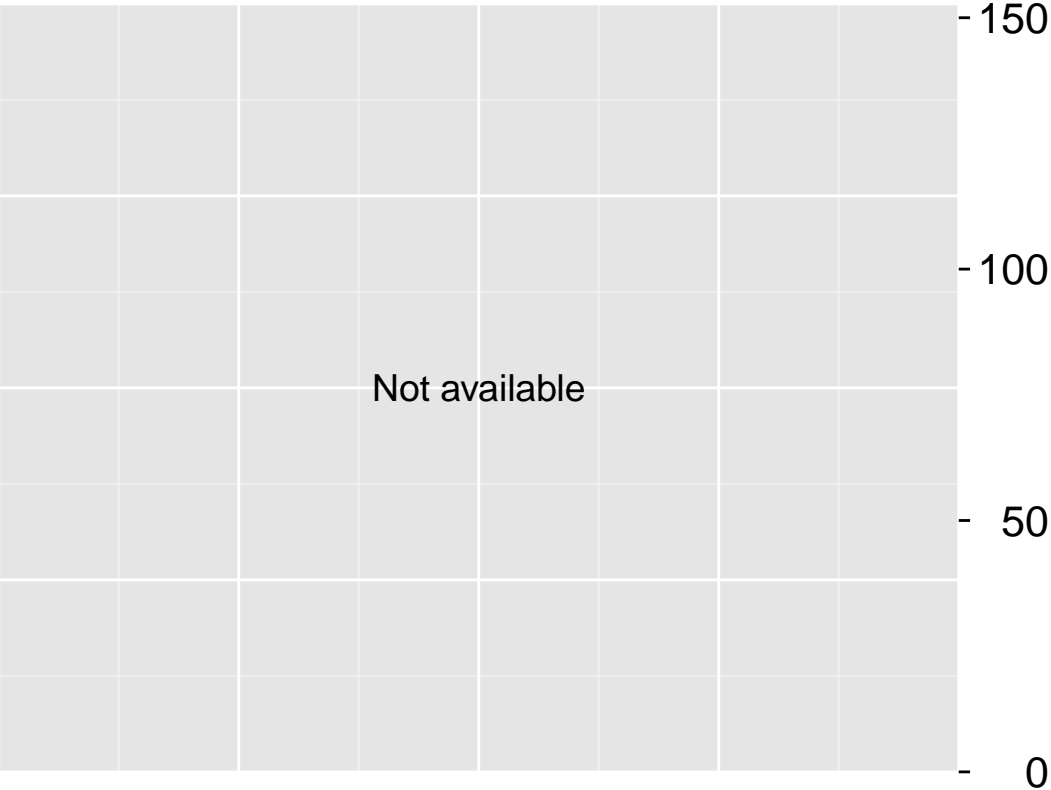

**Prss2 log2(Ribosome occupancy)**

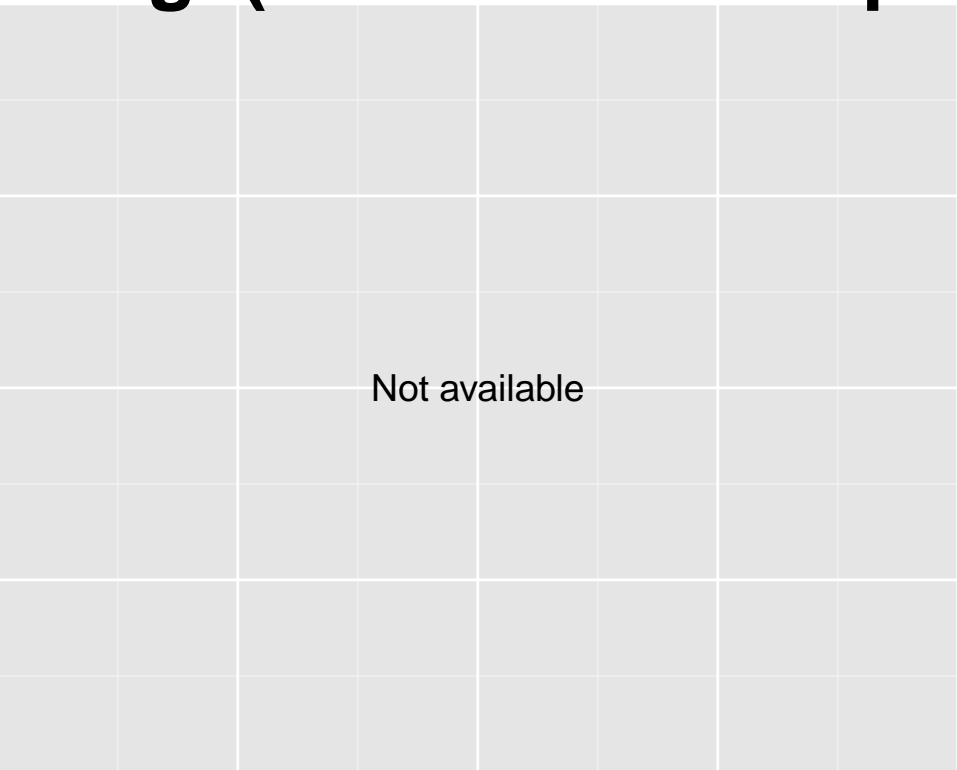

Supplement: SuppDataset_1.zip [file Prss2_set_A.pdf › Supplemental Dataset 1/A-mRNA_nonrhyth_translation_nonrhyth/Prss2_set_A.pdf]

# Prss53

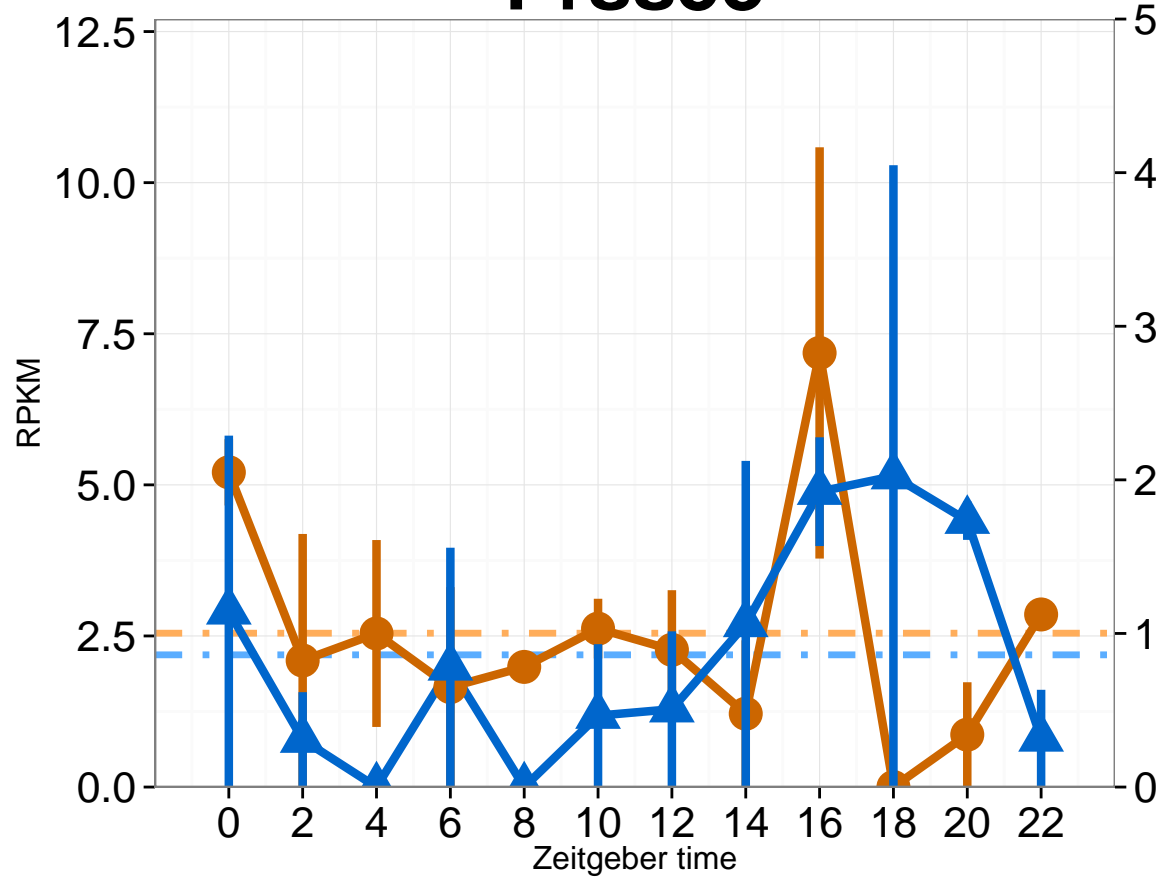

# Prss53

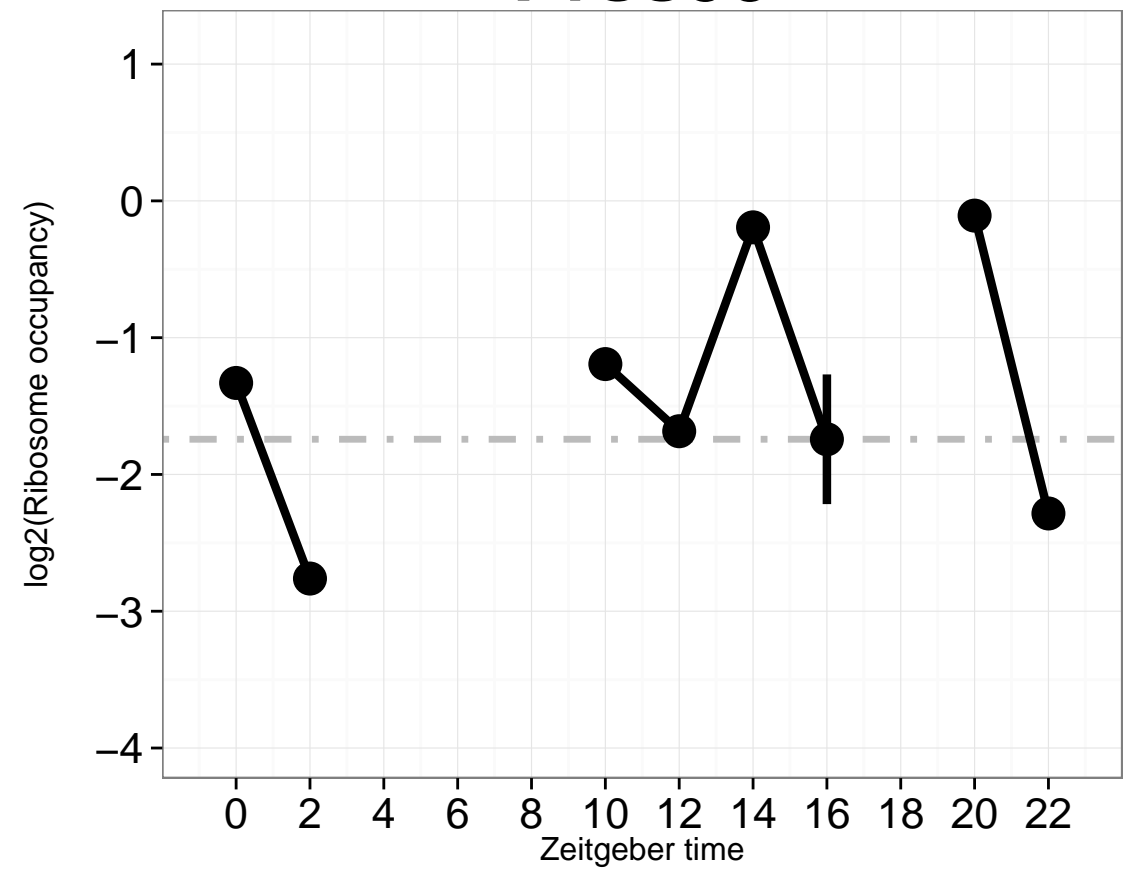

Supplement: SuppDataset_1.zip [file Prss53_set_A.pdf › Supplemental Dataset 1/A-mRNA_nonrhyth_translation_nonrhyth/Prss53_set_A.pdf]

# Prss8

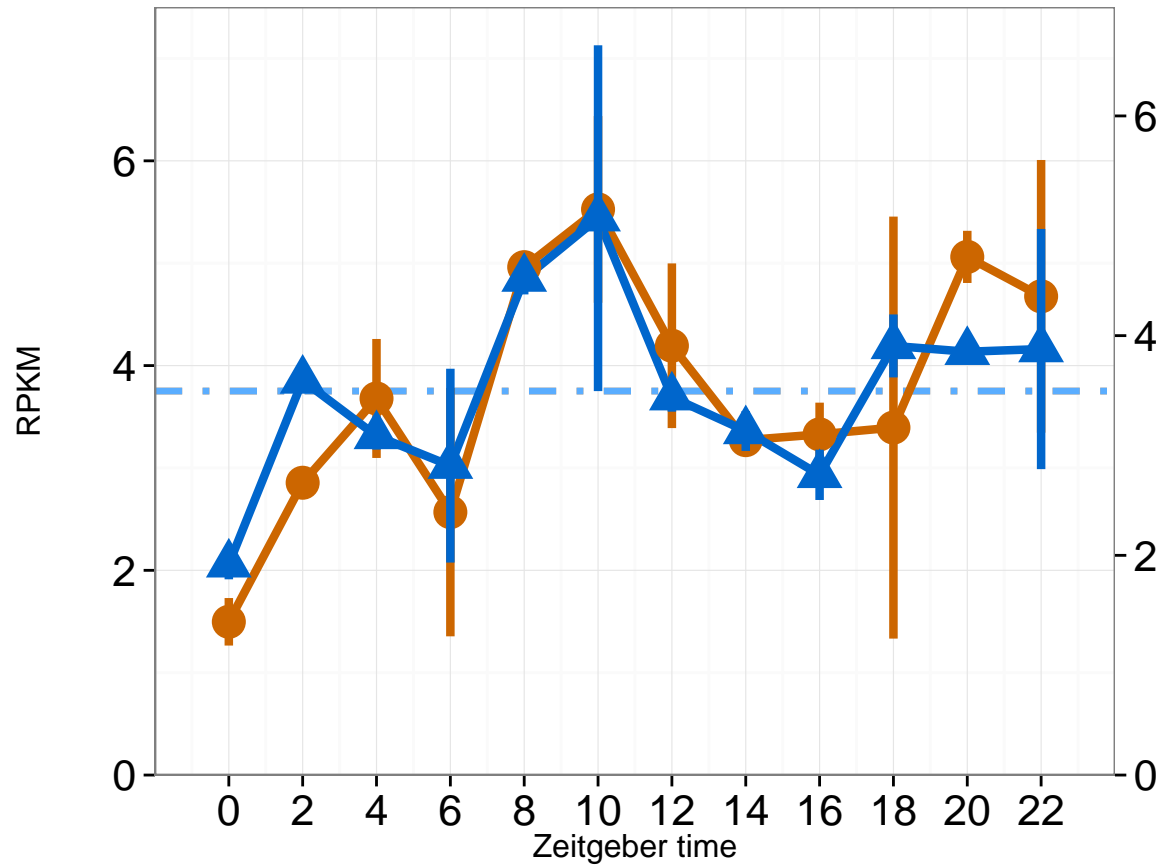

# Prss8

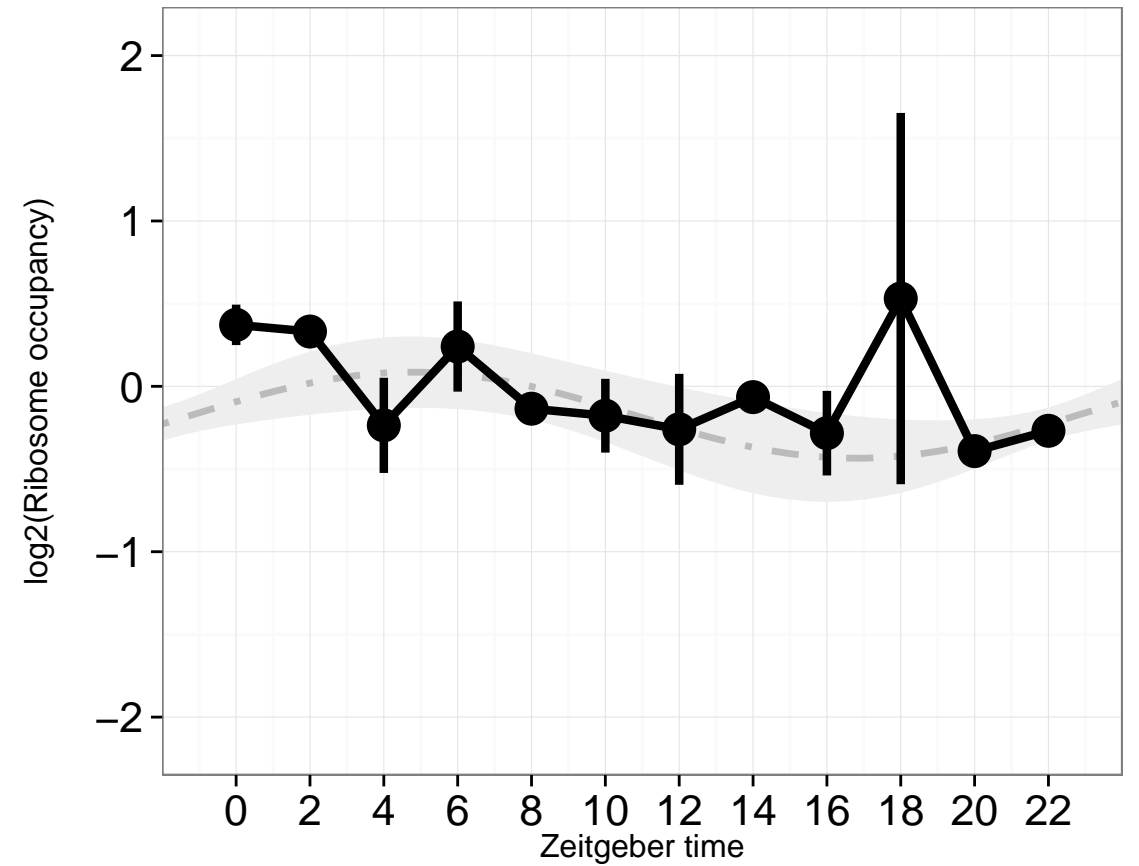

Supplement: SuppDataset_1.zip [file Prss8_set_A.pdf › Supplemental Dataset 1/A-mRNA_nonrhyth_translation_nonrhyth/Prss8_set_A.pdf]

## Psap

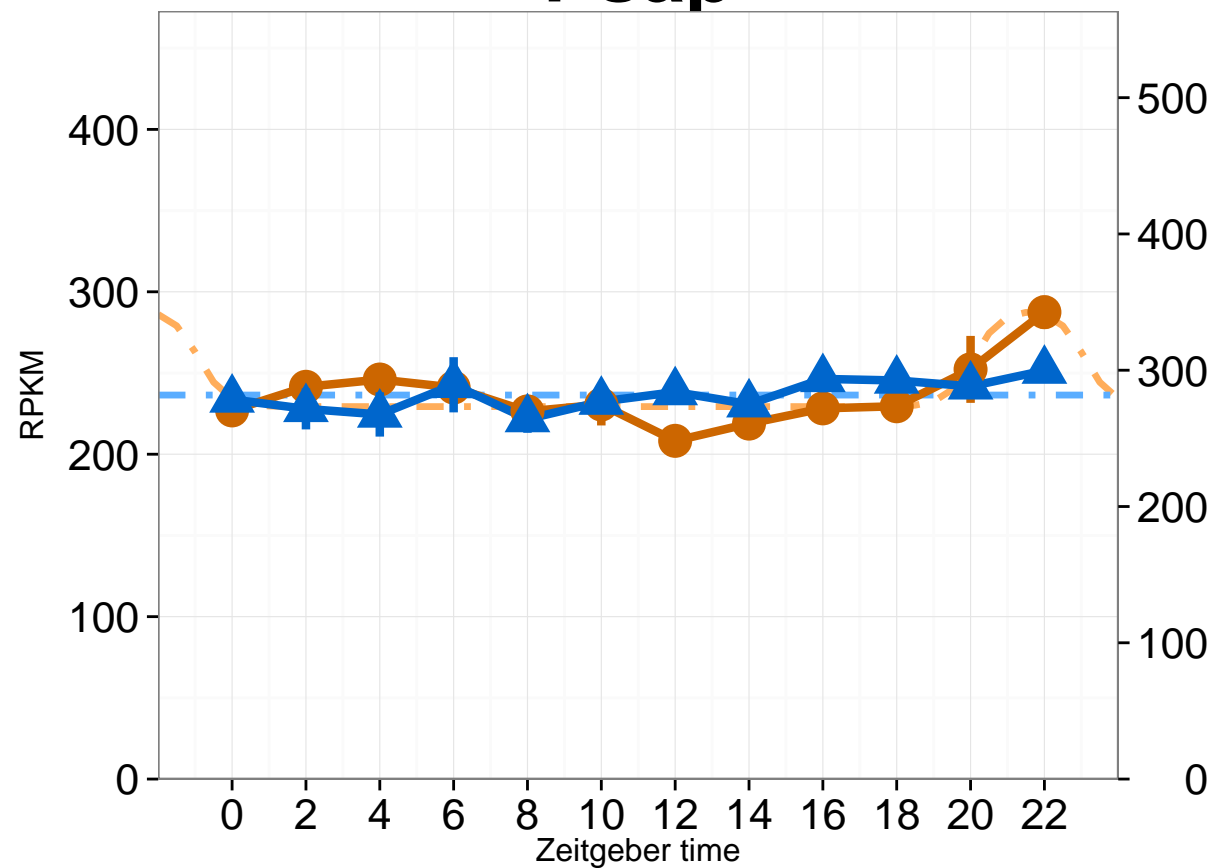

## Psap

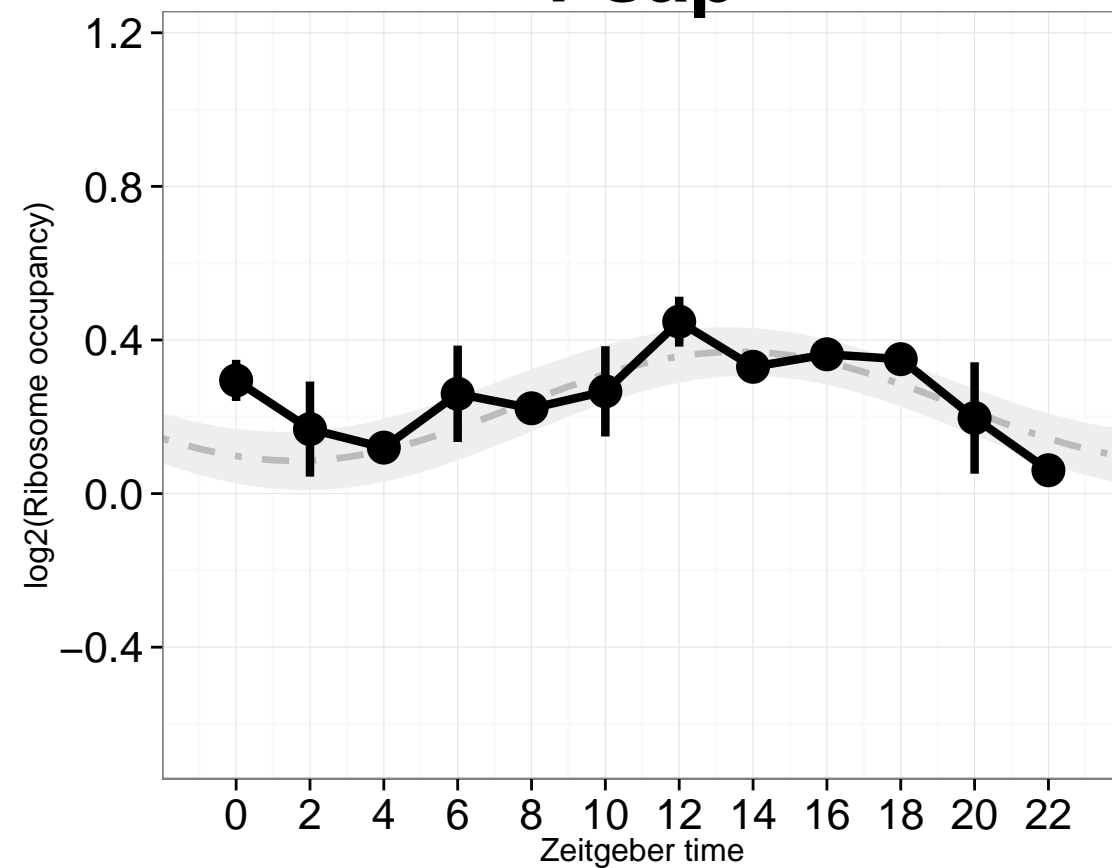

Supplement: SuppDataset_1.zip [file Psap_set_A.pdf › Supplemental Dataset 1/A-mRNA_nonrhyth_translation_nonrhyth/Psap_set_A.pdf]

# Psd3

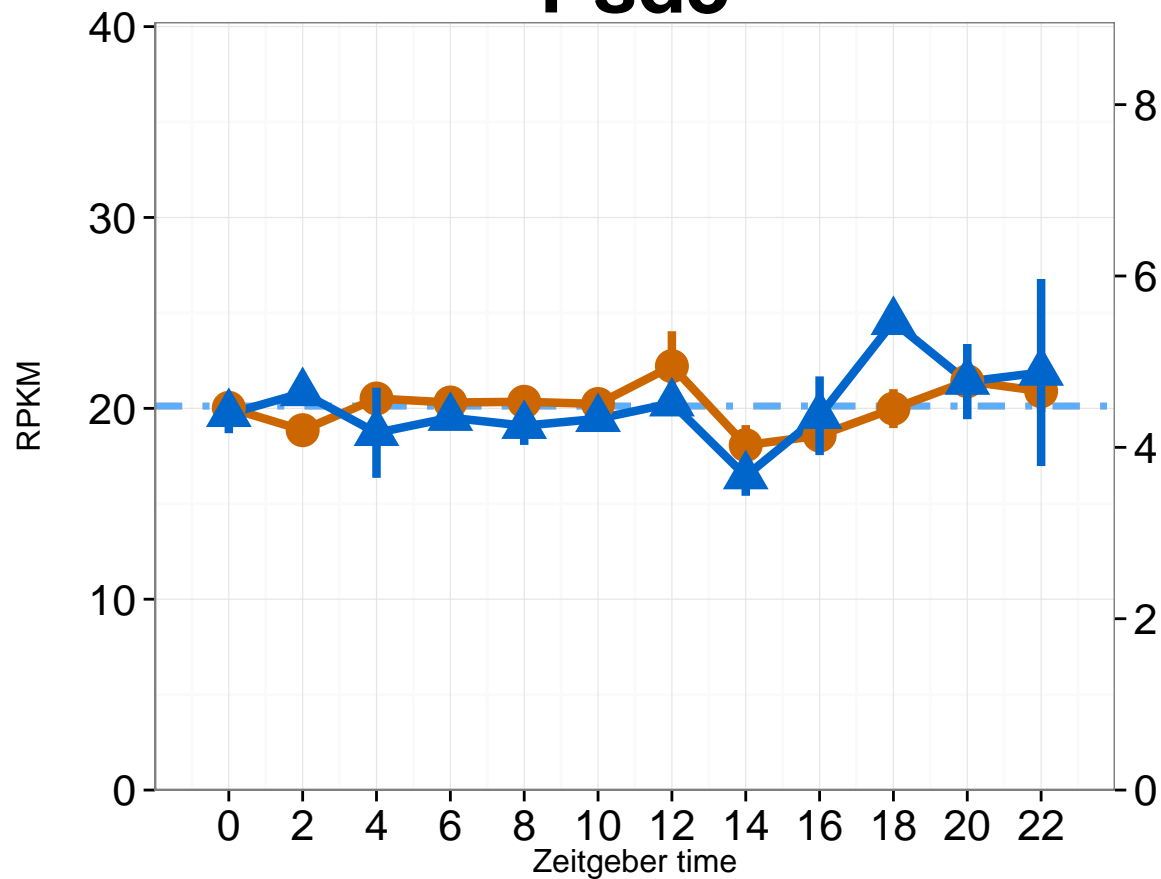

# Psd3

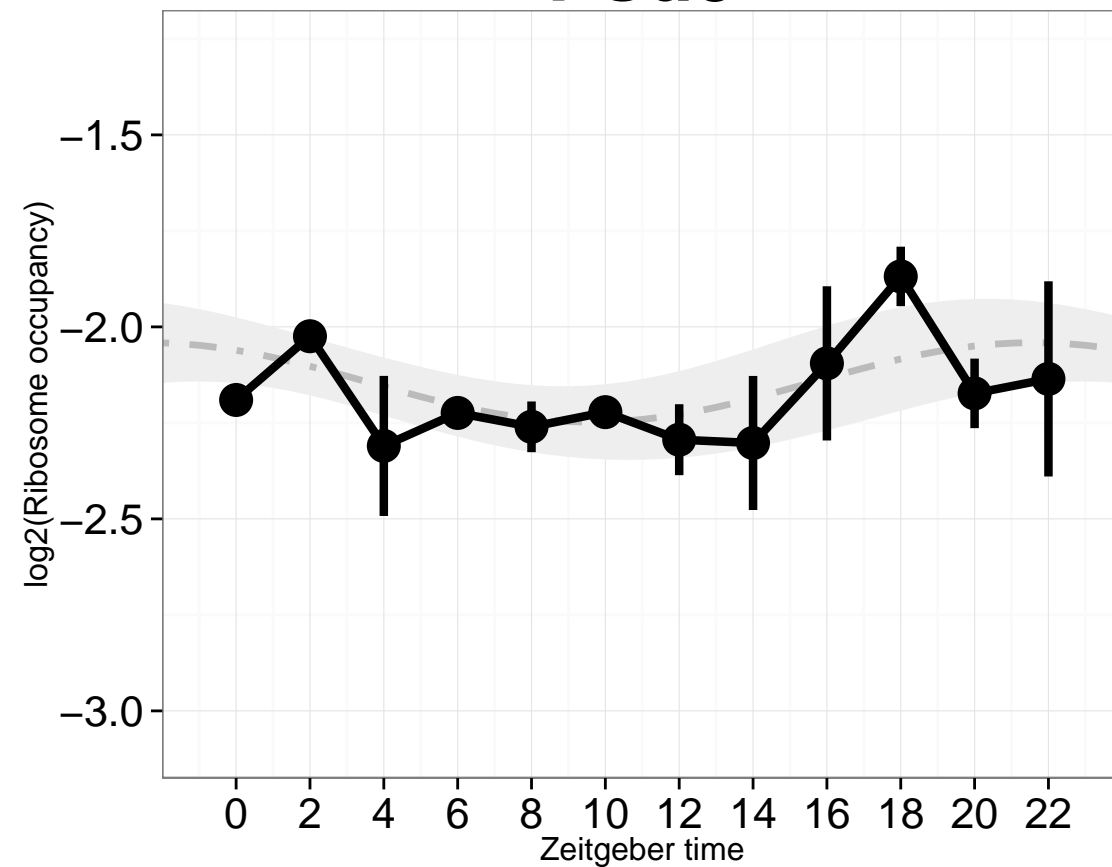

Supplement: SuppDataset_1.zip [file Psd3_set_A.pdf › Supplemental Dataset 1/A-mRNA_nonrhyth_translation_nonrhyth/Psd3_set_A.pdf]

# Psd4

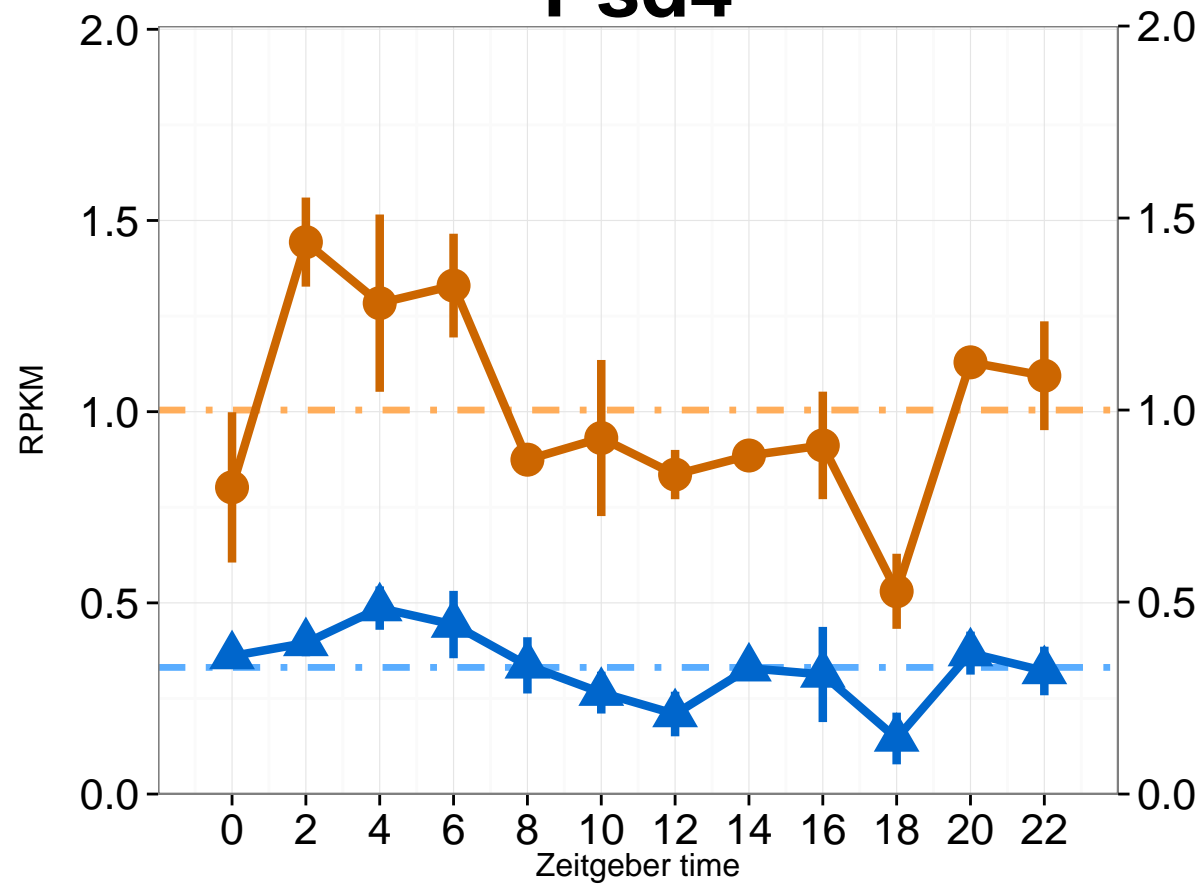

# Psd4

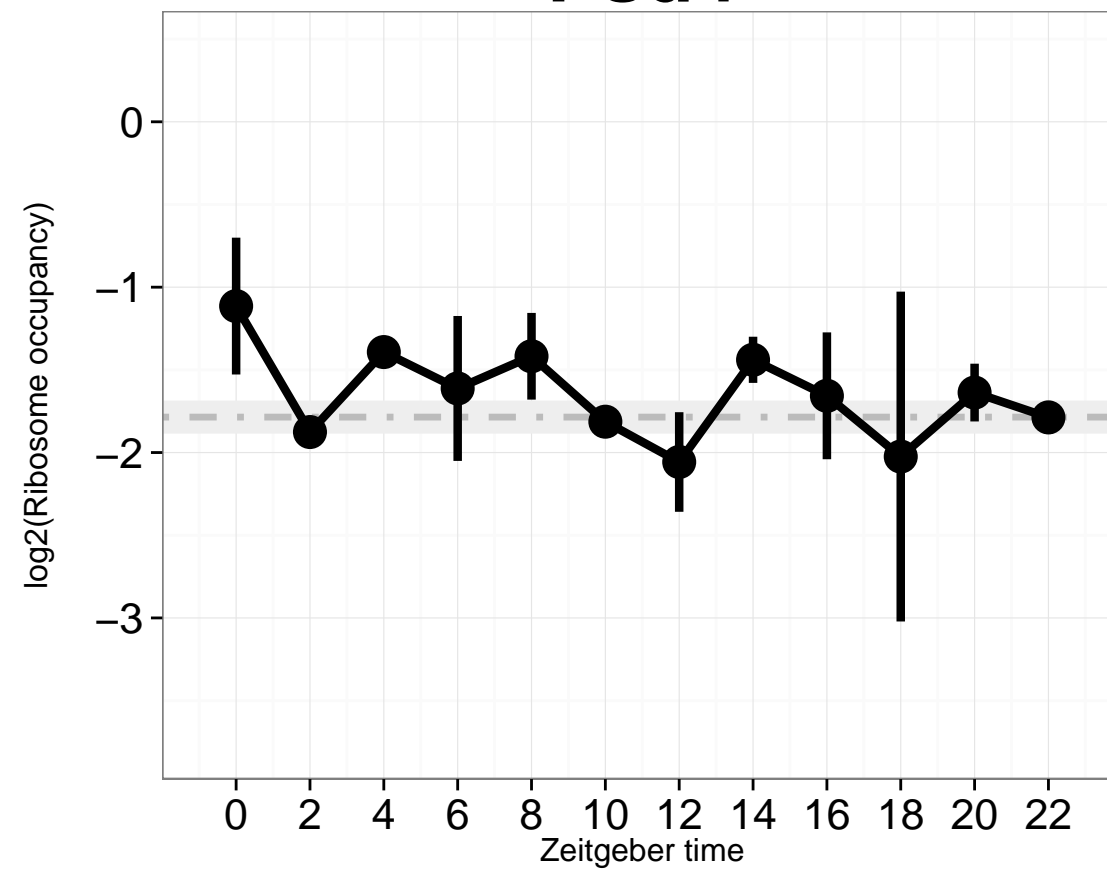

Supplement: SuppDataset_1.zip [file Psd4_set_A.pdf › Supplemental Dataset 1/A-mRNA_nonrhyth_translation_nonrhyth/Psd4_set_A.pdf]

# Psen1

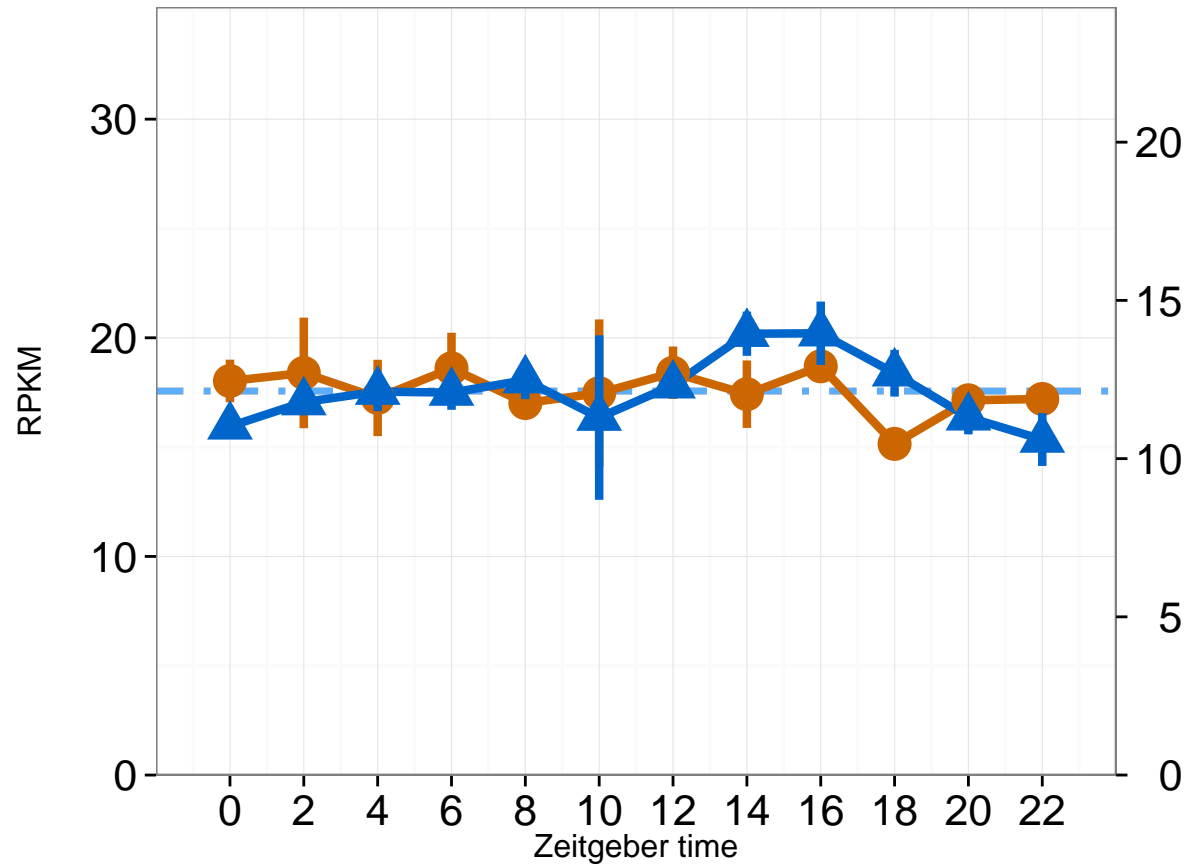

# Psen1

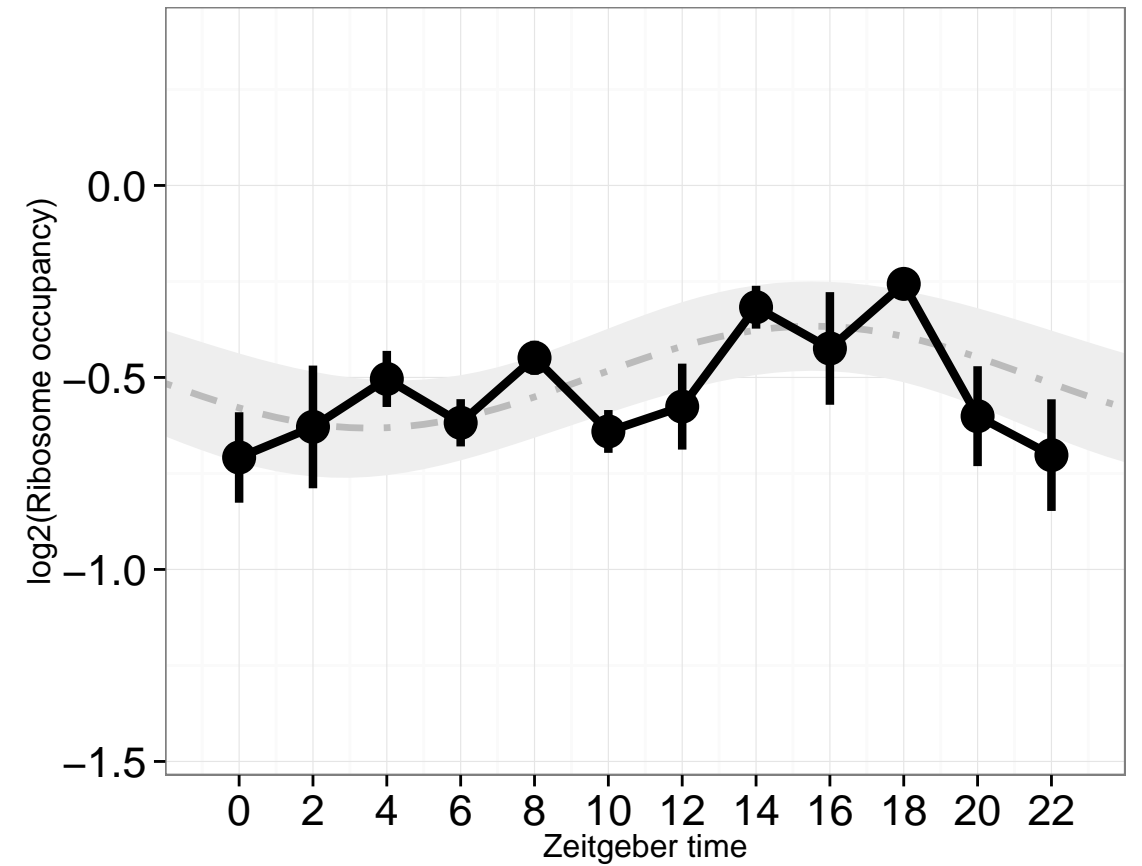

Supplement: SuppDataset_1.zip [file Psen1_set_A.pdf › Supplemental Dataset 1/A-mRNA_nonrhyth_translation_nonrhyth/Psen1_set_A.pdf]

## Psenen

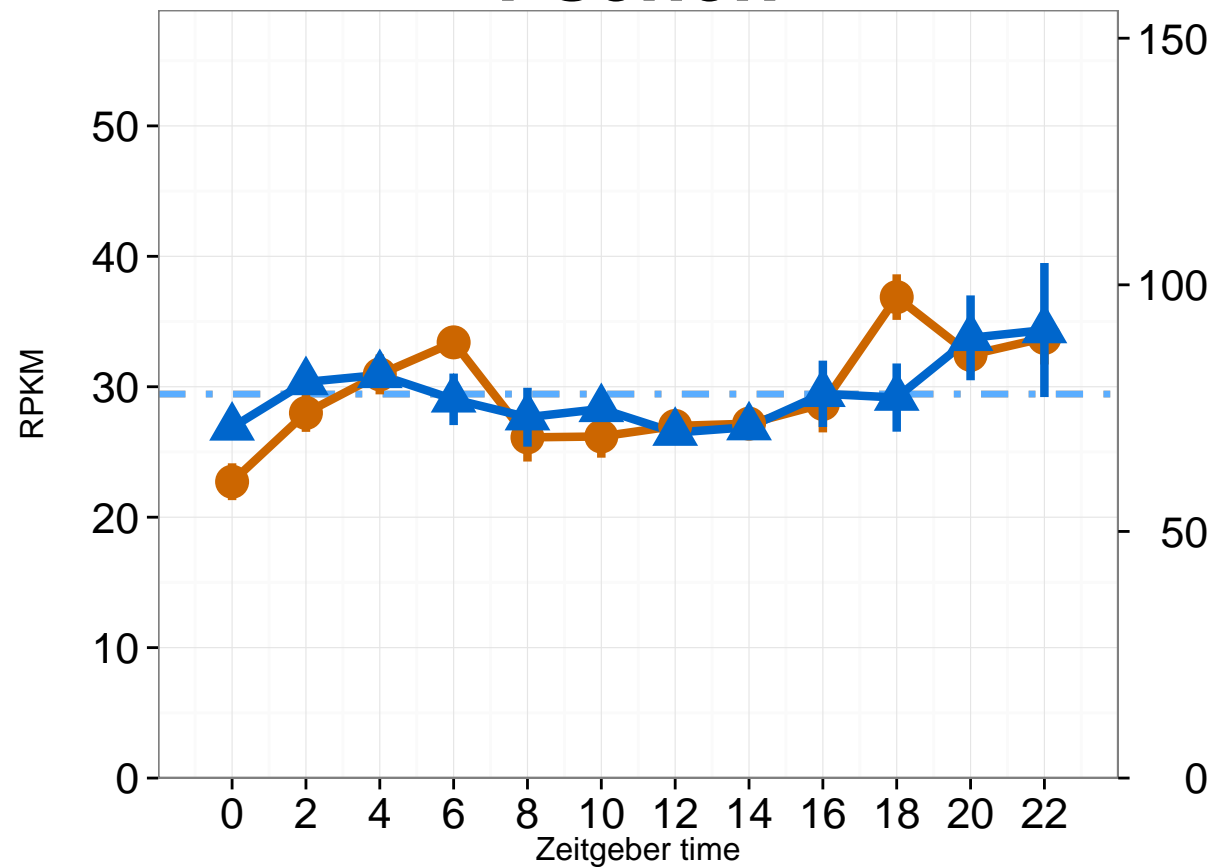

## Psenen

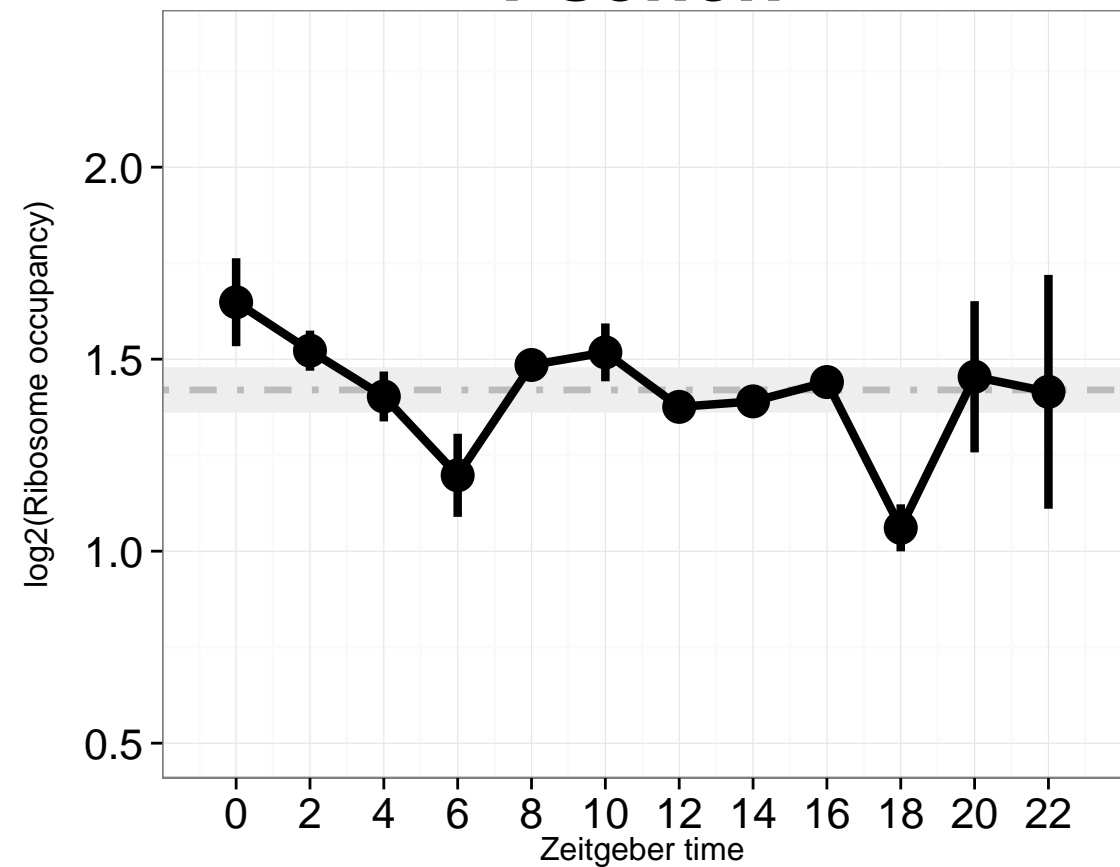

Supplement: SuppDataset_1.zip [file Psenen_set_A.pdf › Supplemental Dataset 1/A-mRNA_nonrhyth_translation_nonrhyth/Psenen_set_A.pdf]

# Psip1

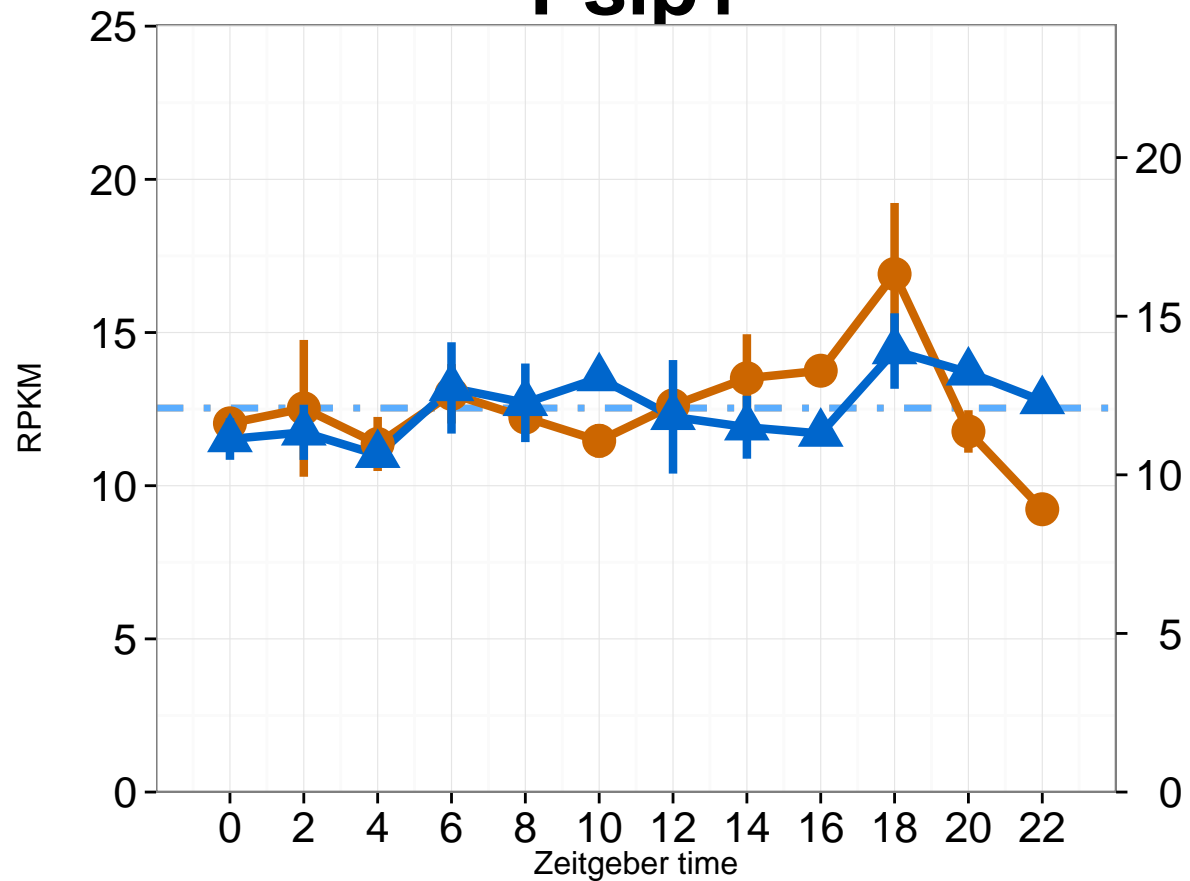

# Psip1

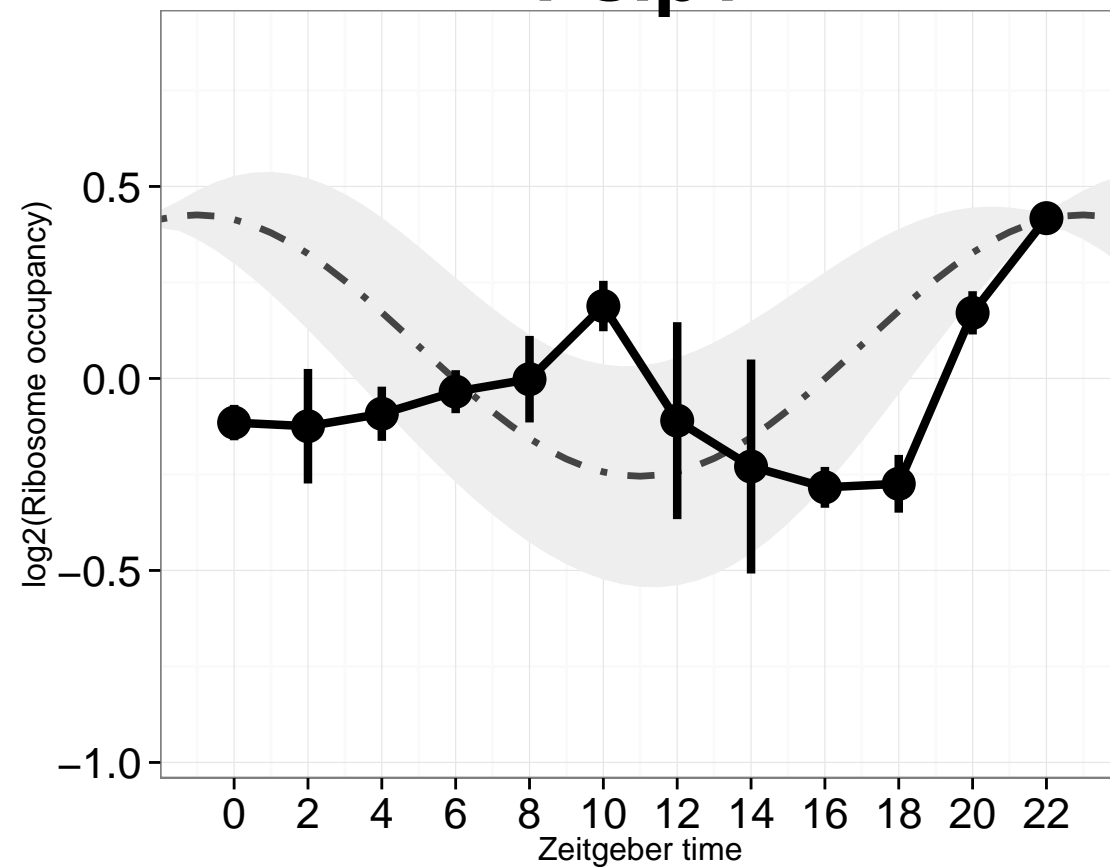

Supplement: SuppDataset_1.zip [file Psip1_set_A.pdf › Supplemental Dataset 1/A-mRNA_nonrhyth_translation_nonrhyth/Psip1_set_A.pdf]

# Pskh1

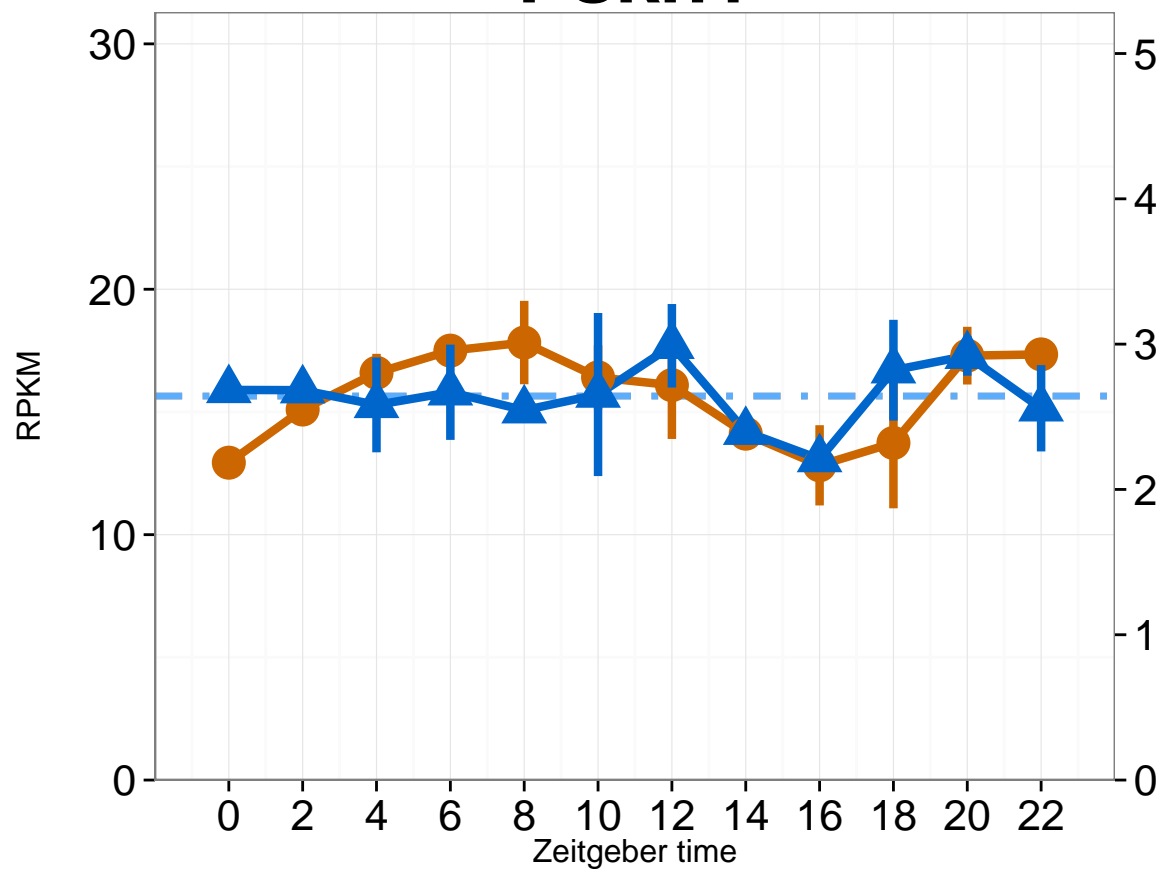

# Pskh1

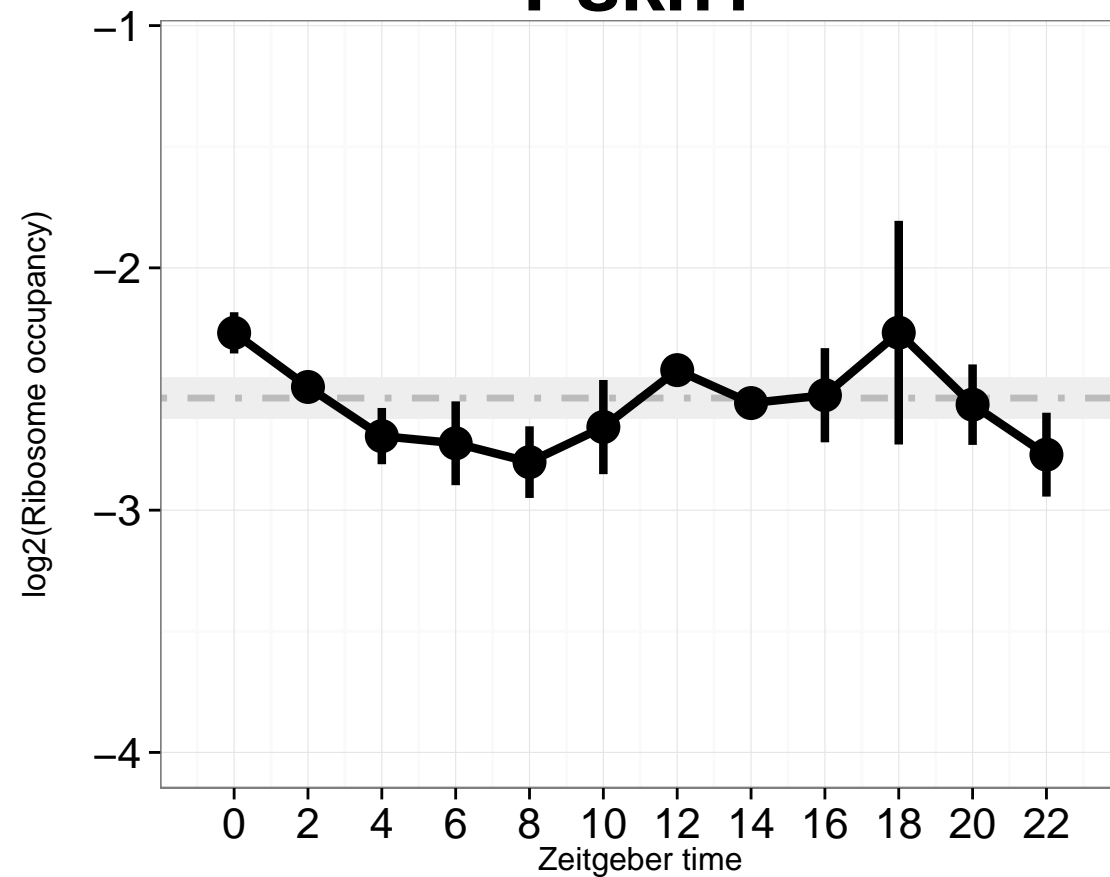

Supplement: SuppDataset_1.zip [file Pskh1_set_A.pdf › Supplemental Dataset 1/A-mRNA_nonrhyth_translation_nonrhyth/Pskh1_set_A.pdf]

# Psma1

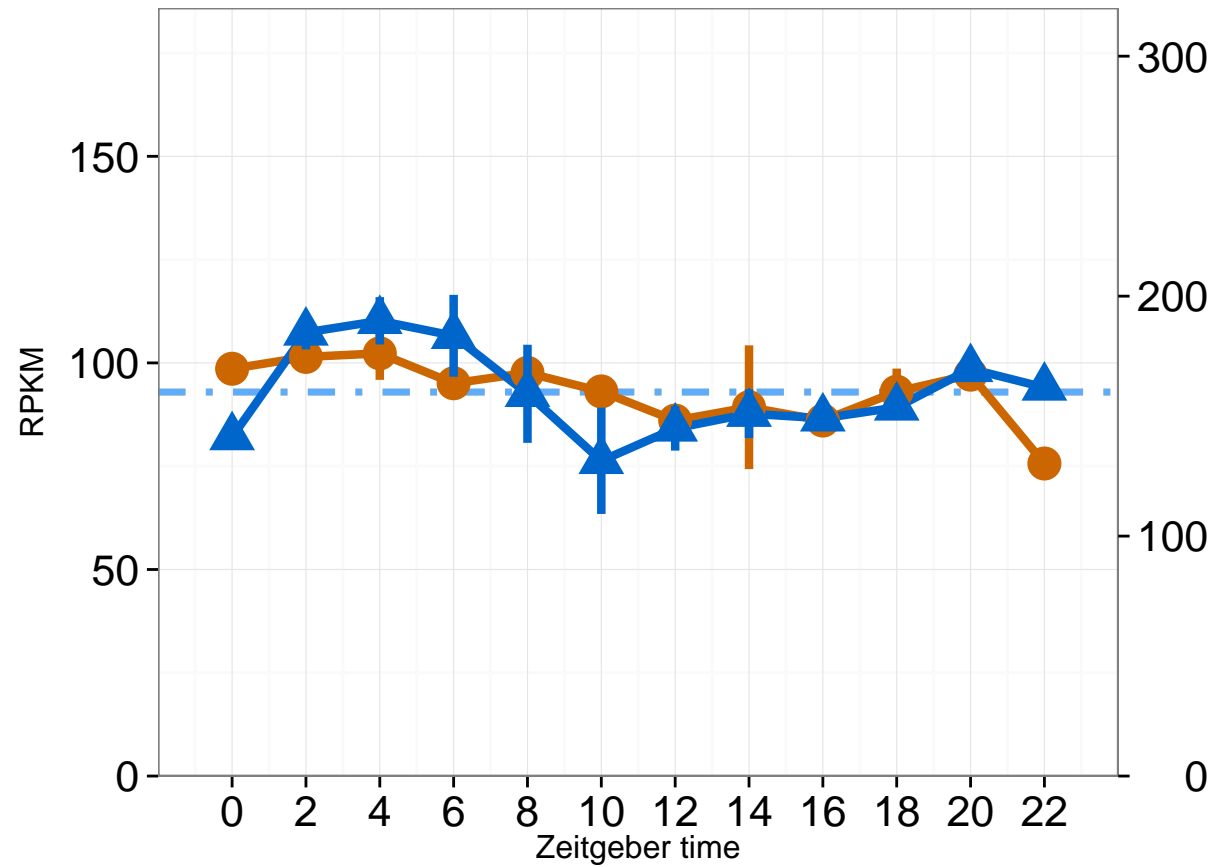

# Psma1

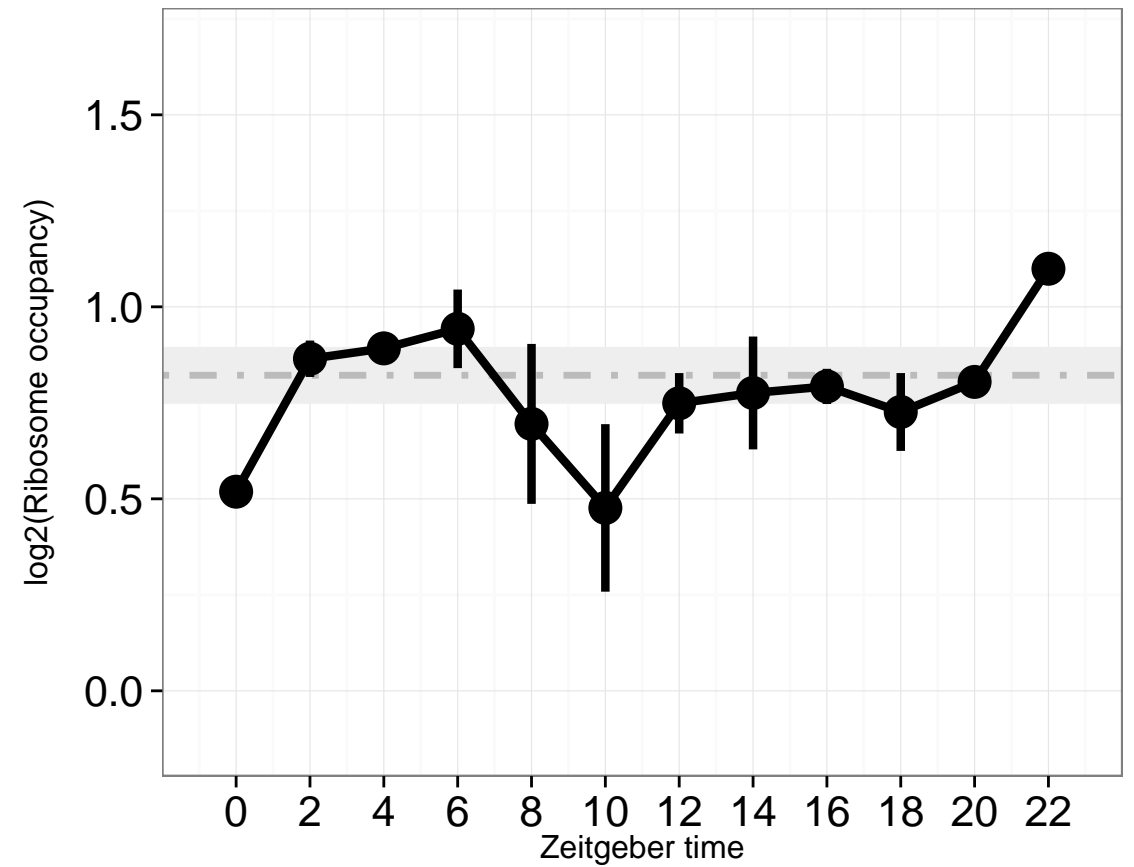

Supplement: SuppDataset_1.zip [file Psma1_set_A.pdf › Supplemental Dataset 1/A-mRNA_nonrhyth_translation_nonrhyth/Psma1_set_A.pdf]

## Psma2

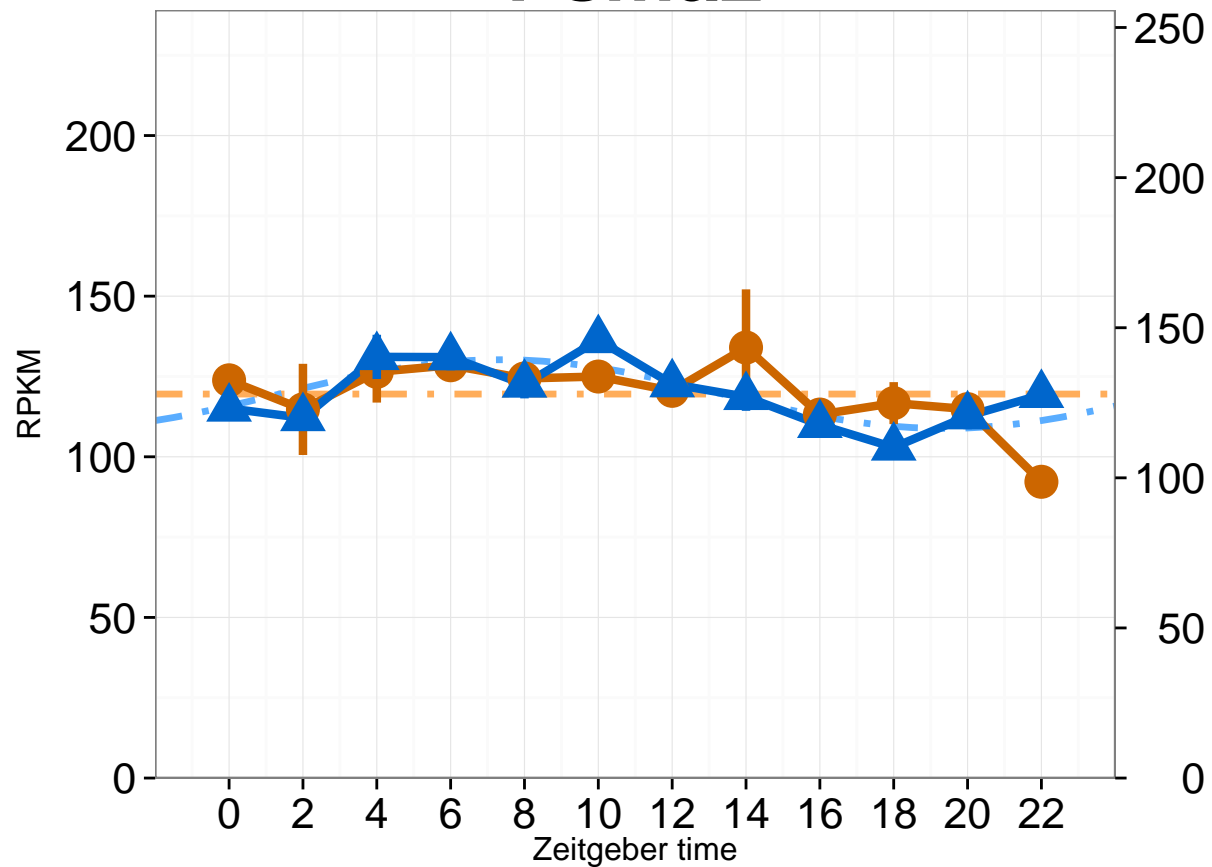

## Psma2

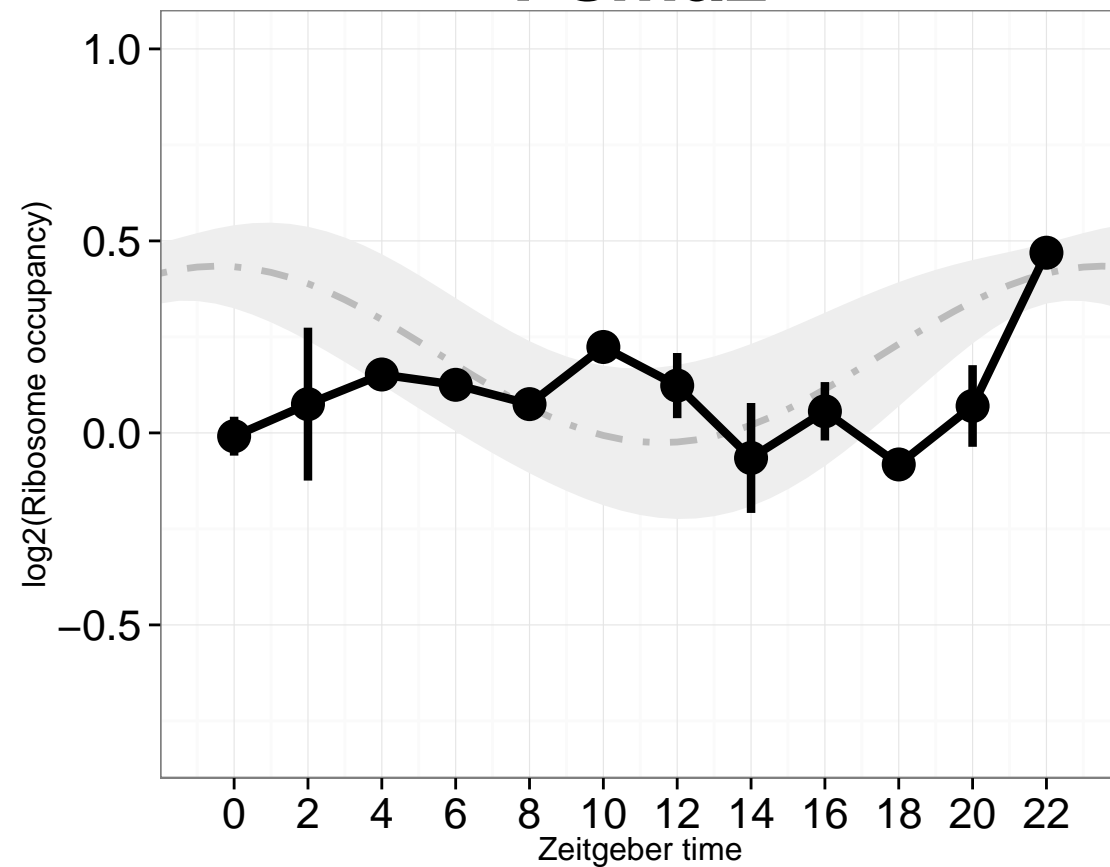

Supplement: SuppDataset_1.zip [file Psma2_set_A.pdf › Supplemental Dataset 1/A-mRNA_nonrhyth_translation_nonrhyth/Psma2_set_A.pdf]

## Psma3

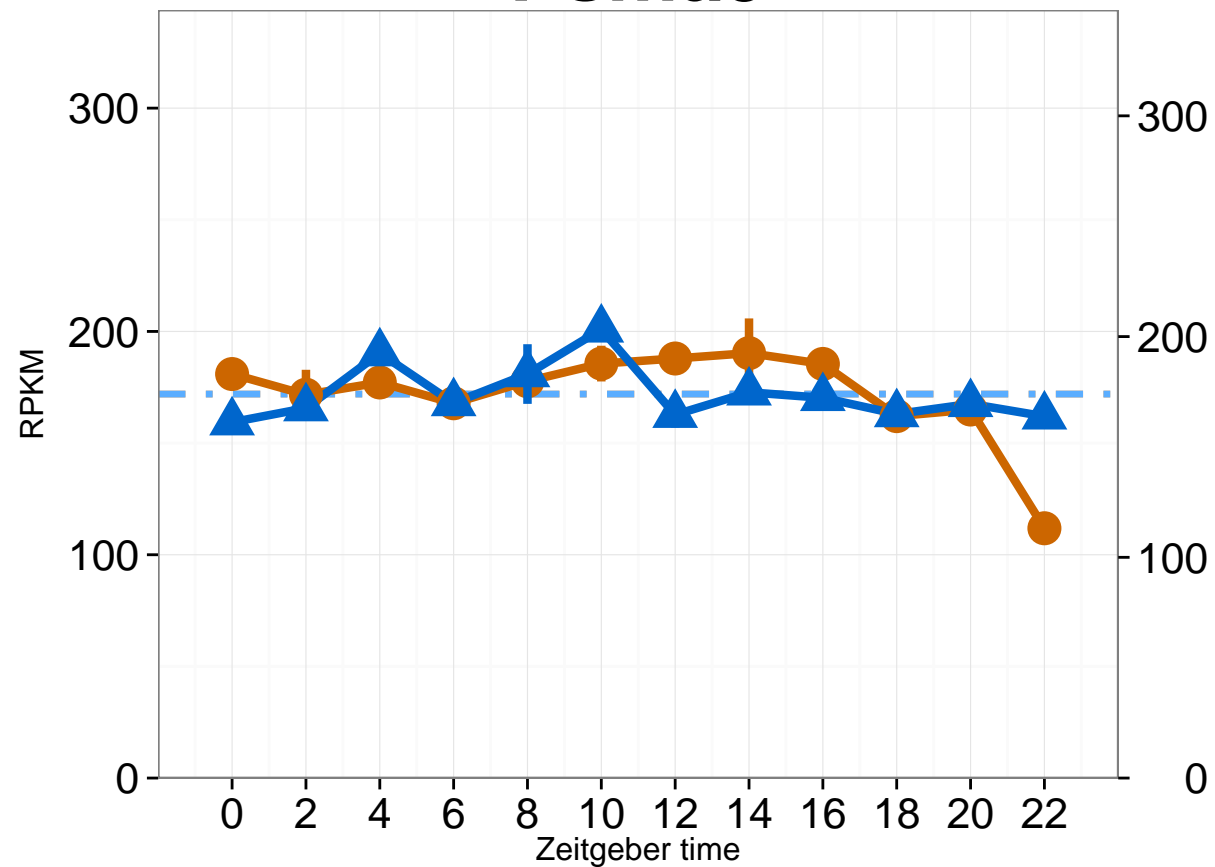

## Psma3

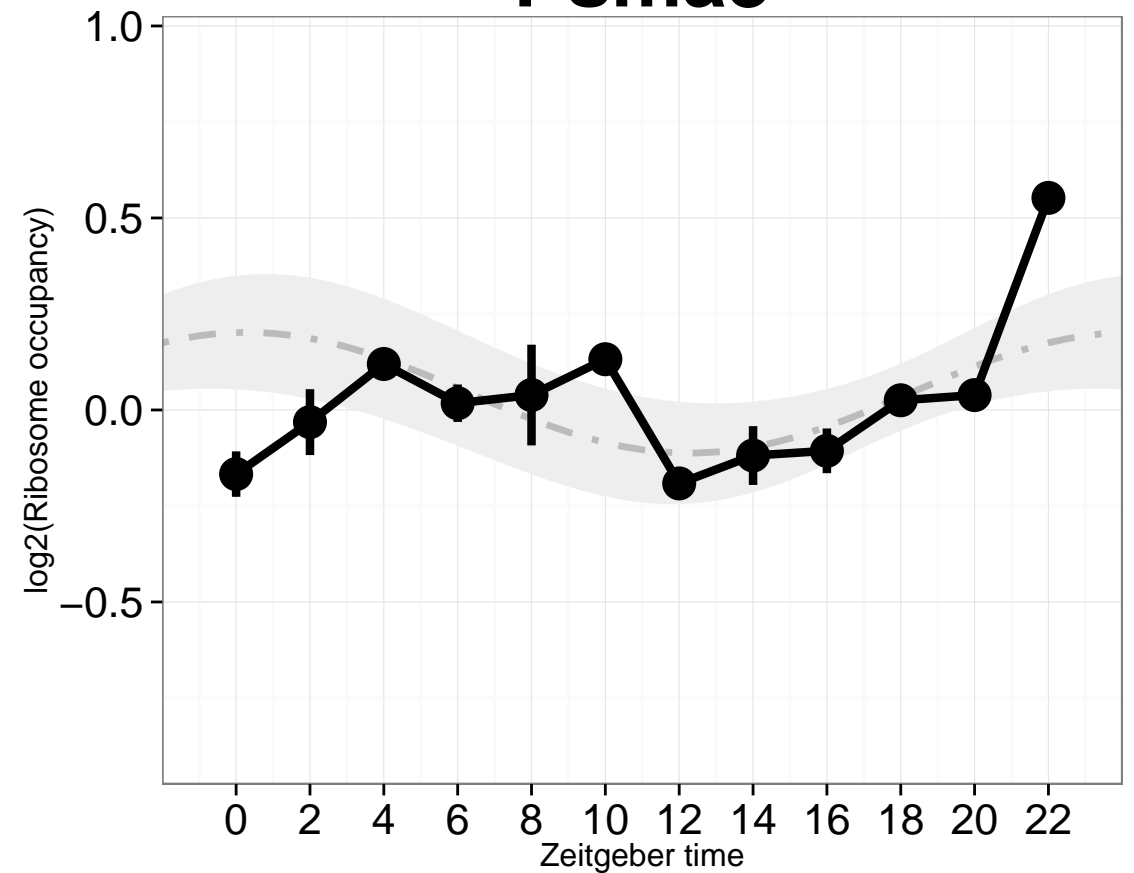

Supplement: SuppDataset_1.zip [file Psma3_set_A.pdf › Supplemental Dataset 1/A-mRNA_nonrhyth_translation_nonrhyth/Psma3_set_A.pdf]

## Psma4

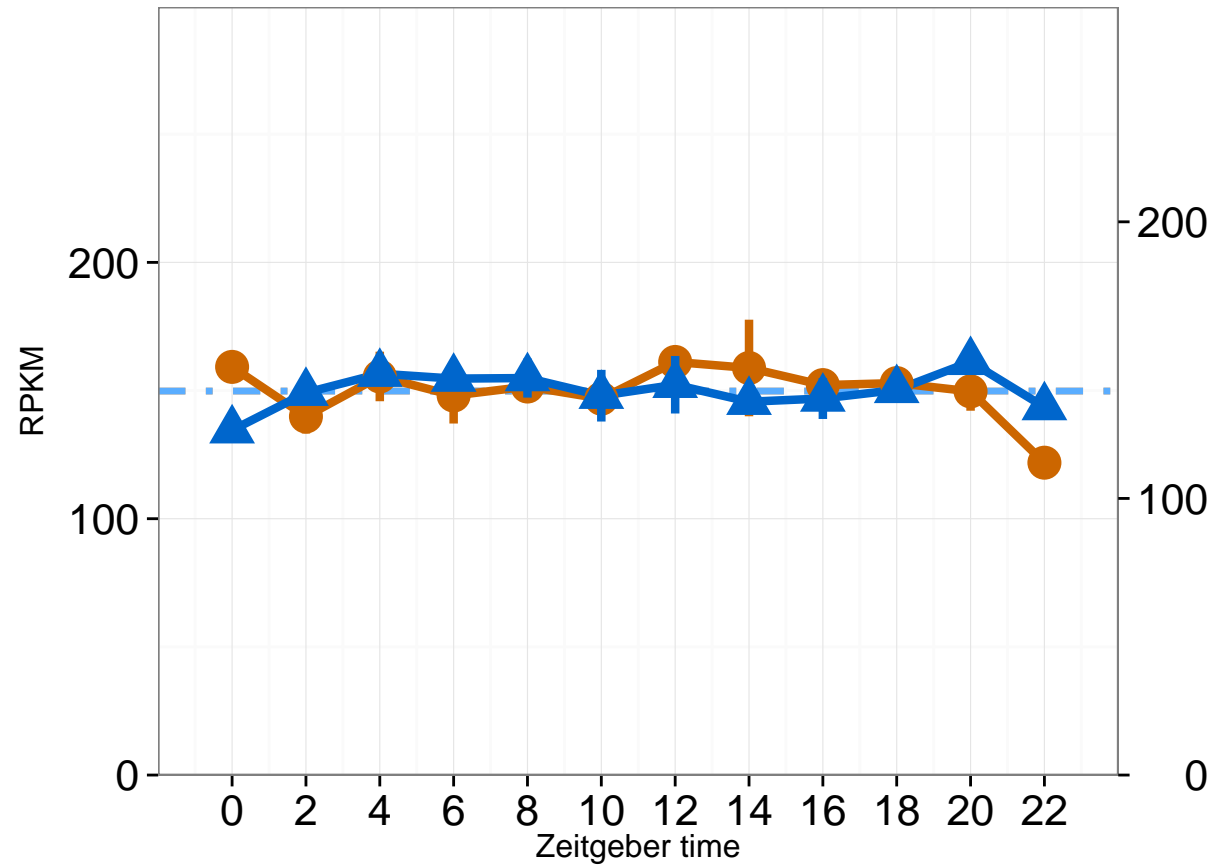

## Psma4

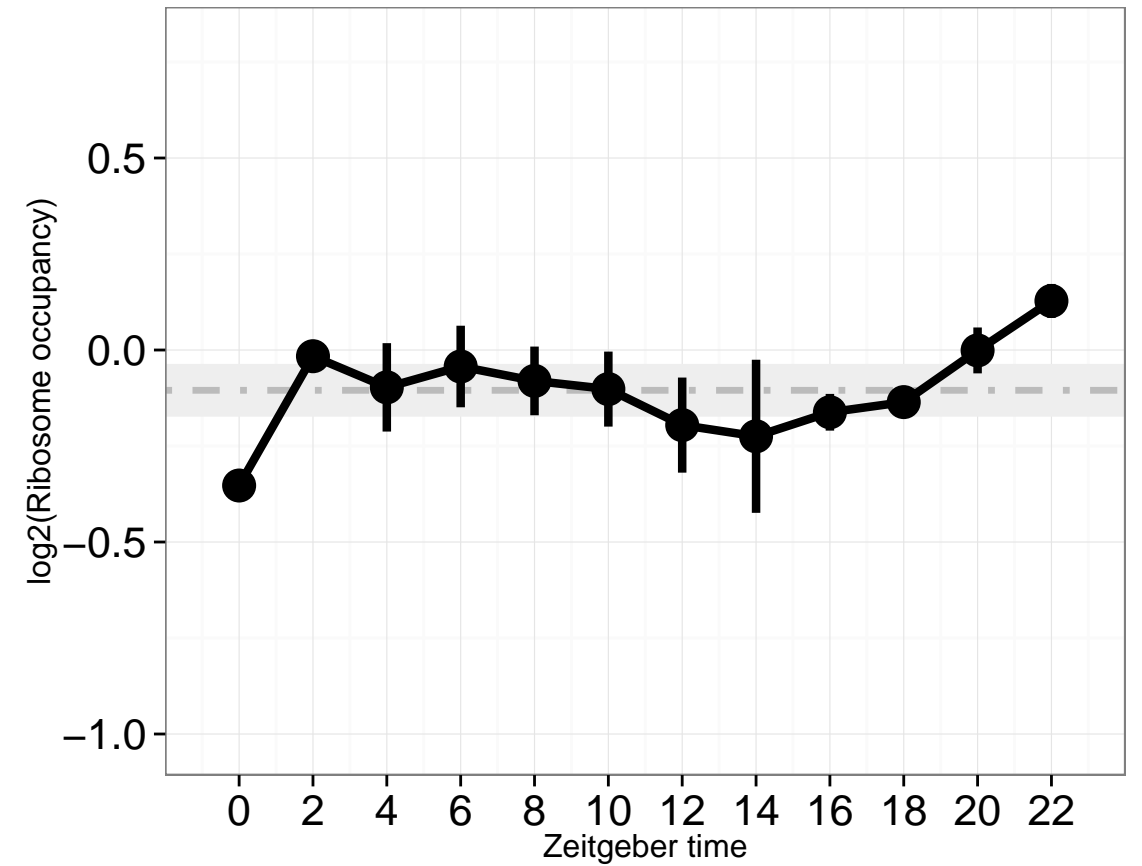

Supplement: SuppDataset_1.zip [file Psma4_set_A.pdf › Supplemental Dataset 1/A-mRNA_nonrhyth_translation_nonrhyth/Psma4_set_A.pdf]

## Psma5

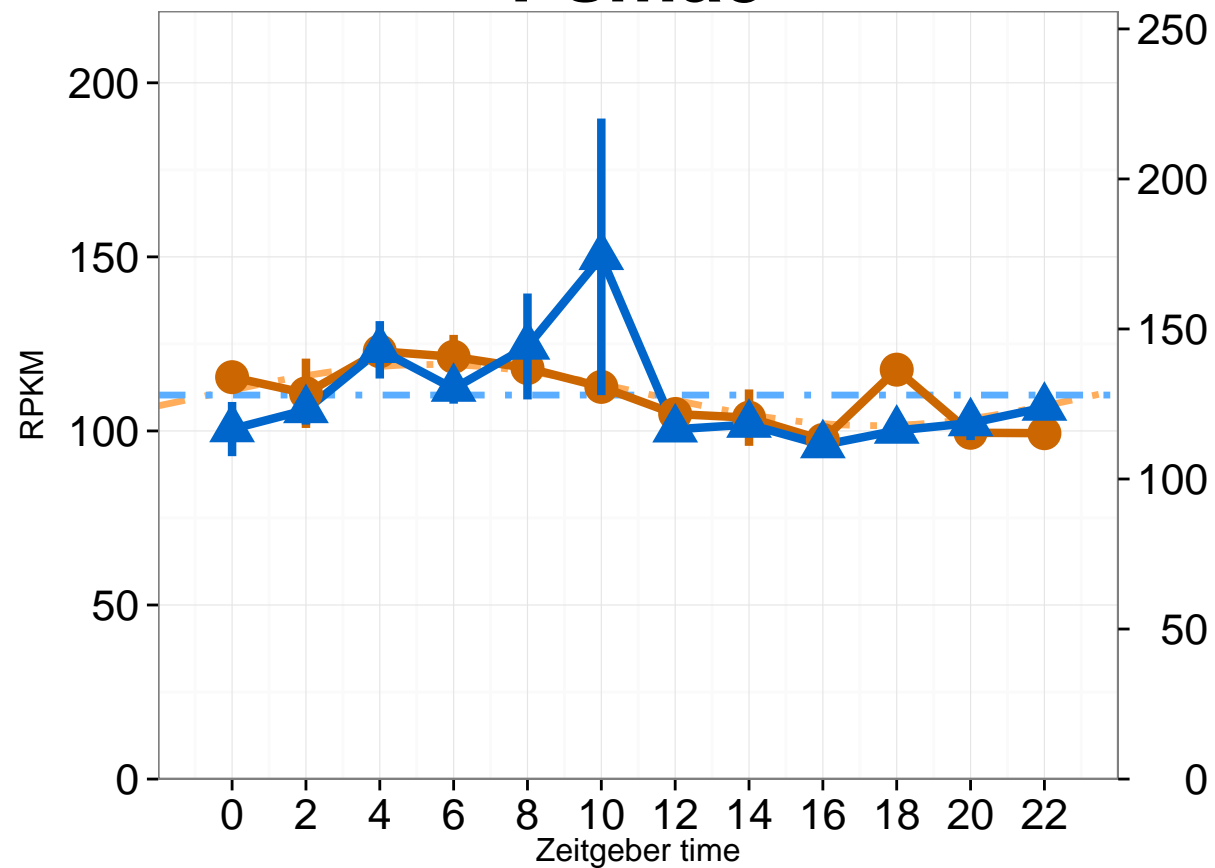

## Psma5

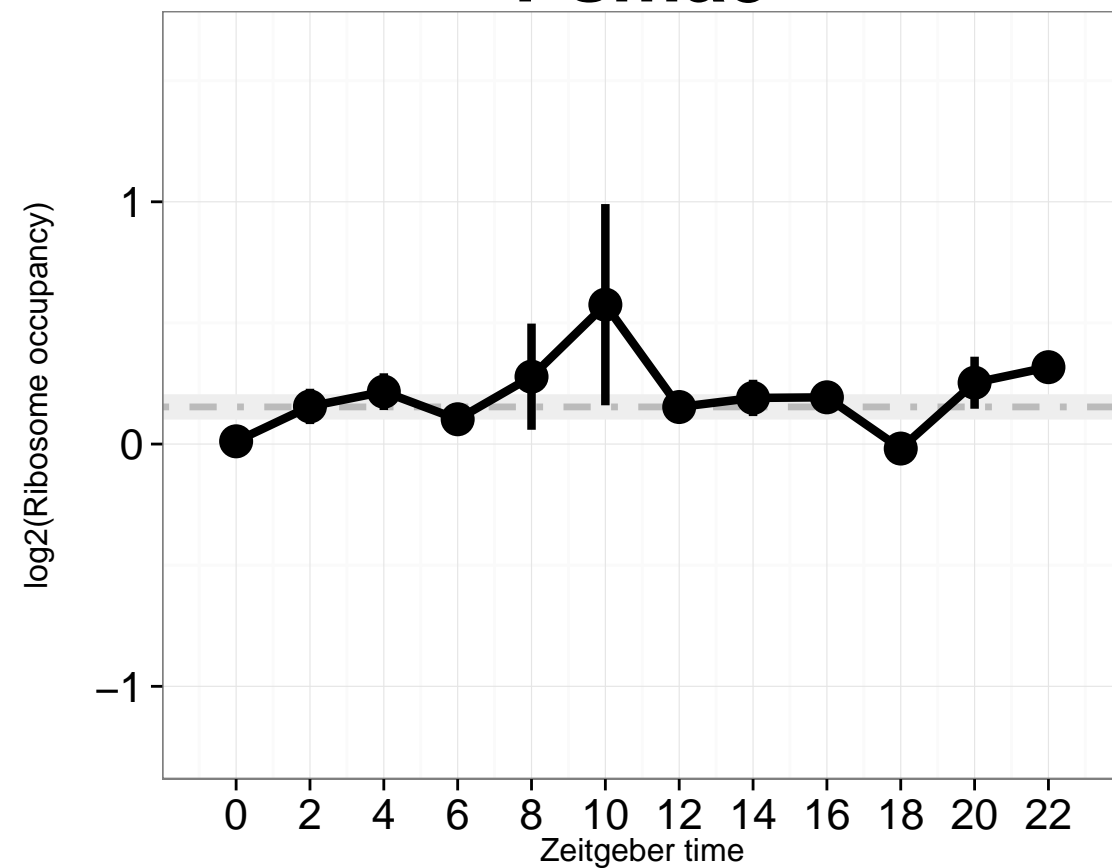

Supplement: SuppDataset_1.zip [file Psma5_set_A.pdf › Supplemental Dataset 1/A-mRNA_nonrhyth_translation_nonrhyth/Psma5_set_A.pdf]

# Psma6

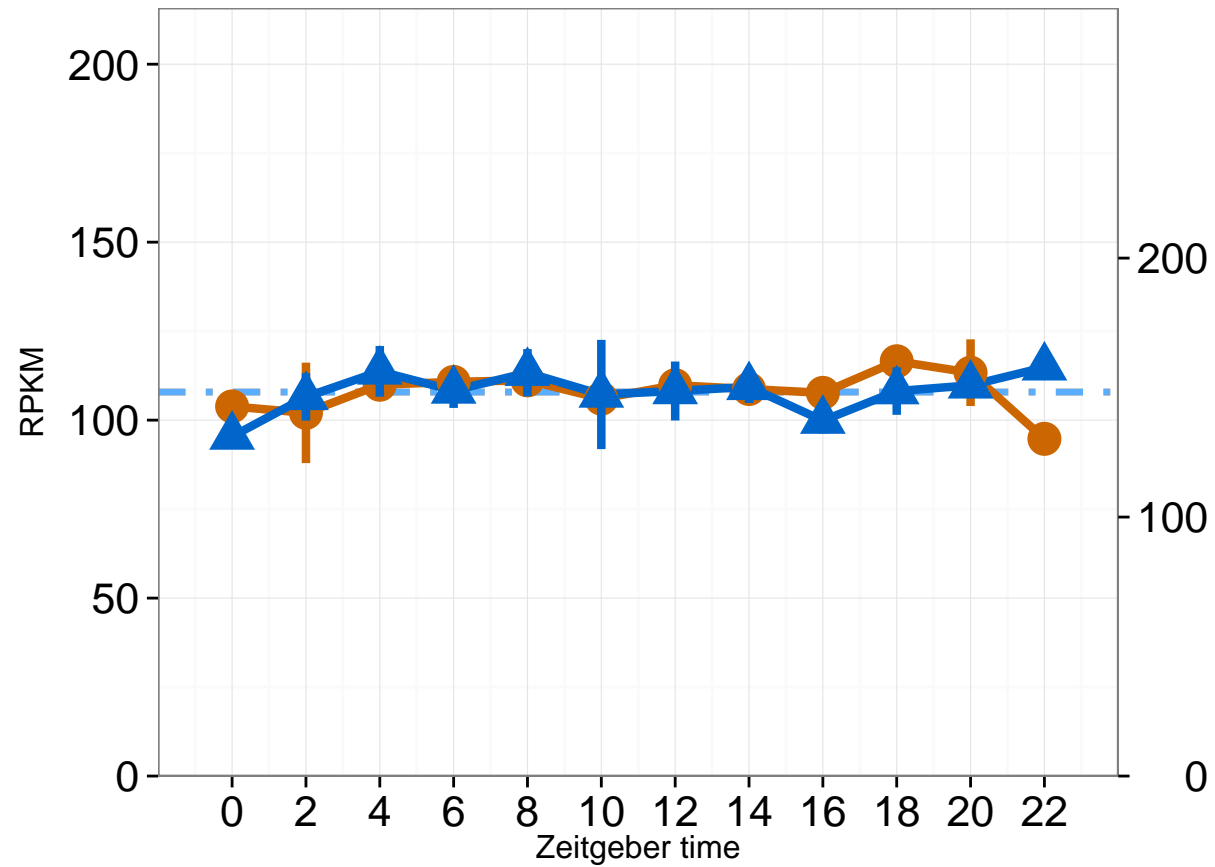

# Psma6

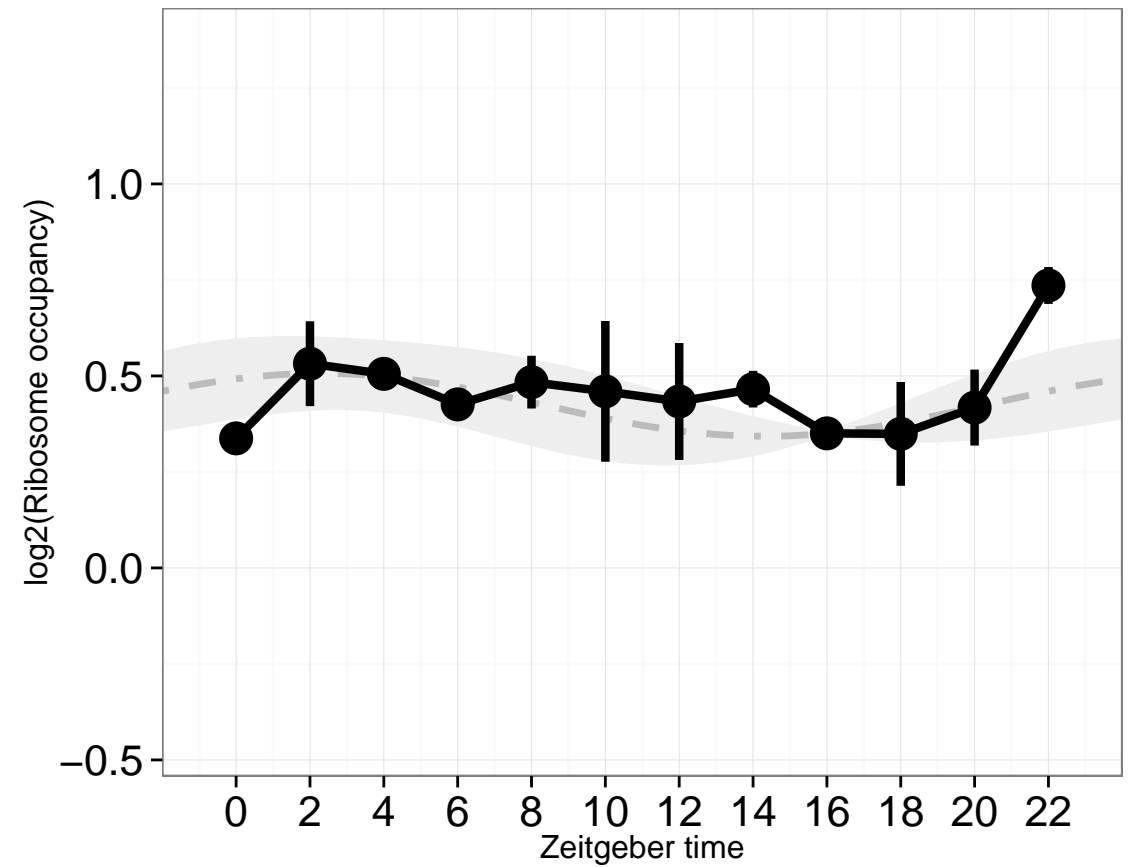

Supplement: SuppDataset_1.zip [file Psma6_set_A.pdf › Supplemental Dataset 1/A-mRNA_nonrhyth_translation_nonrhyth/Psma6_set_A.pdf]

## Psma7

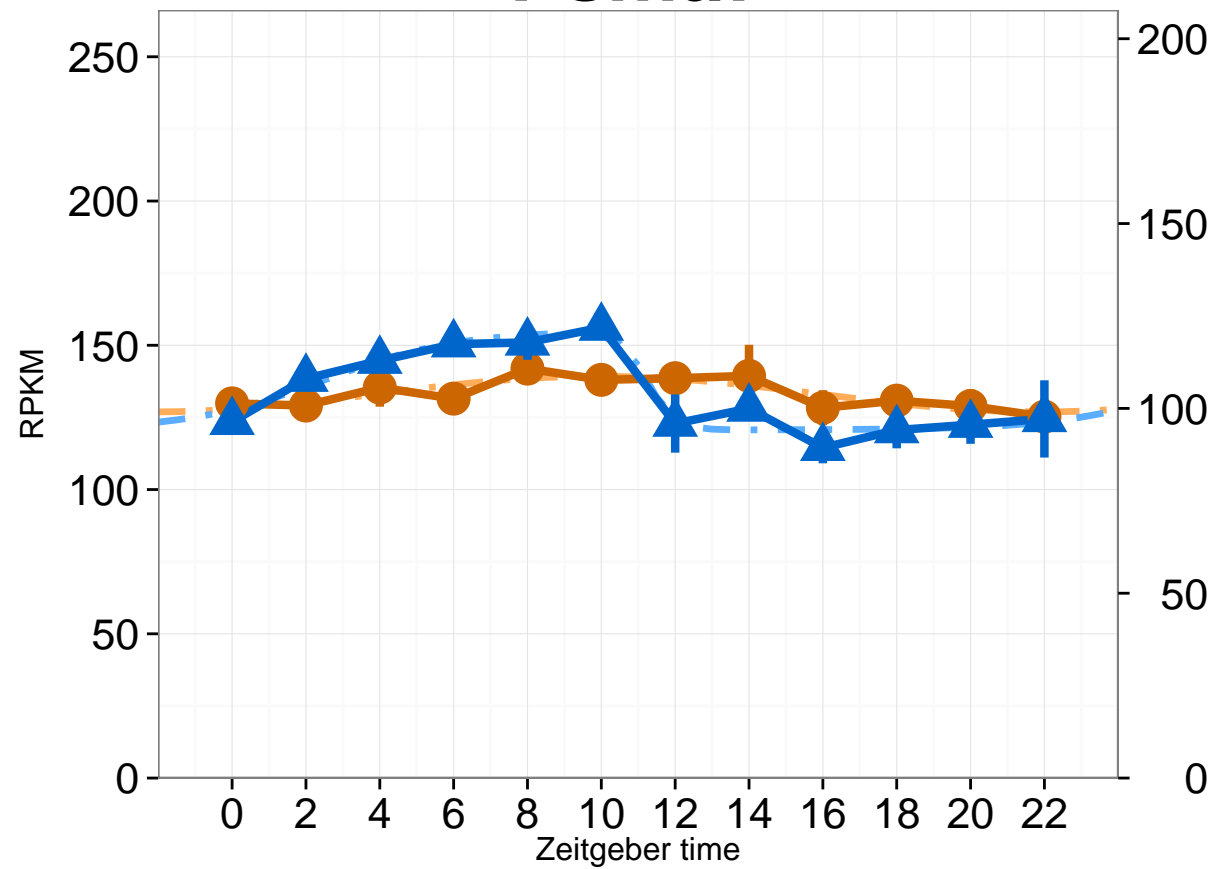

## Psma7

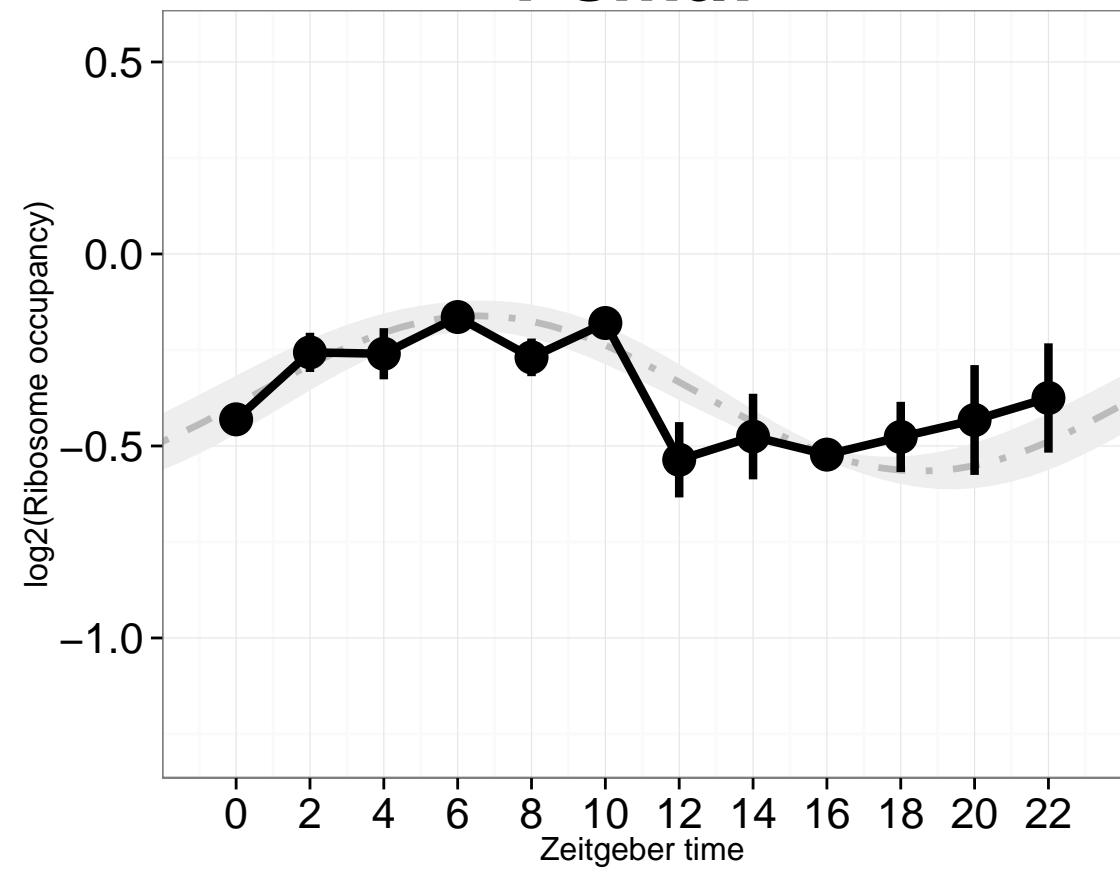

Supplement: SuppDataset_1.zip [file Psma7_set_A.pdf › Supplemental Dataset 1/A-mRNA_nonrhyth_translation_nonrhyth/Psma7_set_A.pdf]

**Psmb10**

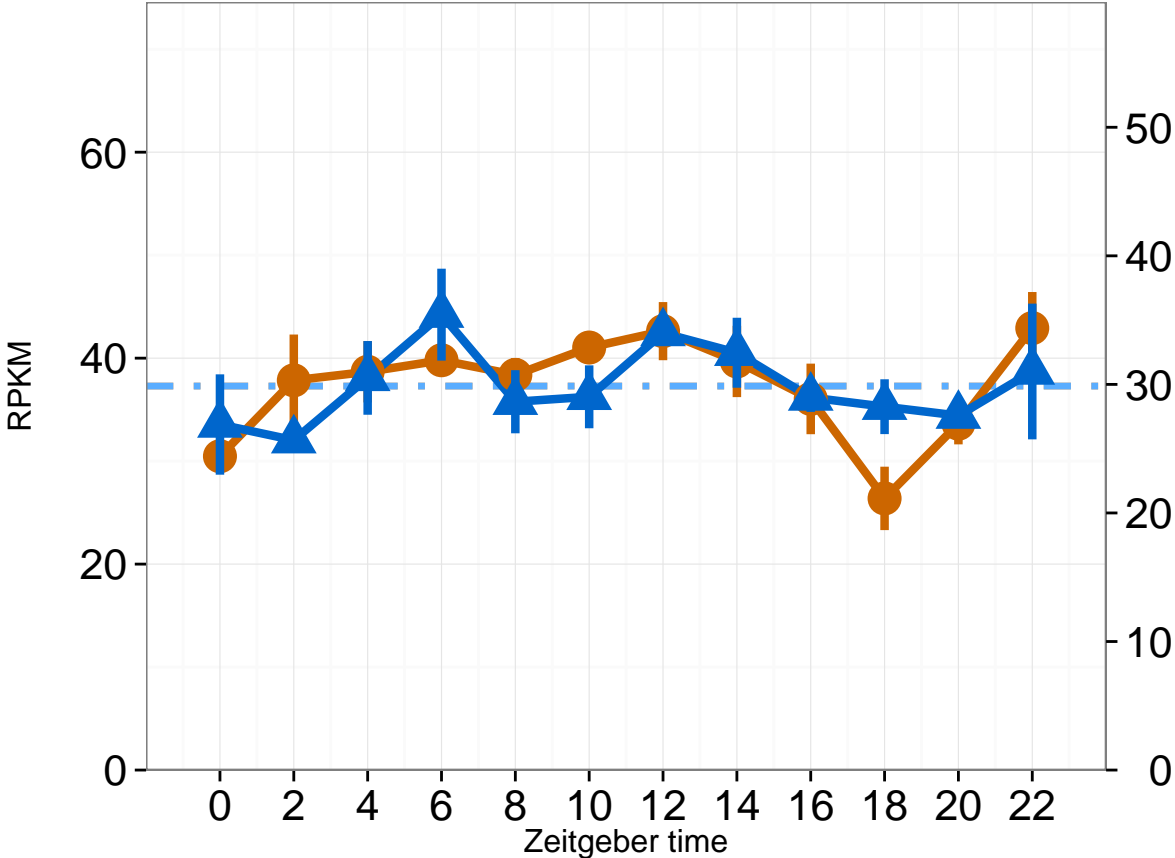

**Psmb10**

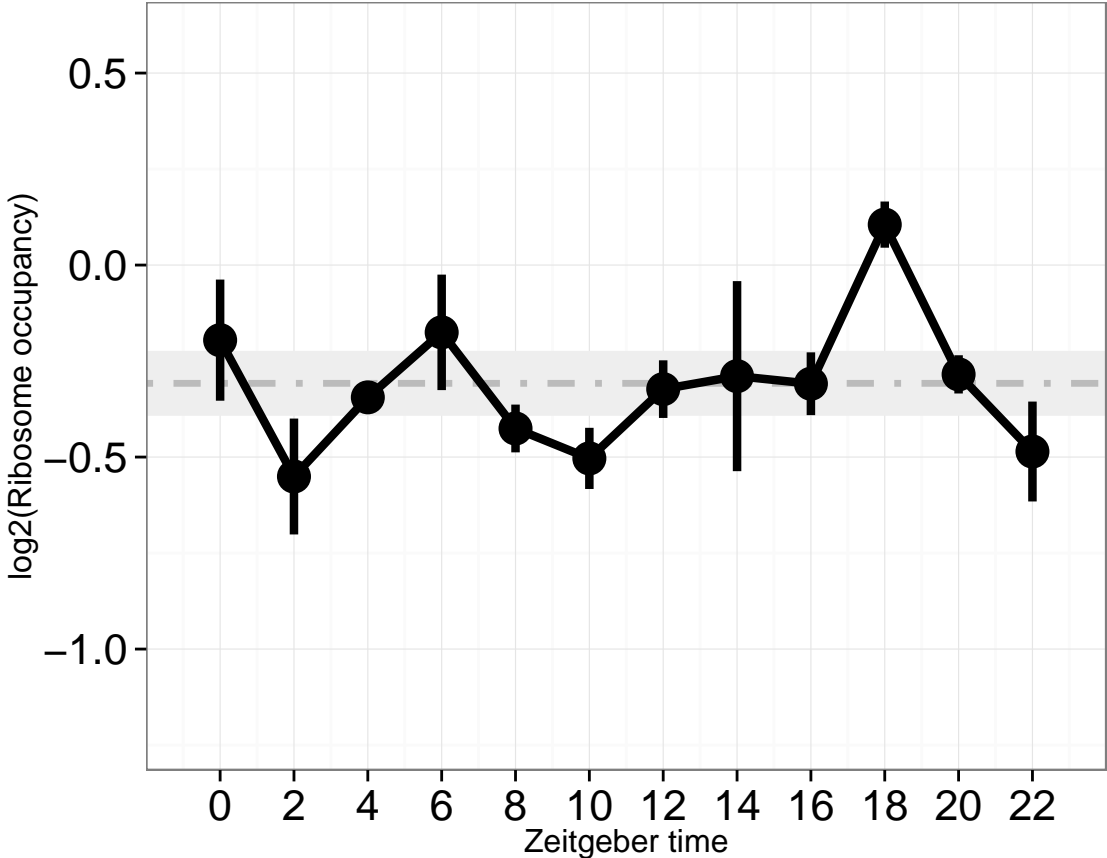

Supplement: SuppDataset_1.zip [file Psmb10_set_A.pdf › Supplemental Dataset 1/A-mRNA_nonrhyth_translation_nonrhyth/Psmb10_set_A.pdf]

## Psmb1

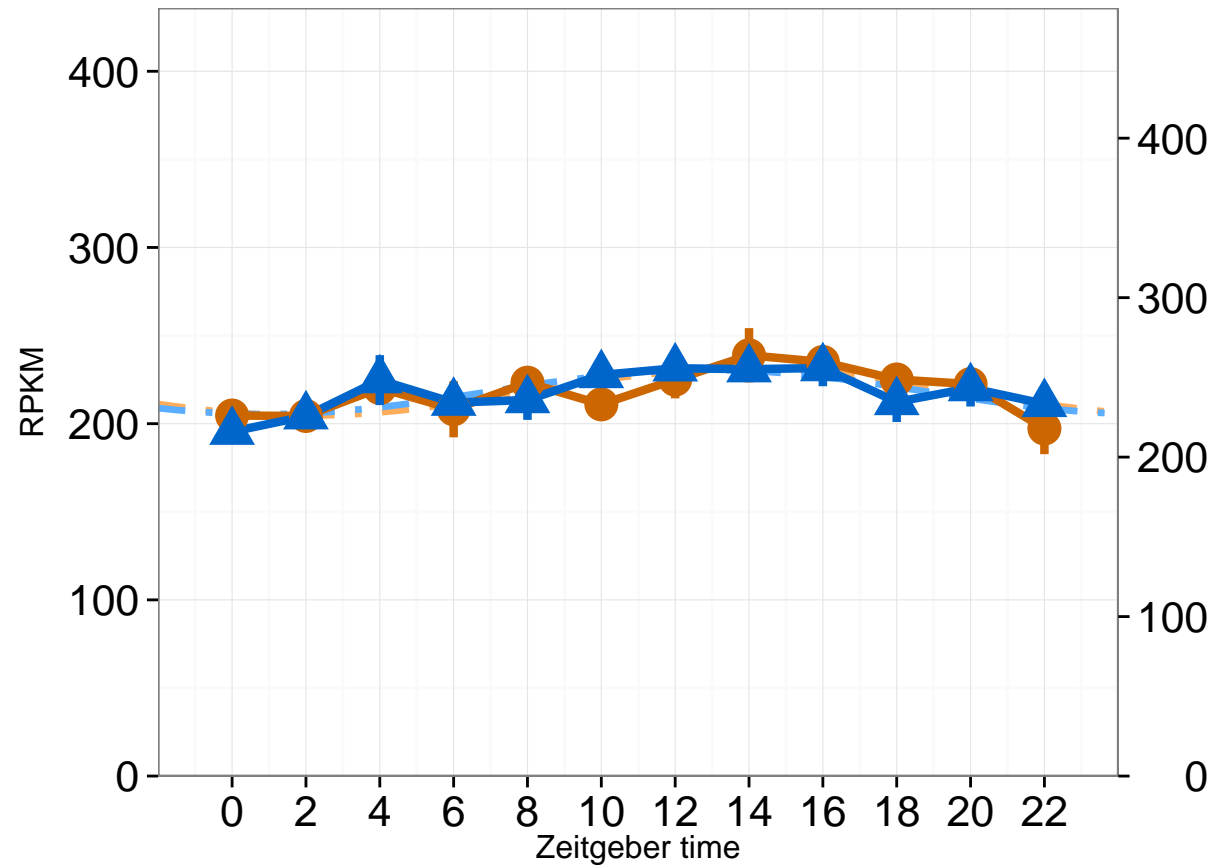

## Psmb1

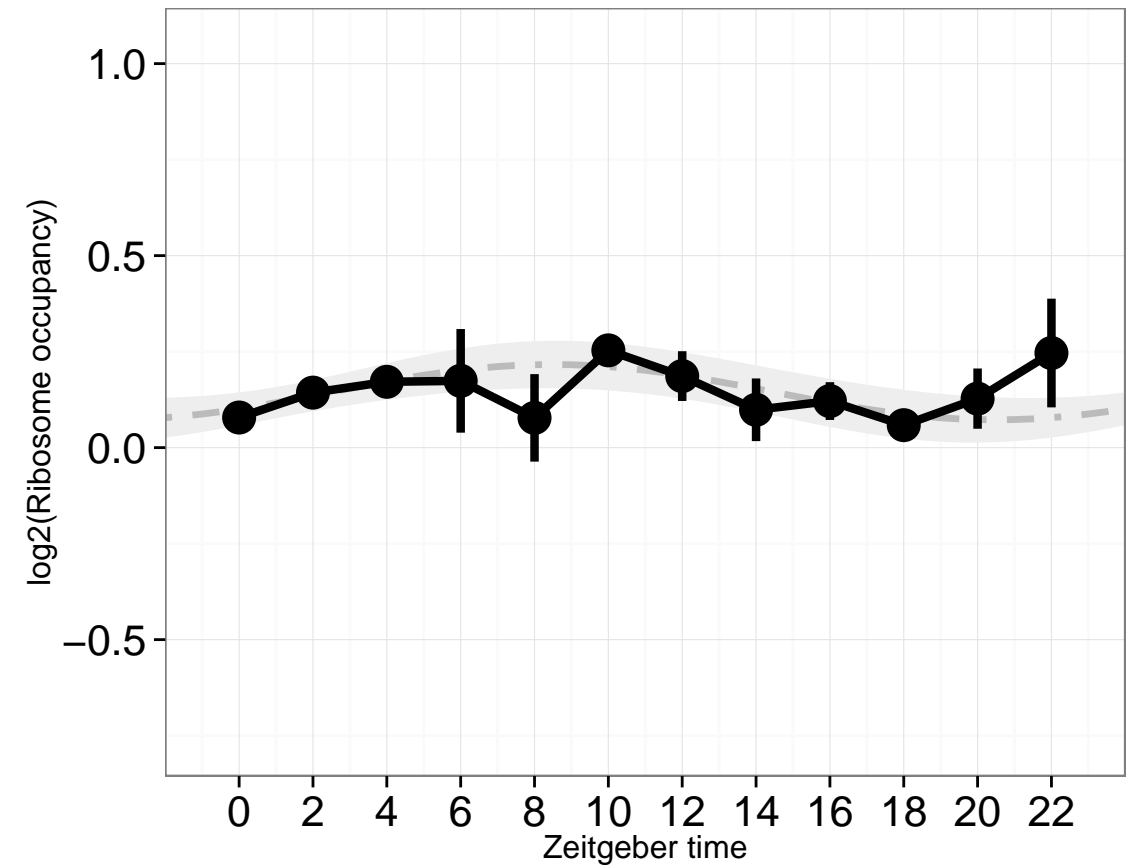

Supplement: SuppDataset_1.zip [file Psmb1_set_A.pdf › Supplemental Dataset 1/A-mRNA_nonrhyth_translation_nonrhyth/Psmb1_set_A.pdf]

# Psmb2

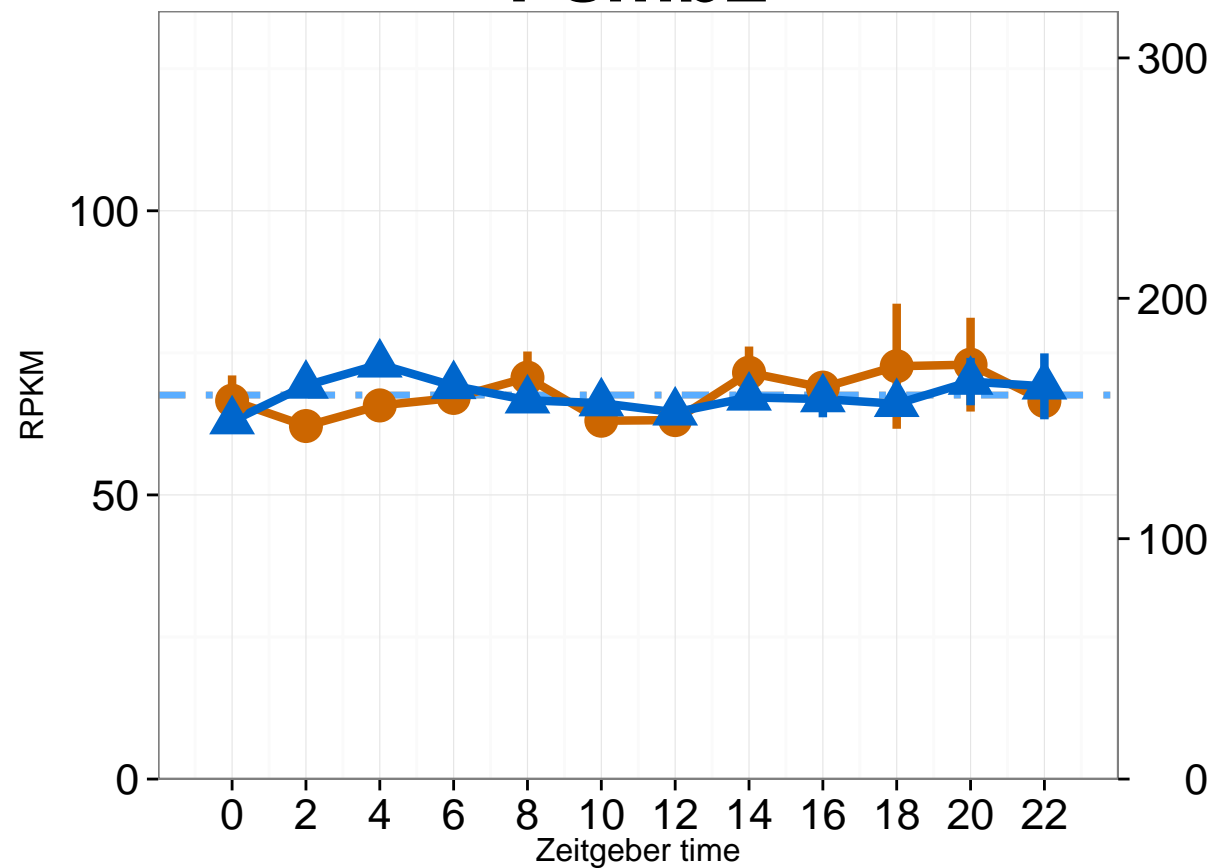

# Psmb2

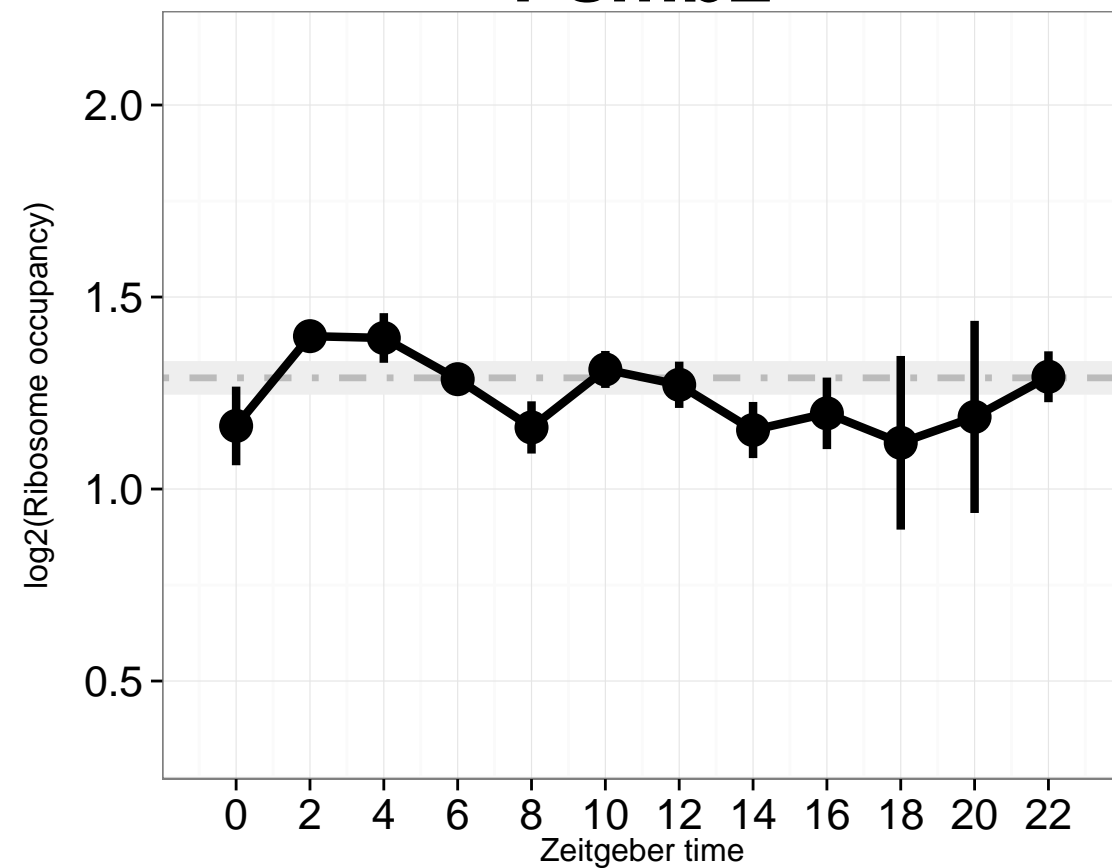

Supplement: SuppDataset_1.zip [file Psmb2_set_A.pdf › Supplemental Dataset 1/A-mRNA_nonrhyth_translation_nonrhyth/Psmb2_set_A.pdf]

# Psmb3

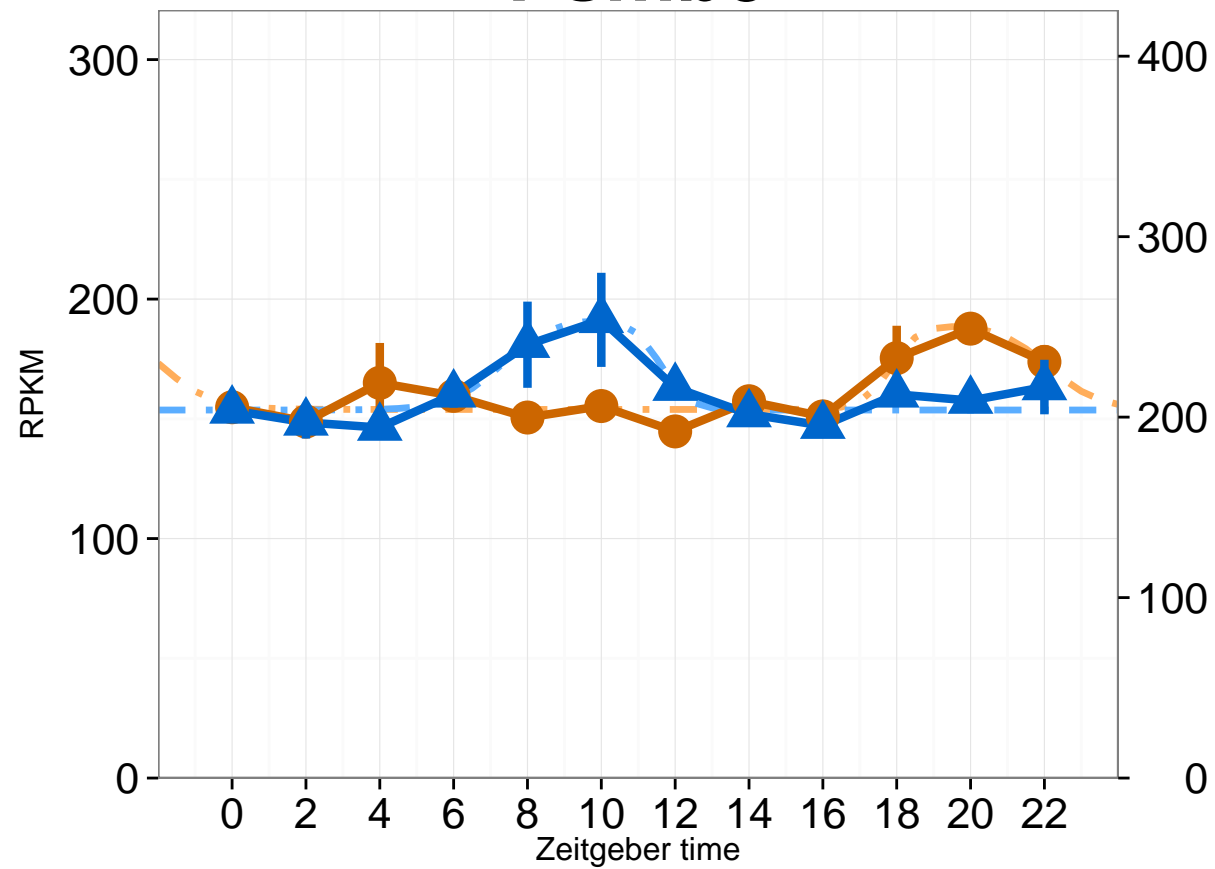

# Psmb3

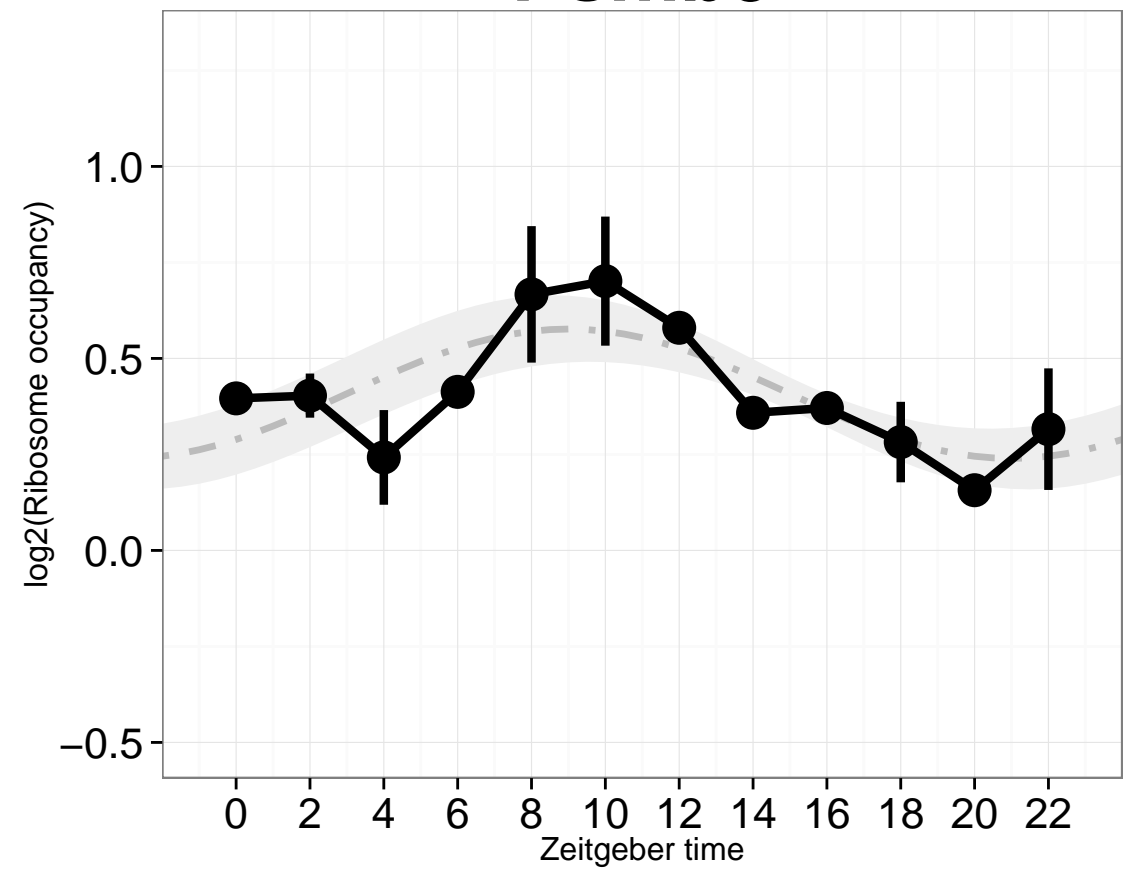

Supplement: SuppDataset_1.zip [file Psmb3_set_A.pdf › Supplemental Dataset 1/A-mRNA_nonrhyth_translation_nonrhyth/Psmb3_set_A.pdf]

## Psmb4

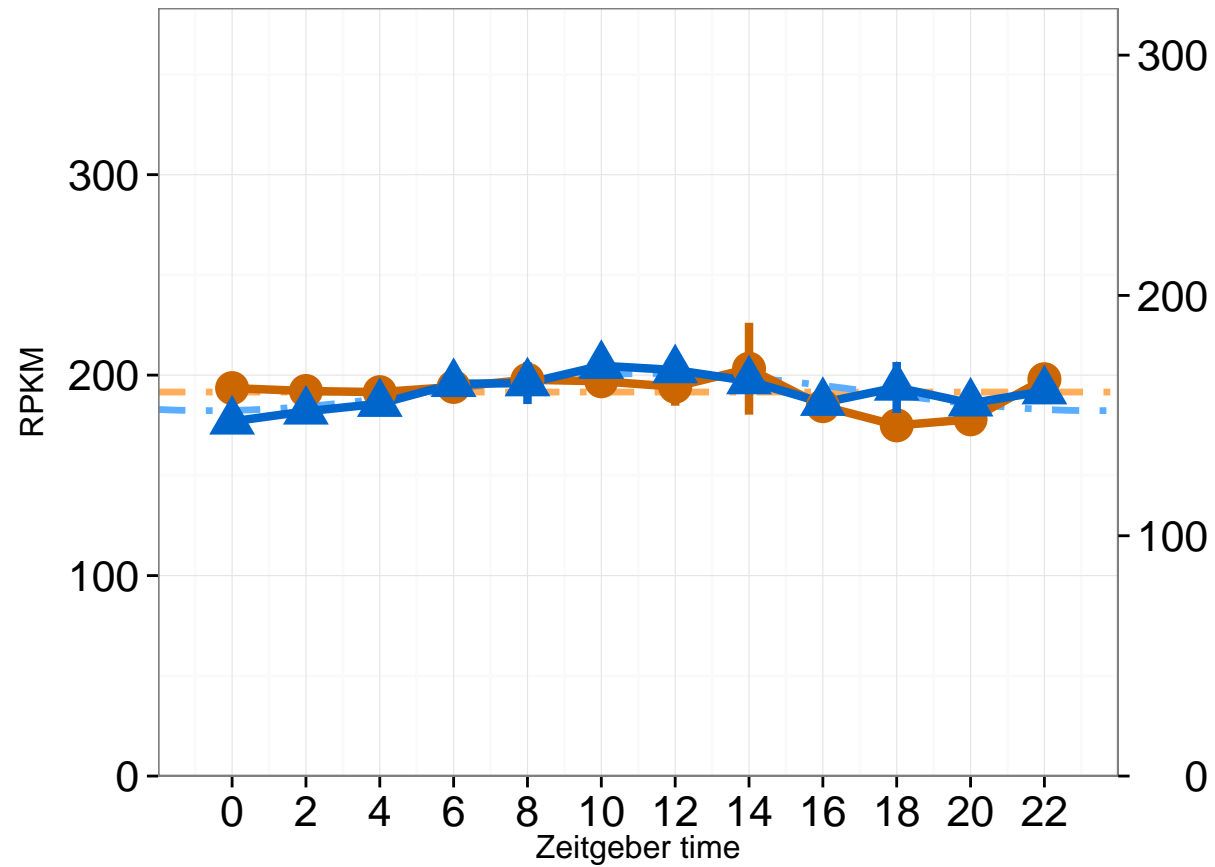

## Psmb4

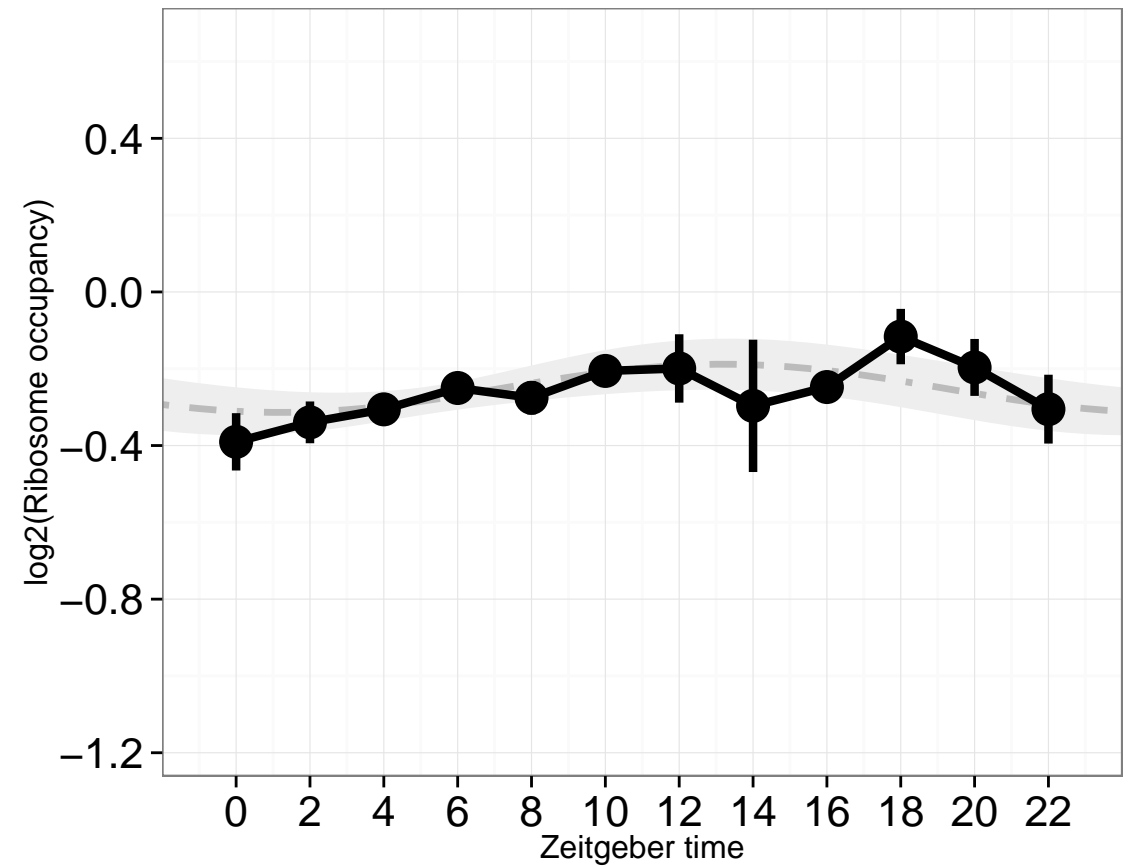

Supplement: SuppDataset_1.zip [file Psmb4_set_A.pdf › Supplemental Dataset 1/A-mRNA_nonrhyth_translation_nonrhyth/Psmb4_set_A.pdf]

## Psmb5

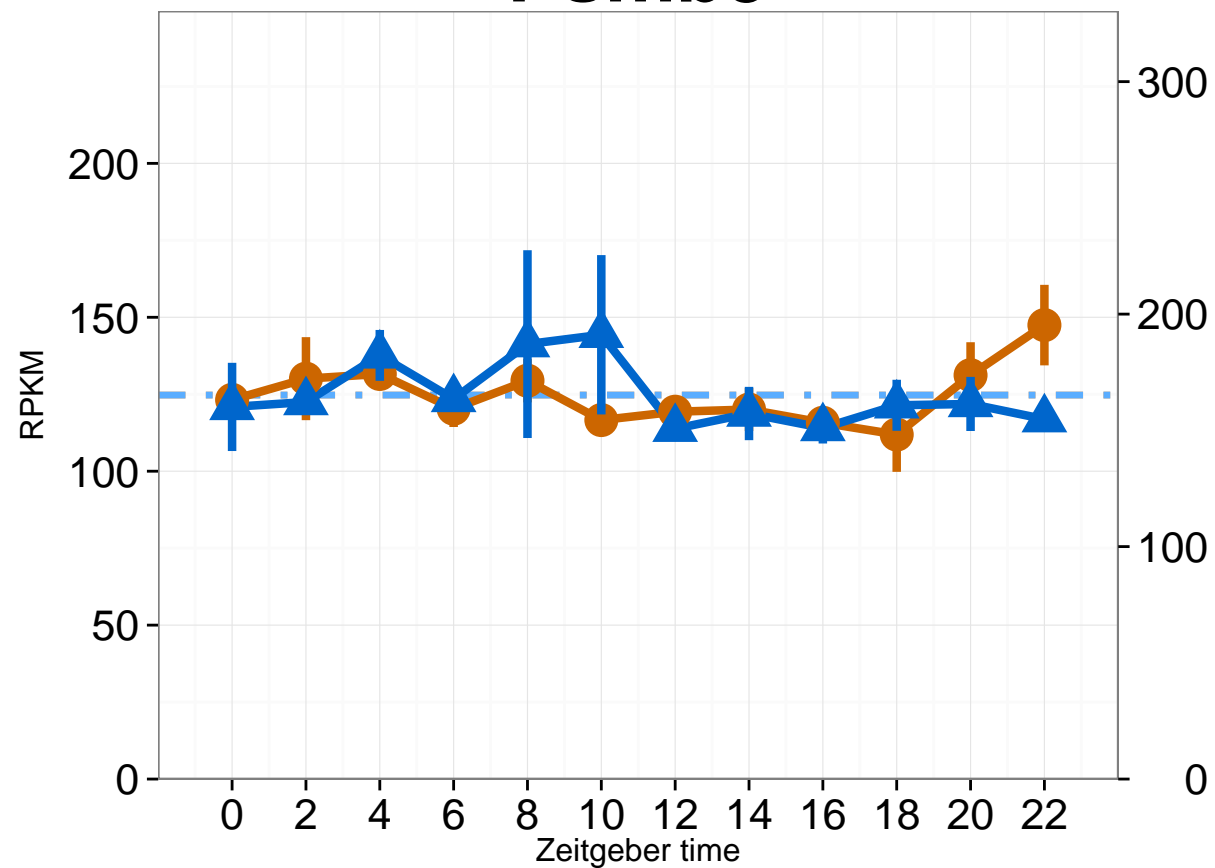

## Psmb5

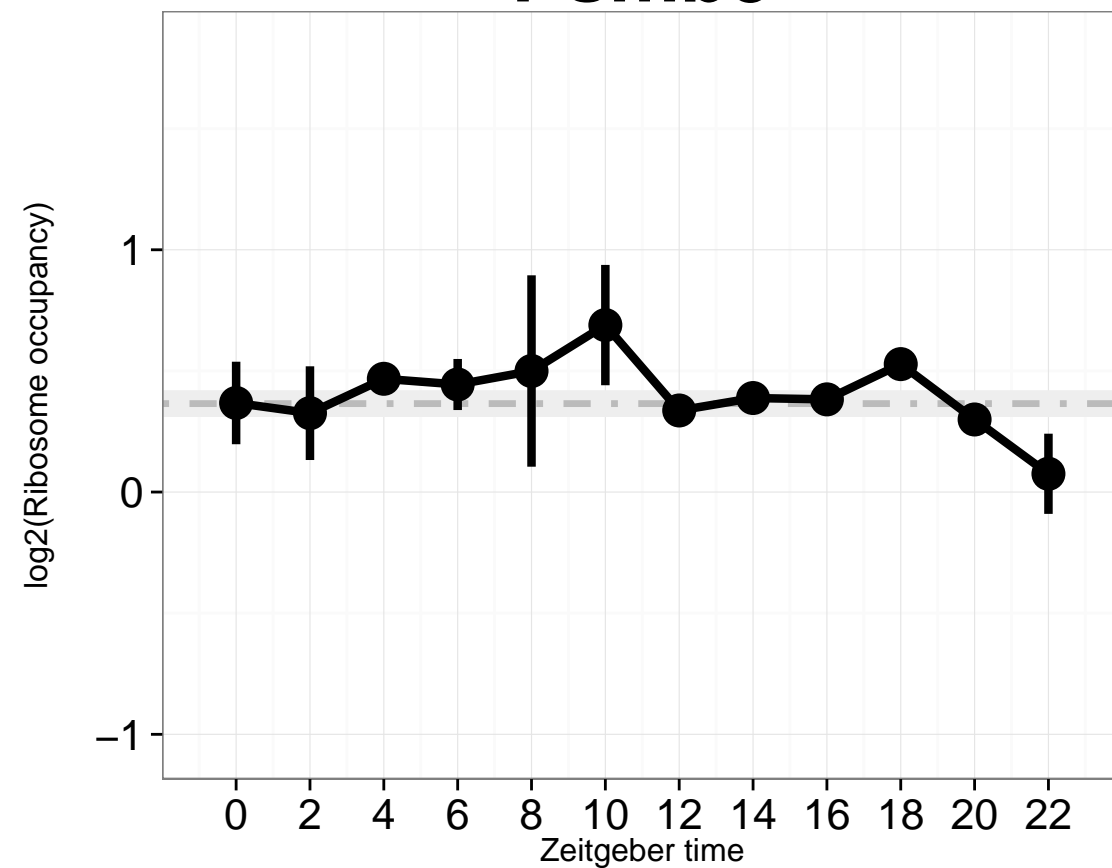

Supplement: SuppDataset_1.zip [file Psmb5_set_A.pdf › Supplemental Dataset 1/A-mRNA_nonrhyth_translation_nonrhyth/Psmb5_set_A.pdf]

# Psmb6

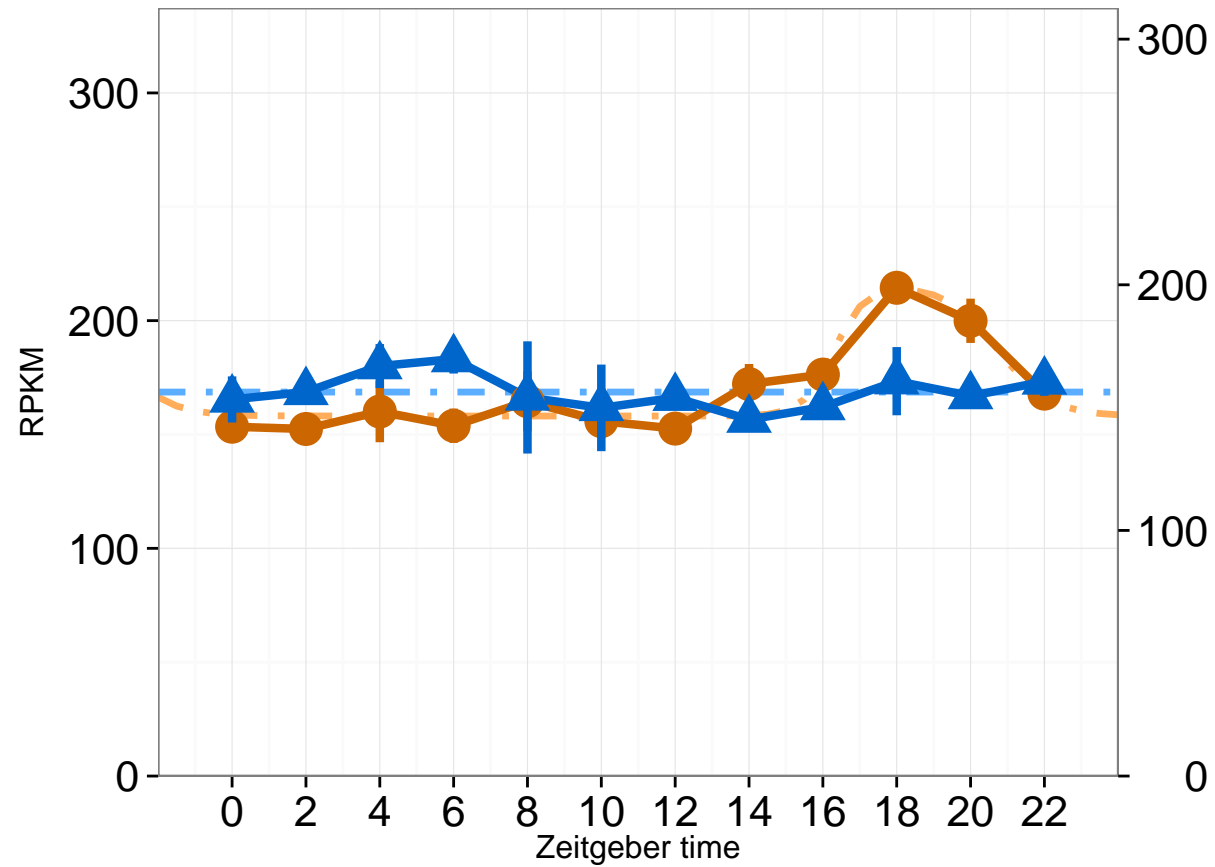

# Psmb6

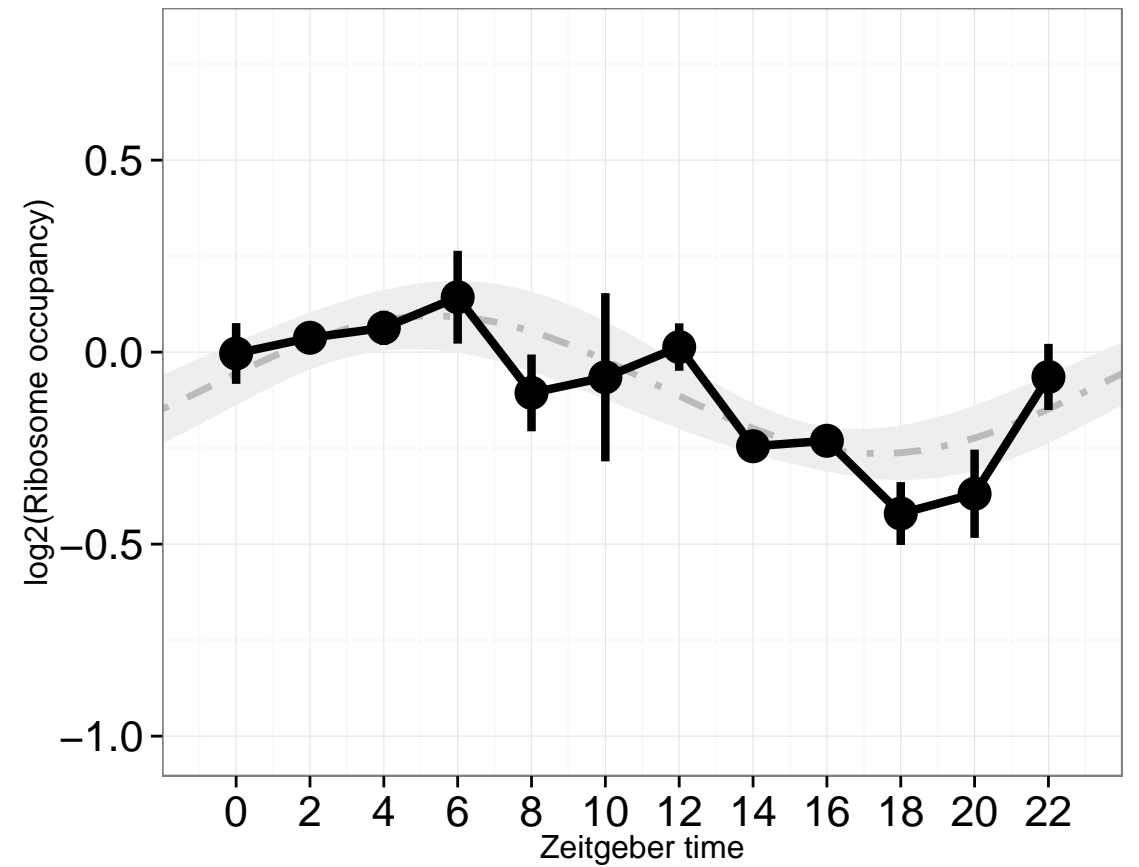

Supplement: SuppDataset_1.zip [file Psmb6_set_A.pdf › Supplemental Dataset 1/A-mRNA_nonrhyth_translation_nonrhyth/Psmb6_set_A.pdf]

# Psmb7

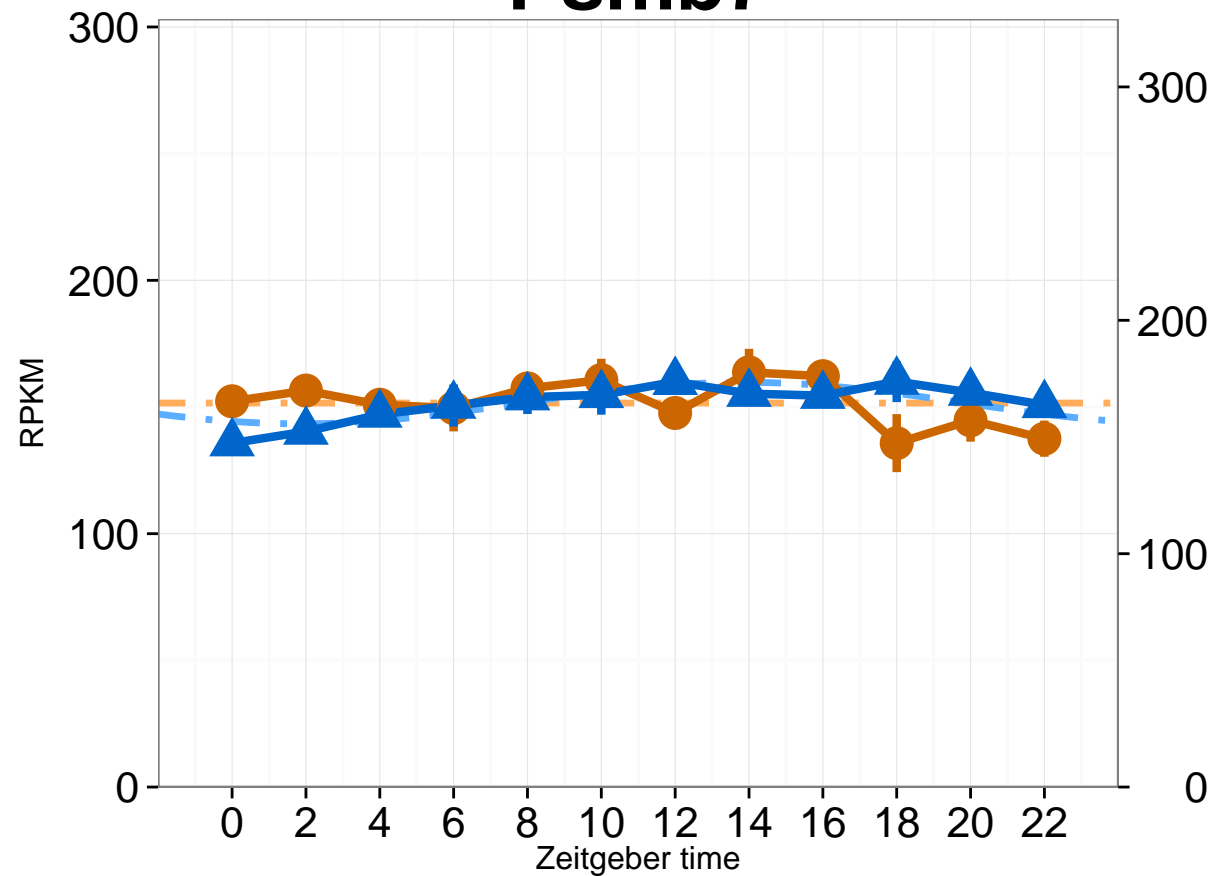

# Psmb7

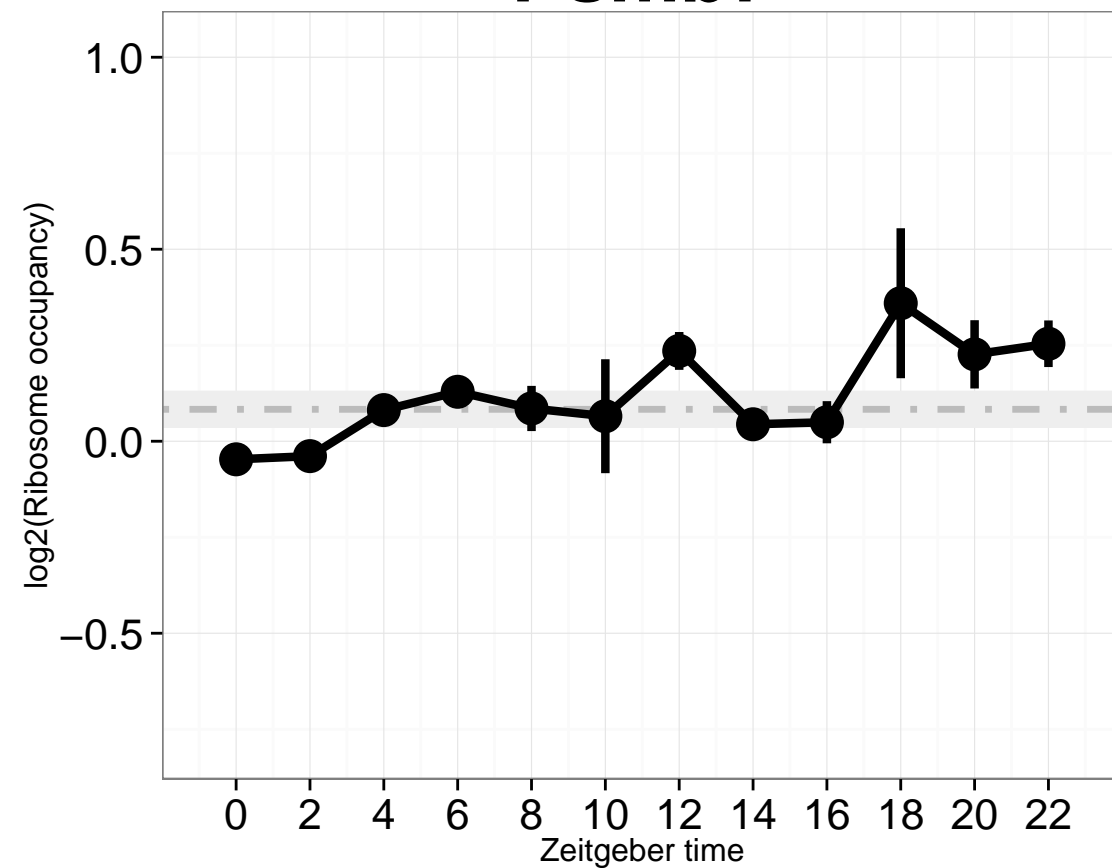

Supplement: SuppDataset_1.zip [file Psmb7_set_A.pdf › Supplemental Dataset 1/A-mRNA_nonrhyth_translation_nonrhyth/Psmb7_set_A.pdf]

## Psmb8

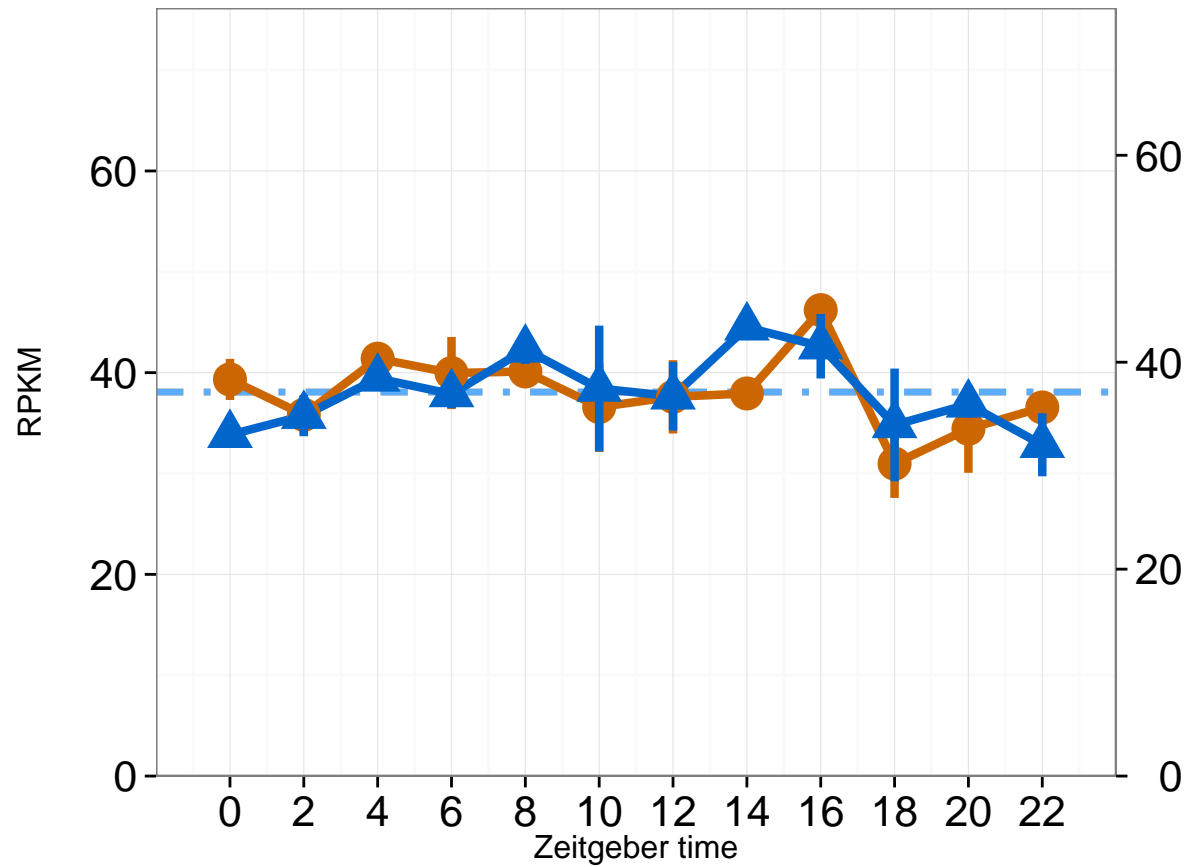

## Psmb8

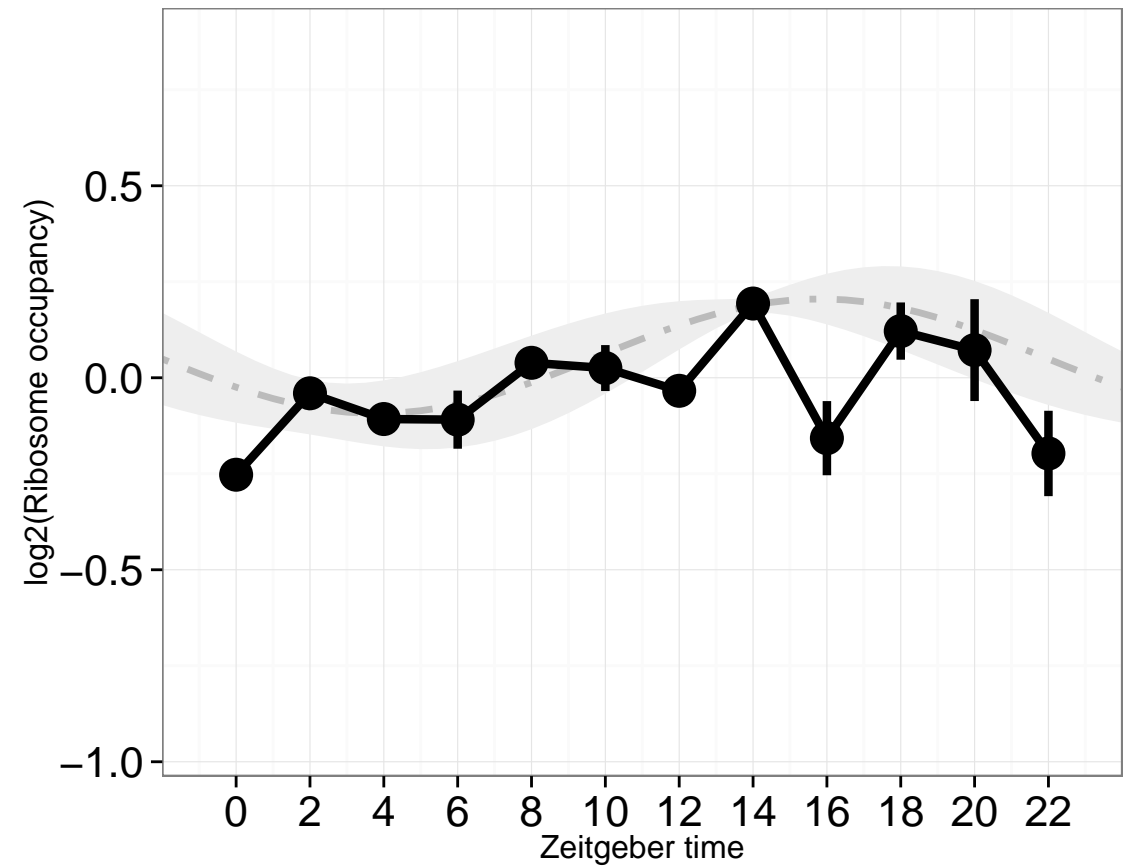

Supplement: SuppDataset_1.zip [file Psmb8_set_A.pdf › Supplemental Dataset 1/A-mRNA_nonrhyth_translation_nonrhyth/Psmb8_set_A.pdf]

## Psmc1

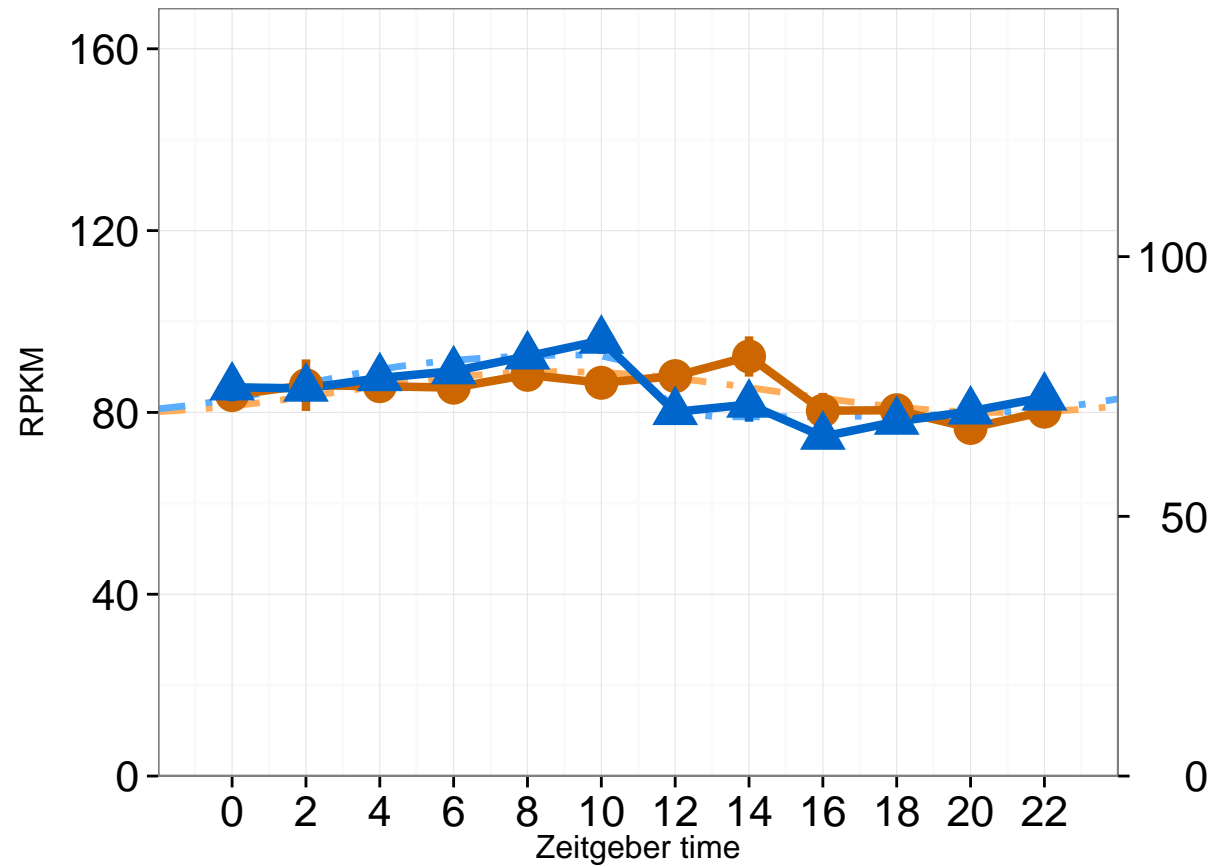

## Psmc1

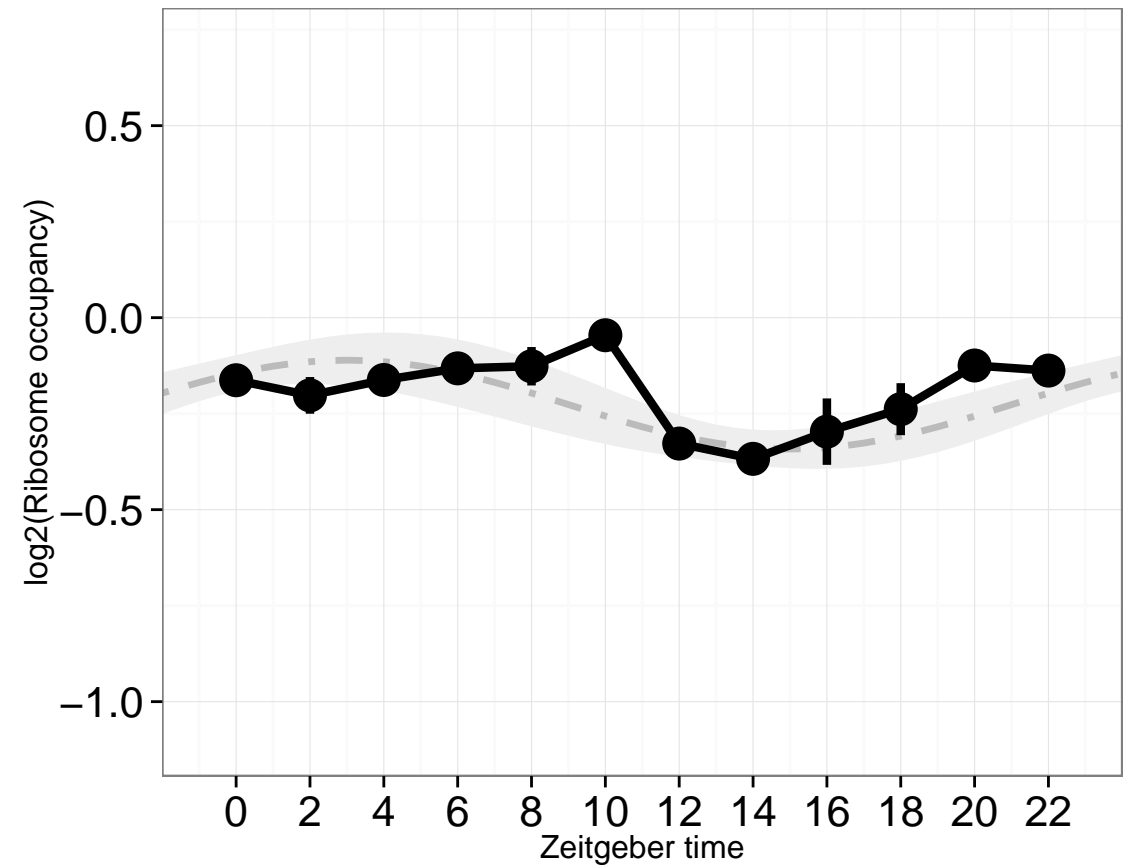

Supplement: SuppDataset_1.zip [file Psmc1_set_A.pdf › Supplemental Dataset 1/A-mRNA_nonrhyth_translation_nonrhyth/Psmc1_set_A.pdf]

## Psmc2

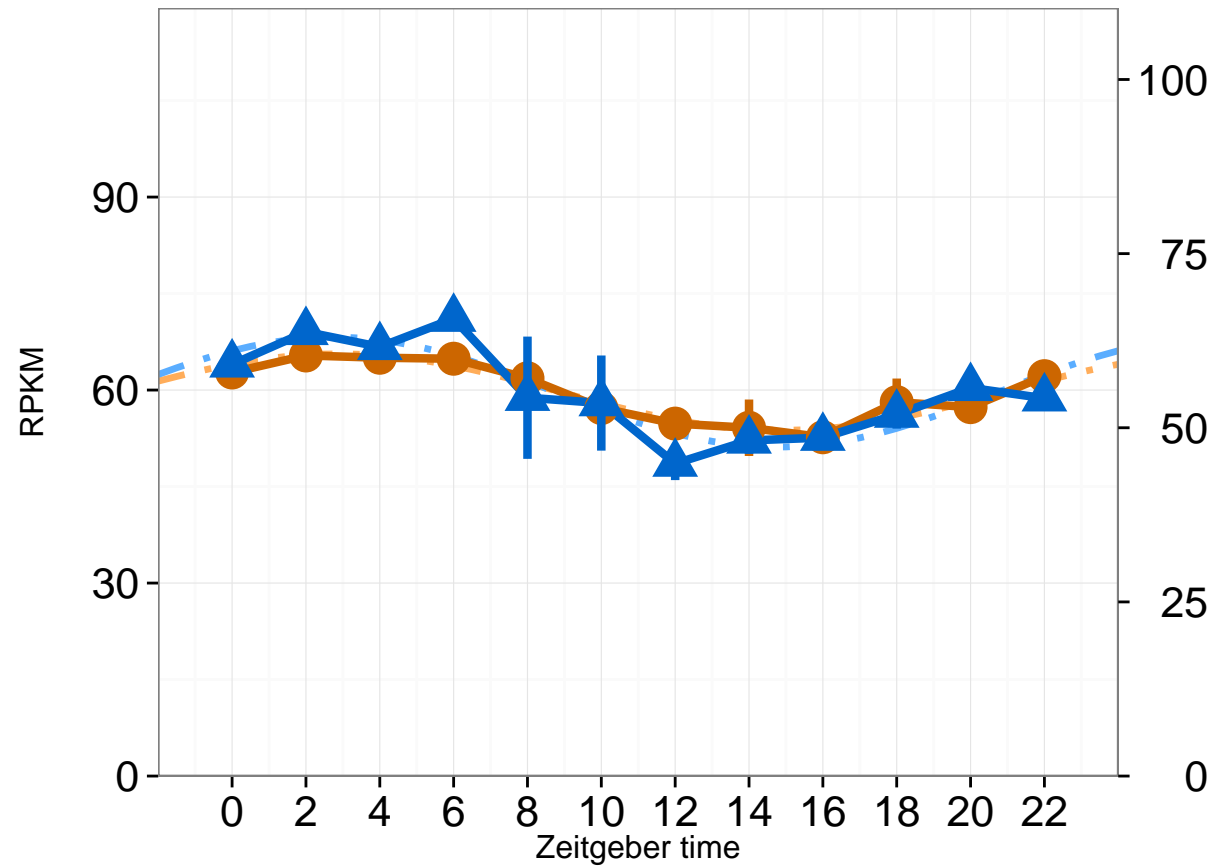

## Psmc2

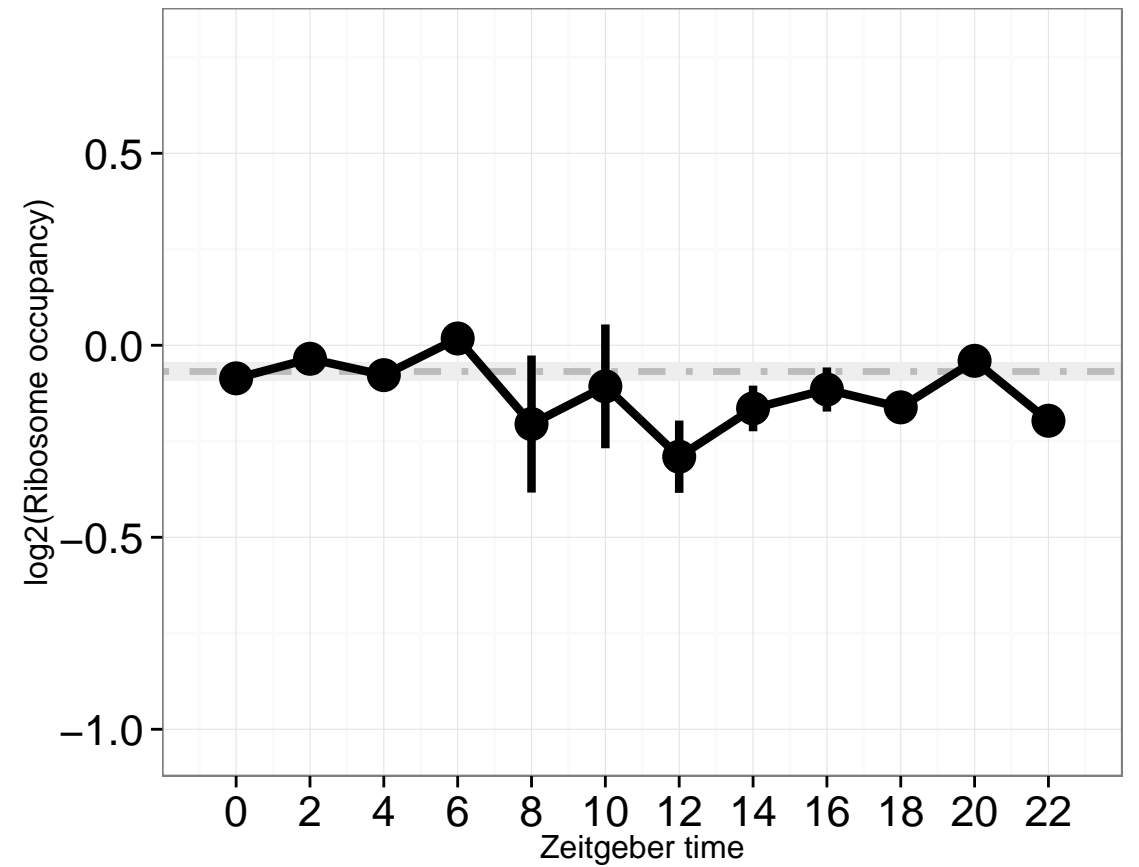

Supplement: SuppDataset_1.zip [file Psmc2_set_A.pdf › Supplemental Dataset 1/A-mRNA_nonrhyth_translation_nonrhyth/Psmc2_set_A.pdf]

## Psmc3

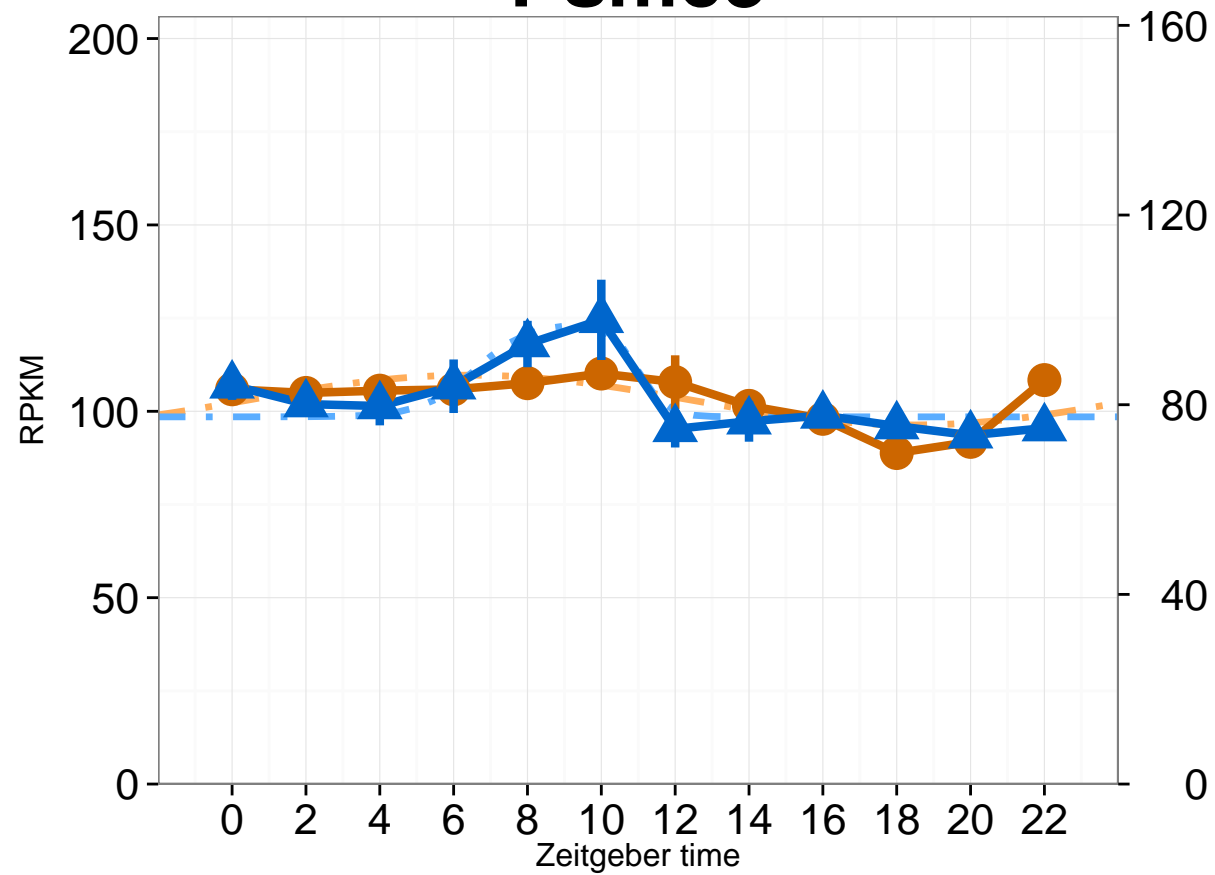

## Psmc3

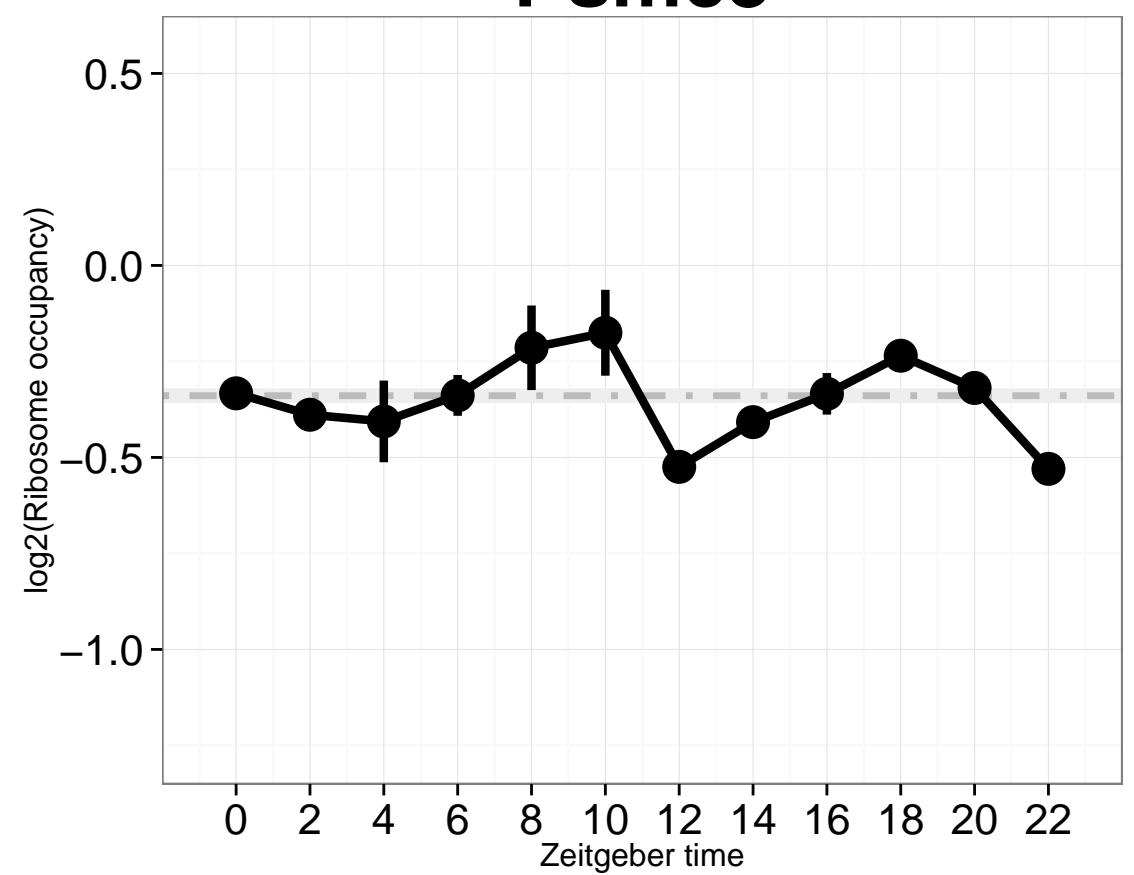

Supplement: SuppDataset_1.zip [file Psmc3_set_A.pdf › Supplemental Dataset 1/A-mRNA_nonrhyth_translation_nonrhyth/Psmc3_set_A.pdf]

# Psmc4

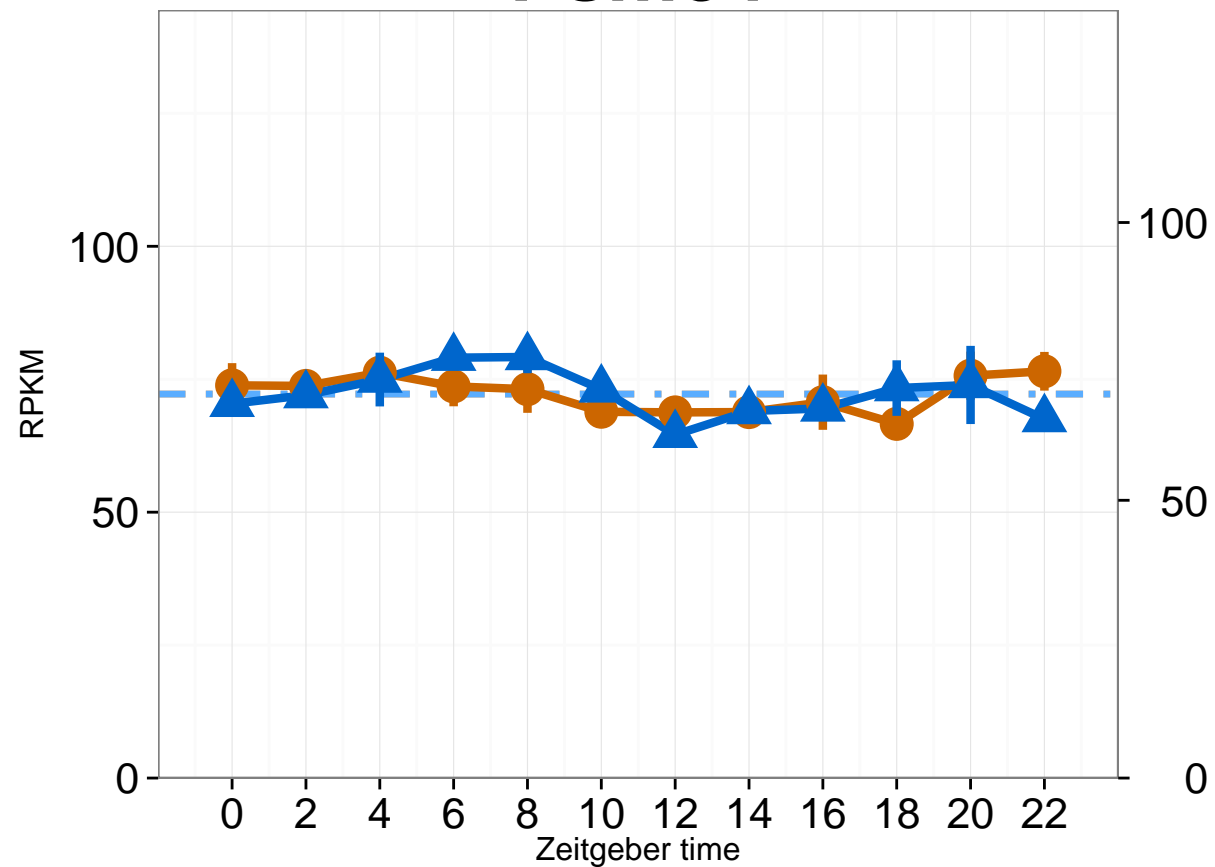

# Psmc4

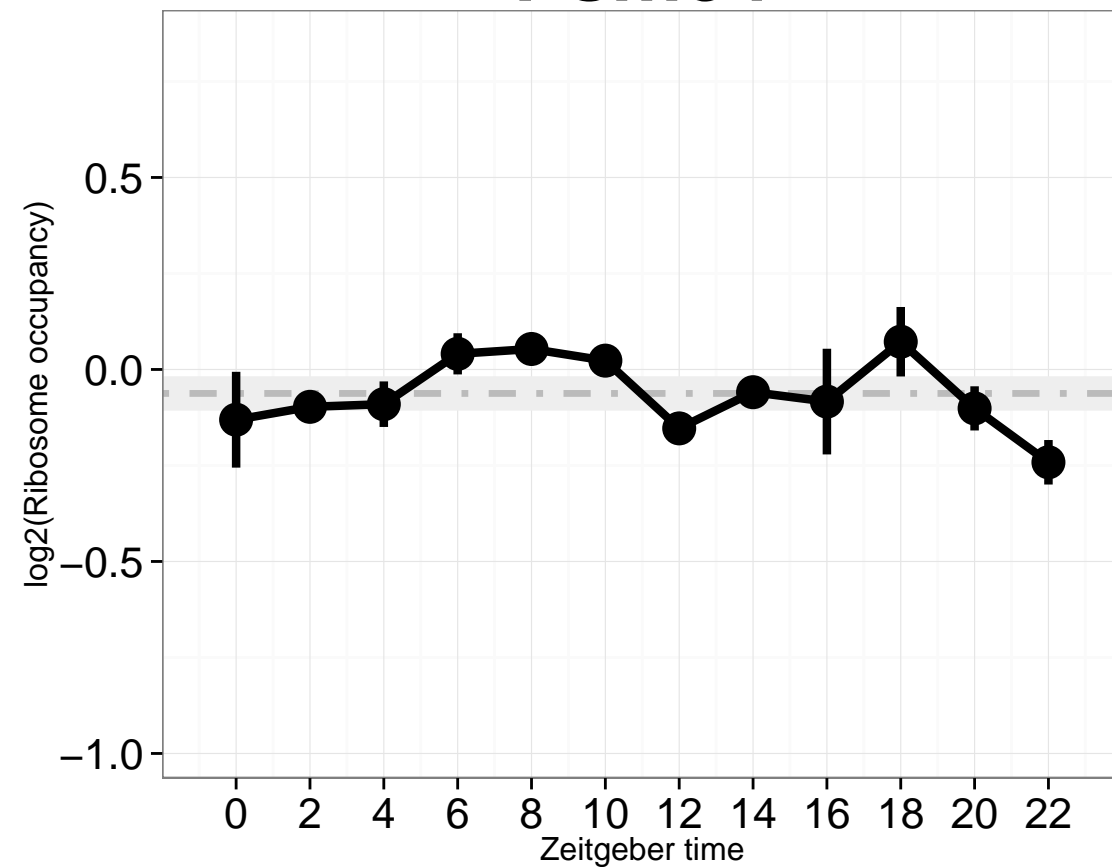

Supplement: SuppDataset_1.zip [file Psmc4_set_A.pdf › Supplemental Dataset 1/A-mRNA_nonrhyth_translation_nonrhyth/Psmc4_set_A.pdf]

## Psmc5

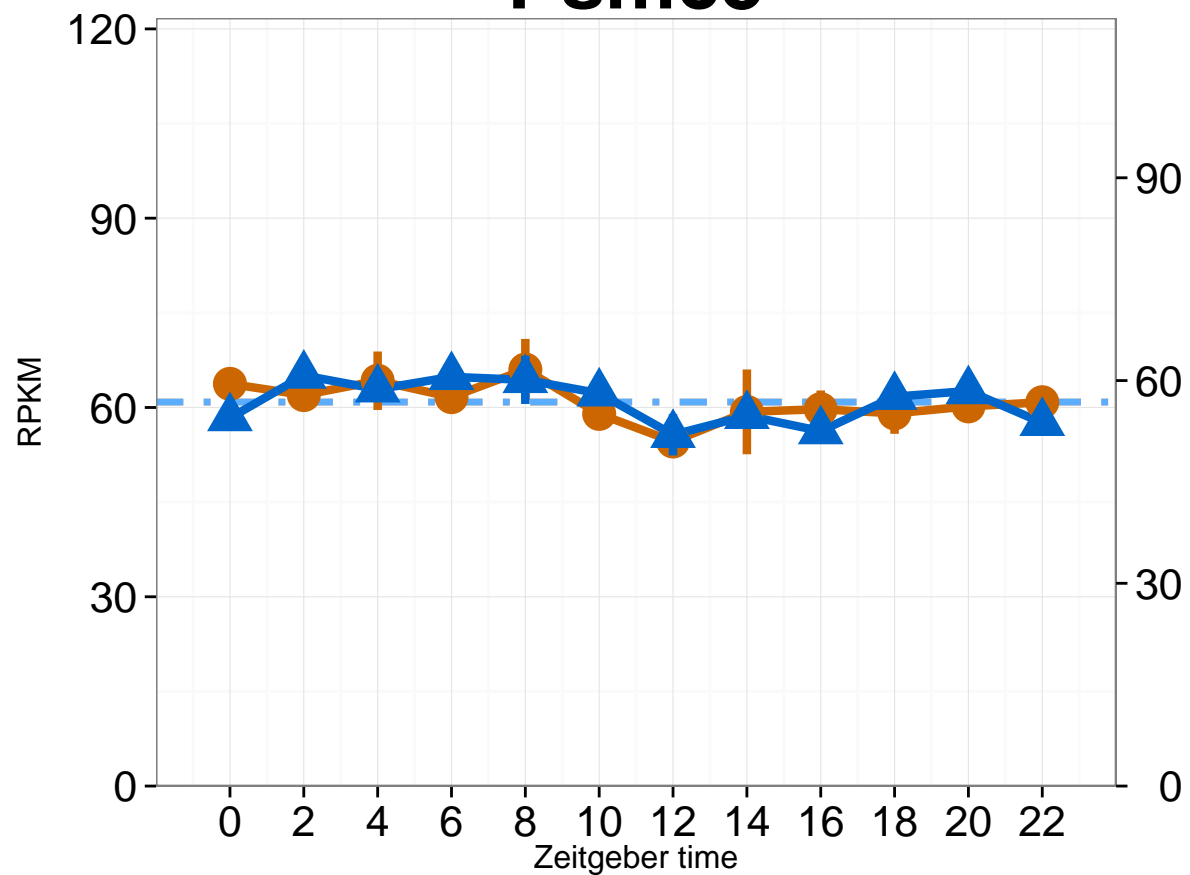

## Psmc5

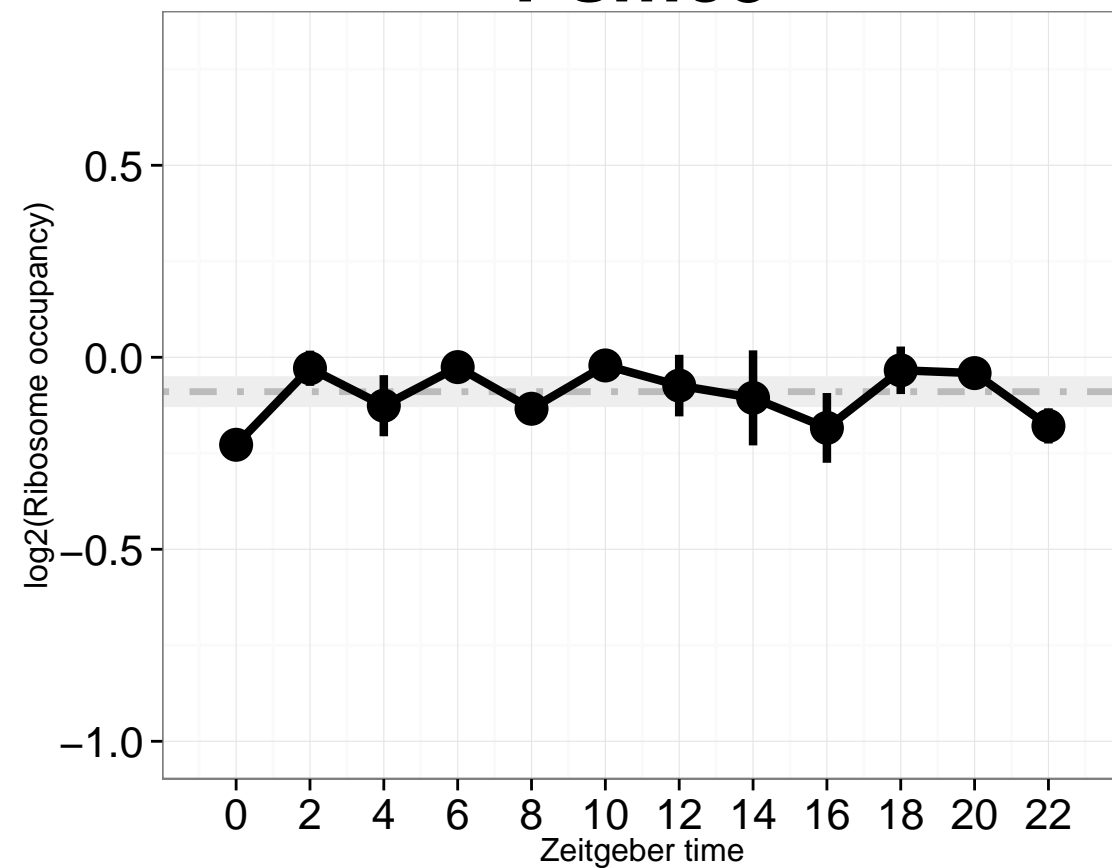

Supplement: SuppDataset_1.zip [file Psmc5_set_A.pdf › Supplemental Dataset 1/A-mRNA_nonrhyth_translation_nonrhyth/Psmc5_set_A.pdf]

# Psmc6

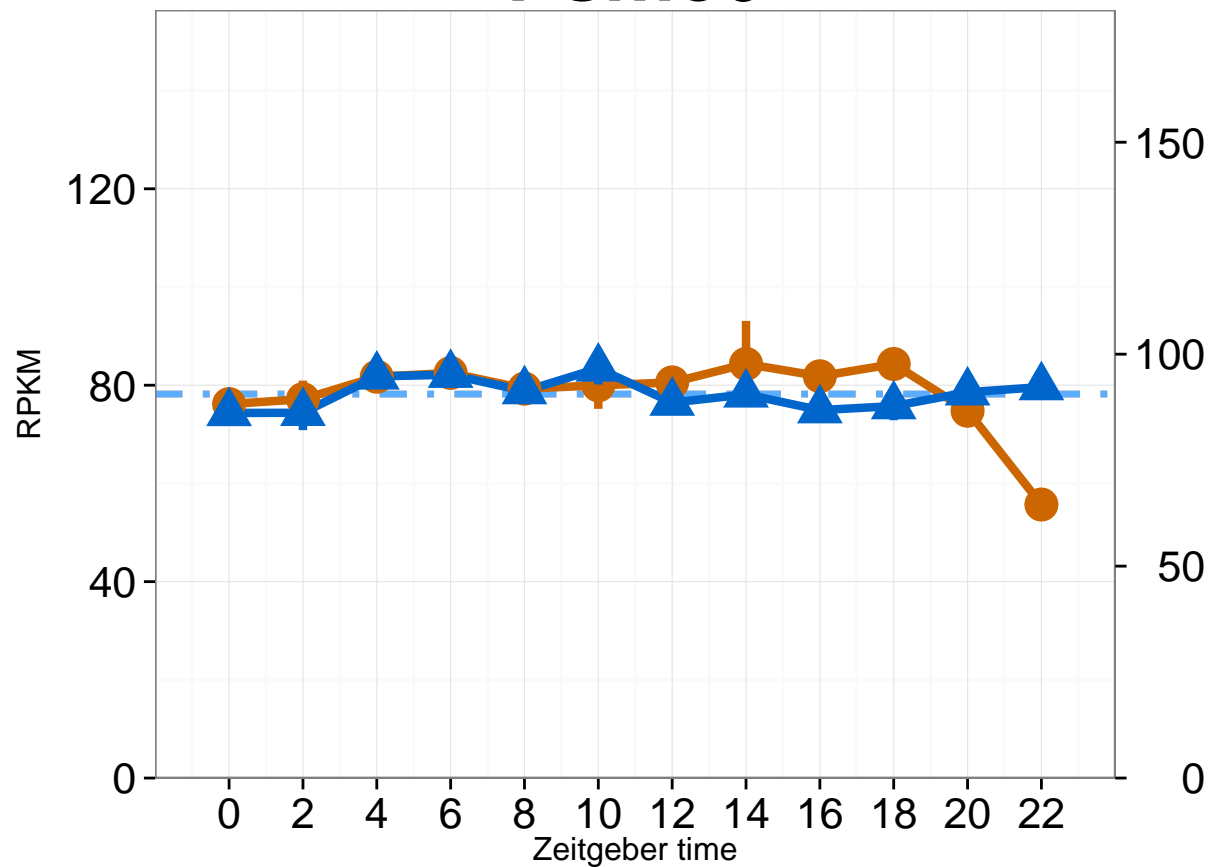

# Psmc6

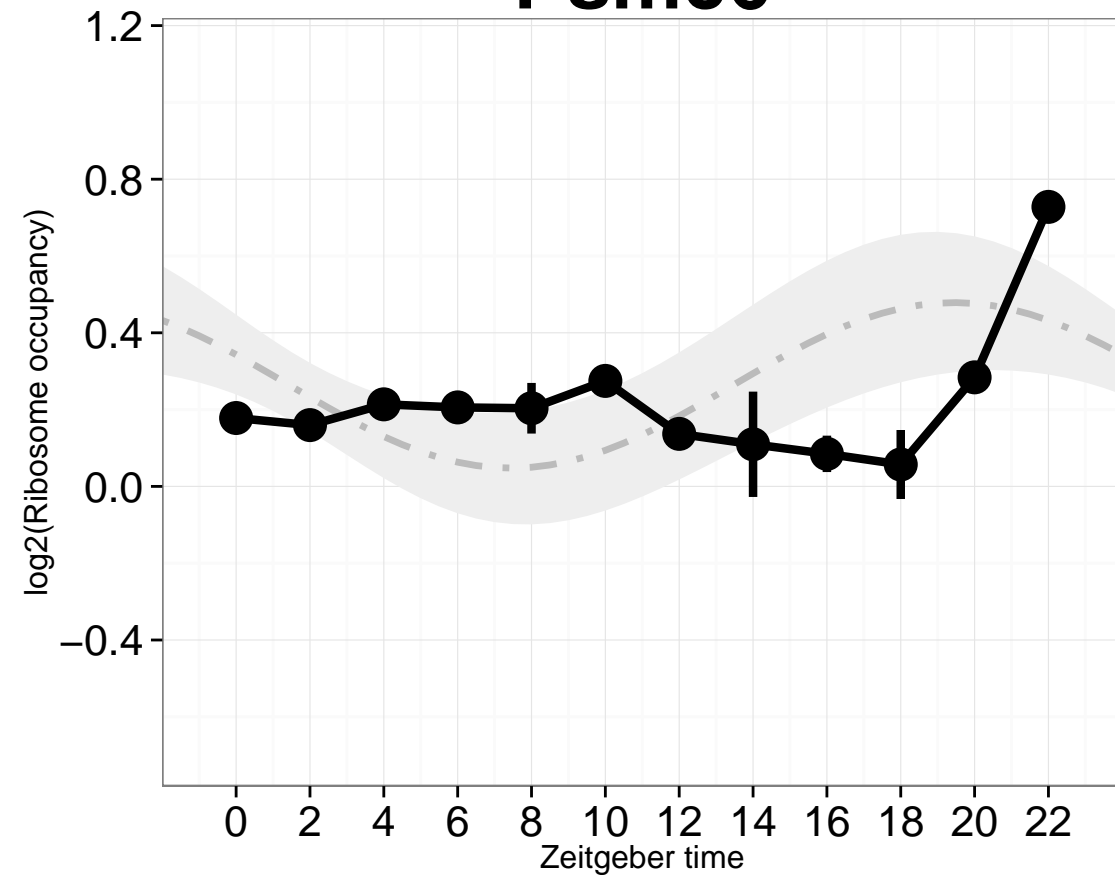

Supplement: SuppDataset_1.zip [file Psmc6_set_A.pdf › Supplemental Dataset 1/A-mRNA_nonrhyth_translation_nonrhyth/Psmc6_set_A.pdf]

**Psmd10**

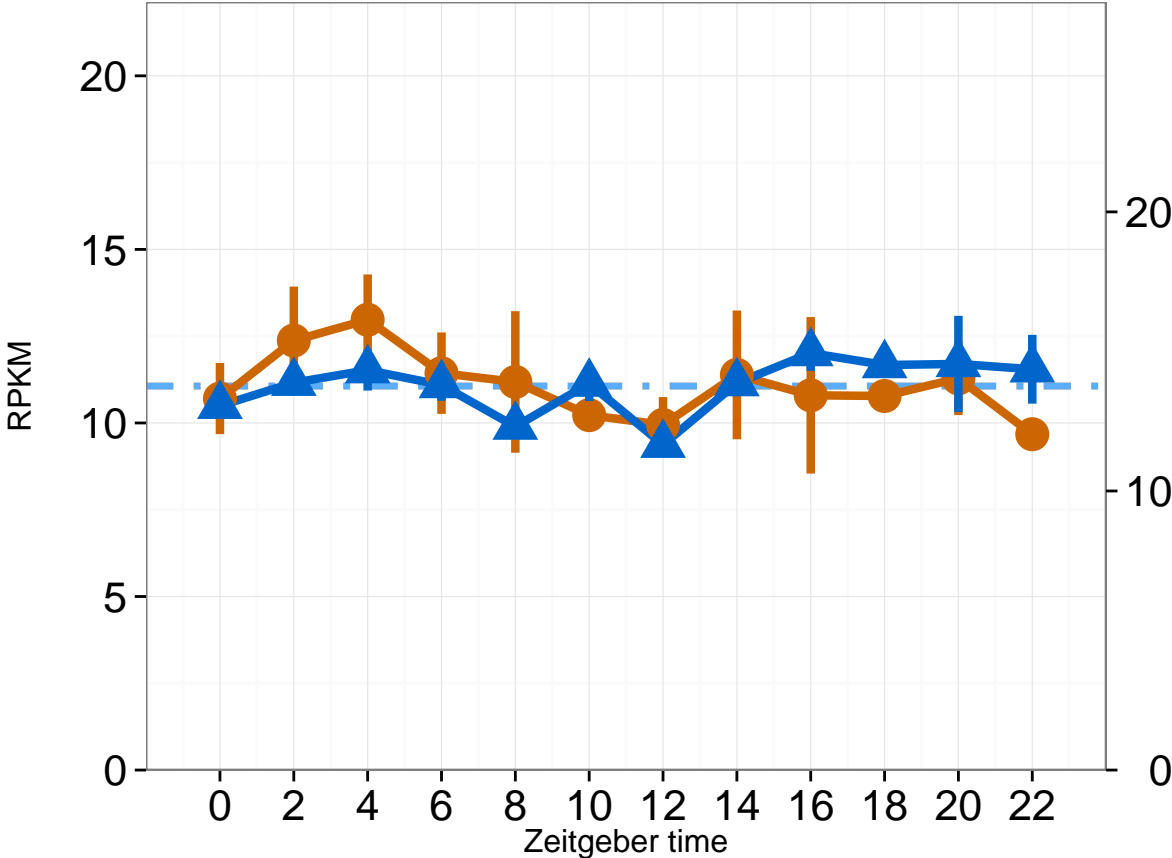

**Psmd10**

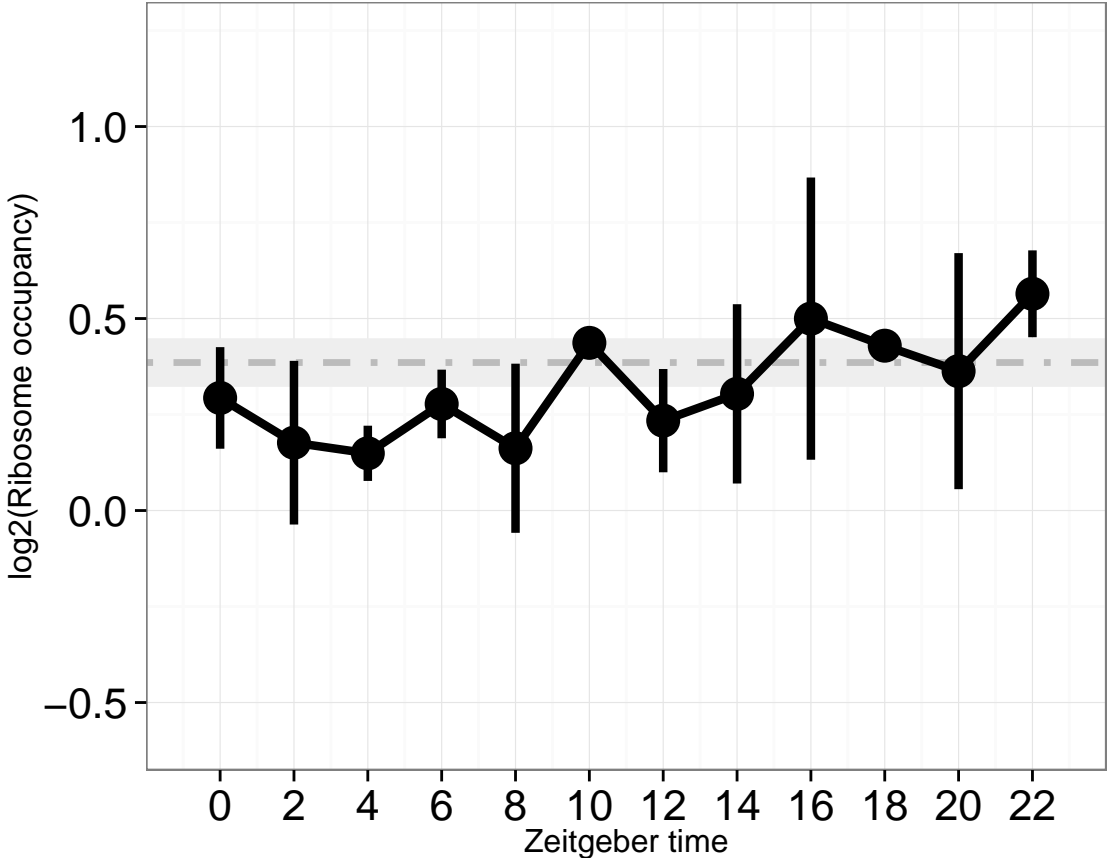

Supplement: SuppDataset_1.zip [file Psmd10_set_A.pdf › Supplemental Dataset 1/A-mRNA_nonrhyth_translation_nonrhyth/Psmd10_set_A.pdf]

# Psmd11

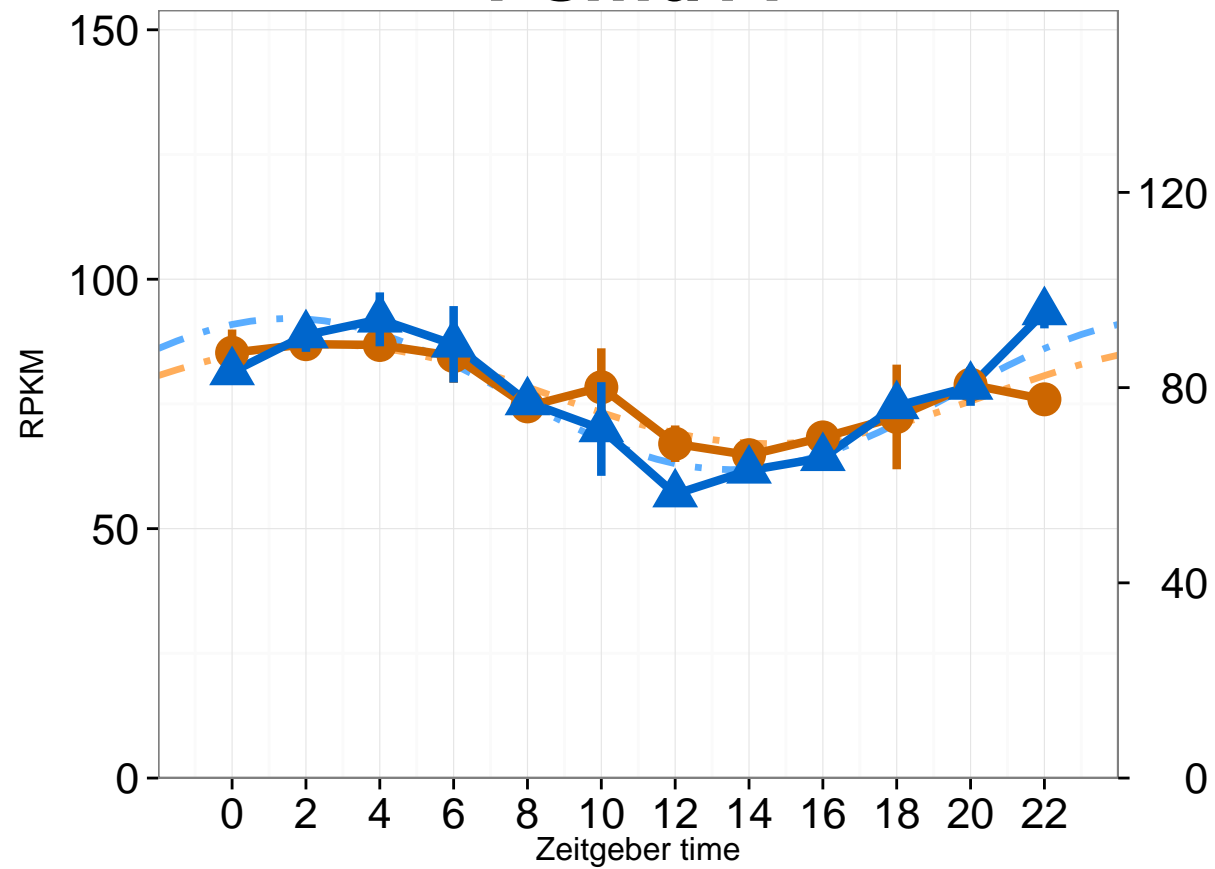

# Psmd11

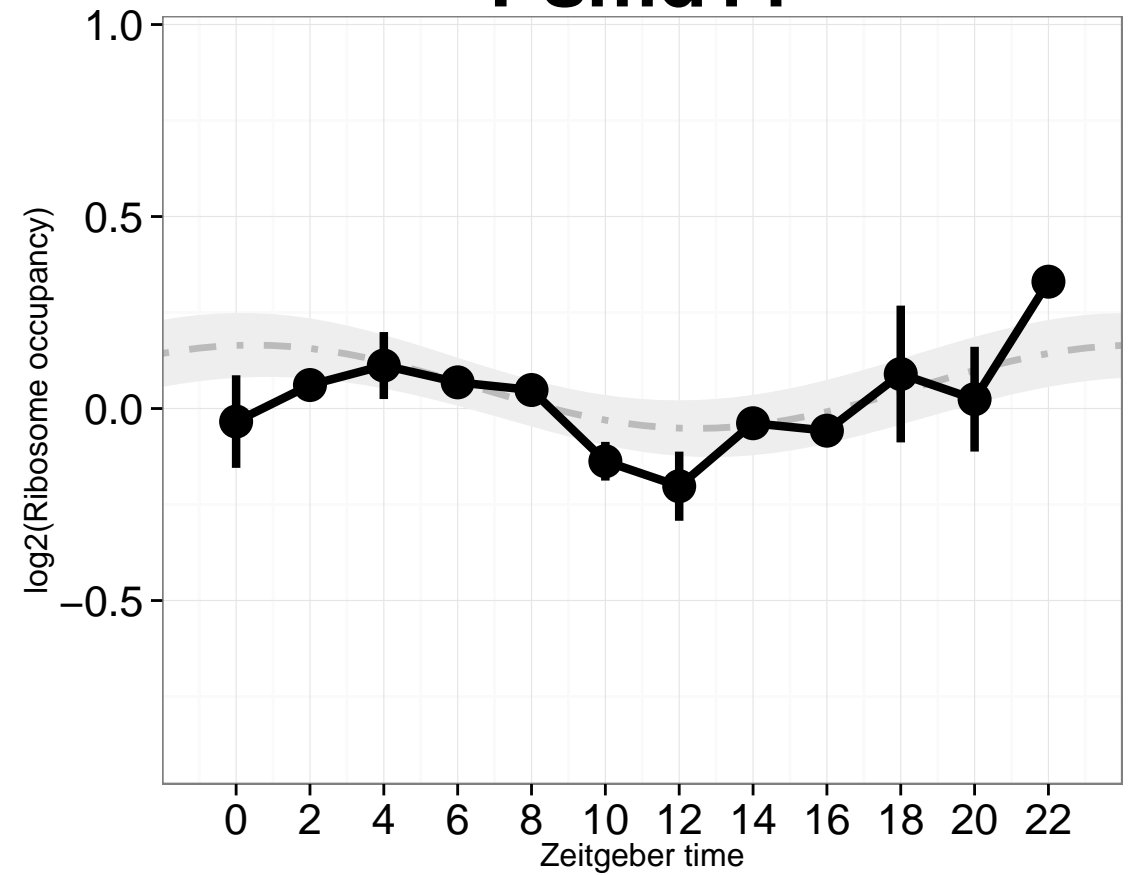

Supplement: SuppDataset_1.zip [file Psmd11_set_A.pdf › Supplemental Dataset 1/A-mRNA_nonrhyth_translation_nonrhyth/Psmd11_set_A.pdf]

## Psmd12

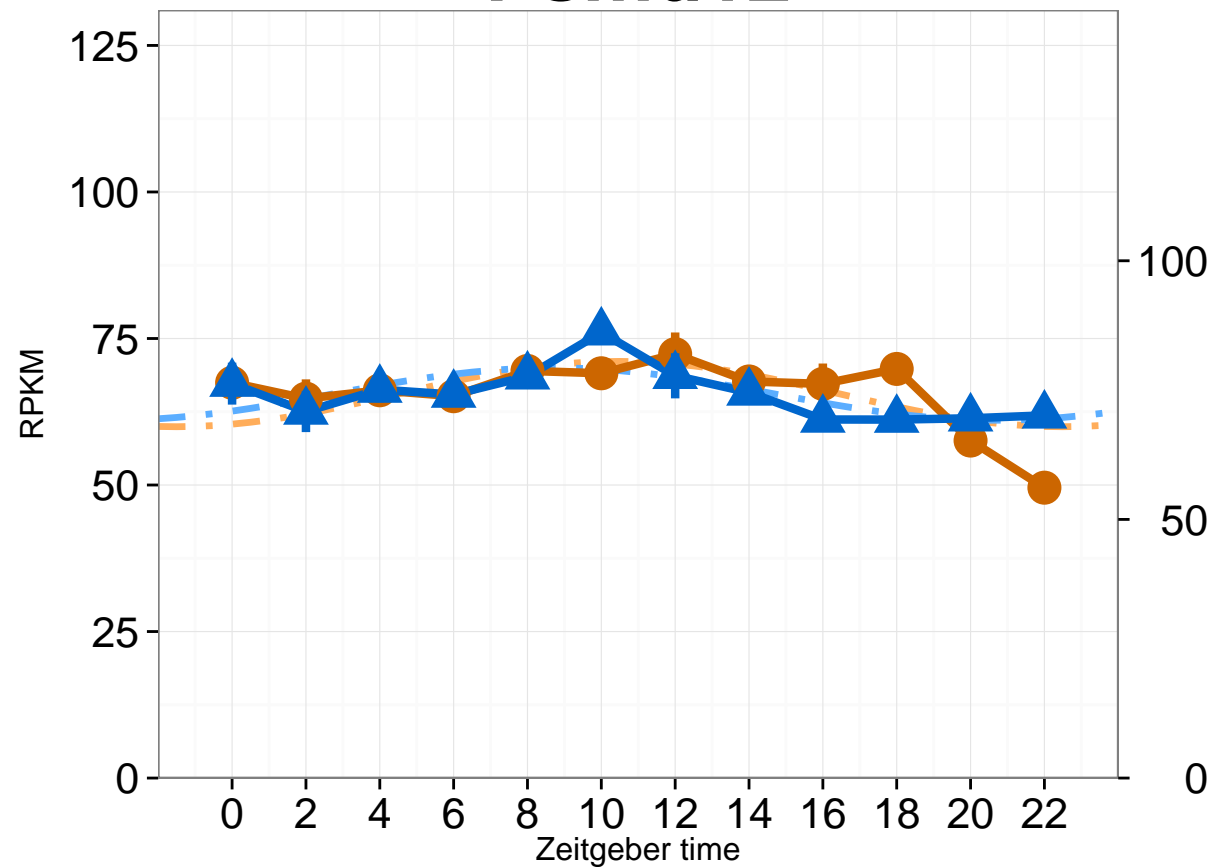

## Psmd12

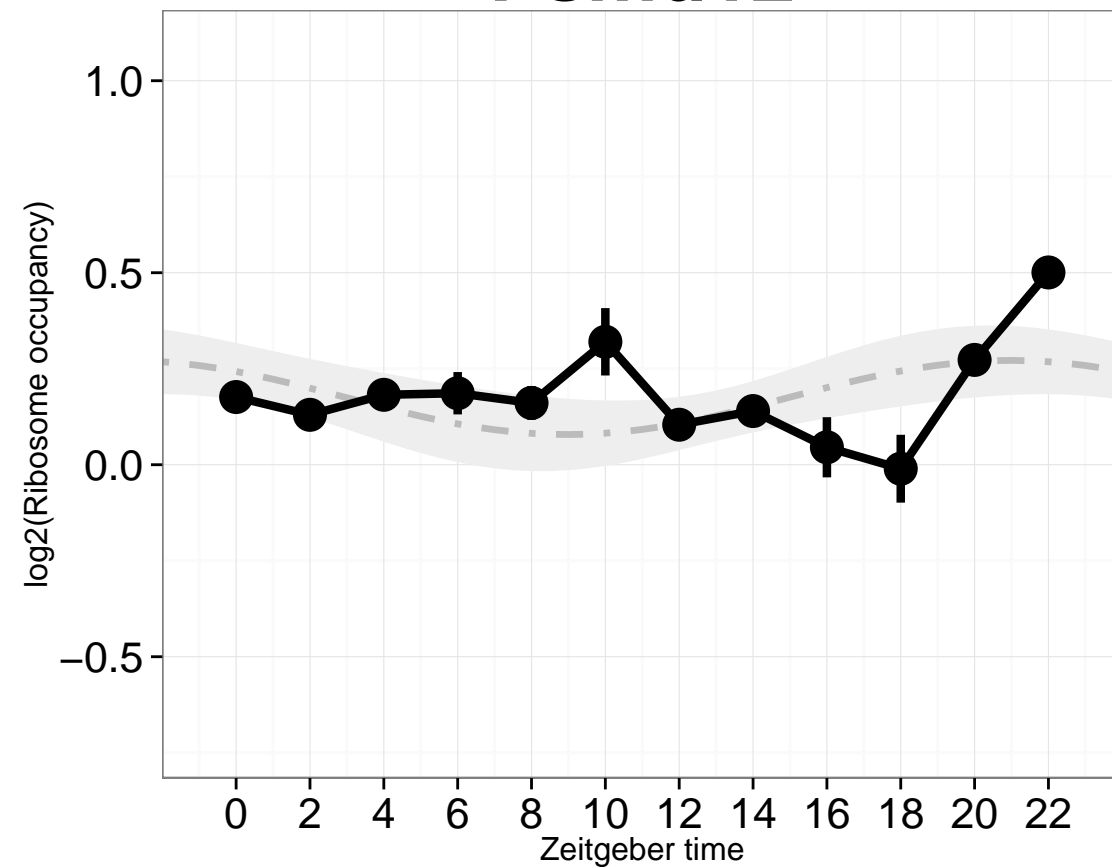

Supplement: SuppDataset_1.zip [file Psmd12_set_A.pdf › Supplemental Dataset 1/A-mRNA_nonrhyth_translation_nonrhyth/Psmd12_set_A.pdf]

# Psmd13

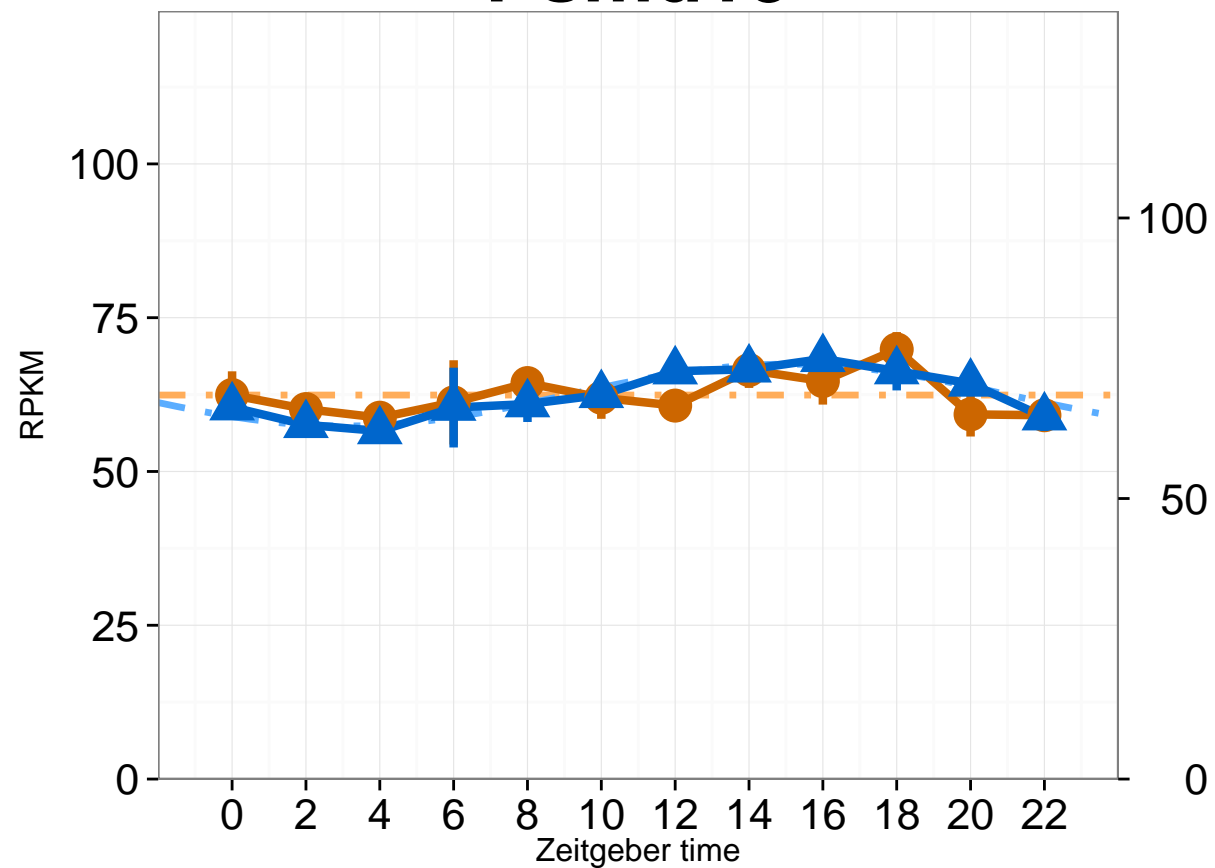

# Psmd13

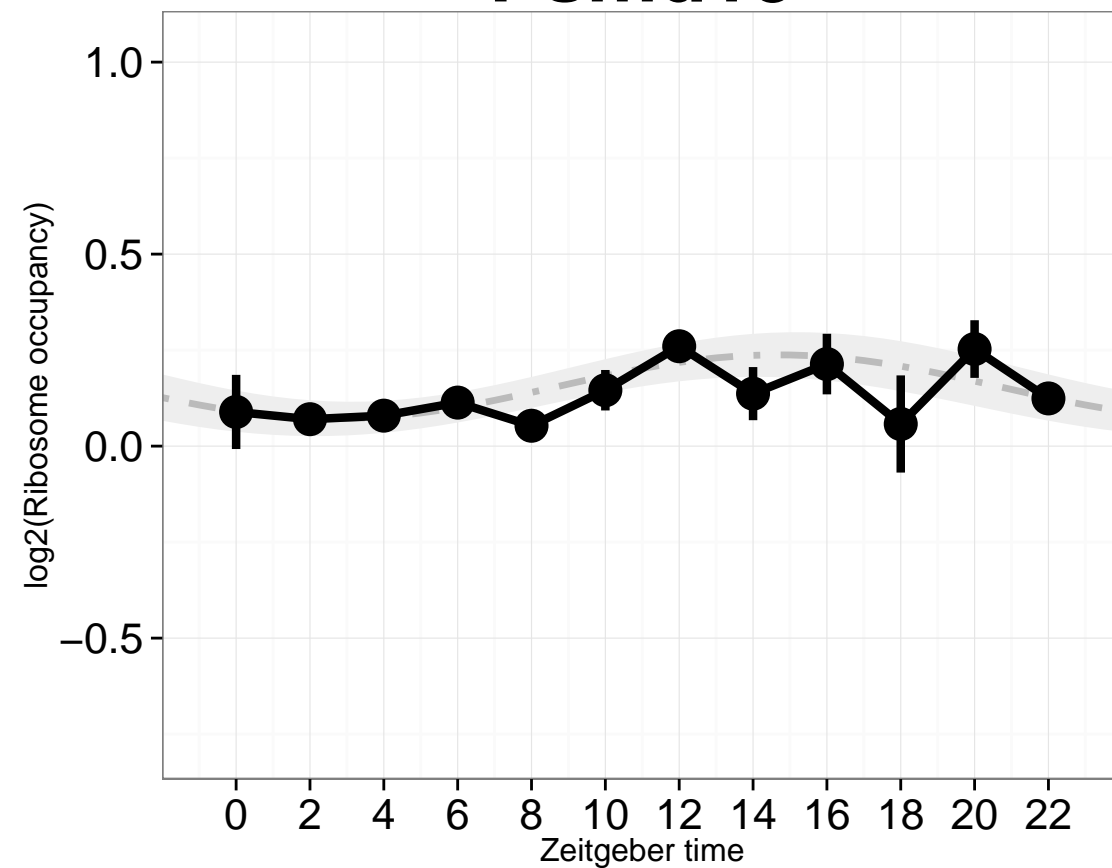

Supplement: SuppDataset_1.zip [file Psmd13_set_A.pdf › Supplemental Dataset 1/A-mRNA_nonrhyth_translation_nonrhyth/Psmd13_set_A.pdf]

**Psmd14**

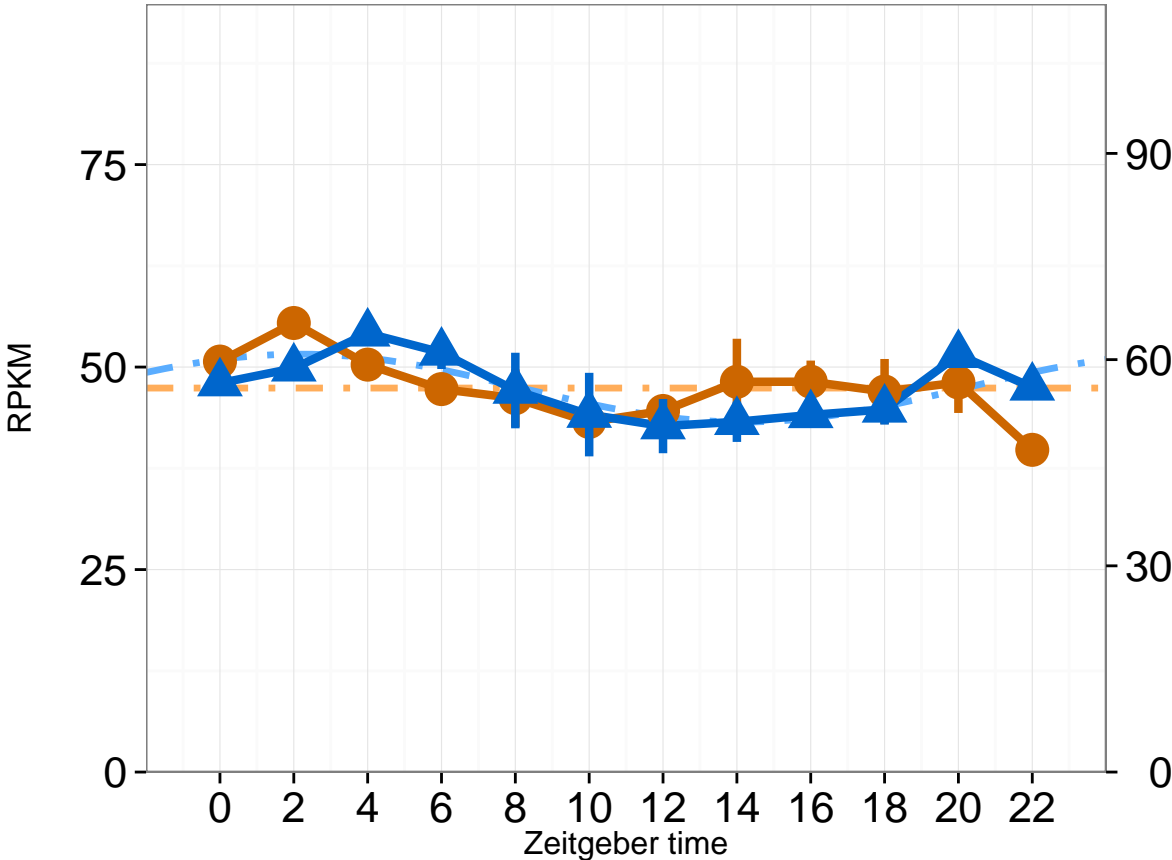

**Psmd14**

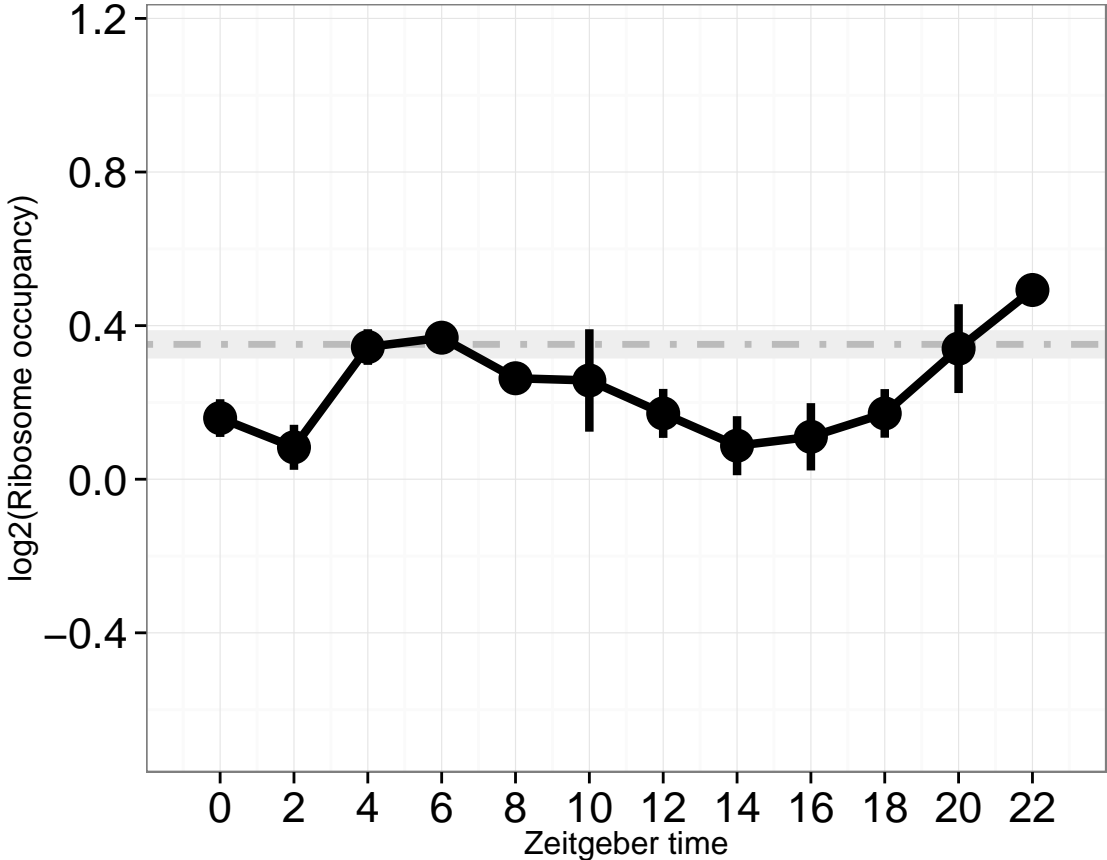

Supplement: SuppDataset_1.zip [file Psmd14_set_A.pdf › Supplemental Dataset 1/A-mRNA_nonrhyth_translation_nonrhyth/Psmd14_set_A.pdf]

# Psmc1

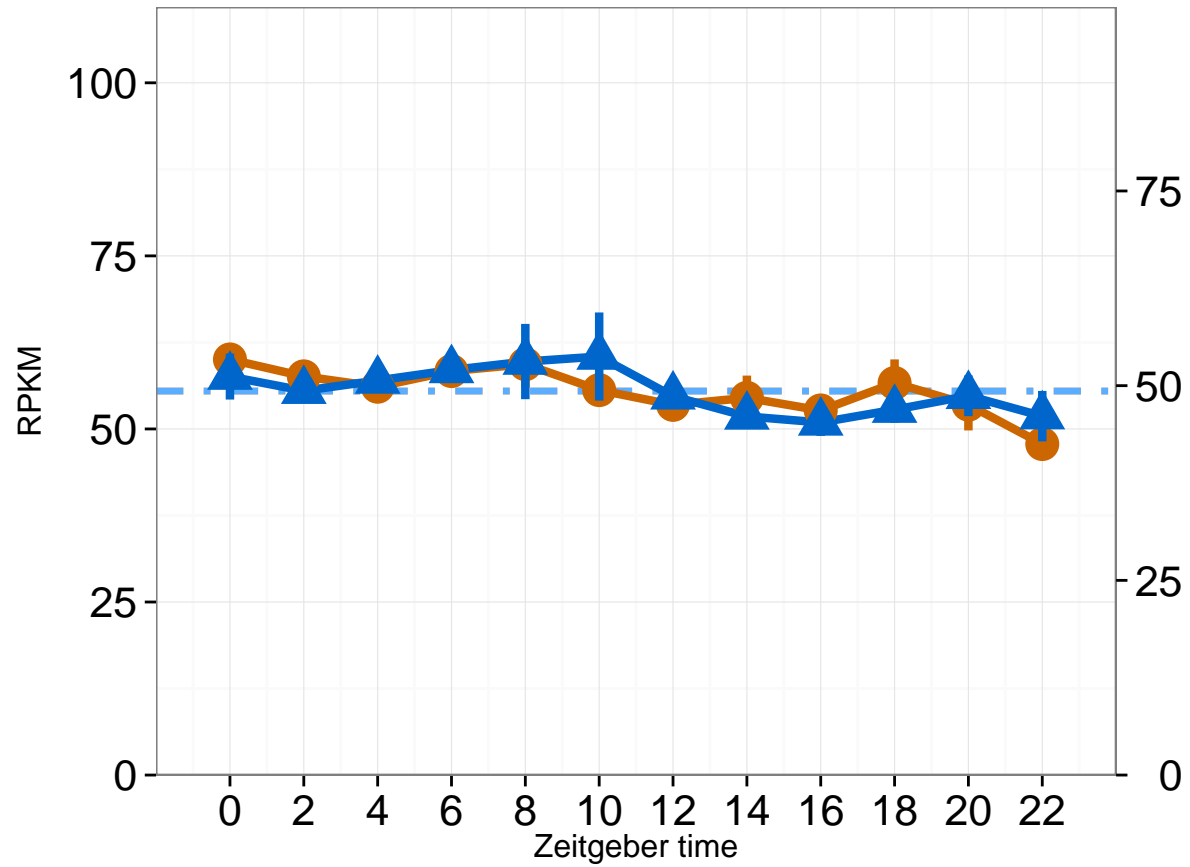

# Psmc1

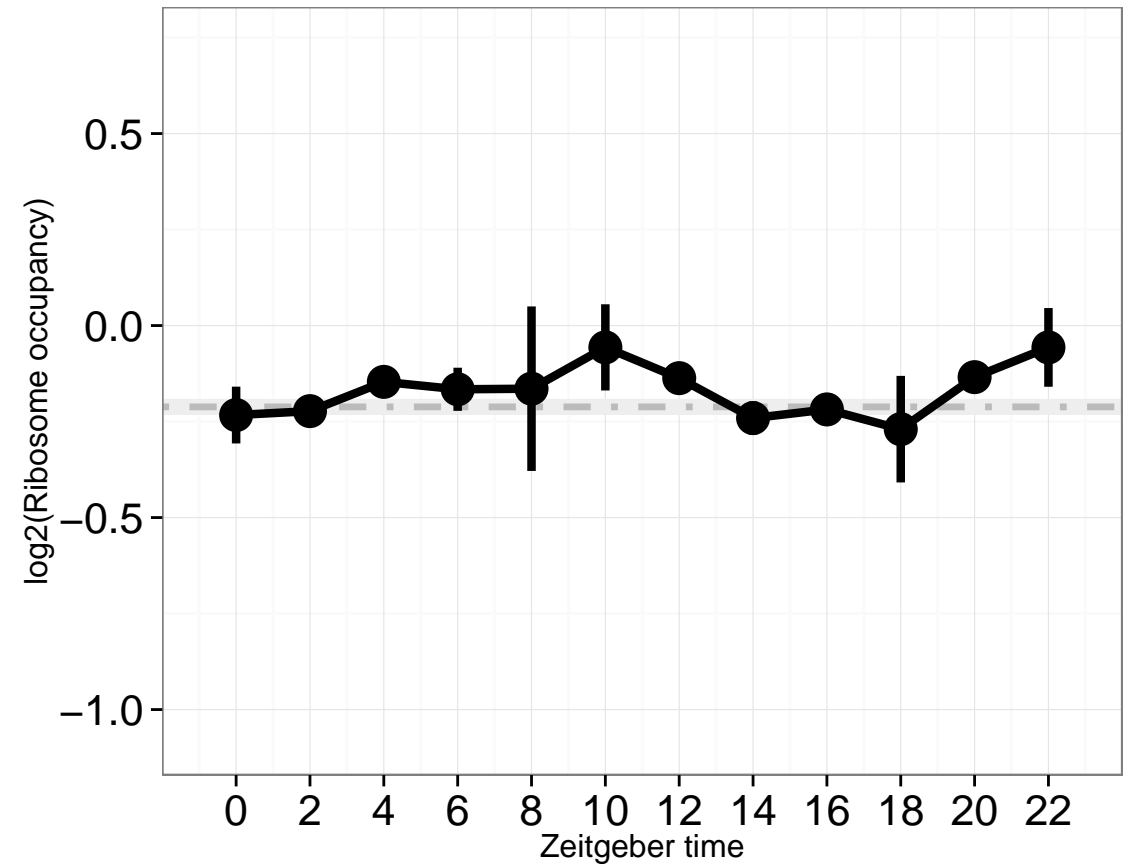

Supplement: SuppDataset_1.zip [file Psmd1_set_A.pdf › Supplemental Dataset 1/A-mRNA_nonrhyth_translation_nonrhyth/Psmd1_set_A.pdf]

## Psmd2

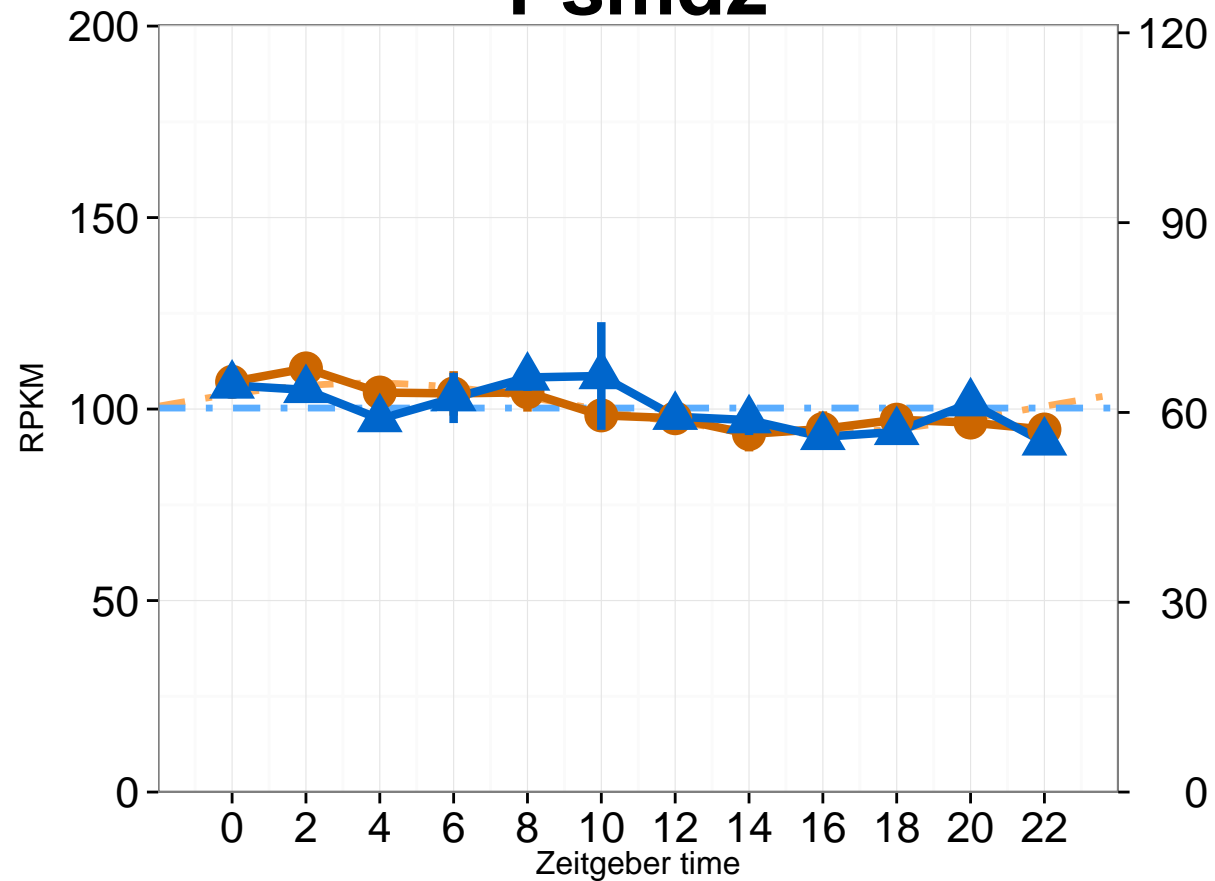

## Psmd2

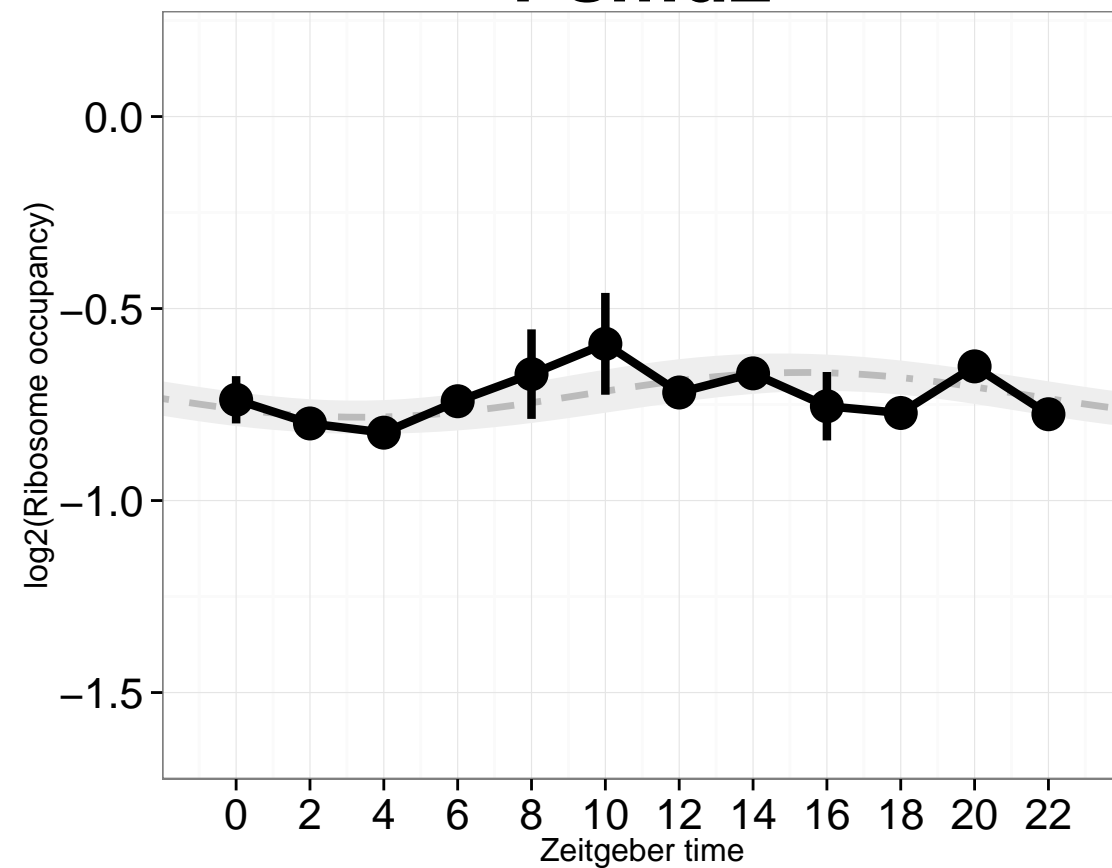

Supplement: SuppDataset_1.zip [file Psmd2_set_A.pdf › Supplemental Dataset 1/A-mRNA_nonrhyth_translation_nonrhyth/Psmd2_set_A.pdf]

## Psmd3

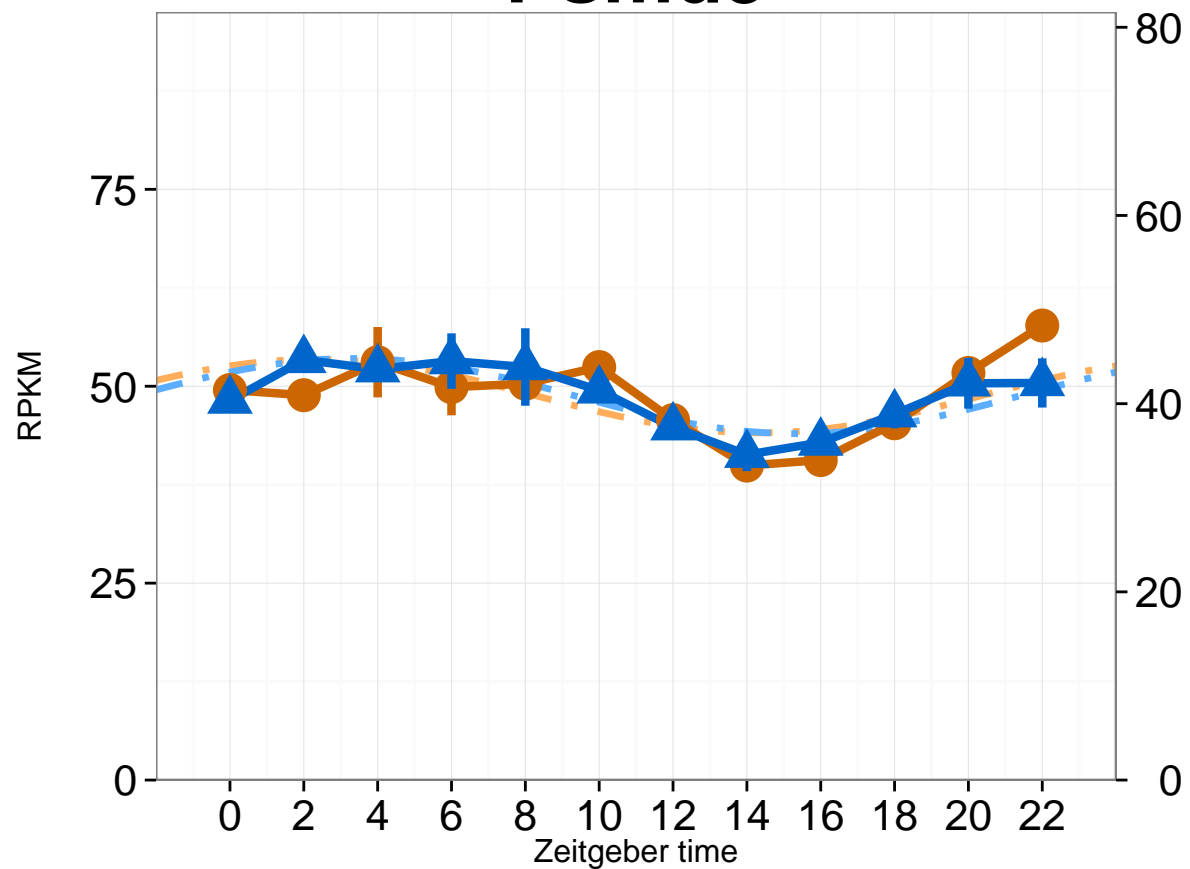

## Psmd3

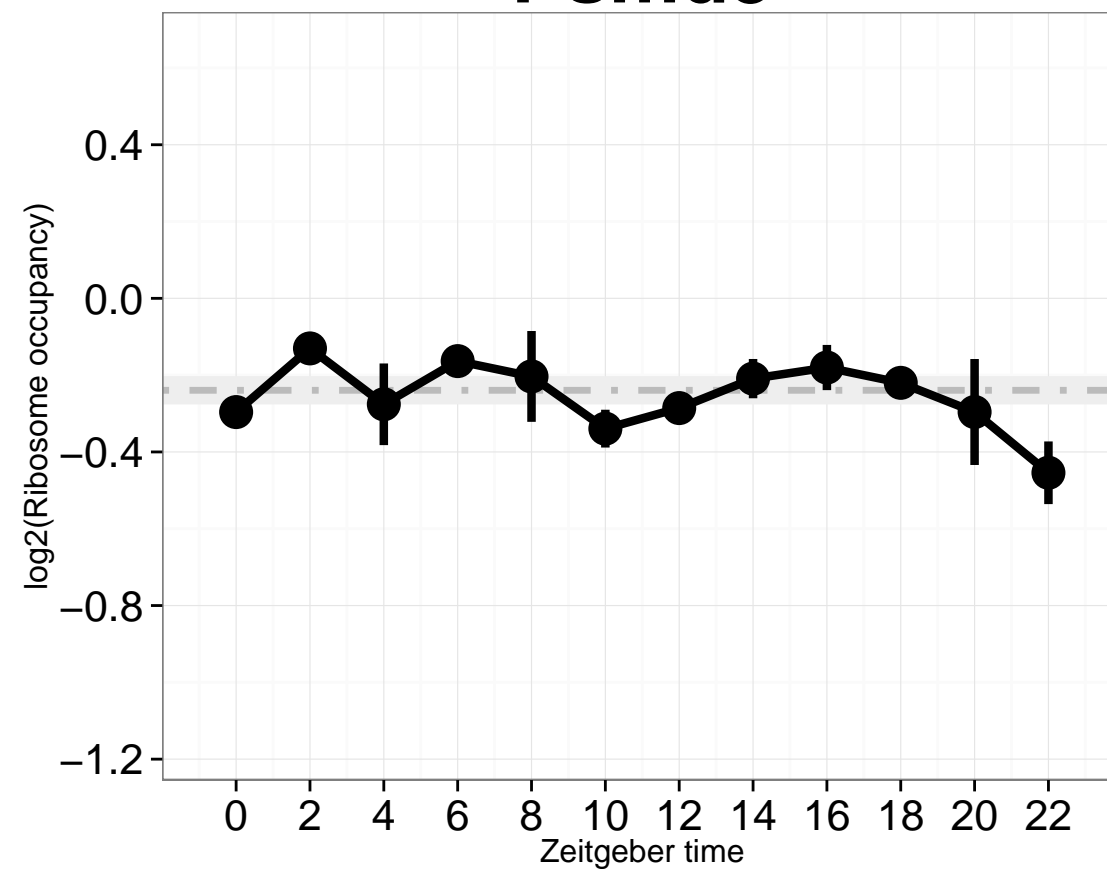

Supplement: SuppDataset_1.zip [file Psmd3_set_A.pdf › Supplemental Dataset 1/A-mRNA_nonrhyth_translation_nonrhyth/Psmd3_set_A.pdf]

# Psm�4

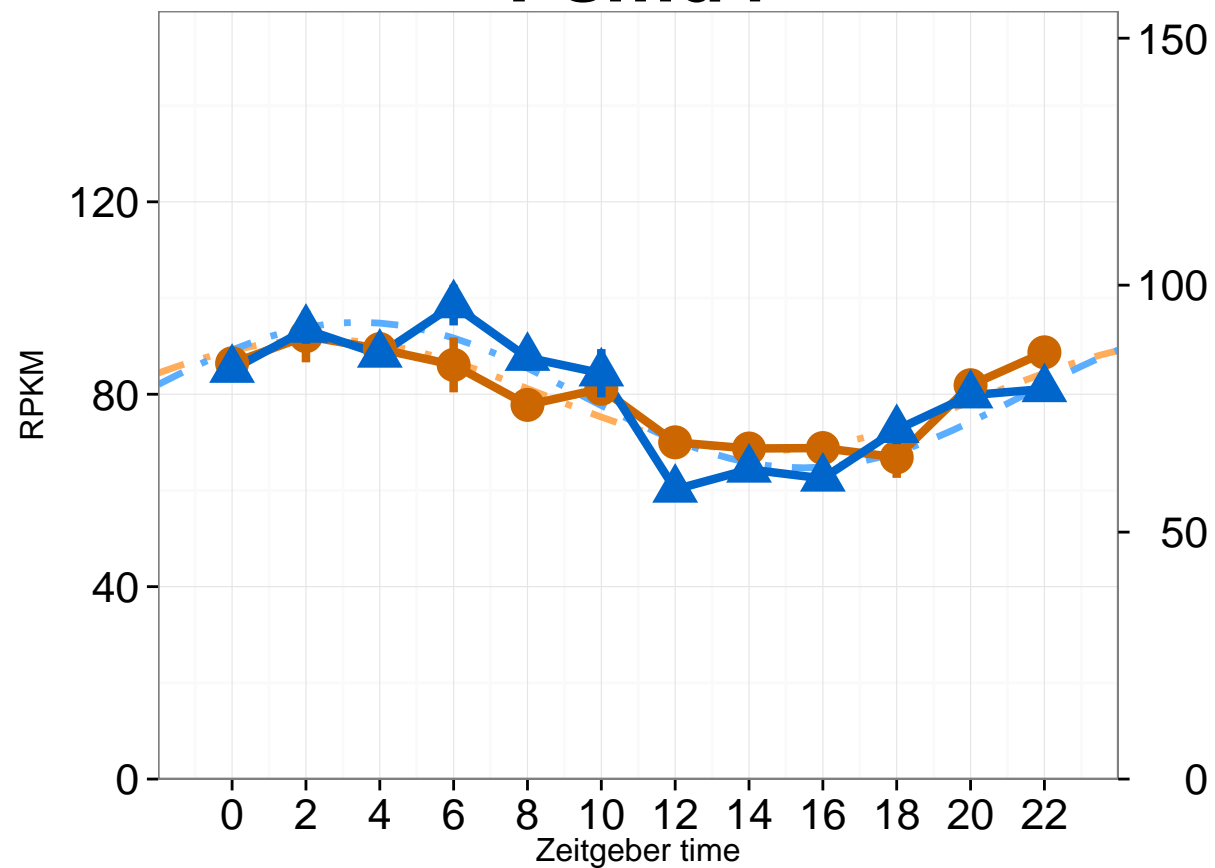

# Psm�4

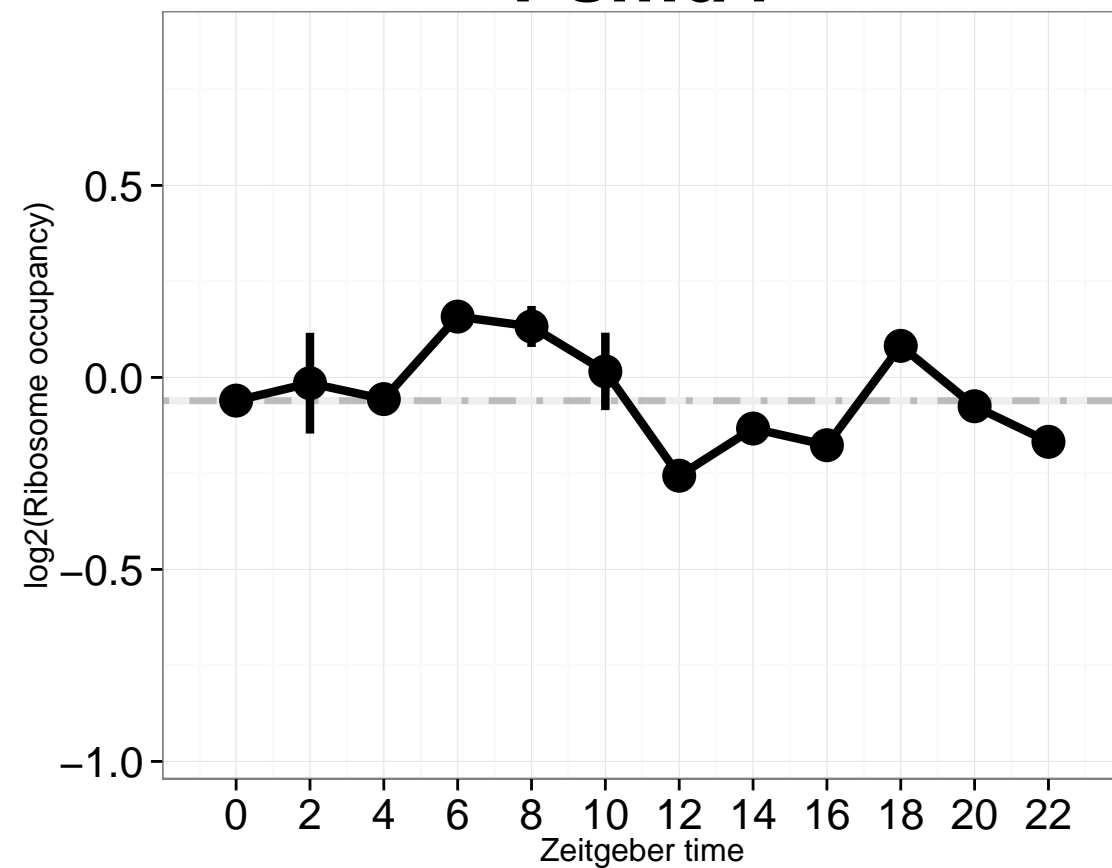

Supplement: SuppDataset_1.zip [file Psmd4_set_A.pdf › Supplemental Dataset 1/A-mRNA_nonrhyth_translation_nonrhyth/Psmd4_set_A.pdf]

## Psmd5

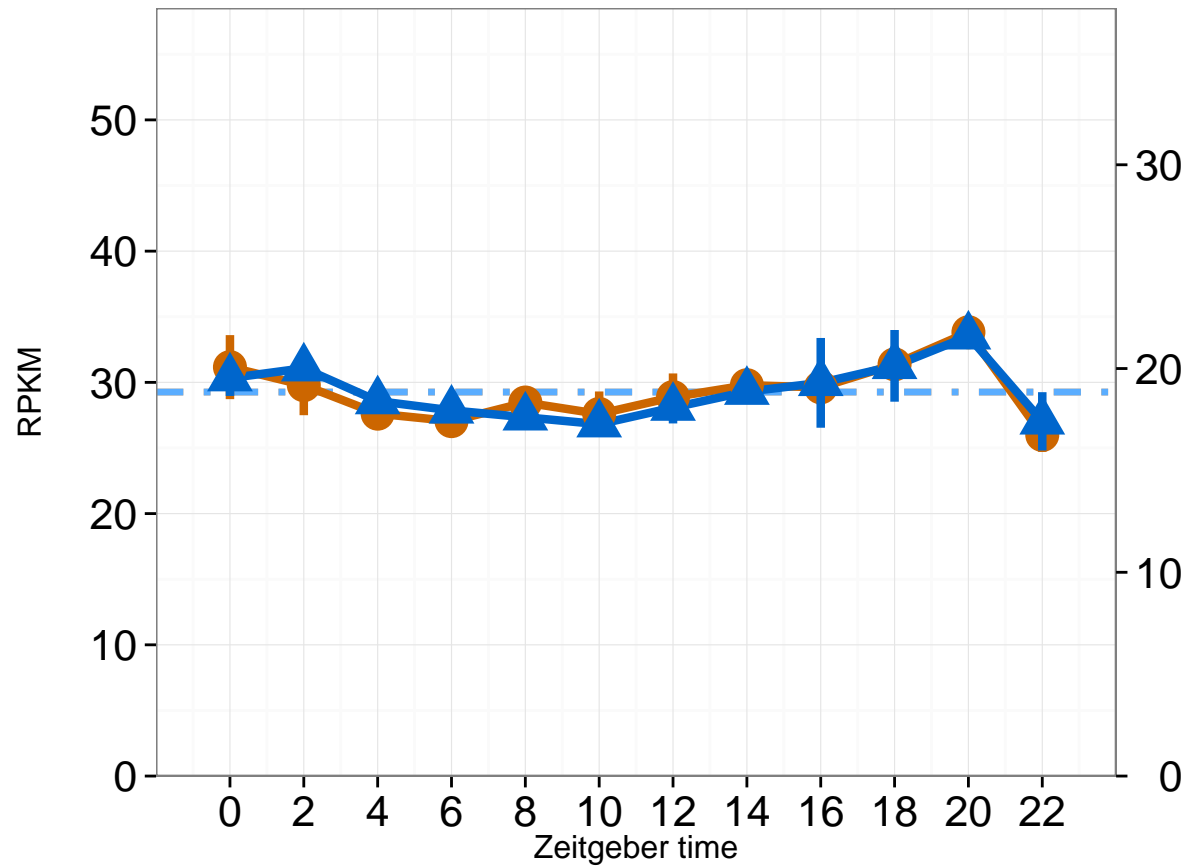

## Psmd5

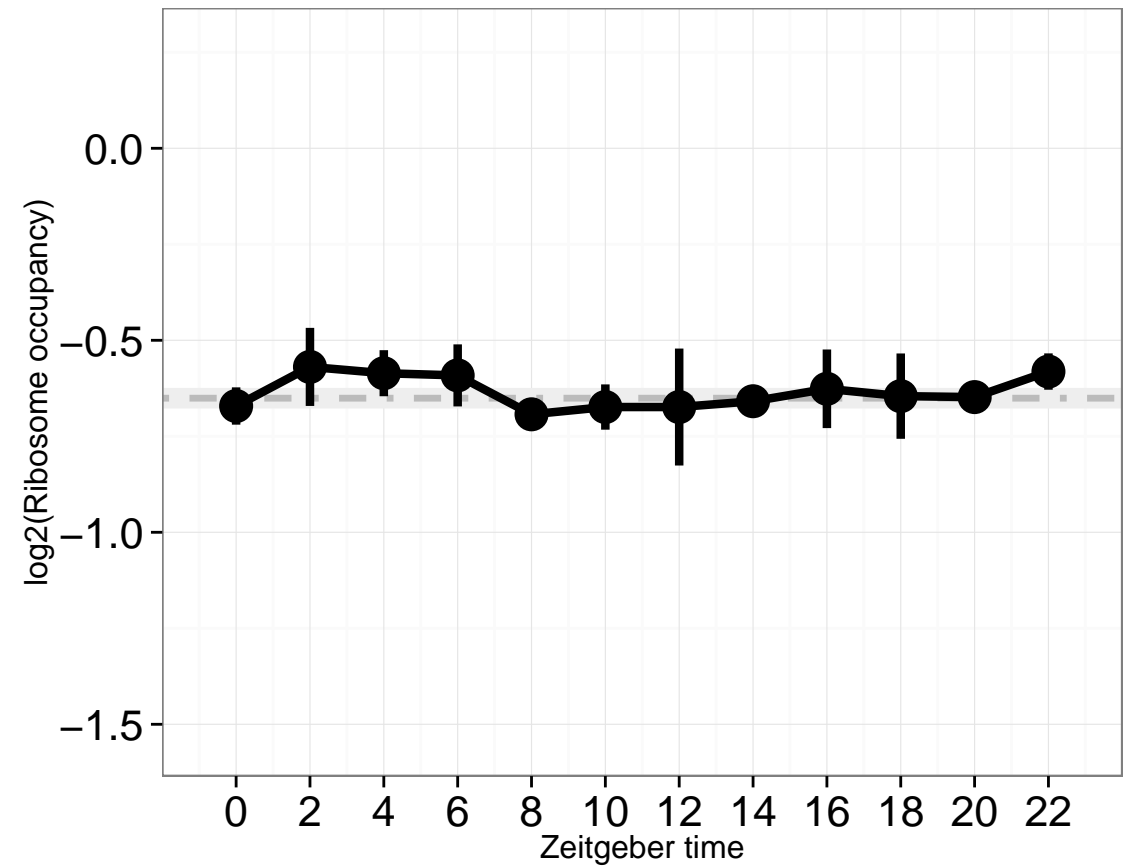

Supplement: SuppDataset_1.zip [file Psmd5_set_A.pdf › Supplemental Dataset 1/A-mRNA_nonrhyth_translation_nonrhyth/Psmd5_set_A.pdf]

# Psm6

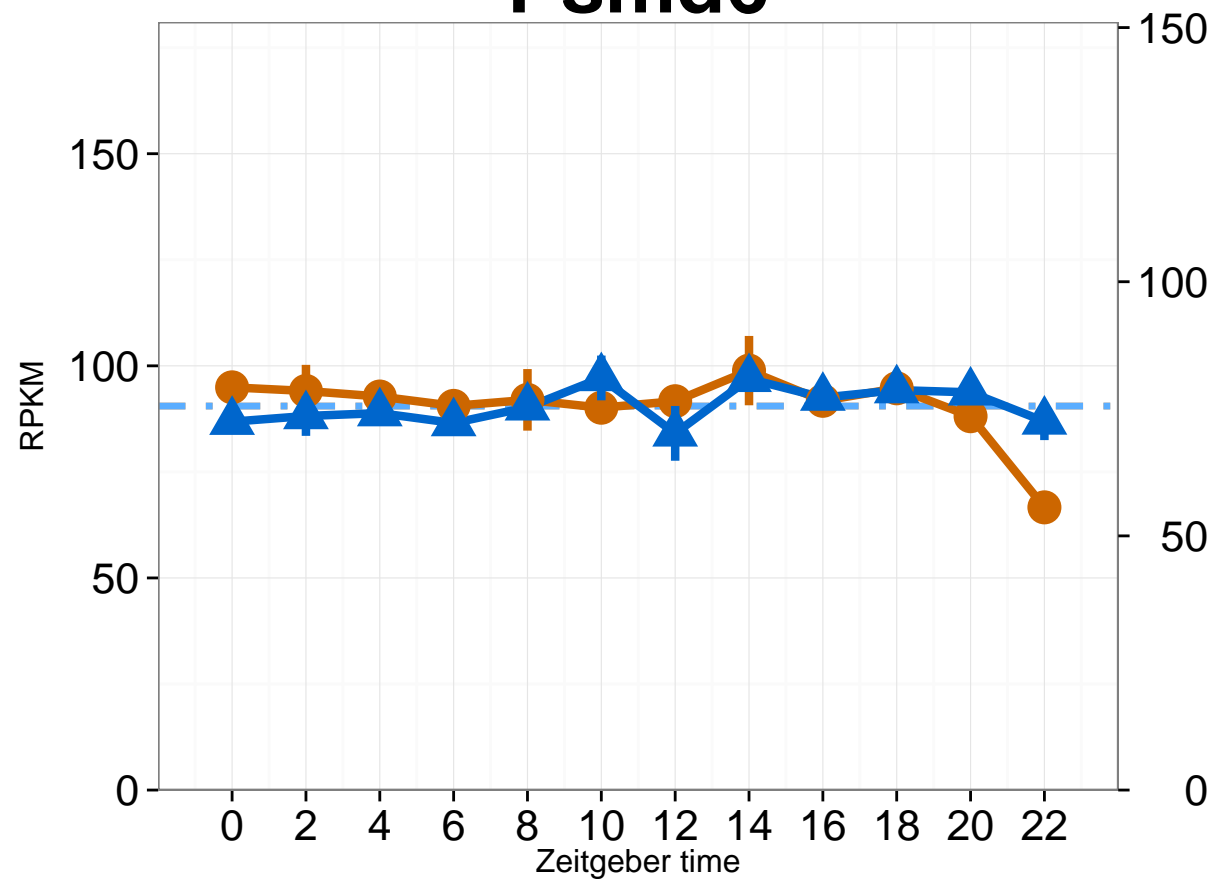

# Psm6

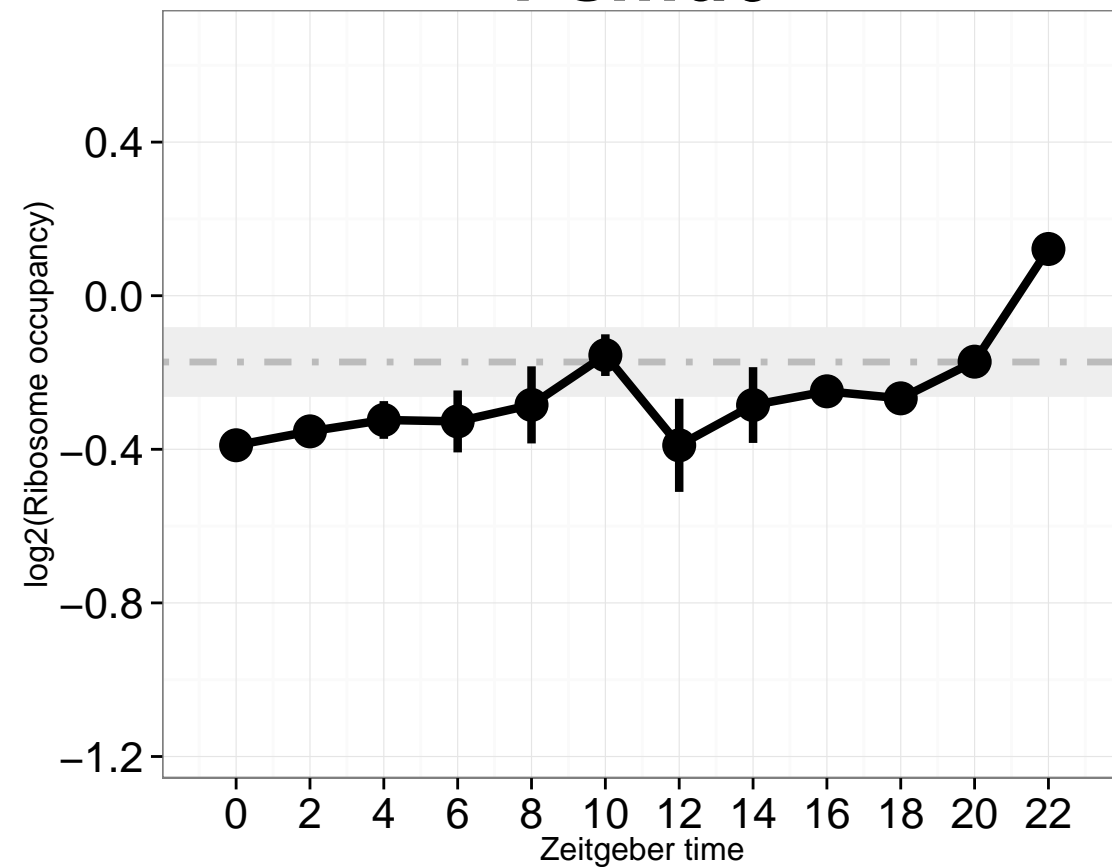

Supplement: SuppDataset_1.zip [file Psmd6_set_A.pdf › Supplemental Dataset 1/A-mRNA_nonrhyth_translation_nonrhyth/Psmd6_set_A.pdf]

## Psmd7

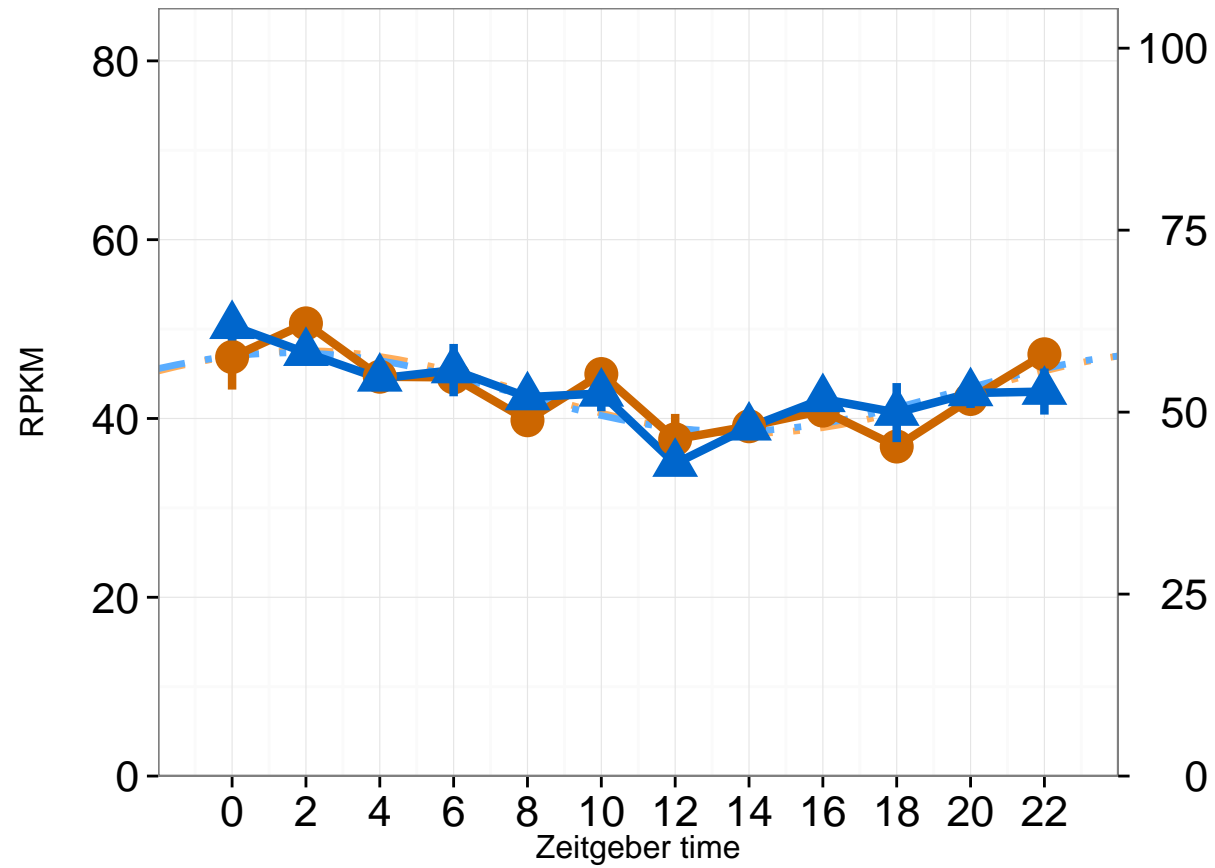

## Psmd7

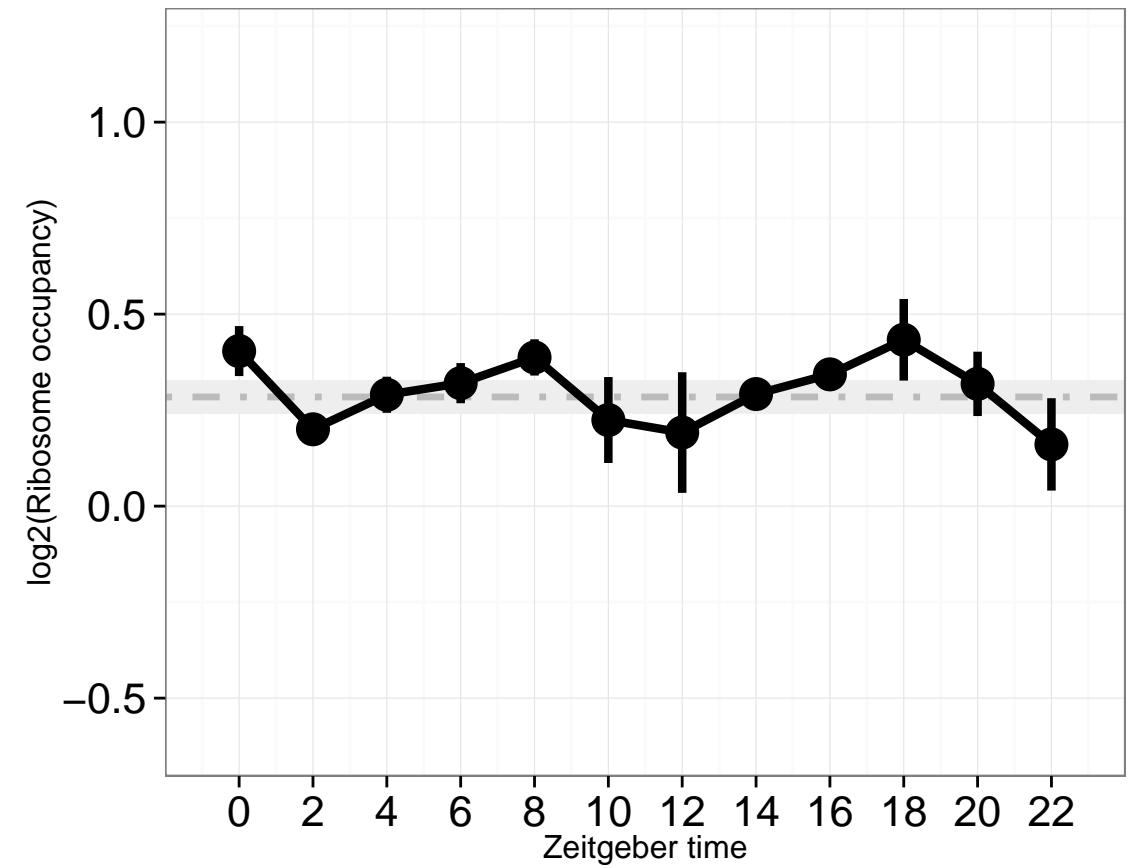

Supplement: SuppDataset_1.zip [file Psmd7_set_A.pdf › Supplemental Dataset 1/A-mRNA_nonrhyth_translation_nonrhyth/Psmd7_set_A.pdf]

# Psmc9

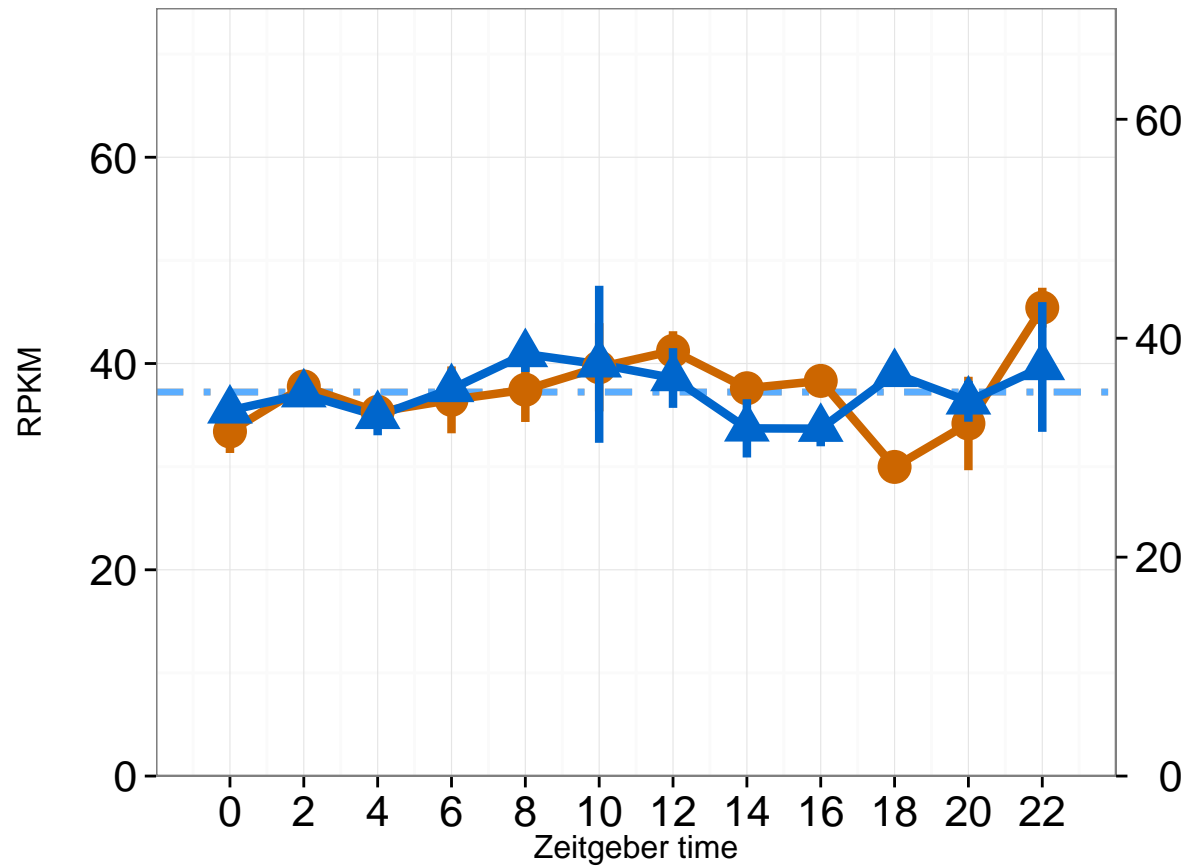

# Psmc9

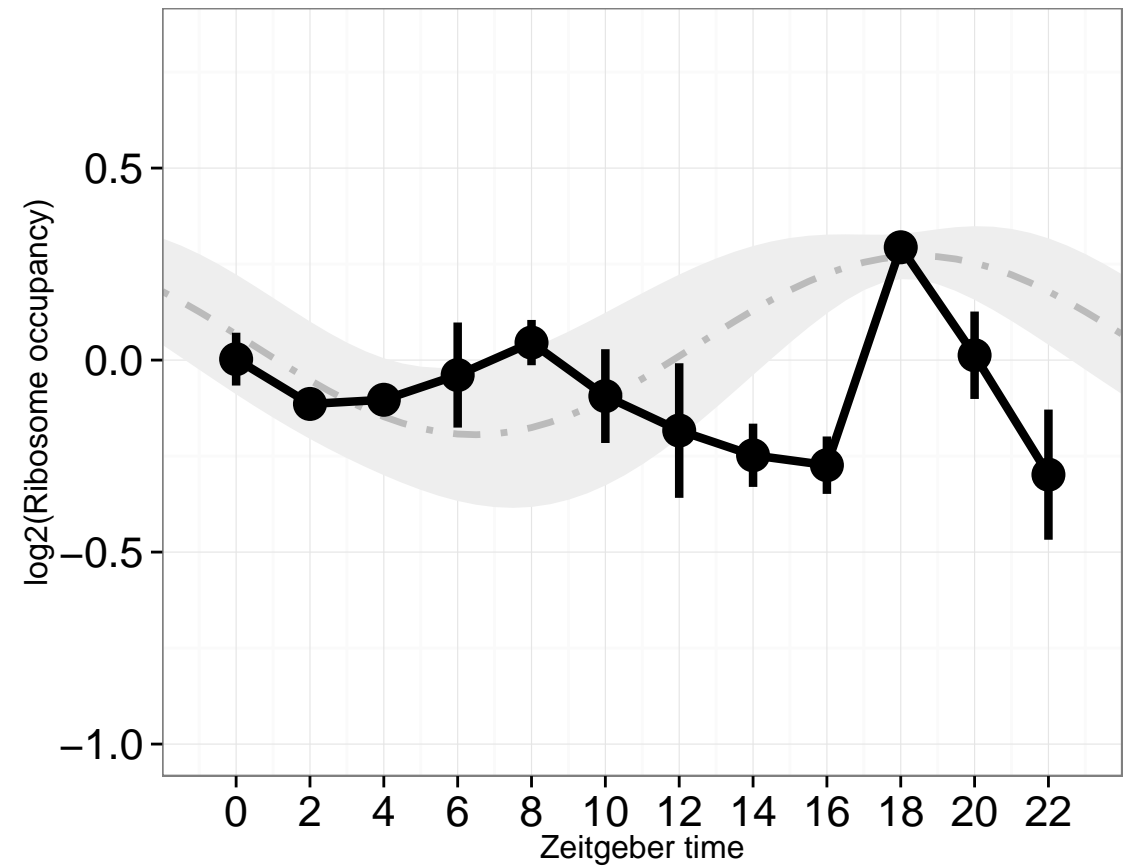

Supplement: SuppDataset_1.zip [file Psmd9_set_A.pdf › Supplemental Dataset 1/A-mRNA_nonrhyth_translation_nonrhyth/Psmd9_set_A.pdf]

# Psme1

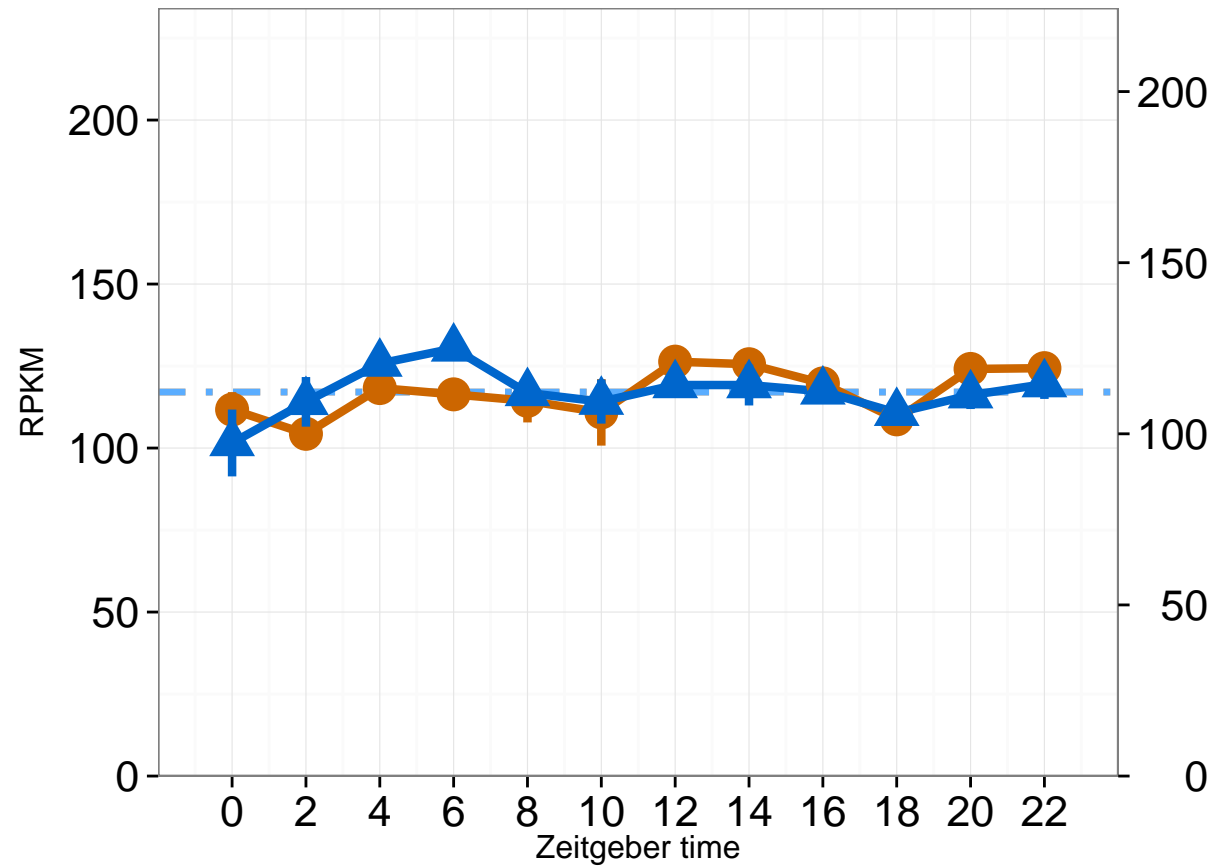

# Psme1

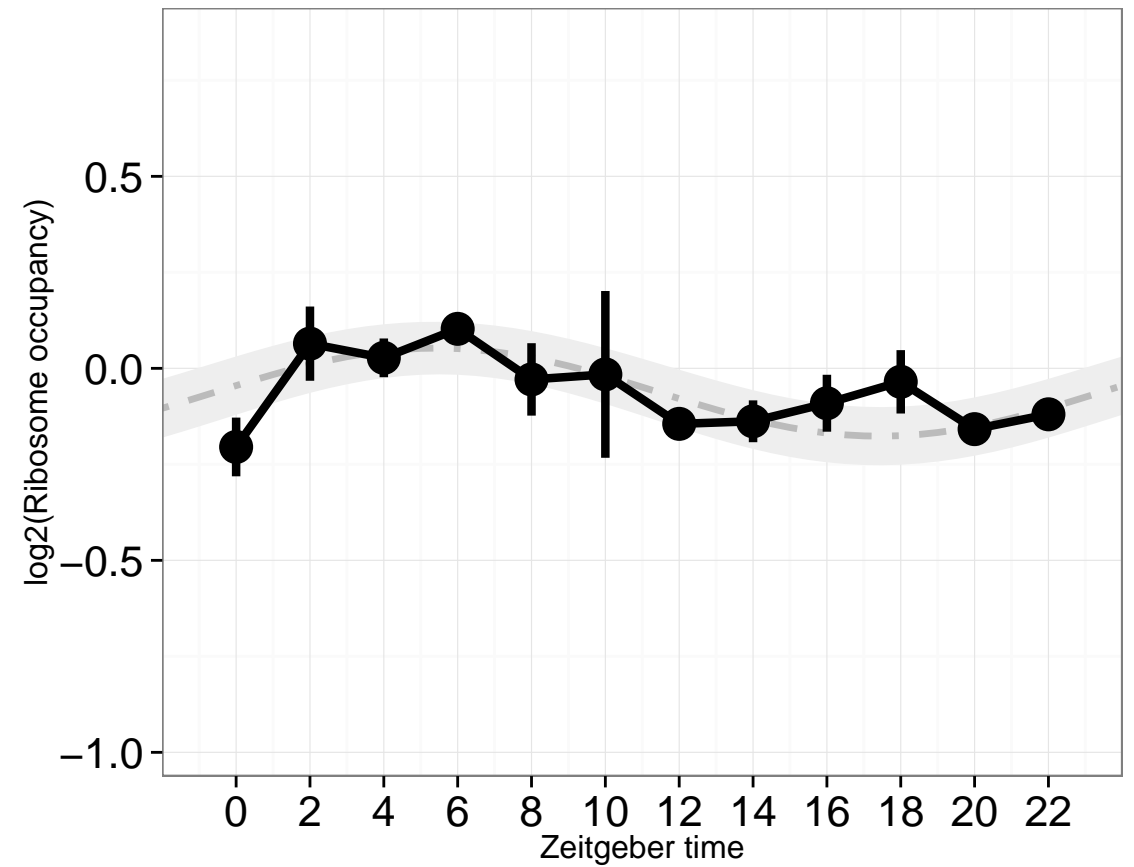

Supplement: SuppDataset_1.zip [file Psme1_set_A.pdf › Supplemental Dataset 1/A-mRNA_nonrhyth_translation_nonrhyth/Psme1_set_A.pdf]

# Psme2

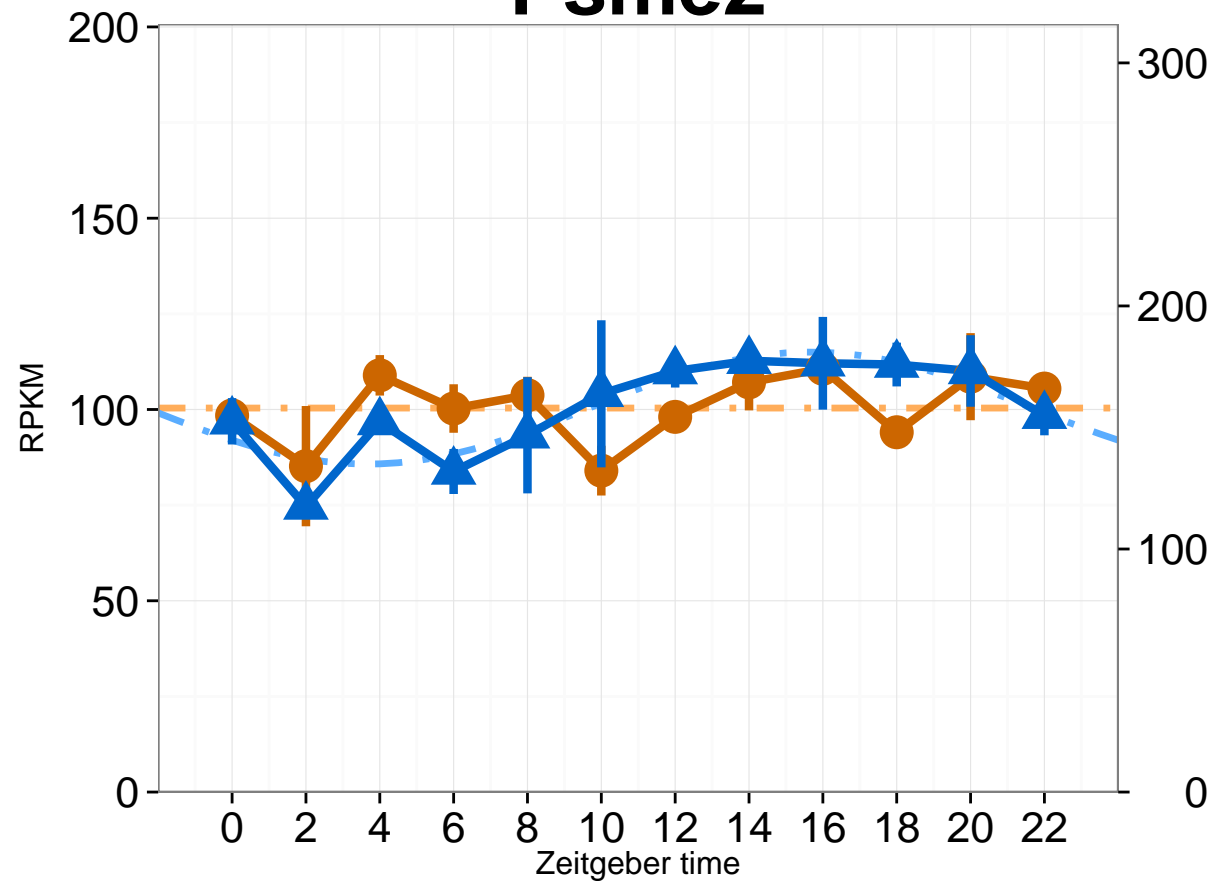

# Psme2

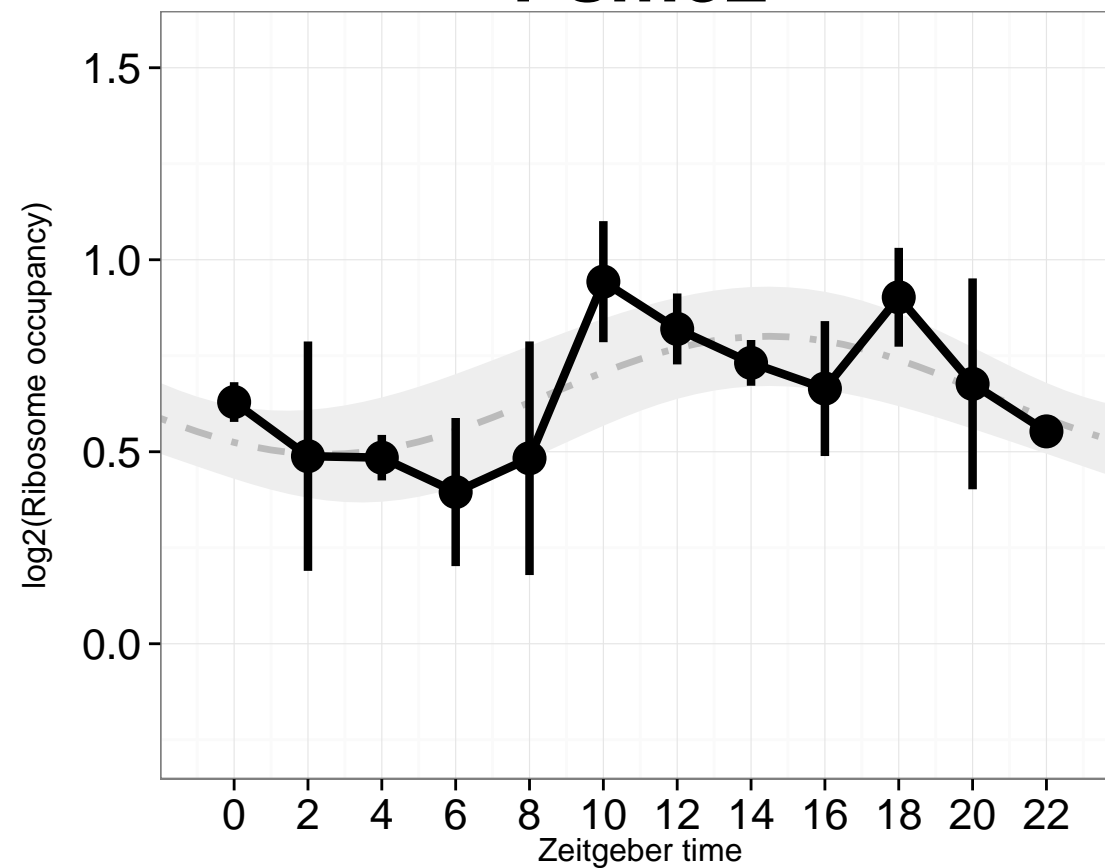

Supplement: SuppDataset_1.zip [file Psme2_set_A.pdf › Supplemental Dataset 1/A-mRNA_nonrhyth_translation_nonrhyth/Psme2_set_A.pdf]

## Psme2b

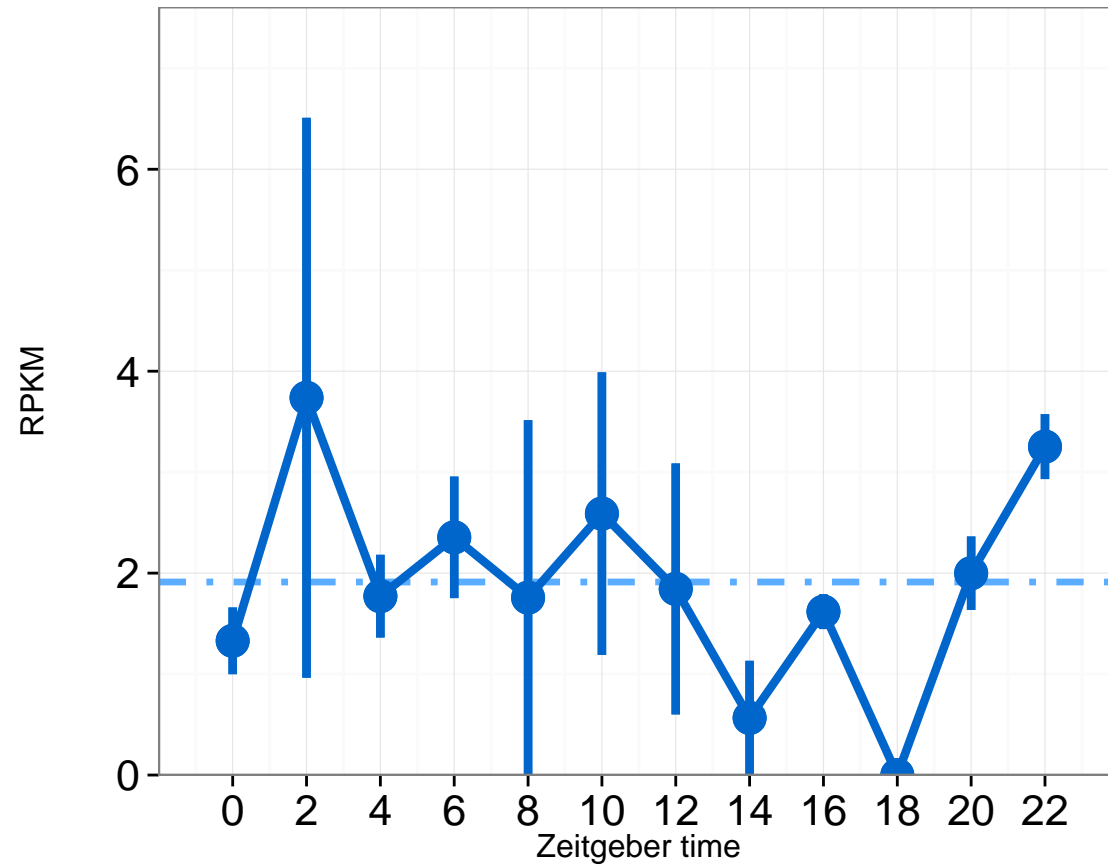

## Psme2b log2(Ribosome occupancy)

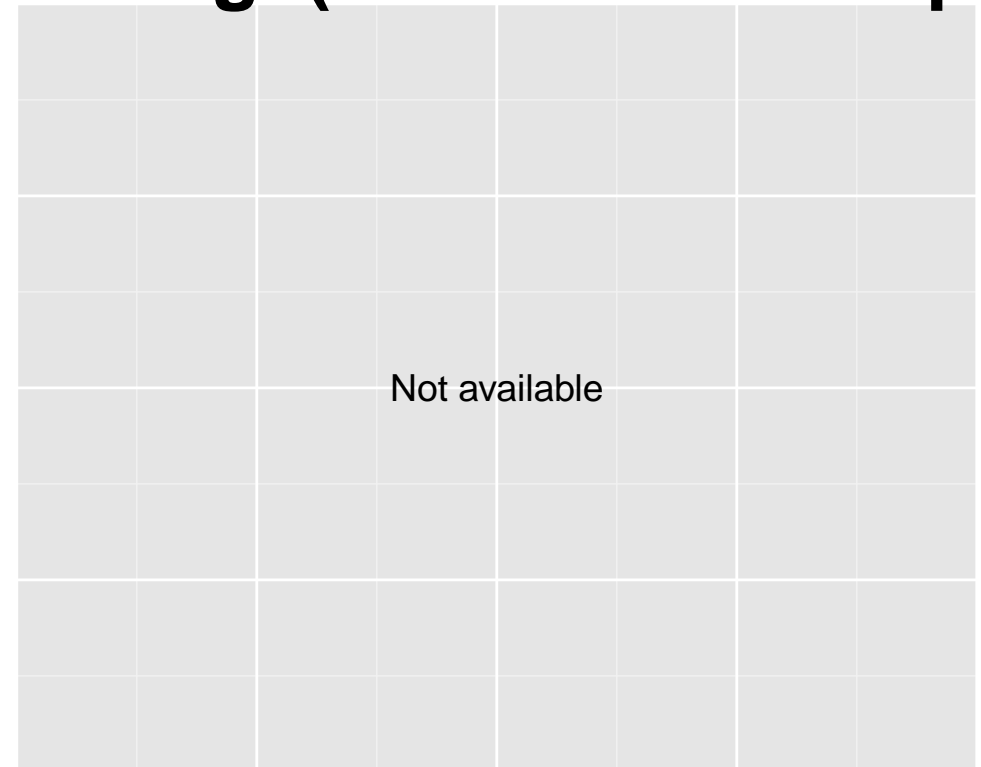

Supplement: SuppDataset_1.zip [file Psme2b_set_A.pdf › Supplemental Dataset 1/A-mRNA_nonrhyth_translation_nonrhyth/Psme2b_set_A.pdf]

## Psme3

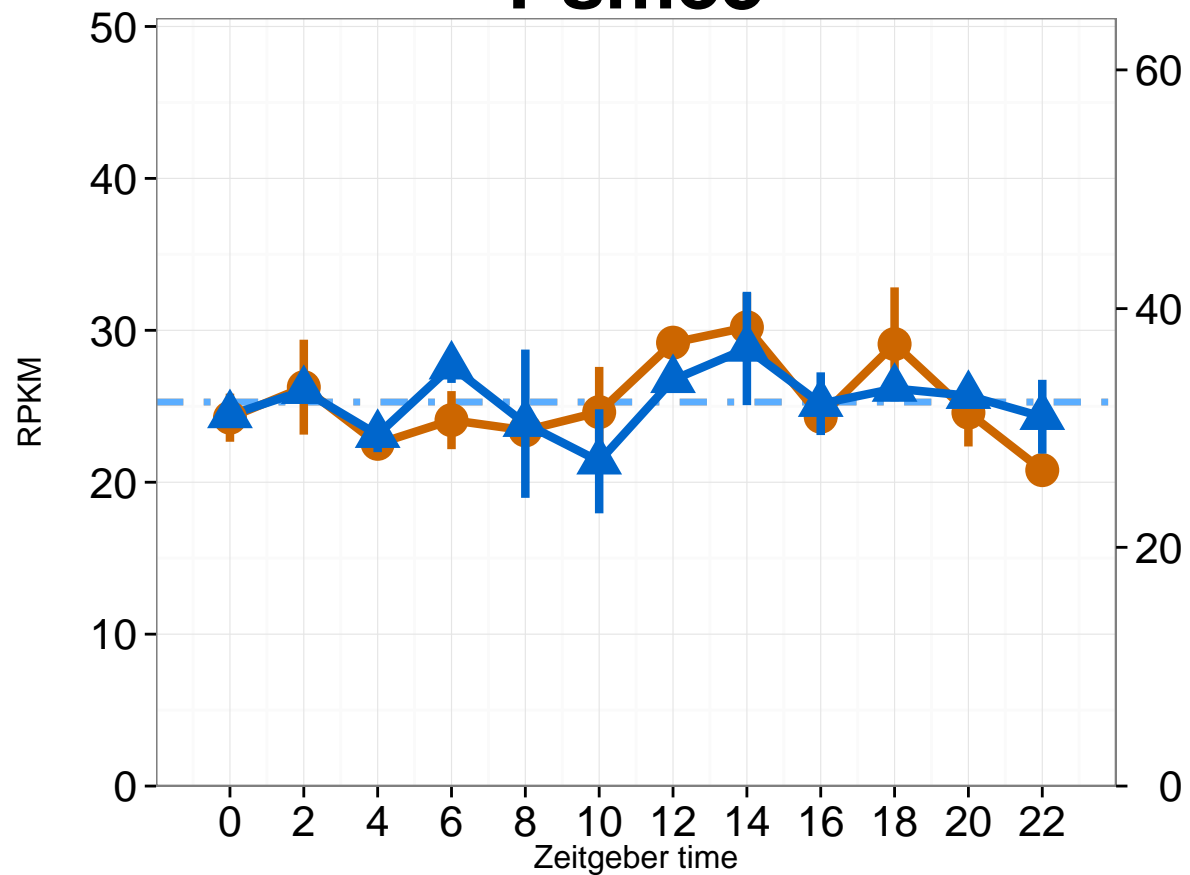

## Psme3

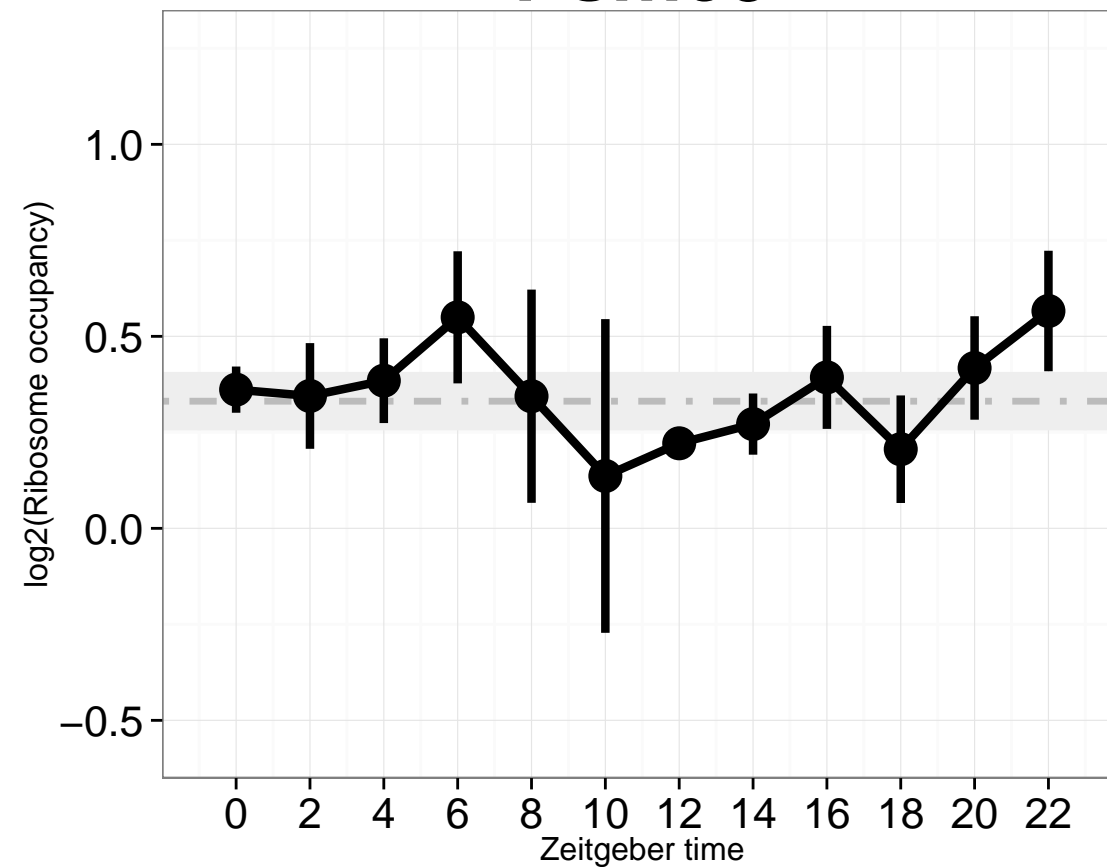

Supplement: SuppDataset_1.zip [file Psme3_set_A.pdf › Supplemental Dataset 1/A-mRNA_nonrhyth_translation_nonrhyth/Psme3_set_A.pdf]

# Psme4

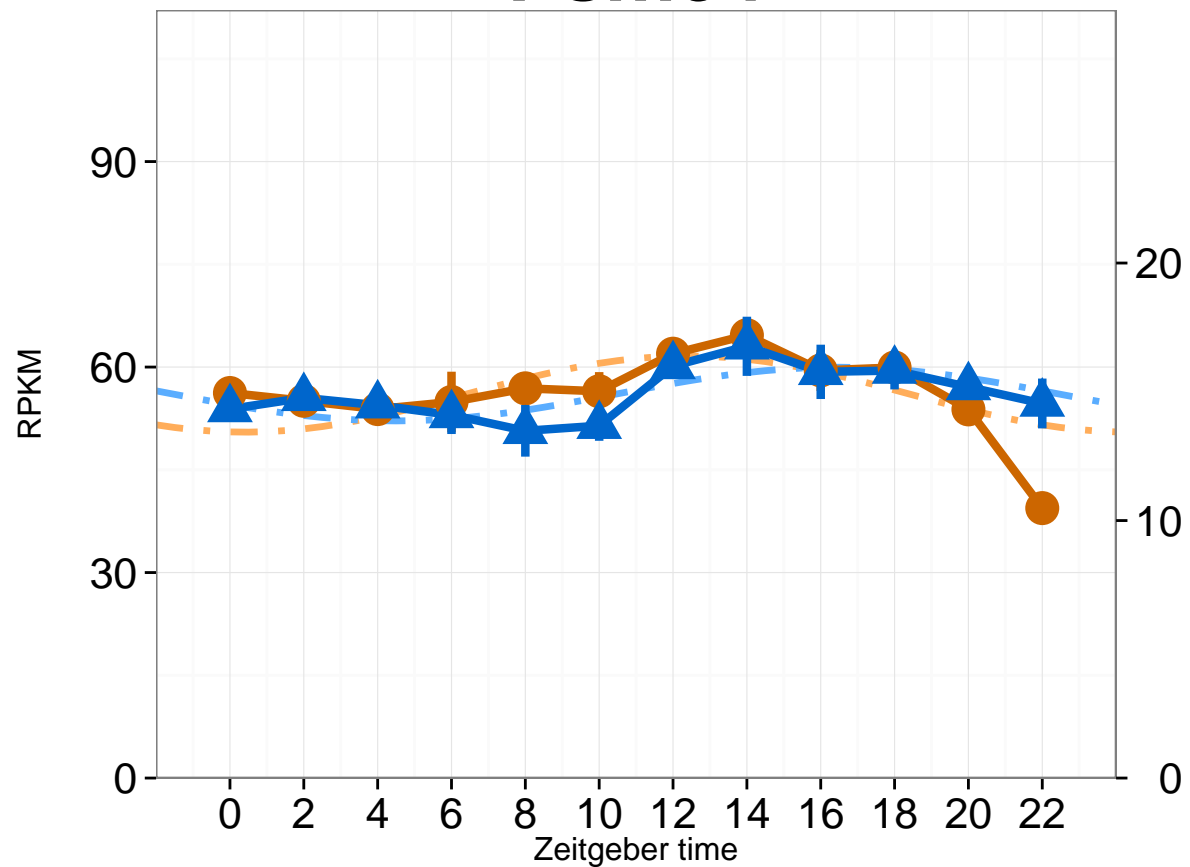

# Psme4

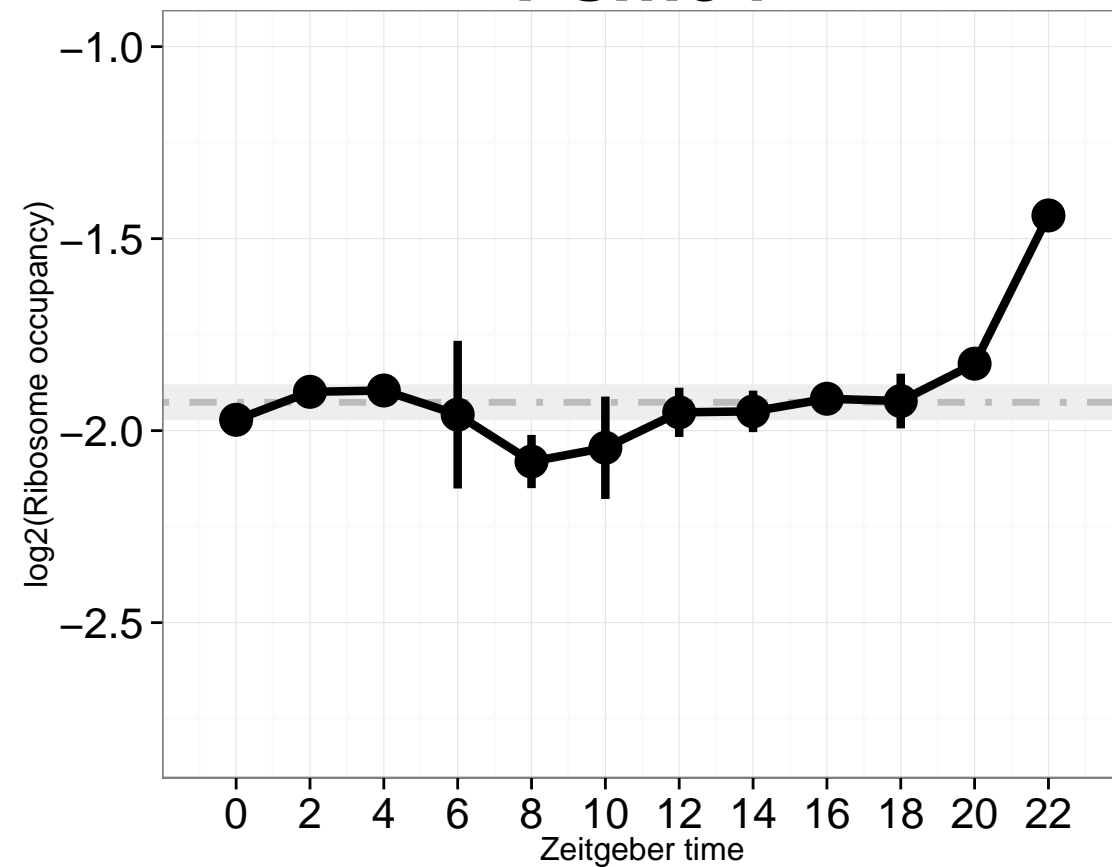

Supplement: SuppDataset_1.zip [file Psme4_set_A.pdf › Supplemental Dataset 1/A-mRNA_nonrhyth_translation_nonrhyth/Psme4_set_A.pdf]

# Psmf1

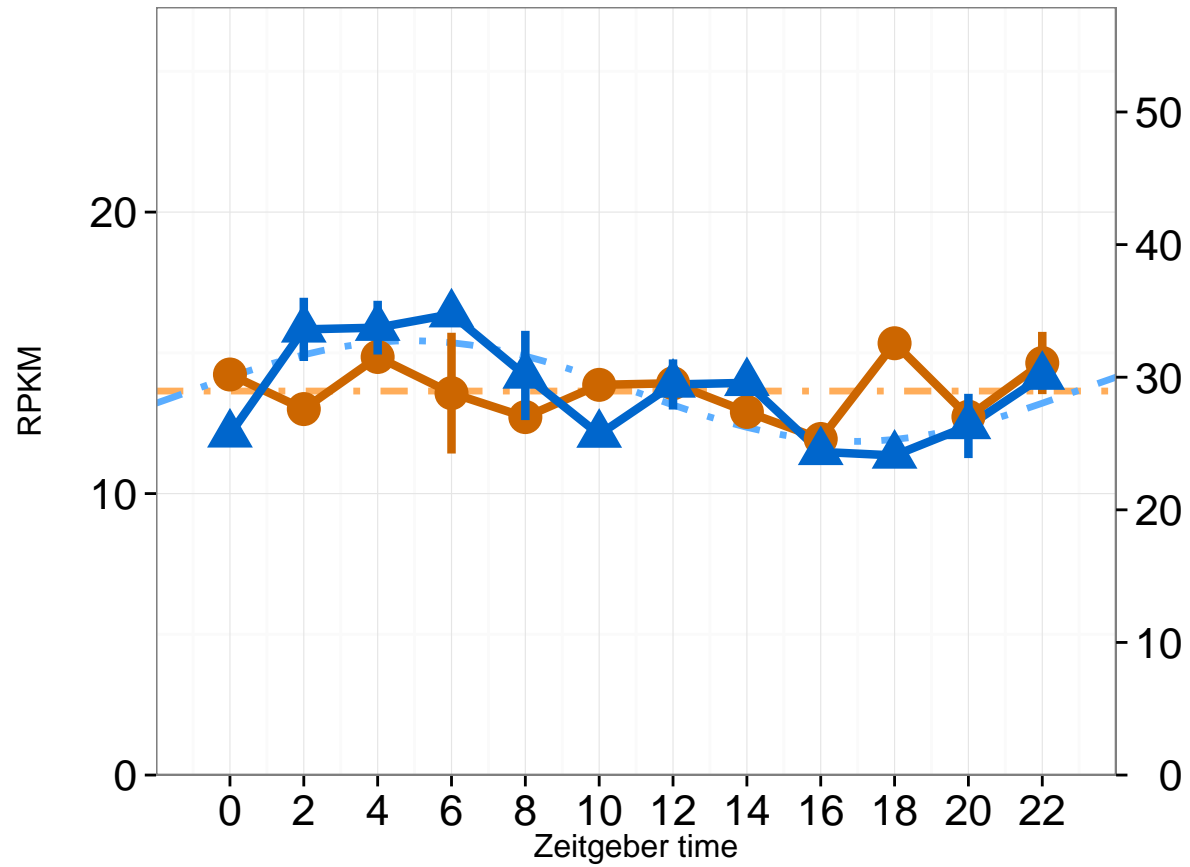

# Psmf1

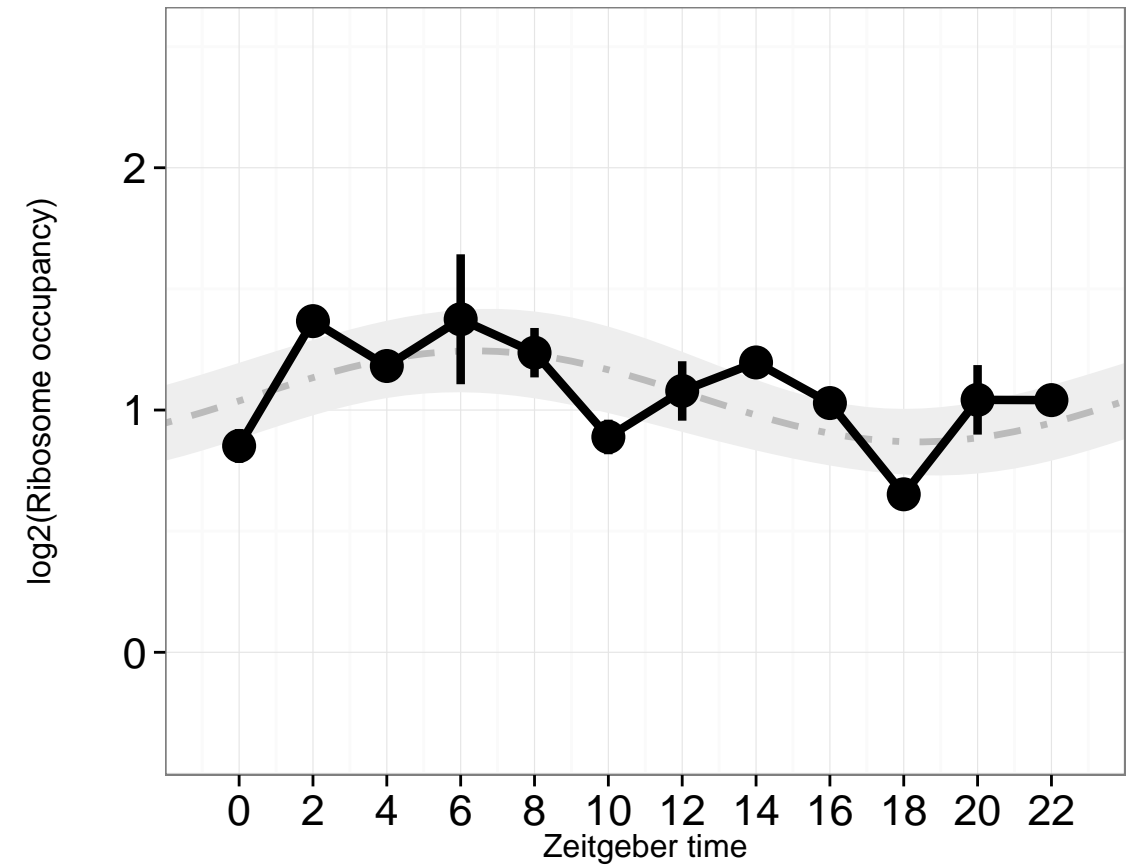

Supplement: SuppDataset_1.zip [file Psmf1_set_A.pdf › Supplemental Dataset 1/A-mRNA_nonrhyth_translation_nonrhyth/Psmf1_set_A.pdf]

# Psmg1

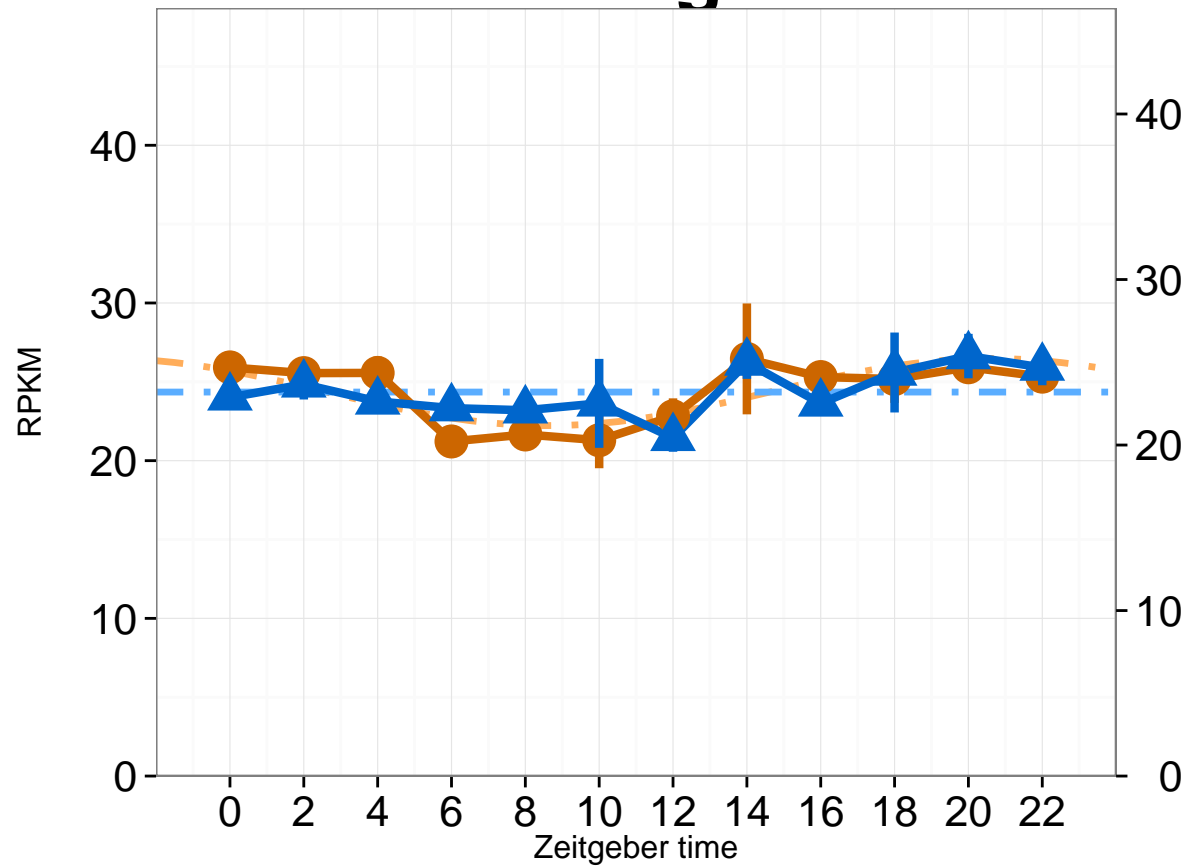

# Psmg1

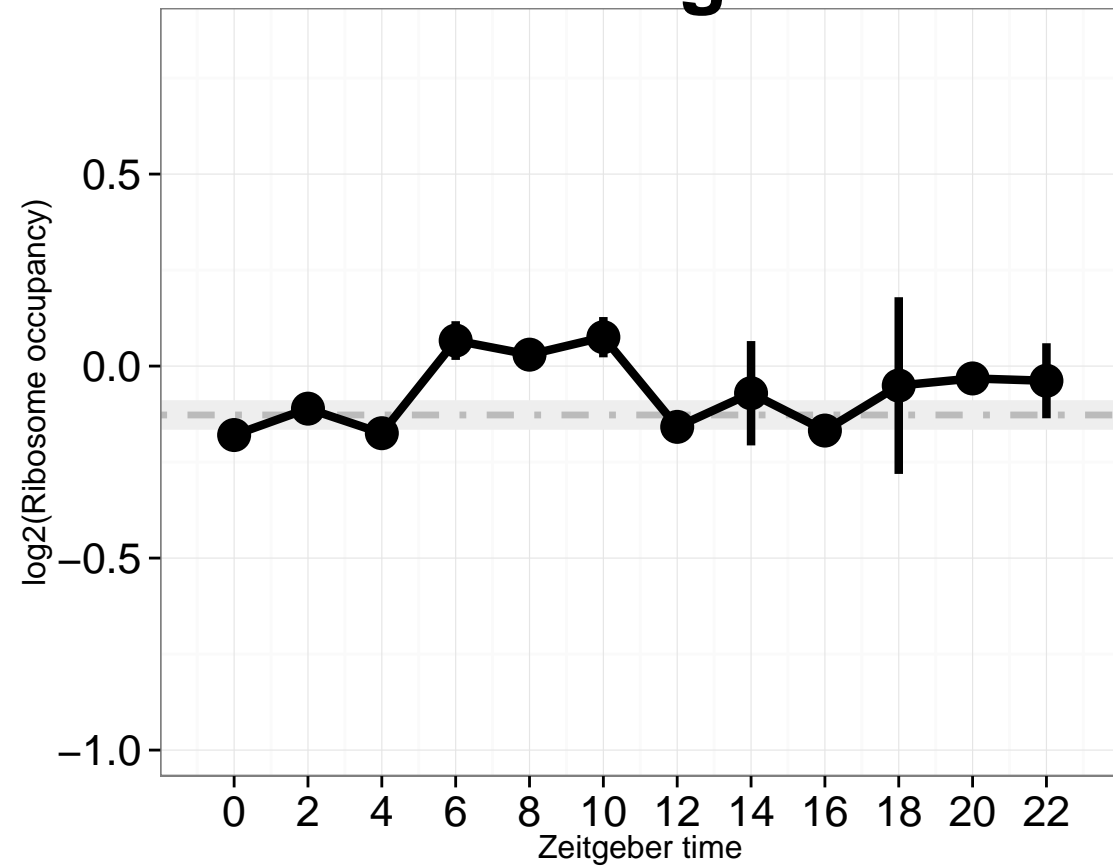

Supplement: SuppDataset_1.zip [file Psmg1_set_A.pdf › Supplemental Dataset 1/A-mRNA_nonrhyth_translation_nonrhyth/Psmg1_set_A.pdf]

# Psmg2

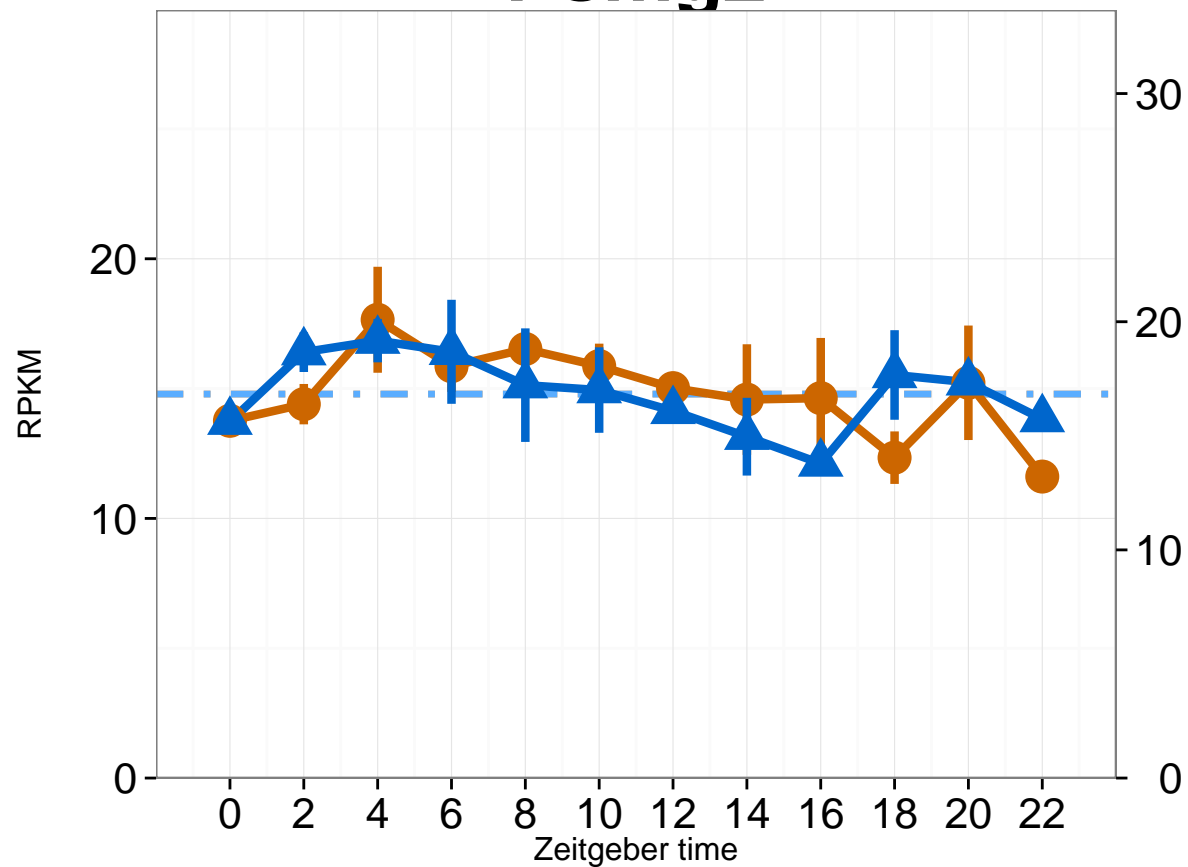

# Psmg2

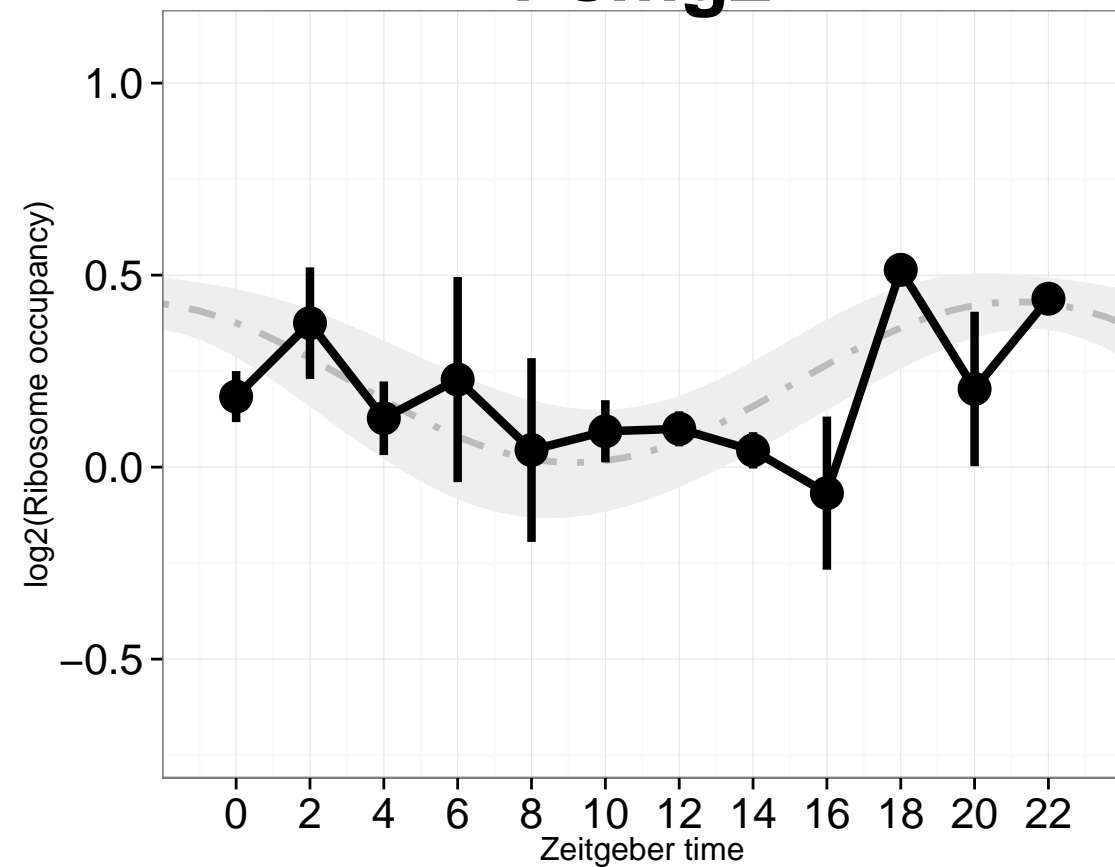

Supplement: SuppDataset_1.zip [file Psmg2_set_A.pdf › Supplemental Dataset 1/A-mRNA_nonrhyth_translation_nonrhyth/Psmg2_set_A.pdf]

## Psmg3

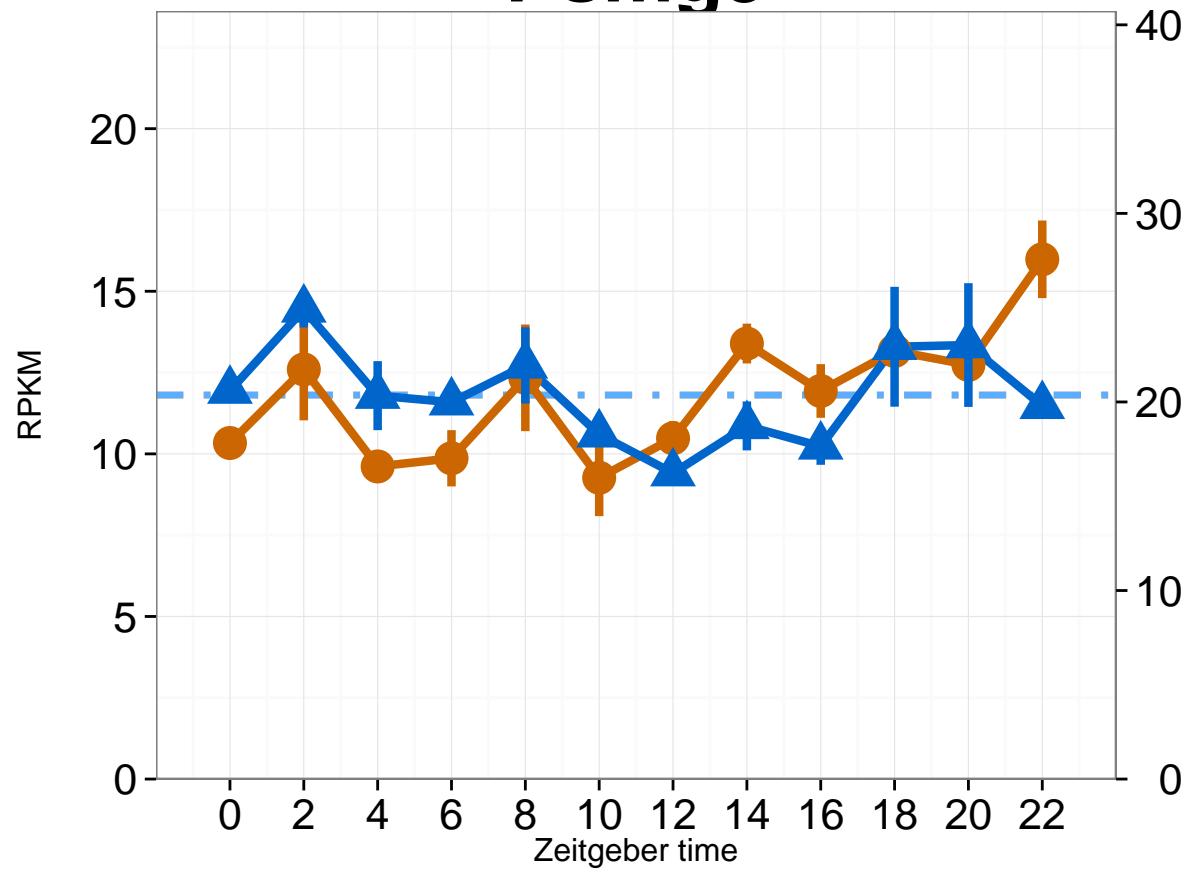

## Psmg3

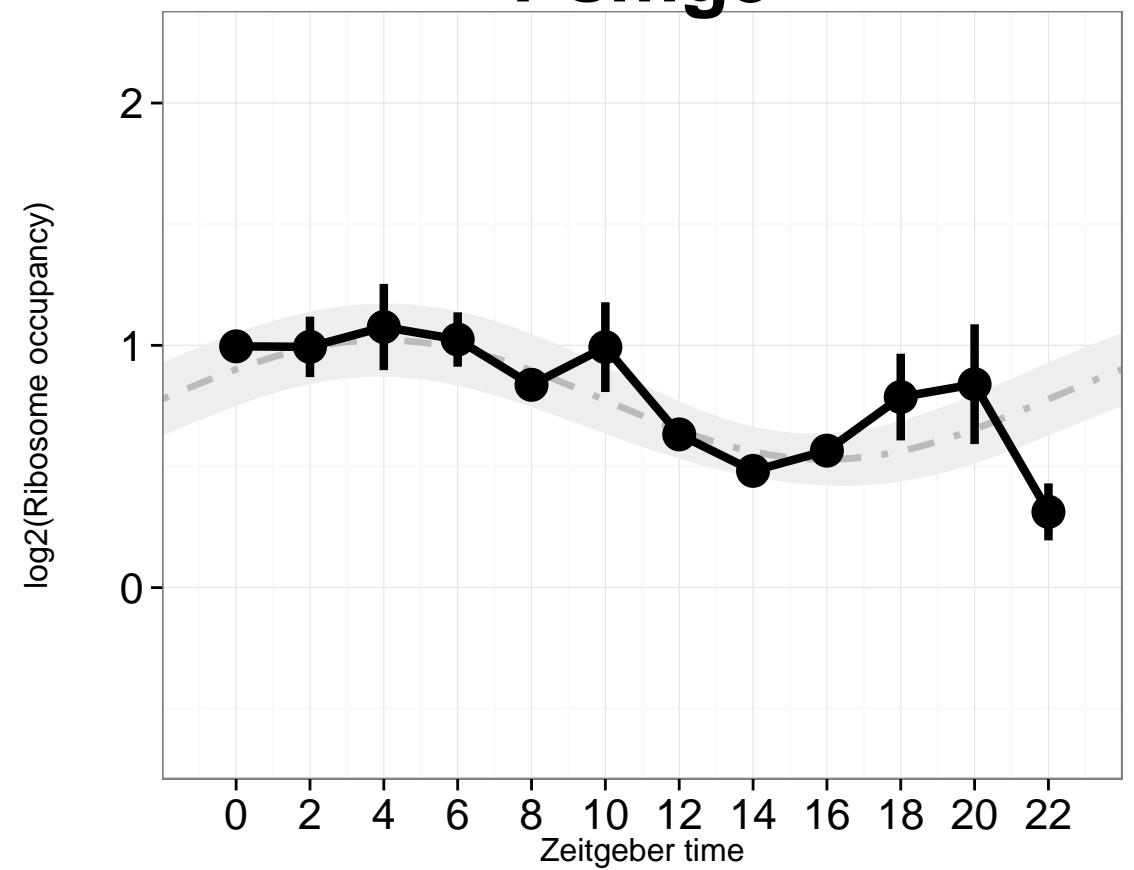

Supplement: SuppDataset_1.zip [file Psmg3_set_A.pdf › Supplemental Dataset 1/A-mRNA_nonrhyth_translation_nonrhyth/Psmg3_set_A.pdf]

# Pspc1

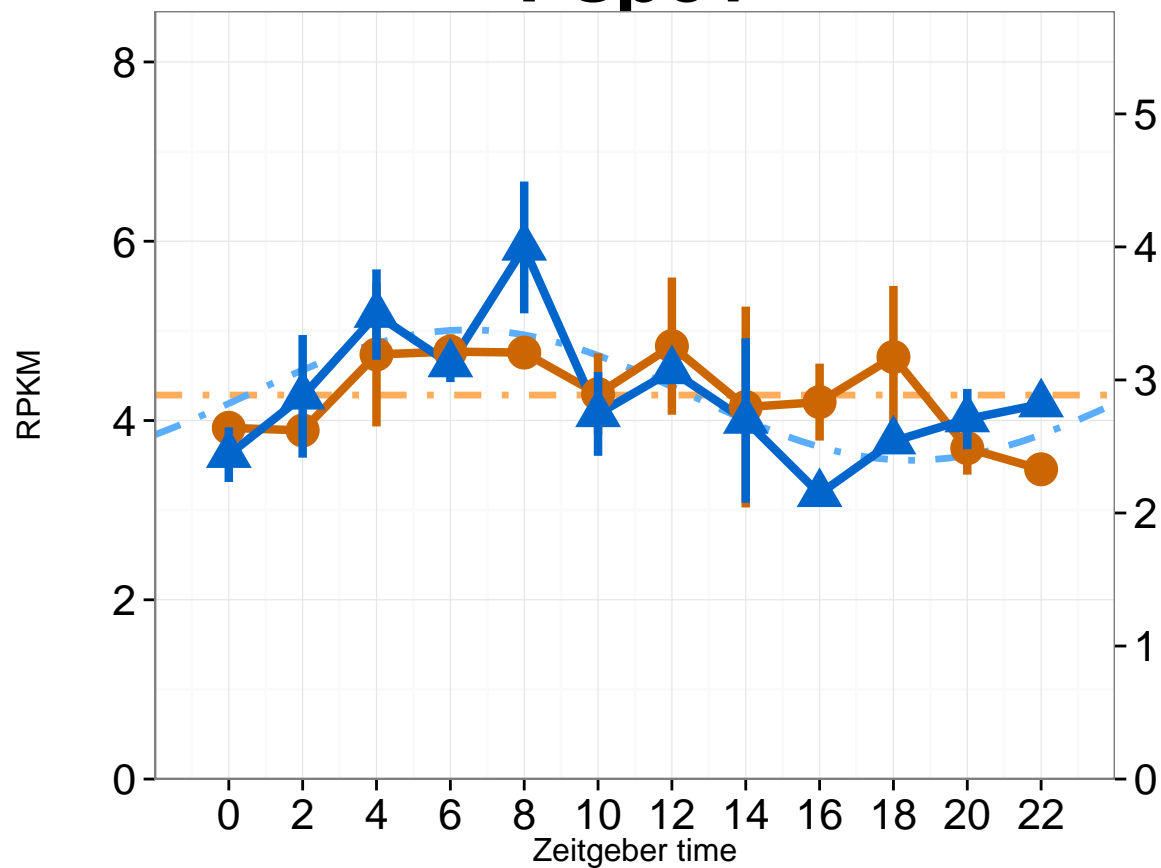

# Pspc1

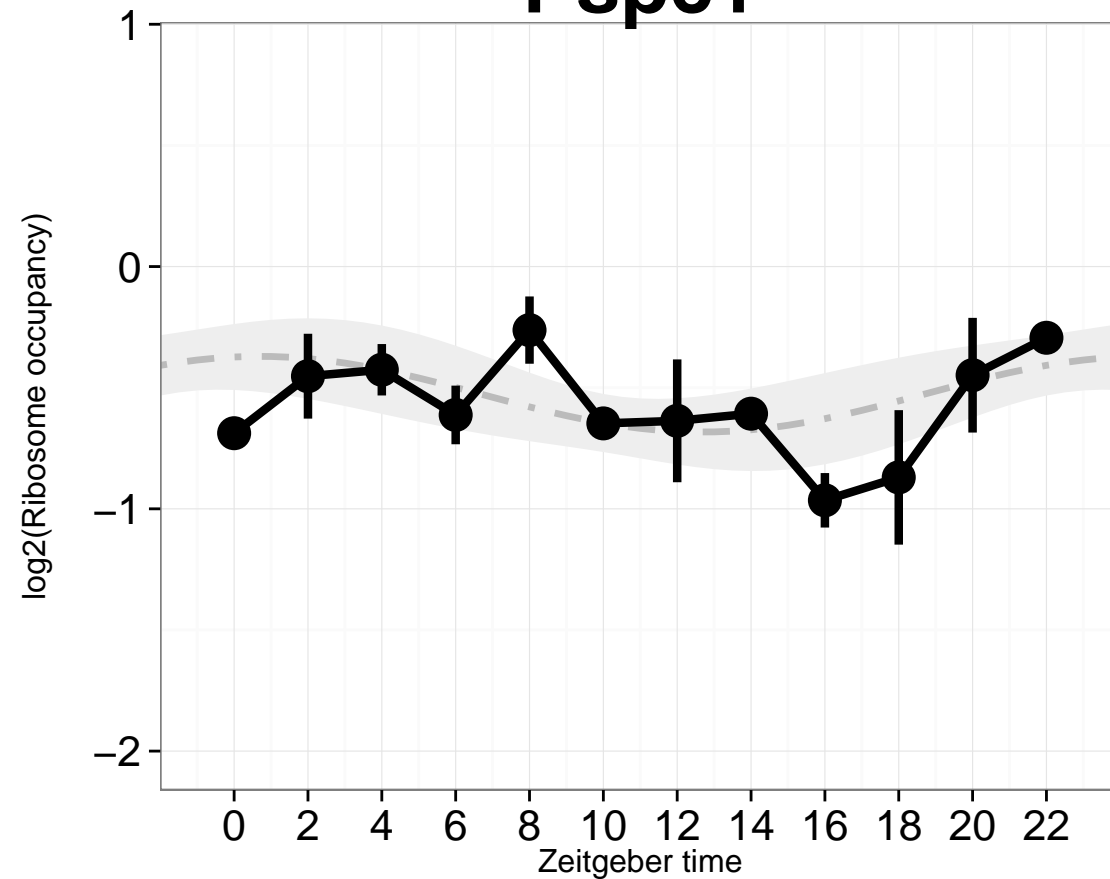

Supplement: SuppDataset_1.zip [file Pspc1_set_A.pdf › Supplemental Dataset 1/A-mRNA_nonrhyth_translation_nonrhyth/Pspc1_set_A.pdf]

## Pstk

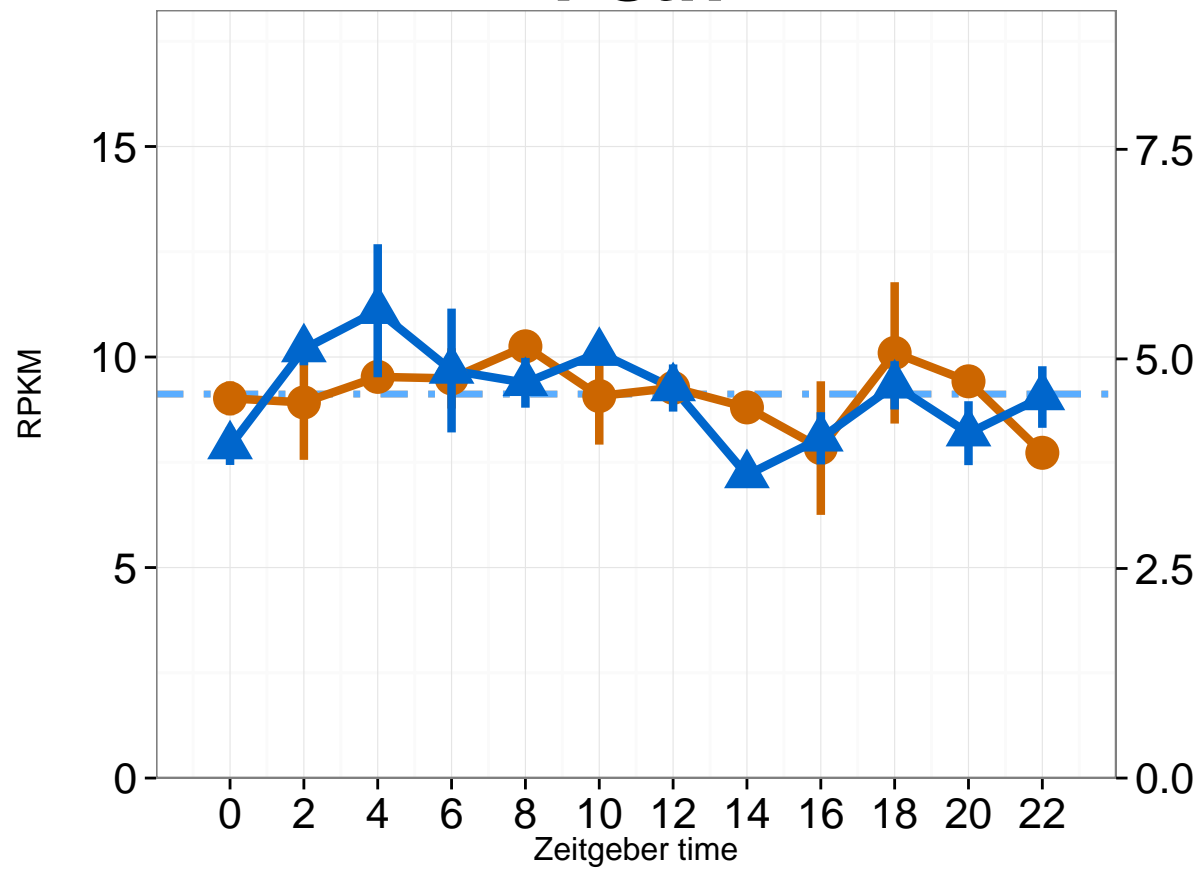

## Pstk

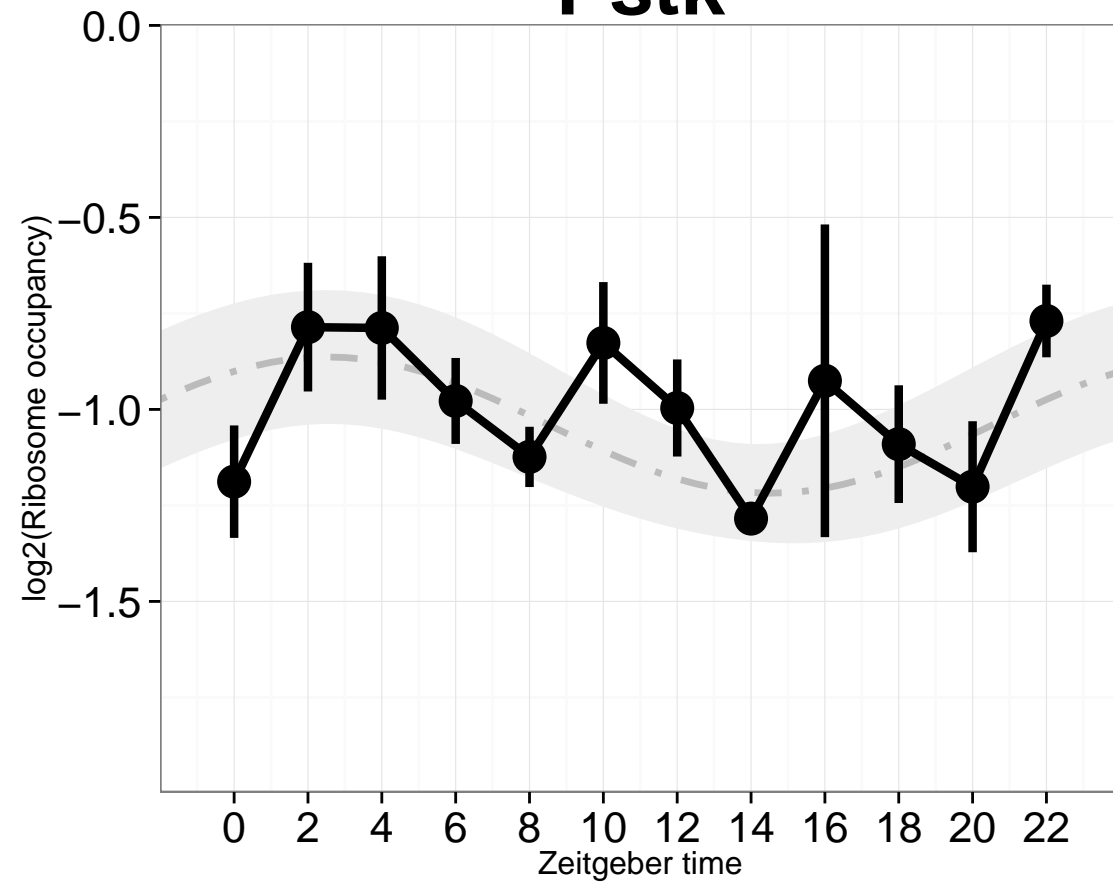

Supplement: SuppDataset_1.zip [file Pstk_set_A.pdf › Supplemental Dataset 1/A-mRNA_nonrhyth_translation_nonrhyth/Pstk_set_A.pdf]

# Ptafr

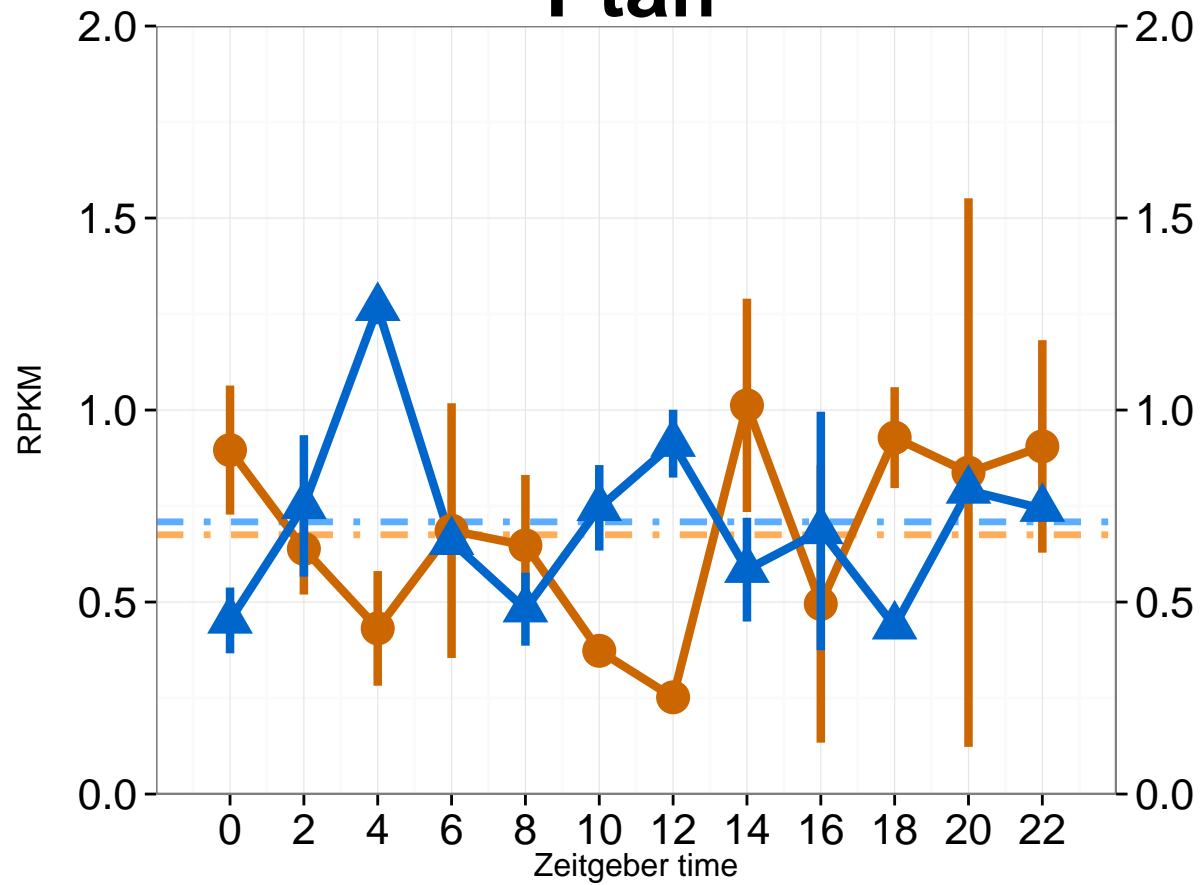

# Ptafr

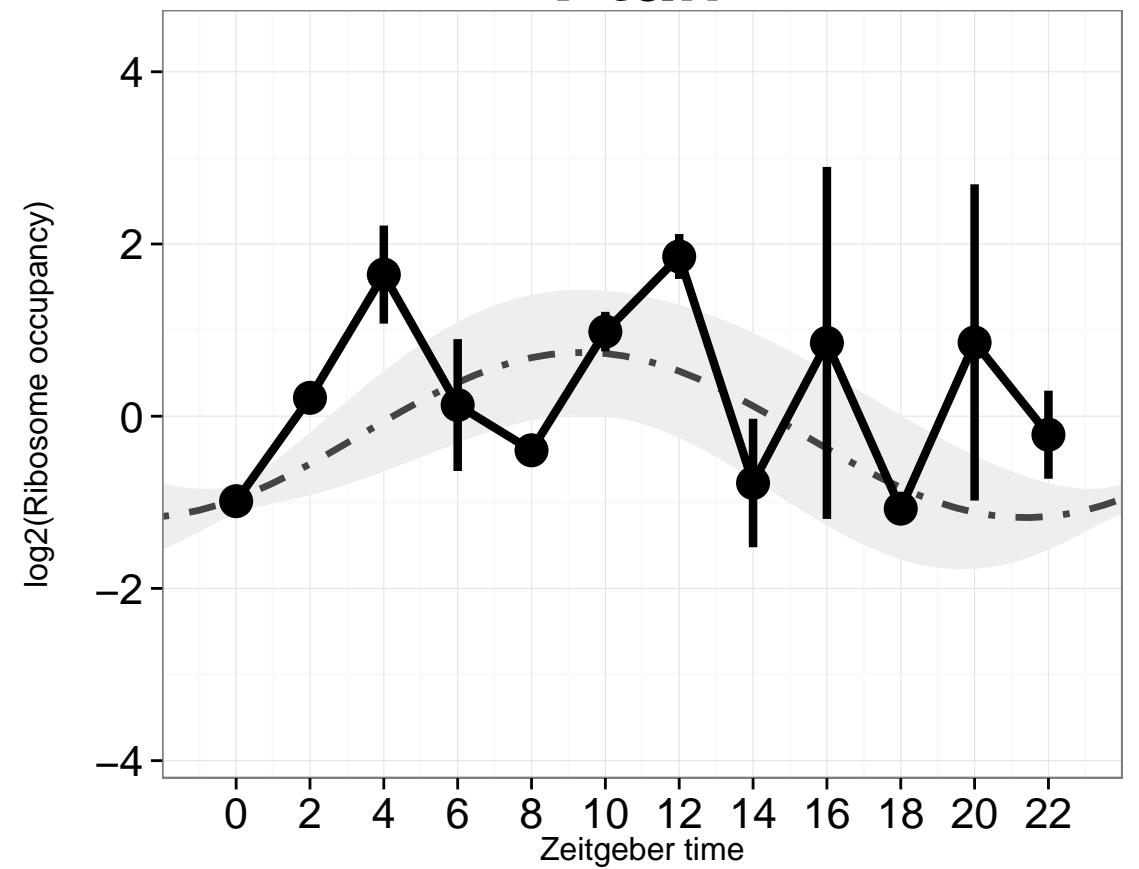

Supplement: SuppDataset_1.zip [file Ptafr_set_A.pdf › Supplemental Dataset 1/A-mRNA_nonrhyth_translation_nonrhyth/Ptafr_set_A.pdf]

# Ptar1

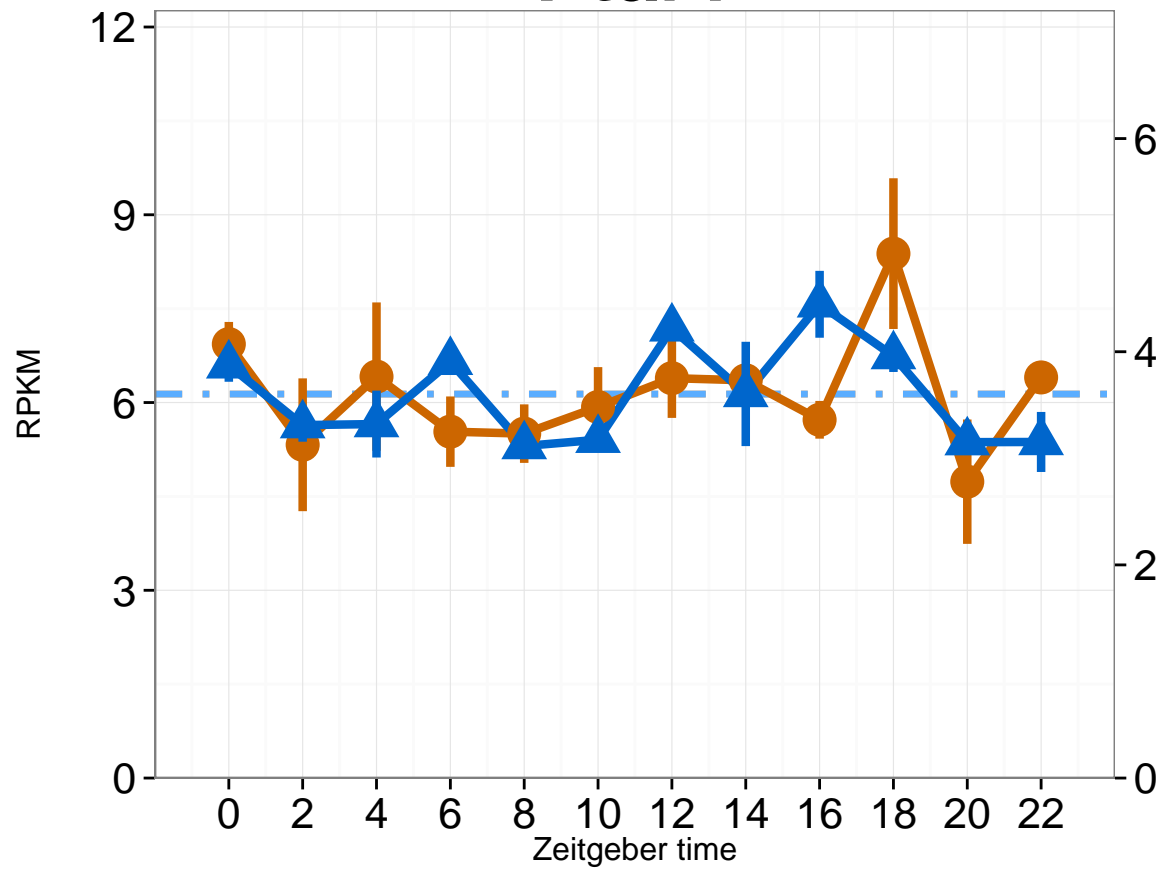

# Ptar1

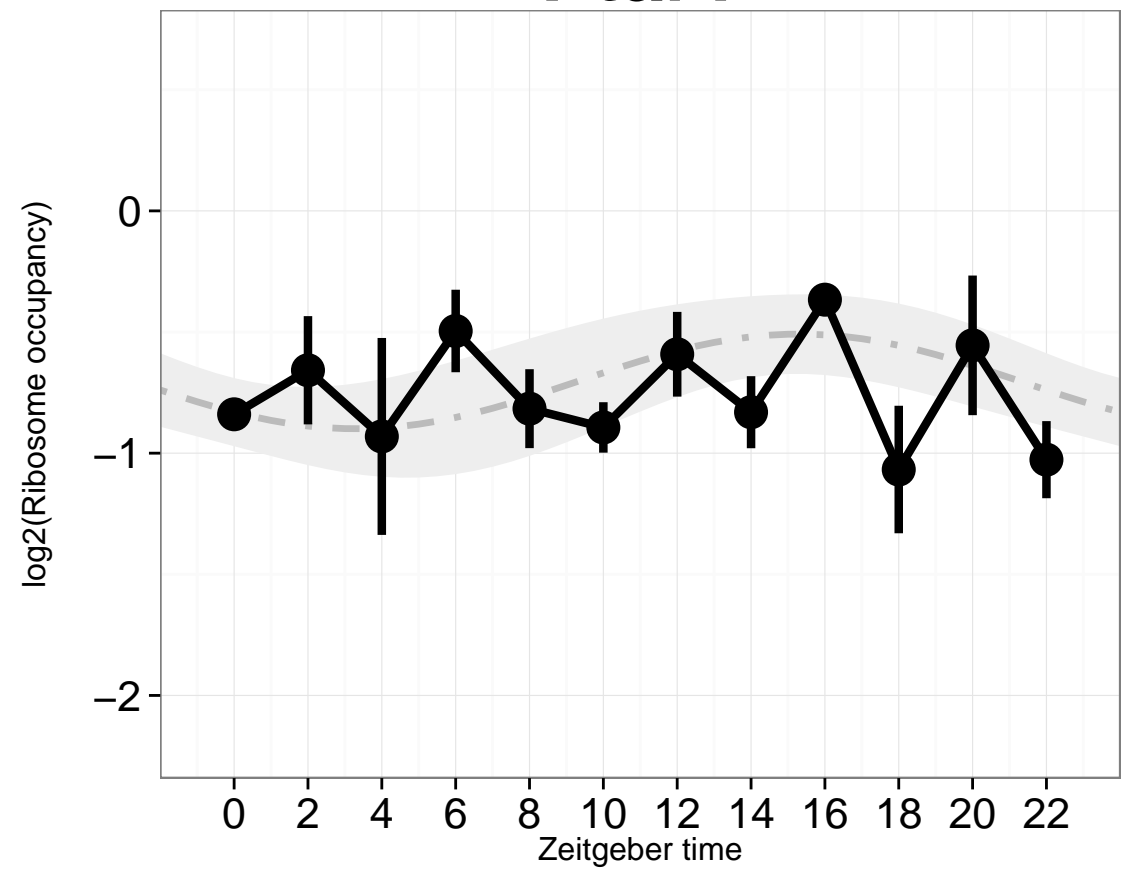

Supplement: SuppDataset_1.zip [file Ptar1_set_A.pdf › Supplemental Dataset 1/A-mRNA_nonrhyth_translation_nonrhyth/Ptar1_set_A.pdf]

## Ptbp1

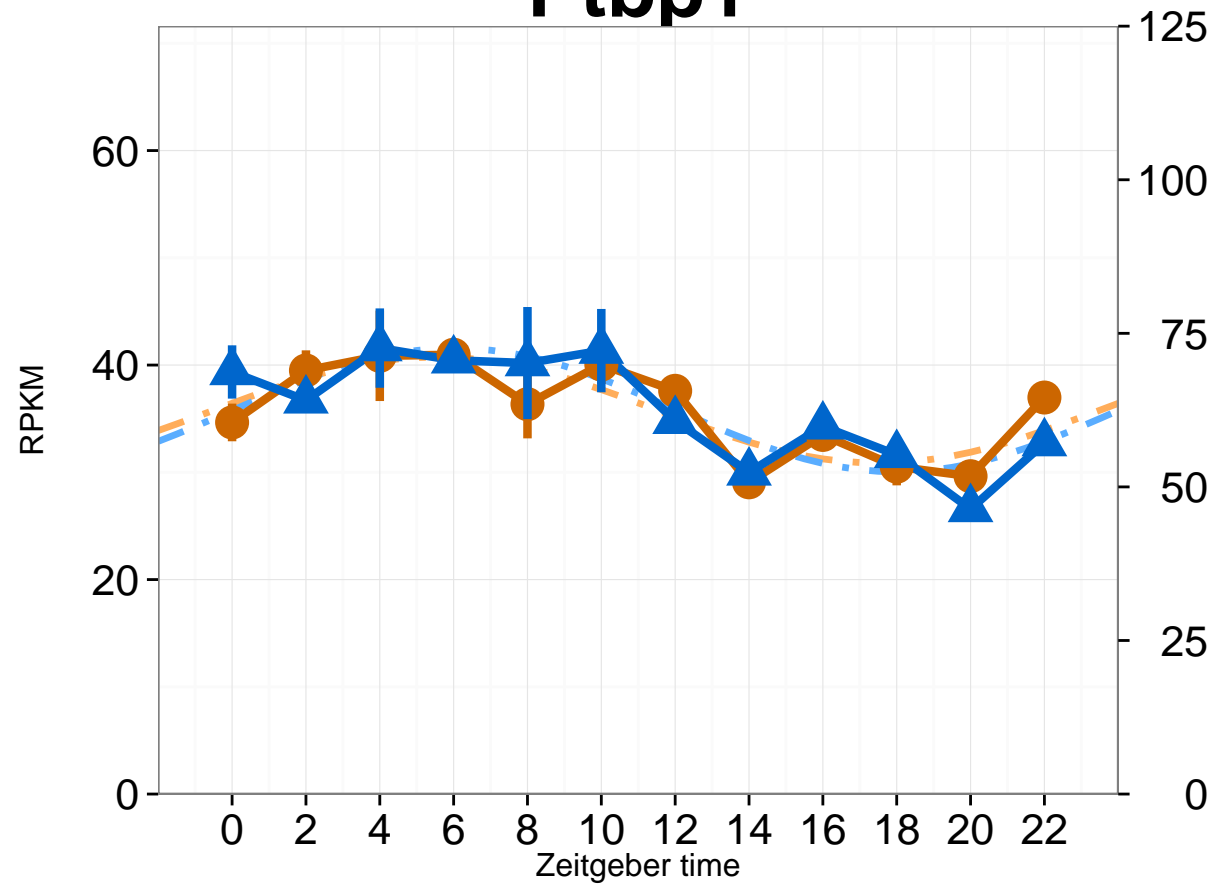

## Ptbp1

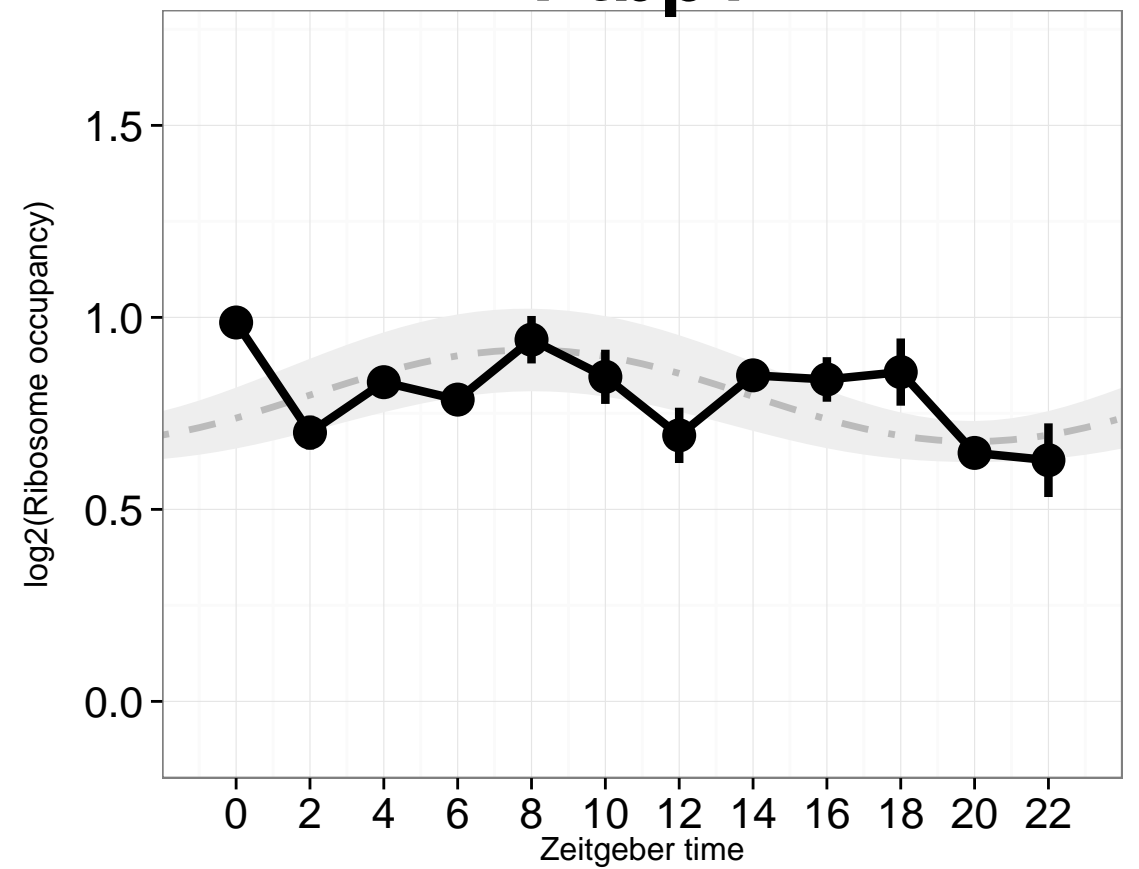

Supplement: SuppDataset_1.zip [file Ptbp1_set_A.pdf › Supplemental Dataset 1/A-mRNA_nonrhyth_translation_nonrhyth/Ptbp1_set_A.pdf]

## Ptbp3

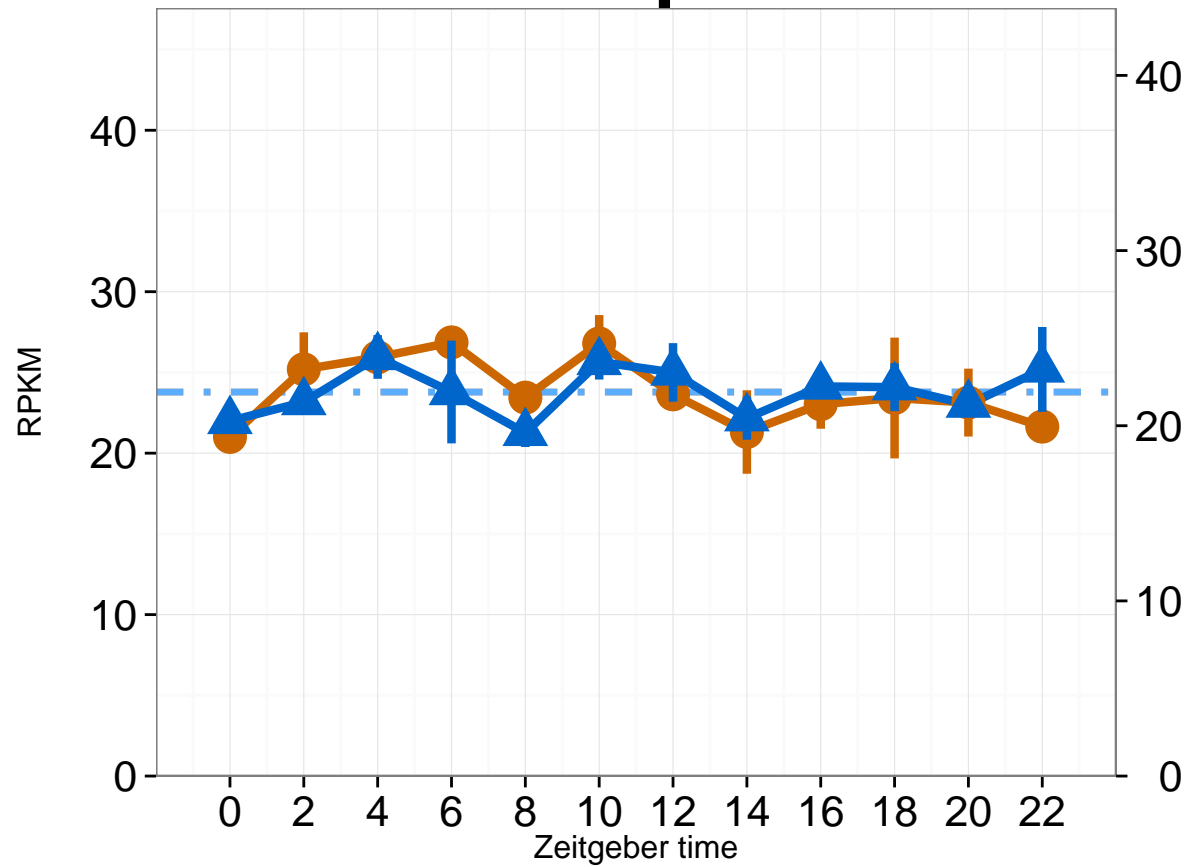

## Ptbp3

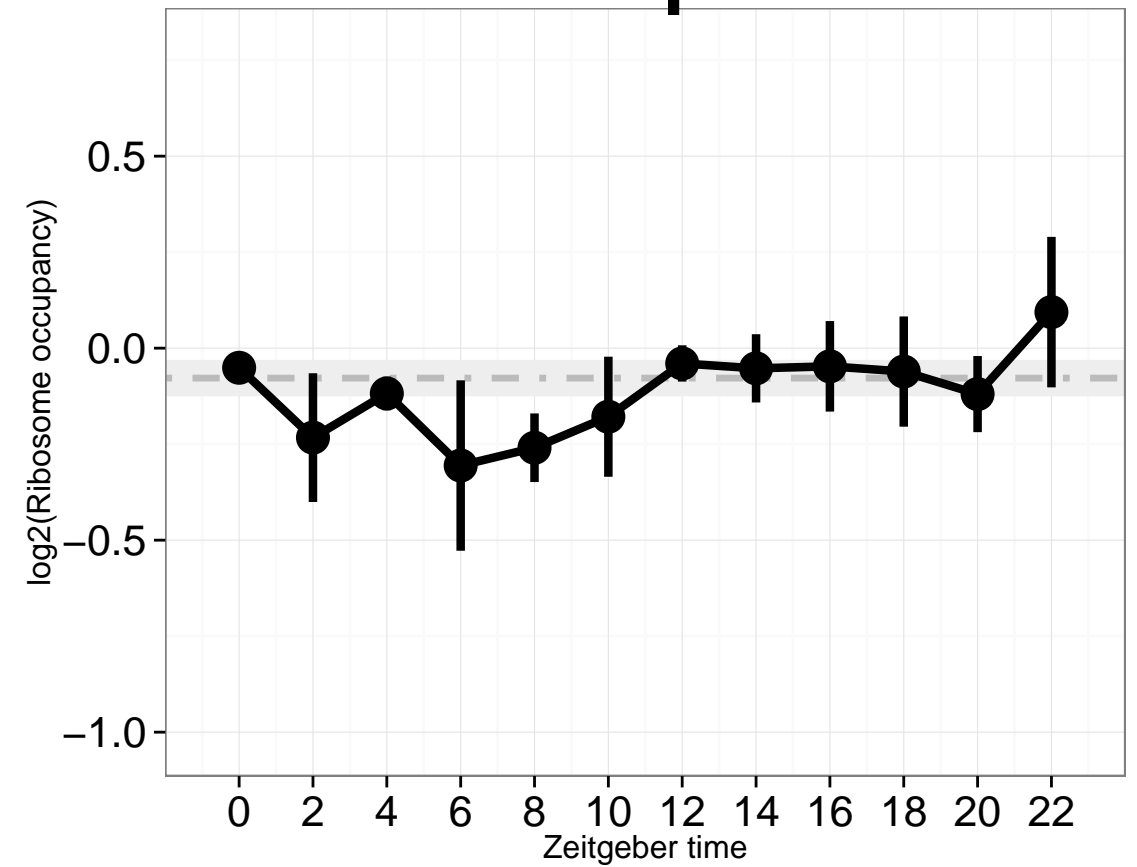

Supplement: SuppDataset_1.zip [file Ptbp3_set_A.pdf › Supplemental Dataset 1/A-mRNA_nonrhyth_translation_nonrhyth/Ptbp3_set_A.pdf]

# Ptcd1

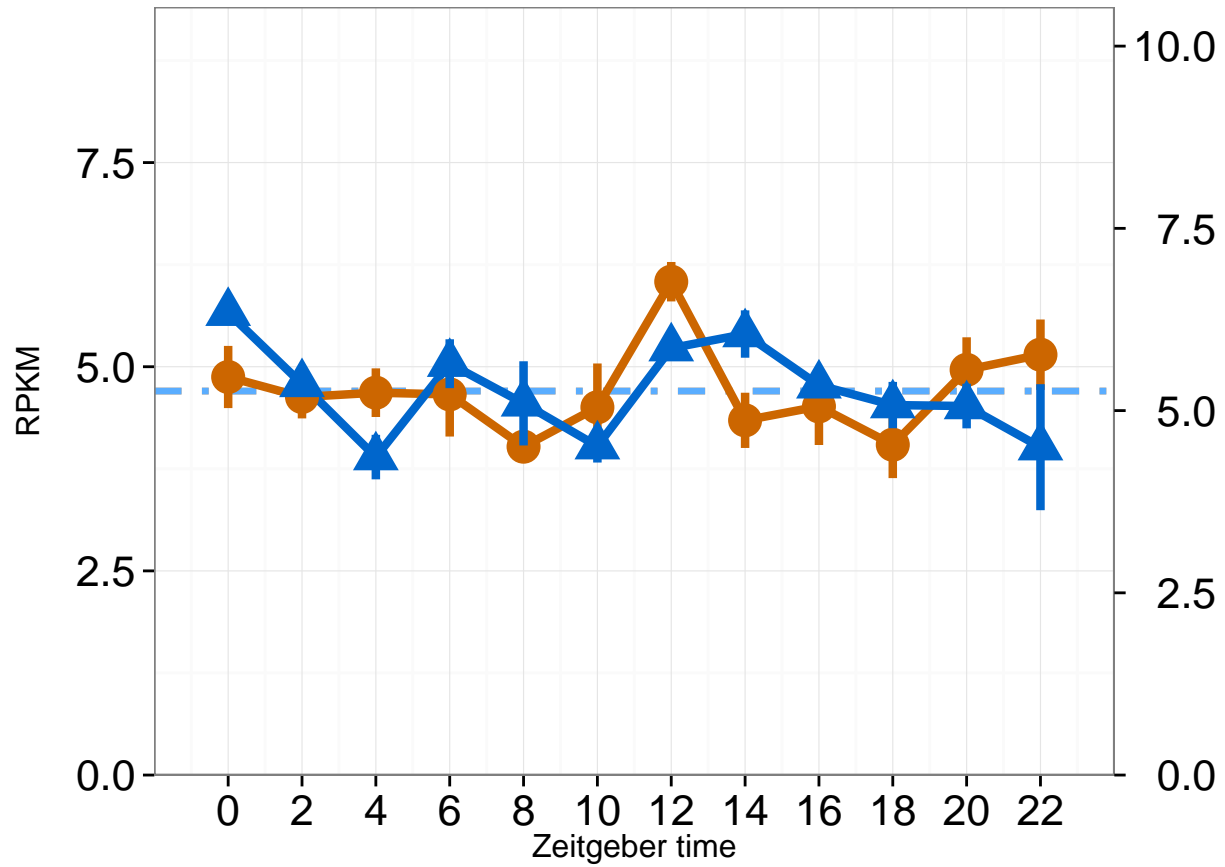

# Ptcd1

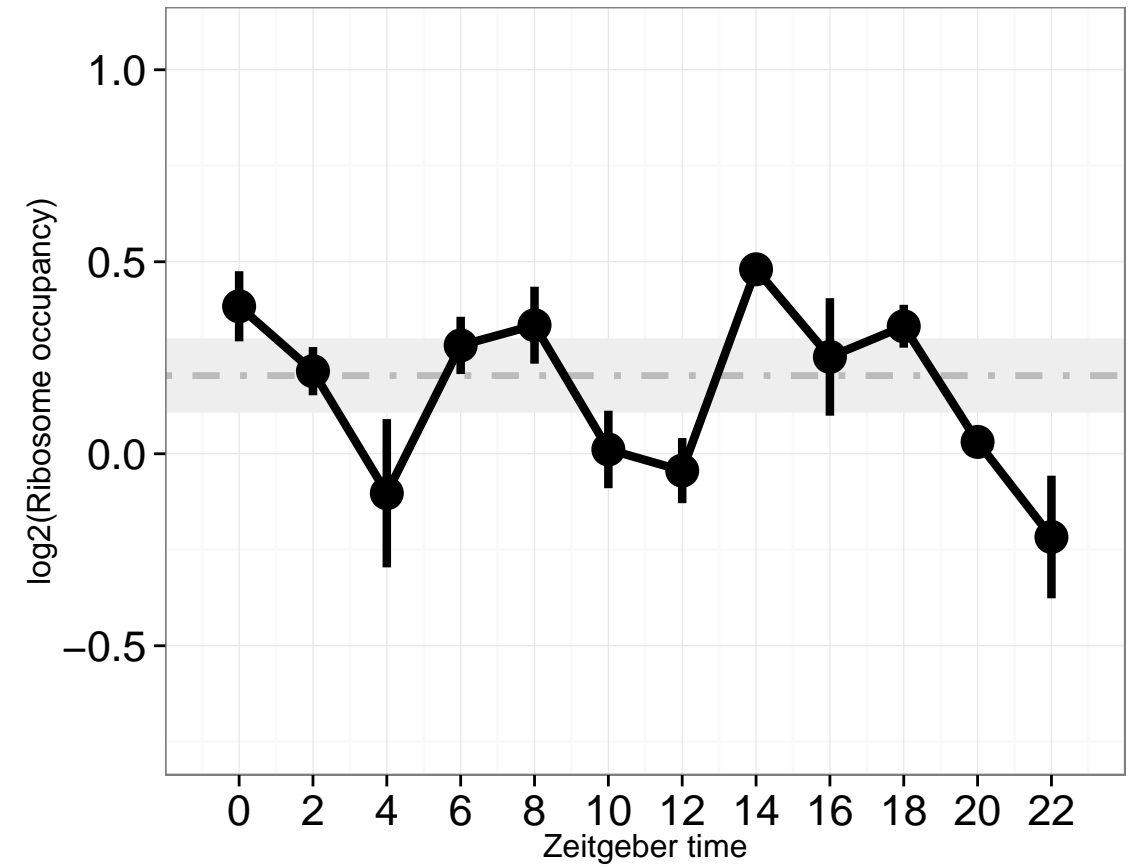

Supplement: SuppDataset_1.zip [file Ptcd1_set_A.pdf › Supplemental Dataset 1/A-mRNA_nonrhyth_translation_nonrhyth/Ptcd1_set_A.pdf]

## Ptcd2

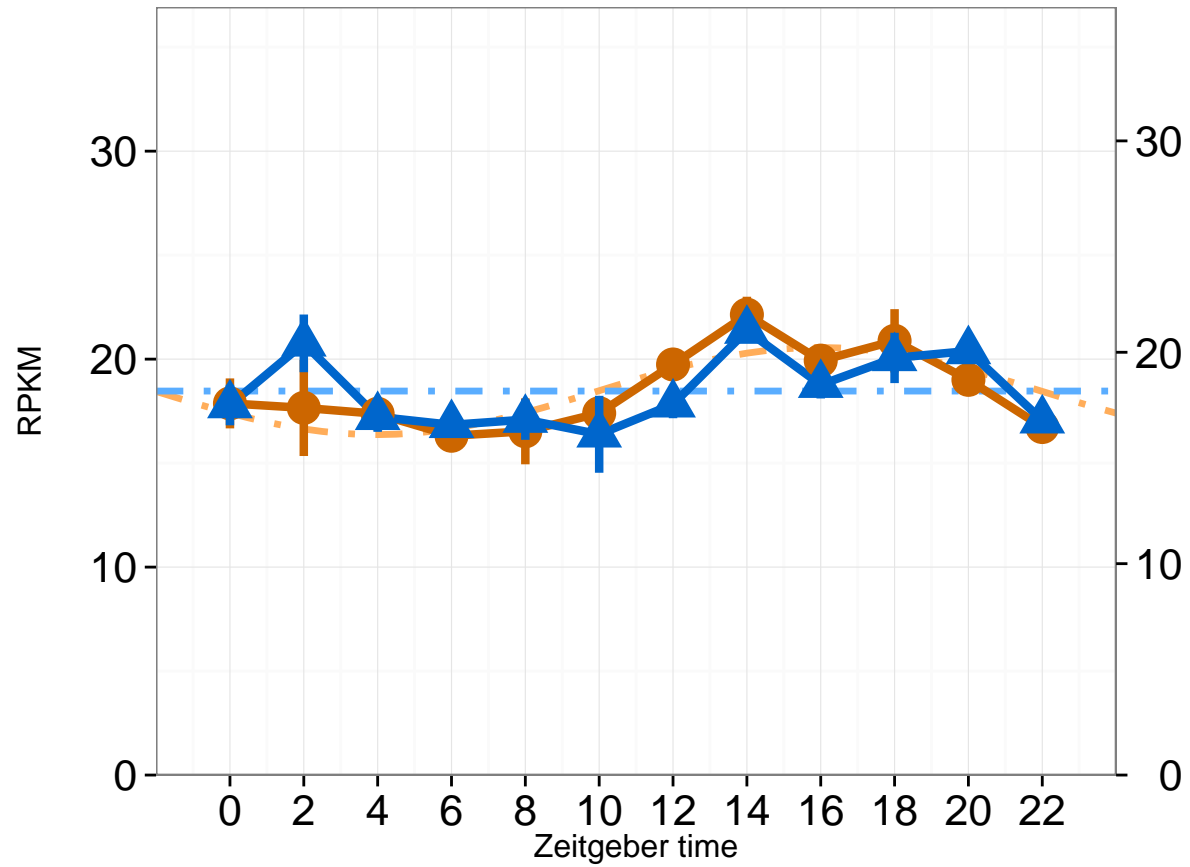

## Ptcd2

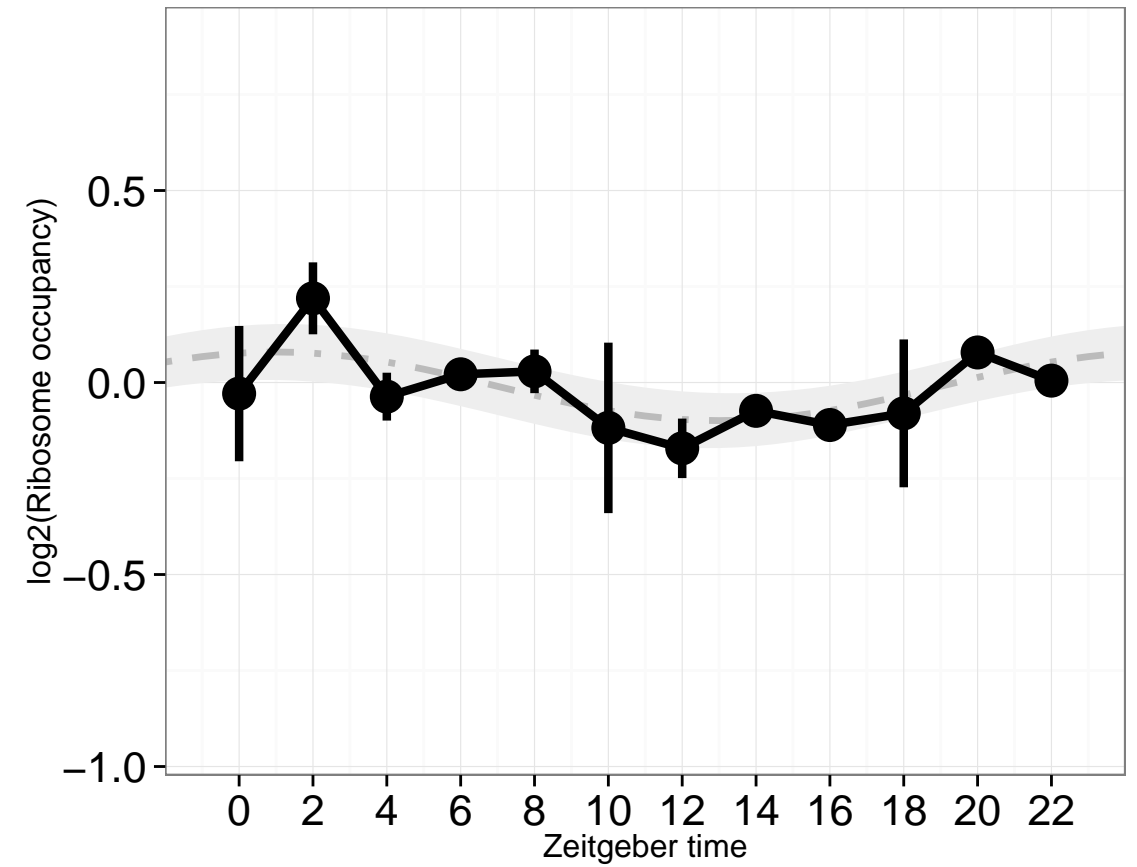

Supplement: SuppDataset_1.zip [file Ptcd2_set_A.pdf › Supplemental Dataset 1/A-mRNA_nonrhyth_translation_nonrhyth/Ptcd2_set_A.pdf]

## Ptcd3

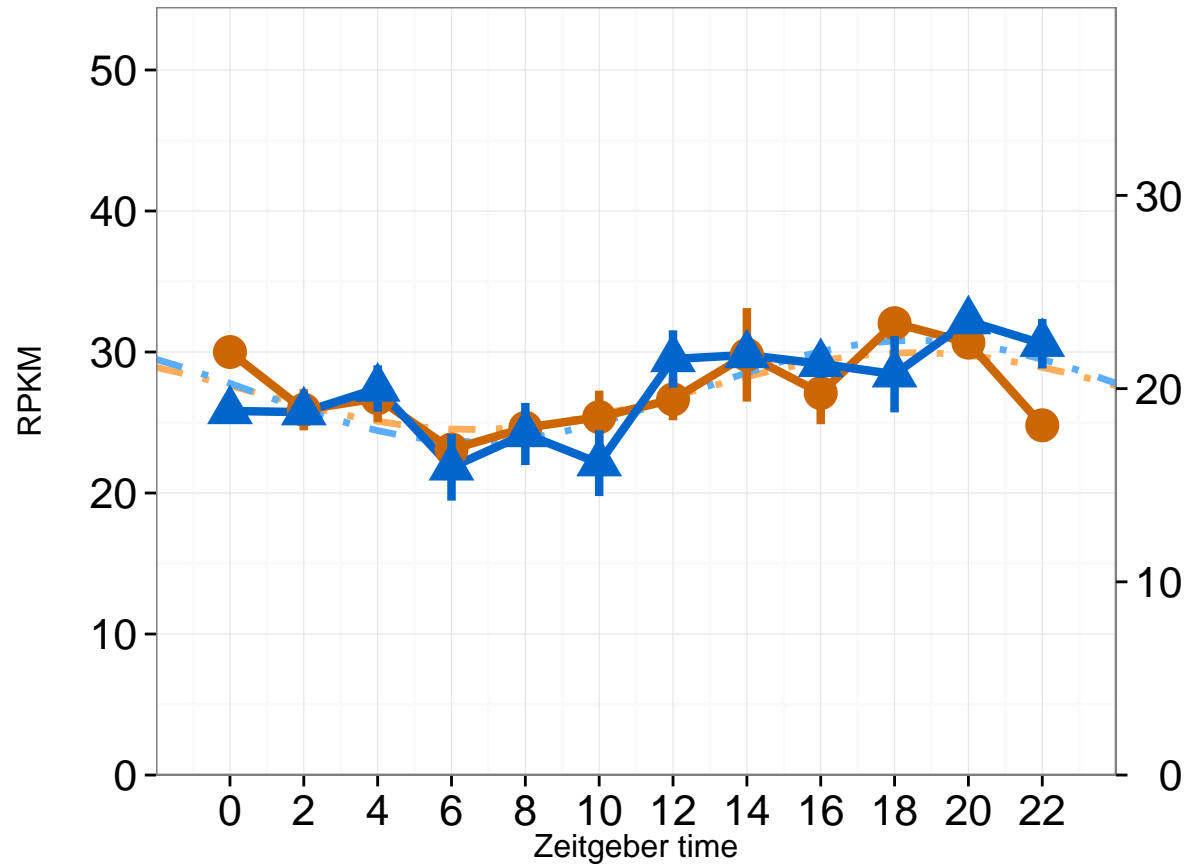

## Ptcd3

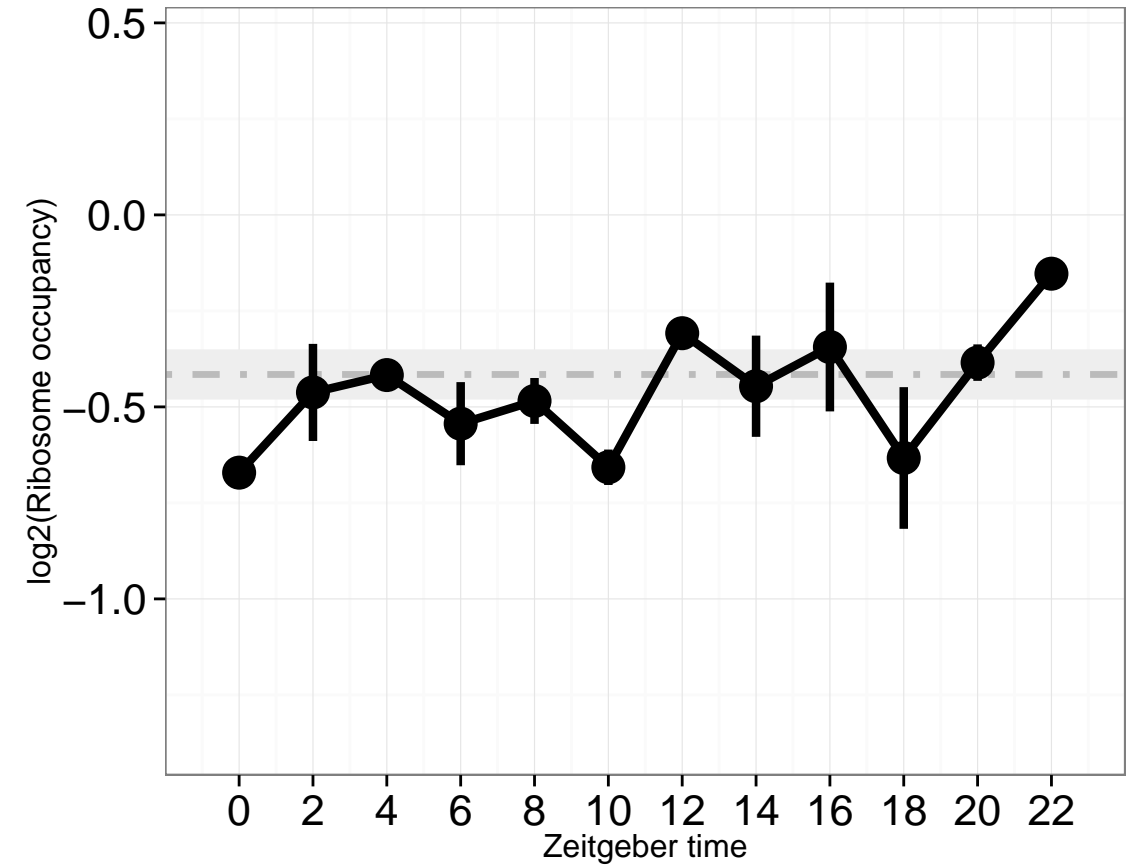

Supplement: SuppDataset_1.zip [file Ptcd3_set_A.pdf › Supplemental Dataset 1/A-mRNA_nonrhyth_translation_nonrhyth/Ptcd3_set_A.pdf]

# Ptch1

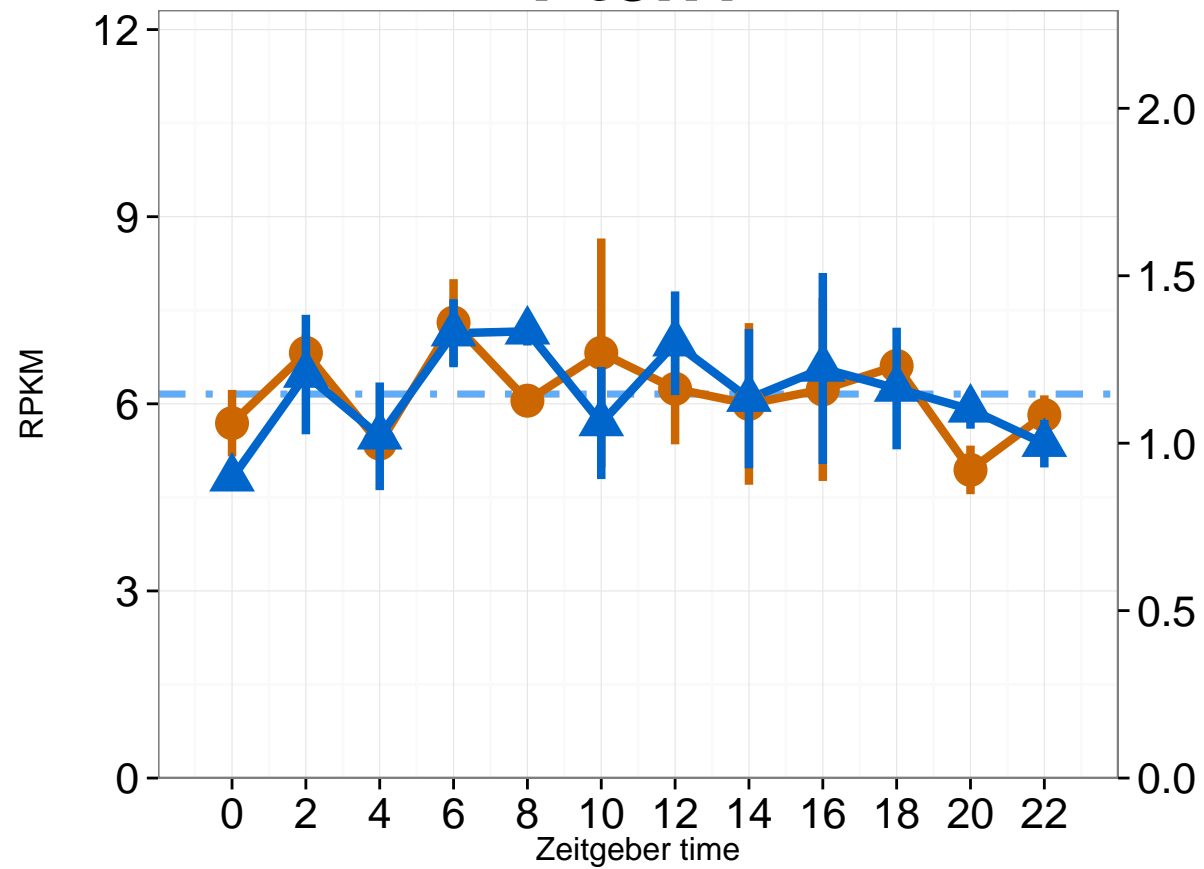

# Ptch1

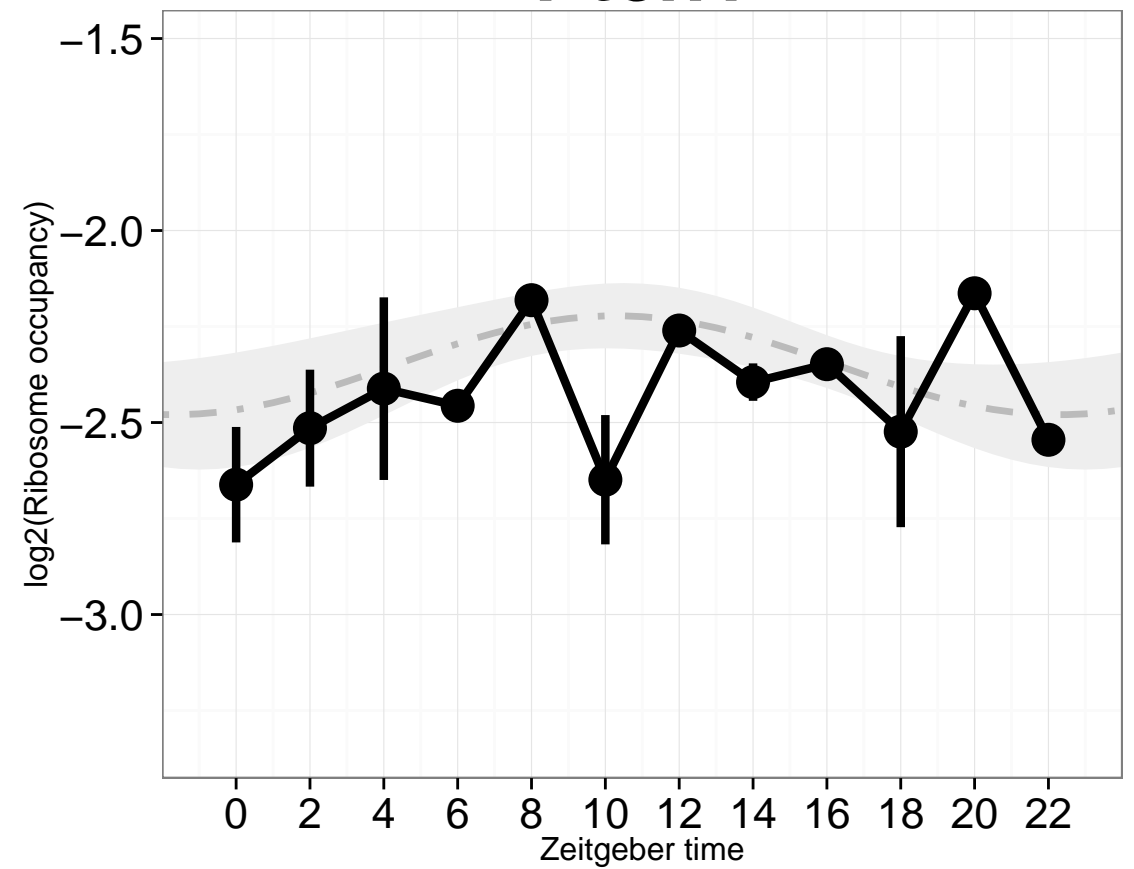

Supplement: SuppDataset_1.zip [file Ptch1_set_A.pdf › Supplemental Dataset 1/A-mRNA_nonrhyth_translation_nonrhyth/Ptch1_set_A.pdf]

## Ptdss1

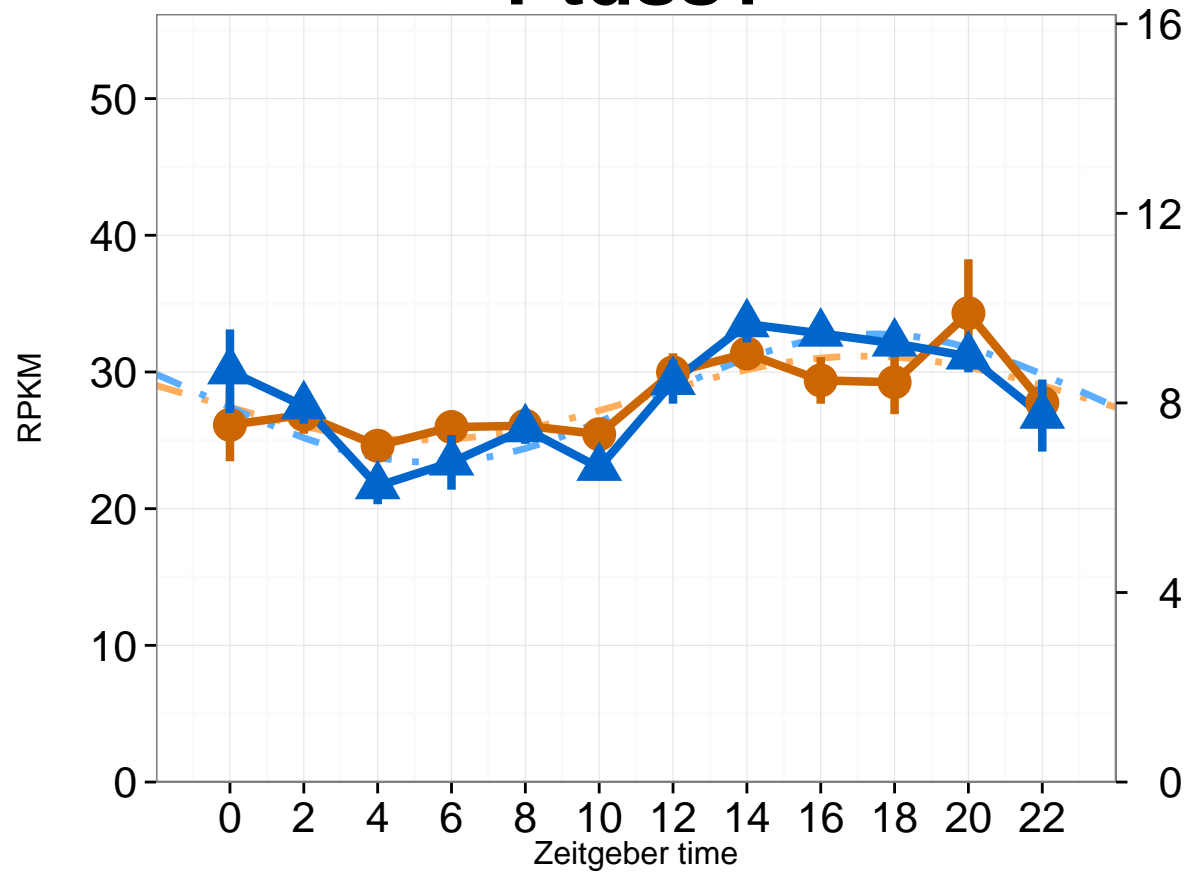

## Ptdss1

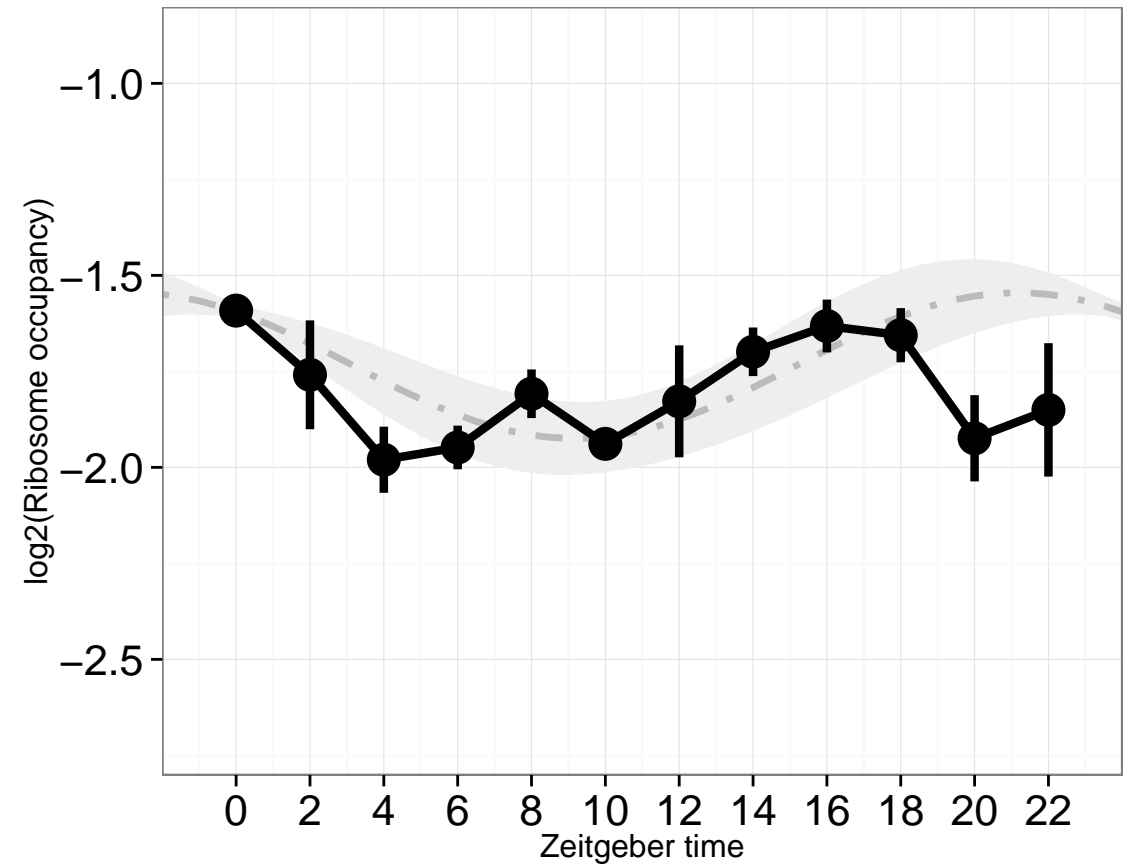

Supplement: SuppDataset_1.zip [file Ptdss1_set_A.pdf › Supplemental Dataset 1/A-mRNA_nonrhyth_translation_nonrhyth/Ptdss1_set_A.pdf]

# Ptdss2

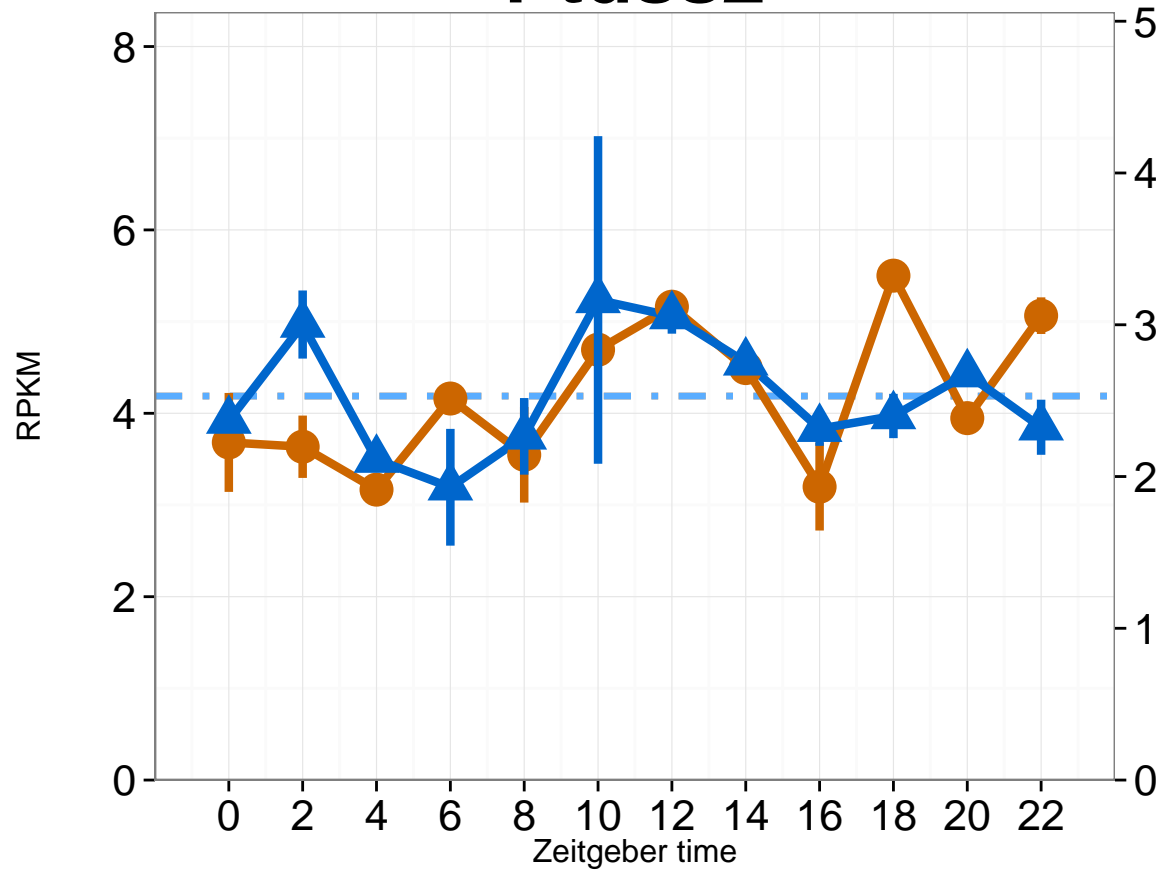

# Ptdss2

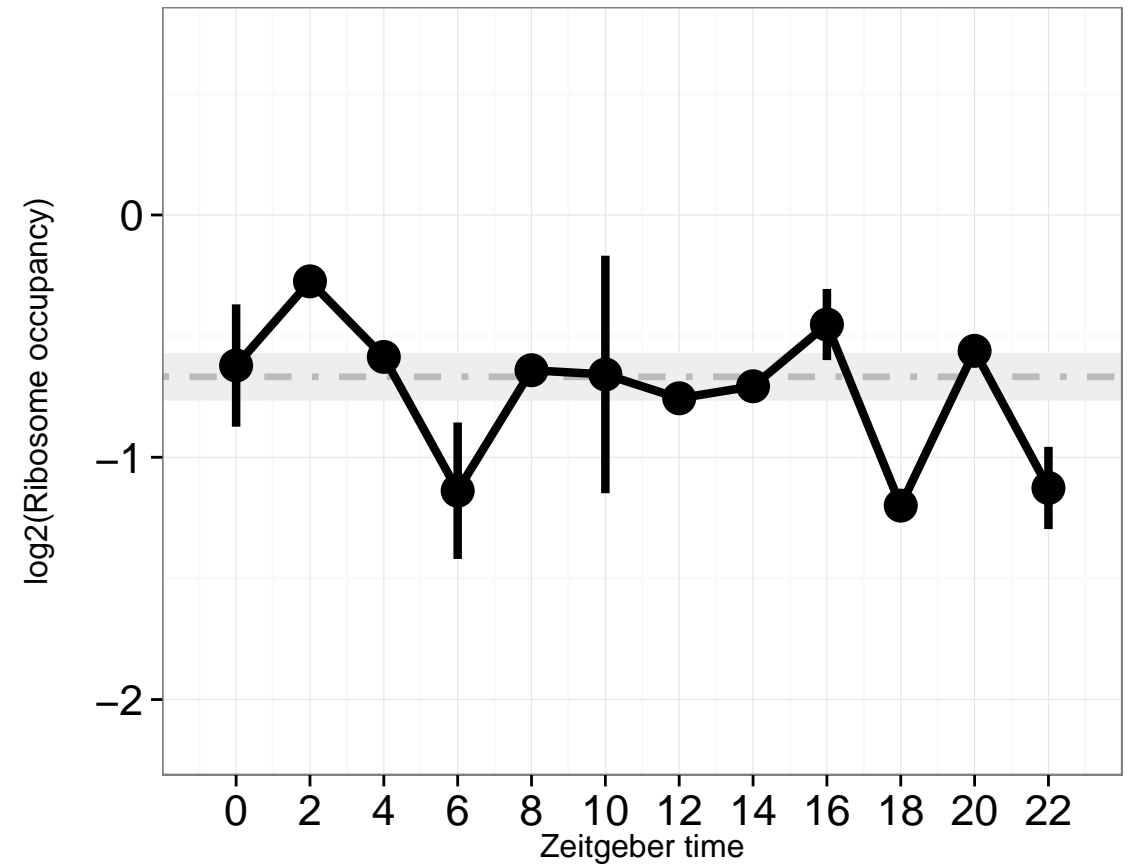

Supplement: SuppDataset_1.zip [file Ptdss2_set_A.pdf › Supplemental Dataset 1/A-mRNA_nonrhyth_translation_nonrhyth/Ptdss2_set_A.pdf]

## Pten

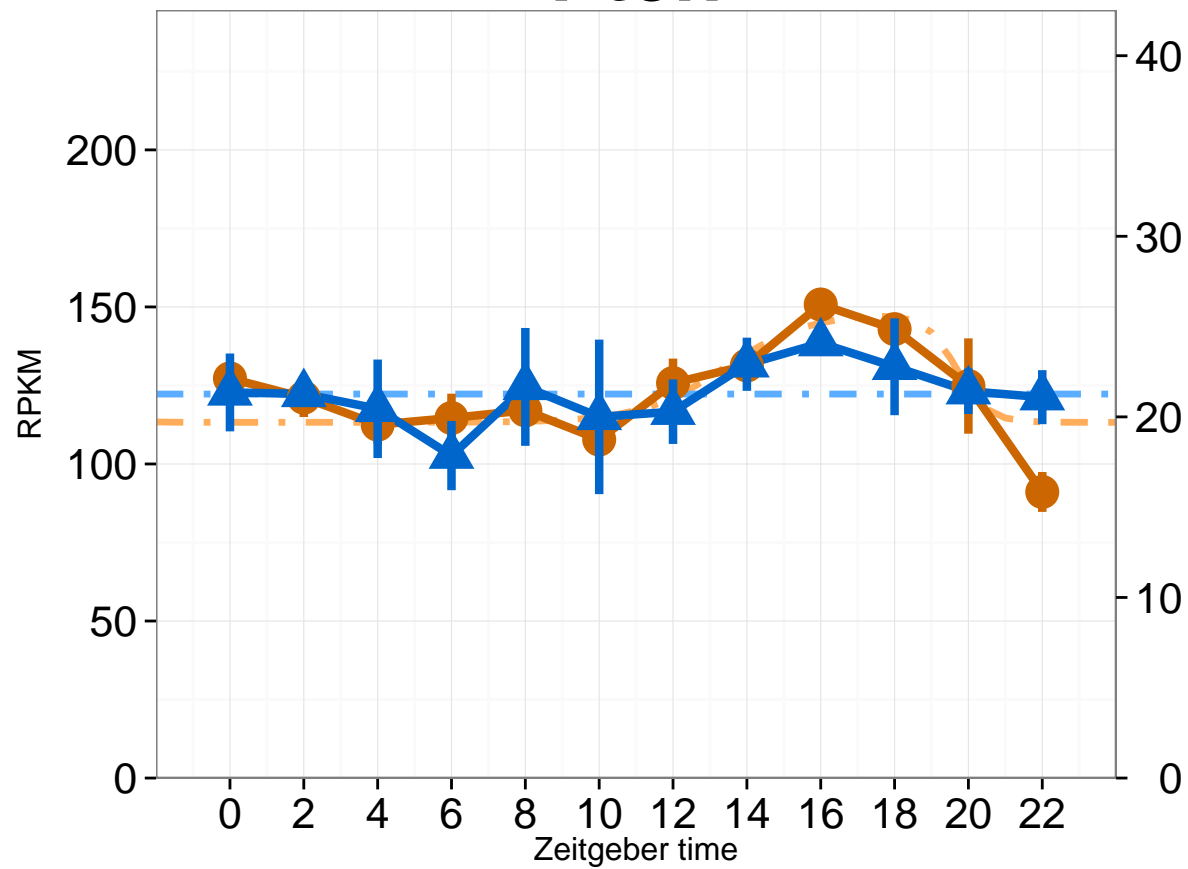

## Pten

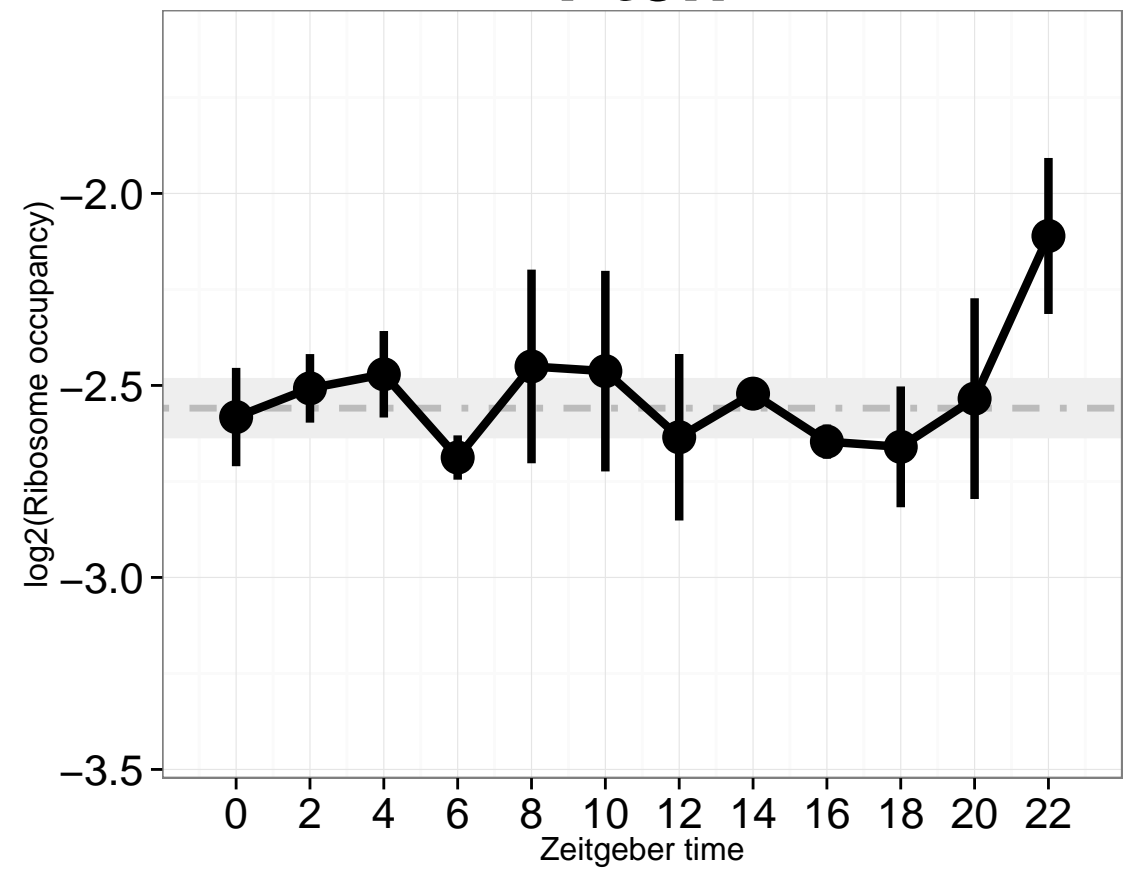

Supplement: SuppDataset_1.zip [file Pten_set_A.pdf › Supplemental Dataset 1/A-mRNA_nonrhyth_translation_nonrhyth/Pten_set_A.pdf]

## Pter

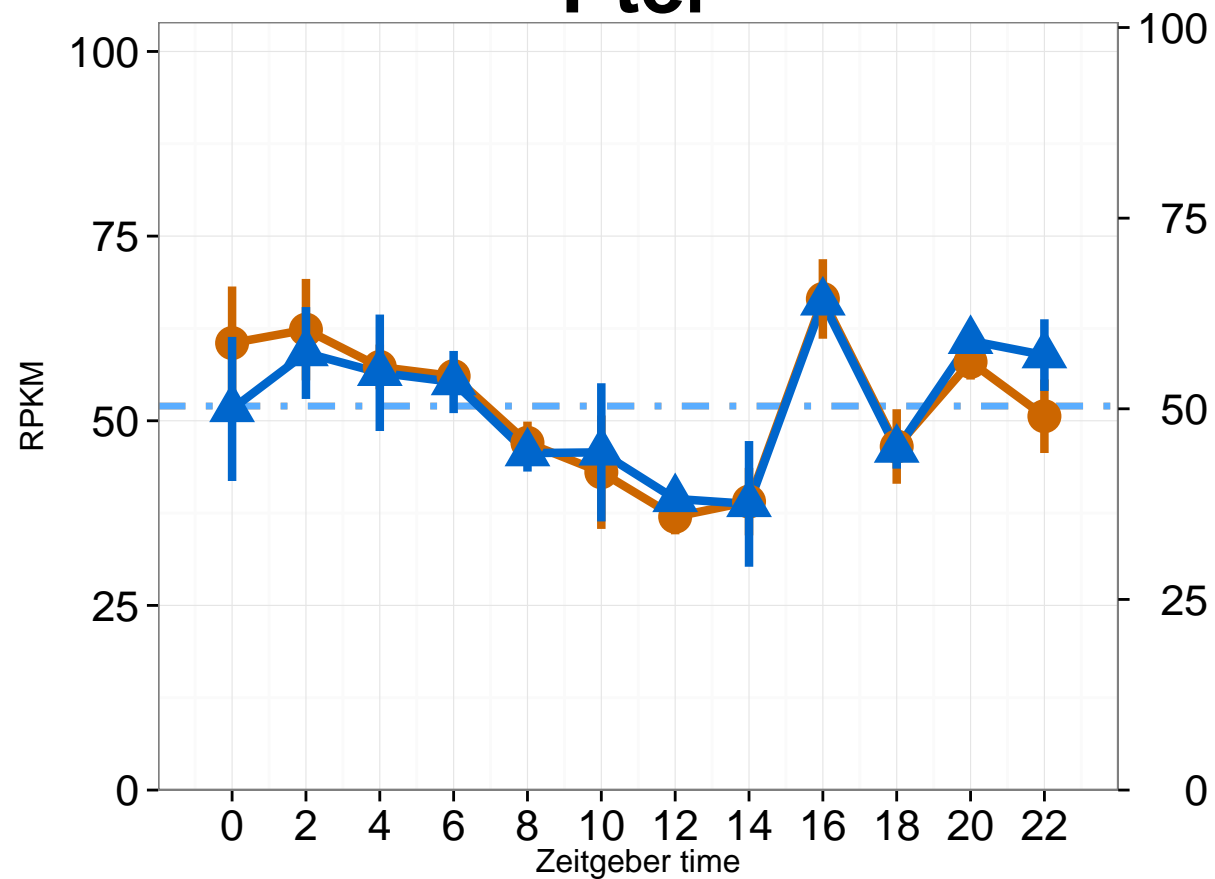

## Pter

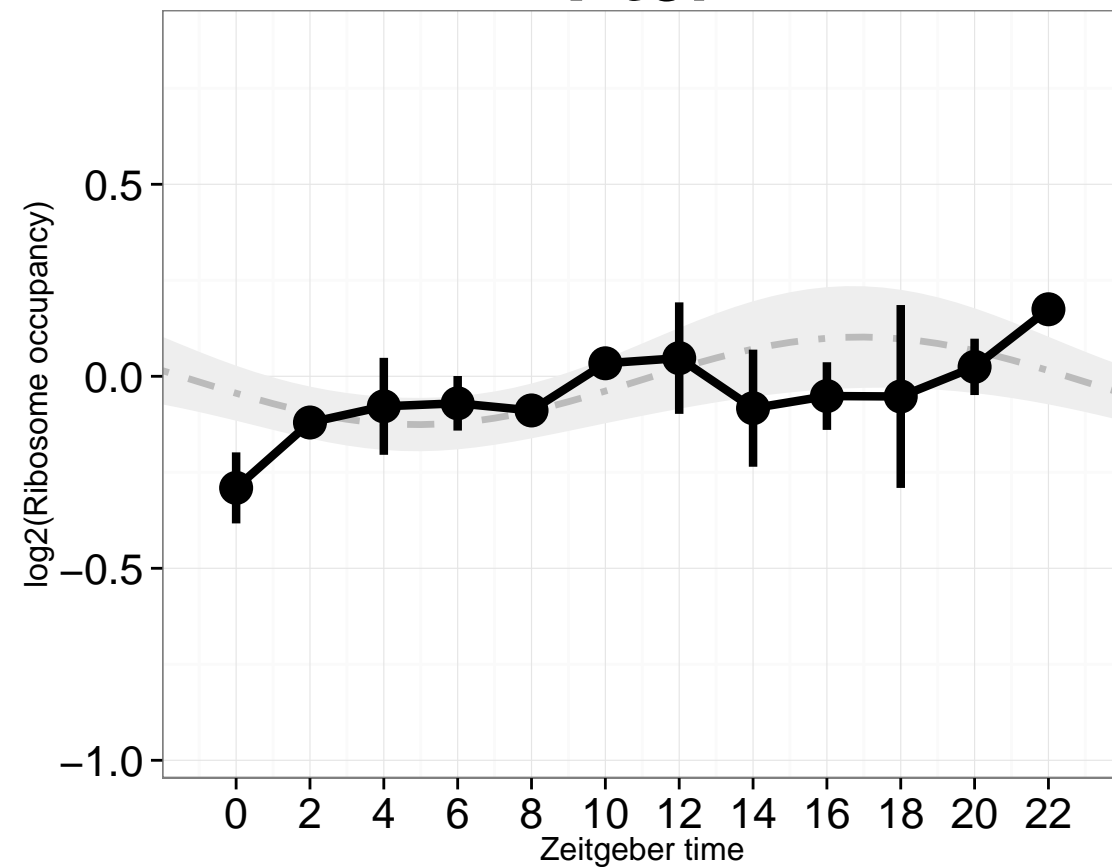

Supplement: SuppDataset_1.zip [file Pter_set_A.pdf › Supplemental Dataset 1/A-mRNA_nonrhyth_translation_nonrhyth/Pter_set_A.pdf]

## Ptgds

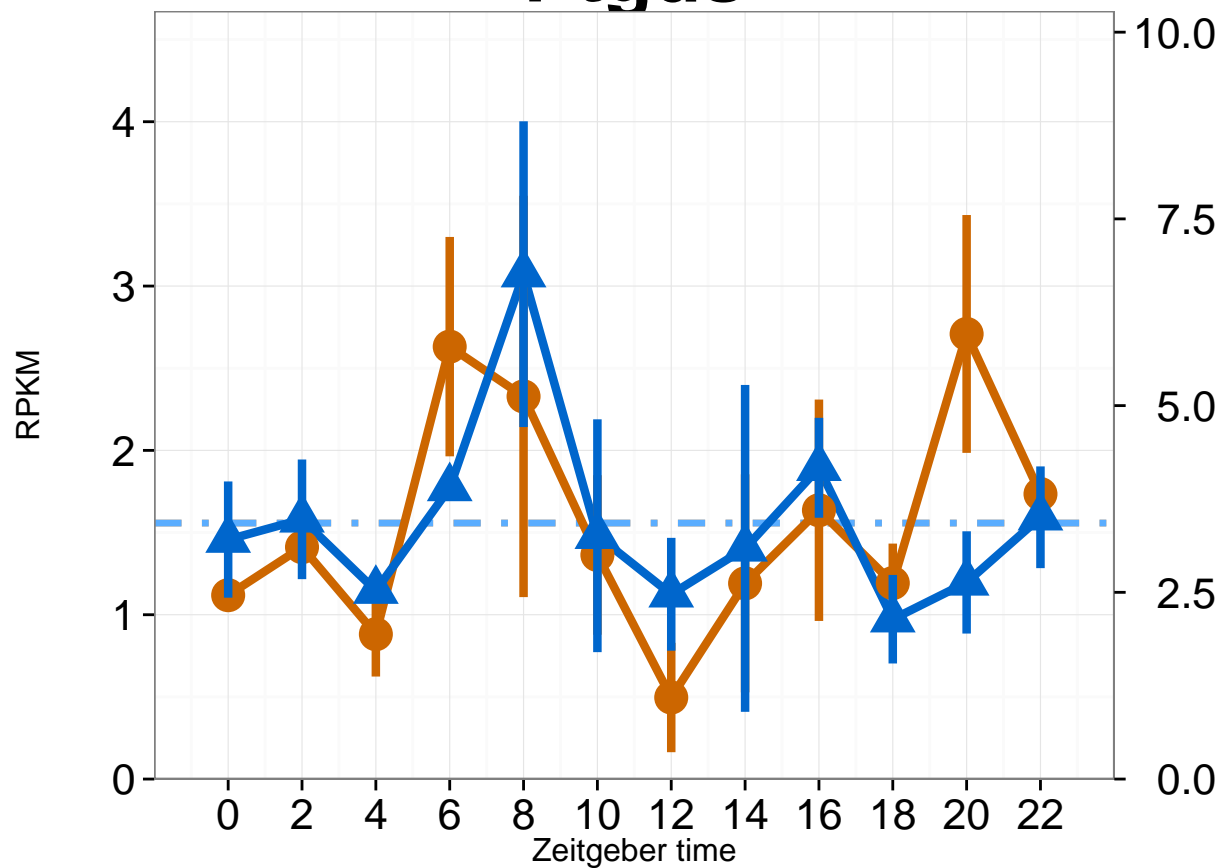

## Ptgds

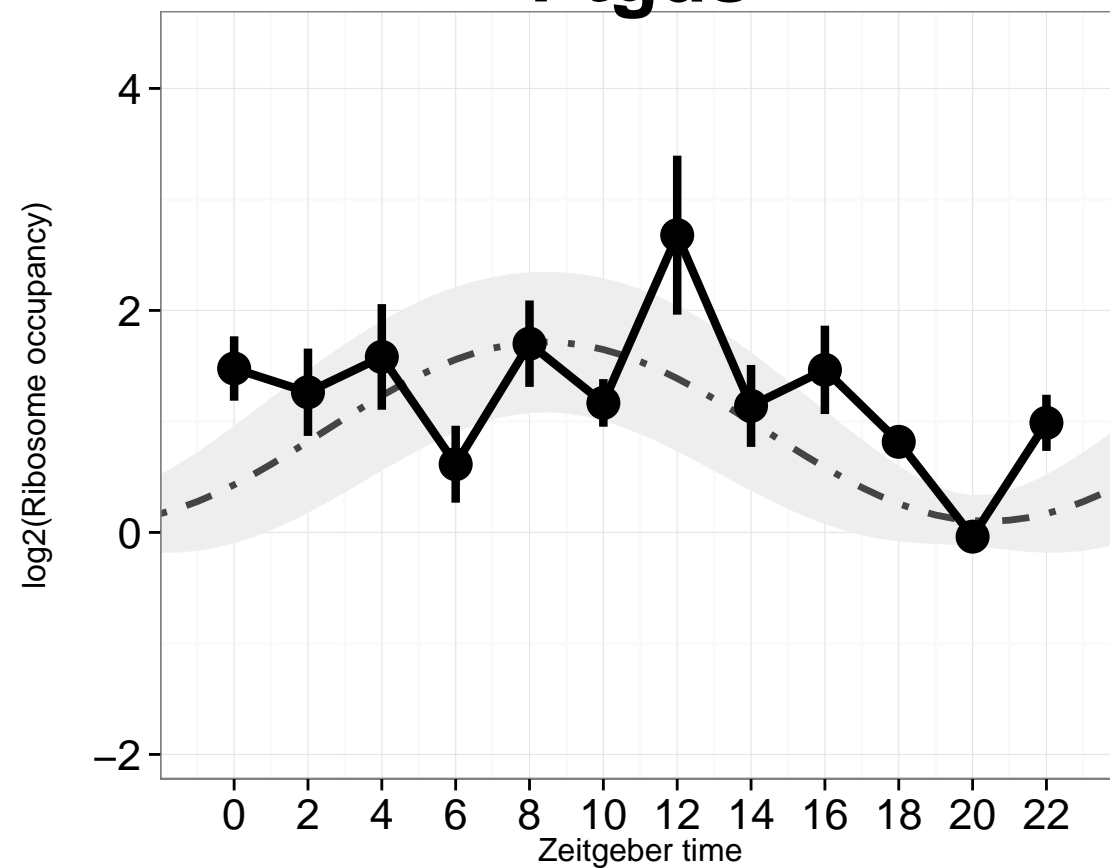

Supplement: SuppDataset_1.zip [file Ptgds_set_A.pdf › Supplemental Dataset 1/A-mRNA_nonrhyth_translation_nonrhyth/Ptgds_set_A.pdf]

# Ptger2

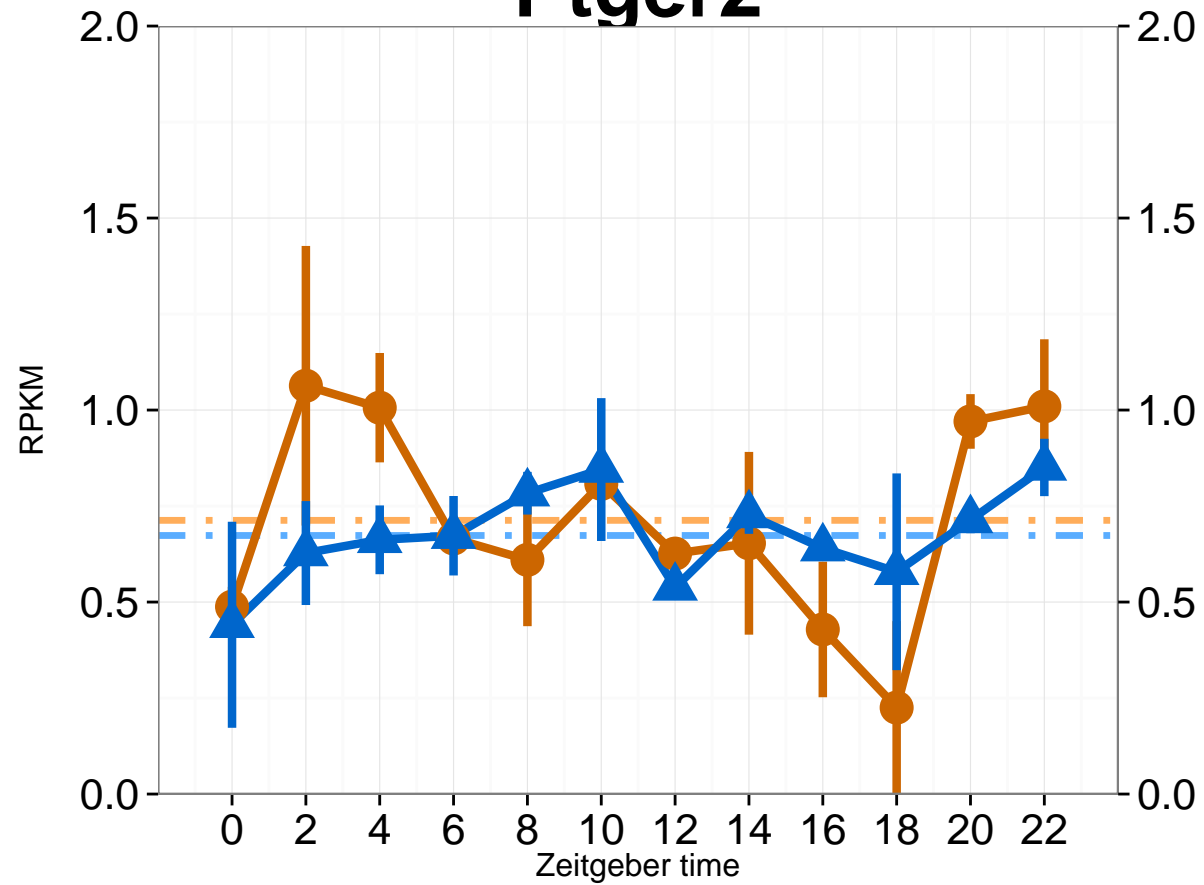

# Ptger2

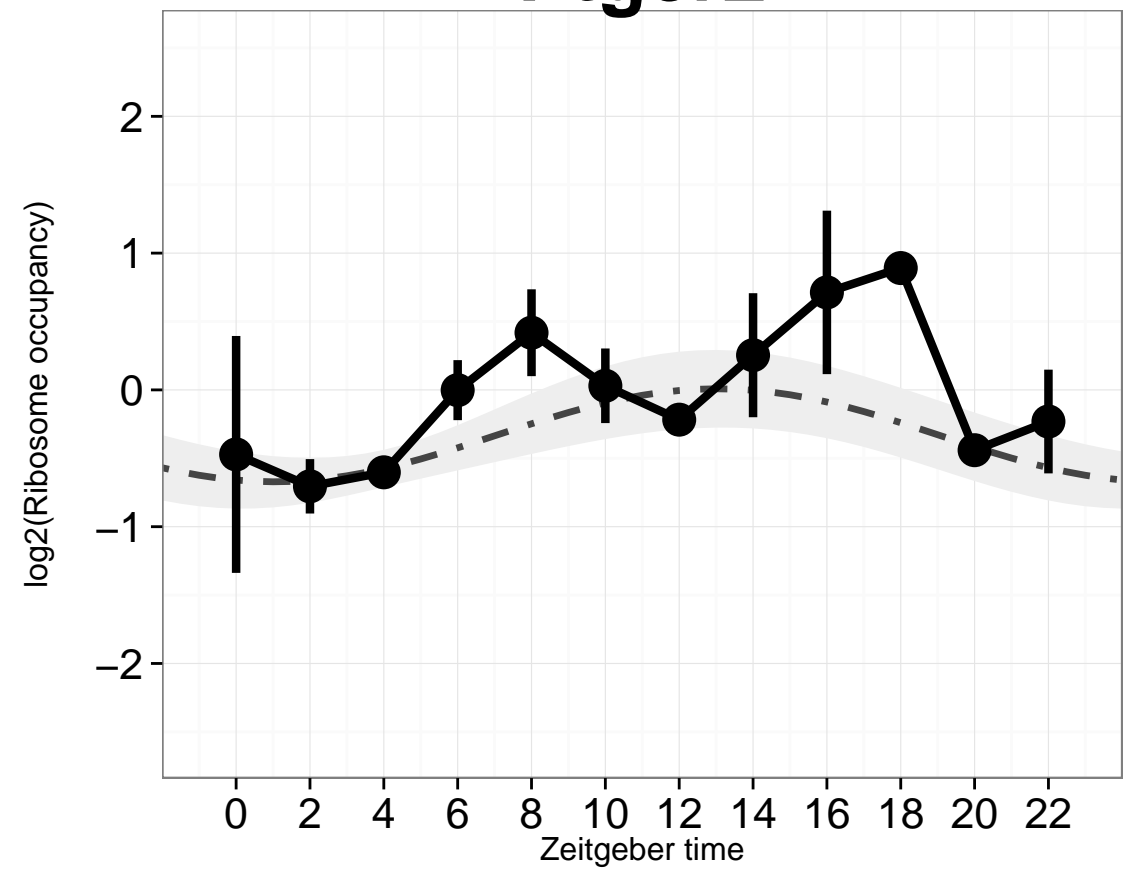

Supplement: SuppDataset_1.zip [file Ptger2_set_A.pdf › Supplemental Dataset 1/A-mRNA_nonrhyth_translation_nonrhyth/Ptger2_set_A.pdf]

## Ptges2

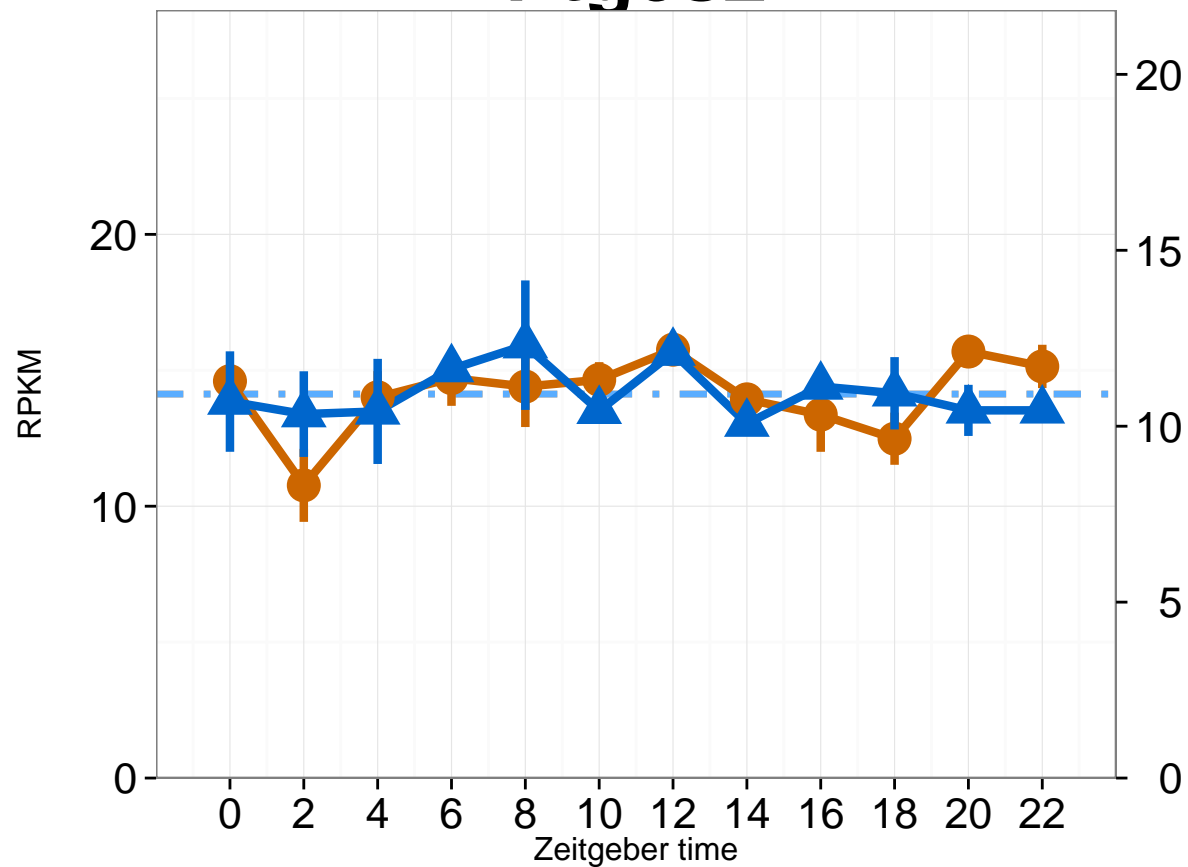

## Ptges2

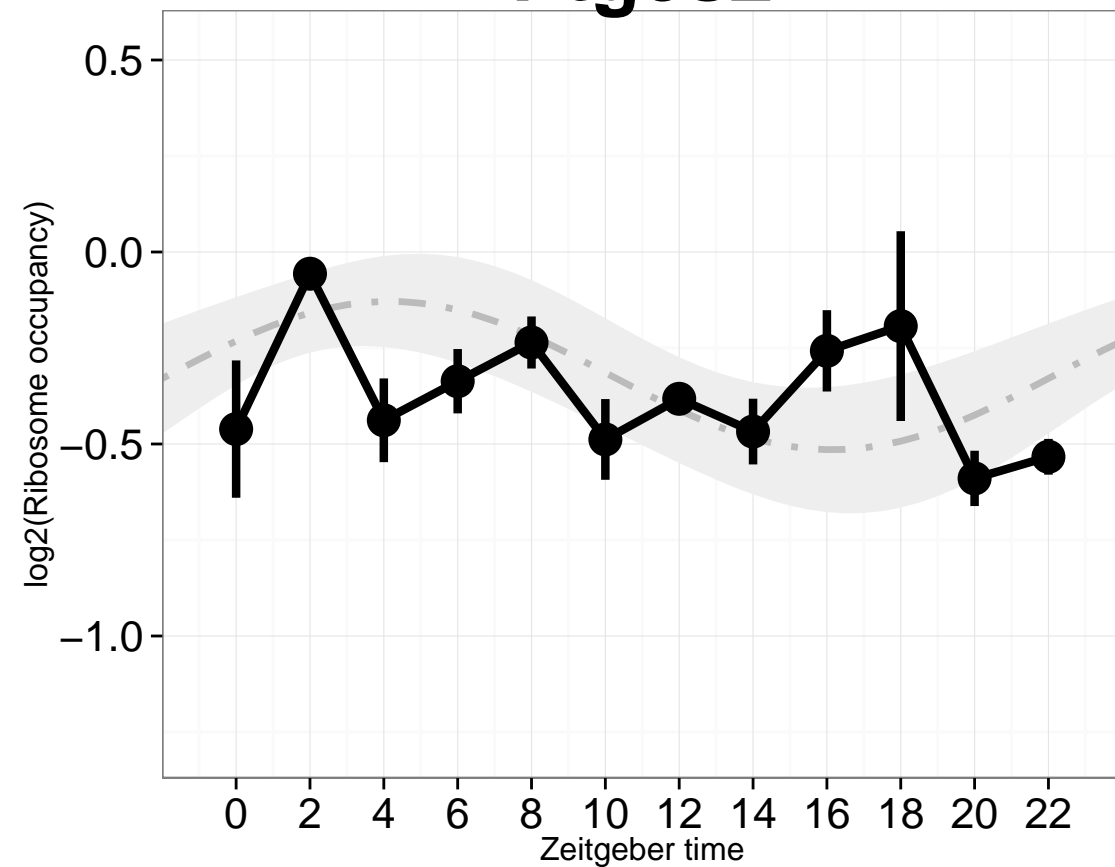

Supplement: SuppDataset_1.zip [file Ptges2_set_A.pdf › Supplemental Dataset 1/A-mRNA_nonrhyth_translation_nonrhyth/Ptges2_set_A.pdf]

# Ptges3

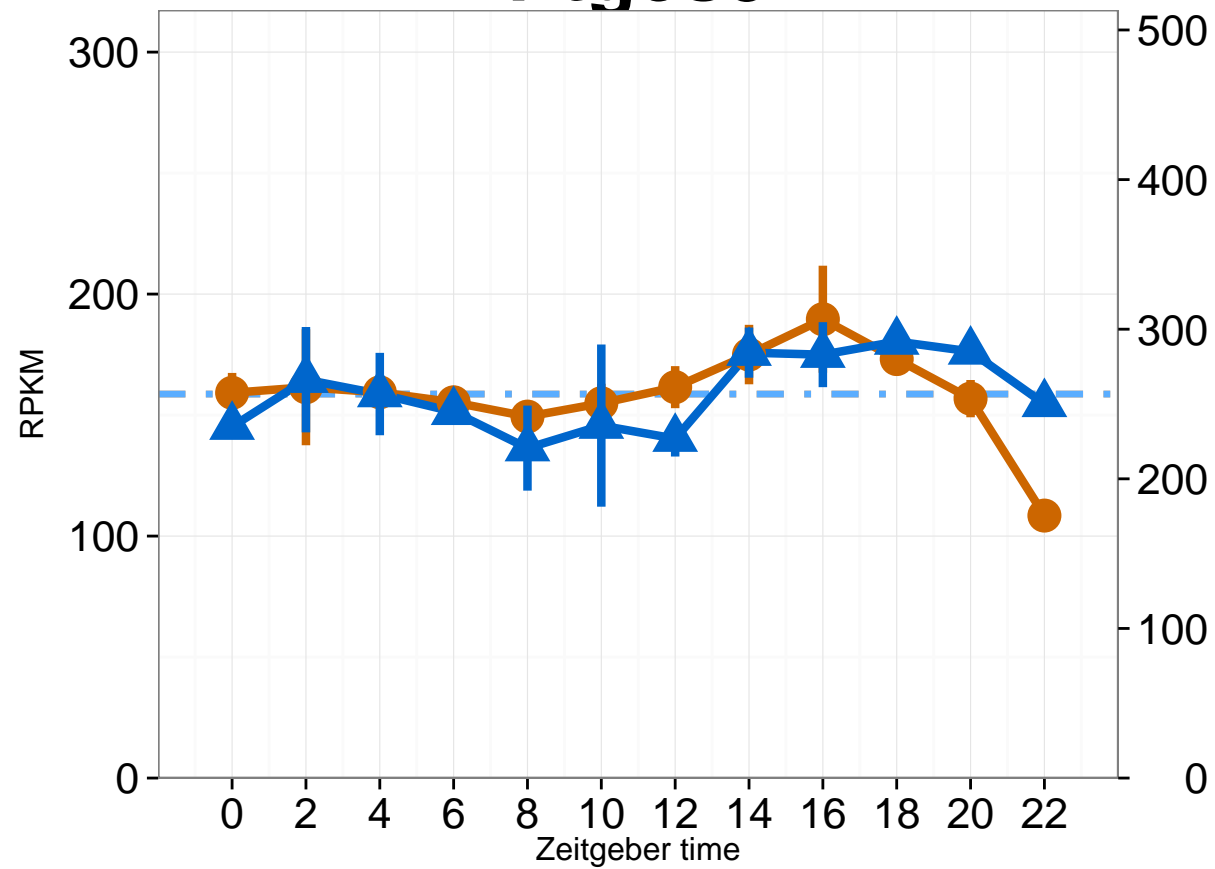

# Ptges3

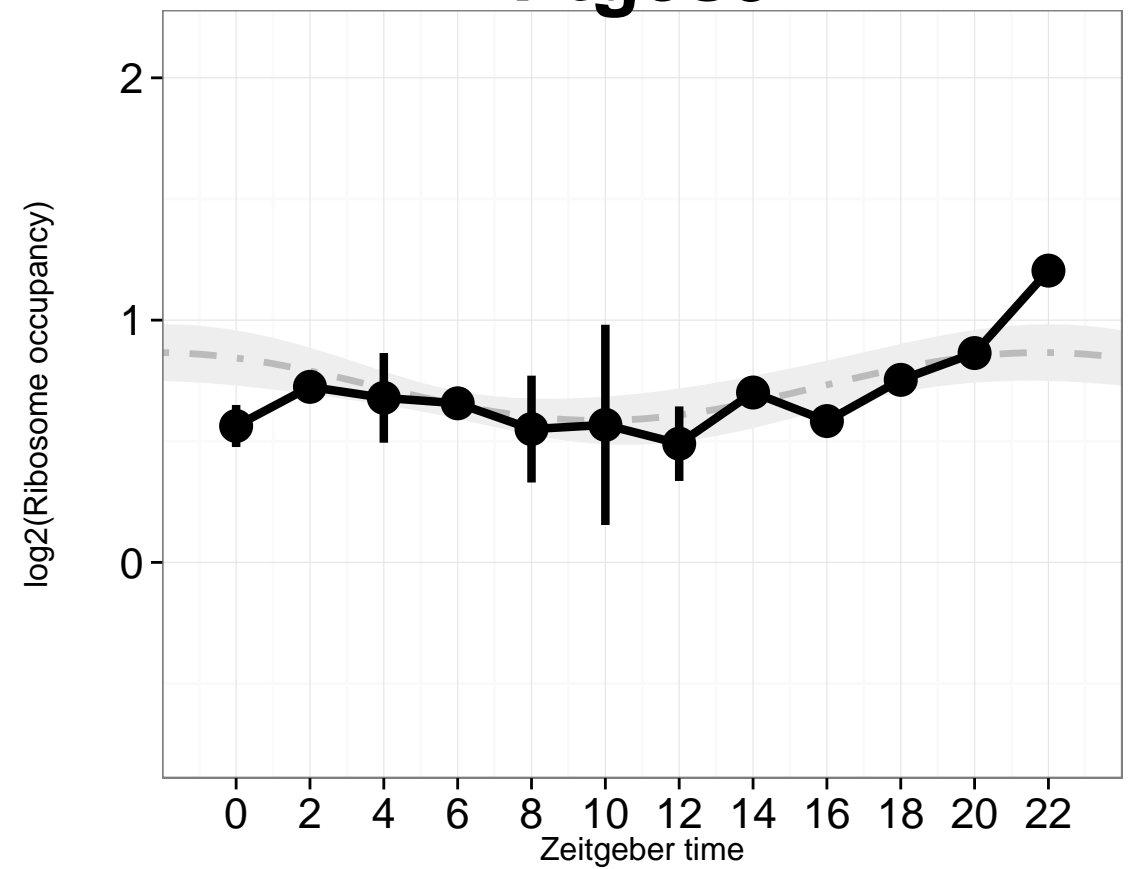

Supplement: SuppDataset_1.zip [file Ptges3_set_A.pdf › Supplemental Dataset 1/A-mRNA_nonrhyth_translation_nonrhyth/Ptges3_set_A.pdf]

## Ptgfrn

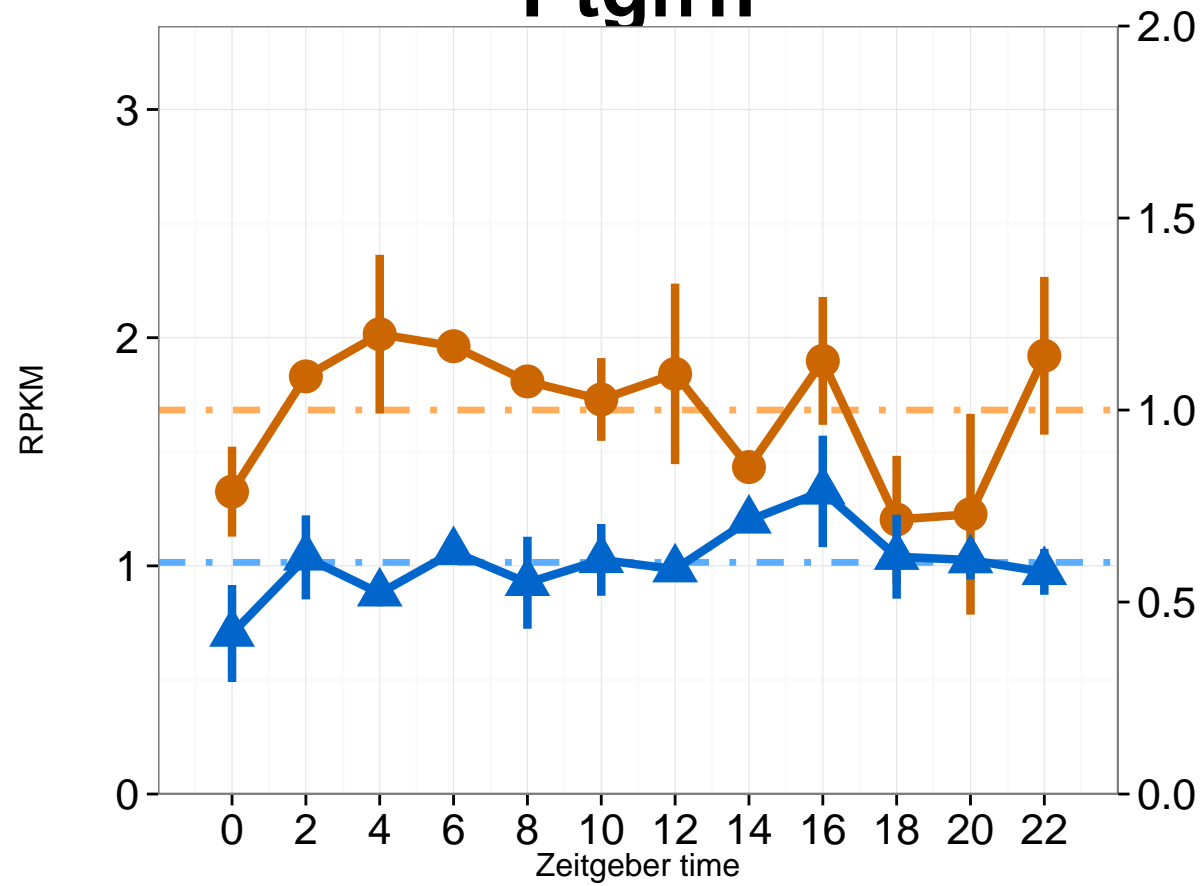

## Ptgfrn

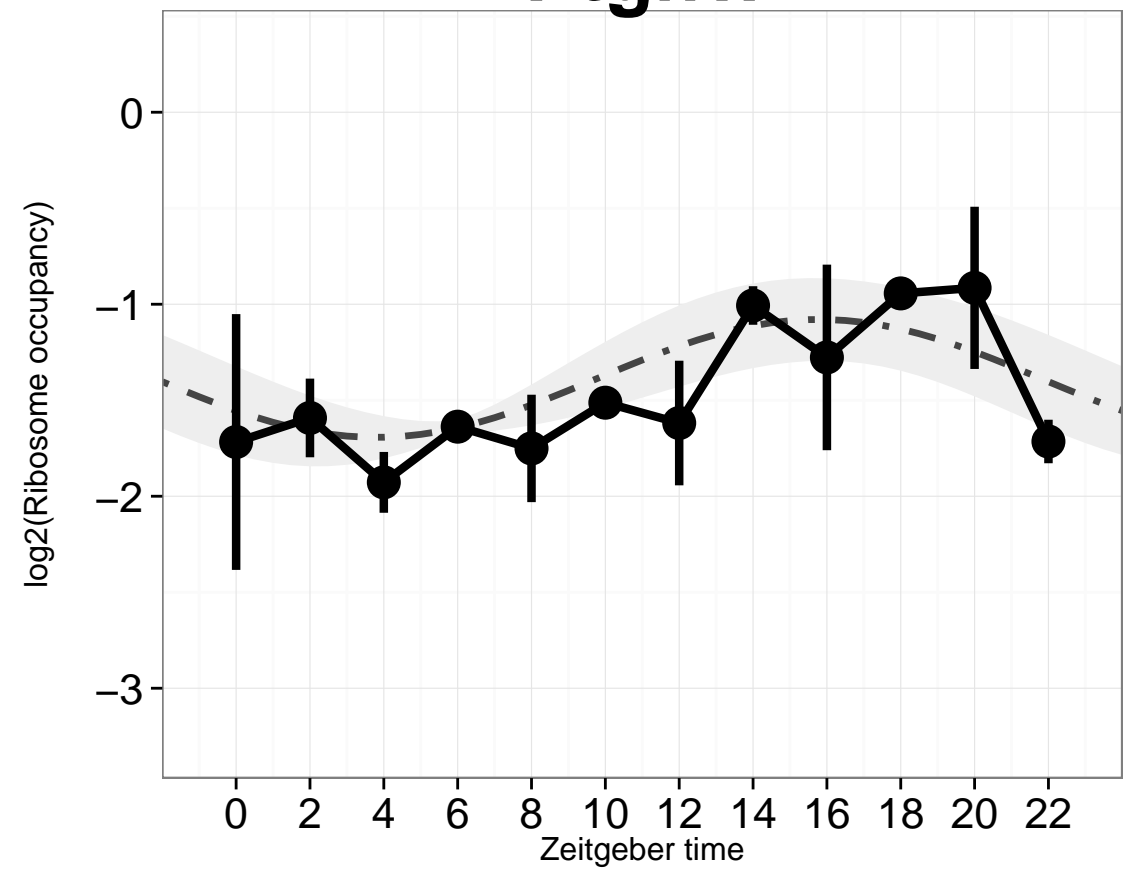

Supplement: SuppDataset_1.zip [file Ptgfrn_set_A.pdf › Supplemental Dataset 1/A-mRNA_nonrhyth_translation_nonrhyth/Ptgfrn_set_A.pdf]

# Ptgr1

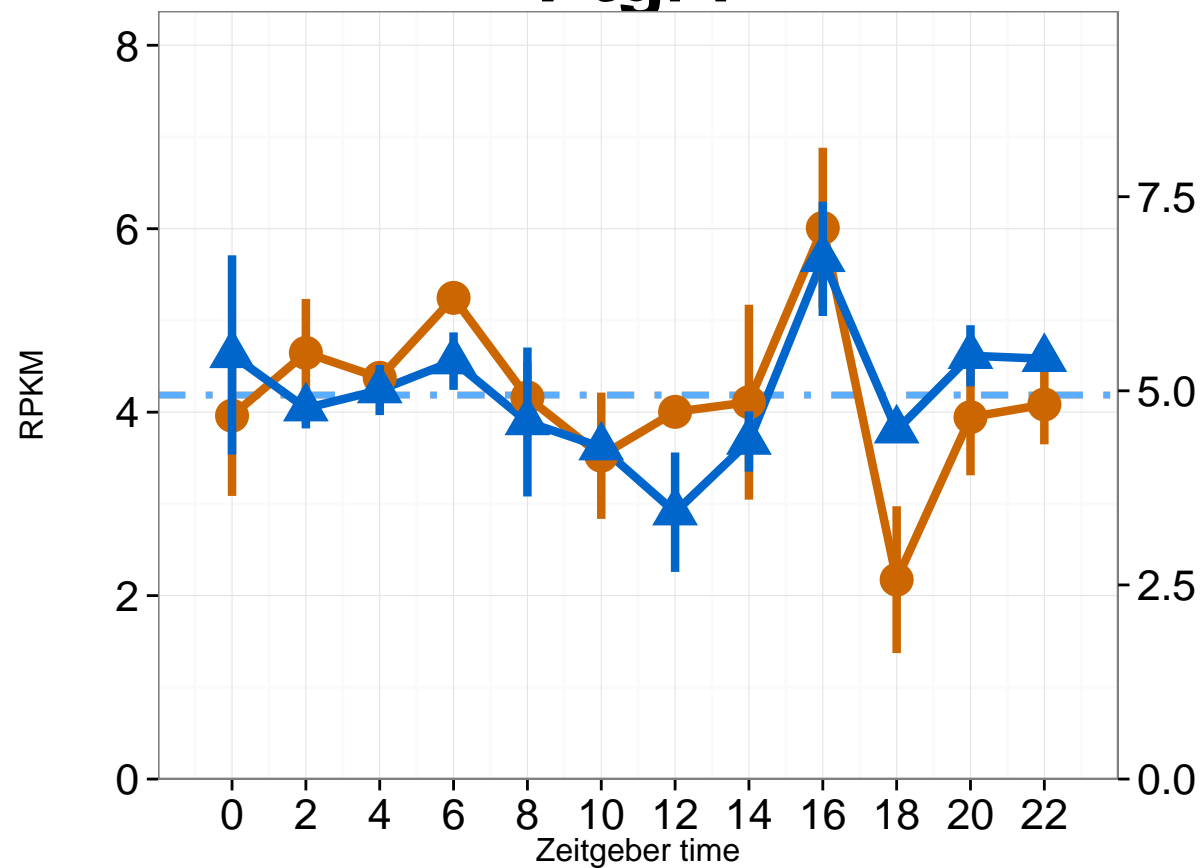

# Ptgr1

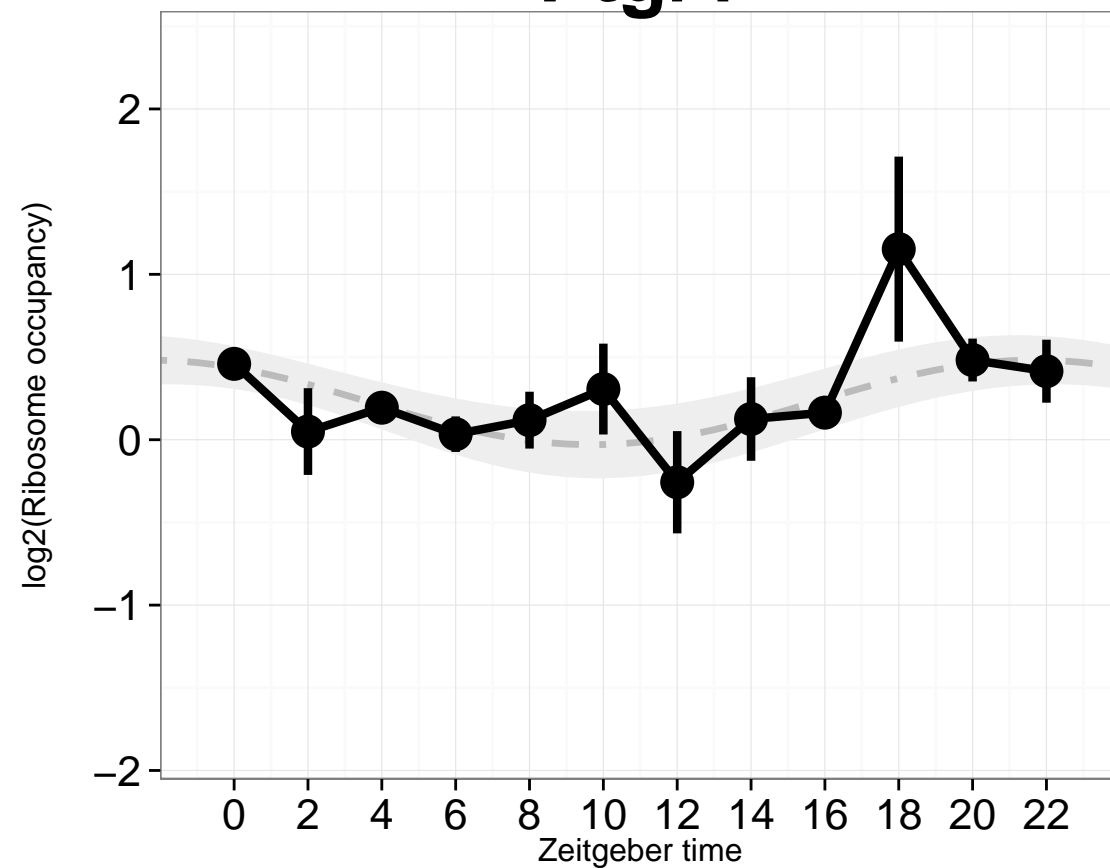

Supplement: SuppDataset_1.zip [file Ptgr1_set_A.pdf › Supplemental Dataset 1/A-mRNA_nonrhyth_translation_nonrhyth/Ptgr1_set_A.pdf]

# Ptgr2

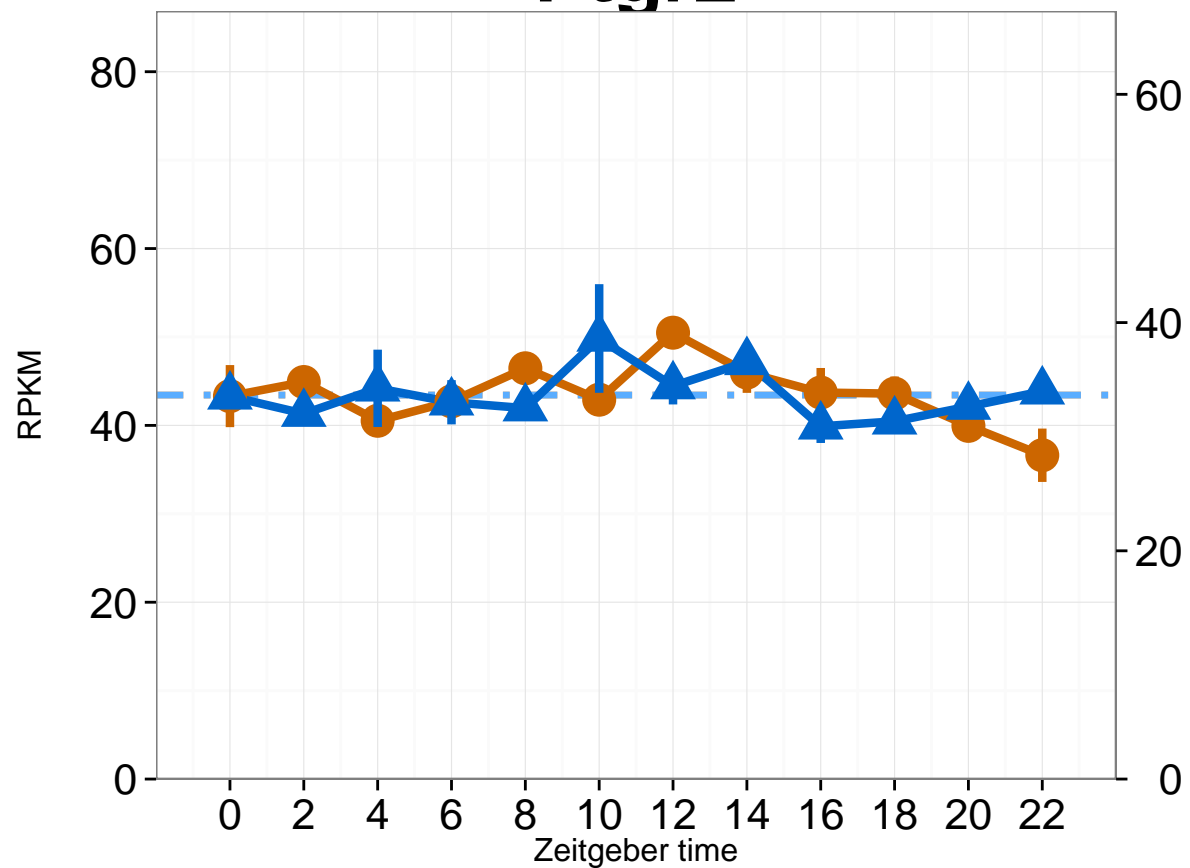

# Ptgr2

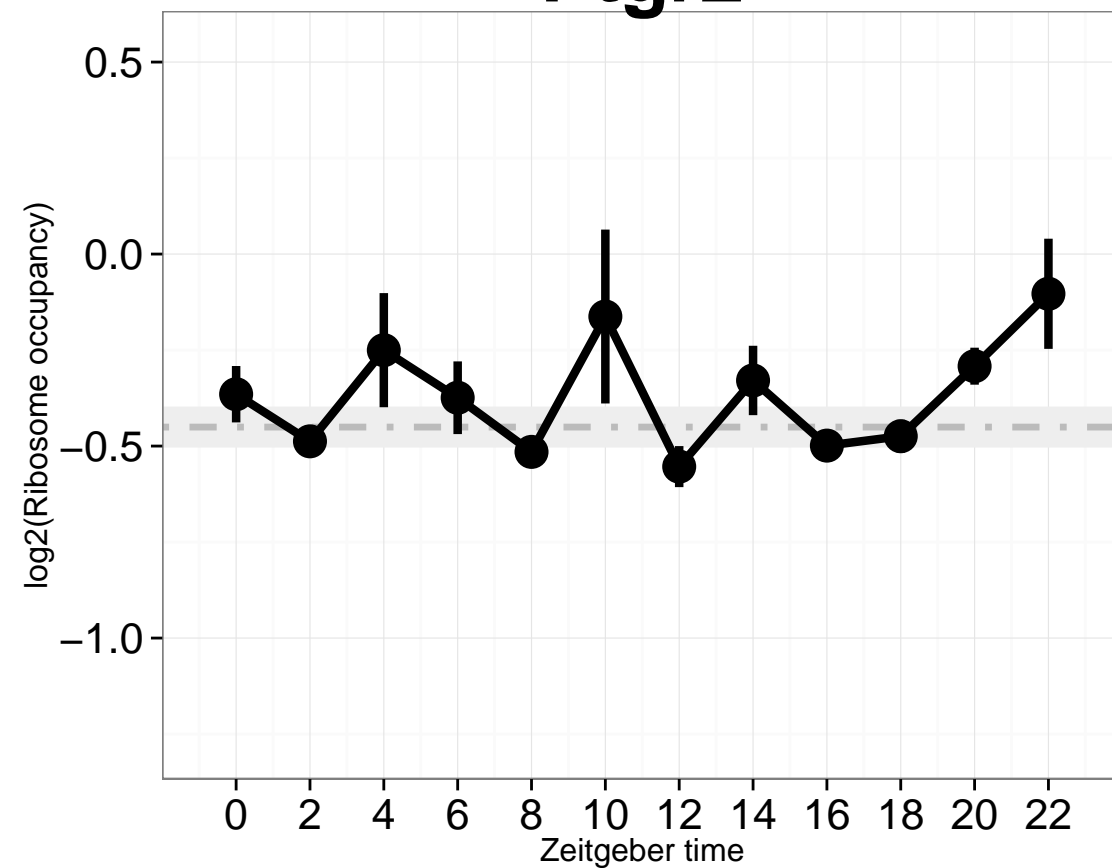

Supplement: SuppDataset_1.zip [file Ptgr2_set_A.pdf › Supplemental Dataset 1/A-mRNA_nonrhyth_translation_nonrhyth/Ptgr2_set_A.pdf]

# Ptgs1

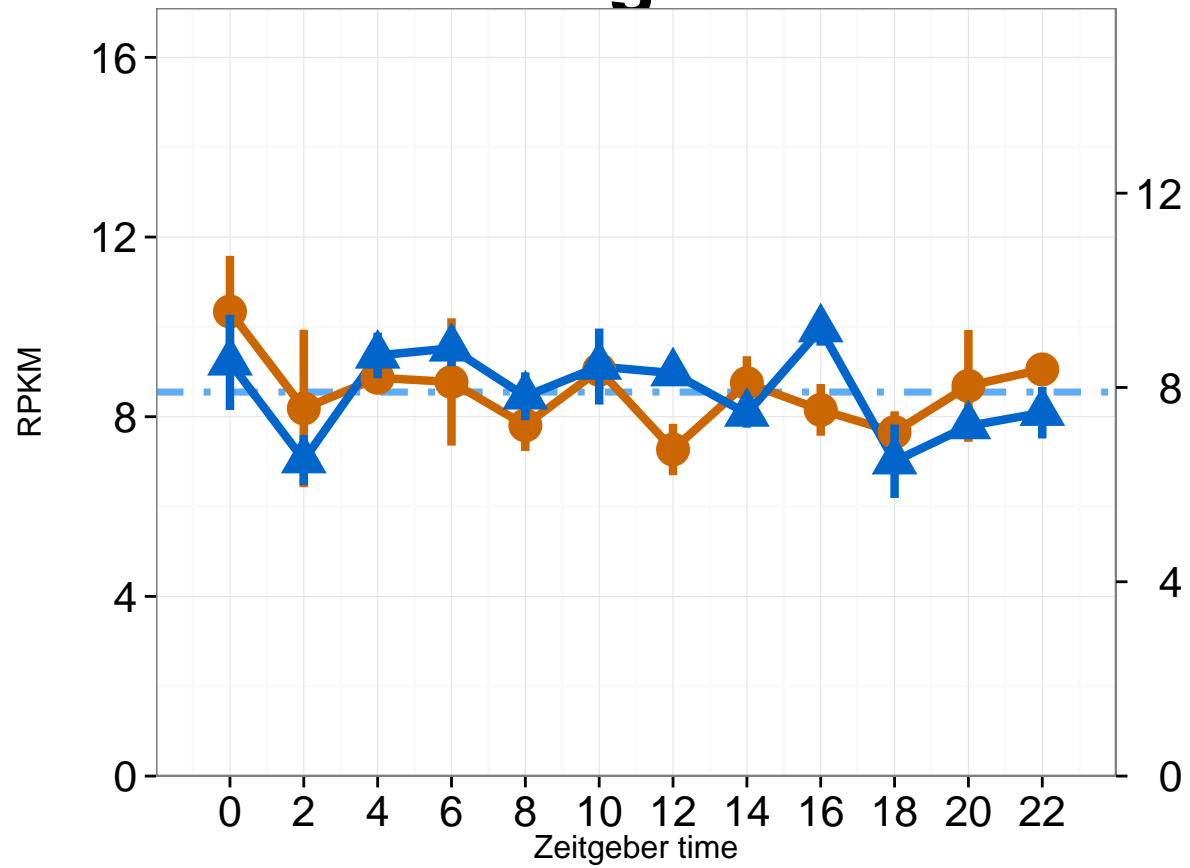

# Ptgs1

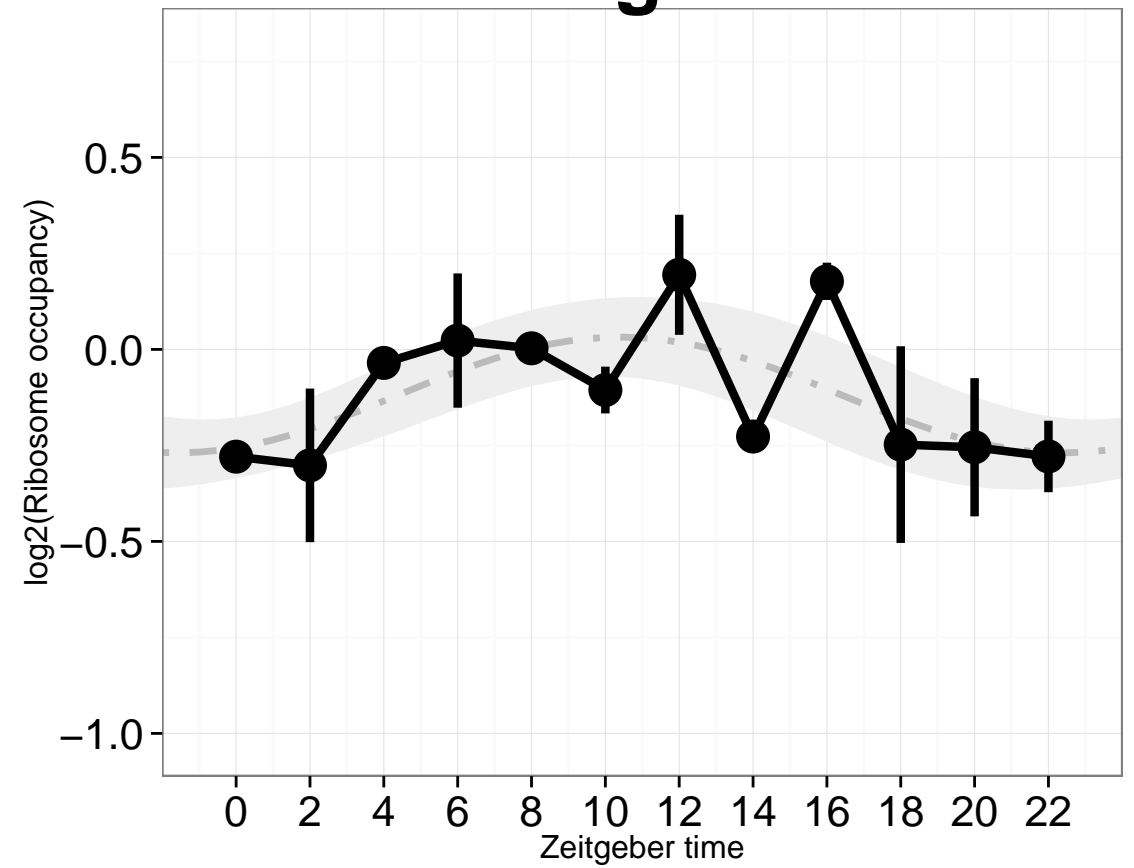

Supplement: SuppDataset_1.zip [file Ptgs1_set_A.pdf › Supplemental Dataset 1/A-mRNA_nonrhyth_translation_nonrhyth/Ptgs1_set_A.pdf]

# Pth1r

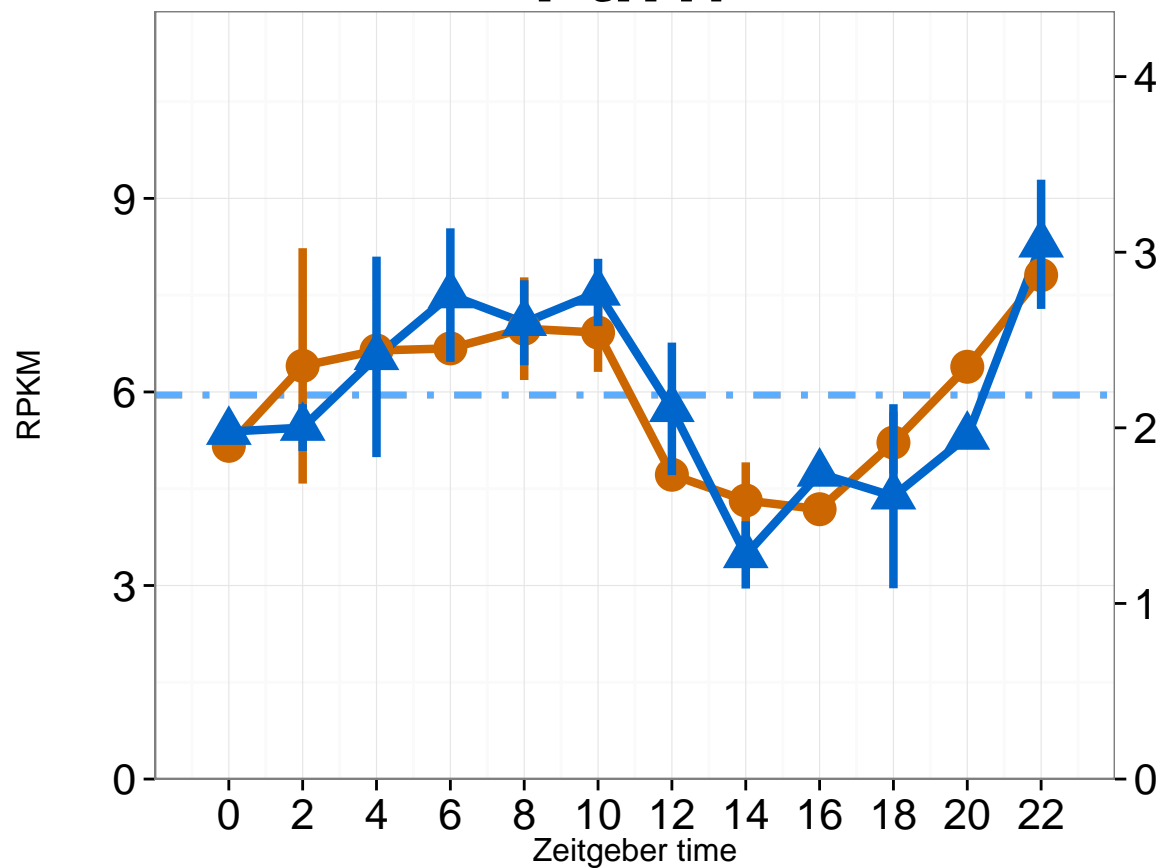

# Pth1r

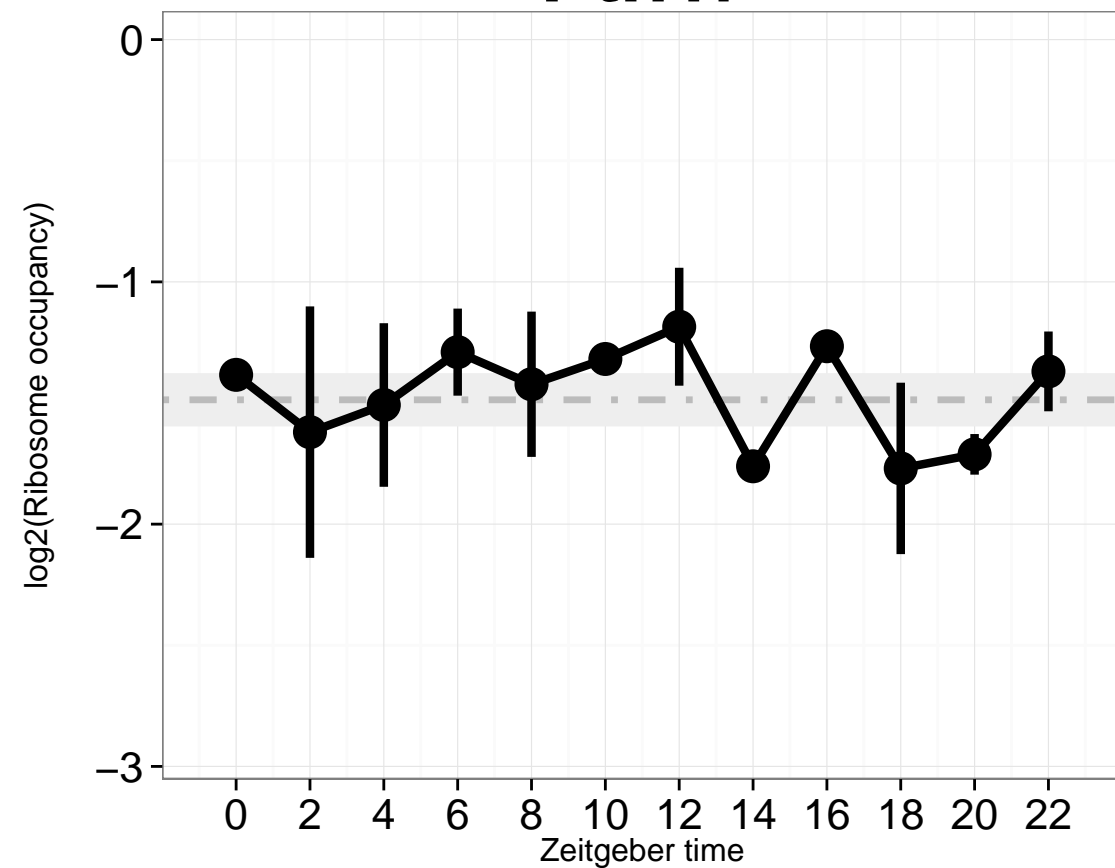

Supplement: SuppDataset_1.zip [file Pth1r_set_A.pdf › Supplemental Dataset 1/A-mRNA_nonrhyth_translation_nonrhyth/Pth1r_set_A.pdf]

## Ptk2

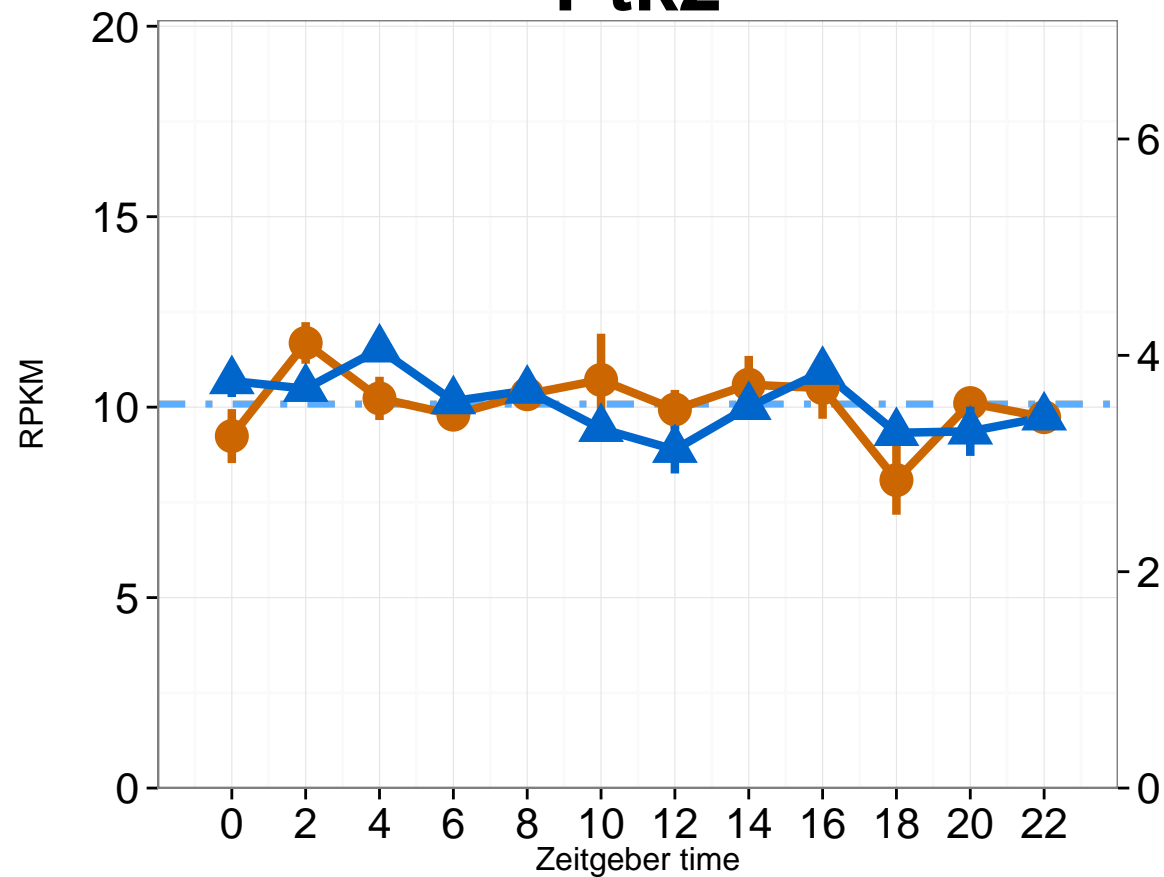

## Ptk2

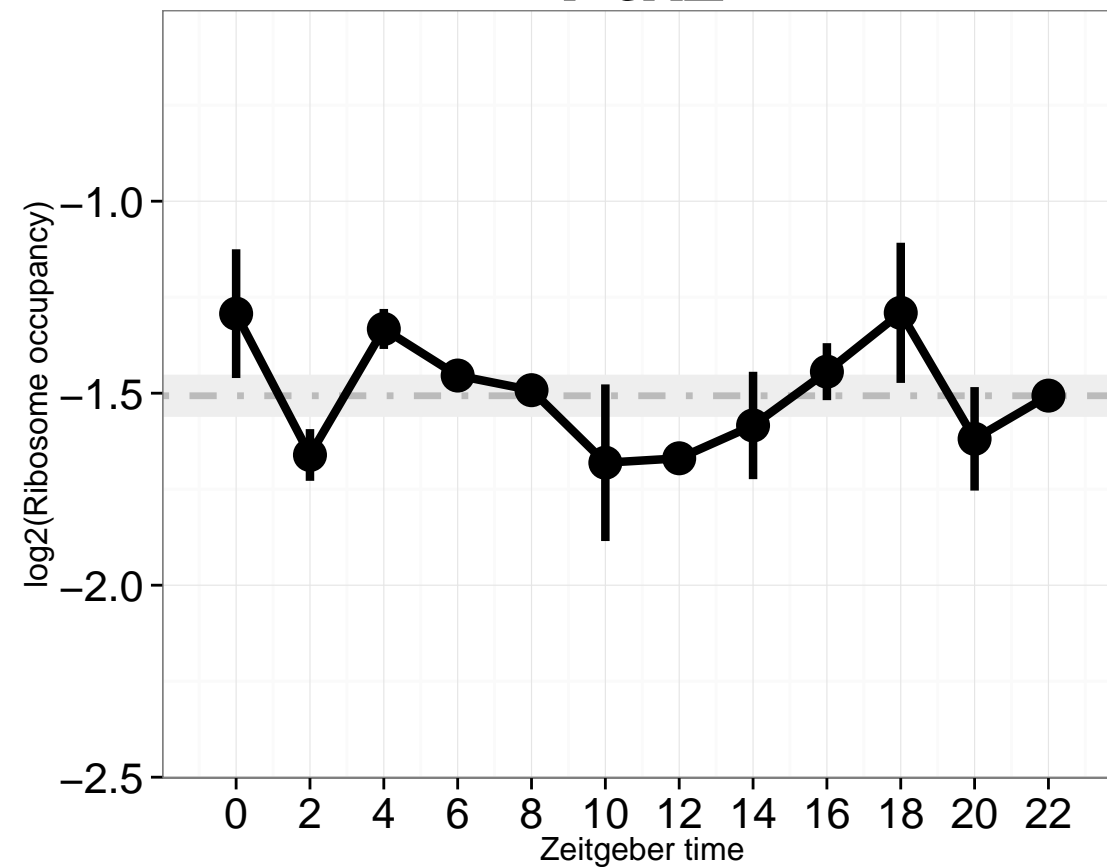

Supplement: SuppDataset_1.zip [file Ptk2_set_A.pdf › Supplemental Dataset 1/A-mRNA_nonrhyth_translation_nonrhyth/Ptk2_set_A.pdf]

# Ptk2b

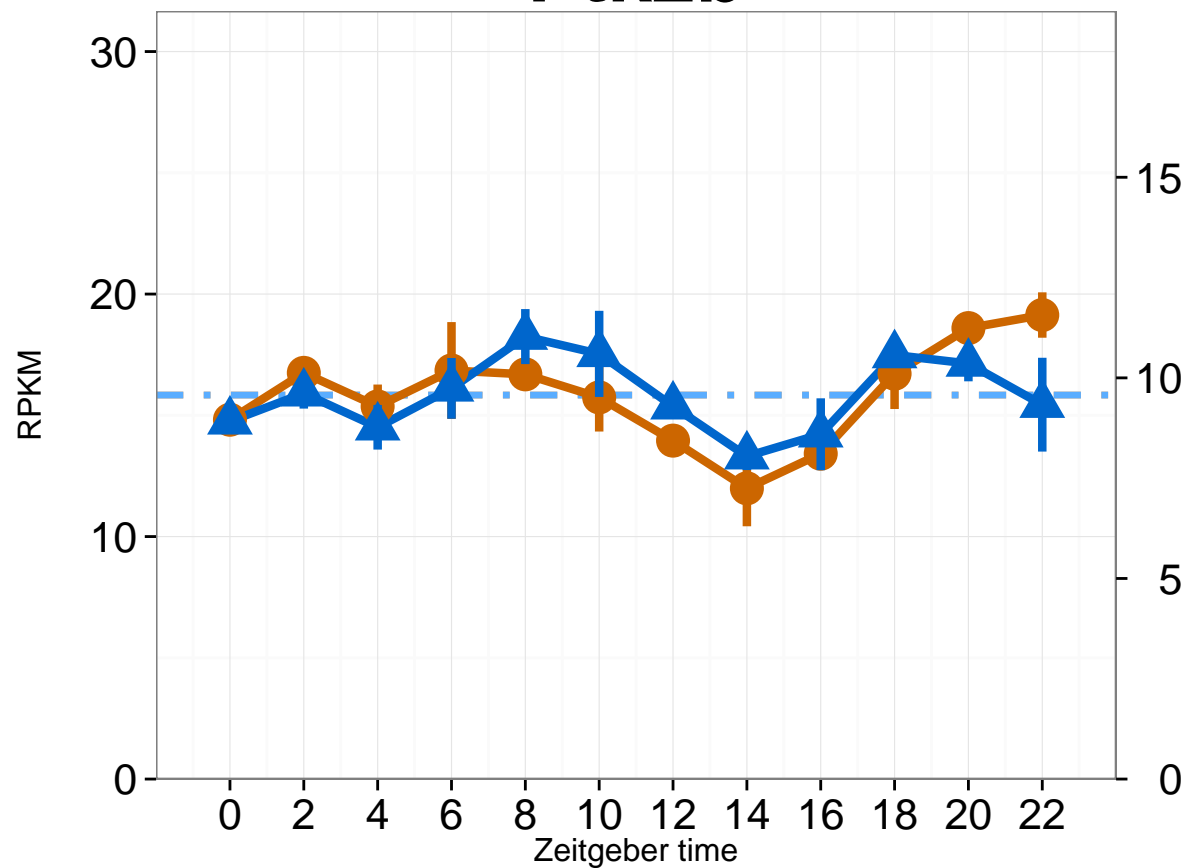

# Ptk2b

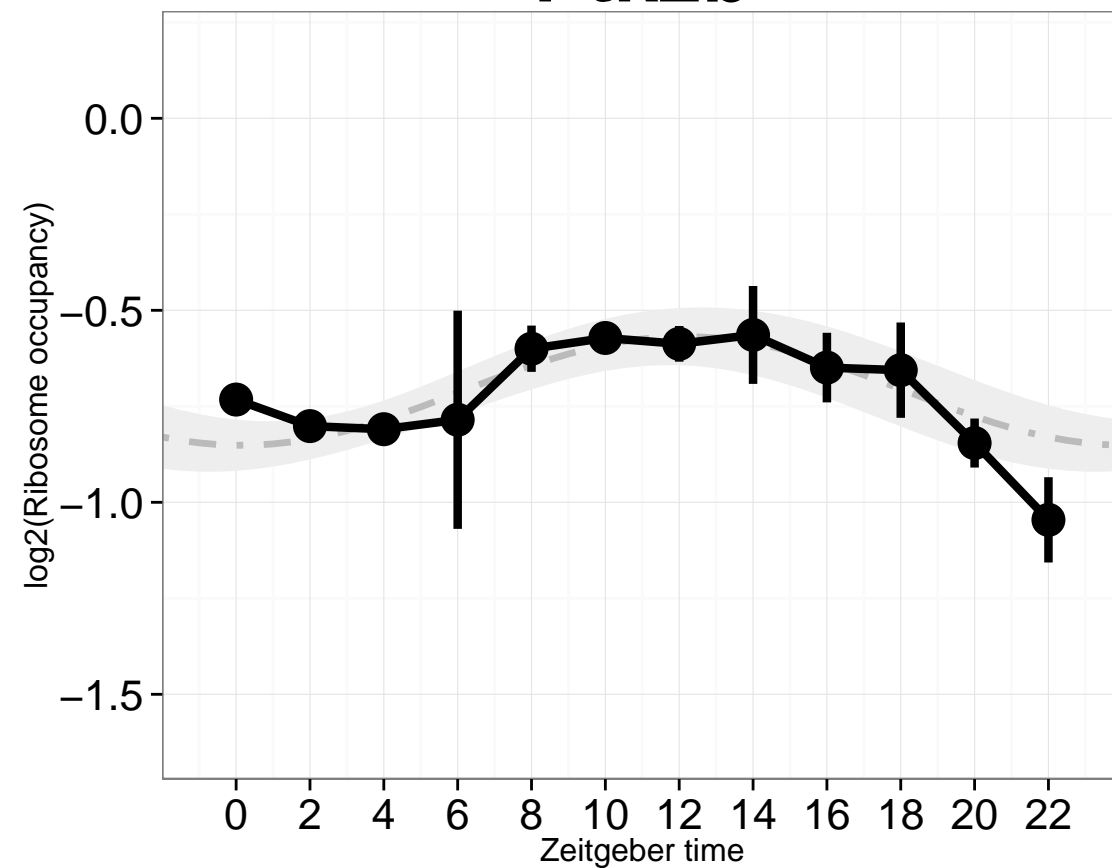

Supplement: SuppDataset_1.zip [file Ptk2b_set_A.pdf › Supplemental Dataset 1/A-mRNA_nonrhyth_translation_nonrhyth/Ptk2b_set_A.pdf]

# Ptk7

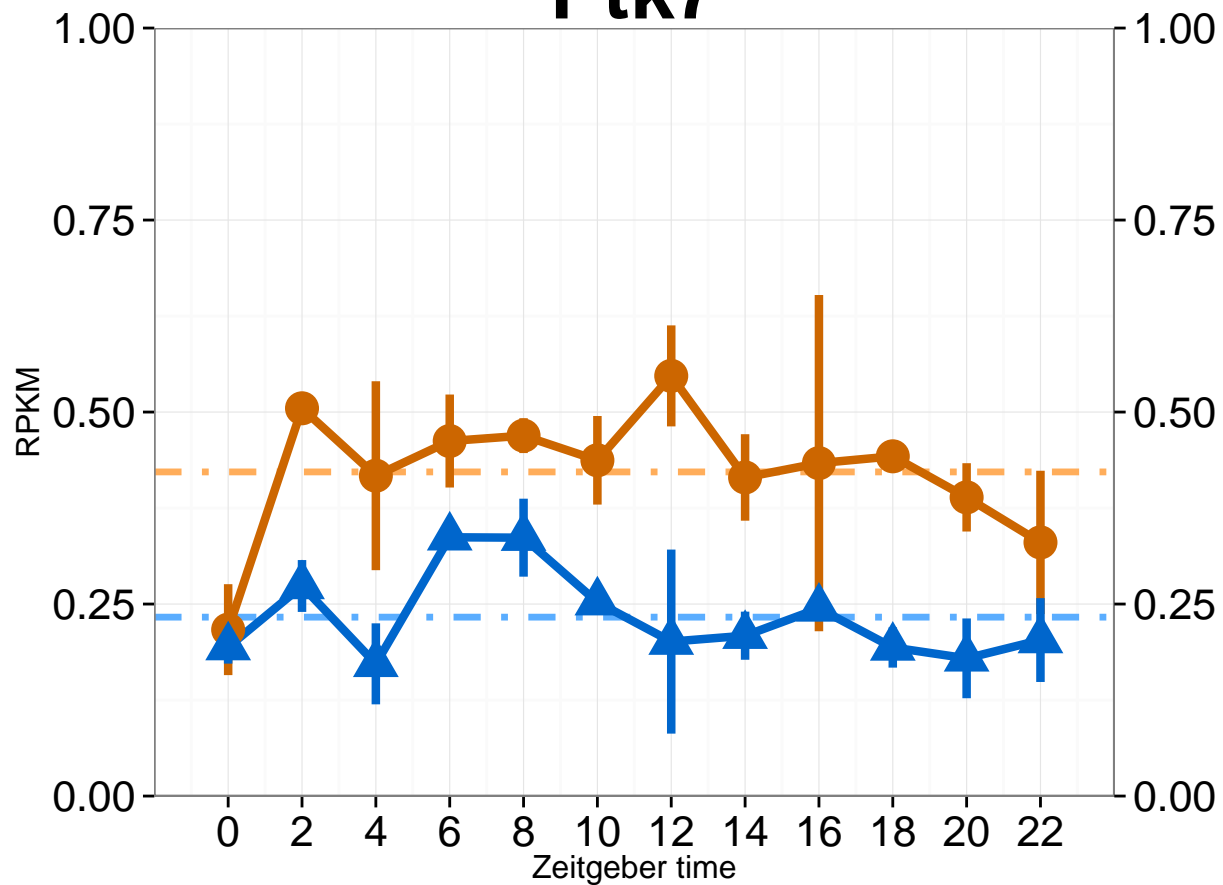

# Ptk7

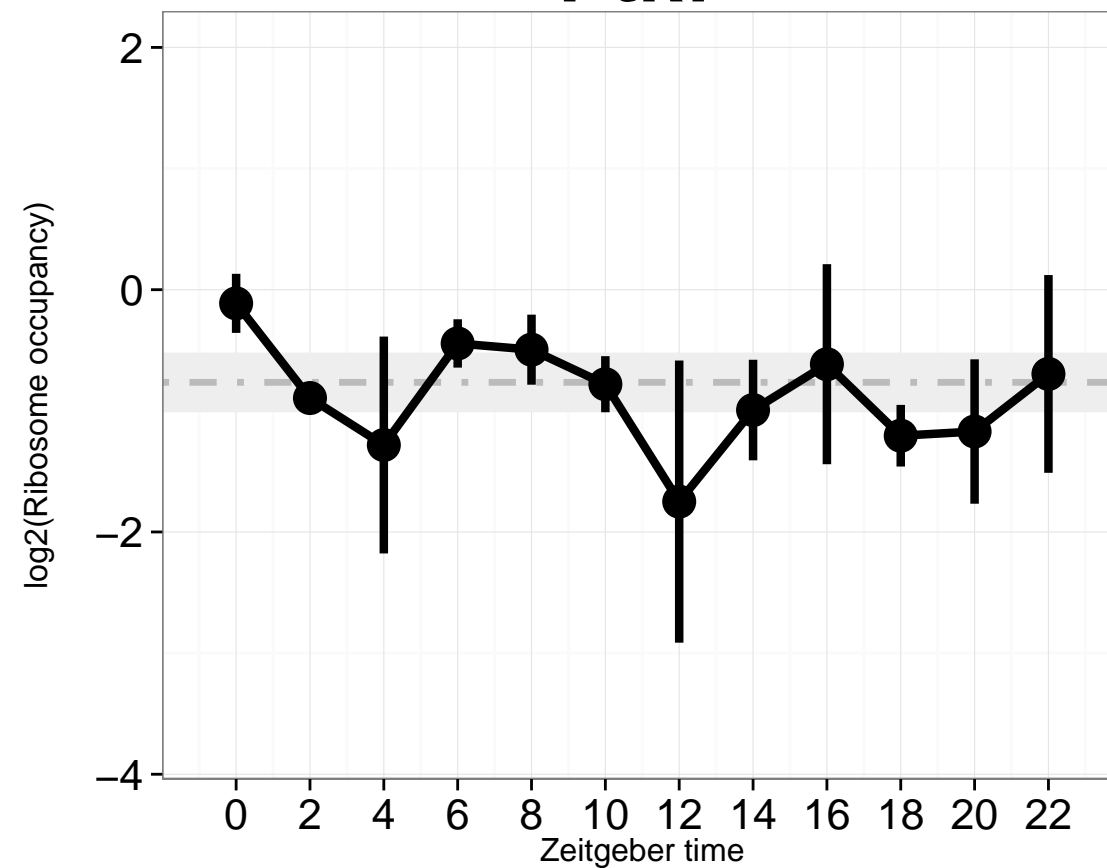

Supplement: SuppDataset_1.zip [file Ptk7_set_A.pdf › Supplemental Dataset 1/A-mRNA_nonrhyth_translation_nonrhyth/Ptk7_set_A.pdf]

# Ptma

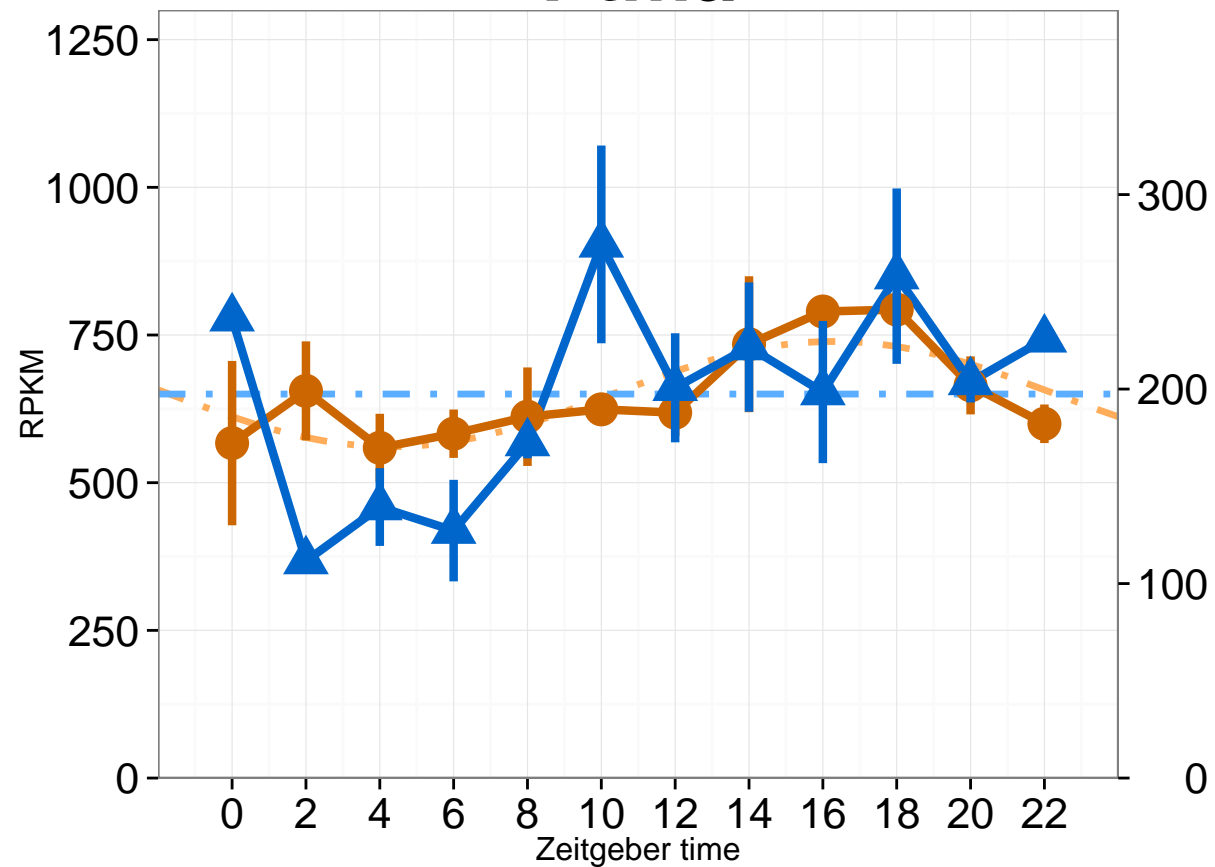

# Ptma

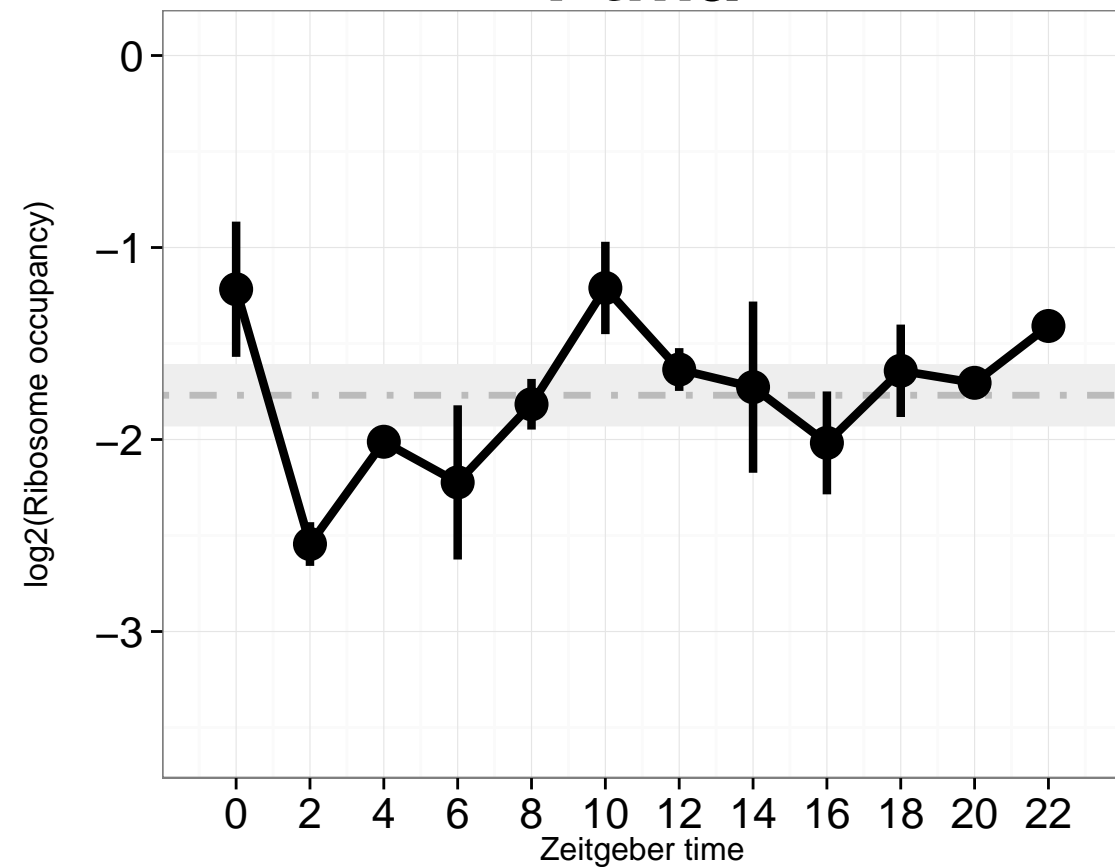

Supplement: SuppDataset_1.zip [file Ptma_set_A.pdf › Supplemental Dataset 1/A-mRNA_nonrhyth_translation_nonrhyth/Ptma_set_A.pdf]

## Ptms

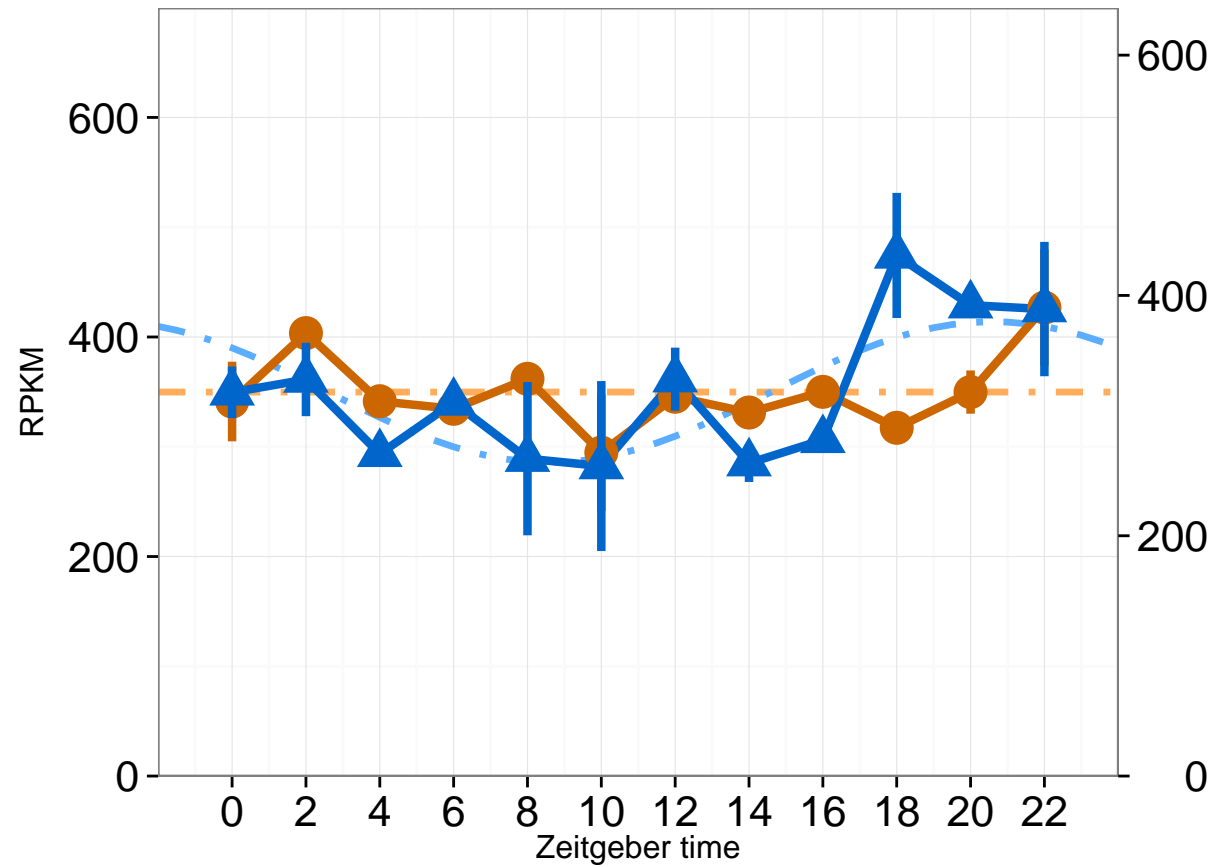

## Ptms

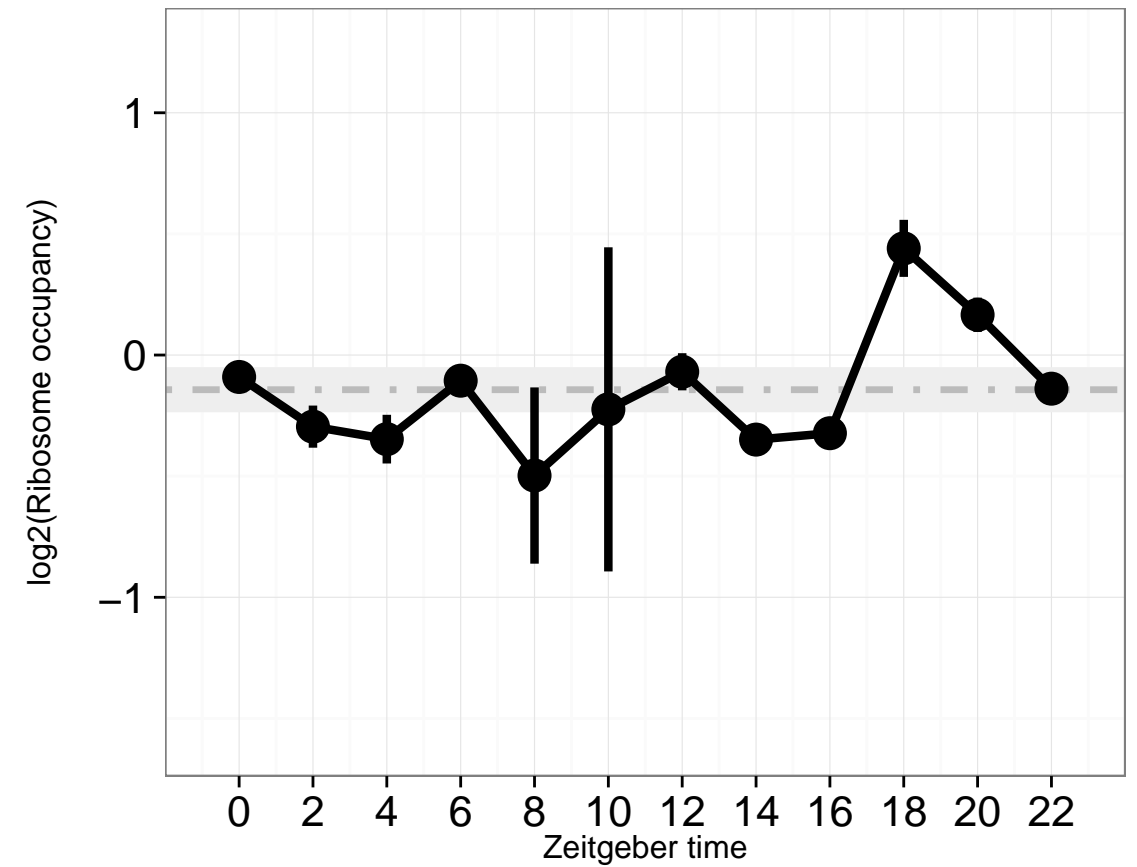

Supplement: SuppDataset_1.zip [file Ptms_set_A.pdf › Supplemental Dataset 1/A-mRNA_nonrhyth_translation_nonrhyth/Ptms_set_A.pdf]

# Ptov1

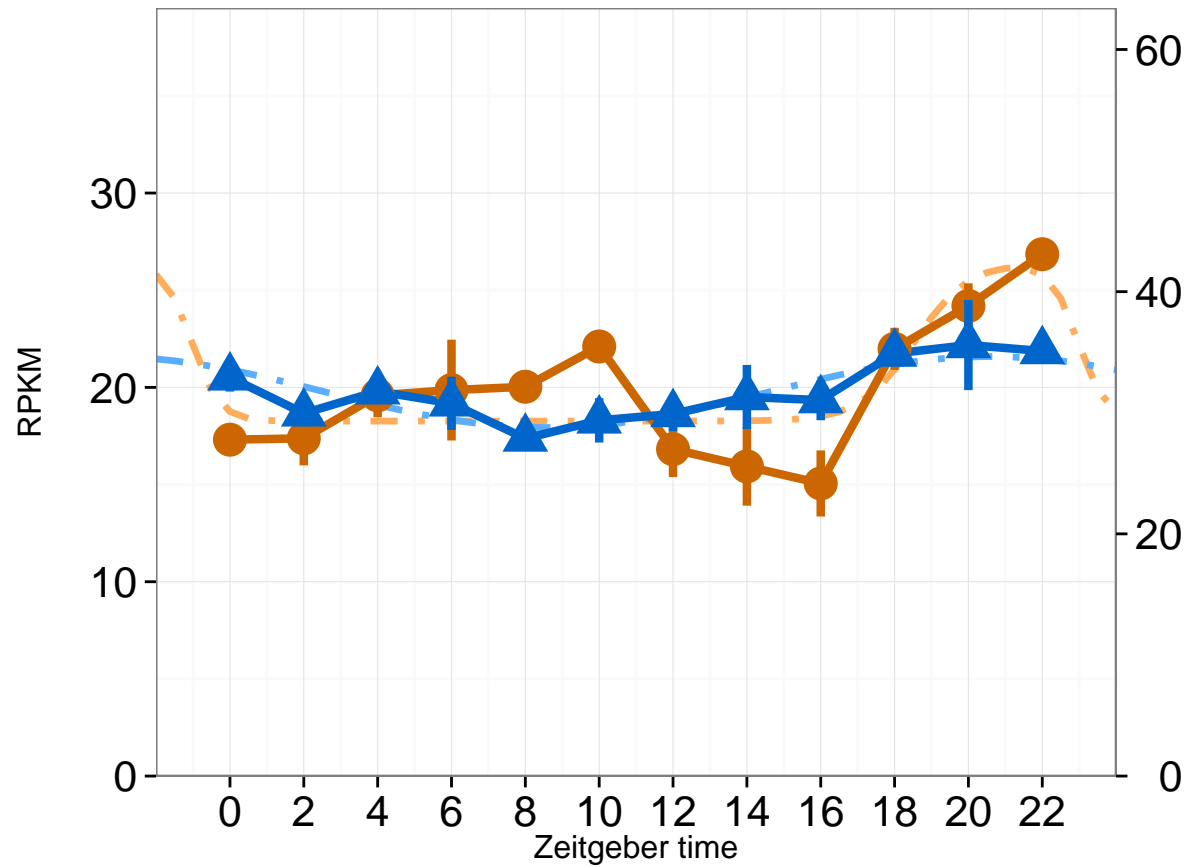

# Ptov1

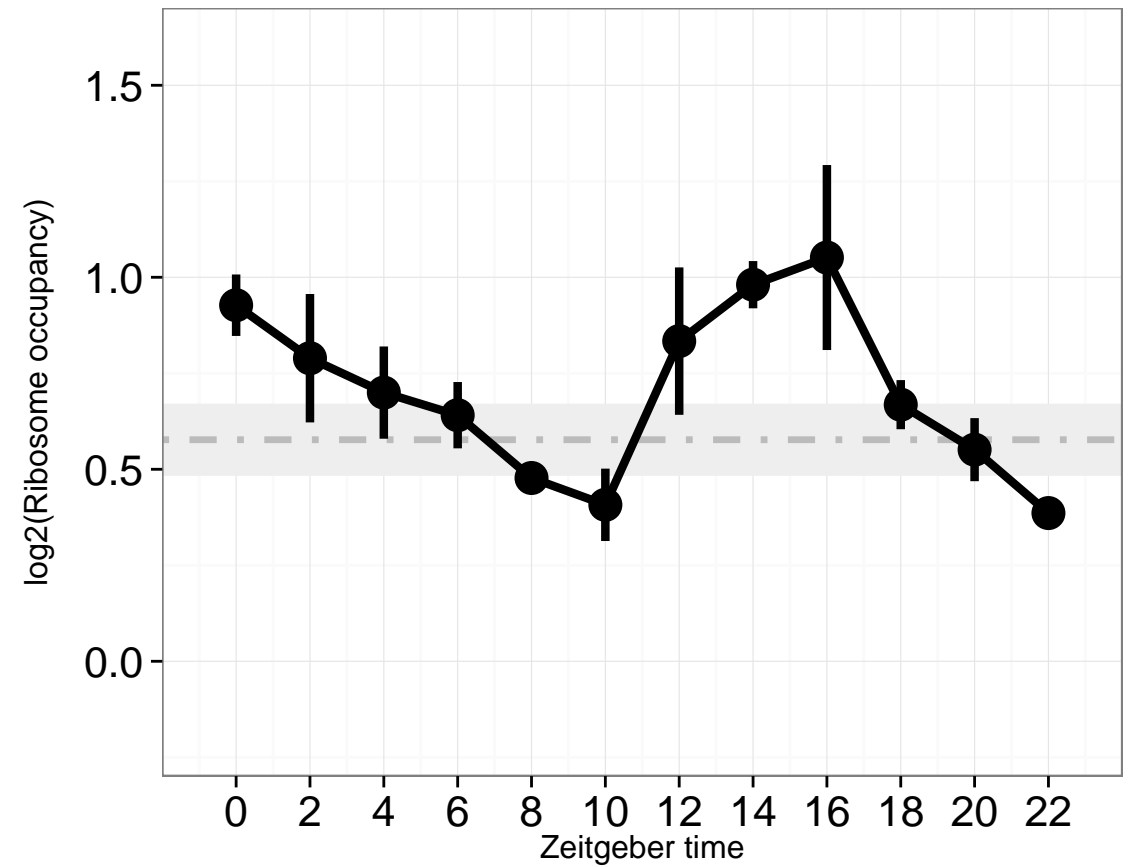

Supplement: SuppDataset_1.zip [file Ptov1_set_A.pdf › Supplemental Dataset 1/A-mRNA_nonrhyth_translation_nonrhyth/Ptov1_set_A.pdf]

# Ptp4a2

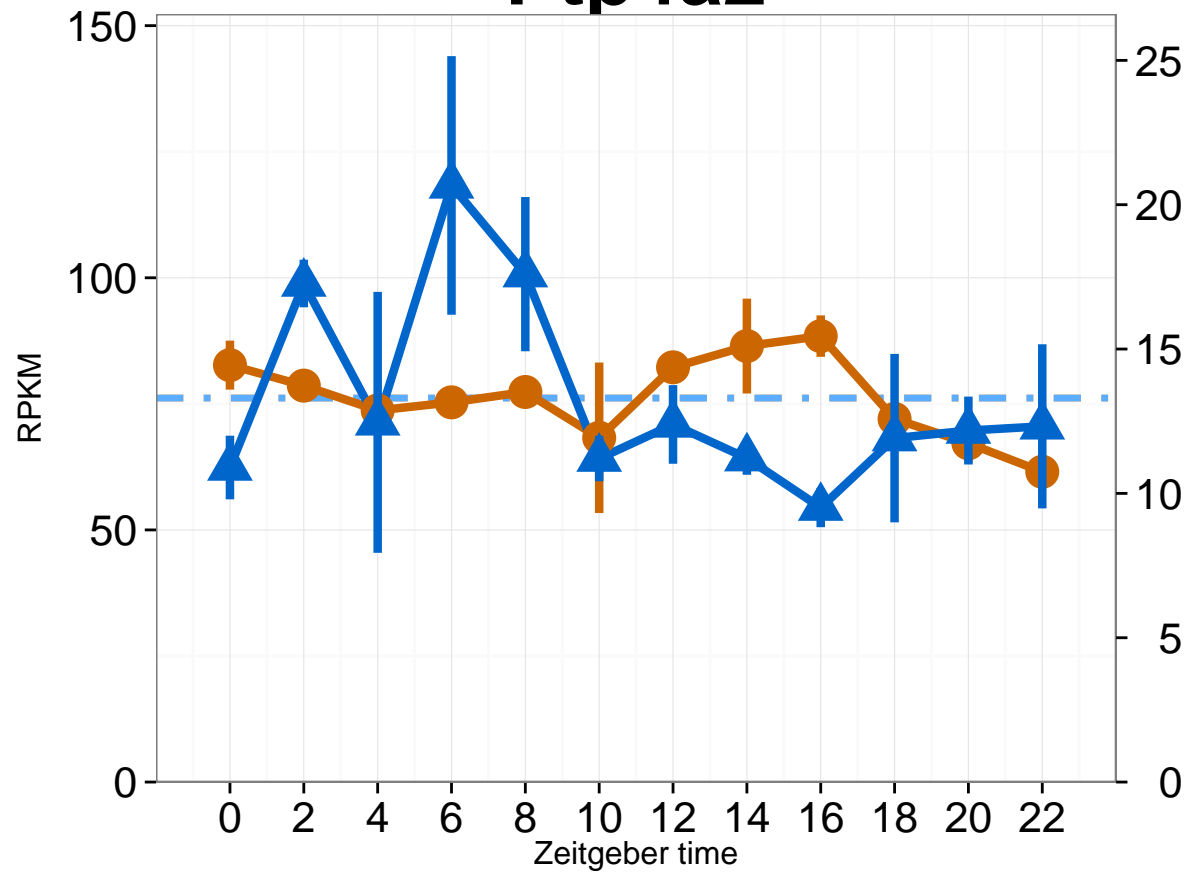

# Ptp4a2

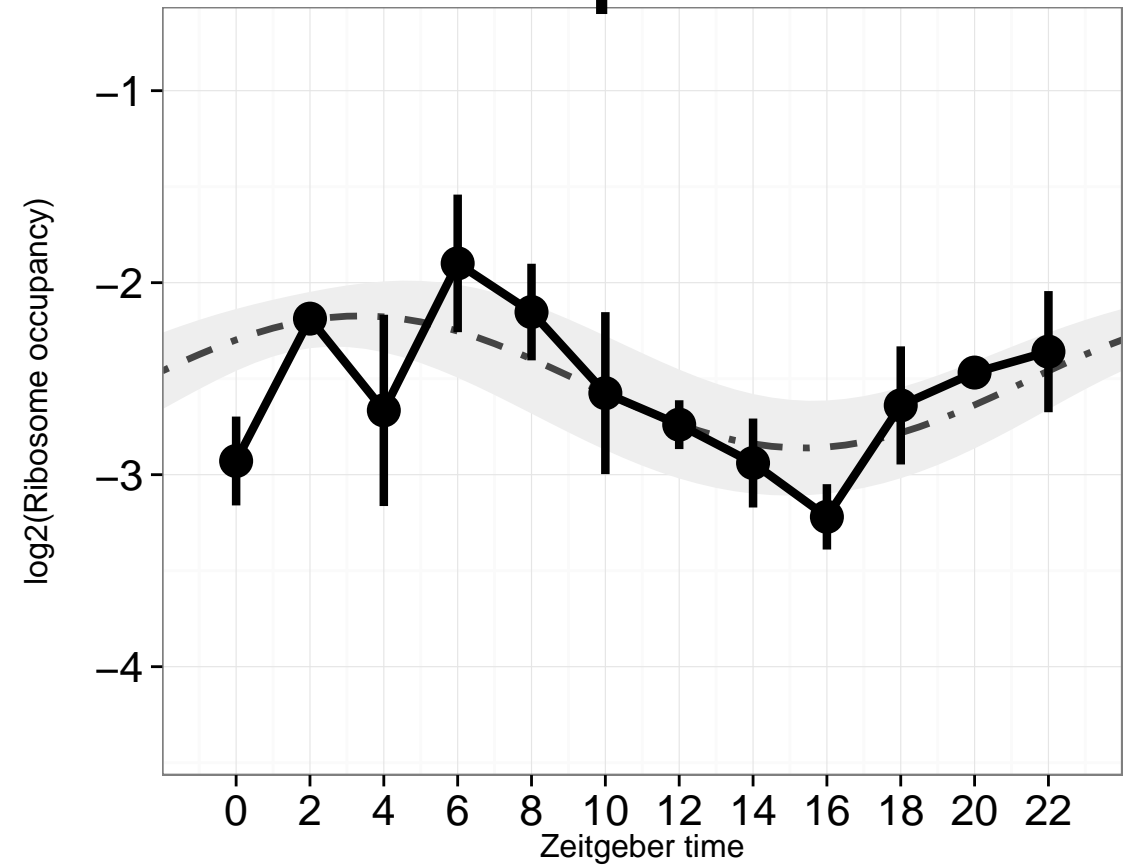

Supplement: SuppDataset_1.zip [file Ptp4a2_set_A.pdf › Supplemental Dataset 1/A-mRNA_nonrhyth_translation_nonrhyth/Ptp4a2_set_A.pdf]

## Ptp4a3

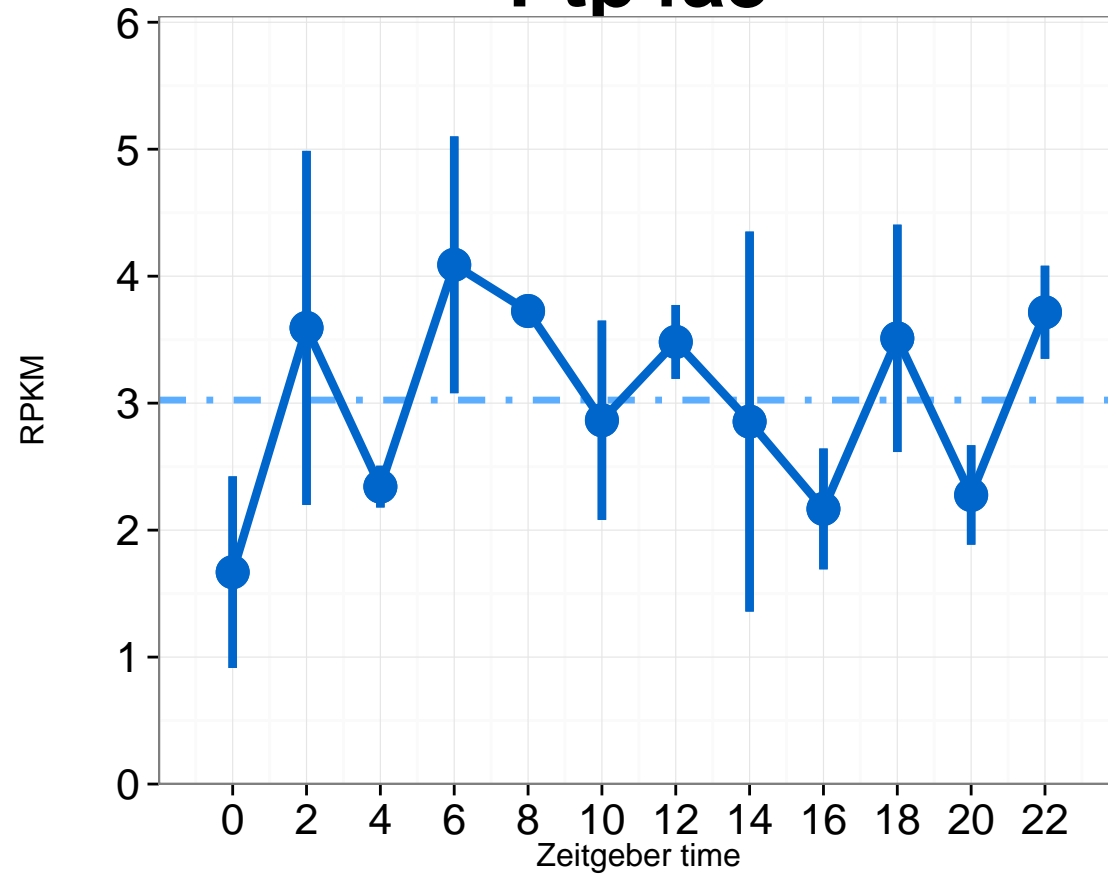

## Ptp4a3 log2(Ribosome occupancy

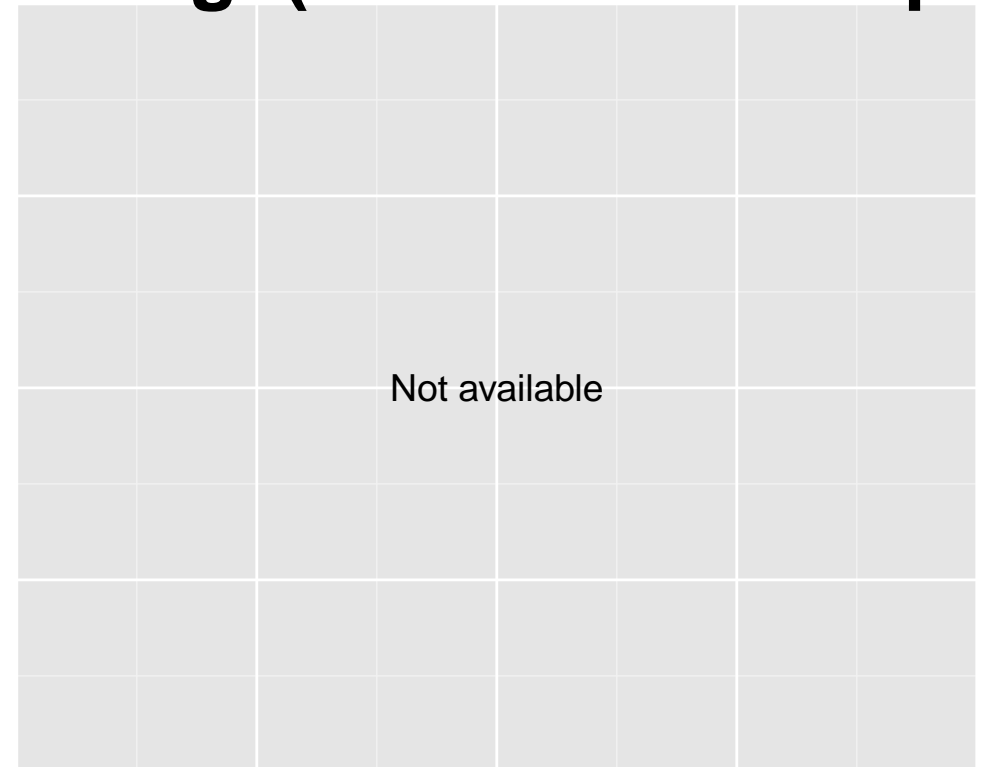

Supplement: SuppDataset_1.zip [file Ptp4a3_set_A.pdf › Supplemental Dataset 1/A-mRNA_nonrhyth_translation_nonrhyth/Ptp4a3_set_A.pdf]

## Ptpdc1

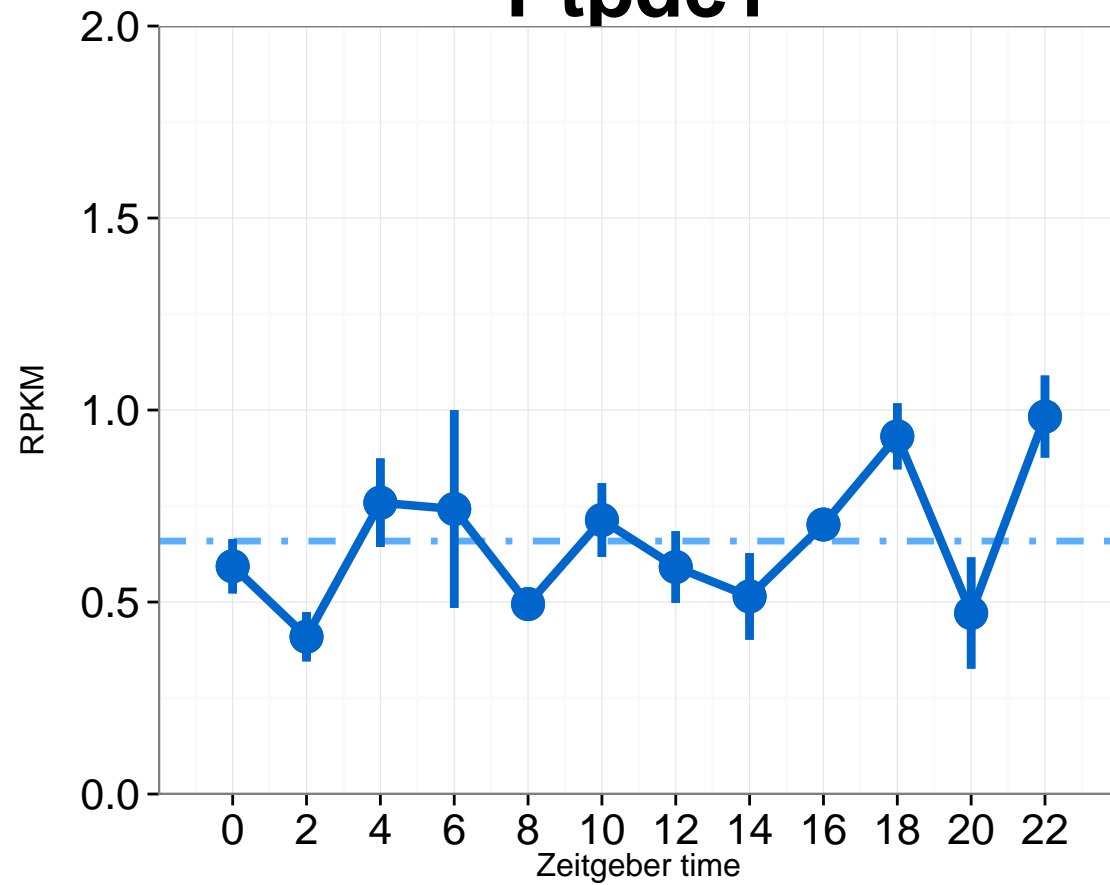

## Ptpdc1 log2(Ribosome occupancy

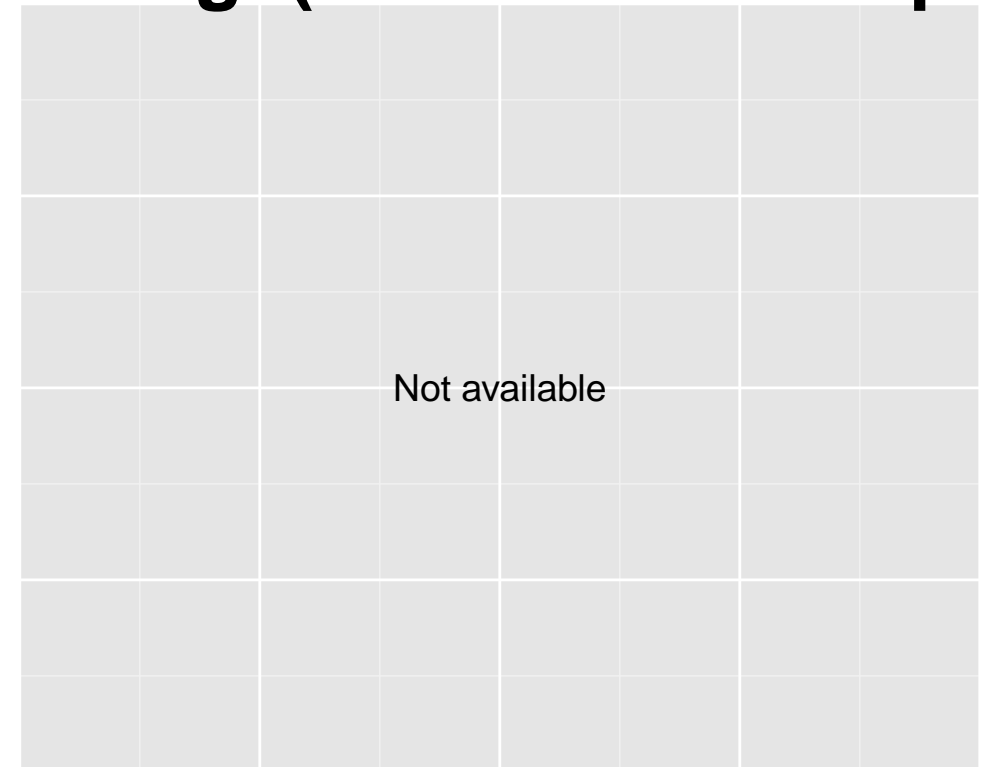

Supplement: SuppDataset_1.zip [file Ptpdc1_set_A.pdf › Supplemental Dataset 1/A-mRNA_nonrhyth_translation_nonrhyth/Ptpdc1_set_A.pdf]

# Ptplad1

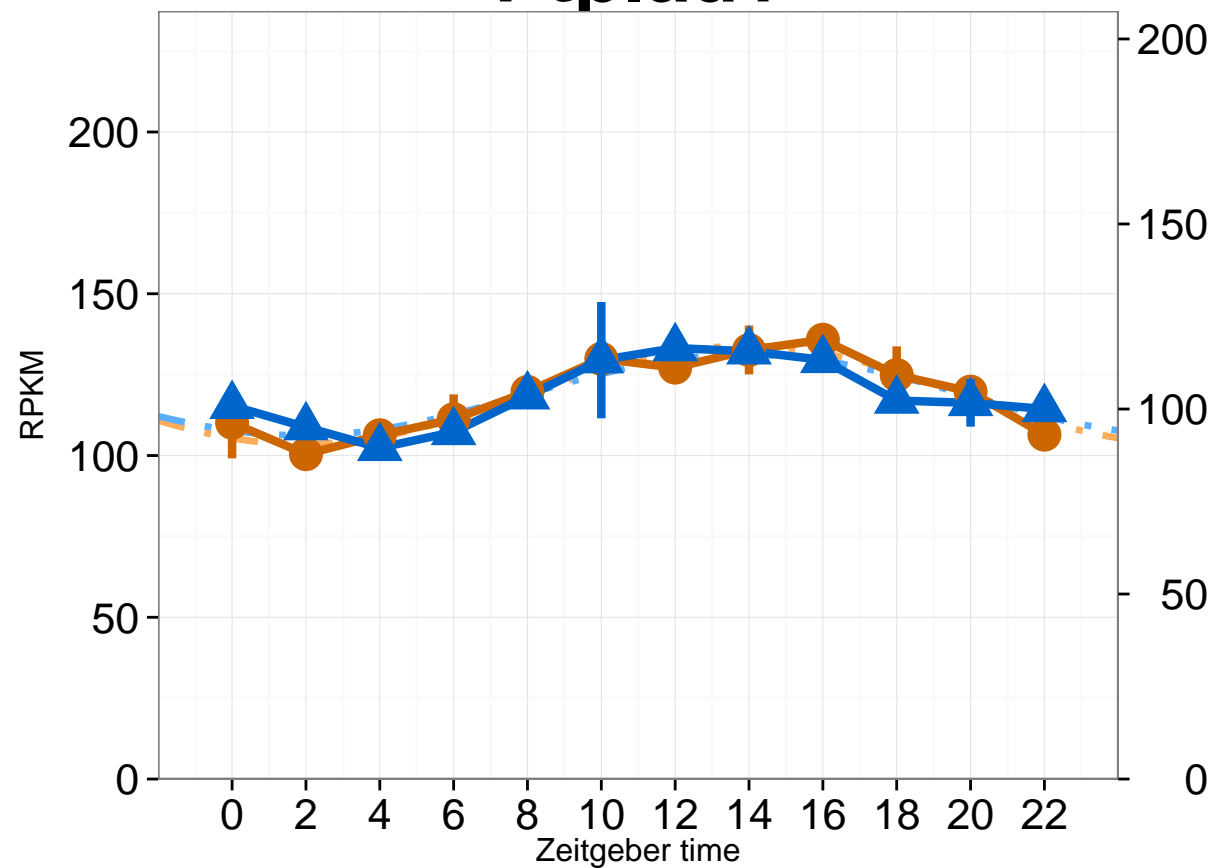

# Ptplad1

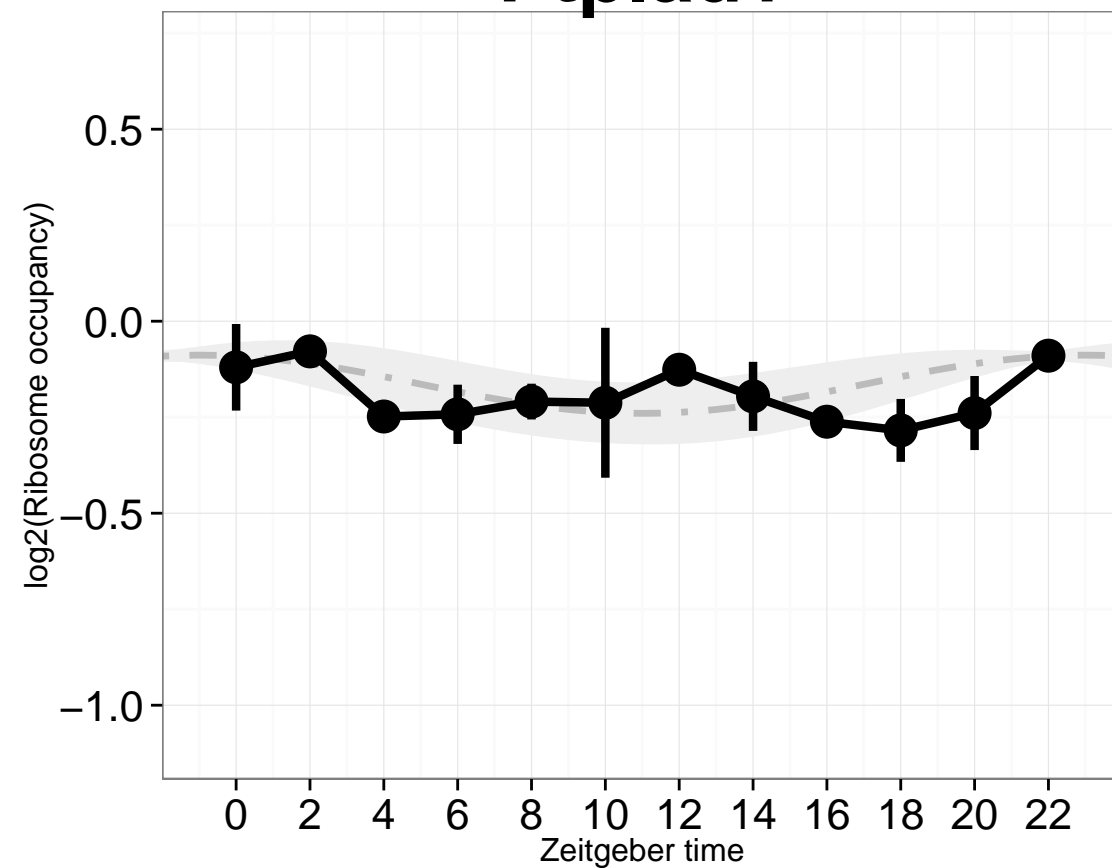

Supplement: SuppDataset_1.zip [file Ptplad1_set_A.pdf › Supplemental Dataset 1/A-mRNA_nonrhyth_translation_nonrhyth/Ptplad1_set_A.pdf]

# Ptplad2

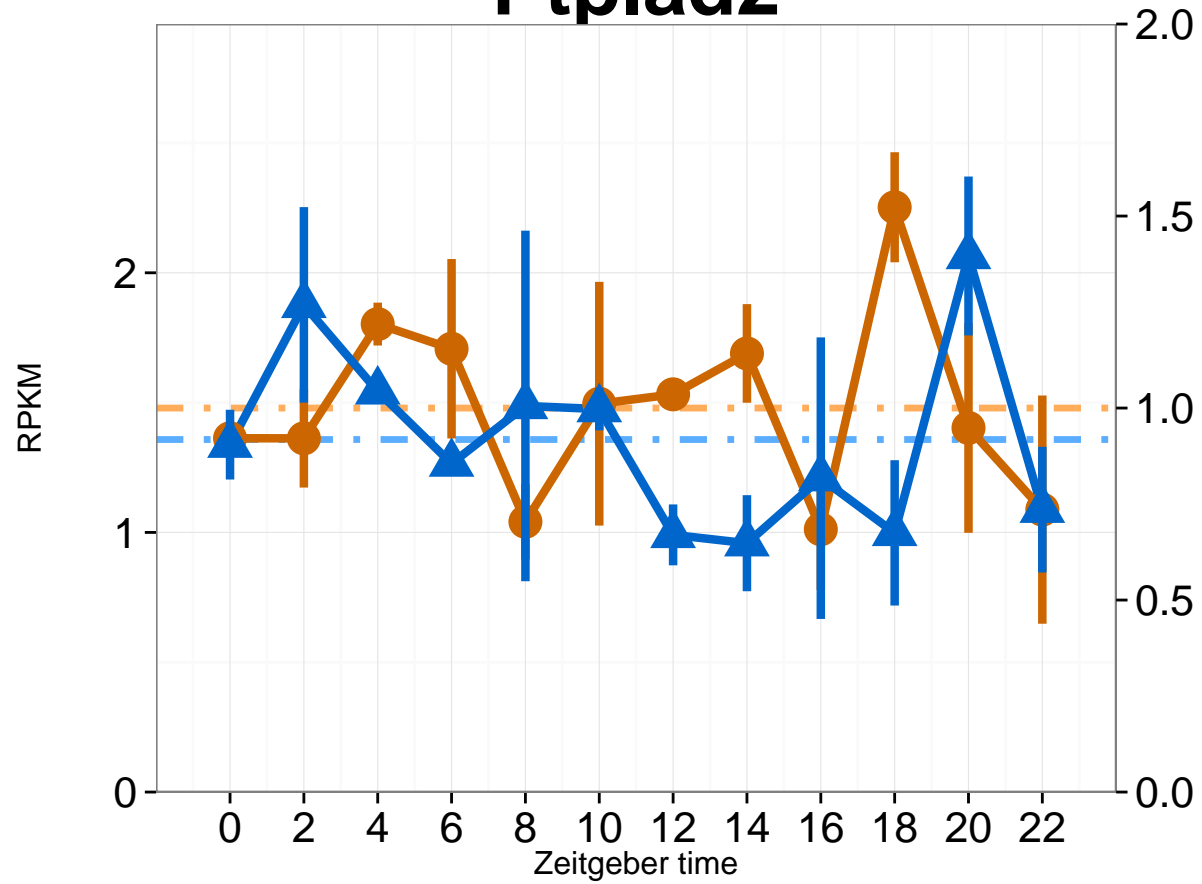

# Ptplad2

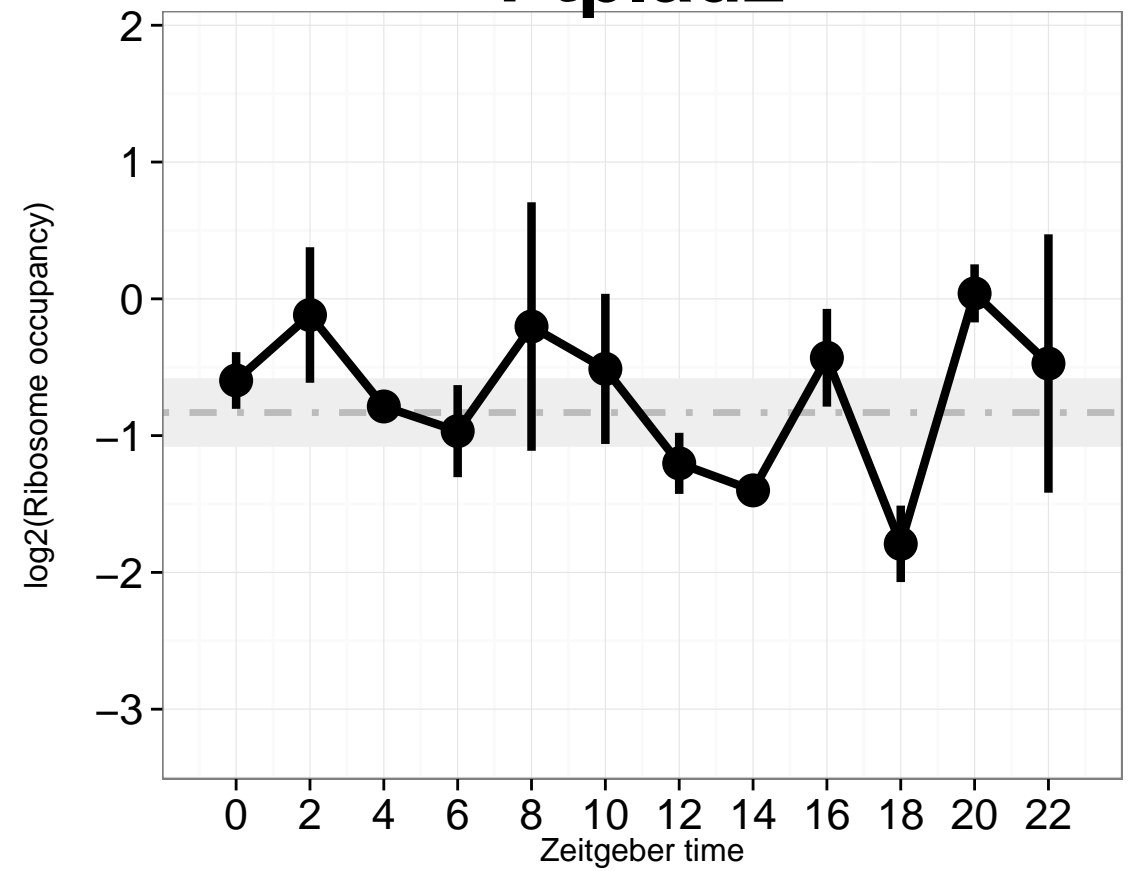

Supplement: SuppDataset_1.zip [file Ptplad2_set_A.pdf › Supplemental Dataset 1/A-mRNA_nonrhyth_translation_nonrhyth/Ptplad2_set_A.pdf]

# Ptplb

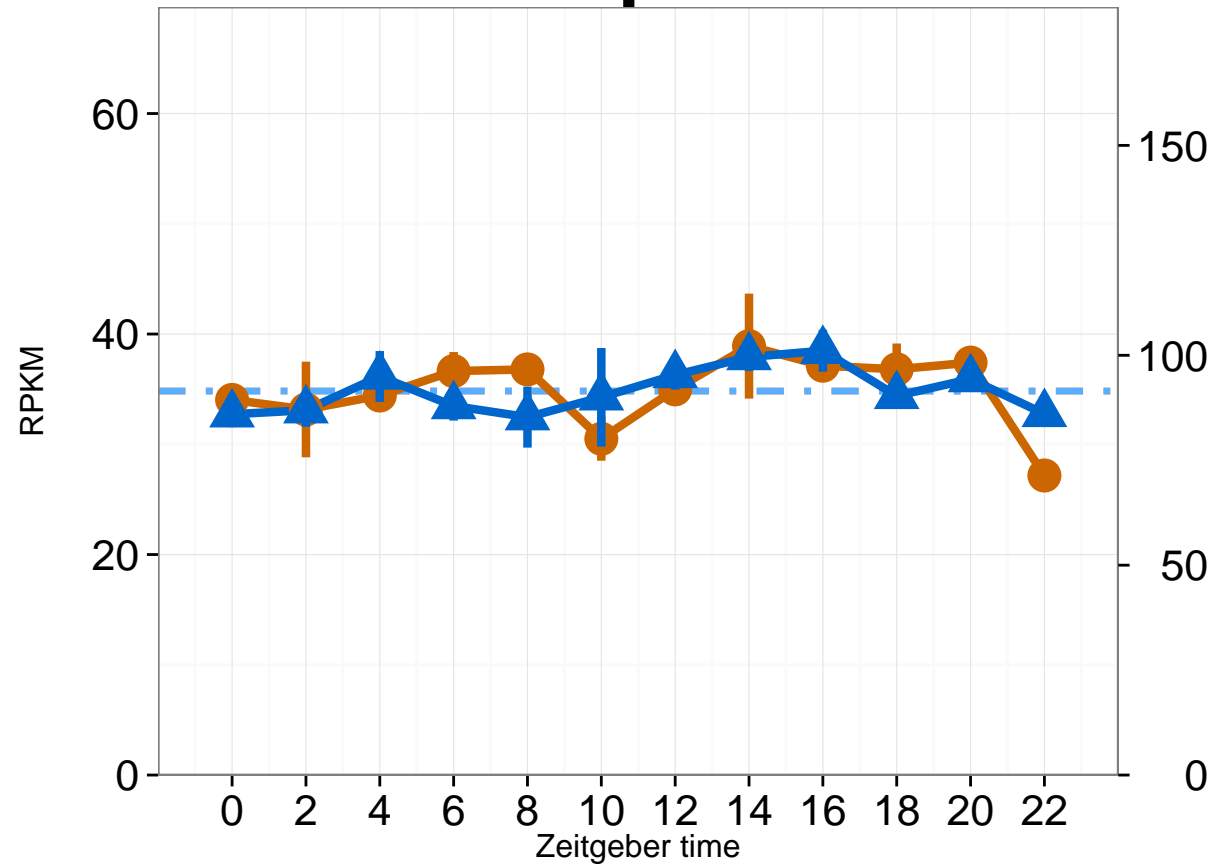

# Ptplb

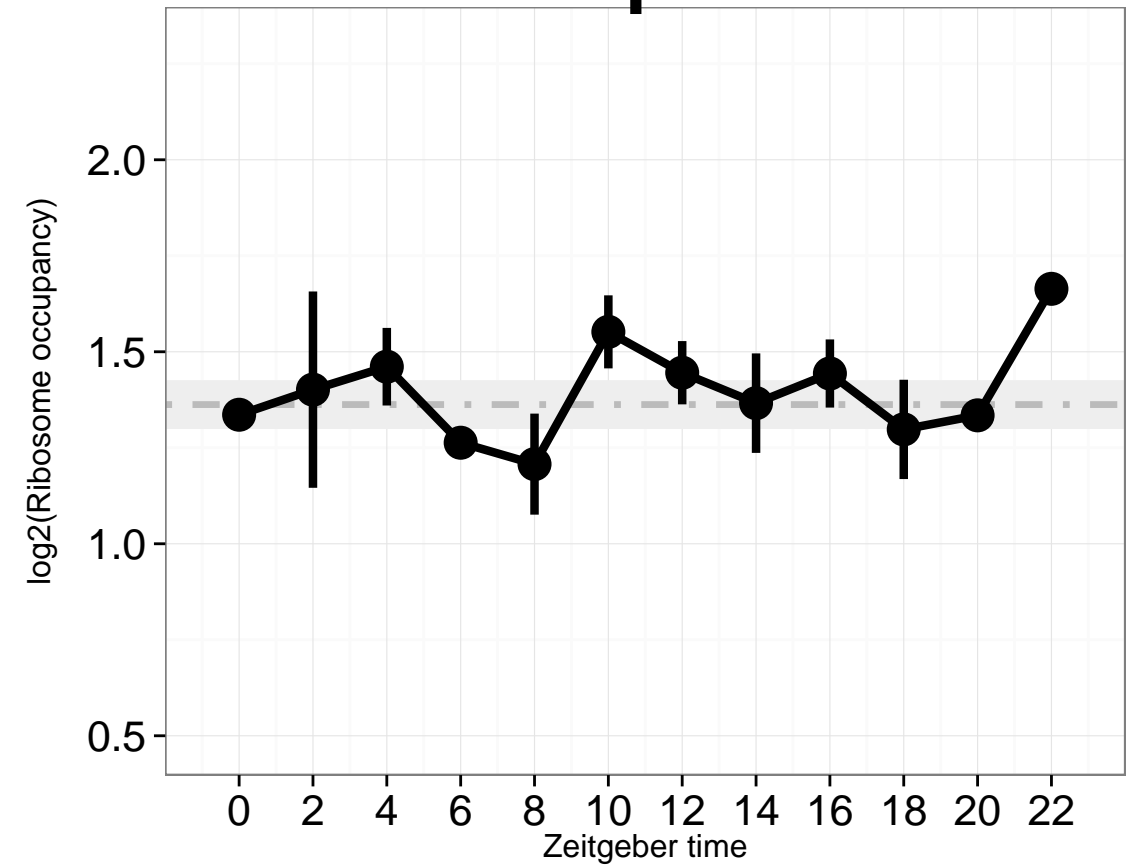

Supplement: SuppDataset_1.zip [file Ptplb_set_A.pdf › Supplemental Dataset 1/A-mRNA_nonrhyth_translation_nonrhyth/Ptplb_set_A.pdf]

# Ptpn11

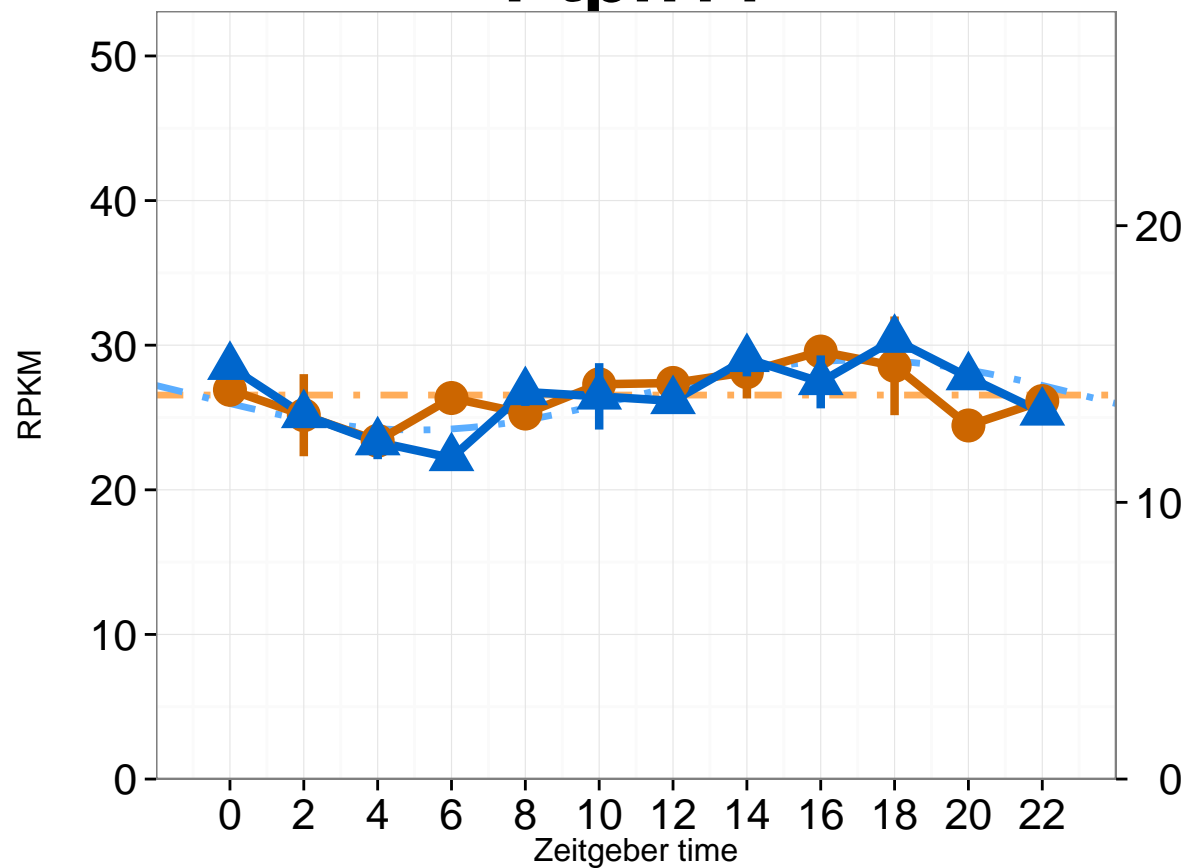

# Ptpn11

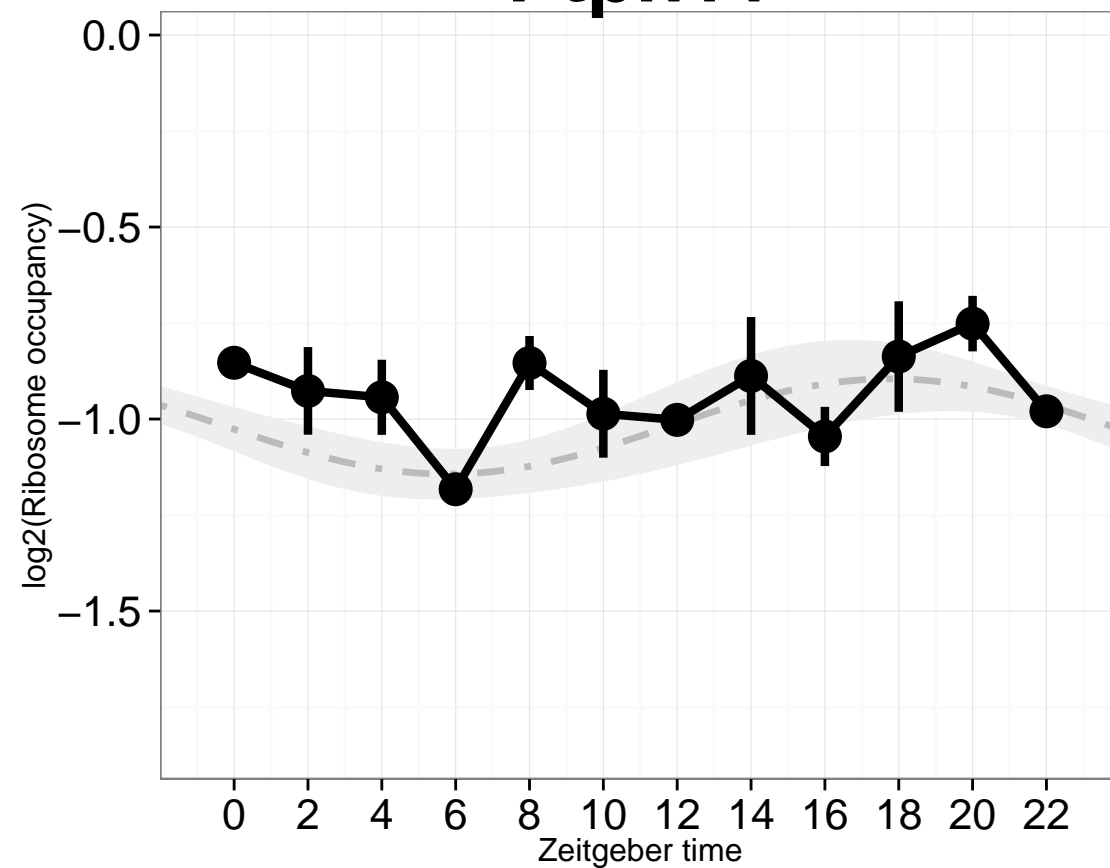

Supplement: SuppDataset_1.zip [file Ptpn11_set_A.pdf › Supplemental Dataset 1/A-mRNA_nonrhyth_translation_nonrhyth/Ptpn11_set_A.pdf]
