# Supplementary figures and images for: Ribosome profiling reveals the rhythmic liver translatome and circadian clock regulation by upstream open reading frames (part 59 of 113)
Source: HighWire-hosted journal article supplement (doi:10.1101/gr.195404.115), 2015-10-20

# Ptpn12

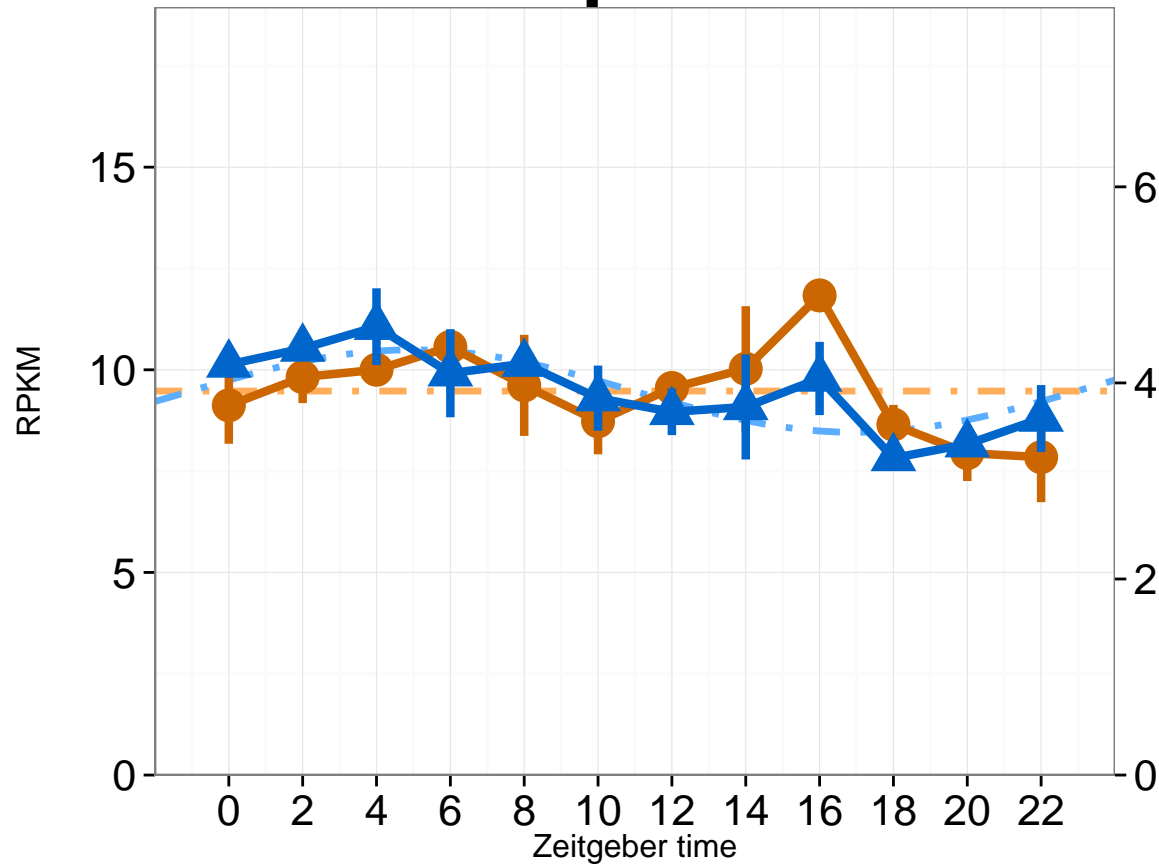

# Ptpn12

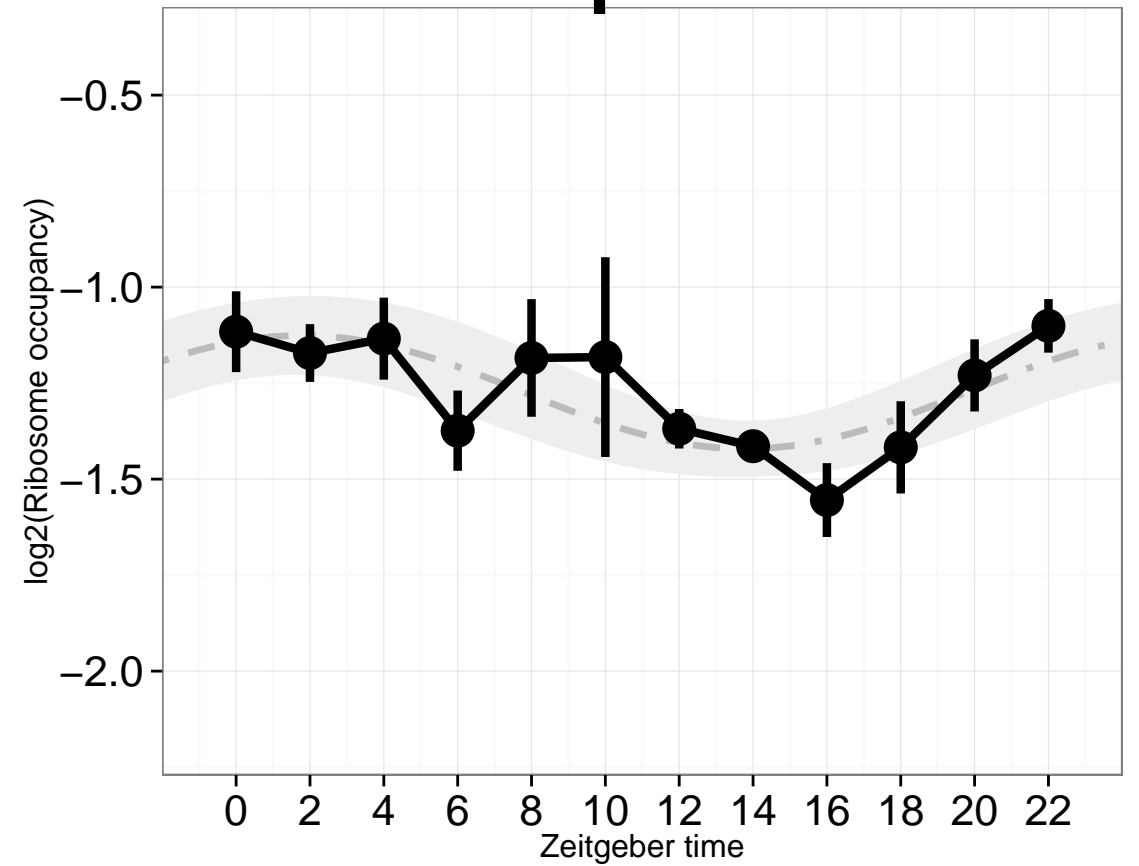

Supplement: SuppDataset_1.zip [file Ptpn12_set_A.pdf › Supplemental Dataset 1/A-mRNA_nonrhyth_translation_nonrhyth/Ptpn12_set_A.pdf]

# Ptpn14

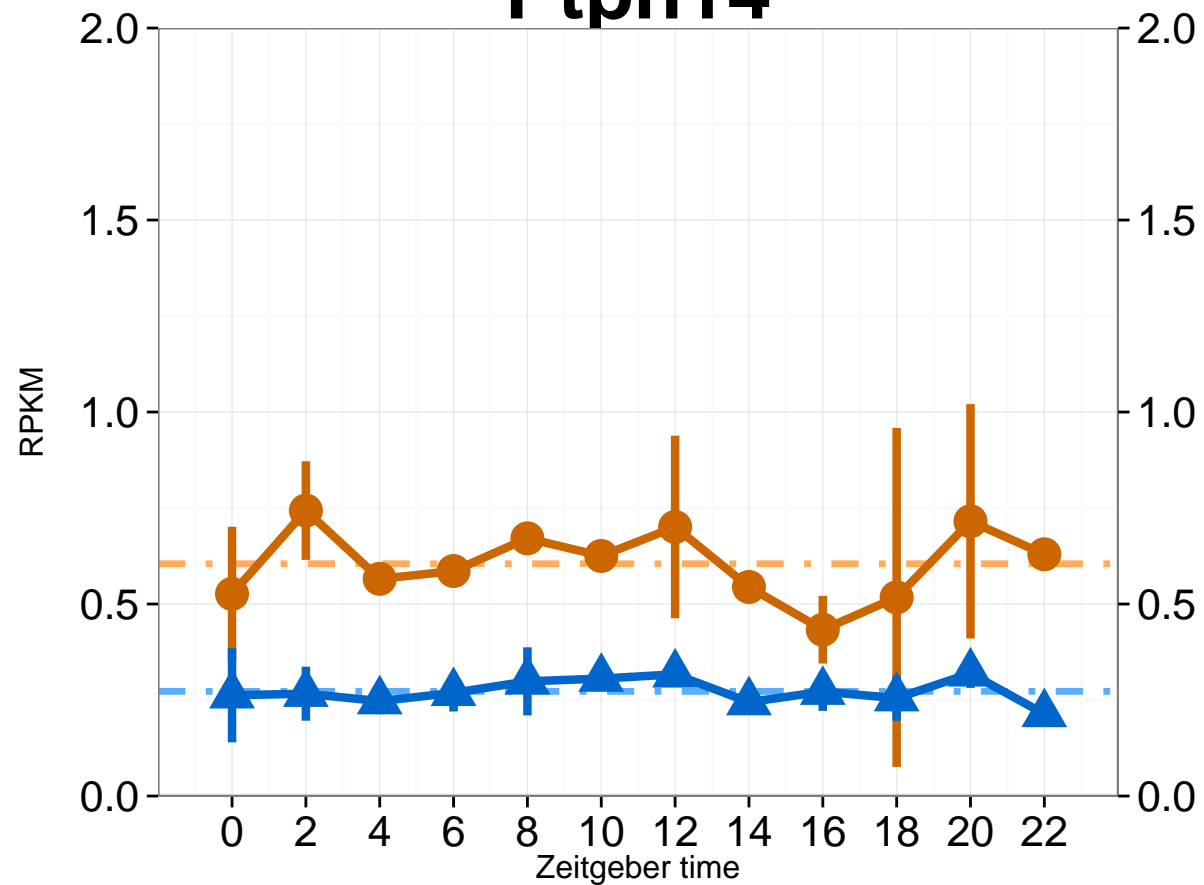

# Ptpn14

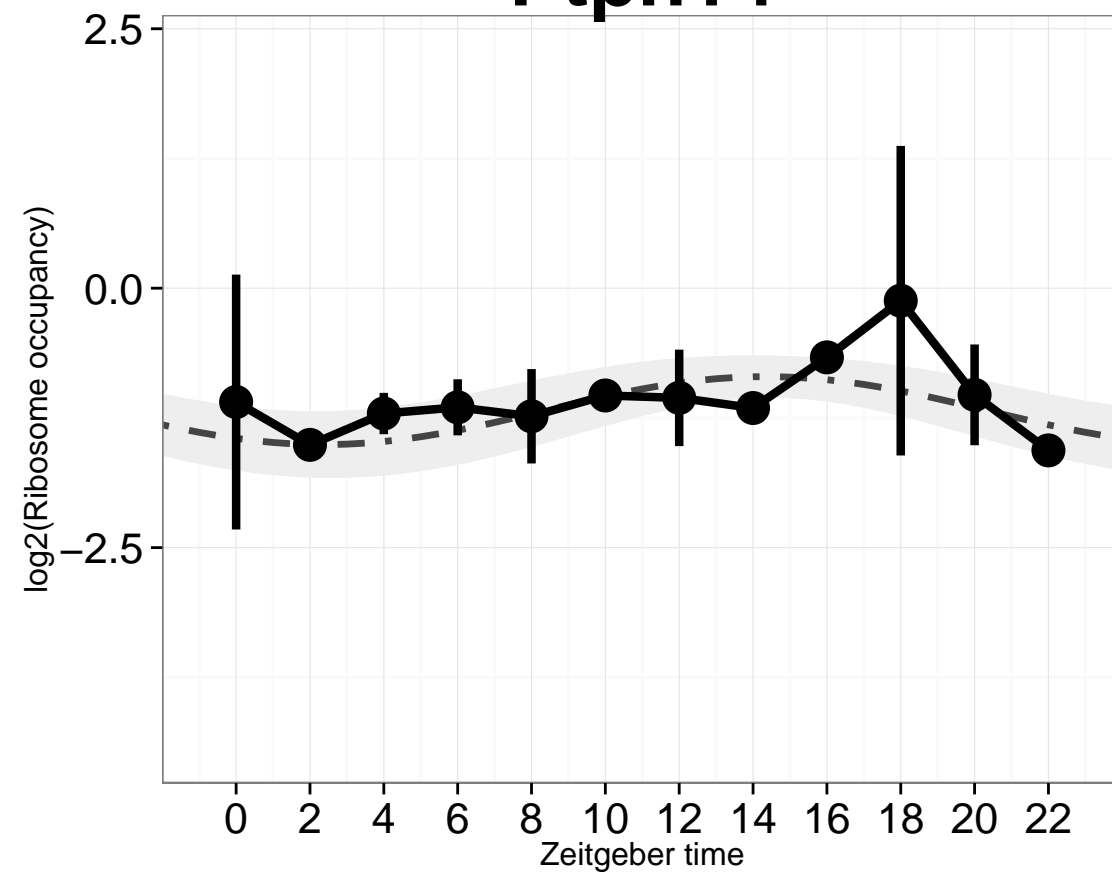

Supplement: SuppDataset_1.zip [file Ptpn14_set_A.pdf › Supplemental Dataset 1/A-mRNA_nonrhyth_translation_nonrhyth/Ptpn14_set_A.pdf]

# Ptpn18

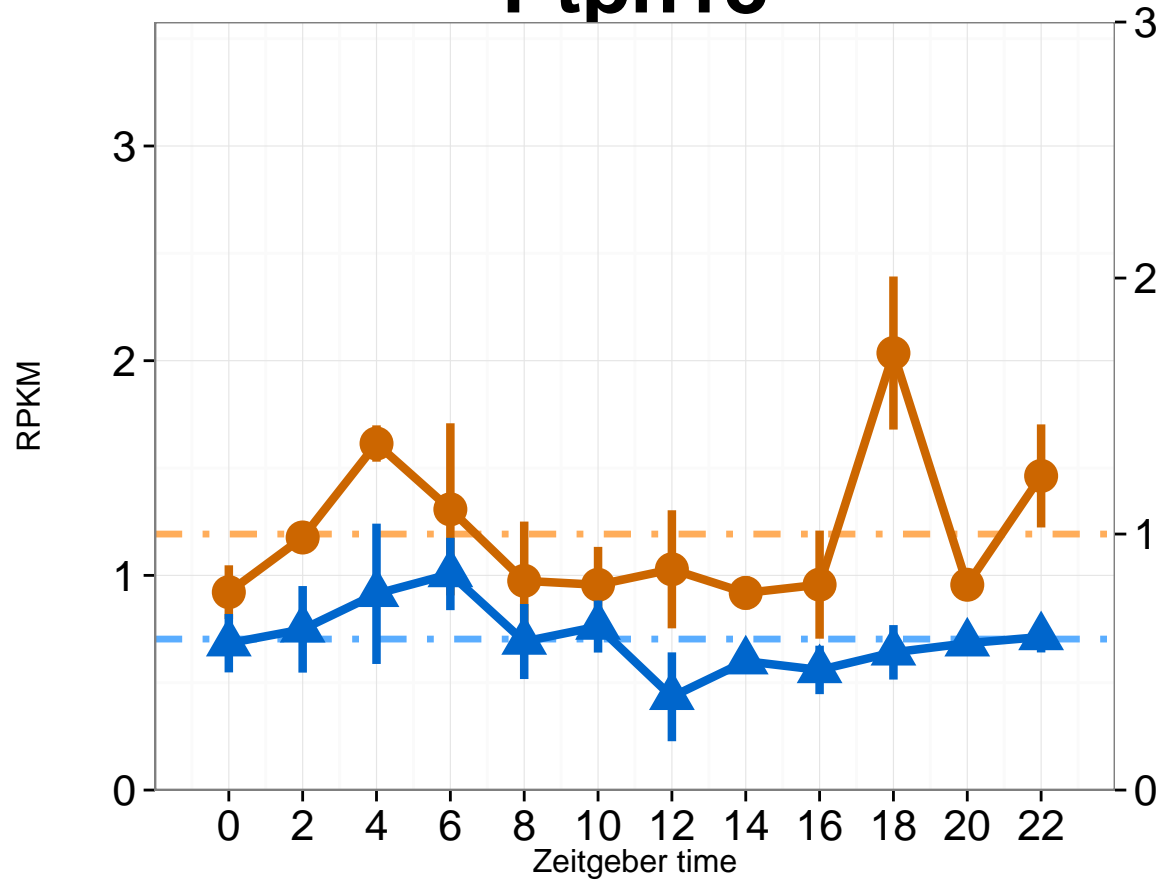

# Ptpn18

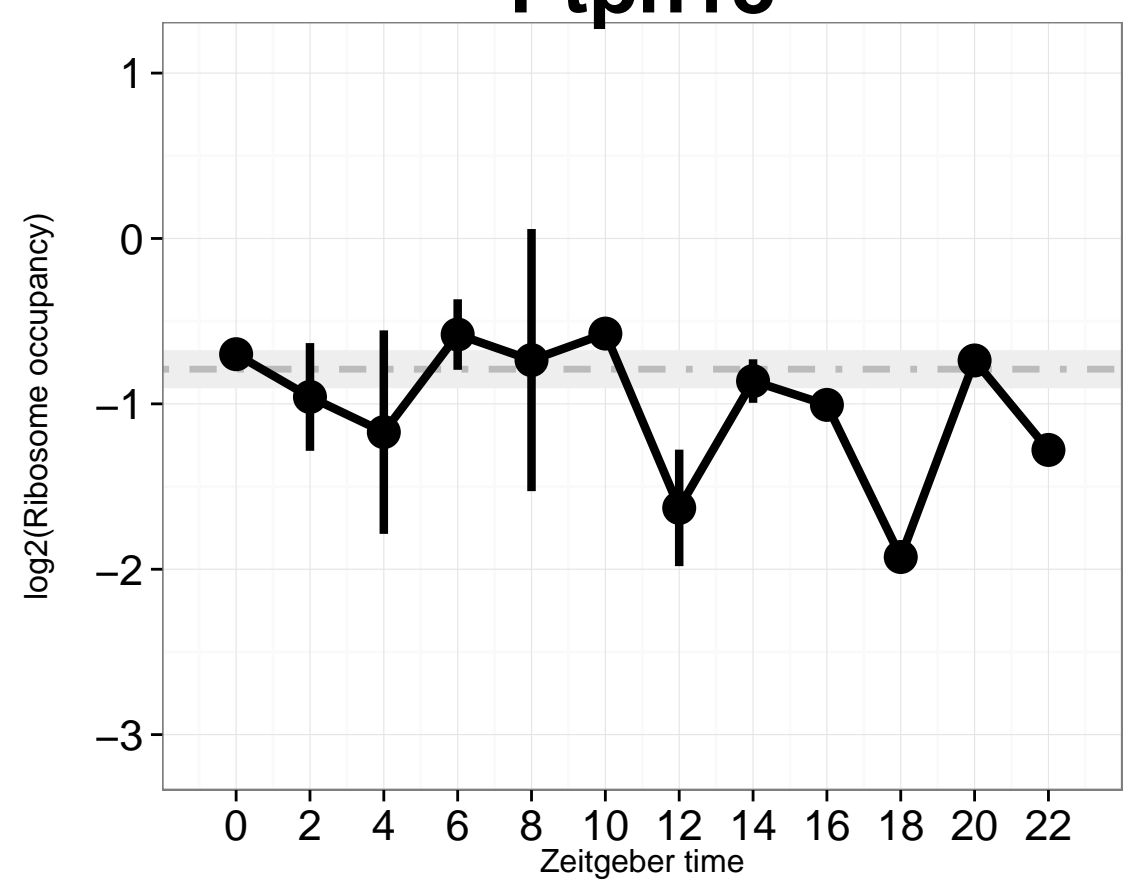

Supplement: SuppDataset_1.zip [file Ptpn18_set_A.pdf › Supplemental Dataset 1/A-mRNA_nonrhyth_translation_nonrhyth/Ptpn18_set_A.pdf]

# Ptpn21

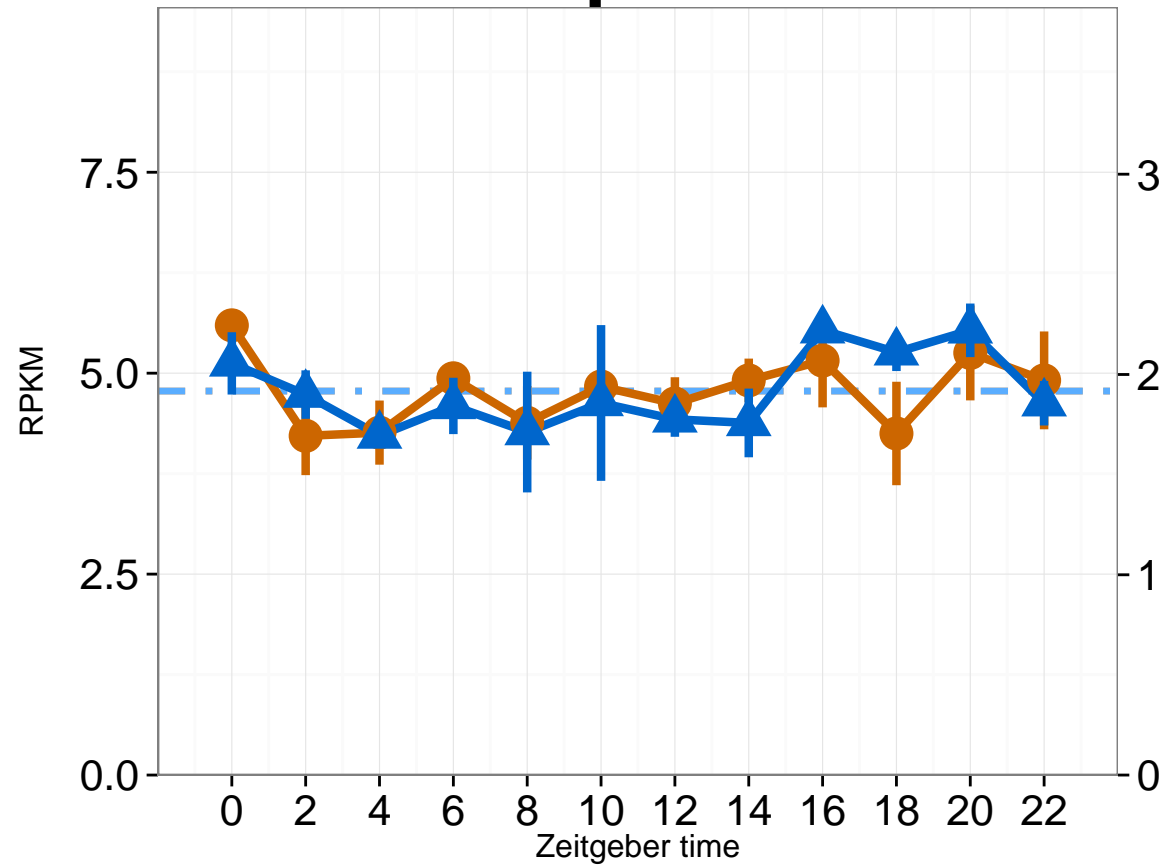

# Ptpn21

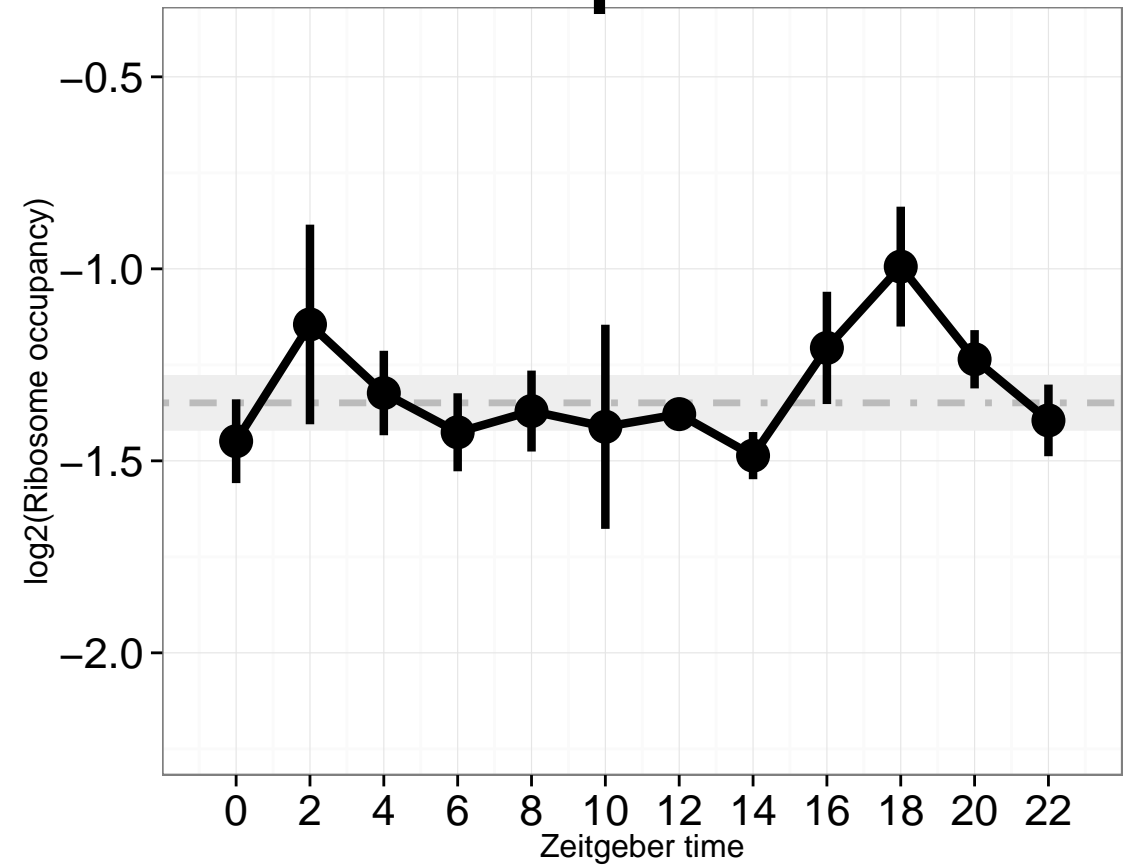

Supplement: SuppDataset_1.zip [file Ptpn21_set_A.pdf › Supplemental Dataset 1/A-mRNA_nonrhyth_translation_nonrhyth/Ptpn21_set_A.pdf]

# Ptpn23

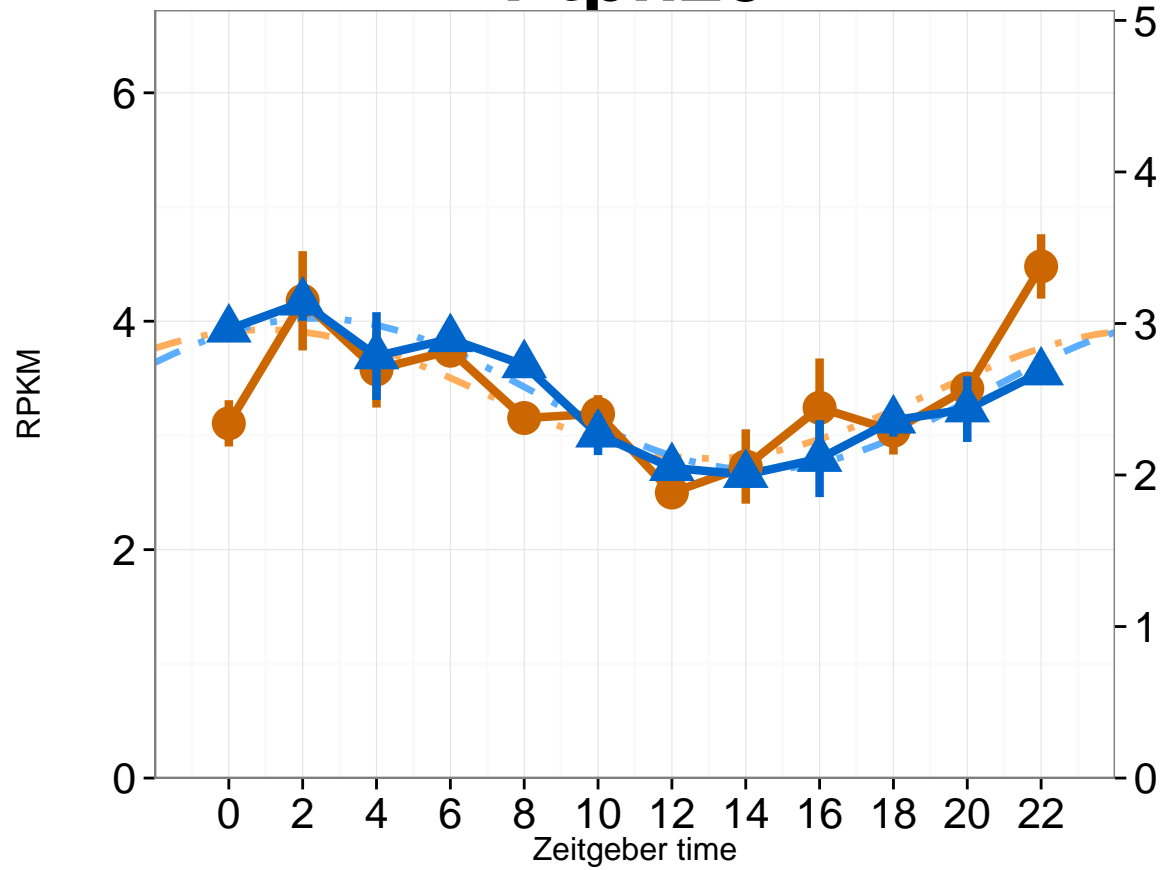

# Ptpn23

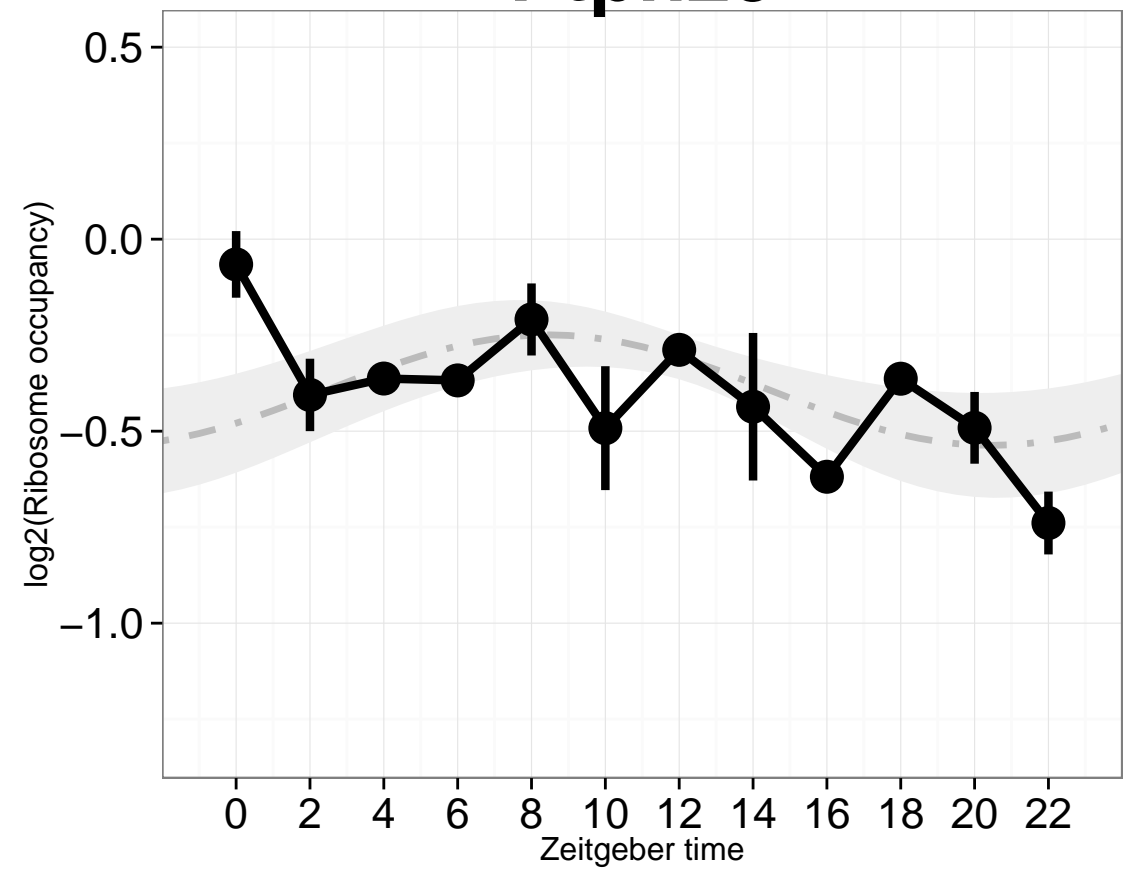

Supplement: SuppDataset_1.zip [file Ptpn23_set_A.pdf › Supplemental Dataset 1/A-mRNA_nonrhyth_translation_nonrhyth/Ptpn23_set_A.pdf]

# Ptpn2

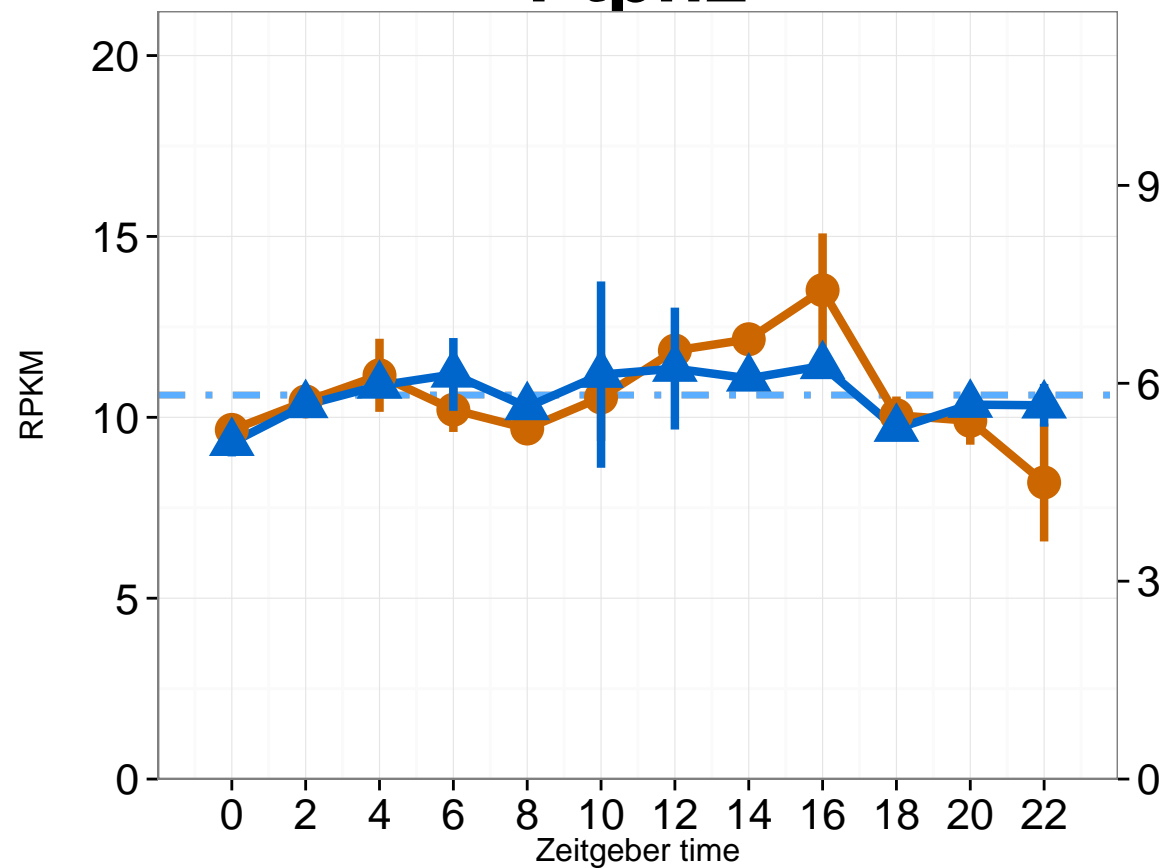

# Ptpn2

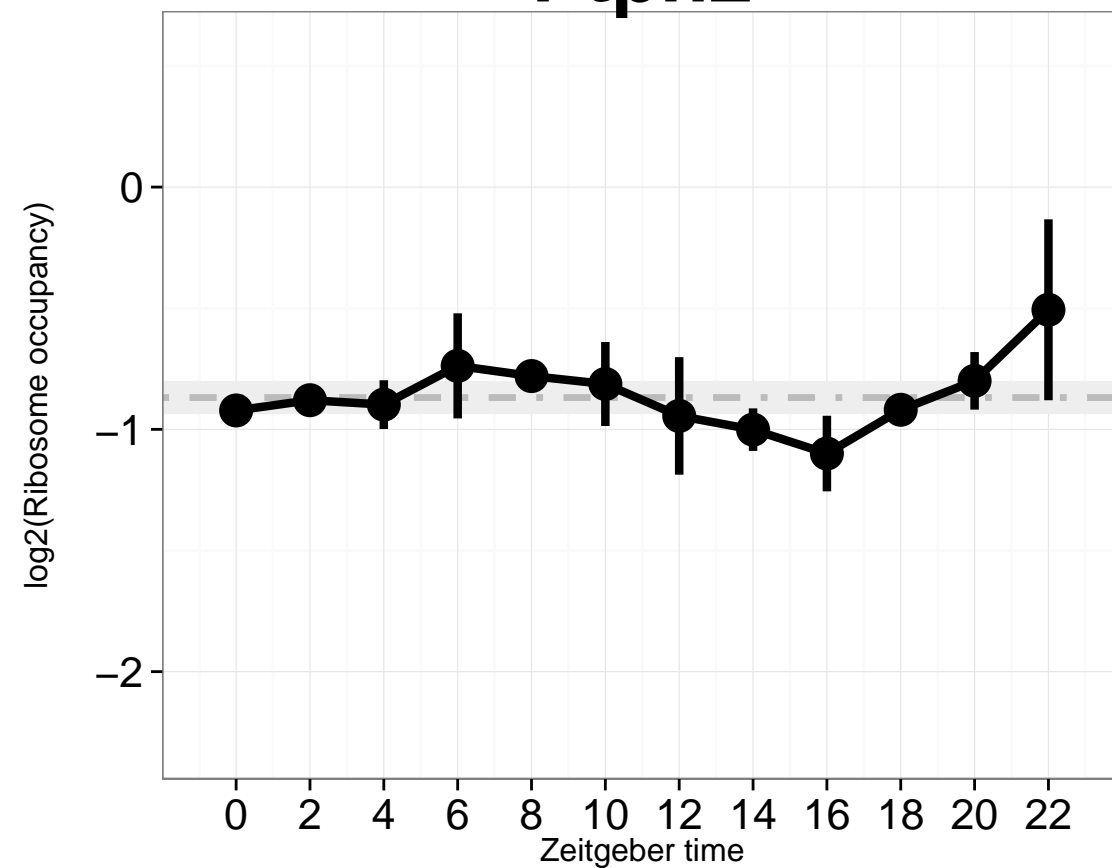

Supplement: SuppDataset_1.zip [file Ptpn2_set_A.pdf › Supplemental Dataset 1/A-mRNA_nonrhyth_translation_nonrhyth/Ptpn2_set_A.pdf]

# Ptpn3

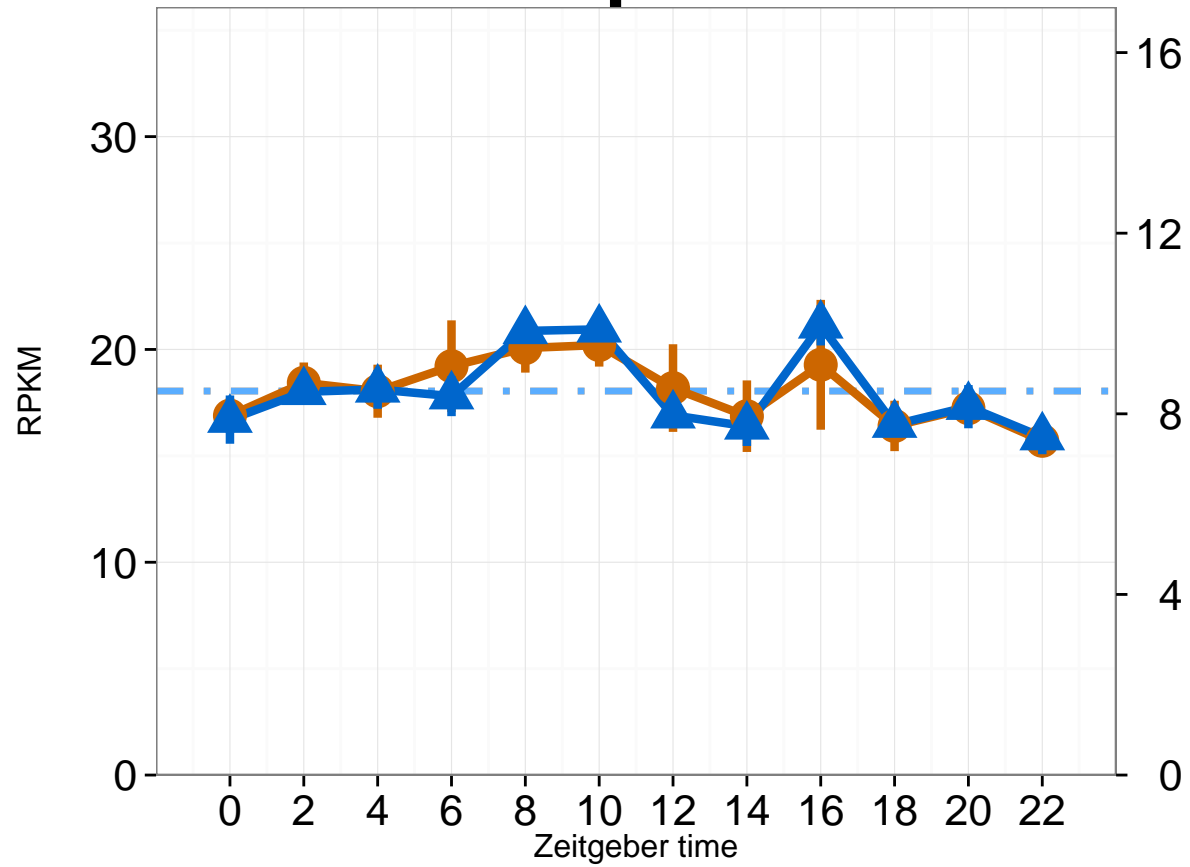

# Ptpn3

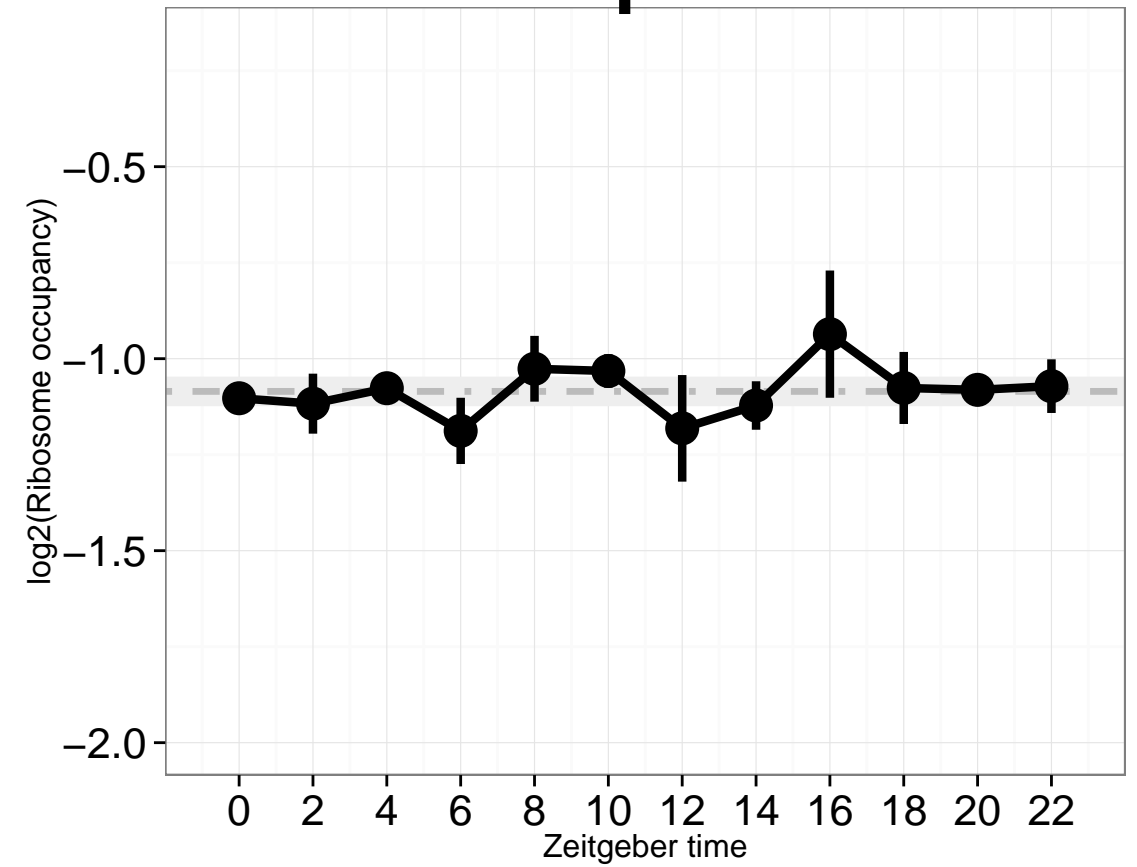

Supplement: SuppDataset_1.zip [file Ptpn3_set_A.pdf › Supplemental Dataset 1/A-mRNA_nonrhyth_translation_nonrhyth/Ptpn3_set_A.pdf]

# Ptpn4

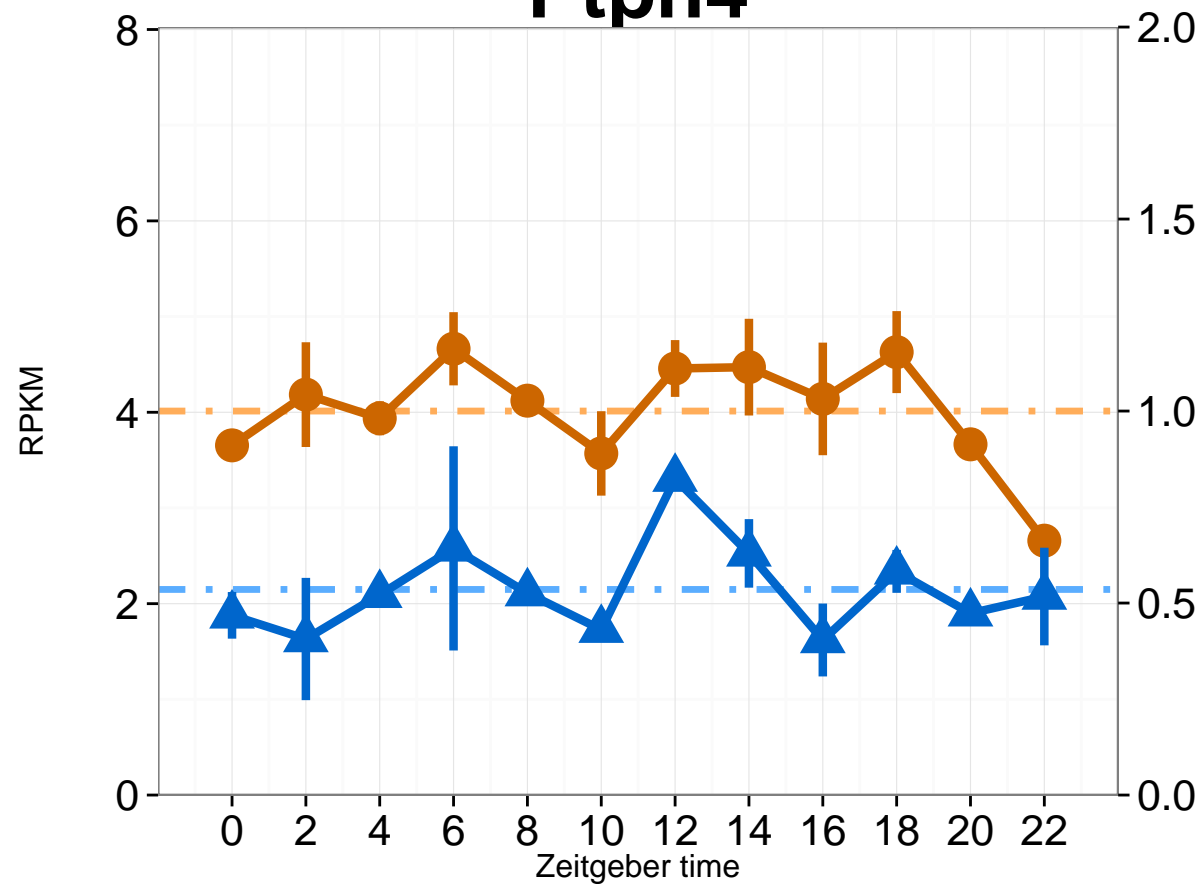

# Ptpn4

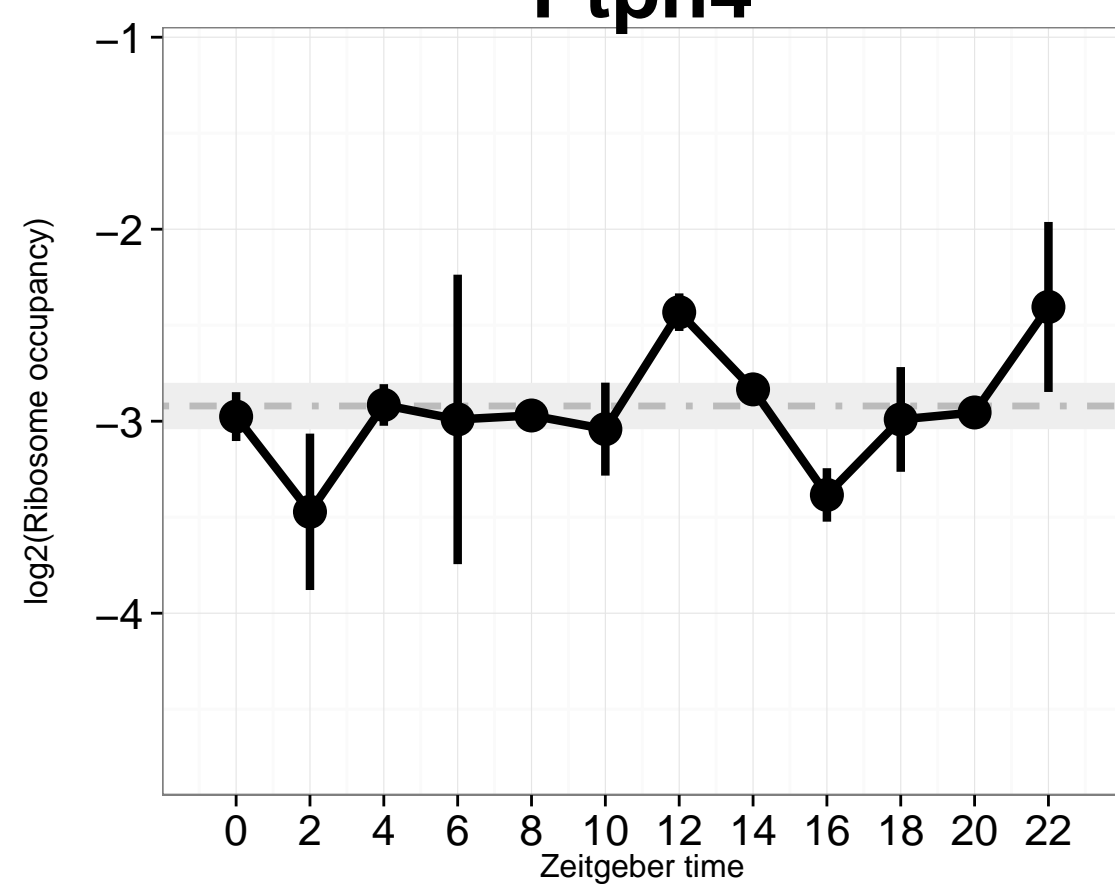

Supplement: SuppDataset_1.zip [file Ptpn4_set_A.pdf › Supplemental Dataset 1/A-mRNA_nonrhyth_translation_nonrhyth/Ptpn4_set_A.pdf]

# Ptpn6

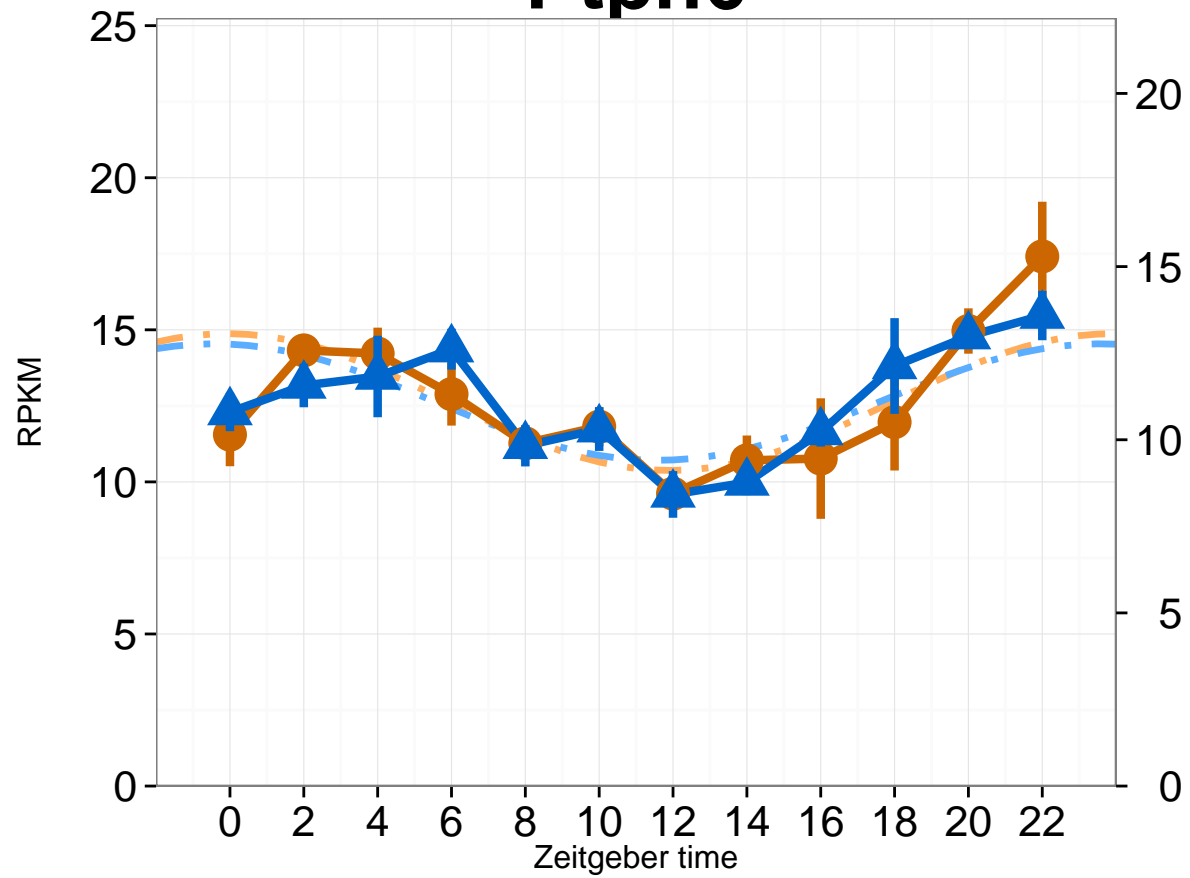

# Ptpn6

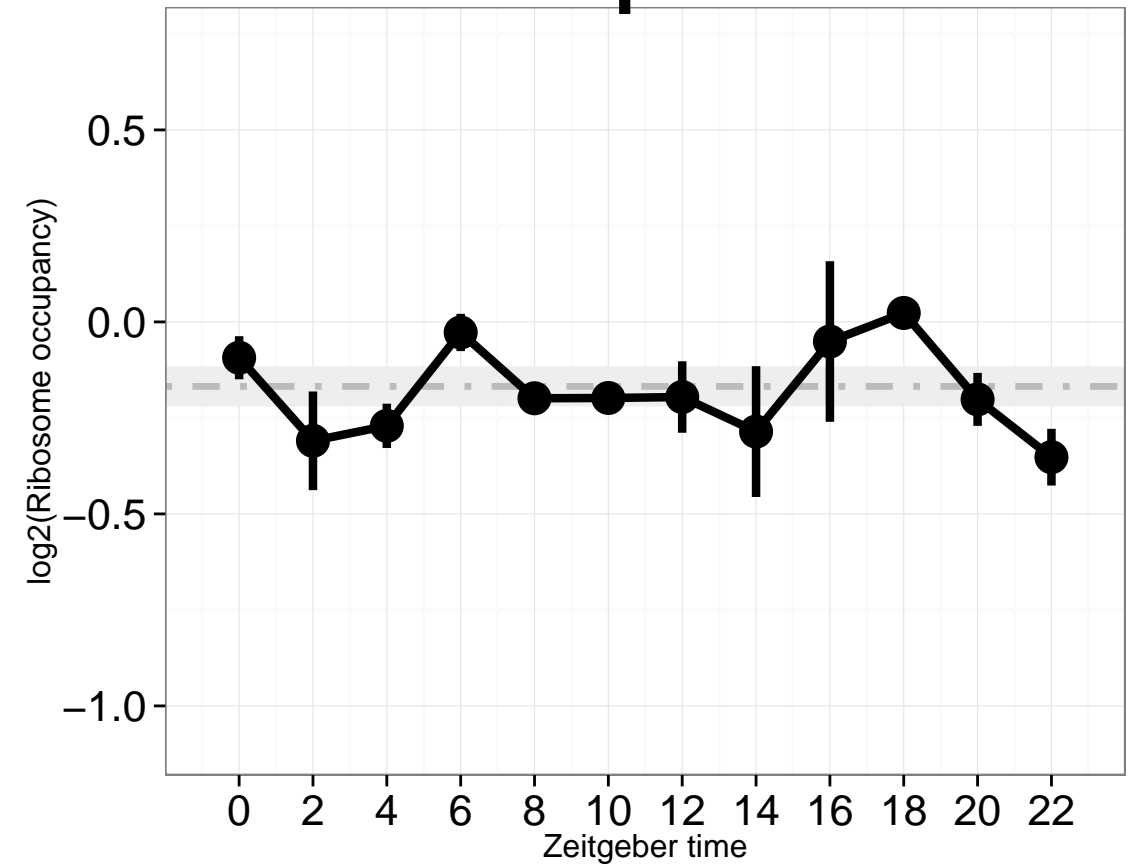

Supplement: SuppDataset_1.zip [file Ptpn6_set_A.pdf › Supplemental Dataset 1/A-mRNA_nonrhyth_translation_nonrhyth/Ptpn6_set_A.pdf]

# Ptpra

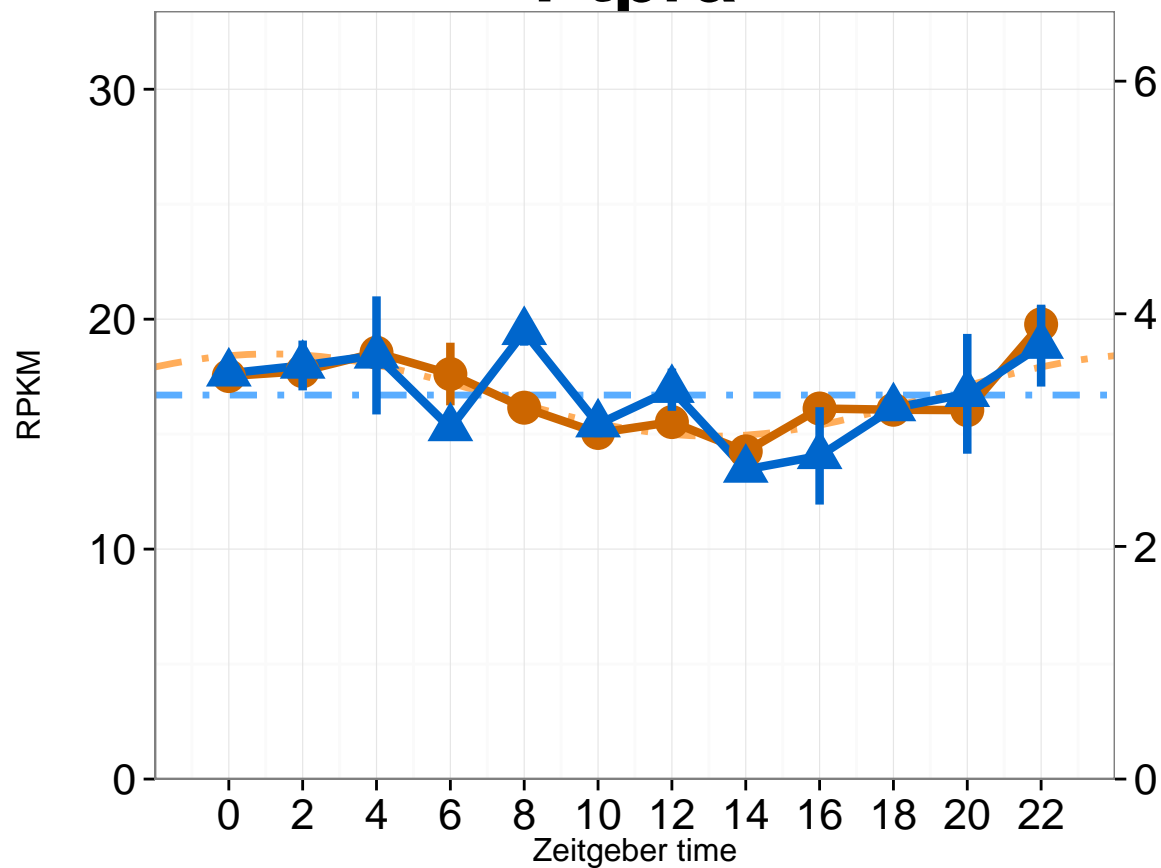

# Ptpra

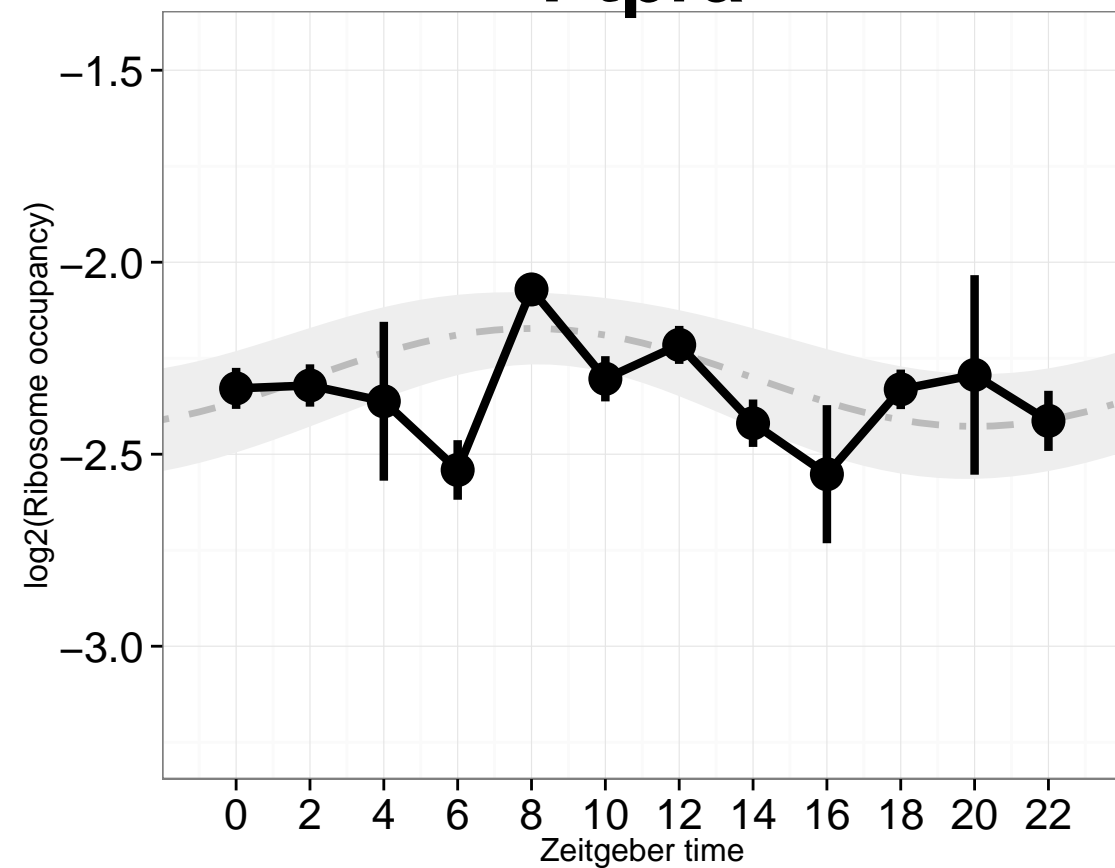

Supplement: SuppDataset_1.zip [file Ptpra_set_A.pdf › Supplemental Dataset 1/A-mRNA_nonrhyth_translation_nonrhyth/Ptpra_set_A.pdf]

# Ptprb

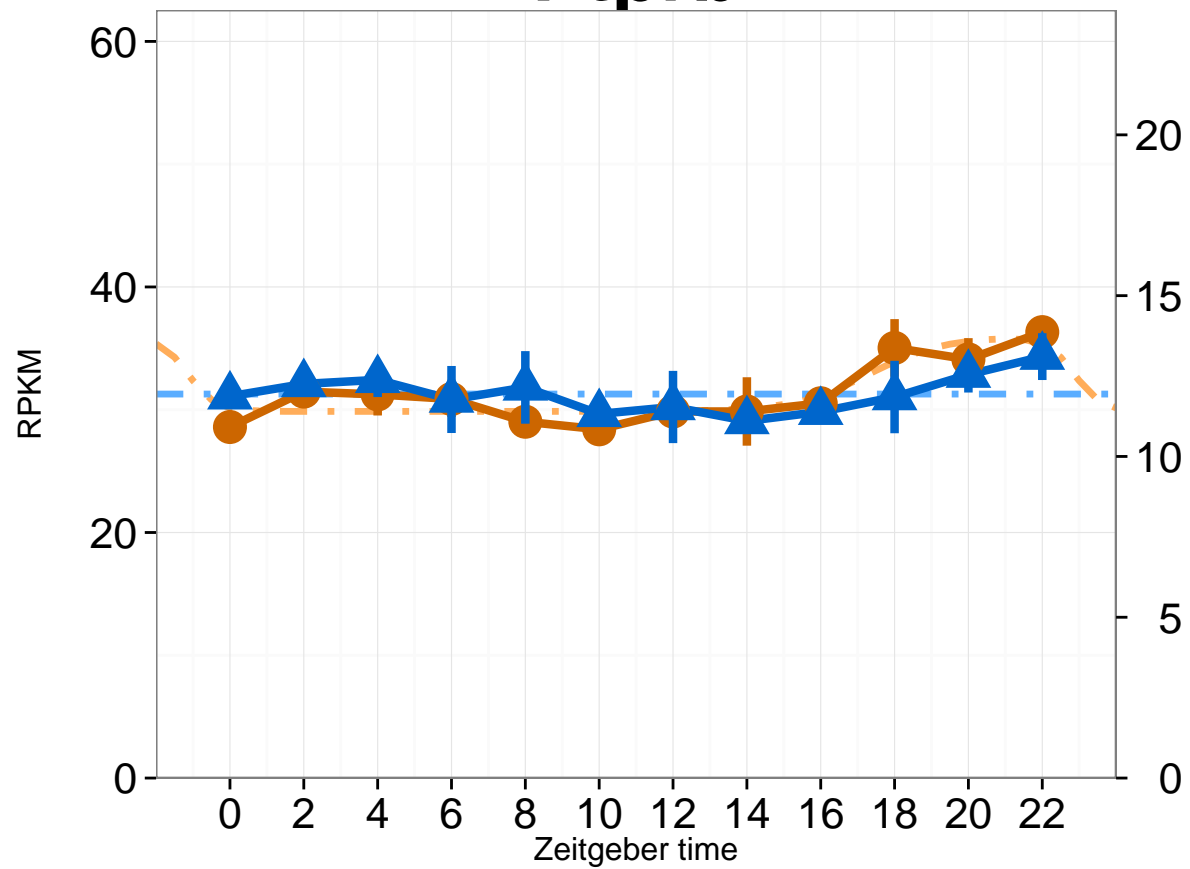

# Ptprb

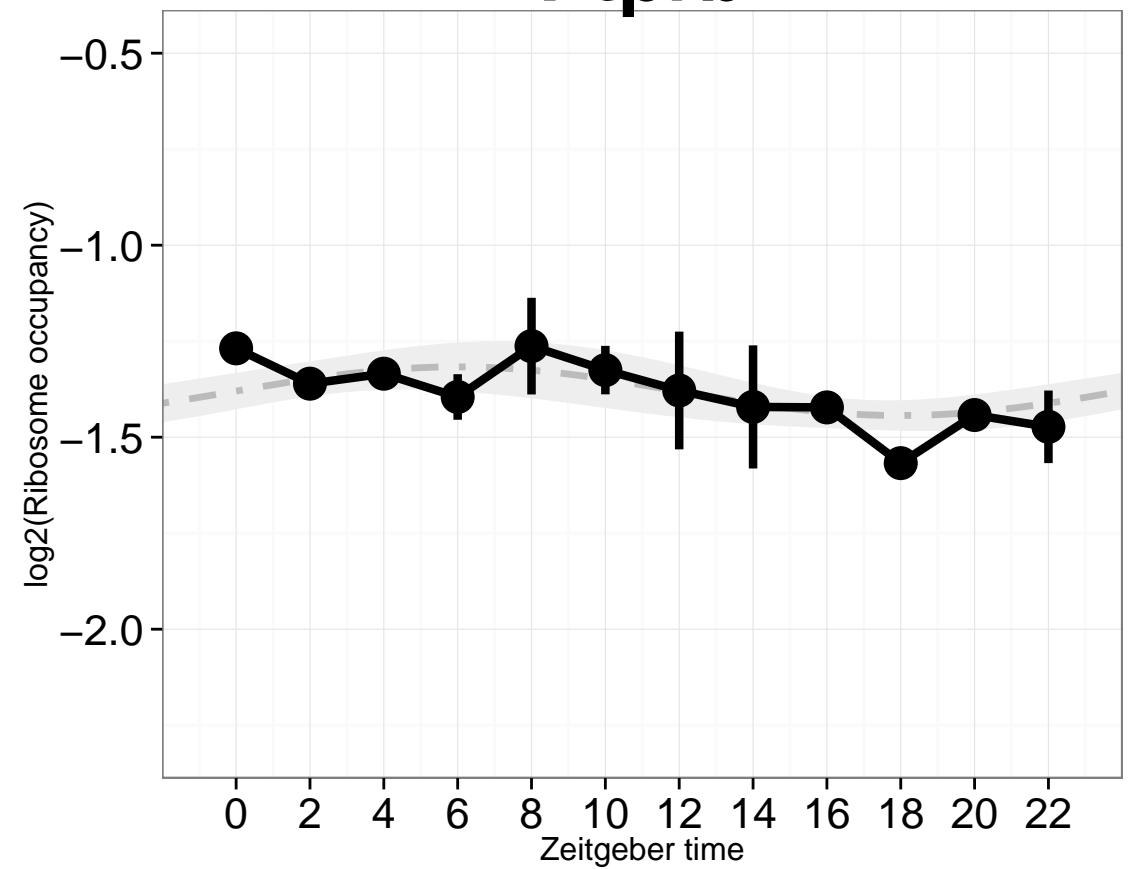

Supplement: SuppDataset_1.zip [file Ptprb_set_A.pdf › Supplemental Dataset 1/A-mRNA_nonrhyth_translation_nonrhyth/Ptprb_set_A.pdf]

# Ptprc

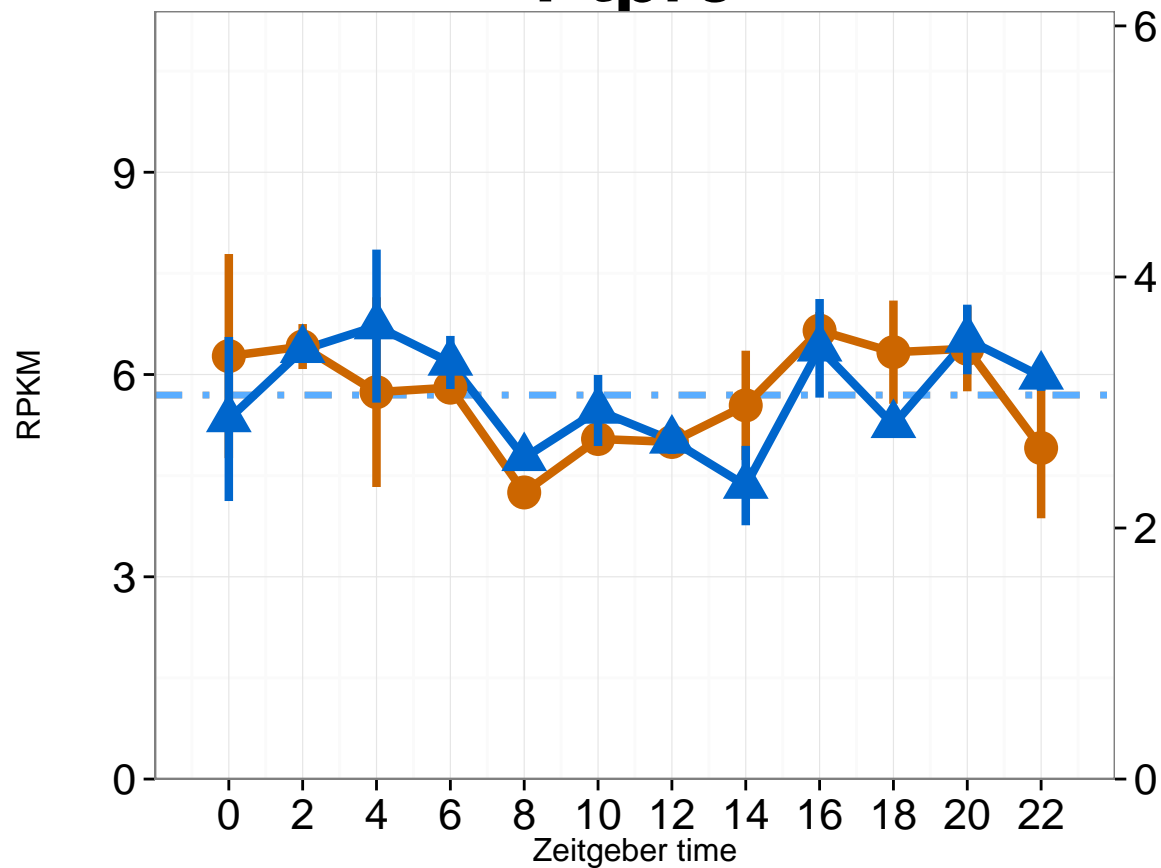

# Ptprc

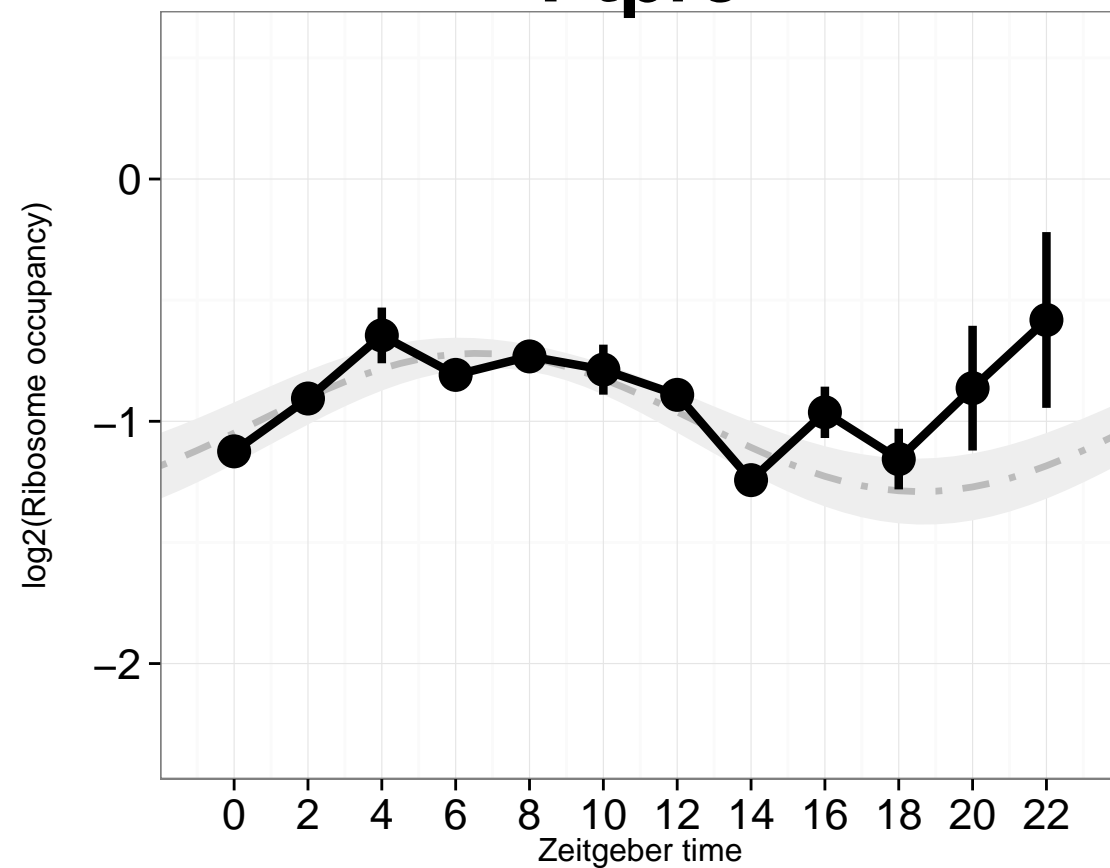

Supplement: SuppDataset_1.zip [file Ptprc_set_A.pdf › Supplemental Dataset 1/A-mRNA_nonrhyth_translation_nonrhyth/Ptprc_set_A.pdf]

# Ptprd

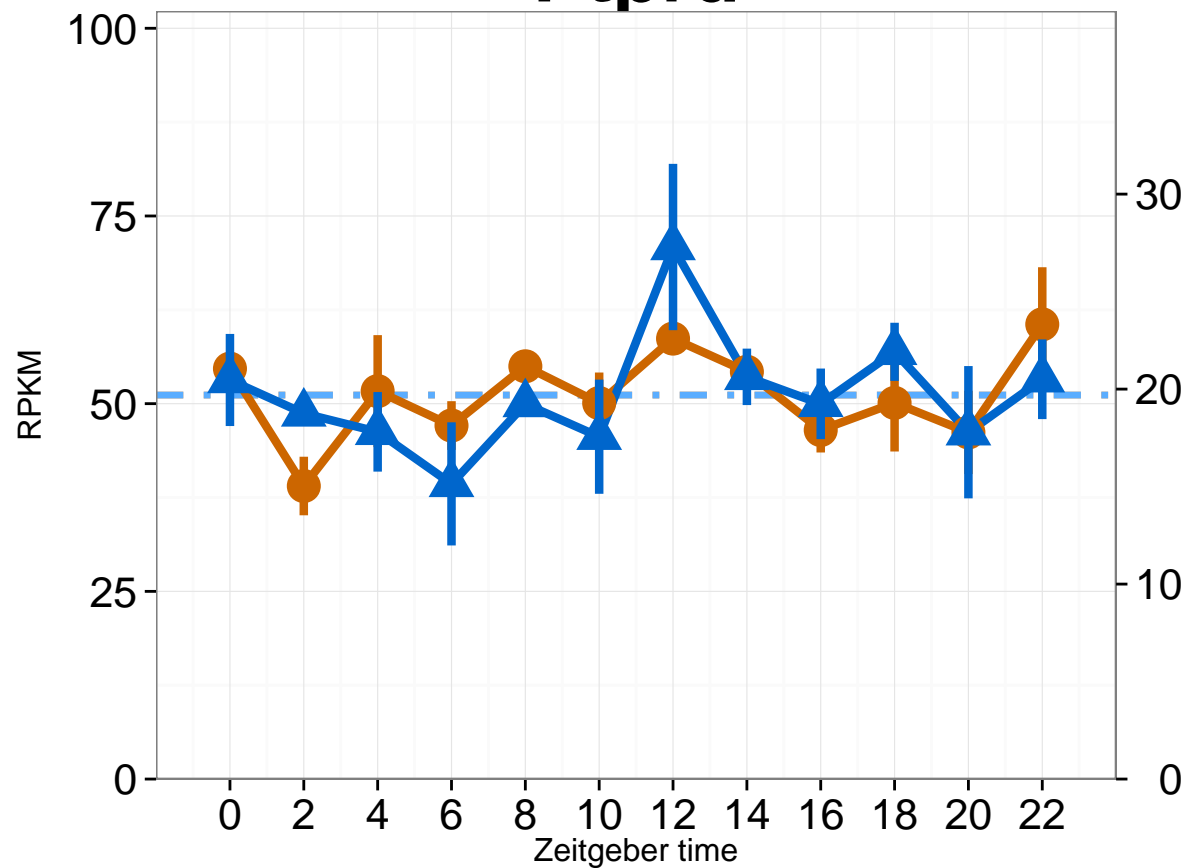

# Ptprd

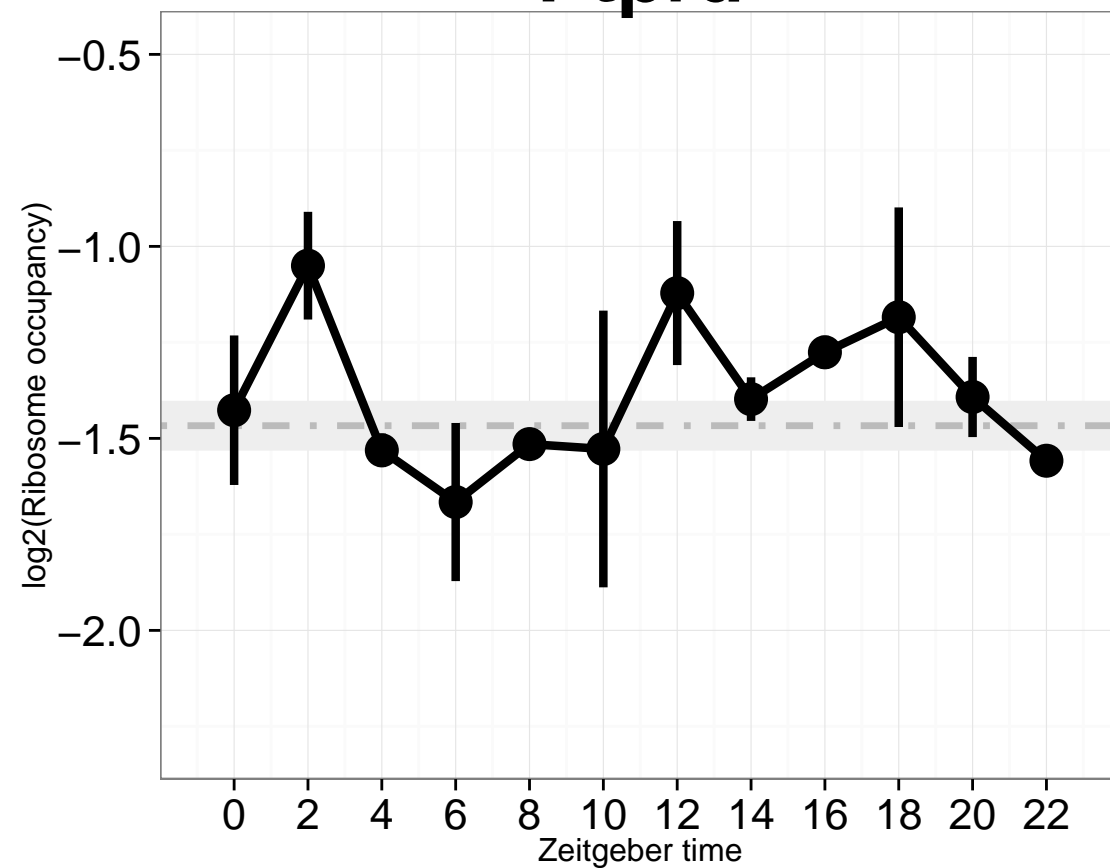

Supplement: SuppDataset_1.zip [file Ptprd_set_A.pdf › Supplemental Dataset 1/A-mRNA_nonrhyth_translation_nonrhyth/Ptprd_set_A.pdf]

**Ptprf**

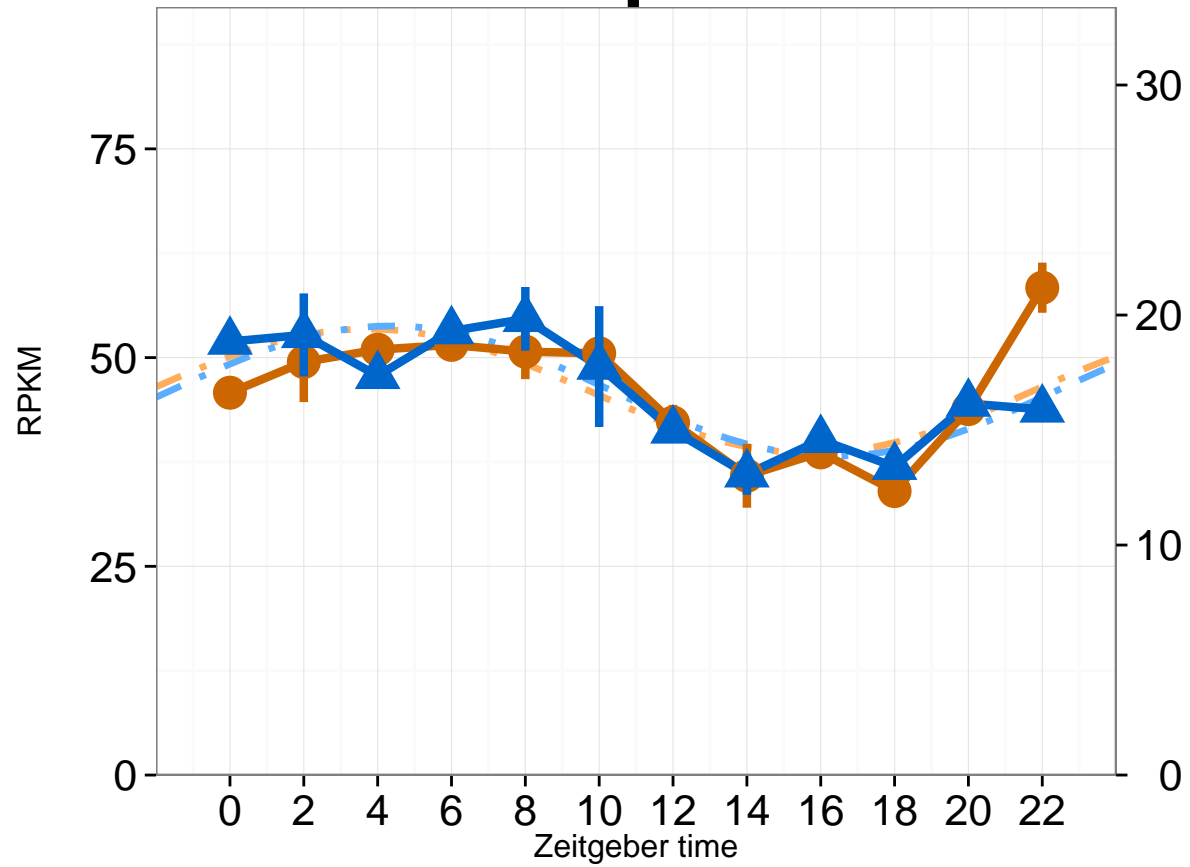

**Ptprf**

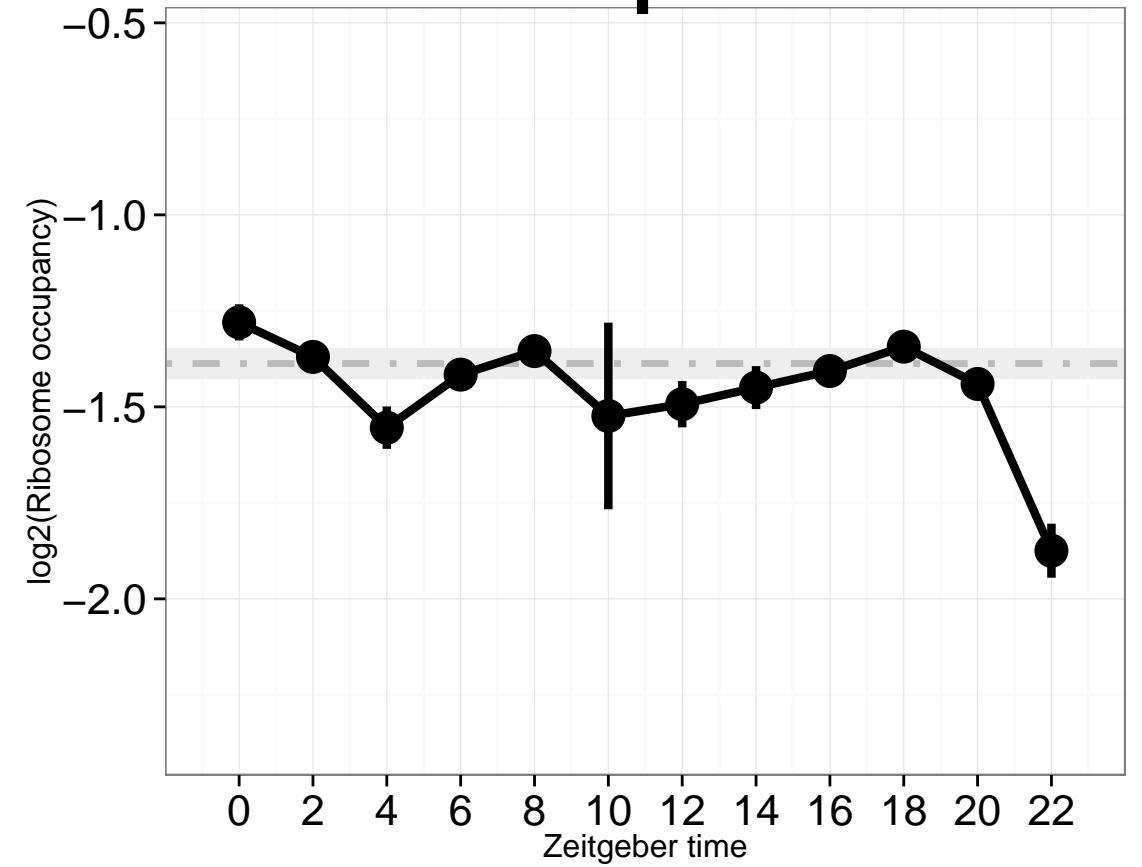

Supplement: SuppDataset_1.zip [file Ptprf_set_A.pdf › Supplemental Dataset 1/A-mRNA_nonrhyth_translation_nonrhyth/Ptprf_set_A.pdf]

## Ptprg

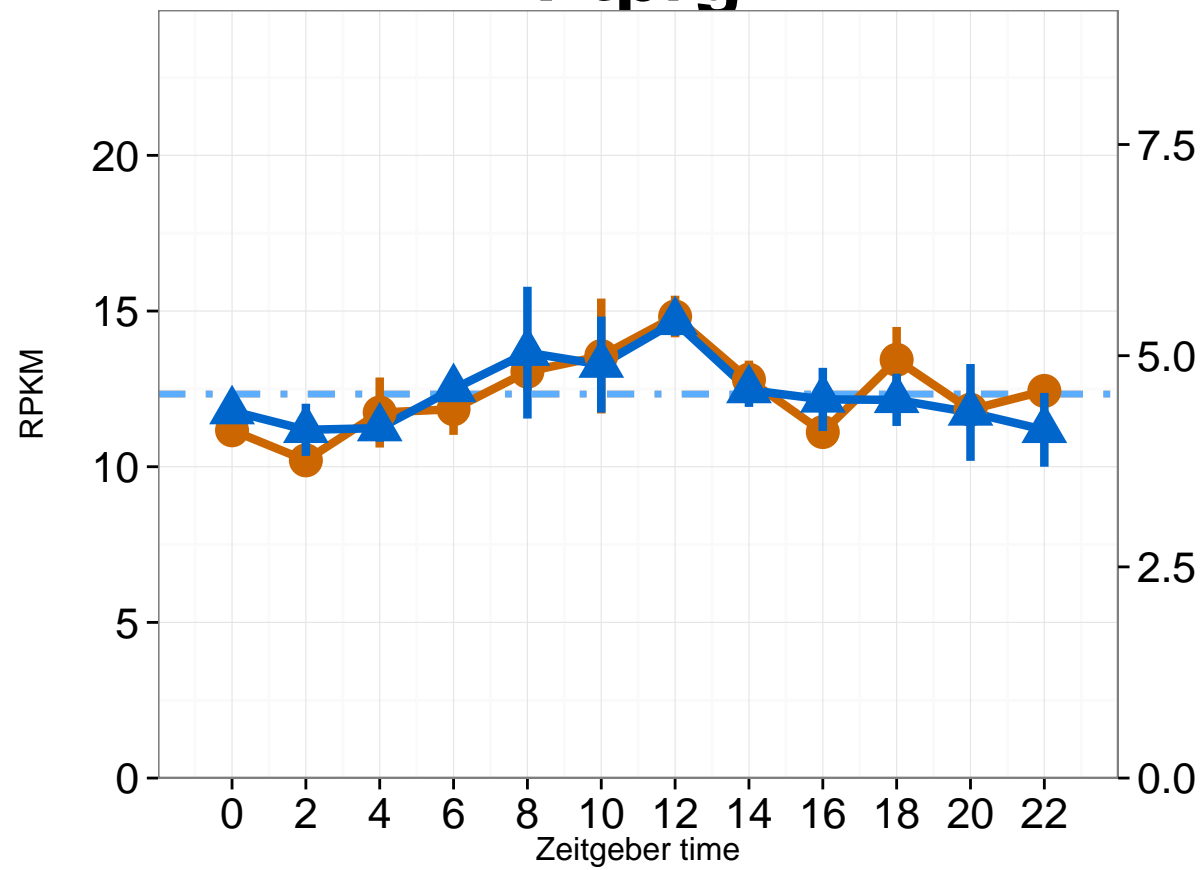

## Ptprg

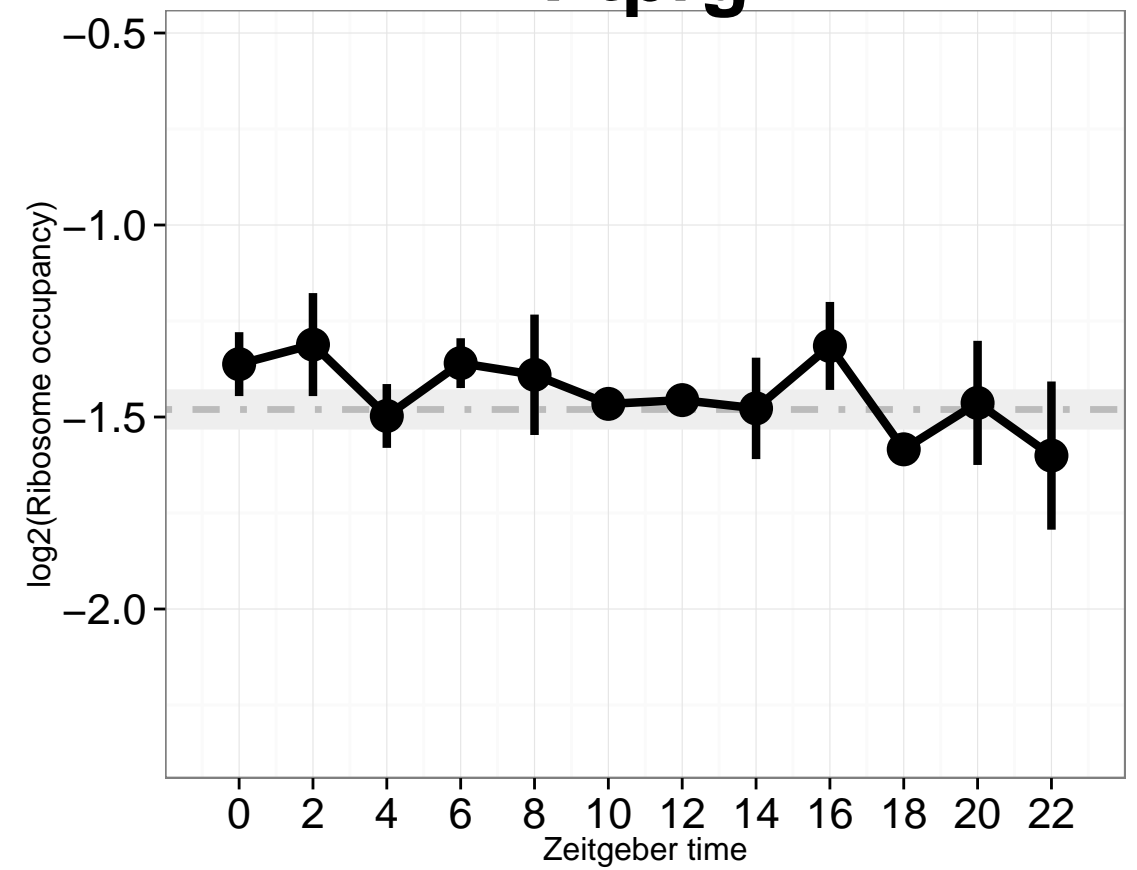

Supplement: SuppDataset_1.zip [file Ptprg_set_A.pdf › Supplemental Dataset 1/A-mRNA_nonrhyth_translation_nonrhyth/Ptprg_set_A.pdf]

**Ptprj**

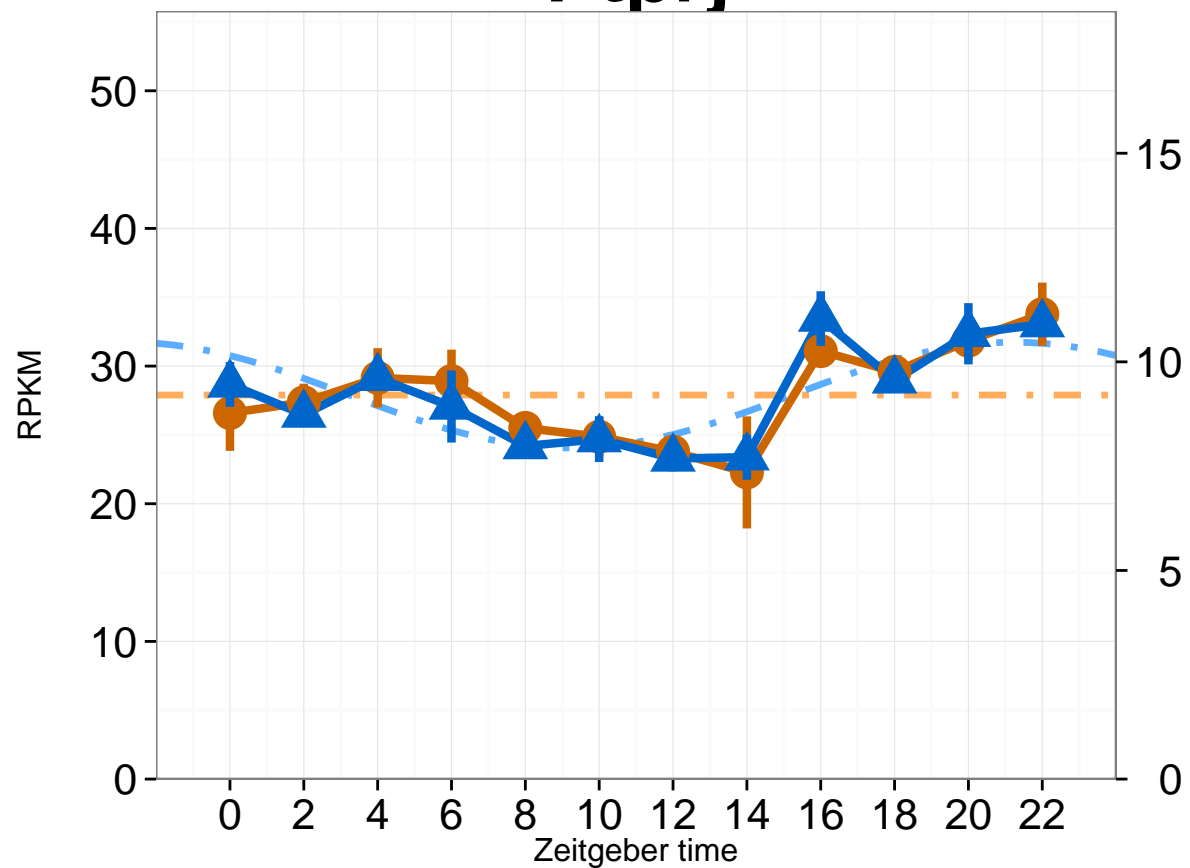

**Ptprj**

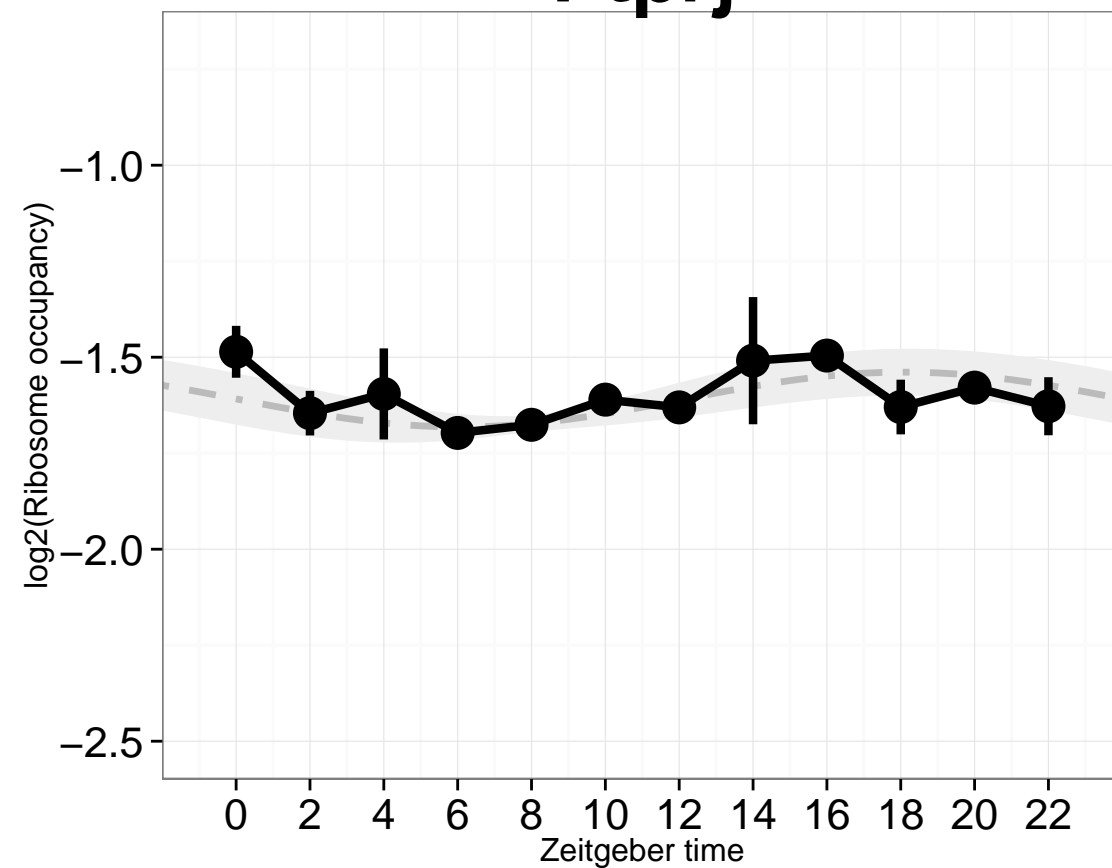

Supplement: SuppDataset_1.zip [file Ptprj_set_A.pdf › Supplemental Dataset 1/A-mRNA_nonrhyth_translation_nonrhyth/Ptprj_set_A.pdf]

# Ptprk

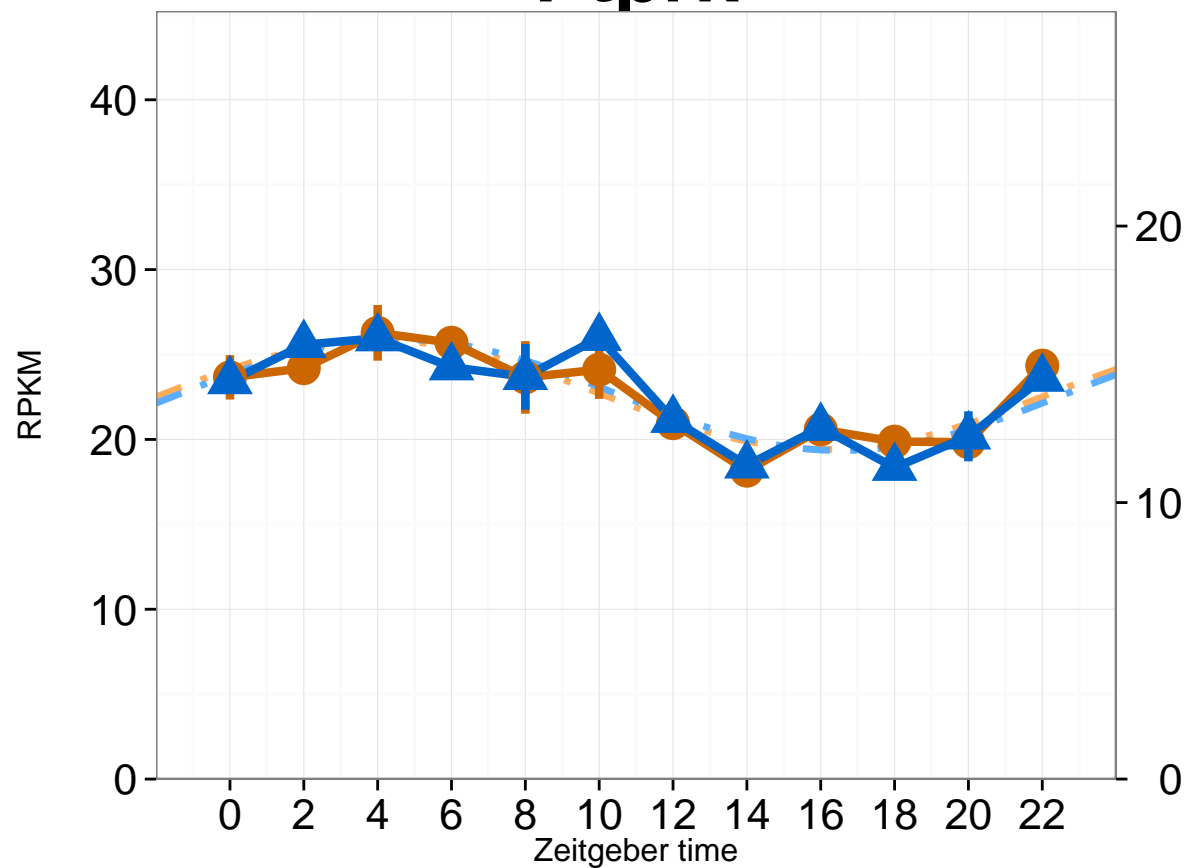

# Ptprk

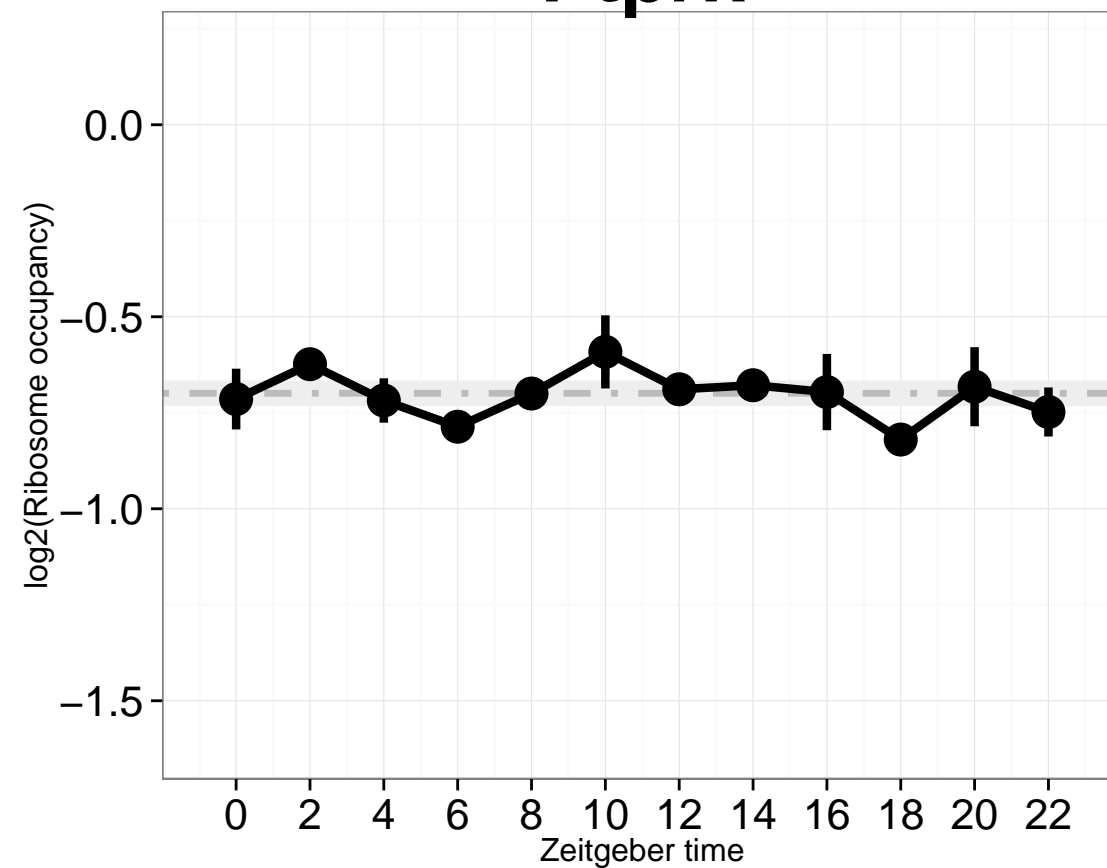

Supplement: SuppDataset_1.zip [file Ptprk_set_A.pdf › Supplemental Dataset 1/A-mRNA_nonrhyth_translation_nonrhyth/Ptprk_set_A.pdf]

# Ptprm

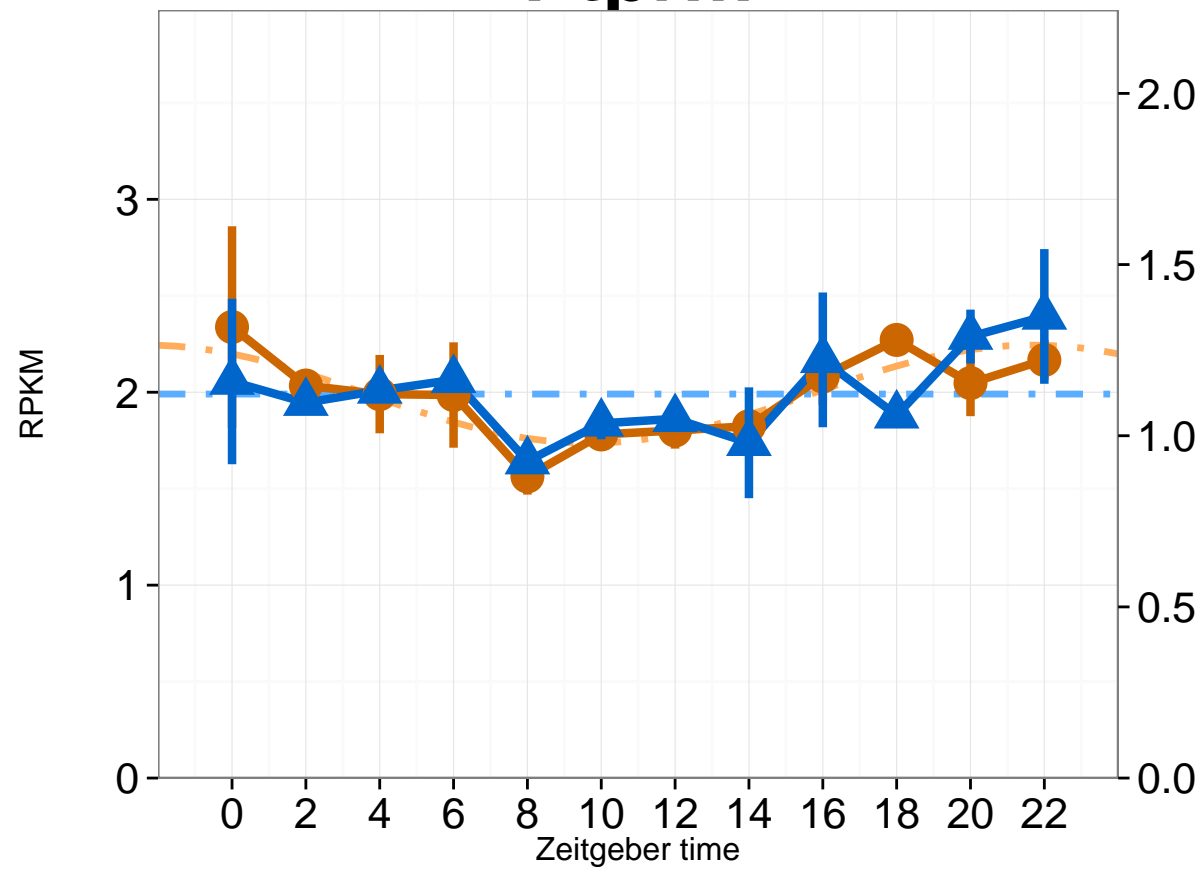

# Ptprm

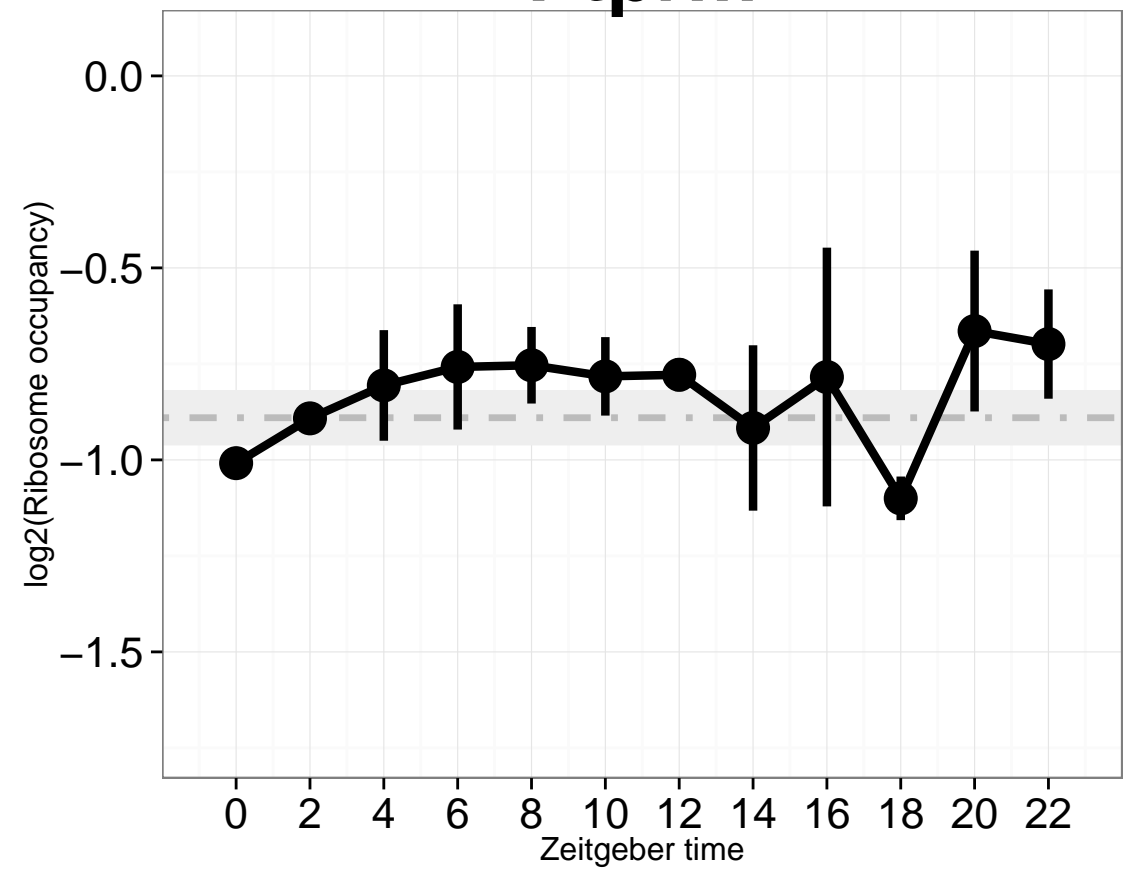

Supplement: SuppDataset_1.zip [file Ptprm_set_A.pdf › Supplemental Dataset 1/A-mRNA_nonrhyth_translation_nonrhyth/Ptprm_set_A.pdf]

## Ptprs

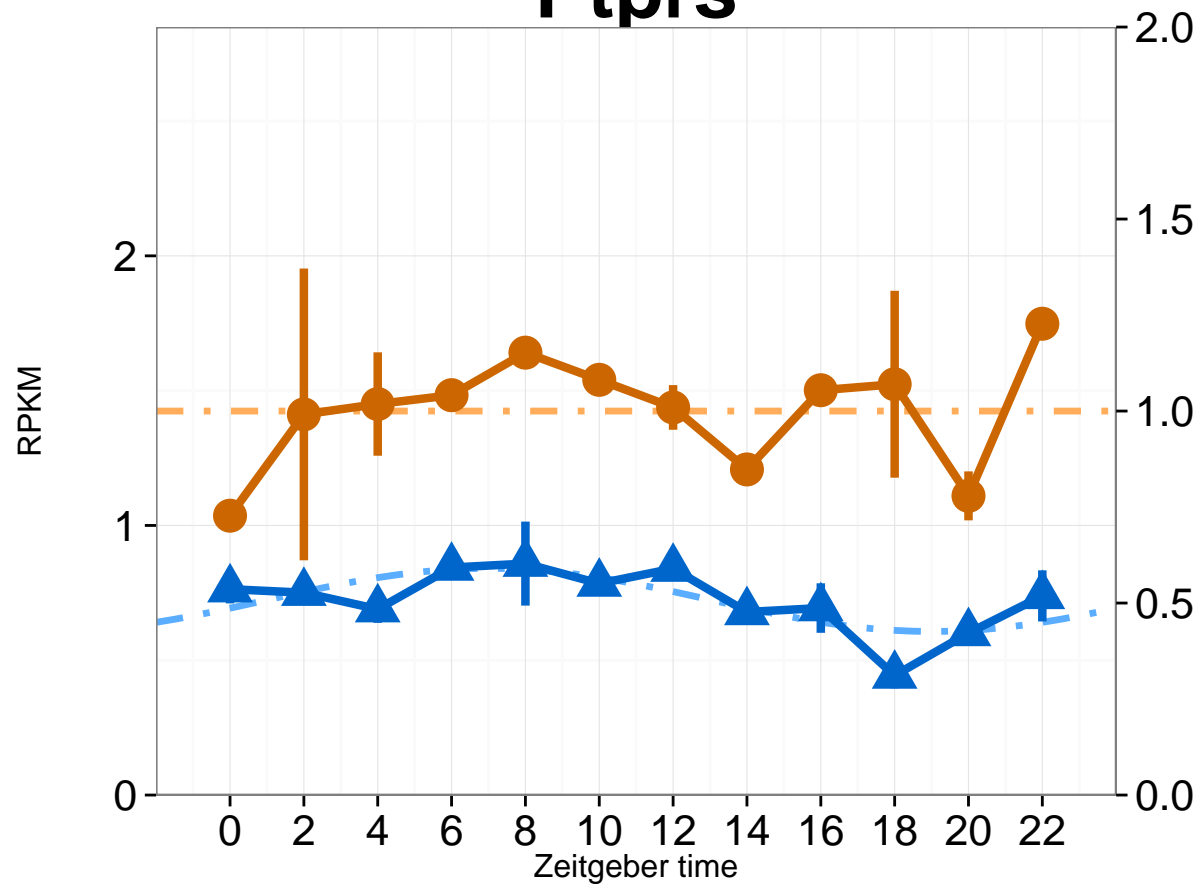

## Ptprs

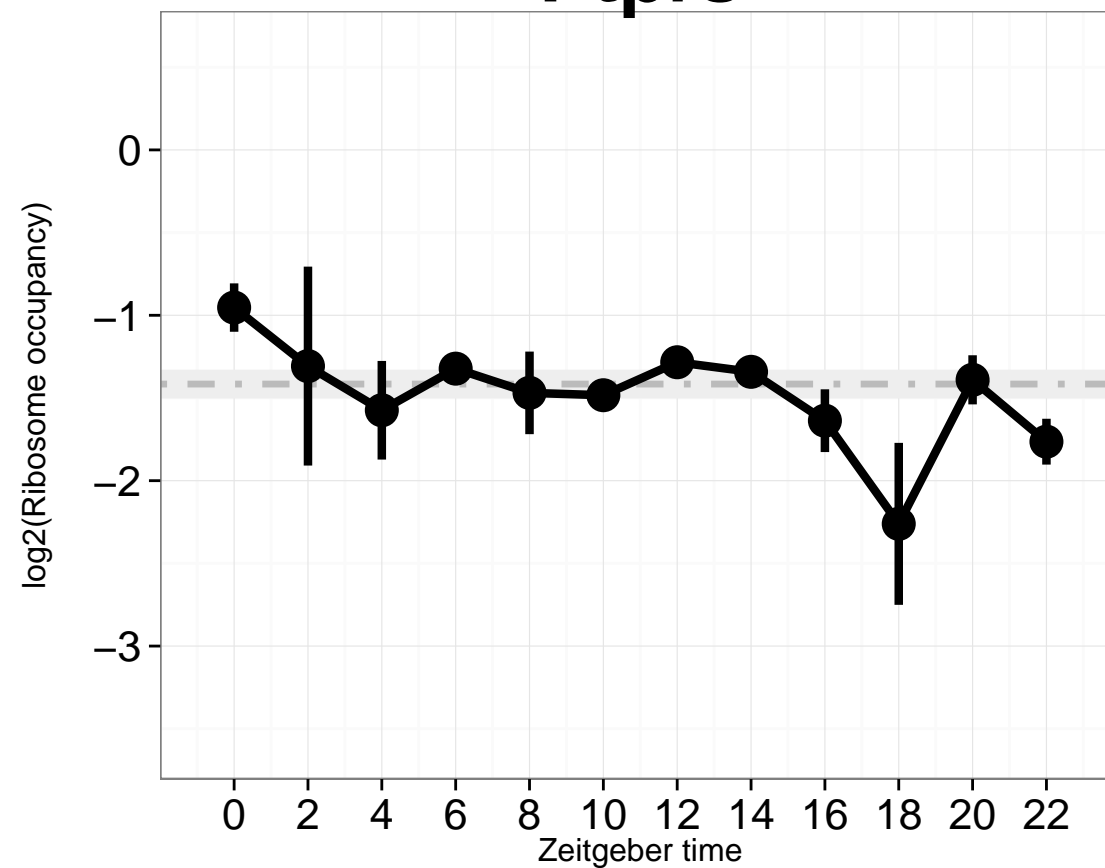

Supplement: SuppDataset_1.zip [file Ptprs_set_A.pdf › Supplemental Dataset 1/A-mRNA_nonrhyth_translation_nonrhyth/Ptprs_set_A.pdf]

## Ptrh2

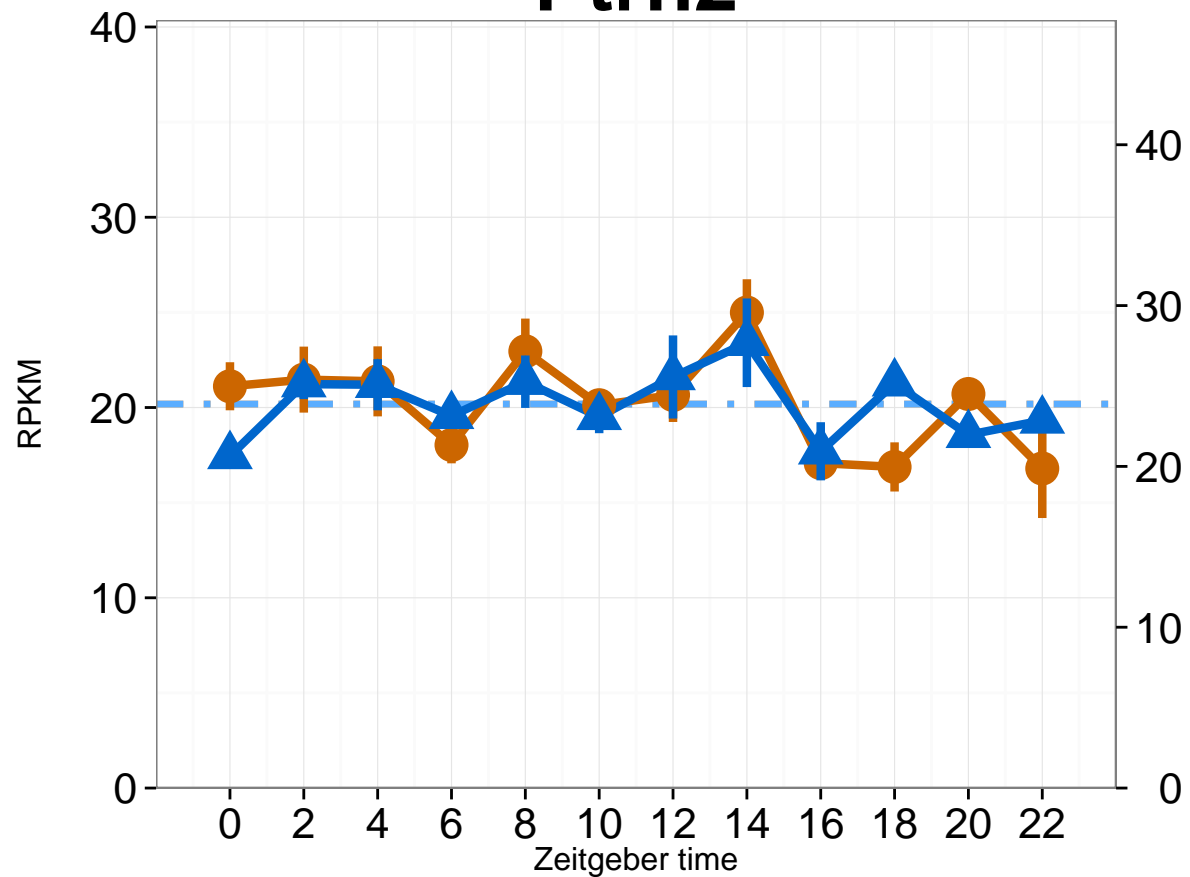

## Ptrh2

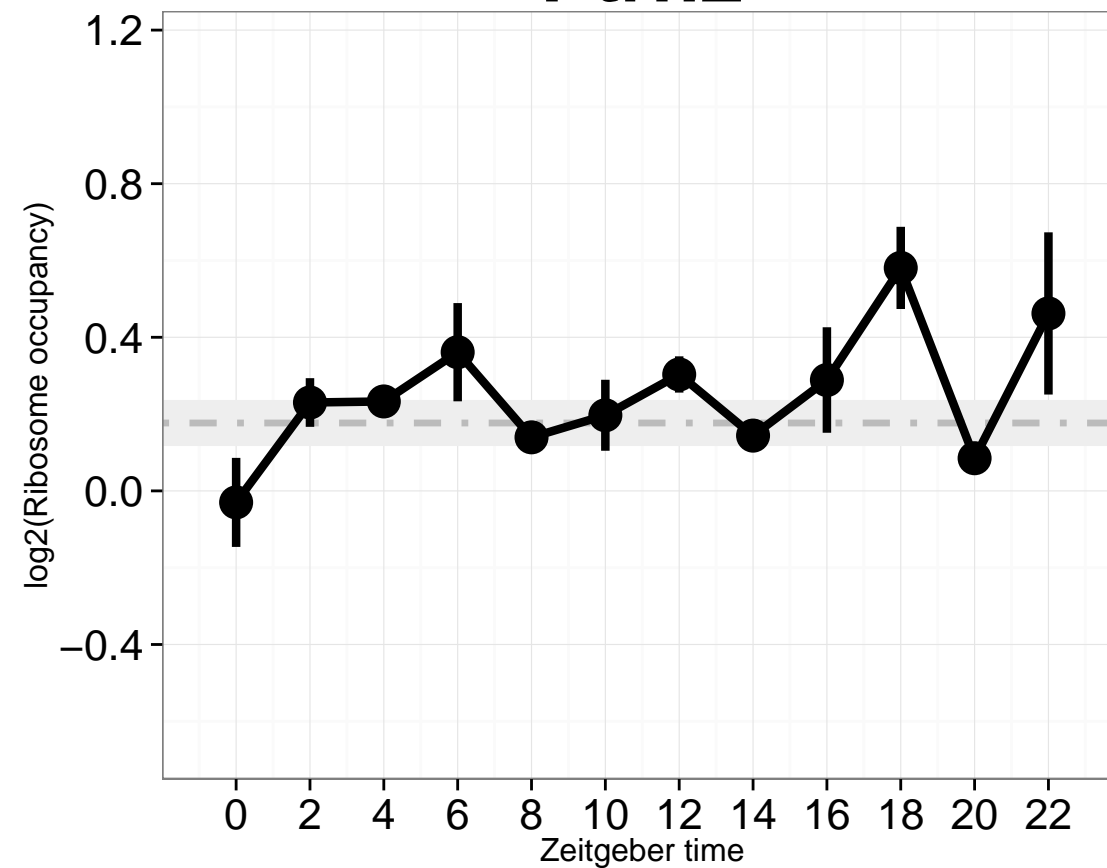

Supplement: SuppDataset_1.zip [file Ptrh2_set_A.pdf › Supplemental Dataset 1/A-mRNA_nonrhyth_translation_nonrhyth/Ptrh2_set_A.pdf]

# Ptrhd1

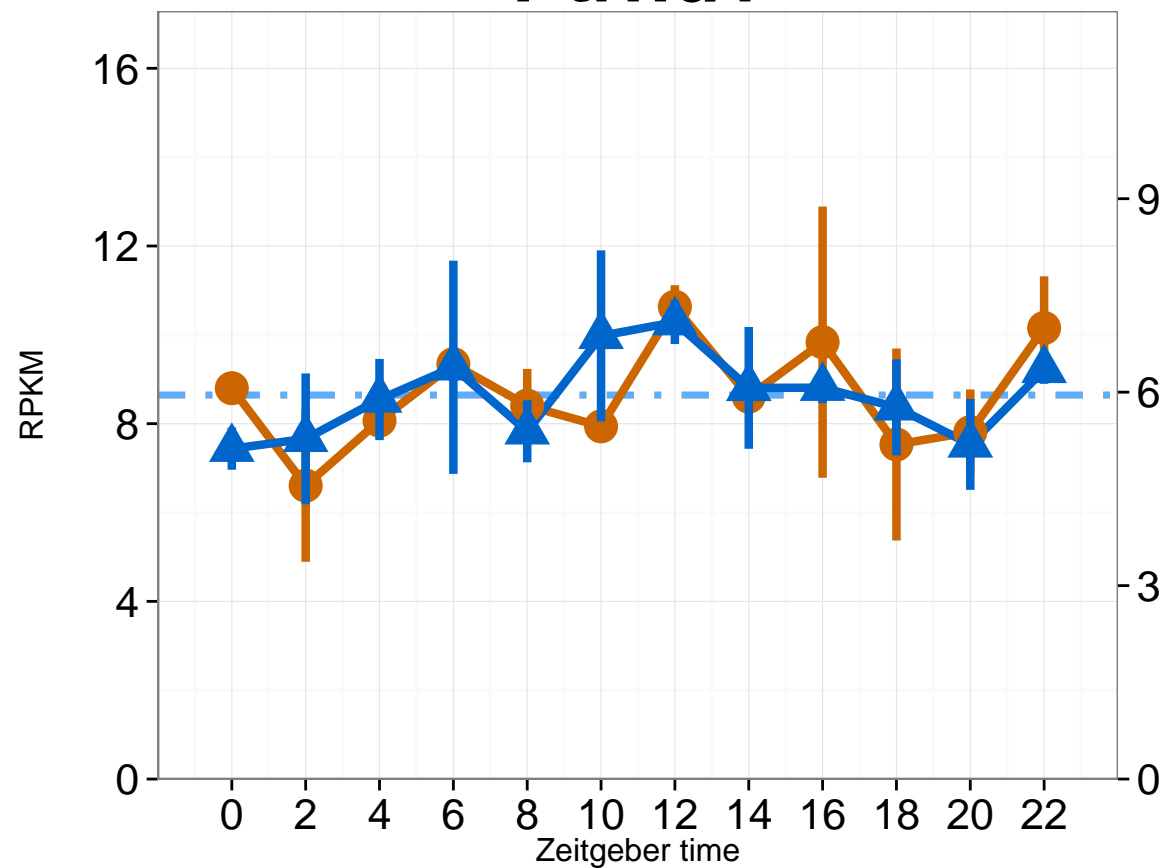

# Ptrhd1

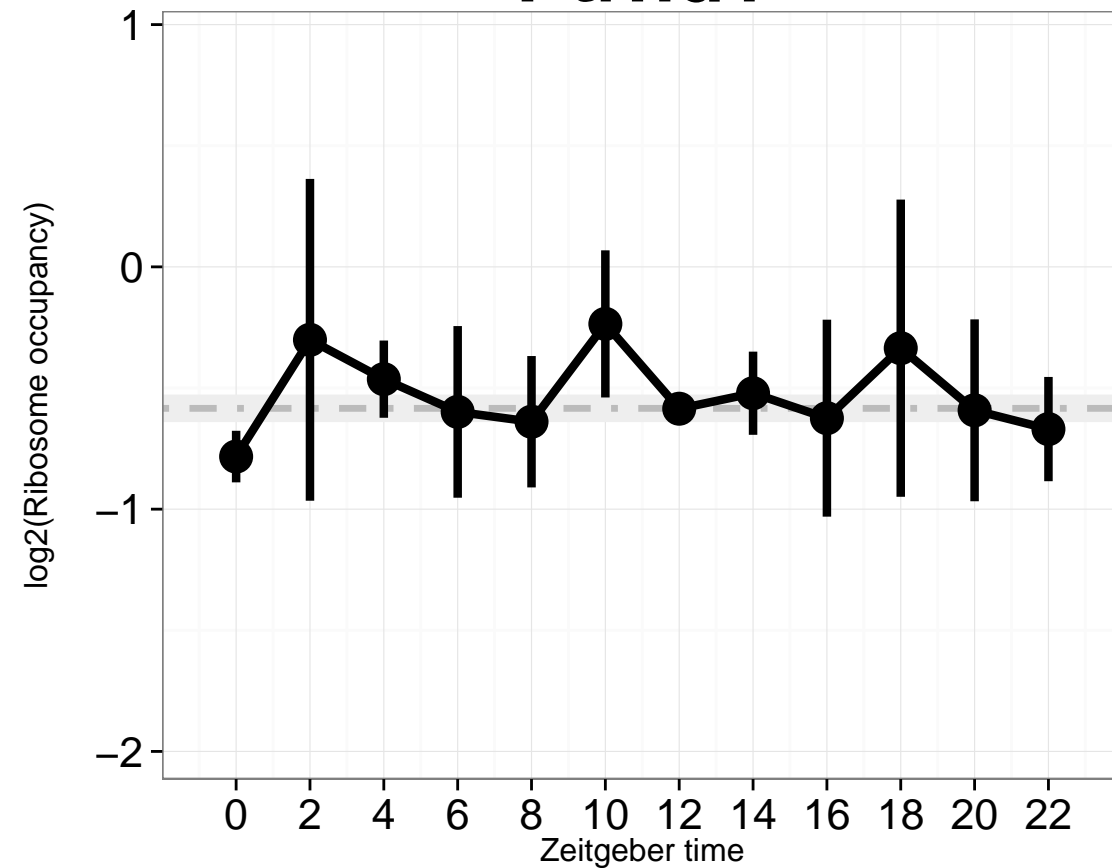

Supplement: SuppDataset_1.zip [file Ptrhd1_set_A.pdf › Supplemental Dataset 1/A-mRNA_nonrhyth_translation_nonrhyth/Ptrhd1_set_A.pdf]

## Pts

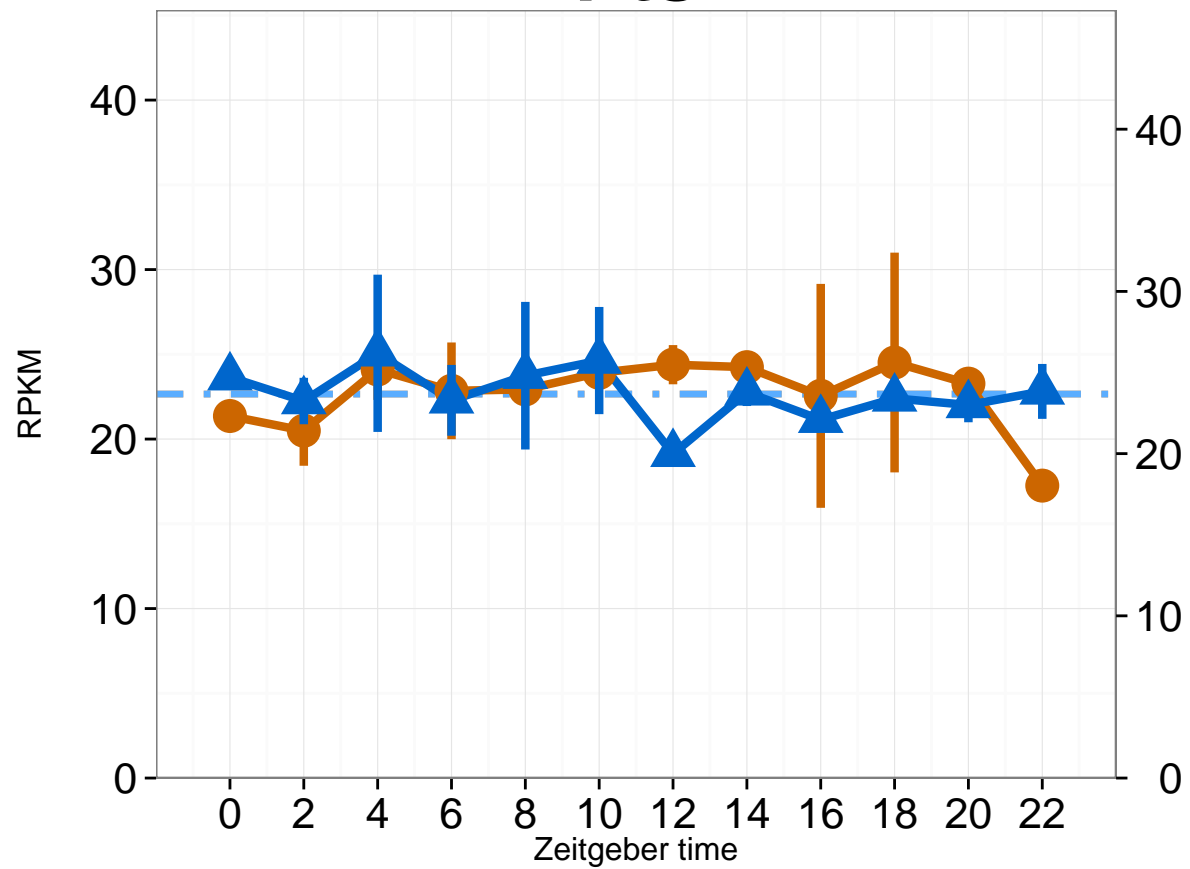

## Pts

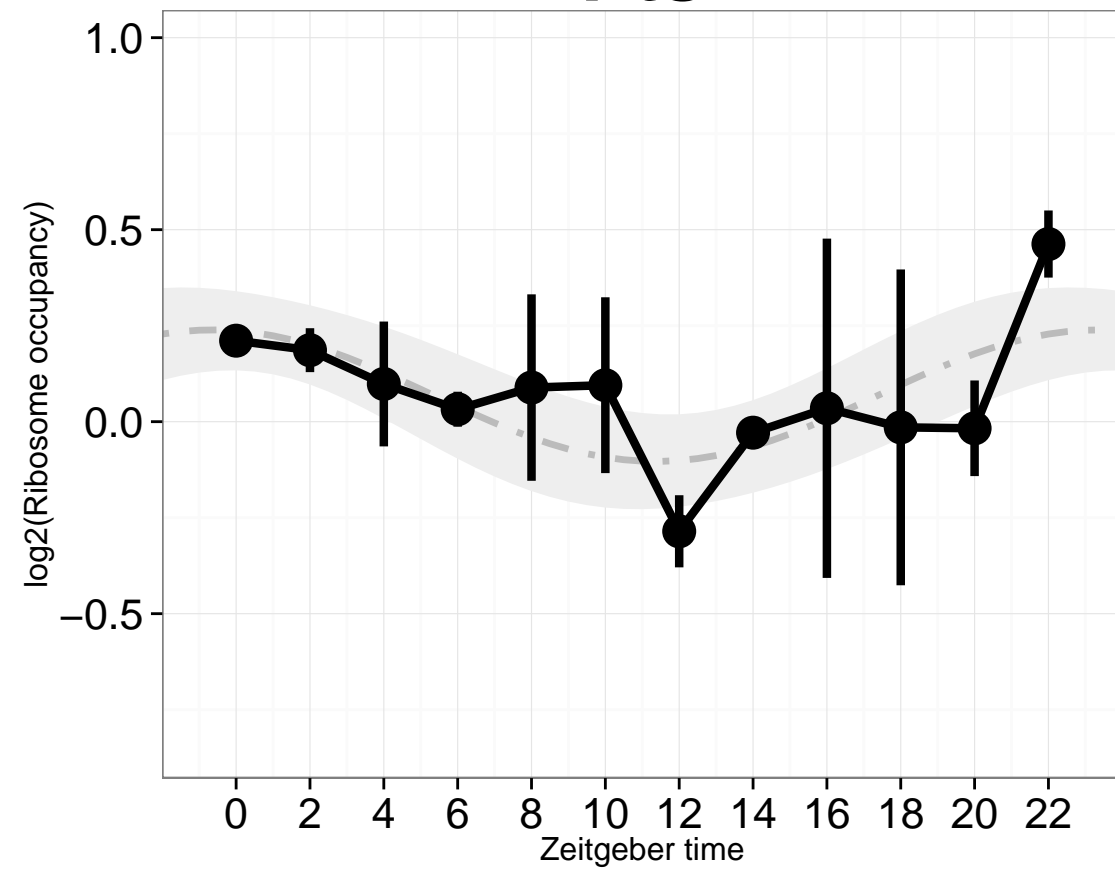

Supplement: SuppDataset_1.zip [file Pts_set_A.pdf › Supplemental Dataset 1/A-mRNA_nonrhyth_translation_nonrhyth/Pts_set_A.pdf]

# Pttg1

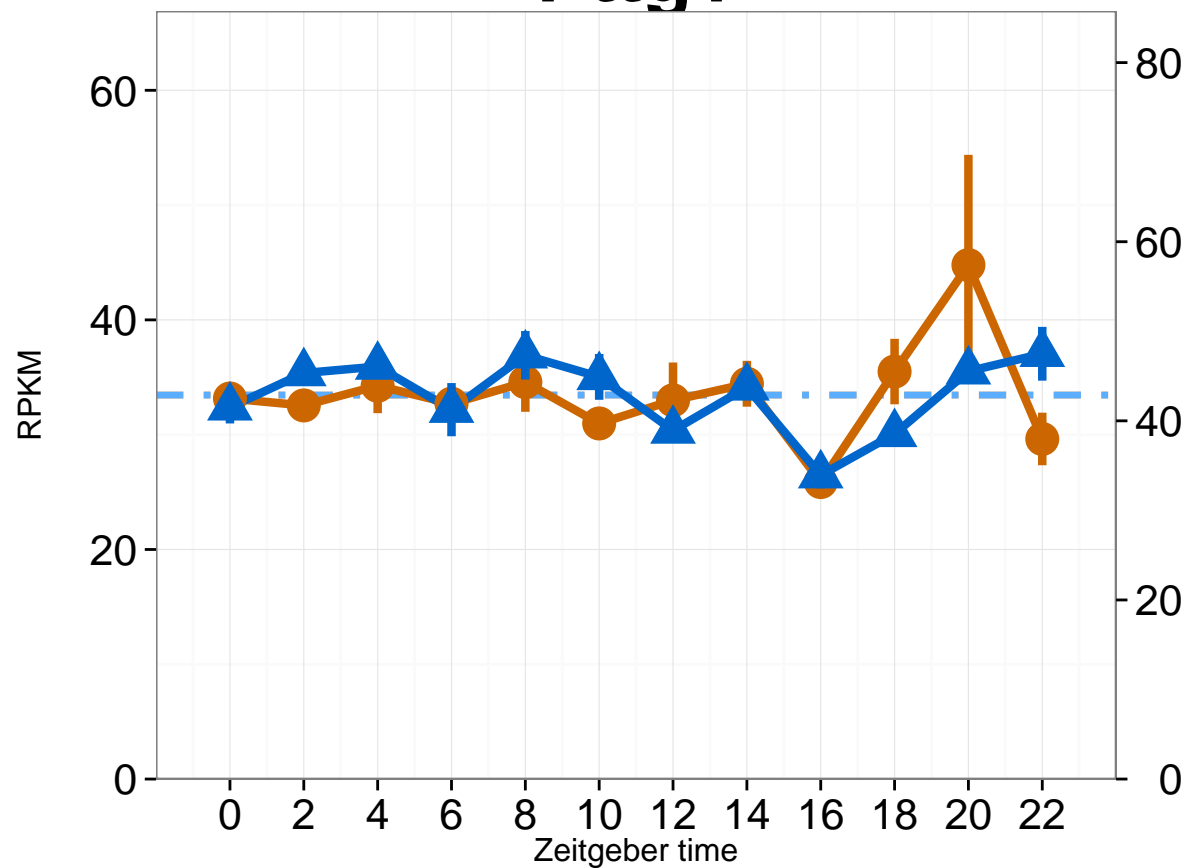

# Pttg1

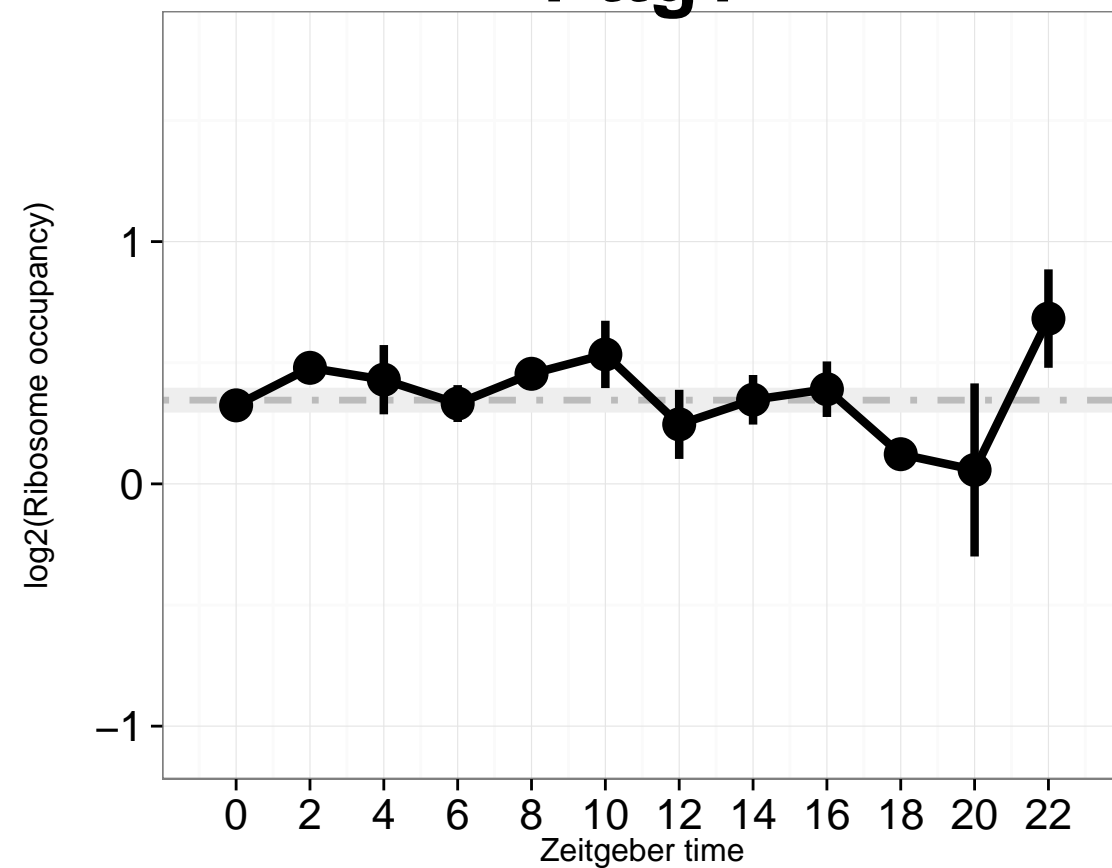

Supplement: SuppDataset_1.zip [file Pttg1_set_A.pdf › Supplemental Dataset 1/A-mRNA_nonrhyth_translation_nonrhyth/Pttg1_set_A.pdf]

# Pttg1ip

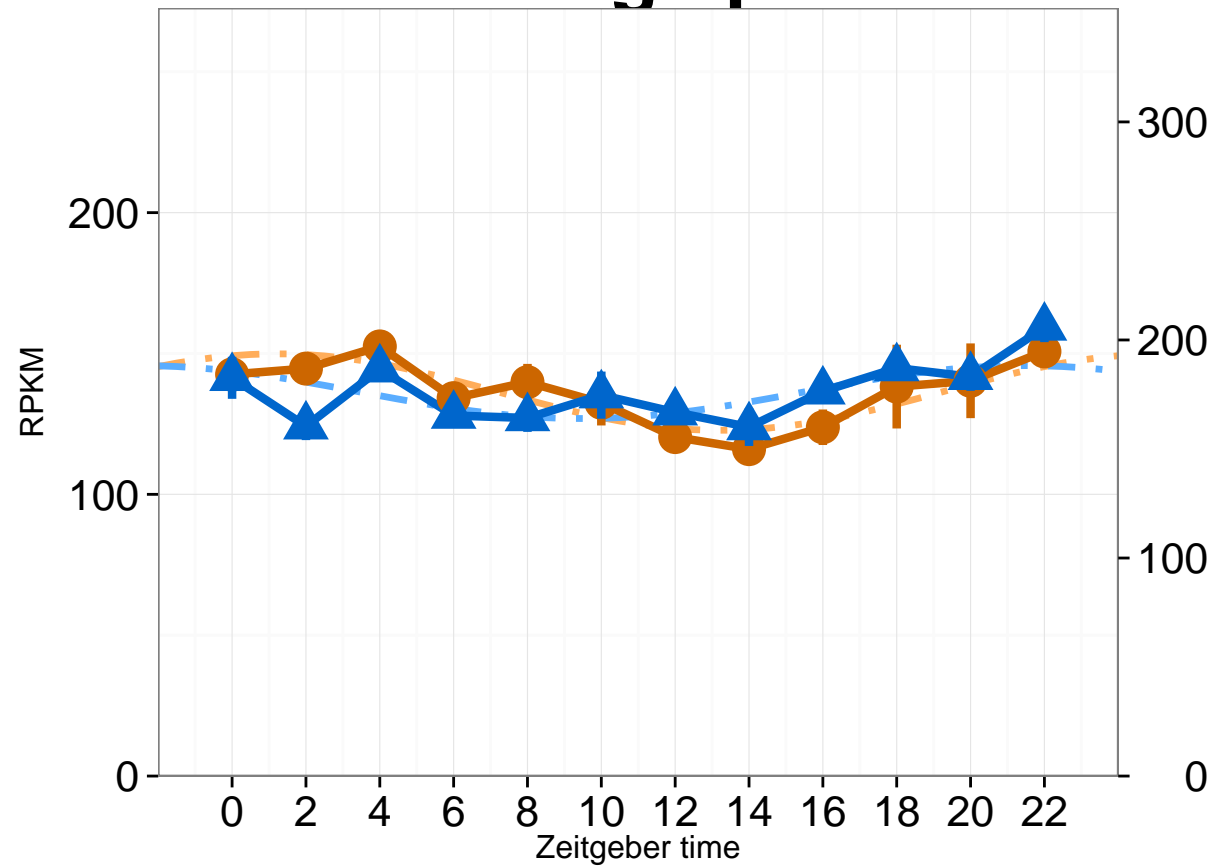

# Pttg1ip

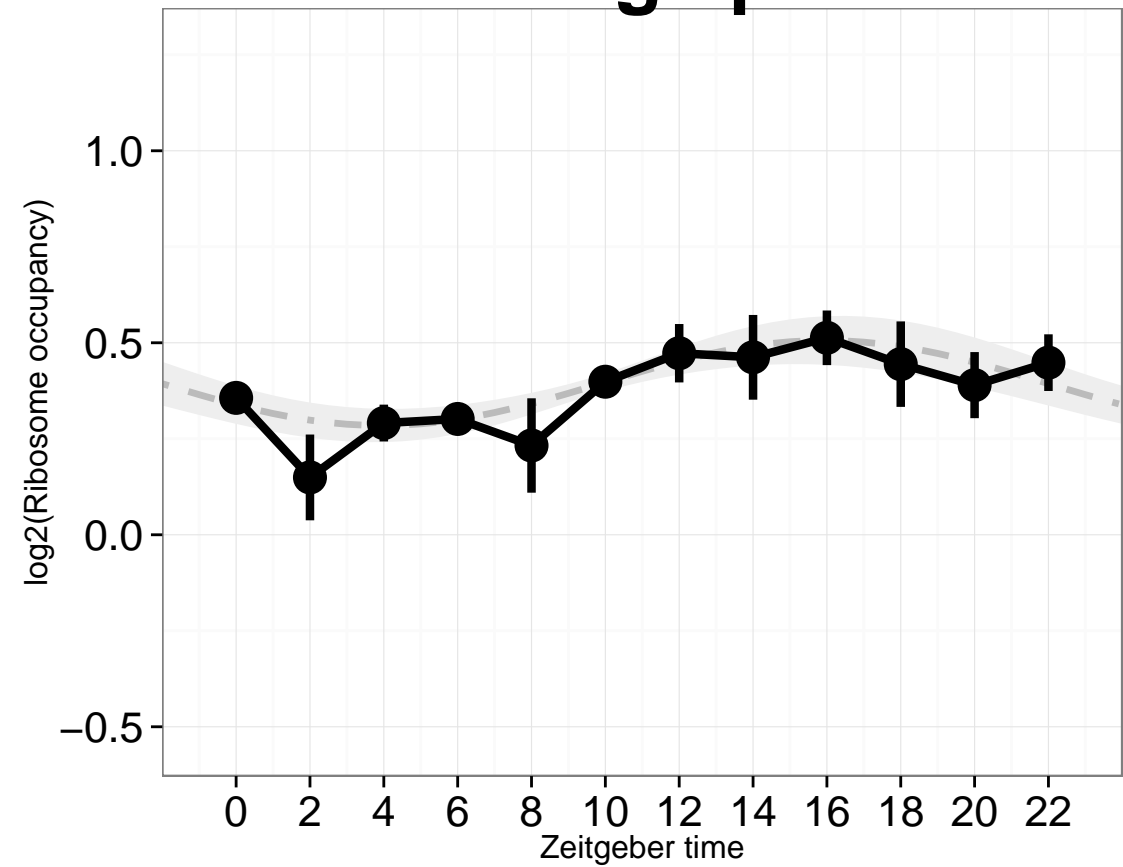

Supplement: SuppDataset_1.zip [file Pttg1ip_set_A.pdf › Supplemental Dataset 1/A-mRNA_nonrhyth_translation_nonrhyth/Pttg1ip_set_A.pdf]

## Puf60

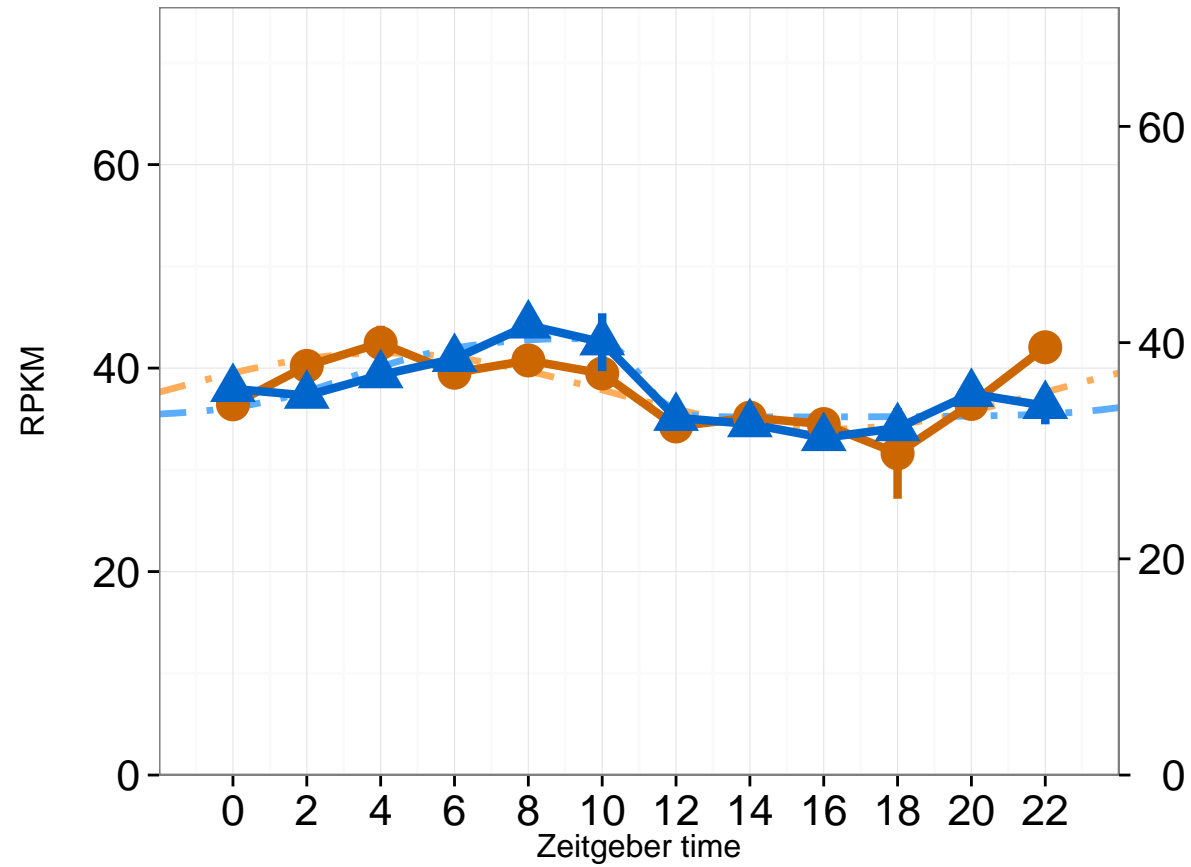

## Puf60

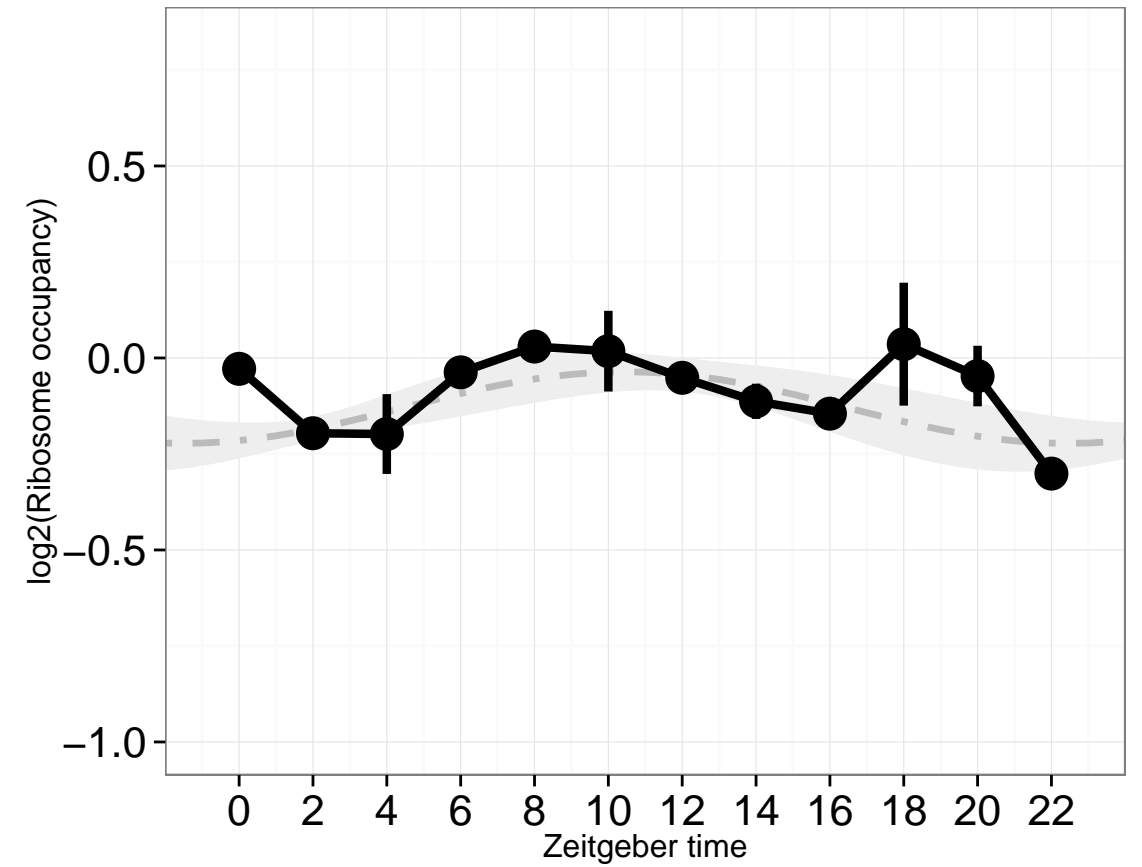

Supplement: SuppDataset_1.zip [file Puf60_set_A.pdf › Supplemental Dataset 1/A-mRNA_nonrhyth_translation_nonrhyth/Puf60_set_A.pdf]

## Pum1

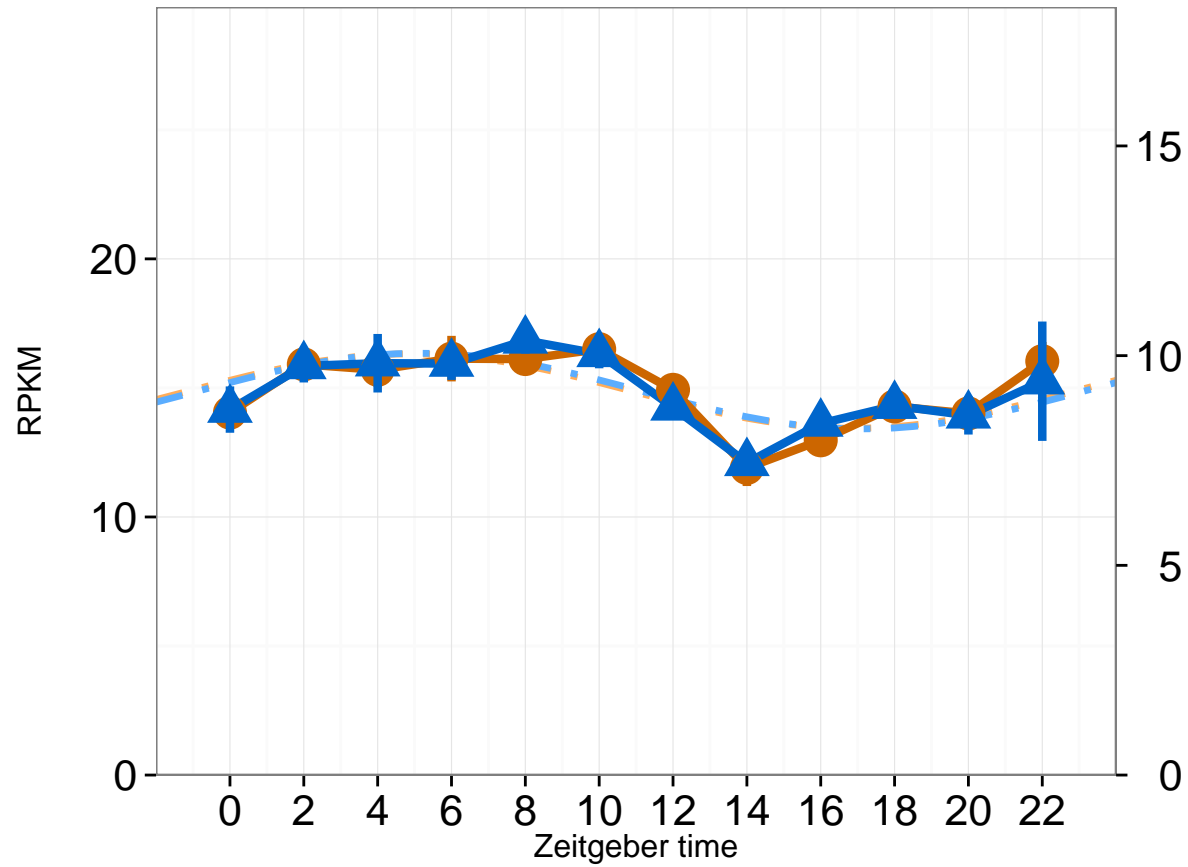

## Pum1

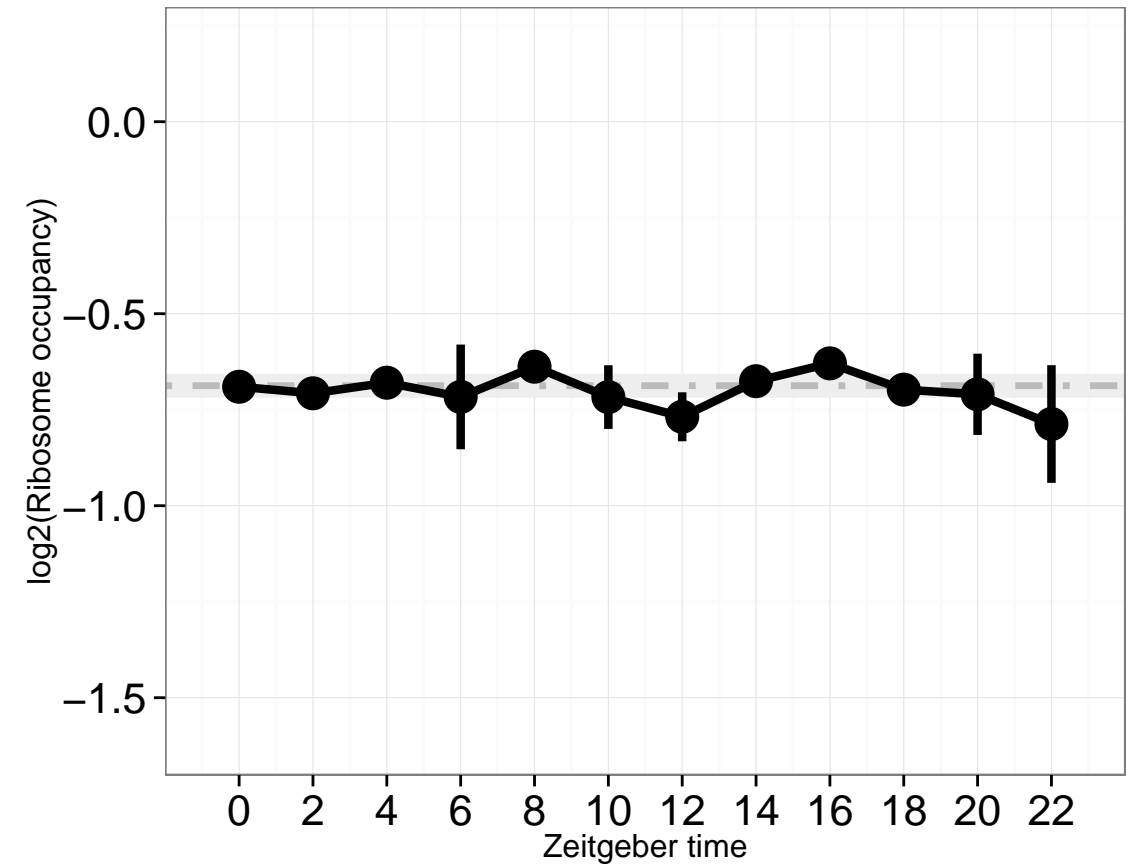

Supplement: SuppDataset_1.zip [file Pum1_set_A.pdf › Supplemental Dataset 1/A-mRNA_nonrhyth_translation_nonrhyth/Pum1_set_A.pdf]

## Pum2

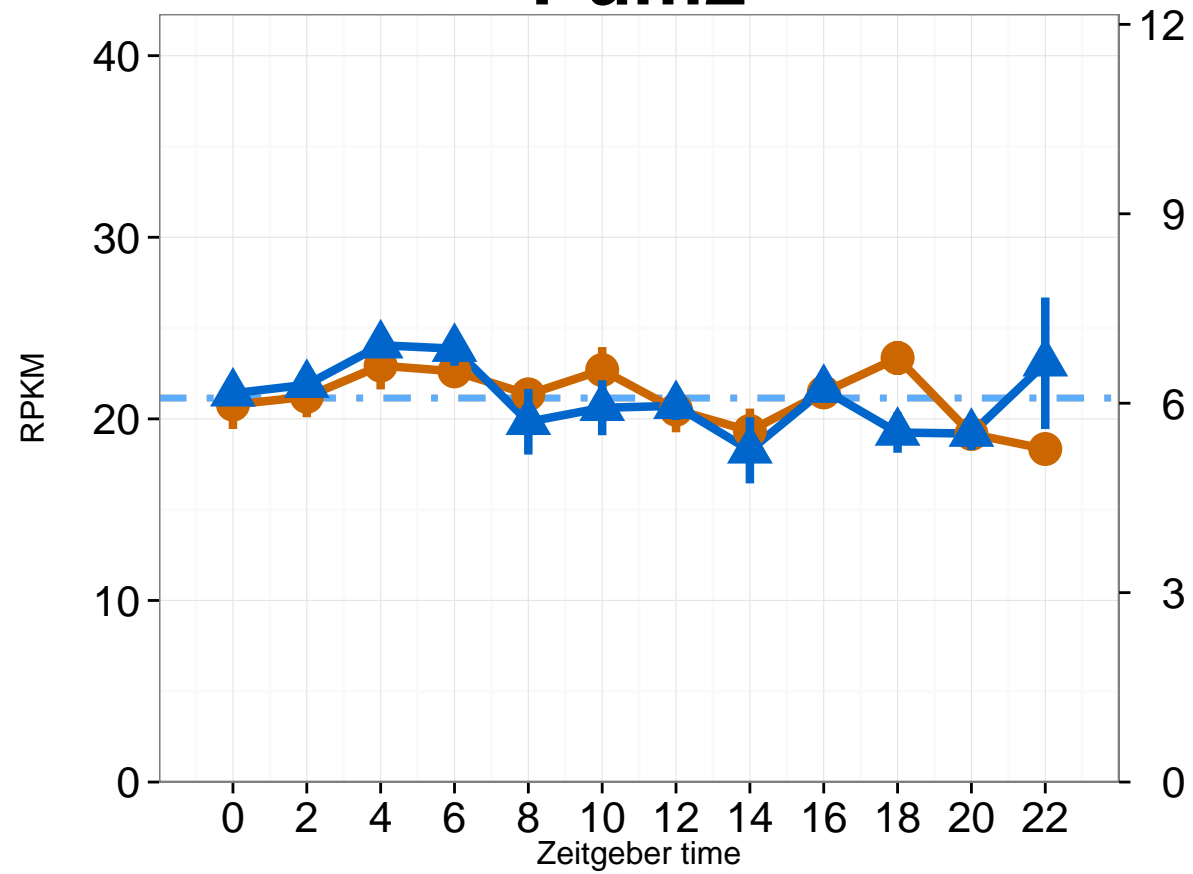

## Pum2

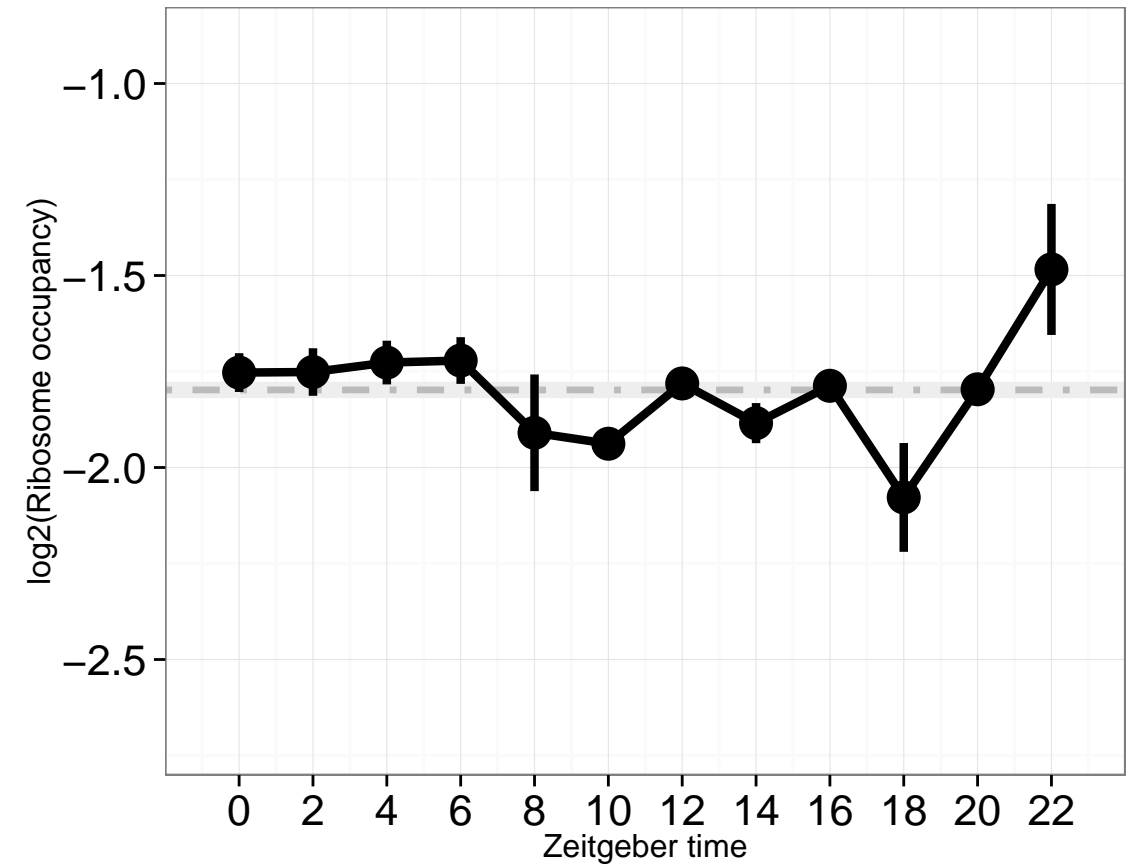

Supplement: SuppDataset_1.zip [file Pum2_set_A.pdf › Supplemental Dataset 1/A-mRNA_nonrhyth_translation_nonrhyth/Pum2_set_A.pdf]

## Pura

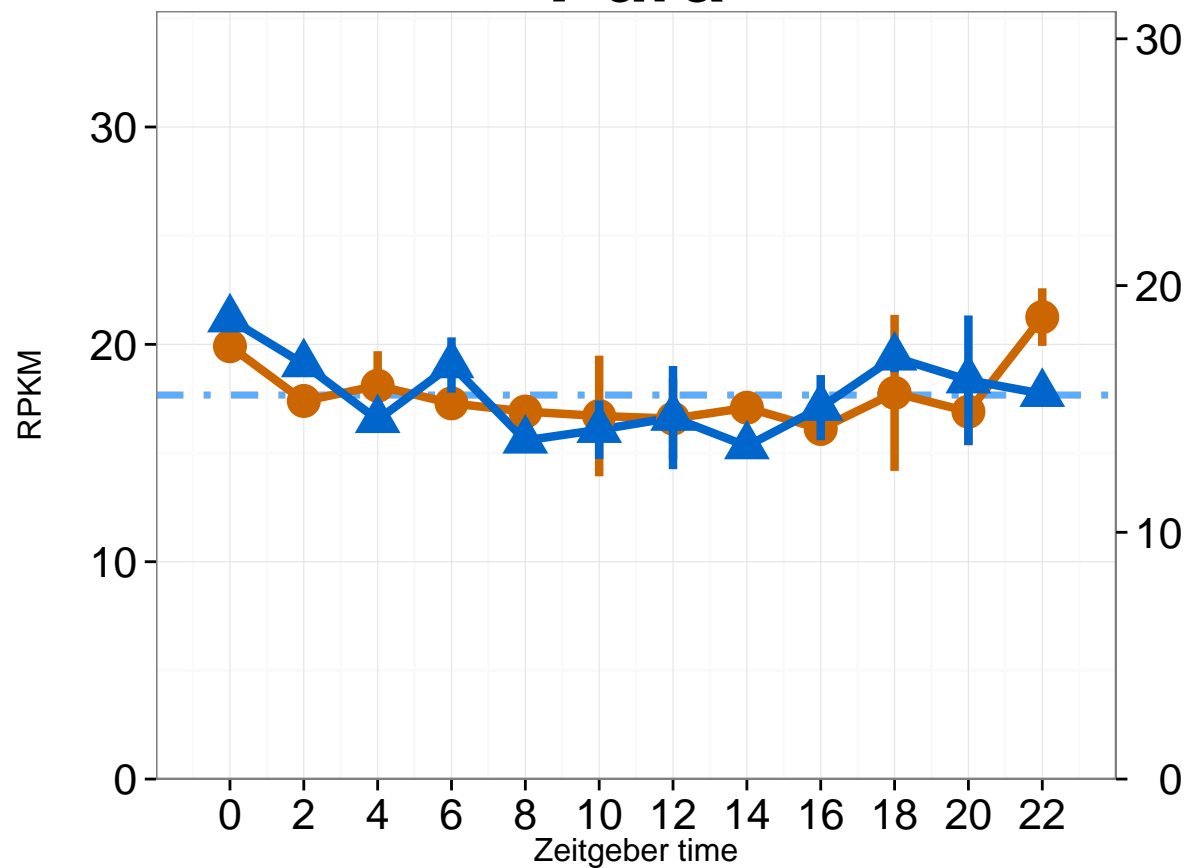

## Pura

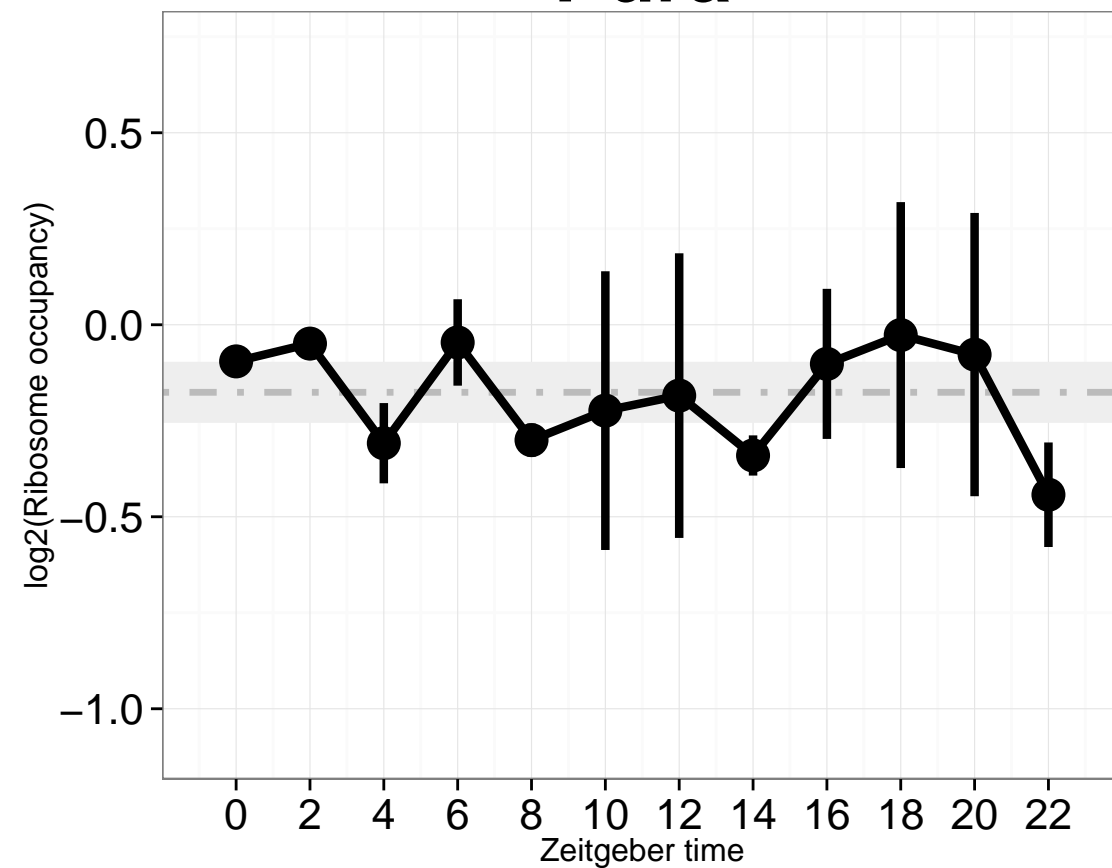

Supplement: SuppDataset_1.zip [file Pura_set_A.pdf › Supplemental Dataset 1/A-mRNA_nonrhyth_translation_nonrhyth/Pura_set_A.pdf]

## Purg

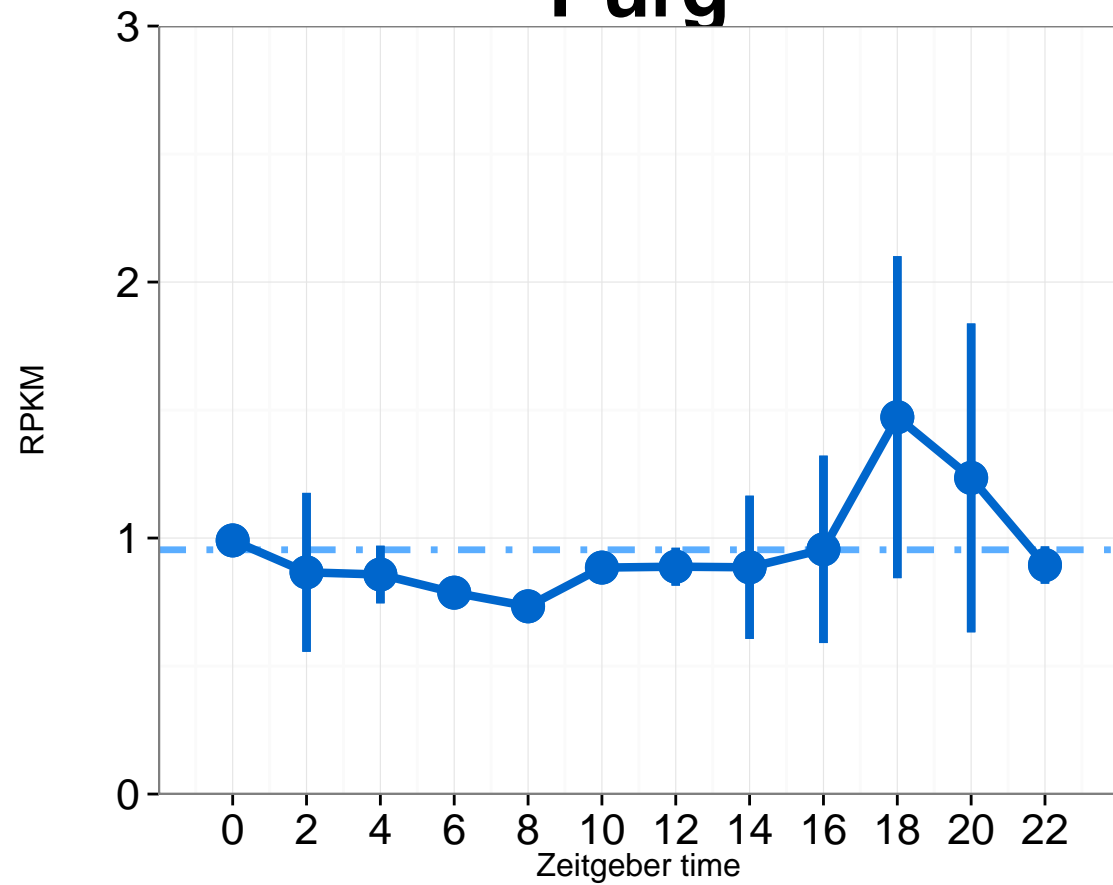

## Purg log2(Ribosome occupancy)

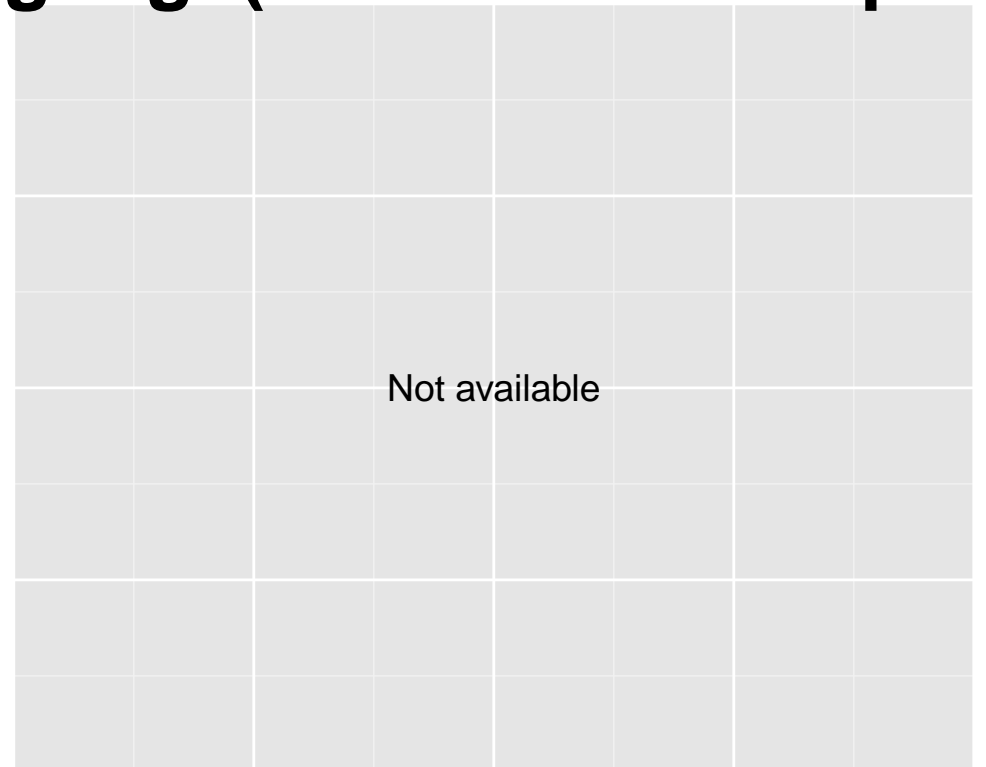

Supplement: SuppDataset_1.zip [file Purg_set_A.pdf › Supplemental Dataset 1/A-mRNA_nonrhyth_translation_nonrhyth/Purg_set_A.pdf]

## Pus10

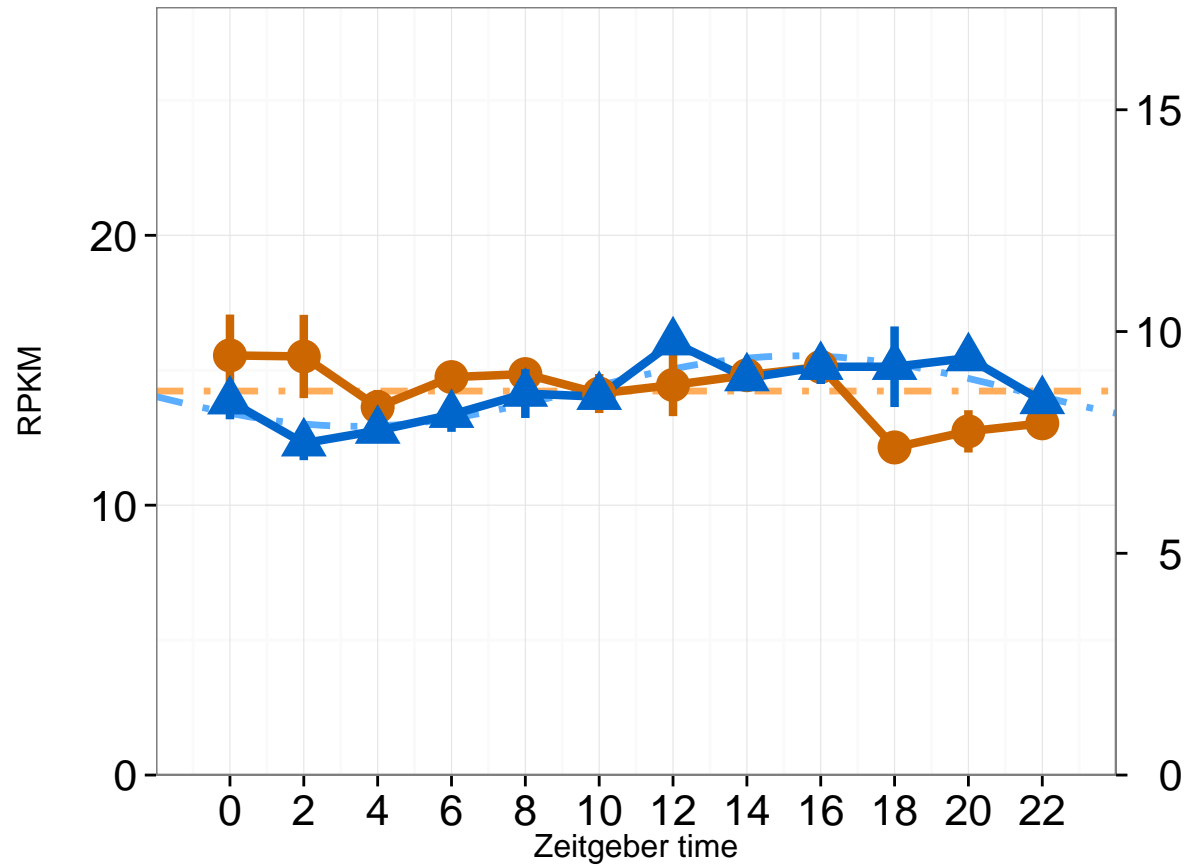

## Pus10

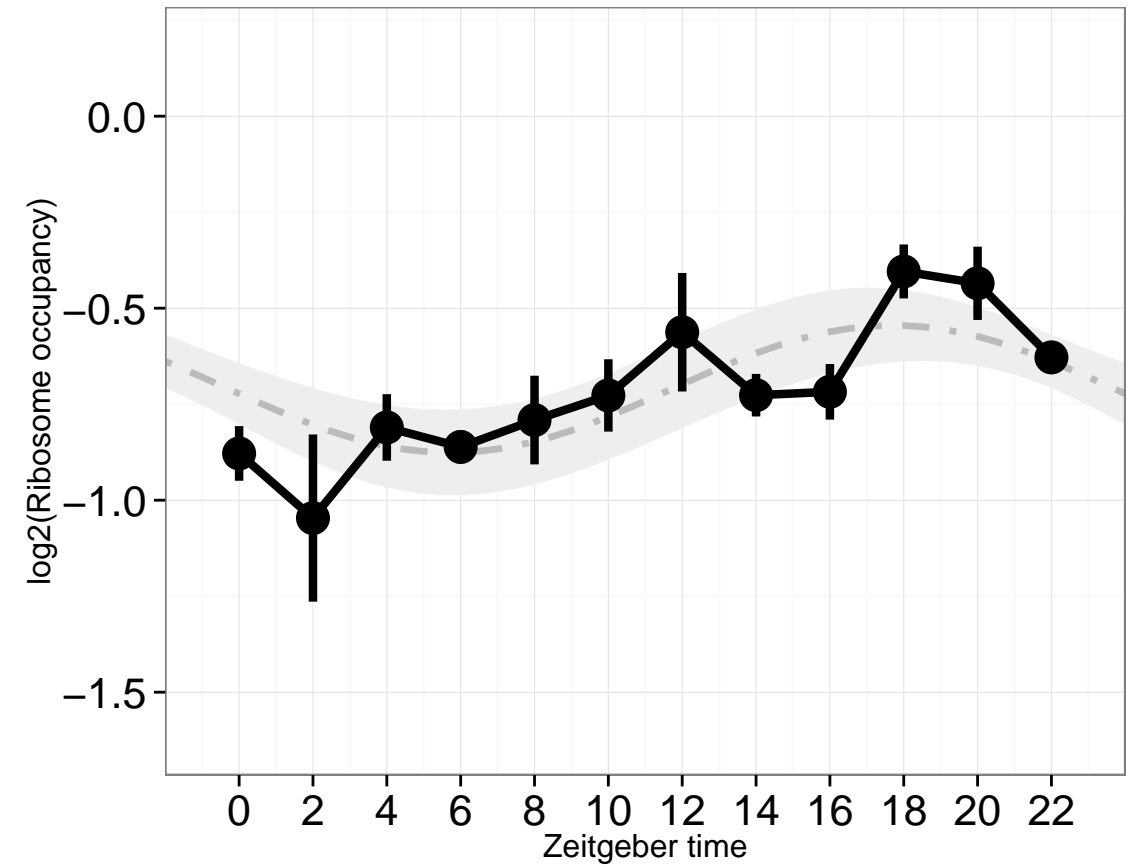

Supplement: SuppDataset_1.zip [file Pus10_set_A.pdf › Supplemental Dataset 1/A-mRNA_nonrhyth_translation_nonrhyth/Pus10_set_A.pdf]

## Pus1

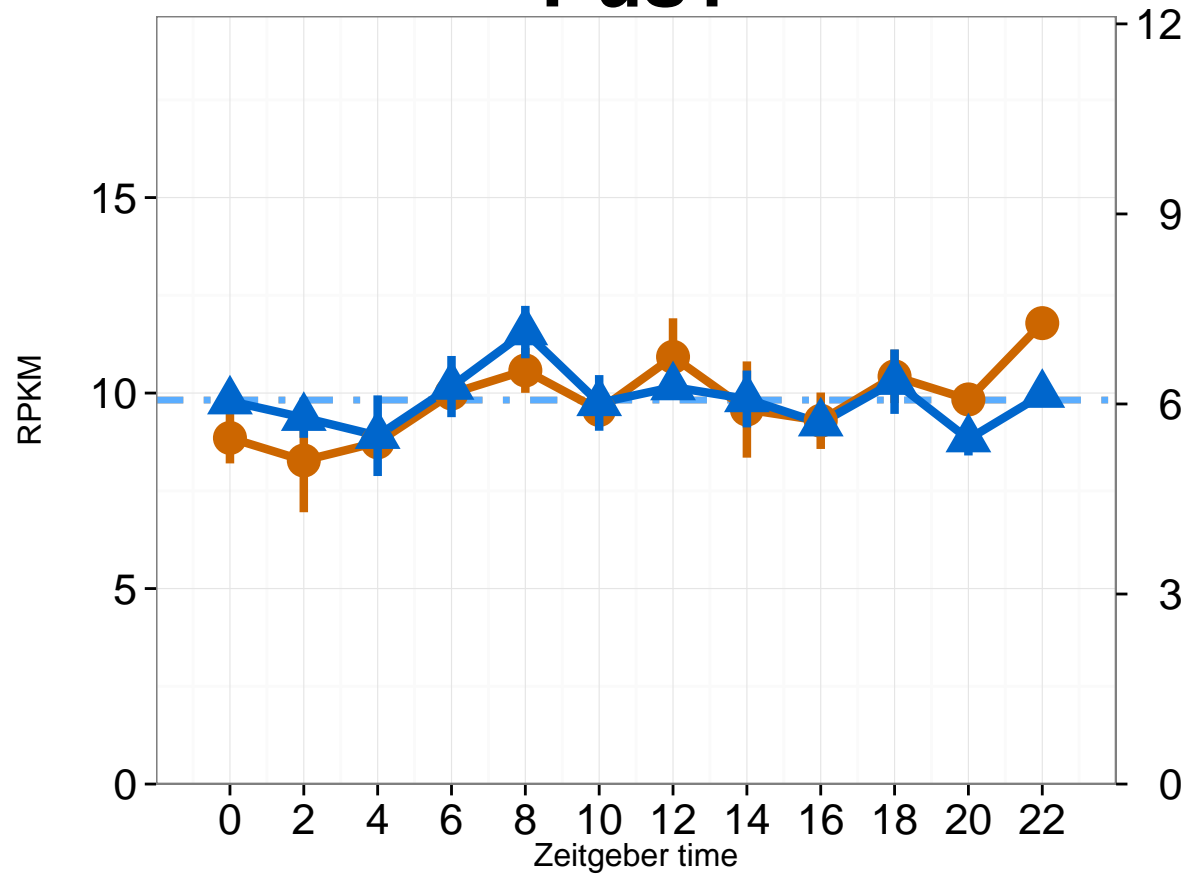

## Pus1

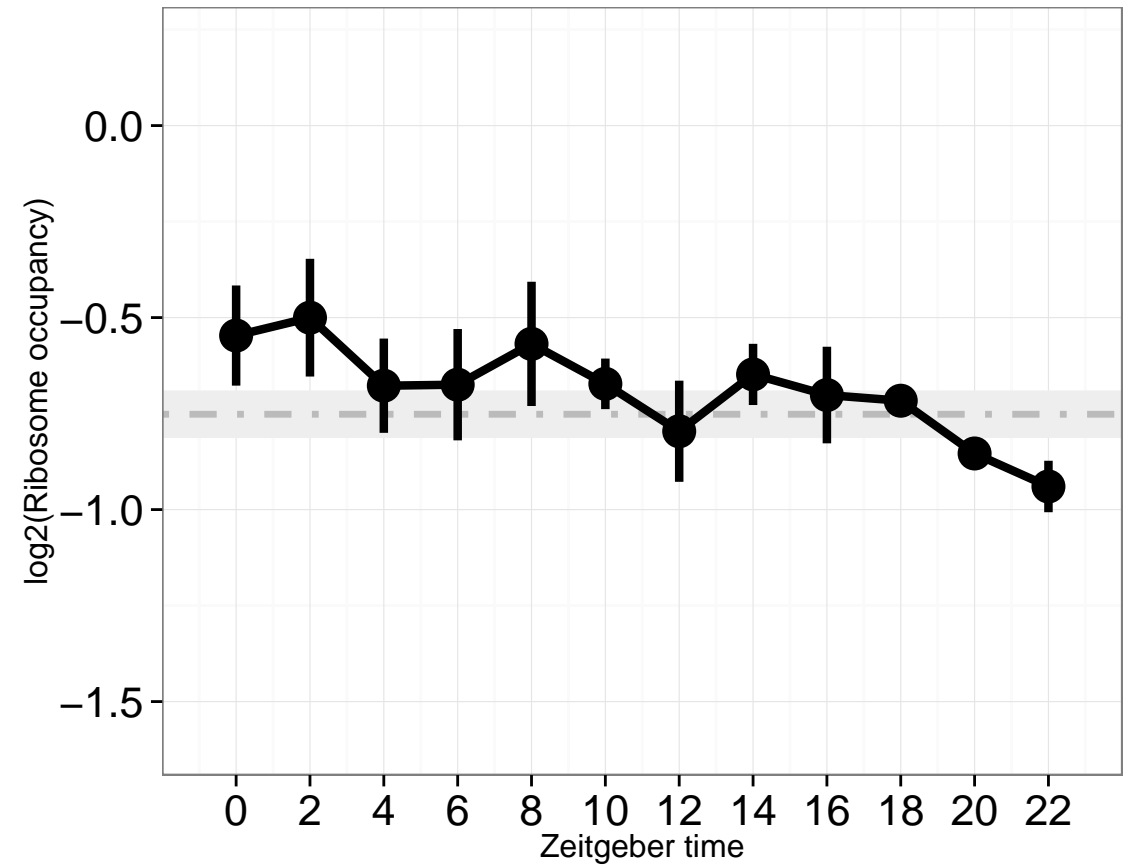

Supplement: SuppDataset_1.zip [file Pus1_set_A.pdf › Supplemental Dataset 1/A-mRNA_nonrhyth_translation_nonrhyth/Pus1_set_A.pdf]

## Pusl1

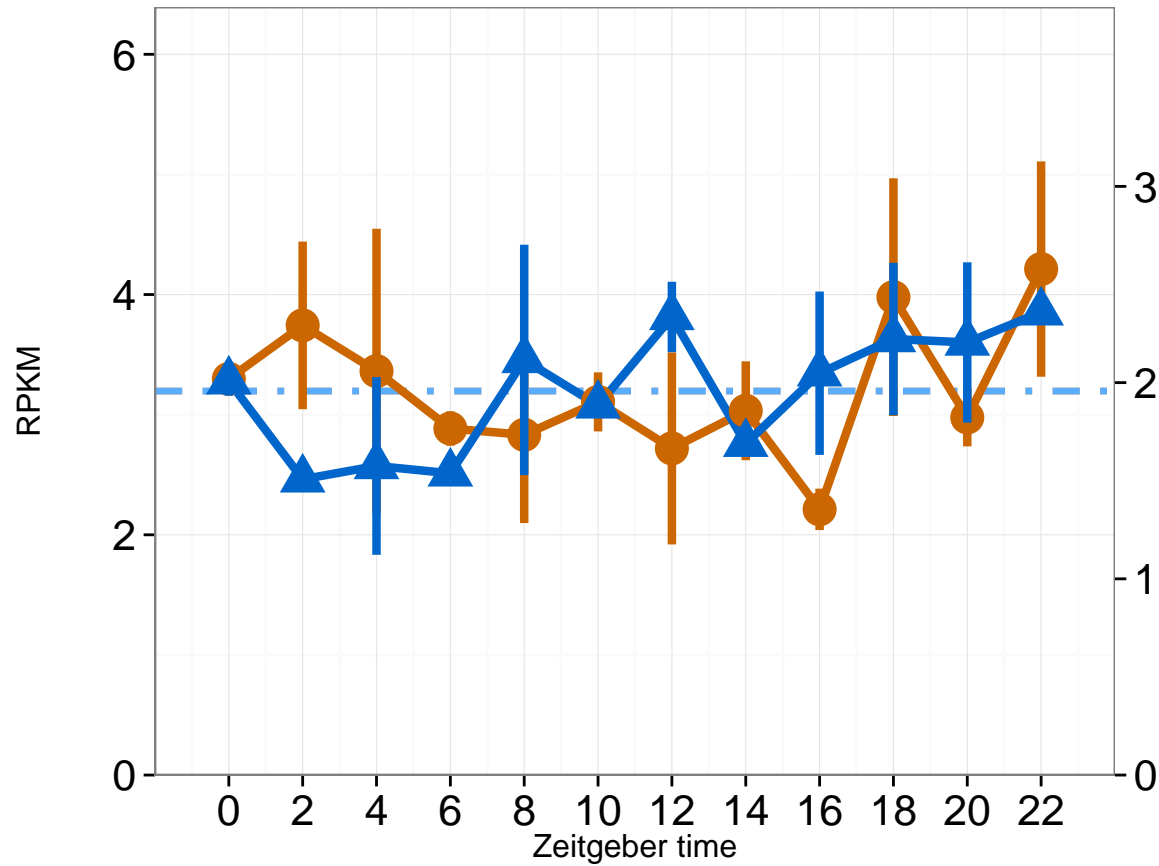

## Pusl1

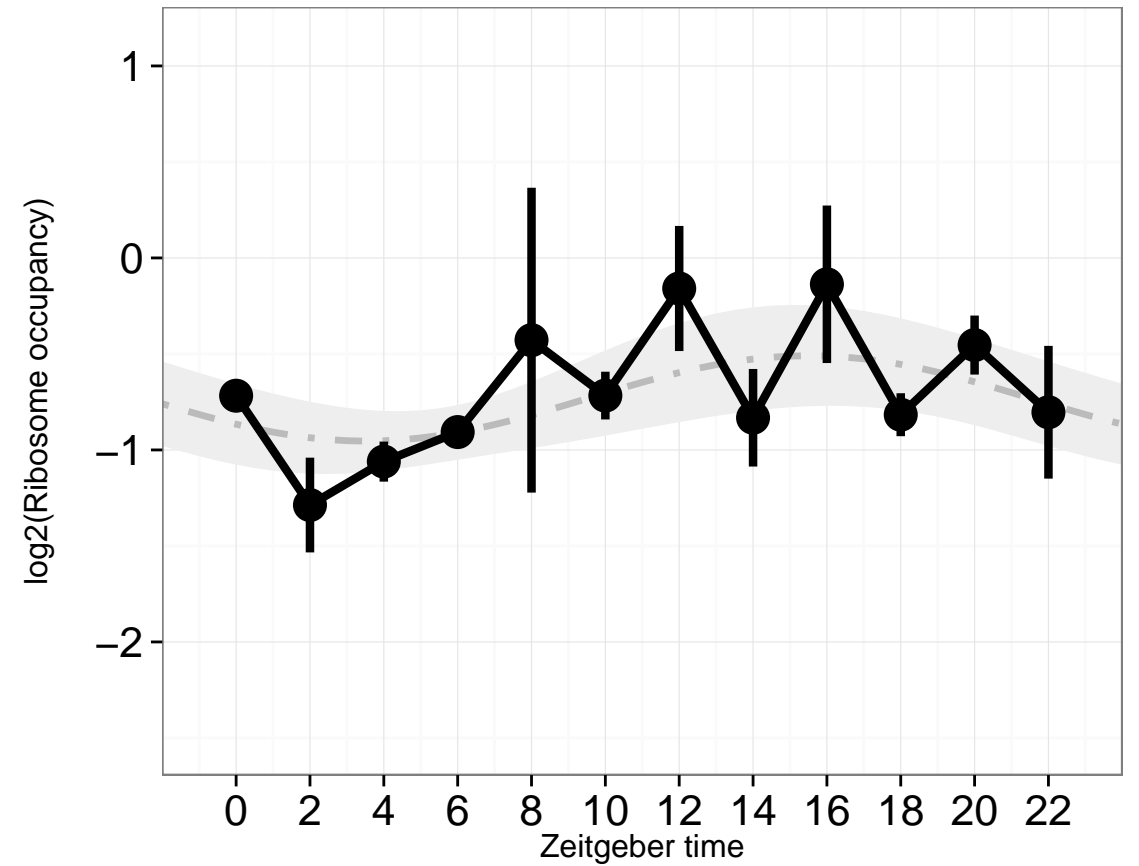

Supplement: SuppDataset_1.zip [file Pusl1_set_A.pdf › Supplemental Dataset 1/A-mRNA_nonrhyth_translation_nonrhyth/Pusl1_set_A.pdf]

## Pvr12

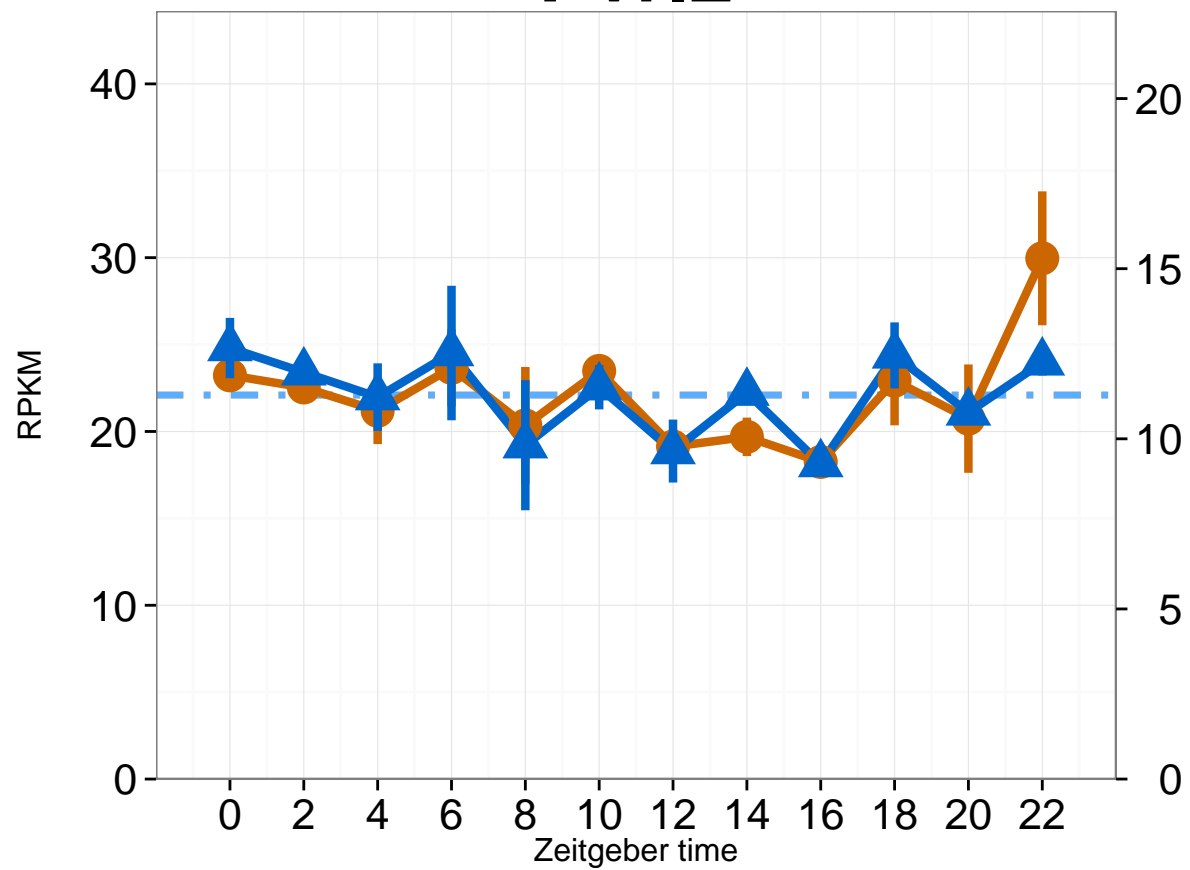

## Pvr12

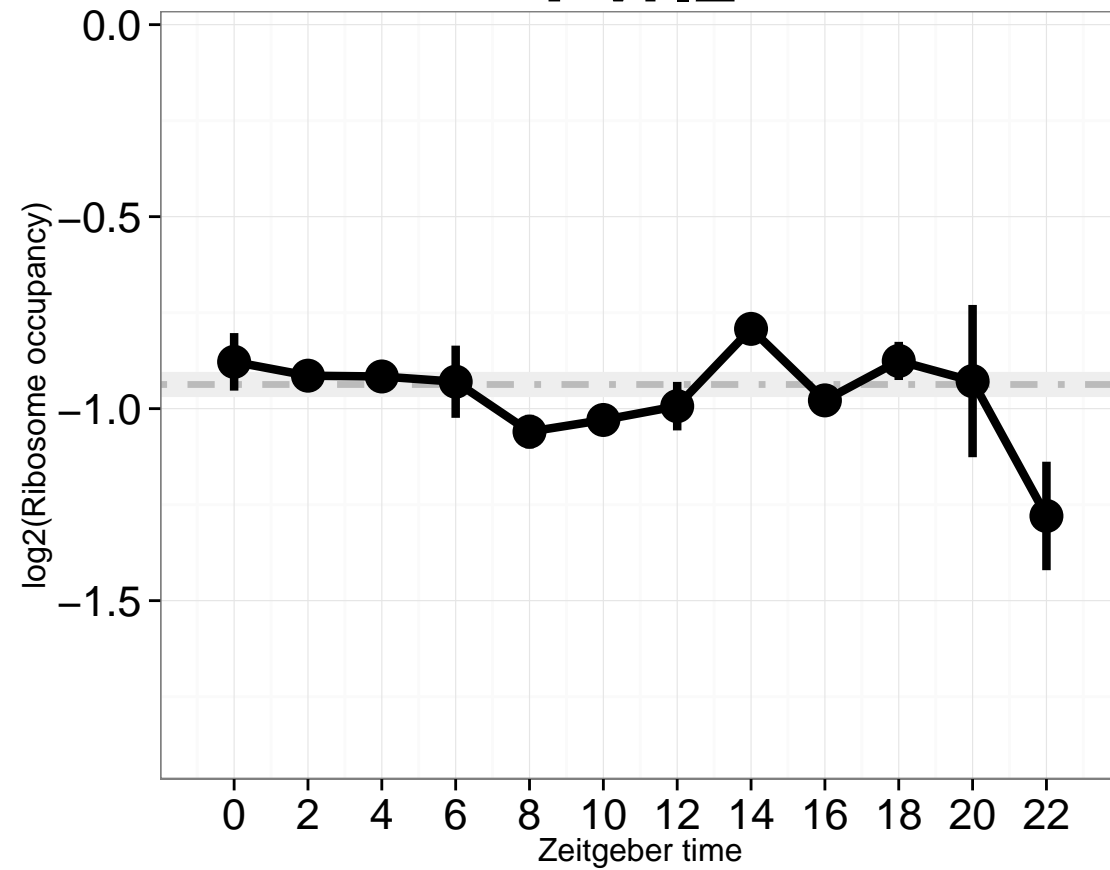

Supplement: SuppDataset_1.zip [file Pvrl2_set_A.pdf › Supplemental Dataset 1/A-mRNA_nonrhyth_translation_nonrhyth/Pvrl2_set_A.pdf]

## PvrI3

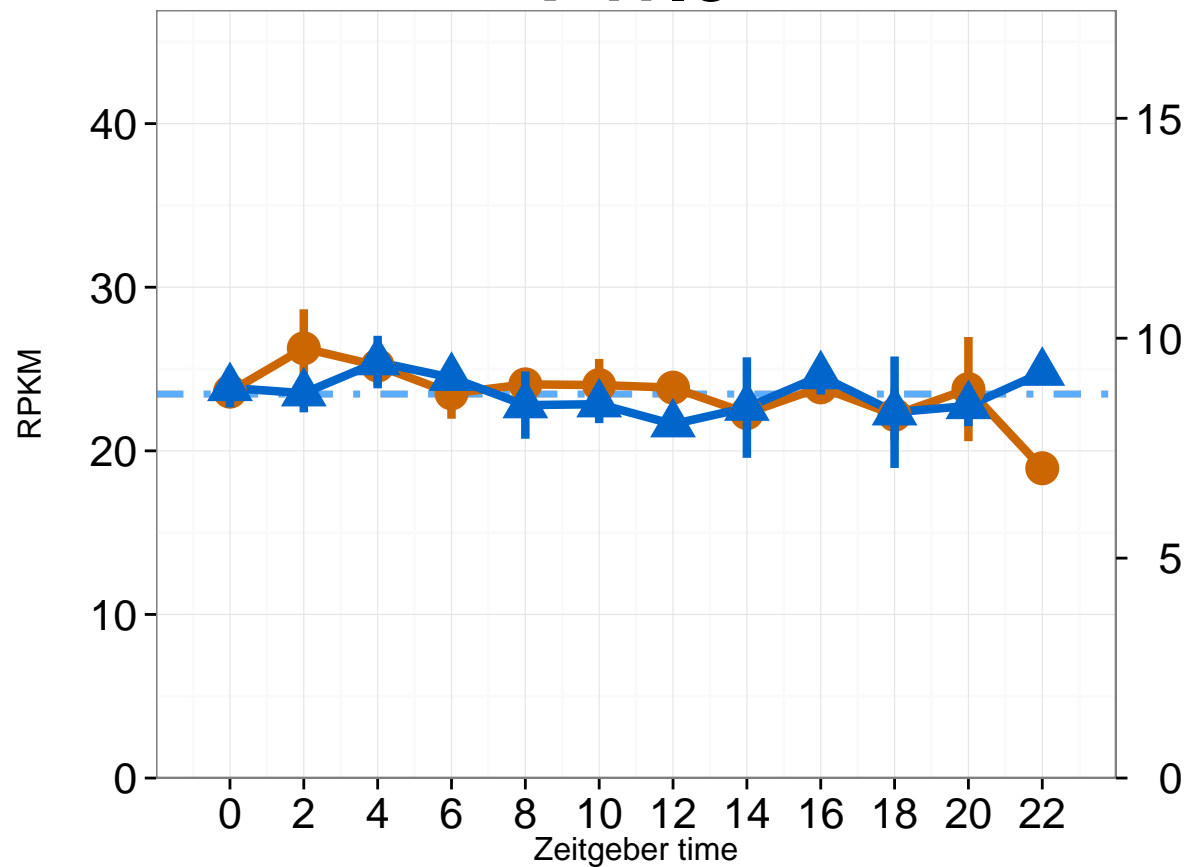

## PvrI3

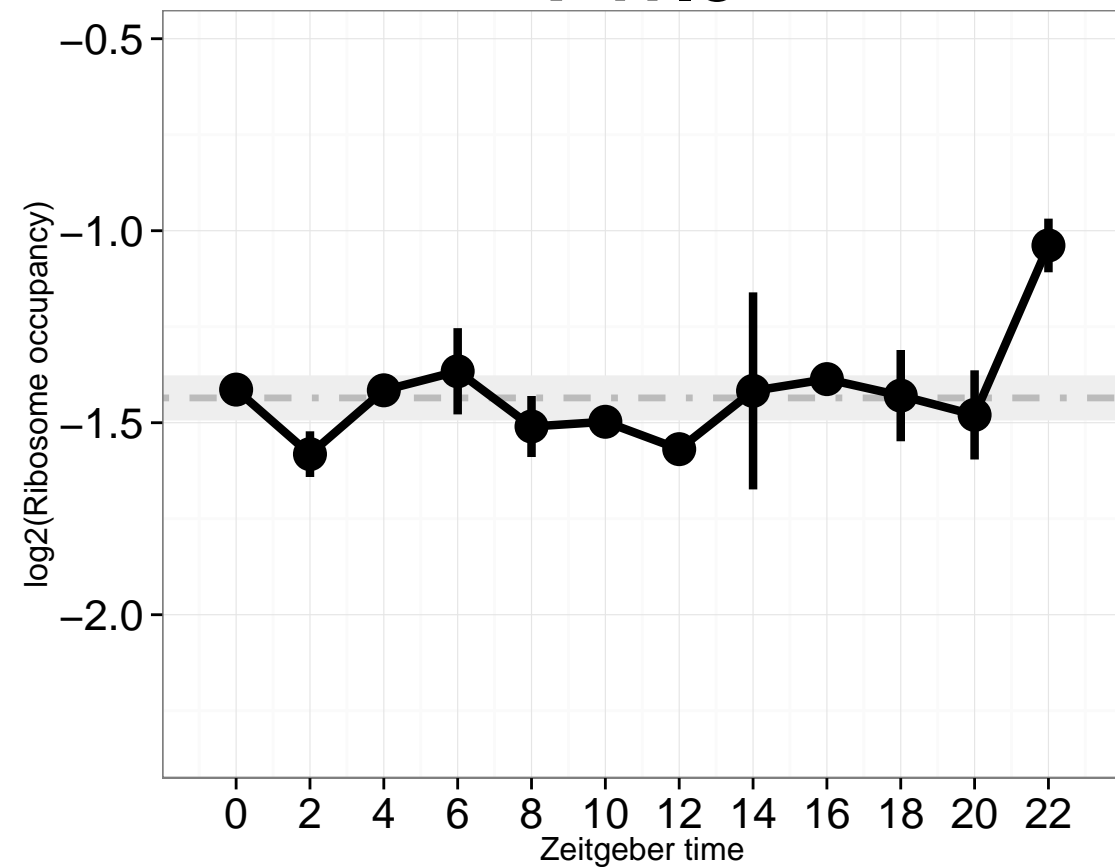

Supplement: SuppDataset_1.zip [file Pvrl3_set_A.pdf › Supplemental Dataset 1/A-mRNA_nonrhyth_translation_nonrhyth/Pvrl3_set_A.pdf]

# Pwp1

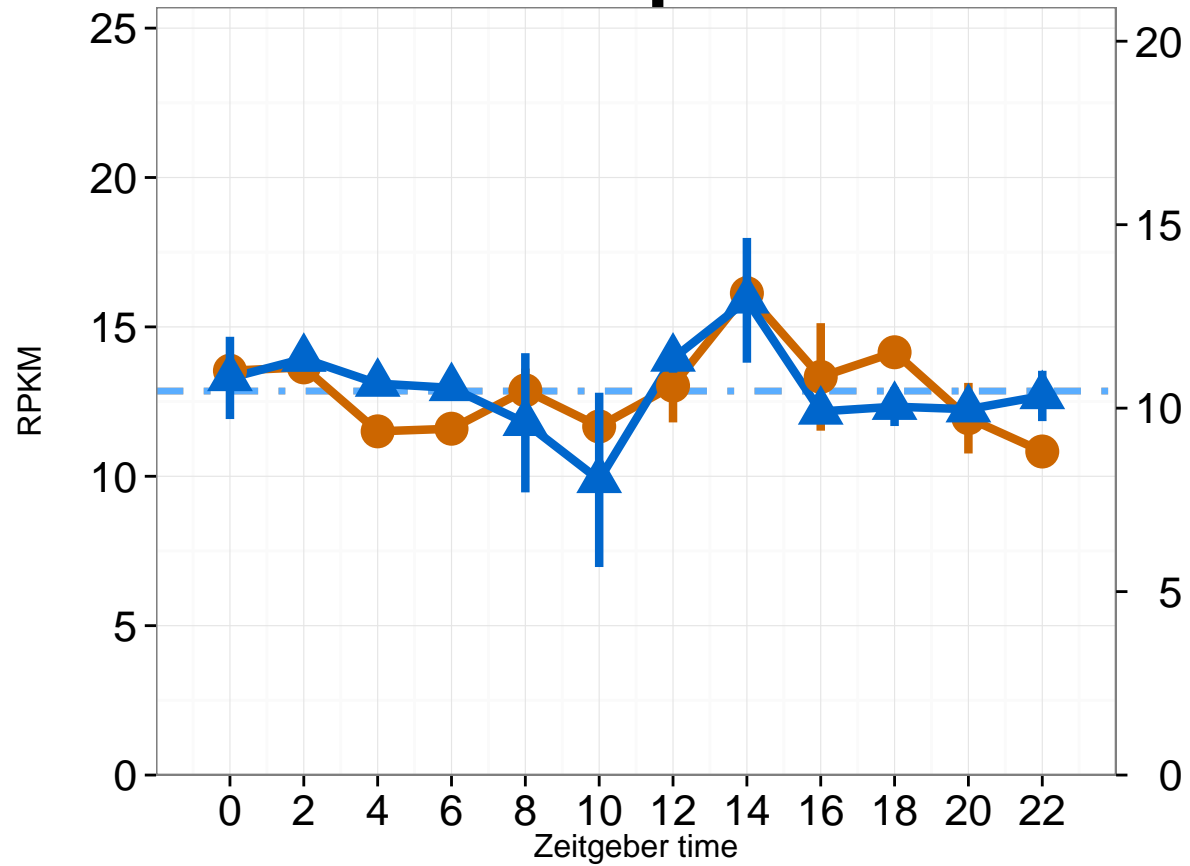

# Pwp1

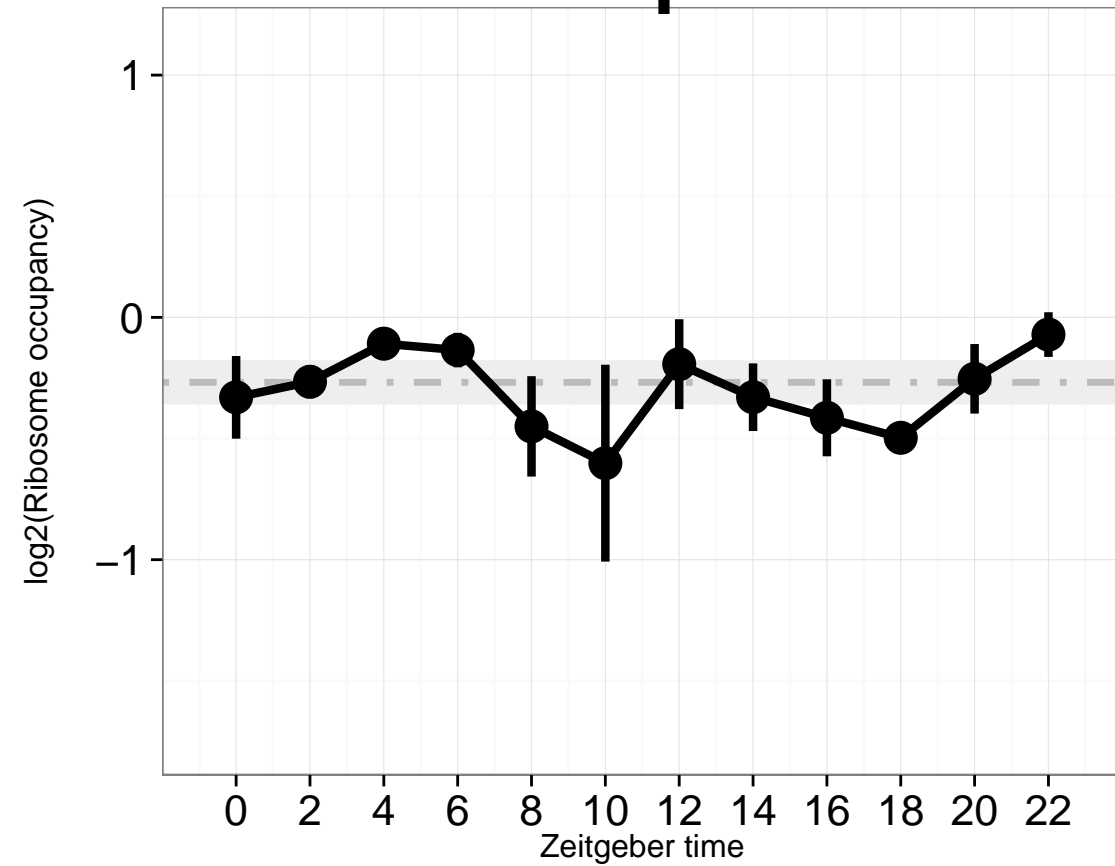

Supplement: SuppDataset_1.zip [file Pwp1_set_A.pdf › Supplemental Dataset 1/A-mRNA_nonrhyth_translation_nonrhyth/Pwp1_set_A.pdf]

## Pwp2

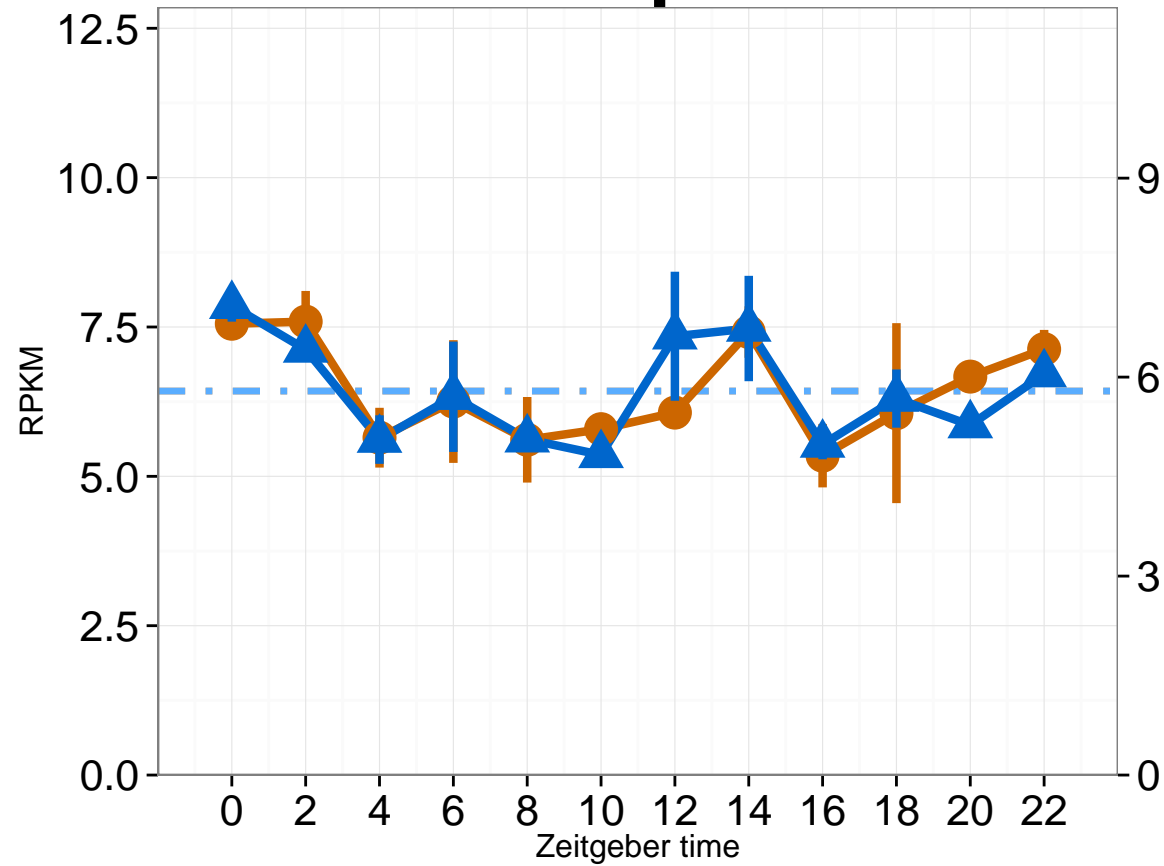

## Pwp2

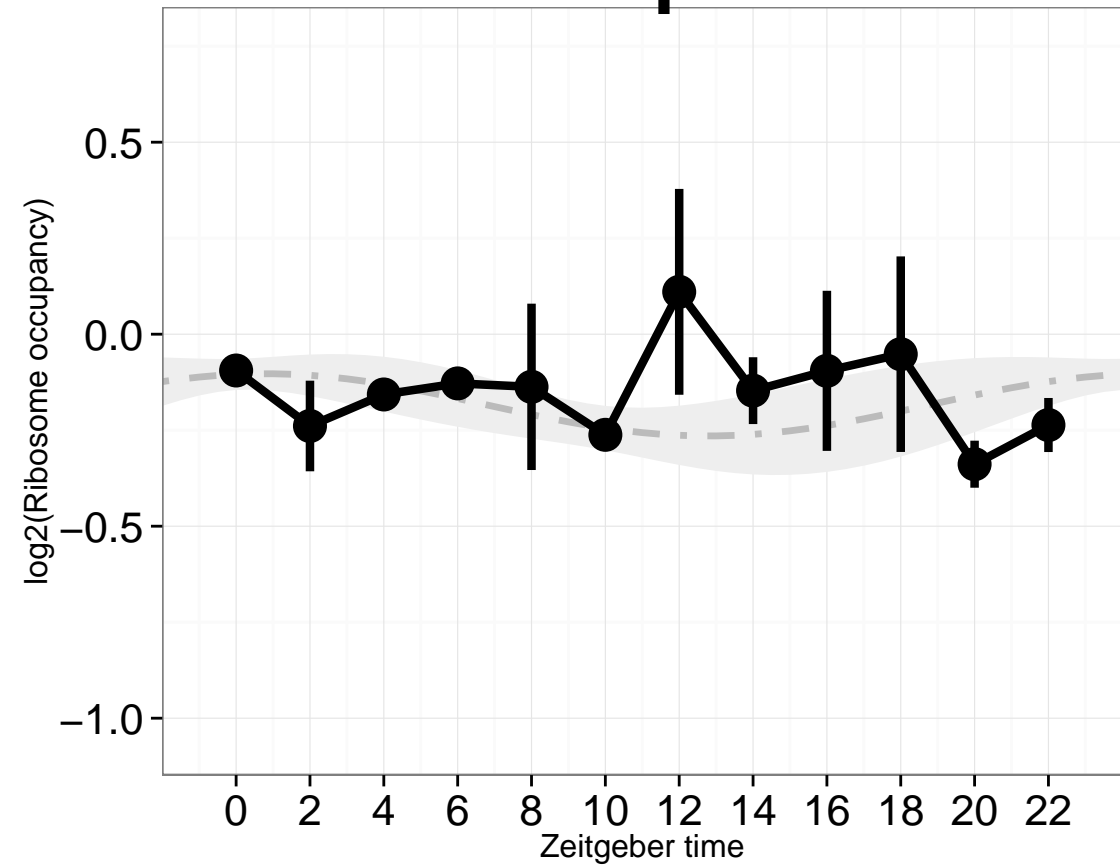

Supplement: SuppDataset_1.zip [file Pwp2_set_A.pdf › Supplemental Dataset 1/A-mRNA_nonrhyth_translation_nonrhyth/Pwp2_set_A.pdf]

# Pwwp2a

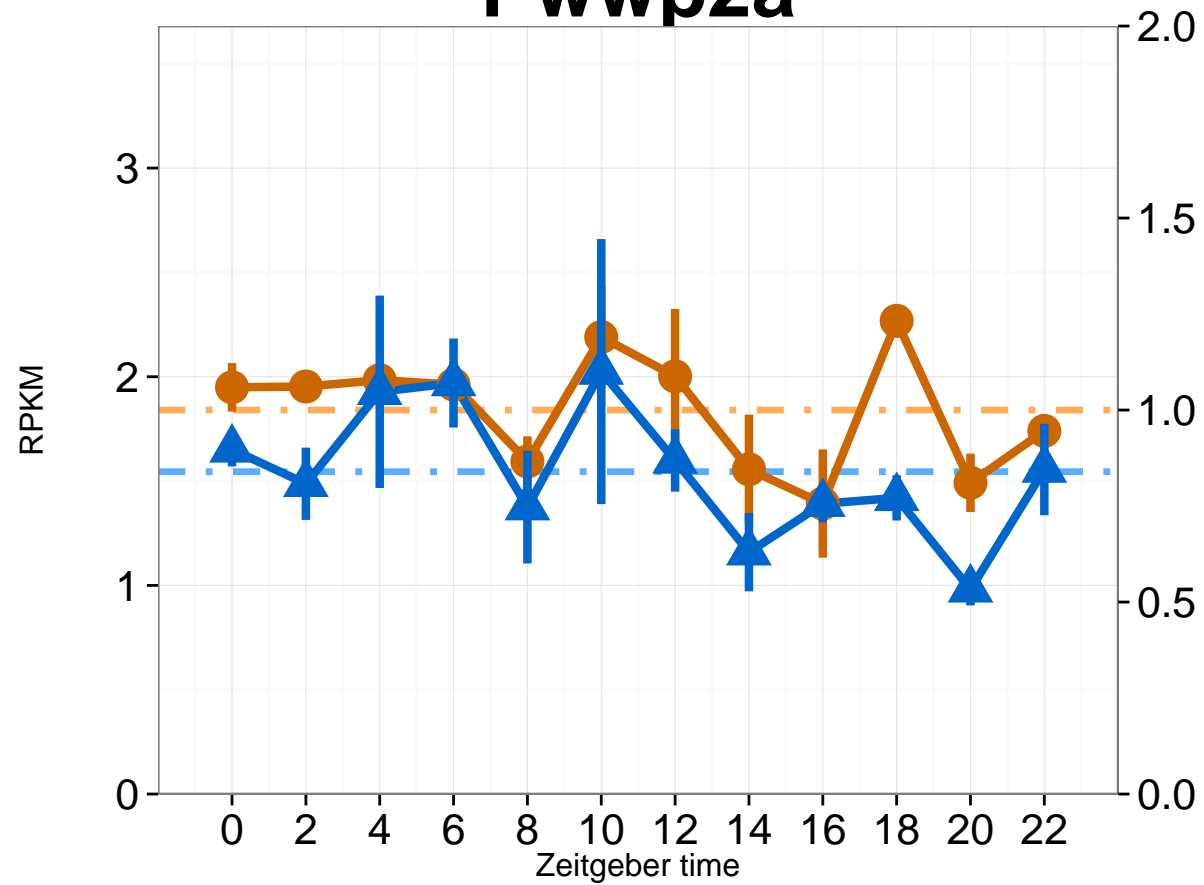

# Pwwp2a

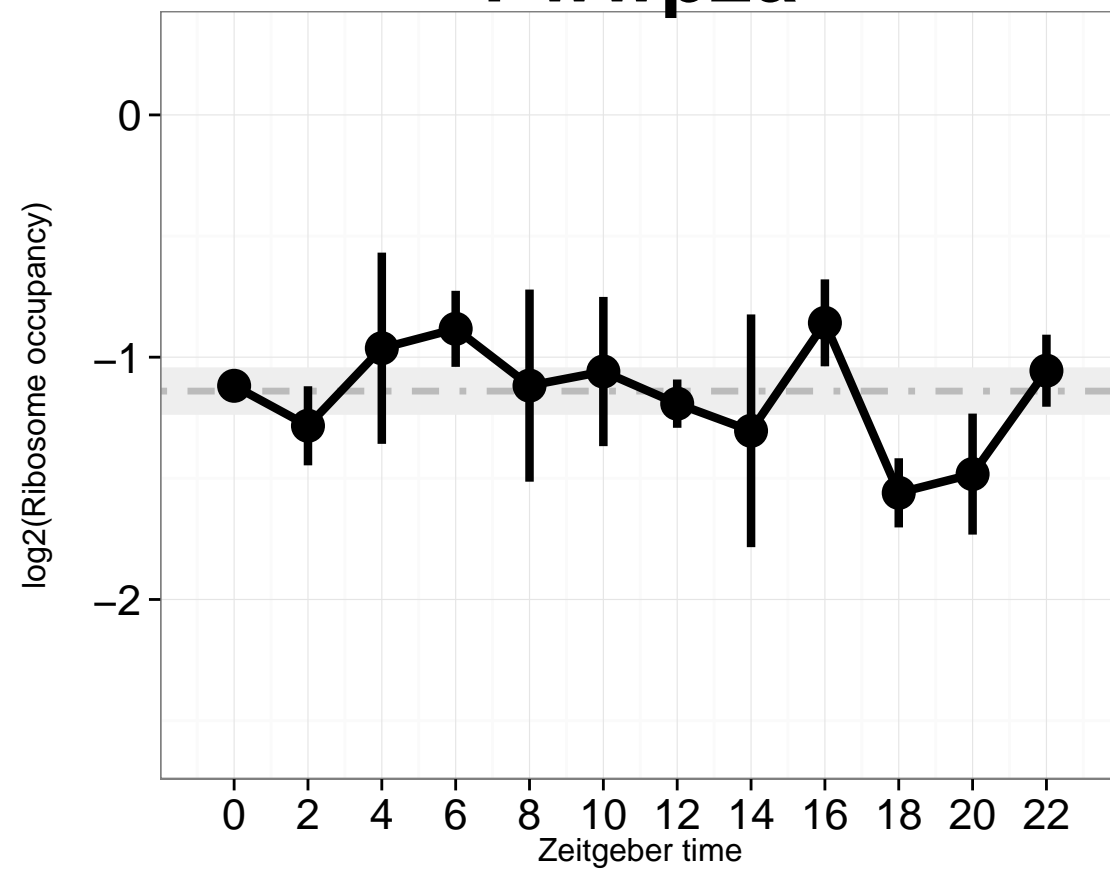

Supplement: SuppDataset_1.zip [file Pwwp2a_set_A.pdf › Supplemental Dataset 1/A-mRNA_nonrhyth_translation_nonrhyth/Pwwp2a_set_A.pdf]

# Pwwp2b

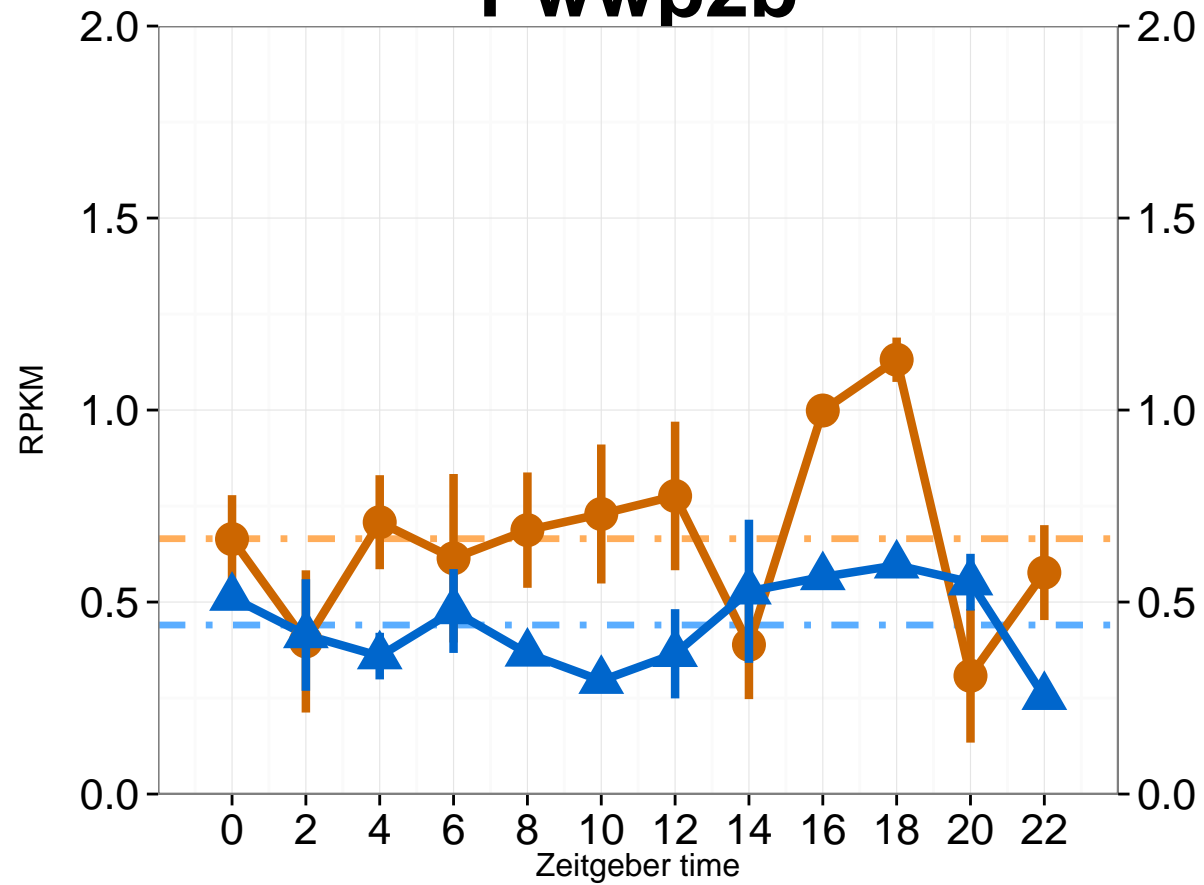

# Pwwp2b

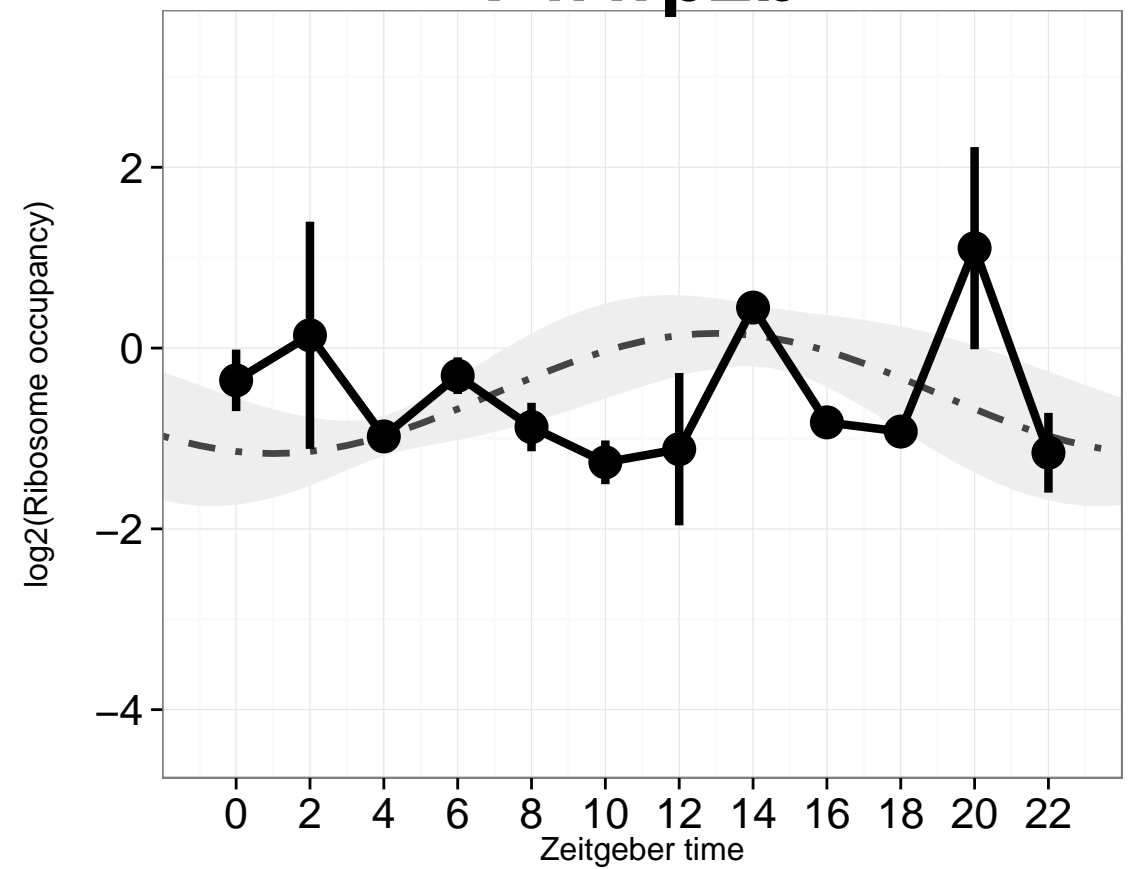

Supplement: SuppDataset_1.zip [file Pwwp2b_set_A.pdf › Supplemental Dataset 1/A-mRNA_nonrhyth_translation_nonrhyth/Pwwp2b_set_A.pdf]

## Pxk

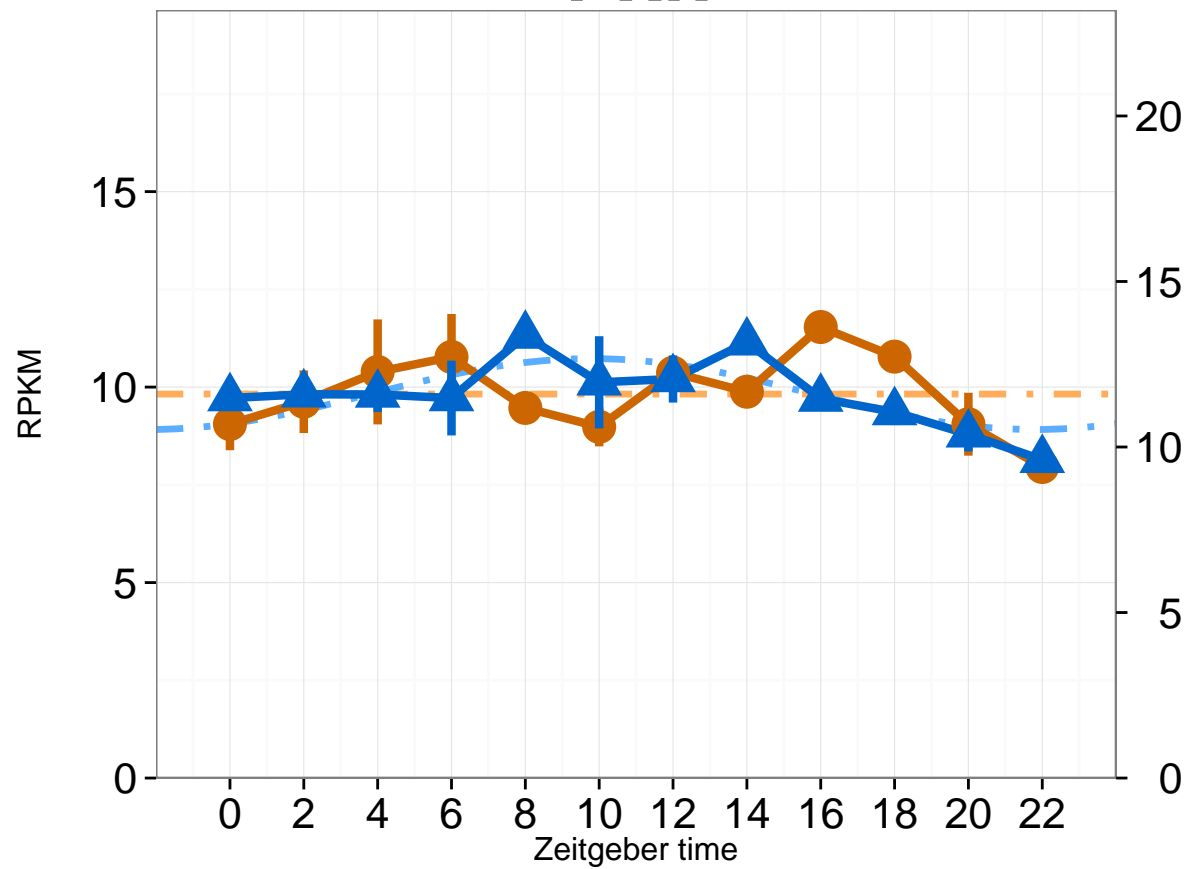

## Pxk

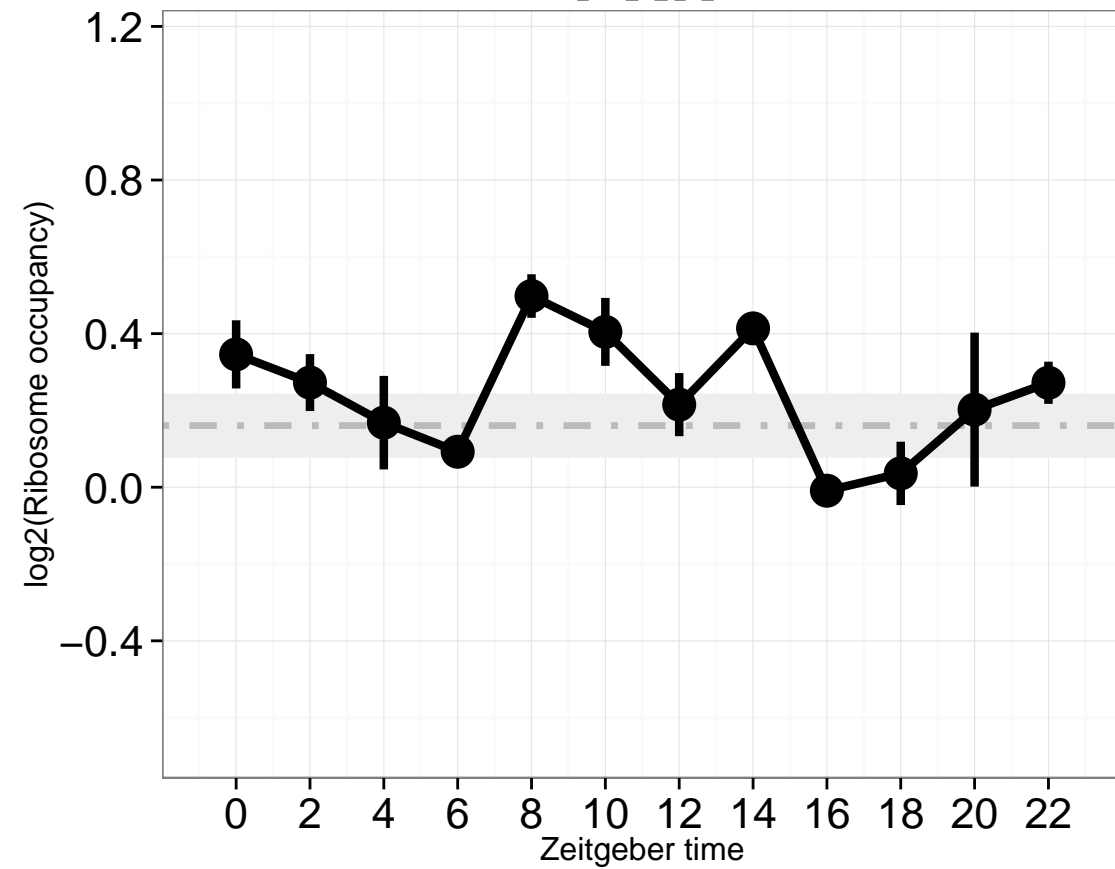

Supplement: SuppDataset_1.zip [file Pxk_set_A.pdf › Supplemental Dataset 1/A-mRNA_nonrhyth_translation_nonrhyth/Pxk_set_A.pdf]

# Pxmp2

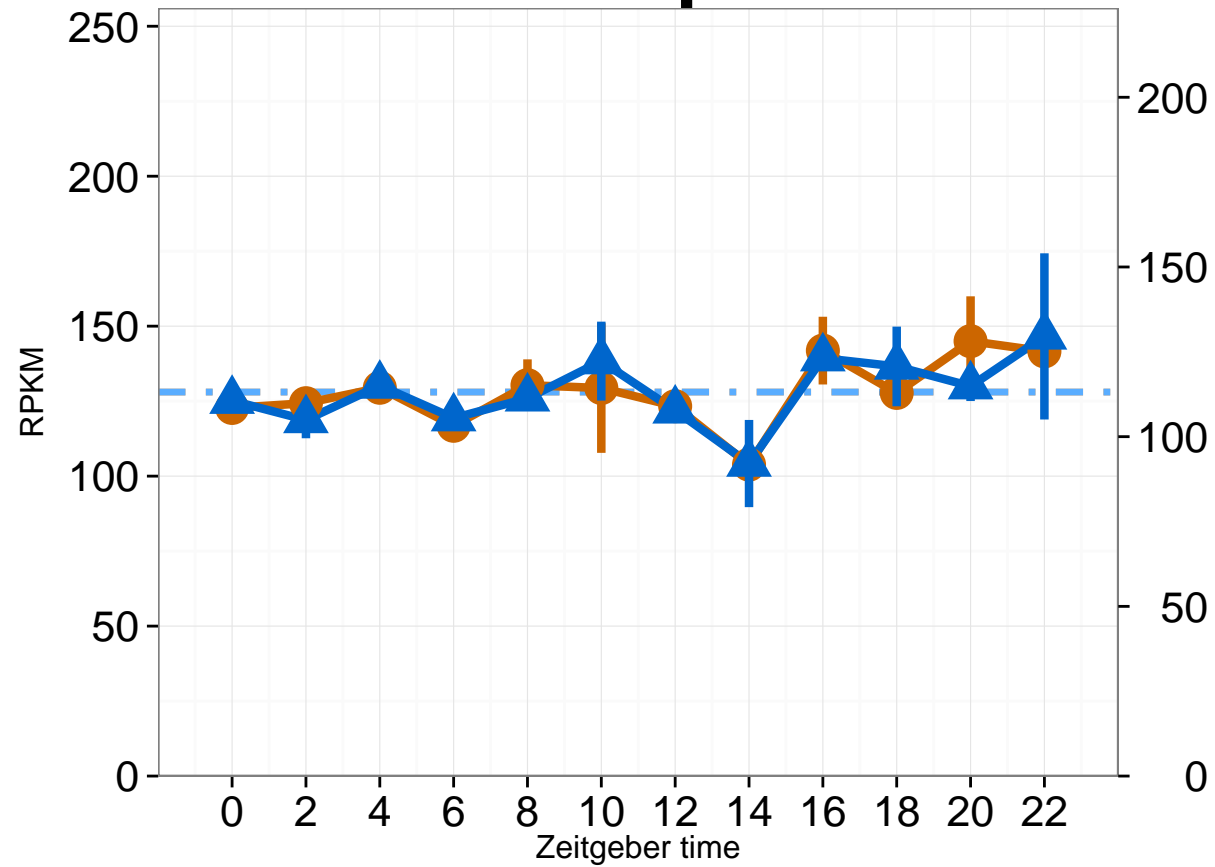

# Pxmp2

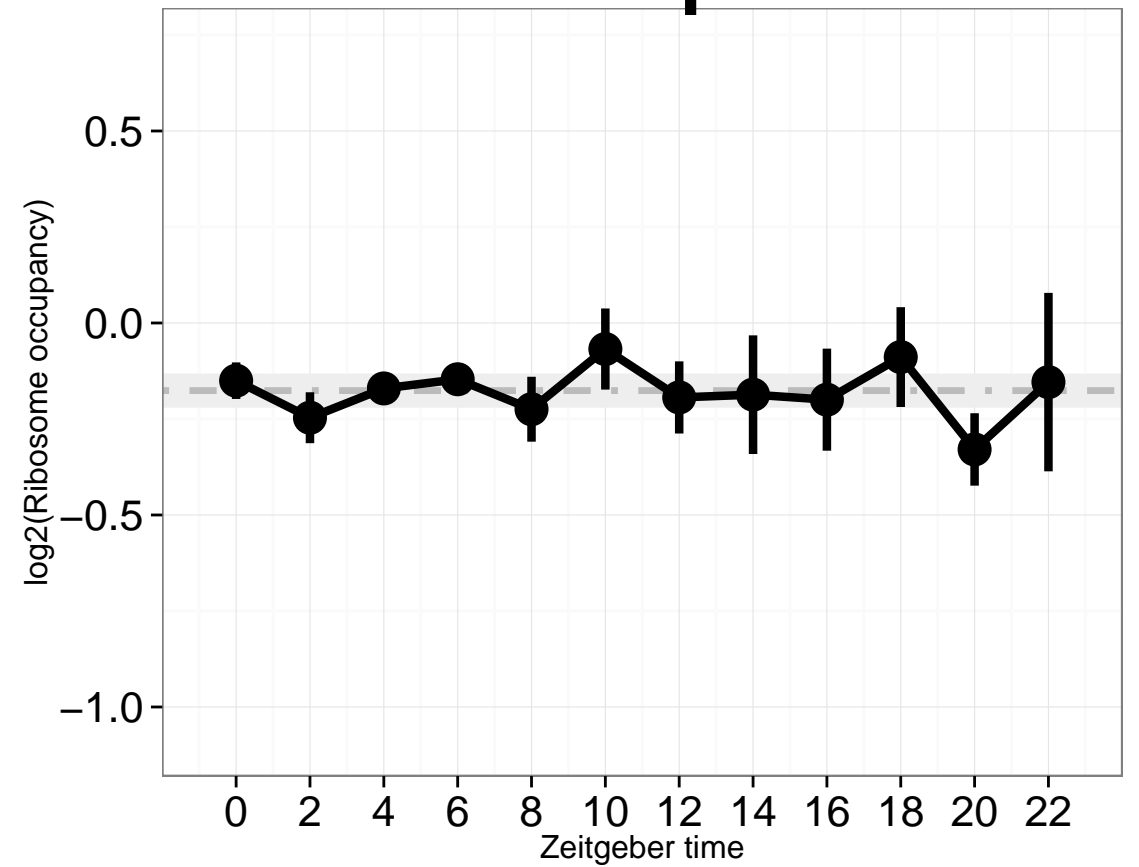

Supplement: SuppDataset_1.zip [file Pxmp2_set_A.pdf › Supplemental Dataset 1/A-mRNA_nonrhyth_translation_nonrhyth/Pxmp2_set_A.pdf]

**Pxn**

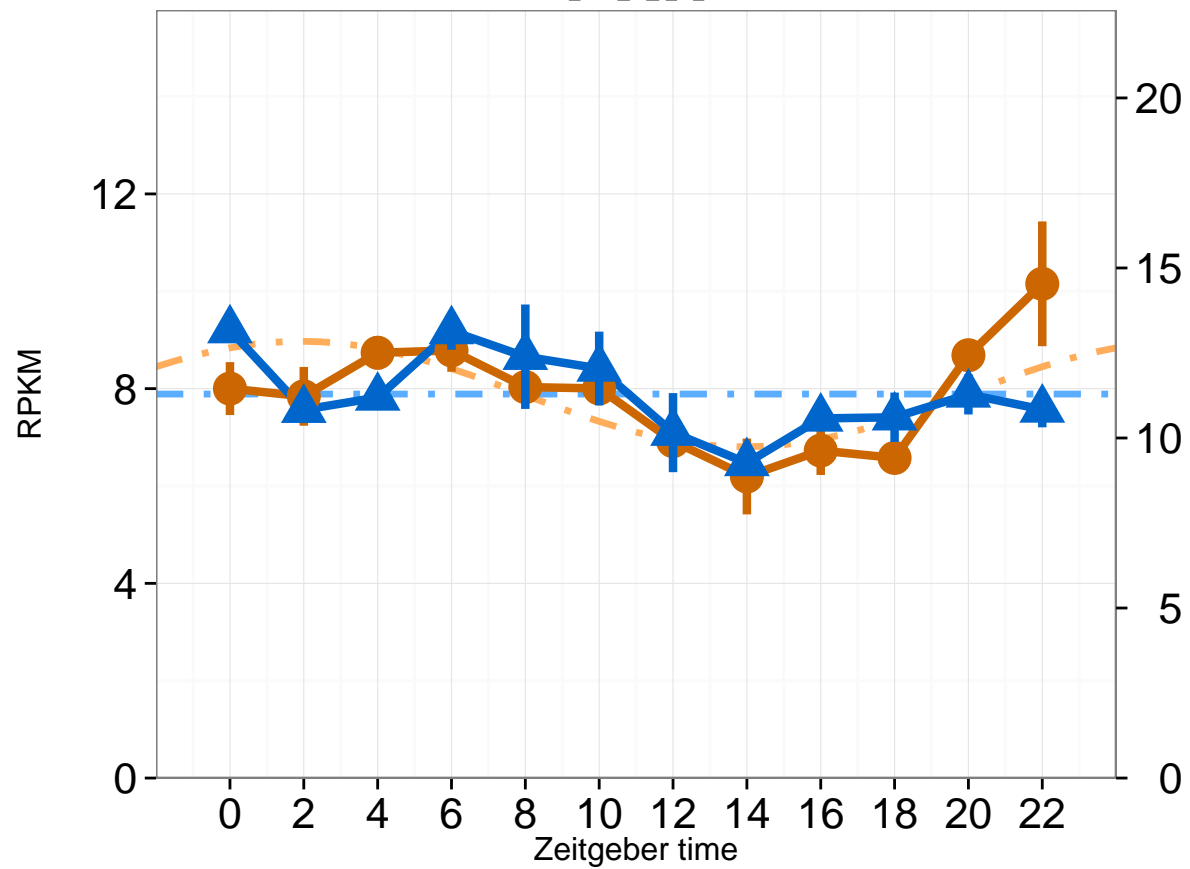

**Pxn**

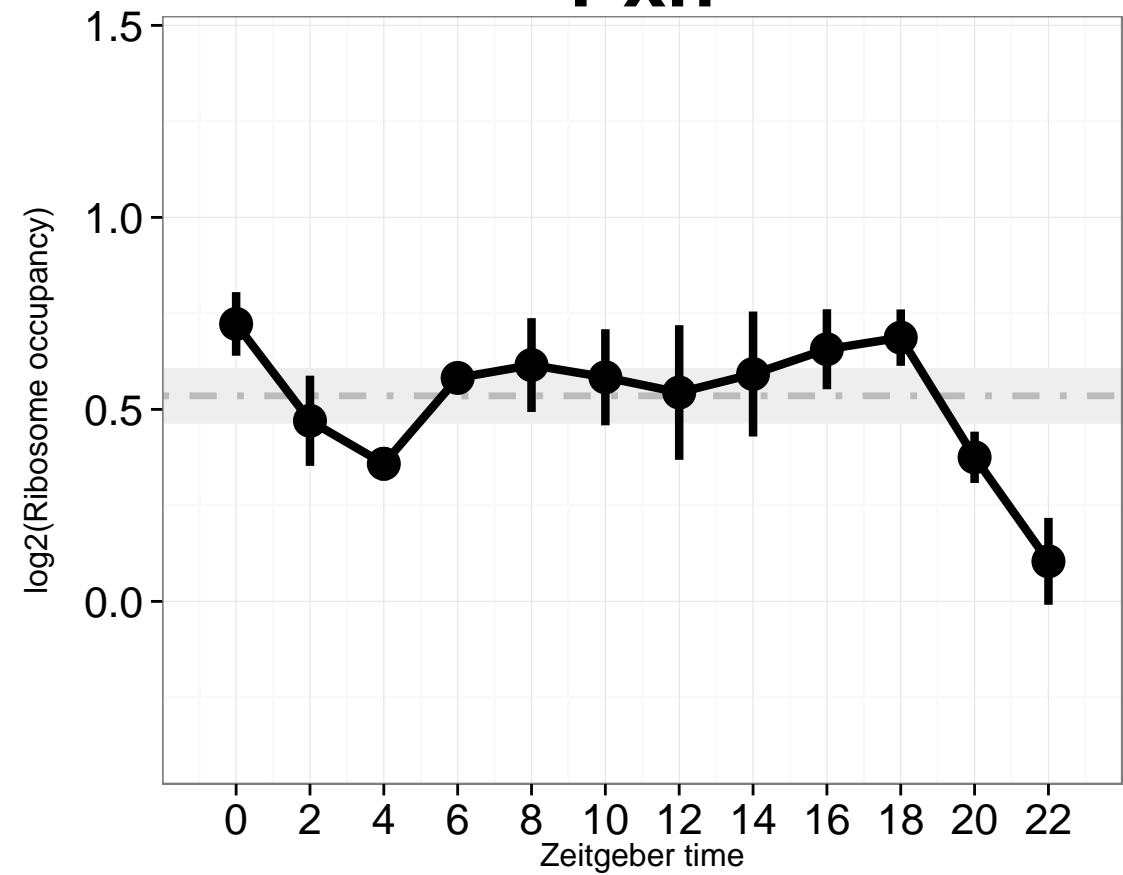

Supplement: SuppDataset_1.zip [file Pxn_set_A.pdf › Supplemental Dataset 1/A-mRNA_nonrhyth_translation_nonrhyth/Pxn_set_A.pdf]

## Pycard

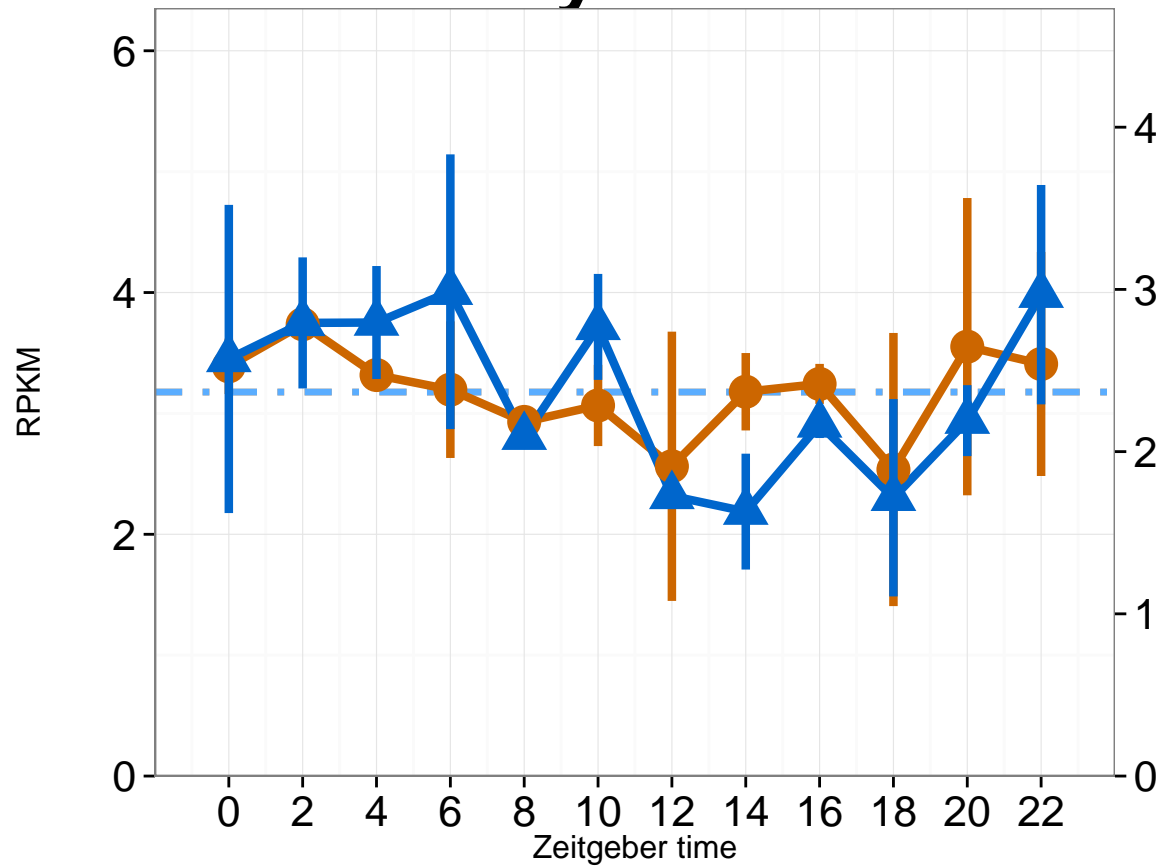

## Pycard

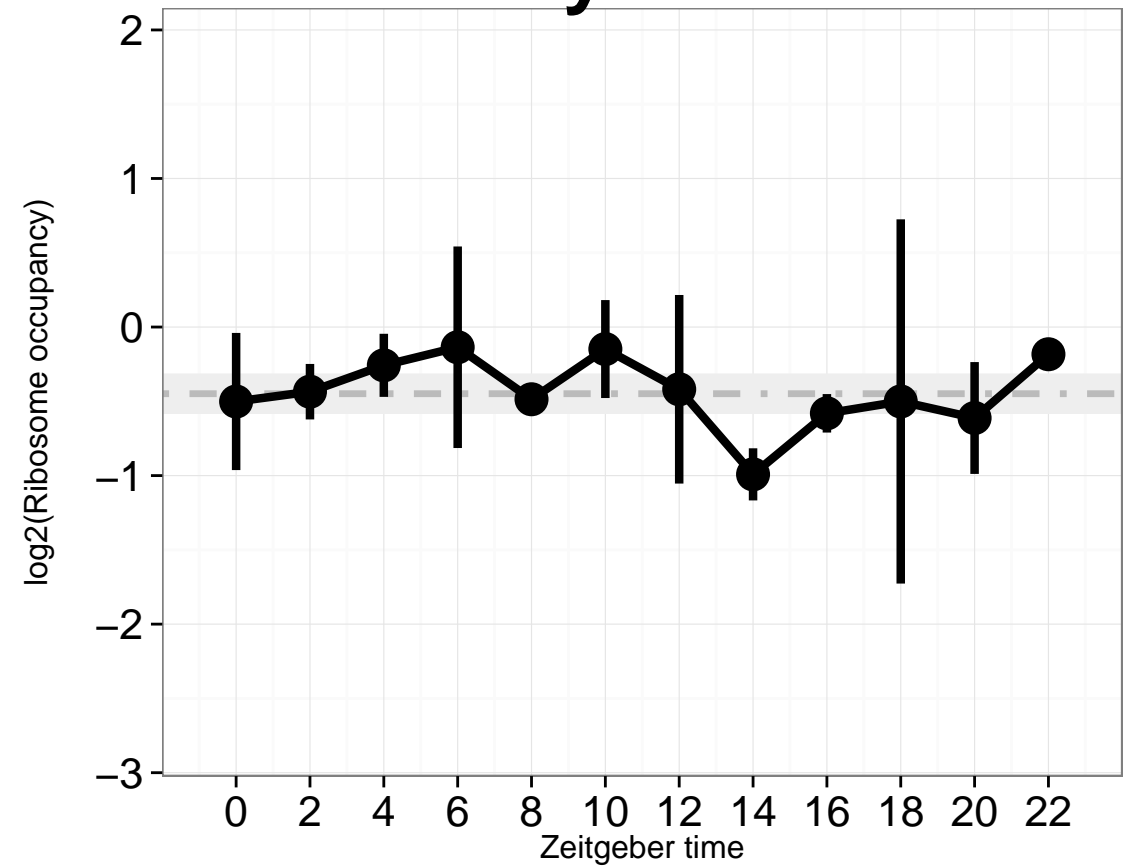

Supplement: SuppDataset_1.zip [file Pycard_set_A.pdf › Supplemental Dataset 1/A-mRNA_nonrhyth_translation_nonrhyth/Pycard_set_A.pdf]

# Pycr2

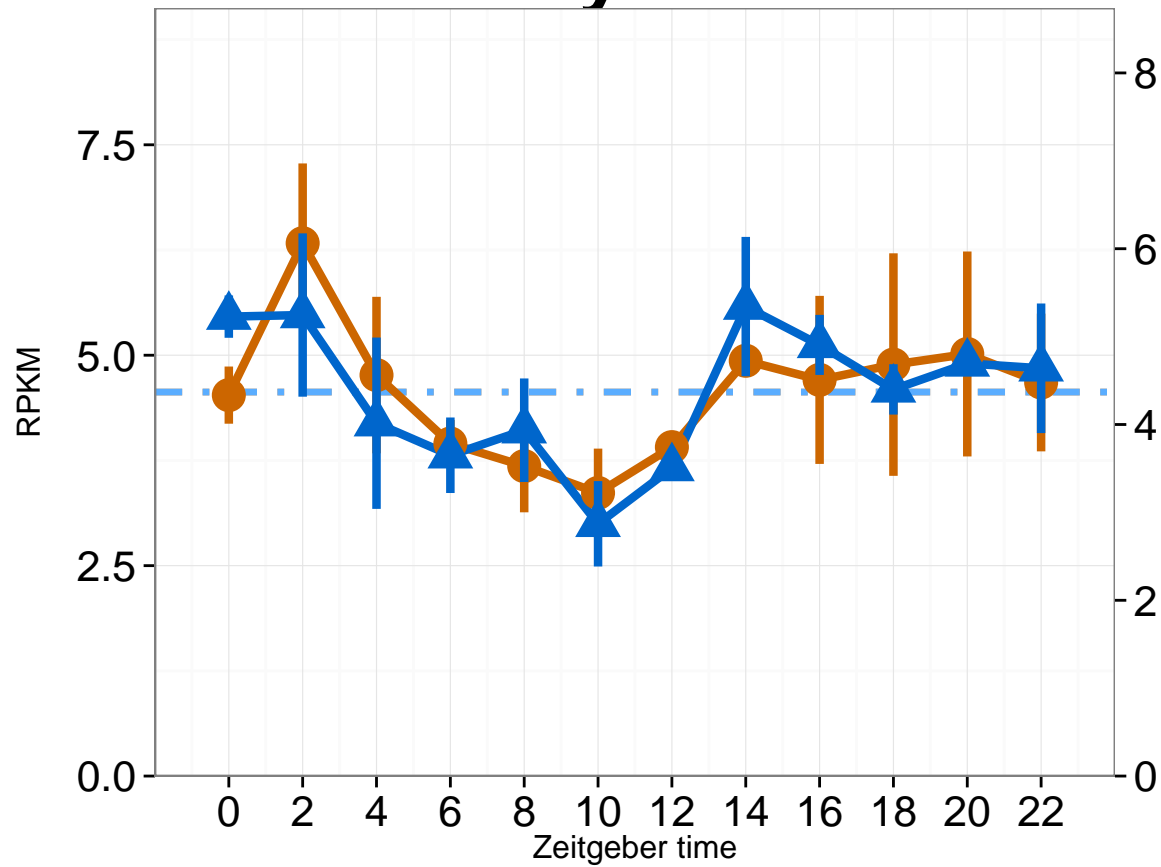

# Pycr2

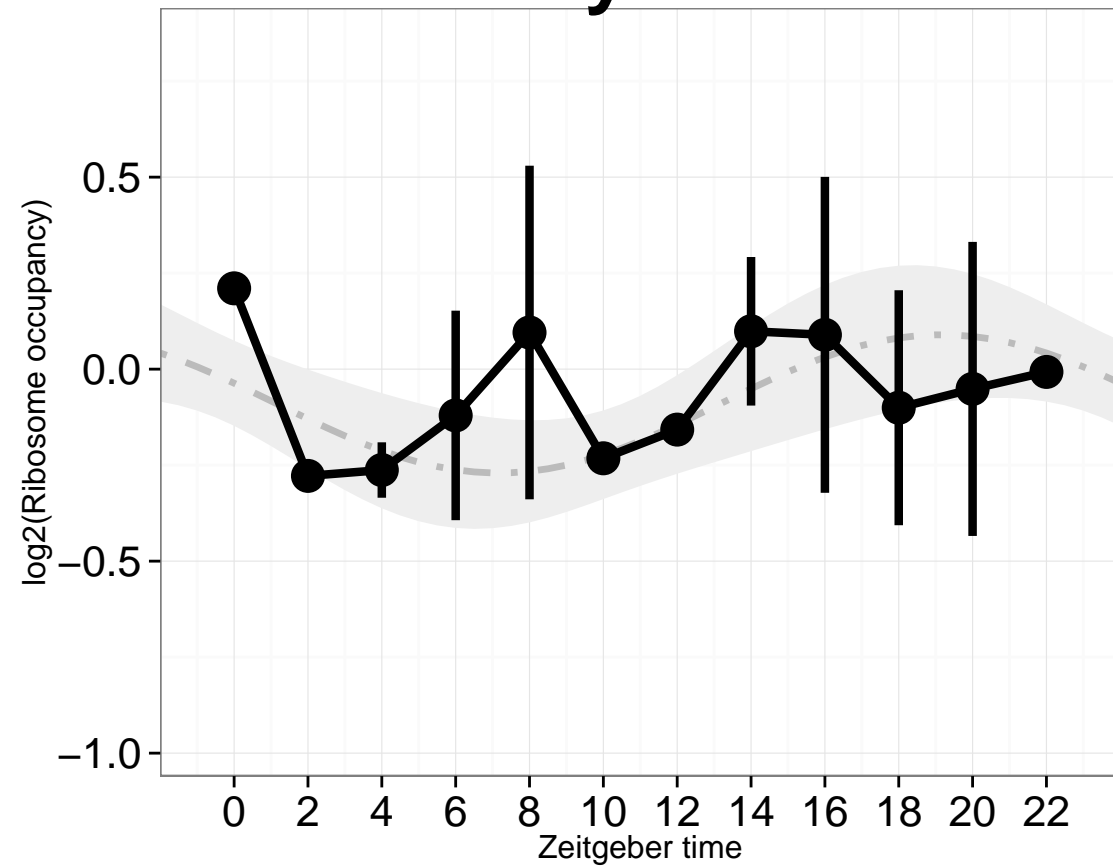

Supplement: SuppDataset_1.zip [file Pycr2_set_A.pdf › Supplemental Dataset 1/A-mRNA_nonrhyth_translation_nonrhyth/Pycr2_set_A.pdf]

## Pycrl

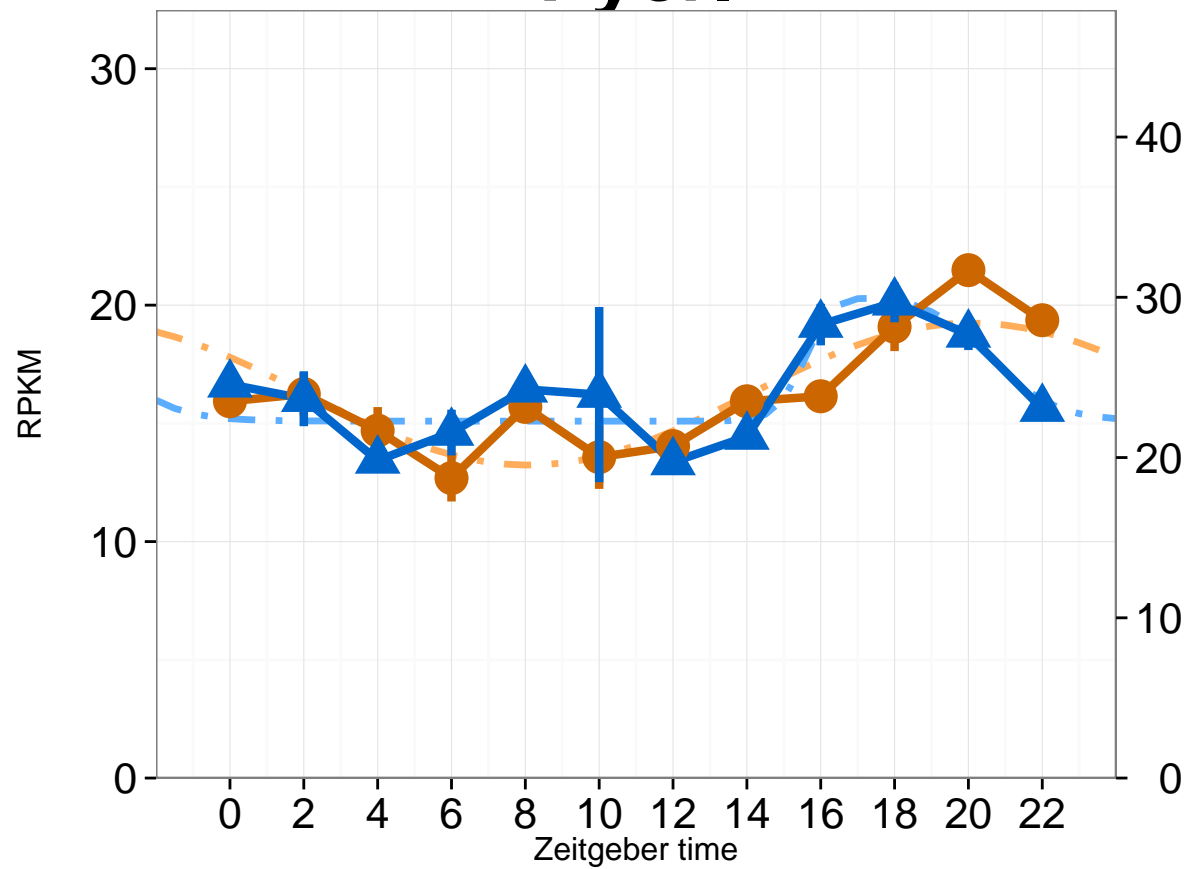

## Pycrl

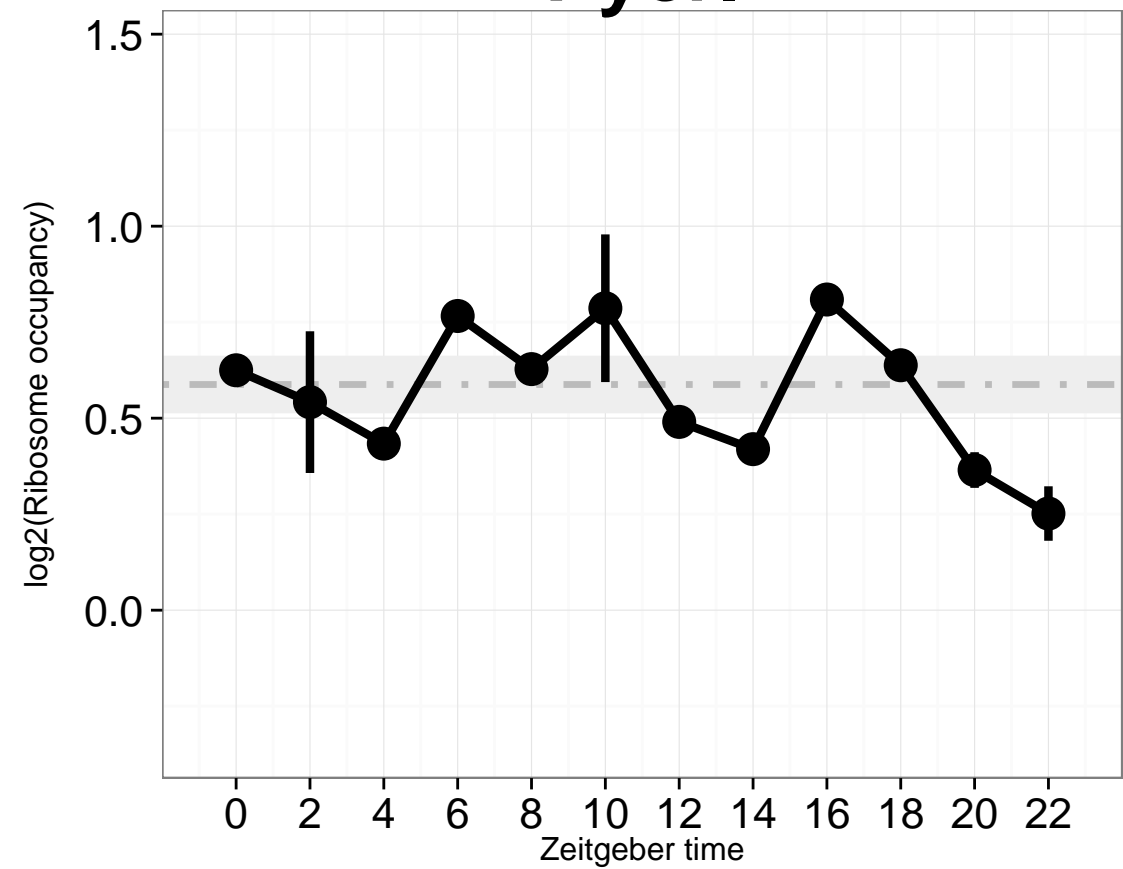

Supplement: SuppDataset_1.zip [file Pycrl_set_A.pdf › Supplemental Dataset 1/A-mRNA_nonrhyth_translation_nonrhyth/Pycrl_set_A.pdf]

## Pygb

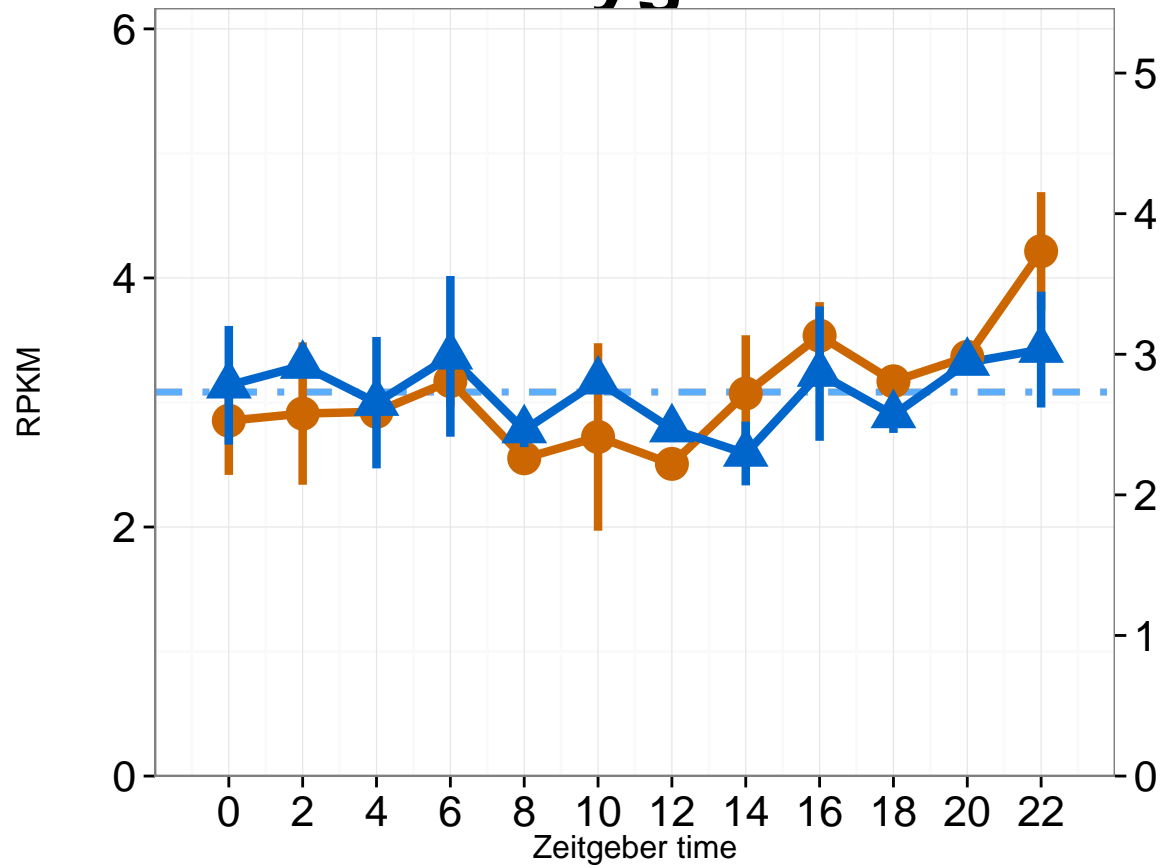

## Pygb

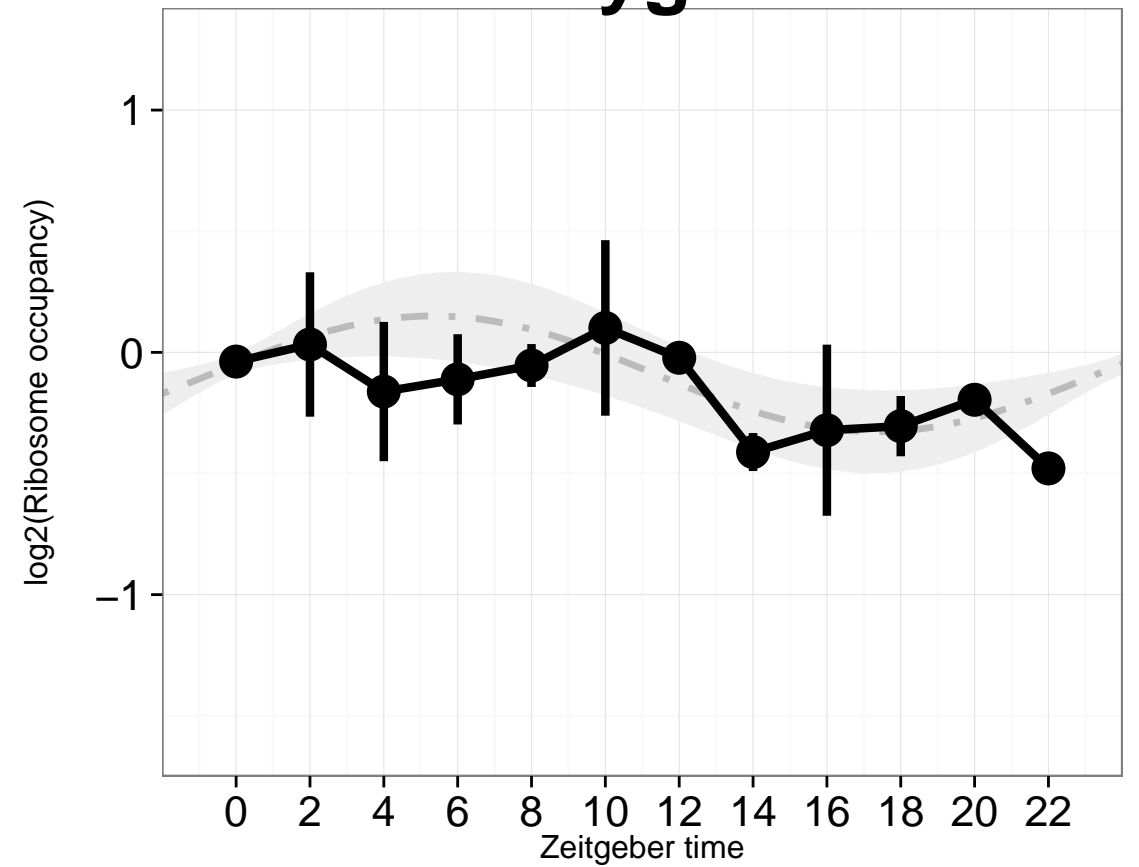

Supplement: SuppDataset_1.zip [file Pygb_set_A.pdf › Supplemental Dataset 1/A-mRNA_nonrhyth_translation_nonrhyth/Pygb_set_A.pdf]

## Pygl

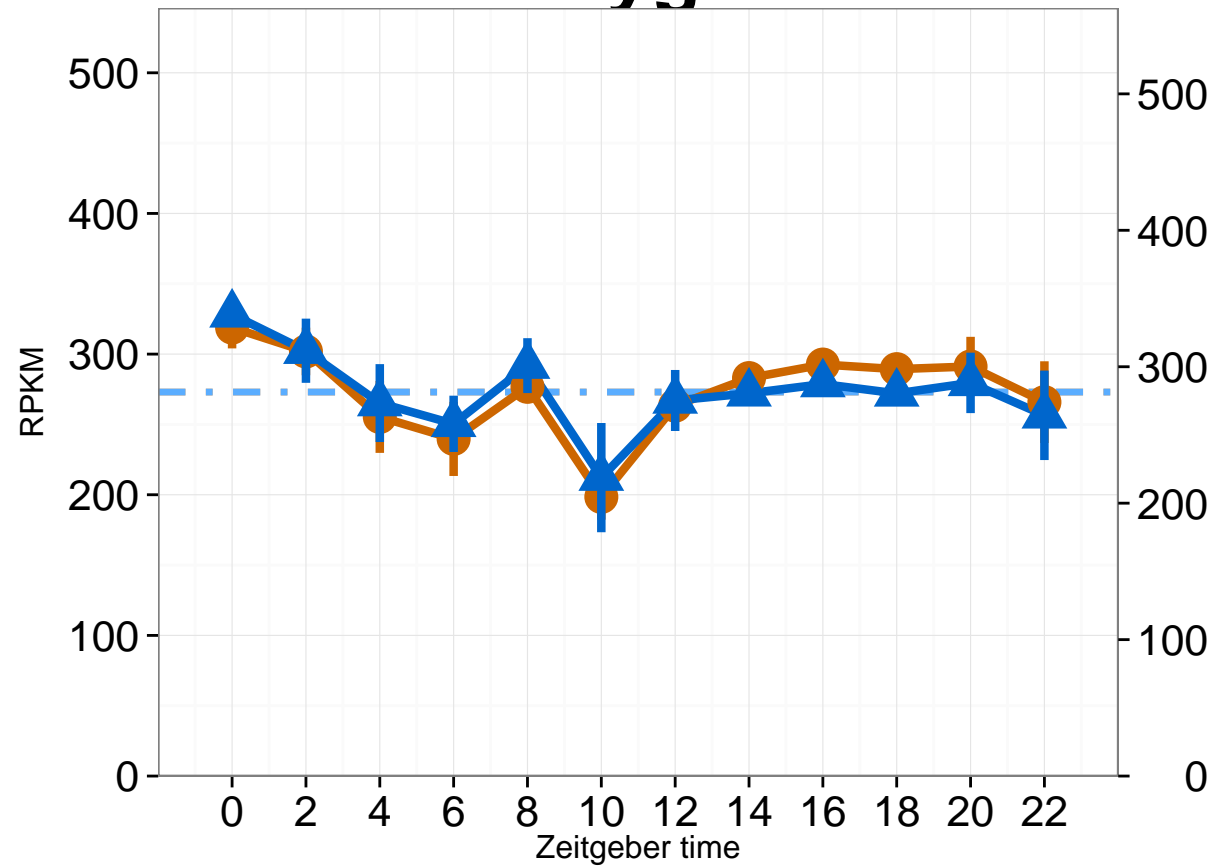

## Pygl

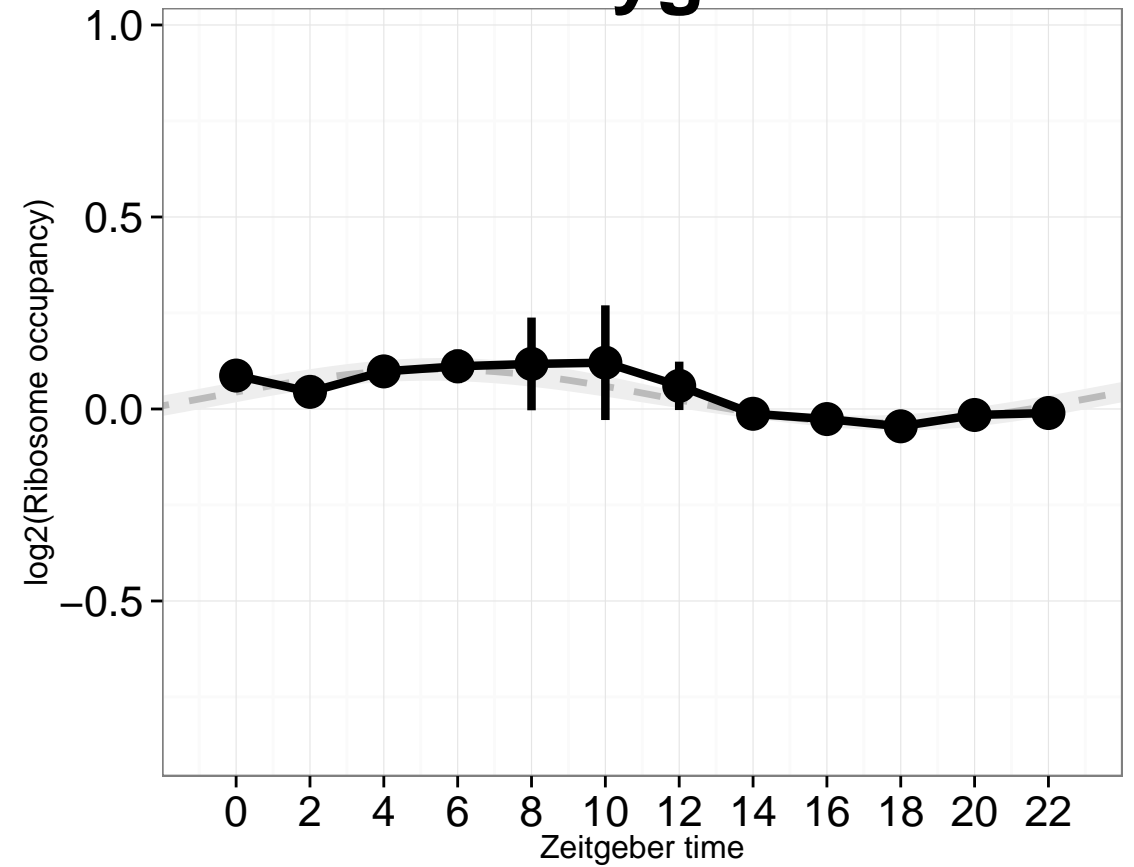

Supplement: SuppDataset_1.zip [file Pygl_set_A.pdf › Supplemental Dataset 1/A-mRNA_nonrhyth_translation_nonrhyth/Pygl_set_A.pdf]

## Pygm

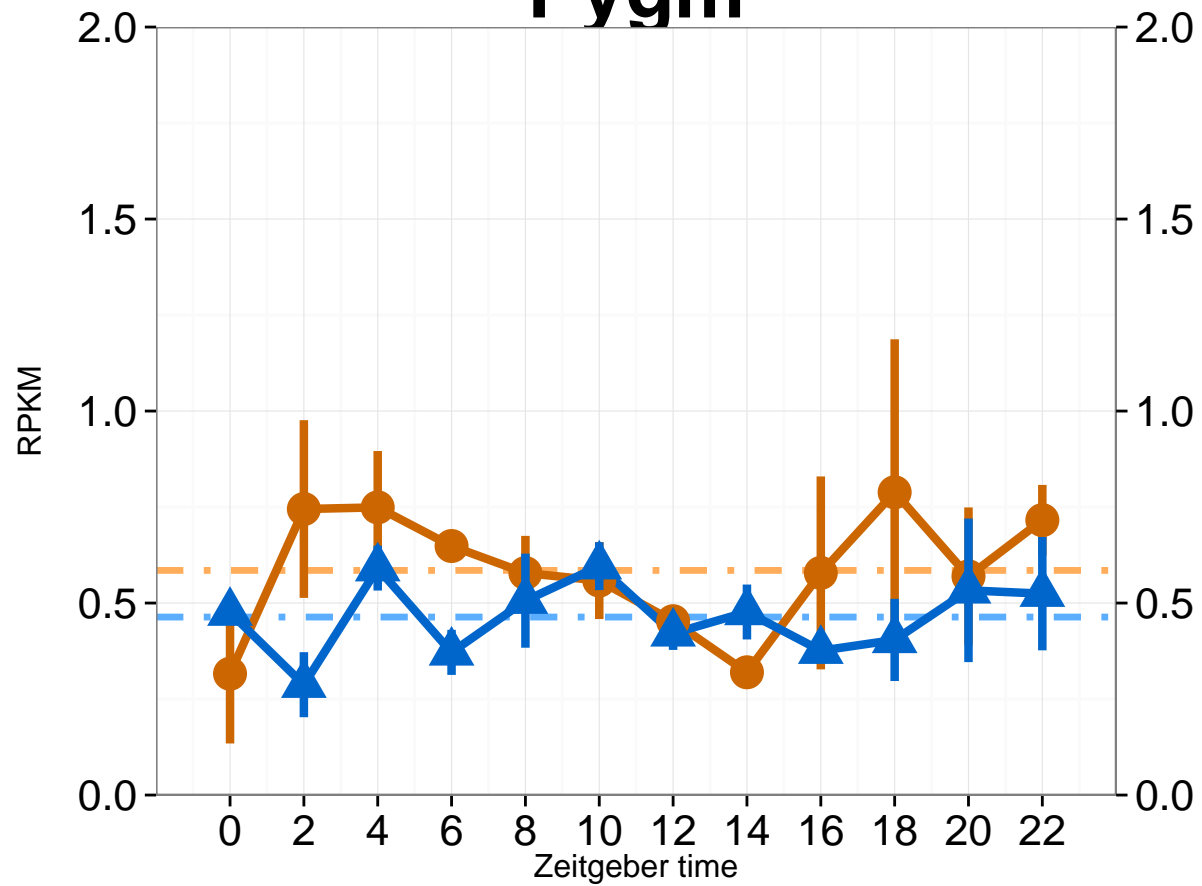

## Pygm

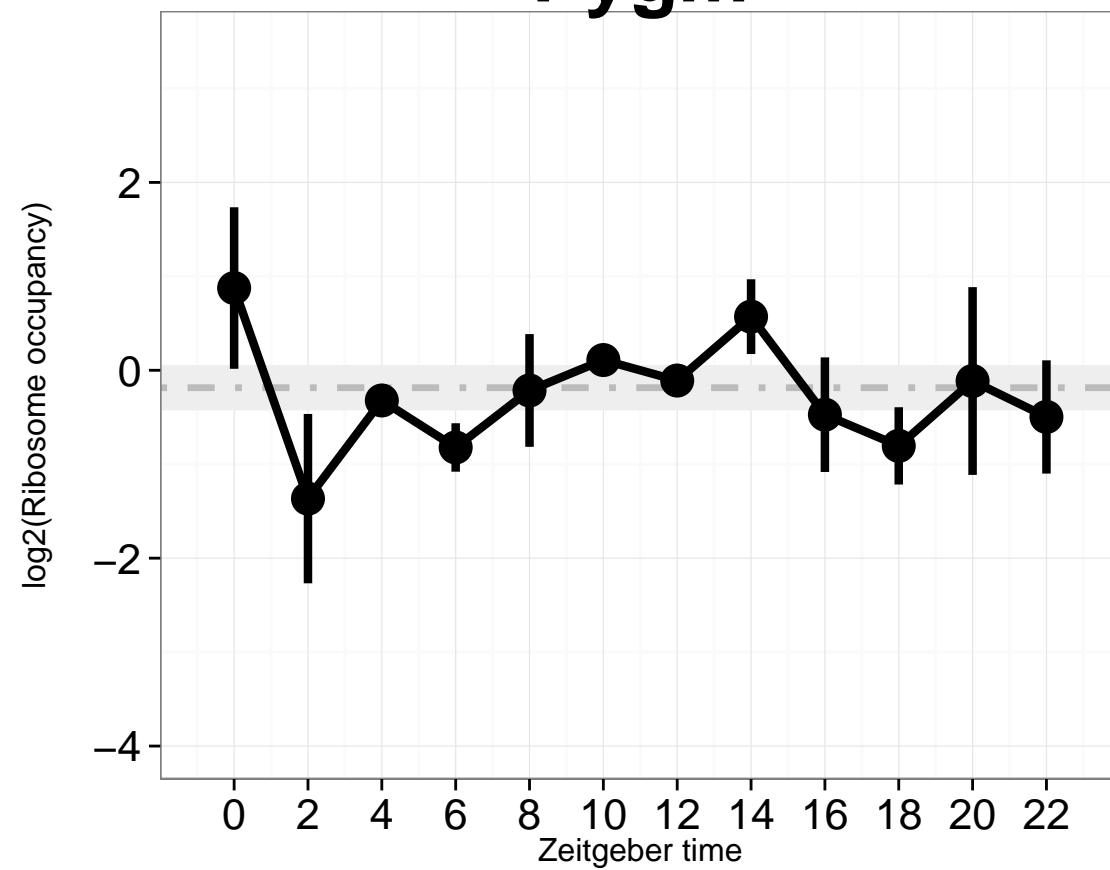

Supplement: SuppDataset_1.zip [file Pygm_set_A.pdf › Supplemental Dataset 1/A-mRNA_nonrhyth_translation_nonrhyth/Pygm_set_A.pdf]

## Pygo2

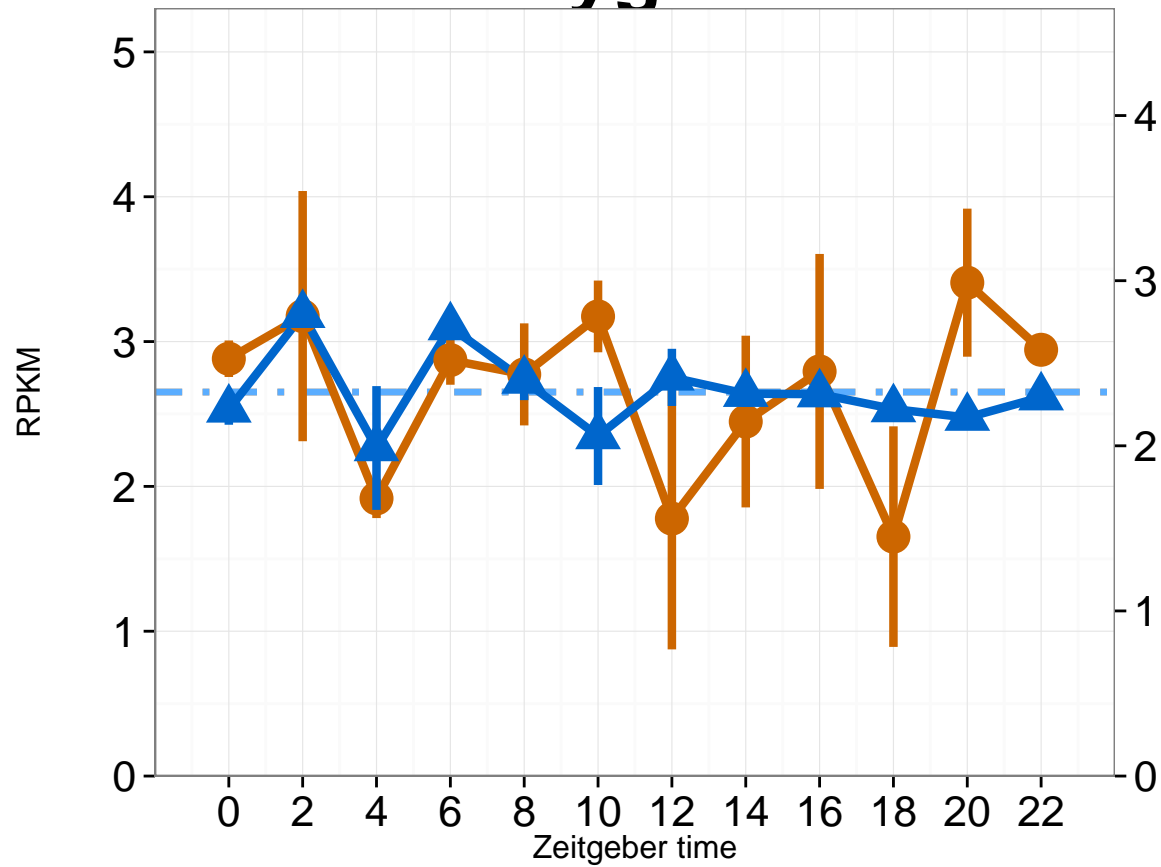

## Pygo2

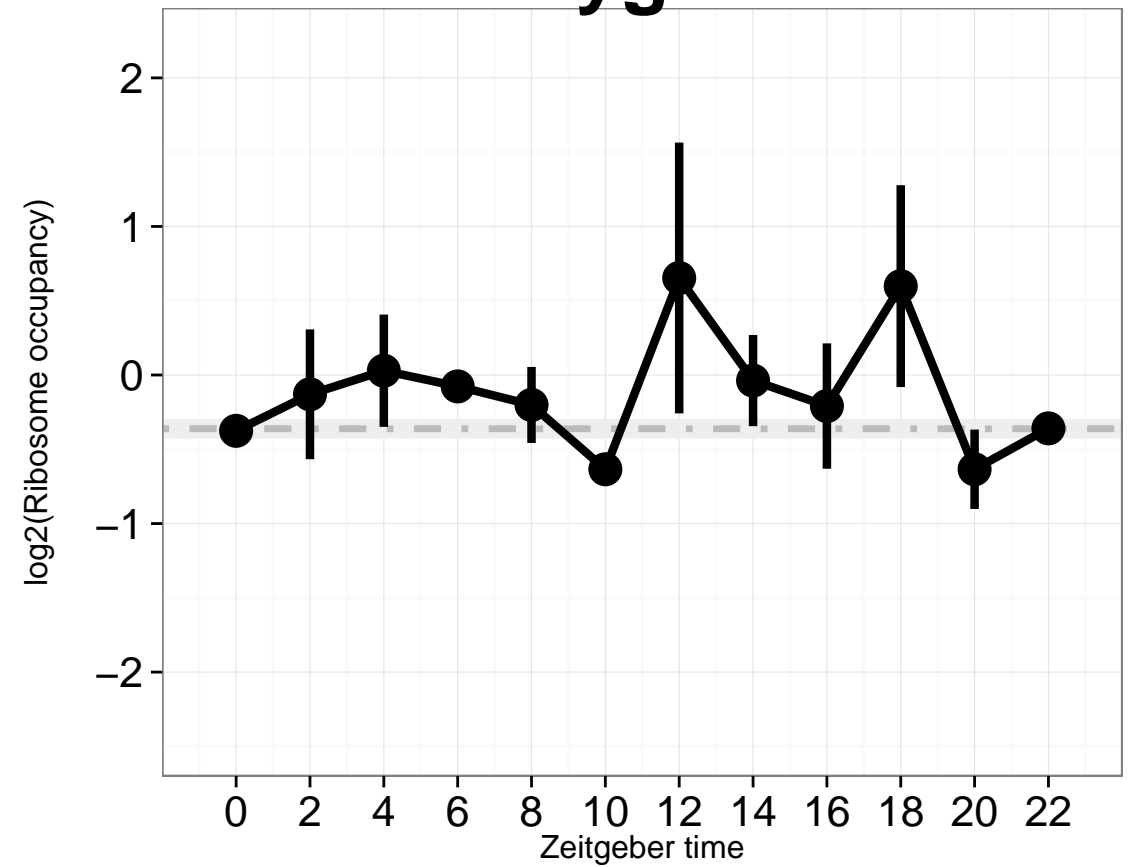

Supplement: SuppDataset_1.zip [file Pygo2_set_A.pdf › Supplemental Dataset 1/A-mRNA_nonrhyth_translation_nonrhyth/Pygo2_set_A.pdf]

## Pyhin1

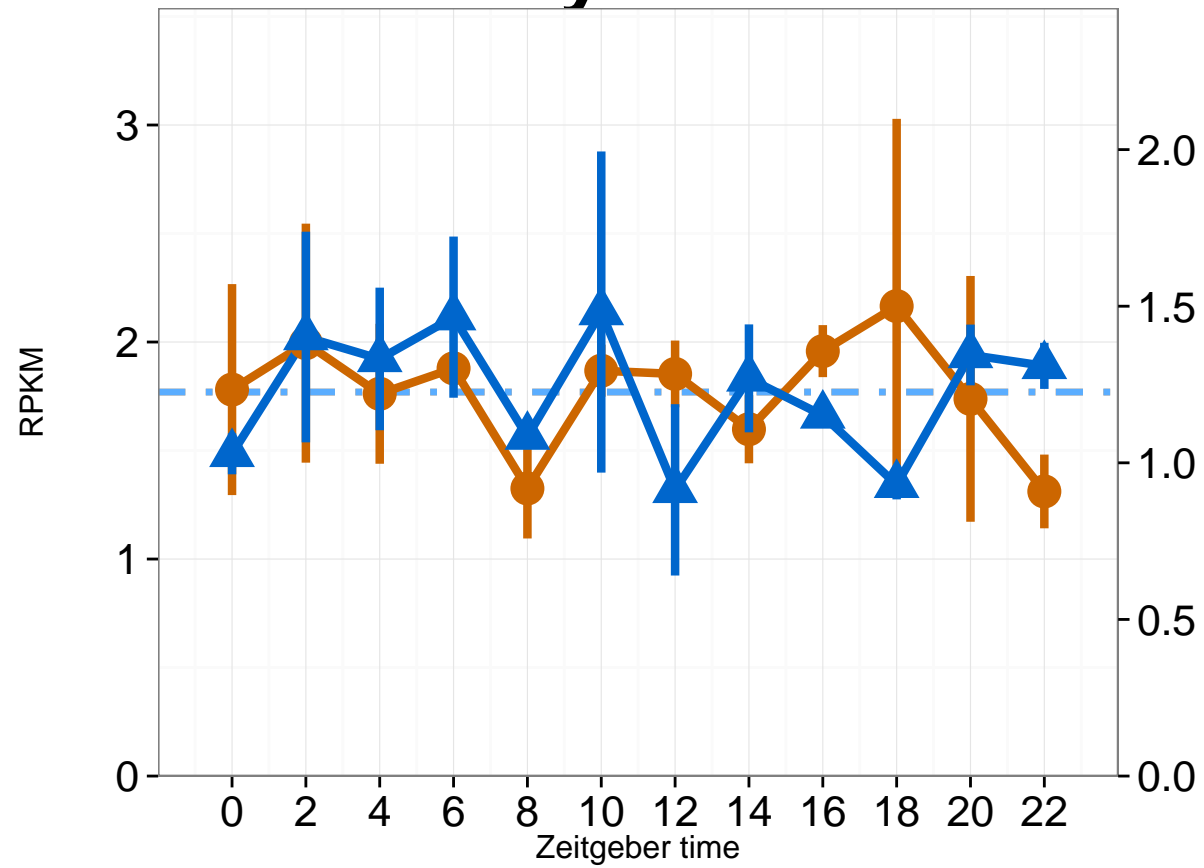

## Pyhin1

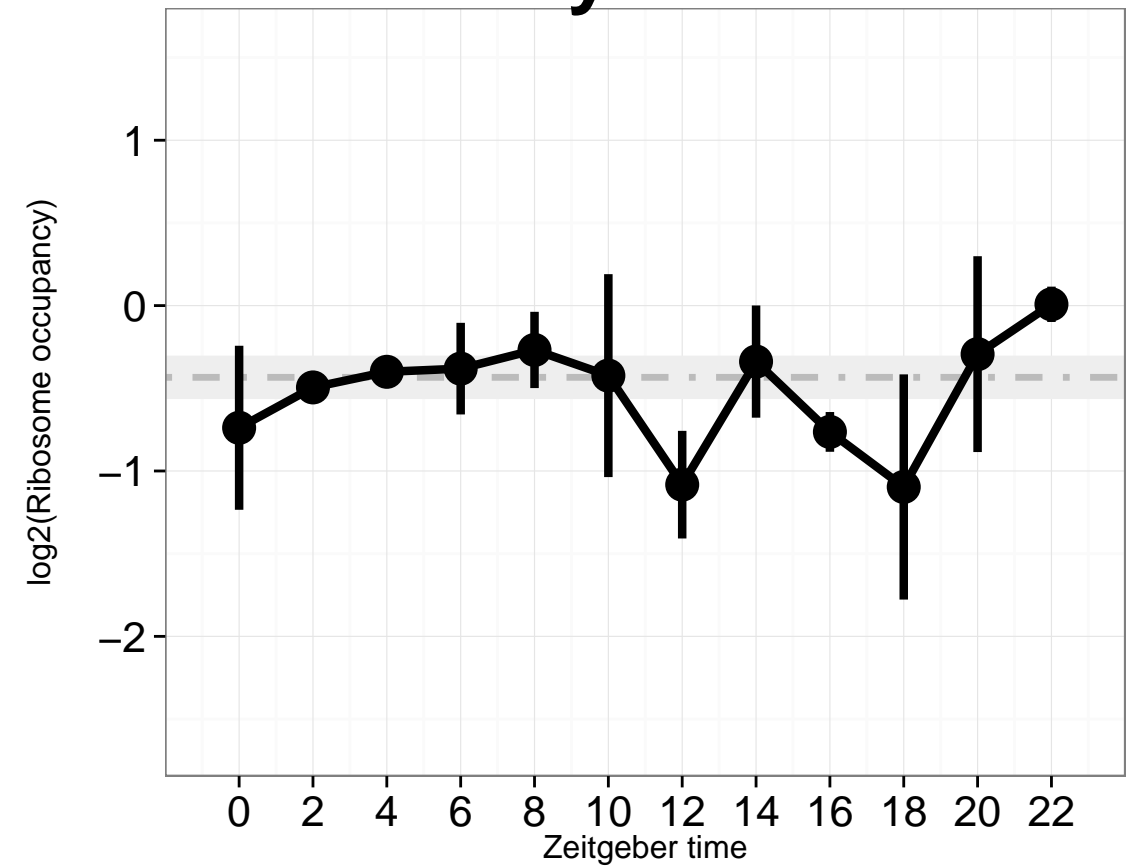

Supplement: SuppDataset_1.zip [file Pyhin1_set_A.pdf › Supplemental Dataset 1/A-mRNA_nonrhyth_translation_nonrhyth/Pyhin1_set_A.pdf]

Pyroxd1

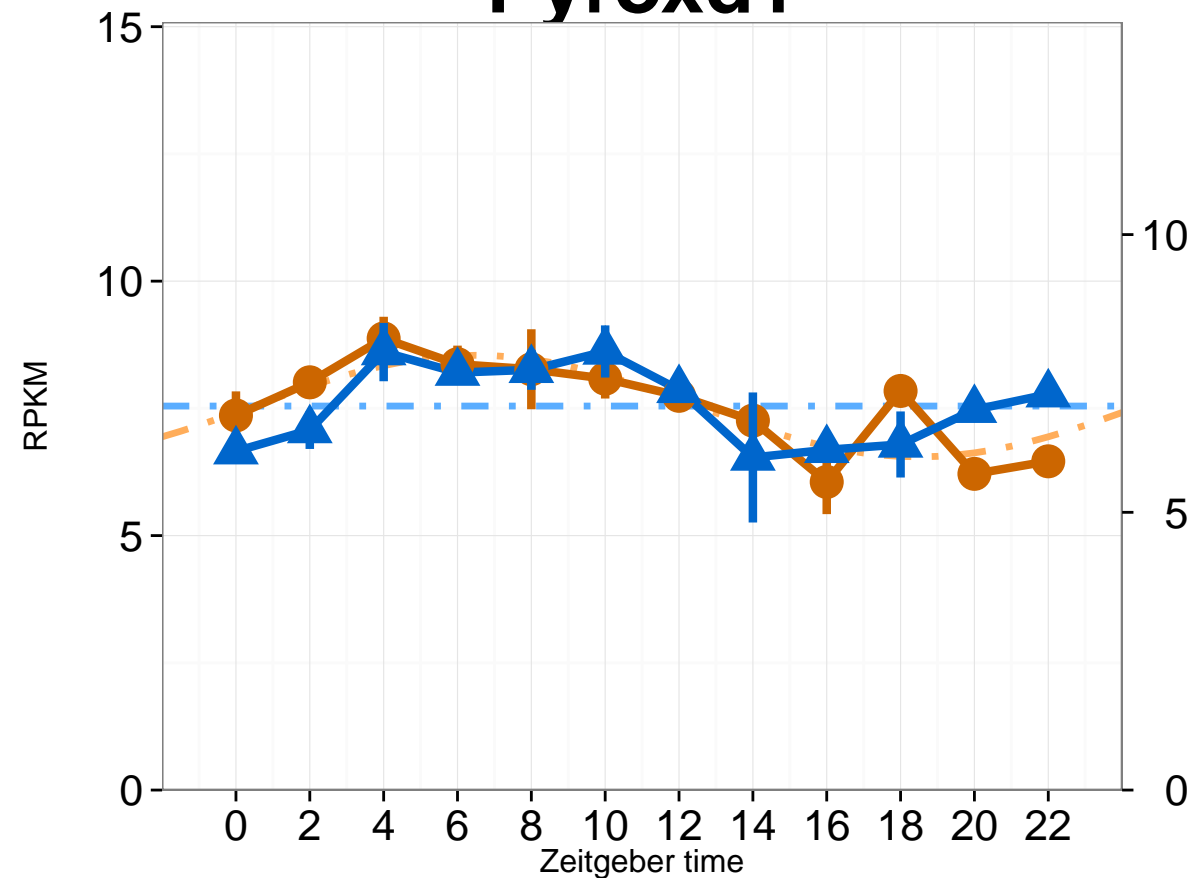

Pyroxd1

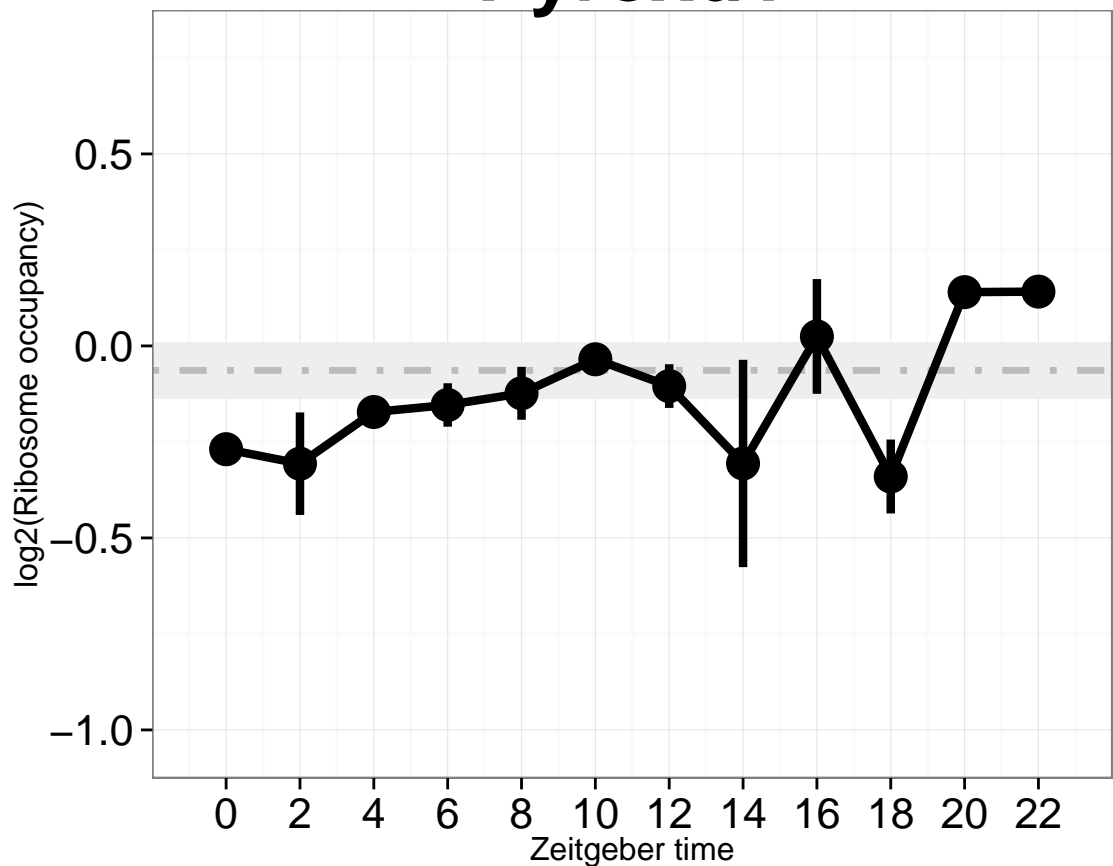

Supplement: SuppDataset_1.zip [file Pyroxd1_set_A.pdf › Supplemental Dataset 1/A-mRNA_nonrhyth_translation_nonrhyth/Pyroxd1_set_A.pdf]

## Pyroxd2

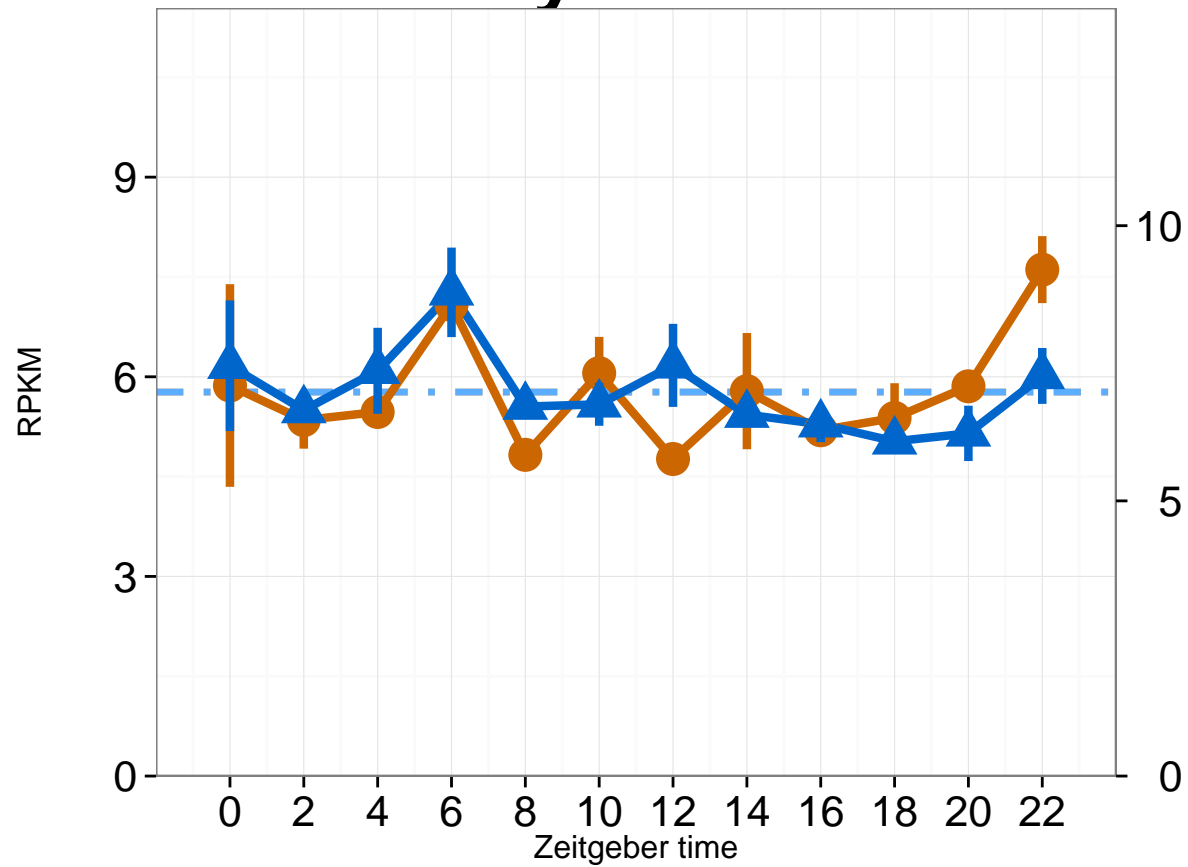

## Pyroxd2

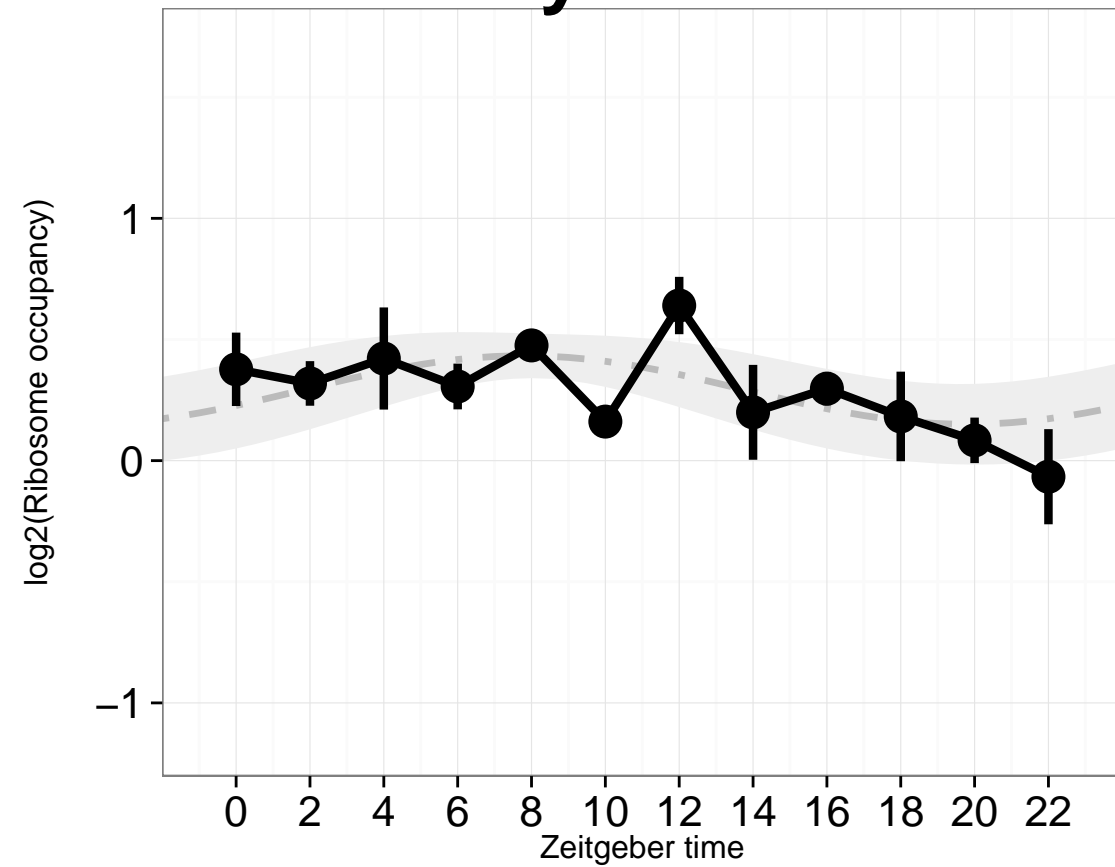

Supplement: SuppDataset_1.zip [file Pyroxd2_set_A.pdf › Supplemental Dataset 1/A-mRNA_nonrhyth_translation_nonrhyth/Pyroxd2_set_A.pdf]

## Pzp

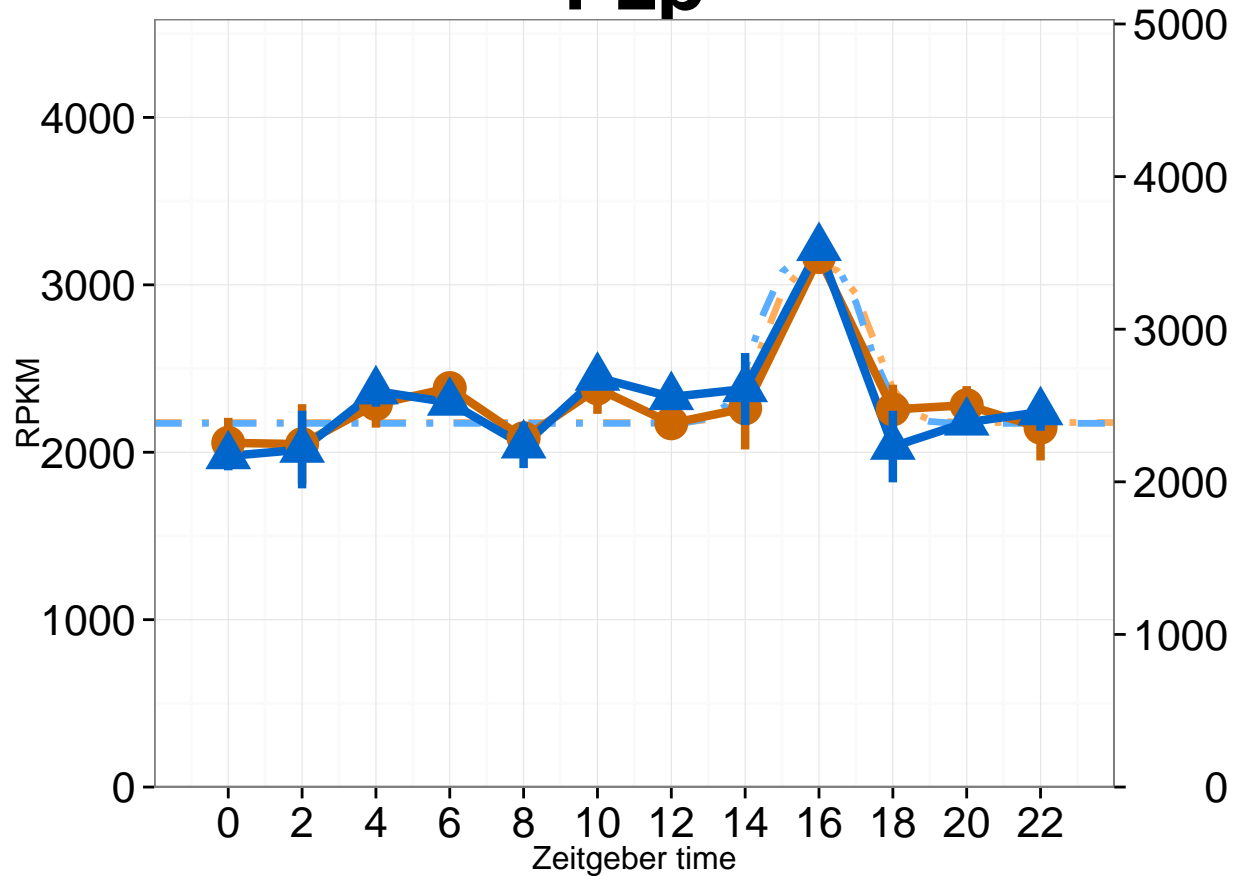

## Pzp

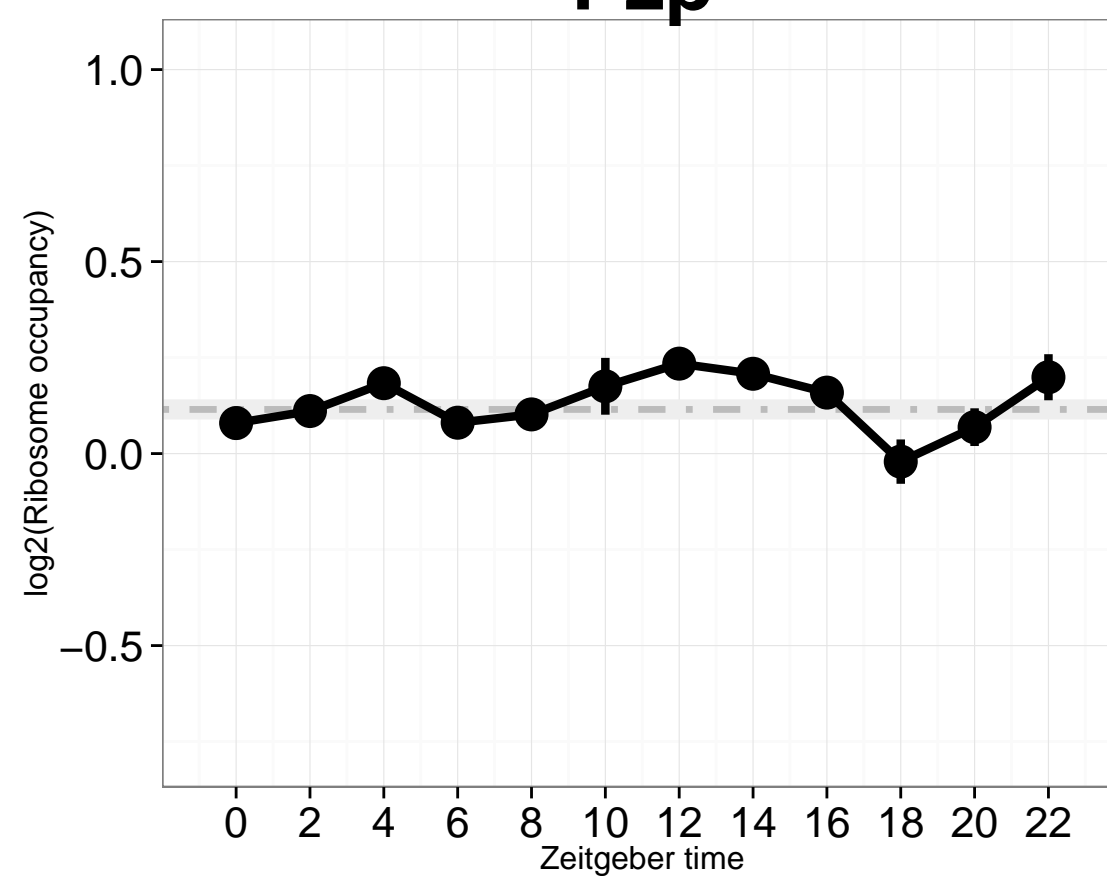

Supplement: SuppDataset_1.zip [file Pzp_set_A.pdf › Supplemental Dataset 1/A-mRNA_nonrhyth_translation_nonrhyth/Pzp_set_A.pdf]

## Qars

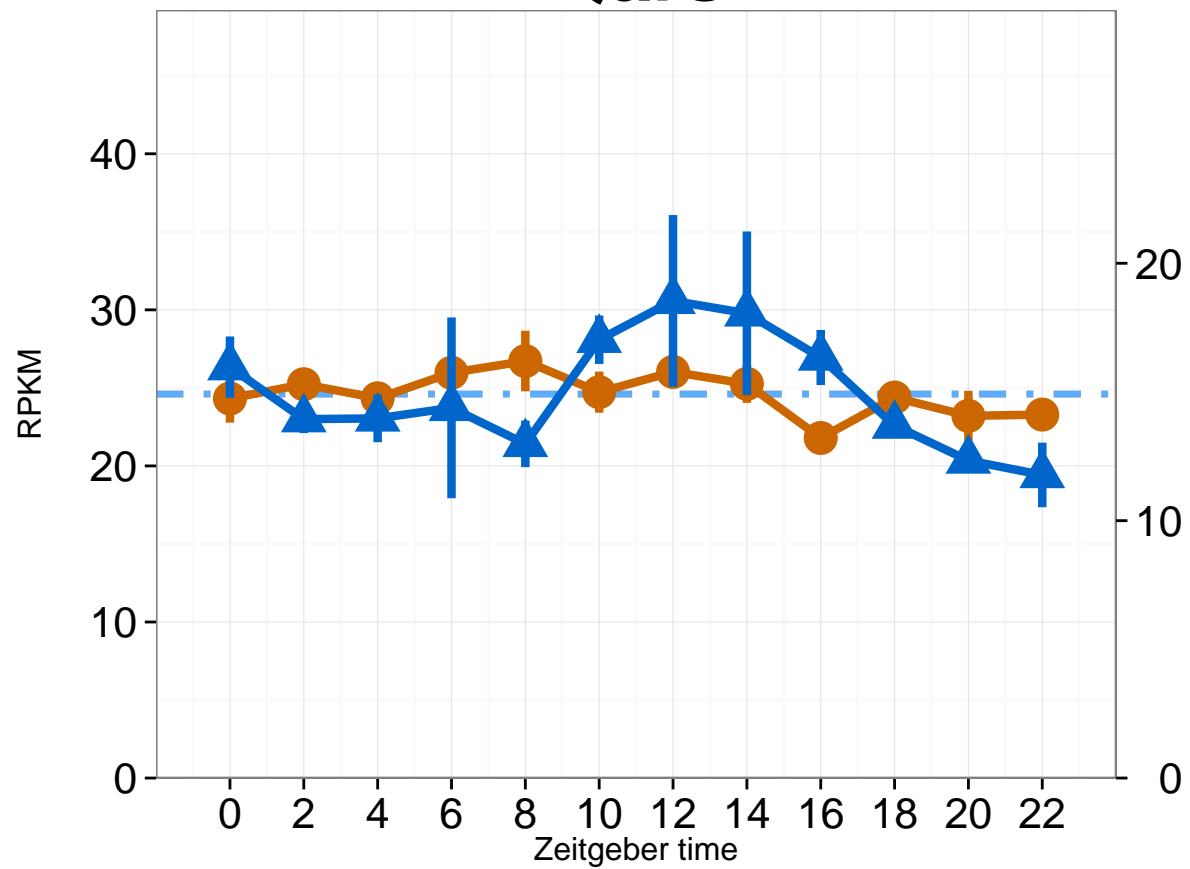

## Qars

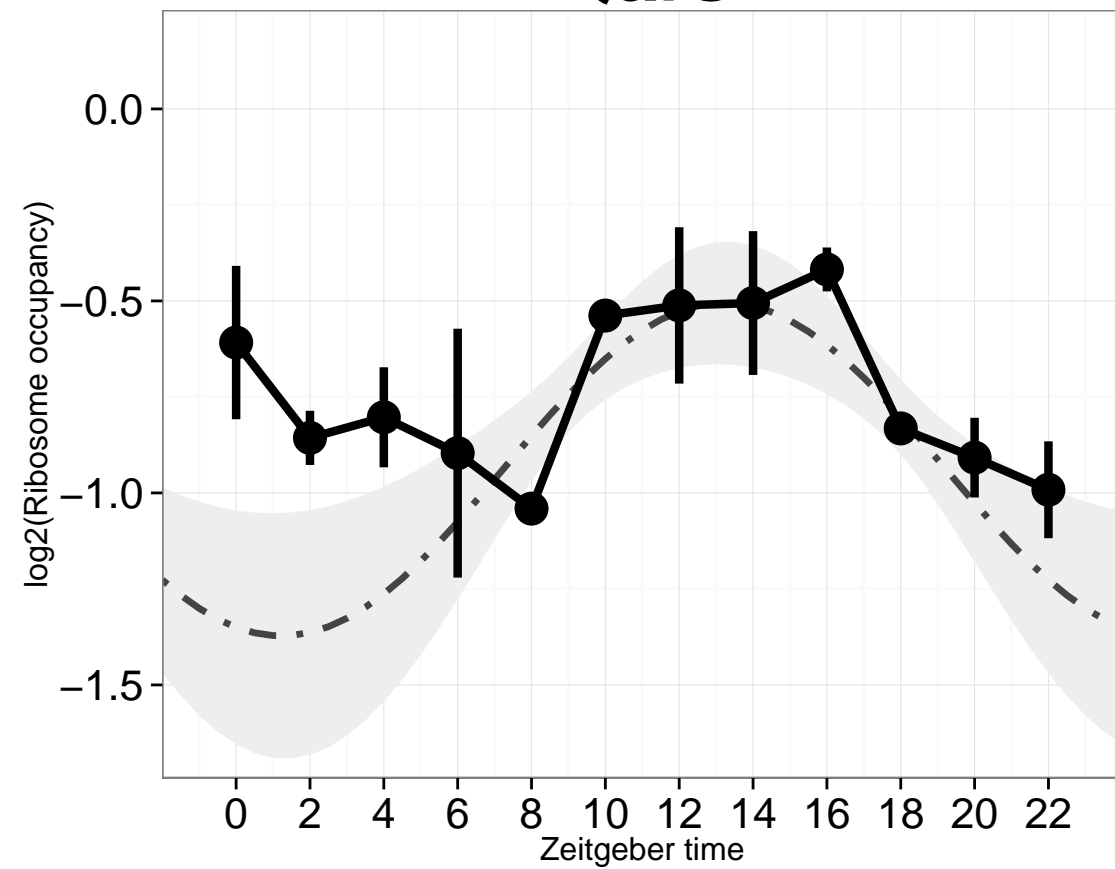

Supplement: SuppDataset_1.zip [file Qars_set_A.pdf › Supplemental Dataset 1/A-mRNA_nonrhyth_translation_nonrhyth/Qars_set_A.pdf]

Qk

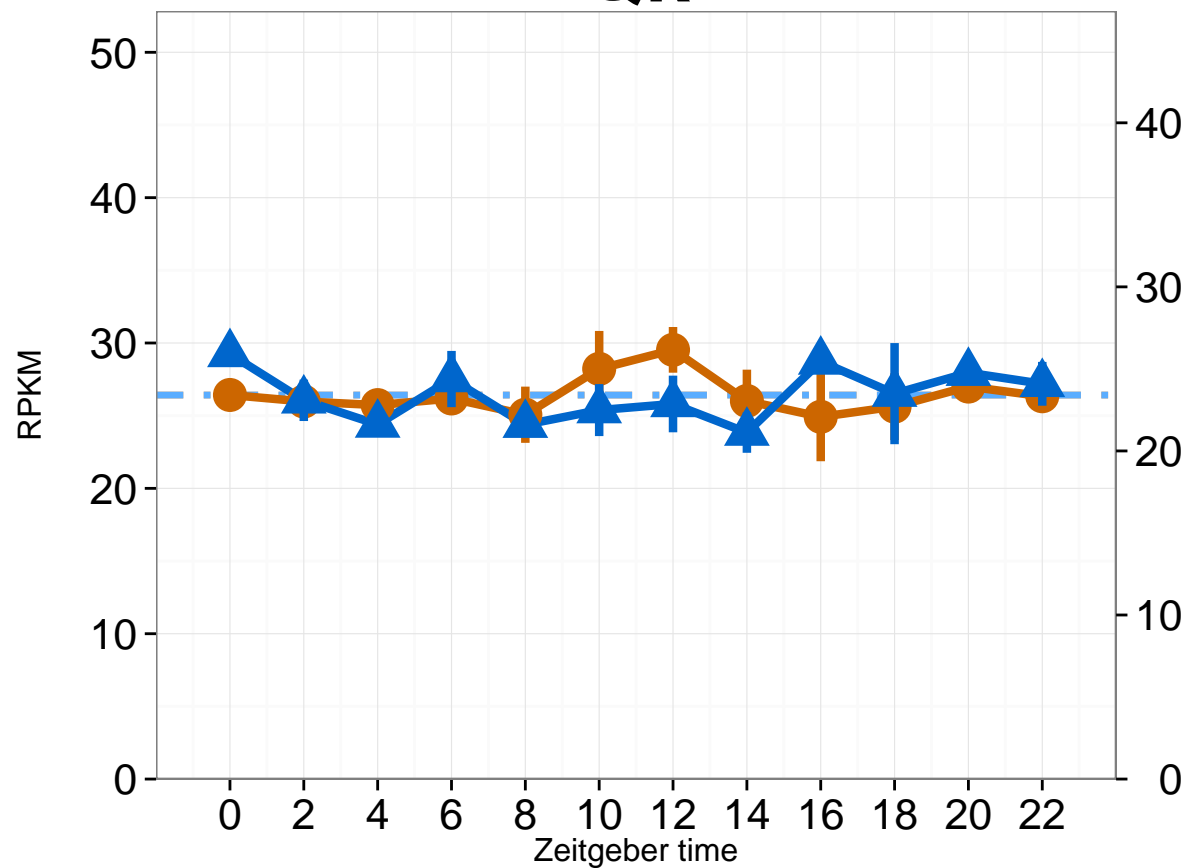

Qk

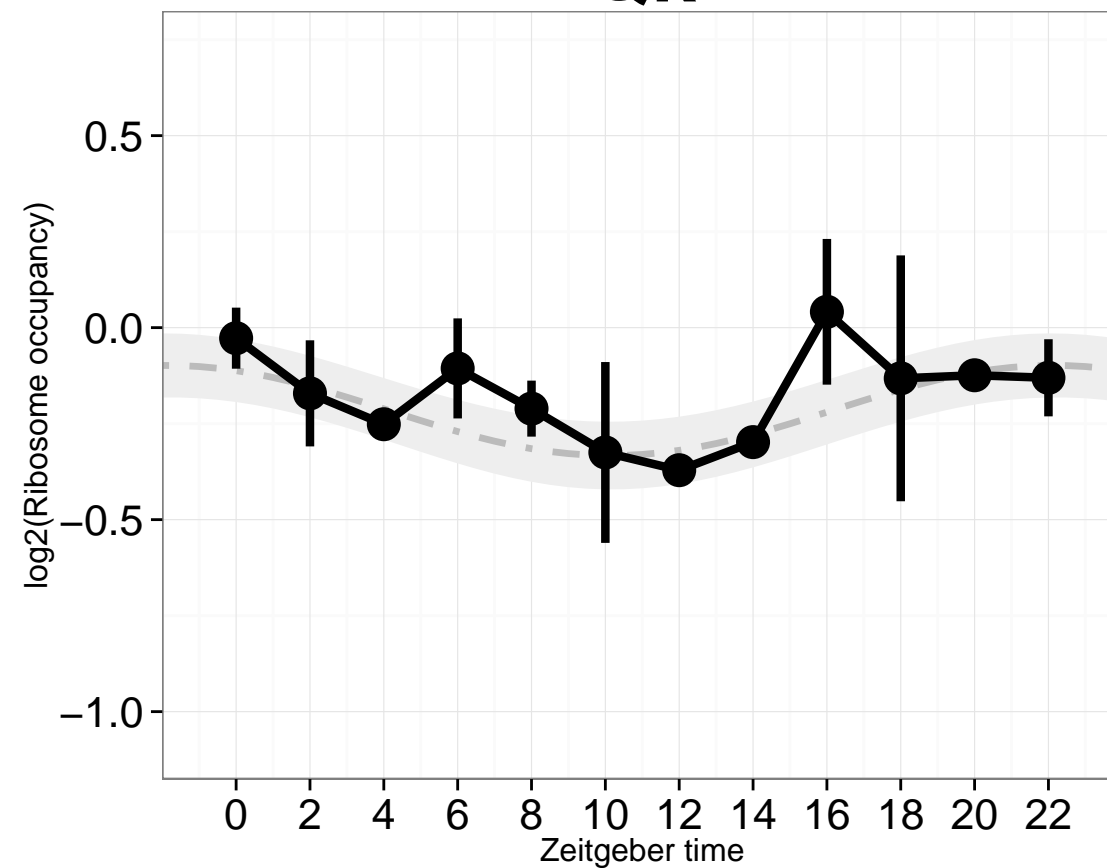

Supplement: SuppDataset_1.zip [file Qk_set_A.pdf › Supplemental Dataset 1/A-mRNA_nonrhyth_translation_nonrhyth/Qk_set_A.pdf]

# Qpct

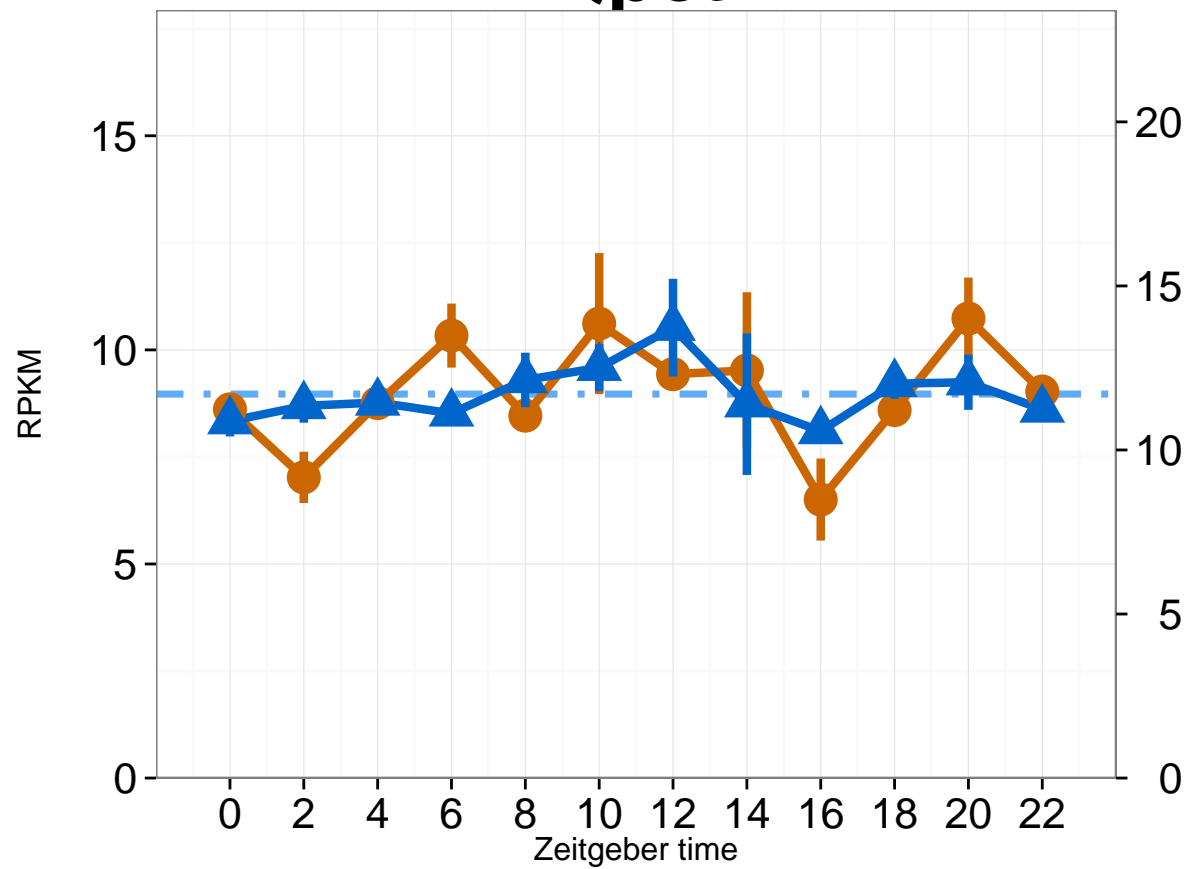

# Qpct

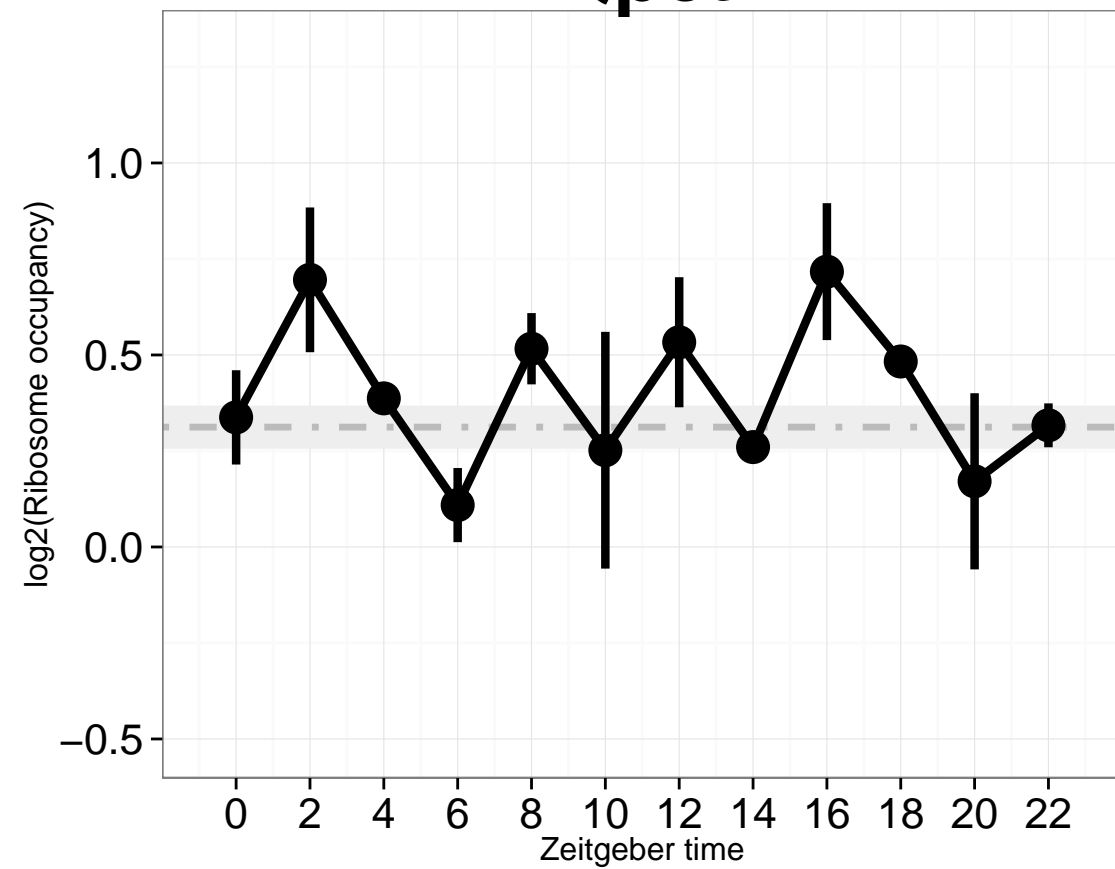

Supplement: SuppDataset_1.zip [file Qpct_set_A.pdf › Supplemental Dataset 1/A-mRNA_nonrhyth_translation_nonrhyth/Qpct_set_A.pdf]

# Qpctl

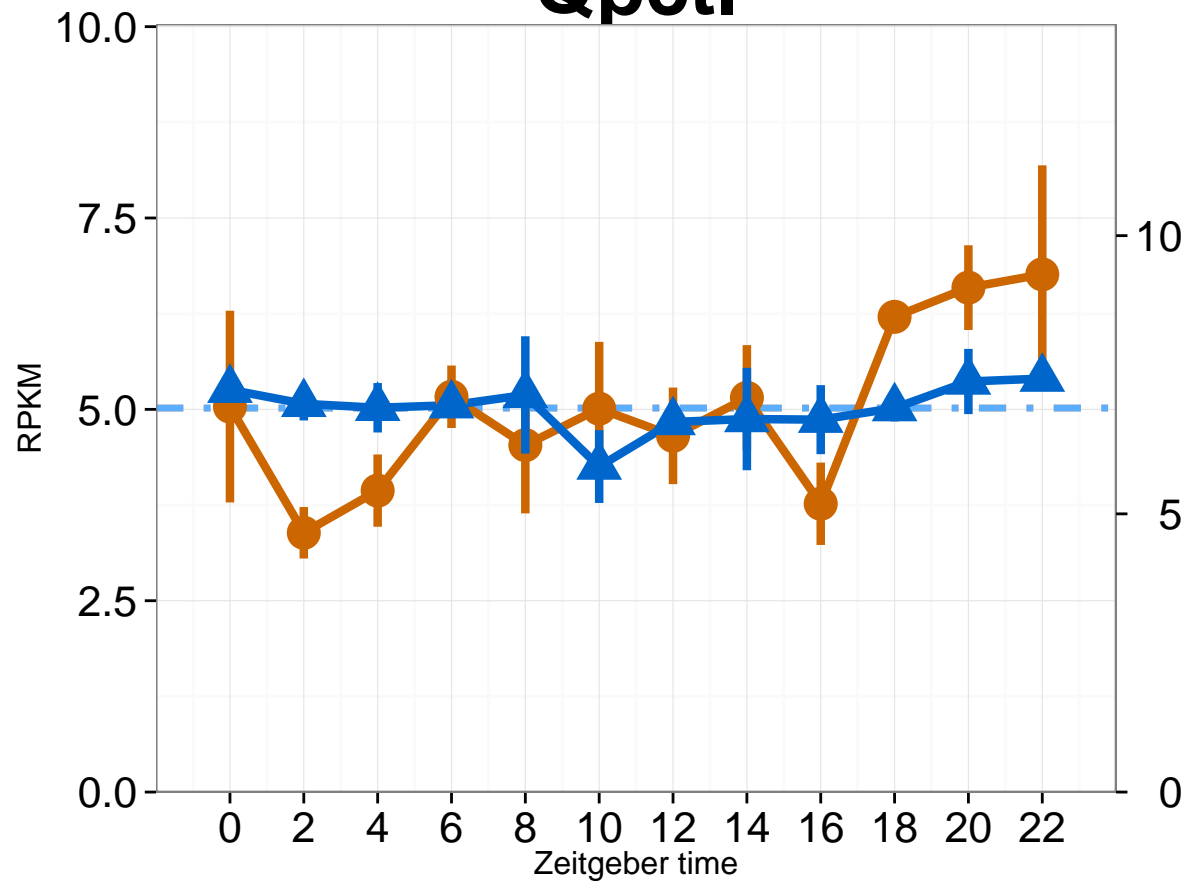

# Qpctl

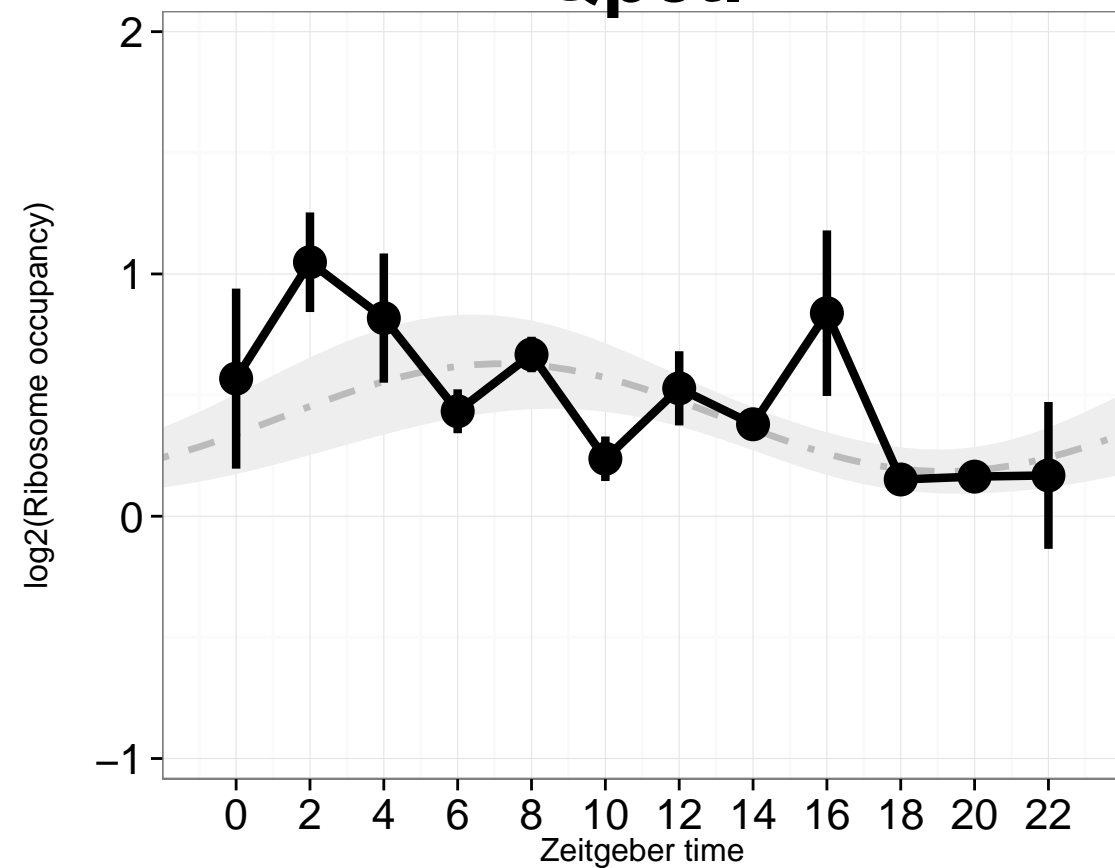

Supplement: SuppDataset_1.zip [file Qpctl_set_A.pdf › Supplemental Dataset 1/A-mRNA_nonrhyth_translation_nonrhyth/Qpctl_set_A.pdf]

# Qrich1

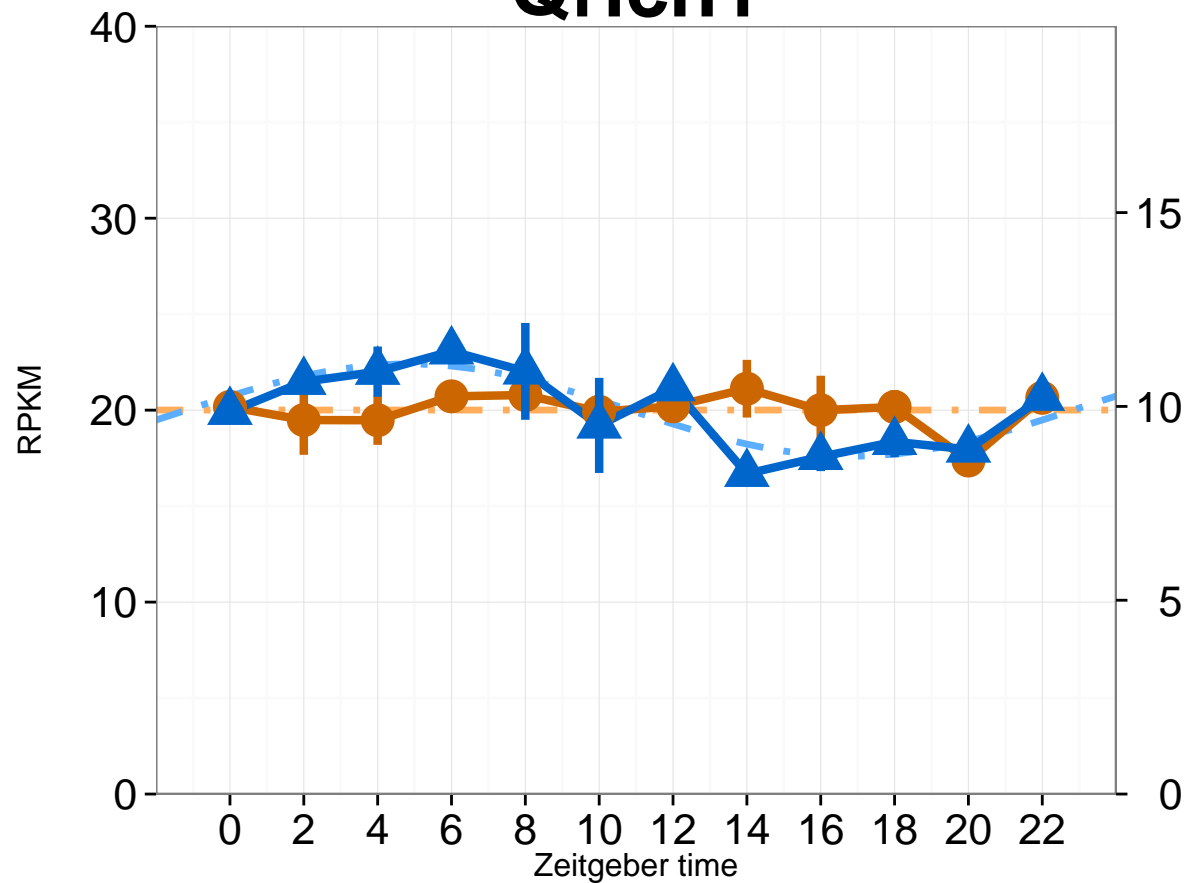

# Qrich1

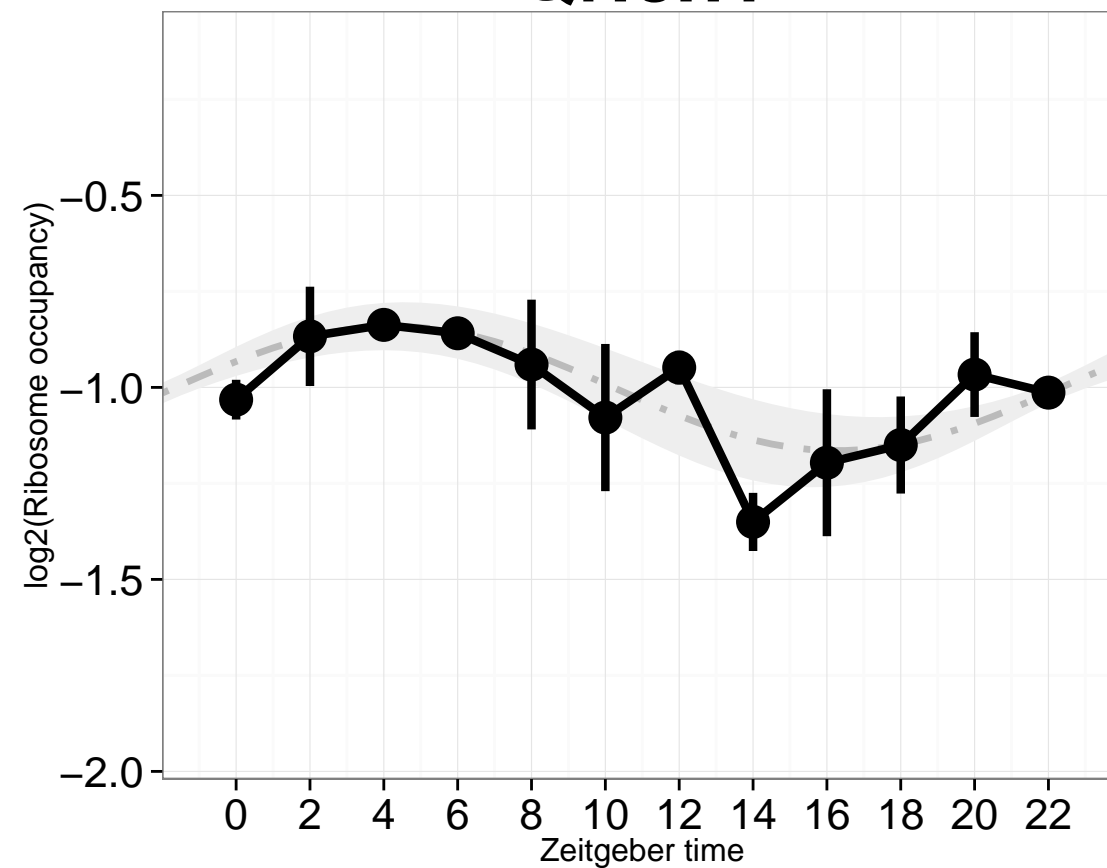

Supplement: SuppDataset_1.zip [file Qrich1_set_A.pdf › Supplemental Dataset 1/A-mRNA_nonrhyth_translation_nonrhyth/Qrich1_set_A.pdf]

# Qrs11

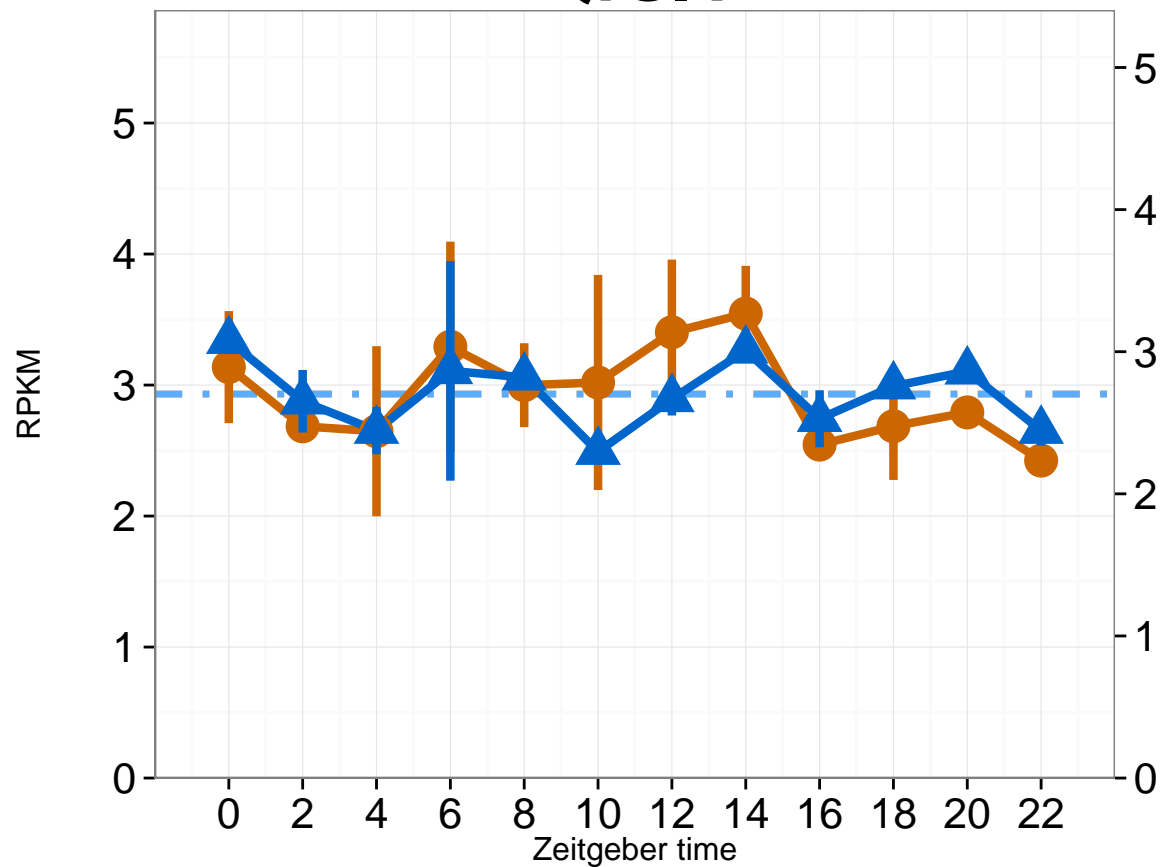

# Qrs11

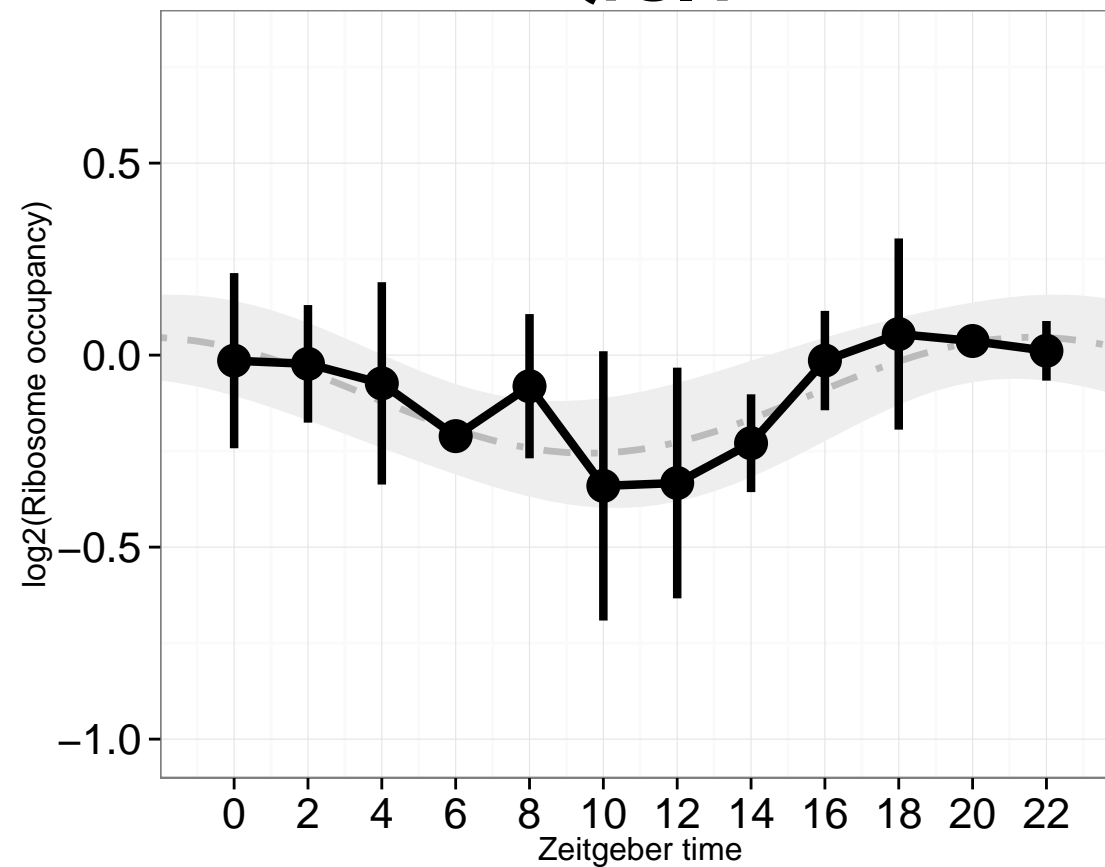

Supplement: SuppDataset_1.zip [file Qrsl1_set_A.pdf › Supplemental Dataset 1/A-mRNA_nonrhyth_translation_nonrhyth/Qrsl1_set_A.pdf]

# Qsox1

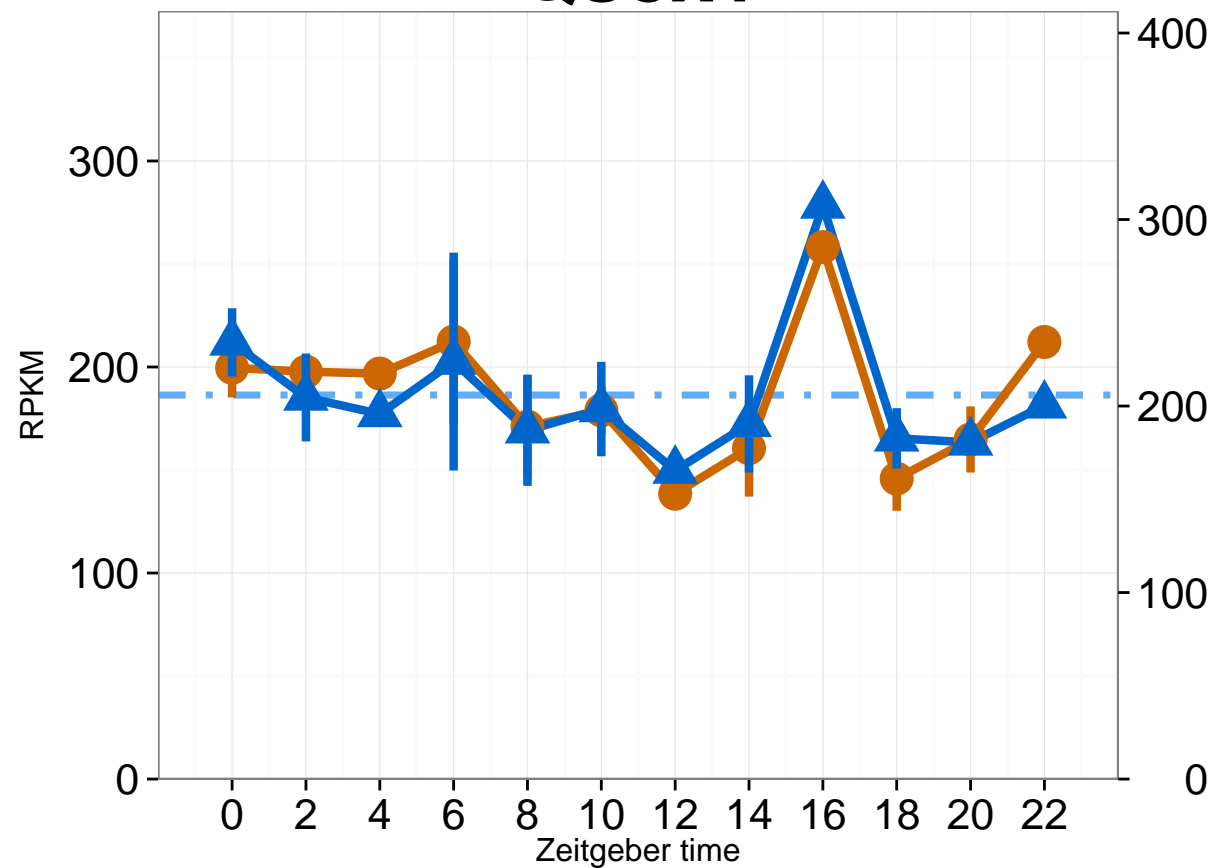

# Qsox1

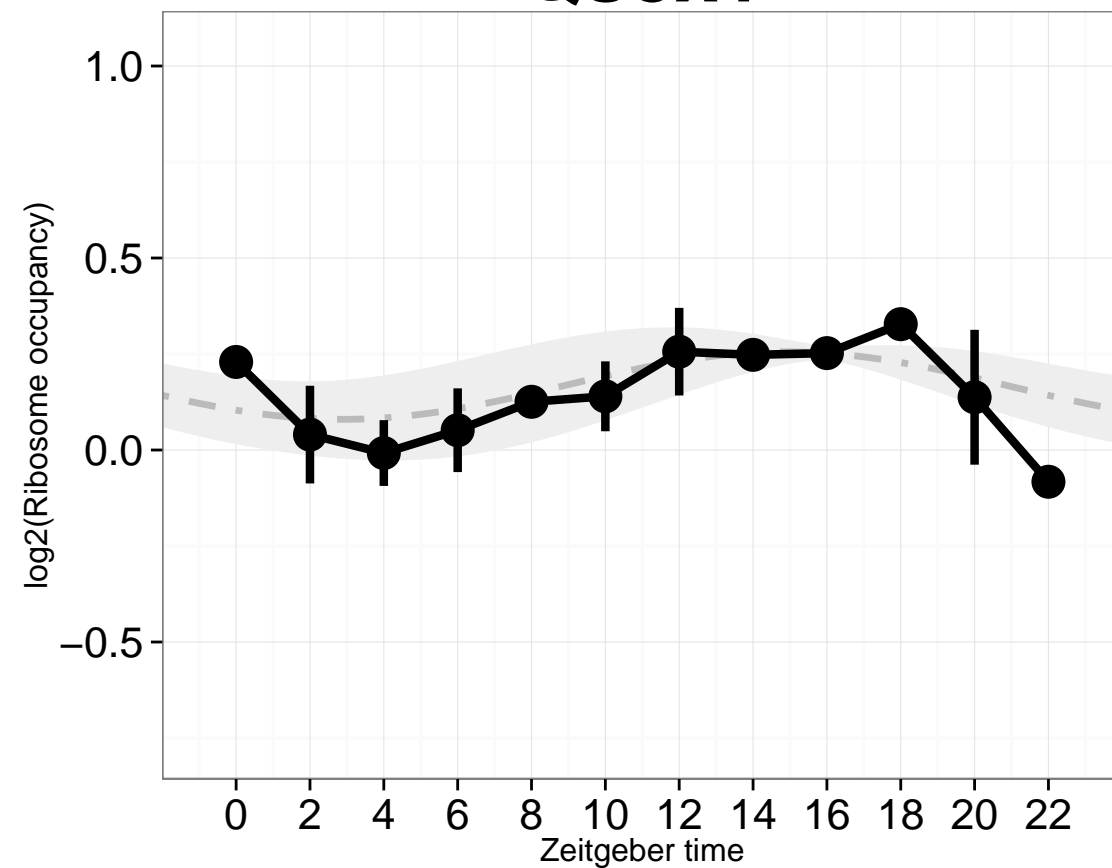

Supplement: SuppDataset_1.zip [file Qsox1_set_A.pdf › Supplemental Dataset 1/A-mRNA_nonrhyth_translation_nonrhyth/Qsox1_set_A.pdf]

# Qsox2

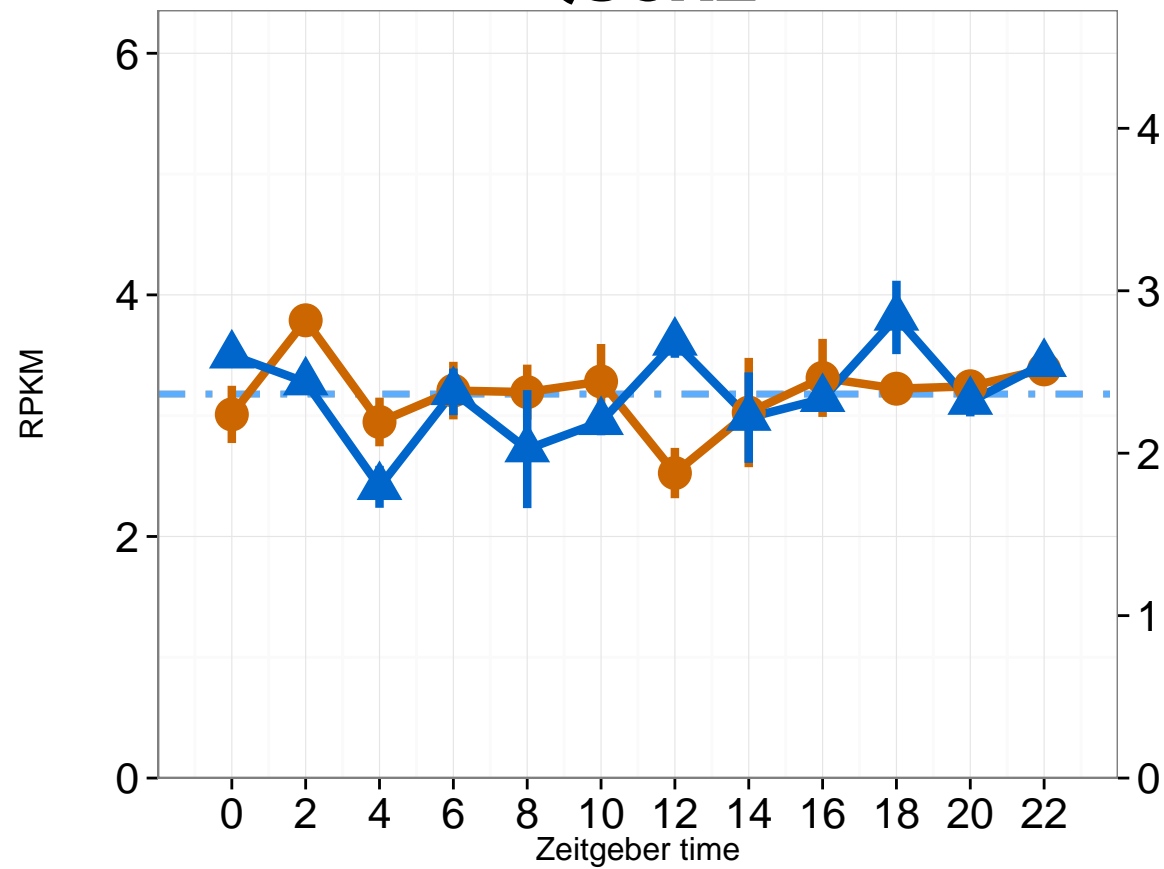

# Qsox2

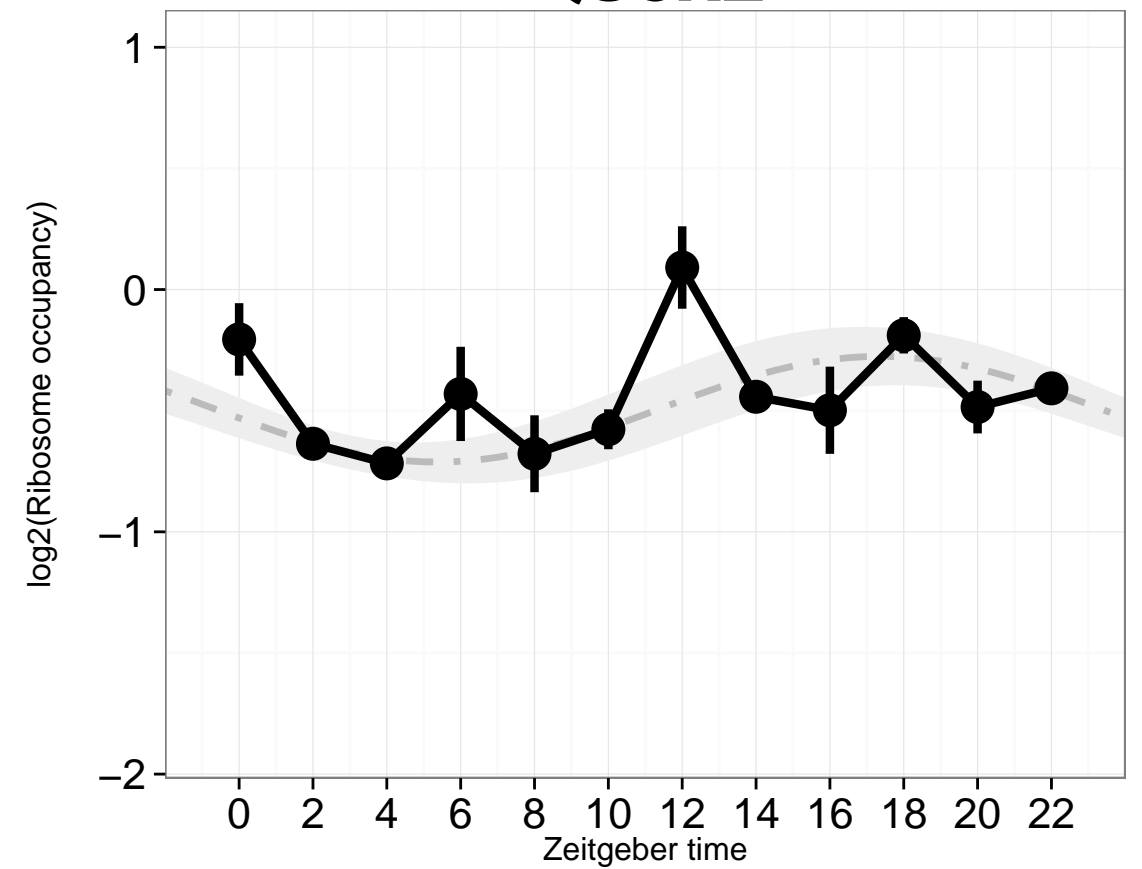

Supplement: SuppDataset_1.zip [file Qsox2_set_A.pdf › Supplemental Dataset 1/A-mRNA_nonrhyth_translation_nonrhyth/Qsox2_set_A.pdf]

# Qtrt1

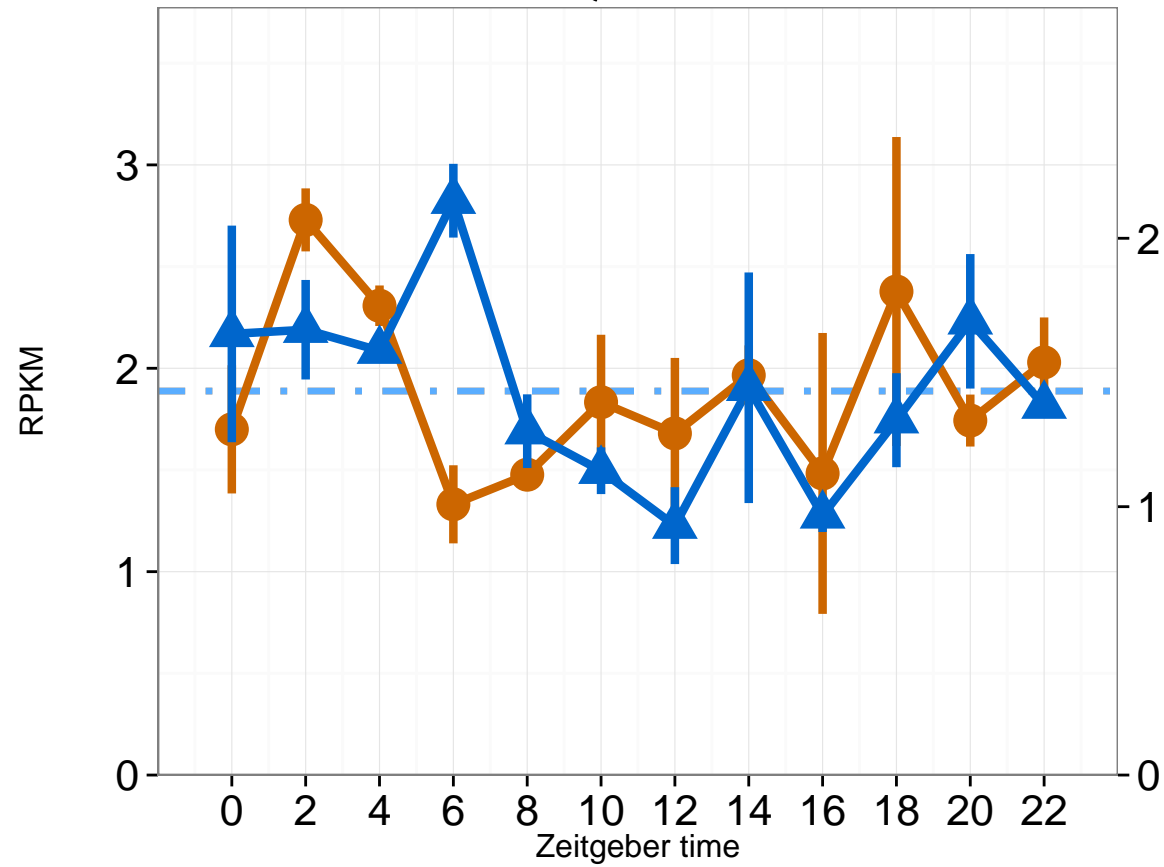

# Qtrt1

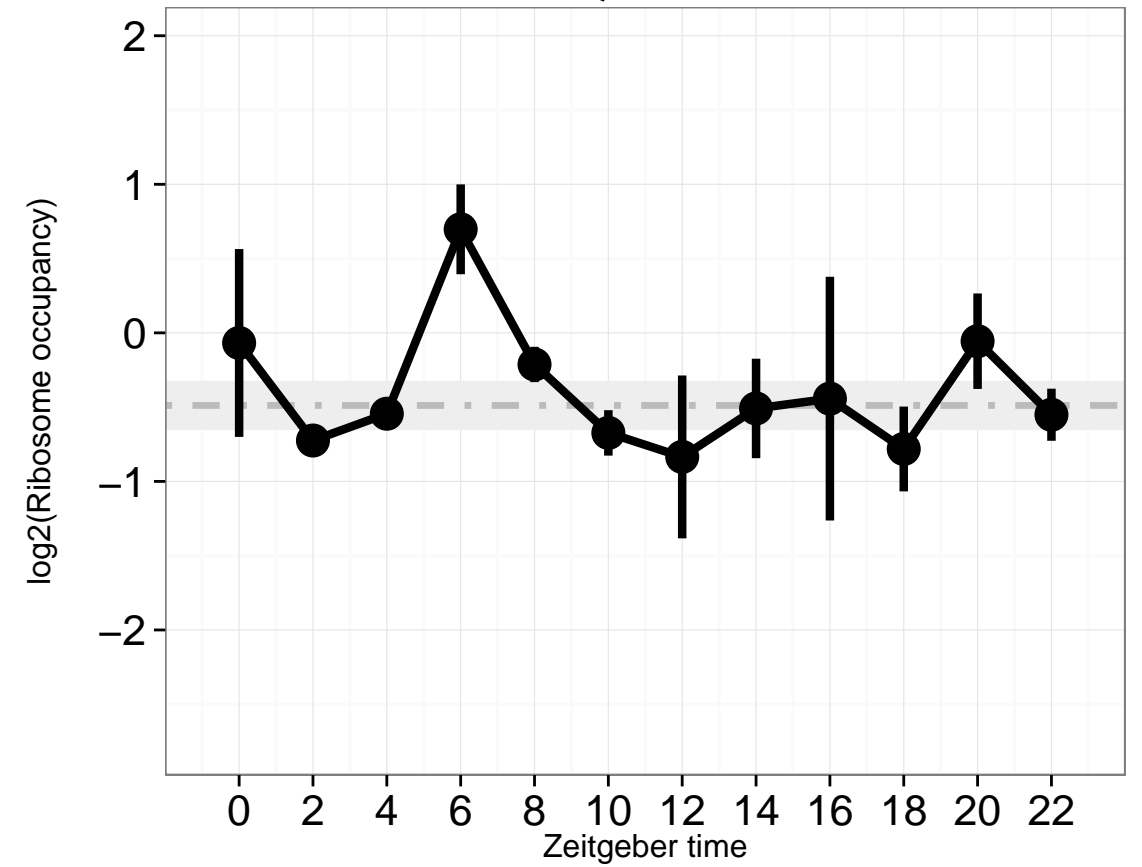

Supplement: SuppDataset_1.zip [file Qtrt1_set_A.pdf › Supplemental Dataset 1/A-mRNA_nonrhyth_translation_nonrhyth/Qtrt1_set_A.pdf]

# Qtrtd1

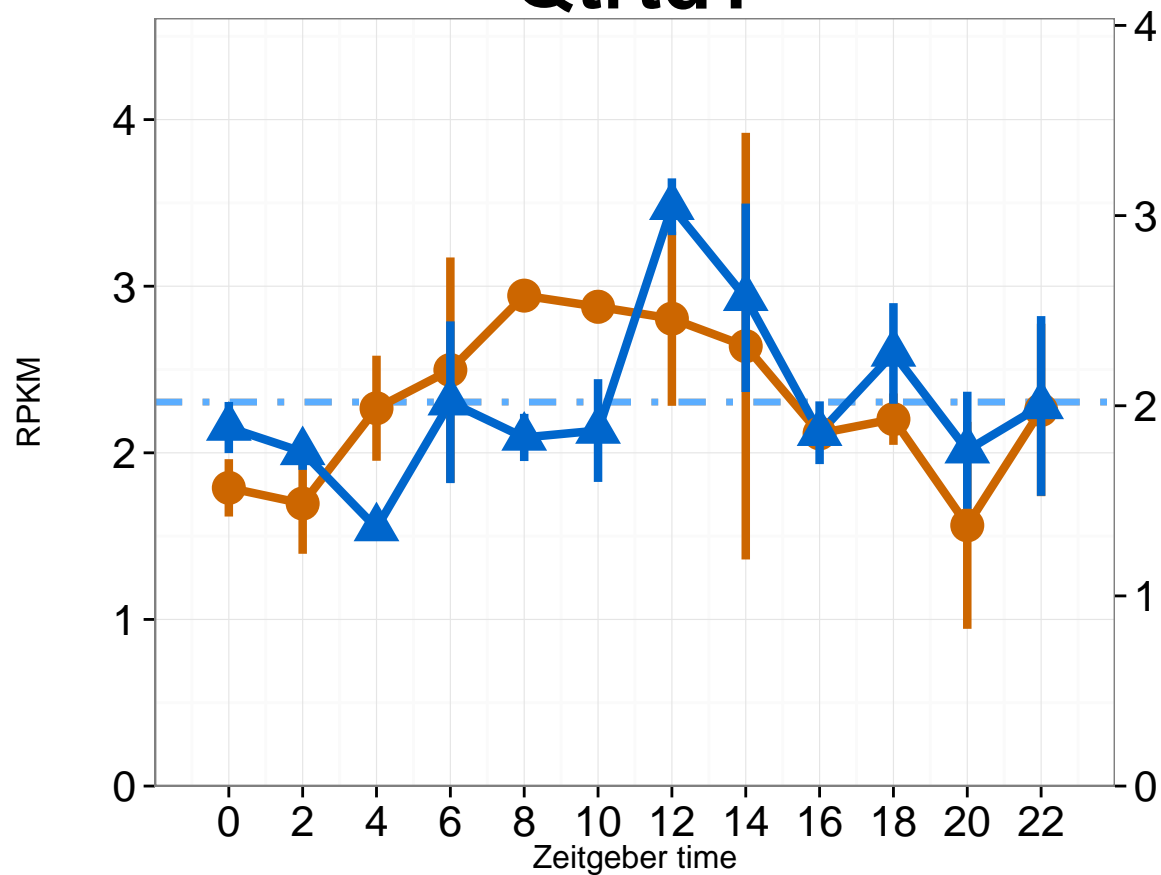

# Qtrtd1

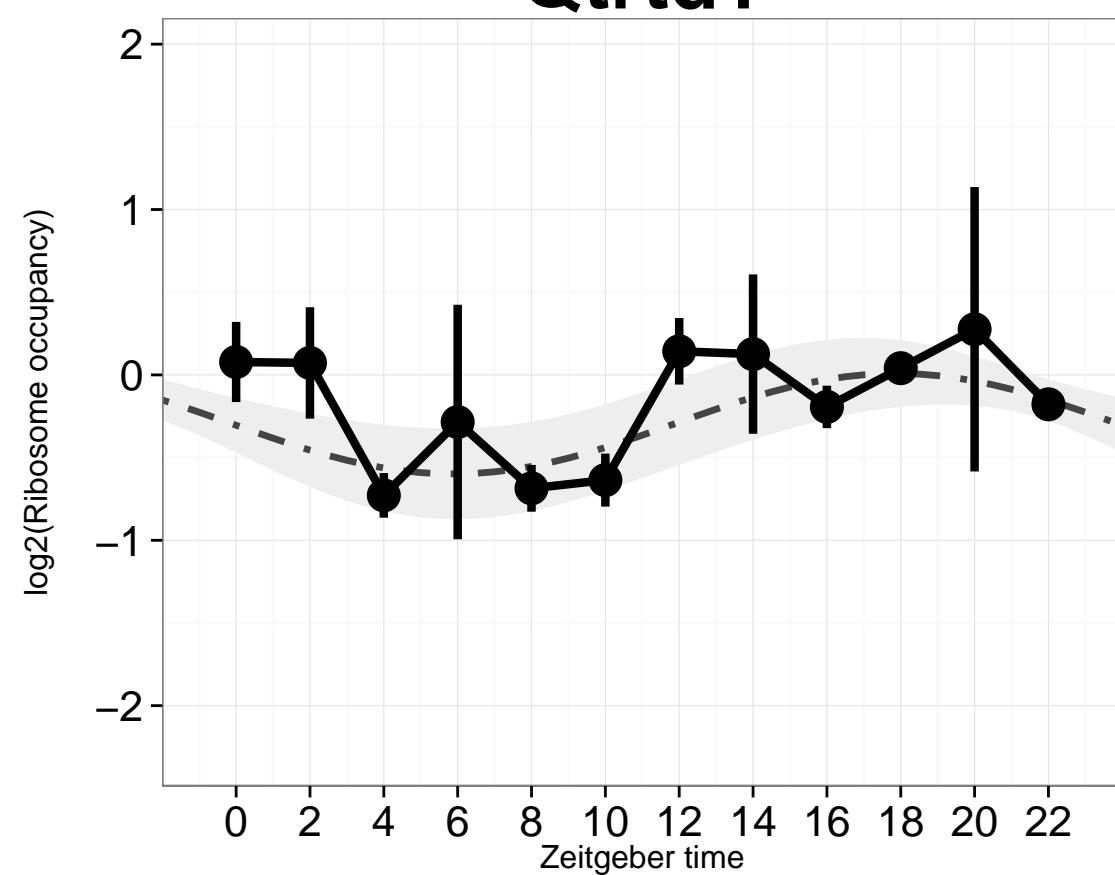

Supplement: SuppDataset_1.zip [file Qtrtd1_set_A.pdf › Supplemental Dataset 1/A-mRNA_nonrhyth_translation_nonrhyth/Qtrtd1_set_A.pdf]

# R3hcc1l

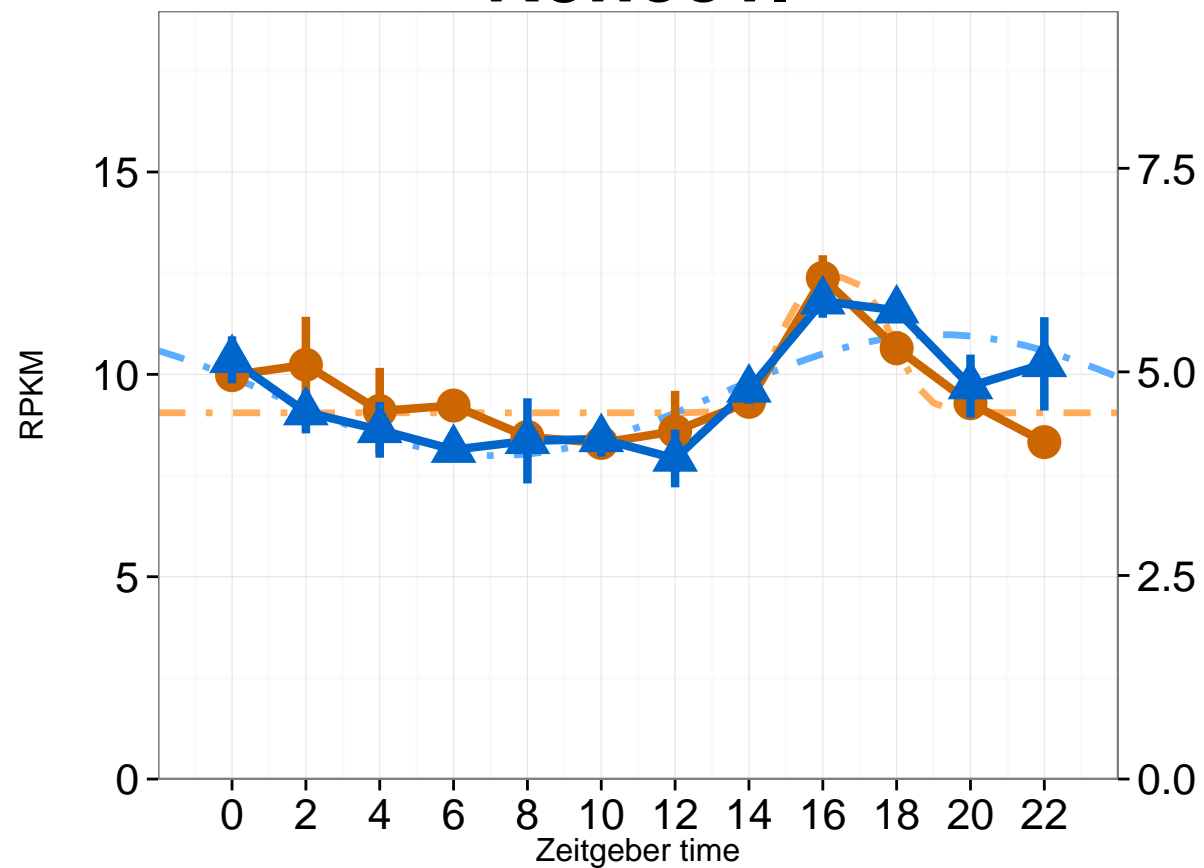

# R3hcc1l

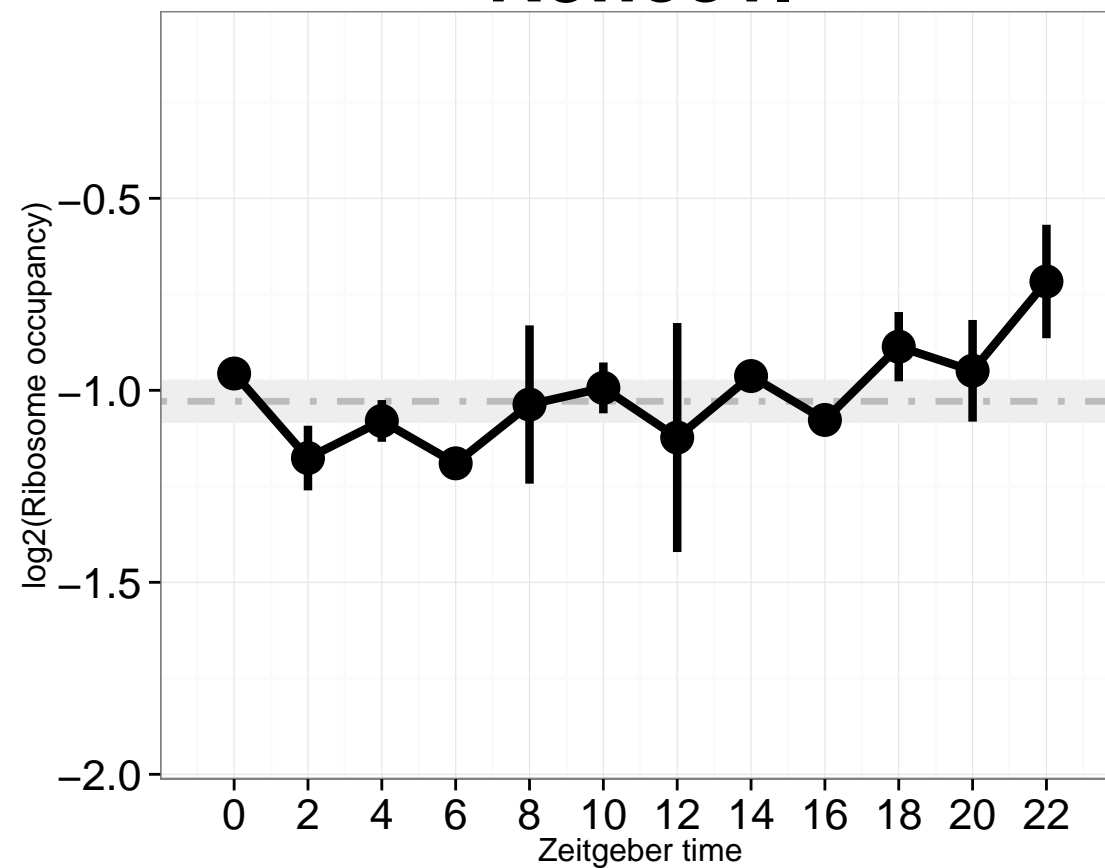

Supplement: SuppDataset_1.zip [file R3hcc1l_set_A.pdf › Supplemental Dataset 1/A-mRNA_nonrhyth_translation_nonrhyth/R3hcc1l_set_A.pdf]

# R3hdm1

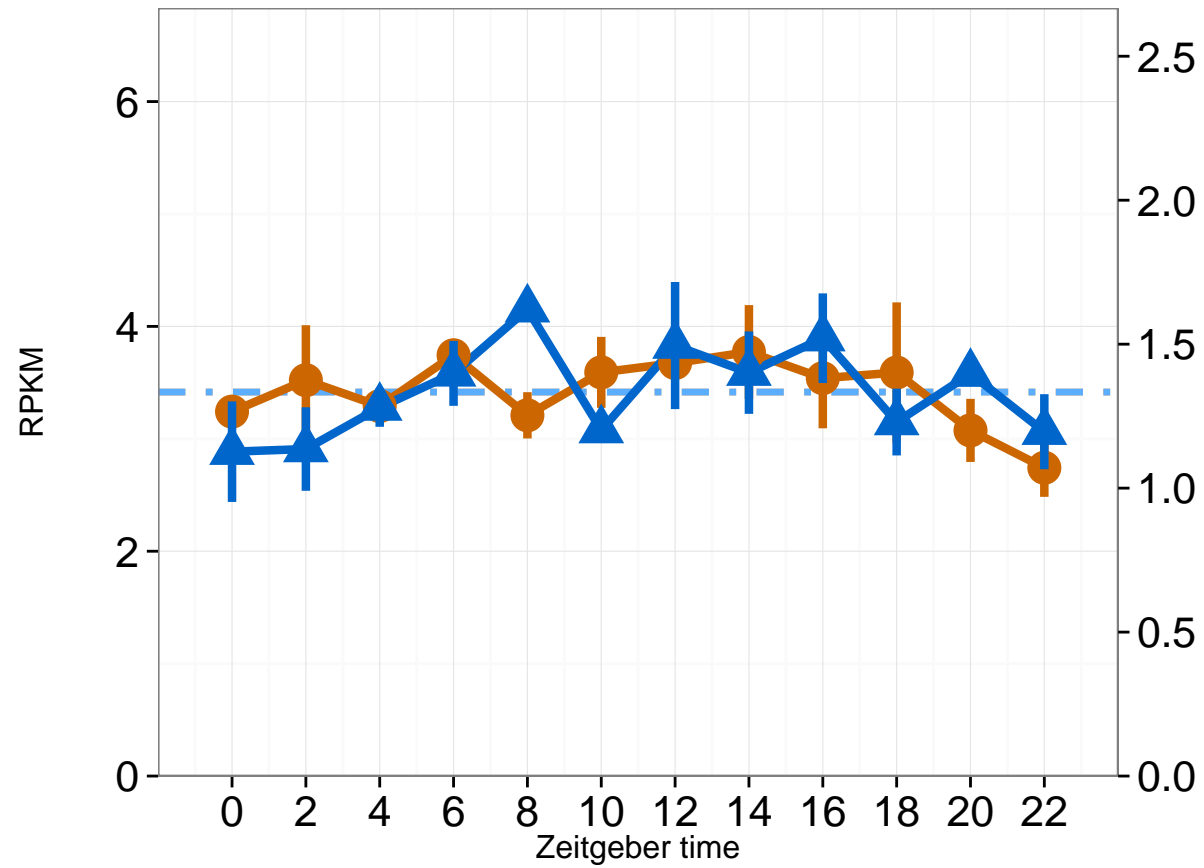

# R3hdm1

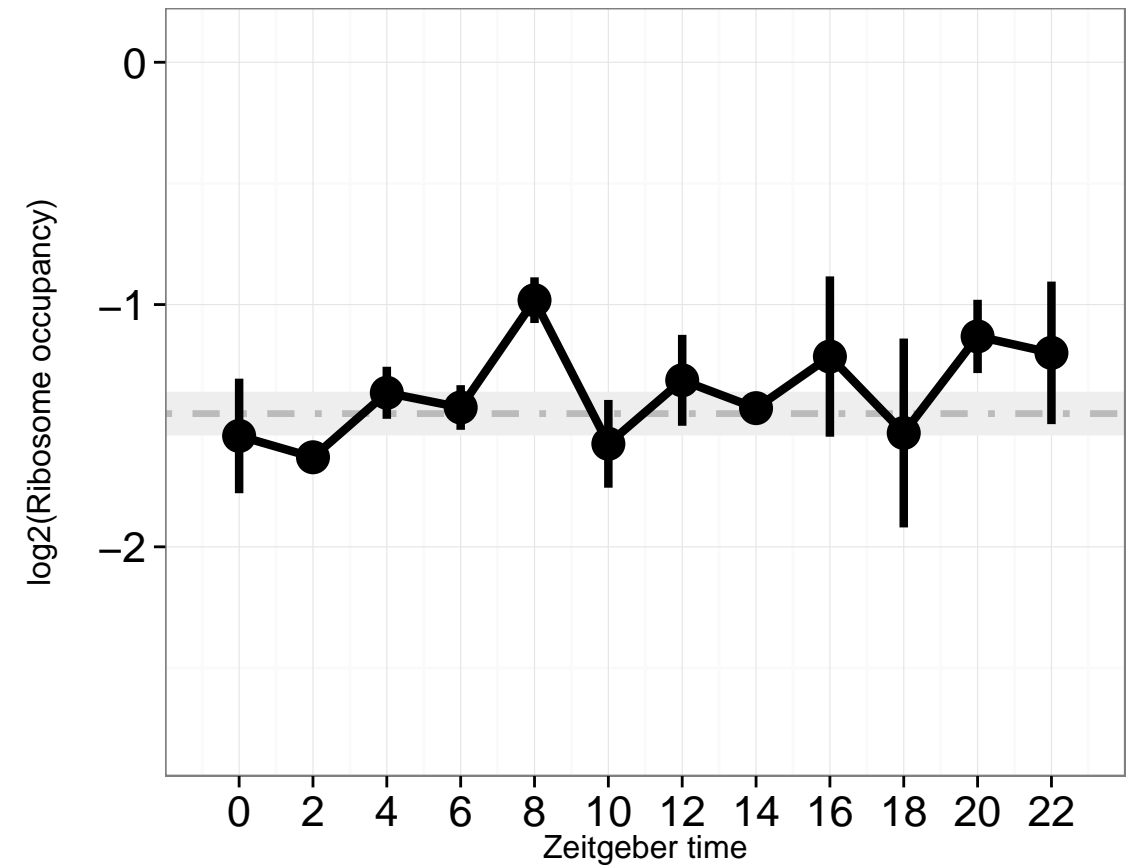

Supplement: SuppDataset_1.zip [file R3hdm1_set_A.pdf › Supplemental Dataset 1/A-mRNA_nonrhyth_translation_nonrhyth/R3hdm1_set_A.pdf]

# R3hdm2

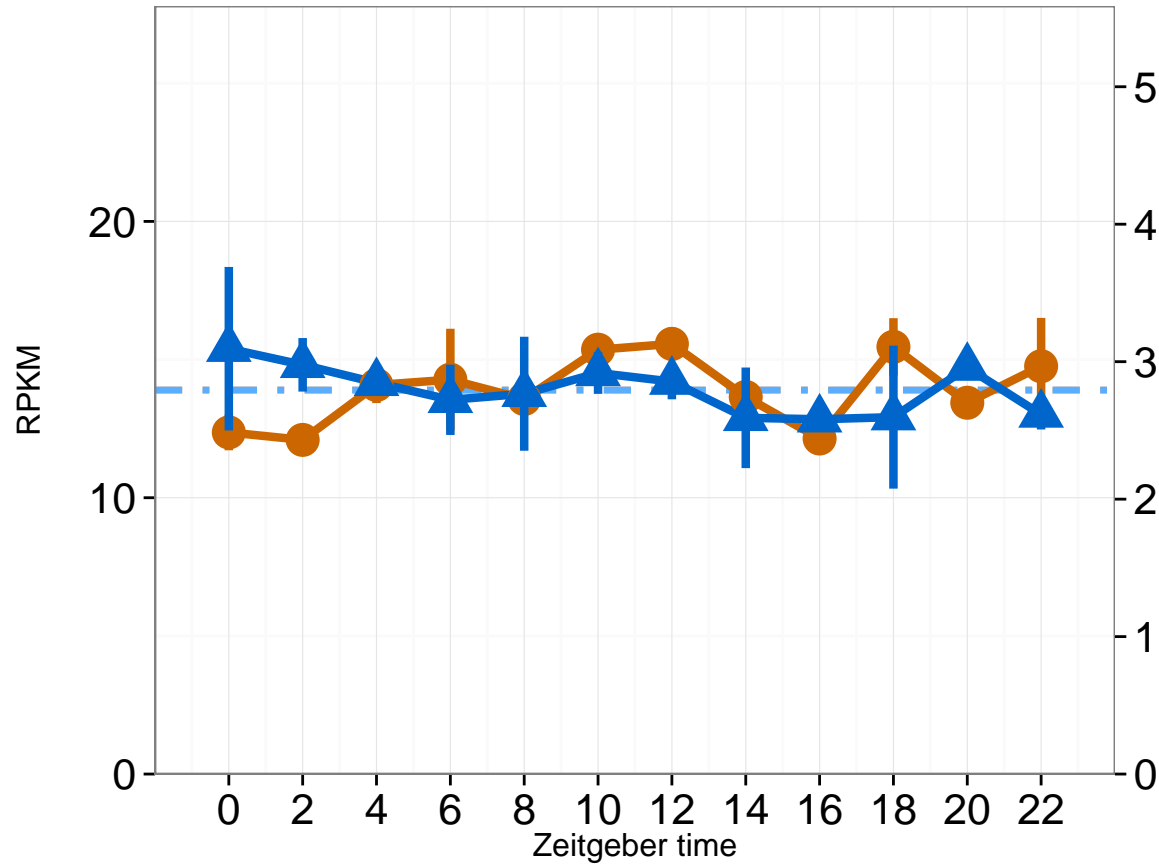

# R3hdm2

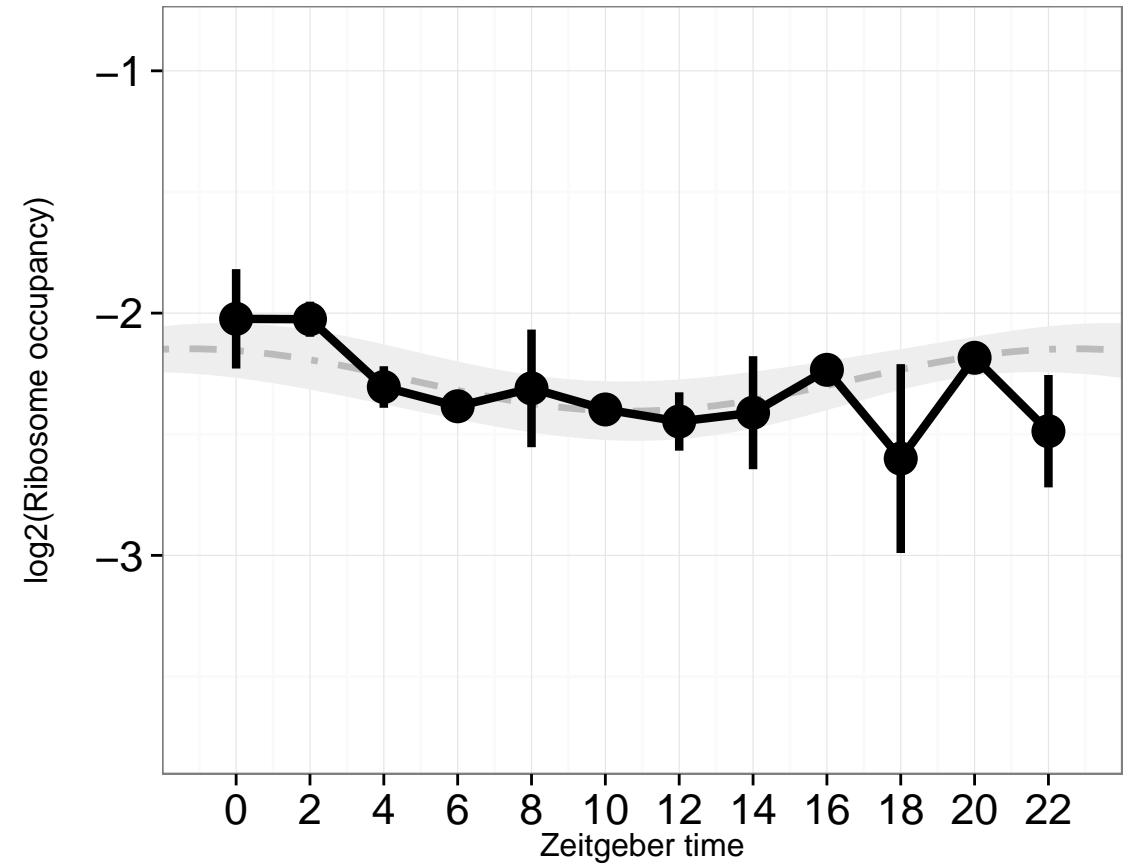

Supplement: SuppDataset_1.zip [file R3hdm2_set_A.pdf › Supplemental Dataset 1/A-mRNA_nonrhyth_translation_nonrhyth/R3hdm2_set_A.pdf]

# R3hdm4

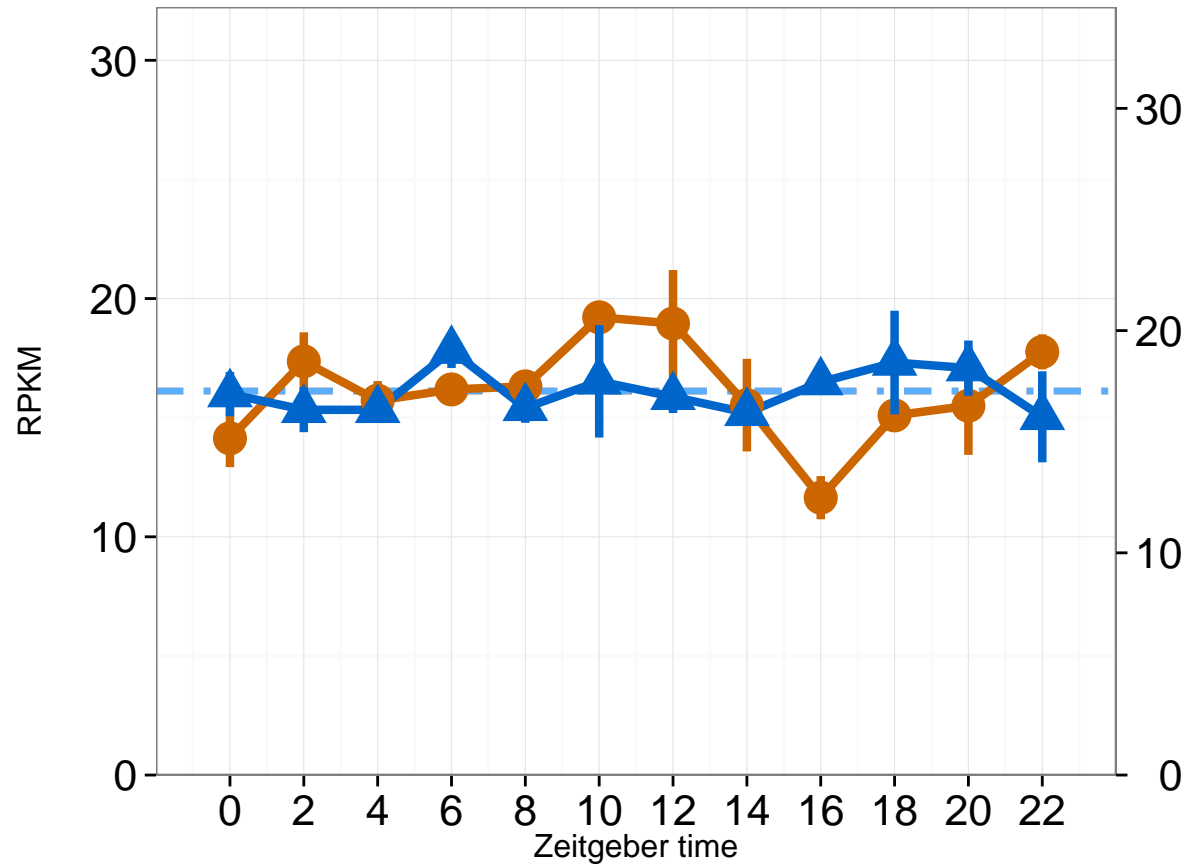

# R3hdm4

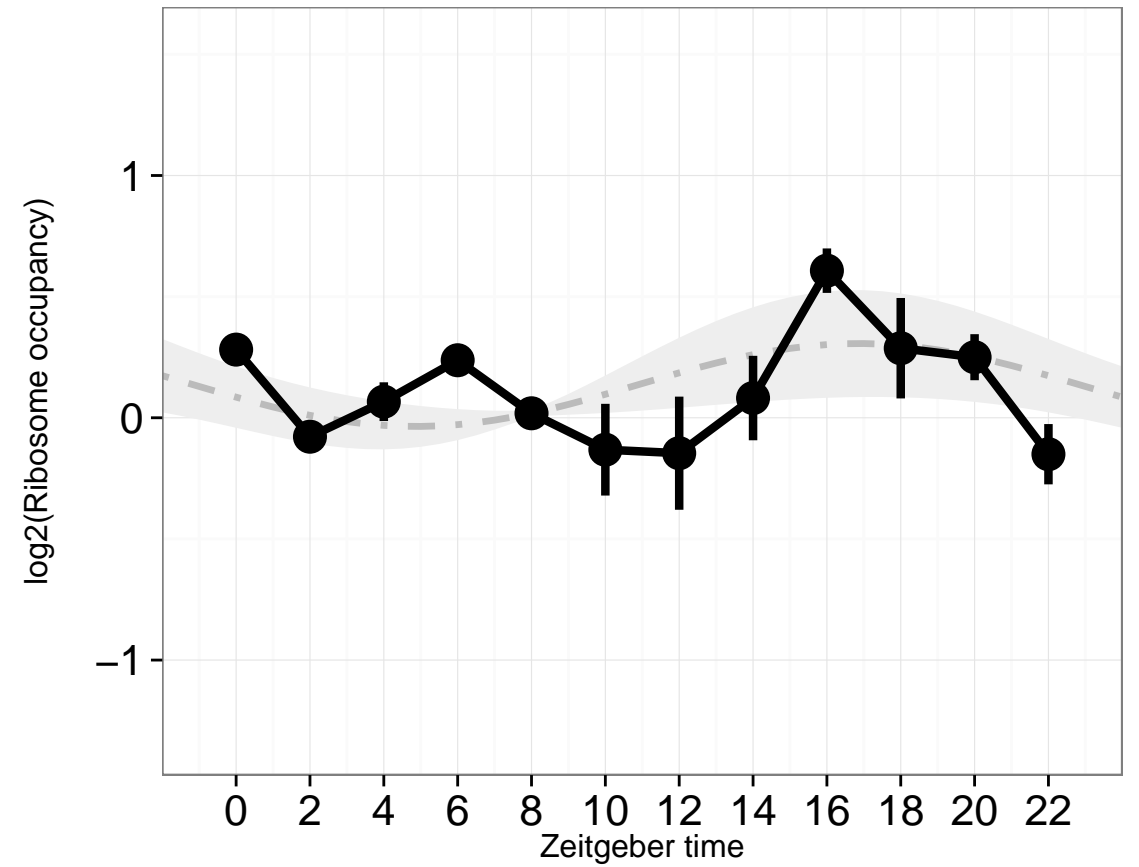

Supplement: SuppDataset_1.zip [file R3hdm4_set_A.pdf › Supplemental Dataset 1/A-mRNA_nonrhyth_translation_nonrhyth/R3hdm4_set_A.pdf]

## Rab10

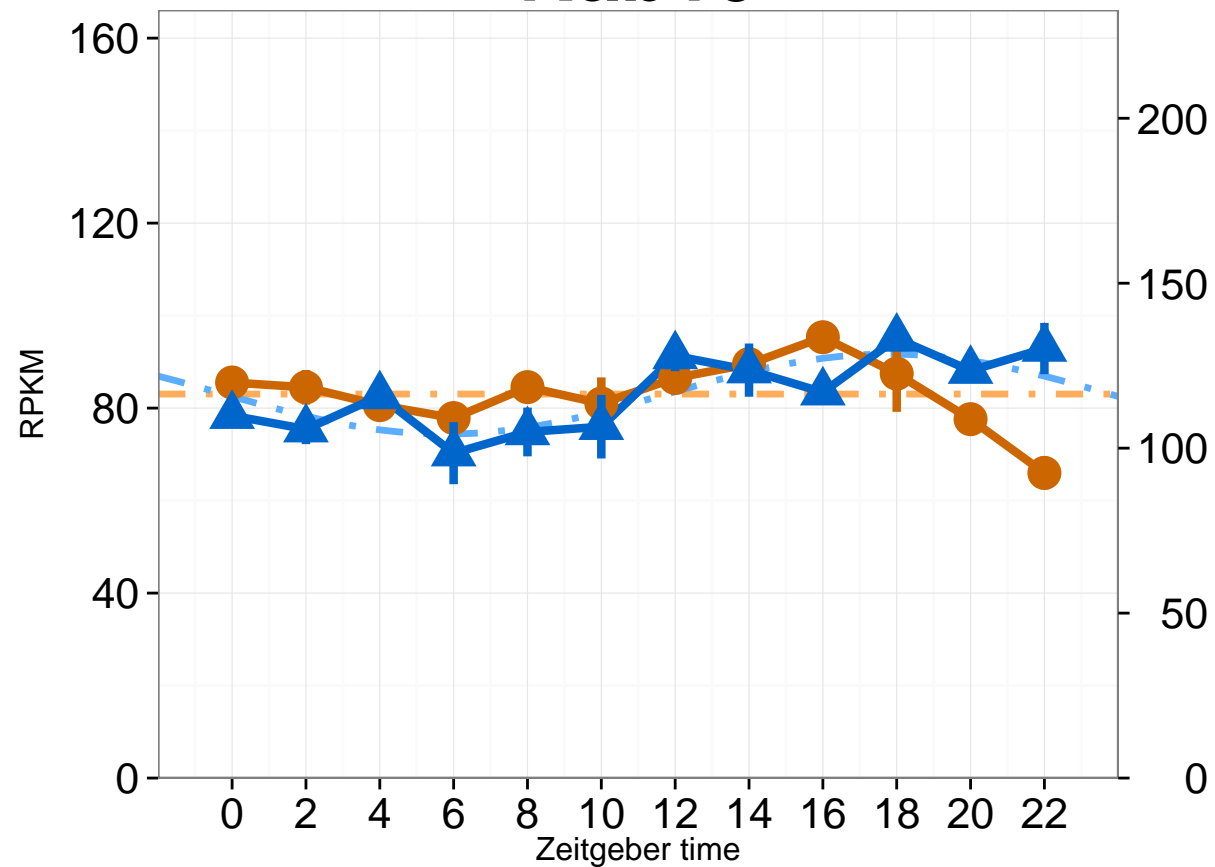

## Rab10

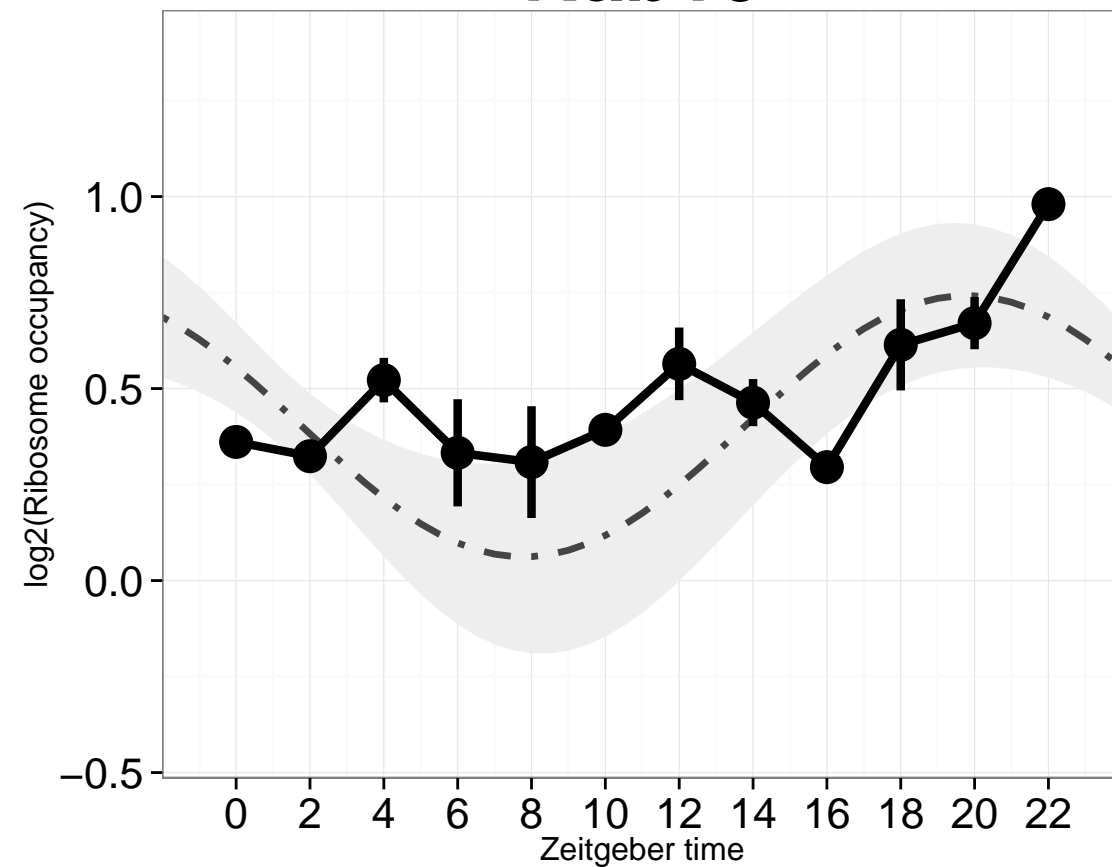

Supplement: SuppDataset_1.zip [file Rab10_set_A.pdf › Supplemental Dataset 1/A-mRNA_nonrhyth_translation_nonrhyth/Rab10_set_A.pdf]

# Rab11a

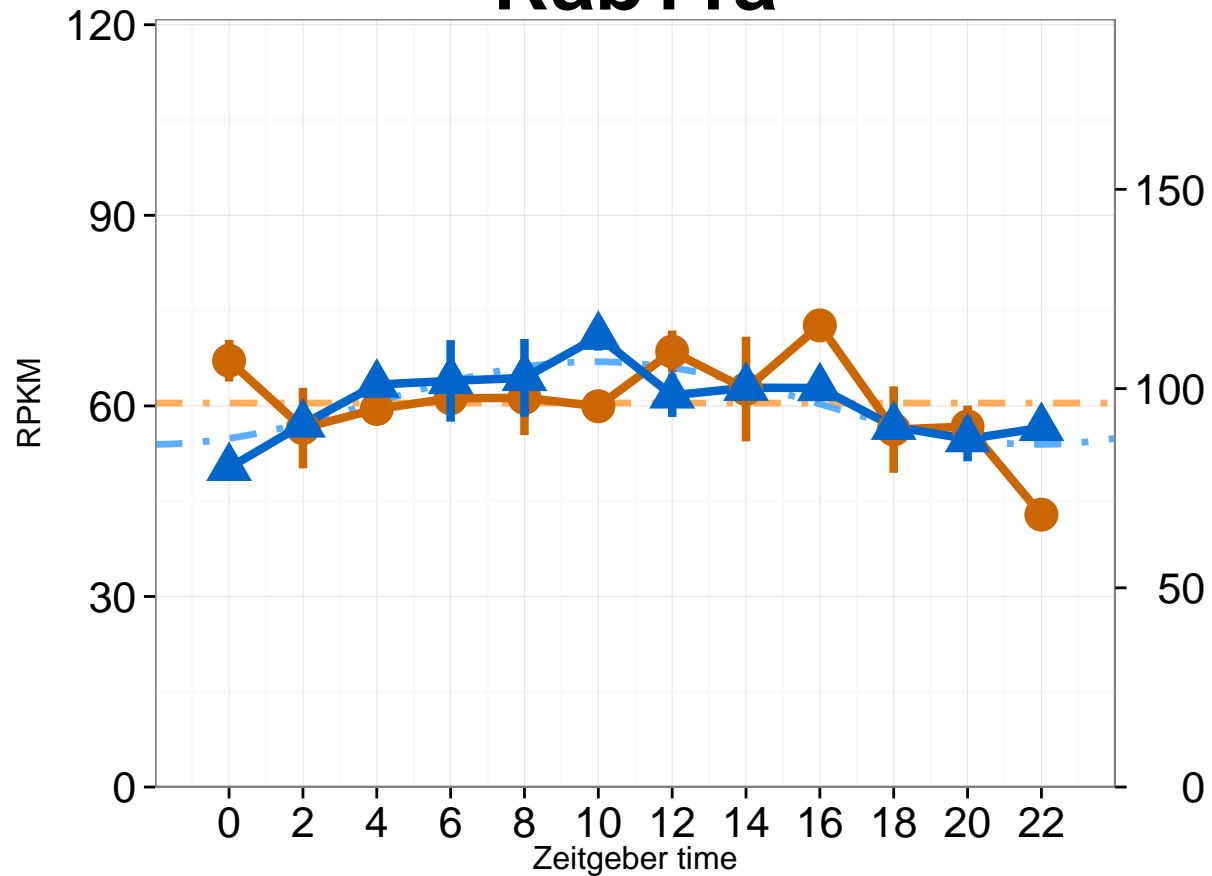

# Rab11a

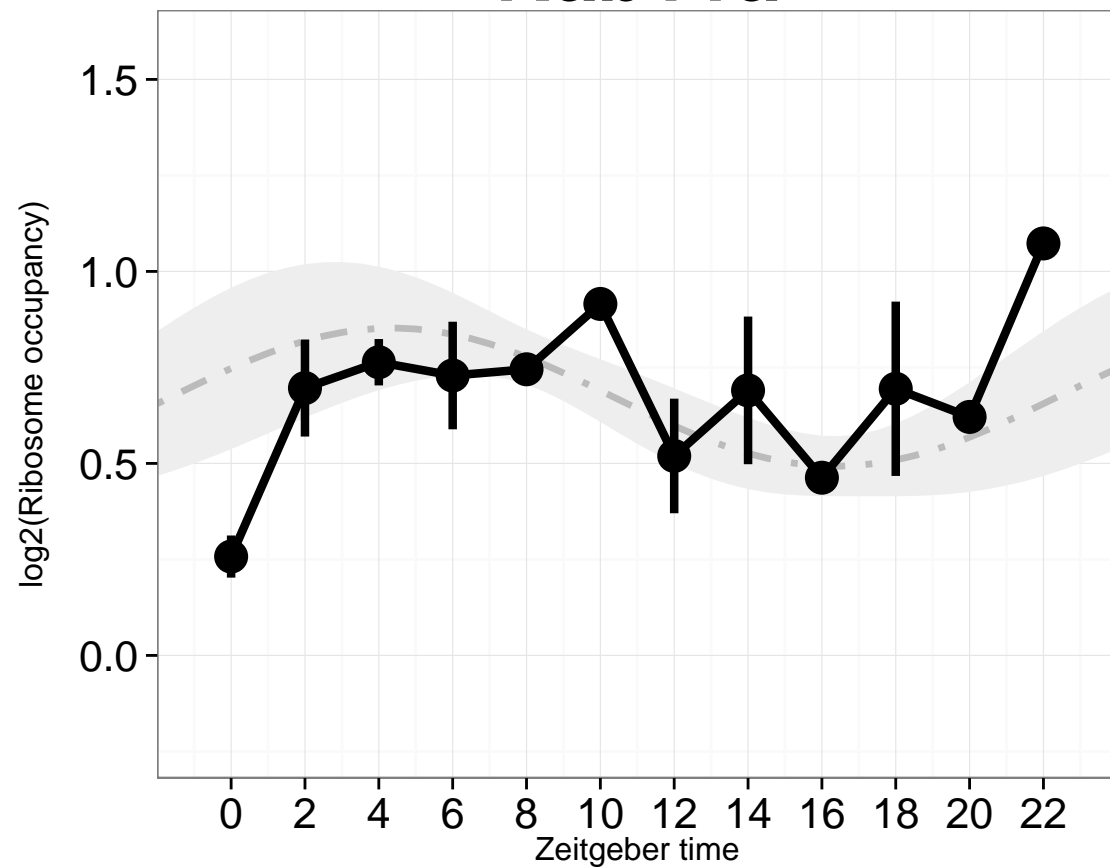

Supplement: SuppDataset_1.zip [file Rab11a_set_A.pdf › Supplemental Dataset 1/A-mRNA_nonrhyth_translation_nonrhyth/Rab11a_set_A.pdf]

## Rab11b

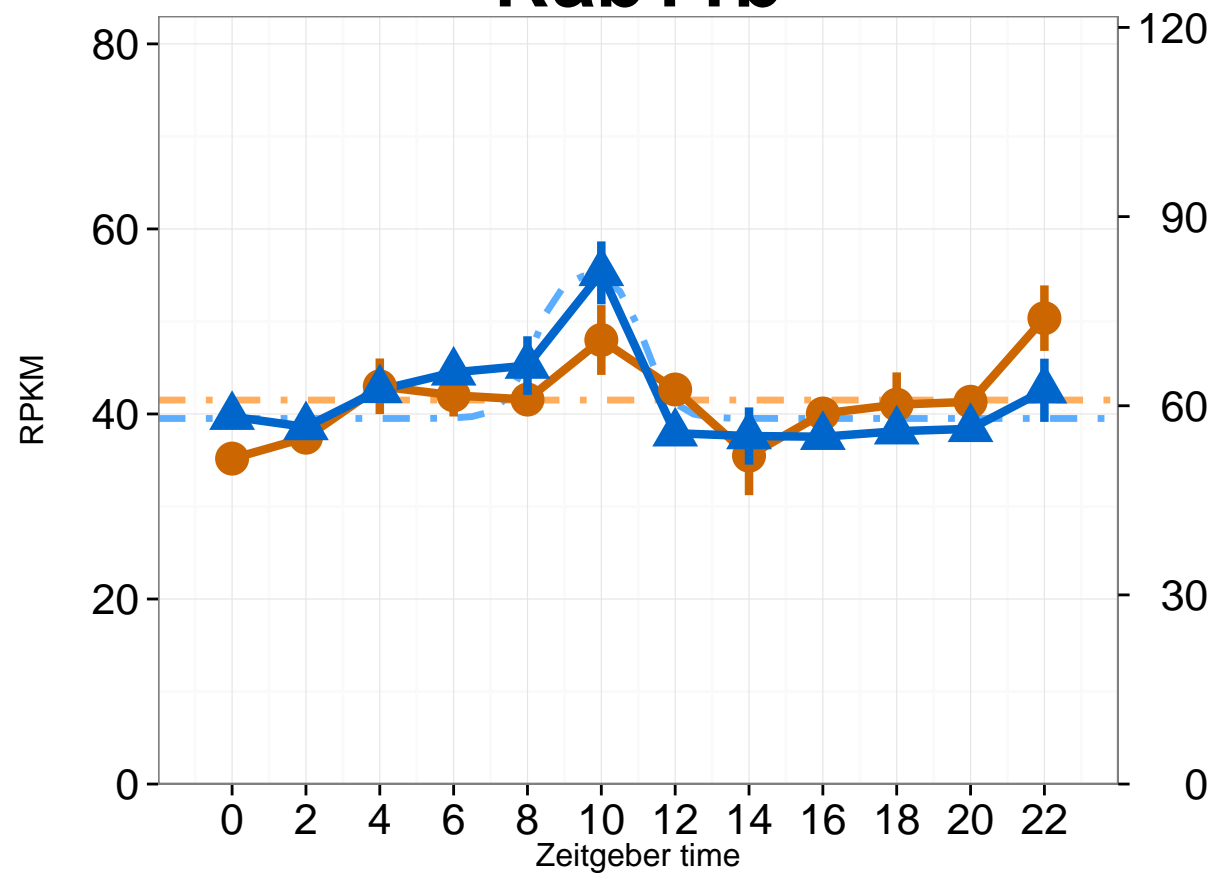

## Rab11b

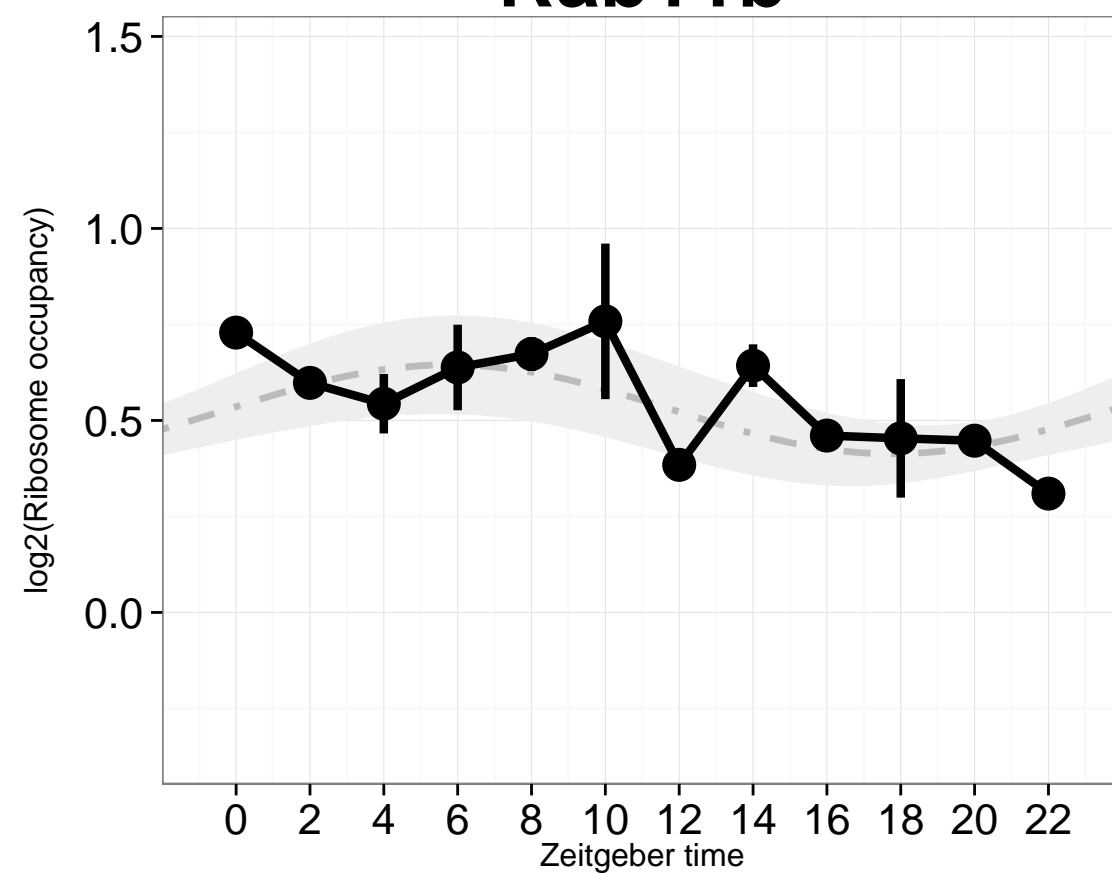

Supplement: SuppDataset_1.zip [file Rab11b_set_A.pdf › Supplemental Dataset 1/A-mRNA_nonrhyth_translation_nonrhyth/Rab11b_set_A.pdf]

# Rab11fip1

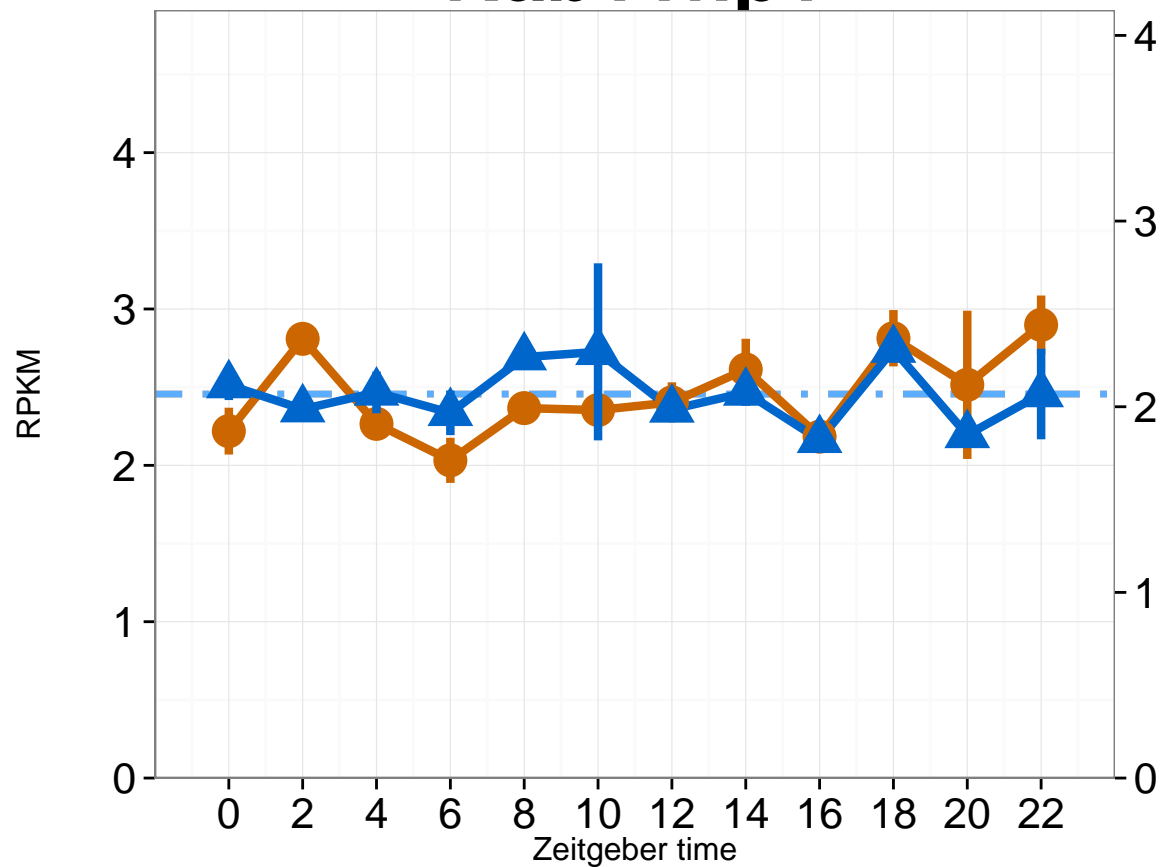

# Rab11fip1

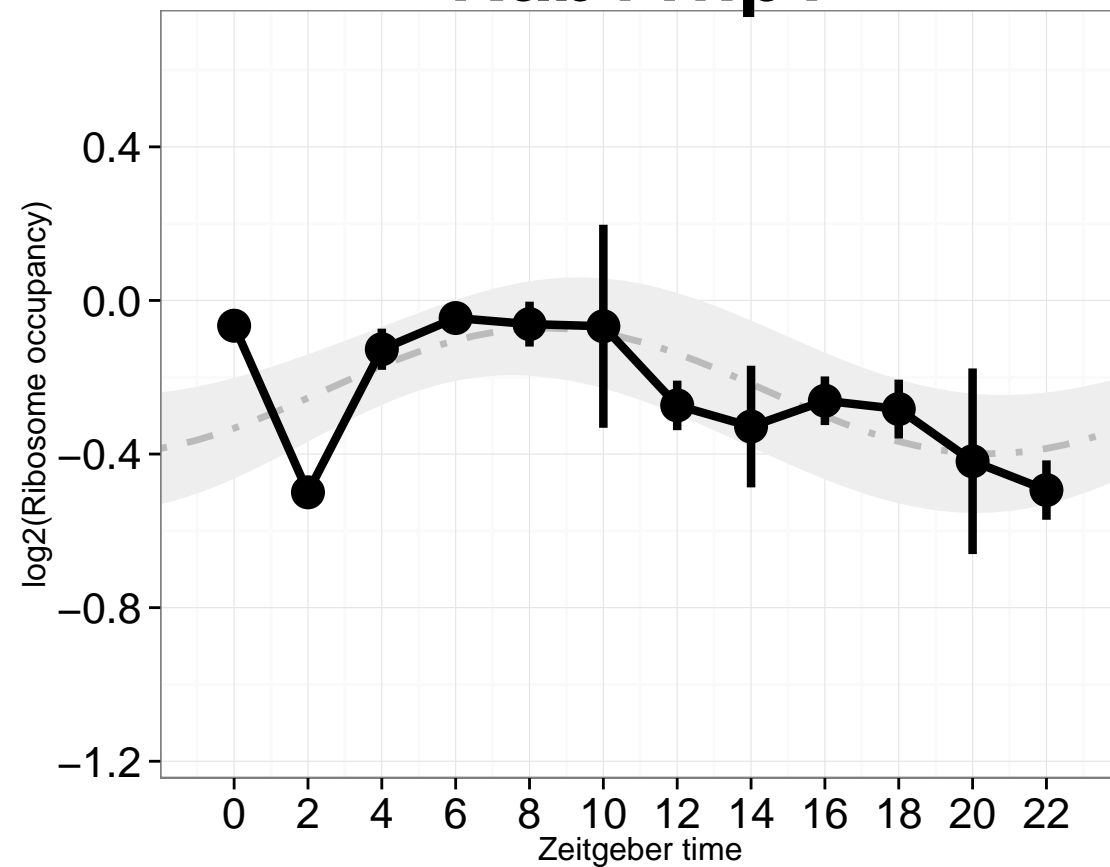

Supplement: SuppDataset_1.zip [file Rab11fip1_set_A.pdf › Supplemental Dataset 1/A-mRNA_nonrhyth_translation_nonrhyth/Rab11fip1_set_A.pdf]

# Rab11fip2

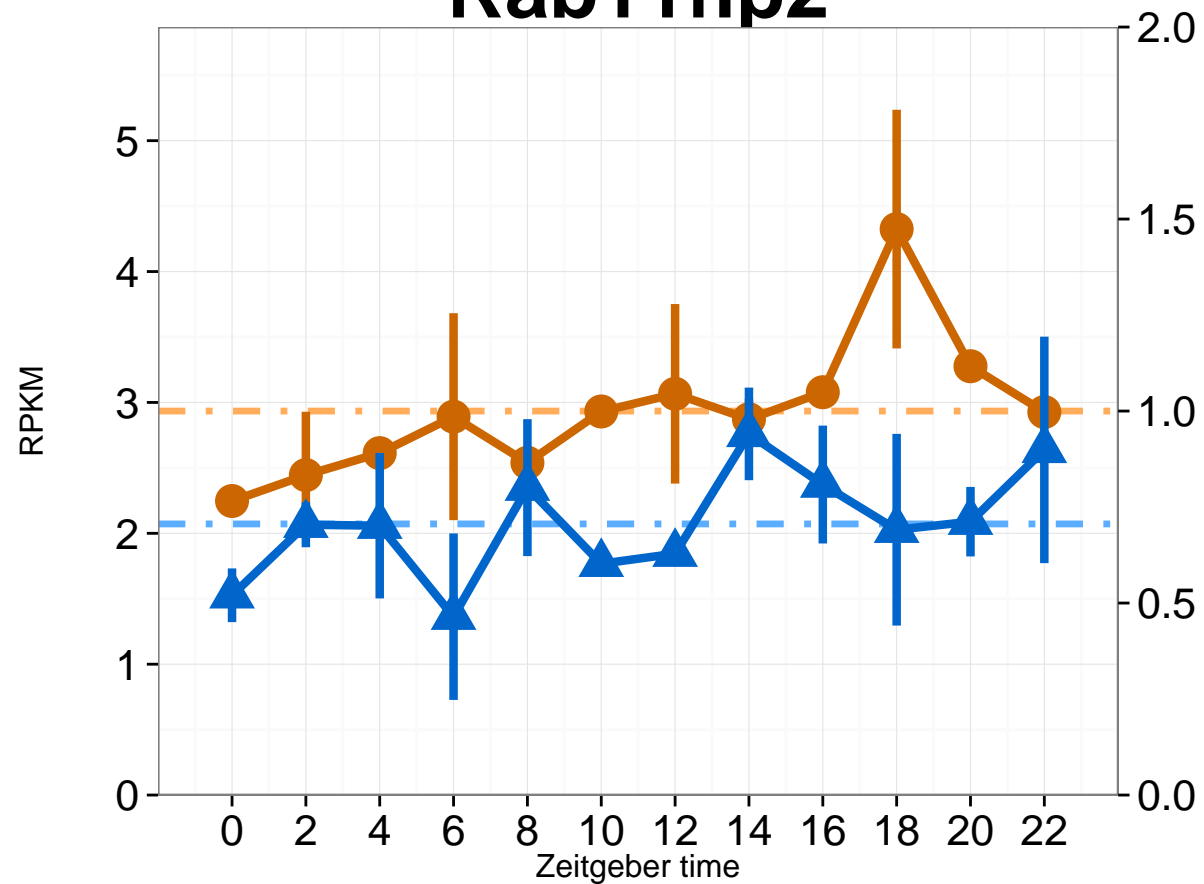

# Rab11fip2

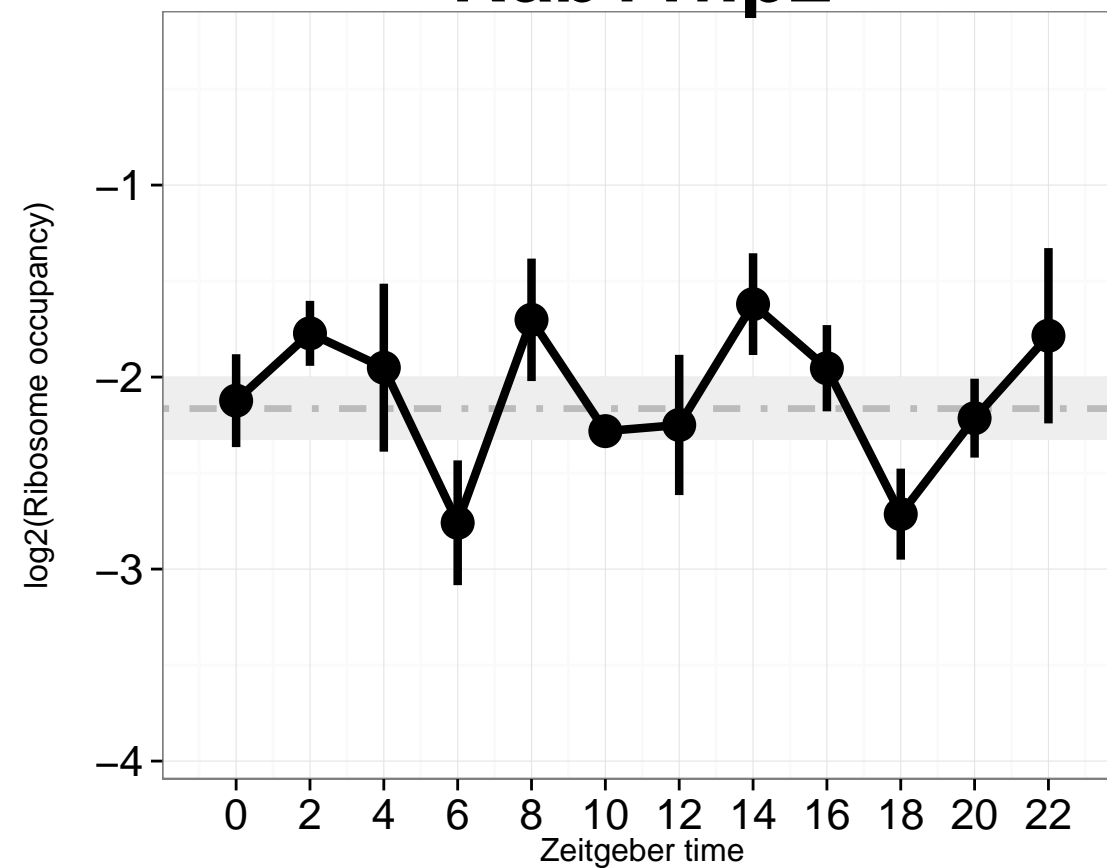

Supplement: SuppDataset_1.zip [file Rab11fip2_set_A.pdf › Supplemental Dataset 1/A-mRNA_nonrhyth_translation_nonrhyth/Rab11fip2_set_A.pdf]

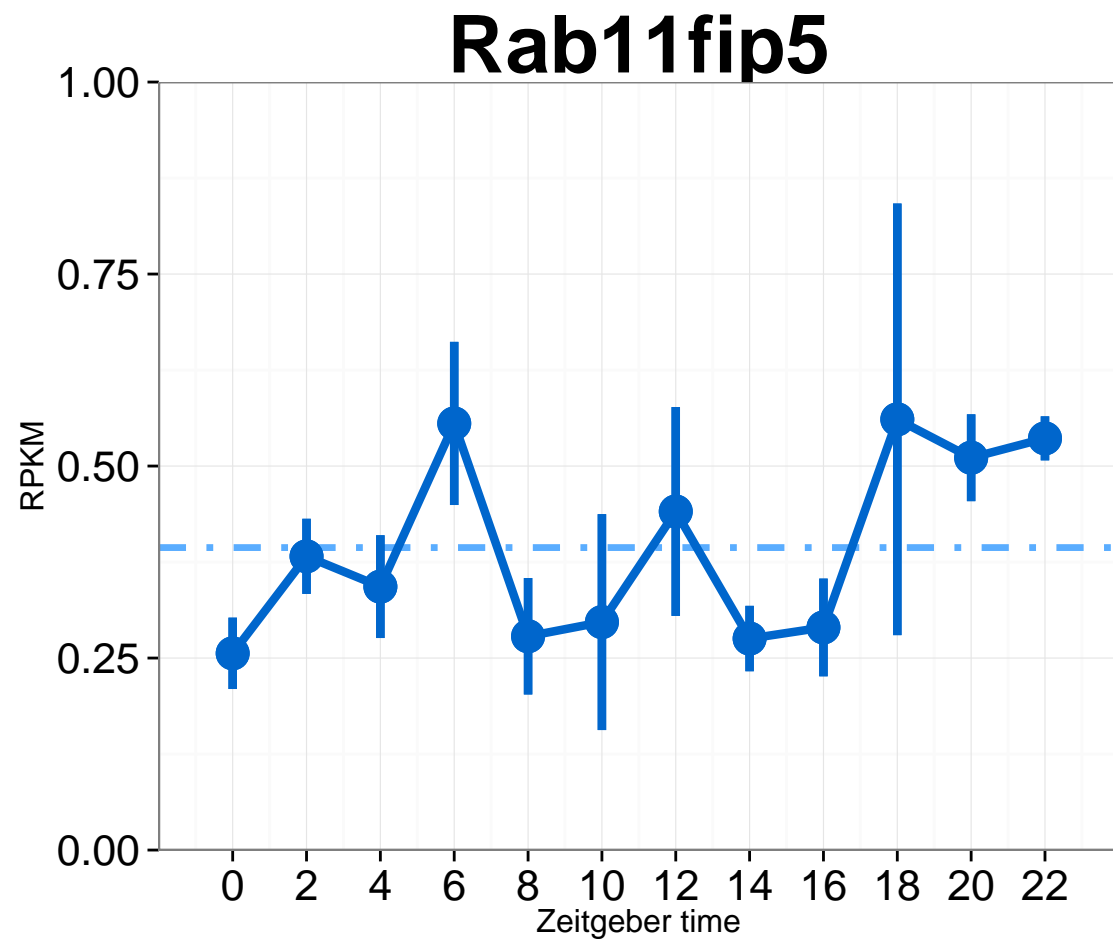

### Rab11fip5 log<sub>2</sub>(Ribosome occupancy)

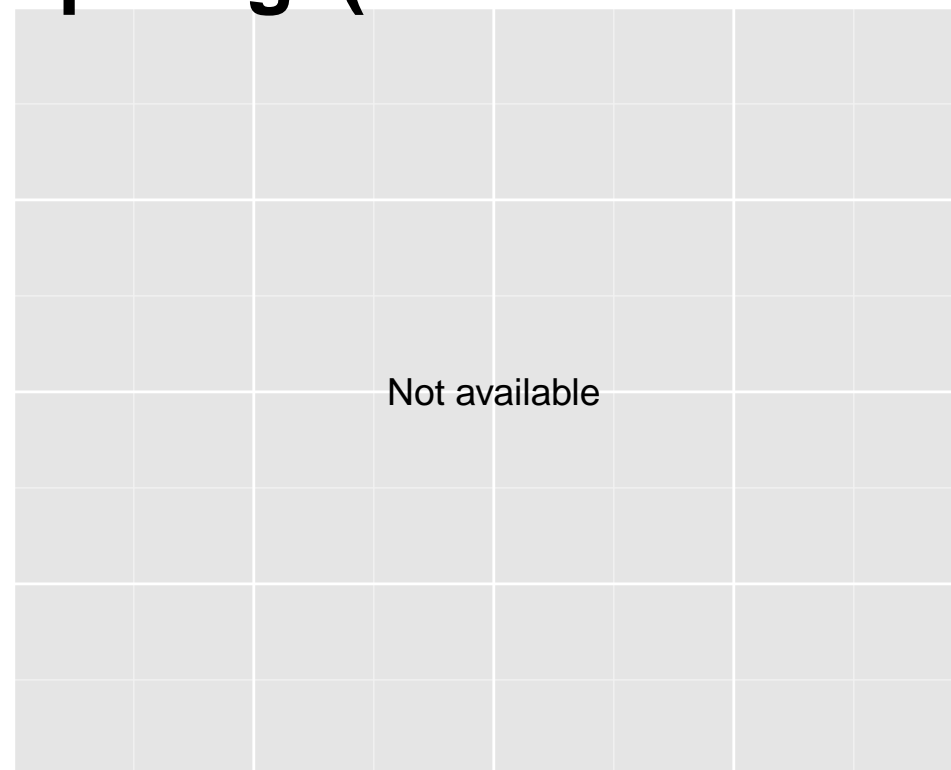

Supplement: SuppDataset_1.zip [file Rab11fip5_set_A.pdf › Supplemental Dataset 1/A-mRNA_nonrhyth_translation_nonrhyth/Rab11fip5_set_A.pdf]

## Rab13

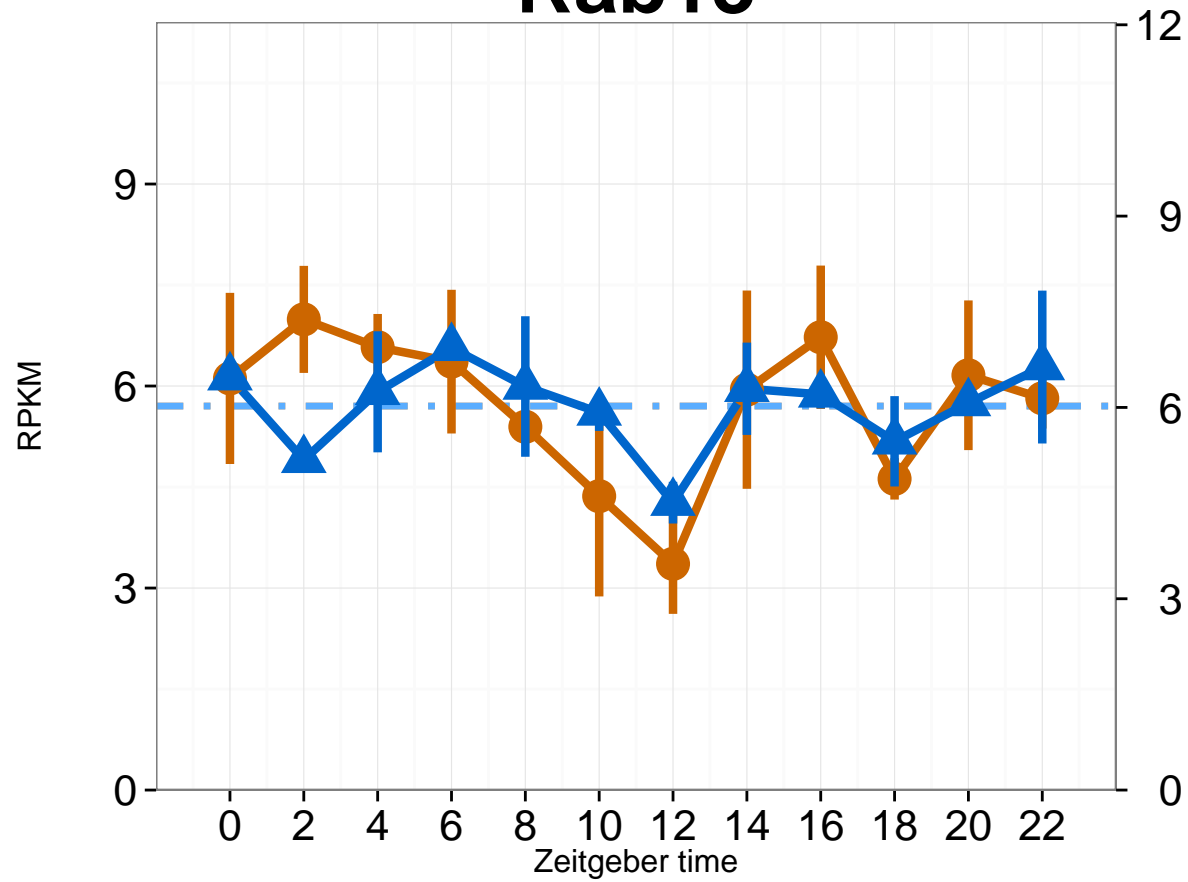

## Rab13

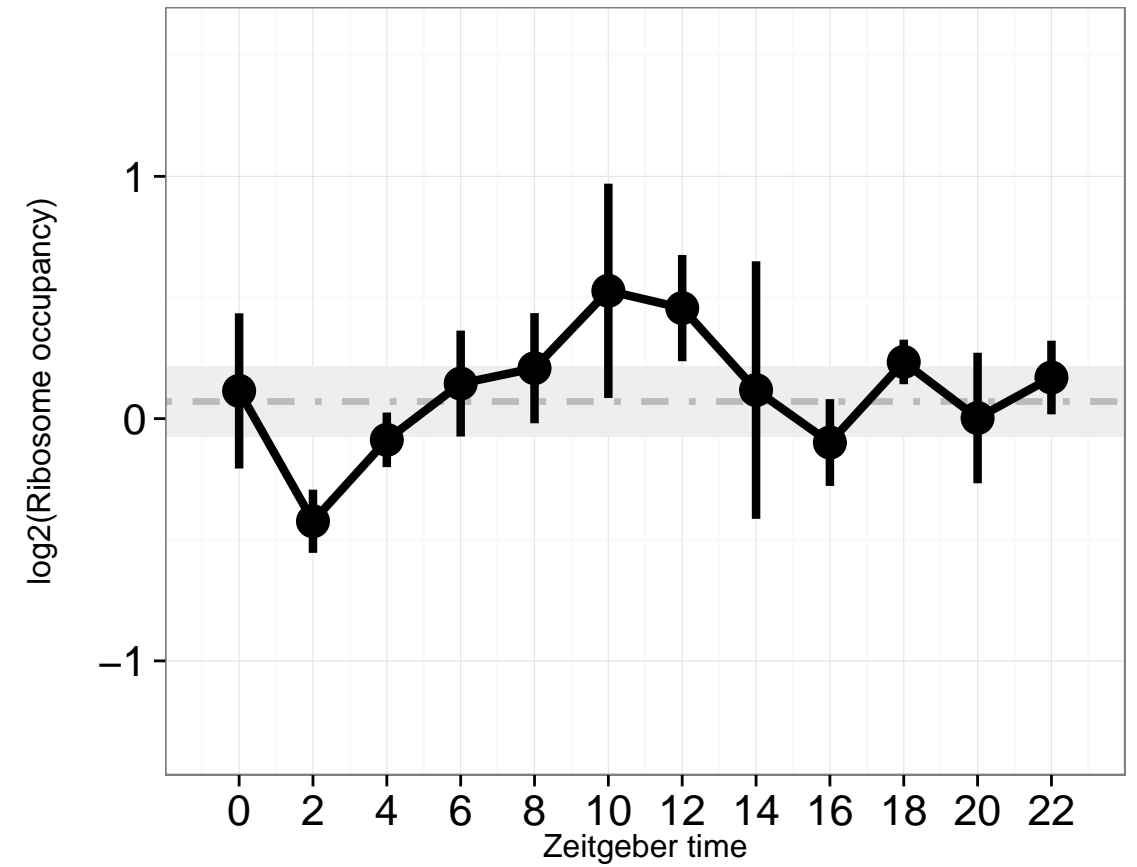

Supplement: SuppDataset_1.zip [file Rab13_set_A.pdf › Supplemental Dataset 1/A-mRNA_nonrhyth_translation_nonrhyth/Rab13_set_A.pdf]

## Rab14

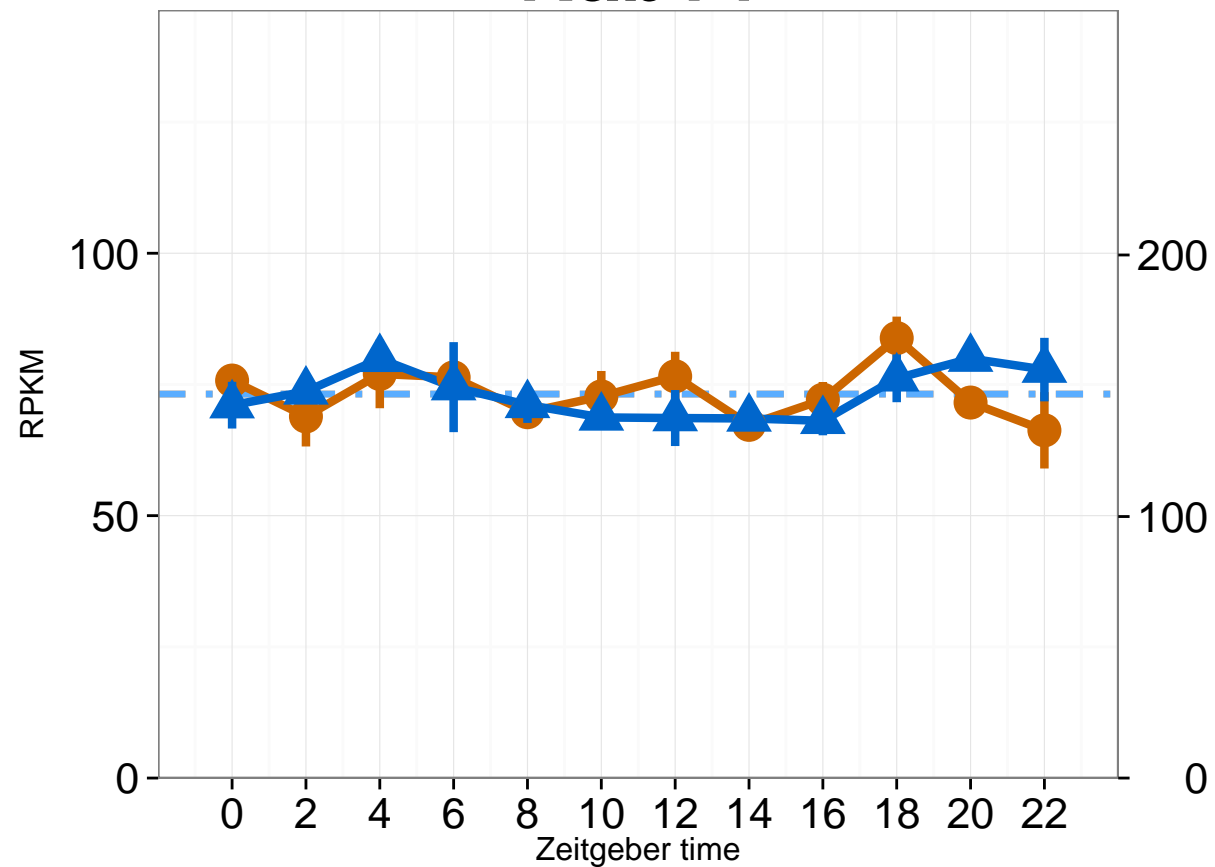

## Rab14

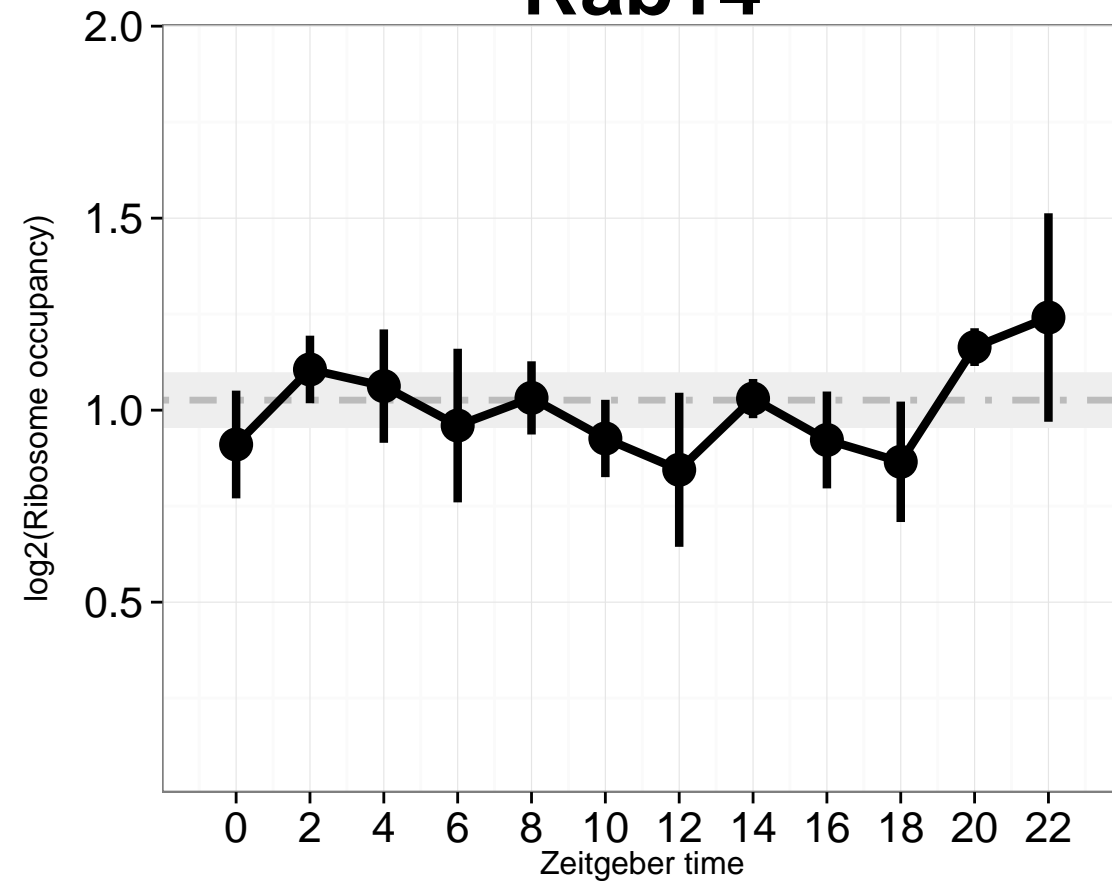

Supplement: SuppDataset_1.zip [file Rab14_set_A.pdf › Supplemental Dataset 1/A-mRNA_nonrhyth_translation_nonrhyth/Rab14_set_A.pdf]

## Rab18

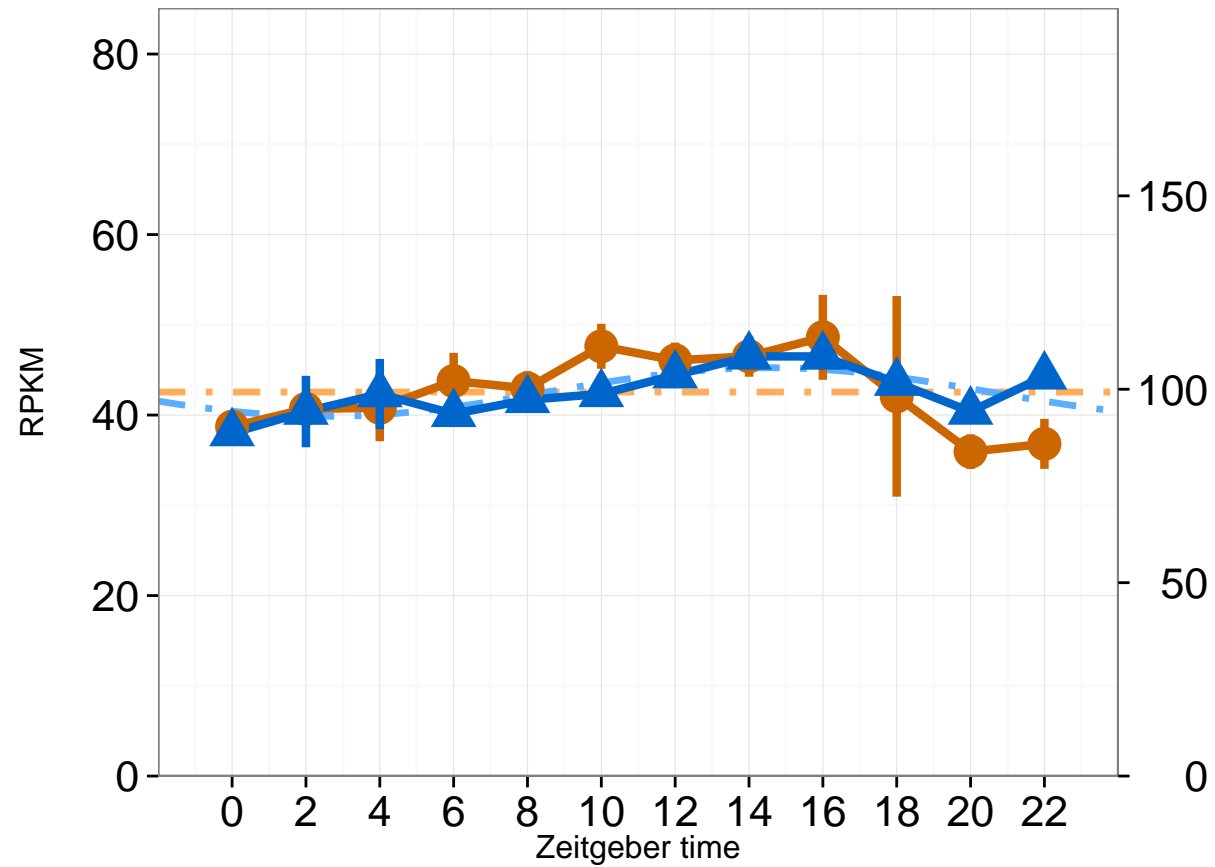

## Rab18

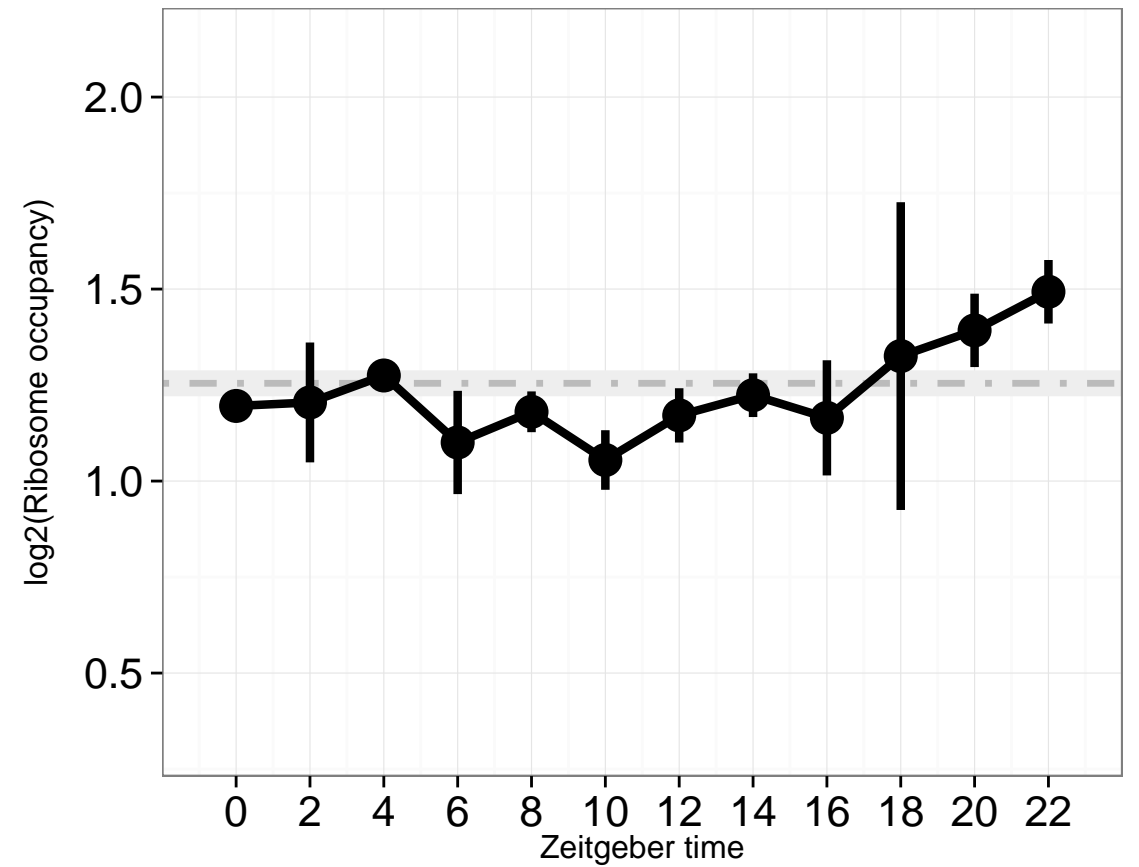

Supplement: SuppDataset_1.zip [file Rab18_set_A.pdf › Supplemental Dataset 1/A-mRNA_nonrhyth_translation_nonrhyth/Rab18_set_A.pdf]

# Rab1

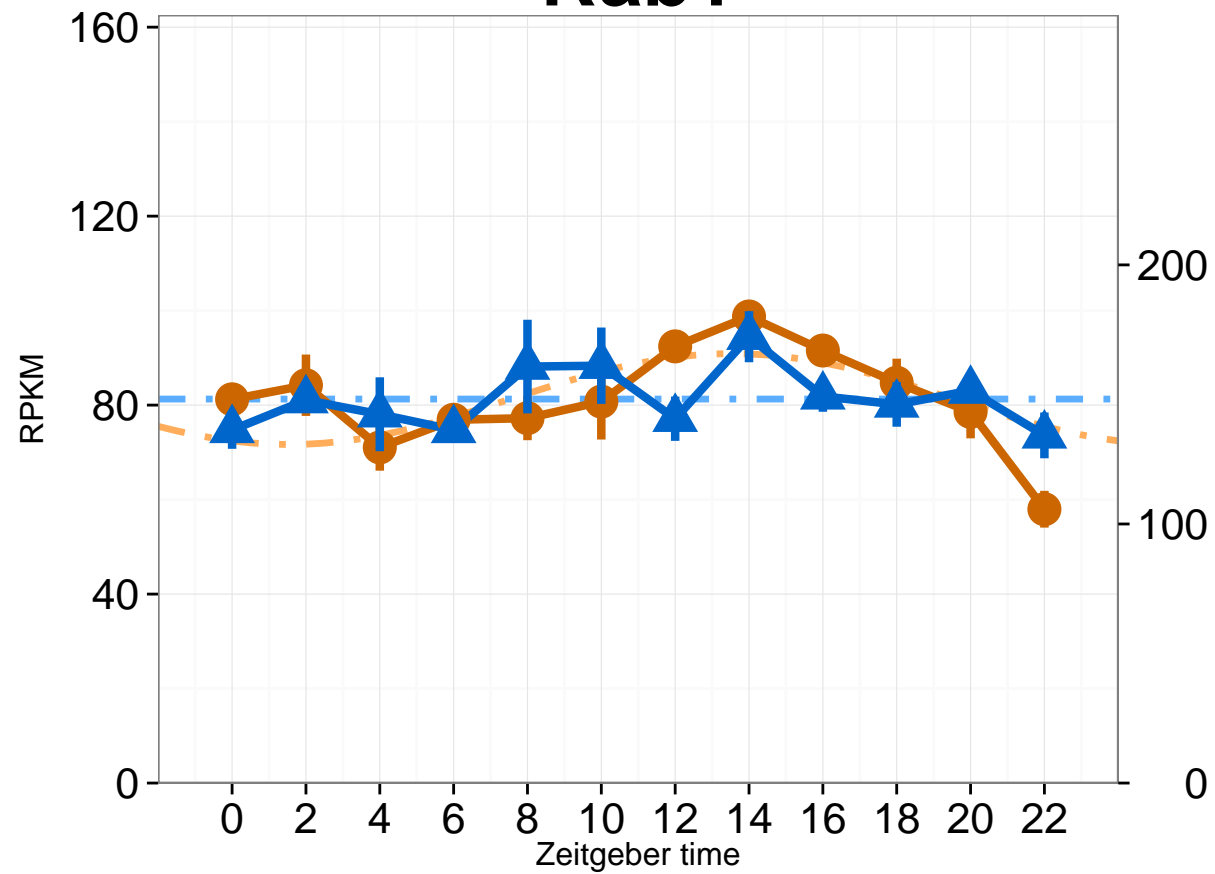

# Rab1

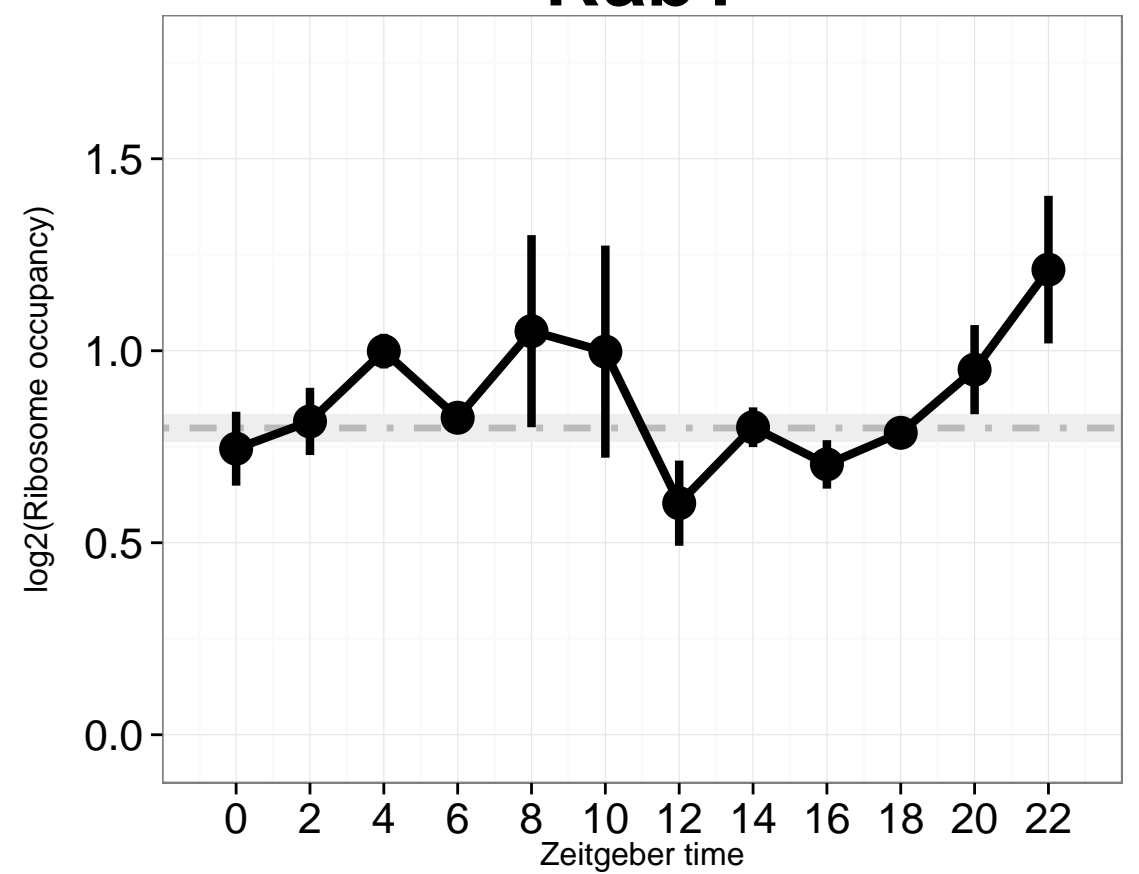

Supplement: SuppDataset_1.zip [file Rab1_set_A.pdf › Supplemental Dataset 1/A-mRNA_nonrhyth_translation_nonrhyth/Rab1_set_A.pdf]

## Rab1b

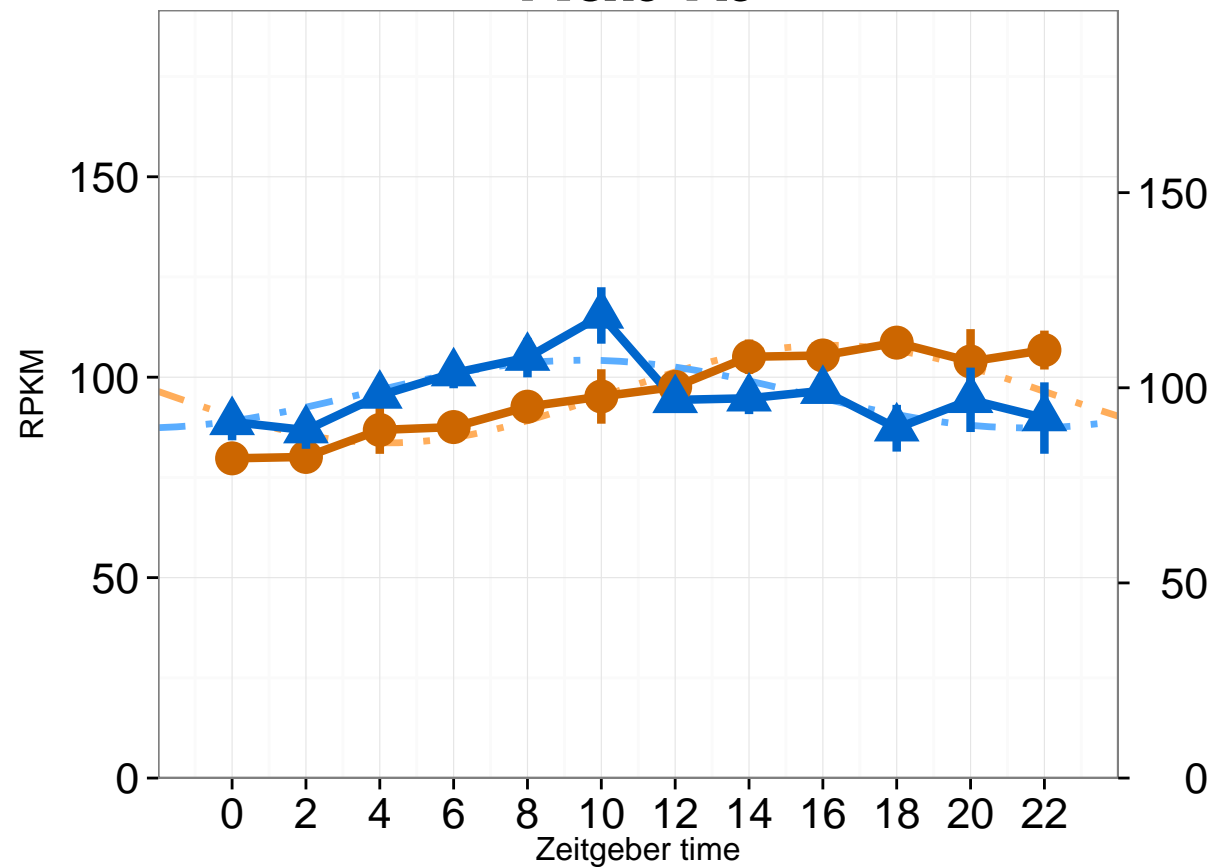

## Rab1b

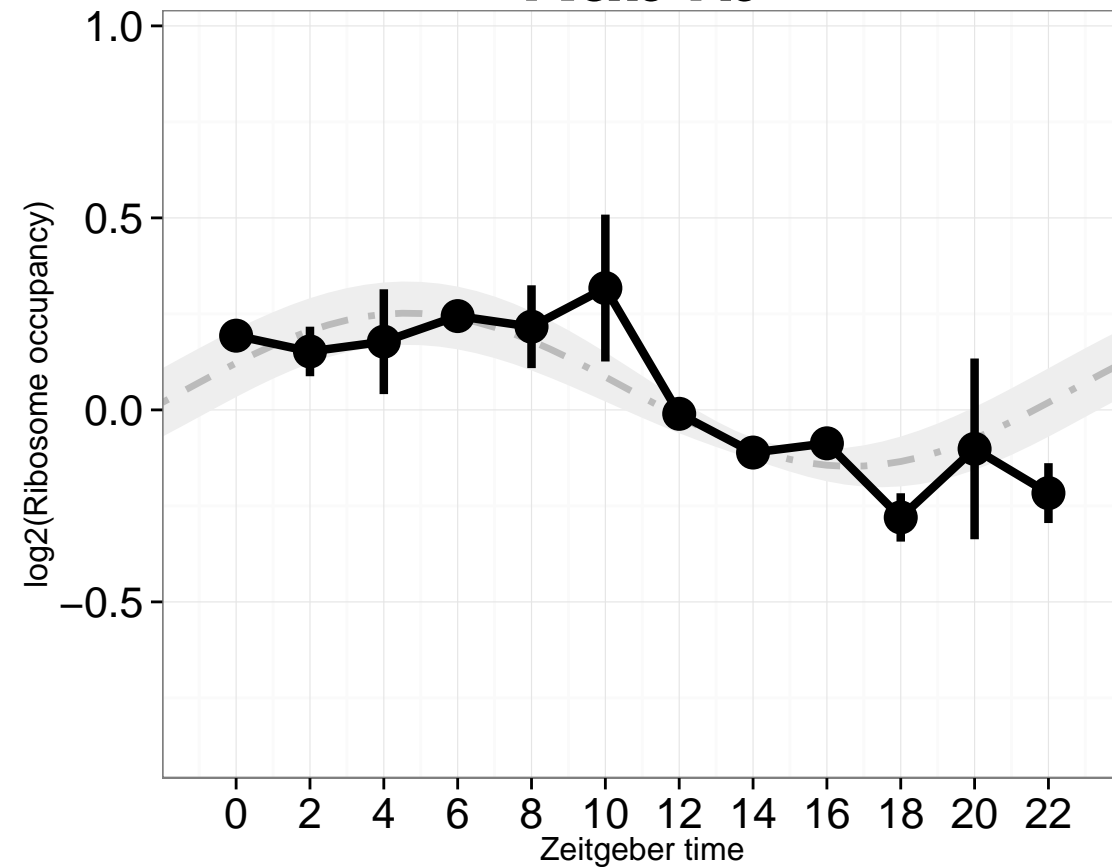

Supplement: SuppDataset_1.zip [file Rab1b_set_A.pdf › Supplemental Dataset 1/A-mRNA_nonrhyth_translation_nonrhyth/Rab1b_set_A.pdf]

## Rab20

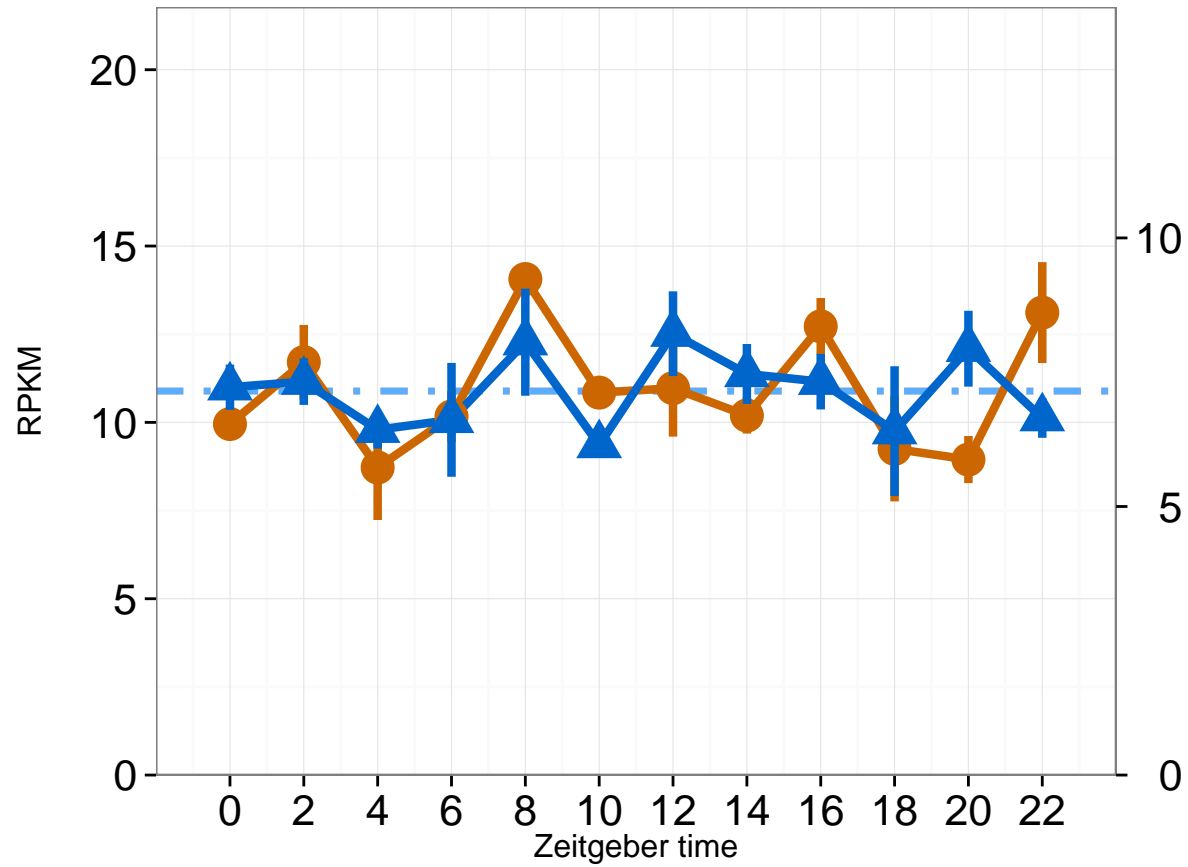

## Rab20

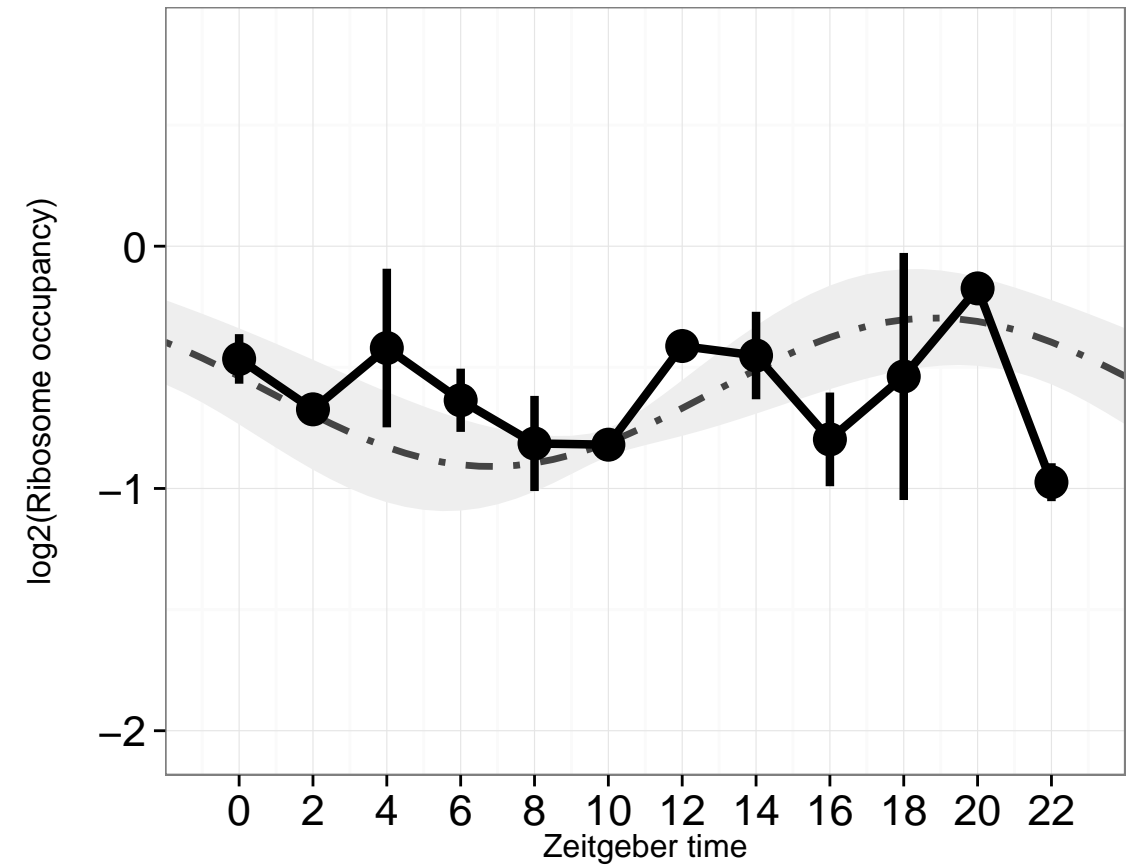

Supplement: SuppDataset_1.zip [file Rab20_set_A.pdf › Supplemental Dataset 1/A-mRNA_nonrhyth_translation_nonrhyth/Rab20_set_A.pdf]

## Rab21

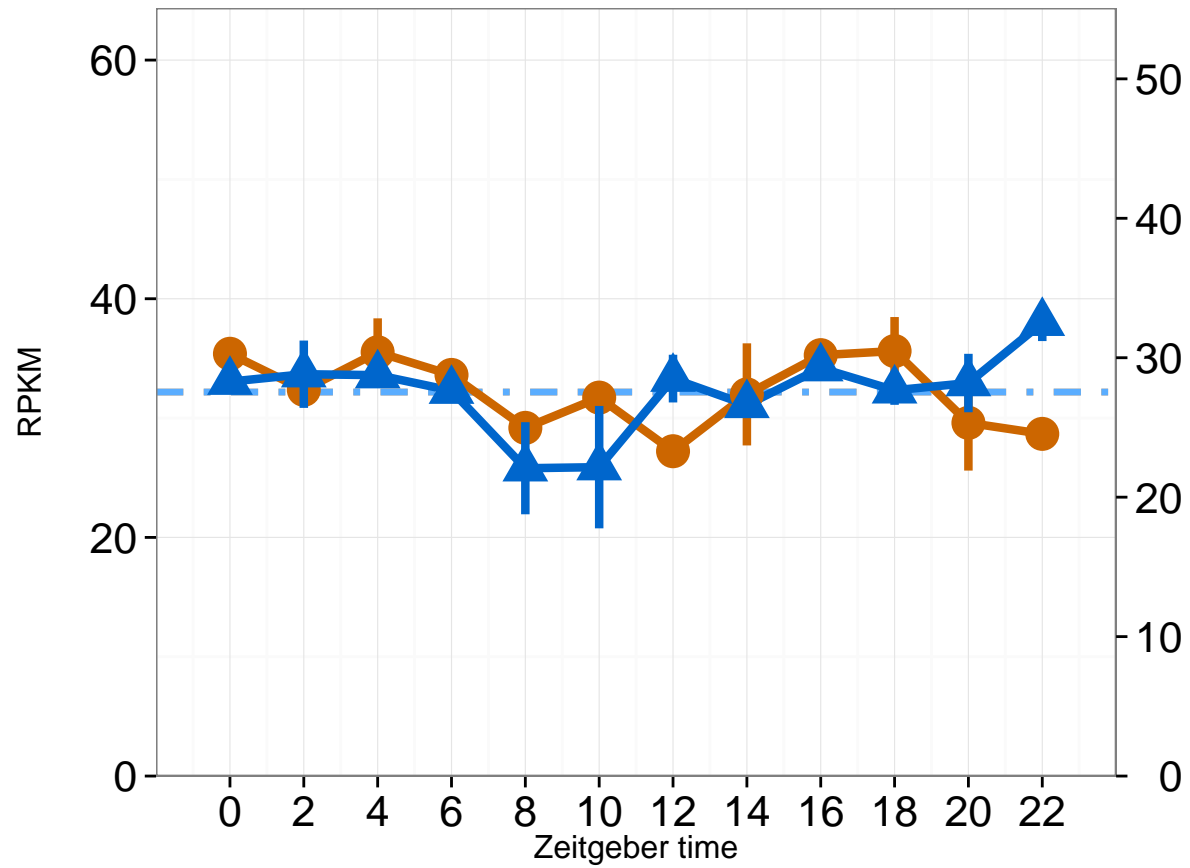

## Rab21

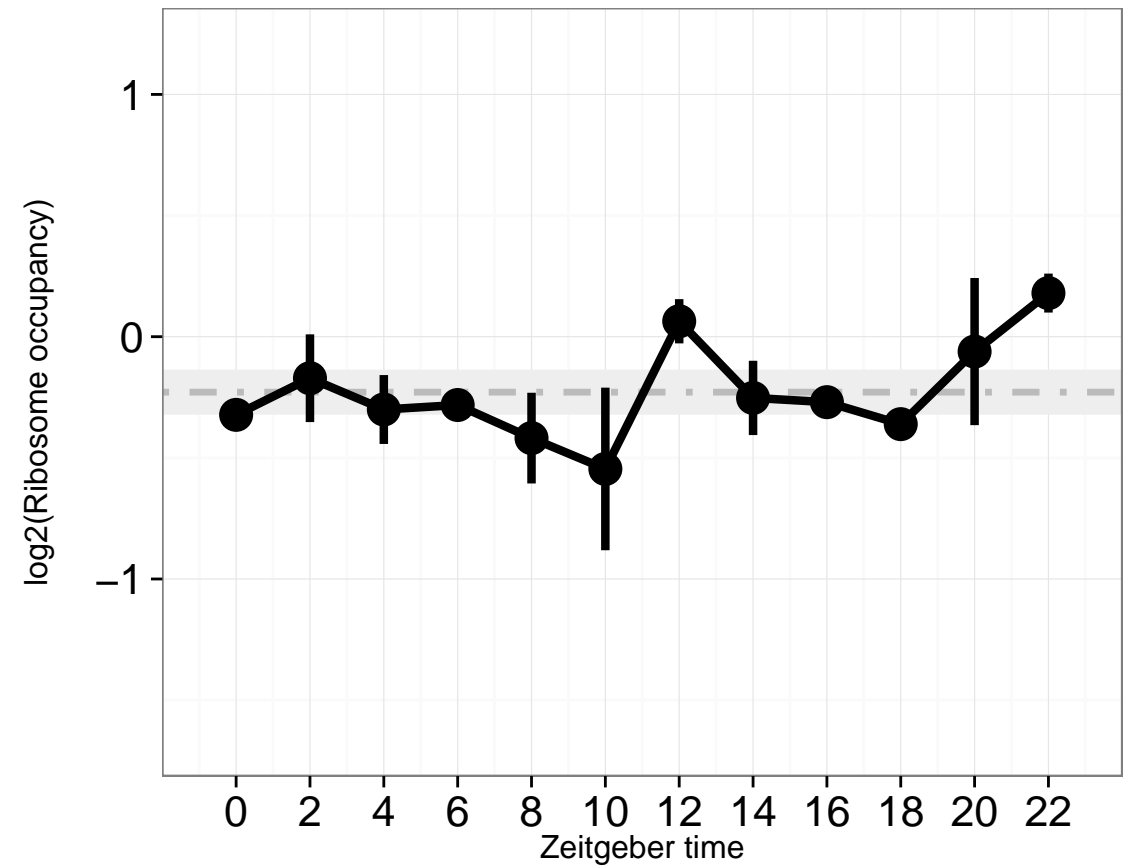

Supplement: SuppDataset_1.zip [file Rab21_set_A.pdf › Supplemental Dataset 1/A-mRNA_nonrhyth_translation_nonrhyth/Rab21_set_A.pdf]

# Rab22a

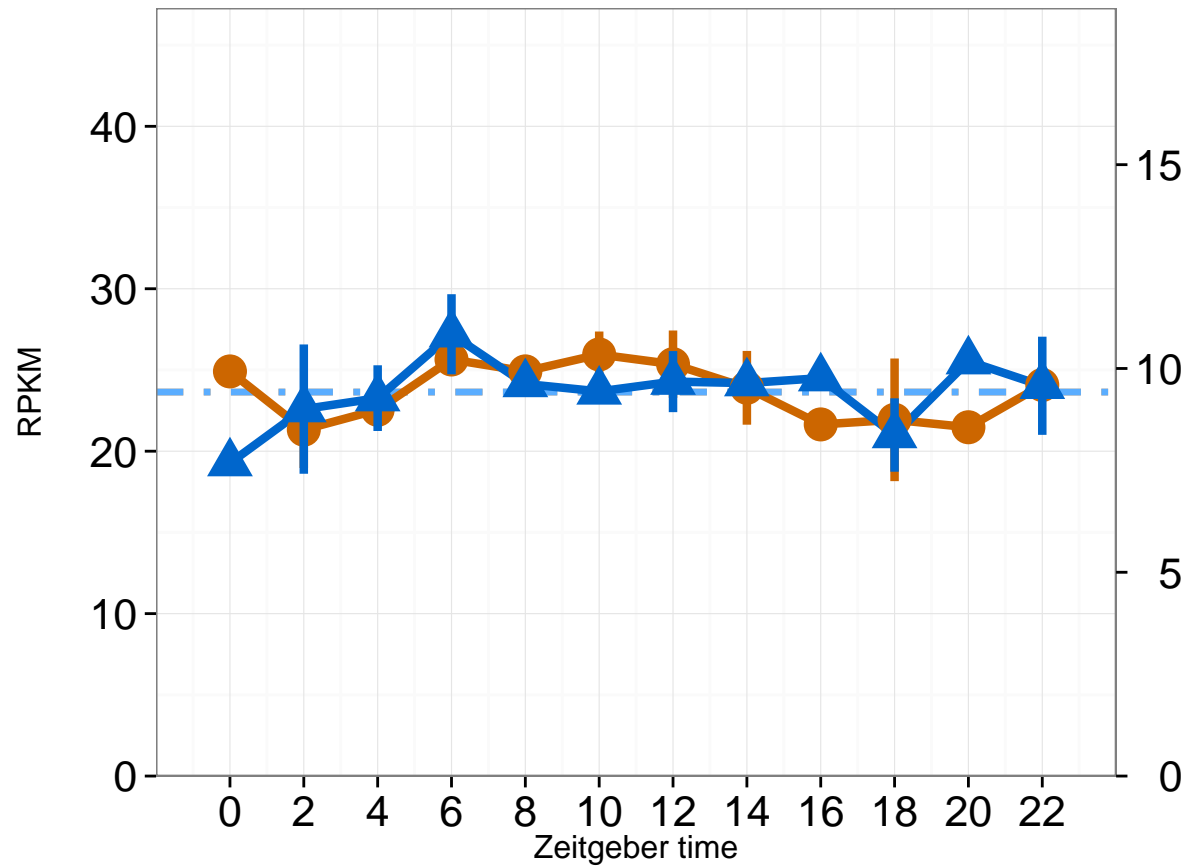

# Rab22a

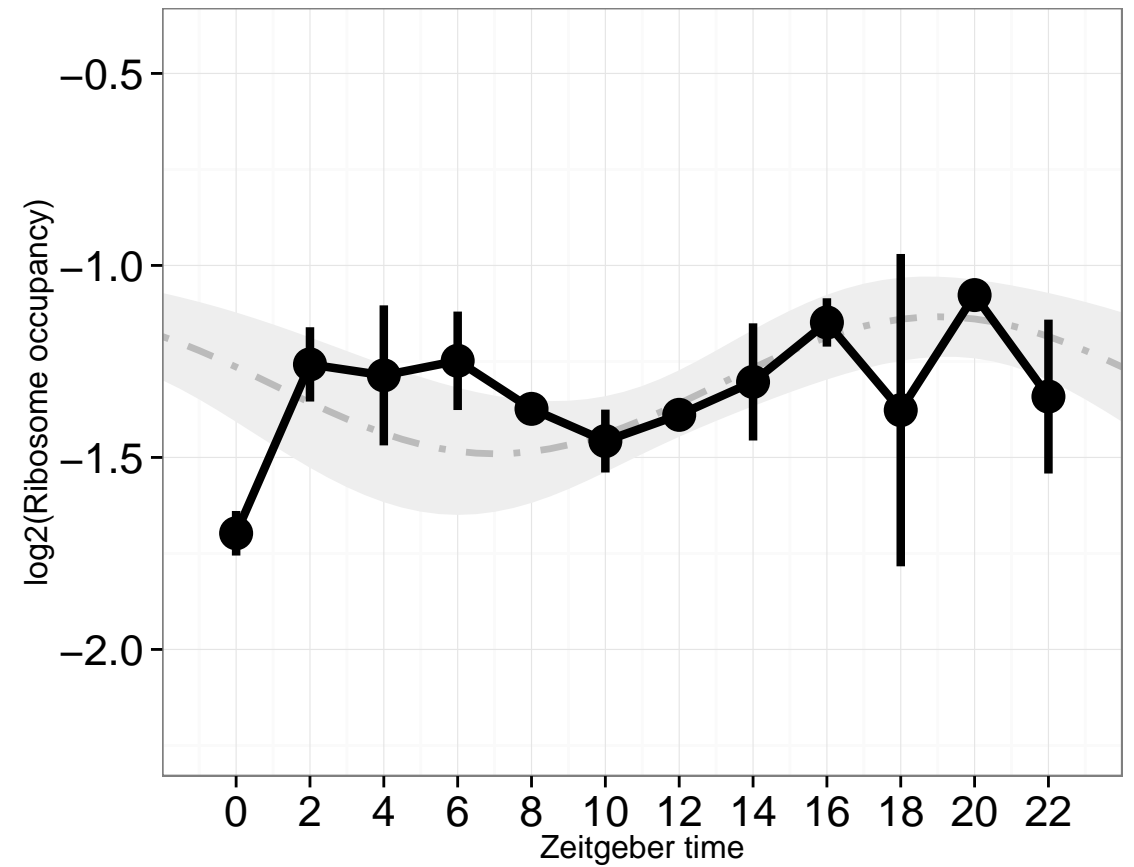

Supplement: SuppDataset_1.zip [file Rab22a_set_A.pdf › Supplemental Dataset 1/A-mRNA_nonrhyth_translation_nonrhyth/Rab22a_set_A.pdf]

## Rab23

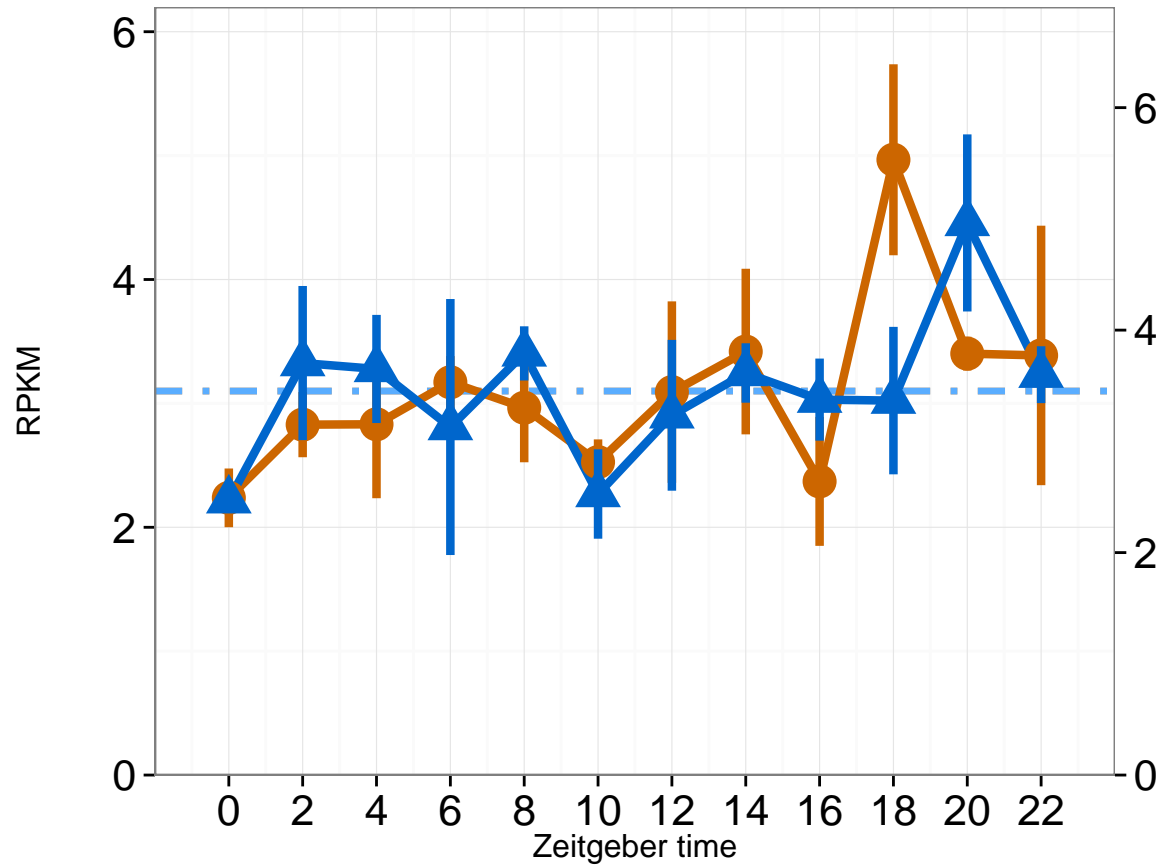

## Rab23

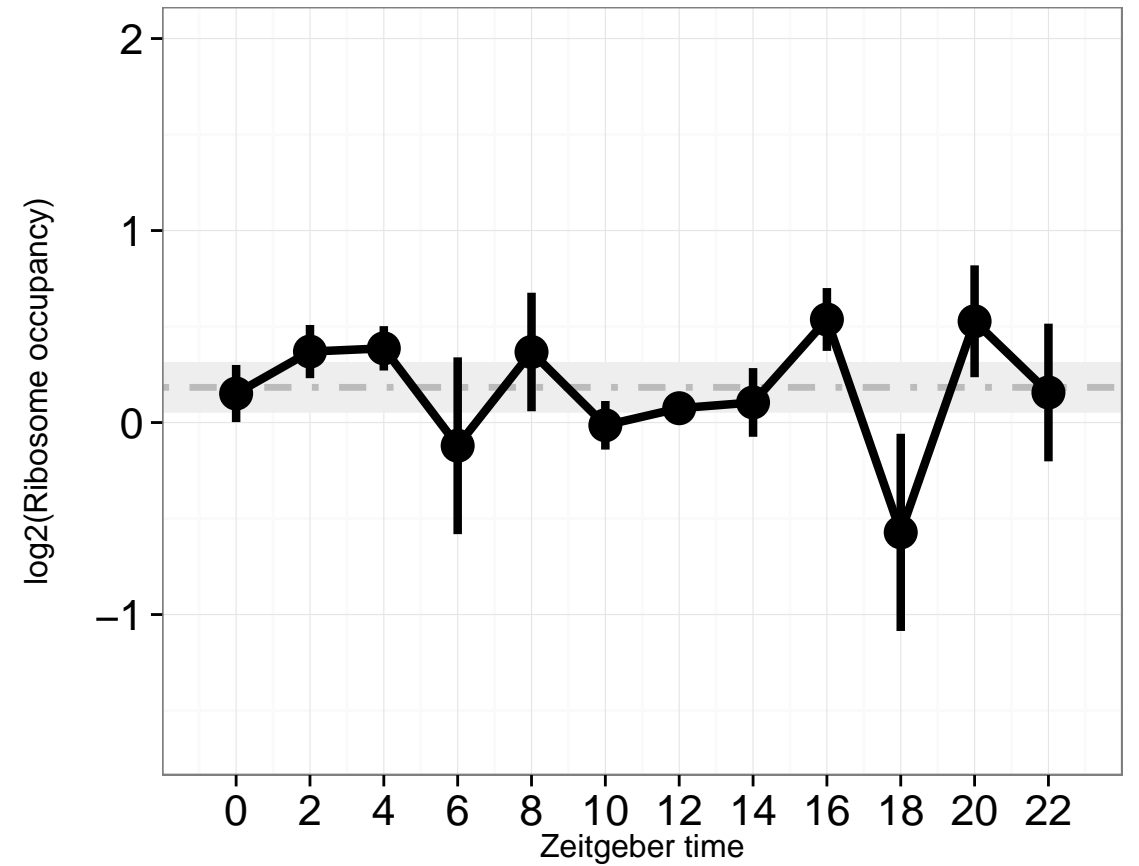

Supplement: SuppDataset_1.zip [file Rab23_set_A.pdf › Supplemental Dataset 1/A-mRNA_nonrhyth_translation_nonrhyth/Rab23_set_A.pdf]

## Rab24

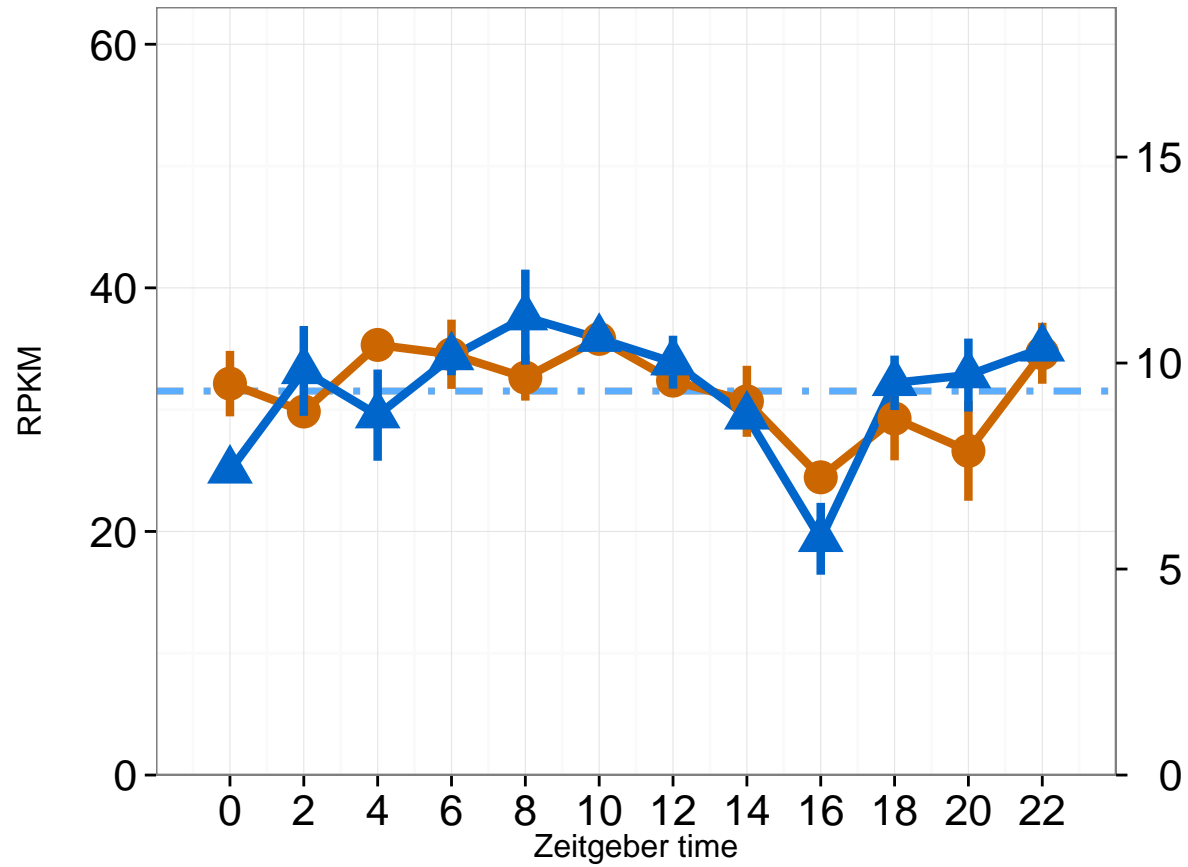

## Rab24

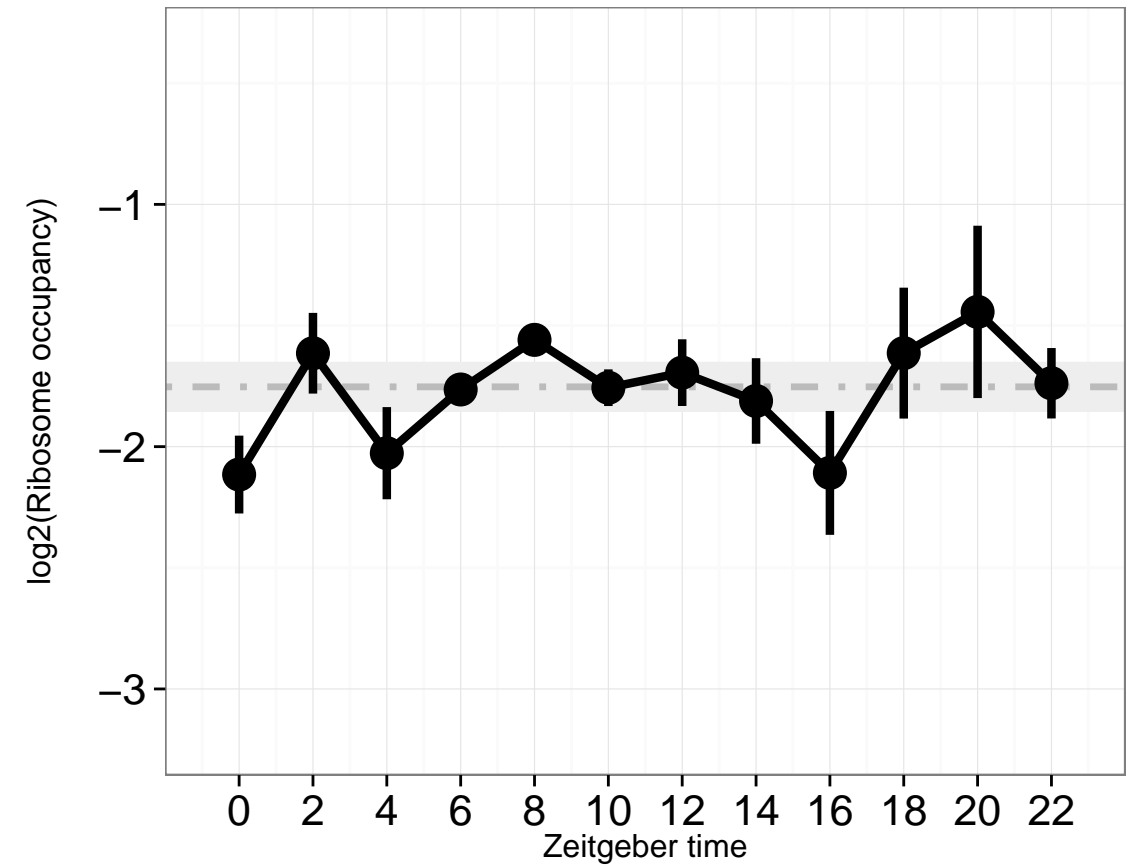

Supplement: SuppDataset_1.zip [file Rab24_set_A.pdf › Supplemental Dataset 1/A-mRNA_nonrhyth_translation_nonrhyth/Rab24_set_A.pdf]

# Rab27a

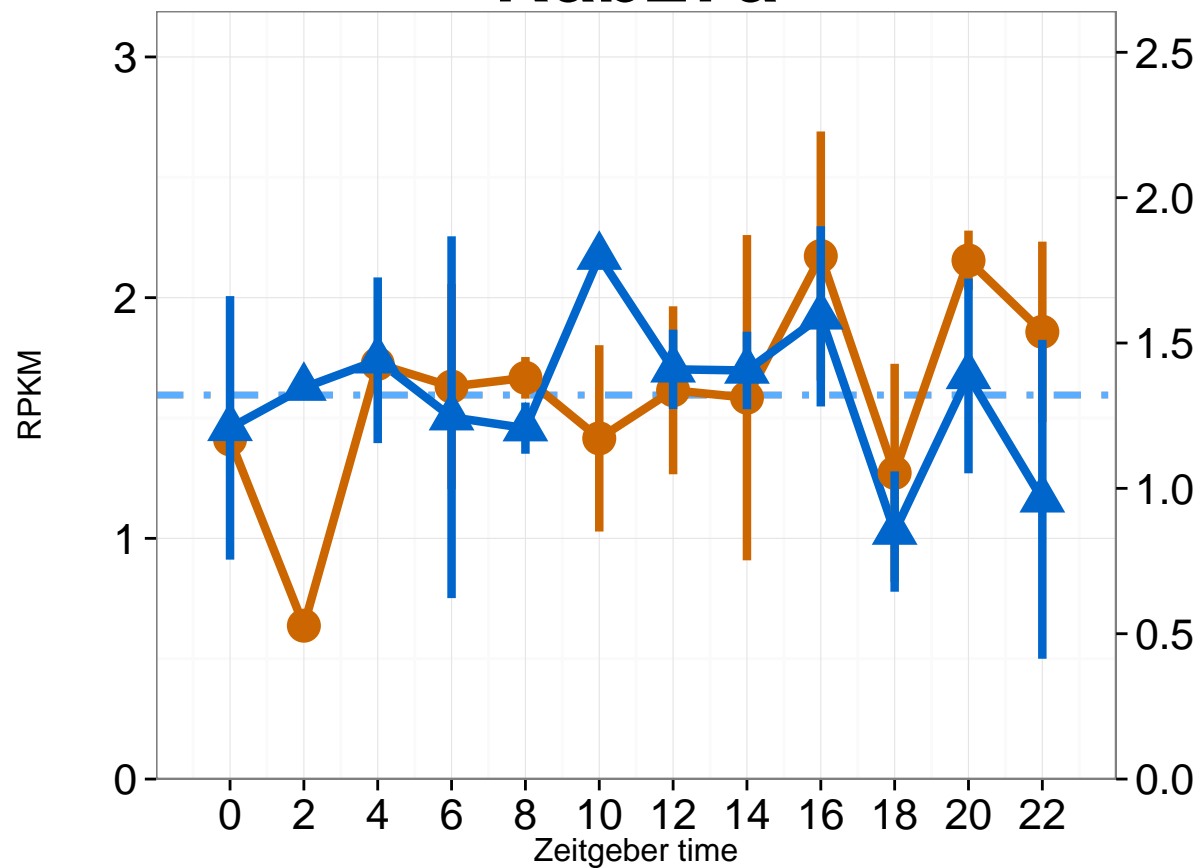

# Rab27a

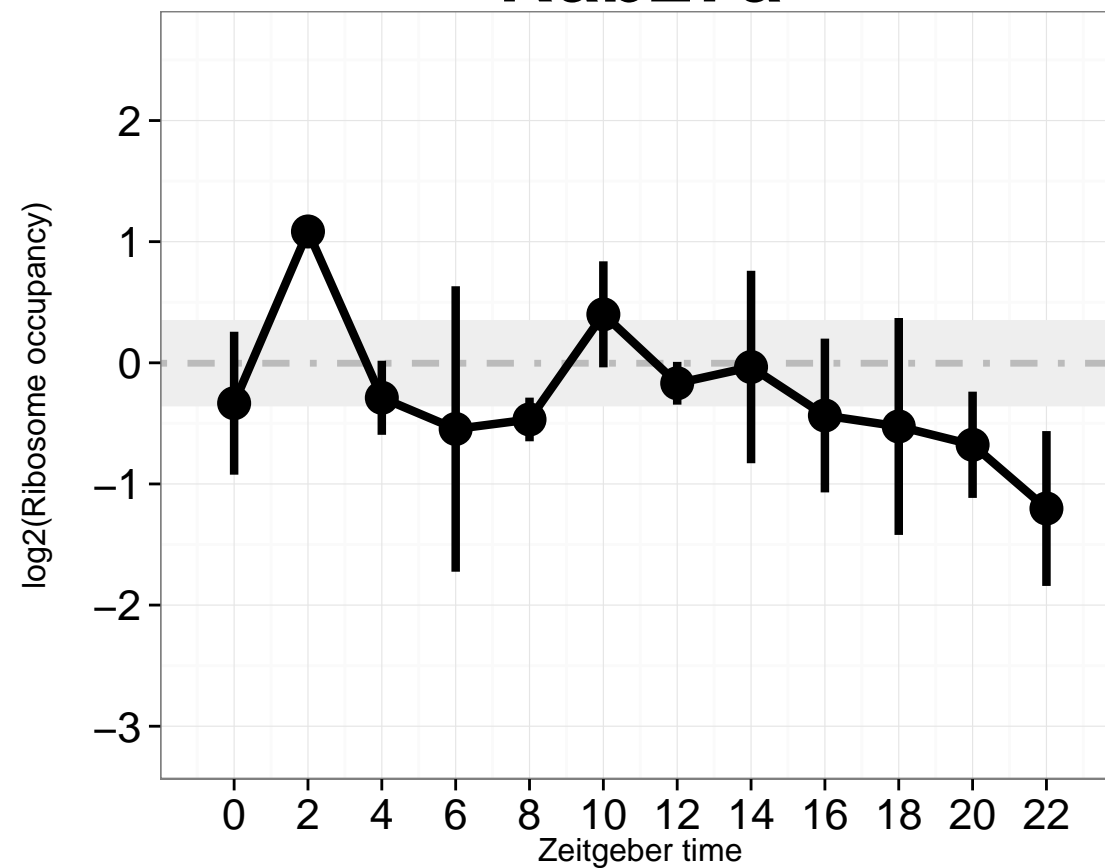

Supplement: SuppDataset_1.zip [file Rab27a_set_A.pdf › Supplemental Dataset 1/A-mRNA_nonrhyth_translation_nonrhyth/Rab27a_set_A.pdf]

# Rab28

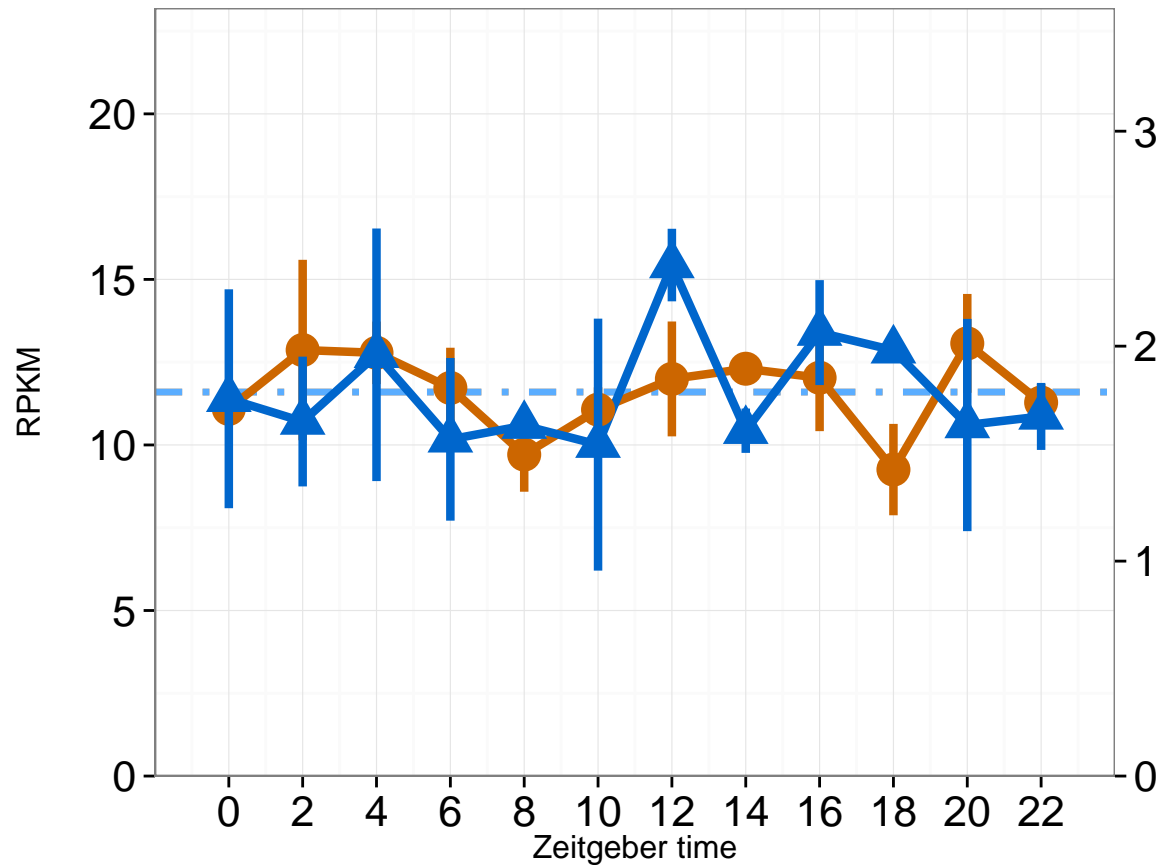

# Rab28

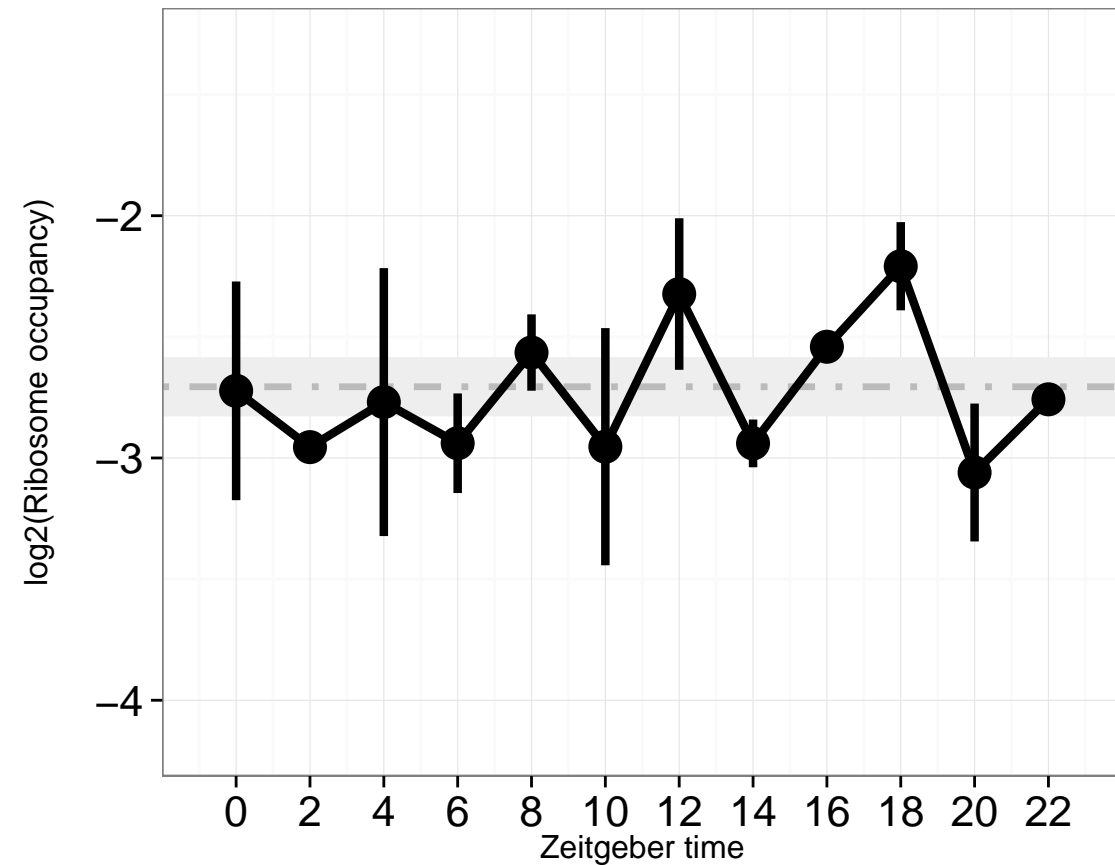

Supplement: SuppDataset_1.zip [file Rab28_set_A.pdf › Supplemental Dataset 1/A-mRNA_nonrhyth_translation_nonrhyth/Rab28_set_A.pdf]

# Rab2a

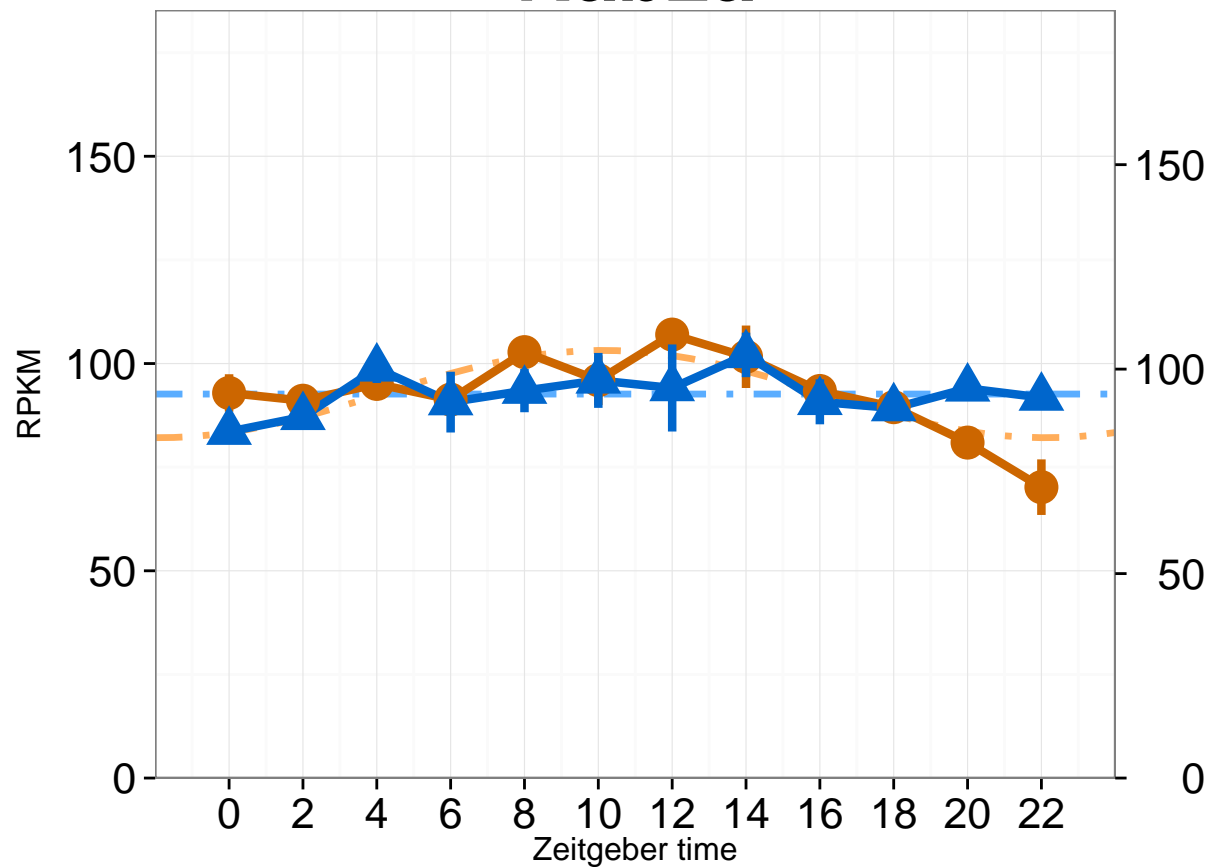

# Rab2a

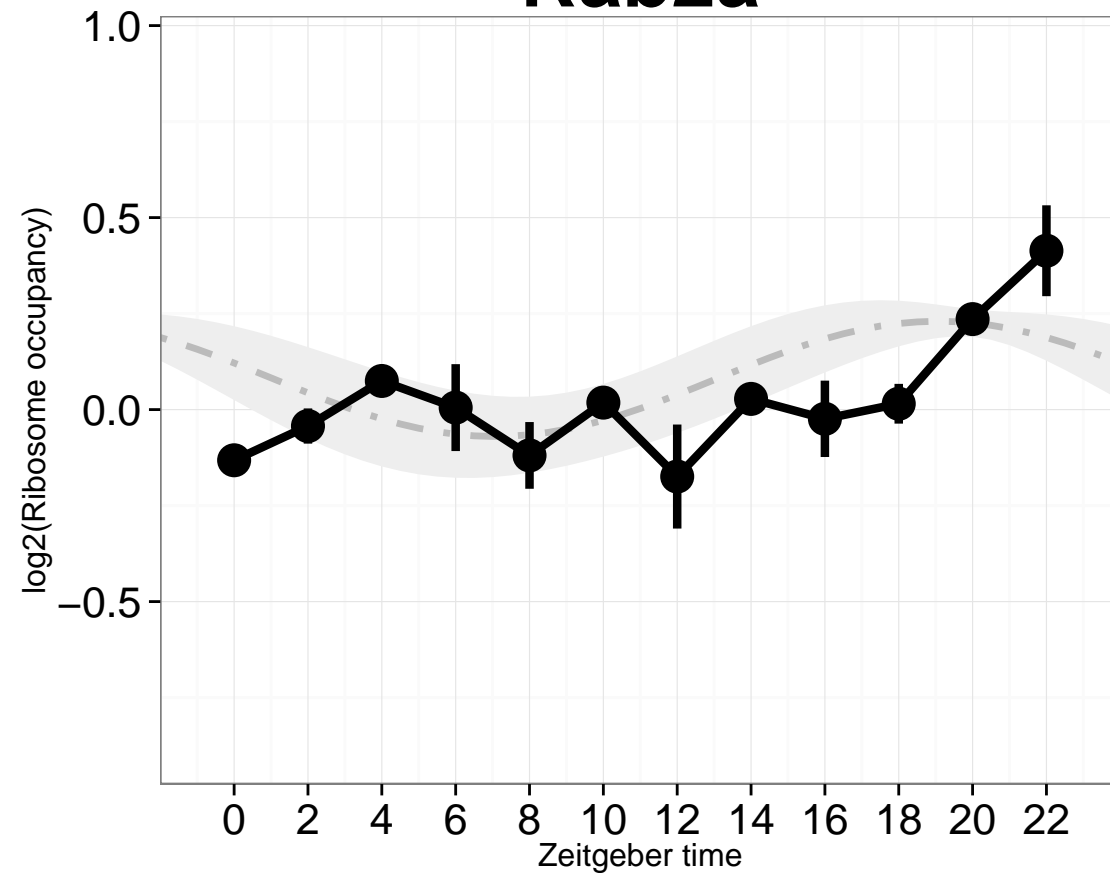

Supplement: SuppDataset_1.zip [file Rab2a_set_A.pdf › Supplemental Dataset 1/A-mRNA_nonrhyth_translation_nonrhyth/Rab2a_set_A.pdf]

## Rab30

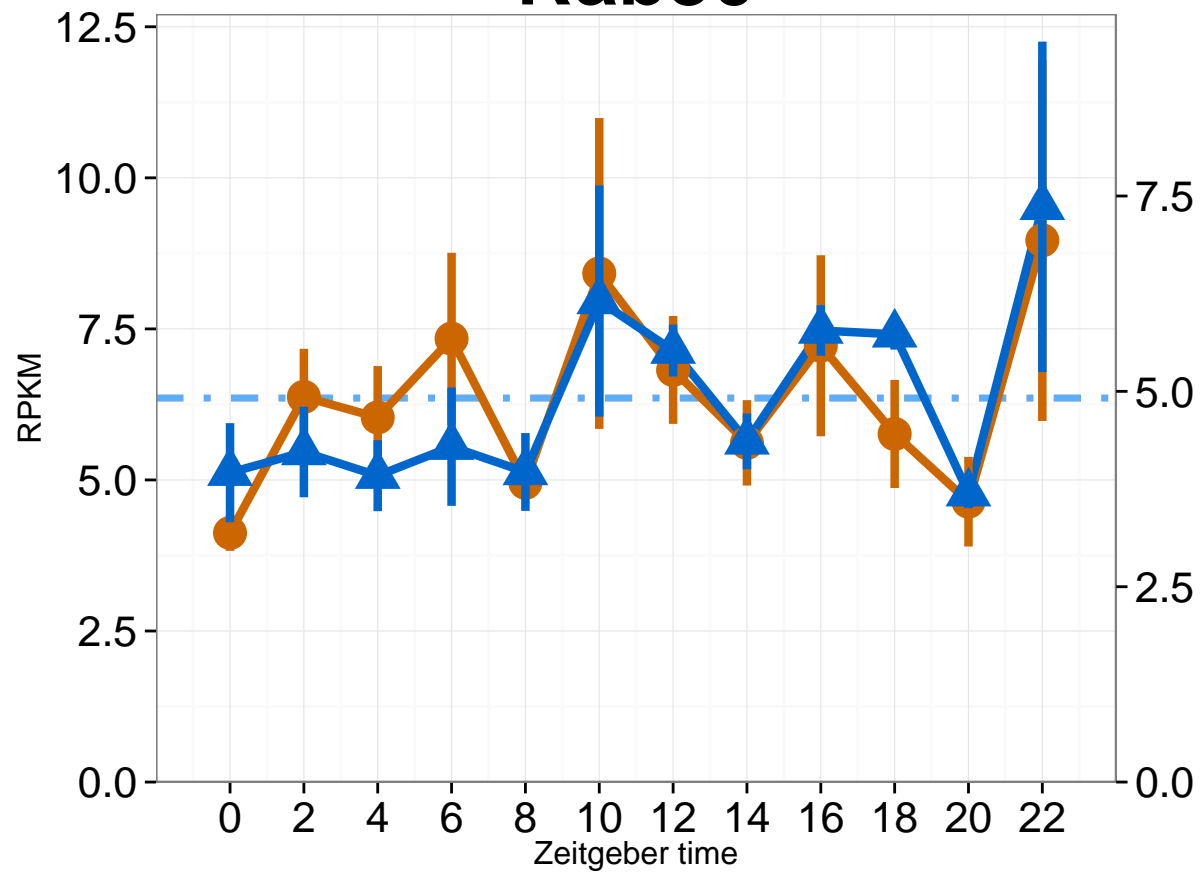

## Rab30

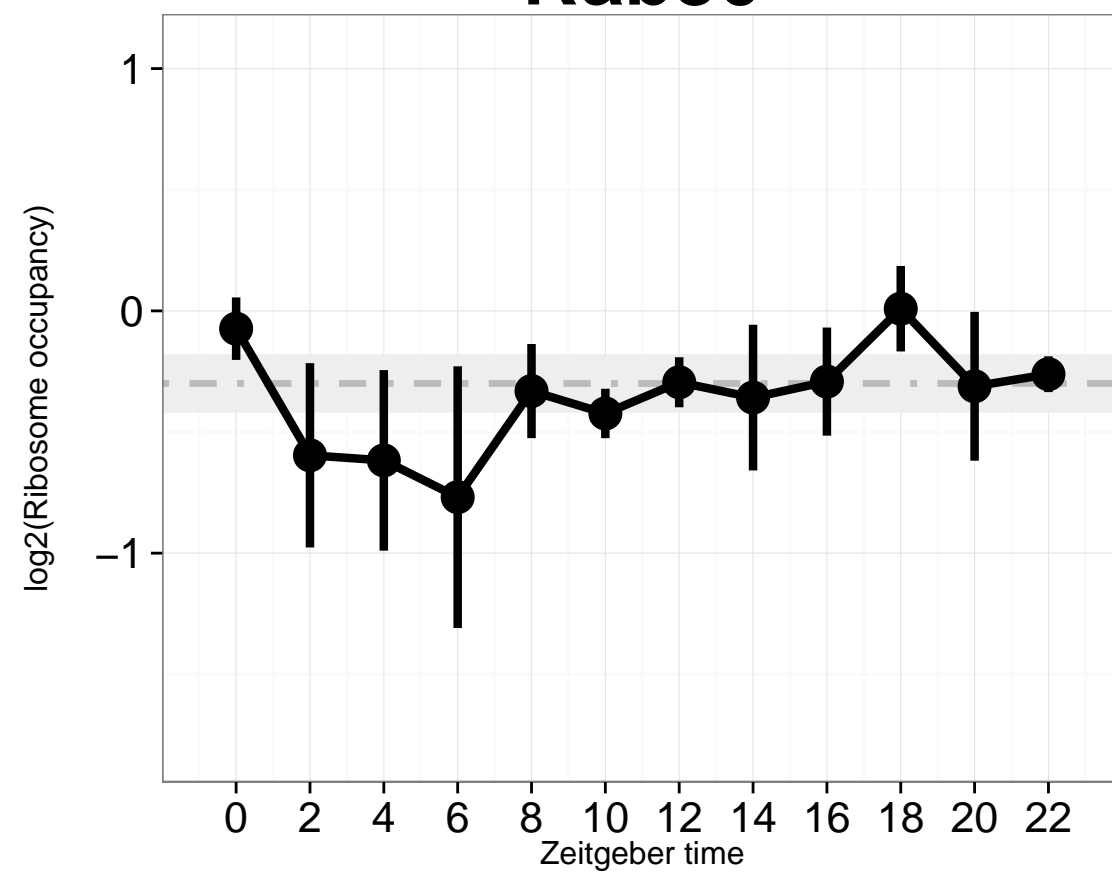

Supplement: SuppDataset_1.zip [file Rab30_set_A.pdf › Supplemental Dataset 1/A-mRNA_nonrhyth_translation_nonrhyth/Rab30_set_A.pdf]

# Rab31

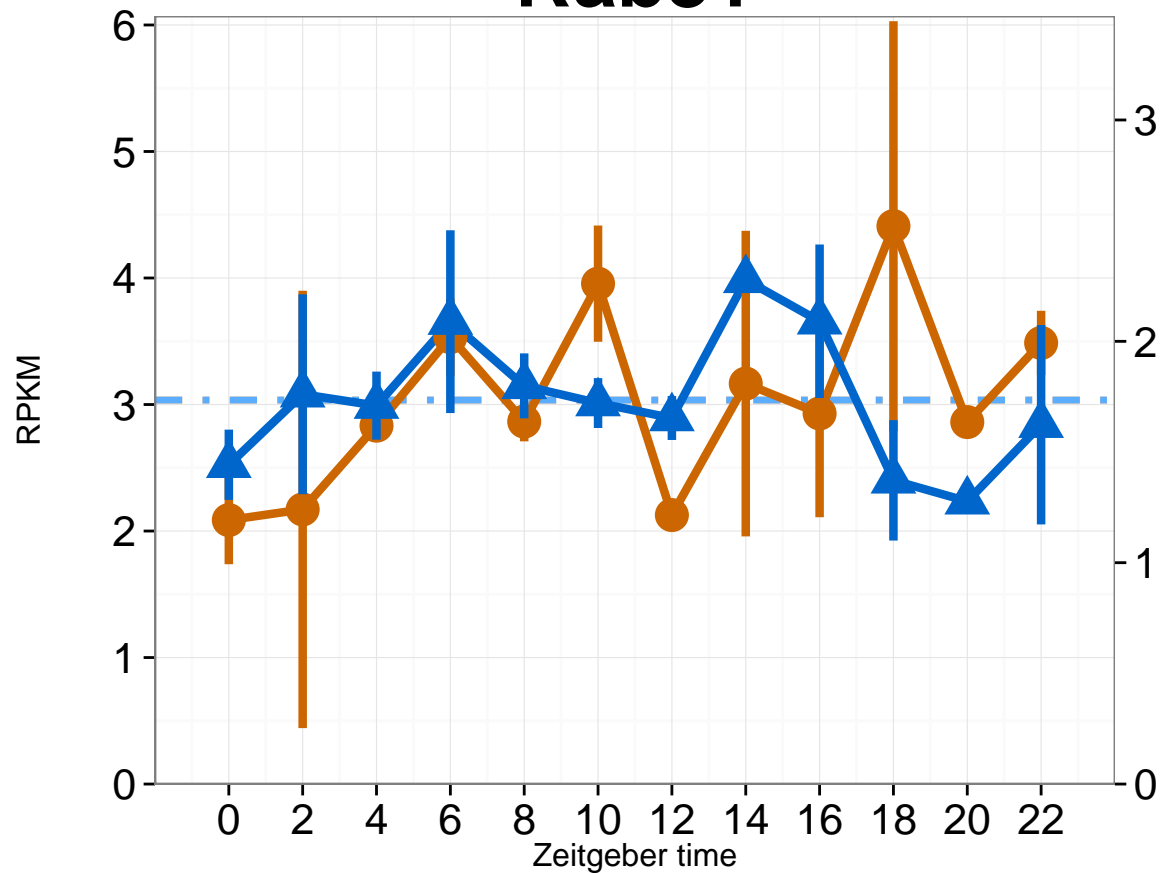

# Rab31

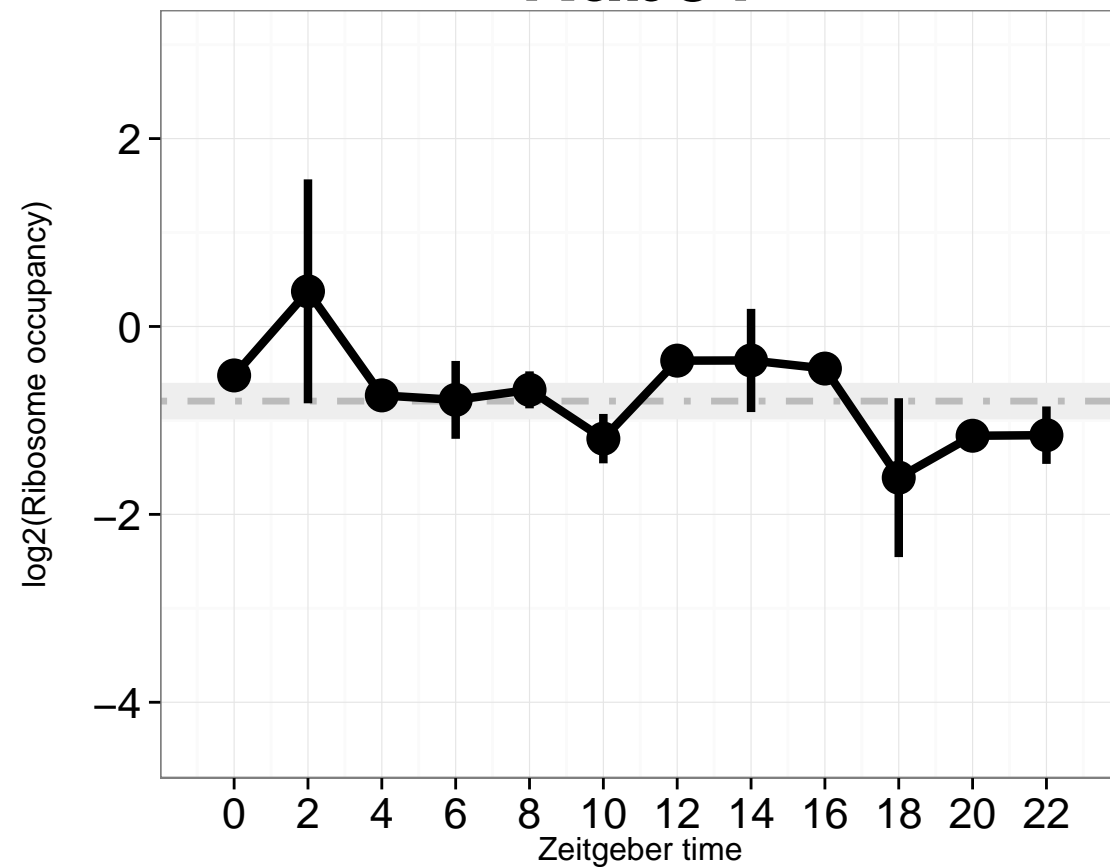

Supplement: SuppDataset_1.zip [file Rab31_set_A.pdf › Supplemental Dataset 1/A-mRNA_nonrhyth_translation_nonrhyth/Rab31_set_A.pdf]

## Rab33b

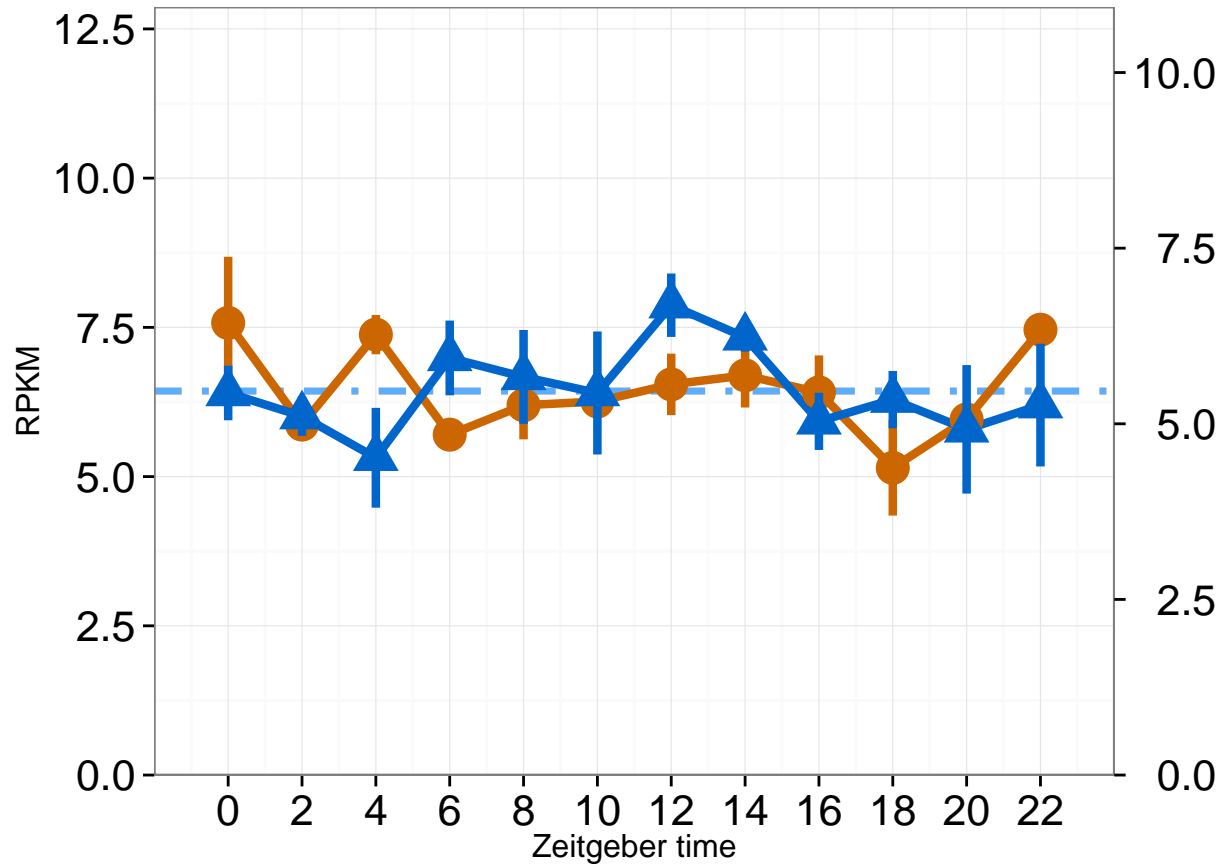

## Rab33b

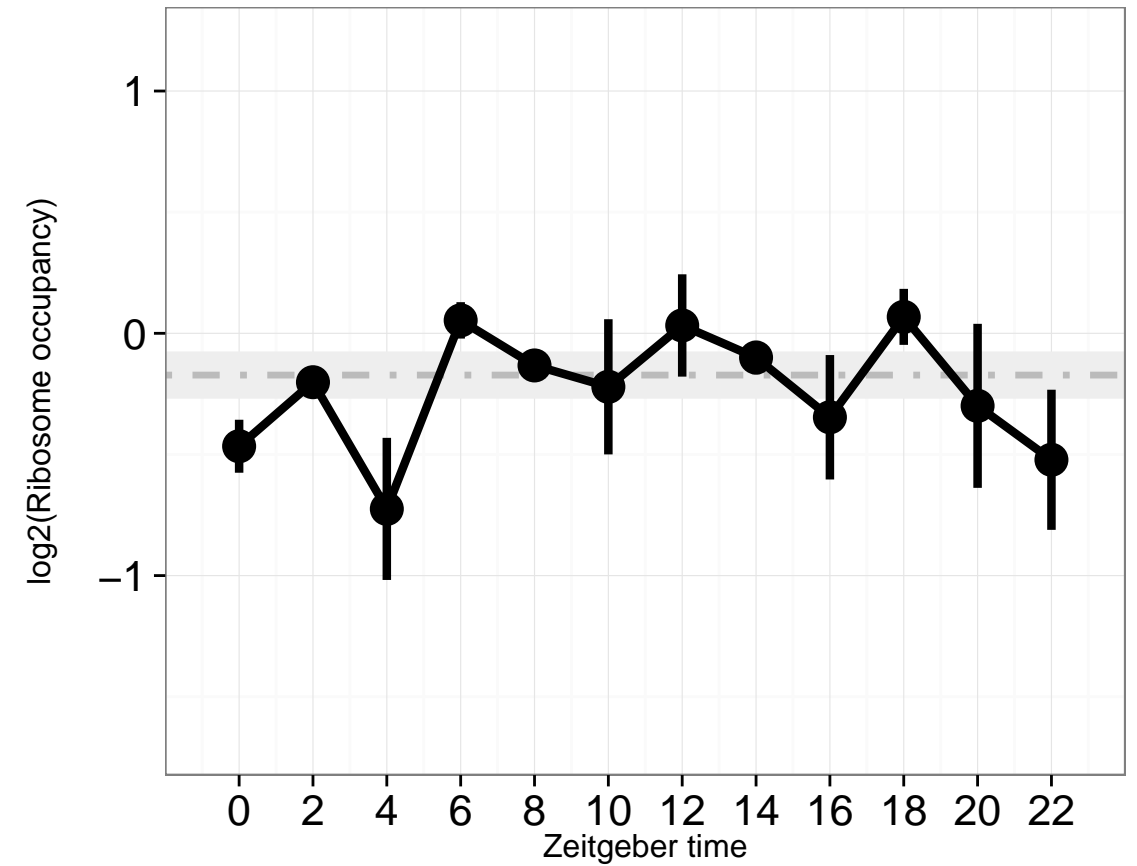

Supplement: SuppDataset_1.zip [file Rab33b_set_A.pdf › Supplemental Dataset 1/A-mRNA_nonrhyth_translation_nonrhyth/Rab33b_set_A.pdf]

# Rab34

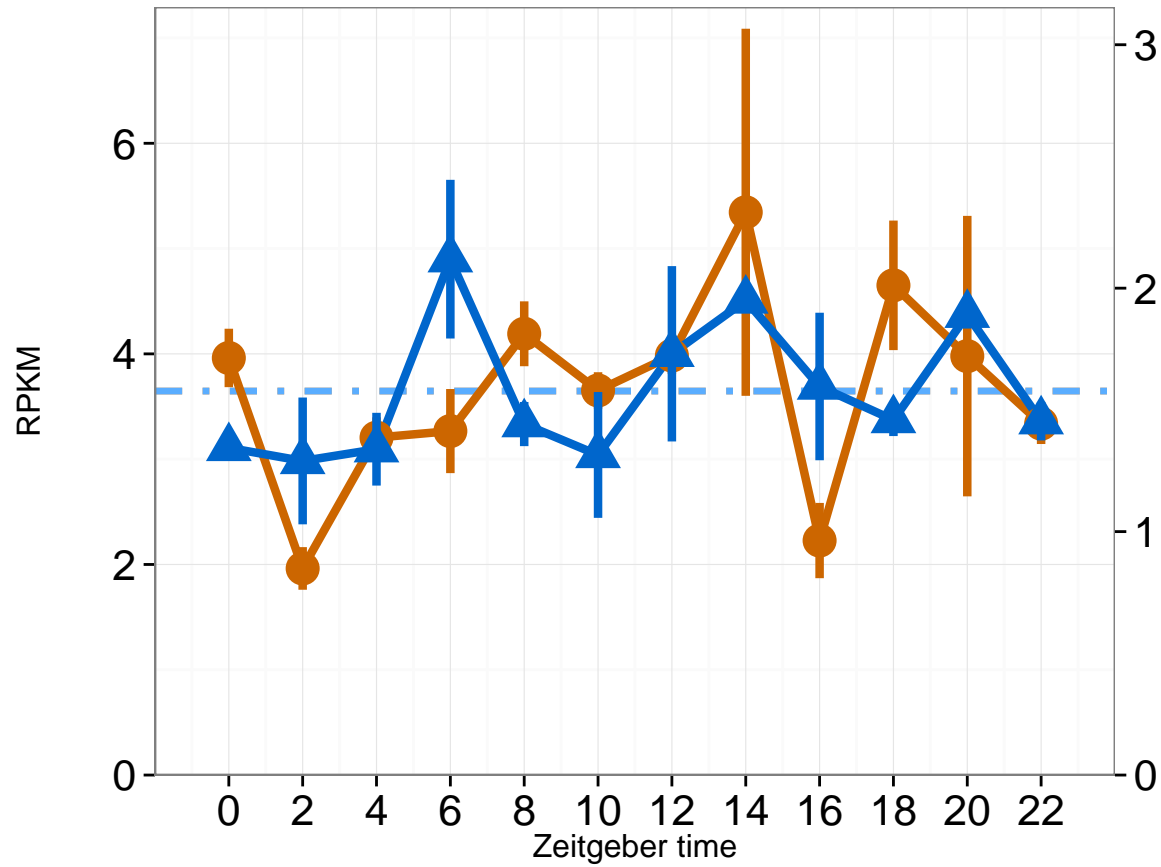

# Rab34

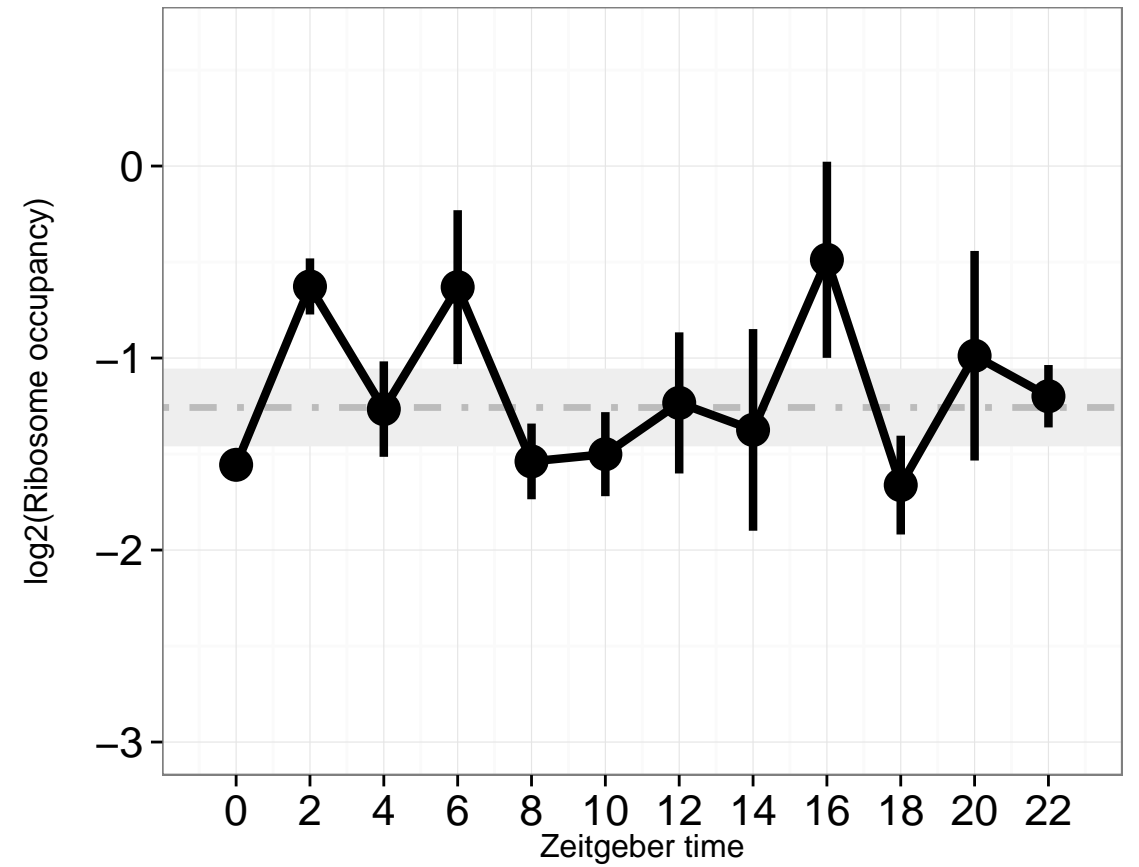

Supplement: SuppDataset_1.zip [file Rab34_set_A.pdf › Supplemental Dataset 1/A-mRNA_nonrhyth_translation_nonrhyth/Rab34_set_A.pdf]

## Rab35

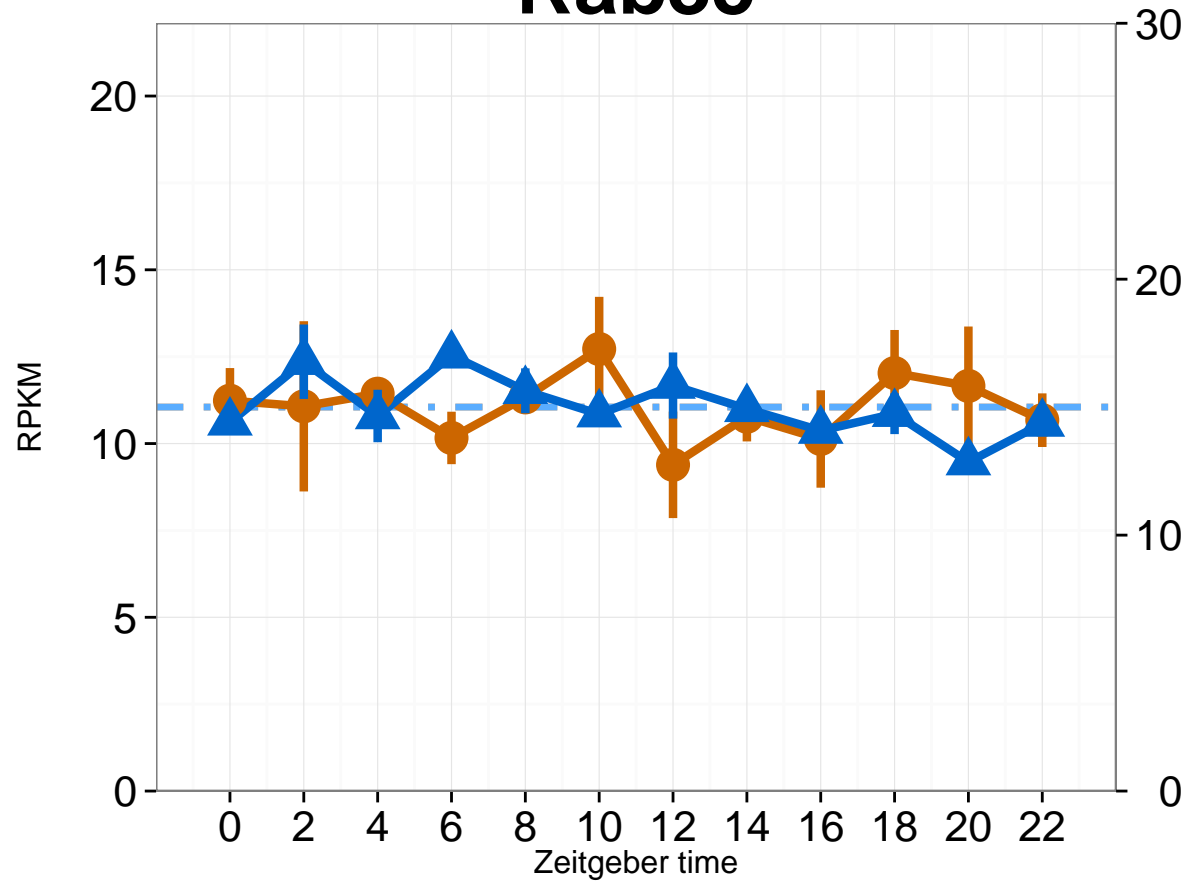

## Rab35

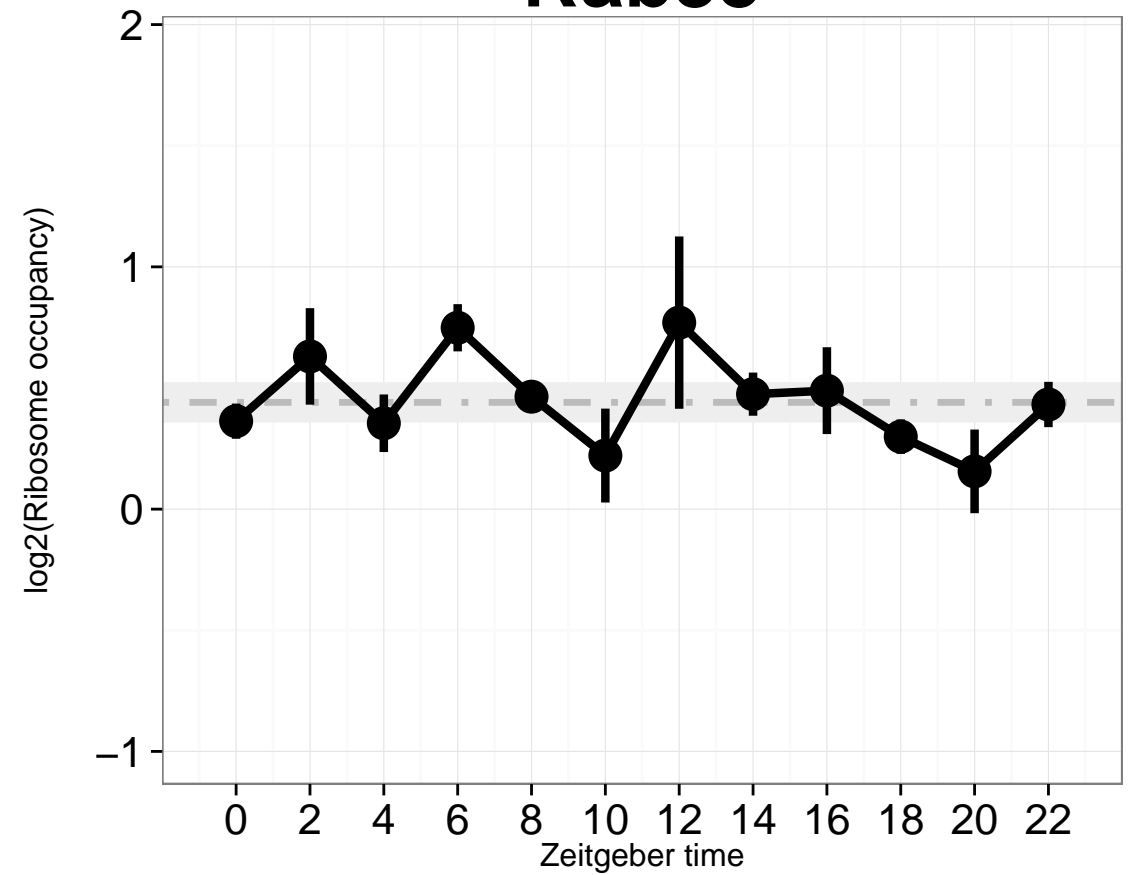

Supplement: SuppDataset_1.zip [file Rab35_set_A.pdf › Supplemental Dataset 1/A-mRNA_nonrhyth_translation_nonrhyth/Rab35_set_A.pdf]

**Rab38 TR**

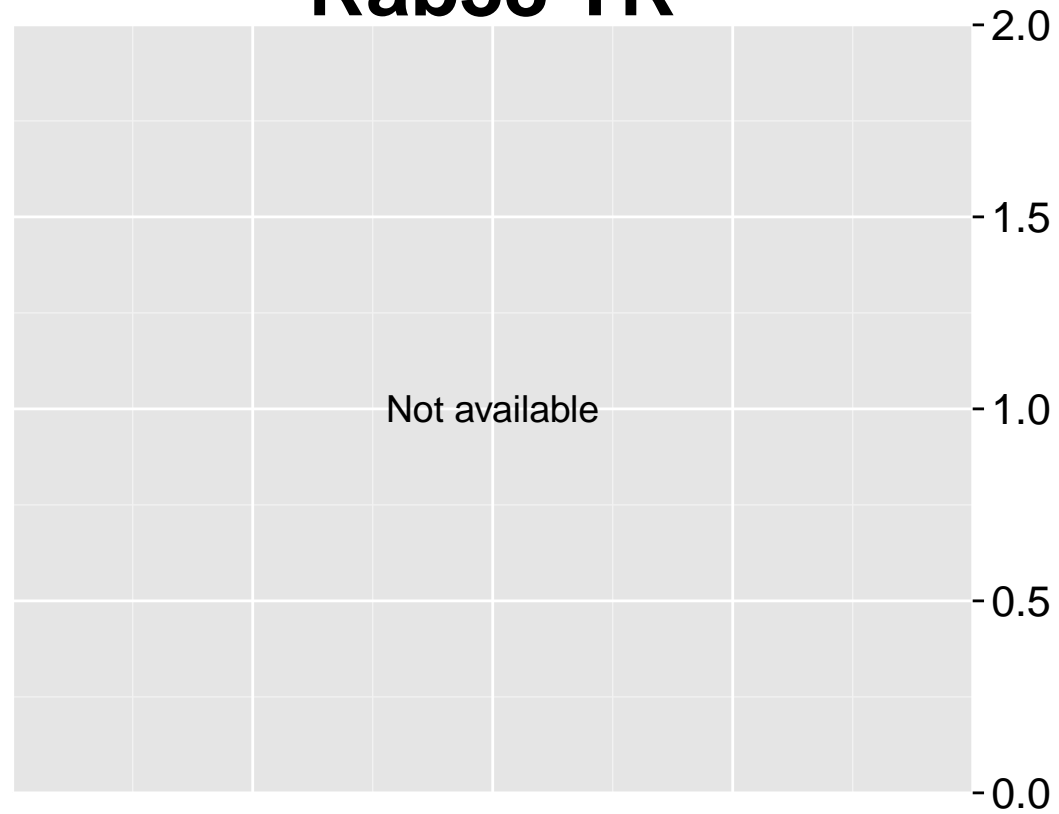

**Rab38 log2(Ribosome occupancy**

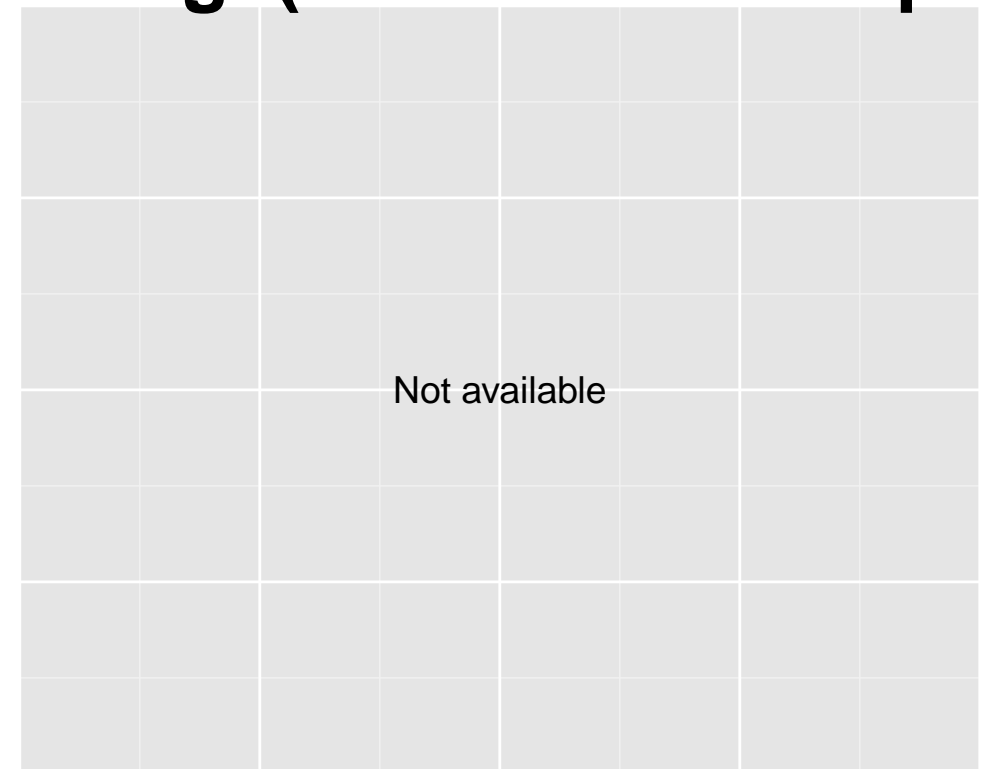

Supplement: SuppDataset_1.zip [file Rab38_set_A.pdf › Supplemental Dataset 1/A-mRNA_nonrhyth_translation_nonrhyth/Rab38_set_A.pdf]

# Rab3a

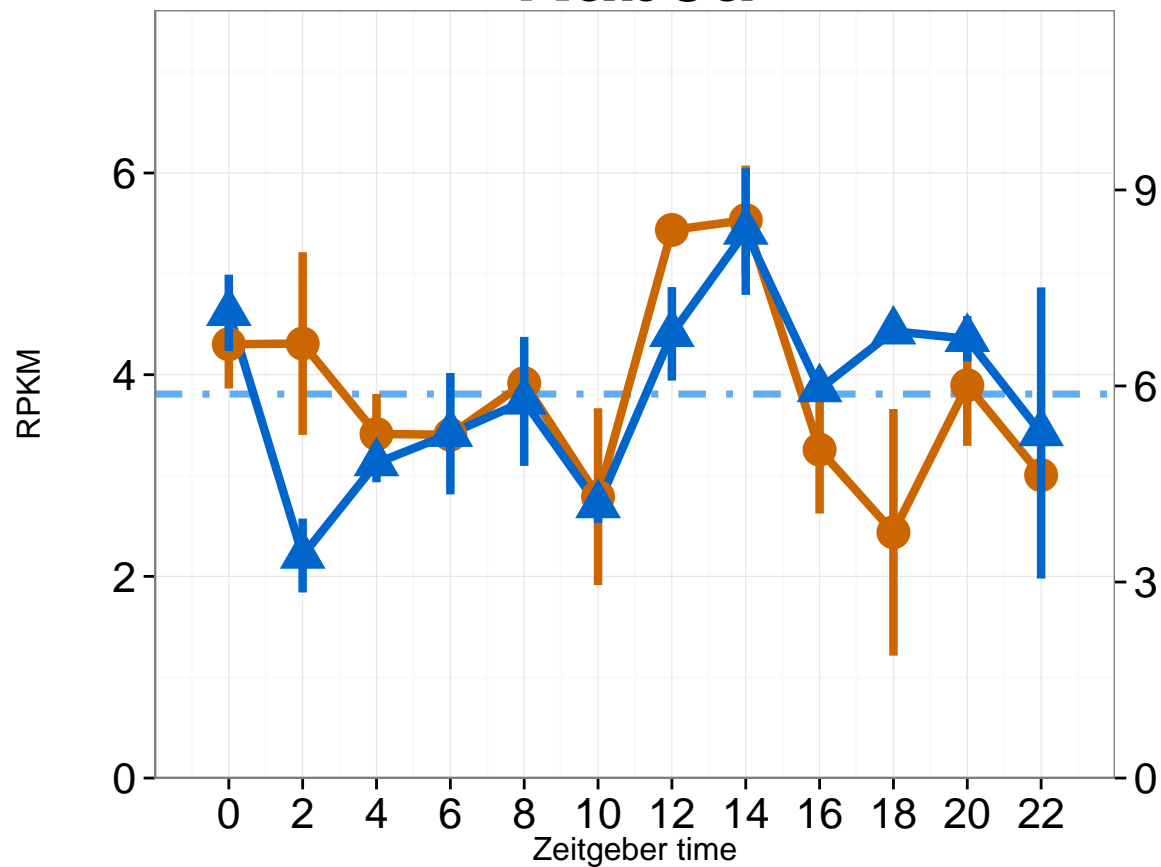

# Rab3a

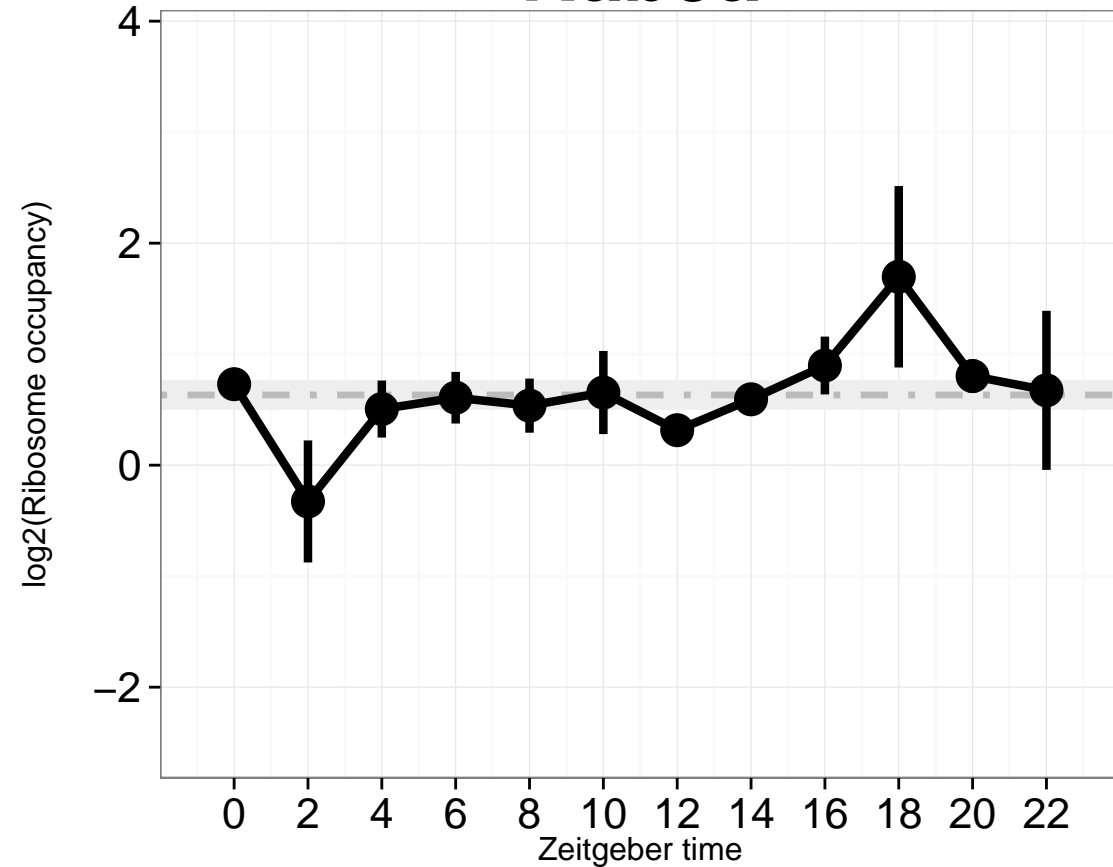

Supplement: SuppDataset_1.zip [file Rab3a_set_A.pdf › Supplemental Dataset 1/A-mRNA_nonrhyth_translation_nonrhyth/Rab3a_set_A.pdf]

## Rab3d

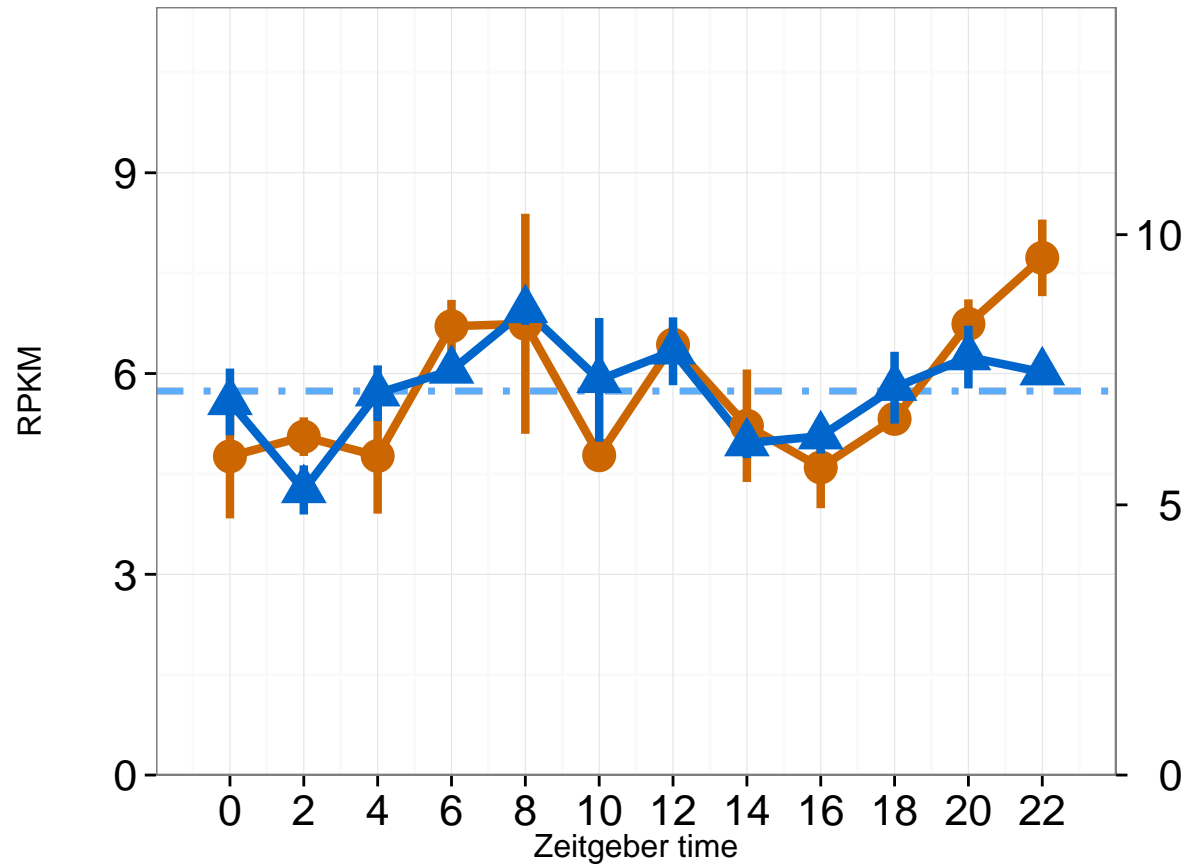

## Rab3d

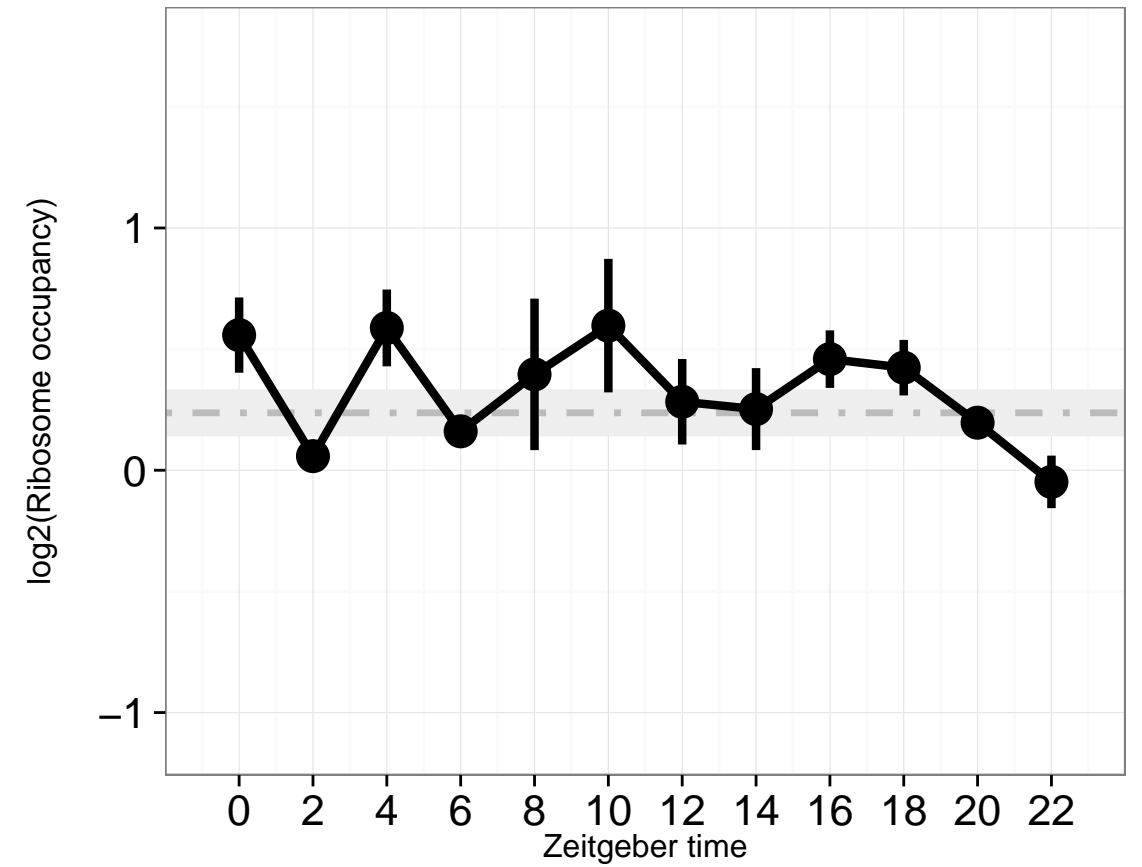

Supplement: SuppDataset_1.zip [file Rab3d_set_A.pdf › Supplemental Dataset 1/A-mRNA_nonrhyth_translation_nonrhyth/Rab3d_set_A.pdf]

# Rab3gap1

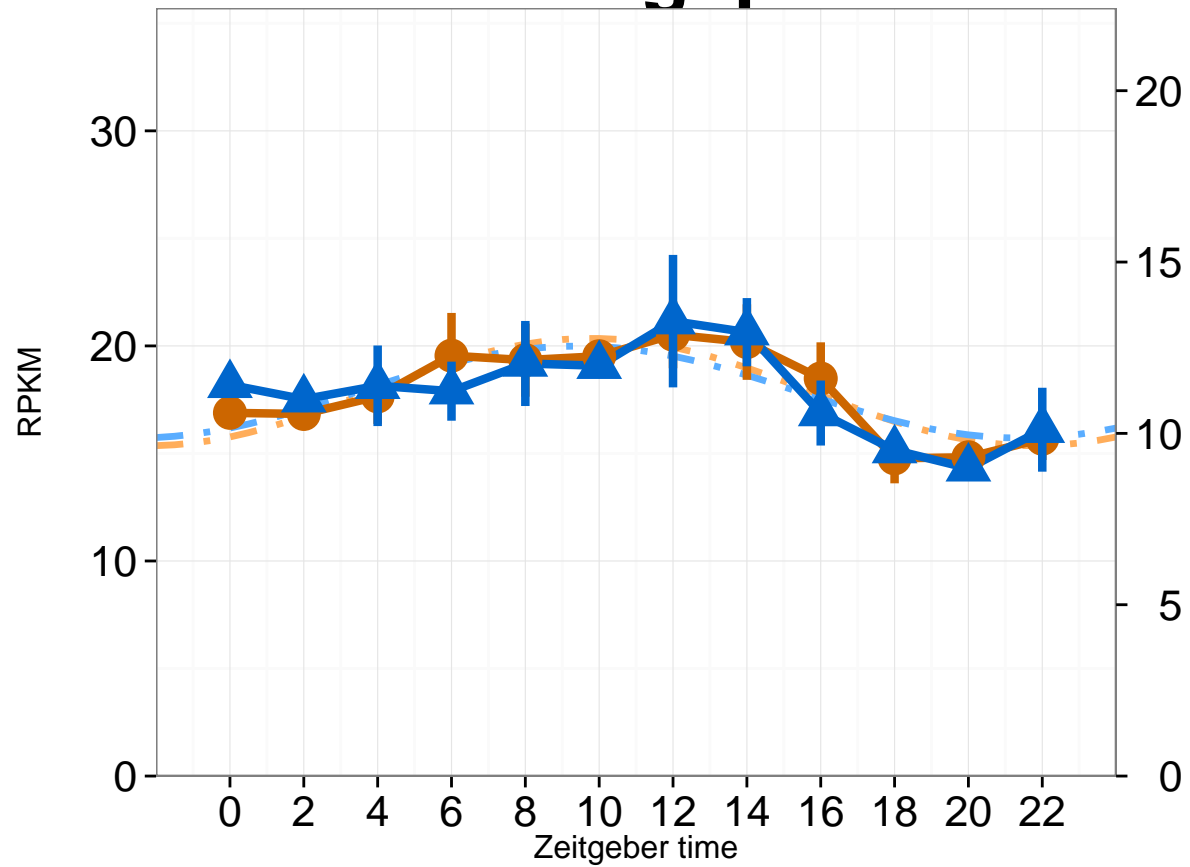

# Rab3gap1

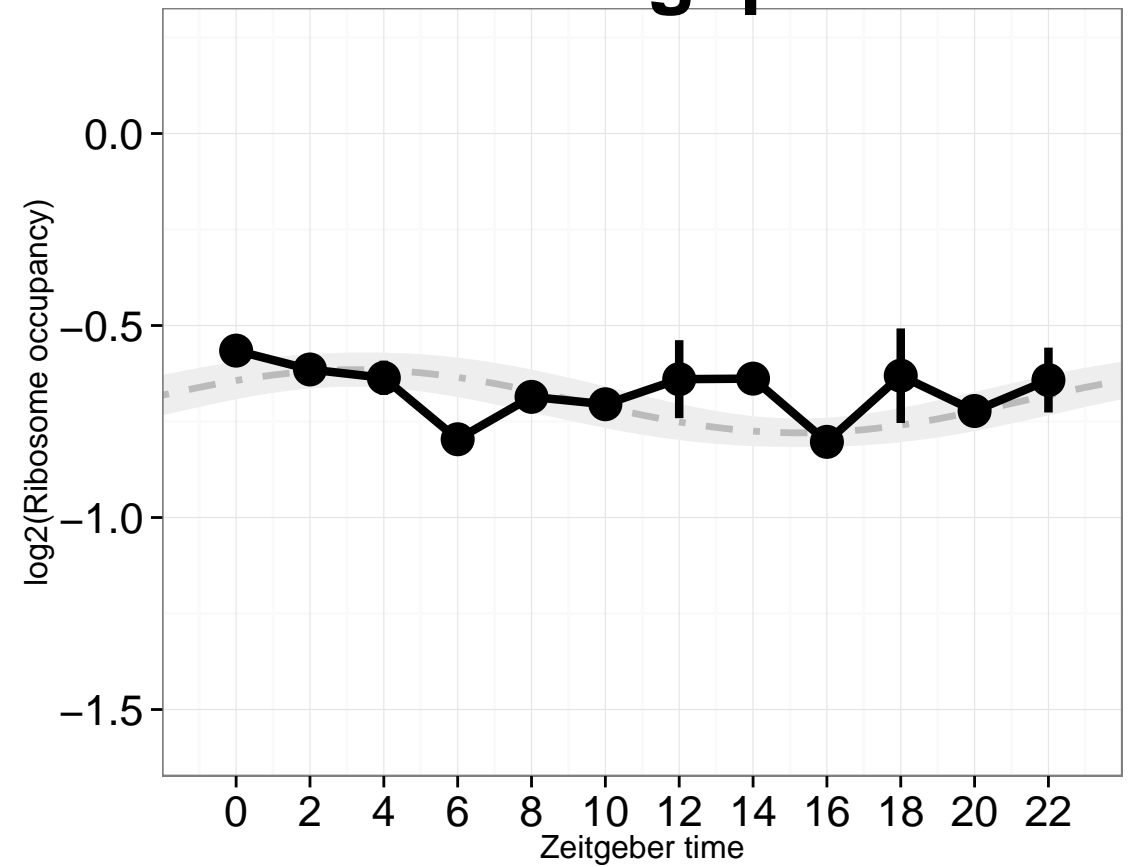

Supplement: SuppDataset_1.zip [file Rab3gap1_set_A.pdf › Supplemental Dataset 1/A-mRNA_nonrhyth_translation_nonrhyth/Rab3gap1_set_A.pdf]

# Rab3gap2

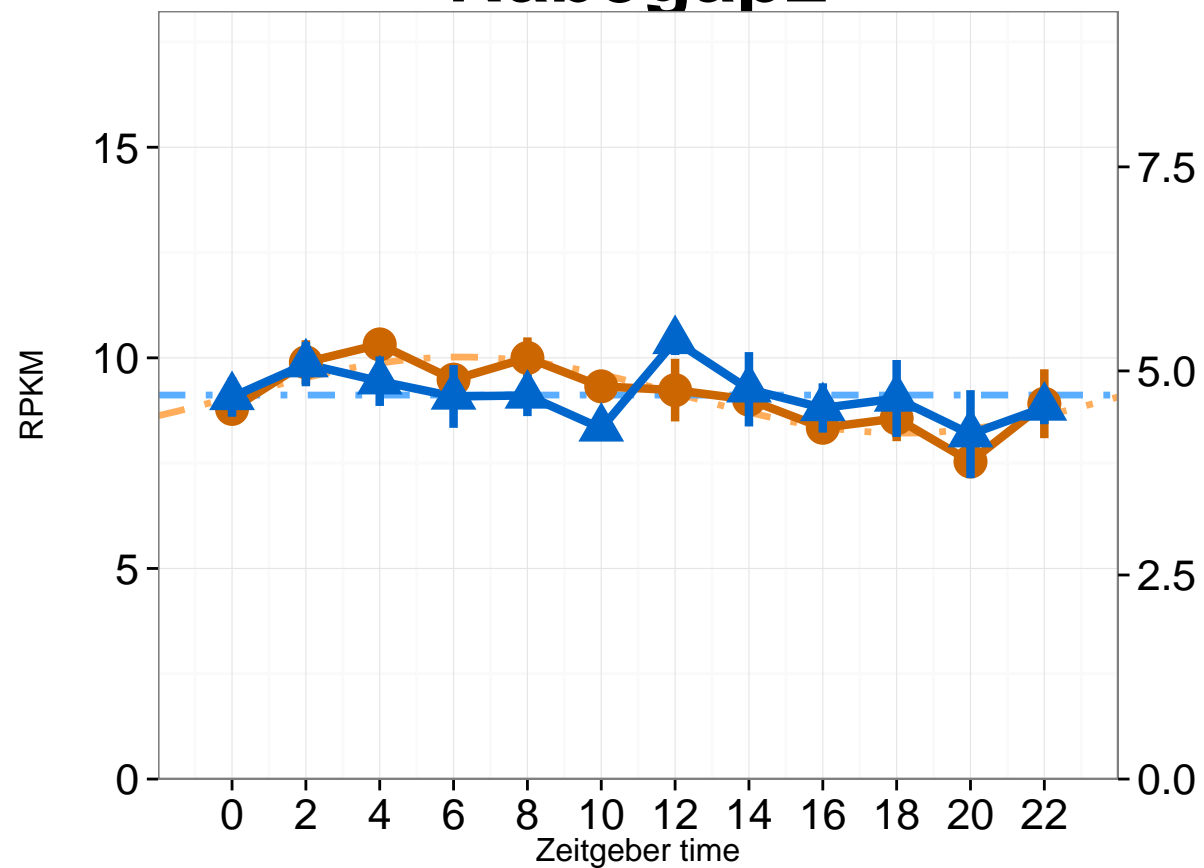

# Rab3gap2

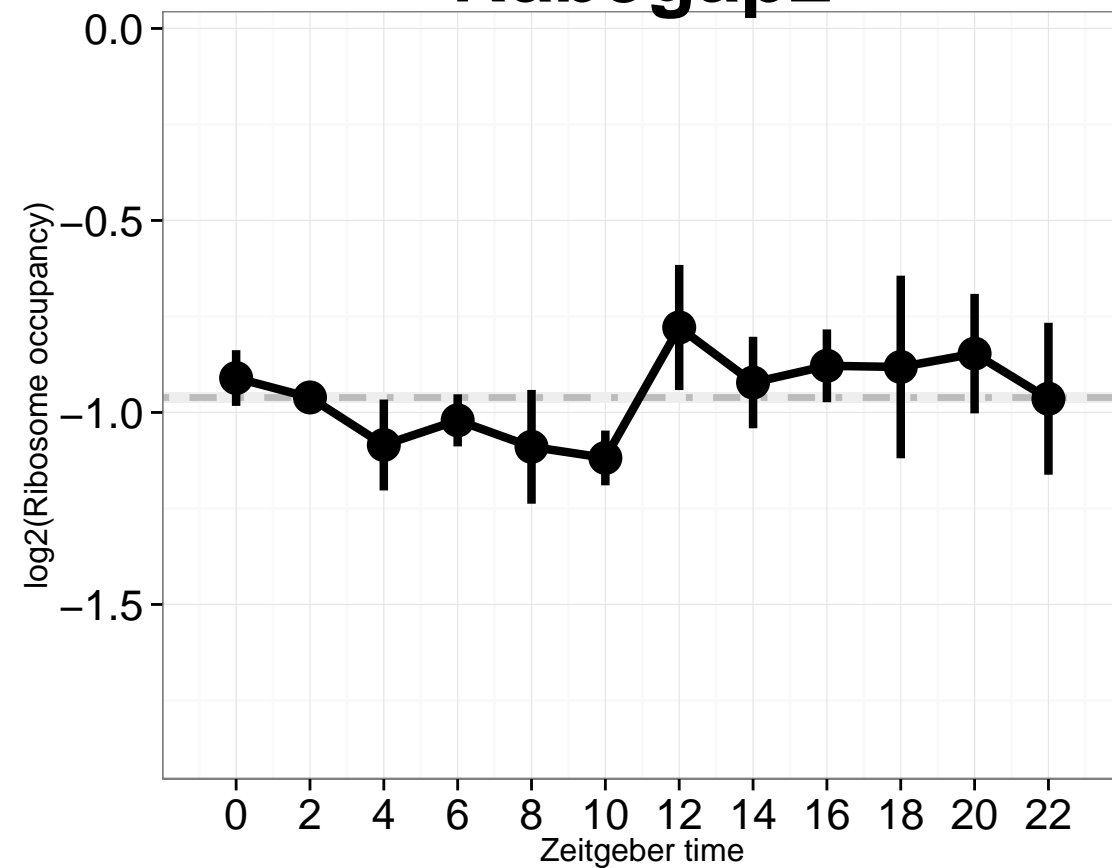

Supplement: SuppDataset_1.zip [file Rab3gap2_set_A.pdf › Supplemental Dataset 1/A-mRNA_nonrhyth_translation_nonrhyth/Rab3gap2_set_A.pdf]

# Rab3il1

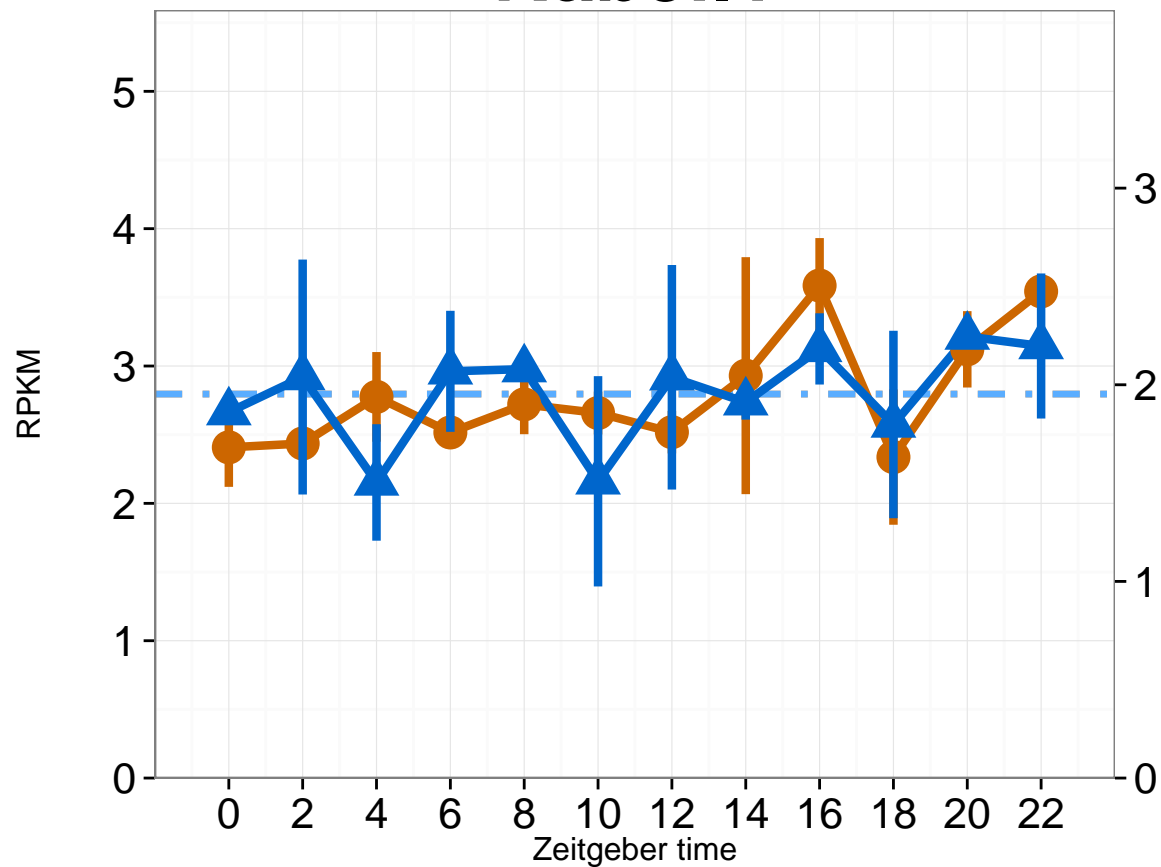

# Rab3il1

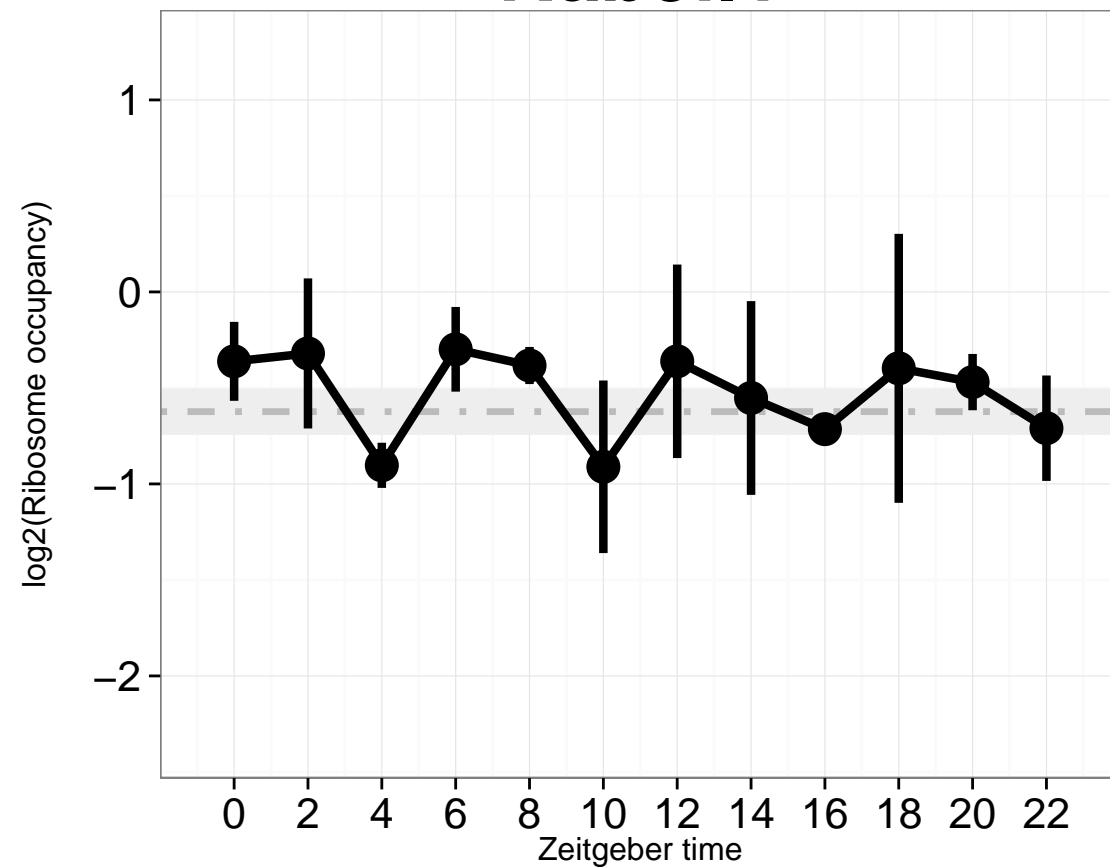

Supplement: SuppDataset_1.zip [file Rab3il1_set_A.pdf › Supplemental Dataset 1/A-mRNA_nonrhyth_translation_nonrhyth/Rab3il1_set_A.pdf]

# Rab3ip

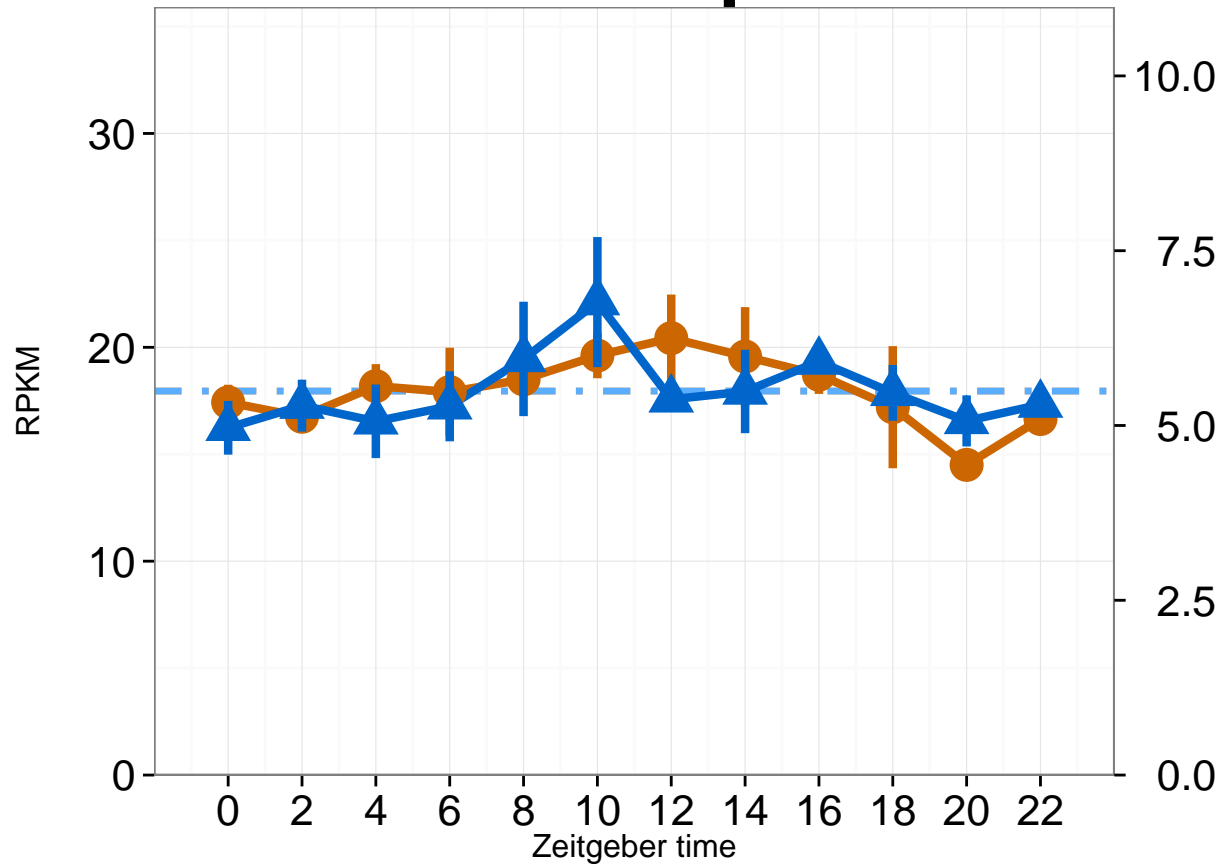

# Rab3ip

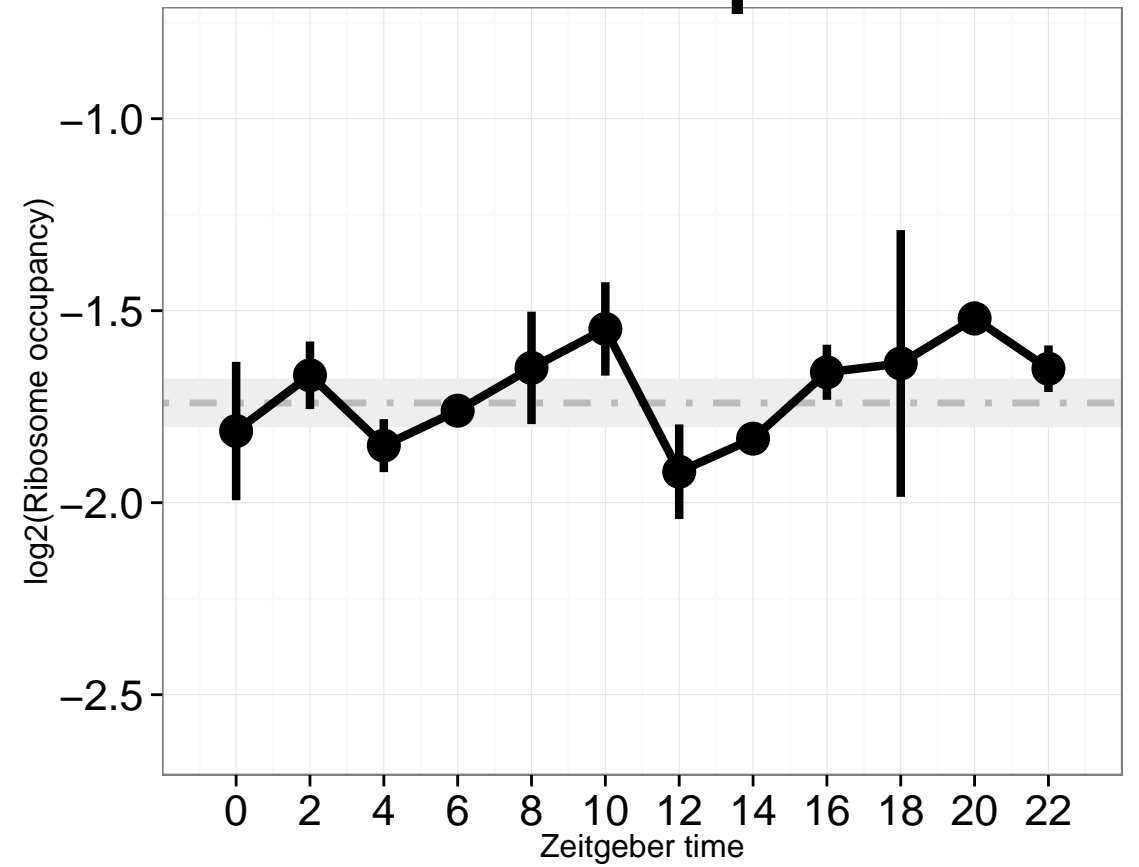

Supplement: SuppDataset_1.zip [file Rab3ip_set_A.pdf › Supplemental Dataset 1/A-mRNA_nonrhyth_translation_nonrhyth/Rab3ip_set_A.pdf]

# Rab40c

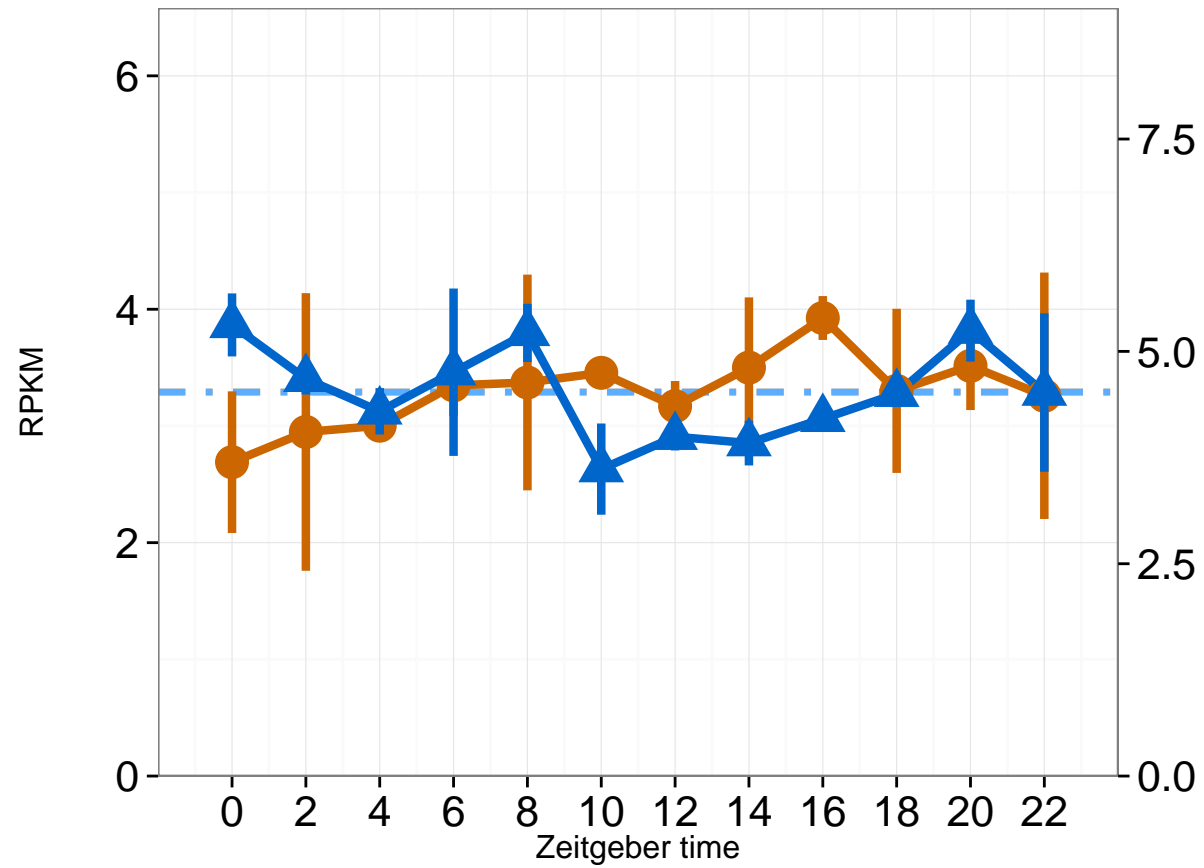

# Rab40c

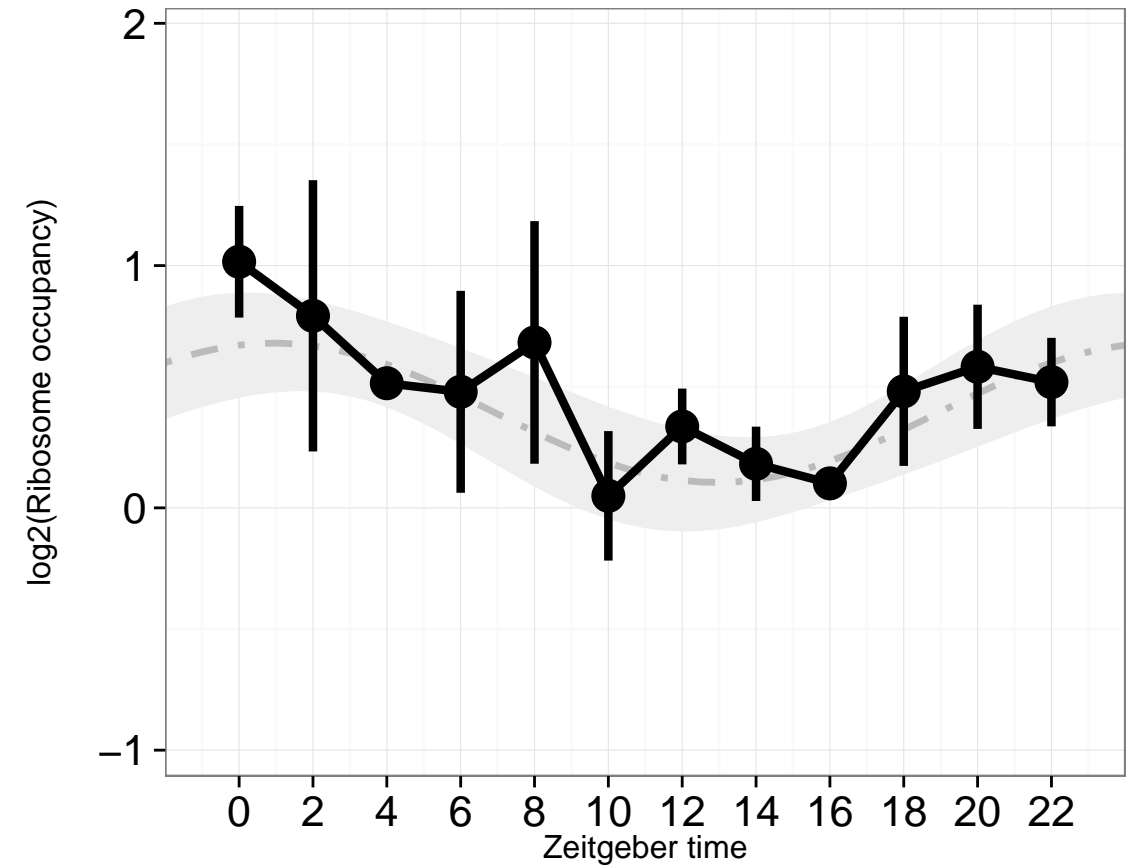

Supplement: SuppDataset_1.zip [file Rab40c_set_A.pdf › Supplemental Dataset 1/A-mRNA_nonrhyth_translation_nonrhyth/Rab40c_set_A.pdf]

## Rab43

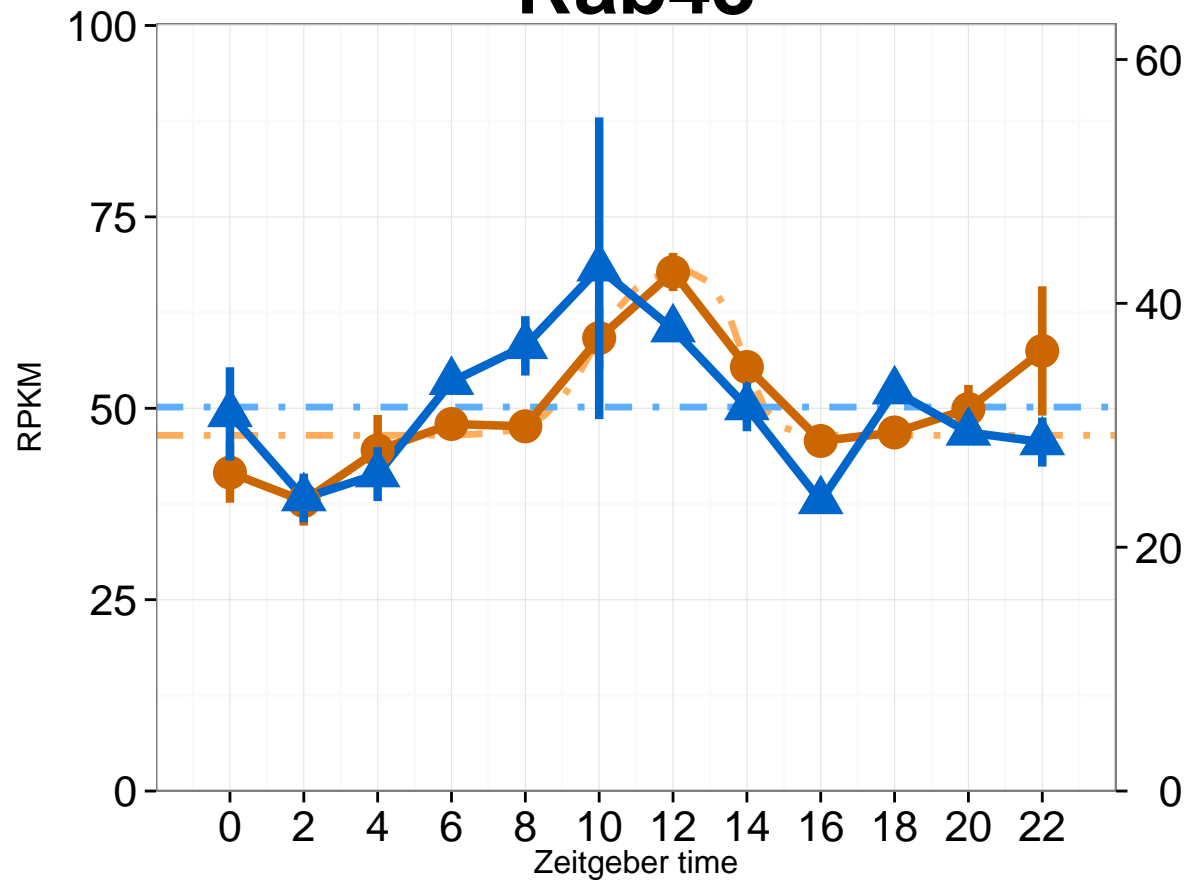

## Rab43

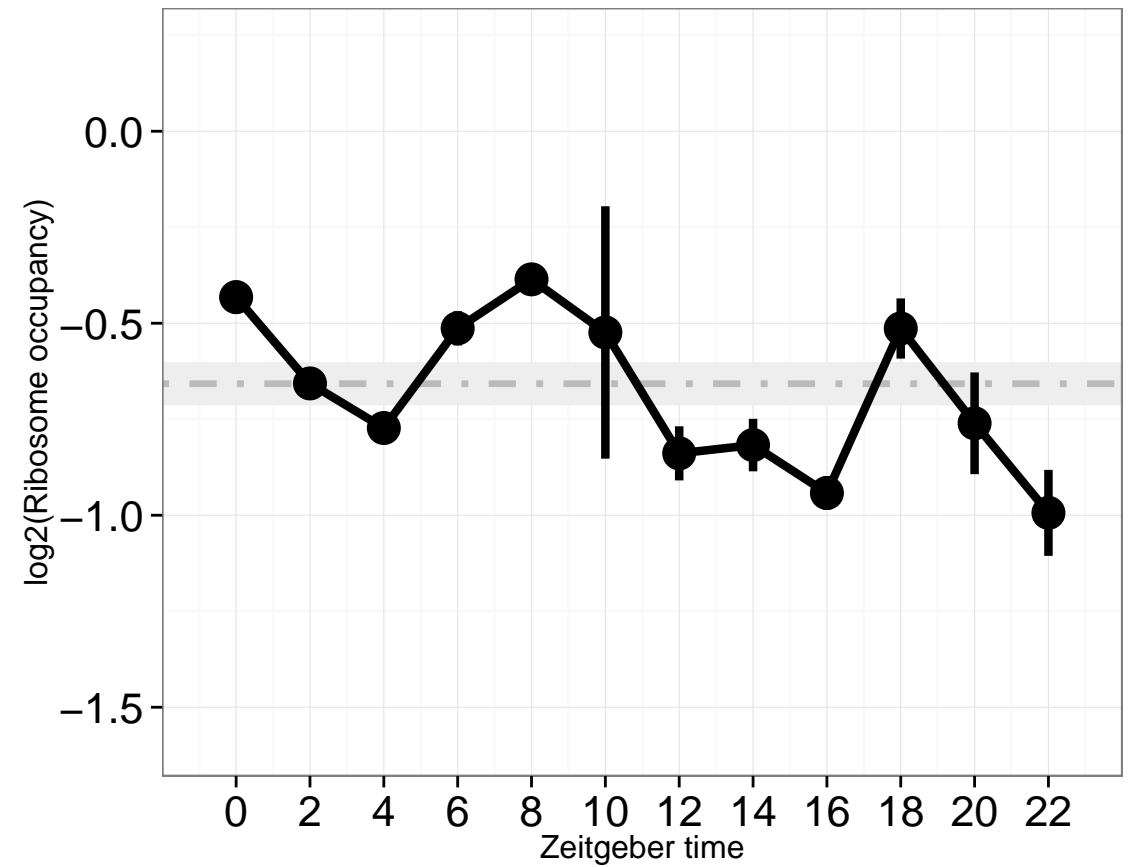

Supplement: SuppDataset_1.zip [file Rab43_set_A.pdf › Supplemental Dataset 1/A-mRNA_nonrhyth_translation_nonrhyth/Rab43_set_A.pdf]

## Rab4b

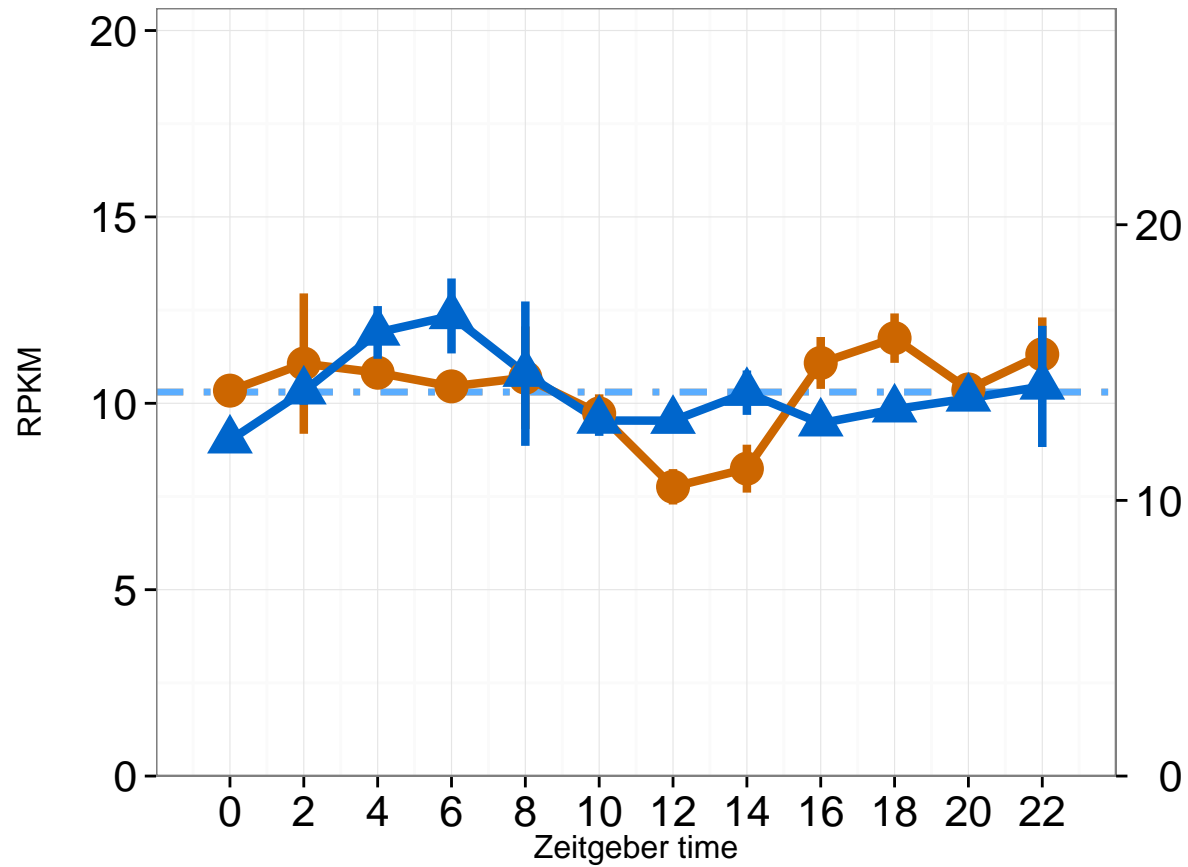

## Rab4b

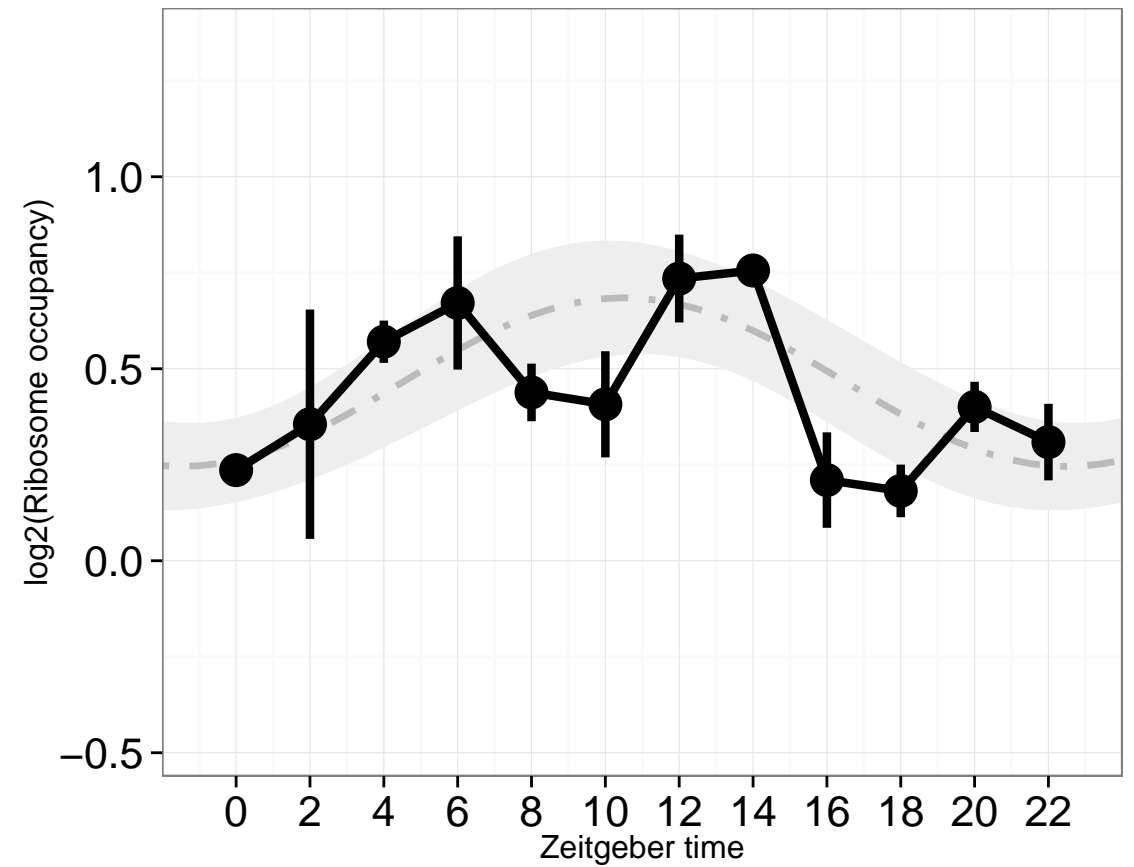

Supplement: SuppDataset_1.zip [file Rab4b_set_A.pdf › Supplemental Dataset 1/A-mRNA_nonrhyth_translation_nonrhyth/Rab4b_set_A.pdf]
