# Supplementary figures and images for: Ribosome profiling reveals the rhythmic liver translatome and circadian clock regulation by upstream open reading frames (part 60 of 113)
Source: HighWire-hosted journal article supplement (doi:10.1101/gr.195404.115), 2015-10-20

## Rab5a

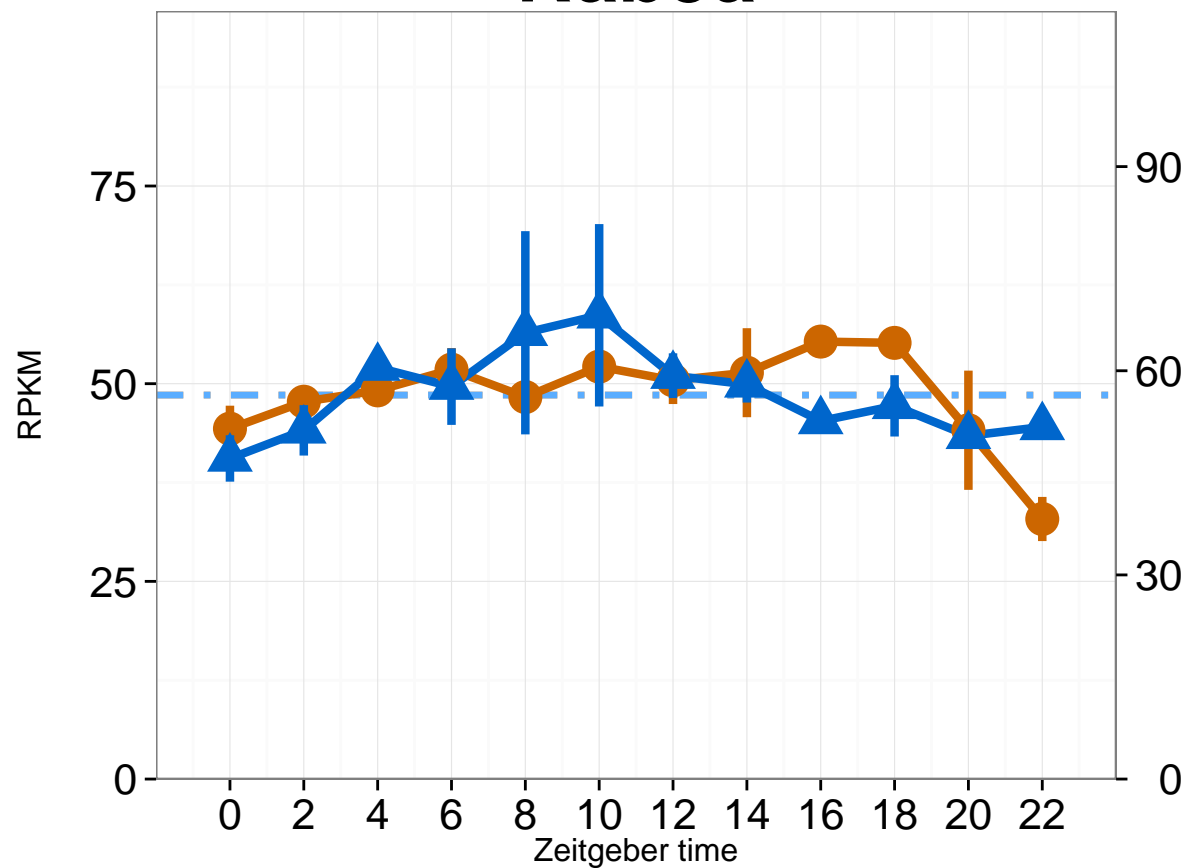

## Rab5a

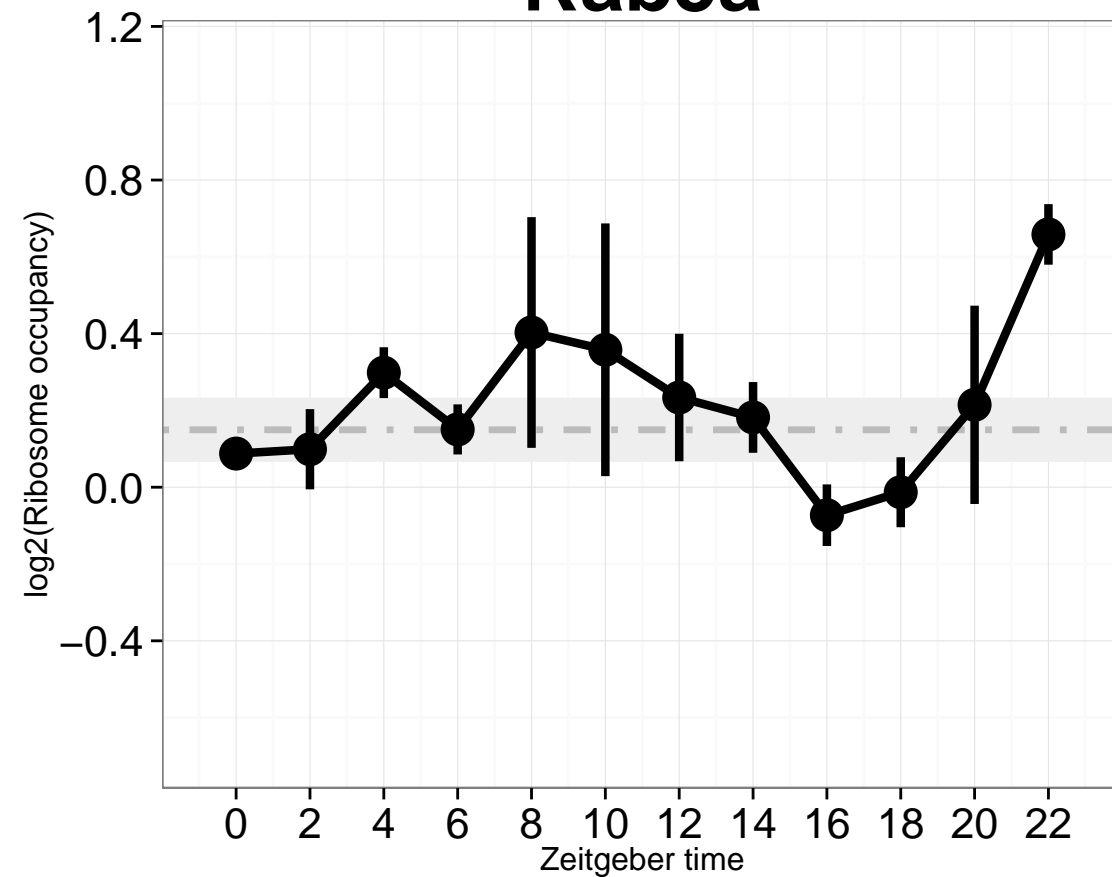

Supplement: SuppDataset_1.zip [file Rab5a_set_A.pdf › Supplemental Dataset 1/A-mRNA_nonrhyth_translation_nonrhyth/Rab5a_set_A.pdf]

## Rab5b

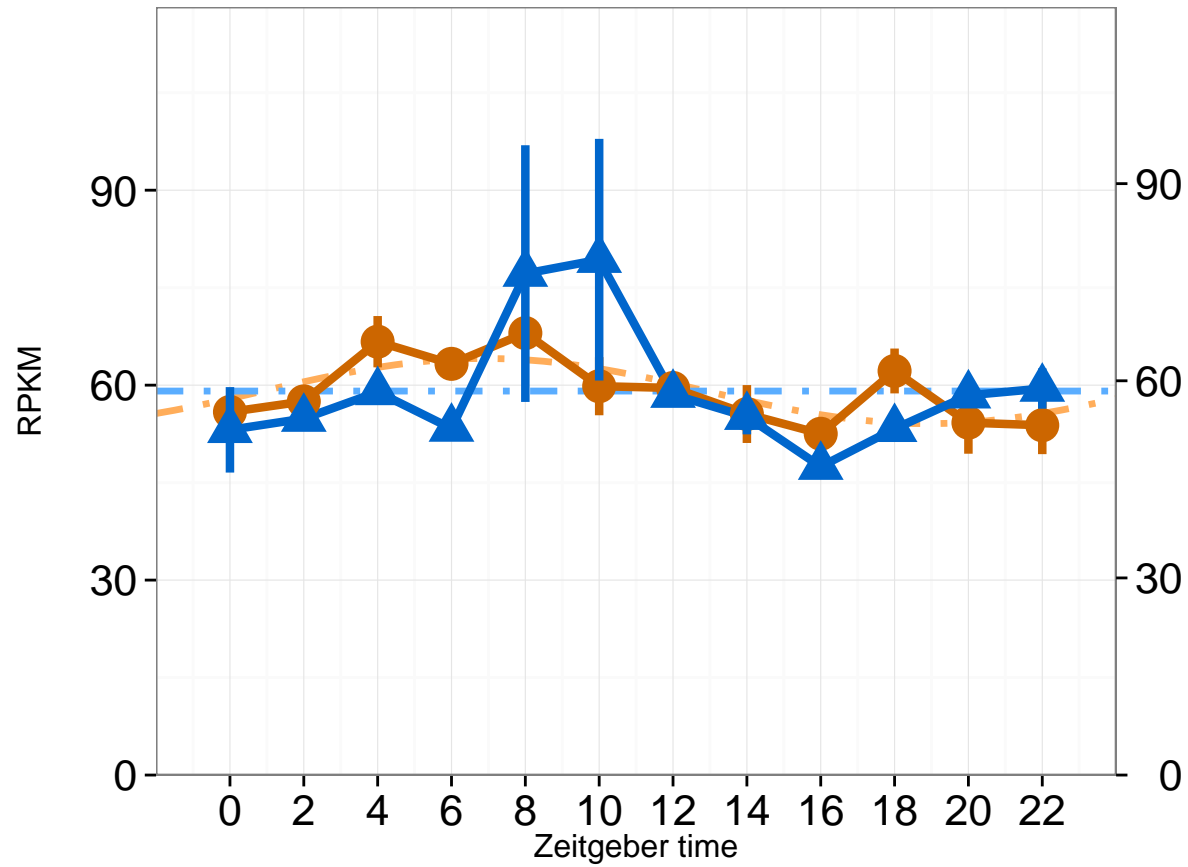

## Rab5b

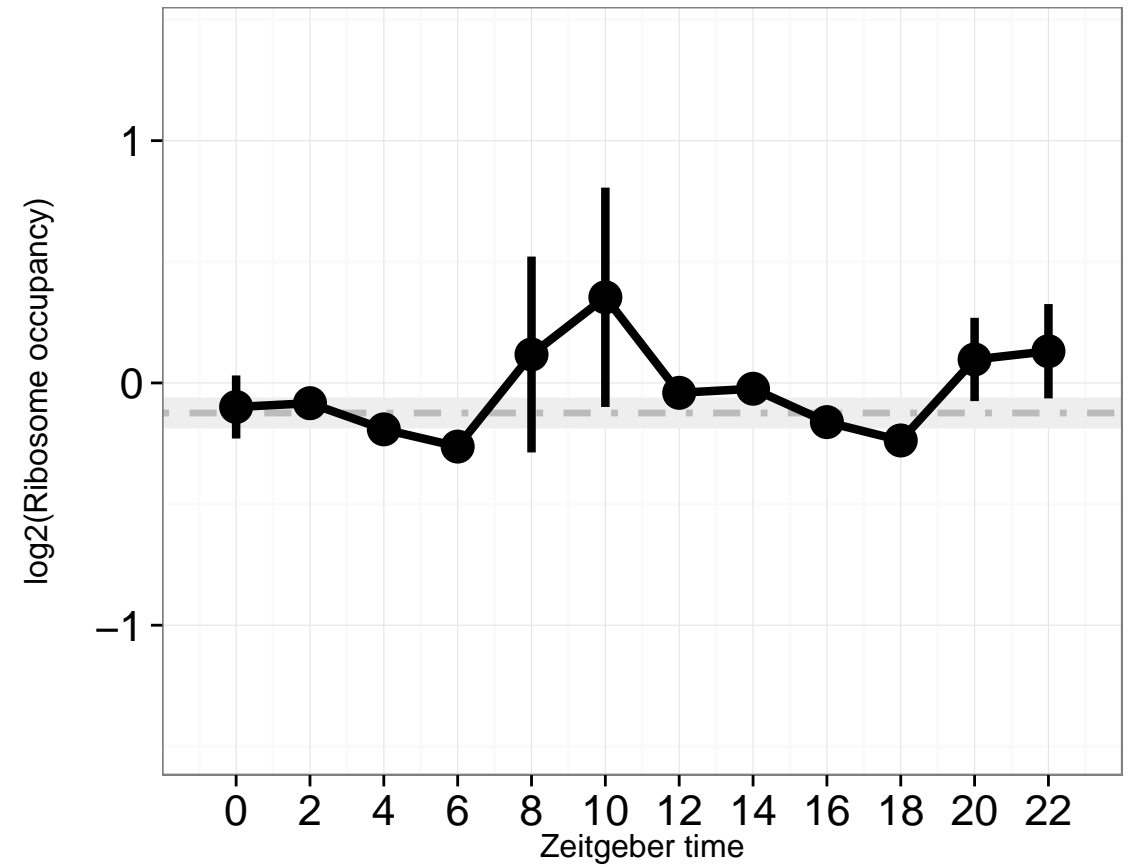

Supplement: SuppDataset_1.zip [file Rab5b_set_A.pdf › Supplemental Dataset 1/A-mRNA_nonrhyth_translation_nonrhyth/Rab5b_set_A.pdf]

## Rab5c

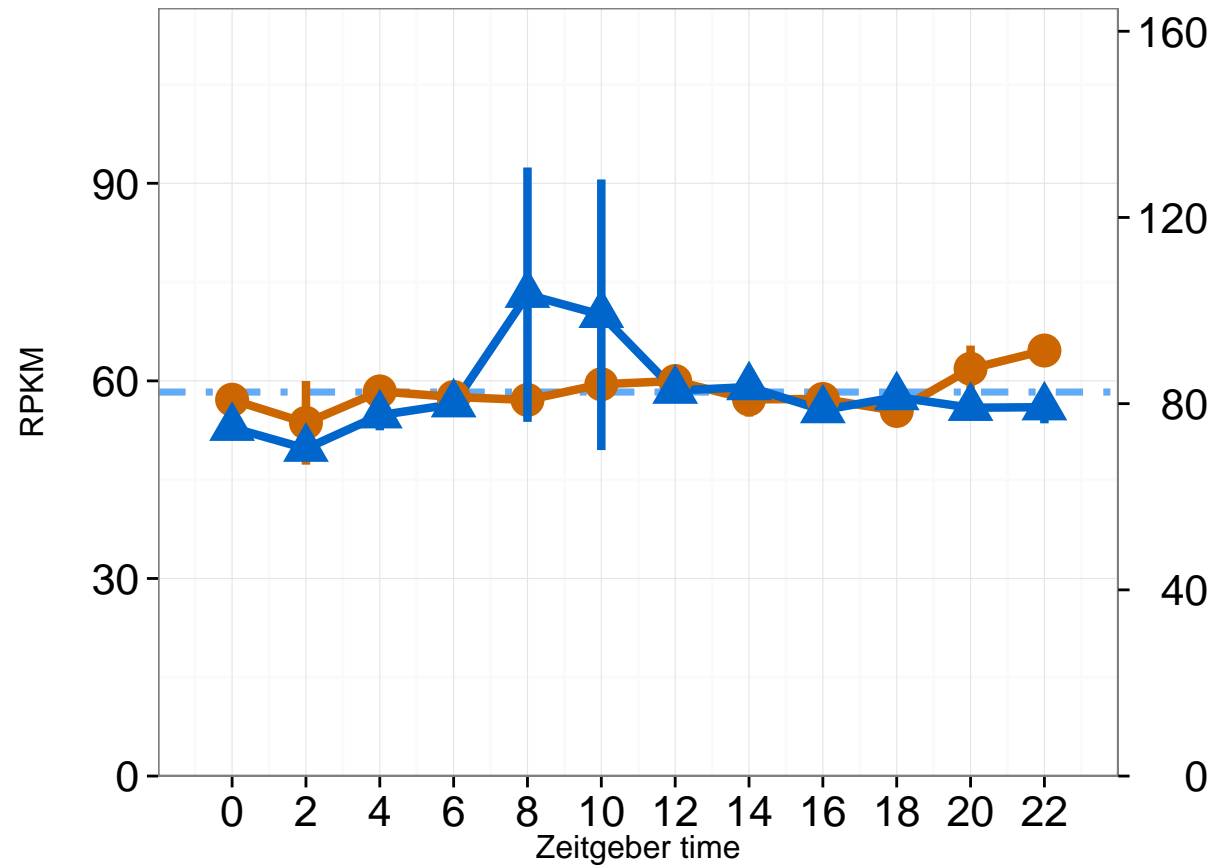

## Rab5c

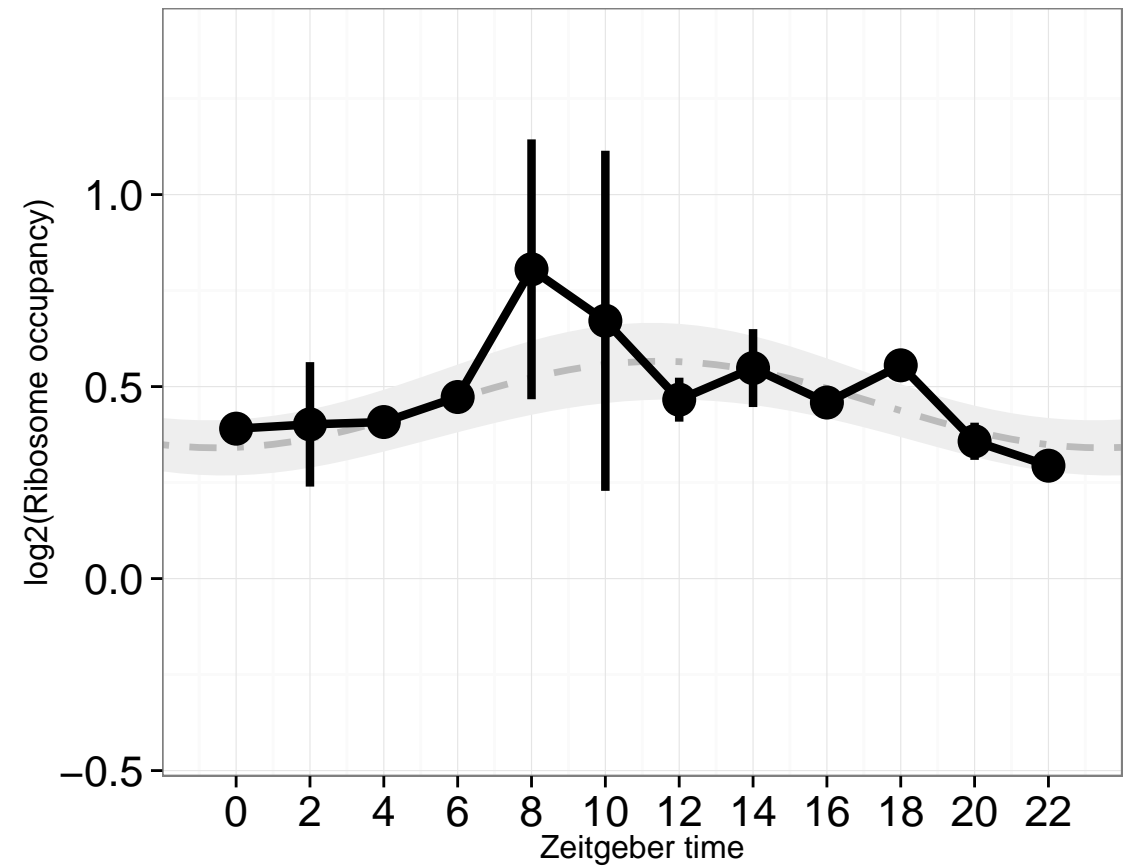

Supplement: SuppDataset_1.zip [file Rab5c_set_A.pdf › Supplemental Dataset 1/A-mRNA_nonrhyth_translation_nonrhyth/Rab5c_set_A.pdf]

# Rab6a

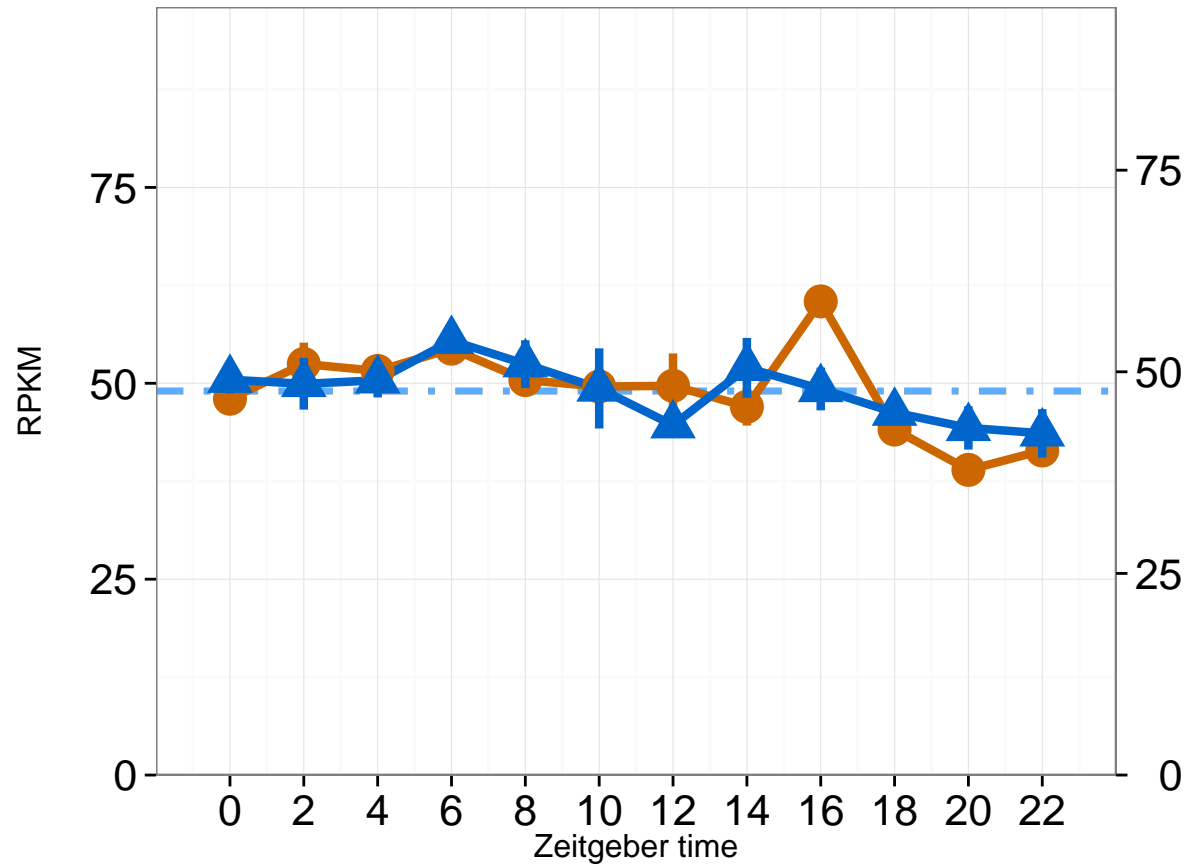

# Rab6a

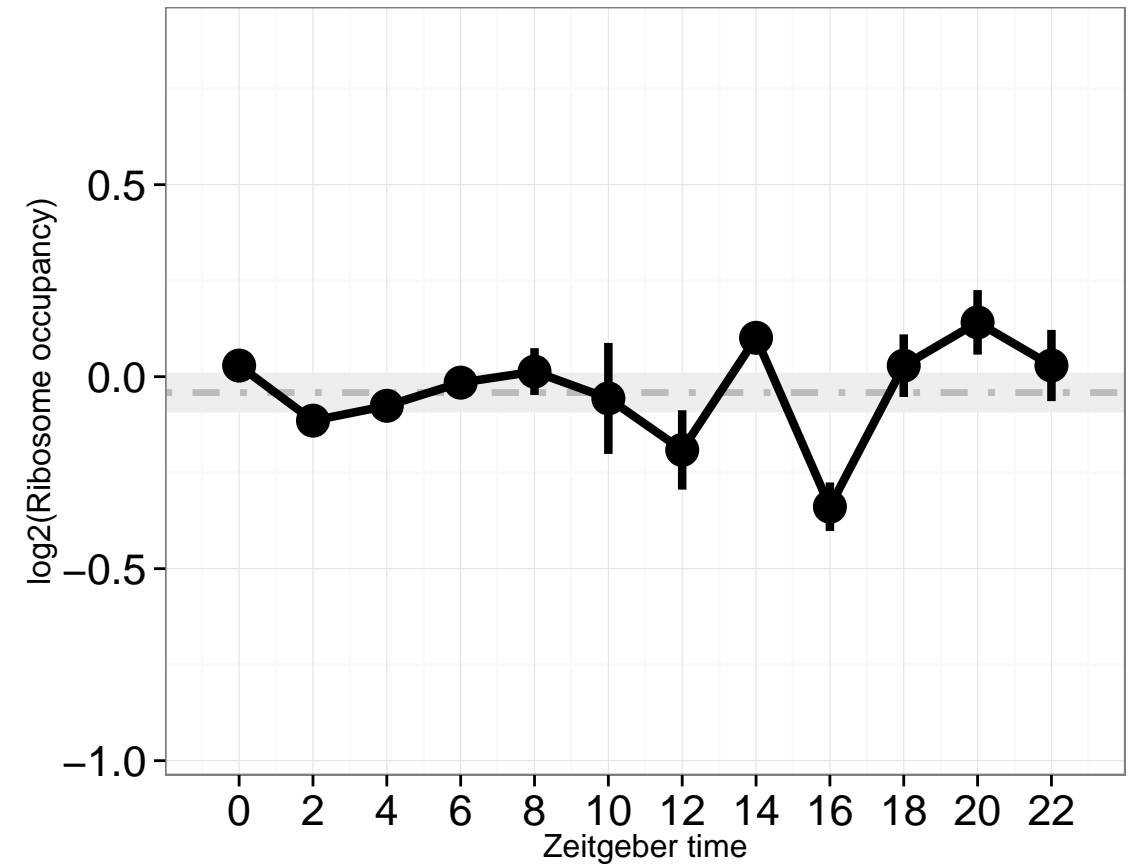

Supplement: SuppDataset_1.zip [file Rab6a_set_A.pdf › Supplemental Dataset 1/A-mRNA_nonrhyth_translation_nonrhyth/Rab6a_set_A.pdf]

## Rab7

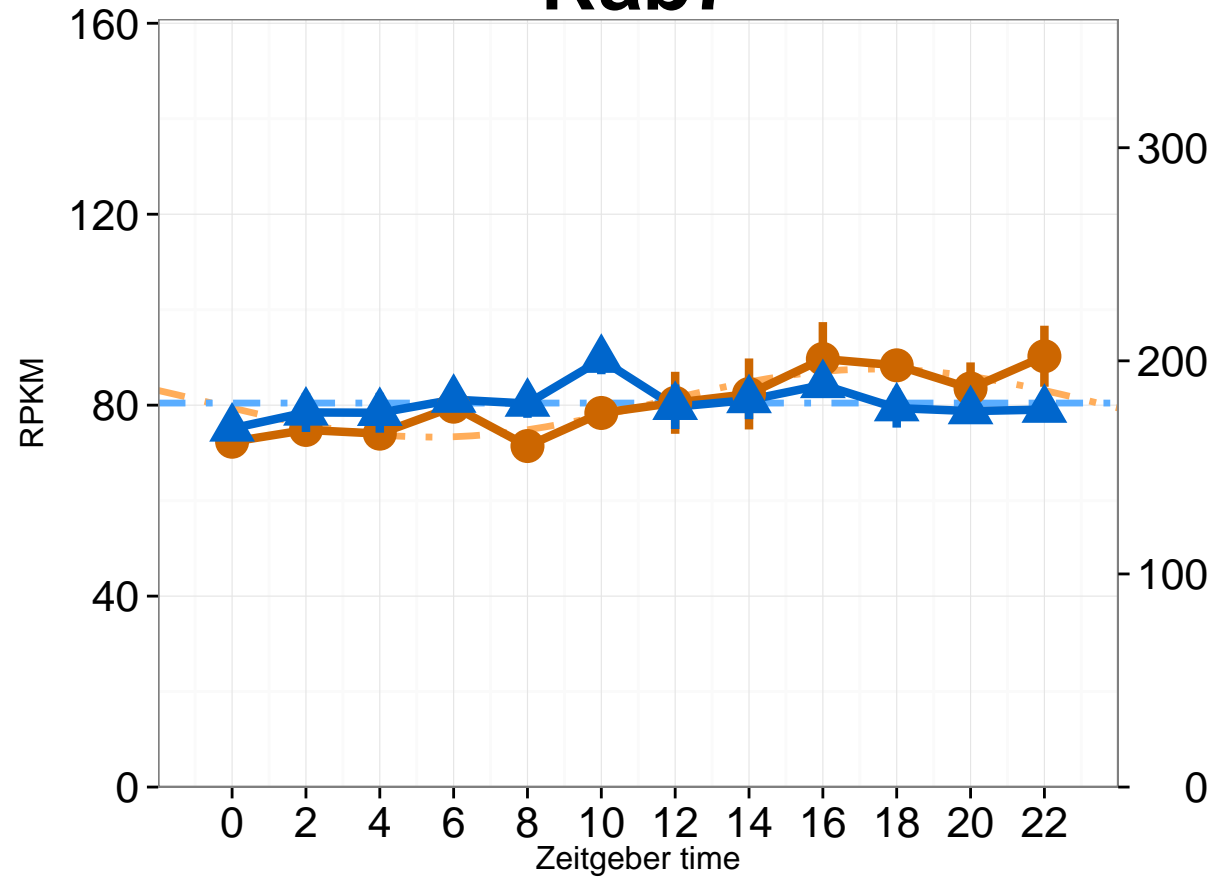

## Rab7

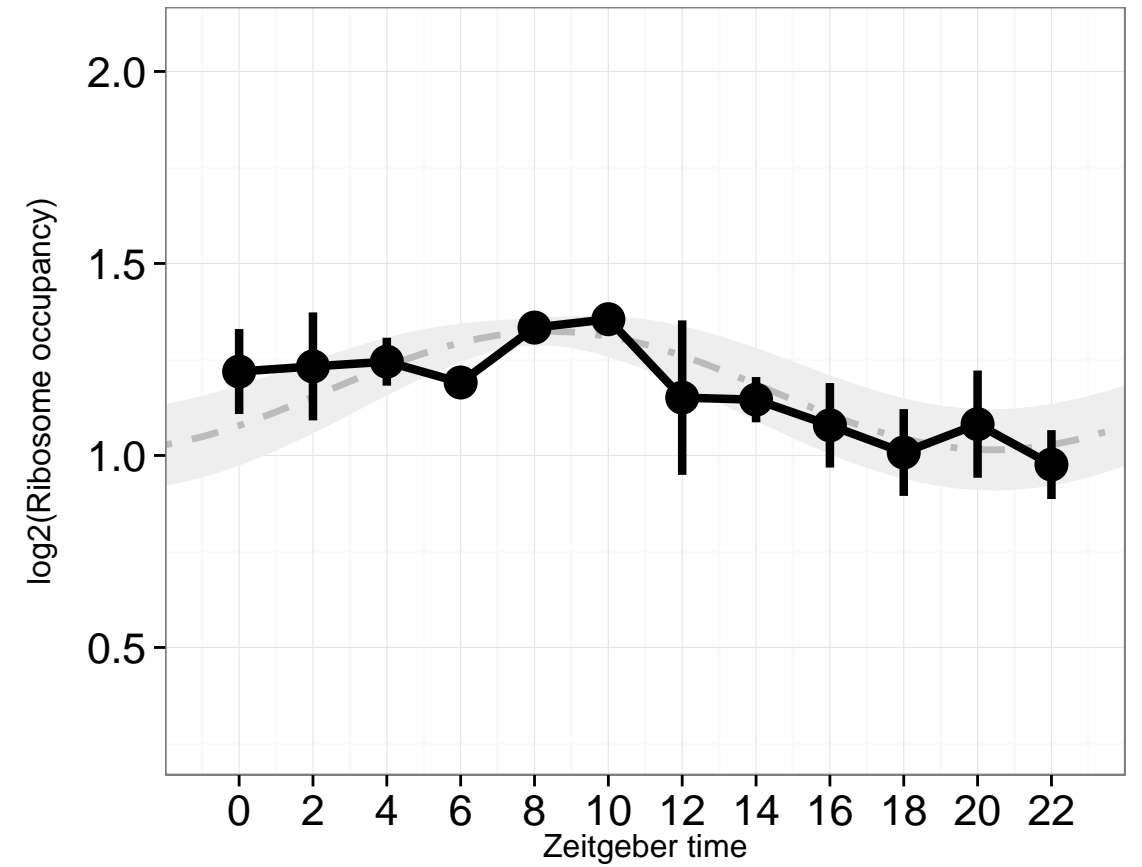

Supplement: SuppDataset_1.zip [file Rab7_set_A.pdf › Supplemental Dataset 1/A-mRNA_nonrhyth_translation_nonrhyth/Rab7_set_A.pdf]

# Rab7l1

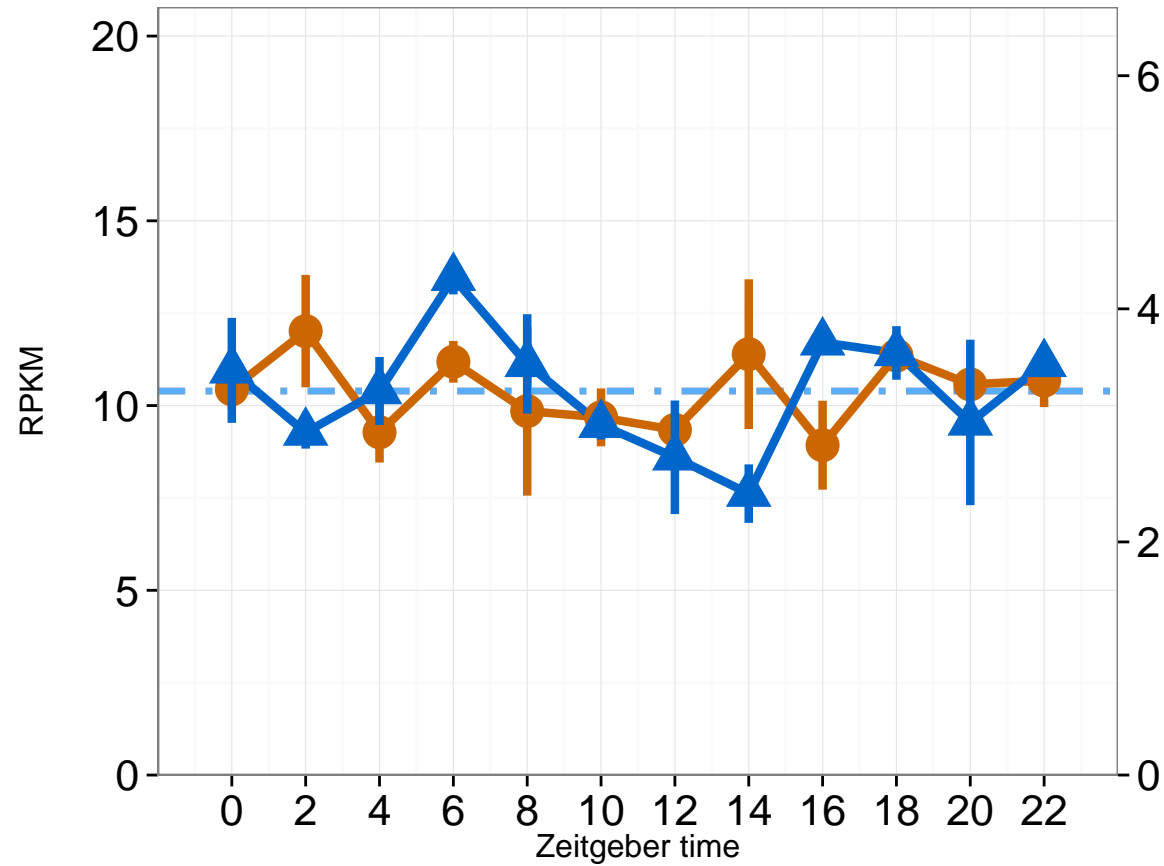

# Rab7l1

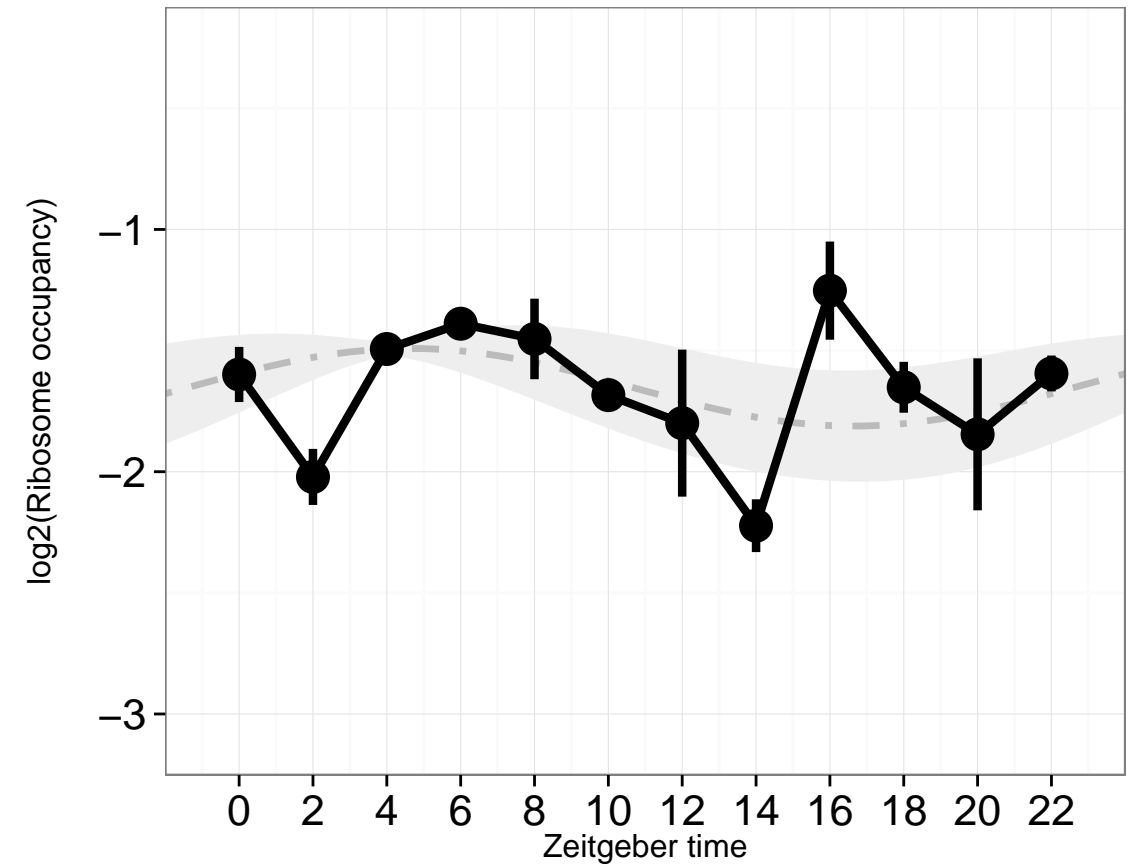

Supplement: SuppDataset_1.zip [file Rab7l1_set_A.pdf › Supplemental Dataset 1/A-mRNA_nonrhyth_translation_nonrhyth/Rab7l1_set_A.pdf]

# Rab8a

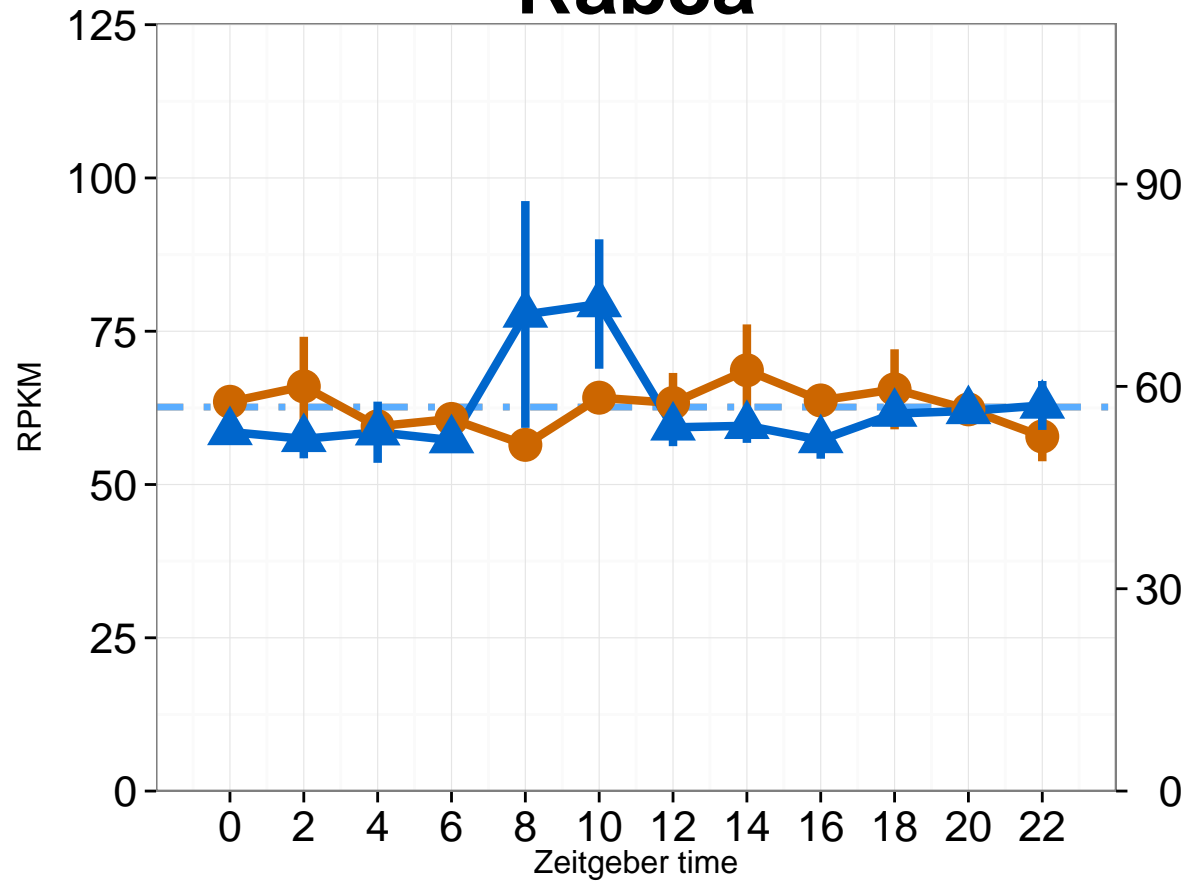

# Rab8a

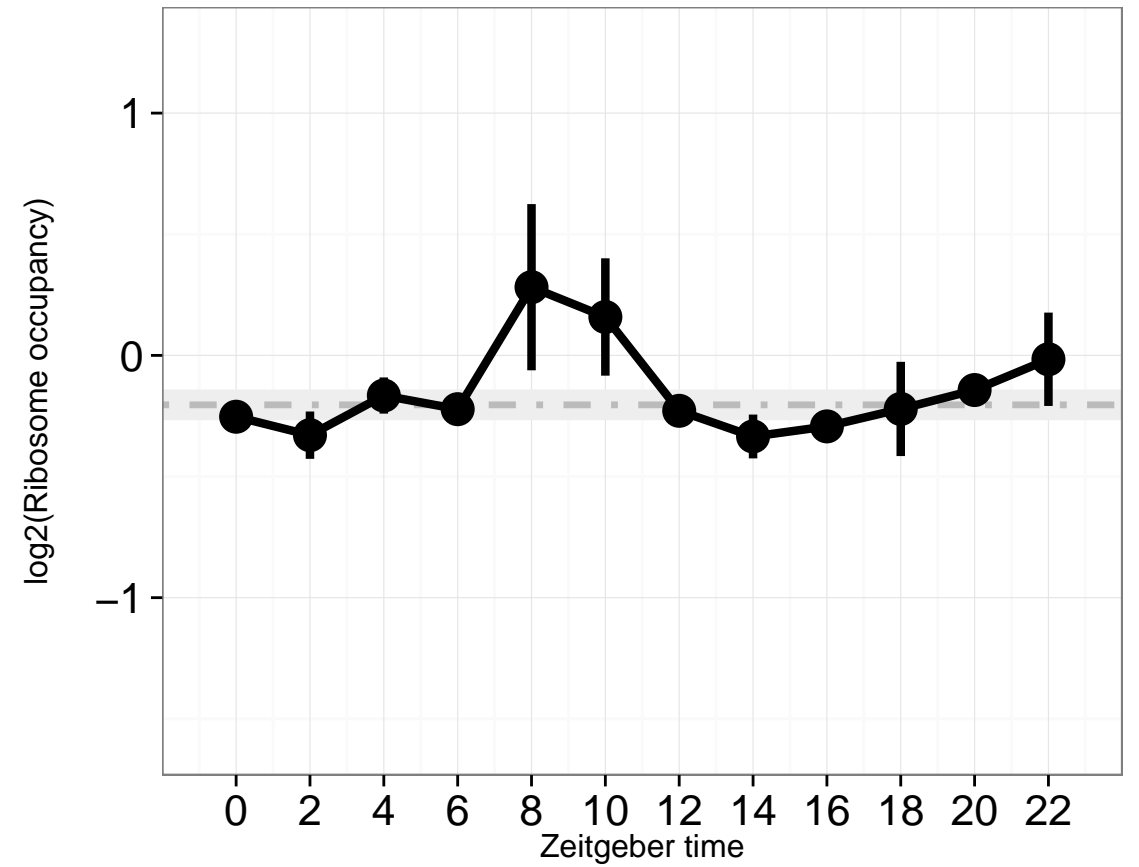

Supplement: SuppDataset_1.zip [file Rab8a_set_A.pdf › Supplemental Dataset 1/A-mRNA_nonrhyth_translation_nonrhyth/Rab8a_set_A.pdf]

# Rab8b

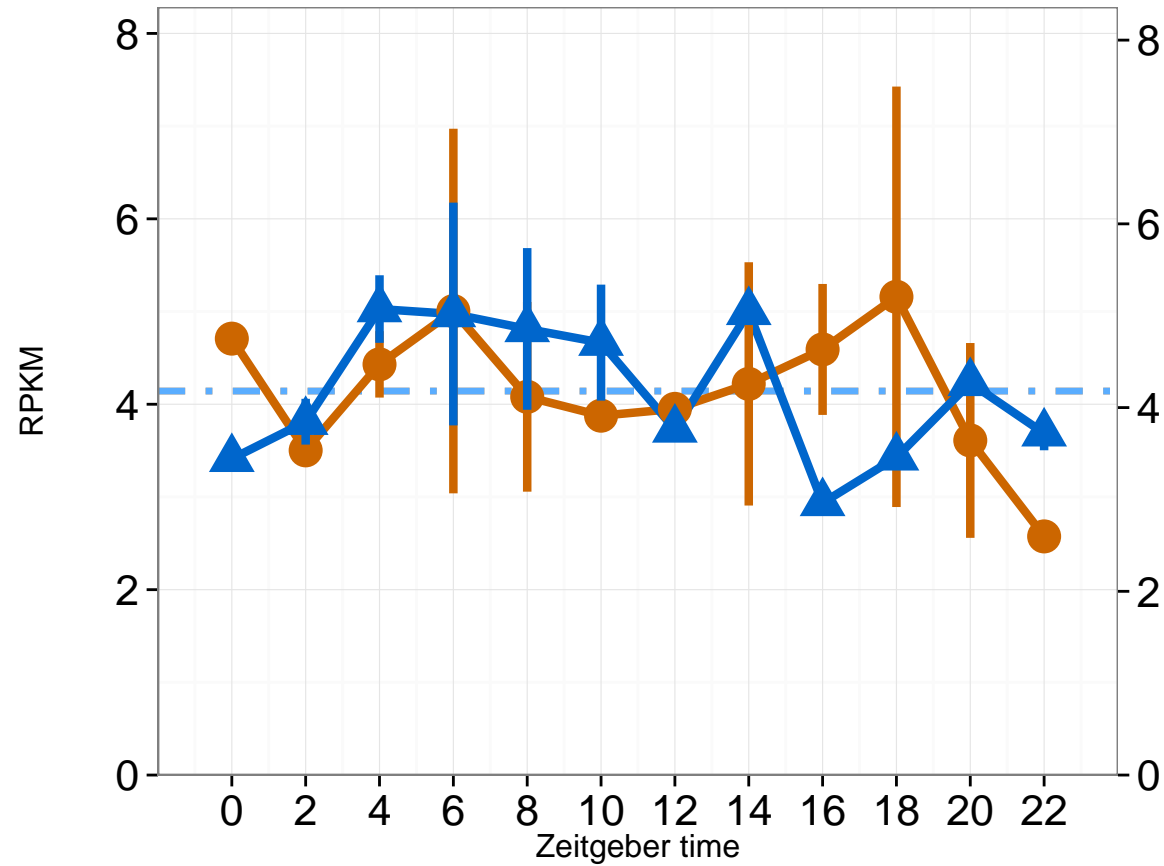

# Rab8b

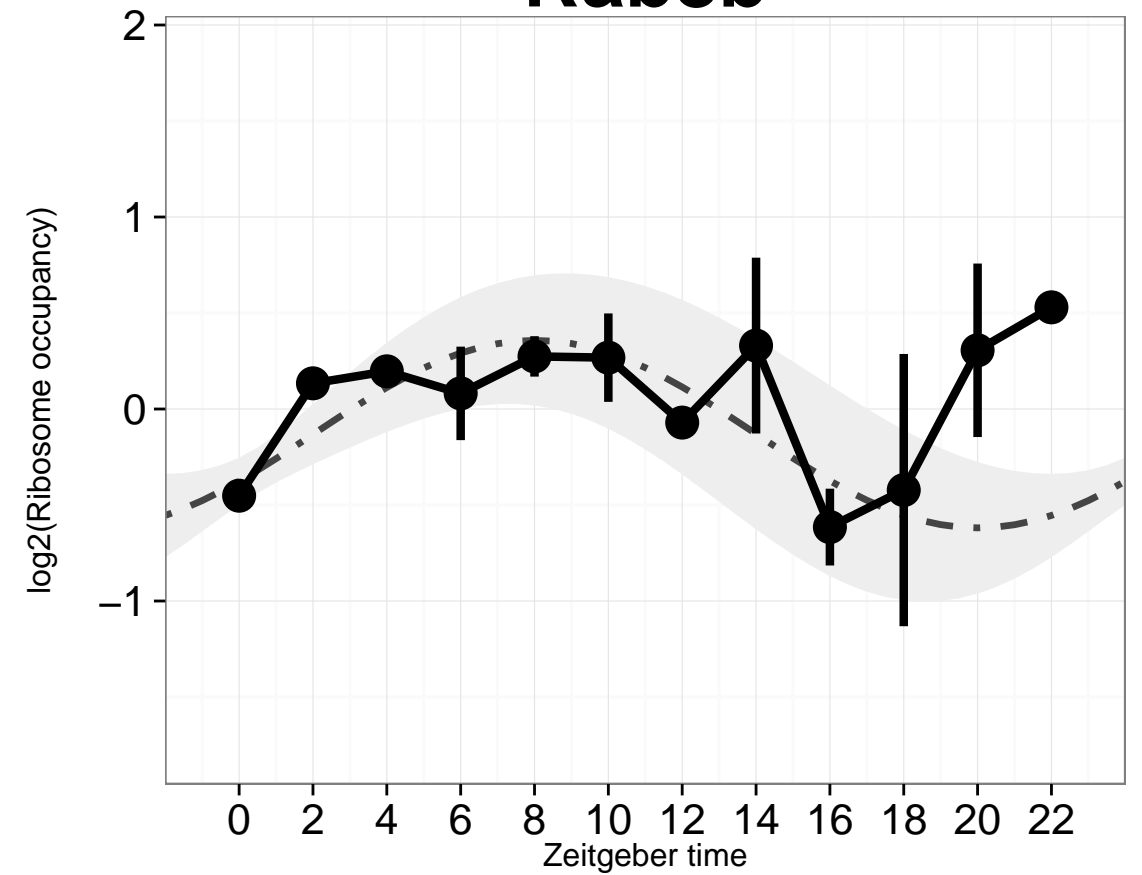

Supplement: SuppDataset_1.zip [file Rab8b_set_A.pdf › Supplemental Dataset 1/A-mRNA_nonrhyth_translation_nonrhyth/Rab8b_set_A.pdf]

## Rab9

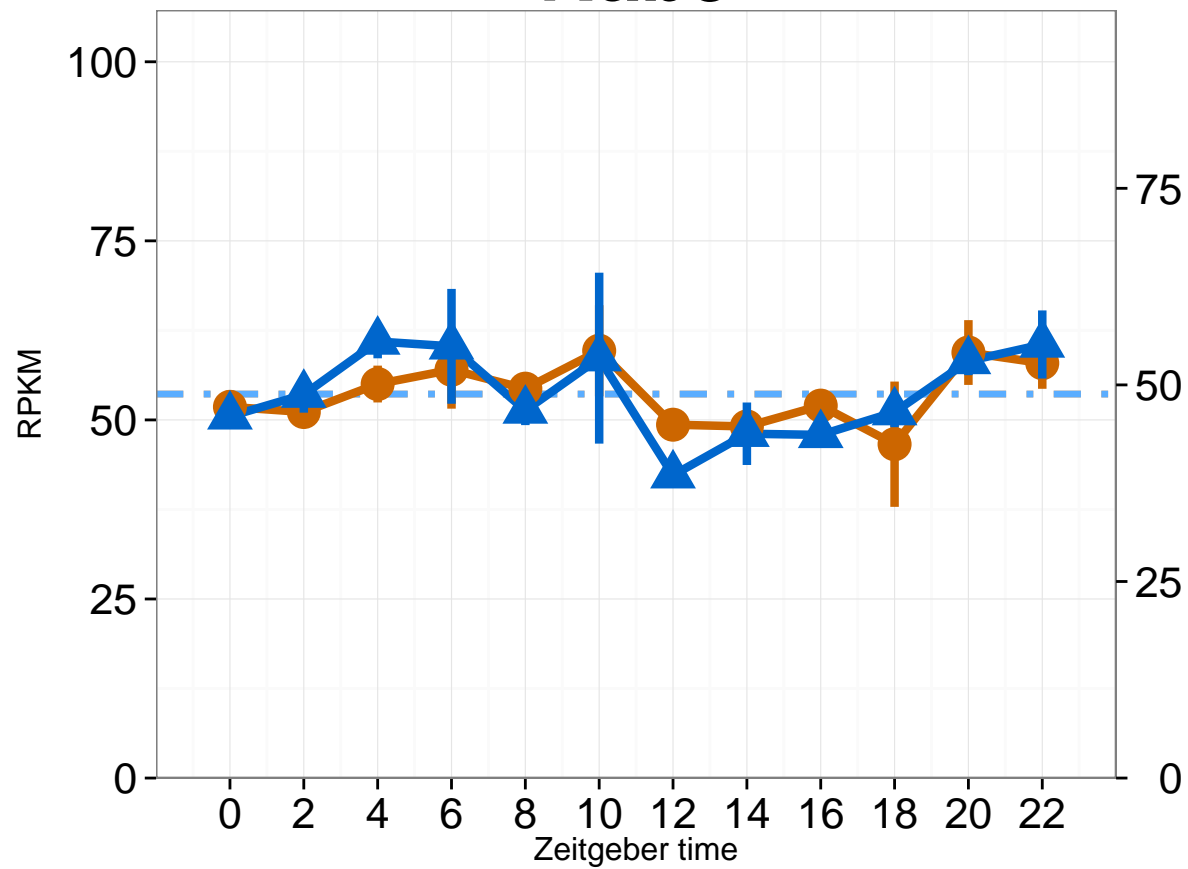

## Rab9

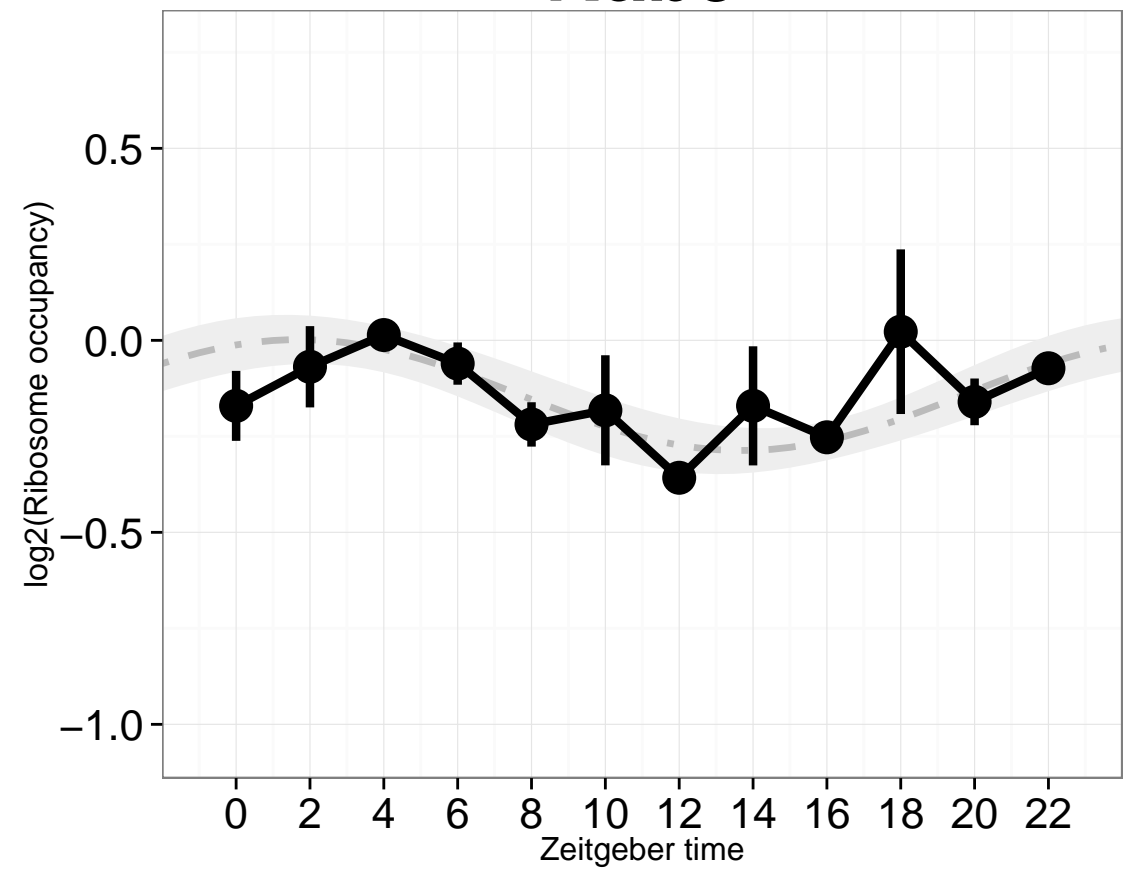

Supplement: SuppDataset_1.zip [file Rab9_set_A.pdf › Supplemental Dataset 1/A-mRNA_nonrhyth_translation_nonrhyth/Rab9_set_A.pdf]

## Rabac1

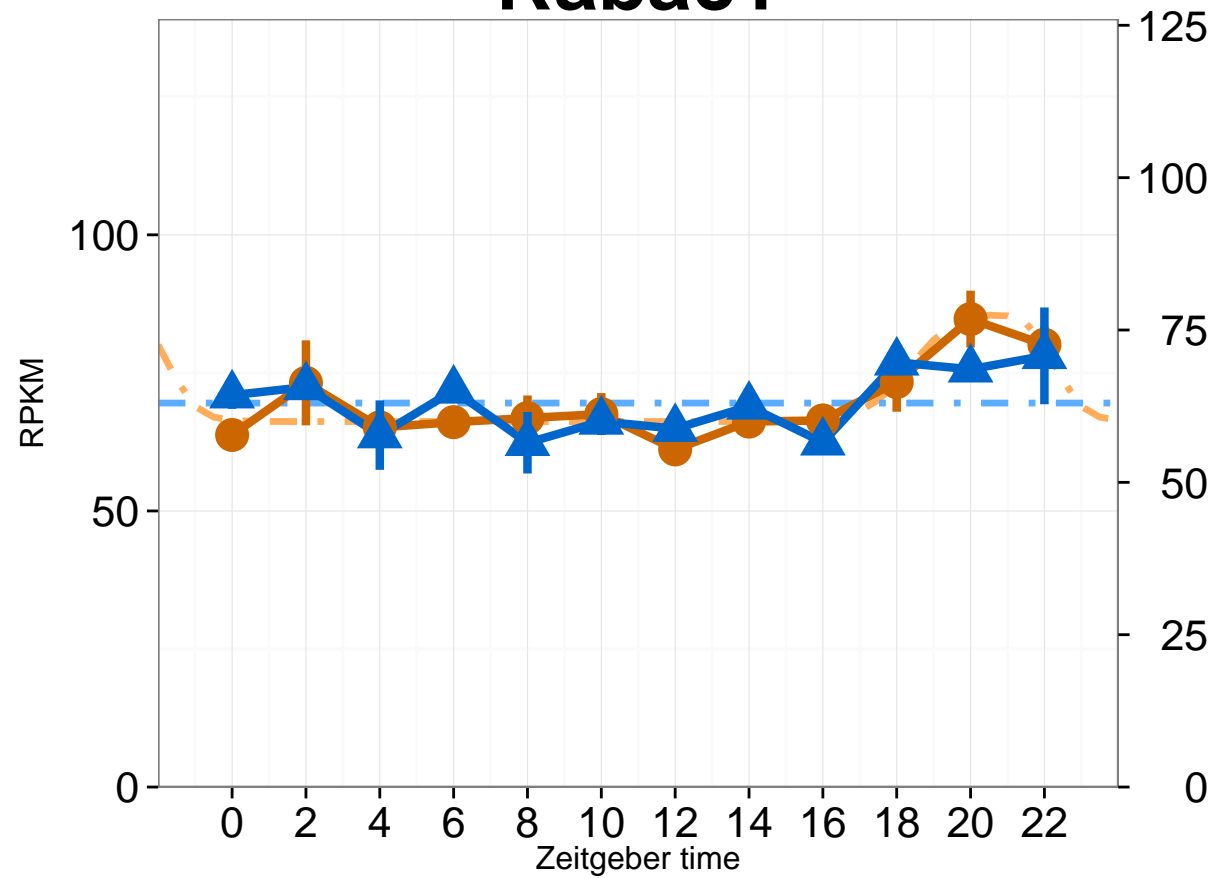

## Rabac1

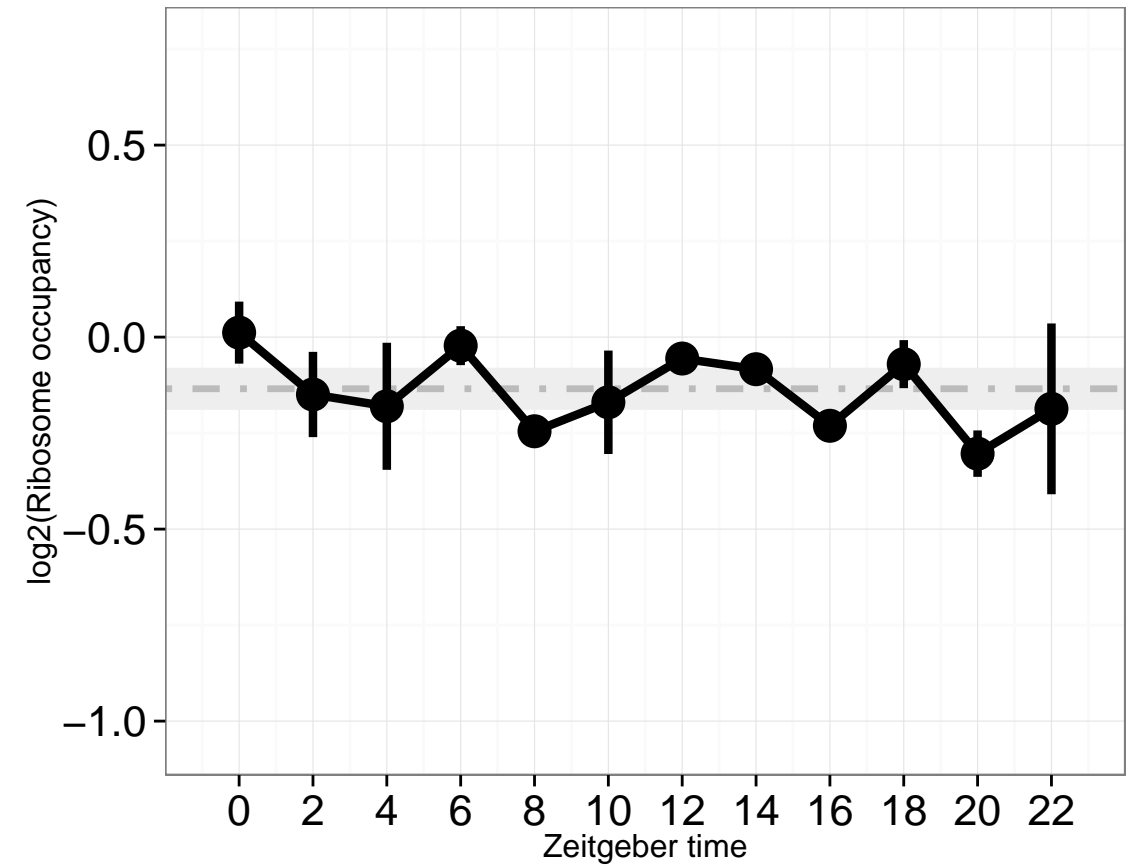

Supplement: SuppDataset_1.zip [file Rabac1_set_A.pdf › Supplemental Dataset 1/A-mRNA_nonrhyth_translation_nonrhyth/Rabac1_set_A.pdf]

# Rabep1

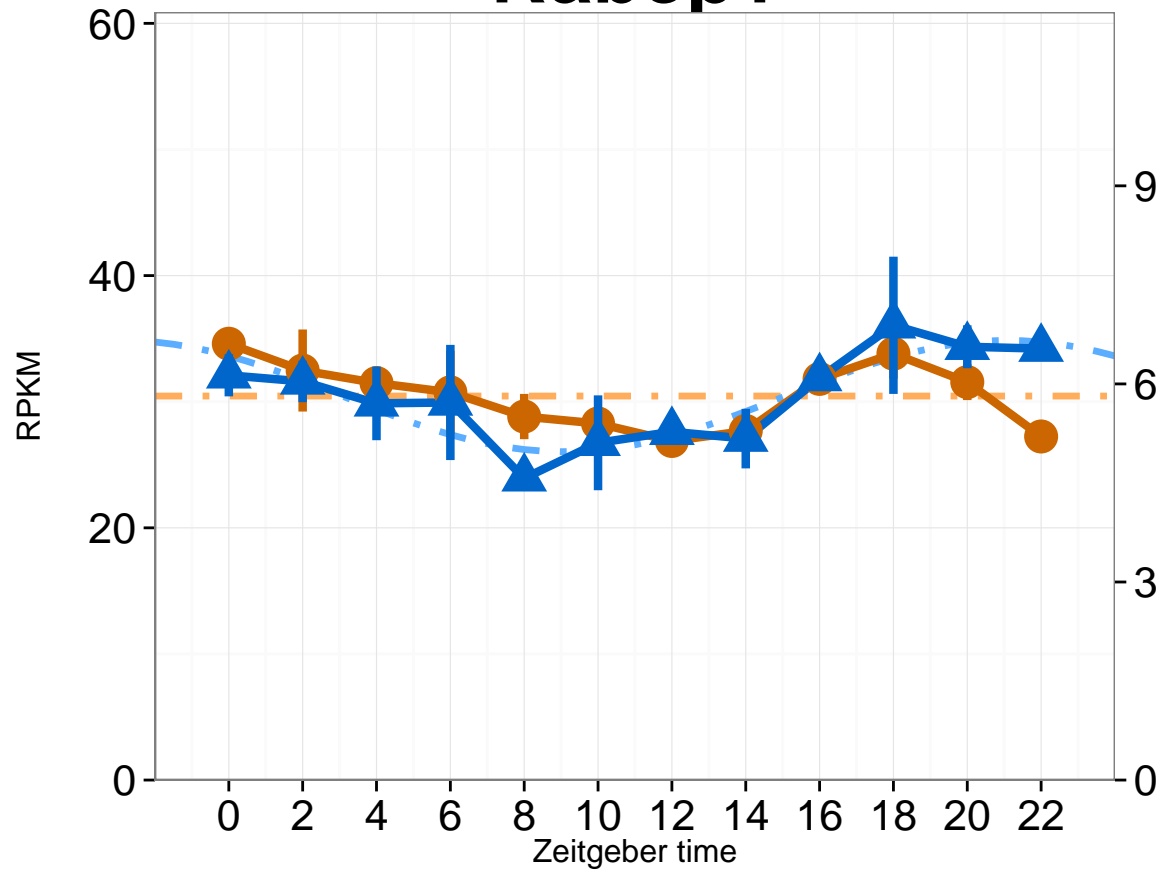

# Rabep1

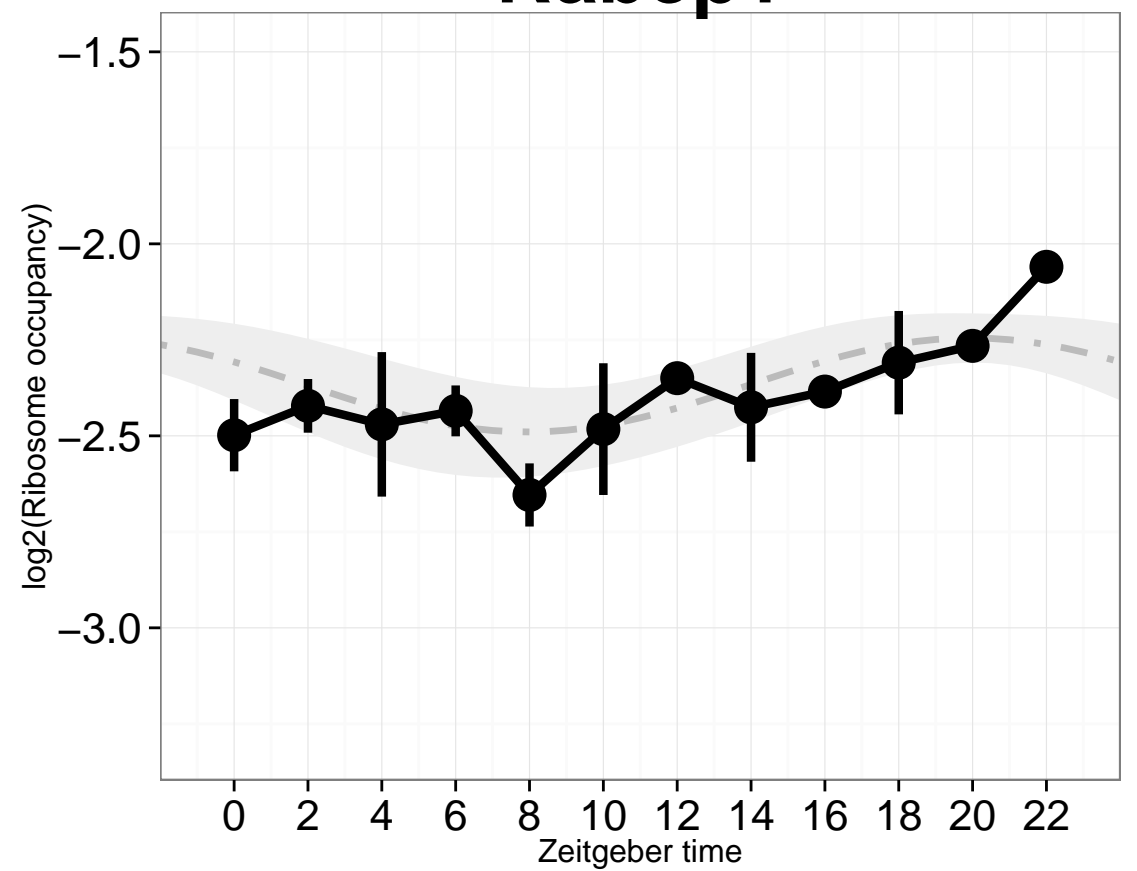

Supplement: SuppDataset_1.zip [file Rabep1_set_A.pdf › Supplemental Dataset 1/A-mRNA_nonrhyth_translation_nonrhyth/Rabep1_set_A.pdf]

# Rabep2

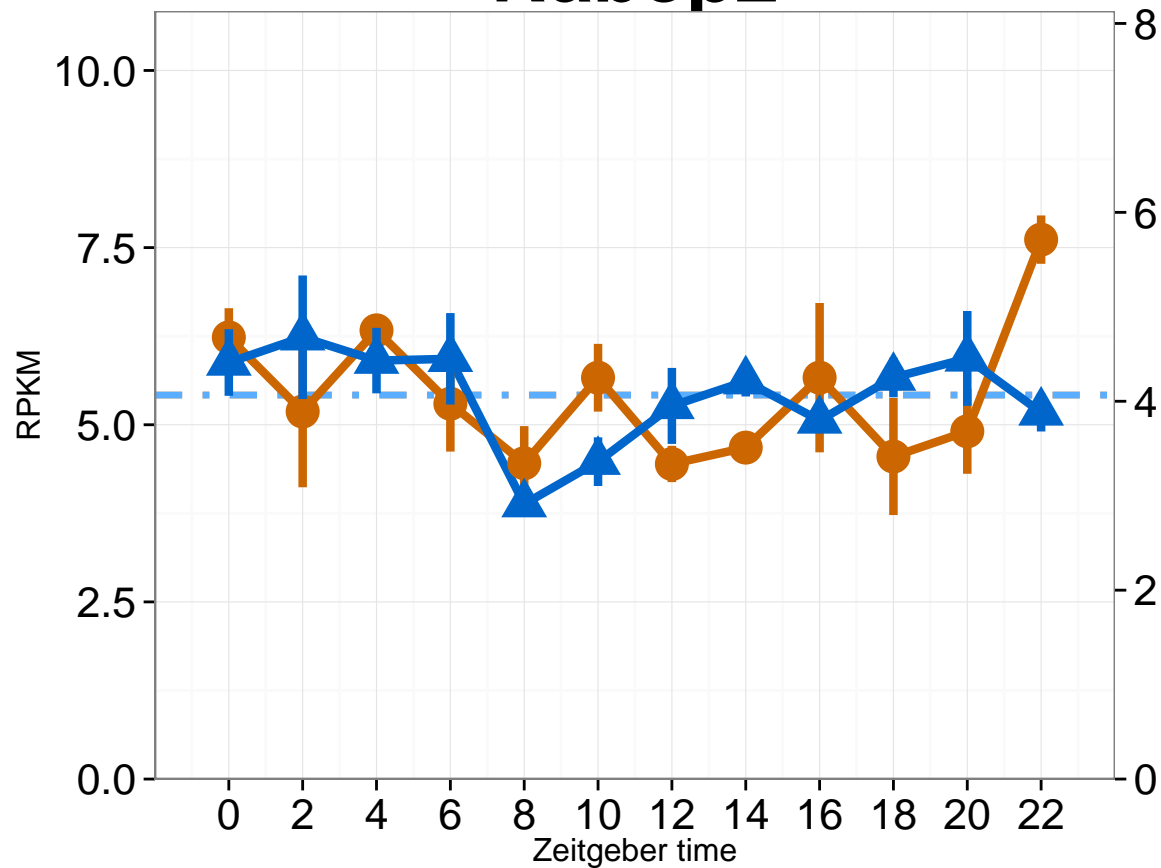

# Rabep2

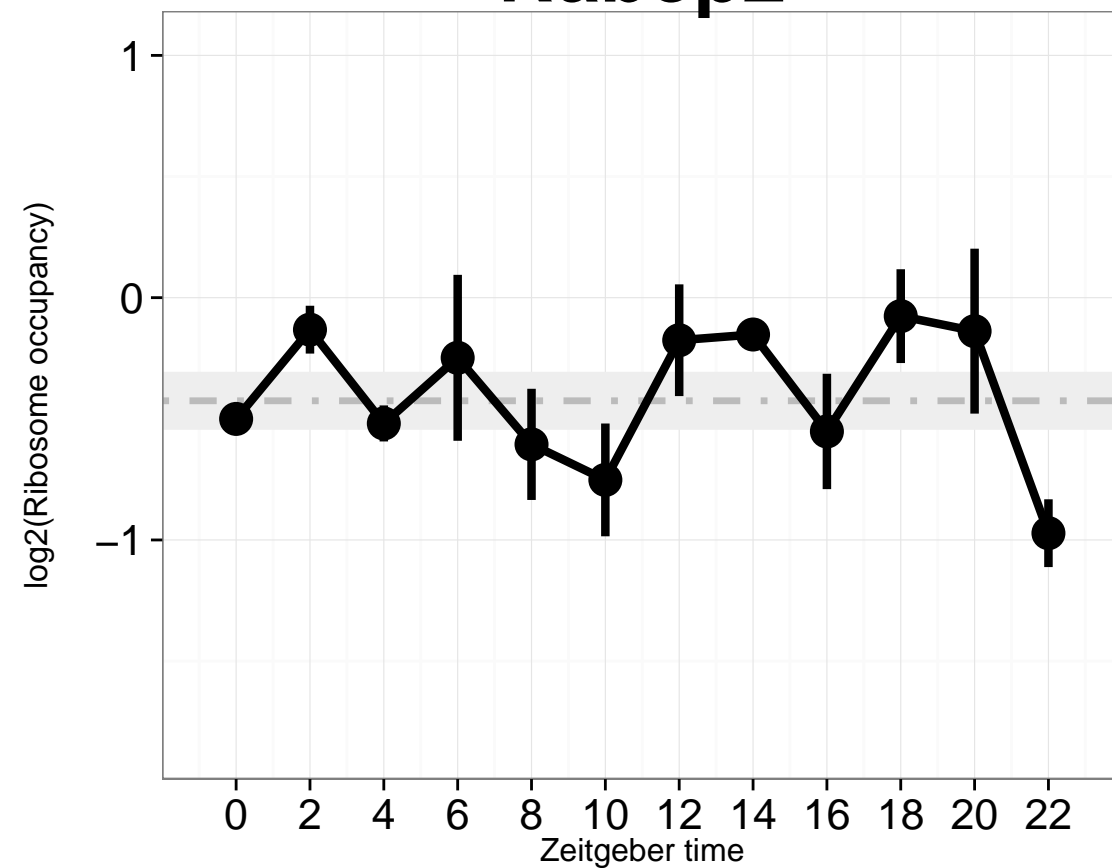

Supplement: SuppDataset_1.zip [file Rabep2_set_A.pdf › Supplemental Dataset 1/A-mRNA_nonrhyth_translation_nonrhyth/Rabep2_set_A.pdf]

## Rabepk

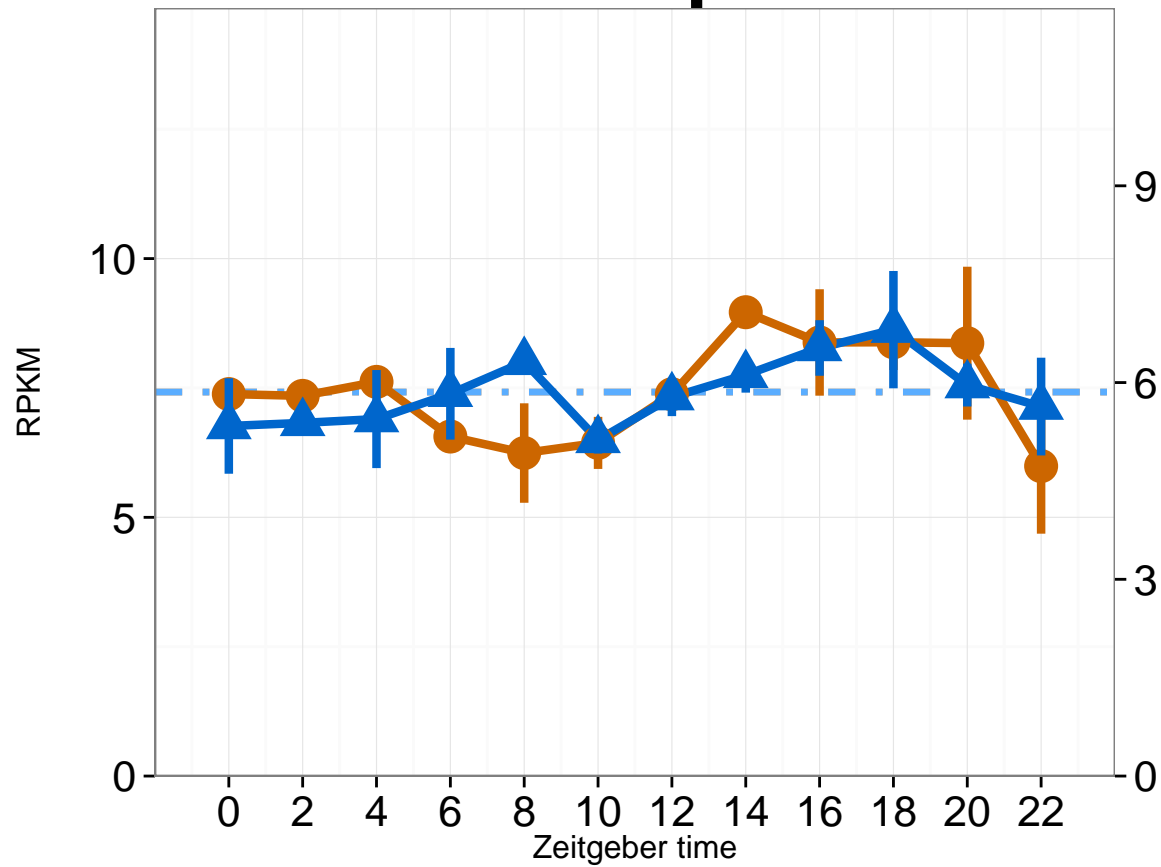

## Rabepk

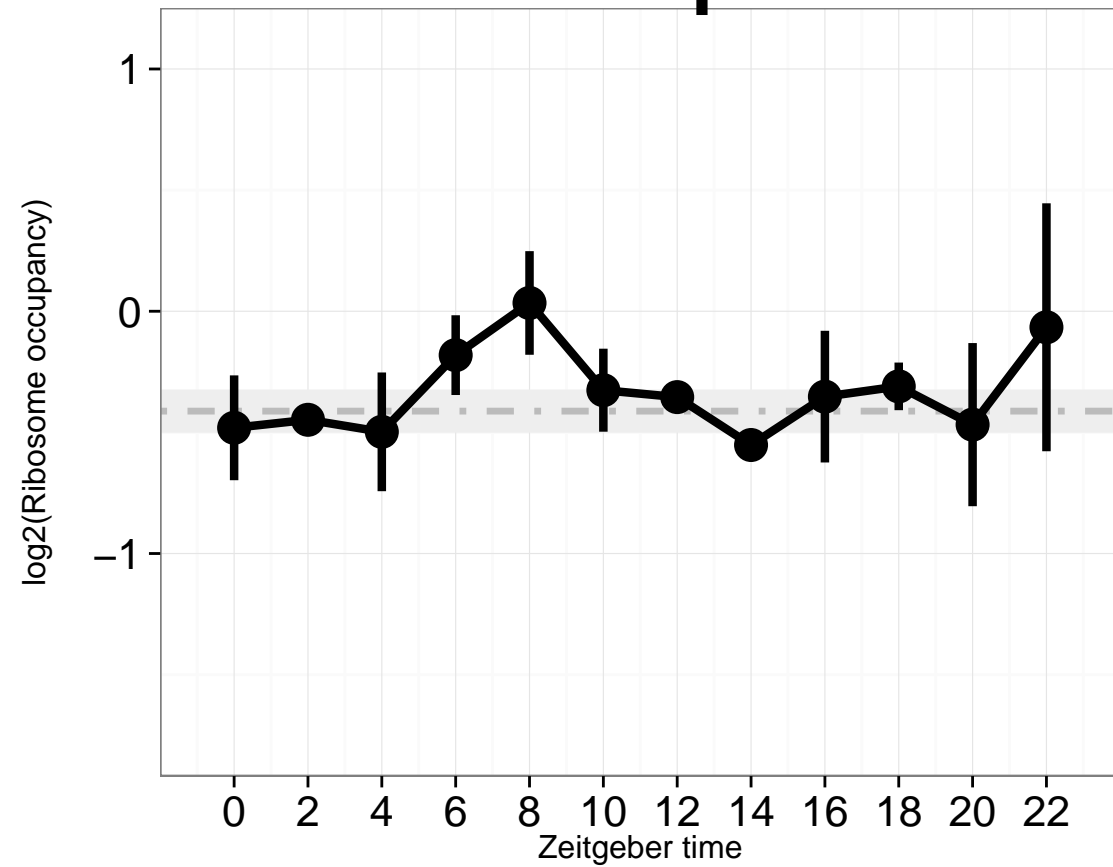

Supplement: SuppDataset_1.zip [file Rabepk_set_A.pdf › Supplemental Dataset 1/A-mRNA_nonrhyth_translation_nonrhyth/Rabepk_set_A.pdf]

# Rabgap1

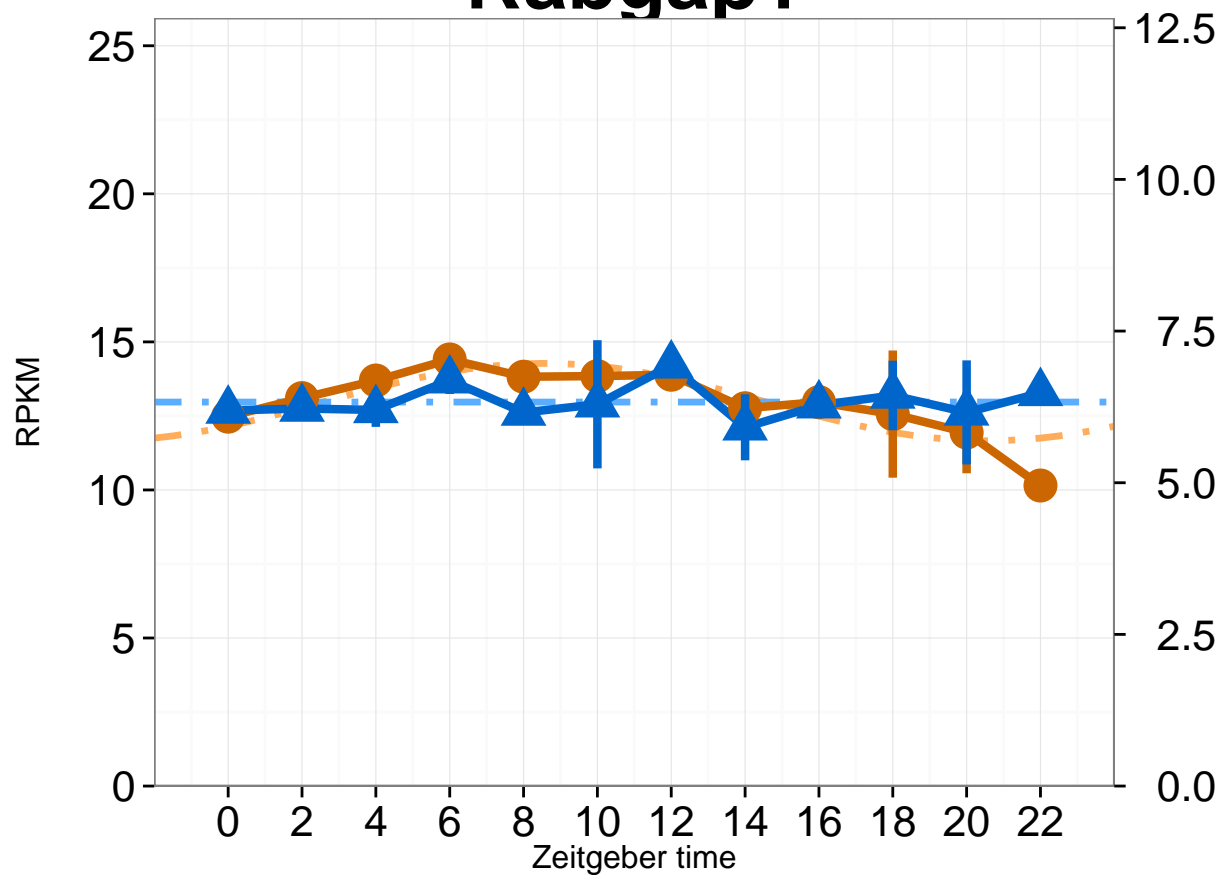

# Rabgap1

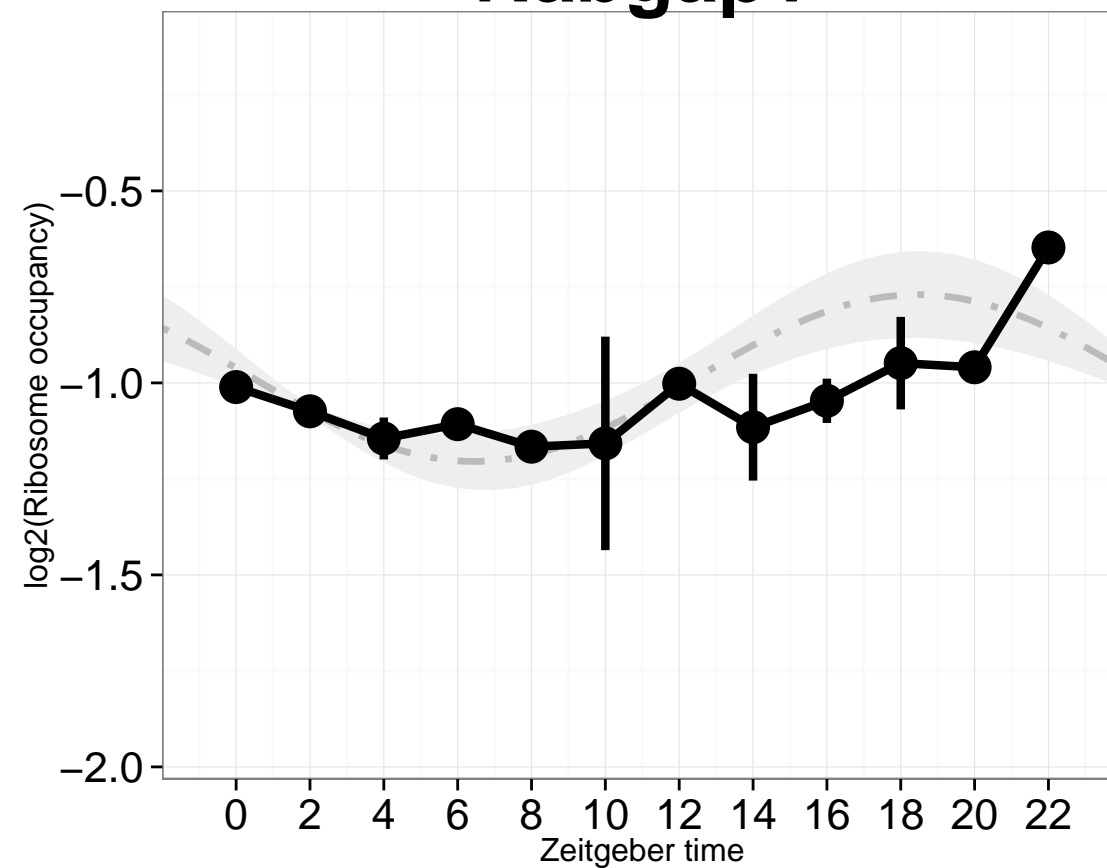

Supplement: SuppDataset_1.zip [file Rabgap1_set_A.pdf › Supplemental Dataset 1/A-mRNA_nonrhyth_translation_nonrhyth/Rabgap1_set_A.pdf]

# Rabgap1l

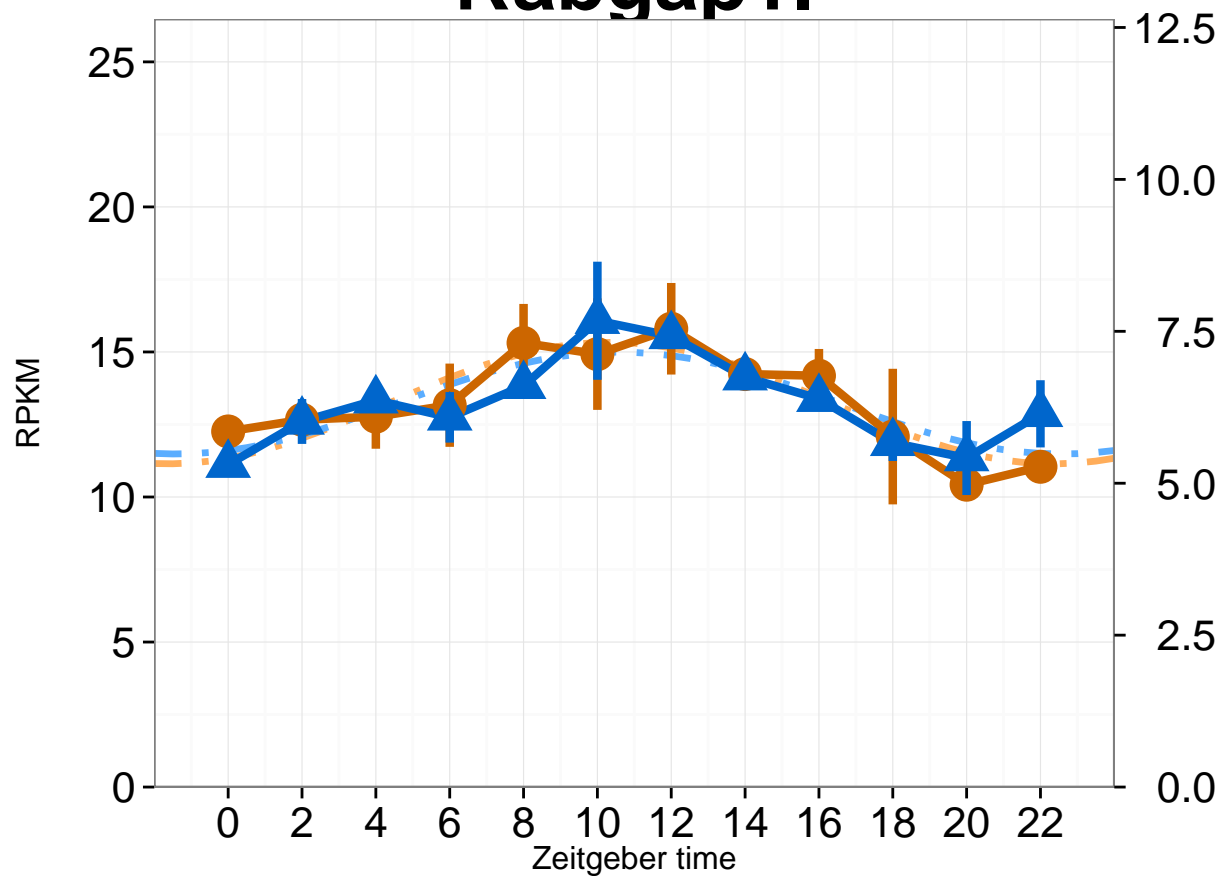

# Rabgap1l

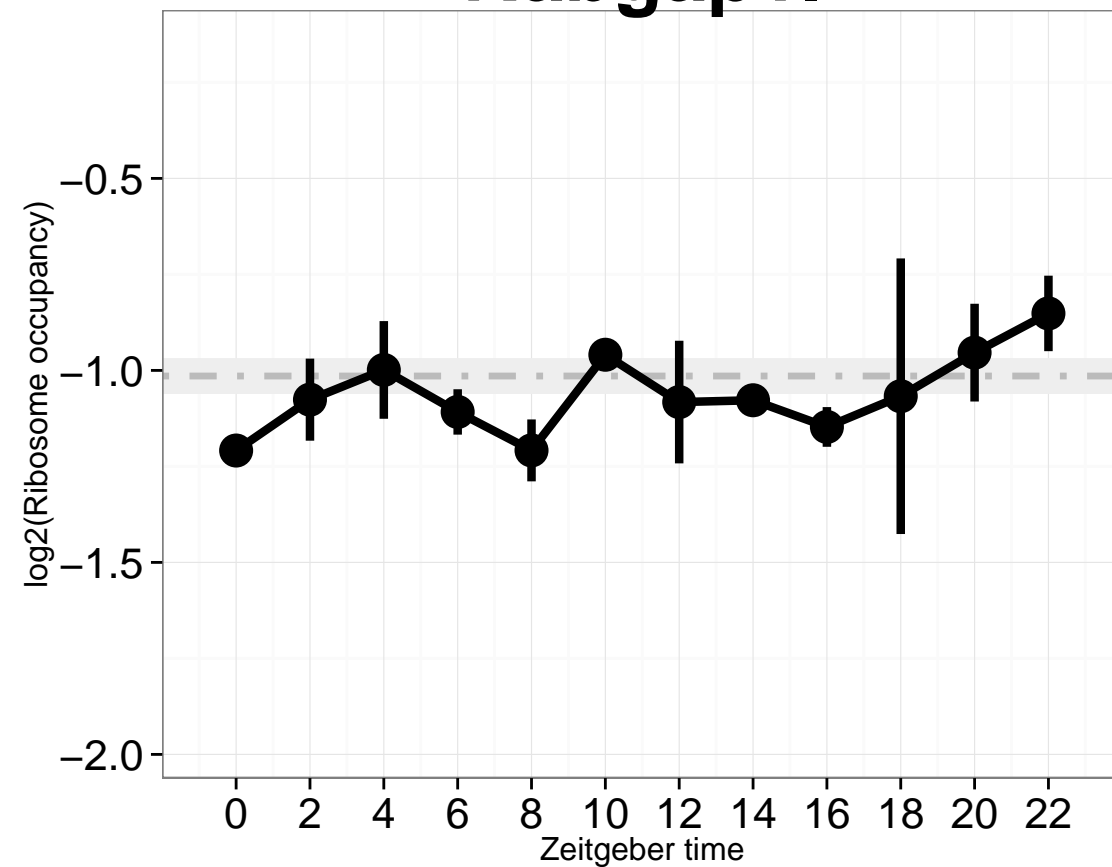

Supplement: SuppDataset_1.zip [file Rabgap1l_set_A.pdf › Supplemental Dataset 1/A-mRNA_nonrhyth_translation_nonrhyth/Rabgap1l_set_A.pdf]

## Rabgef1

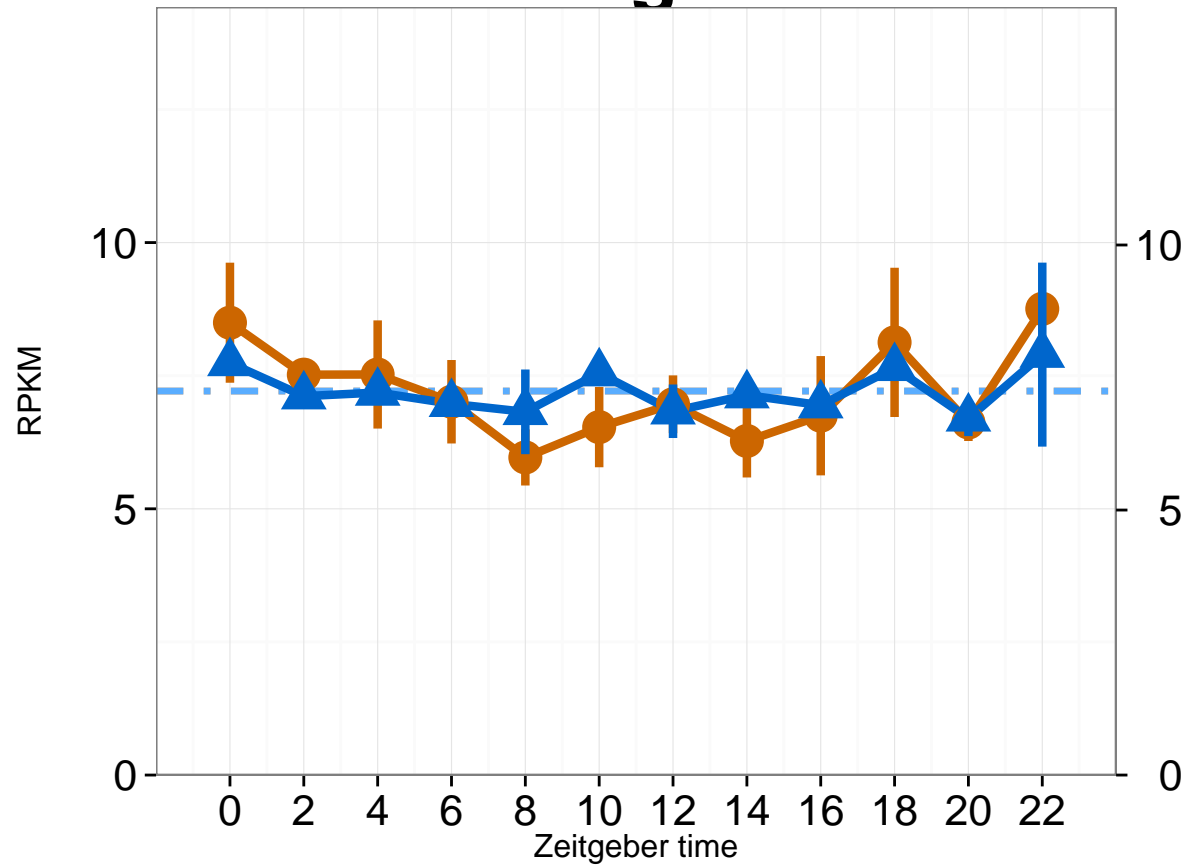

## Rabgef1

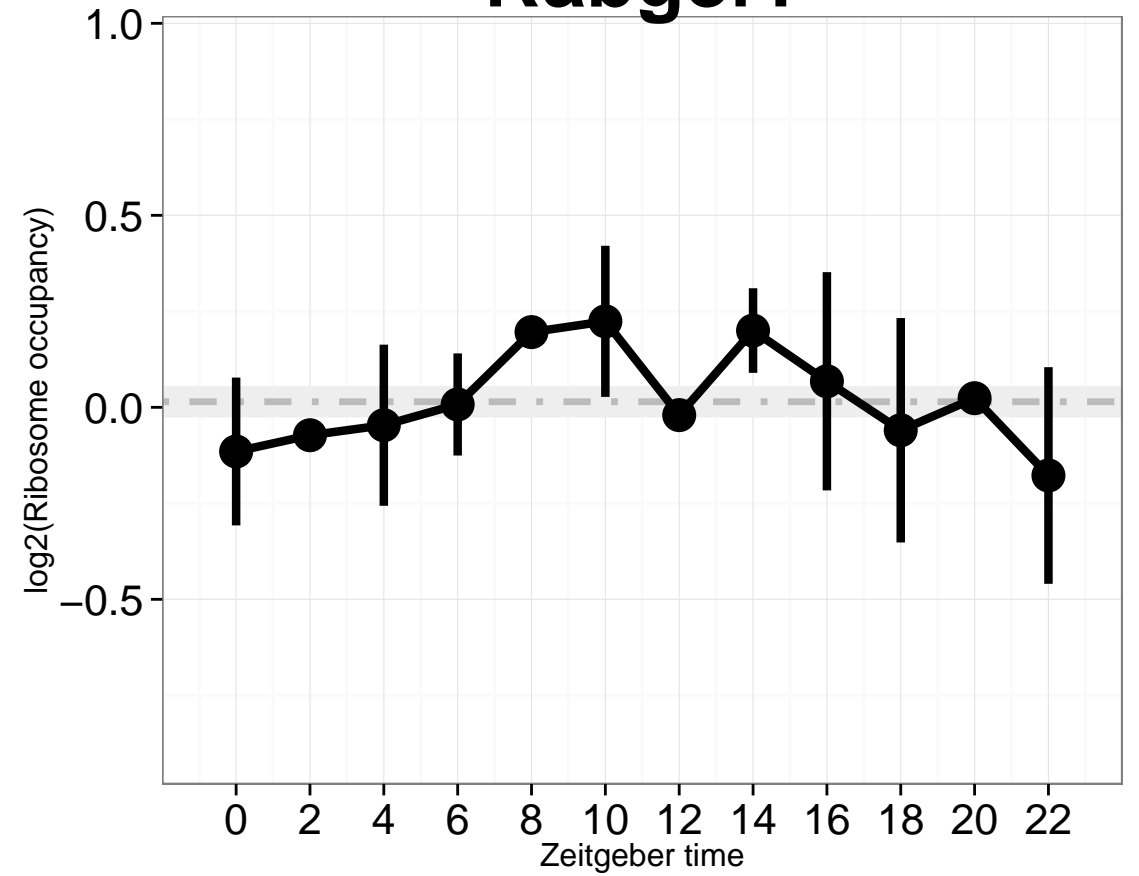

Supplement: SuppDataset_1.zip [file Rabgef1_set_A.pdf › Supplemental Dataset 1/A-mRNA_nonrhyth_translation_nonrhyth/Rabgef1_set_A.pdf]

## Rabggta

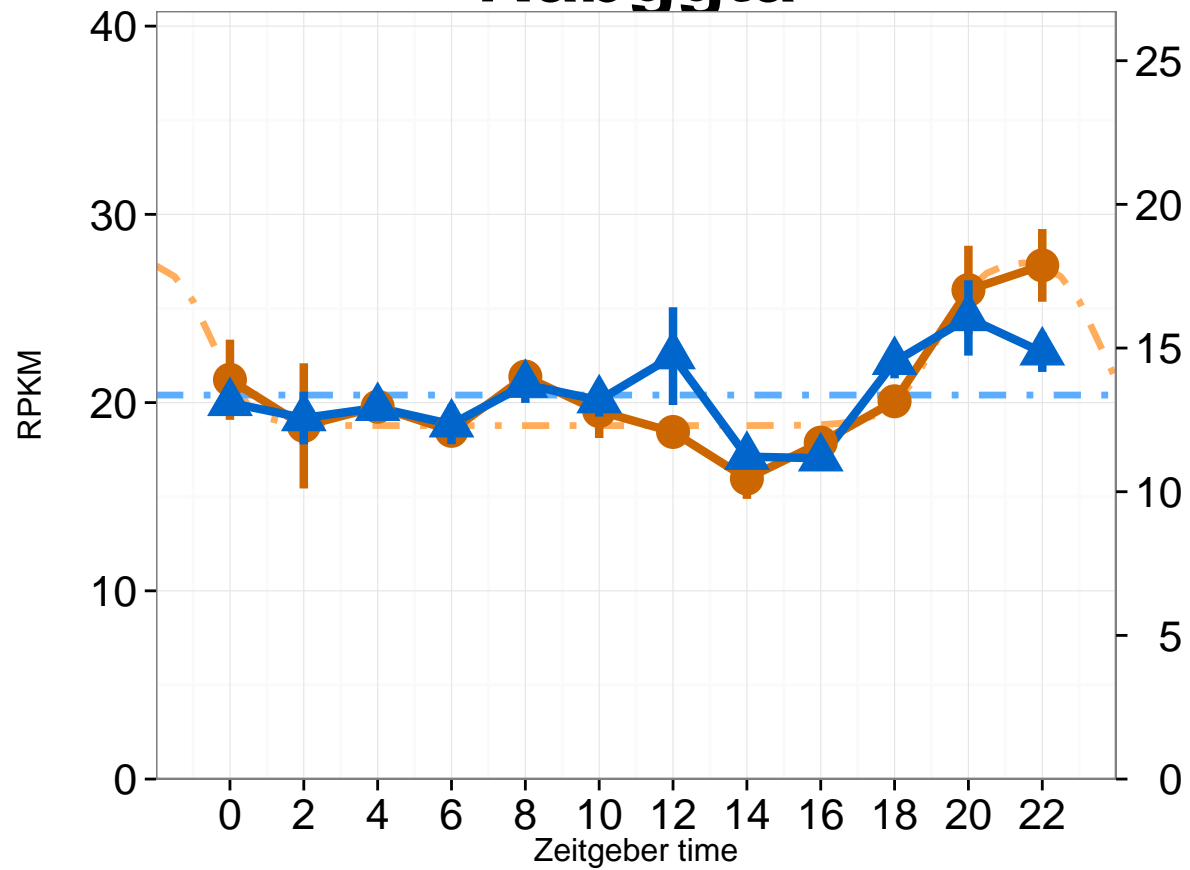

## Rabggta

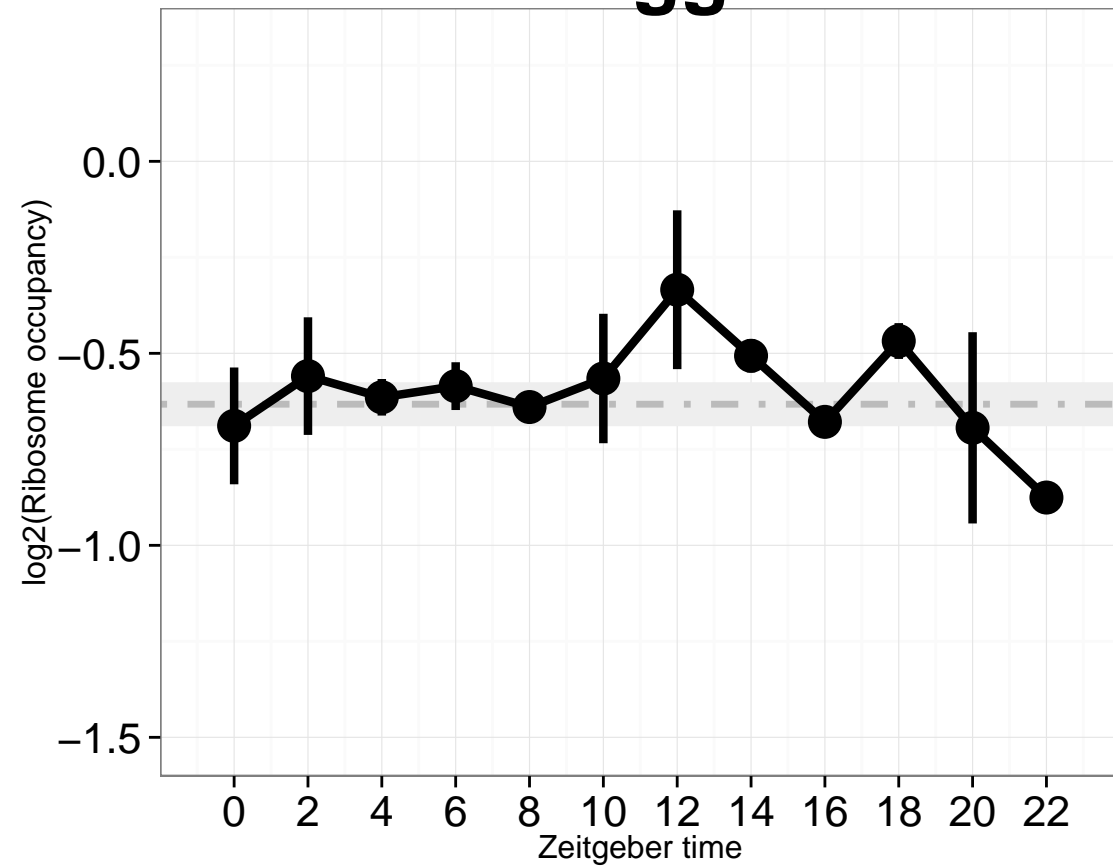

Supplement: SuppDataset_1.zip [file Rabggta_set_A.pdf › Supplemental Dataset 1/A-mRNA_nonrhyth_translation_nonrhyth/Rabggta_set_A.pdf]

## Rabif

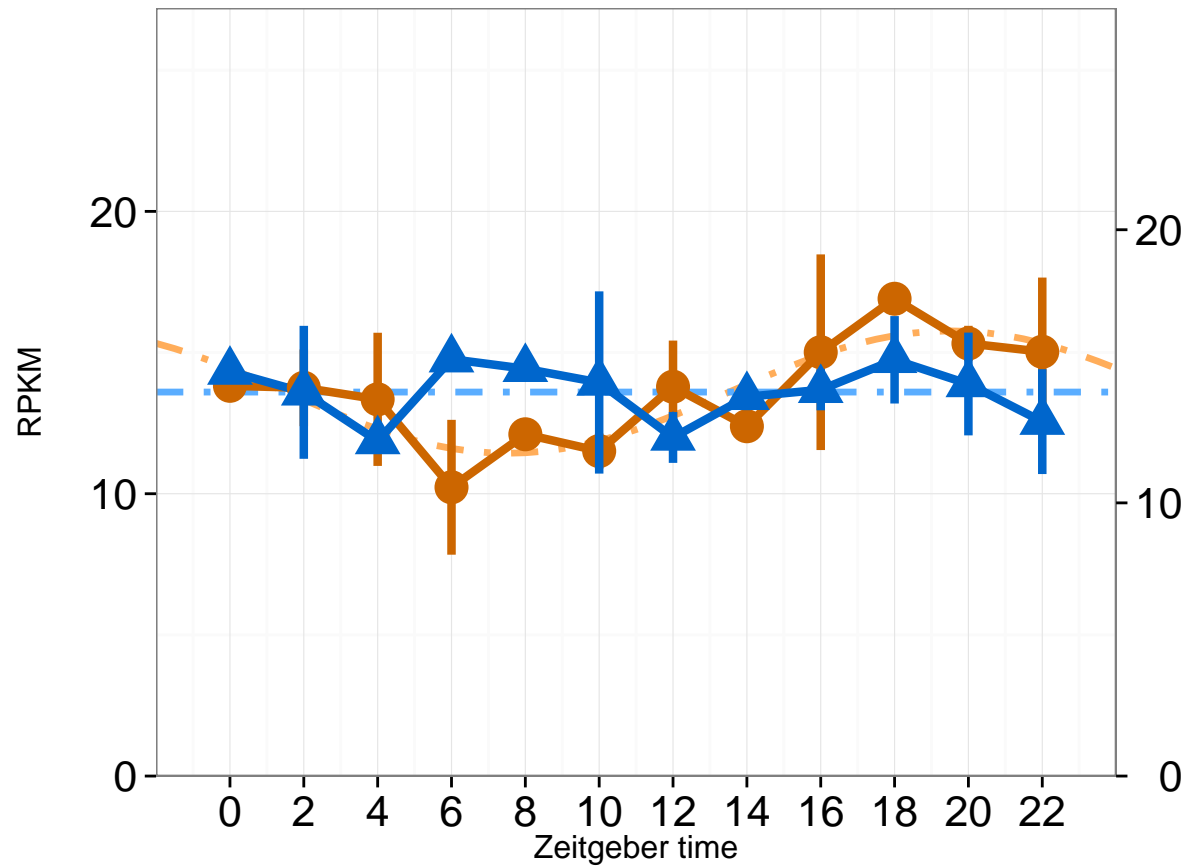

## Rabif

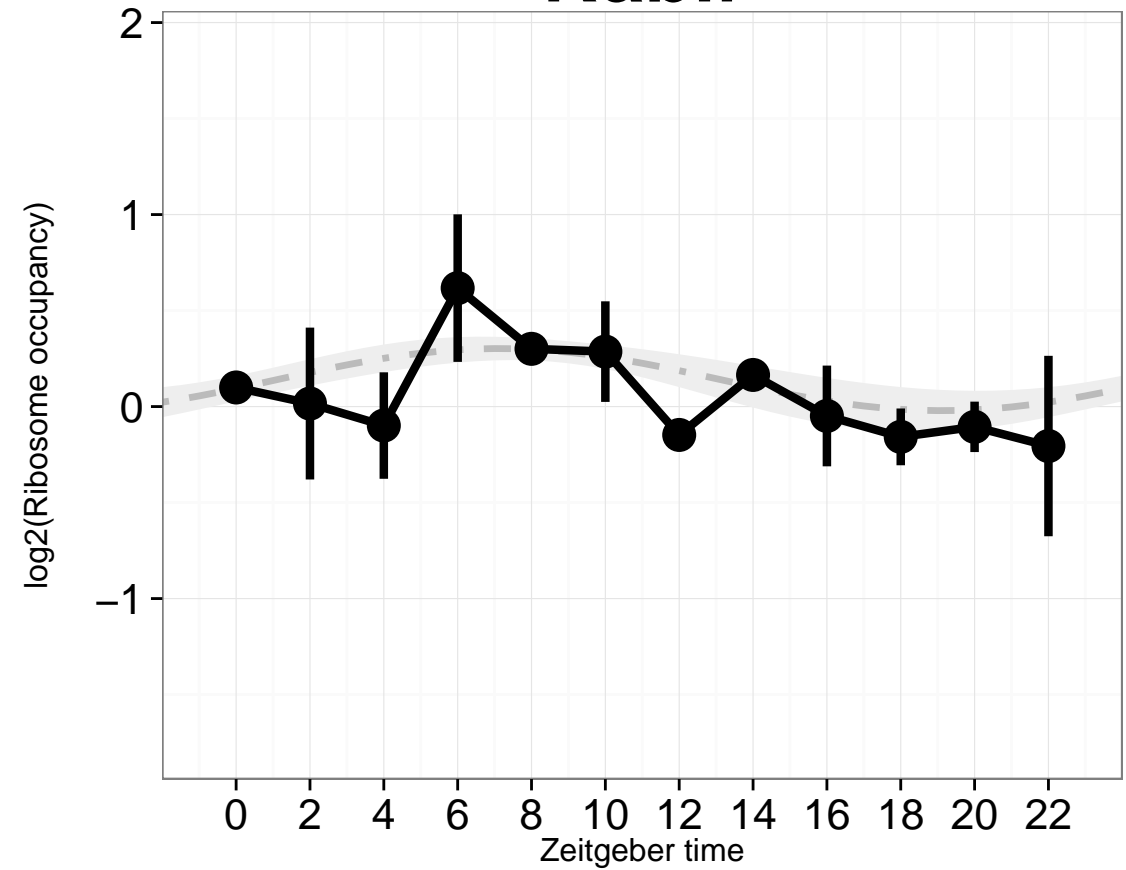

Supplement: SuppDataset_1.zip [file Rabif_set_A.pdf › Supplemental Dataset 1/A-mRNA_nonrhyth_translation_nonrhyth/Rabif_set_A.pdf]

## Rabl3

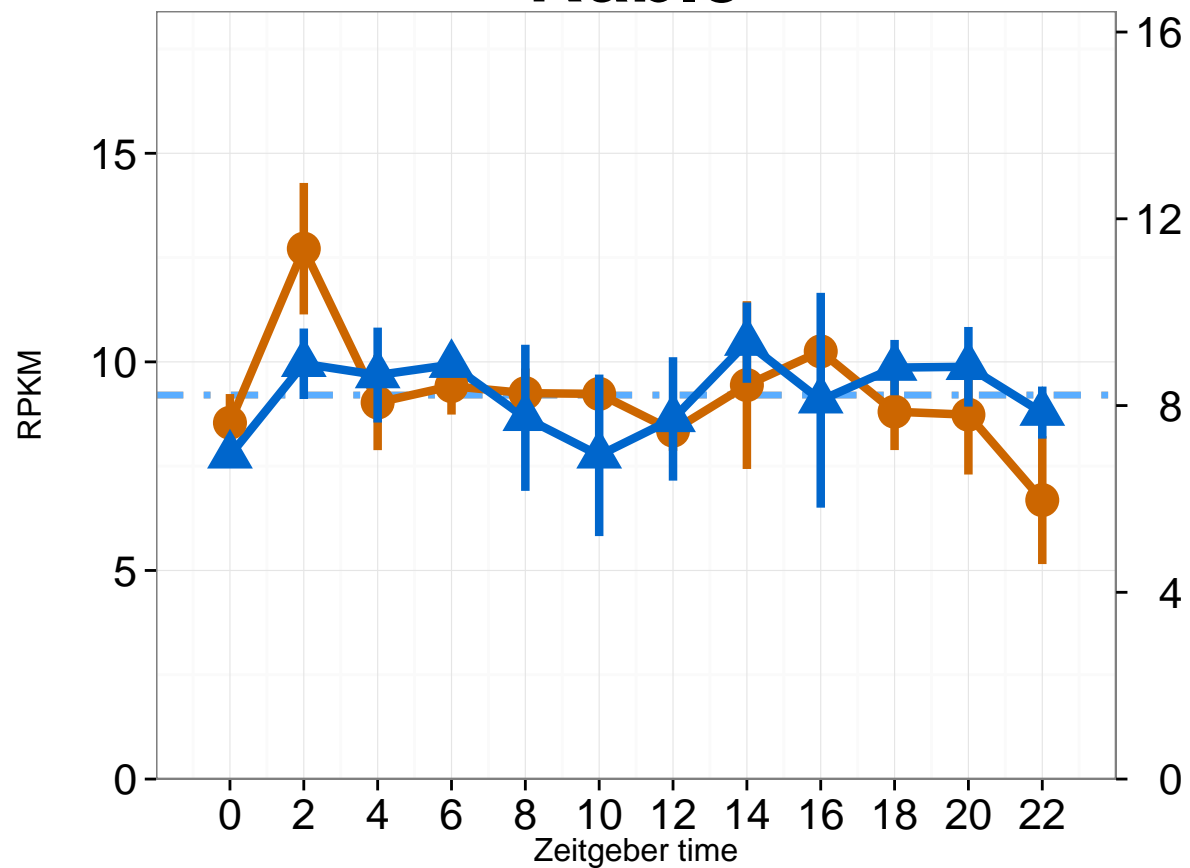

## Rabl3

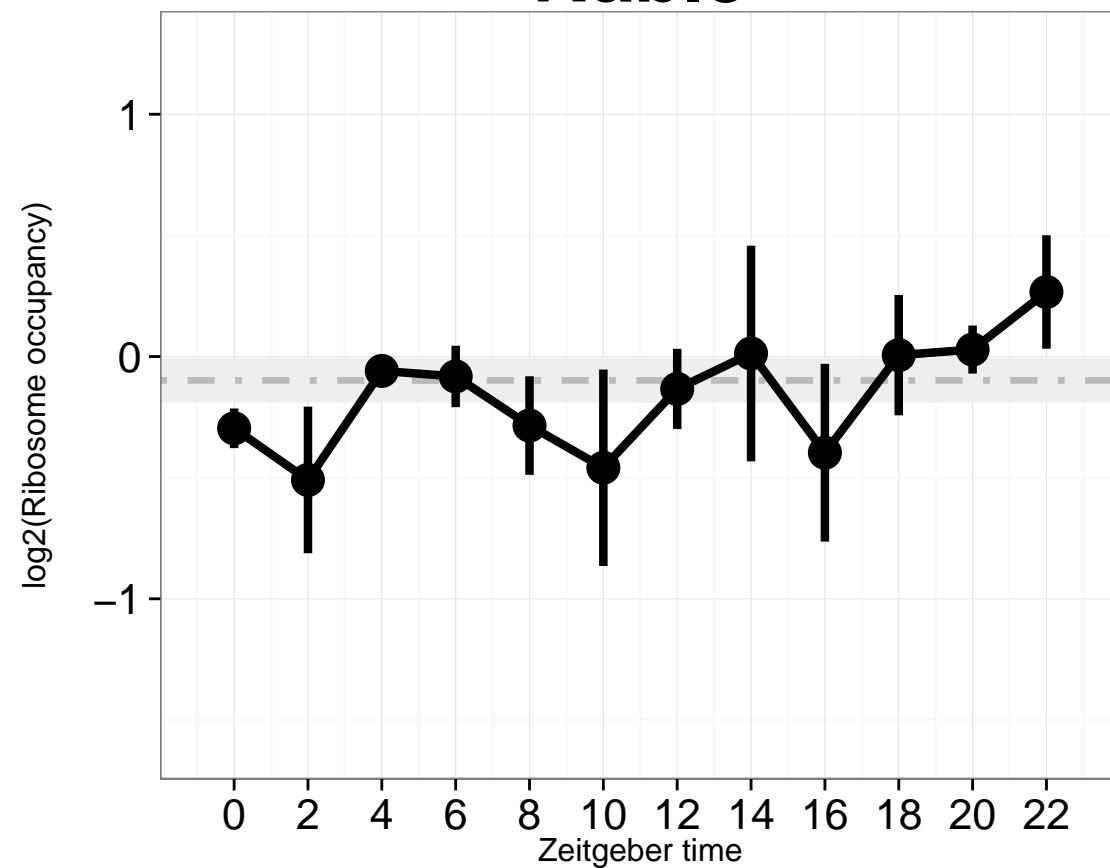

Supplement: SuppDataset_1.zip [file Rabl3_set_A.pdf › Supplemental Dataset 1/A-mRNA_nonrhyth_translation_nonrhyth/Rabl3_set_A.pdf]

## Rab15

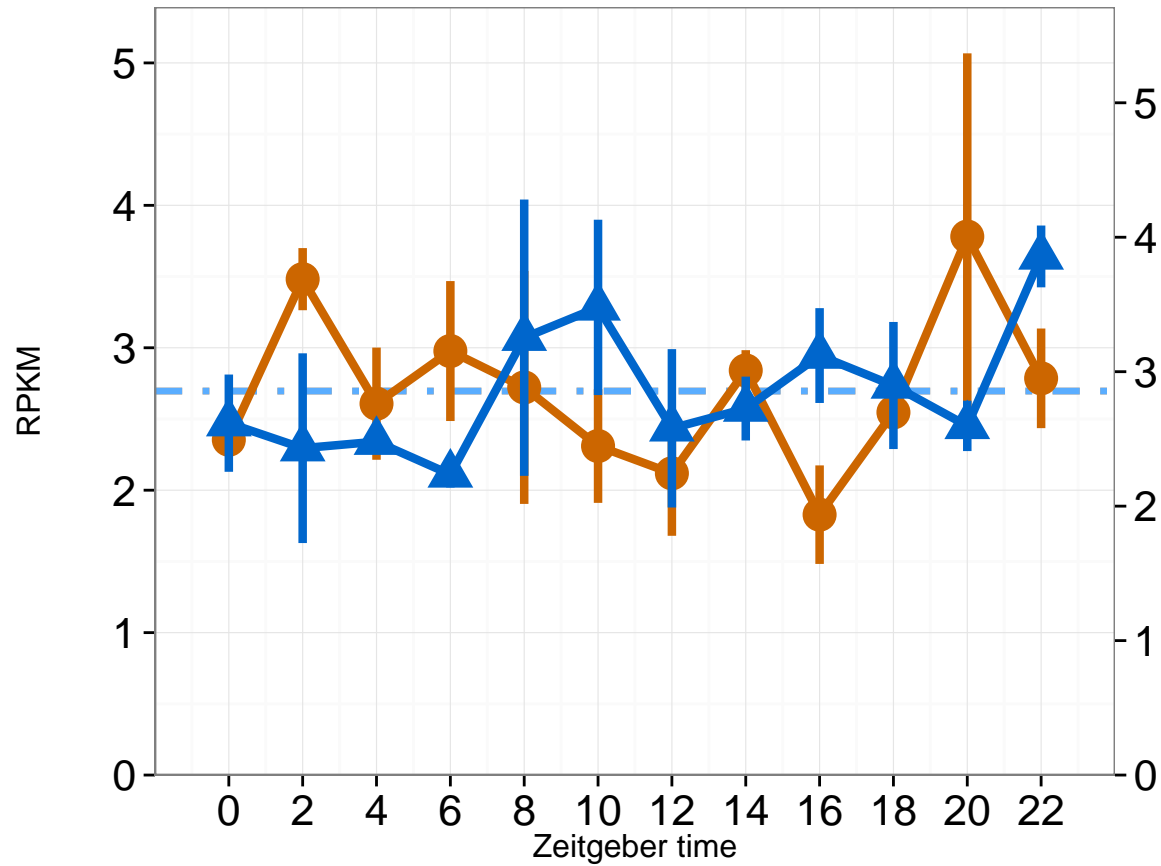

## Rab15

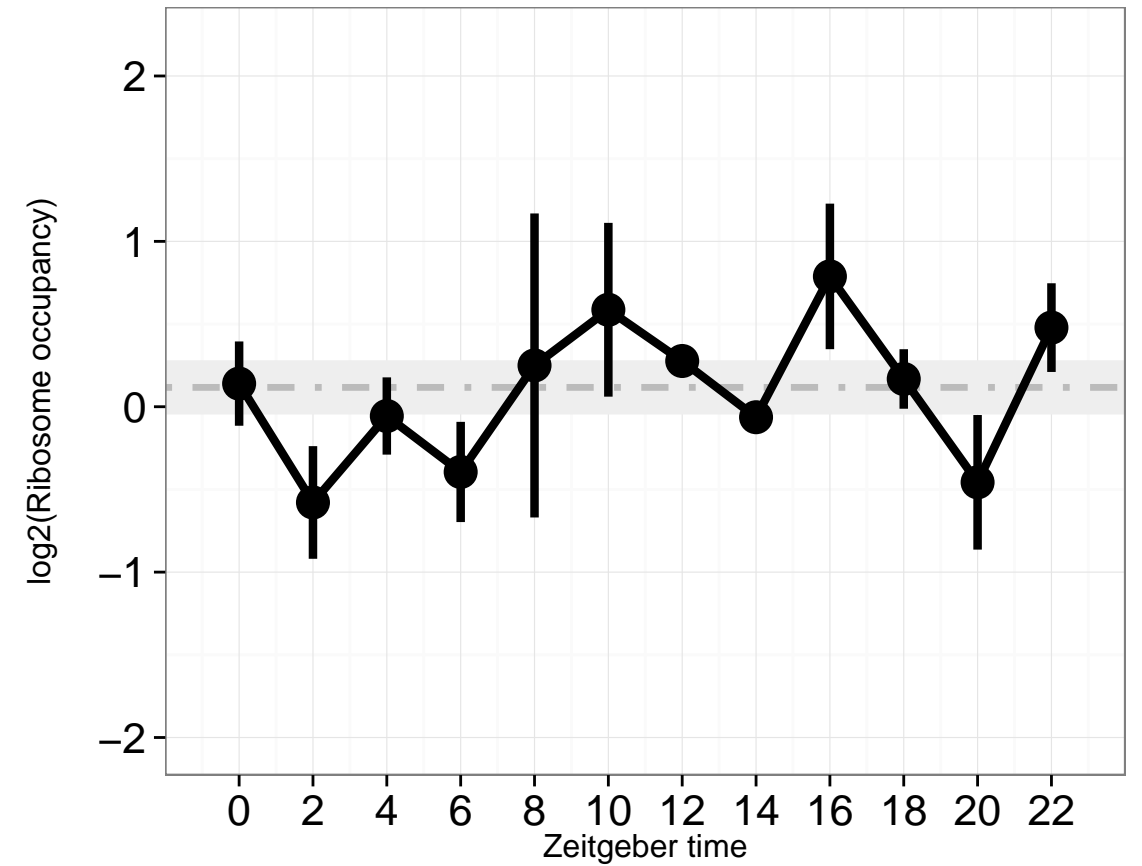

Supplement: SuppDataset_1.zip [file Rabl5_set_A.pdf › Supplemental Dataset 1/A-mRNA_nonrhyth_translation_nonrhyth/Rabl5_set_A.pdf]

# Rab16

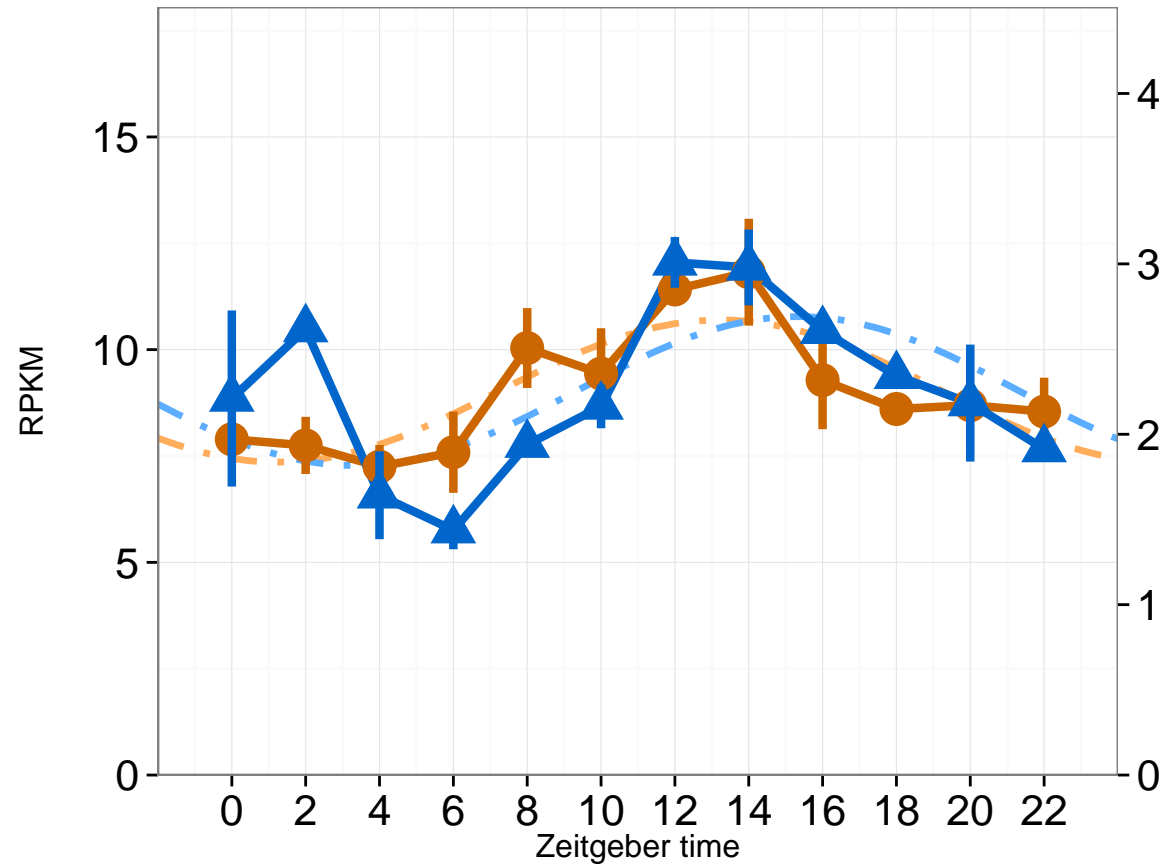

# Rab16

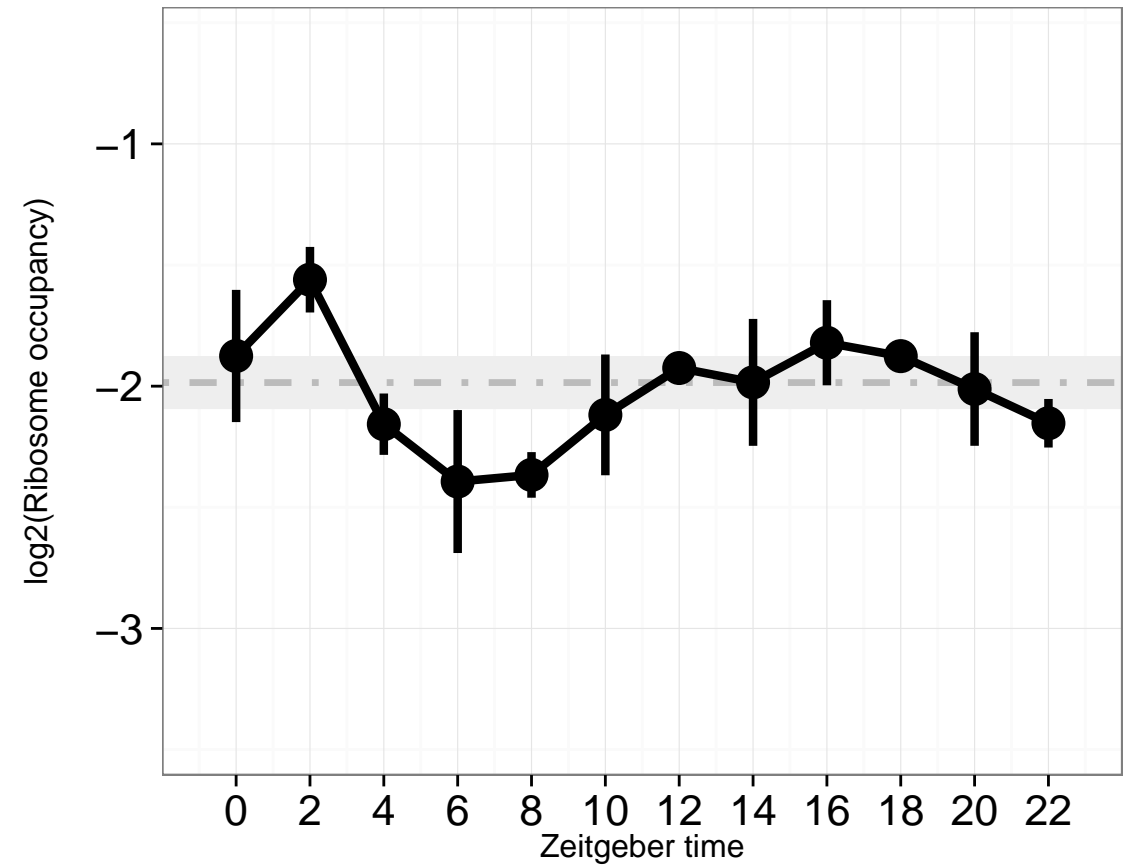

Supplement: SuppDataset_1.zip [file Rabl6_set_A.pdf › Supplemental Dataset 1/A-mRNA_nonrhyth_translation_nonrhyth/Rabl6_set_A.pdf]

## Rac1

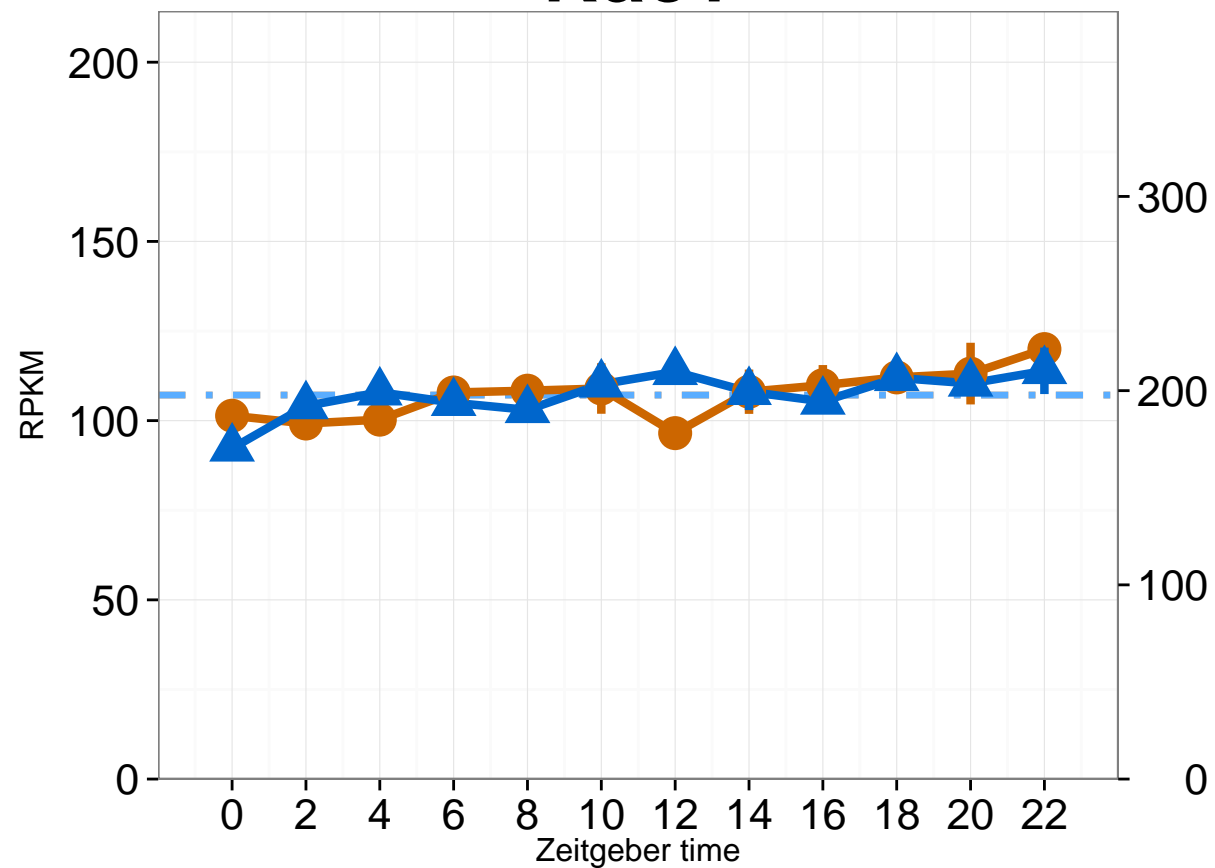

## Rac1

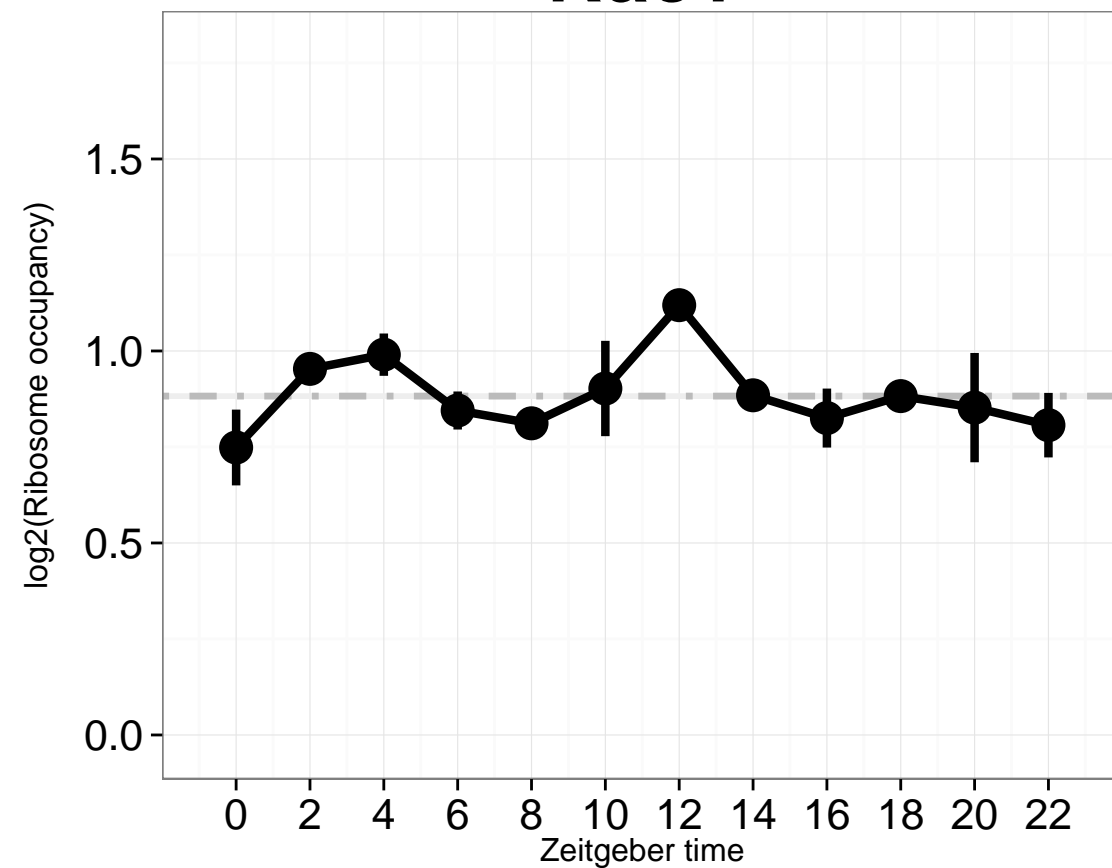

Supplement: SuppDataset_1.zip [file Rac1_set_A.pdf › Supplemental Dataset 1/A-mRNA_nonrhyth_translation_nonrhyth/Rac1_set_A.pdf]

## Rac2

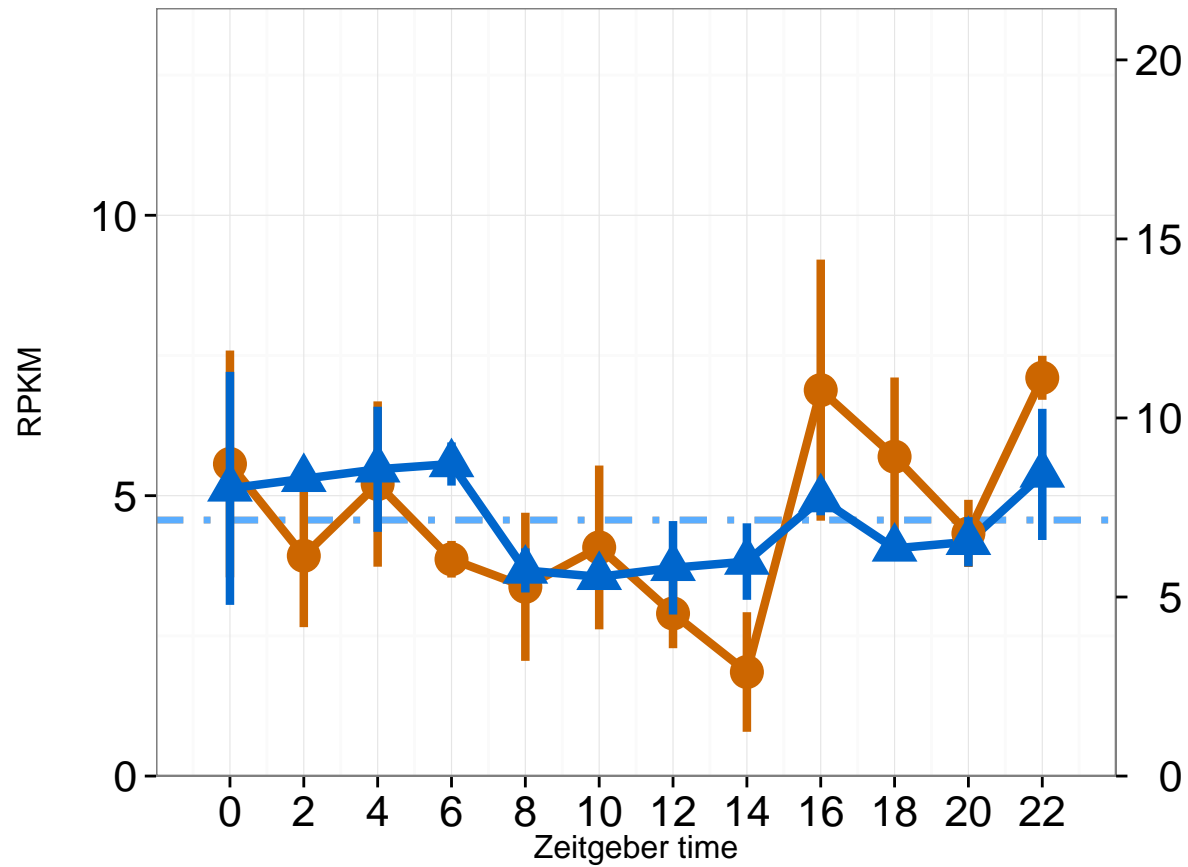

## Rac2

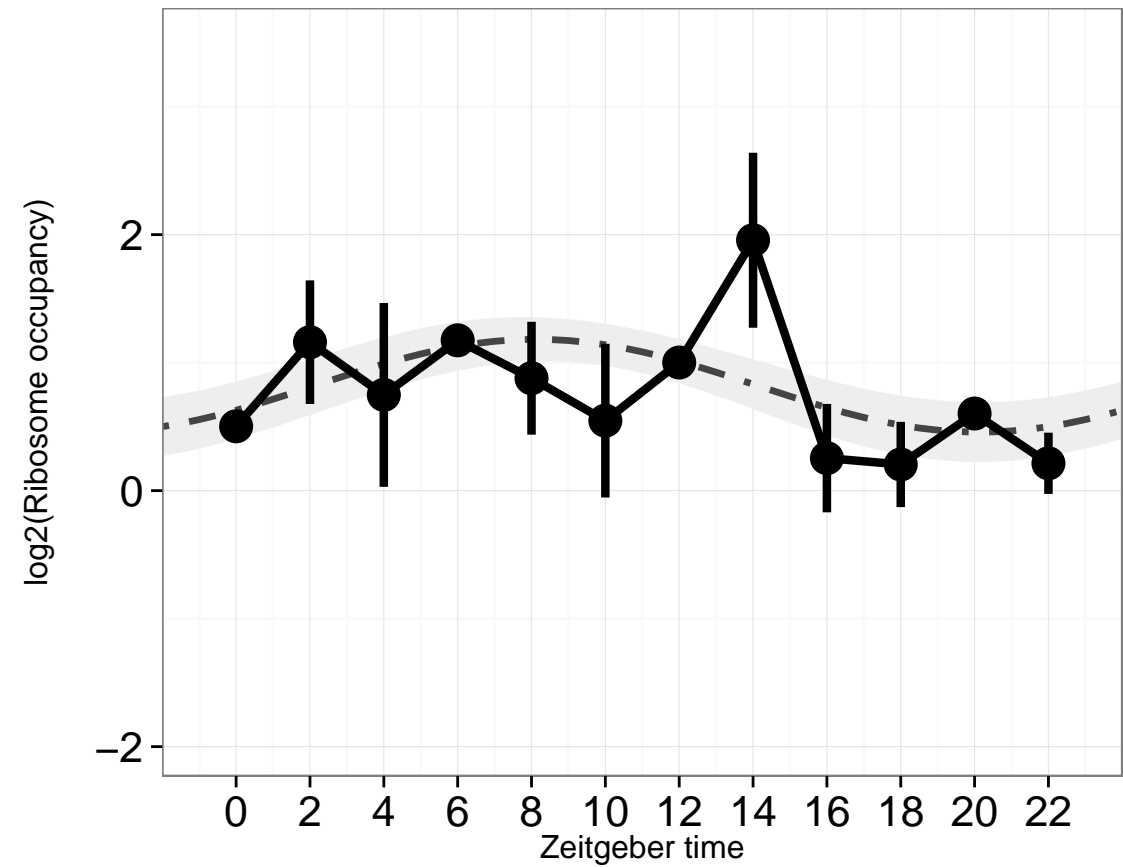

Supplement: SuppDataset_1.zip [file Rac2_set_A.pdf › Supplemental Dataset 1/A-mRNA_nonrhyth_translation_nonrhyth/Rac2_set_A.pdf]

# Racgap1

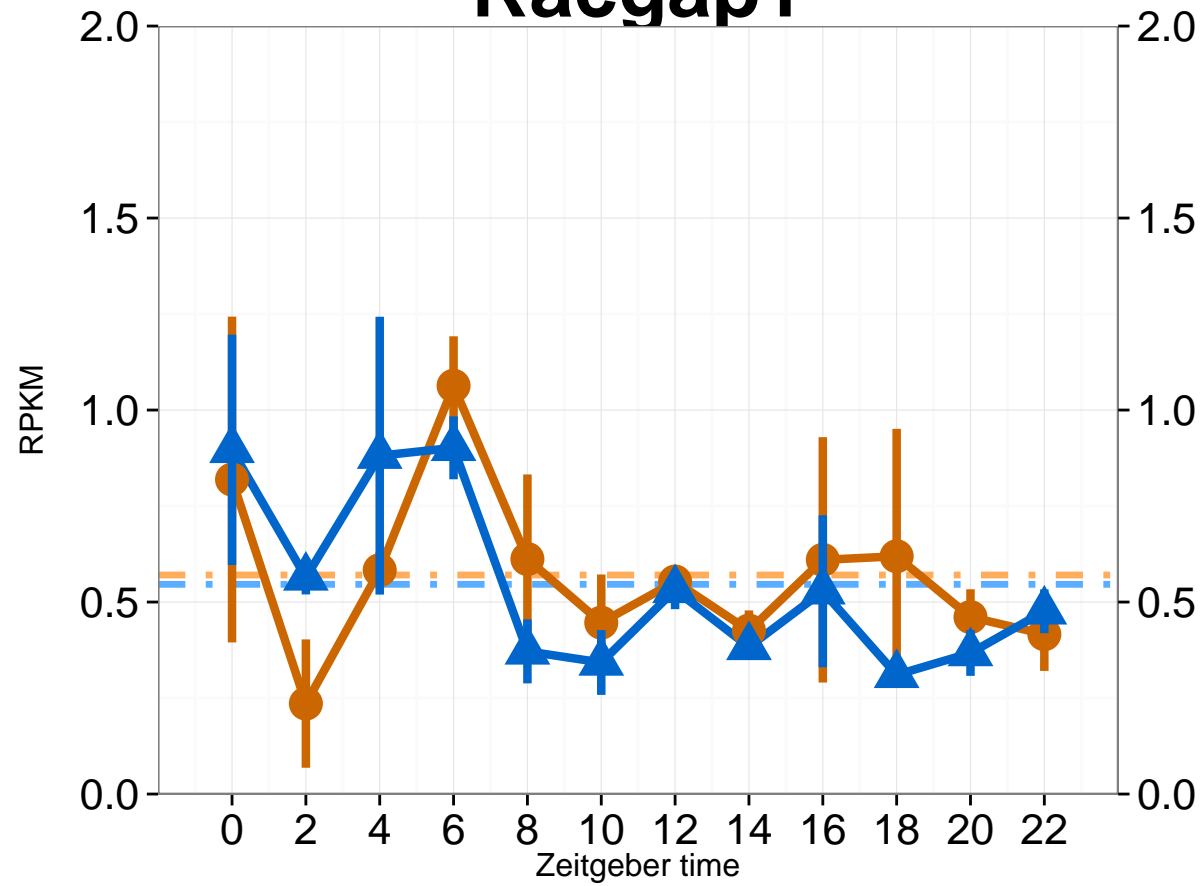

# Racgap1

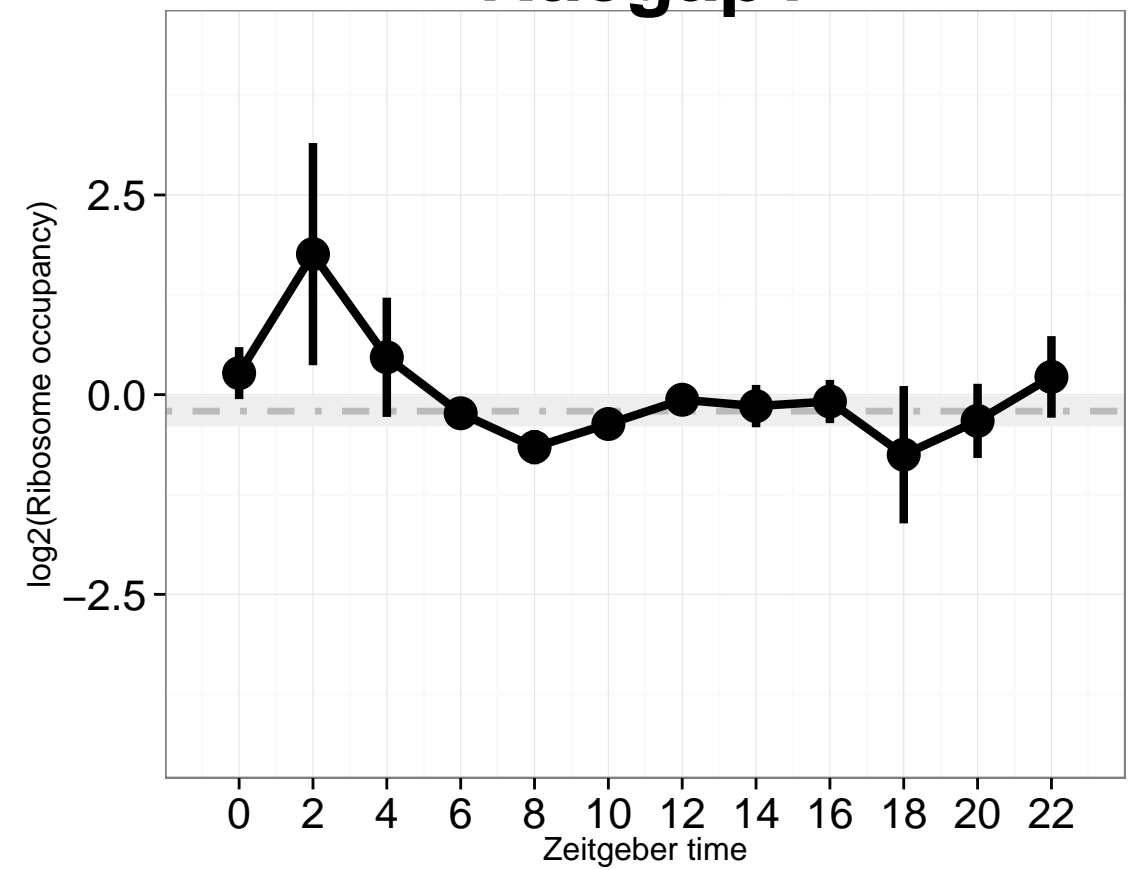

Supplement: SuppDataset_1.zip [file Racgap1_set_A.pdf › Supplemental Dataset 1/A-mRNA_nonrhyth_translation_nonrhyth/Racgap1_set_A.pdf]

## Rad17

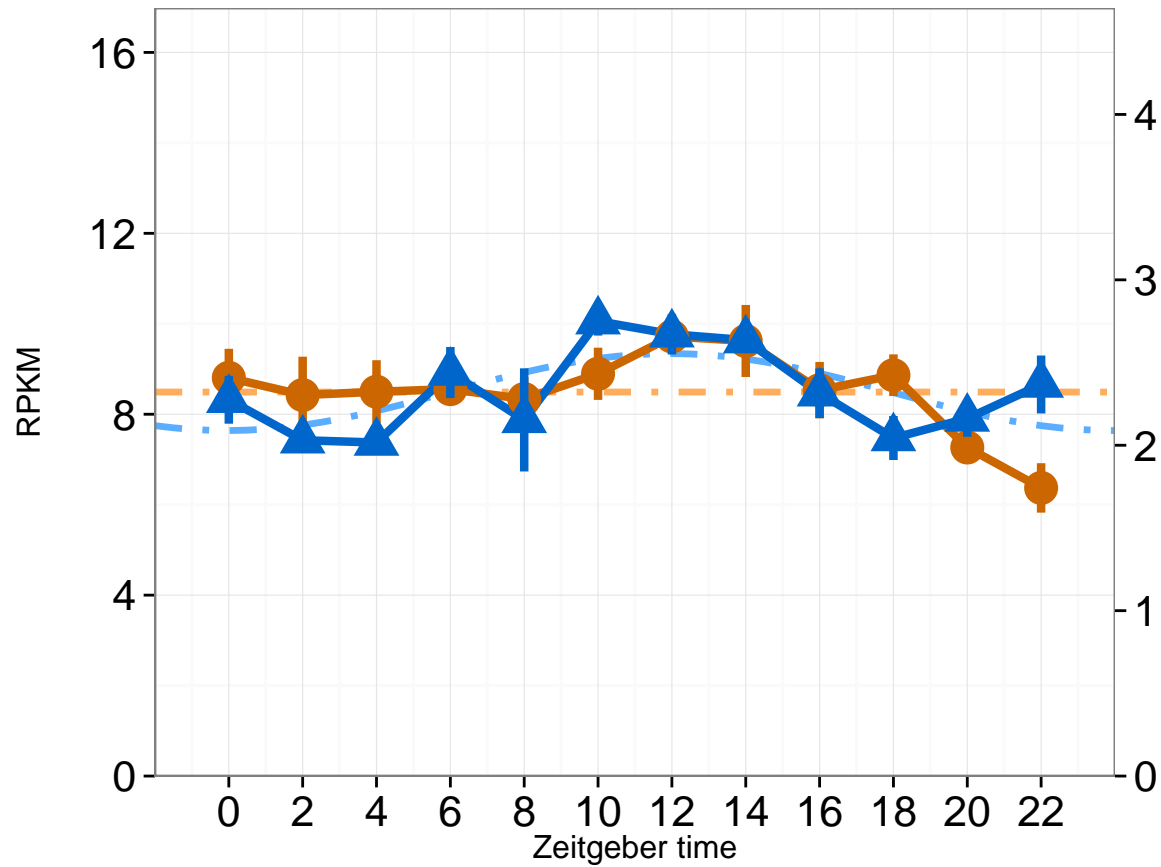

## Rad17

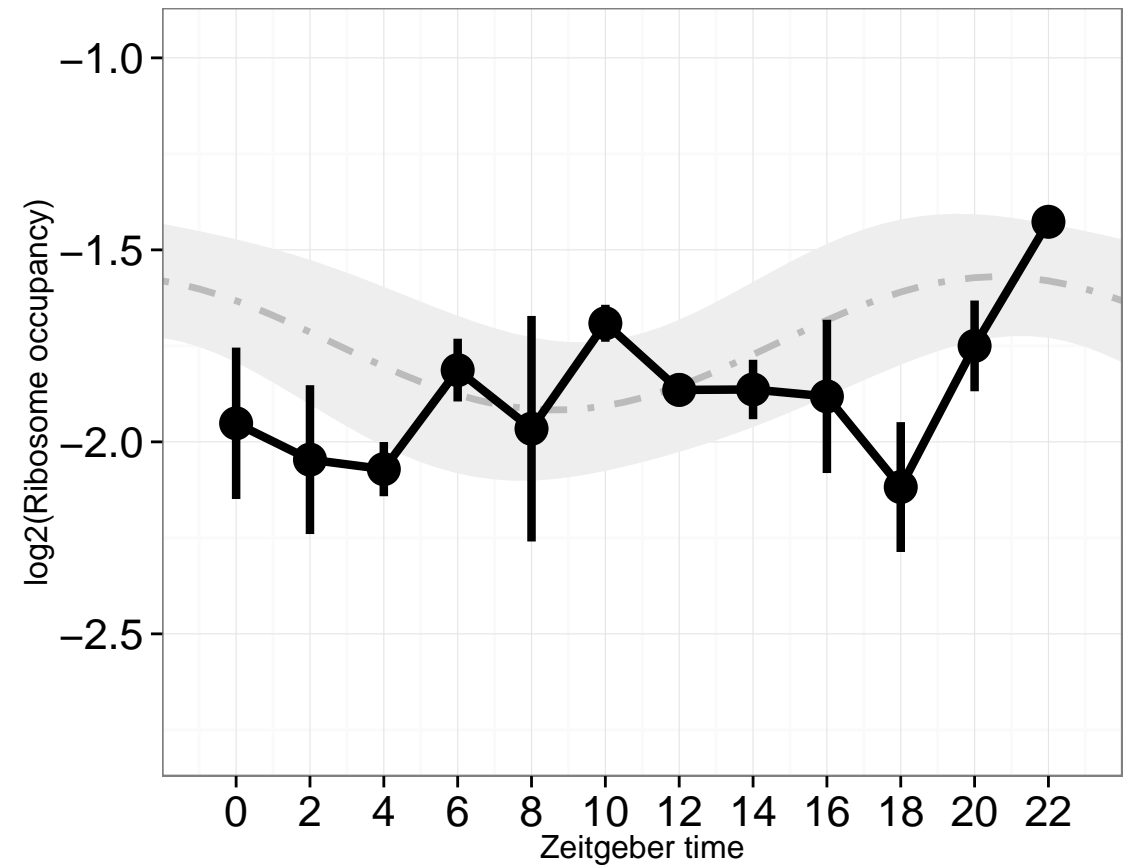

Supplement: SuppDataset_1.zip [file Rad17_set_A.pdf › Supplemental Dataset 1/A-mRNA_nonrhyth_translation_nonrhyth/Rad17_set_A.pdf]

## Rad18

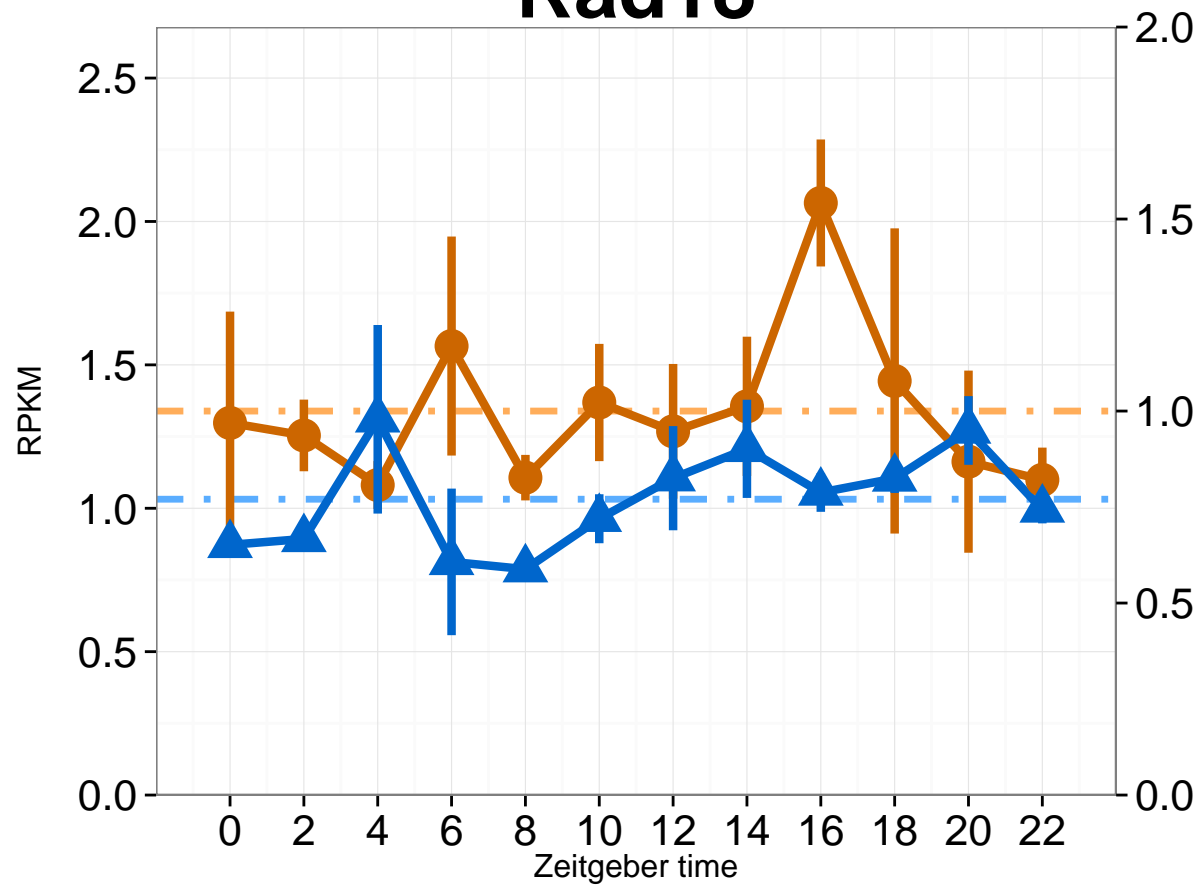

## Rad18

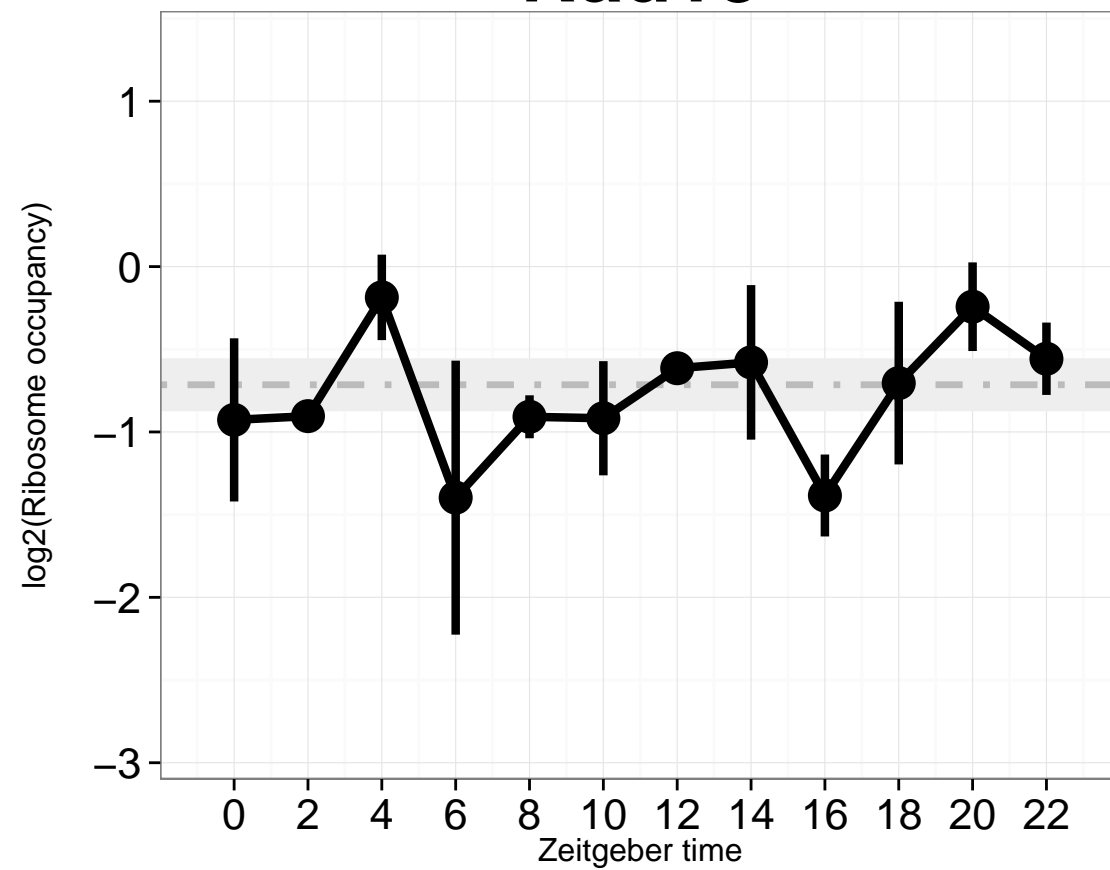

Supplement: SuppDataset_1.zip [file Rad18_set_A.pdf › Supplemental Dataset 1/A-mRNA_nonrhyth_translation_nonrhyth/Rad18_set_A.pdf]

## Rad1

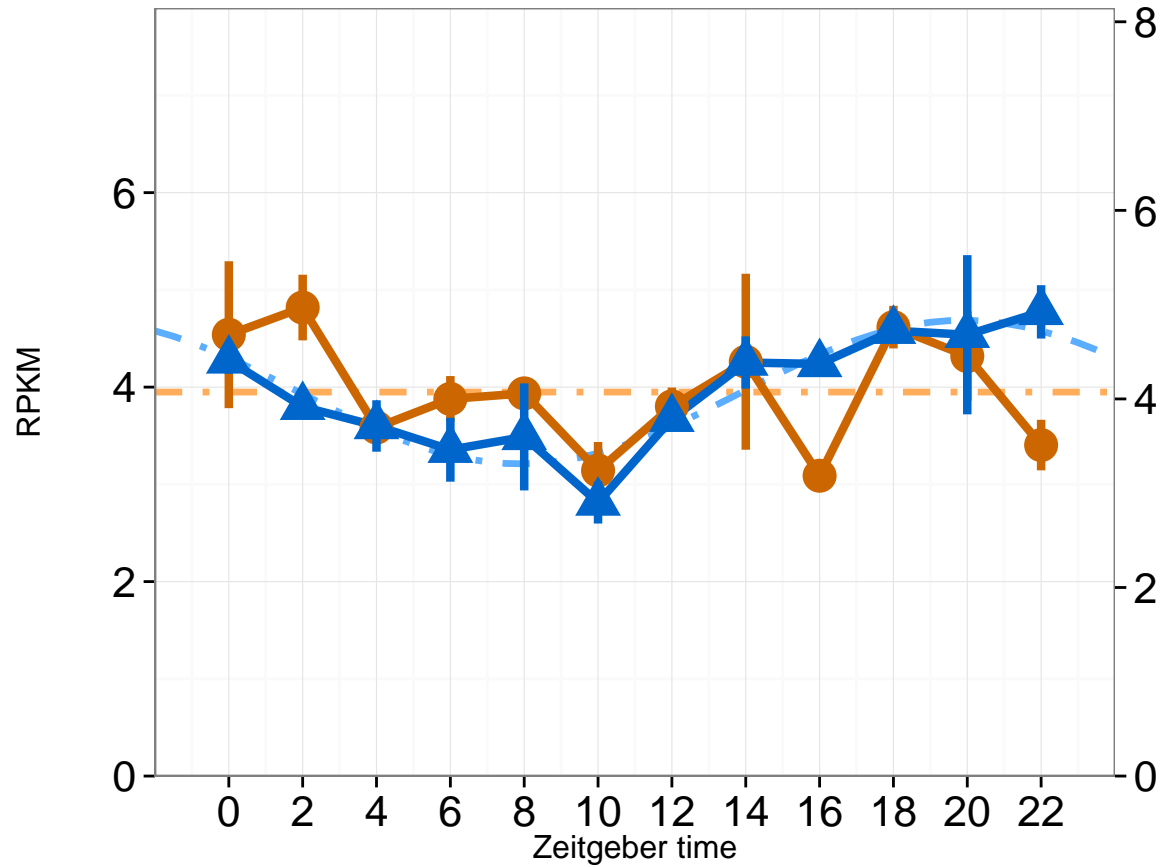

## Rad1

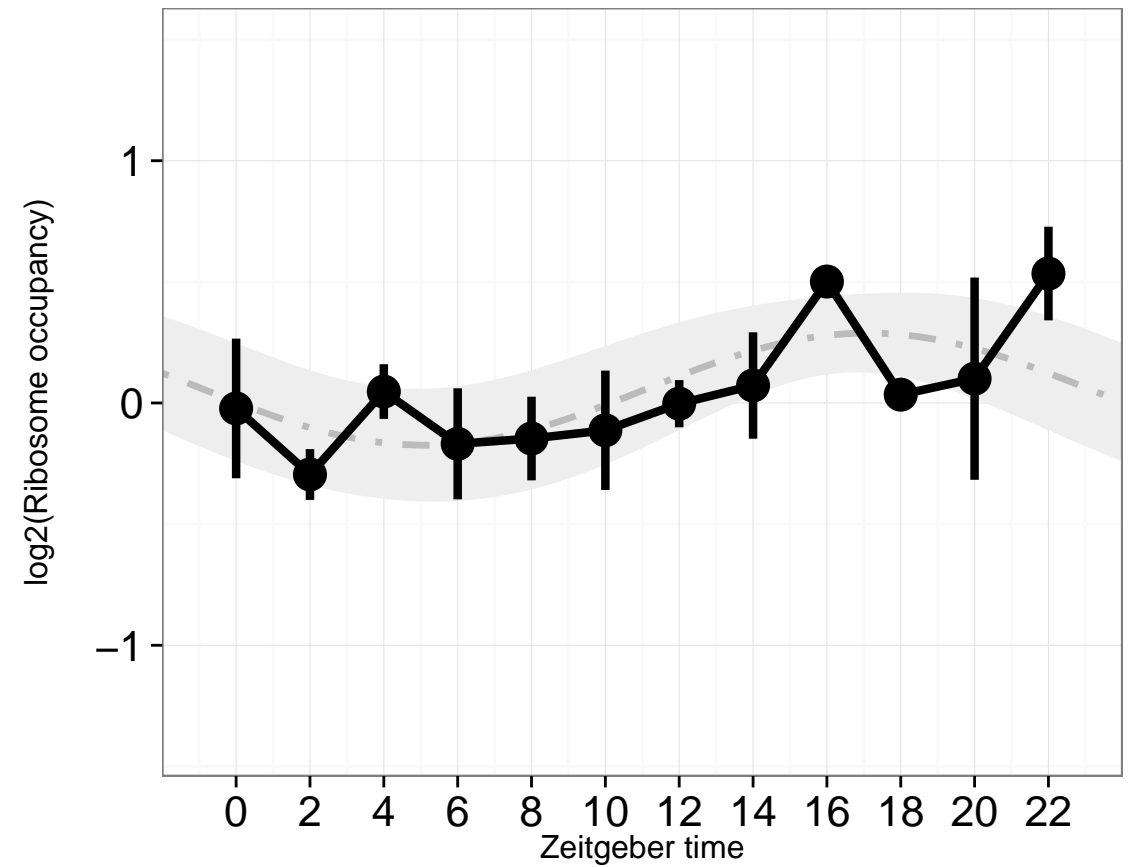

Supplement: SuppDataset_1.zip [file Rad1_set_A.pdf › Supplemental Dataset 1/A-mRNA_nonrhyth_translation_nonrhyth/Rad1_set_A.pdf]

## Rad21

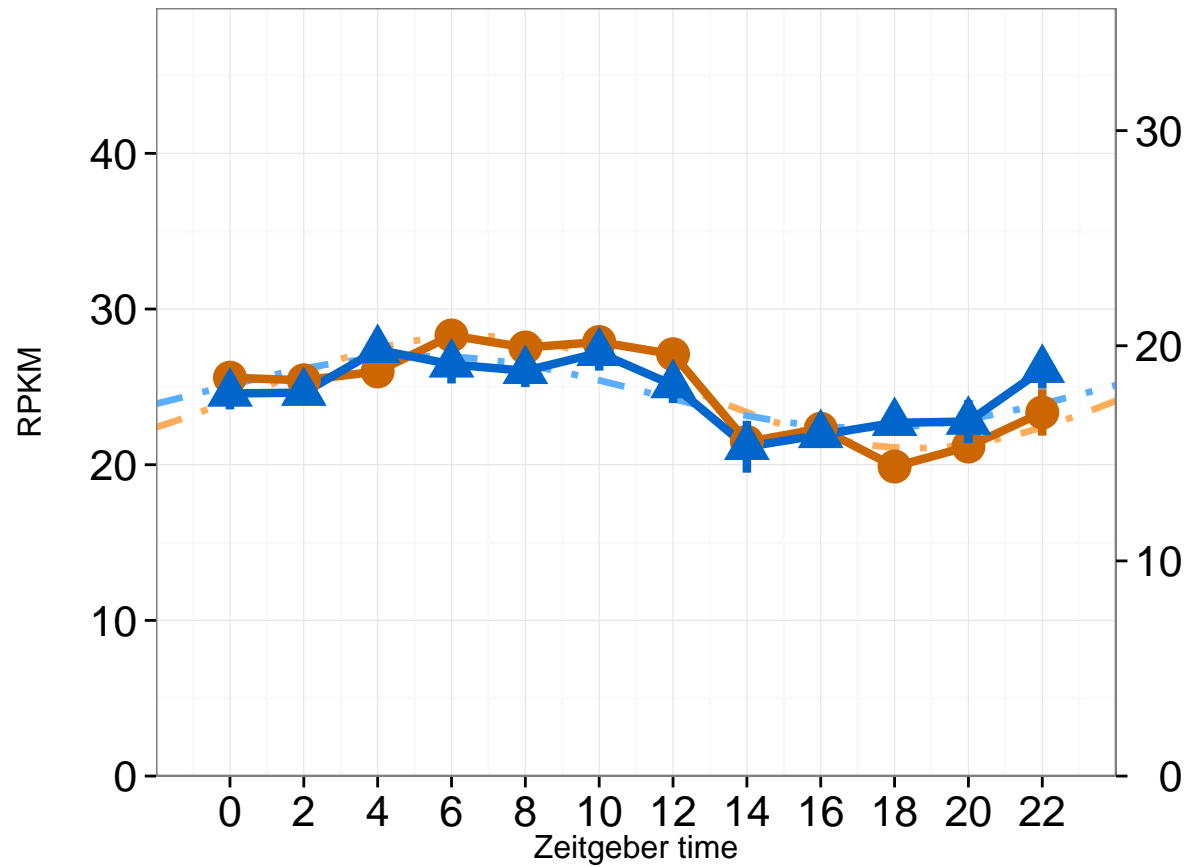

## Rad21

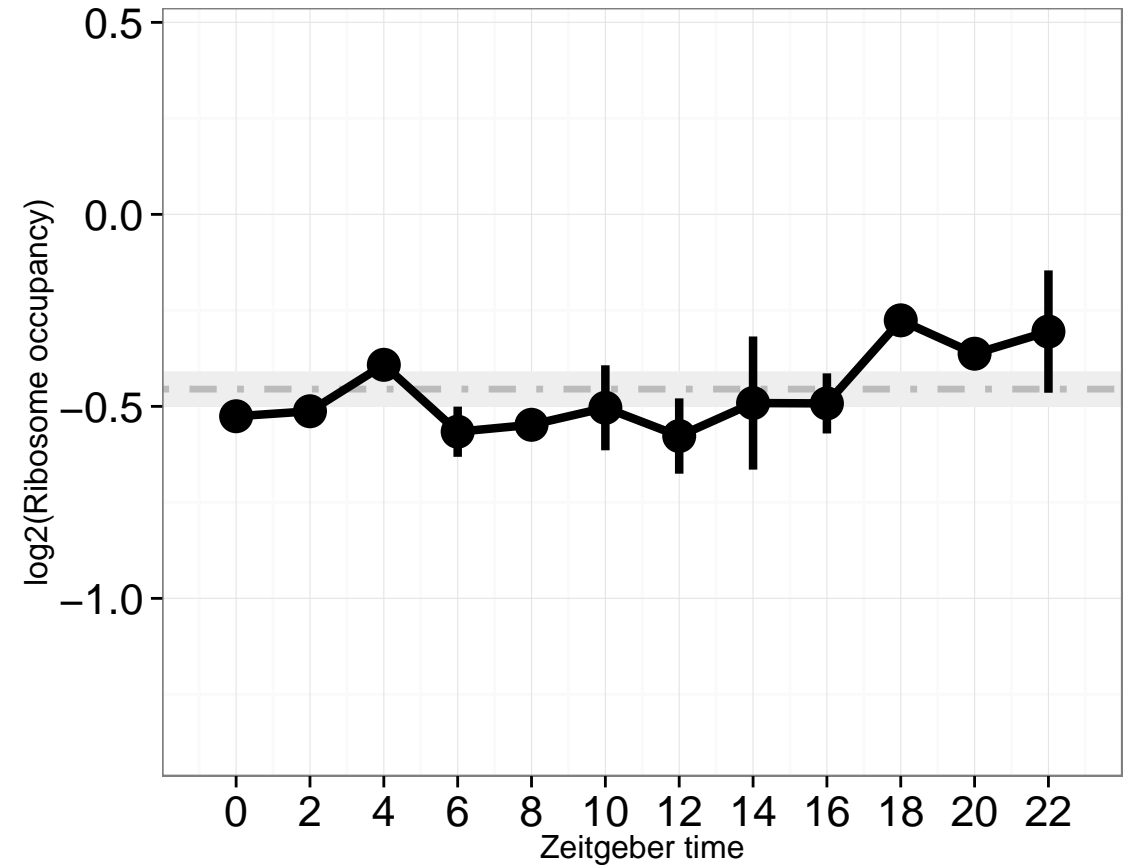

Supplement: SuppDataset_1.zip [file Rad21_set_A.pdf › Supplemental Dataset 1/A-mRNA_nonrhyth_translation_nonrhyth/Rad21_set_A.pdf]

# Rad23a

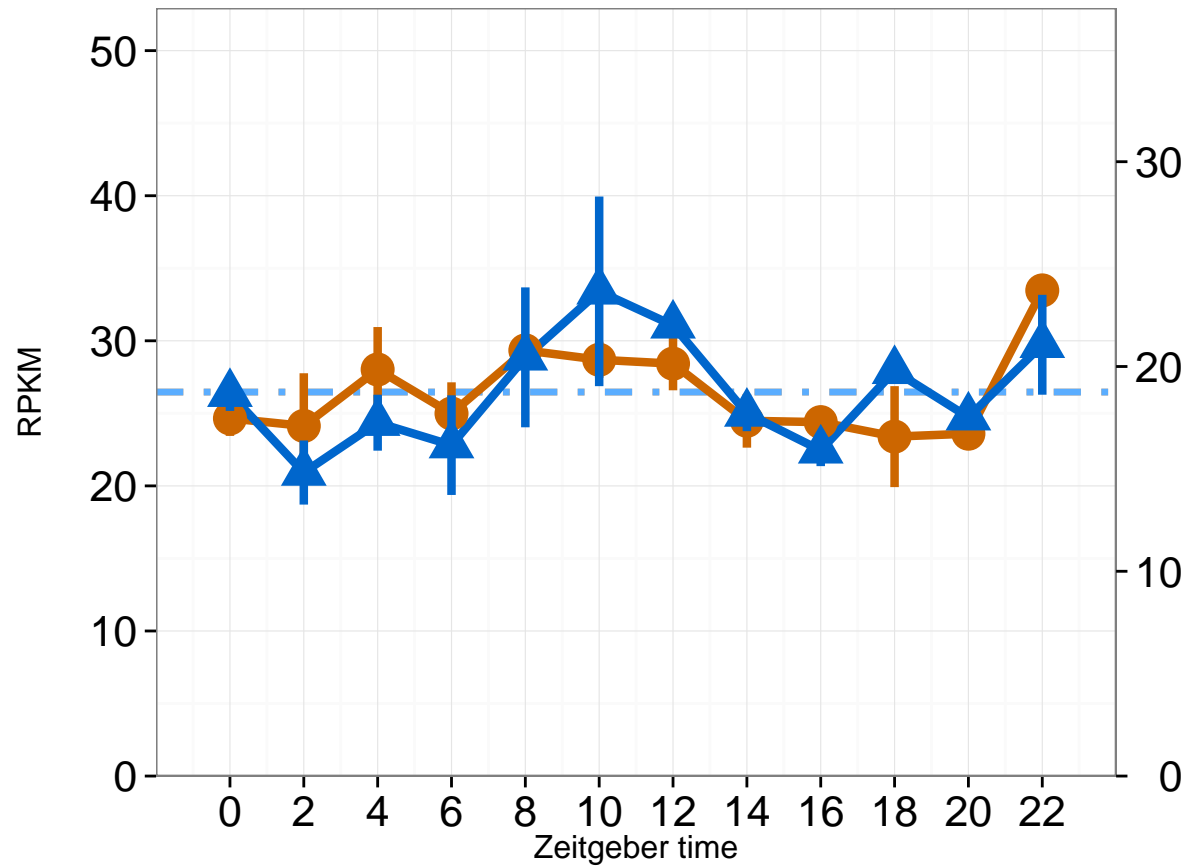

# Rad23a

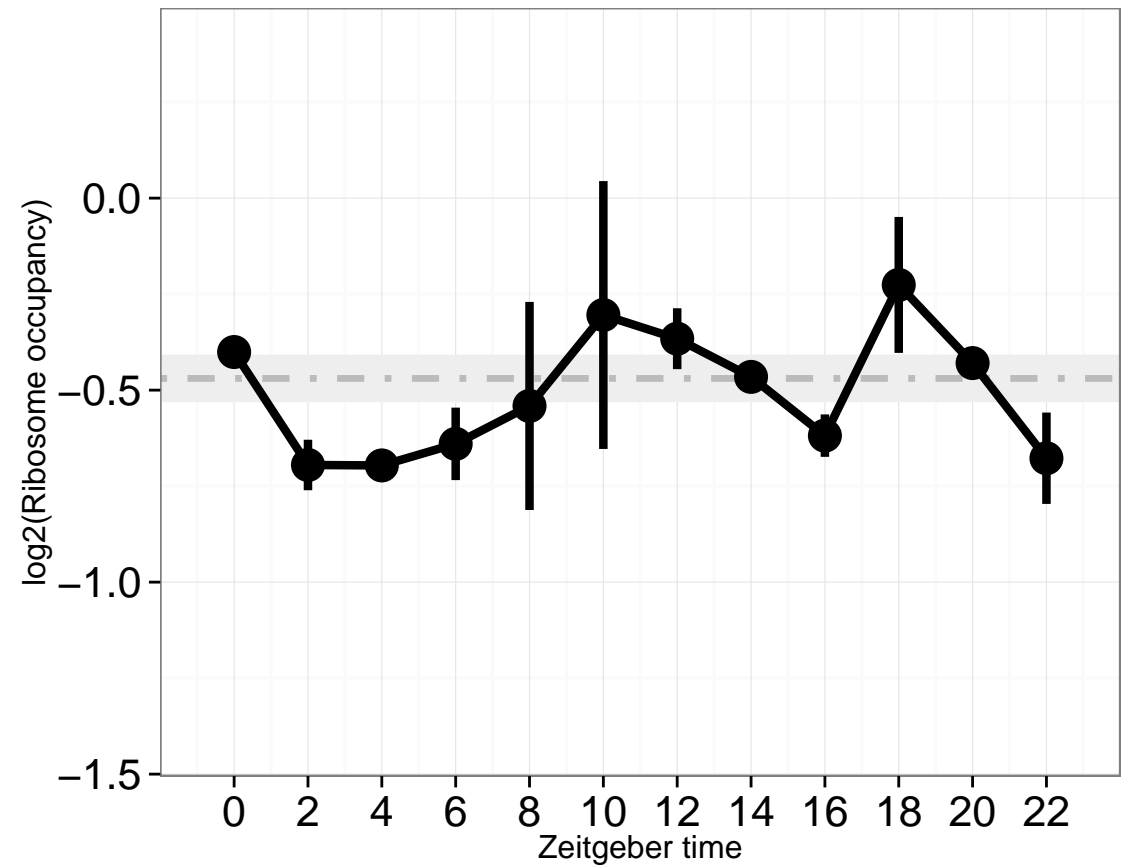

Supplement: SuppDataset_1.zip [file Rad23a_set_A.pdf › Supplemental Dataset 1/A-mRNA_nonrhyth_translation_nonrhyth/Rad23a_set_A.pdf]

## Rad23b

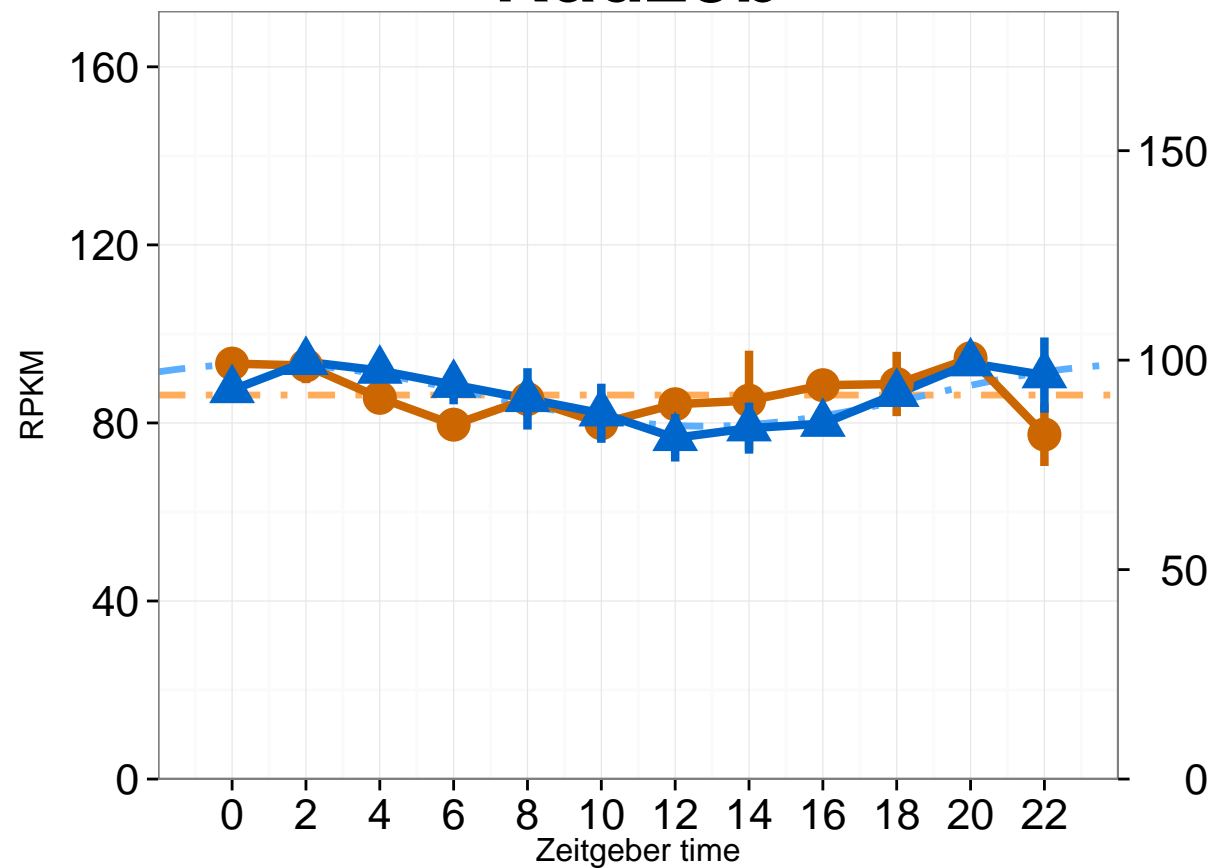

## Rad23b

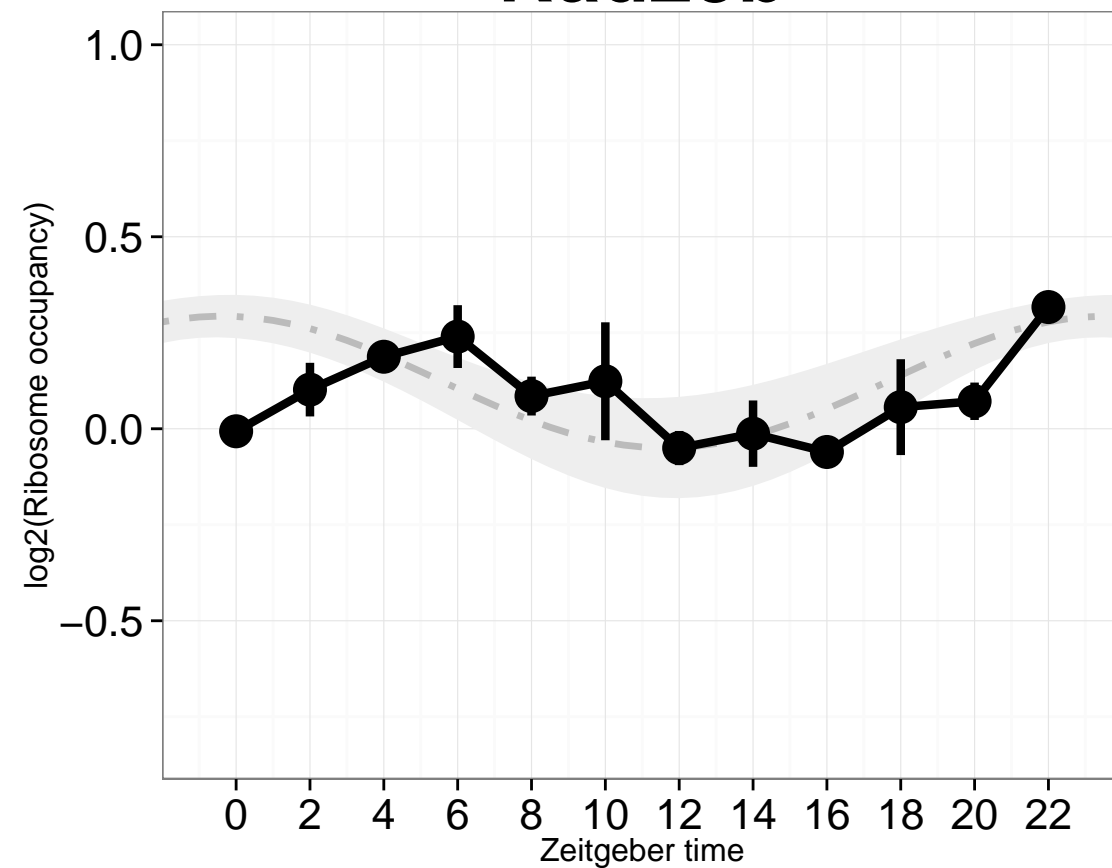

Supplement: SuppDataset_1.zip [file Rad23b_set_A.pdf › Supplemental Dataset 1/A-mRNA_nonrhyth_translation_nonrhyth/Rad23b_set_A.pdf]

## Rad50

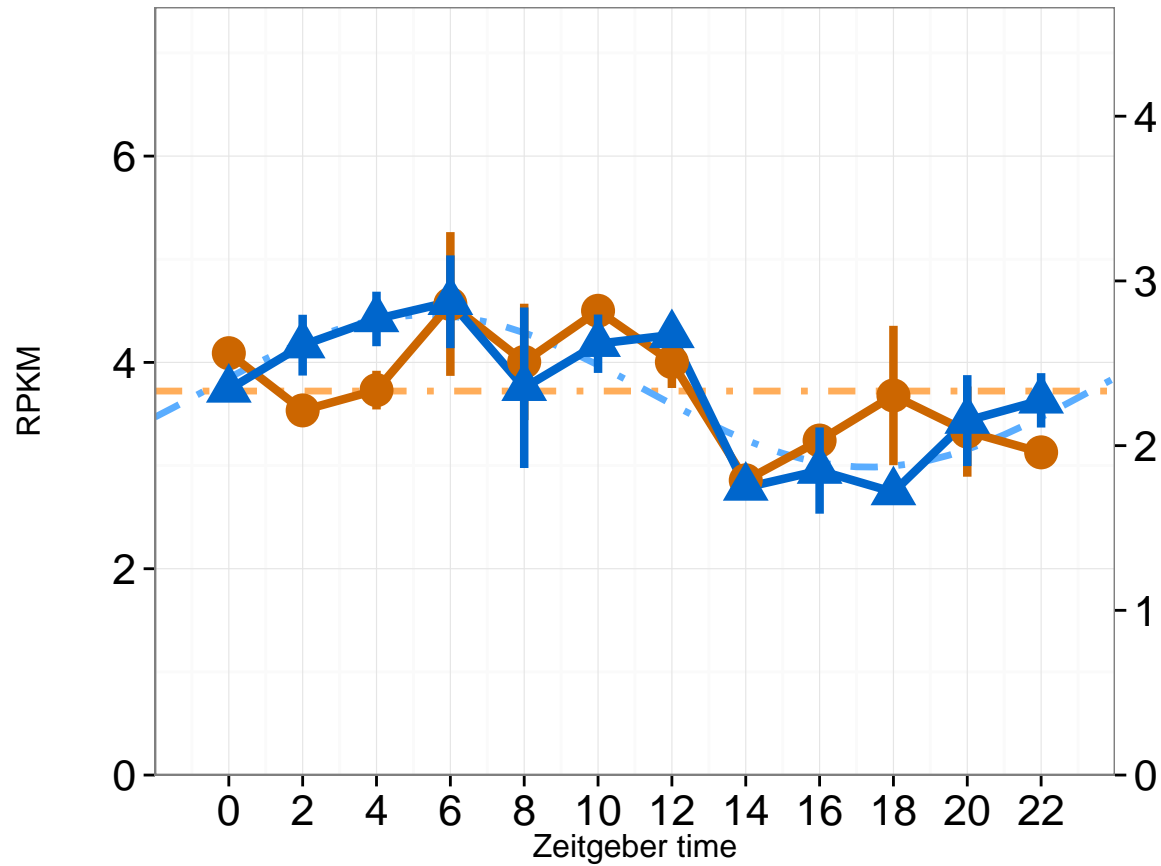

## Rad50

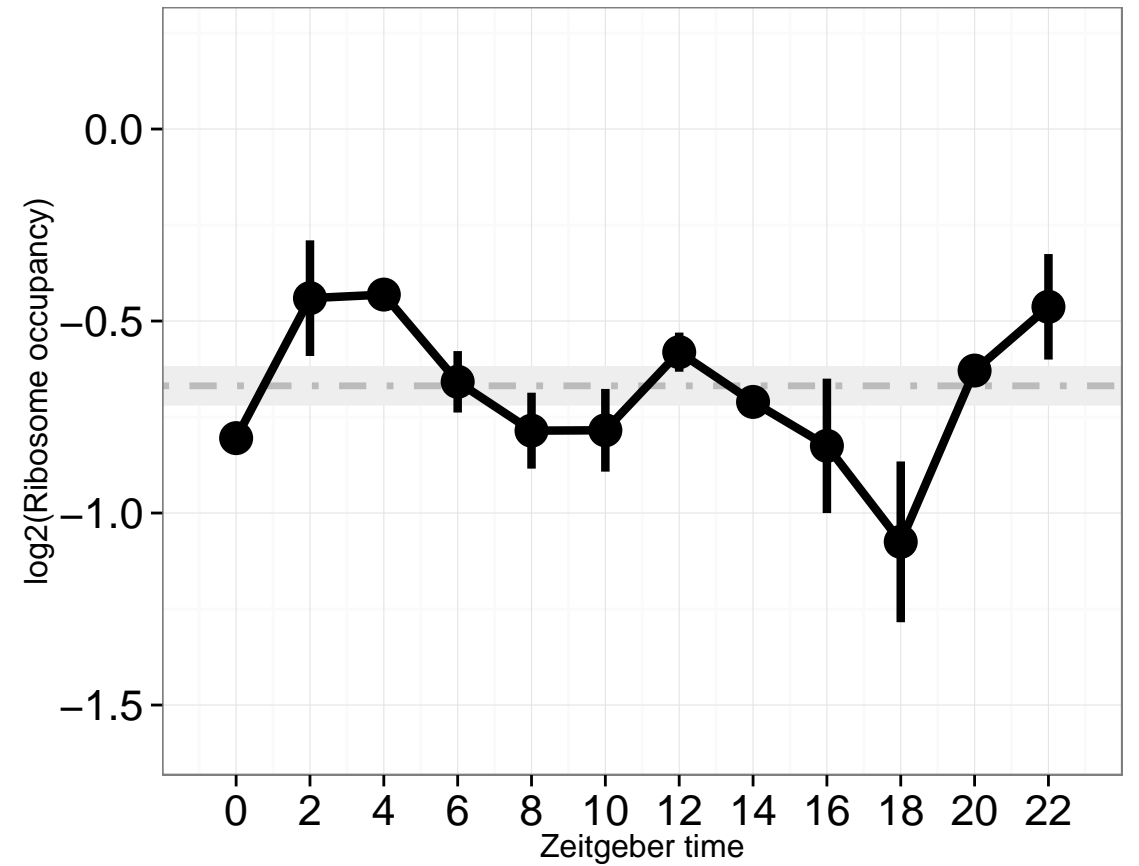

Supplement: SuppDataset_1.zip [file Rad50_set_A.pdf › Supplemental Dataset 1/A-mRNA_nonrhyth_translation_nonrhyth/Rad50_set_A.pdf]

**Rad51 TR**

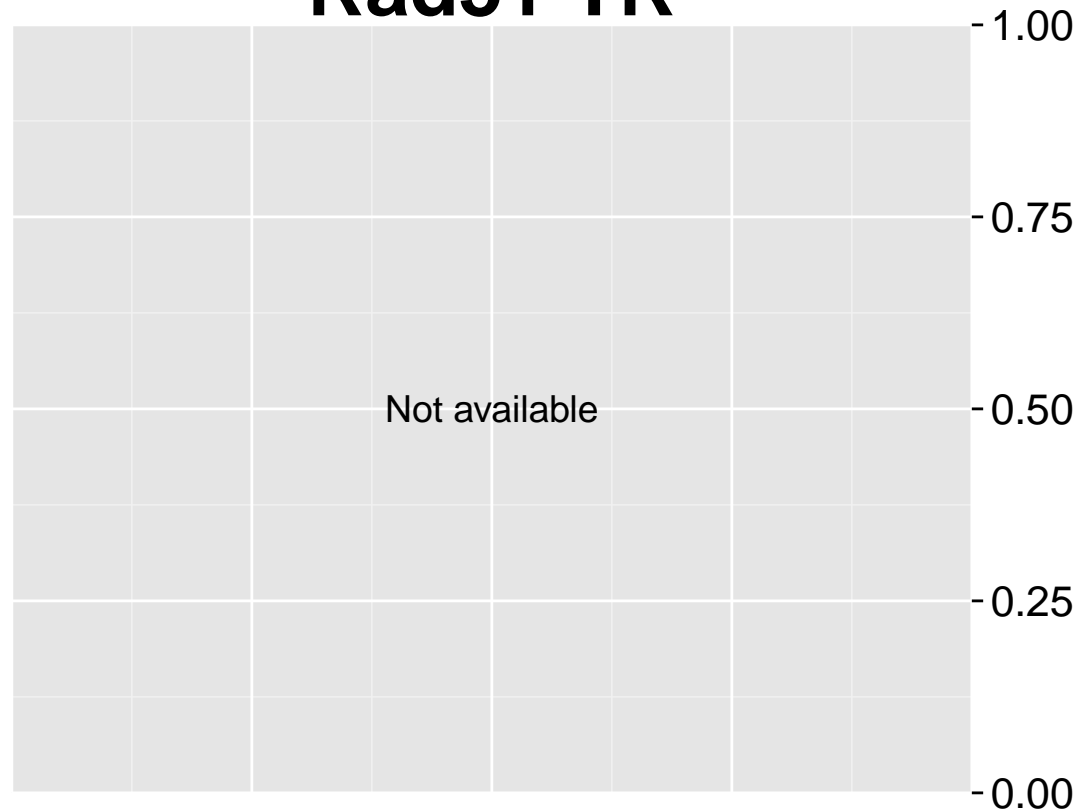

**Rad51 log2(Ribosome occupancy**

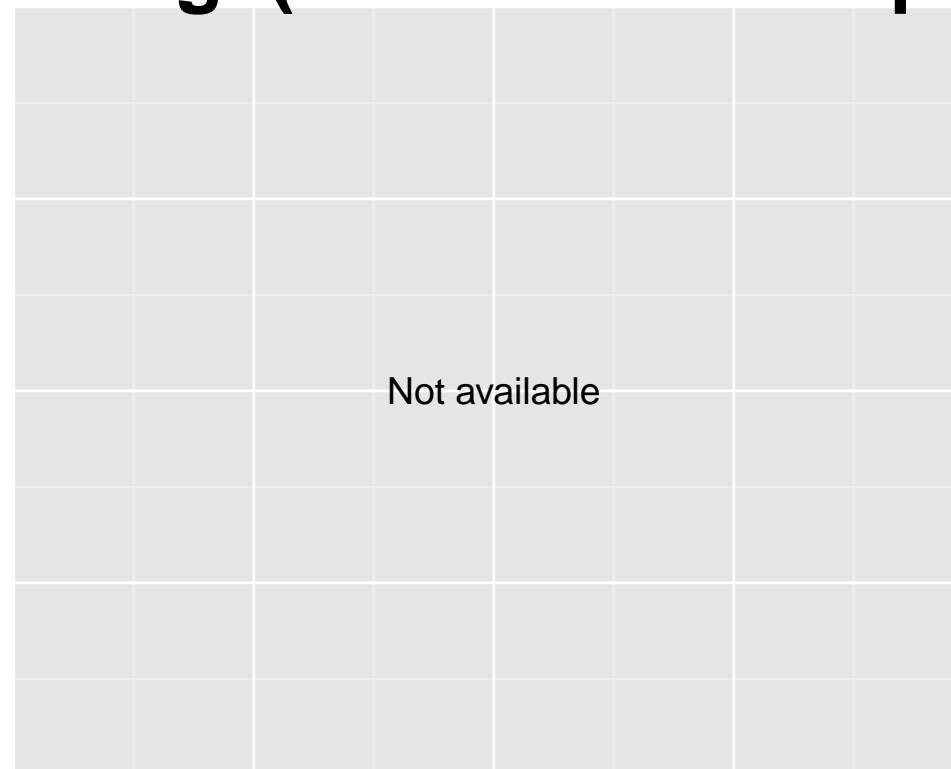

Supplement: SuppDataset_1.zip [file Rad51_set_A.pdf › Supplemental Dataset 1/A-mRNA_nonrhyth_translation_nonrhyth/Rad51_set_A.pdf]

## Rad51d

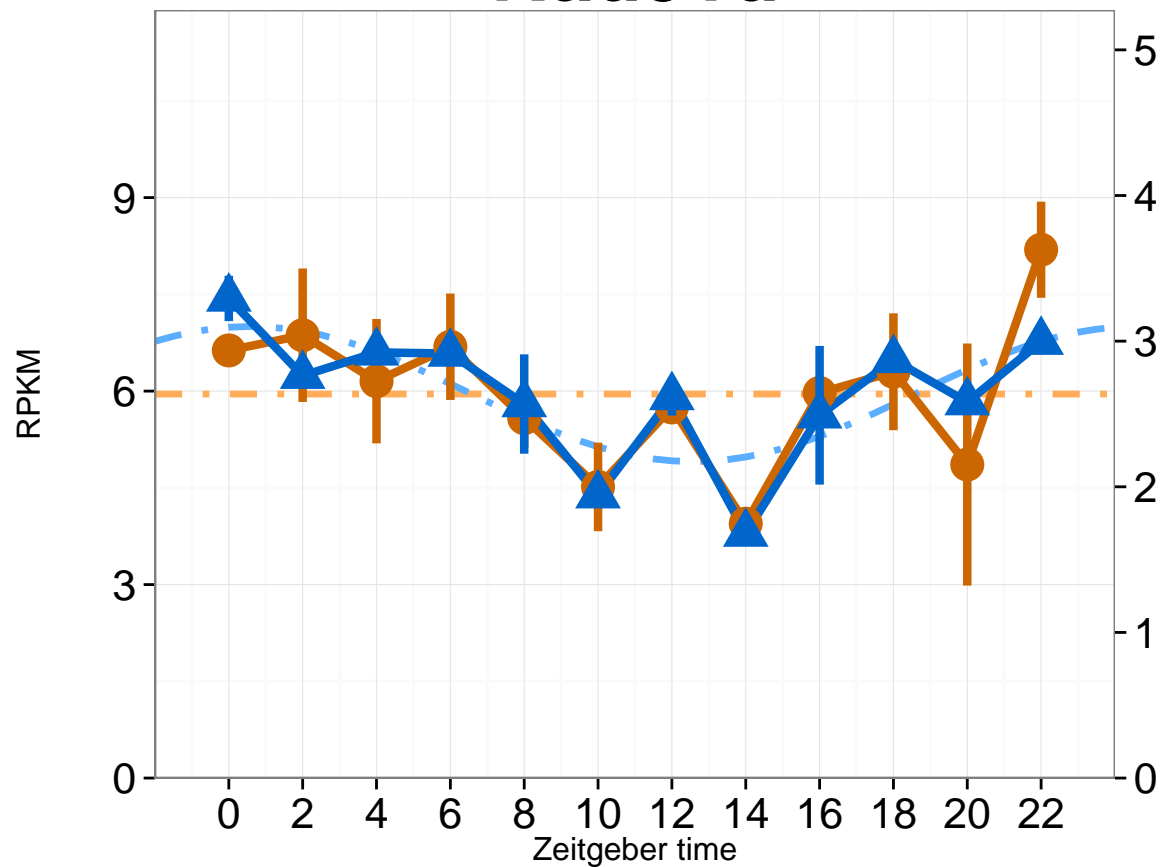

## Rad51d

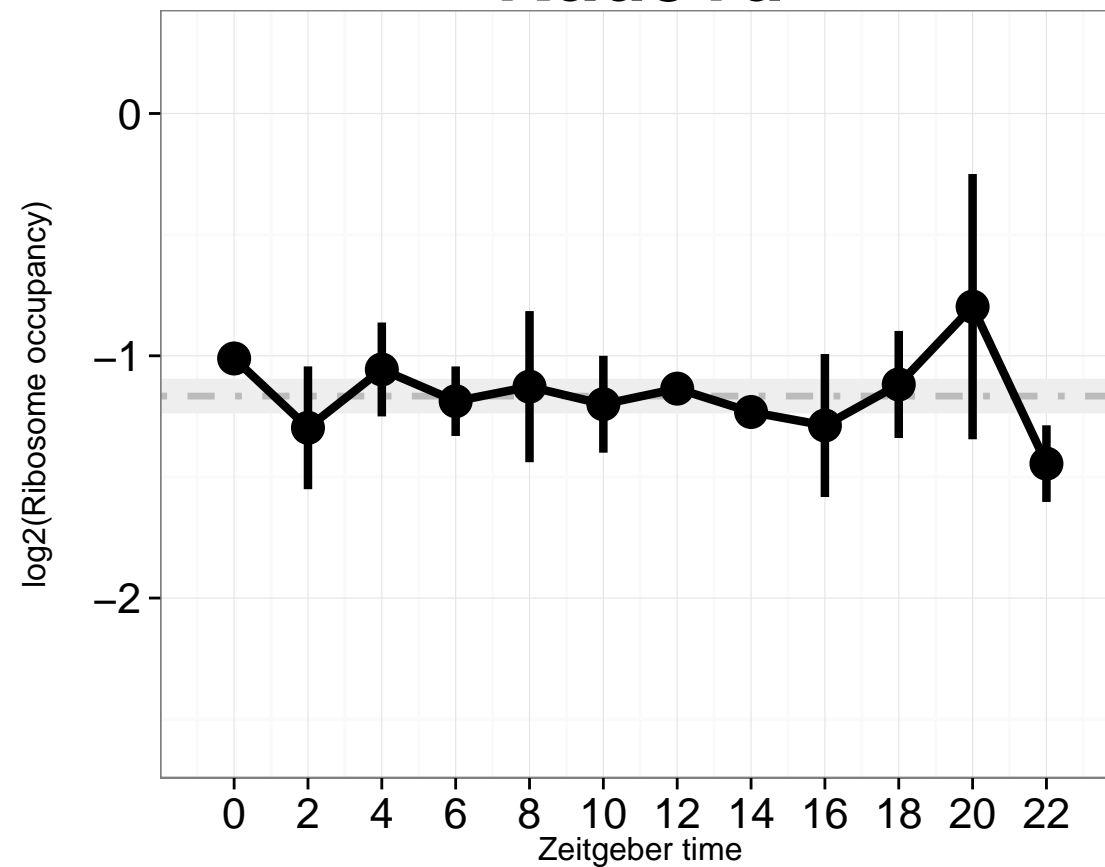

Supplement: SuppDataset_1.zip [file Rad51d_set_A.pdf › Supplemental Dataset 1/A-mRNA_nonrhyth_translation_nonrhyth/Rad51d_set_A.pdf]

## Rad52

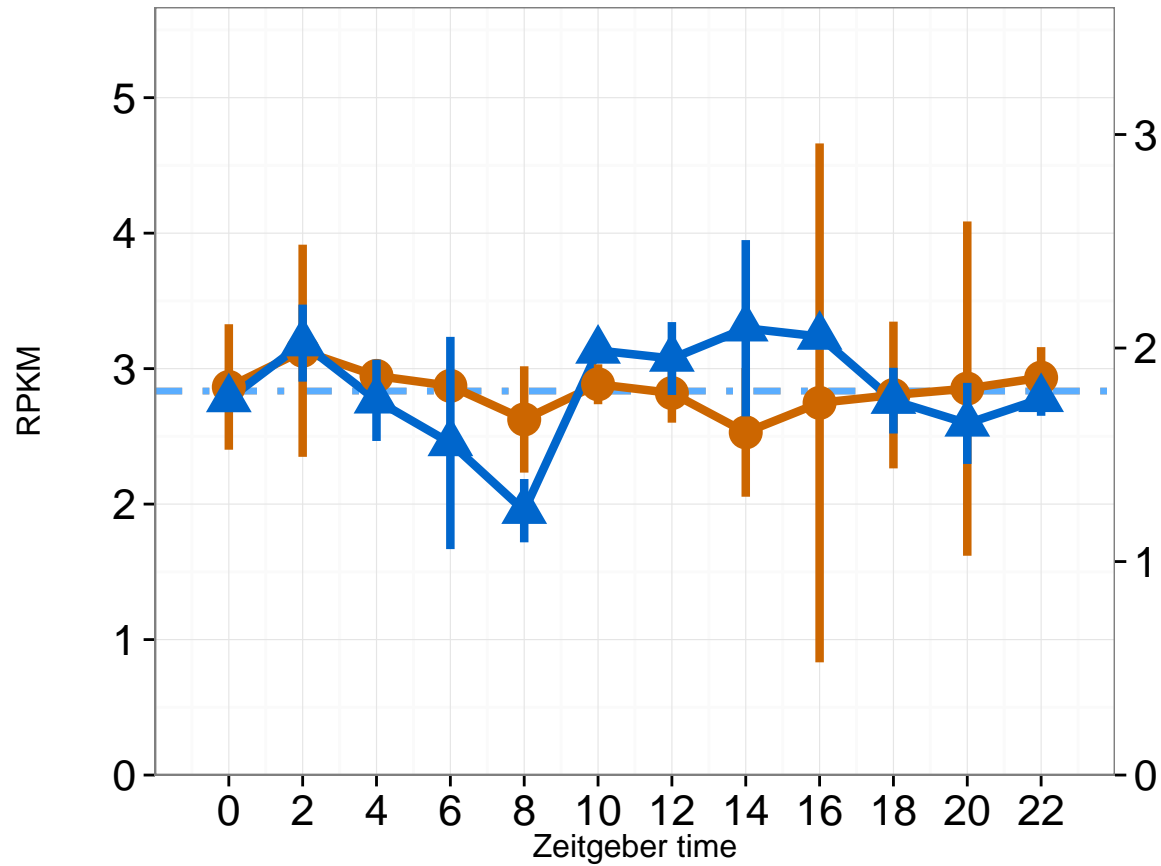

## Rad52

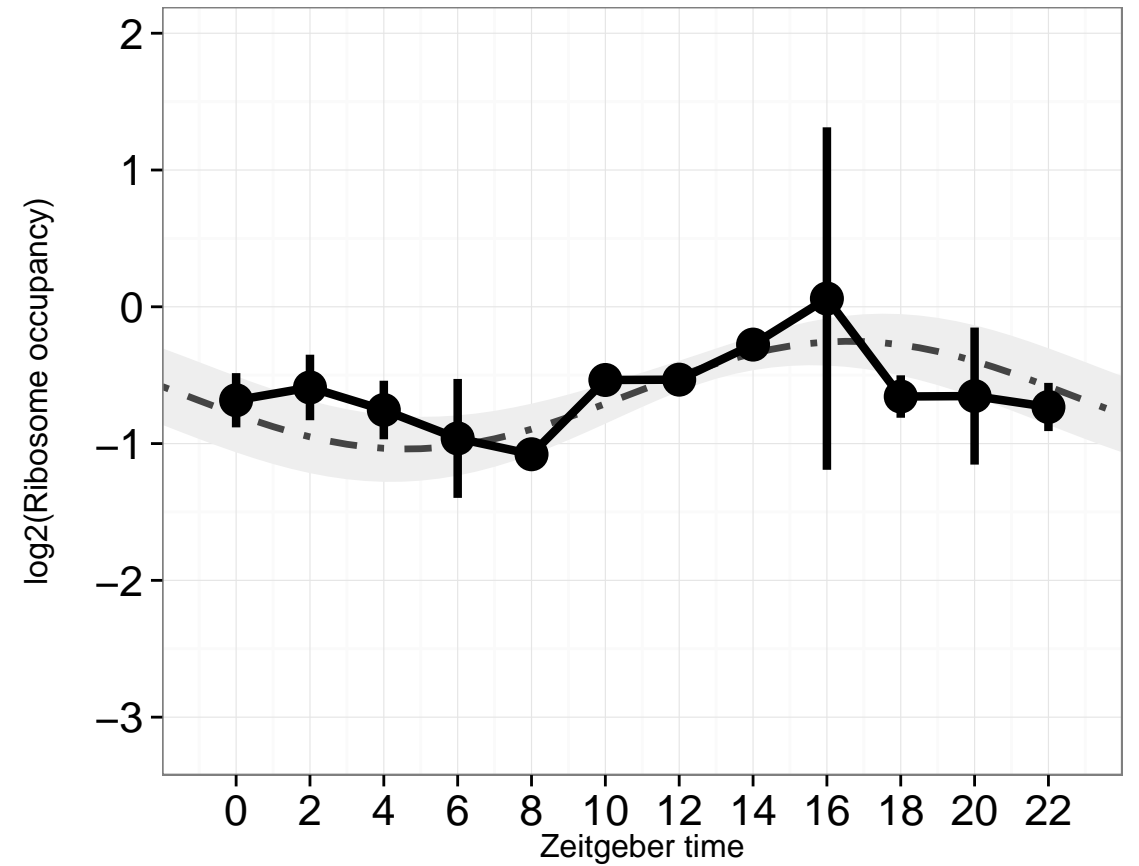

Supplement: SuppDataset_1.zip [file Rad52_set_A.pdf › Supplemental Dataset 1/A-mRNA_nonrhyth_translation_nonrhyth/Rad52_set_A.pdf]

## Rad54l2

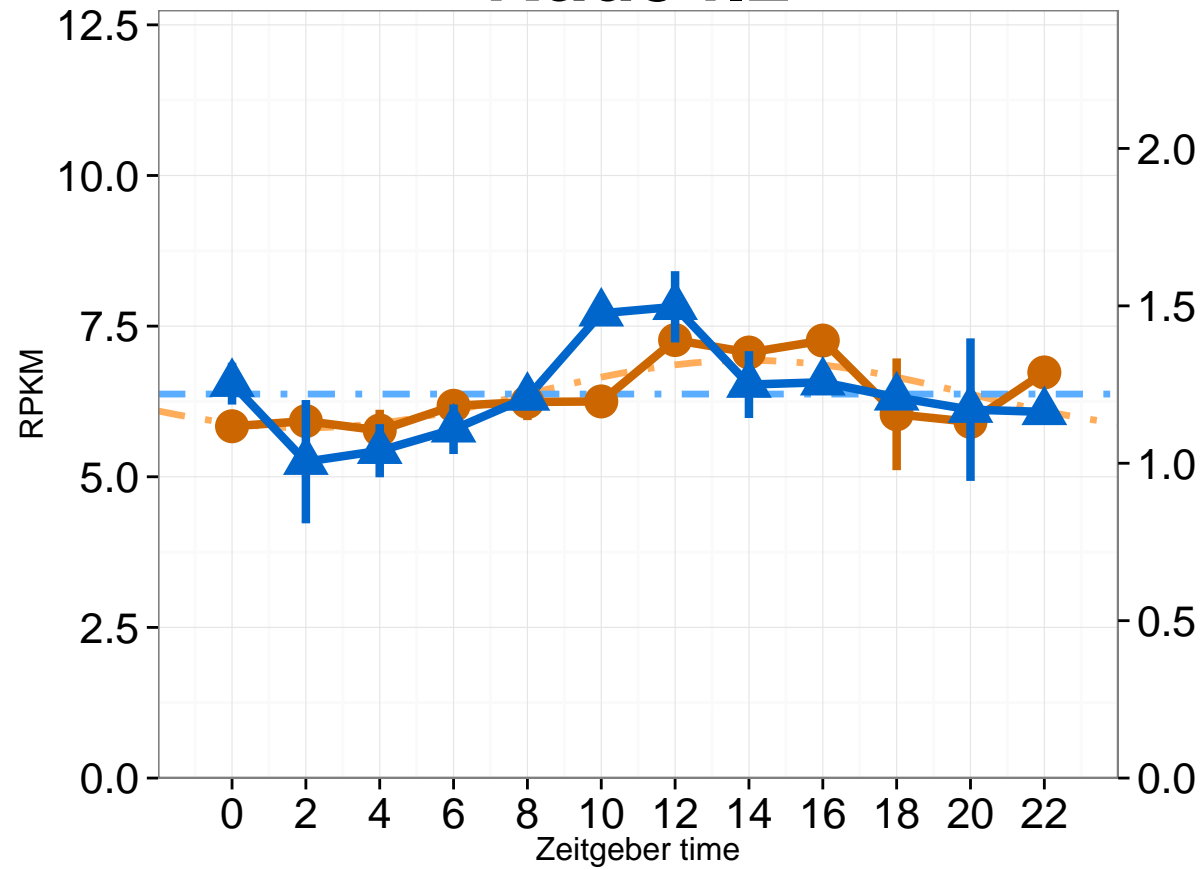

## Rad54l2

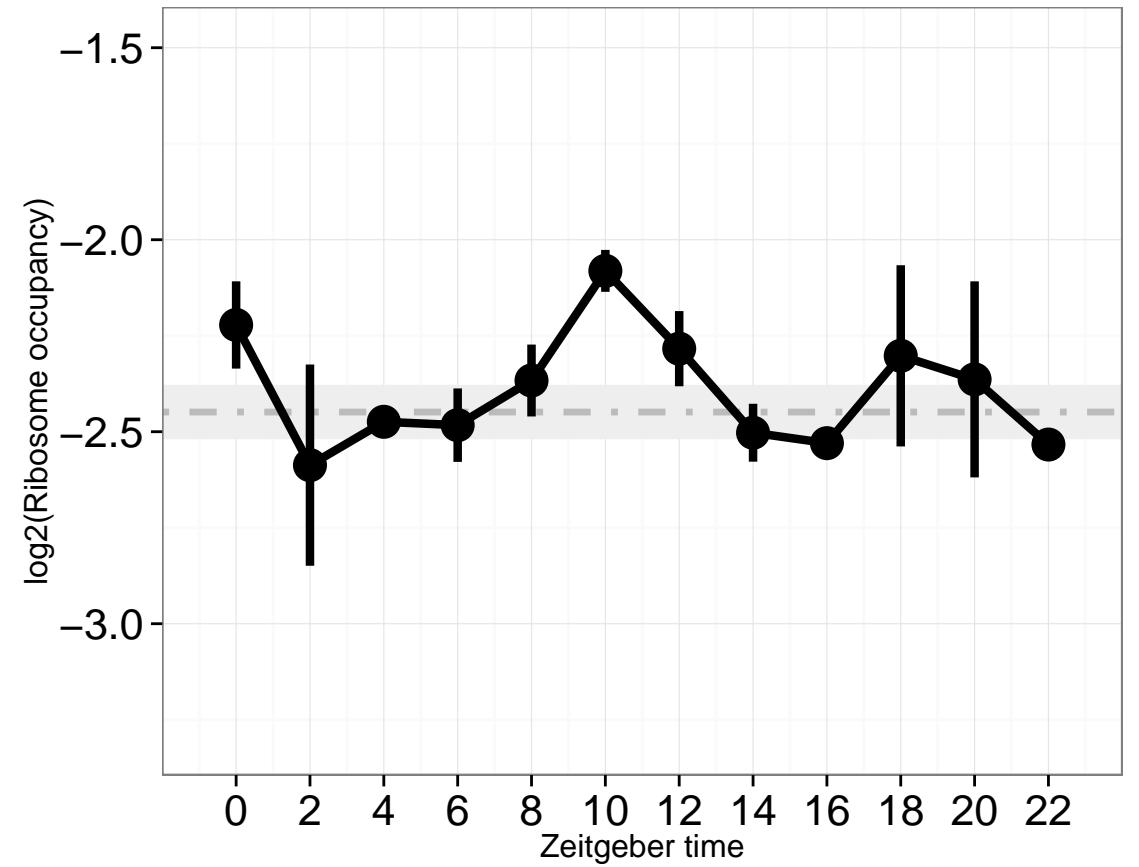

Supplement: SuppDataset_1.zip [file Rad54l2_set_A.pdf › Supplemental Dataset 1/A-mRNA_nonrhyth_translation_nonrhyth/Rad54l2_set_A.pdf]

## Rae1

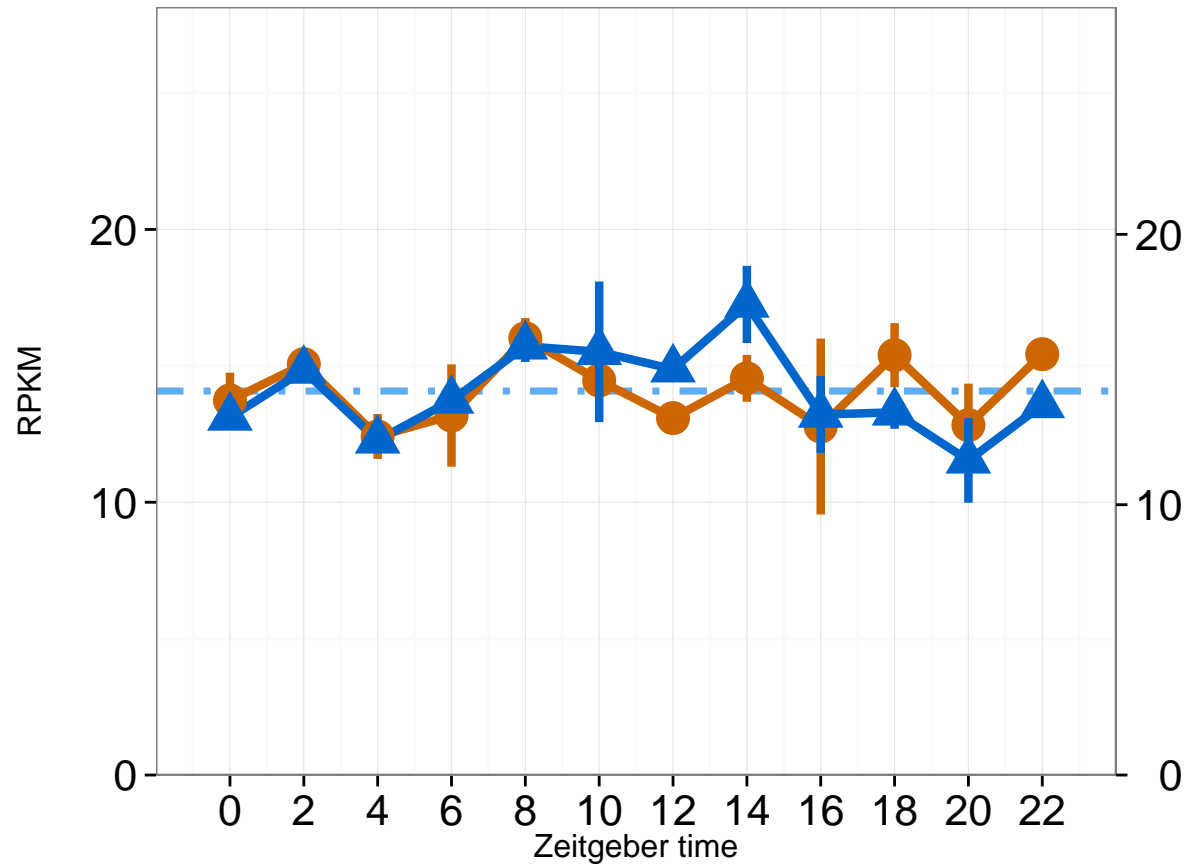

## Rae1

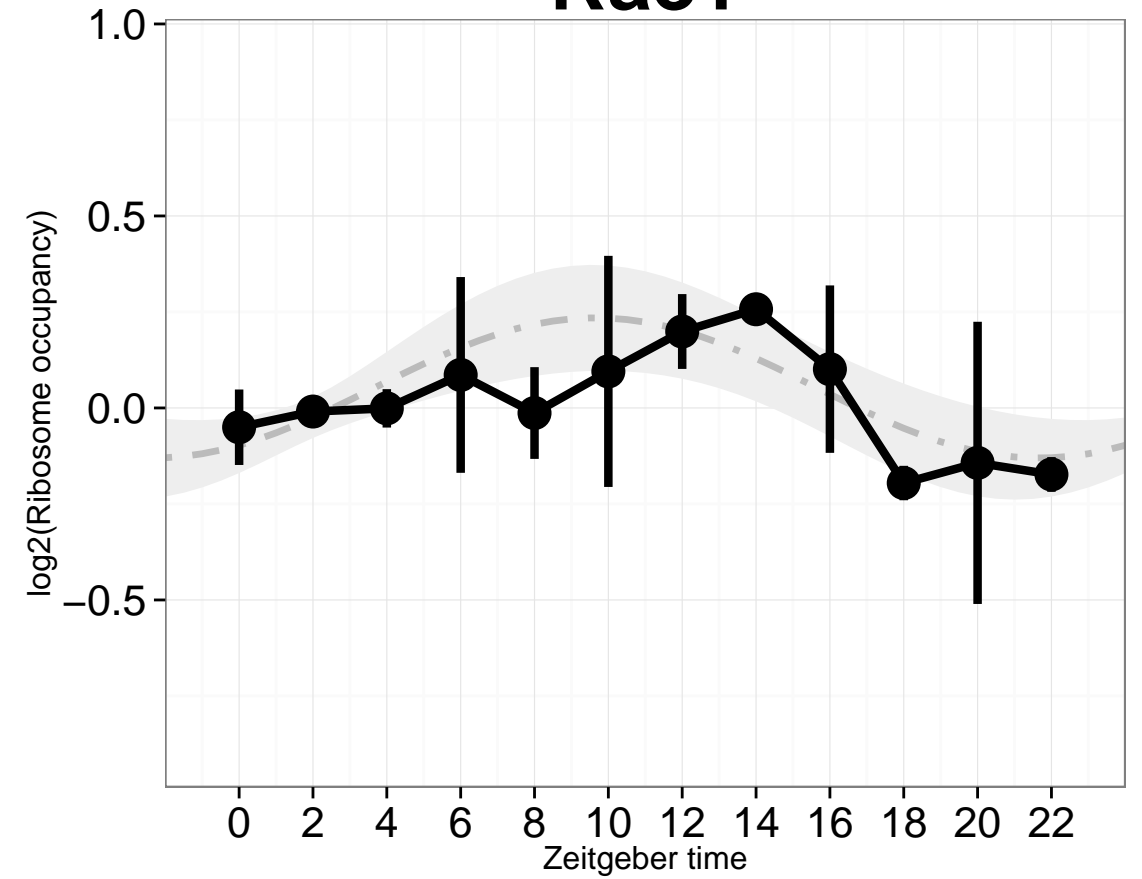

Supplement: SuppDataset_1.zip [file Rae1_set_A.pdf › Supplemental Dataset 1/A-mRNA_nonrhyth_translation_nonrhyth/Rae1_set_A.pdf]

# Raet1e

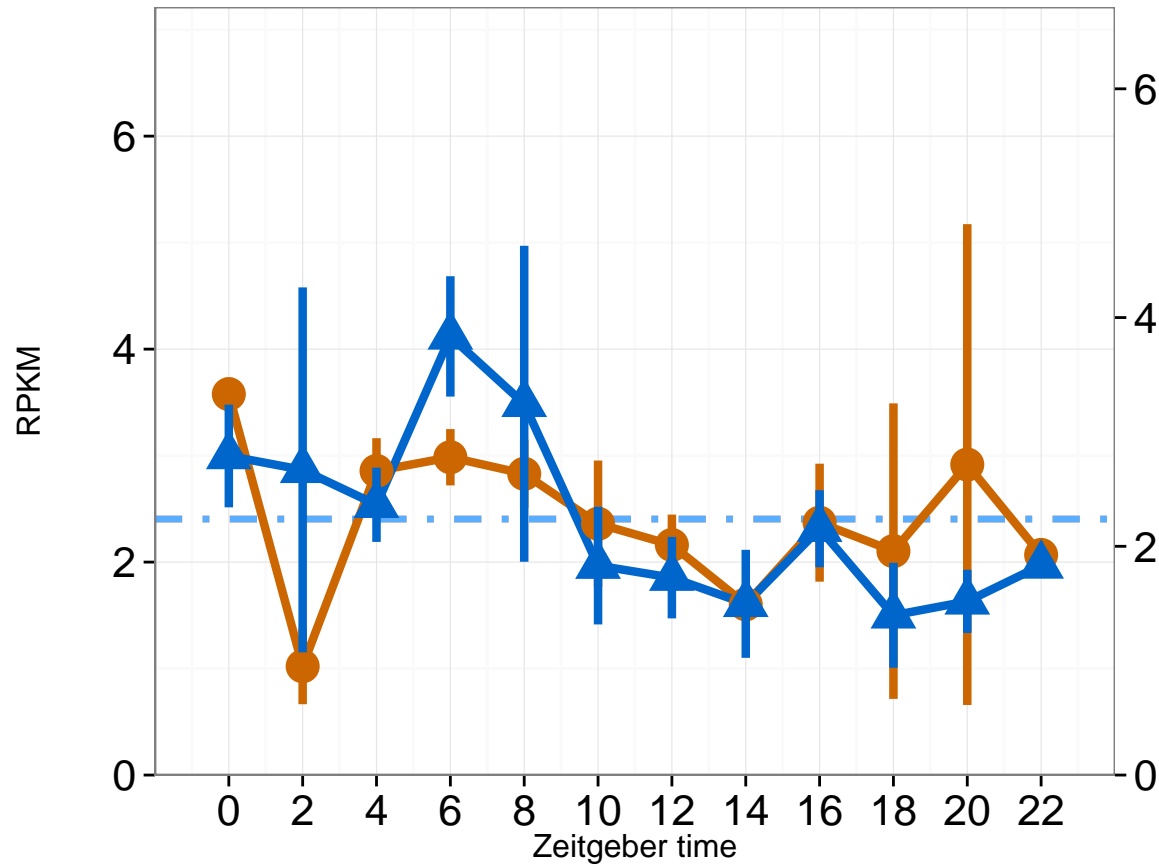

# Raet1e

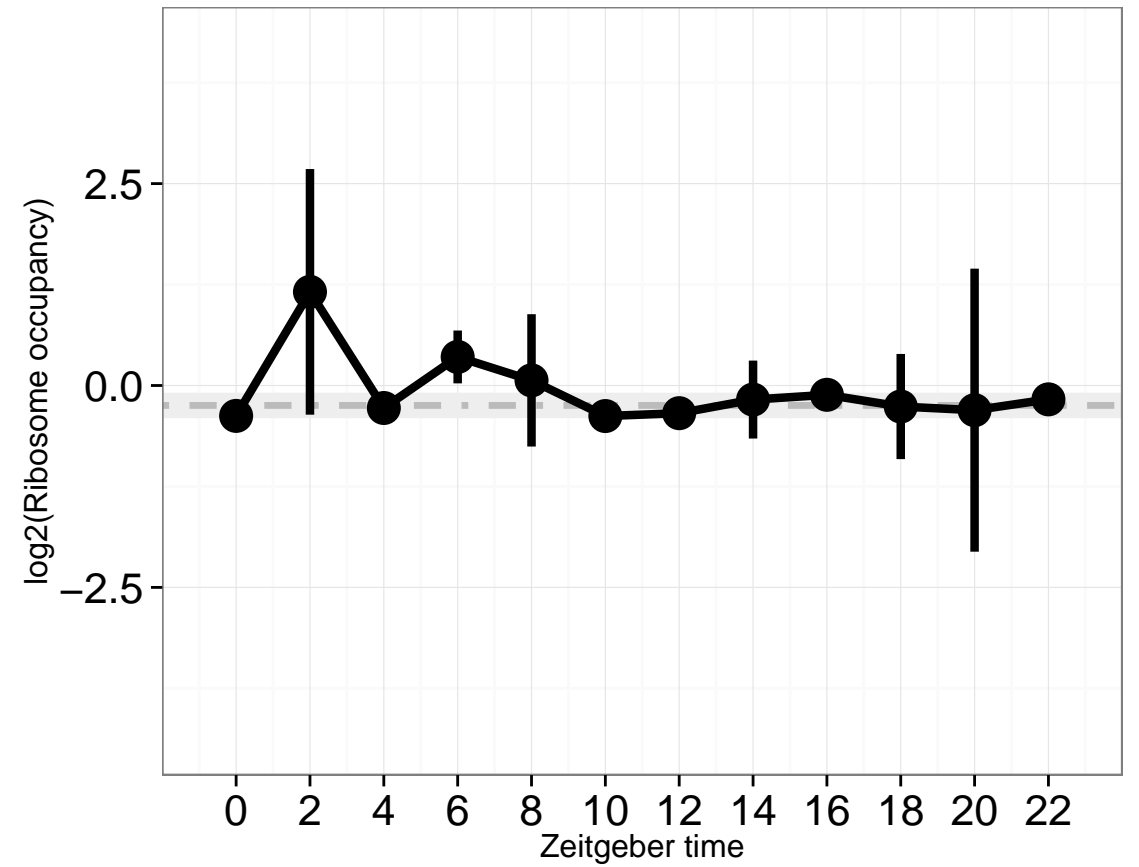

Supplement: SuppDataset_1.zip [file Raet1e_set_A.pdf › Supplemental Dataset 1/A-mRNA_nonrhyth_translation_nonrhyth/Raet1e_set_A.pdf]

## Raf1

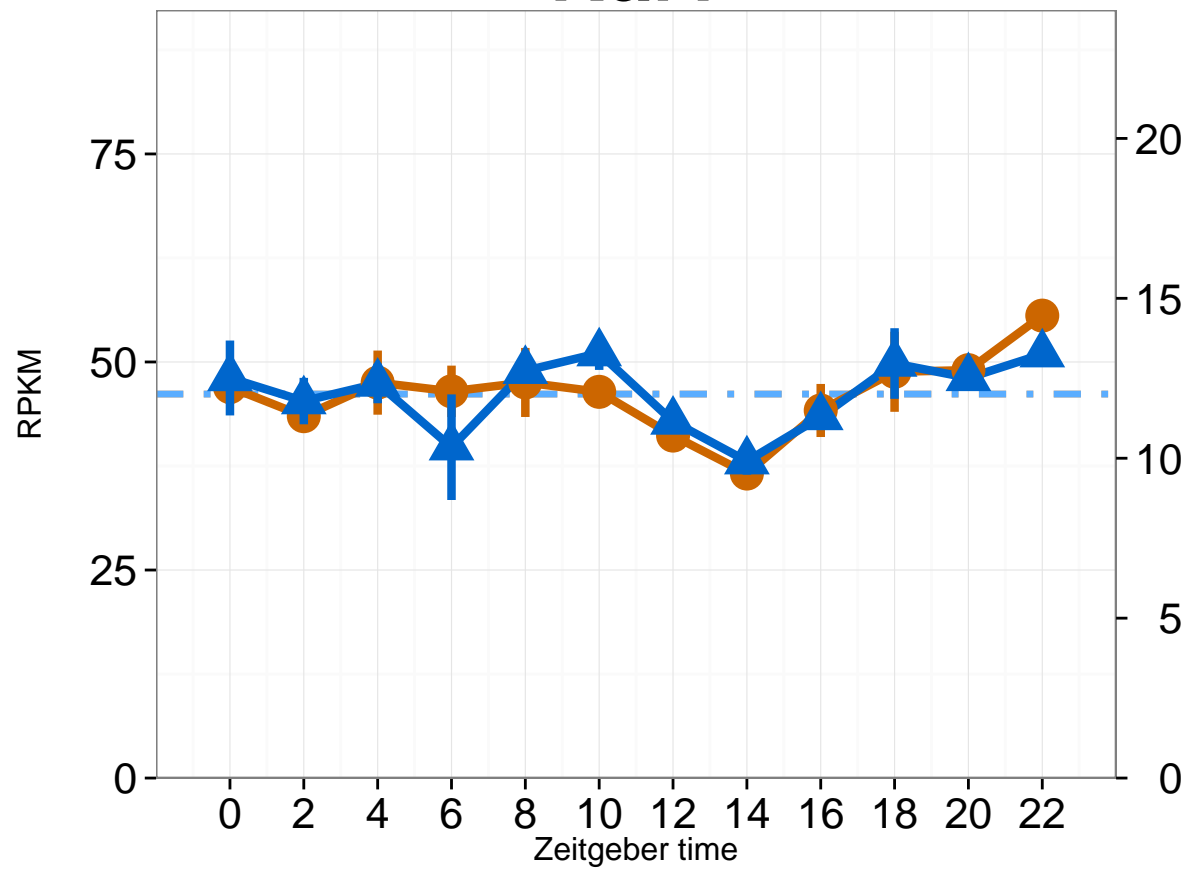

## Raf1

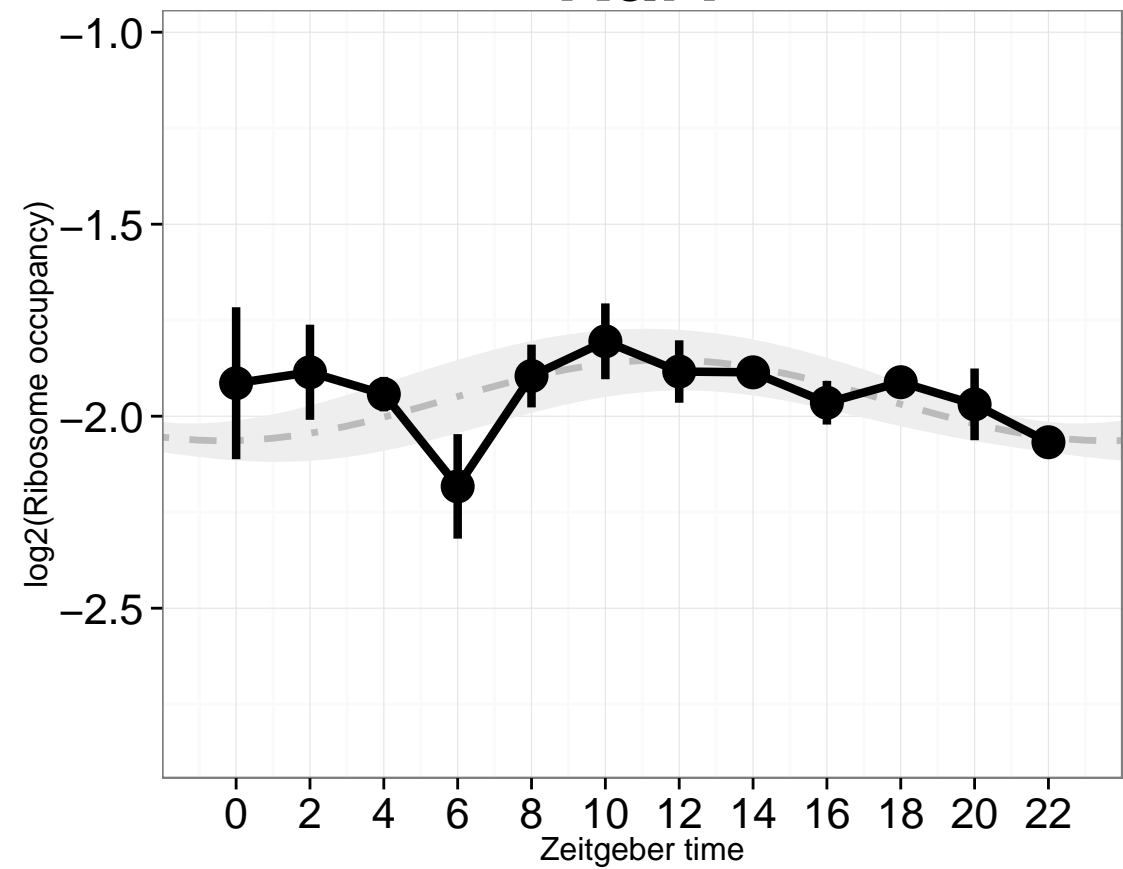

Supplement: SuppDataset_1.zip [file Raf1_set_A.pdf › Supplemental Dataset 1/A-mRNA_nonrhyth_translation_nonrhyth/Raf1_set_A.pdf]

## Rai1

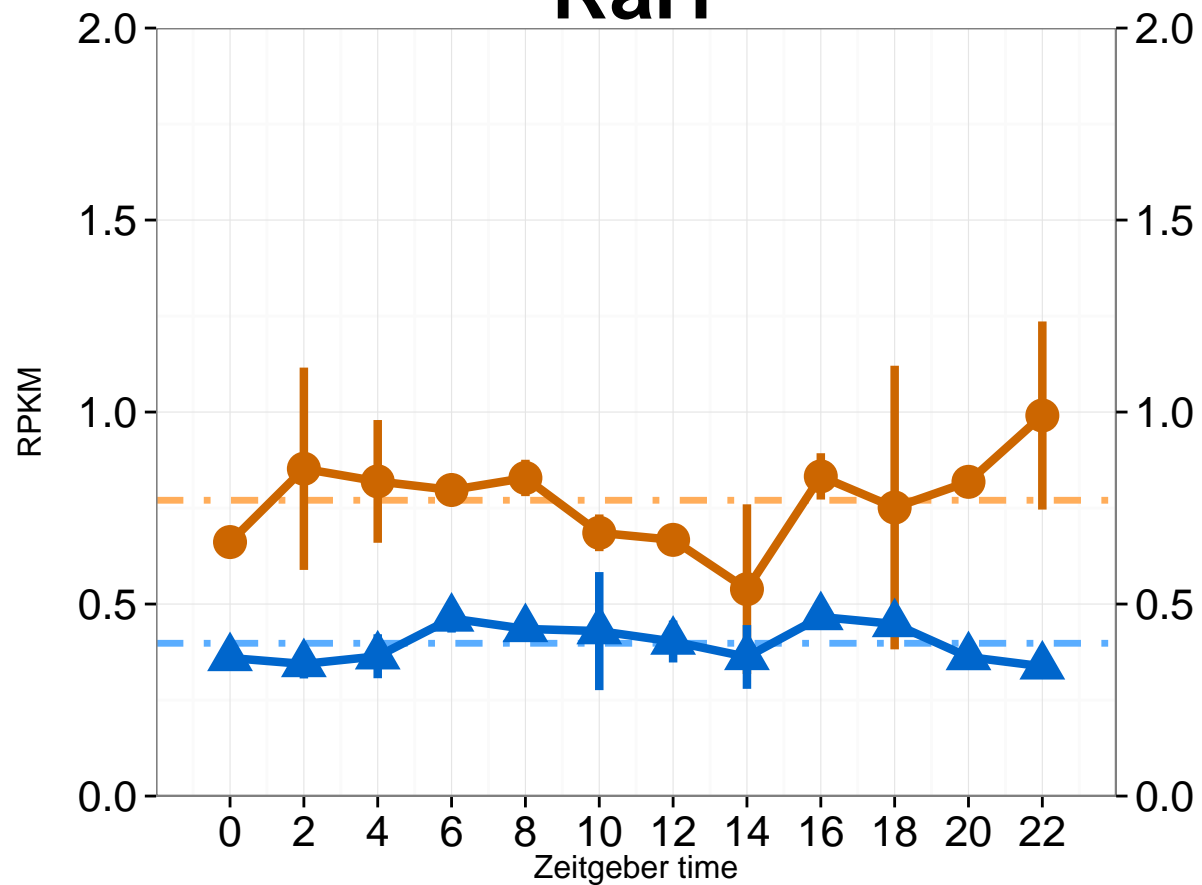

## Rai1

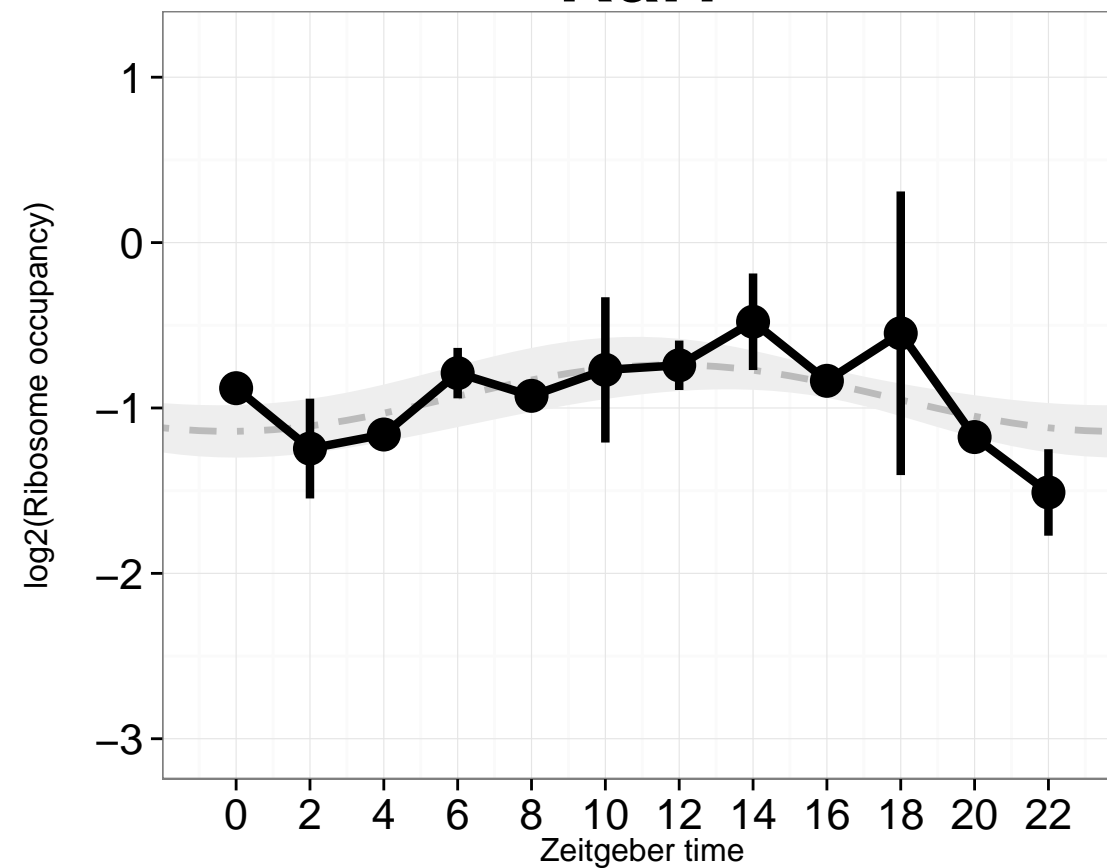

Supplement: SuppDataset_1.zip [file Rai1_set_A.pdf › Supplemental Dataset 1/A-mRNA_nonrhyth_translation_nonrhyth/Rai1_set_A.pdf]

## Rai2

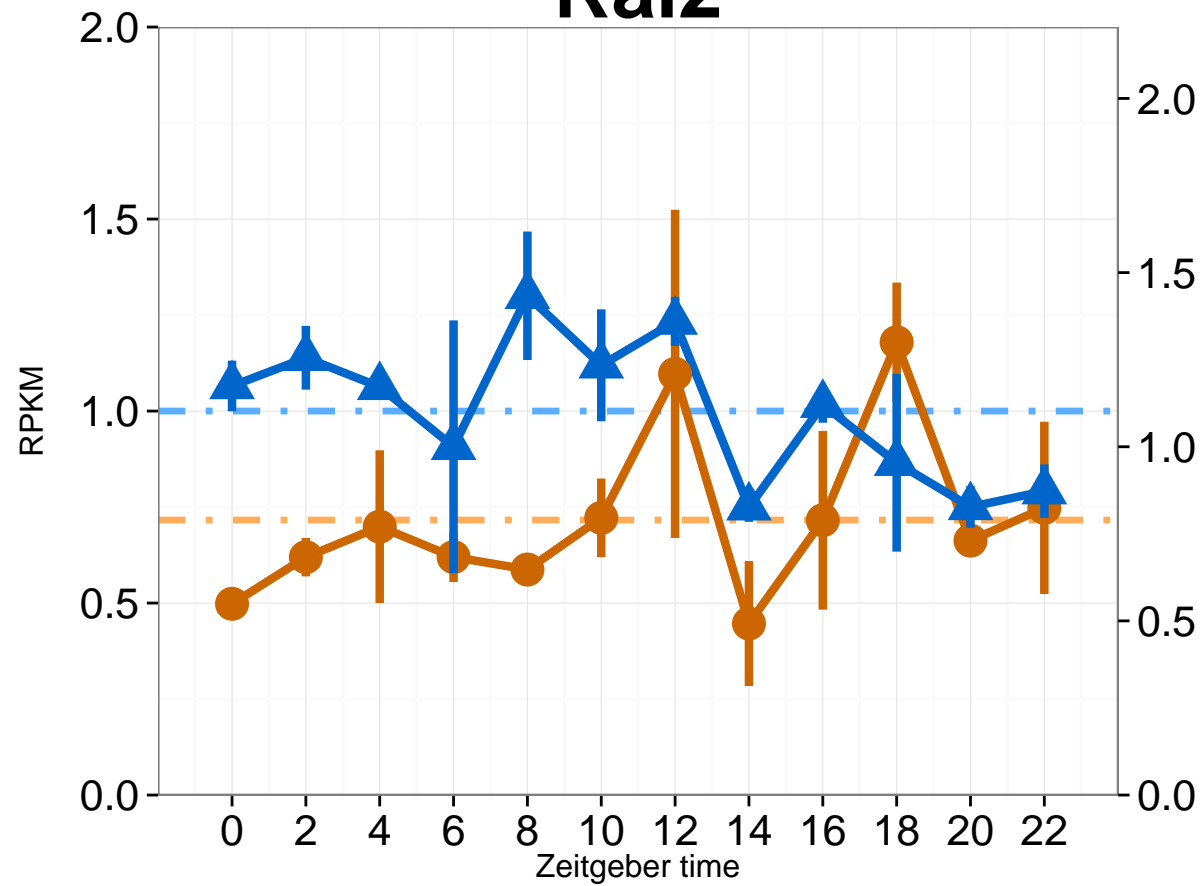

## Rai2

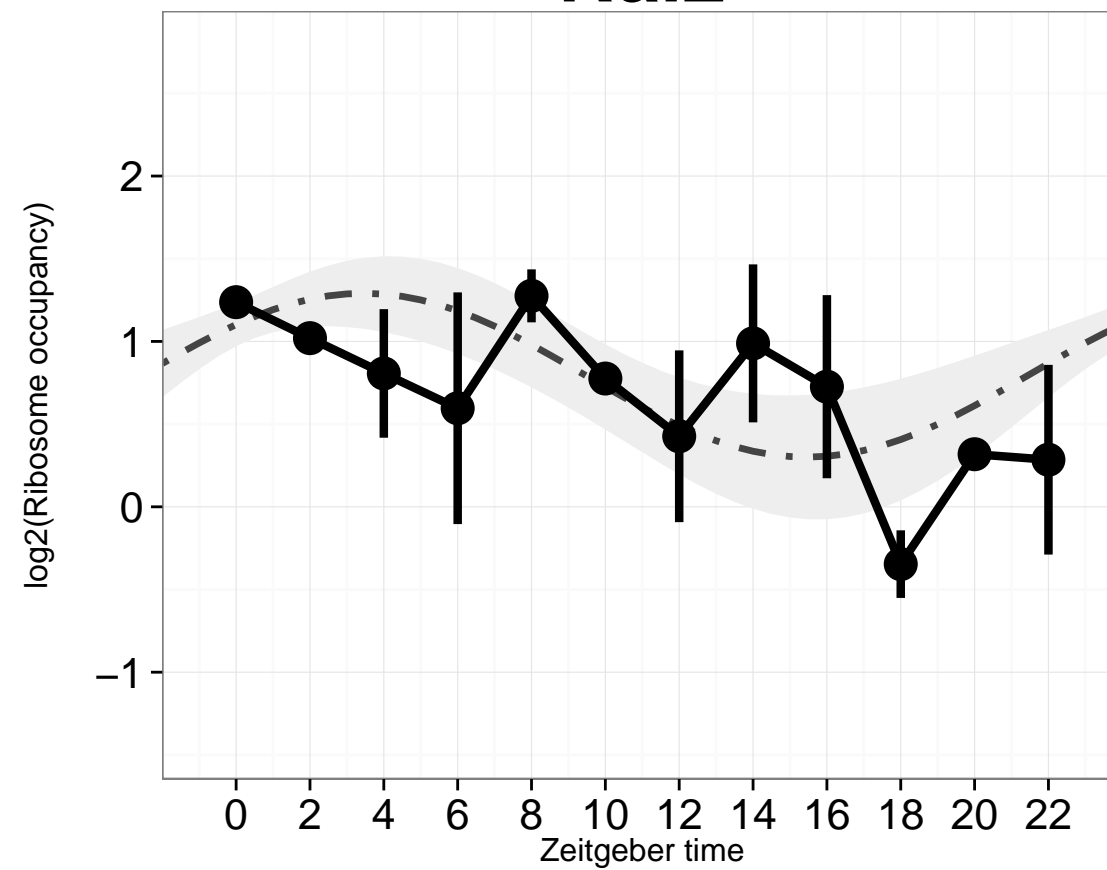

Supplement: SuppDataset_1.zip [file Rai2_set_A.pdf › Supplemental Dataset 1/A-mRNA_nonrhyth_translation_nonrhyth/Rai2_set_A.pdf]

## Rala

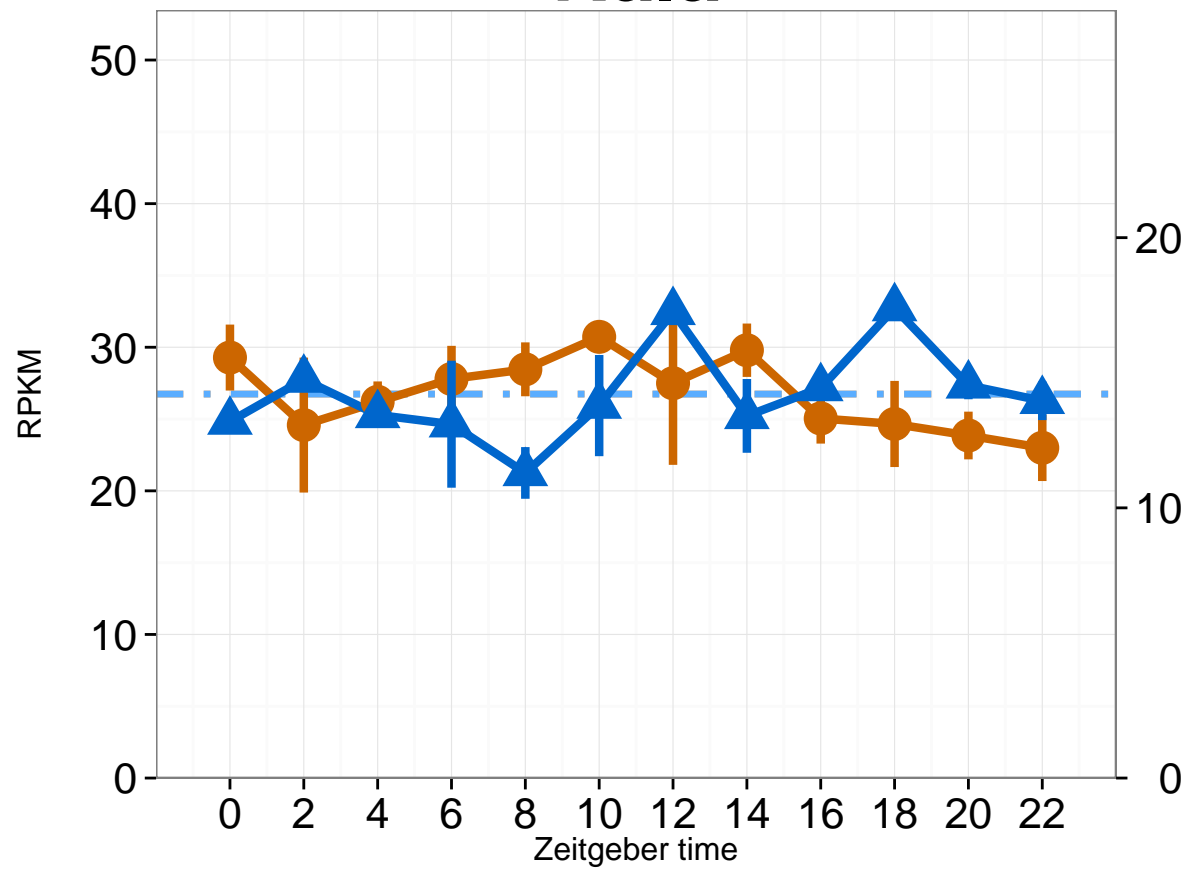

## Rala

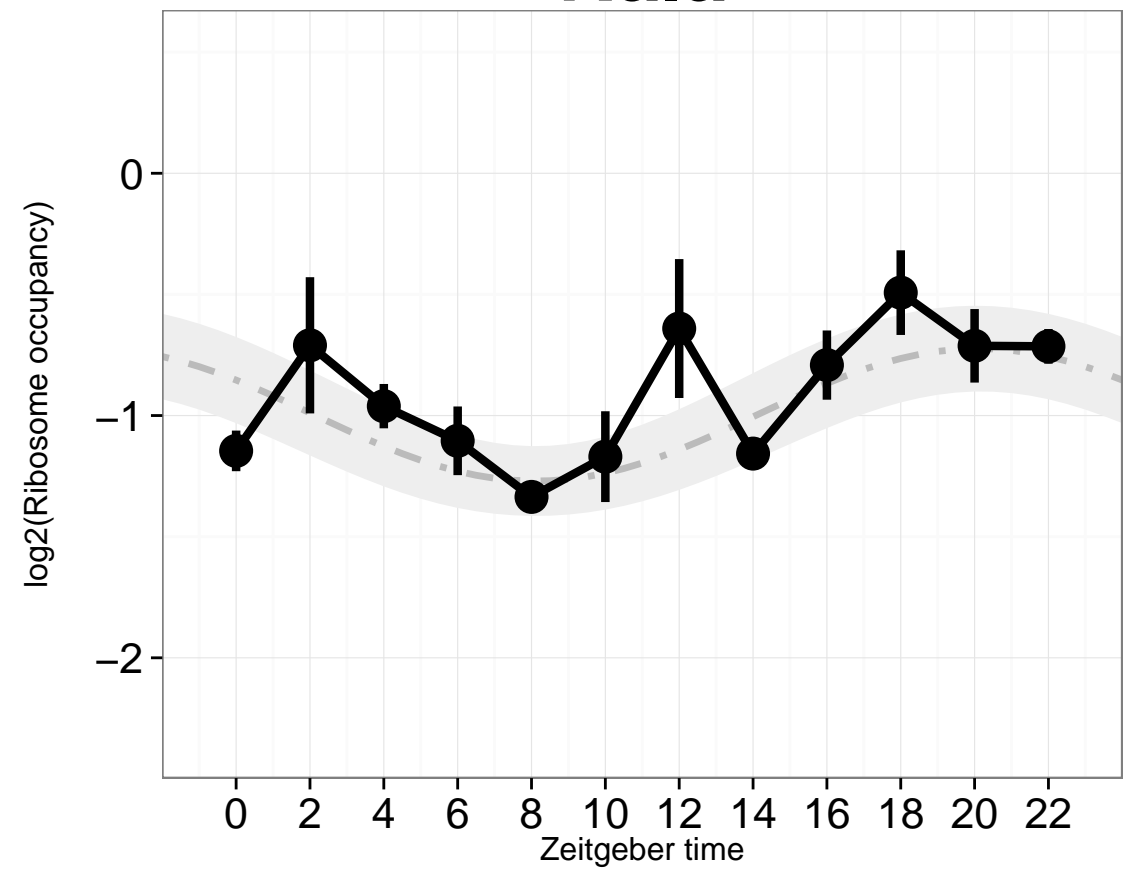

Supplement: SuppDataset_1.zip [file Rala_set_A.pdf › Supplemental Dataset 1/A-mRNA_nonrhyth_translation_nonrhyth/Rala_set_A.pdf]

## Ralb

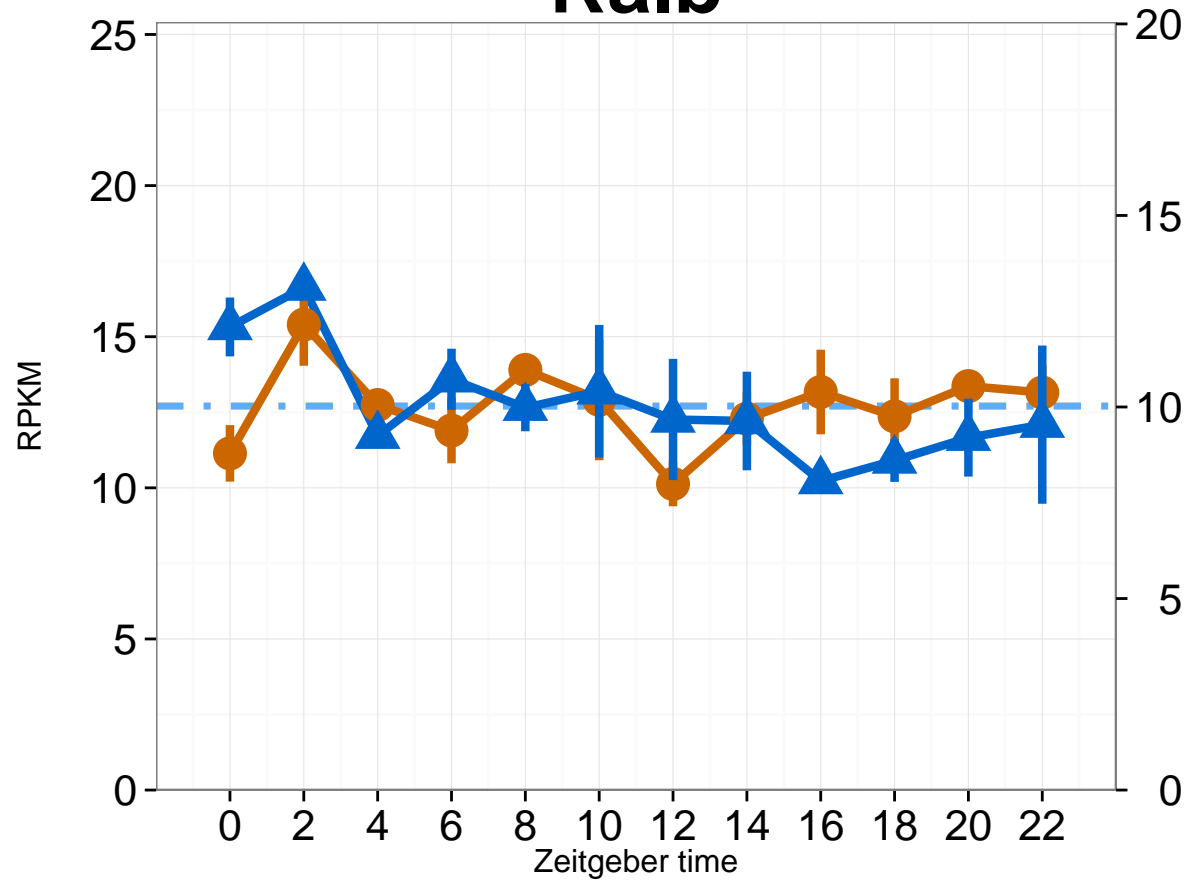

## Ralb

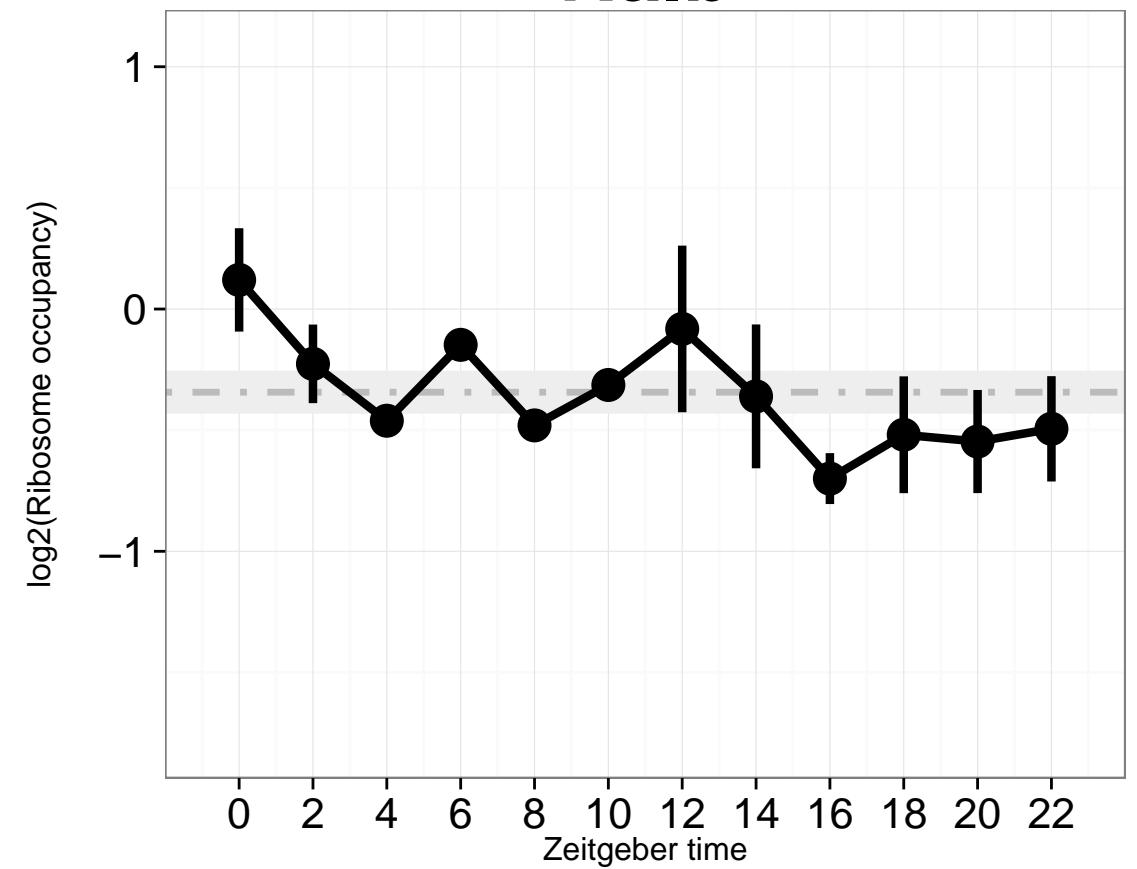

Supplement: SuppDataset_1.zip [file Ralb_set_A.pdf › Supplemental Dataset 1/A-mRNA_nonrhyth_translation_nonrhyth/Ralb_set_A.pdf]

# Ralbp1

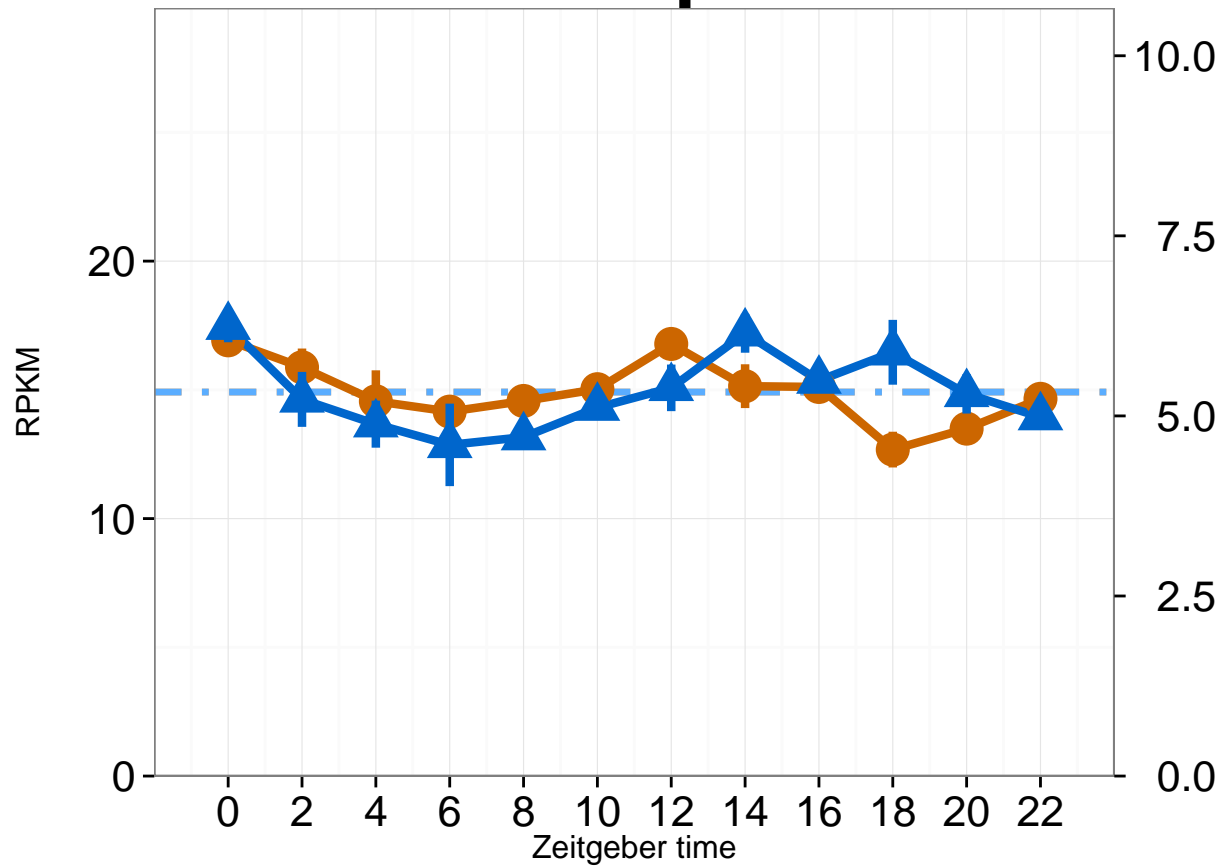

# Ralbp1

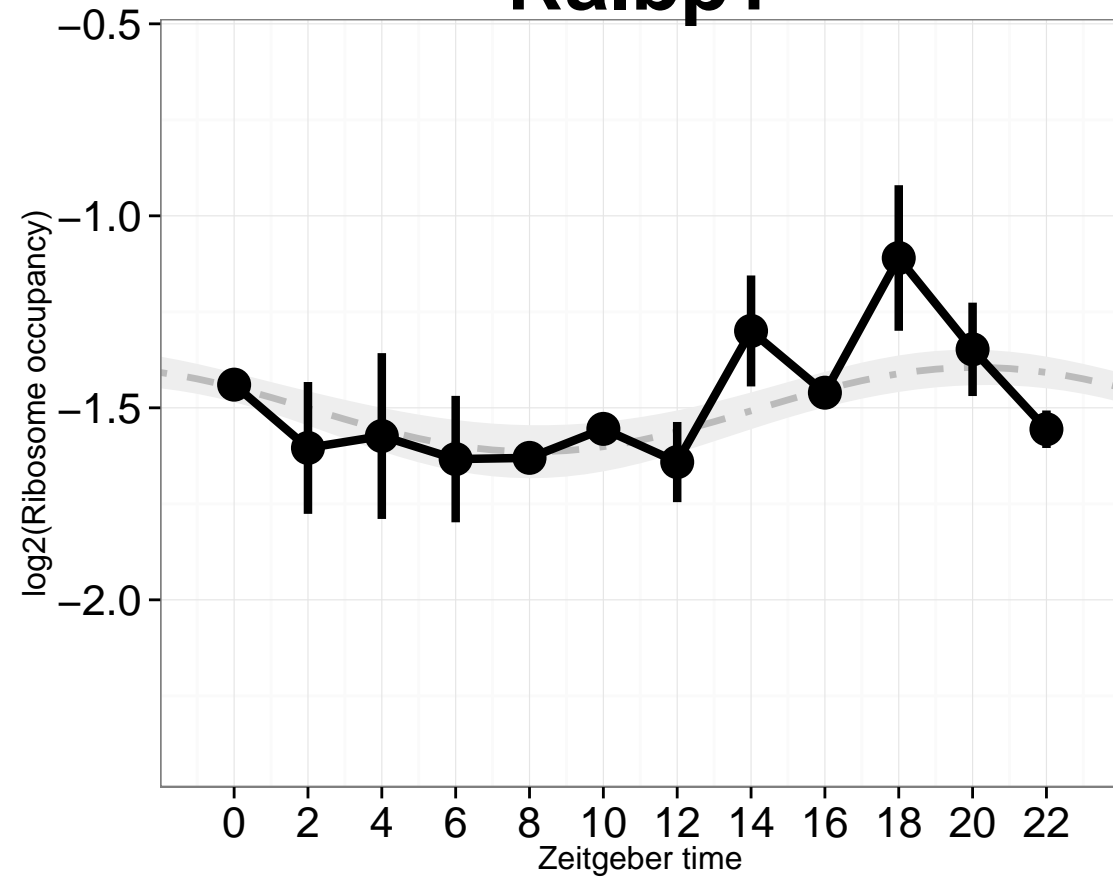

Supplement: SuppDataset_1.zip [file Ralbp1_set_A.pdf › Supplemental Dataset 1/A-mRNA_nonrhyth_translation_nonrhyth/Ralbp1_set_A.pdf]

## Ralgapa1

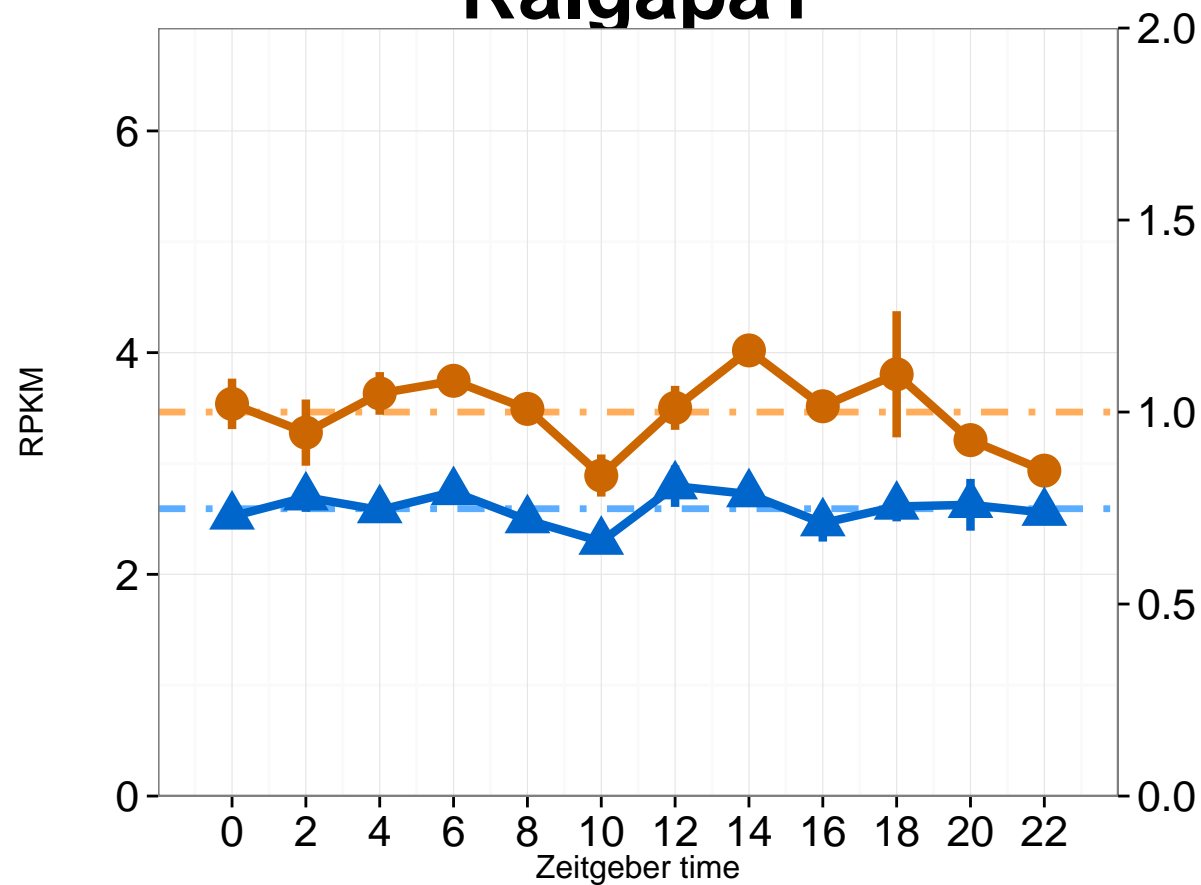

## Ralgapa1

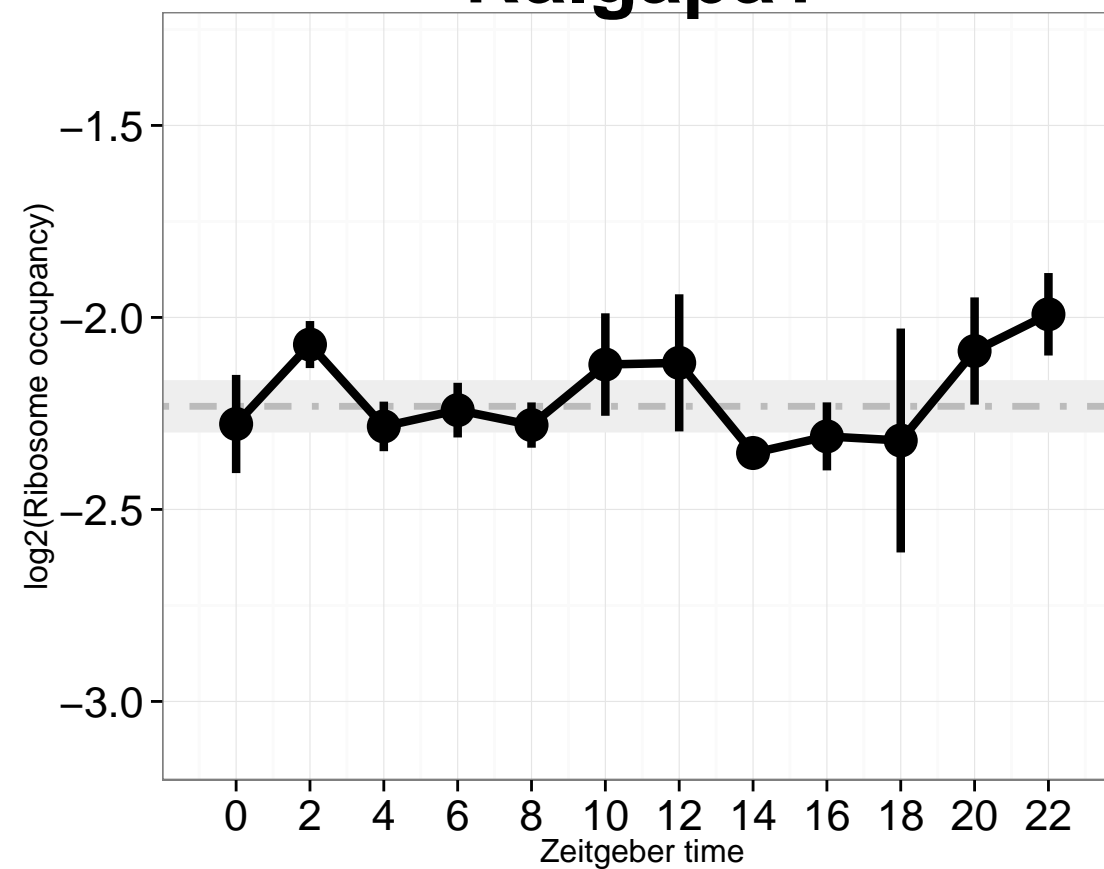

Supplement: SuppDataset_1.zip [file Ralgapa1_set_A.pdf › Supplemental Dataset 1/A-mRNA_nonrhyth_translation_nonrhyth/Ralgapa1_set_A.pdf]

## Ralgapb

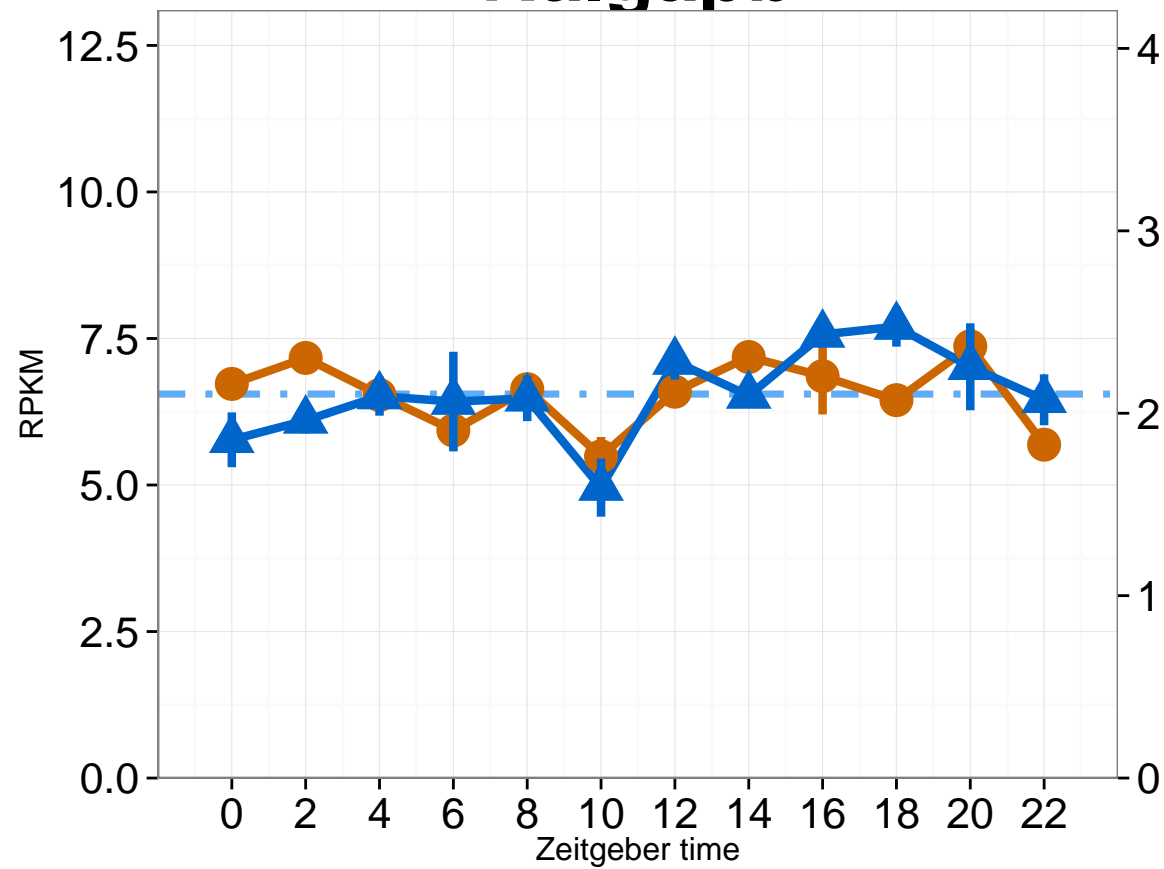

## Ralgapb

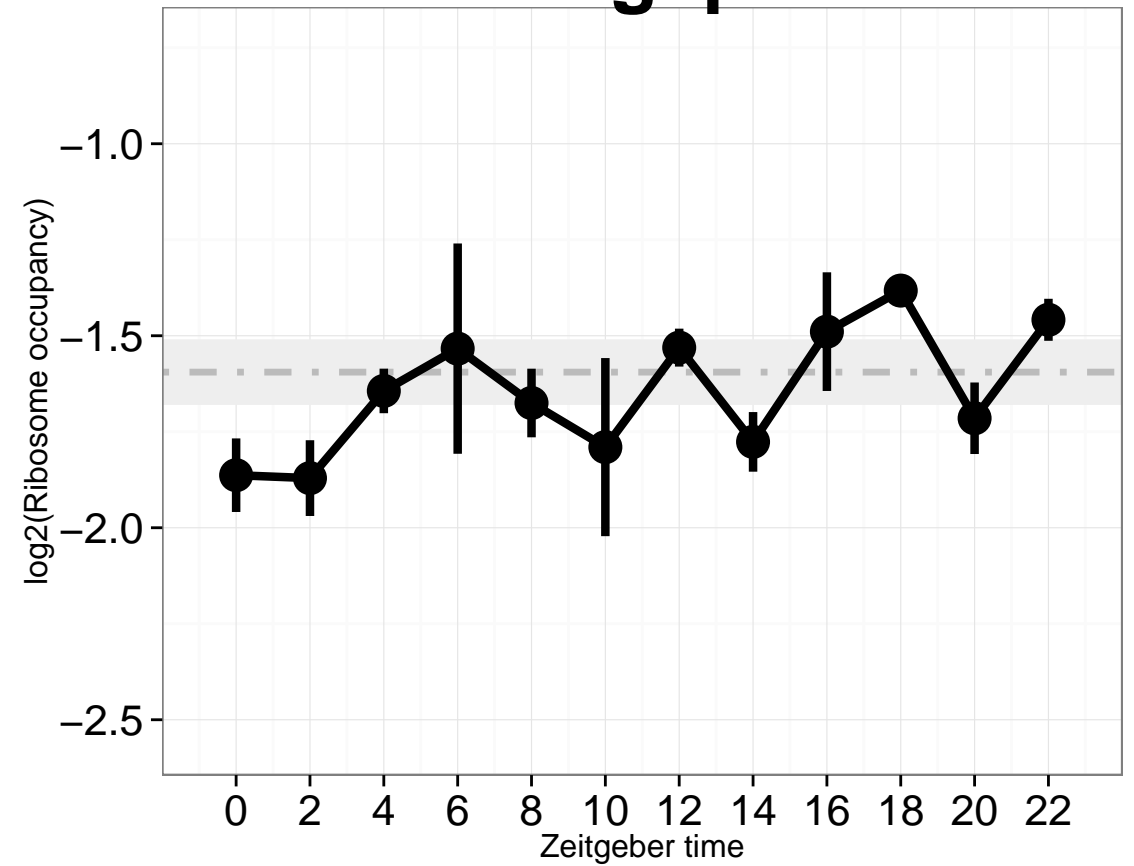

Supplement: SuppDataset_1.zip [file Ralgapb_set_A.pdf › Supplemental Dataset 1/A-mRNA_nonrhyth_translation_nonrhyth/Ralgapb_set_A.pdf]

## Ralgds

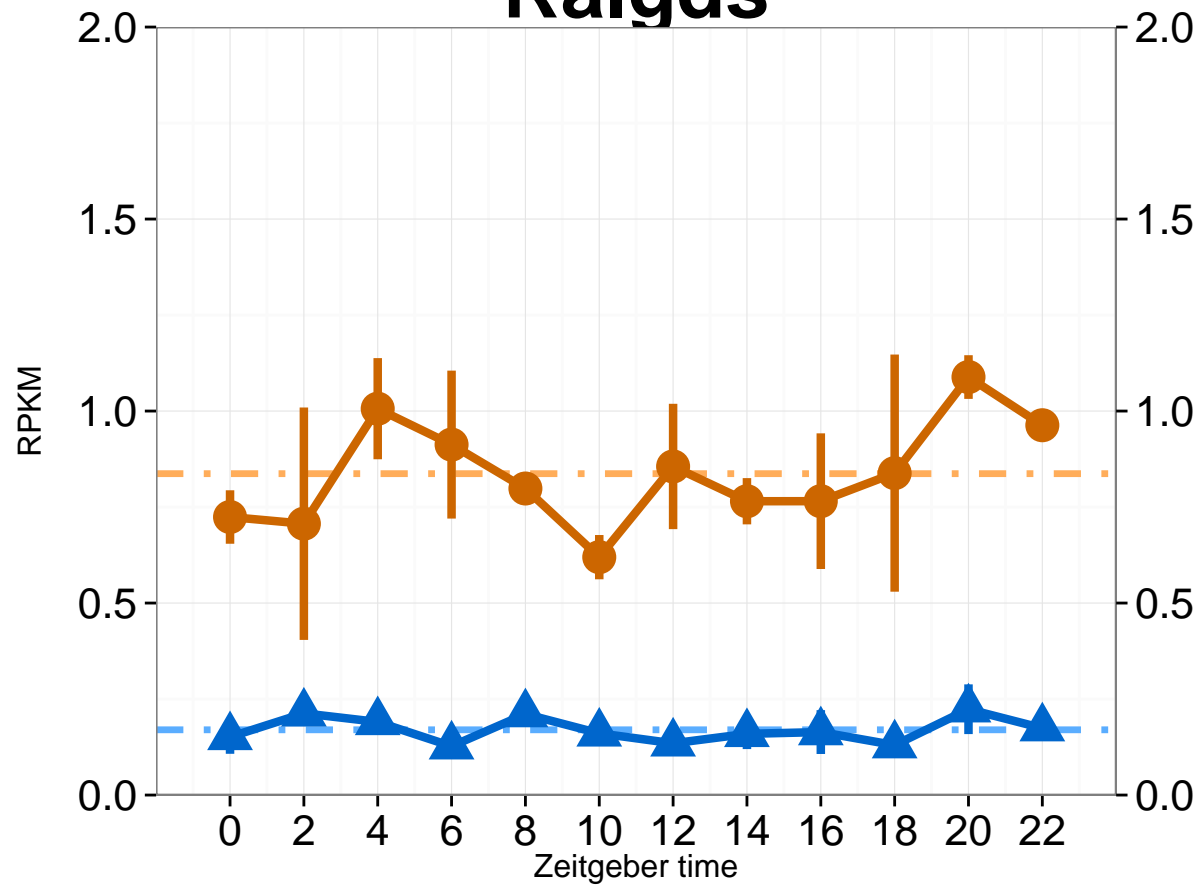

## Ralgds

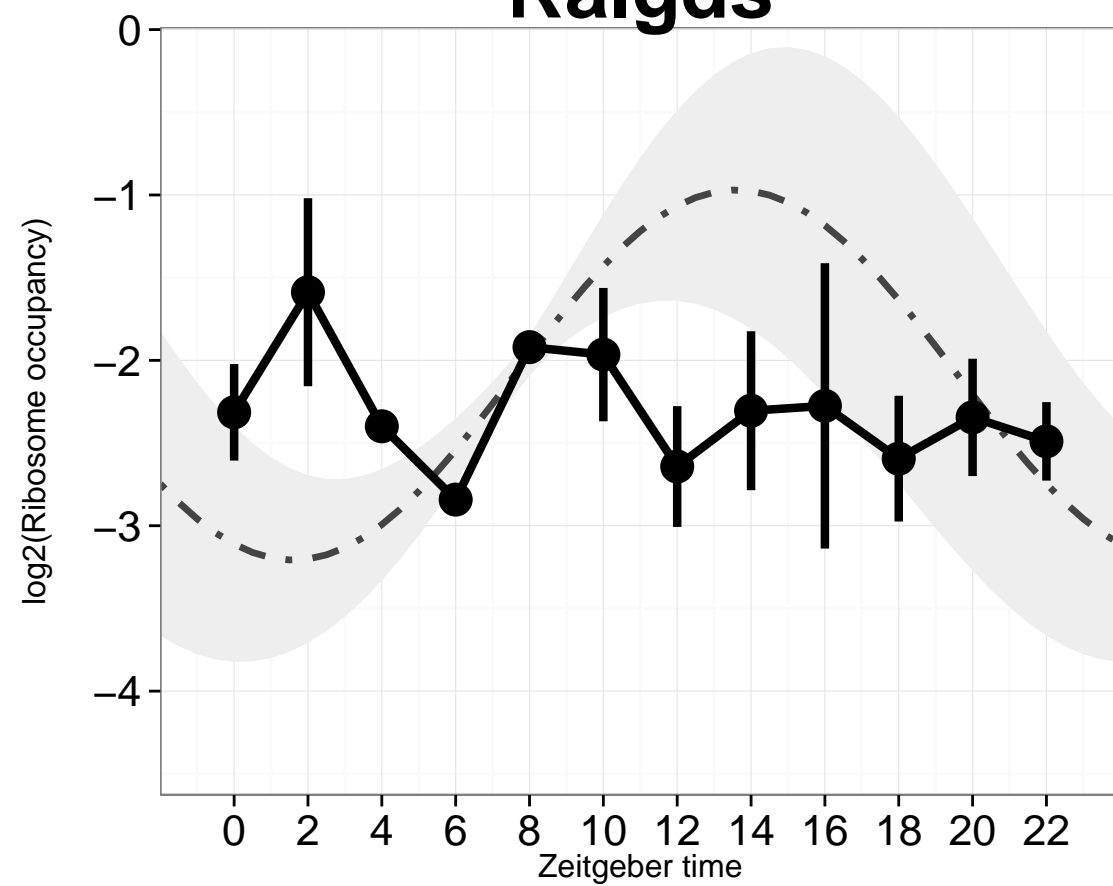

Supplement: SuppDataset_1.zip [file Ralgds_set_A.pdf › Supplemental Dataset 1/A-mRNA_nonrhyth_translation_nonrhyth/Ralgds_set_A.pdf]

## Raly

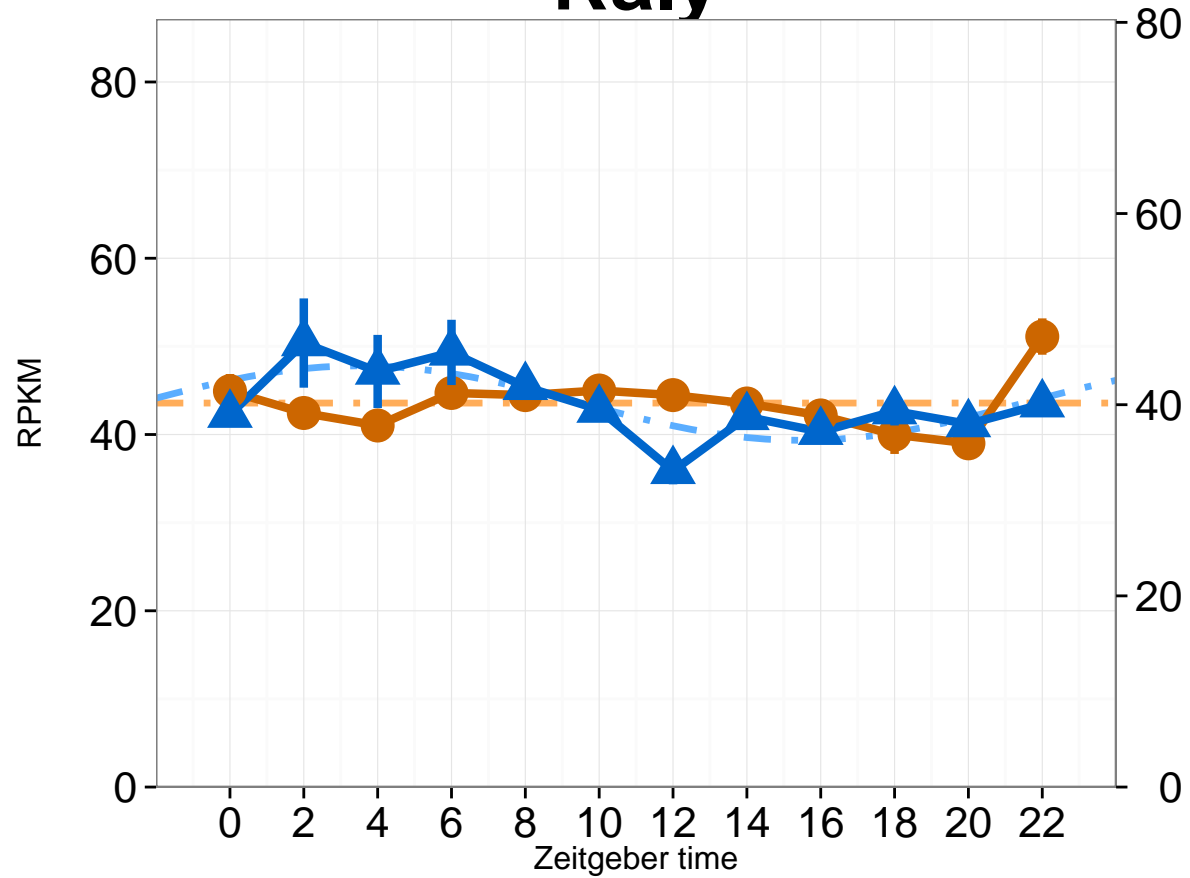

## Raly

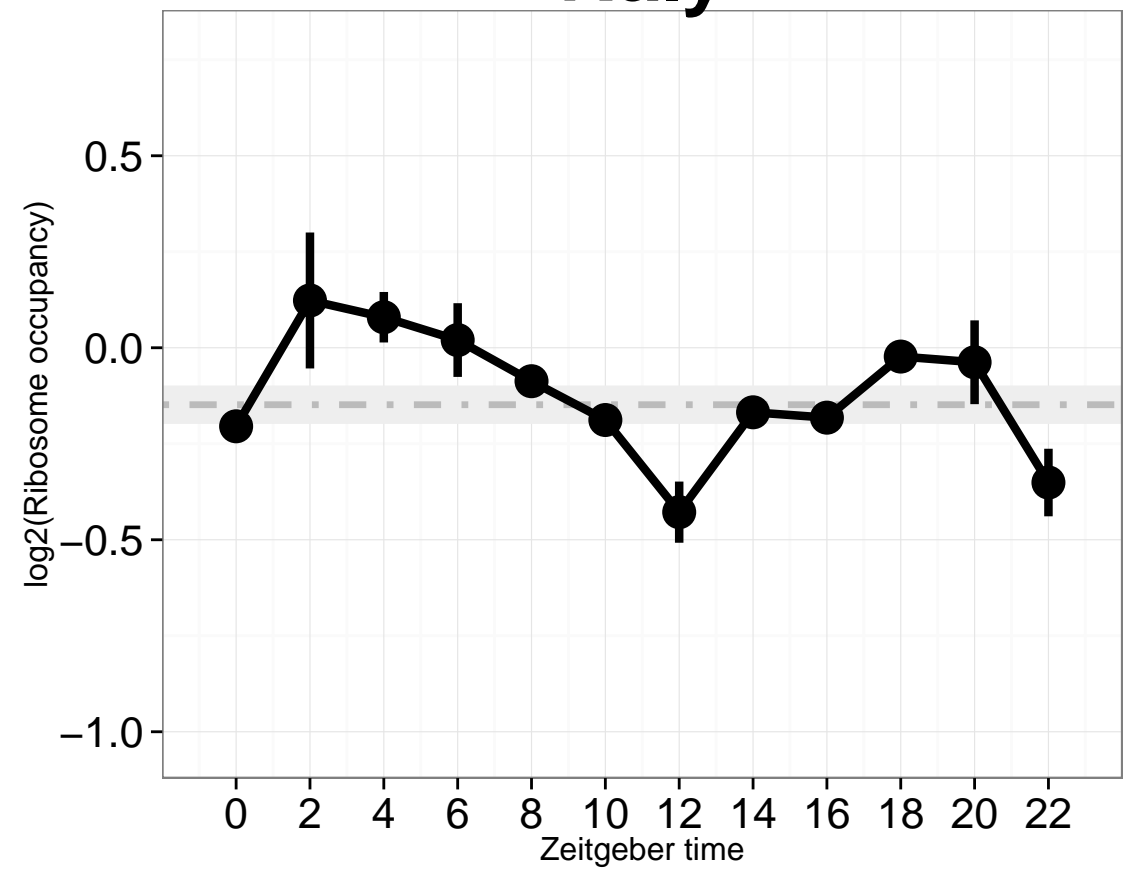

Supplement: SuppDataset_1.zip [file Raly_set_A.pdf › Supplemental Dataset 1/A-mRNA_nonrhyth_translation_nonrhyth/Raly_set_A.pdf]

# Ramp1

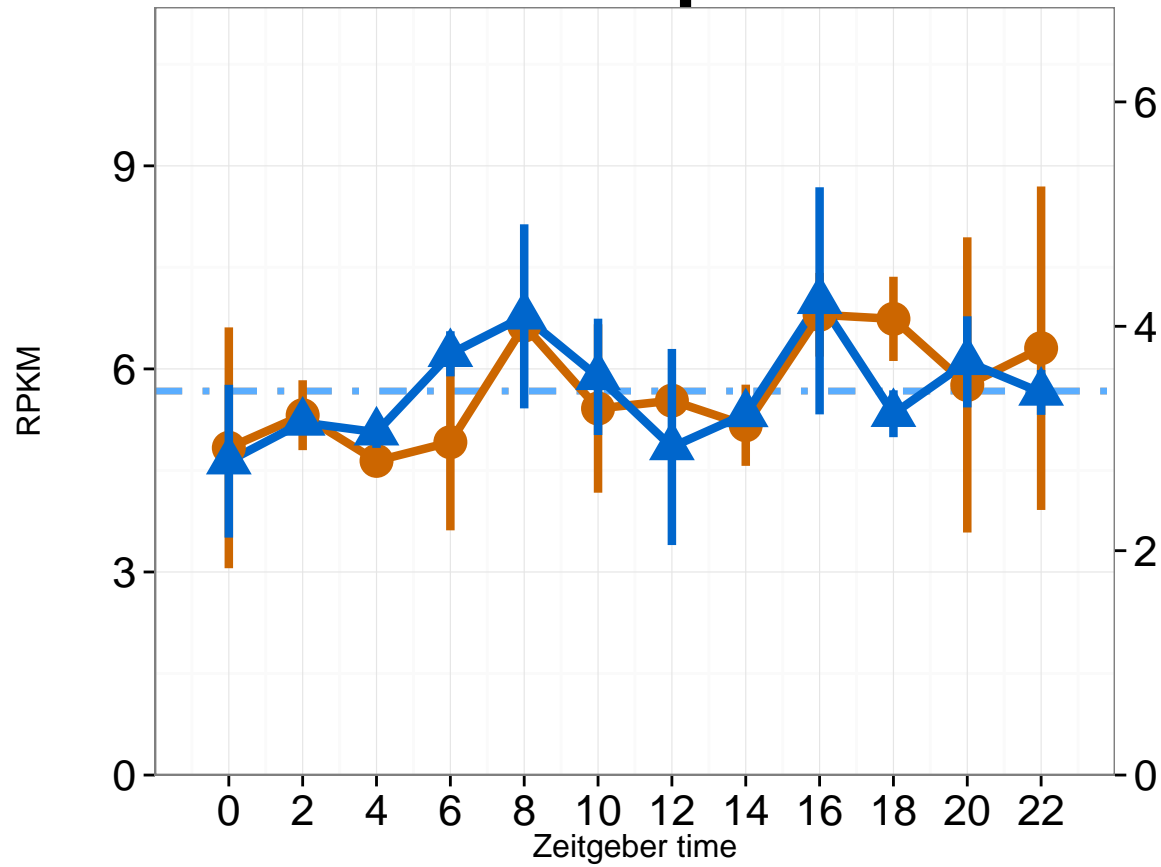

# Ramp1

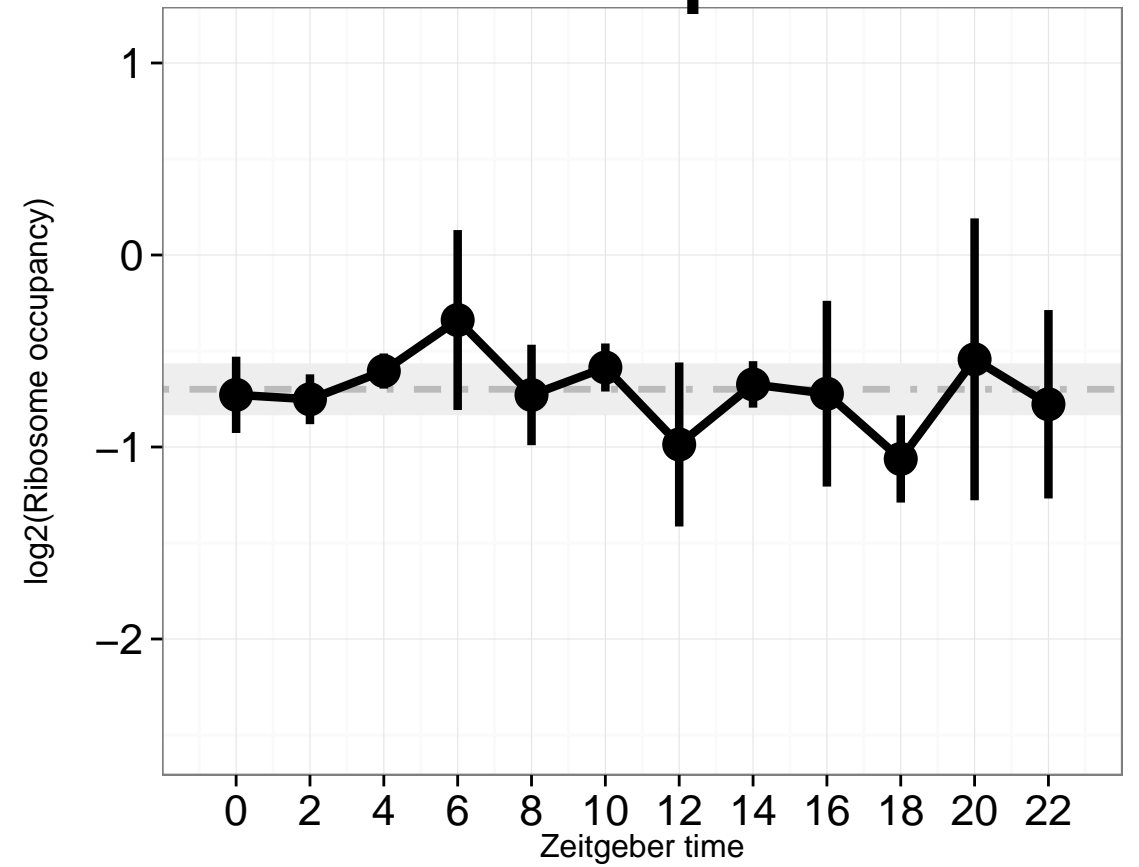

Supplement: SuppDataset_1.zip [file Ramp1_set_A.pdf › Supplemental Dataset 1/A-mRNA_nonrhyth_translation_nonrhyth/Ramp1_set_A.pdf]

## Ramp2

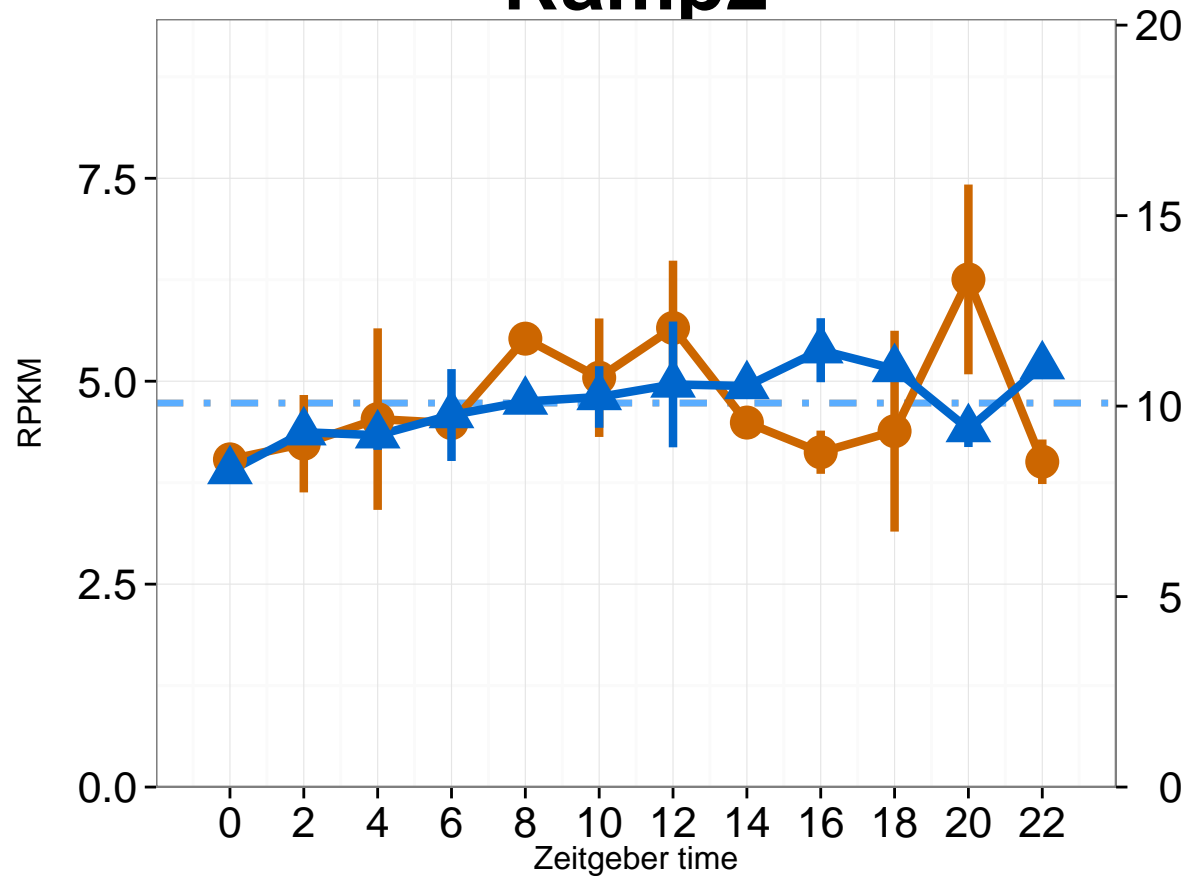

## Ramp2

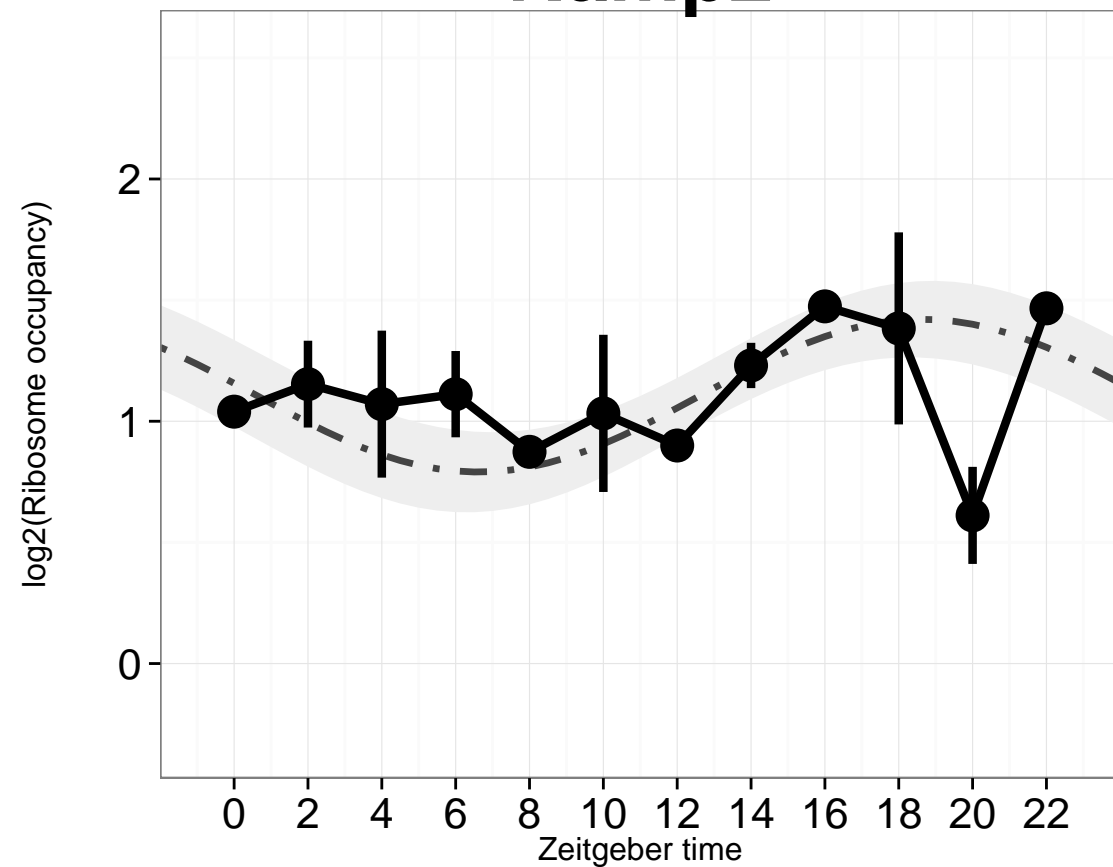

Supplement: SuppDataset_1.zip [file Ramp2_set_A.pdf › Supplemental Dataset 1/A-mRNA_nonrhyth_translation_nonrhyth/Ramp2_set_A.pdf]

## Ran

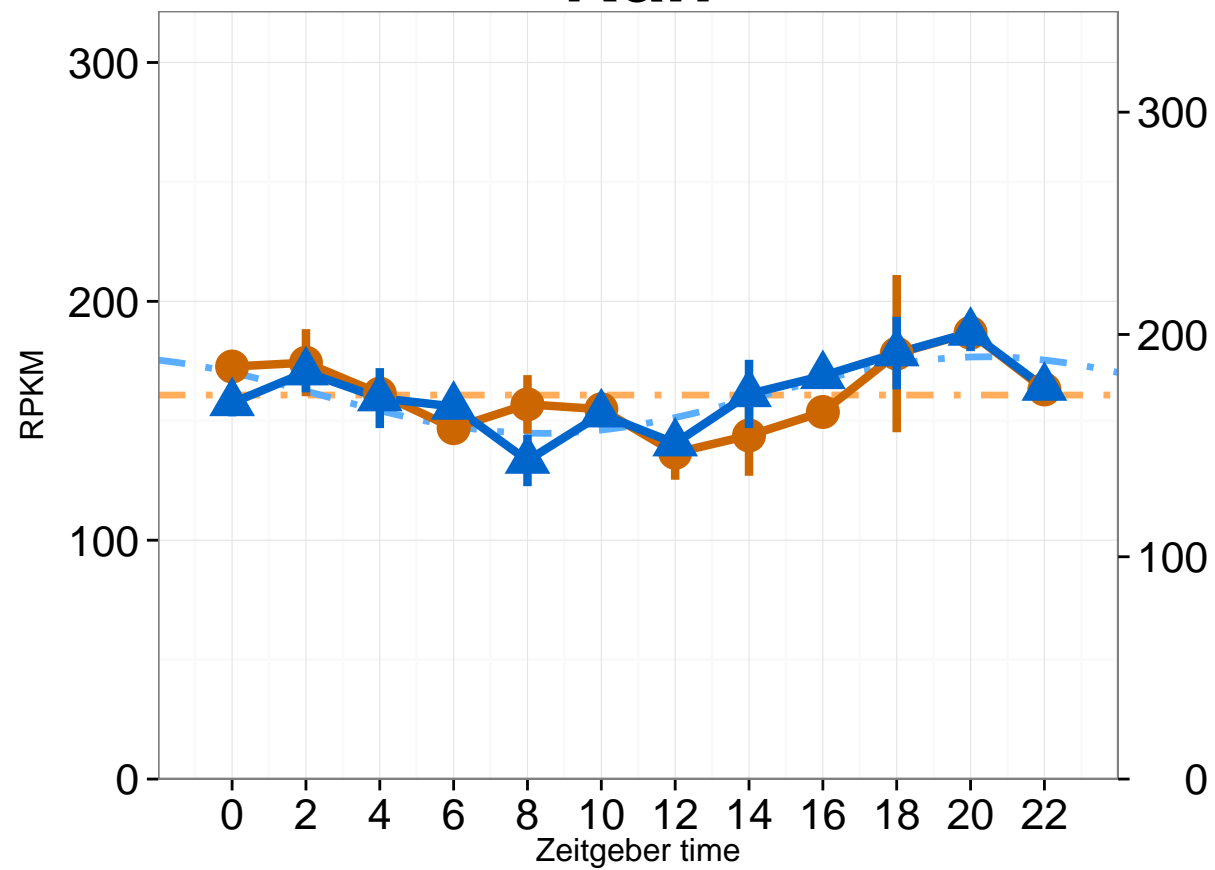

## Ran

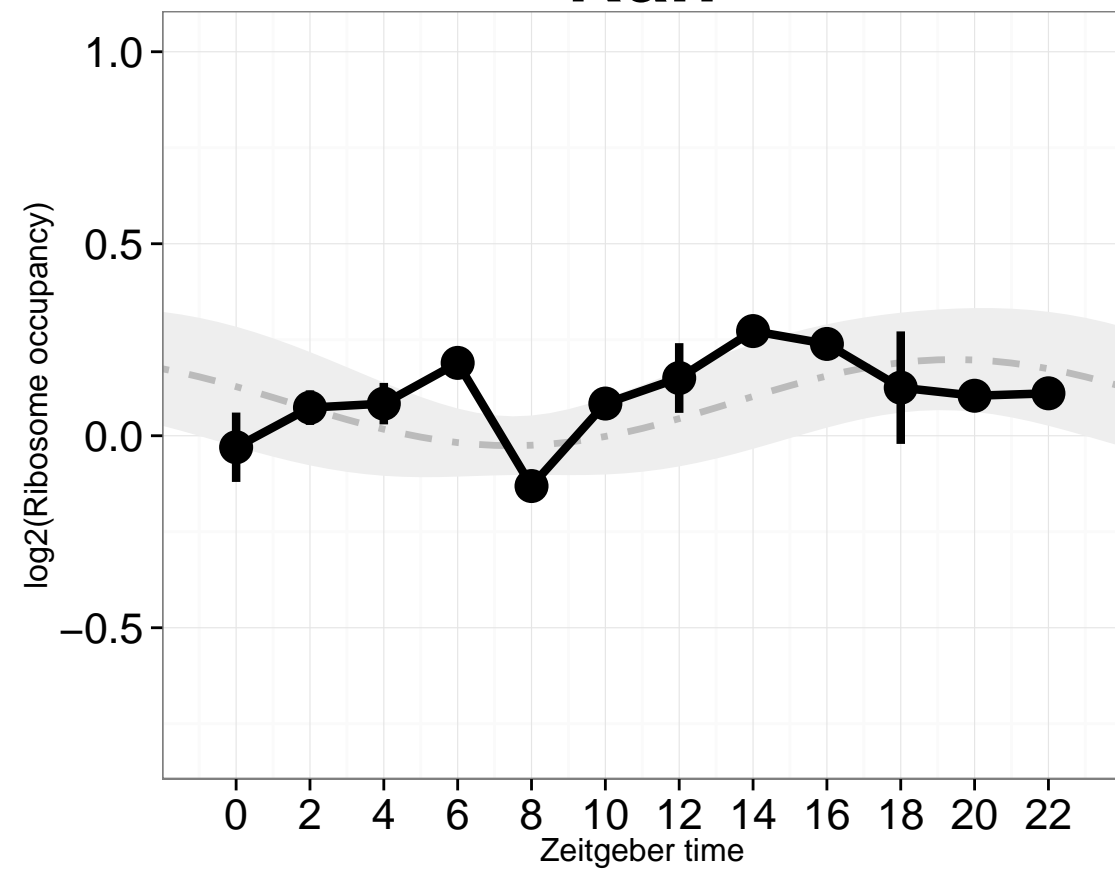

Supplement: SuppDataset_1.zip [file Ran_set_A.pdf › Supplemental Dataset 1/A-mRNA_nonrhyth_translation_nonrhyth/Ran_set_A.pdf]

## Ranbp2

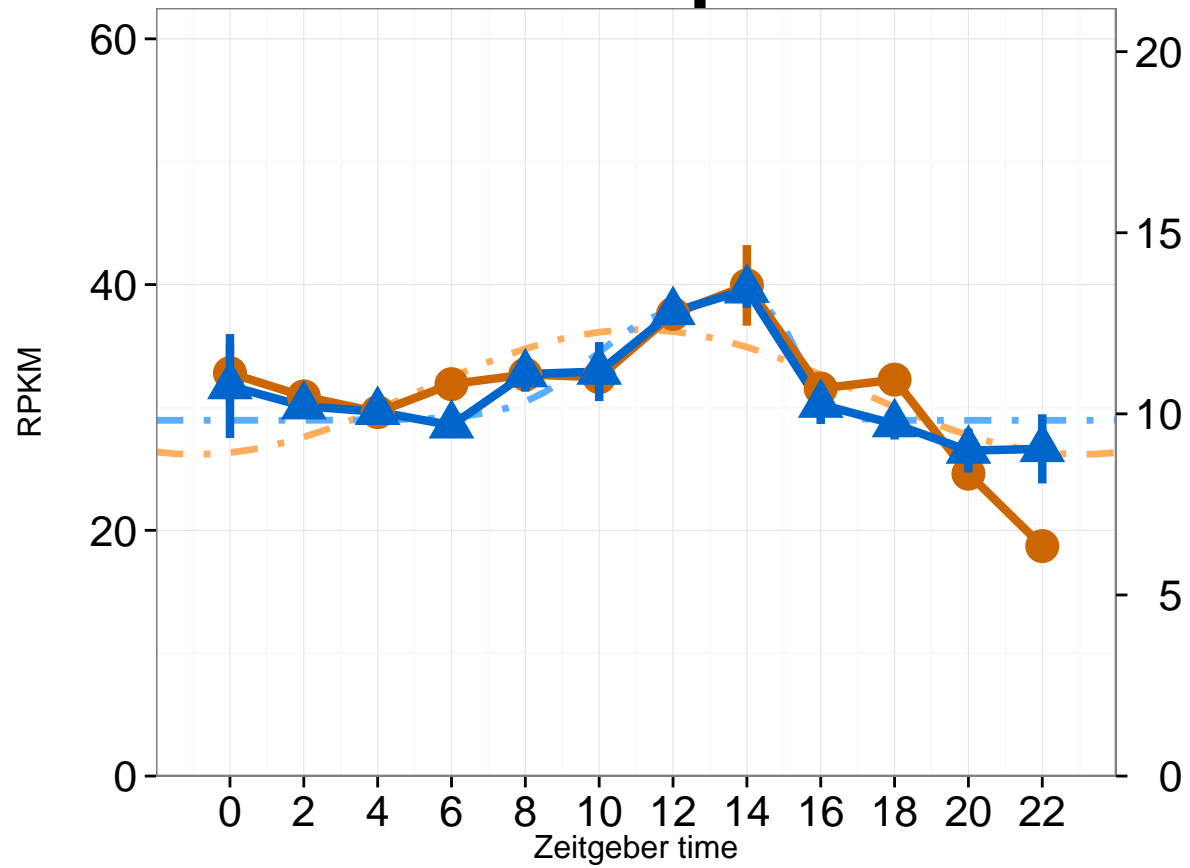

## Ranbp2

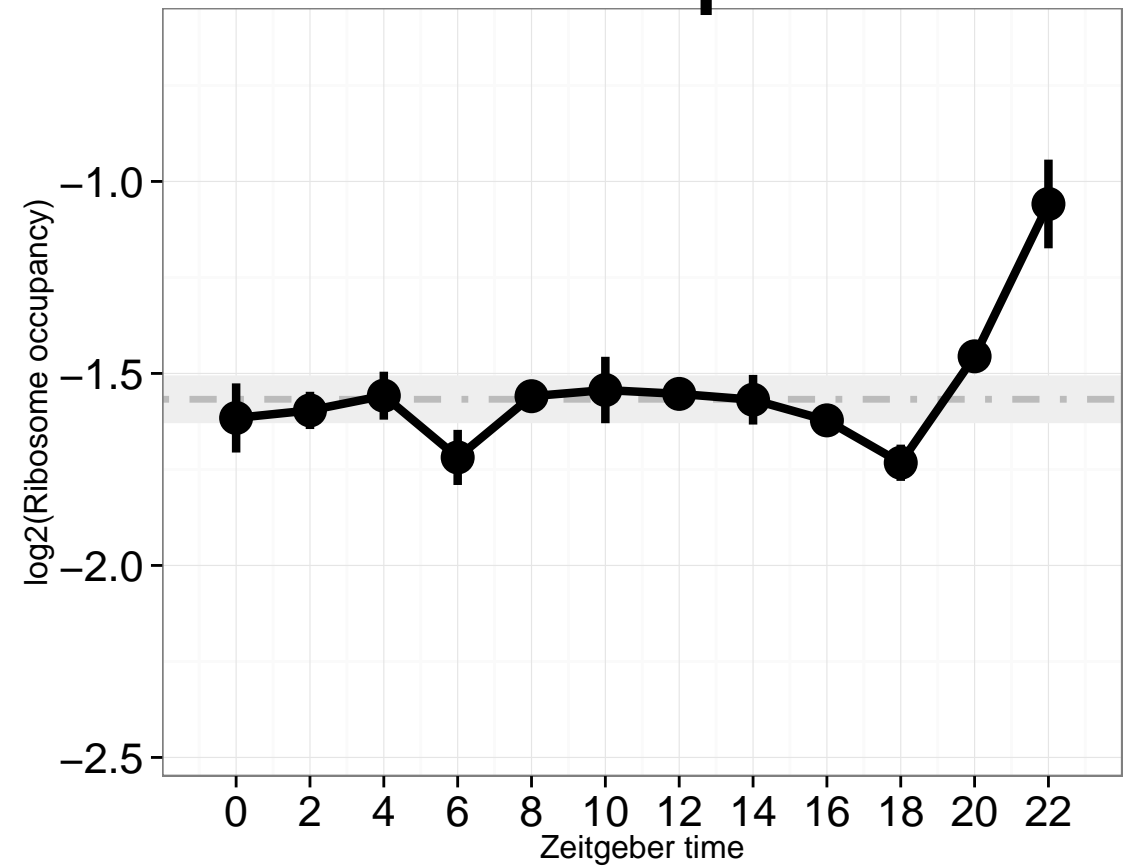

Supplement: SuppDataset_1.zip [file Ranbp2_set_A.pdf › Supplemental Dataset 1/A-mRNA_nonrhyth_translation_nonrhyth/Ranbp2_set_A.pdf]

## Ranbp3

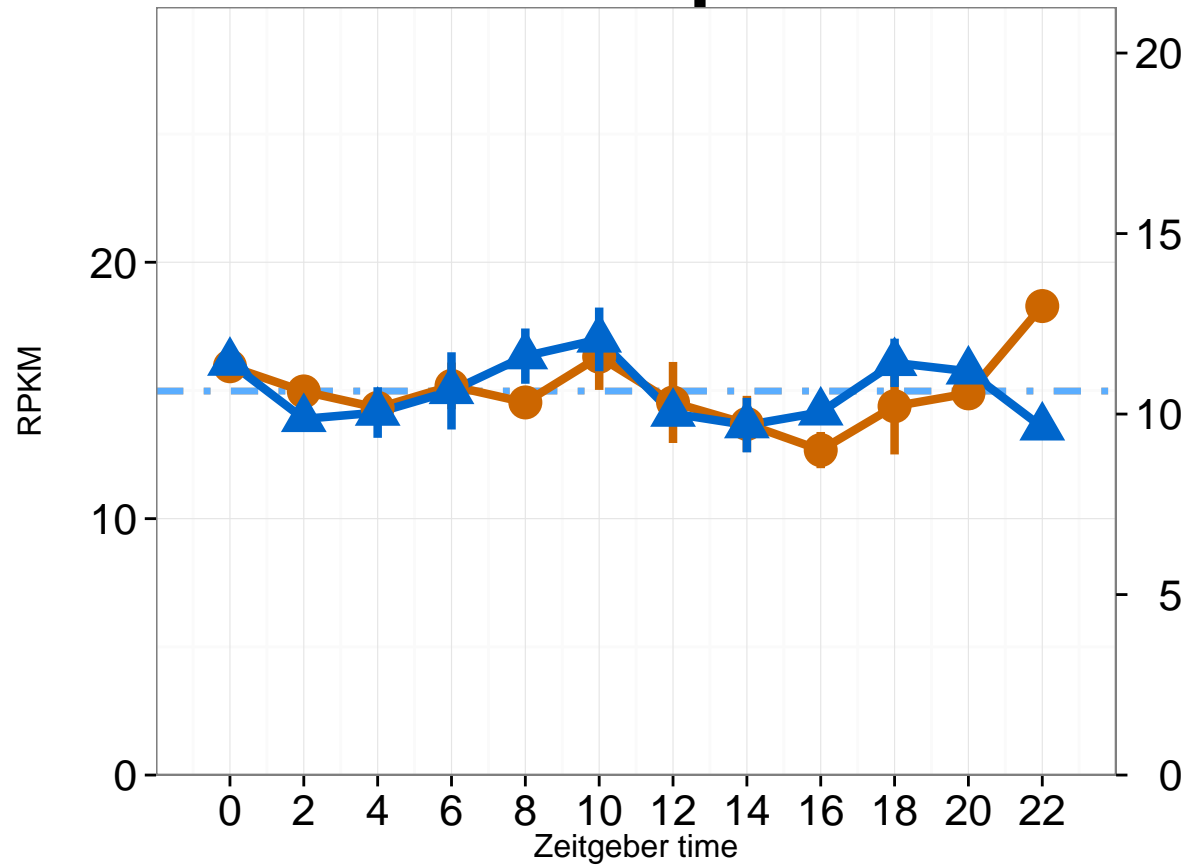

## Ranbp3

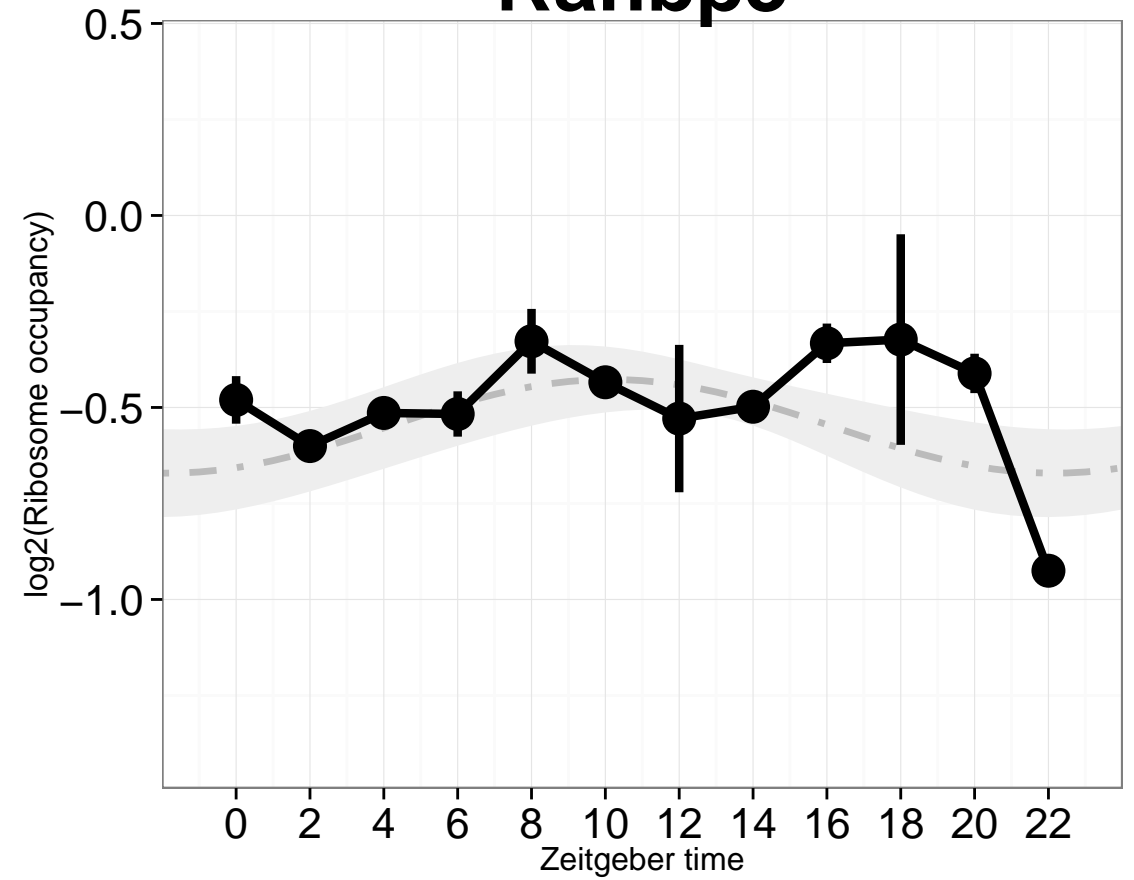

Supplement: SuppDataset_1.zip [file Ranbp3_set_A.pdf › Supplemental Dataset 1/A-mRNA_nonrhyth_translation_nonrhyth/Ranbp3_set_A.pdf]

## Ranbp6

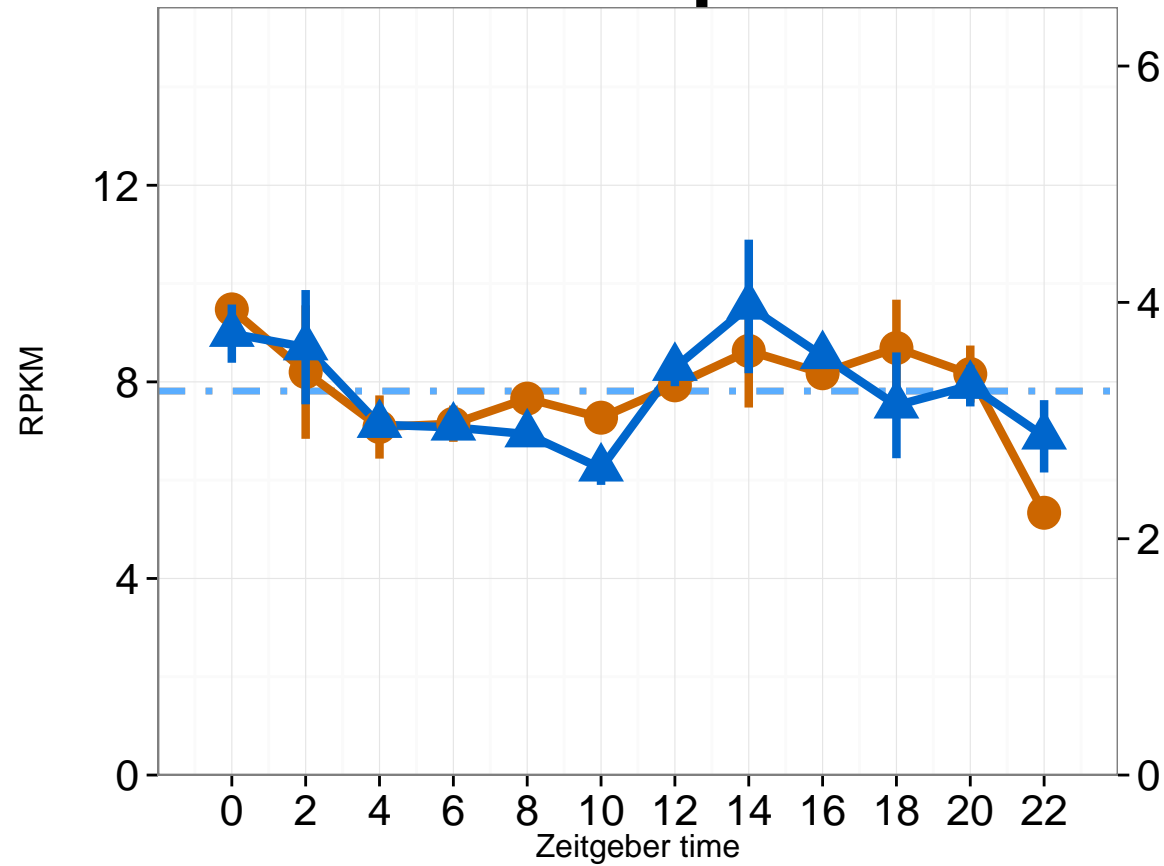

## Ranbp6

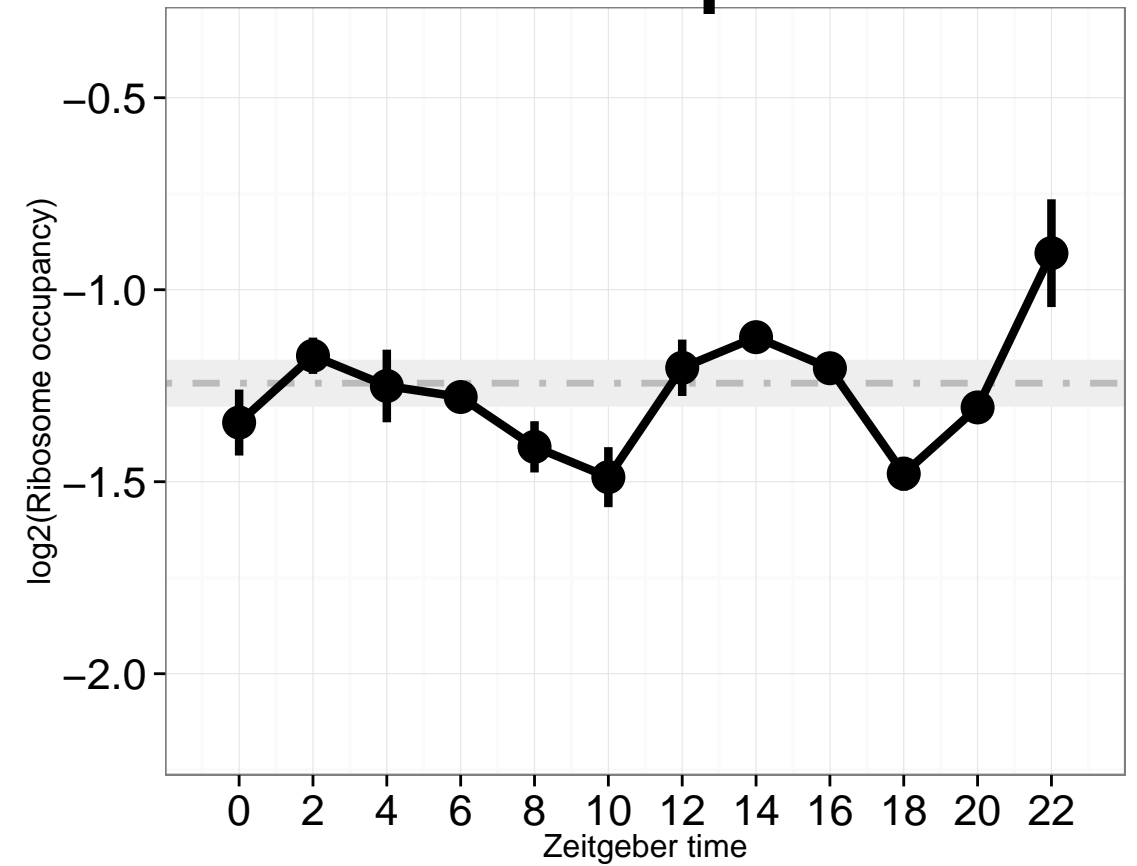

Supplement: SuppDataset_1.zip [file Ranbp6_set_A.pdf › Supplemental Dataset 1/A-mRNA_nonrhyth_translation_nonrhyth/Ranbp6_set_A.pdf]

# Ranbp9

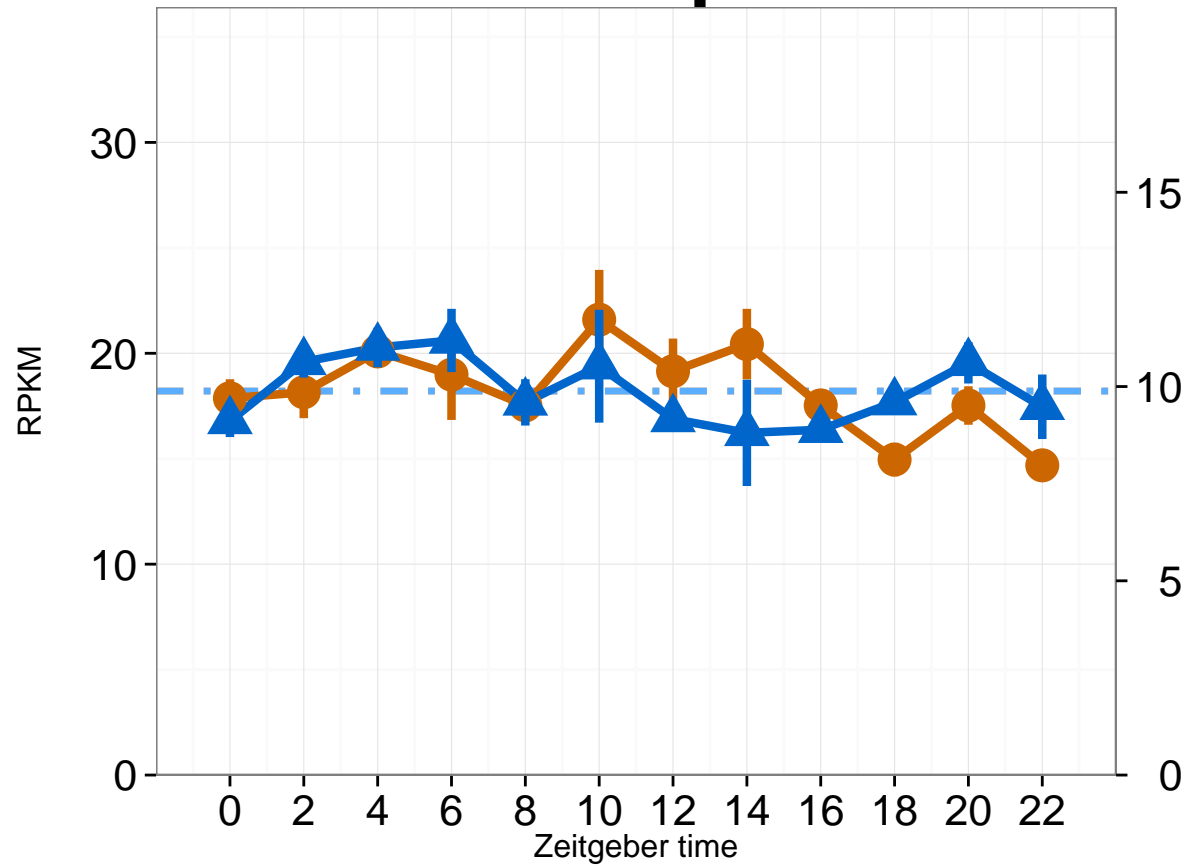

# Ranbp9

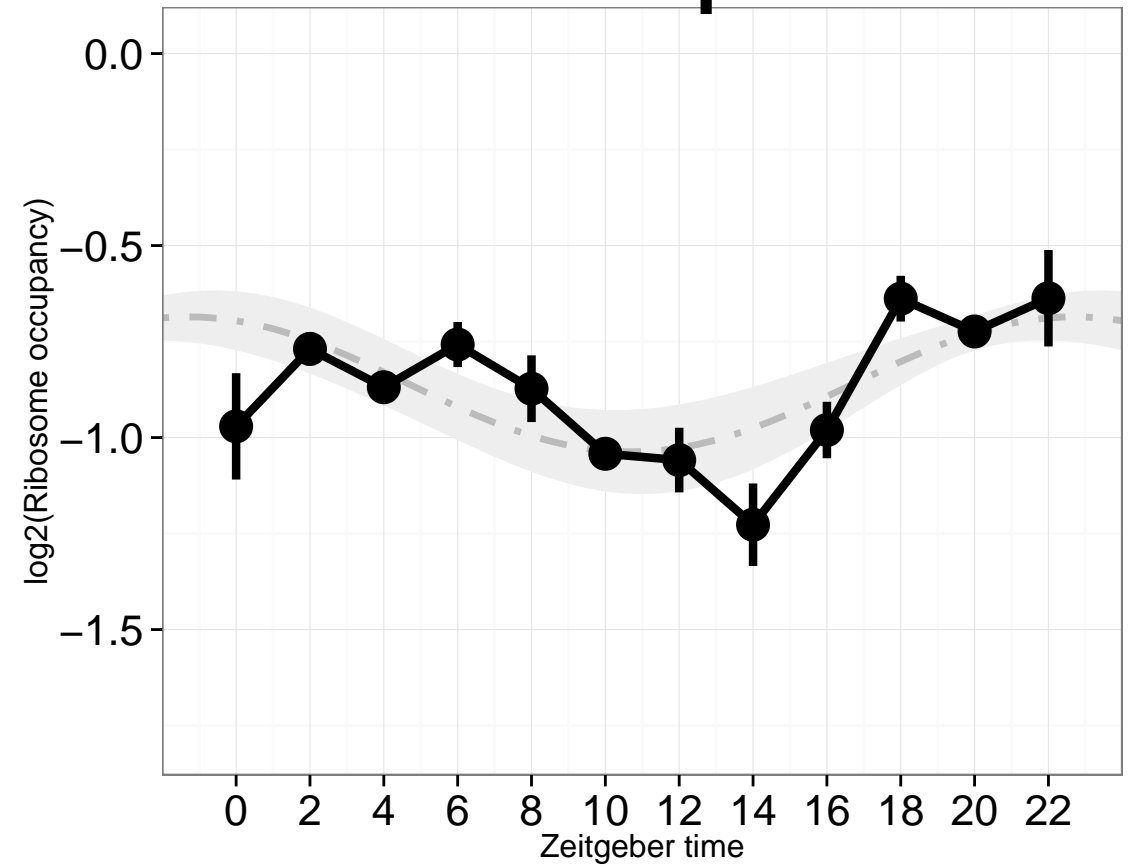

Supplement: SuppDataset_1.zip [file Ranbp9_set_A.pdf › Supplemental Dataset 1/A-mRNA_nonrhyth_translation_nonrhyth/Ranbp9_set_A.pdf]

## Rangap1

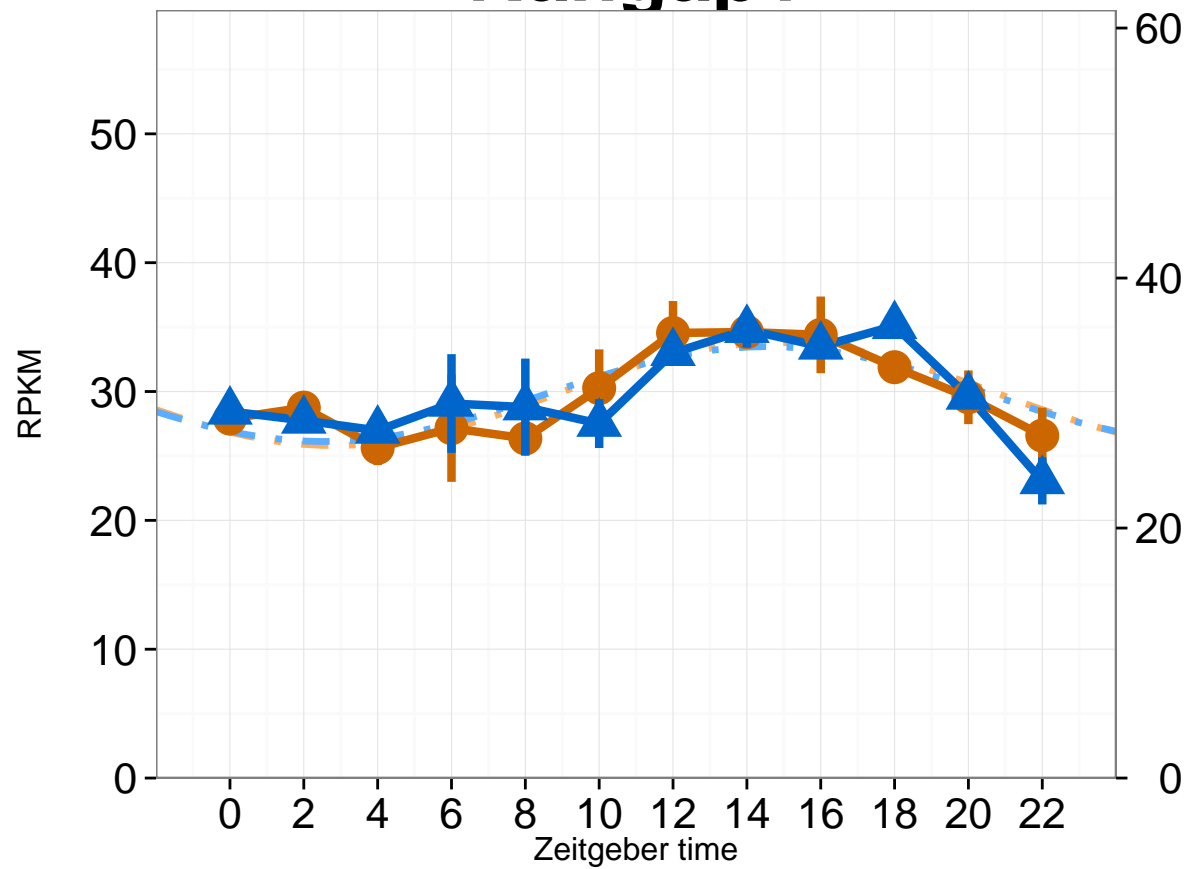

## Rangap1

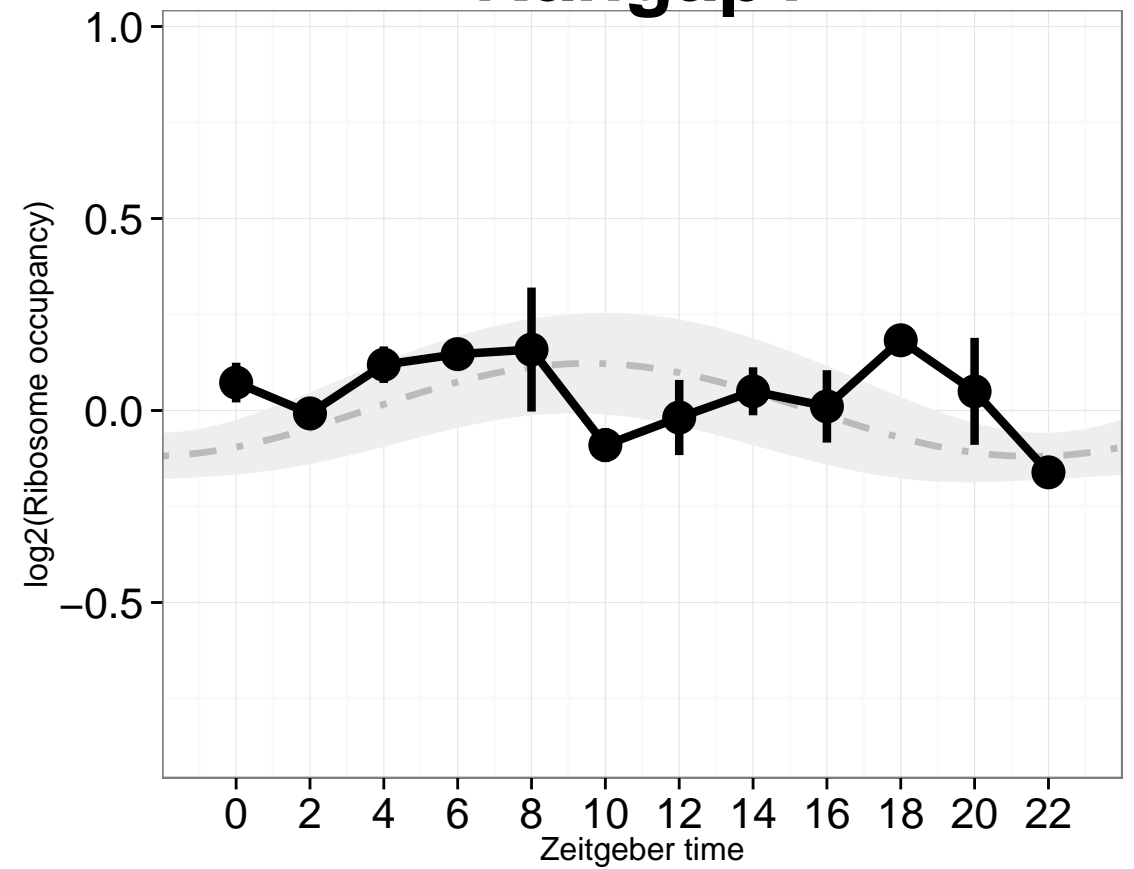

Supplement: SuppDataset_1.zip [file Rangap1_set_A.pdf › Supplemental Dataset 1/A-mRNA_nonrhyth_translation_nonrhyth/Rangap1_set_A.pdf]

# Rap1a

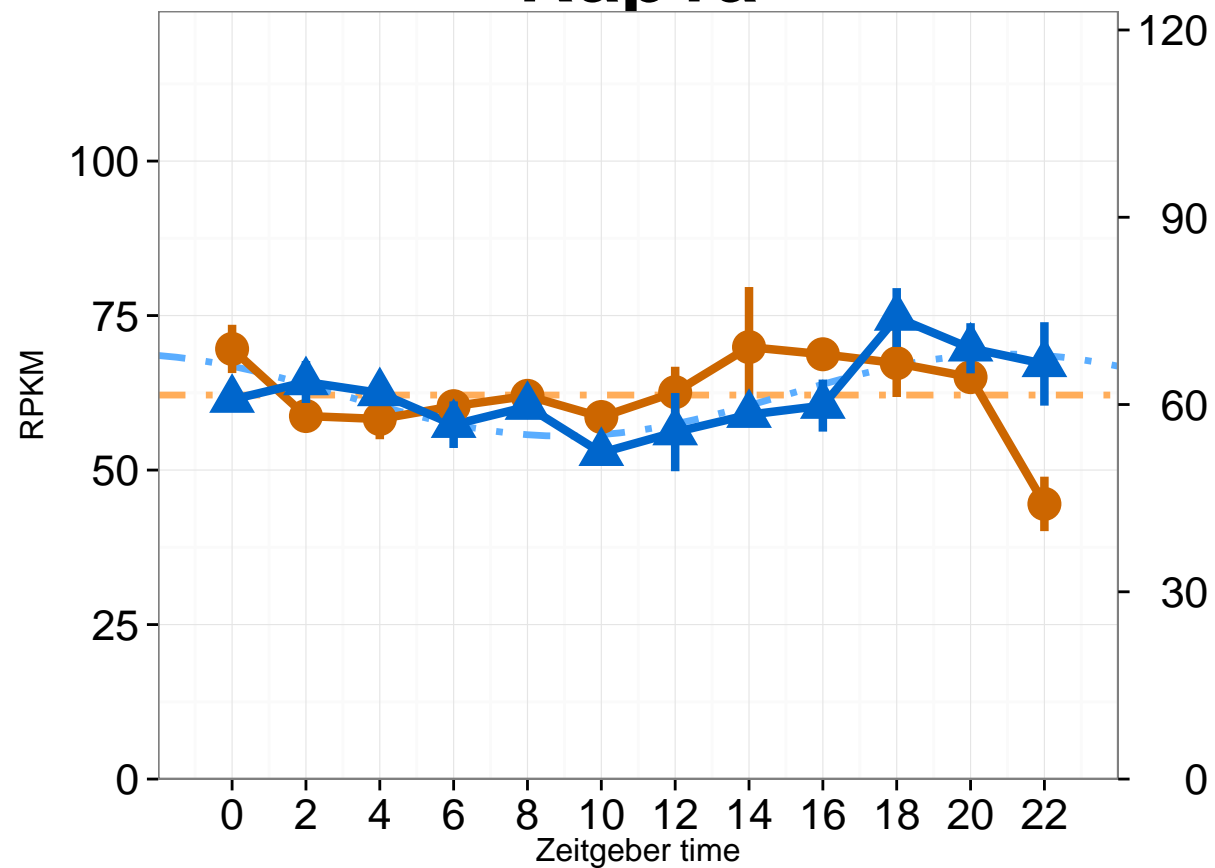

# Rap1a

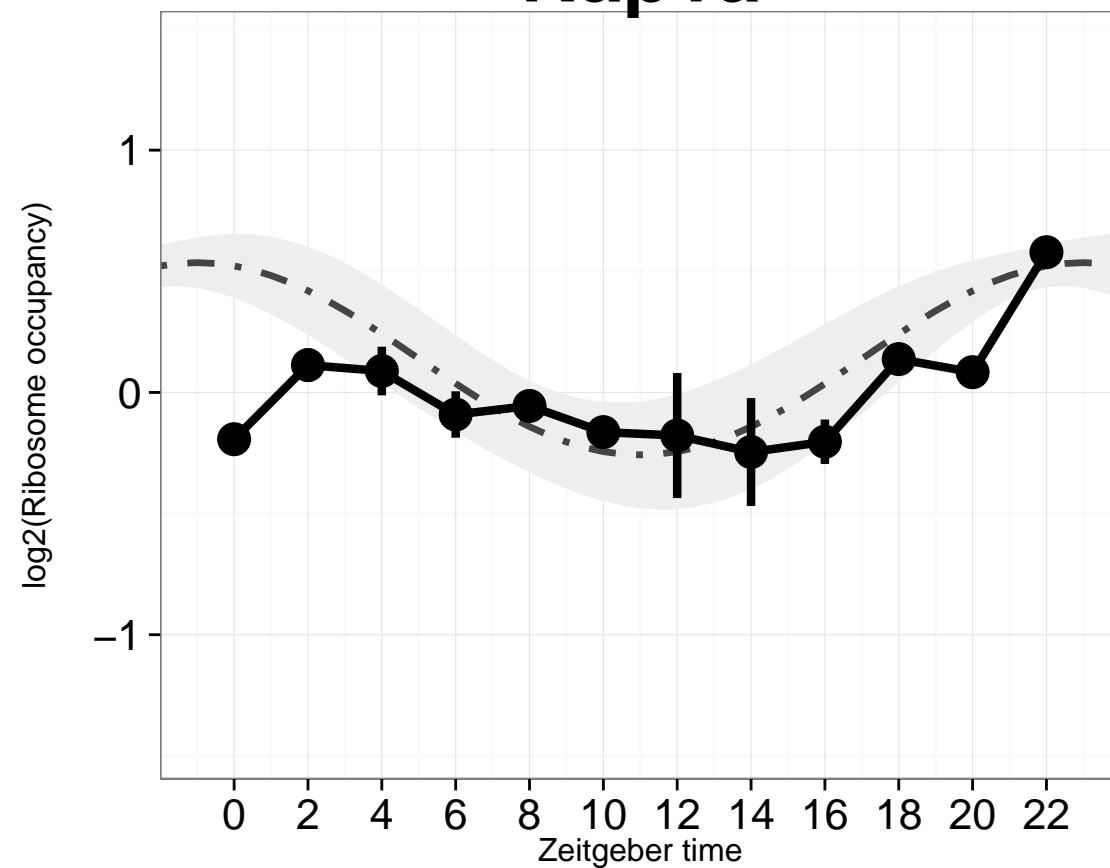

Supplement: SuppDataset_1.zip [file Rap1a_set_A.pdf › Supplemental Dataset 1/A-mRNA_nonrhyth_translation_nonrhyth/Rap1a_set_A.pdf]

## Rap1gap2

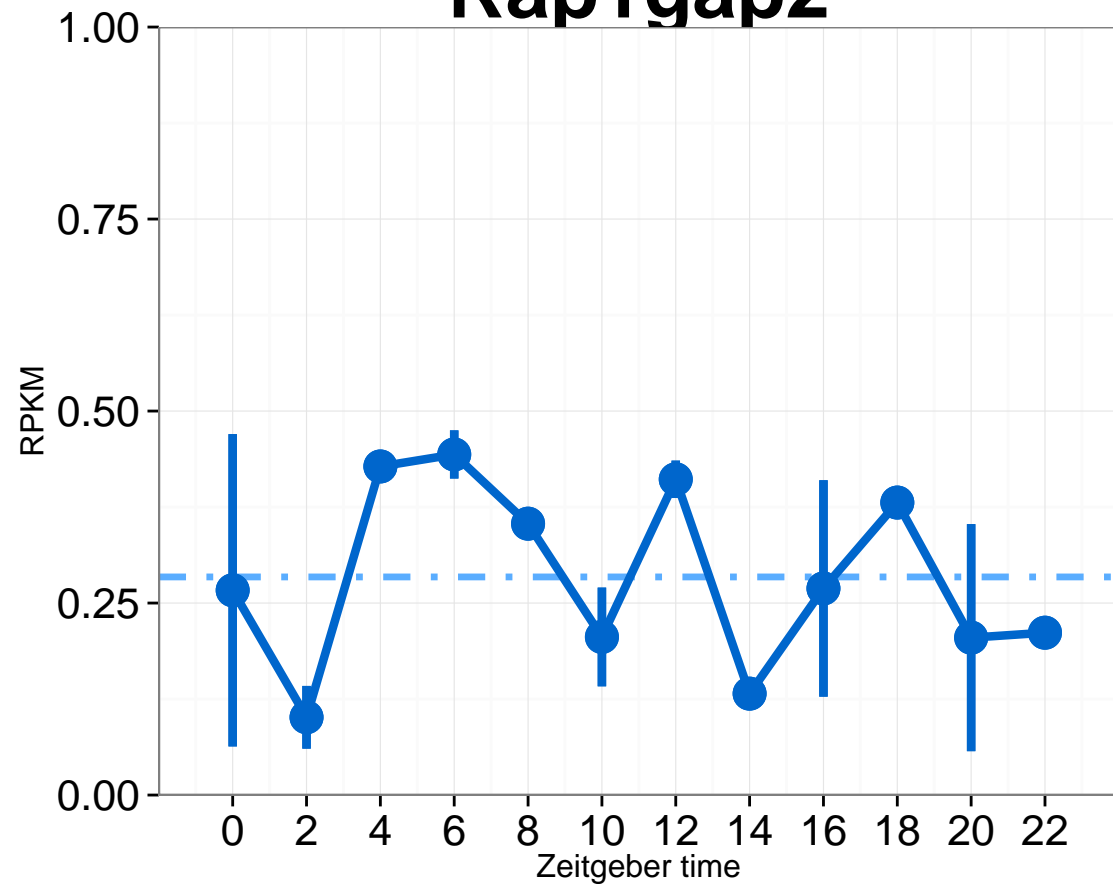

## Rap1gap2 log2(Ribosome occupancy)

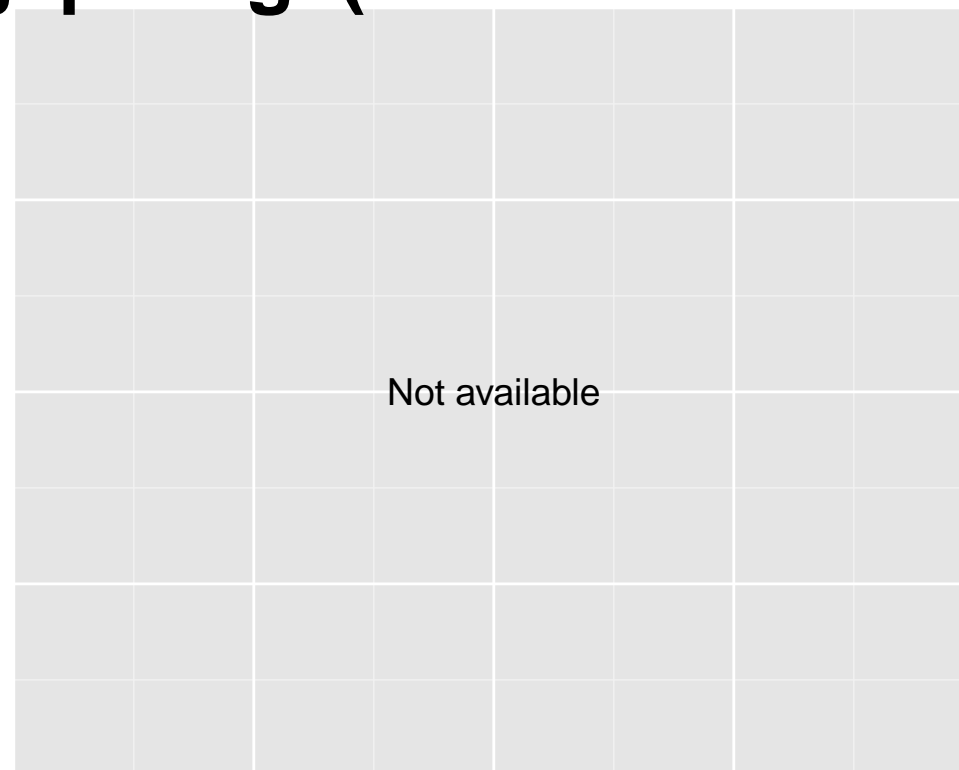

Supplement: SuppDataset_1.zip [file Rap1gap2_set_A.pdf › Supplemental Dataset 1/A-mRNA_nonrhyth_translation_nonrhyth/Rap1gap2_set_A.pdf]

# Rap1gds1

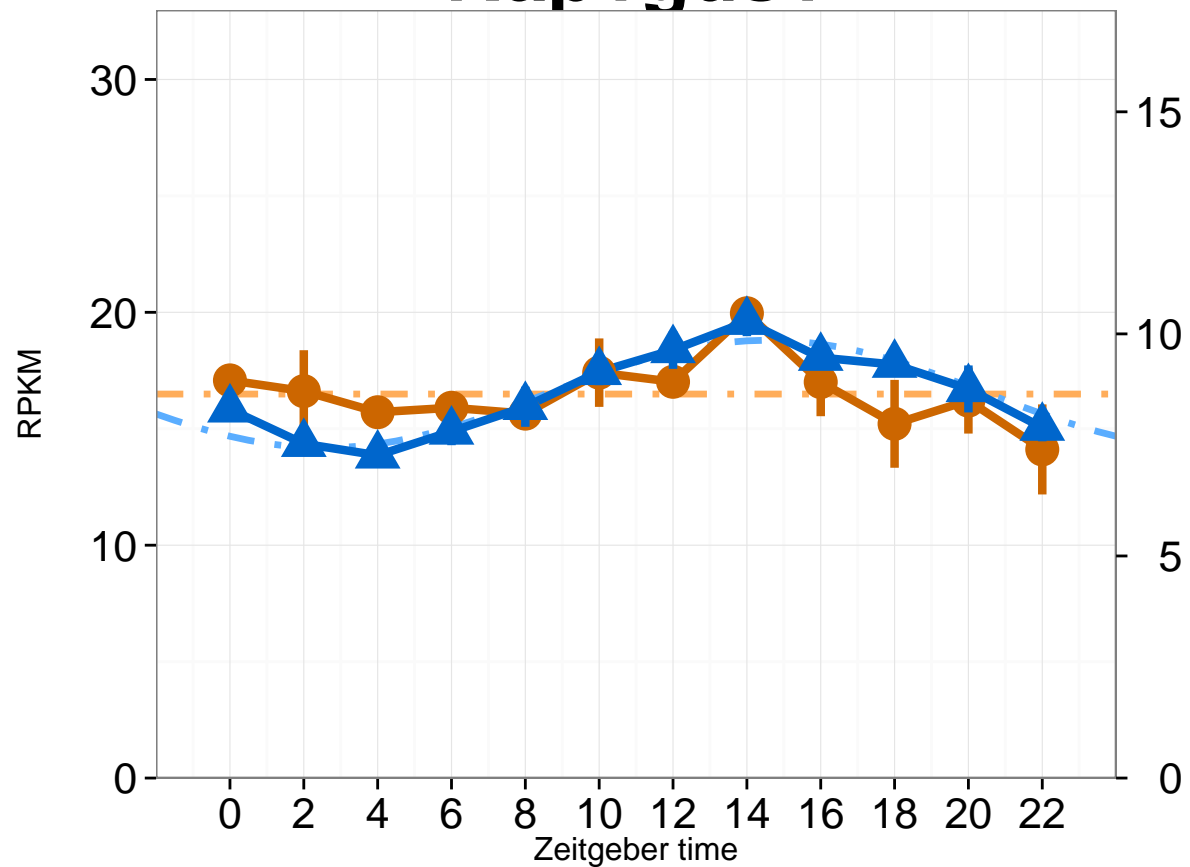

# Rap1gds1

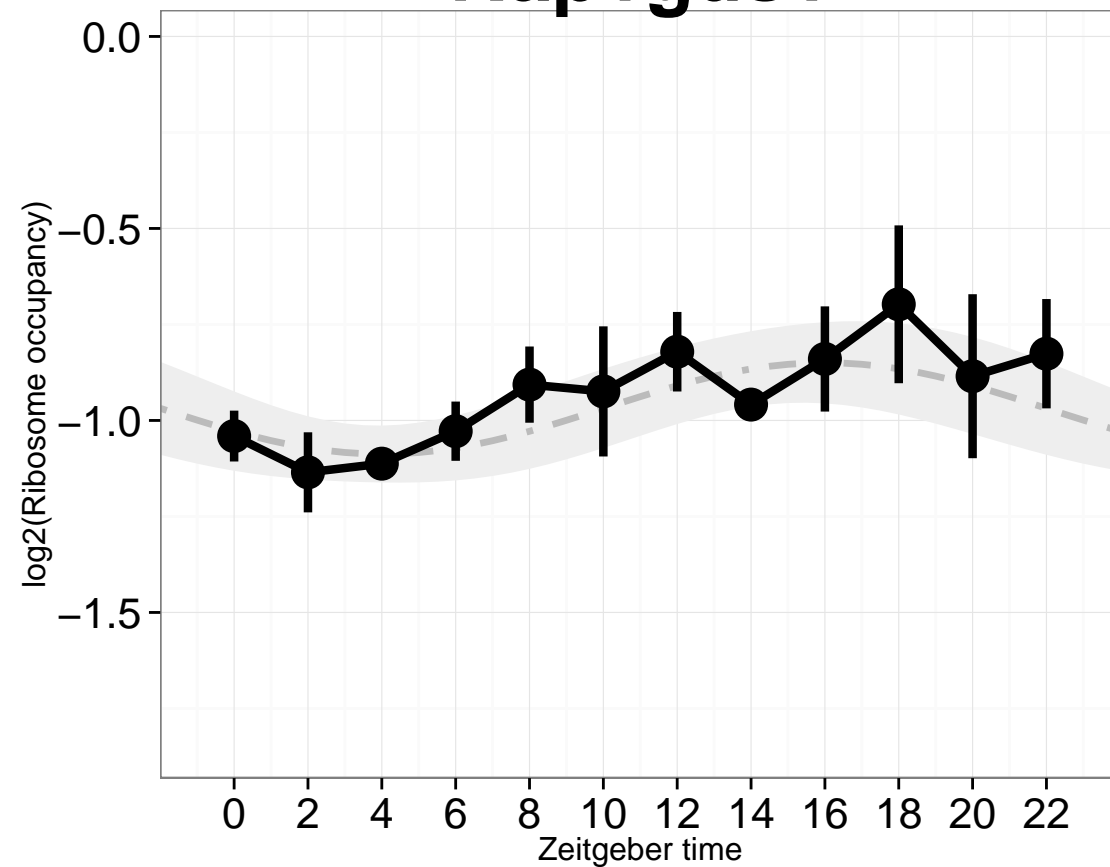

Supplement: SuppDataset_1.zip [file Rap1gds1_set_A.pdf › Supplemental Dataset 1/A-mRNA_nonrhyth_translation_nonrhyth/Rap1gds1_set_A.pdf]

# Rap2a

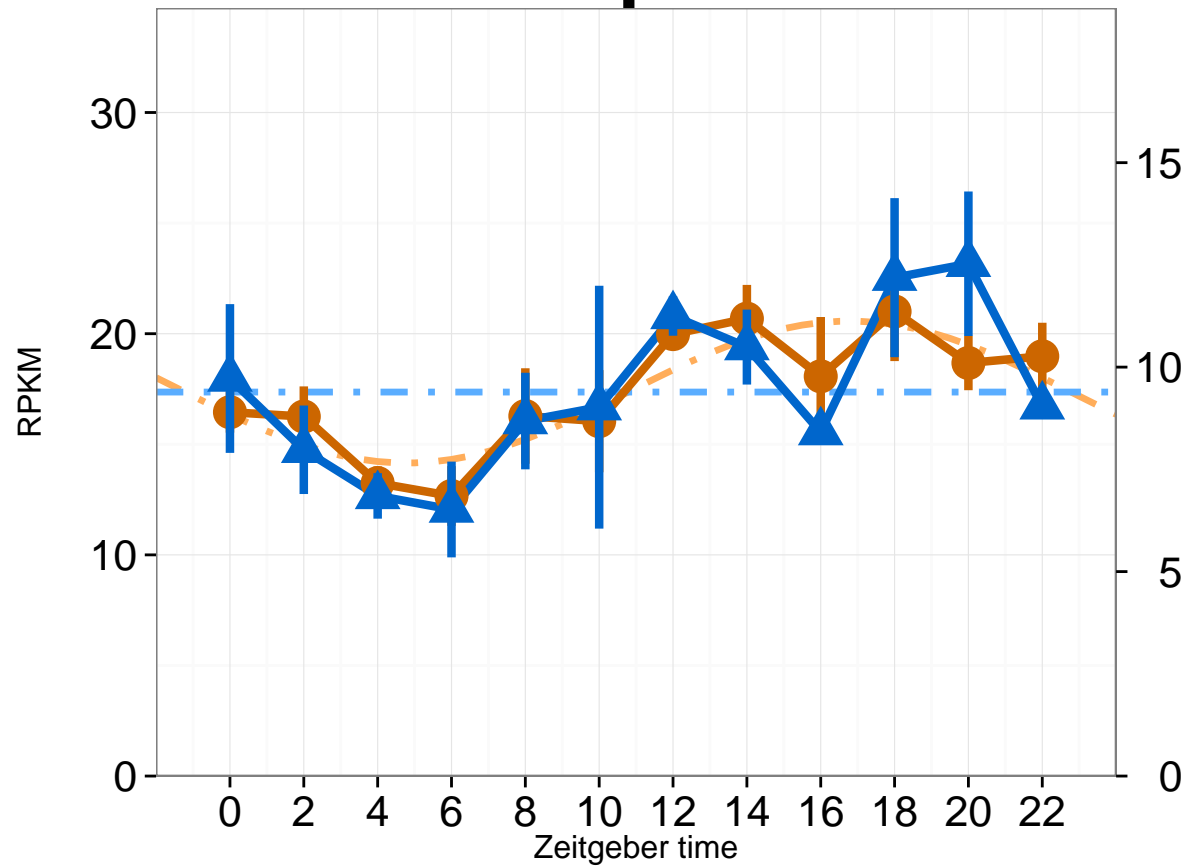

# Rap2a

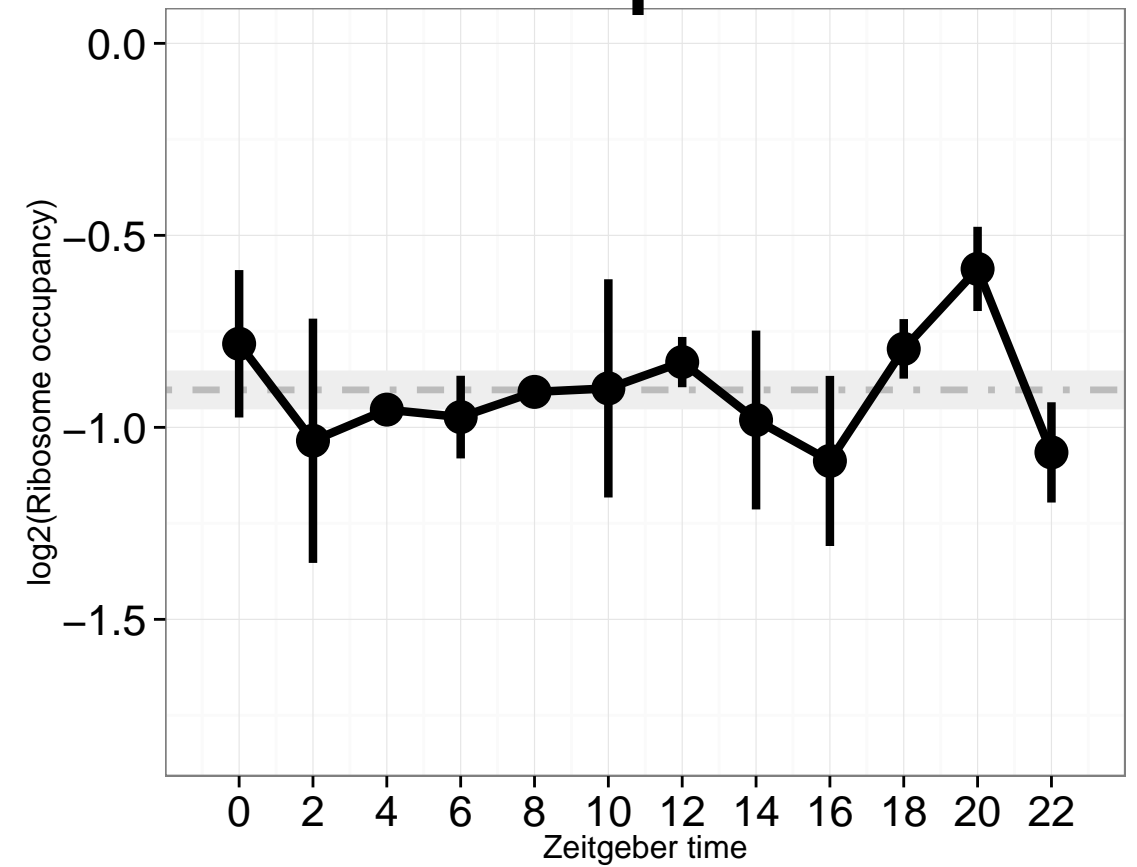

Supplement: SuppDataset_1.zip [file Rap2a_set_A.pdf › Supplemental Dataset 1/A-mRNA_nonrhyth_translation_nonrhyth/Rap2a_set_A.pdf]

# Rap2b

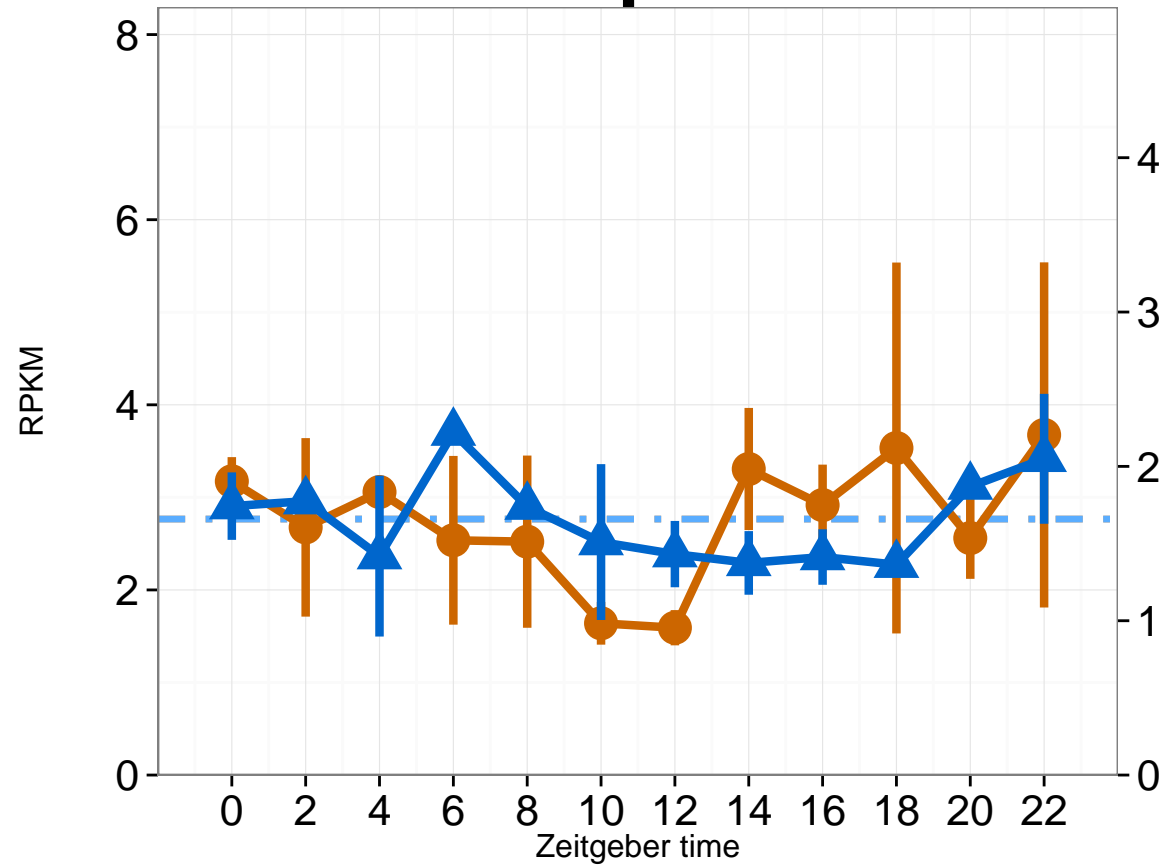

# Rap2b

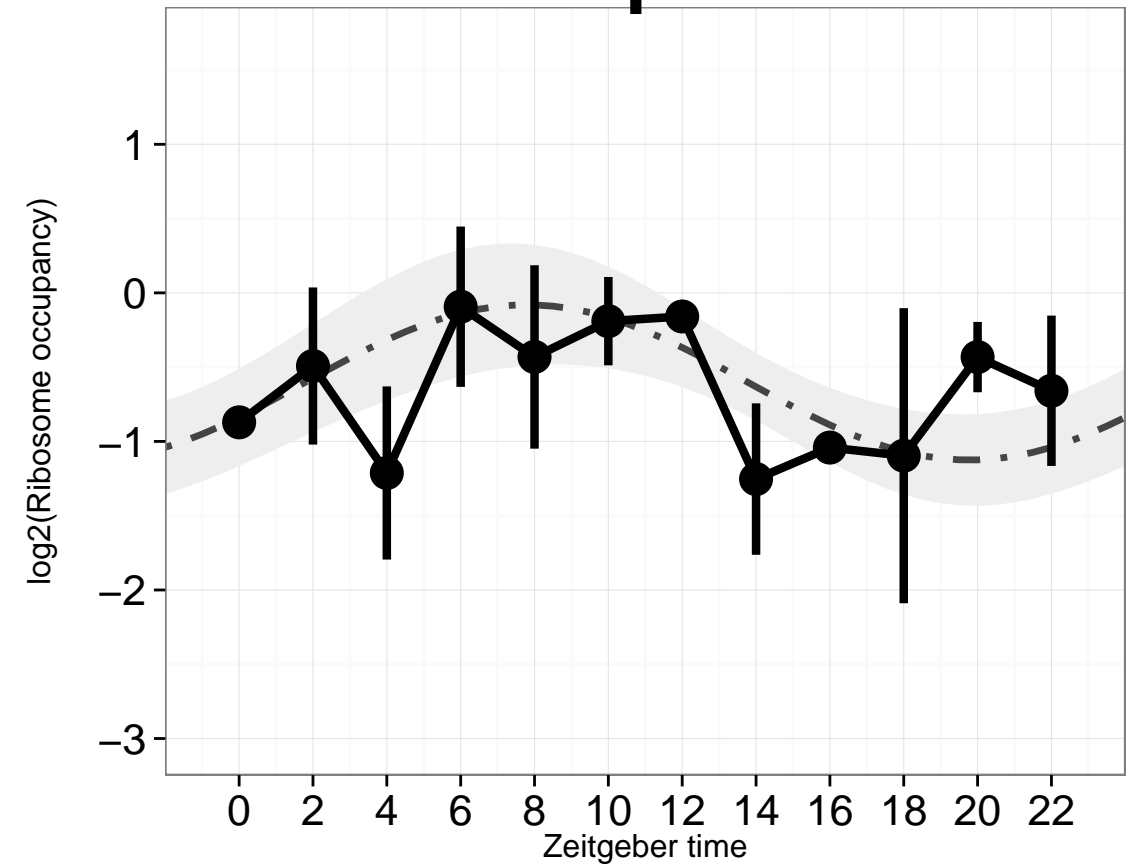

Supplement: SuppDataset_1.zip [file Rap2b_set_A.pdf › Supplemental Dataset 1/A-mRNA_nonrhyth_translation_nonrhyth/Rap2b_set_A.pdf]

## Rap2c

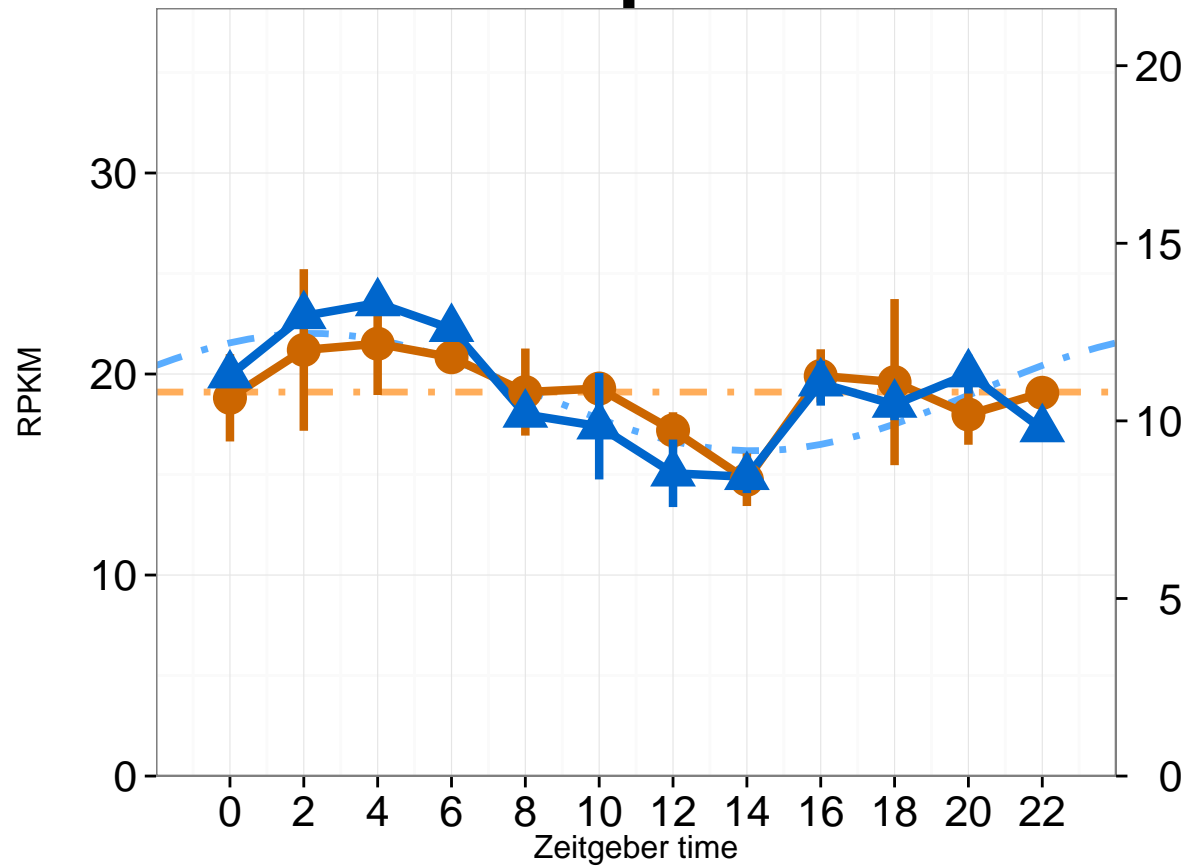

## Rap2c

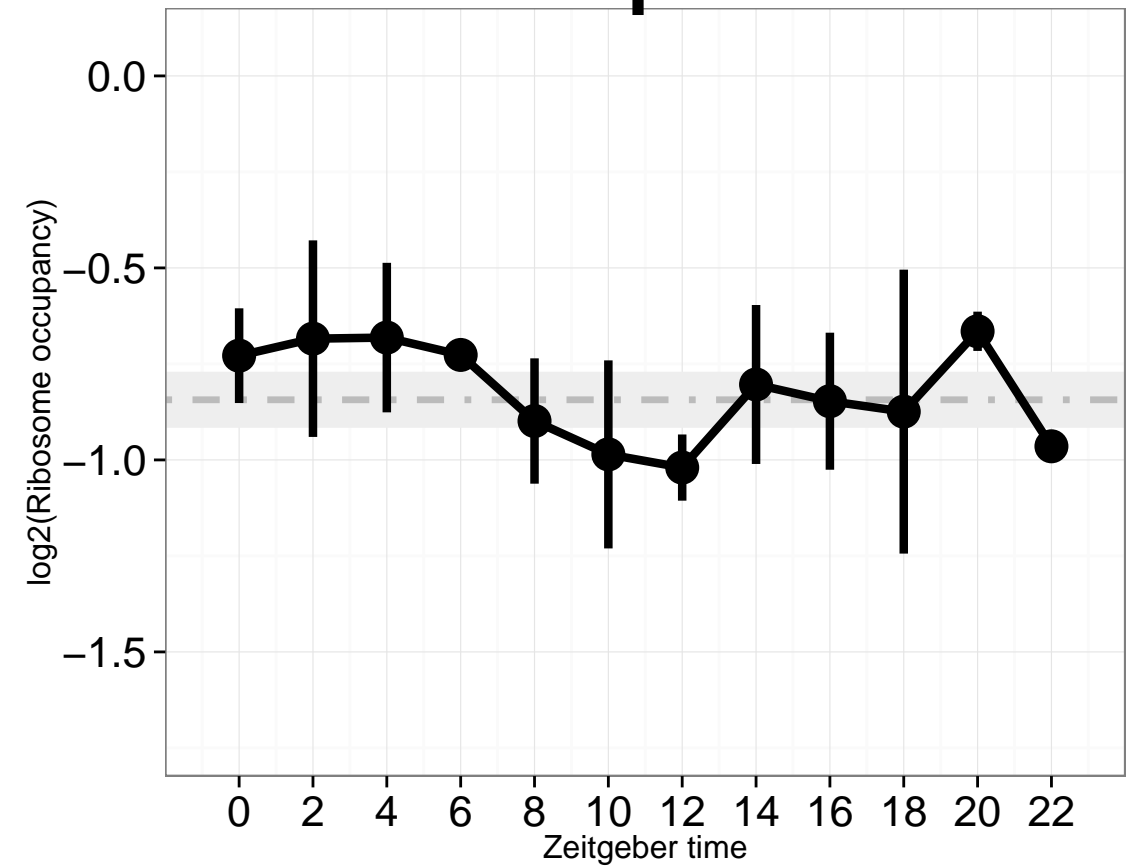

Supplement: SuppDataset_1.zip [file Rap2c_set_A.pdf › Supplemental Dataset 1/A-mRNA_nonrhyth_translation_nonrhyth/Rap2c_set_A.pdf]

# Rapgef1

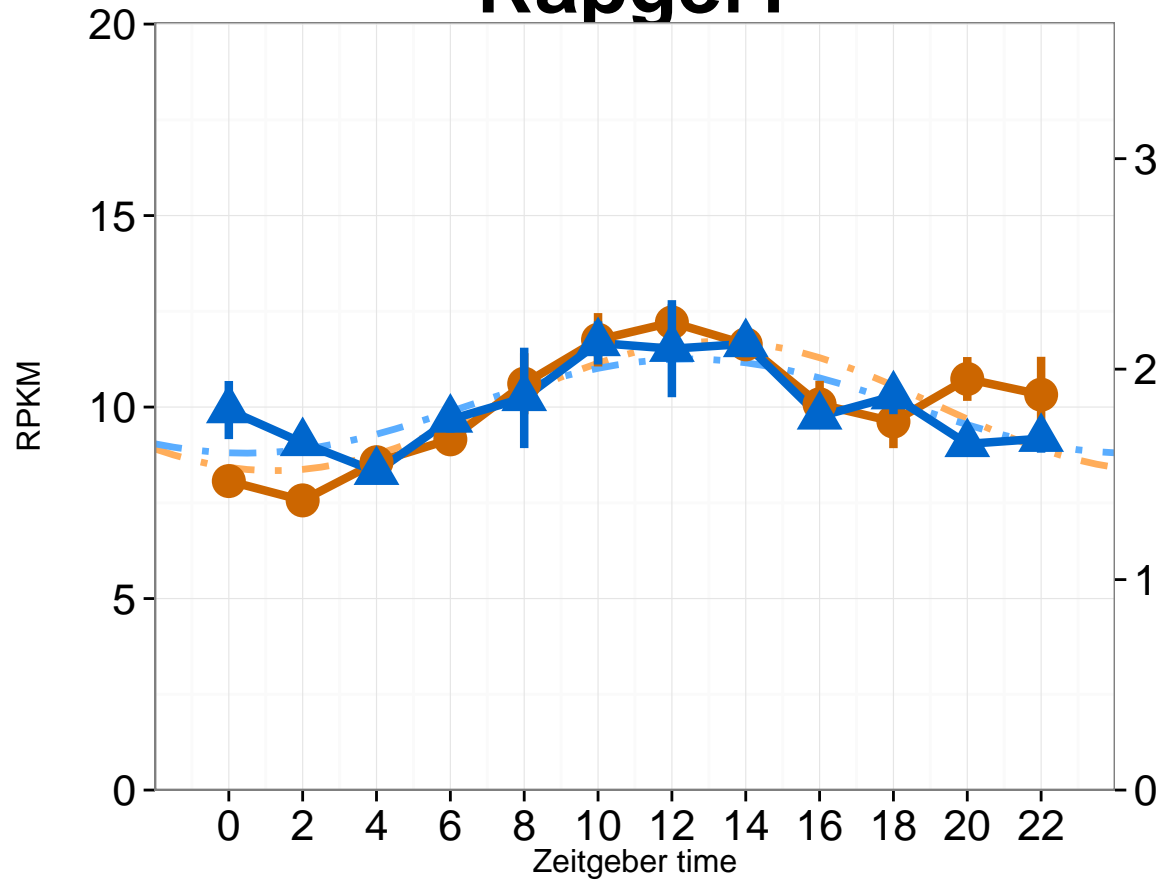

# Rapgef1

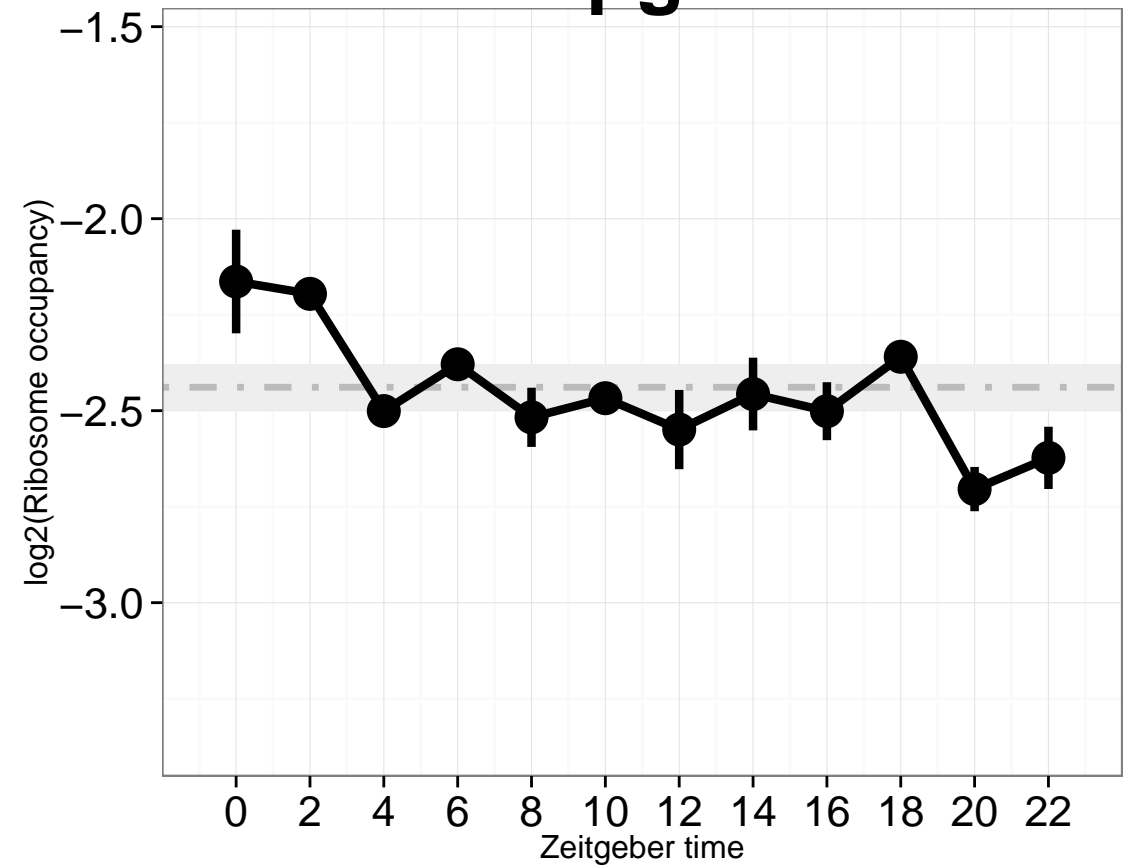

Supplement: SuppDataset_1.zip [file Rapgef1_set_A.pdf › Supplemental Dataset 1/A-mRNA_nonrhyth_translation_nonrhyth/Rapgef1_set_A.pdf]

## Rapgef6

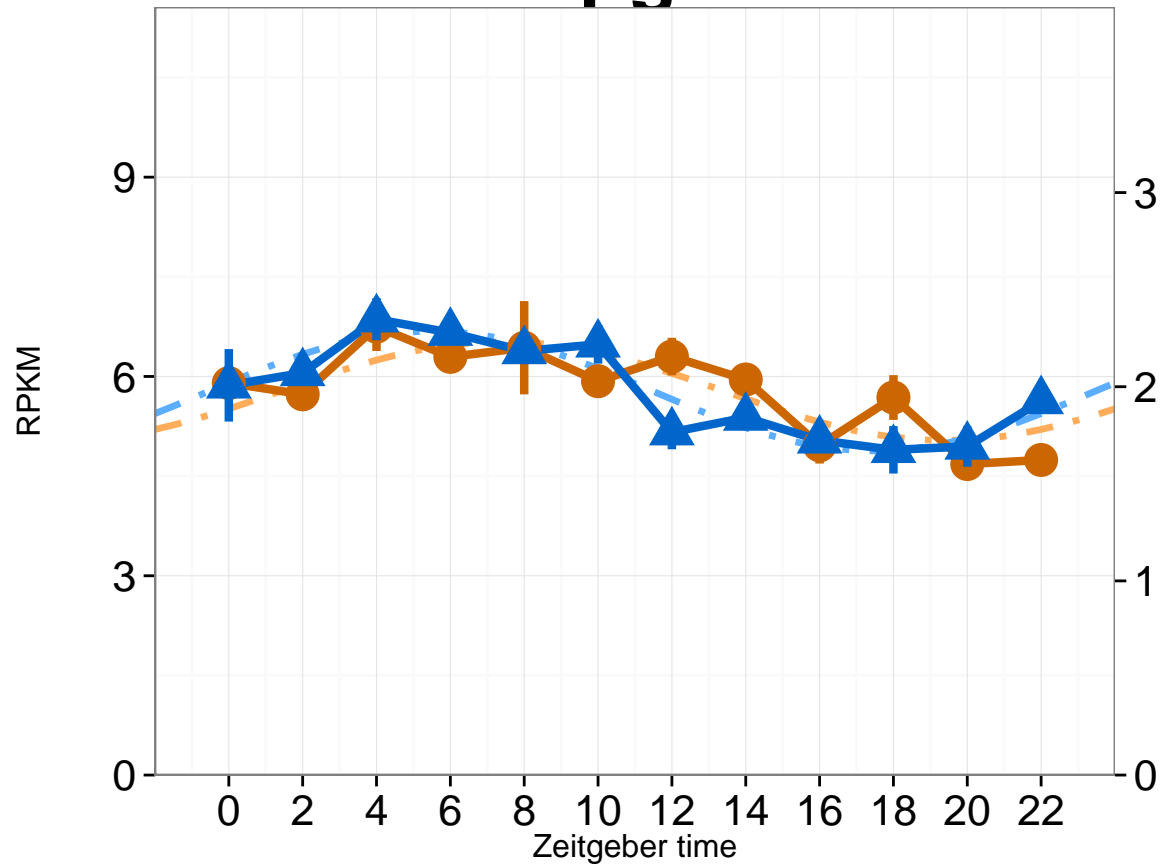

## Rapgef6

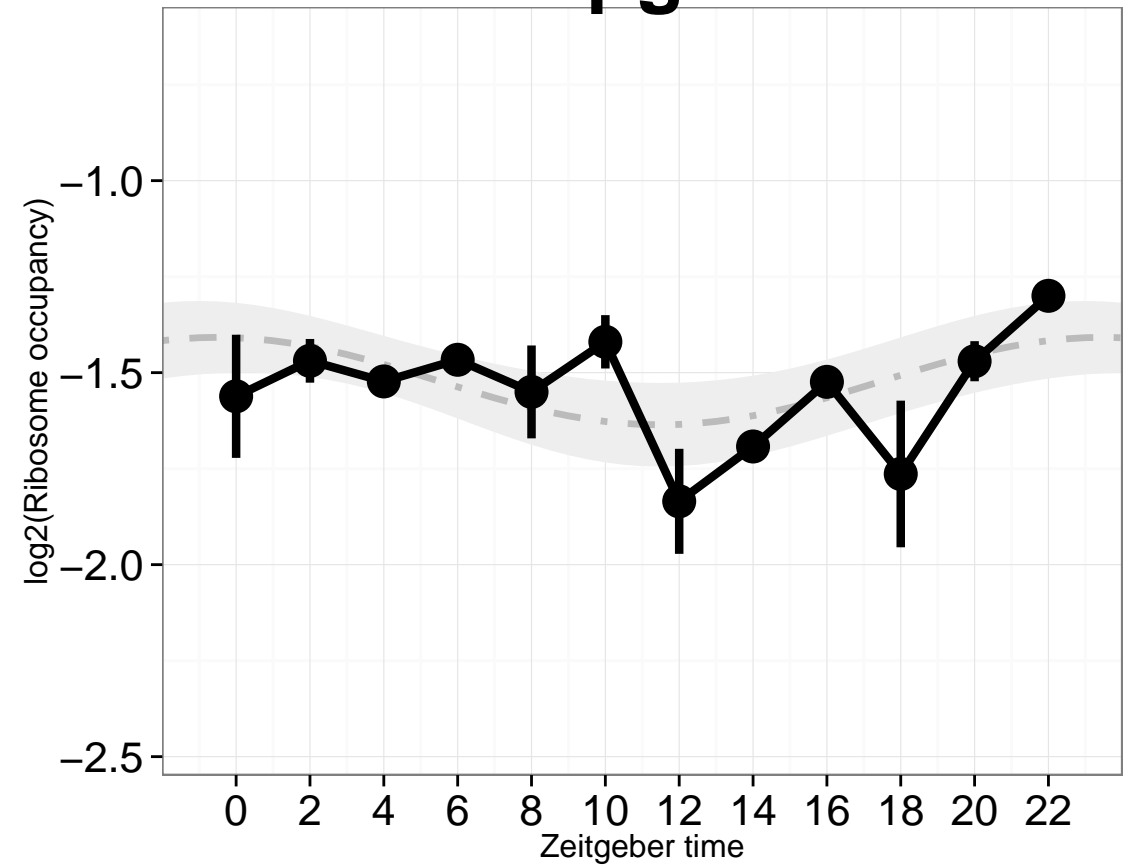

Supplement: SuppDataset_1.zip [file Rapgef6_set_A.pdf › Supplemental Dataset 1/A-mRNA_nonrhyth_translation_nonrhyth/Rapgef6_set_A.pdf]

## Rara

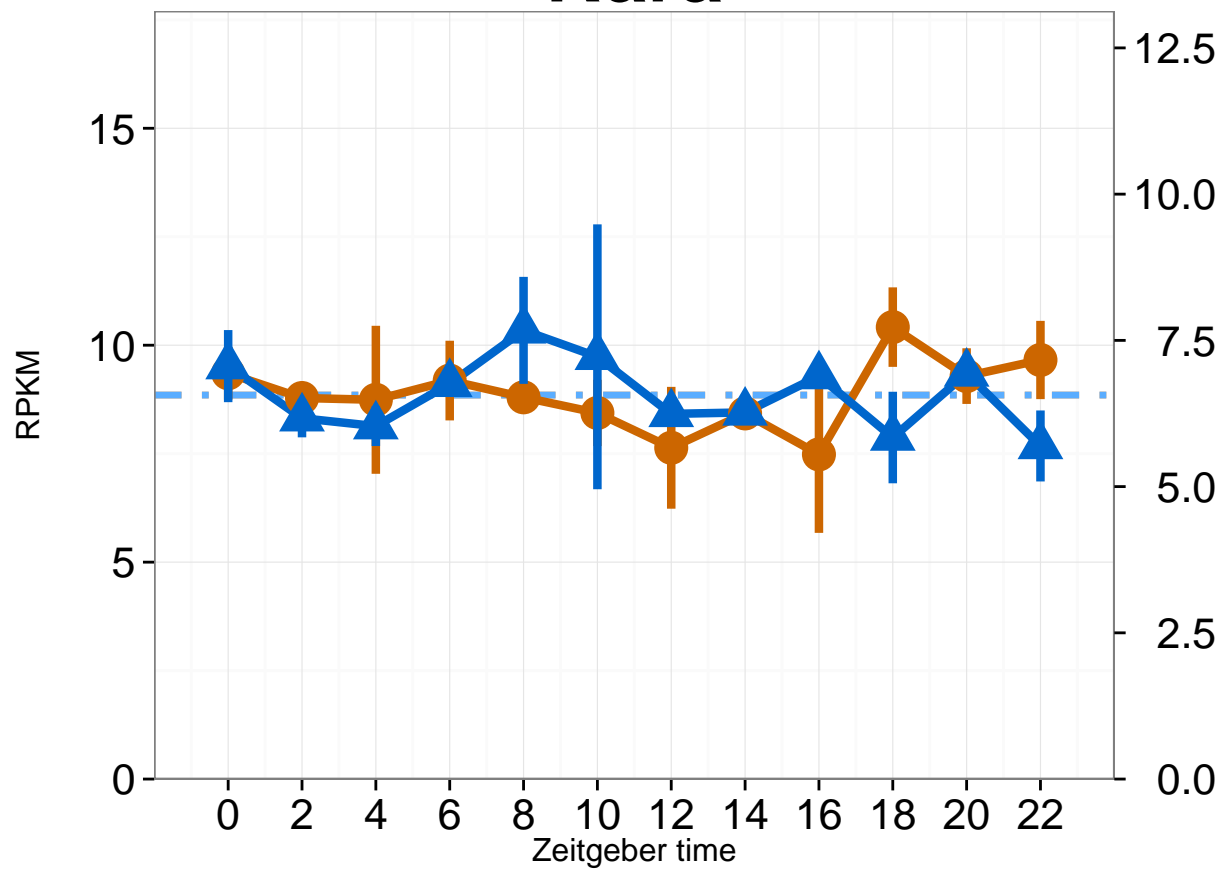

## Rara

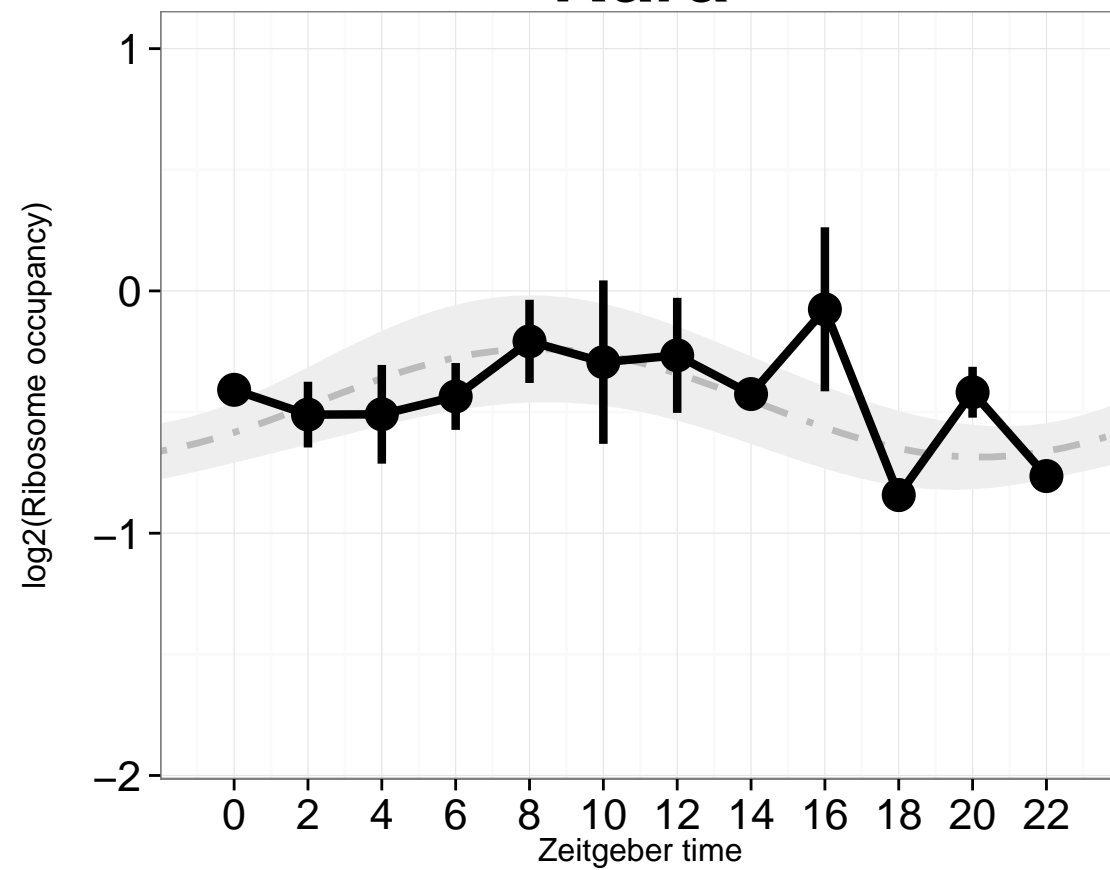

Supplement: SuppDataset_1.zip [file Rara_set_A.pdf › Supplemental Dataset 1/A-mRNA_nonrhyth_translation_nonrhyth/Rara_set_A.pdf]

## Rarb

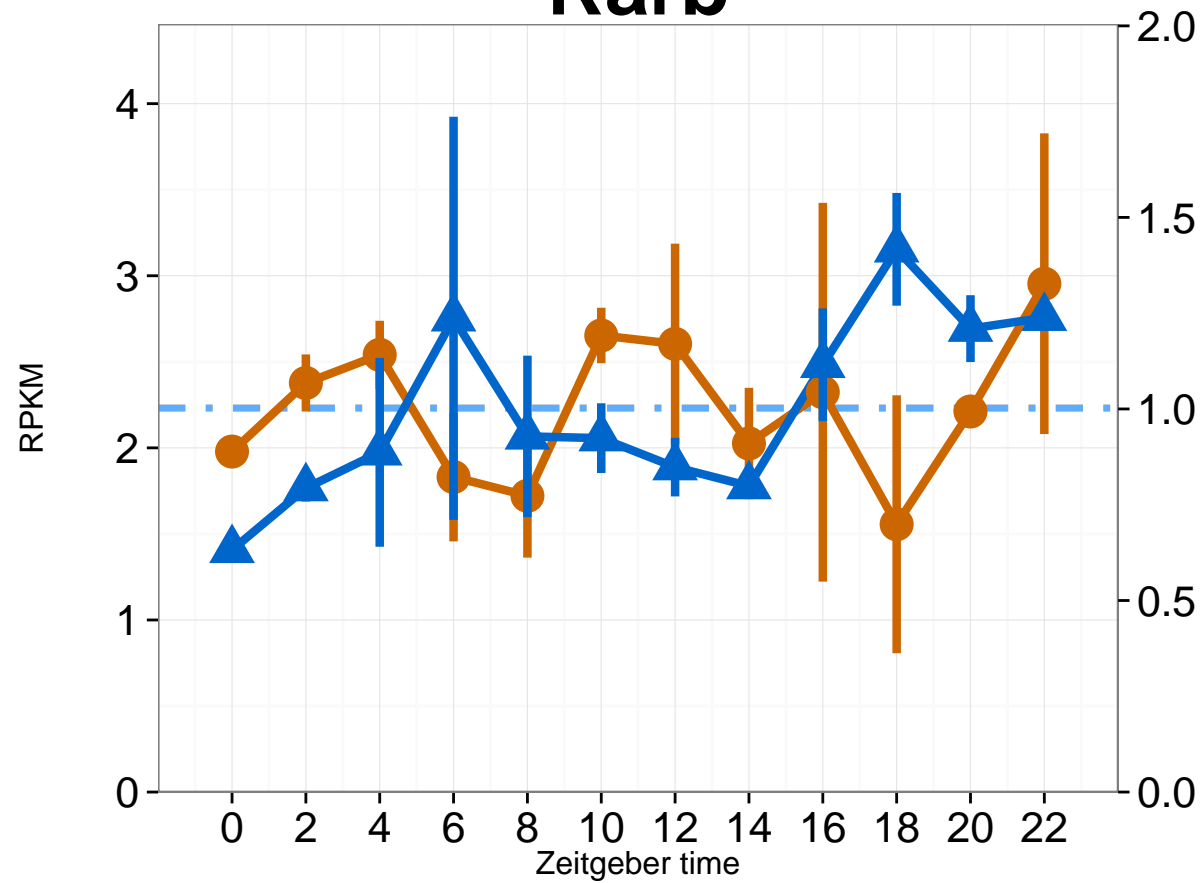

## Rarb

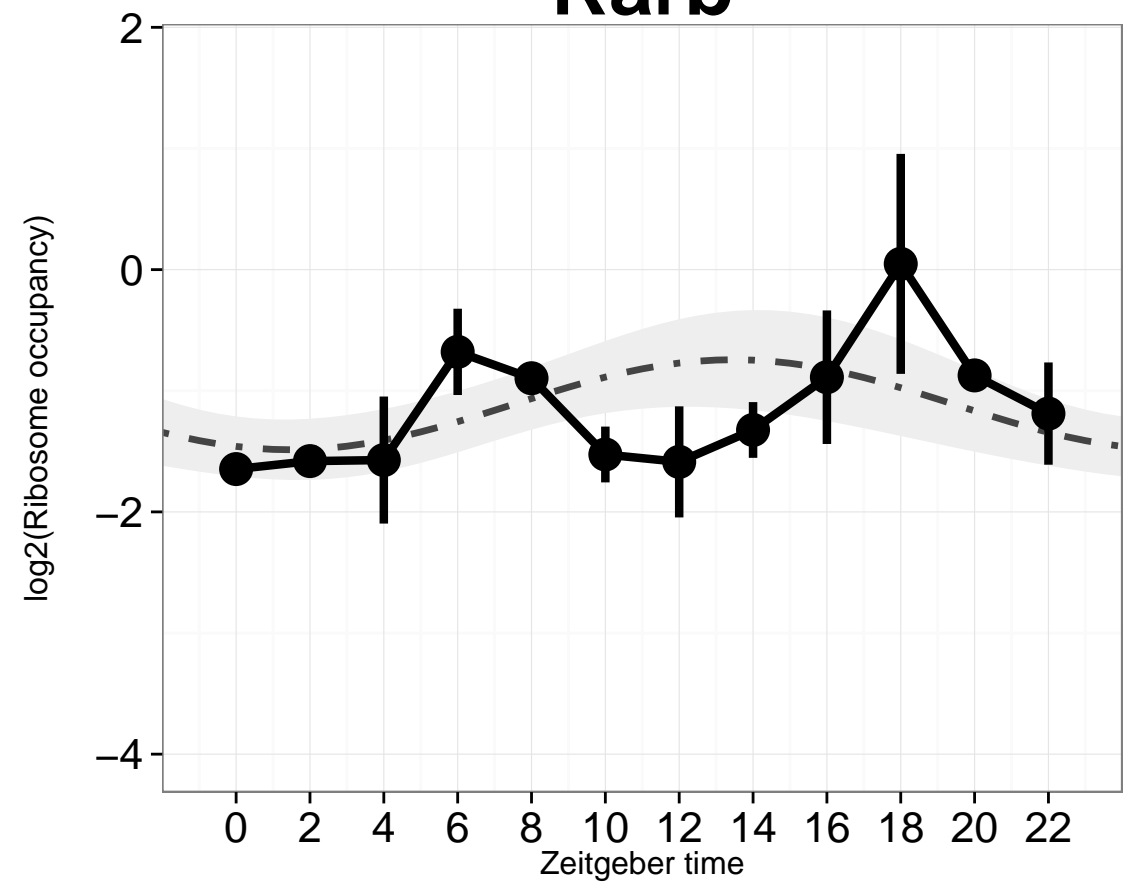

Supplement: SuppDataset_1.zip [file Rarb_set_A.pdf › Supplemental Dataset 1/A-mRNA_nonrhyth_translation_nonrhyth/Rarb_set_A.pdf]

# Rarg

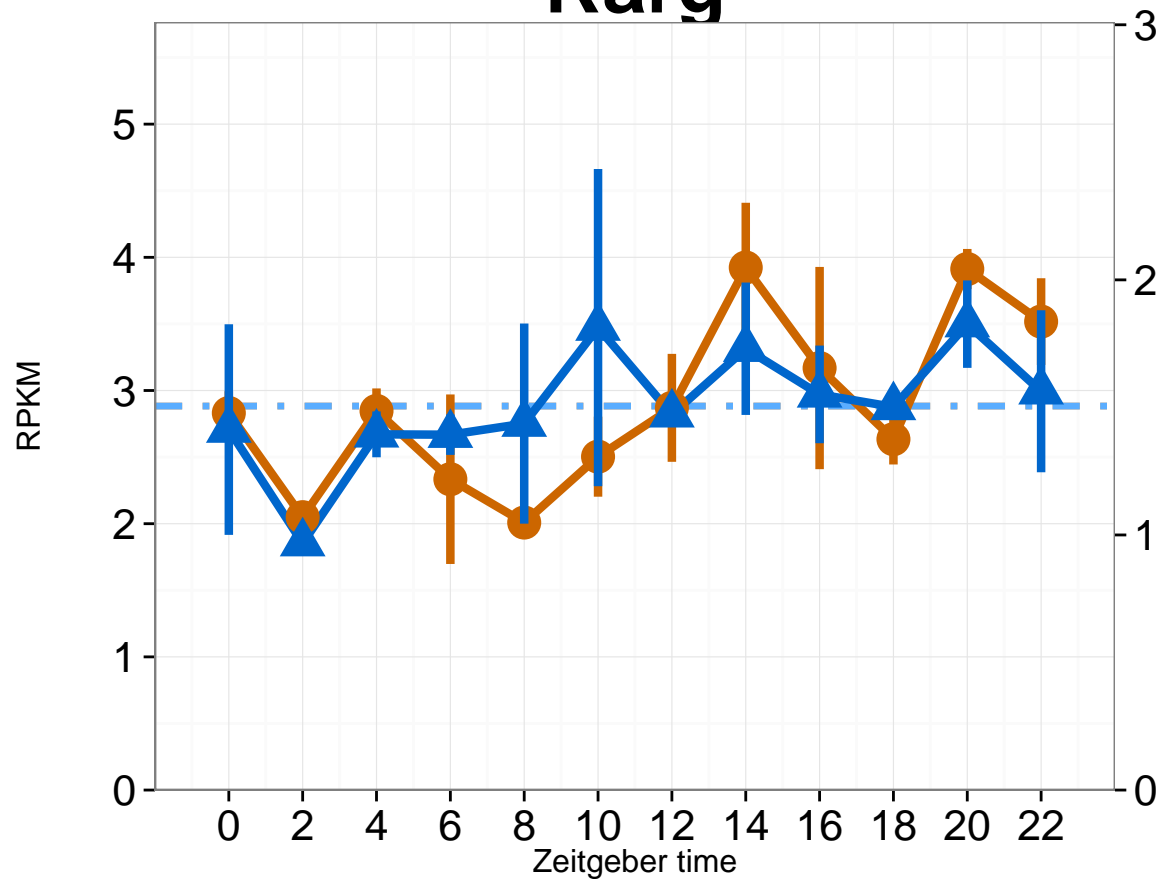

# Rarg

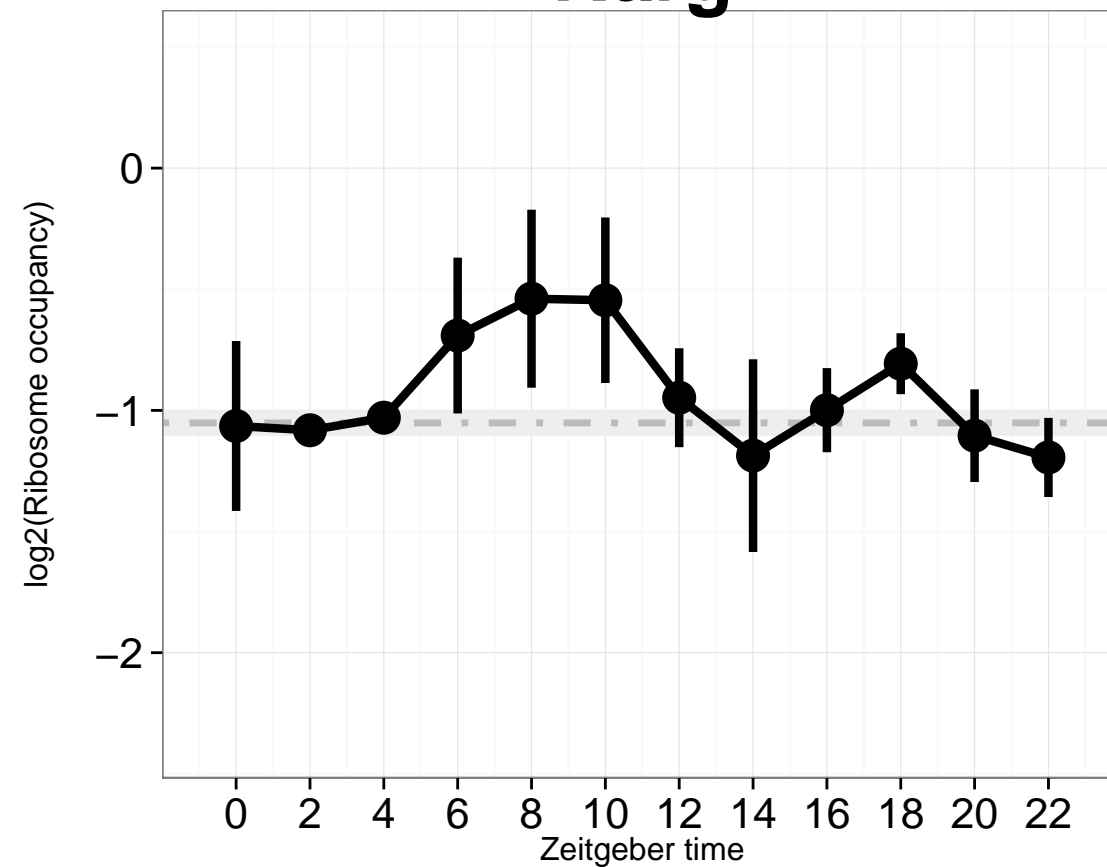

Supplement: SuppDataset_1.zip [file Rarg_set_A.pdf › Supplemental Dataset 1/A-mRNA_nonrhyth_translation_nonrhyth/Rarg_set_A.pdf]

# Rarres1

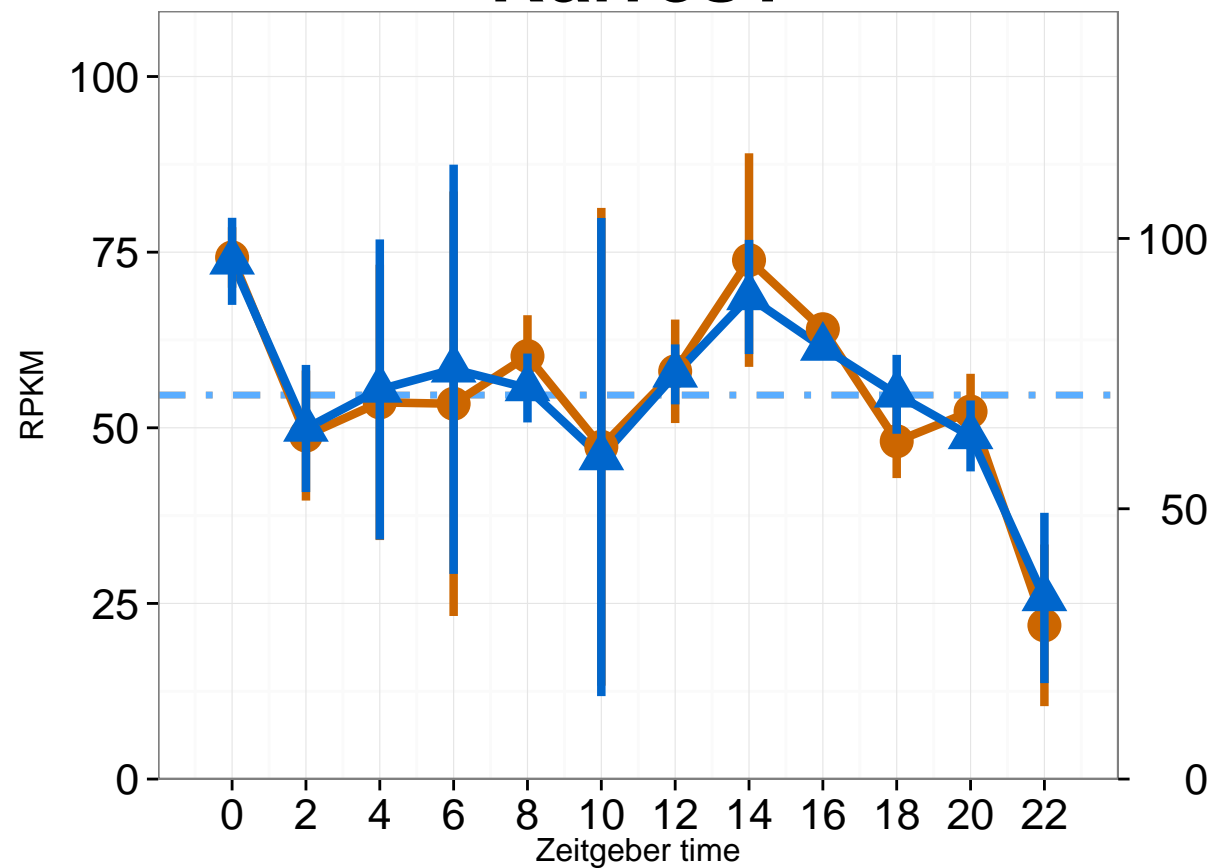

# Rarres1

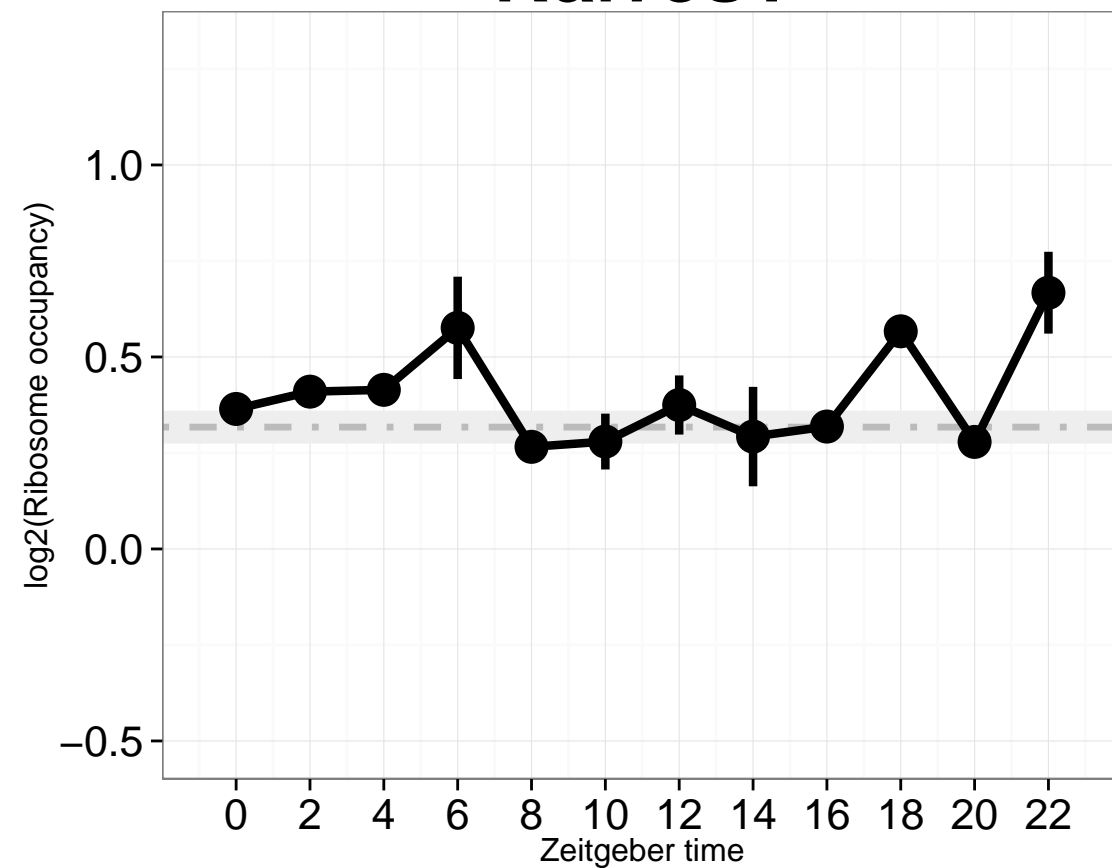

Supplement: SuppDataset_1.zip [file Rarres1_set_A.pdf › Supplemental Dataset 1/A-mRNA_nonrhyth_translation_nonrhyth/Rarres1_set_A.pdf]

## Rarres2

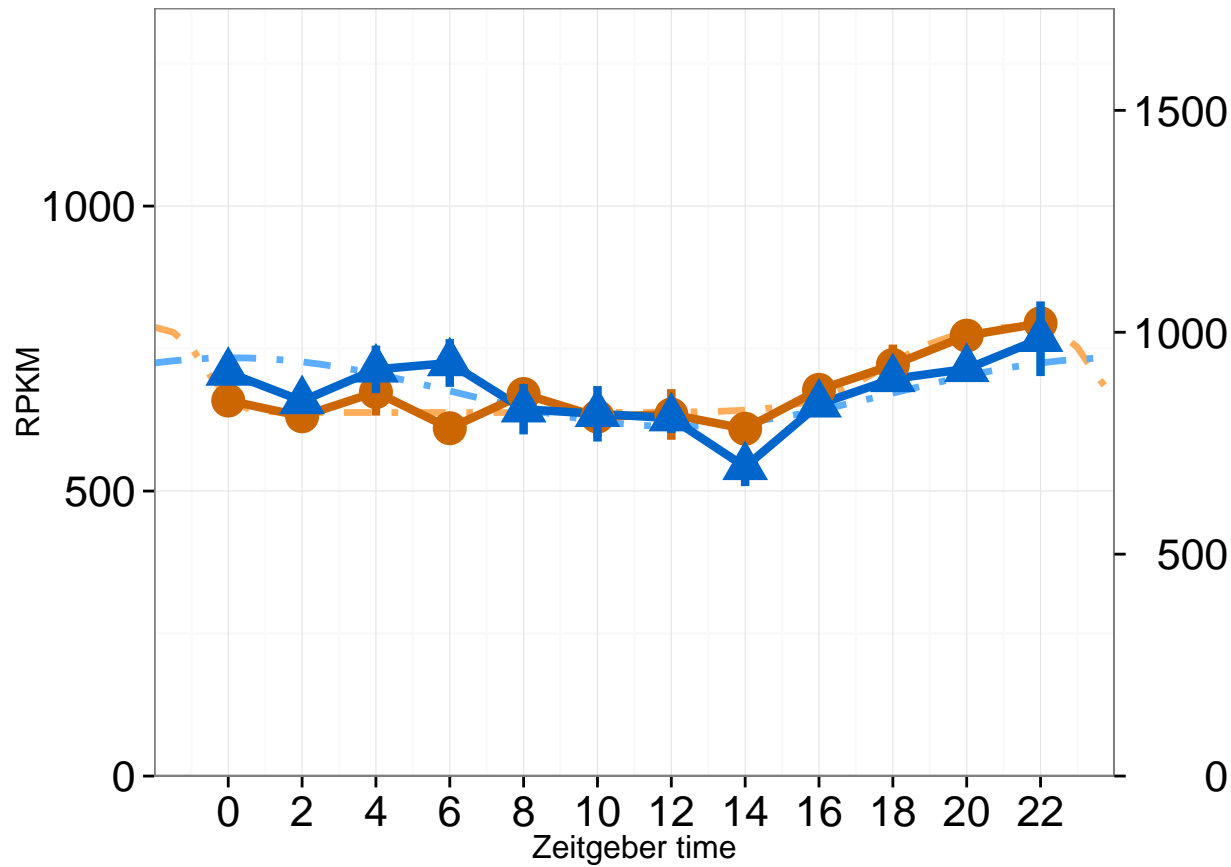

## Rarres2

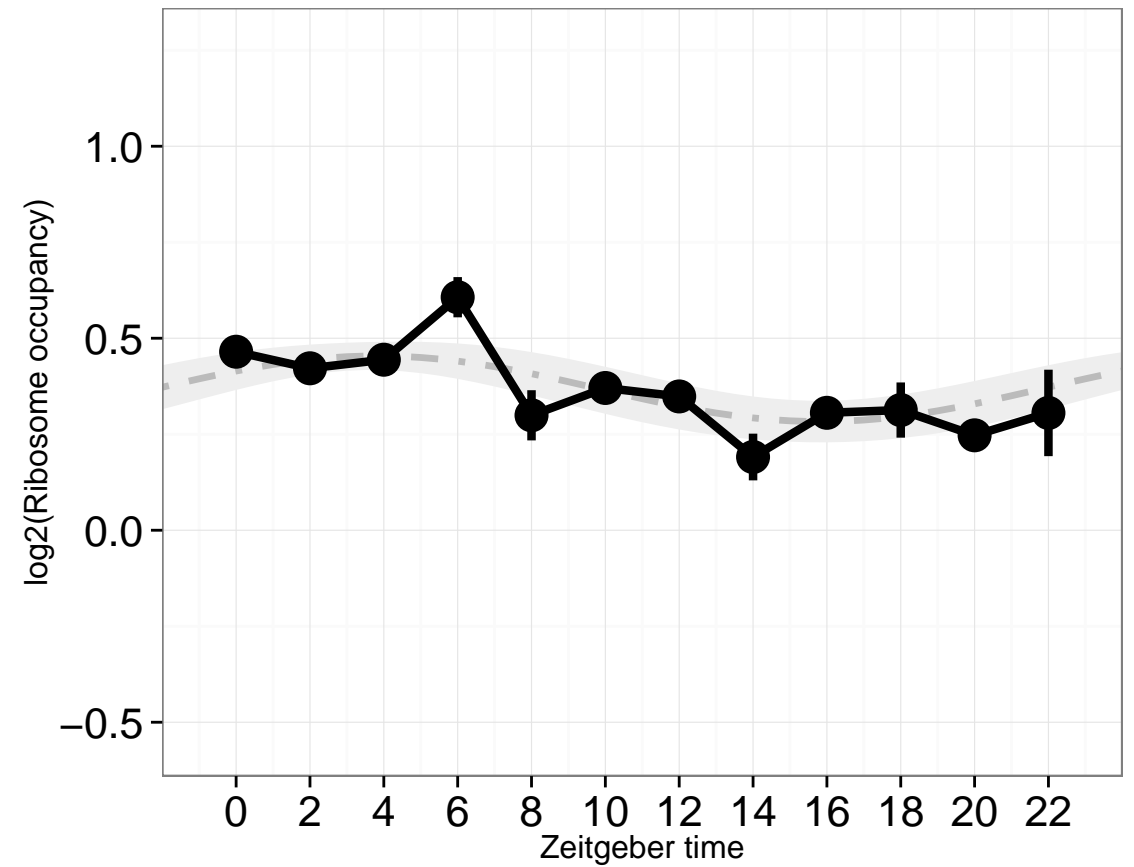

Supplement: SuppDataset_1.zip [file Rarres2_set_A.pdf › Supplemental Dataset 1/A-mRNA_nonrhyth_translation_nonrhyth/Rarres2_set_A.pdf]

# Rars2

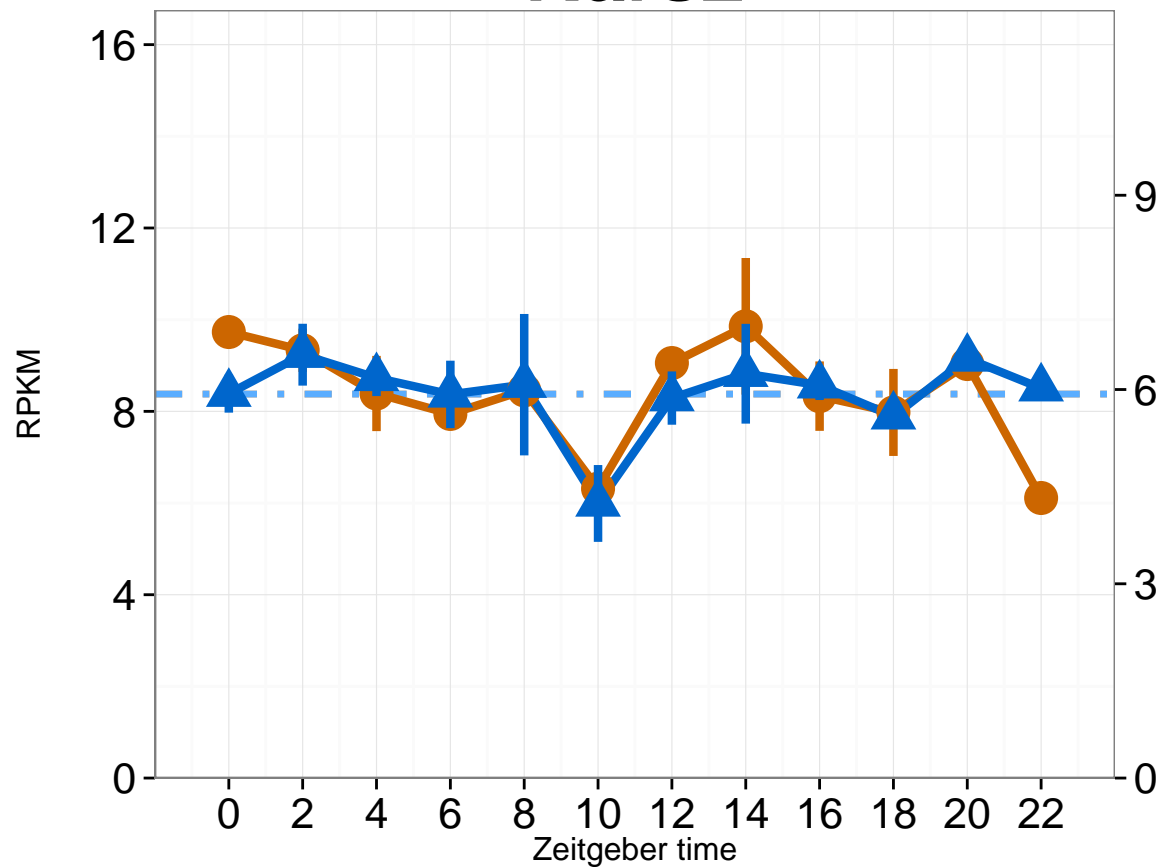

# Rars2

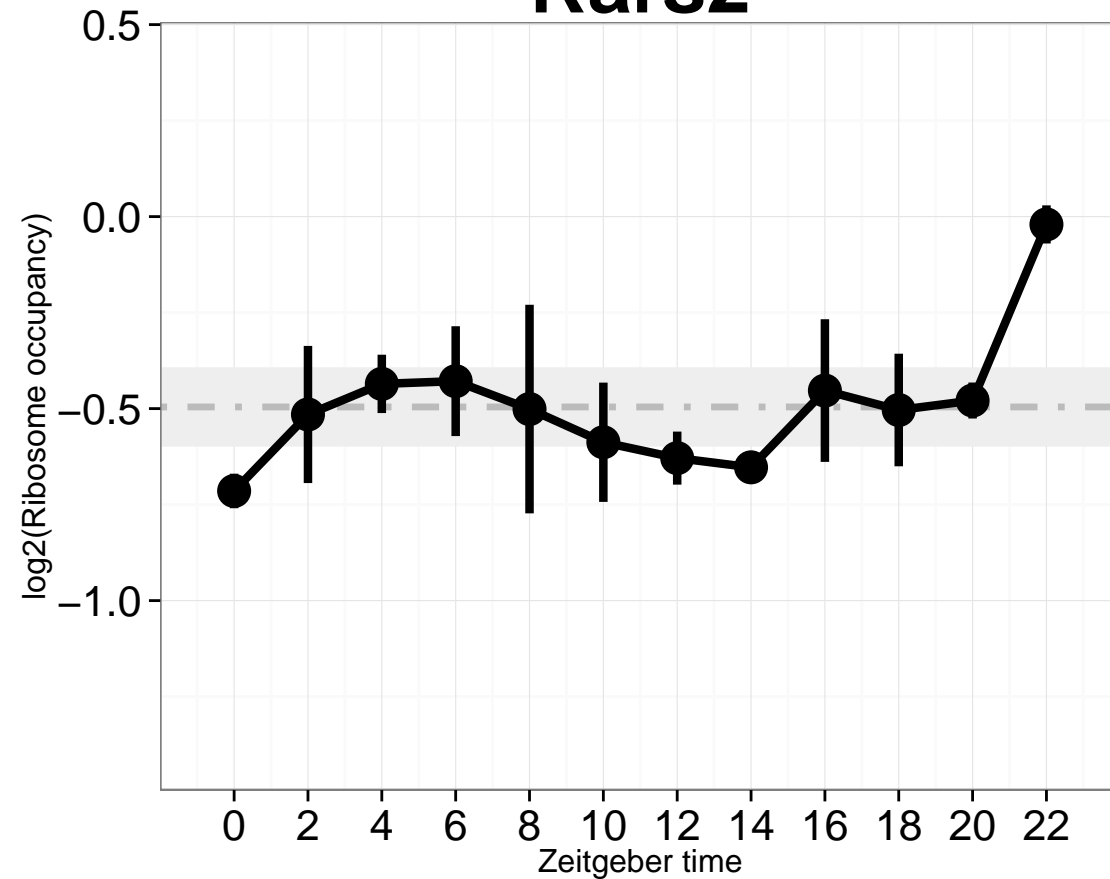

Supplement: SuppDataset_1.zip [file Rars2_set_A.pdf › Supplemental Dataset 1/A-mRNA_nonrhyth_translation_nonrhyth/Rars2_set_A.pdf]

## Rars

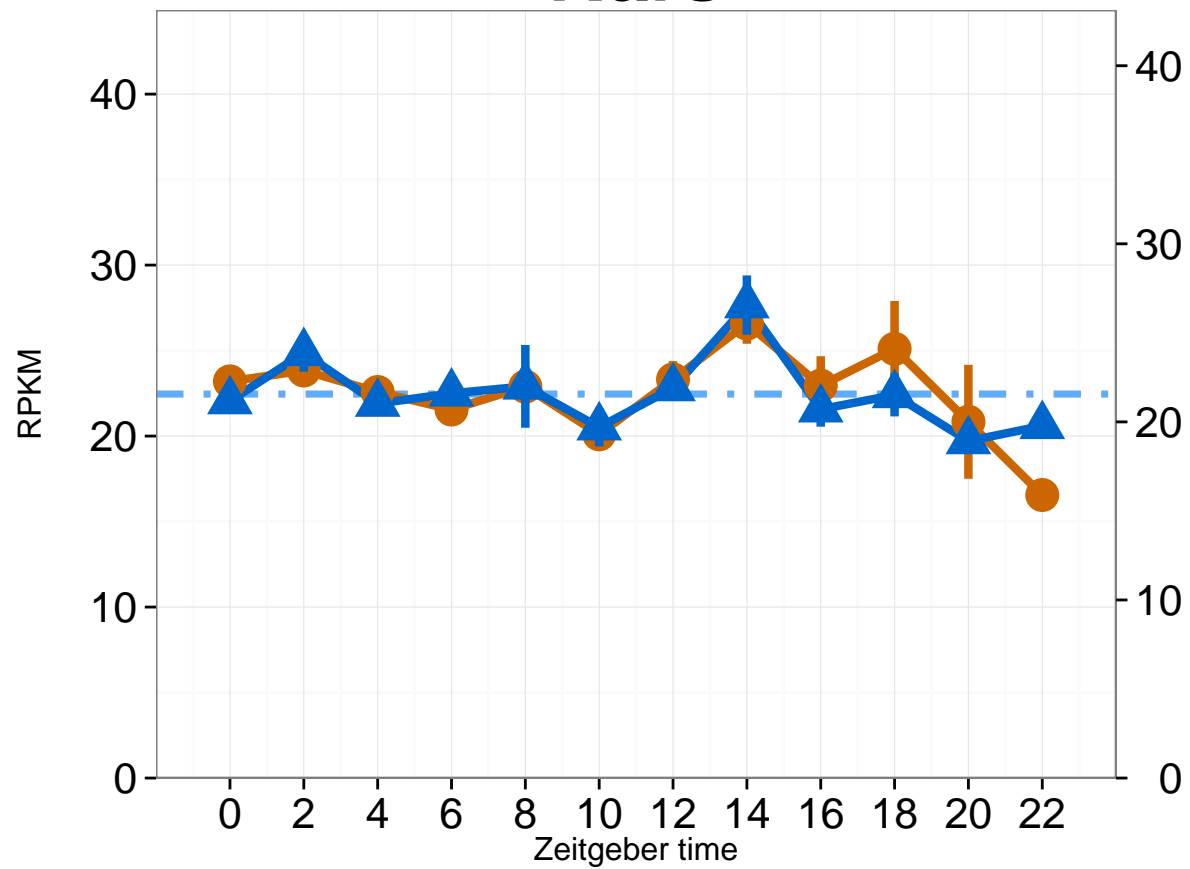

## Rars

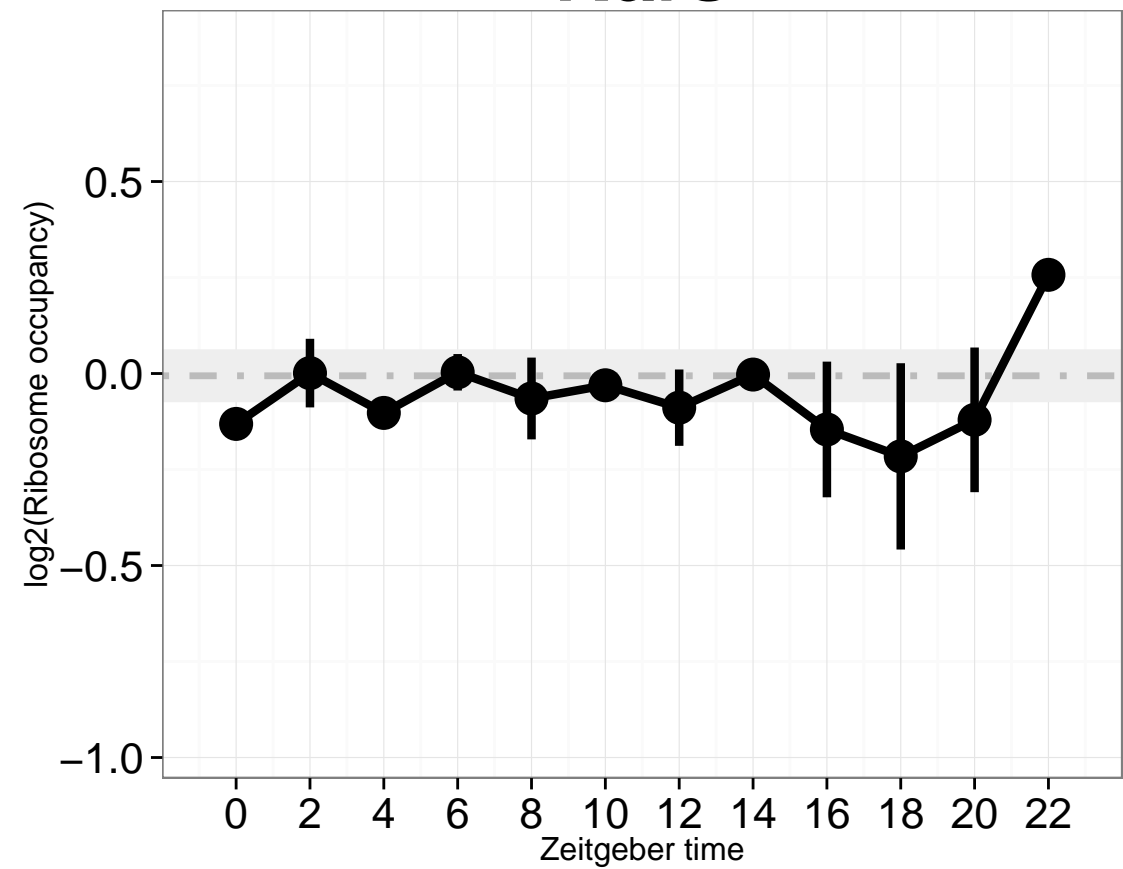

Supplement: SuppDataset_1.zip [file Rars_set_A.pdf › Supplemental Dataset 1/A-mRNA_nonrhyth_translation_nonrhyth/Rars_set_A.pdf]

# Rasa1

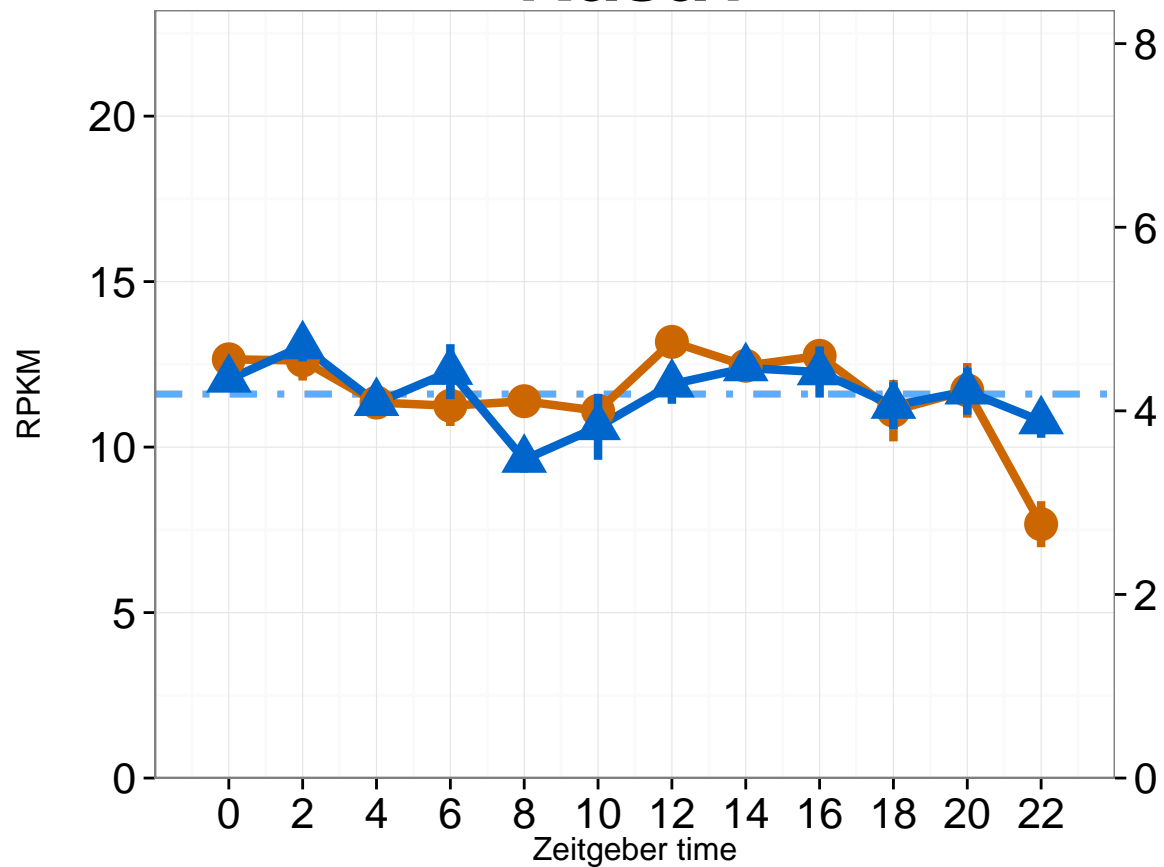

# Rasa1

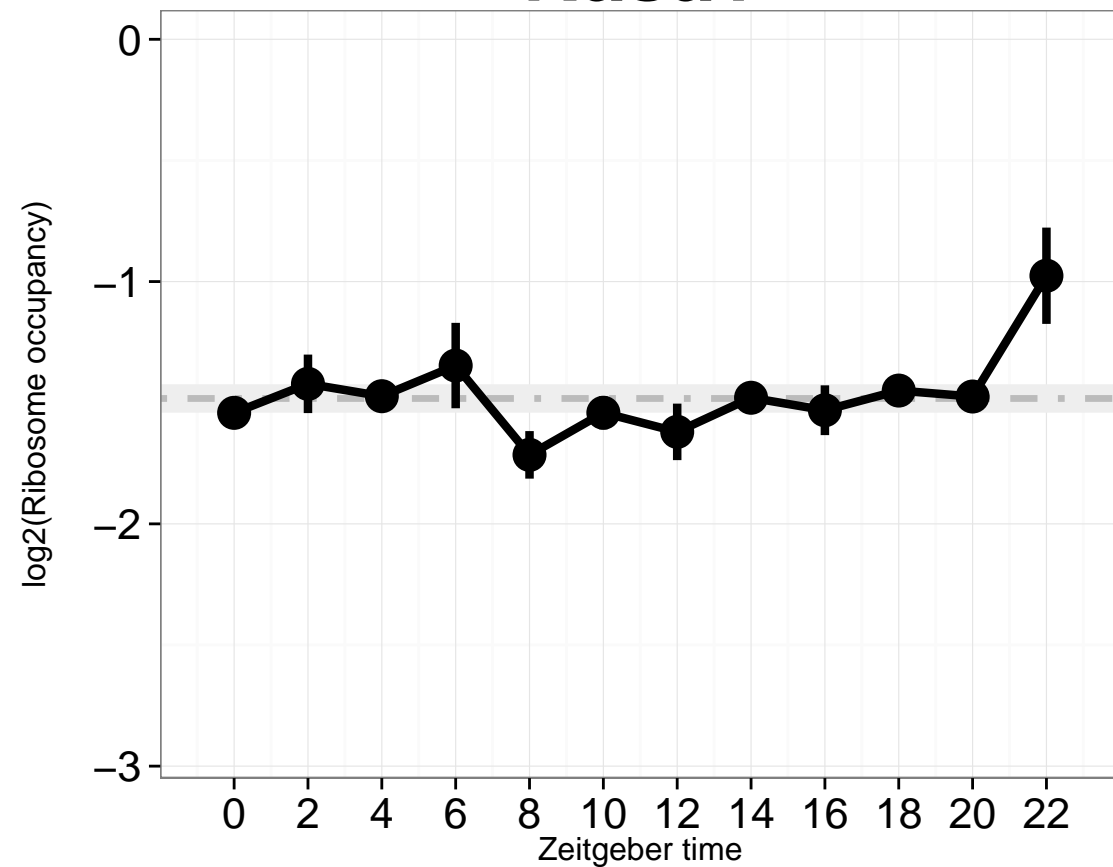

Supplement: SuppDataset_1.zip [file Rasa1_set_A.pdf › Supplemental Dataset 1/A-mRNA_nonrhyth_translation_nonrhyth/Rasa1_set_A.pdf]

## Rasa2

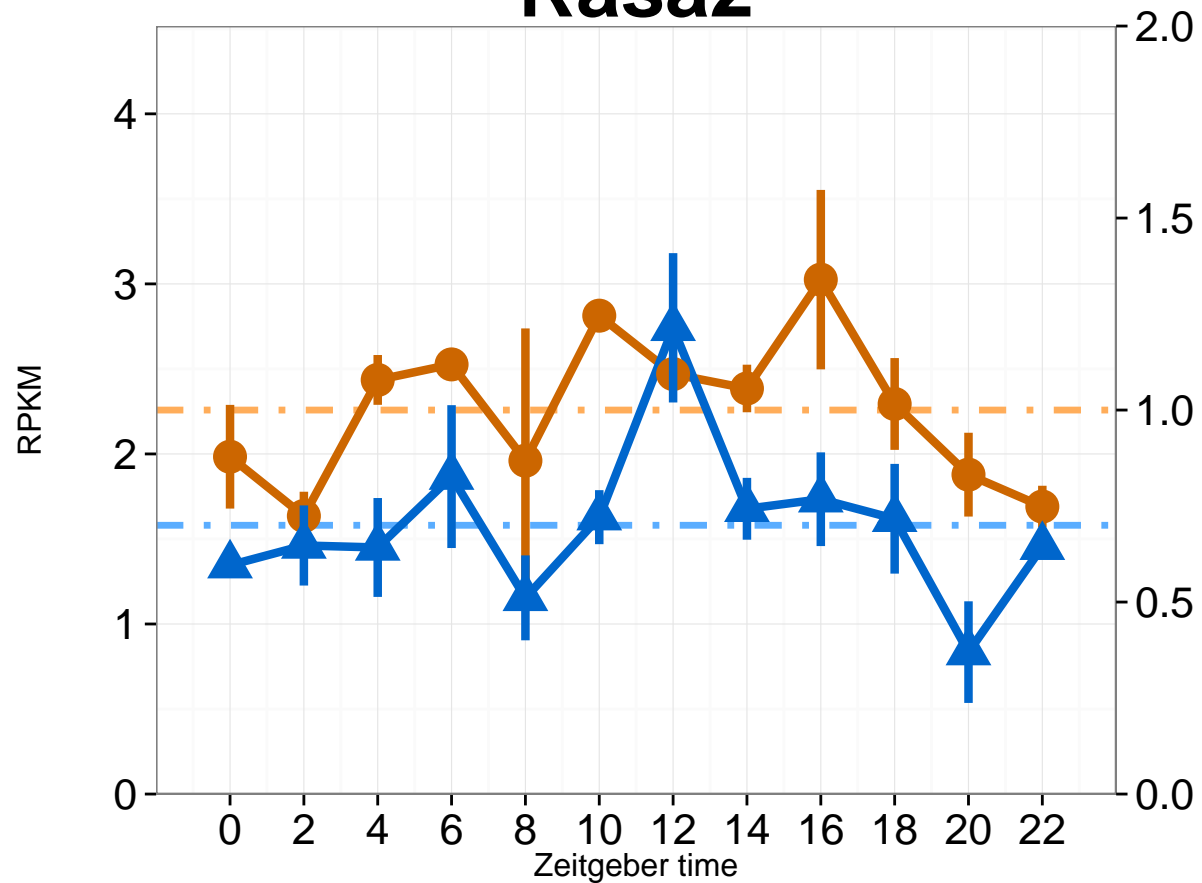

## Rasa2

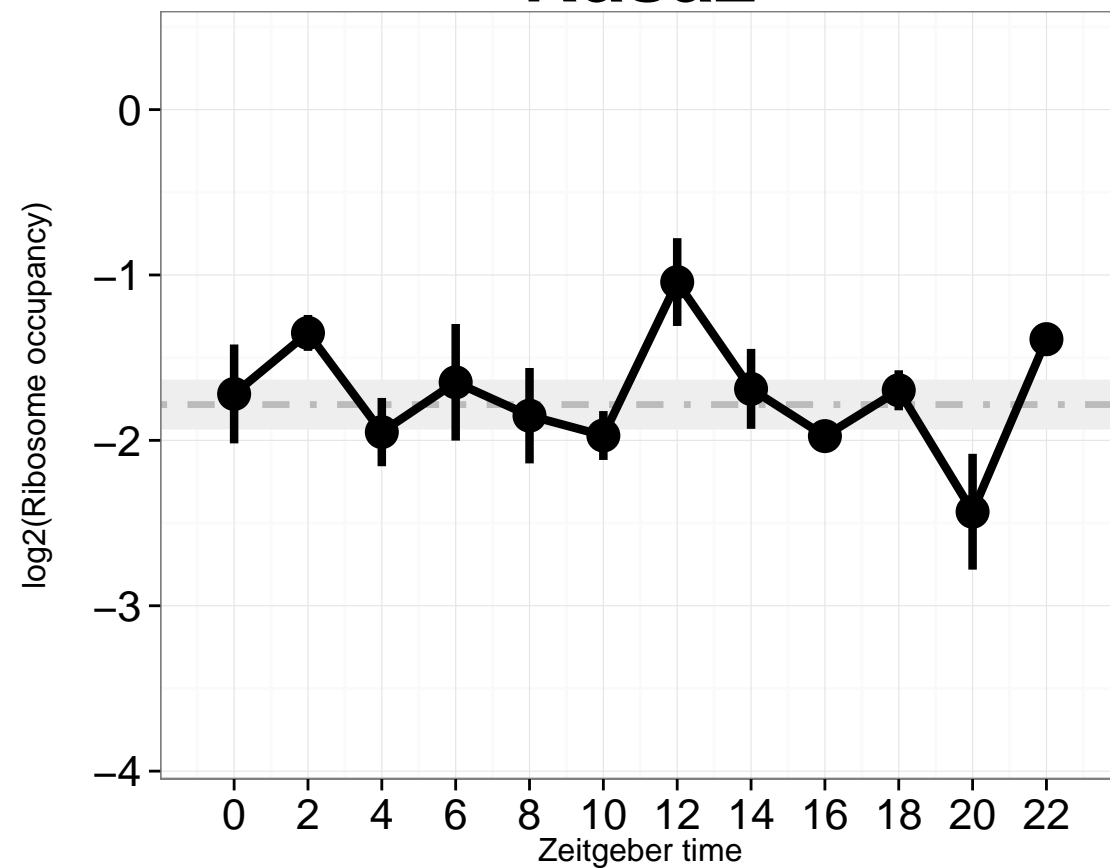

Supplement: SuppDataset_1.zip [file Rasa2_set_A.pdf › Supplemental Dataset 1/A-mRNA_nonrhyth_translation_nonrhyth/Rasa2_set_A.pdf]

## Rasa3

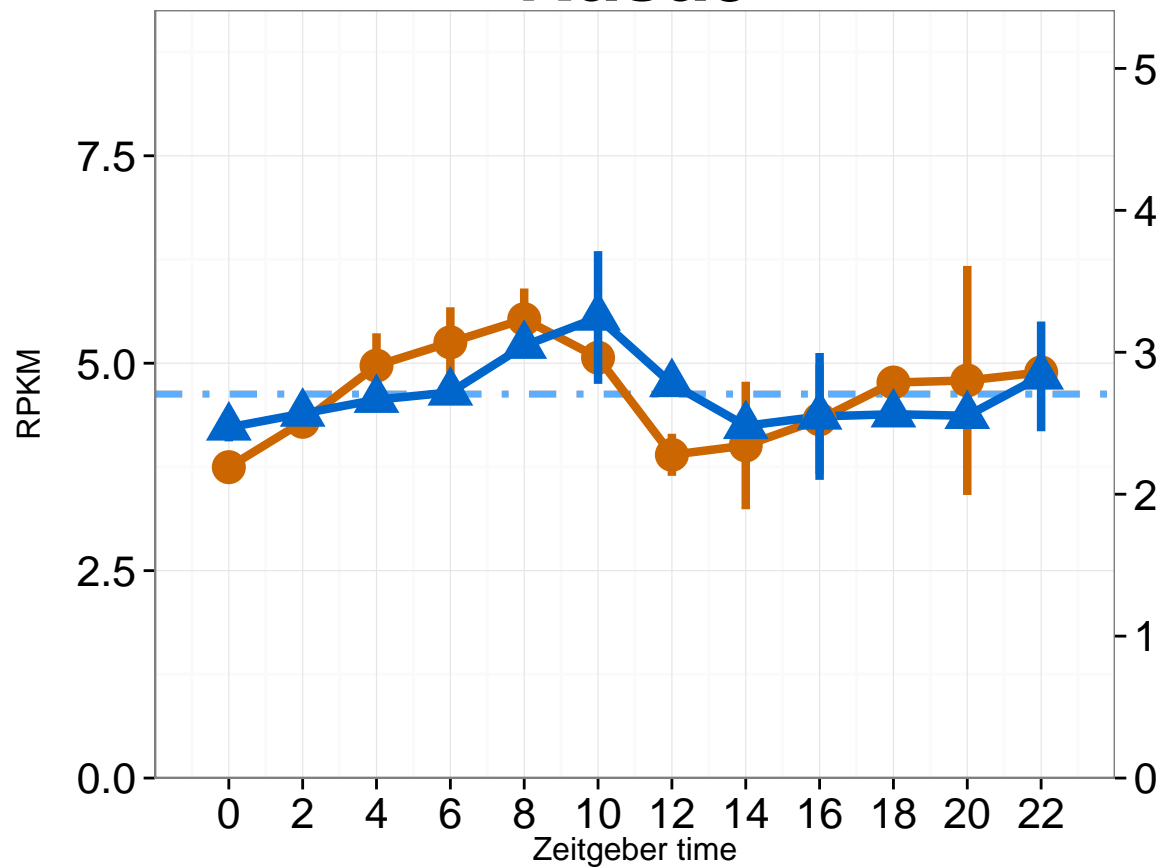

## Rasa3

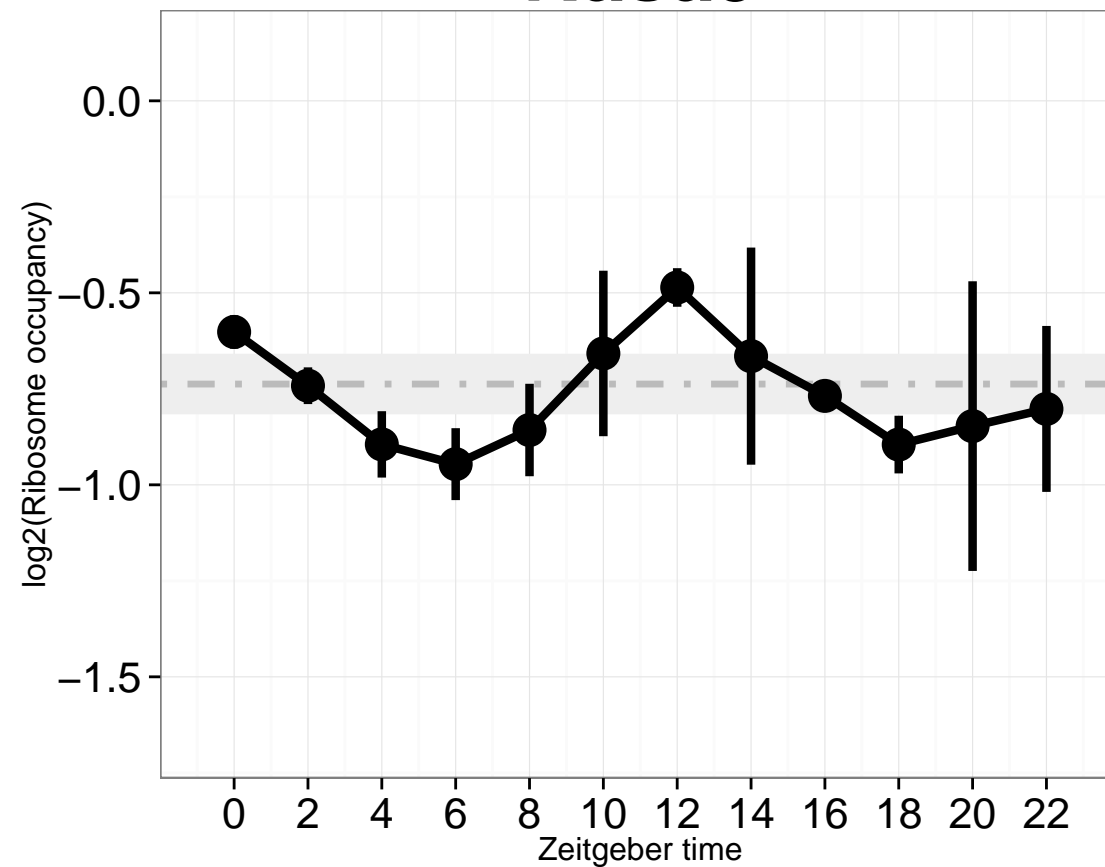

Supplement: SuppDataset_1.zip [file Rasa3_set_A.pdf › Supplemental Dataset 1/A-mRNA_nonrhyth_translation_nonrhyth/Rasa3_set_A.pdf]

## Rasa12

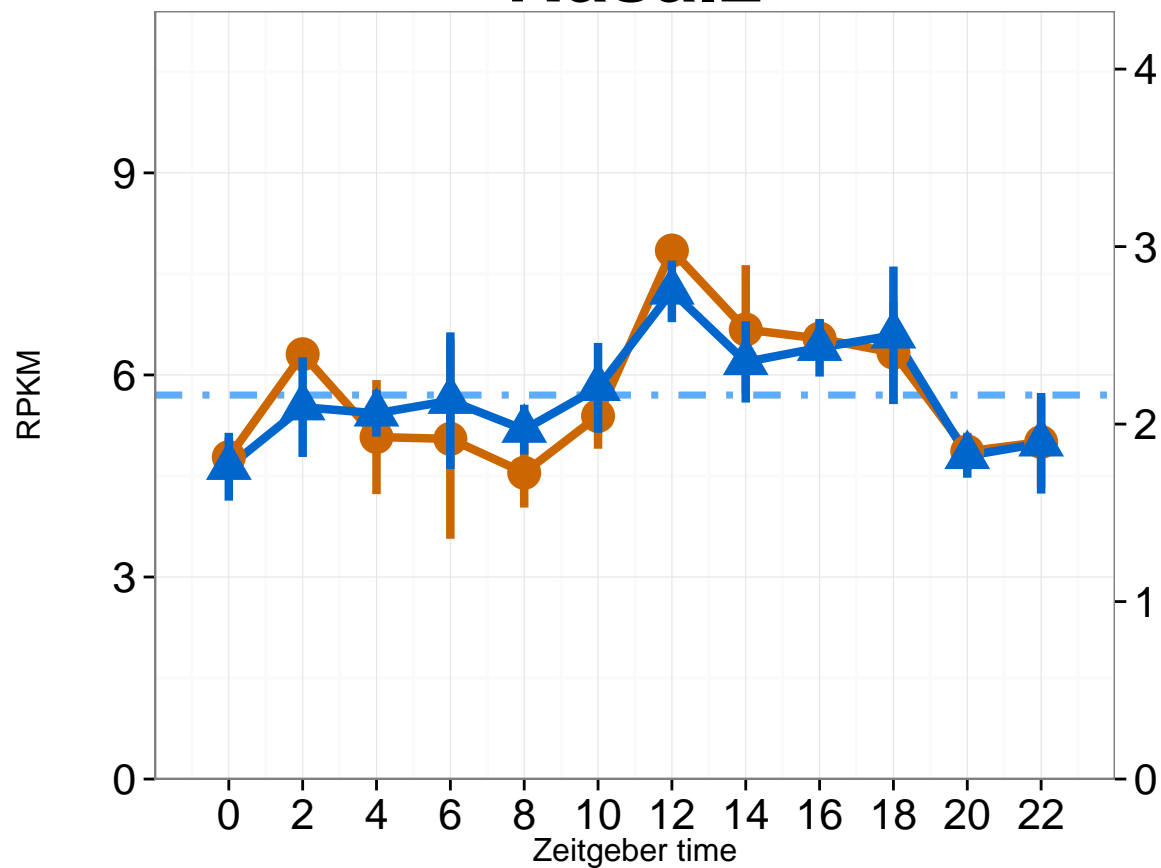

## Rasa12

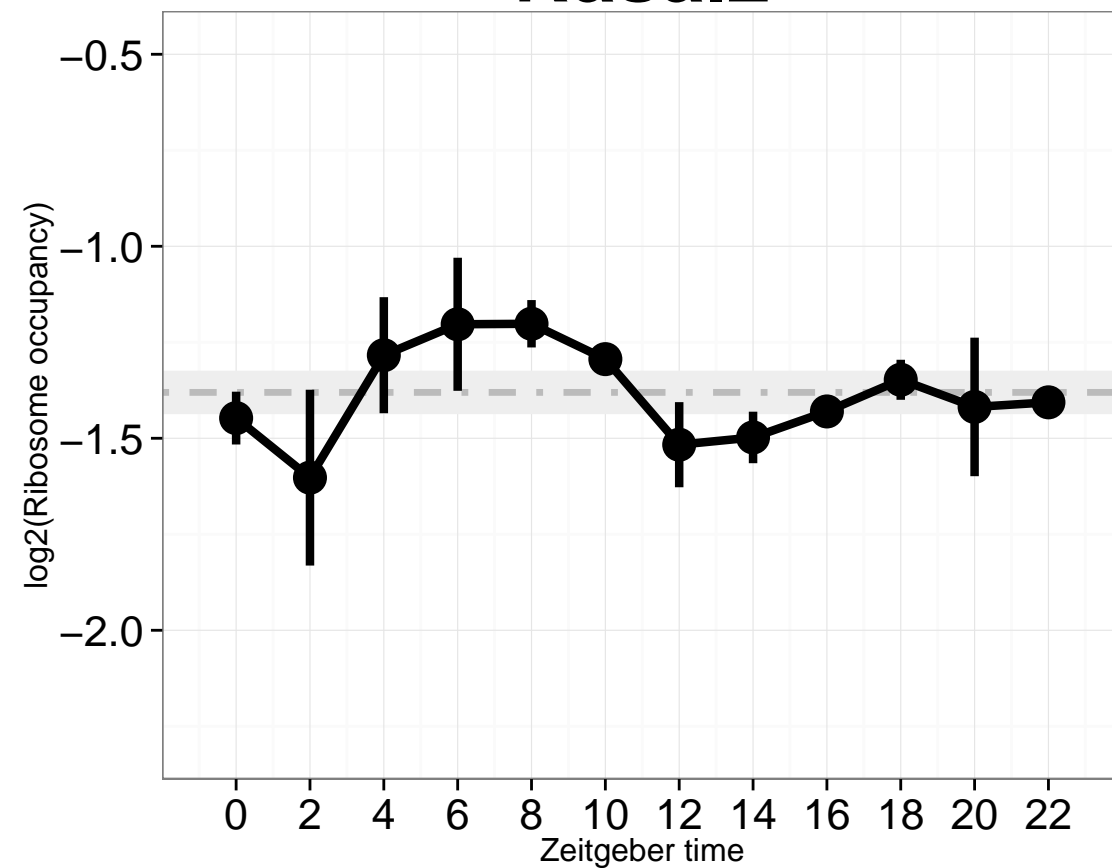

Supplement: SuppDataset_1.zip [file Rasal2_set_A.pdf › Supplemental Dataset 1/A-mRNA_nonrhyth_translation_nonrhyth/Rasal2_set_A.pdf]

# Rasgrp1

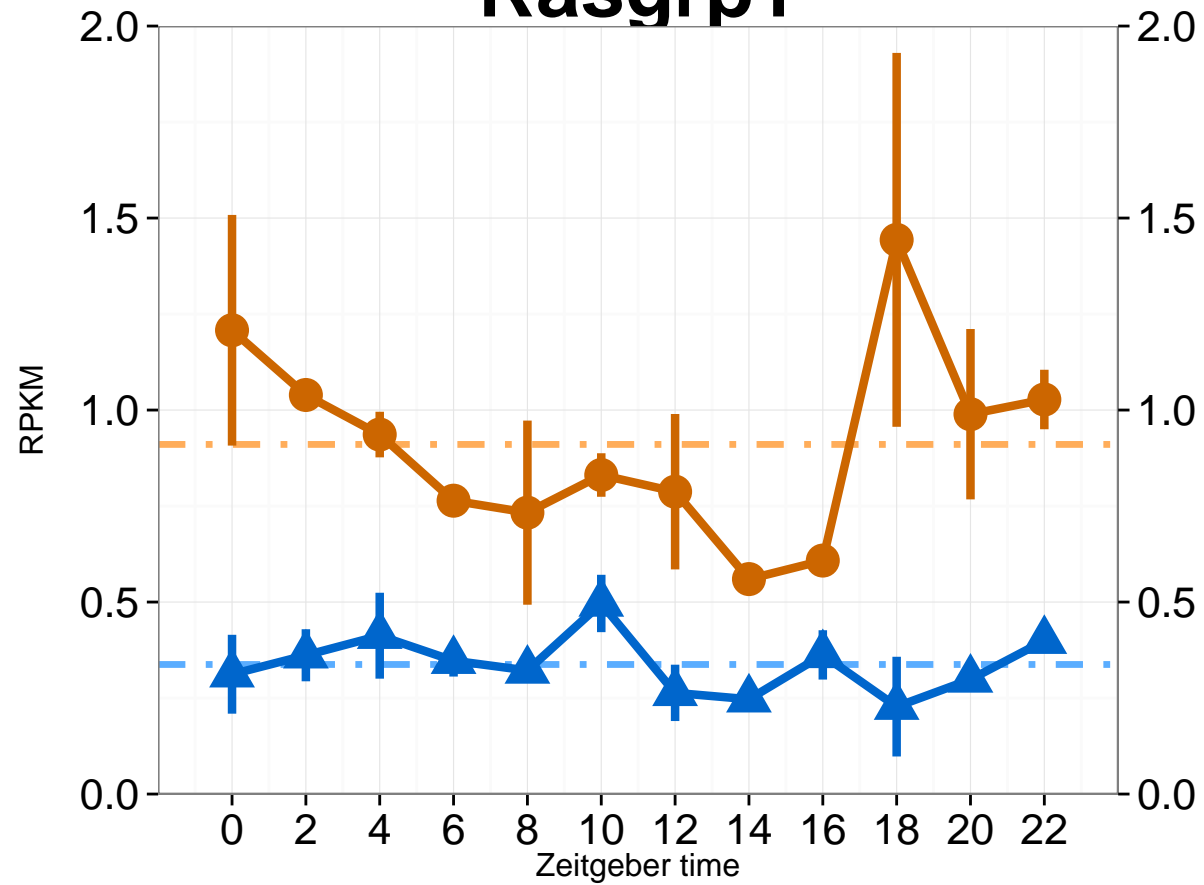

# Rasgrp1

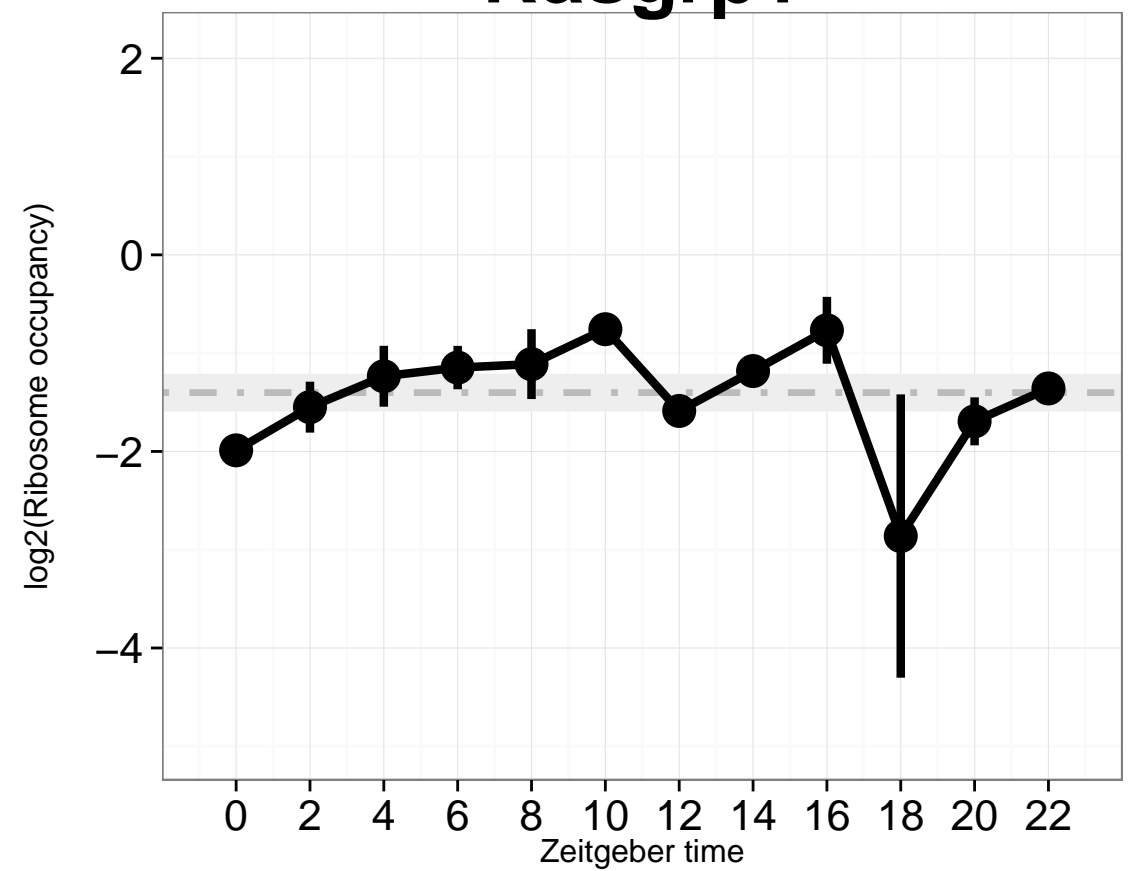

Supplement: SuppDataset_1.zip [file Rasgrp1_set_A.pdf › Supplemental Dataset 1/A-mRNA_nonrhyth_translation_nonrhyth/Rasgrp1_set_A.pdf]

## Rasgrp2

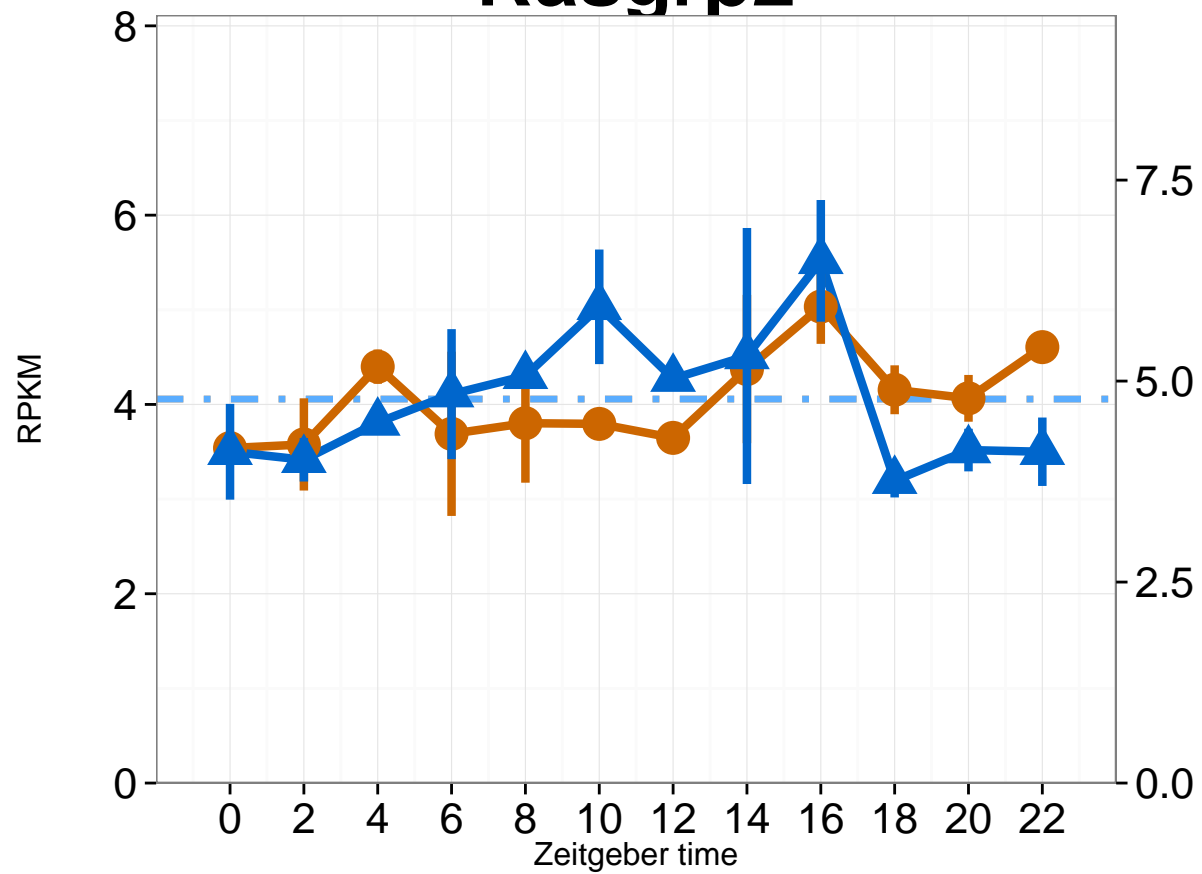

## Rasgrp2

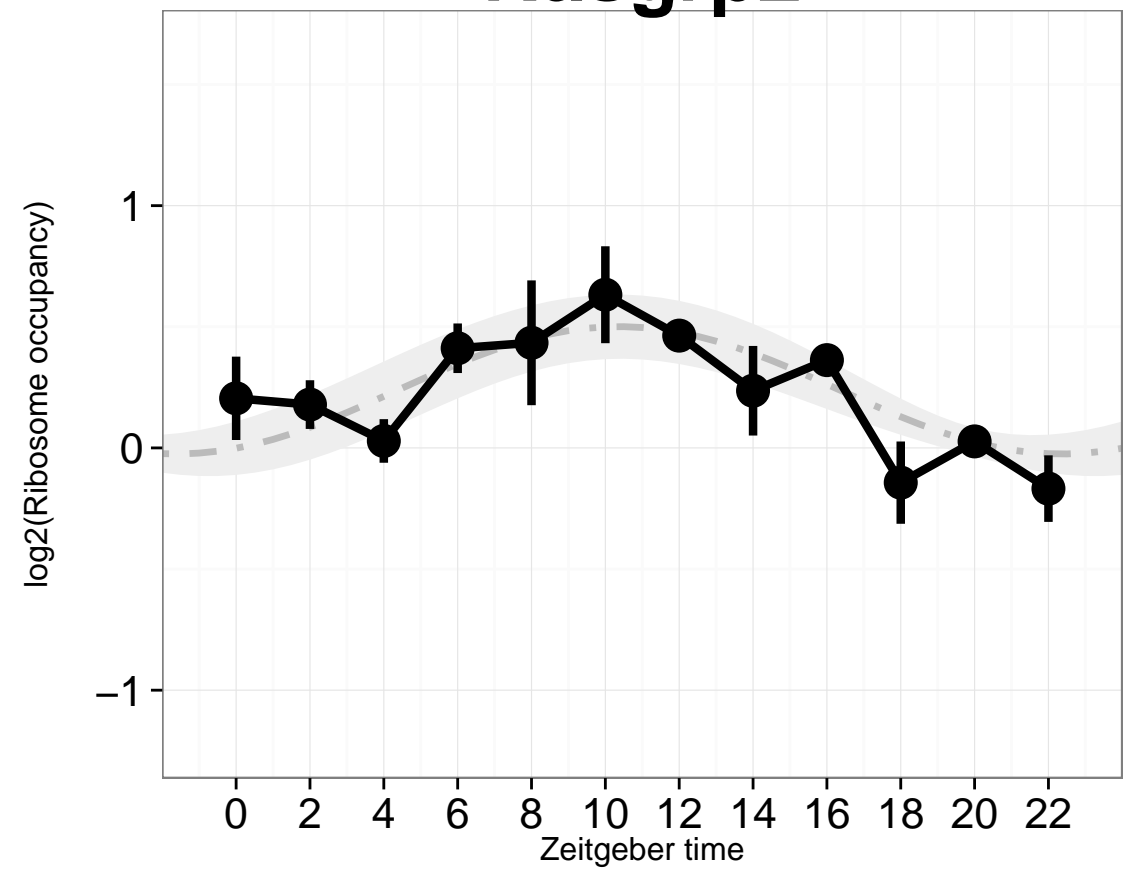

Supplement: SuppDataset_1.zip [file Rasgrp2_set_A.pdf › Supplemental Dataset 1/A-mRNA_nonrhyth_translation_nonrhyth/Rasgrp2_set_A.pdf]

## Rasgrp3

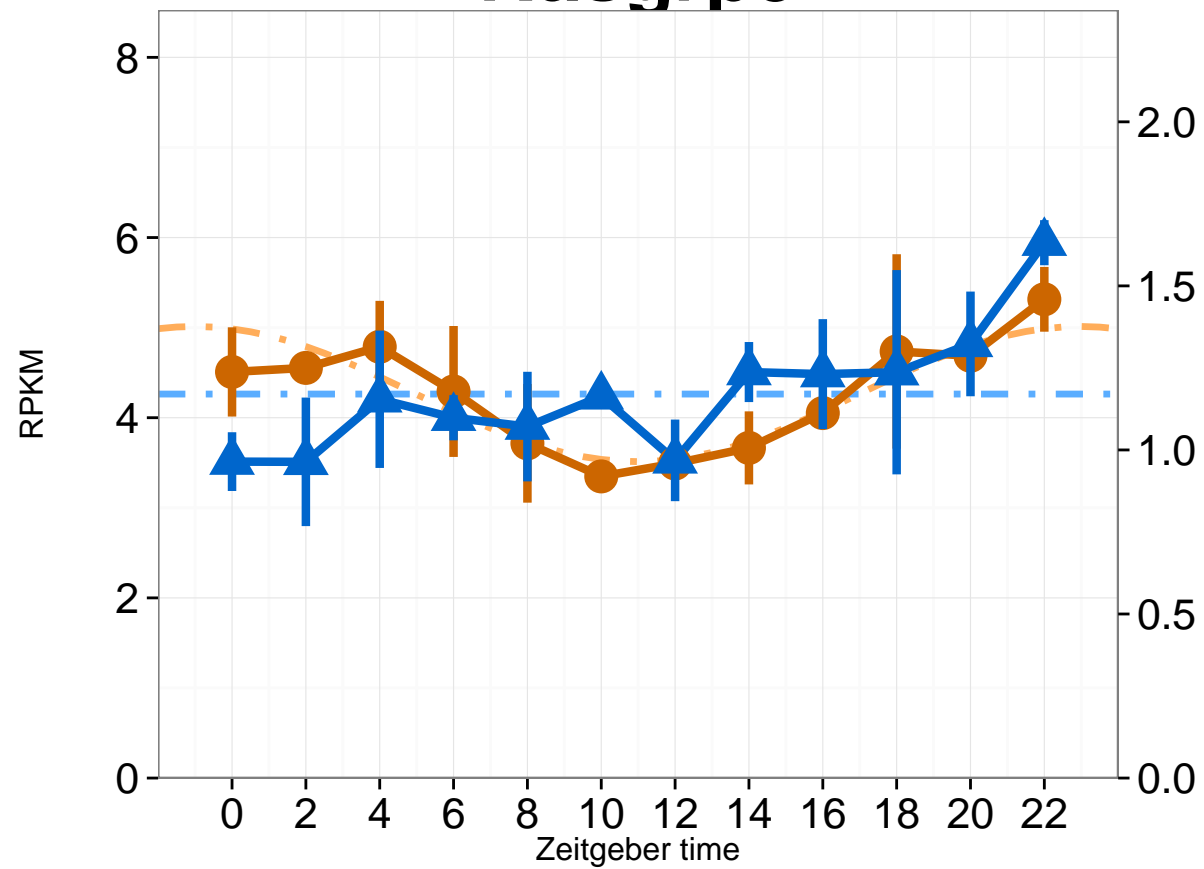

## Rasgrp3

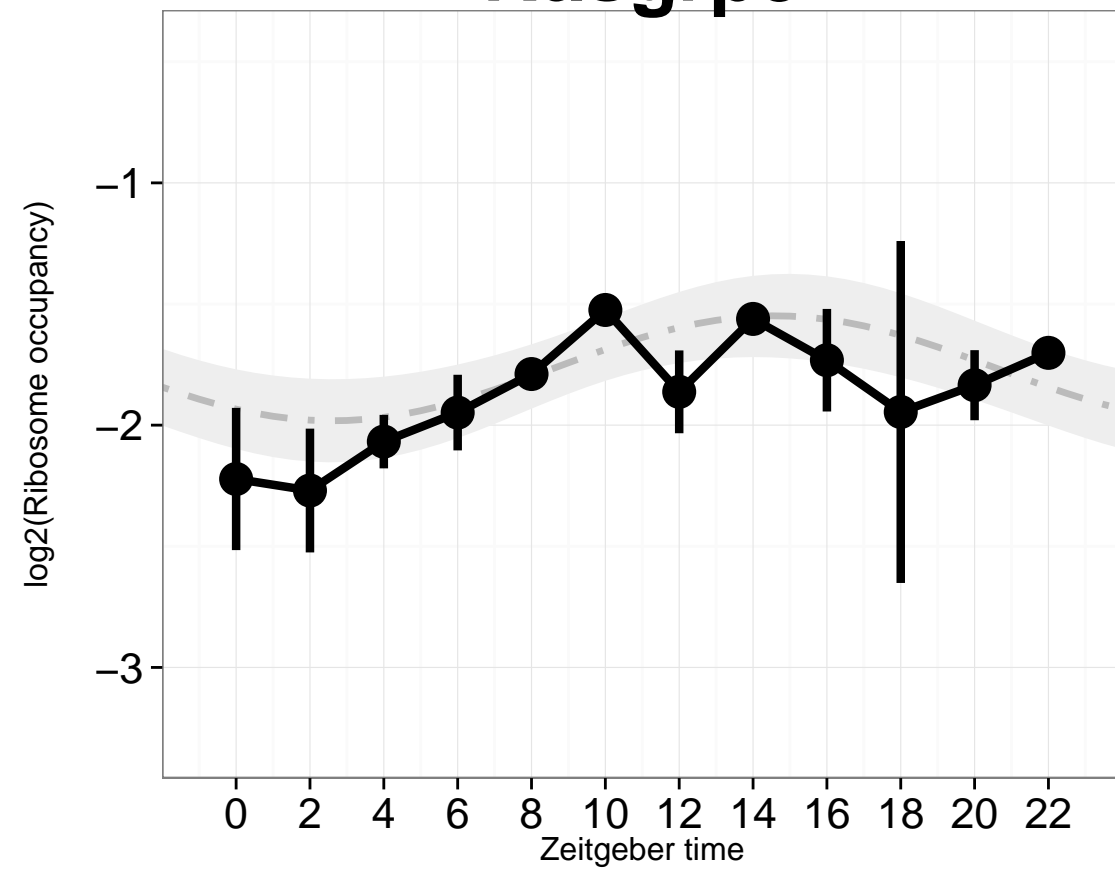

Supplement: SuppDataset_1.zip [file Rasgrp3_set_A.pdf › Supplemental Dataset 1/A-mRNA_nonrhyth_translation_nonrhyth/Rasgrp3_set_A.pdf]

# Rasip1

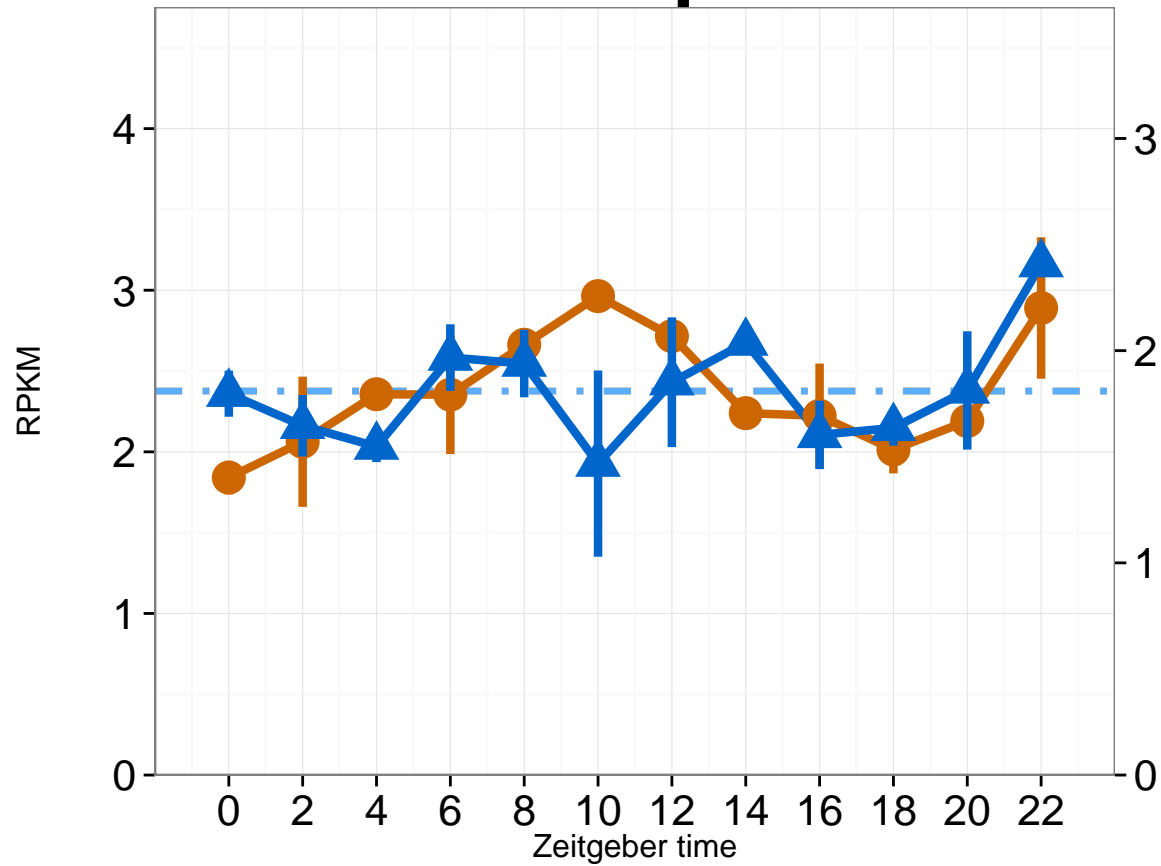

# Rasip1

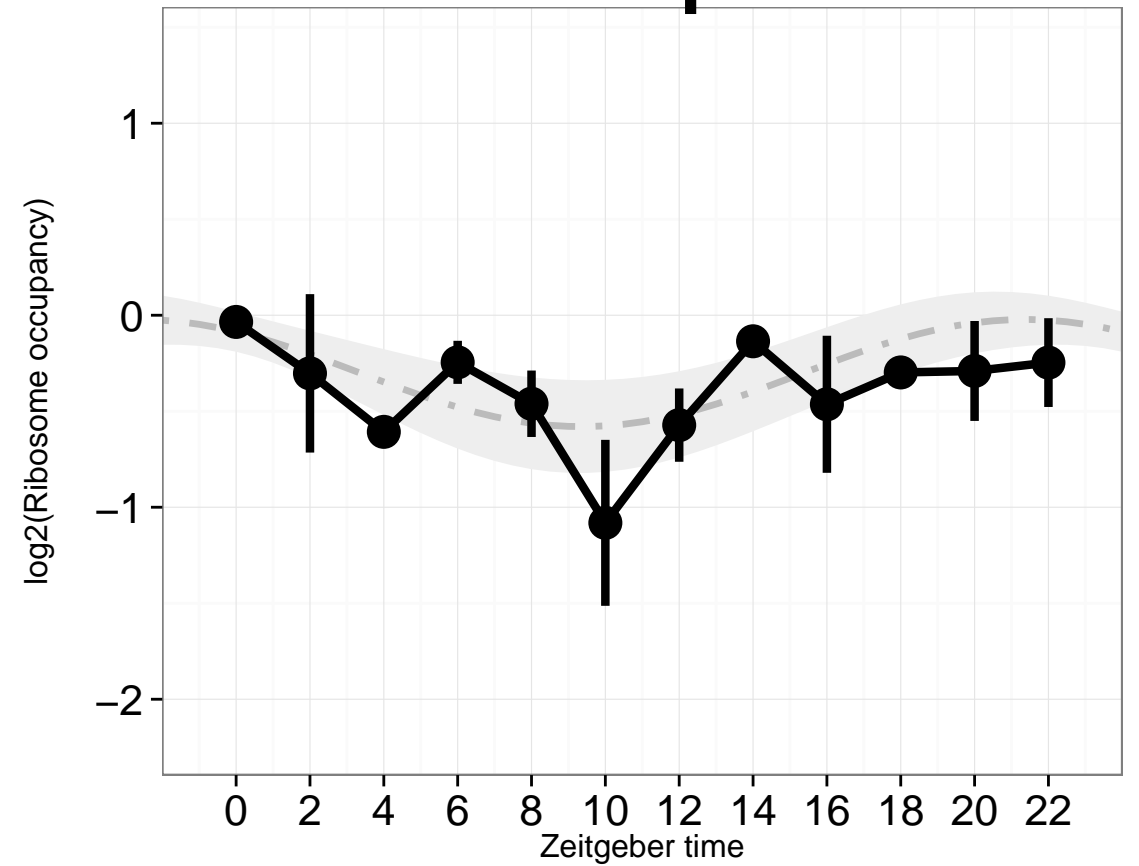

Supplement: SuppDataset_1.zip [file Rasip1_set_A.pdf › Supplemental Dataset 1/A-mRNA_nonrhyth_translation_nonrhyth/Rasip1_set_A.pdf]

## Rassf1

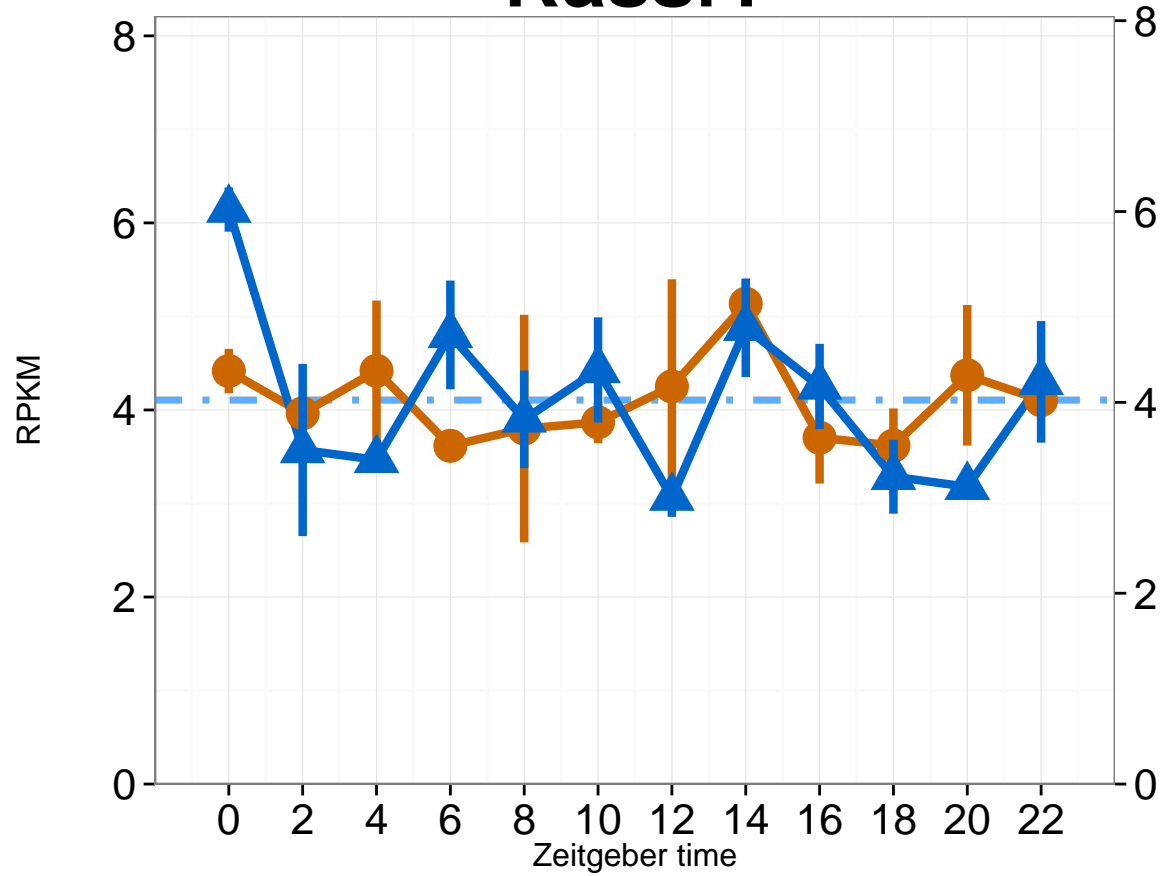

## Rassf1

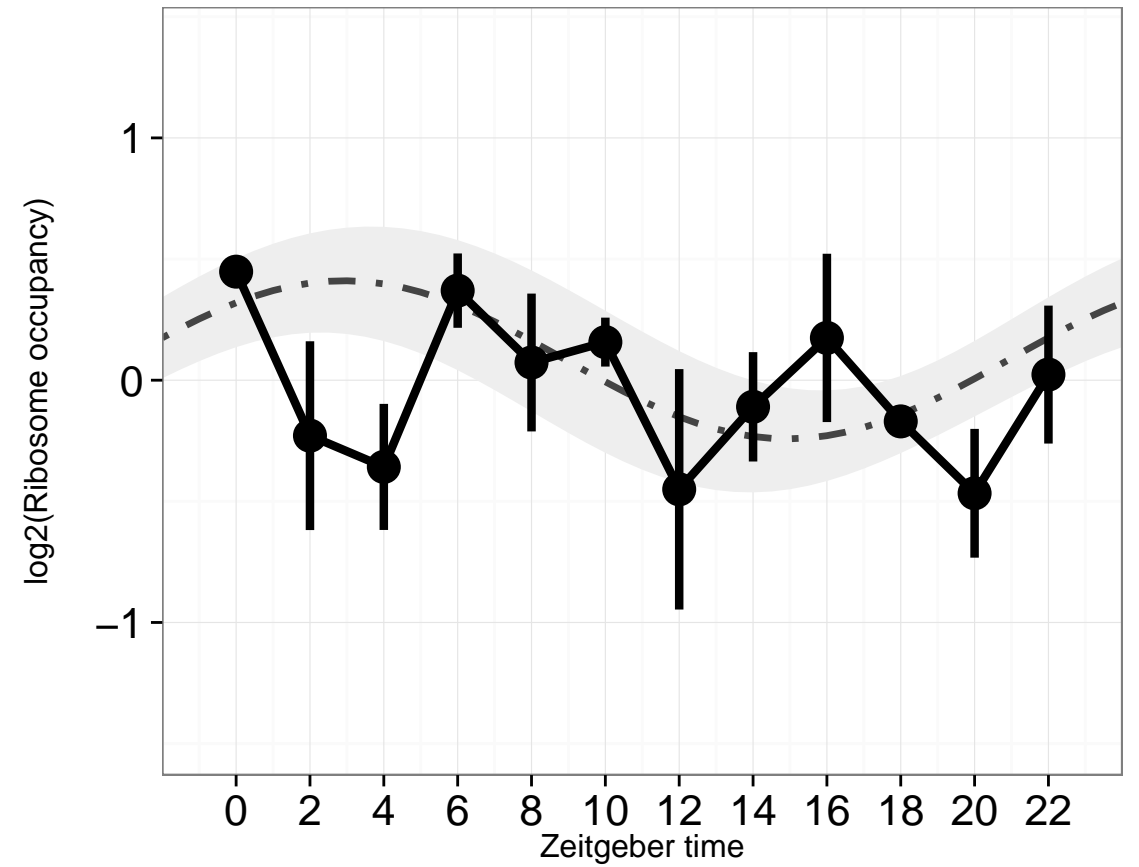

Supplement: SuppDataset_1.zip [file Rassf1_set_A.pdf › Supplemental Dataset 1/A-mRNA_nonrhyth_translation_nonrhyth/Rassf1_set_A.pdf]

## Rassf2

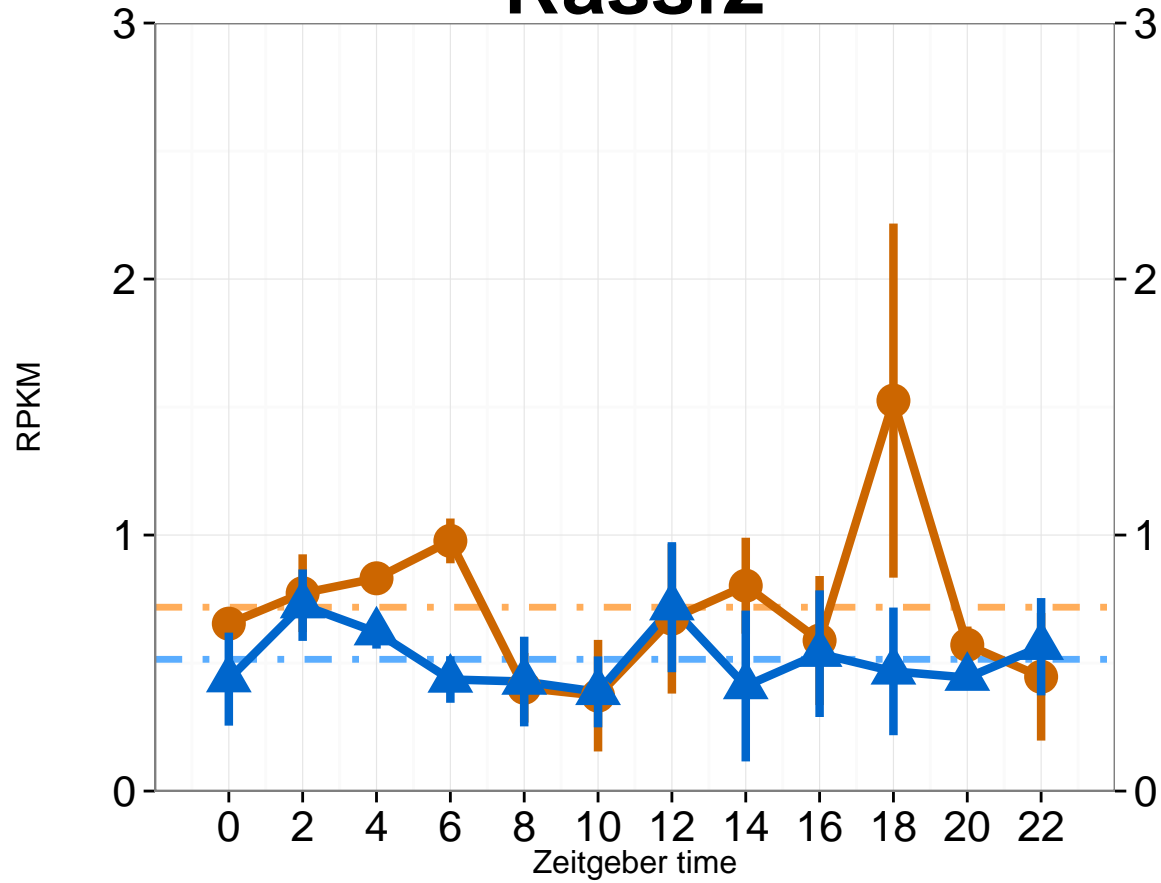

## Rassf2

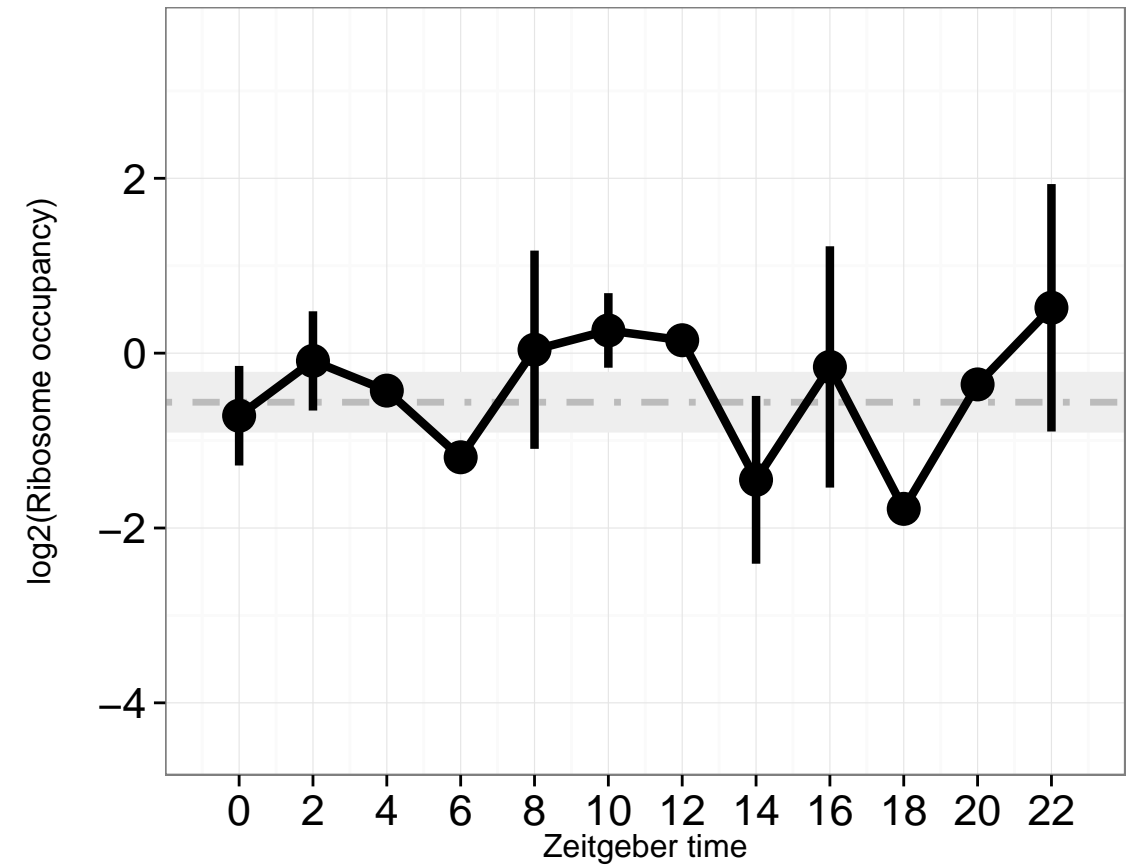

Supplement: SuppDataset_1.zip [file Rassf2_set_A.pdf › Supplemental Dataset 1/A-mRNA_nonrhyth_translation_nonrhyth/Rassf2_set_A.pdf]

## Rassf4

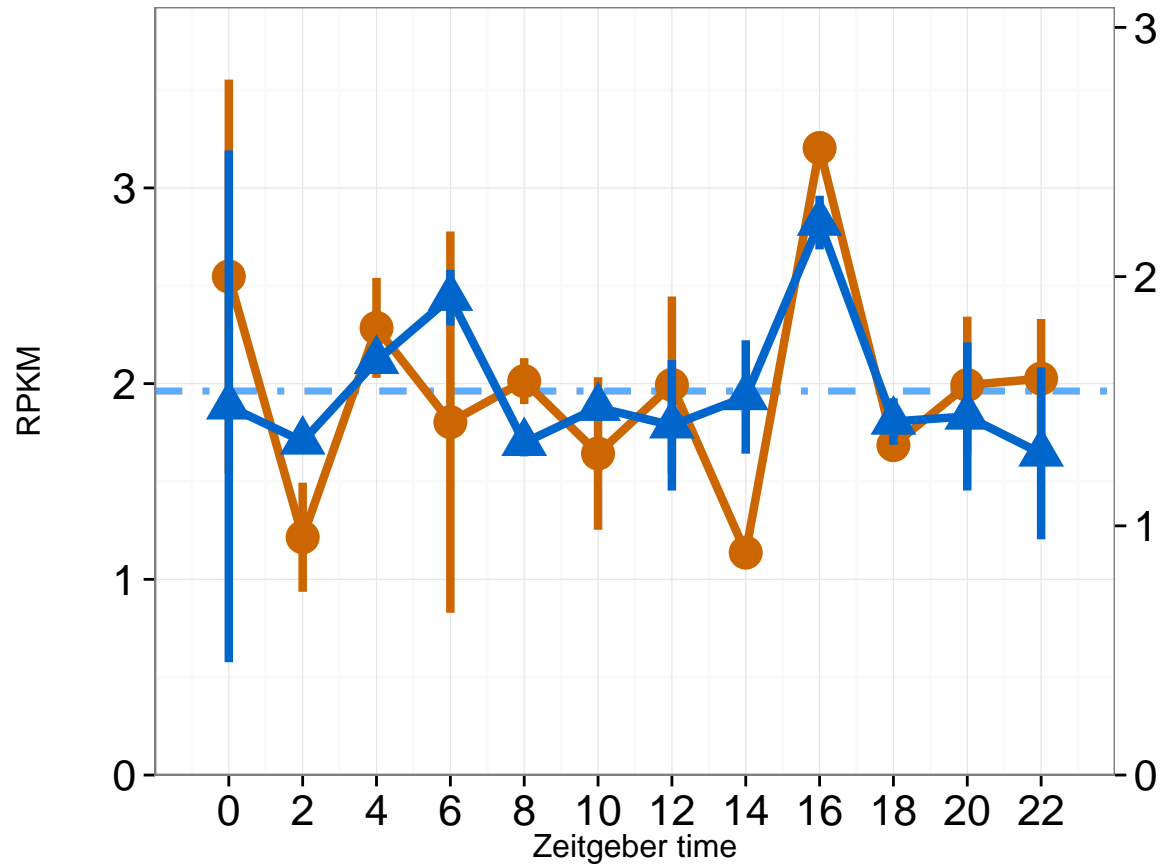

## Rassf4

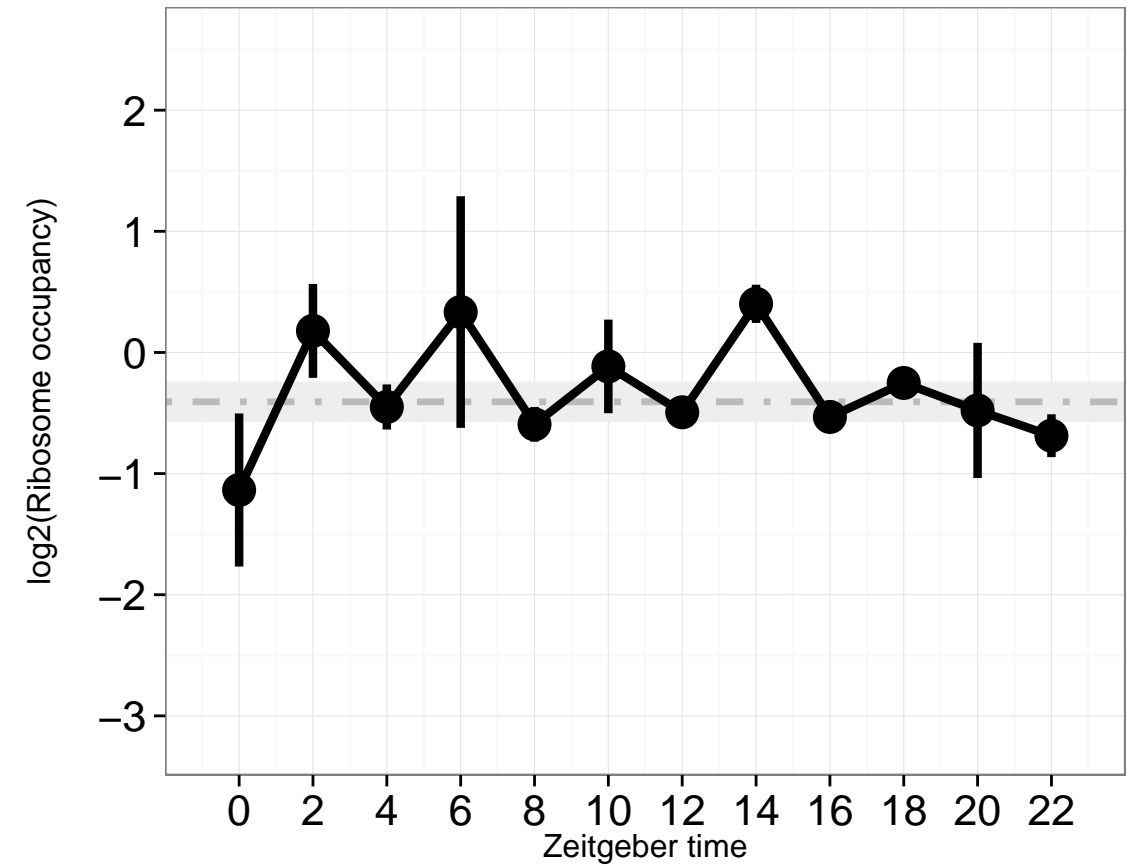

Supplement: SuppDataset_1.zip [file Rassf4_set_A.pdf › Supplemental Dataset 1/A-mRNA_nonrhyth_translation_nonrhyth/Rassf4_set_A.pdf]

## Rassf5

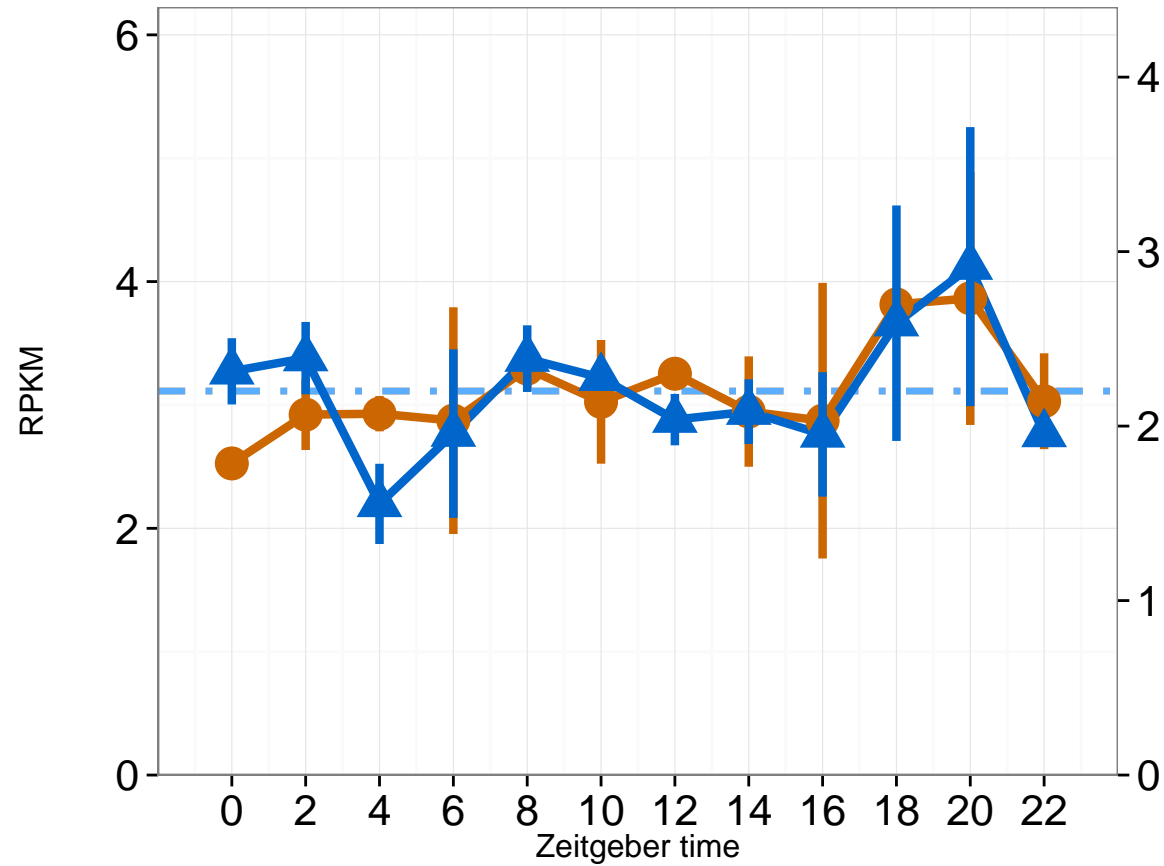

## Rassf5

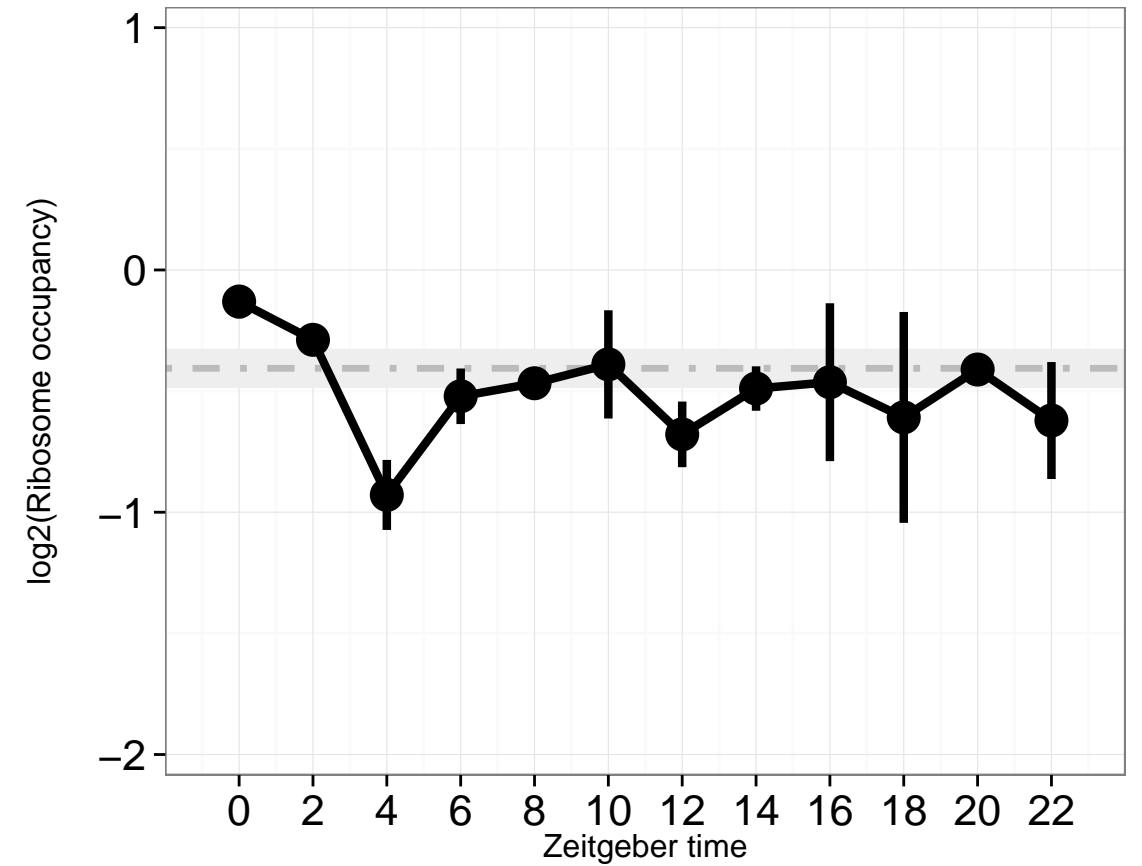

Supplement: SuppDataset_1.zip [file Rassf5_set_A.pdf › Supplemental Dataset 1/A-mRNA_nonrhyth_translation_nonrhyth/Rassf5_set_A.pdf]

## Rassf8

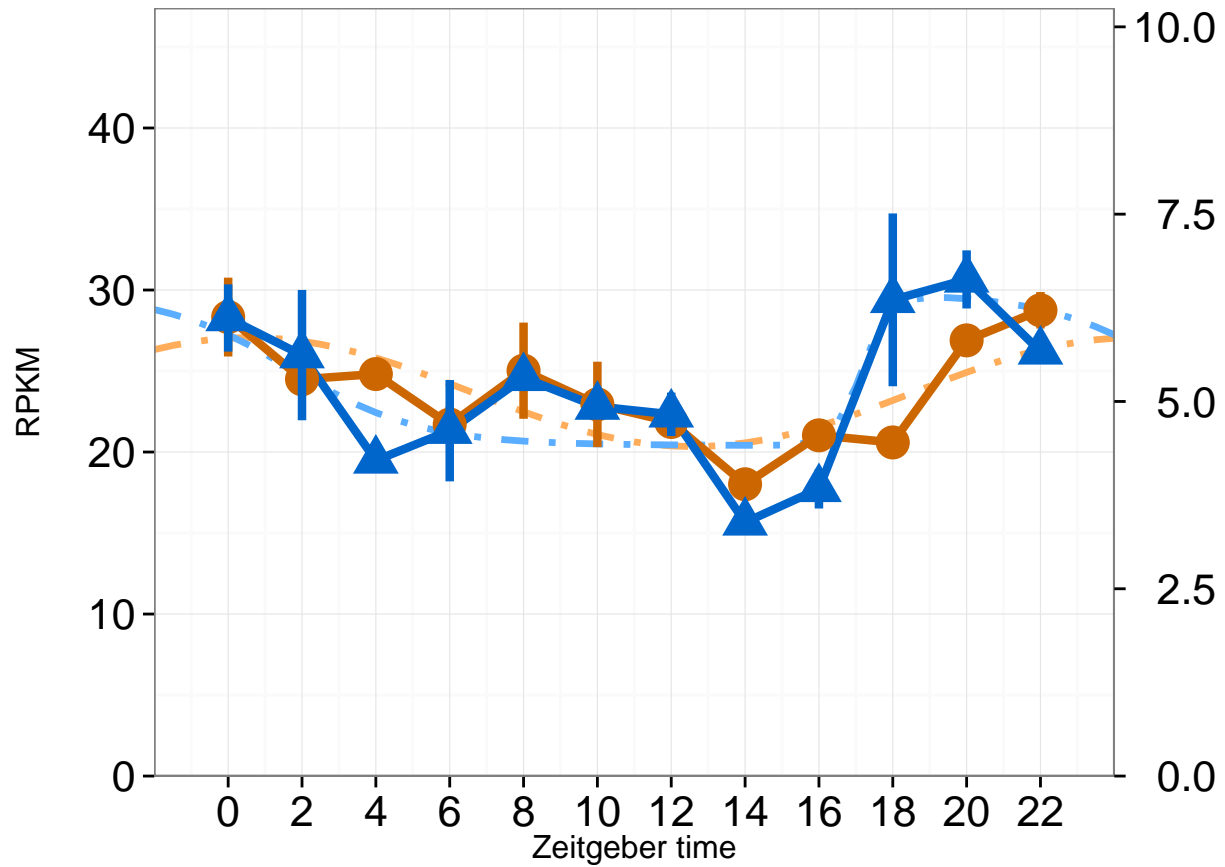

## Rassf8

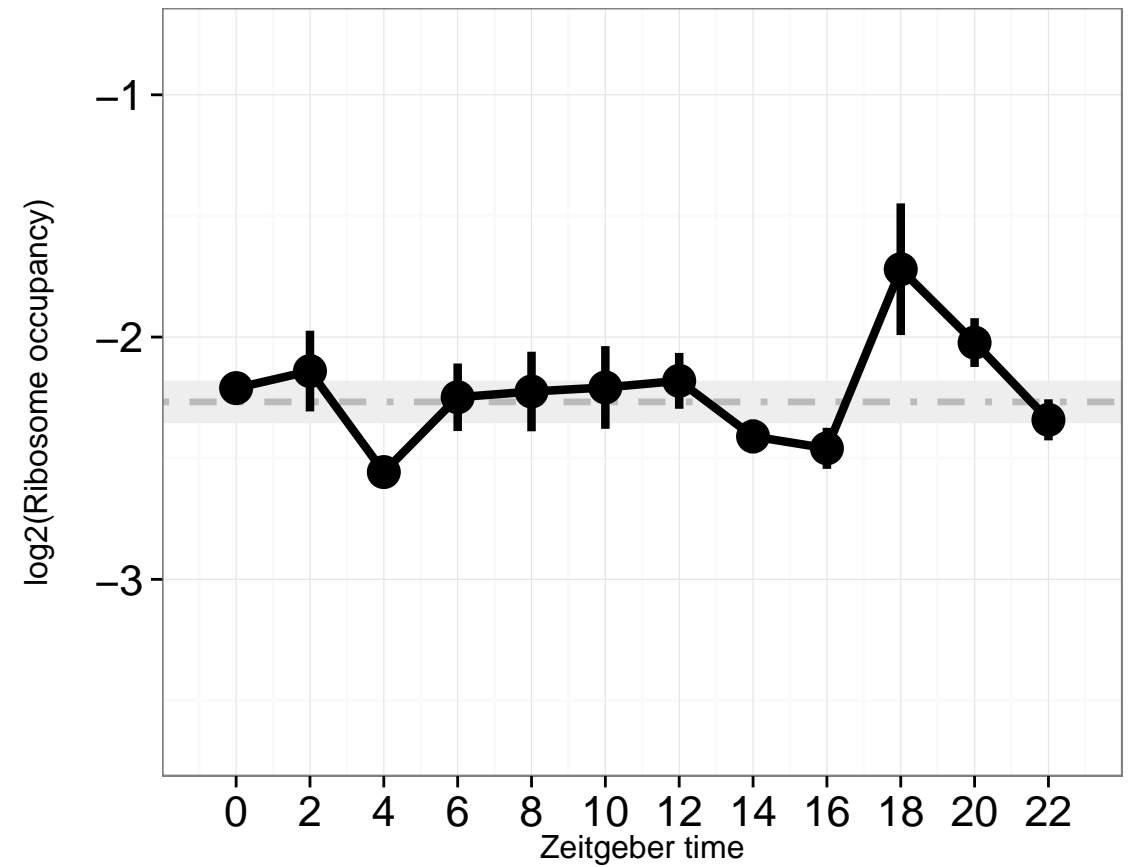

Supplement: SuppDataset_1.zip [file Rassf8_set_A.pdf › Supplemental Dataset 1/A-mRNA_nonrhyth_translation_nonrhyth/Rassf8_set_A.pdf]

## Raver1

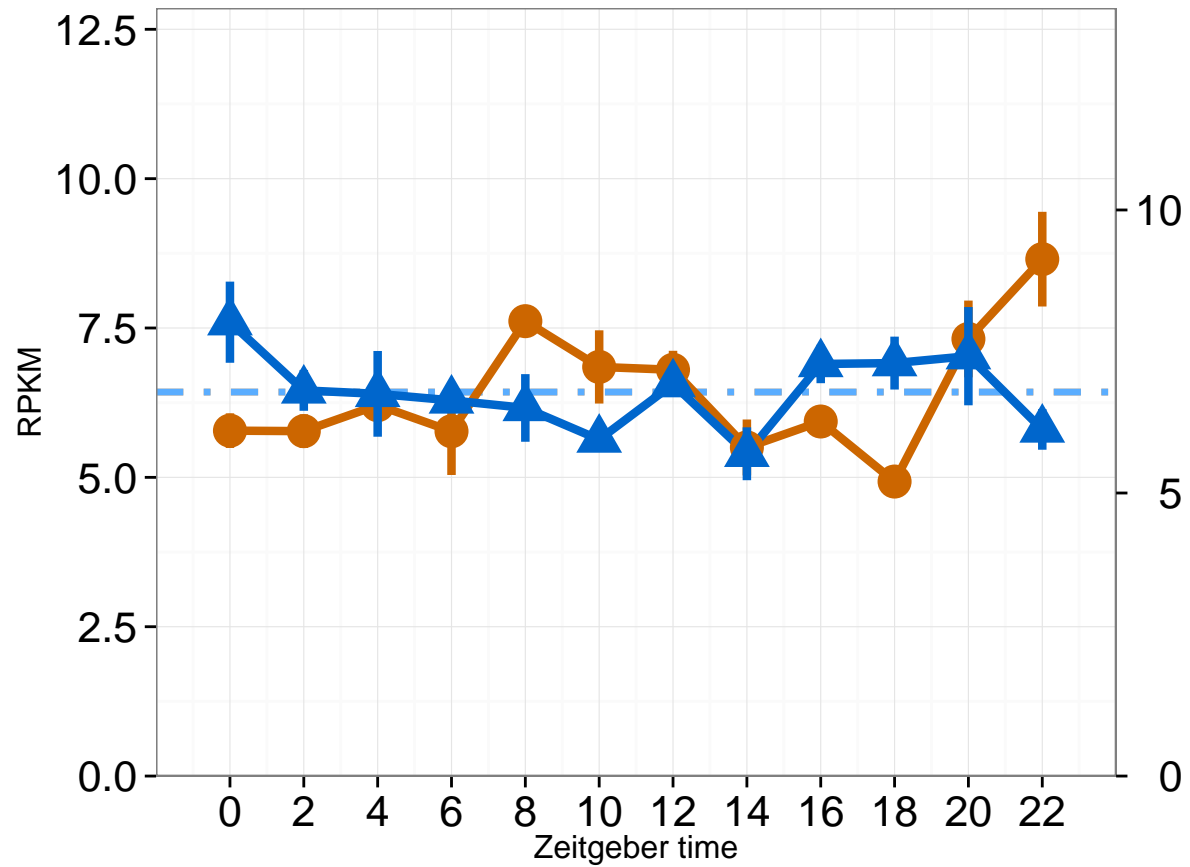

## Raver1

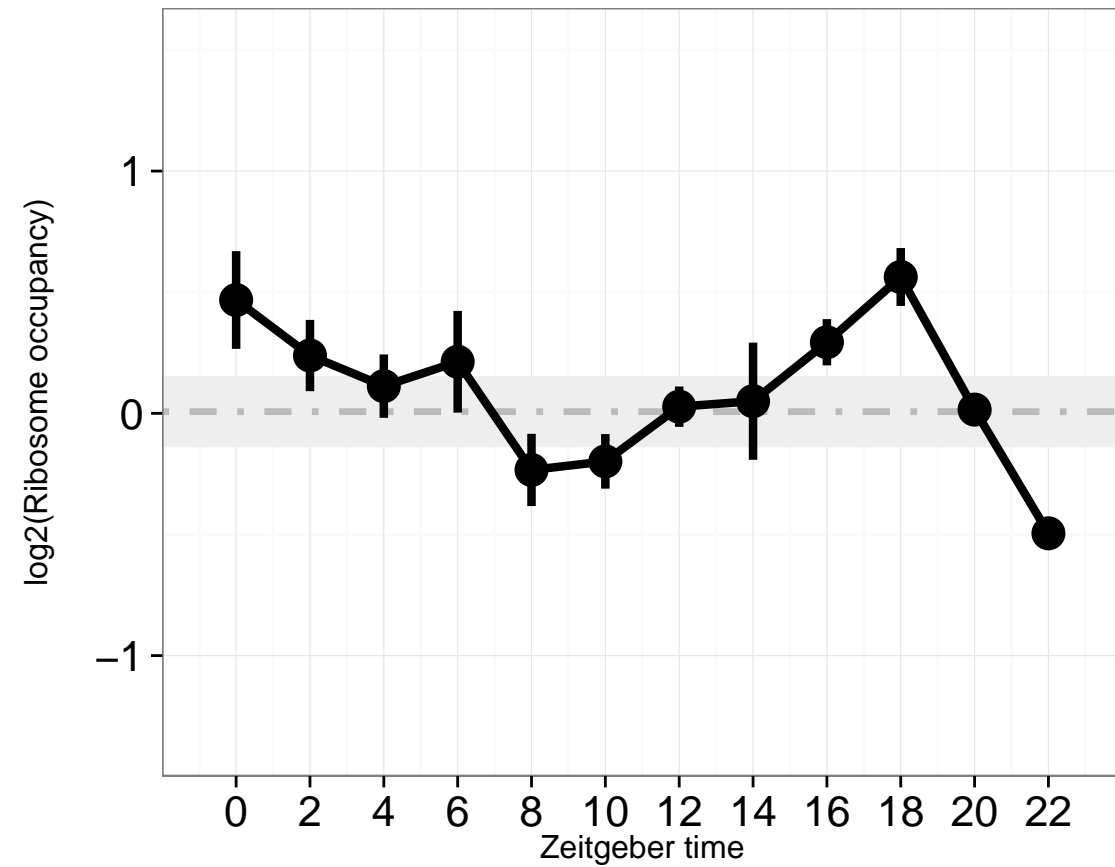

Supplement: SuppDataset_1.zip [file Raver1_set_A.pdf › Supplemental Dataset 1/A-mRNA_nonrhyth_translation_nonrhyth/Raver1_set_A.pdf]

# Rb1

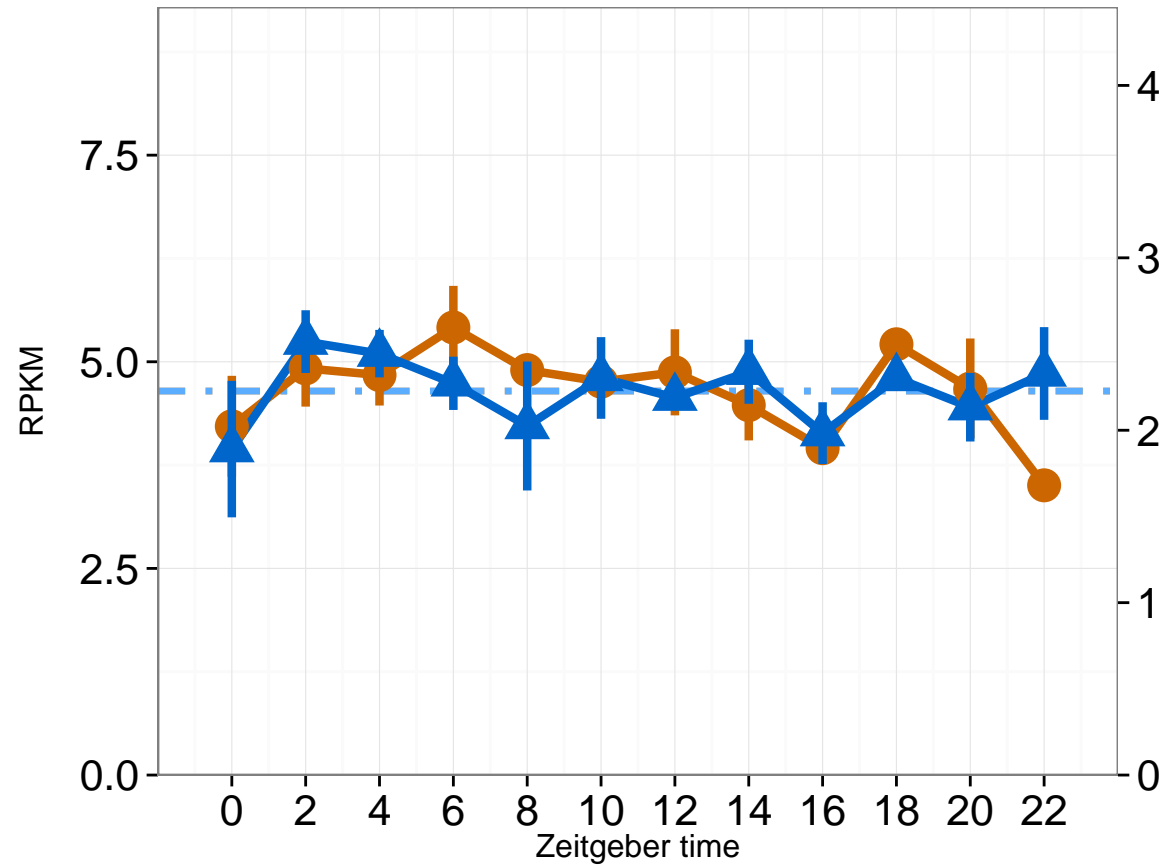

# Rb1

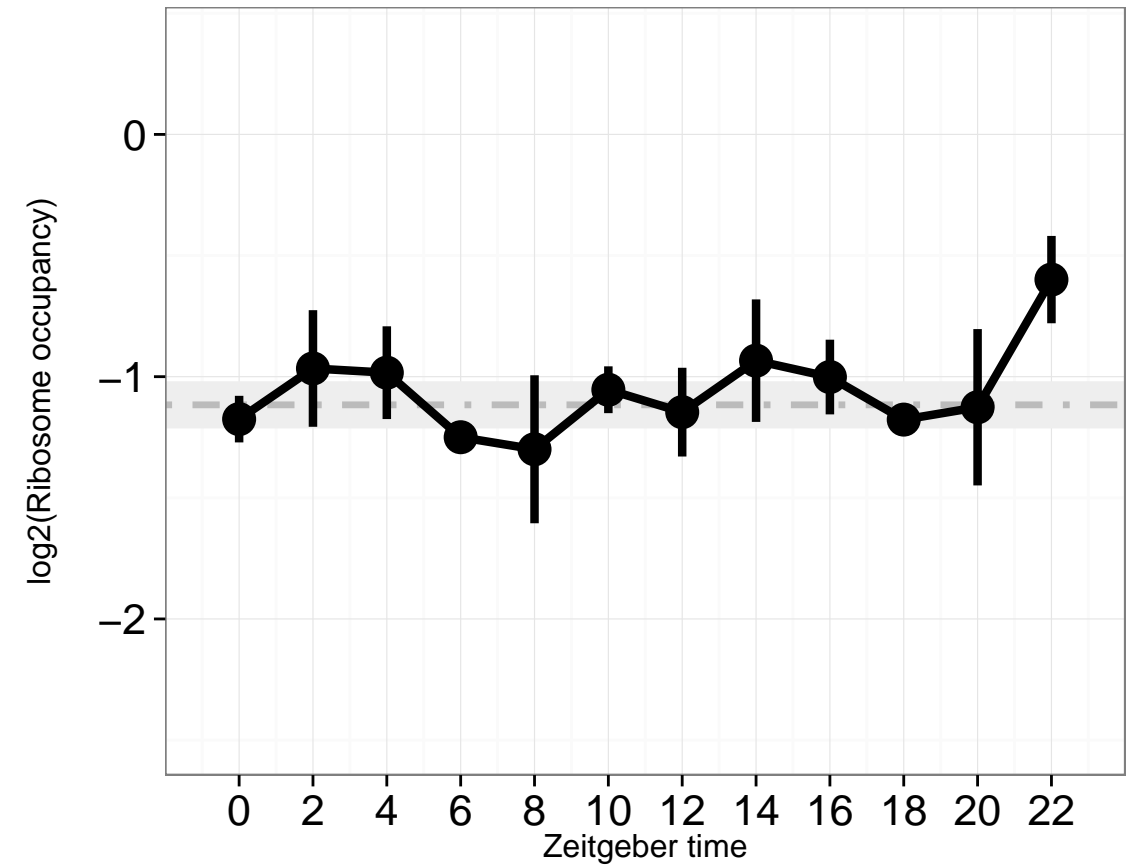

Supplement: SuppDataset_1.zip [file Rb1_set_A.pdf › Supplemental Dataset 1/A-mRNA_nonrhyth_translation_nonrhyth/Rb1_set_A.pdf]

# Rb1cc1

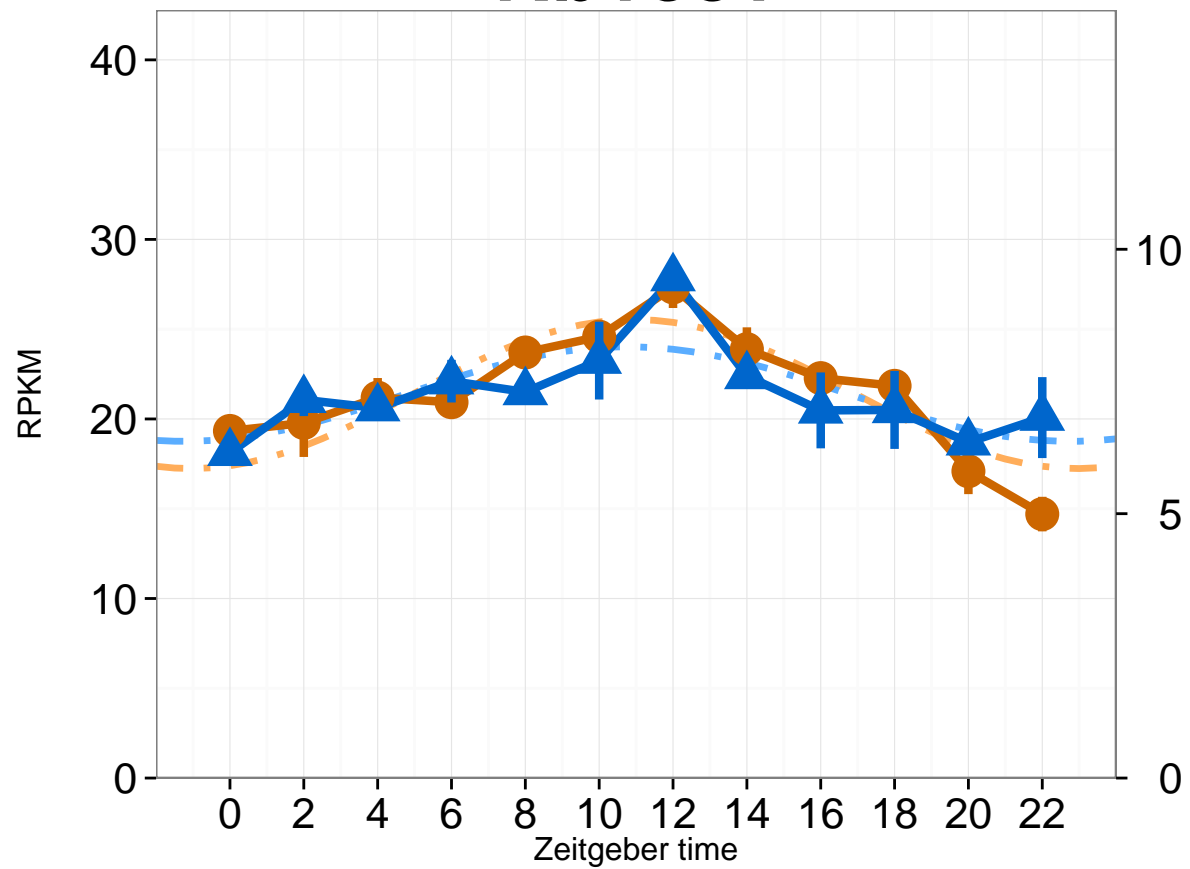

# Rb1cc1

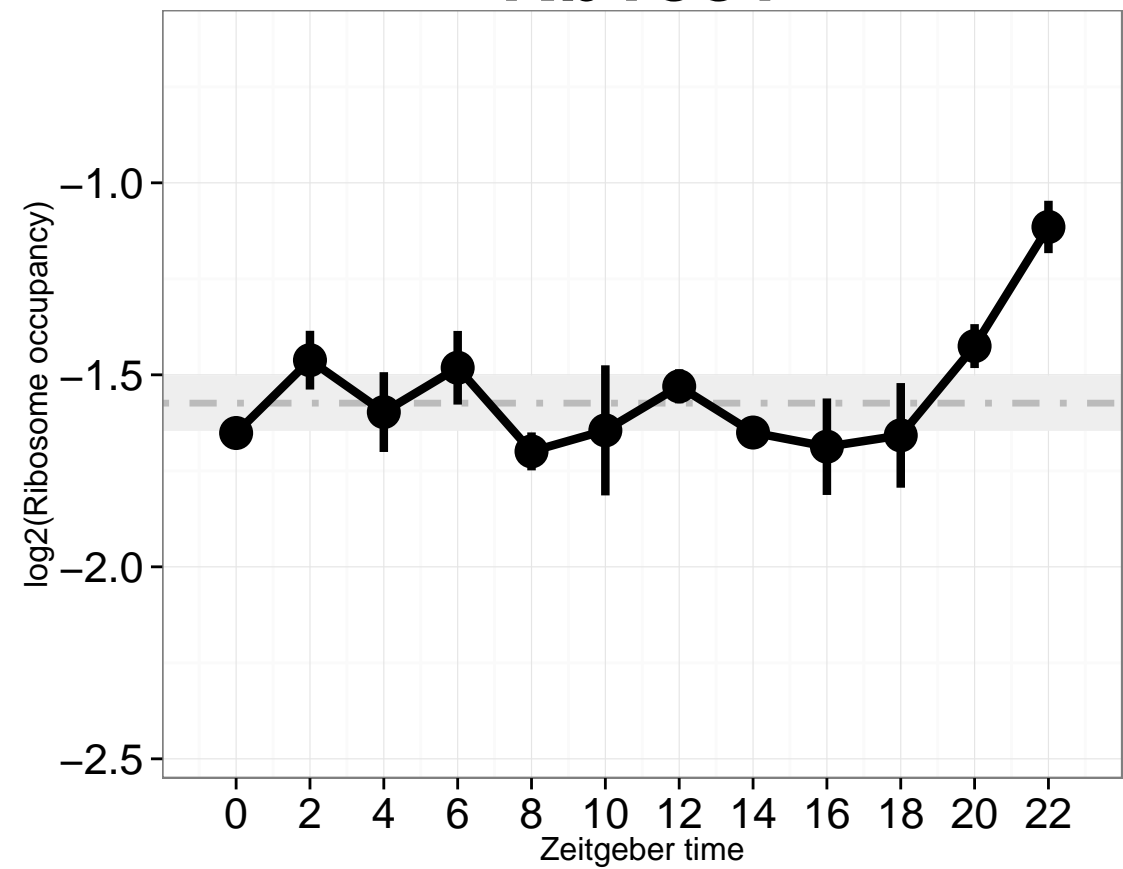

Supplement: SuppDataset_1.zip [file Rb1cc1_set_A.pdf › Supplemental Dataset 1/A-mRNA_nonrhyth_translation_nonrhyth/Rb1cc1_set_A.pdf]

## Rbak

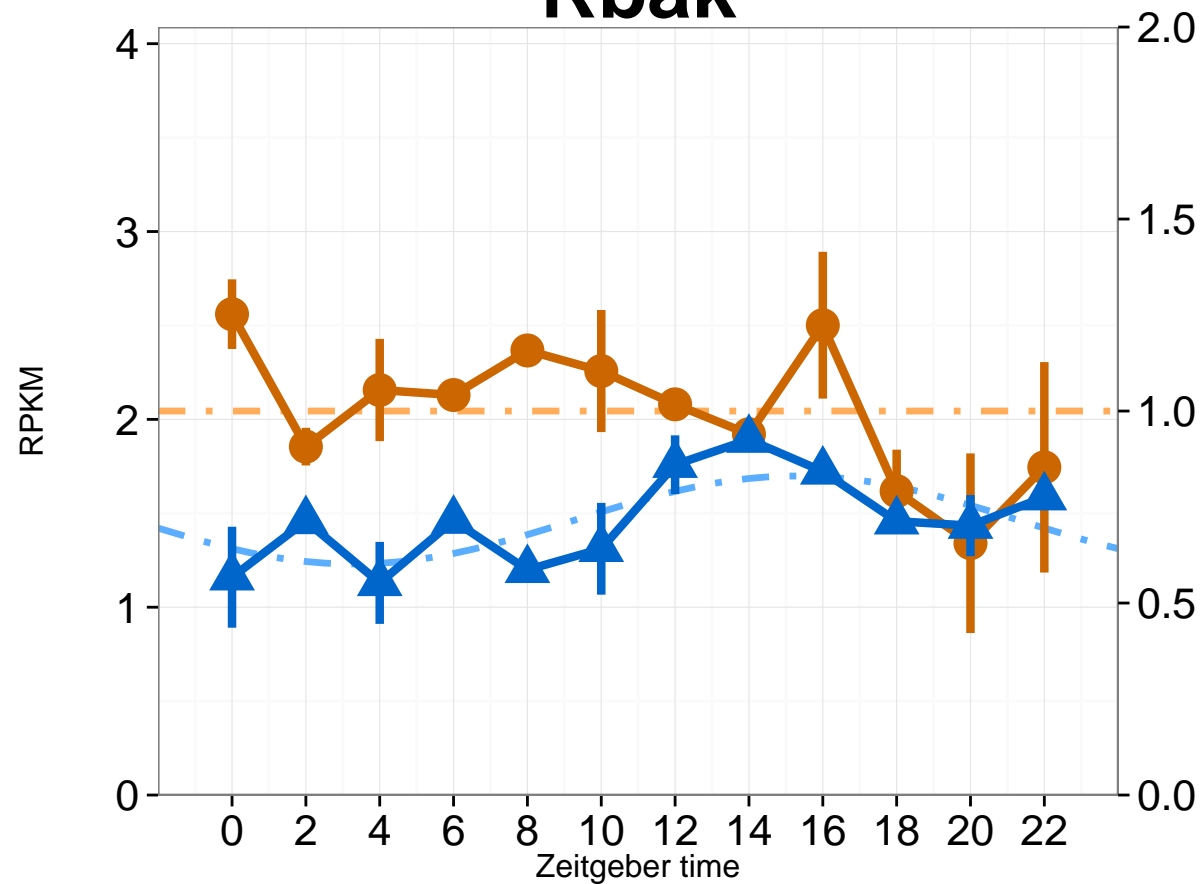

## Rbak

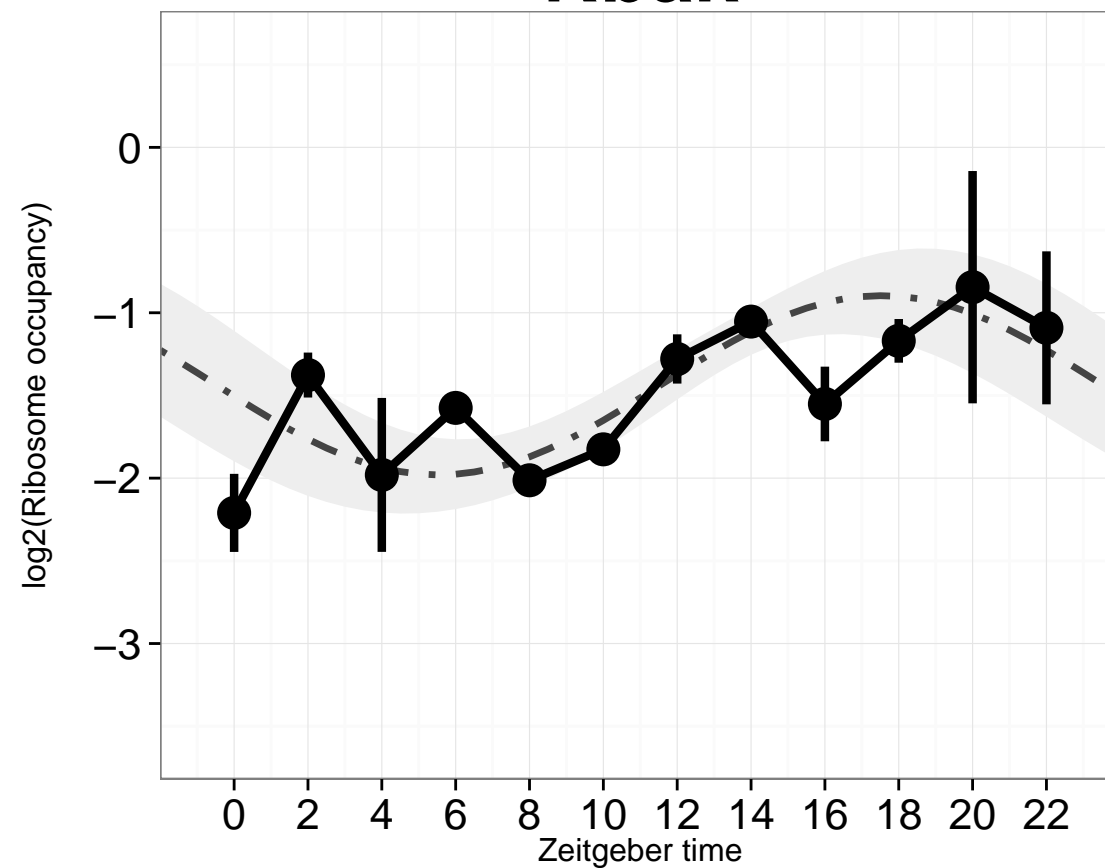

Supplement: SuppDataset_1.zip [file Rbak_set_A.pdf › Supplemental Dataset 1/A-mRNA_nonrhyth_translation_nonrhyth/Rbak_set_A.pdf]

## Rbbp4

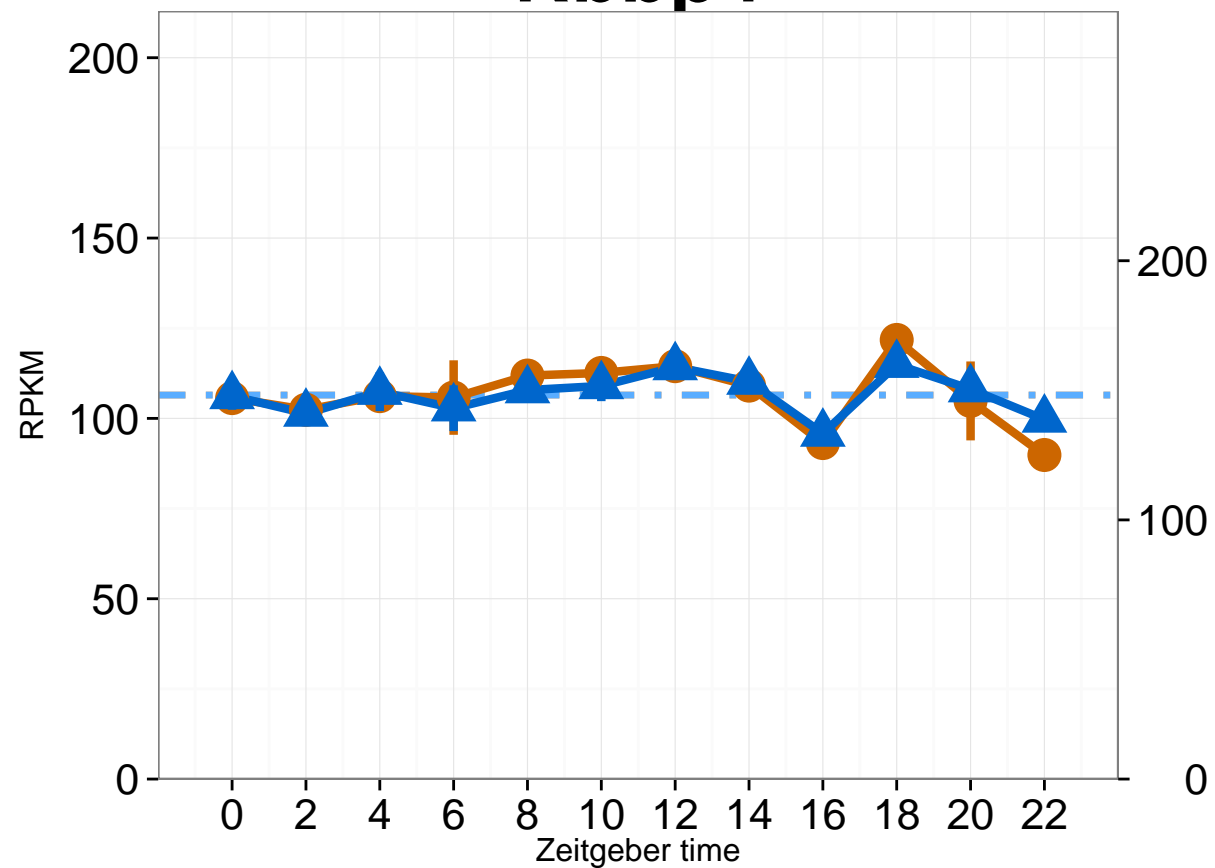

## Rbbp4

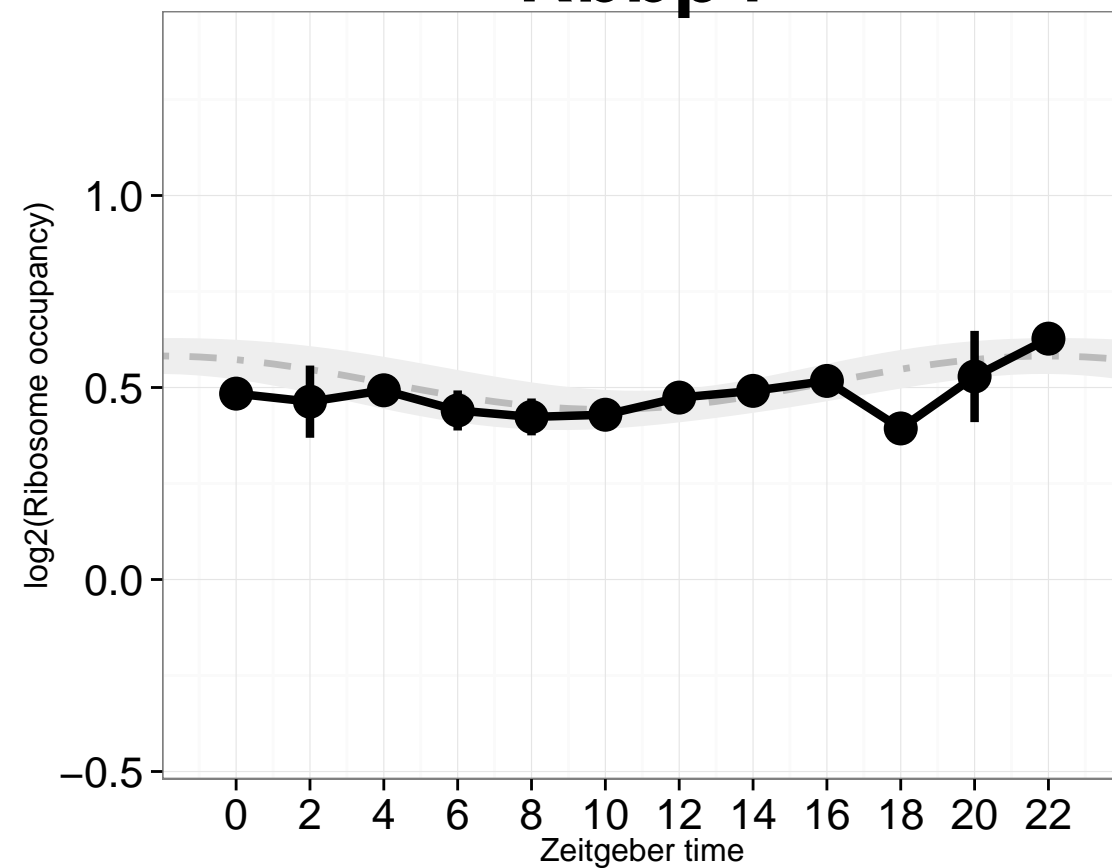

Supplement: SuppDataset_1.zip [file Rbbp4_set_A.pdf › Supplemental Dataset 1/A-mRNA_nonrhyth_translation_nonrhyth/Rbbp4_set_A.pdf]

## Rbbp5

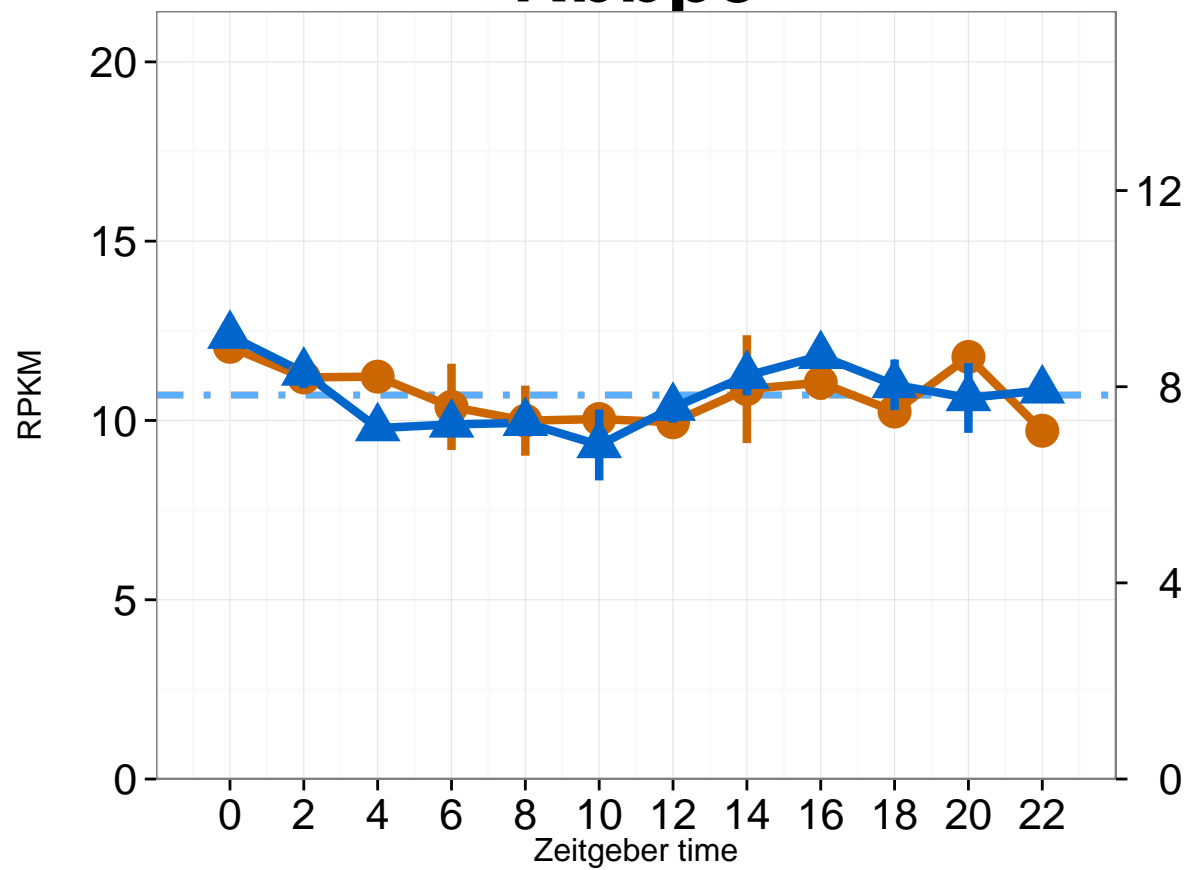

## Rbbp5

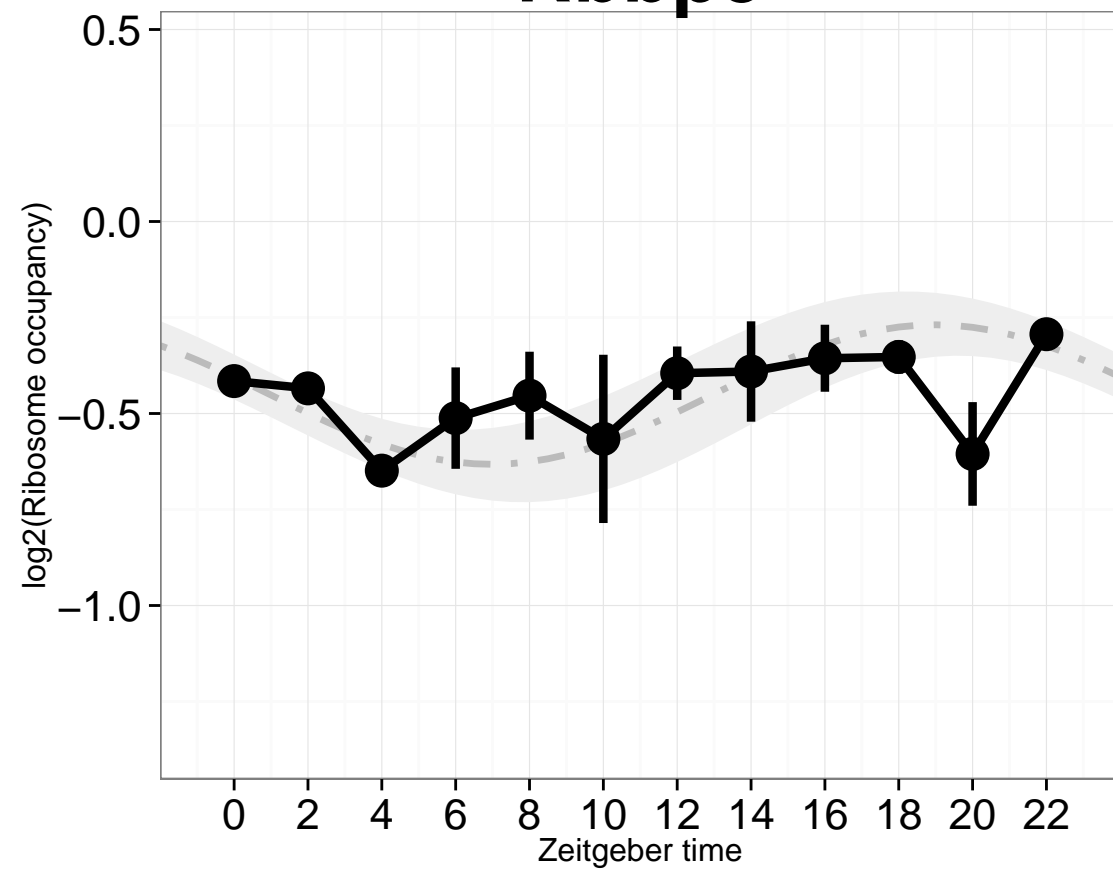

Supplement: SuppDataset_1.zip [file Rbbp5_set_A.pdf › Supplemental Dataset 1/A-mRNA_nonrhyth_translation_nonrhyth/Rbbp5_set_A.pdf]

# Rbbp6

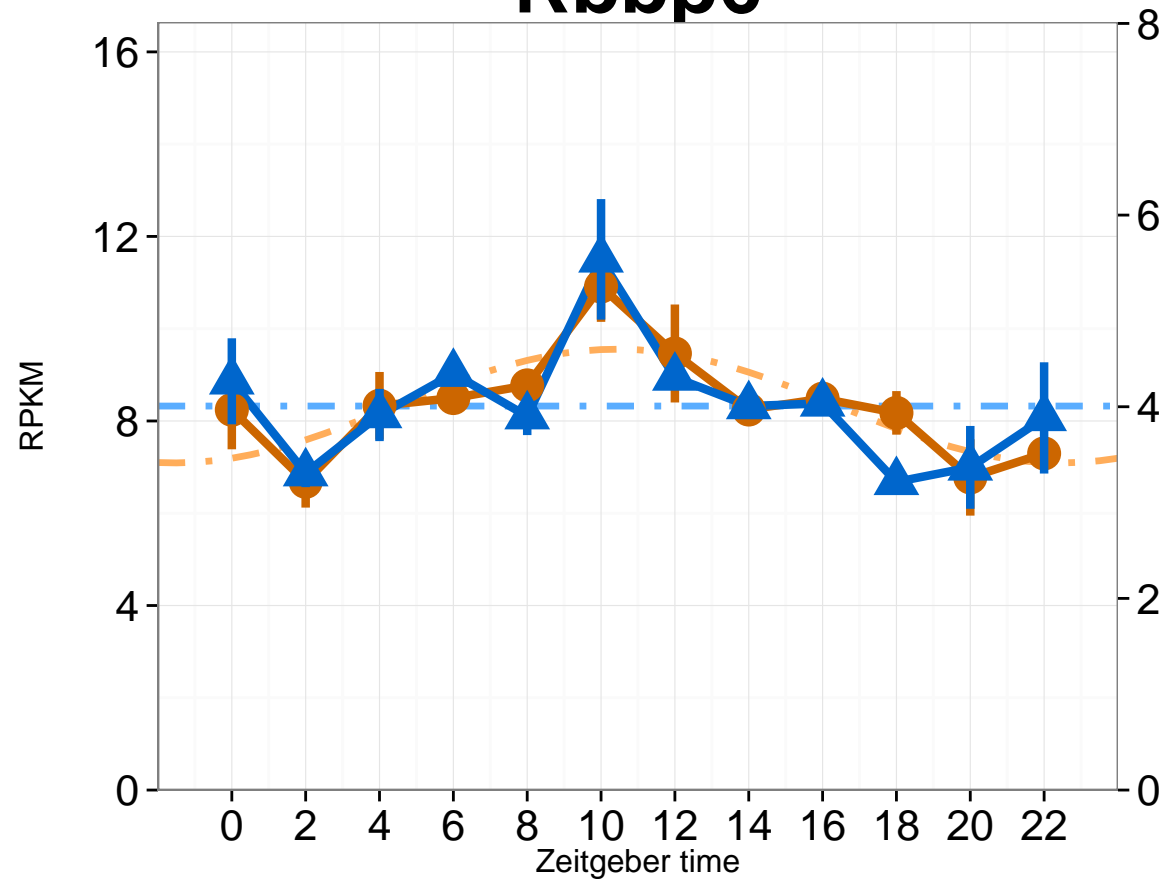

# Rbbp6

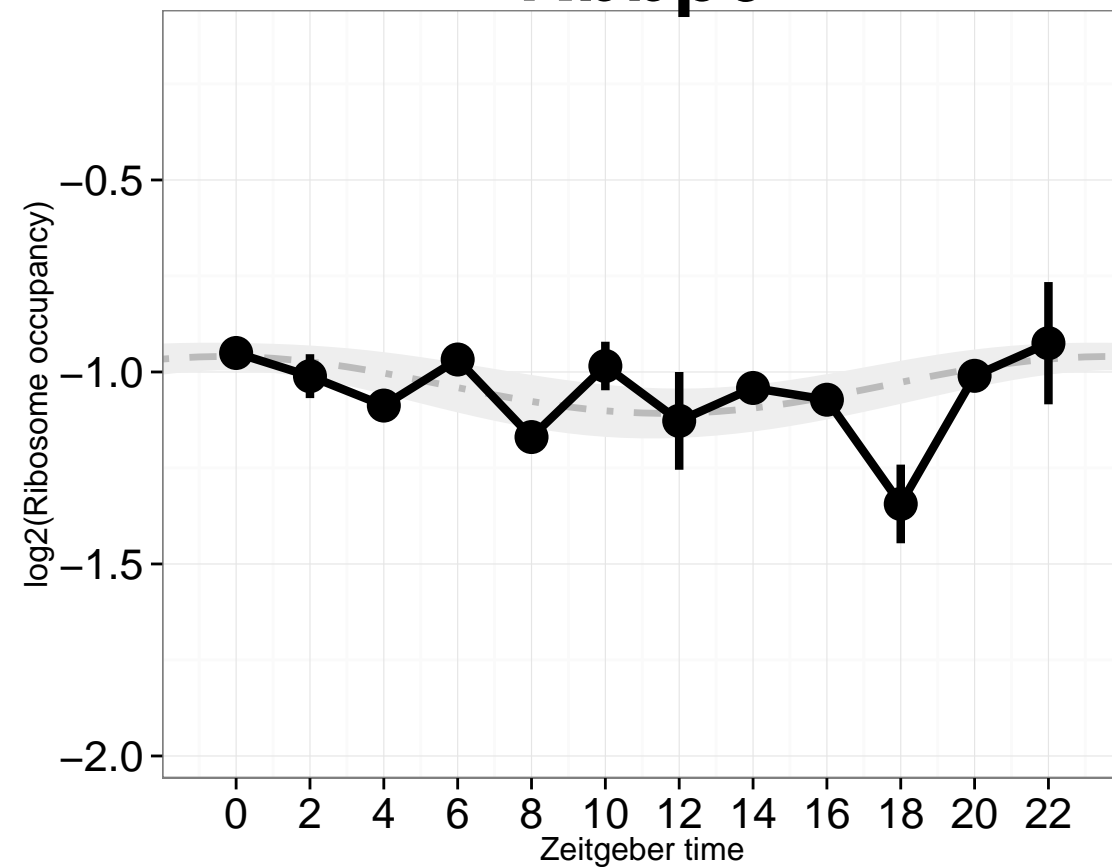

Supplement: SuppDataset_1.zip [file Rbbp6_set_A.pdf › Supplemental Dataset 1/A-mRNA_nonrhyth_translation_nonrhyth/Rbbp6_set_A.pdf]

## Rbbp7

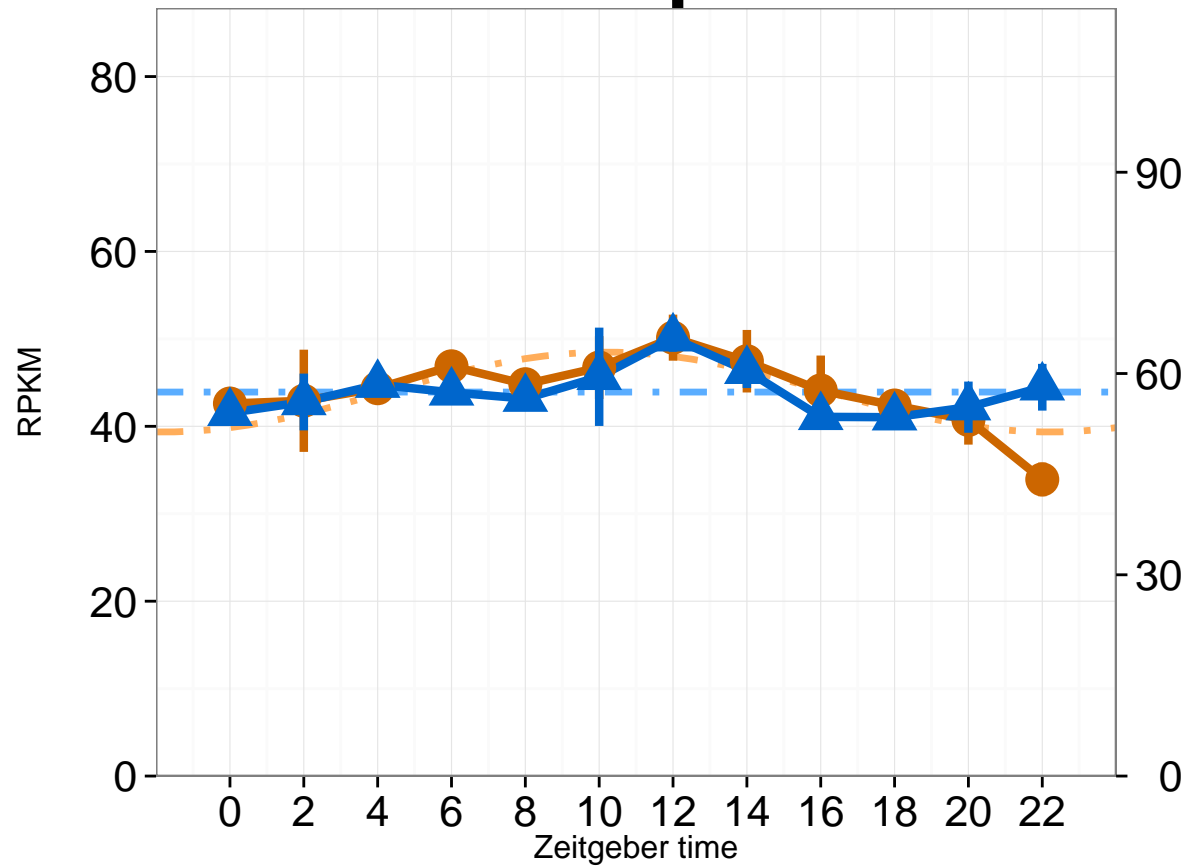

## Rbbp7

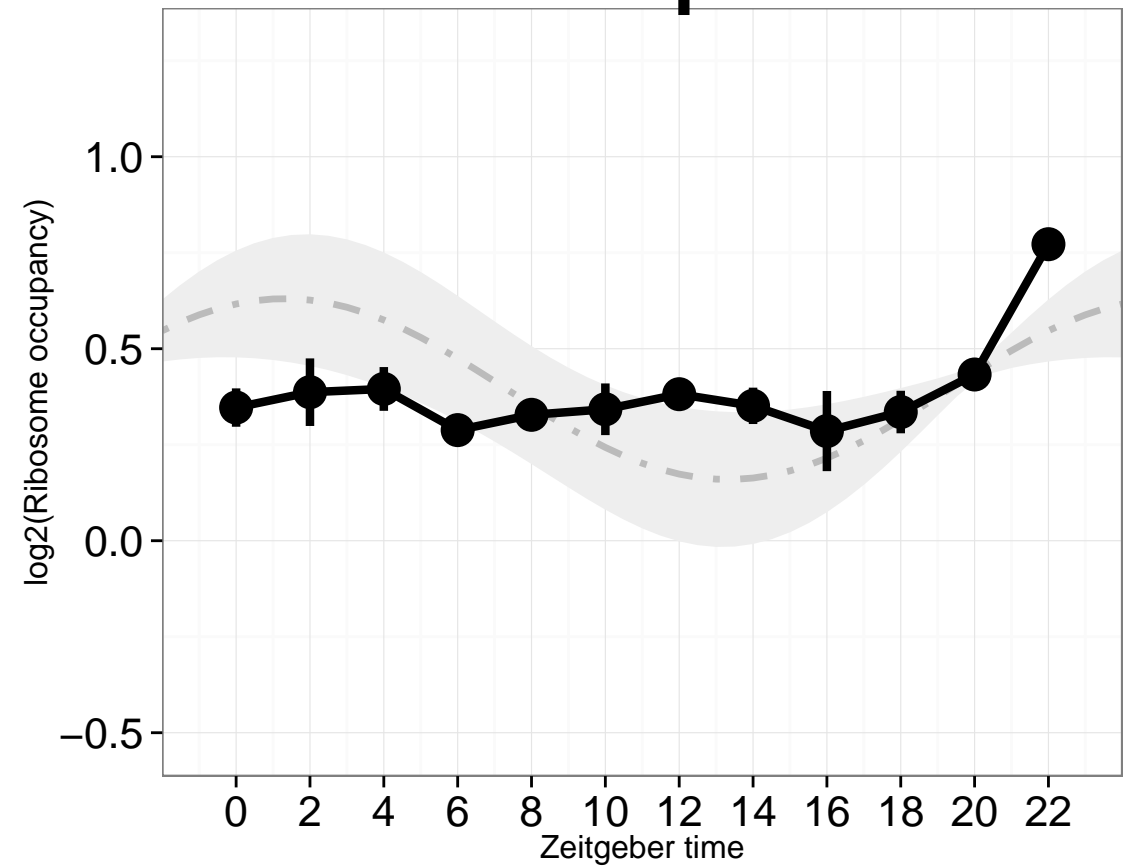

Supplement: SuppDataset_1.zip [file Rbbp7_set_A.pdf › Supplemental Dataset 1/A-mRNA_nonrhyth_translation_nonrhyth/Rbbp7_set_A.pdf]

# Rbck1

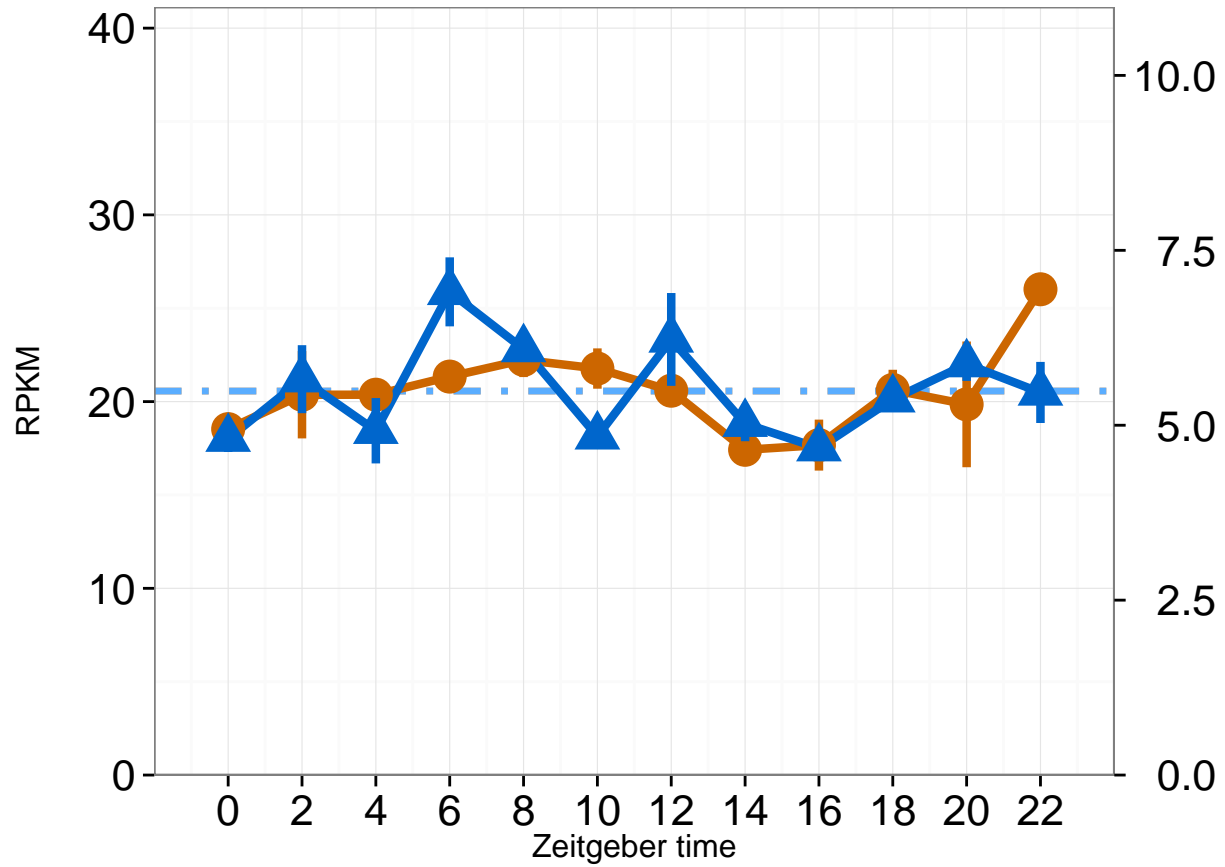

# Rbck1

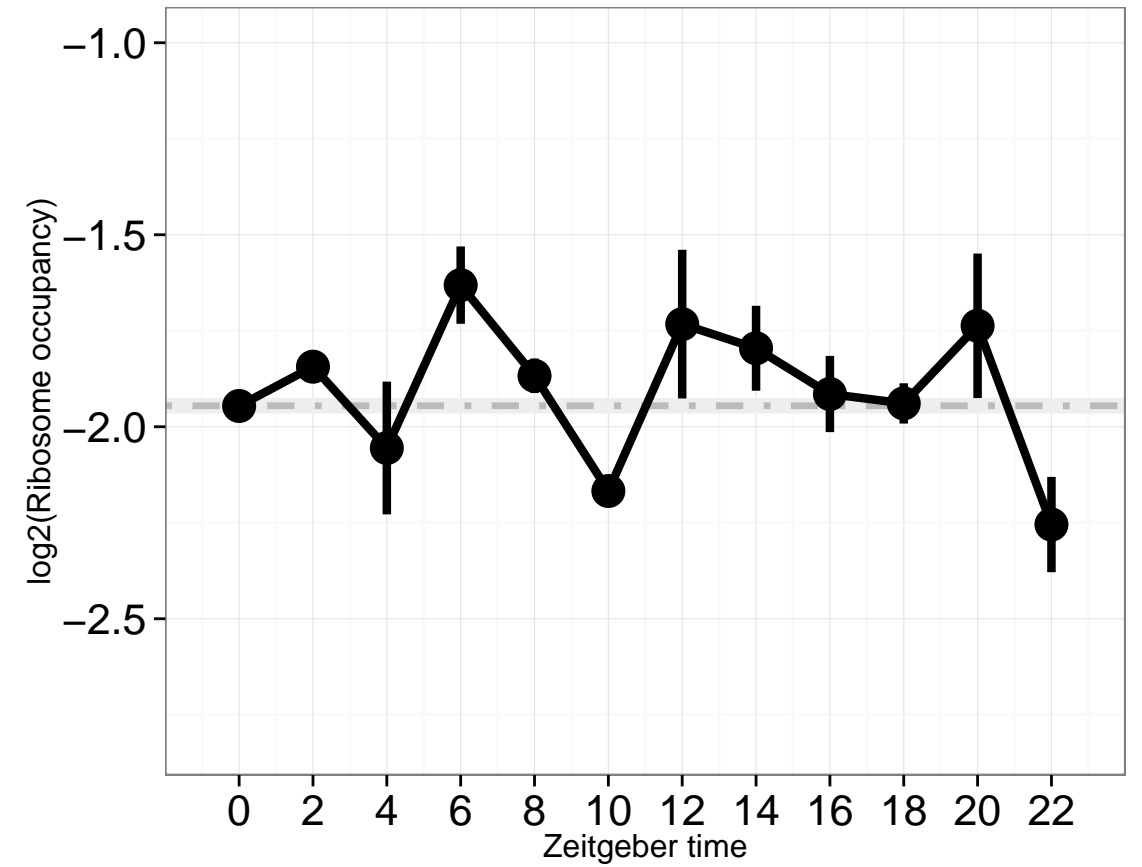

Supplement: SuppDataset_1.zip [file Rbck1_set_A.pdf › Supplemental Dataset 1/A-mRNA_nonrhyth_translation_nonrhyth/Rbck1_set_A.pdf]

## Rbfa

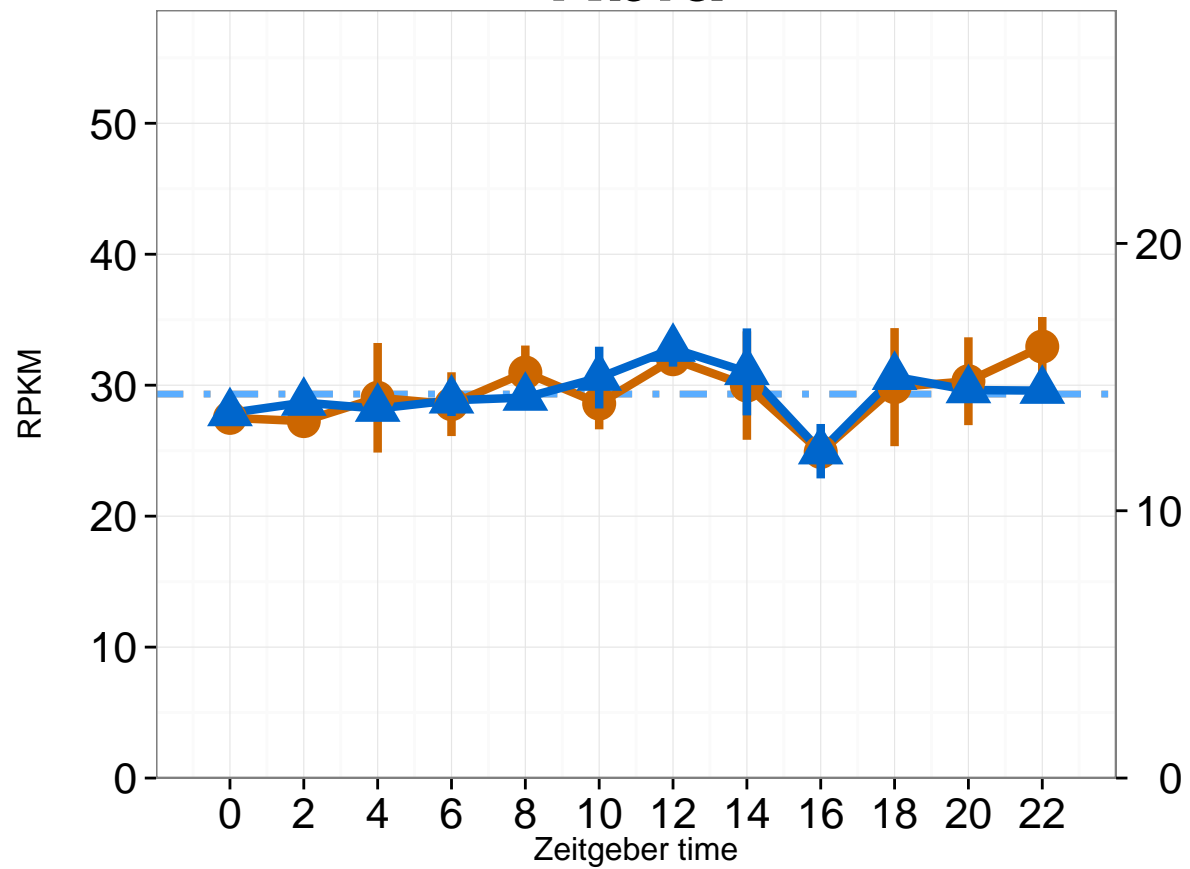

## Rbfa

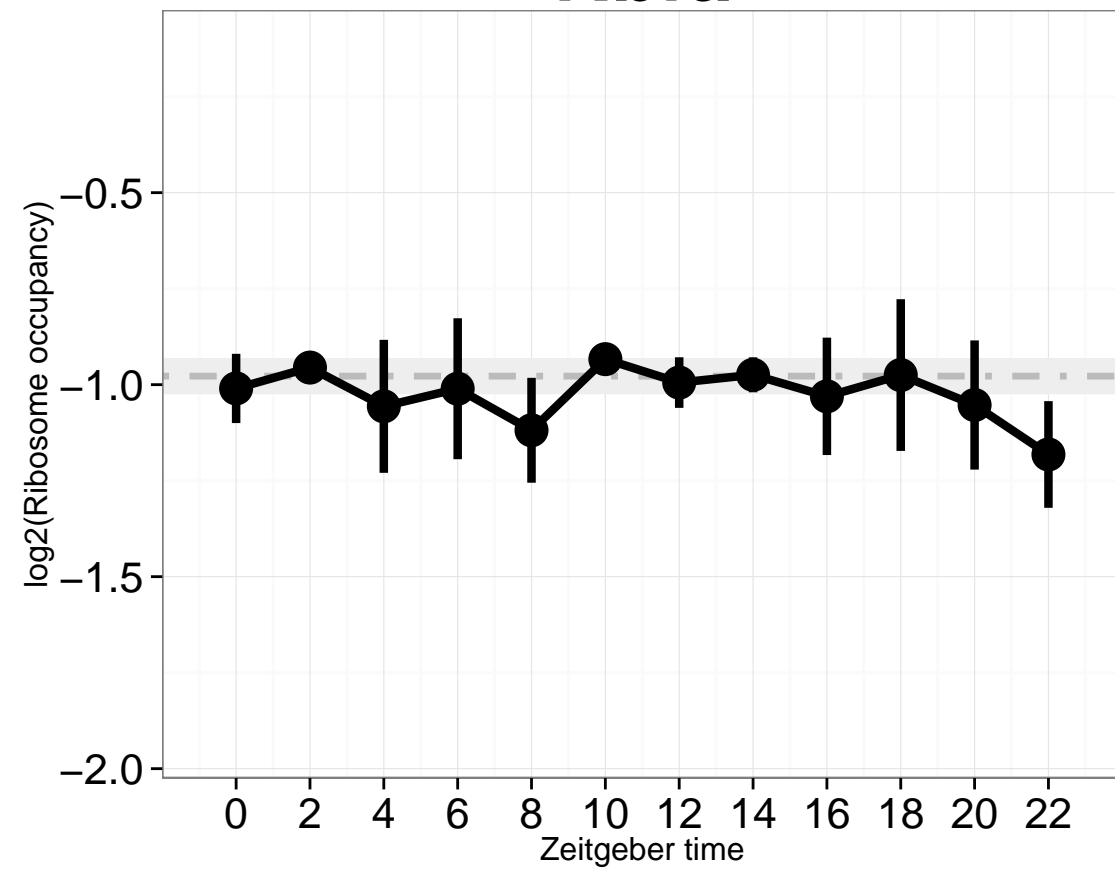

Supplement: SuppDataset_1.zip [file Rbfa_set_A.pdf › Supplemental Dataset 1/A-mRNA_nonrhyth_translation_nonrhyth/Rbfa_set_A.pdf]

## Rbfox2

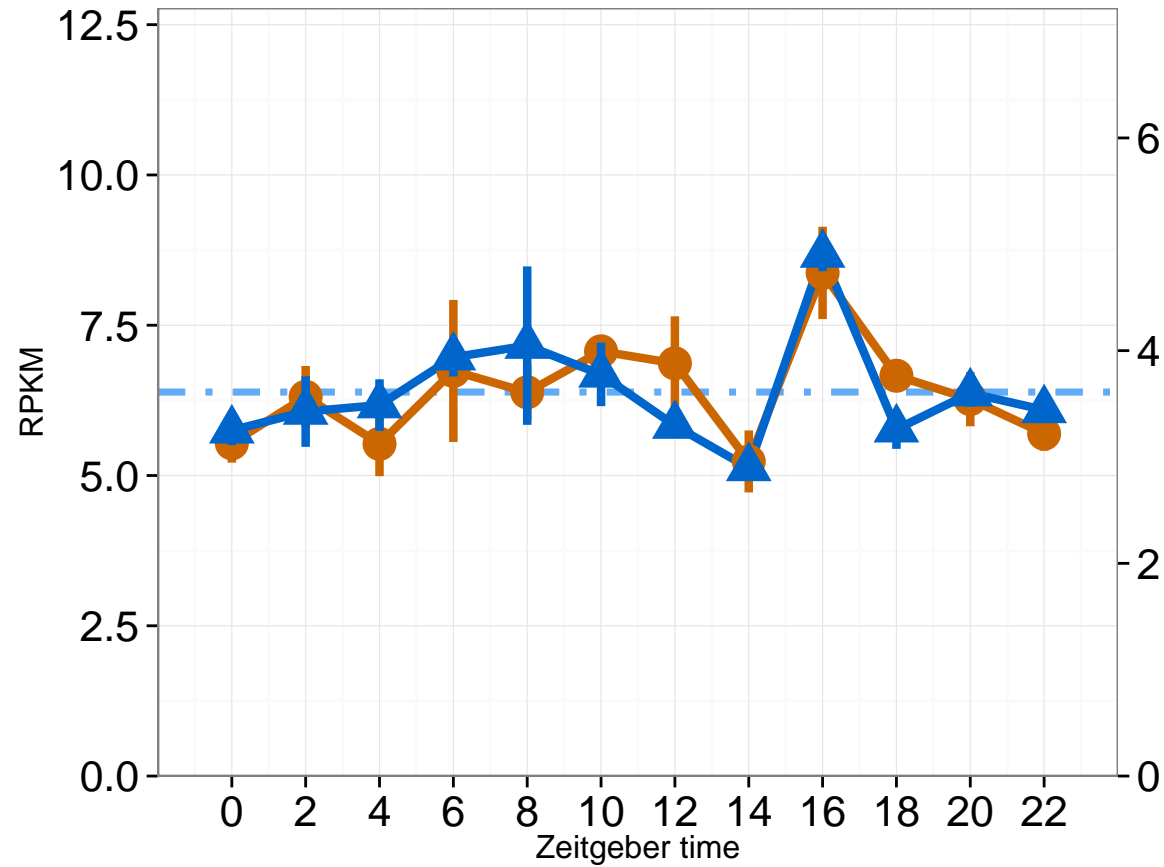

## Rbfox2

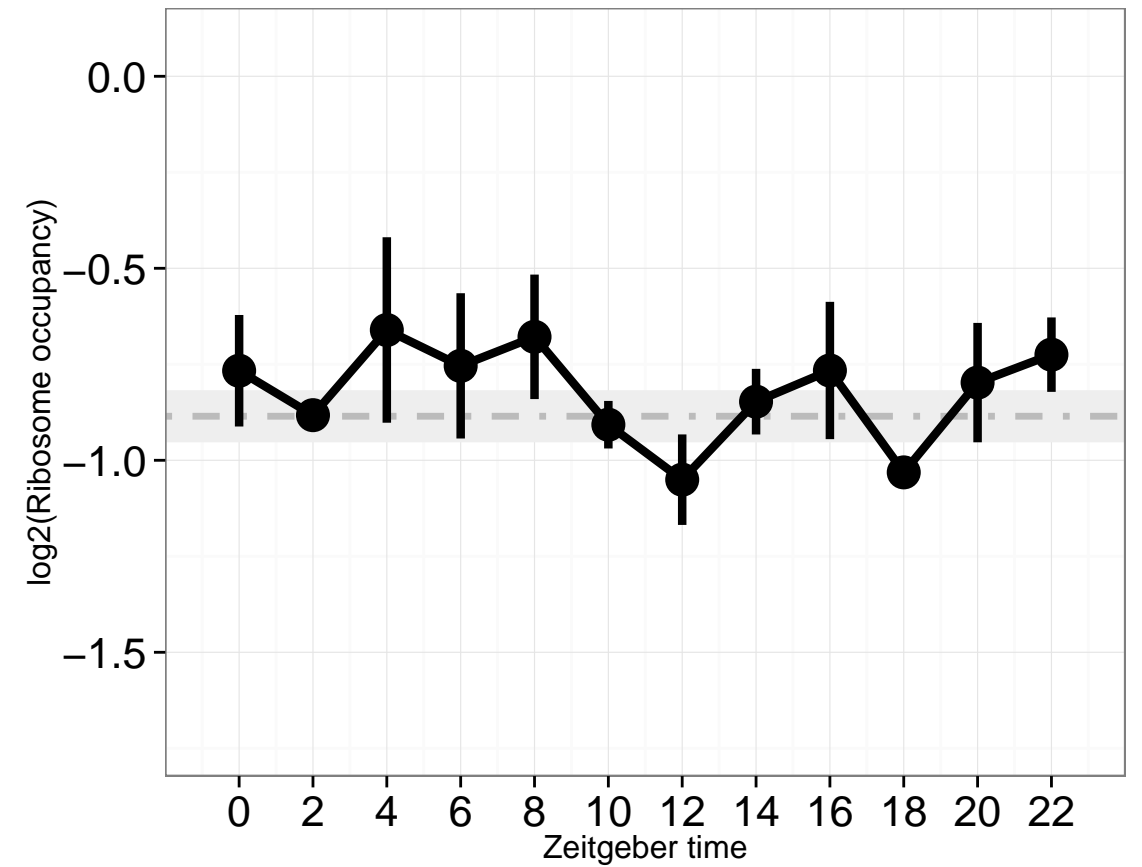

Supplement: SuppDataset_1.zip [file Rbfox2_set_A.pdf › Supplemental Dataset 1/A-mRNA_nonrhyth_translation_nonrhyth/Rbfox2_set_A.pdf]

# Rbks

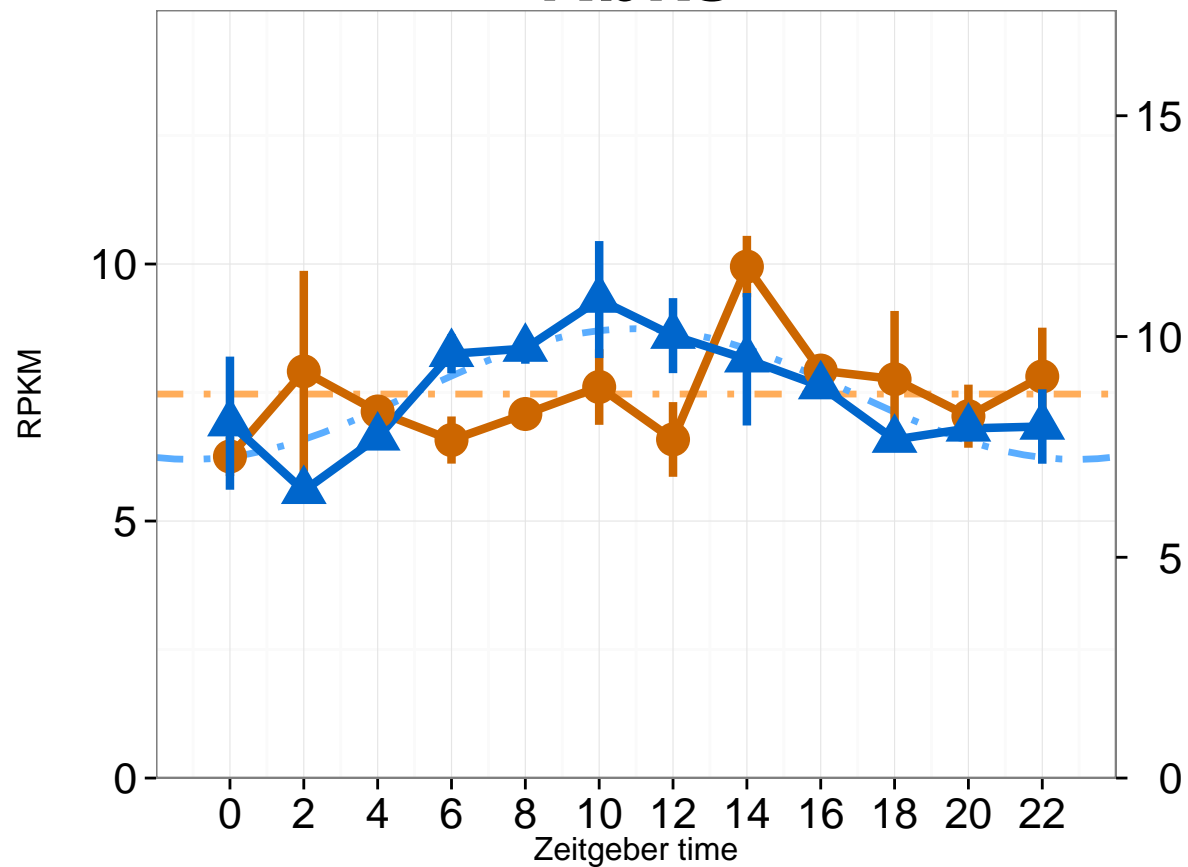

# Rbks

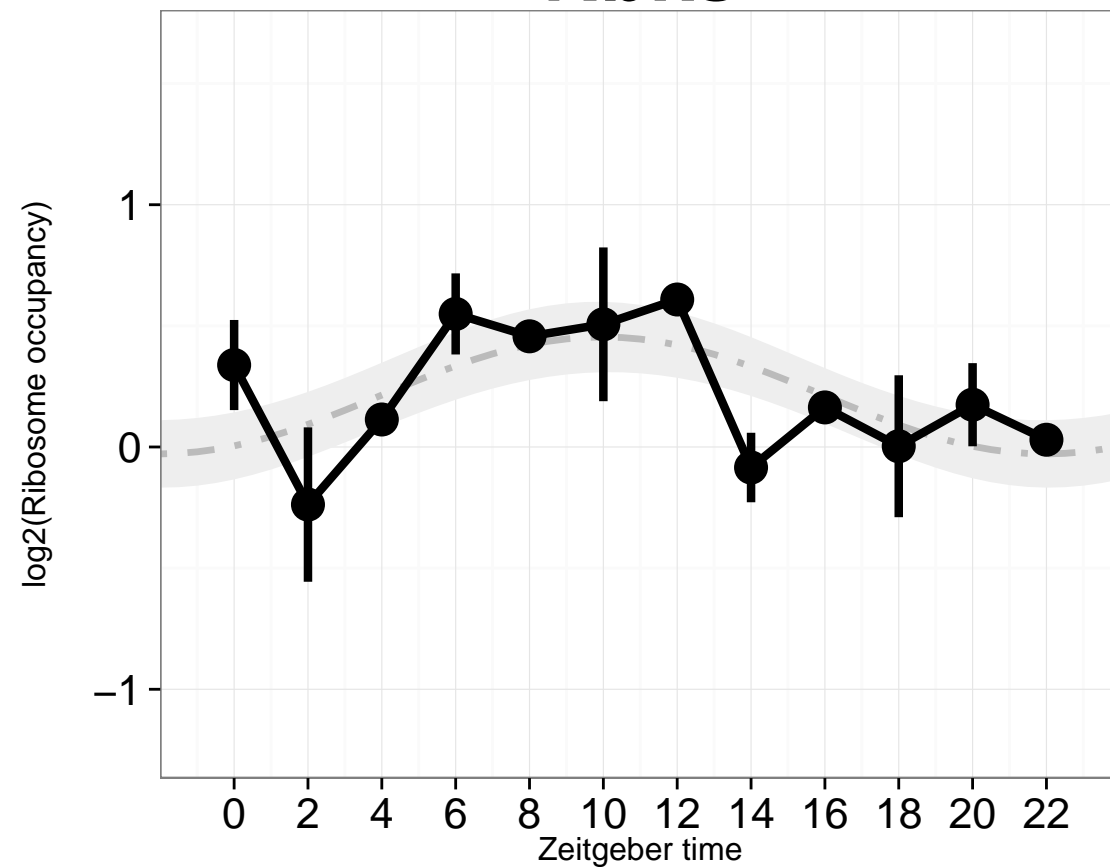

Supplement: SuppDataset_1.zip [file Rbks_set_A.pdf › Supplemental Dataset 1/A-mRNA_nonrhyth_translation_nonrhyth/Rbks_set_A.pdf]

## Rbl1

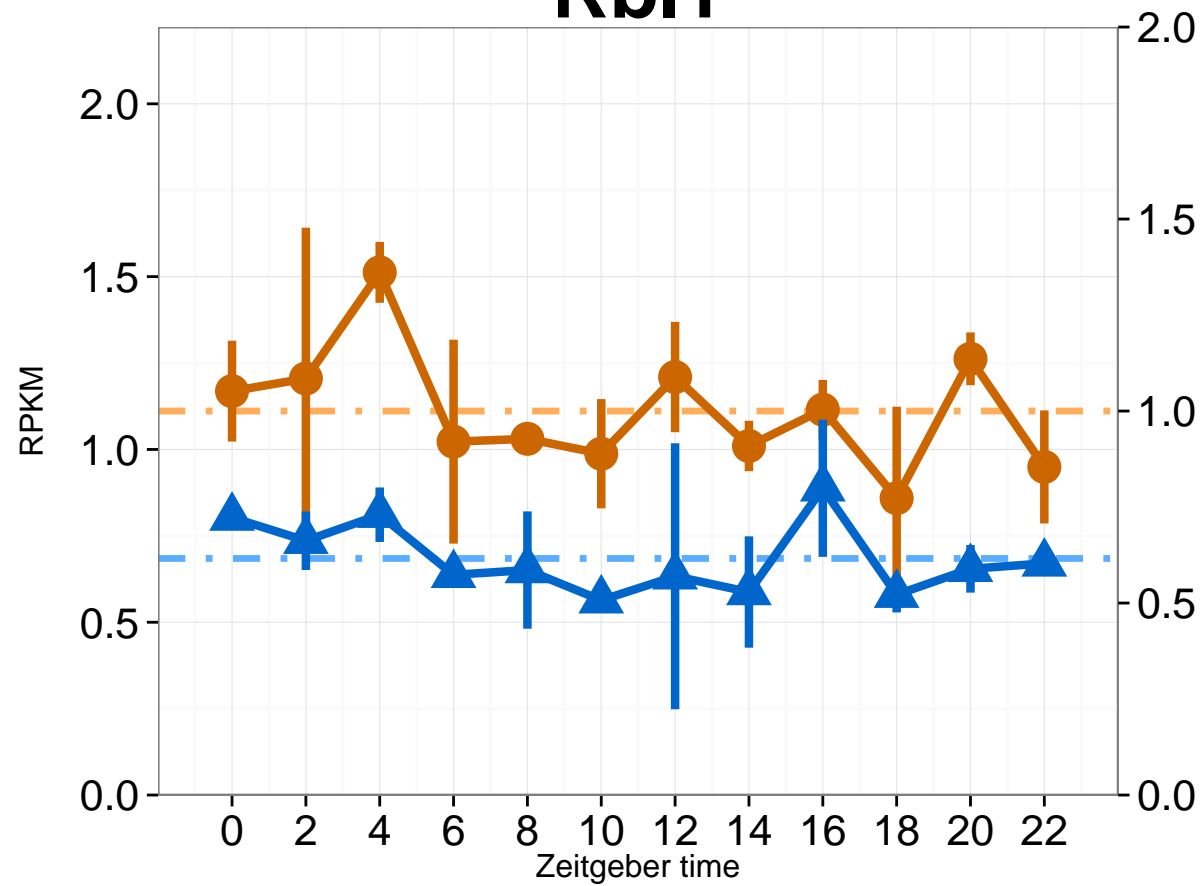

## Rbl1

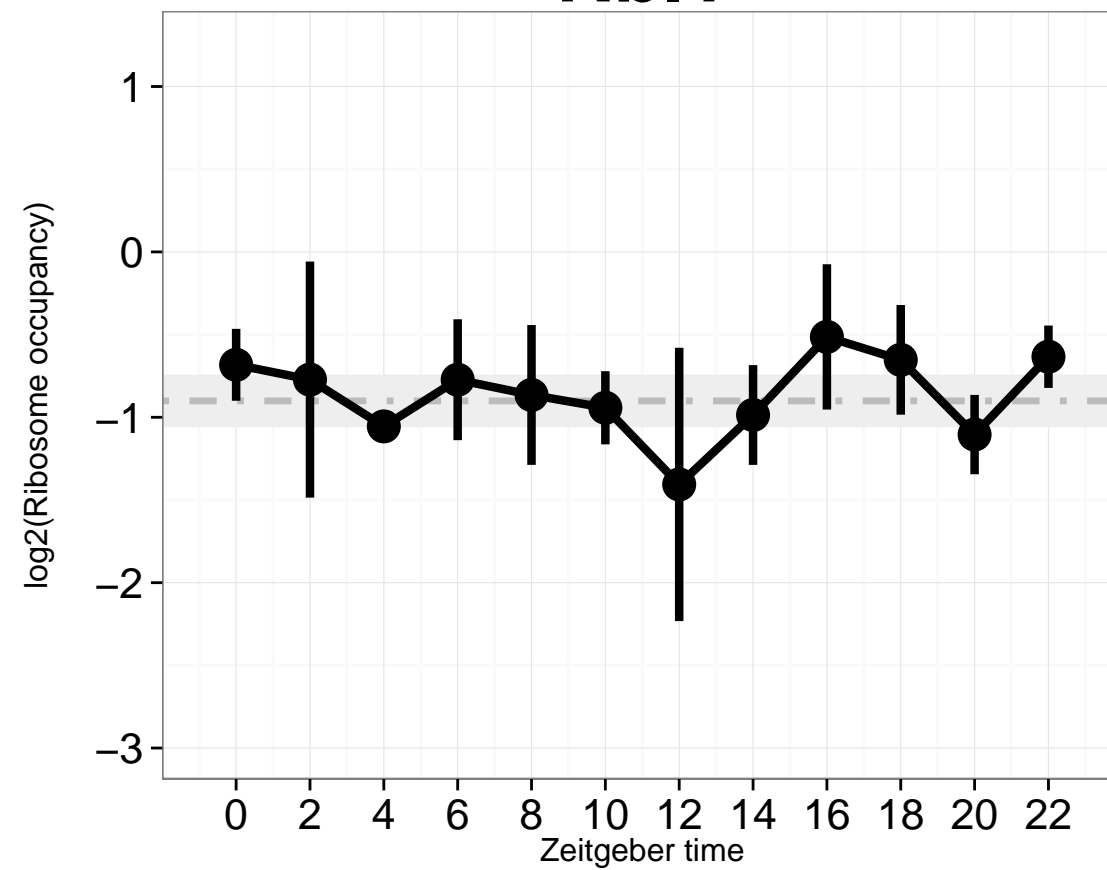

Supplement: SuppDataset_1.zip [file Rbl1_set_A.pdf › Supplemental Dataset 1/A-mRNA_nonrhyth_translation_nonrhyth/Rbl1_set_A.pdf]

## Rbl2

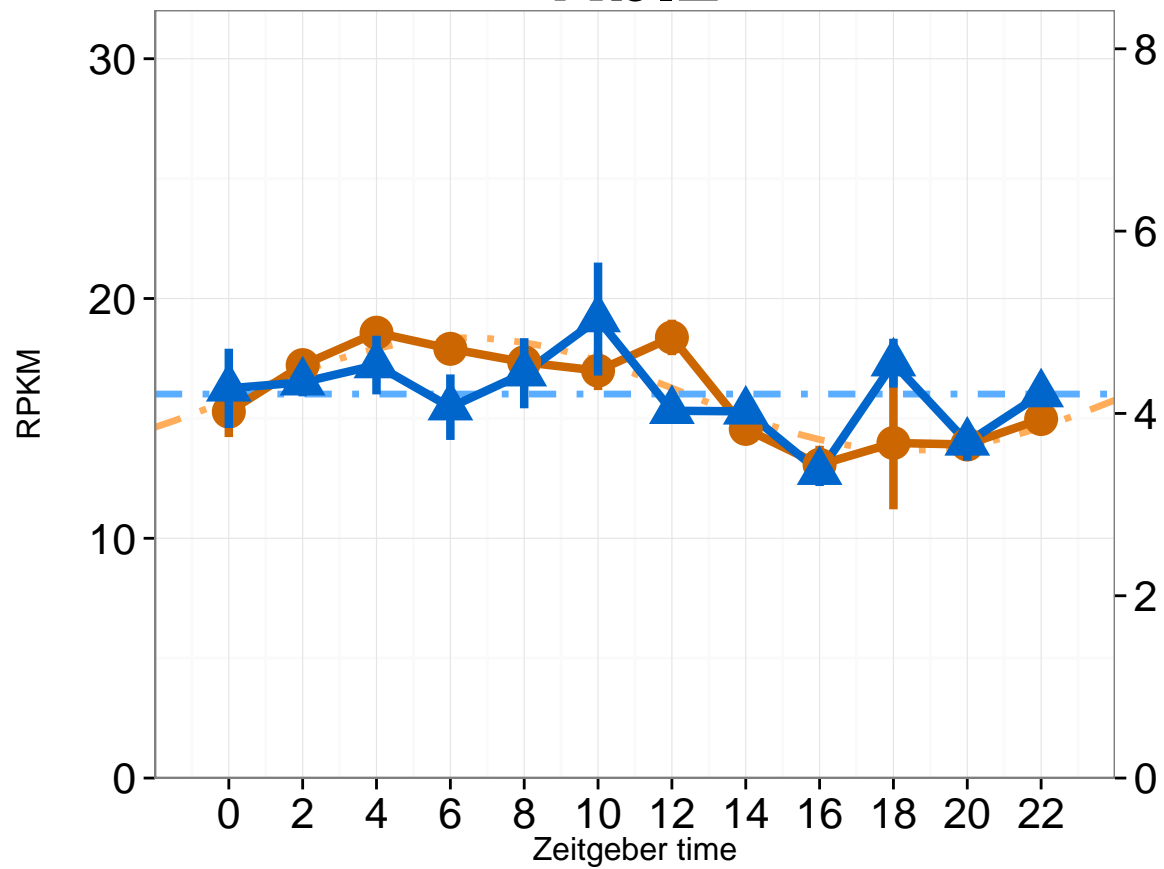

## Rbl2

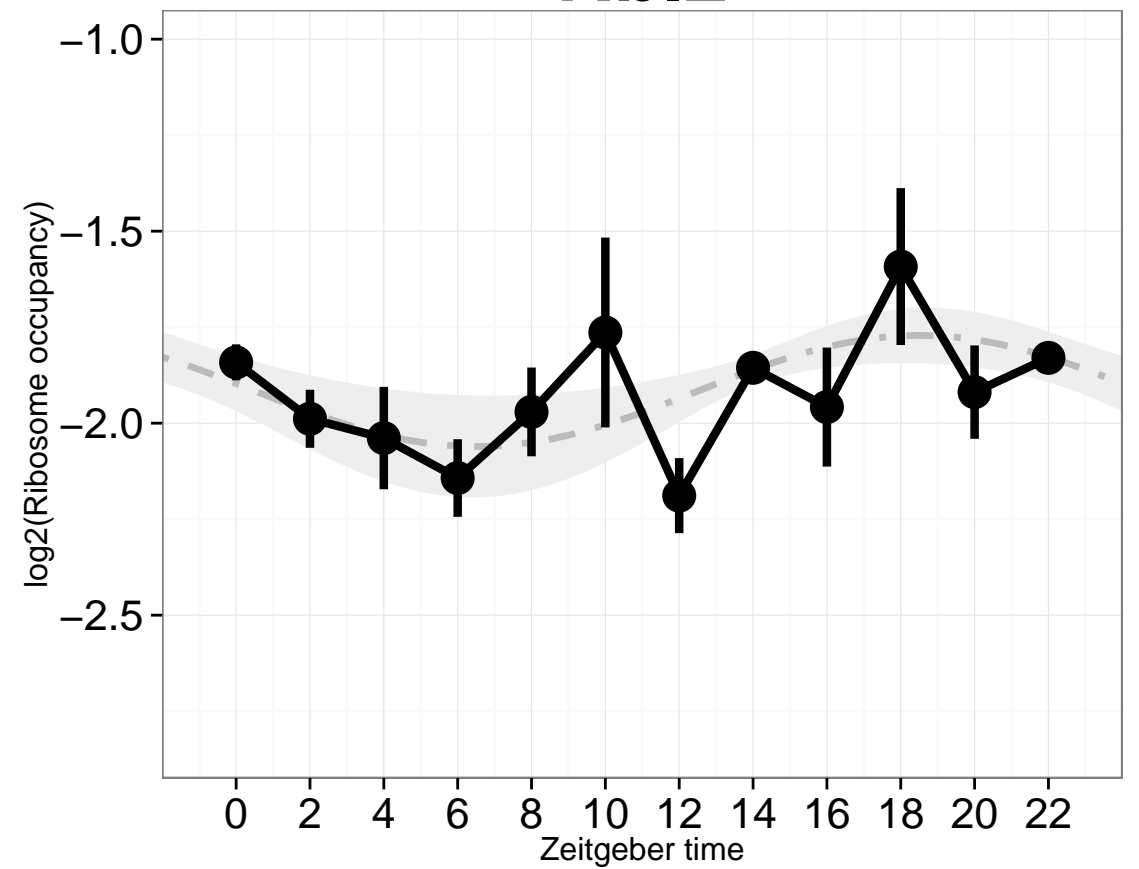

Supplement: SuppDataset_1.zip [file Rbl2_set_A.pdf › Supplemental Dataset 1/A-mRNA_nonrhyth_translation_nonrhyth/Rbl2_set_A.pdf]

# Rbm10

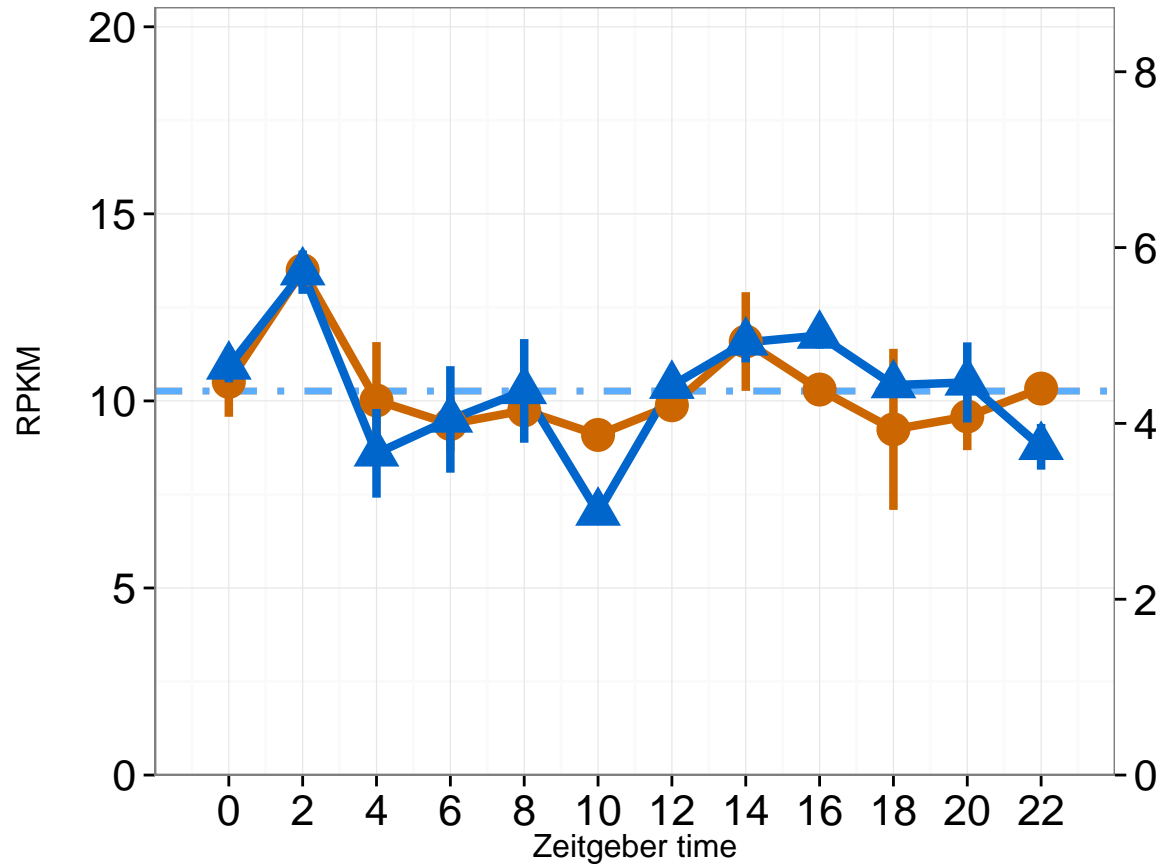

# Rbm10

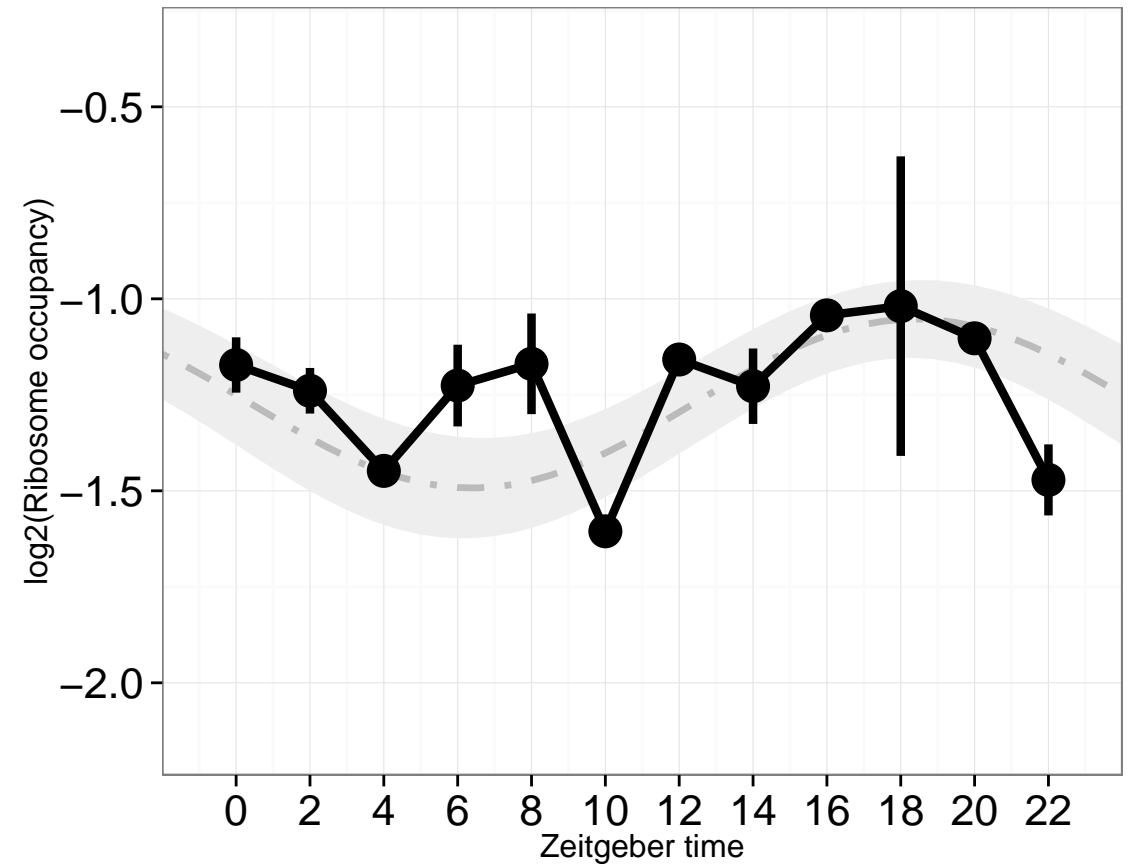

Supplement: SuppDataset_1.zip [file Rbm10_set_A.pdf › Supplemental Dataset 1/A-mRNA_nonrhyth_translation_nonrhyth/Rbm10_set_A.pdf]

# Rbm12

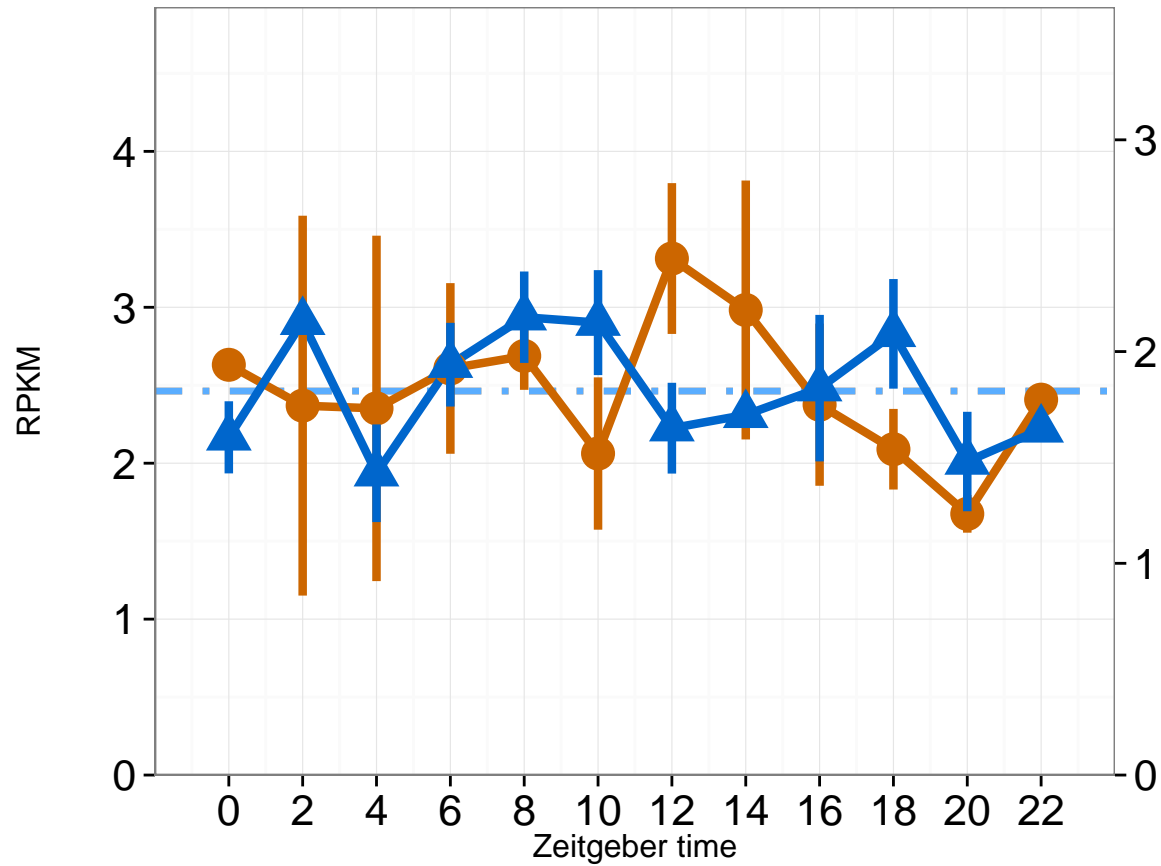

# Rbm12

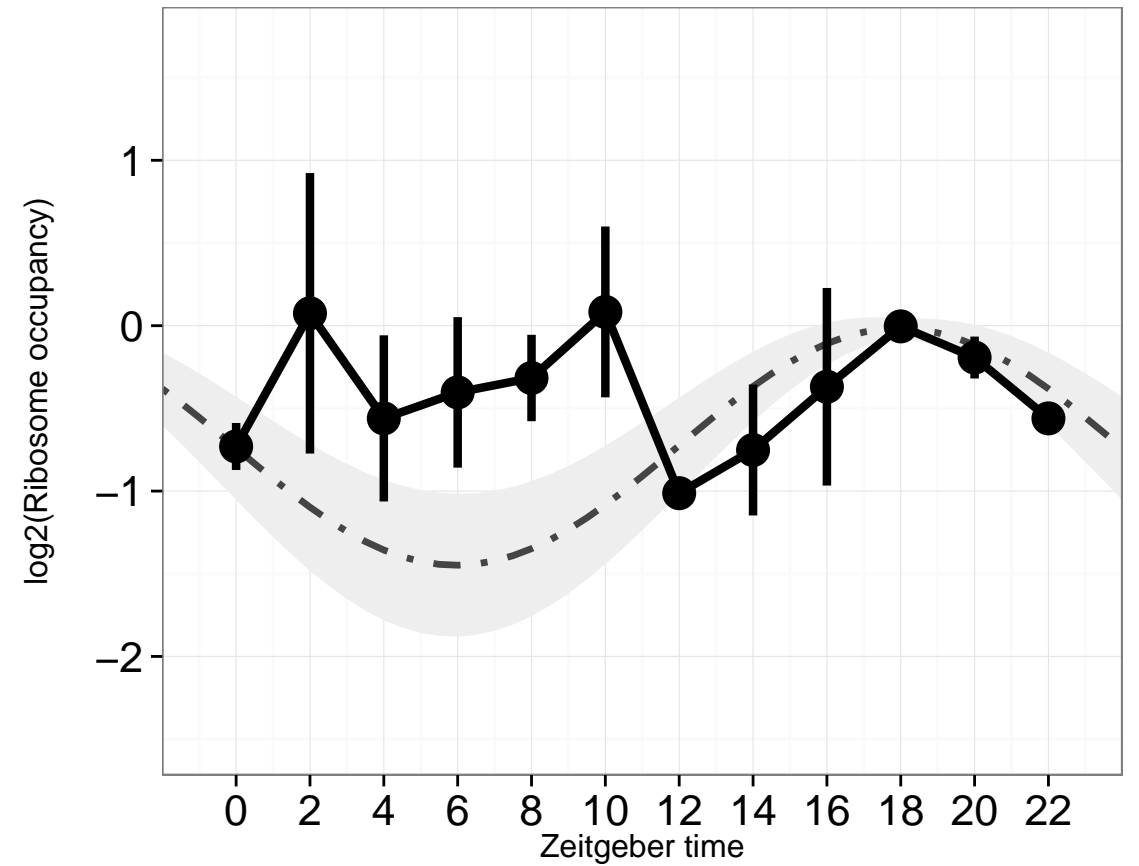

Supplement: SuppDataset_1.zip [file Rbm12_set_A.pdf › Supplemental Dataset 1/A-mRNA_nonrhyth_translation_nonrhyth/Rbm12_set_A.pdf]

# Rbm15

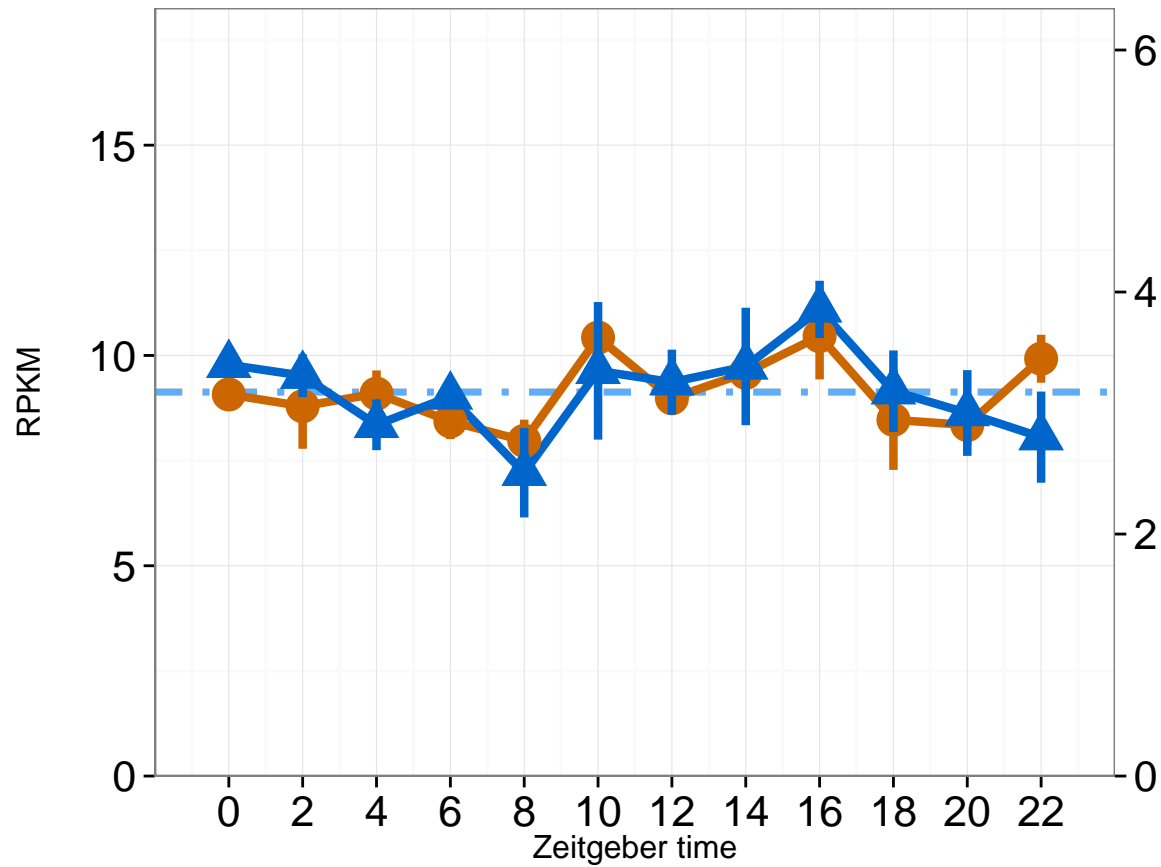

# Rbm15

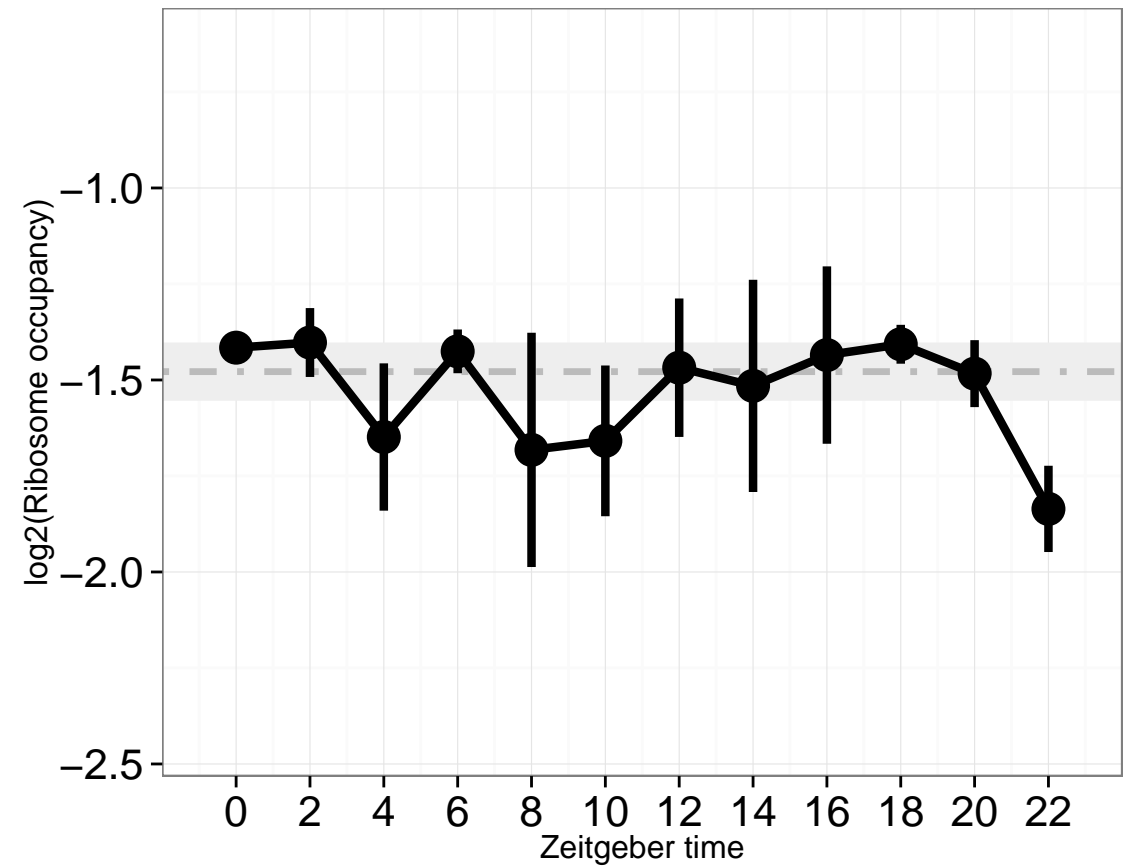

Supplement: SuppDataset_1.zip [file Rbm15_set_A.pdf › Supplemental Dataset 1/A-mRNA_nonrhyth_translation_nonrhyth/Rbm15_set_A.pdf]
