# Supplementary figures and images for: Ribosome profiling reveals the rhythmic liver translatome and circadian clock regulation by upstream open reading frames (part 61 of 113)
Source: HighWire-hosted journal article supplement (doi:10.1101/gr.195404.115), 2015-10-20

## Rbm15b

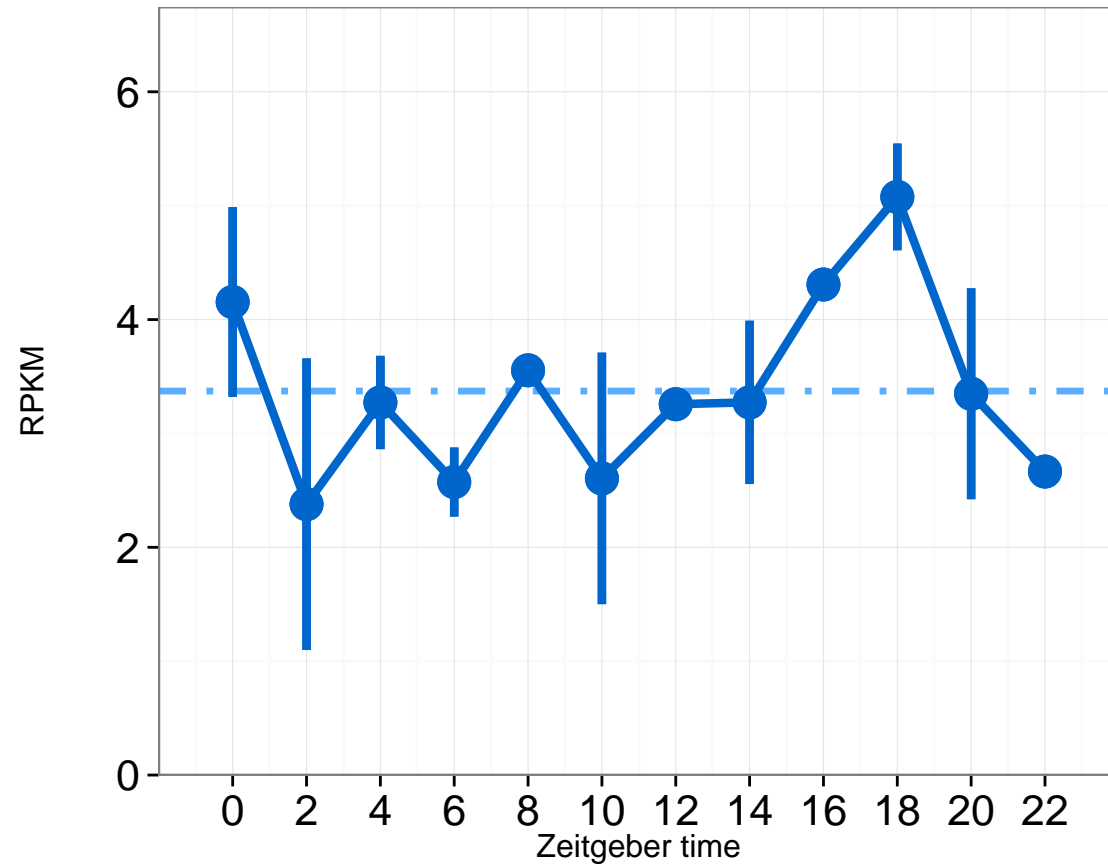

## Rbm15b log2(Ribosome occupanc

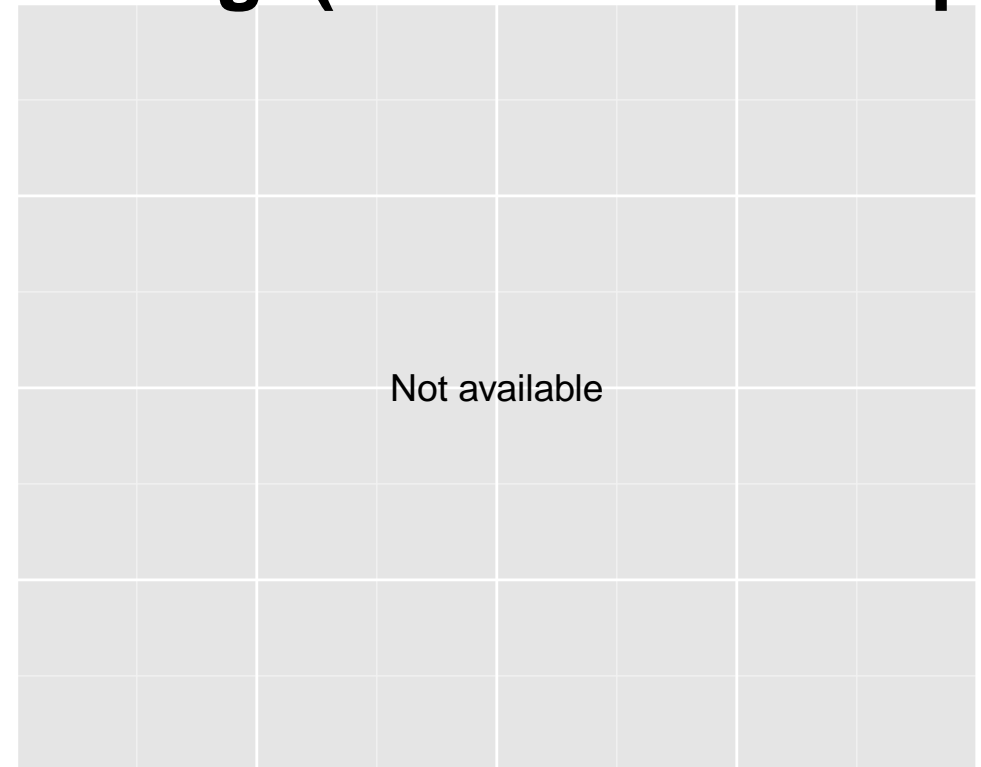

Supplement: SuppDataset_1.zip [file Rbm15b_set_A.pdf › Supplemental Dataset 1/A-mRNA_nonrhyth_translation_nonrhyth/Rbm15b_set_A.pdf]

# Rbm17

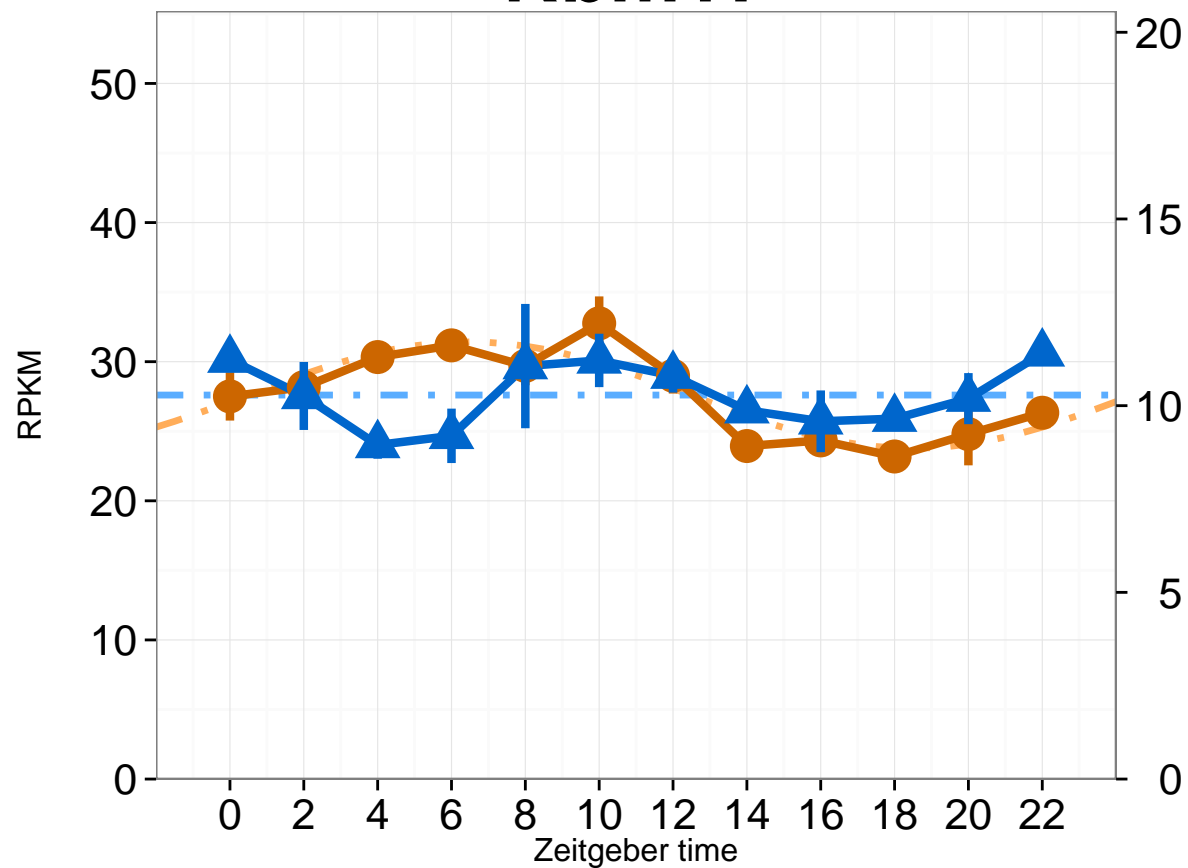

# Rbm17

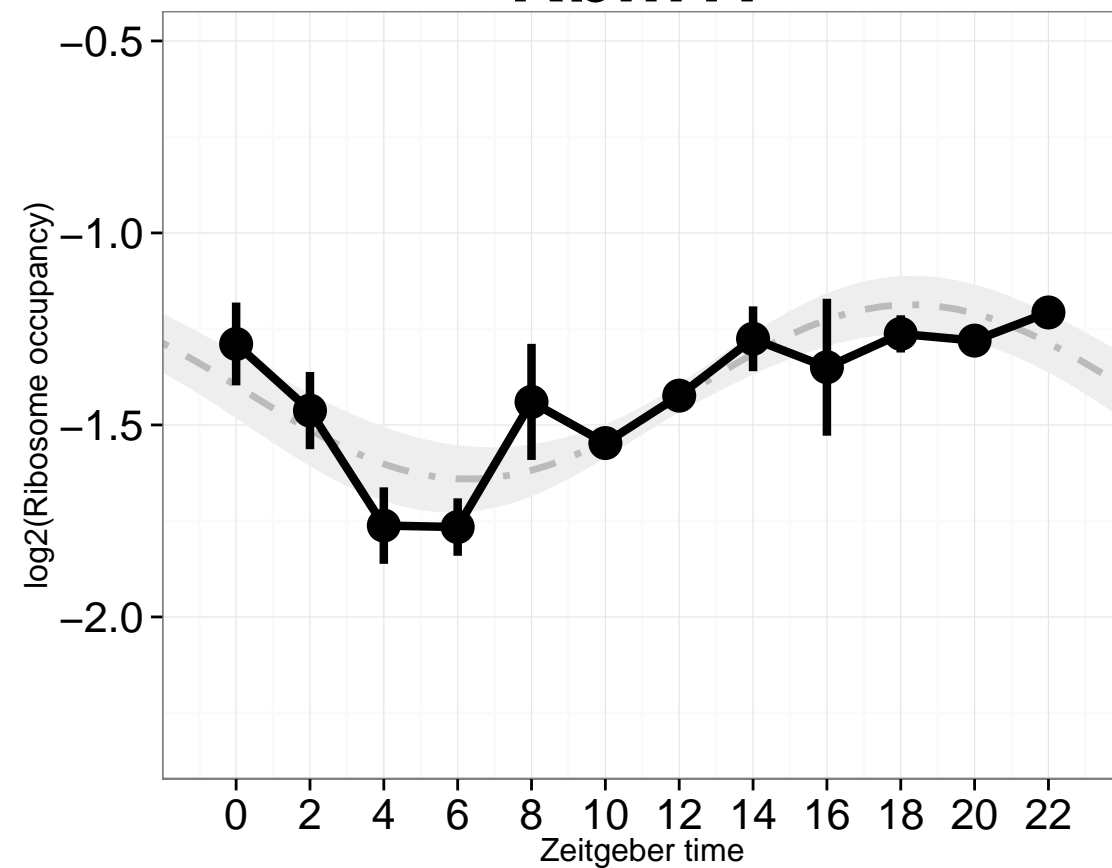

Supplement: SuppDataset_1.zip [file Rbm17_set_A.pdf › Supplemental Dataset 1/A-mRNA_nonrhyth_translation_nonrhyth/Rbm17_set_A.pdf]

# Rbm18

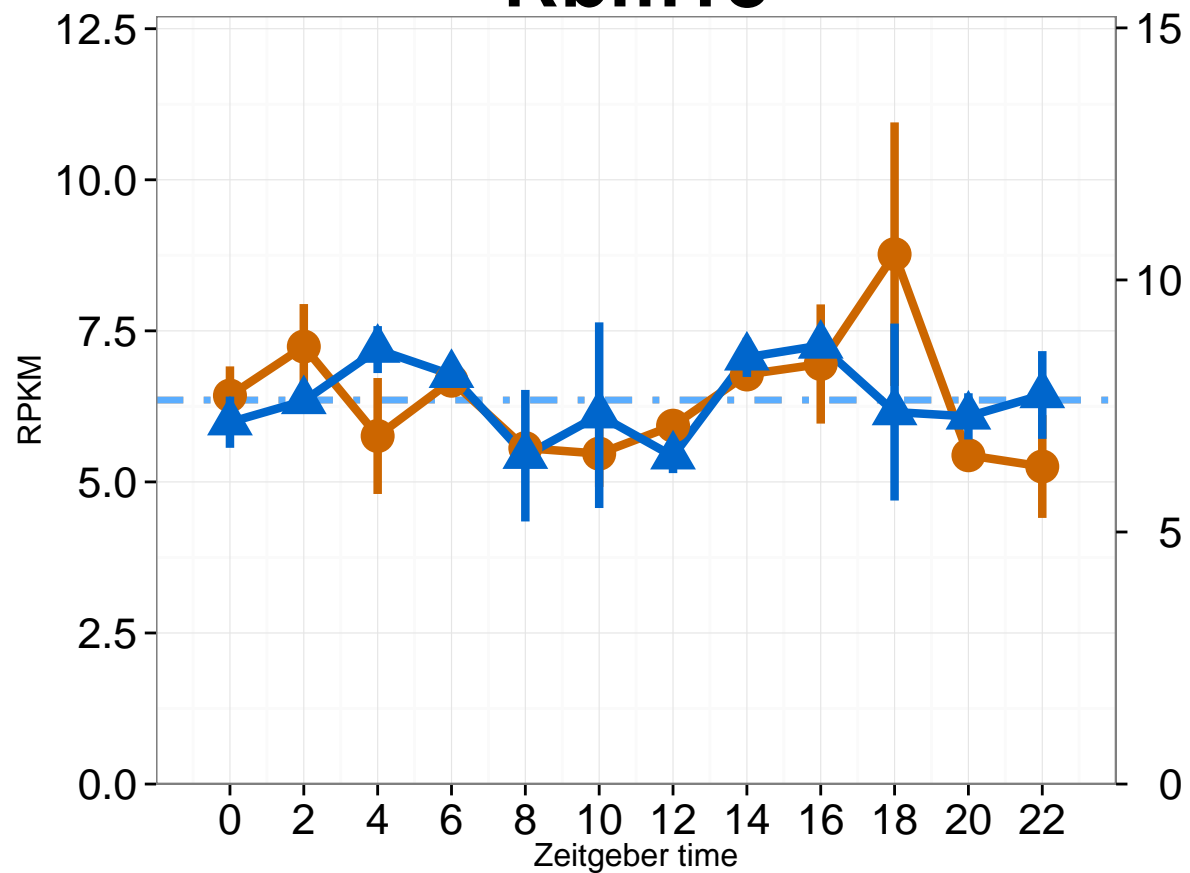

# Rbm18

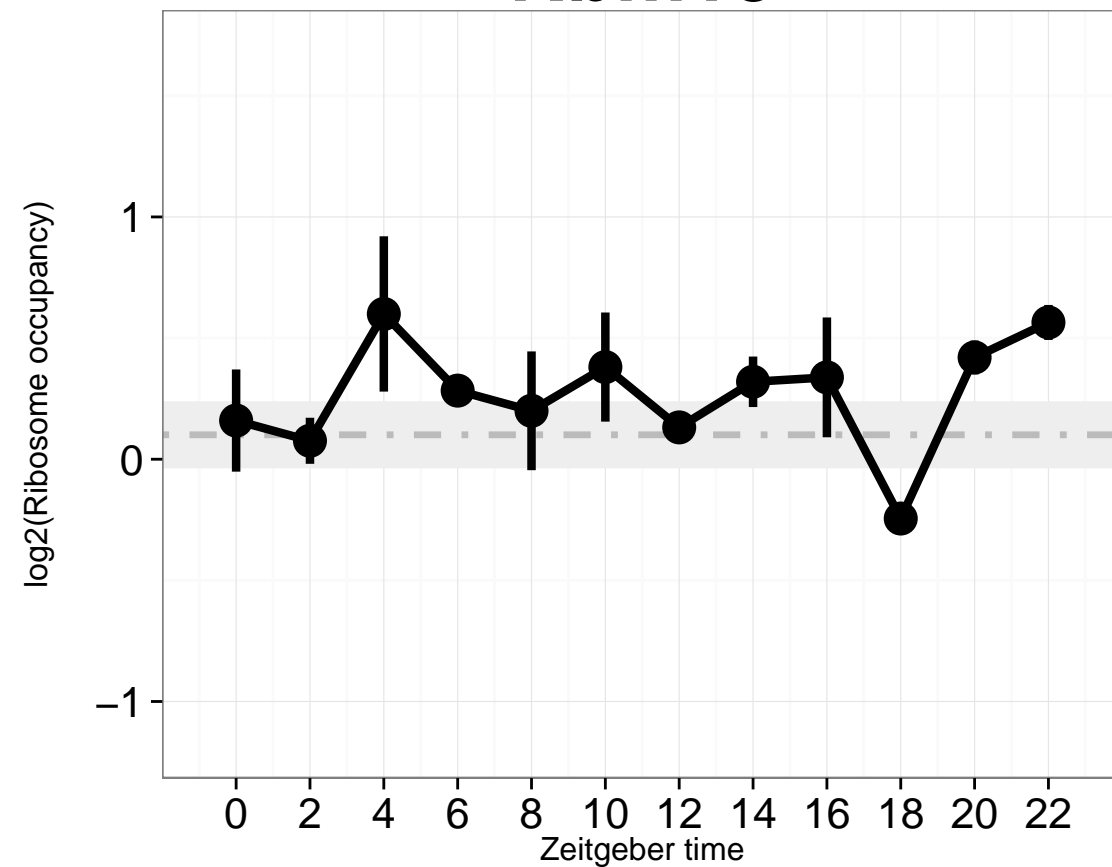

Supplement: SuppDataset_1.zip [file Rbm18_set_A.pdf › Supplemental Dataset 1/A-mRNA_nonrhyth_translation_nonrhyth/Rbm18_set_A.pdf]

# Rbm19

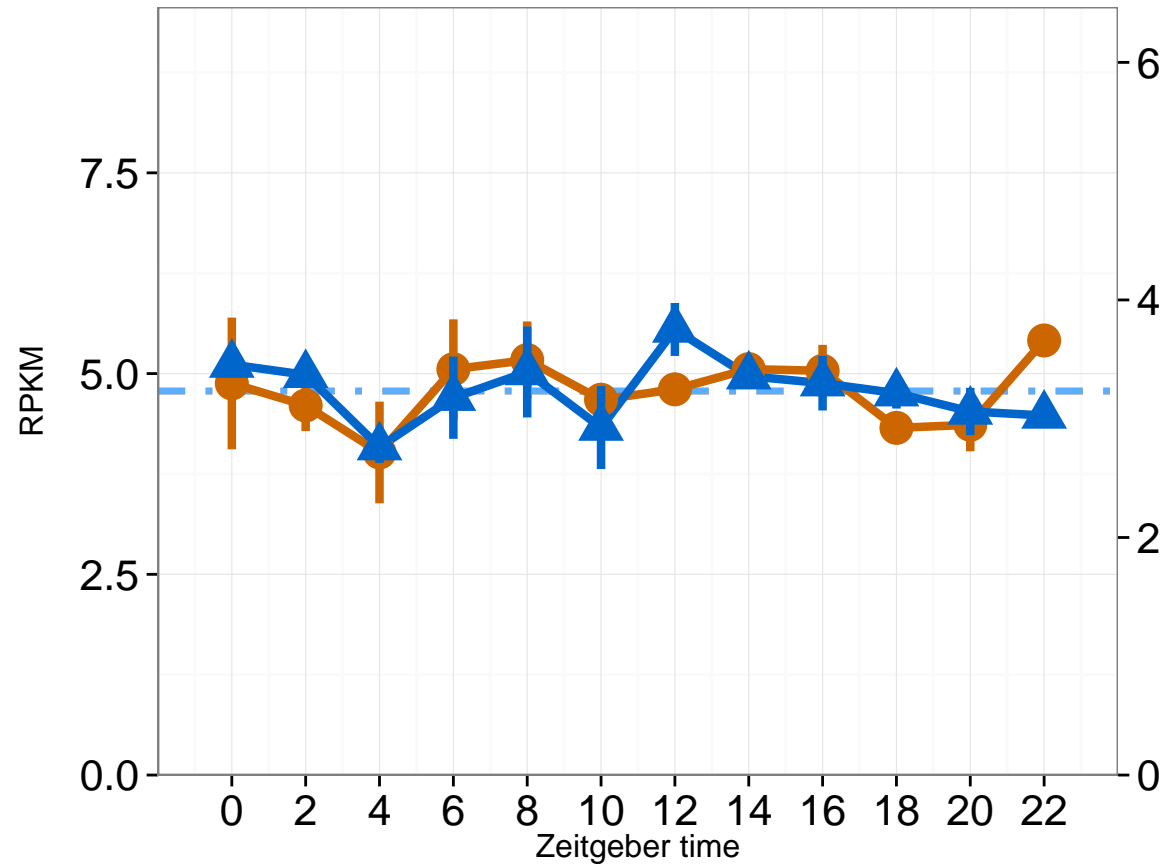

# Rbm19

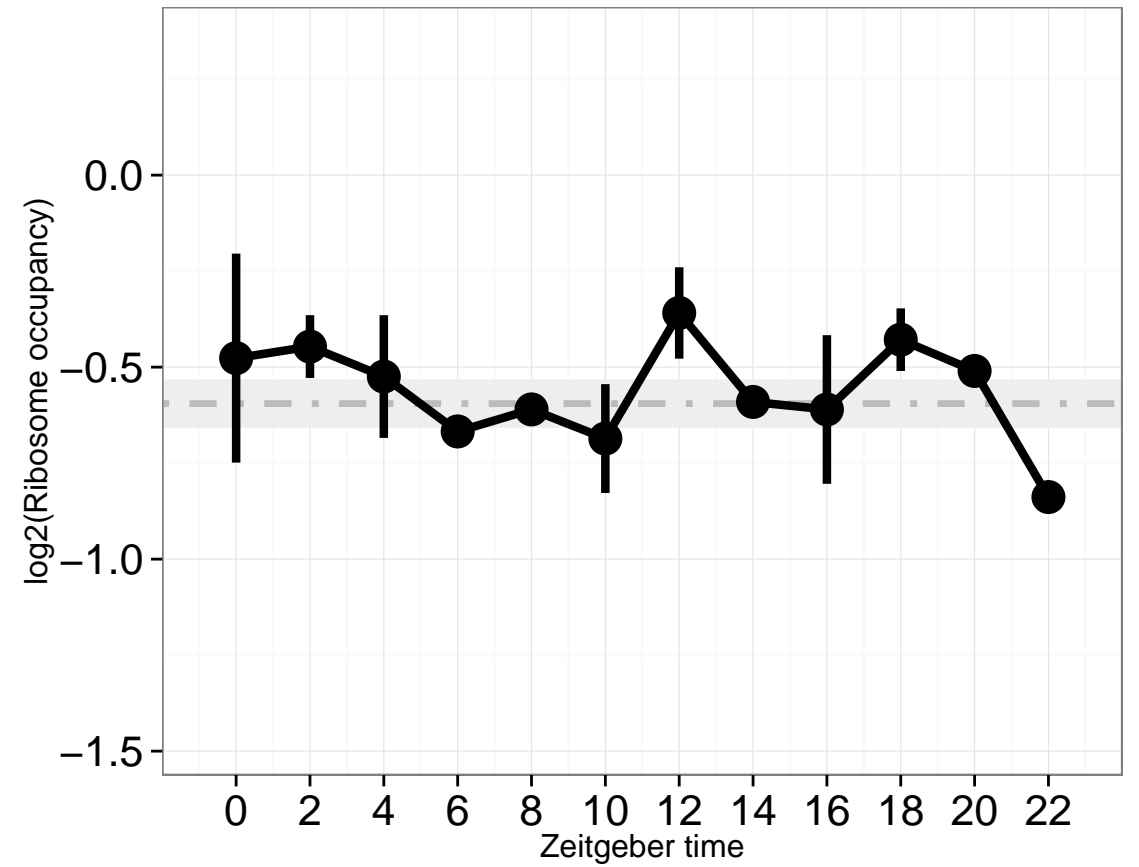

Supplement: SuppDataset_1.zip [file Rbm19_set_A.pdf › Supplemental Dataset 1/A-mRNA_nonrhyth_translation_nonrhyth/Rbm19_set_A.pdf]

# Rbm26

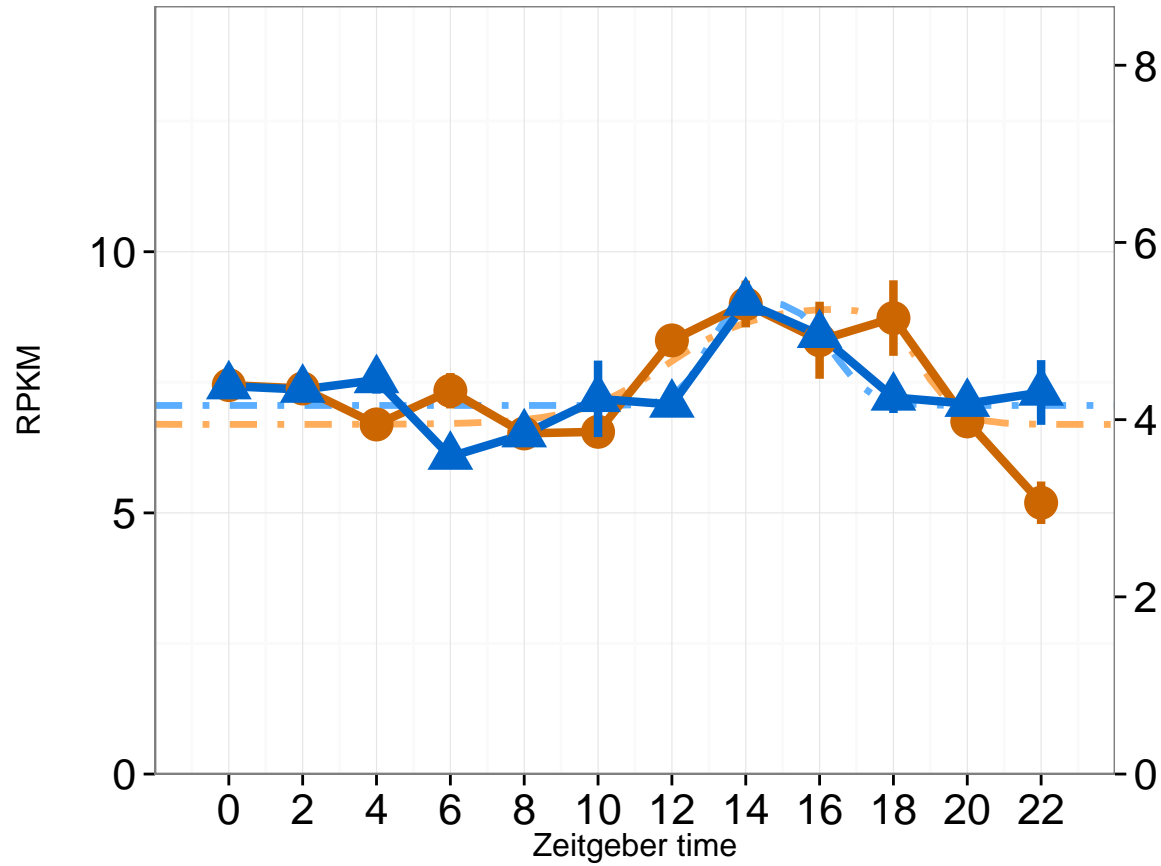

# Rbm26

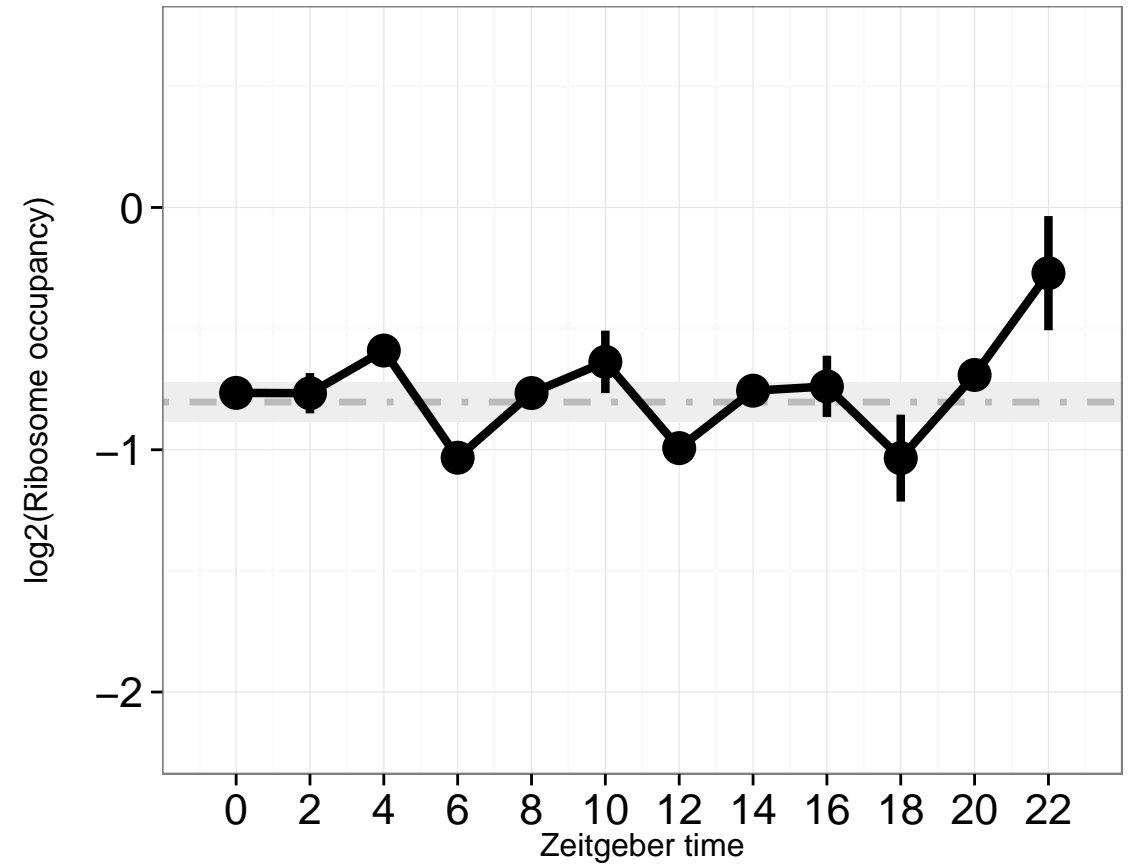

Supplement: SuppDataset_1.zip [file Rbm26_set_A.pdf › Supplemental Dataset 1/A-mRNA_nonrhyth_translation_nonrhyth/Rbm26_set_A.pdf]

# Rbm27

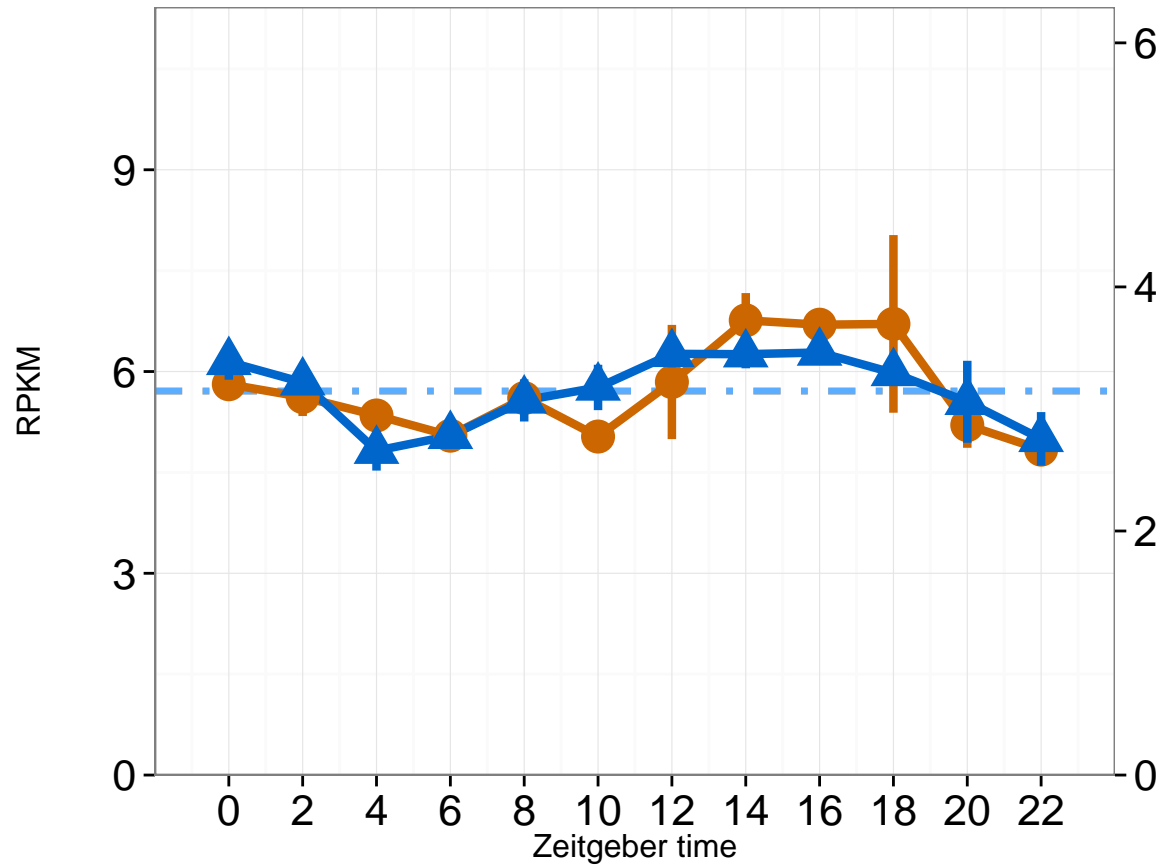

# Rbm27

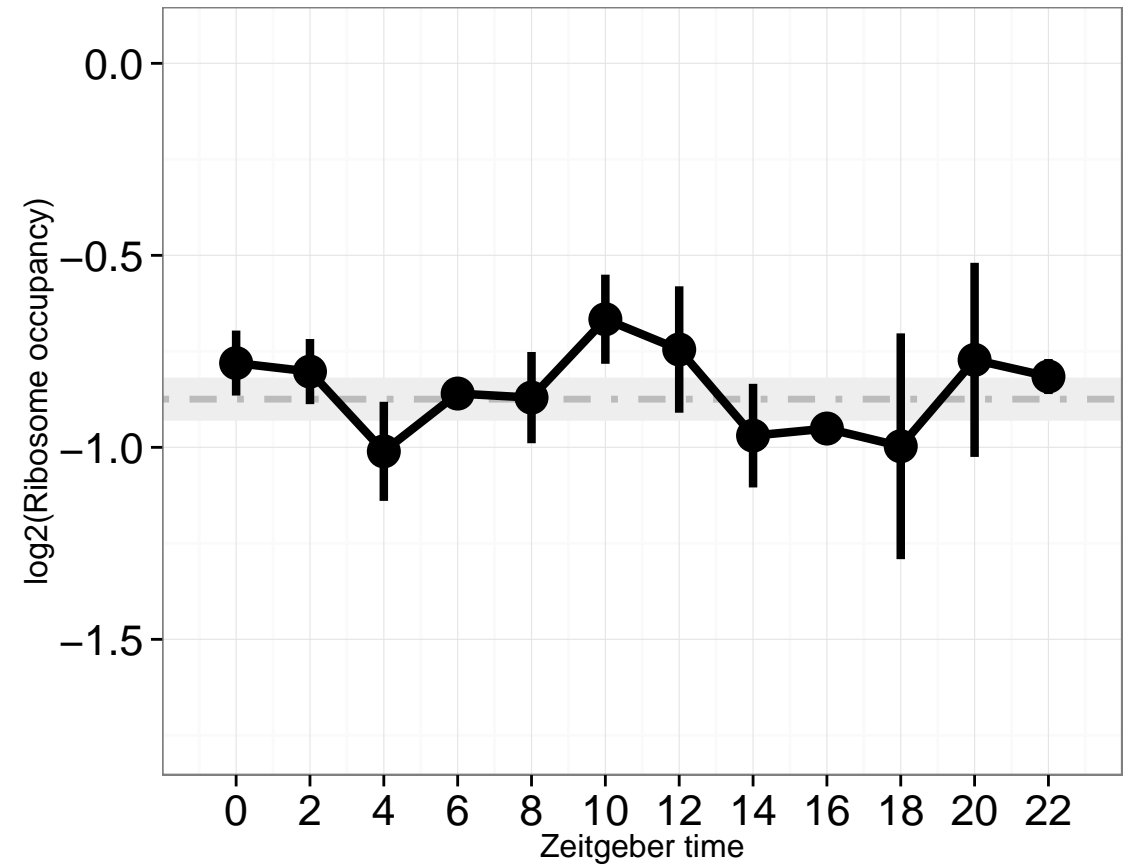

Supplement: SuppDataset_1.zip [file Rbm27_set_A.pdf › Supplemental Dataset 1/A-mRNA_nonrhyth_translation_nonrhyth/Rbm27_set_A.pdf]

# Rbm28

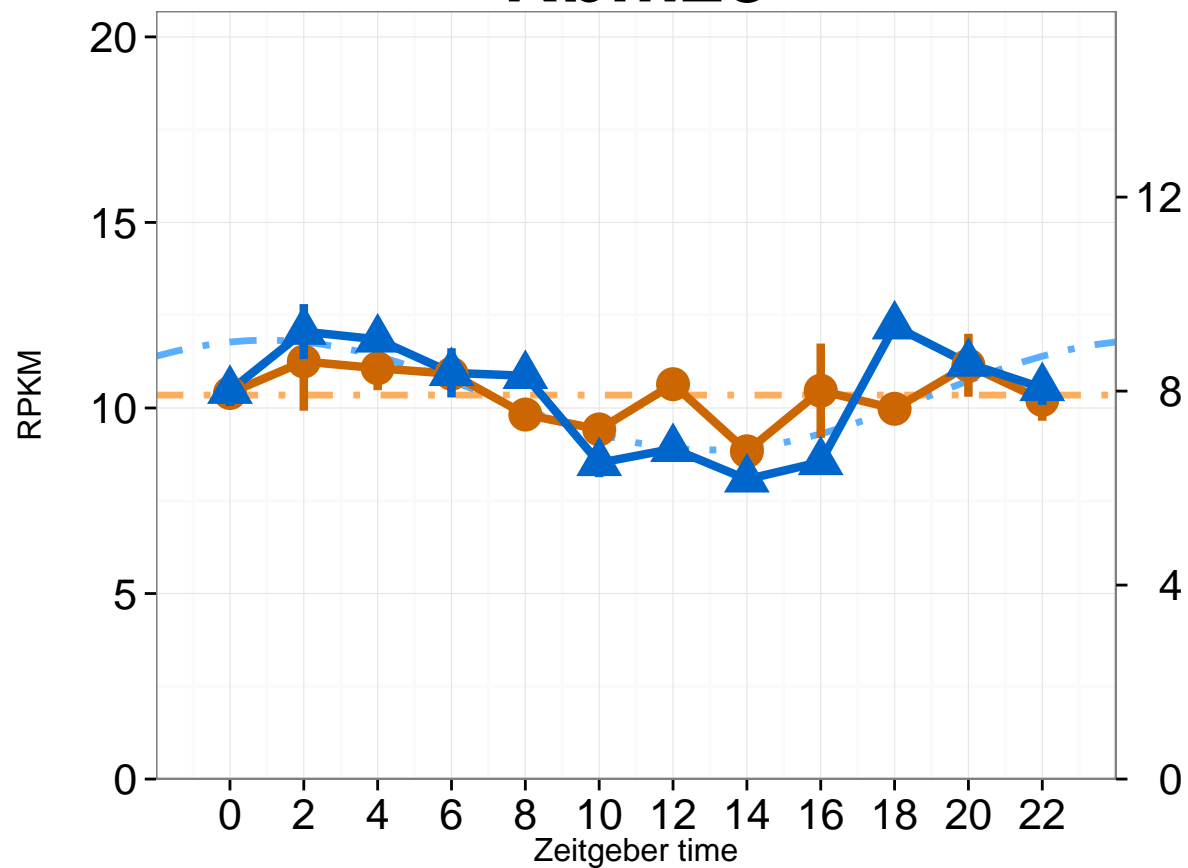

# Rbm28

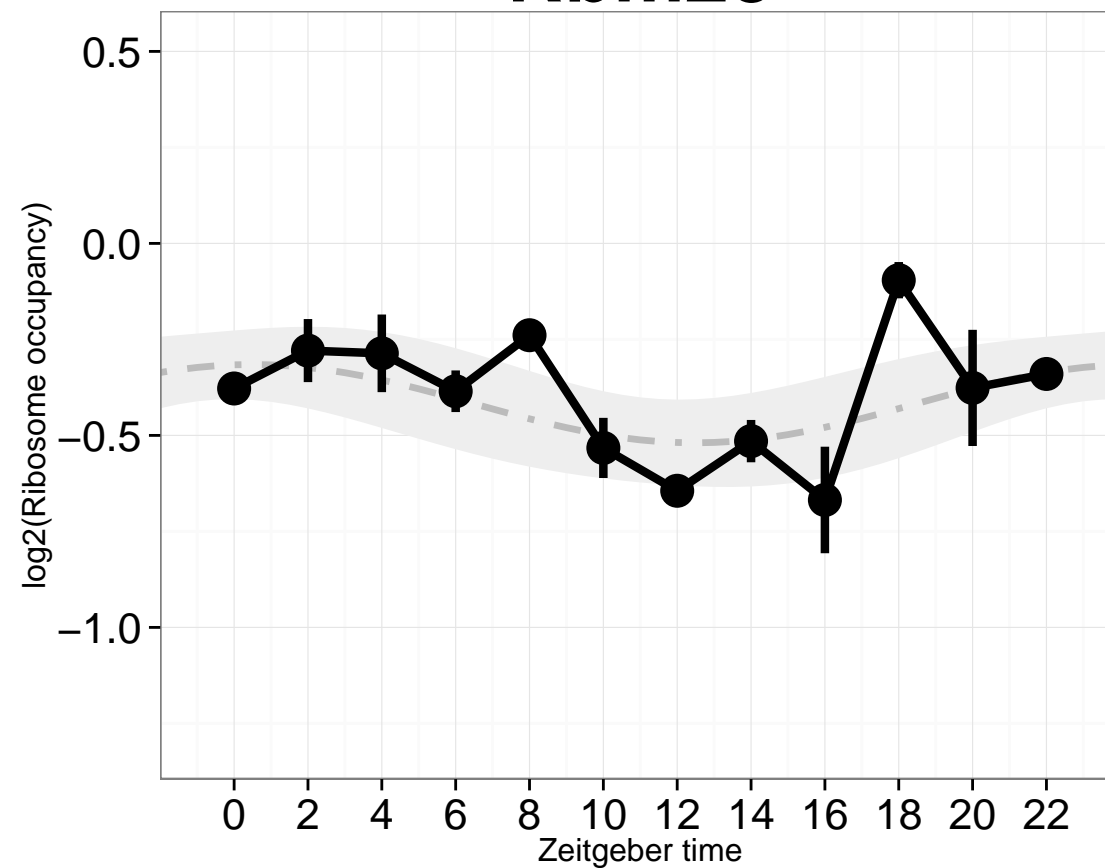

Supplement: SuppDataset_1.zip [file Rbm28_set_A.pdf › Supplemental Dataset 1/A-mRNA_nonrhyth_translation_nonrhyth/Rbm28_set_A.pdf]

# Rbm33

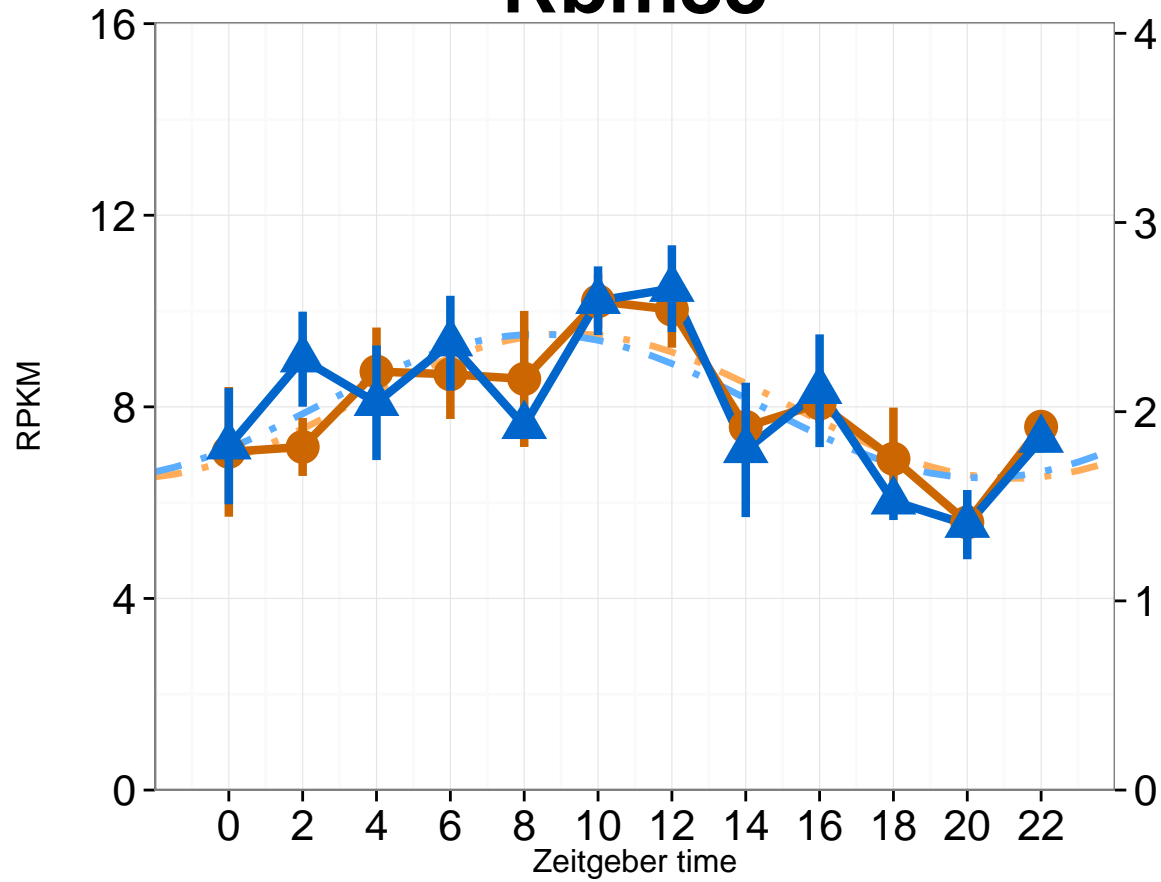

# Rbm33

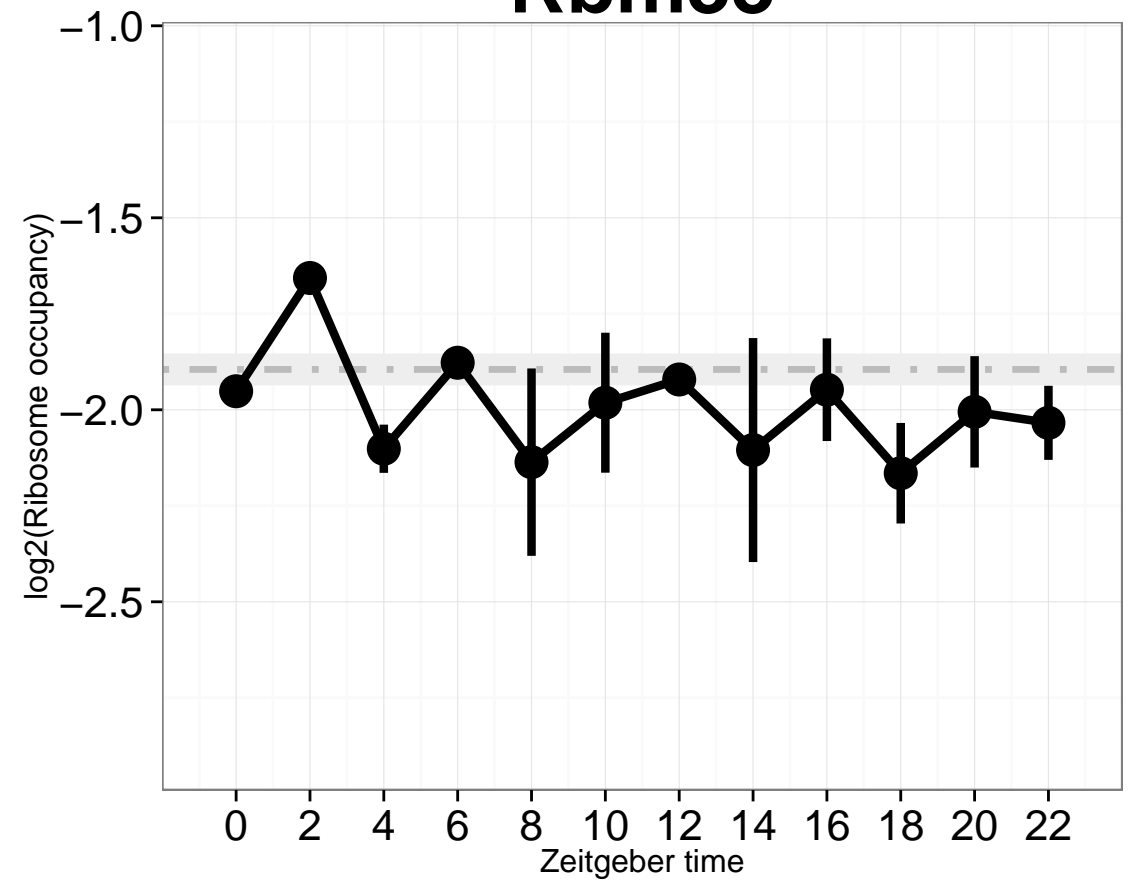

Supplement: SuppDataset_1.zip [file Rbm33_set_A.pdf › Supplemental Dataset 1/A-mRNA_nonrhyth_translation_nonrhyth/Rbm33_set_A.pdf]

# Rbm34

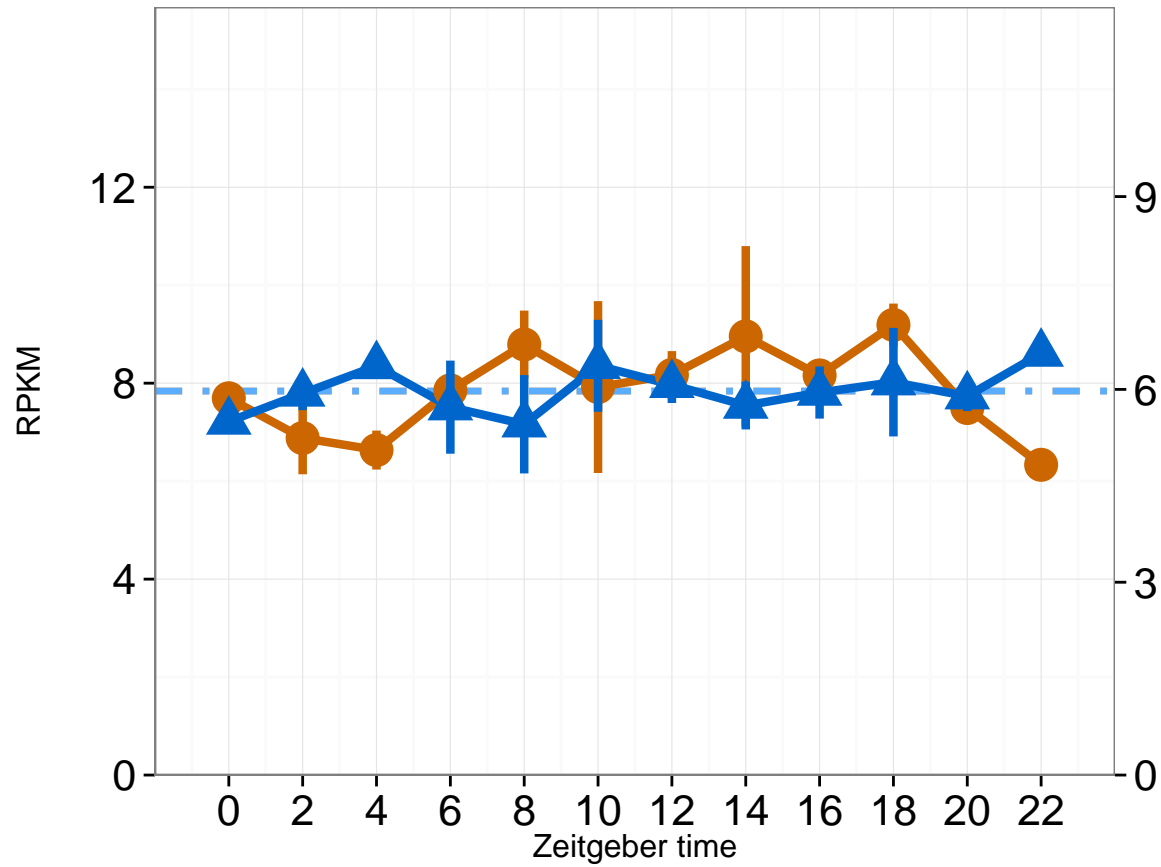

# Rbm34

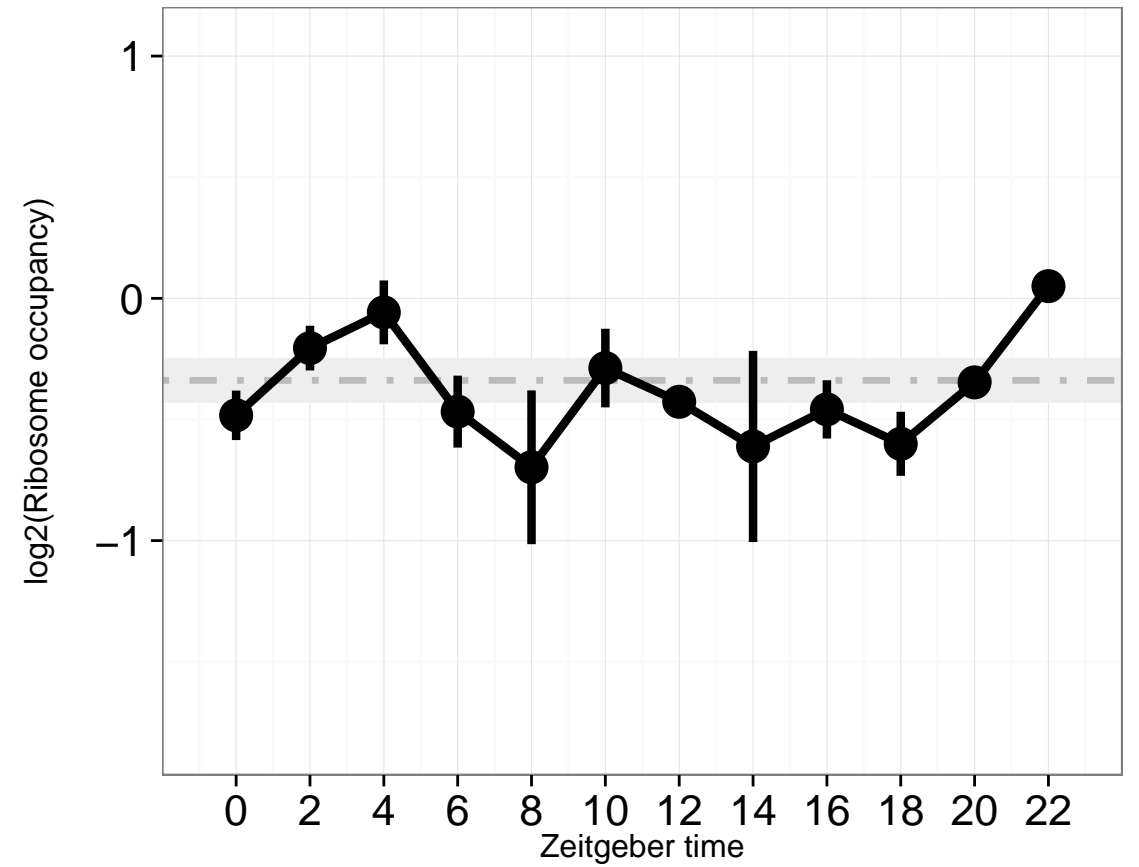

Supplement: SuppDataset_1.zip [file Rbm34_set_A.pdf › Supplemental Dataset 1/A-mRNA_nonrhyth_translation_nonrhyth/Rbm34_set_A.pdf]

# Rbm39

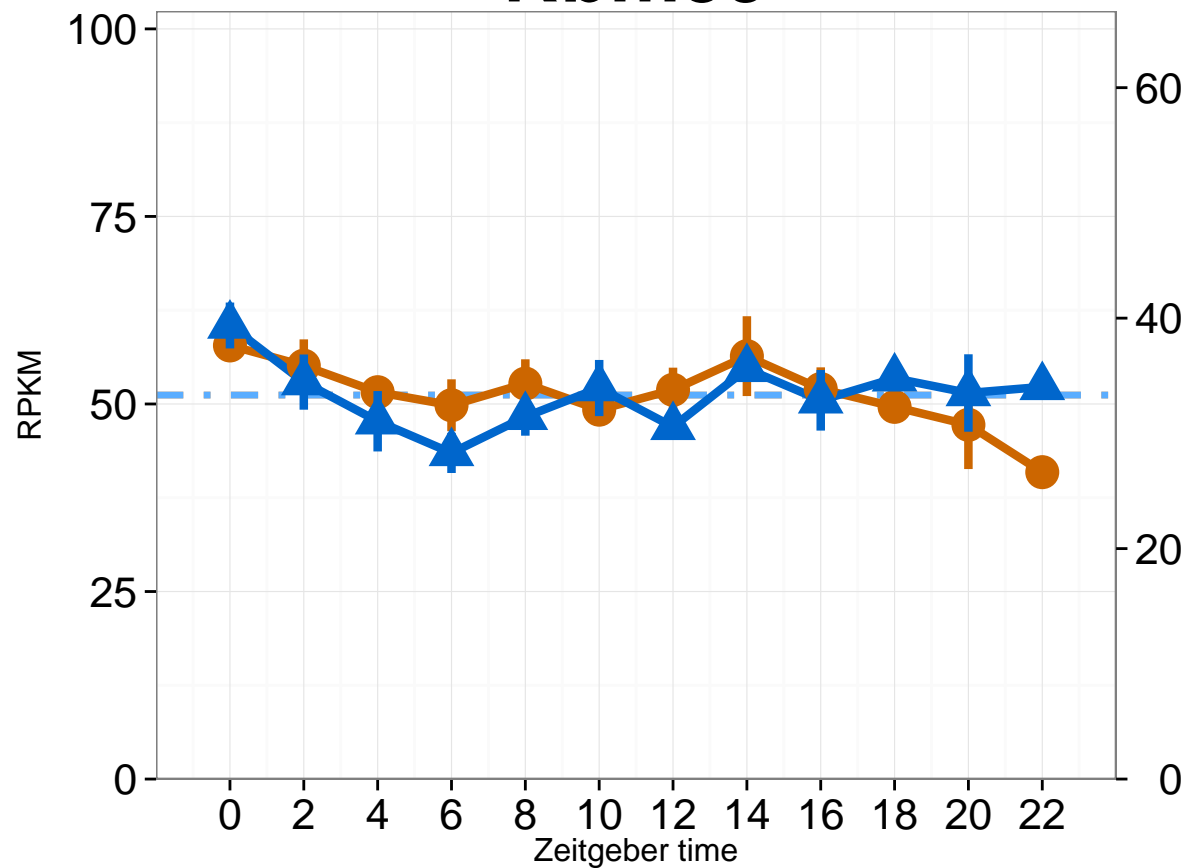

# Rbm39

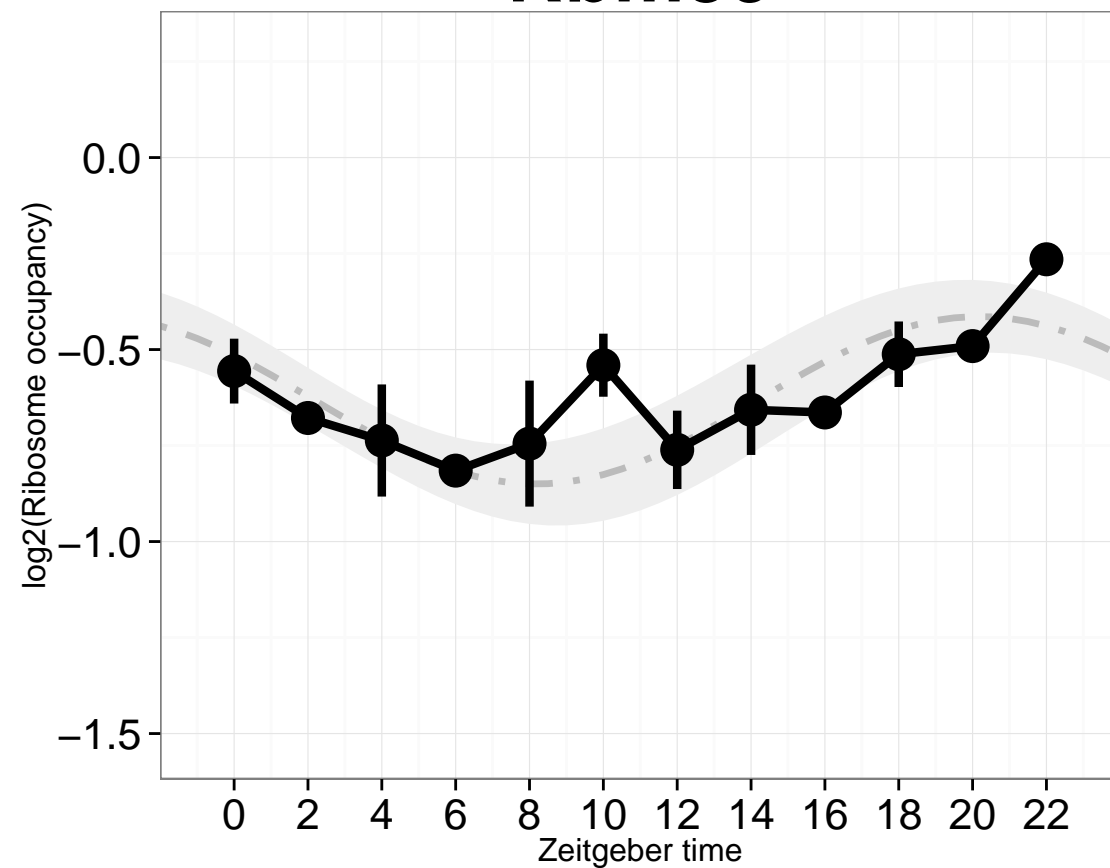

Supplement: SuppDataset_1.zip [file Rbm39_set_A.pdf › Supplemental Dataset 1/A-mRNA_nonrhyth_translation_nonrhyth/Rbm39_set_A.pdf]

# Rbm41

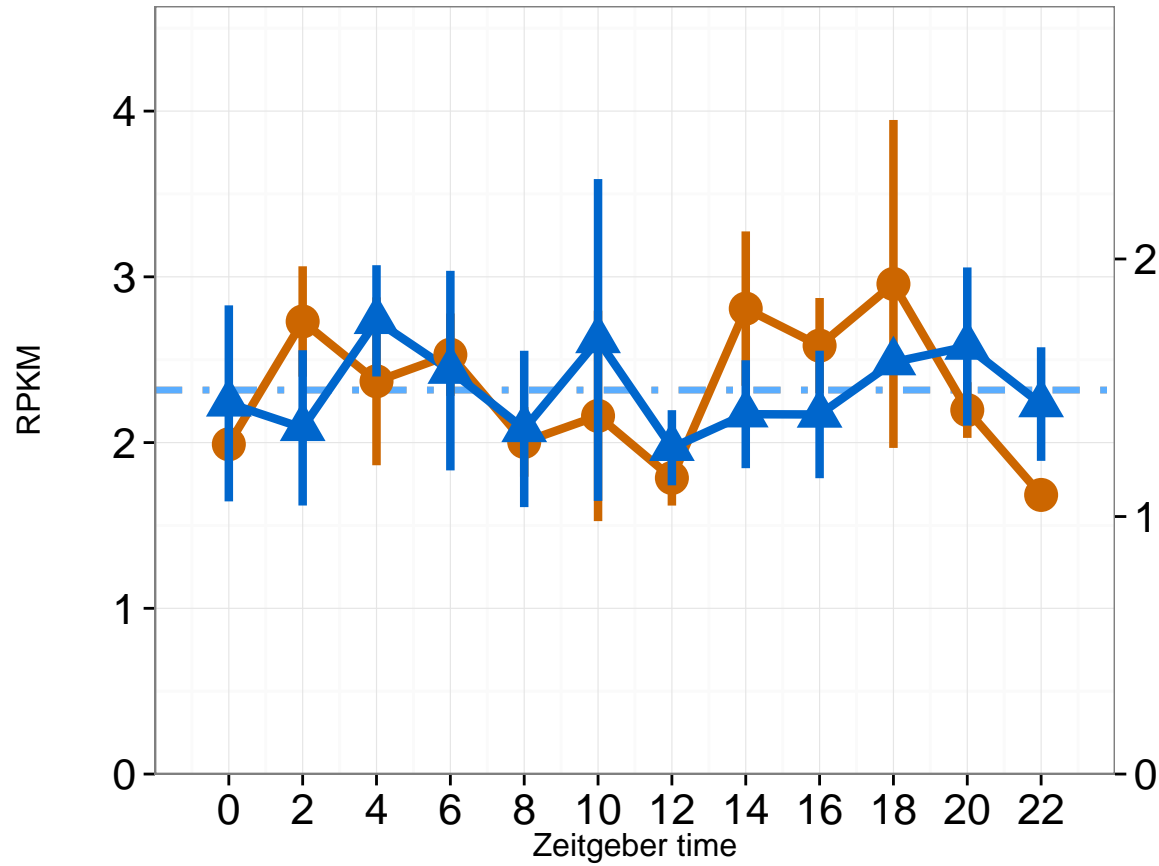

# Rbm41

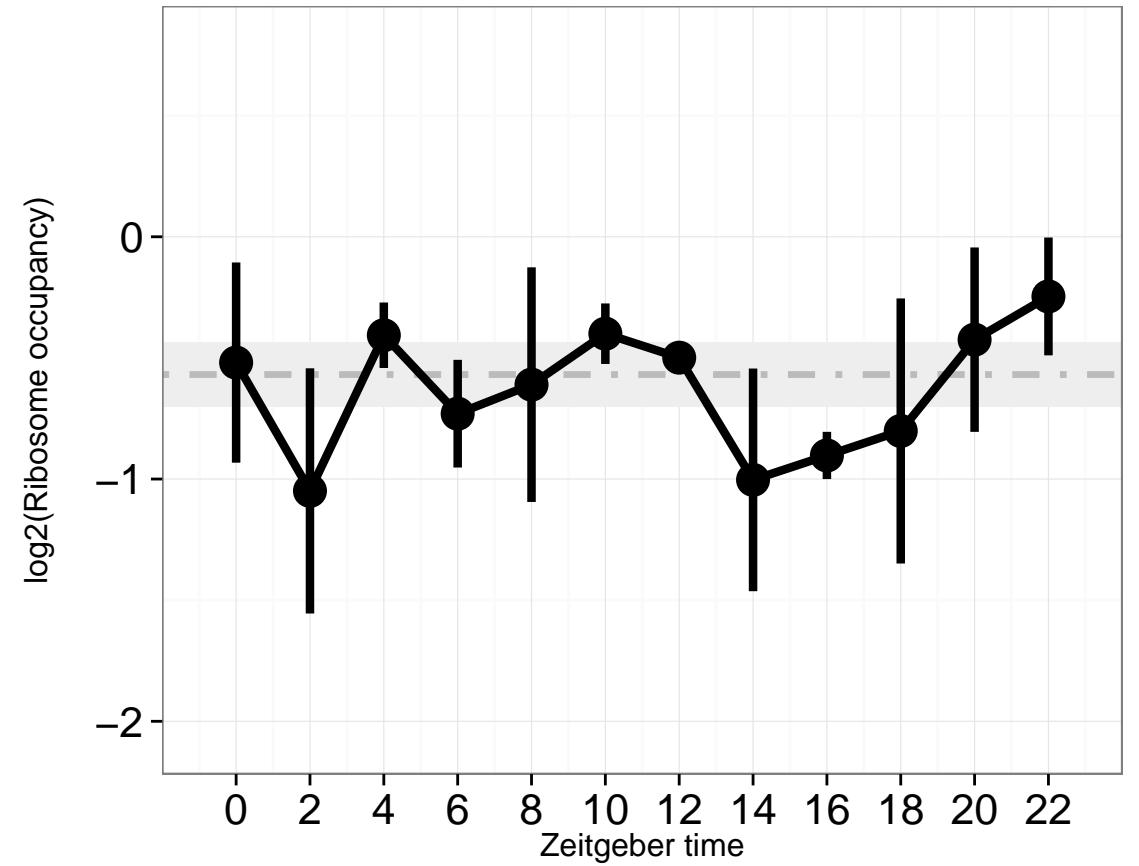

Supplement: SuppDataset_1.zip [file Rbm41_set_A.pdf › Supplemental Dataset 1/A-mRNA_nonrhyth_translation_nonrhyth/Rbm41_set_A.pdf]

# Rbm45

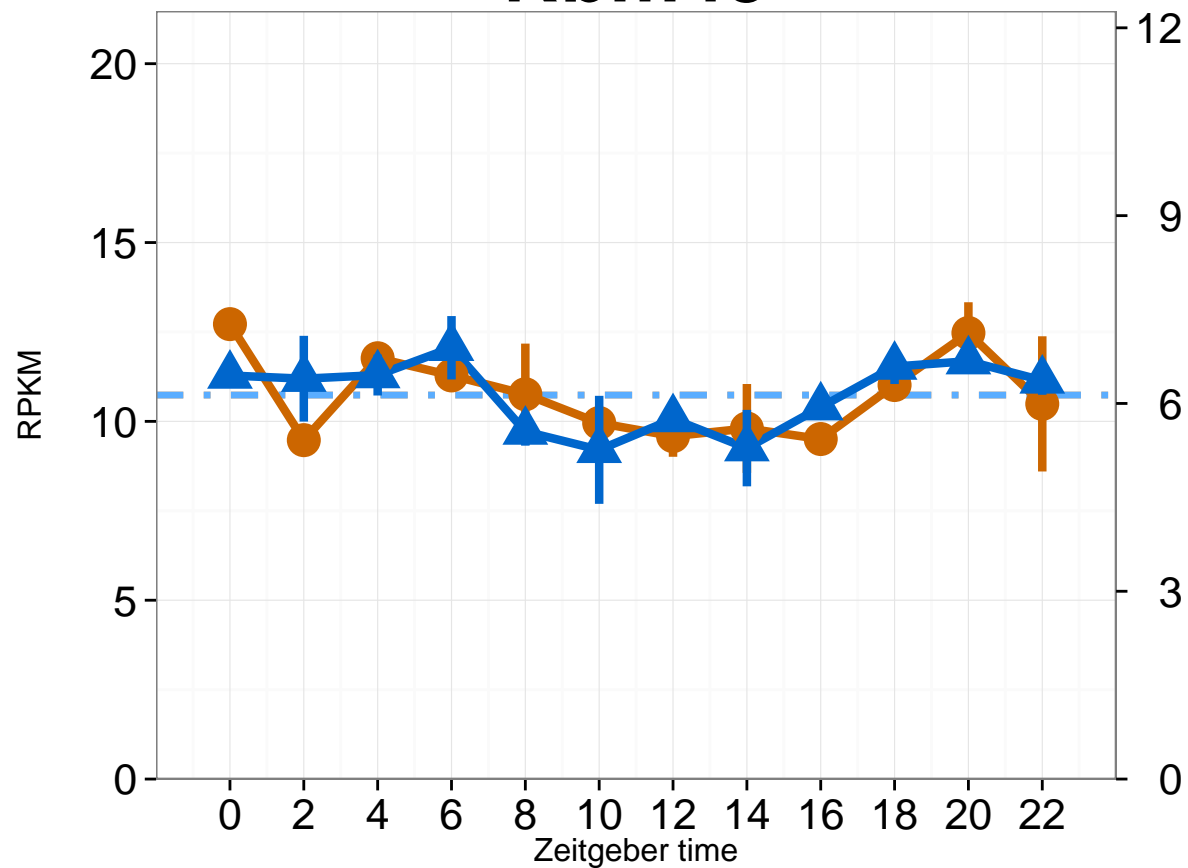

# Rbm45

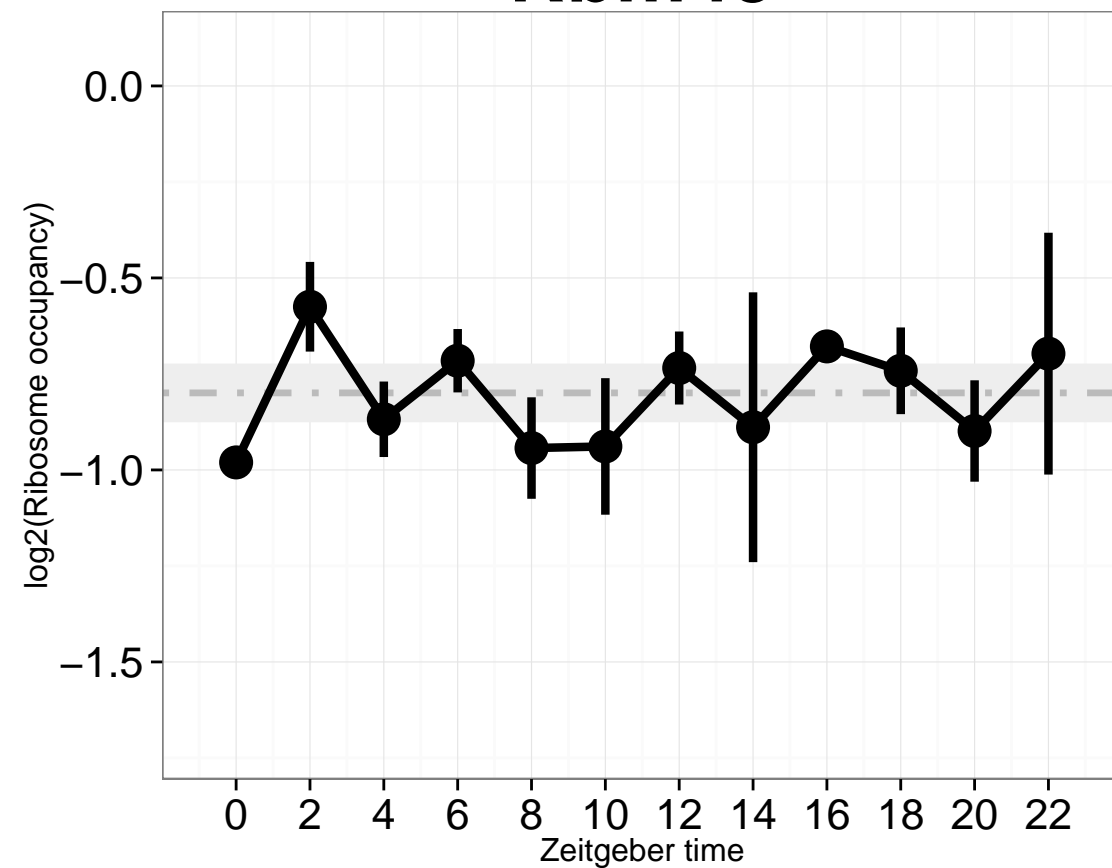

Supplement: SuppDataset_1.zip [file Rbm45_set_A.pdf › Supplemental Dataset 1/A-mRNA_nonrhyth_translation_nonrhyth/Rbm45_set_A.pdf]

## Rbm47

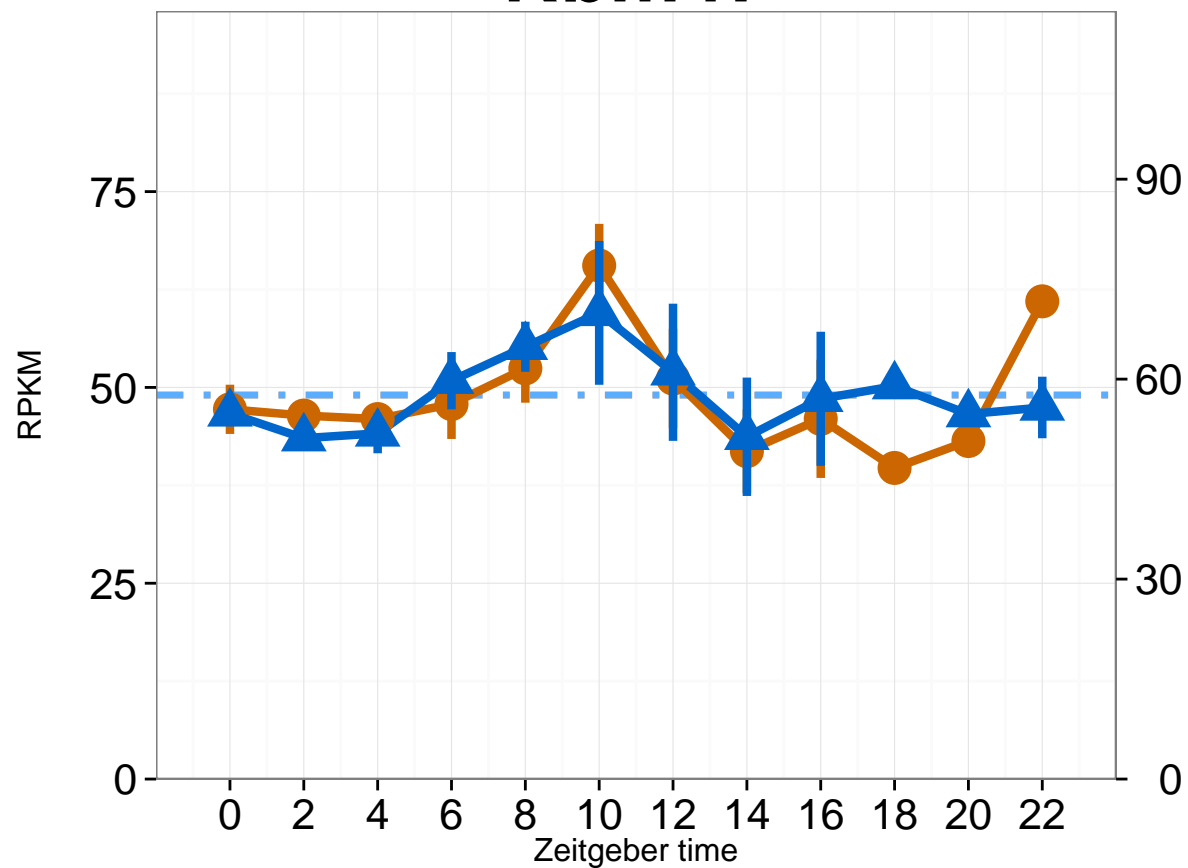

## Rbm47

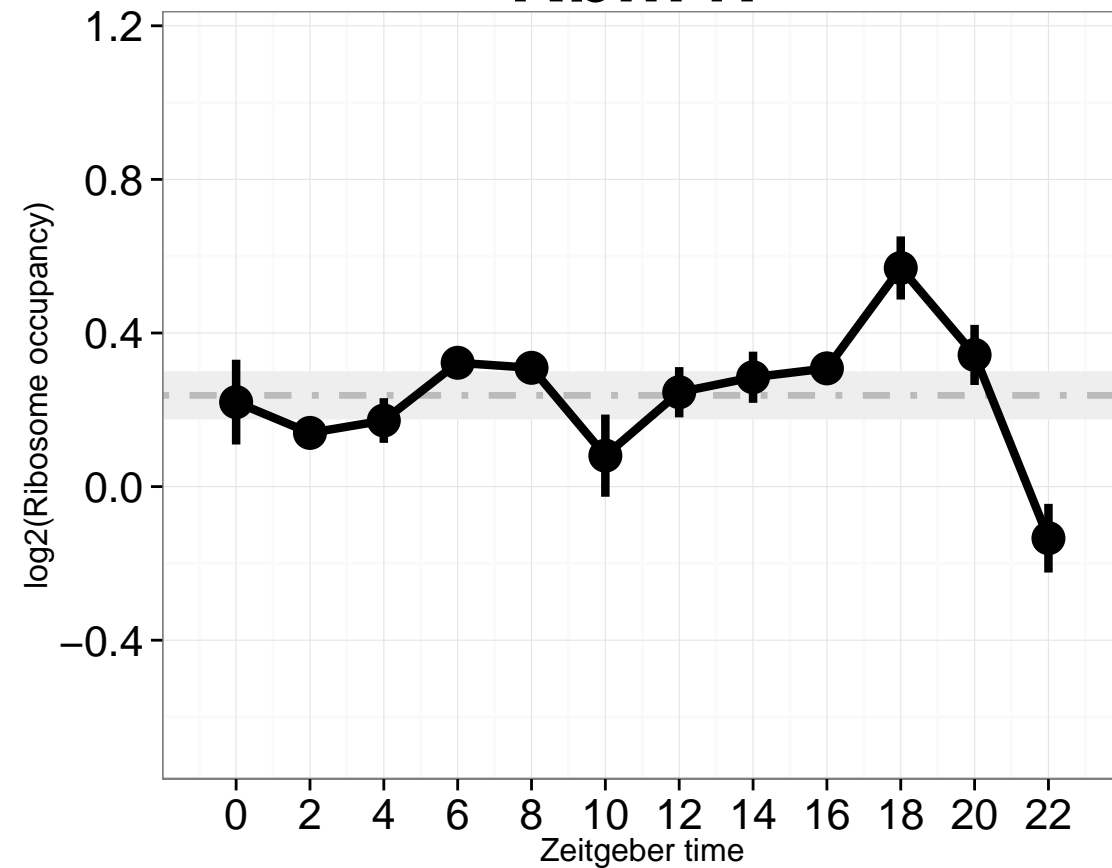

Supplement: SuppDataset_1.zip [file Rbm47_set_A.pdf › Supplemental Dataset 1/A-mRNA_nonrhyth_translation_nonrhyth/Rbm47_set_A.pdf]

# Rbm48

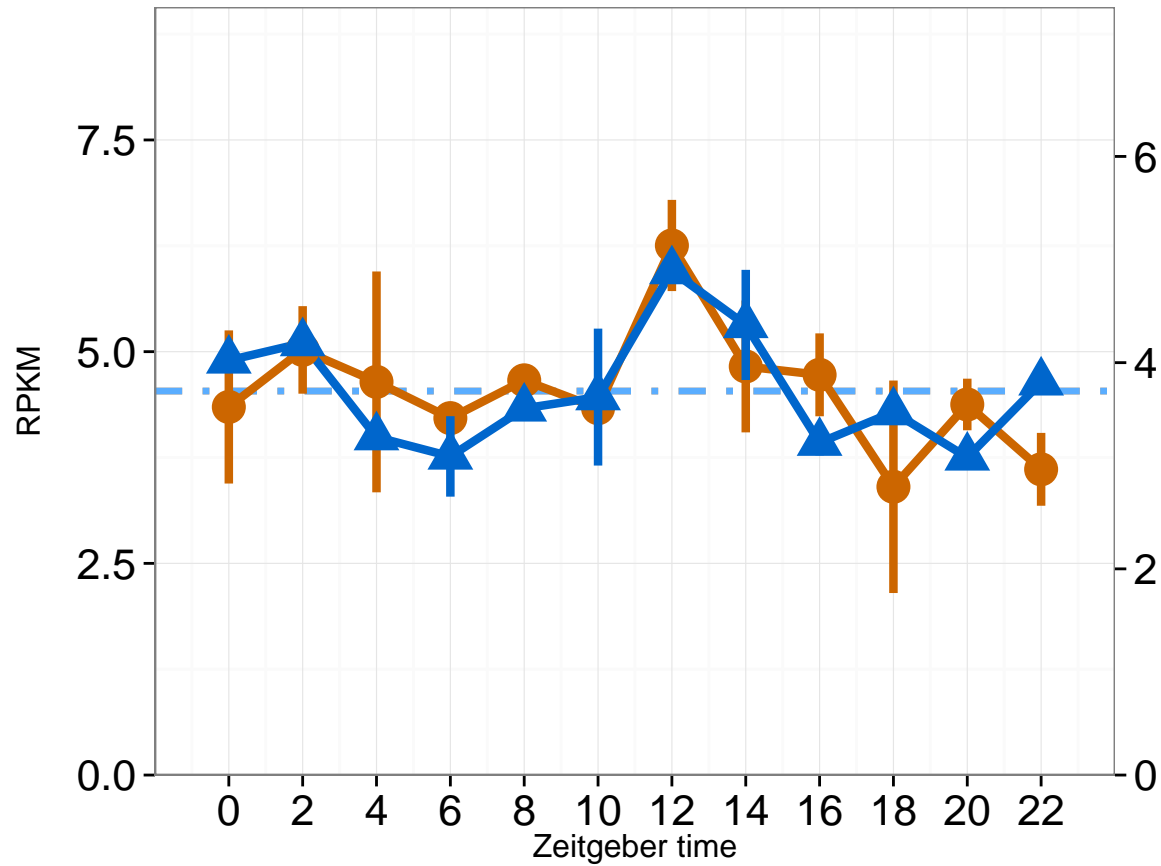

# Rbm48

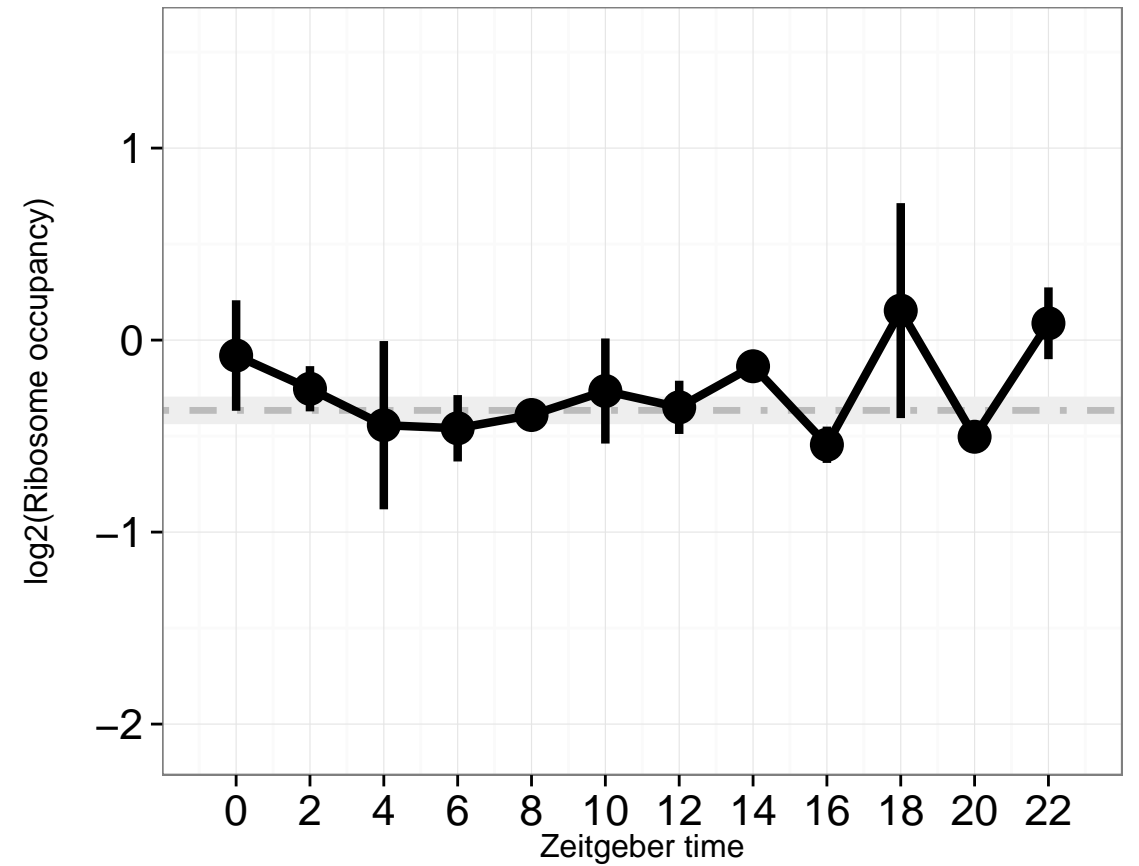

Supplement: SuppDataset_1.zip [file Rbm48_set_A.pdf › Supplemental Dataset 1/A-mRNA_nonrhyth_translation_nonrhyth/Rbm48_set_A.pdf]

# Rbm4

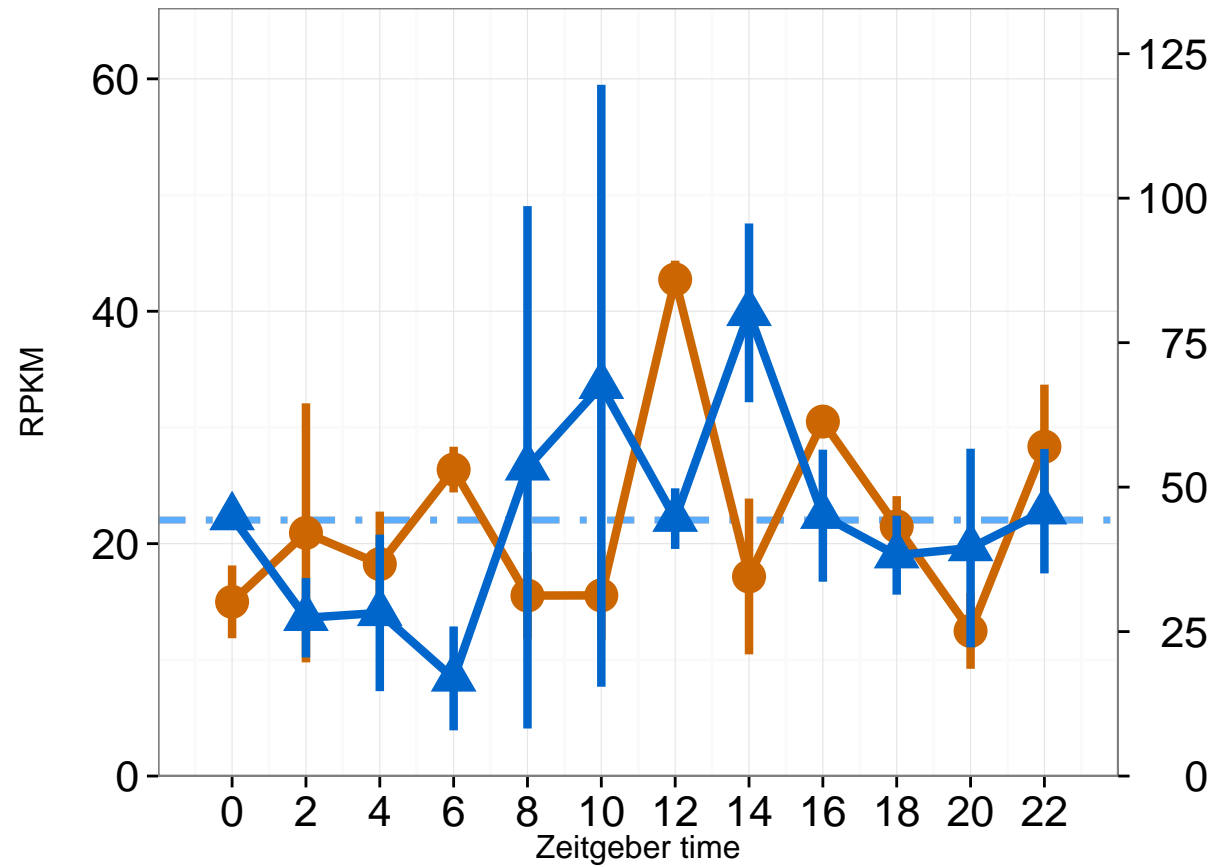

# Rbm4

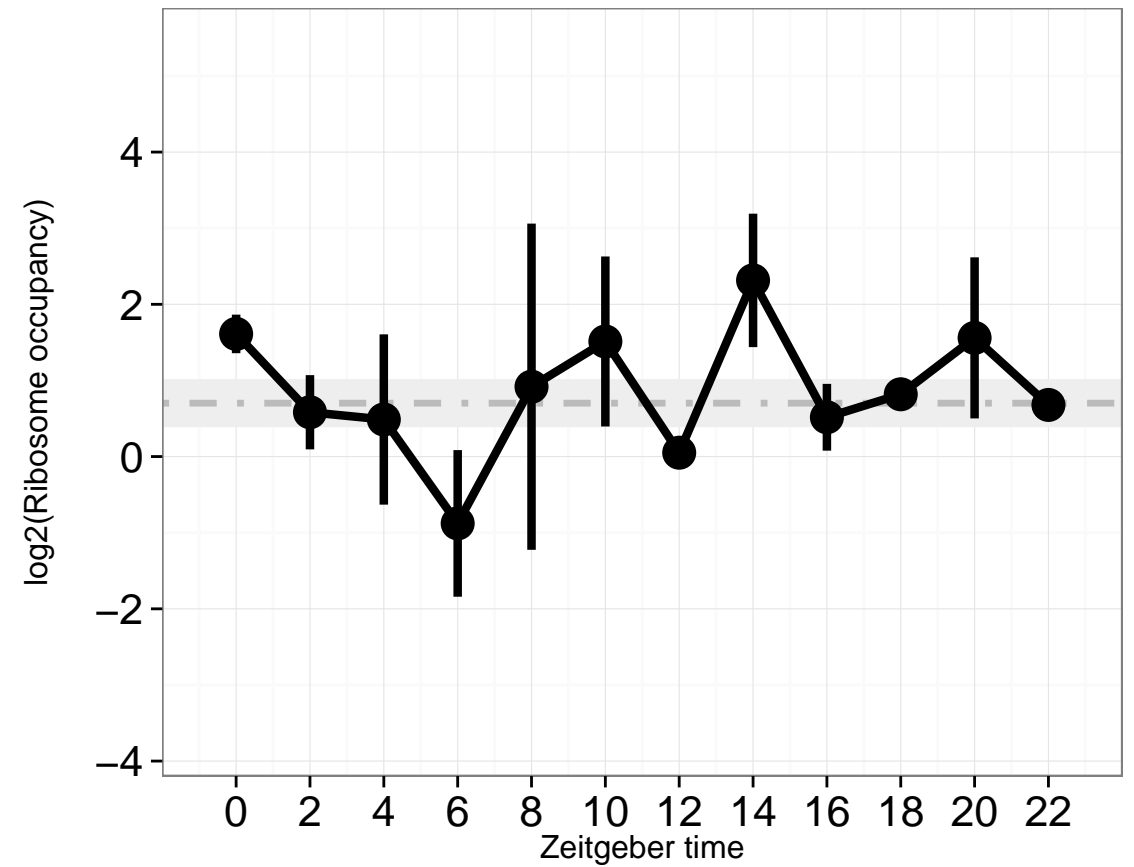

Supplement: SuppDataset_1.zip [file Rbm4_set_A.pdf › Supplemental Dataset 1/A-mRNA_nonrhyth_translation_nonrhyth/Rbm4_set_A.pdf]

# Rbm4b

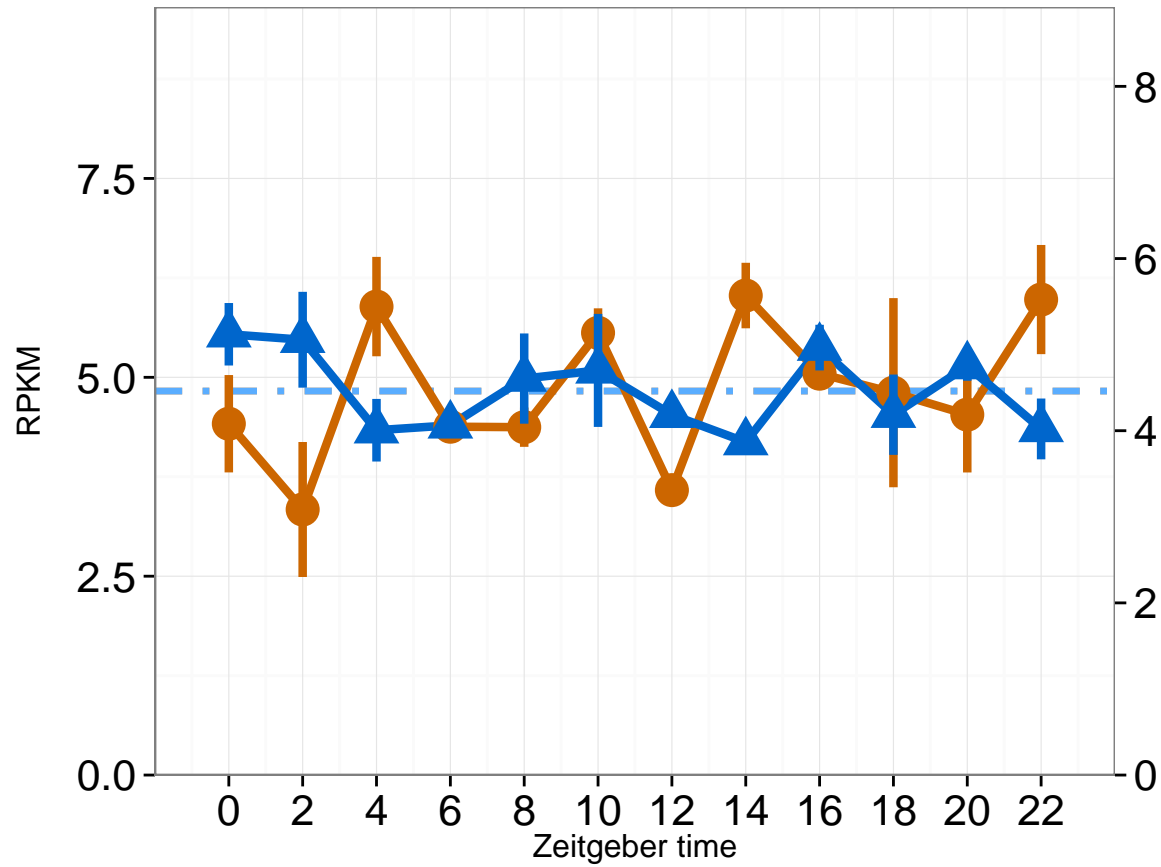

# Rbm4b

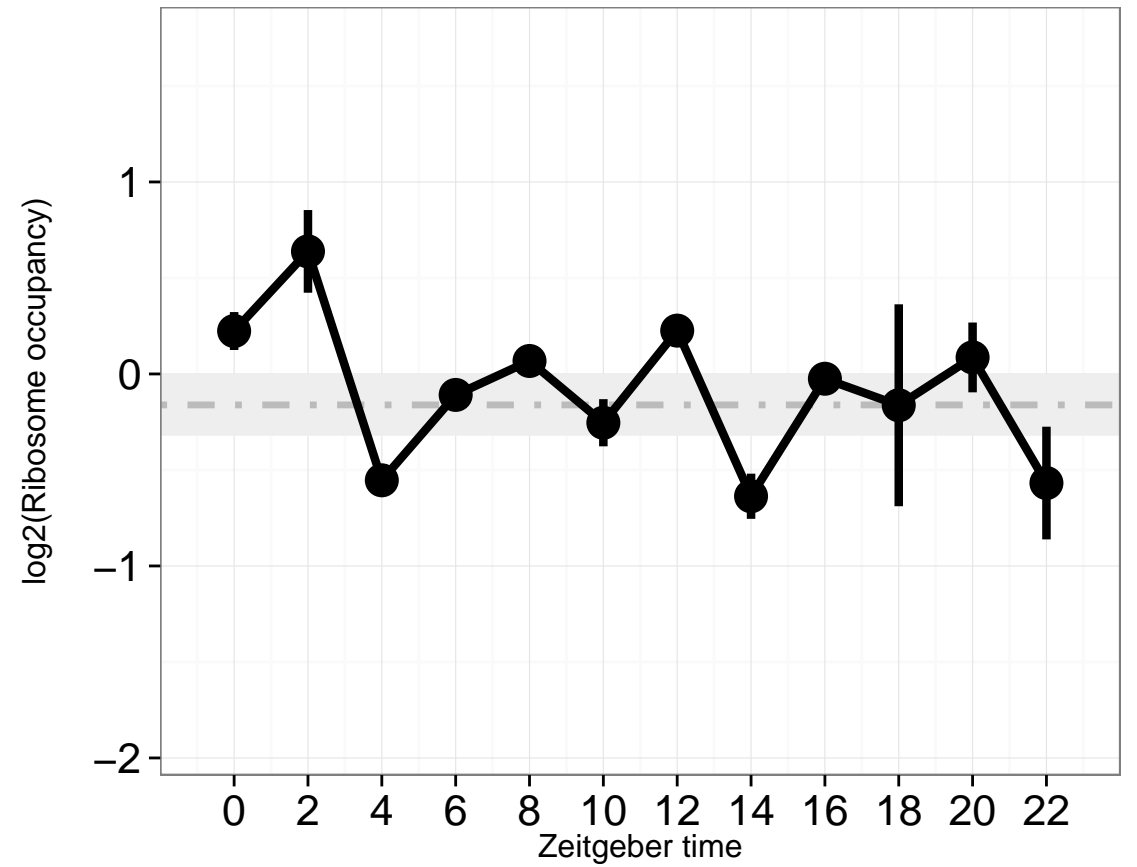

Supplement: SuppDataset_1.zip [file Rbm4b_set_A.pdf › Supplemental Dataset 1/A-mRNA_nonrhyth_translation_nonrhyth/Rbm4b_set_A.pdf]

## Rbm5

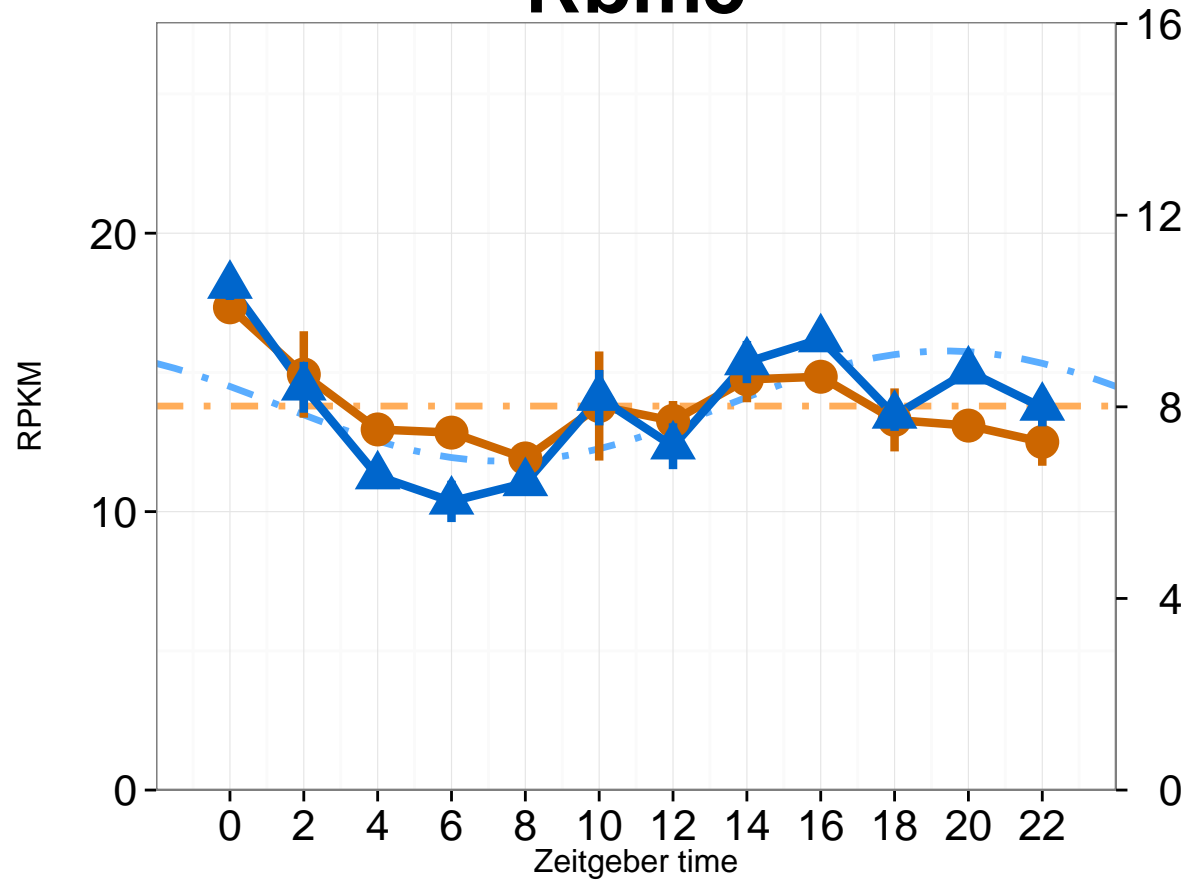

## Rbm5

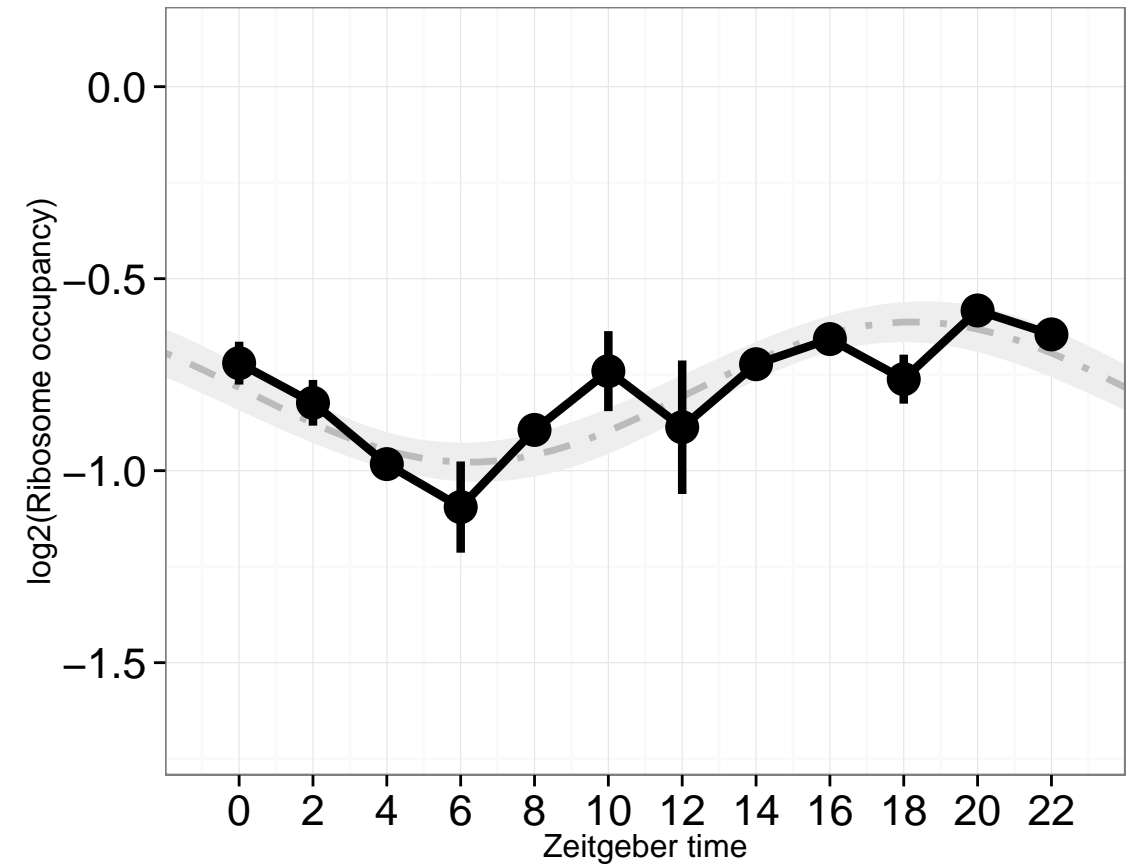

Supplement: SuppDataset_1.zip [file Rbm5_set_A.pdf › Supplemental Dataset 1/A-mRNA_nonrhyth_translation_nonrhyth/Rbm5_set_A.pdf]

# Rbm6

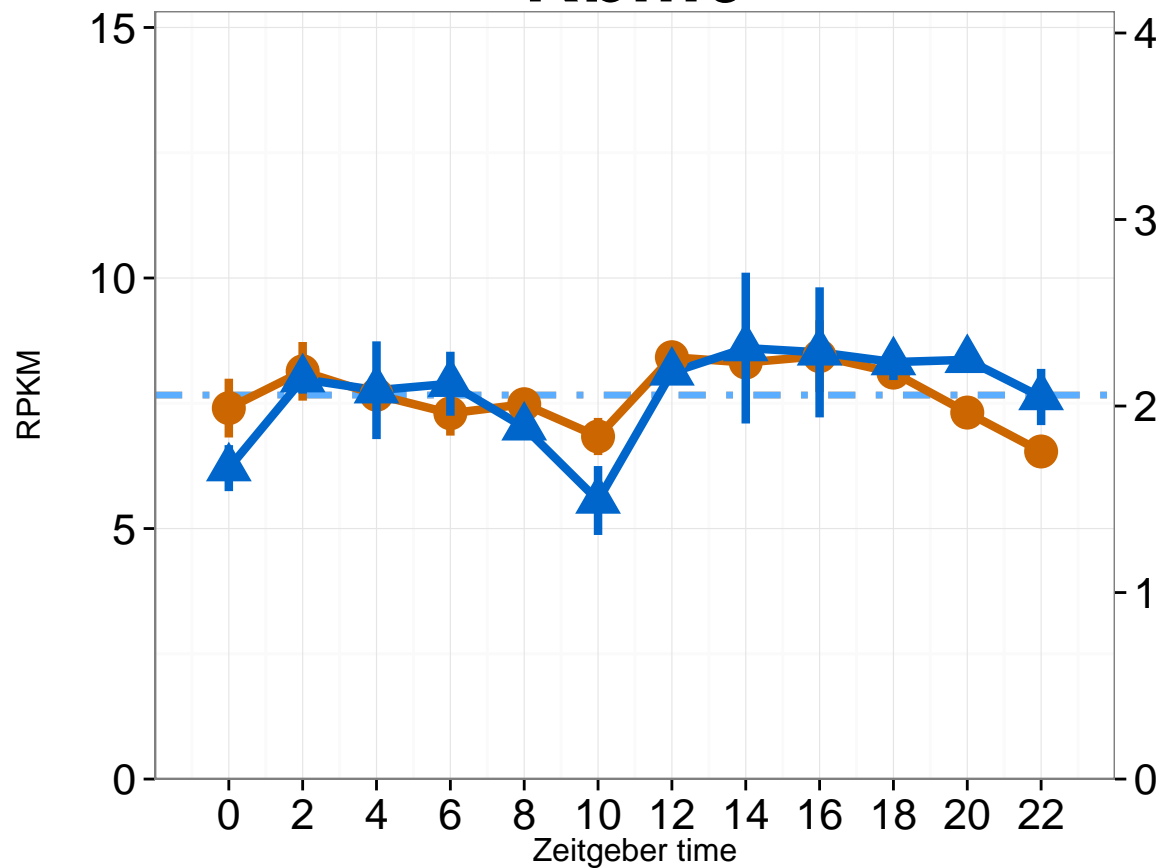

# Rbm6

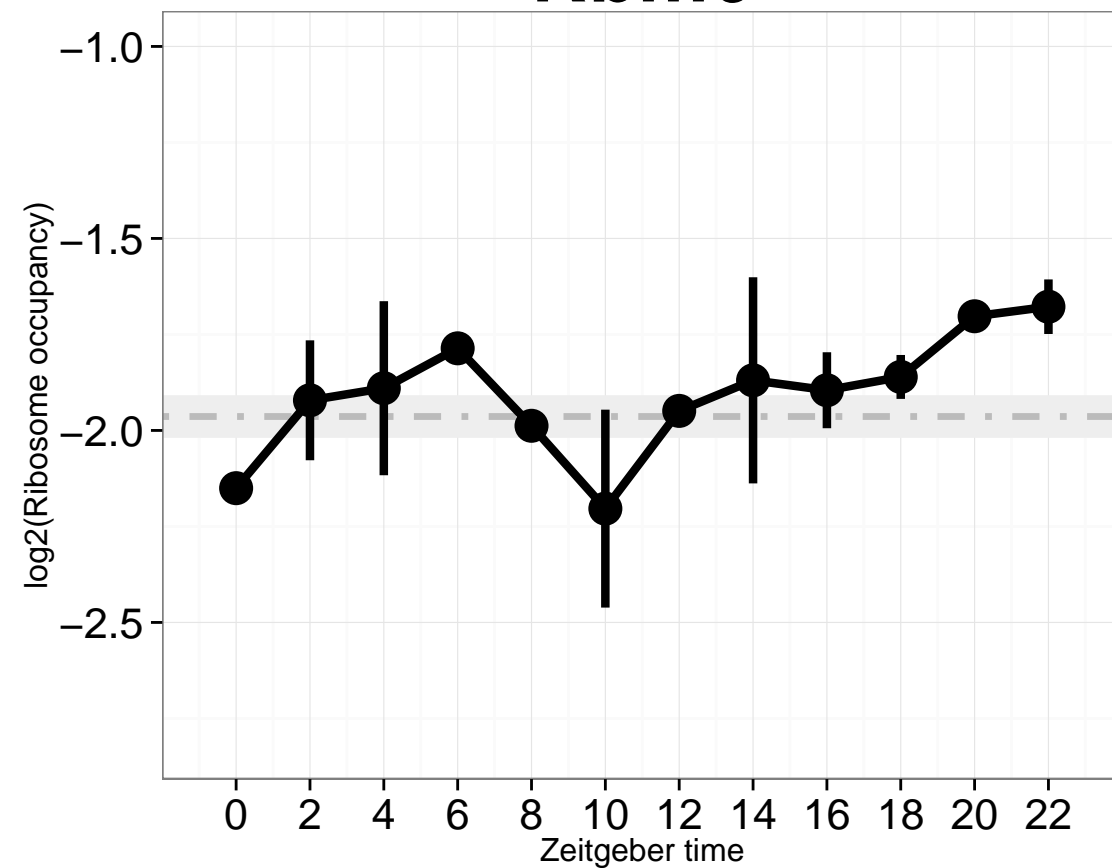

Supplement: SuppDataset_1.zip [file Rbm6_set_A.pdf › Supplemental Dataset 1/A-mRNA_nonrhyth_translation_nonrhyth/Rbm6_set_A.pdf]

## Rbm7

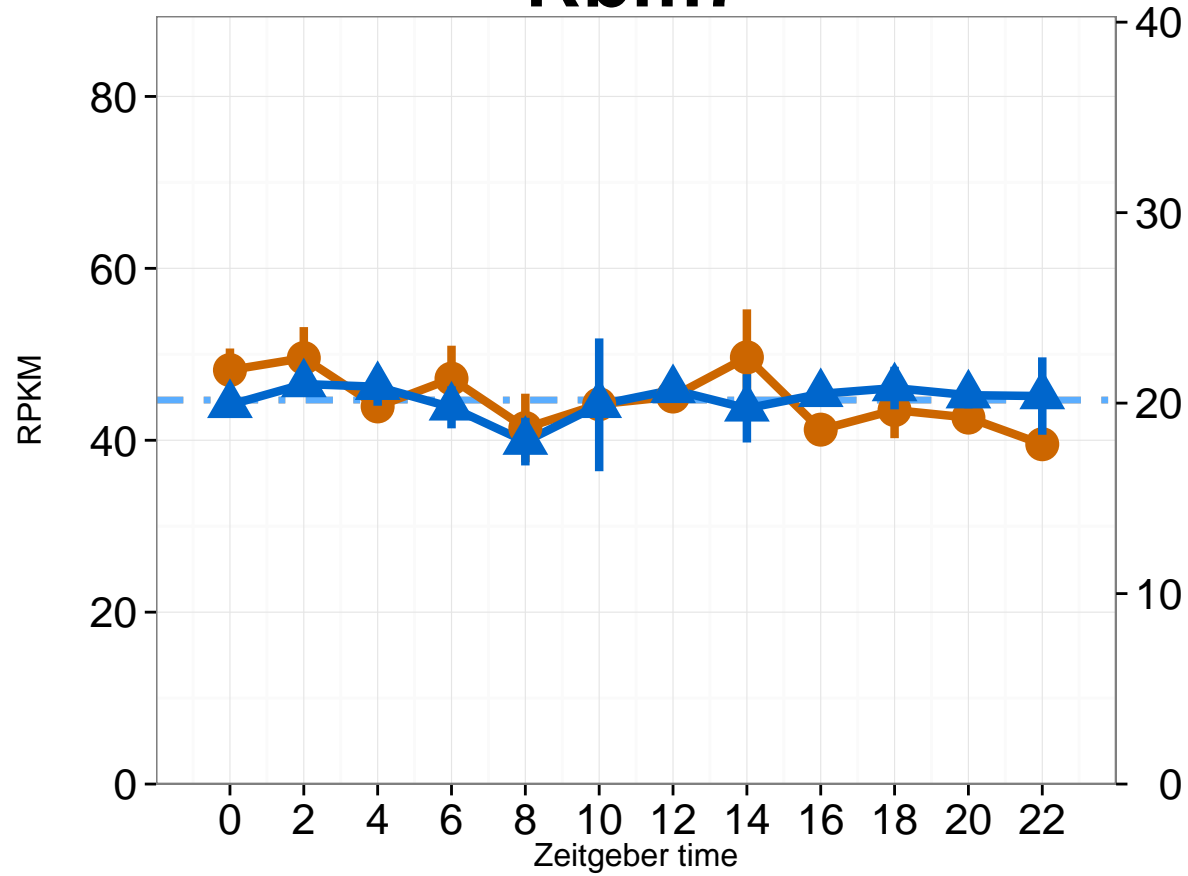

## Rbm7

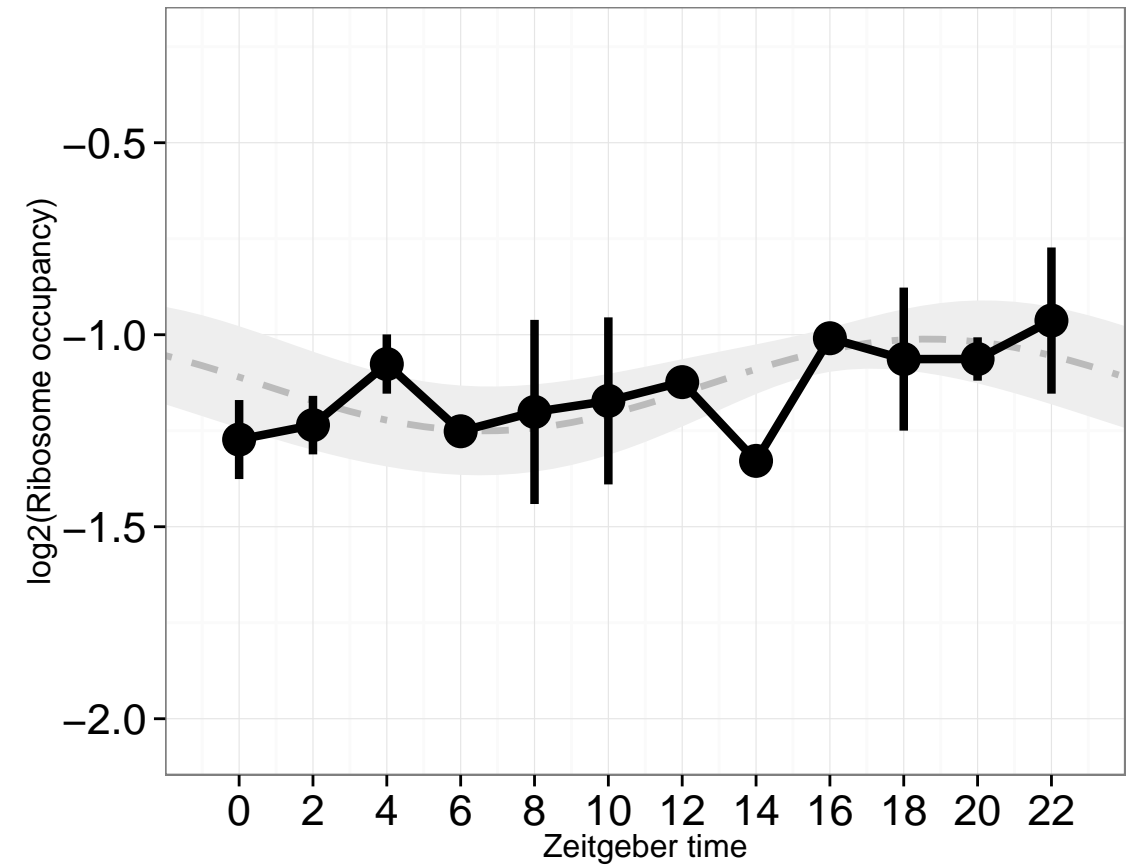

Supplement: SuppDataset_1.zip [file Rbm7_set_A.pdf › Supplemental Dataset 1/A-mRNA_nonrhyth_translation_nonrhyth/Rbm7_set_A.pdf]

# Rbm8a

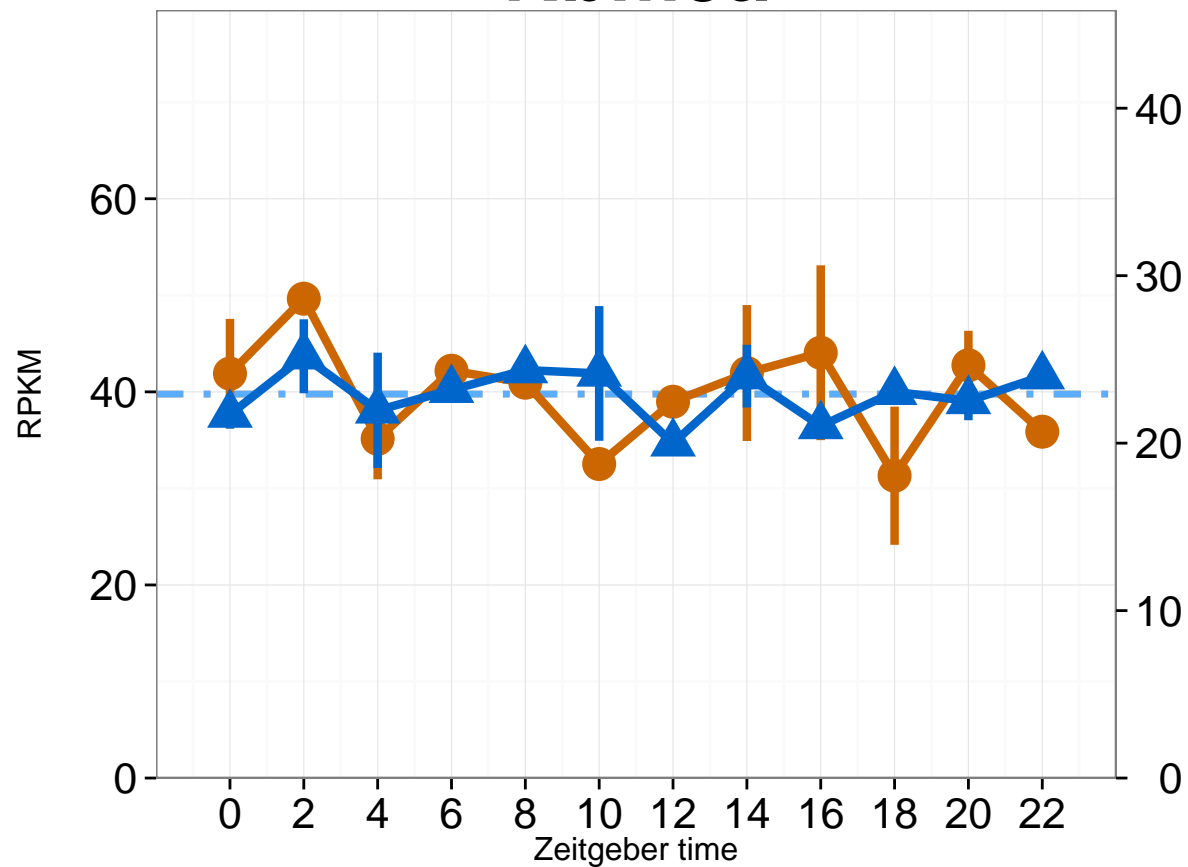

# Rbm8a

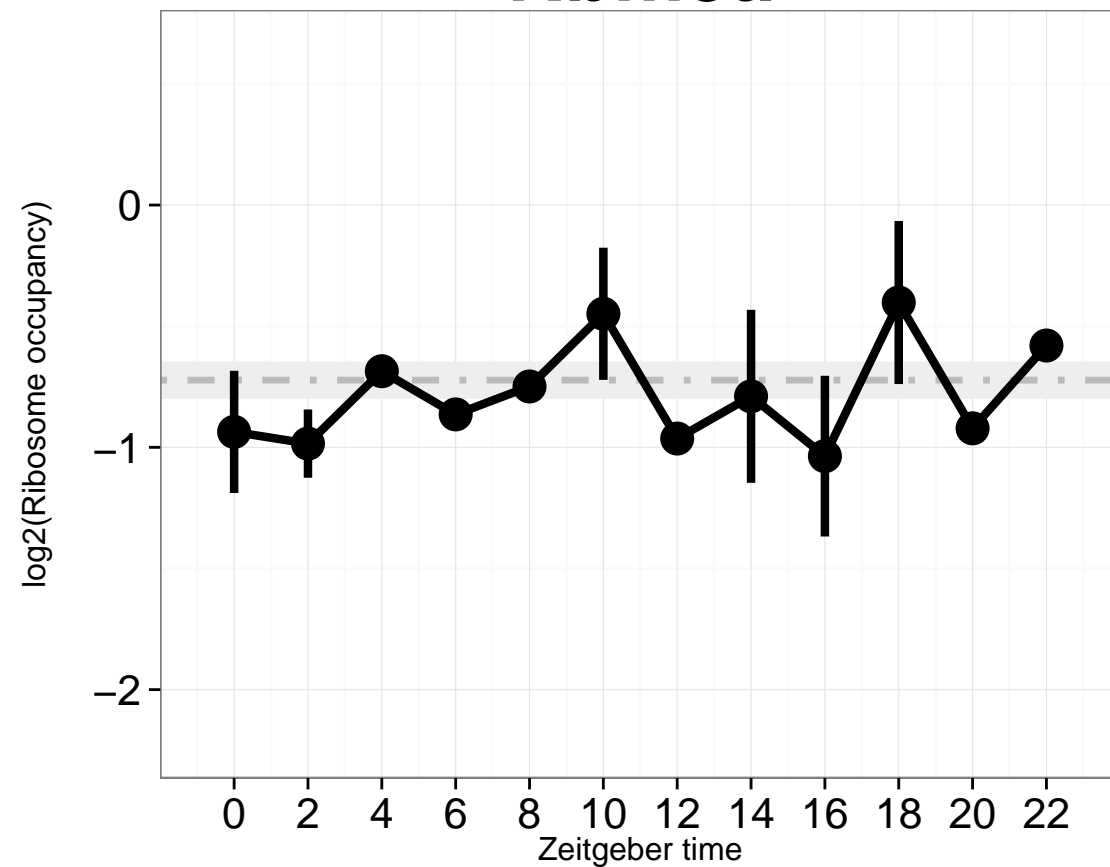

Supplement: SuppDataset_1.zip [file Rbm8a_set_A.pdf › Supplemental Dataset 1/A-mRNA_nonrhyth_translation_nonrhyth/Rbm8a_set_A.pdf]

## Rbms2

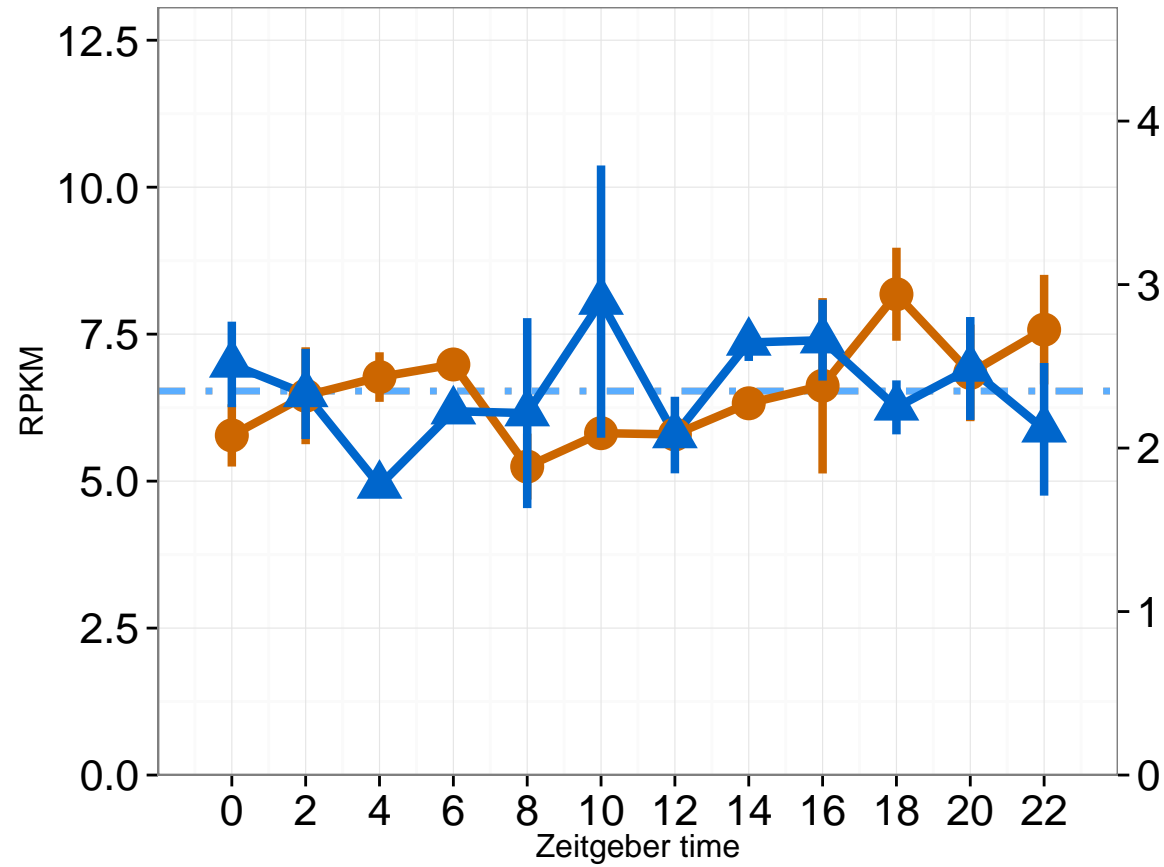

## Rbms2

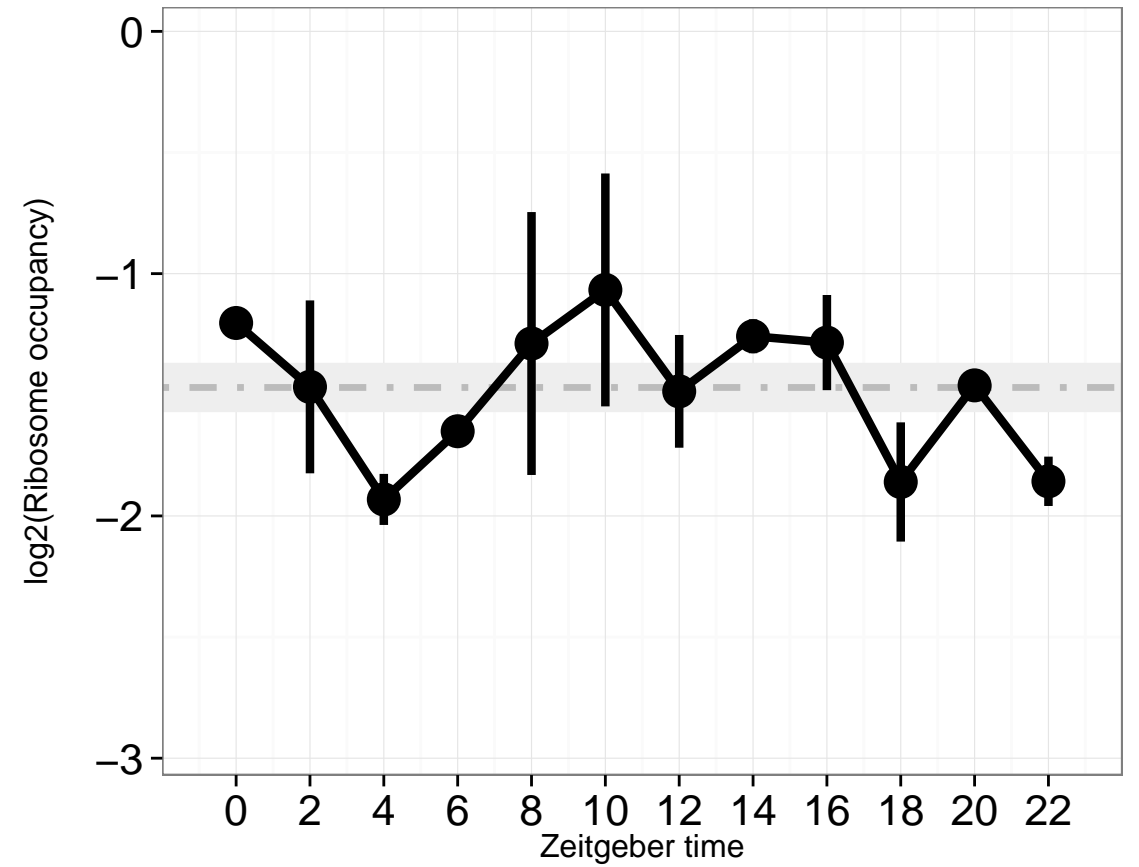

Supplement: SuppDataset_1.zip [file Rbms2_set_A.pdf › Supplemental Dataset 1/A-mRNA_nonrhyth_translation_nonrhyth/Rbms2_set_A.pdf]

# Rbms3

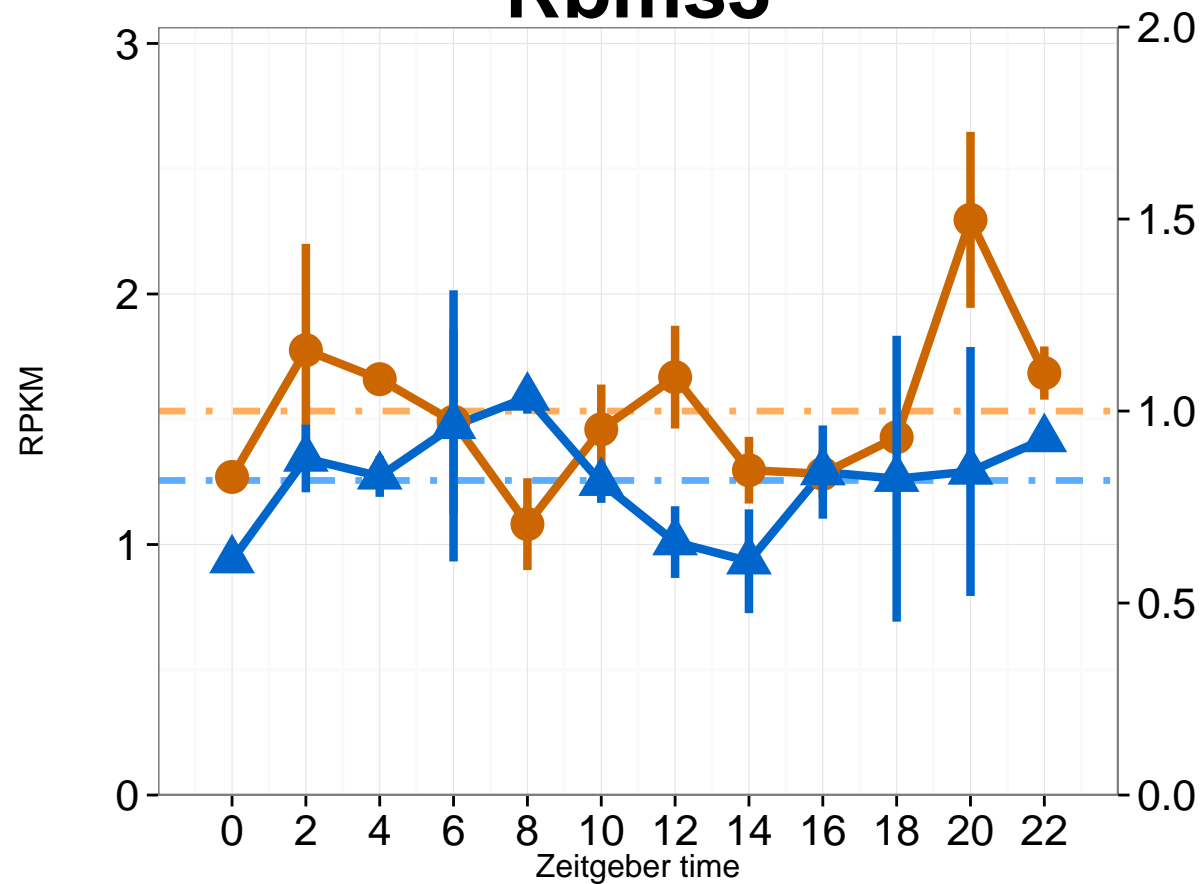

# Rbms3

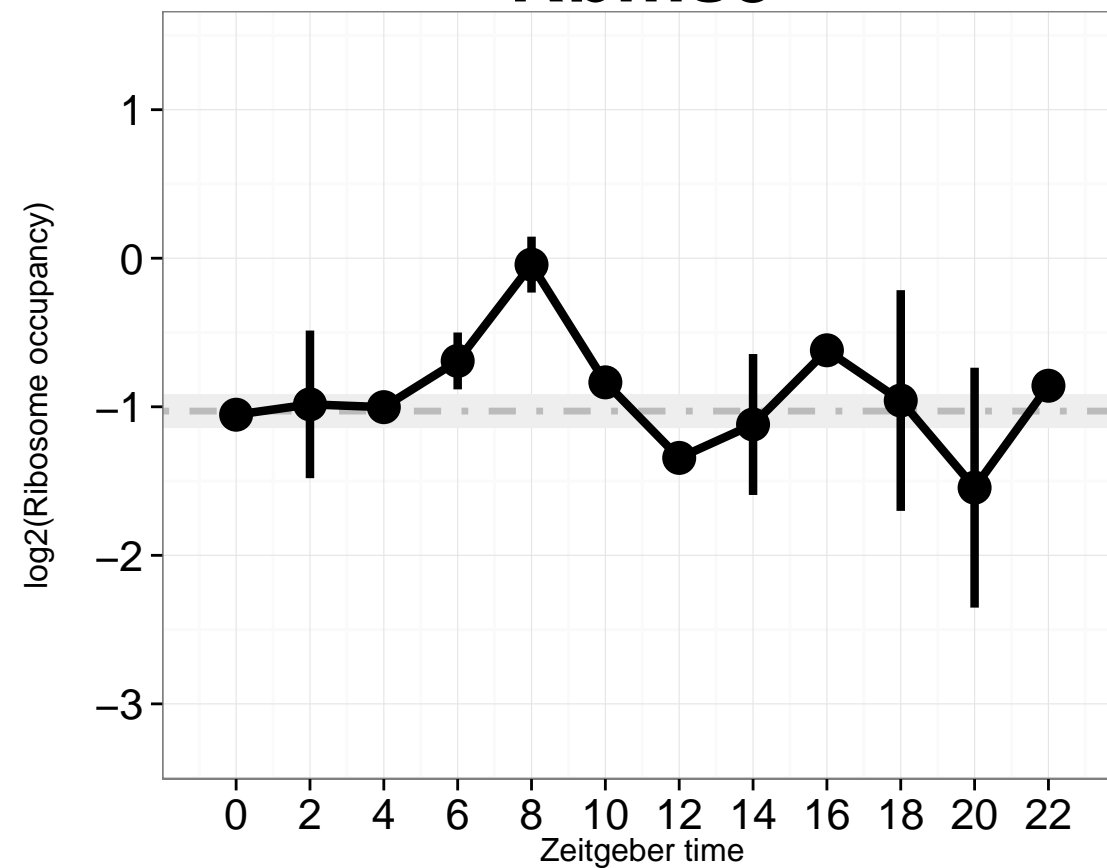

Supplement: SuppDataset_1.zip [file Rbms3_set_A.pdf › Supplemental Dataset 1/A-mRNA_nonrhyth_translation_nonrhyth/Rbms3_set_A.pdf]

## RbmX

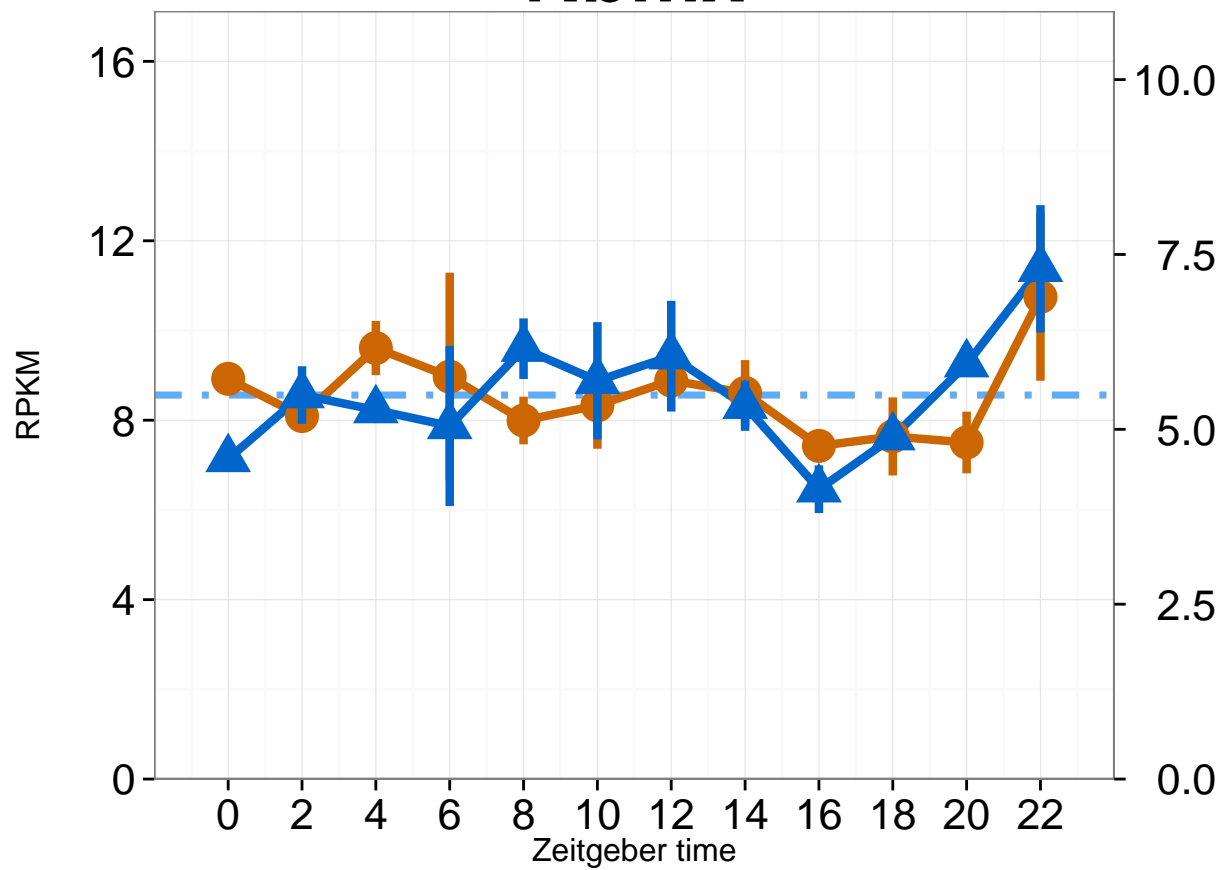

## RbmX

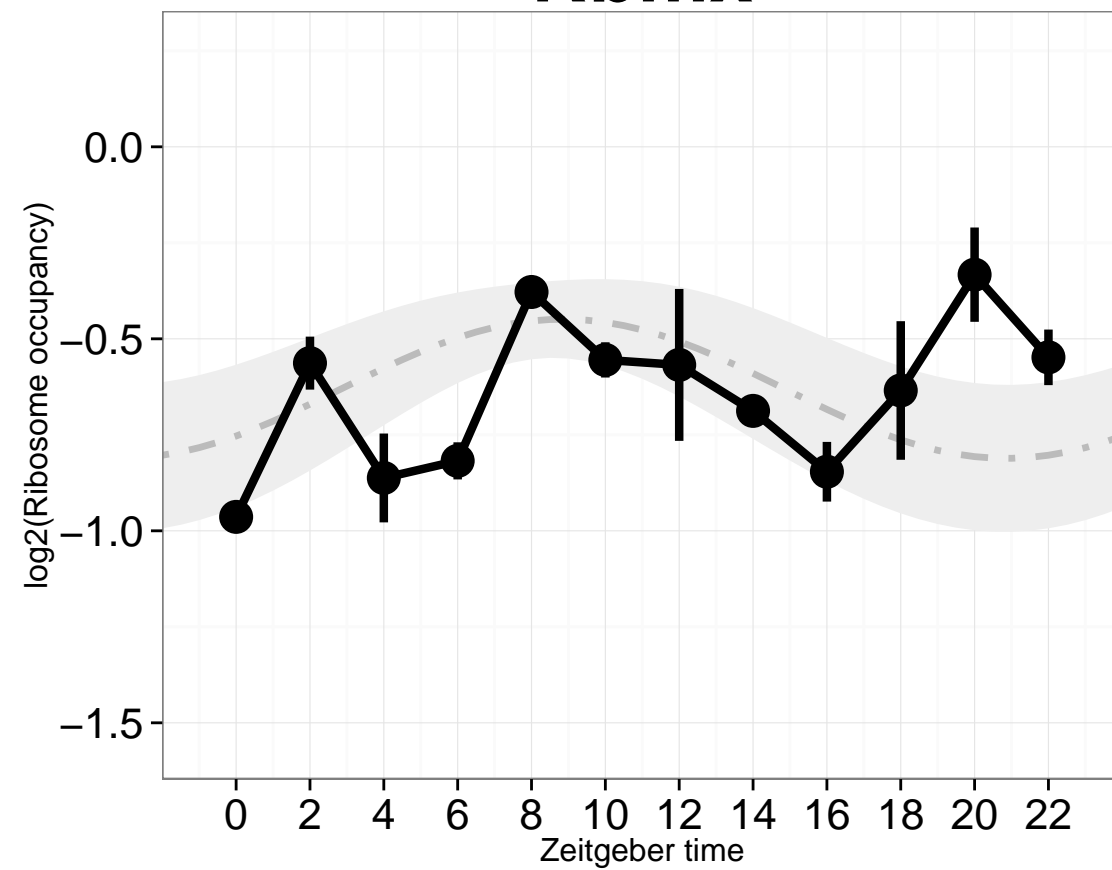

Supplement: SuppDataset_1.zip [file Rbmx_set_A.pdf › Supplemental Dataset 1/A-mRNA_nonrhyth_translation_nonrhyth/Rbmx_set_A.pdf]

# Rbmxl1

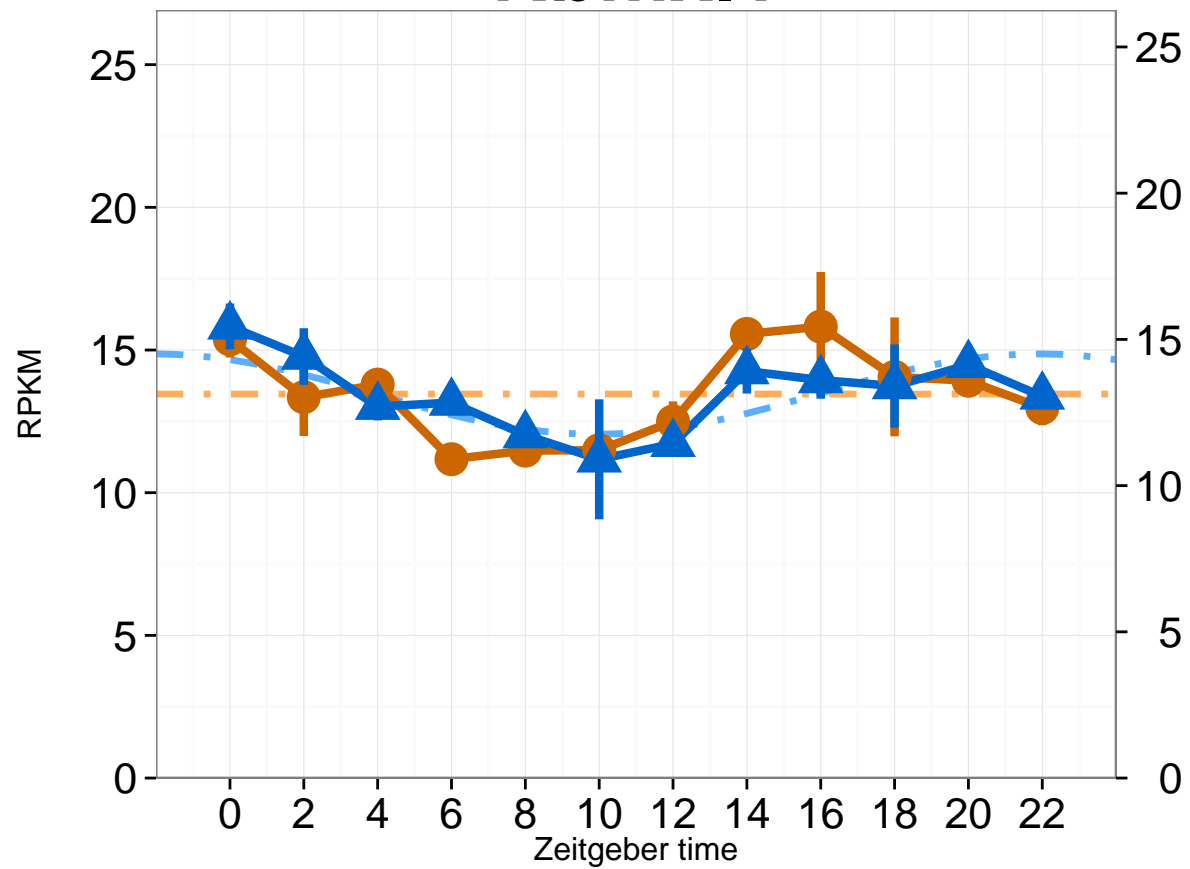

# Rbmxl1

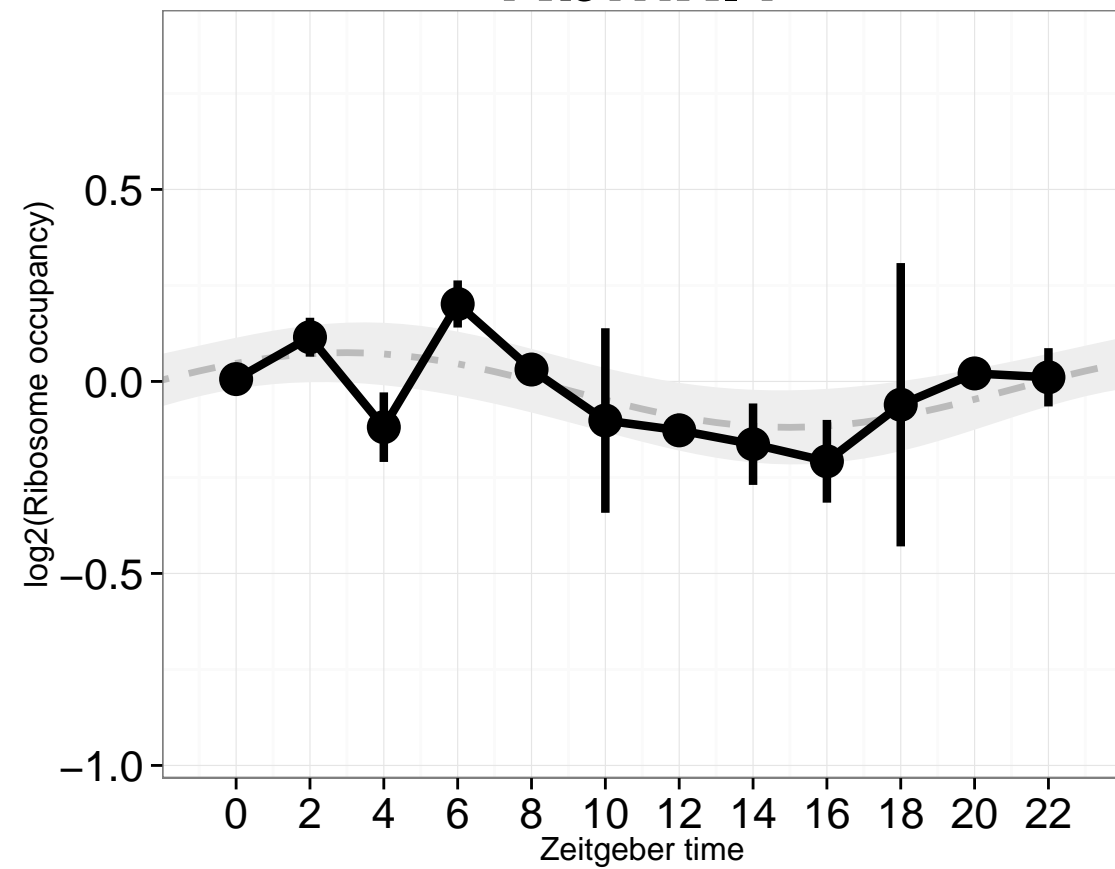

Supplement: SuppDataset_1.zip [file Rbmxl1_set_A.pdf › Supplemental Dataset 1/A-mRNA_nonrhyth_translation_nonrhyth/Rbmxl1_set_A.pdf]

# Rbp1

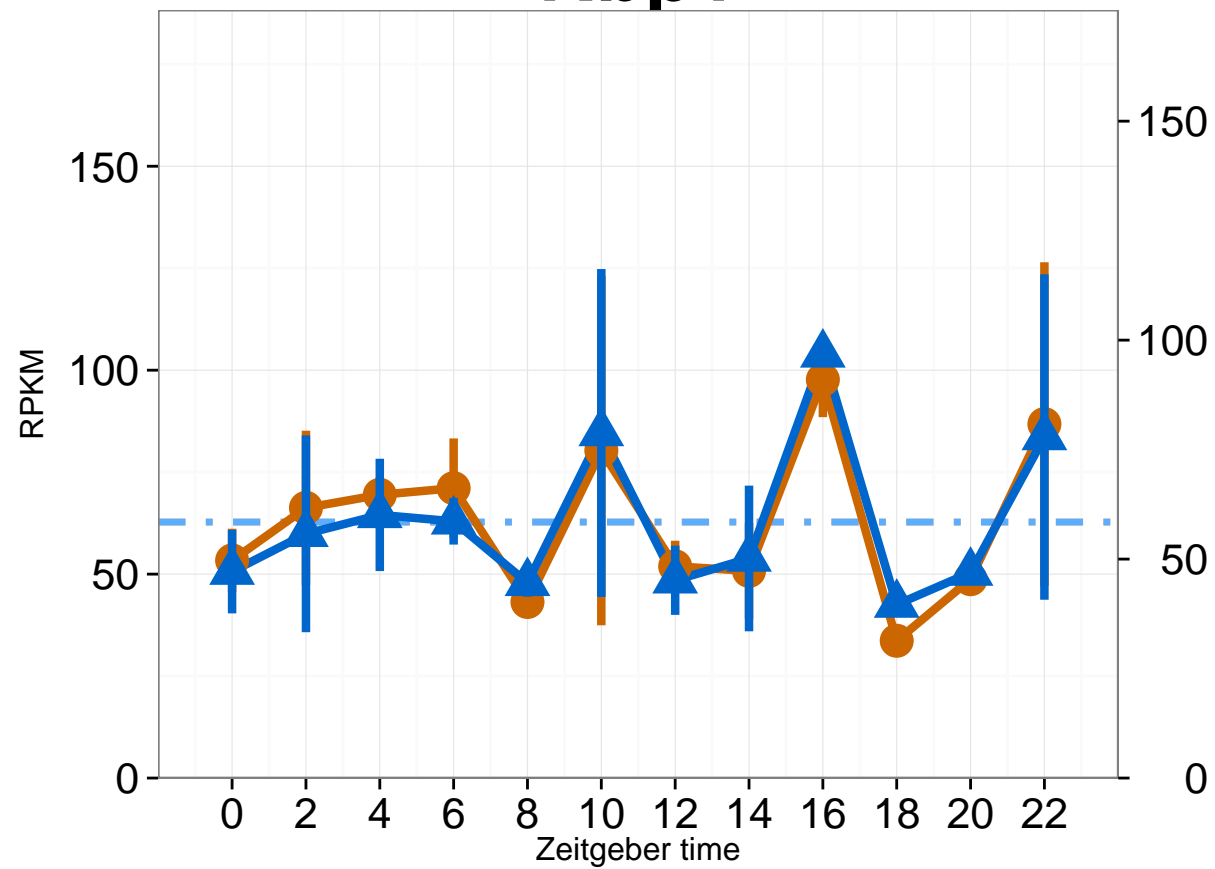

# Rbp1

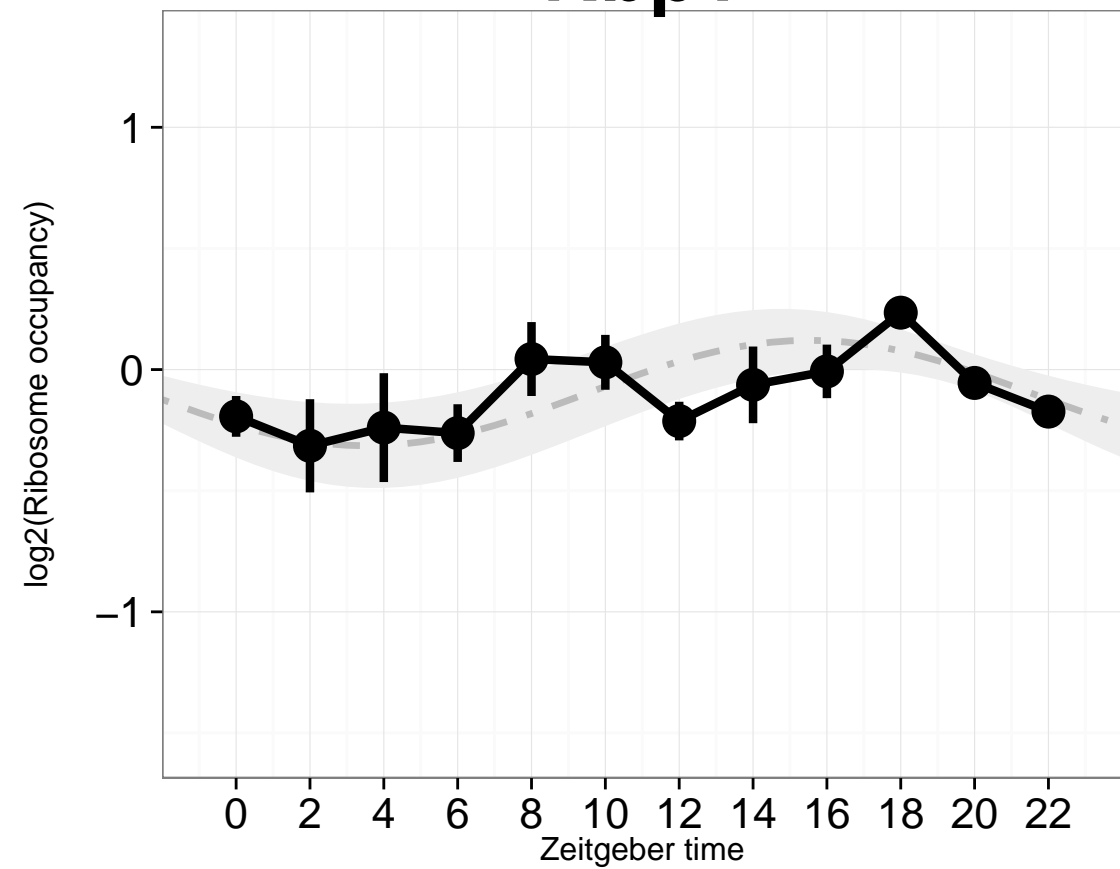

Supplement: SuppDataset_1.zip [file Rbp1_set_A.pdf › Supplemental Dataset 1/A-mRNA_nonrhyth_translation_nonrhyth/Rbp1_set_A.pdf]

## Rbp4

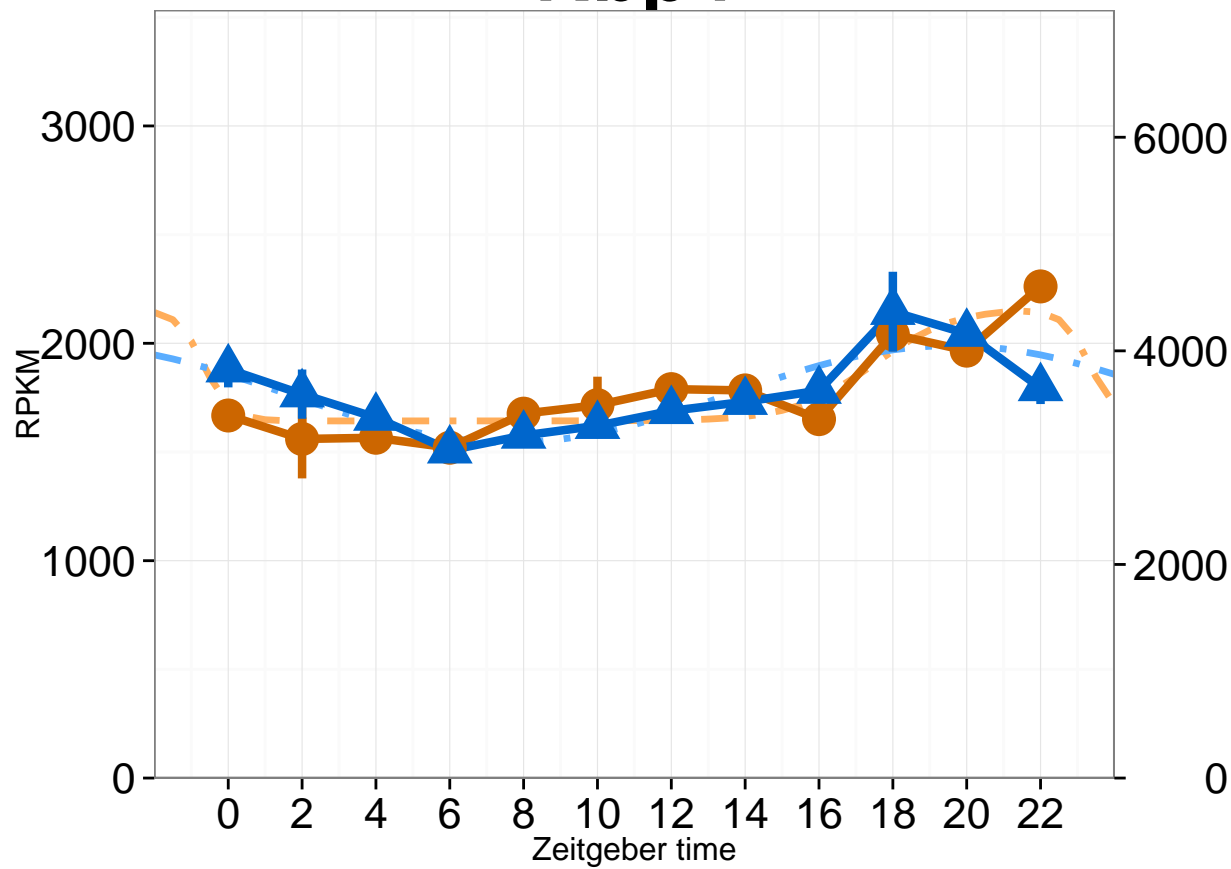

## Rbp4

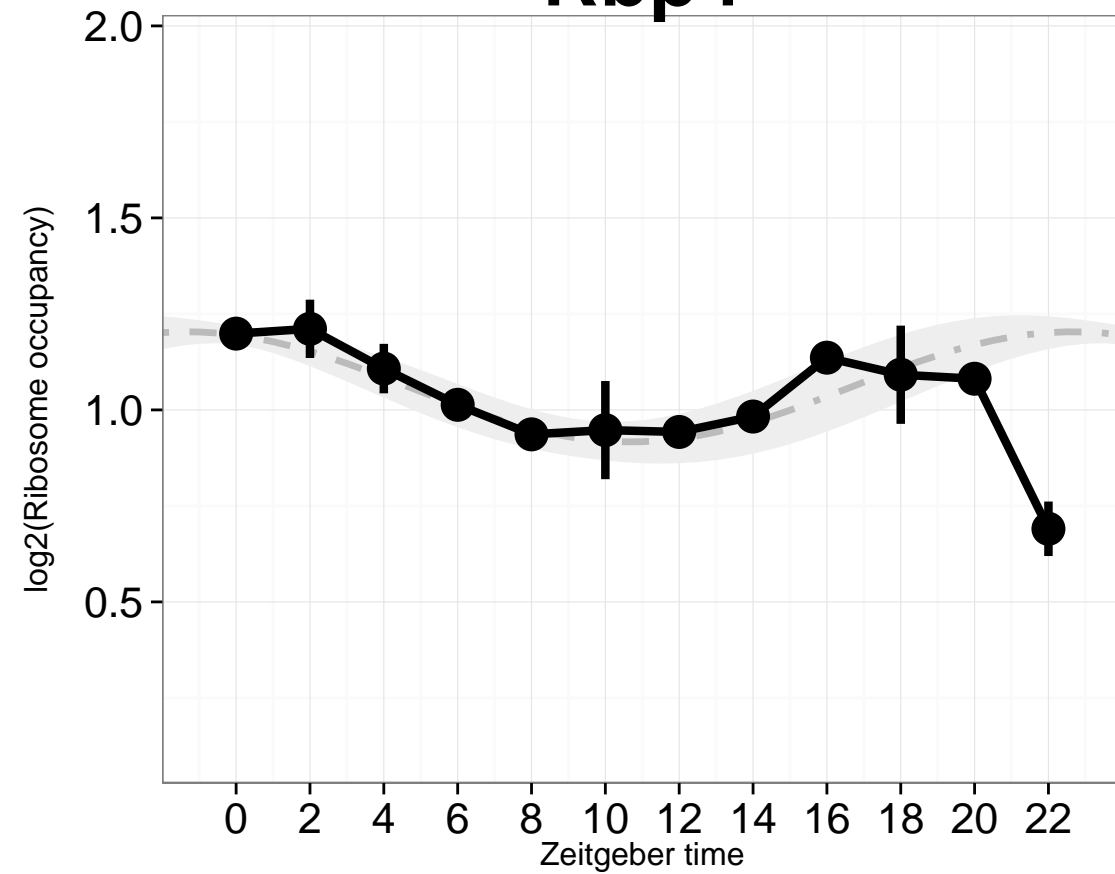

Supplement: SuppDataset_1.zip [file Rbp4_set_A.pdf › Supplemental Dataset 1/A-mRNA_nonrhyth_translation_nonrhyth/Rbp4_set_A.pdf]

## Rbpj

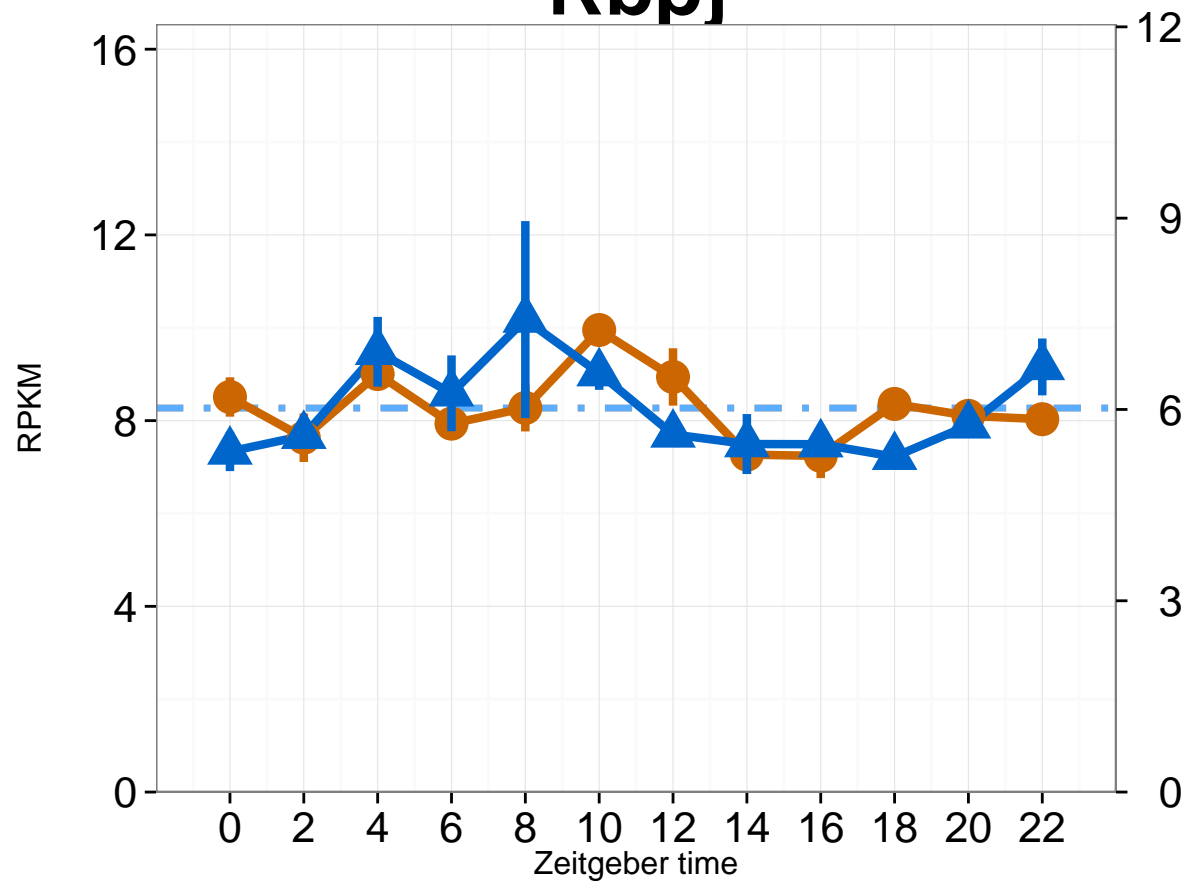

## Rbpj

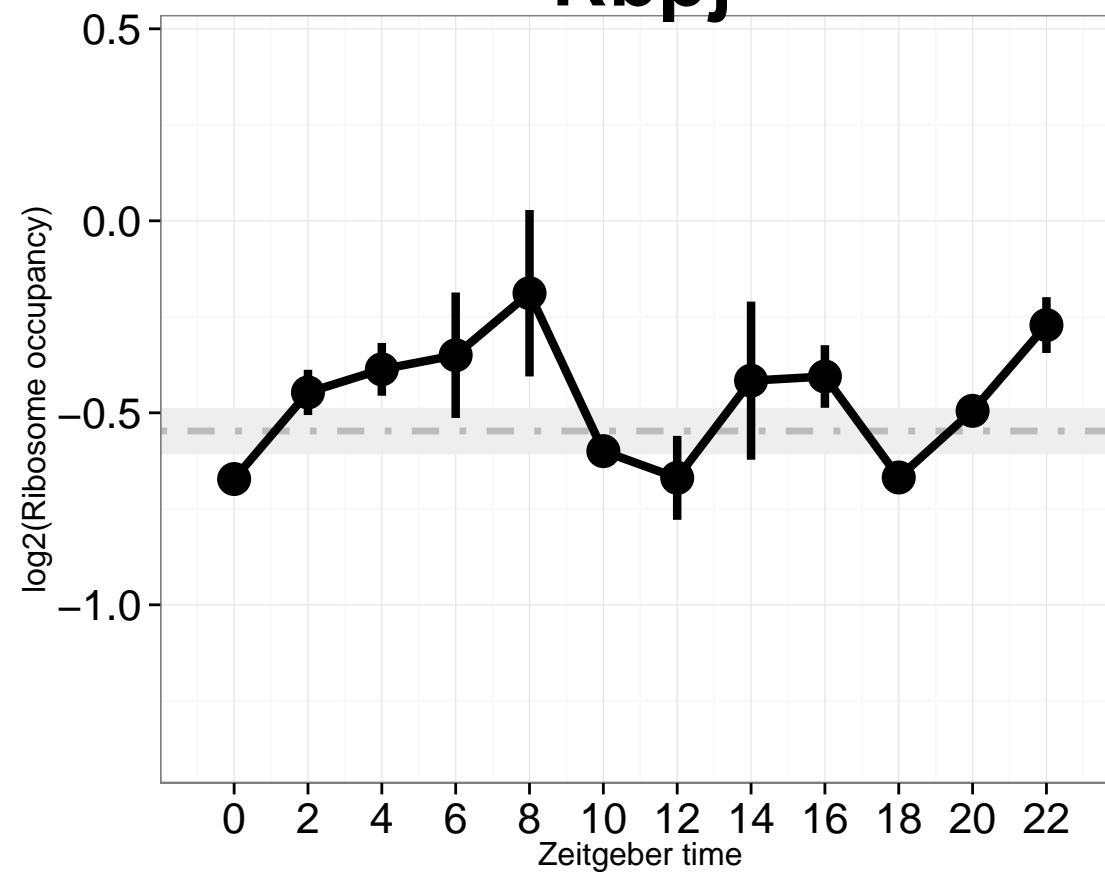

Supplement: SuppDataset_1.zip [file Rbpj_set_A.pdf › Supplemental Dataset 1/A-mRNA_nonrhyth_translation_nonrhyth/Rbpj_set_A.pdf]

## Rbpms2

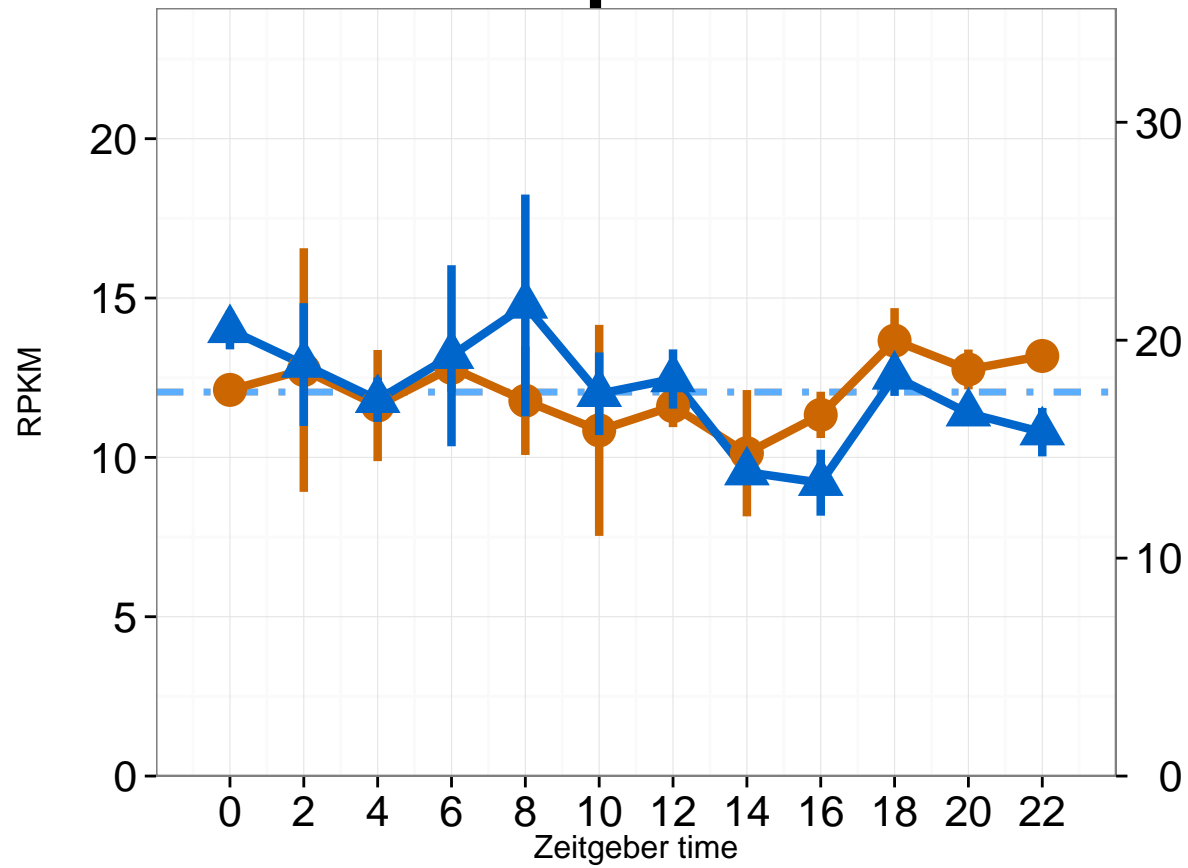

## Rbpms2

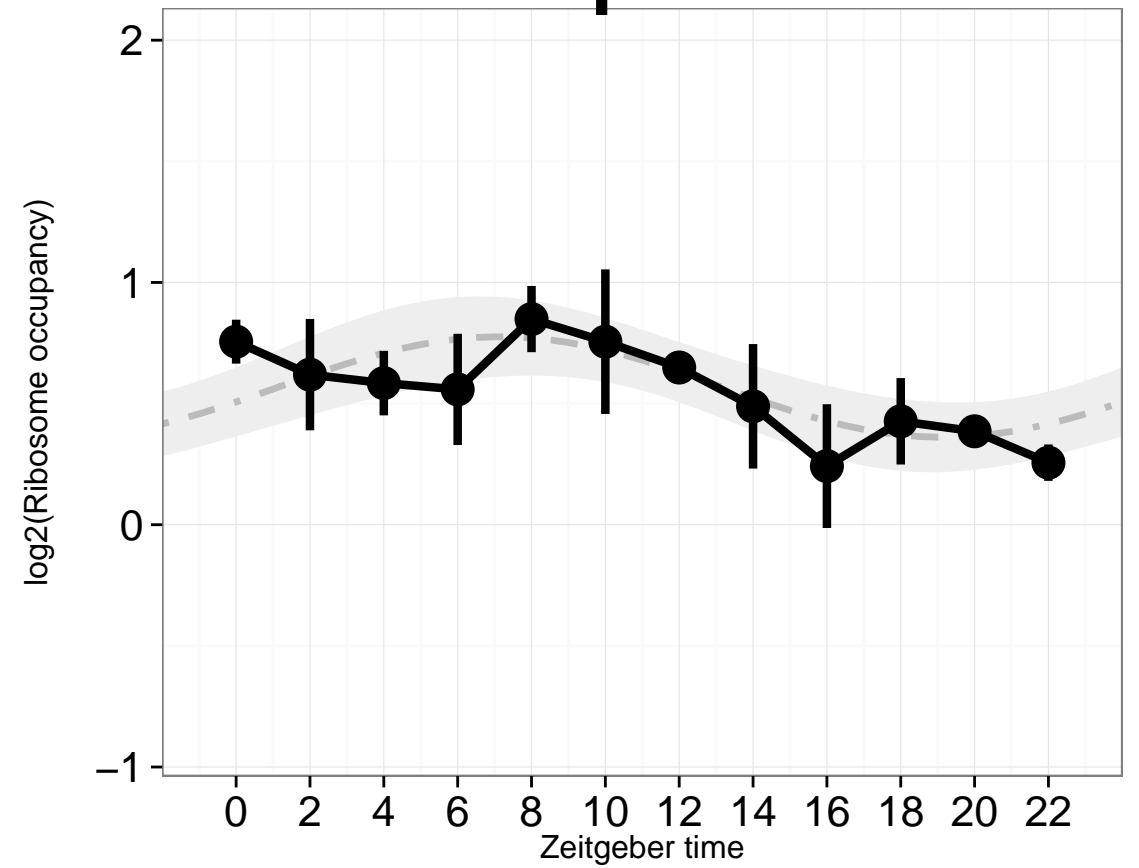

Supplement: SuppDataset_1.zip [file Rbpms2_set_A.pdf › Supplemental Dataset 1/A-mRNA_nonrhyth_translation_nonrhyth/Rbpms2_set_A.pdf]

## Rbx1

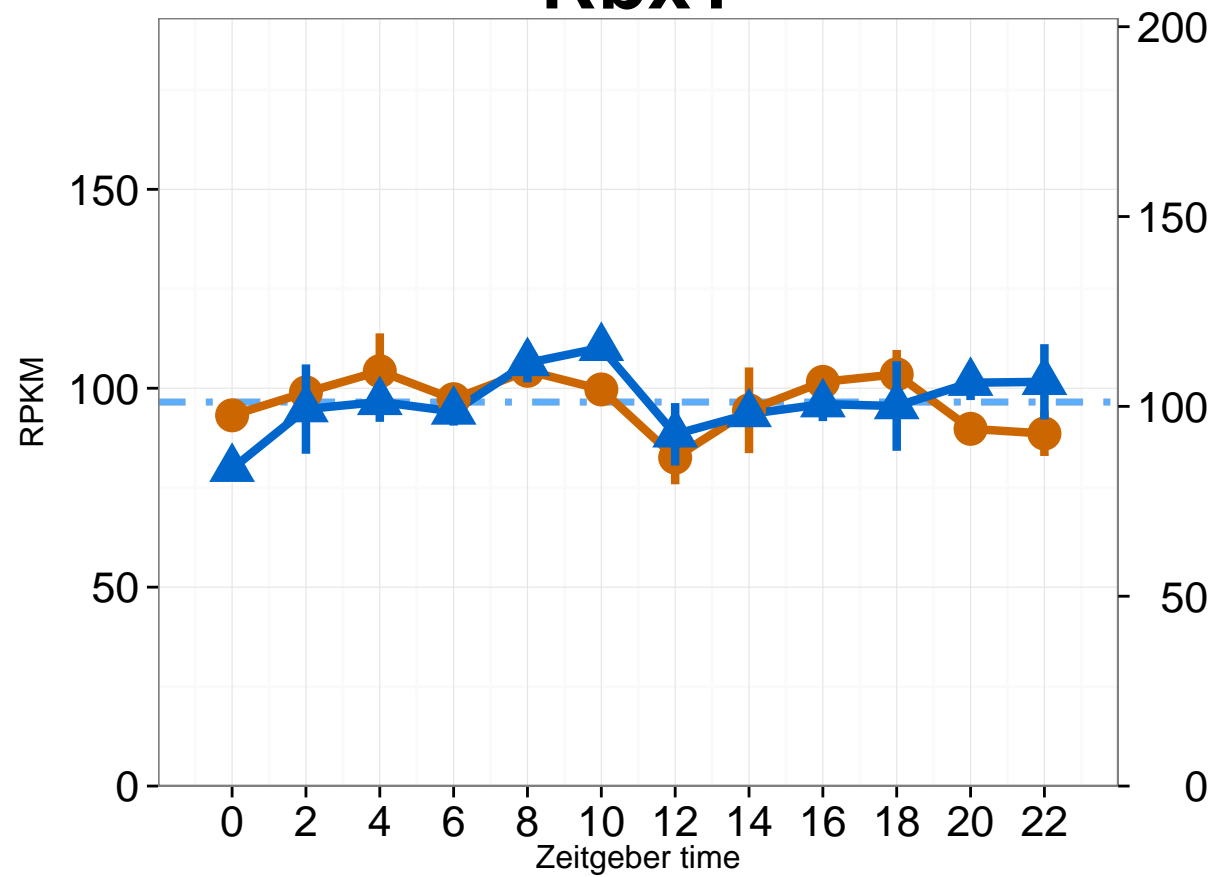

## Rbx1

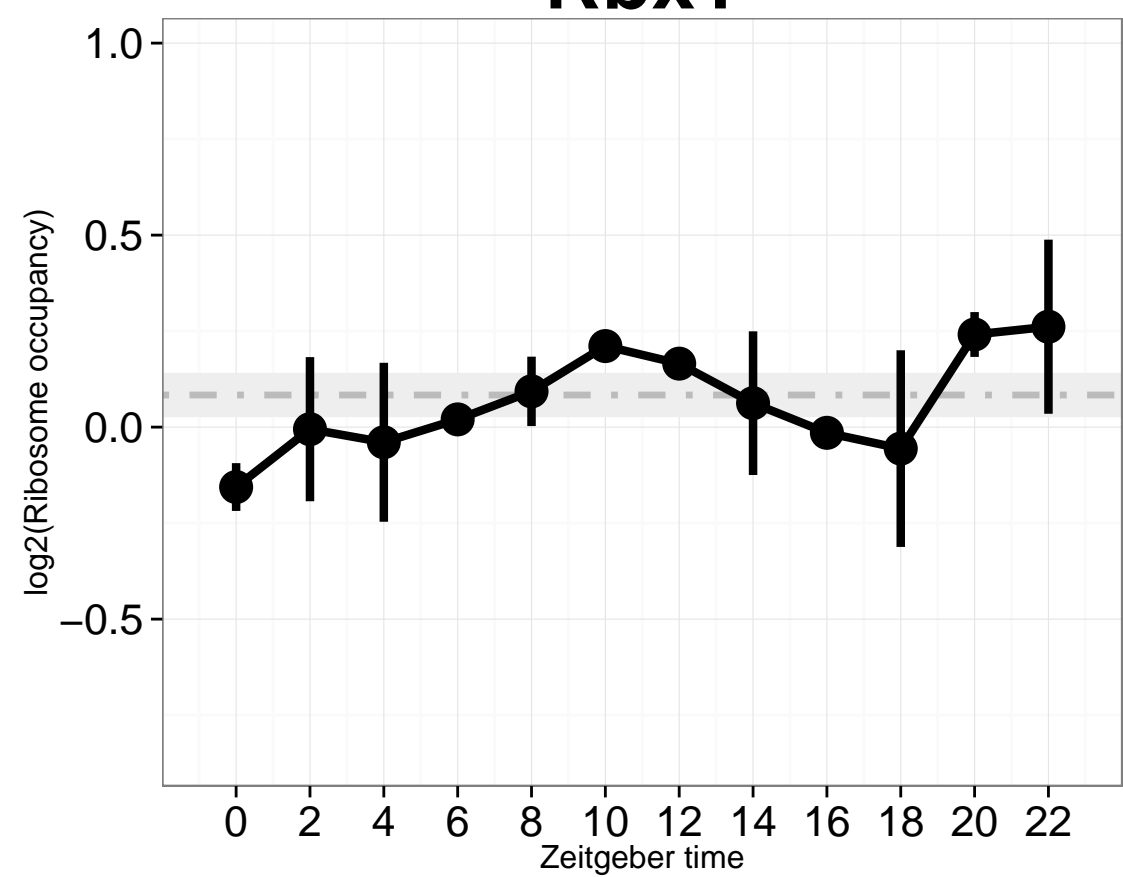

Supplement: SuppDataset_1.zip [file Rbx1_set_A.pdf › Supplemental Dataset 1/A-mRNA_nonrhyth_translation_nonrhyth/Rbx1_set_A.pdf]

# Rc3h1

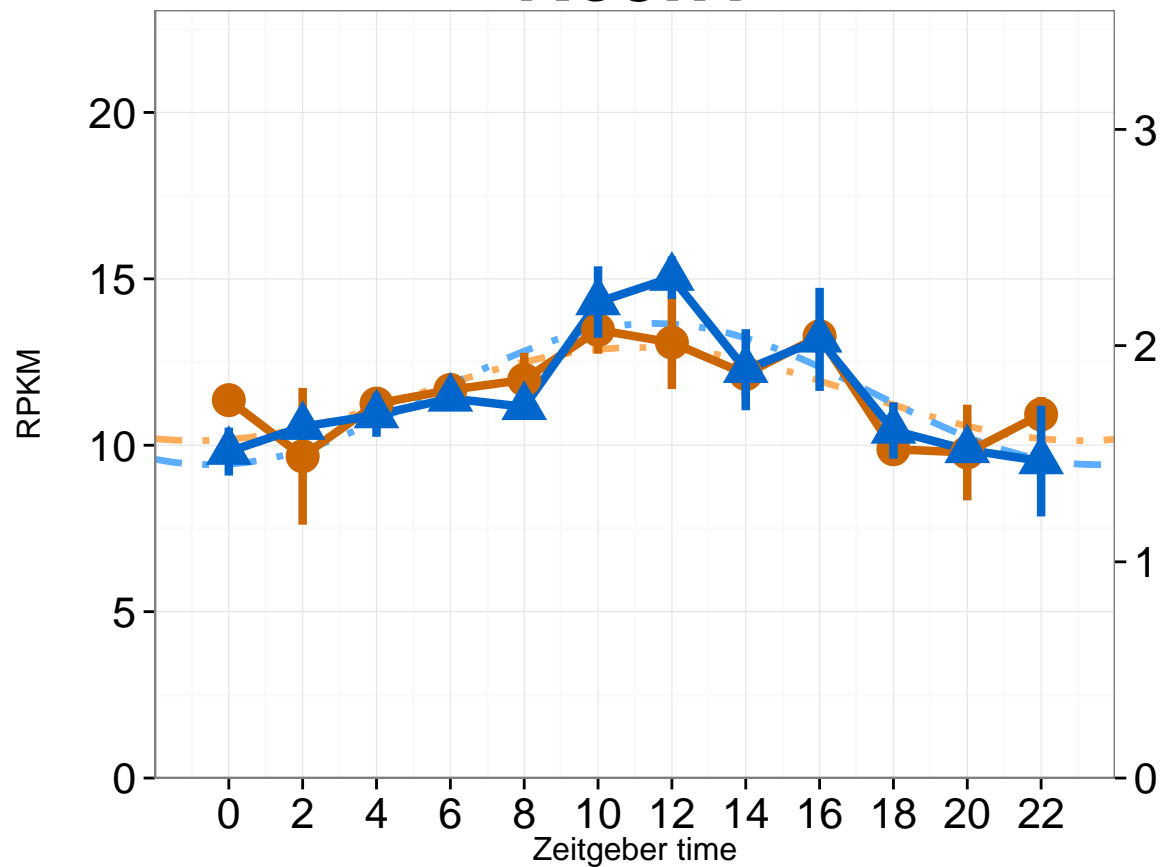

# Rc3h1

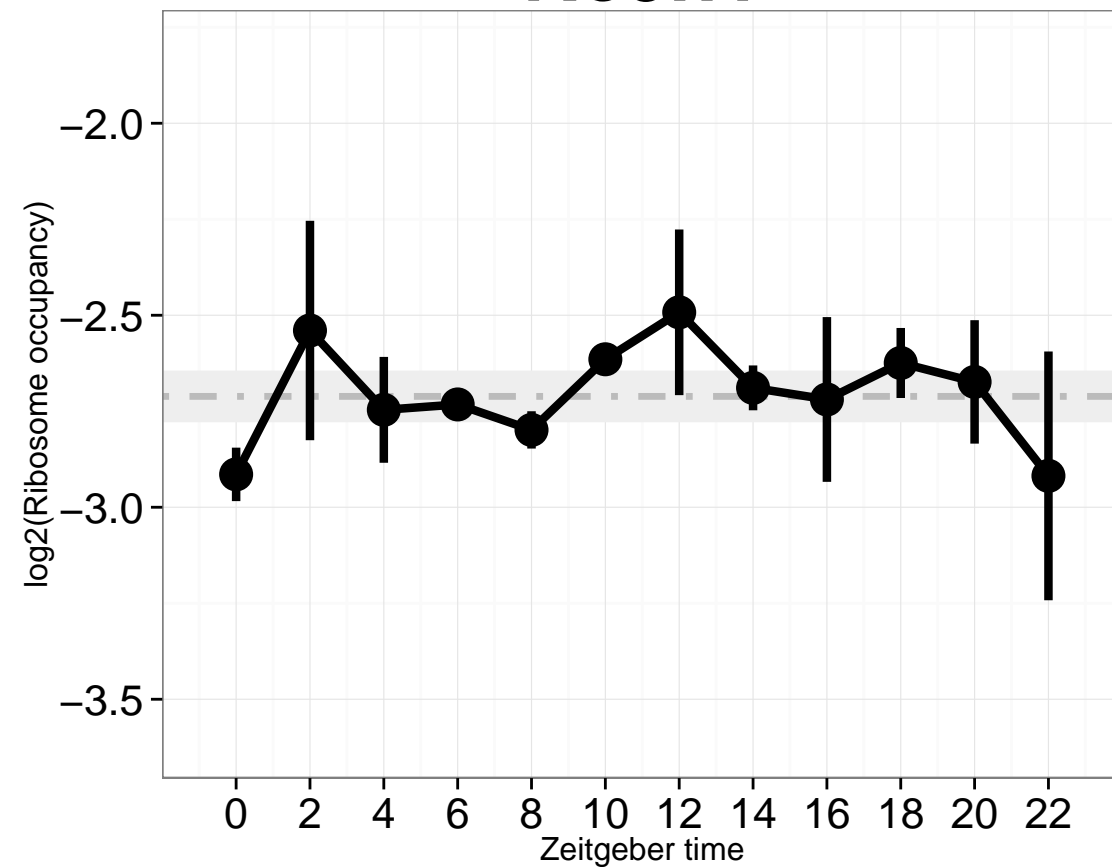

Supplement: SuppDataset_1.zip [file Rc3h1_set_A.pdf › Supplemental Dataset 1/A-mRNA_nonrhyth_translation_nonrhyth/Rc3h1_set_A.pdf]

# Rc3h2

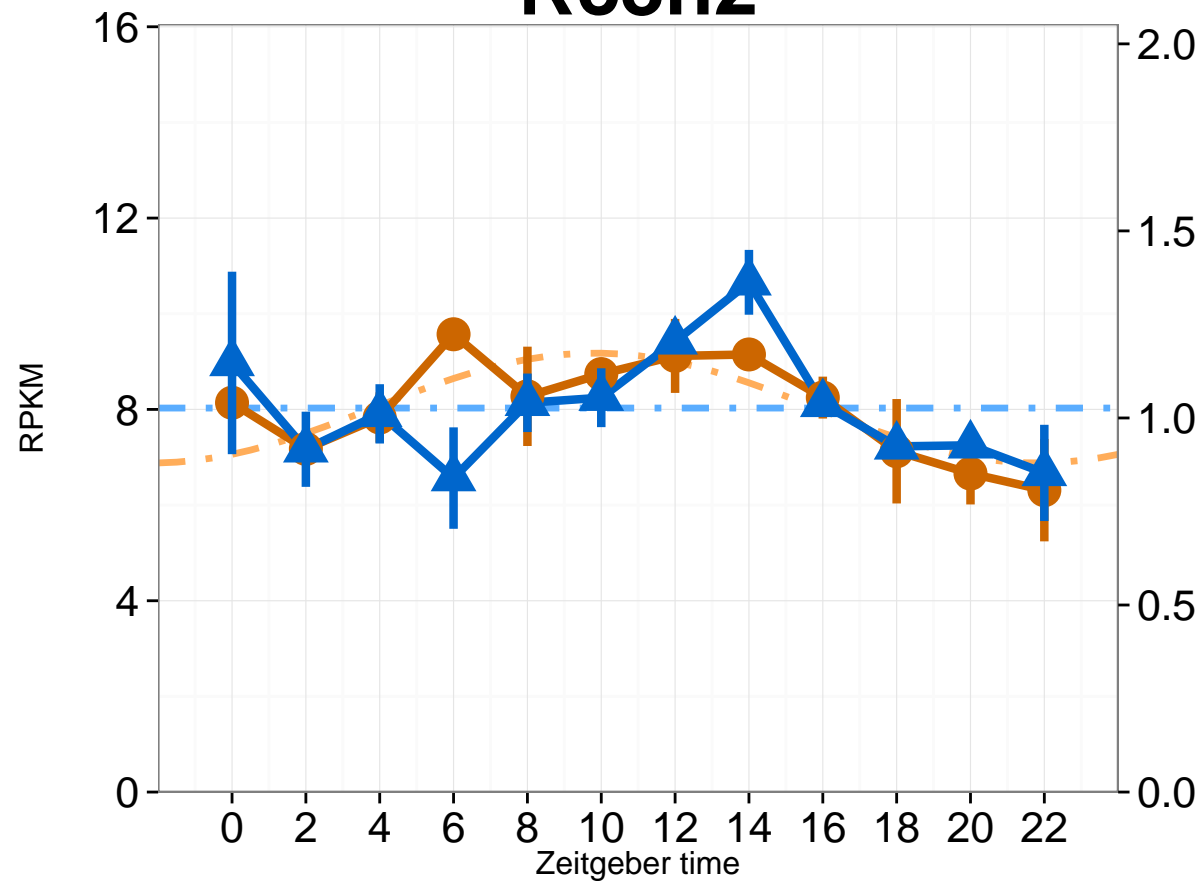

# Rc3h2

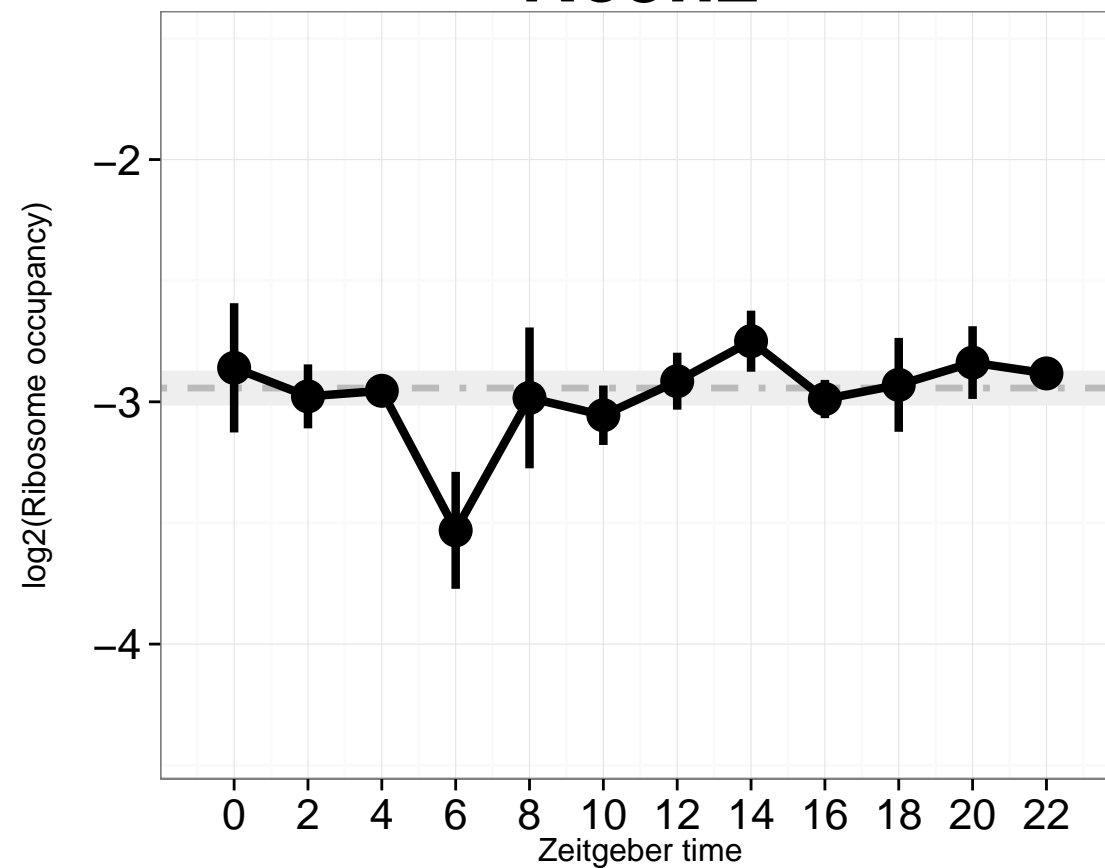

Supplement: SuppDataset_1.zip [file Rc3h2_set_A.pdf › Supplemental Dataset 1/A-mRNA_nonrhyth_translation_nonrhyth/Rc3h2_set_A.pdf]

## Rcbtb1

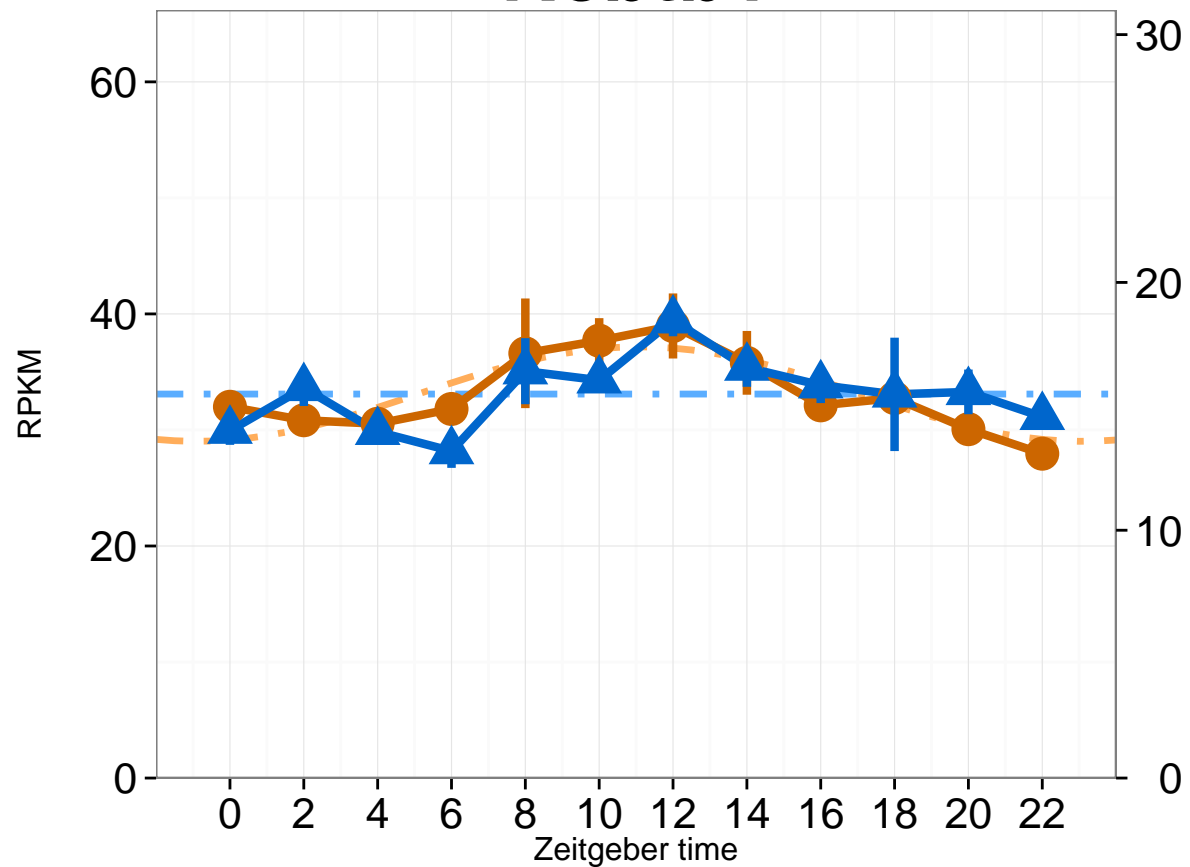

## Rcbtb1

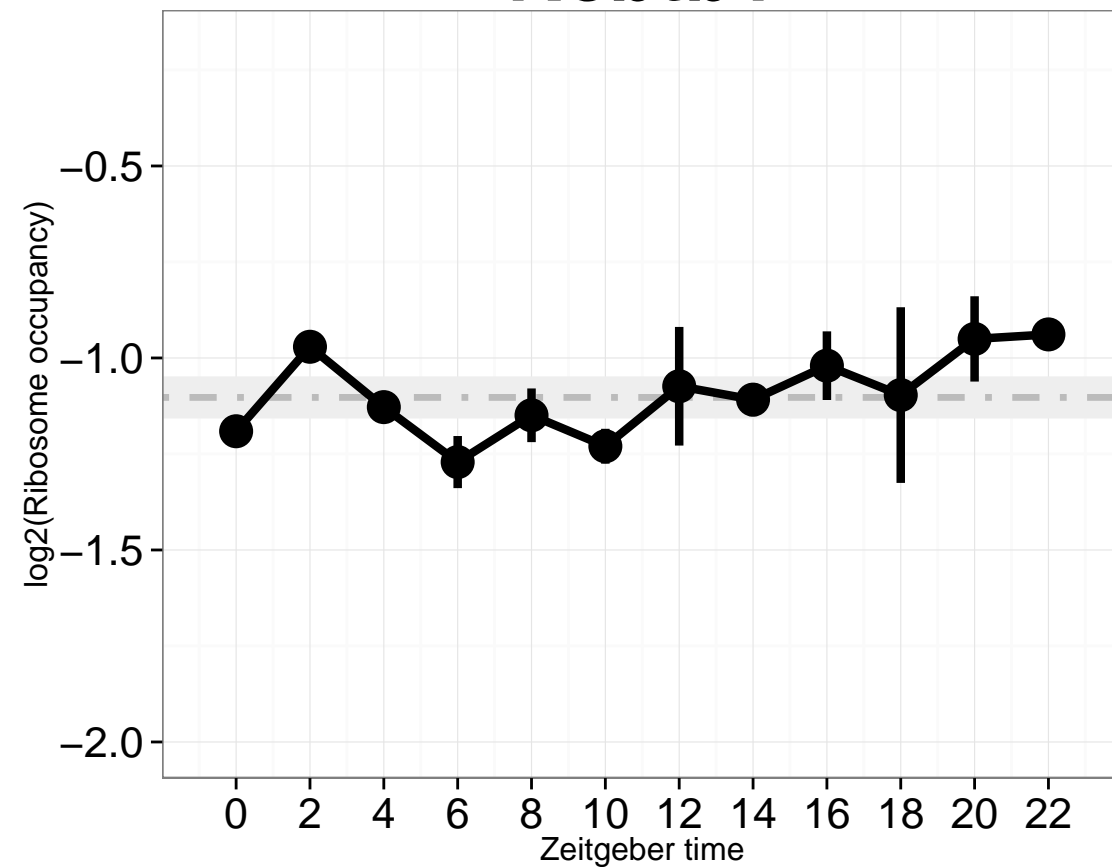

Supplement: SuppDataset_1.zip [file Rcbtb1_set_A.pdf › Supplemental Dataset 1/A-mRNA_nonrhyth_translation_nonrhyth/Rcbtb1_set_A.pdf]

# Rcbtb2

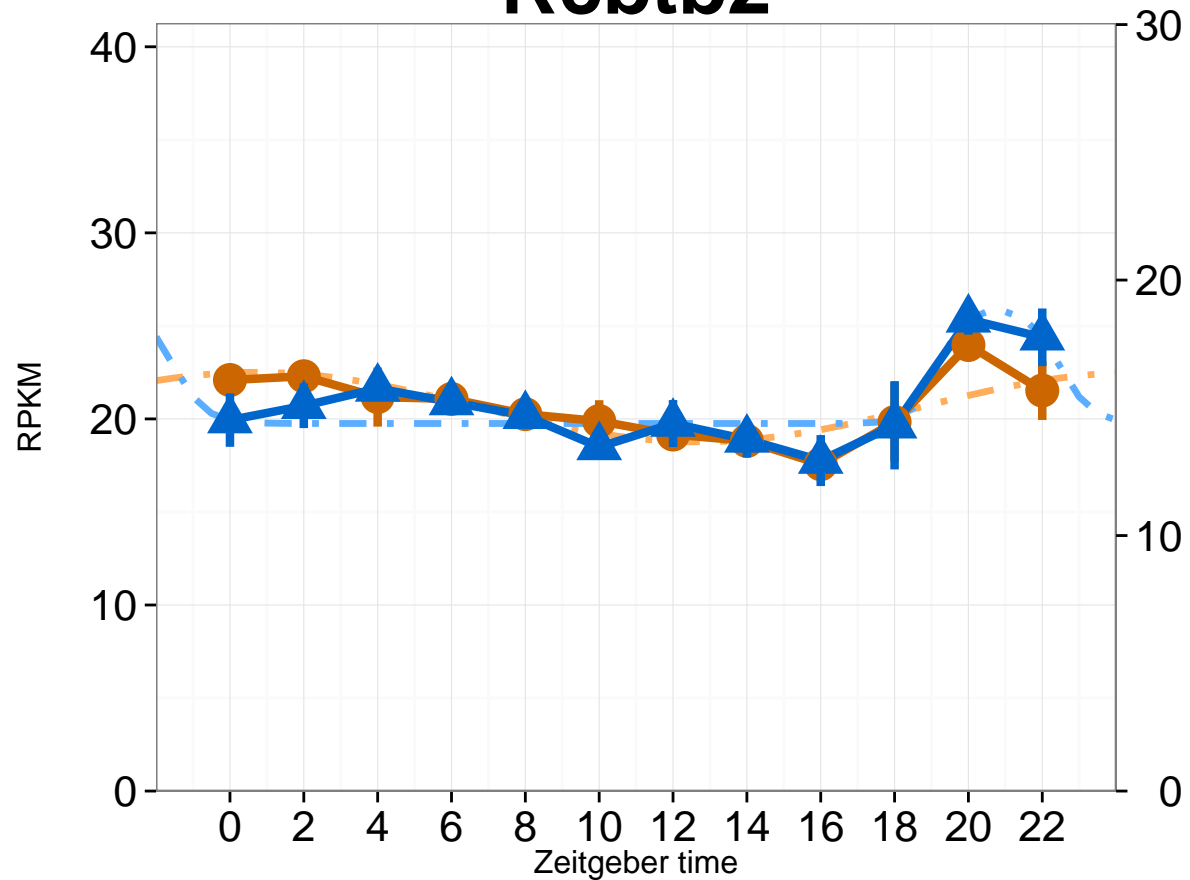

# Rcbtb2

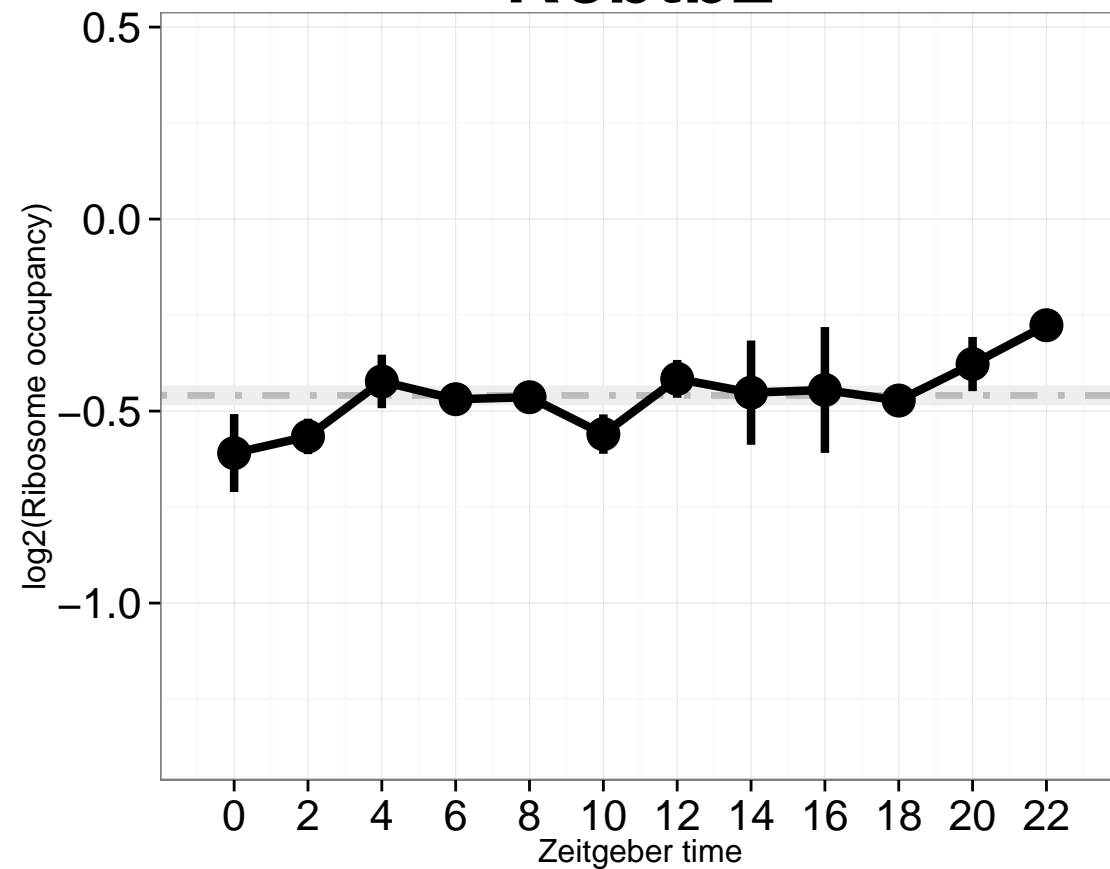

Supplement: SuppDataset_1.zip [file Rcbtb2_set_A.pdf › Supplemental Dataset 1/A-mRNA_nonrhyth_translation_nonrhyth/Rcbtb2_set_A.pdf]

## Rcc1

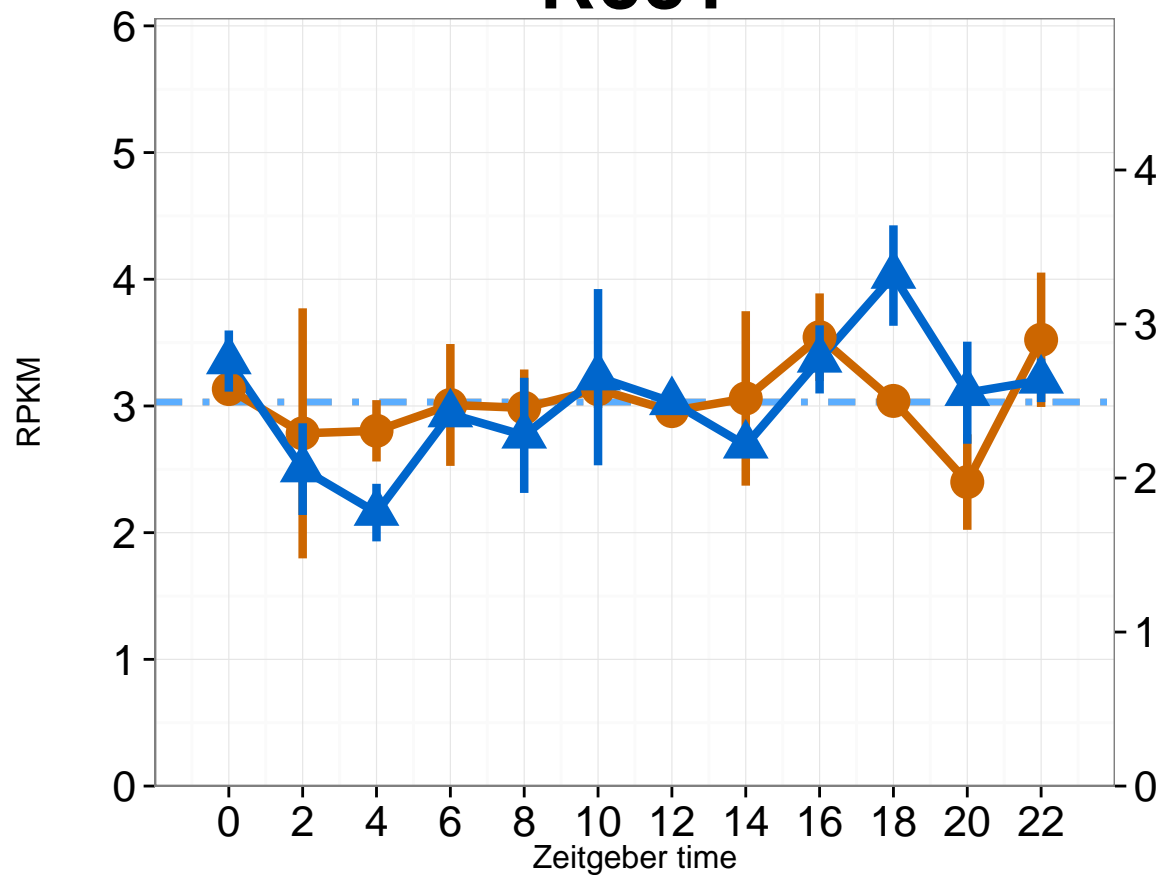

## Rcc1

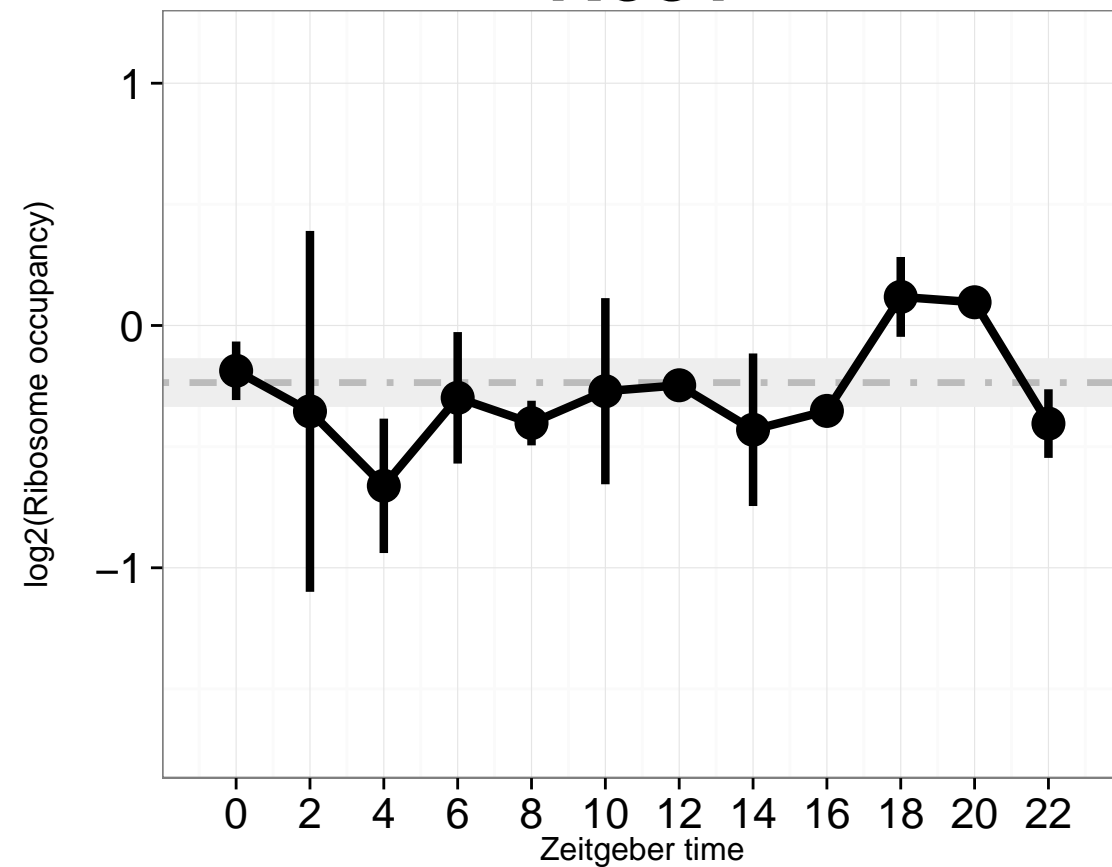

Supplement: SuppDataset_1.zip [file Rcc1_set_A.pdf › Supplemental Dataset 1/A-mRNA_nonrhyth_translation_nonrhyth/Rcc1_set_A.pdf]

## Rcc2

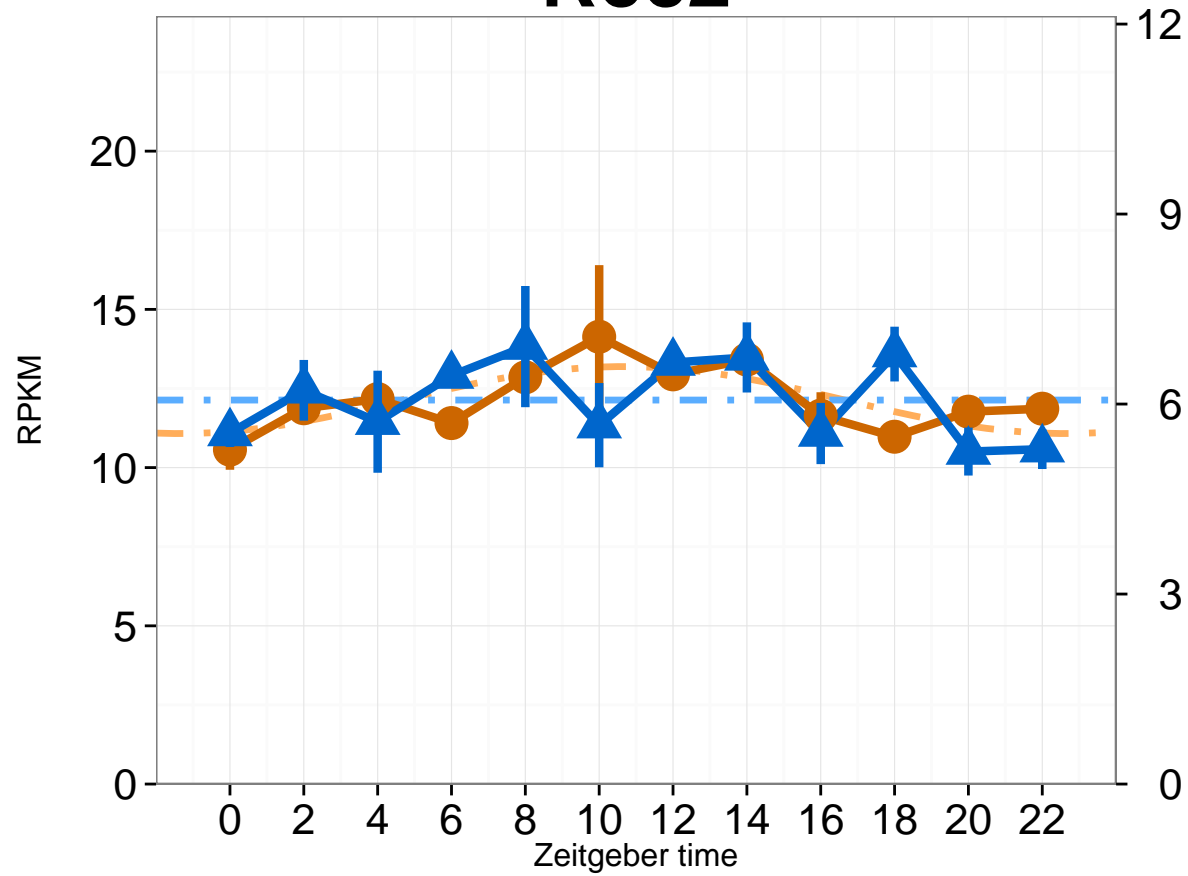

## Rcc2

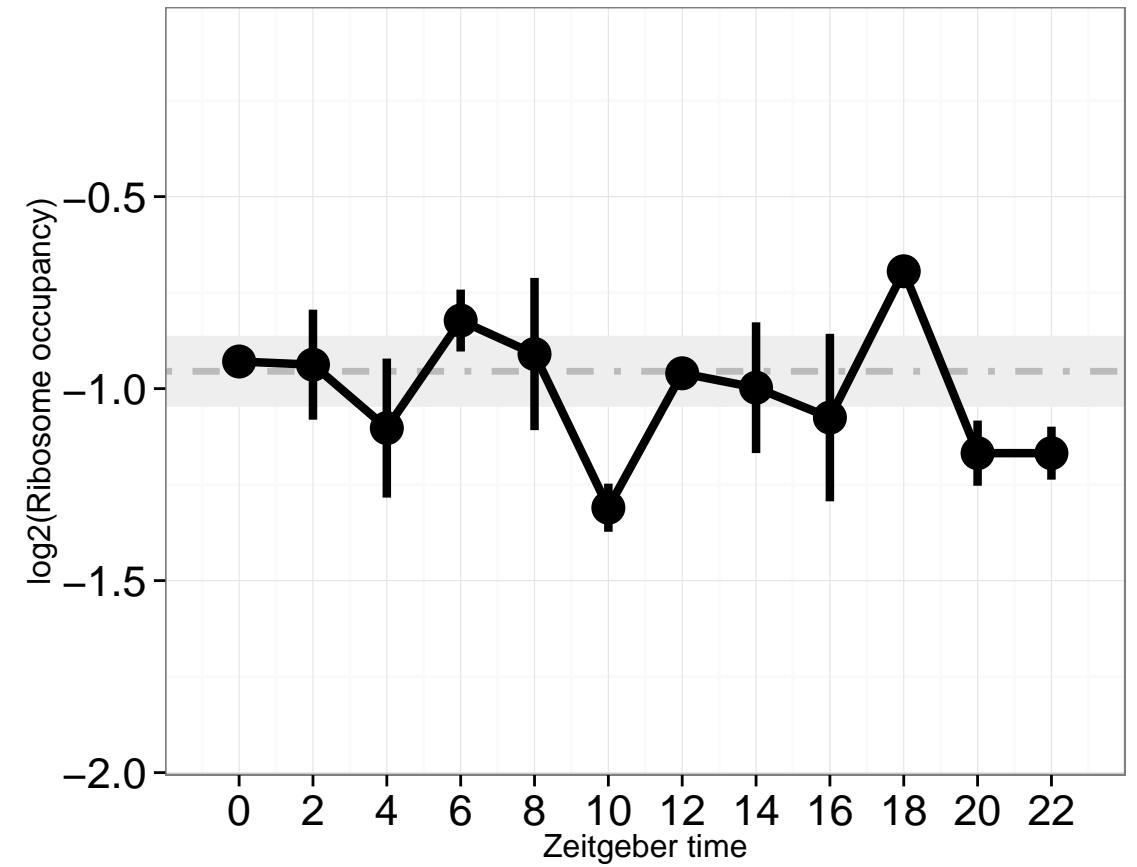

Supplement: SuppDataset_1.zip [file Rcc2_set_A.pdf › Supplemental Dataset 1/A-mRNA_nonrhyth_translation_nonrhyth/Rcc2_set_A.pdf]

## Rccd1

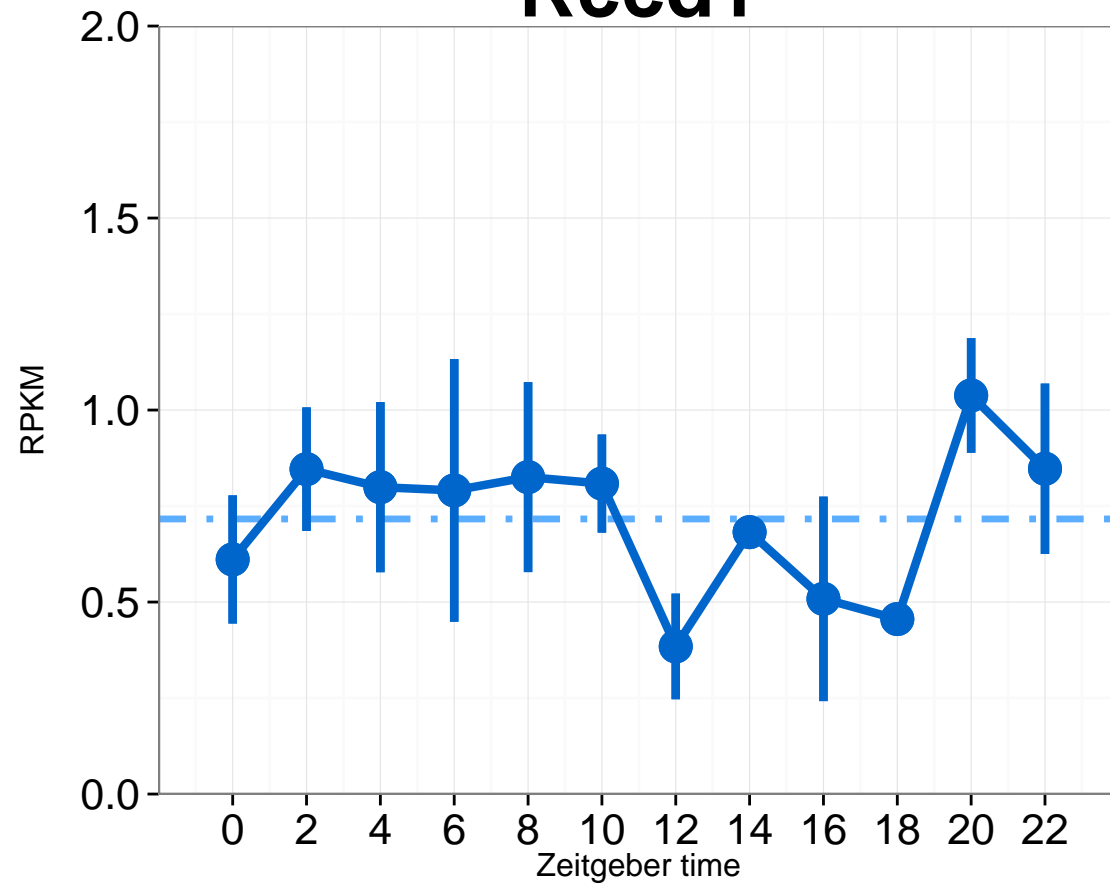

## Rccd1 log2(Ribosome occupancy

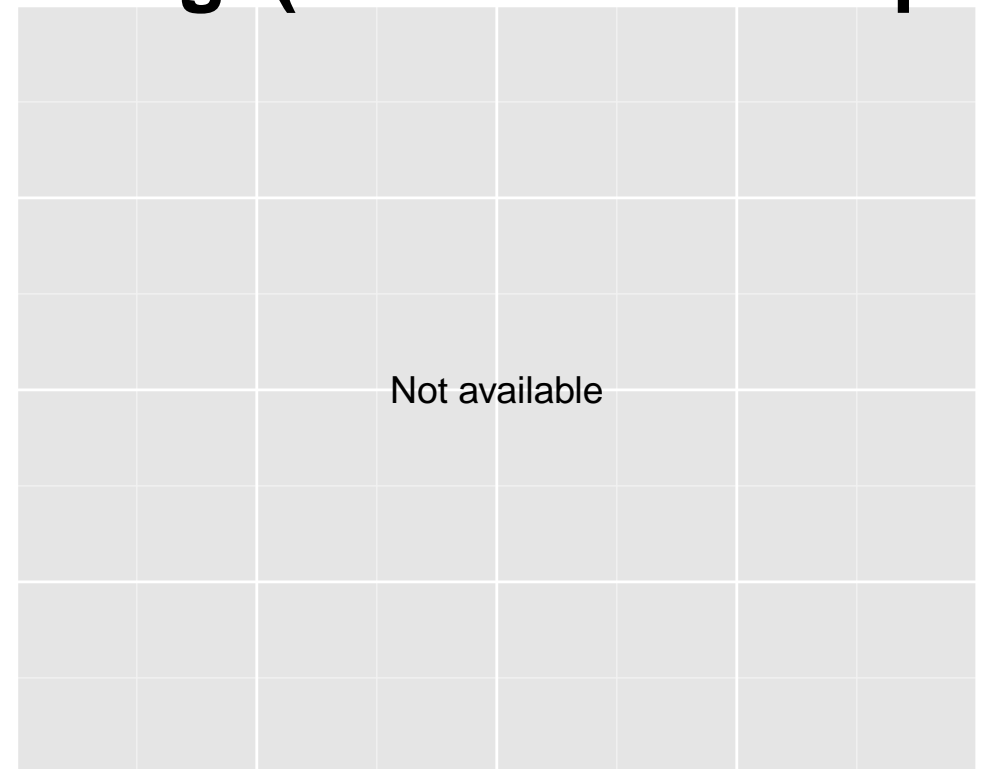

Supplement: SuppDataset_1.zip [file Rccd1_set_A.pdf › Supplemental Dataset 1/A-mRNA_nonrhyth_translation_nonrhyth/Rccd1_set_A.pdf]

## Rchy1

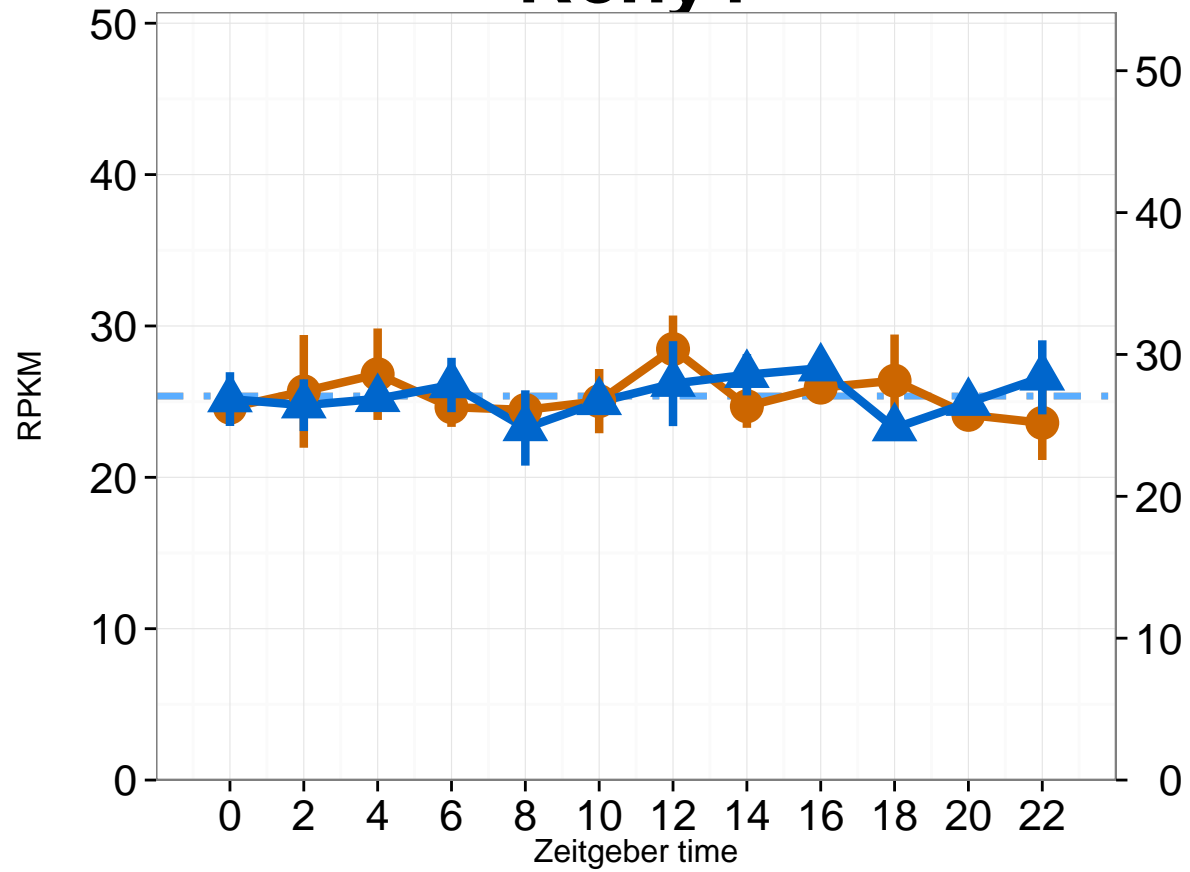

## Rchy1

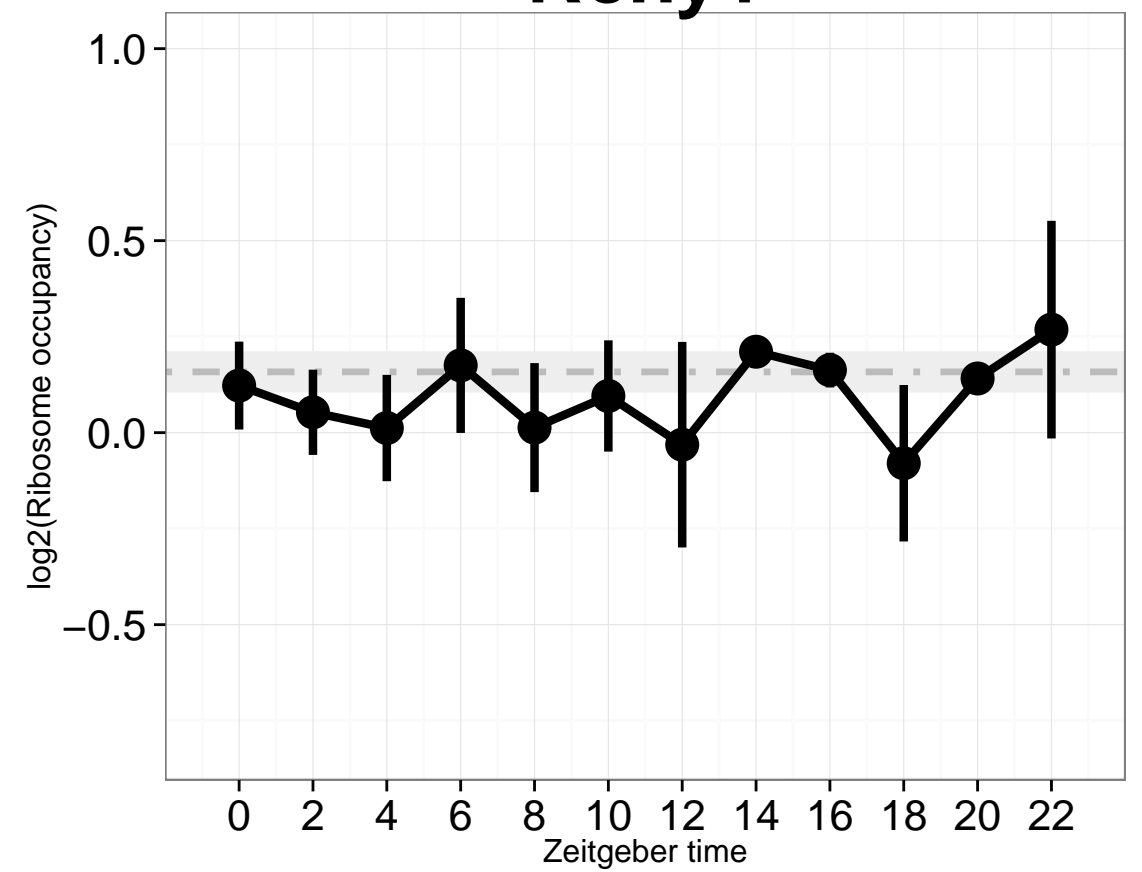

Supplement: SuppDataset_1.zip [file Rchy1_set_A.pdf › Supplemental Dataset 1/A-mRNA_nonrhyth_translation_nonrhyth/Rchy1_set_A.pdf]

# Rcn1

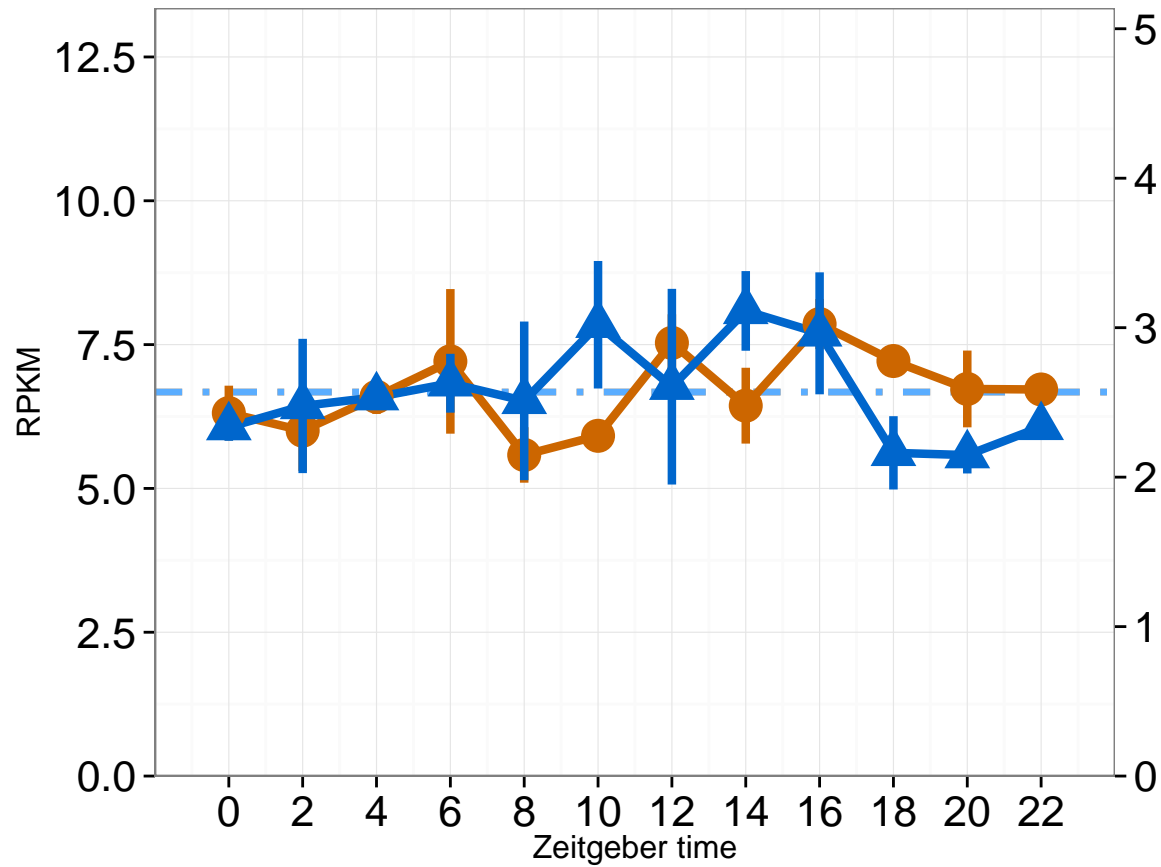

# Rcn1

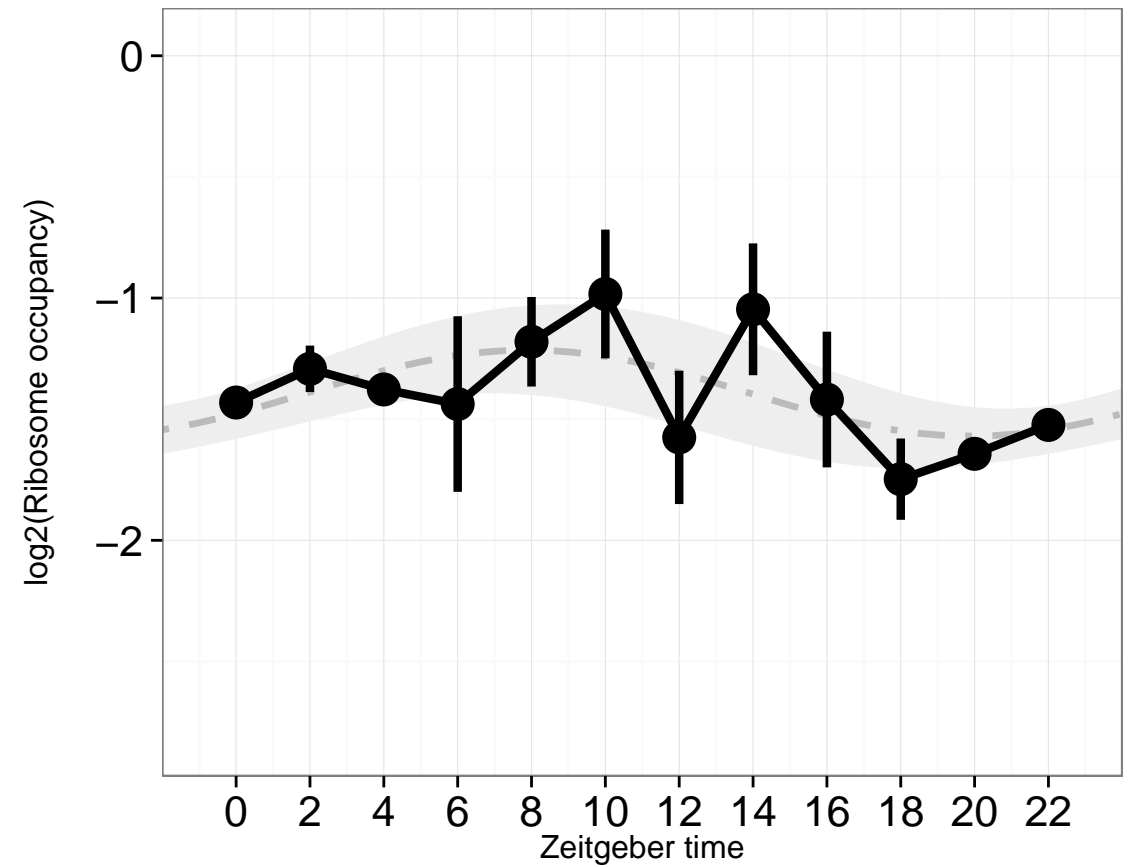

Supplement: SuppDataset_1.zip [file Rcn1_set_A.pdf › Supplemental Dataset 1/A-mRNA_nonrhyth_translation_nonrhyth/Rcn1_set_A.pdf]

## Rcn2

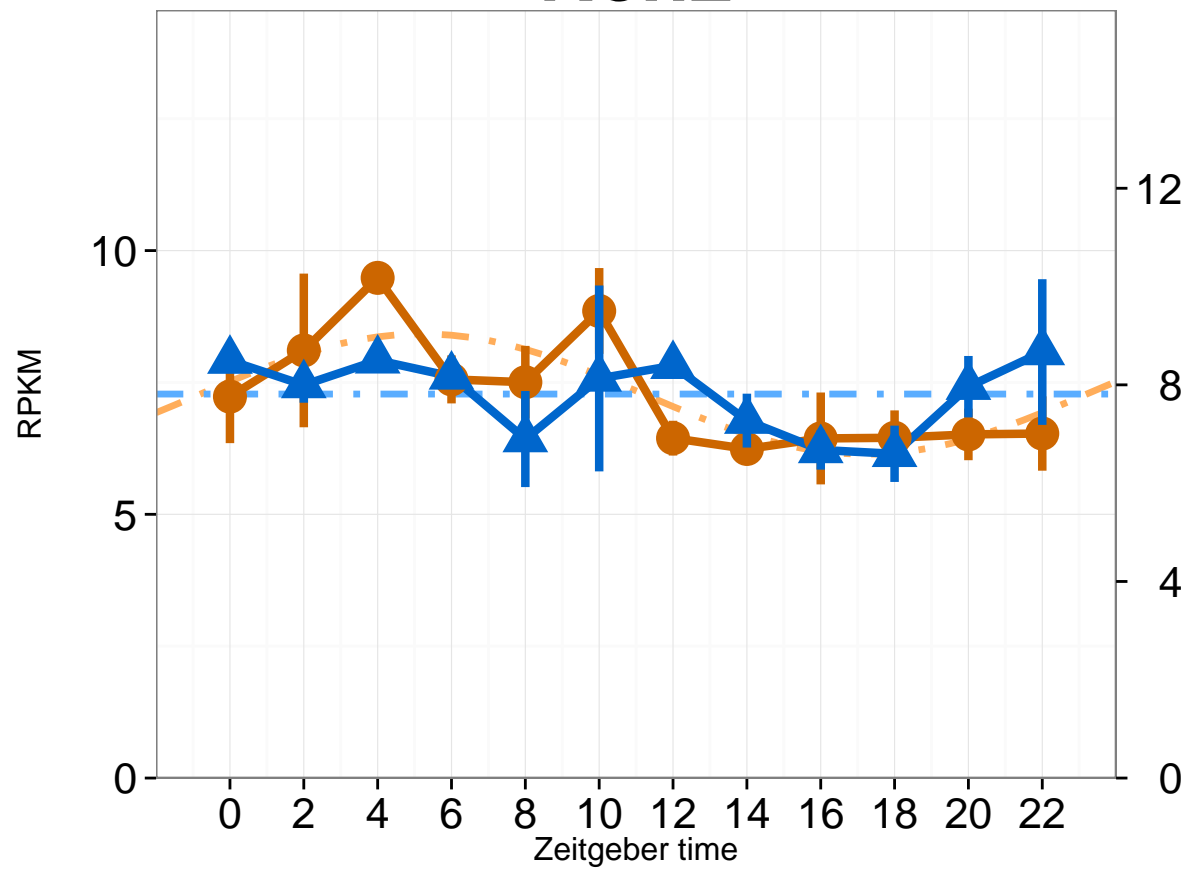

## Rcn2

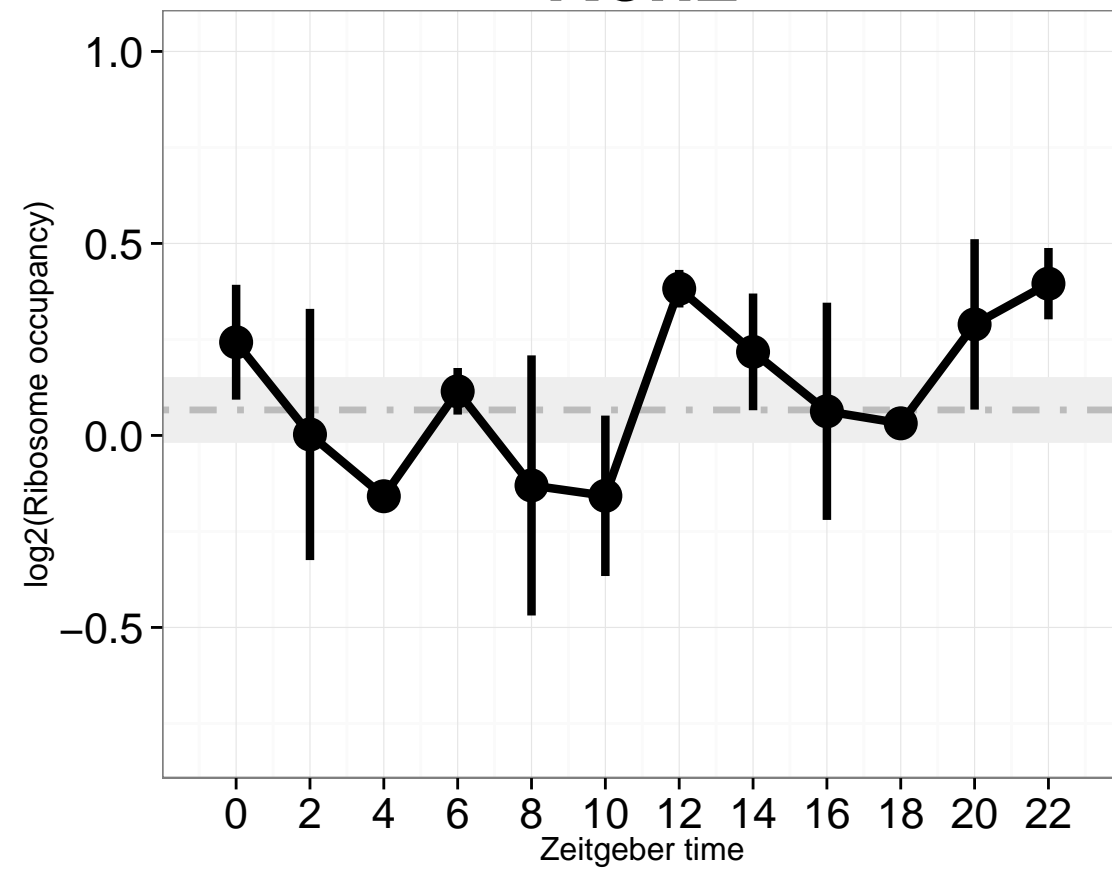

Supplement: SuppDataset_1.zip [file Rcn2_set_A.pdf › Supplemental Dataset 1/A-mRNA_nonrhyth_translation_nonrhyth/Rcn2_set_A.pdf]

## Rcn3

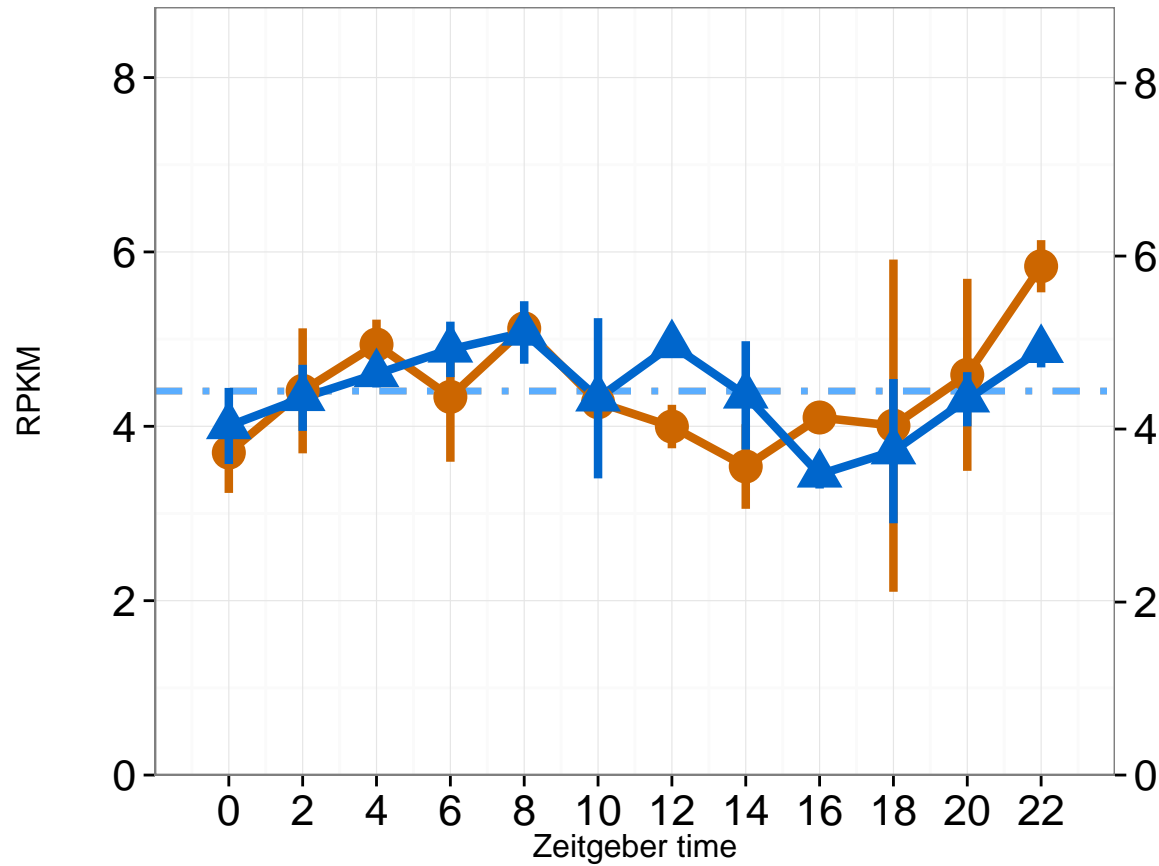

## Rcn3

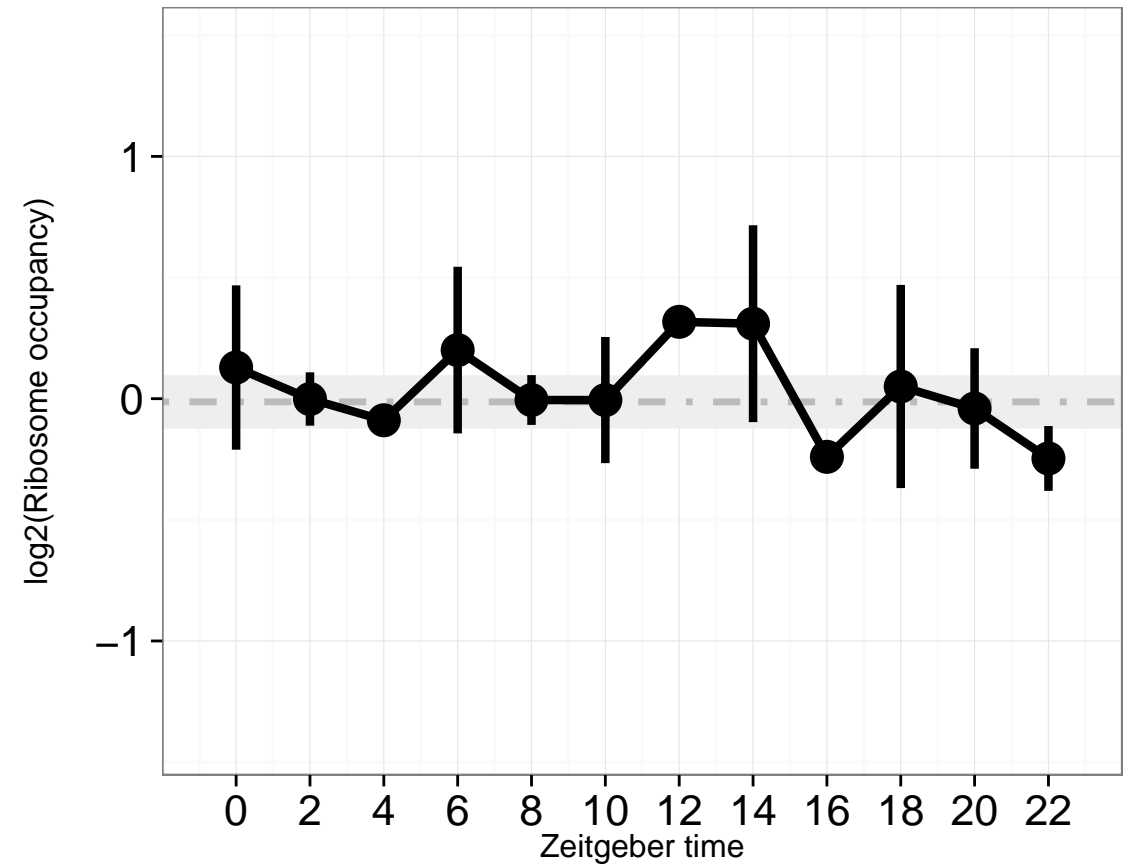

Supplement: SuppDataset_1.zip [file Rcn3_set_A.pdf › Supplemental Dataset 1/A-mRNA_nonrhyth_translation_nonrhyth/Rcn3_set_A.pdf]

# Rcor1

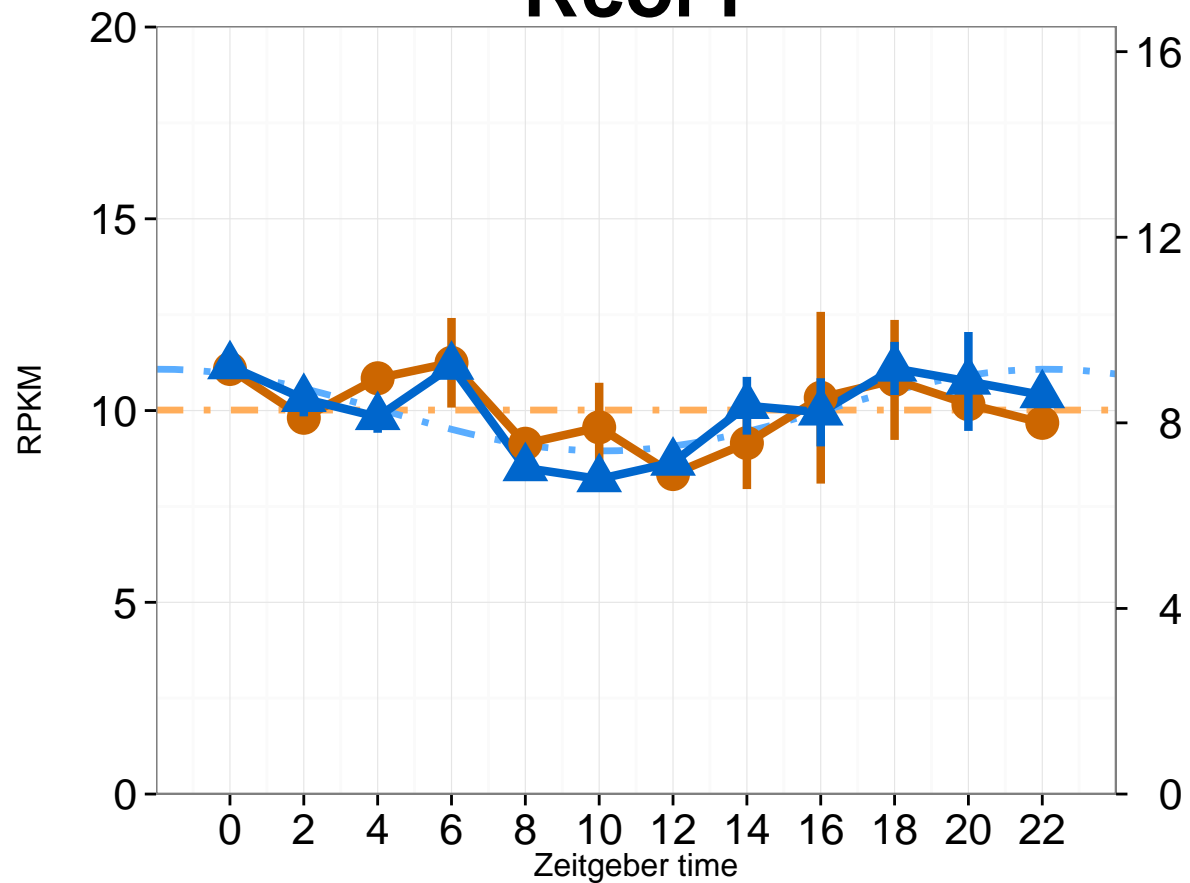

# Rcor1

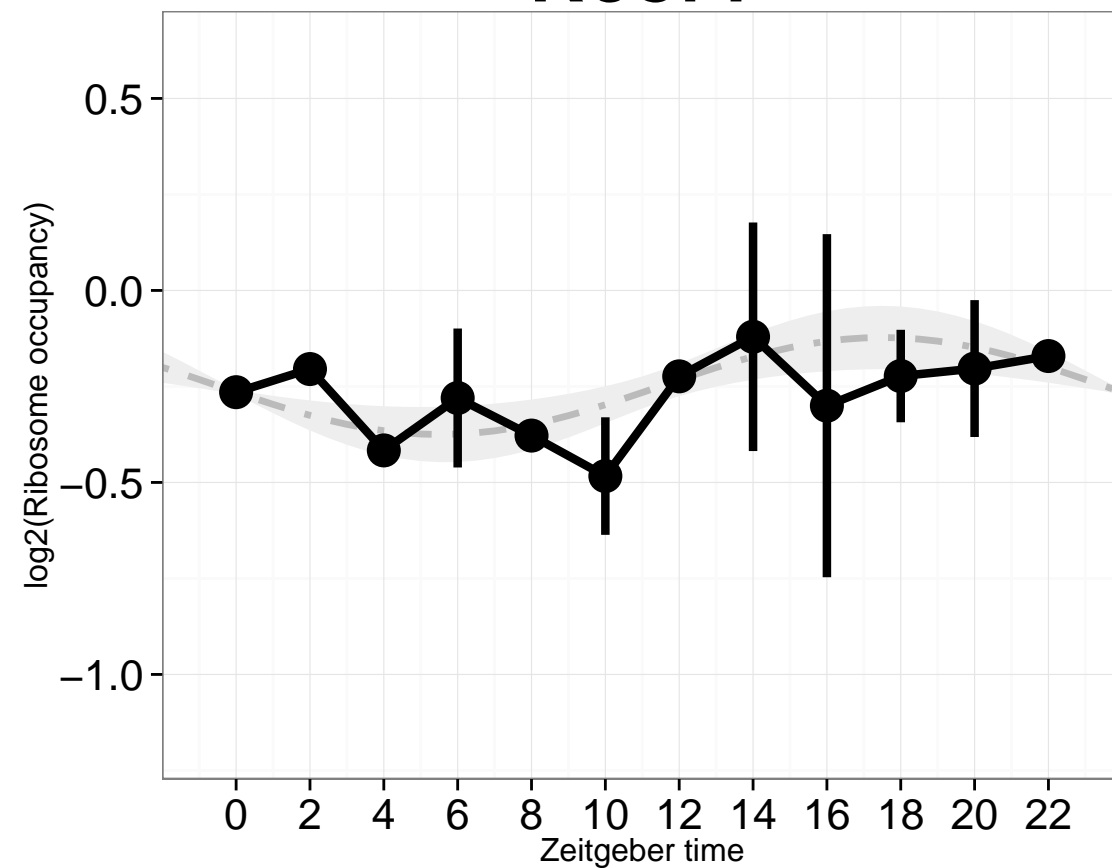

Supplement: SuppDataset_1.zip [file Rcor1_set_A.pdf › Supplemental Dataset 1/A-mRNA_nonrhyth_translation_nonrhyth/Rcor1_set_A.pdf]

## Rcor3

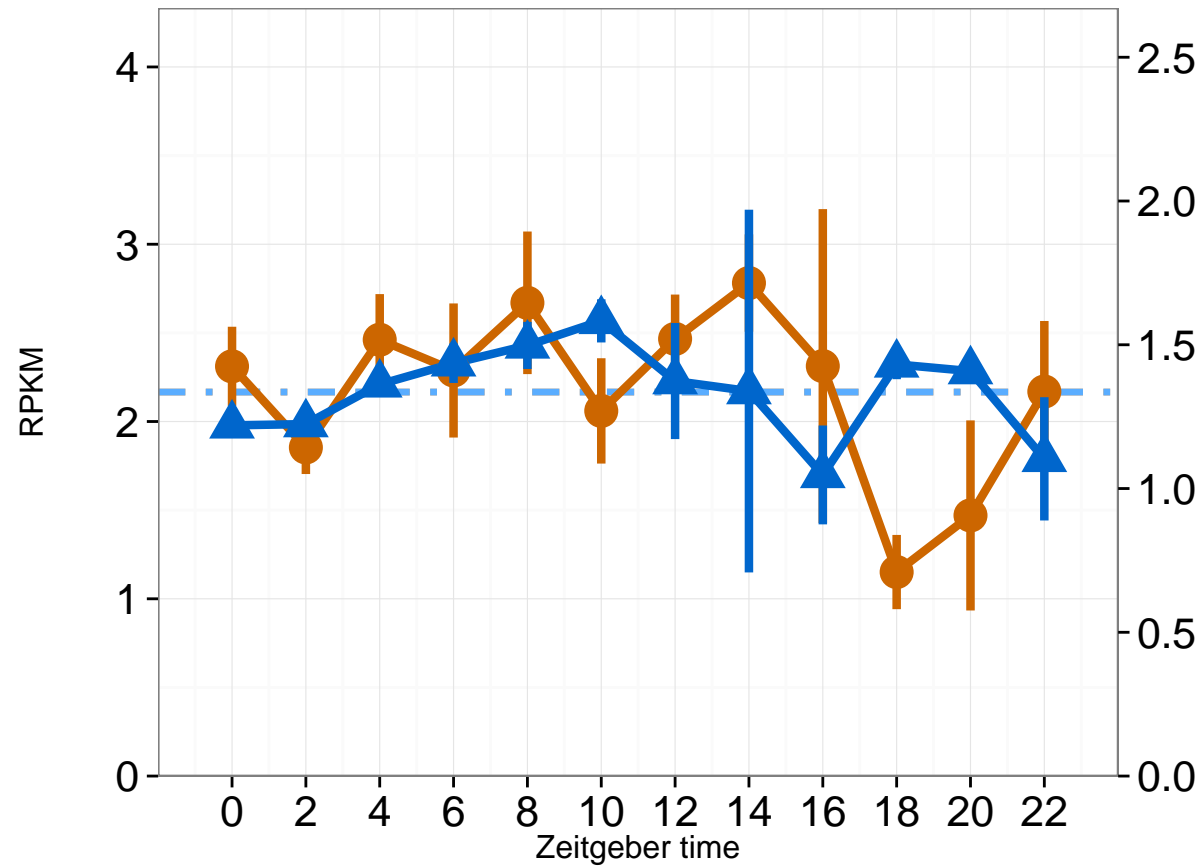

## Rcor3

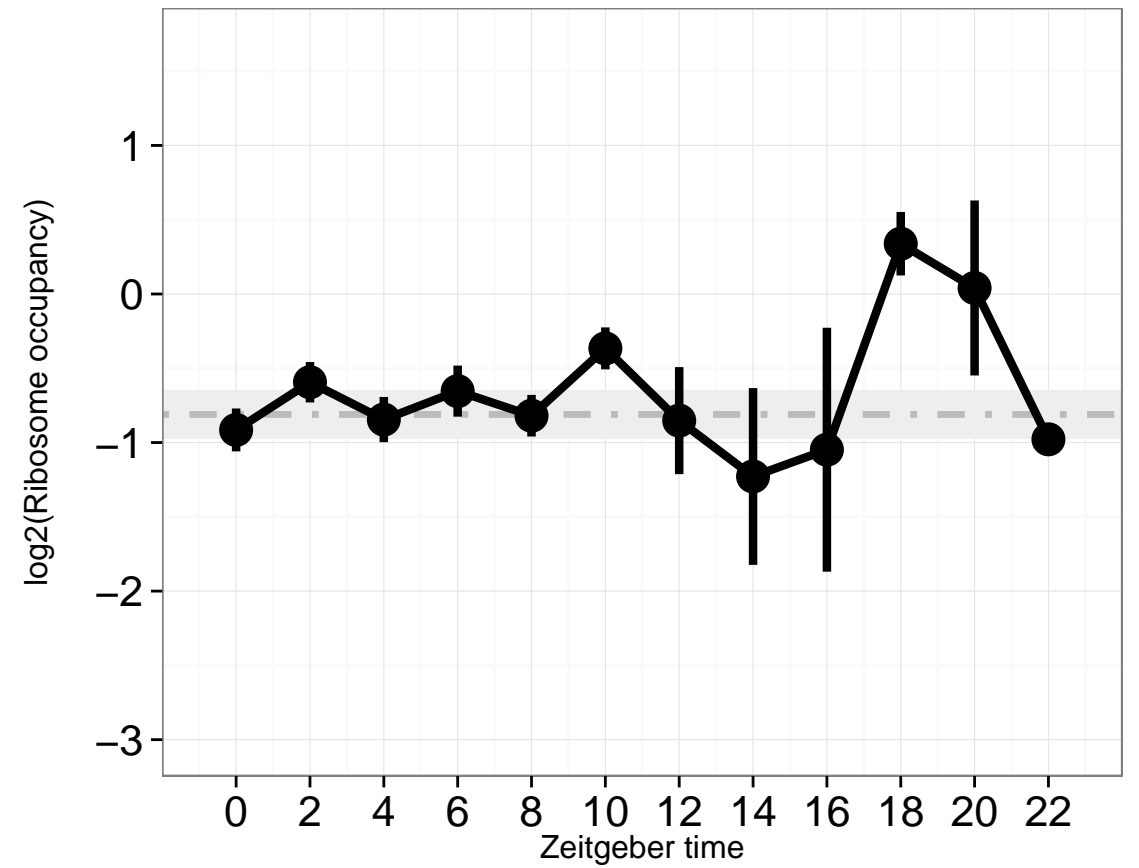

Supplement: SuppDataset_1.zip [file Rcor3_set_A.pdf › Supplemental Dataset 1/A-mRNA_nonrhyth_translation_nonrhyth/Rcor3_set_A.pdf]

## Rcsd1

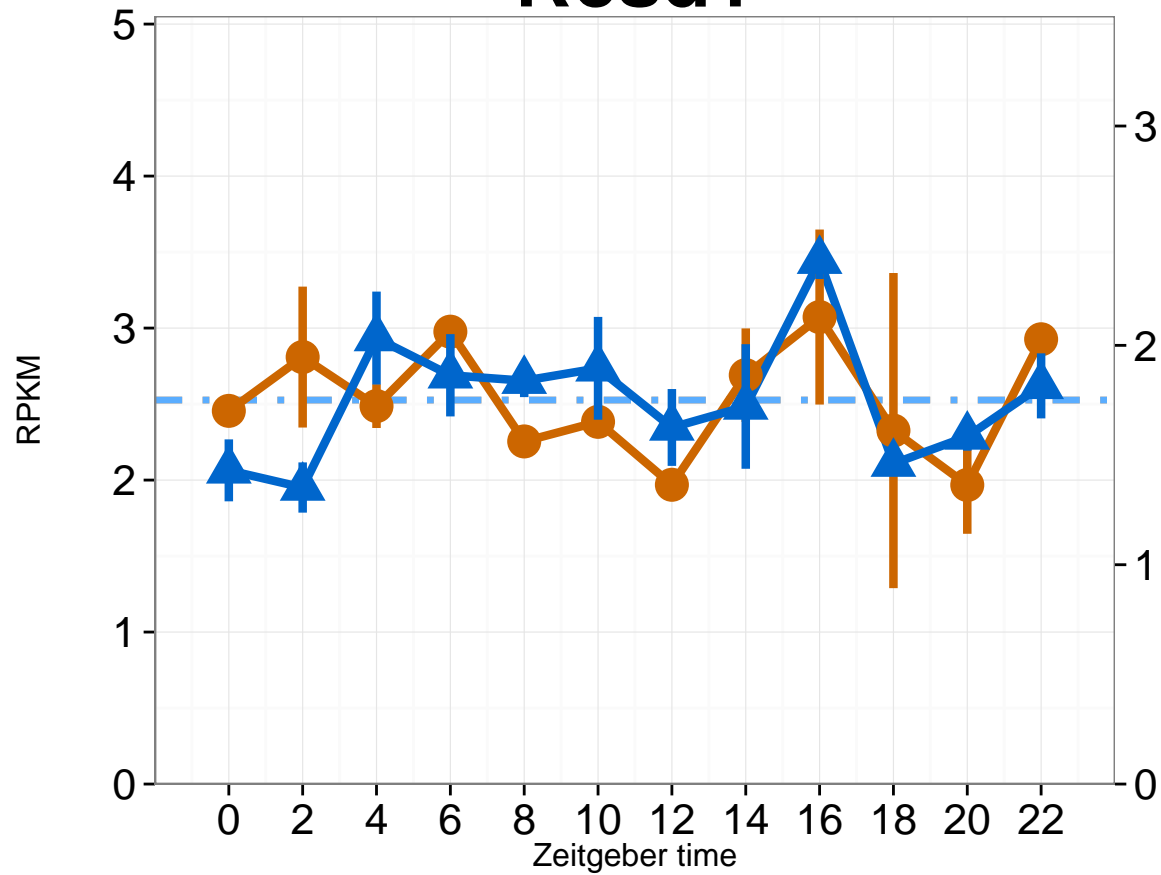

## Rcsd1

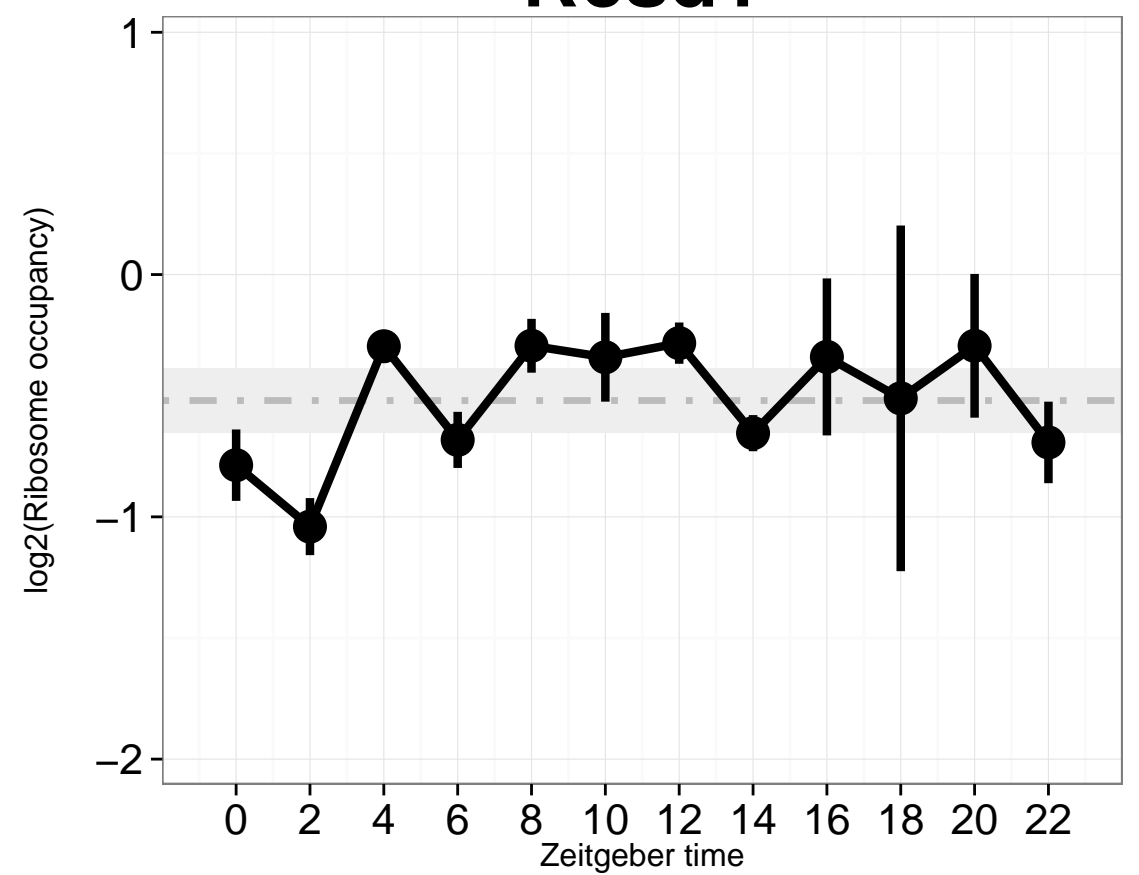

Supplement: SuppDataset_1.zip [file Rcsd1_set_A.pdf › Supplemental Dataset 1/A-mRNA_nonrhyth_translation_nonrhyth/Rcsd1_set_A.pdf]

## Rdh10

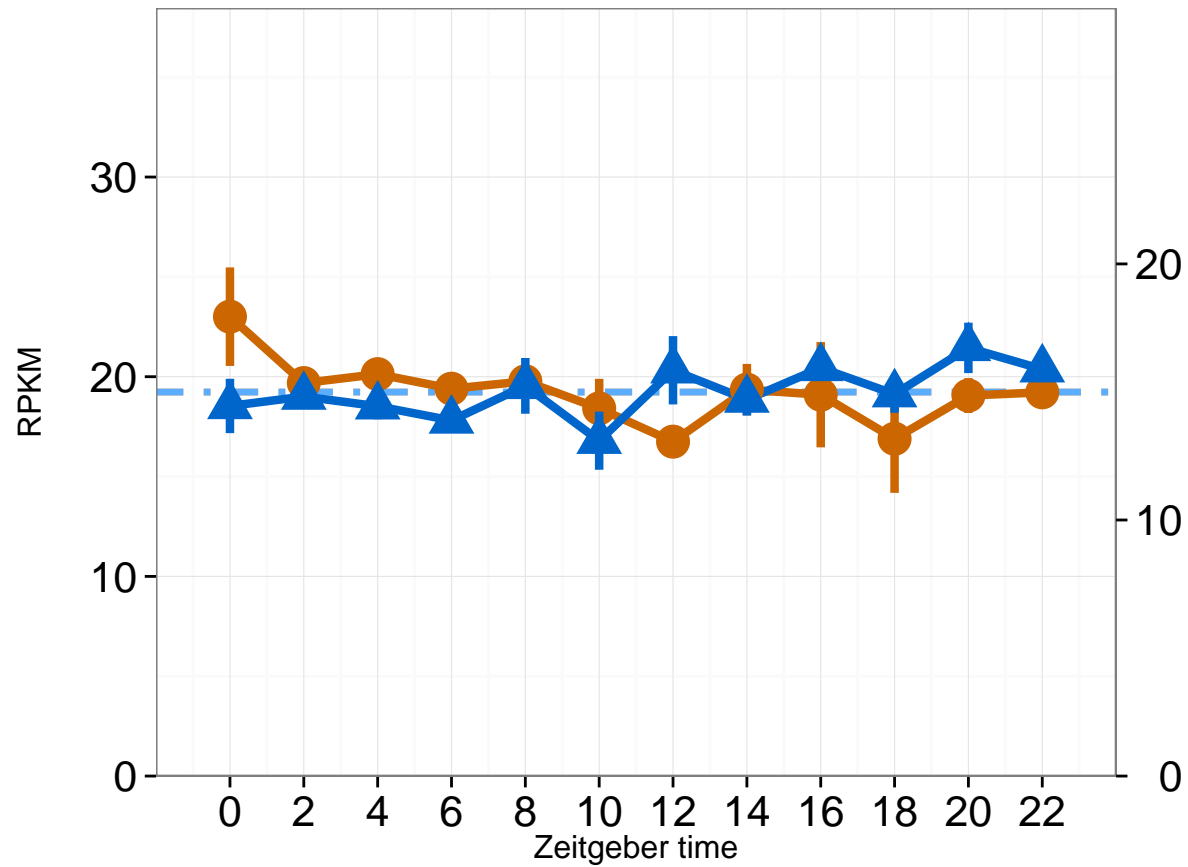

## Rdh10

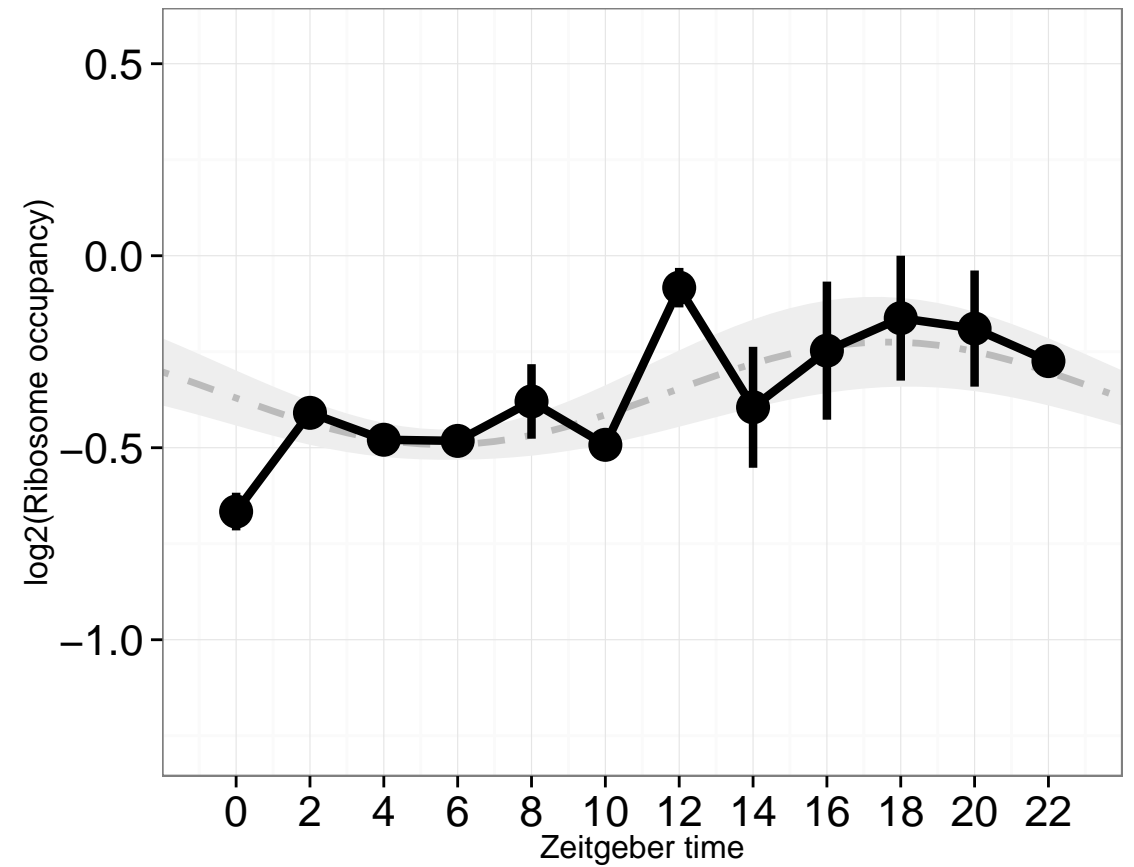

Supplement: SuppDataset_1.zip [file Rdh10_set_A.pdf › Supplemental Dataset 1/A-mRNA_nonrhyth_translation_nonrhyth/Rdh10_set_A.pdf]

## Rdh14

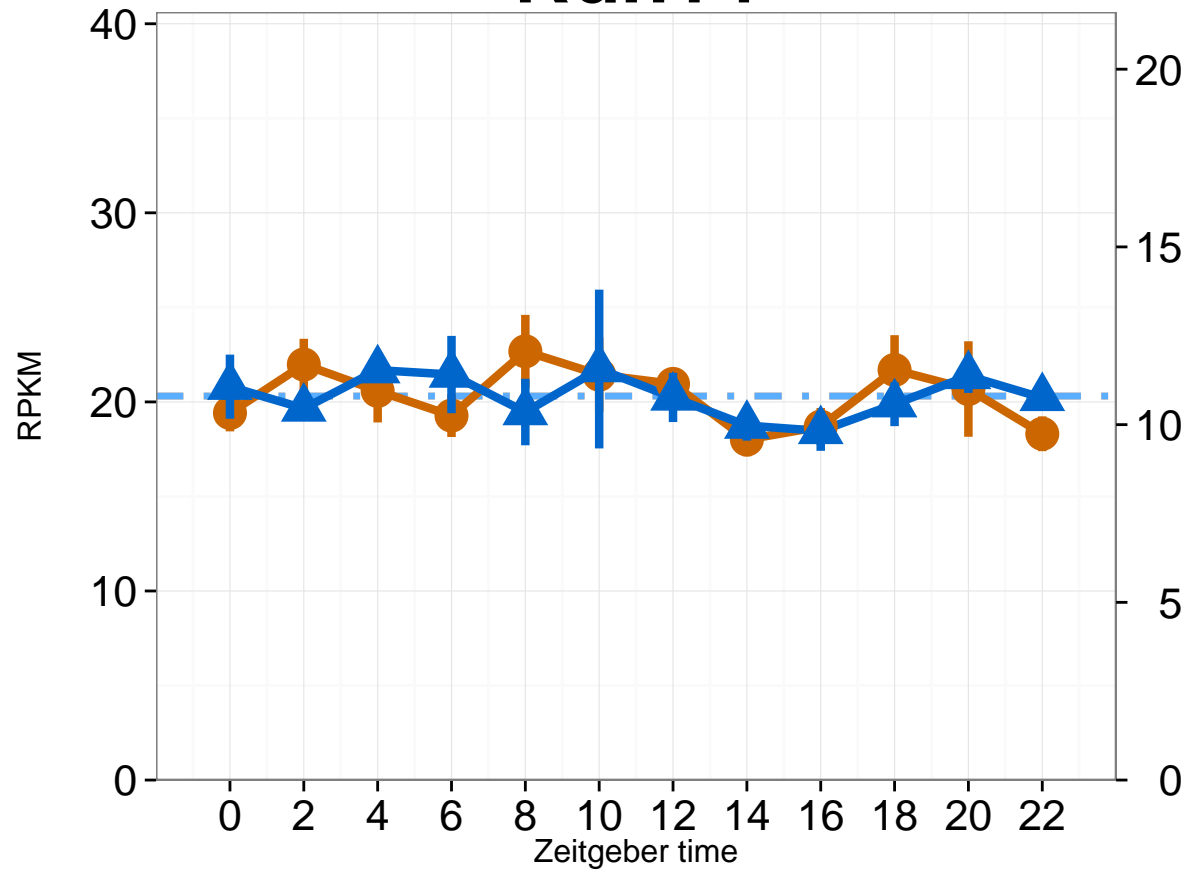

## Rdh14

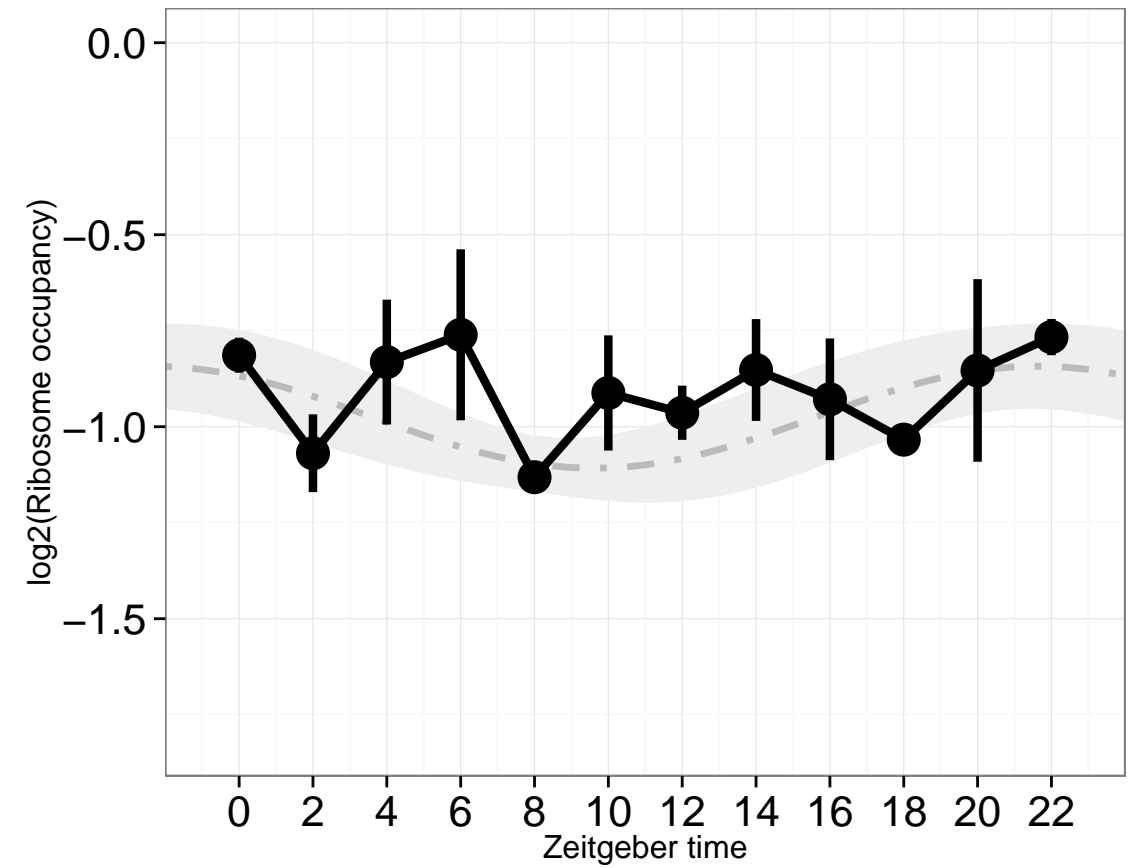

Supplement: SuppDataset_1.zip [file Rdh14_set_A.pdf › Supplemental Dataset 1/A-mRNA_nonrhyth_translation_nonrhyth/Rdh14_set_A.pdf]

## Rdh16

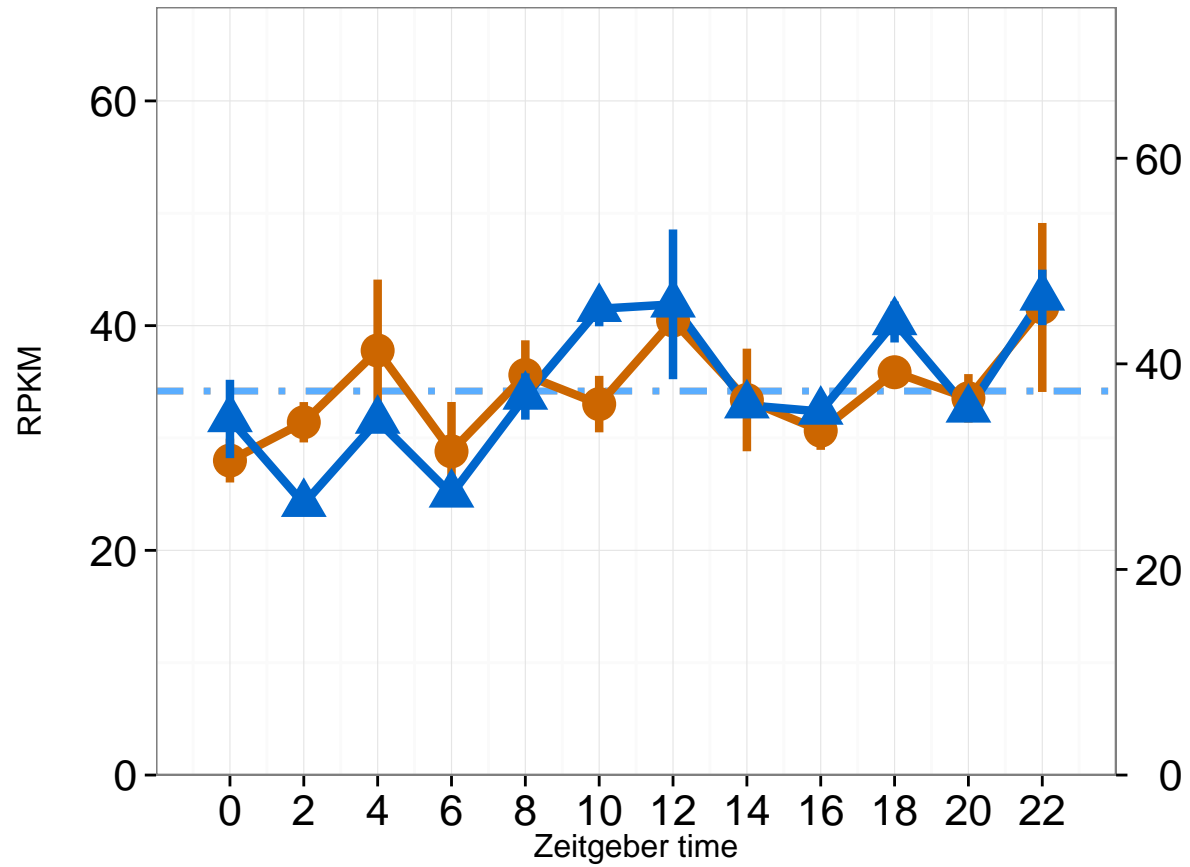

## Rdh16

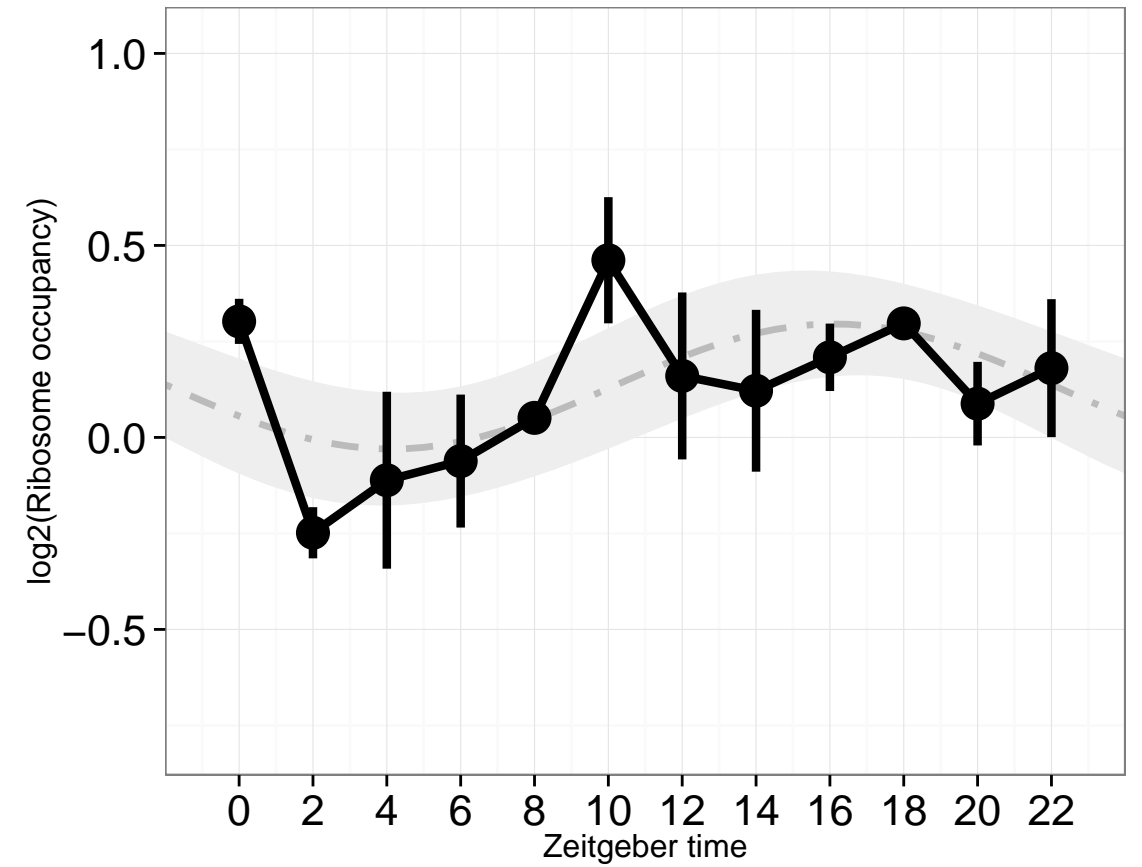

Supplement: SuppDataset_1.zip [file Rdh16_set_A.pdf › Supplemental Dataset 1/A-mRNA_nonrhyth_translation_nonrhyth/Rdh16_set_A.pdf]

**Rdh1 TR**

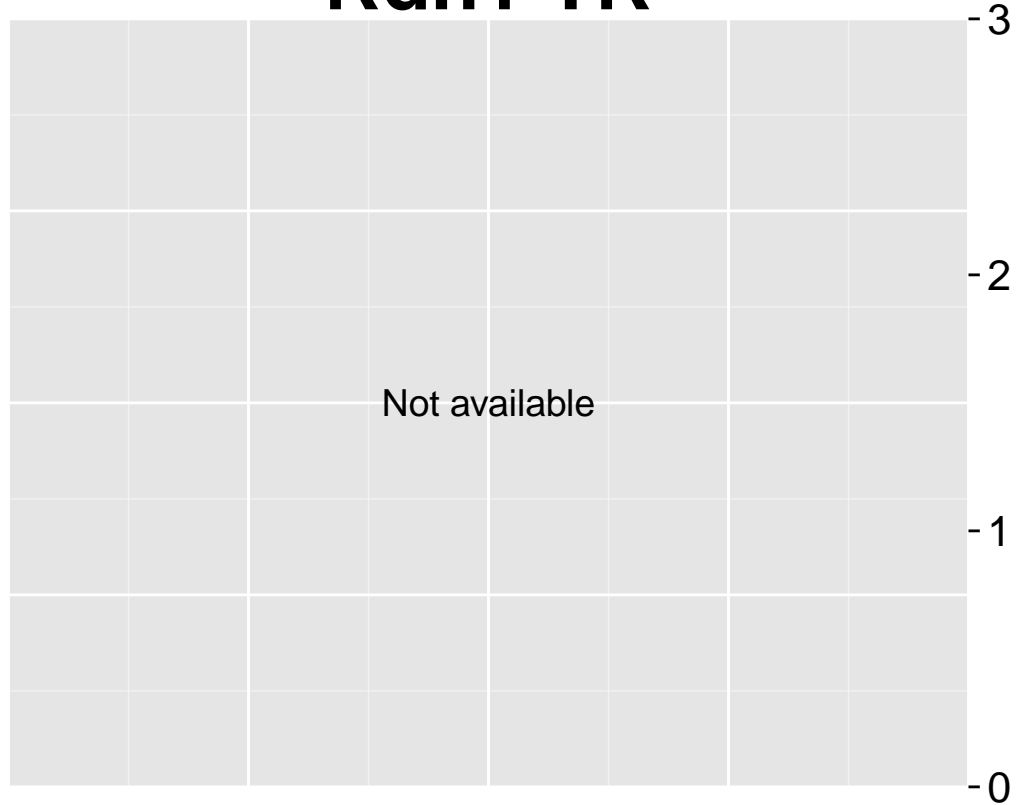

**Rdh1 log2(Ribosome occupancy)**

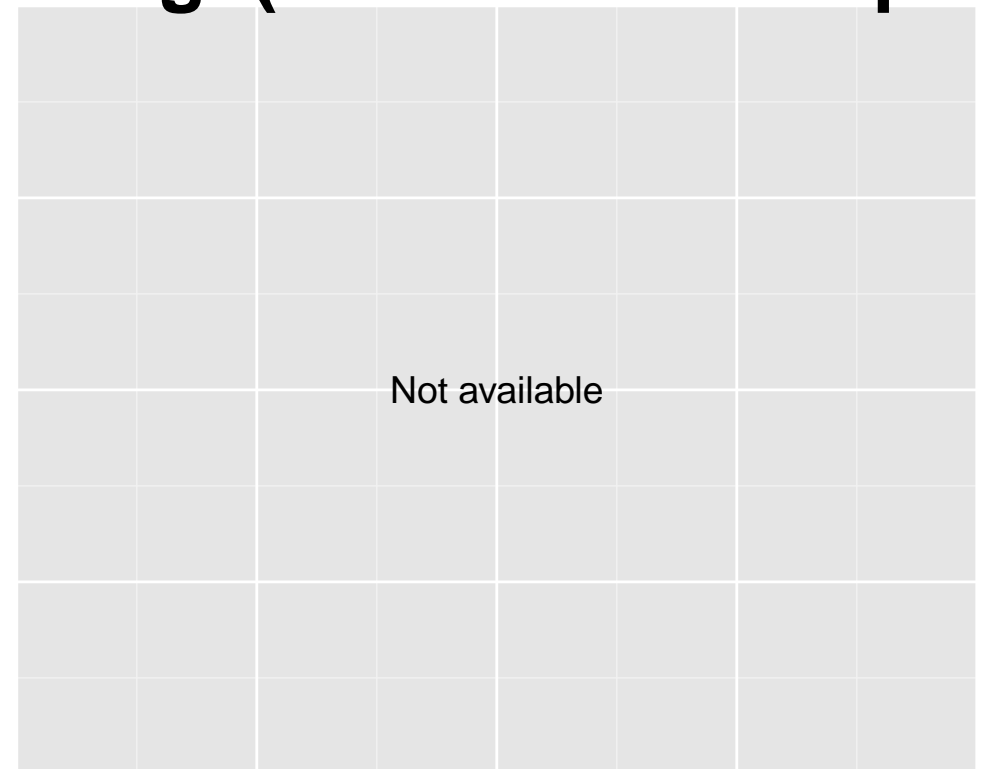

Supplement: SuppDataset_1.zip [file Rdh1_set_A.pdf › Supplemental Dataset 1/A-mRNA_nonrhyth_translation_nonrhyth/Rdh1_set_A.pdf]

# Rdh5

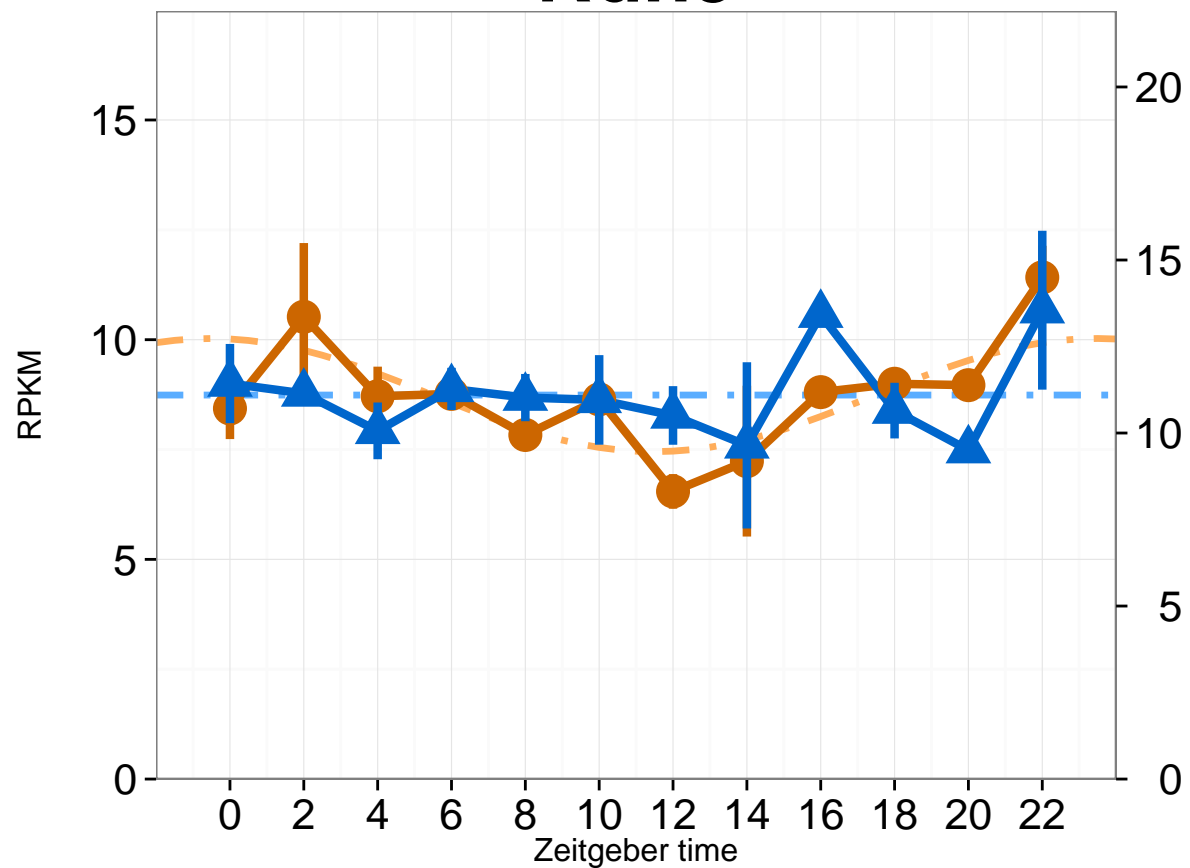

# Rdh5

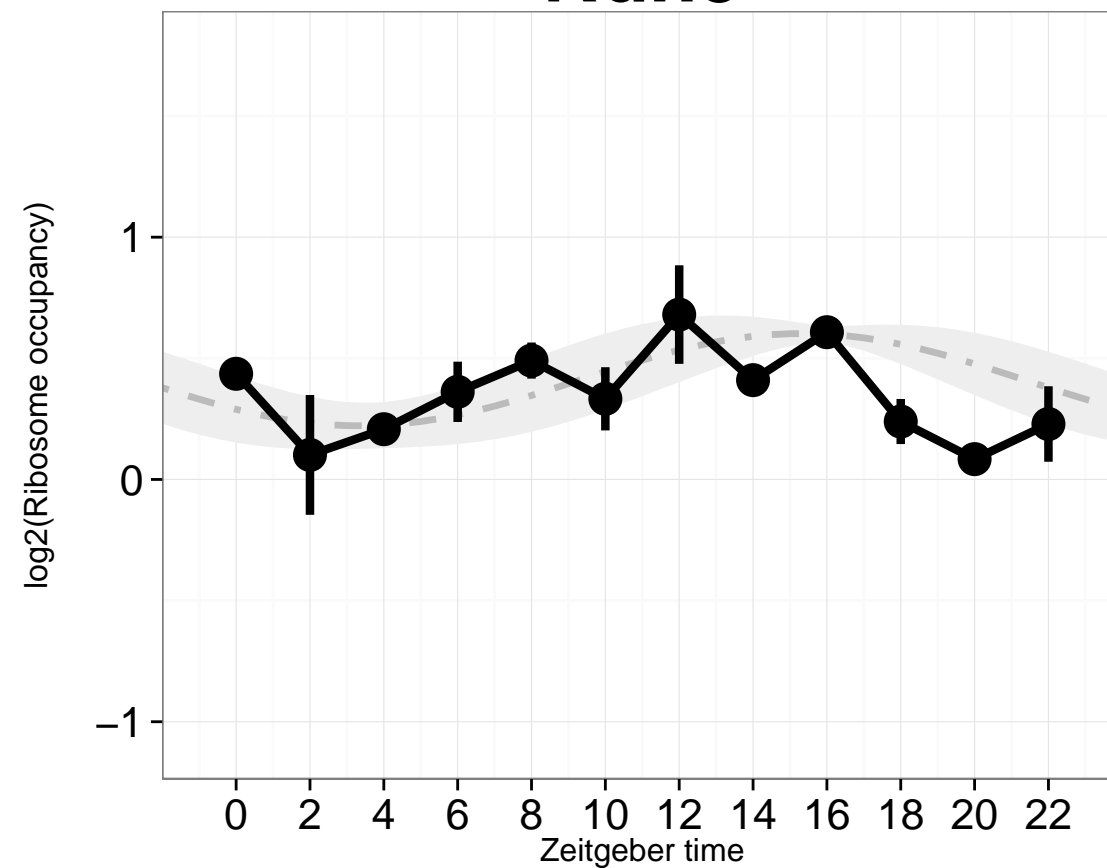

Supplement: SuppDataset_1.zip [file Rdh5_set_A.pdf › Supplemental Dataset 1/A-mRNA_nonrhyth_translation_nonrhyth/Rdh5_set_A.pdf]

## Rdh7

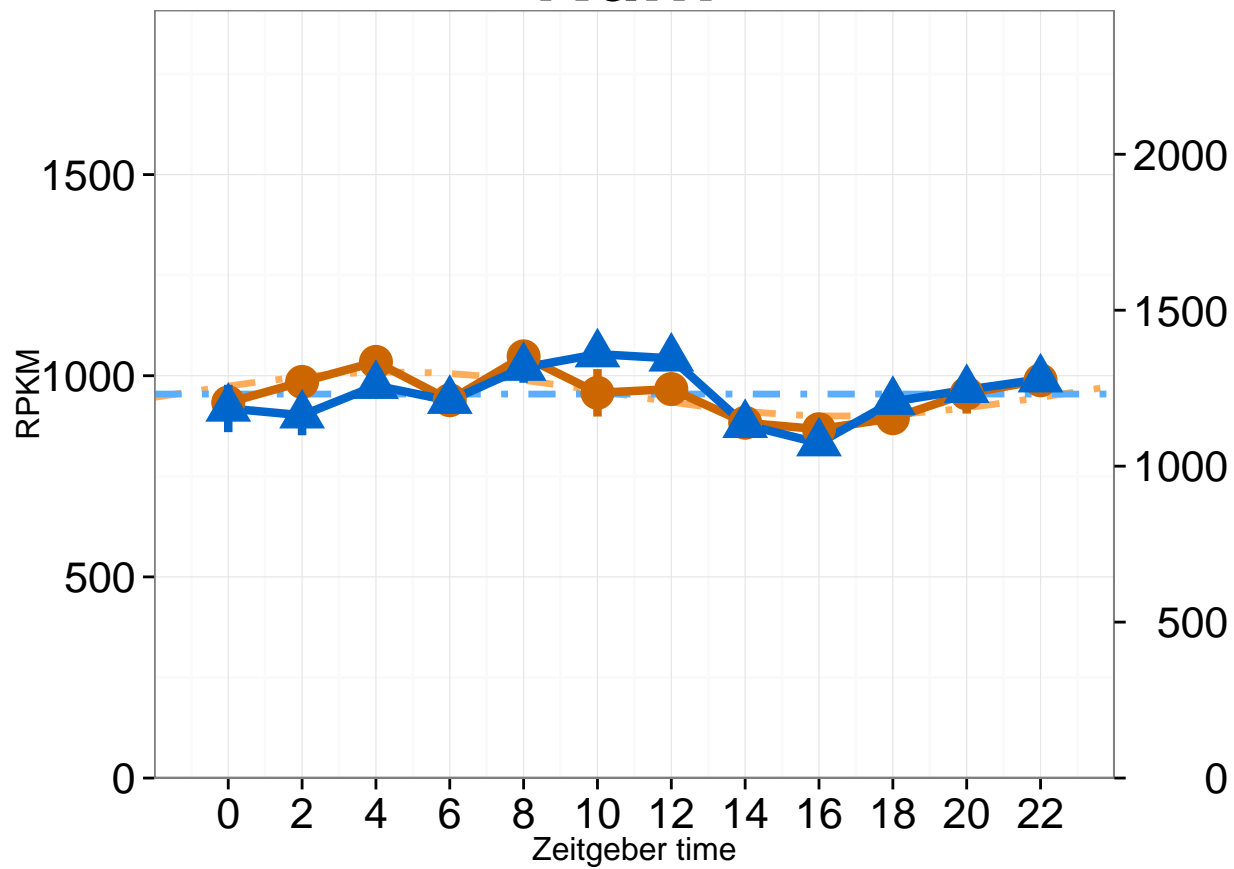

## Rdh7

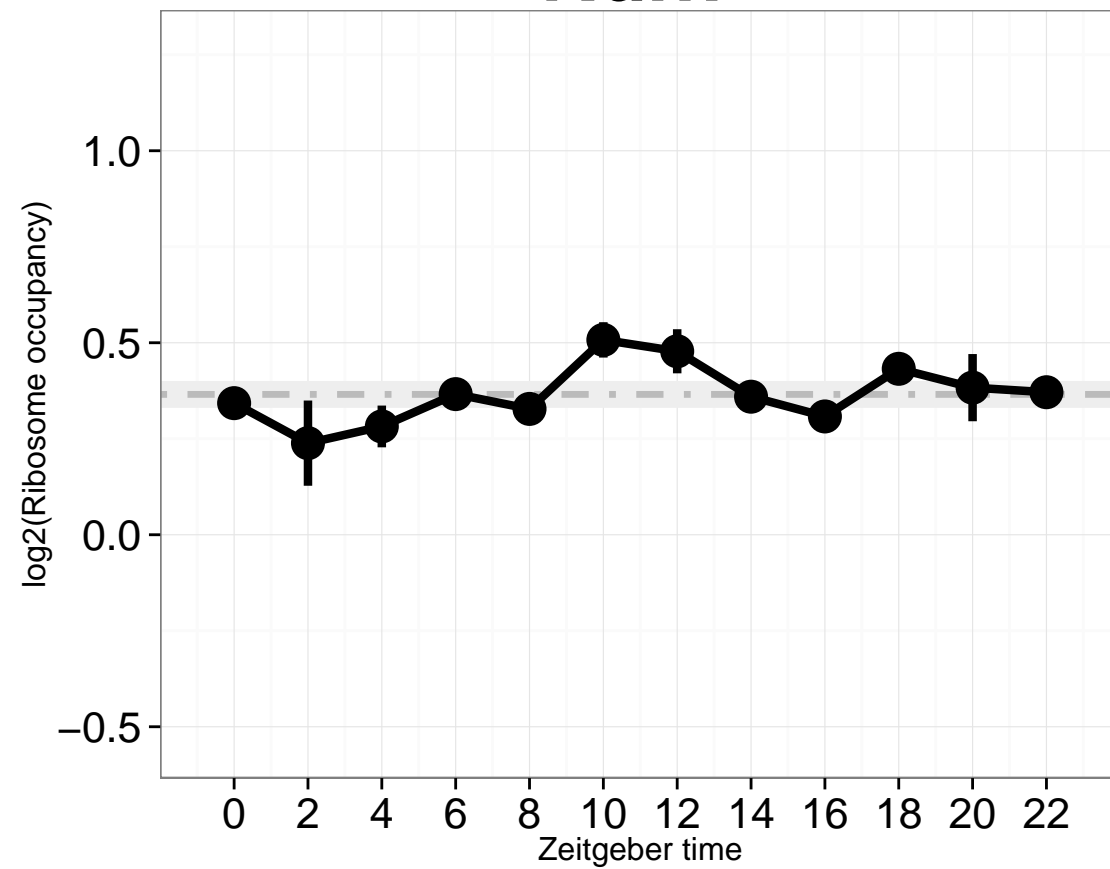

Supplement: SuppDataset_1.zip [file Rdh7_set_A.pdf › Supplemental Dataset 1/A-mRNA_nonrhyth_translation_nonrhyth/Rdh7_set_A.pdf]

# Rdm1

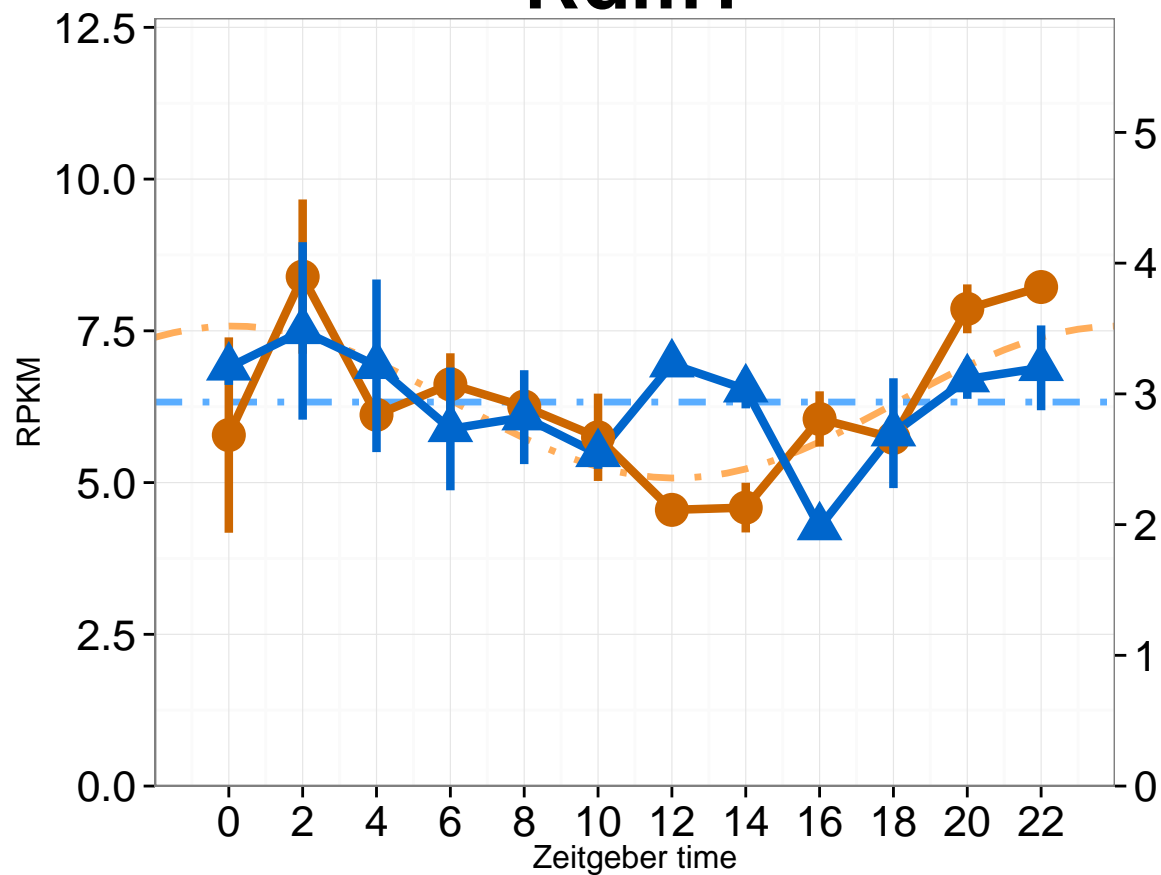

# Rdm1

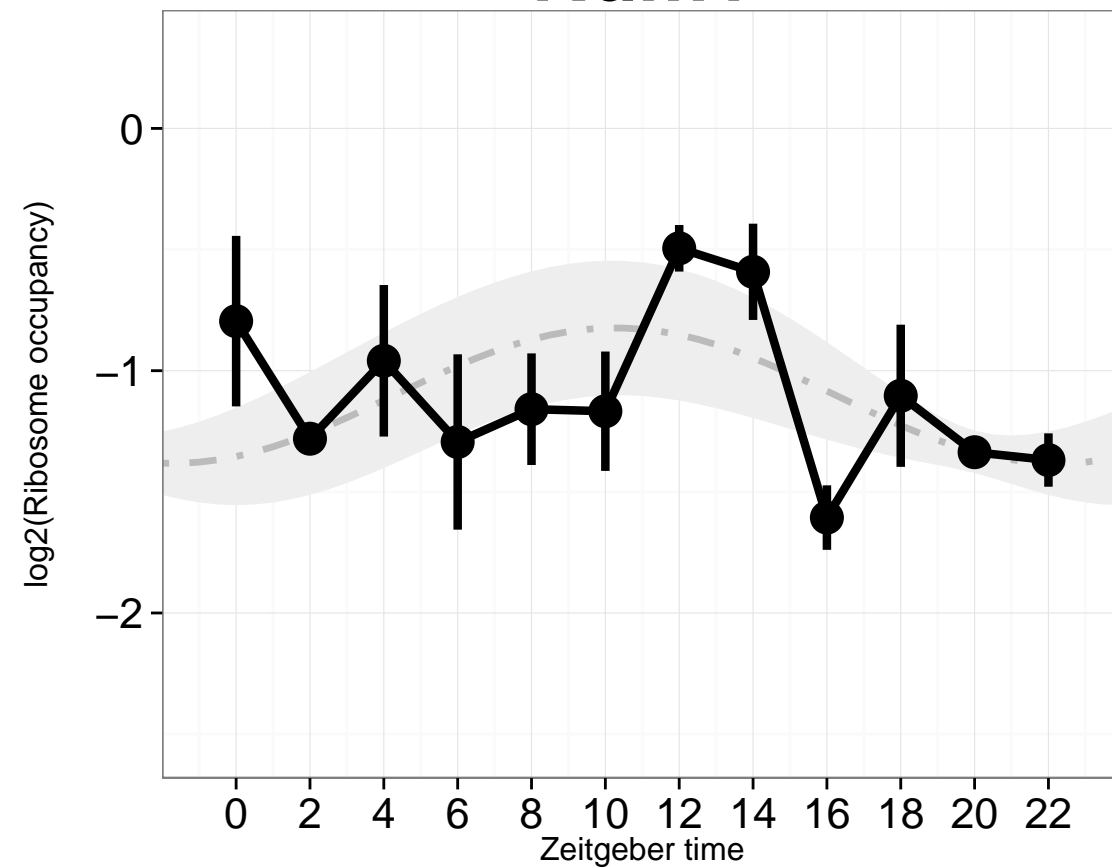

Supplement: SuppDataset_1.zip [file Rdm1_set_A.pdf › Supplemental Dataset 1/A-mRNA_nonrhyth_translation_nonrhyth/Rdm1_set_A.pdf]

## Rdx

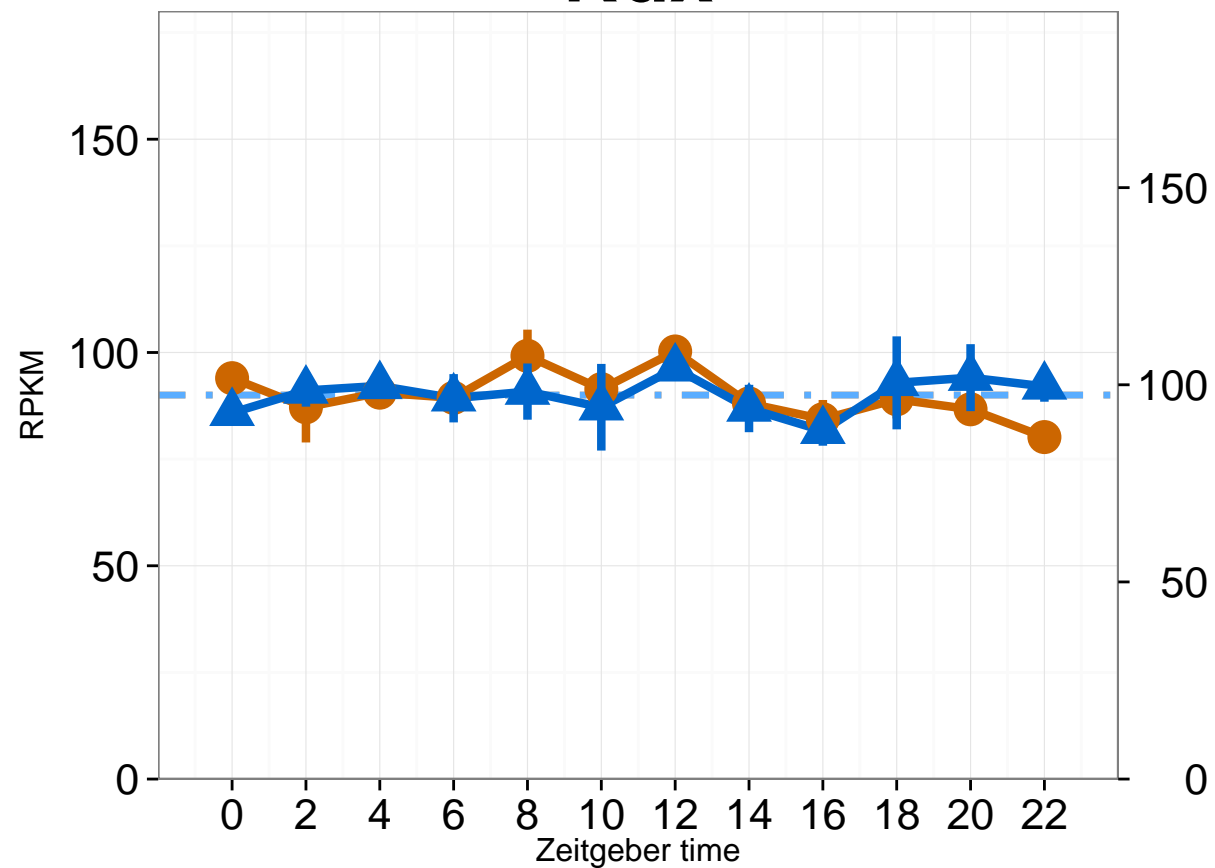

## Rdx

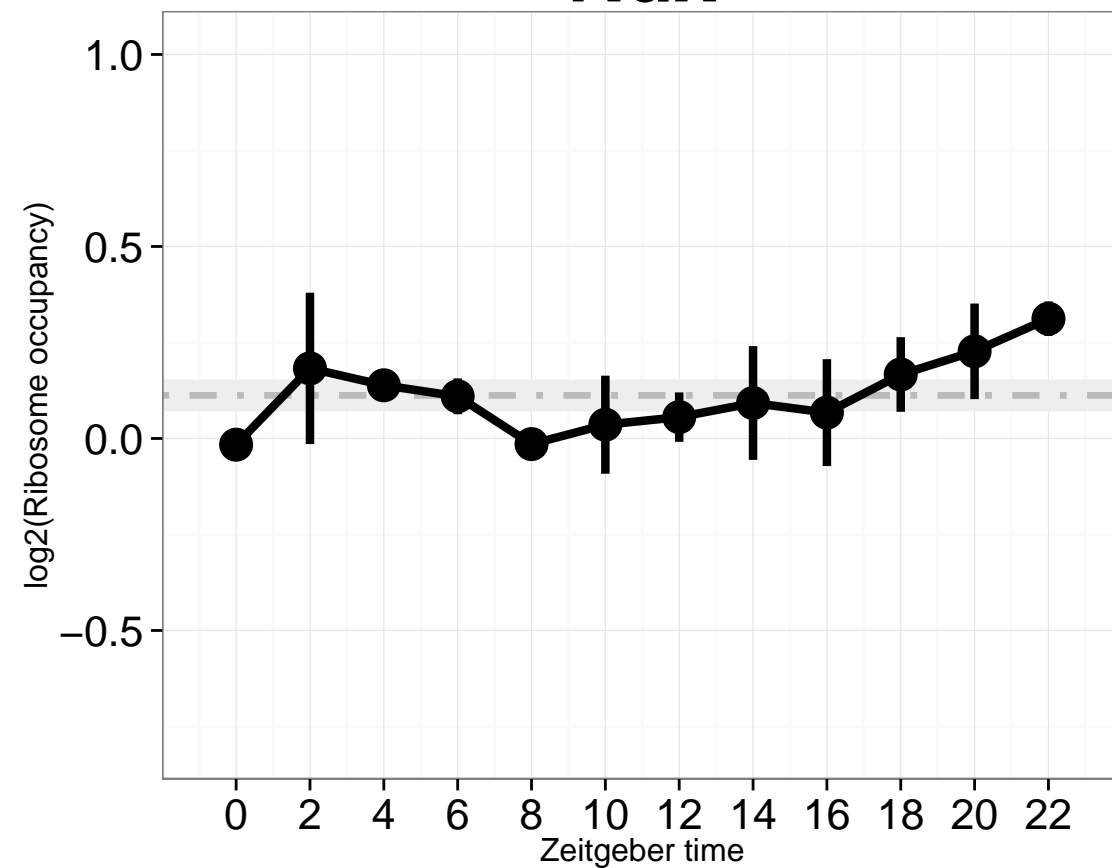

Supplement: SuppDataset_1.zip [file Rdx_set_A.pdf › Supplemental Dataset 1/A-mRNA_nonrhyth_translation_nonrhyth/Rdx_set_A.pdf]

# Rec8

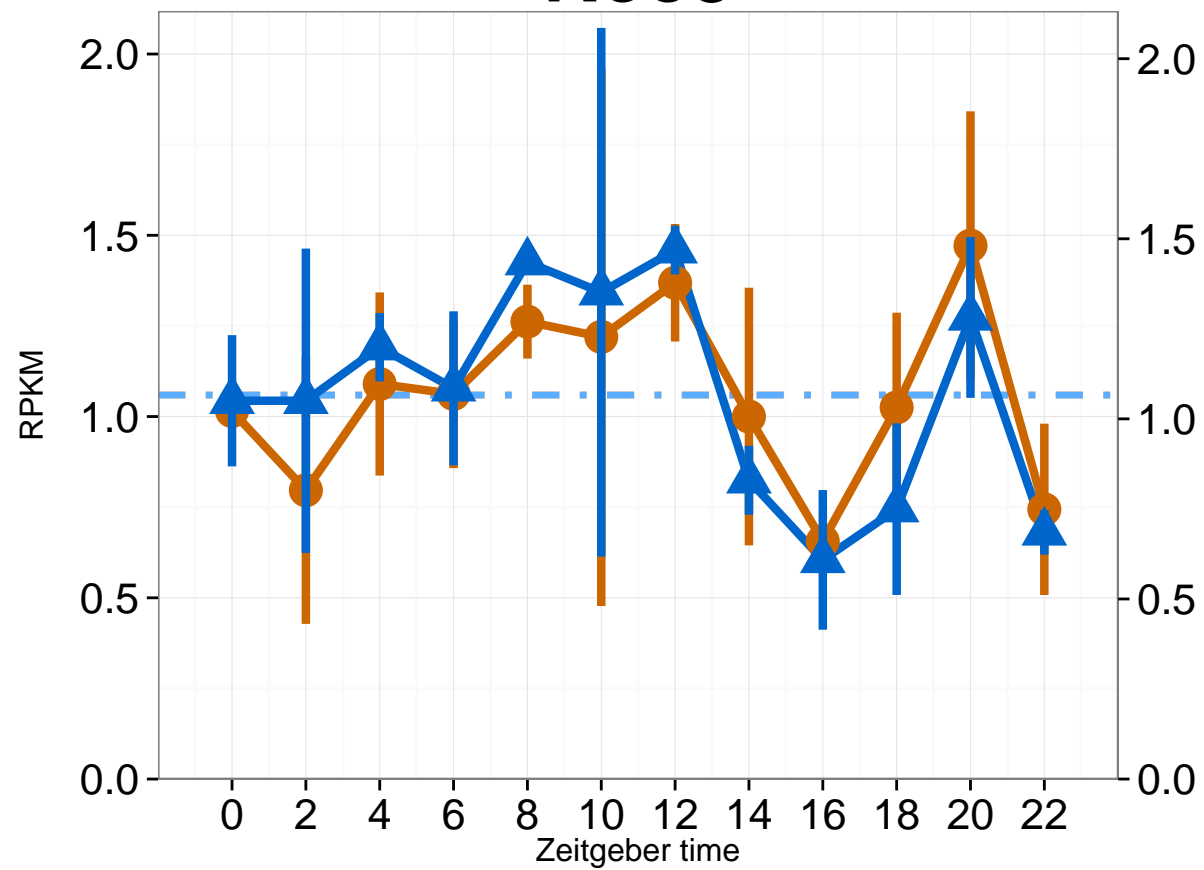

# Rec8

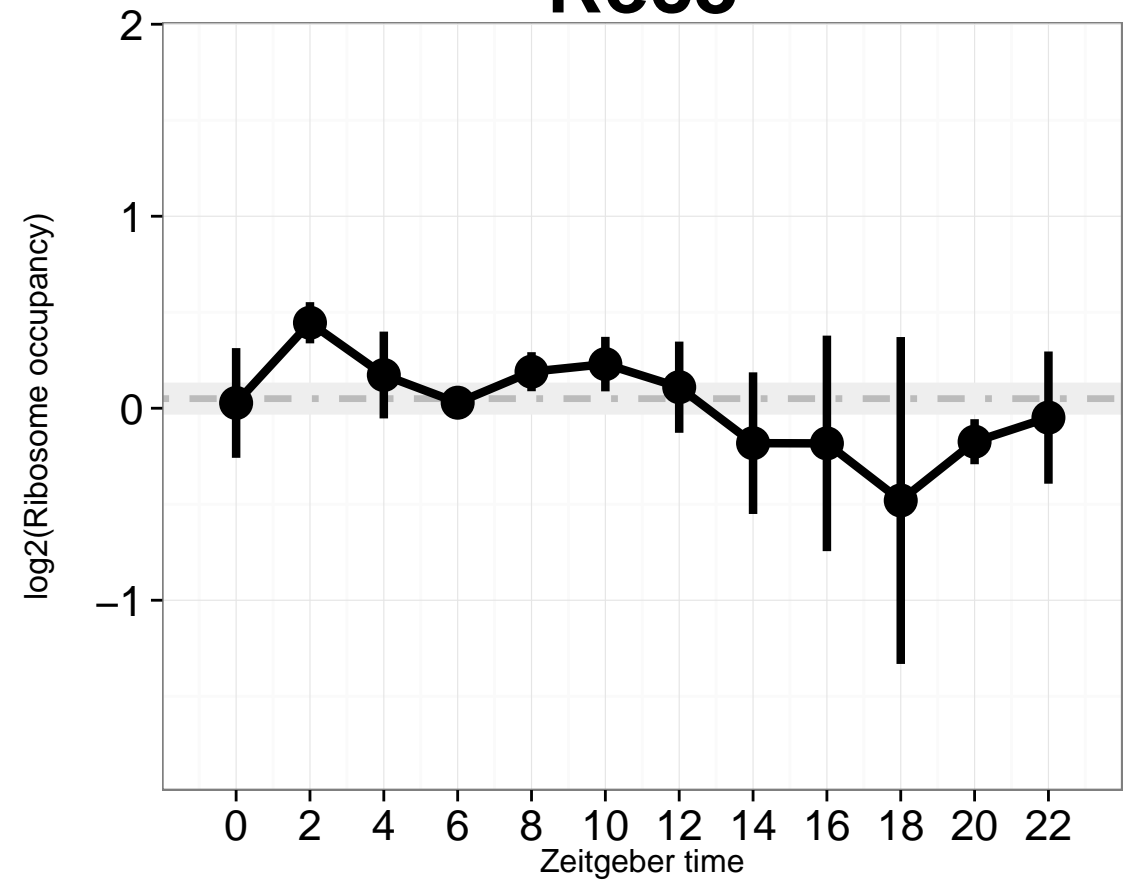

Supplement: SuppDataset_1.zip [file Rec8_set_A.pdf › Supplemental Dataset 1/A-mRNA_nonrhyth_translation_nonrhyth/Rec8_set_A.pdf]

## Recql5

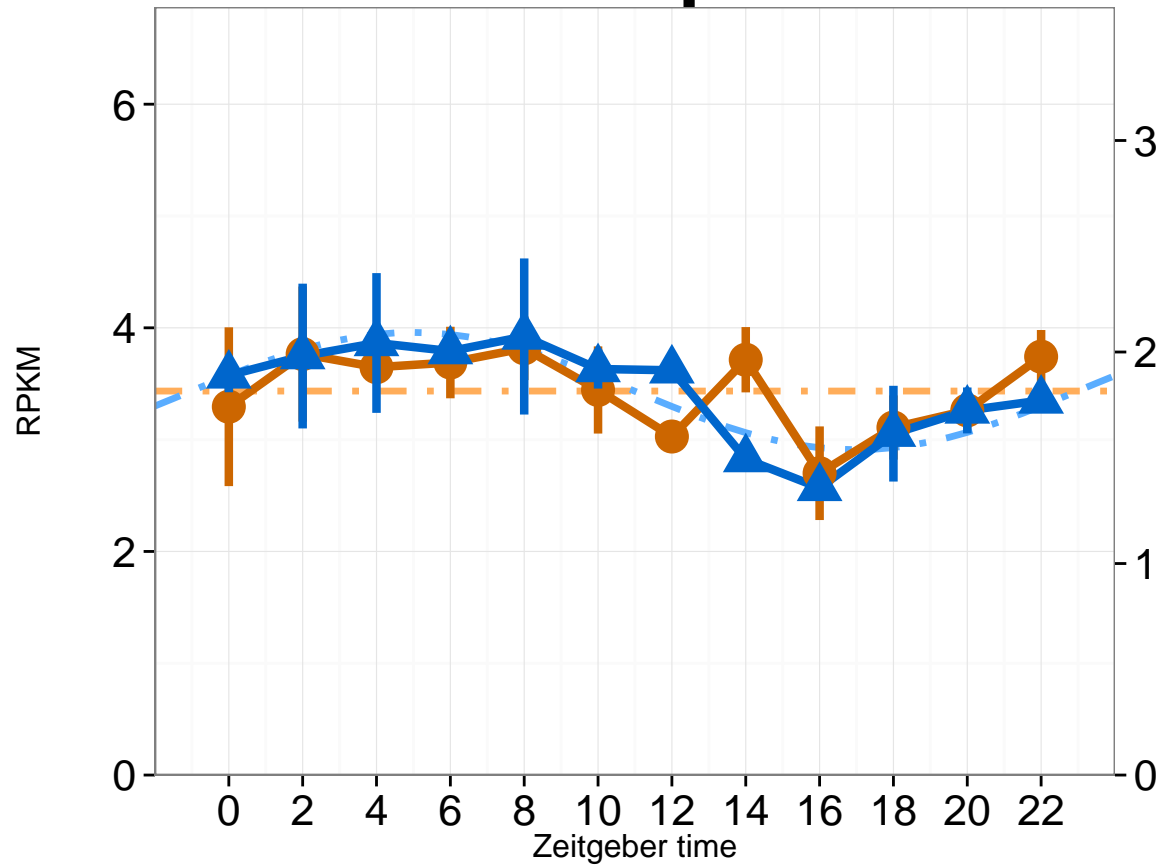

## Recql5

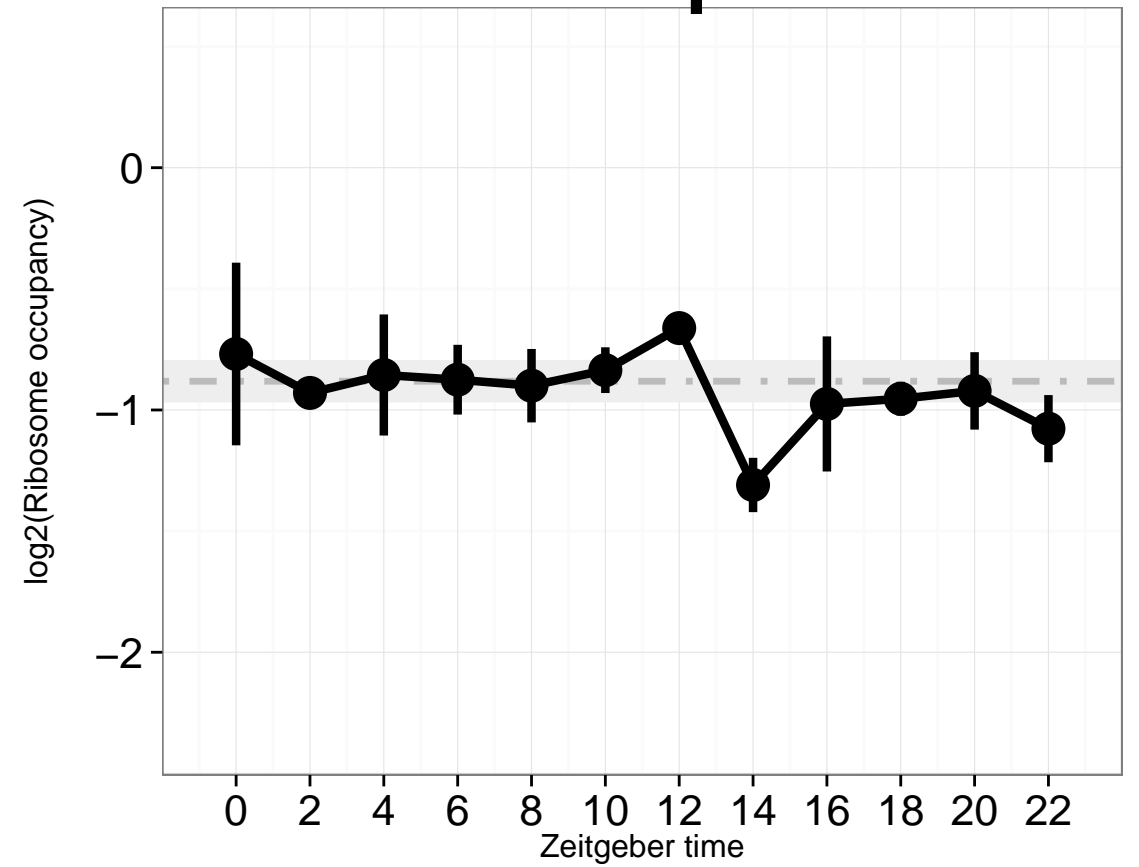

Supplement: SuppDataset_1.zip [file Recql5_set_A.pdf › Supplemental Dataset 1/A-mRNA_nonrhyth_translation_nonrhyth/Recql5_set_A.pdf]

## Recql

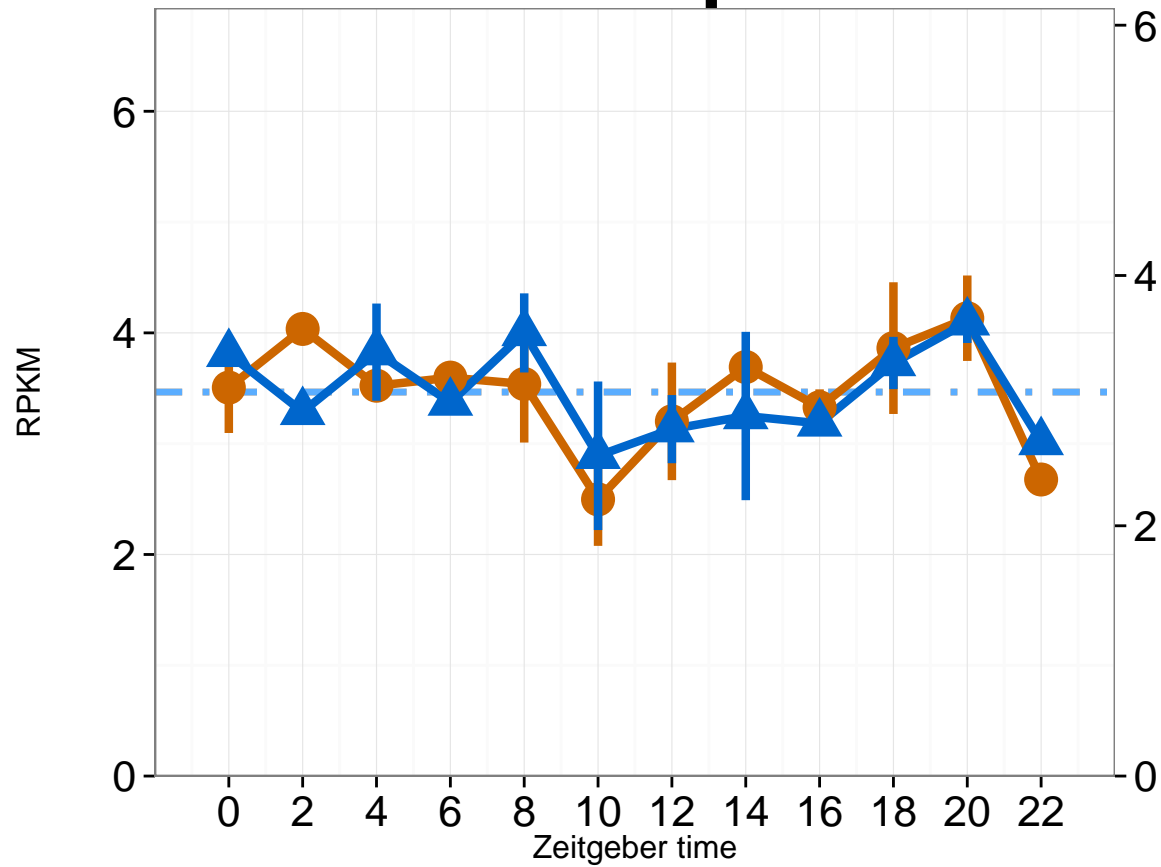

## Recql

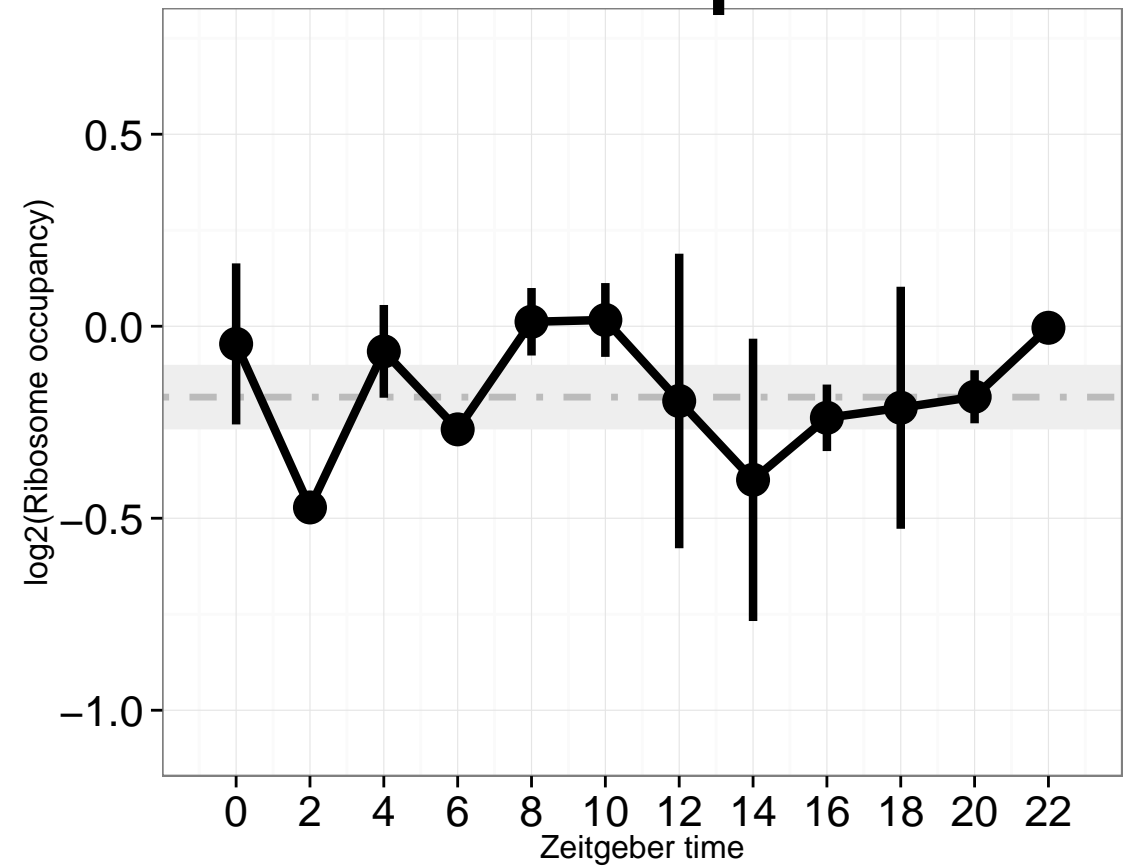

Supplement: SuppDataset_1.zip [file Recql_set_A.pdf › Supplemental Dataset 1/A-mRNA_nonrhyth_translation_nonrhyth/Recql_set_A.pdf]

## Reep3

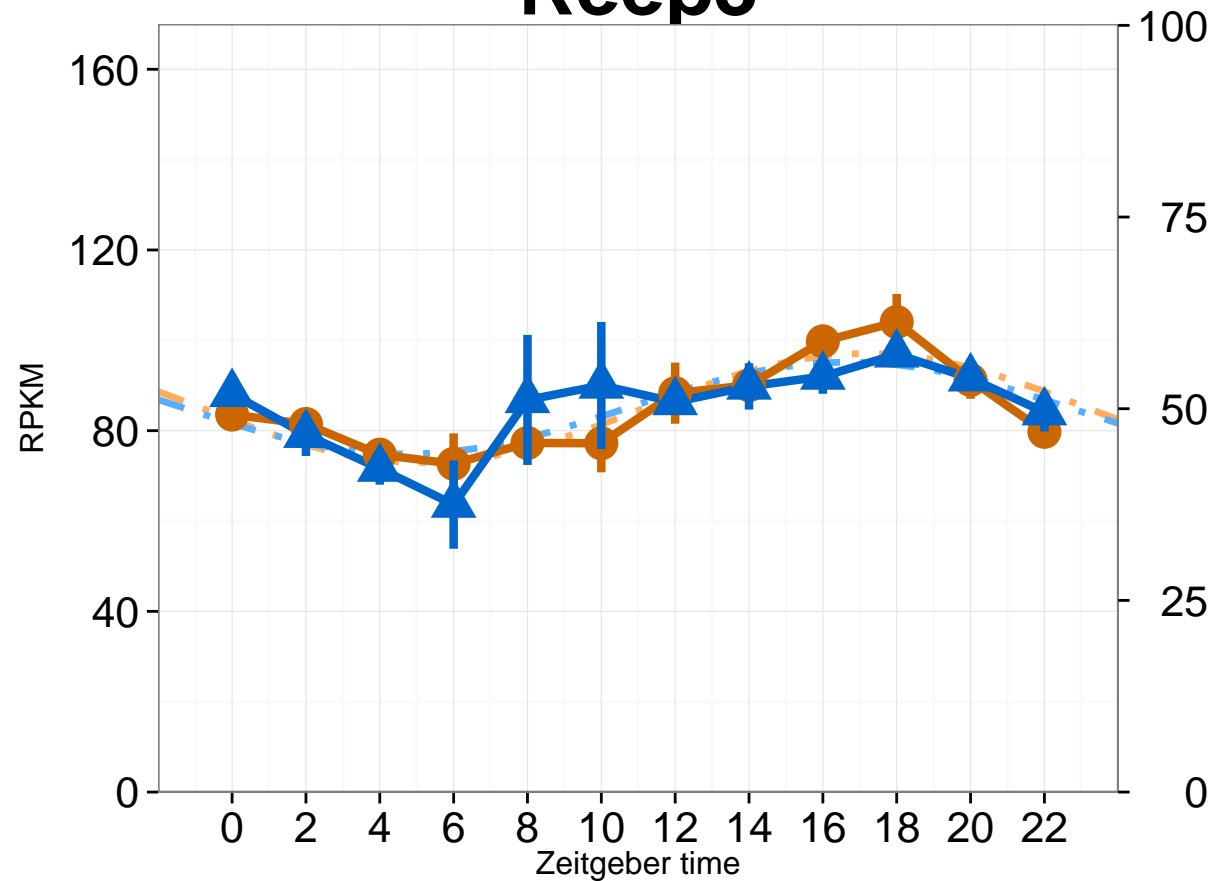

## Reep3

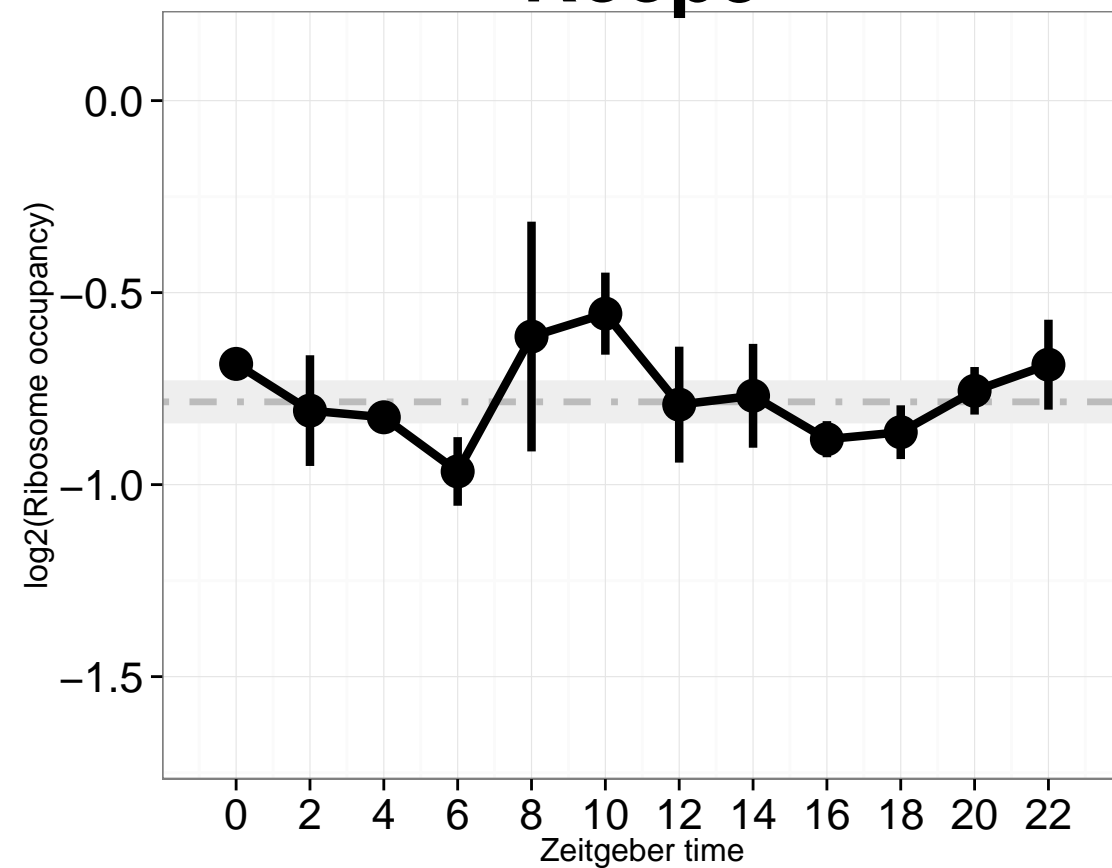

Supplement: SuppDataset_1.zip [file Reep3_set_A.pdf › Supplemental Dataset 1/A-mRNA_nonrhyth_translation_nonrhyth/Reep3_set_A.pdf]

**Reg1 TR**

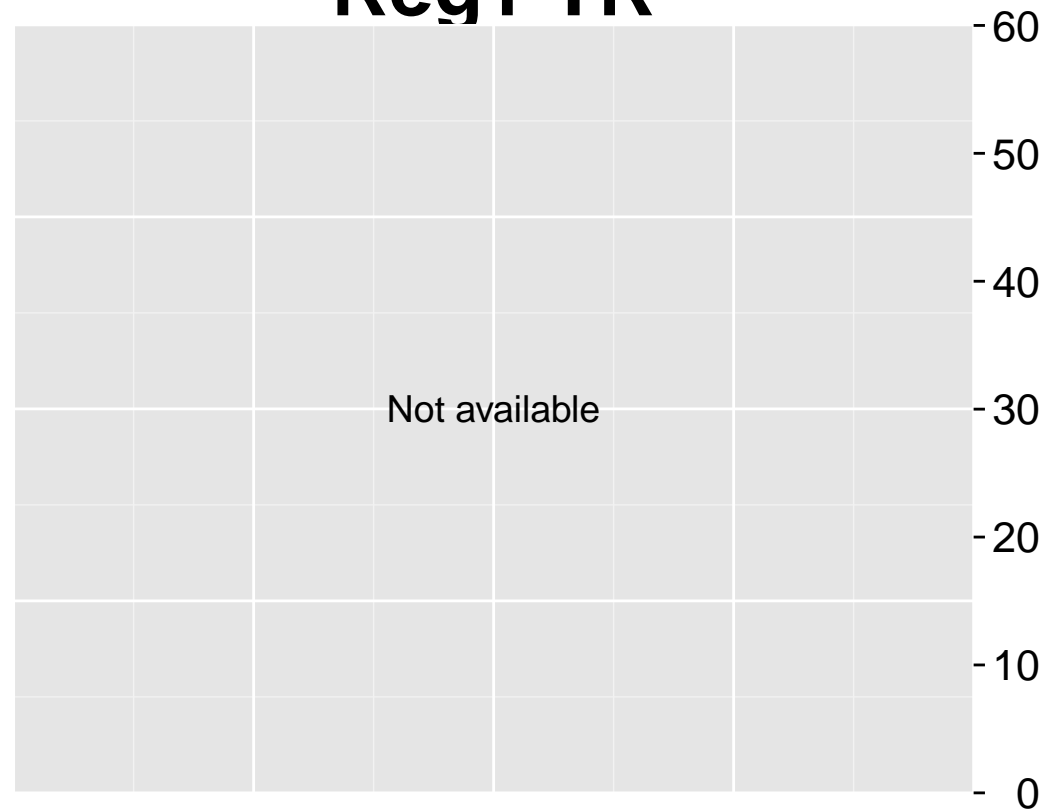

**Reg1 log2(Ribosome occupancy)**

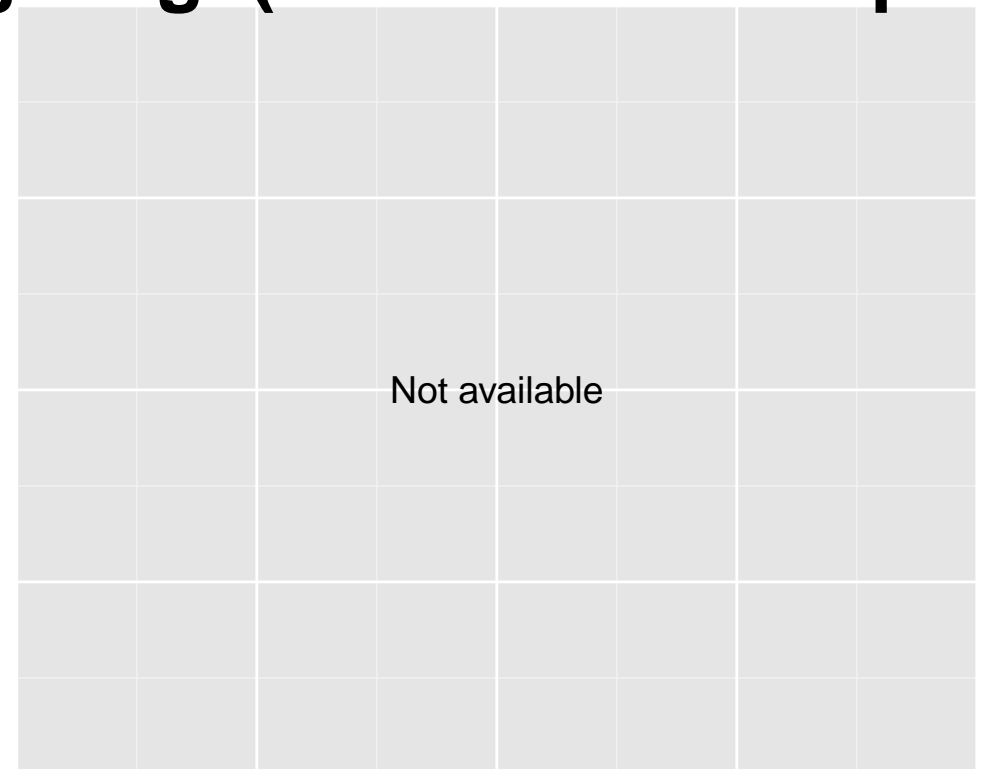

Supplement: SuppDataset_1.zip [file Reg1_set_A.pdf › Supplemental Dataset 1/A-mRNA_nonrhyth_translation_nonrhyth/Reg1_set_A.pdf]

## Rela

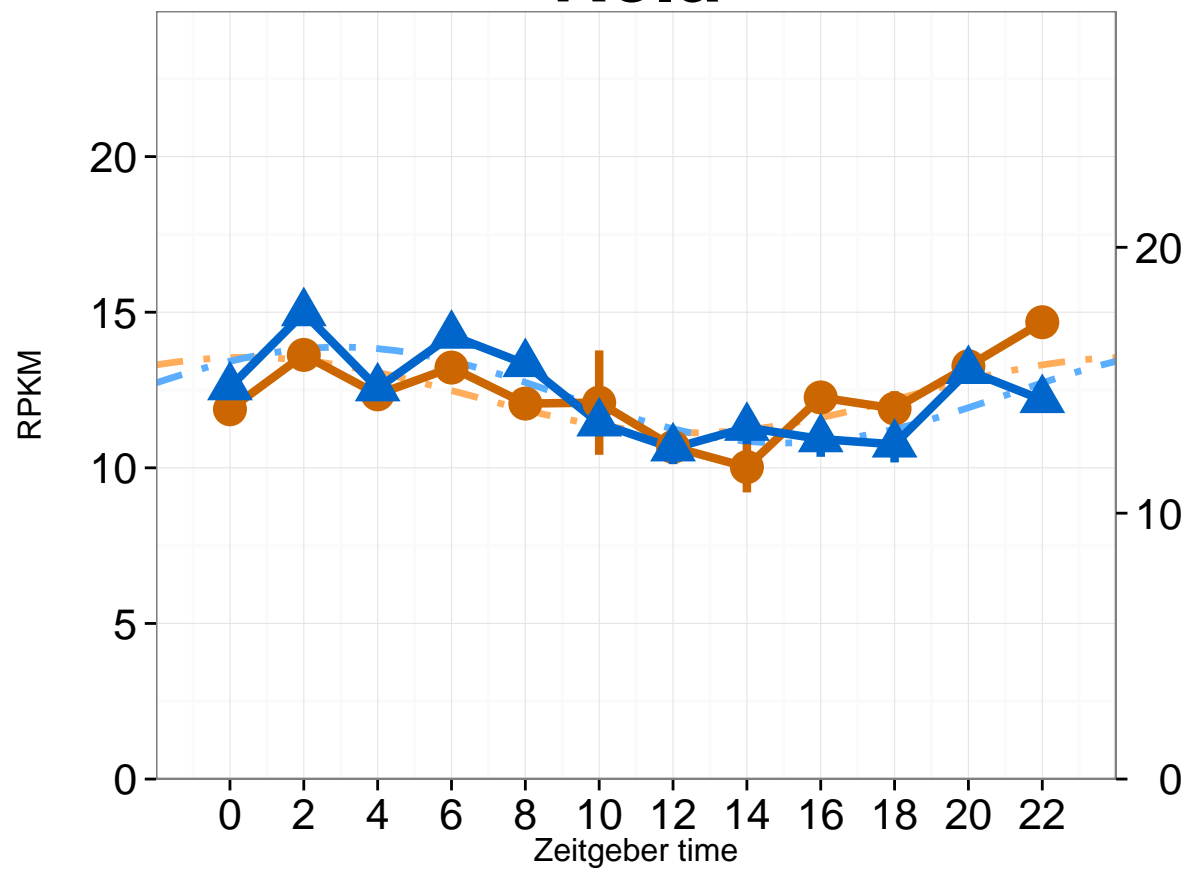

## Rela

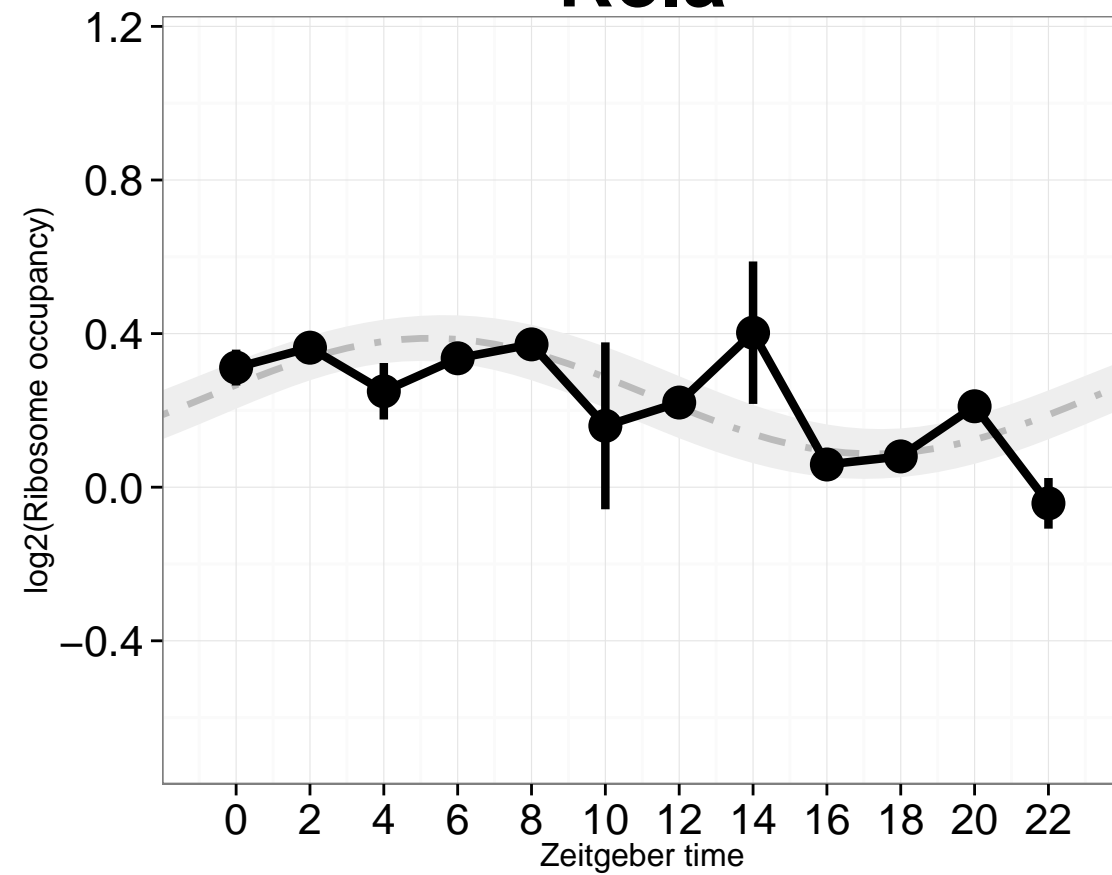

Supplement: SuppDataset_1.zip [file Rela_set_A.pdf › Supplemental Dataset 1/A-mRNA_nonrhyth_translation_nonrhyth/Rela_set_A.pdf]

## Relb

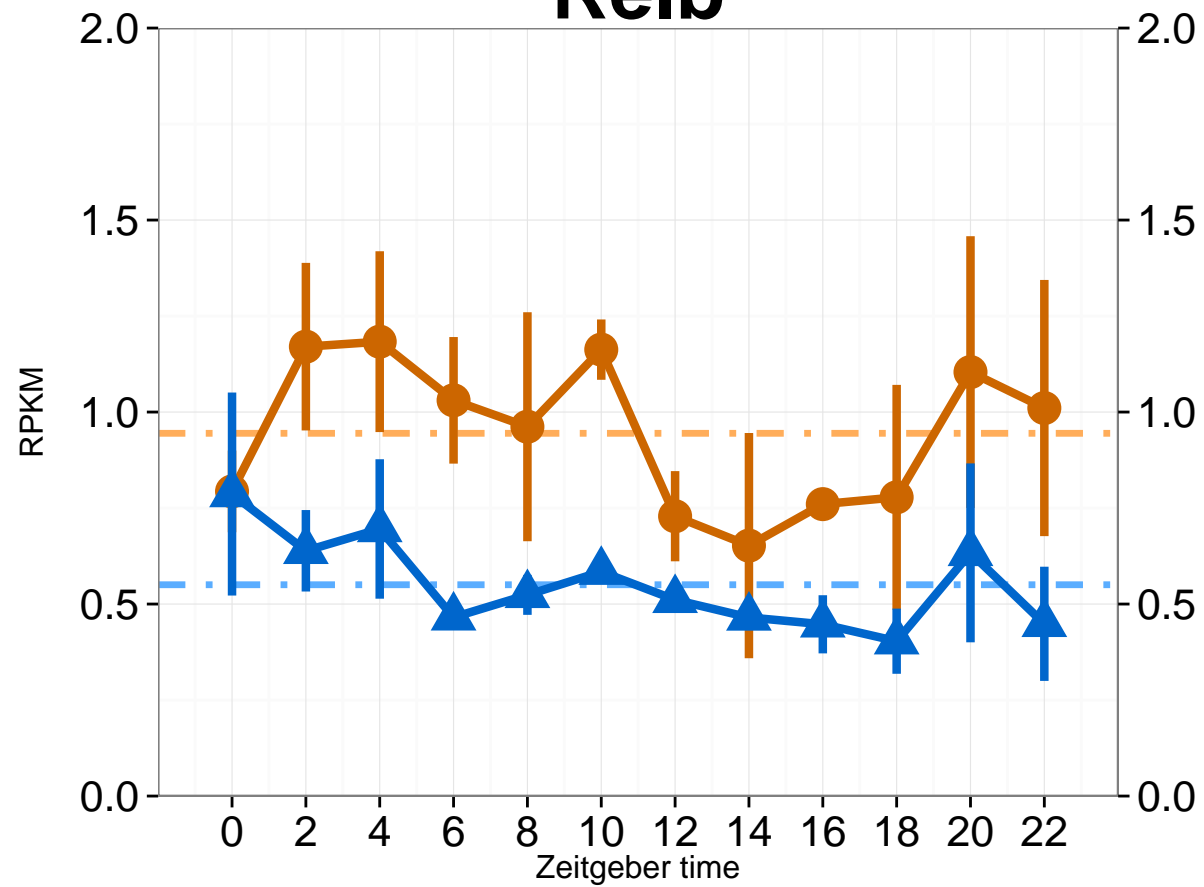

## Relb

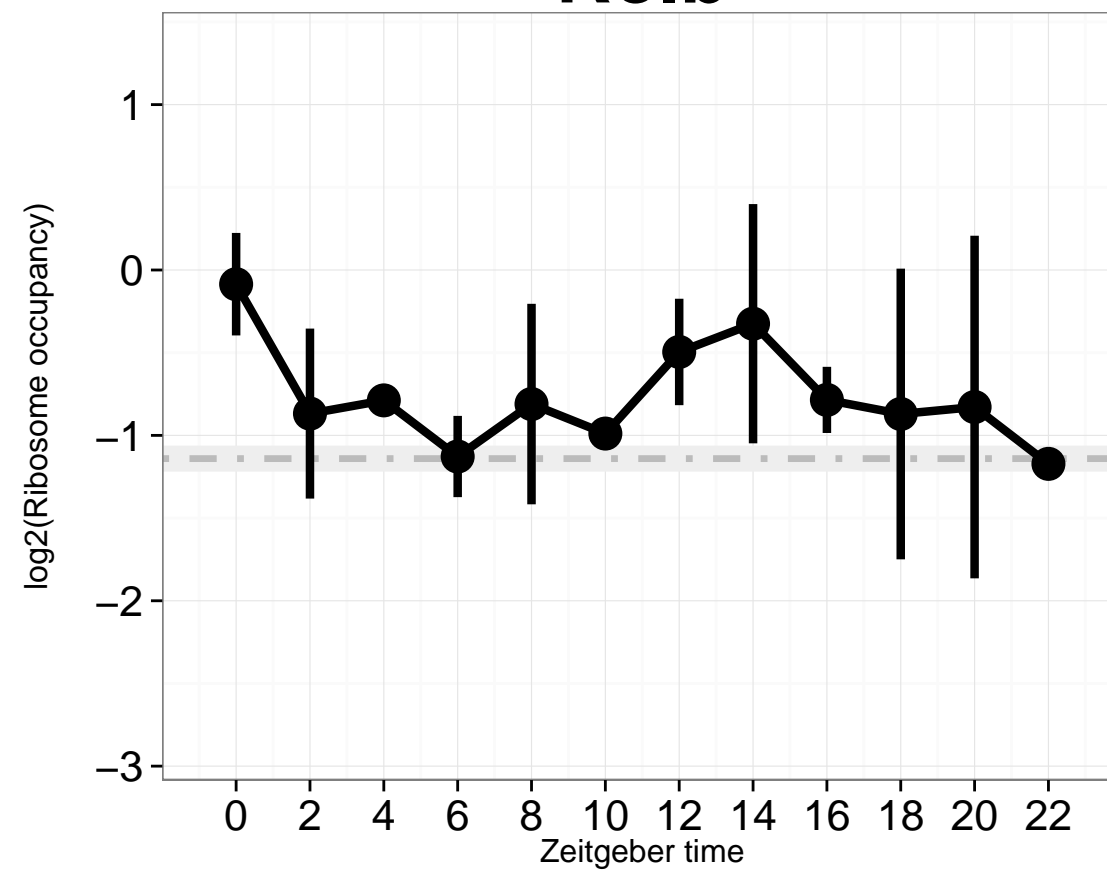

Supplement: SuppDataset_1.zip [file Relb_set_A.pdf › Supplemental Dataset 1/A-mRNA_nonrhyth_translation_nonrhyth/Relb_set_A.pdf]

## ReIn

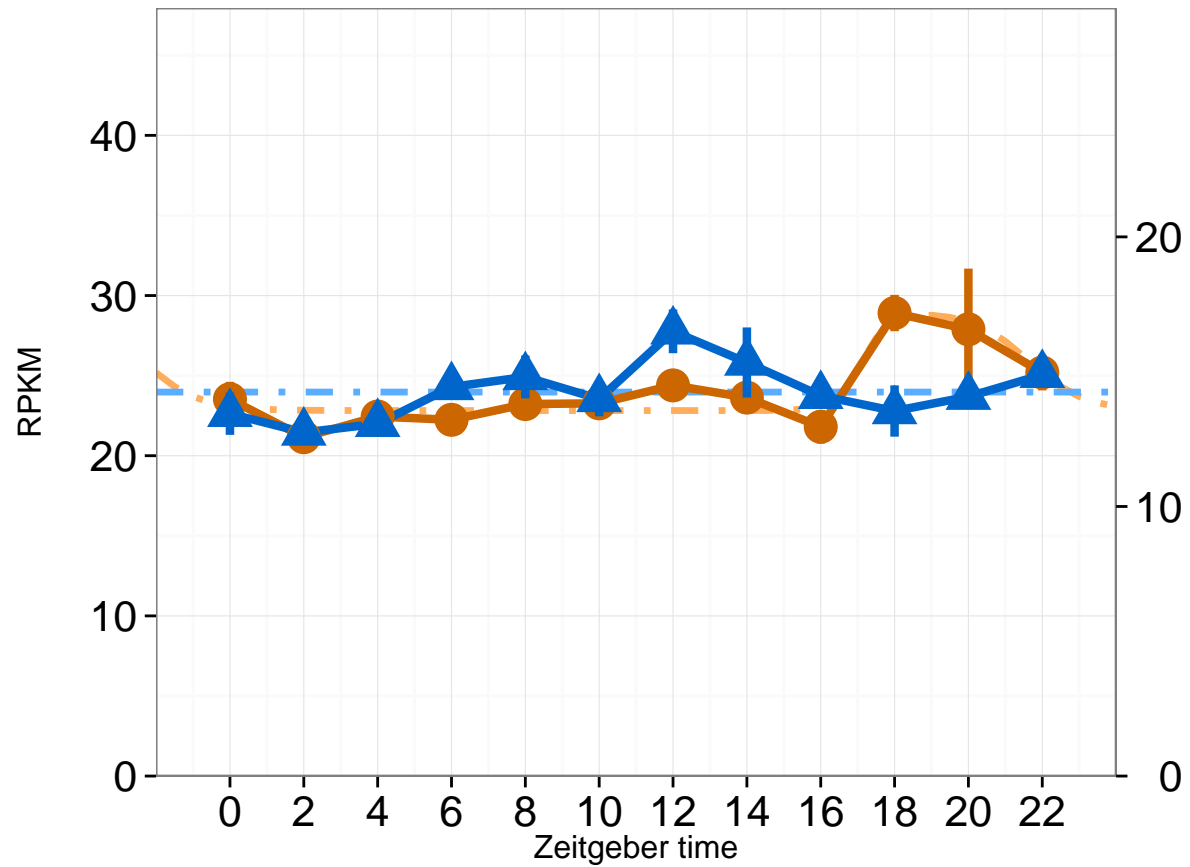

## ReIn

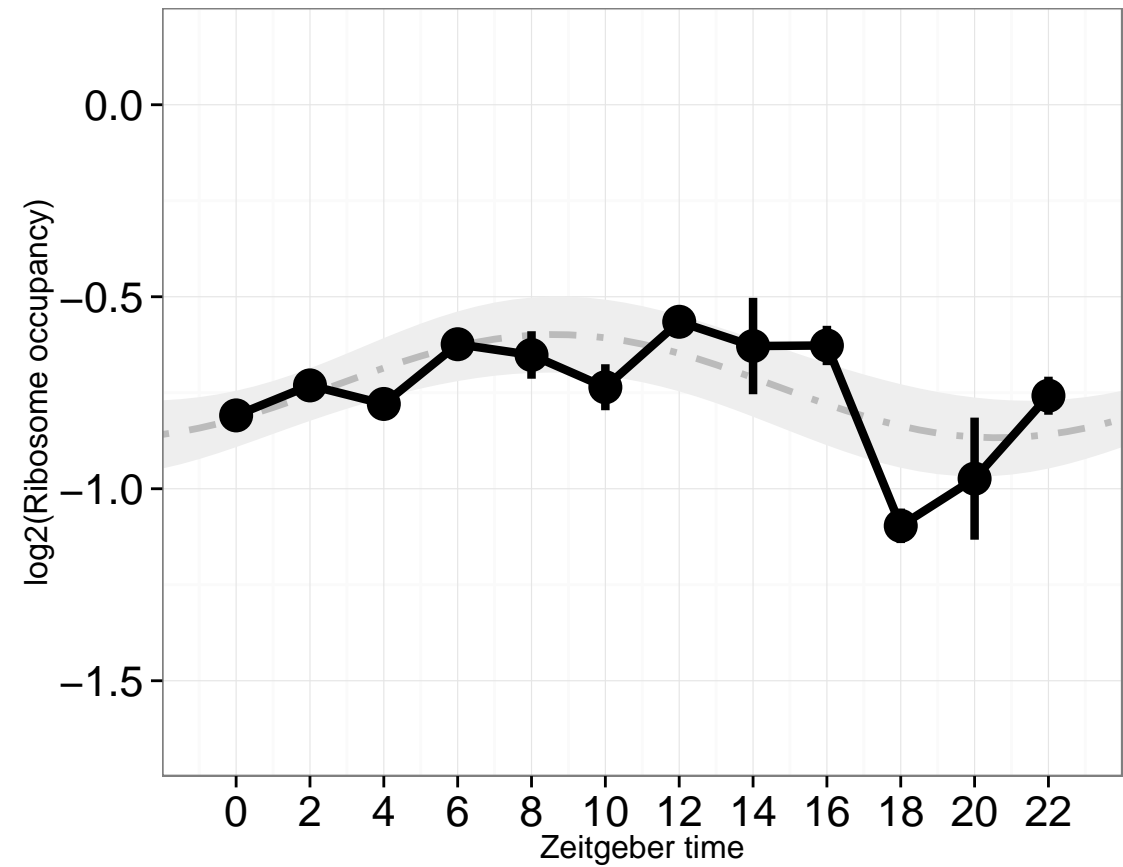

Supplement: SuppDataset_1.zip [file Reln_set_A.pdf › Supplemental Dataset 1/A-mRNA_nonrhyth_translation_nonrhyth/Reln_set_A.pdf]

## Renbp

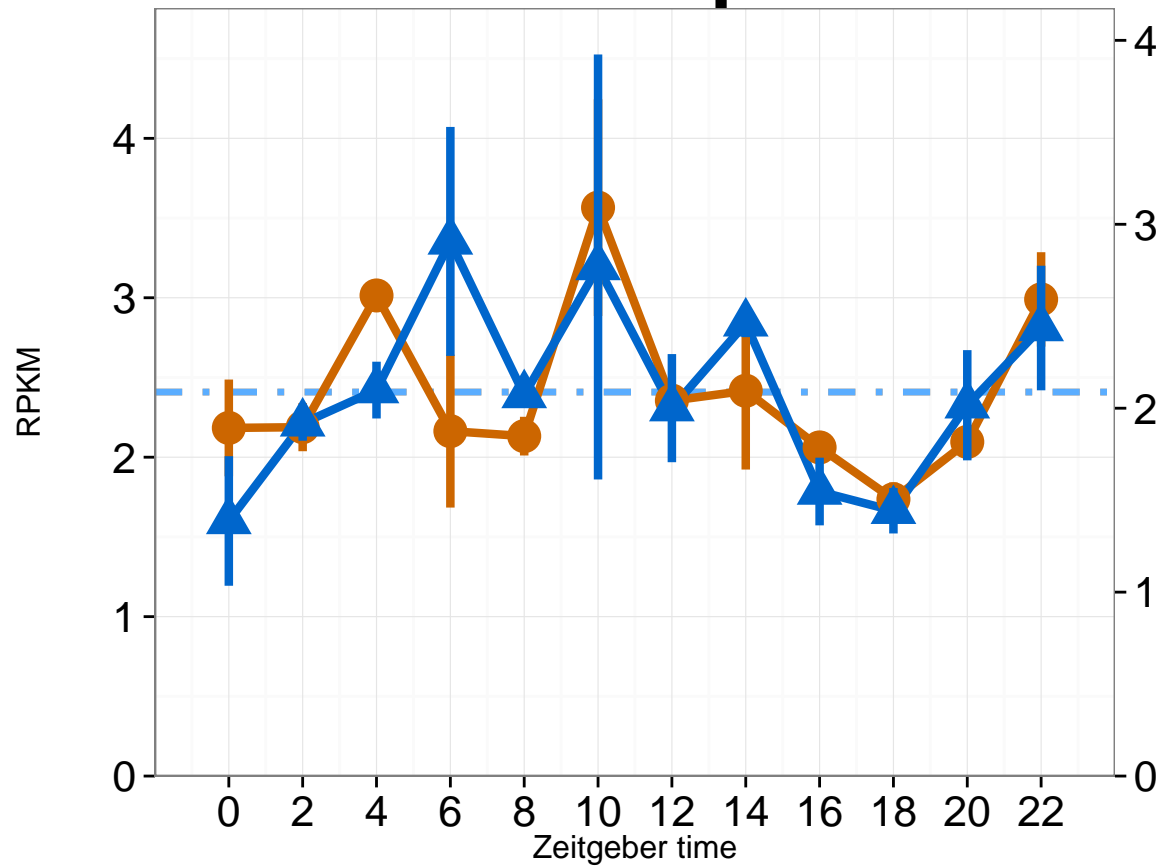

## Renbp

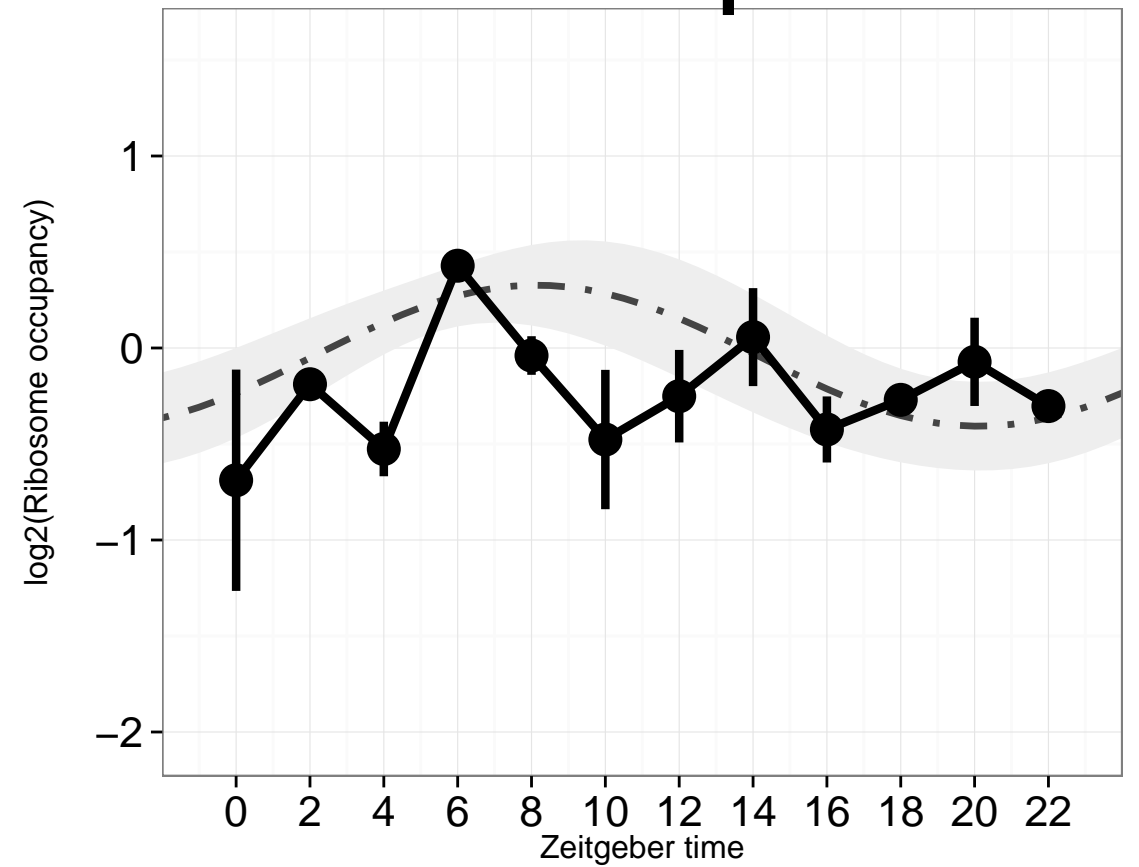

Supplement: SuppDataset_1.zip [file Renbp_set_A.pdf › Supplemental Dataset 1/A-mRNA_nonrhyth_translation_nonrhyth/Renbp_set_A.pdf]

# Reps1

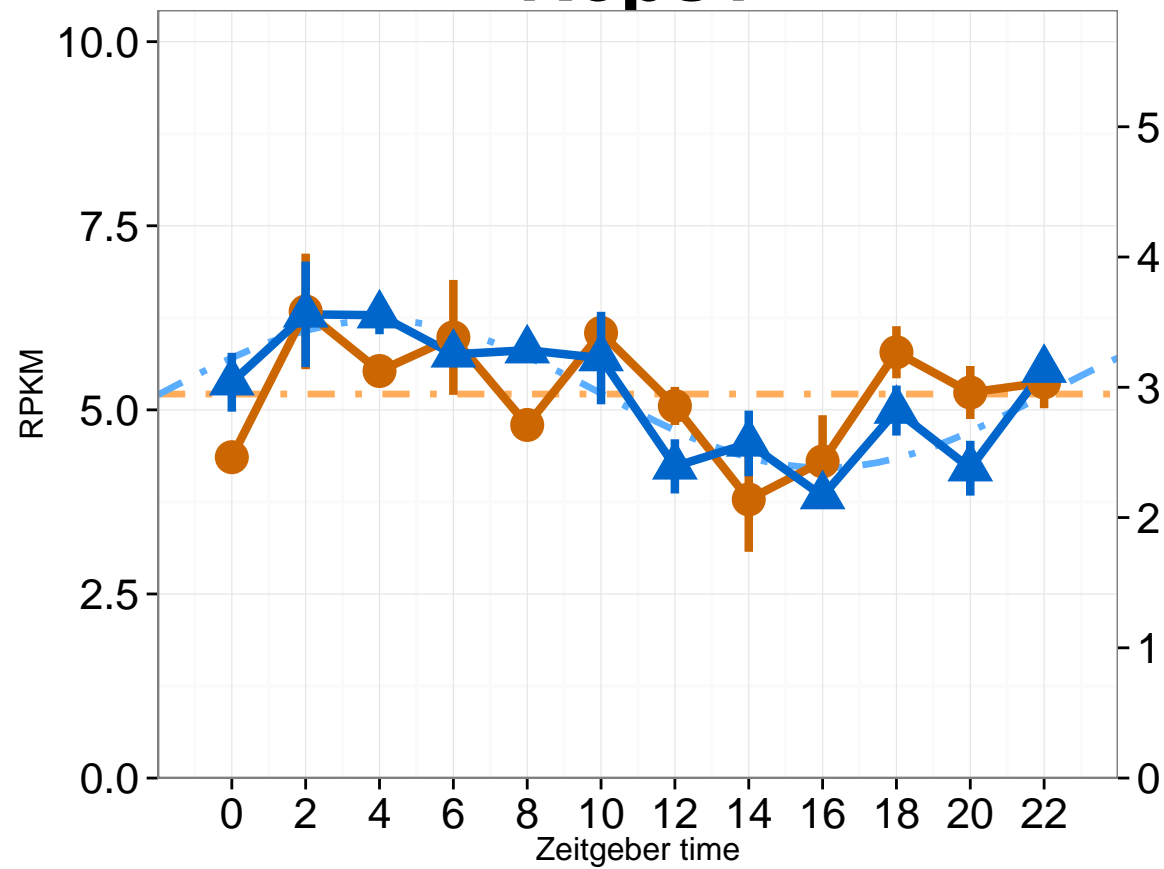

# Reps1

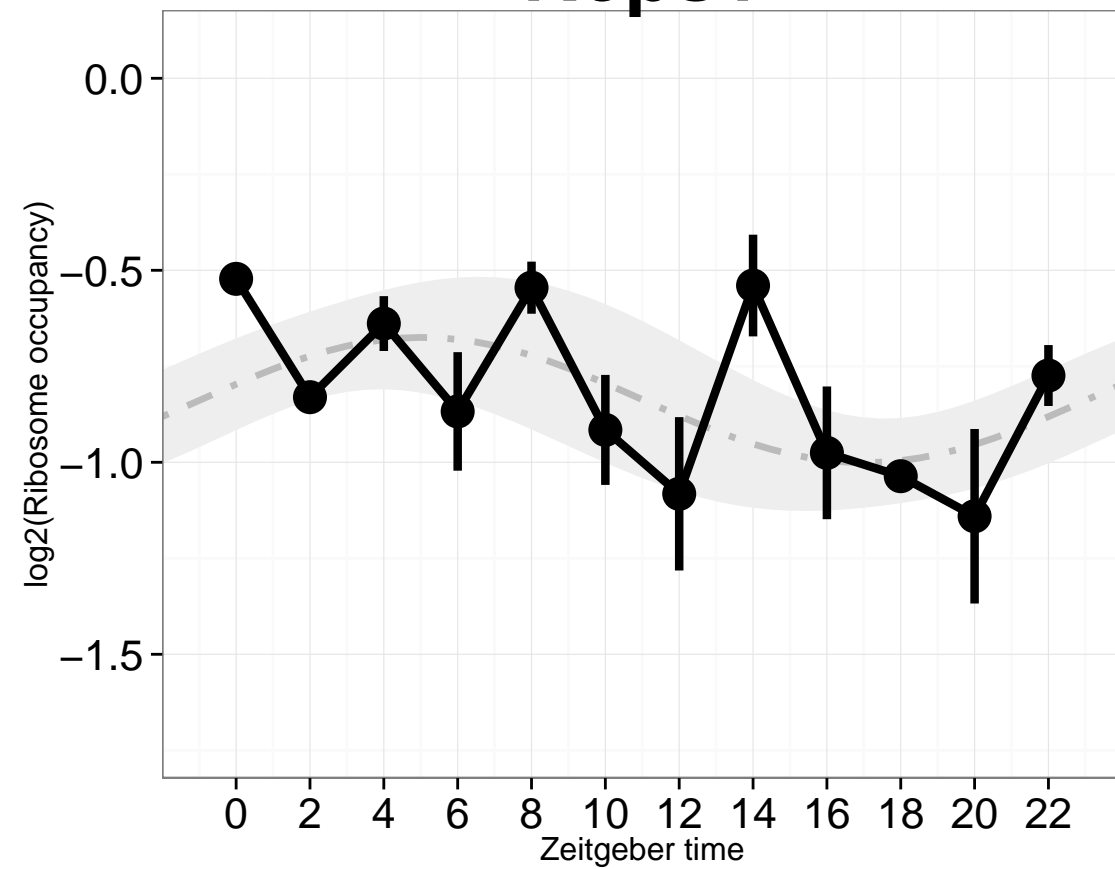

Supplement: SuppDataset_1.zip [file Reps1_set_A.pdf › Supplemental Dataset 1/A-mRNA_nonrhyth_translation_nonrhyth/Reps1_set_A.pdf]

# Reps2

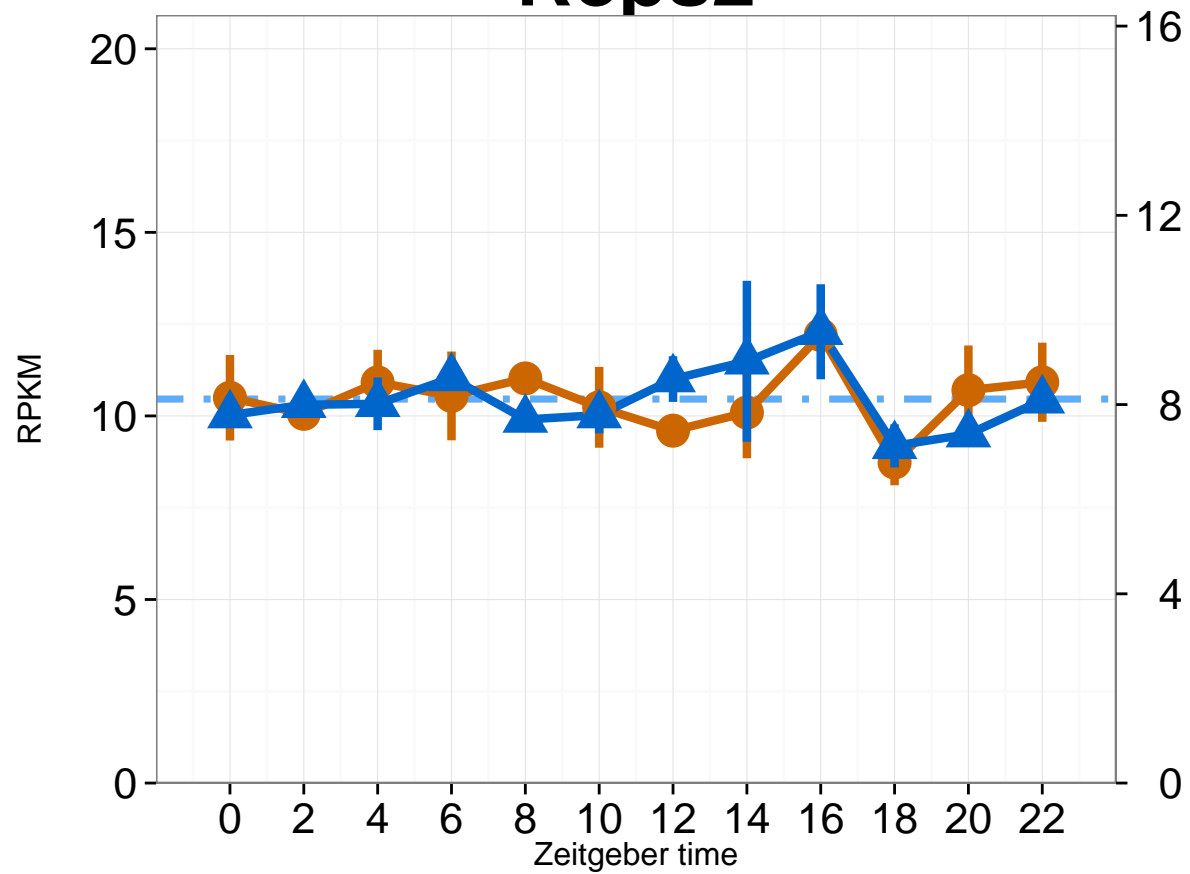

# Reps2

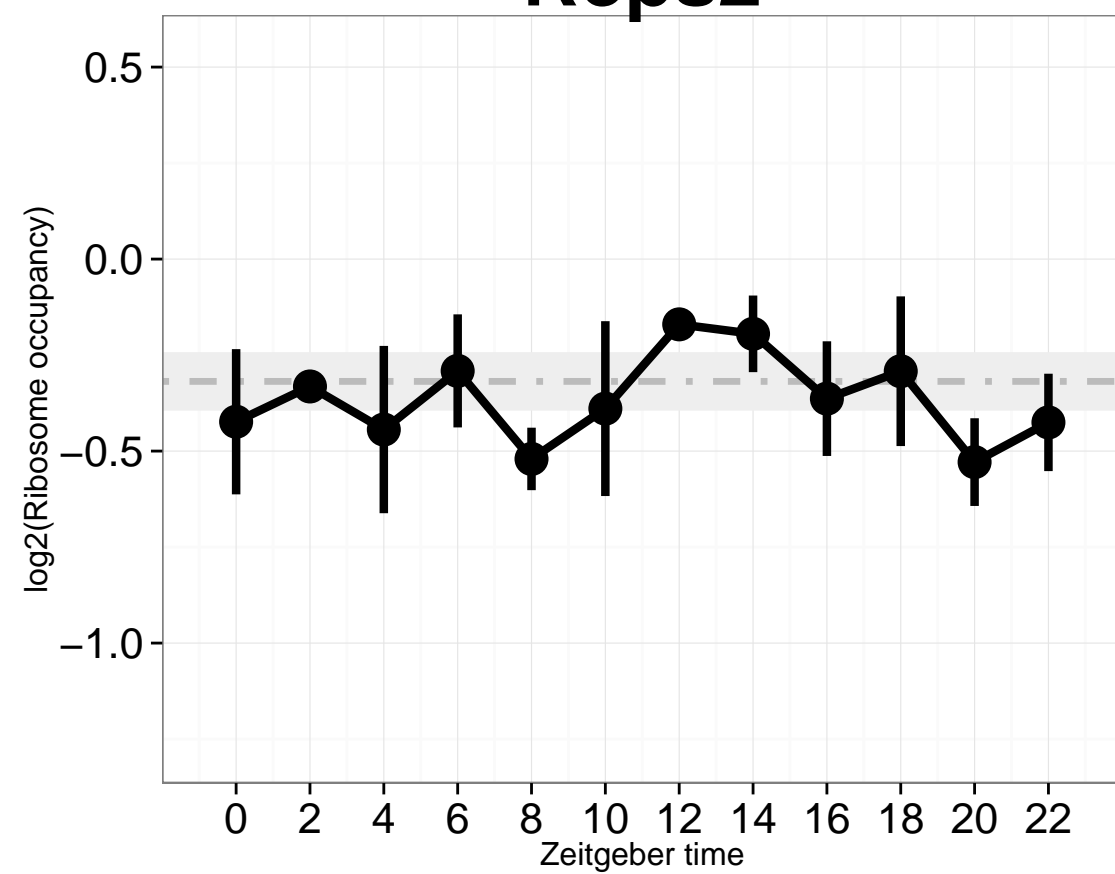

Supplement: SuppDataset_1.zip [file Reps2_set_A.pdf › Supplemental Dataset 1/A-mRNA_nonrhyth_translation_nonrhyth/Reps2_set_A.pdf]

# Rer1

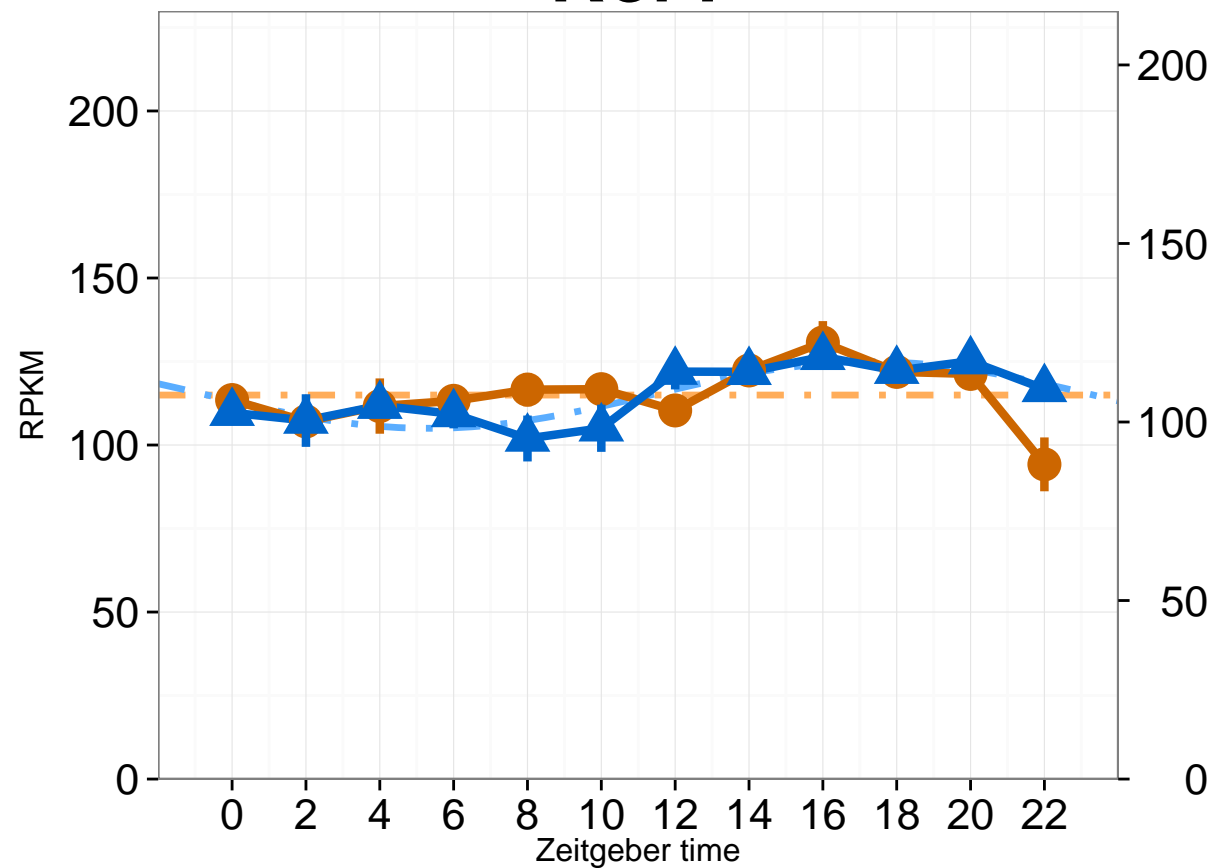

# Rer1

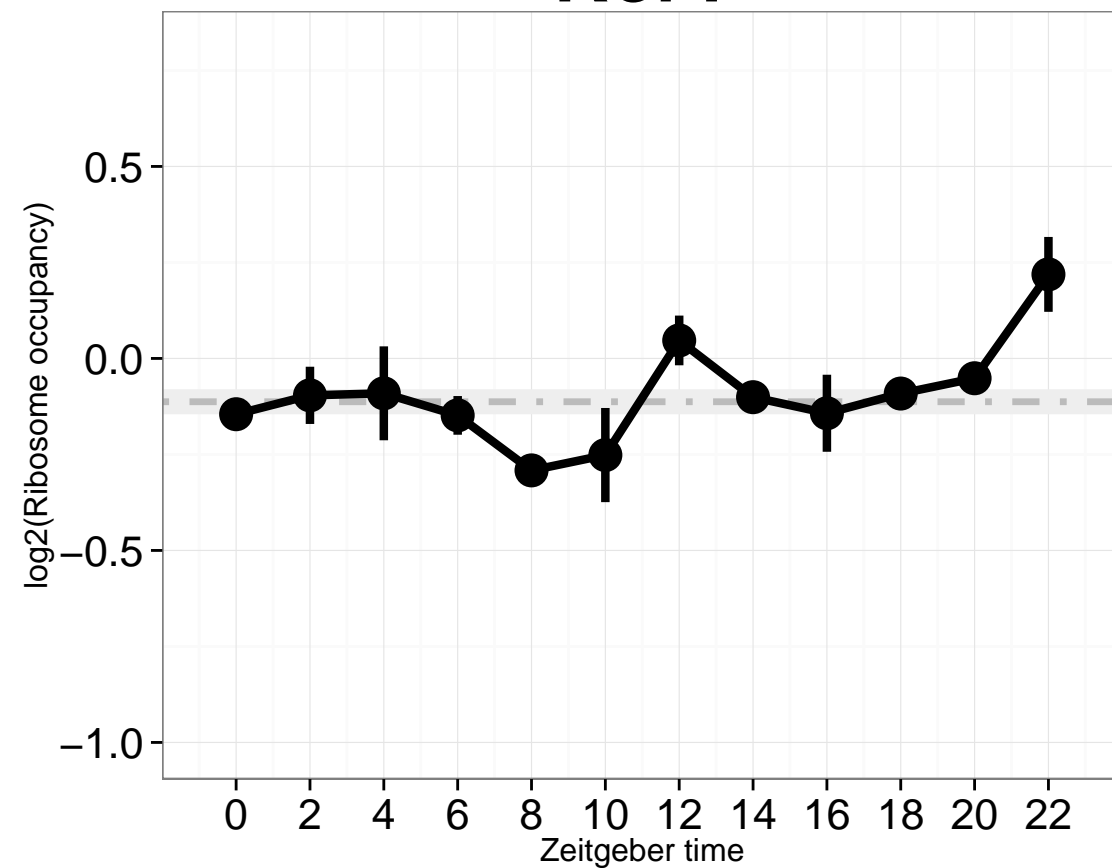

Supplement: SuppDataset_1.zip [file Rer1_set_A.pdf › Supplemental Dataset 1/A-mRNA_nonrhyth_translation_nonrhyth/Rer1_set_A.pdf]

## Rerg

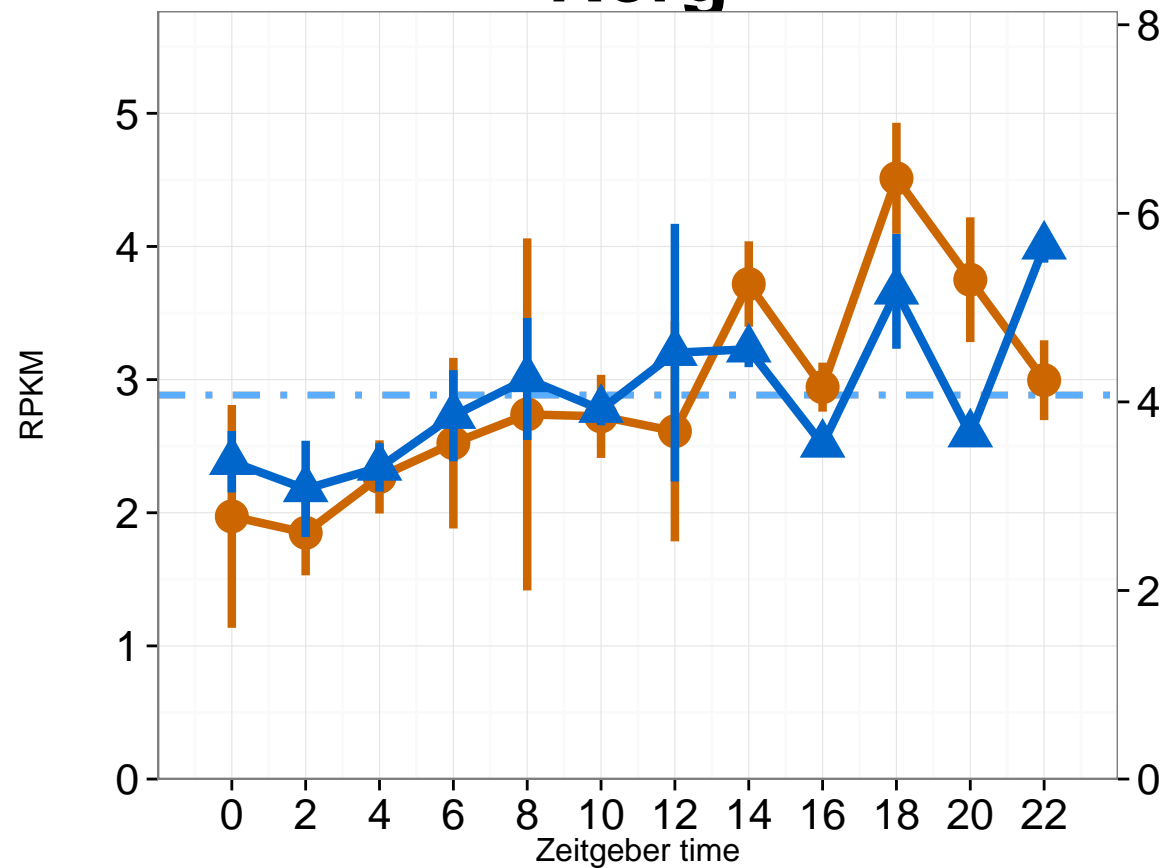

## Rerg

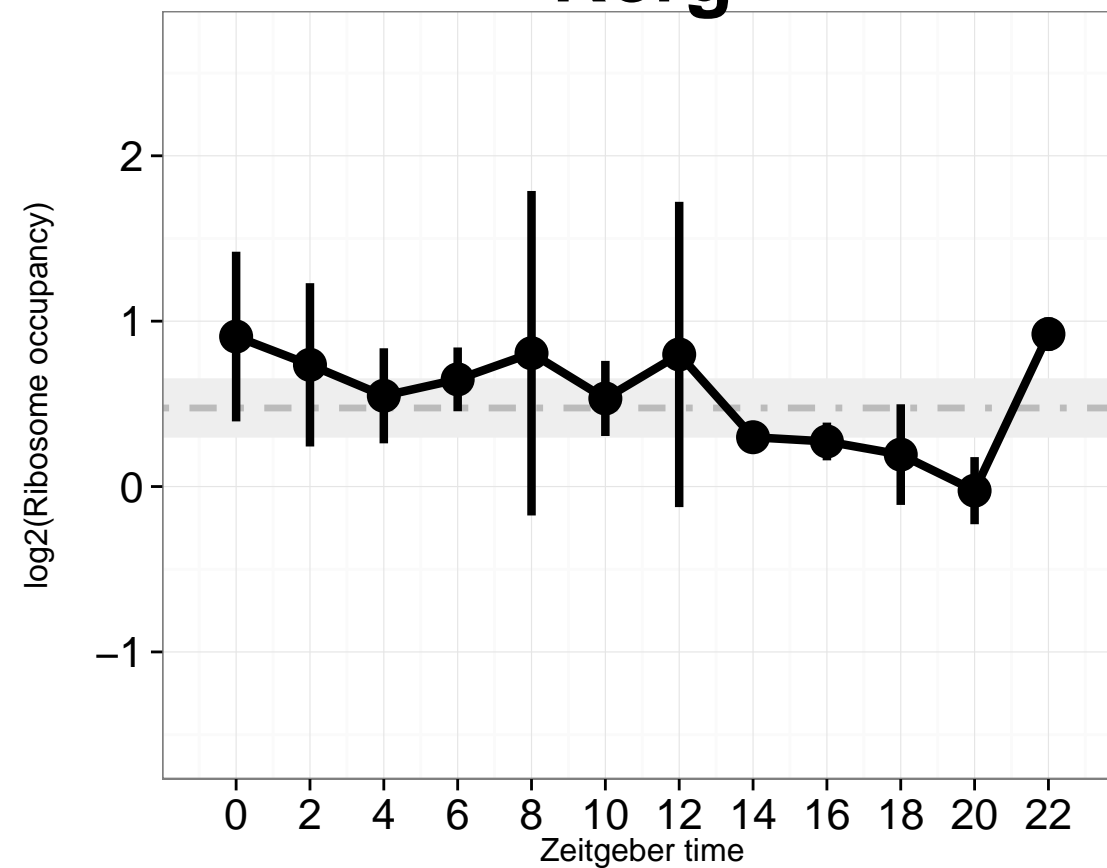

Supplement: SuppDataset_1.zip [file Rerg_set_A.pdf › Supplemental Dataset 1/A-mRNA_nonrhyth_translation_nonrhyth/Rerg_set_A.pdf]

## Rest

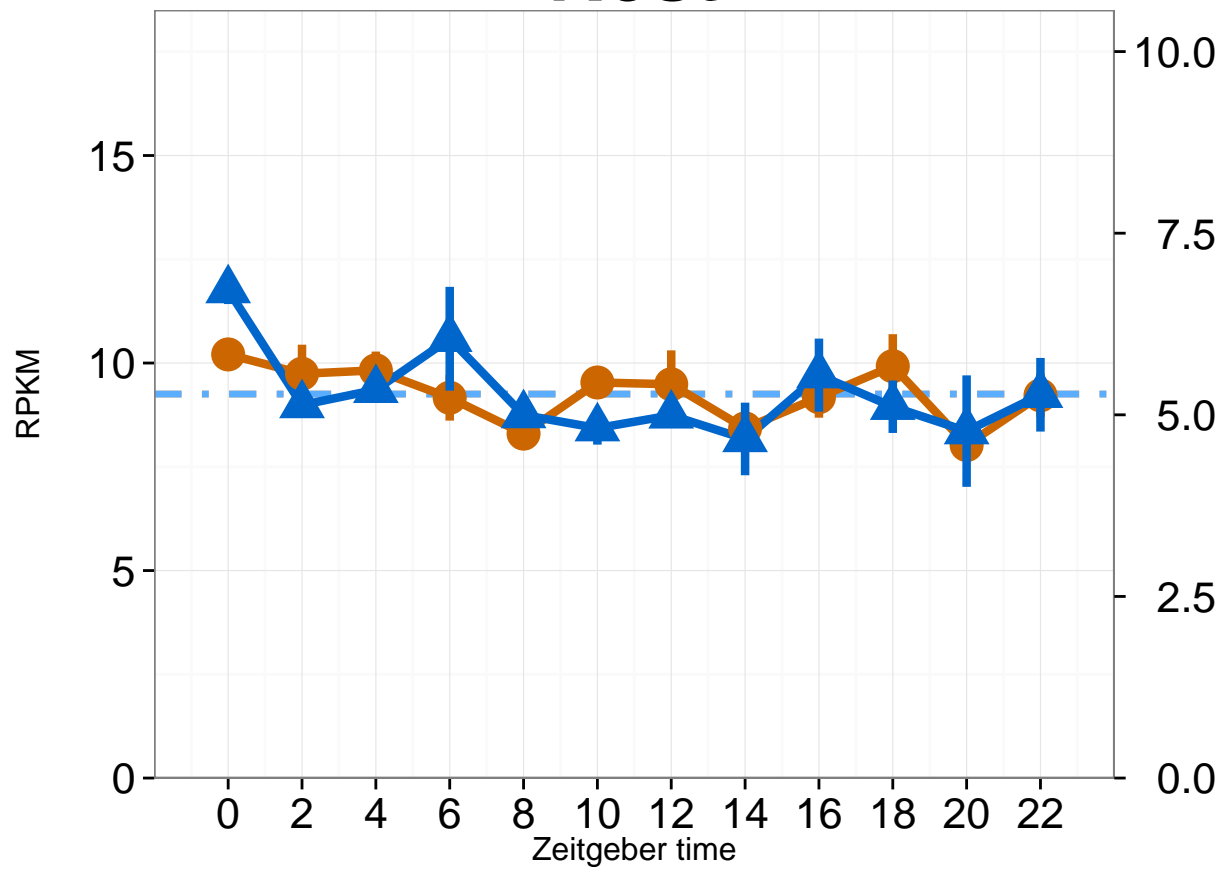

## Rest

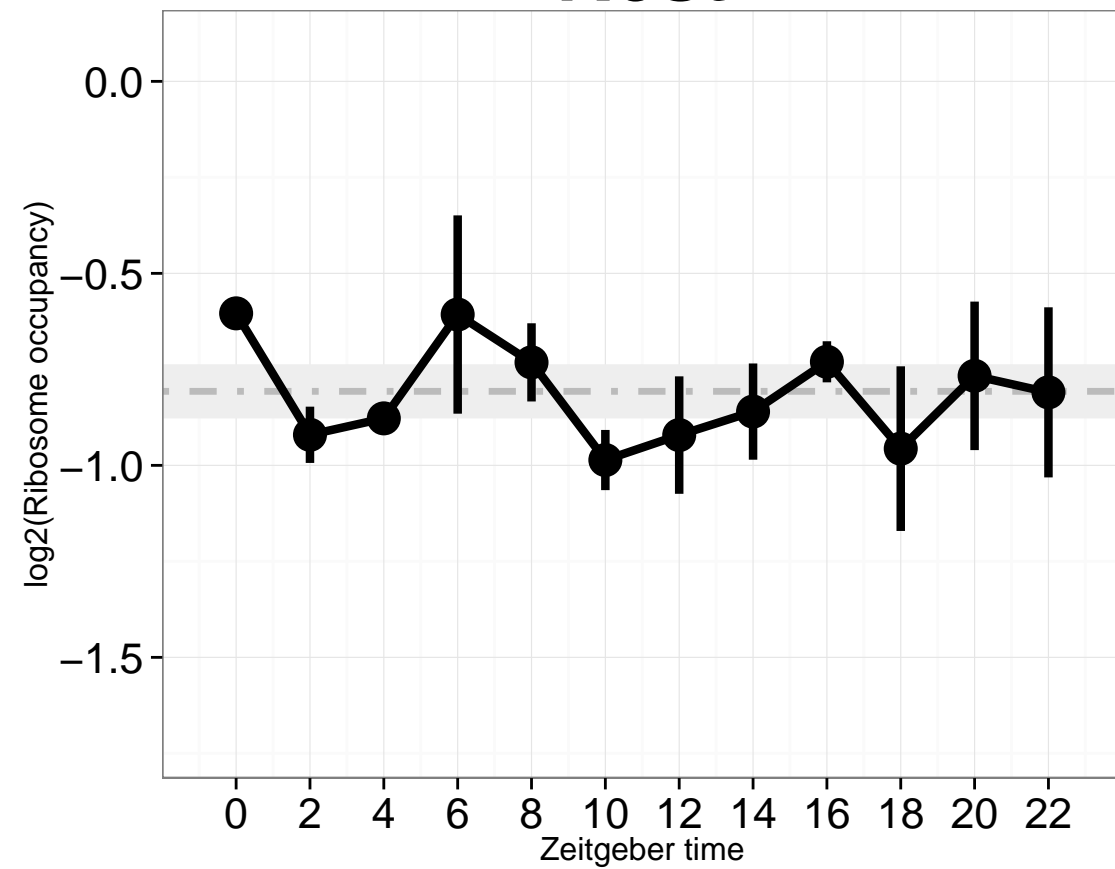

Supplement: SuppDataset_1.zip [file Rest_set_A.pdf › Supplemental Dataset 1/A-mRNA_nonrhyth_translation_nonrhyth/Rest_set_A.pdf]

## Rev3l

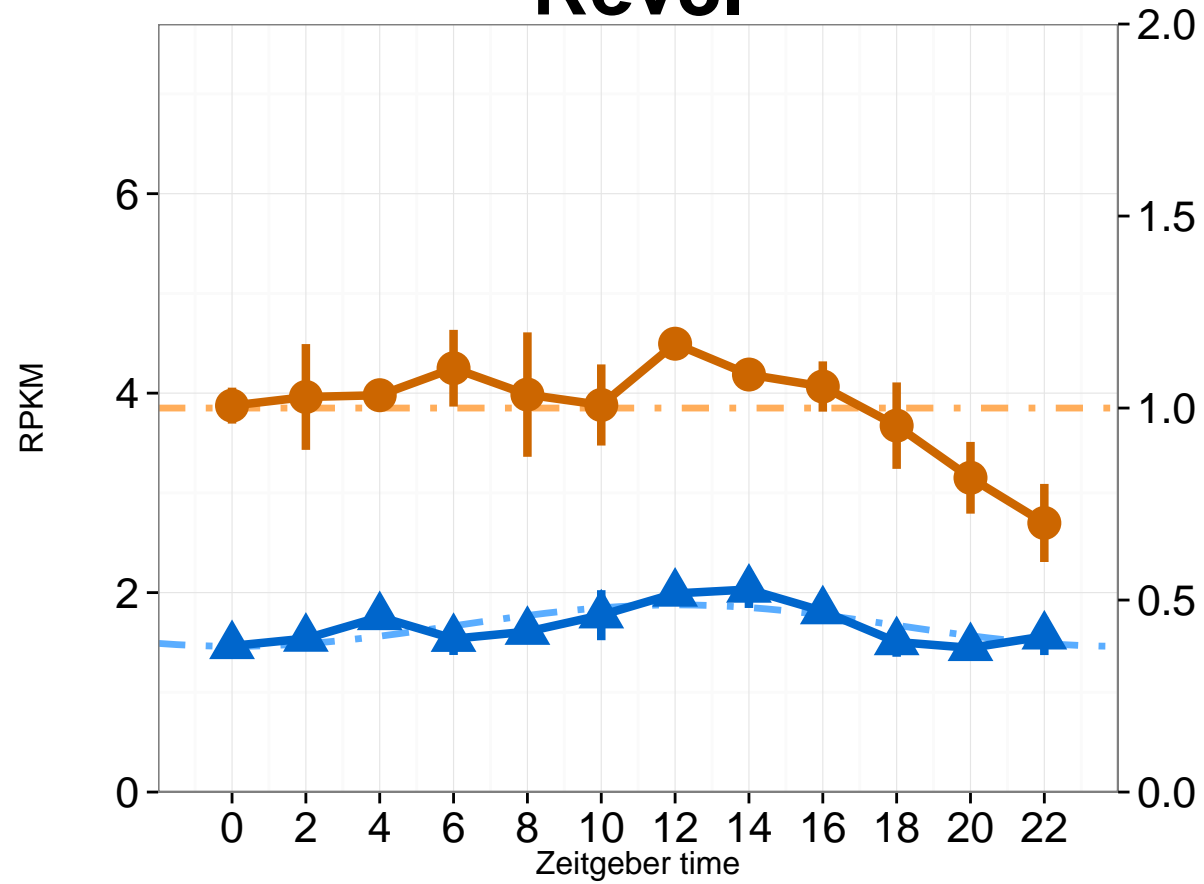

## Rev3l

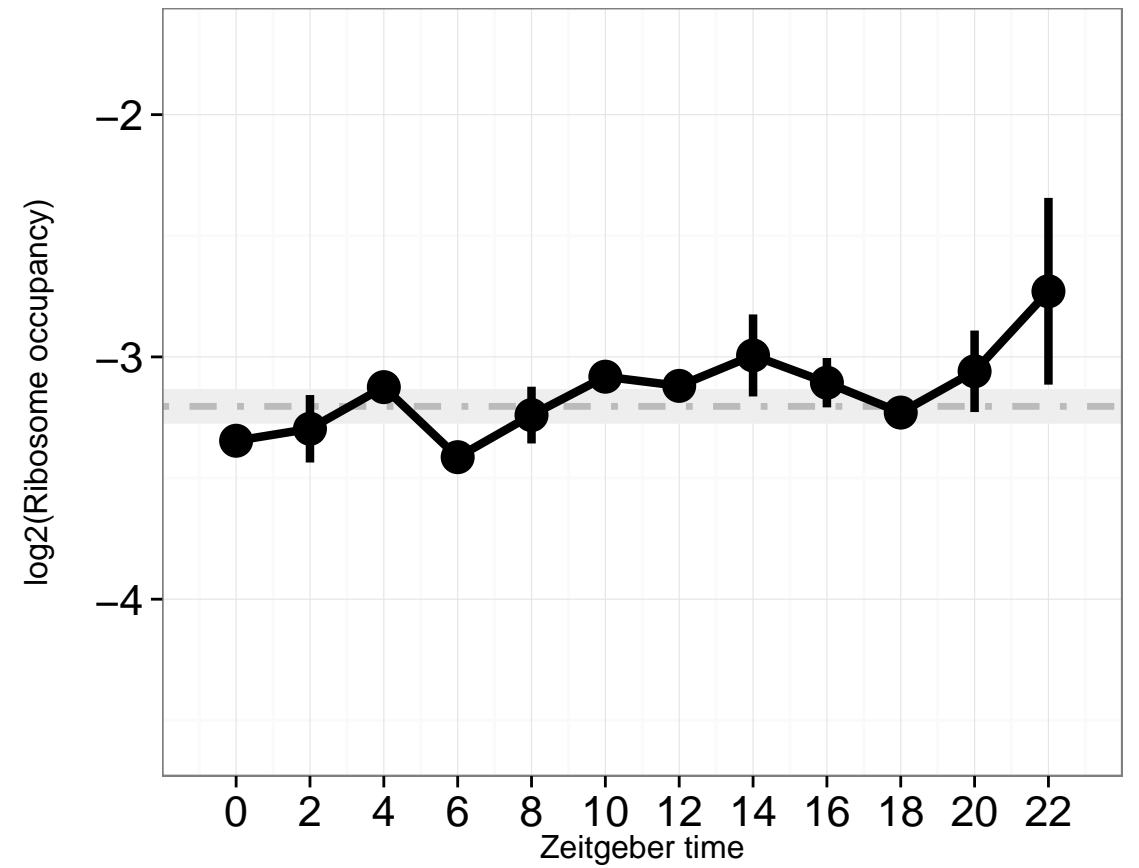

Supplement: SuppDataset_1.zip [file Rev3l_set_A.pdf › Supplemental Dataset 1/A-mRNA_nonrhyth_translation_nonrhyth/Rev3l_set_A.pdf]

# Rexo1

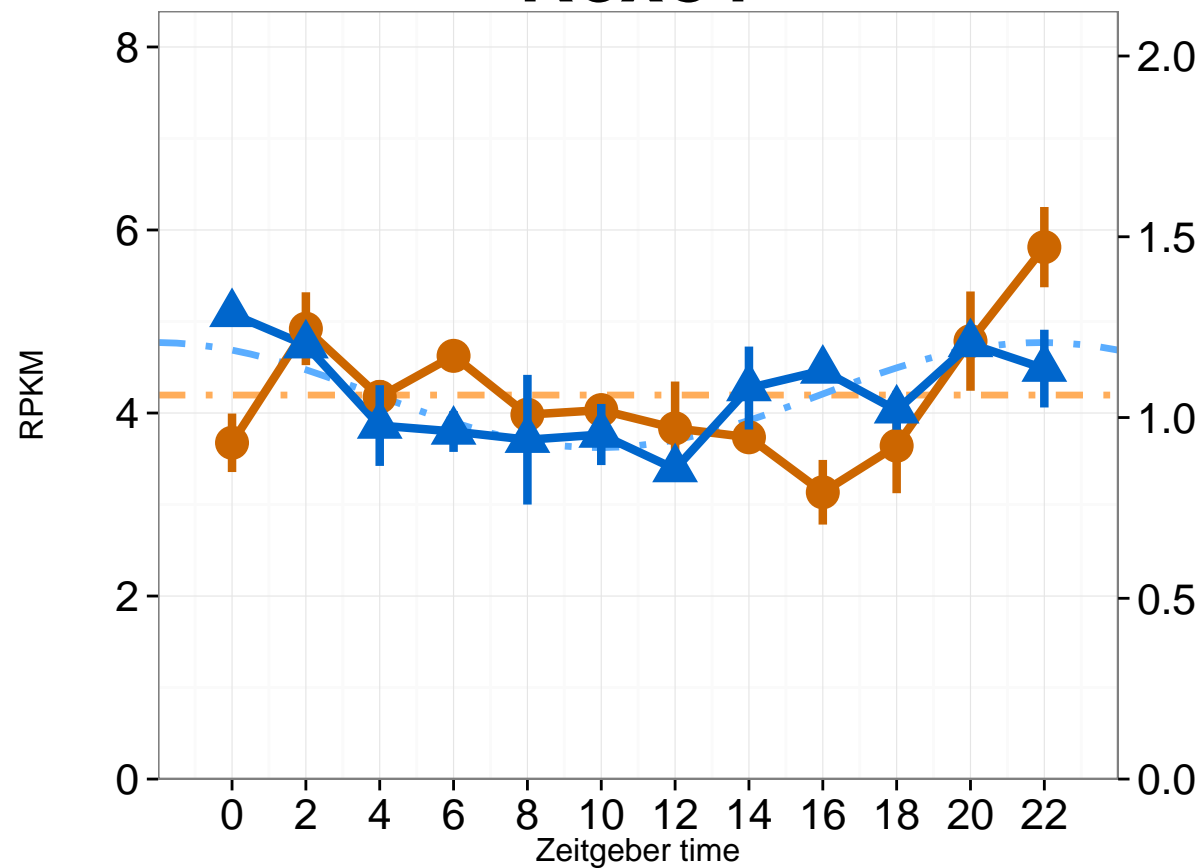

# Rexo1

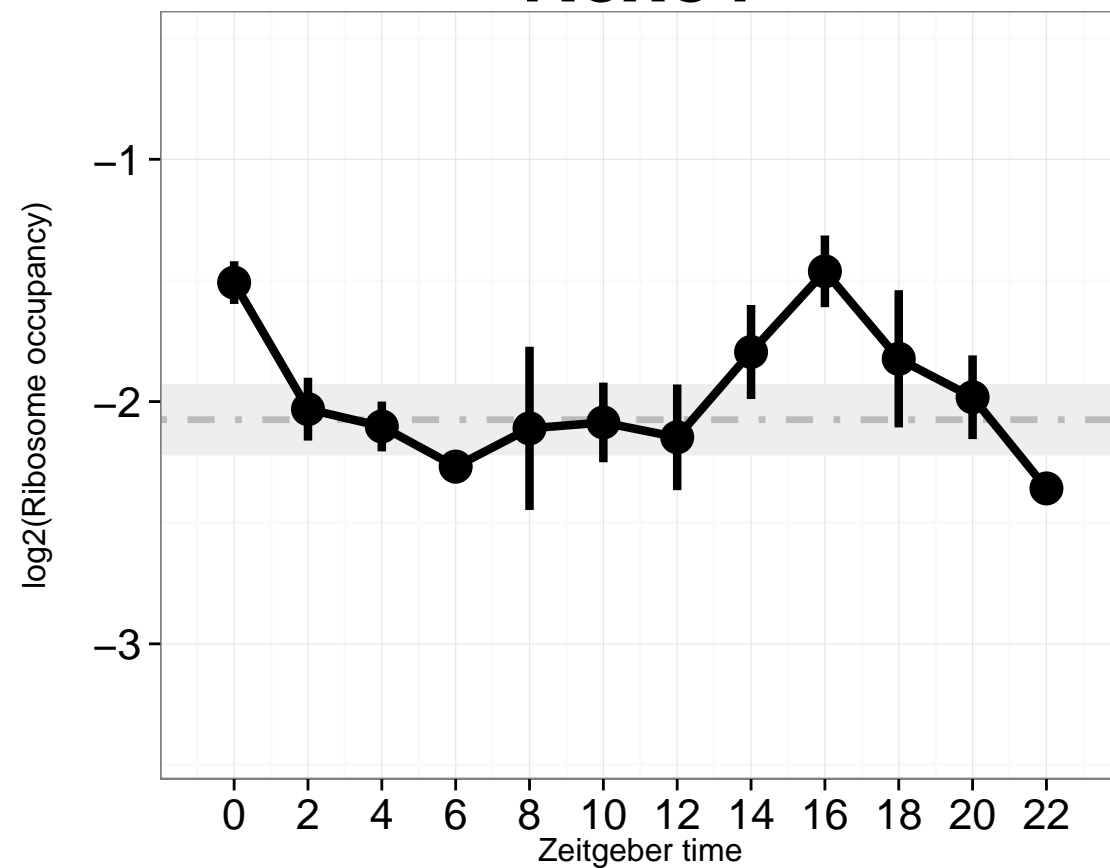

Supplement: SuppDataset_1.zip [file Rexo1_set_A.pdf › Supplemental Dataset 1/A-mRNA_nonrhyth_translation_nonrhyth/Rexo1_set_A.pdf]

## Rexo4

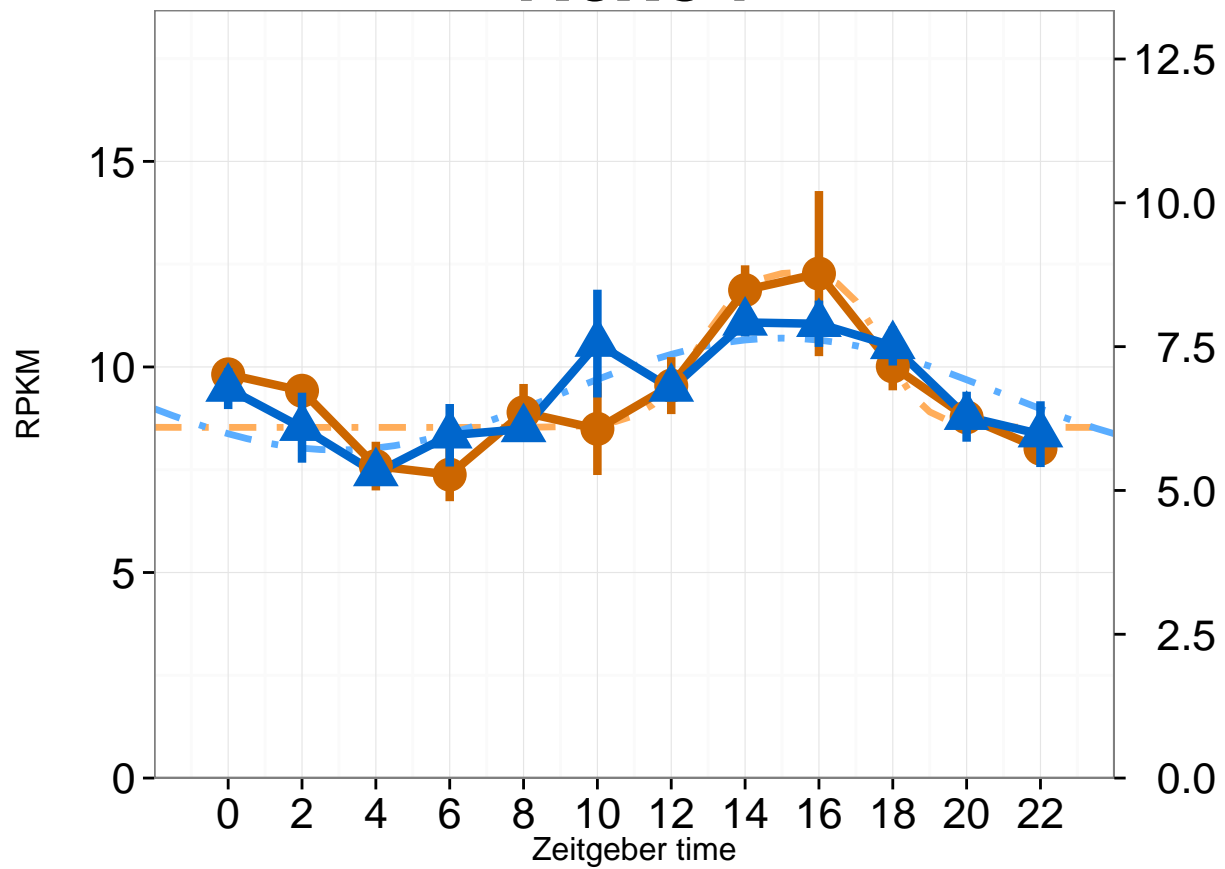

## Rexo4

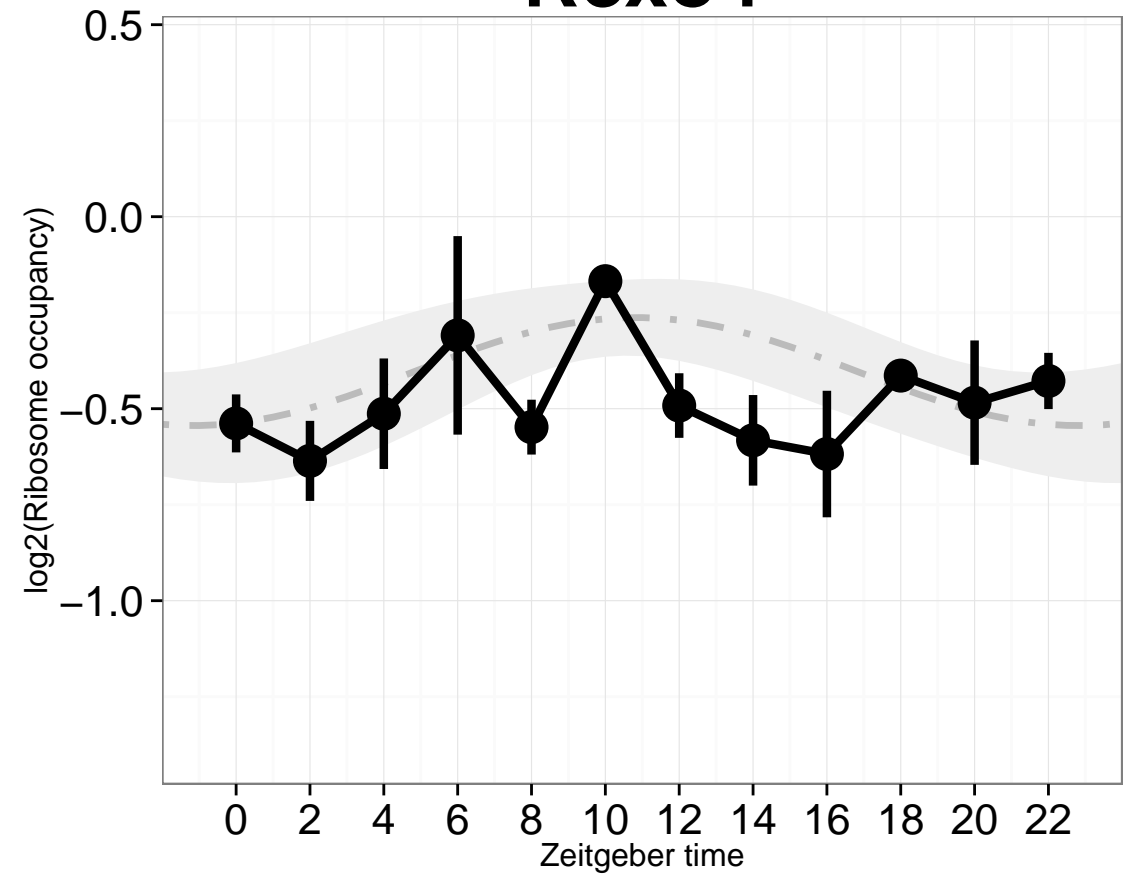

Supplement: SuppDataset_1.zip [file Rexo4_set_A.pdf › Supplemental Dataset 1/A-mRNA_nonrhyth_translation_nonrhyth/Rexo4_set_A.pdf]

# Rfc1

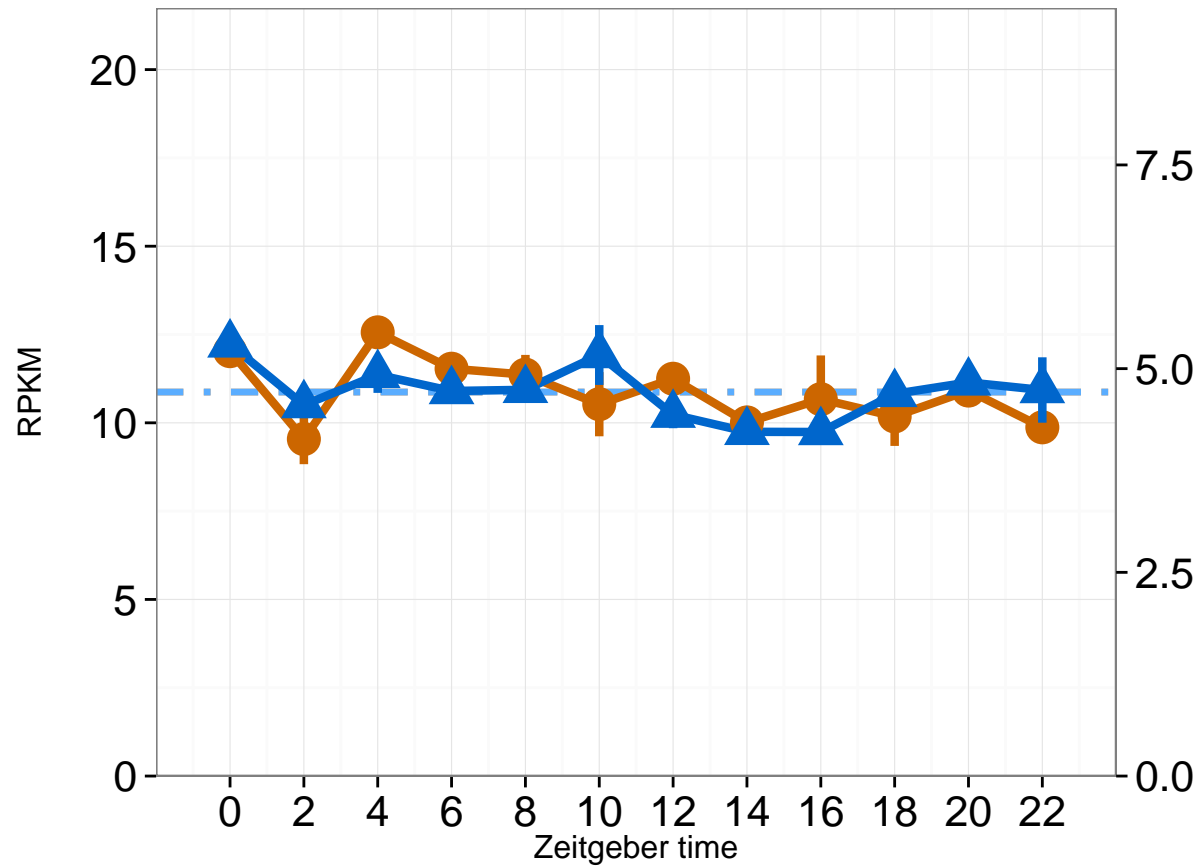

# Rfc1

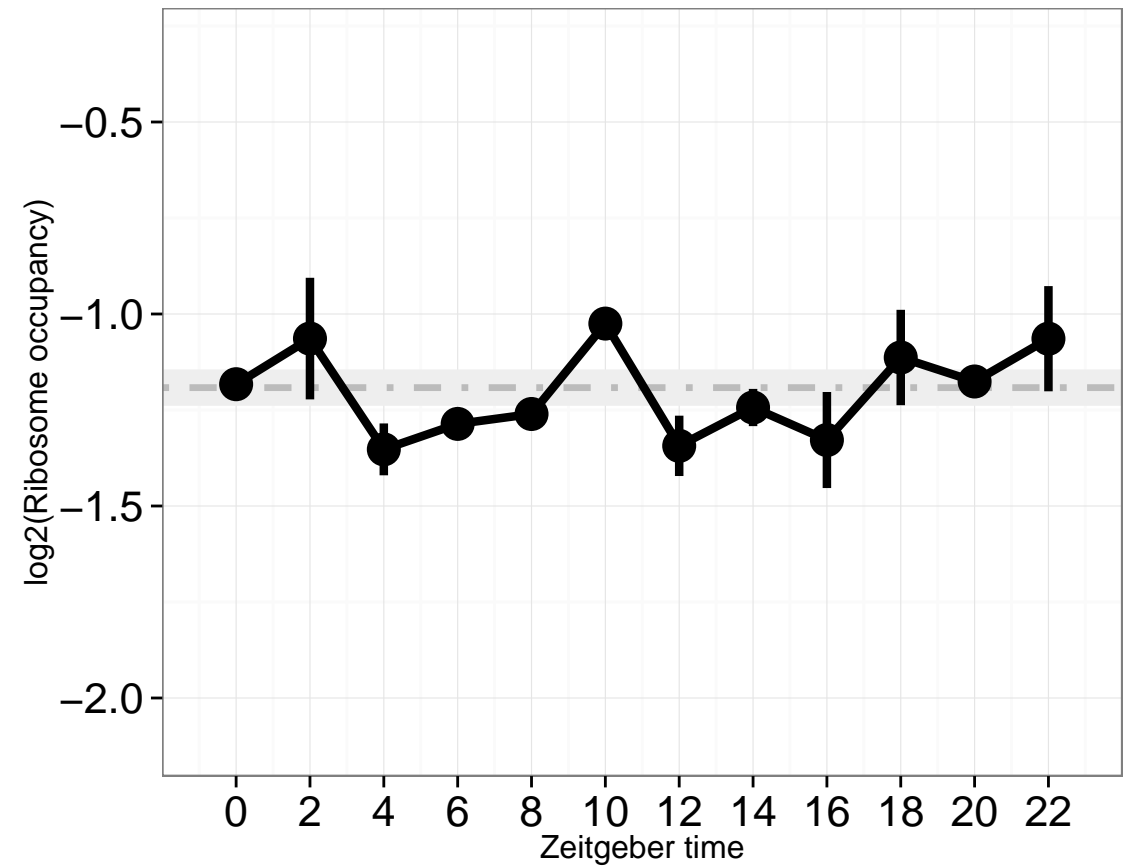

Supplement: SuppDataset_1.zip [file Rfc1_set_A.pdf › Supplemental Dataset 1/A-mRNA_nonrhyth_translation_nonrhyth/Rfc1_set_A.pdf]

# Rfc2

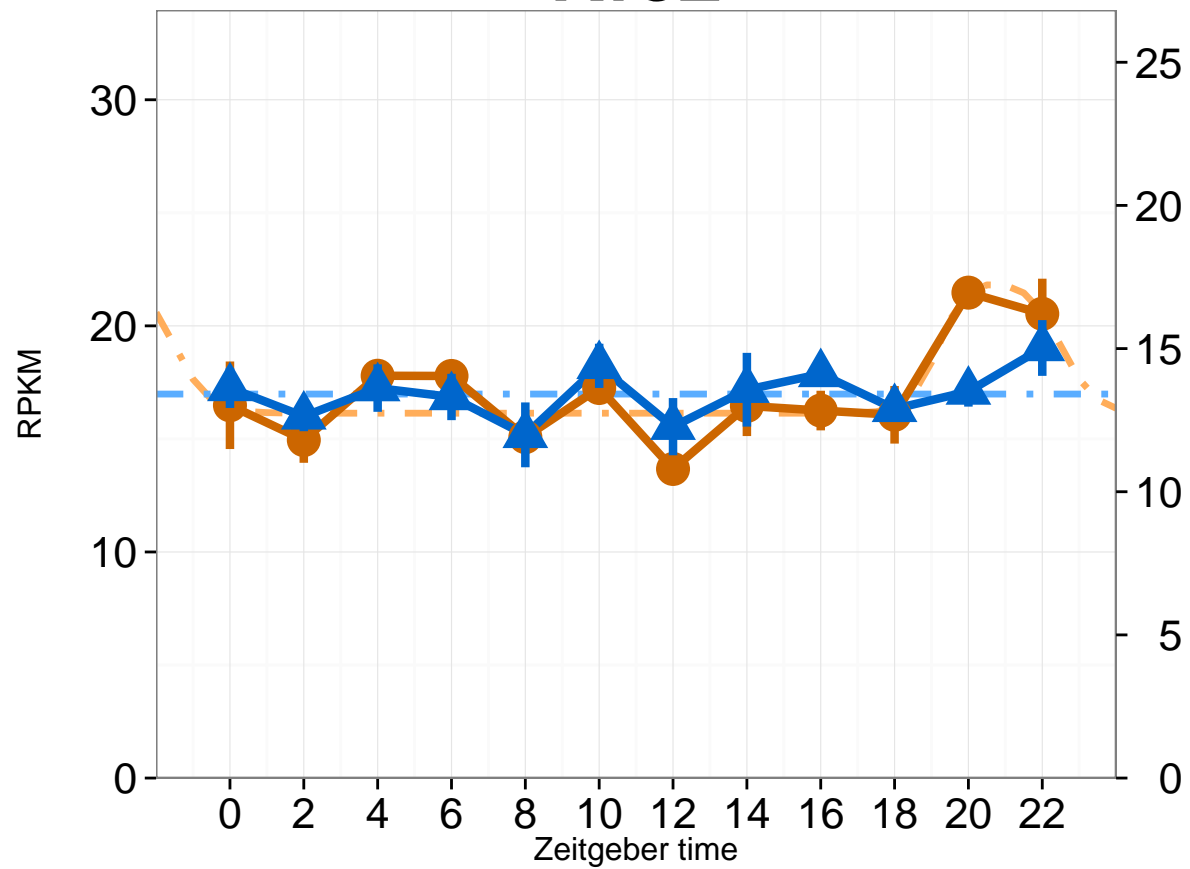

# Rfc2

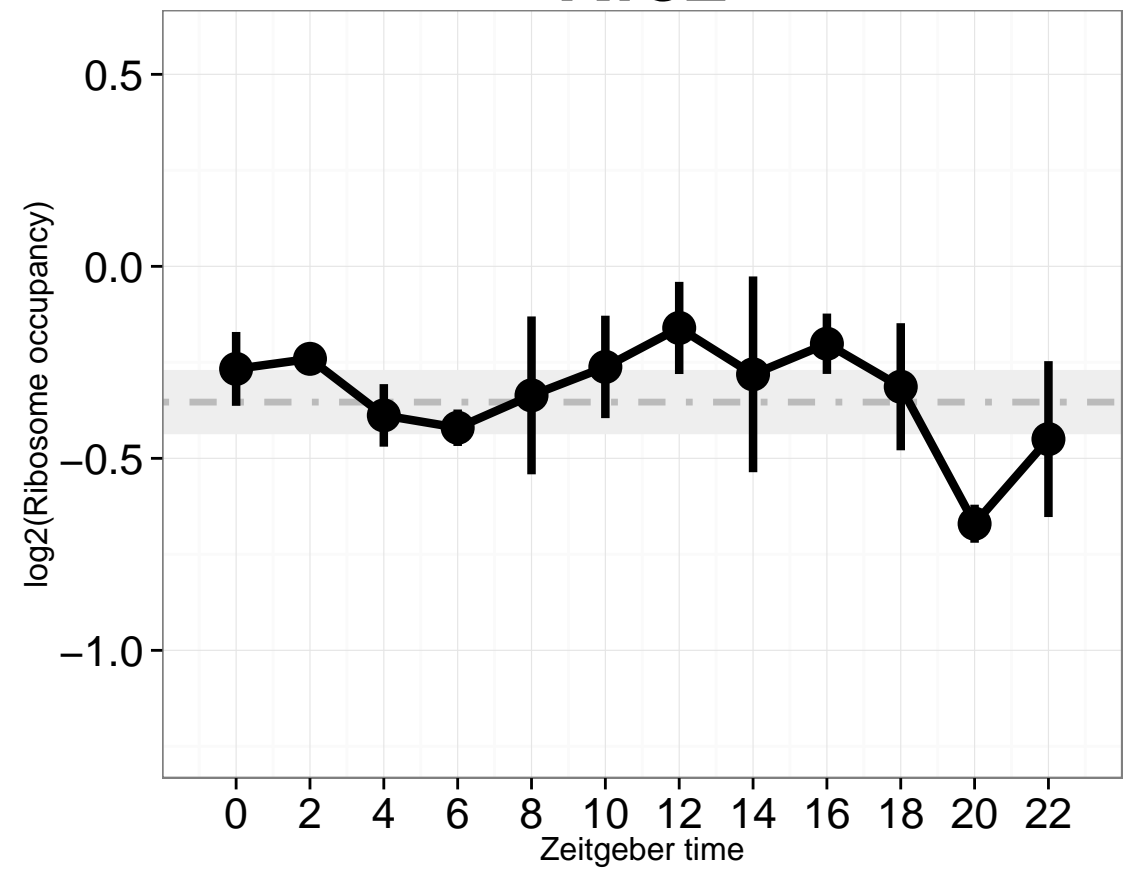

Supplement: SuppDataset_1.zip [file Rfc2_set_A.pdf › Supplemental Dataset 1/A-mRNA_nonrhyth_translation_nonrhyth/Rfc2_set_A.pdf]

## Rfc4

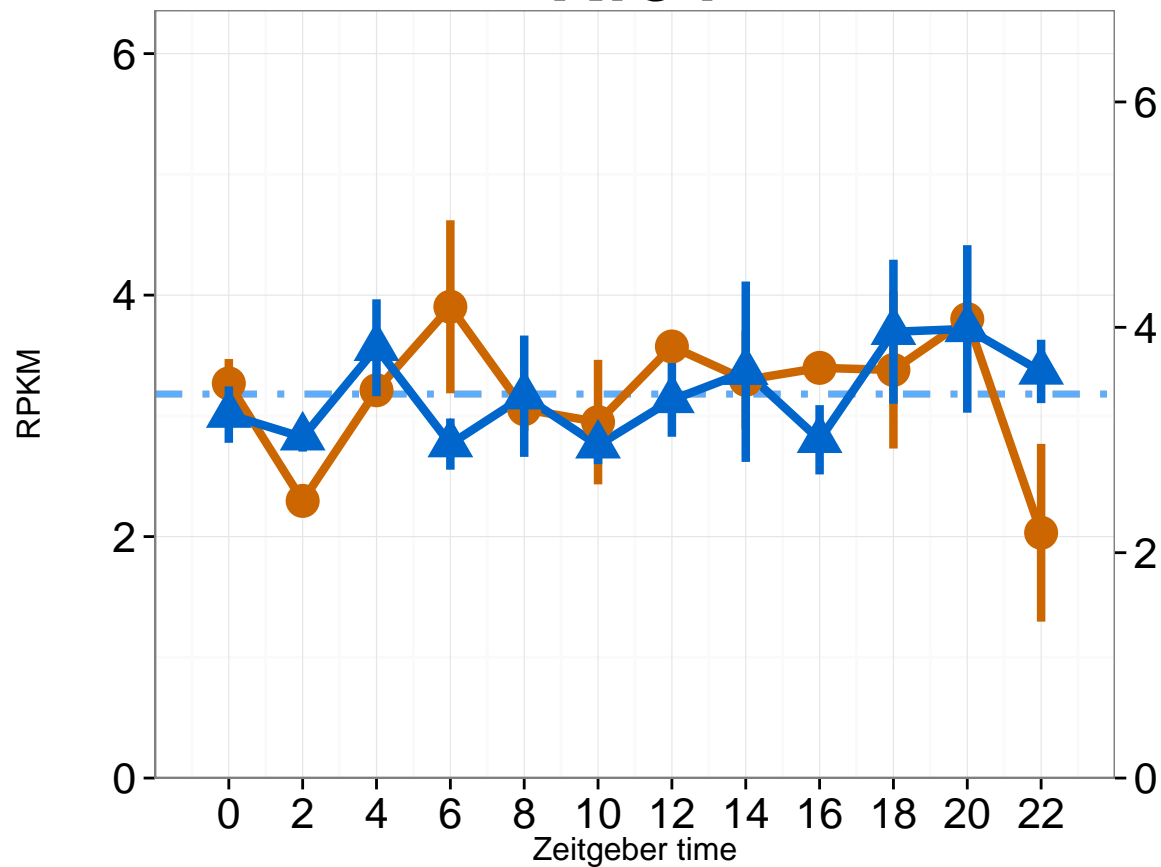

## Rfc4

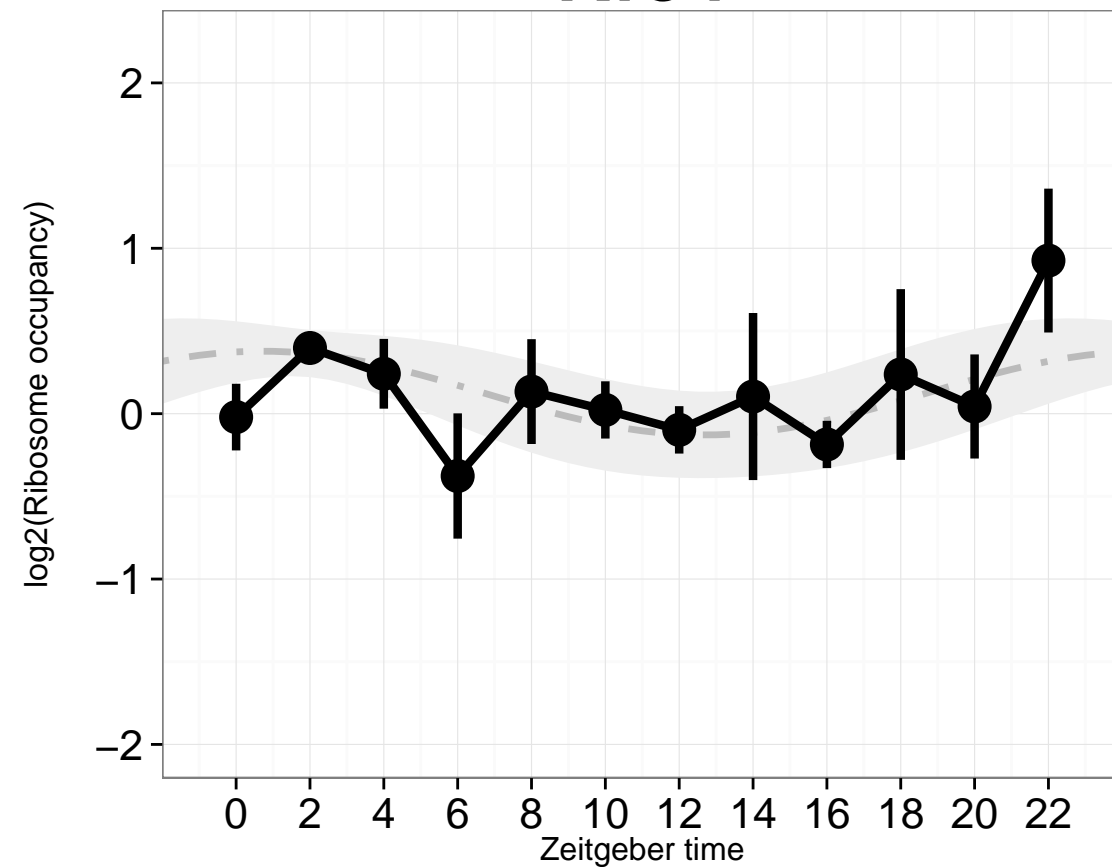

Supplement: SuppDataset_1.zip [file Rfc4_set_A.pdf › Supplemental Dataset 1/A-mRNA_nonrhyth_translation_nonrhyth/Rfc4_set_A.pdf]

## Rfc5

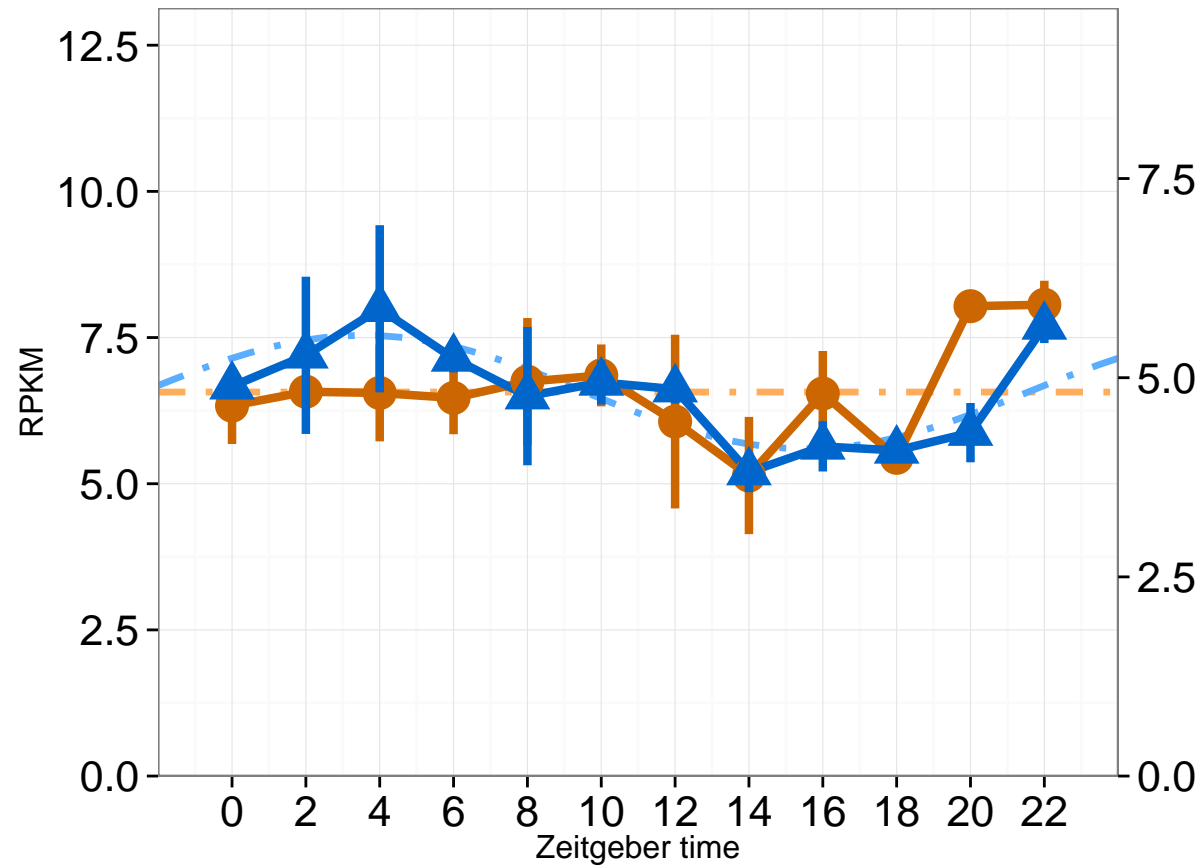

## Rfc5

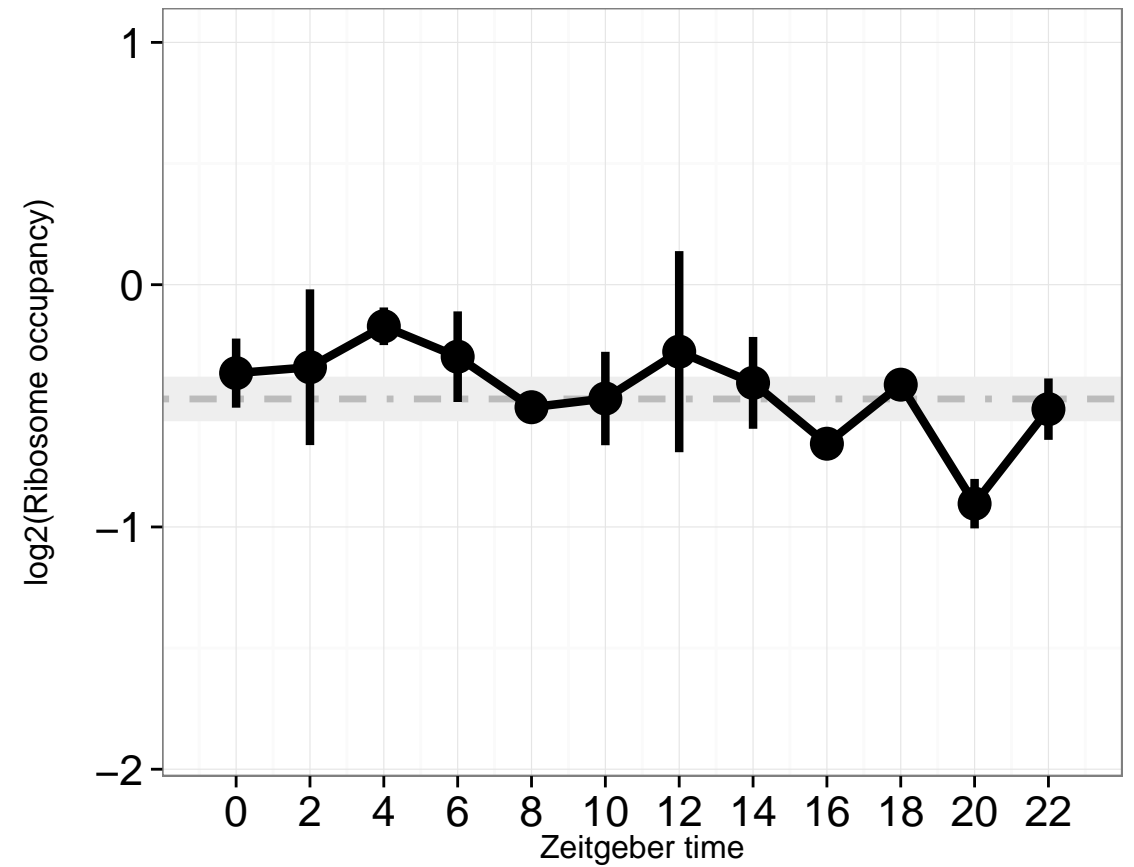

Supplement: SuppDataset_1.zip [file Rfc5_set_A.pdf › Supplemental Dataset 1/A-mRNA_nonrhyth_translation_nonrhyth/Rfc5_set_A.pdf]

# Rfesd

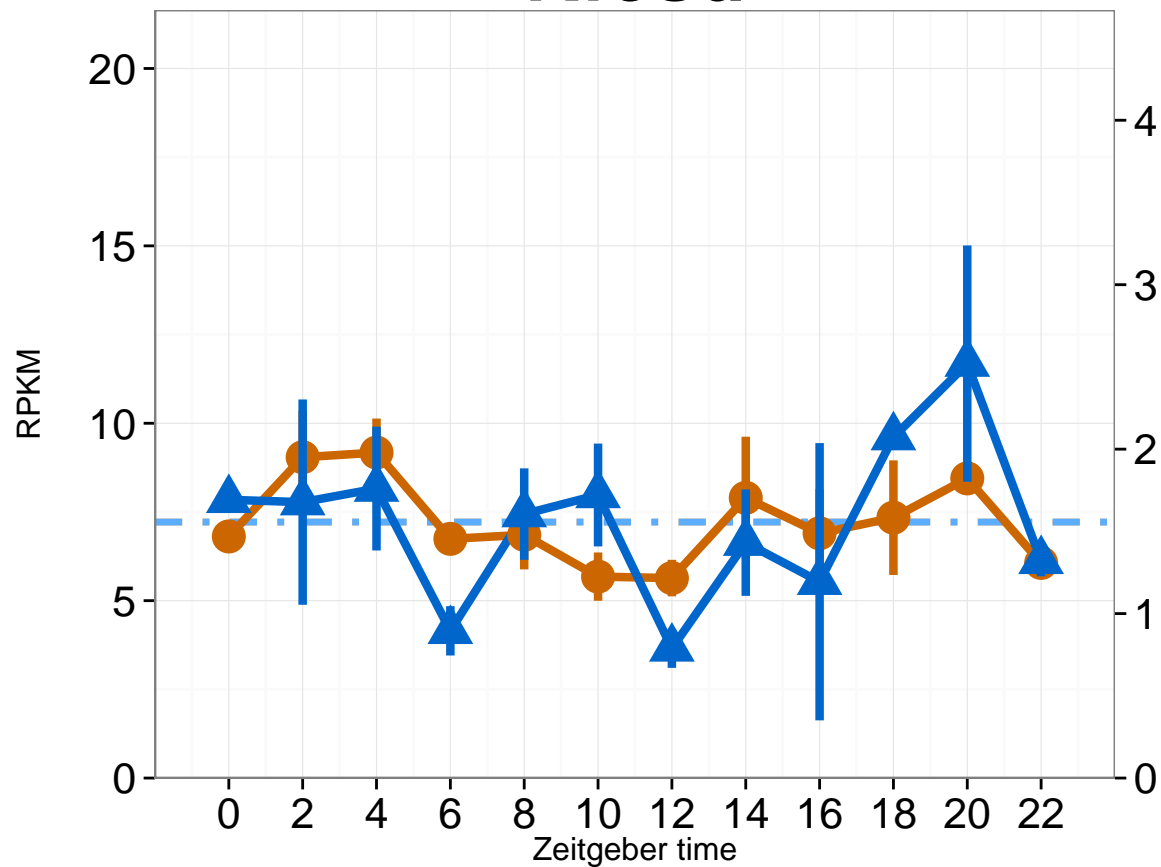

# Rfesd

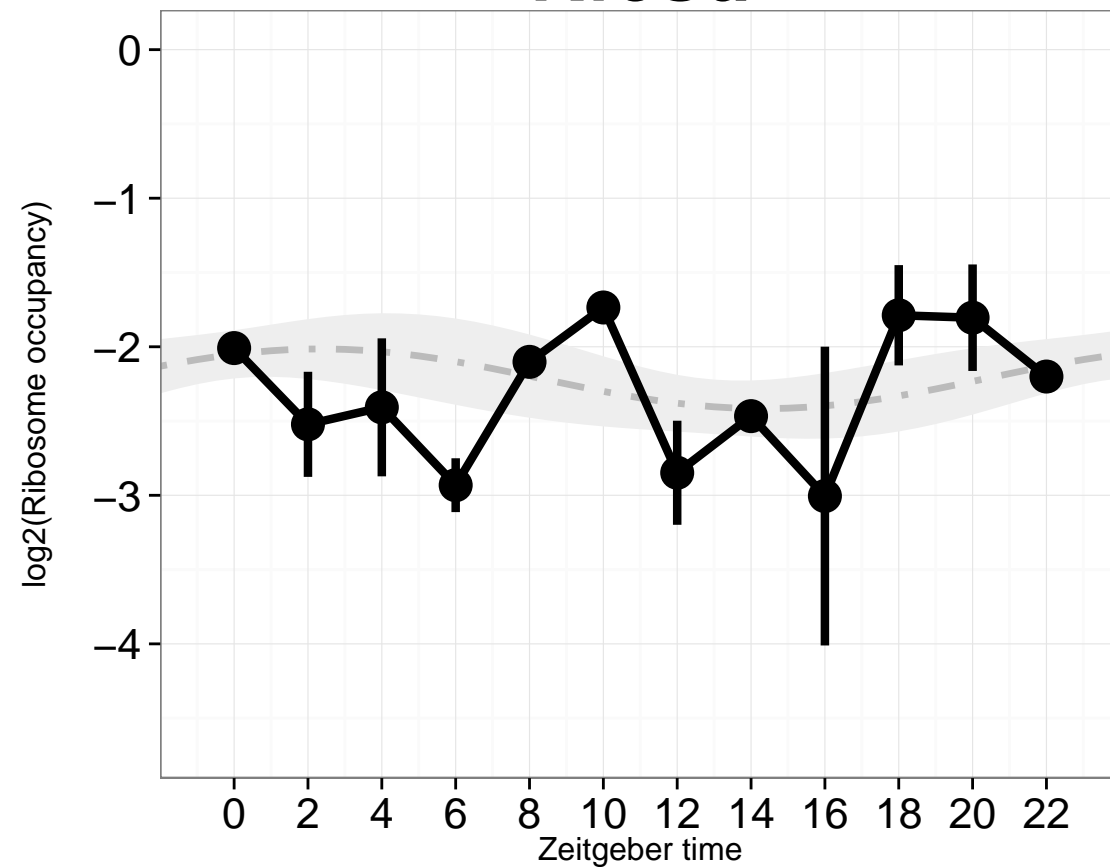

Supplement: SuppDataset_1.zip [file Rfesd_set_A.pdf › Supplemental Dataset 1/A-mRNA_nonrhyth_translation_nonrhyth/Rfesd_set_A.pdf]

## Rffl

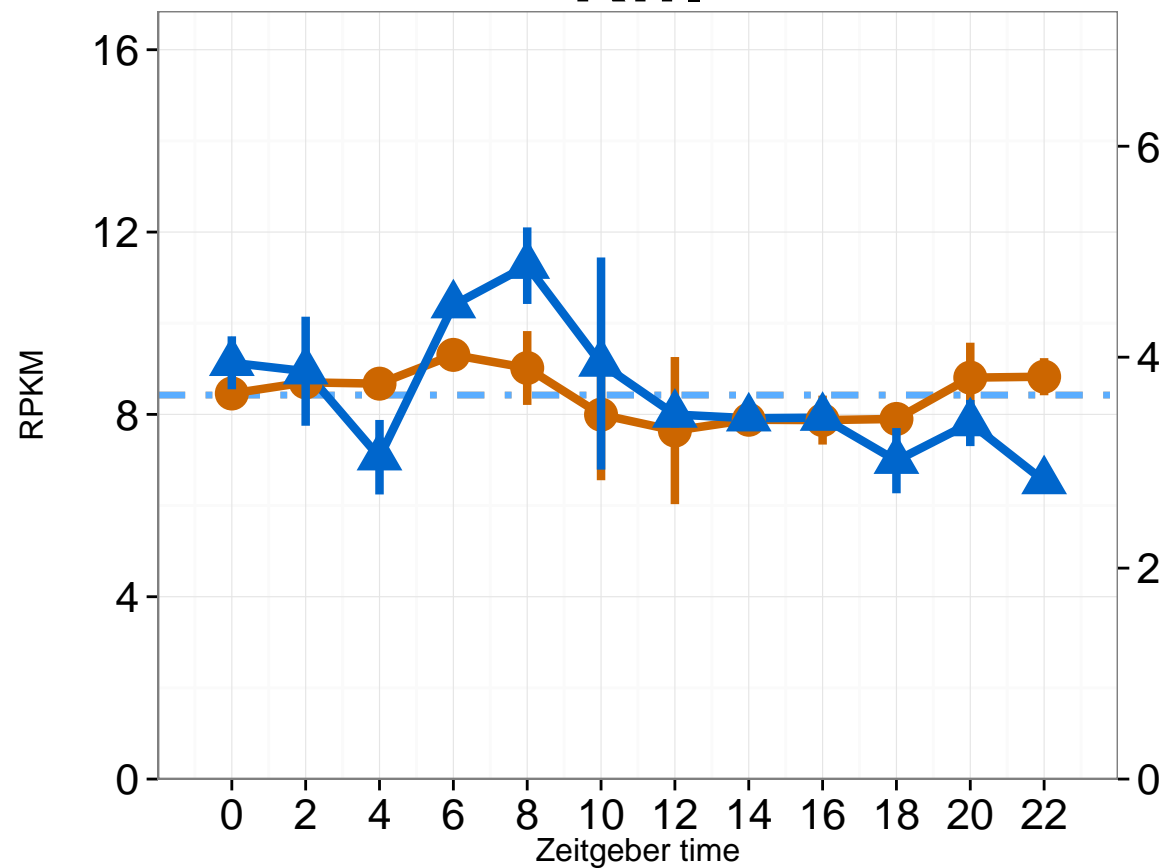

## Rffl

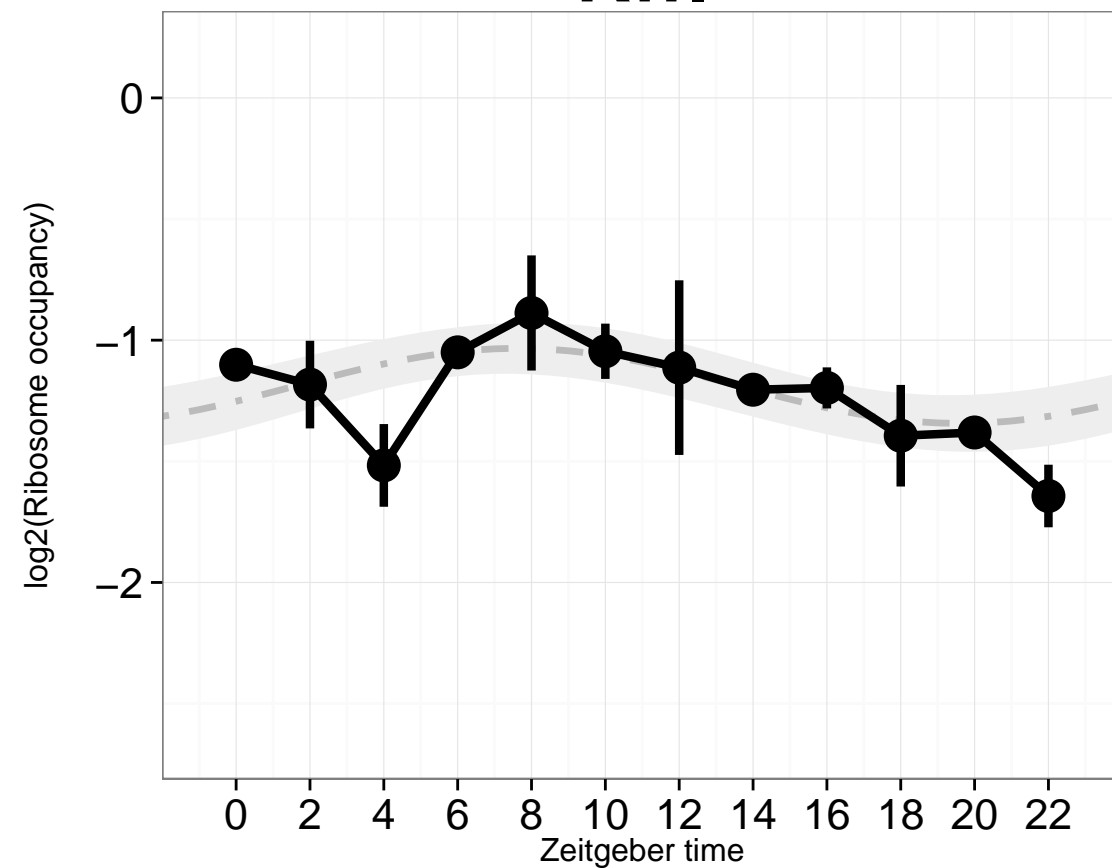

Supplement: SuppDataset_1.zip [file Rffl_set_A.pdf › Supplemental Dataset 1/A-mRNA_nonrhyth_translation_nonrhyth/Rffl_set_A.pdf]

## Rfk

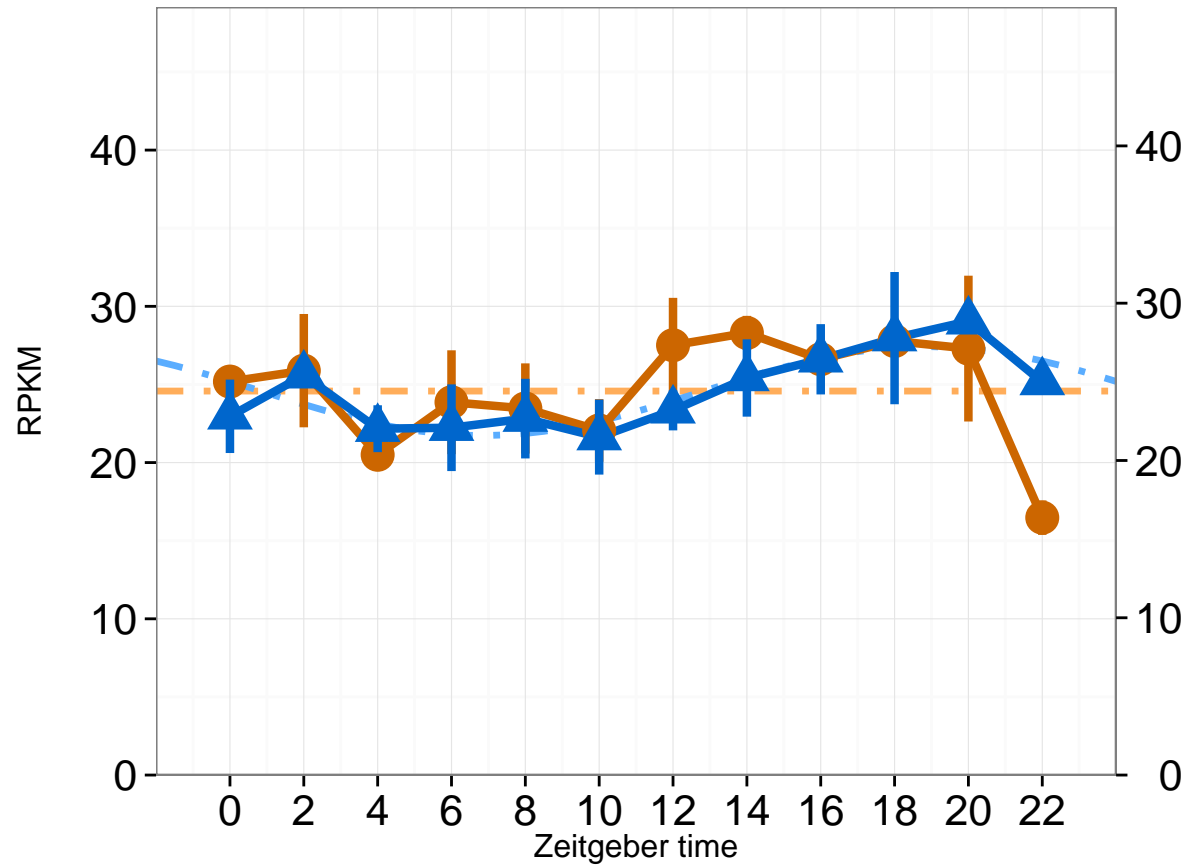

## Rfk

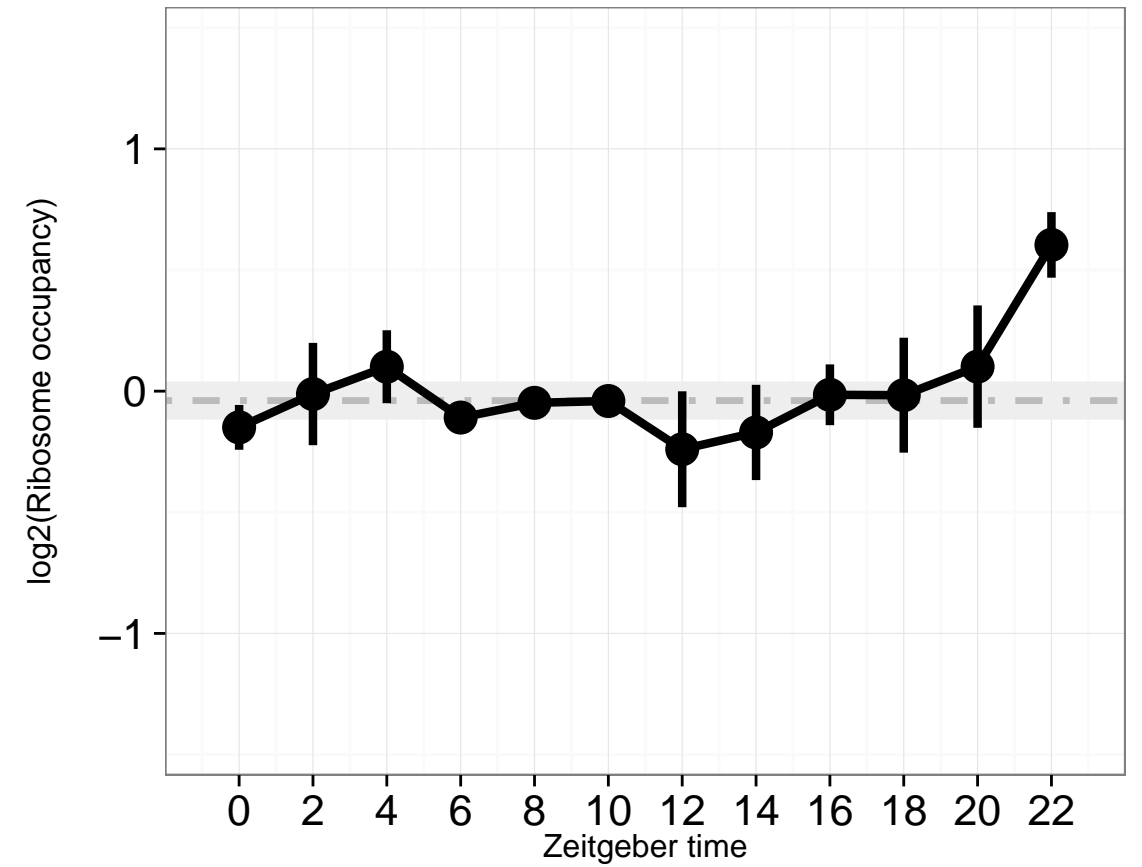

Supplement: SuppDataset_1.zip [file Rfk_set_A.pdf › Supplemental Dataset 1/A-mRNA_nonrhyth_translation_nonrhyth/Rfk_set_A.pdf]

# Rft1

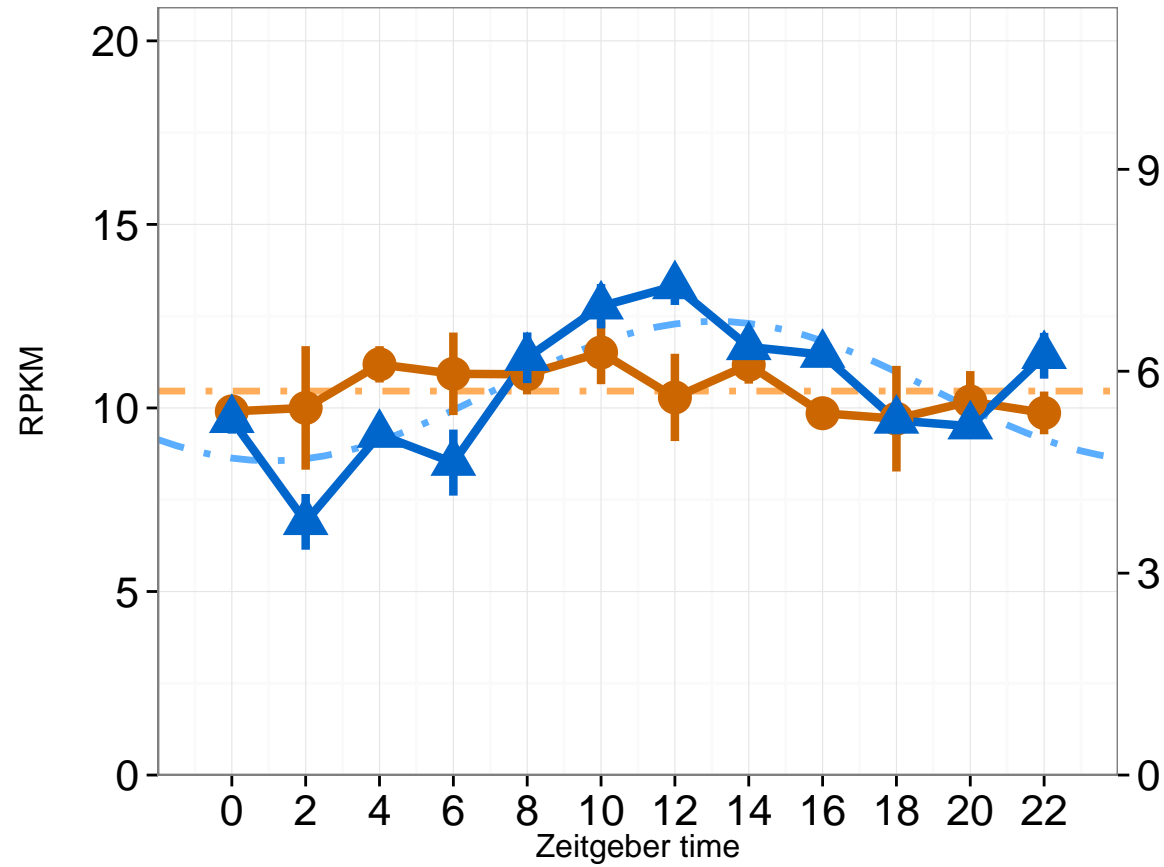

# Rft1

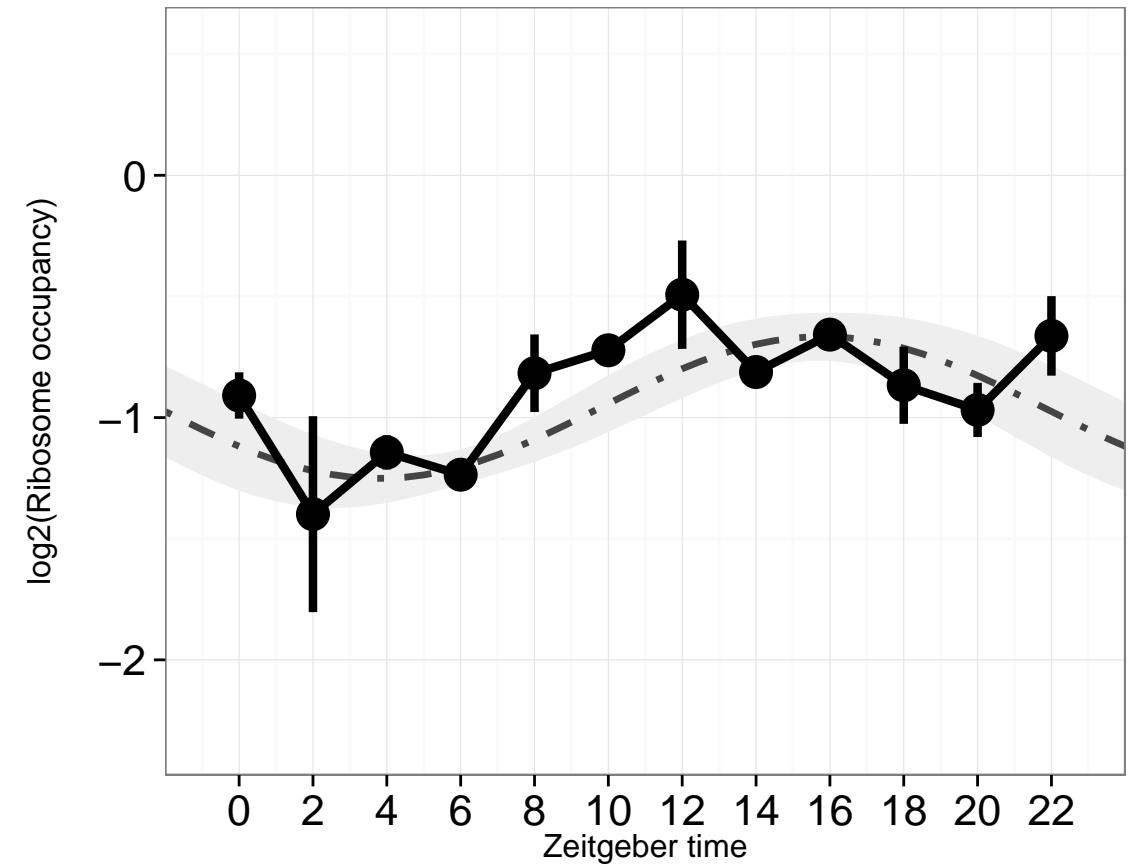

Supplement: SuppDataset_1.zip [file Rft1_set_A.pdf › Supplemental Dataset 1/A-mRNA_nonrhyth_translation_nonrhyth/Rft1_set_A.pdf]

## Rftn2

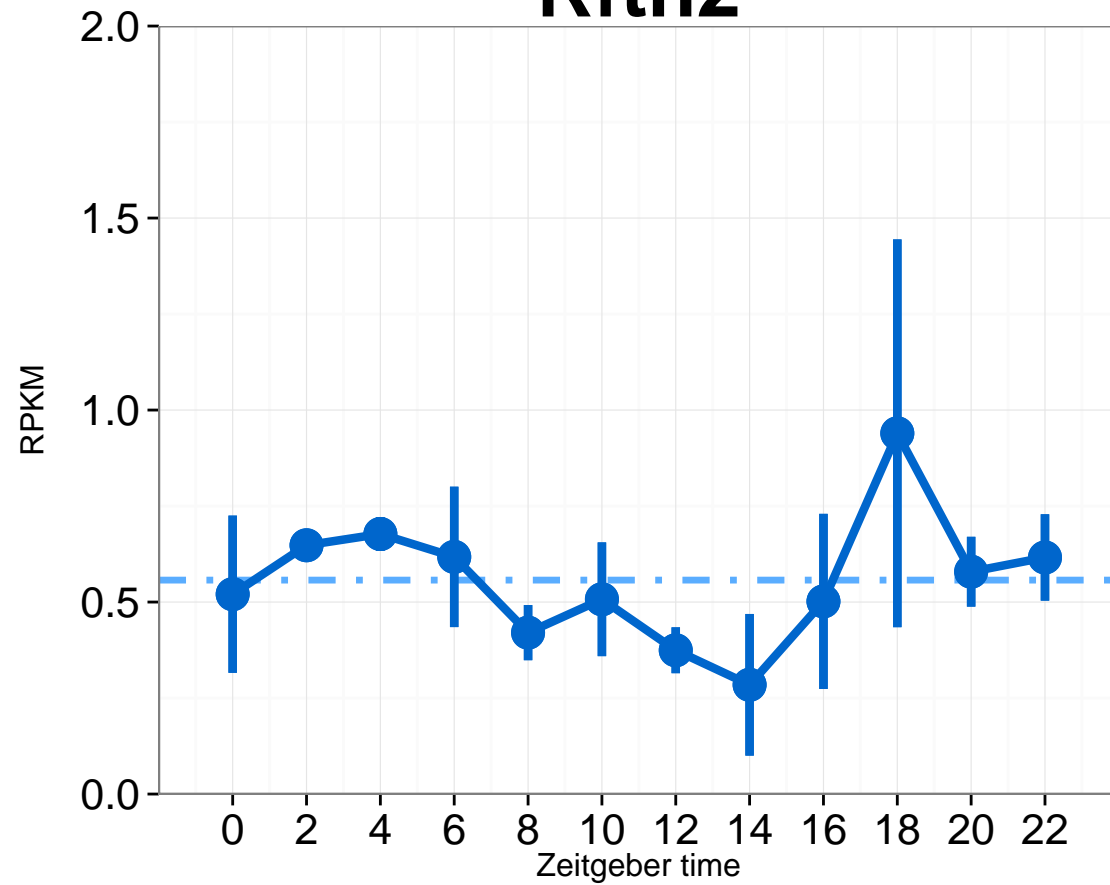

## Rftn2 log2(Ribosome occupancy)

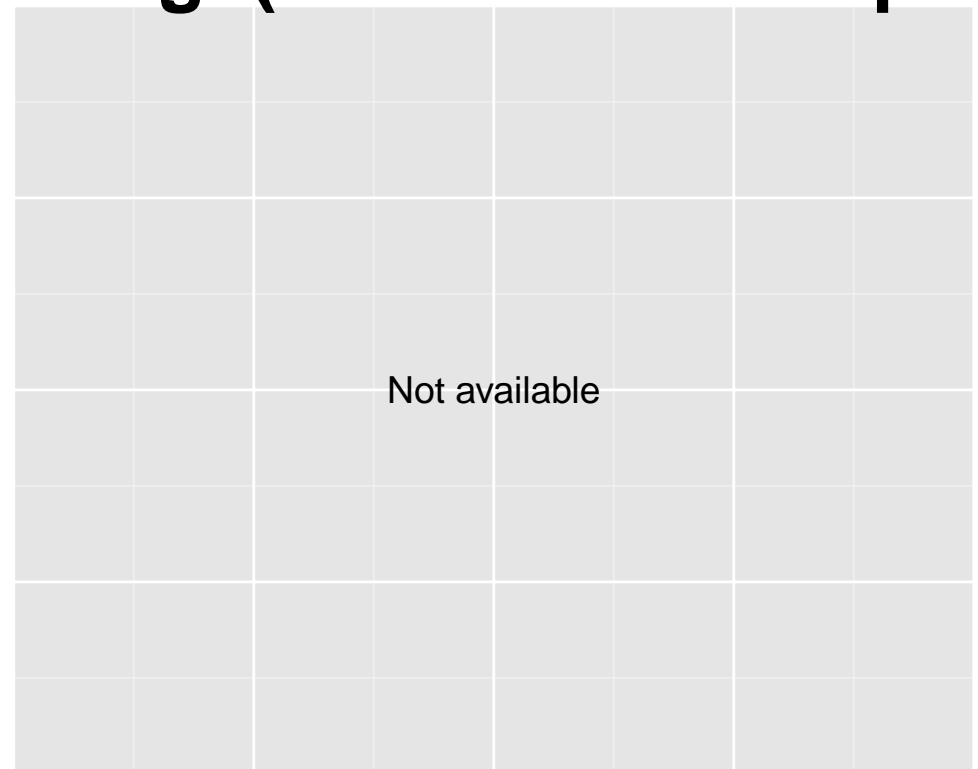

Supplement: SuppDataset_1.zip [file Rftn2_set_A.pdf › Supplemental Dataset 1/A-mRNA_nonrhyth_translation_nonrhyth/Rftn2_set_A.pdf]

## Rfwd2

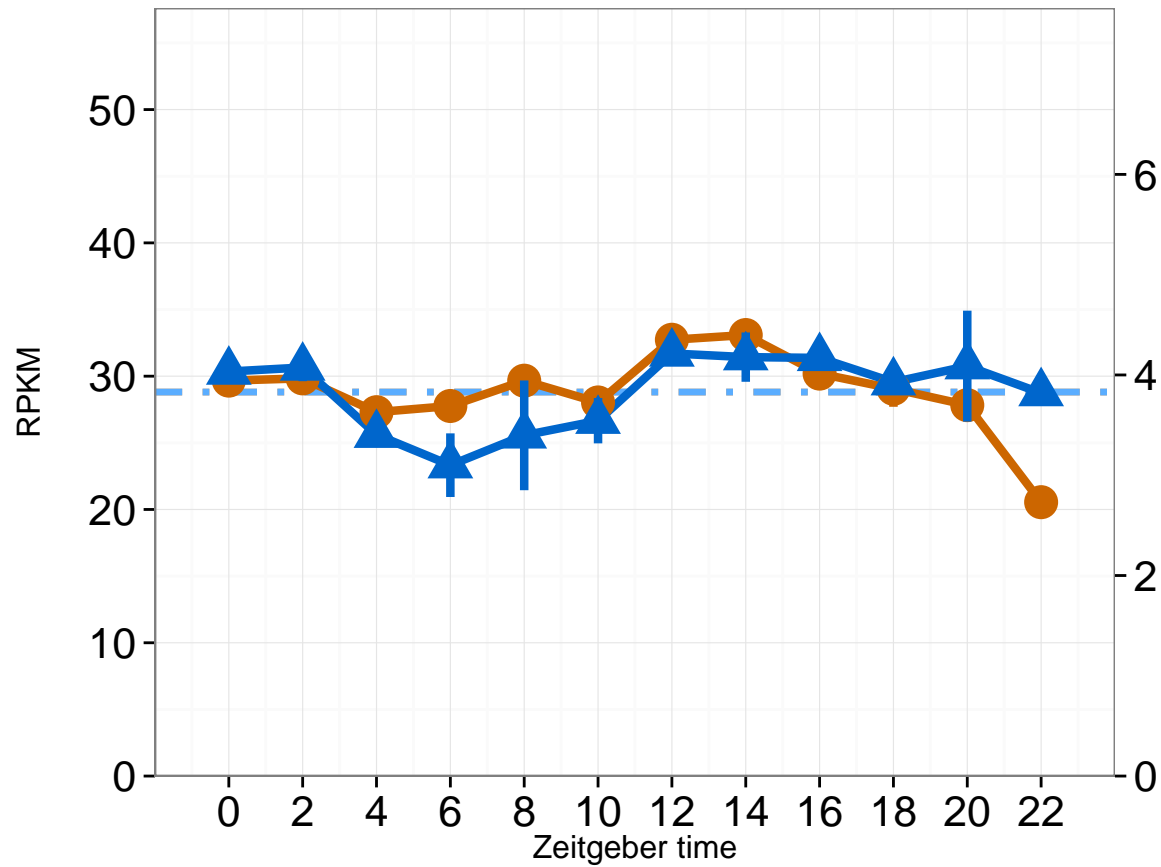

## Rfwd2

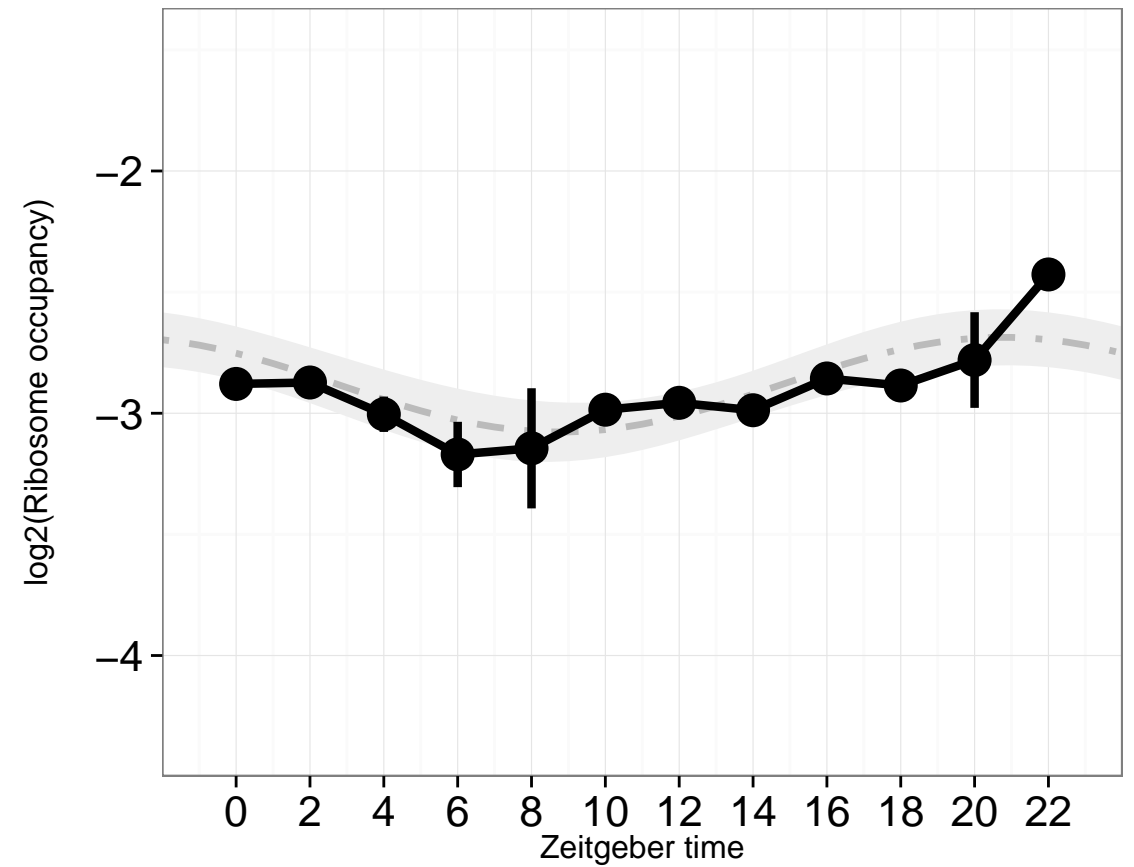

Supplement: SuppDataset_1.zip [file Rfwd2_set_A.pdf › Supplemental Dataset 1/A-mRNA_nonrhyth_translation_nonrhyth/Rfwd2_set_A.pdf]

# Rfwd3

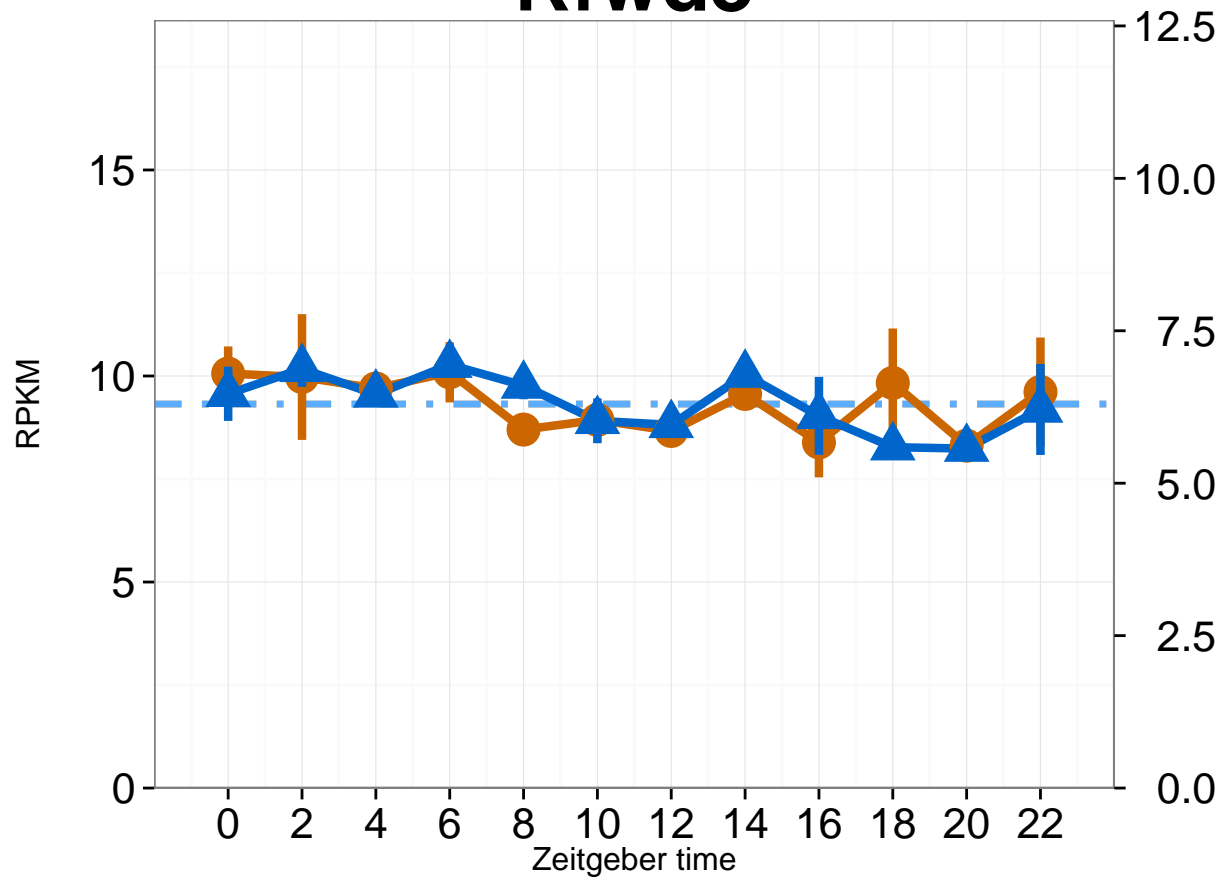

# Rfwd3

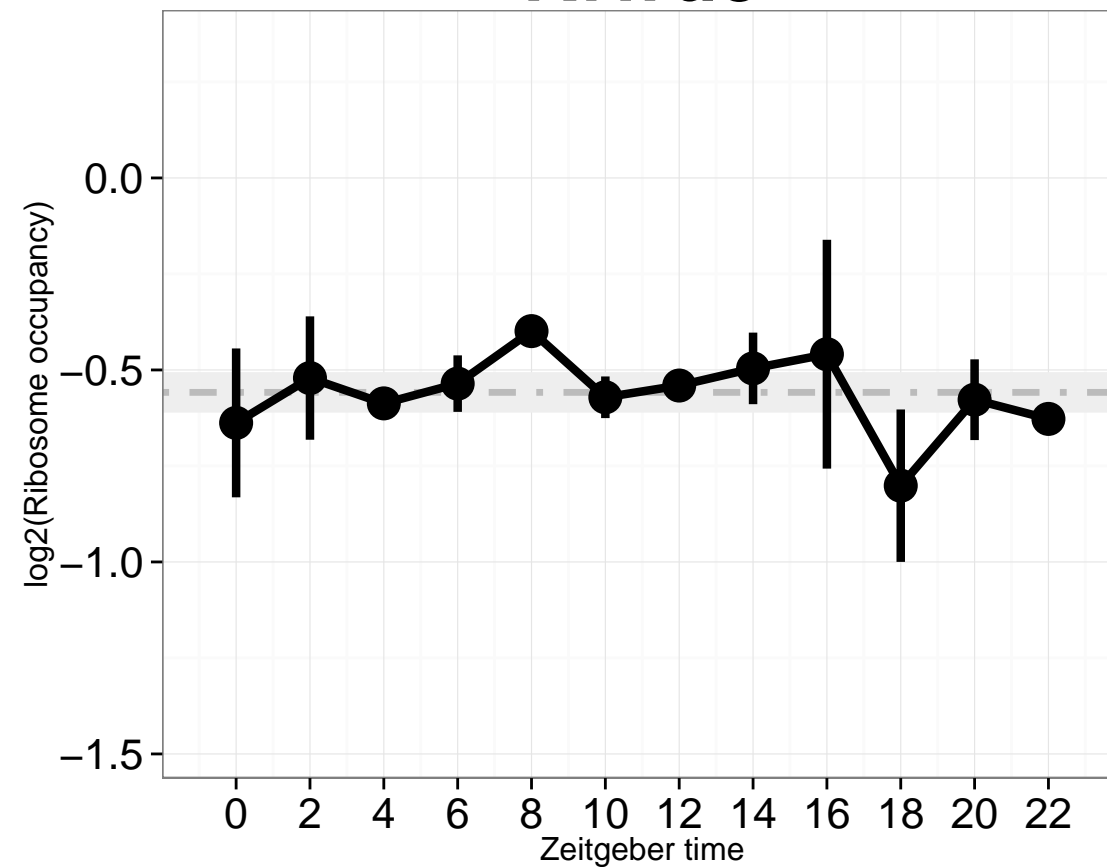

Supplement: SuppDataset_1.zip [file Rfwd3_set_A.pdf › Supplemental Dataset 1/A-mRNA_nonrhyth_translation_nonrhyth/Rfwd3_set_A.pdf]

# Rfx1

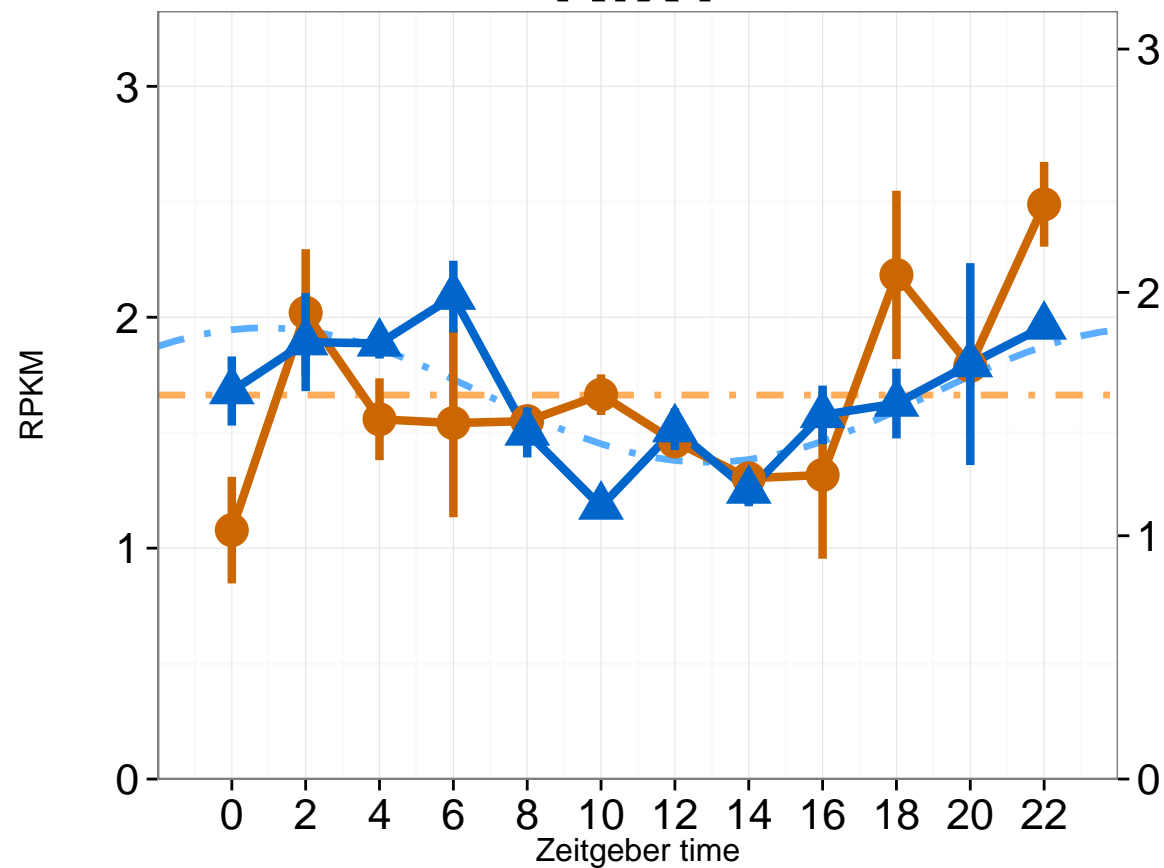

# Rfx1

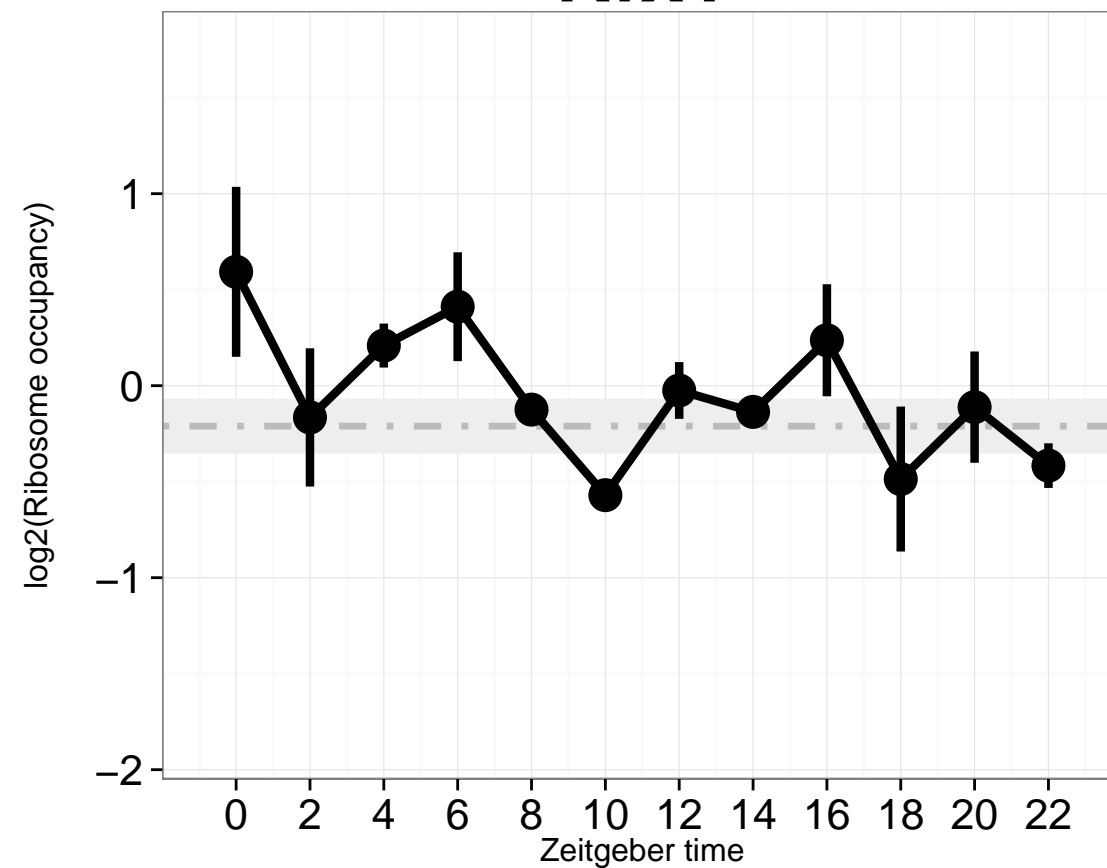

Supplement: SuppDataset_1.zip [file Rfx1_set_A.pdf › Supplemental Dataset 1/A-mRNA_nonrhyth_translation_nonrhyth/Rfx1_set_A.pdf]

# Rfx7

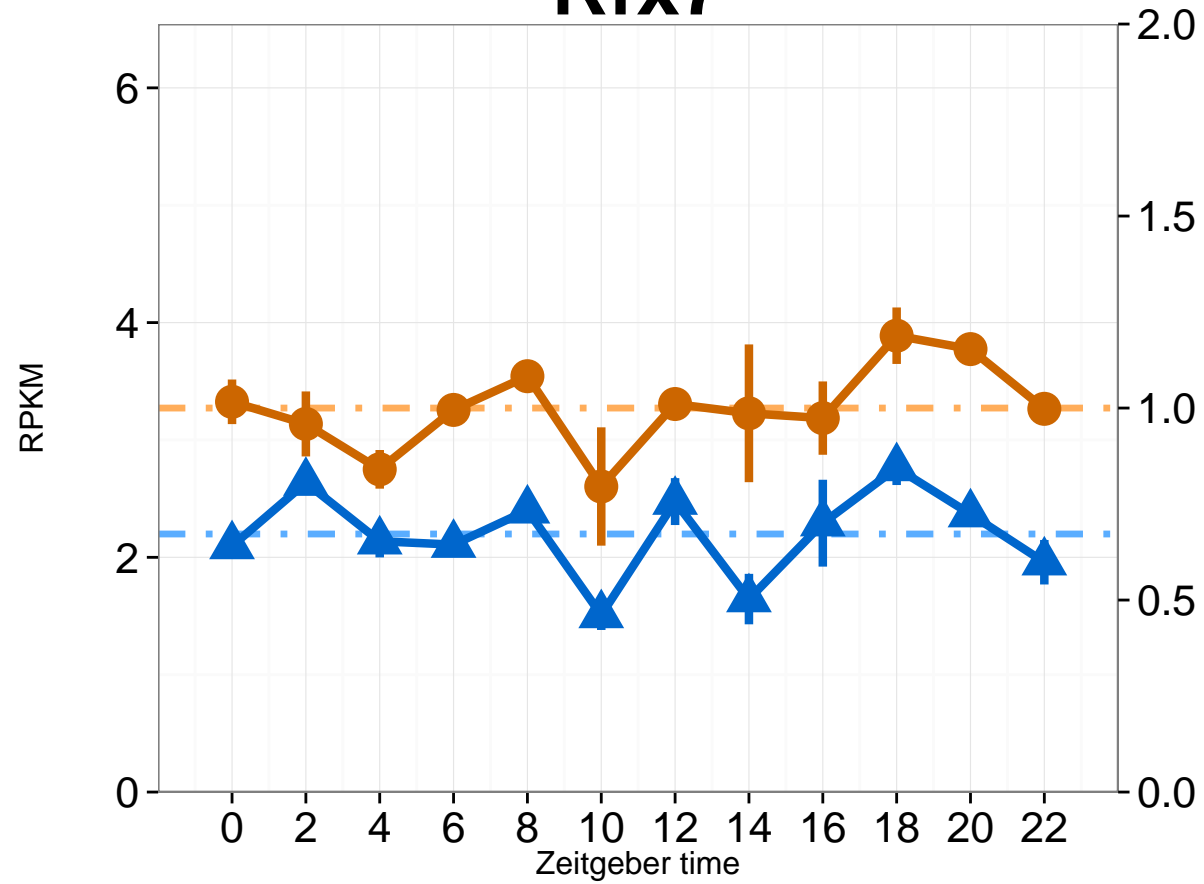

# Rfx7

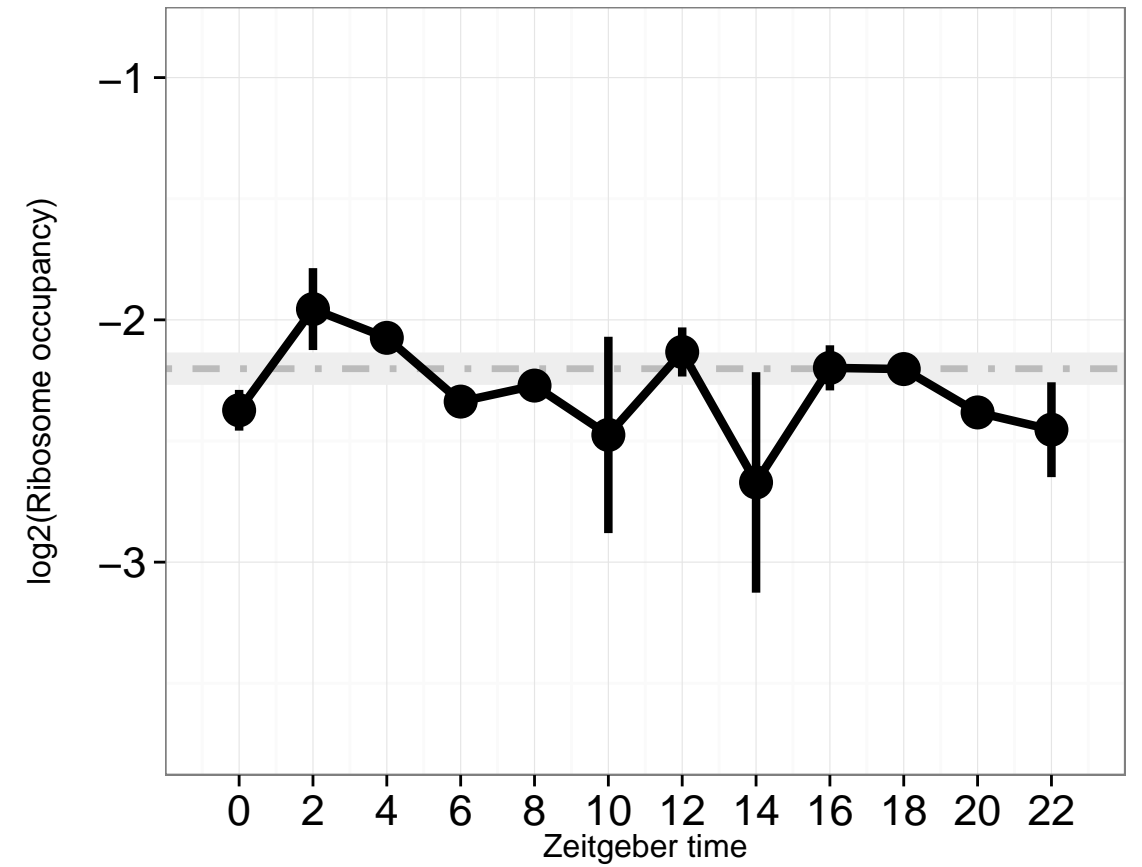

Supplement: SuppDataset_1.zip [file Rfx7_set_A.pdf › Supplemental Dataset 1/A-mRNA_nonrhyth_translation_nonrhyth/Rfx7_set_A.pdf]

# Rfxap

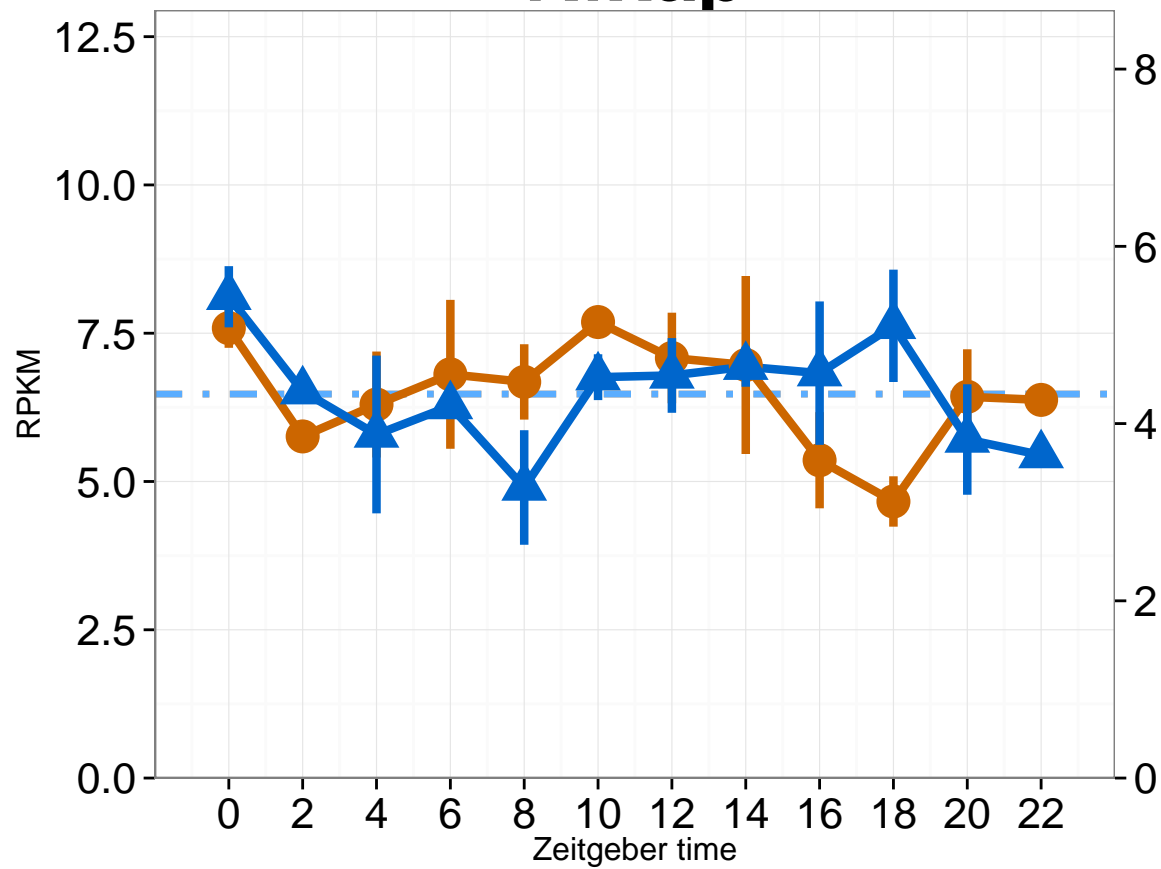

# Rfxap

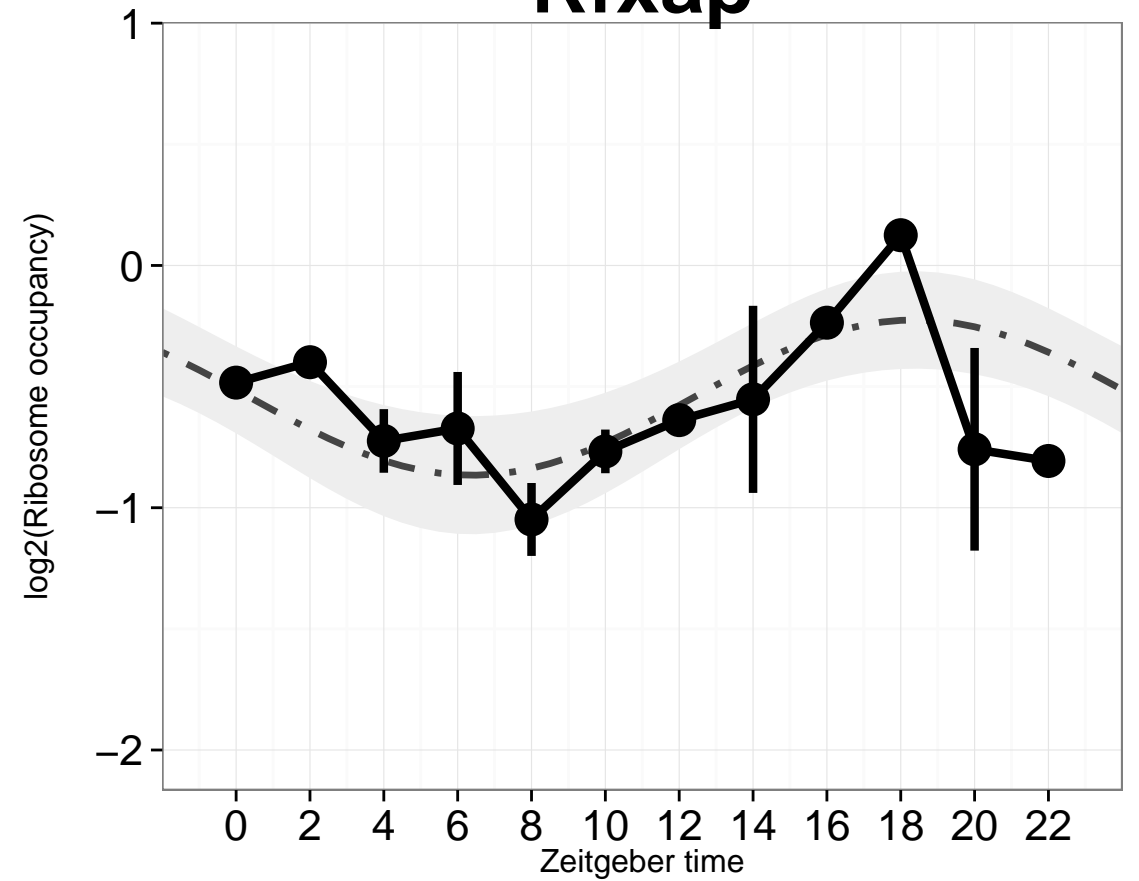

Supplement: SuppDataset_1.zip [file Rfxap_set_A.pdf › Supplemental Dataset 1/A-mRNA_nonrhyth_translation_nonrhyth/Rfxap_set_A.pdf]

# Rgl1

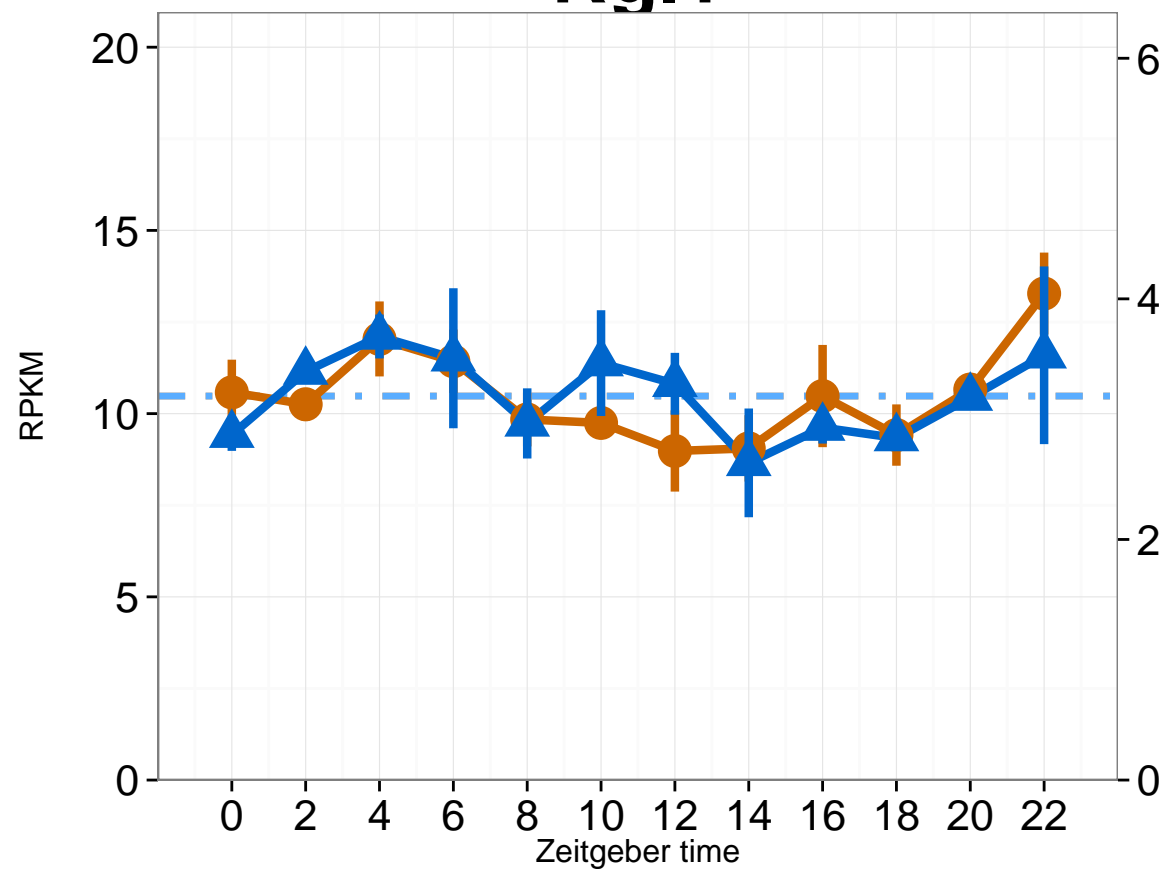

# Rgl1

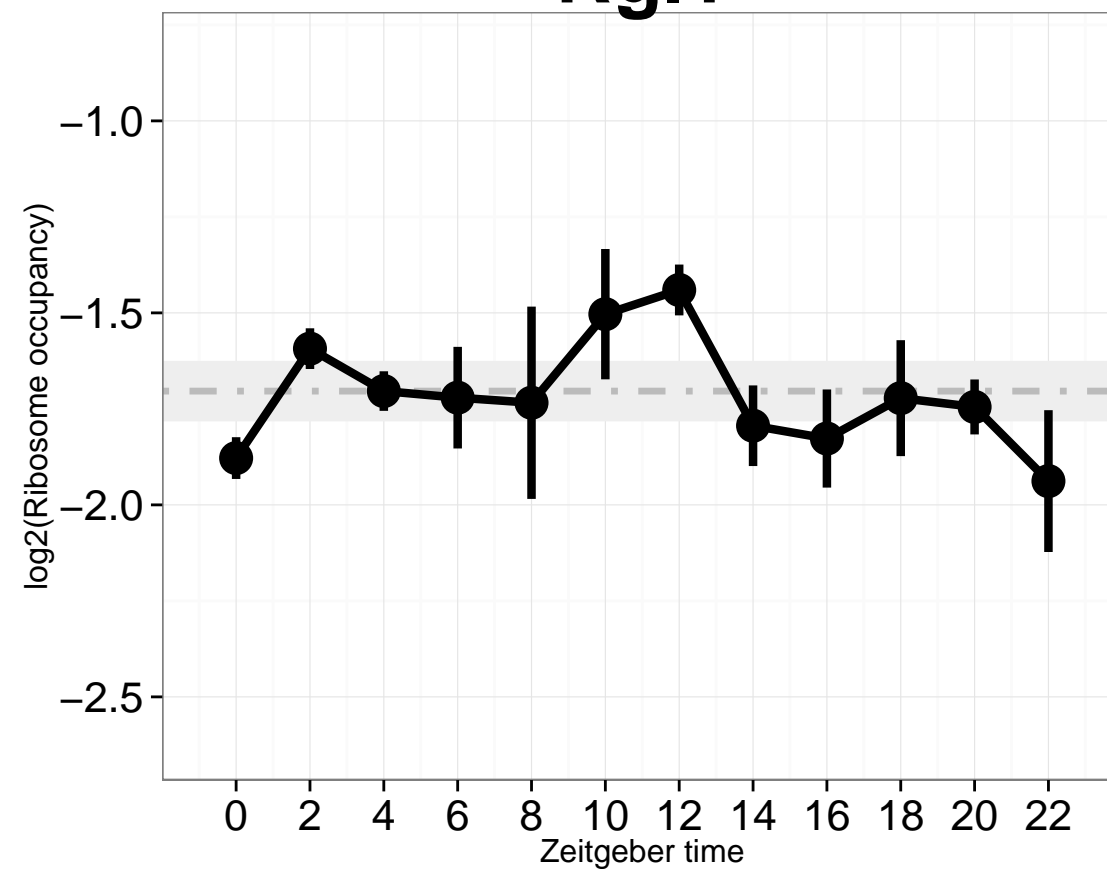

Supplement: SuppDataset_1.zip [file Rgl1_set_A.pdf › Supplemental Dataset 1/A-mRNA_nonrhyth_translation_nonrhyth/Rgl1_set_A.pdf]

## Rgl2

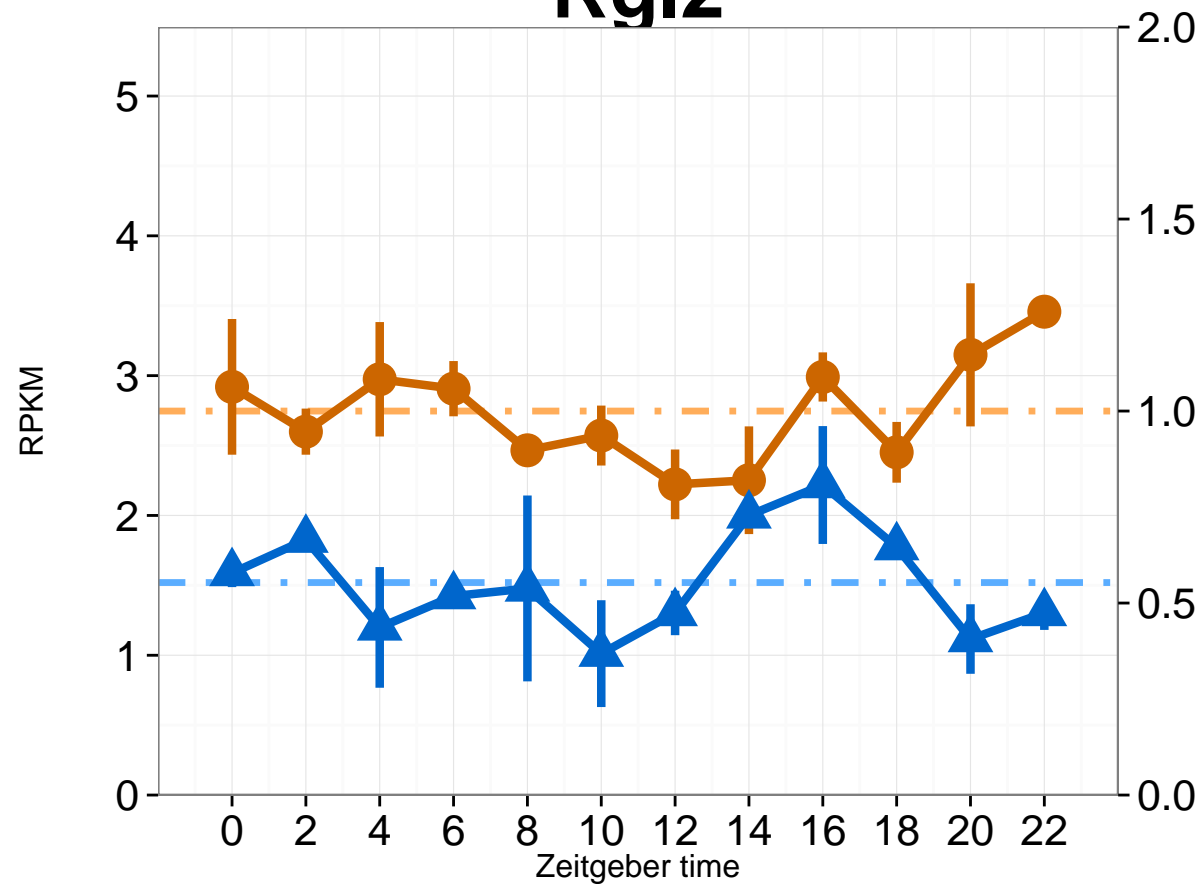

## Rgl2

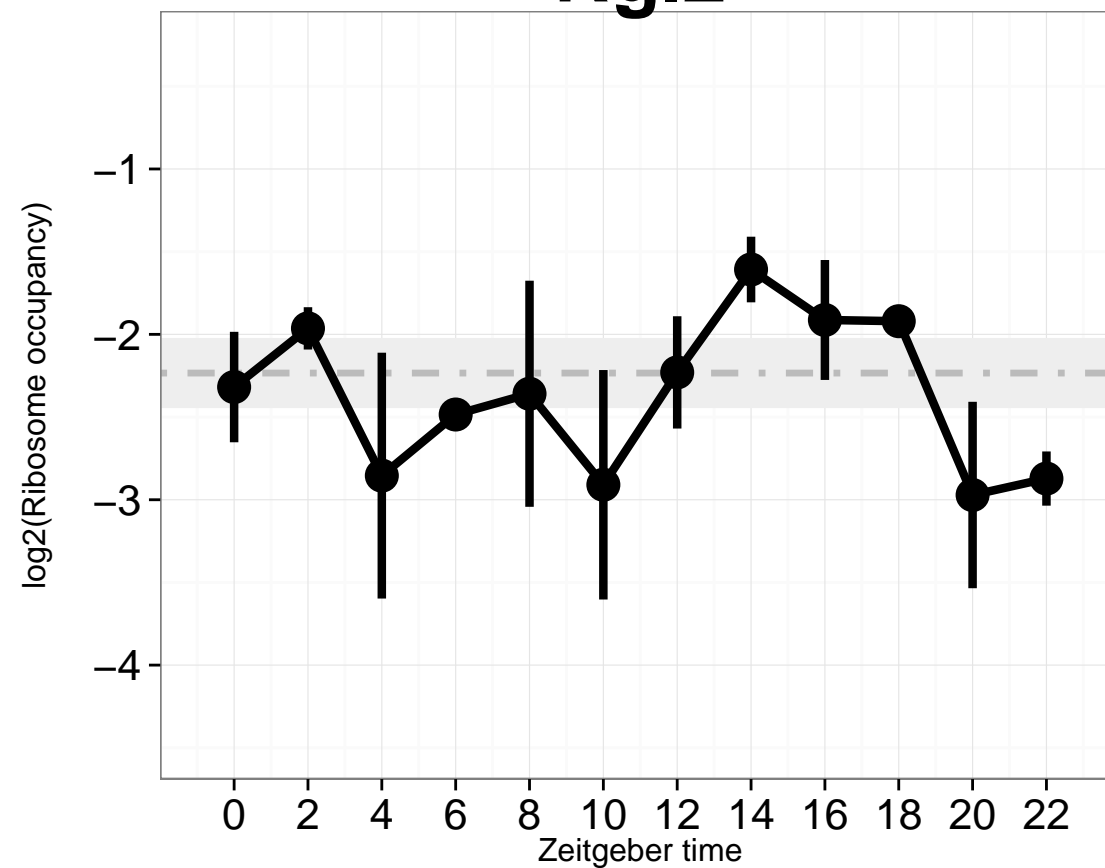

Supplement: SuppDataset_1.zip [file Rgl2_set_A.pdf › Supplemental Dataset 1/A-mRNA_nonrhyth_translation_nonrhyth/Rgl2_set_A.pdf]

## Rgl3

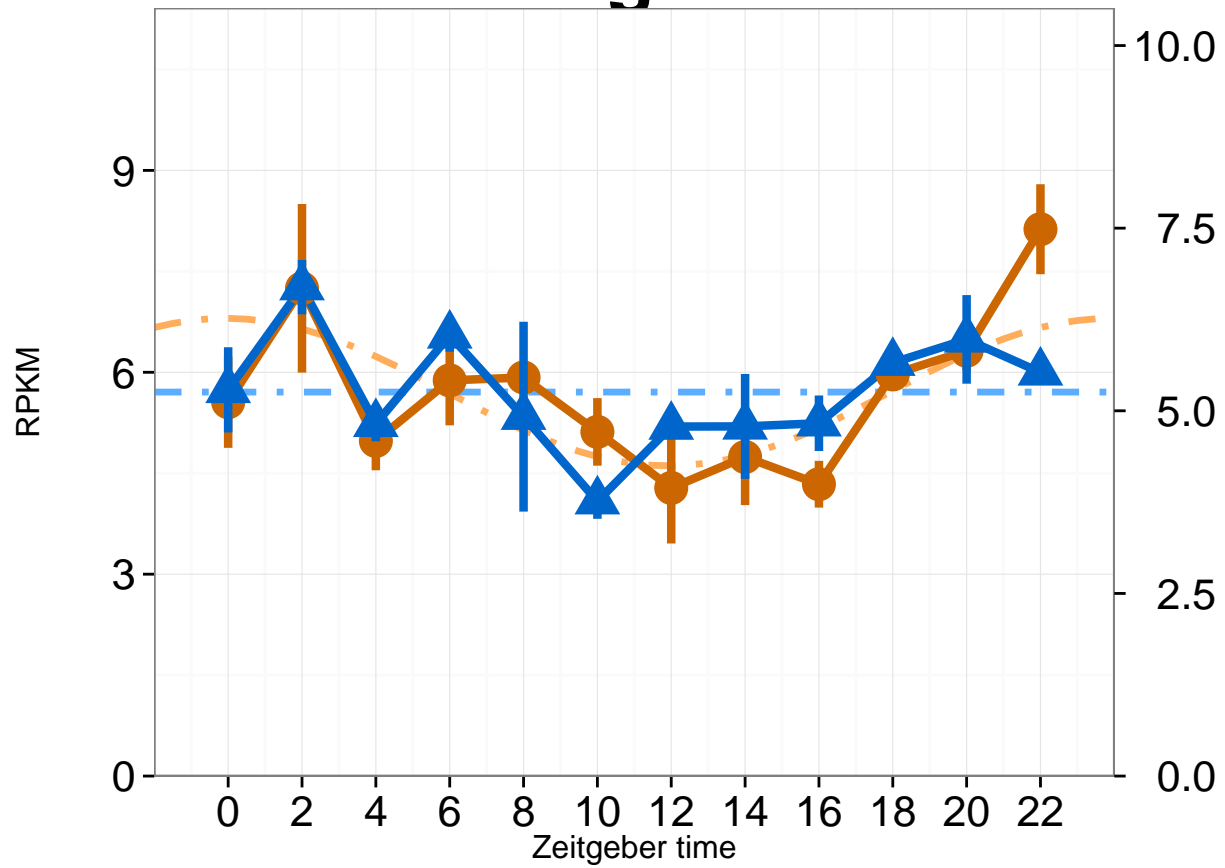

## Rgl3

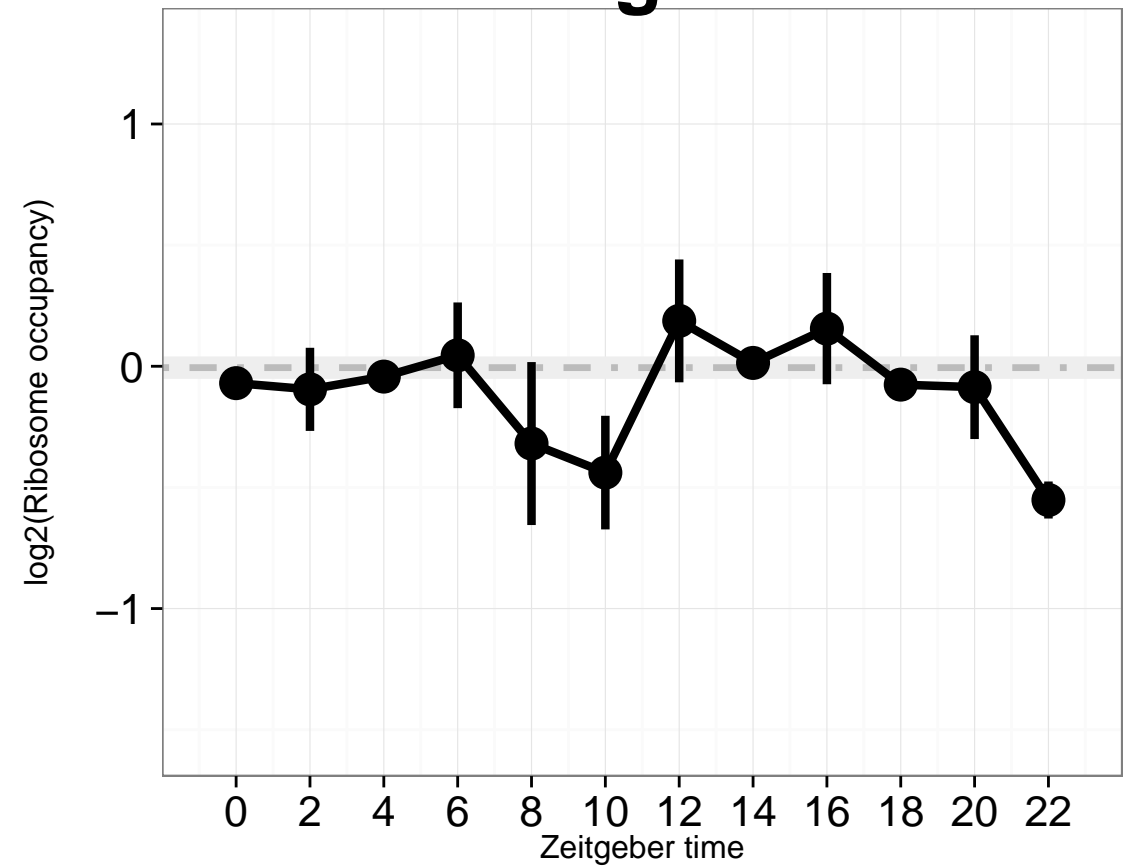

Supplement: SuppDataset_1.zip [file Rgl3_set_A.pdf › Supplemental Dataset 1/A-mRNA_nonrhyth_translation_nonrhyth/Rgl3_set_A.pdf]

## Rgmb

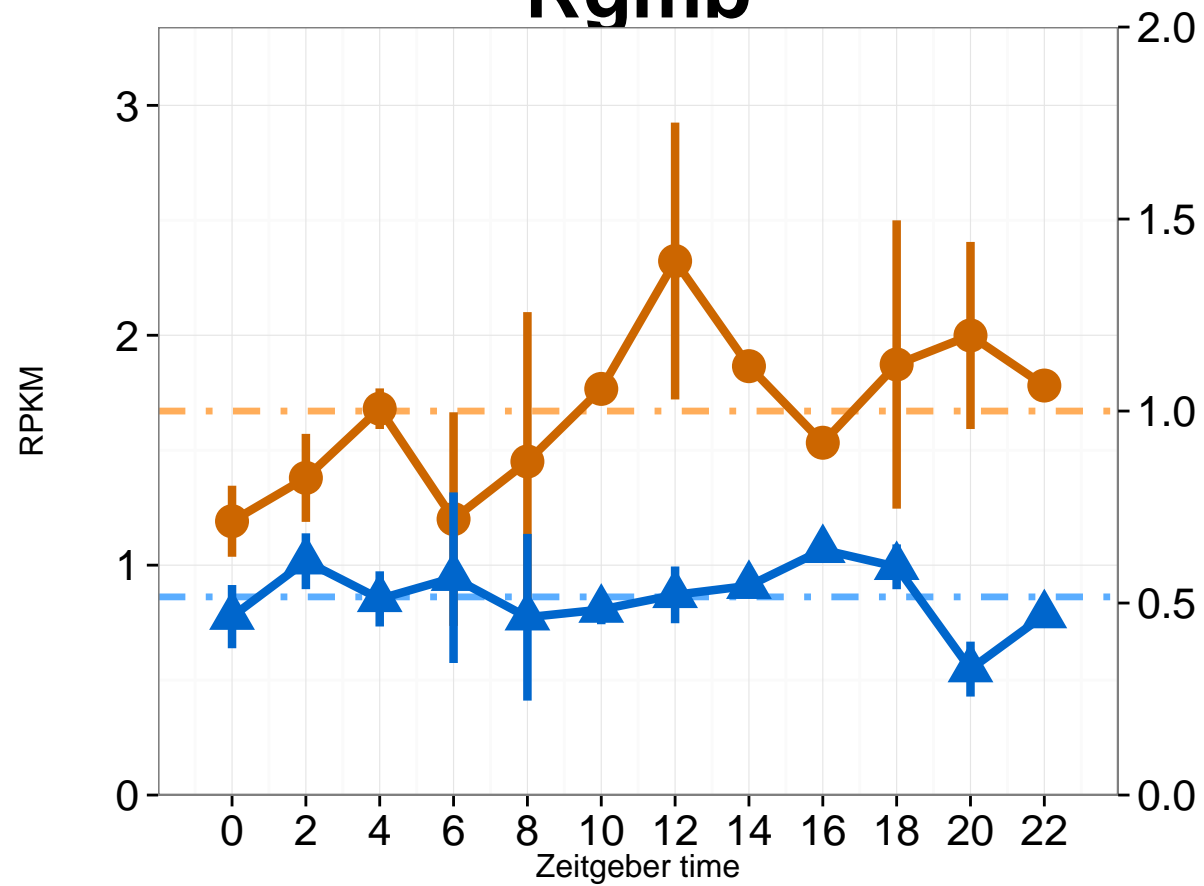

## Rgmb

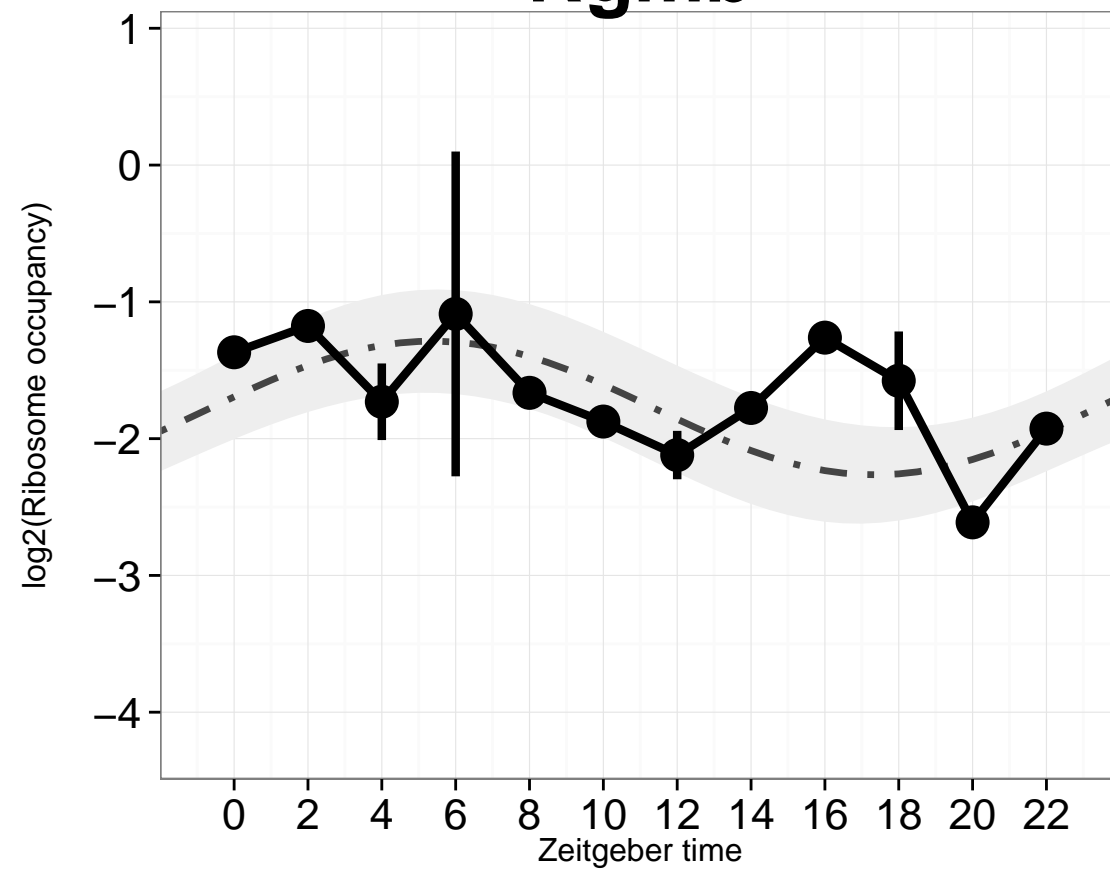

Supplement: SuppDataset_1.zip [file Rgmb_set_A.pdf › Supplemental Dataset 1/A-mRNA_nonrhyth_translation_nonrhyth/Rgmb_set_A.pdf]

## Rgn

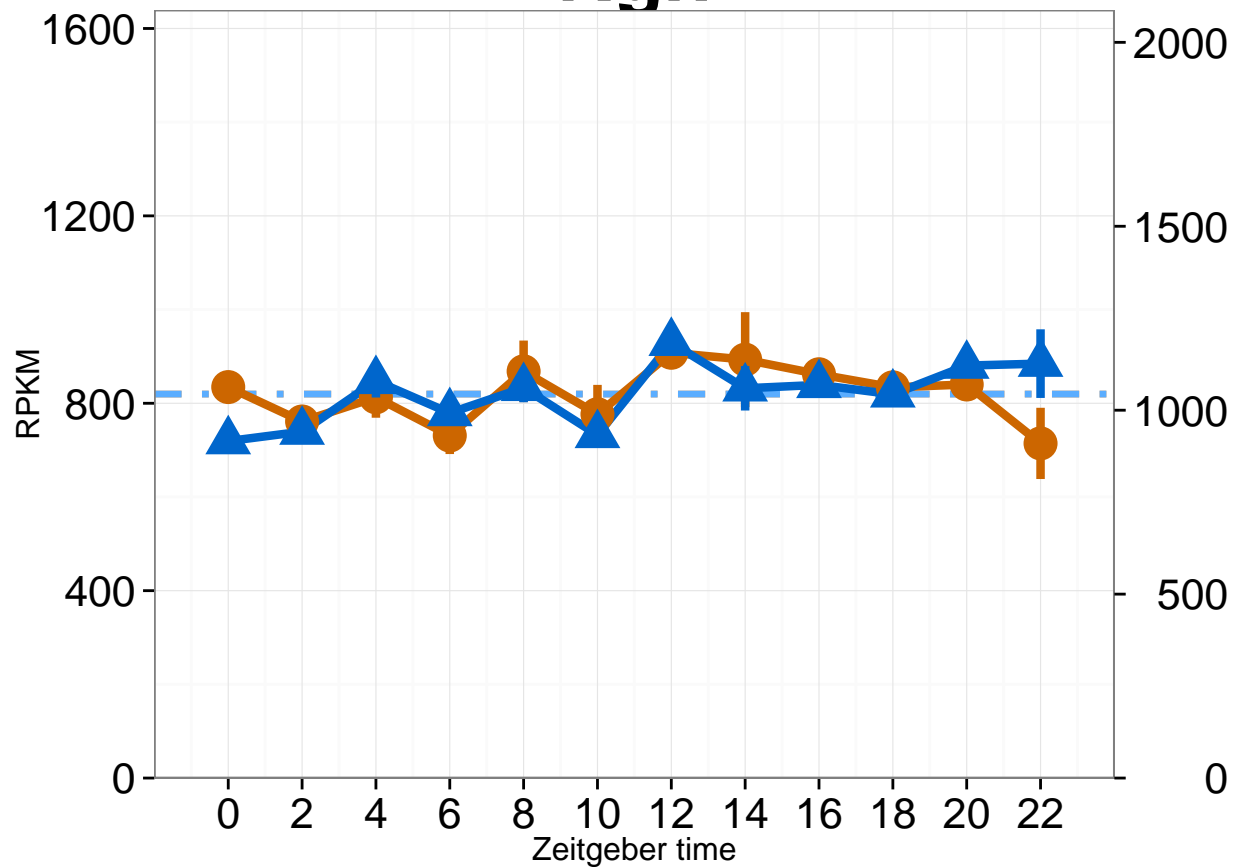

## Rgn

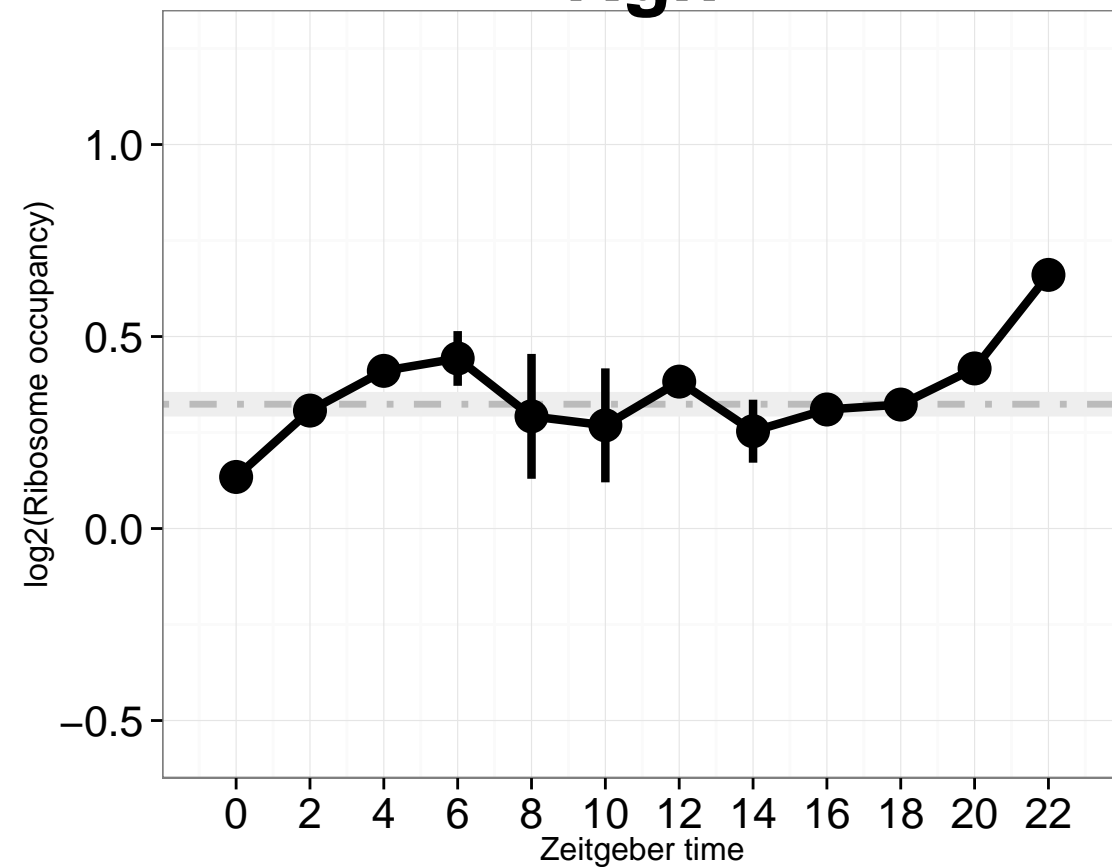

Supplement: SuppDataset_1.zip [file Rgn_set_A.pdf › Supplemental Dataset 1/A-mRNA_nonrhyth_translation_nonrhyth/Rgn_set_A.pdf]

# Rgp1

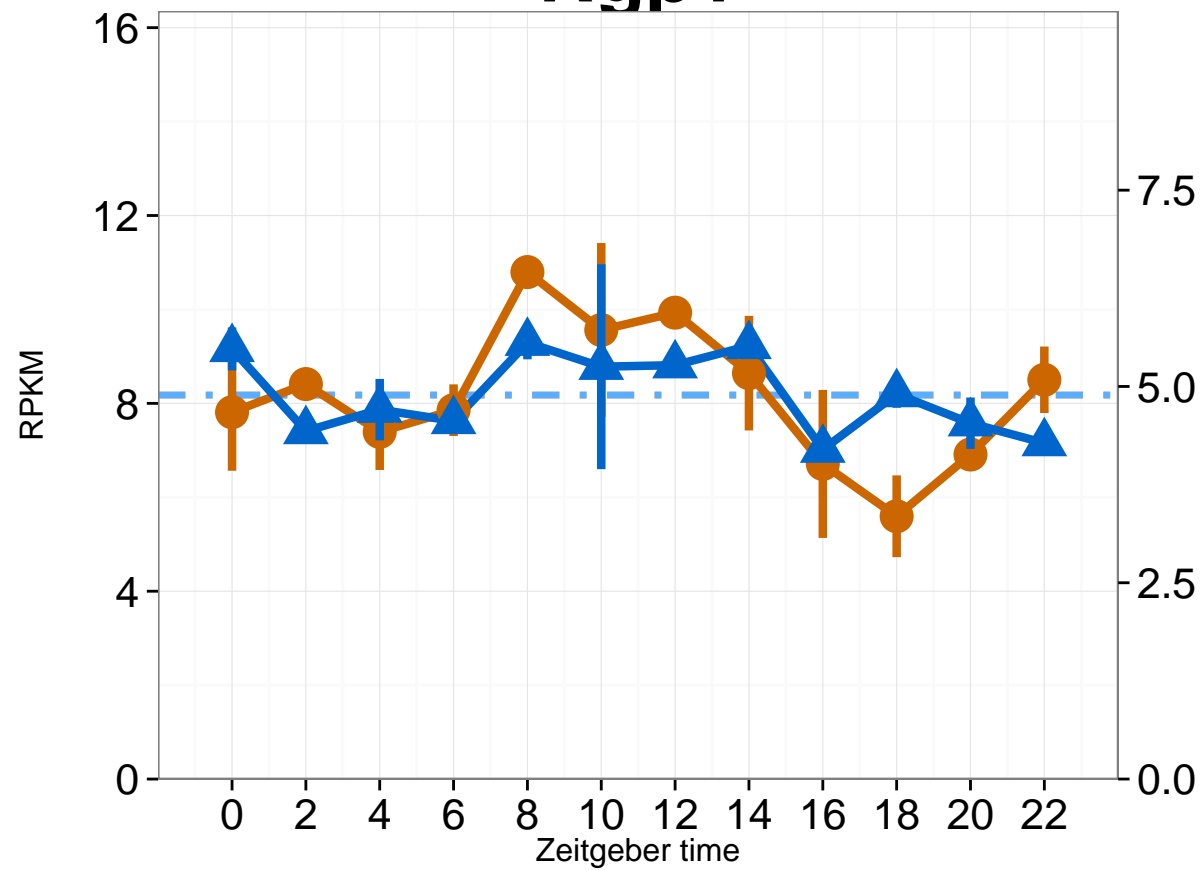

# Rgp1

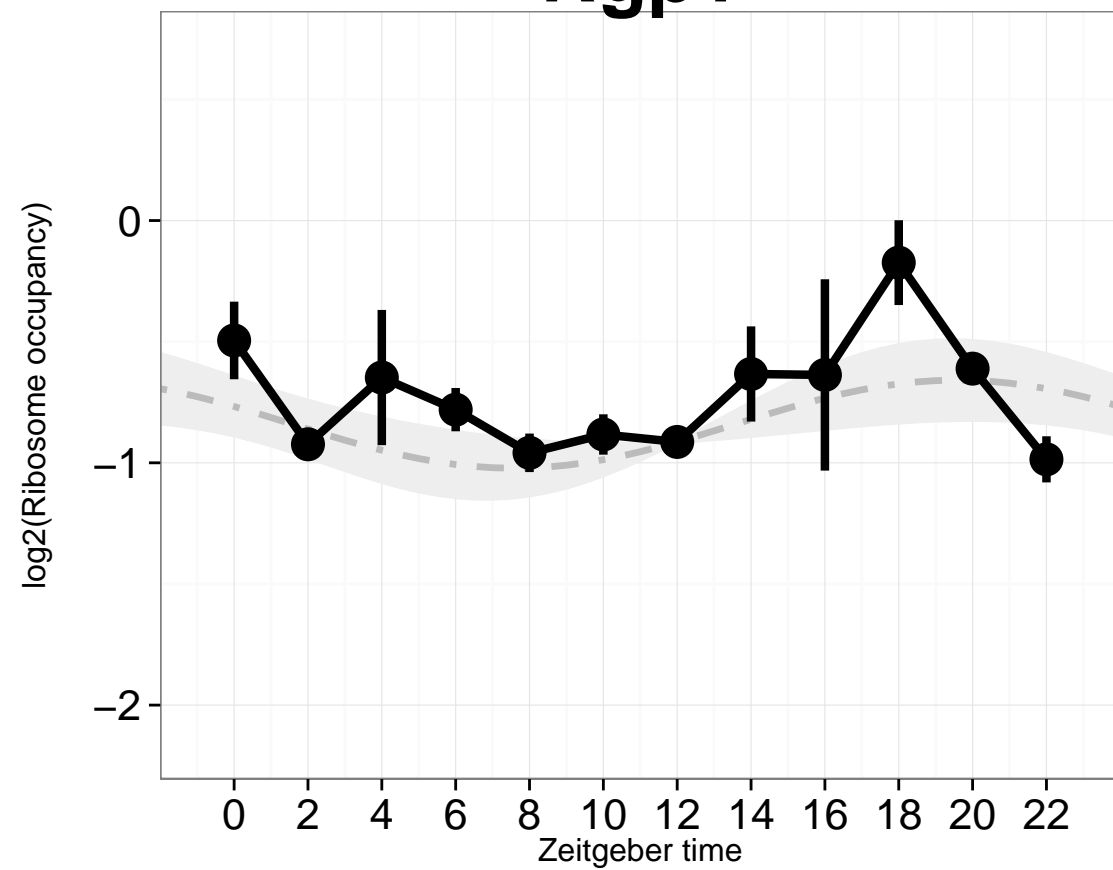

Supplement: SuppDataset_1.zip [file Rgp1_set_A.pdf › Supplemental Dataset 1/A-mRNA_nonrhyth_translation_nonrhyth/Rgp1_set_A.pdf]

## Rgs10

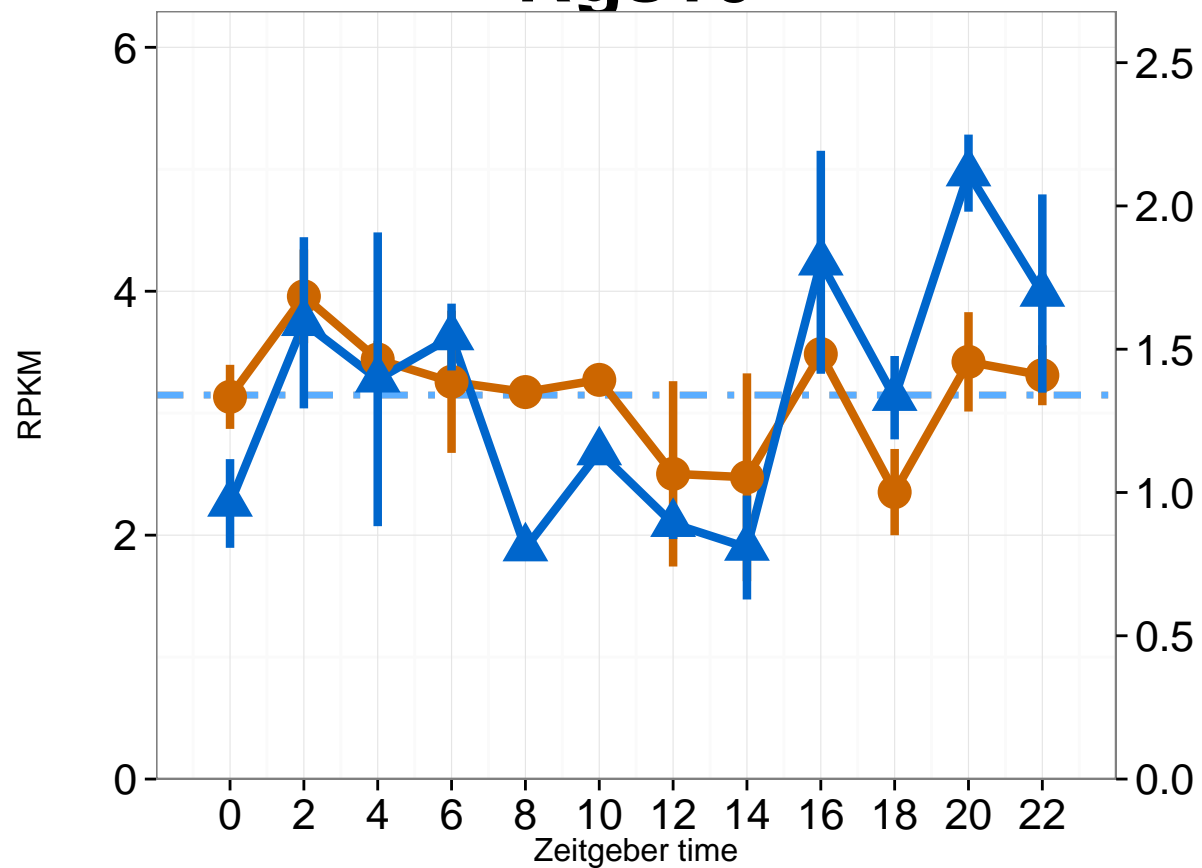

## Rgs10

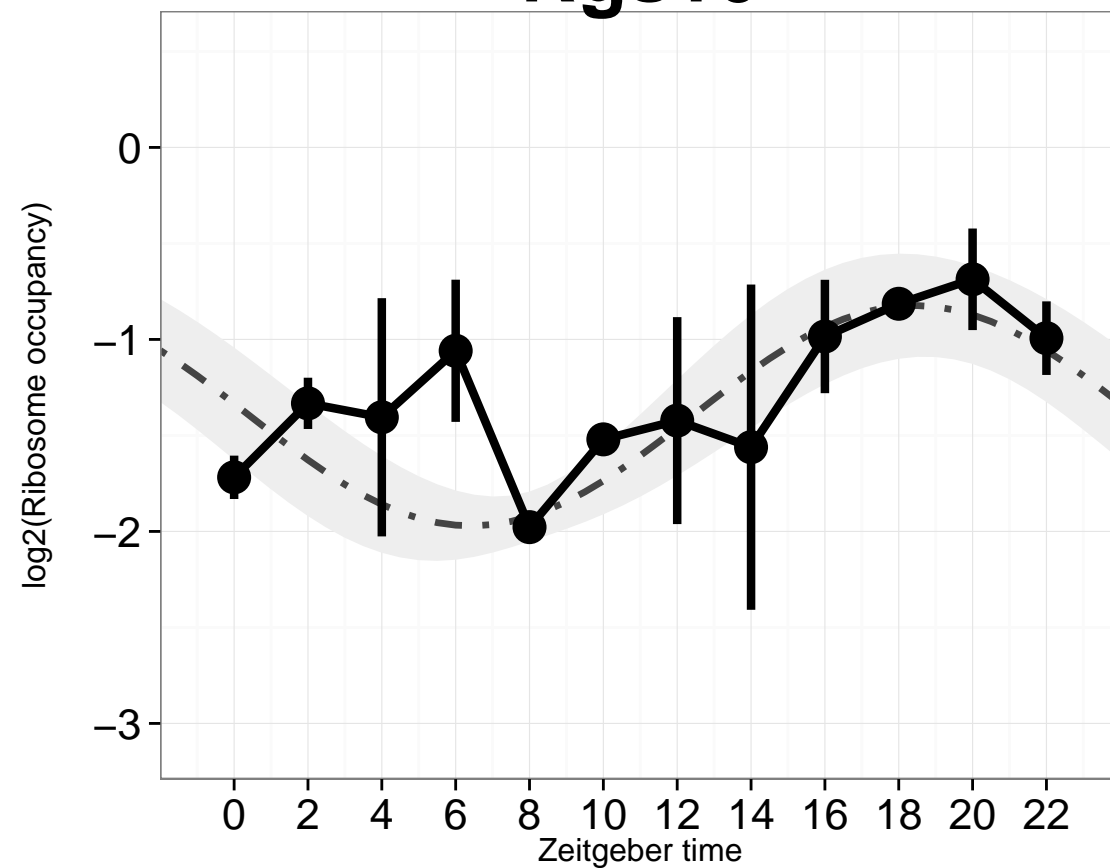

Supplement: SuppDataset_1.zip [file Rgs10_set_A.pdf › Supplemental Dataset 1/A-mRNA_nonrhyth_translation_nonrhyth/Rgs10_set_A.pdf]

## Rgs12

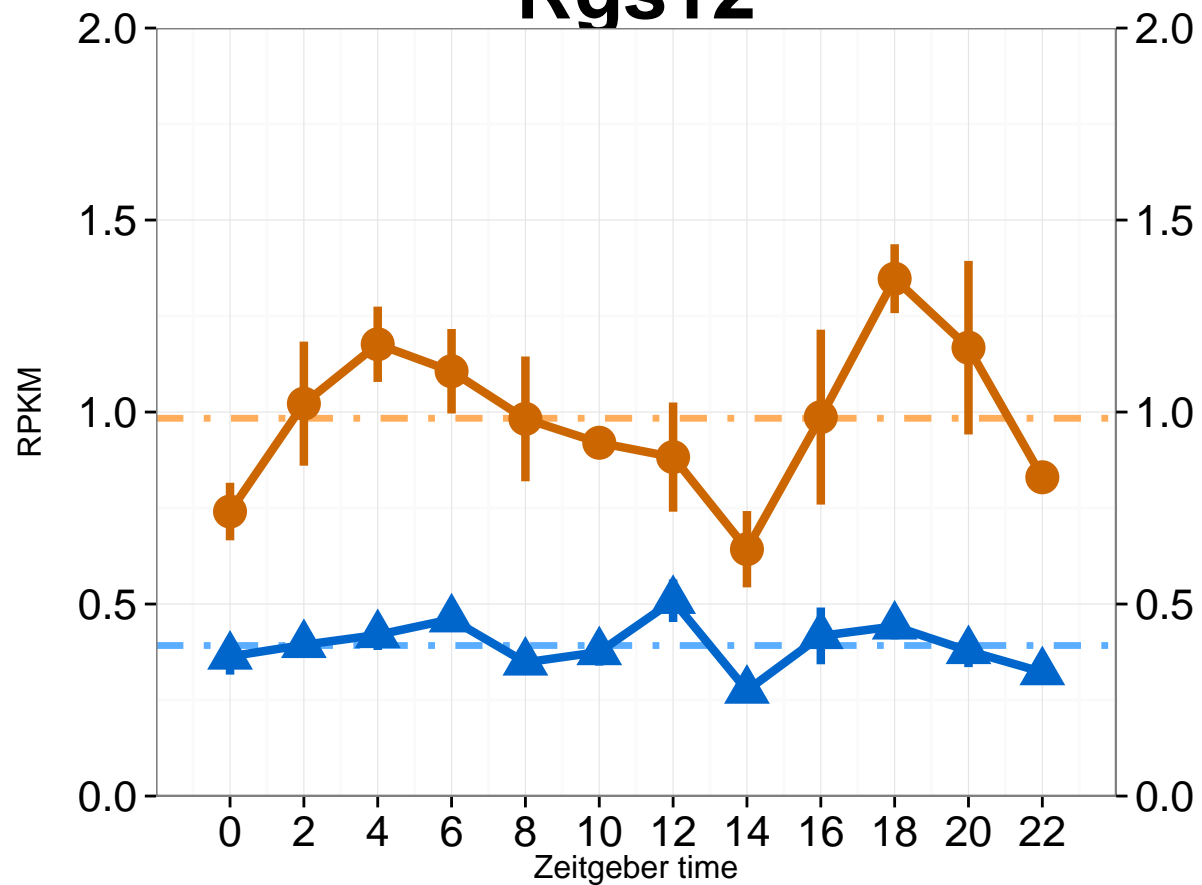

## Rgs12

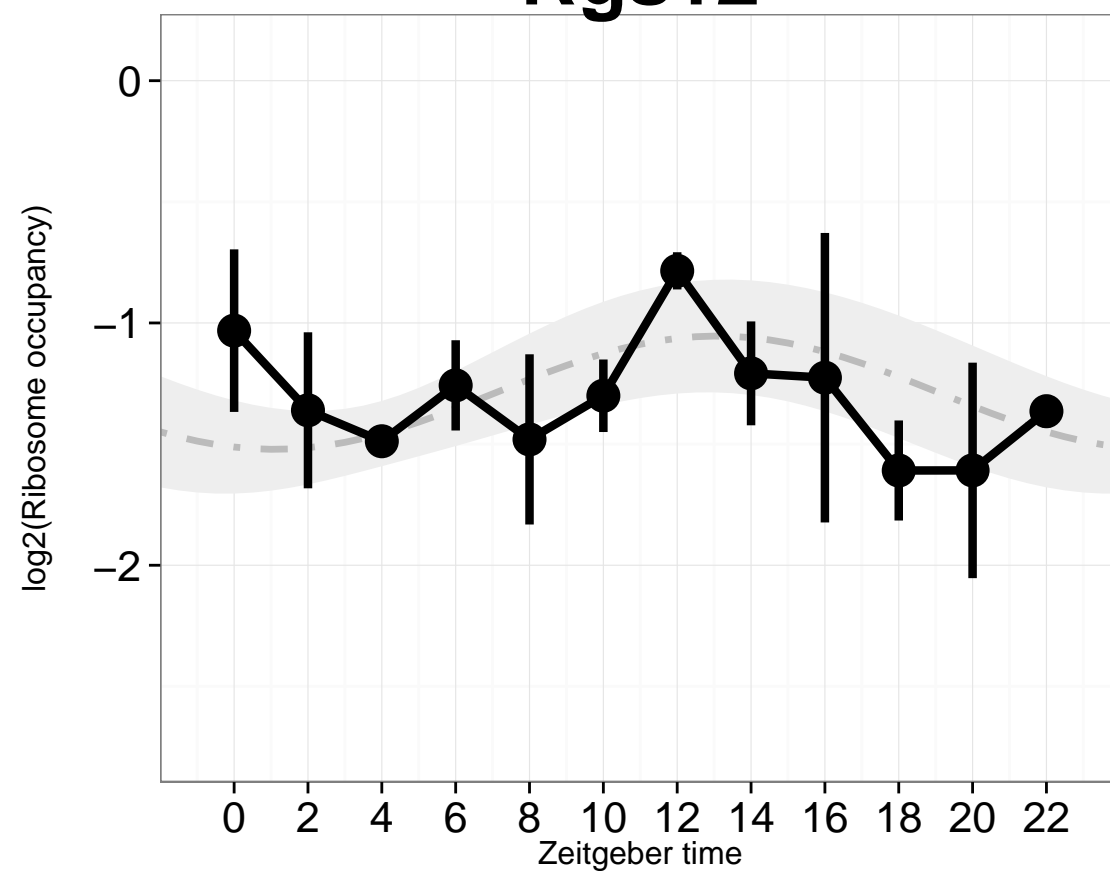

Supplement: SuppDataset_1.zip [file Rgs12_set_A.pdf › Supplemental Dataset 1/A-mRNA_nonrhyth_translation_nonrhyth/Rgs12_set_A.pdf]

## Rgs1

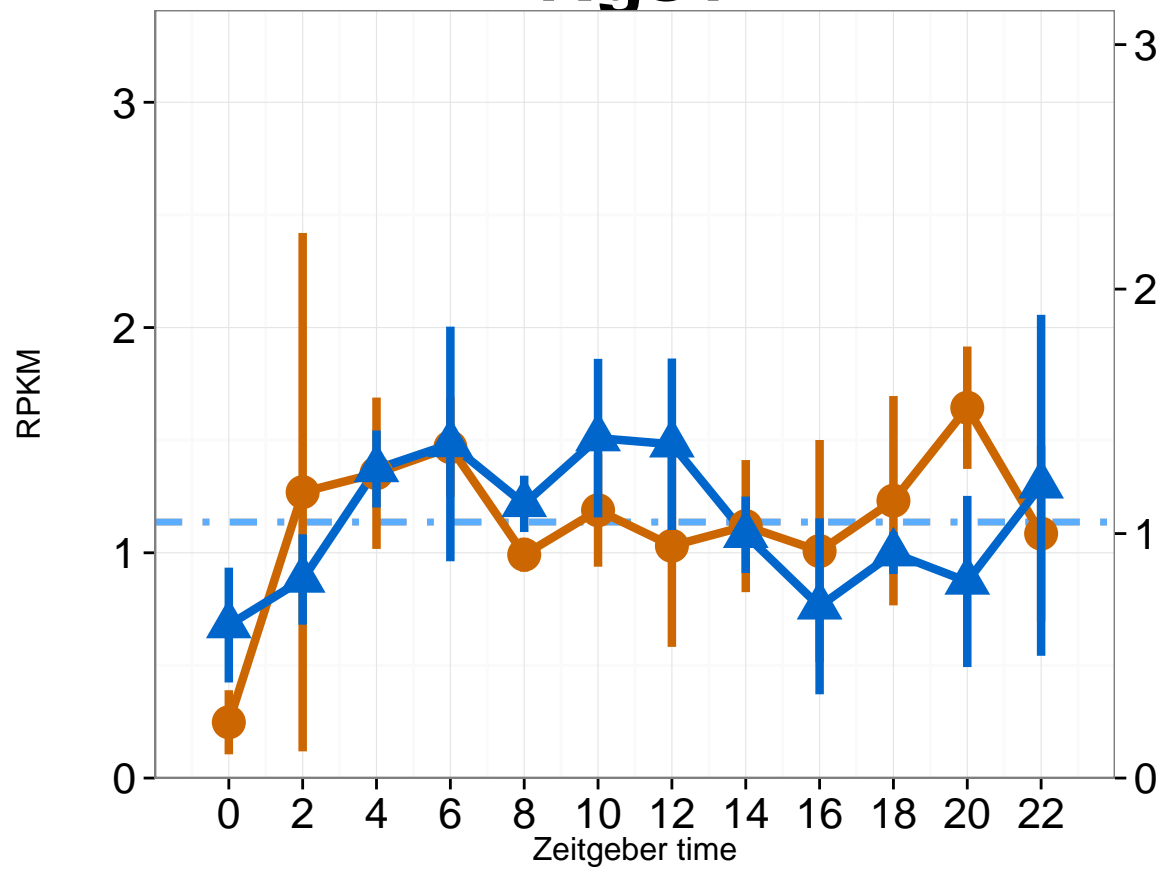

## Rgs1

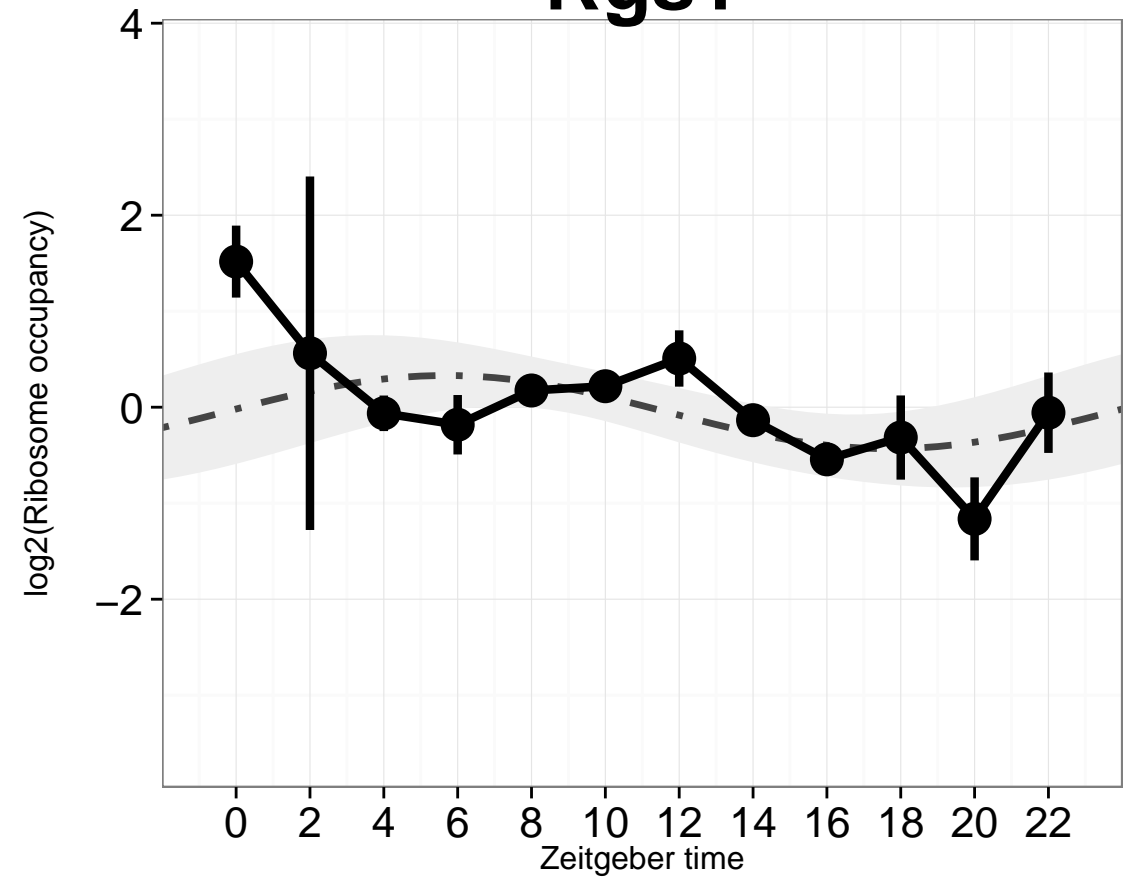

Supplement: SuppDataset_1.zip [file Rgs1_set_A.pdf › Supplemental Dataset 1/A-mRNA_nonrhyth_translation_nonrhyth/Rgs1_set_A.pdf]

# Rgs3

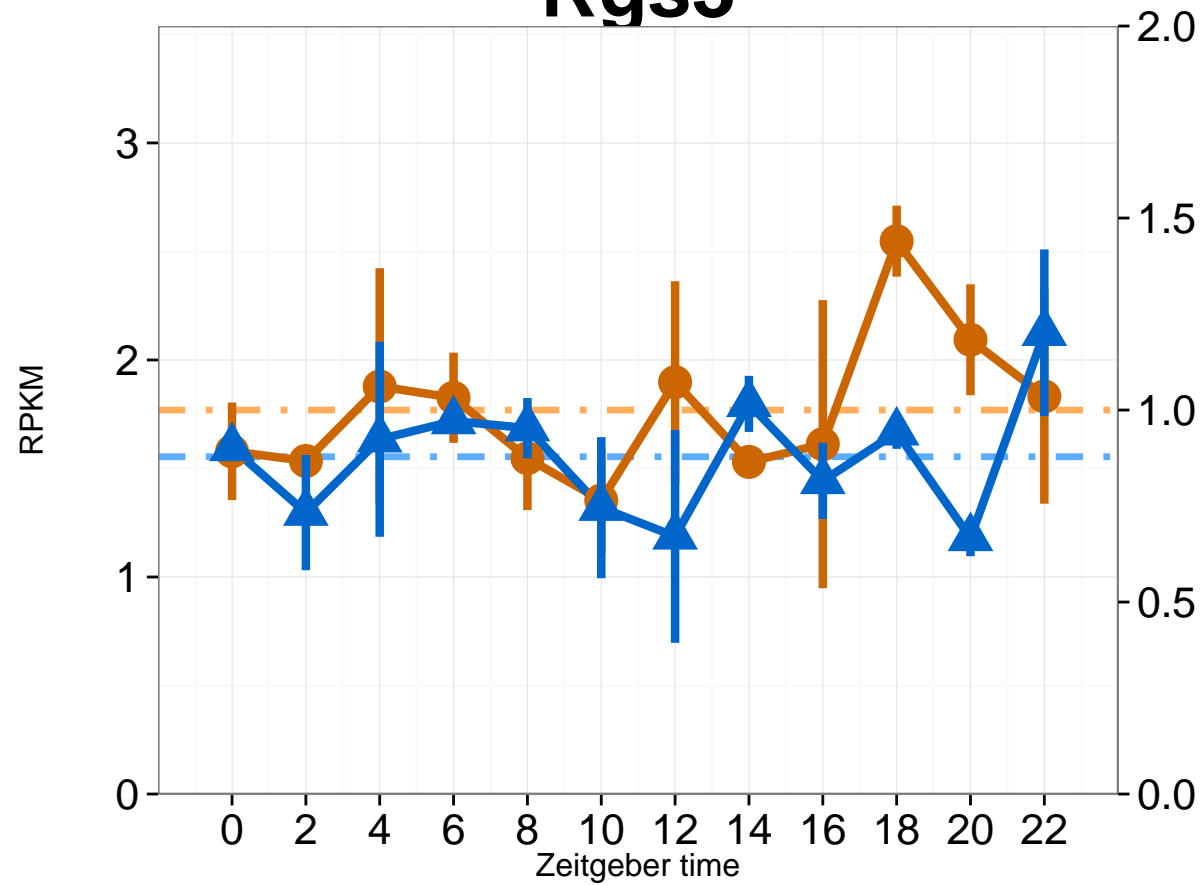

# Rgs3

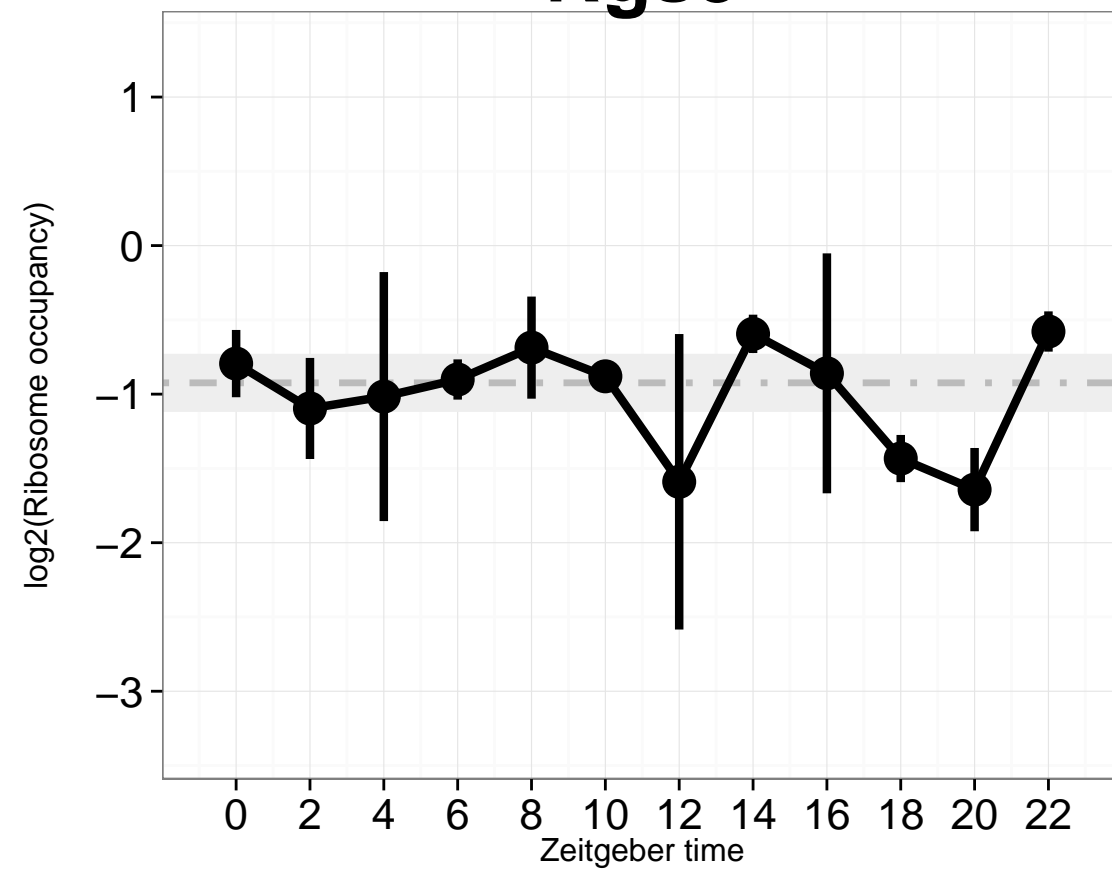

Supplement: SuppDataset_1.zip [file Rgs3_set_A.pdf › Supplemental Dataset 1/A-mRNA_nonrhyth_translation_nonrhyth/Rgs3_set_A.pdf]

# Rgs4

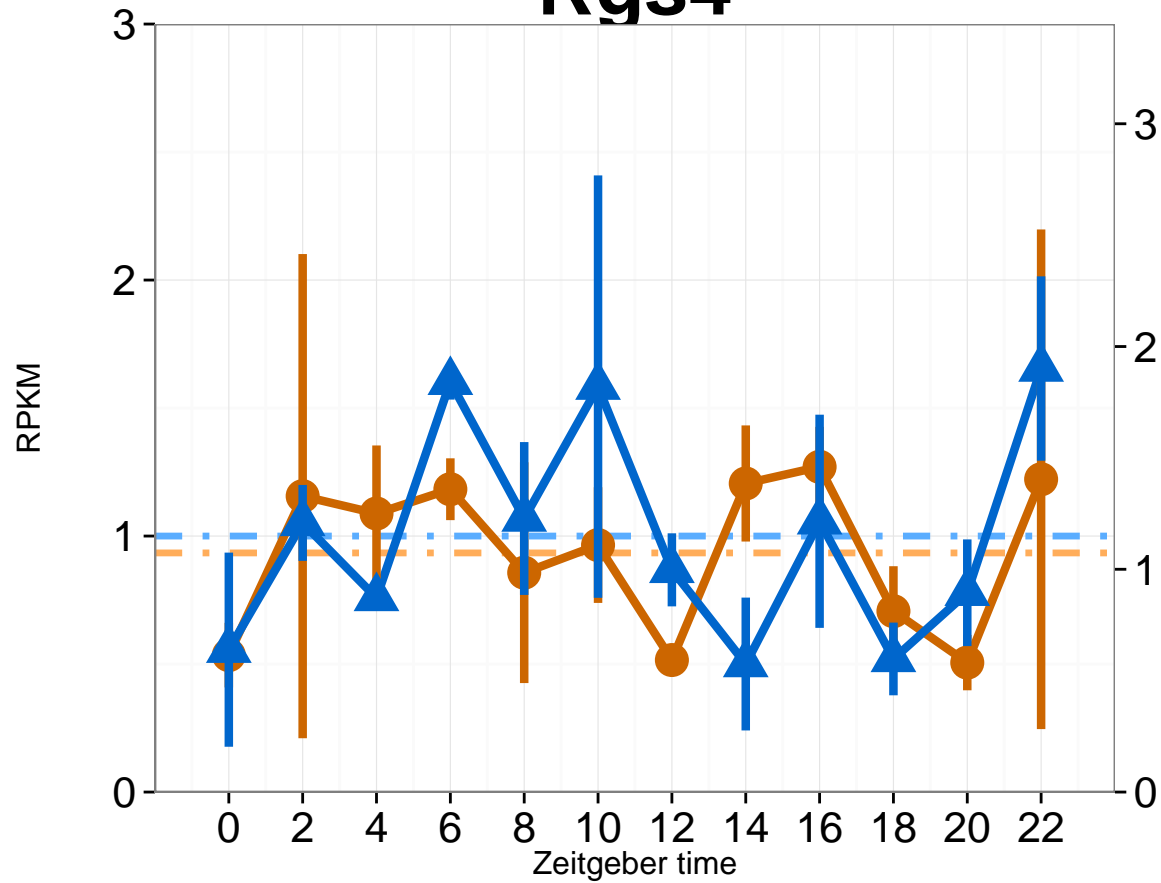

# Rgs4

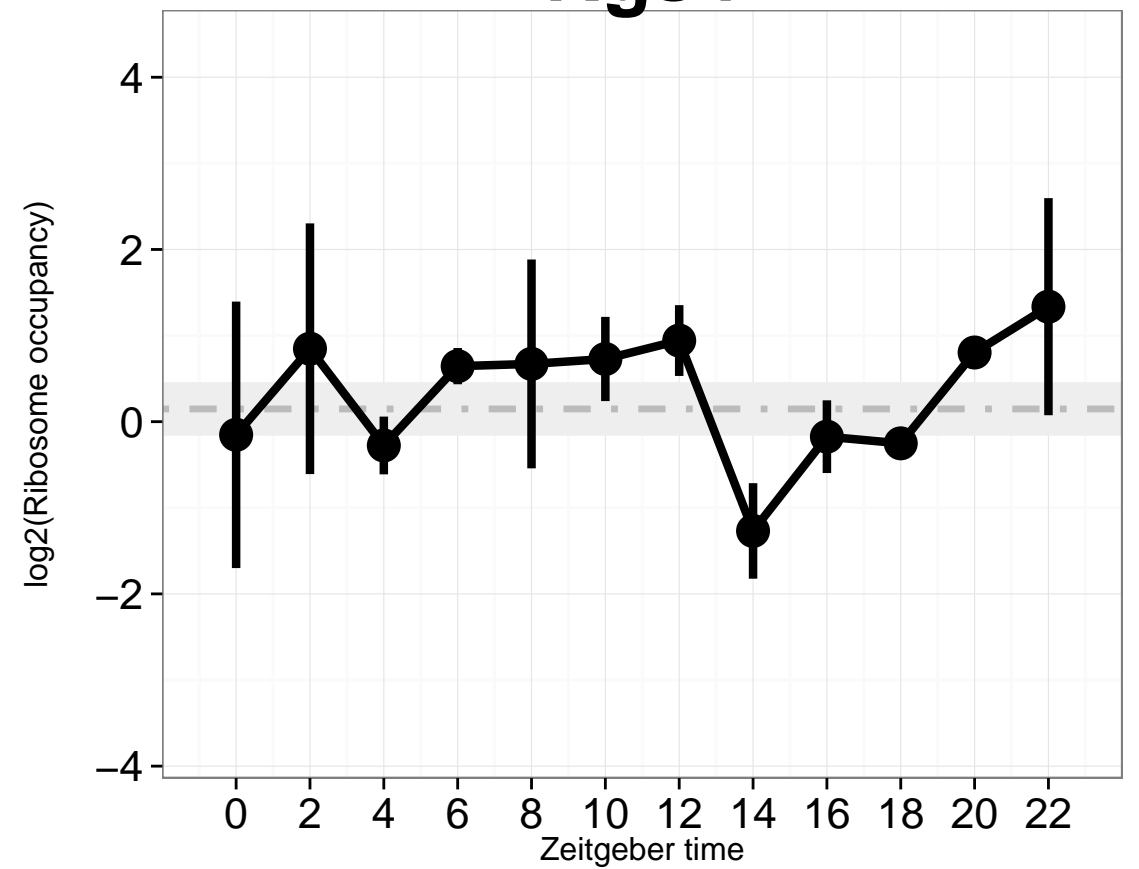

Supplement: SuppDataset_1.zip [file Rgs4_set_A.pdf › Supplemental Dataset 1/A-mRNA_nonrhyth_translation_nonrhyth/Rgs4_set_A.pdf]

## Rgs5

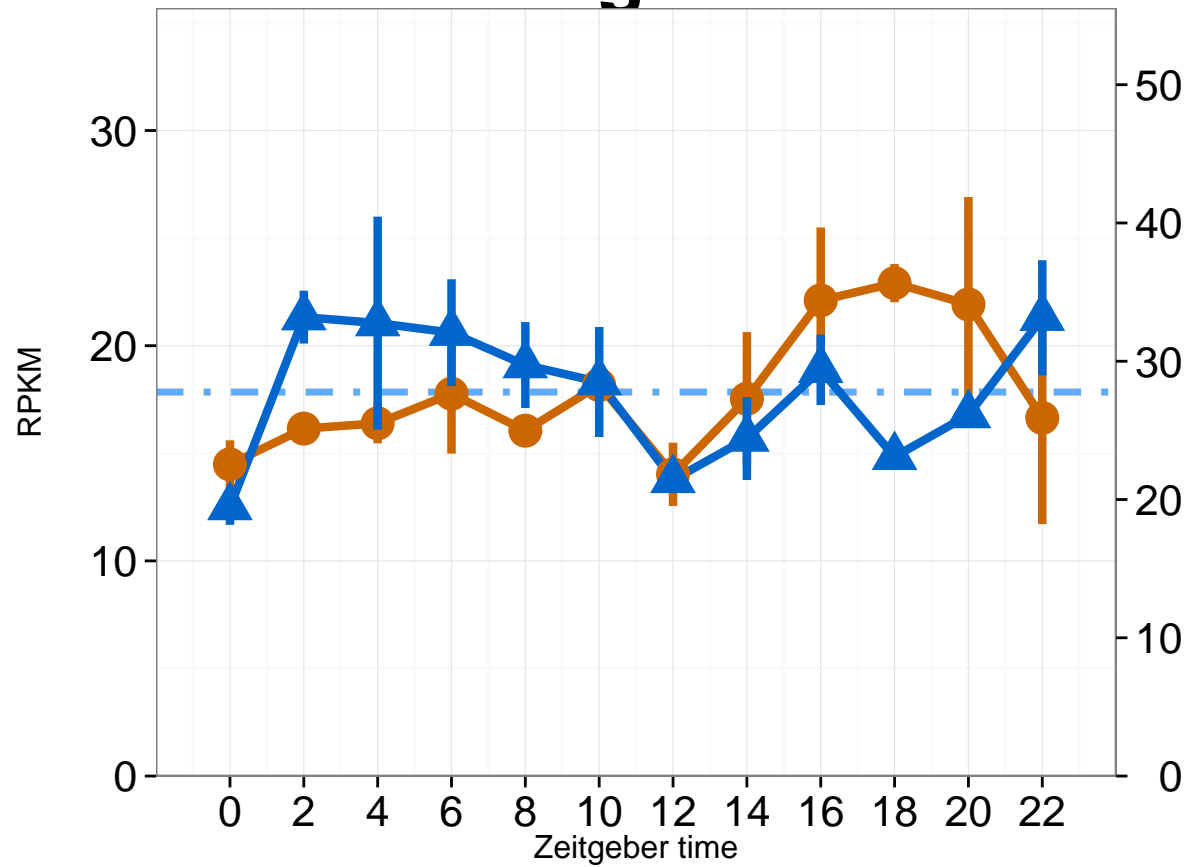

## Rgs5

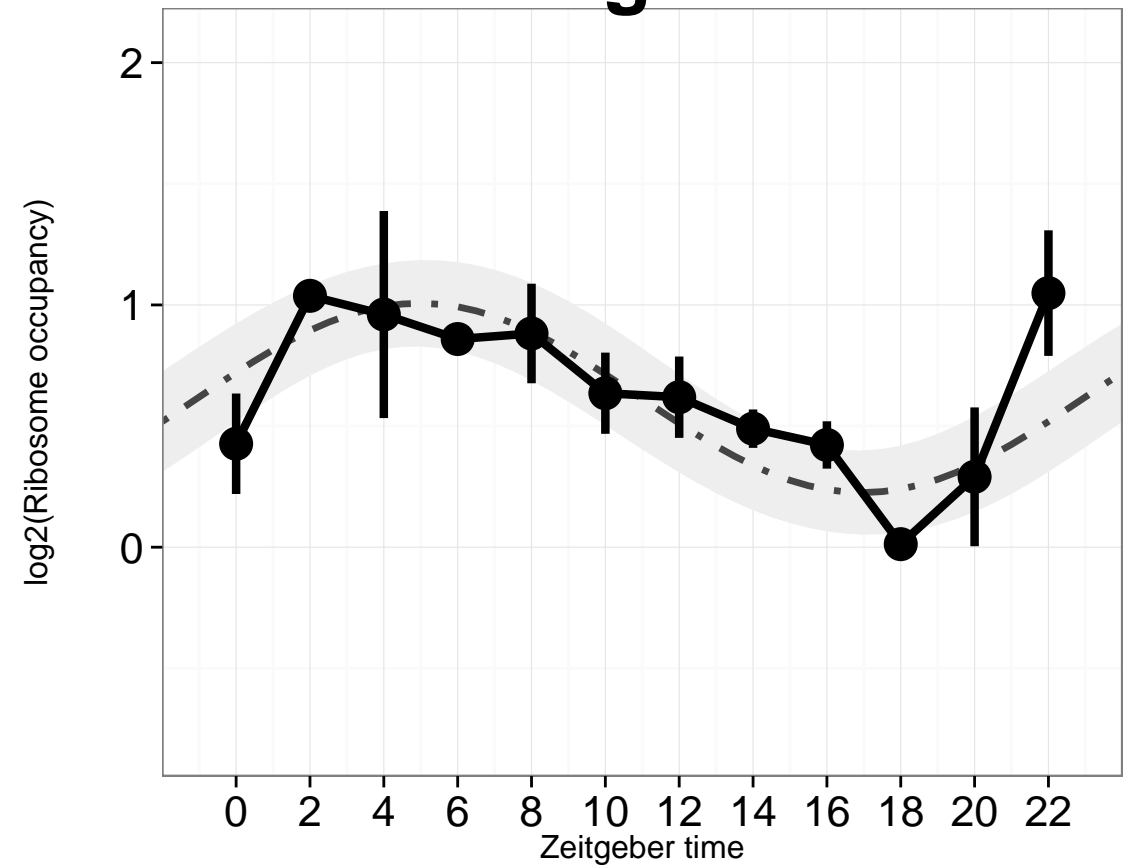

Supplement: SuppDataset_1.zip [file Rgs5_set_A.pdf › Supplemental Dataset 1/A-mRNA_nonrhyth_translation_nonrhyth/Rgs5_set_A.pdf]

## Rhbdd1

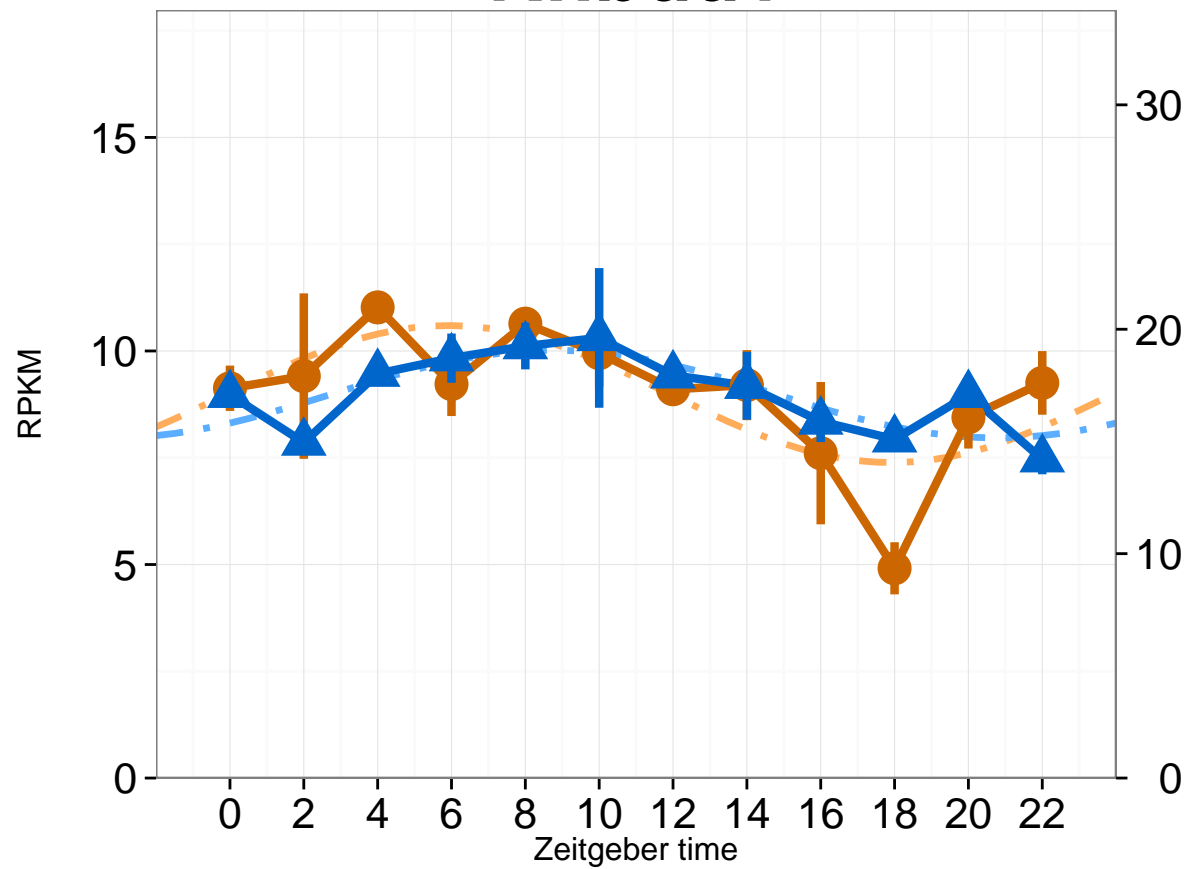

## Rhbdd1

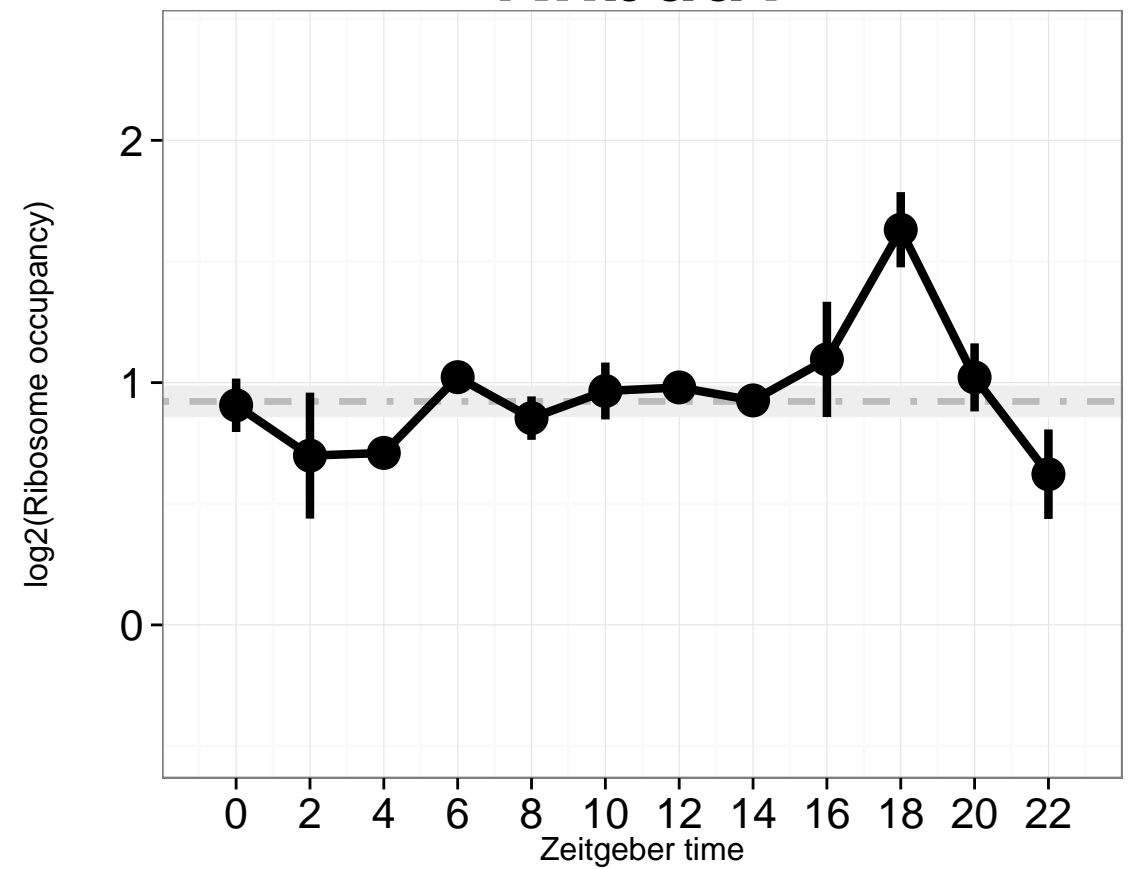

Supplement: SuppDataset_1.zip [file Rhbdd1_set_A.pdf › Supplemental Dataset 1/A-mRNA_nonrhyth_translation_nonrhyth/Rhbdd1_set_A.pdf]

## Rhbdf1

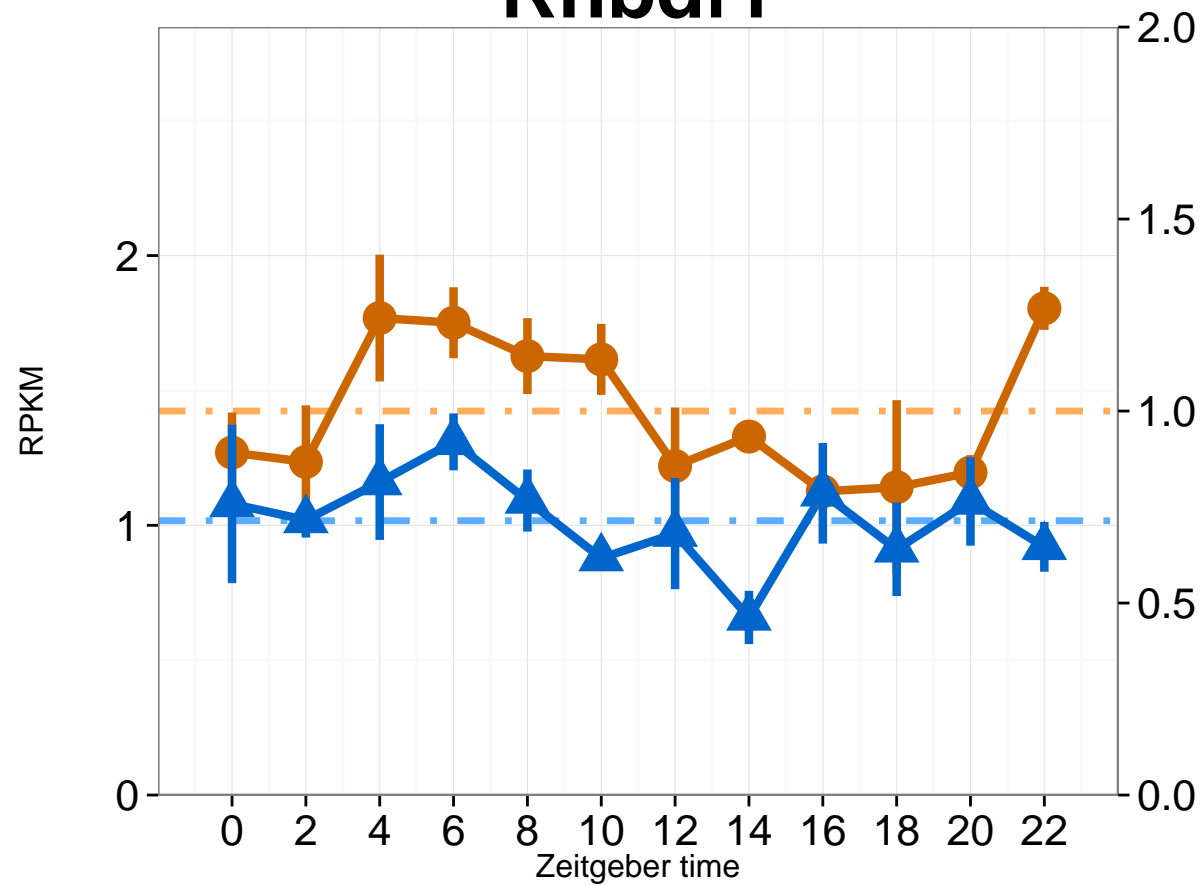

## Rhbdf1

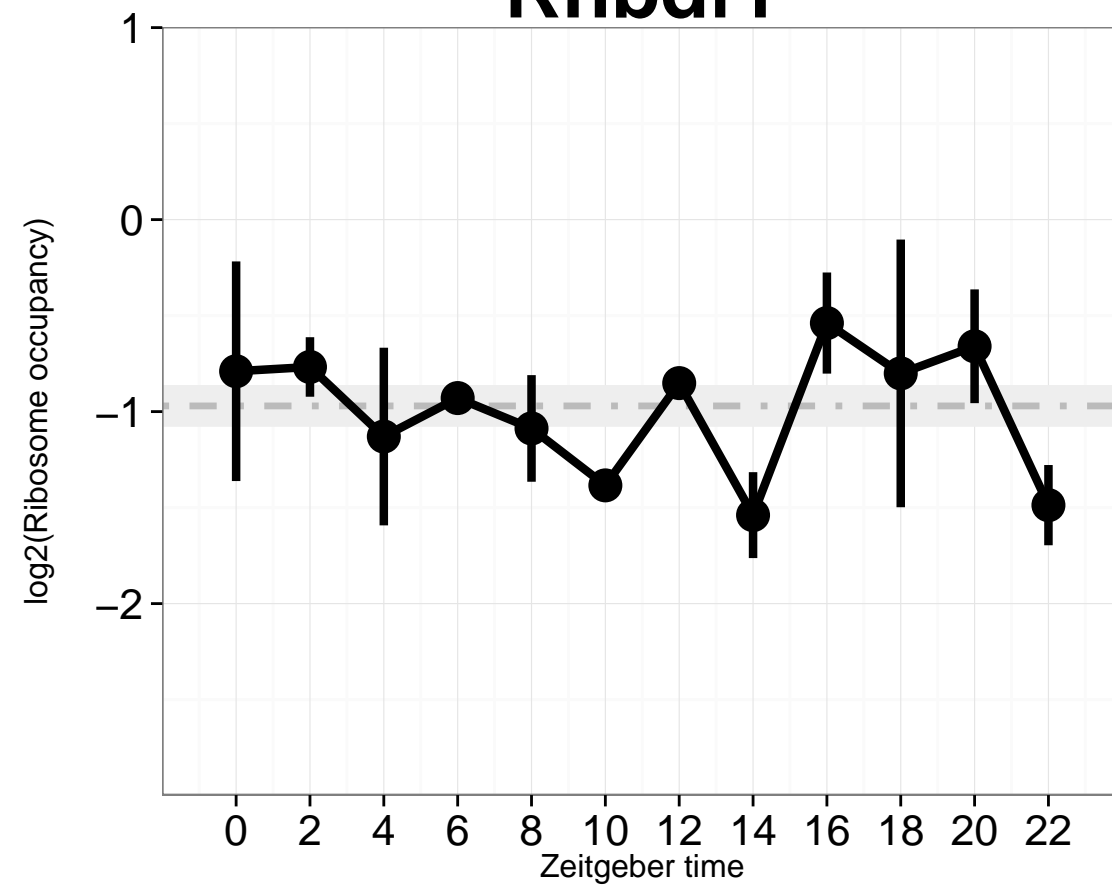

Supplement: SuppDataset_1.zip [file Rhbdf1_set_A.pdf › Supplemental Dataset 1/A-mRNA_nonrhyth_translation_nonrhyth/Rhbdf1_set_A.pdf]

## Rhbdf2

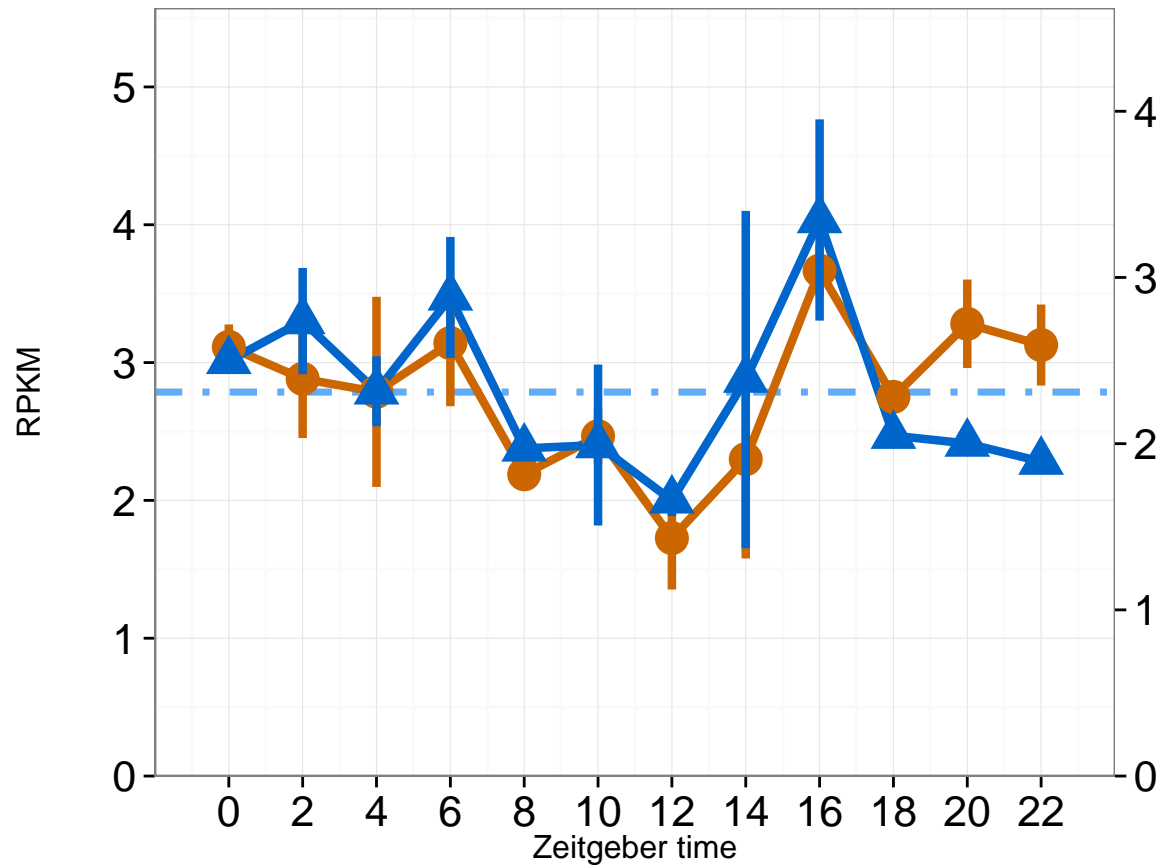

## Rhbdf2

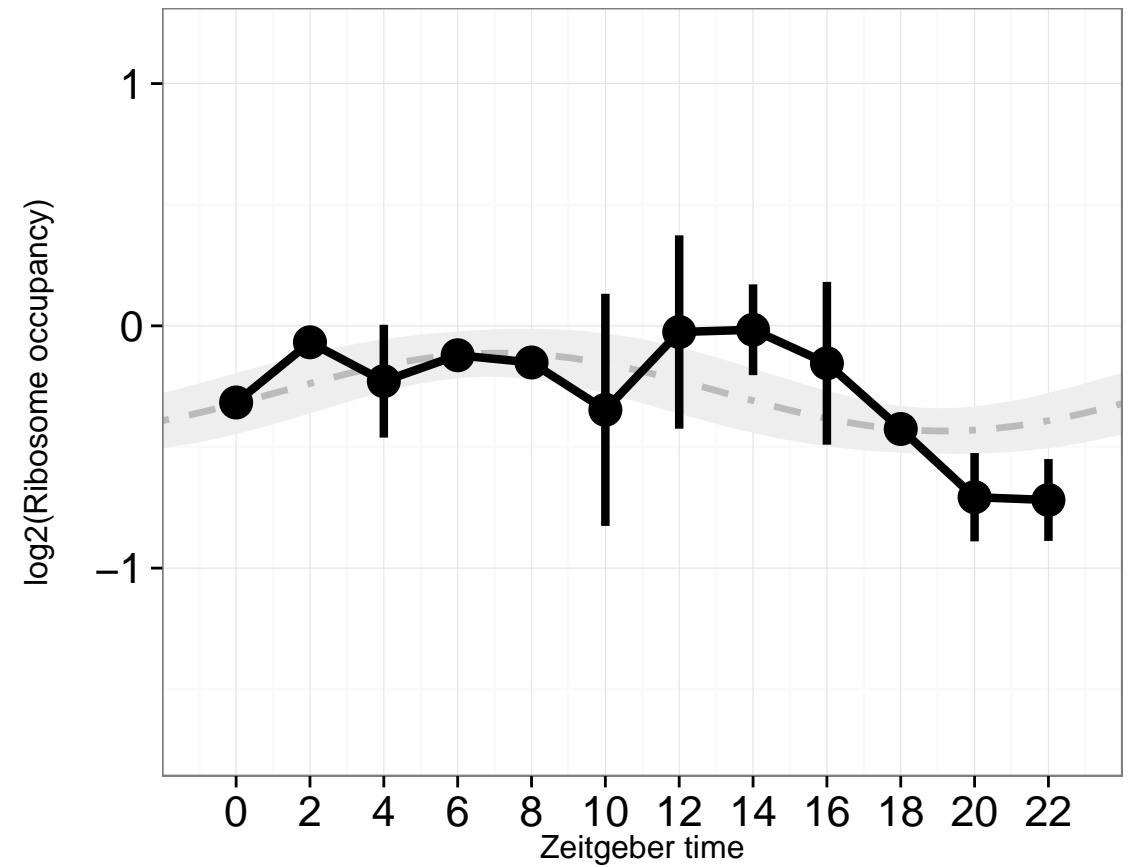

Supplement: SuppDataset_1.zip [file Rhbdf2_set_A.pdf › Supplemental Dataset 1/A-mRNA_nonrhyth_translation_nonrhyth/Rhbdf2_set_A.pdf]

## Rhbg

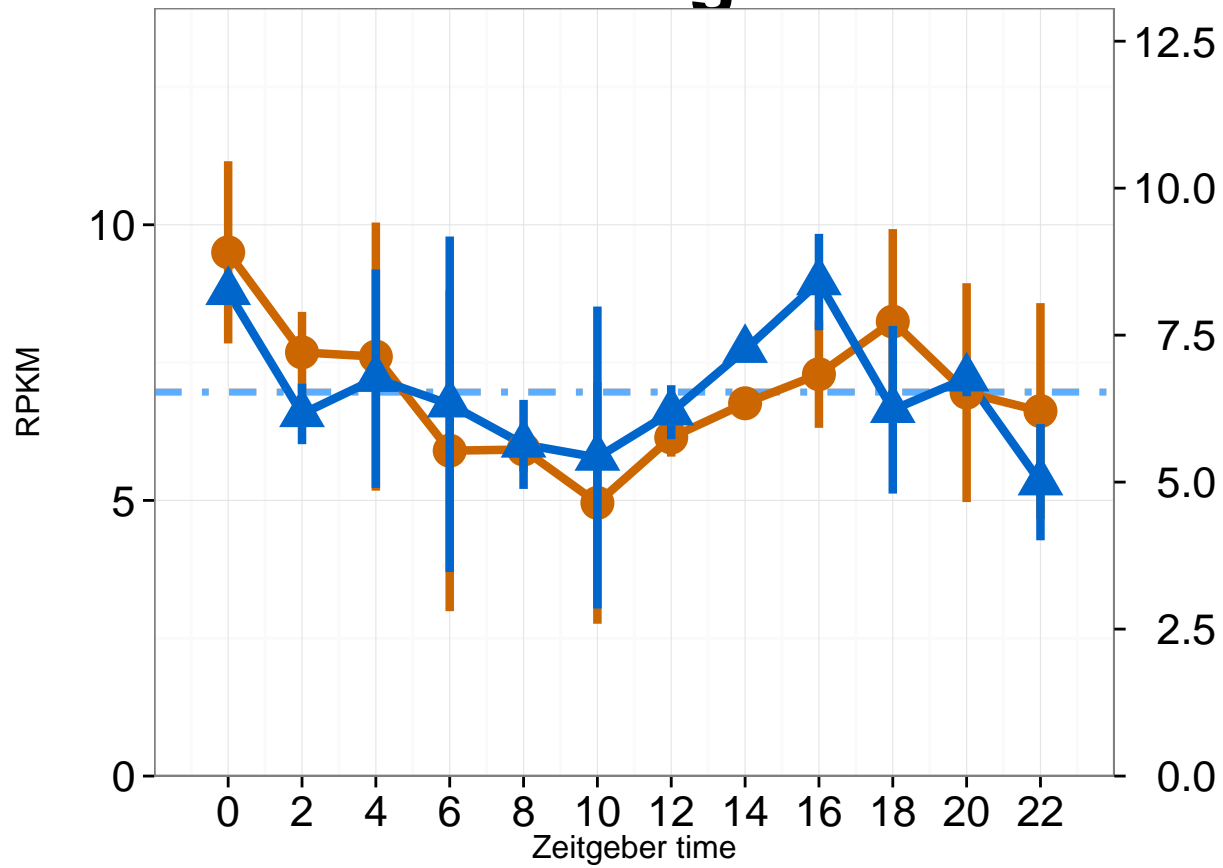

## Rhbg

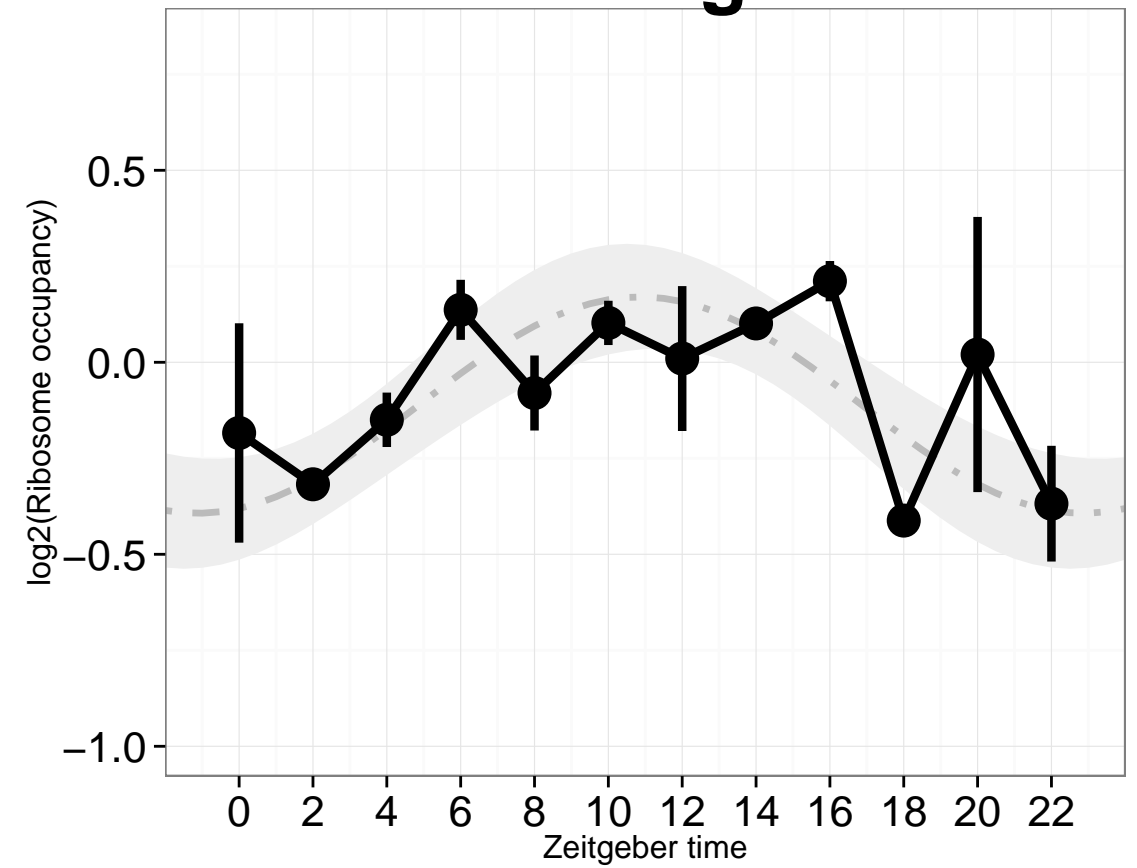

Supplement: SuppDataset_1.zip [file Rhbg_set_A.pdf › Supplemental Dataset 1/A-mRNA_nonrhyth_translation_nonrhyth/Rhbg_set_A.pdf]

## Rheb

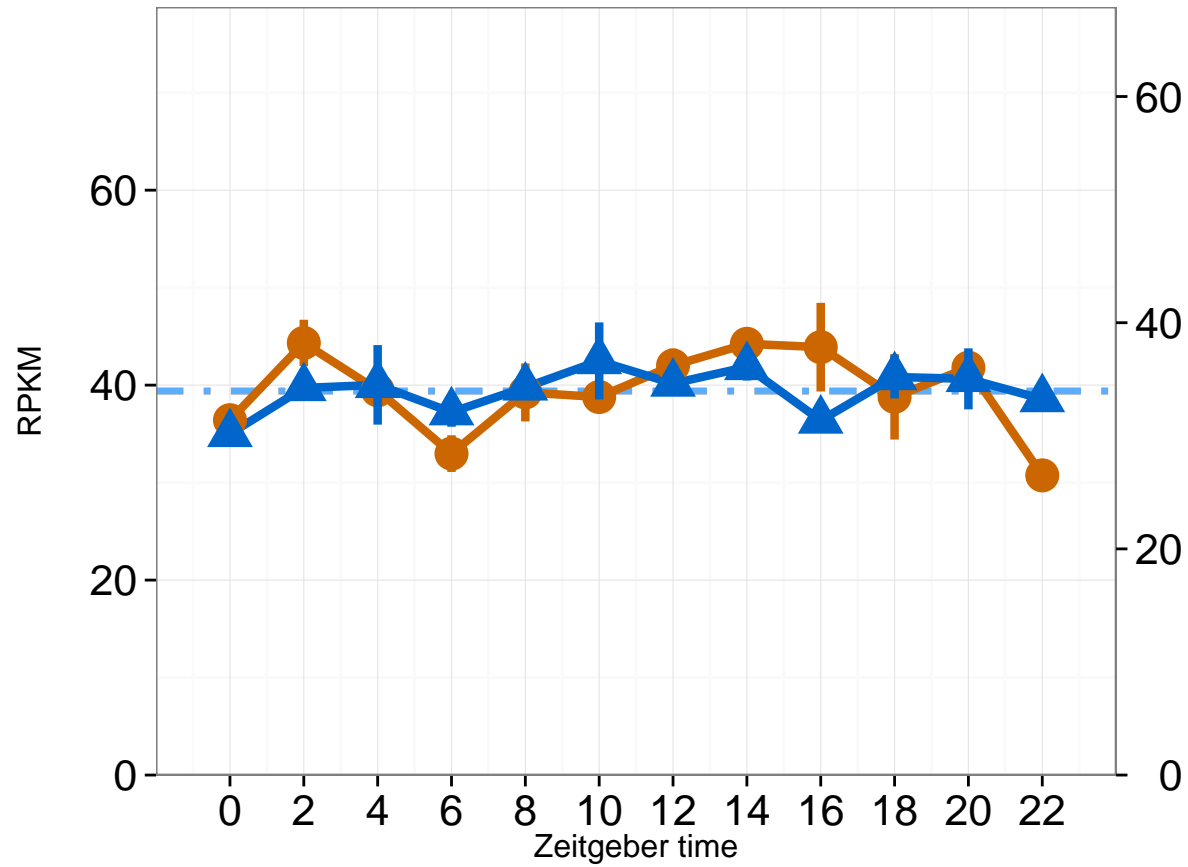

## Rheb

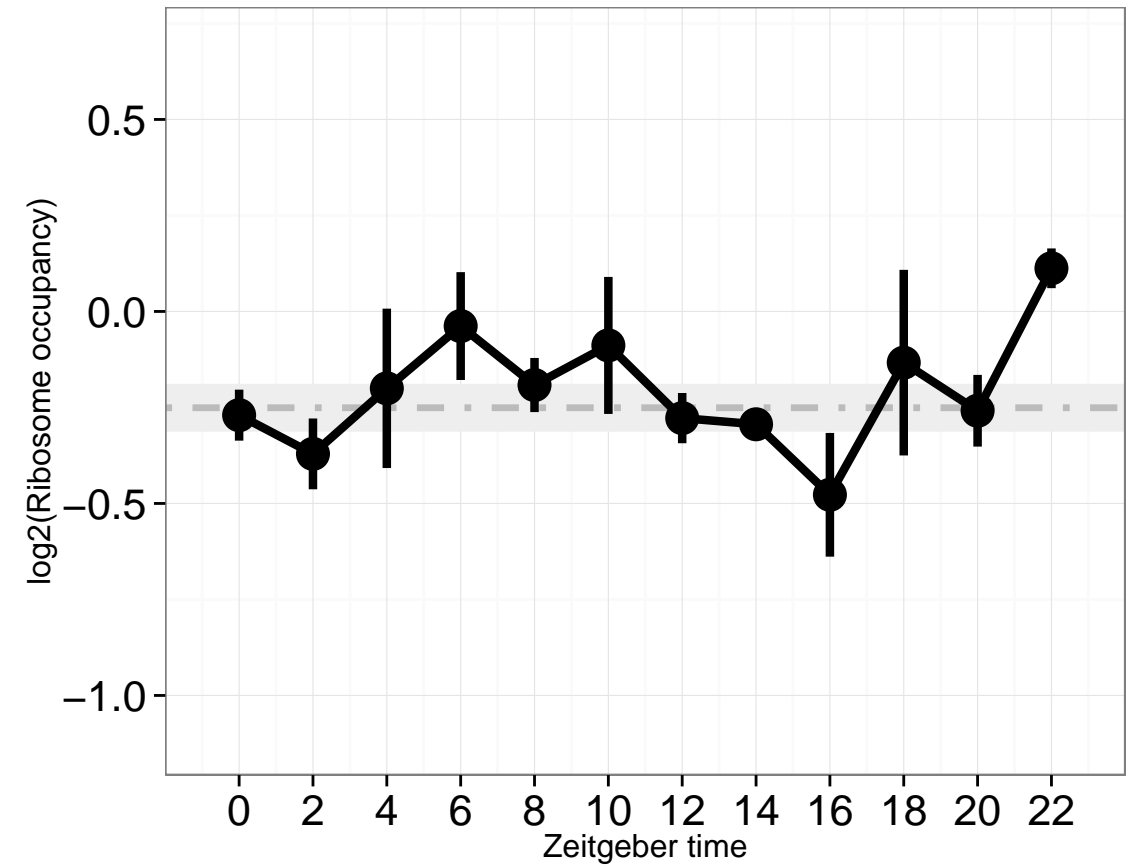

Supplement: SuppDataset_1.zip [file Rheb_set_A.pdf › Supplemental Dataset 1/A-mRNA_nonrhyth_translation_nonrhyth/Rheb_set_A.pdf]

# Rhno1

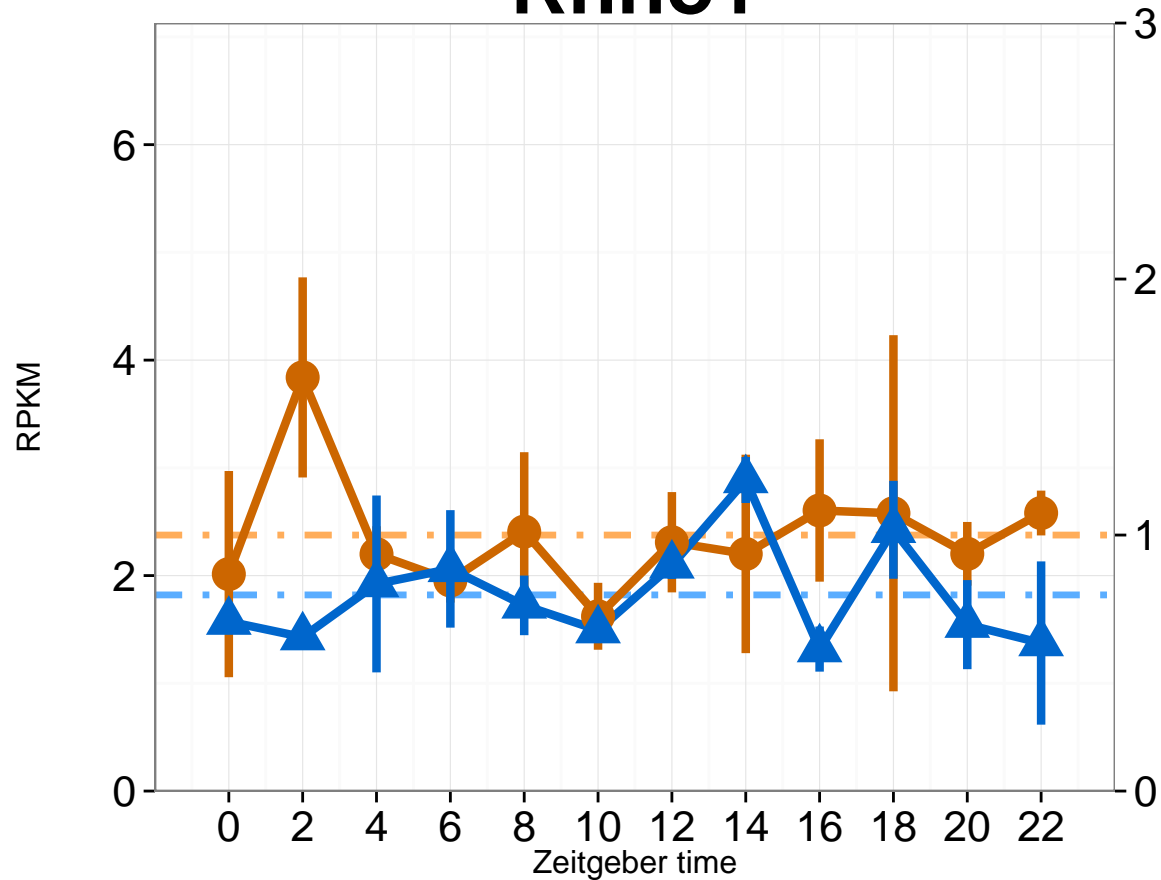

# Rhno1

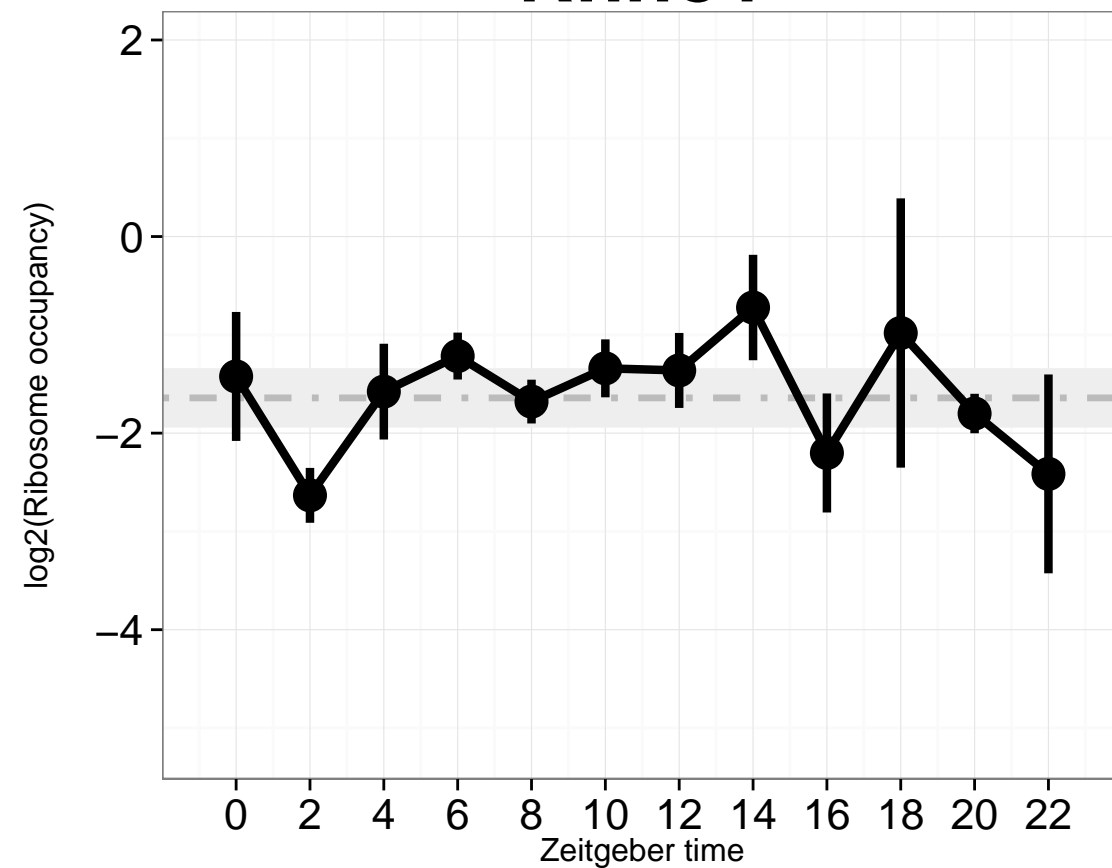

Supplement: SuppDataset_1.zip [file Rhno1_set_A.pdf › Supplemental Dataset 1/A-mRNA_nonrhyth_translation_nonrhyth/Rhno1_set_A.pdf]
