# Supplementary figures and images for: Ribosome profiling reveals the rhythmic liver translatome and circadian clock regulation by upstream open reading frames (part 62 of 113)
Source: HighWire-hosted journal article supplement (doi:10.1101/gr.195404.115), 2015-10-20

## Rhoa

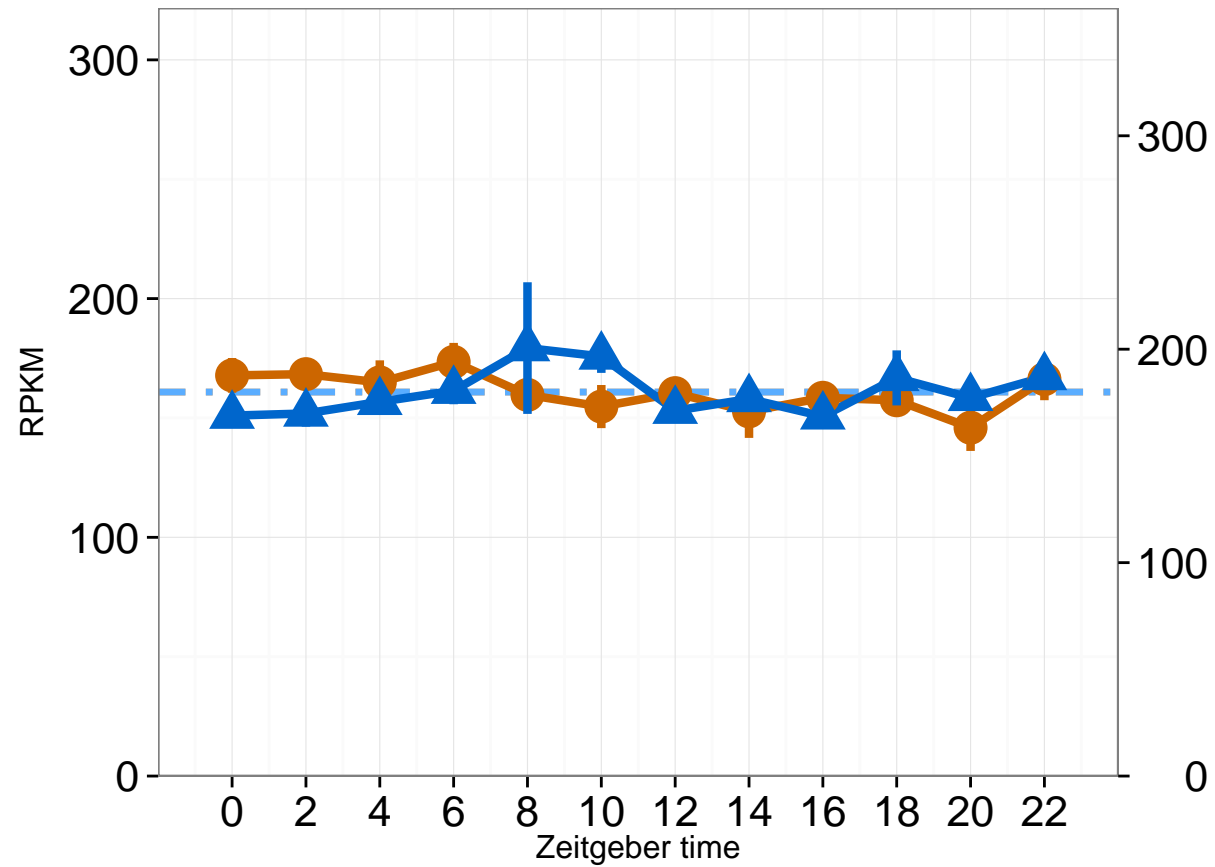

## Rhoa

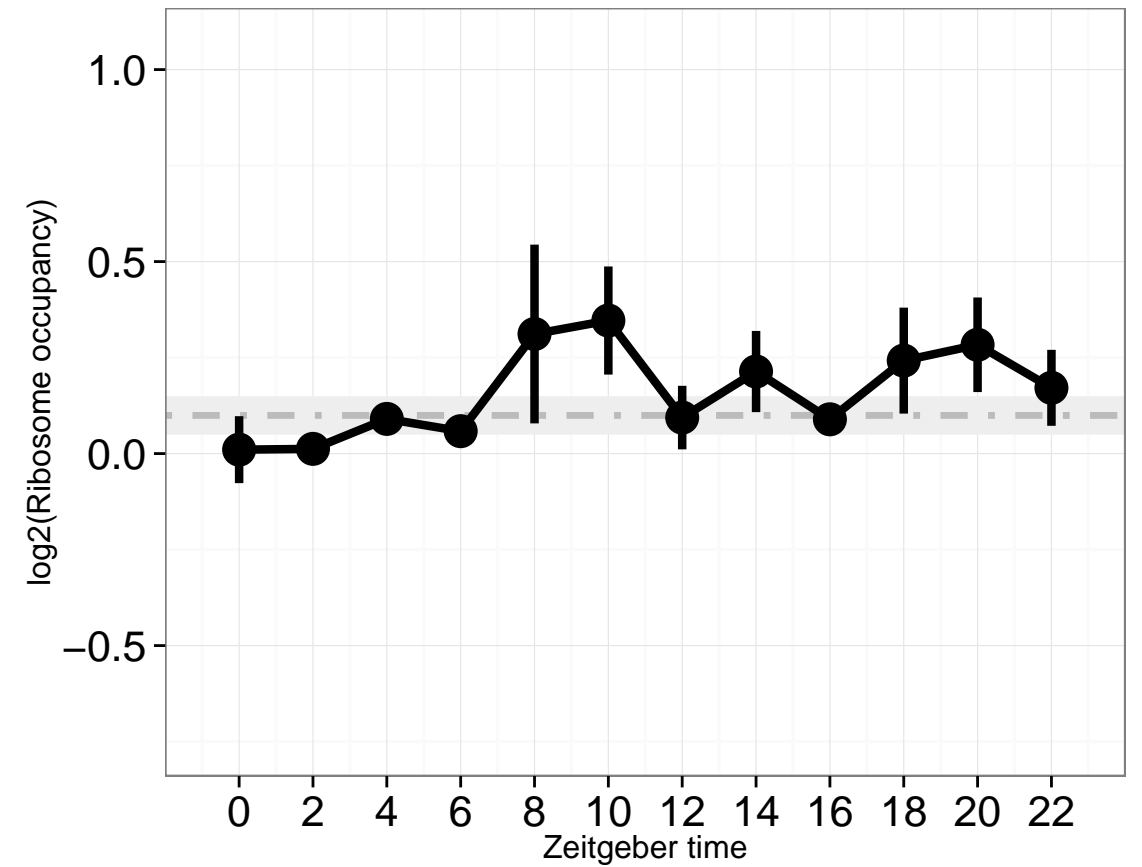

Supplement: SuppDataset_1.zip [file Rhoa_set_A.pdf › Supplemental Dataset 1/A-mRNA_nonrhyth_translation_nonrhyth/Rhoa_set_A.pdf]

## Rhob

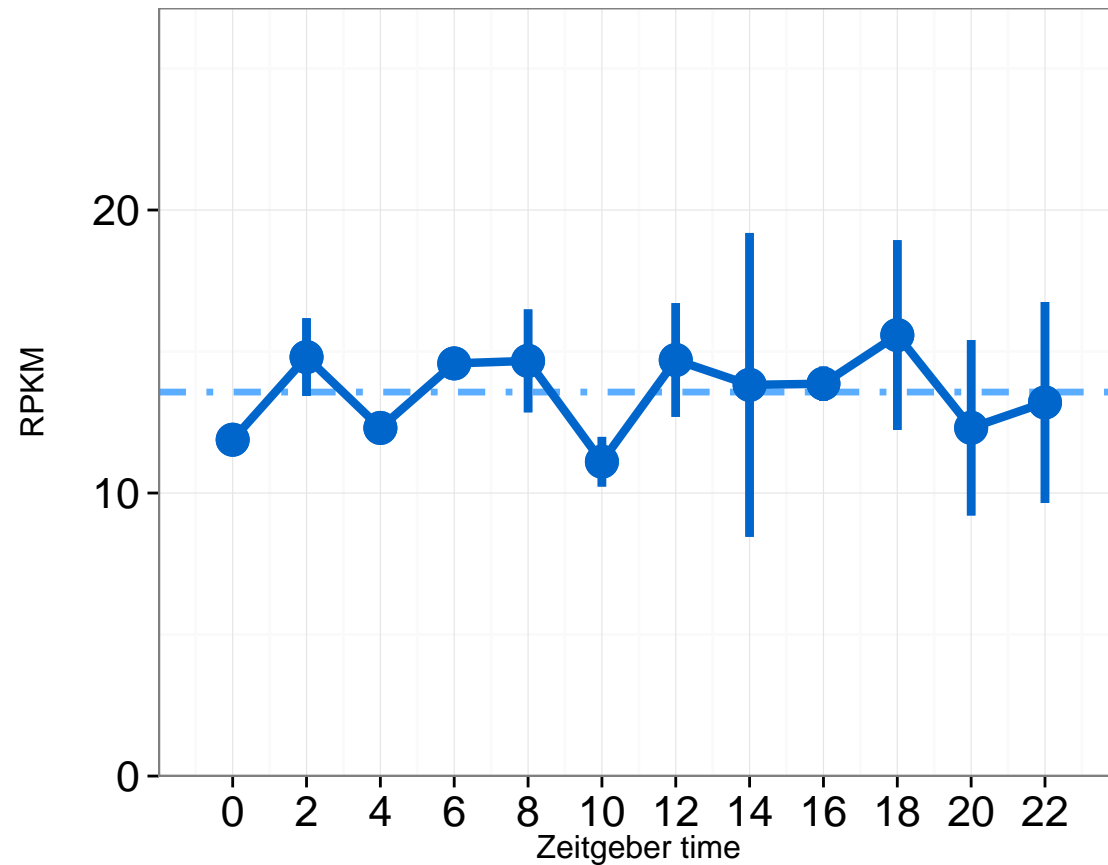

## Rhob log2(Ribosome occupancy)

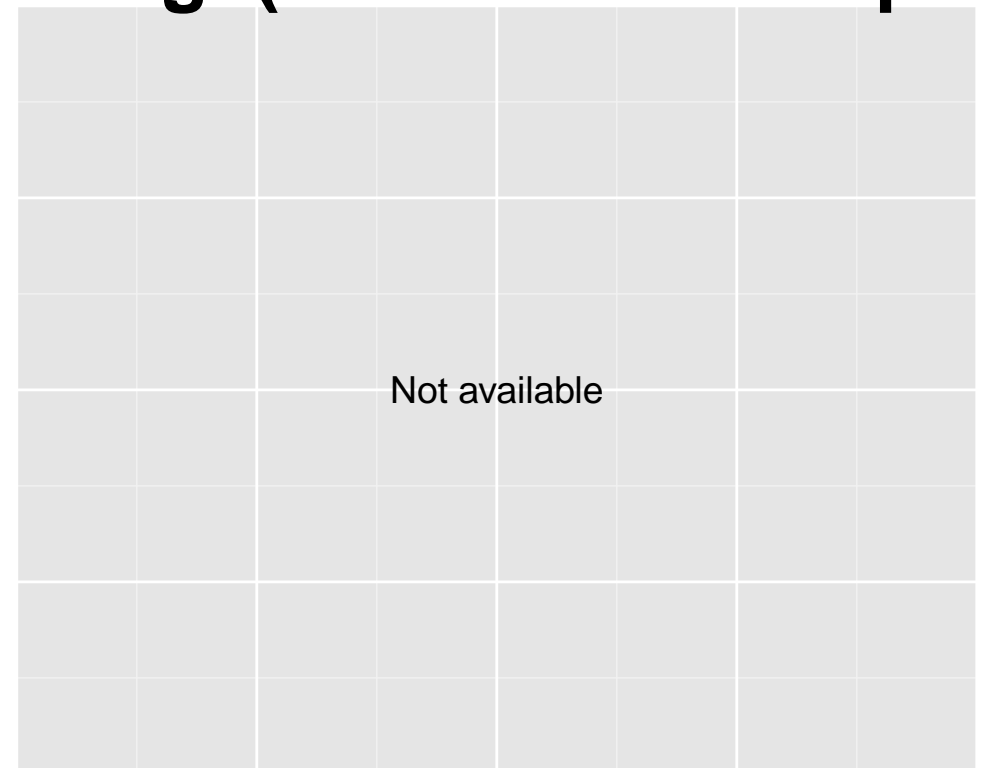

Supplement: SuppDataset_1.zip [file Rhob_set_A.pdf › Supplemental Dataset 1/A-mRNA_nonrhyth_translation_nonrhyth/Rhob_set_A.pdf]

## Rhobtb1

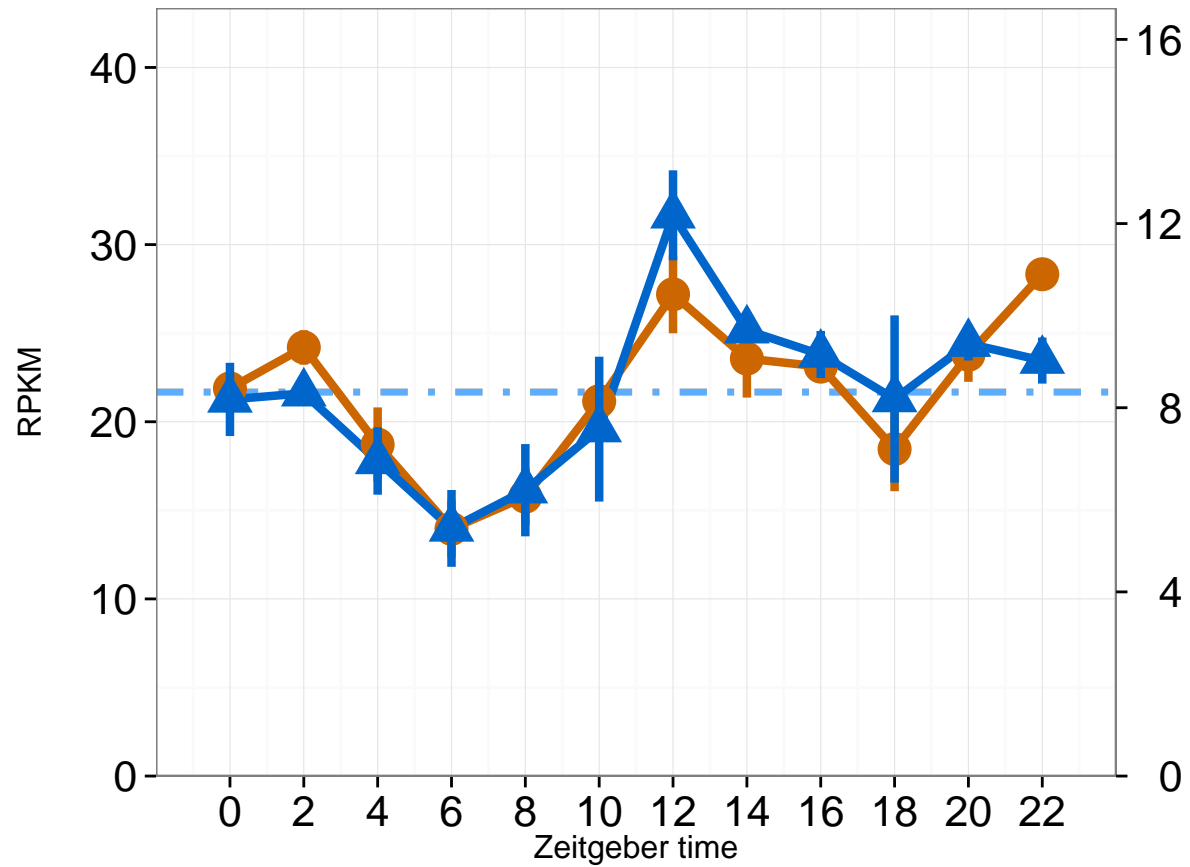

## Rhobtb1

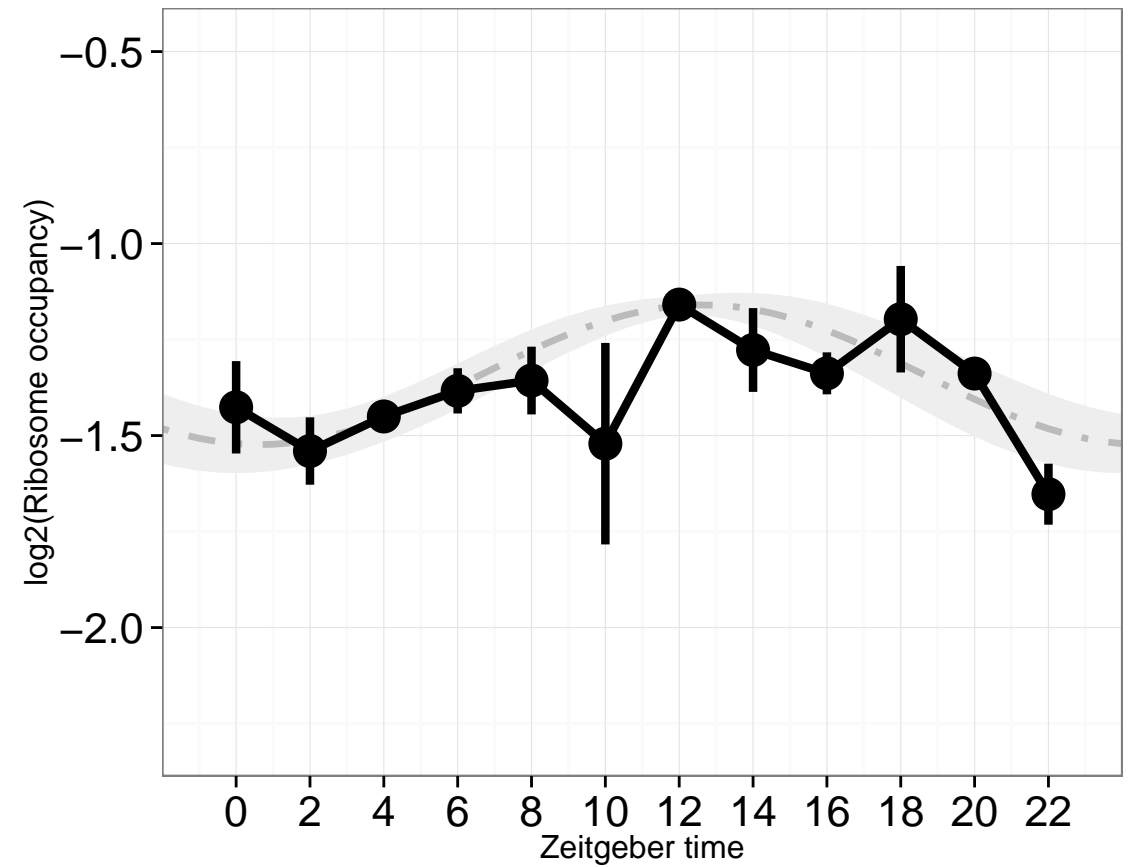

Supplement: SuppDataset_1.zip [file Rhobtb1_set_A.pdf › Supplemental Dataset 1/A-mRNA_nonrhyth_translation_nonrhyth/Rhobtb1_set_A.pdf]

## Rhobtb2

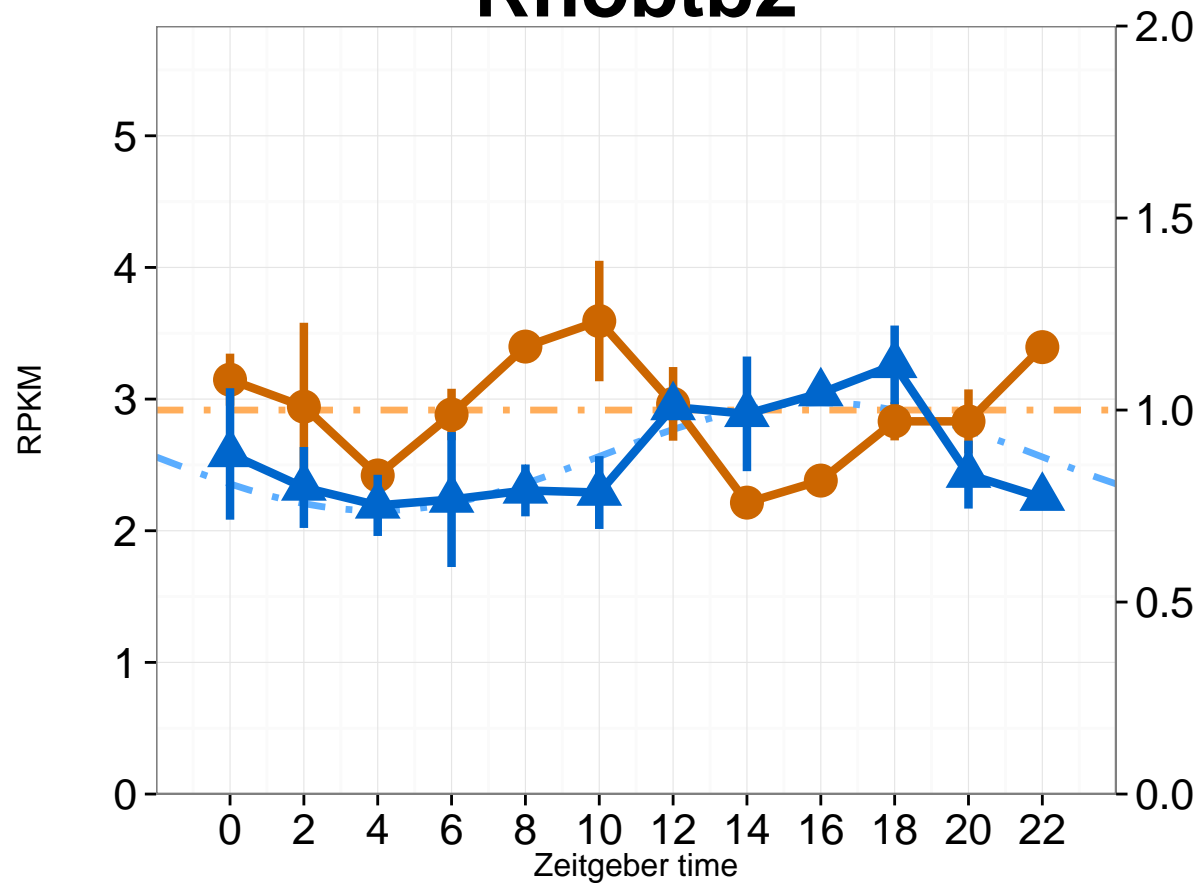

## Rhobtb2

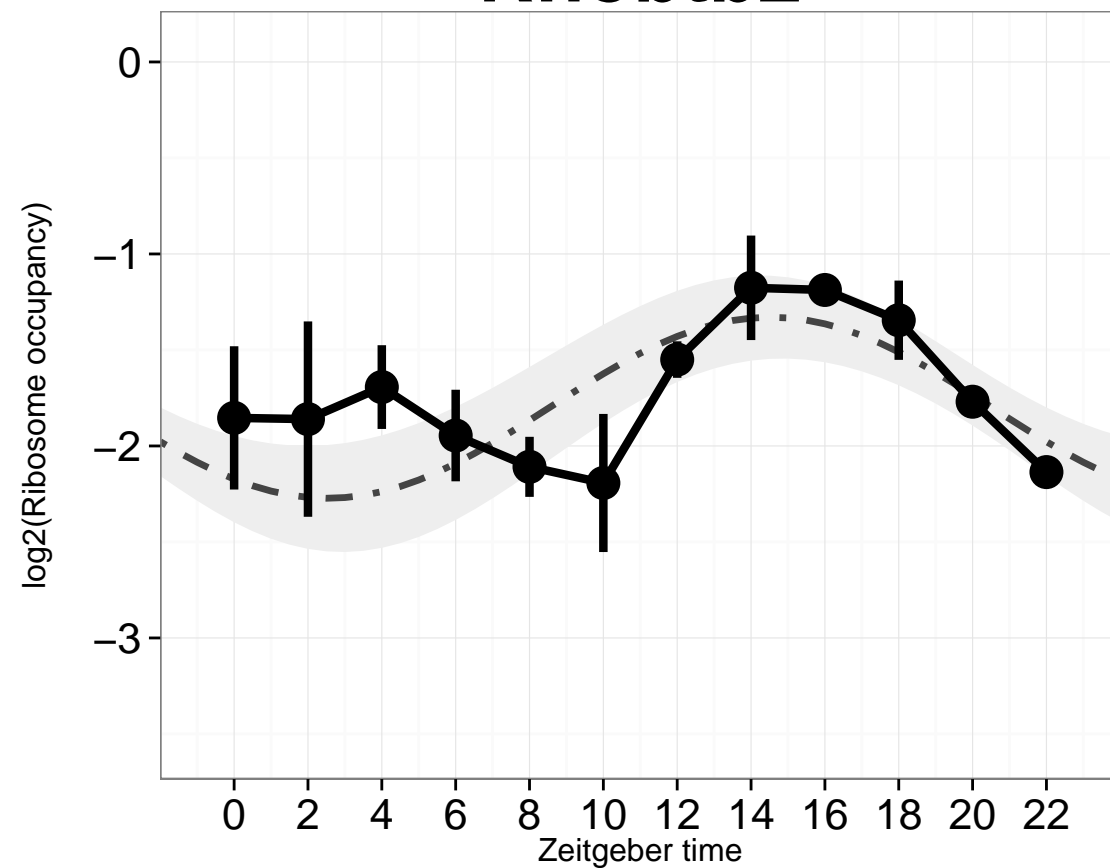

Supplement: SuppDataset_1.zip [file Rhobtb2_set_A.pdf › Supplemental Dataset 1/A-mRNA_nonrhyth_translation_nonrhyth/Rhobtb2_set_A.pdf]

# Rhobtb3

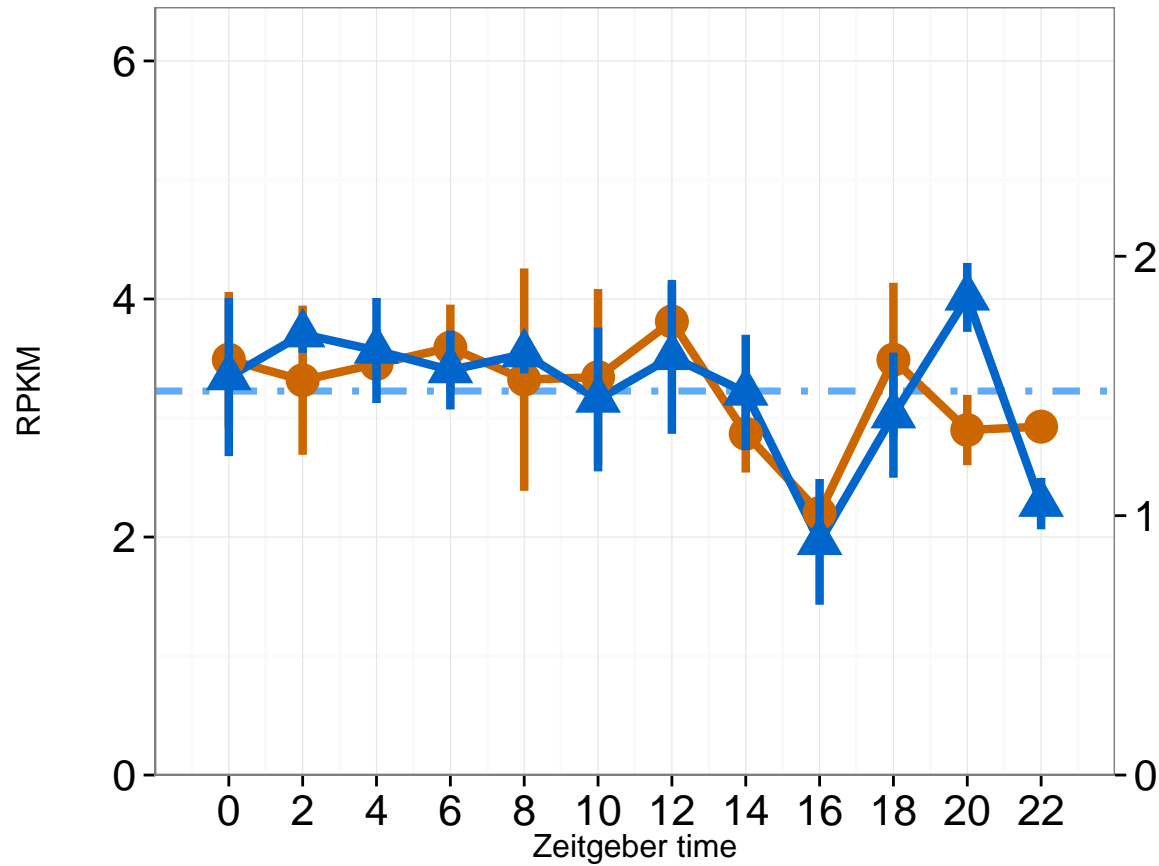

# Rhobtb3

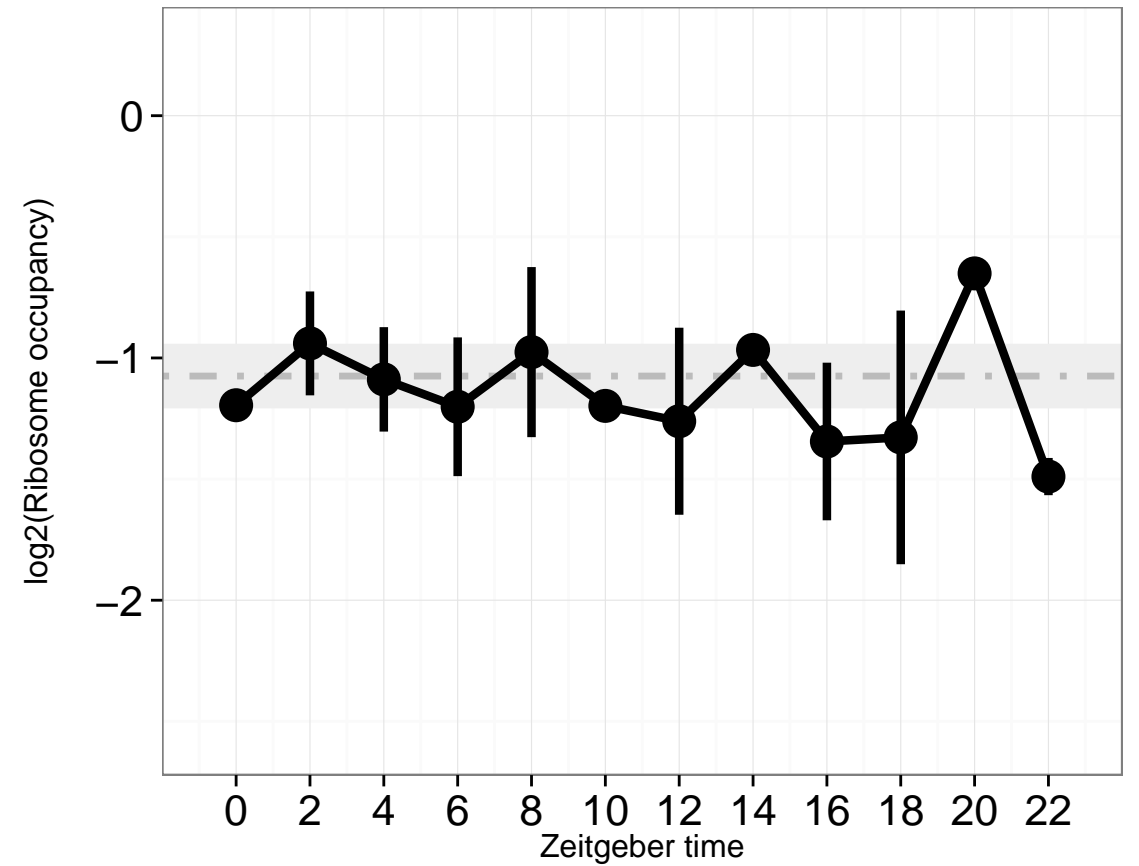

Supplement: SuppDataset_1.zip [file Rhobtb3_set_A.pdf › Supplemental Dataset 1/A-mRNA_nonrhyth_translation_nonrhyth/Rhobtb3_set_A.pdf]

## Rhoc

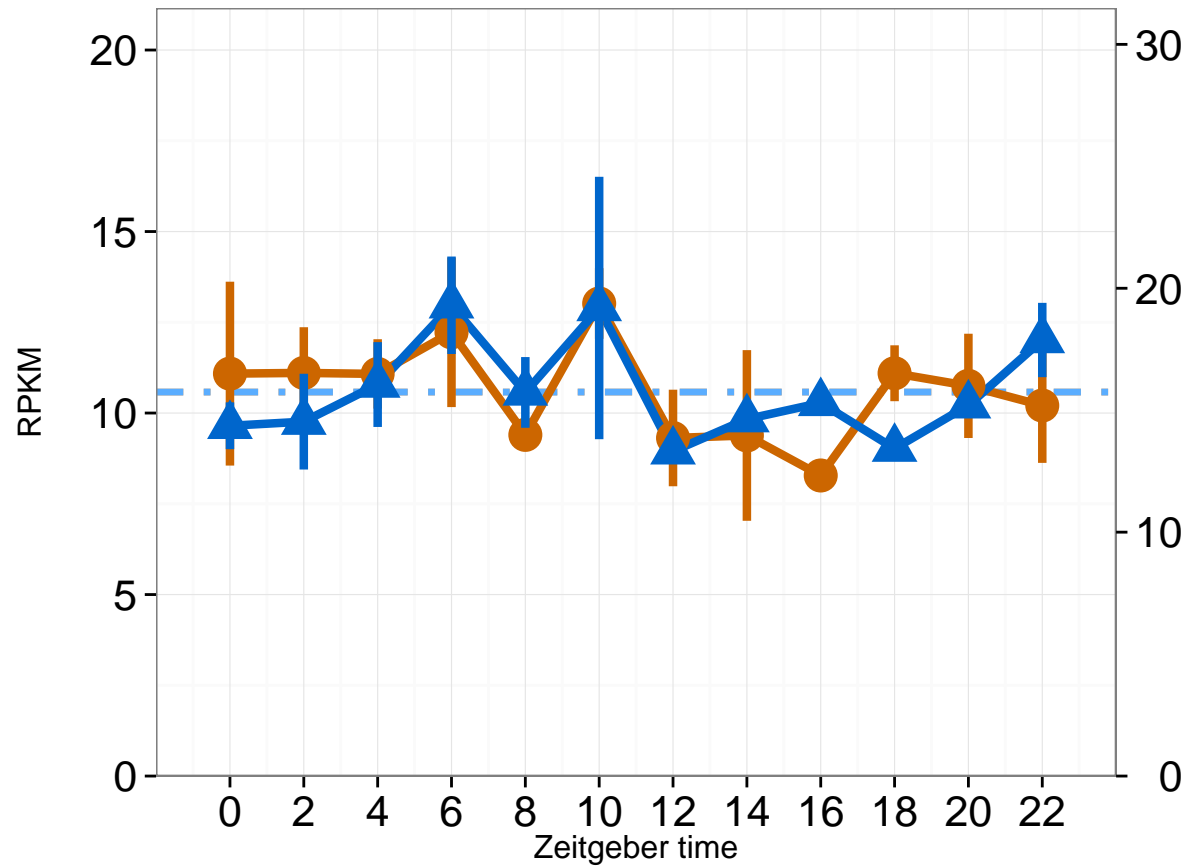

## Rhoc

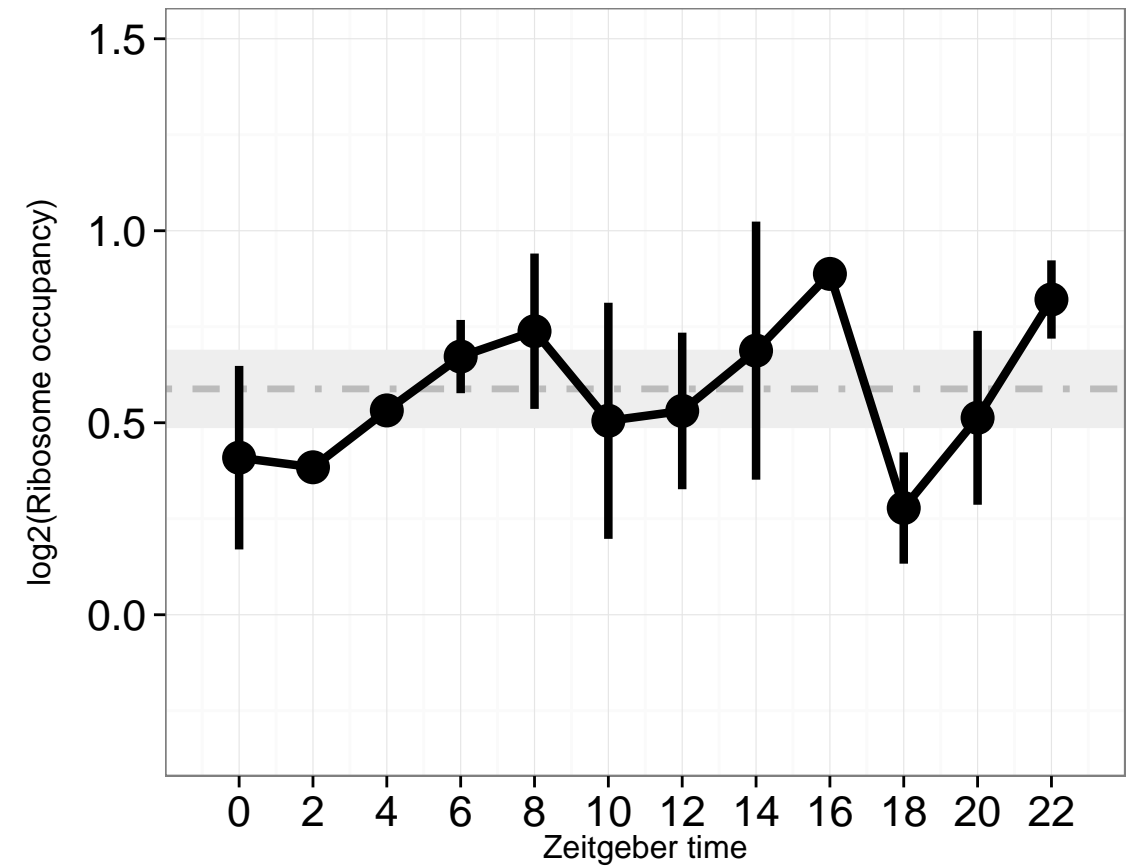

Supplement: SuppDataset_1.zip [file Rhoc_set_A.pdf › Supplemental Dataset 1/A-mRNA_nonrhyth_translation_nonrhyth/Rhoc_set_A.pdf]

## Rhog

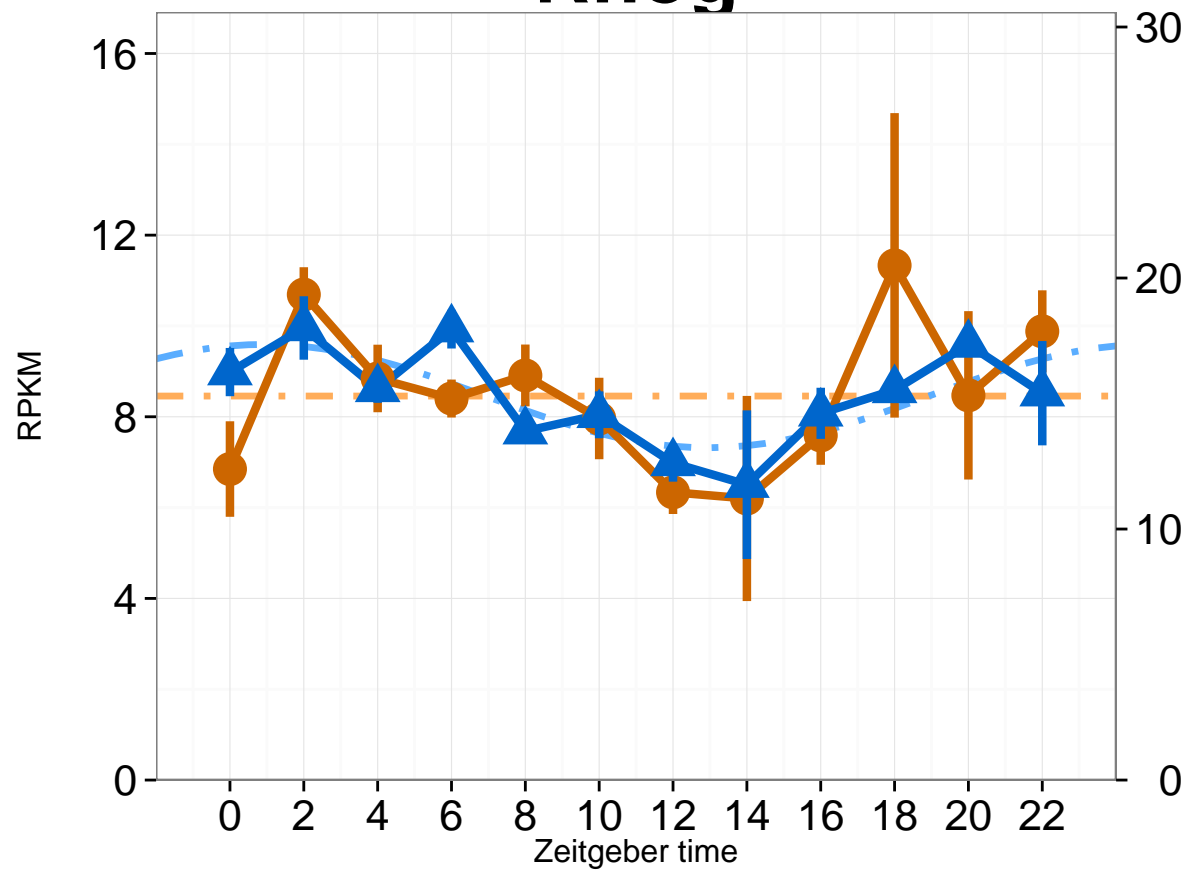

## Rhog

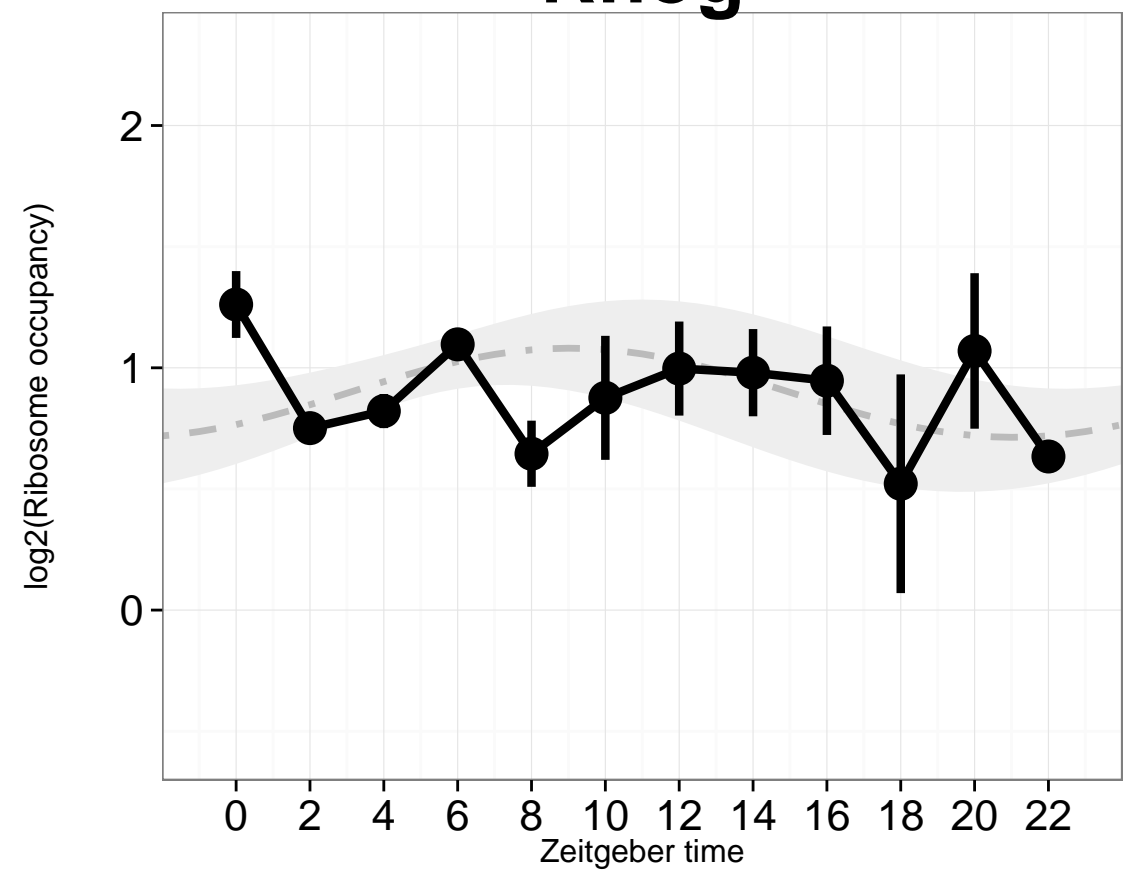

Supplement: SuppDataset_1.zip [file Rhog_set_A.pdf › Supplemental Dataset 1/A-mRNA_nonrhyth_translation_nonrhyth/Rhog_set_A.pdf]

## Rhoj

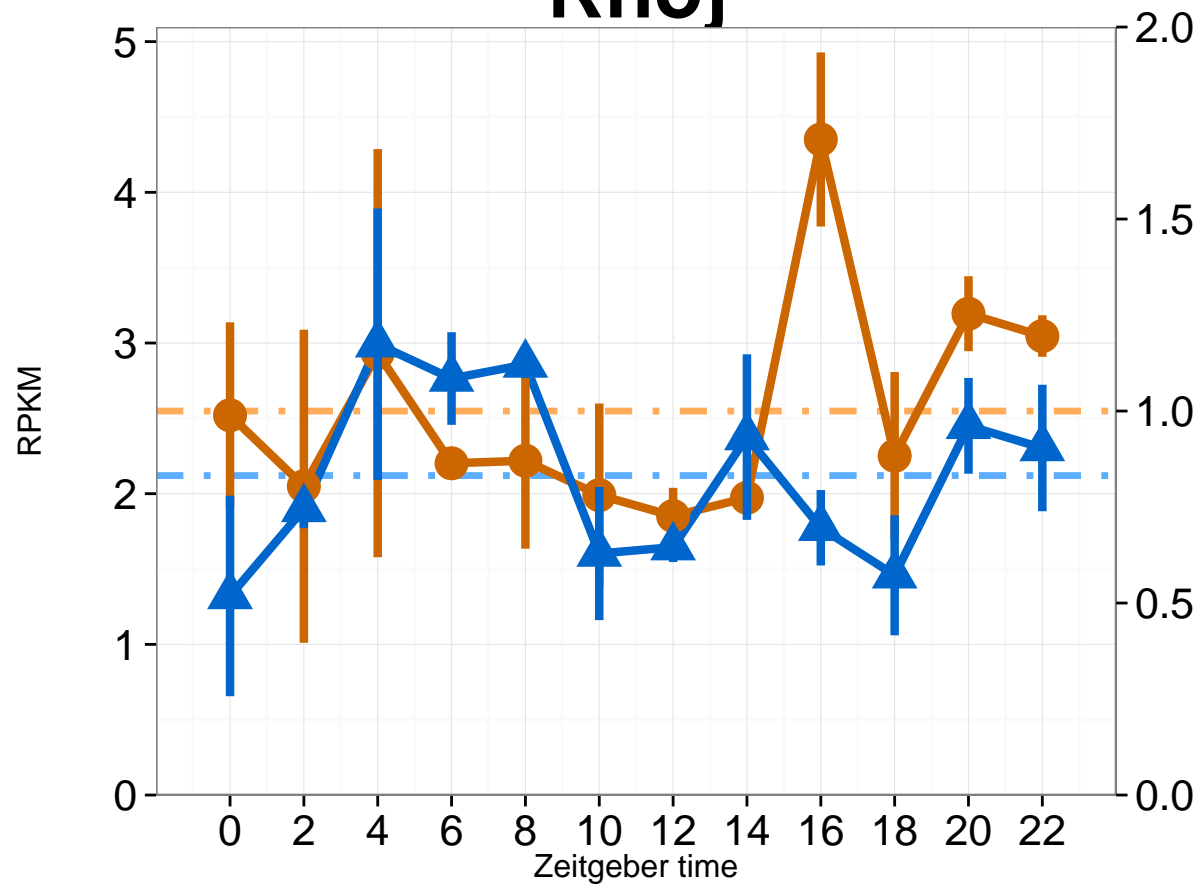

## Rhoj

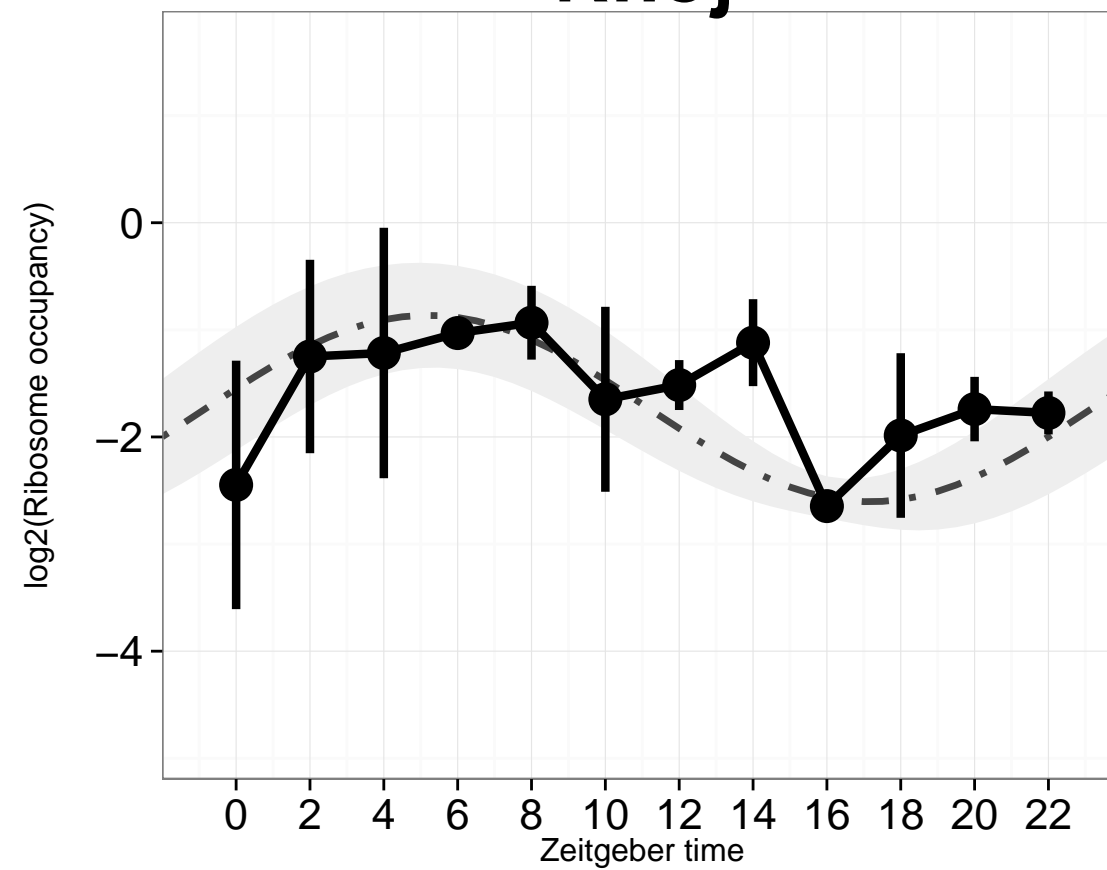

Supplement: SuppDataset_1.zip [file Rhoj_set_A.pdf › Supplemental Dataset 1/A-mRNA_nonrhyth_translation_nonrhyth/Rhoj_set_A.pdf]

## Rhoq

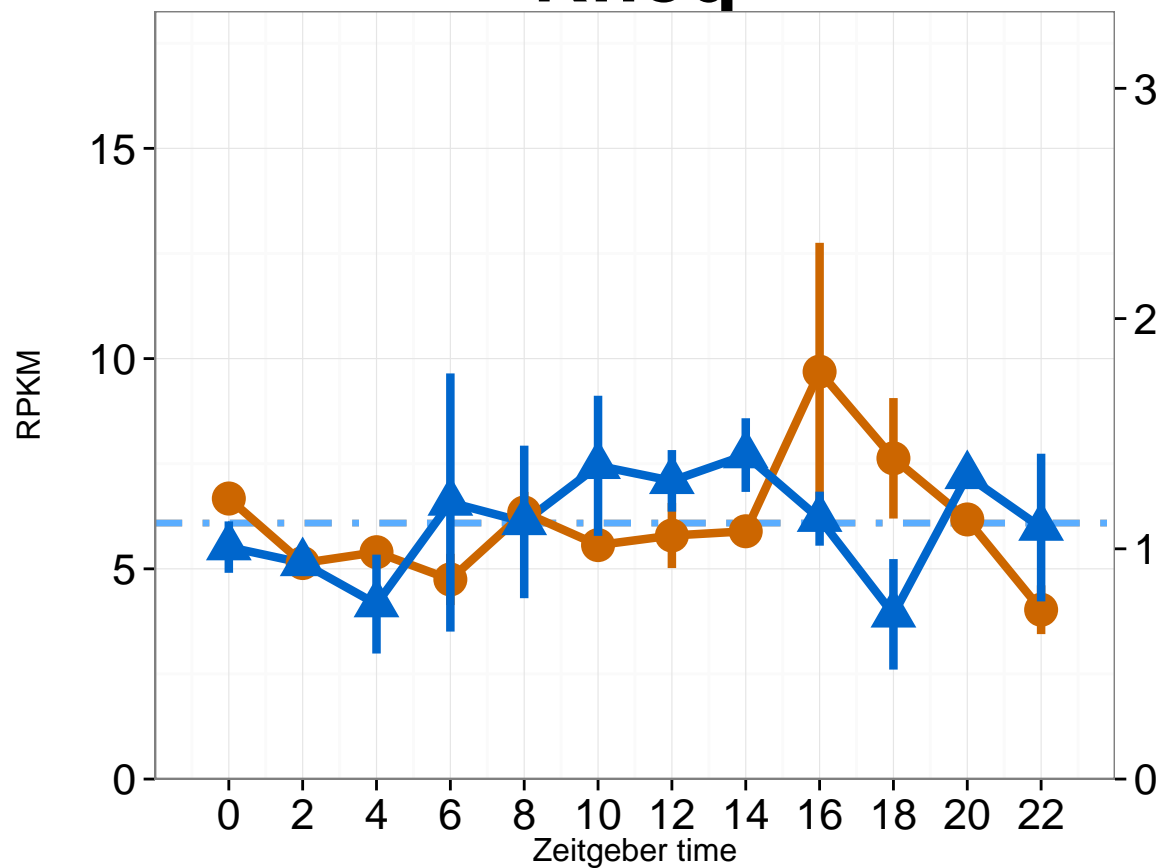

## Rhoq

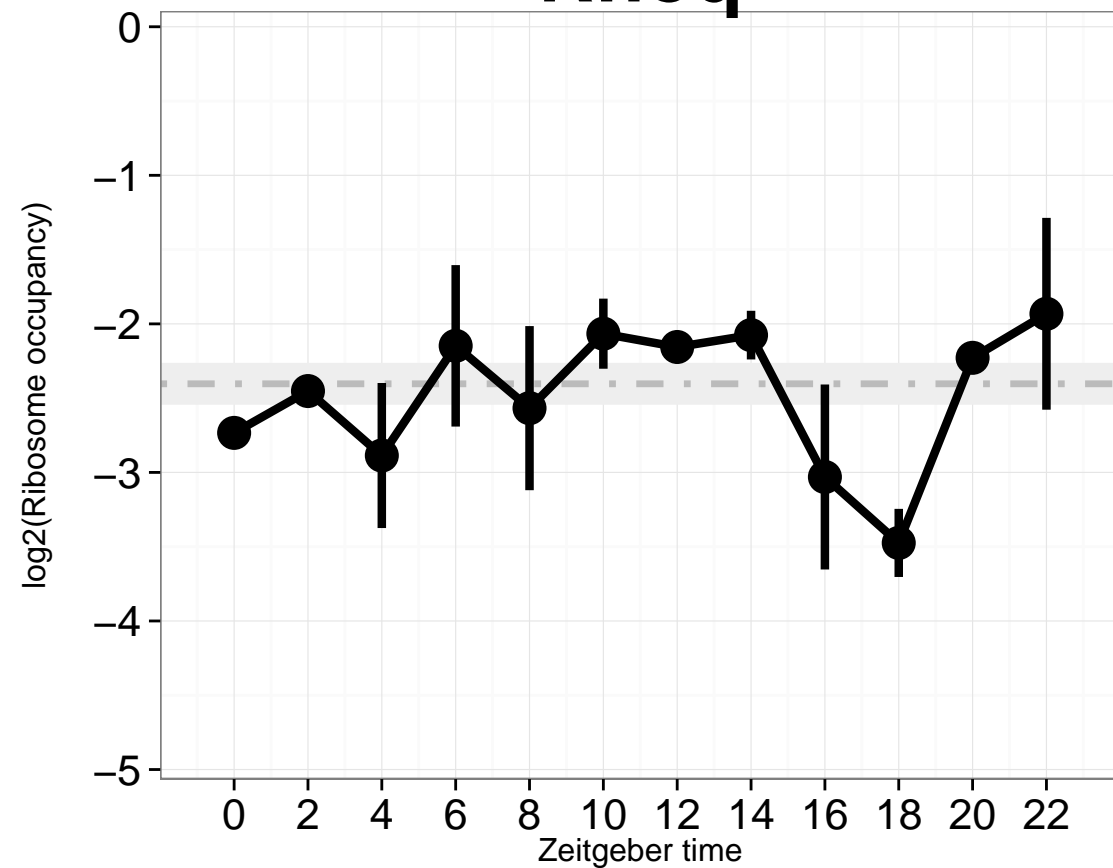

Supplement: SuppDataset_1.zip [file Rhoq_set_A.pdf › Supplemental Dataset 1/A-mRNA_nonrhyth_translation_nonrhyth/Rhoq_set_A.pdf]

# Rhot1

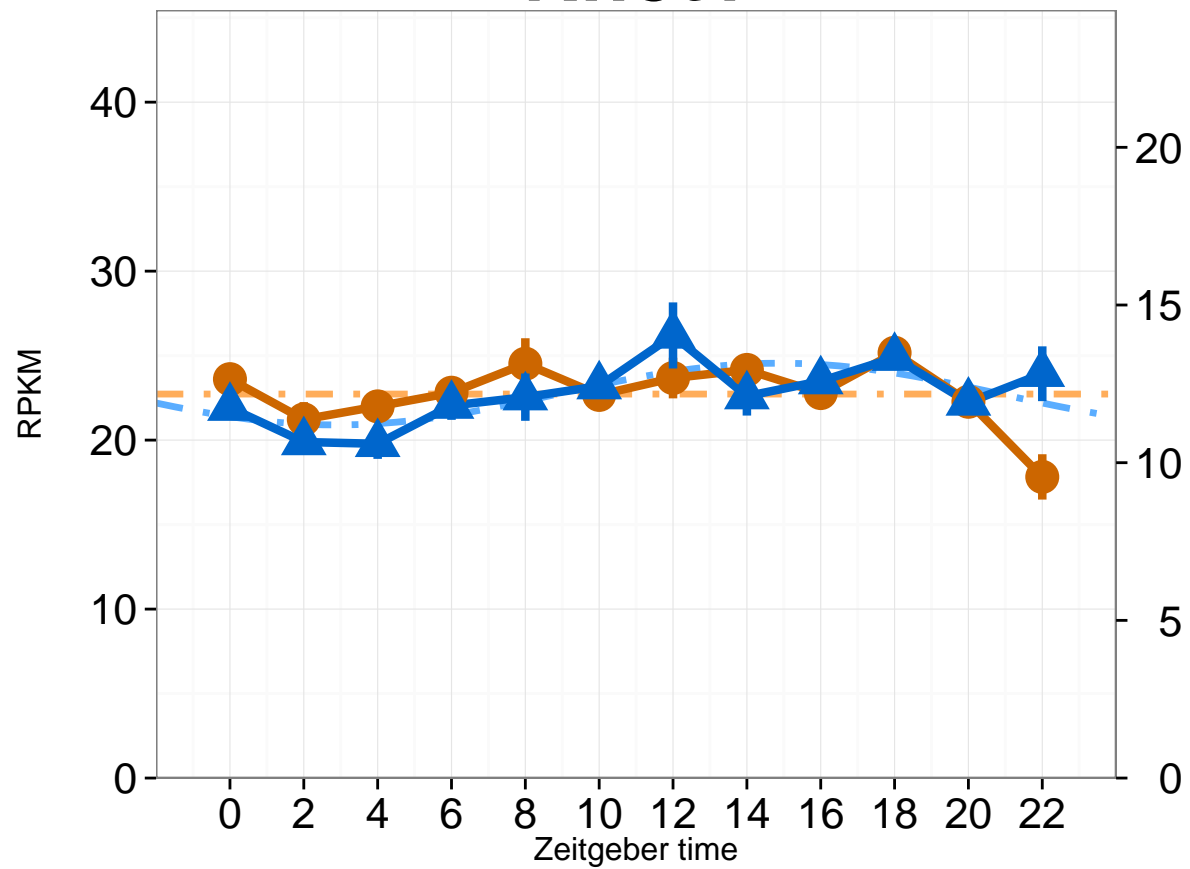

# Rhot1

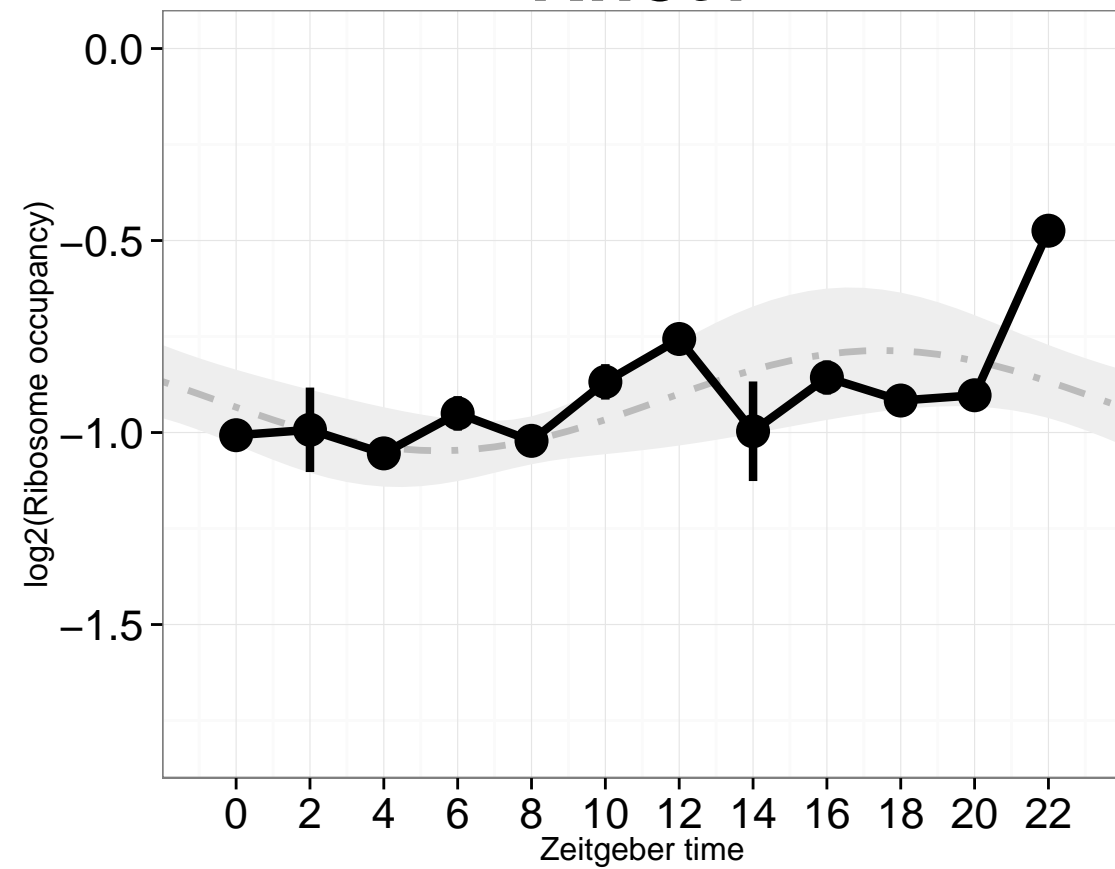

Supplement: SuppDataset_1.zip [file Rhot1_set_A.pdf › Supplemental Dataset 1/A-mRNA_nonrhyth_translation_nonrhyth/Rhot1_set_A.pdf]

## Rhot2

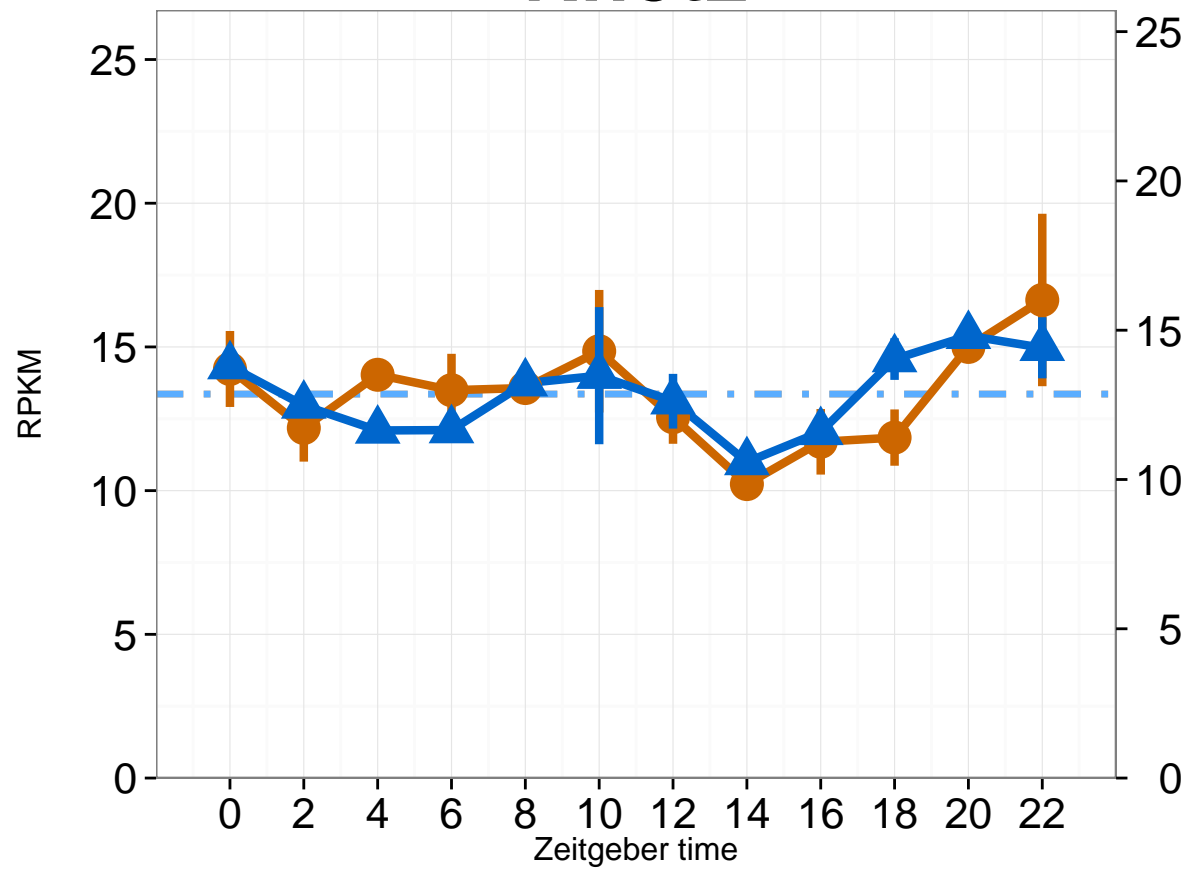

## Rhot2

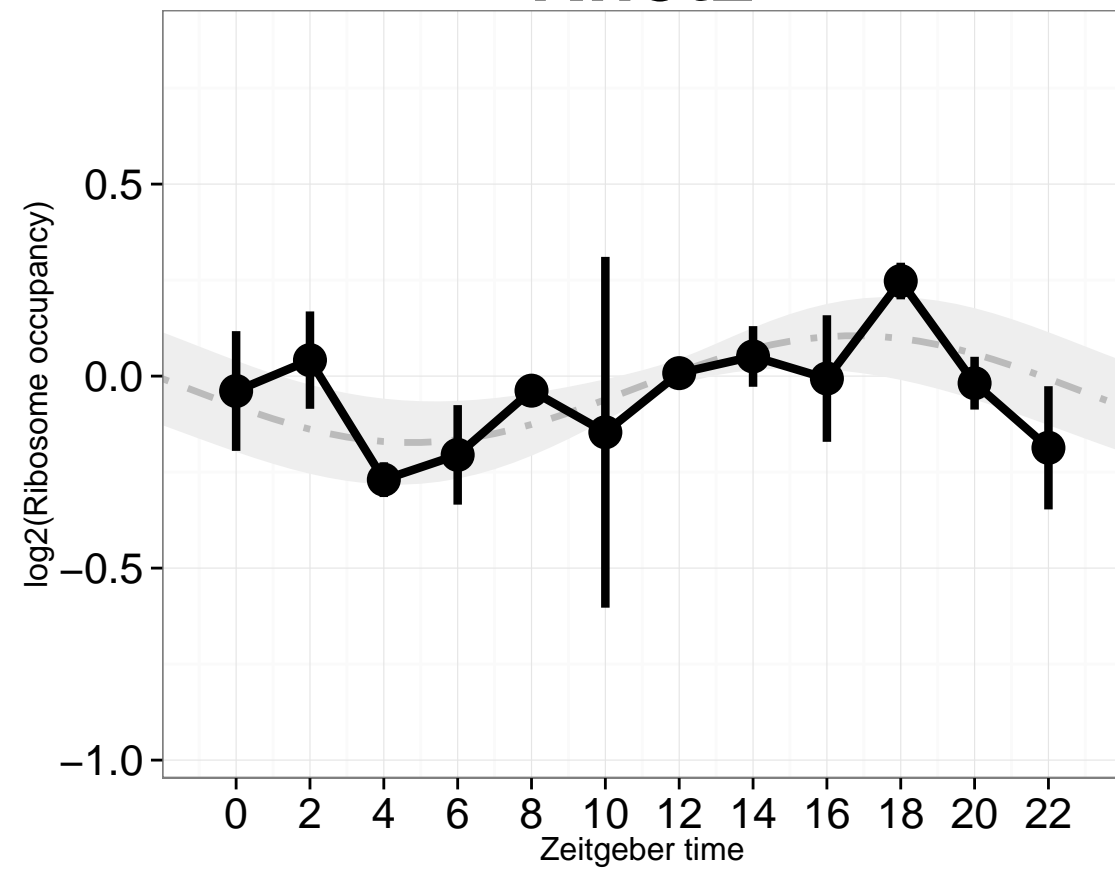

Supplement: SuppDataset_1.zip [file Rhot2_set_A.pdf › Supplemental Dataset 1/A-mRNA_nonrhyth_translation_nonrhyth/Rhot2_set_A.pdf]

## Rhpn2

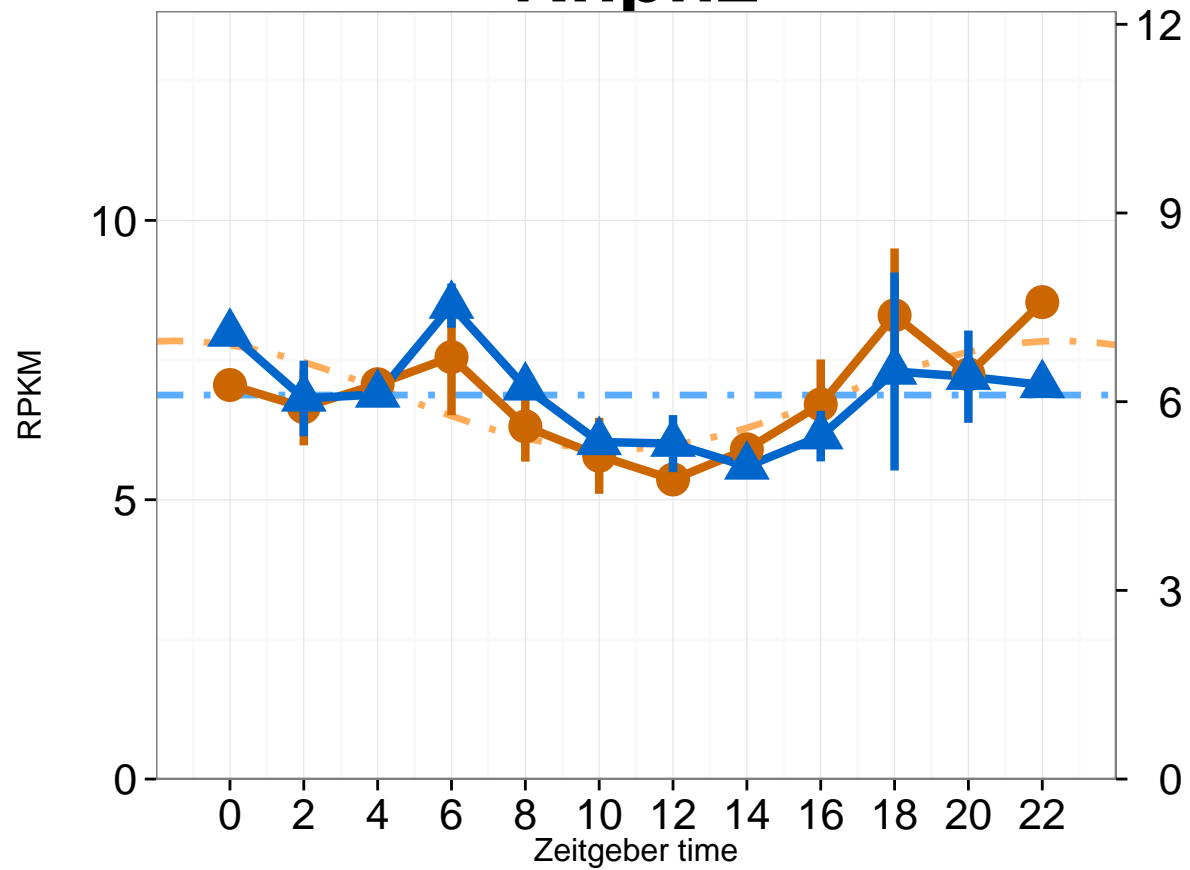

## Rhpn2

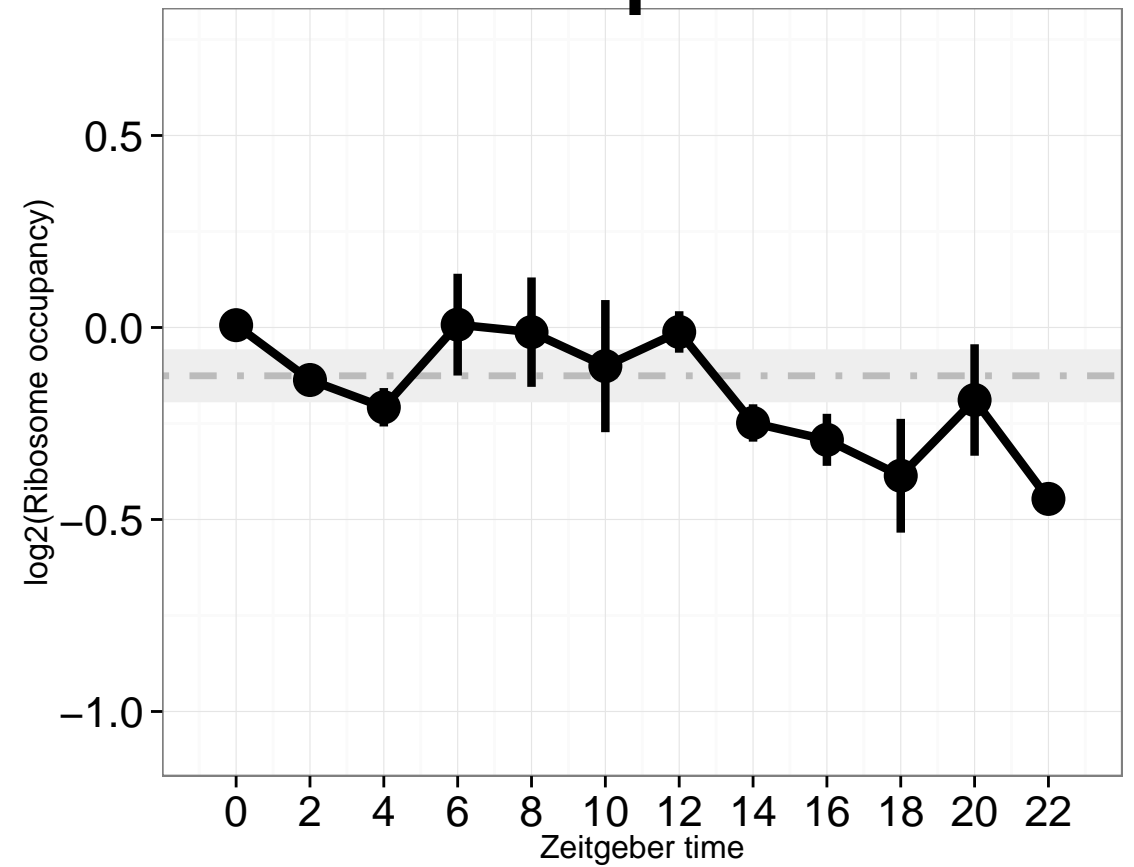

Supplement: SuppDataset_1.zip [file Rhpn2_set_A.pdf › Supplemental Dataset 1/A-mRNA_nonrhyth_translation_nonrhyth/Rhpn2_set_A.pdf]

# Ribc1

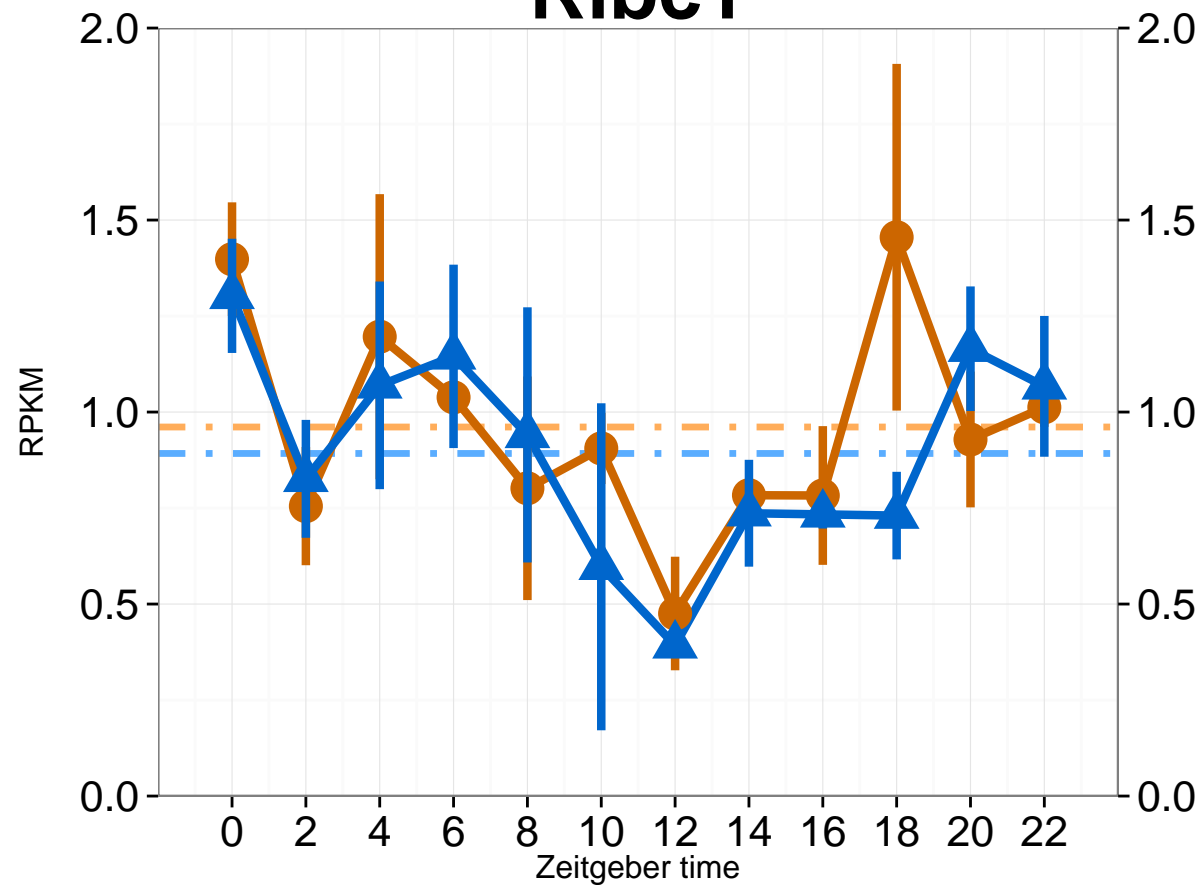

# Ribc1

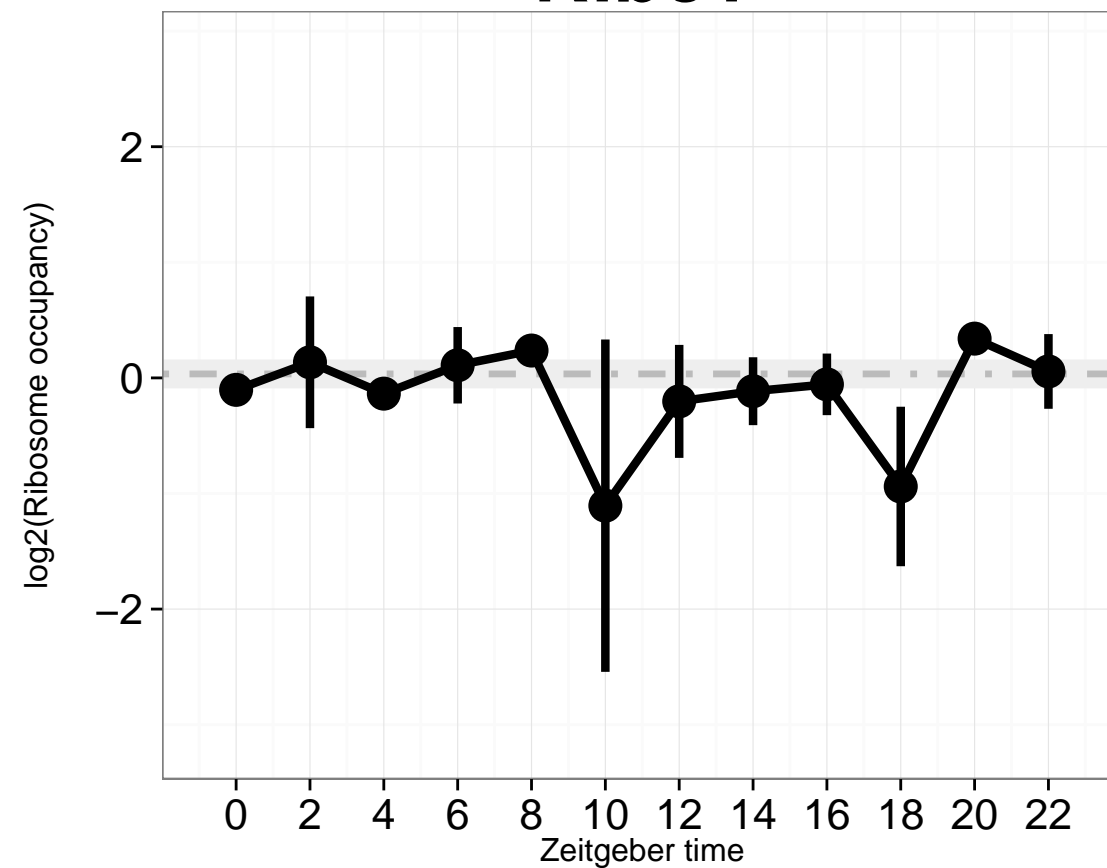

Supplement: SuppDataset_1.zip [file Ribc1_set_A.pdf › Supplemental Dataset 1/A-mRNA_nonrhyth_translation_nonrhyth/Ribc1_set_A.pdf]

## Ric8

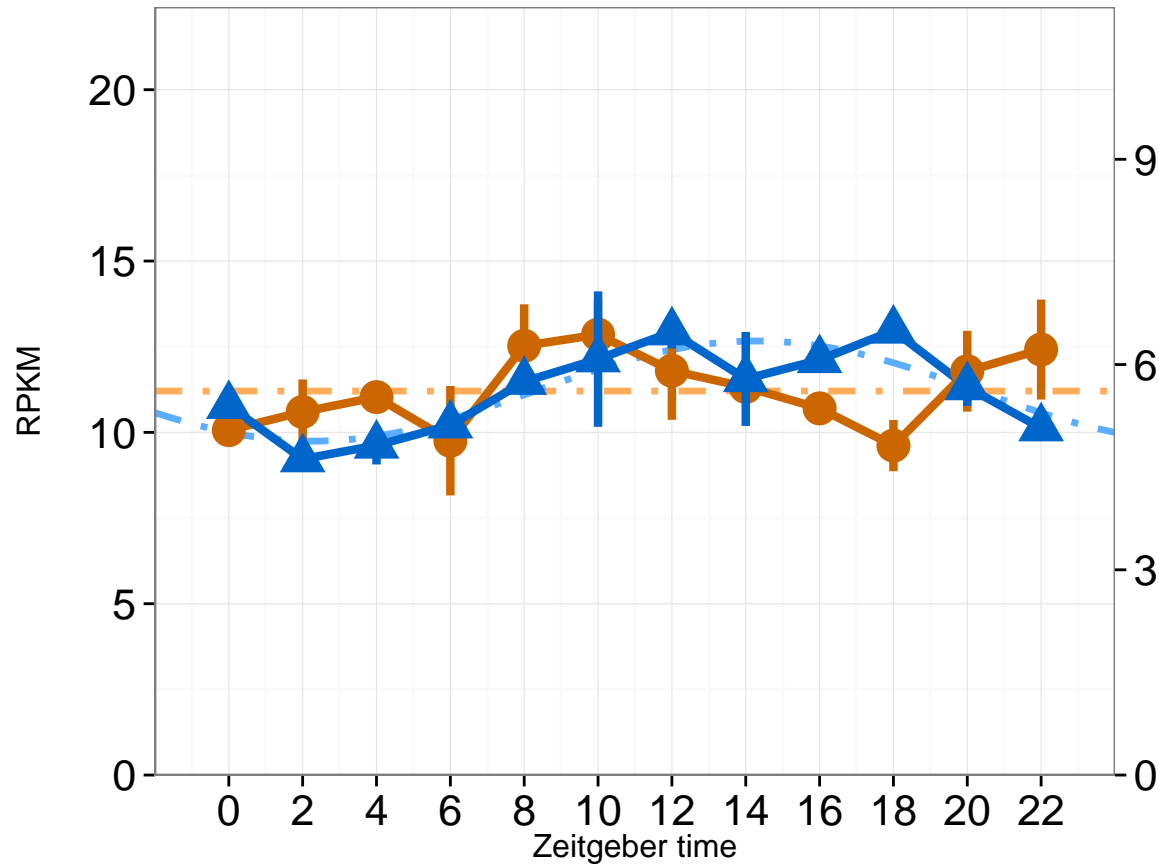

## Ric8

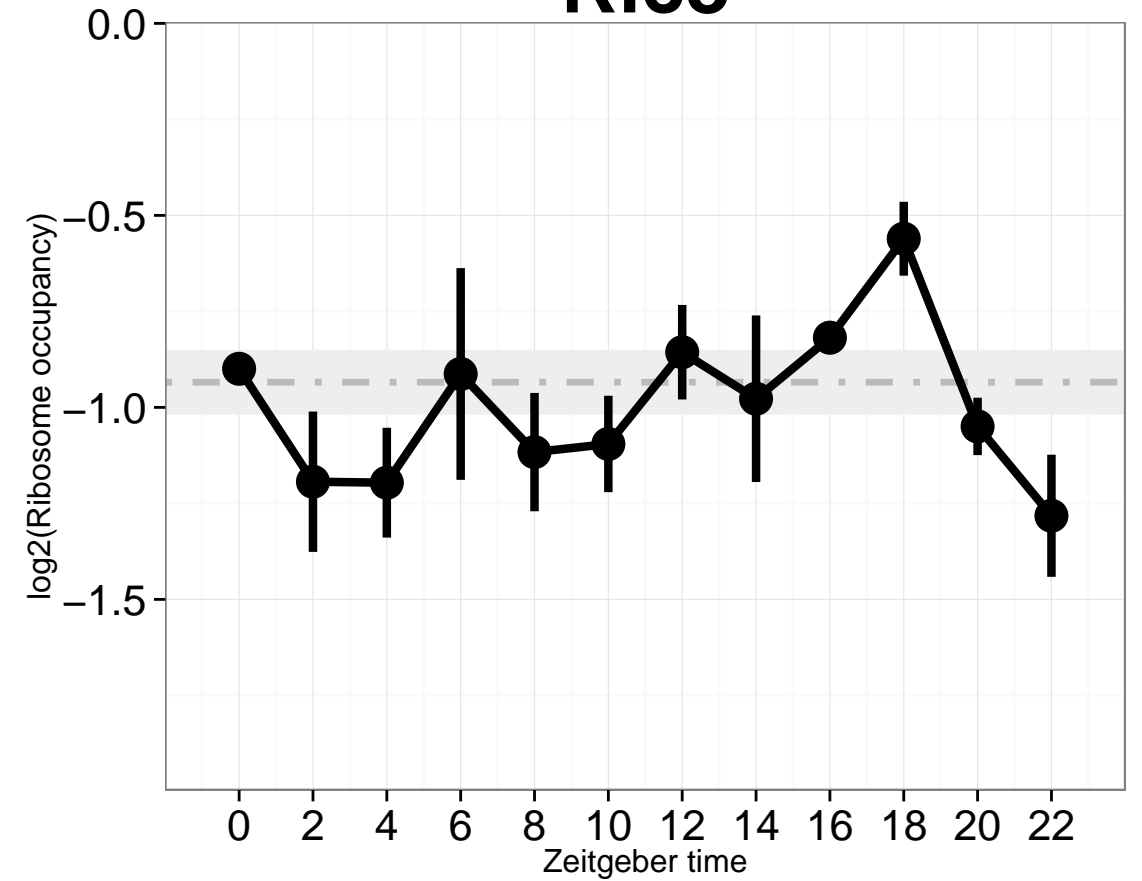

Supplement: SuppDataset_1.zip [file Ric8_set_A.pdf › Supplemental Dataset 1/A-mRNA_nonrhyth_translation_nonrhyth/Ric8_set_A.pdf]

# Ric8b

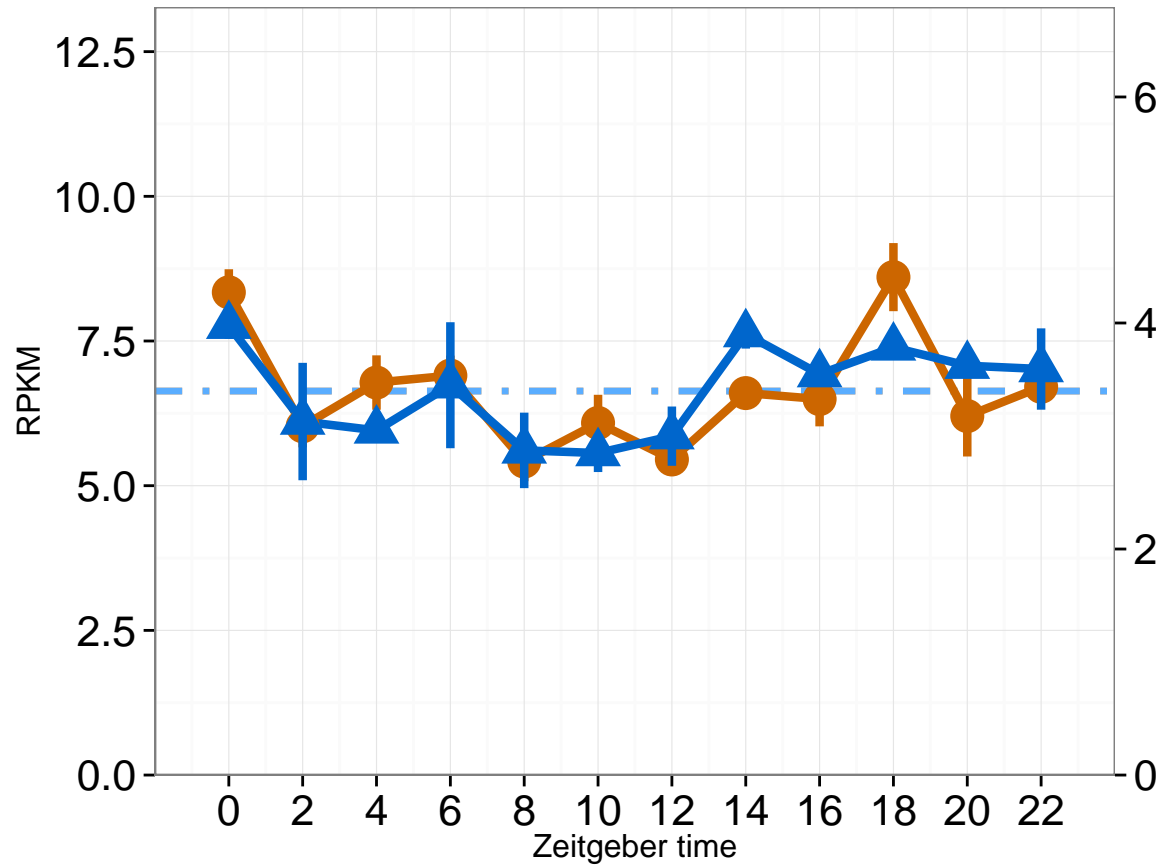

# Ric8b

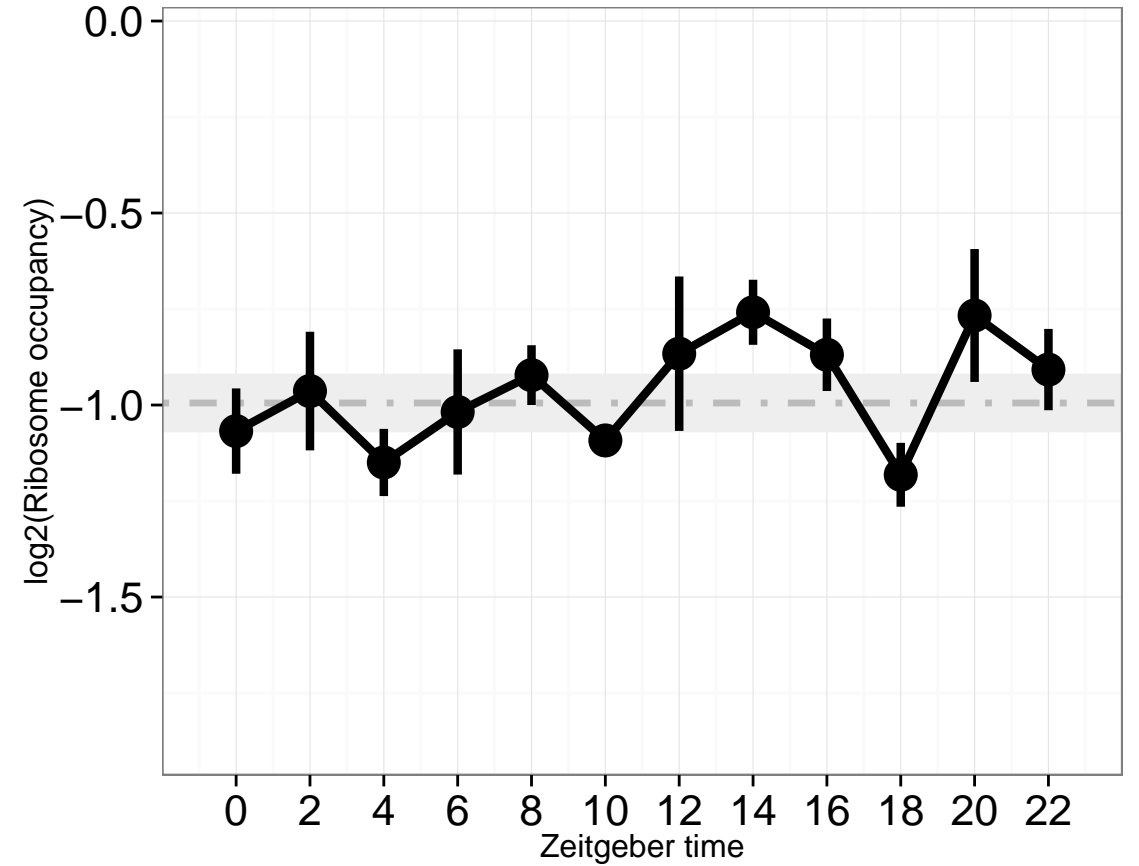

Supplement: SuppDataset_1.zip [file Ric8b_set_A.pdf › Supplemental Dataset 1/A-mRNA_nonrhyth_translation_nonrhyth/Ric8b_set_A.pdf]

## Rif1

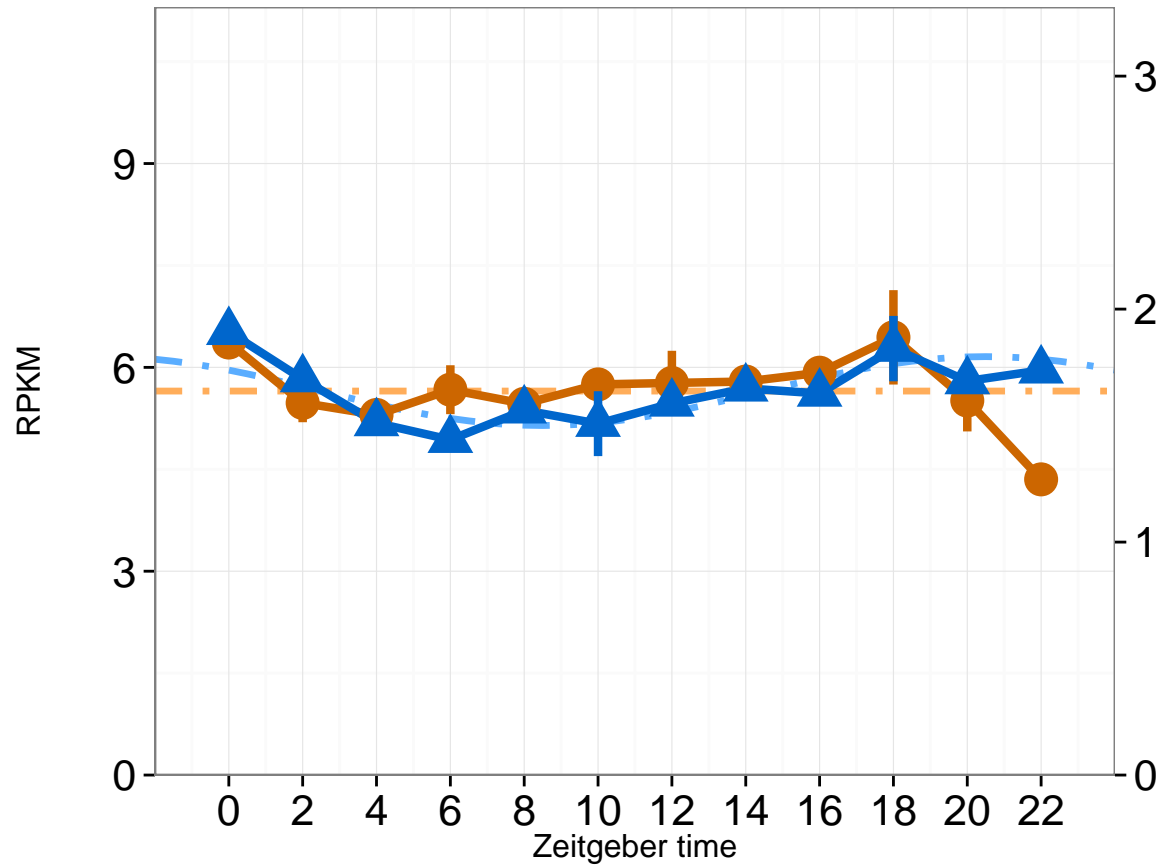

## Rif1

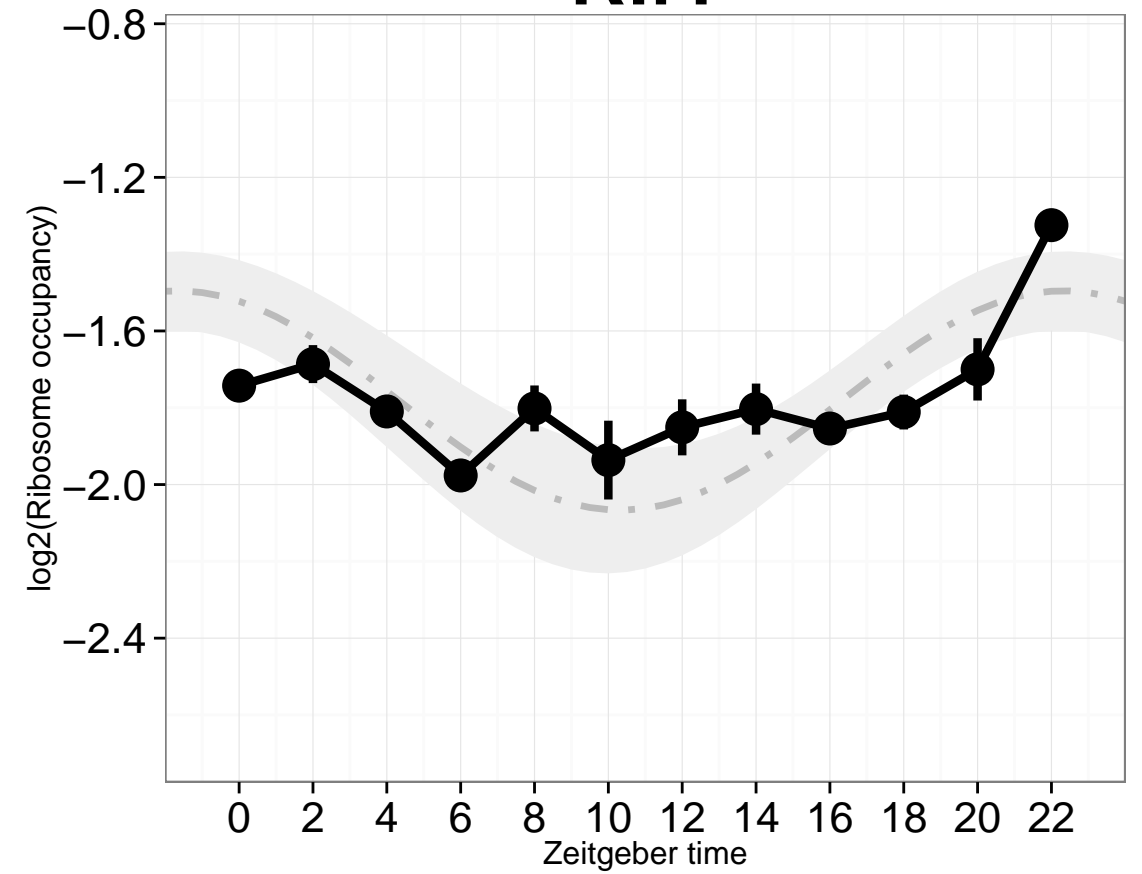

Supplement: SuppDataset_1.zip [file Rif1_set_A.pdf › Supplemental Dataset 1/A-mRNA_nonrhyth_translation_nonrhyth/Rif1_set_A.pdf]

## Rilpl1

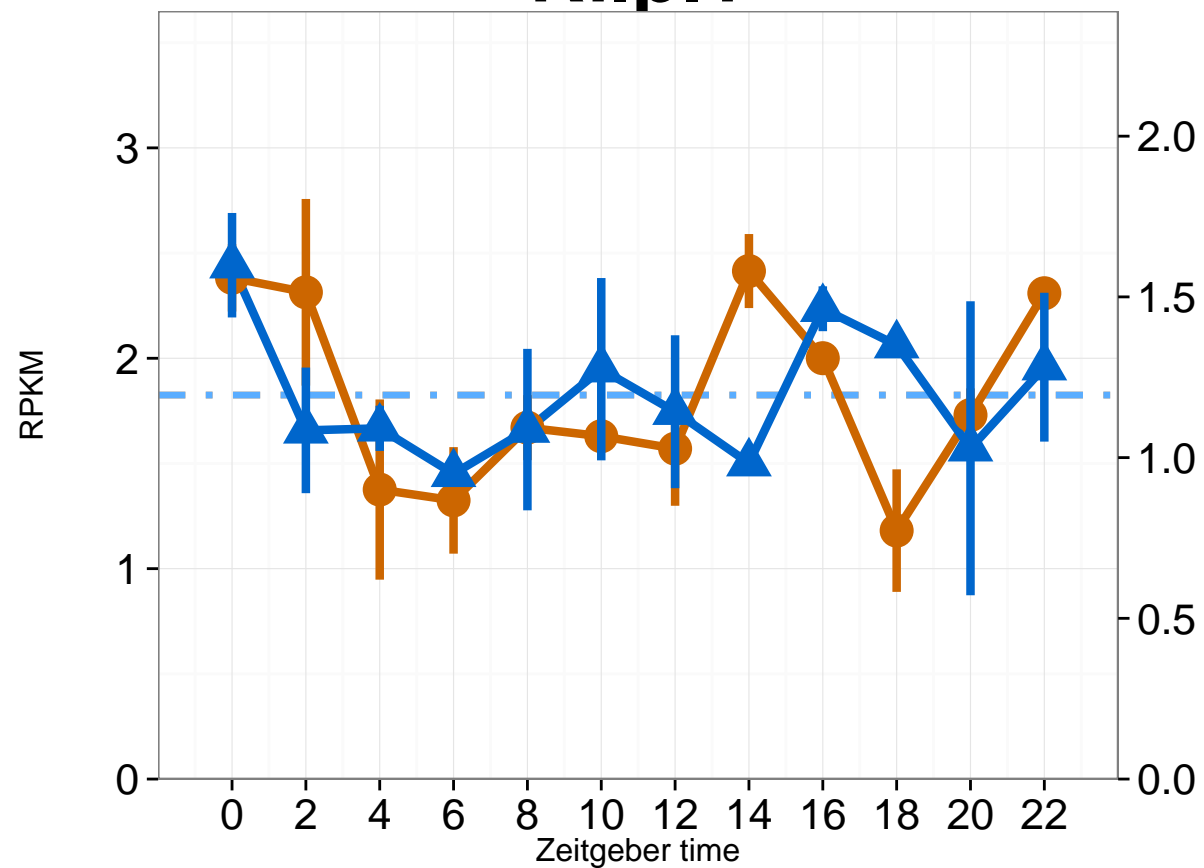

## Rilpl1

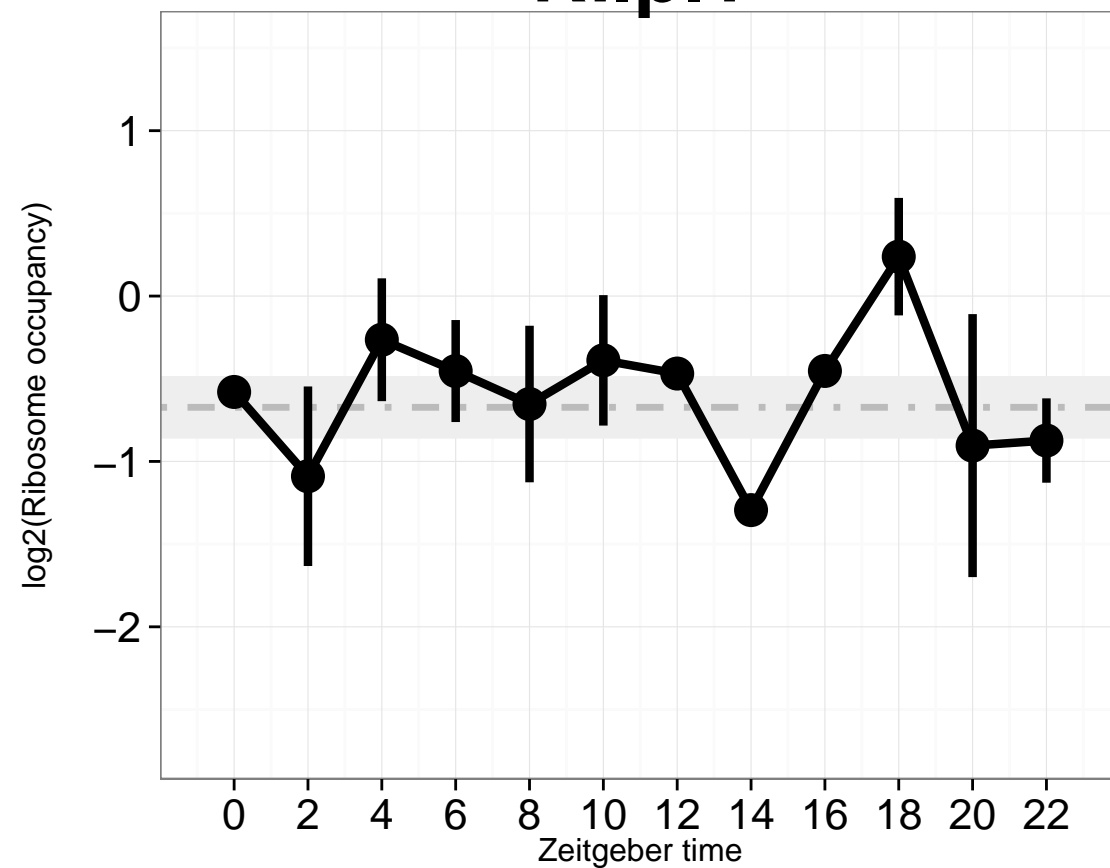

Supplement: SuppDataset_1.zip [file Rilpl1_set_A.pdf › Supplemental Dataset 1/A-mRNA_nonrhyth_translation_nonrhyth/Rilpl1_set_A.pdf]

# Rilpl2

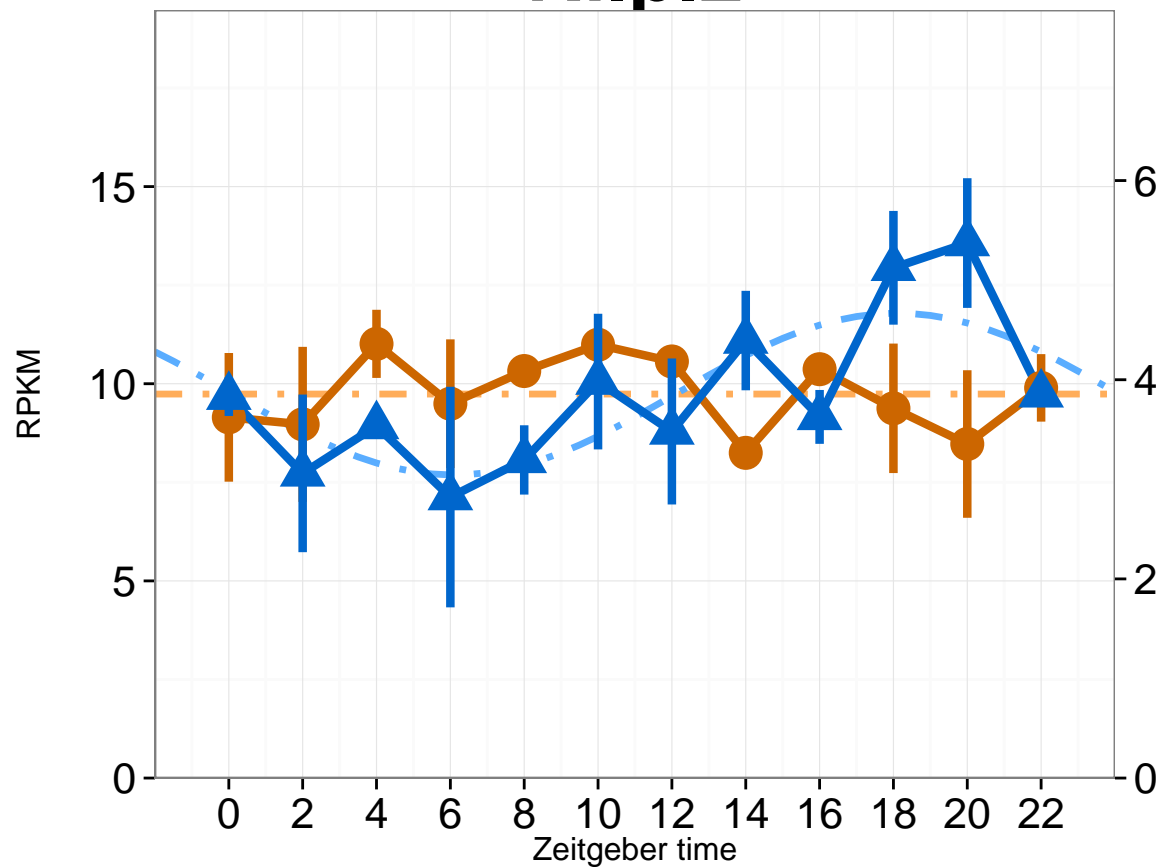

# Rilpl2

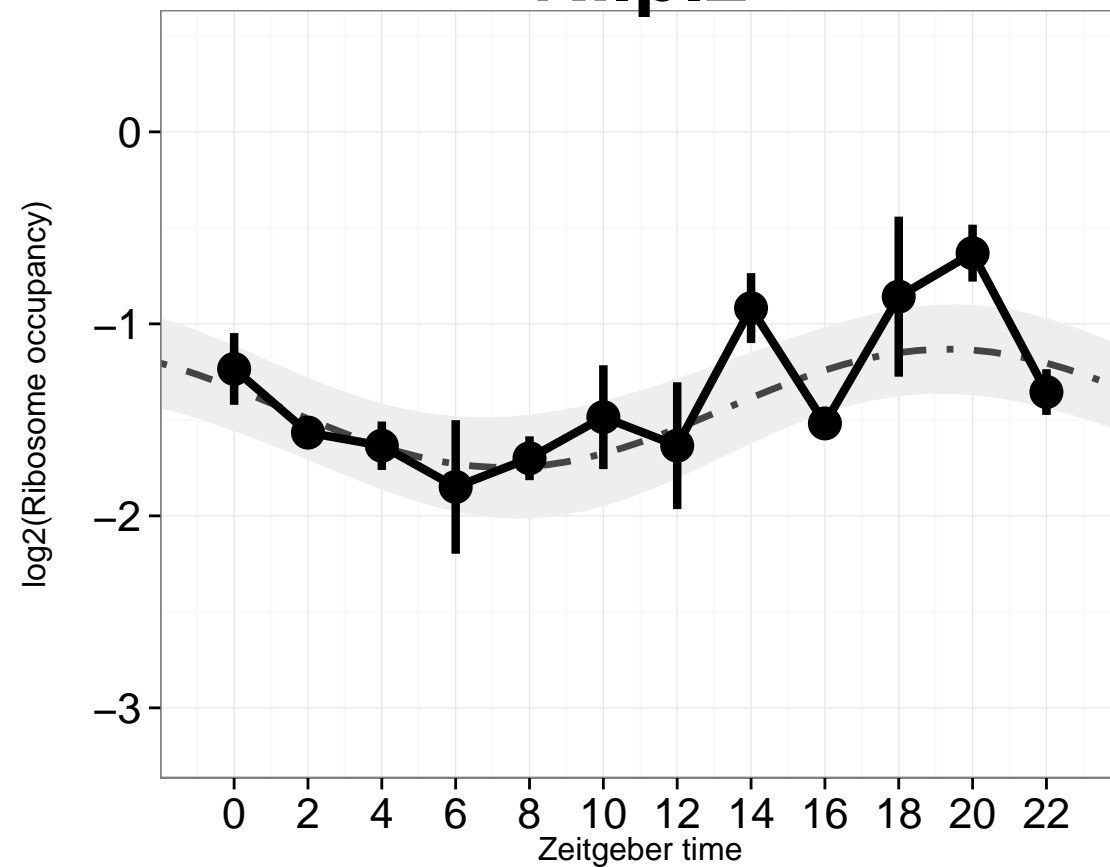

Supplement: SuppDataset_1.zip [file Rilpl2_set_A.pdf › Supplemental Dataset 1/A-mRNA_nonrhyth_translation_nonrhyth/Rilpl2_set_A.pdf]

## Rin2

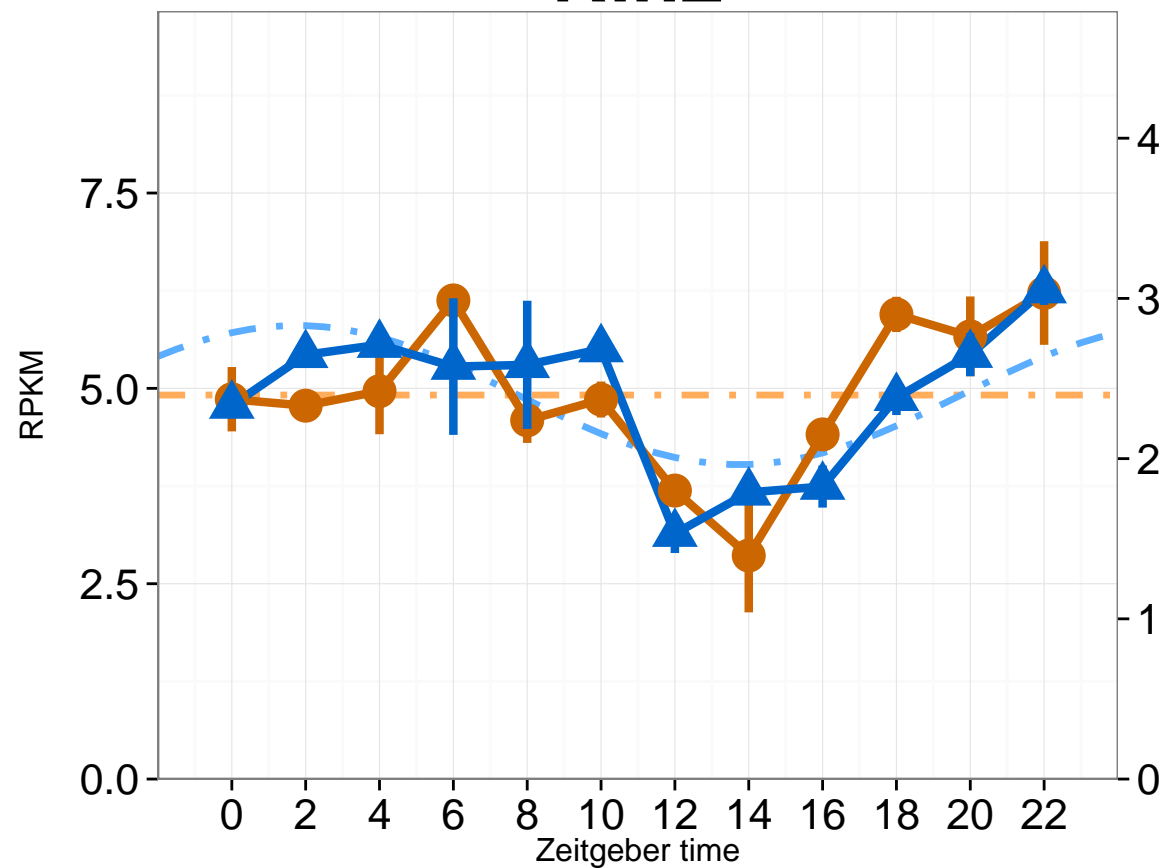

## Rin2

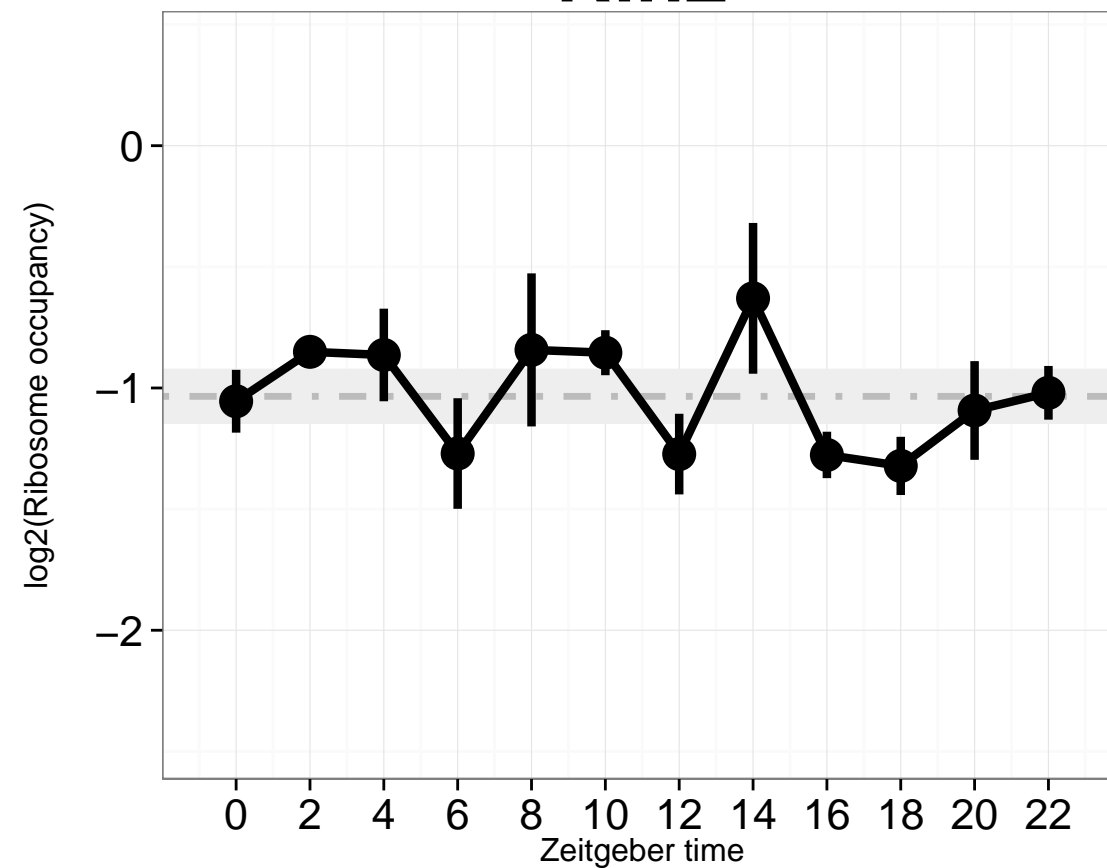

Supplement: SuppDataset_1.zip [file Rin2_set_A.pdf › Supplemental Dataset 1/A-mRNA_nonrhyth_translation_nonrhyth/Rin2_set_A.pdf]

## Rin3

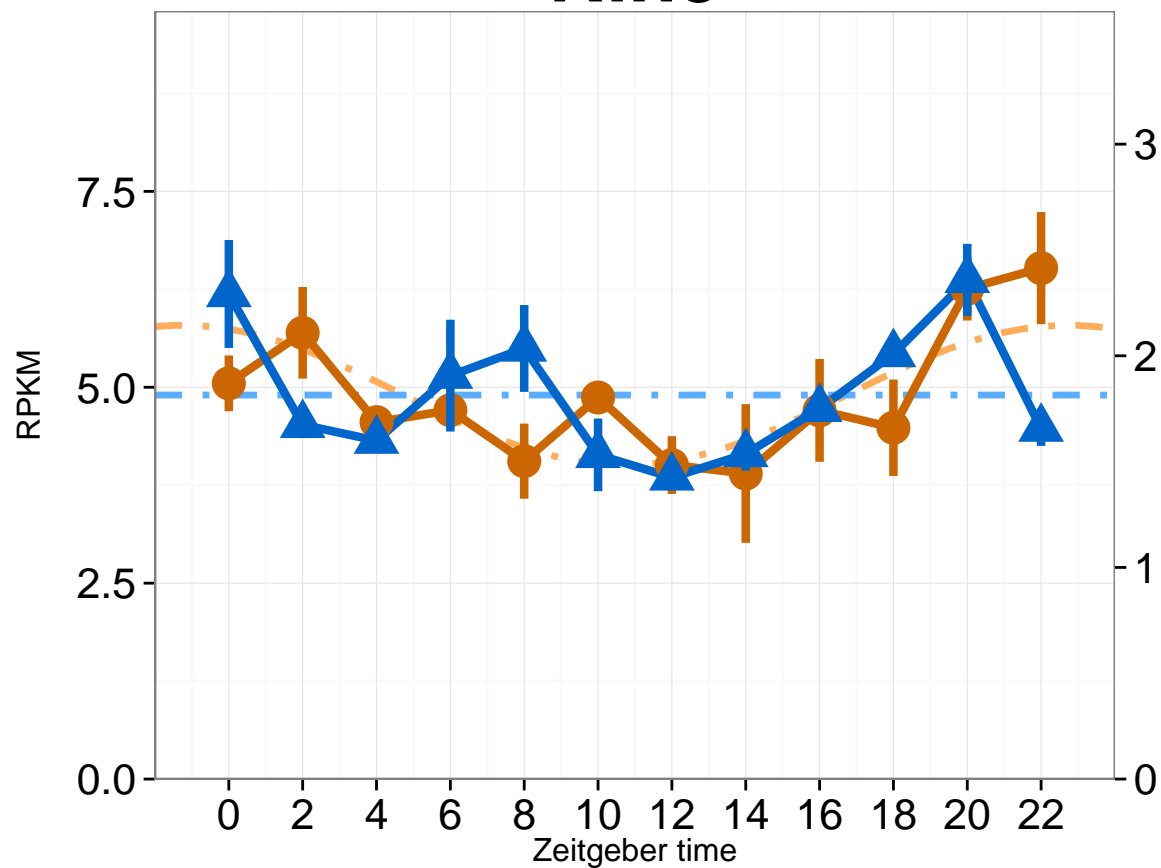

## Rin3

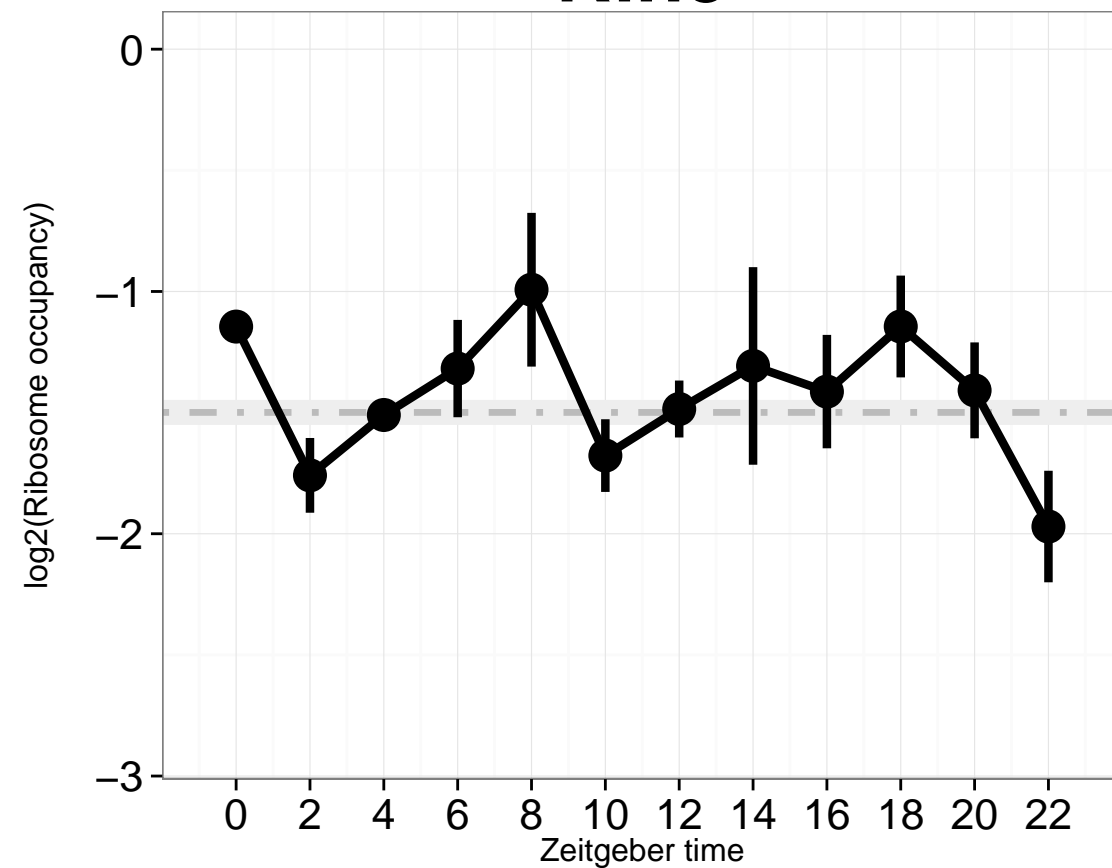

Supplement: SuppDataset_1.zip [file Rin3_set_A.pdf › Supplemental Dataset 1/A-mRNA_nonrhyth_translation_nonrhyth/Rin3_set_A.pdf]

# RinI

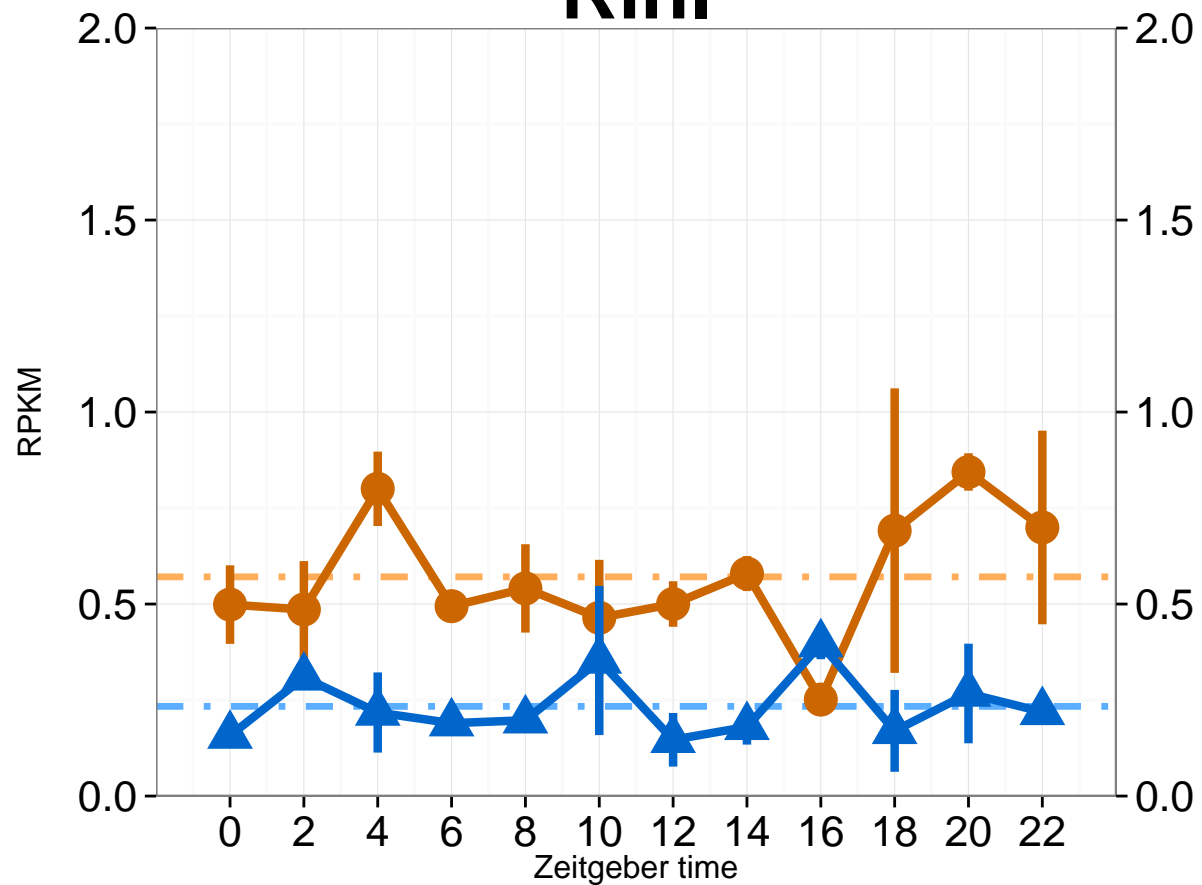

# RinI

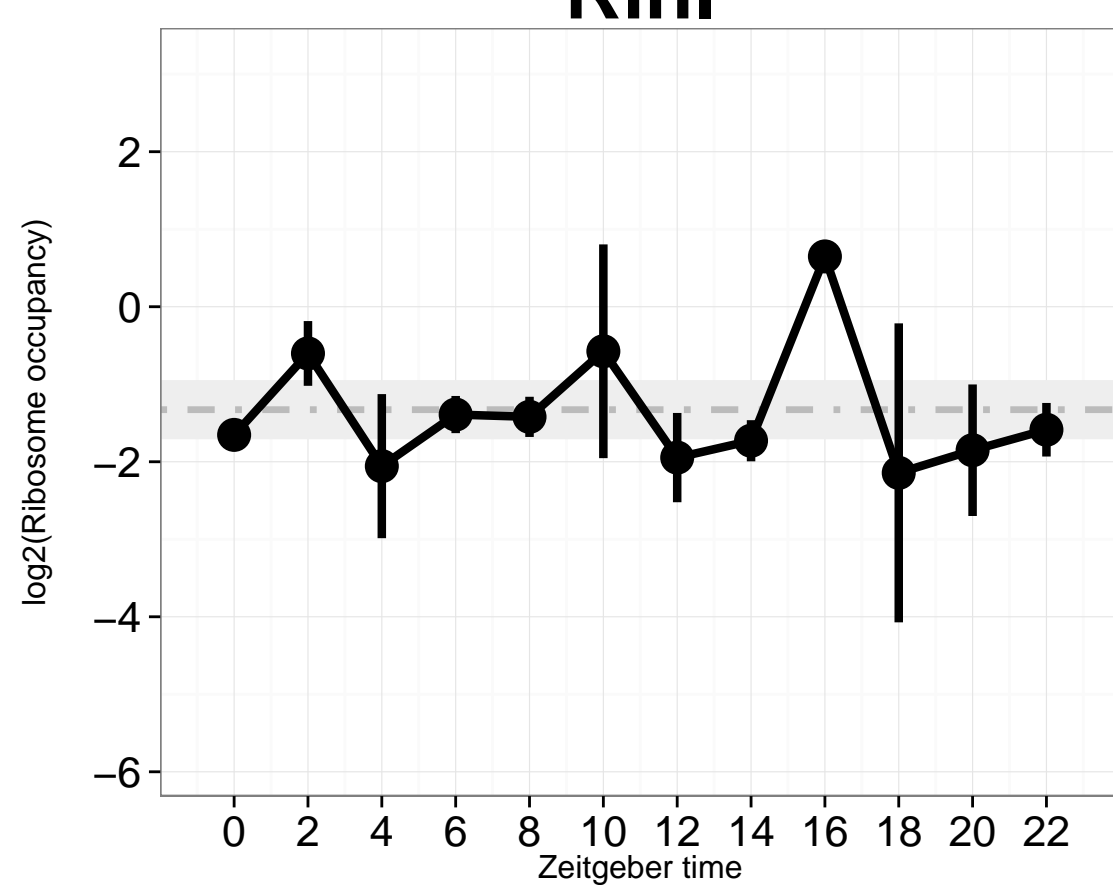

Supplement: SuppDataset_1.zip [file Rinl_set_A.pdf › Supplemental Dataset 1/A-mRNA_nonrhyth_translation_nonrhyth/Rinl_set_A.pdf]

# Rint1

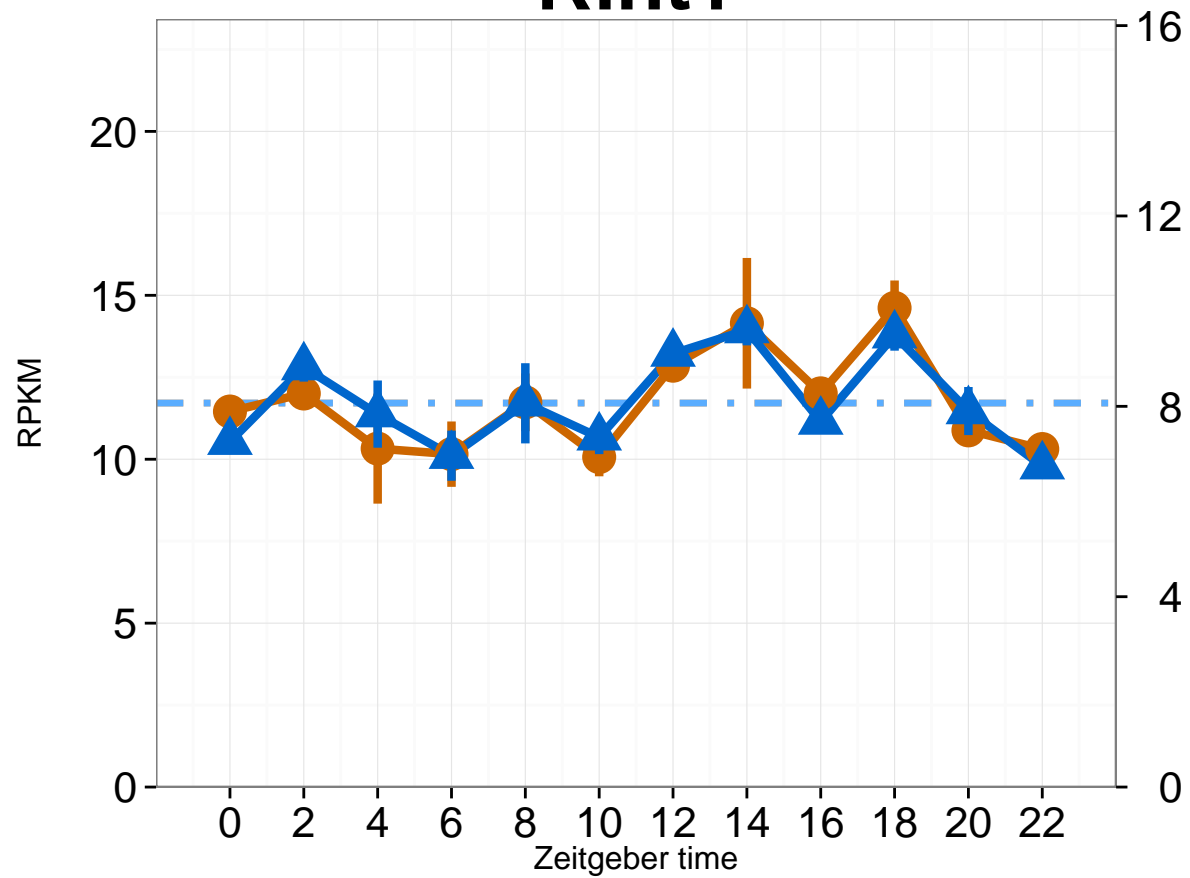

# Rint1

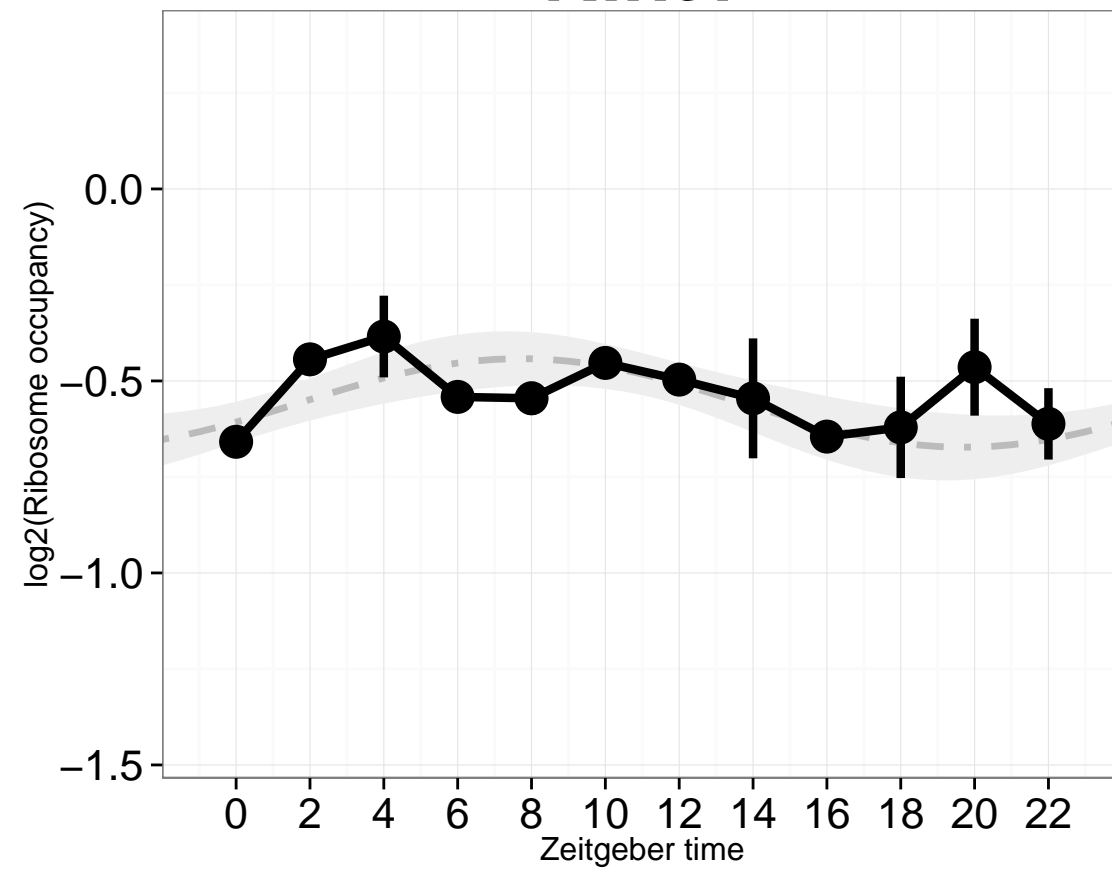

Supplement: SuppDataset_1.zip [file Rint1_set_A.pdf › Supplemental Dataset 1/A-mRNA_nonrhyth_translation_nonrhyth/Rint1_set_A.pdf]

## Riok1

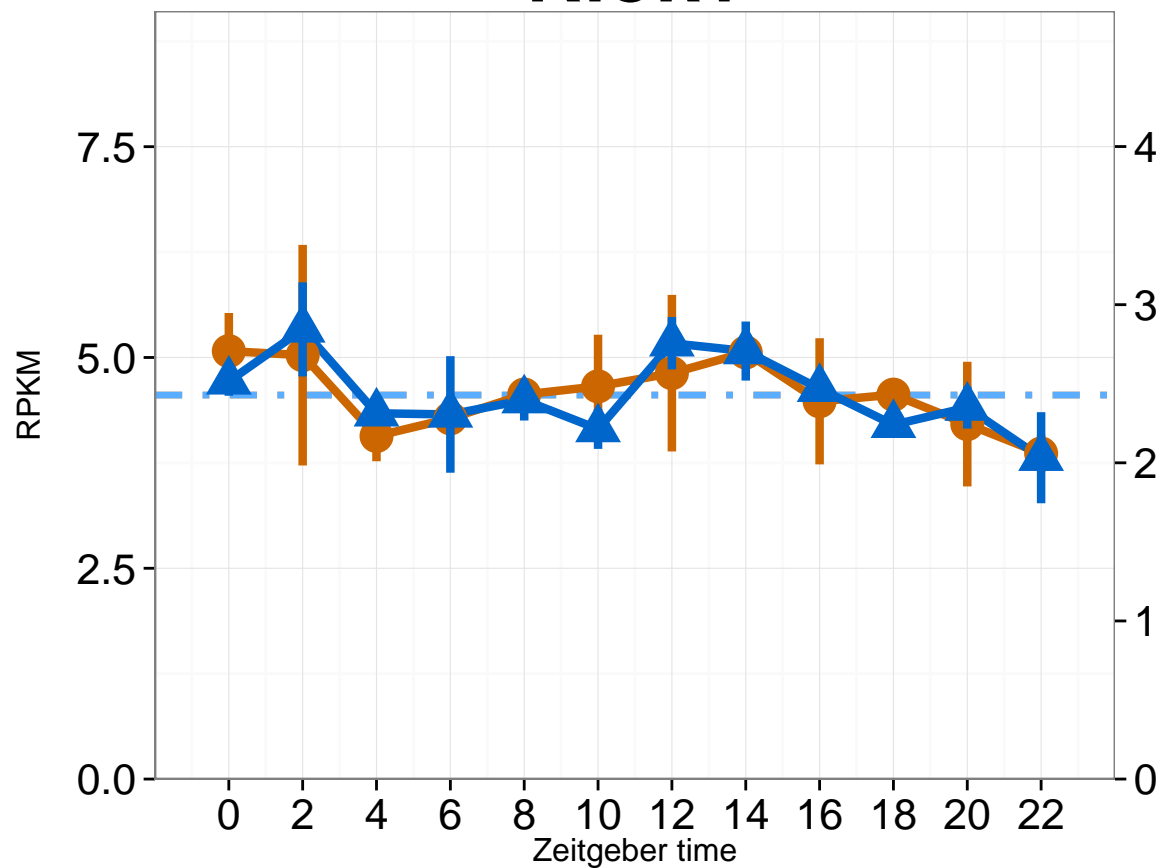

## Riok1

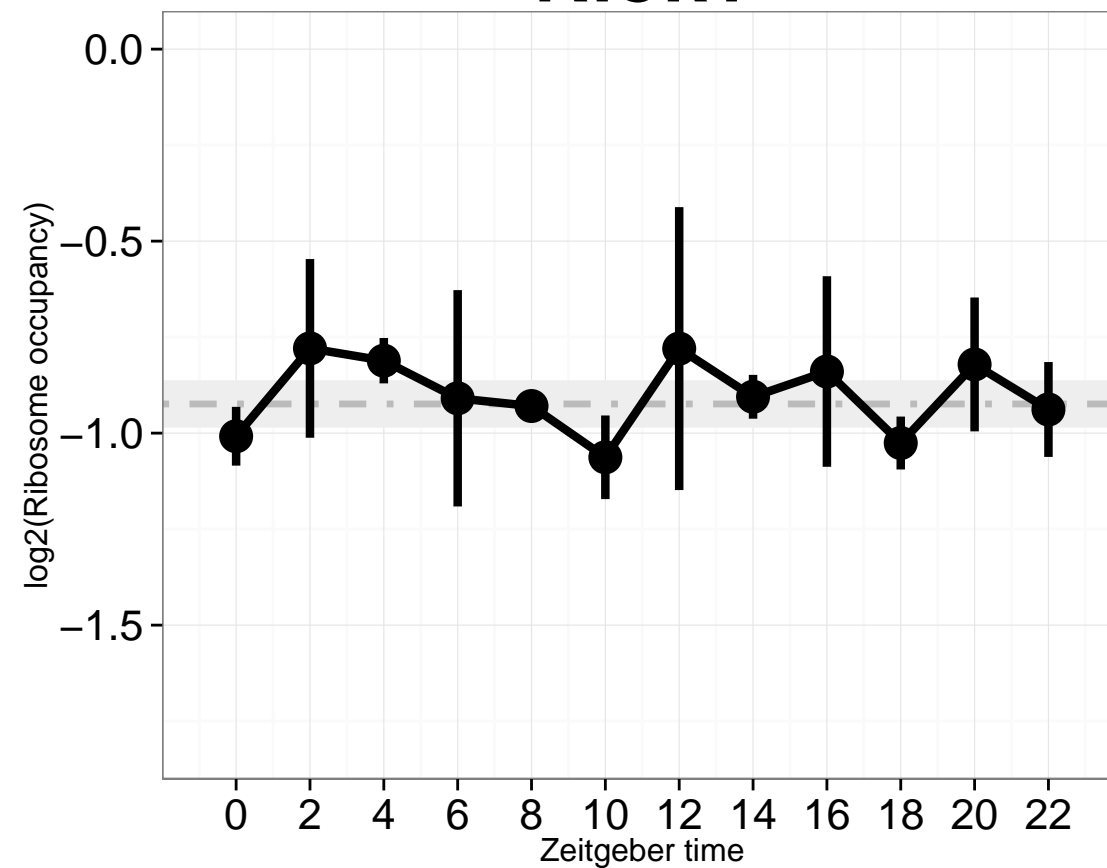

Supplement: SuppDataset_1.zip [file Riok1_set_A.pdf › Supplemental Dataset 1/A-mRNA_nonrhyth_translation_nonrhyth/Riok1_set_A.pdf]

## Riok3

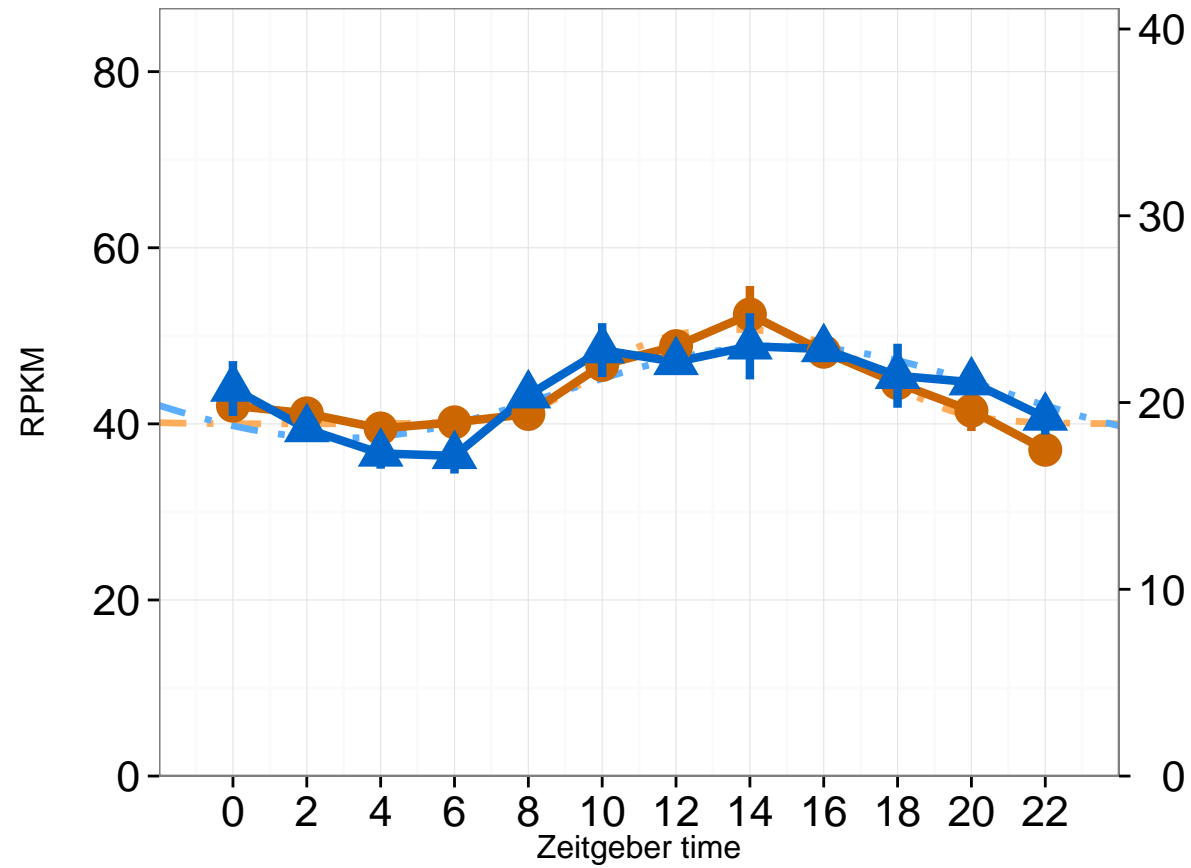

## Riok3

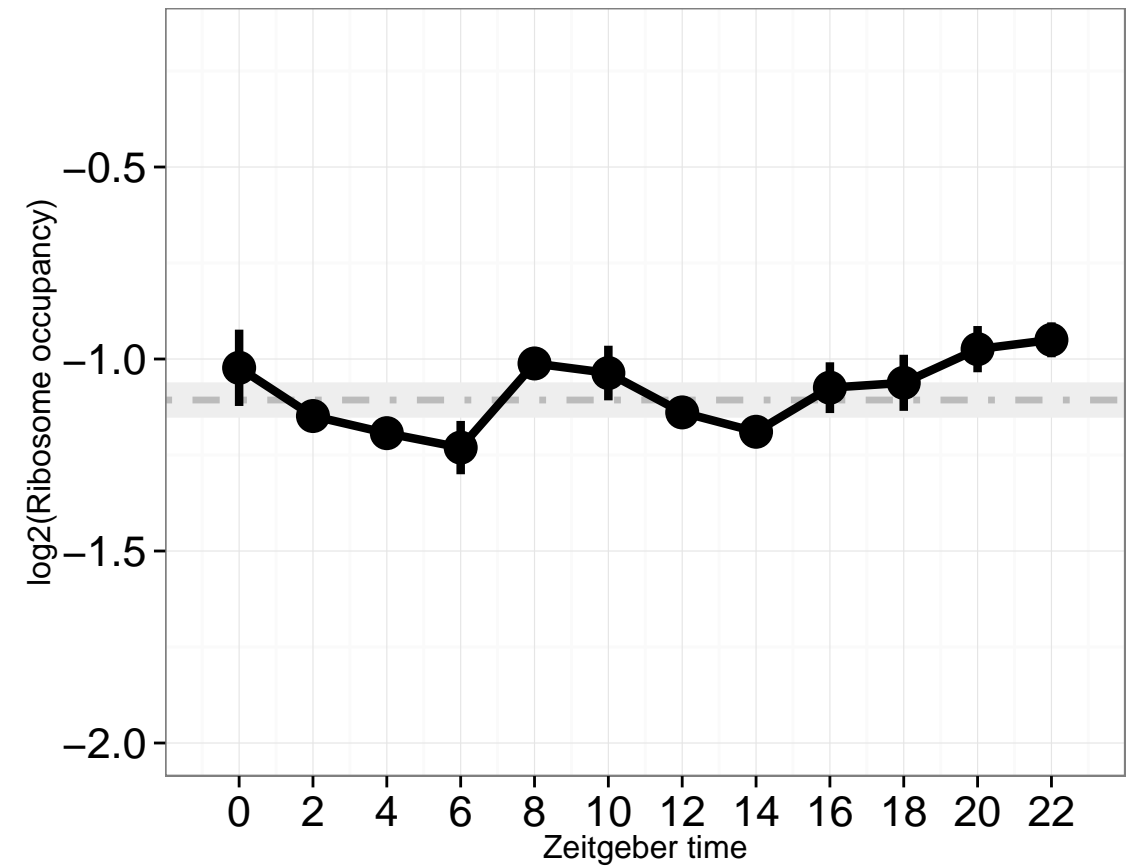

Supplement: SuppDataset_1.zip [file Riok3_set_A.pdf › Supplemental Dataset 1/A-mRNA_nonrhyth_translation_nonrhyth/Riok3_set_A.pdf]

## Ripk1

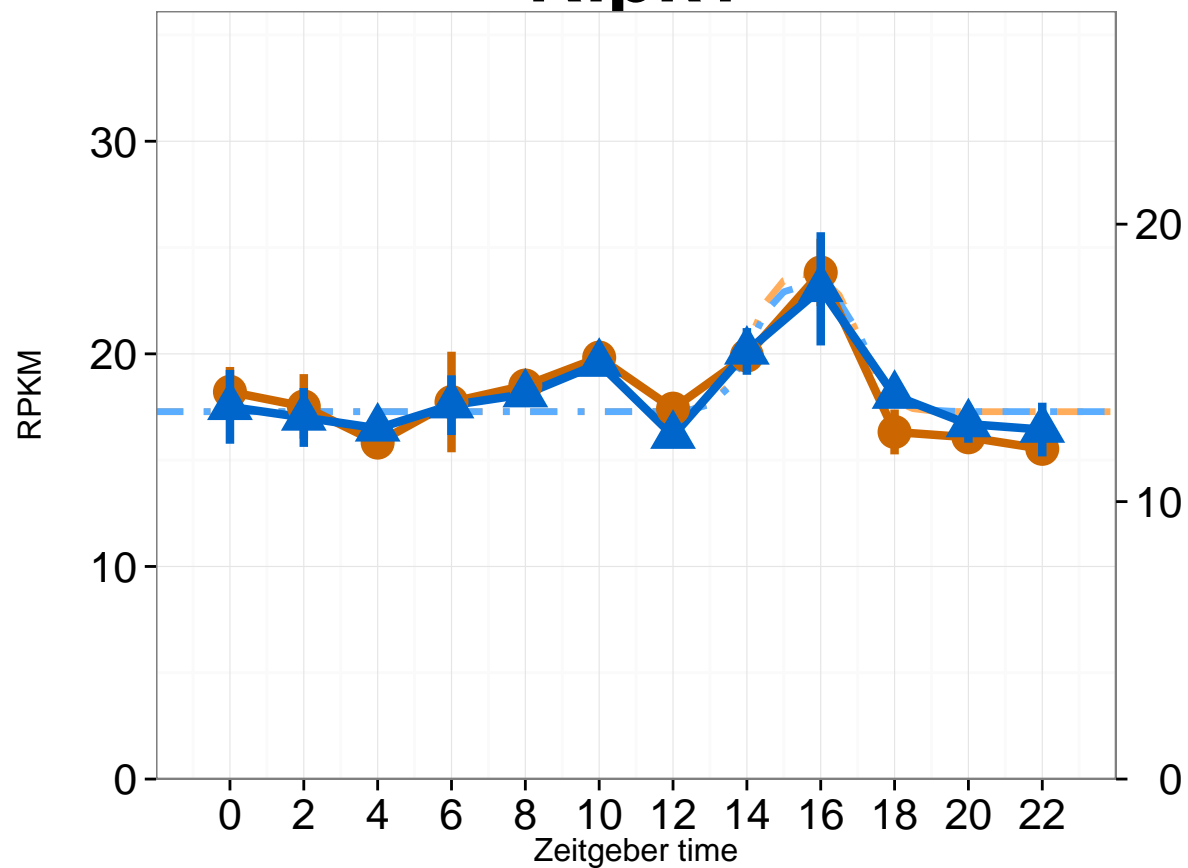

## Ripk1

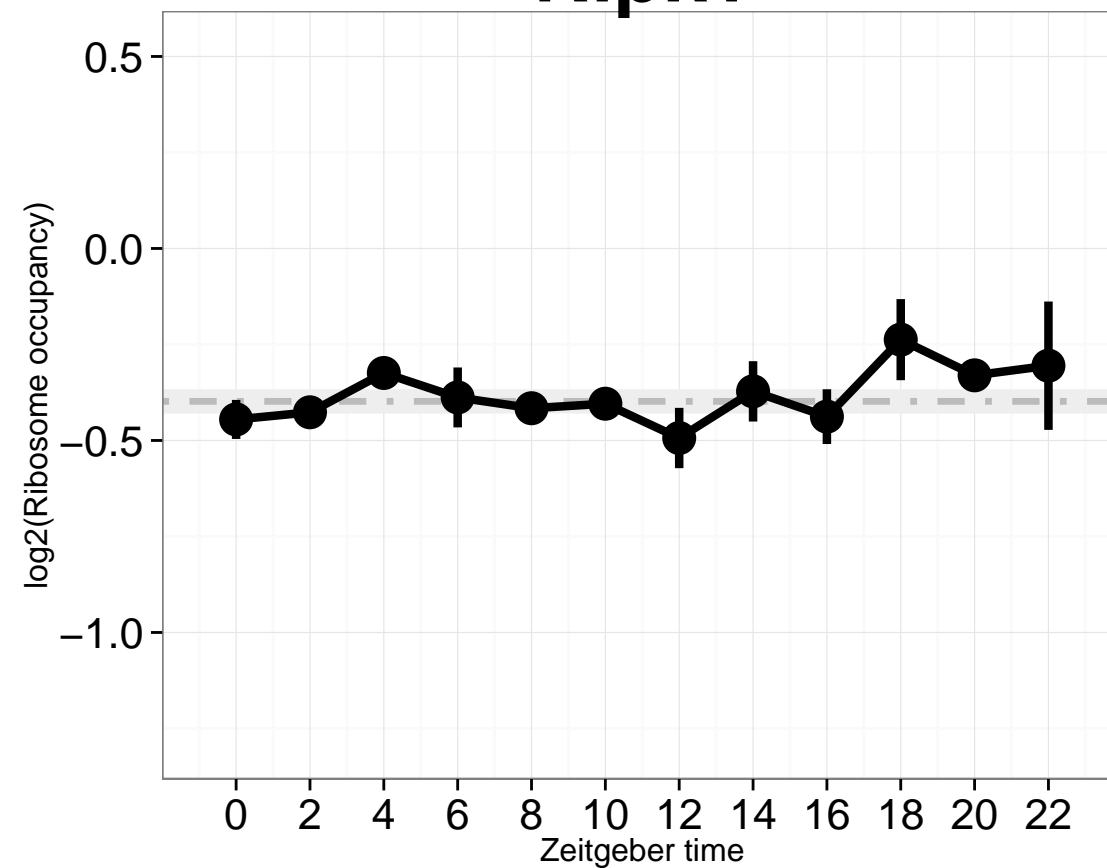

Supplement: SuppDataset_1.zip [file Ripk1_set_A.pdf › Supplemental Dataset 1/A-mRNA_nonrhyth_translation_nonrhyth/Ripk1_set_A.pdf]

## Ripk3

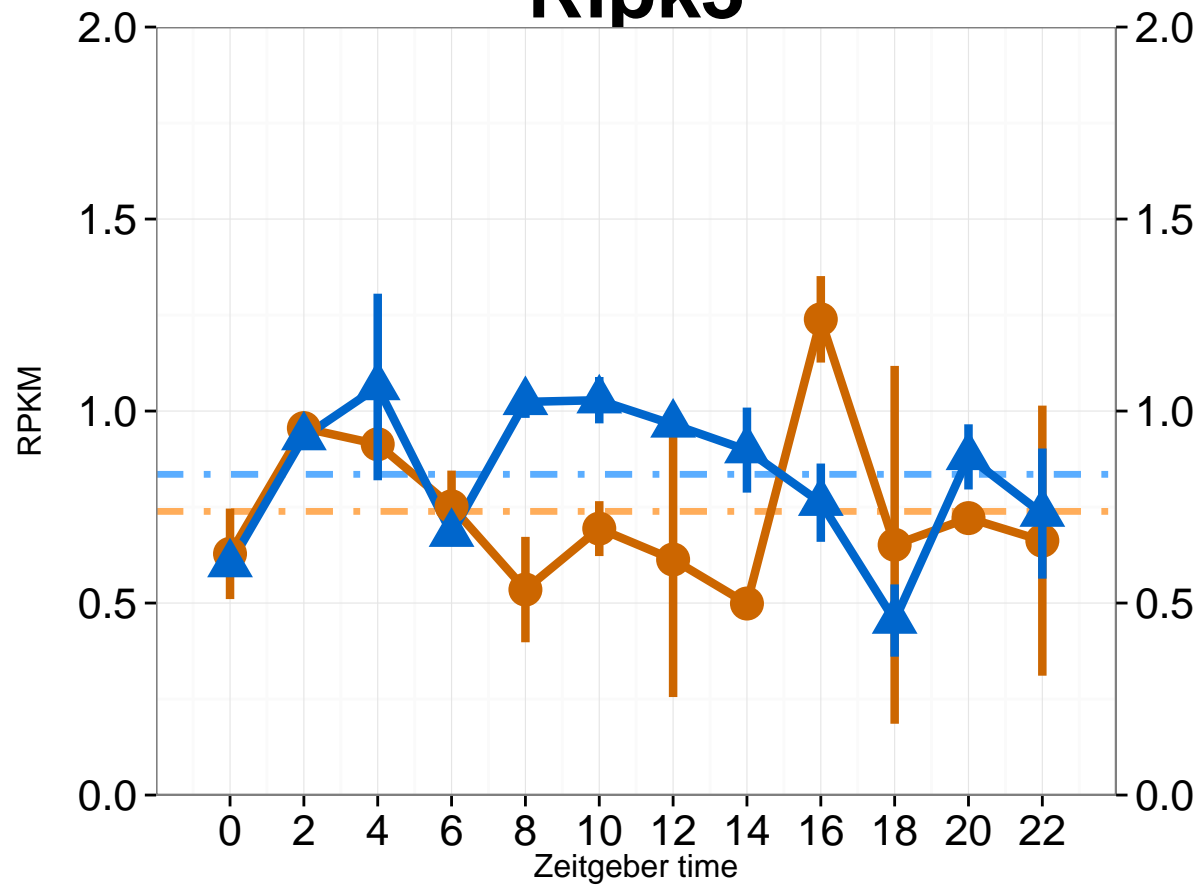

## Ripk3

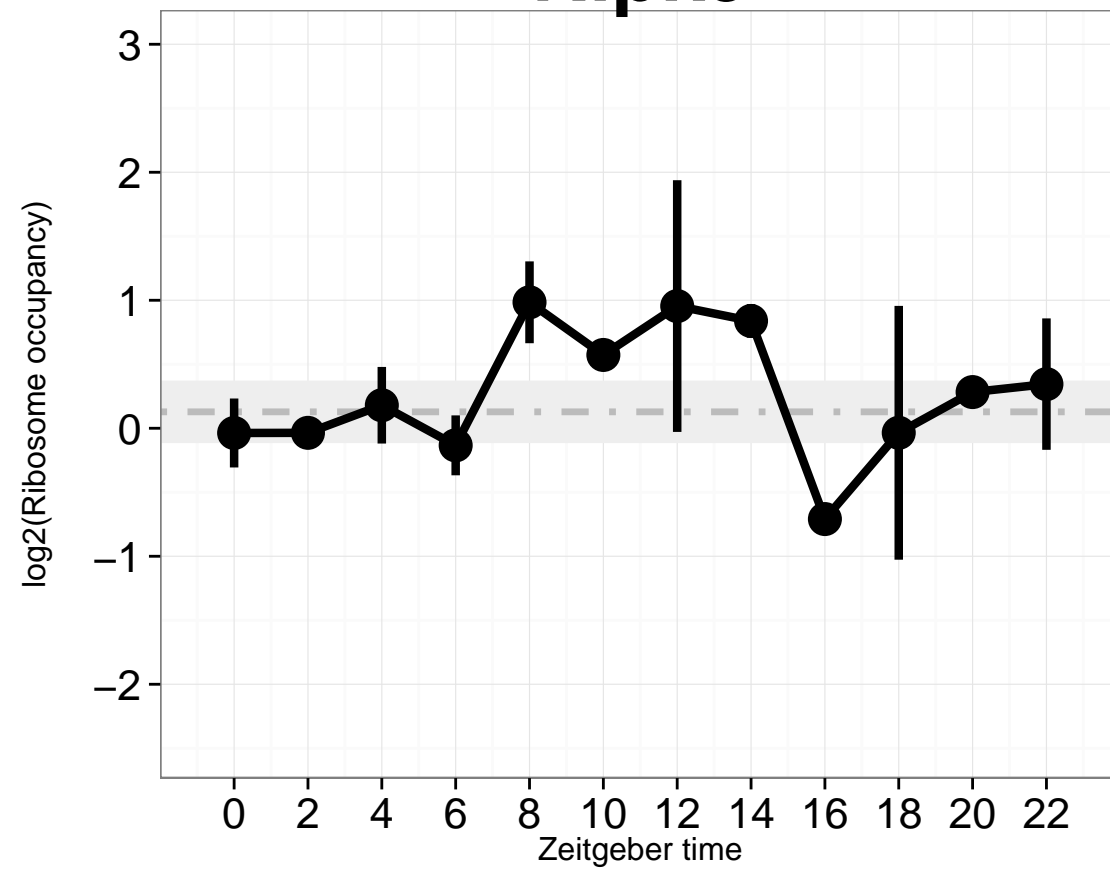

Supplement: SuppDataset_1.zip [file Ripk3_set_A.pdf › Supplemental Dataset 1/A-mRNA_nonrhyth_translation_nonrhyth/Ripk3_set_A.pdf]

## Ripply3

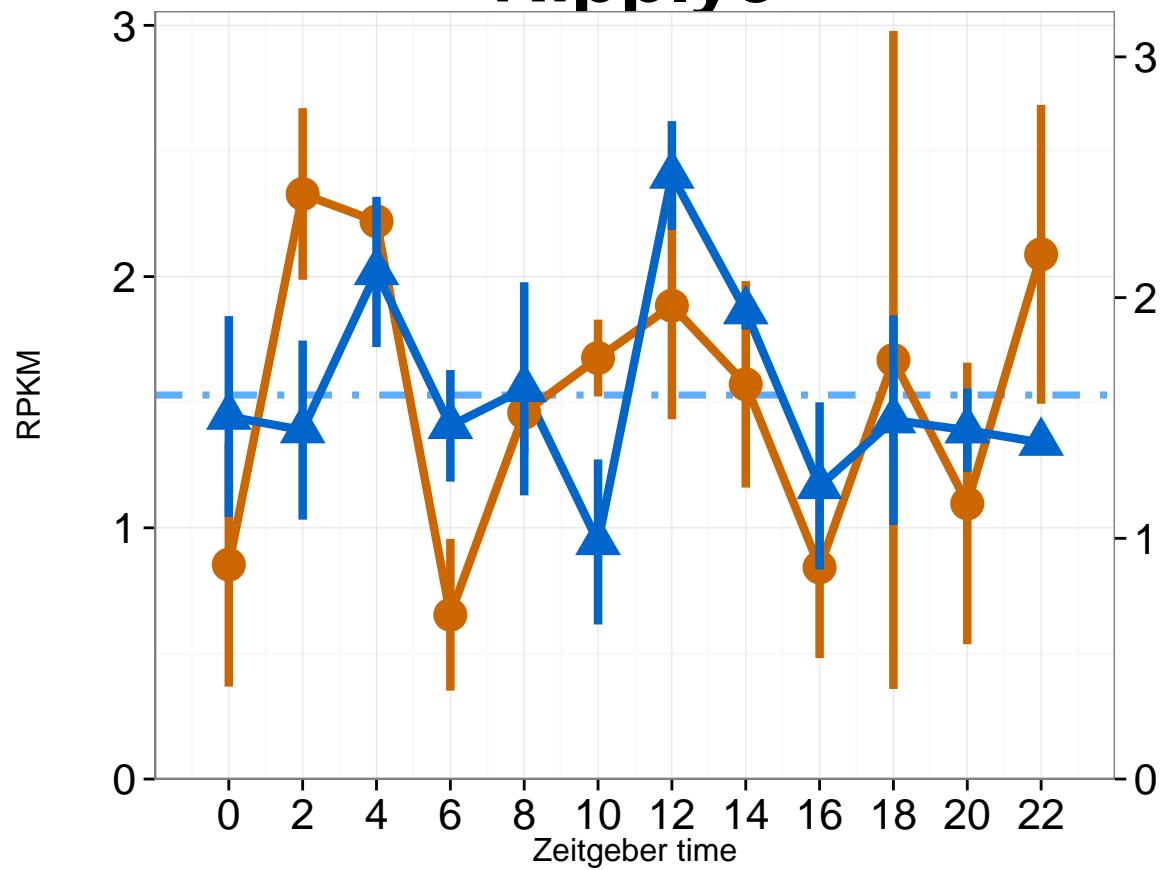

## Ripply3

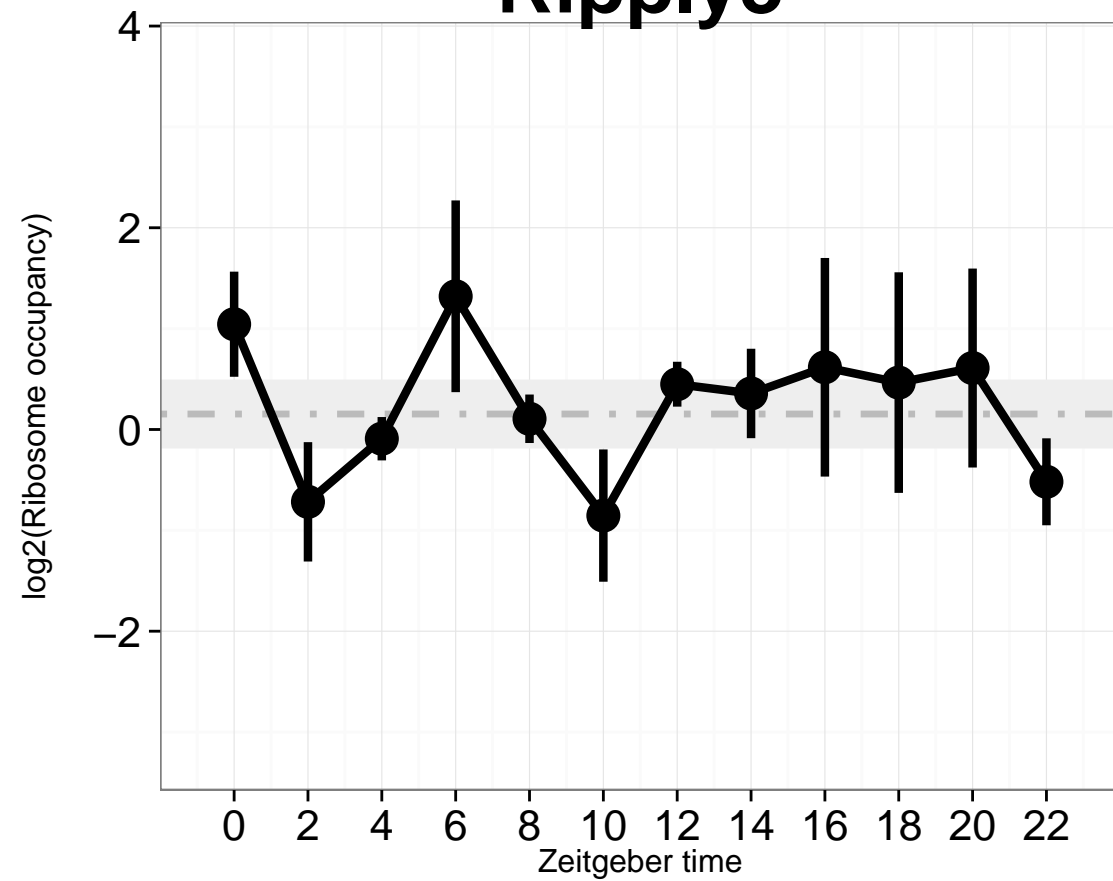

Supplement: SuppDataset_1.zip [file Ripply3_set_A.pdf › Supplemental Dataset 1/A-mRNA_nonrhyth_translation_nonrhyth/Ripply3_set_A.pdf]

## Rif

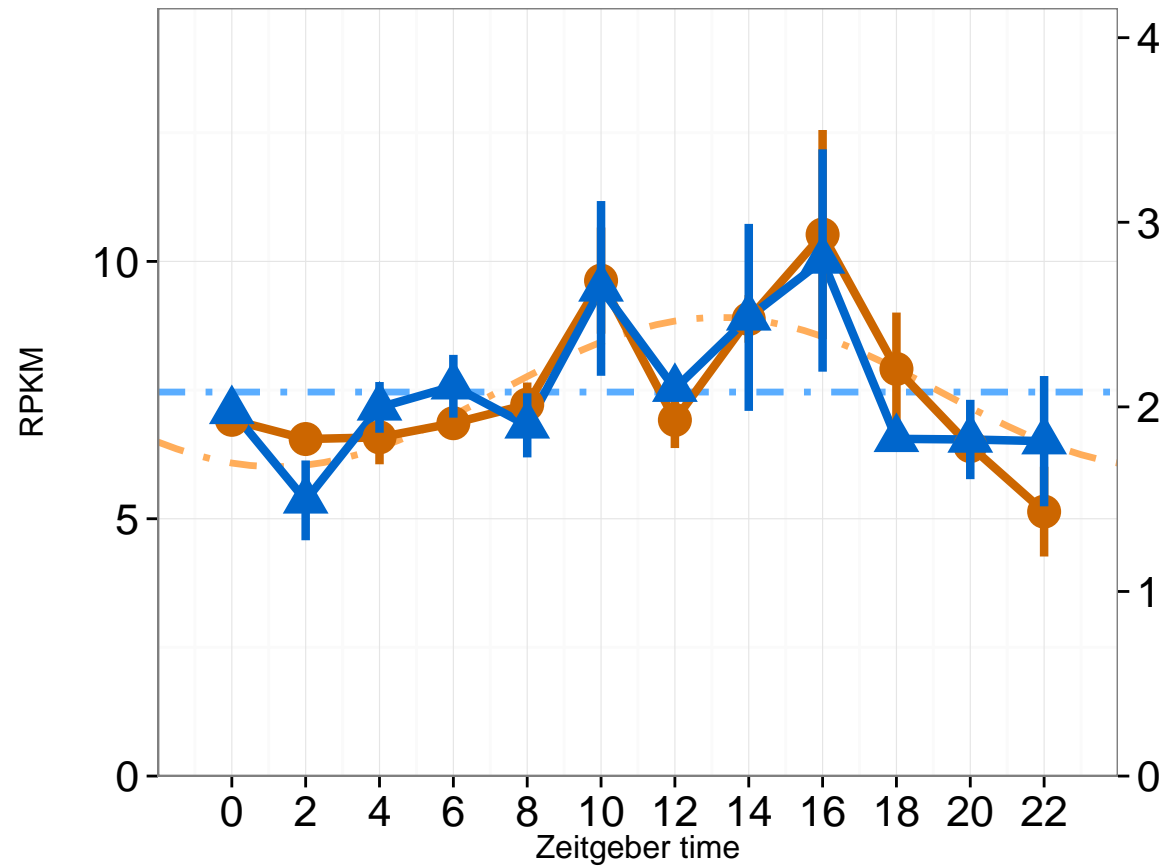

## Rif

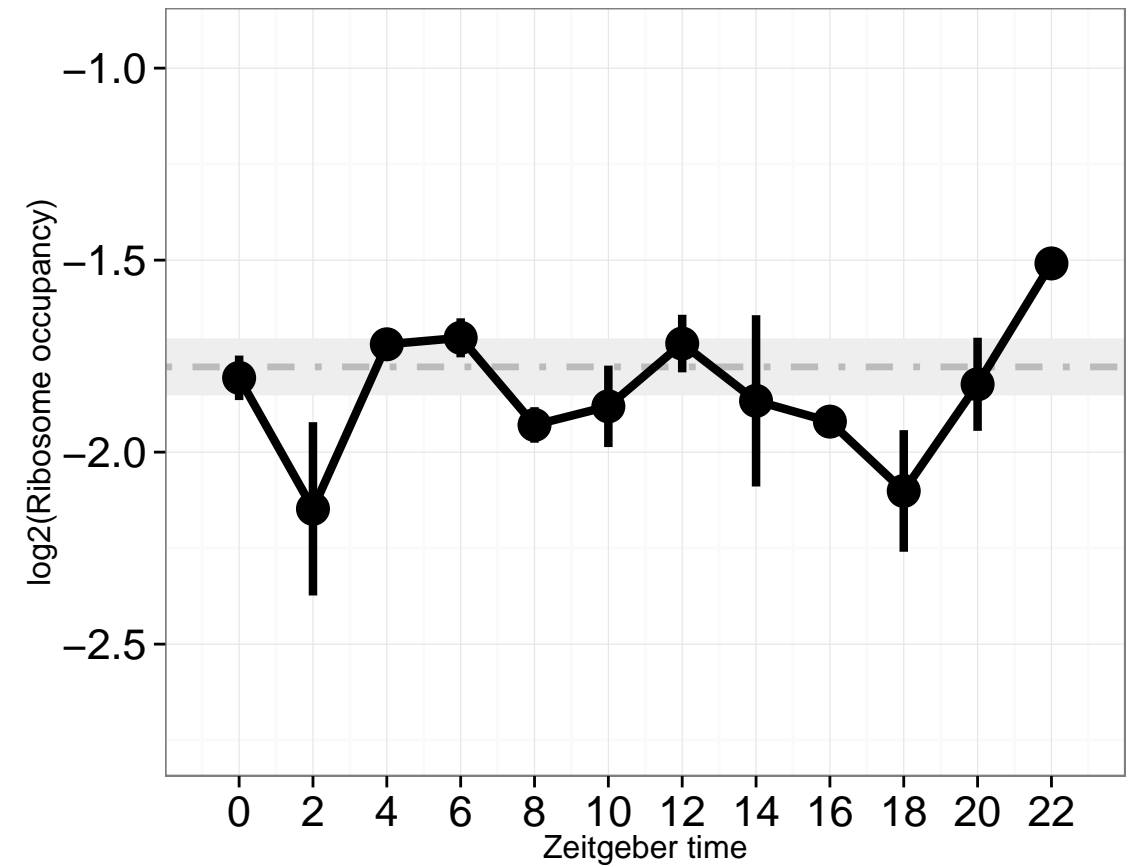

Supplement: SuppDataset_1.zip [file Rlf_set_A.pdf › Supplemental Dataset 1/A-mRNA_nonrhyth_translation_nonrhyth/Rlf_set_A.pdf]

## Rlim

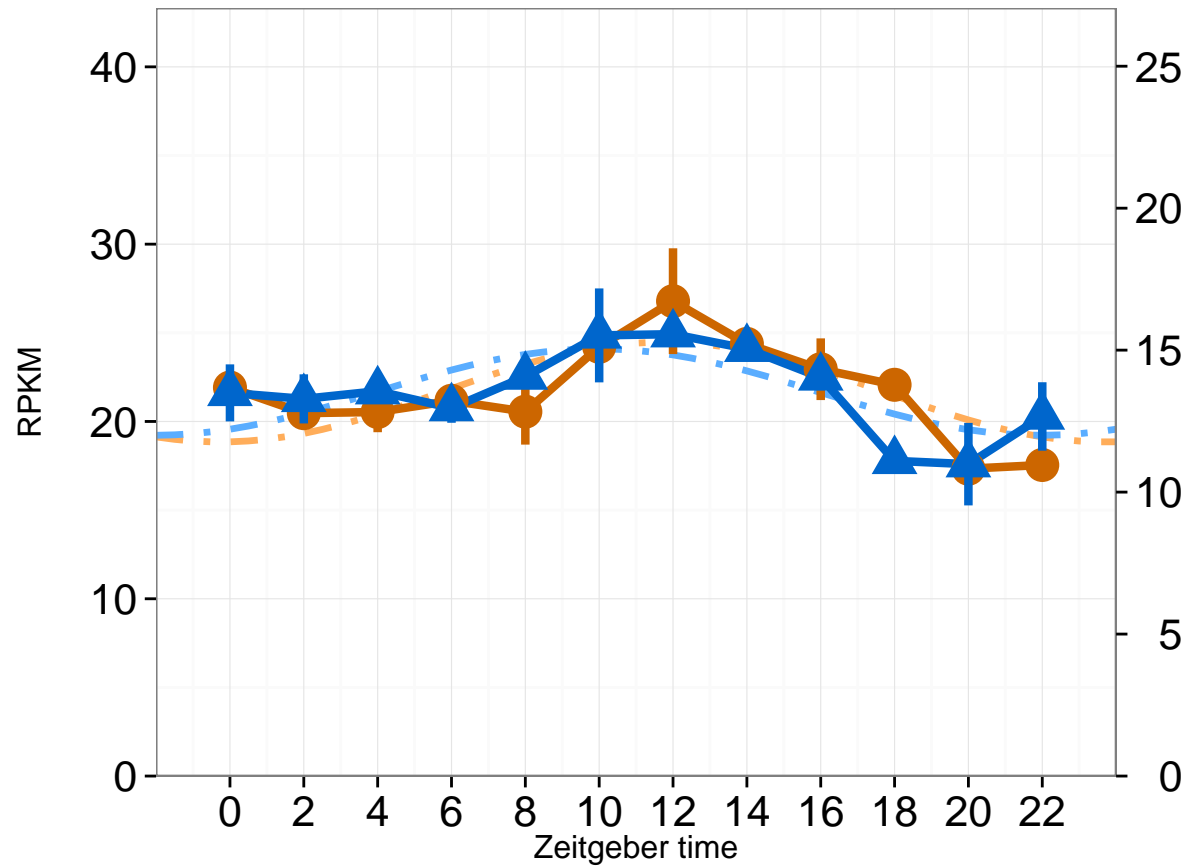

## Rlim

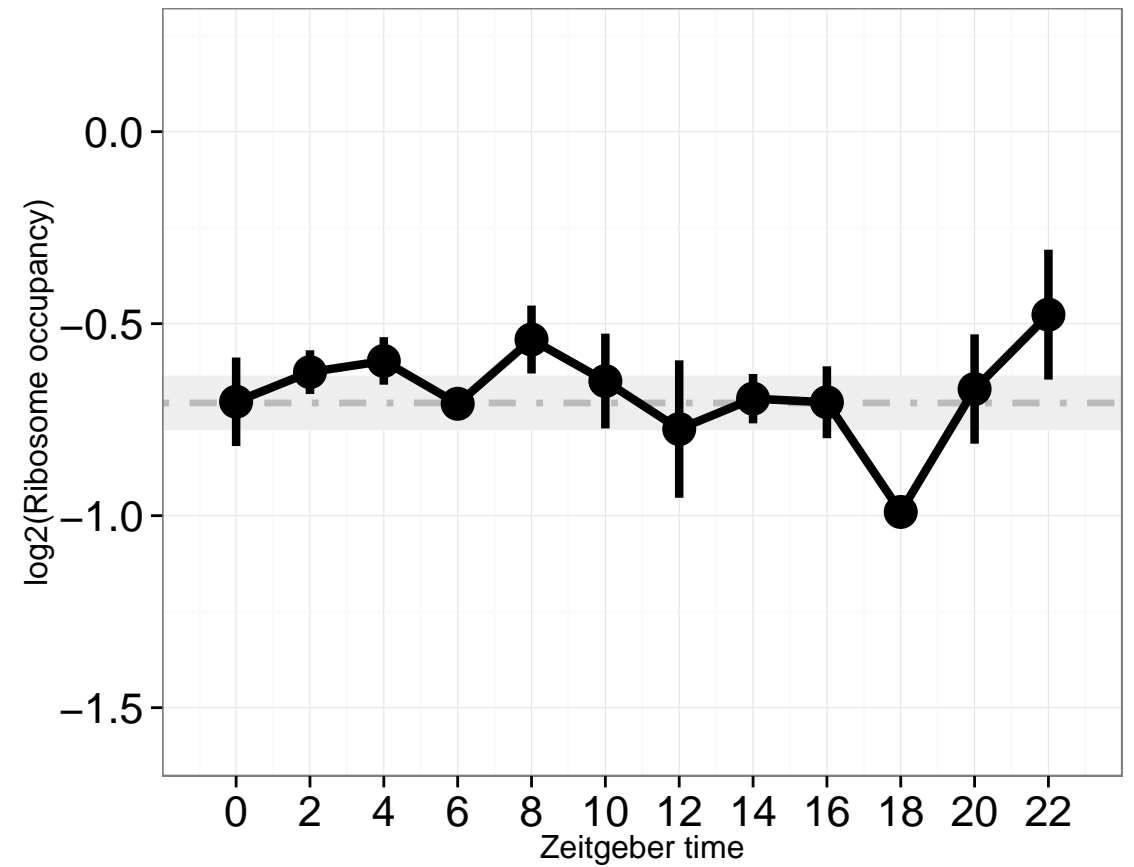

Supplement: SuppDataset_1.zip [file Rlim_set_A.pdf › Supplemental Dataset 1/A-mRNA_nonrhyth_translation_nonrhyth/Rlim_set_A.pdf]

# Rmdn1

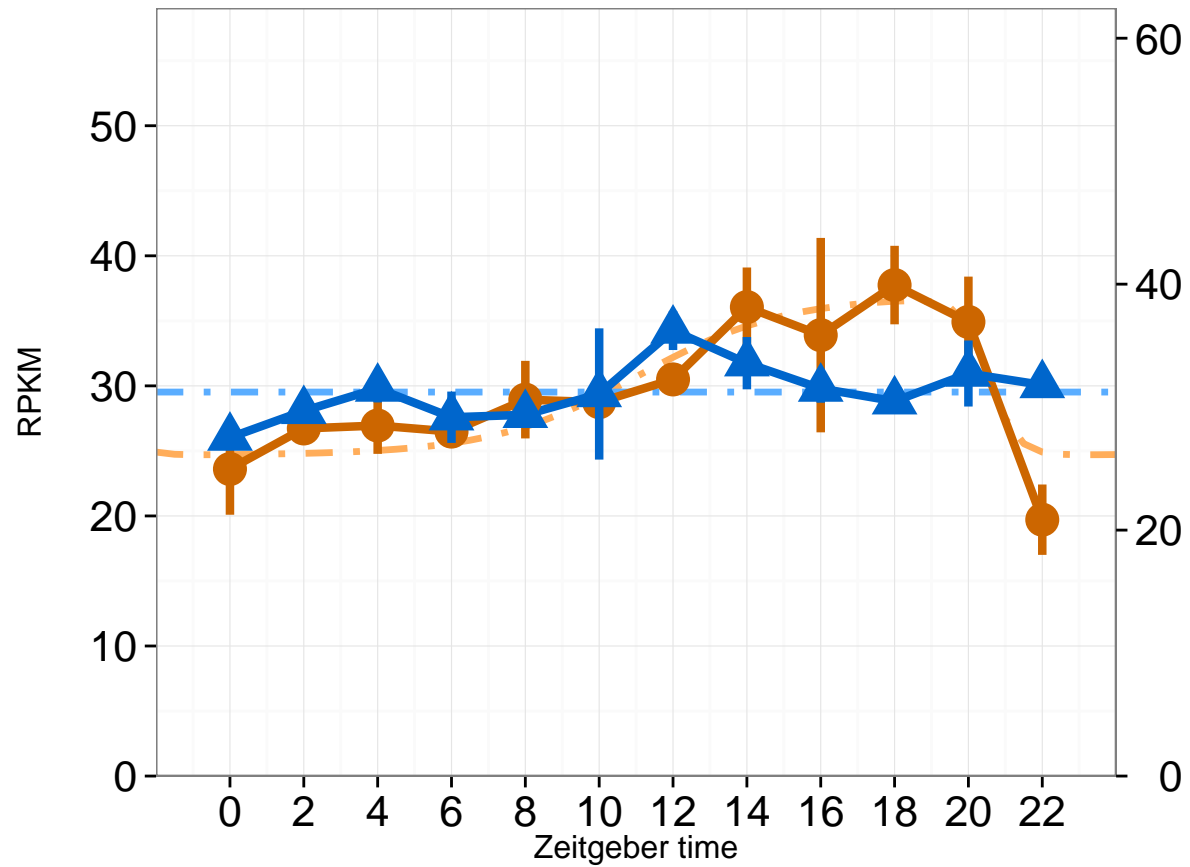

# Rmdn1

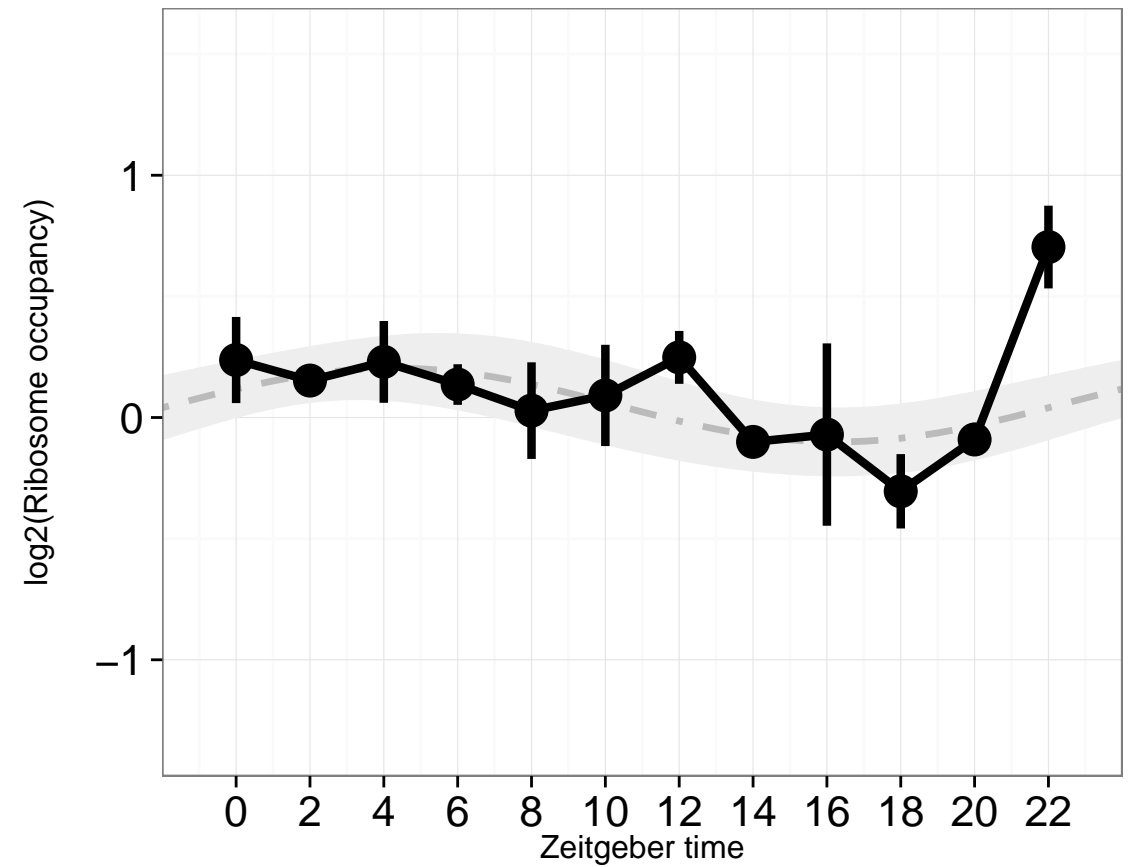

Supplement: SuppDataset_1.zip [file Rmdn1_set_A.pdf › Supplemental Dataset 1/A-mRNA_nonrhyth_translation_nonrhyth/Rmdn1_set_A.pdf]

# Rmdn2

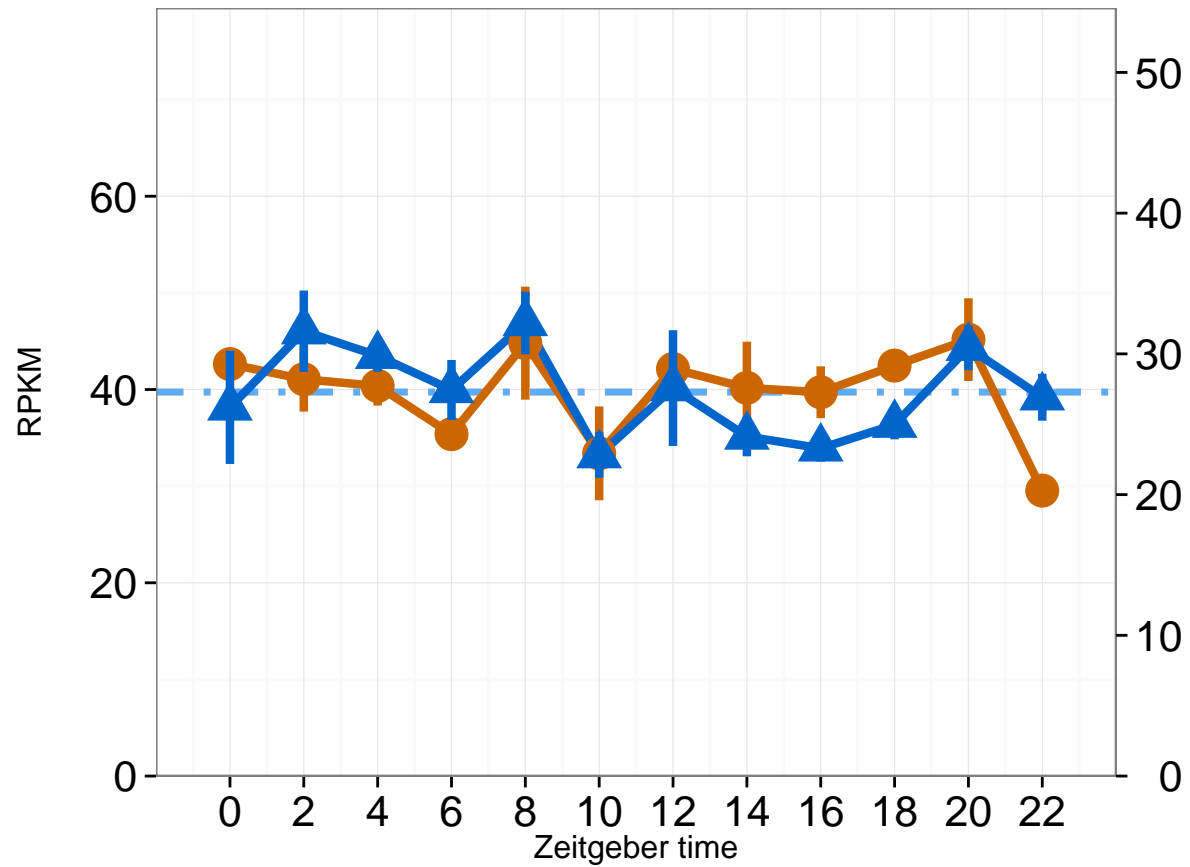

# Rmdn2

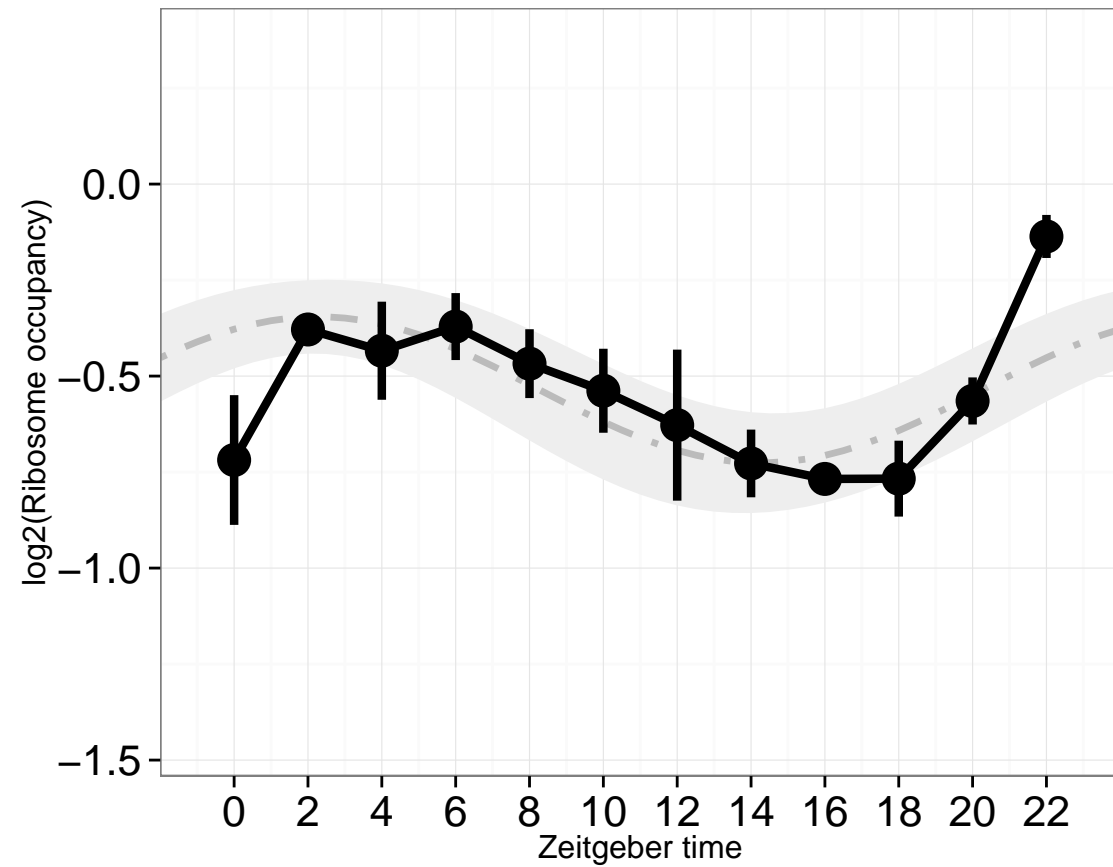

Supplement: SuppDataset_1.zip [file Rmdn2_set_A.pdf › Supplemental Dataset 1/A-mRNA_nonrhyth_translation_nonrhyth/Rmdn2_set_A.pdf]

# Rmdn3

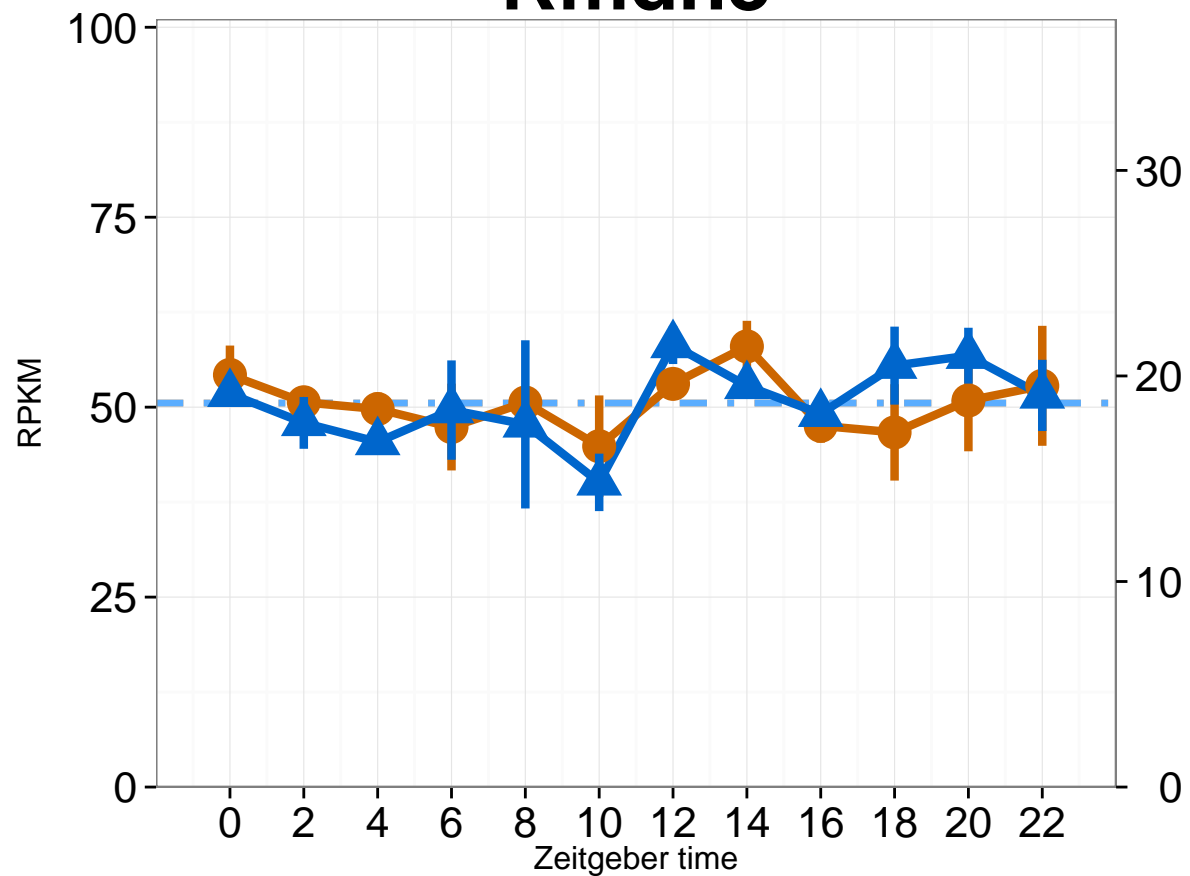

# Rmdn3

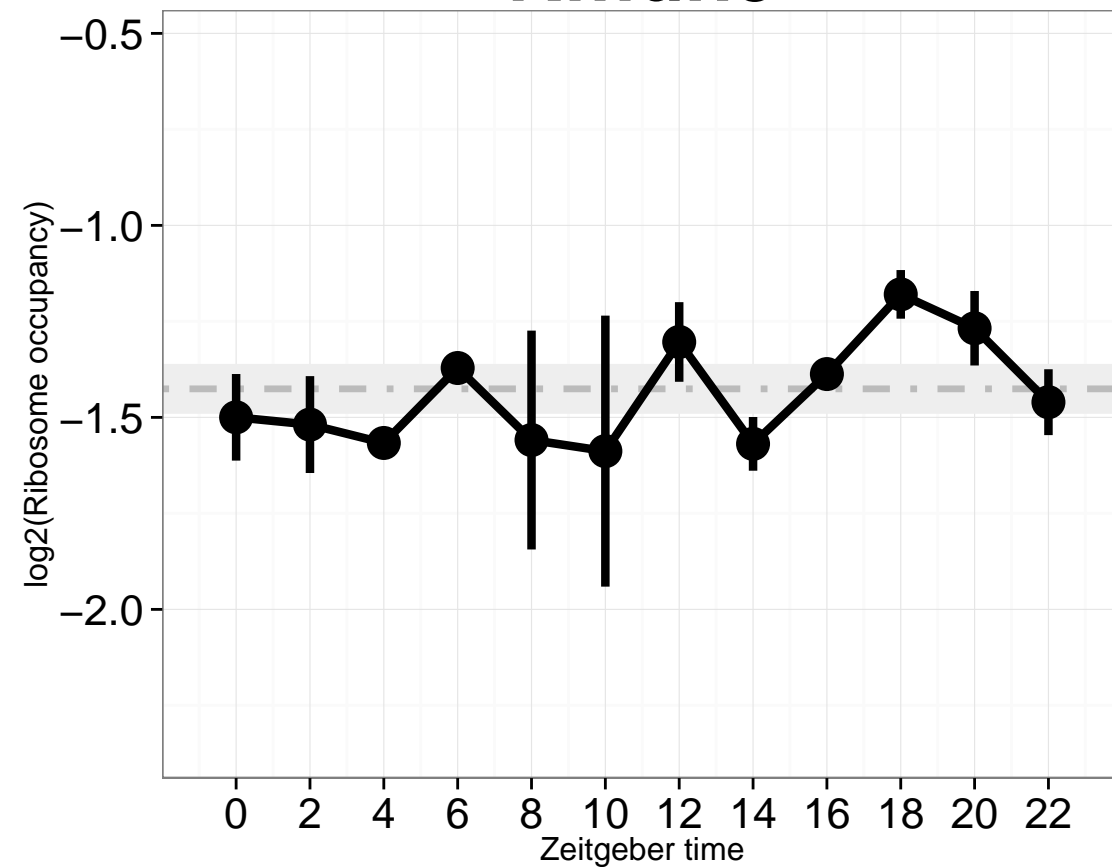

Supplement: SuppDataset_1.zip [file Rmdn3_set_A.pdf › Supplemental Dataset 1/A-mRNA_nonrhyth_translation_nonrhyth/Rmdn3_set_A.pdf]

# Rmi1

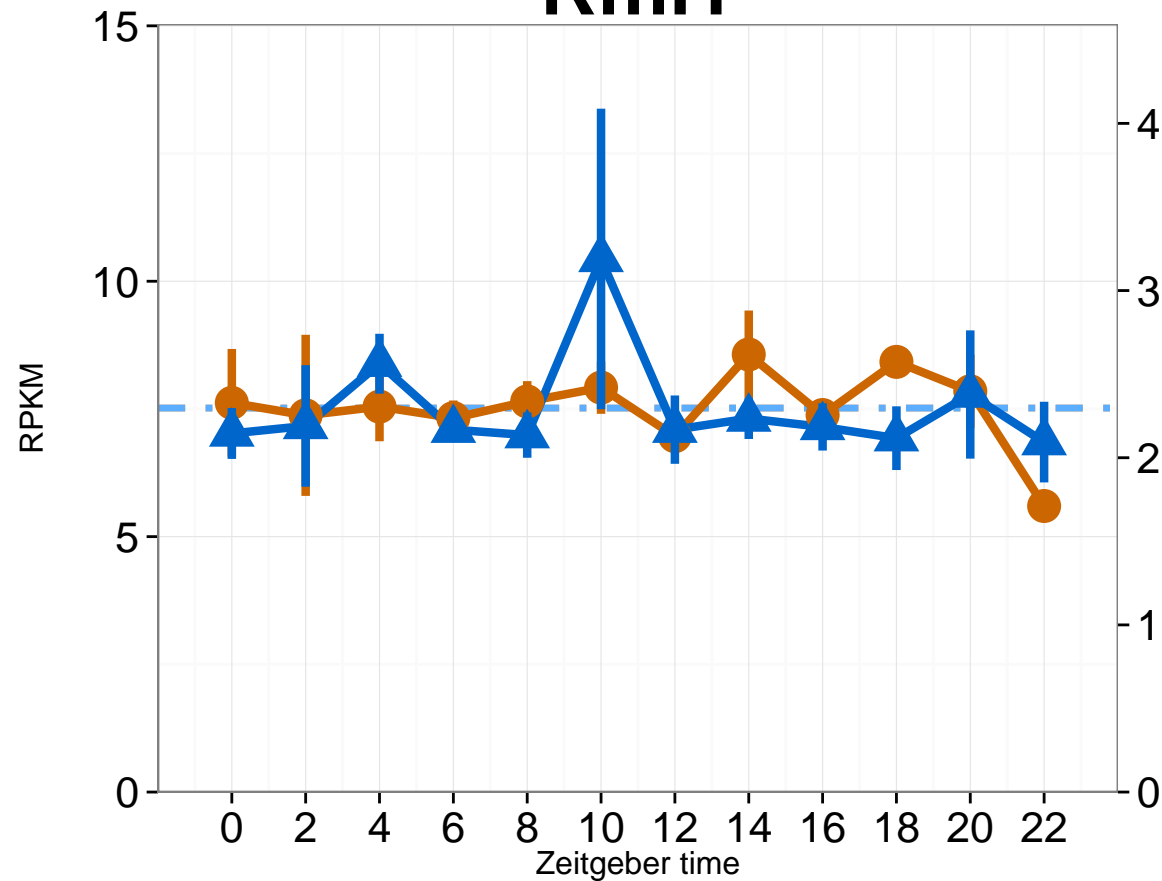

# Rmi1

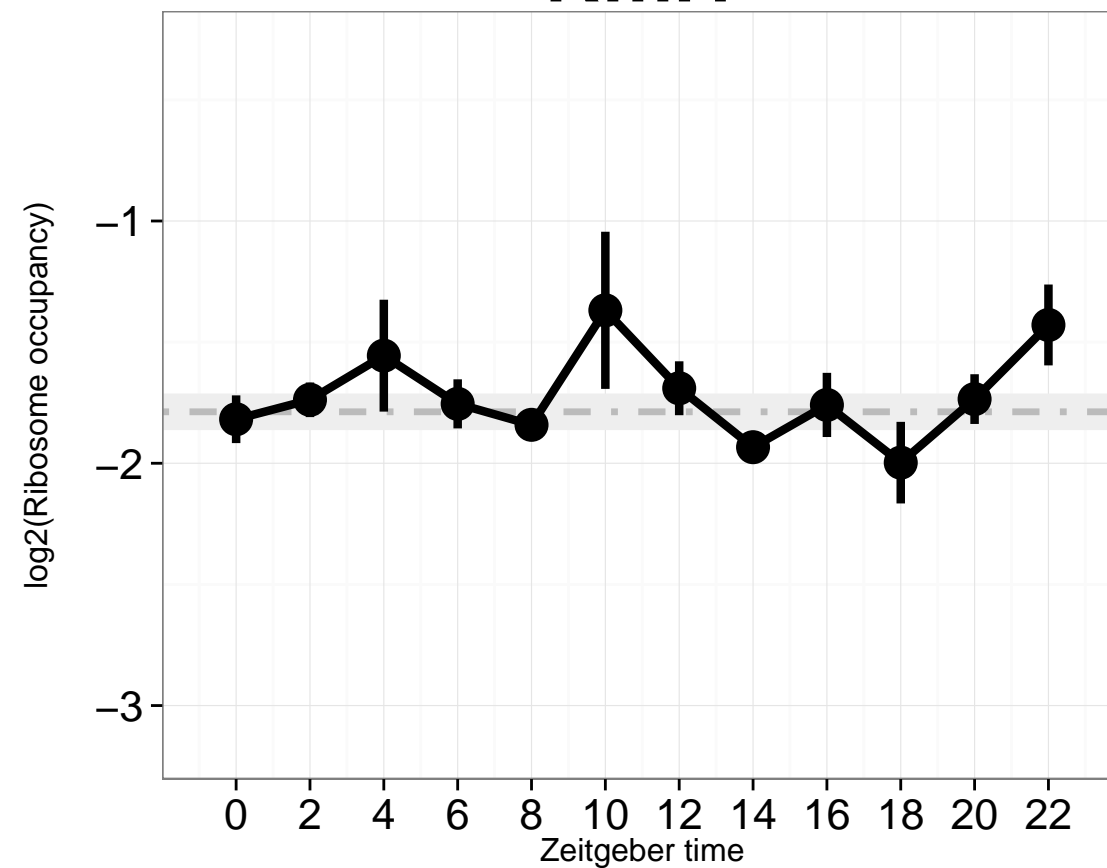

Supplement: SuppDataset_1.zip [file Rmi1_set_A.pdf › Supplemental Dataset 1/A-mRNA_nonrhyth_translation_nonrhyth/Rmi1_set_A.pdf]

# Rmnd1

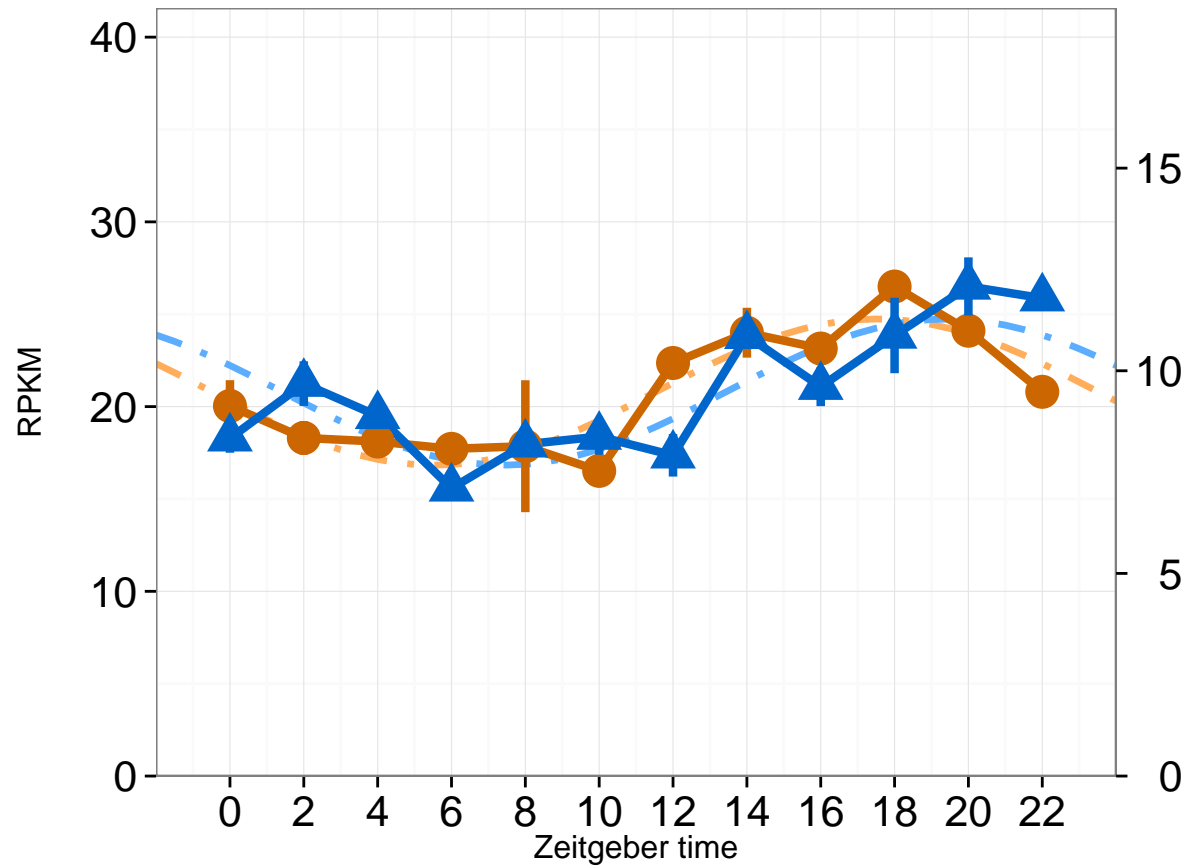

# Rmnd1

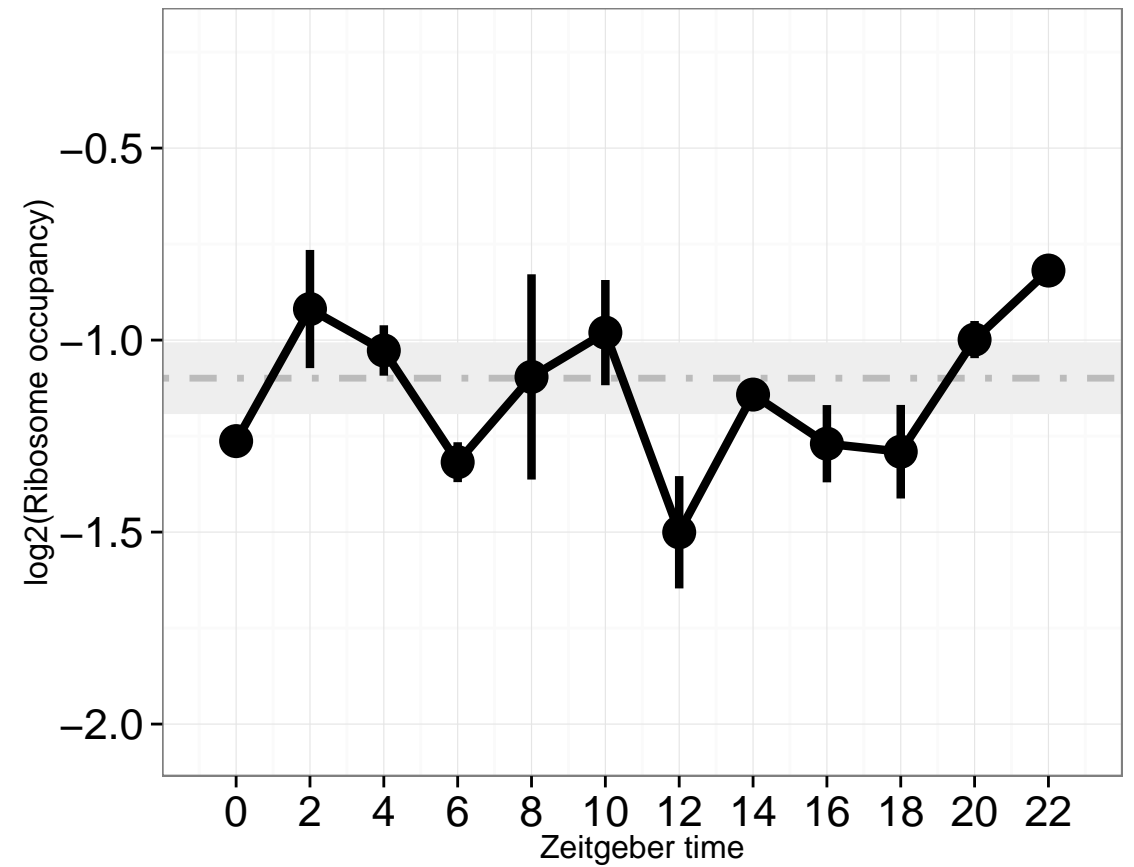

Supplement: SuppDataset_1.zip [file Rmnd1_set_A.pdf › Supplemental Dataset 1/A-mRNA_nonrhyth_translation_nonrhyth/Rmnd1_set_A.pdf]

# Rmnd5a

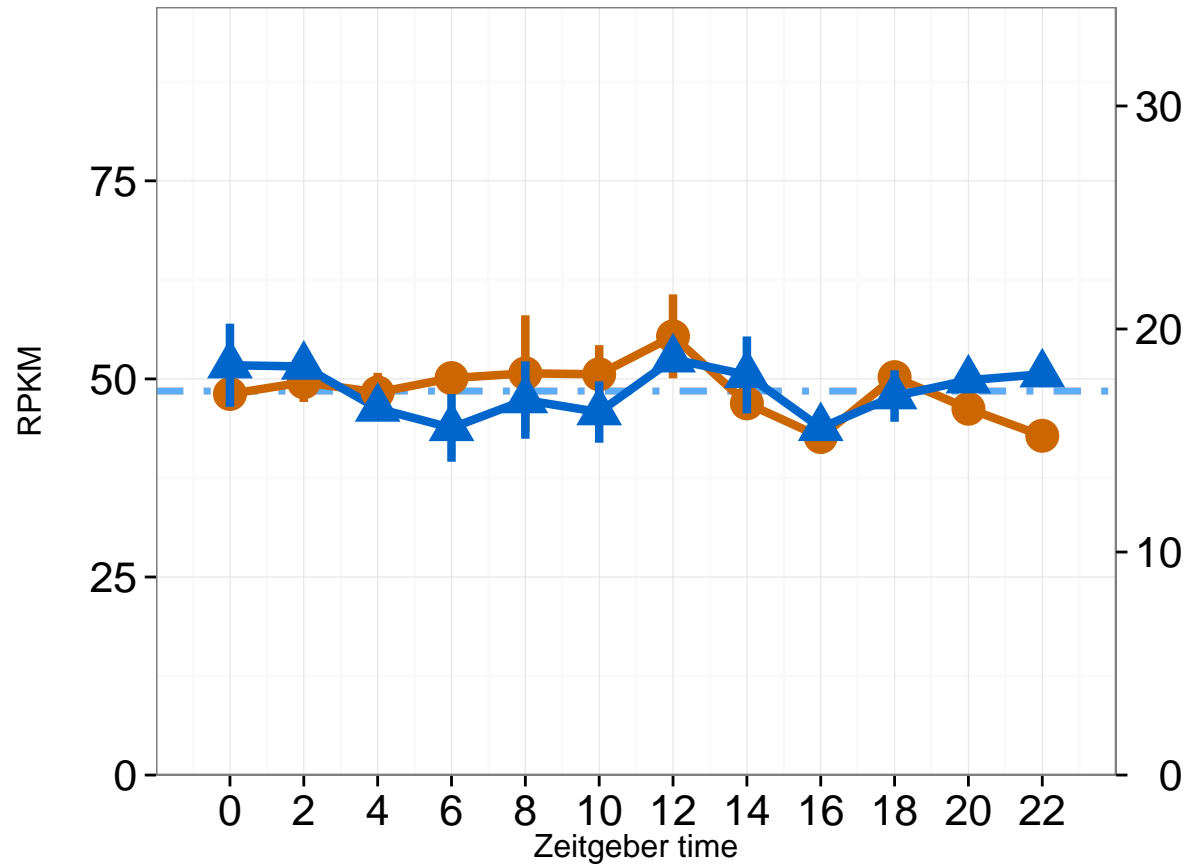

# Rmnd5a

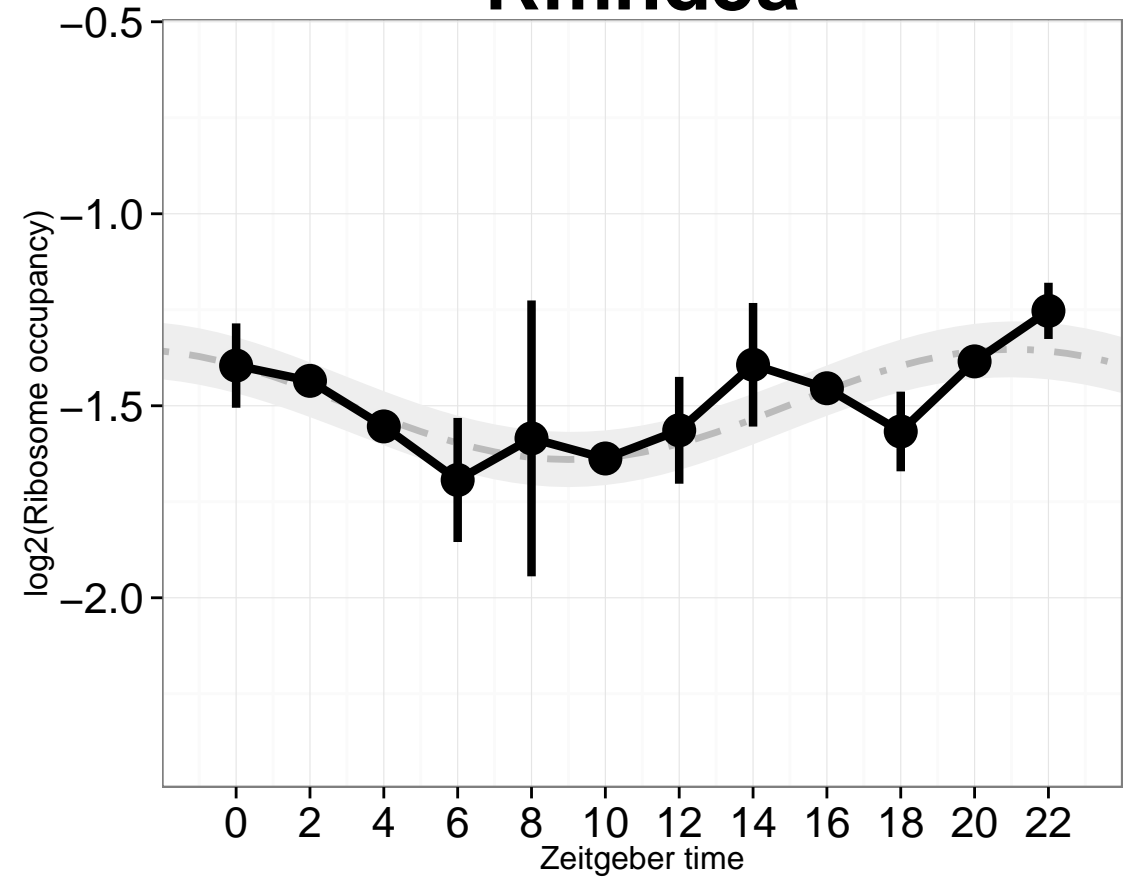

Supplement: SuppDataset_1.zip [file Rmnd5a_set_A.pdf › Supplemental Dataset 1/A-mRNA_nonrhyth_translation_nonrhyth/Rmnd5a_set_A.pdf]

## Rmnd5b

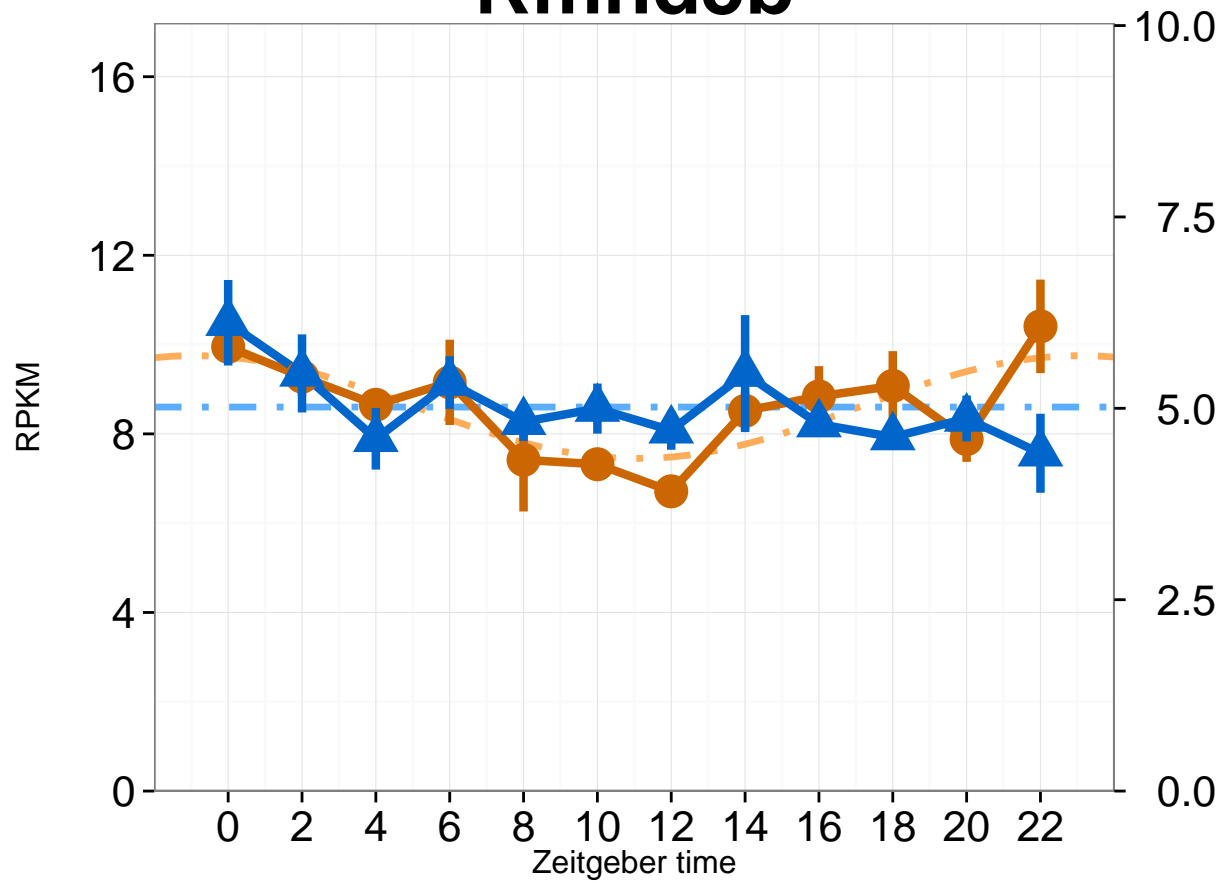

## Rmnd5b

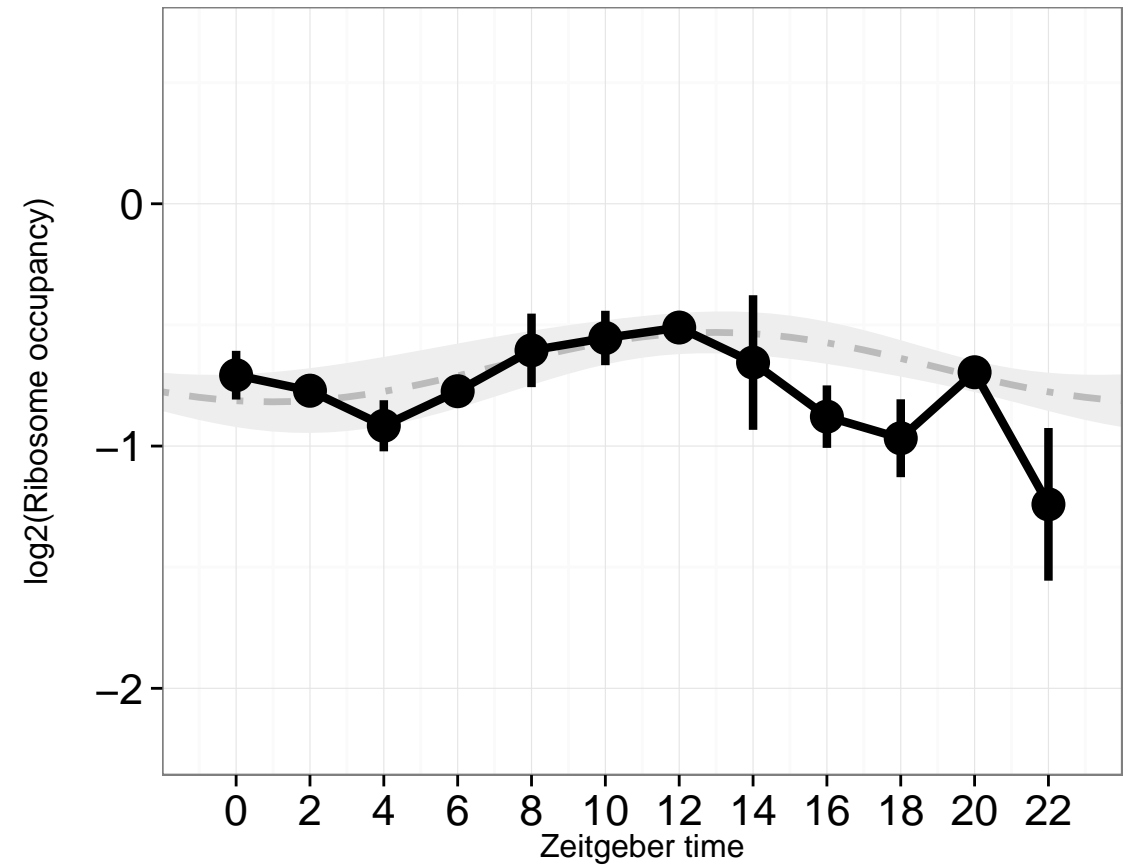

Supplement: SuppDataset_1.zip [file Rmnd5b_set_A.pdf › Supplemental Dataset 1/A-mRNA_nonrhyth_translation_nonrhyth/Rmnd5b_set_A.pdf]

**Rnase1 TR**

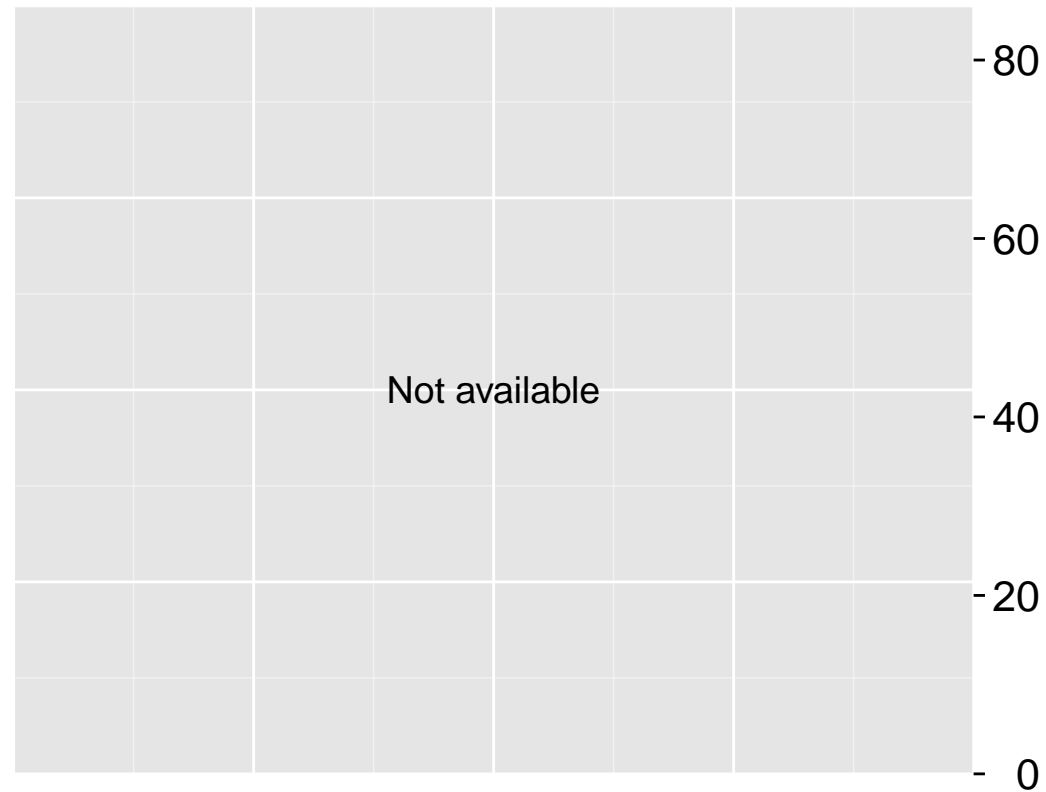

**Rnase1 log2(Ribosome occupancy**

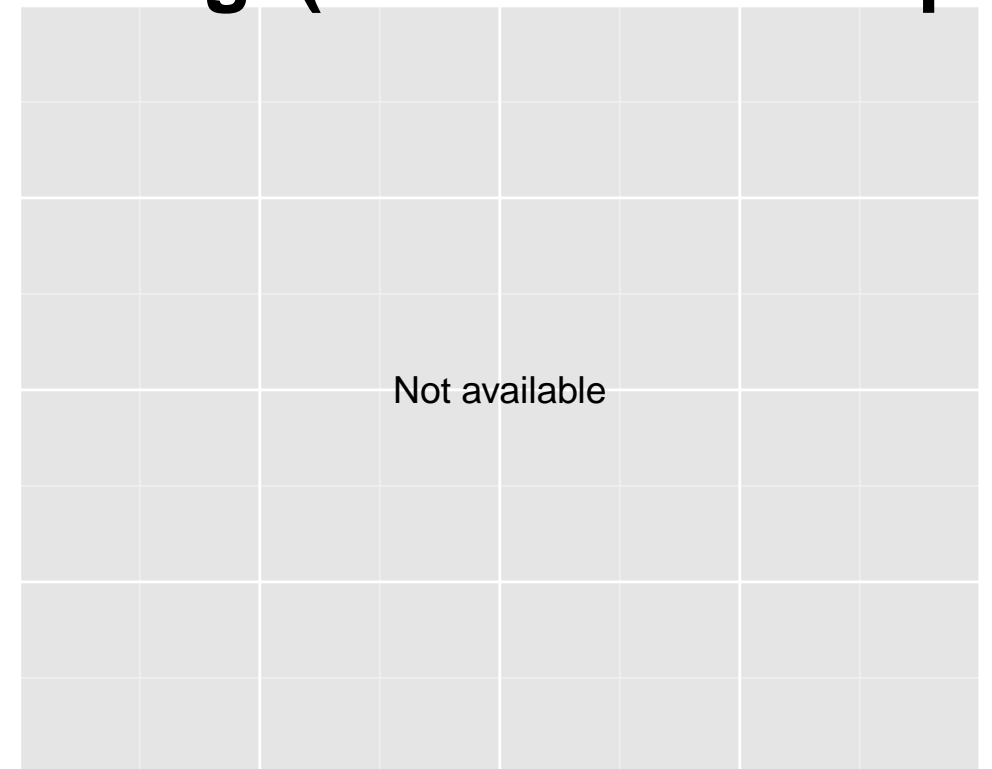

Supplement: SuppDataset_1.zip [file Rnase1_set_A.pdf › Supplemental Dataset 1/A-mRNA_nonrhyth_translation_nonrhyth/Rnase1_set_A.pdf]

**Rnase6 TR**

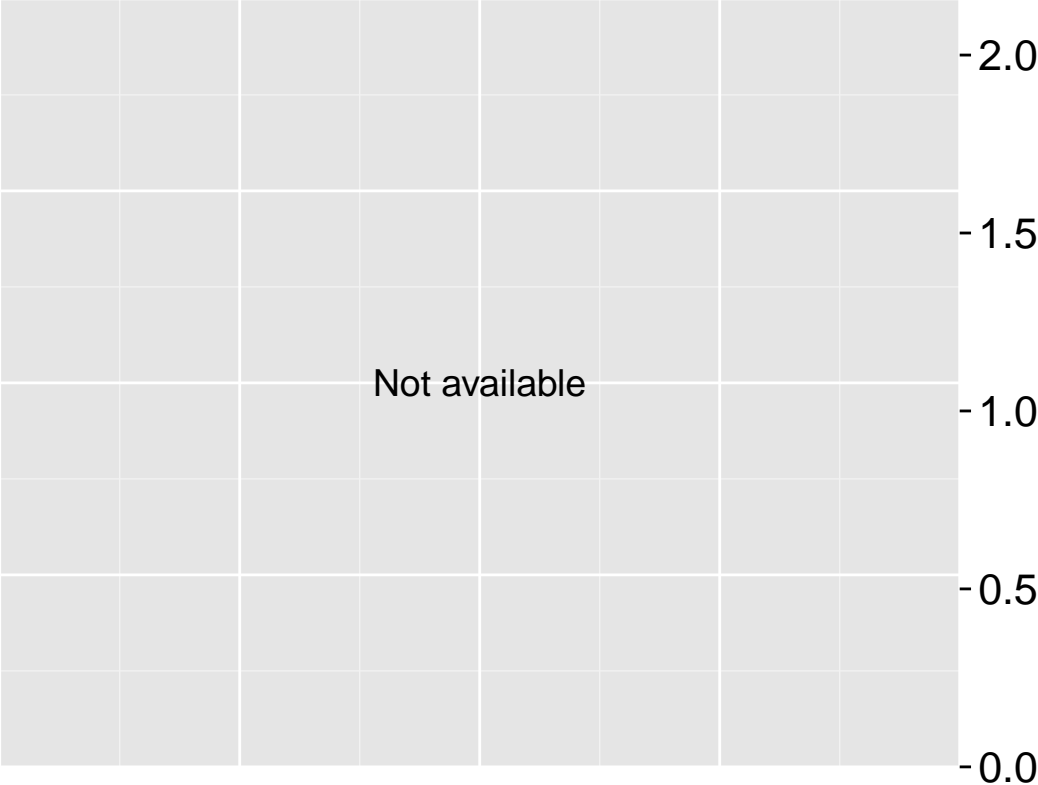

**Rnase6 log2(Ribosome occupancy**

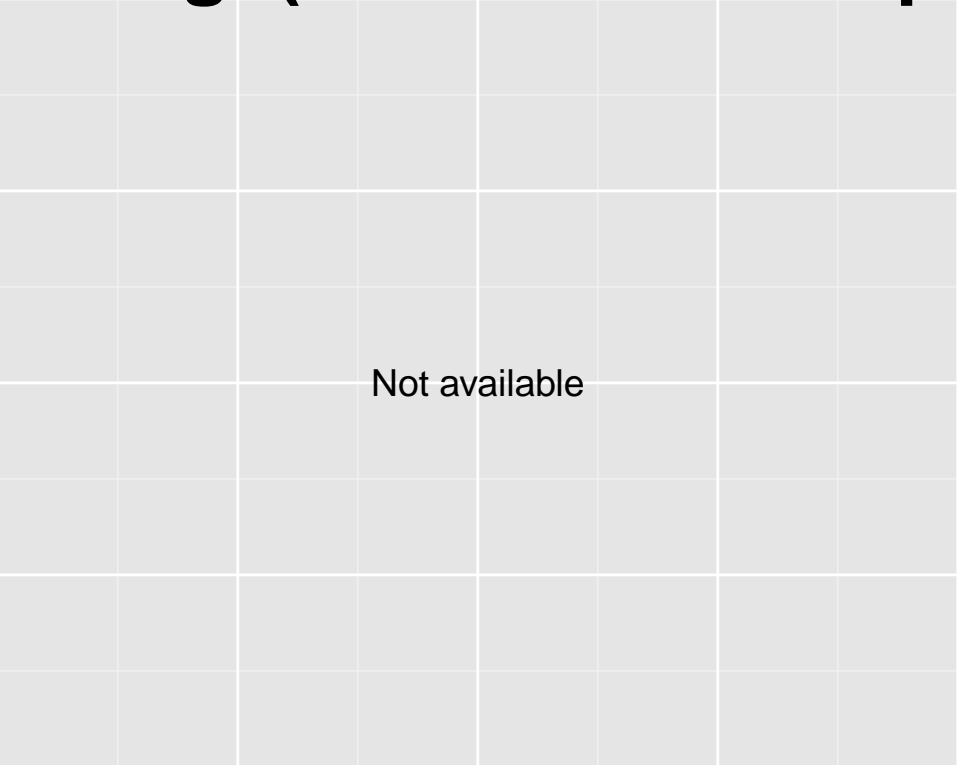

Supplement: SuppDataset_1.zip [file Rnase6_set_A.pdf › Supplemental Dataset 1/A-mRNA_nonrhyth_translation_nonrhyth/Rnase6_set_A.pdf]

## Rnaseh1

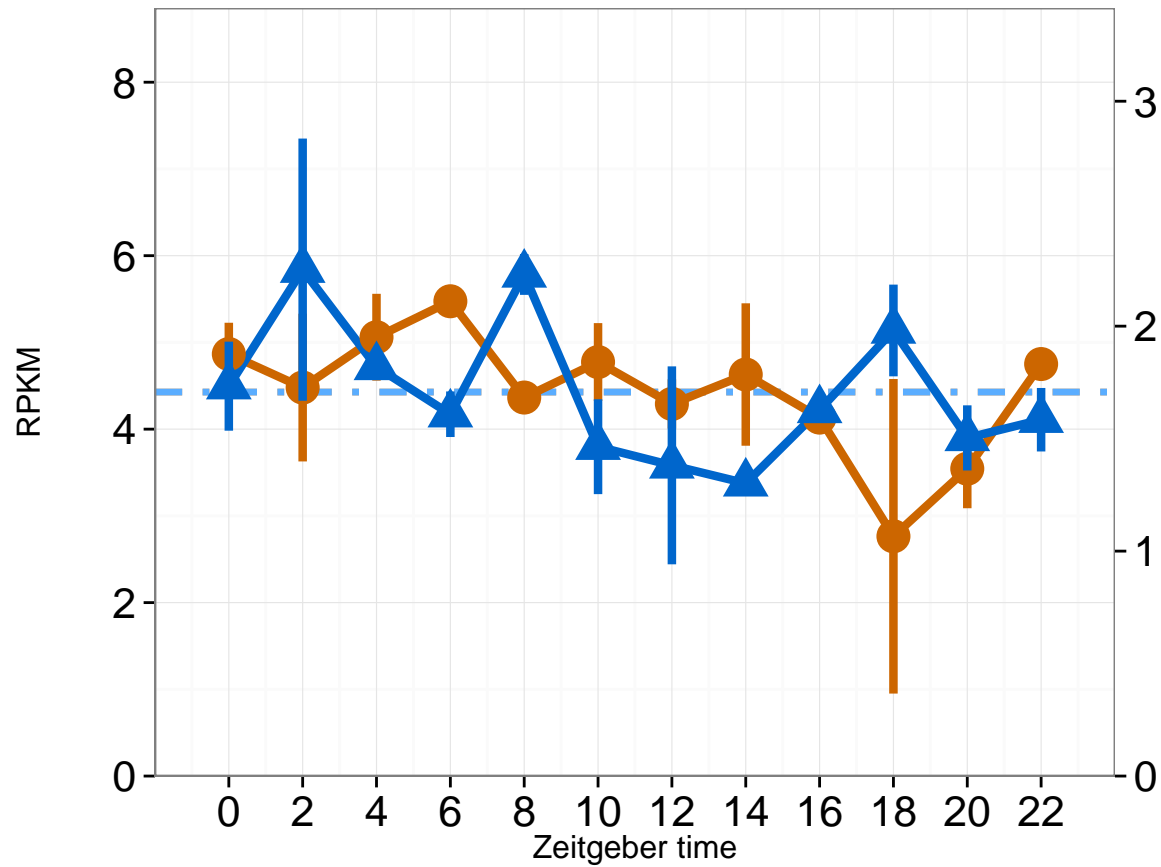

## Rnaseh1

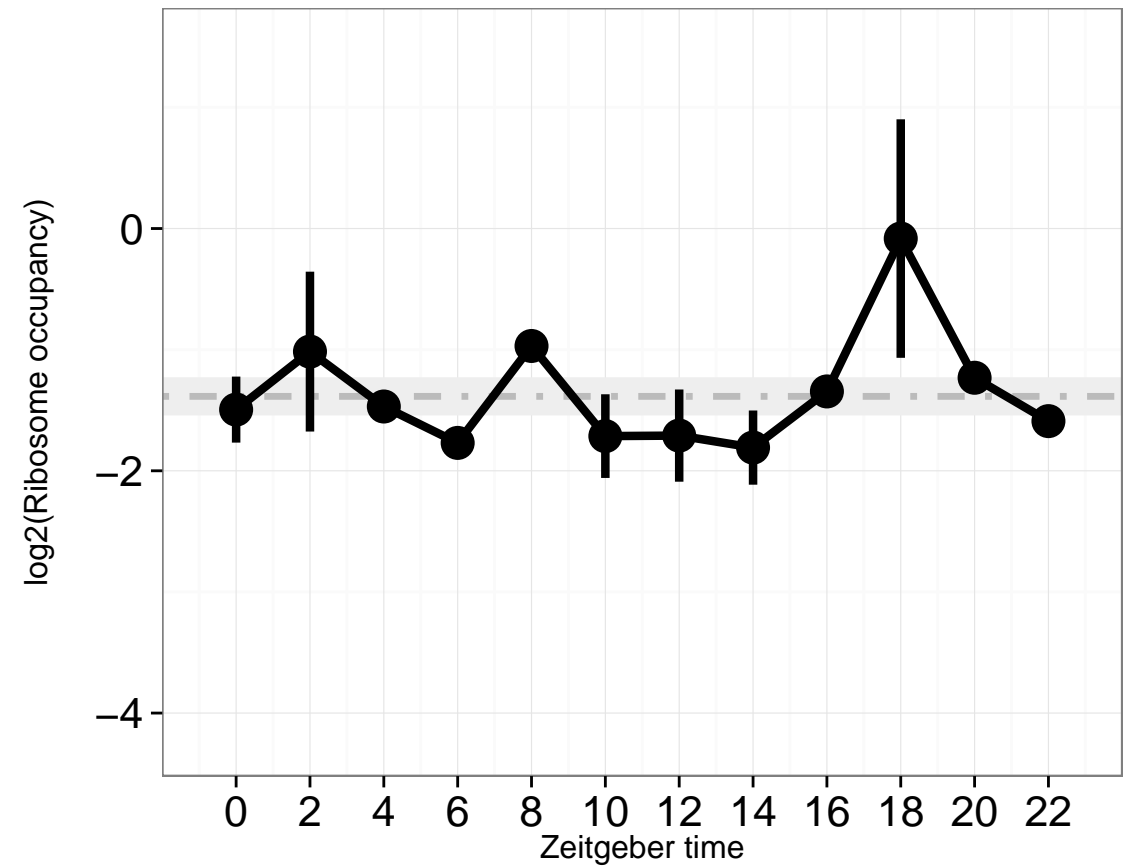

Supplement: SuppDataset_1.zip [file Rnaseh1_set_A.pdf › Supplemental Dataset 1/A-mRNA_nonrhyth_translation_nonrhyth/Rnaseh1_set_A.pdf]

# Rnaseh2a

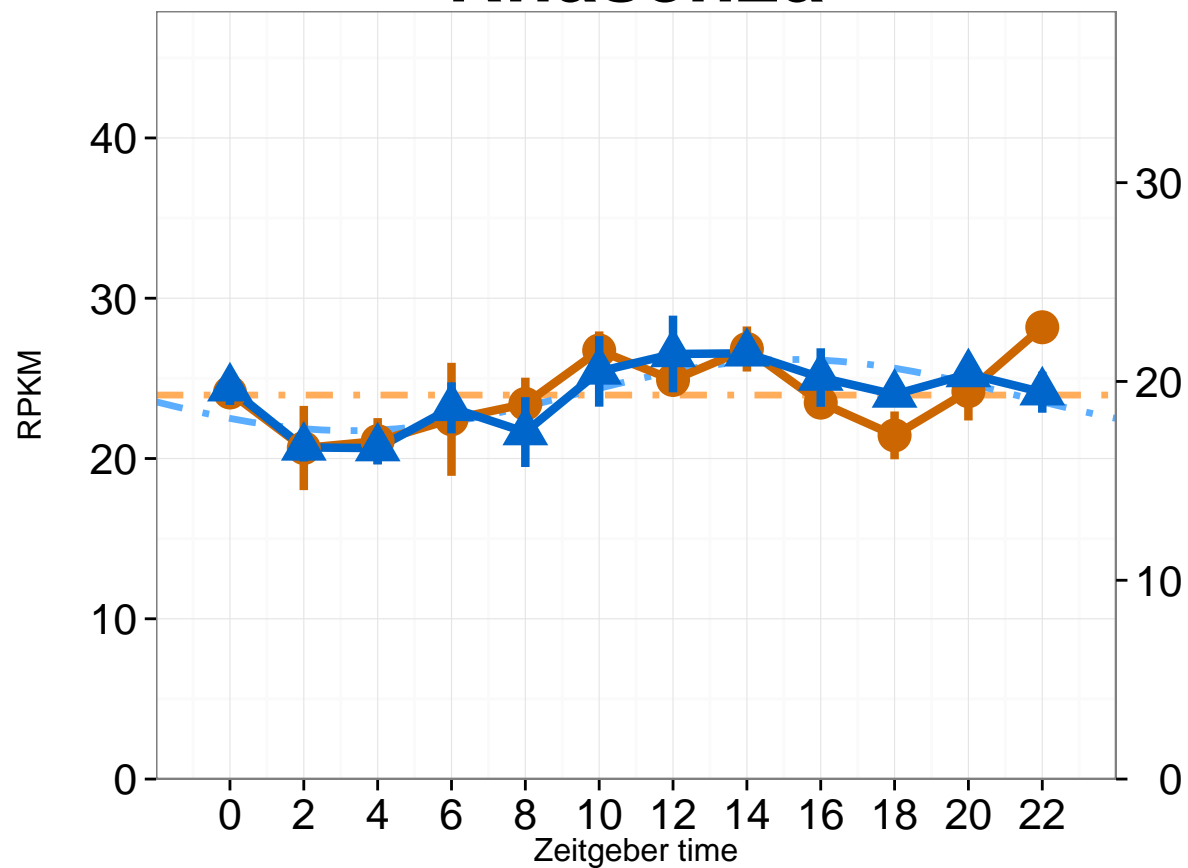

# Rnaseh2a

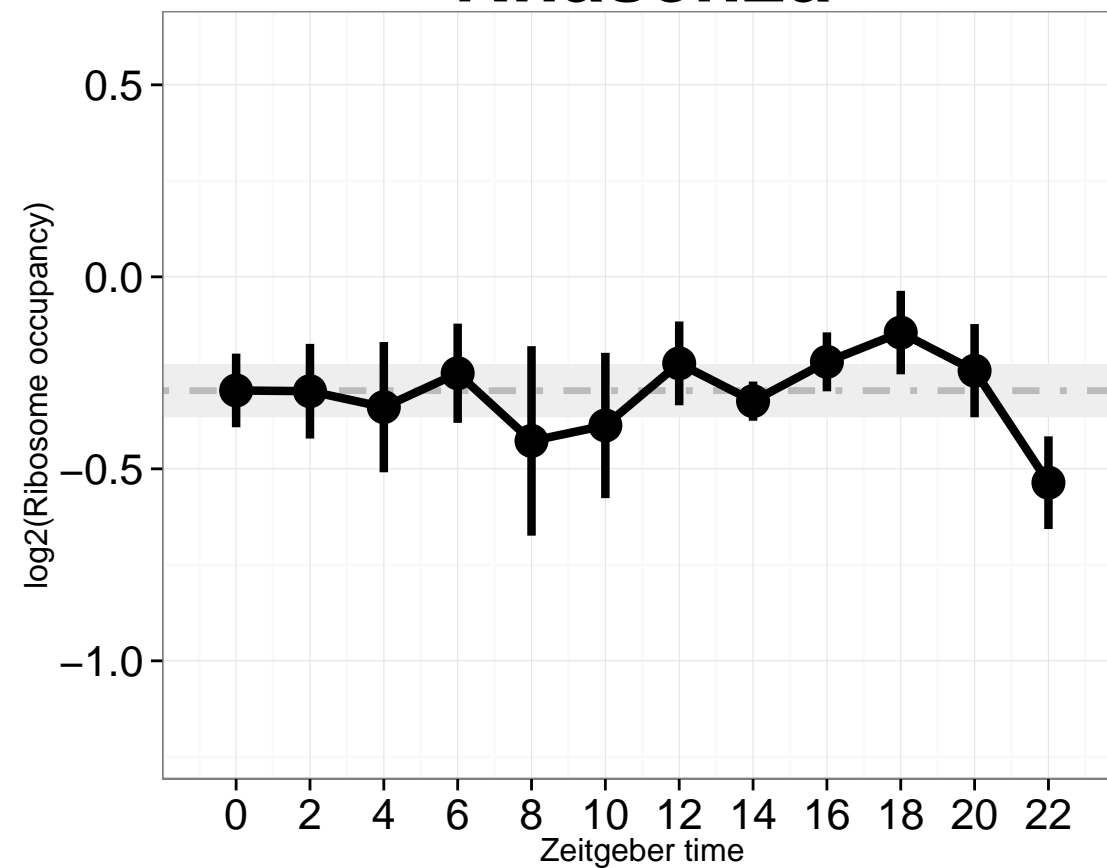

Supplement: SuppDataset_1.zip [file Rnaseh2a_set_A.pdf › Supplemental Dataset 1/A-mRNA_nonrhyth_translation_nonrhyth/Rnaseh2a_set_A.pdf]

## Rnaseh2c

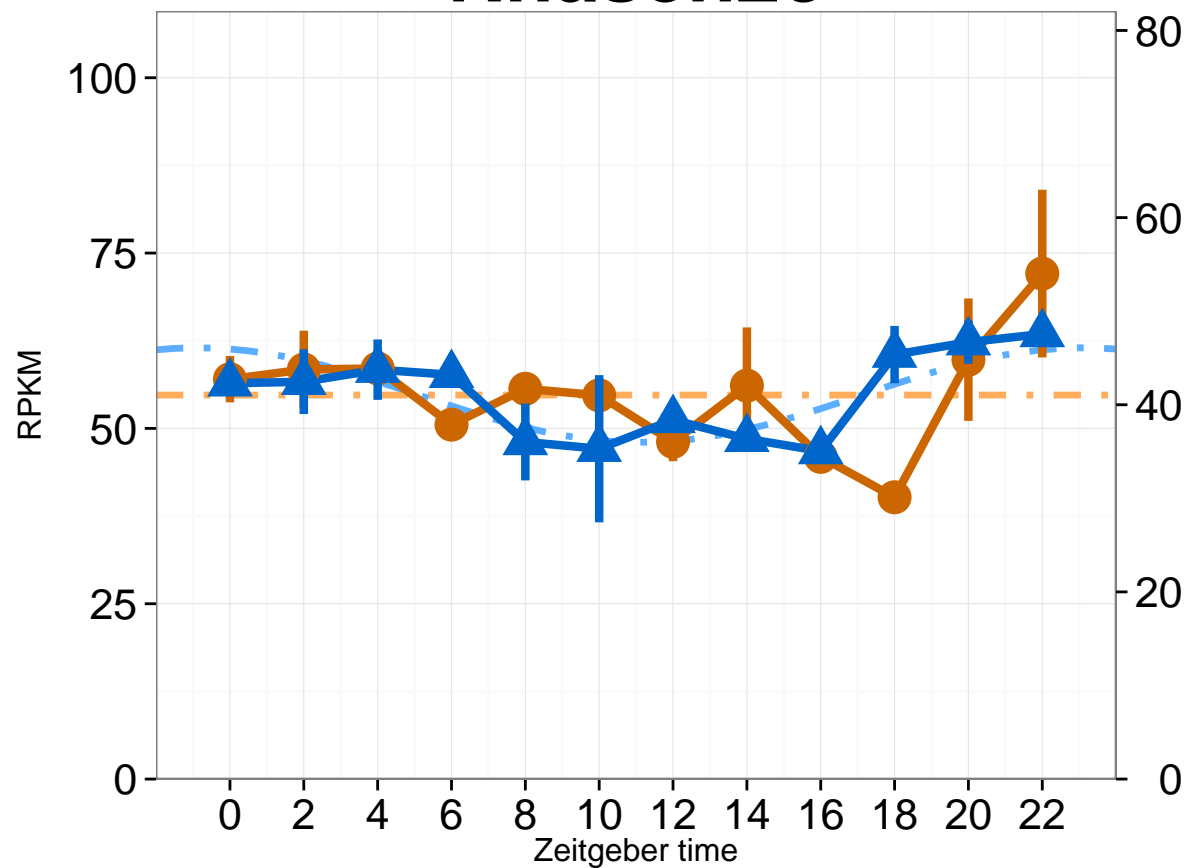

## Rnaseh2c

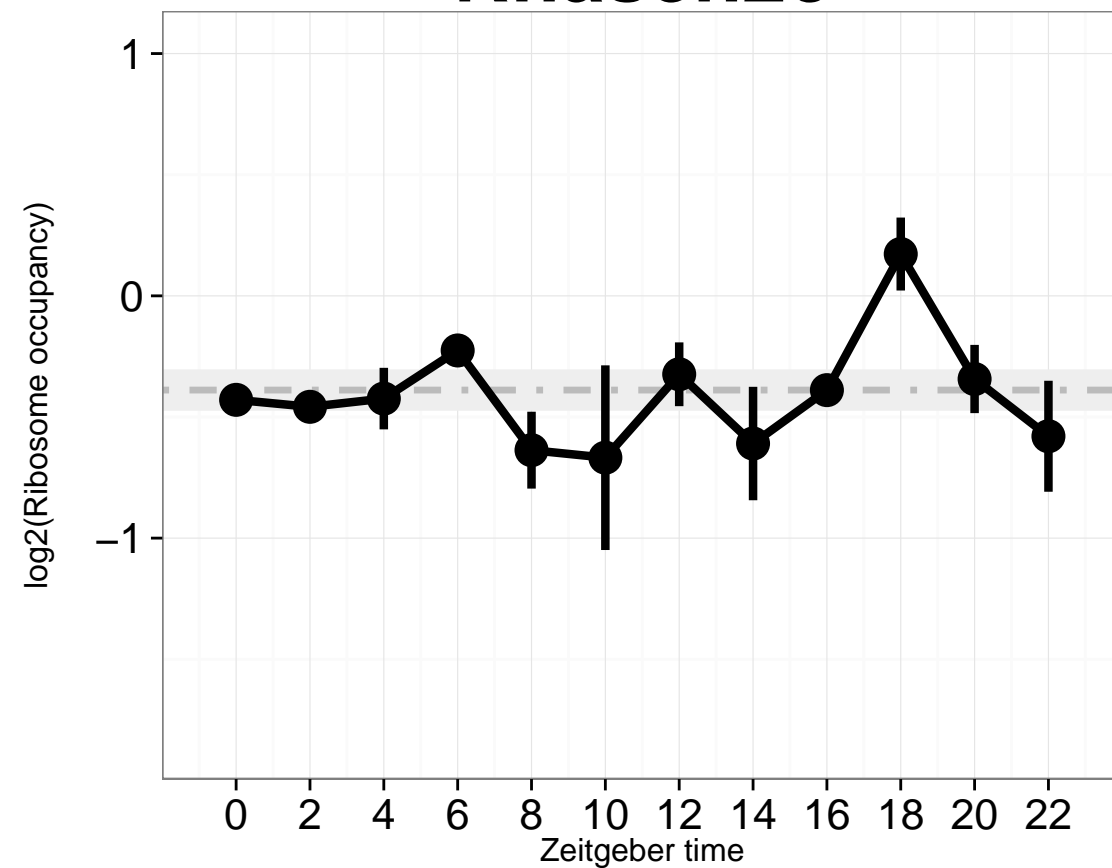

Supplement: SuppDataset_1.zip [file Rnaseh2c_set_A.pdf › Supplemental Dataset 1/A-mRNA_nonrhyth_translation_nonrhyth/Rnaseh2c_set_A.pdf]

**Rnasek TR**

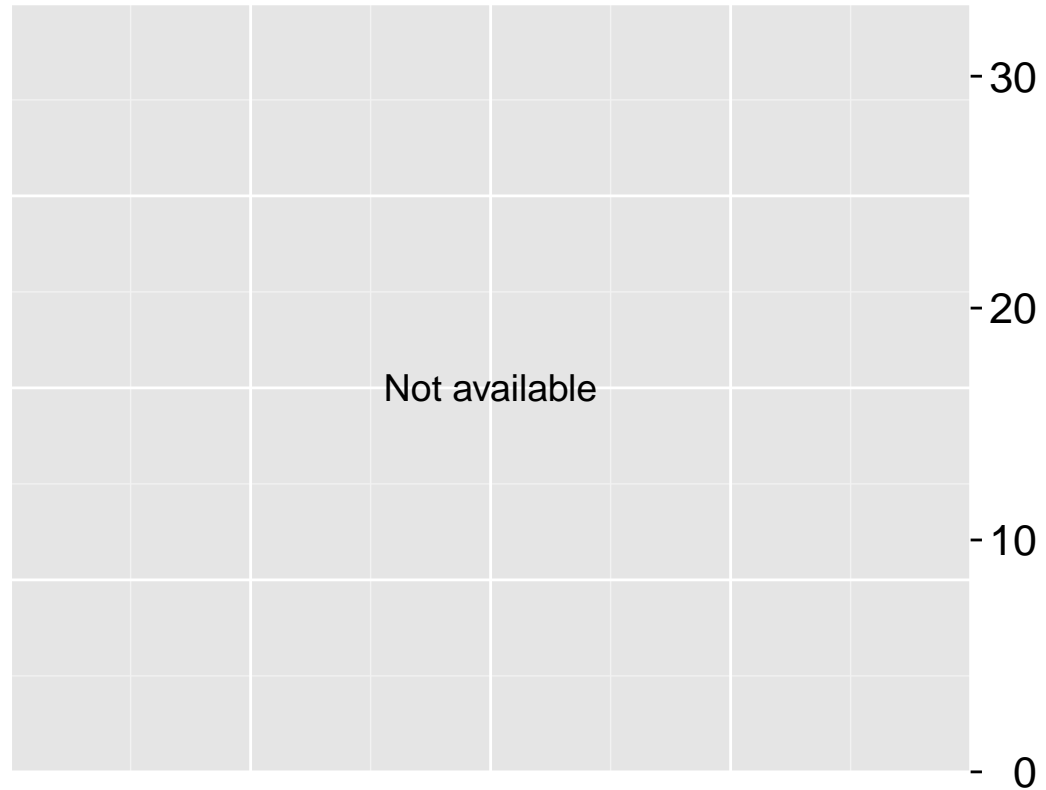

**Rnasek log2(Ribosome occupancy**

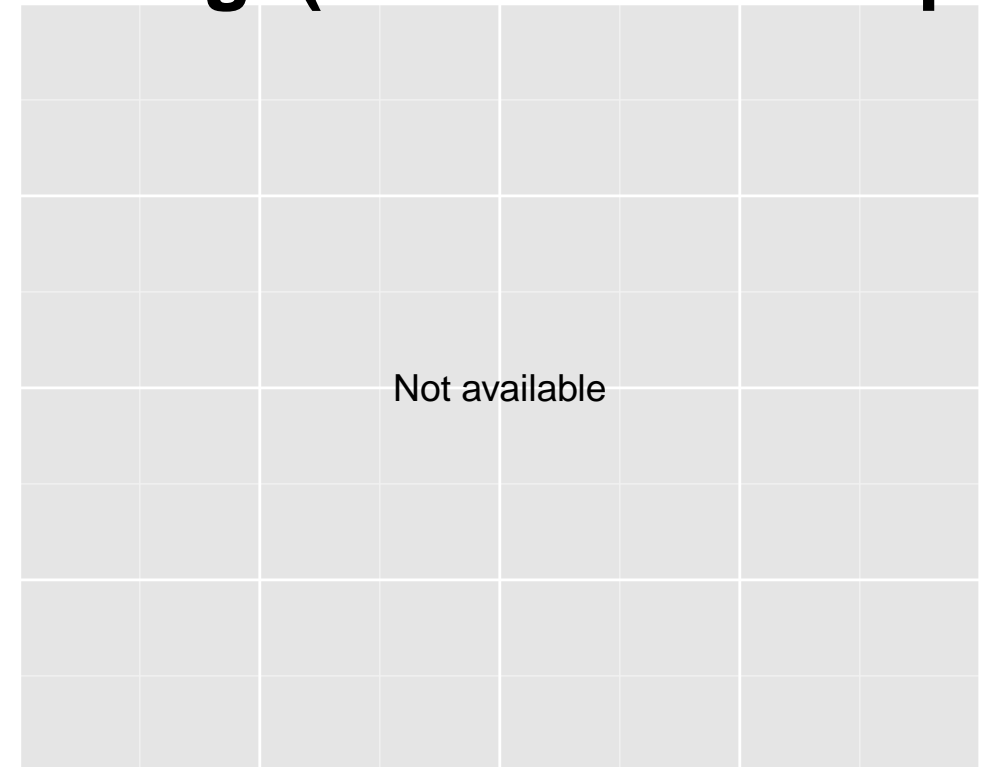

Supplement: SuppDataset_1.zip [file Rnasek_set_A.pdf › Supplemental Dataset 1/A-mRNA_nonrhyth_translation_nonrhyth/Rnasek_set_A.pdf]

## Rnase

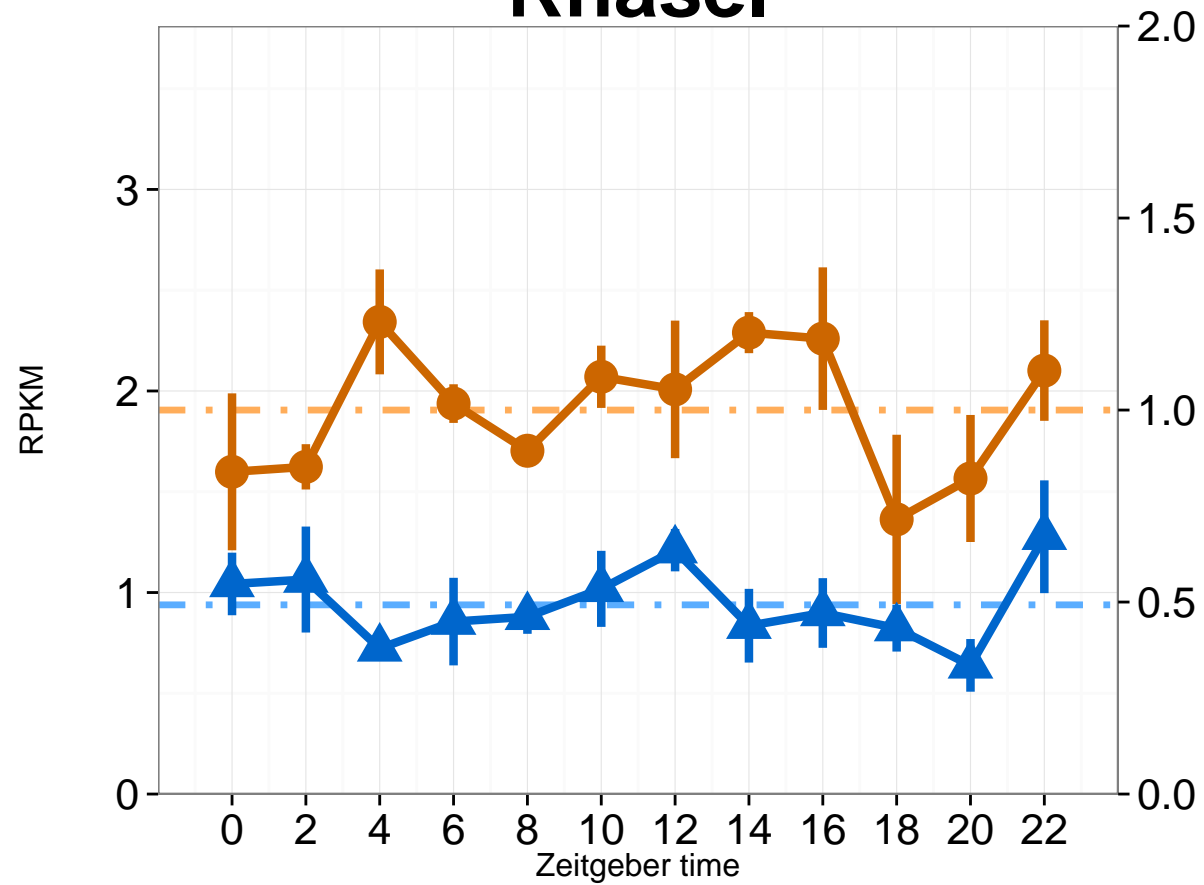

## Rnase

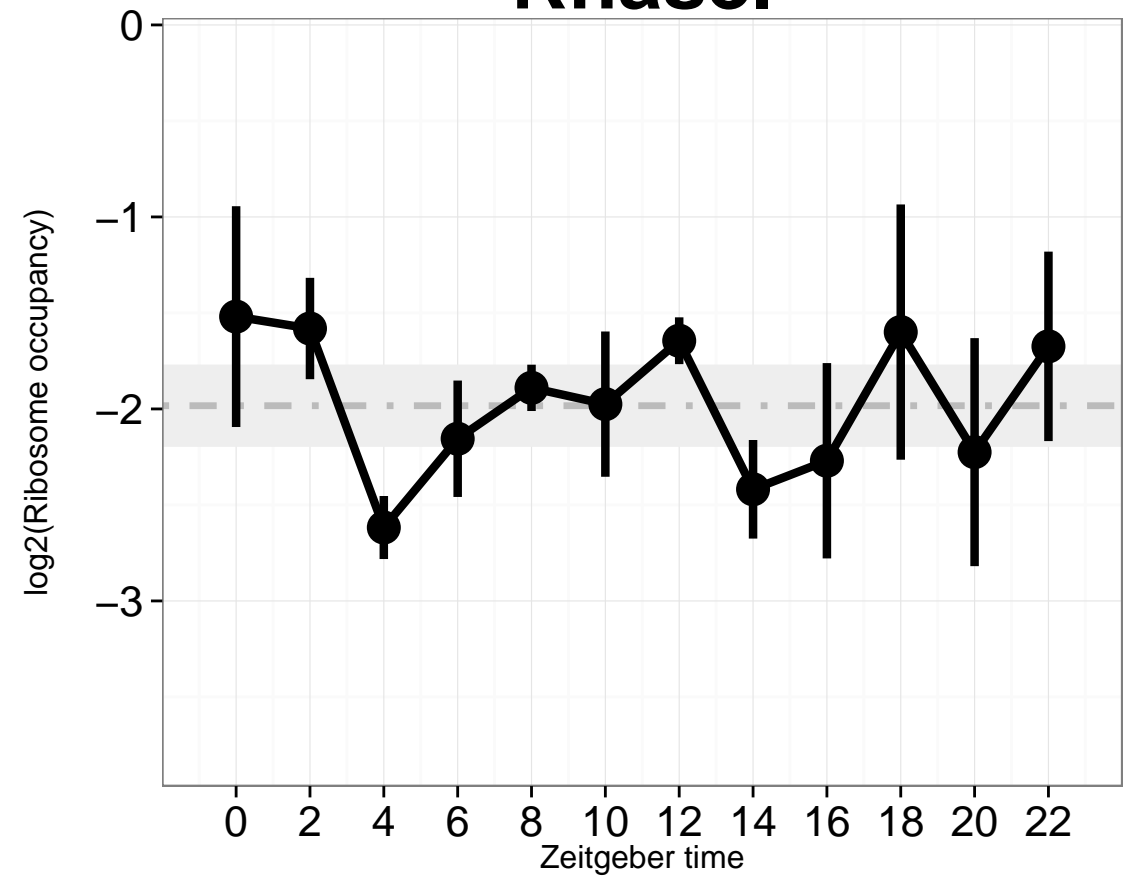

Supplement: SuppDataset_1.zip [file Rnasel_set_A.pdf › Supplemental Dataset 1/A-mRNA_nonrhyth_translation_nonrhyth/Rnasel_set_A.pdf]

# Rnaset2a

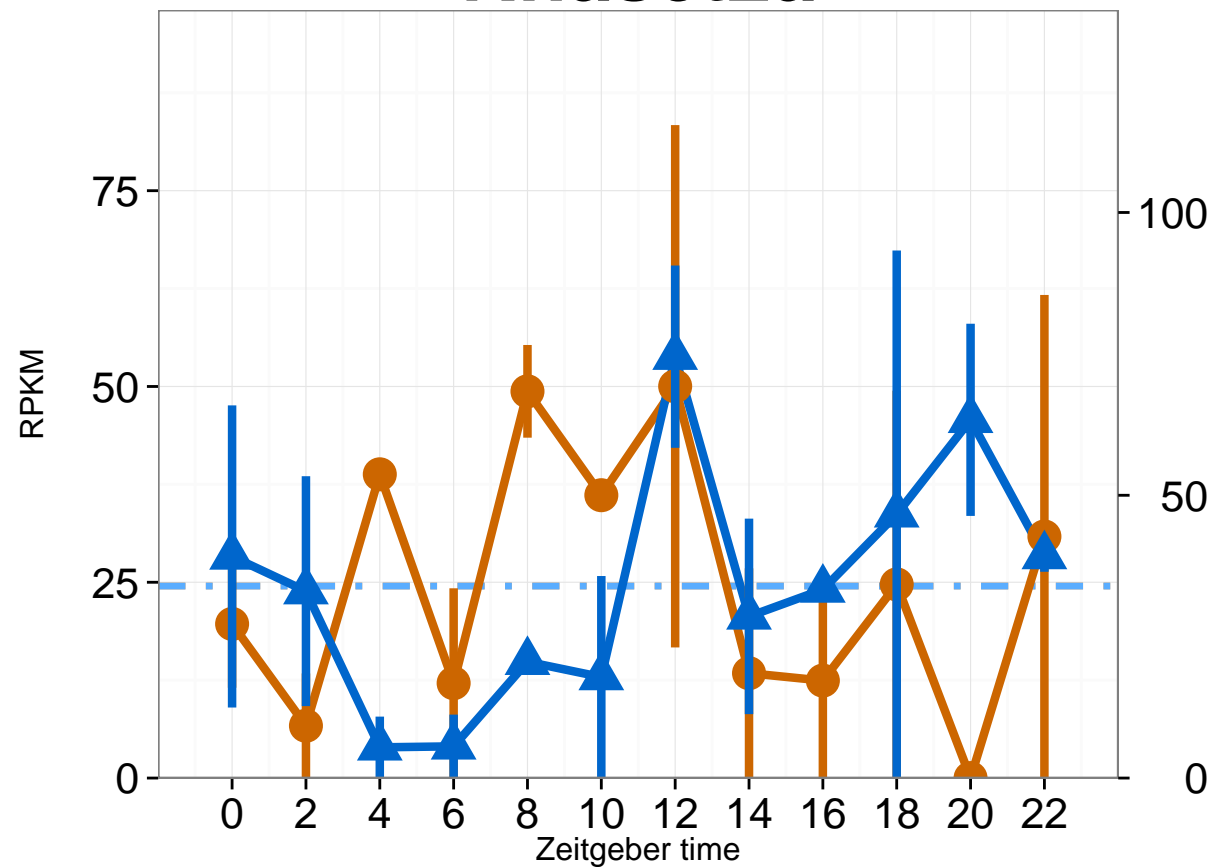

# Rnaset2a

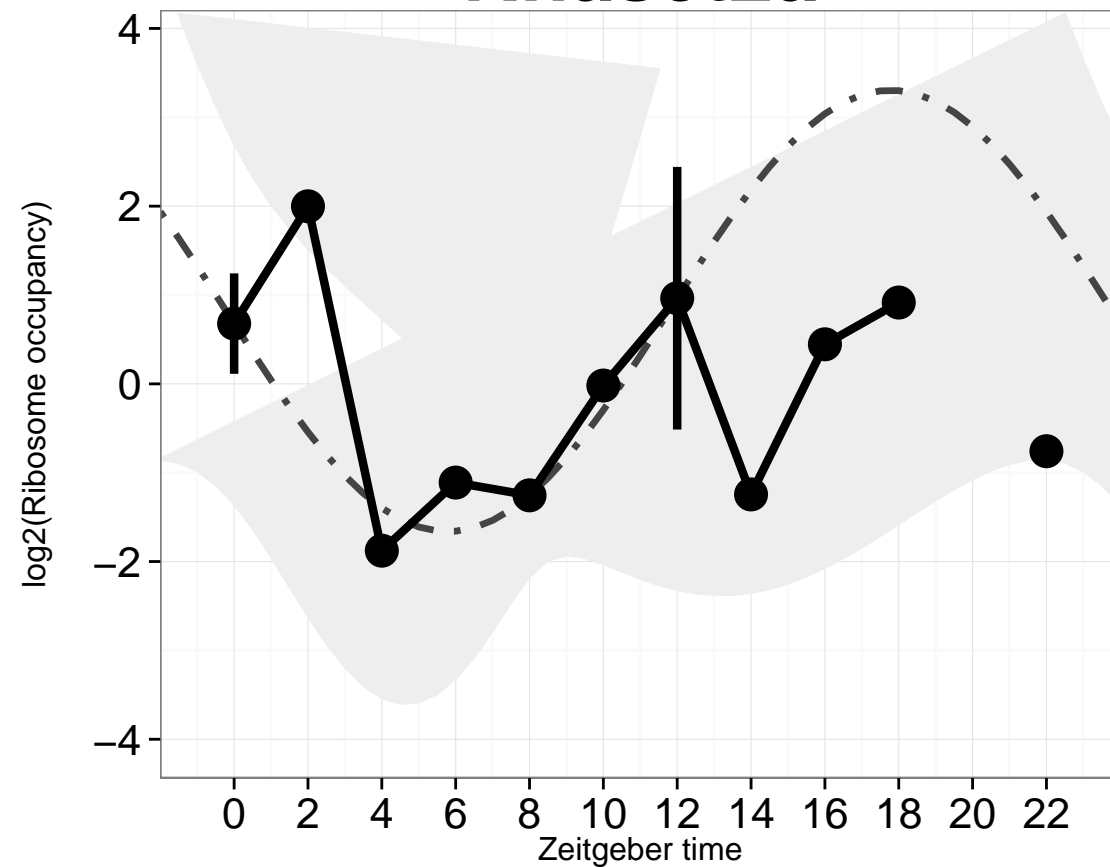

Supplement: SuppDataset_1.zip [file Rnaset2a_set_A.pdf › Supplemental Dataset 1/A-mRNA_nonrhyth_translation_nonrhyth/Rnaset2a_set_A.pdf]

# Rnaset2b

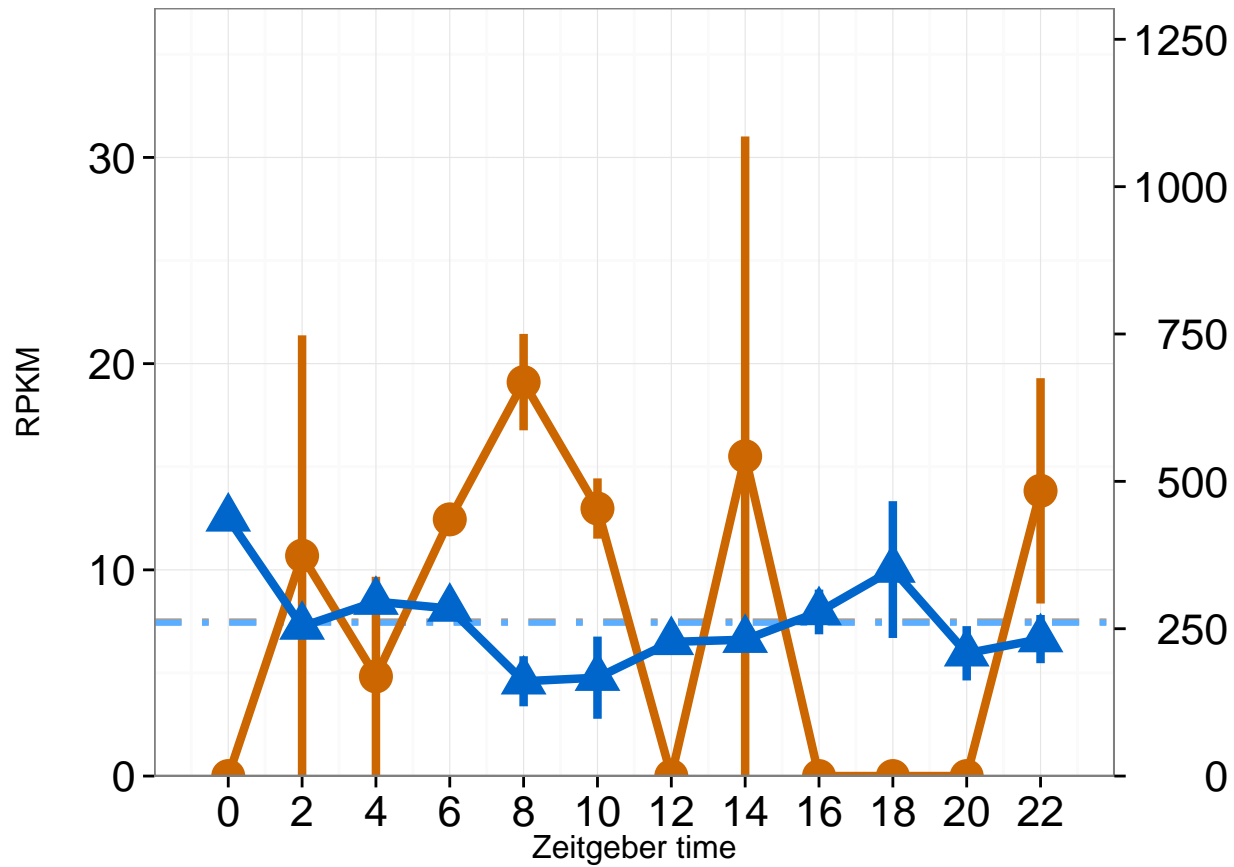

# Rnaset2b

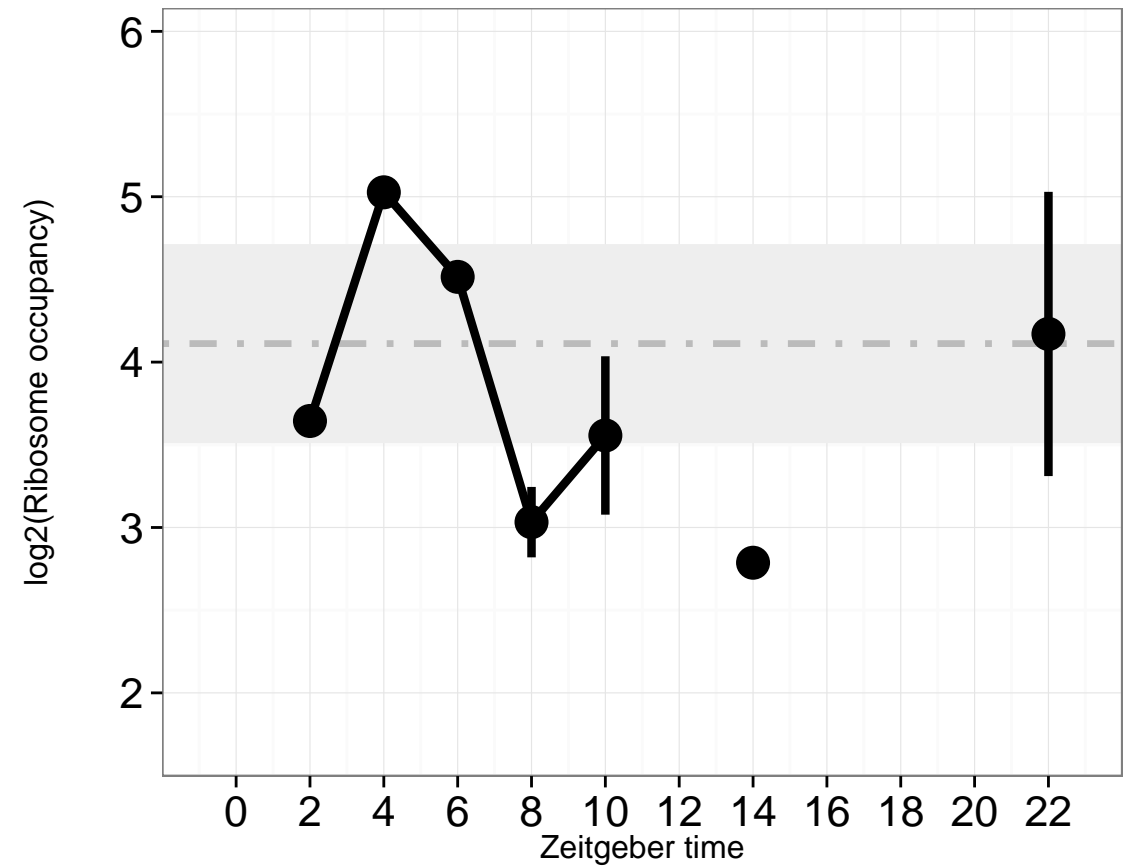

Supplement: SuppDataset_1.zip [file Rnaset2b_set_A.pdf › Supplemental Dataset 1/A-mRNA_nonrhyth_translation_nonrhyth/Rnaset2b_set_A.pdf]

# Rnd3

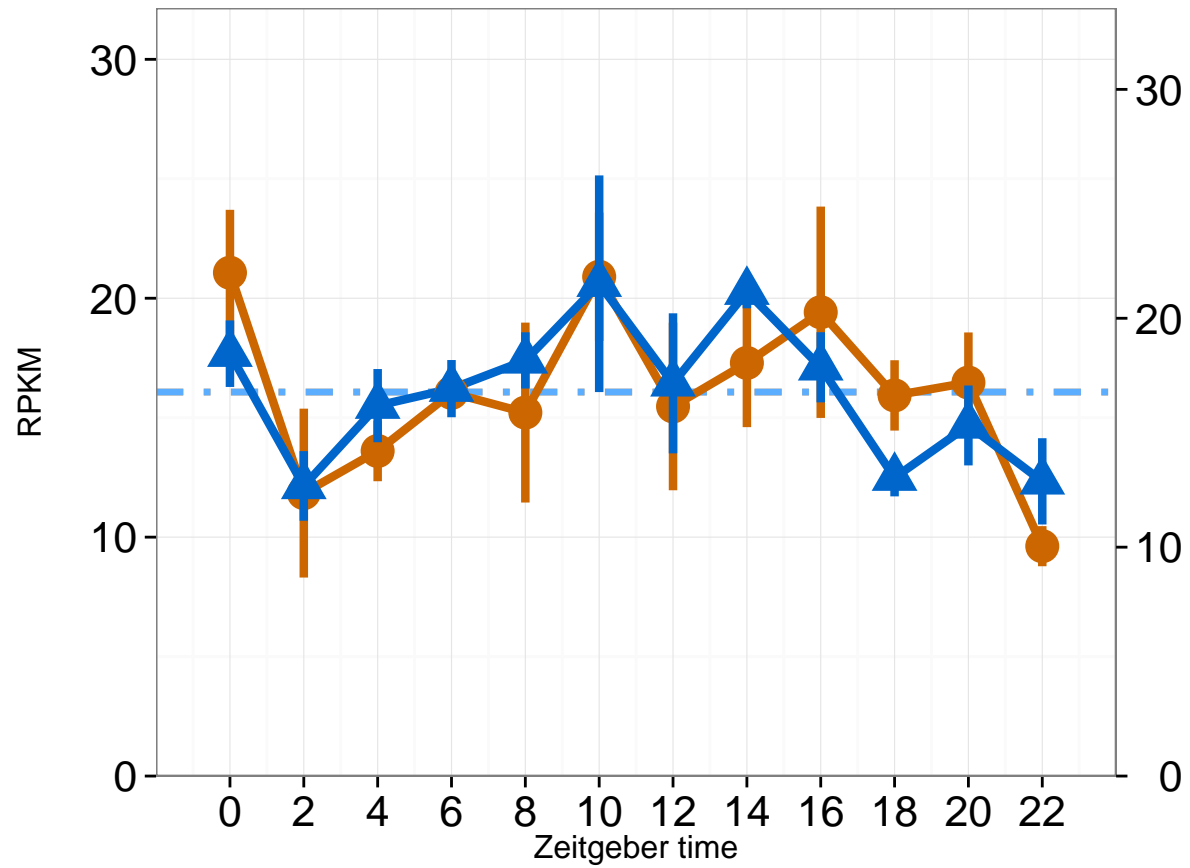

# Rnd3

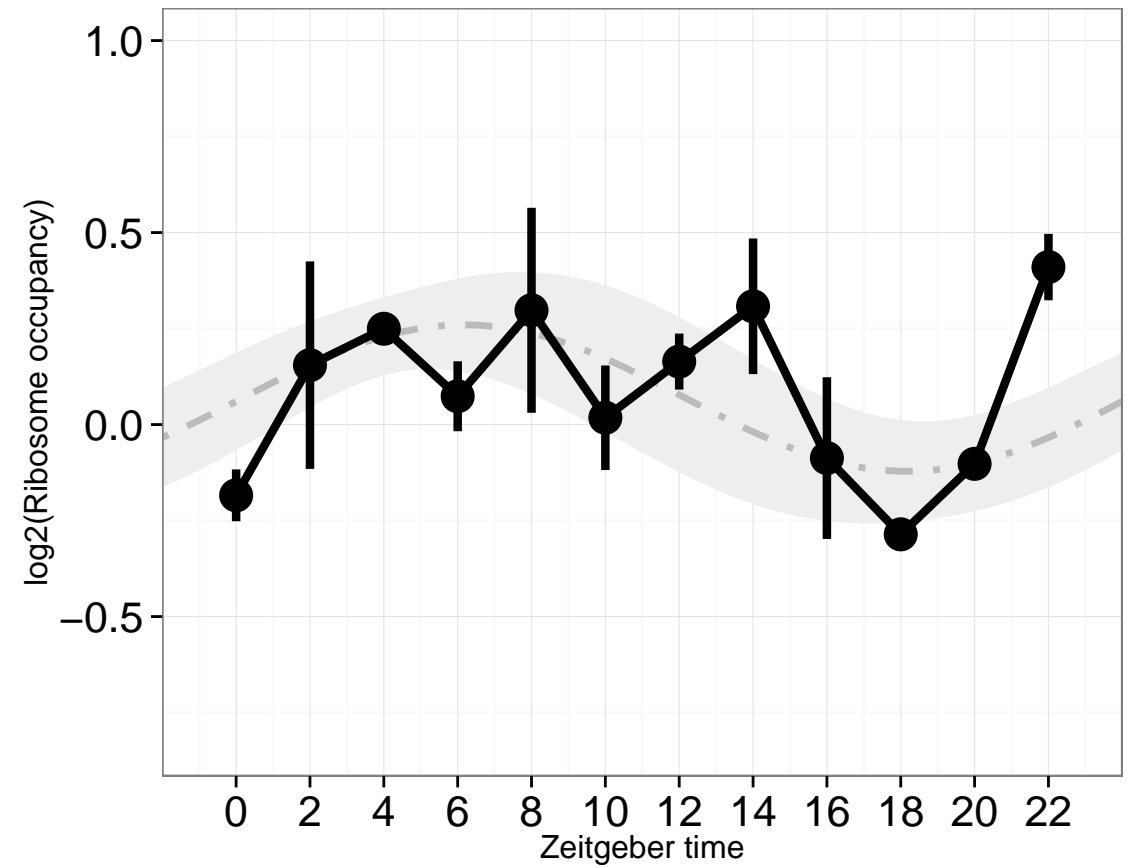

Supplement: SuppDataset_1.zip [file Rnd3_set_A.pdf › Supplemental Dataset 1/A-mRNA_nonrhyth_translation_nonrhyth/Rnd3_set_A.pdf]

# Rnf103

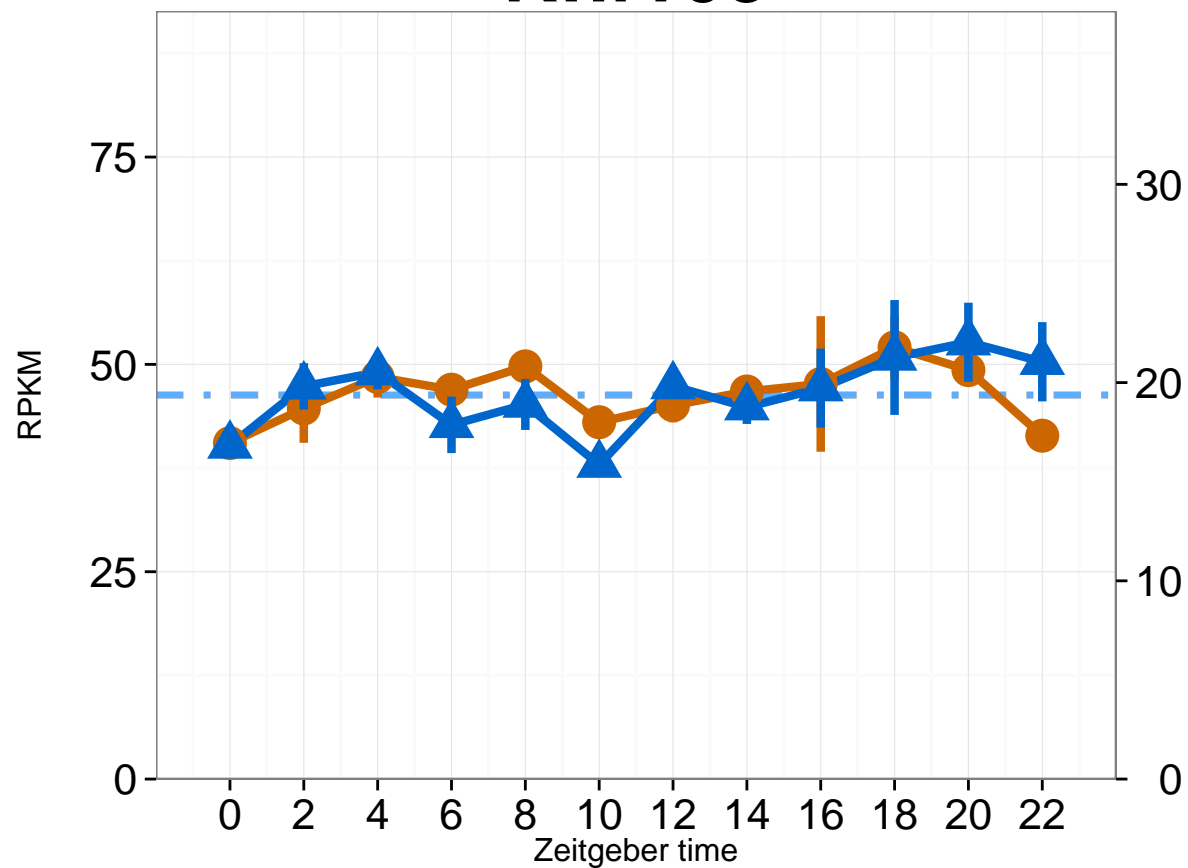

# Rnf103

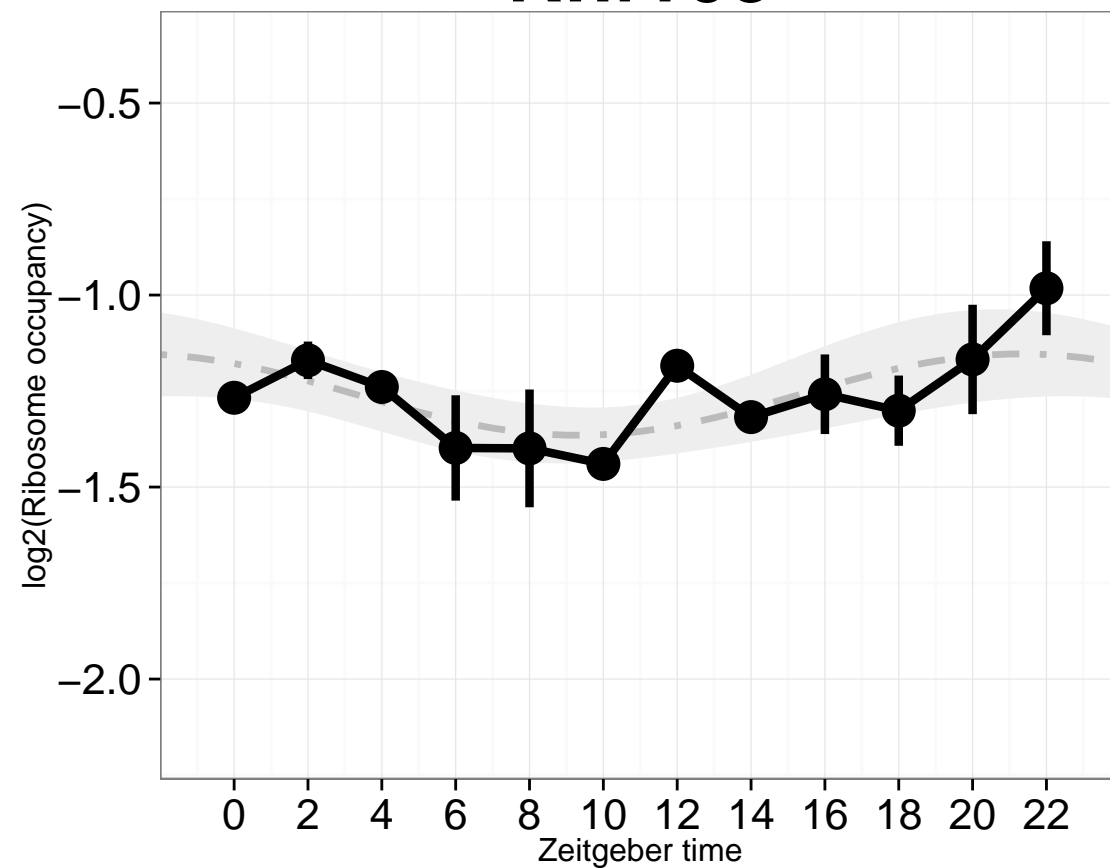

Supplement: SuppDataset_1.zip [file Rnf103_set_A.pdf › Supplemental Dataset 1/A-mRNA_nonrhyth_translation_nonrhyth/Rnf103_set_A.pdf]

## Rnf10

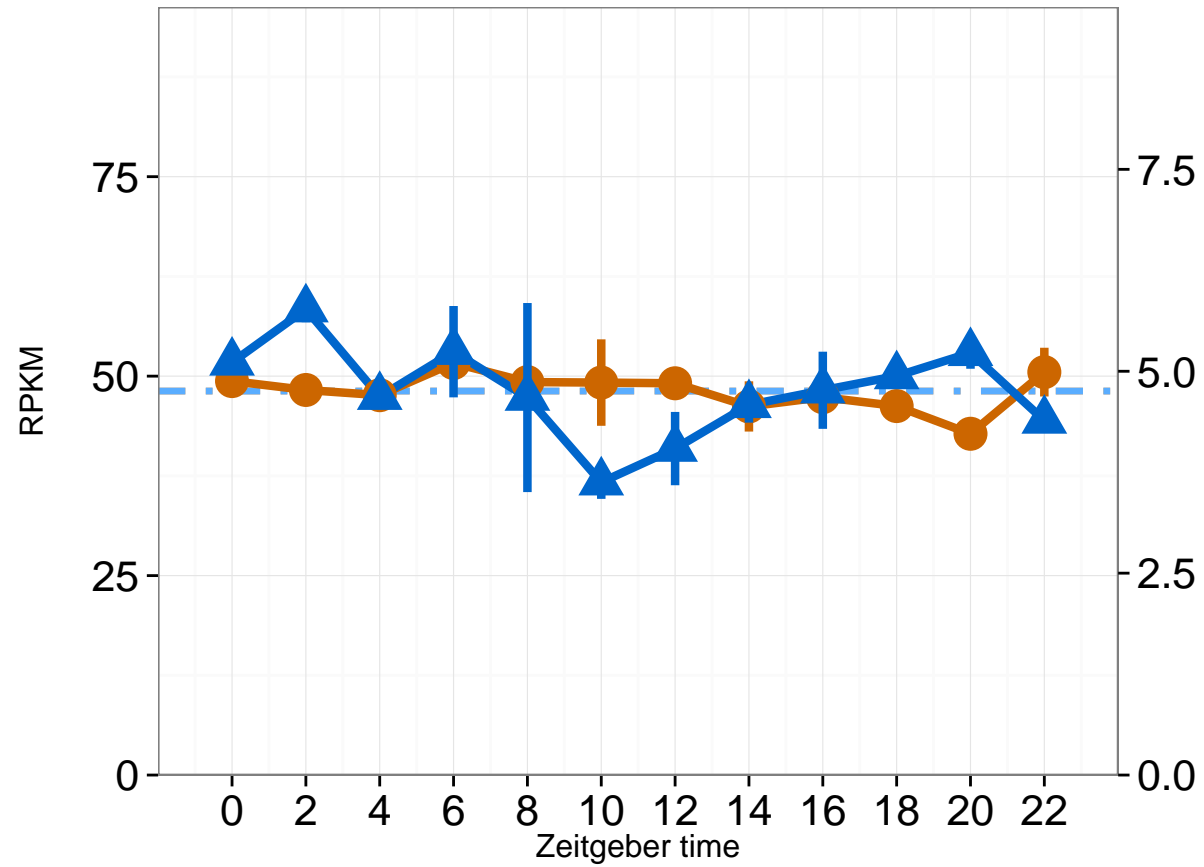

## Rnf10

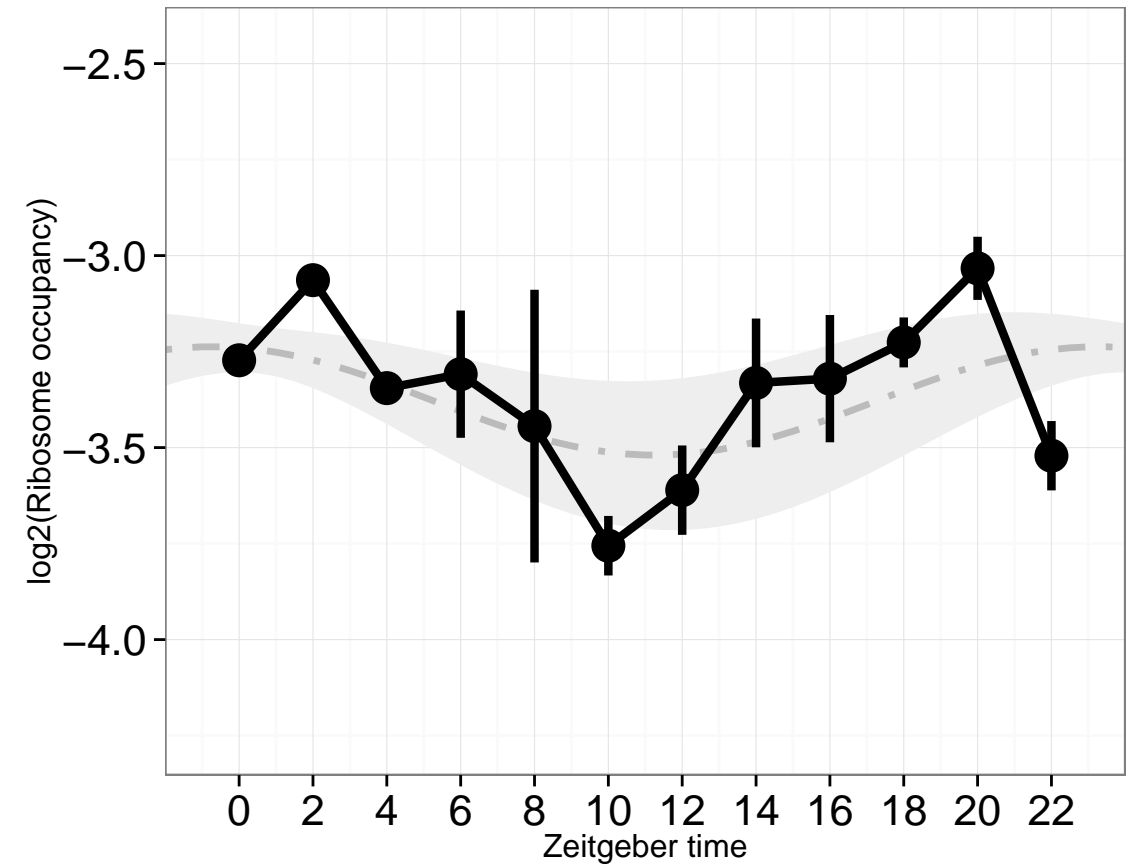

Supplement: SuppDataset_1.zip [file Rnf10_set_A.pdf › Supplemental Dataset 1/A-mRNA_nonrhyth_translation_nonrhyth/Rnf10_set_A.pdf]

## Rnf111

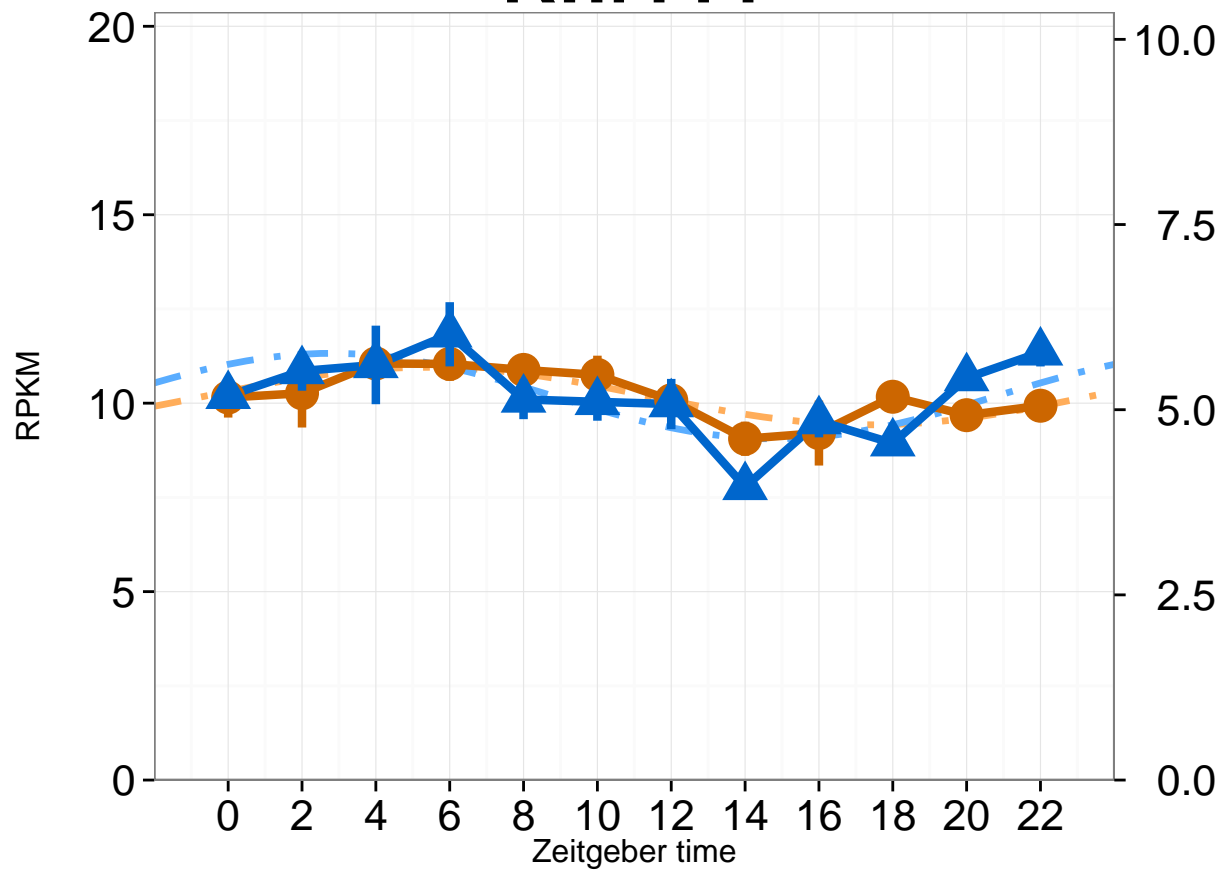

## Rnf111

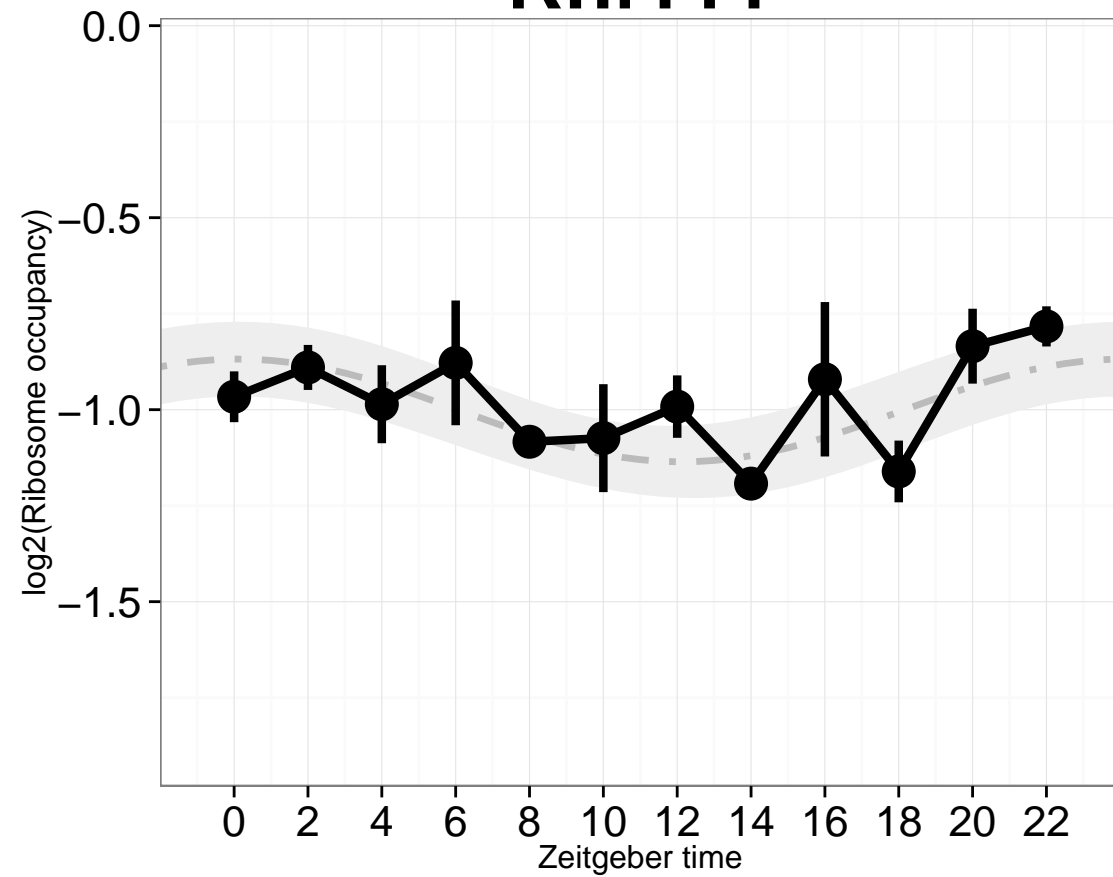

Supplement: SuppDataset_1.zip [file Rnf111_set_A.pdf › Supplemental Dataset 1/A-mRNA_nonrhyth_translation_nonrhyth/Rnf111_set_A.pdf]

# Rnf113a1

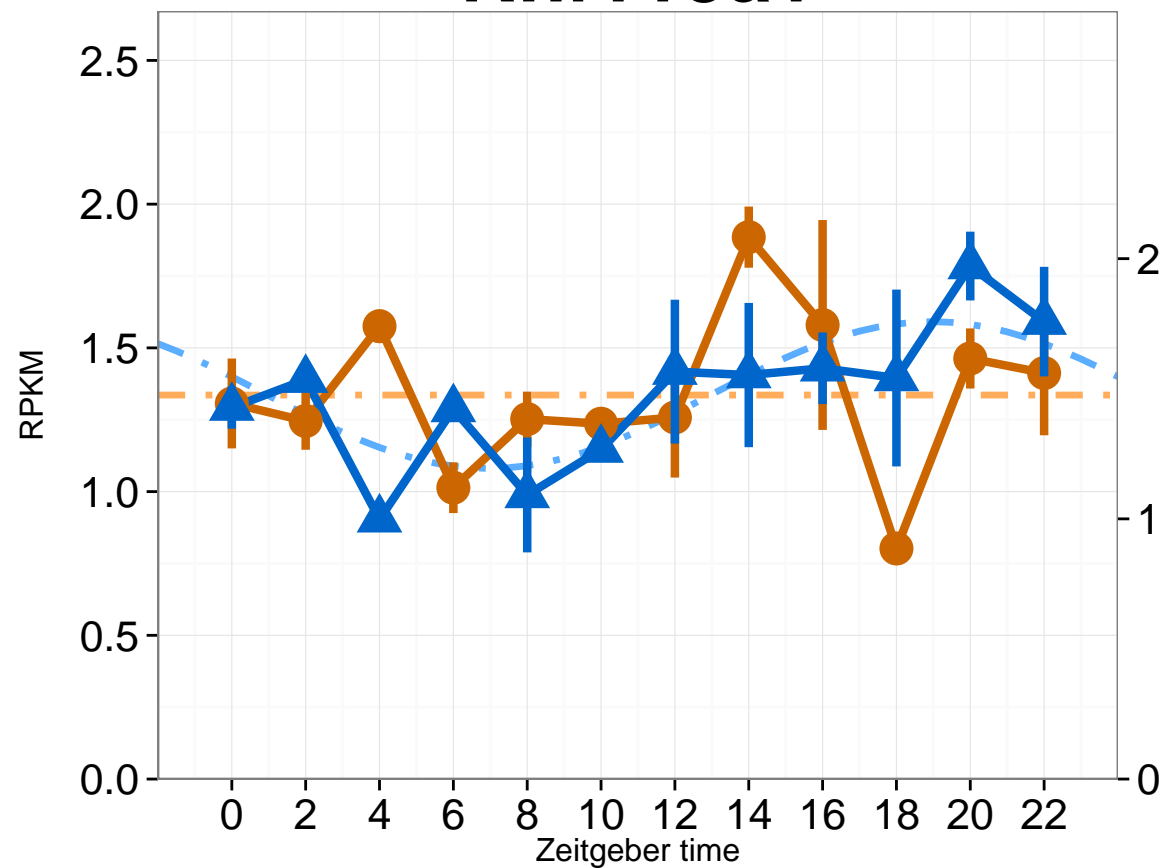

# Rnf113a1

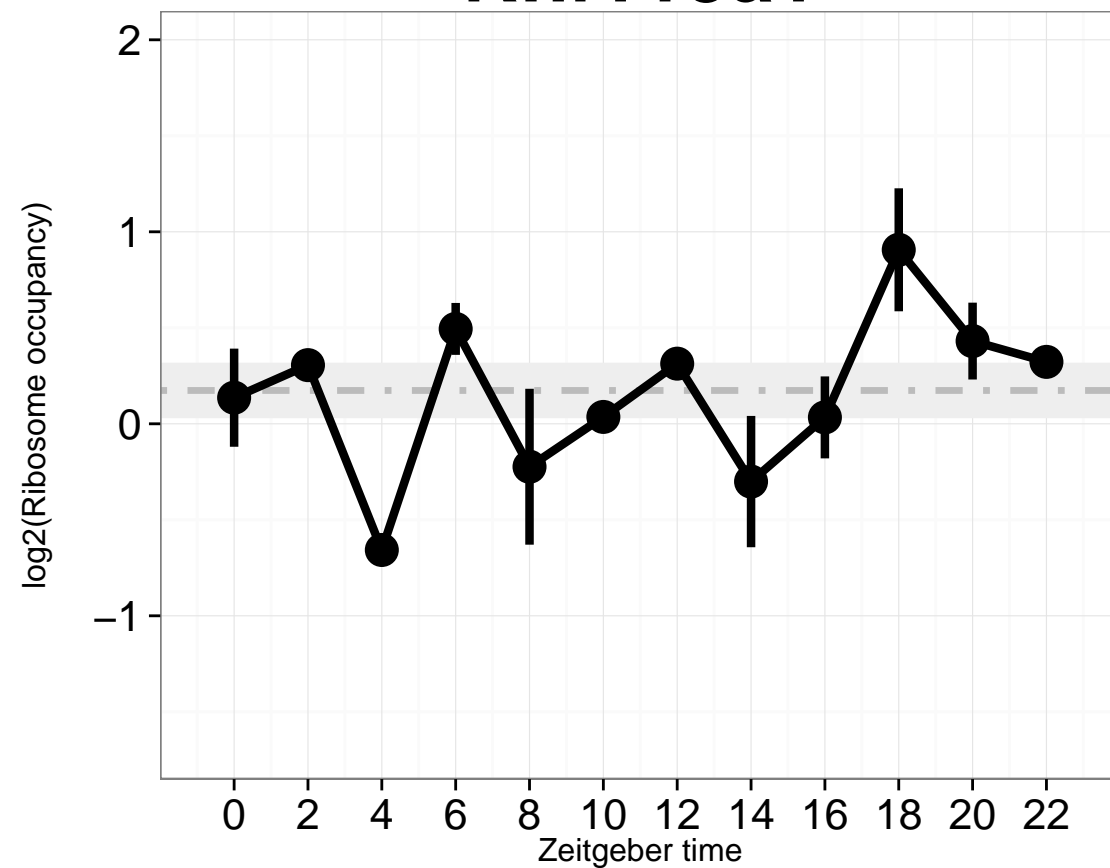

Supplement: SuppDataset_1.zip [file Rnf113a1_set_A.pdf › Supplemental Dataset 1/A-mRNA_nonrhyth_translation_nonrhyth/Rnf113a1_set_A.pdf]

# Rnf113a2

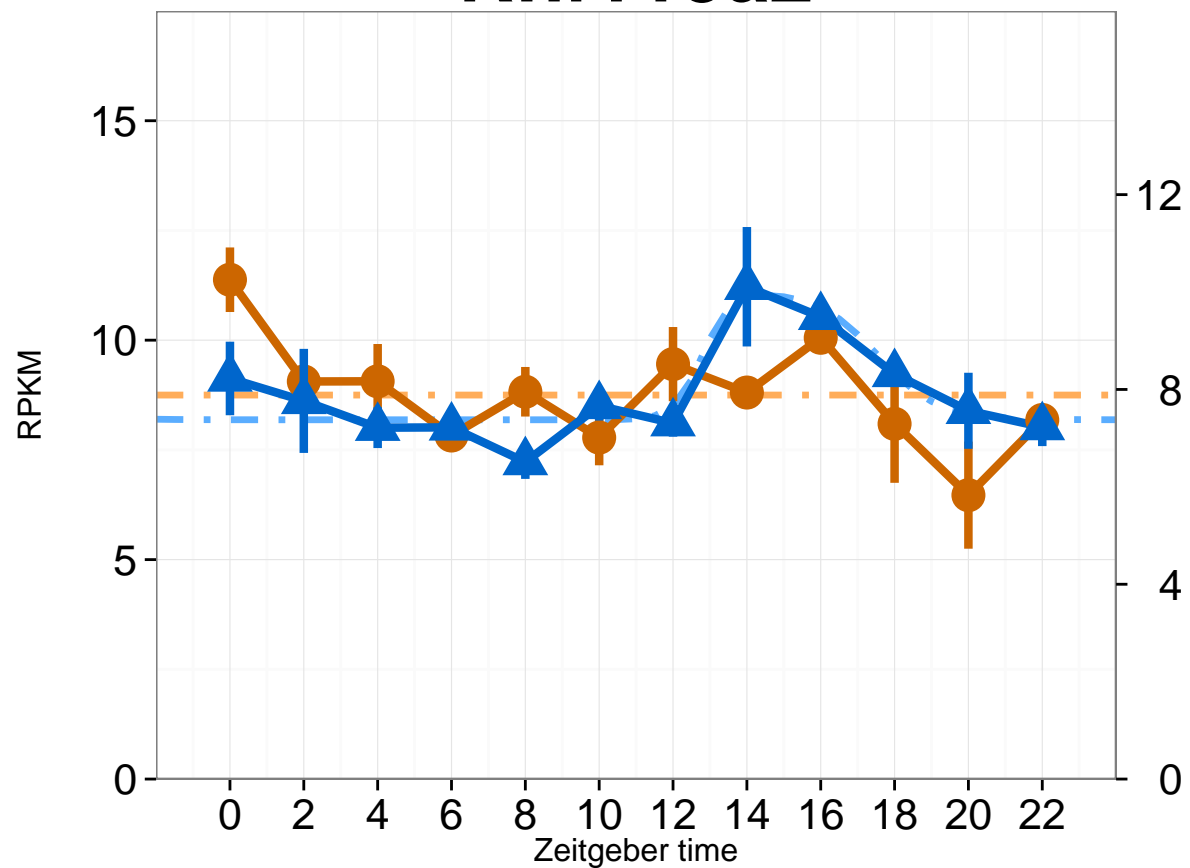

# Rnf113a2

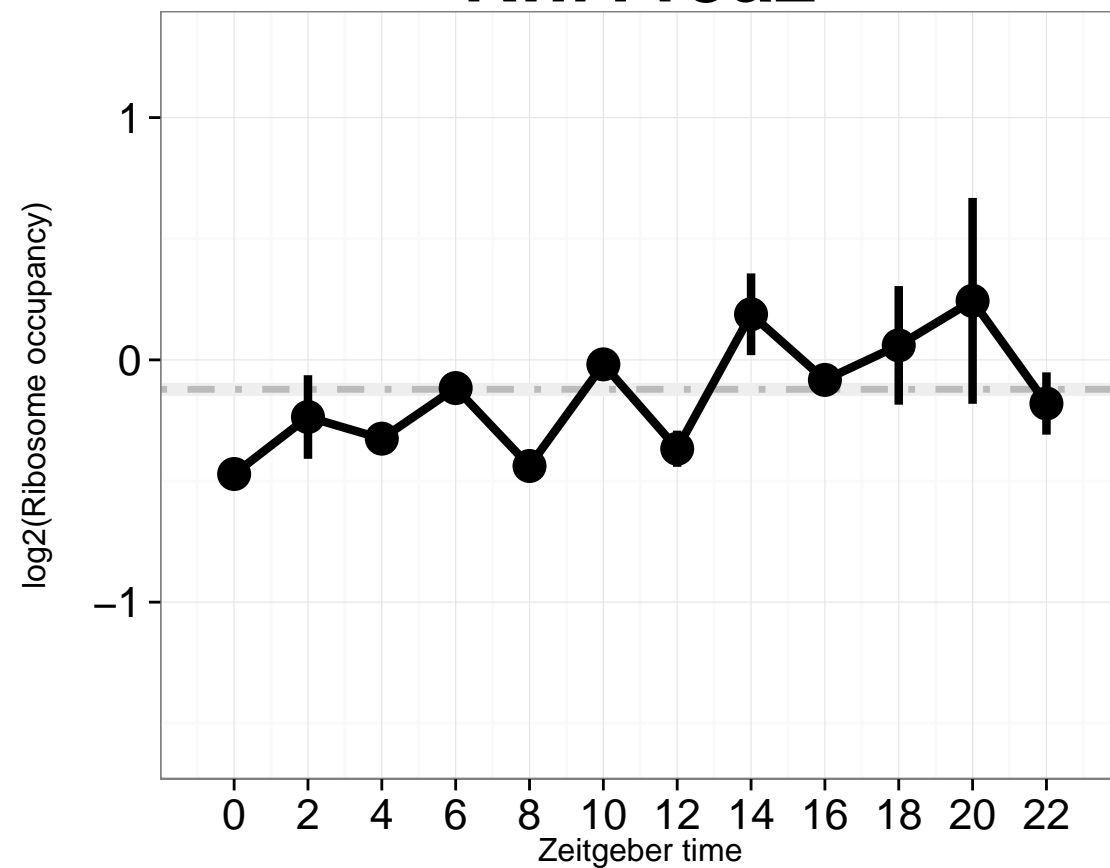

Supplement: SuppDataset_1.zip [file Rnf113a2_set_A.pdf › Supplemental Dataset 1/A-mRNA_nonrhyth_translation_nonrhyth/Rnf113a2_set_A.pdf]

## Rnf114

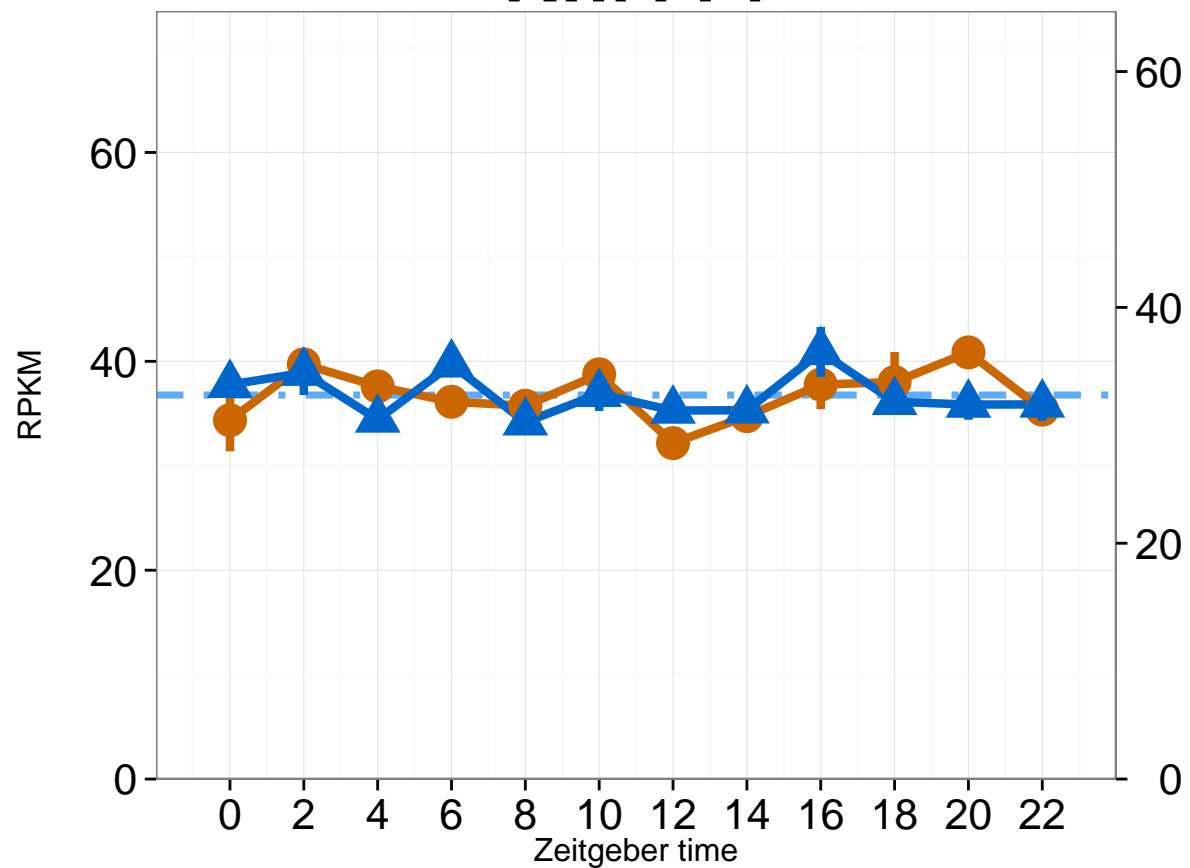

## Rnf114

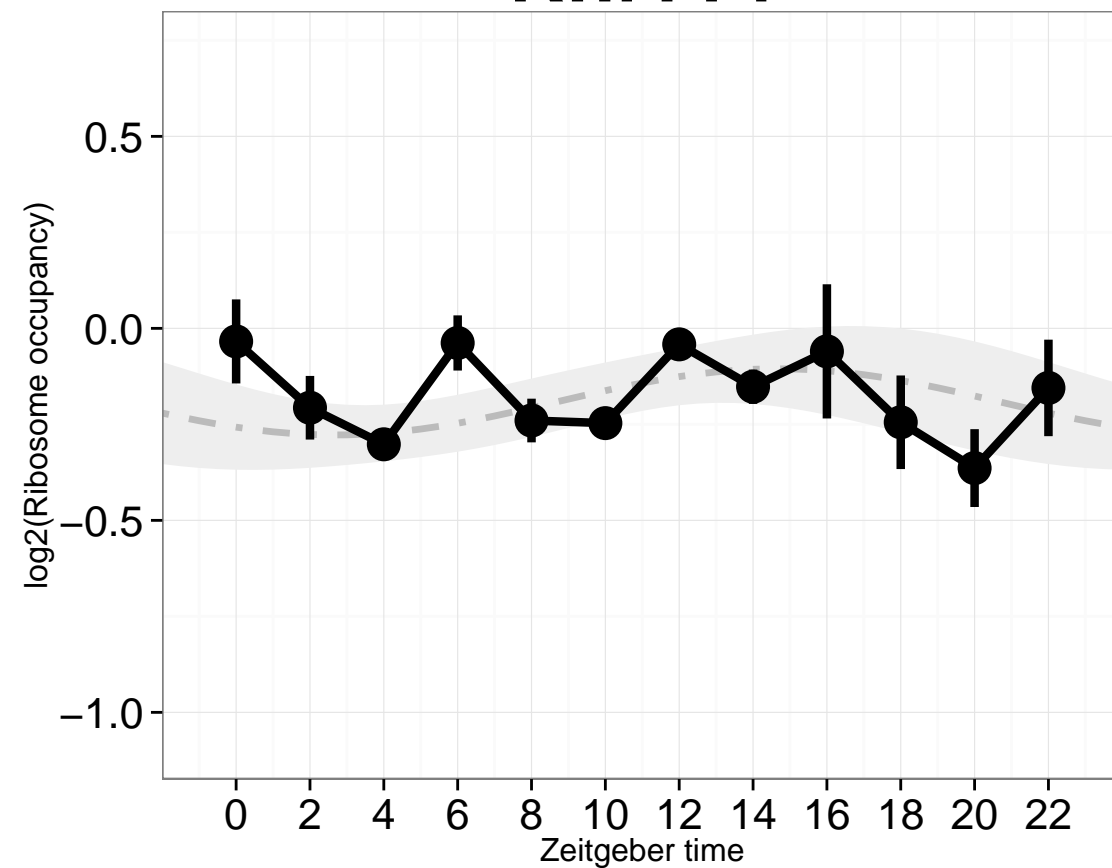

Supplement: SuppDataset_1.zip [file Rnf114_set_A.pdf › Supplemental Dataset 1/A-mRNA_nonrhyth_translation_nonrhyth/Rnf114_set_A.pdf]

## Rnf115

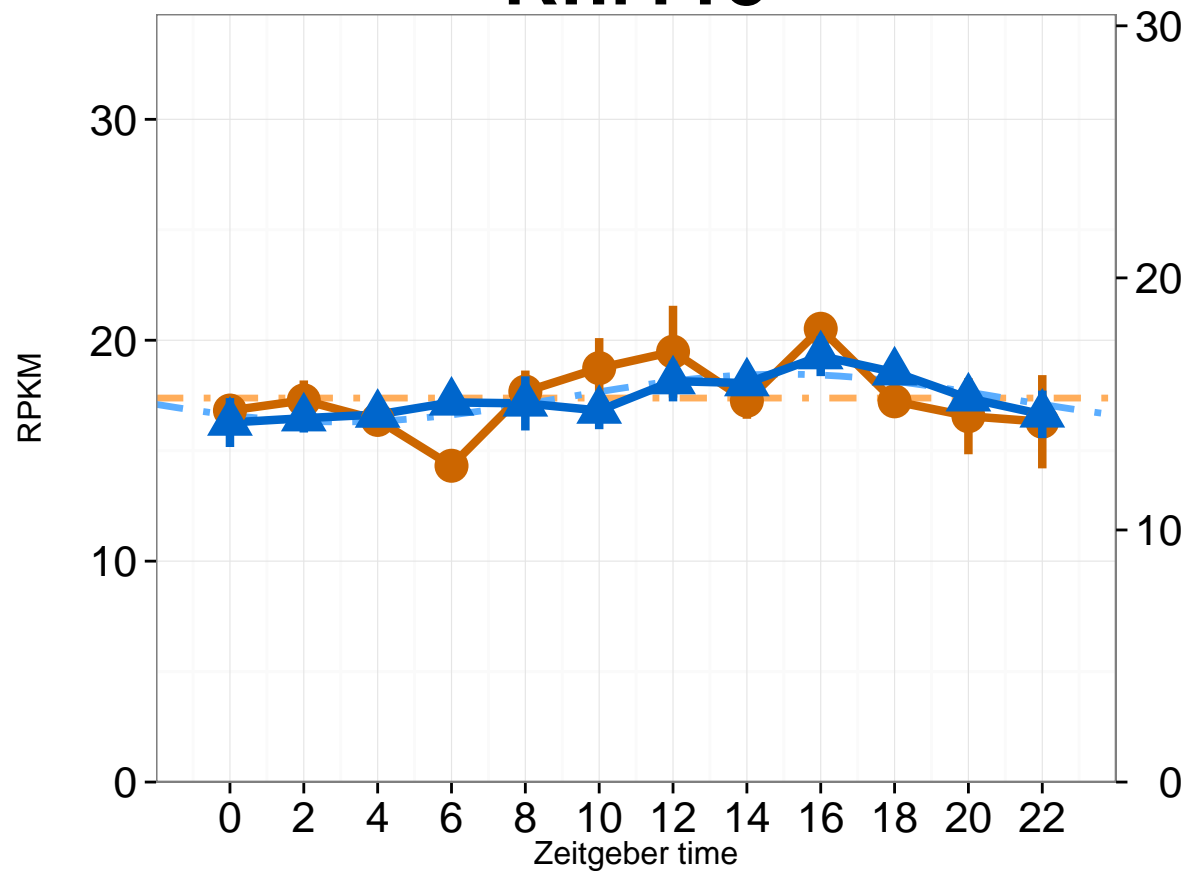

## Rnf115

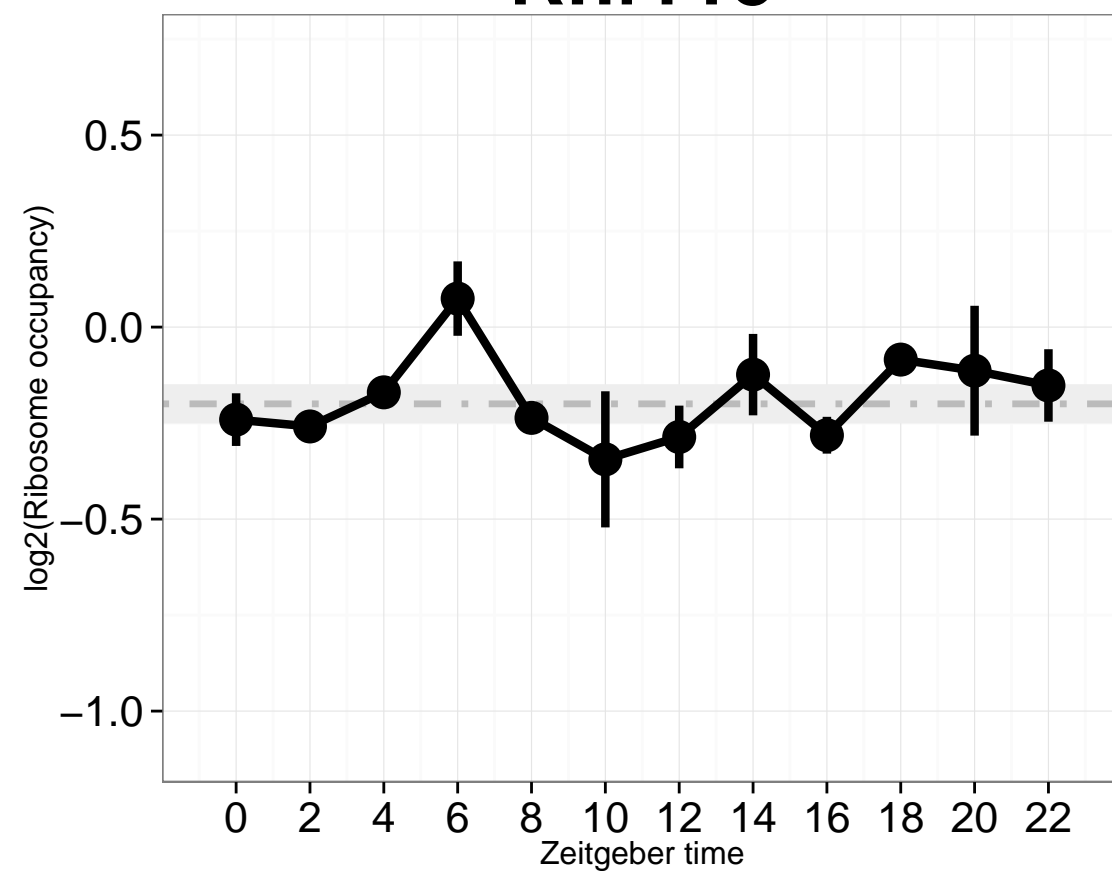

Supplement: SuppDataset_1.zip [file Rnf115_set_A.pdf › Supplemental Dataset 1/A-mRNA_nonrhyth_translation_nonrhyth/Rnf115_set_A.pdf]

## Rnf11

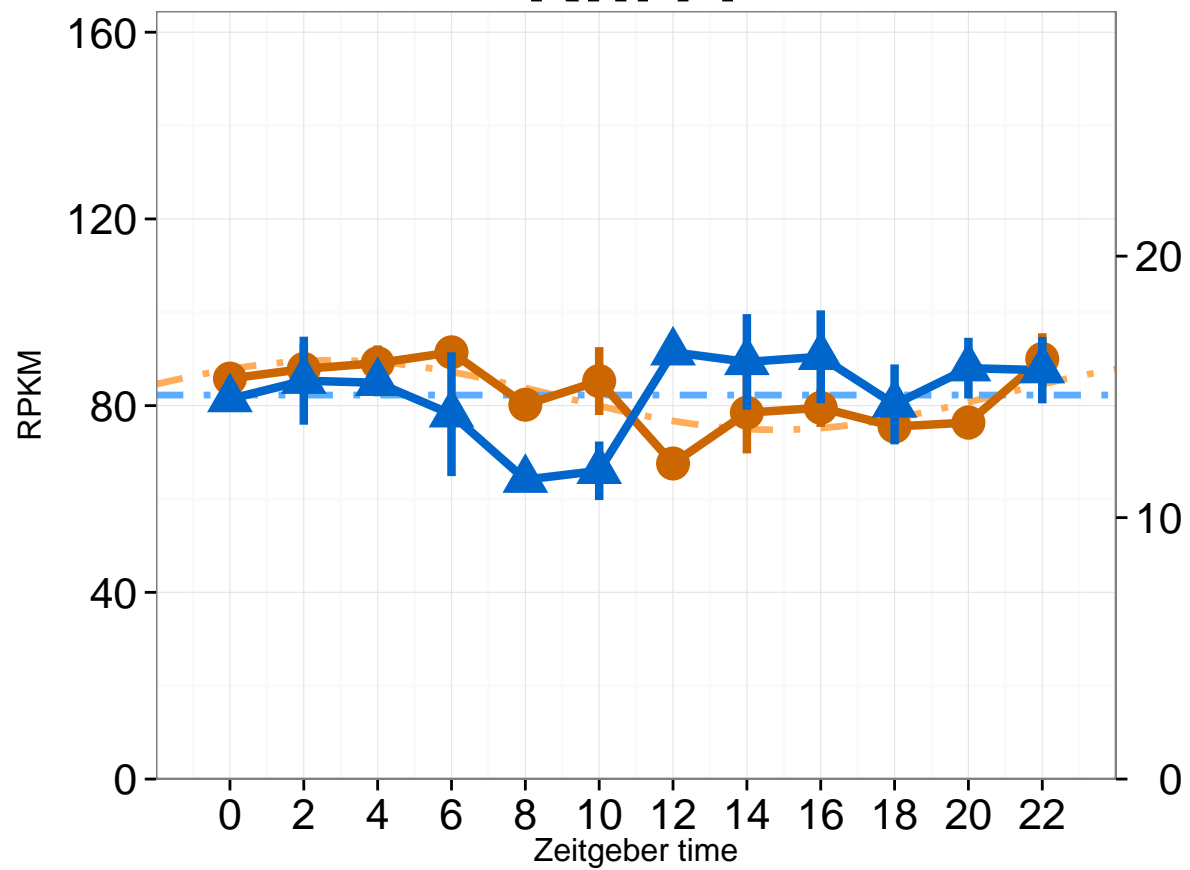

## Rnf11

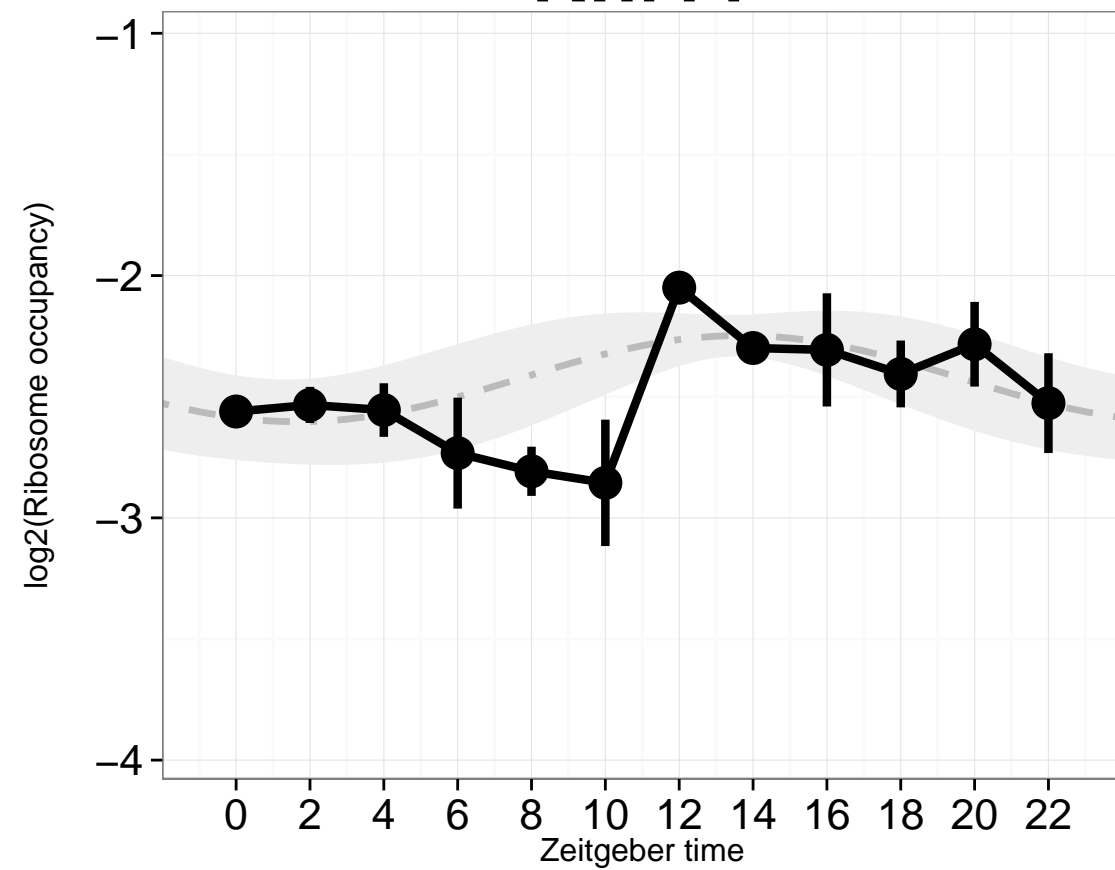

Supplement: SuppDataset_1.zip [file Rnf11_set_A.pdf › Supplemental Dataset 1/A-mRNA_nonrhyth_translation_nonrhyth/Rnf11_set_A.pdf]

## Rnf121

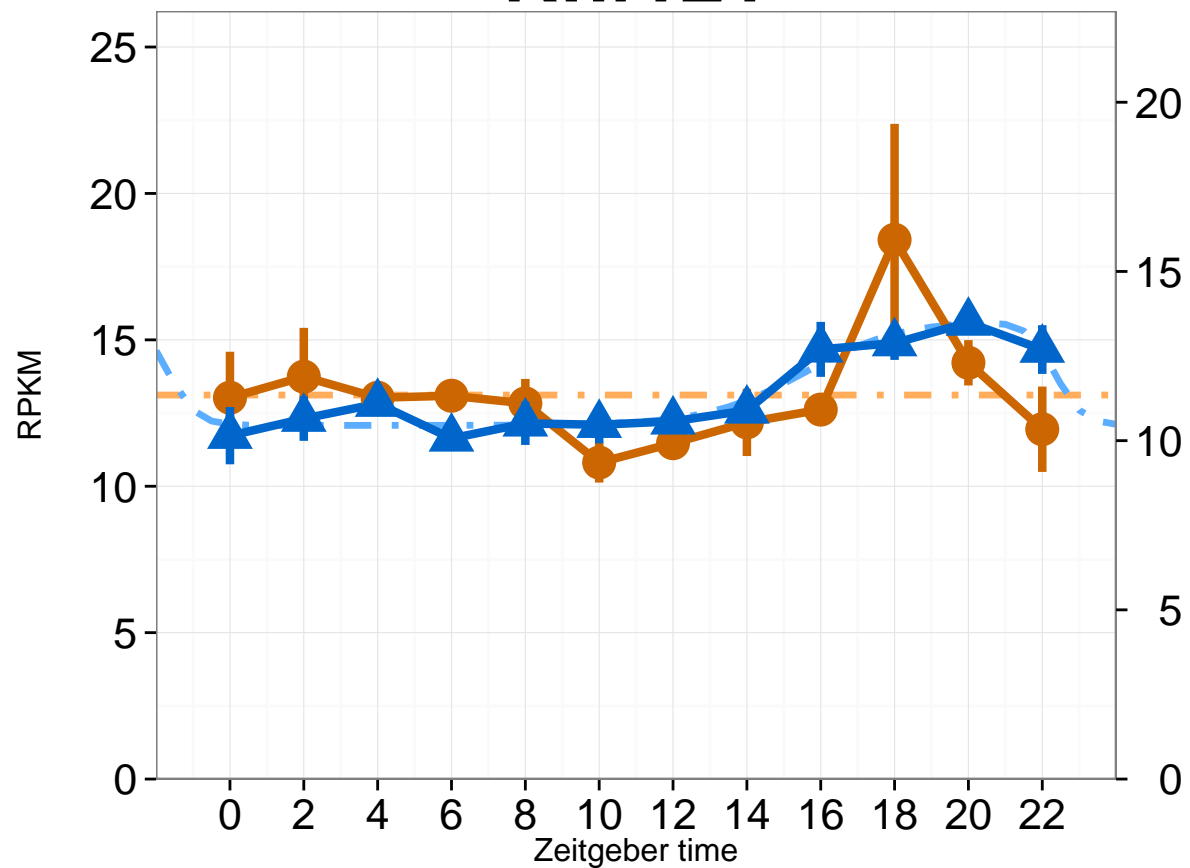

## Rnf121

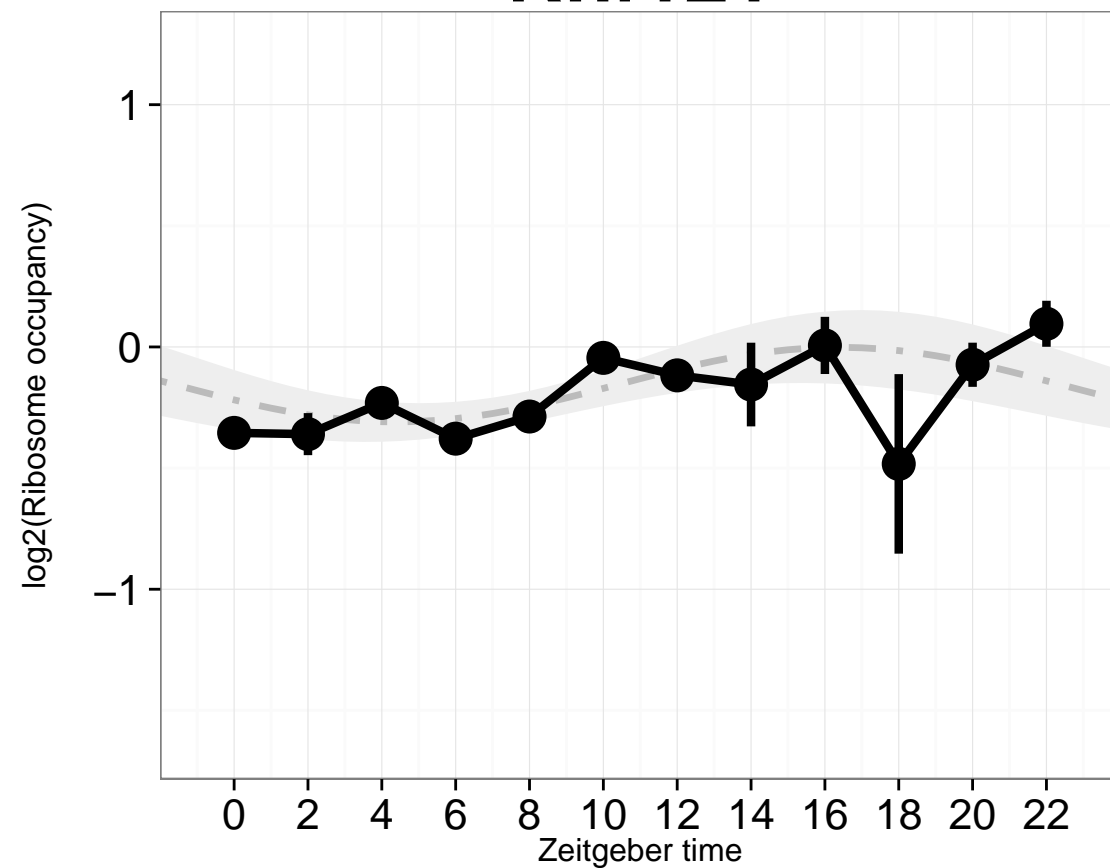

Supplement: SuppDataset_1.zip [file Rnf121_set_A.pdf › Supplemental Dataset 1/A-mRNA_nonrhyth_translation_nonrhyth/Rnf121_set_A.pdf]

# Rnf123

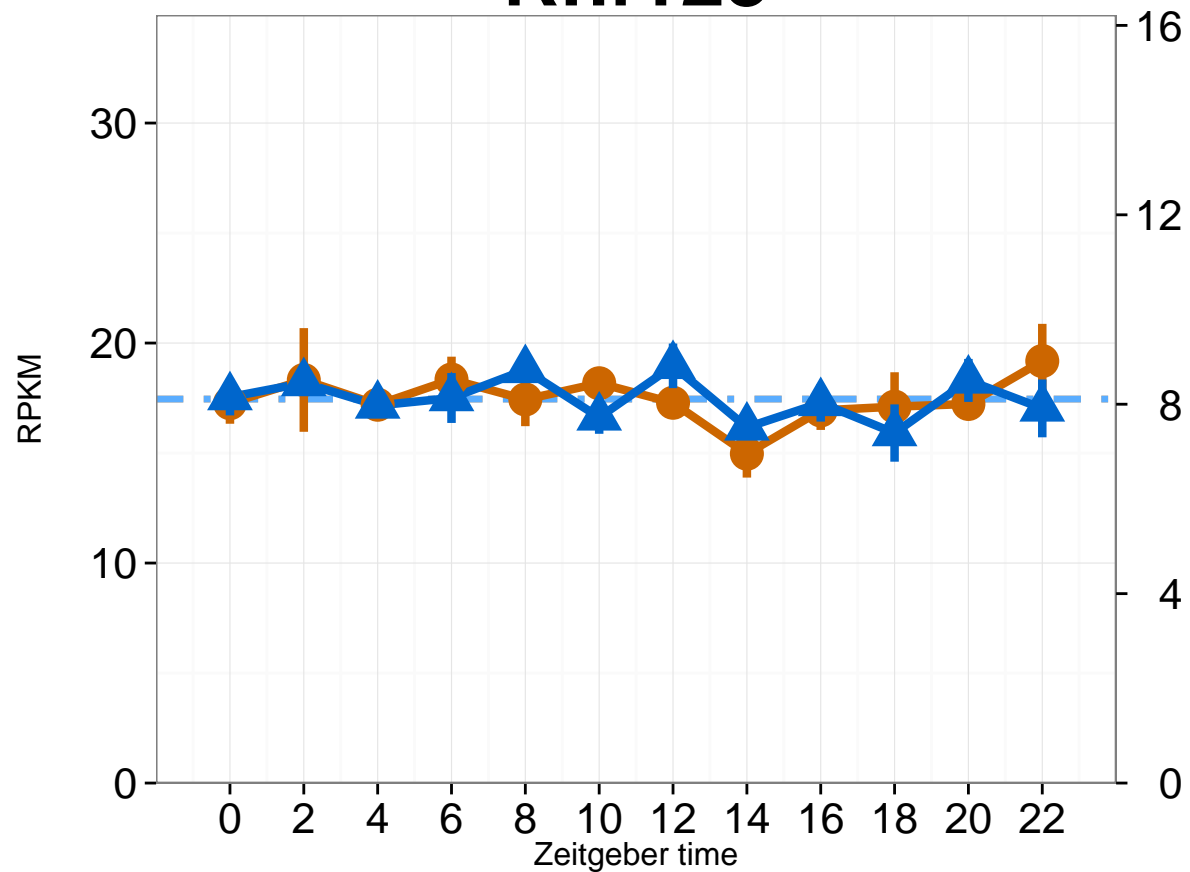

# Rnf123

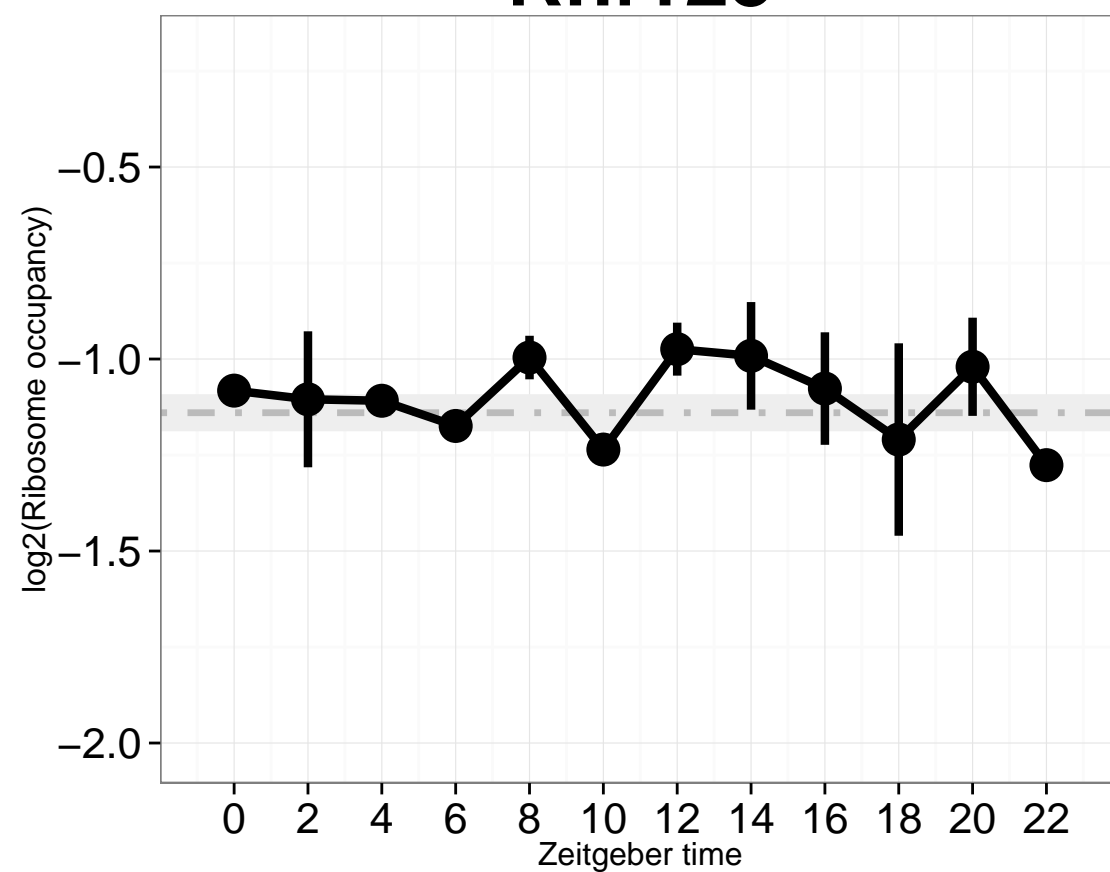

Supplement: SuppDataset_1.zip [file Rnf123_set_A.pdf › Supplemental Dataset 1/A-mRNA_nonrhyth_translation_nonrhyth/Rnf123_set_A.pdf]

# Rnf126

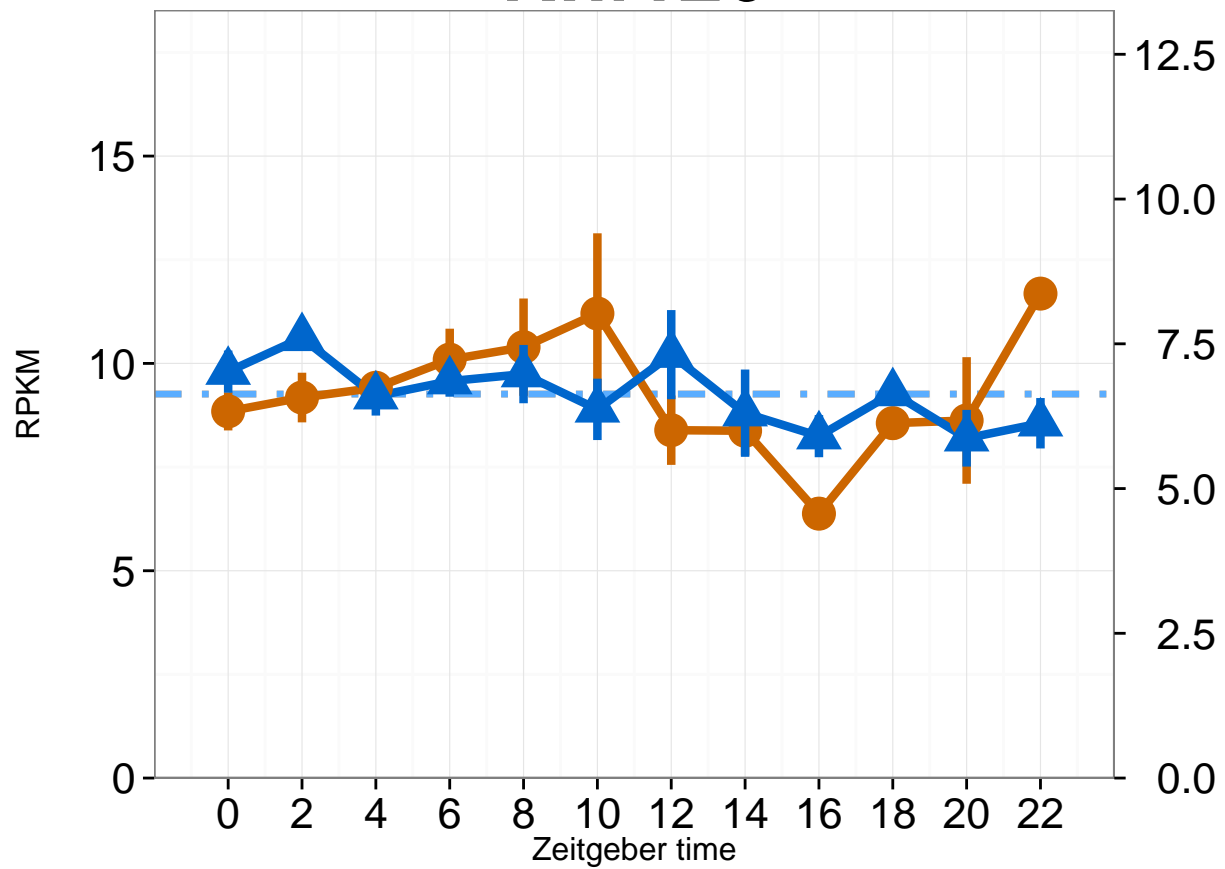

# Rnf126

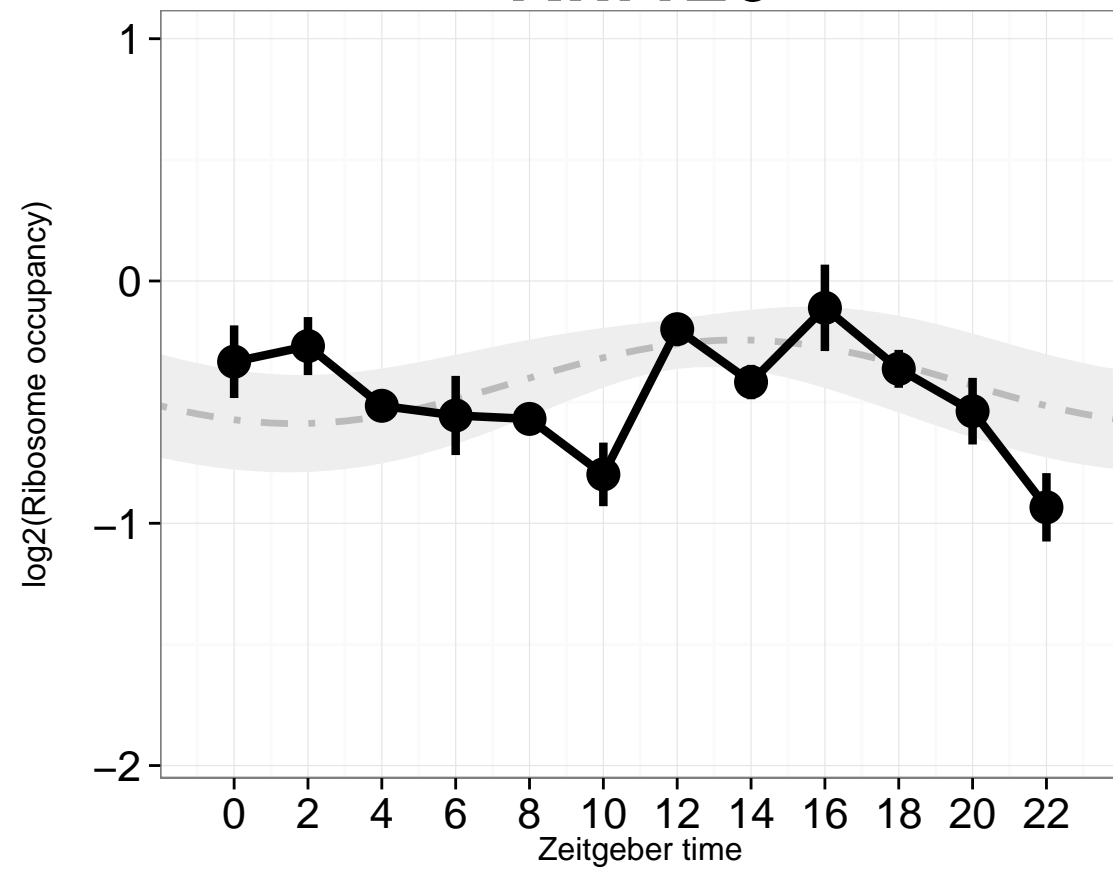

Supplement: SuppDataset_1.zip [file Rnf126_set_A.pdf › Supplemental Dataset 1/A-mRNA_nonrhyth_translation_nonrhyth/Rnf126_set_A.pdf]

## Rnf128

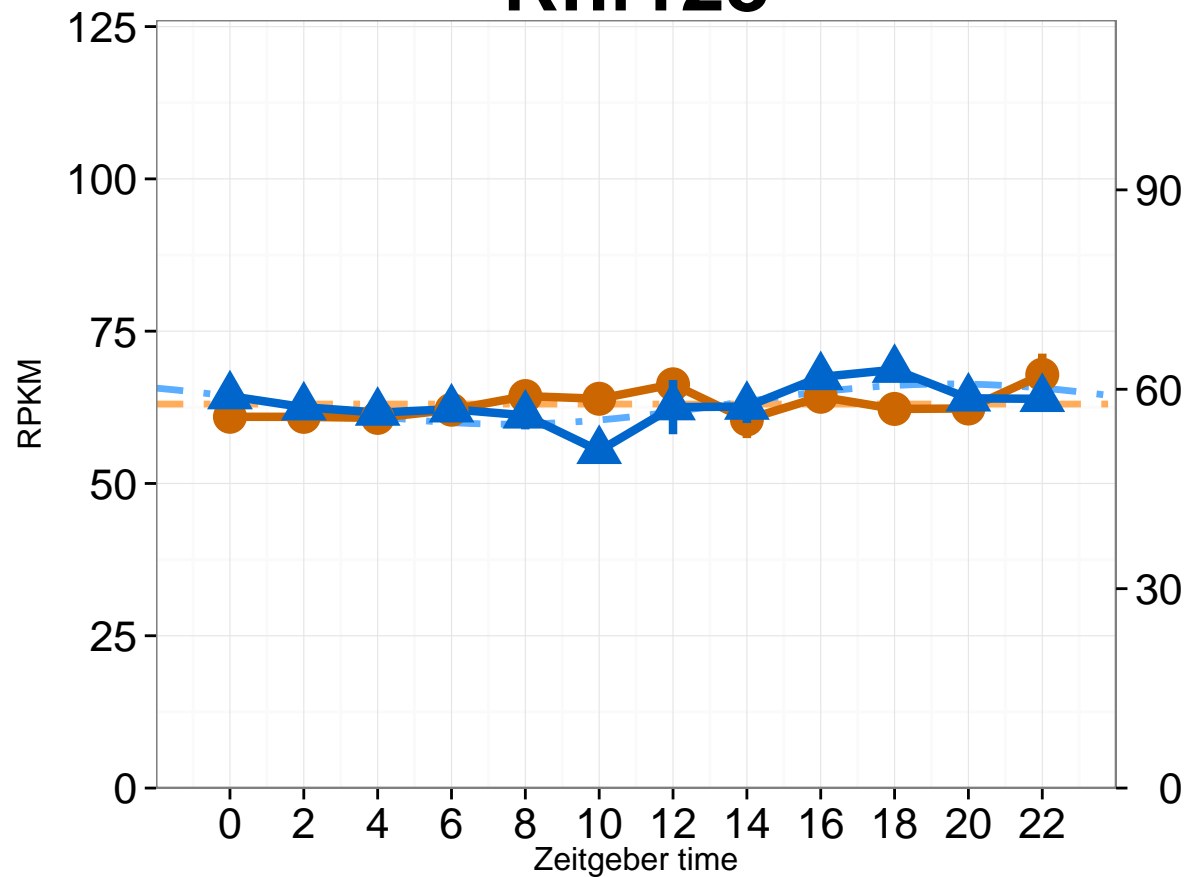

## Rnf128

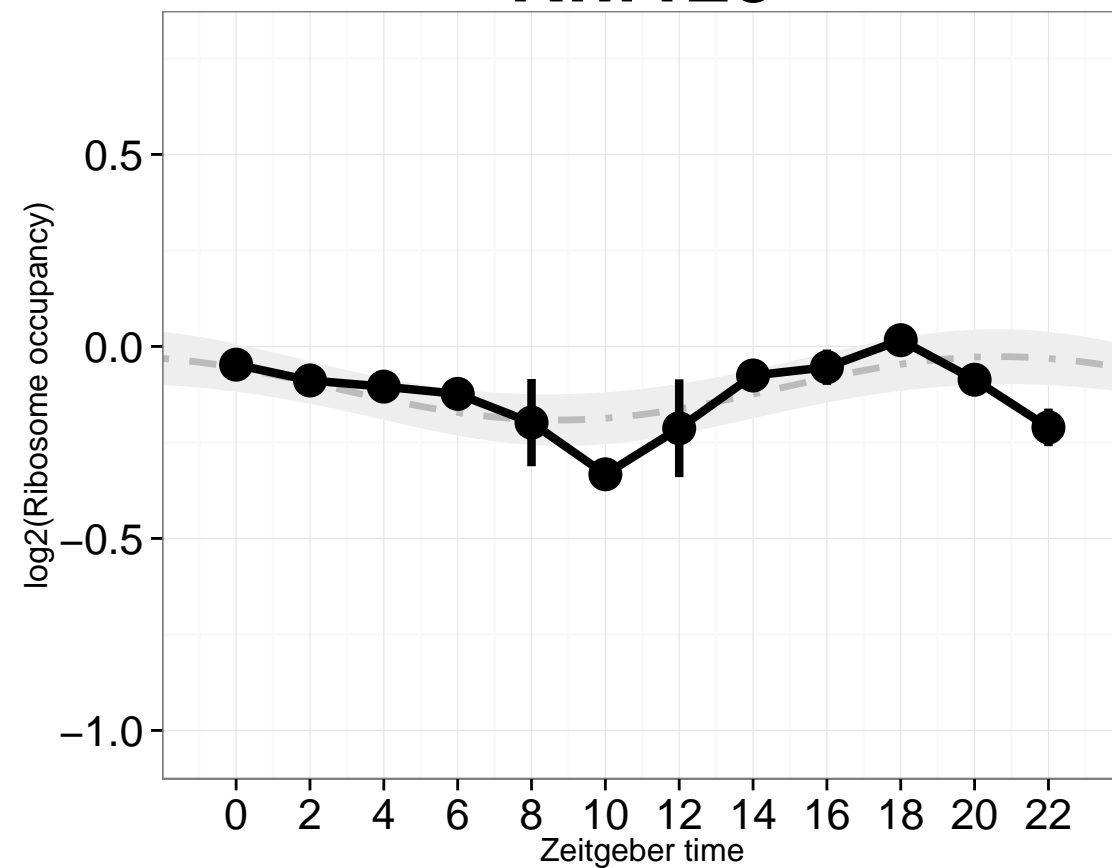

Supplement: SuppDataset_1.zip [file Rnf128_set_A.pdf › Supplemental Dataset 1/A-mRNA_nonrhyth_translation_nonrhyth/Rnf128_set_A.pdf]

## Rnf130

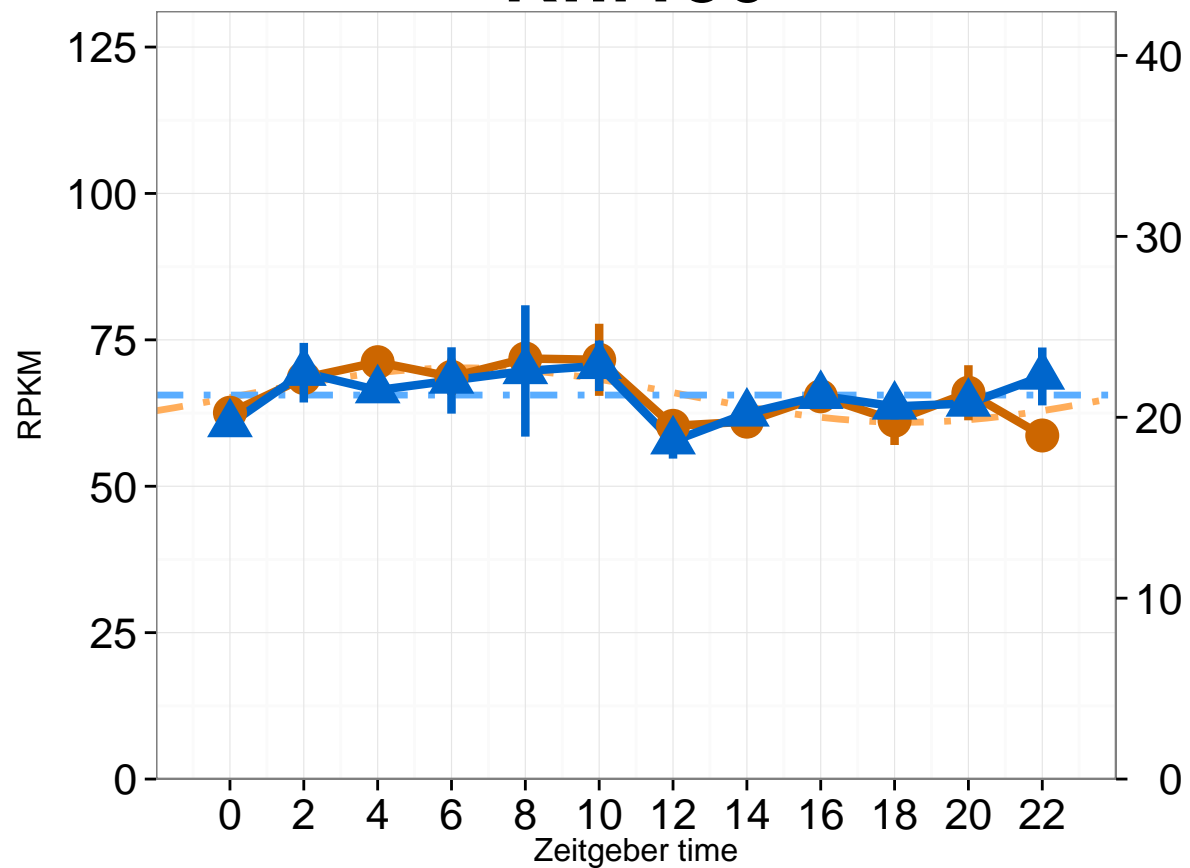

## Rnf130

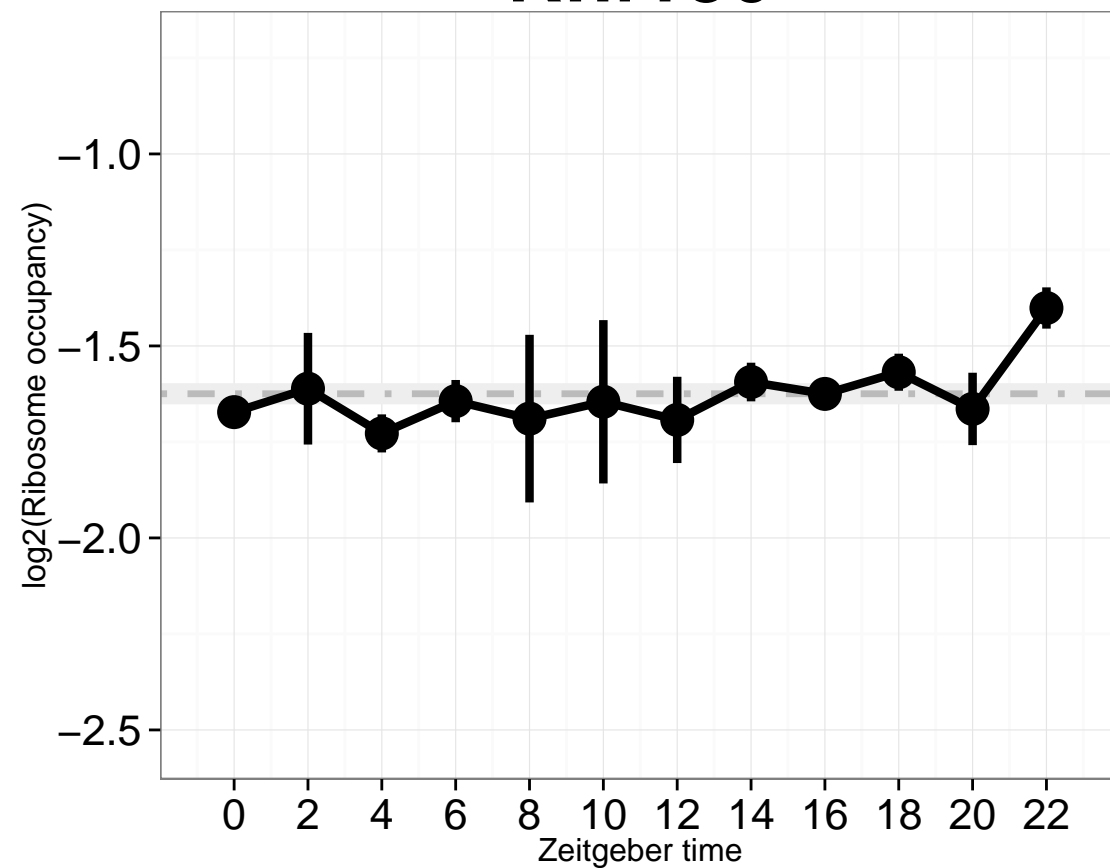

Supplement: SuppDataset_1.zip [file Rnf130_set_A.pdf › Supplemental Dataset 1/A-mRNA_nonrhyth_translation_nonrhyth/Rnf130_set_A.pdf]

## Rnf135

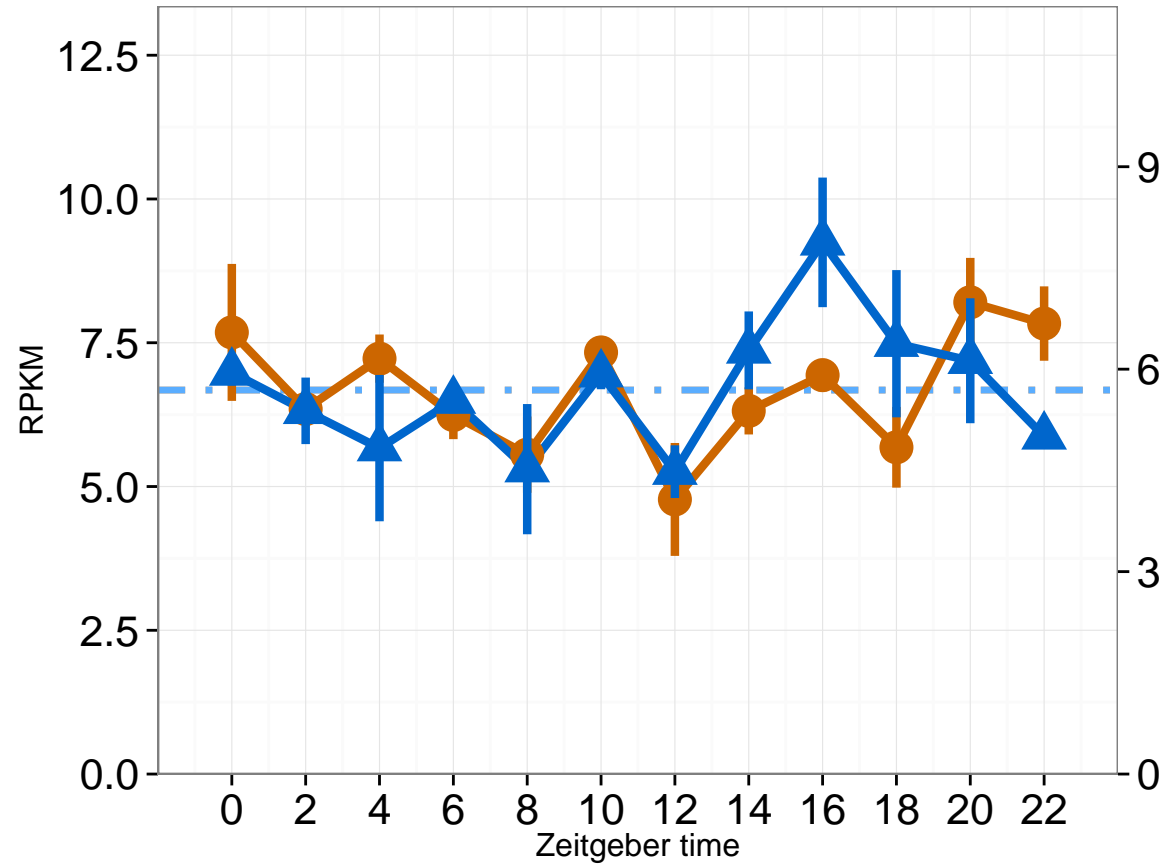

## Rnf135

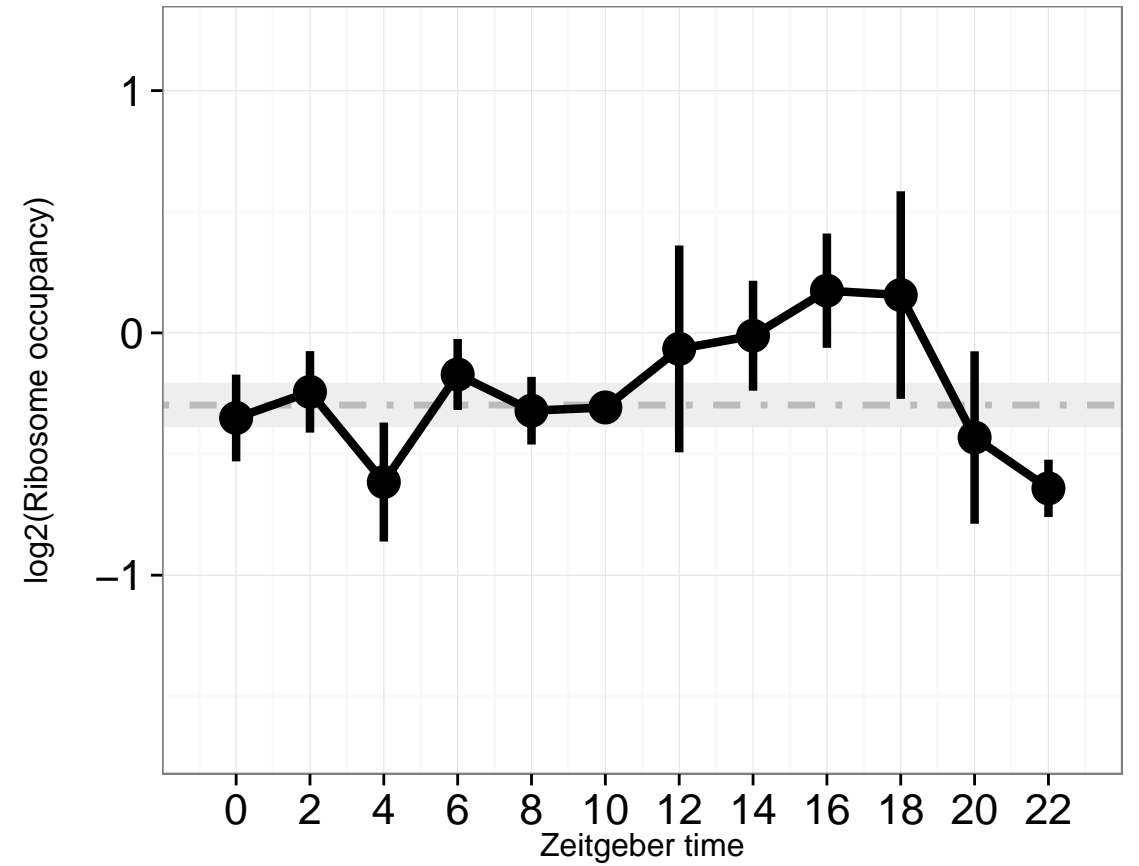

Supplement: SuppDataset_1.zip [file Rnf135_set_A.pdf › Supplemental Dataset 1/A-mRNA_nonrhyth_translation_nonrhyth/Rnf135_set_A.pdf]

# Rnf138

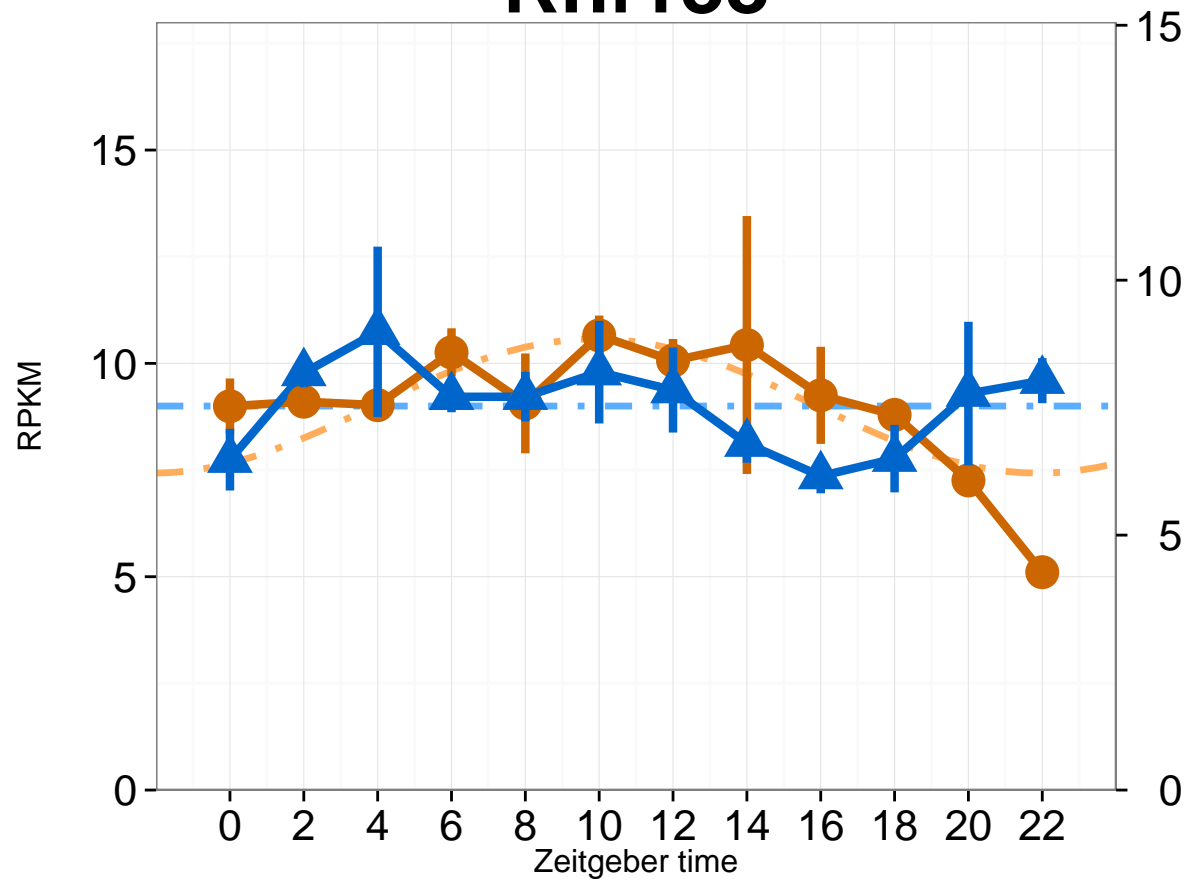

# Rnf138

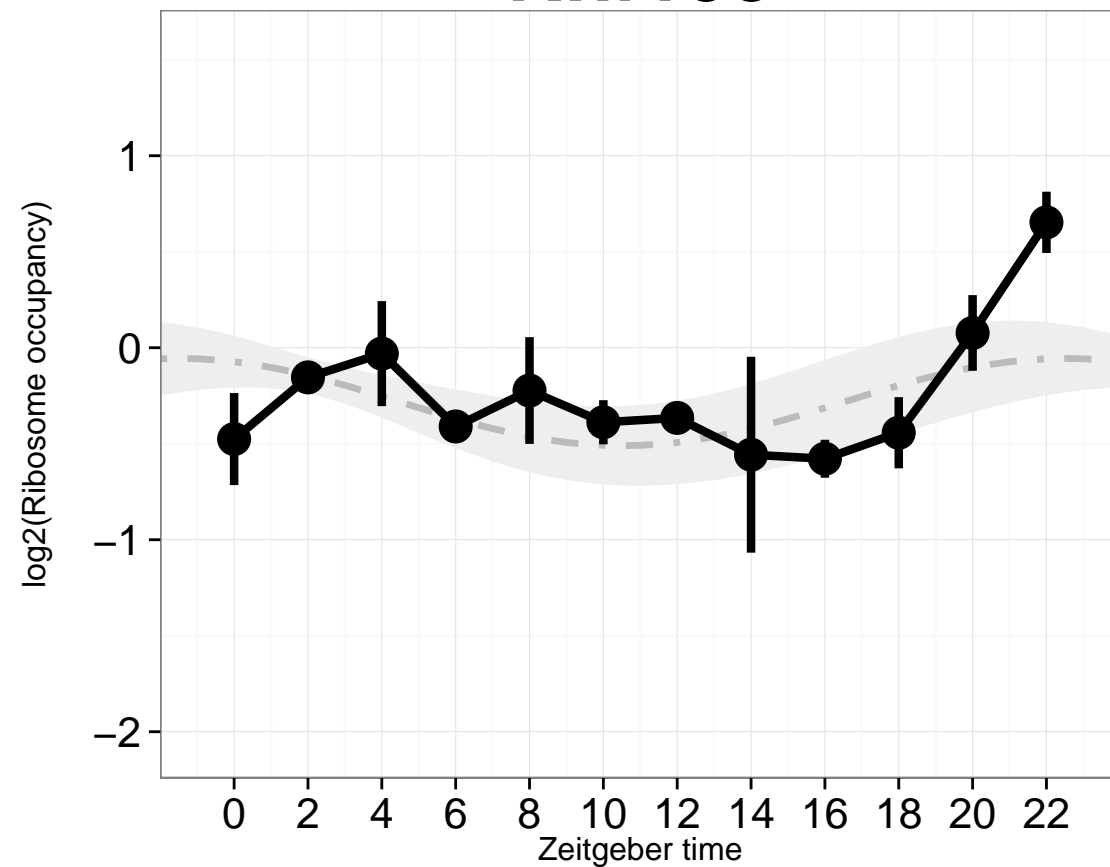

Supplement: SuppDataset_1.zip [file Rnf138_set_A.pdf › Supplemental Dataset 1/A-mRNA_nonrhyth_translation_nonrhyth/Rnf138_set_A.pdf]

## Rnf139

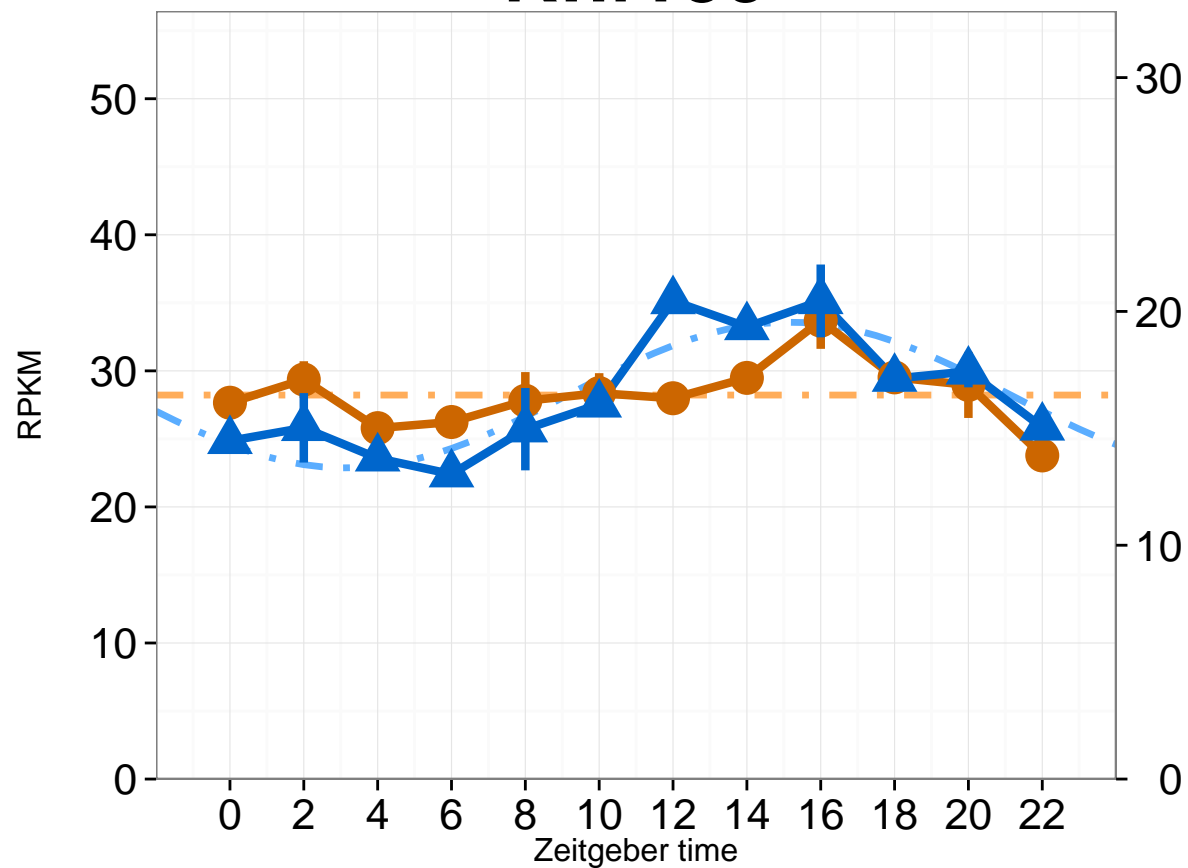

## Rnf139

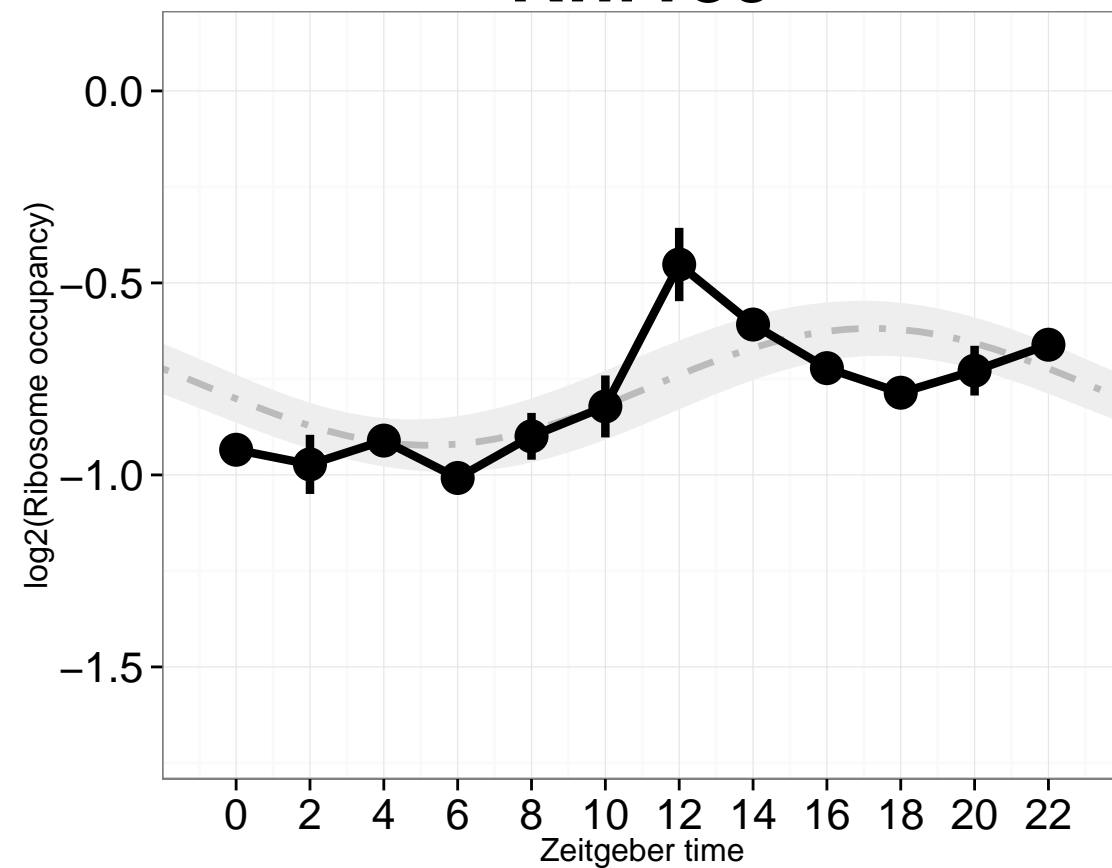

Supplement: SuppDataset_1.zip [file Rnf139_set_A.pdf › Supplemental Dataset 1/A-mRNA_nonrhyth_translation_nonrhyth/Rnf139_set_A.pdf]

# Rnf13

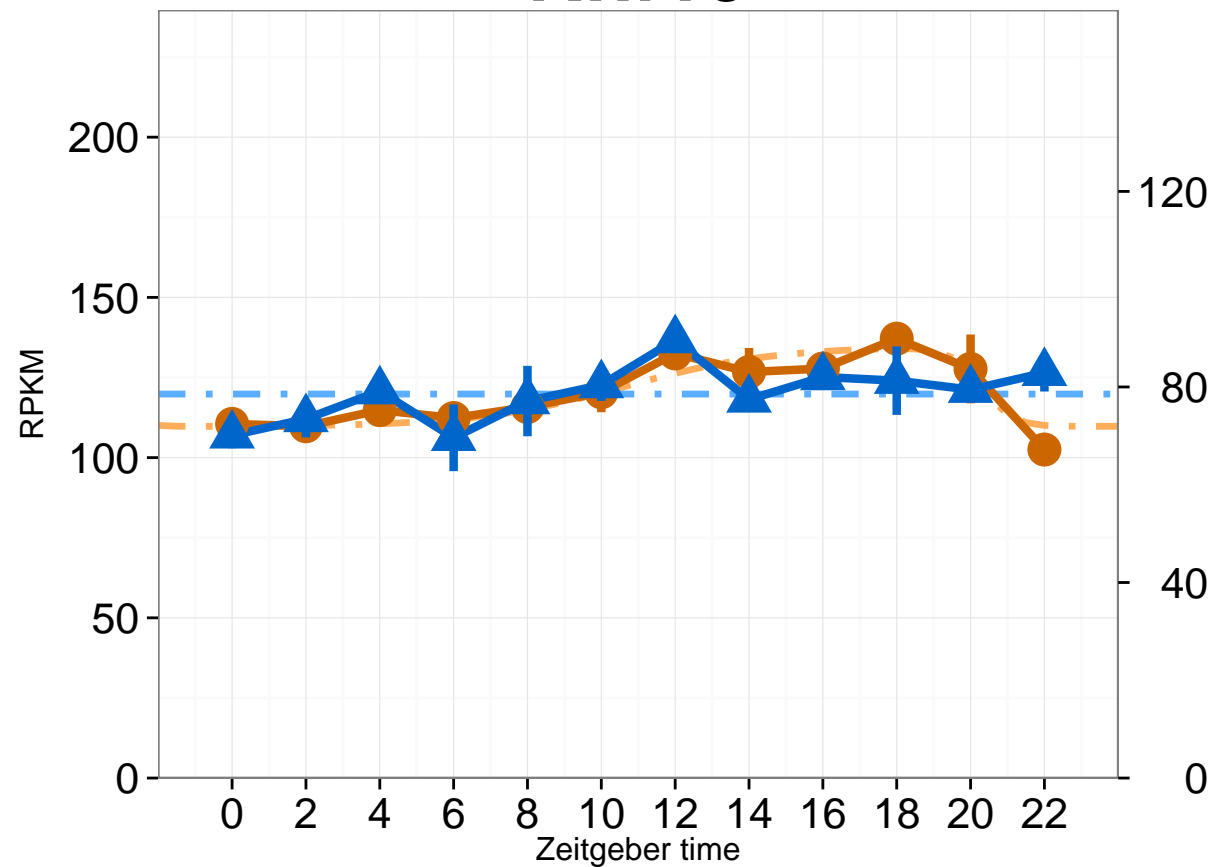

# Rnf13

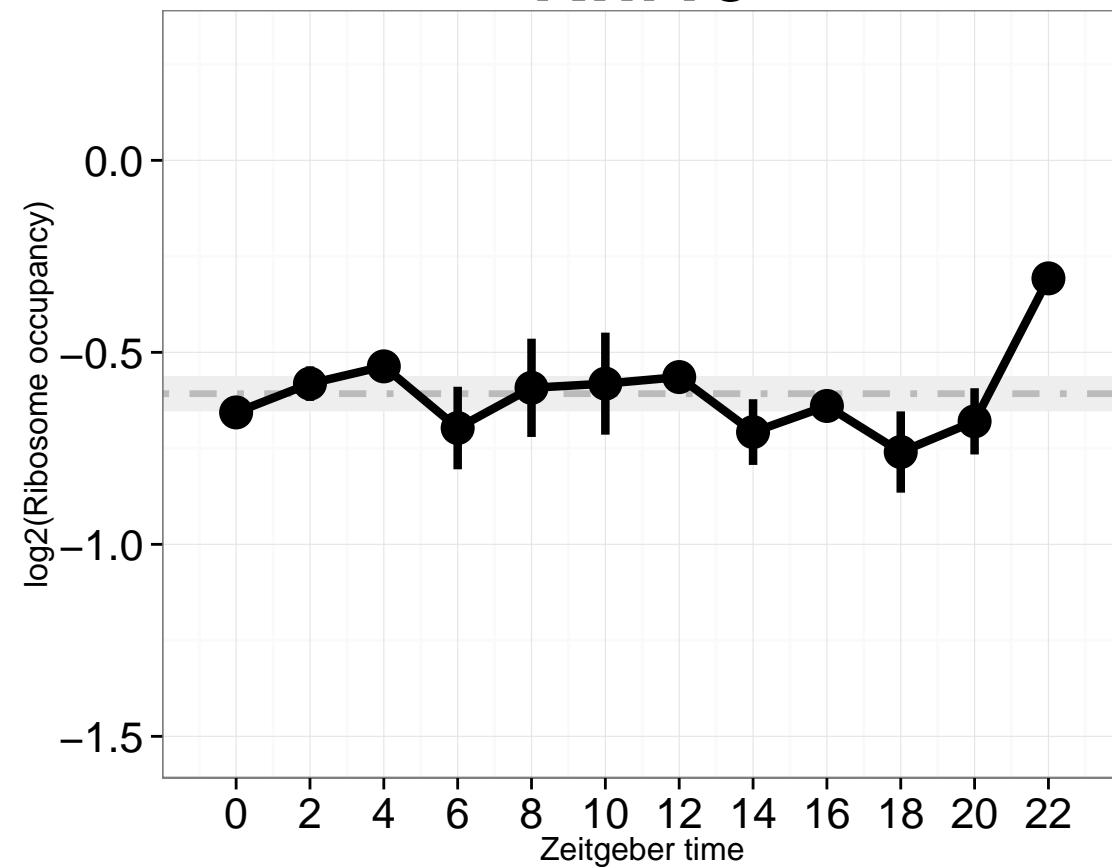

Supplement: SuppDataset_1.zip [file Rnf13_set_A.pdf › Supplemental Dataset 1/A-mRNA_nonrhyth_translation_nonrhyth/Rnf13_set_A.pdf]

## Rnf146

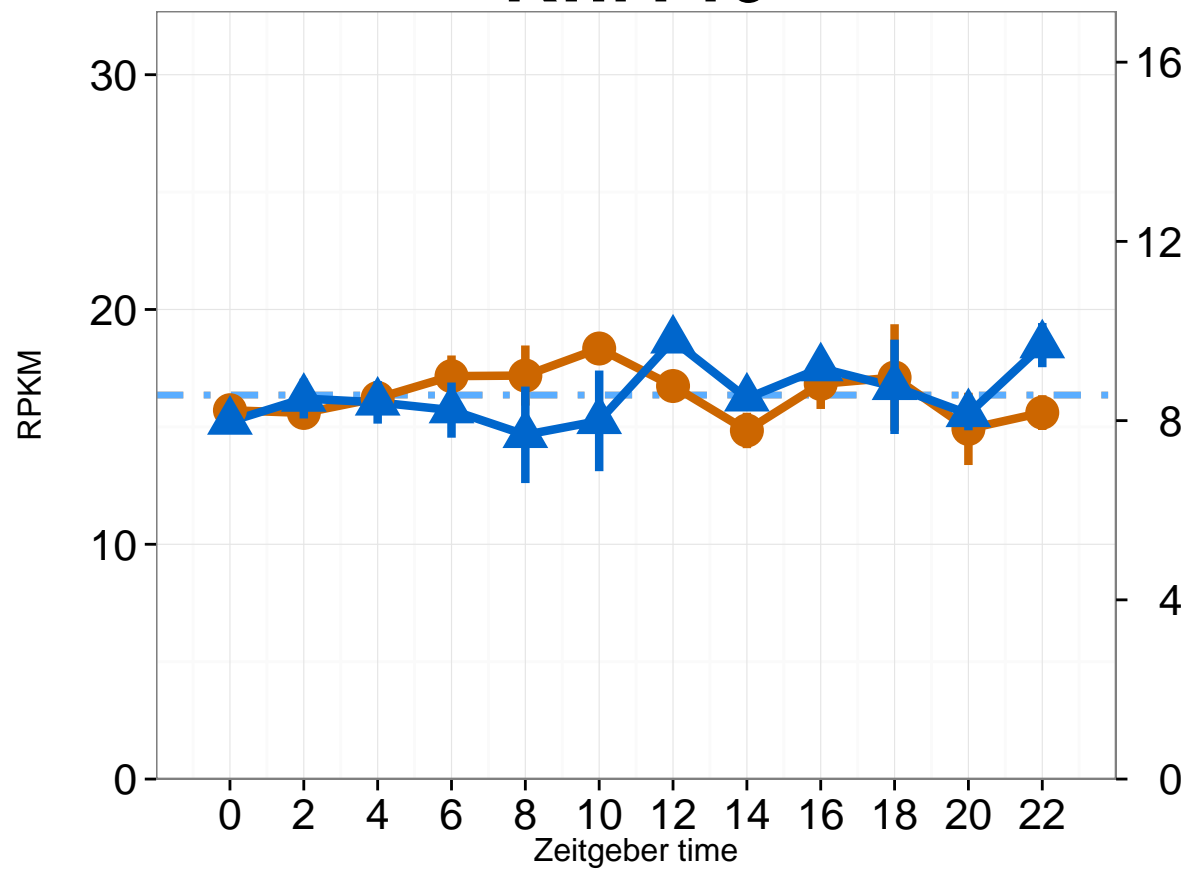

## Rnf146

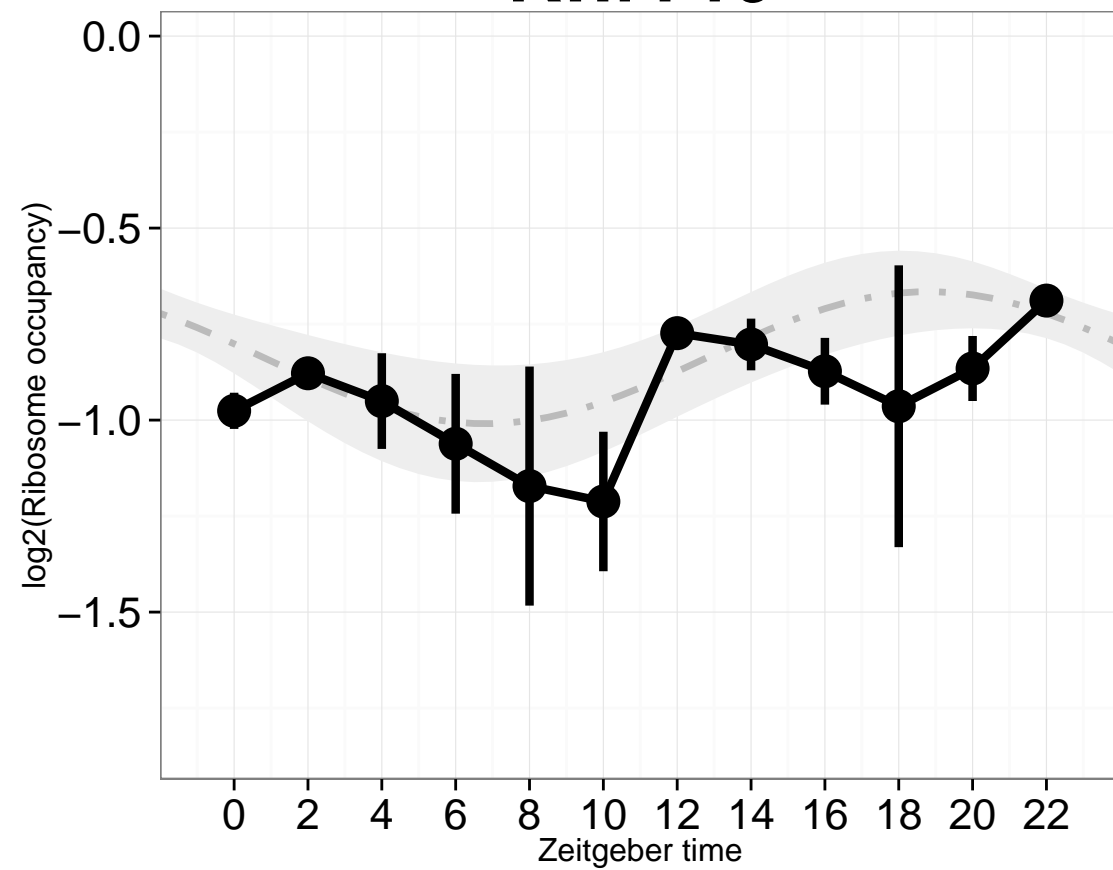

Supplement: SuppDataset_1.zip [file Rnf146_set_A.pdf › Supplemental Dataset 1/A-mRNA_nonrhyth_translation_nonrhyth/Rnf146_set_A.pdf]

## Rnf149

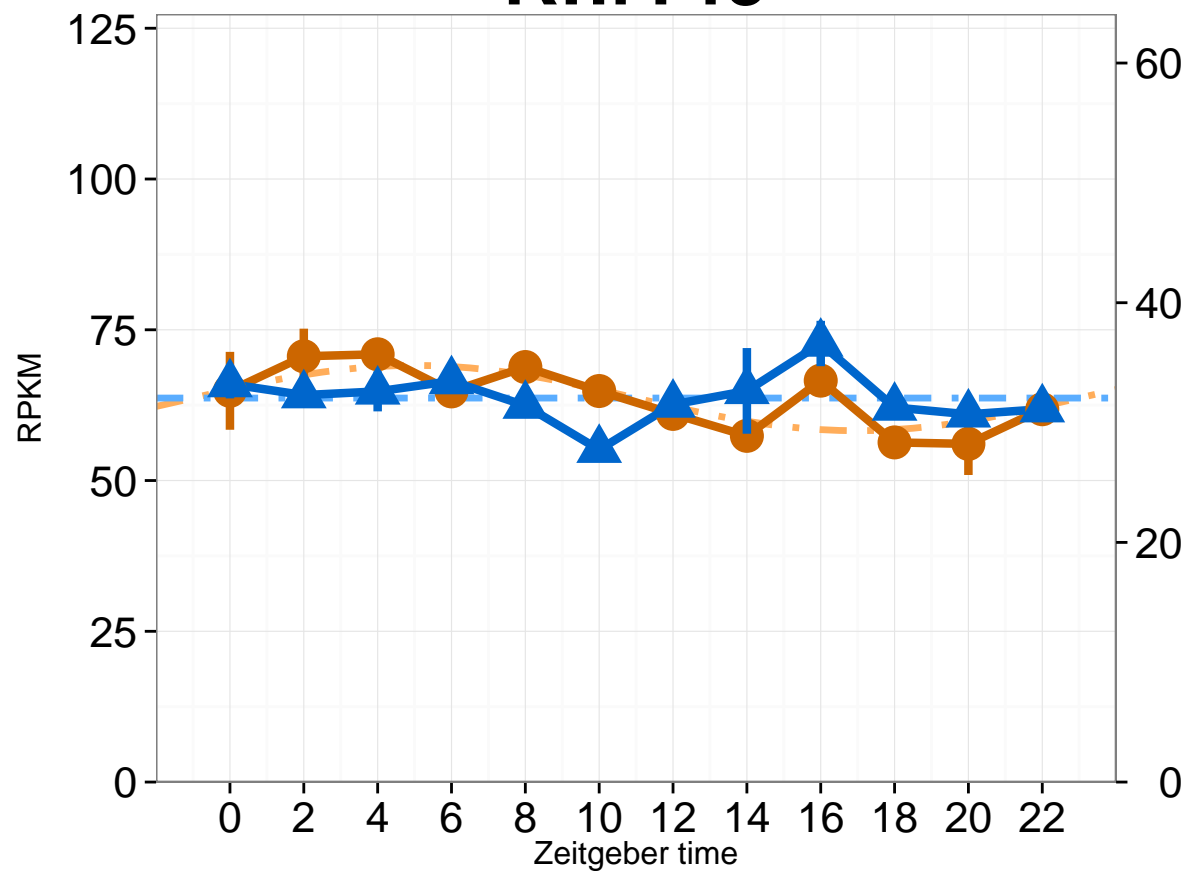

## Rnf149

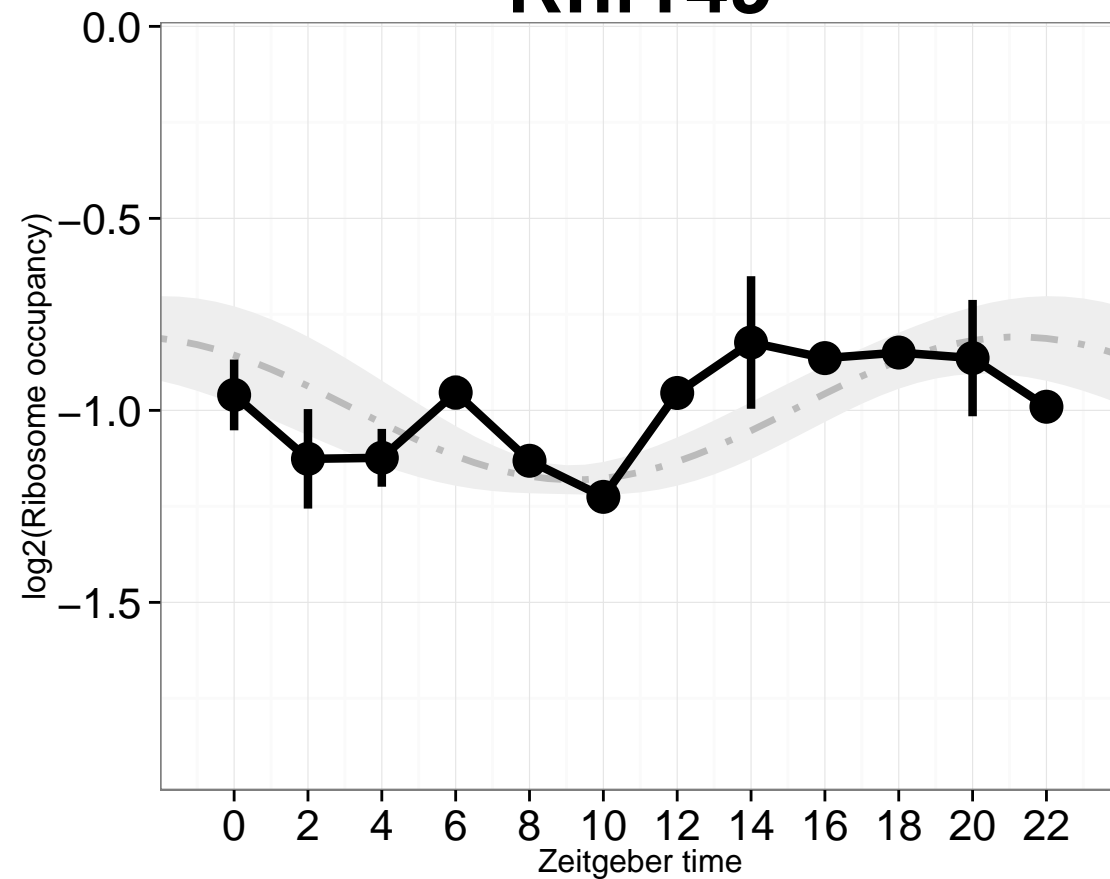

Supplement: SuppDataset_1.zip [file Rnf149_set_A.pdf › Supplemental Dataset 1/A-mRNA_nonrhyth_translation_nonrhyth/Rnf149_set_A.pdf]

## Rnf14

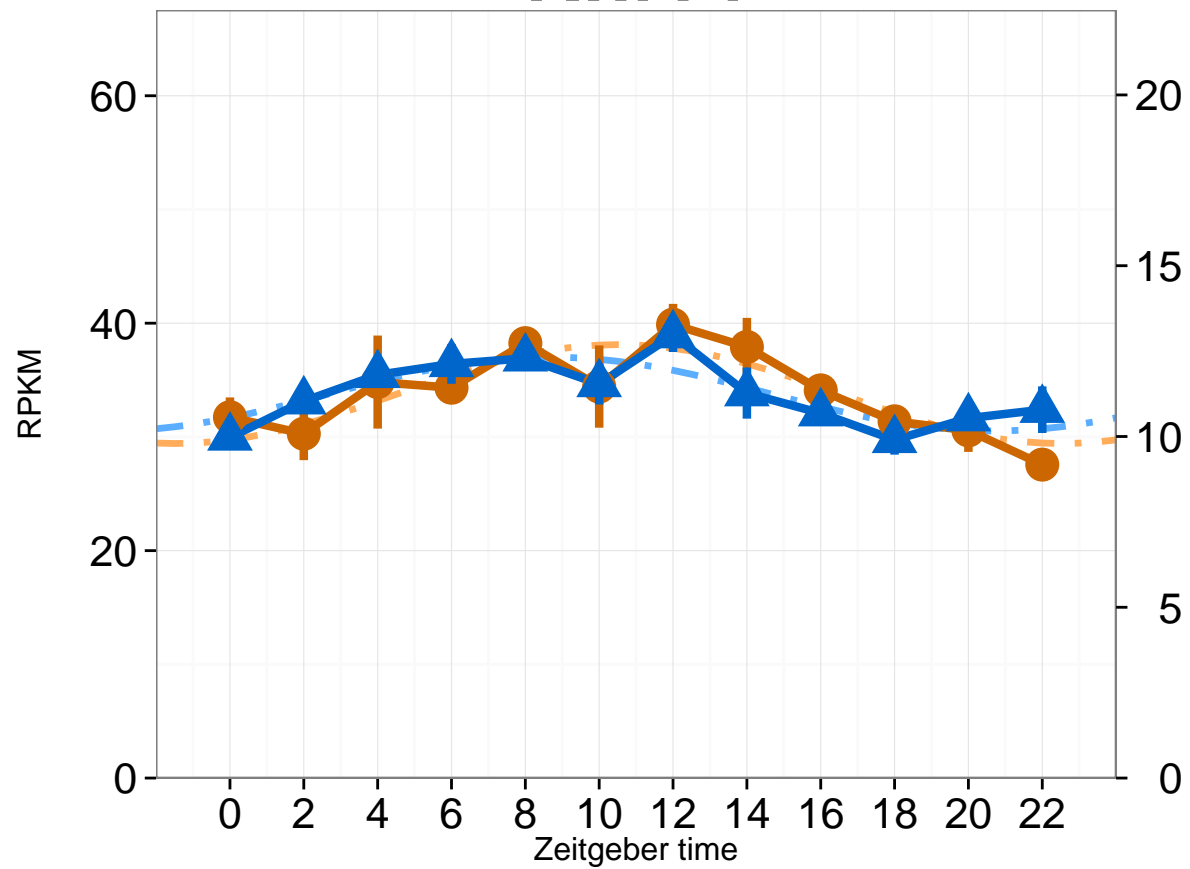

## Rnf14

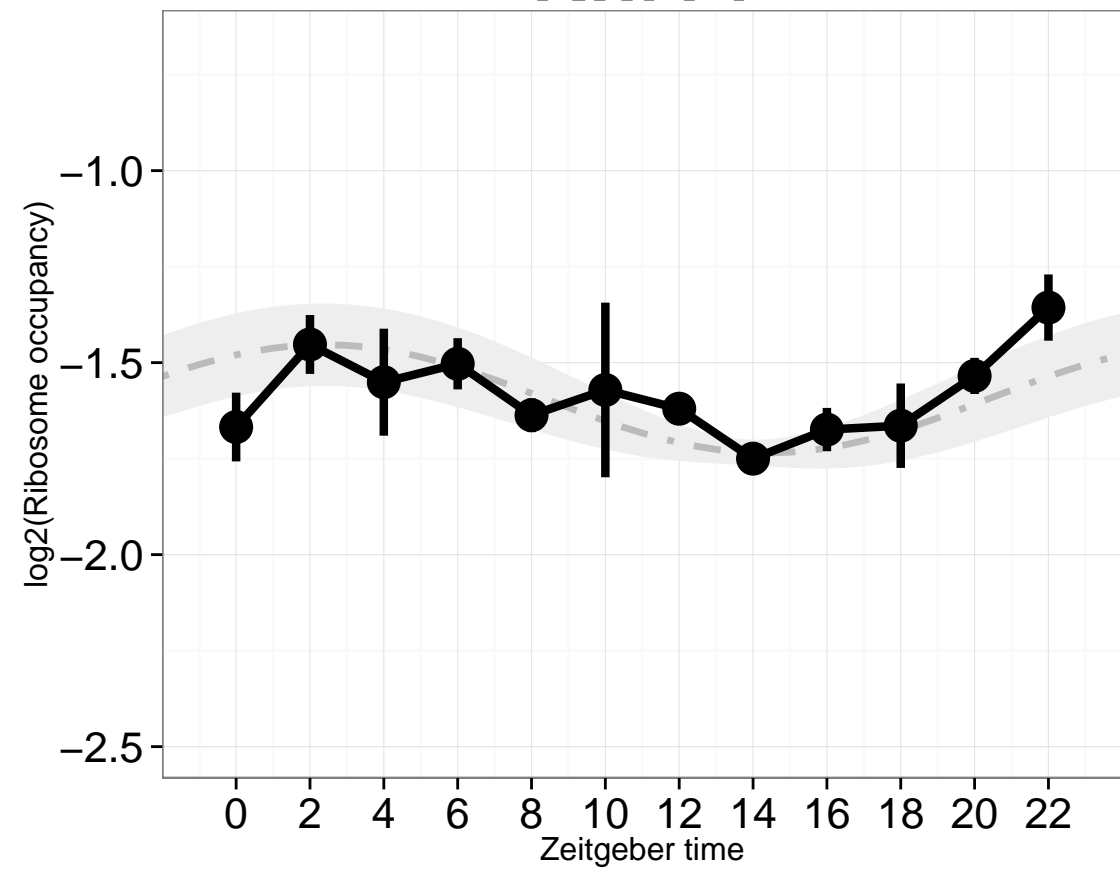

Supplement: SuppDataset_1.zip [file Rnf14_set_A.pdf › Supplemental Dataset 1/A-mRNA_nonrhyth_translation_nonrhyth/Rnf14_set_A.pdf]

## Rnf150

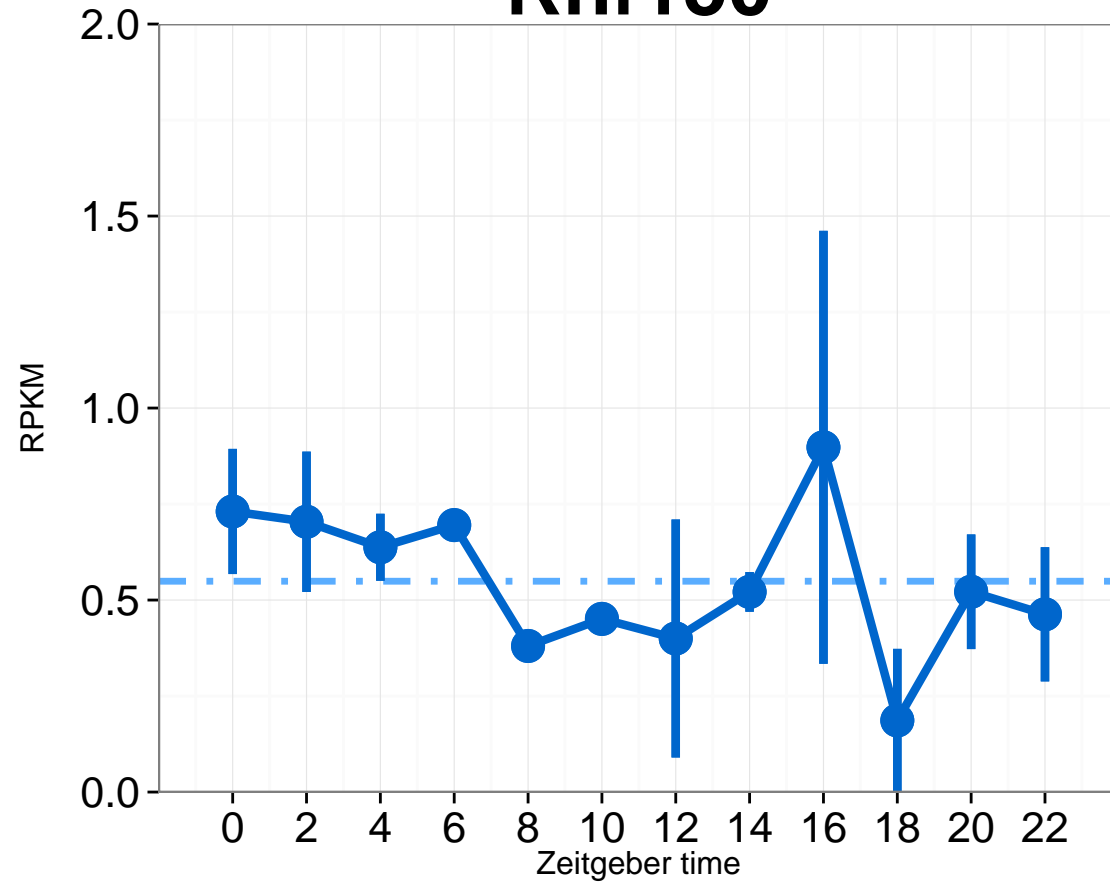

## Rnf150 log2(Ribosome occupancy

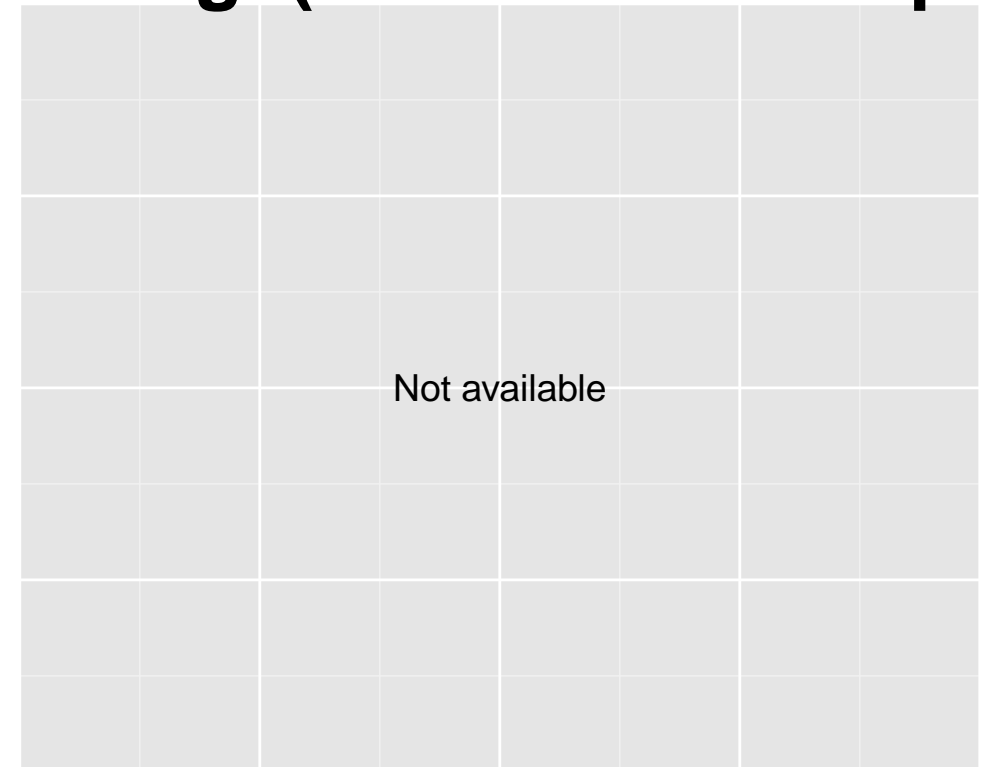

Supplement: SuppDataset_1.zip [file Rnf150_set_A.pdf › Supplemental Dataset 1/A-mRNA_nonrhyth_translation_nonrhyth/Rnf150_set_A.pdf]

## Rnf157

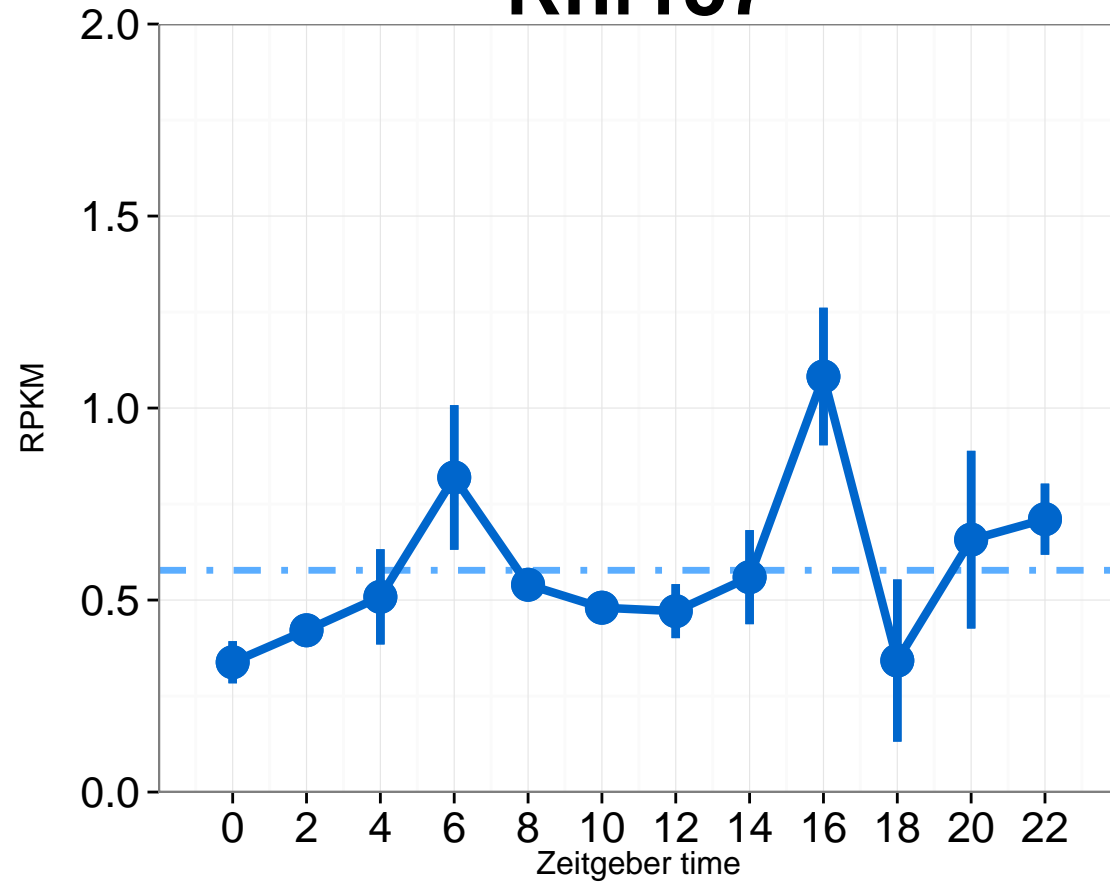

## Rnf157 log2(Ribosome occupancy

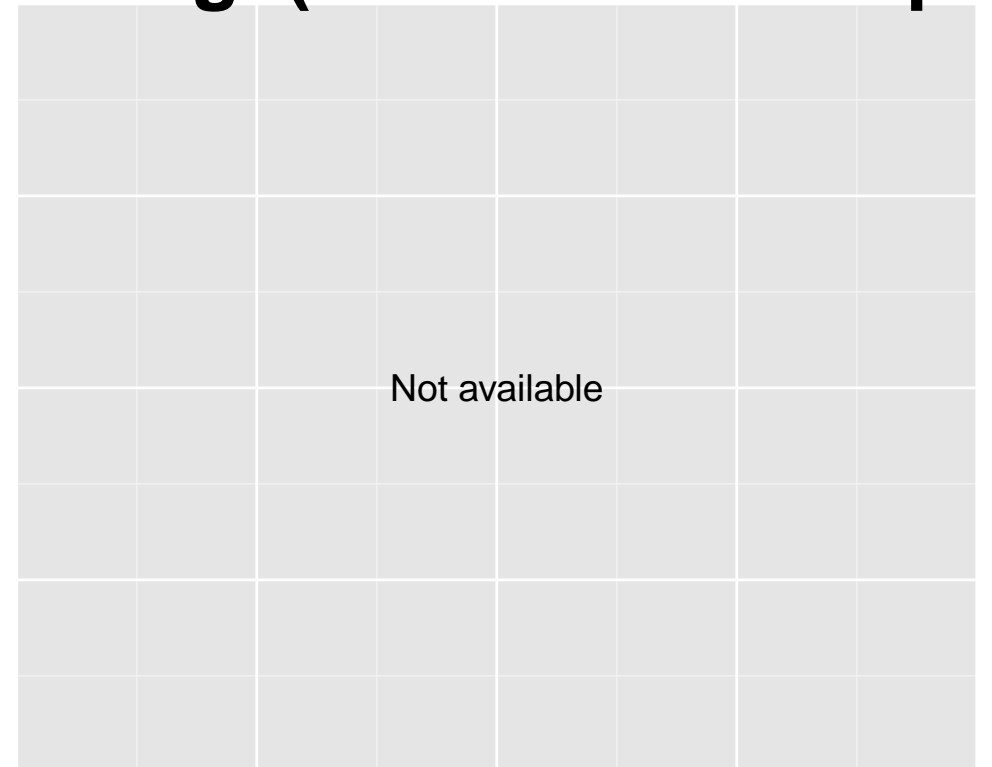

Supplement: SuppDataset_1.zip [file Rnf157_set_A.pdf › Supplemental Dataset 1/A-mRNA_nonrhyth_translation_nonrhyth/Rnf157_set_A.pdf]

# Rnf167

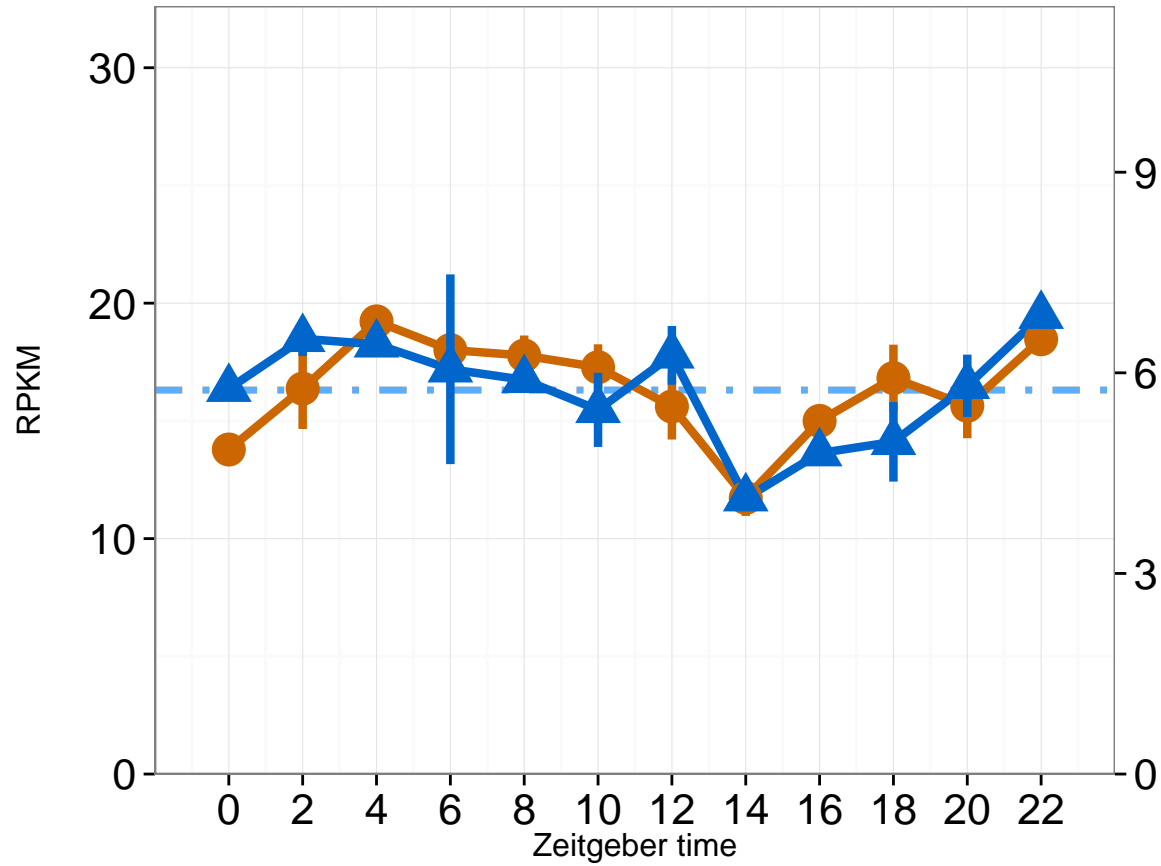

# Rnf167

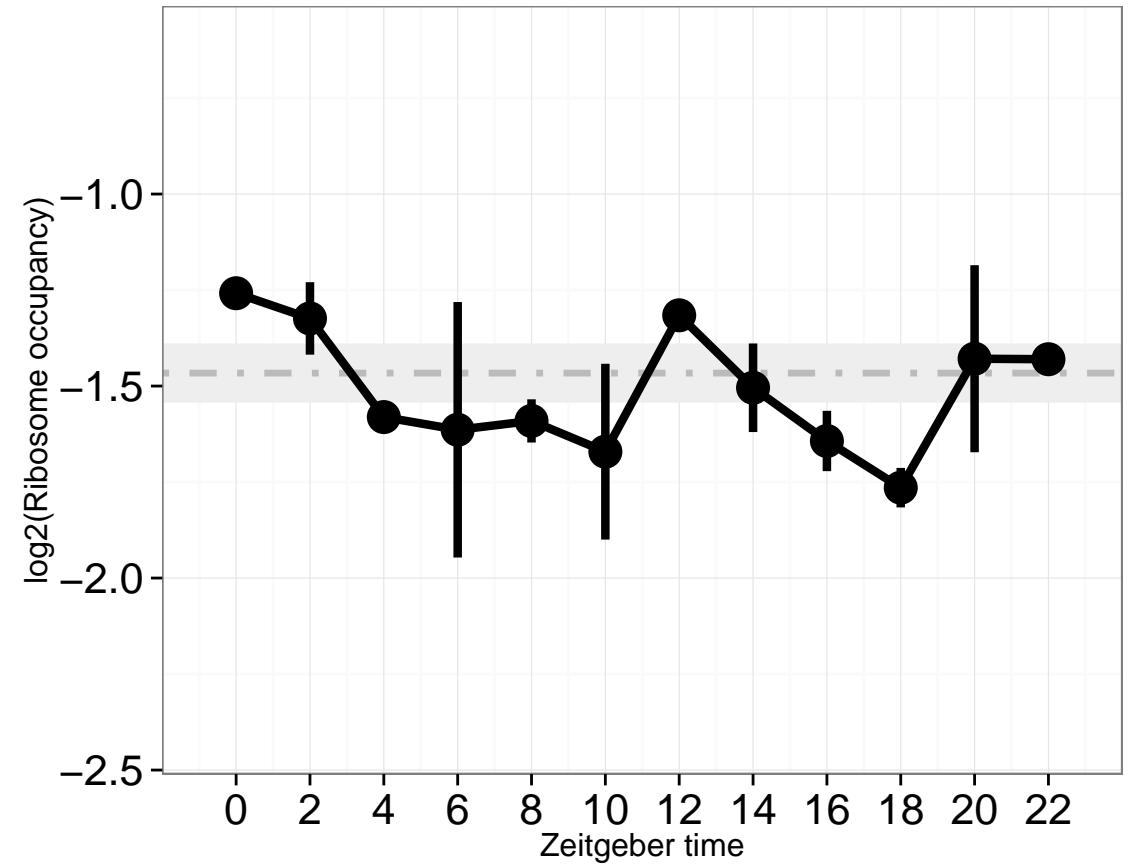

Supplement: SuppDataset_1.zip [file Rnf167_set_A.pdf › Supplemental Dataset 1/A-mRNA_nonrhyth_translation_nonrhyth/Rnf167_set_A.pdf]

## Rnf168

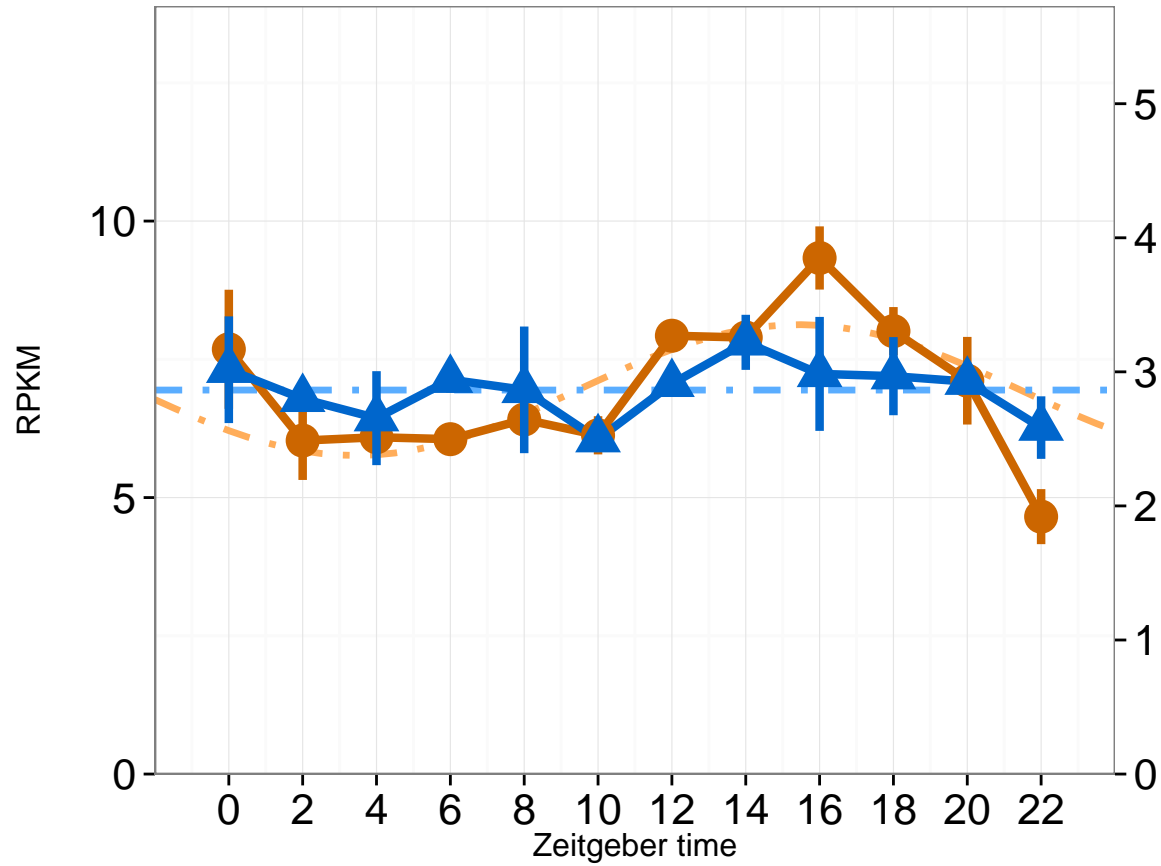

## Rnf168

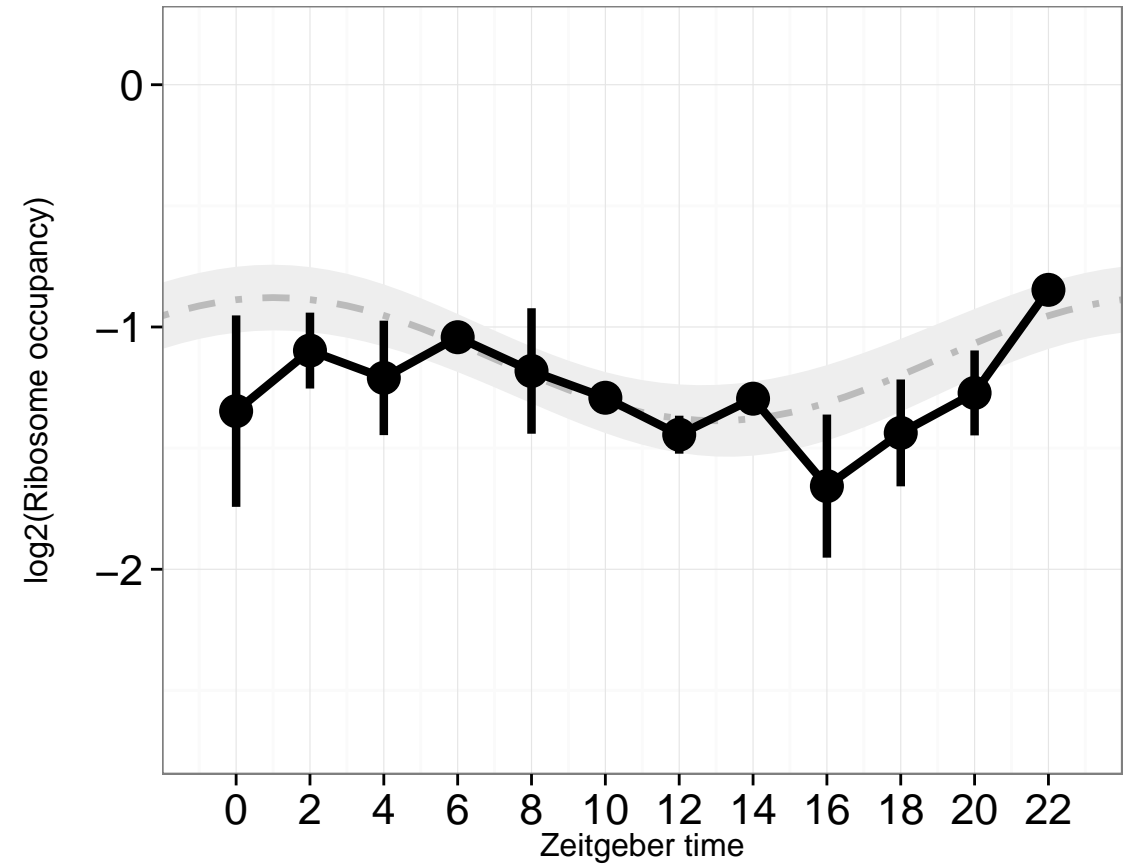

Supplement: SuppDataset_1.zip [file Rnf168_set_A.pdf › Supplemental Dataset 1/A-mRNA_nonrhyth_translation_nonrhyth/Rnf168_set_A.pdf]

# Rnf170

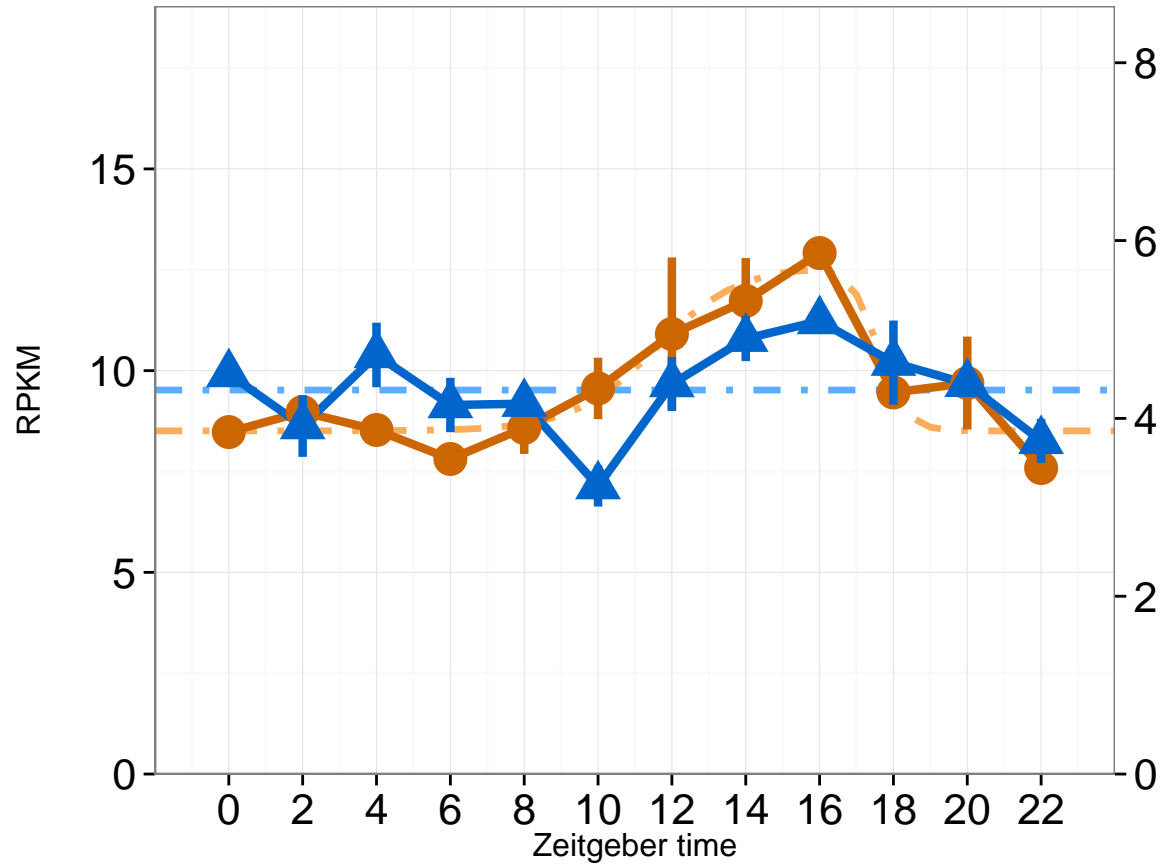

# Rnf170

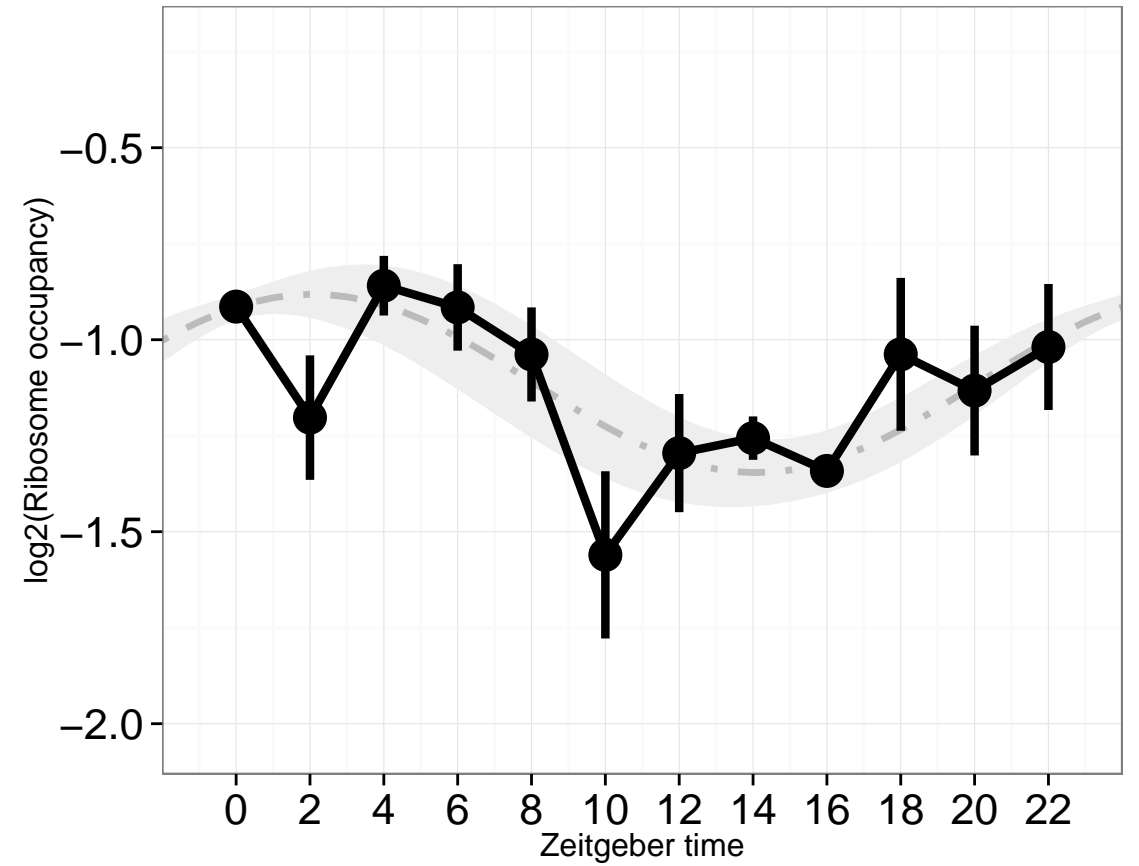

Supplement: SuppDataset_1.zip [file Rnf170_set_A.pdf › Supplemental Dataset 1/A-mRNA_nonrhyth_translation_nonrhyth/Rnf170_set_A.pdf]

## Rnf180

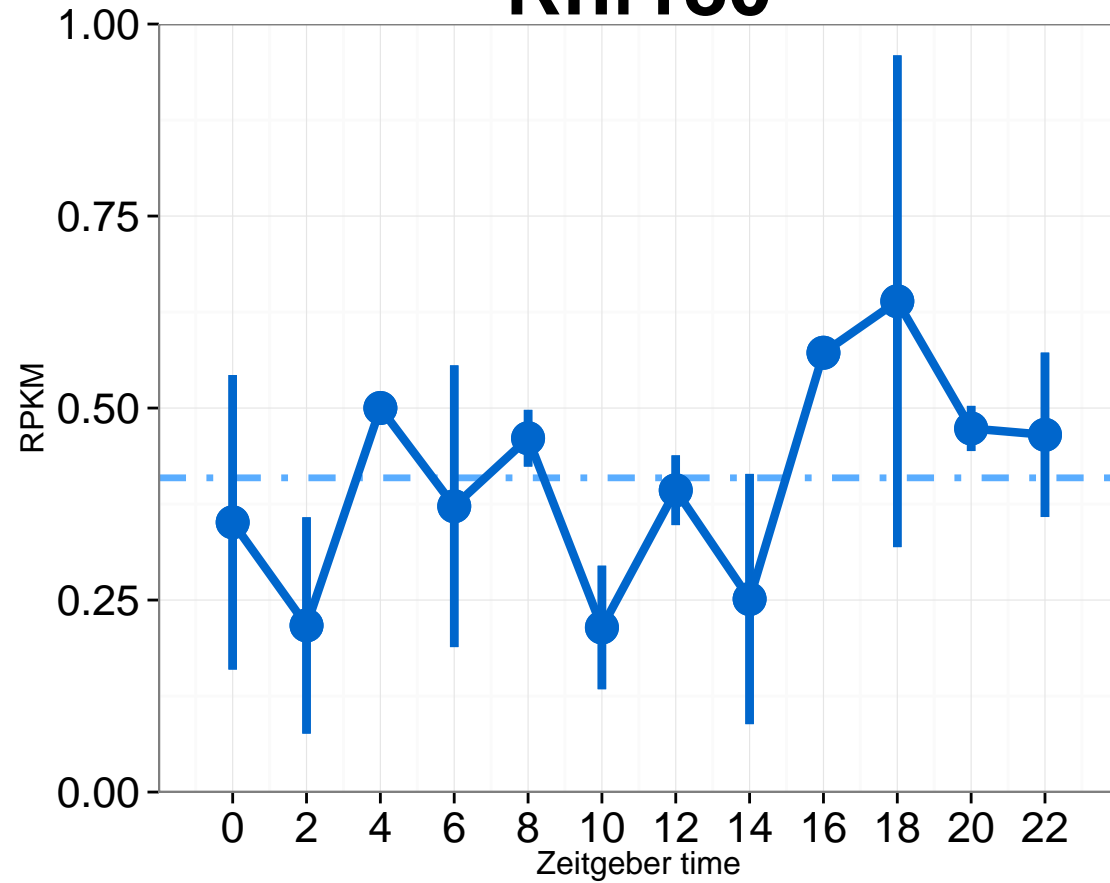

## Rnf180 log2(Ribosome occupancy

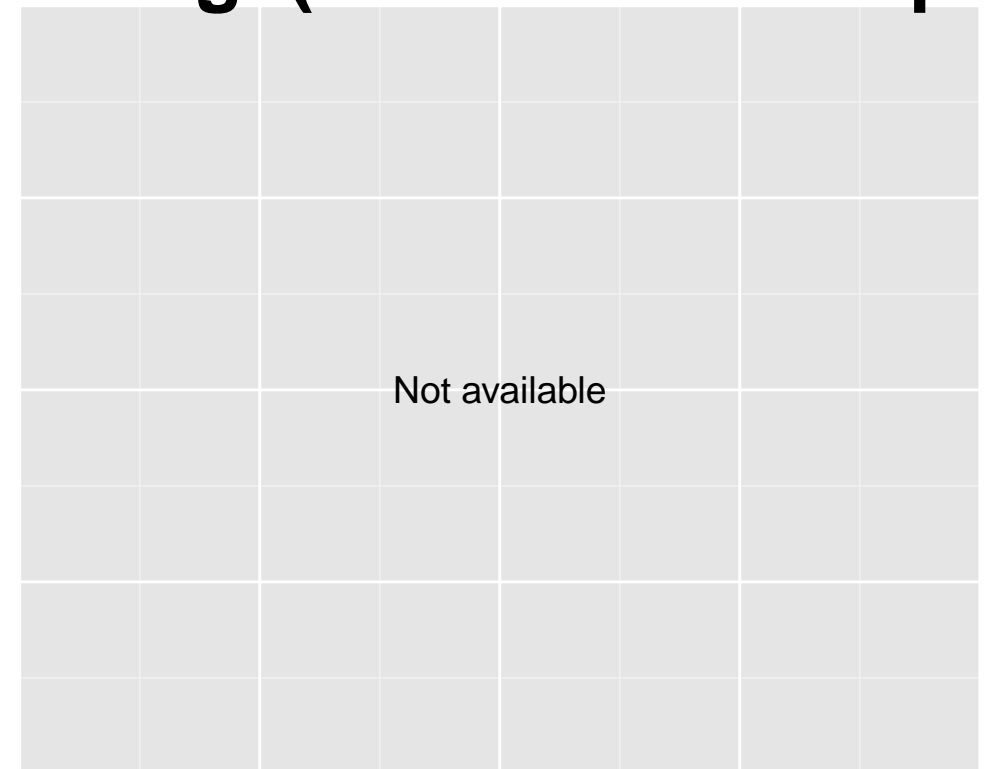

Supplement: SuppDataset_1.zip [file Rnf180_set_A.pdf › Supplemental Dataset 1/A-mRNA_nonrhyth_translation_nonrhyth/Rnf180_set_A.pdf]

## Rnf181

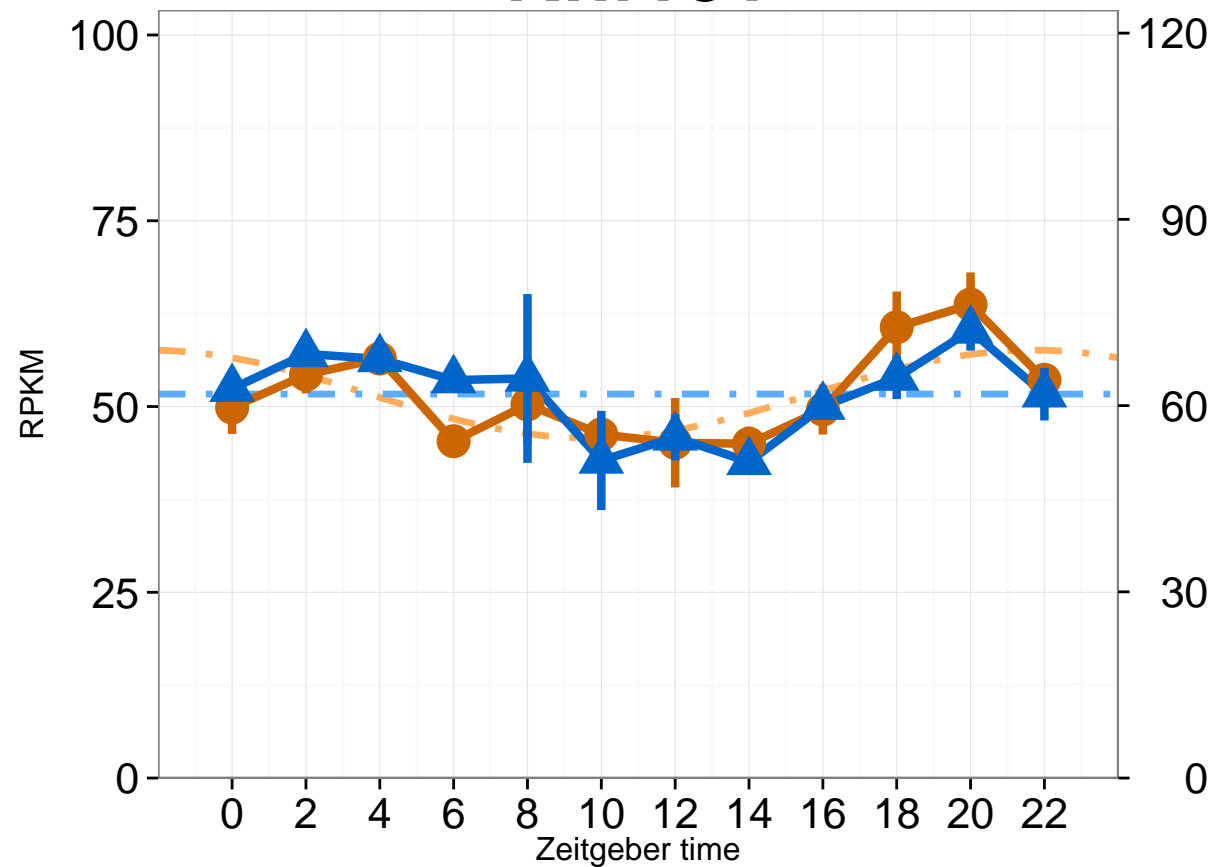

## Rnf181

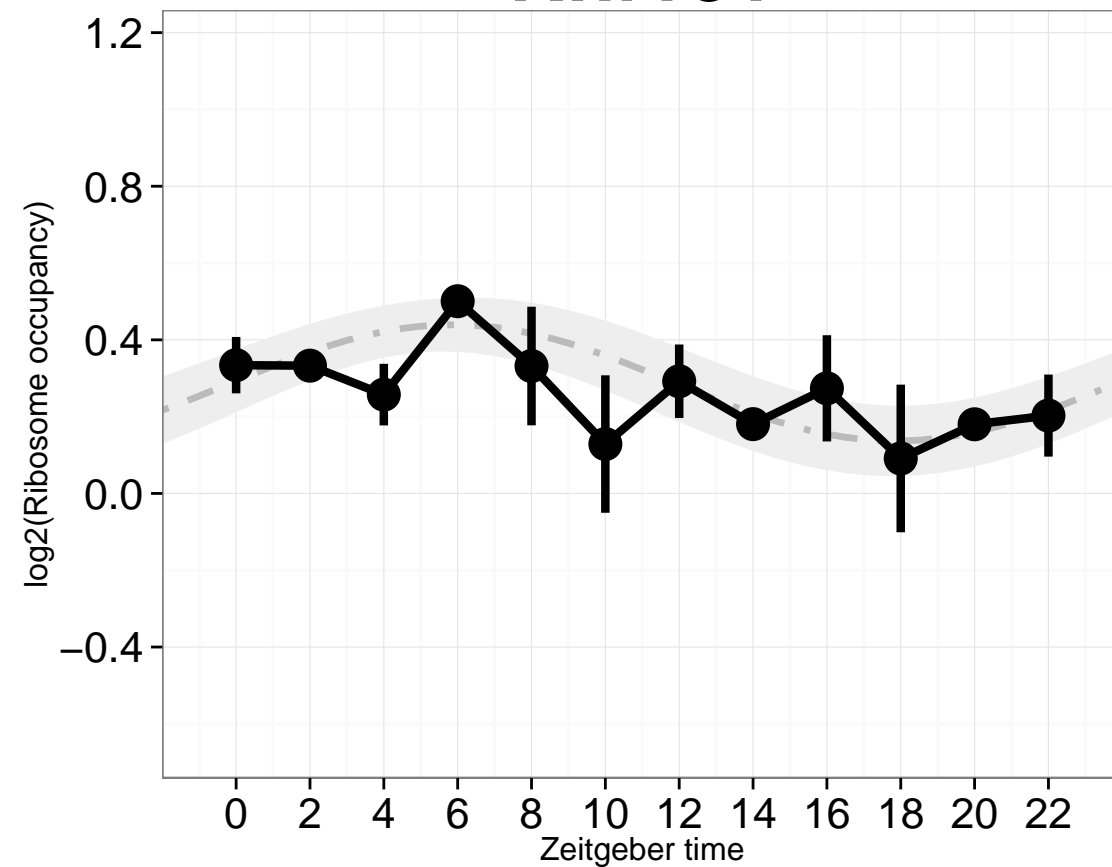

Supplement: SuppDataset_1.zip [file Rnf181_set_A.pdf › Supplemental Dataset 1/A-mRNA_nonrhyth_translation_nonrhyth/Rnf181_set_A.pdf]

## Rnf185

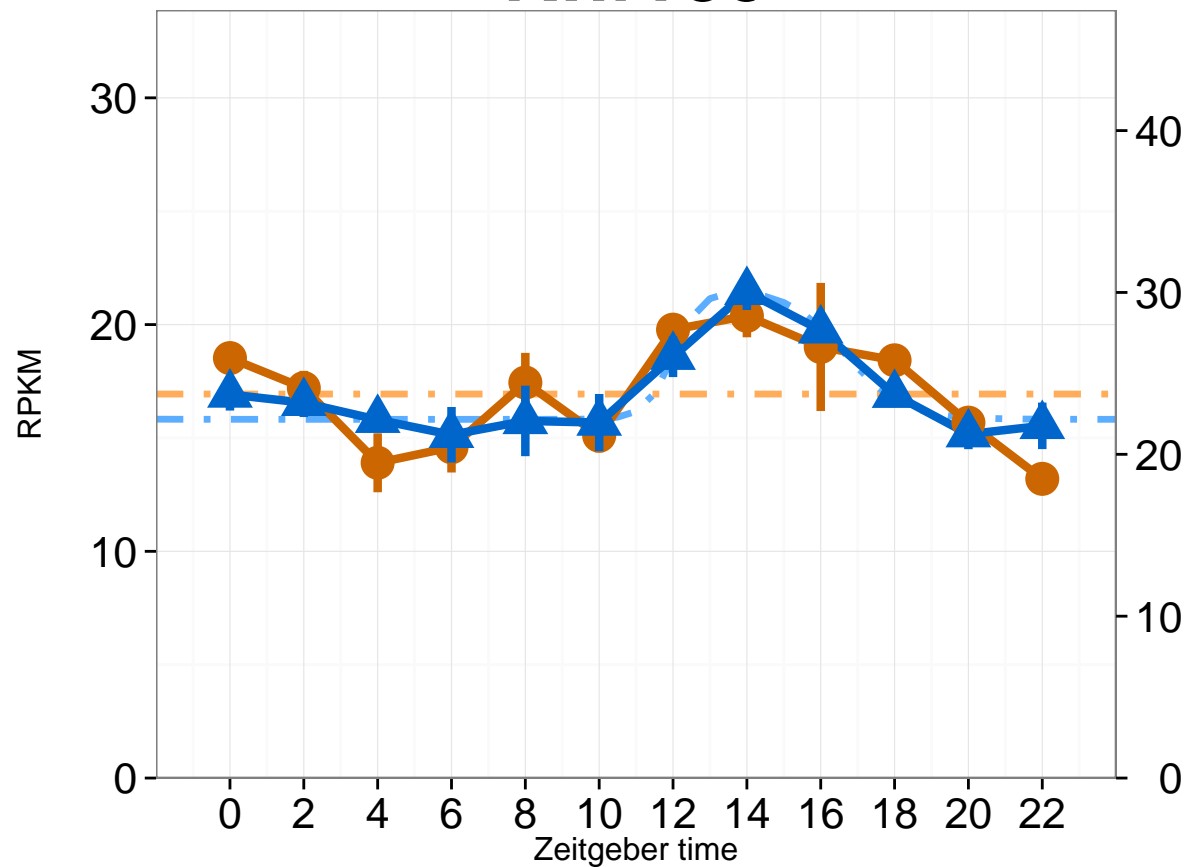

## Rnf185

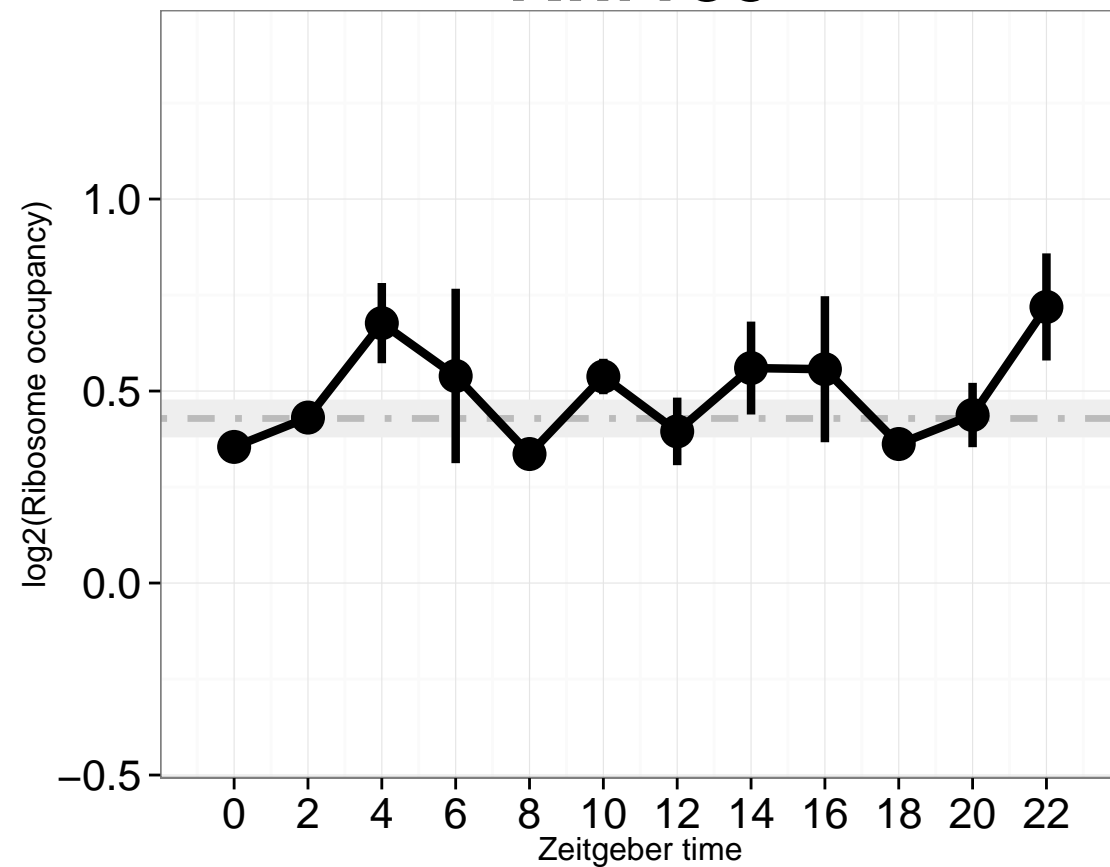

Supplement: SuppDataset_1.zip [file Rnf185_set_A.pdf › Supplemental Dataset 1/A-mRNA_nonrhyth_translation_nonrhyth/Rnf185_set_A.pdf]

# Rnf186

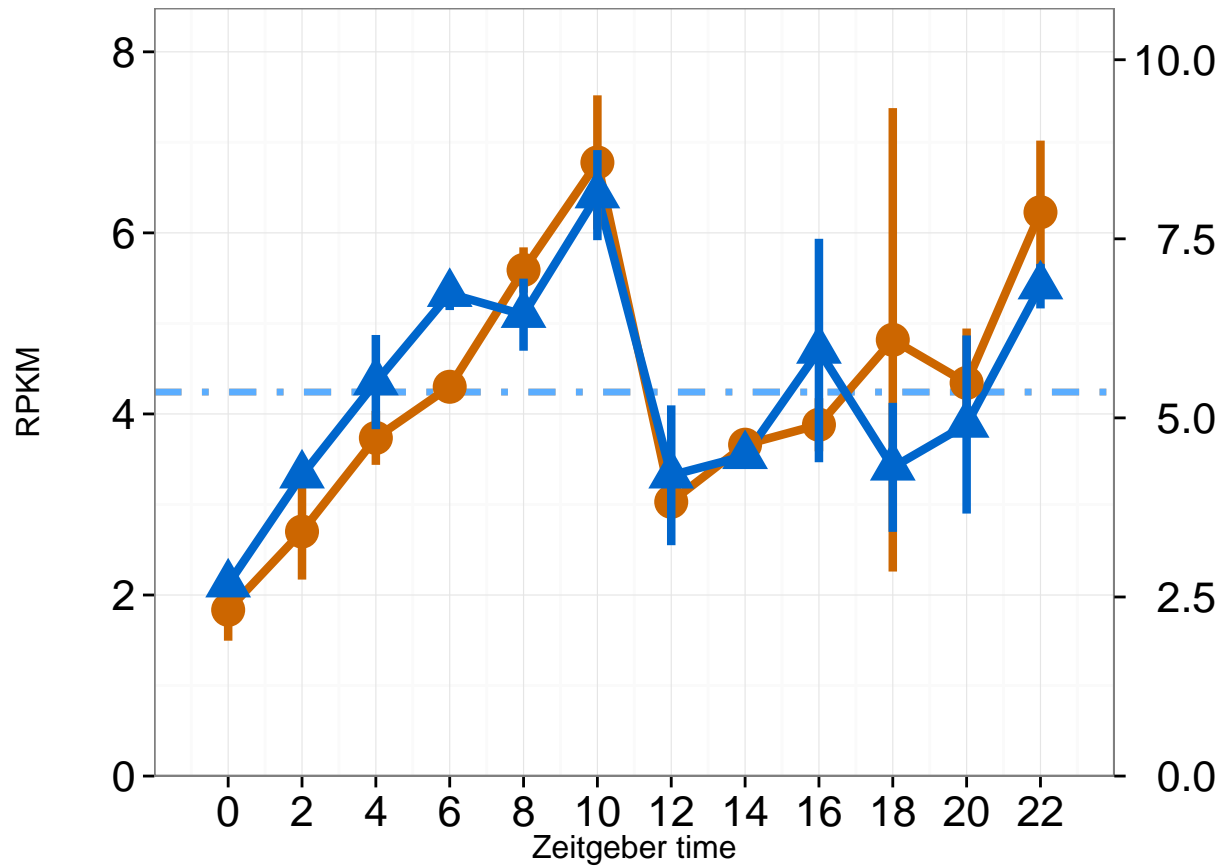

# Rnf186

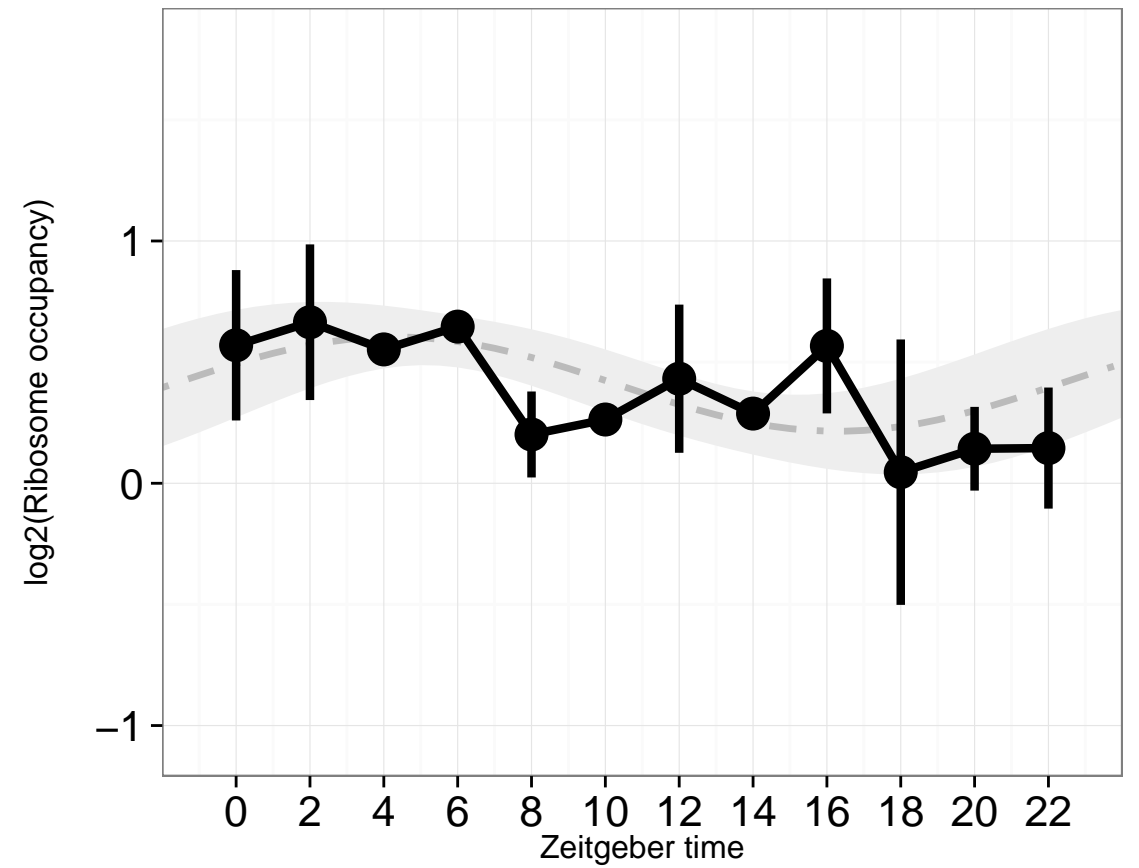

Supplement: SuppDataset_1.zip [file Rnf186_set_A.pdf › Supplemental Dataset 1/A-mRNA_nonrhyth_translation_nonrhyth/Rnf186_set_A.pdf]

## Rnf187

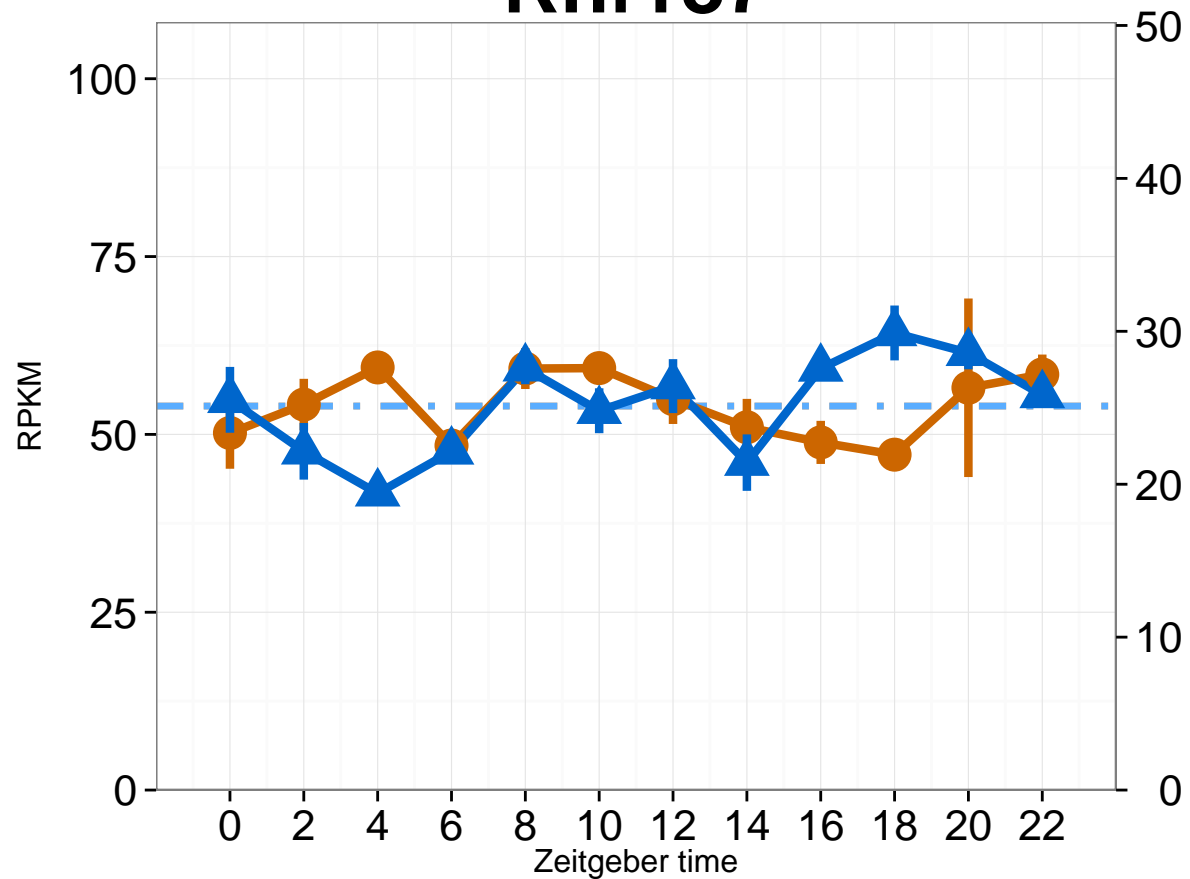

## Rnf187

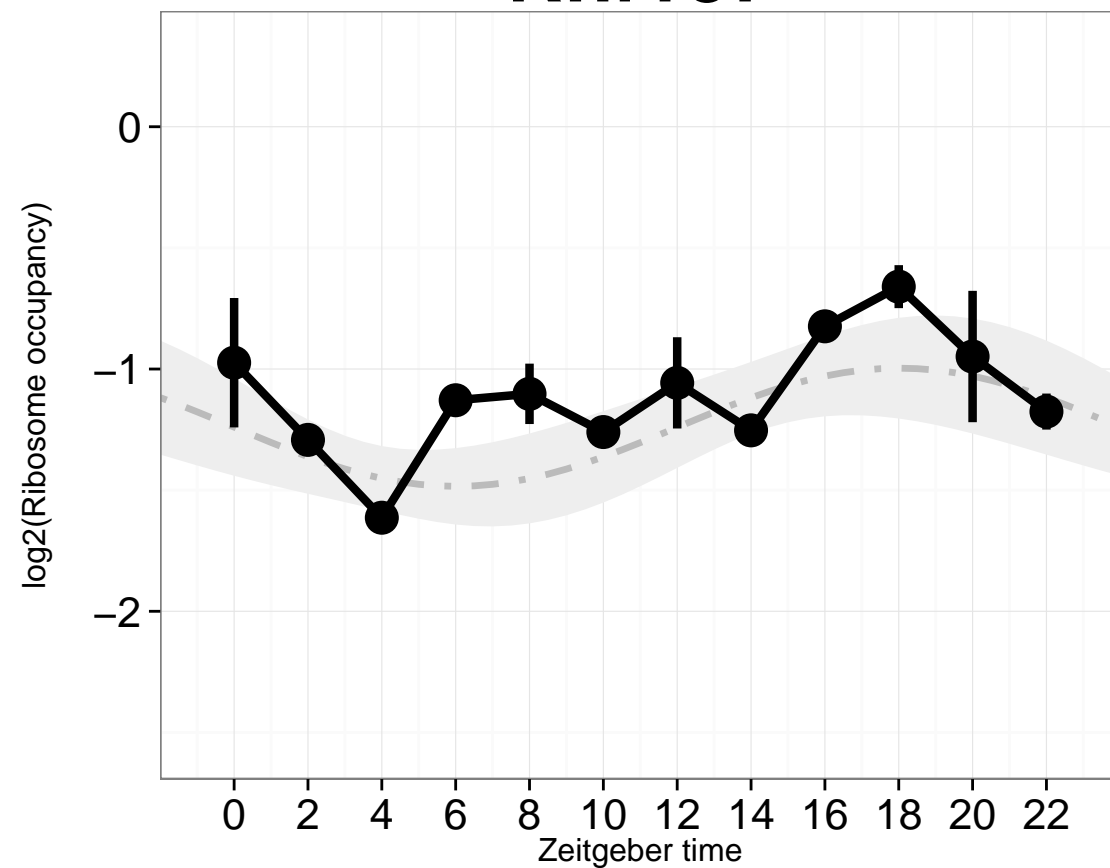

Supplement: SuppDataset_1.zip [file Rnf187_set_A.pdf › Supplemental Dataset 1/A-mRNA_nonrhyth_translation_nonrhyth/Rnf187_set_A.pdf]

# Rnf19a

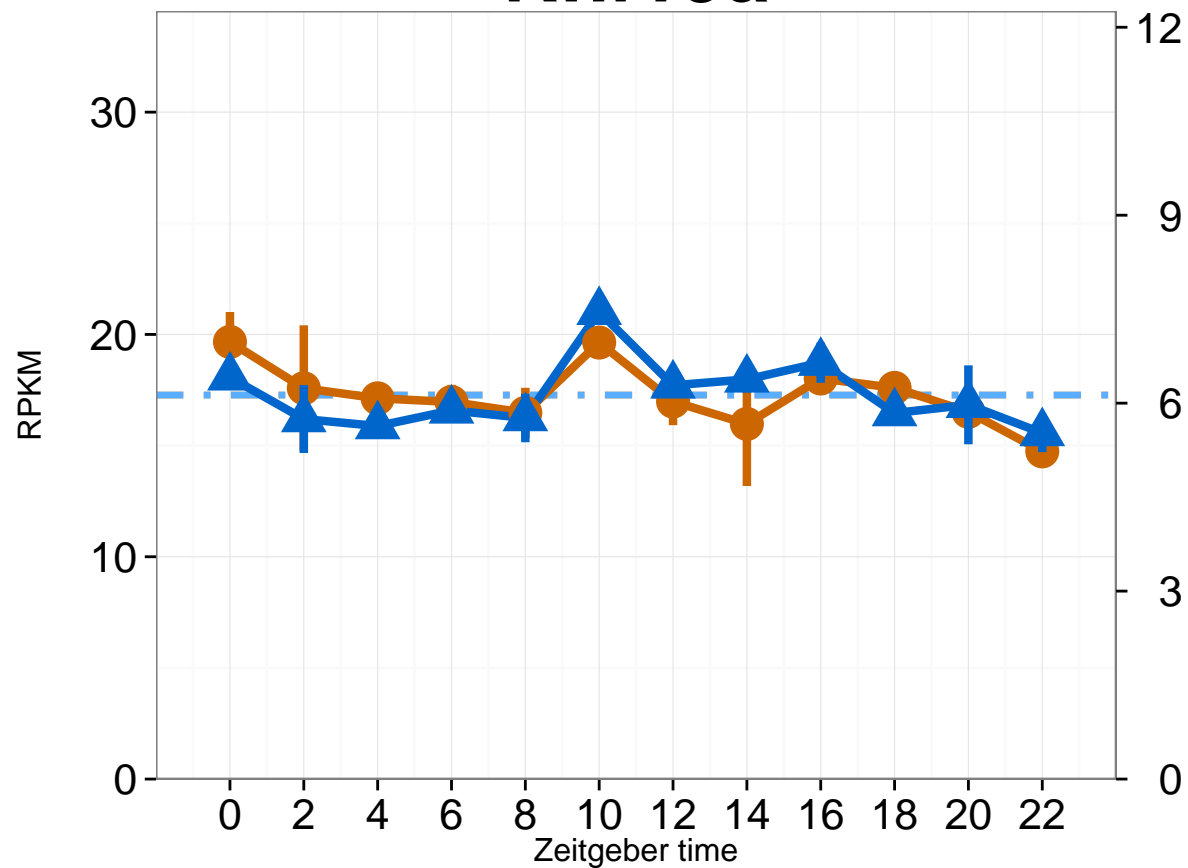

# Rnf19a

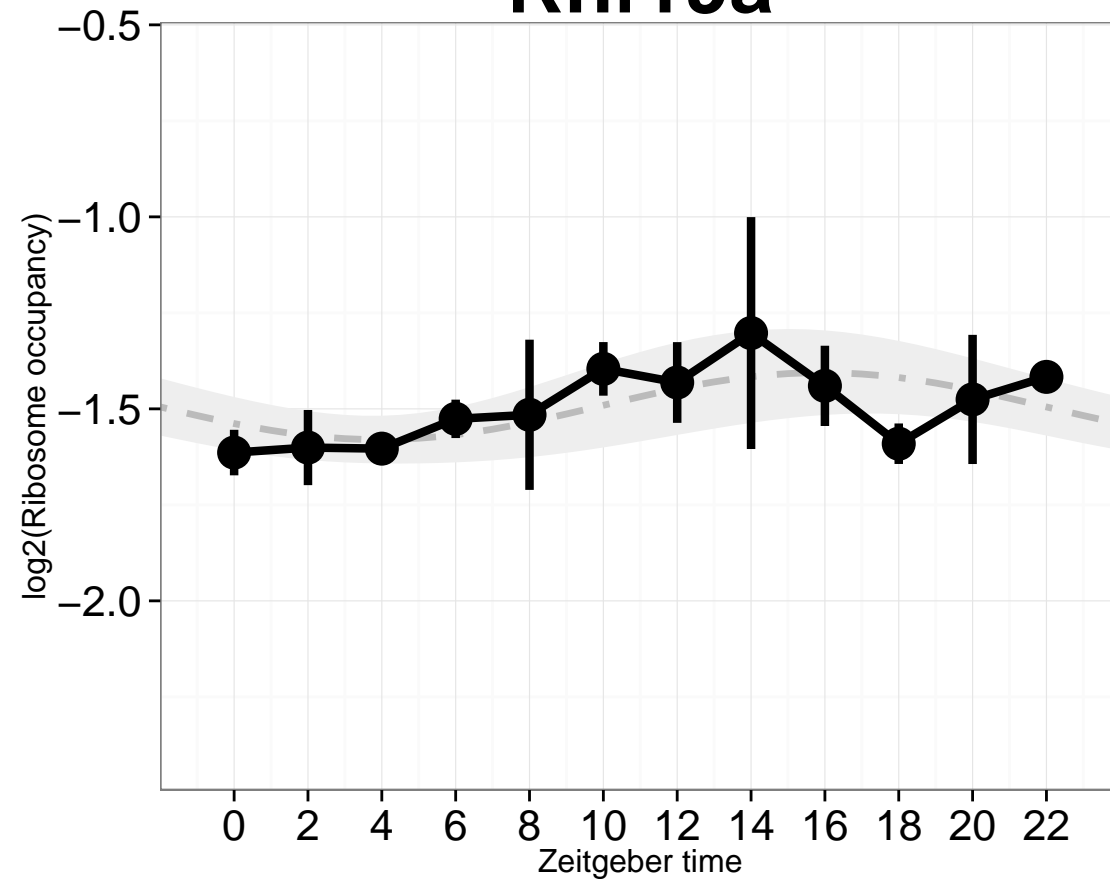

Supplement: SuppDataset_1.zip [file Rnf19a_set_A.pdf › Supplemental Dataset 1/A-mRNA_nonrhyth_translation_nonrhyth/Rnf19a_set_A.pdf]

## Rnf20

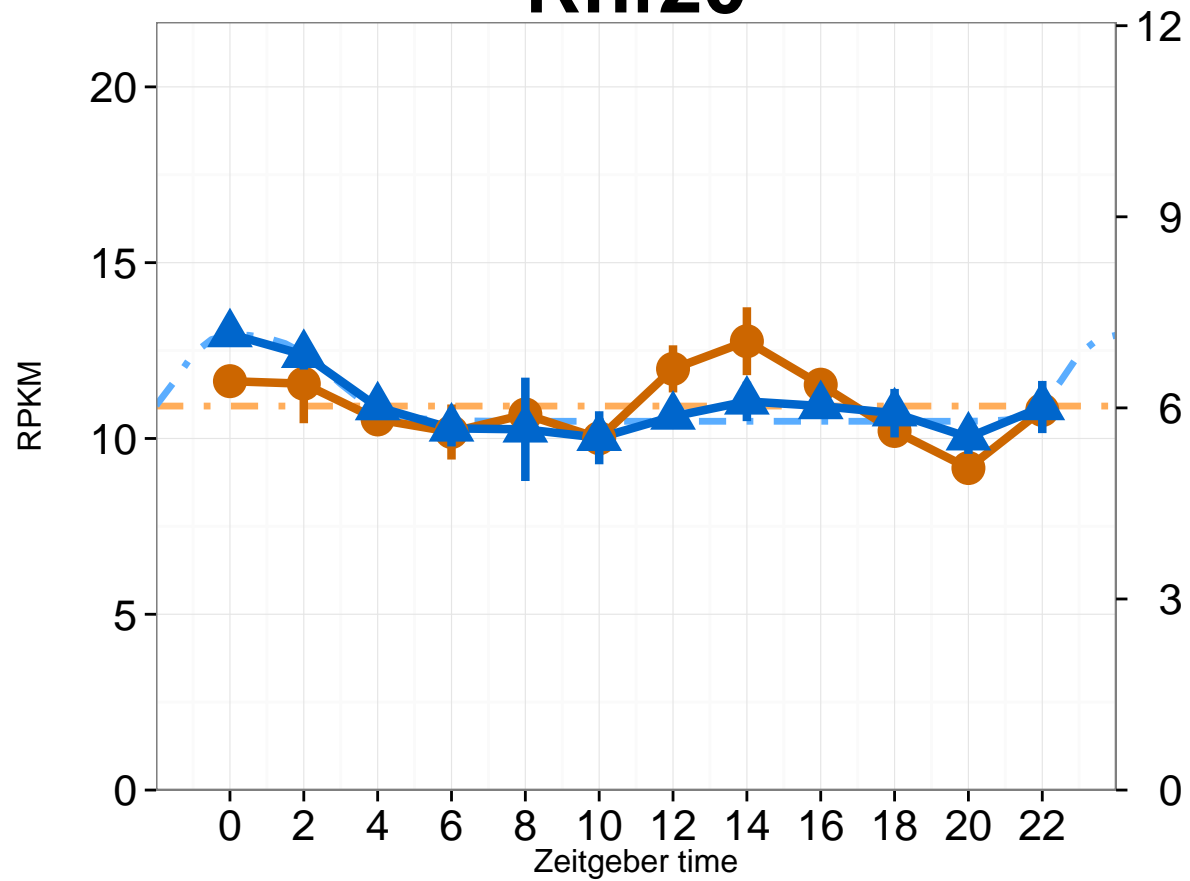

## Rnf20

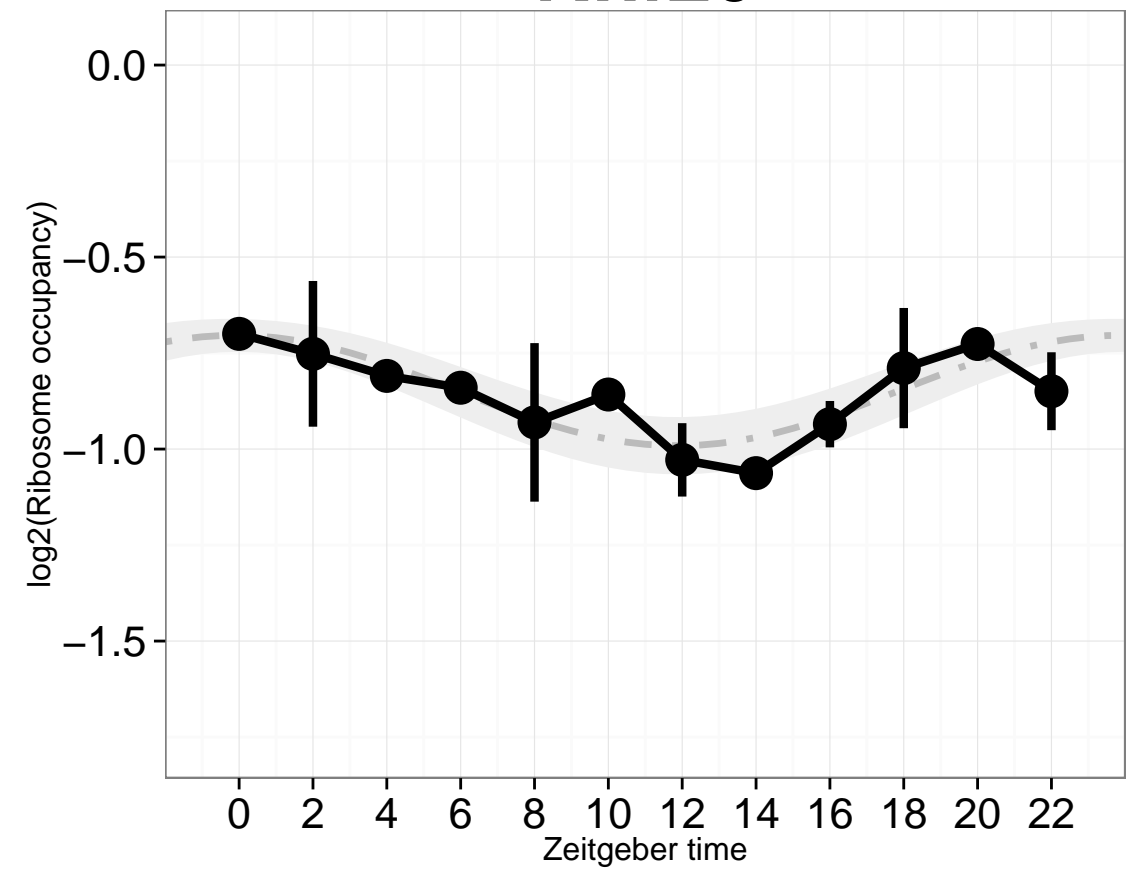

Supplement: SuppDataset_1.zip [file Rnf20_set_A.pdf › Supplemental Dataset 1/A-mRNA_nonrhyth_translation_nonrhyth/Rnf20_set_A.pdf]

## Rnf214

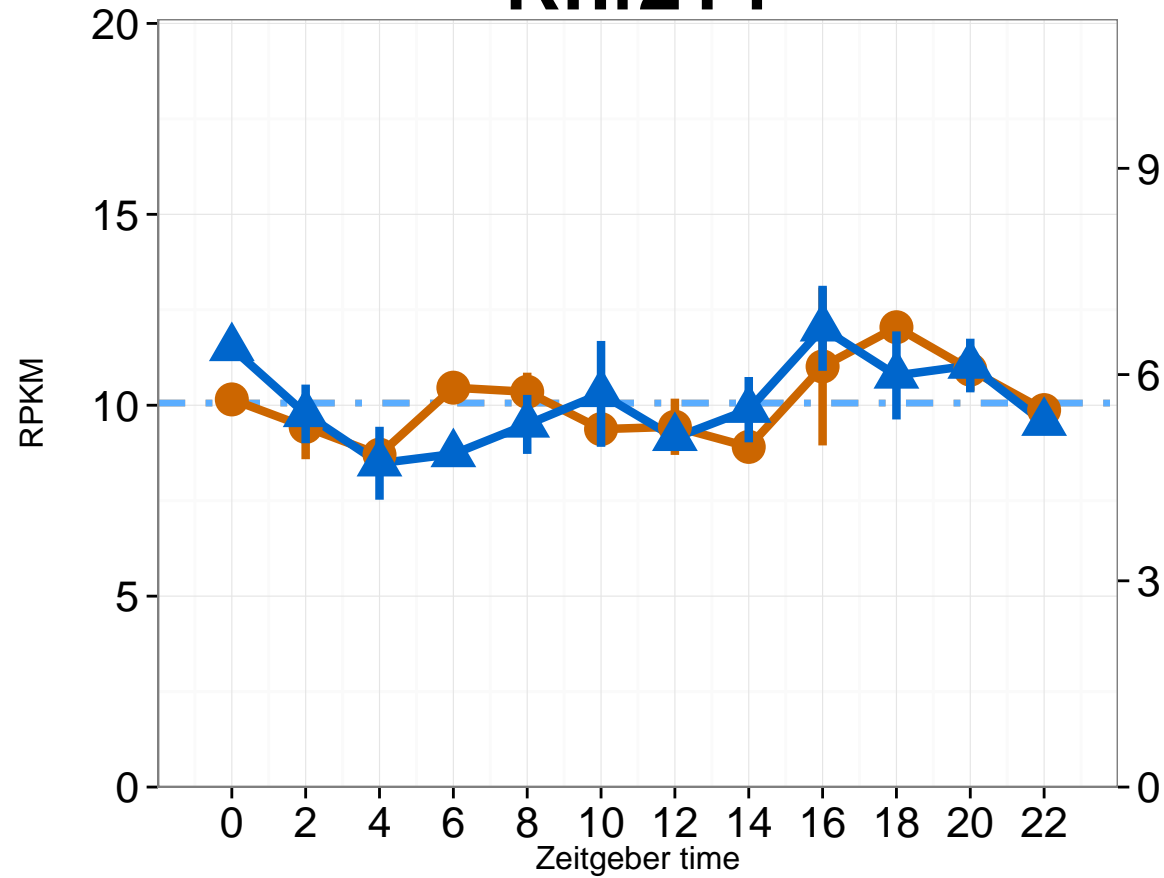

## Rnf214

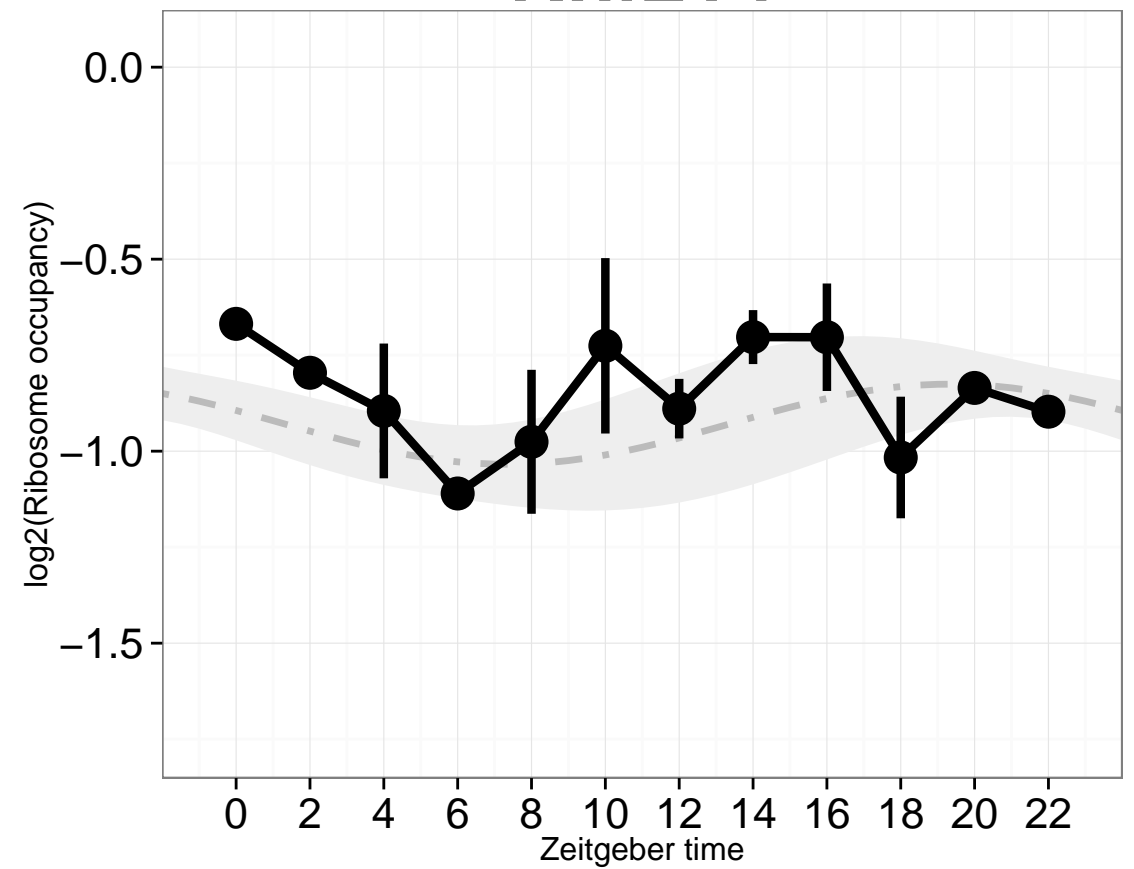

Supplement: SuppDataset_1.zip [file Rnf214_set_A.pdf › Supplemental Dataset 1/A-mRNA_nonrhyth_translation_nonrhyth/Rnf214_set_A.pdf]

## Rnf215

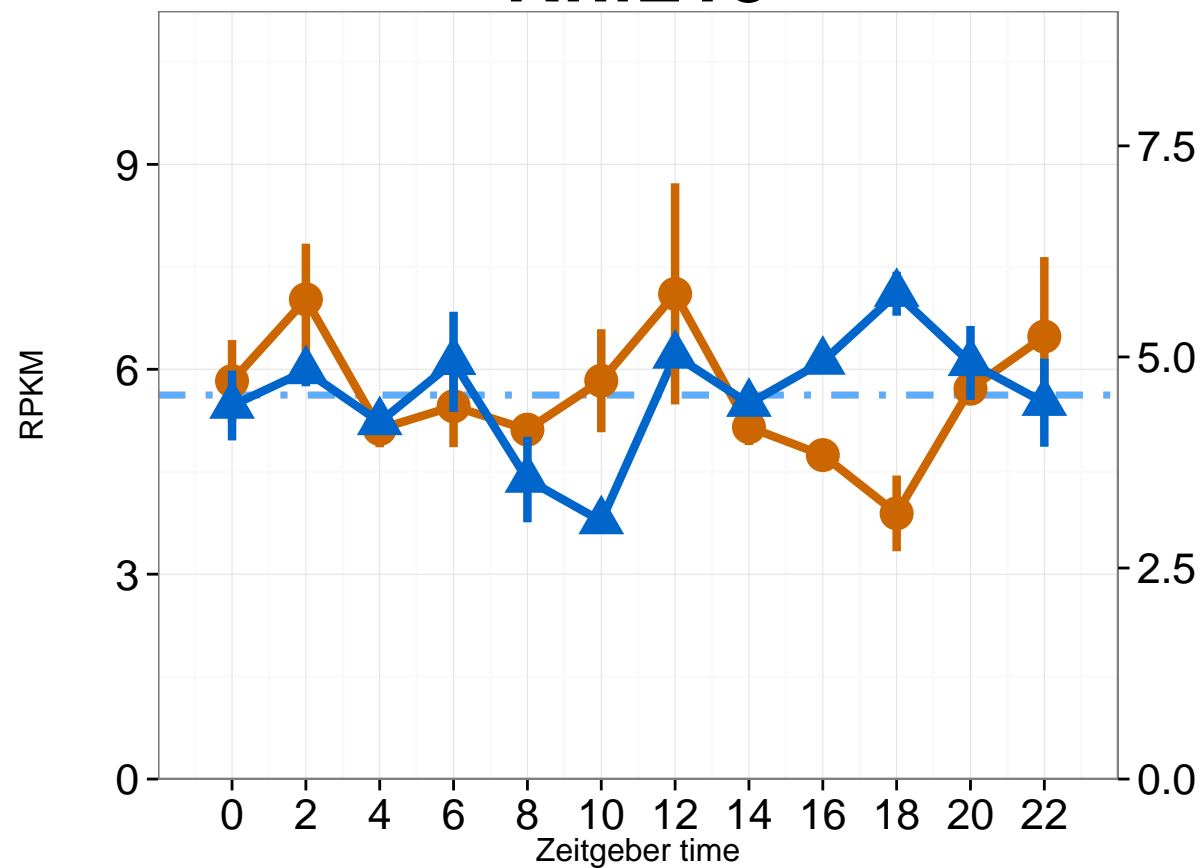

## Rnf215

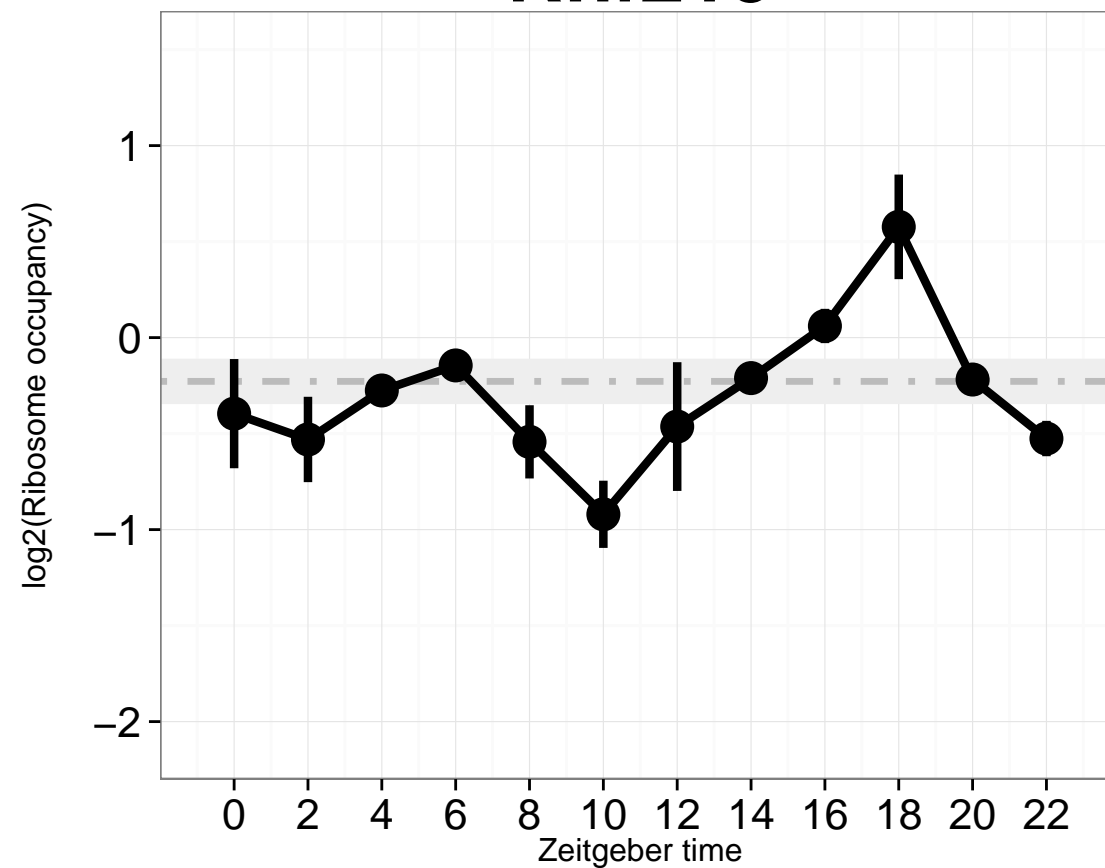

Supplement: SuppDataset_1.zip [file Rnf215_set_A.pdf › Supplemental Dataset 1/A-mRNA_nonrhyth_translation_nonrhyth/Rnf215_set_A.pdf]

## Rnf216

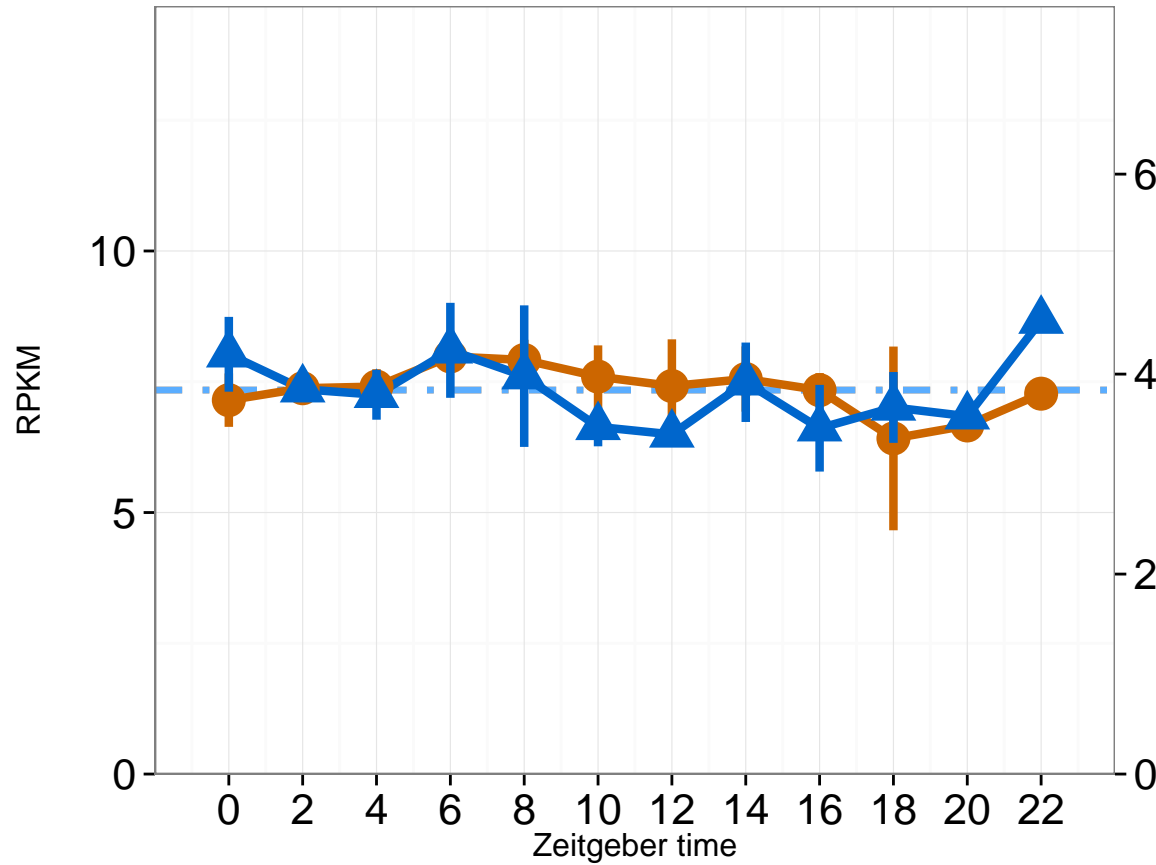

## Rnf216

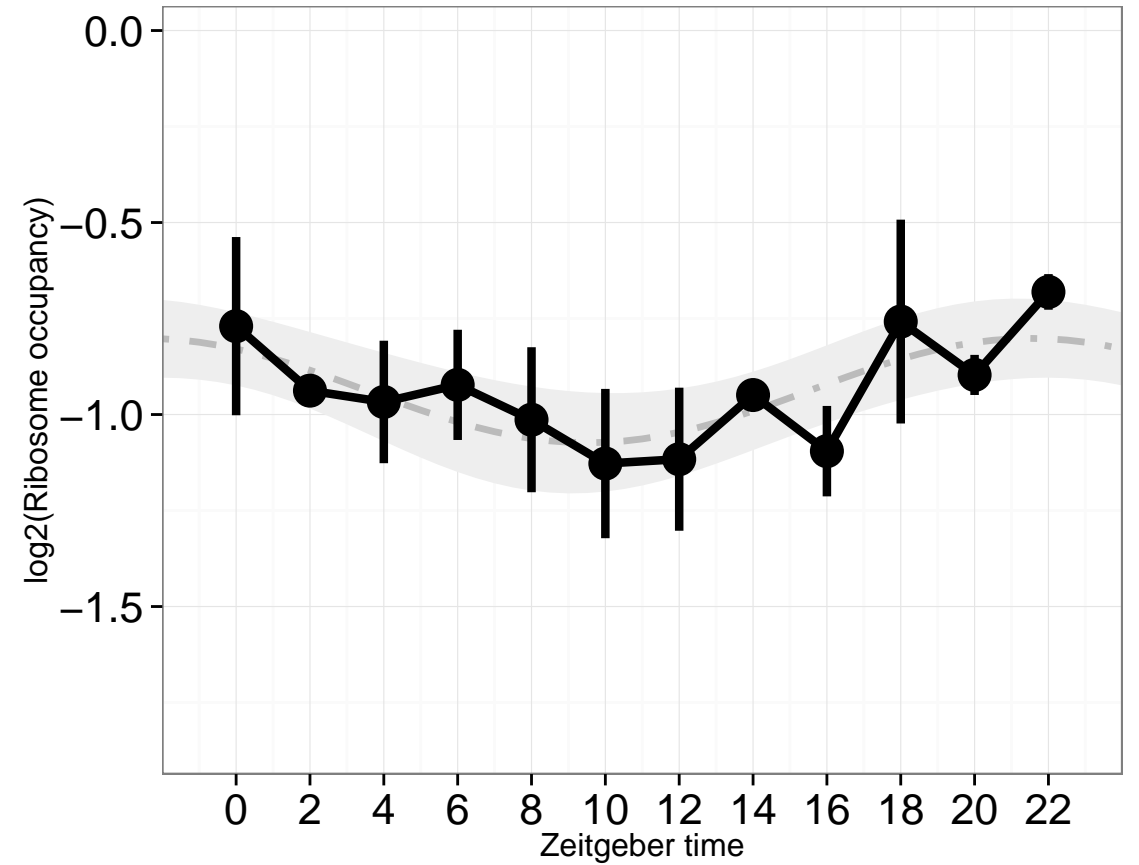

Supplement: SuppDataset_1.zip [file Rnf216_set_A.pdf › Supplemental Dataset 1/A-mRNA_nonrhyth_translation_nonrhyth/Rnf216_set_A.pdf]

## Rnf217

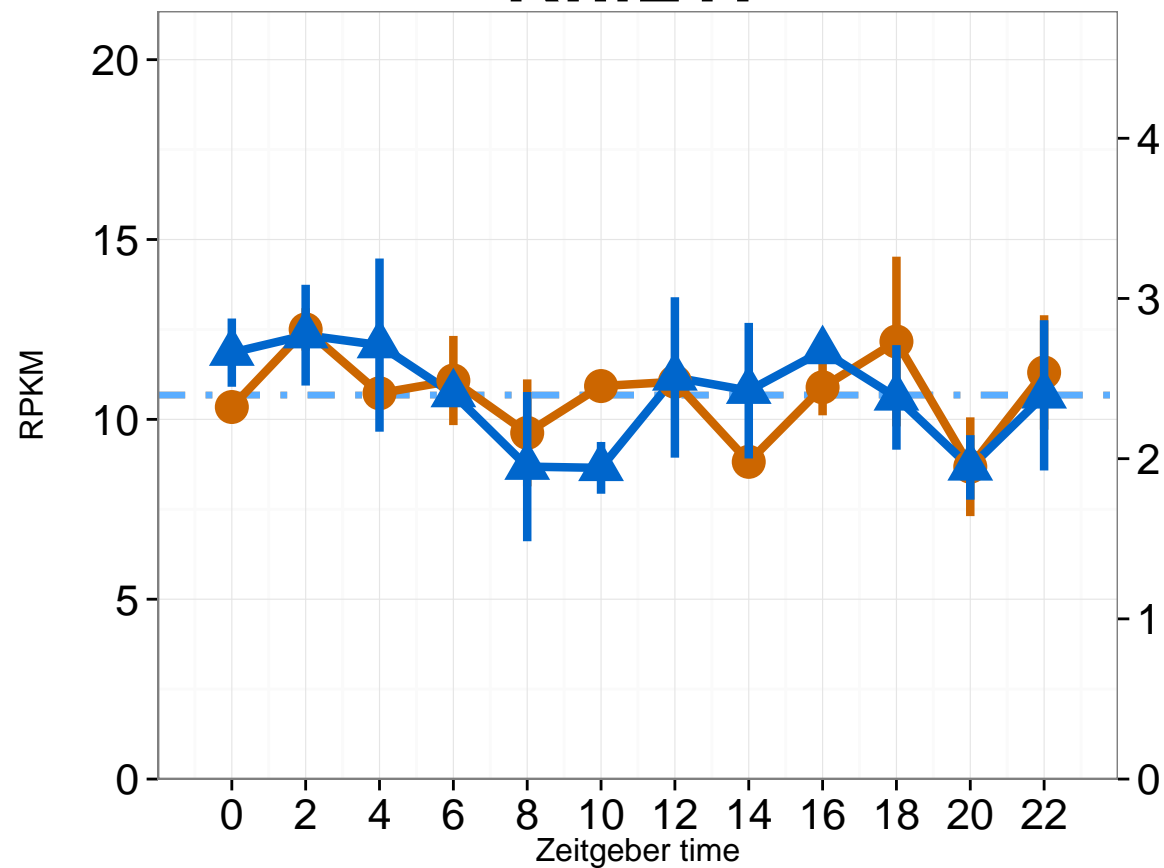

## Rnf217

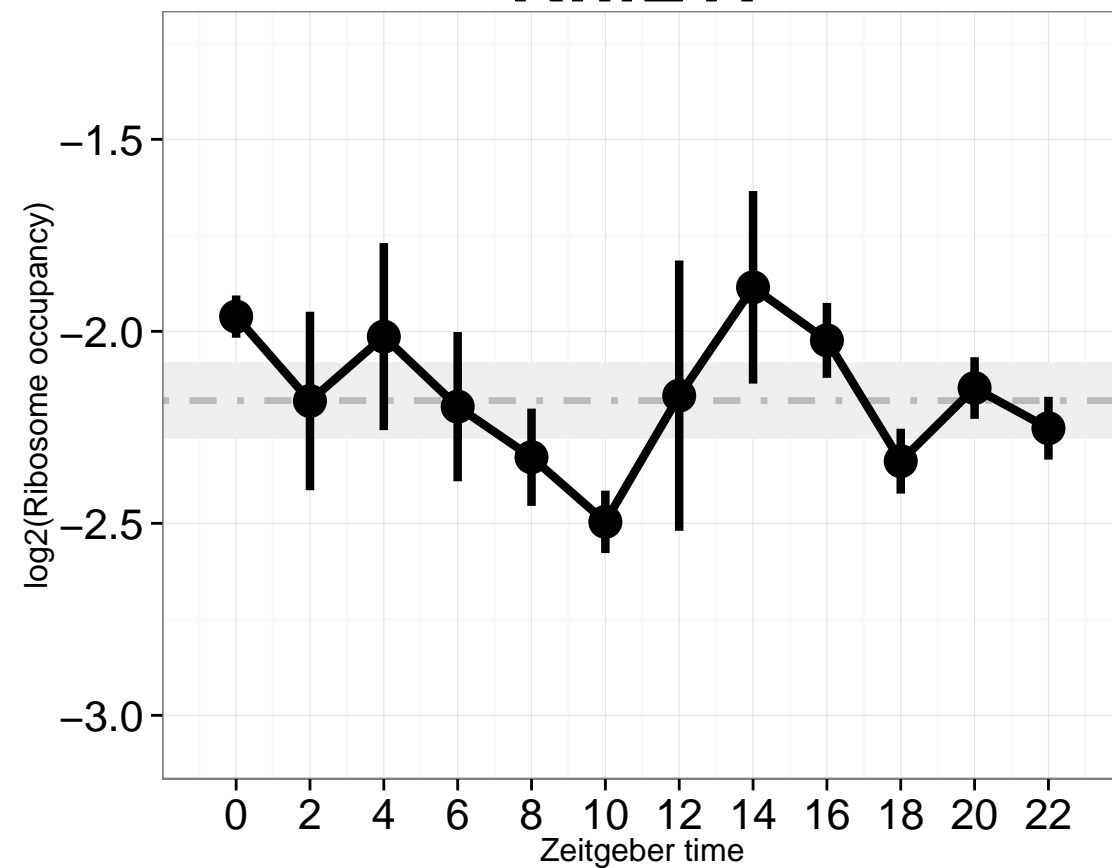

Supplement: SuppDataset_1.zip [file Rnf217_set_A.pdf › Supplemental Dataset 1/A-mRNA_nonrhyth_translation_nonrhyth/Rnf217_set_A.pdf]

# Rnf219

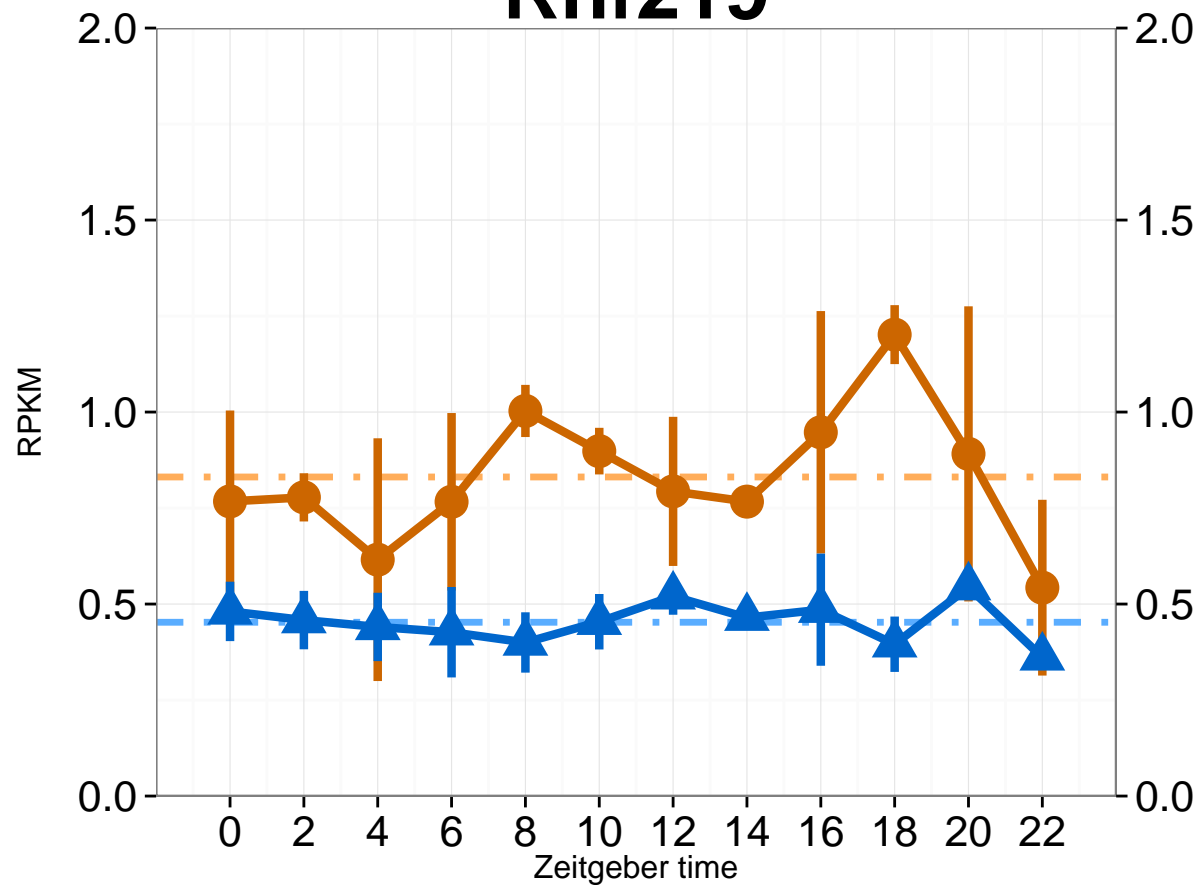

# Rnf219

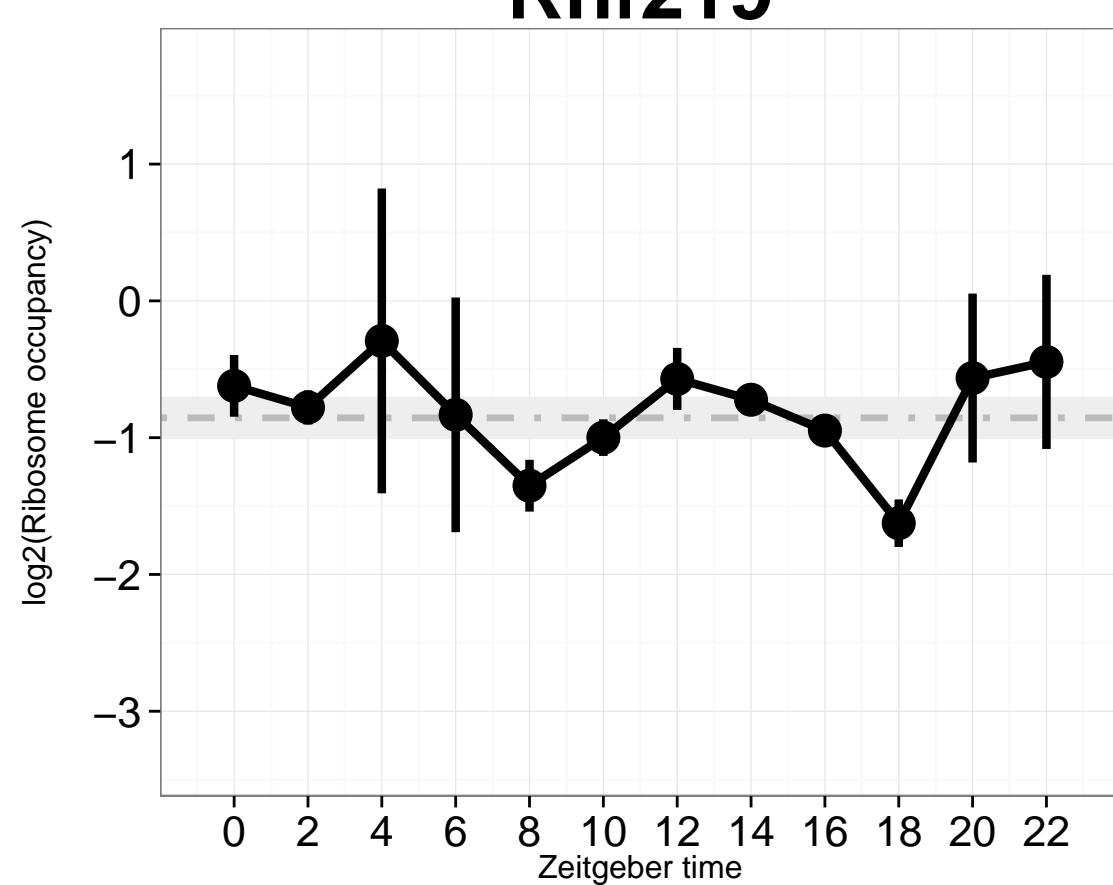

Supplement: SuppDataset_1.zip [file Rnf219_set_A.pdf › Supplemental Dataset 1/A-mRNA_nonrhyth_translation_nonrhyth/Rnf219_set_A.pdf]

## Rnf220

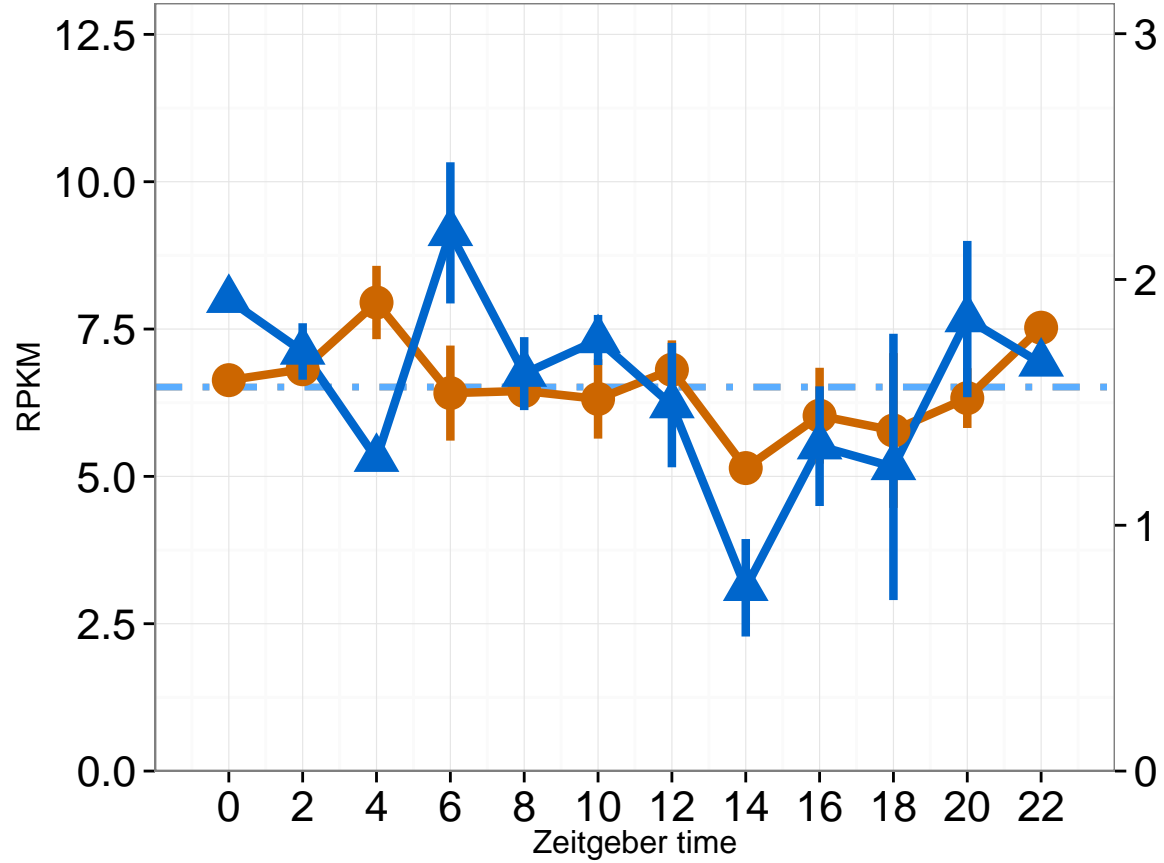

## Rnf220

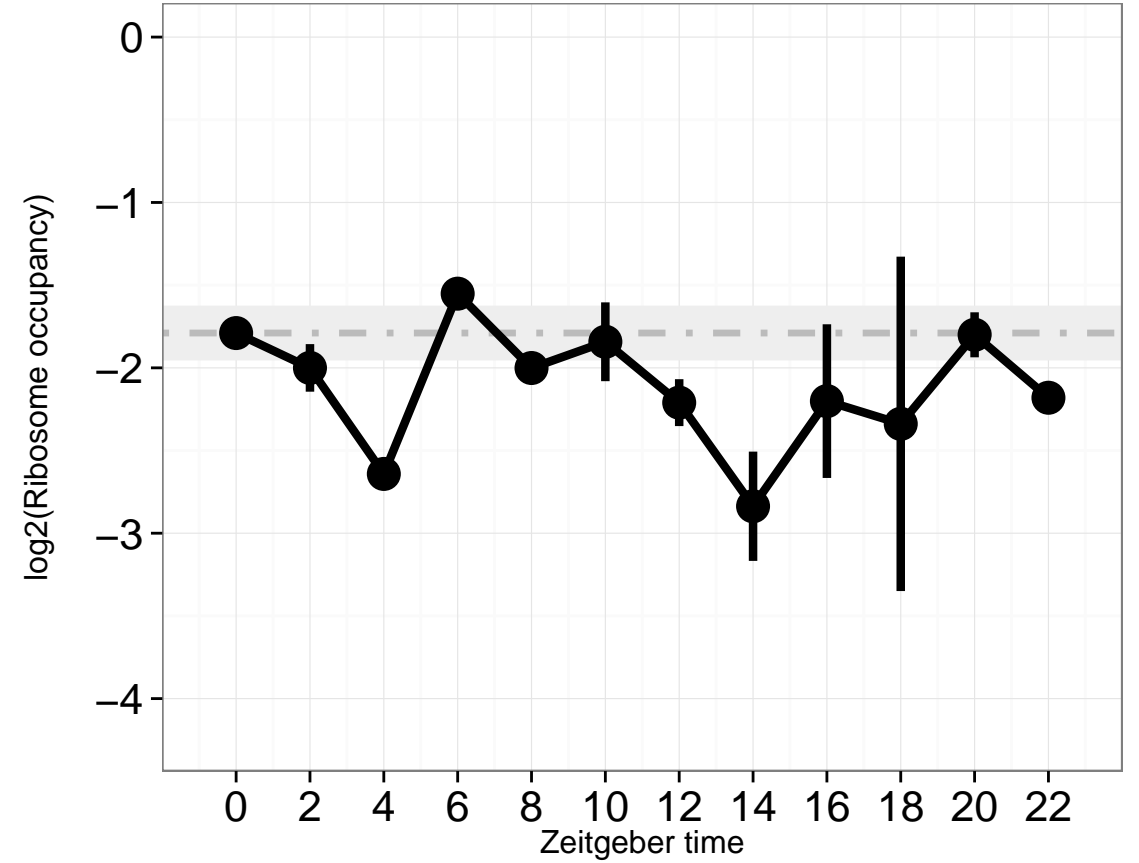

Supplement: SuppDataset_1.zip [file Rnf220_set_A.pdf › Supplemental Dataset 1/A-mRNA_nonrhyth_translation_nonrhyth/Rnf220_set_A.pdf]

# Rnf24

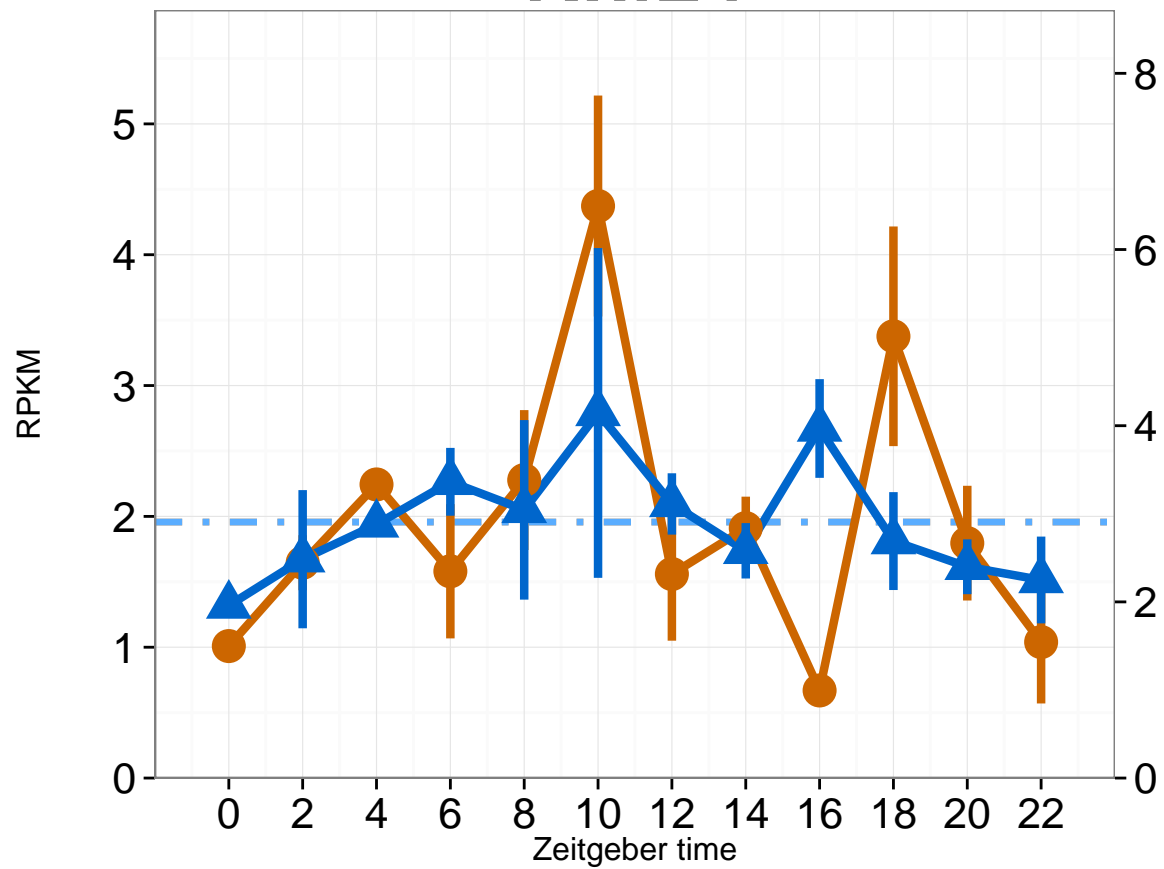

# Rnf24

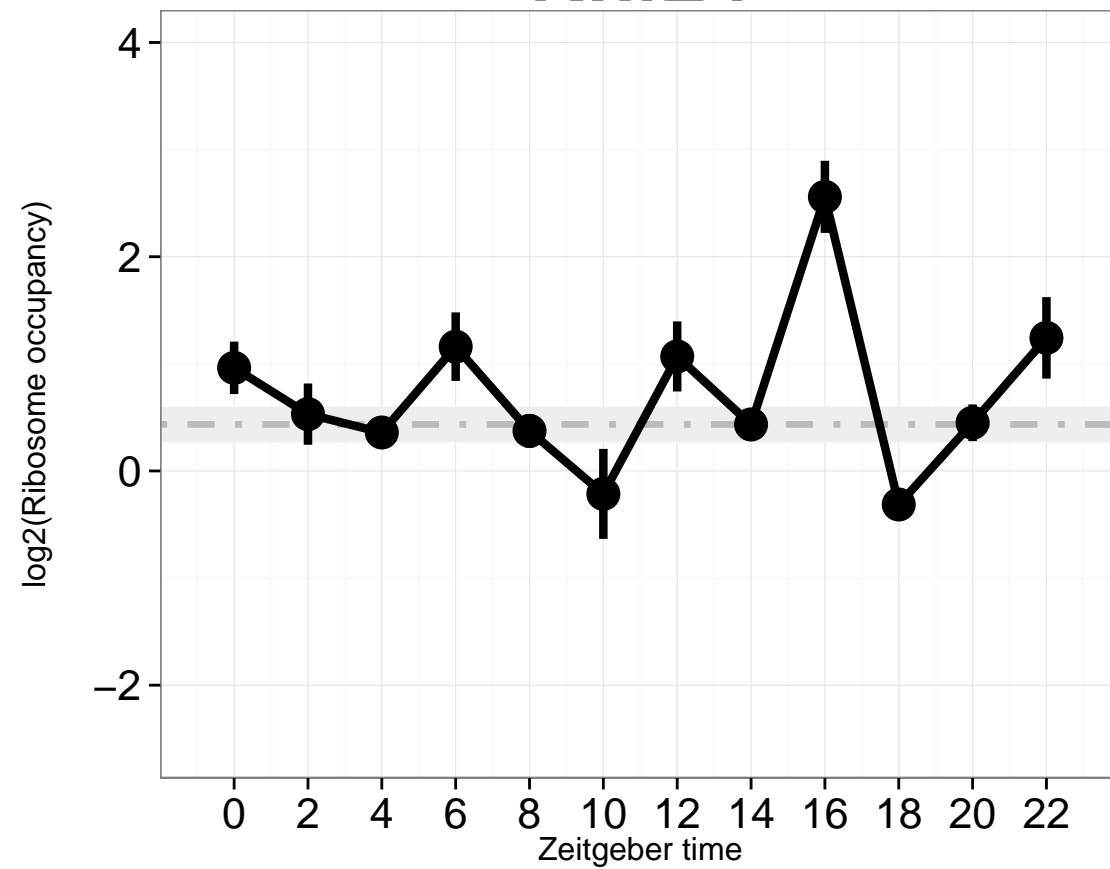

Supplement: SuppDataset_1.zip [file Rnf24_set_A.pdf › Supplemental Dataset 1/A-mRNA_nonrhyth_translation_nonrhyth/Rnf24_set_A.pdf]

## Rnf25

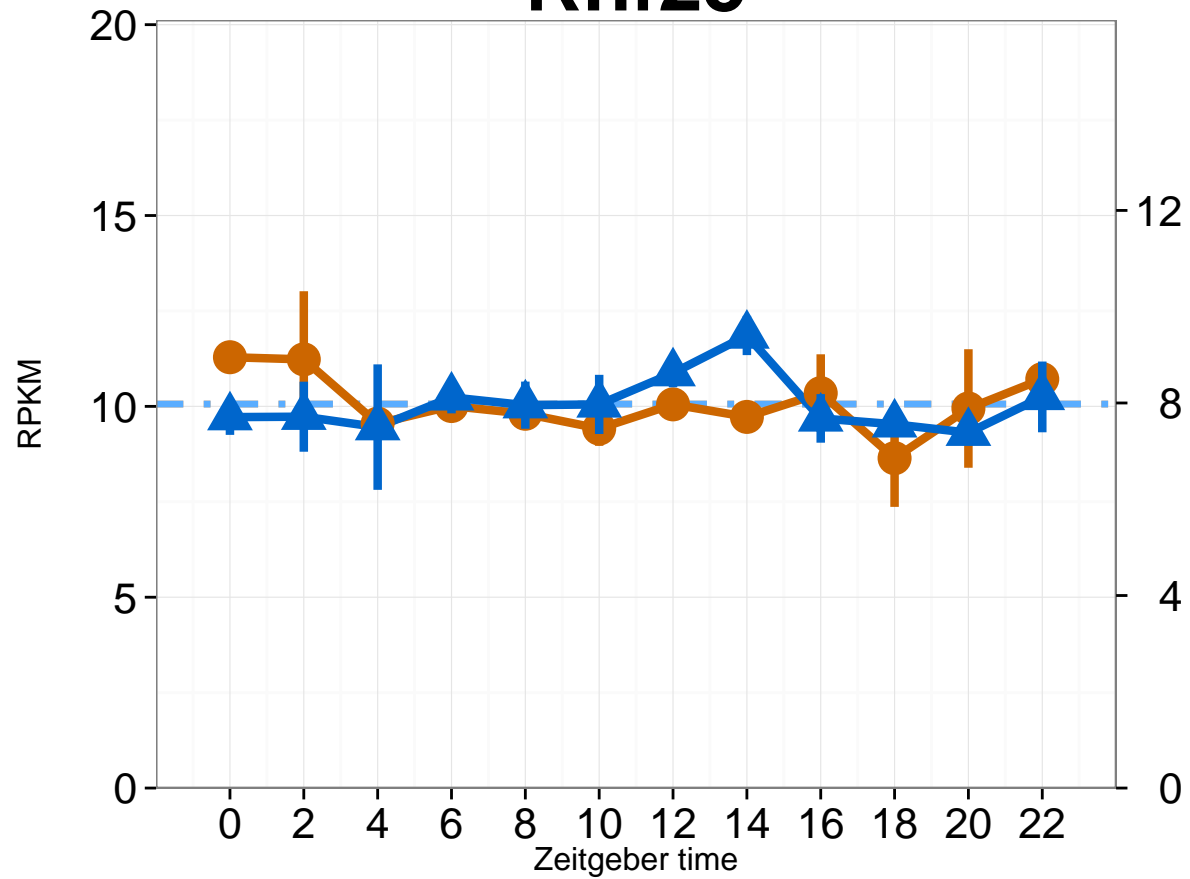

## Rnf25

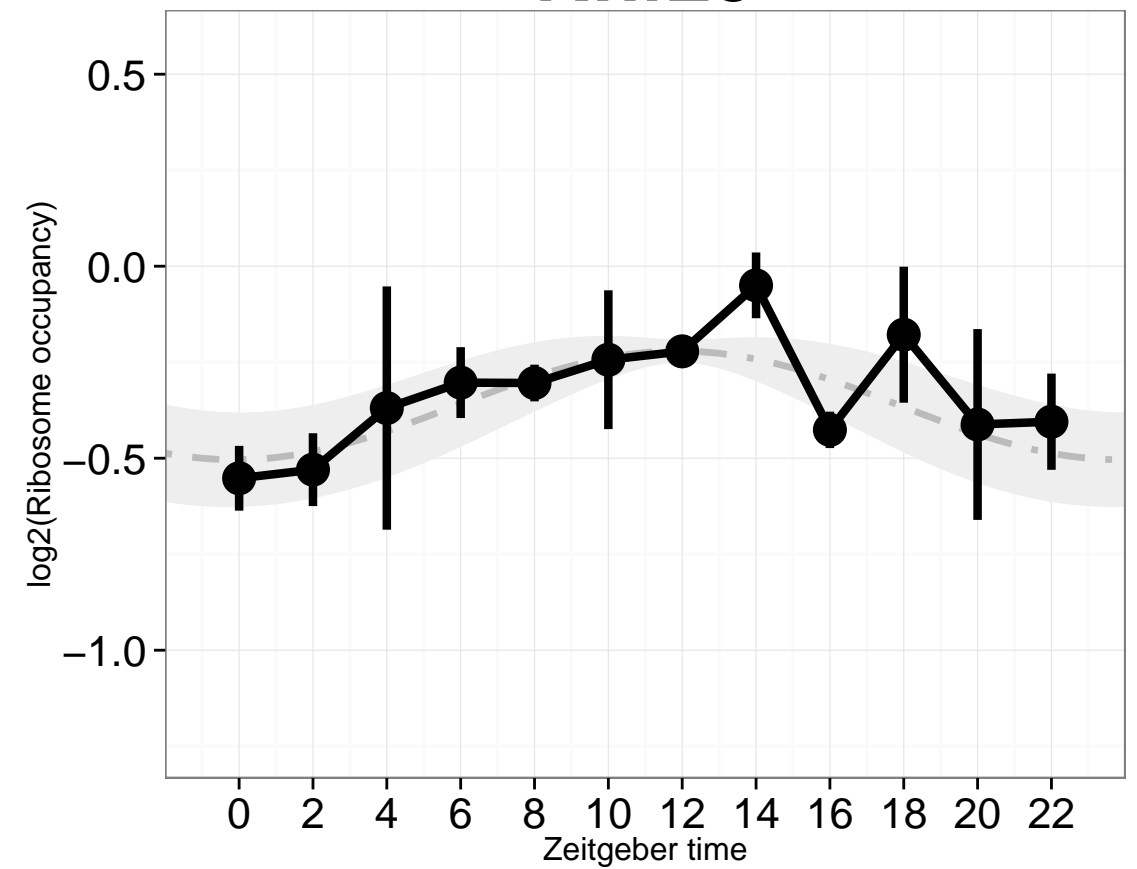

Supplement: SuppDataset_1.zip [file Rnf25_set_A.pdf › Supplemental Dataset 1/A-mRNA_nonrhyth_translation_nonrhyth/Rnf25_set_A.pdf]

## Rnf26

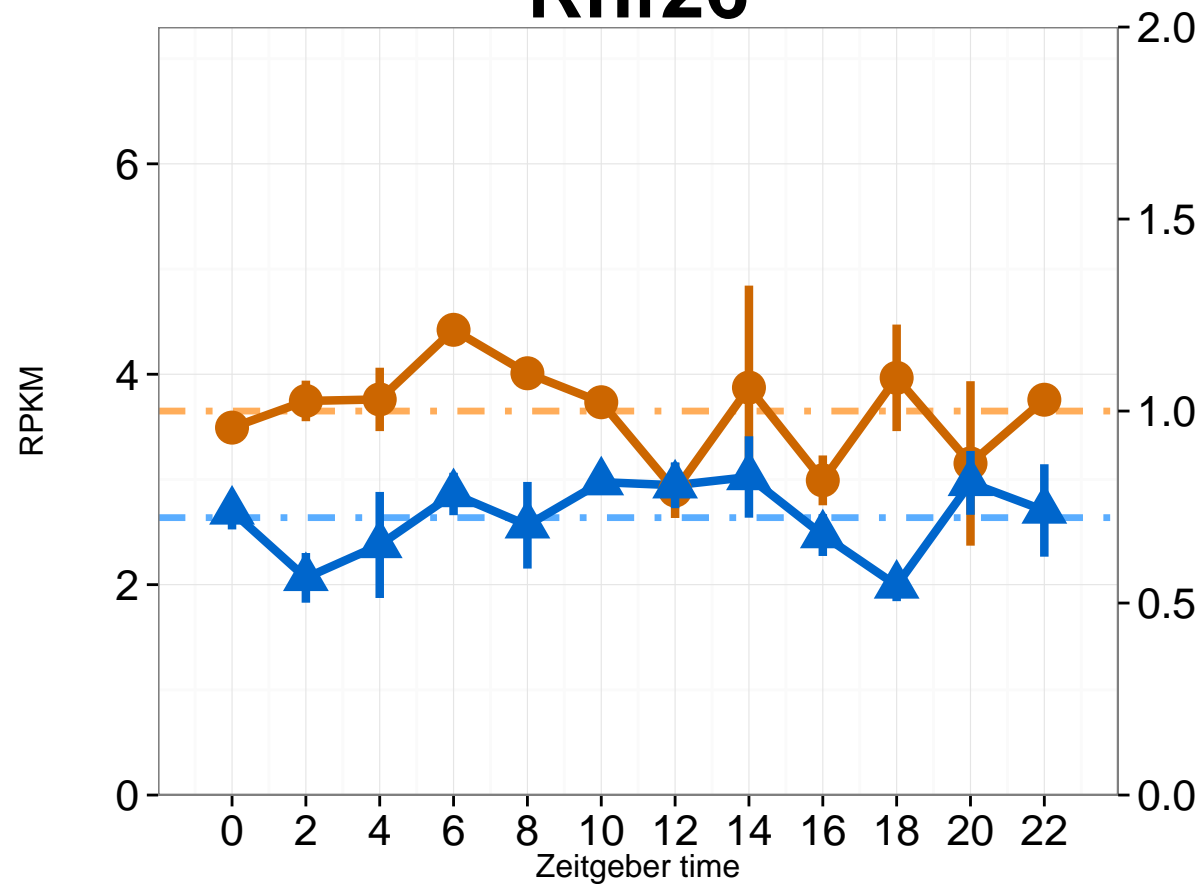

## Rnf26

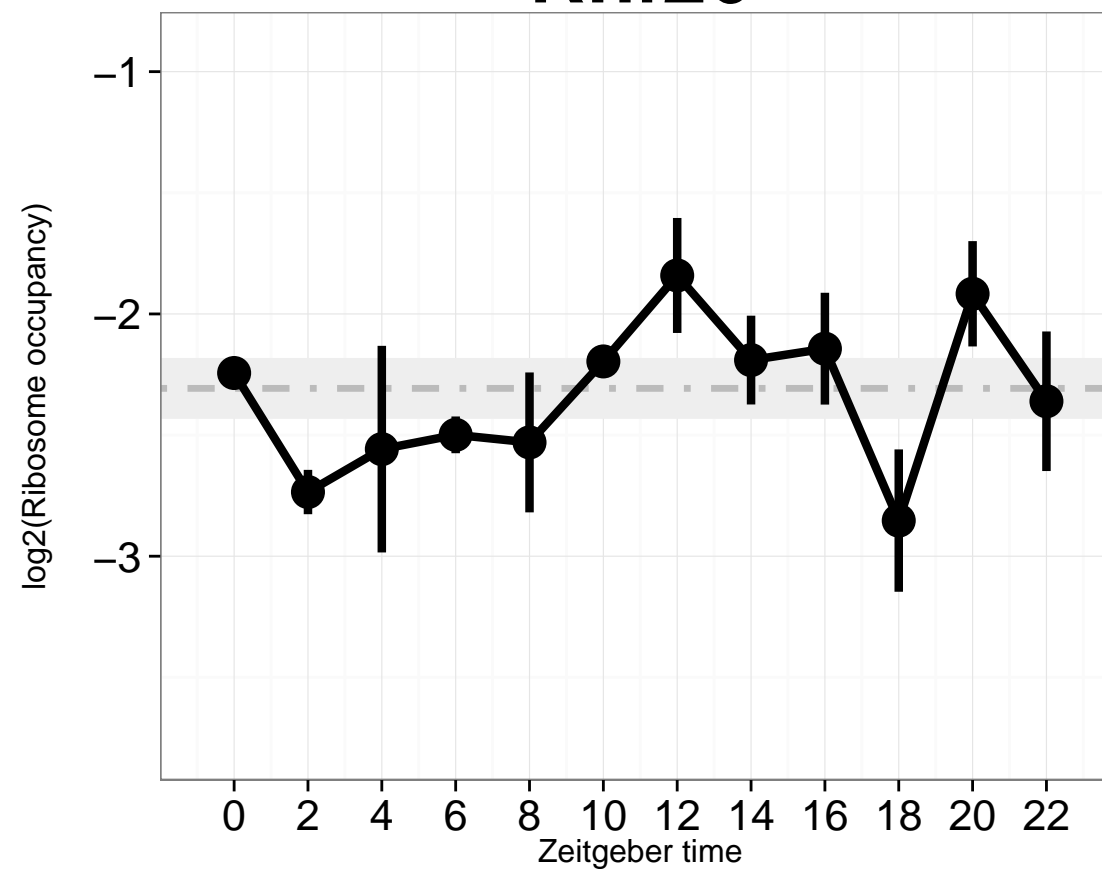

Supplement: SuppDataset_1.zip [file Rnf26_set_A.pdf › Supplemental Dataset 1/A-mRNA_nonrhyth_translation_nonrhyth/Rnf26_set_A.pdf]

## Rnf2

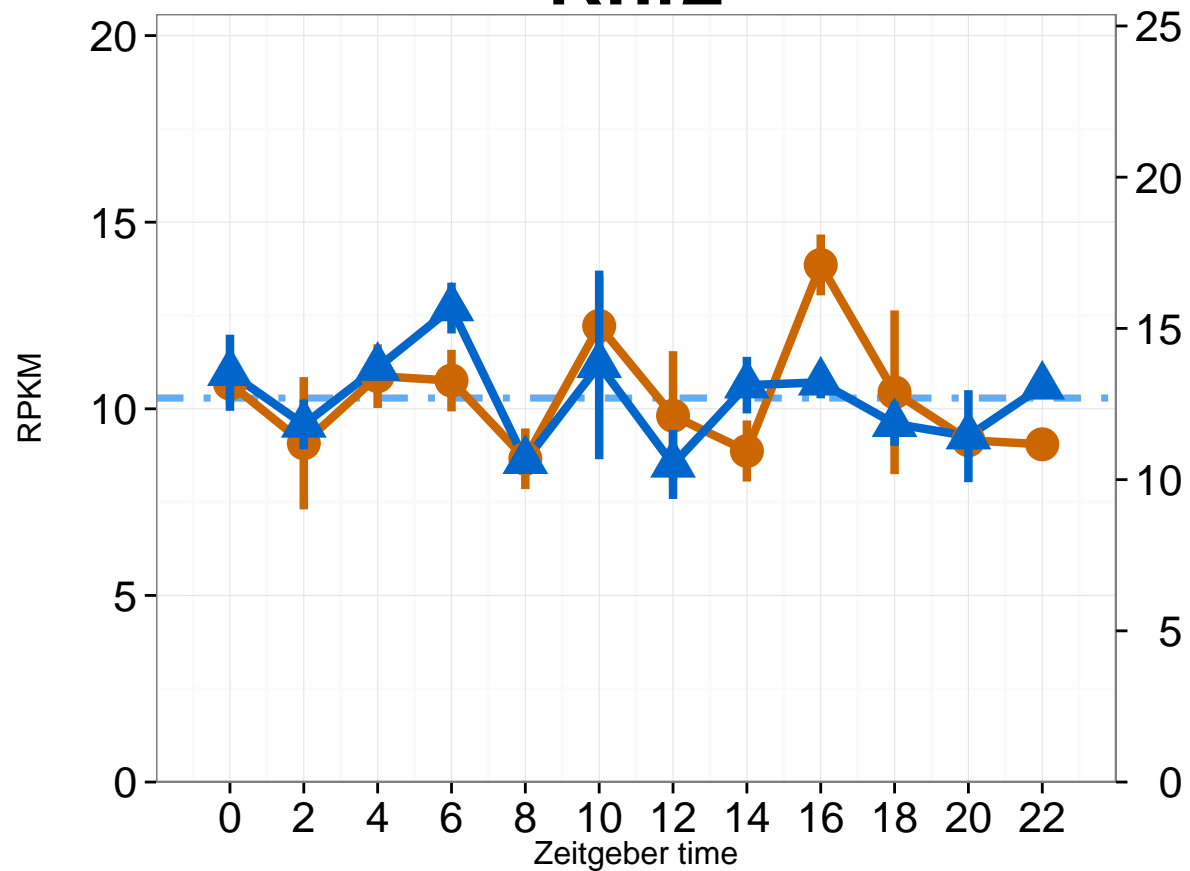

## Rnf2

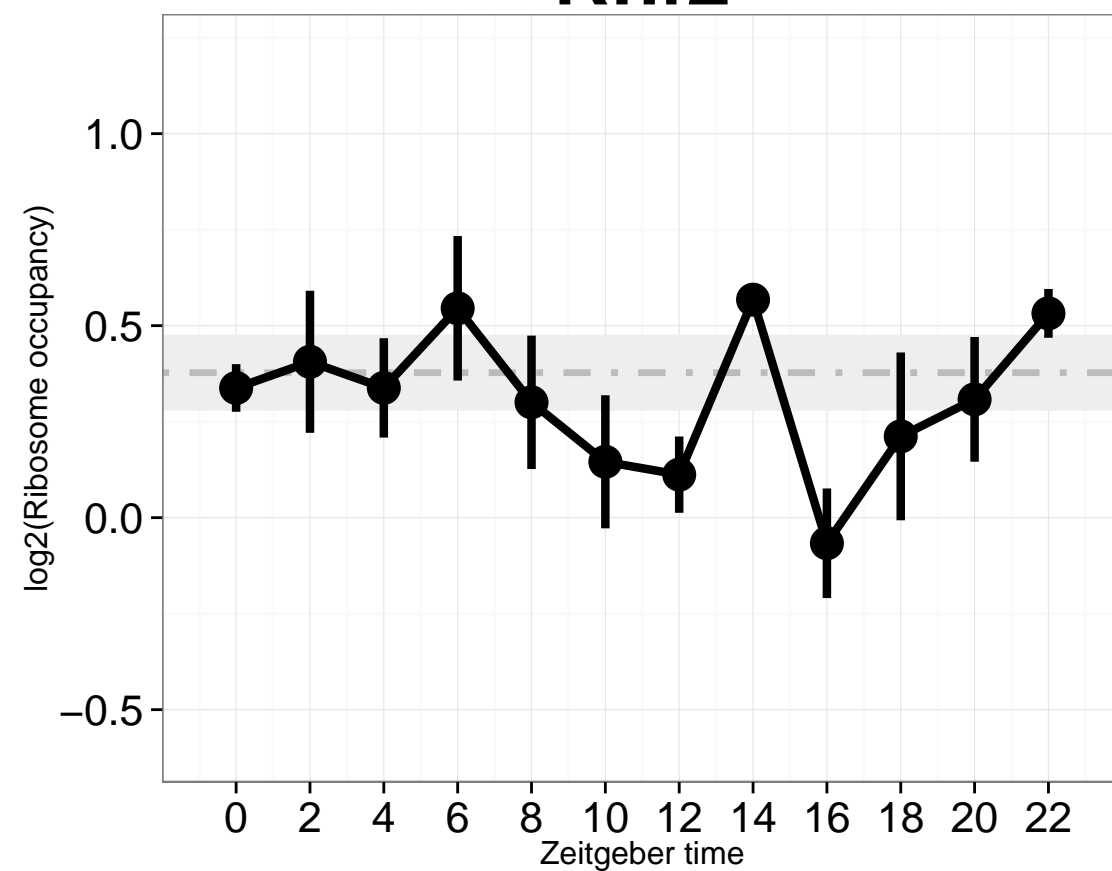

Supplement: SuppDataset_1.zip [file Rnf2_set_A.pdf › Supplemental Dataset 1/A-mRNA_nonrhyth_translation_nonrhyth/Rnf2_set_A.pdf]

# Rnf31

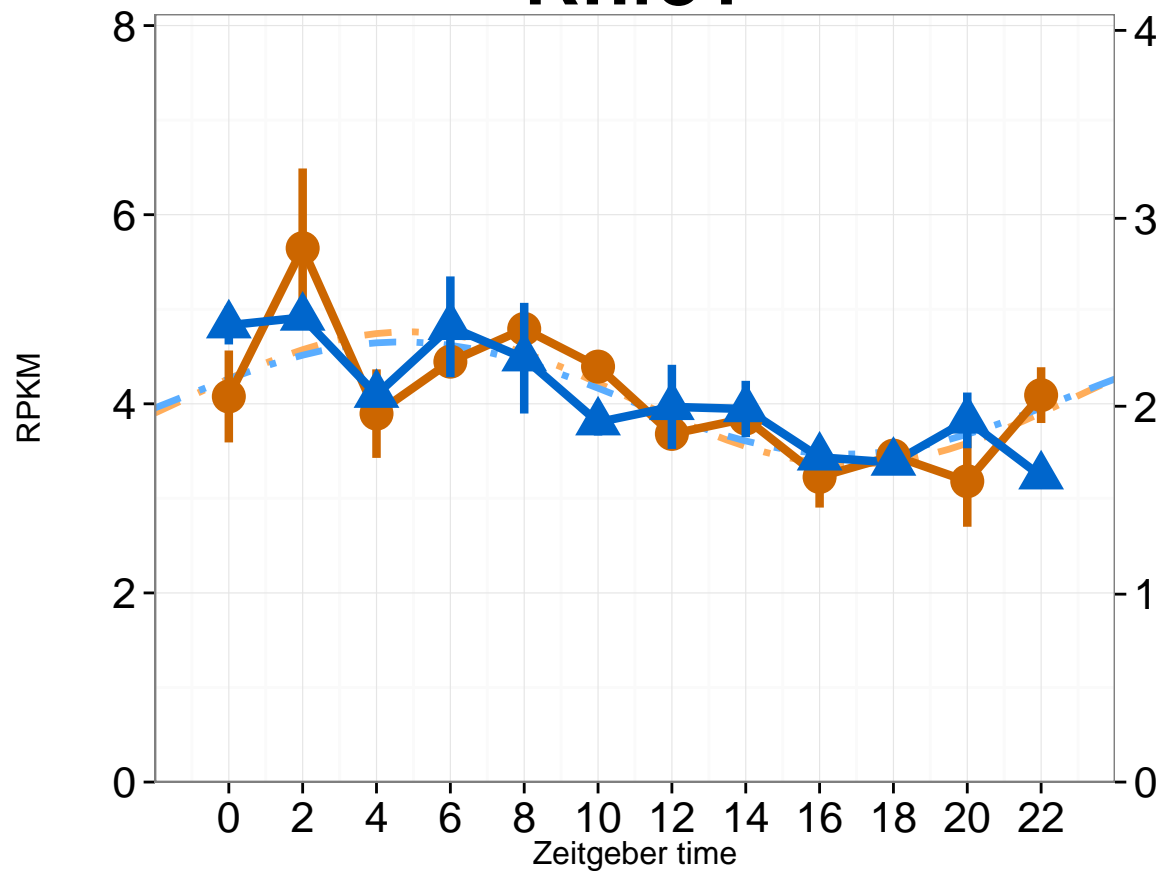

# Rnf31

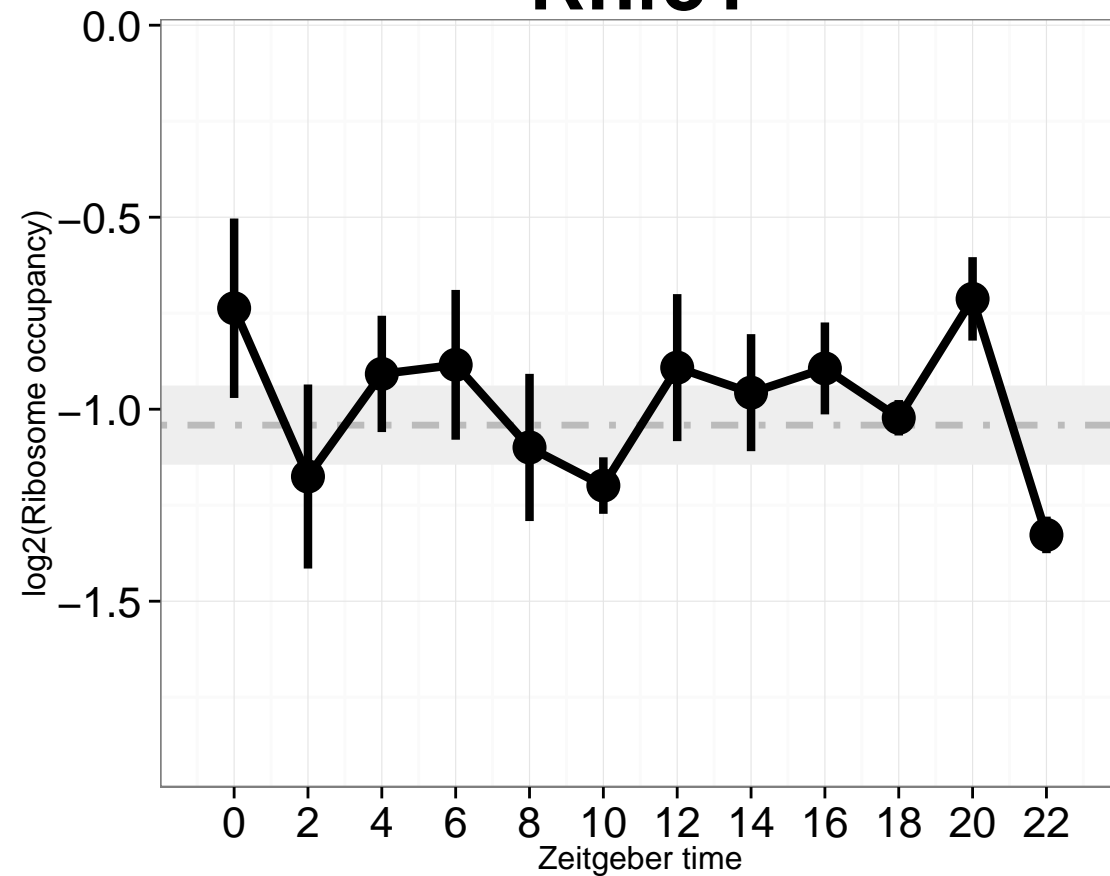

Supplement: SuppDataset_1.zip [file Rnf31_set_A.pdf › Supplemental Dataset 1/A-mRNA_nonrhyth_translation_nonrhyth/Rnf31_set_A.pdf]

## Rnf34

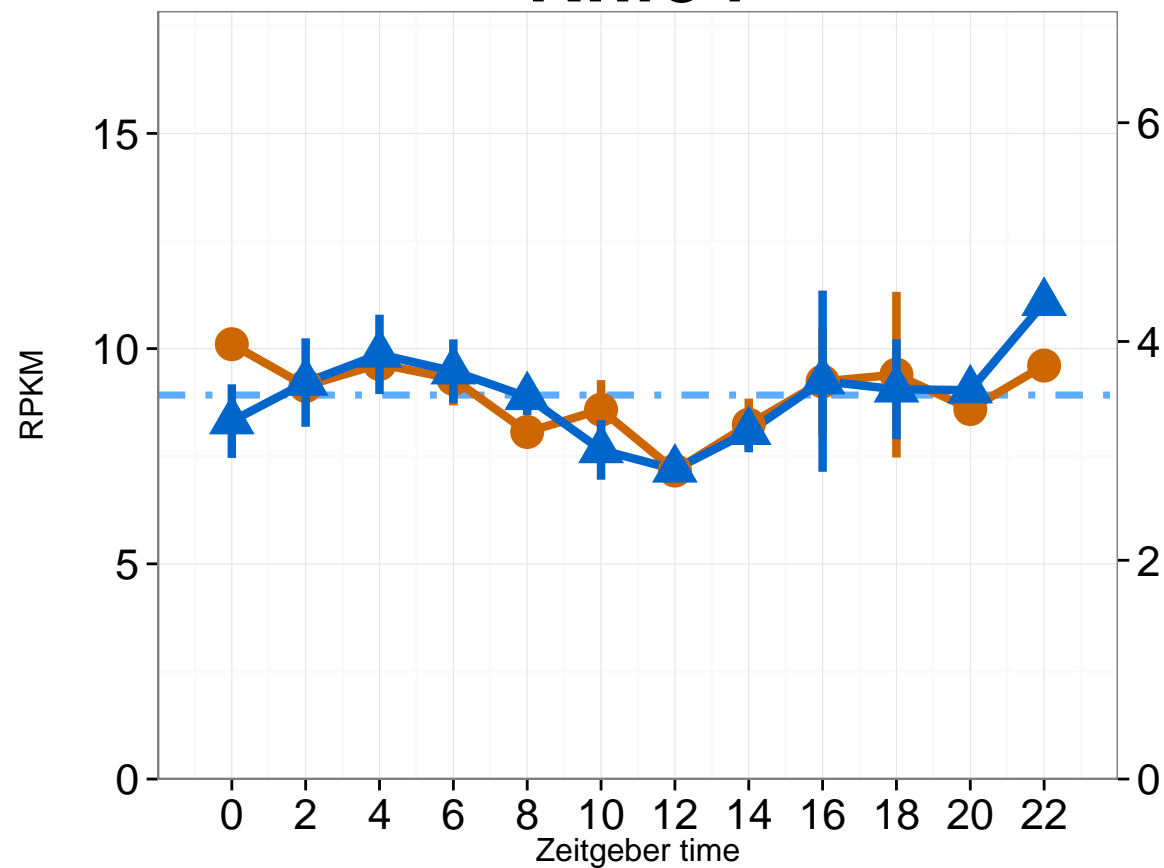

## Rnf34

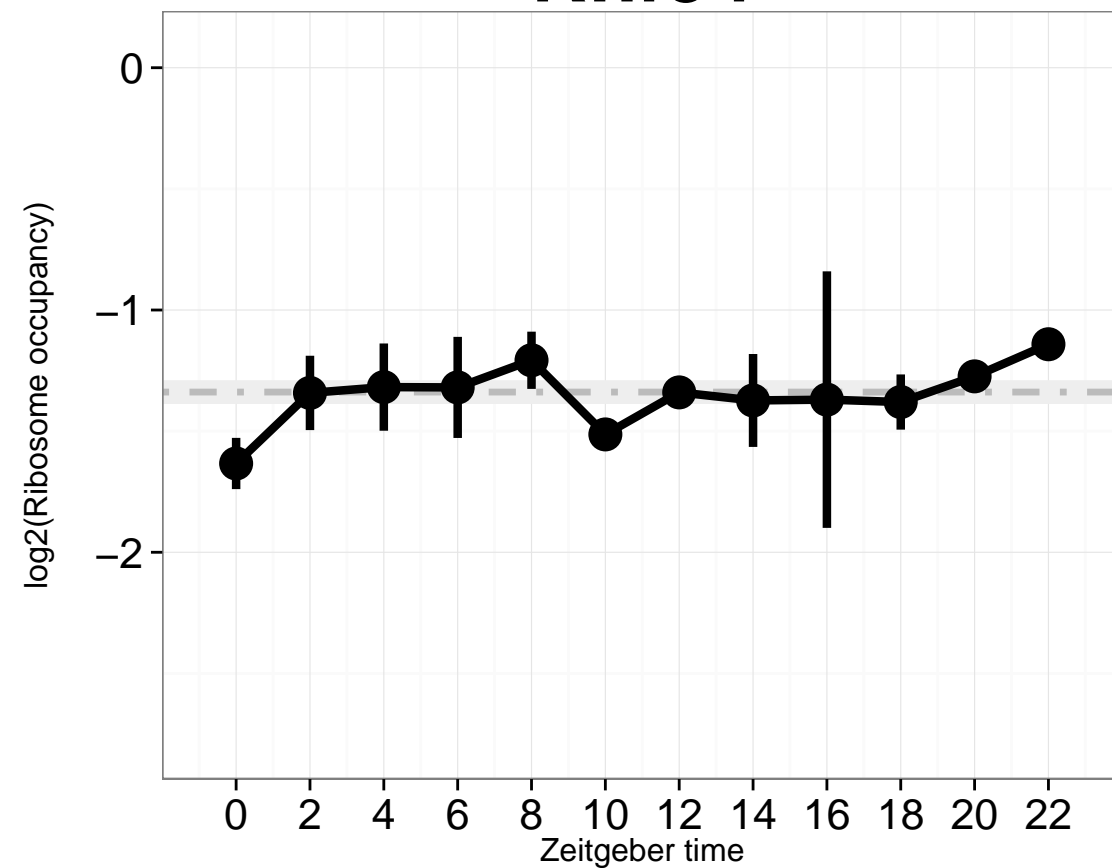

Supplement: SuppDataset_1.zip [file Rnf34_set_A.pdf › Supplemental Dataset 1/A-mRNA_nonrhyth_translation_nonrhyth/Rnf34_set_A.pdf]

# Rnf38

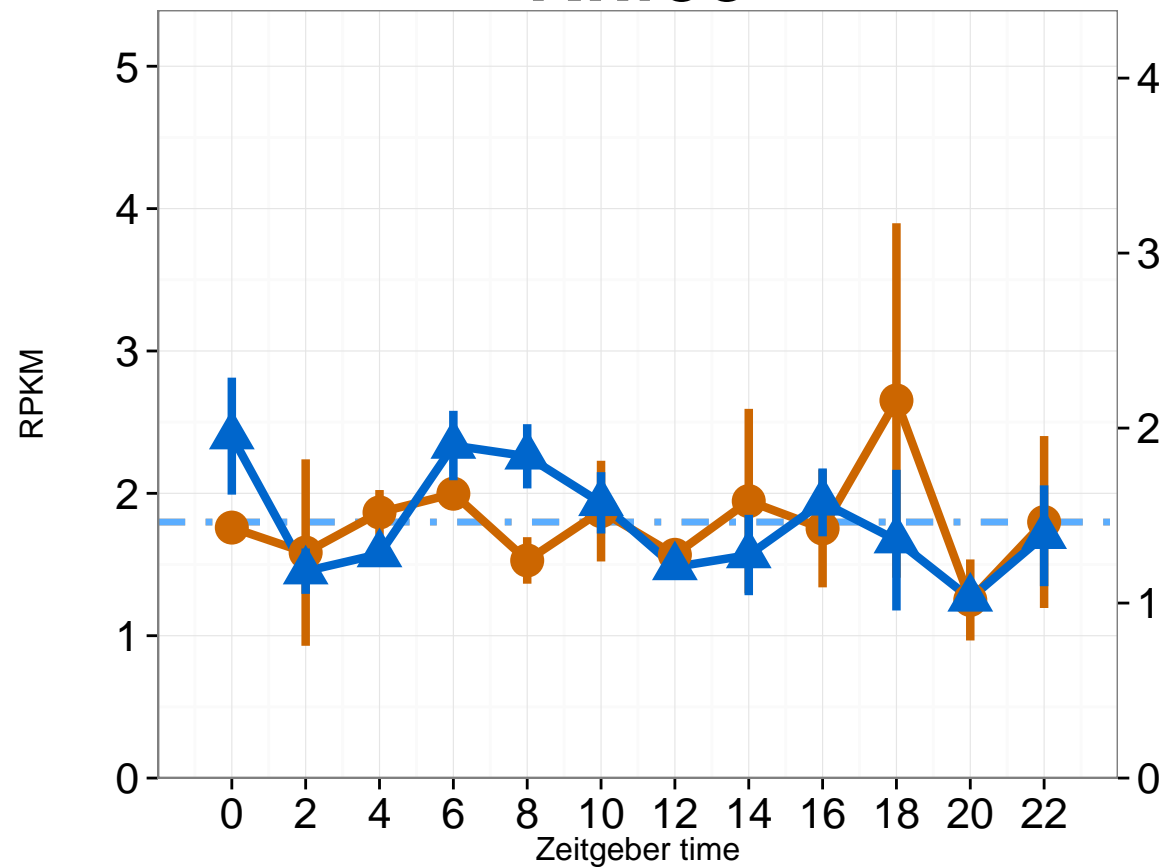

# Rnf38

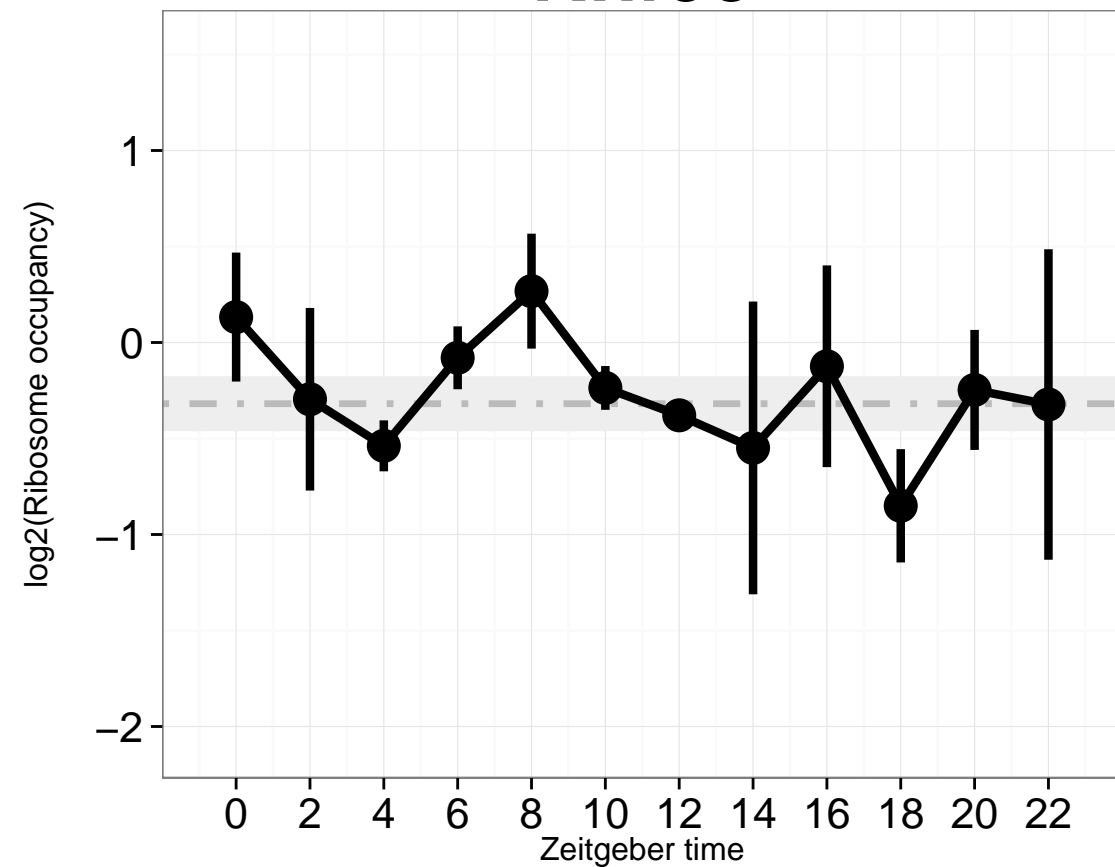

Supplement: SuppDataset_1.zip [file Rnf38_set_A.pdf › Supplemental Dataset 1/A-mRNA_nonrhyth_translation_nonrhyth/Rnf38_set_A.pdf]

# Rnf39

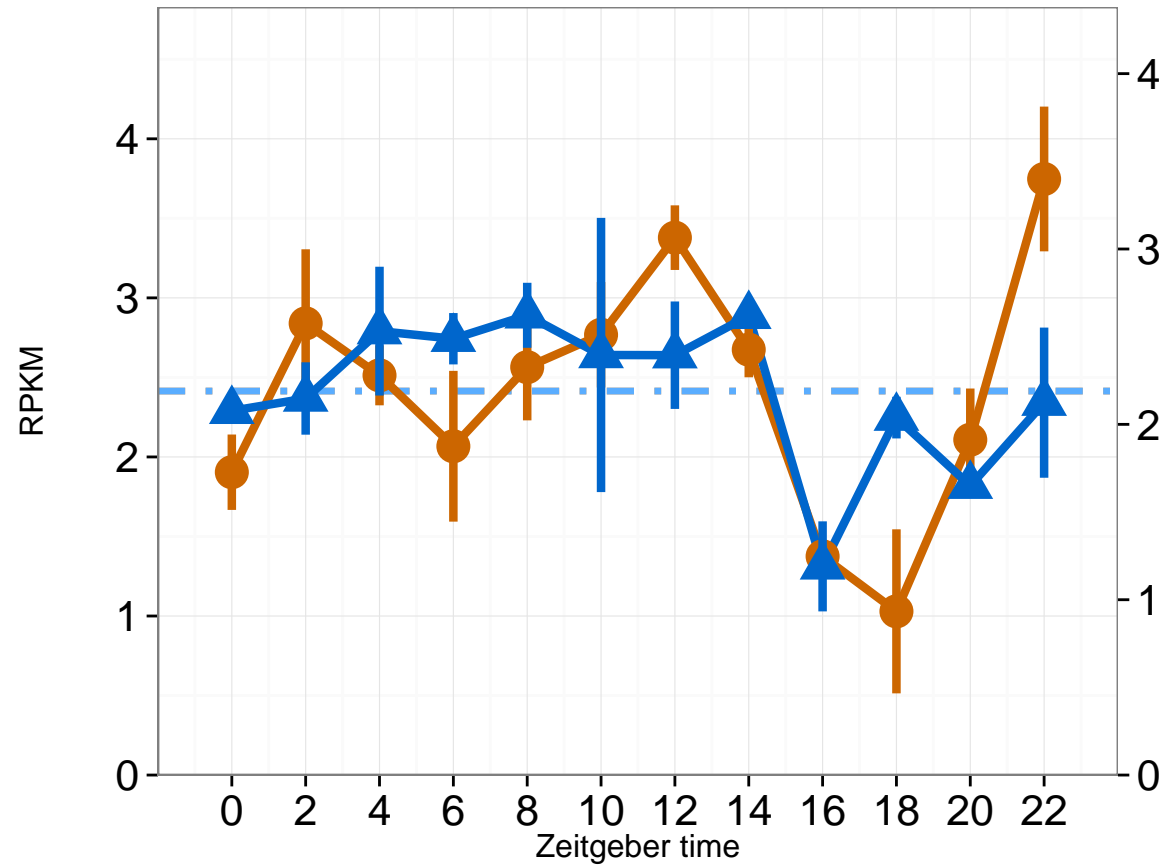

# Rnf39

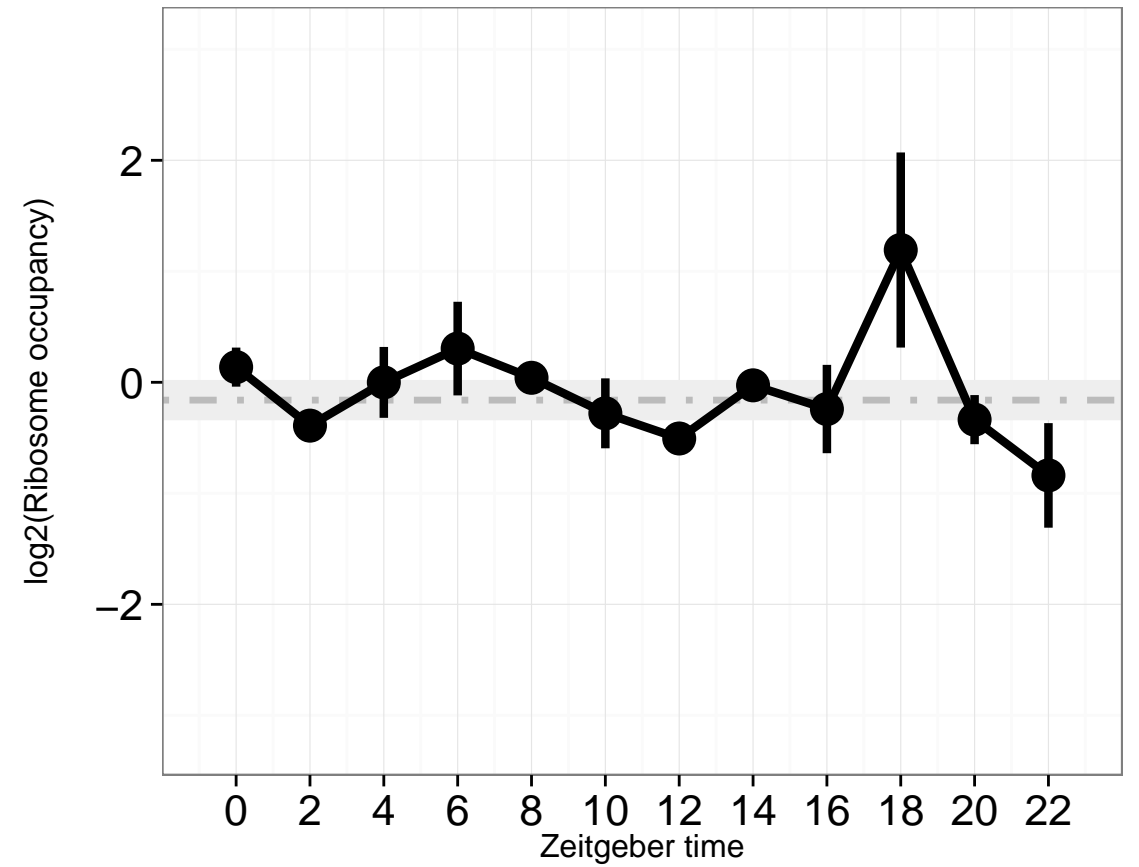

Supplement: SuppDataset_1.zip [file Rnf39_set_A.pdf › Supplemental Dataset 1/A-mRNA_nonrhyth_translation_nonrhyth/Rnf39_set_A.pdf]

## Rnf40

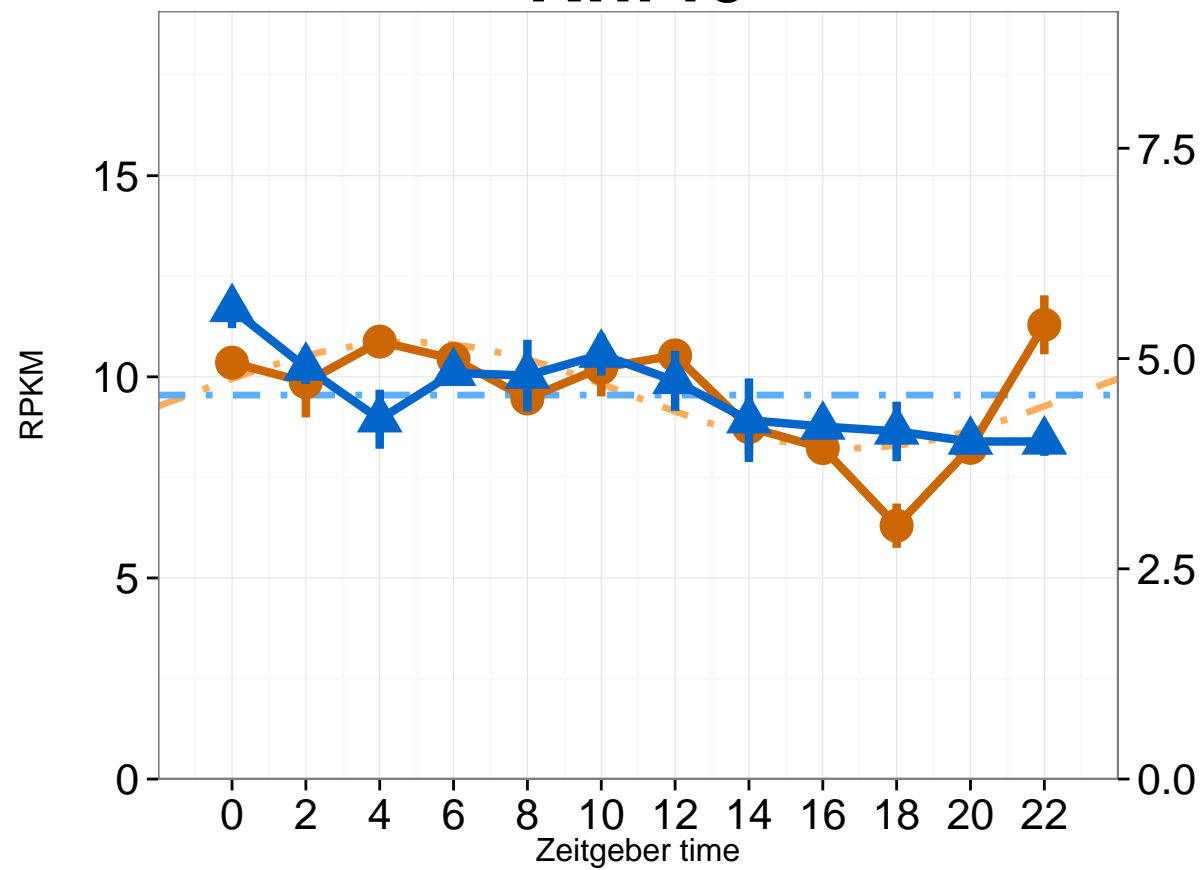

## Rnf40

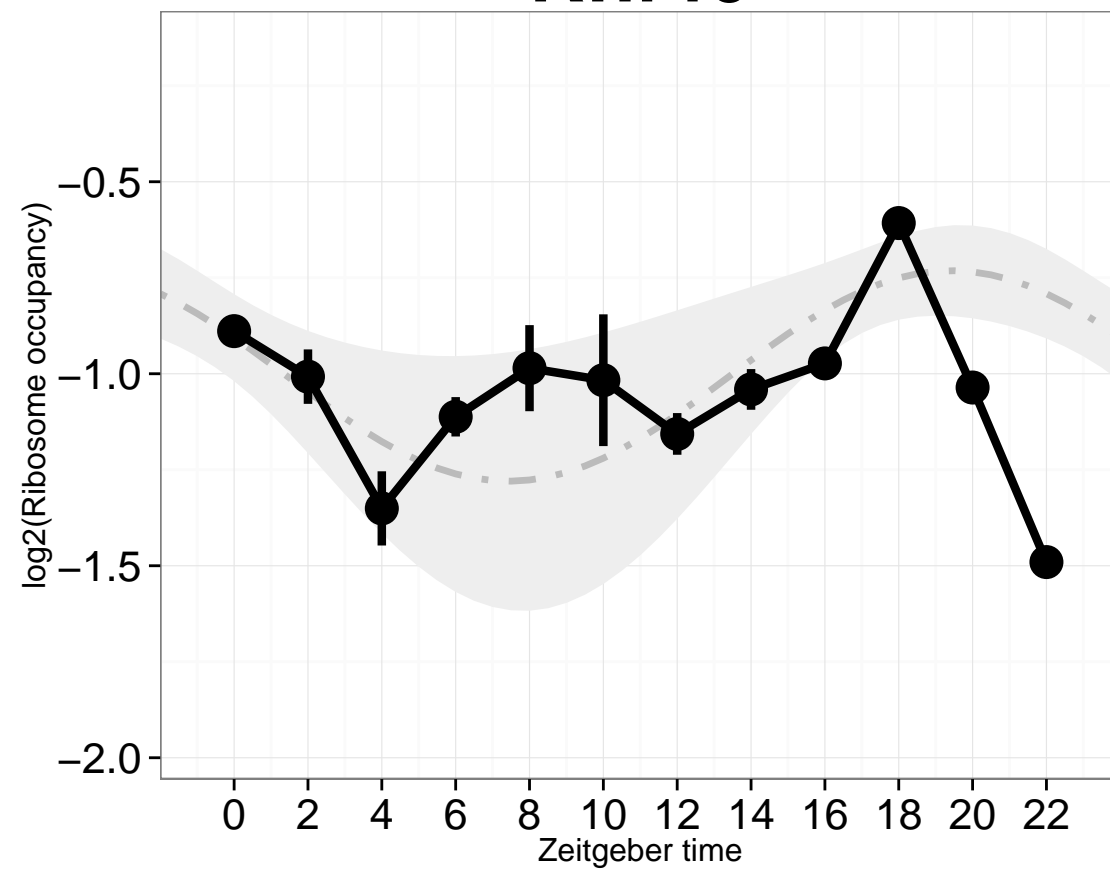

Supplement: SuppDataset_1.zip [file Rnf40_set_A.pdf › Supplemental Dataset 1/A-mRNA_nonrhyth_translation_nonrhyth/Rnf40_set_A.pdf]

# Rnf41

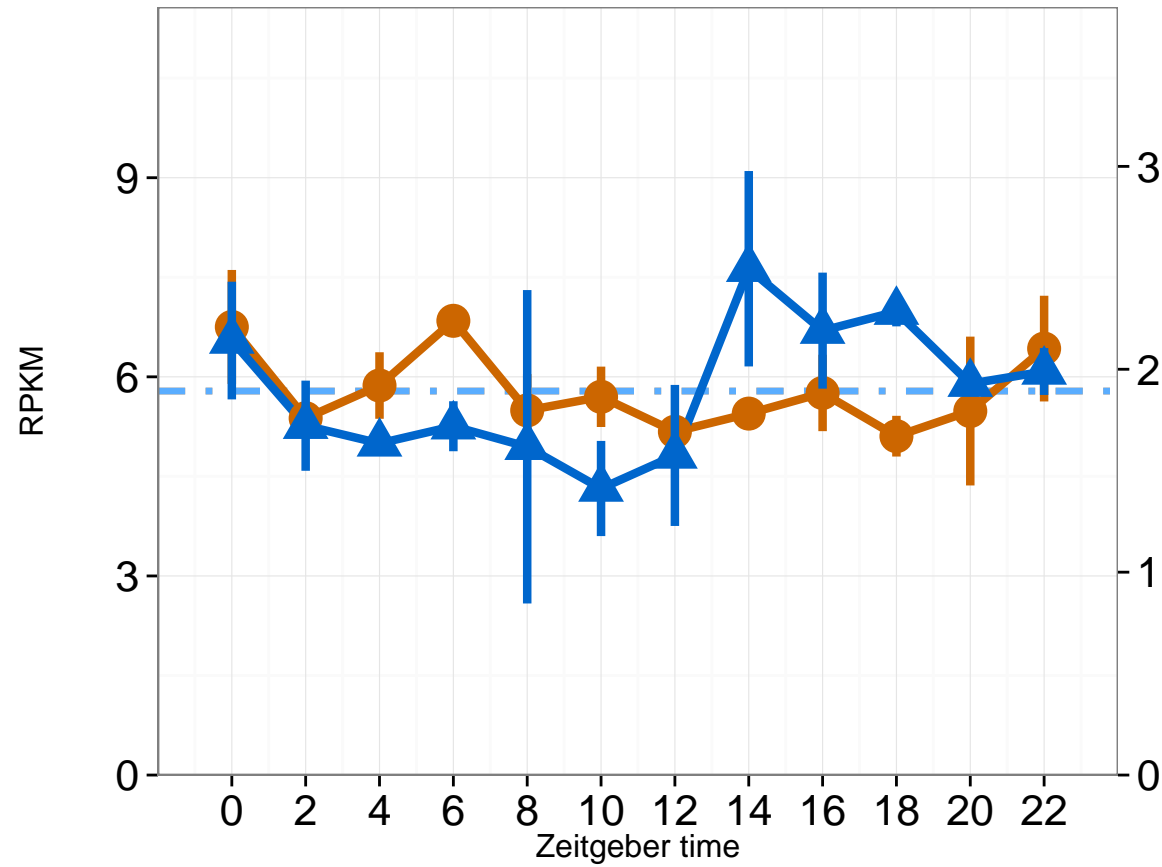

# Rnf41

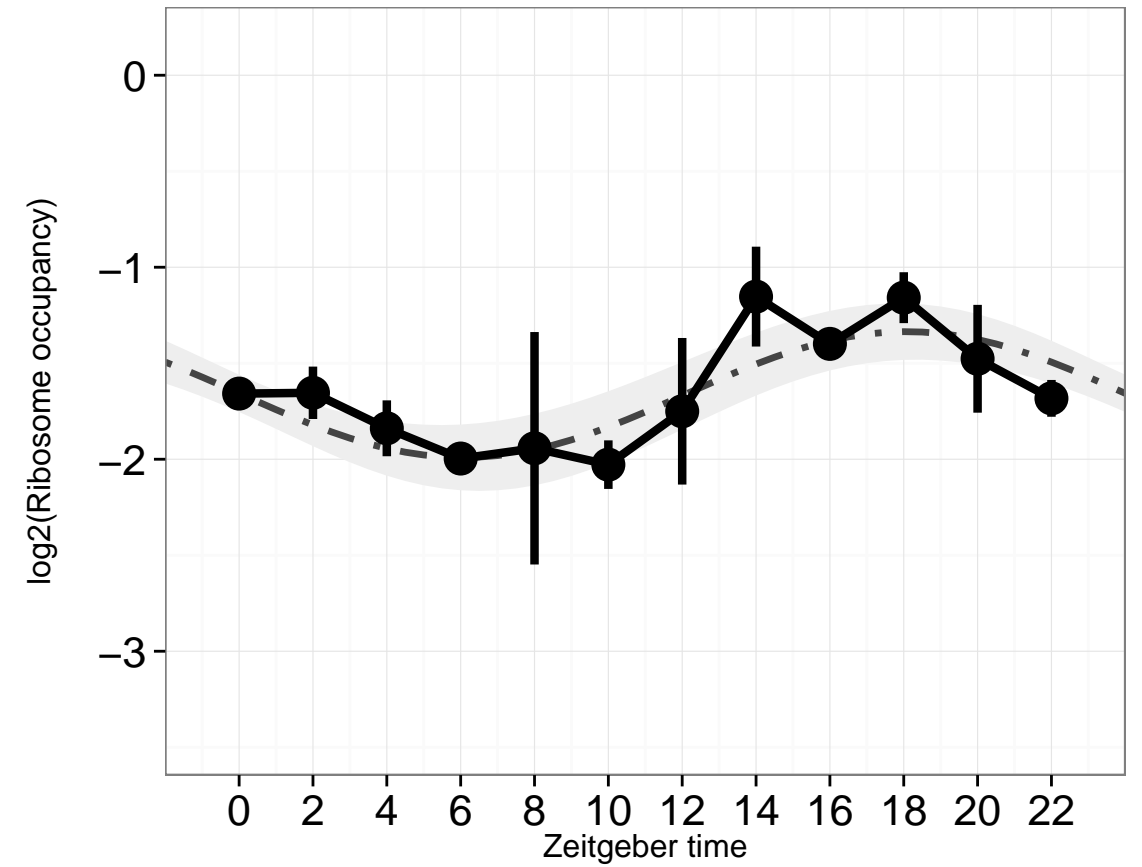

Supplement: SuppDataset_1.zip [file Rnf41_set_A.pdf › Supplemental Dataset 1/A-mRNA_nonrhyth_translation_nonrhyth/Rnf41_set_A.pdf]

# Rnf43

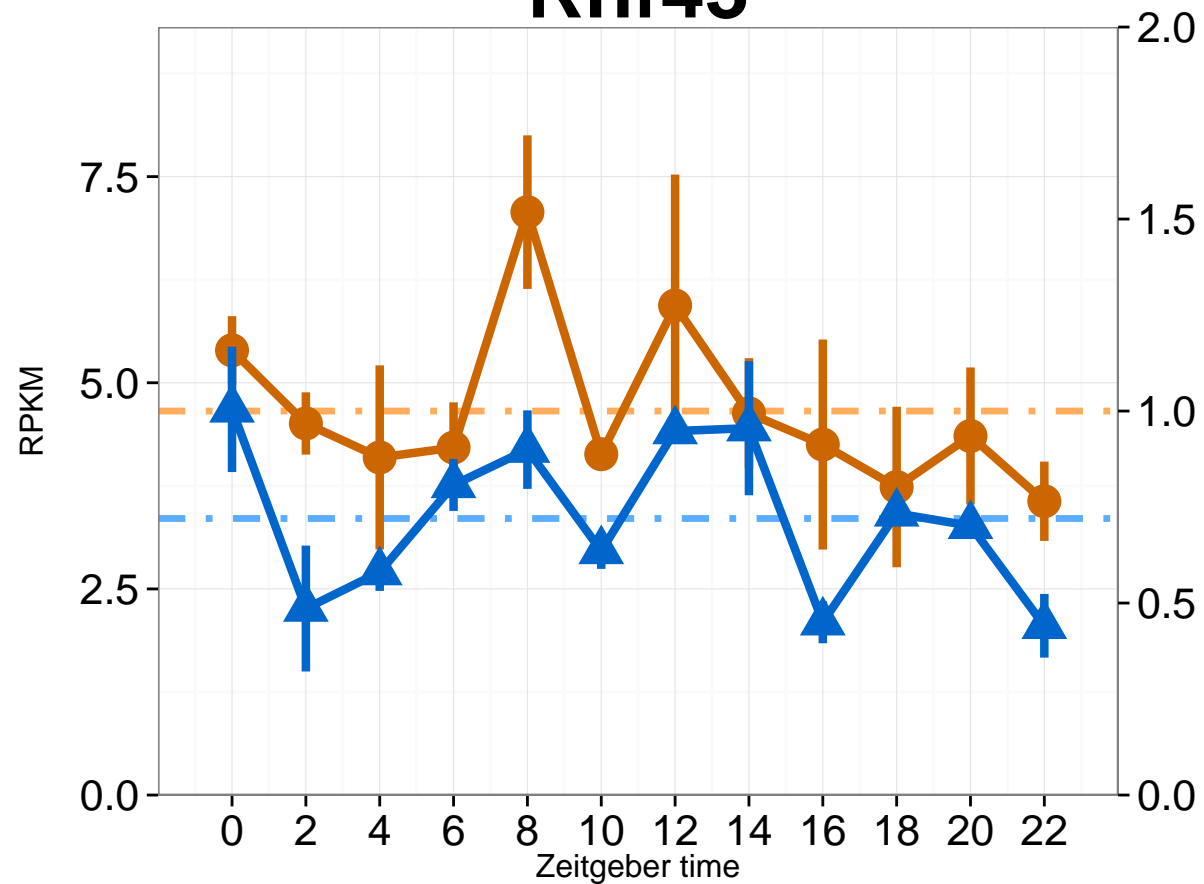

# Rnf43

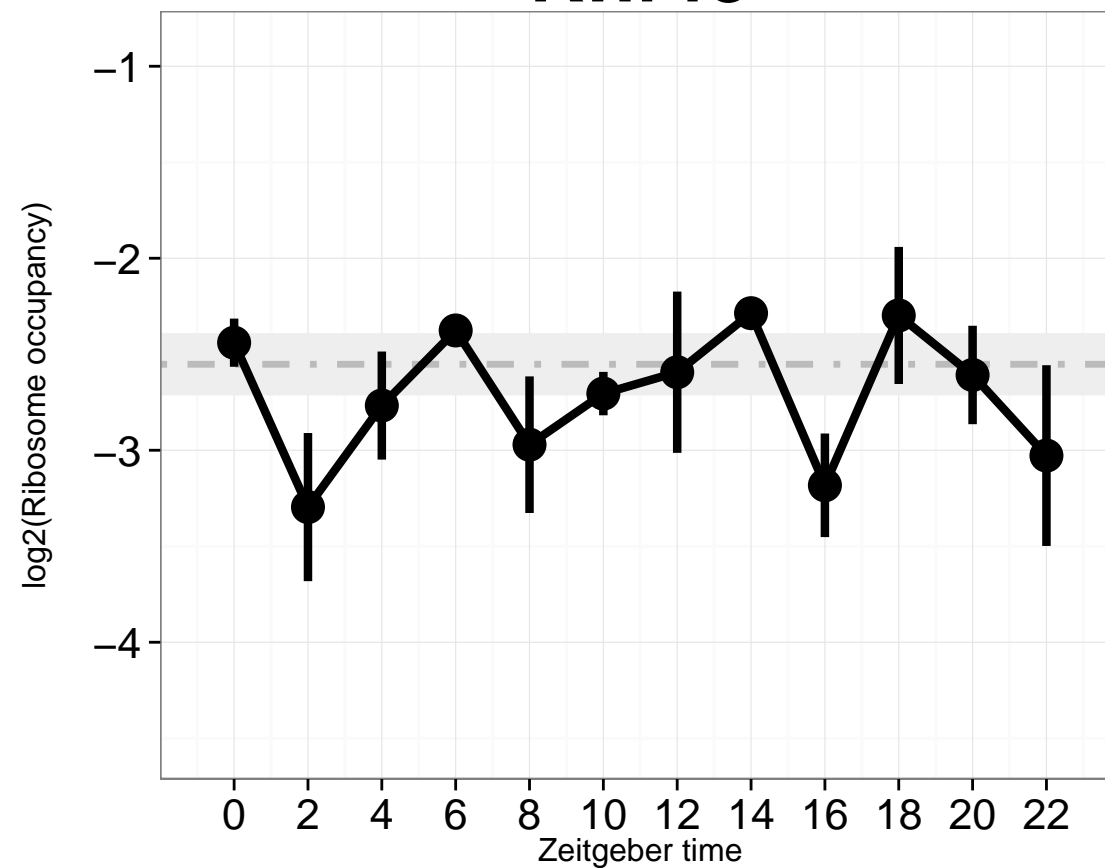

Supplement: SuppDataset_1.zip [file Rnf43_set_A.pdf › Supplemental Dataset 1/A-mRNA_nonrhyth_translation_nonrhyth/Rnf43_set_A.pdf]

## Rnf44

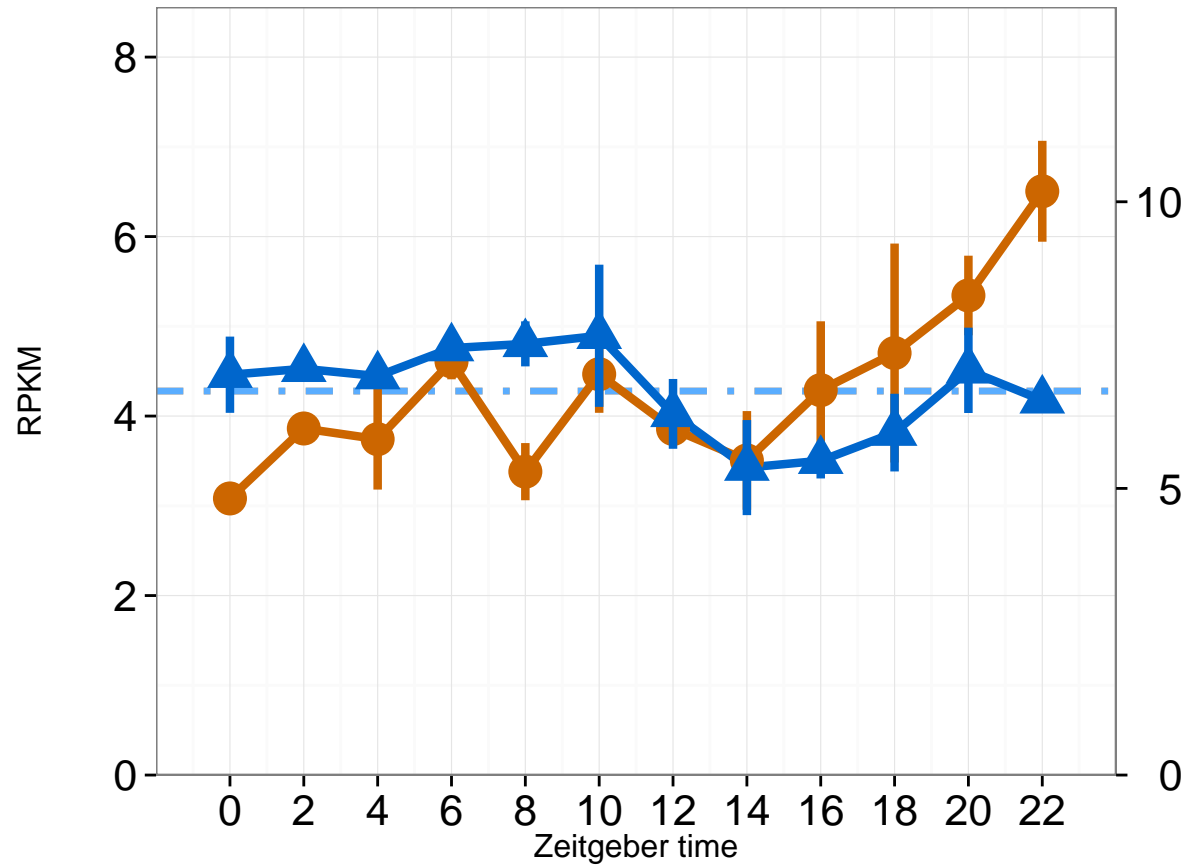

## Rnf44

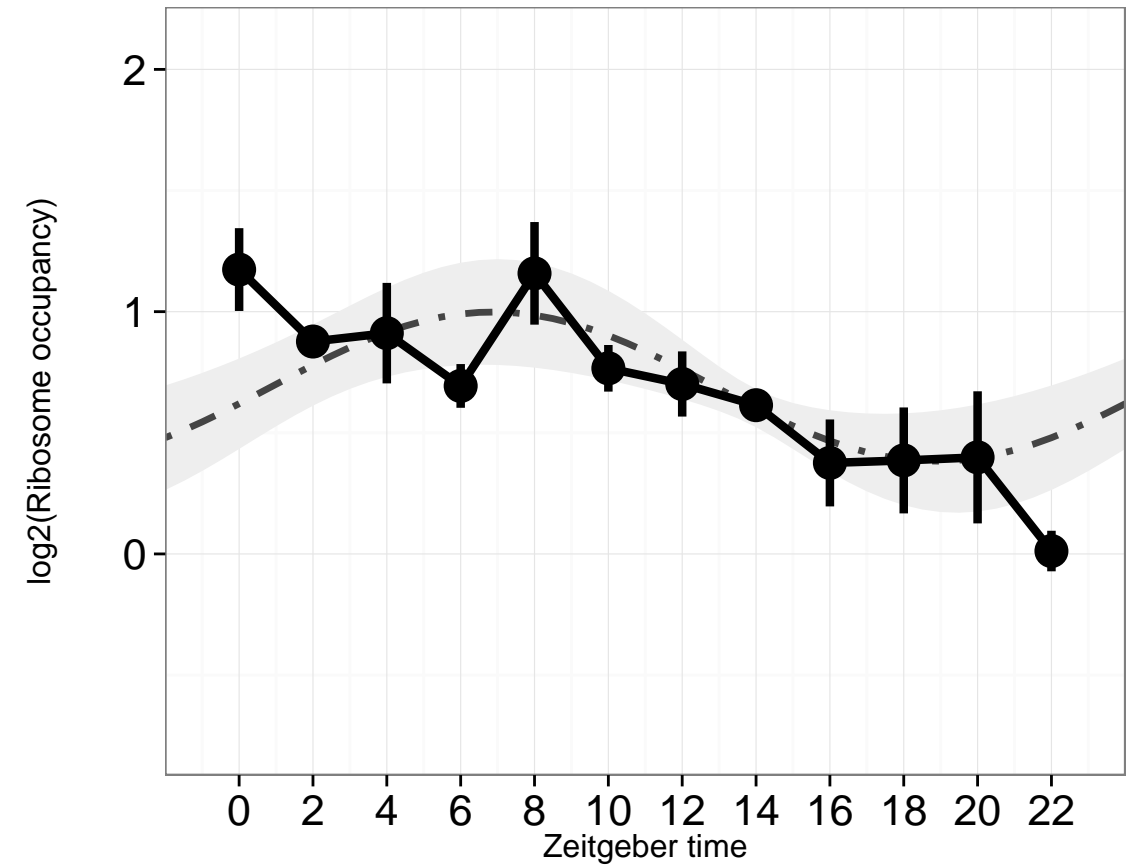

Supplement: SuppDataset_1.zip [file Rnf44_set_A.pdf › Supplemental Dataset 1/A-mRNA_nonrhyth_translation_nonrhyth/Rnf44_set_A.pdf]

# Rnf4

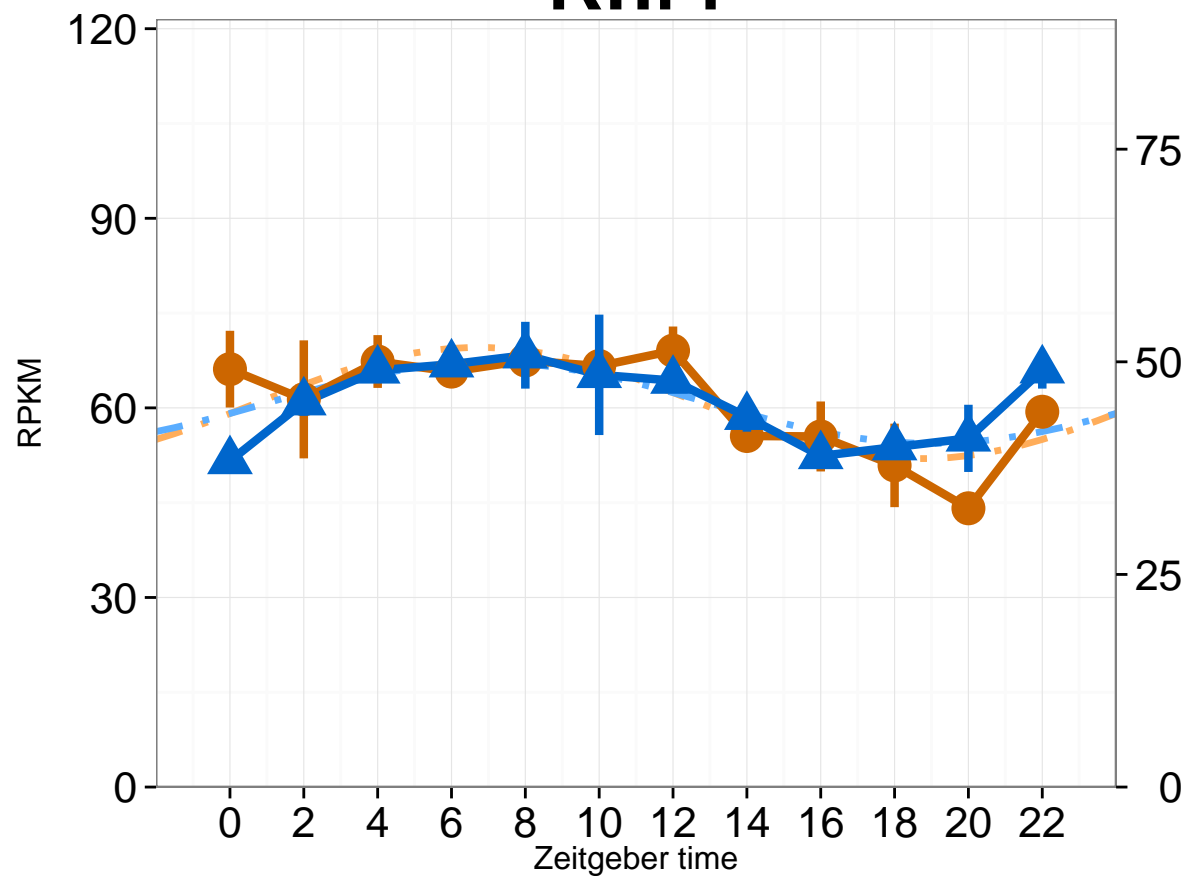

# Rnf4

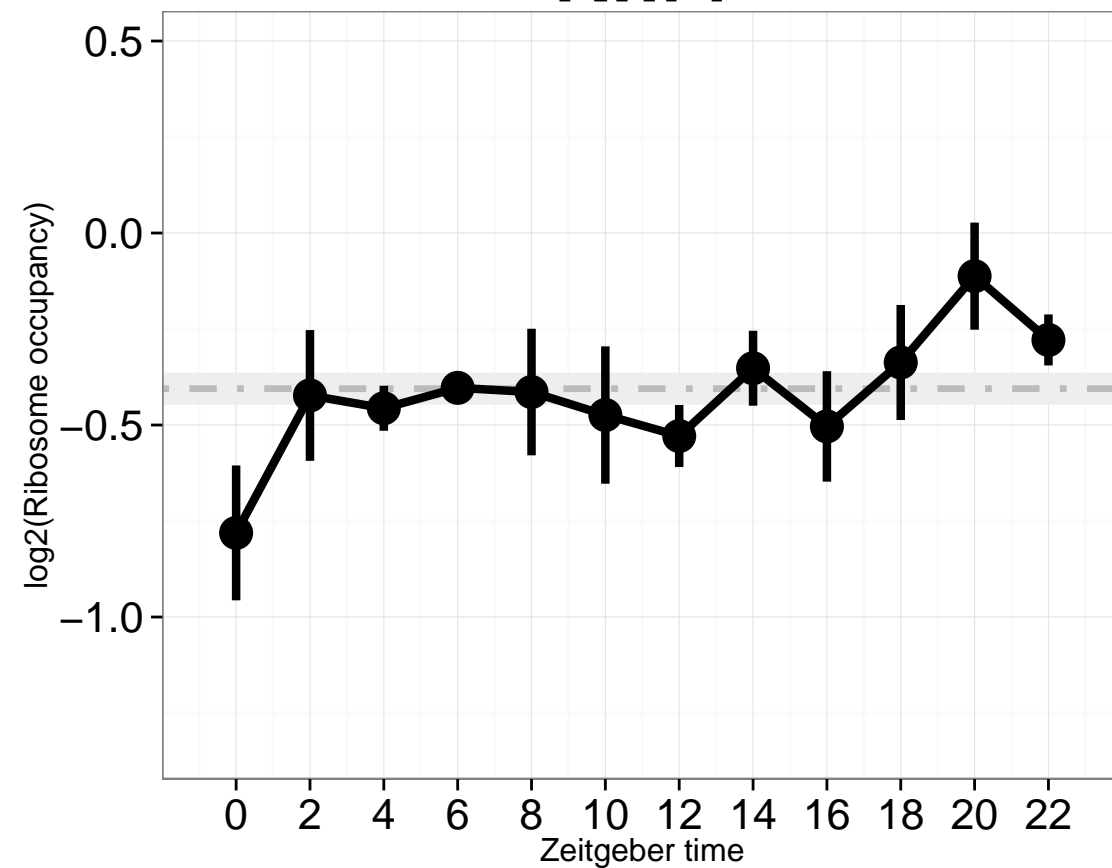

Supplement: SuppDataset_1.zip [file Rnf4_set_A.pdf › Supplemental Dataset 1/A-mRNA_nonrhyth_translation_nonrhyth/Rnf4_set_A.pdf]

## Rnf5

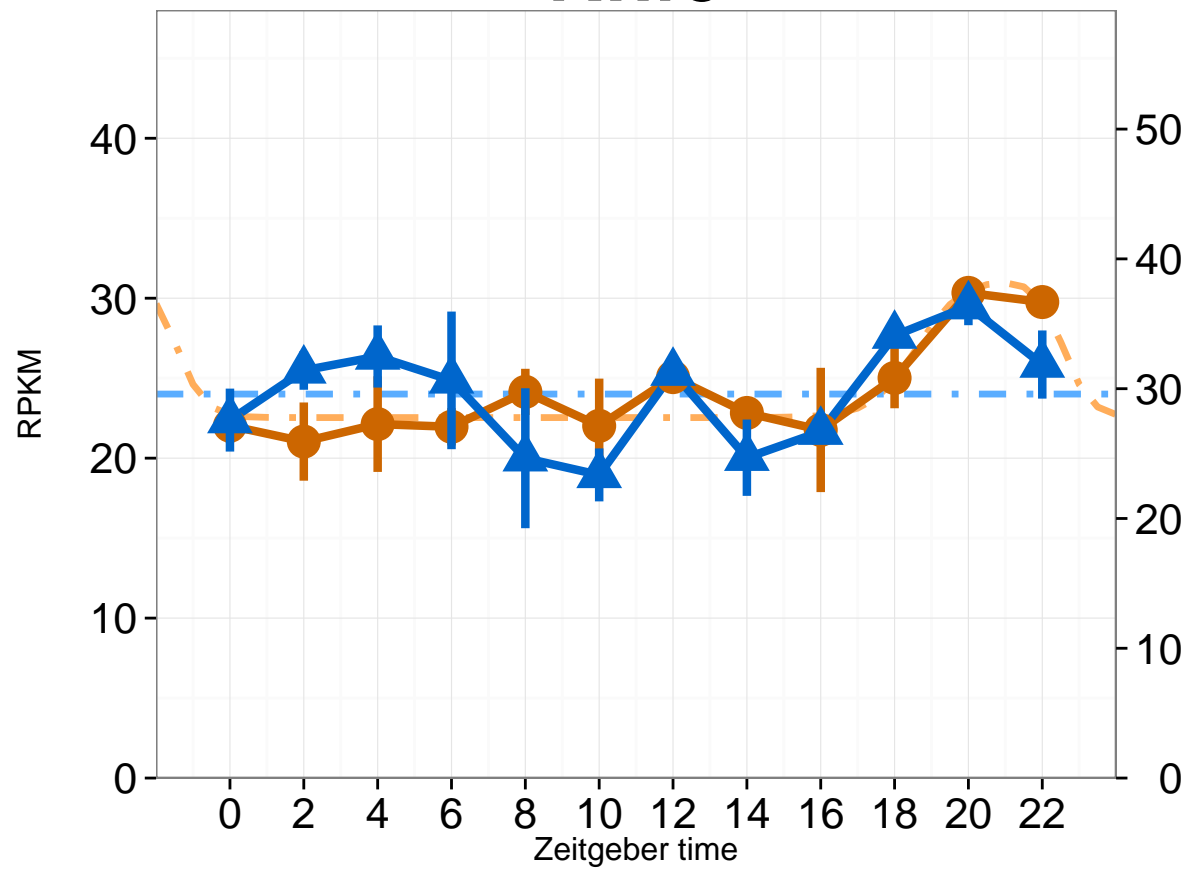

## Rnf5

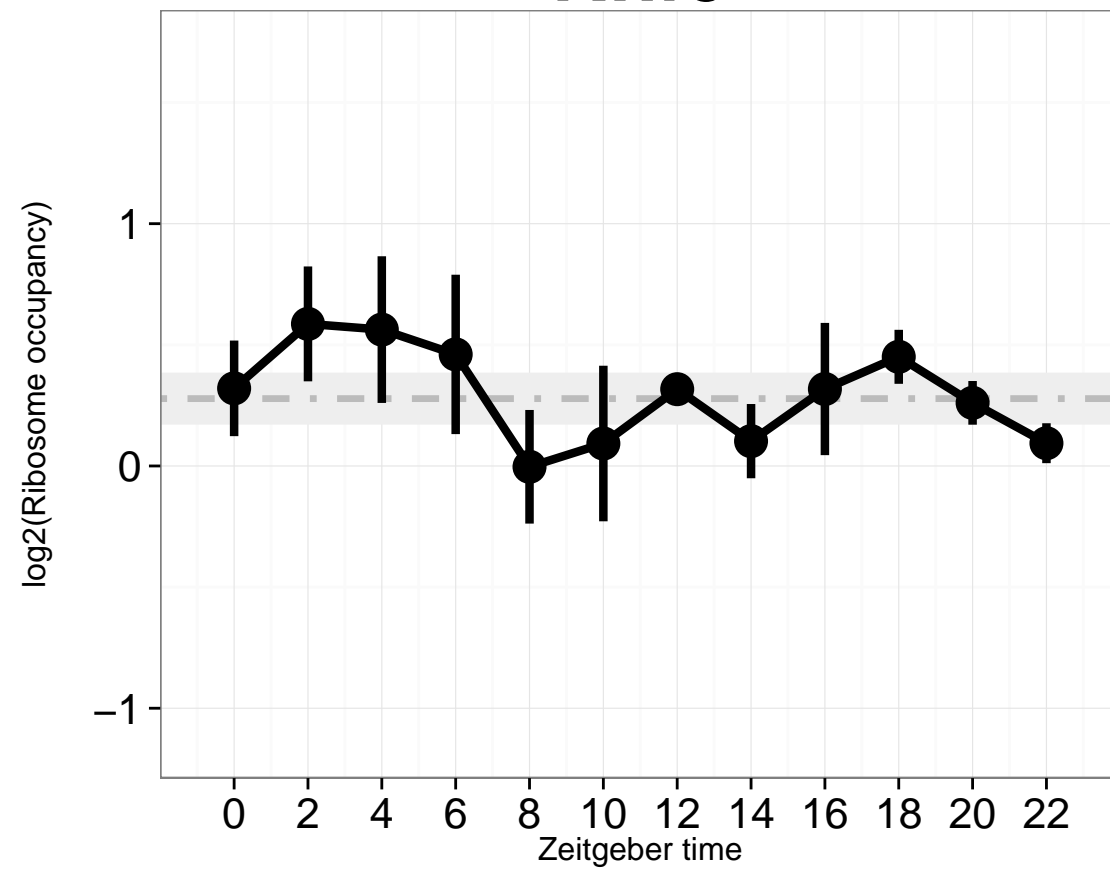

Supplement: SuppDataset_1.zip [file Rnf5_set_A.pdf › Supplemental Dataset 1/A-mRNA_nonrhyth_translation_nonrhyth/Rnf5_set_A.pdf]

# Rnf6

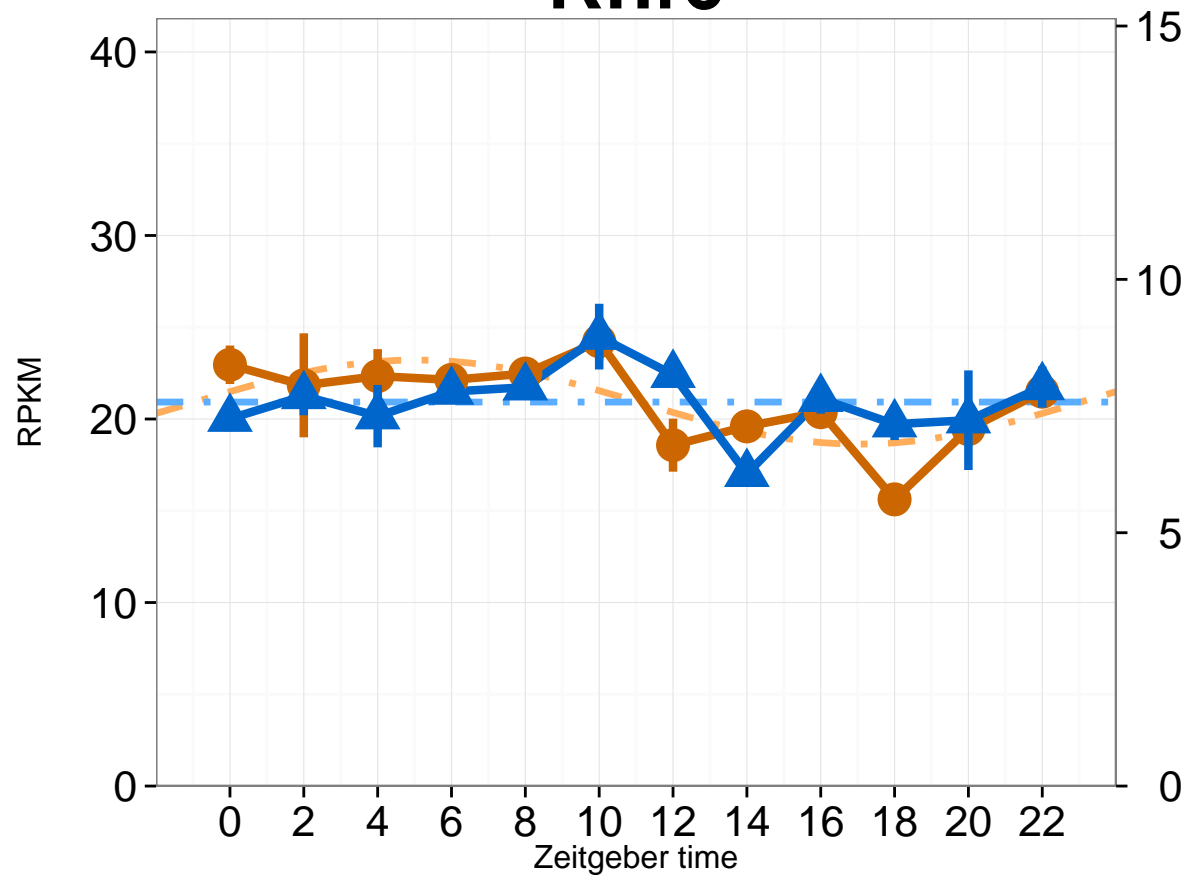

# Rnf6

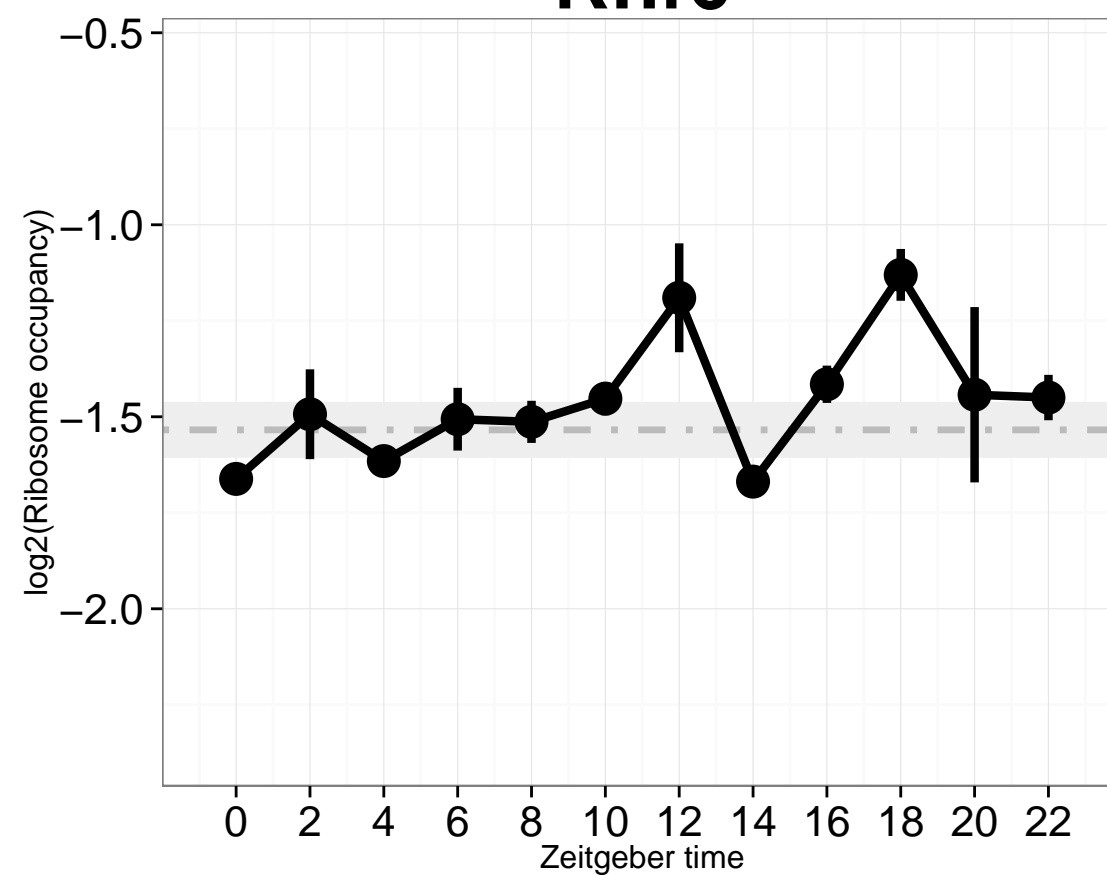

Supplement: SuppDataset_1.zip [file Rnf6_set_A.pdf › Supplemental Dataset 1/A-mRNA_nonrhyth_translation_nonrhyth/Rnf6_set_A.pdf]

## Rnf7

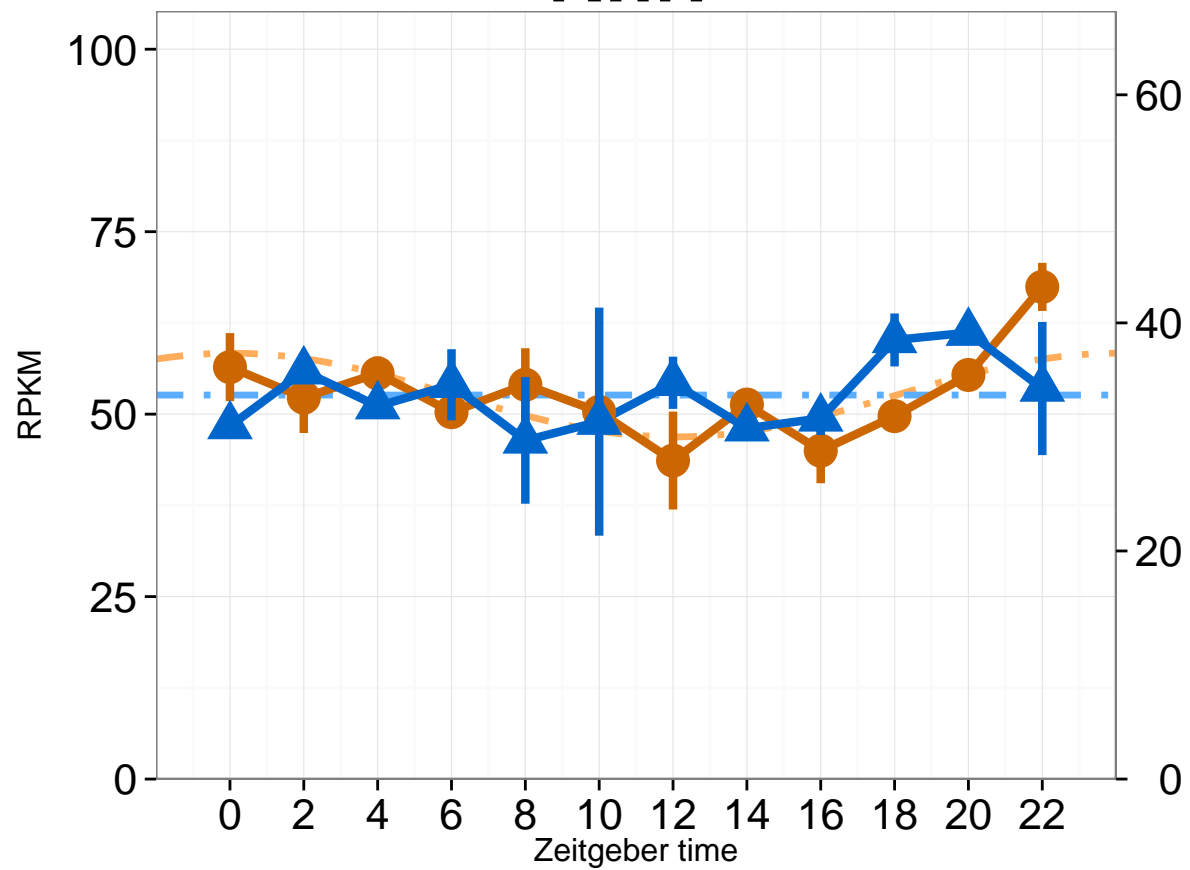

## Rnf7

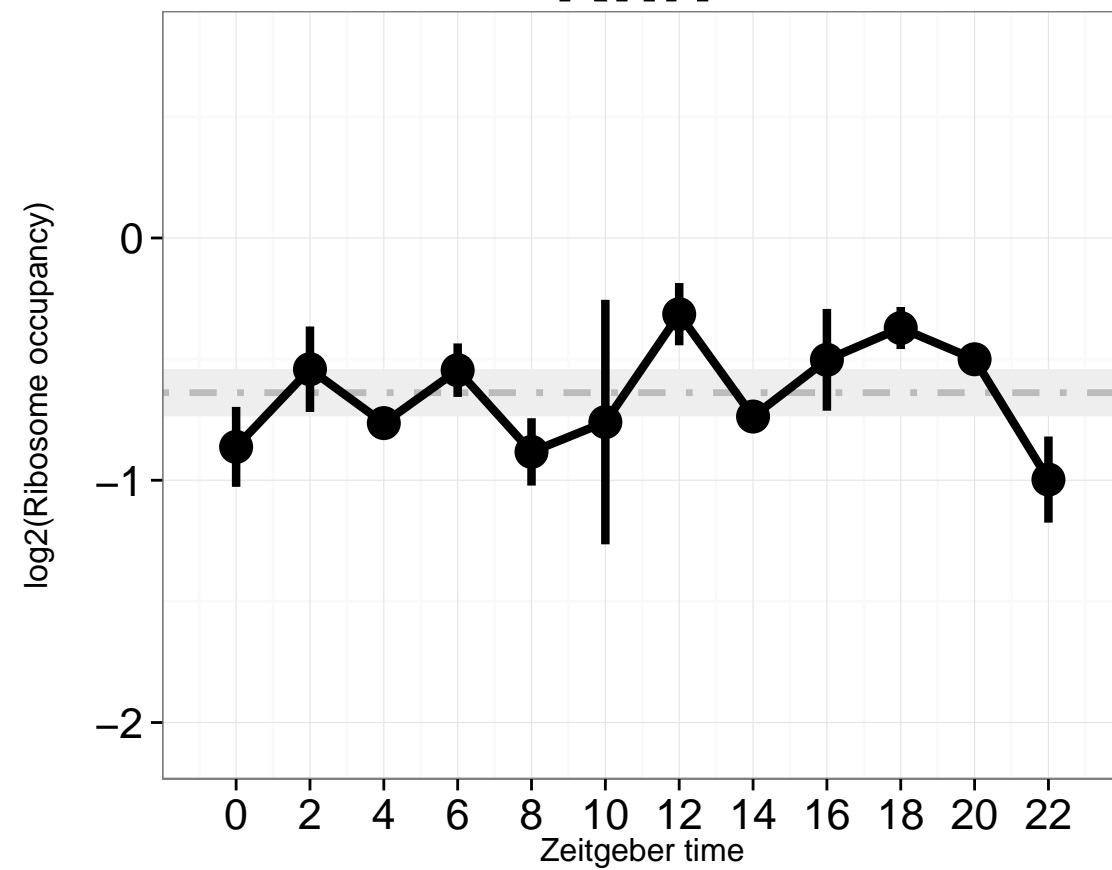

Supplement: SuppDataset_1.zip [file Rnf7_set_A.pdf › Supplemental Dataset 1/A-mRNA_nonrhyth_translation_nonrhyth/Rnf7_set_A.pdf]
