# Supplementary figures and images for: Ribosome profiling reveals the rhythmic liver translatome and circadian clock regulation by upstream open reading frames (part 63 of 113)
Source: HighWire-hosted journal article supplement (doi:10.1101/gr.195404.115), 2015-10-20

## Rnf8

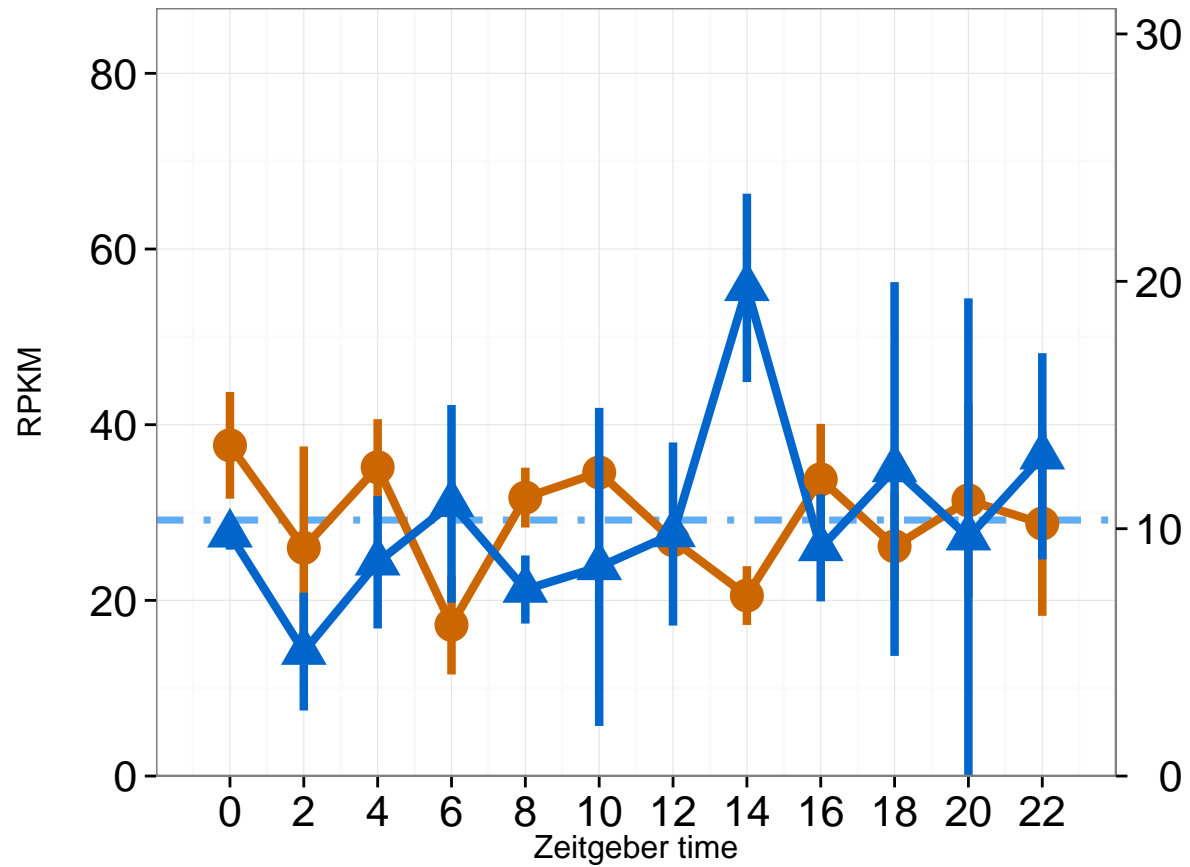

## Rnf8

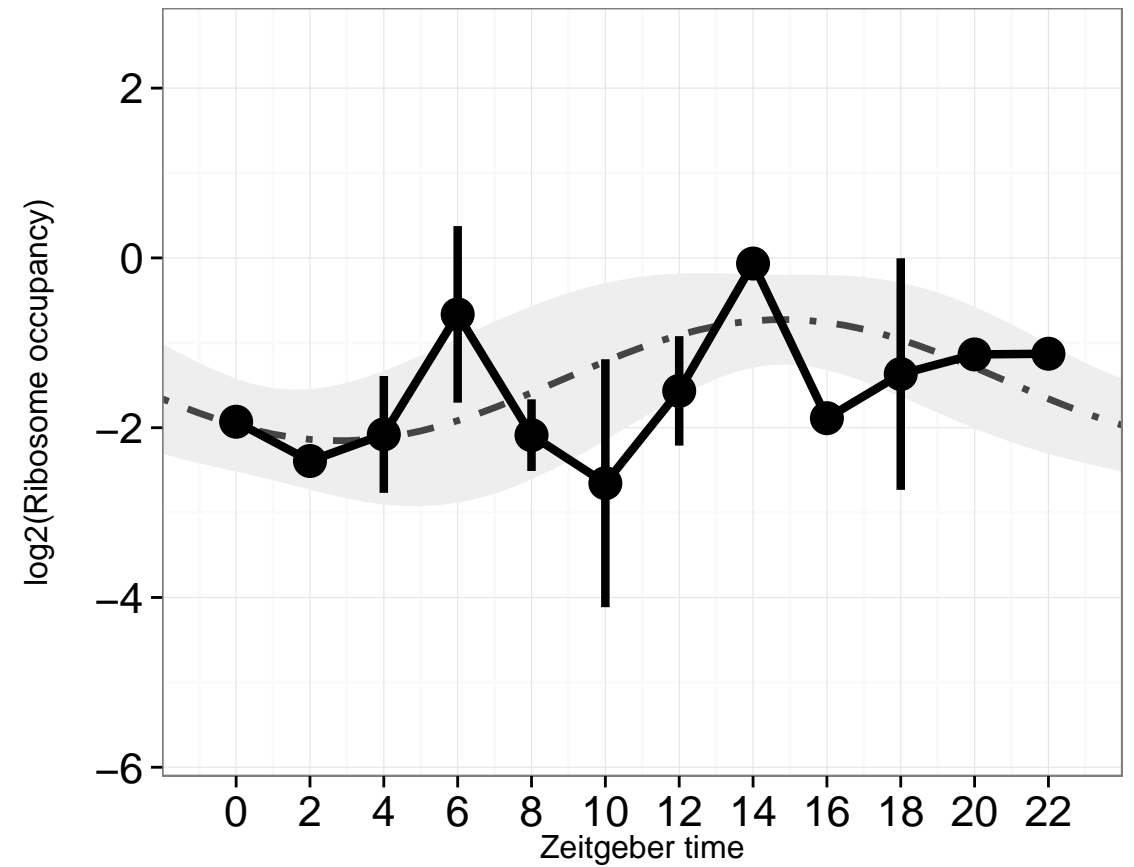

Supplement: SuppDataset_1.zip [file Rnf8_set_A.pdf › Supplemental Dataset 1/A-mRNA_nonrhyth_translation_nonrhyth/Rnf8_set_A.pdf]

# Rnft1

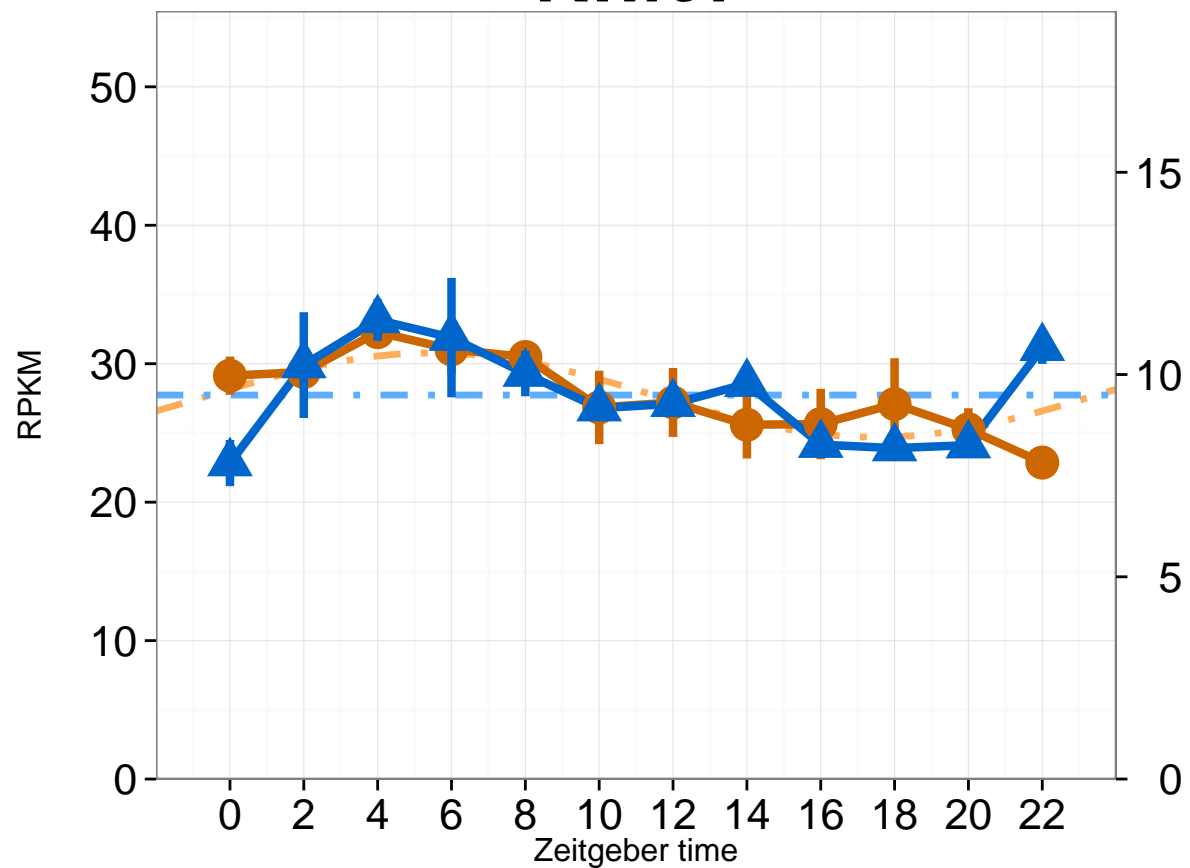

# Rnft1

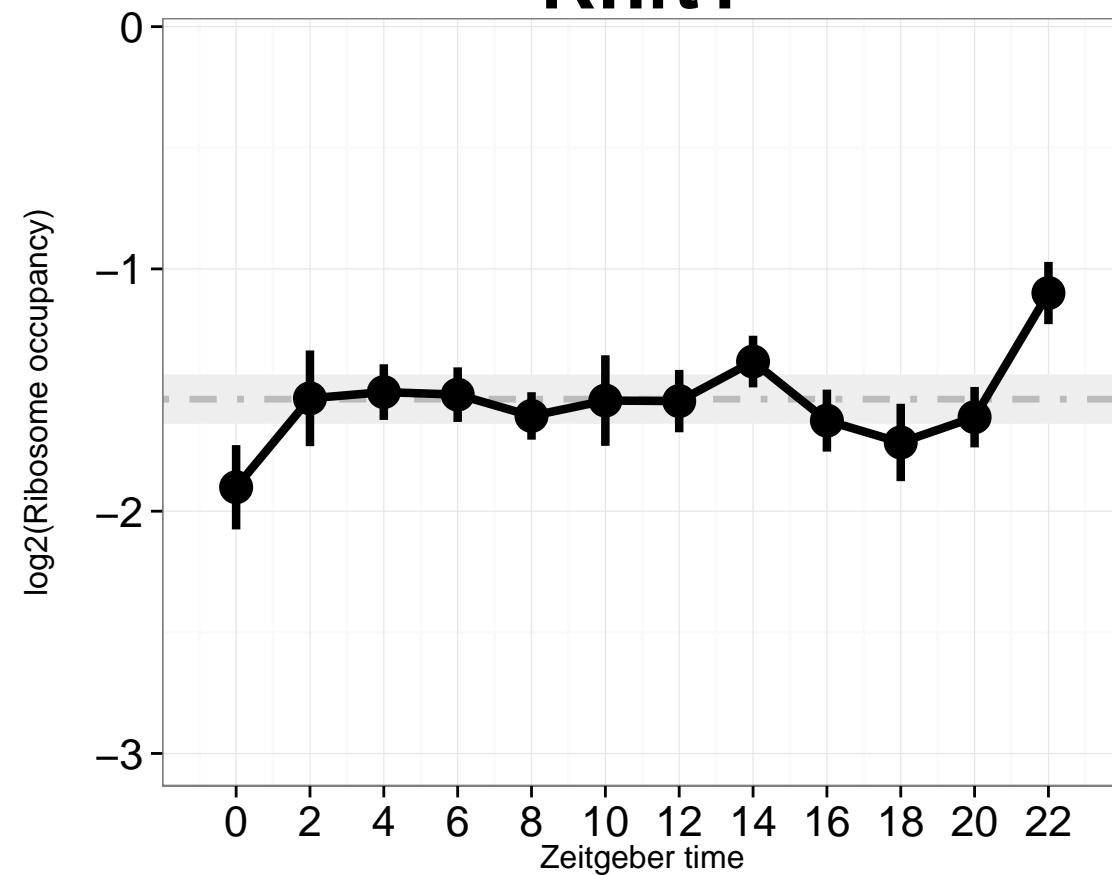

Supplement: SuppDataset_1.zip [file Rnft1_set_A.pdf › Supplemental Dataset 1/A-mRNA_nonrhyth_translation_nonrhyth/Rnft1_set_A.pdf]

# Rngtt

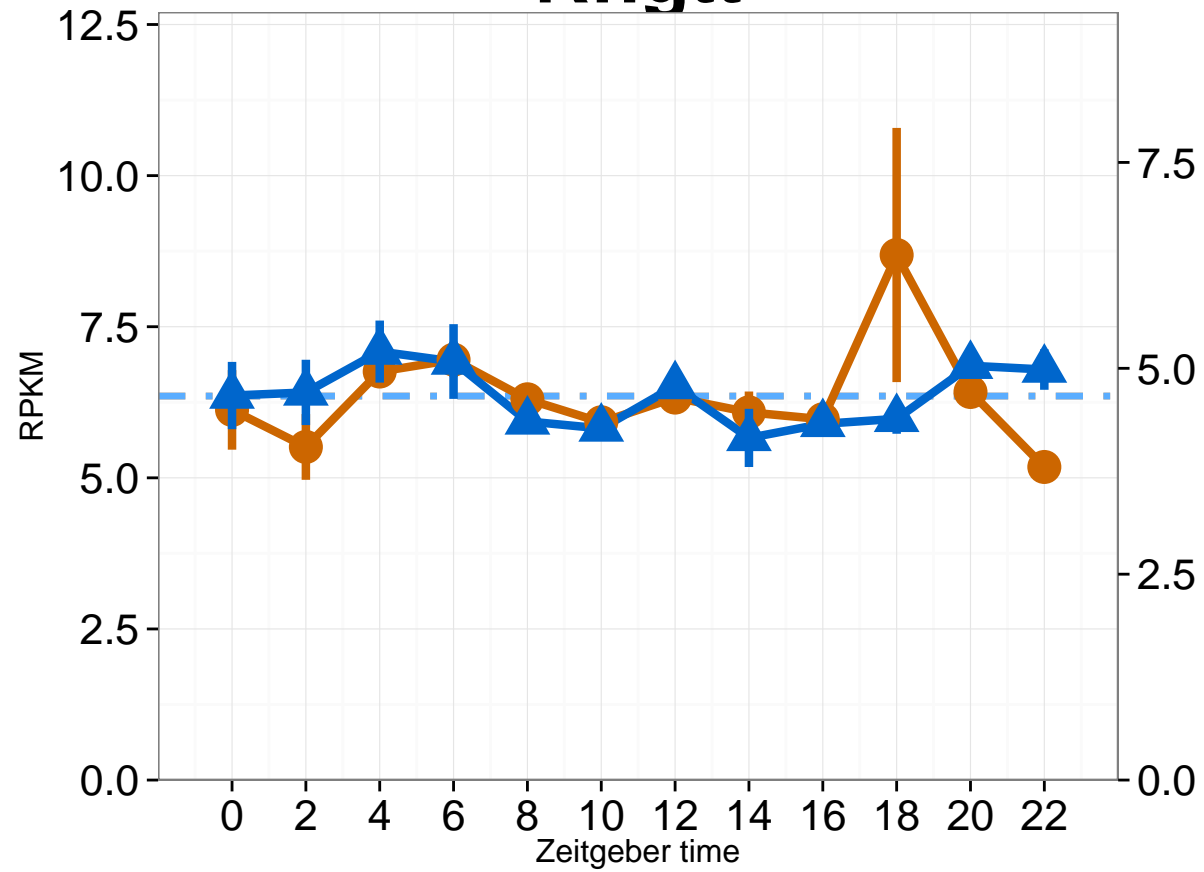

# Rngtt

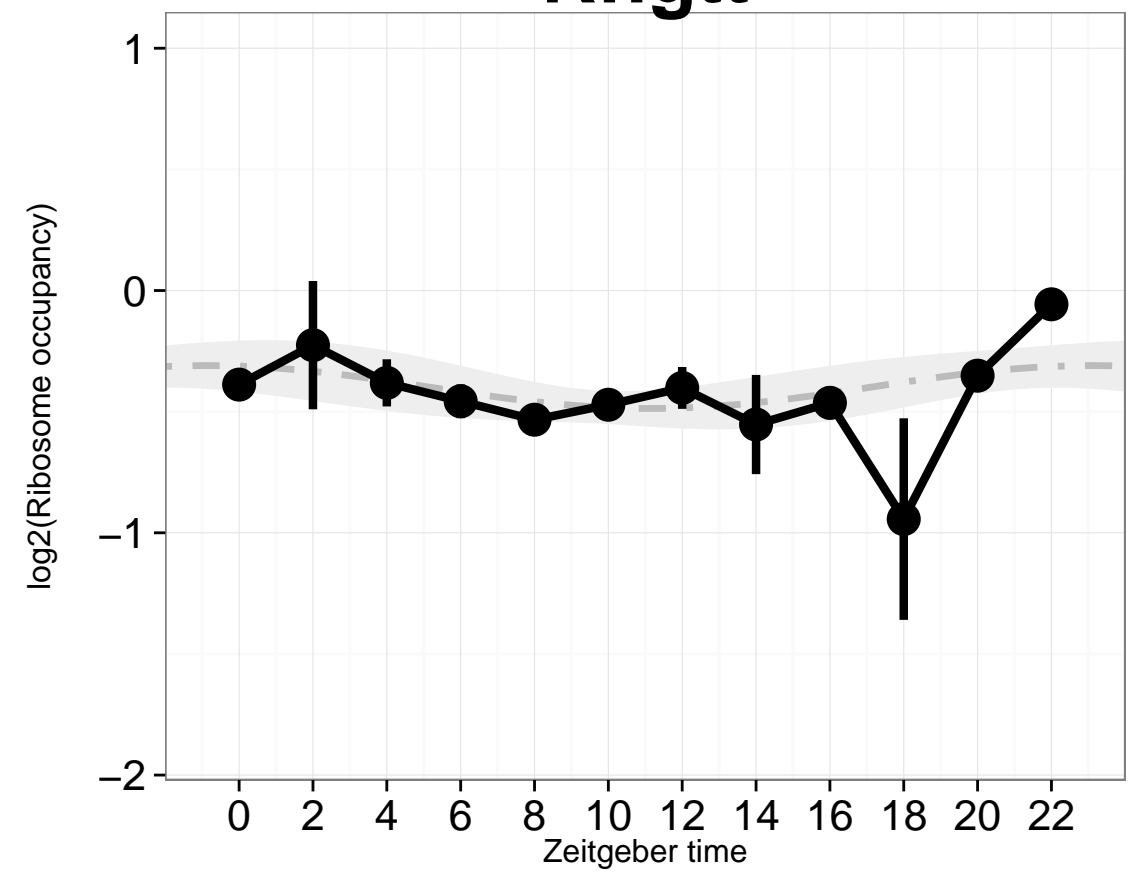

Supplement: SuppDataset_1.zip [file Rngtt_set_A.pdf › Supplemental Dataset 1/A-mRNA_nonrhyth_translation_nonrhyth/Rngtt_set_A.pdf]

## Rnh1

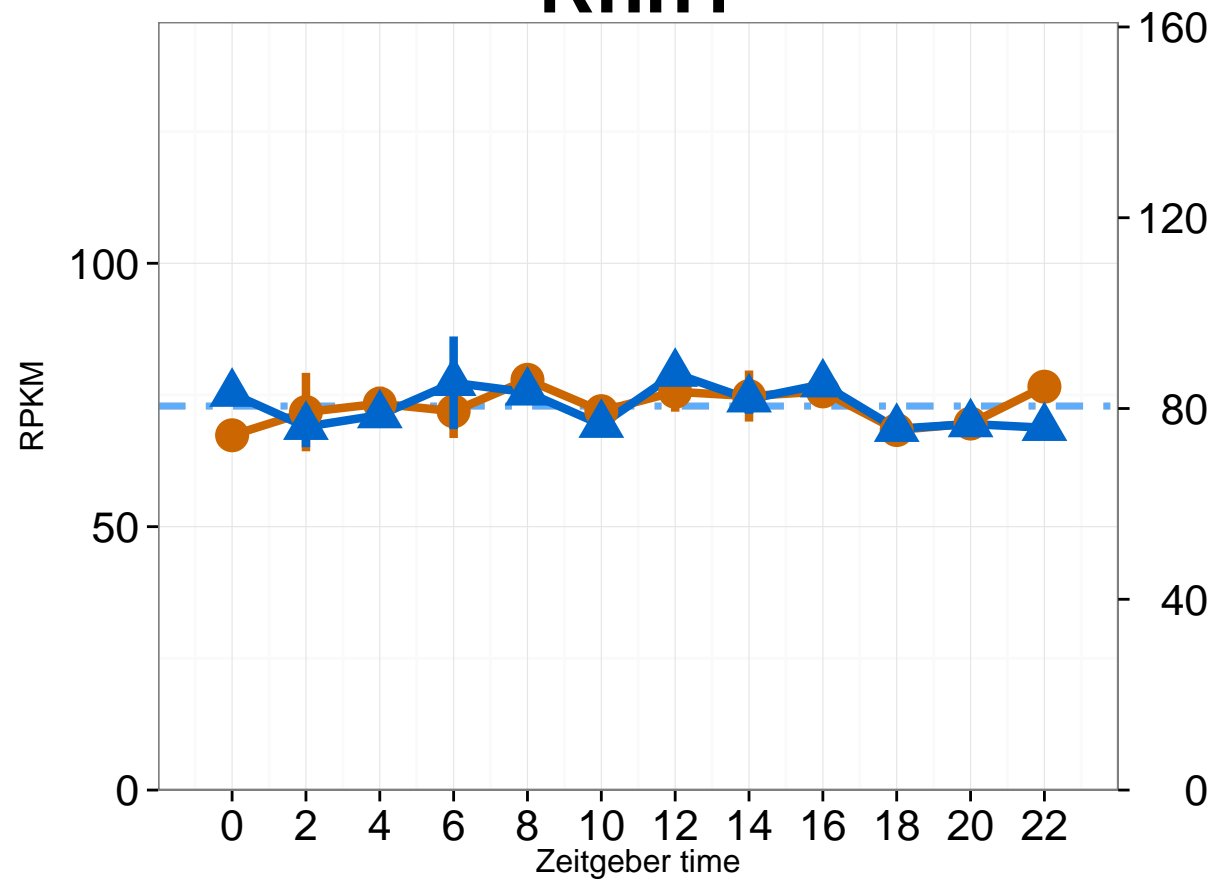

## Rnh1

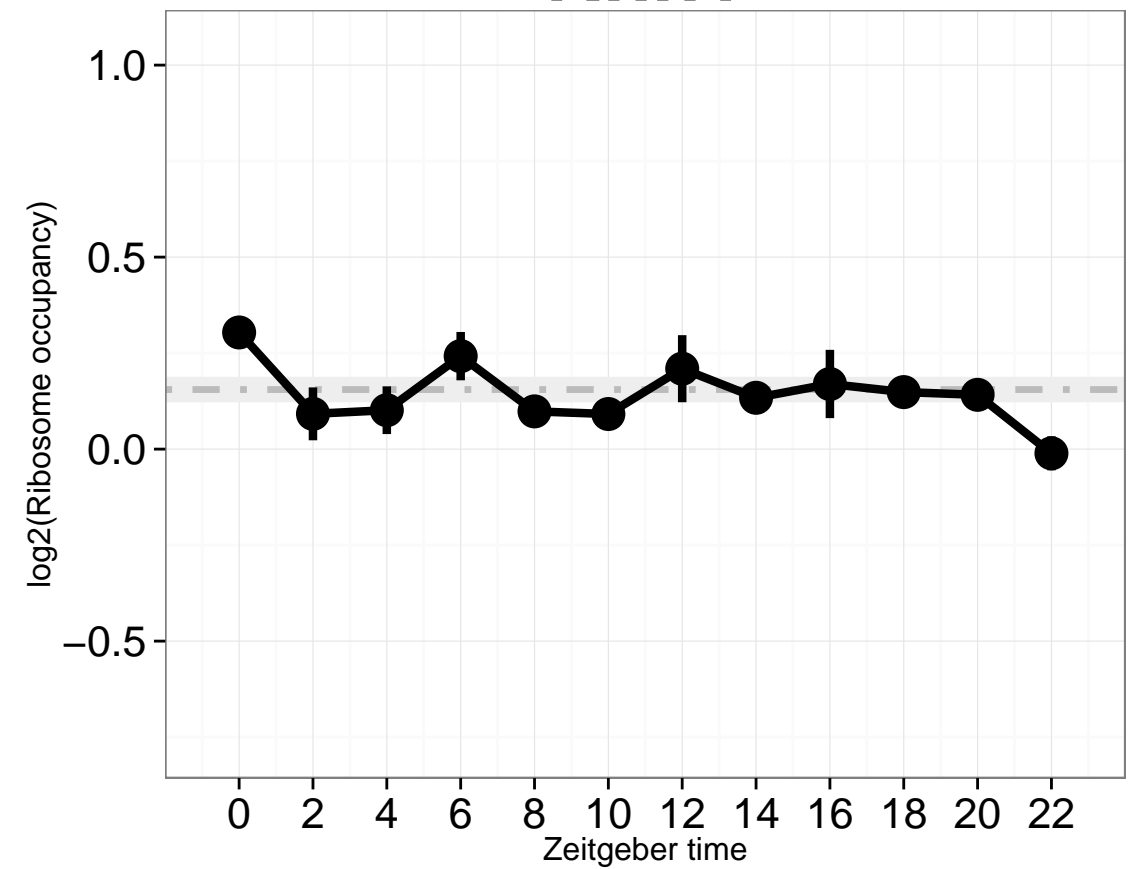

Supplement: SuppDataset_1.zip [file Rnh1_set_A.pdf › Supplemental Dataset 1/A-mRNA_nonrhyth_translation_nonrhyth/Rnh1_set_A.pdf]

## Rnmt

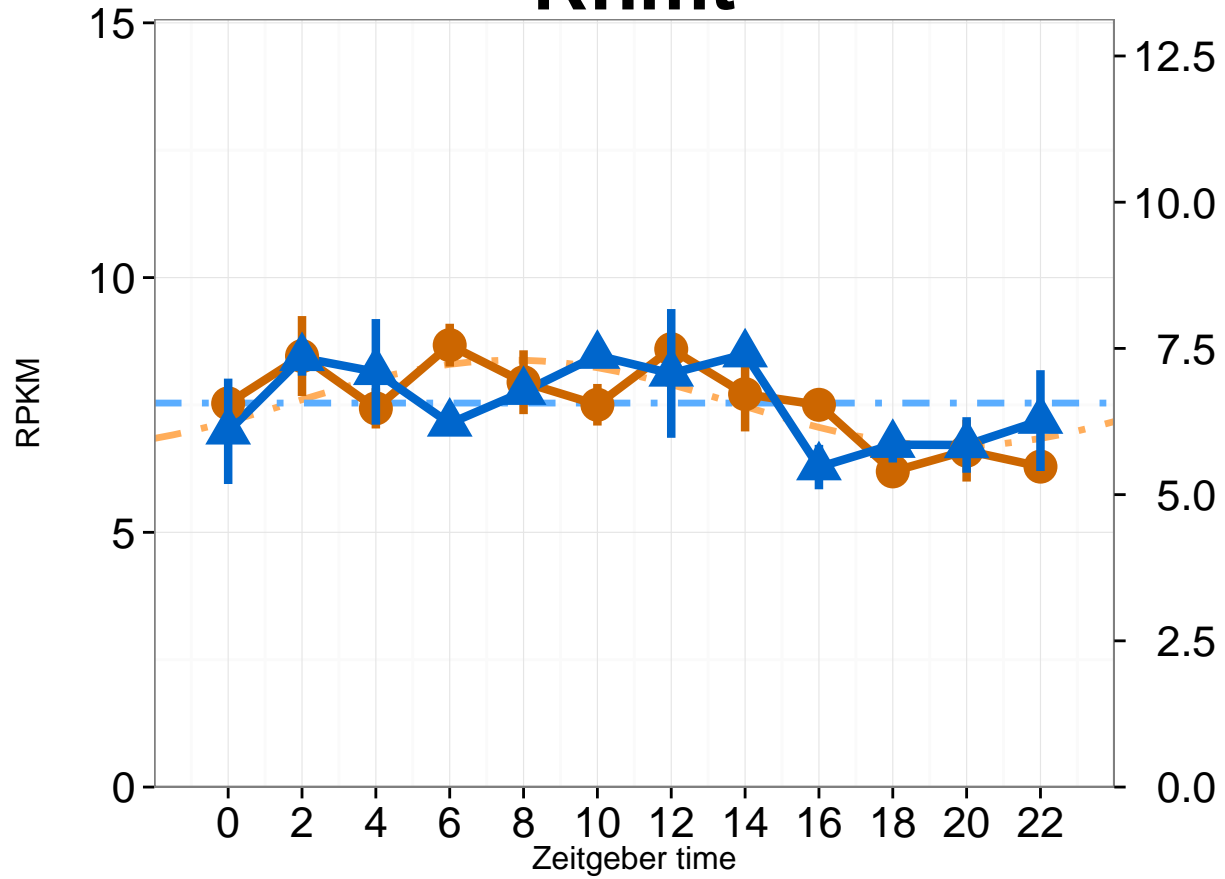

## Rnmt

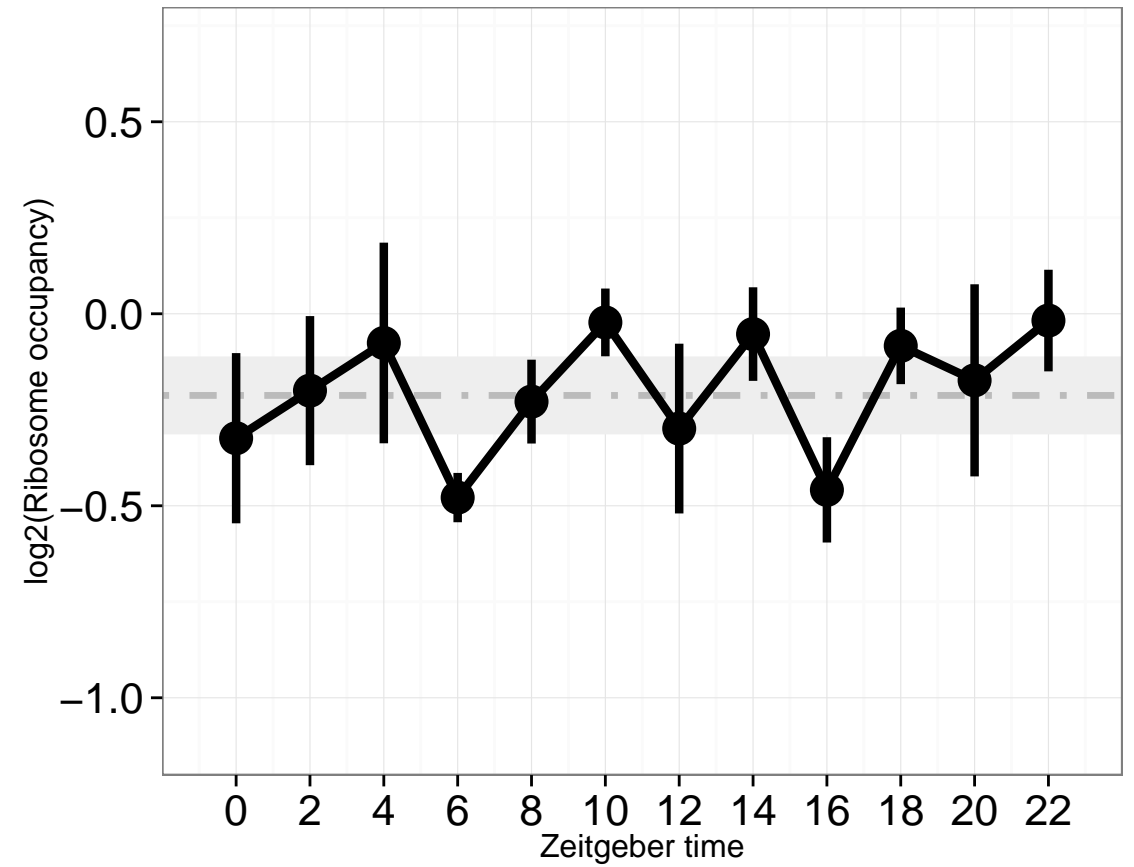

Supplement: SuppDataset_1.zip [file Rnmt_set_A.pdf › Supplemental Dataset 1/A-mRNA_nonrhyth_translation_nonrhyth/Rnmt_set_A.pdf]

## Rnmtl1

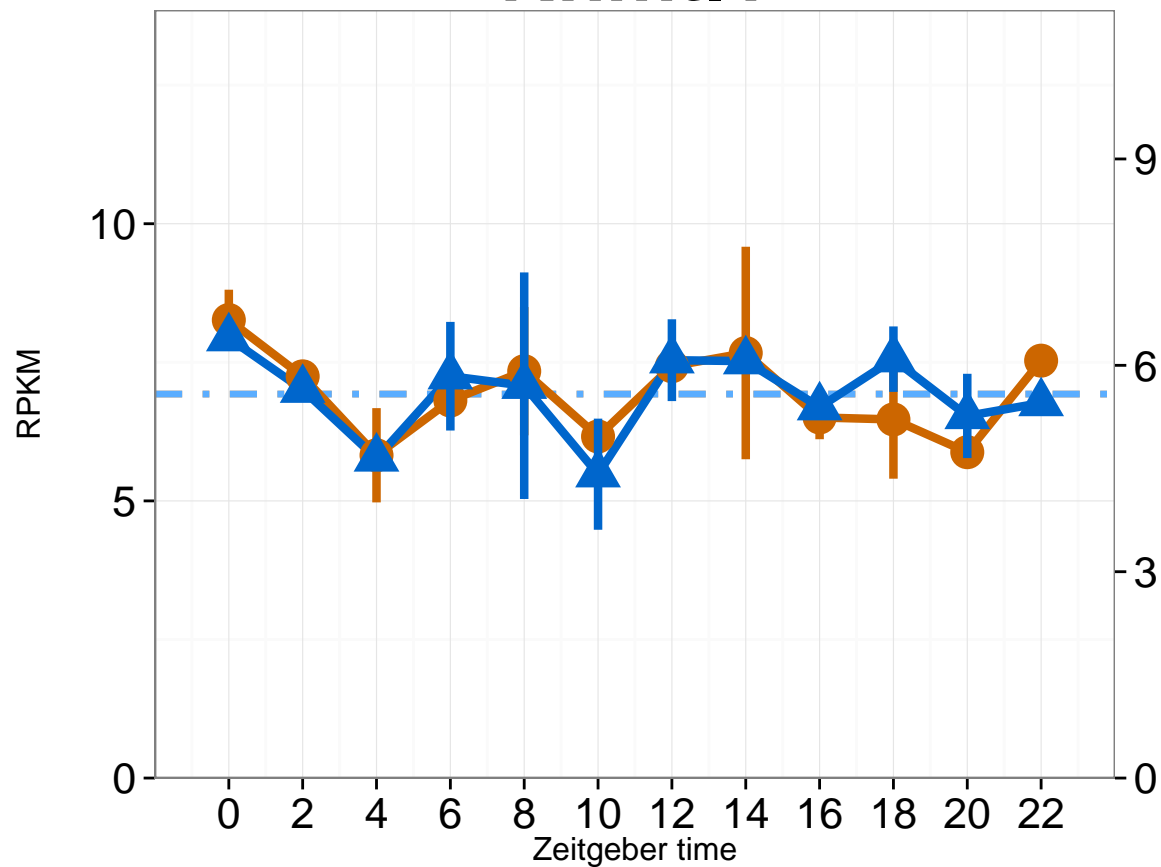

## Rnmtl1

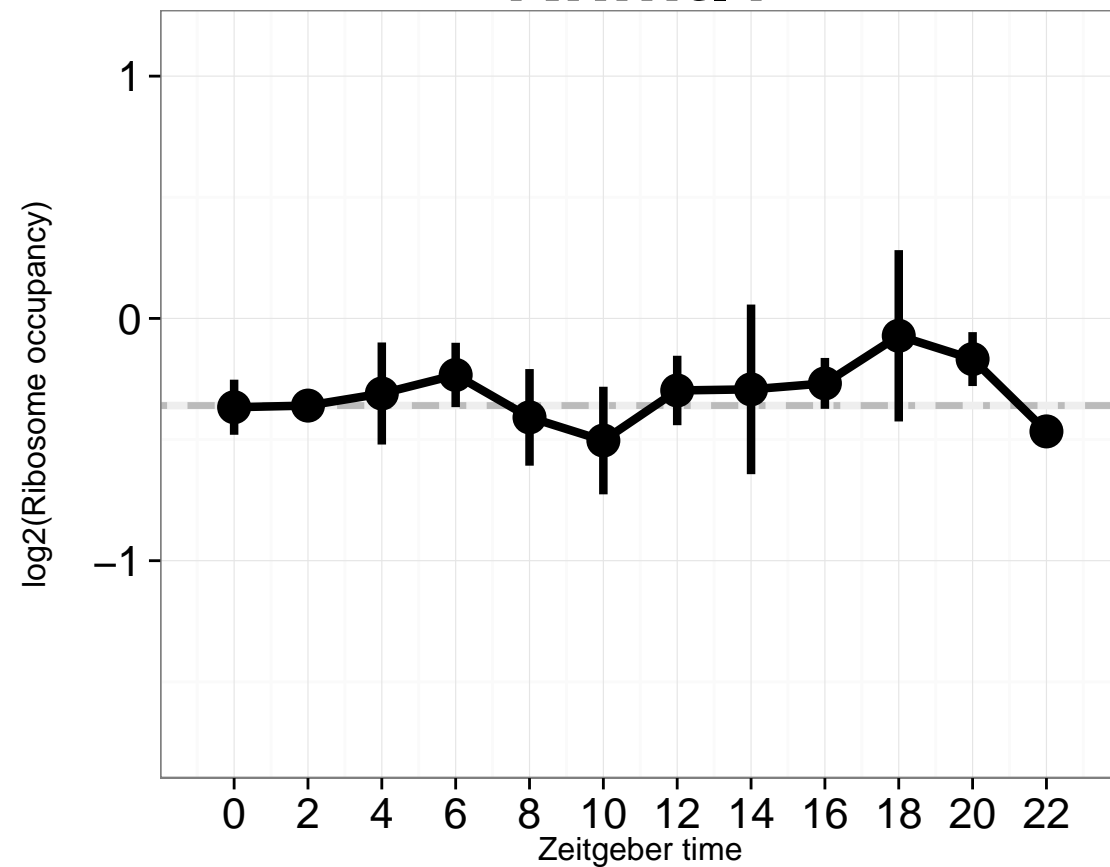

Supplement: SuppDataset_1.zip [file Rnmtl1_set_A.pdf › Supplemental Dataset 1/A-mRNA_nonrhyth_translation_nonrhyth/Rnmtl1_set_A.pdf]

## Rnpc3

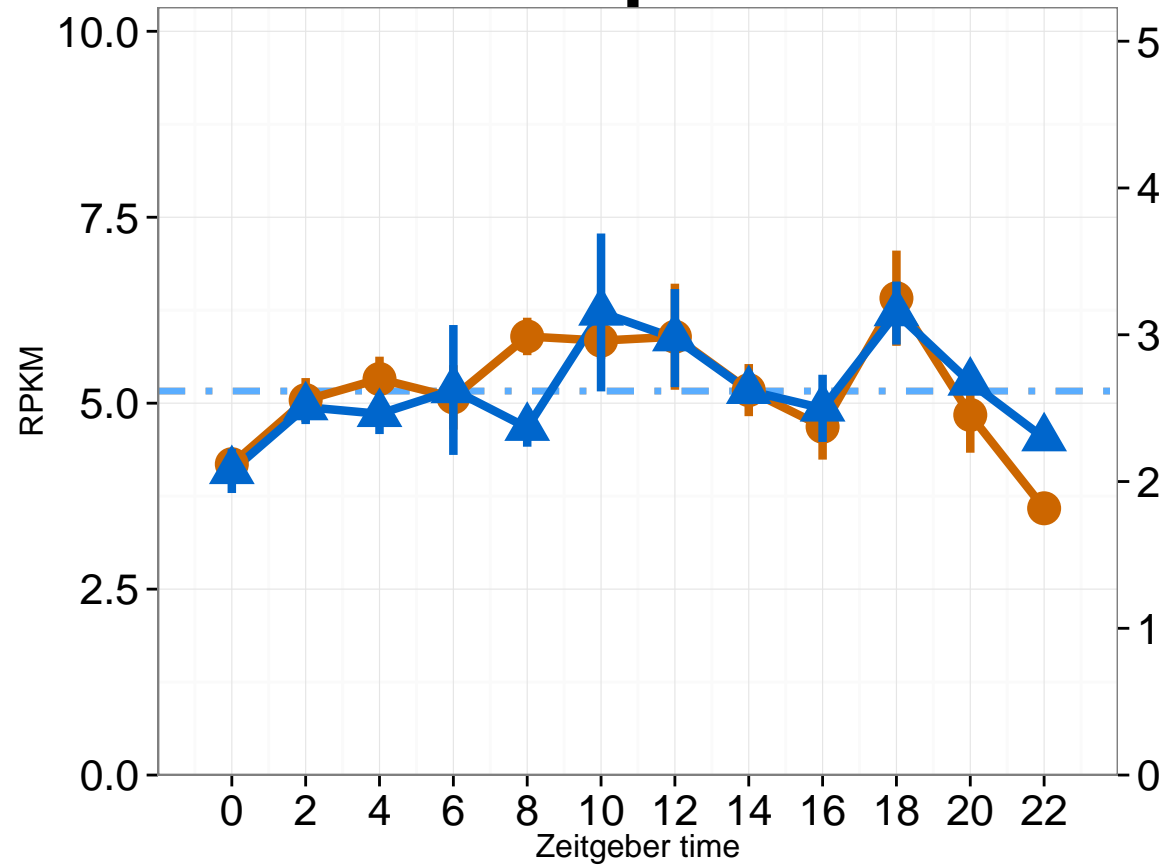

## Rnpc3

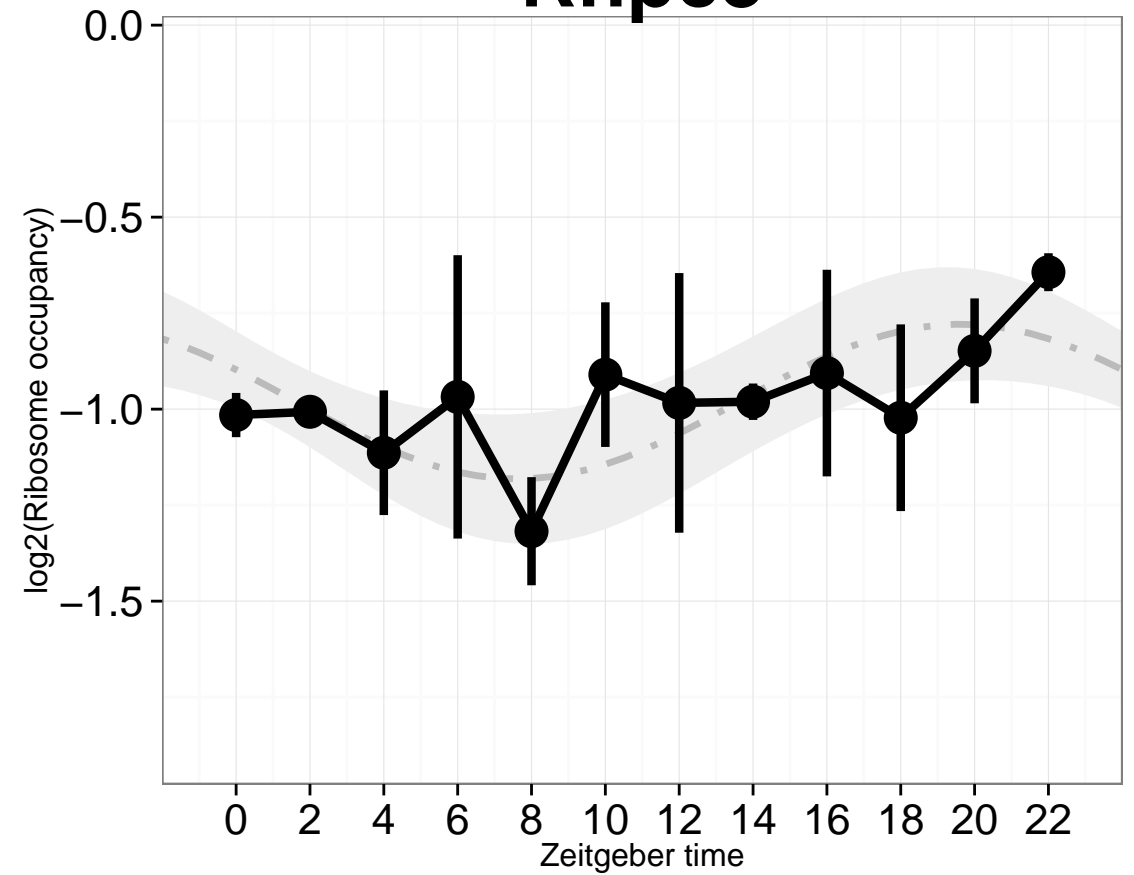

Supplement: SuppDataset_1.zip [file Rnpc3_set_A.pdf › Supplemental Dataset 1/A-mRNA_nonrhyth_translation_nonrhyth/Rnpc3_set_A.pdf]

## Rnpep

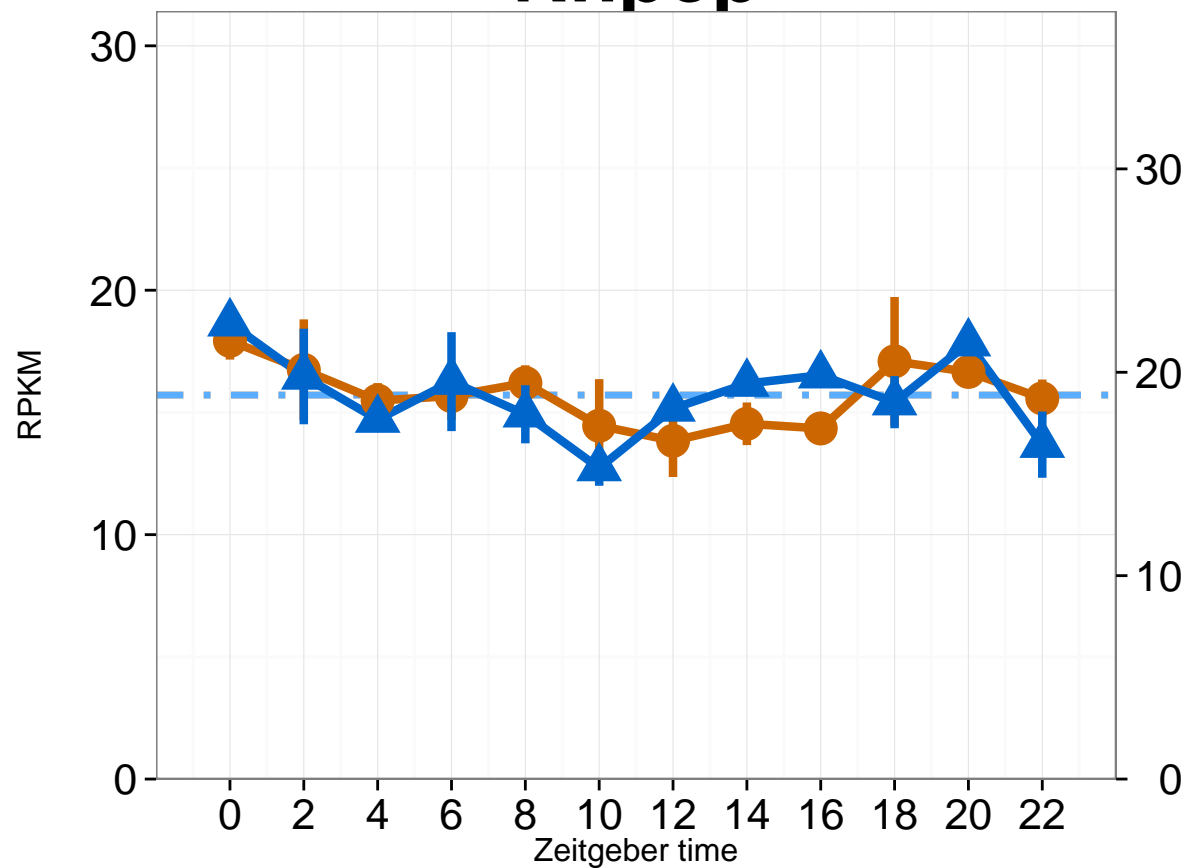

## Rnpep

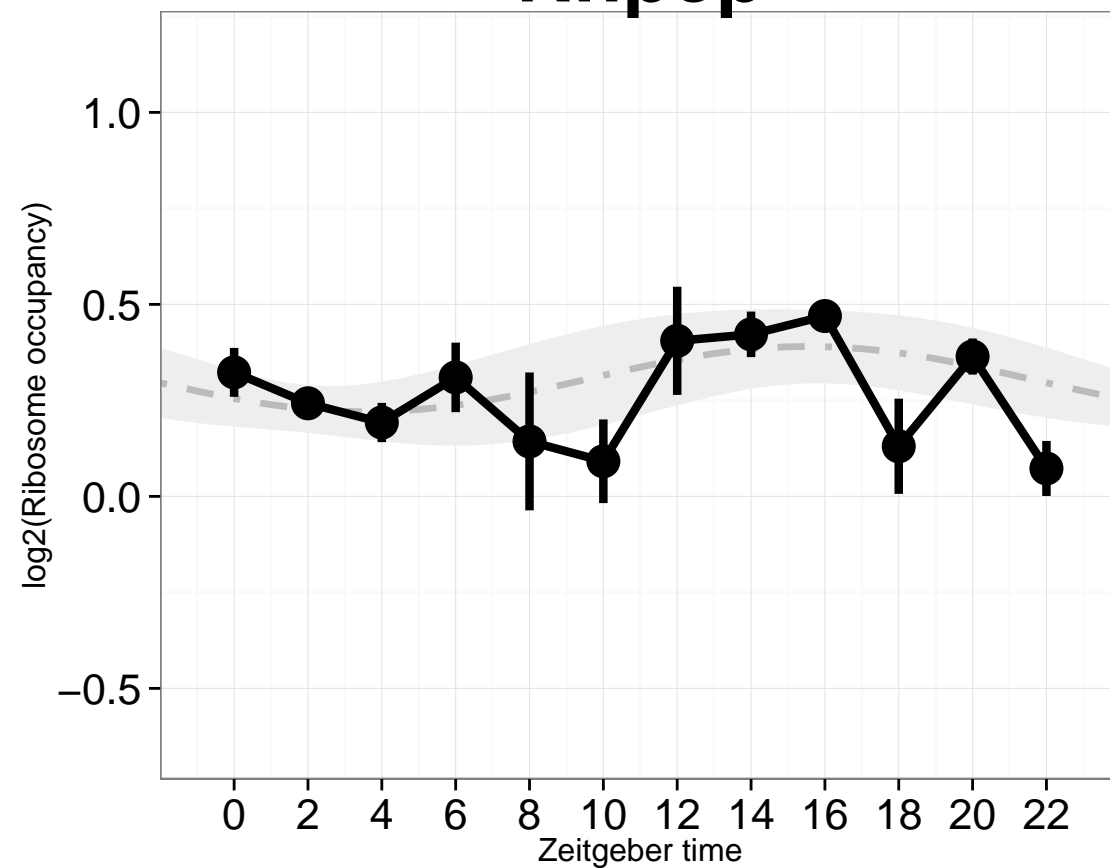

Supplement: SuppDataset_1.zip [file Rnpep_set_A.pdf › Supplemental Dataset 1/A-mRNA_nonrhyth_translation_nonrhyth/Rnpep_set_A.pdf]

# Rnpepl1

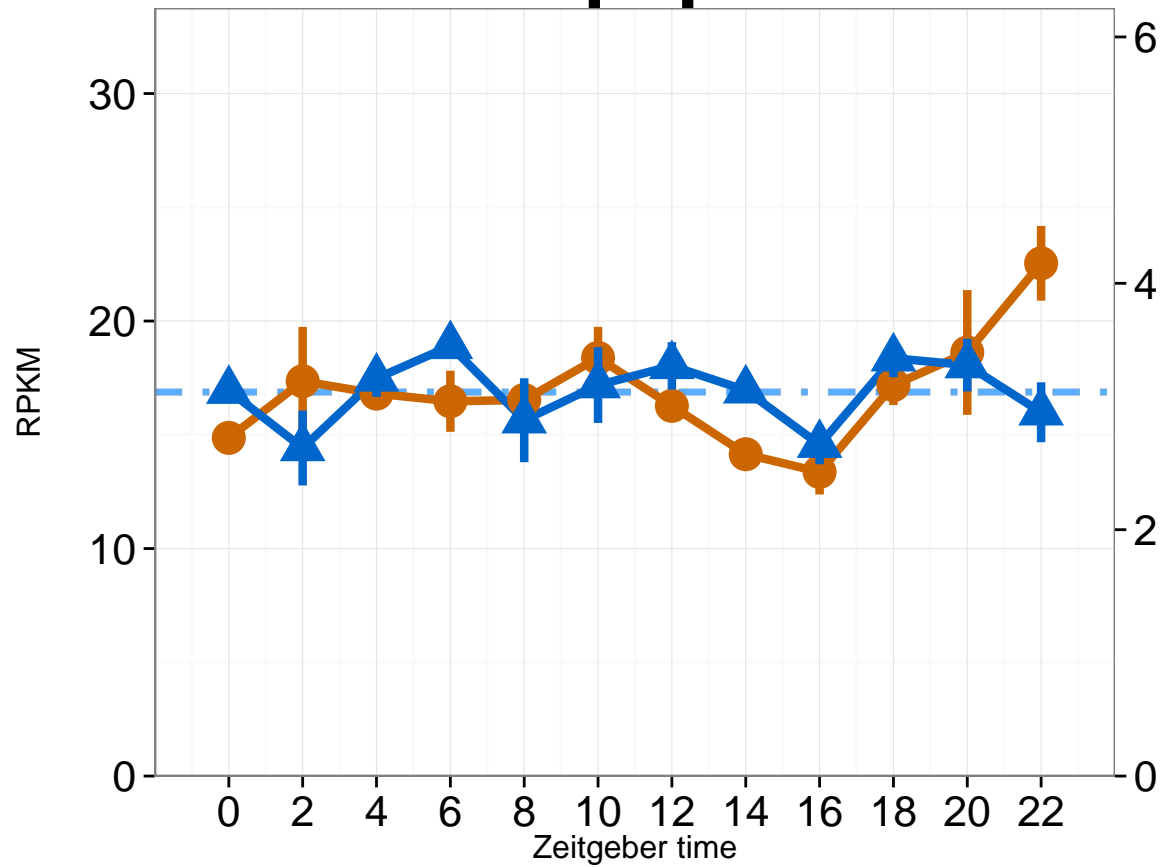

# Rnpepl1

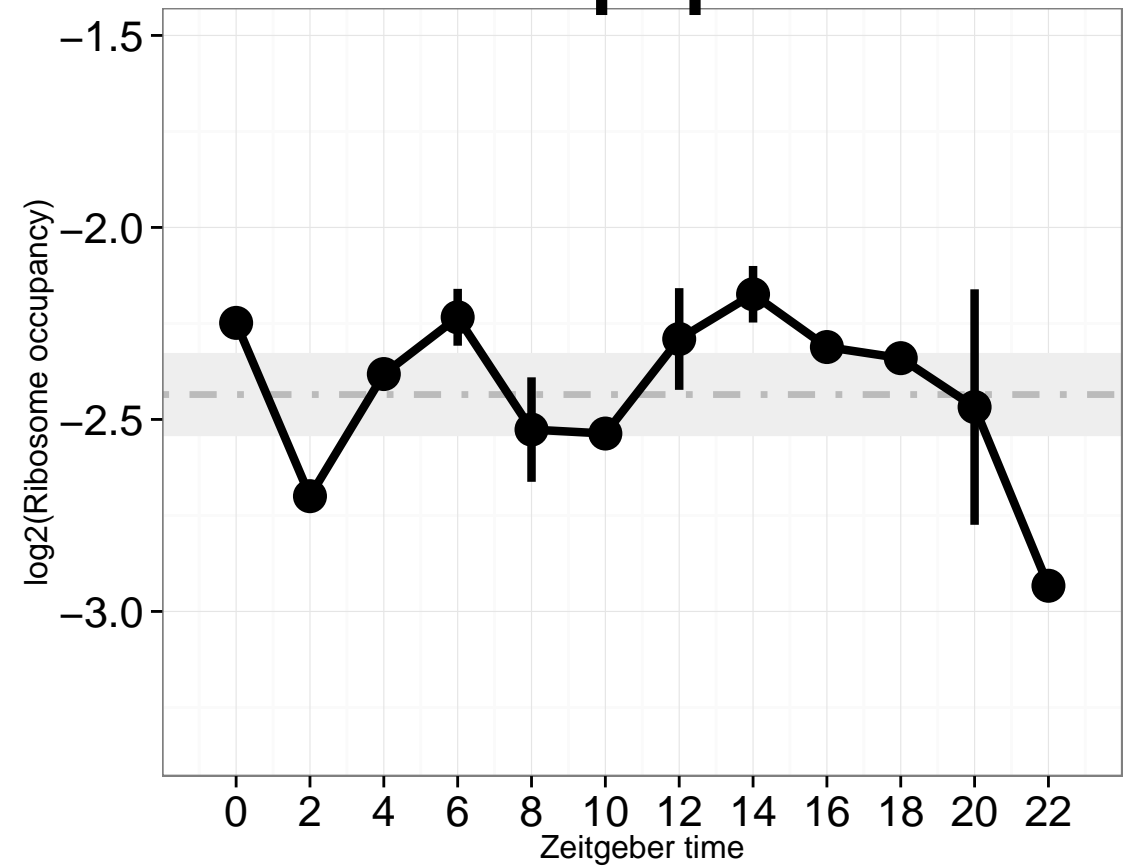

Supplement: SuppDataset_1.zip [file Rnpepl1_set_A.pdf › Supplemental Dataset 1/A-mRNA_nonrhyth_translation_nonrhyth/Rnpepl1_set_A.pdf]

## Rnps1

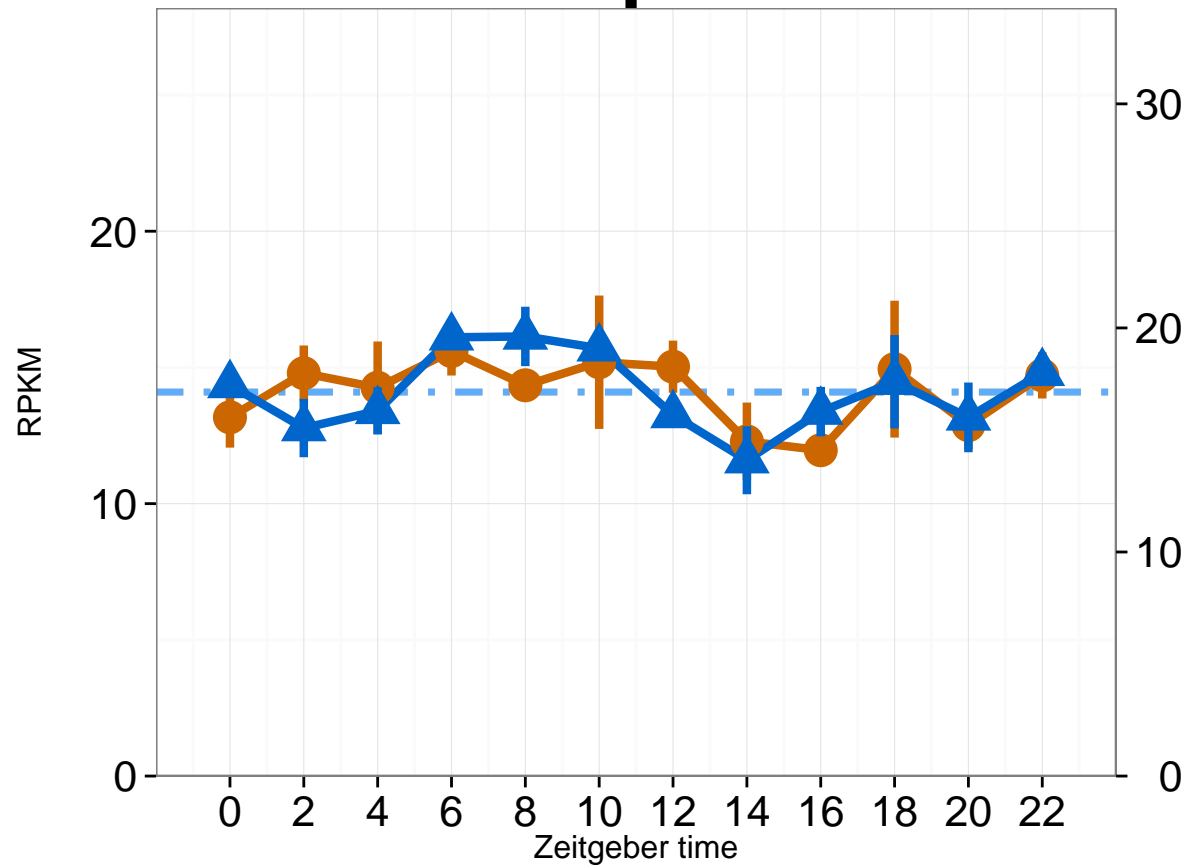

## Rnps1

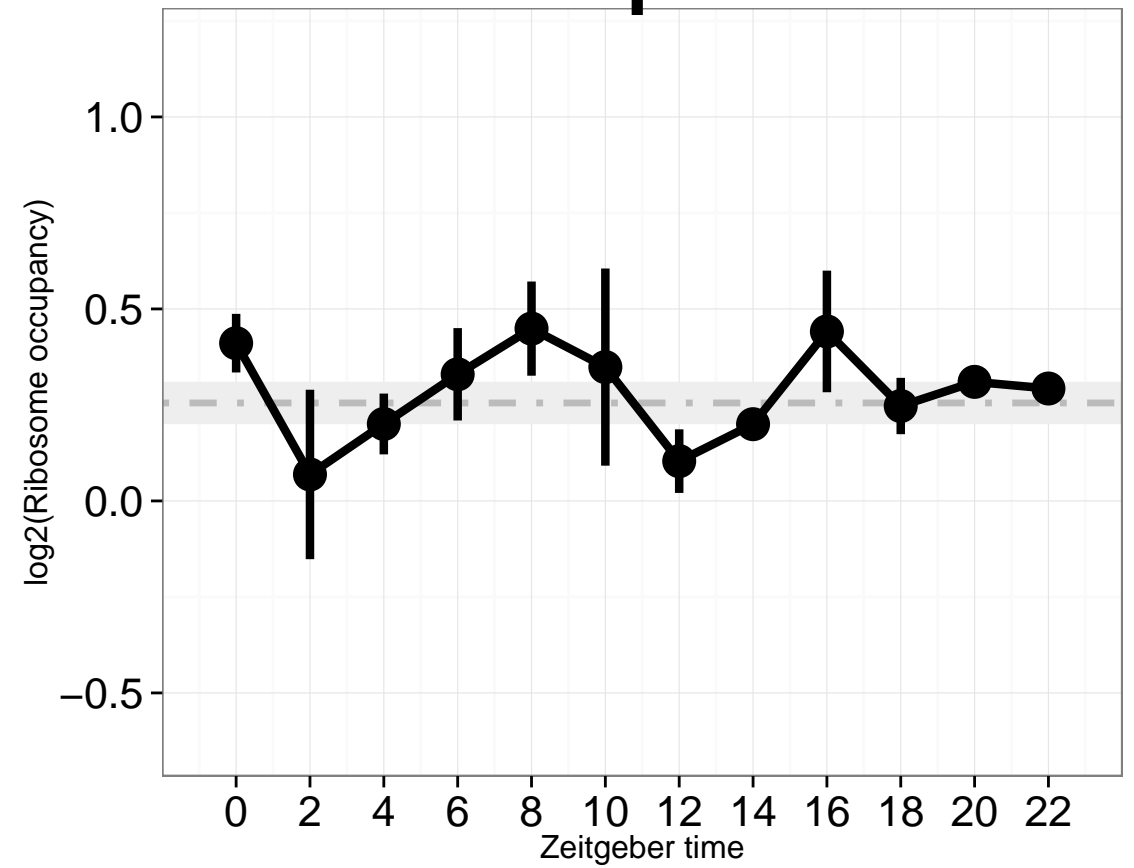

Supplement: SuppDataset_1.zip [file Rnps1_set_A.pdf › Supplemental Dataset 1/A-mRNA_nonrhyth_translation_nonrhyth/Rnps1_set_A.pdf]

# Robo2

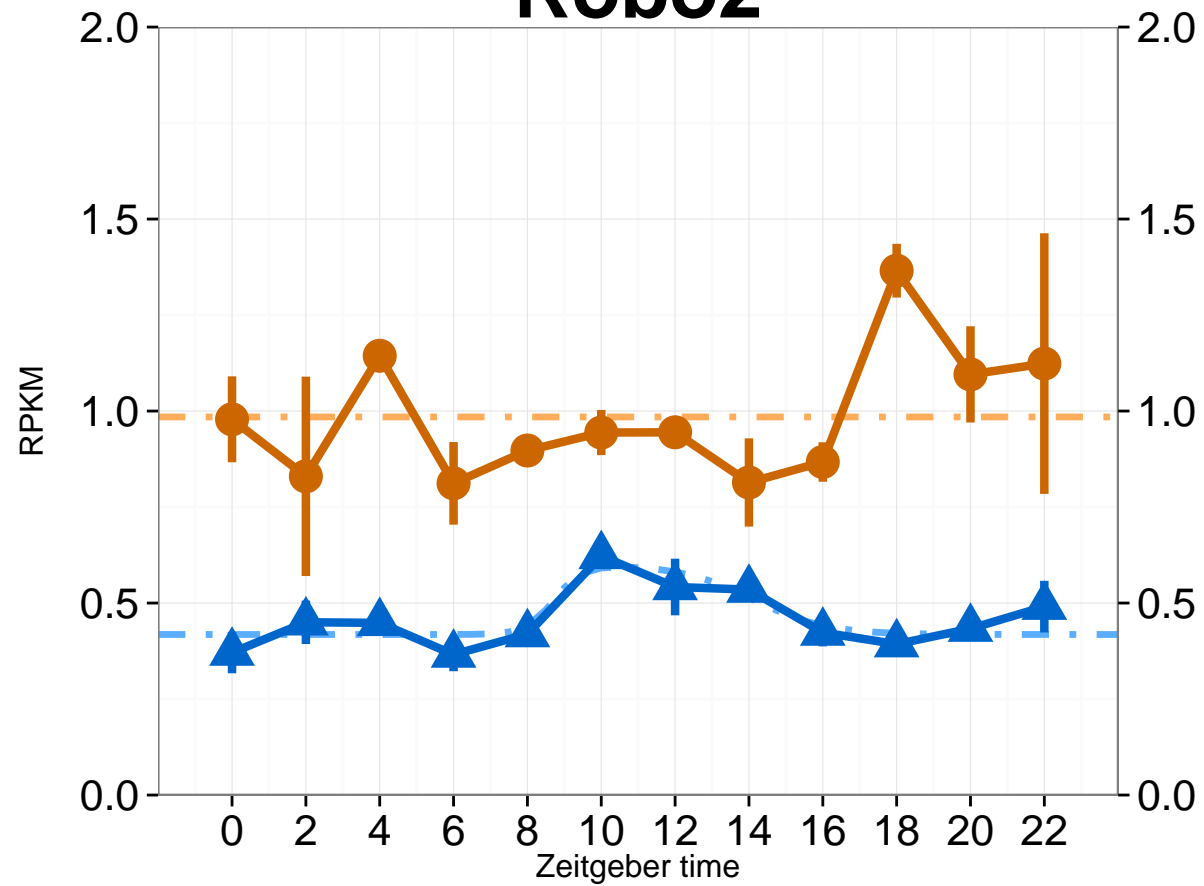

# Robo2

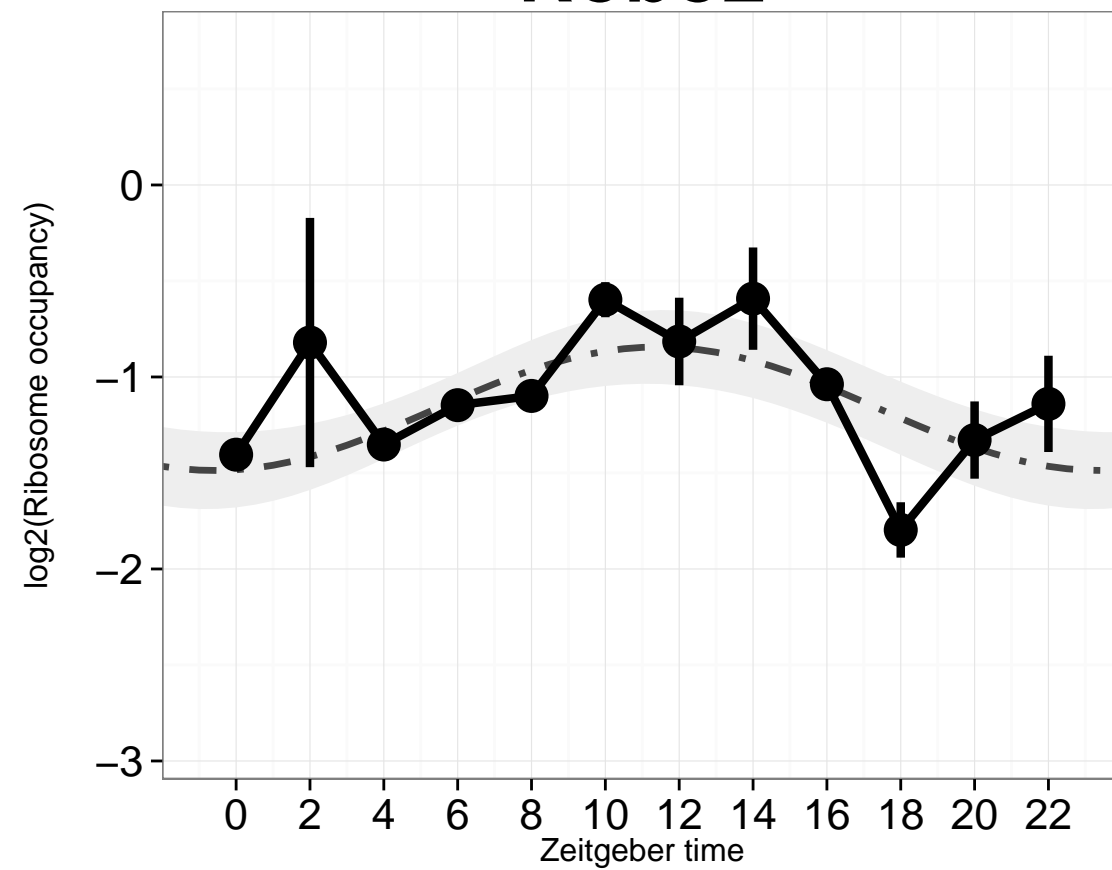

Supplement: SuppDataset_1.zip [file Robo2_set_A.pdf › Supplemental Dataset 1/A-mRNA_nonrhyth_translation_nonrhyth/Robo2_set_A.pdf]

## Rock1

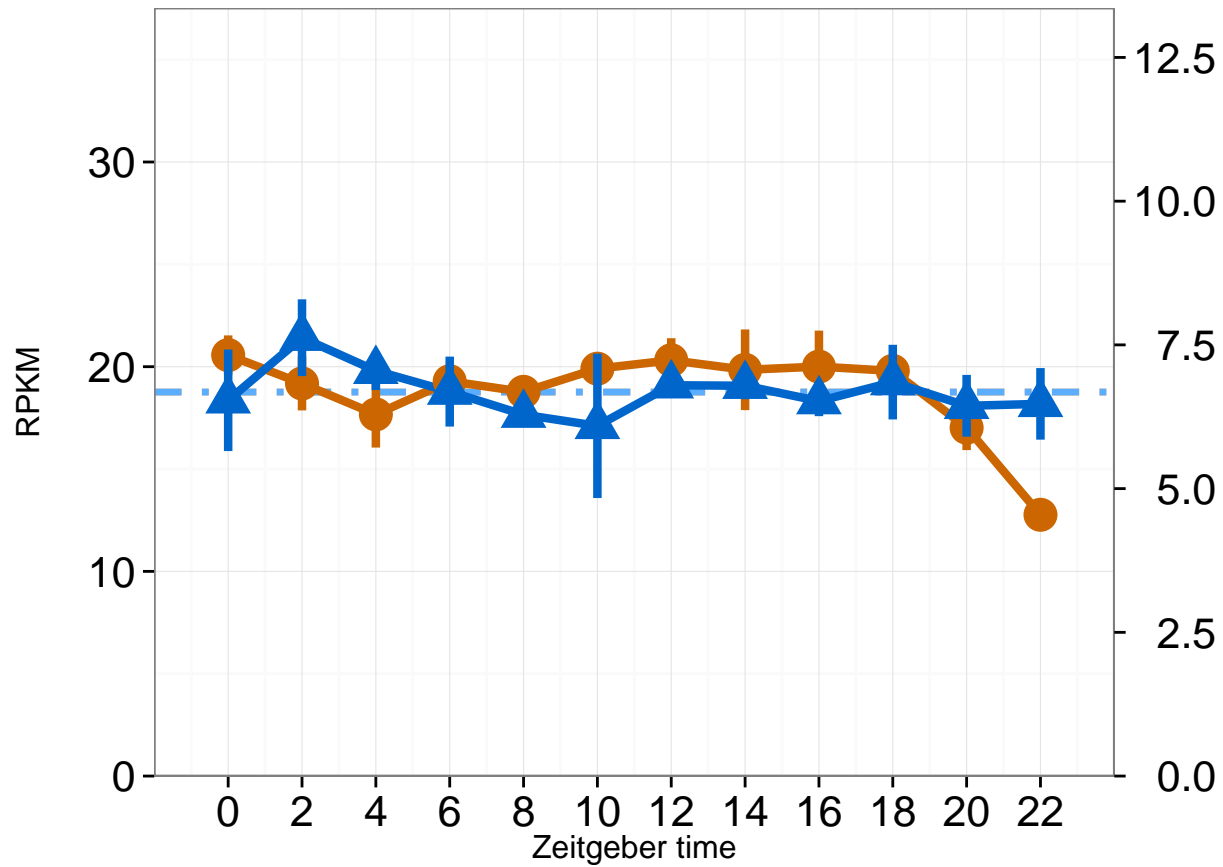

## Rock1

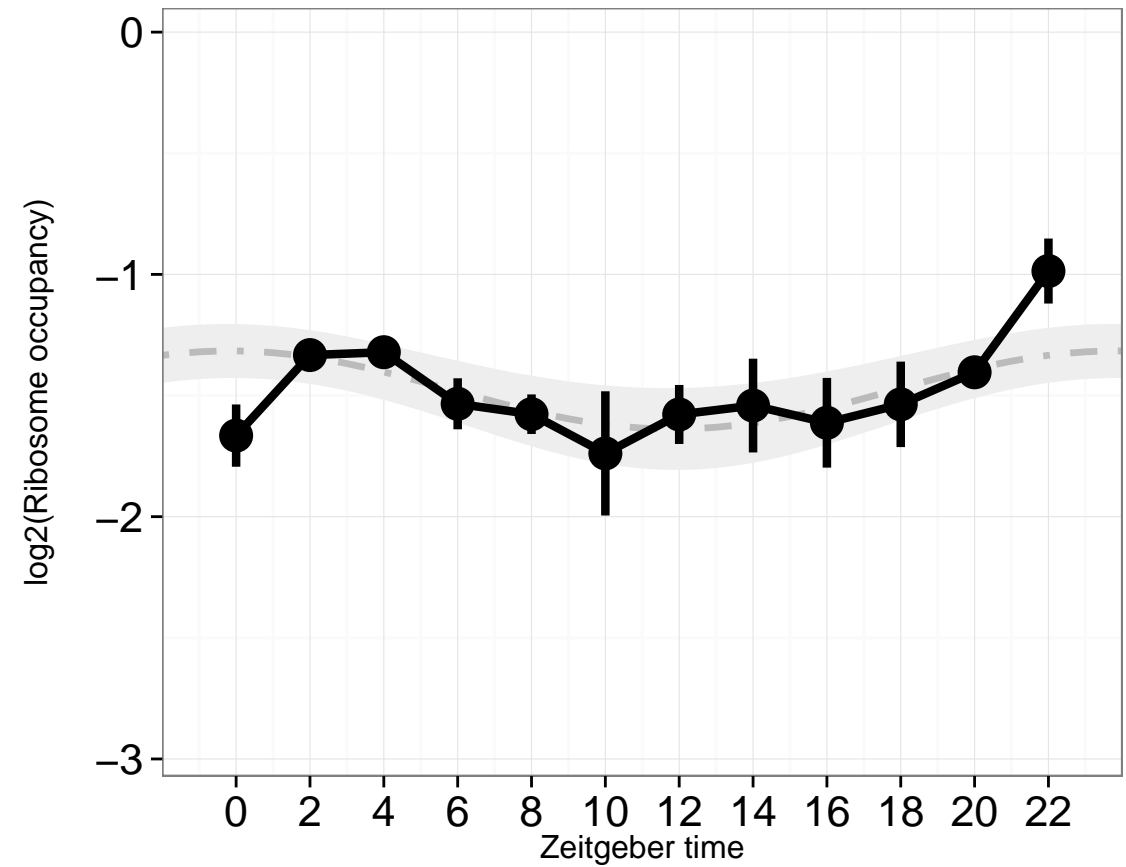

Supplement: SuppDataset_1.zip [file Rock1_set_A.pdf › Supplemental Dataset 1/A-mRNA_nonrhyth_translation_nonrhyth/Rock1_set_A.pdf]

## Rogdi

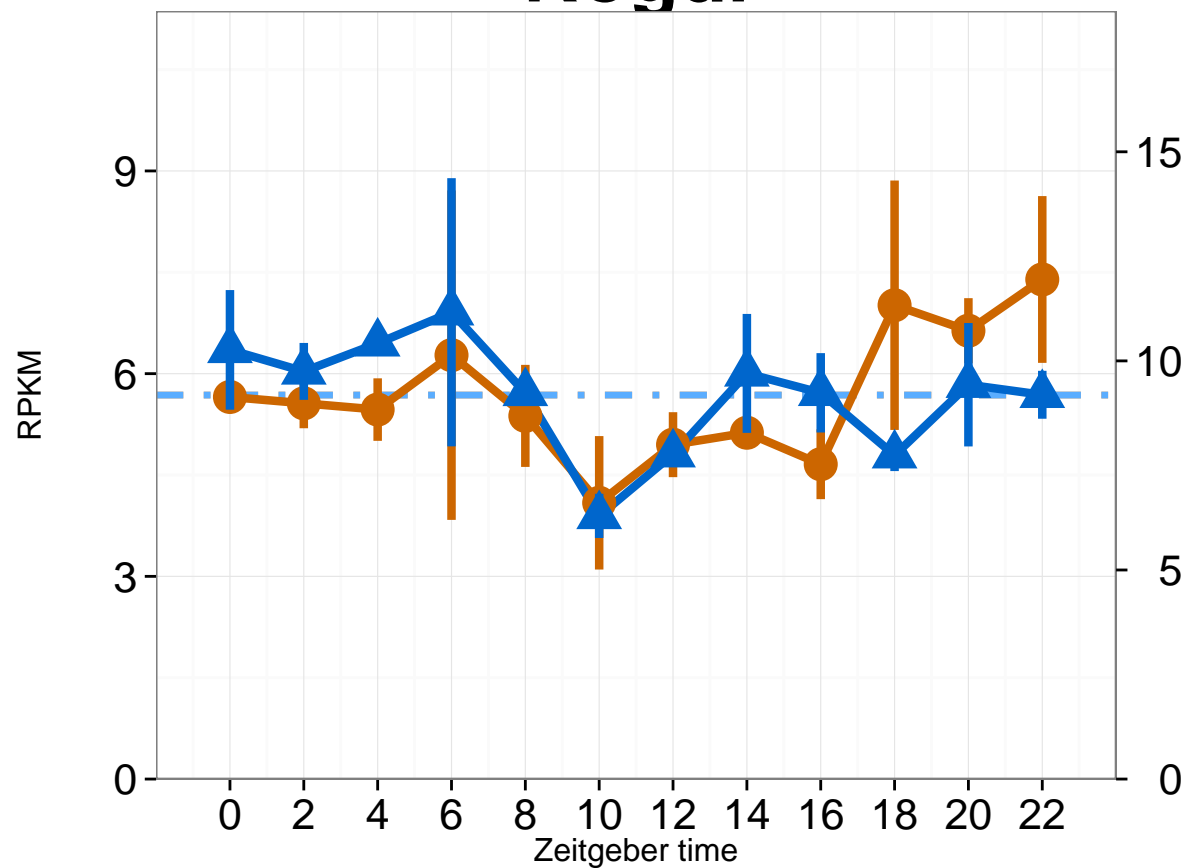

## Rogdi

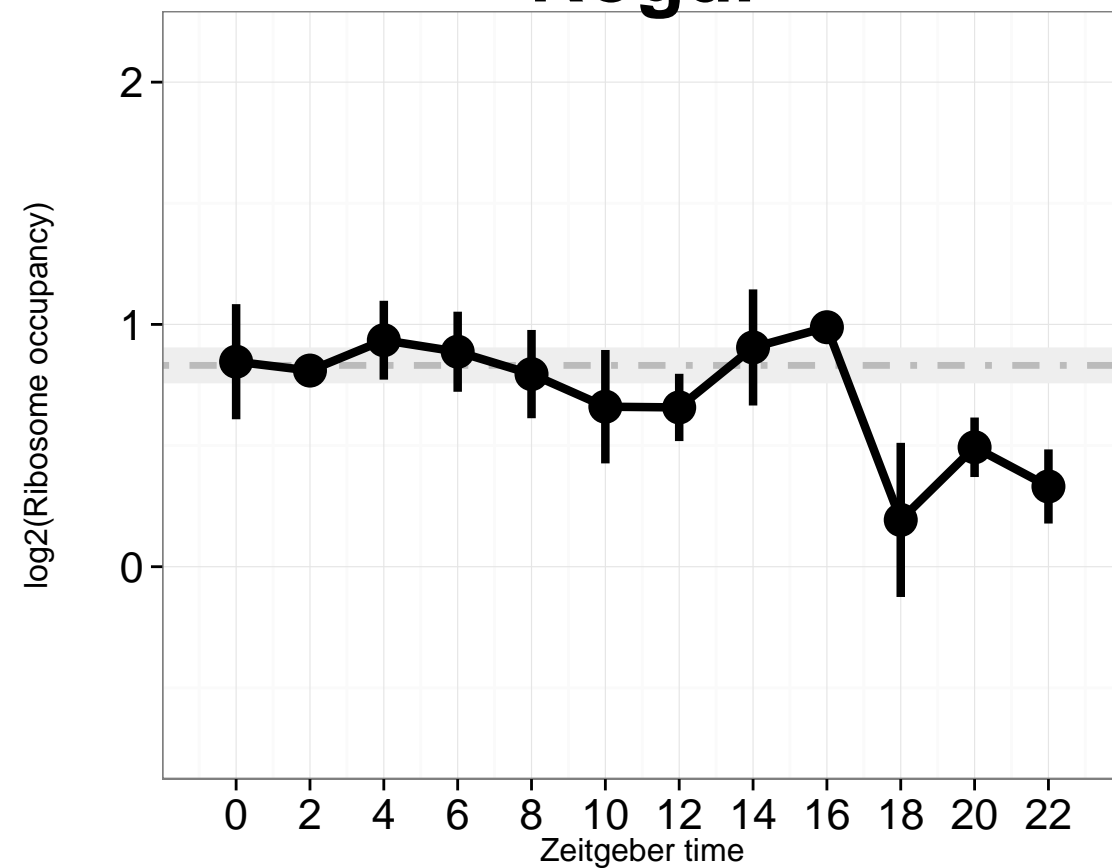

Supplement: SuppDataset_1.zip [file Rogdi_set_A.pdf › Supplemental Dataset 1/A-mRNA_nonrhyth_translation_nonrhyth/Rogdi_set_A.pdf]

## Rom1

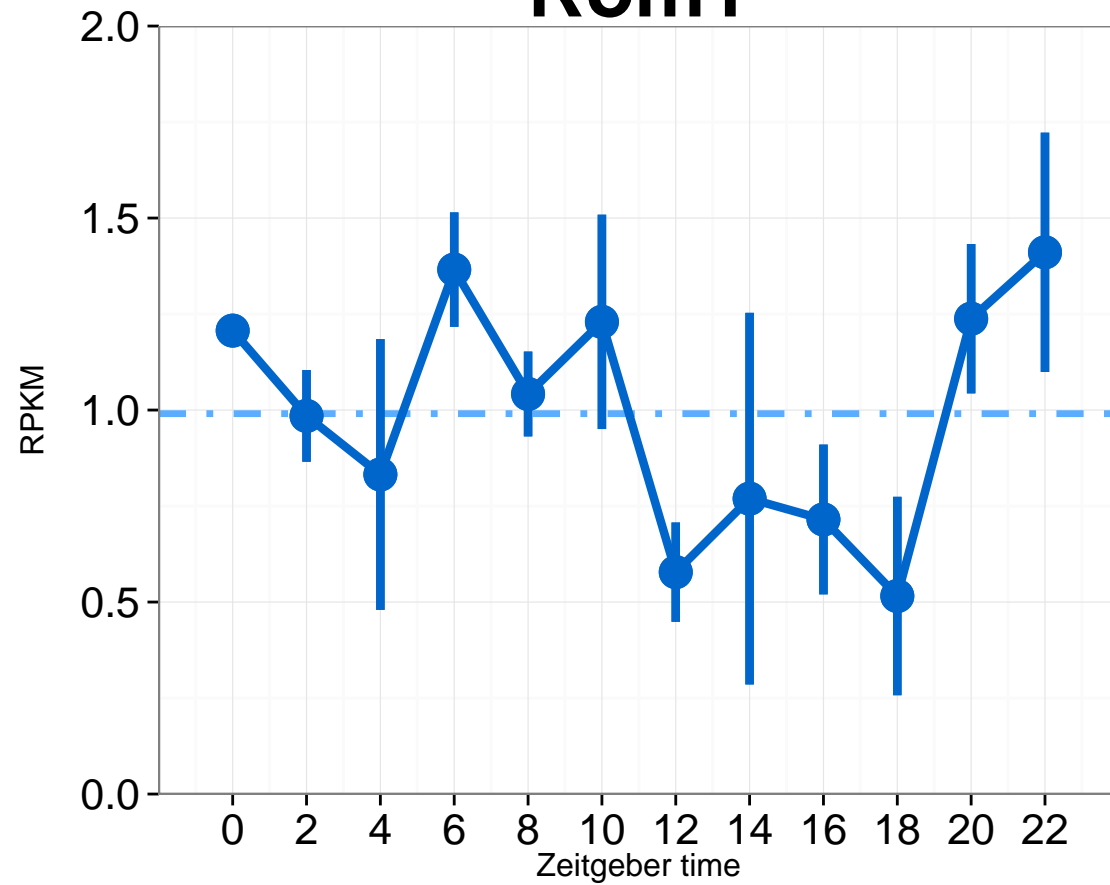

## Rom1 log2(Ribosome occupancy

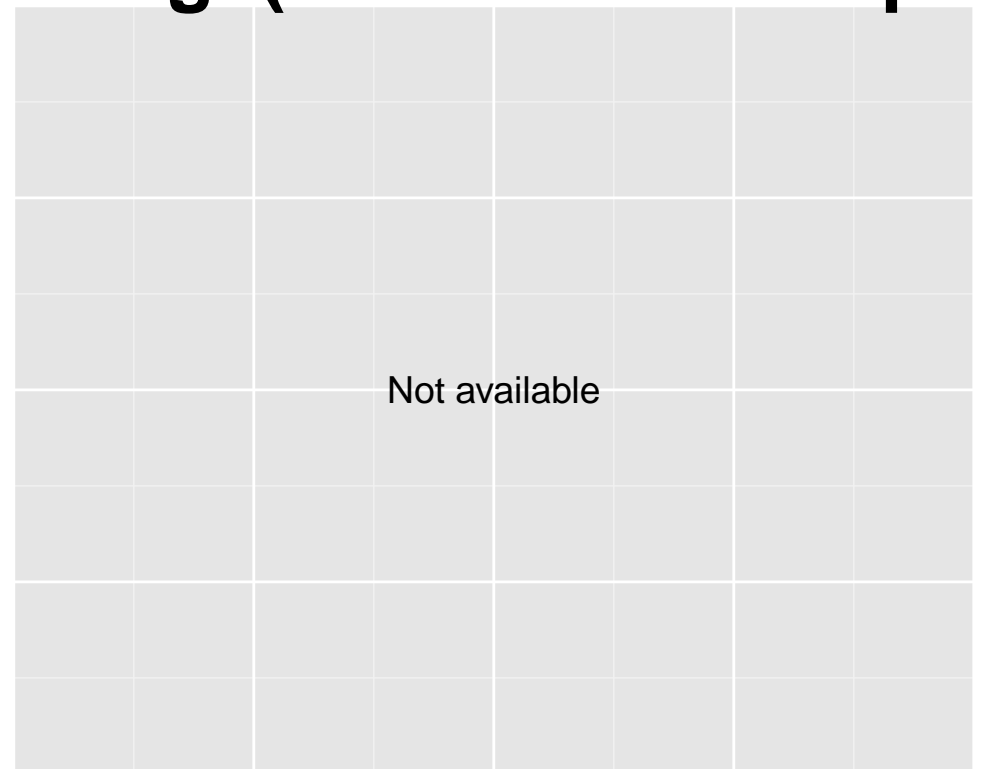

Supplement: SuppDataset_1.zip [file Rom1_set_A.pdf › Supplemental Dataset 1/A-mRNA_nonrhyth_translation_nonrhyth/Rom1_set_A.pdf]

# Romo1

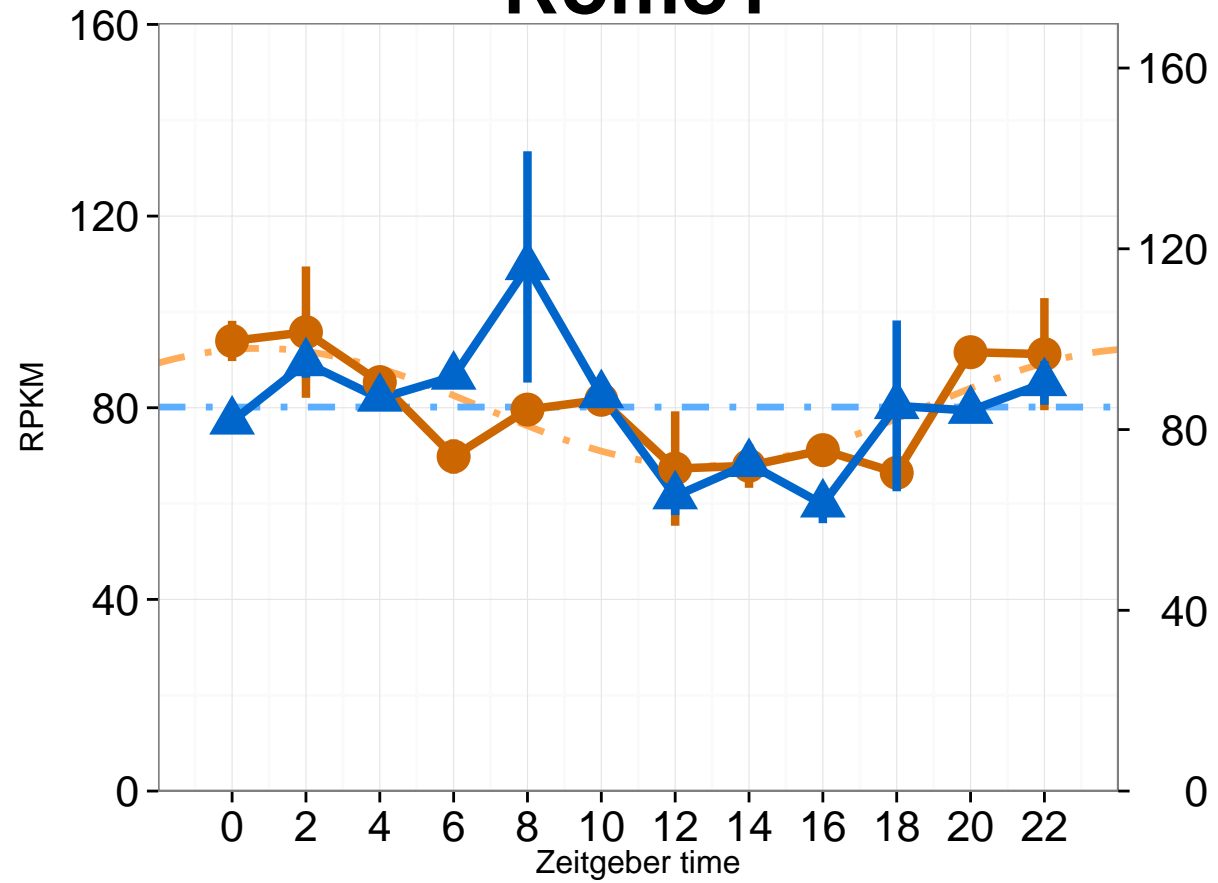

# Romo1

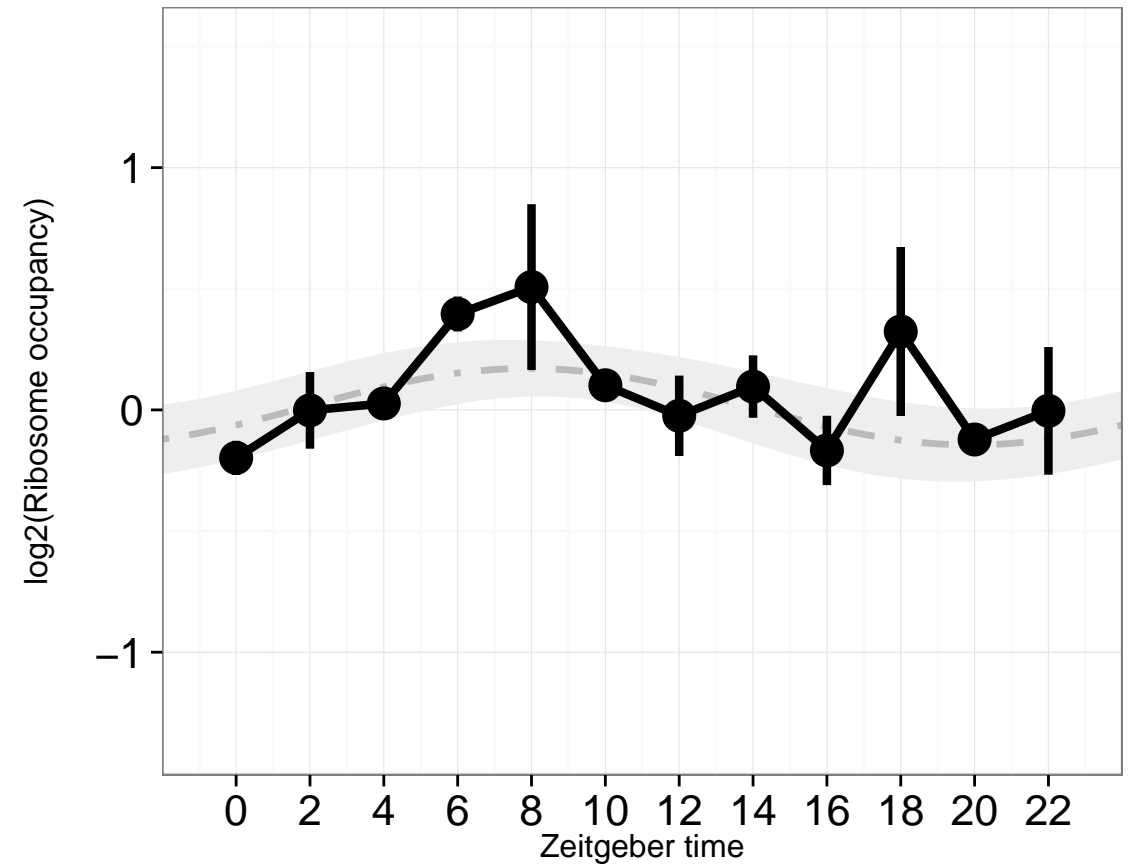

Supplement: SuppDataset_1.zip [file Romo1_set_A.pdf › Supplemental Dataset 1/A-mRNA_nonrhyth_translation_nonrhyth/Romo1_set_A.pdf]

## Ropn1l

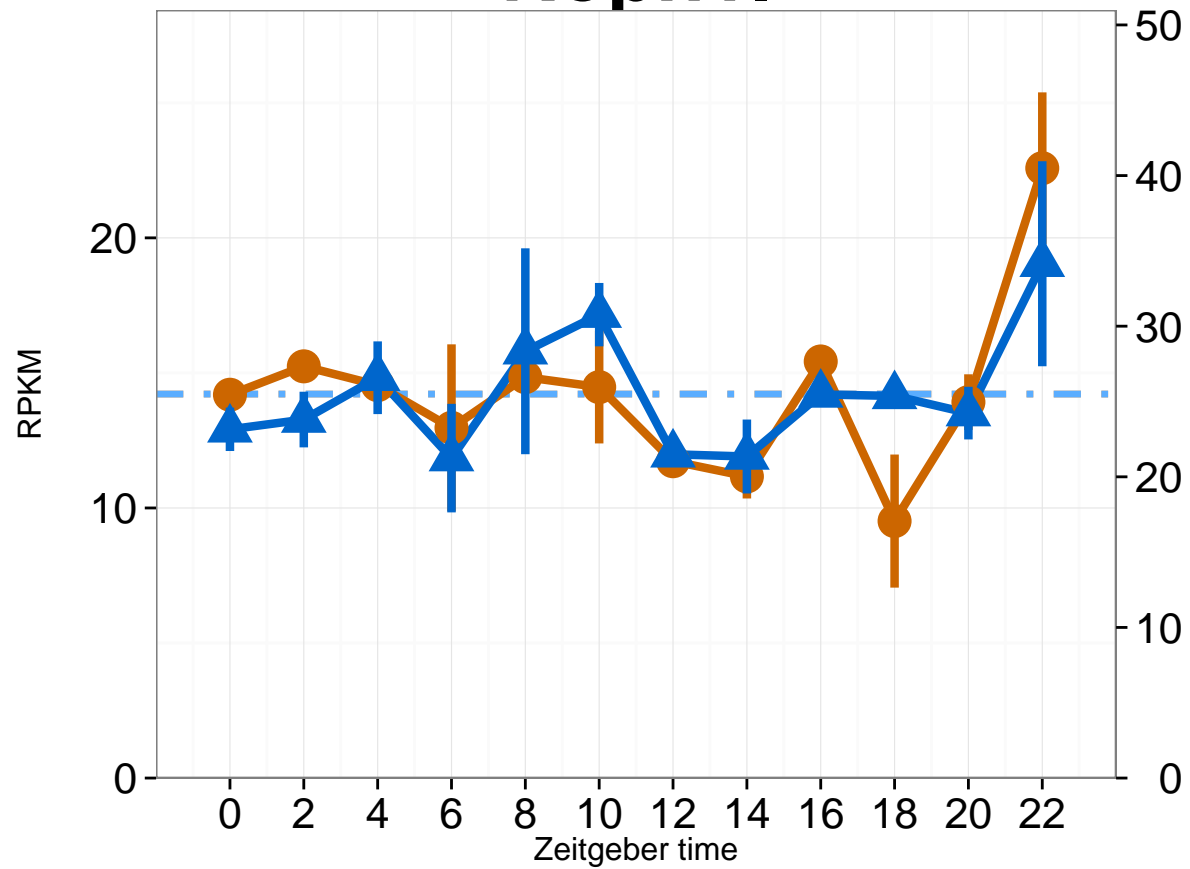

## Ropn1l

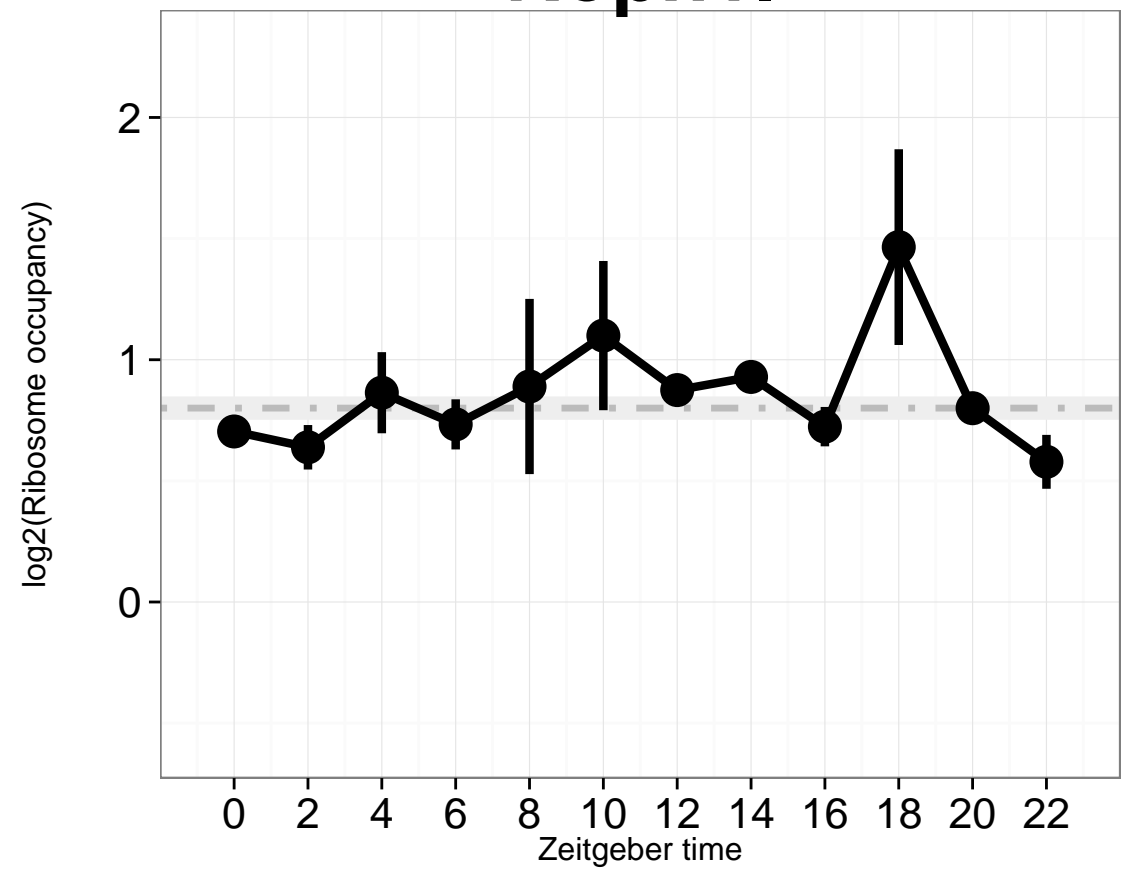

Supplement: SuppDataset_1.zip [file Ropn1l_set_A.pdf › Supplemental Dataset 1/A-mRNA_nonrhyth_translation_nonrhyth/Ropn1l_set_A.pdf]

# Ror1

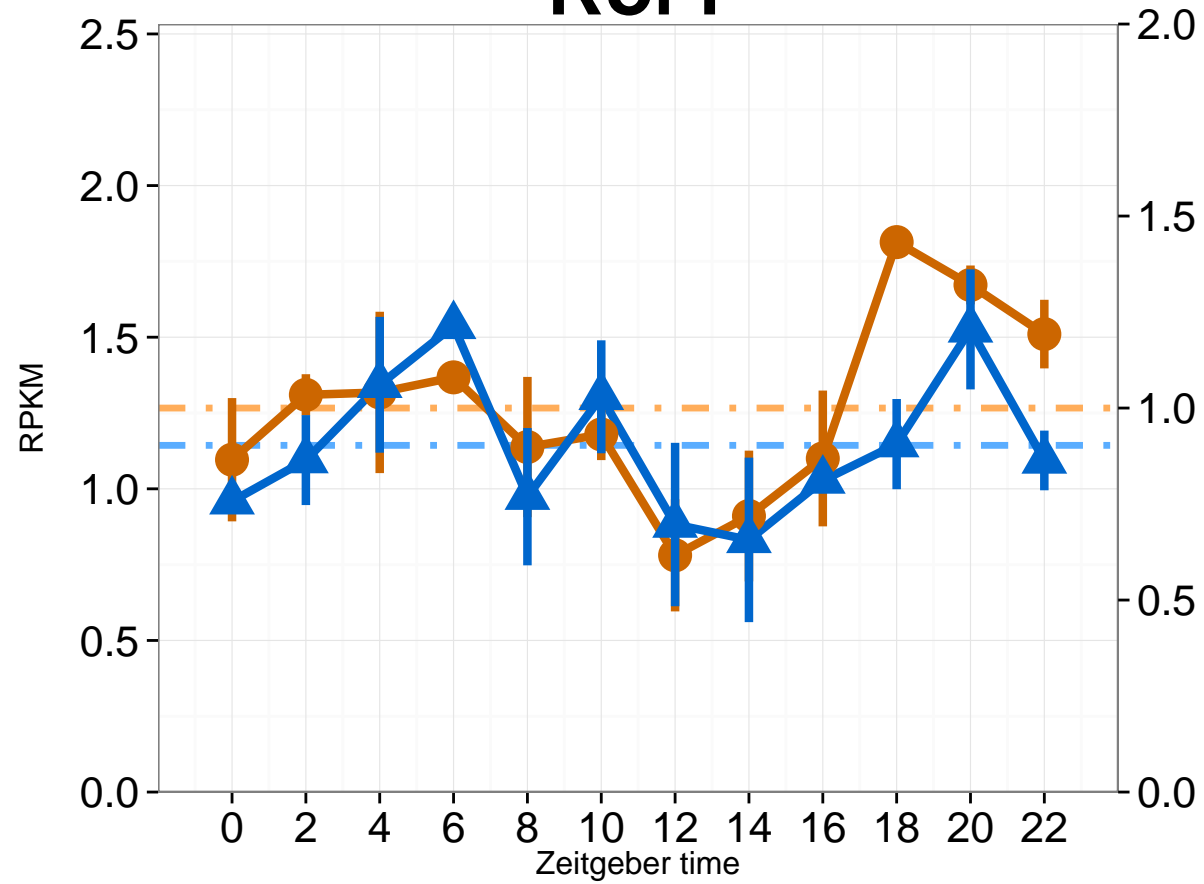

# Ror1

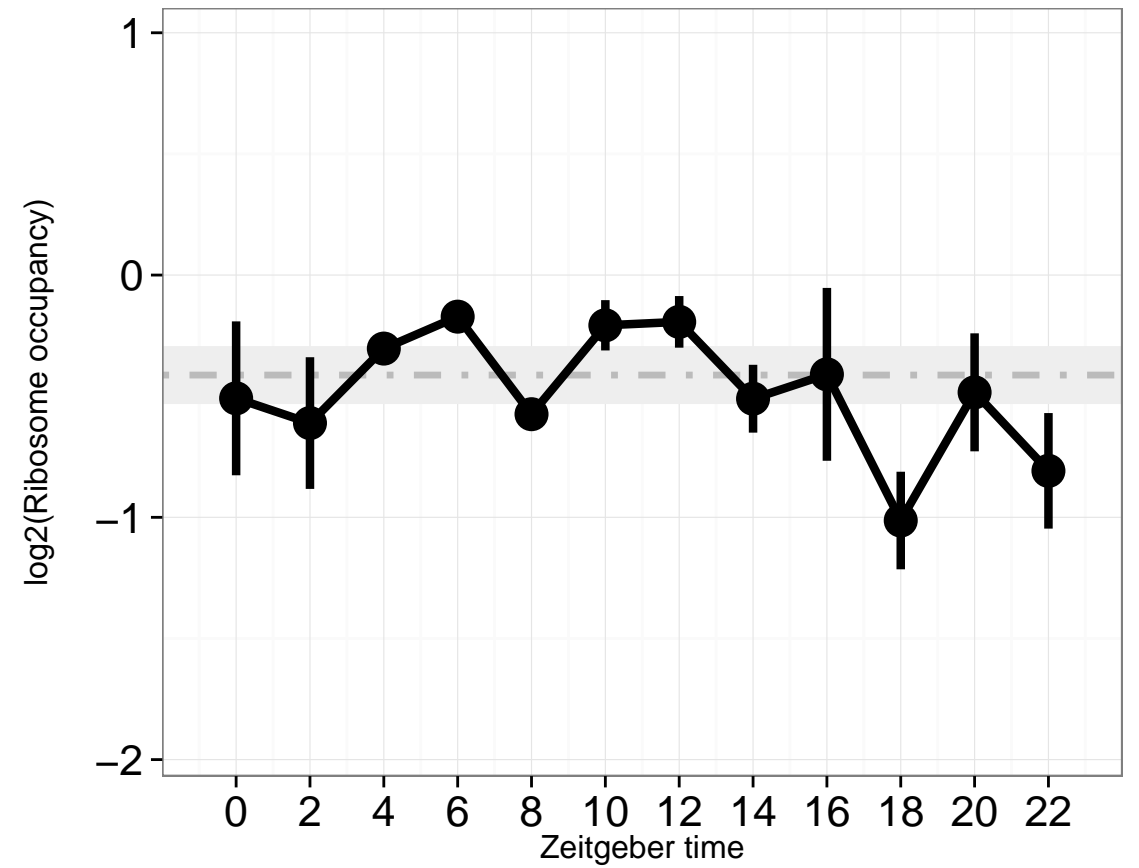

Supplement: SuppDataset_1.zip [file Ror1_set_A.pdf › Supplemental Dataset 1/A-mRNA_nonrhyth_translation_nonrhyth/Ror1_set_A.pdf]

# Rora

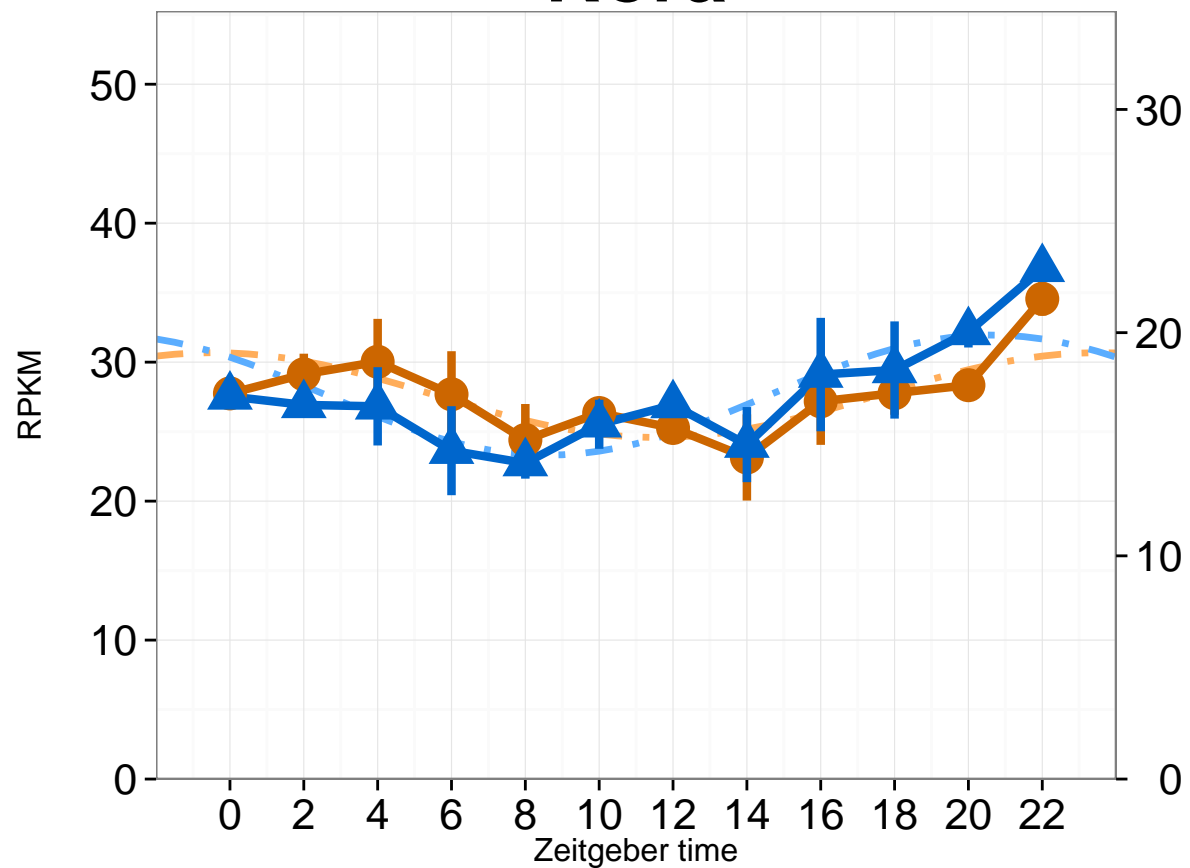

# Rora

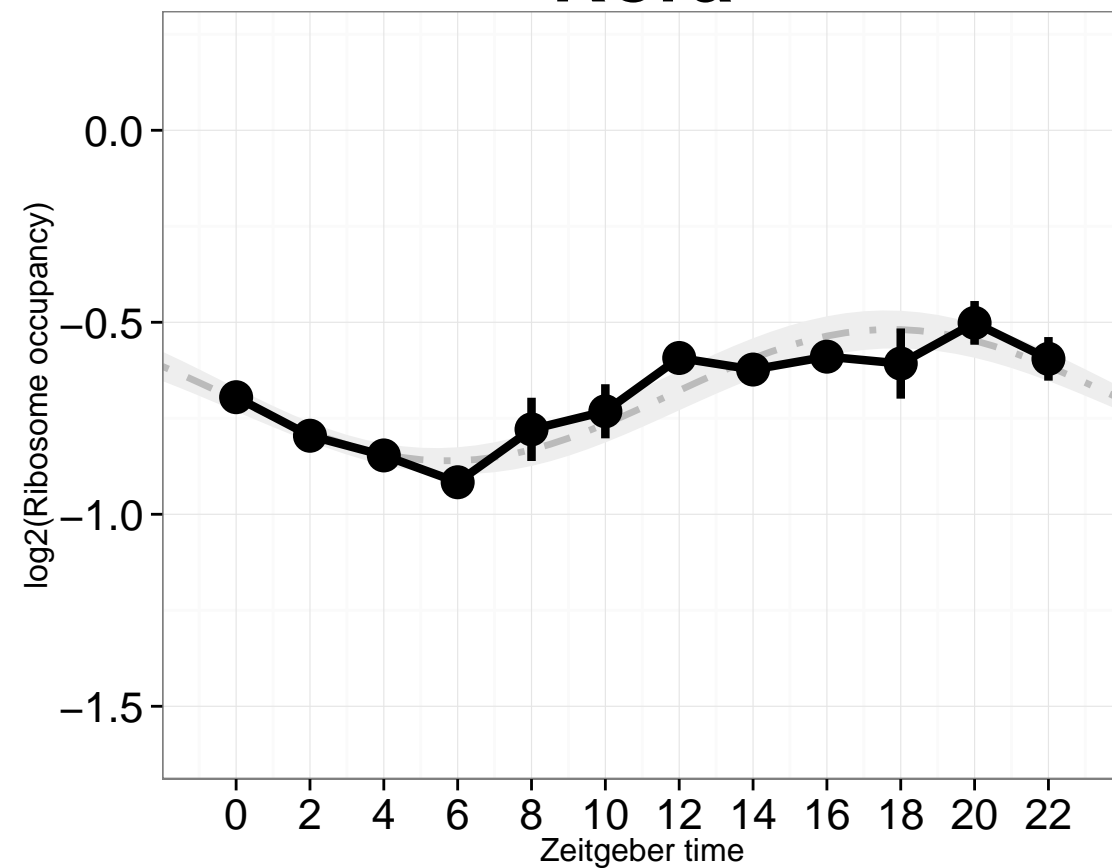

Supplement: SuppDataset_1.zip [file Rora_set_A.pdf › Supplemental Dataset 1/A-mRNA_nonrhyth_translation_nonrhyth/Rora_set_A.pdf]

# Rp2h

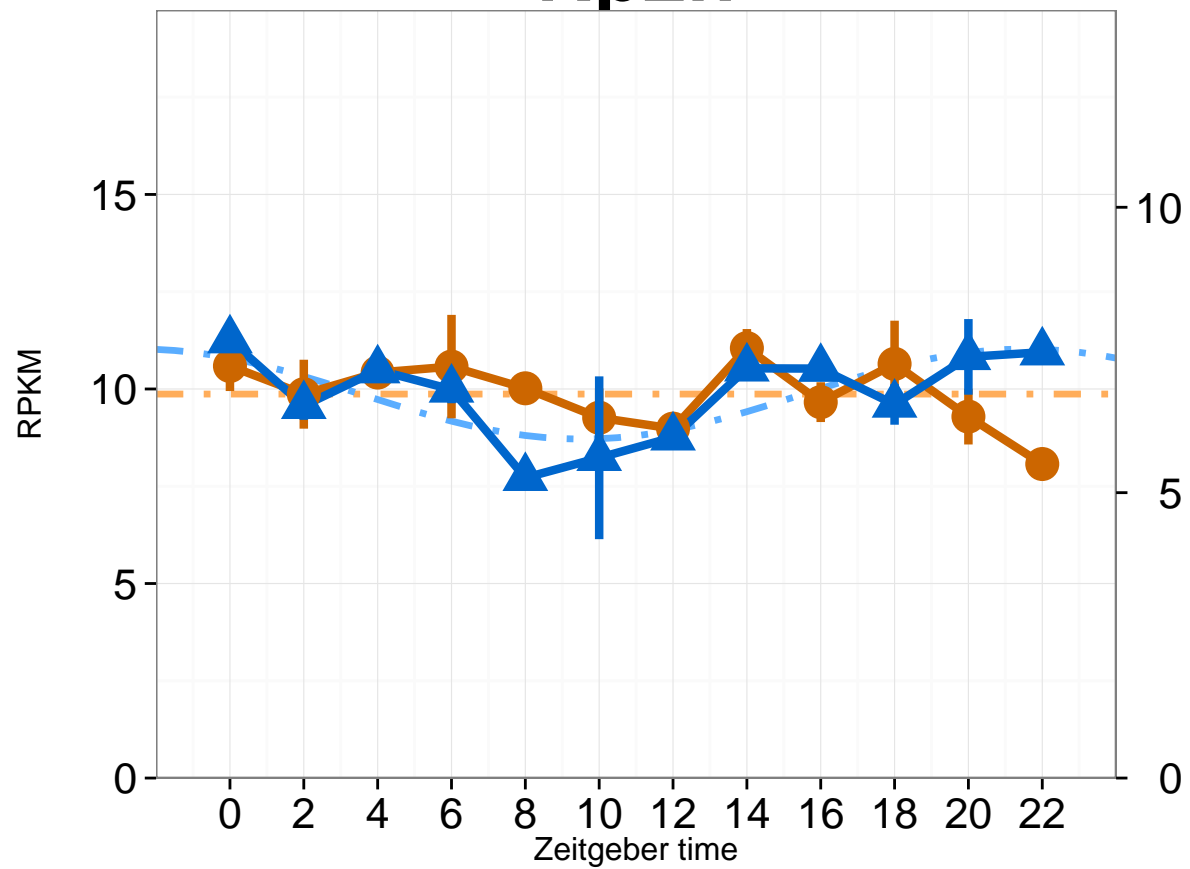

# Rp2h

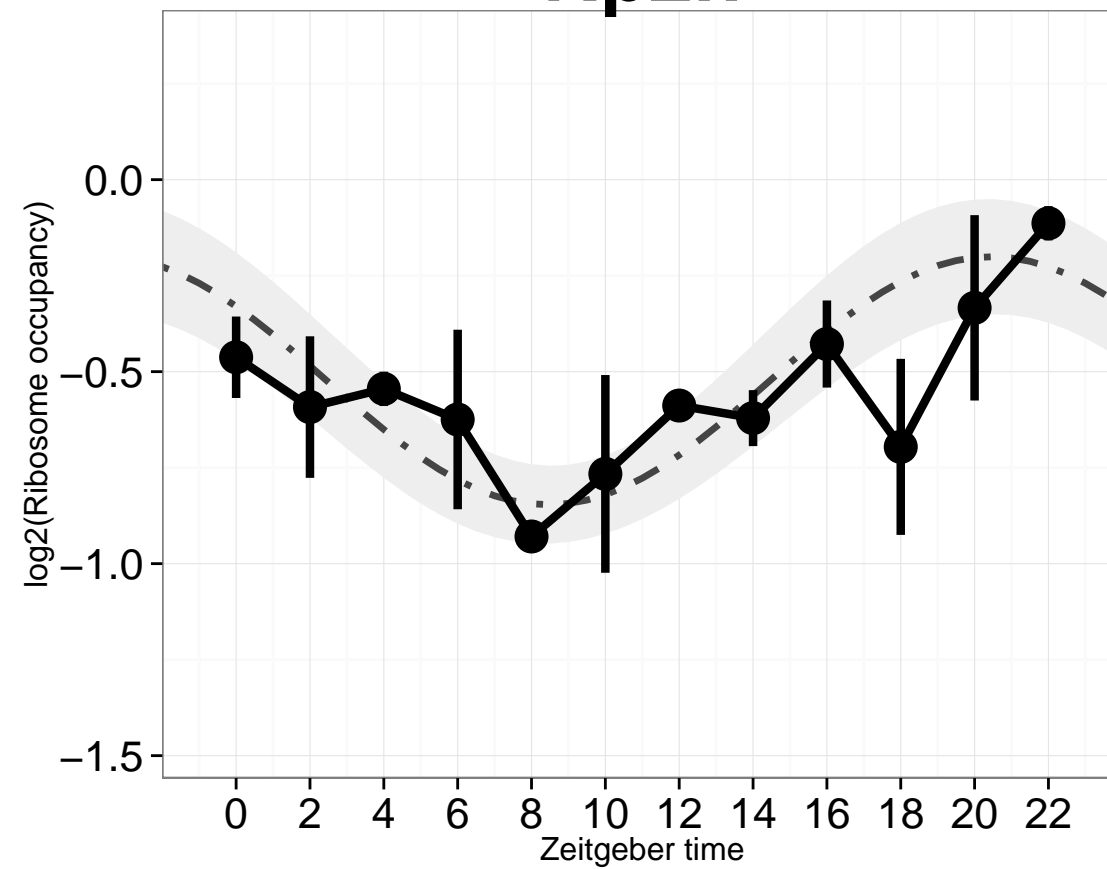

Supplement: SuppDataset_1.zip [file Rp2h_set_A.pdf › Supplemental Dataset 1/A-mRNA_nonrhyth_translation_nonrhyth/Rp2h_set_A.pdf]

# Rp9

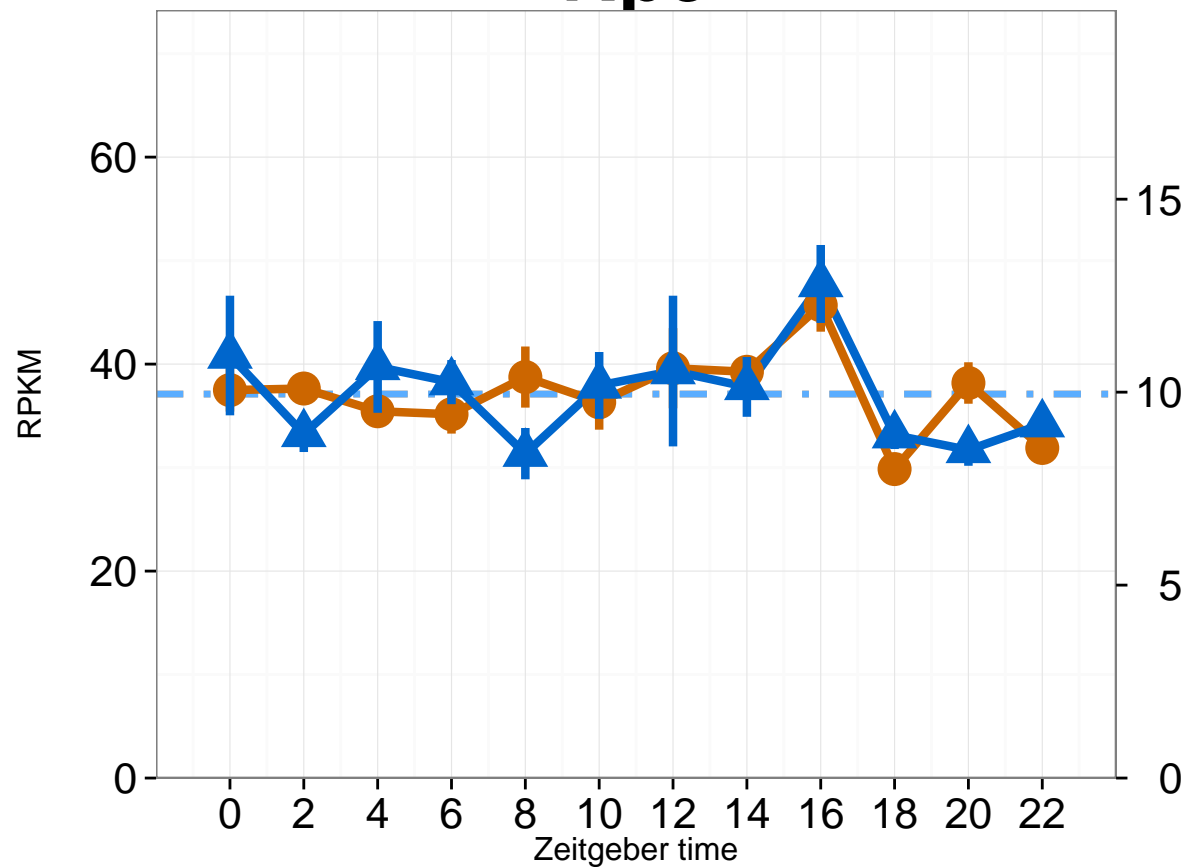

# Rp9

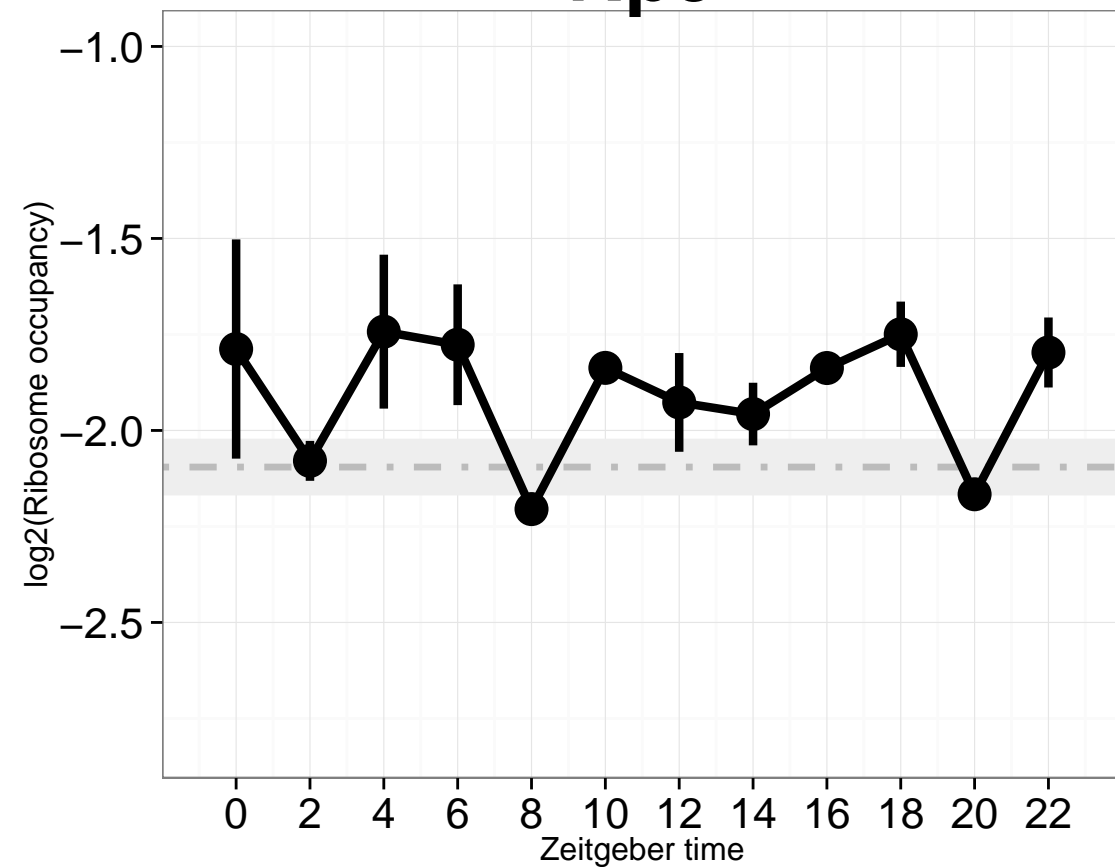

Supplement: SuppDataset_1.zip [file Rp9_set_A.pdf › Supplemental Dataset 1/A-mRNA_nonrhyth_translation_nonrhyth/Rp9_set_A.pdf]

## Rpa2

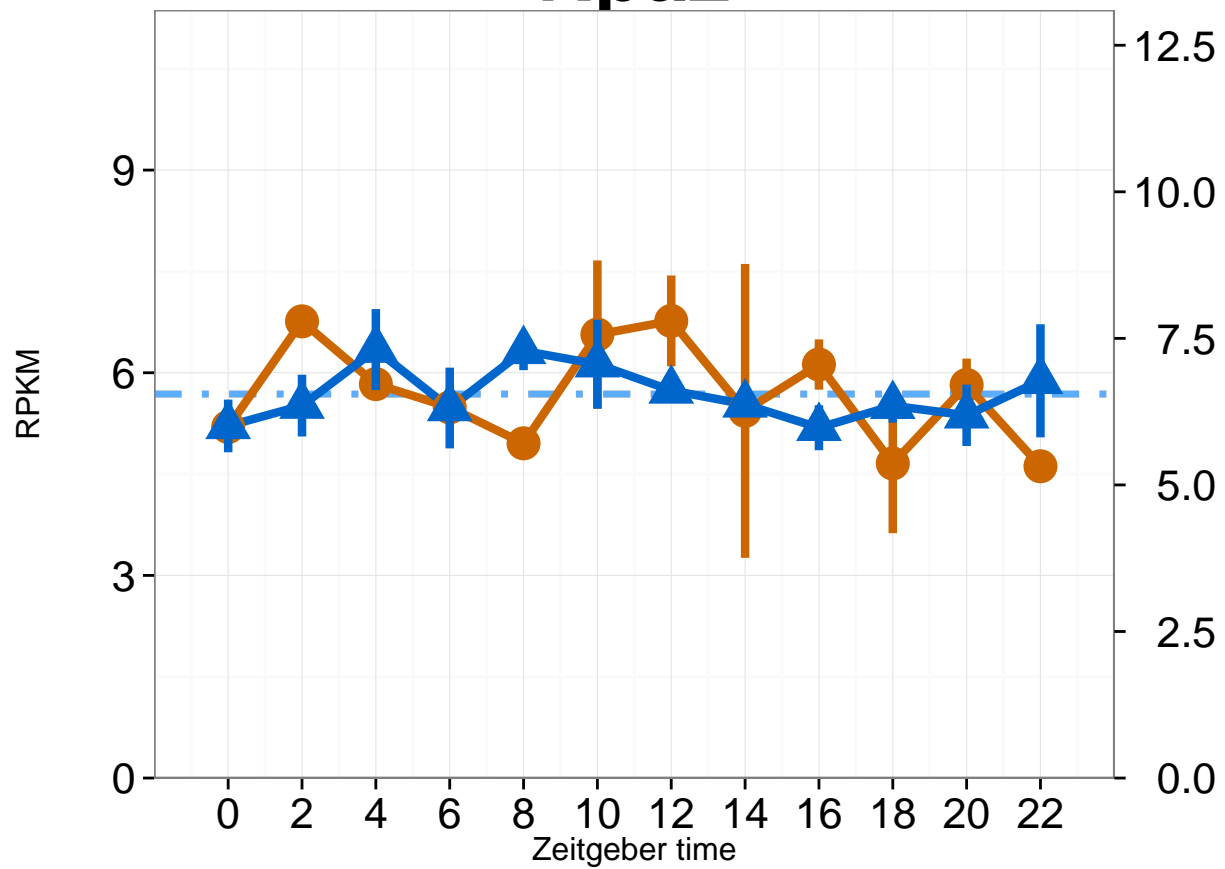

## Rpa2

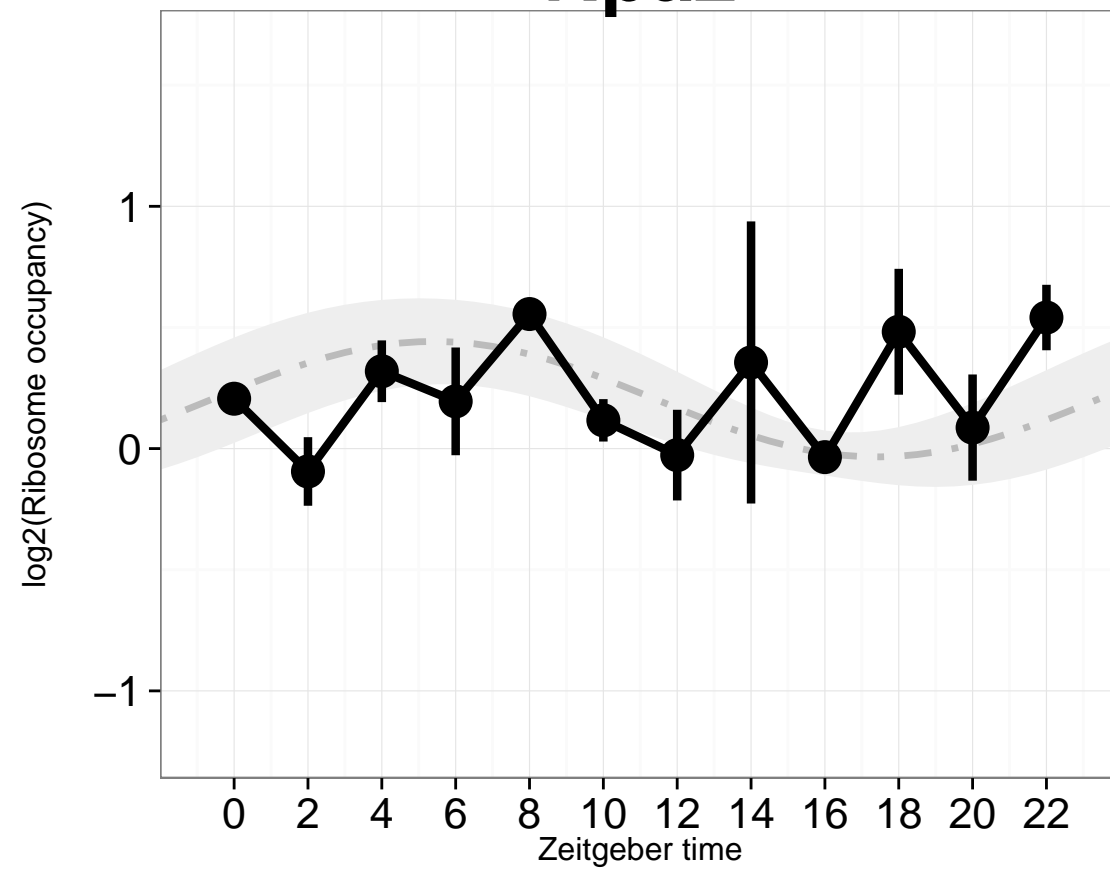

Supplement: SuppDataset_1.zip [file Rpa2_set_A.pdf › Supplemental Dataset 1/A-mRNA_nonrhyth_translation_nonrhyth/Rpa2_set_A.pdf]

# Rpa3

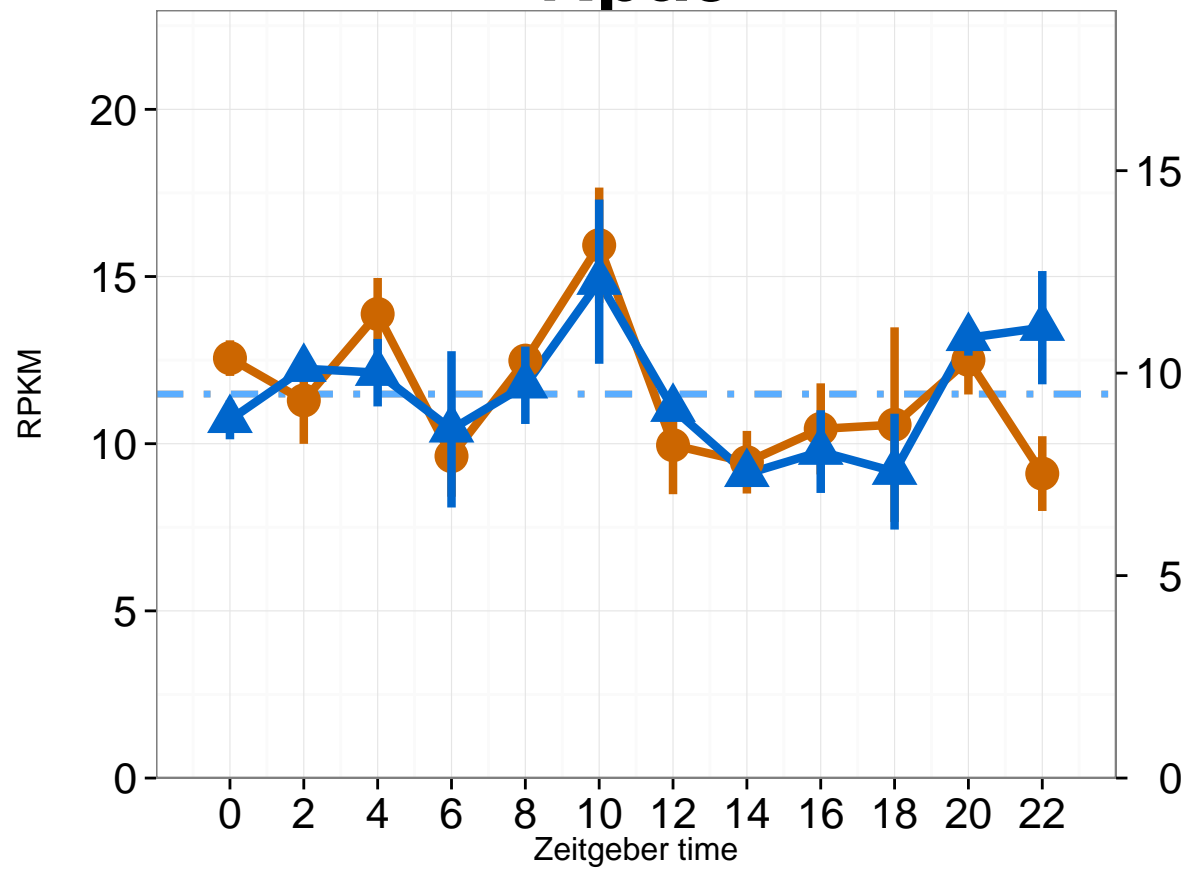

# Rpa3

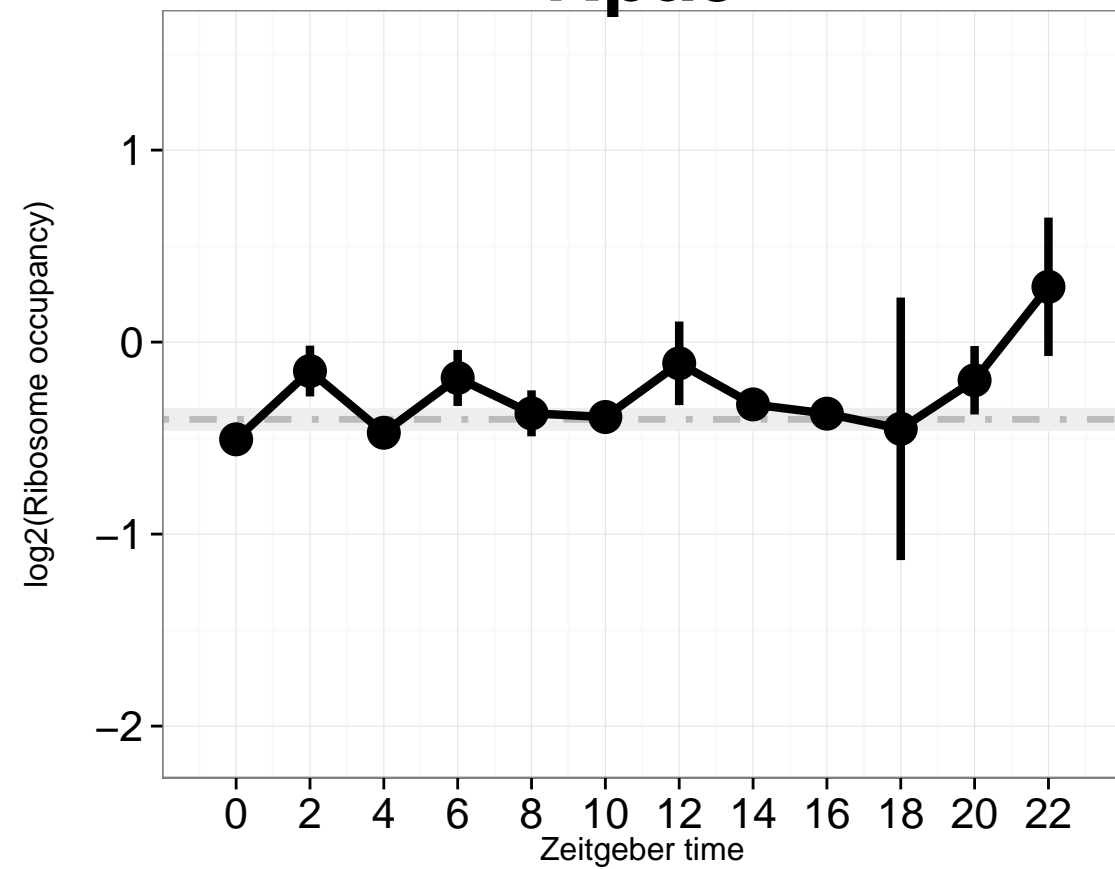

Supplement: SuppDataset_1.zip [file Rpa3_set_A.pdf › Supplemental Dataset 1/A-mRNA_nonrhyth_translation_nonrhyth/Rpa3_set_A.pdf]

# Rpain

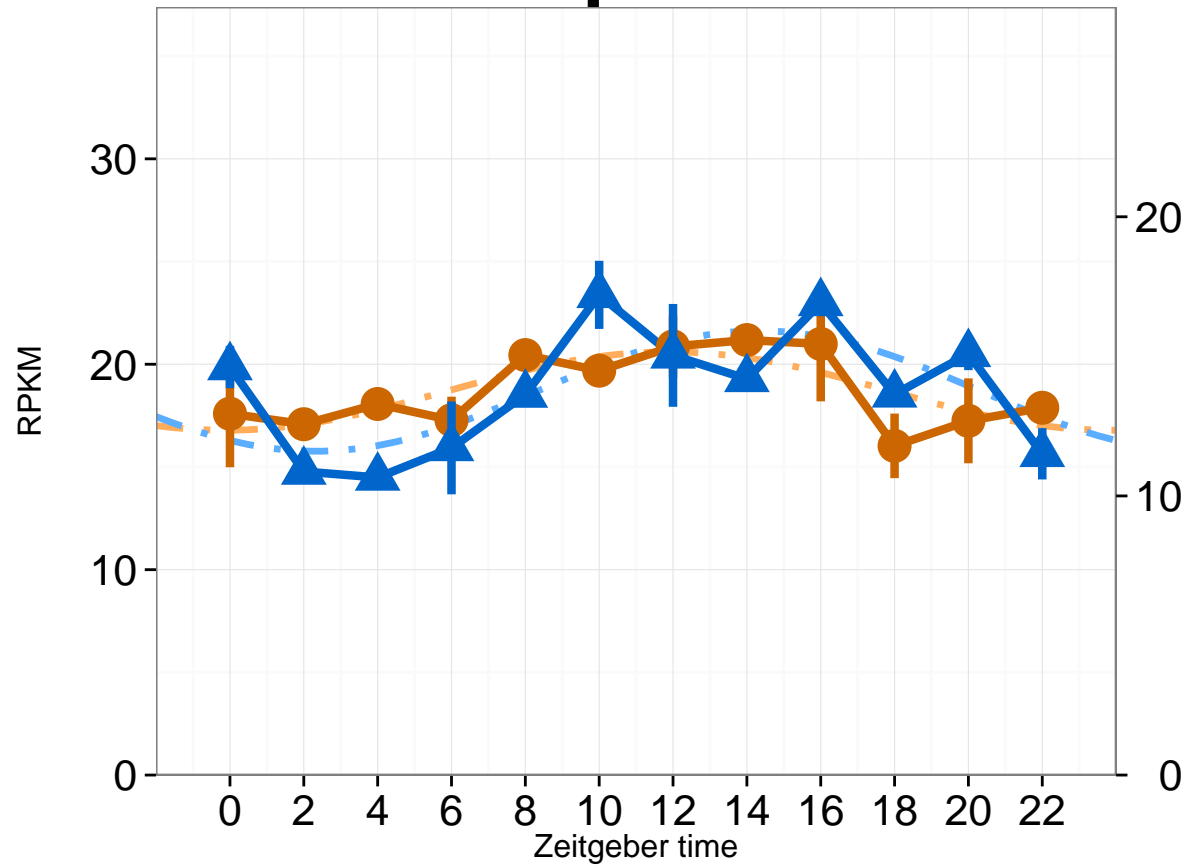

# Rpain

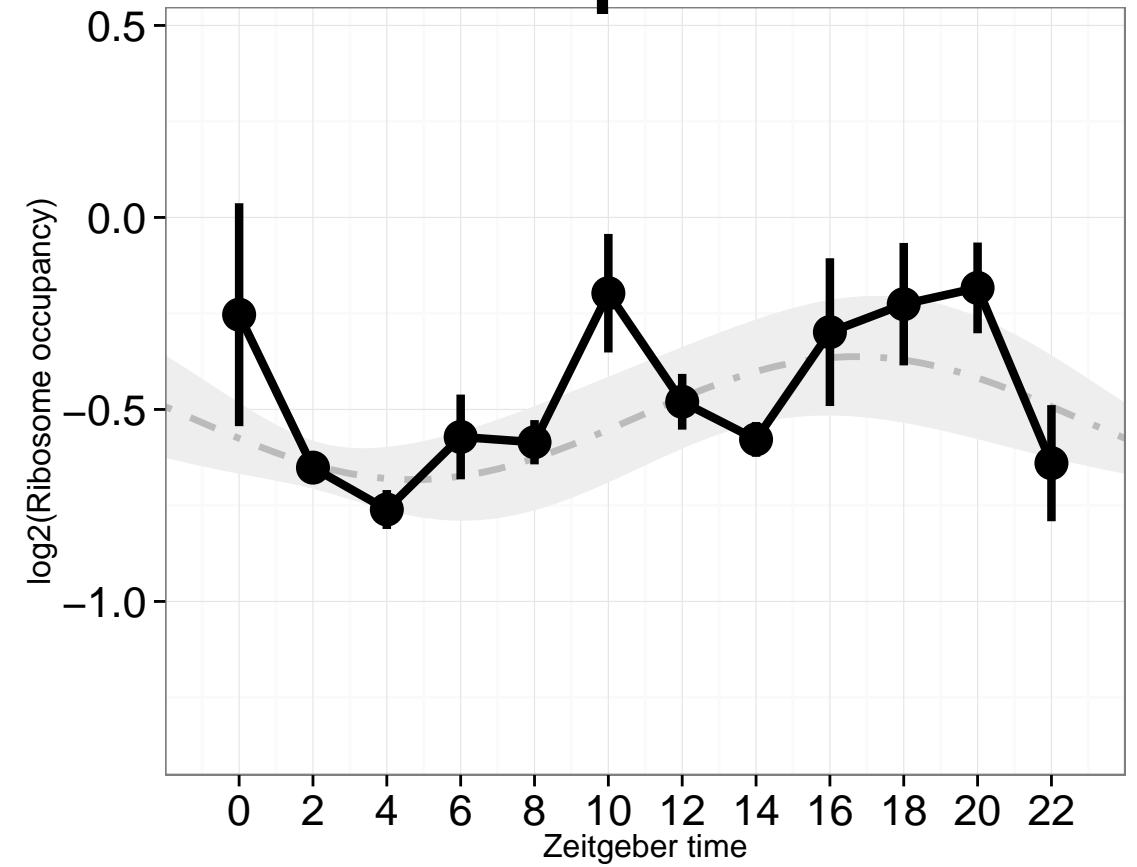

Supplement: SuppDataset_1.zip [file Rpain_set_A.pdf › Supplemental Dataset 1/A-mRNA_nonrhyth_translation_nonrhyth/Rpain_set_A.pdf]

# Rpap1

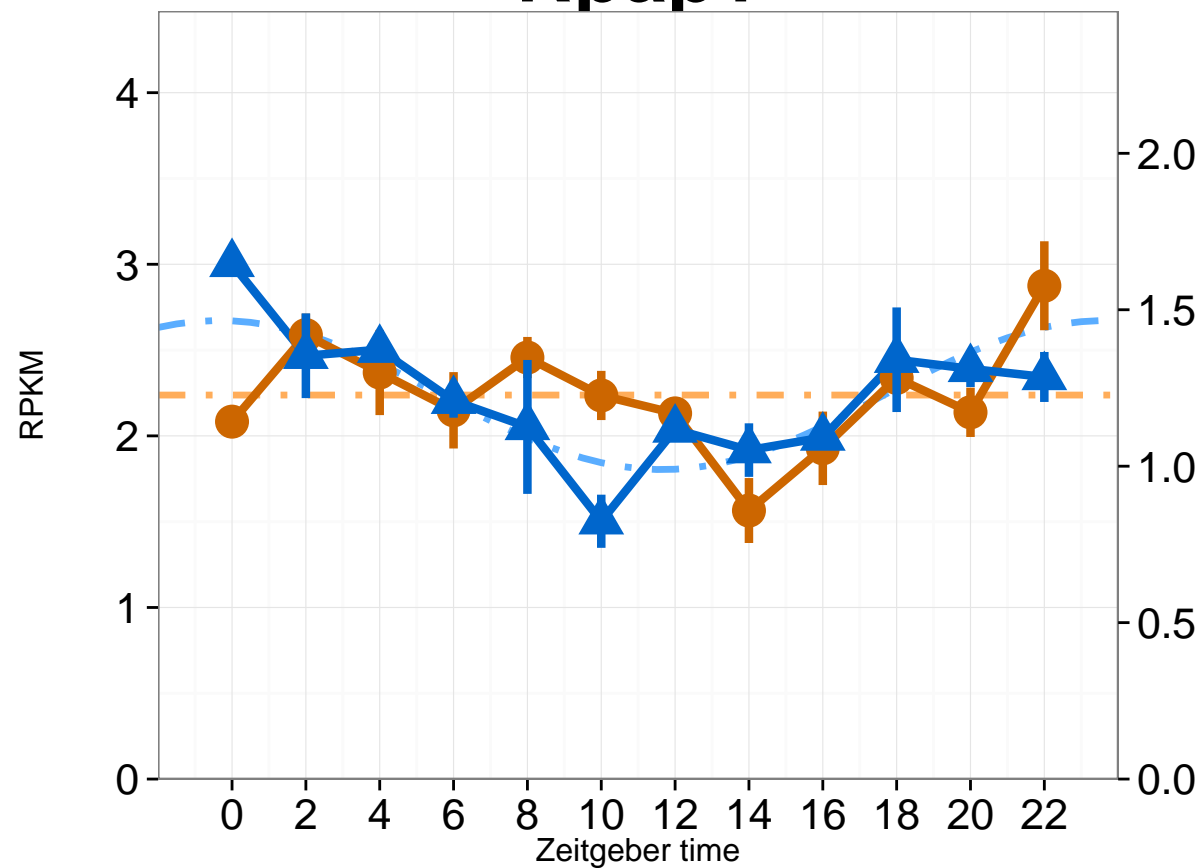

# Rpap1

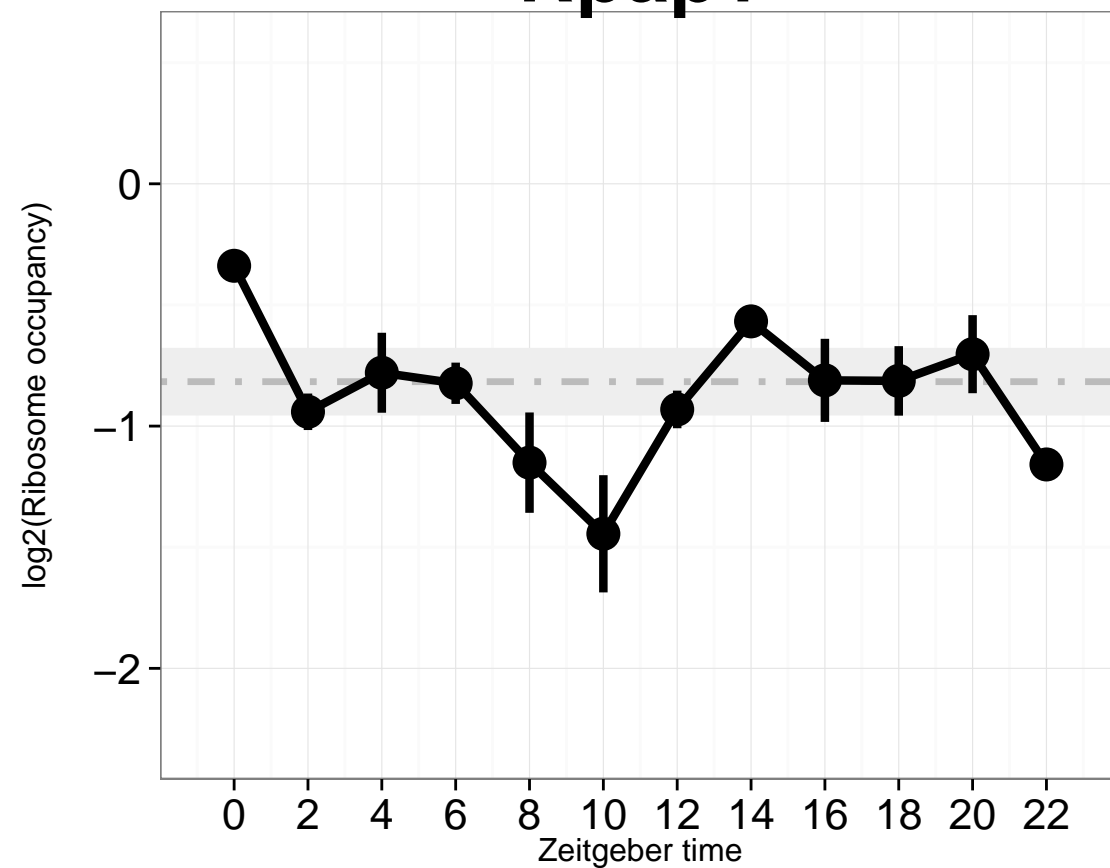

Supplement: SuppDataset_1.zip [file Rpap1_set_A.pdf › Supplemental Dataset 1/A-mRNA_nonrhyth_translation_nonrhyth/Rpap1_set_A.pdf]

# Rpap2

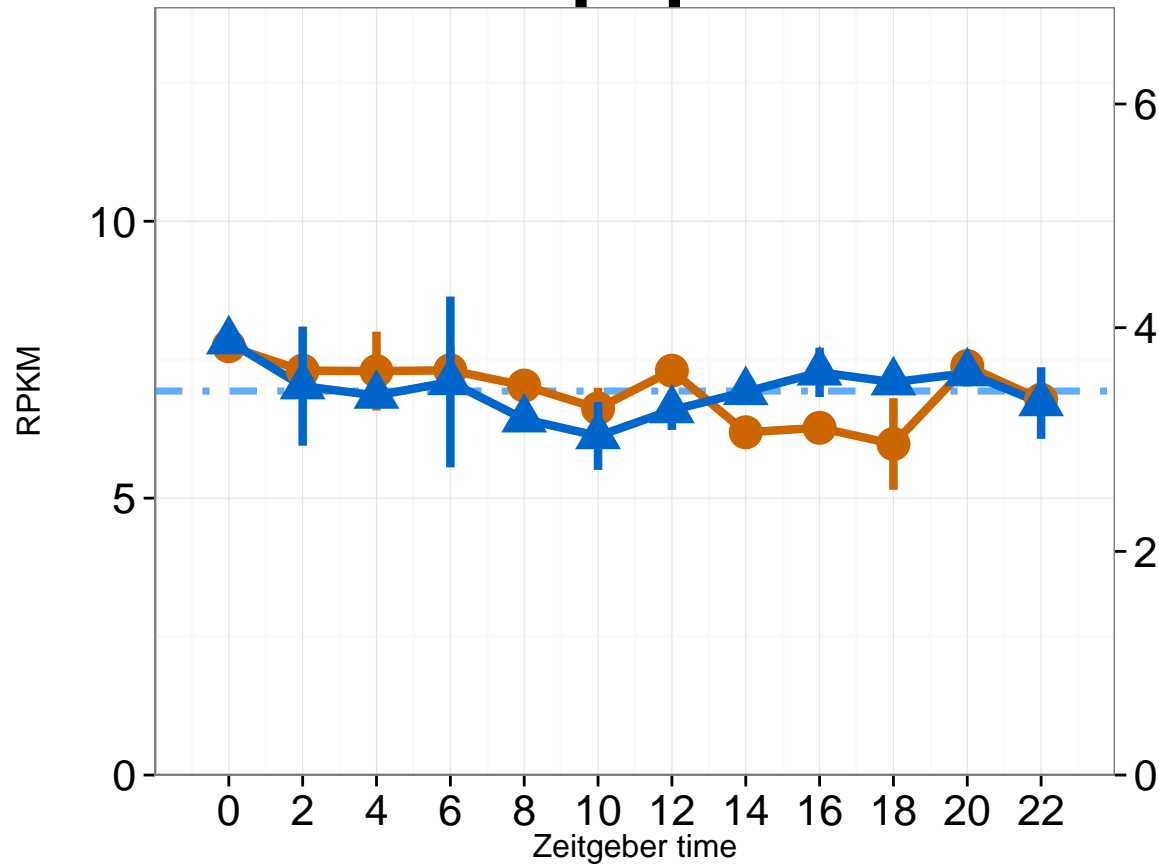

# Rpap2

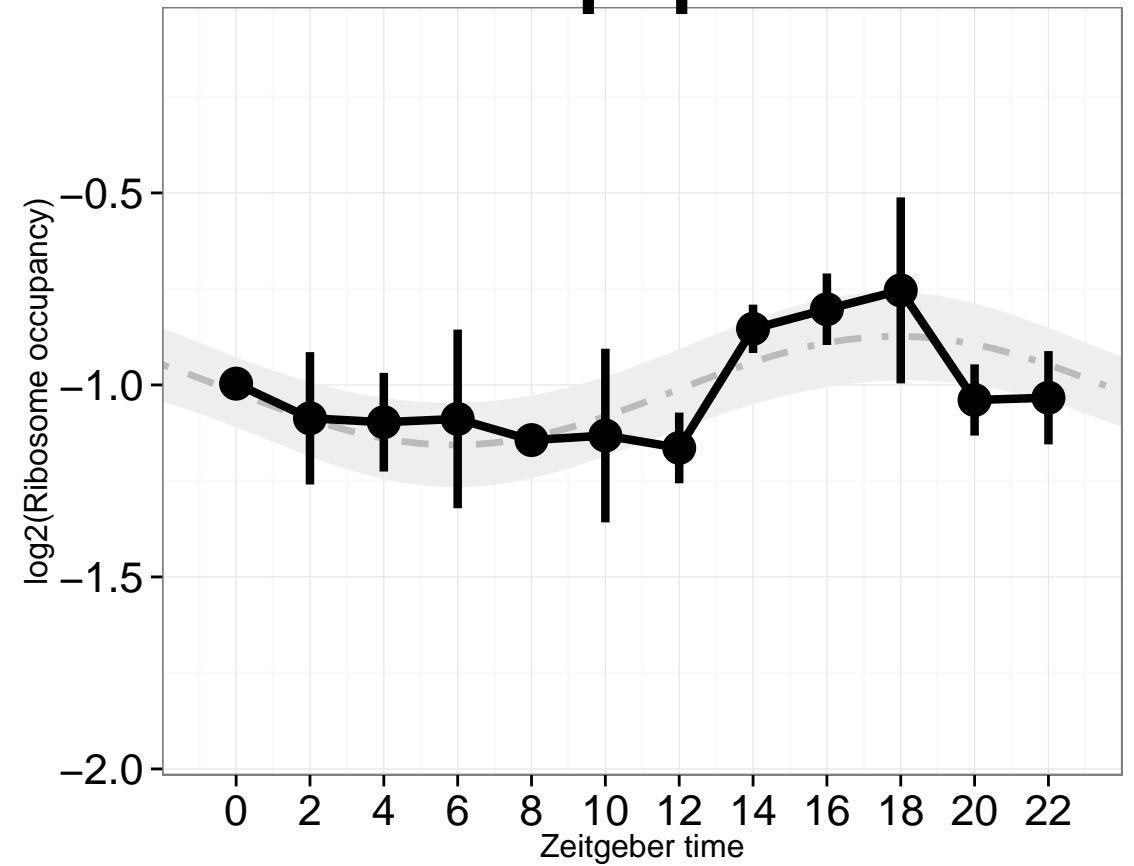

Supplement: SuppDataset_1.zip [file Rpap2_set_A.pdf › Supplemental Dataset 1/A-mRNA_nonrhyth_translation_nonrhyth/Rpap2_set_A.pdf]

# Rpap3

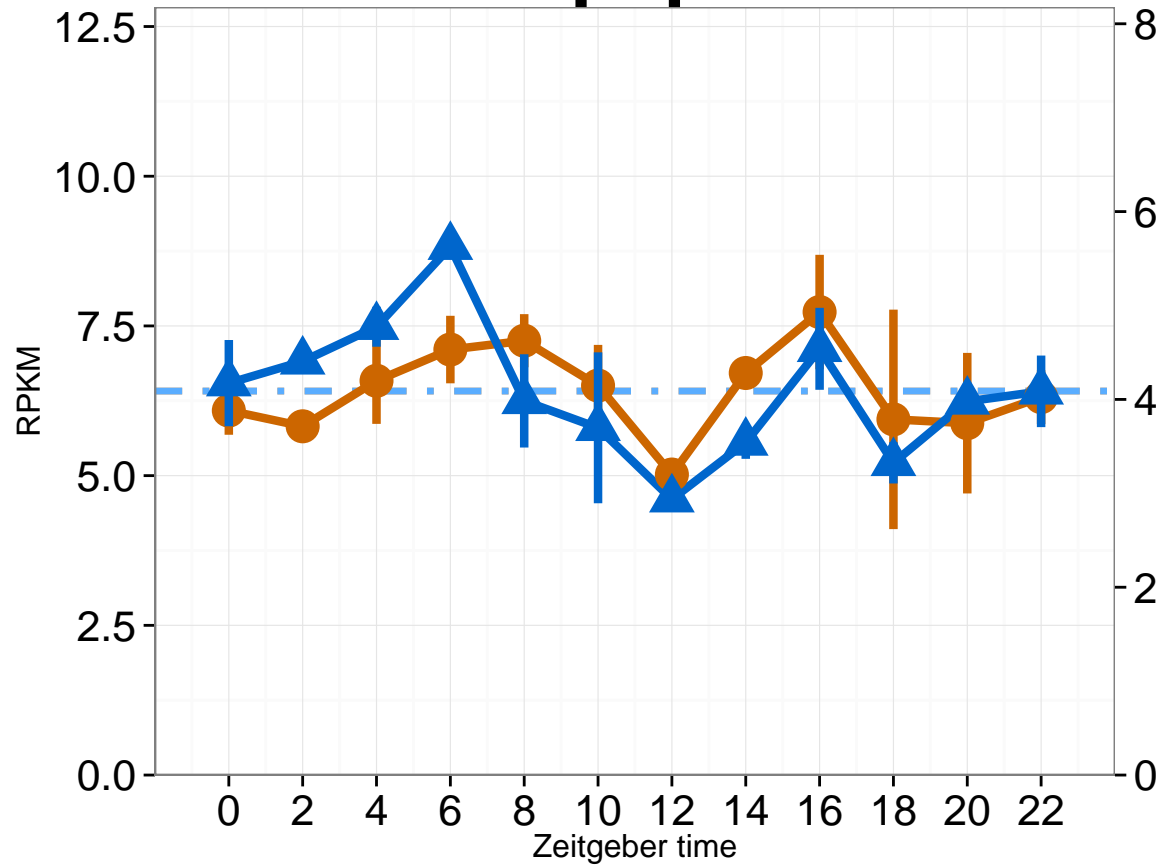

# Rpap3

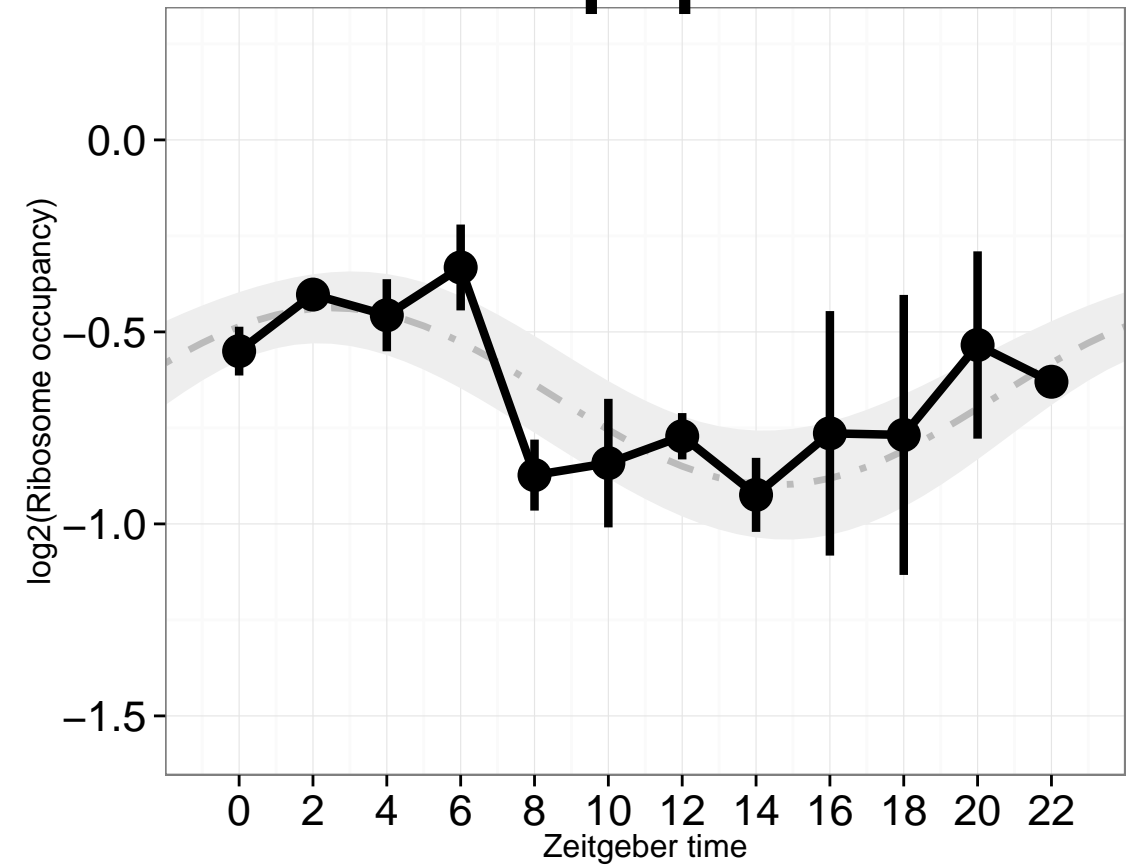

Supplement: SuppDataset_1.zip [file Rpap3_set_A.pdf › Supplemental Dataset 1/A-mRNA_nonrhyth_translation_nonrhyth/Rpap3_set_A.pdf]

## Rpe

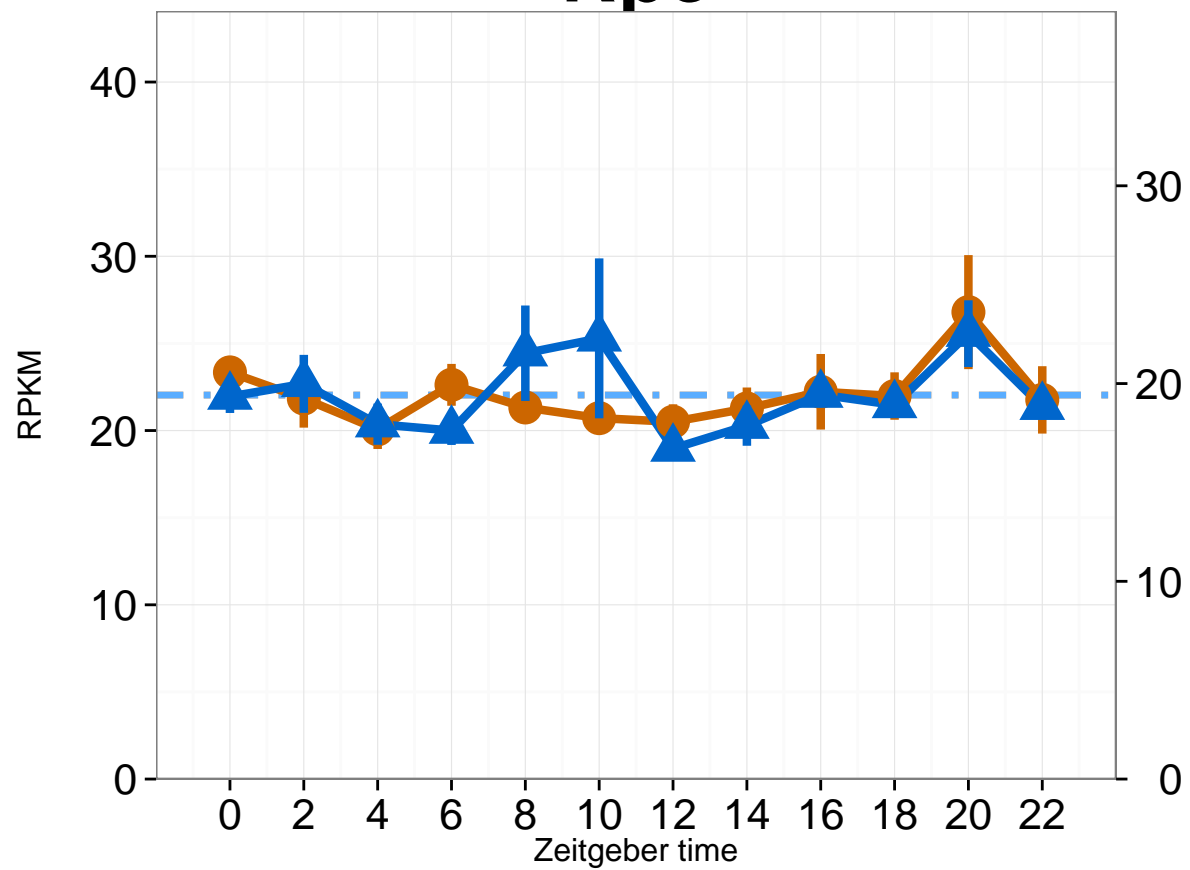

## Rpe

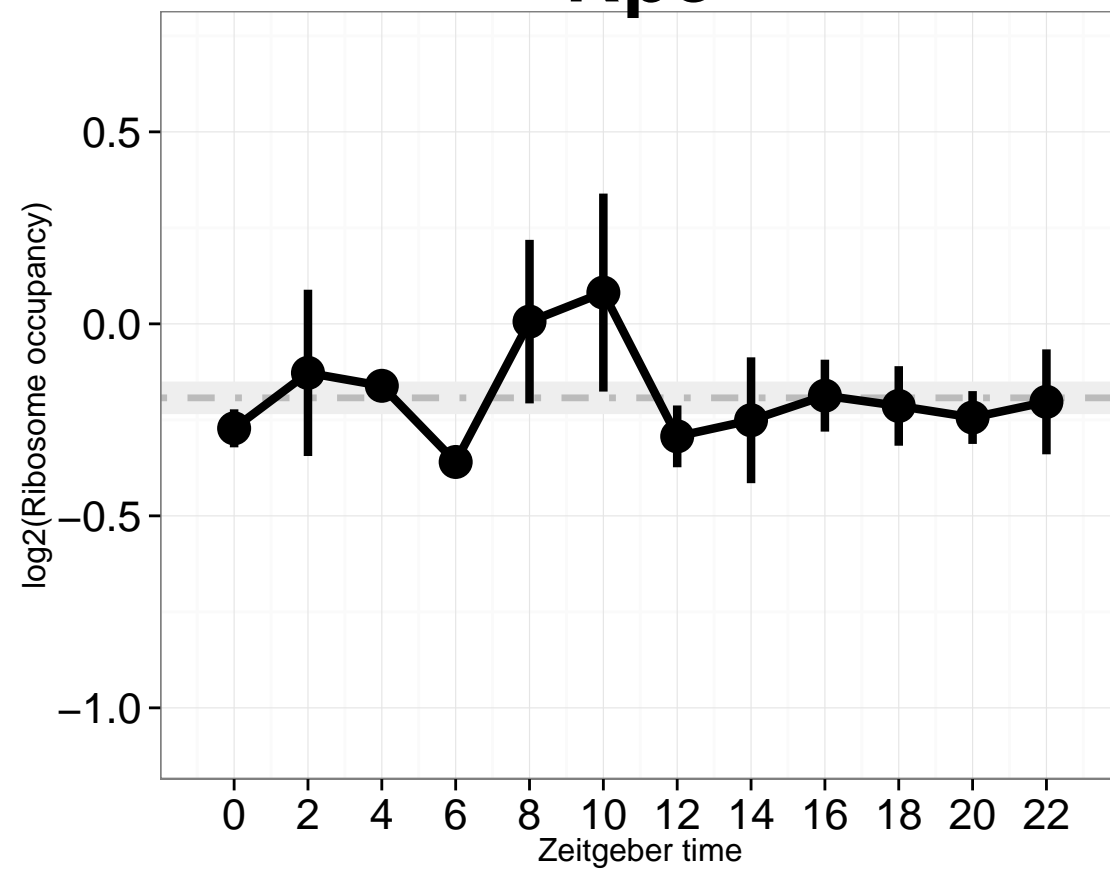

Supplement: SuppDataset_1.zip [file Rpe_set_A.pdf › Supplemental Dataset 1/A-mRNA_nonrhyth_translation_nonrhyth/Rpe_set_A.pdf]

# Rpf1

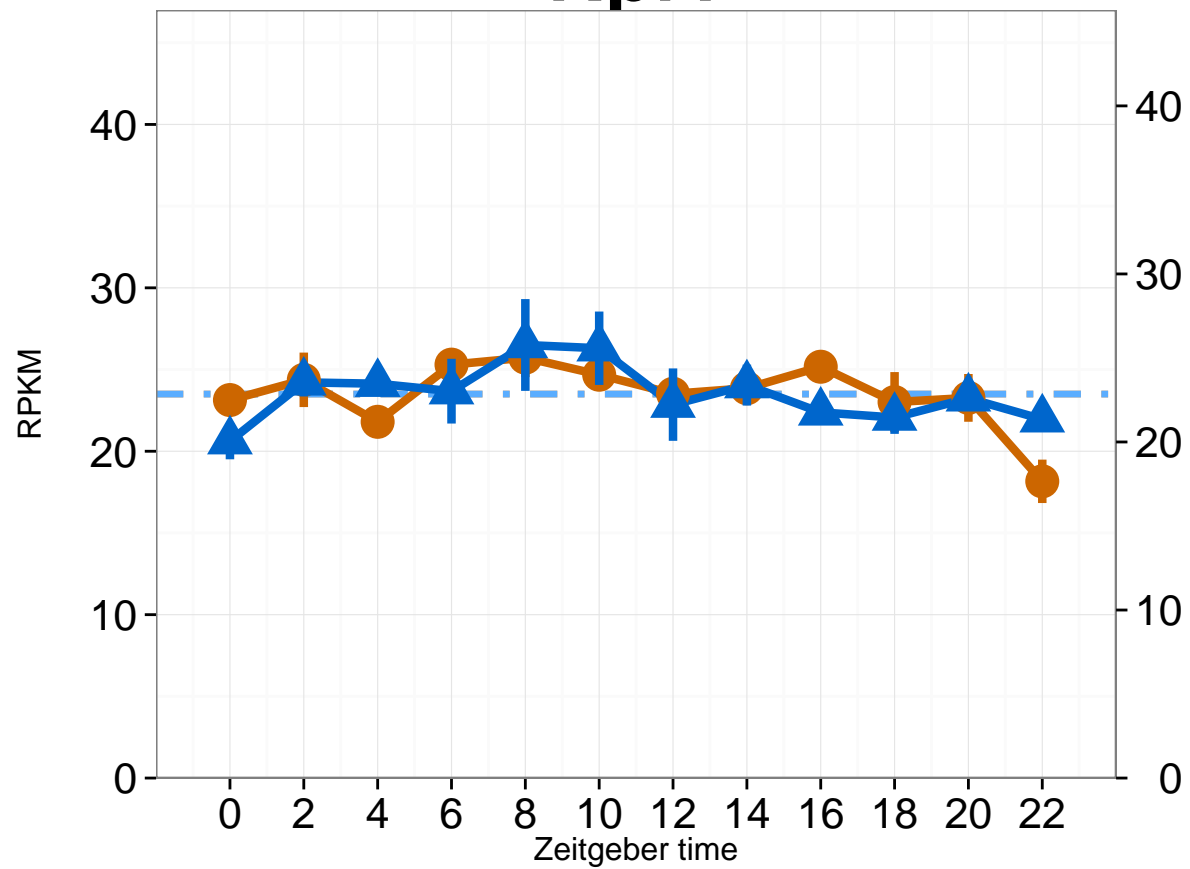

# Rpf1

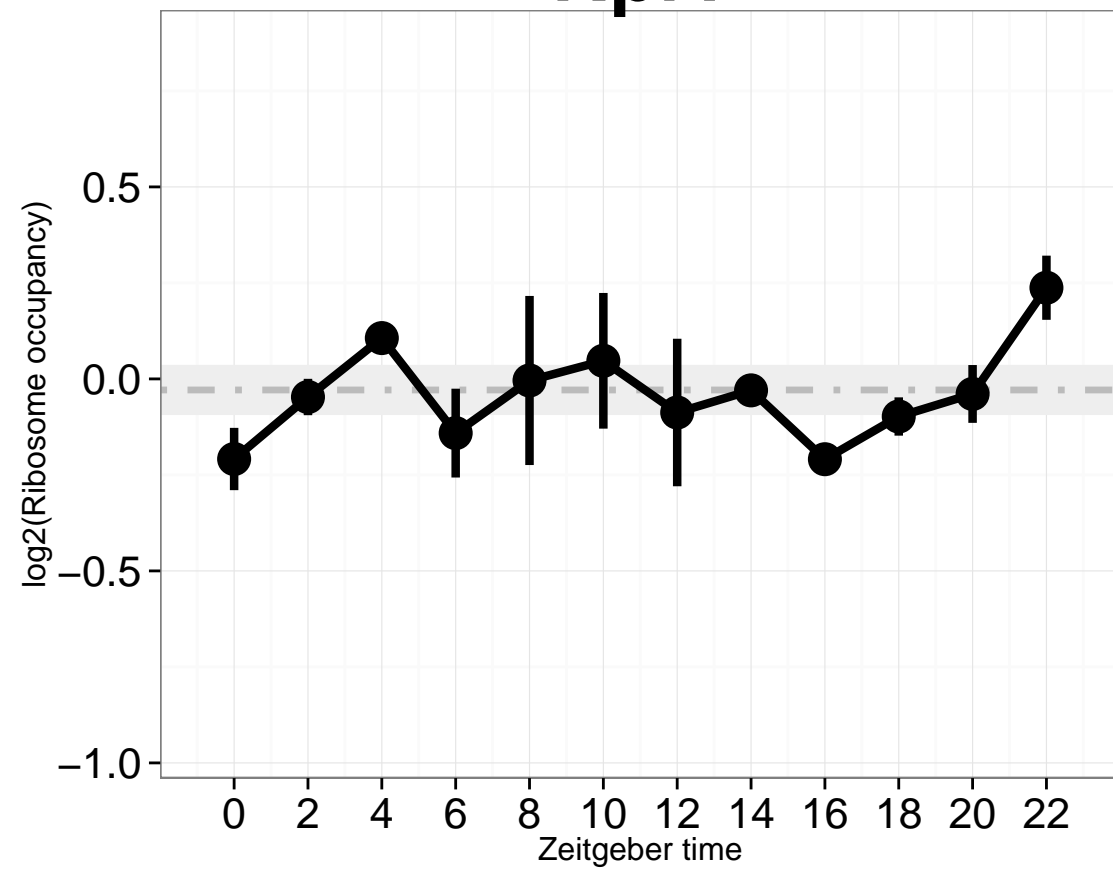

Supplement: SuppDataset_1.zip [file Rpf1_set_A.pdf › Supplemental Dataset 1/A-mRNA_nonrhyth_translation_nonrhyth/Rpf1_set_A.pdf]

# Rpf2

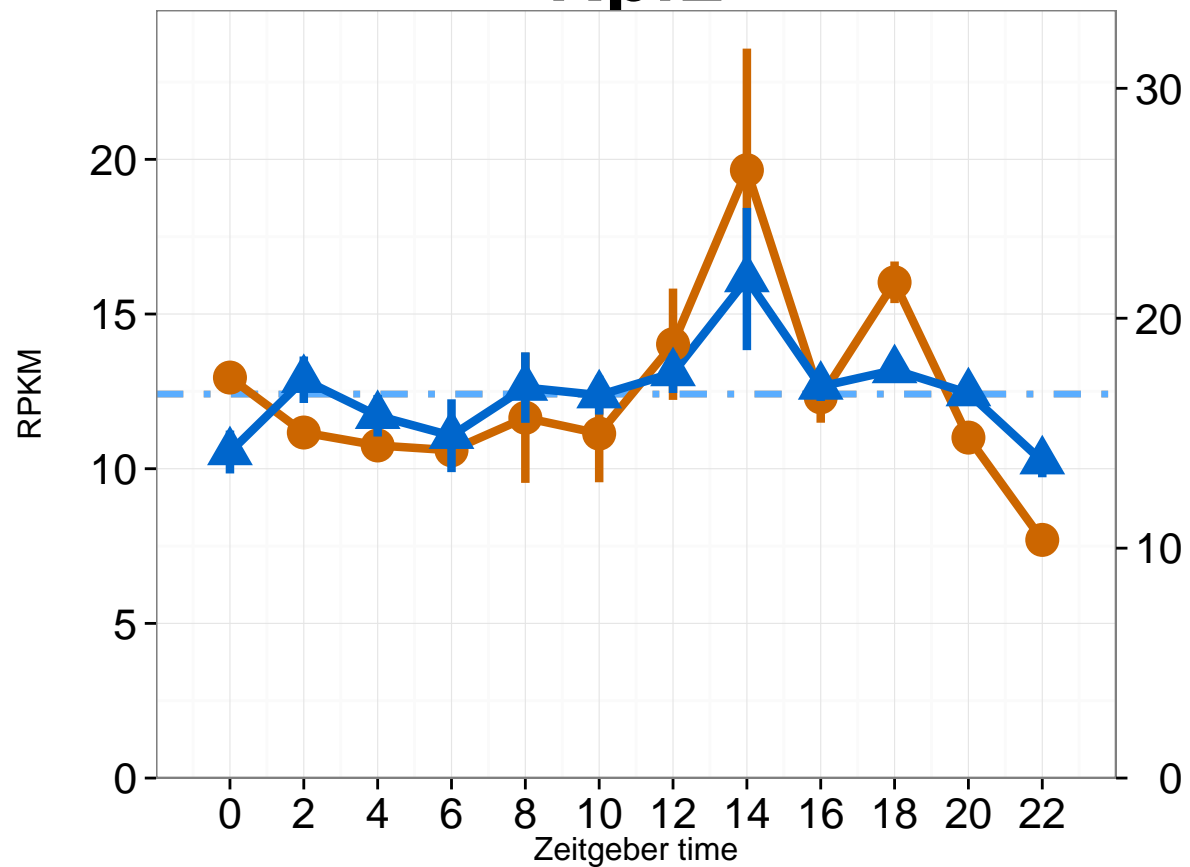

# Rpf2

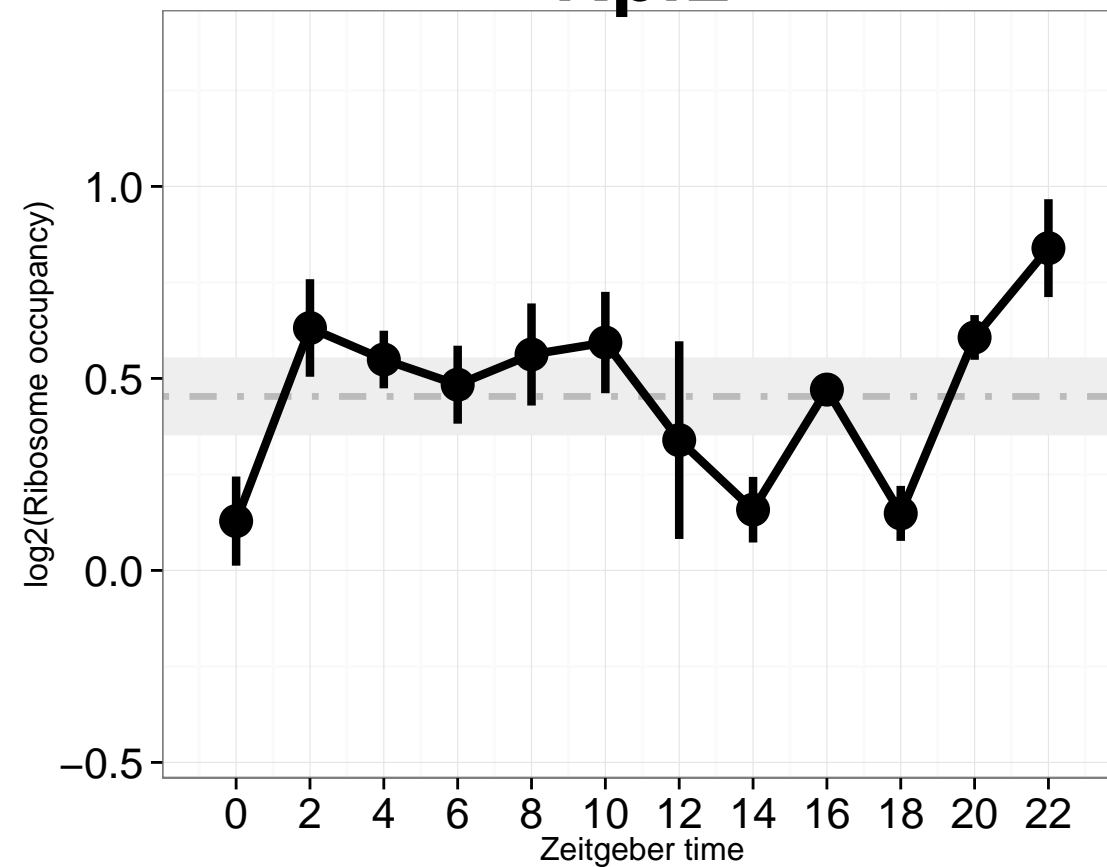

Supplement: SuppDataset_1.zip [file Rpf2_set_A.pdf › Supplemental Dataset 1/A-mRNA_nonrhyth_translation_nonrhyth/Rpf2_set_A.pdf]

# Rpgr

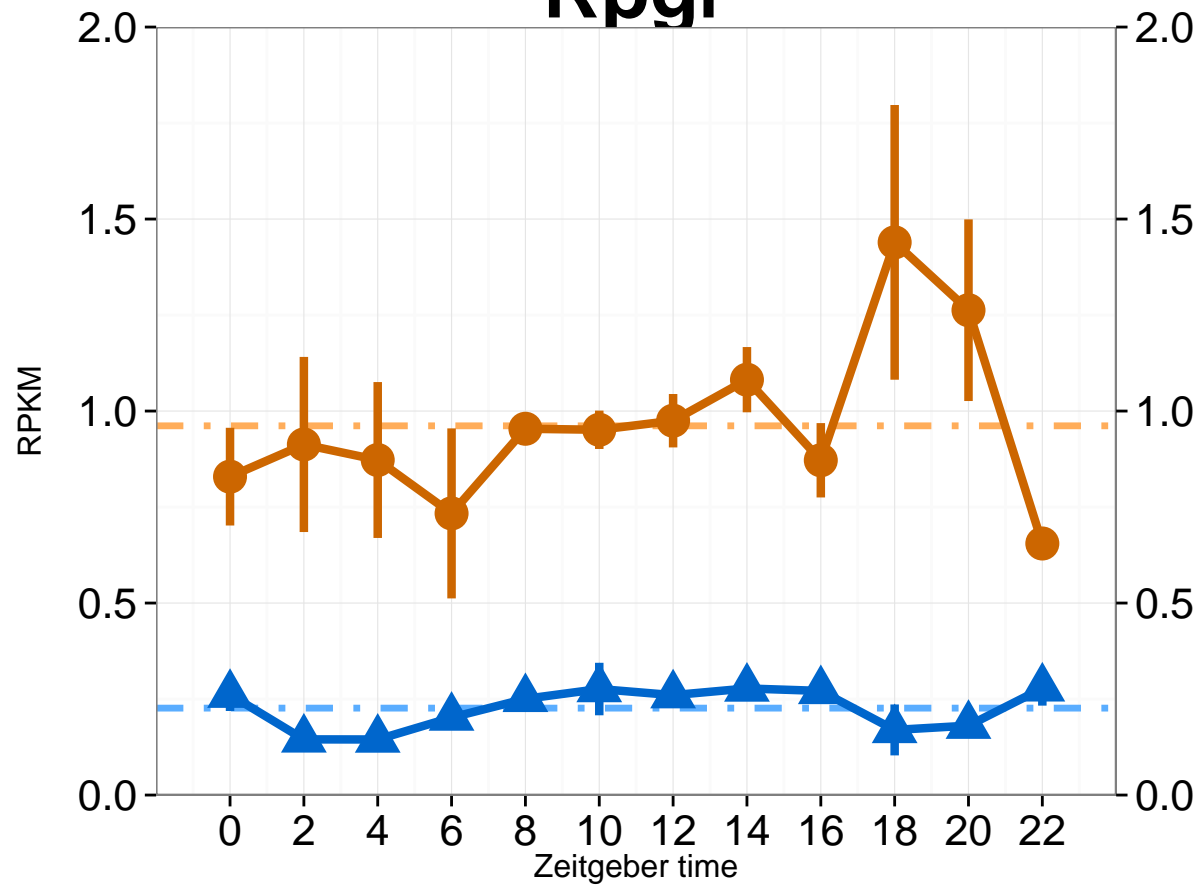

# Rpgr

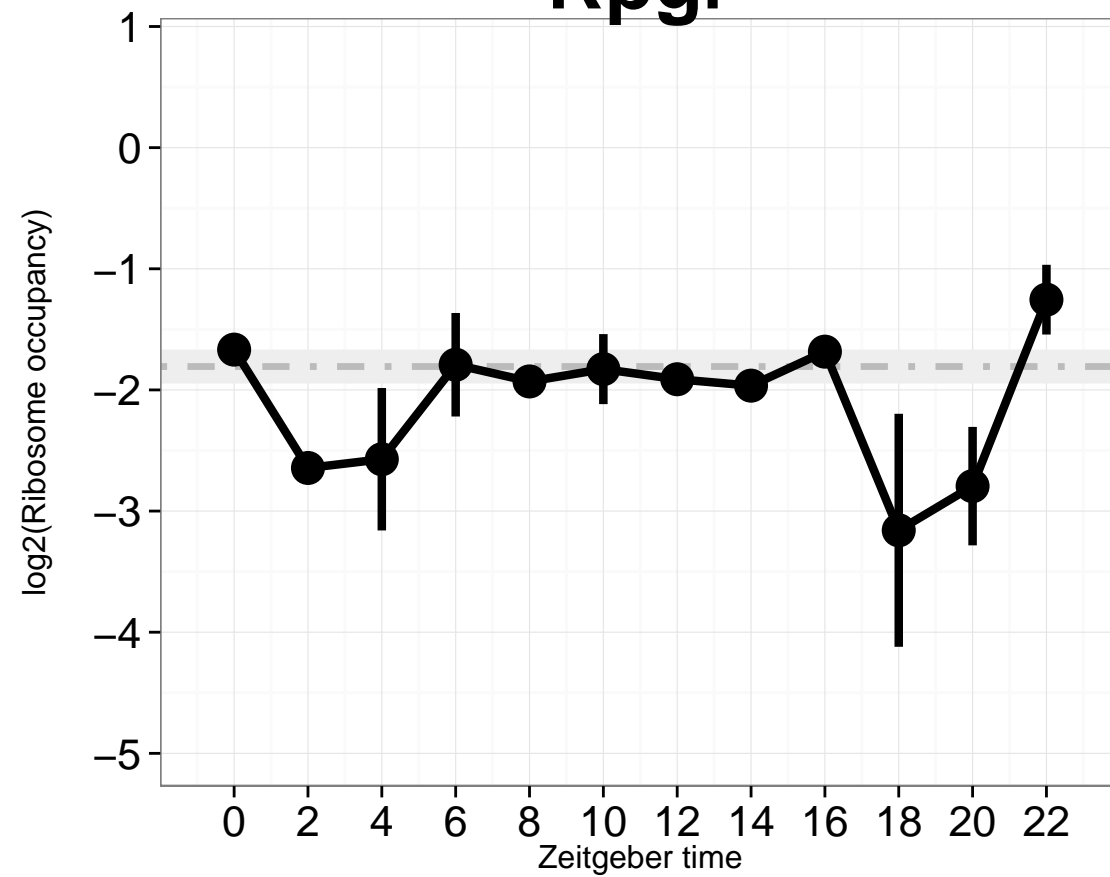

Supplement: SuppDataset_1.zip [file Rpgr_set_A.pdf › Supplemental Dataset 1/A-mRNA_nonrhyth_translation_nonrhyth/Rpgr_set_A.pdf]

# Rpgrip1l

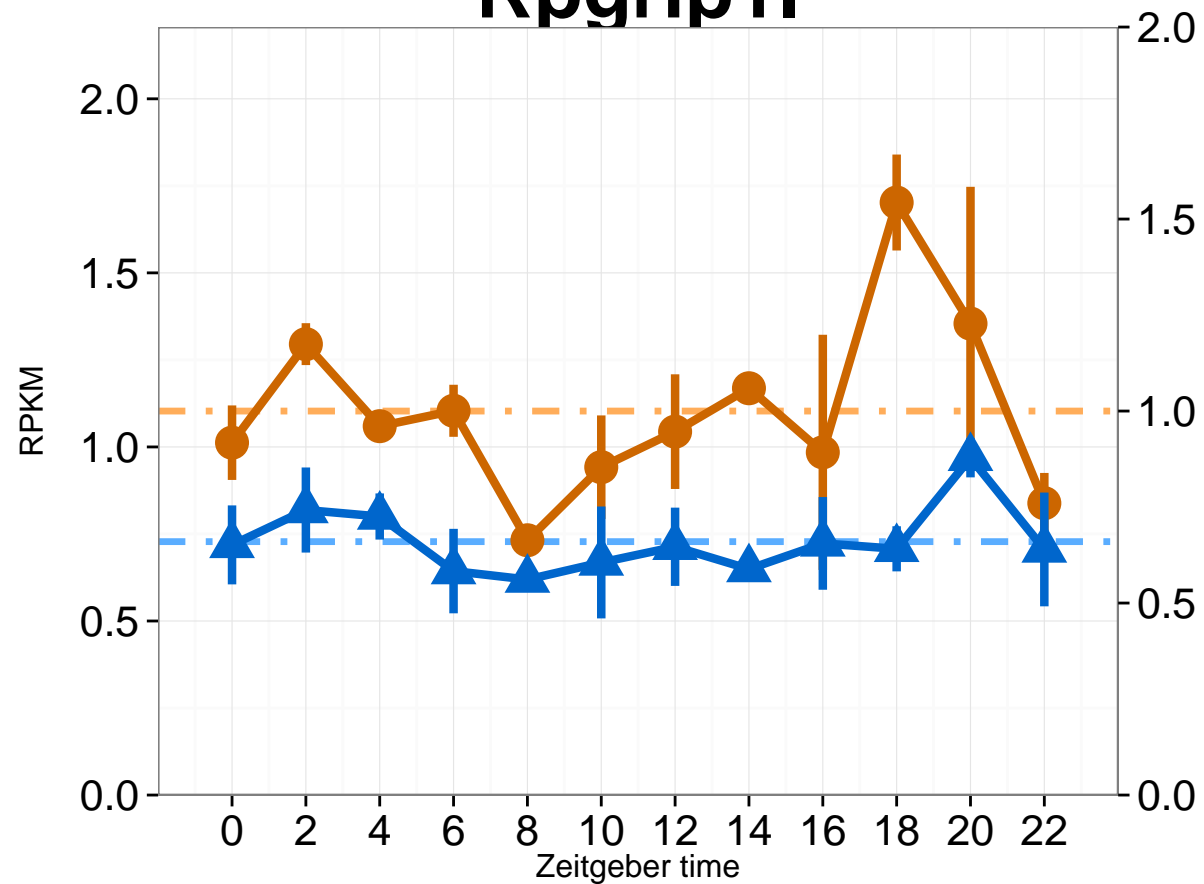

# Rpgrip1l

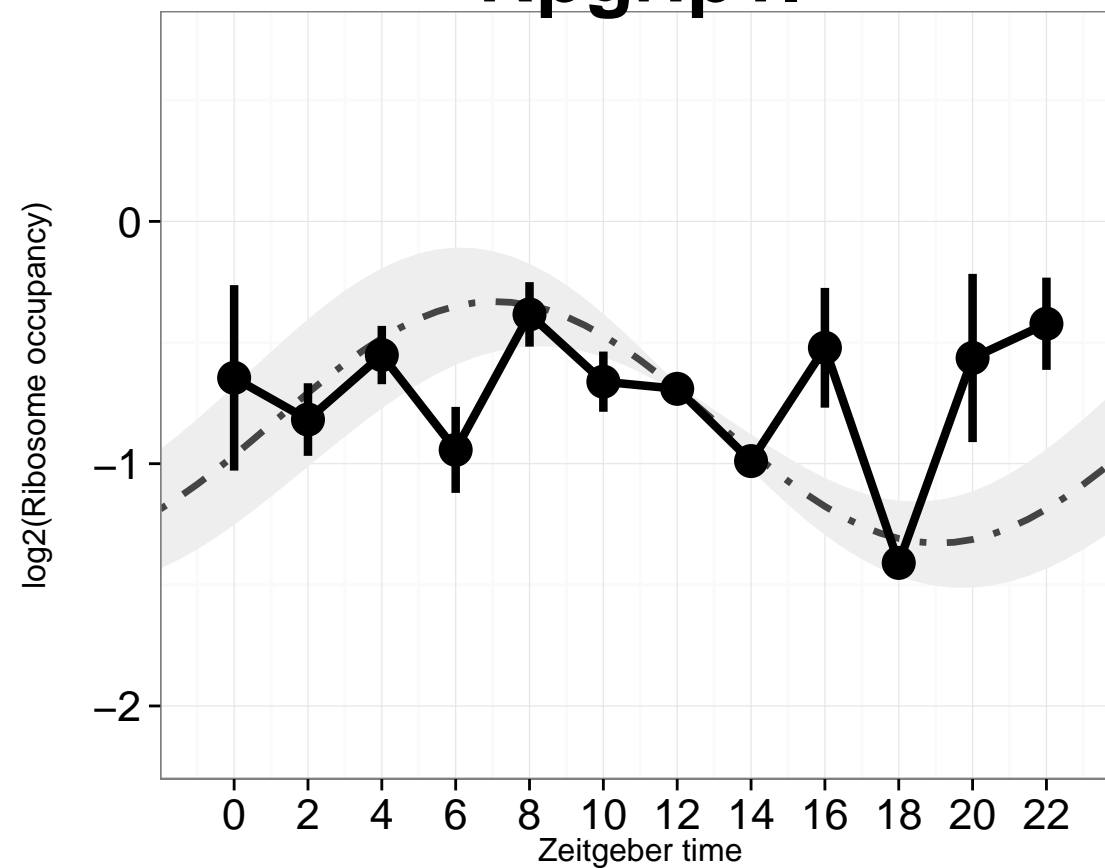

Supplement: SuppDataset_1.zip [file Rpgrip1l_set_A.pdf › Supplemental Dataset 1/A-mRNA_nonrhyth_translation_nonrhyth/Rpgrip1l_set_A.pdf]

# Rph3a1

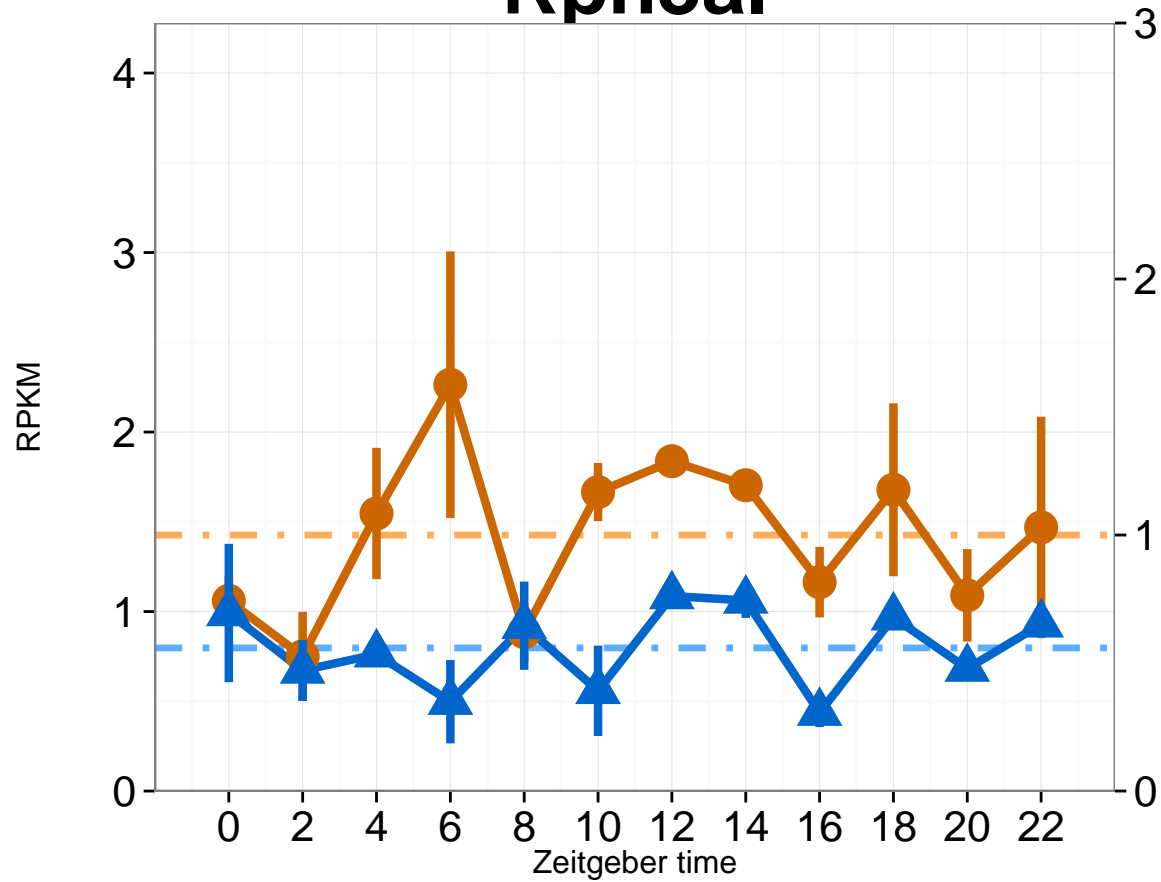

# Rph3a1

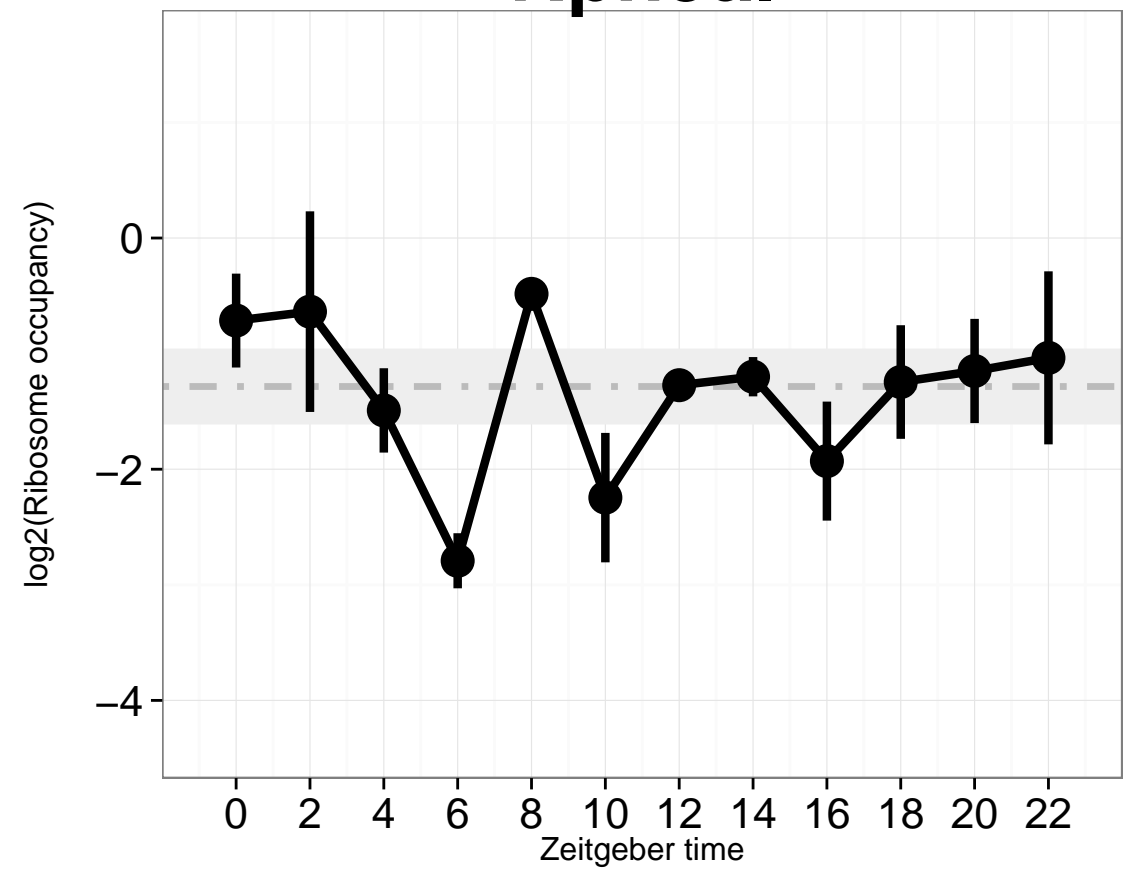

Supplement: SuppDataset_1.zip [file Rph3al_set_A.pdf › Supplemental Dataset 1/A-mRNA_nonrhyth_translation_nonrhyth/Rph3al_set_A.pdf]

# Rpl10a

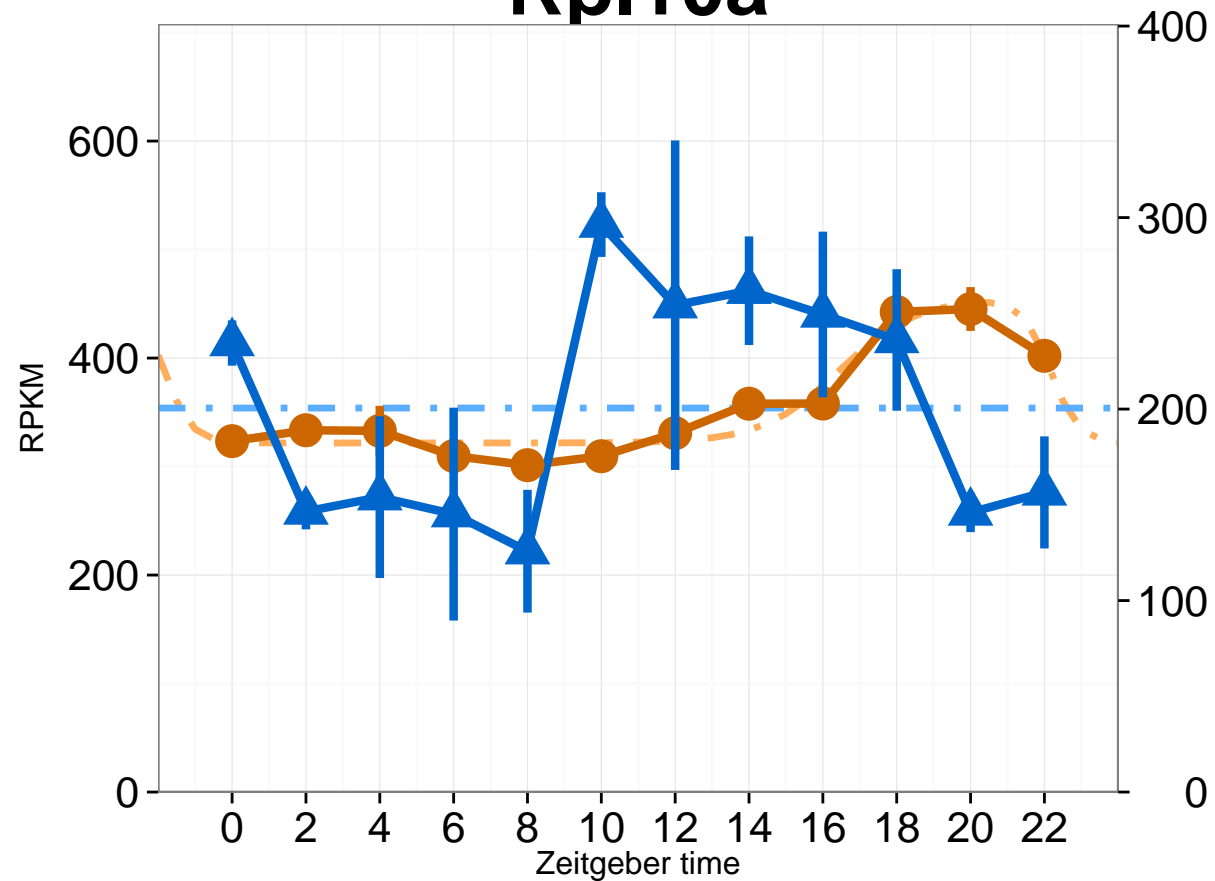

# Rpl10a

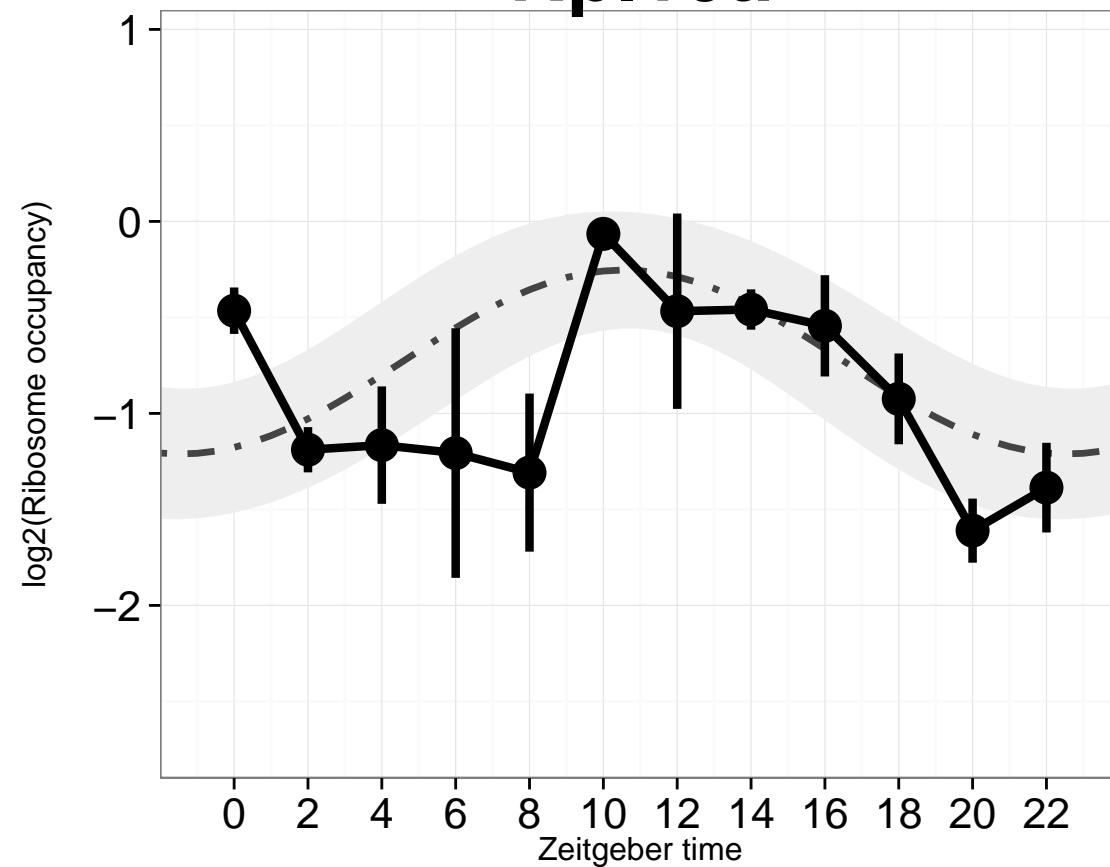

Supplement: SuppDataset_1.zip [file Rpl10a_set_A.pdf › Supplemental Dataset 1/A-mRNA_nonrhyth_translation_nonrhyth/Rpl10a_set_A.pdf]

# Rpl12

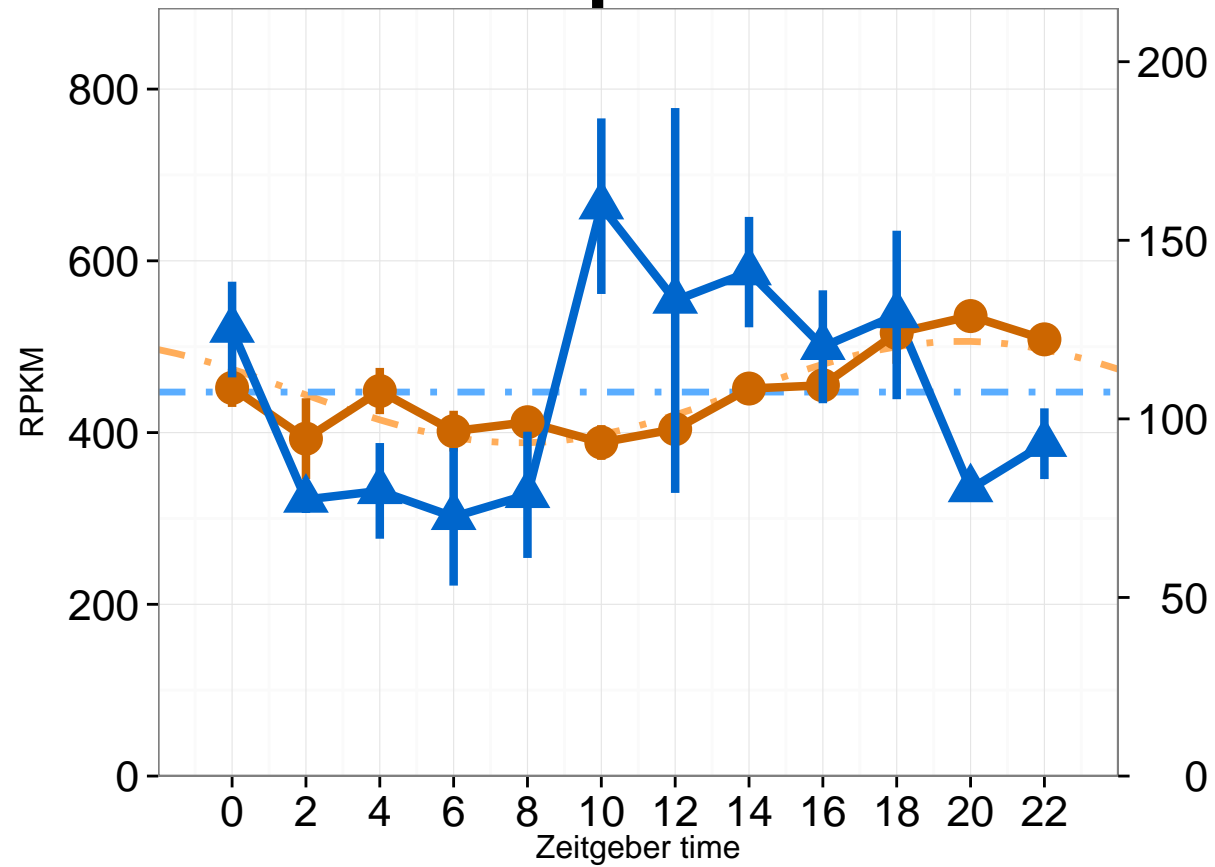

# Rpl12

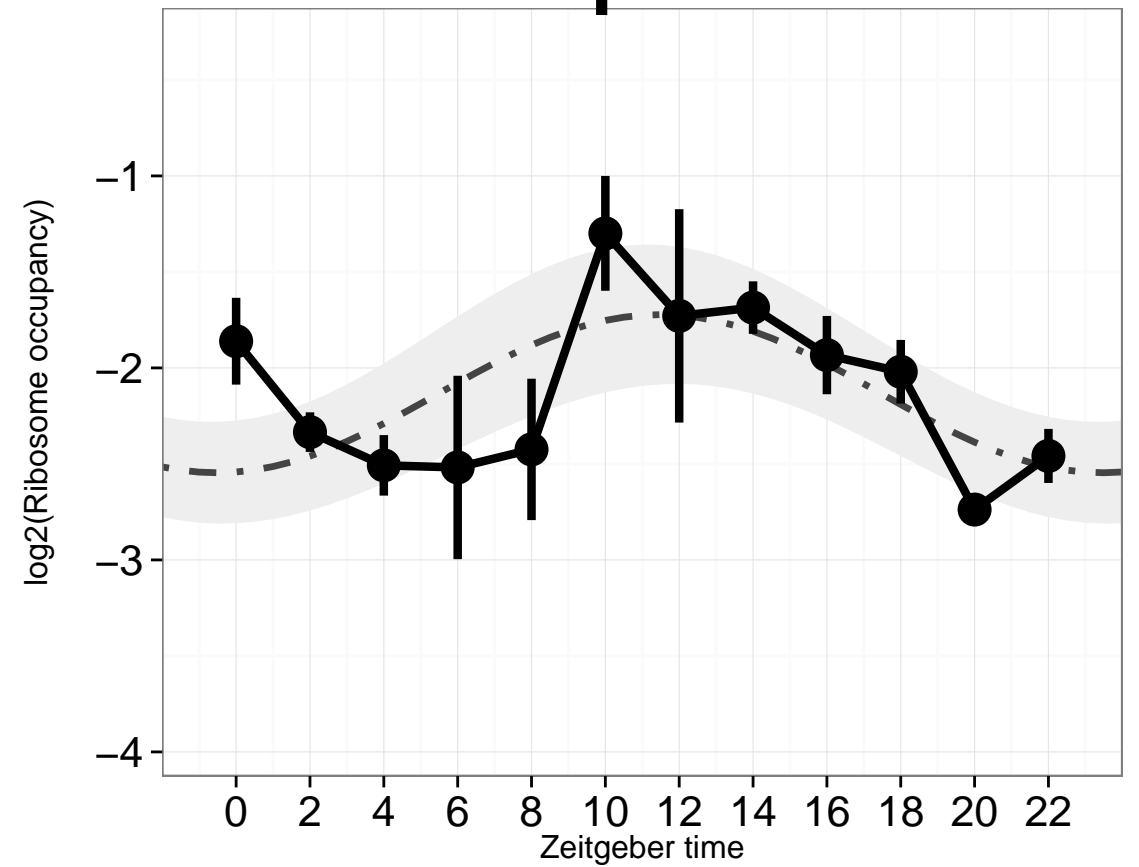

Supplement: SuppDataset_1.zip [file Rpl12_set_A.pdf › Supplemental Dataset 1/A-mRNA_nonrhyth_translation_nonrhyth/Rpl12_set_A.pdf]

# Rpl13a

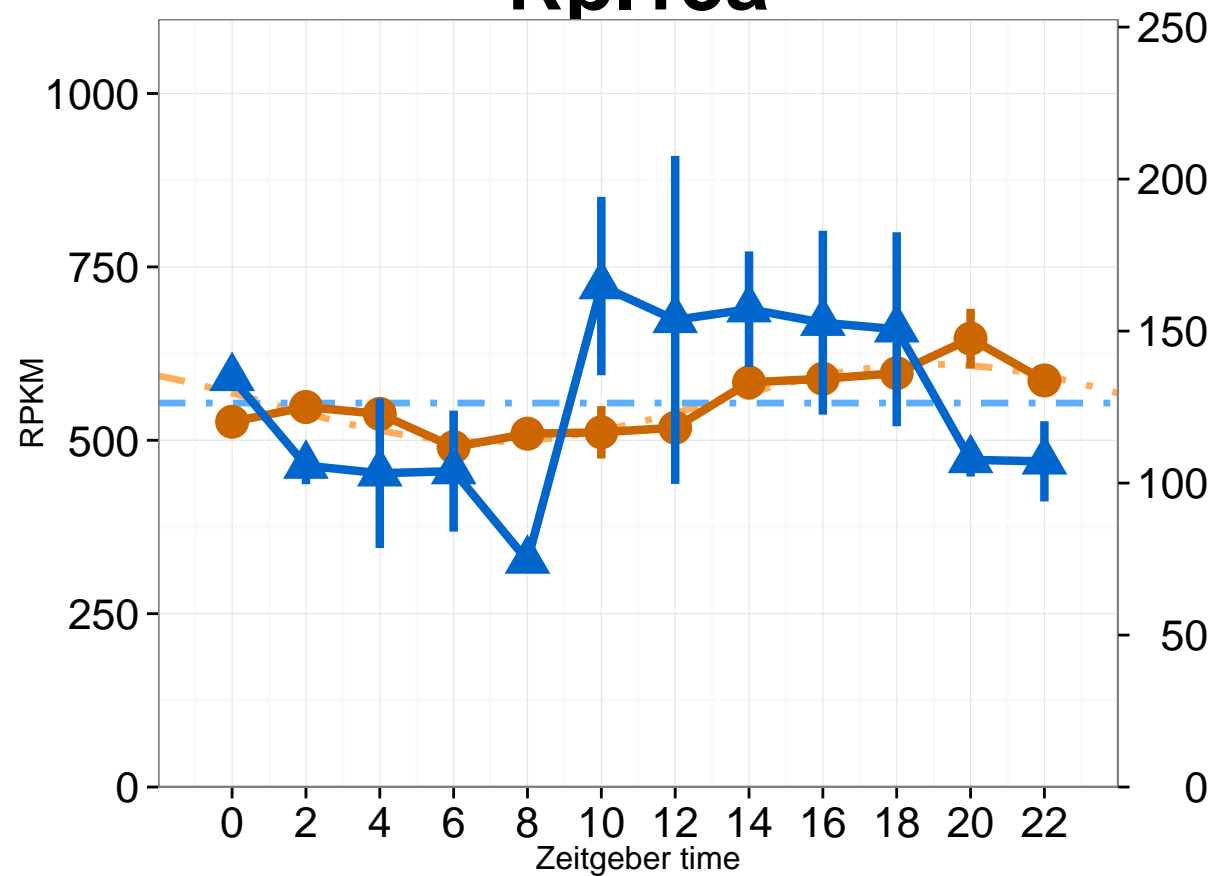

# Rpl13a

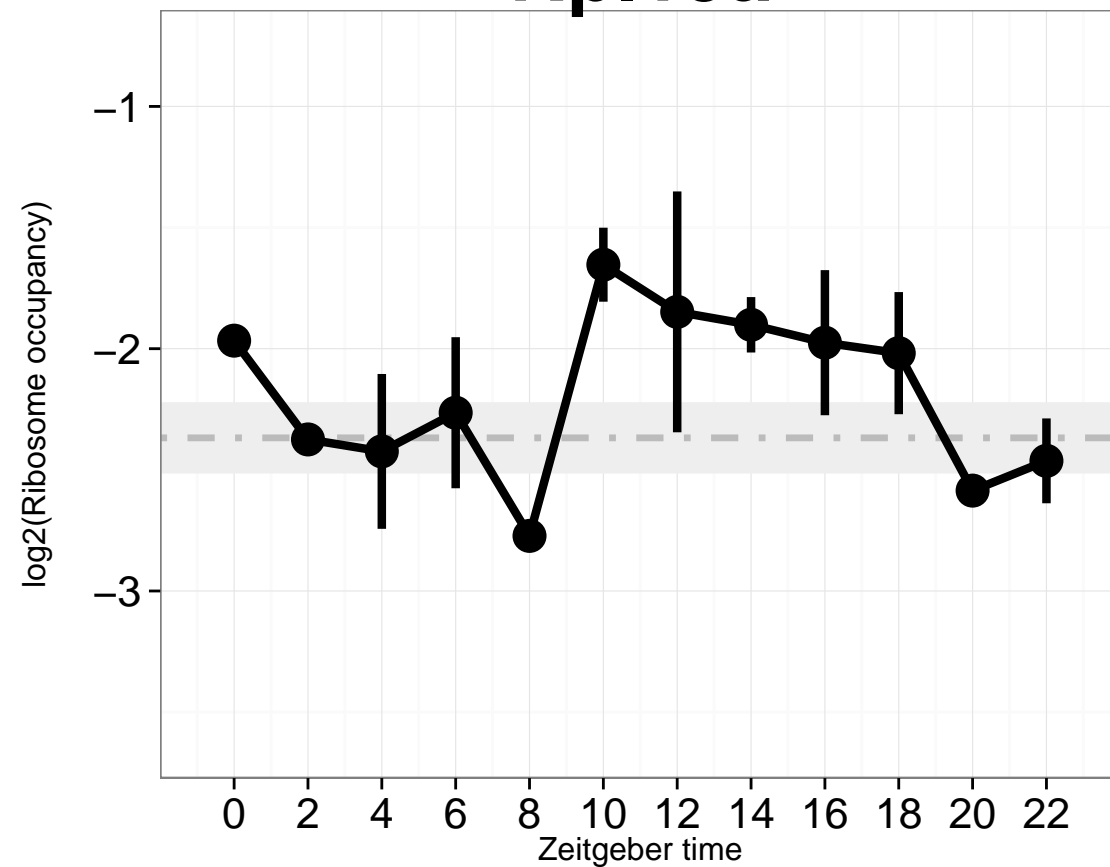

Supplement: SuppDataset_1.zip [file Rpl13a_set_A.pdf › Supplemental Dataset 1/A-mRNA_nonrhyth_translation_nonrhyth/Rpl13a_set_A.pdf]

## Rpl14

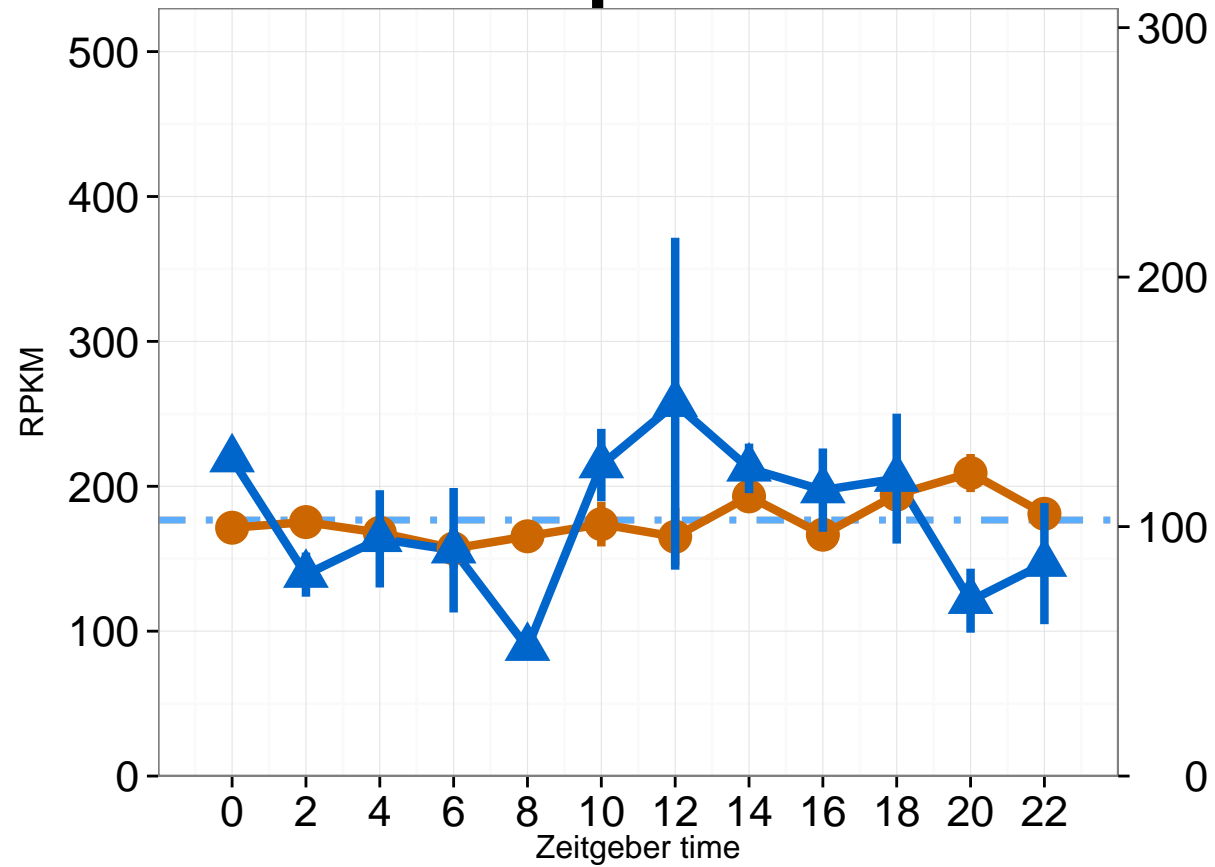

## Rpl14

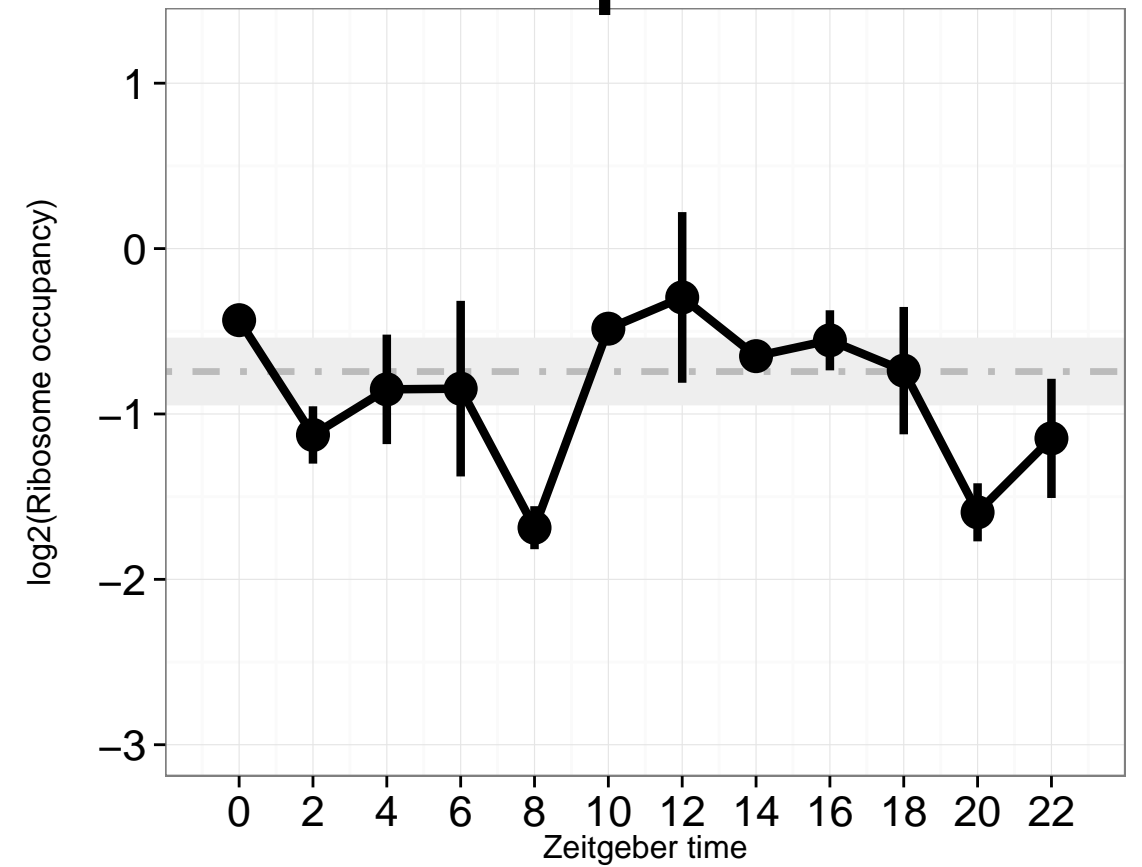

Supplement: SuppDataset_1.zip [file Rpl14_set_A.pdf › Supplemental Dataset 1/A-mRNA_nonrhyth_translation_nonrhyth/Rpl14_set_A.pdf]

## Rpl15

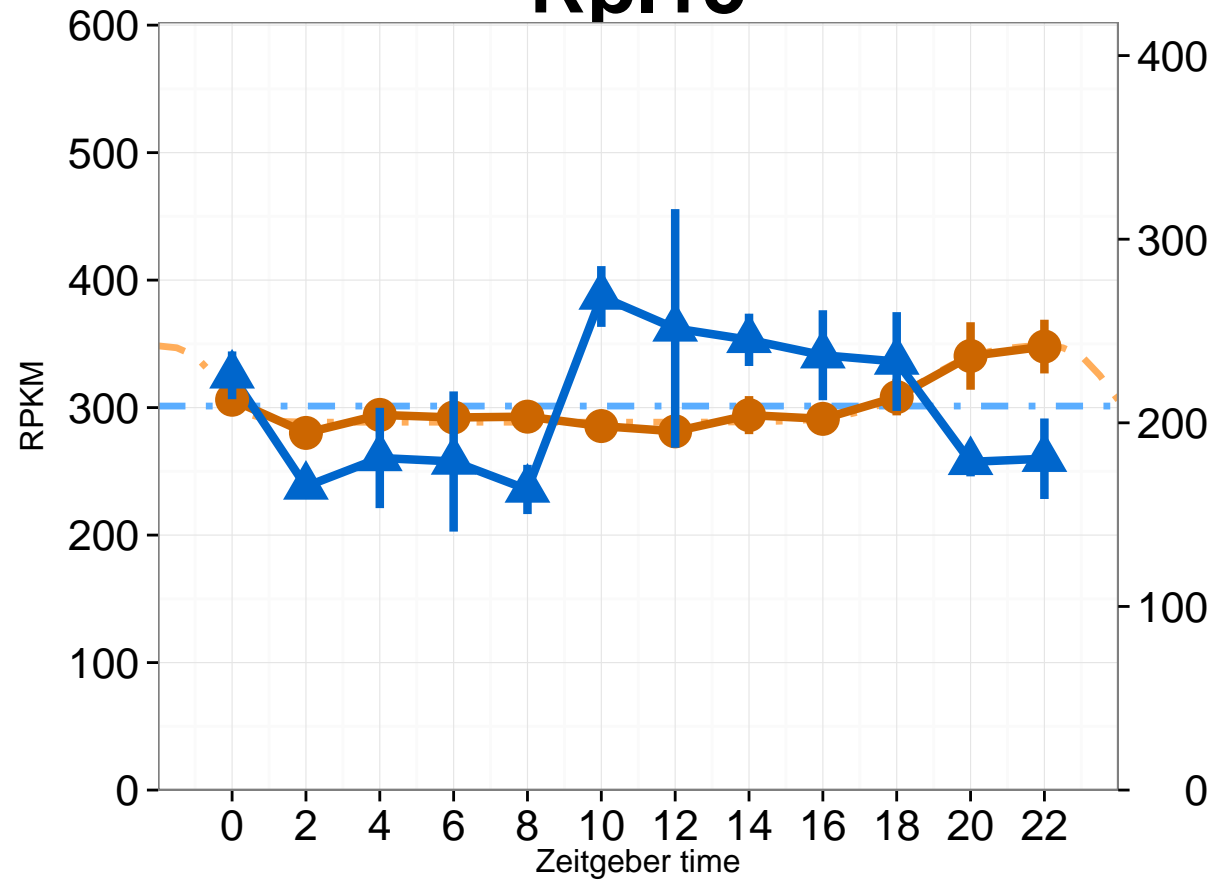

## Rpl15

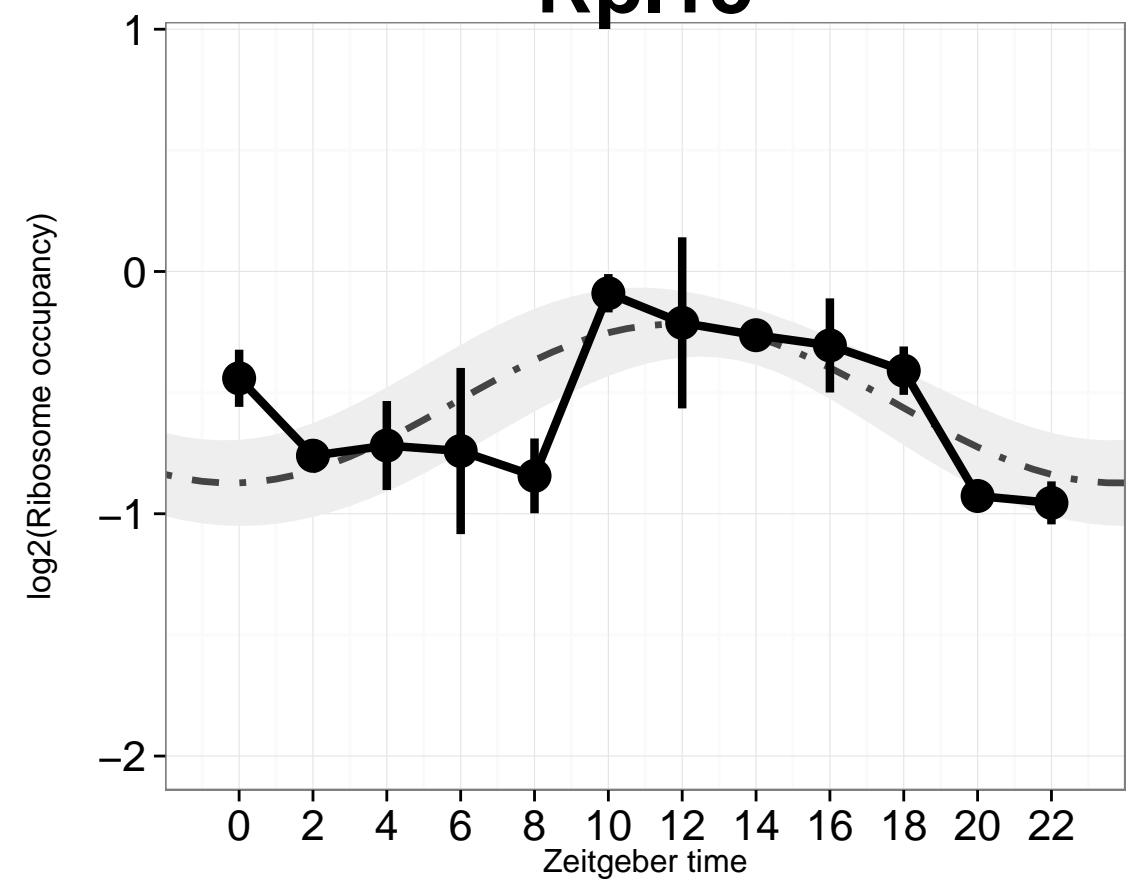

Supplement: SuppDataset_1.zip [file Rpl15_set_A.pdf › Supplemental Dataset 1/A-mRNA_nonrhyth_translation_nonrhyth/Rpl15_set_A.pdf]

# Rpl17

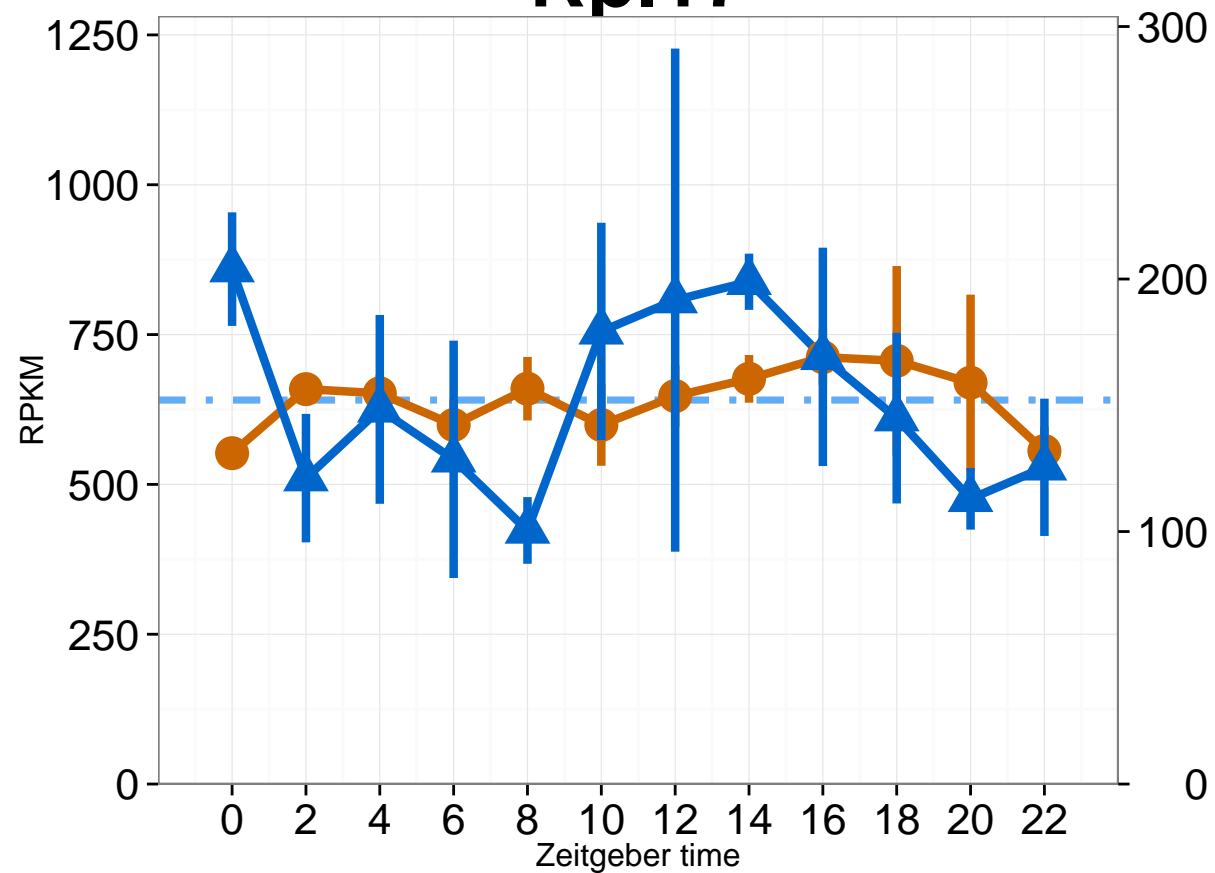

# Rpl17

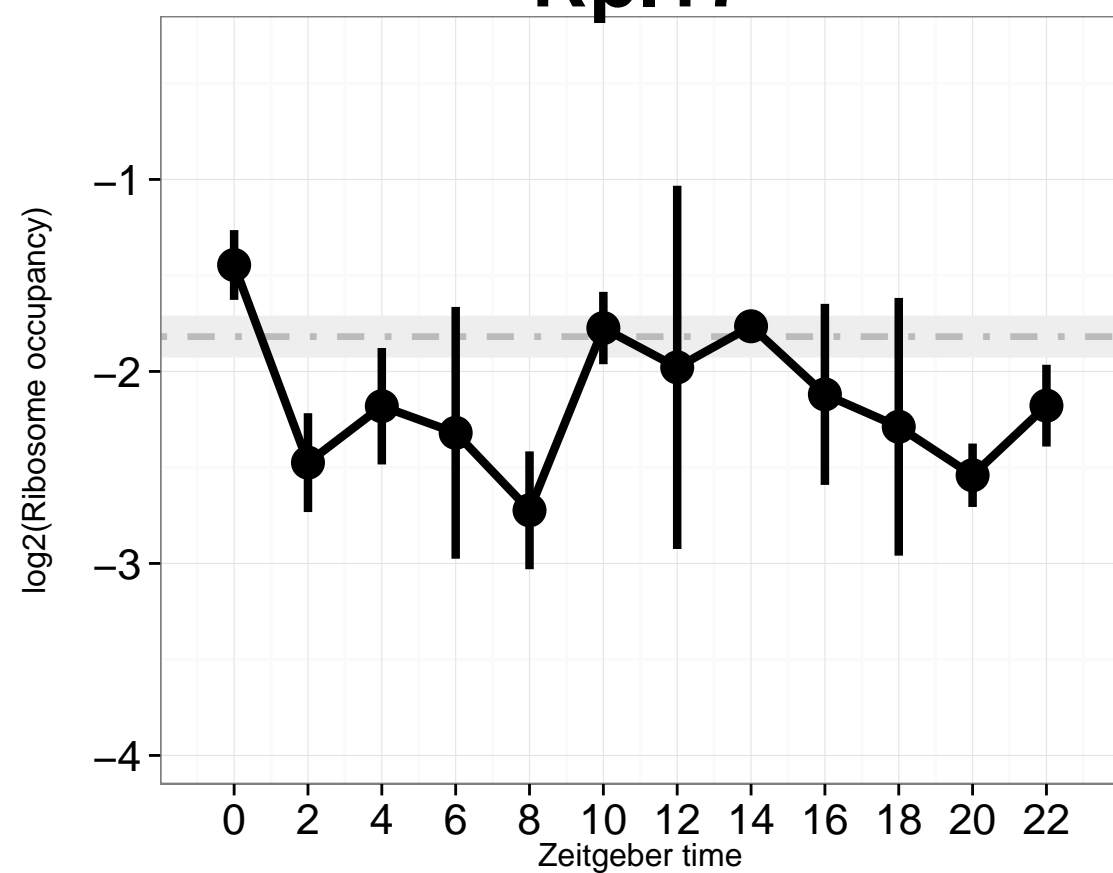

Supplement: SuppDataset_1.zip [file Rpl17_set_A.pdf › Supplemental Dataset 1/A-mRNA_nonrhyth_translation_nonrhyth/Rpl17_set_A.pdf]

# Rpl19

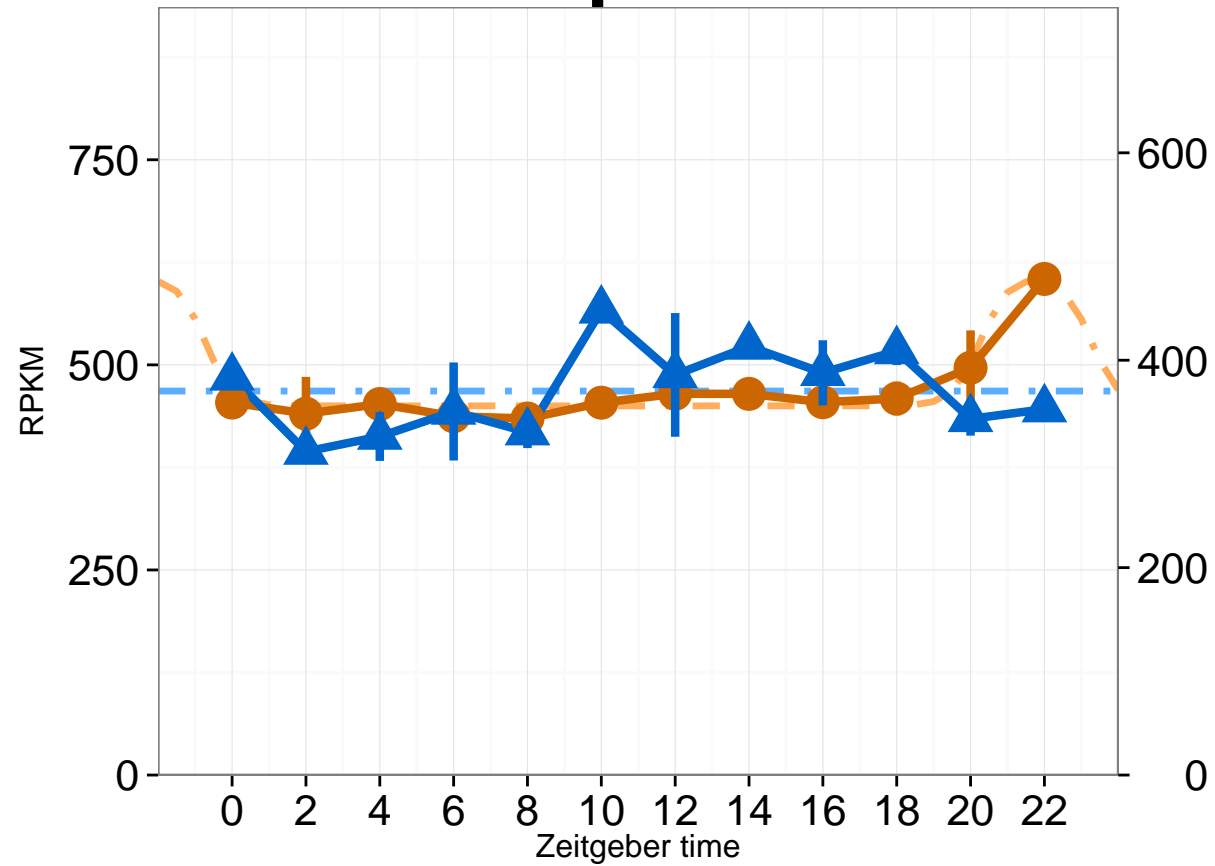

# Rpl19

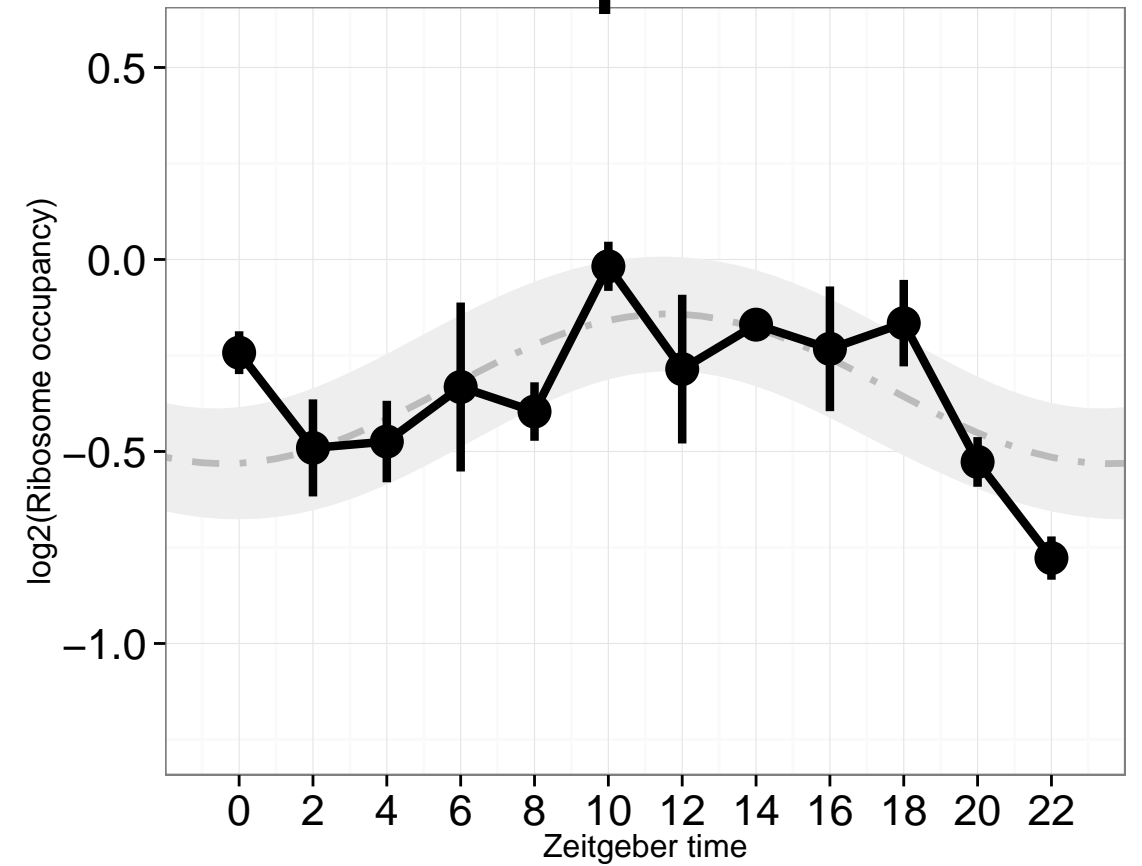

Supplement: SuppDataset_1.zip [file Rpl19_set_A.pdf › Supplemental Dataset 1/A-mRNA_nonrhyth_translation_nonrhyth/Rpl19_set_A.pdf]

# Rpl21

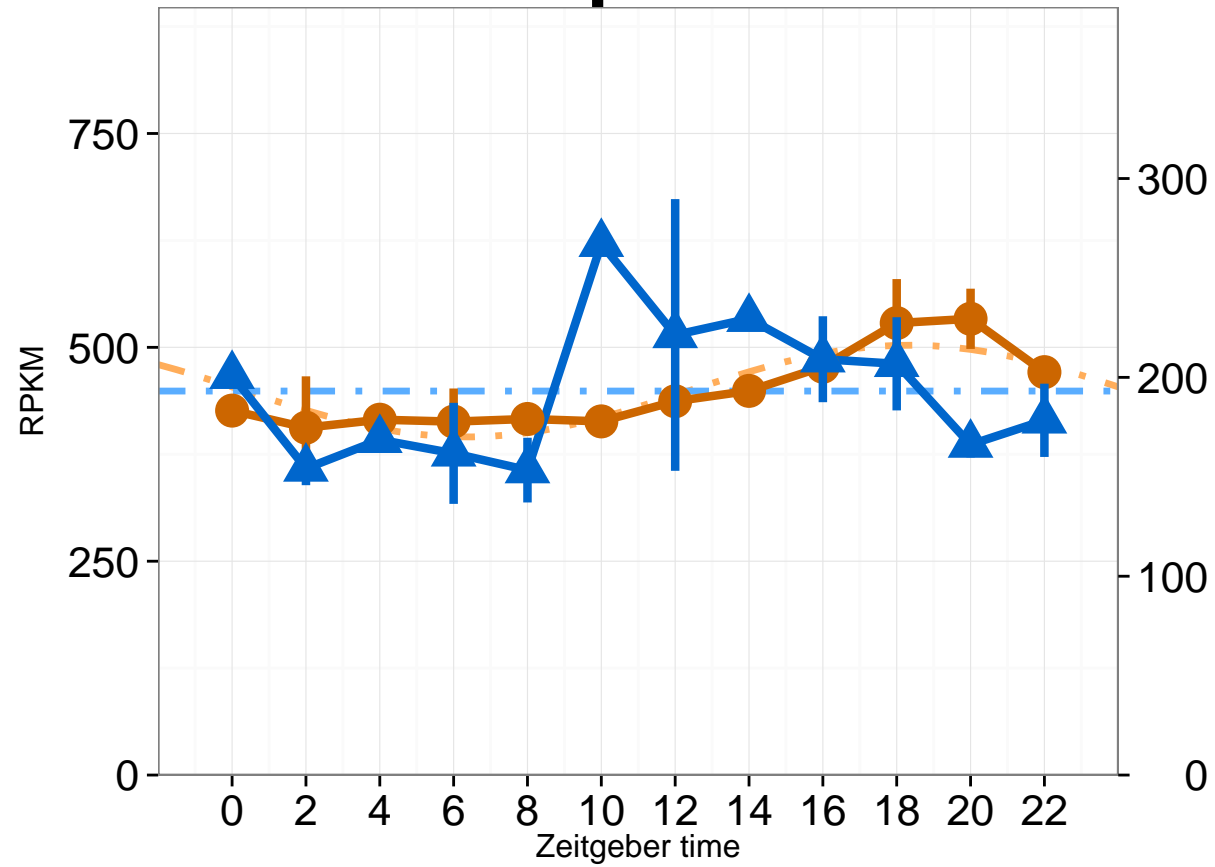

# Rpl21

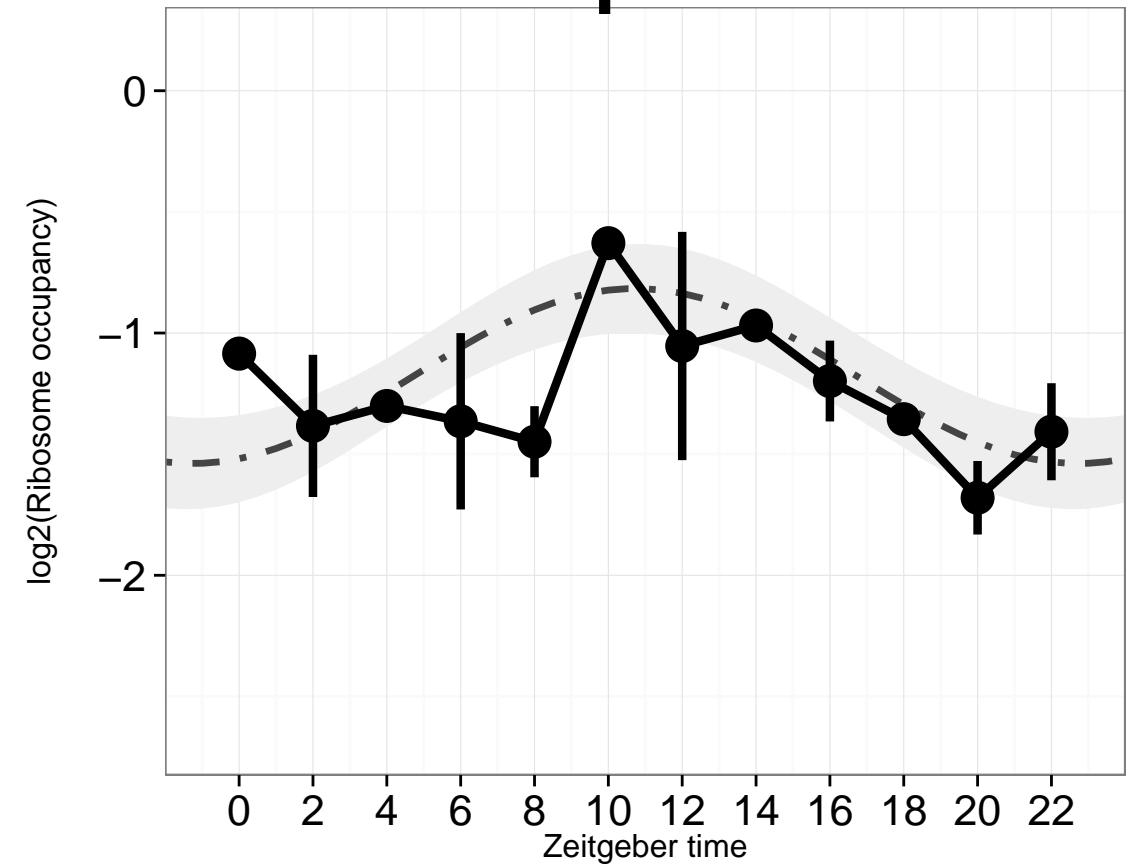

Supplement: SuppDataset_1.zip [file Rpl21_set_A.pdf › Supplemental Dataset 1/A-mRNA_nonrhyth_translation_nonrhyth/Rpl21_set_A.pdf]

# Rpl22l1

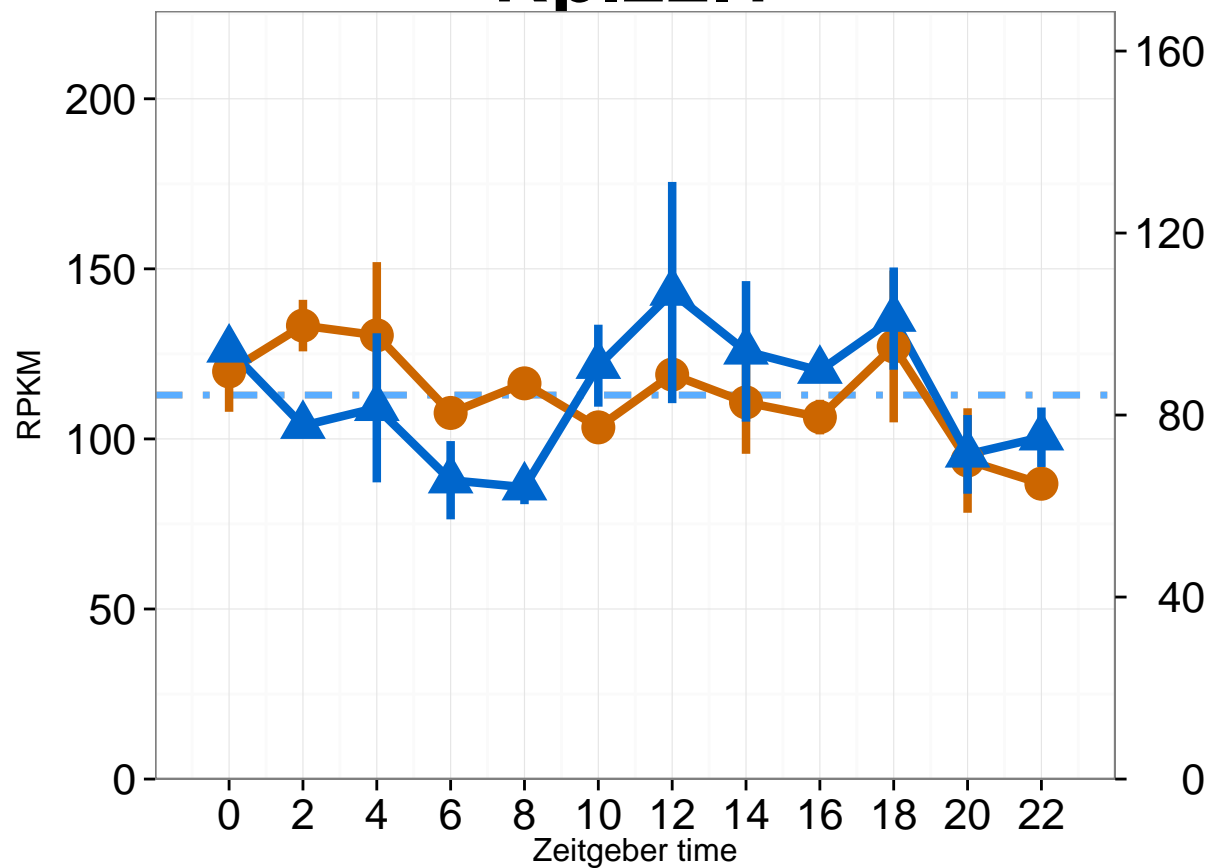

# Rpl22l1

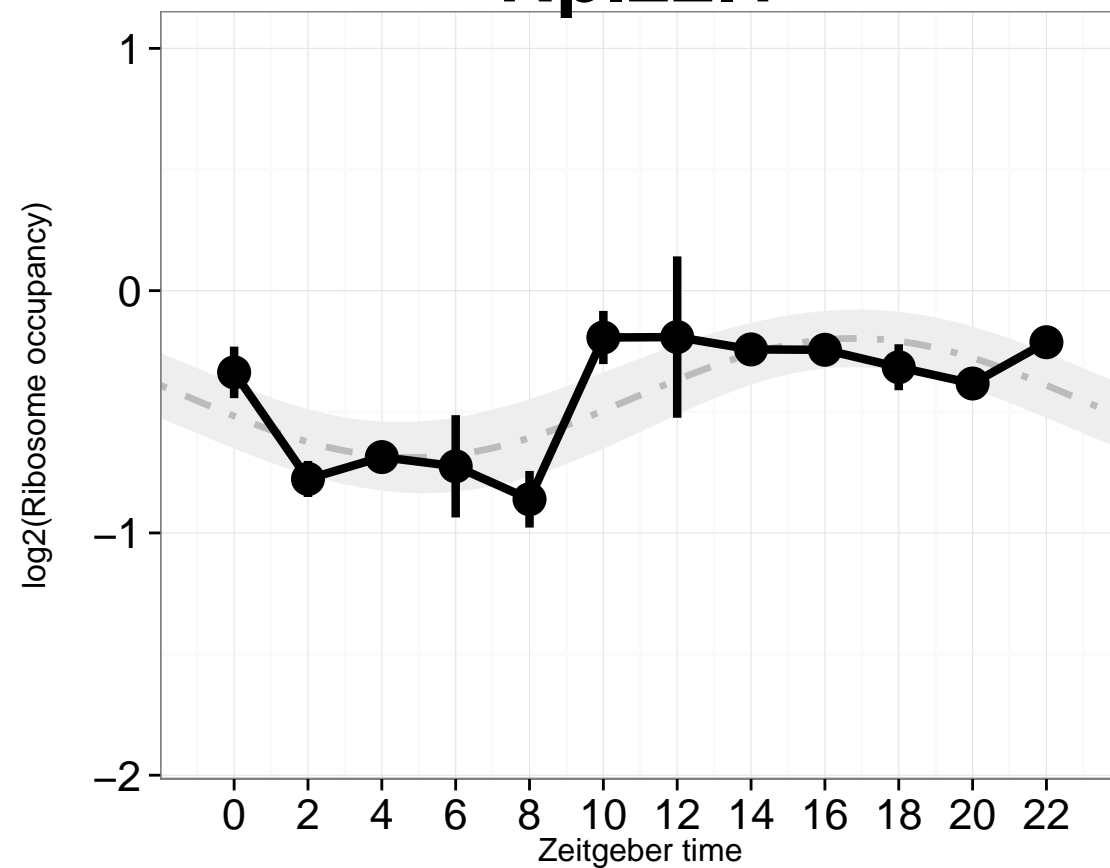

Supplement: SuppDataset_1.zip [file Rpl22l1_set_A.pdf › Supplemental Dataset 1/A-mRNA_nonrhyth_translation_nonrhyth/Rpl22l1_set_A.pdf]

# Rpl24

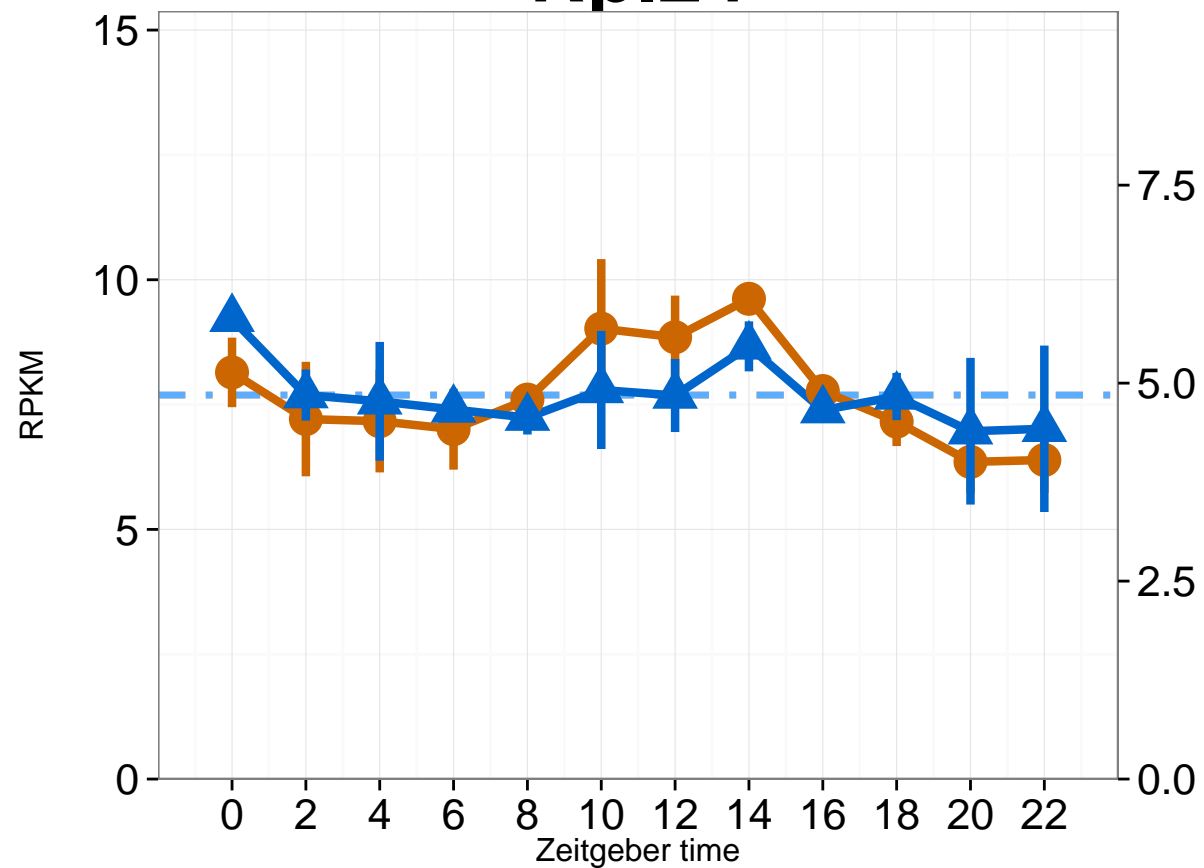

# Rpl24

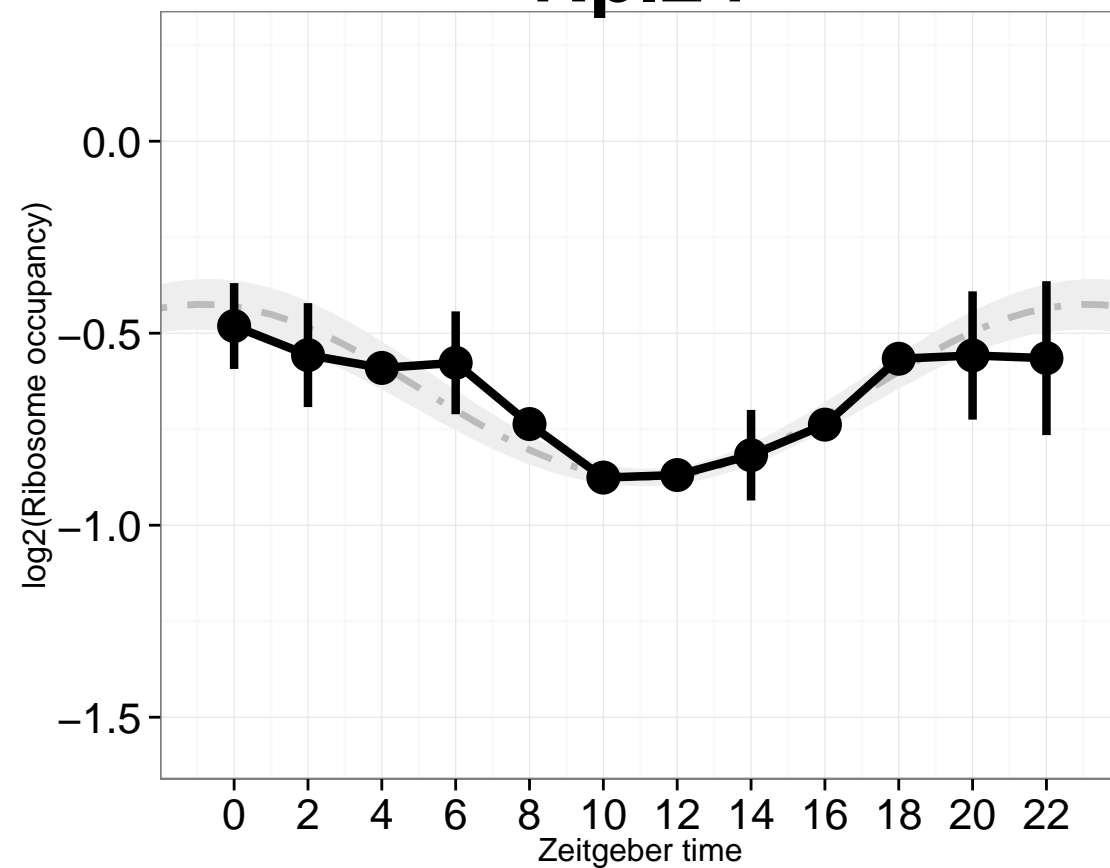

Supplement: SuppDataset_1.zip [file Rpl24_set_A.pdf › Supplemental Dataset 1/A-mRNA_nonrhyth_translation_nonrhyth/Rpl24_set_A.pdf]

# Rpl27

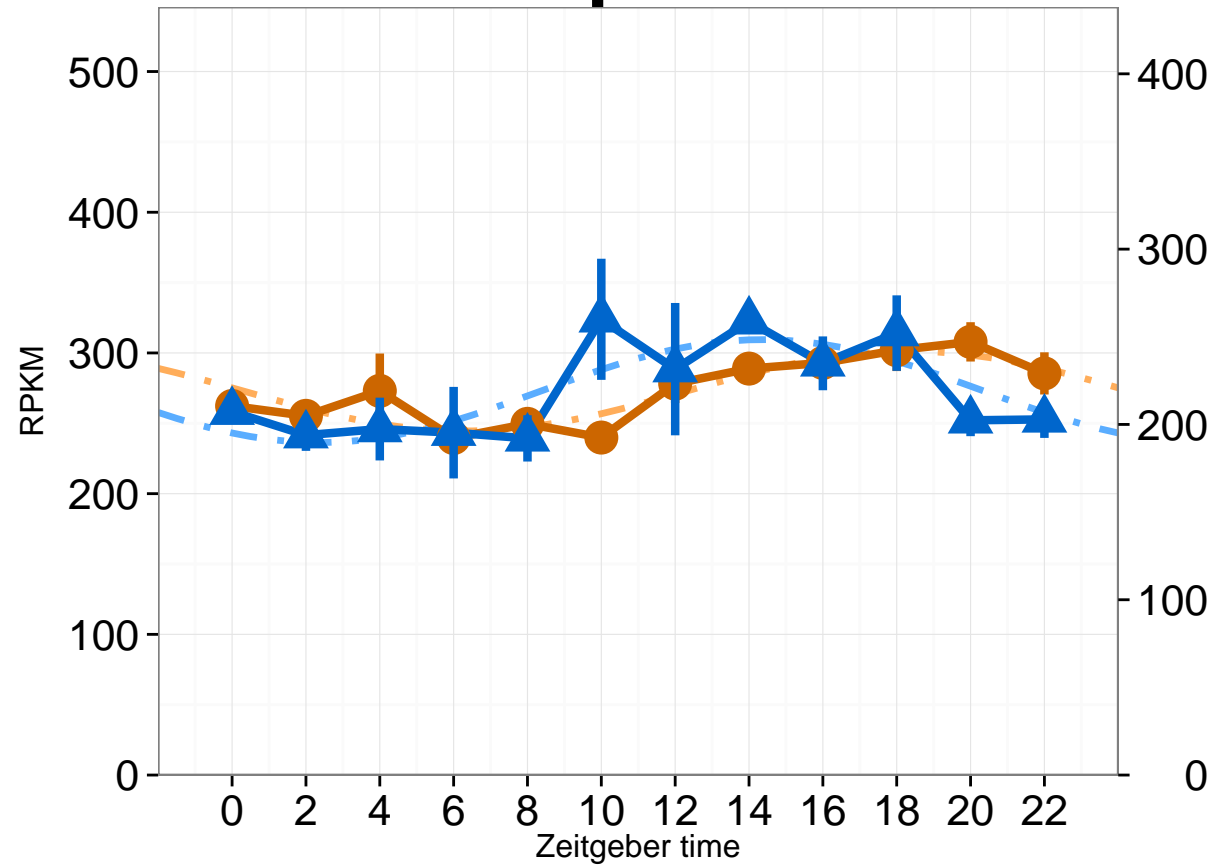

# Rpl27

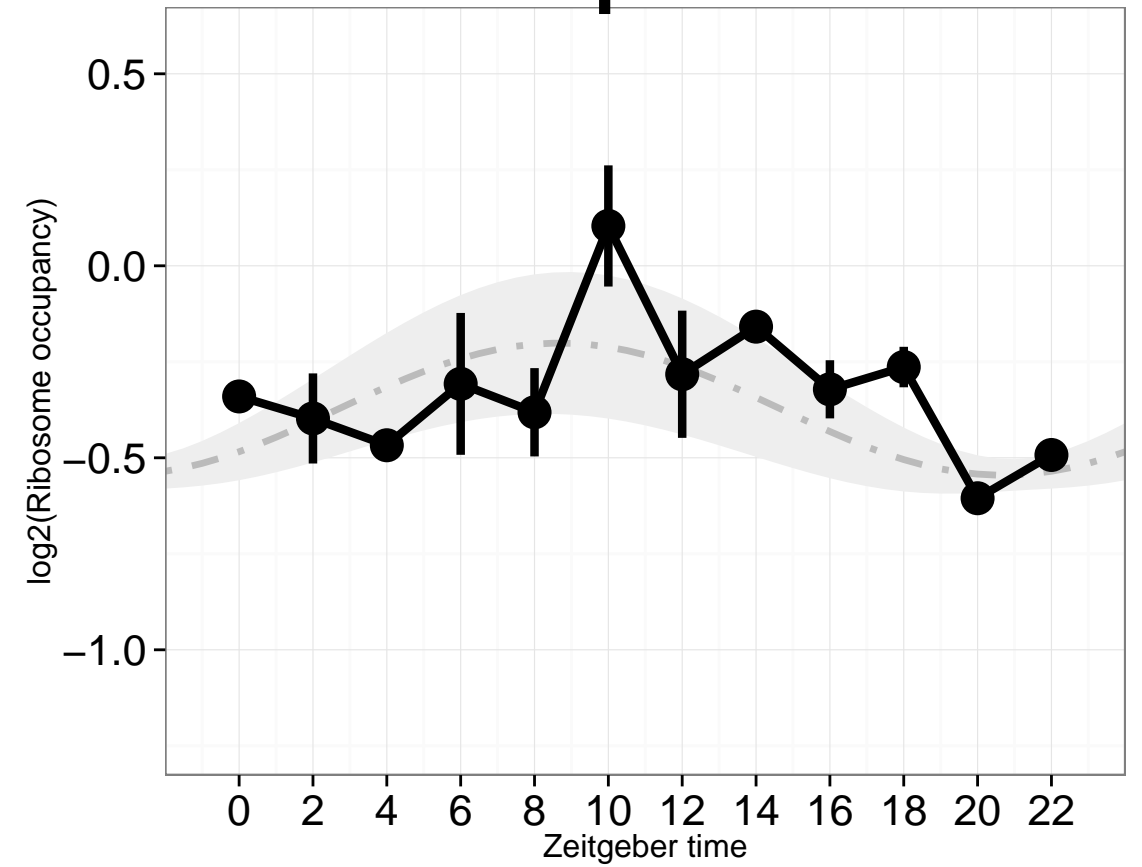

Supplement: SuppDataset_1.zip [file Rpl27_set_A.pdf › Supplemental Dataset 1/A-mRNA_nonrhyth_translation_nonrhyth/Rpl27_set_A.pdf]

## Rpl34

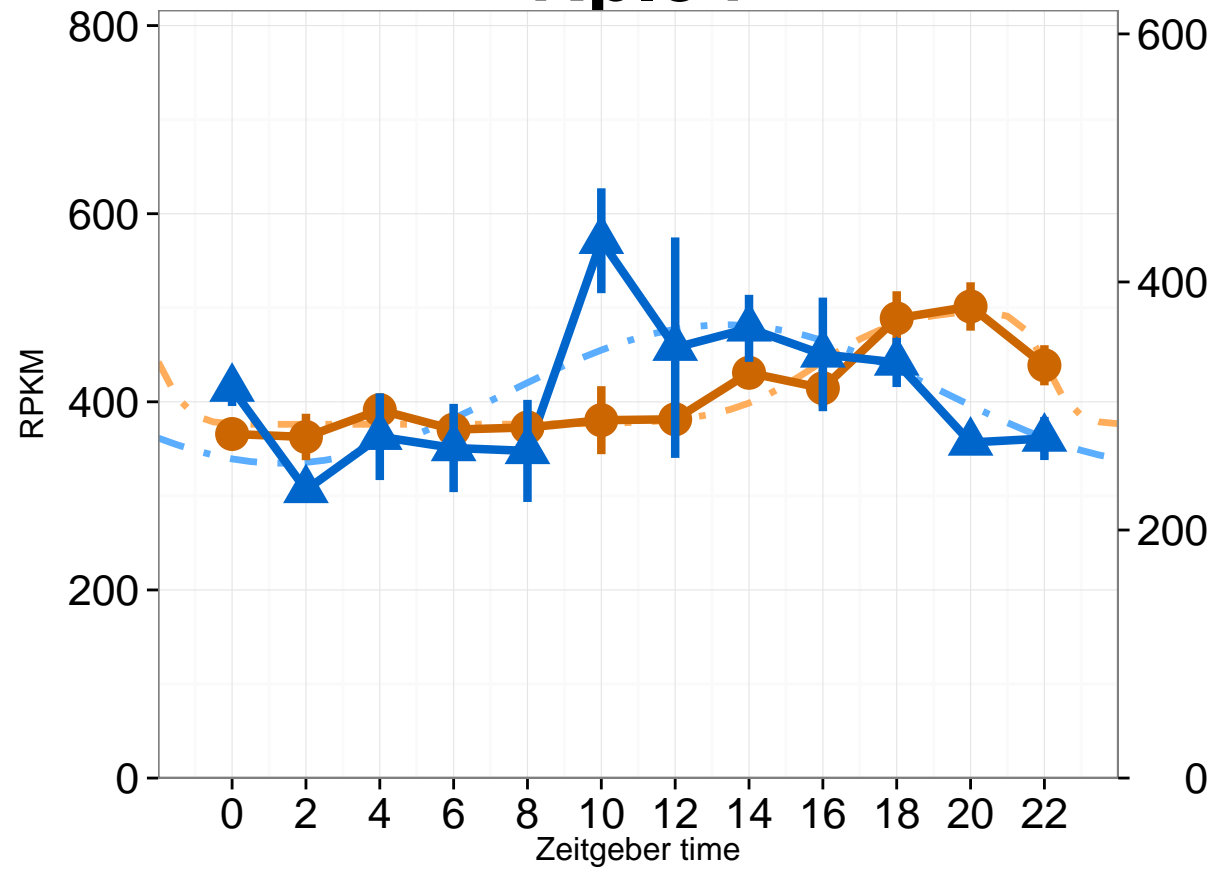

## Rpl34

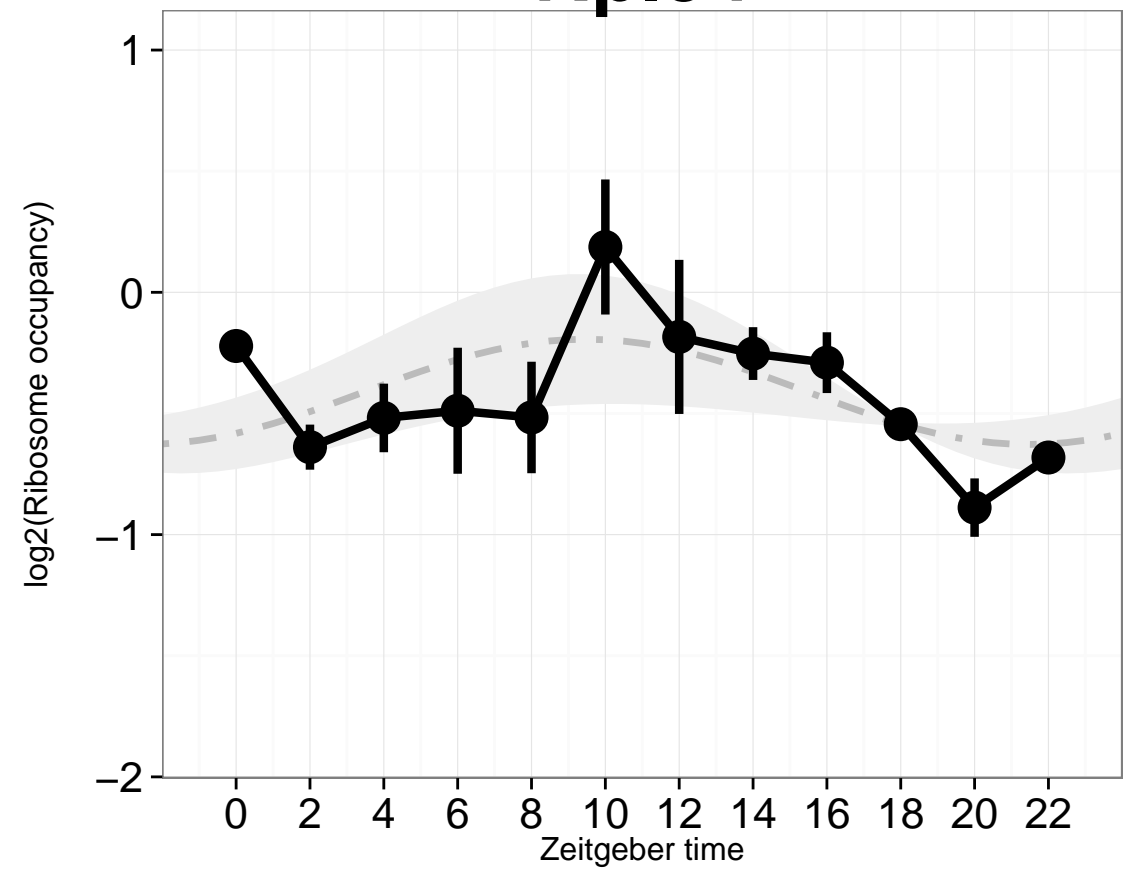

Supplement: SuppDataset_1.zip [file Rpl34_set_A.pdf › Supplemental Dataset 1/A-mRNA_nonrhyth_translation_nonrhyth/Rpl34_set_A.pdf]

# Rpl35

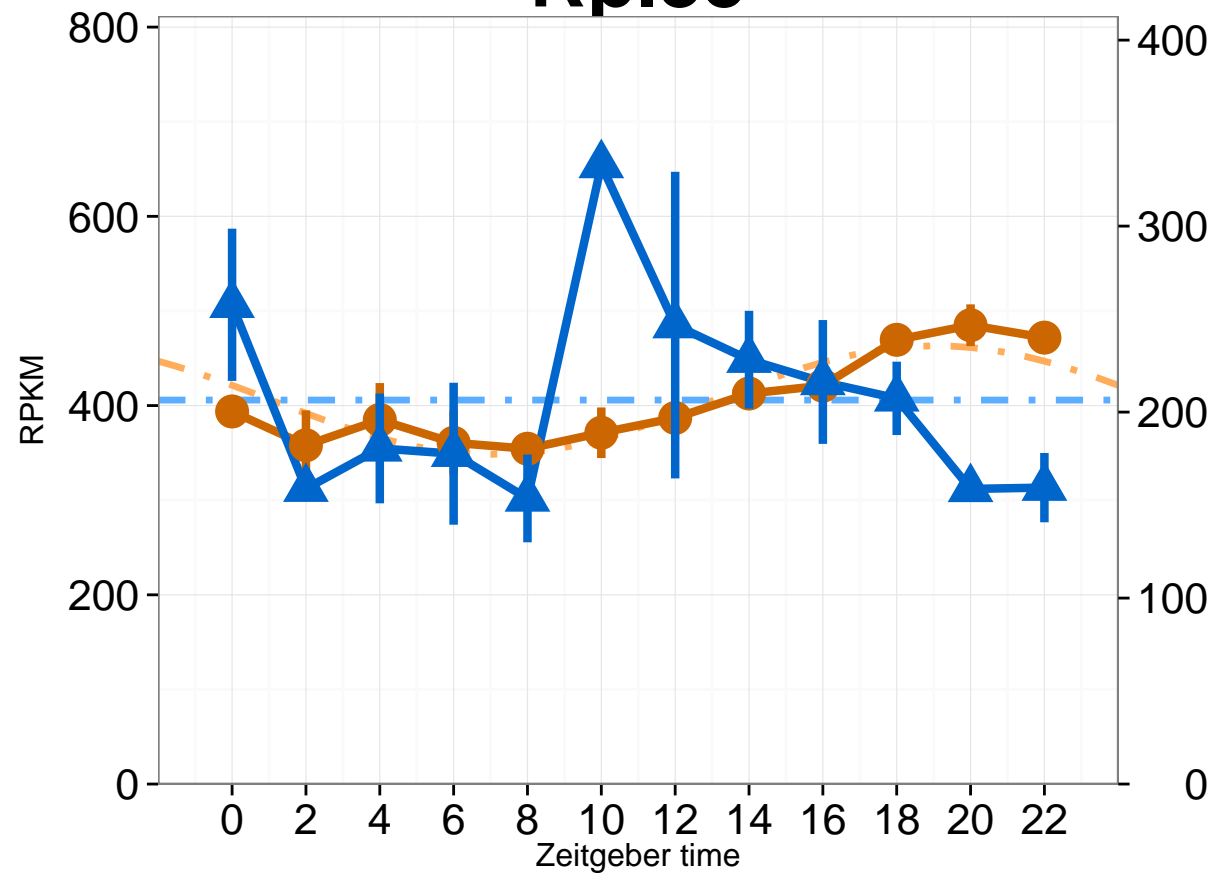

# Rpl35

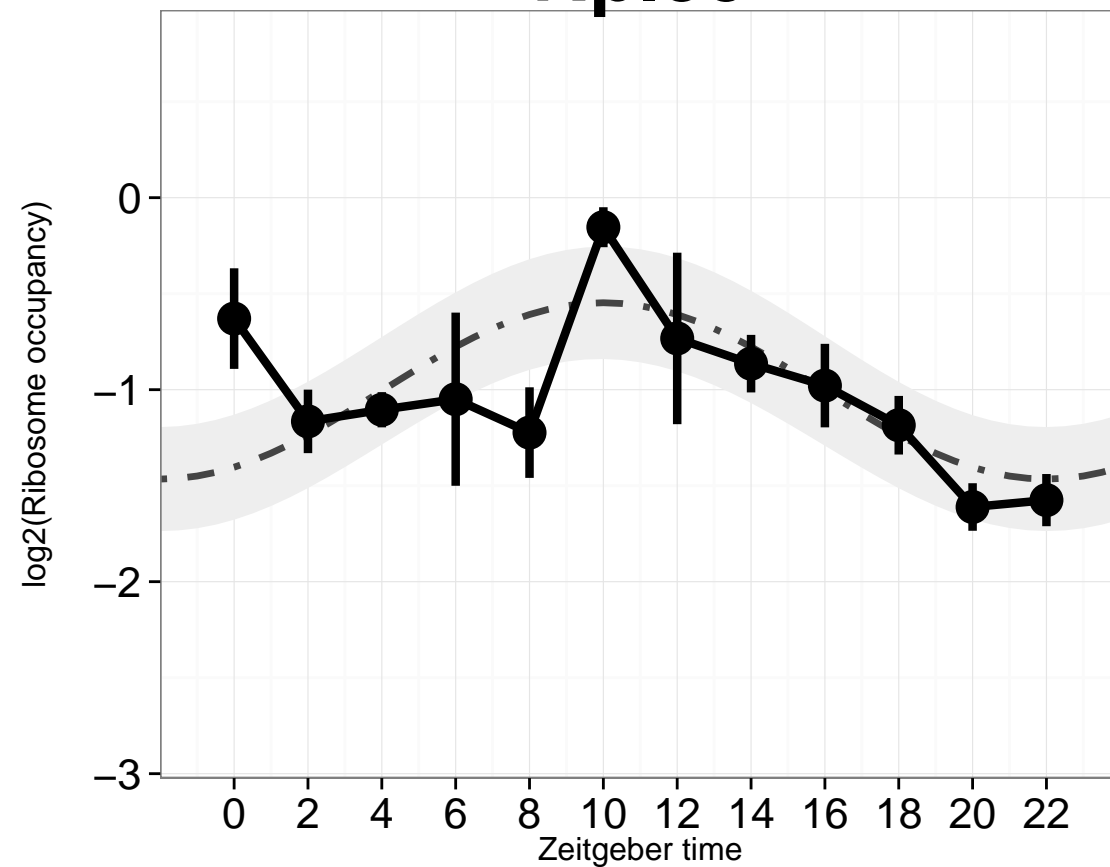

Supplement: SuppDataset_1.zip [file Rpl35_set_A.pdf › Supplemental Dataset 1/A-mRNA_nonrhyth_translation_nonrhyth/Rpl35_set_A.pdf]

# Rpl35a

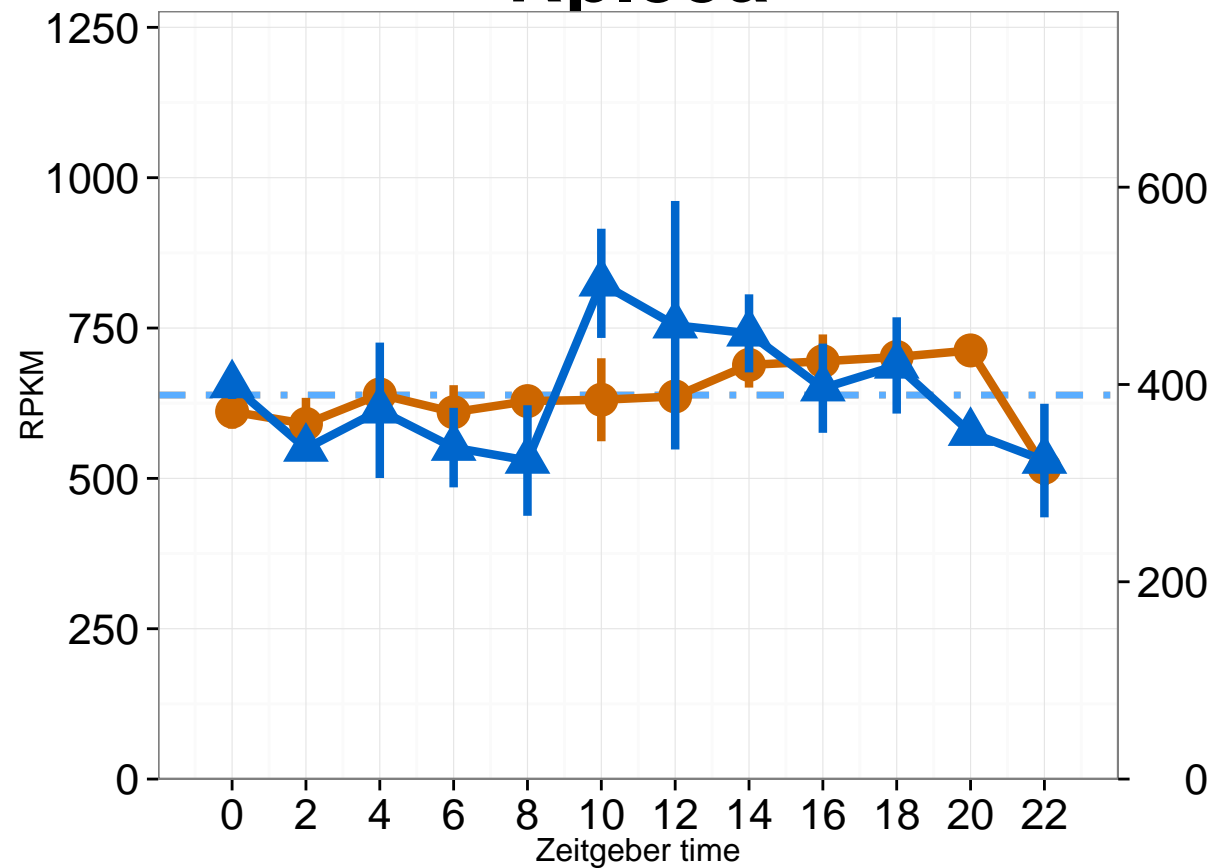

# Rpl35a

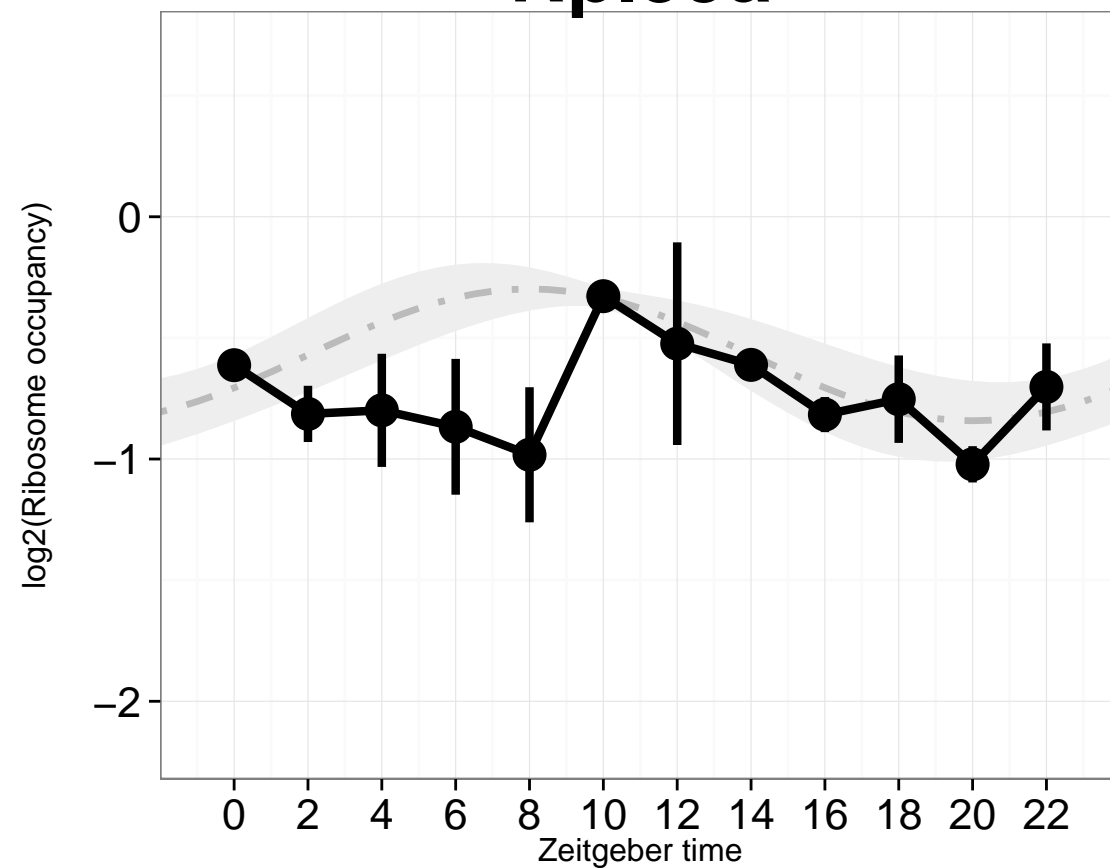

Supplement: SuppDataset_1.zip [file Rpl35a_set_A.pdf › Supplemental Dataset 1/A-mRNA_nonrhyth_translation_nonrhyth/Rpl35a_set_A.pdf]

# Rpl36

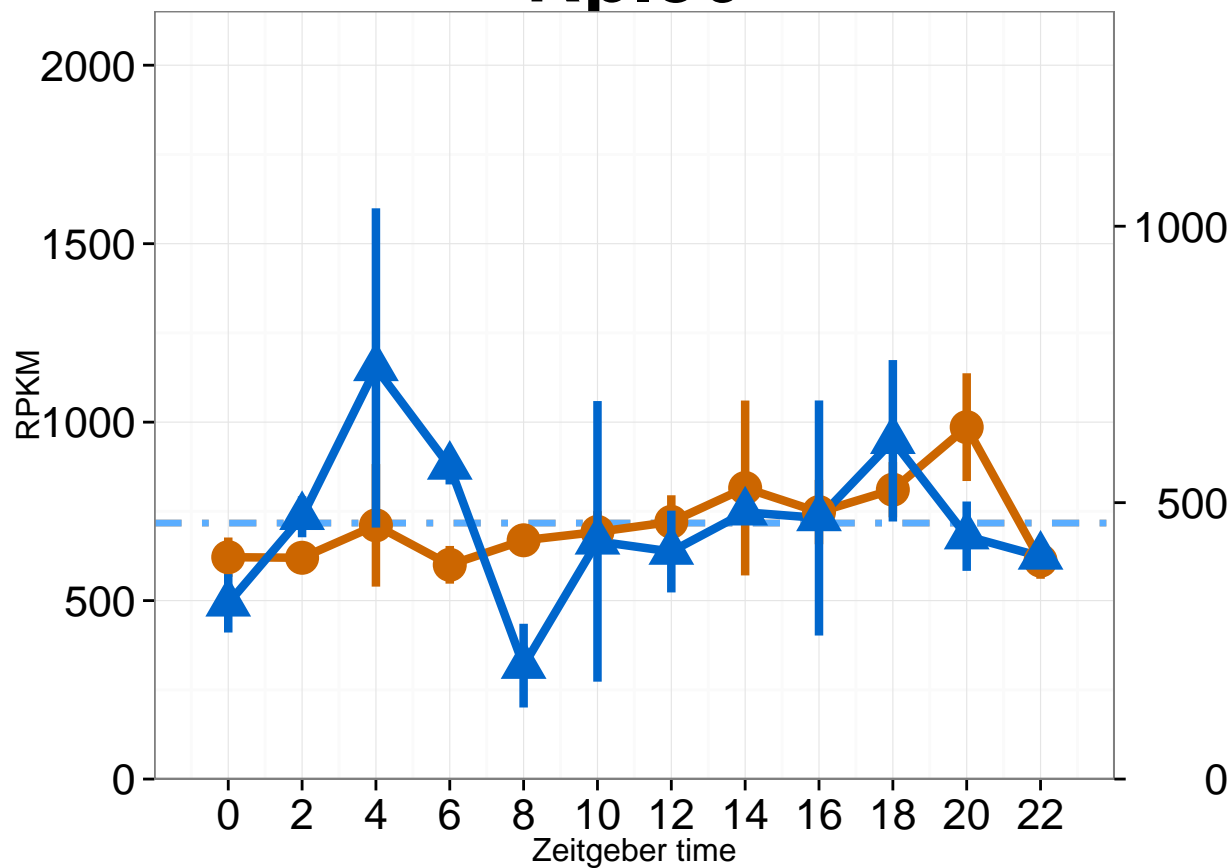

# Rpl36

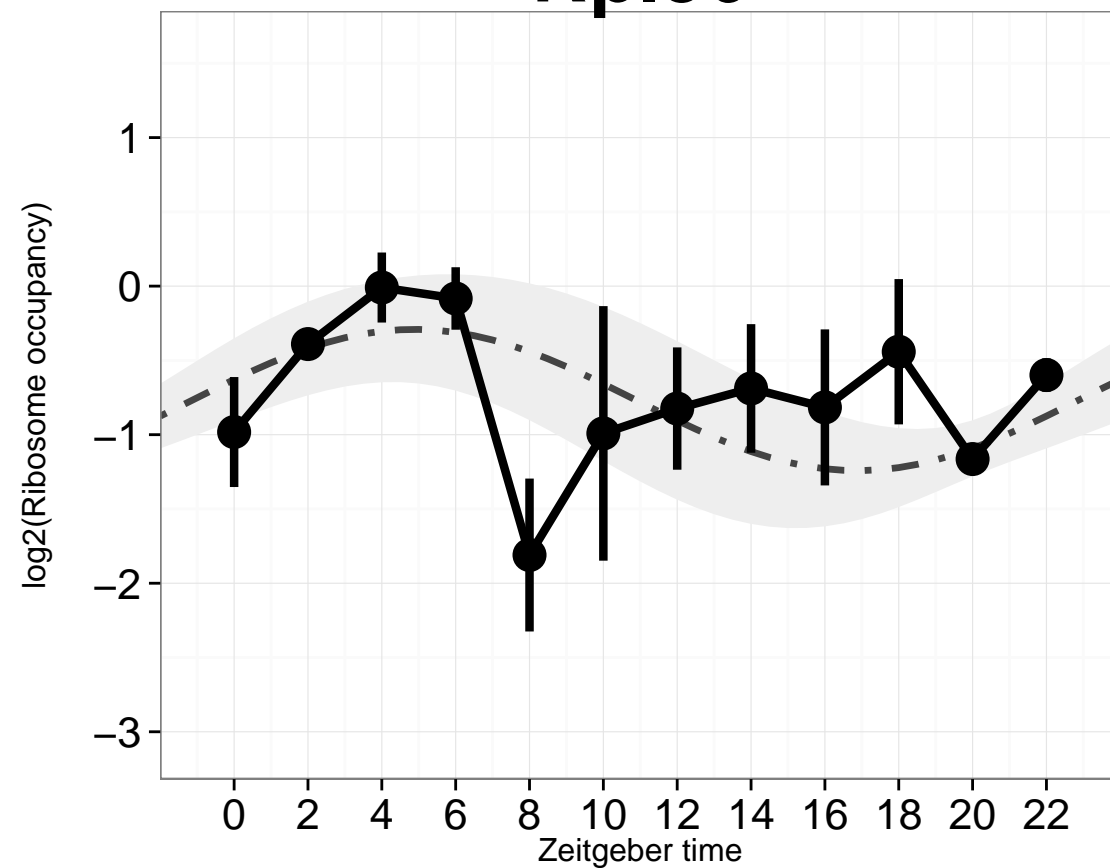

Supplement: SuppDataset_1.zip [file Rpl36_set_A.pdf › Supplemental Dataset 1/A-mRNA_nonrhyth_translation_nonrhyth/Rpl36_set_A.pdf]

# Rpl36a

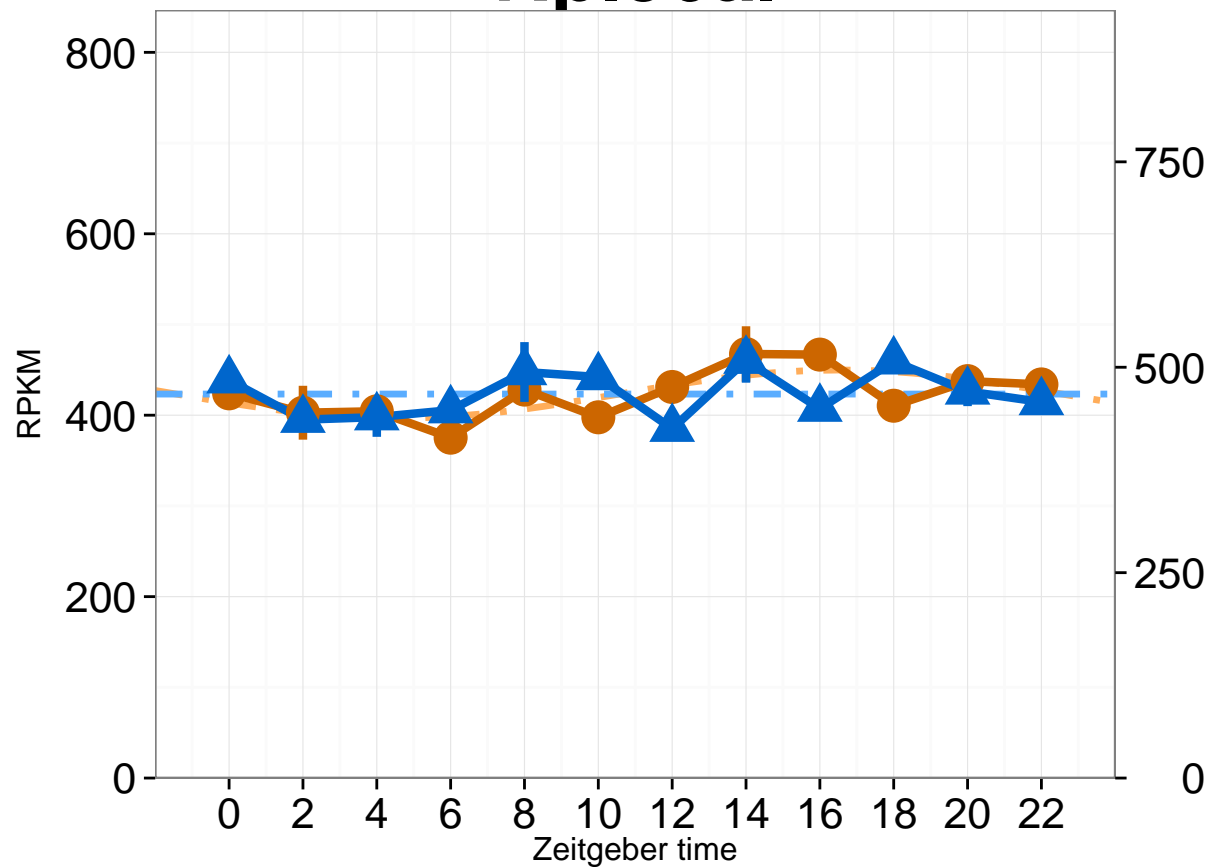

# Rpl36a

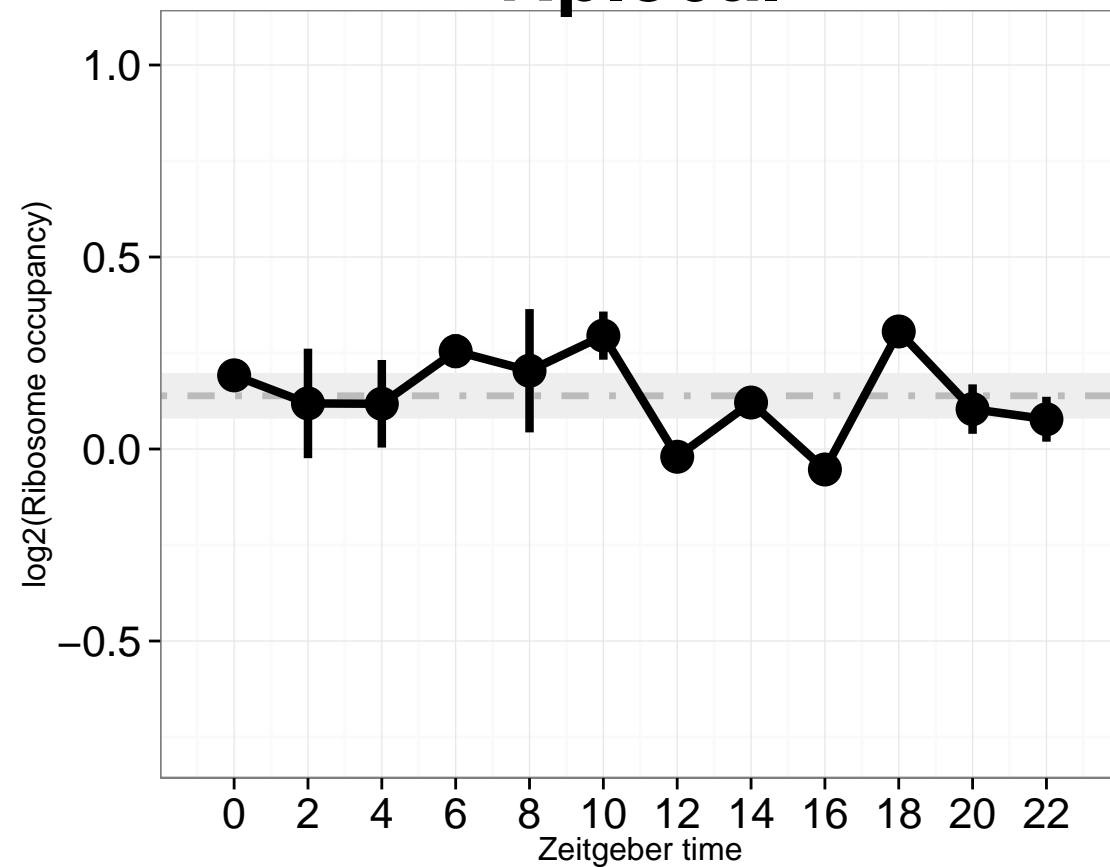

Supplement: SuppDataset_1.zip [file Rpl36al_set_A.pdf › Supplemental Dataset 1/A-mRNA_nonrhyth_translation_nonrhyth/Rpl36al_set_A.pdf]

# Rpl38

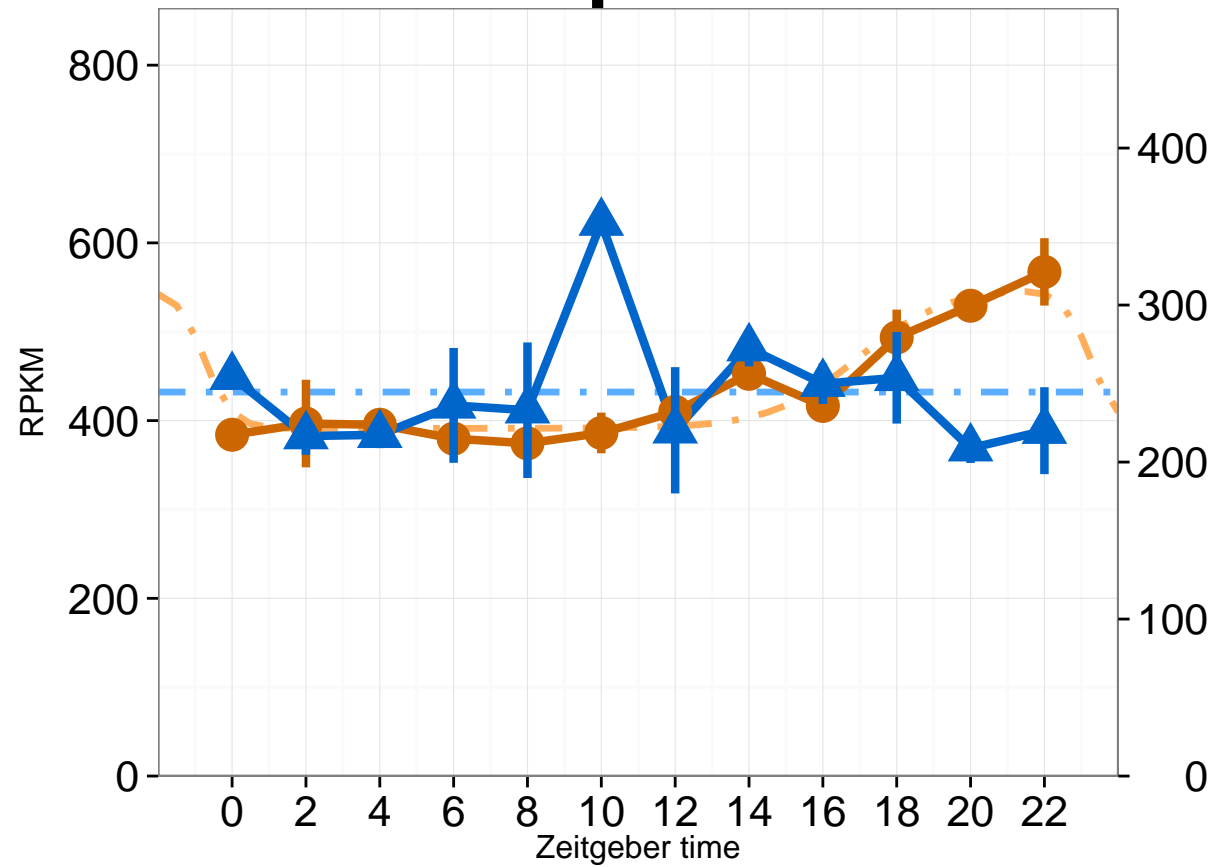

# Rpl38

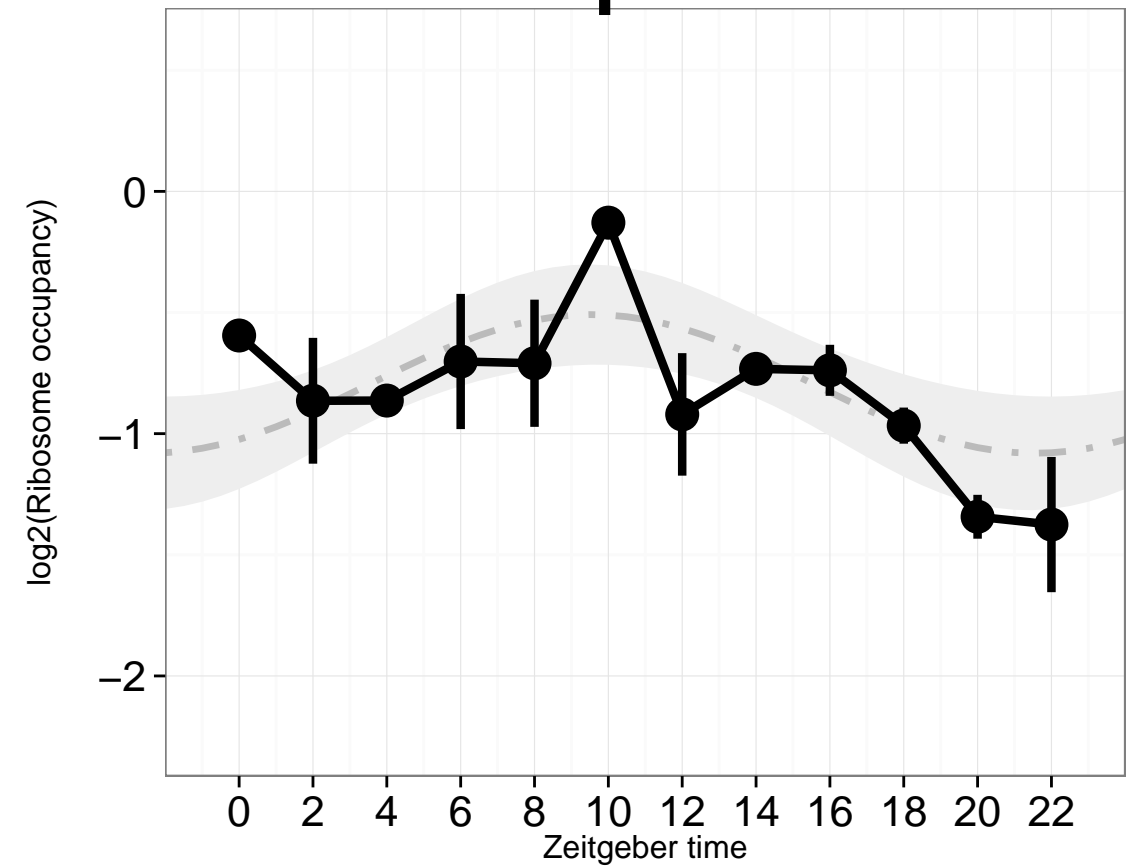

Supplement: SuppDataset_1.zip [file Rpl38_set_A.pdf › Supplemental Dataset 1/A-mRNA_nonrhyth_translation_nonrhyth/Rpl38_set_A.pdf]

# Rpl3

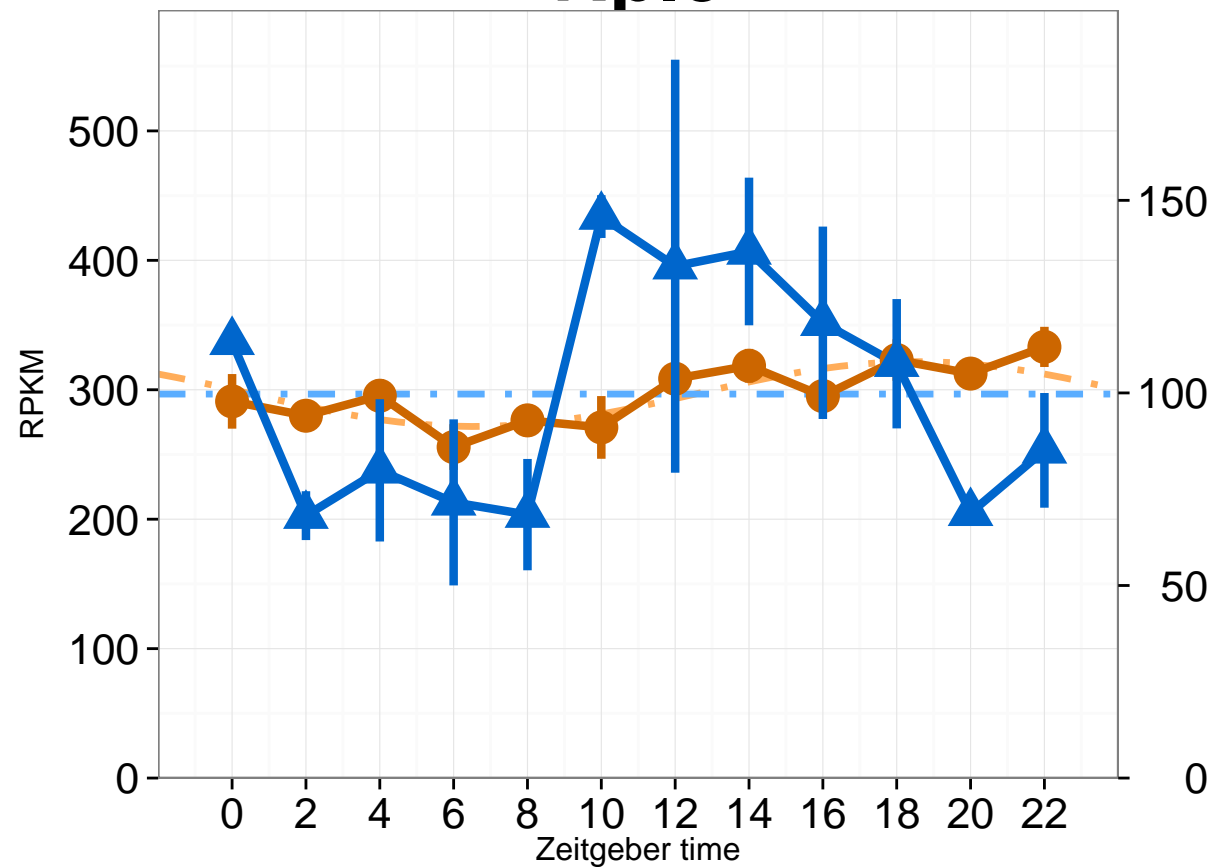

# Rpl3

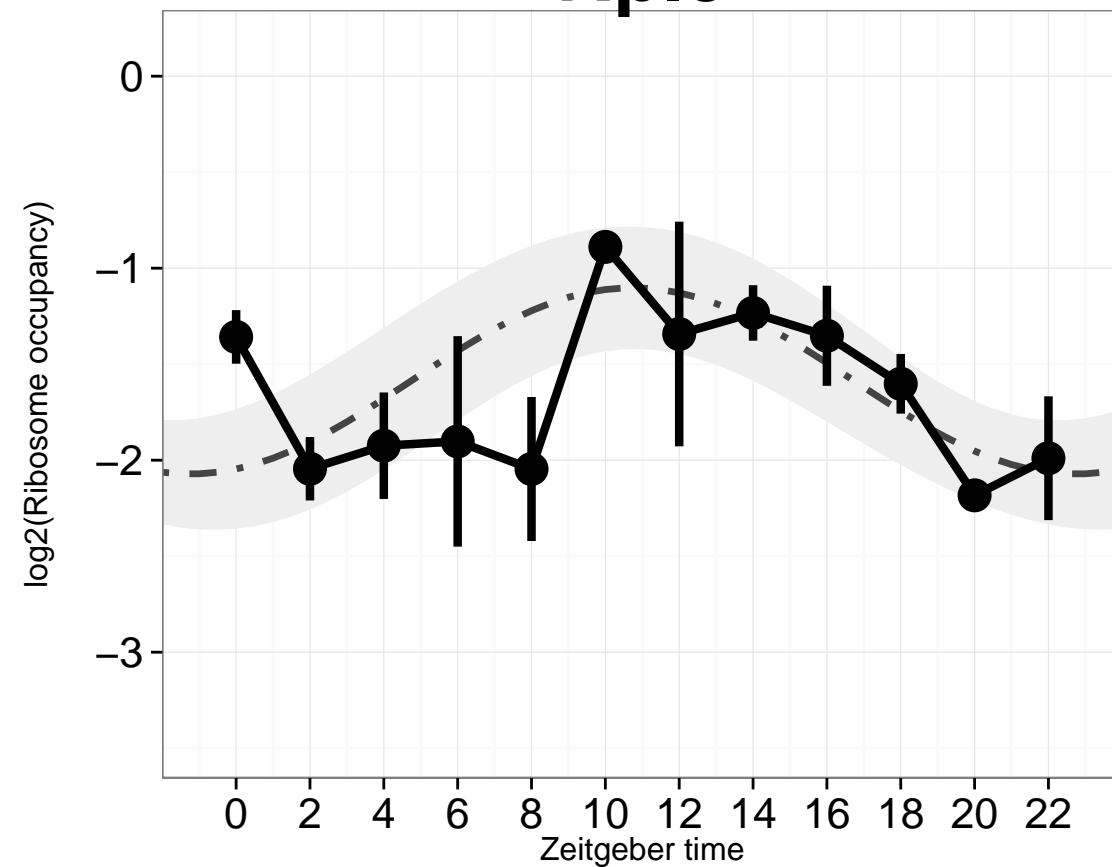

Supplement: SuppDataset_1.zip [file Rpl3_set_A.pdf › Supplemental Dataset 1/A-mRNA_nonrhyth_translation_nonrhyth/Rpl3_set_A.pdf]

# Rpl7l1

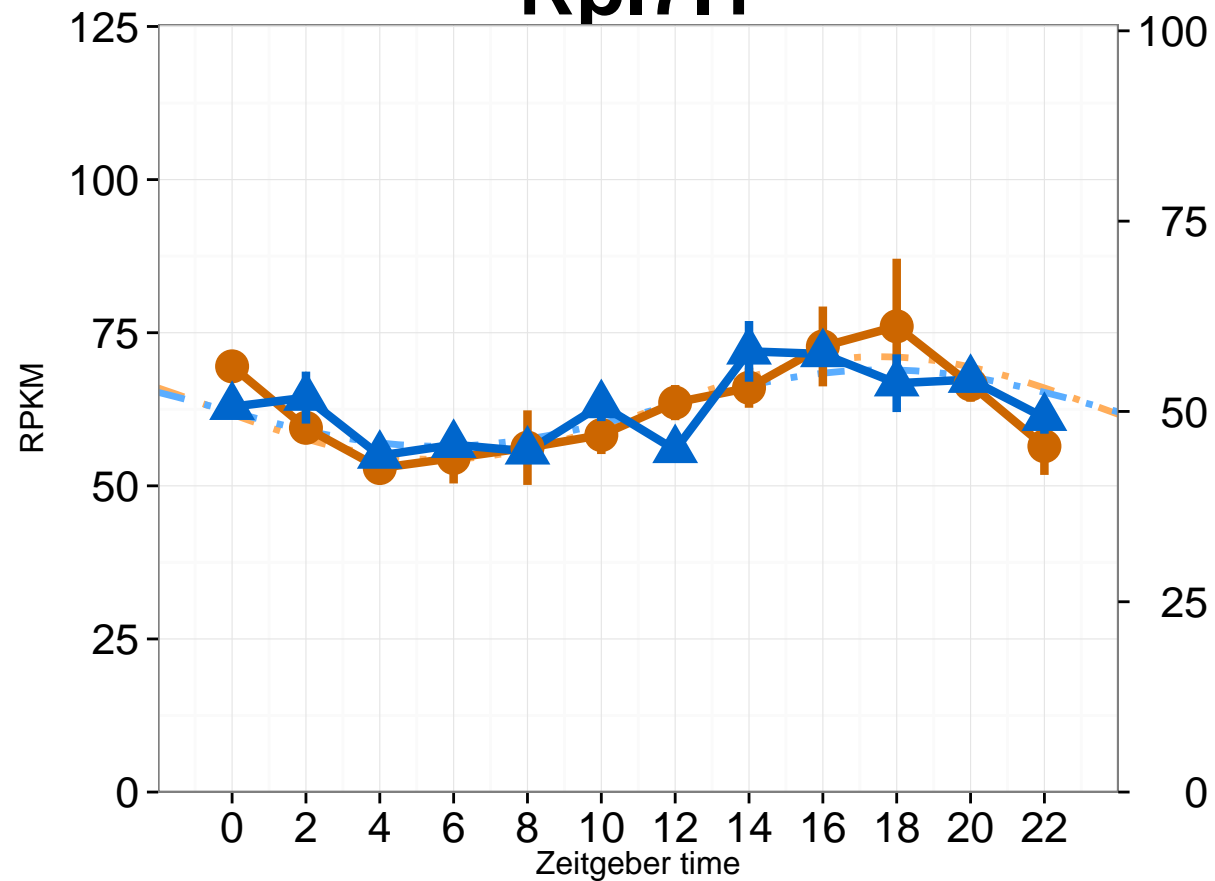

# Rpl7l1

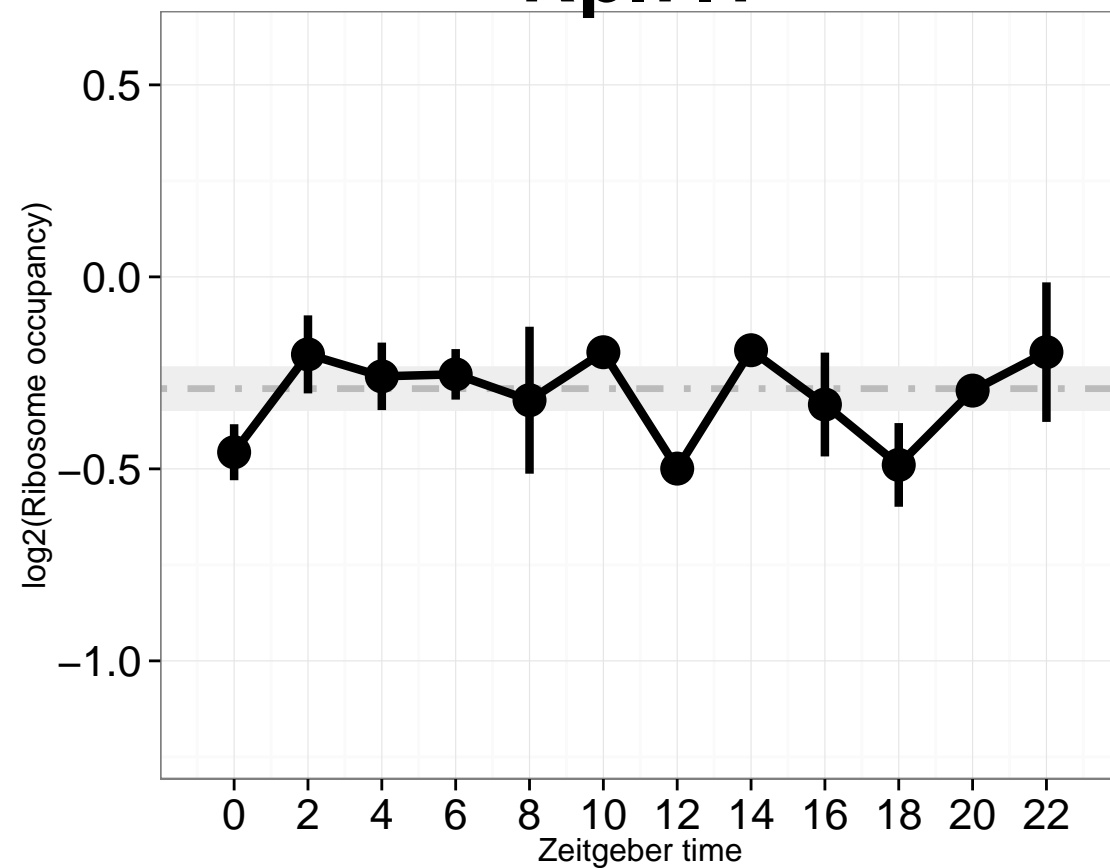

Supplement: SuppDataset_1.zip [file Rpl7l1_set_A.pdf › Supplemental Dataset 1/A-mRNA_nonrhyth_translation_nonrhyth/Rpl7l1_set_A.pdf]

# Rpl8

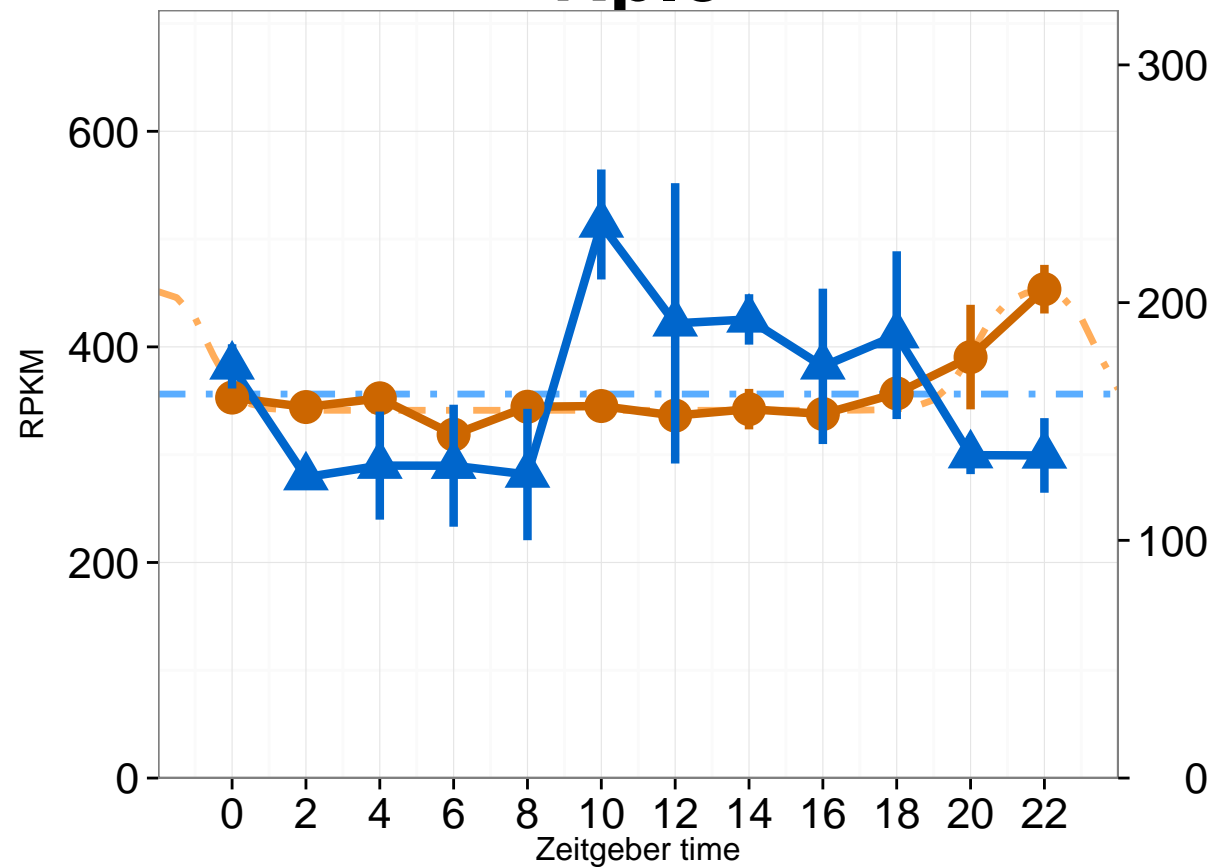

# Rpl8

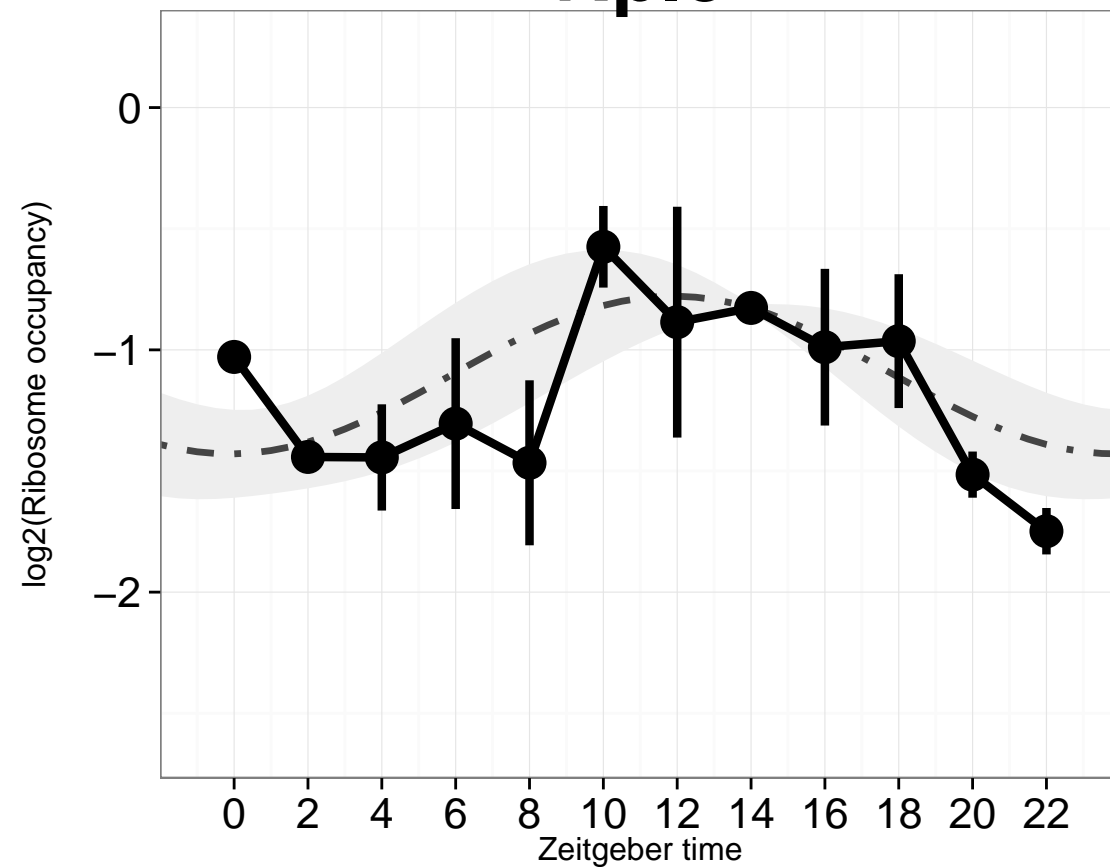

Supplement: SuppDataset_1.zip [file Rpl8_set_A.pdf › Supplemental Dataset 1/A-mRNA_nonrhyth_translation_nonrhyth/Rpl8_set_A.pdf]

# Rplp0

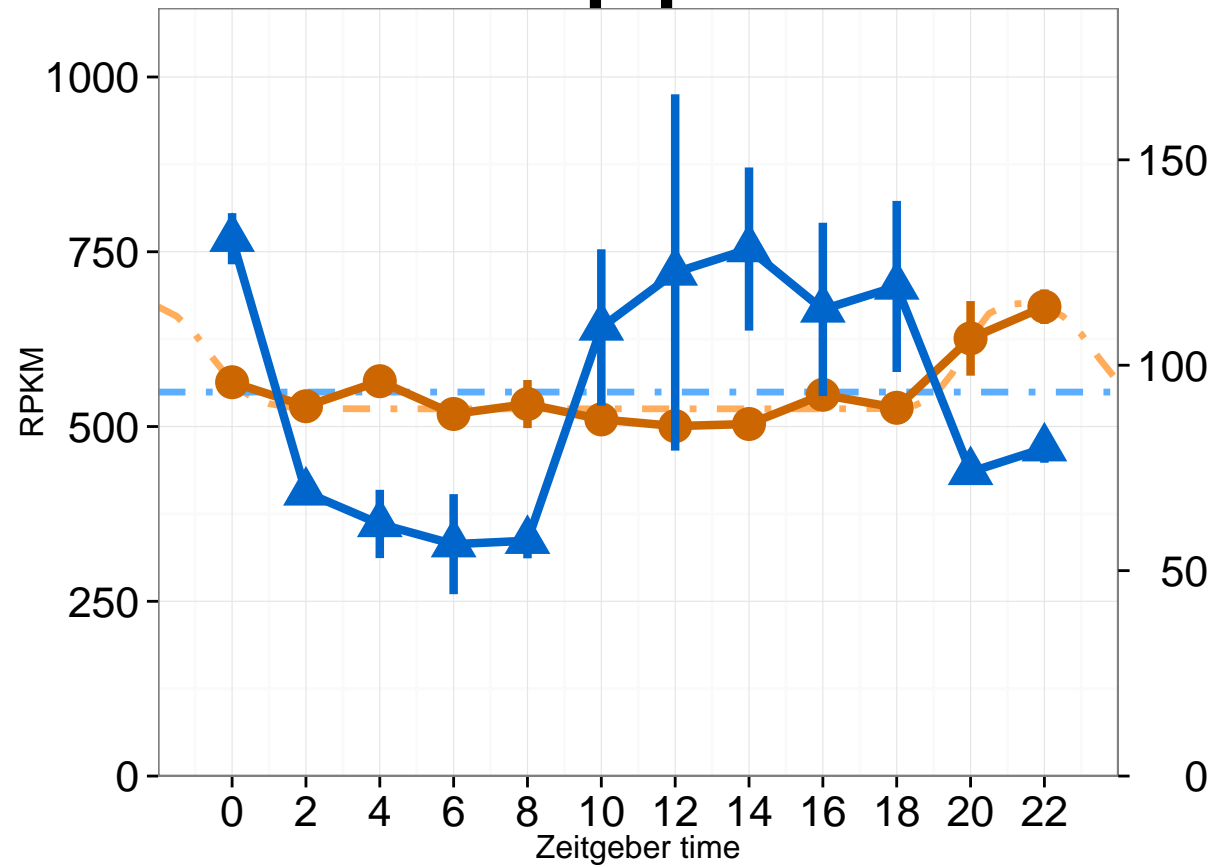

# Rplp0

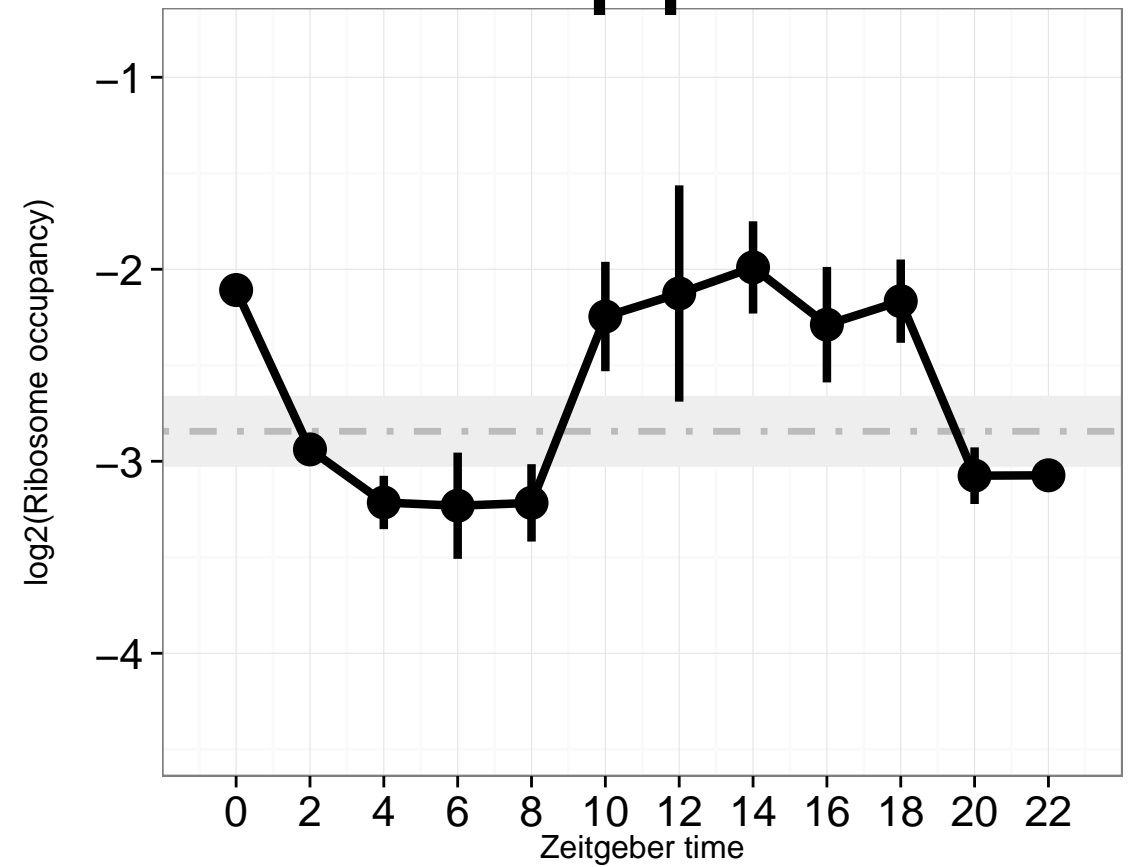

Supplement: SuppDataset_1.zip [file Rplp0_set_A.pdf › Supplemental Dataset 1/A-mRNA_nonrhyth_translation_nonrhyth/Rplp0_set_A.pdf]

## Rpn1

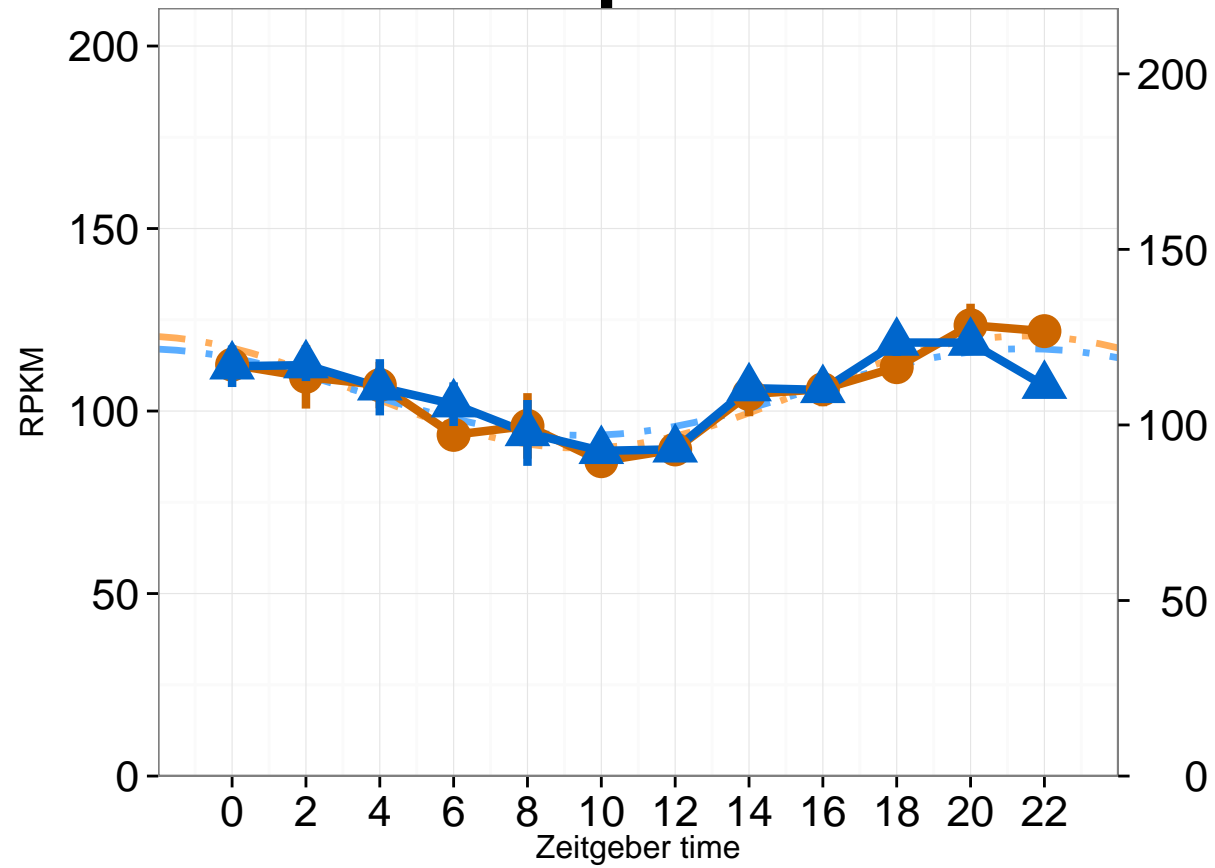

## Rpn1

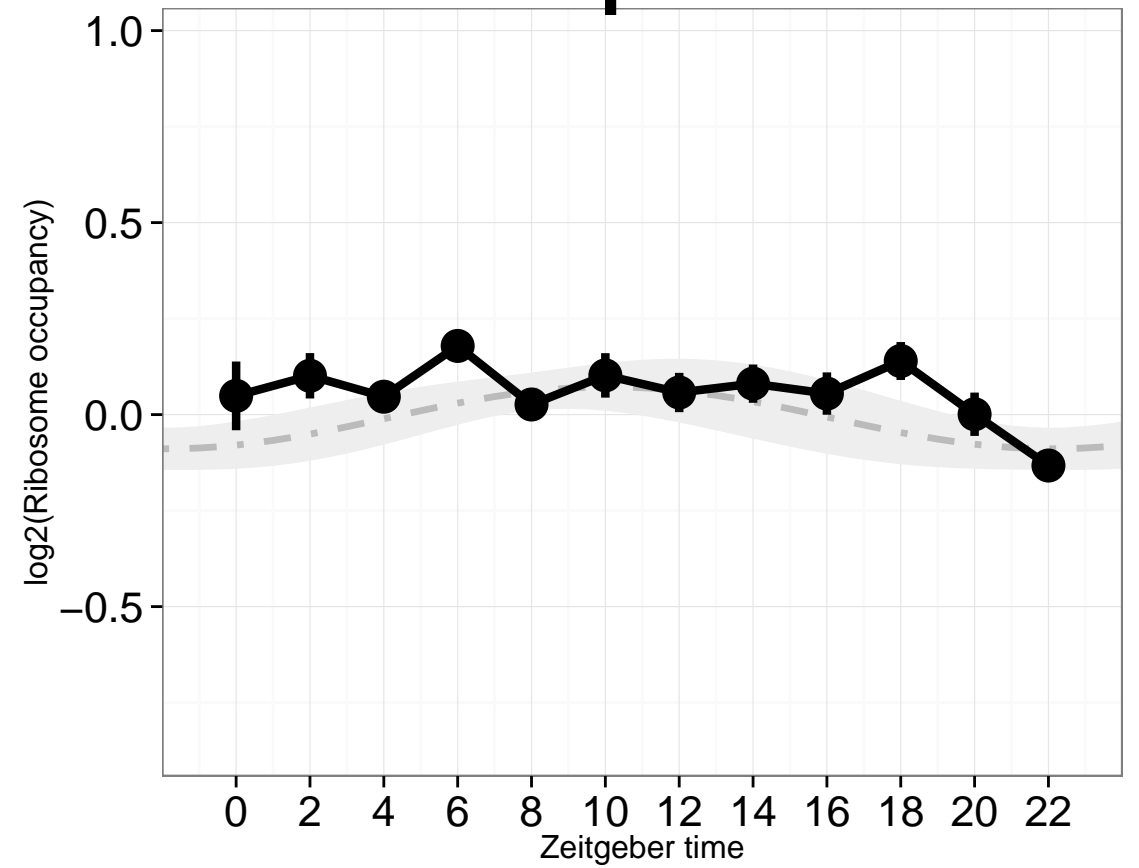

Supplement: SuppDataset_1.zip [file Rpn1_set_A.pdf › Supplemental Dataset 1/A-mRNA_nonrhyth_translation_nonrhyth/Rpn1_set_A.pdf]

## Rpn2

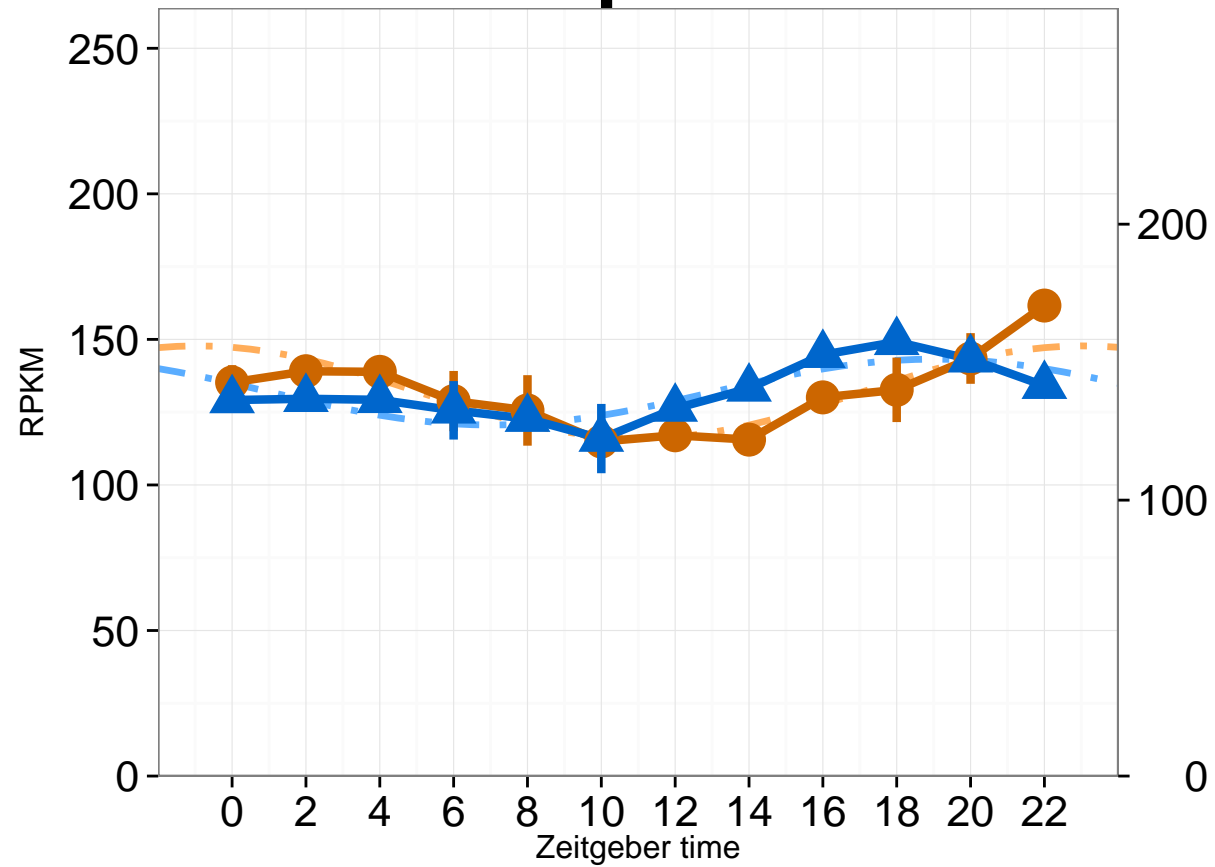

## Rpn2

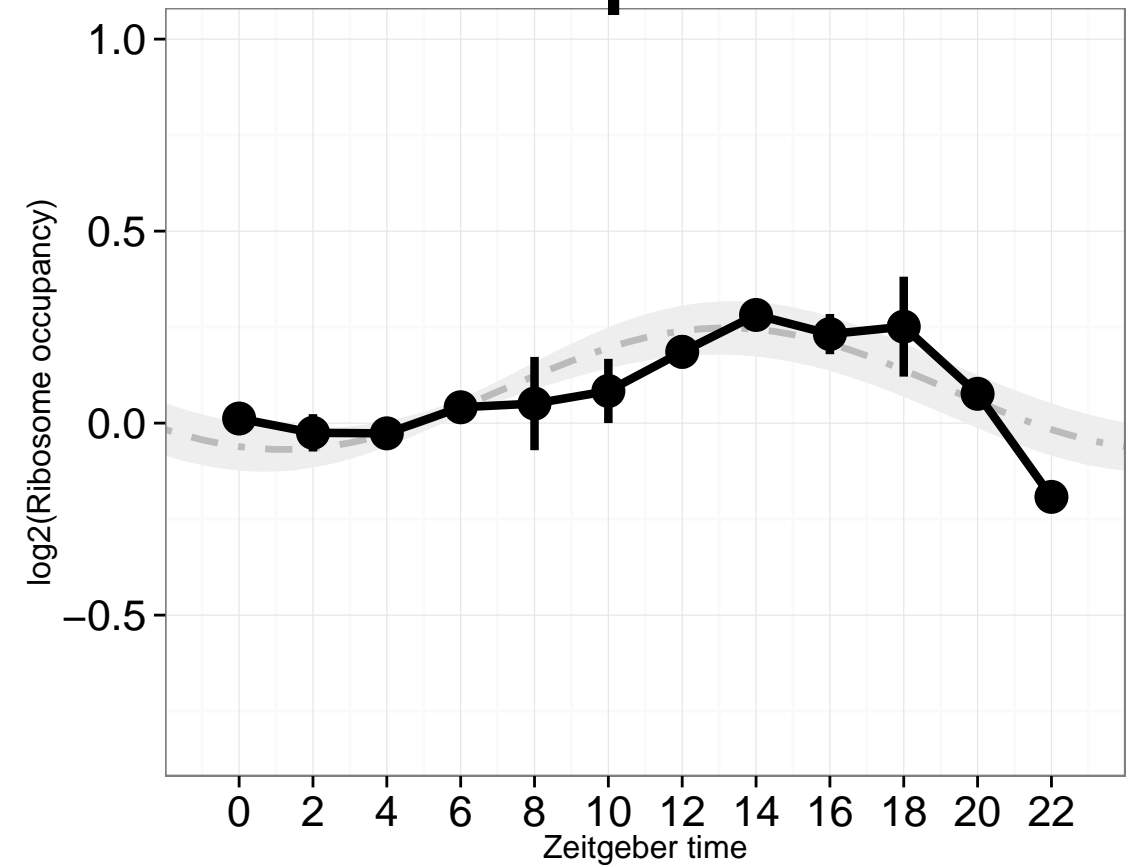

Supplement: SuppDataset_1.zip [file Rpn2_set_A.pdf › Supplemental Dataset 1/A-mRNA_nonrhyth_translation_nonrhyth/Rpn2_set_A.pdf]

# Rpp30

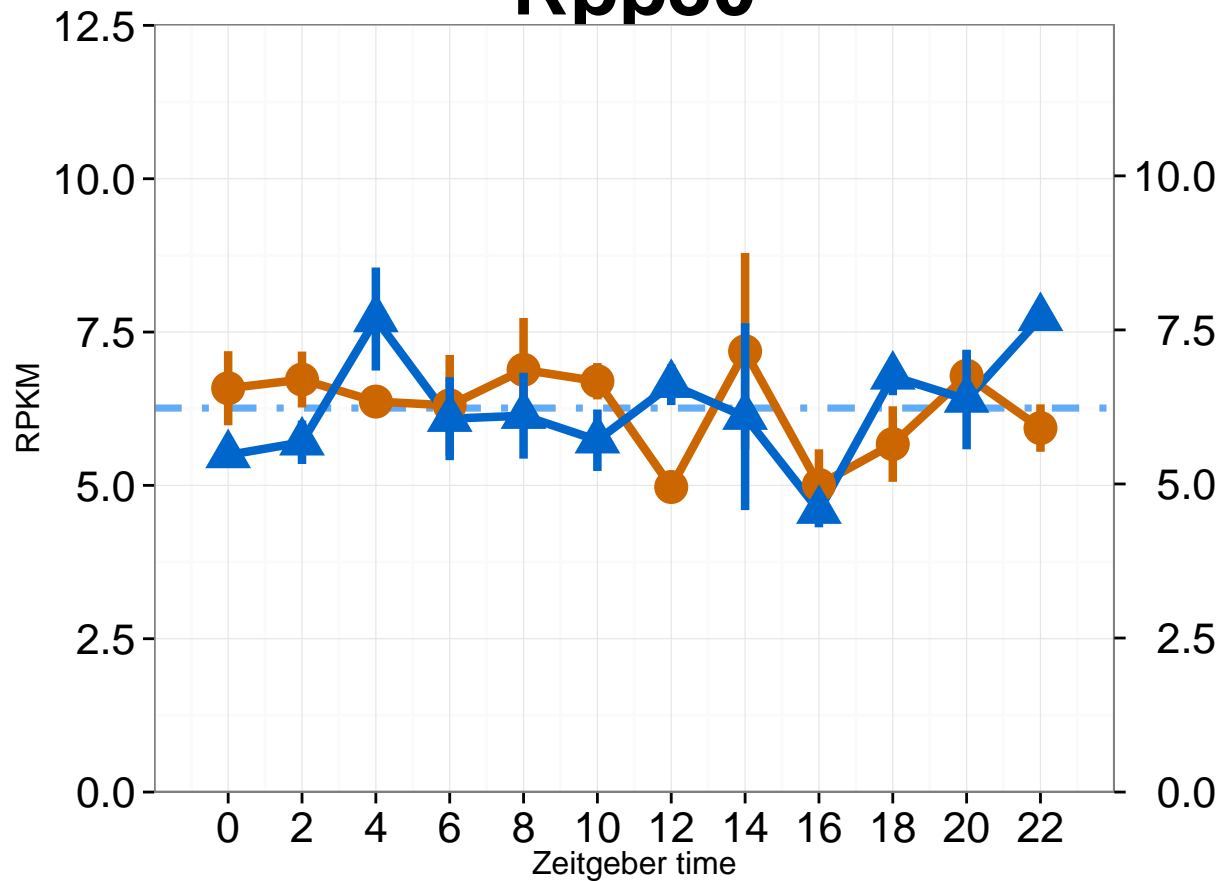

# Rpp30

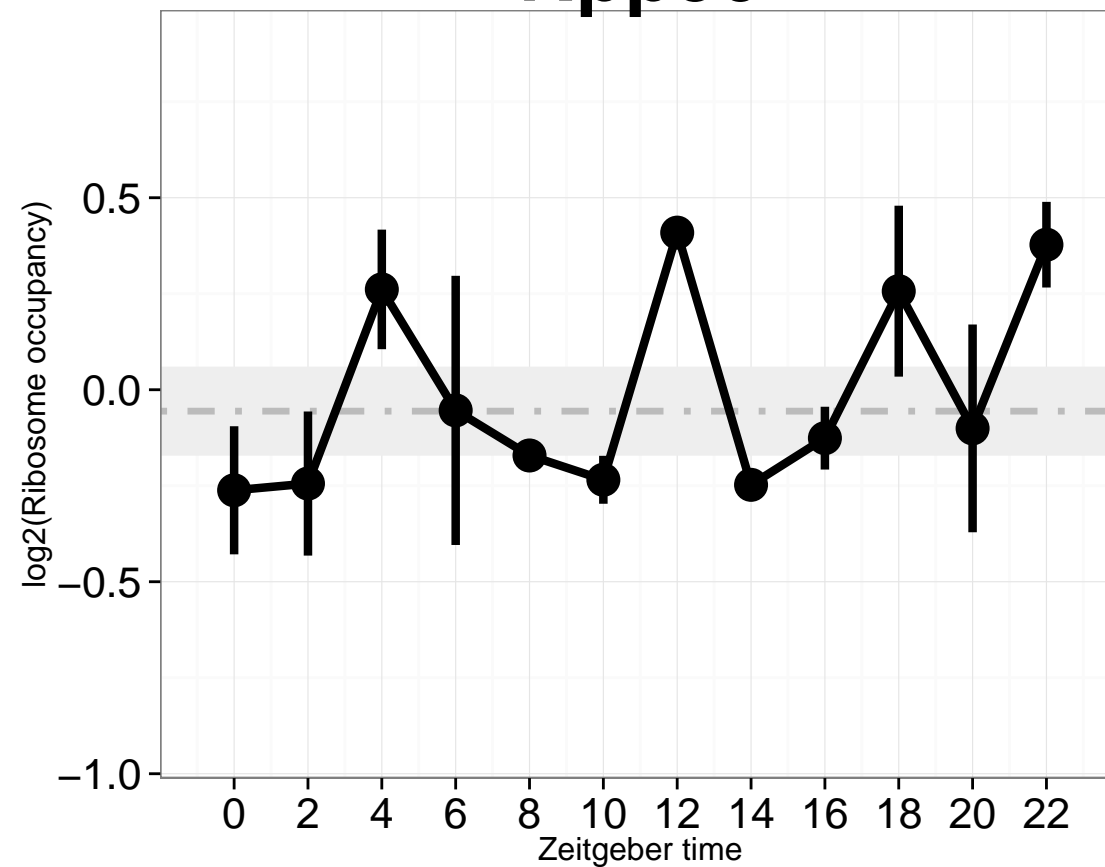

Supplement: SuppDataset_1.zip [file Rpp30_set_A.pdf › Supplemental Dataset 1/A-mRNA_nonrhyth_translation_nonrhyth/Rpp30_set_A.pdf]

# Rpp40

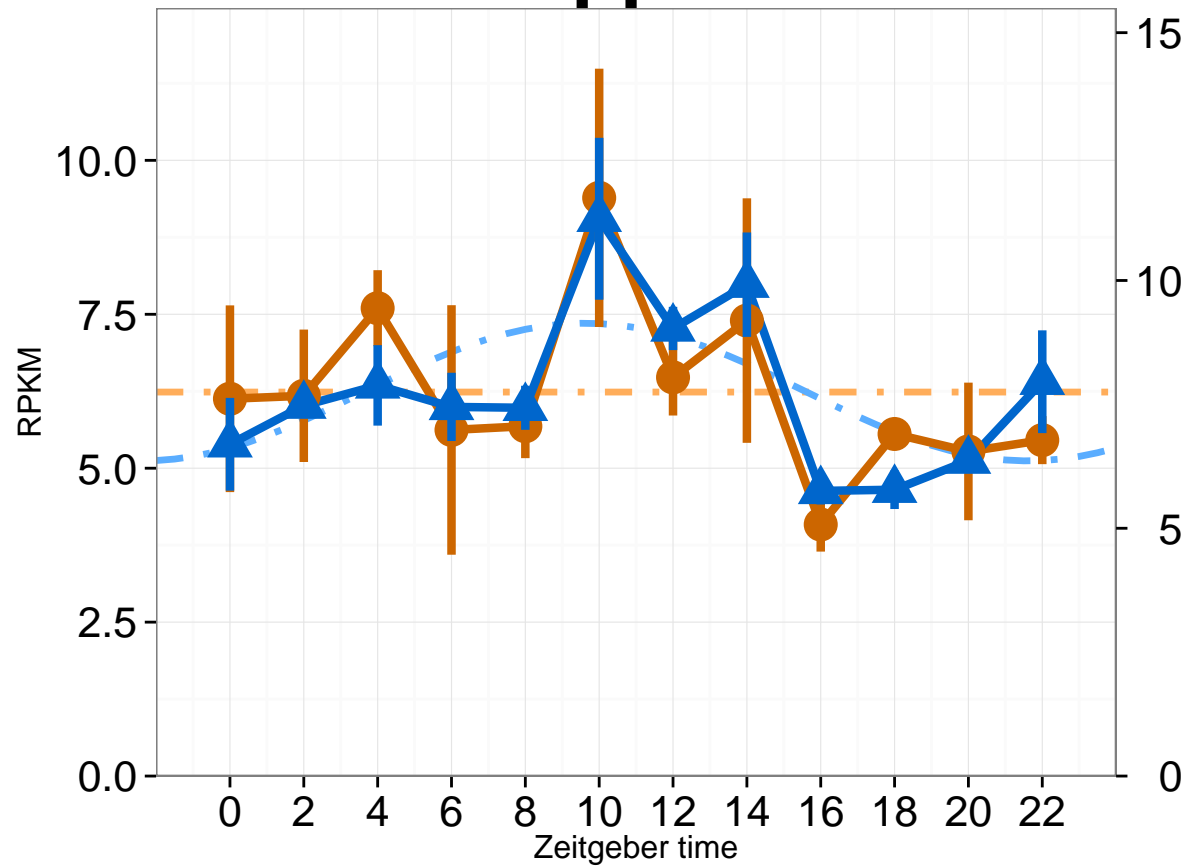

# Rpp40

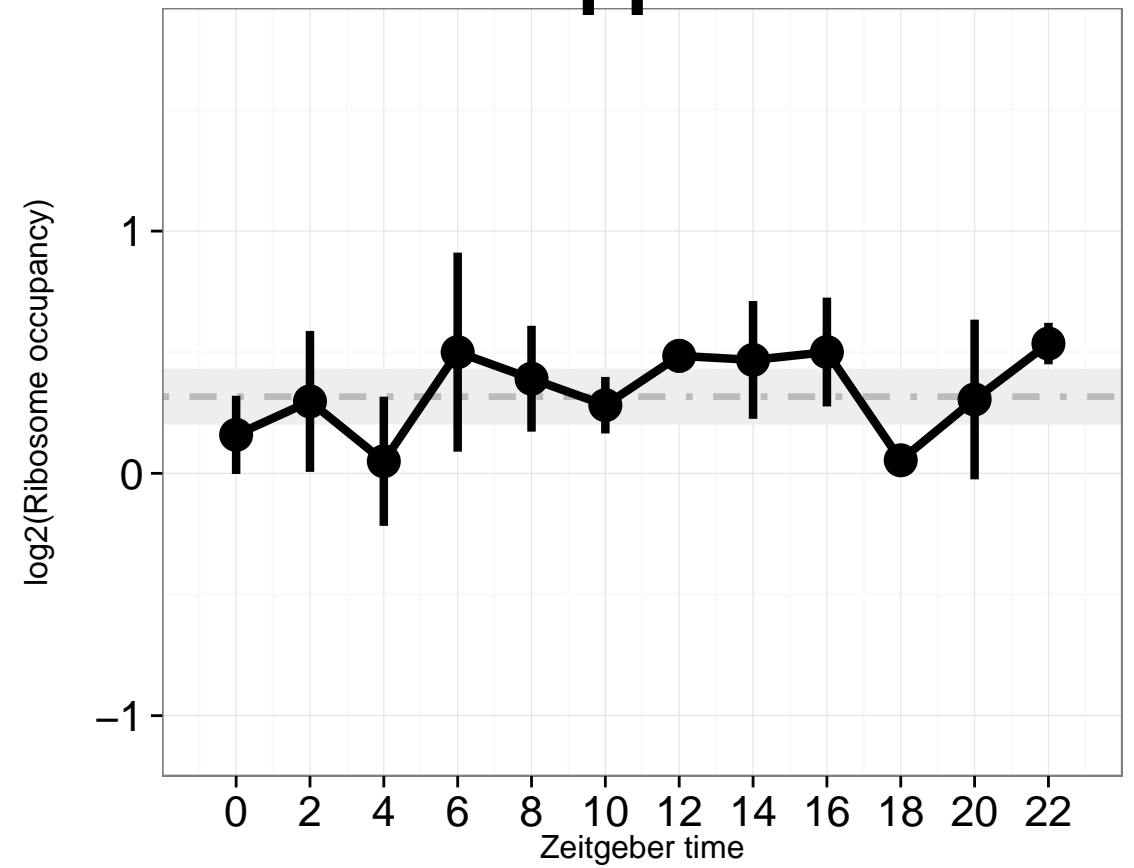

Supplement: SuppDataset_1.zip [file Rpp40_set_A.pdf › Supplemental Dataset 1/A-mRNA_nonrhyth_translation_nonrhyth/Rpp40_set_A.pdf]

# Rprd1a

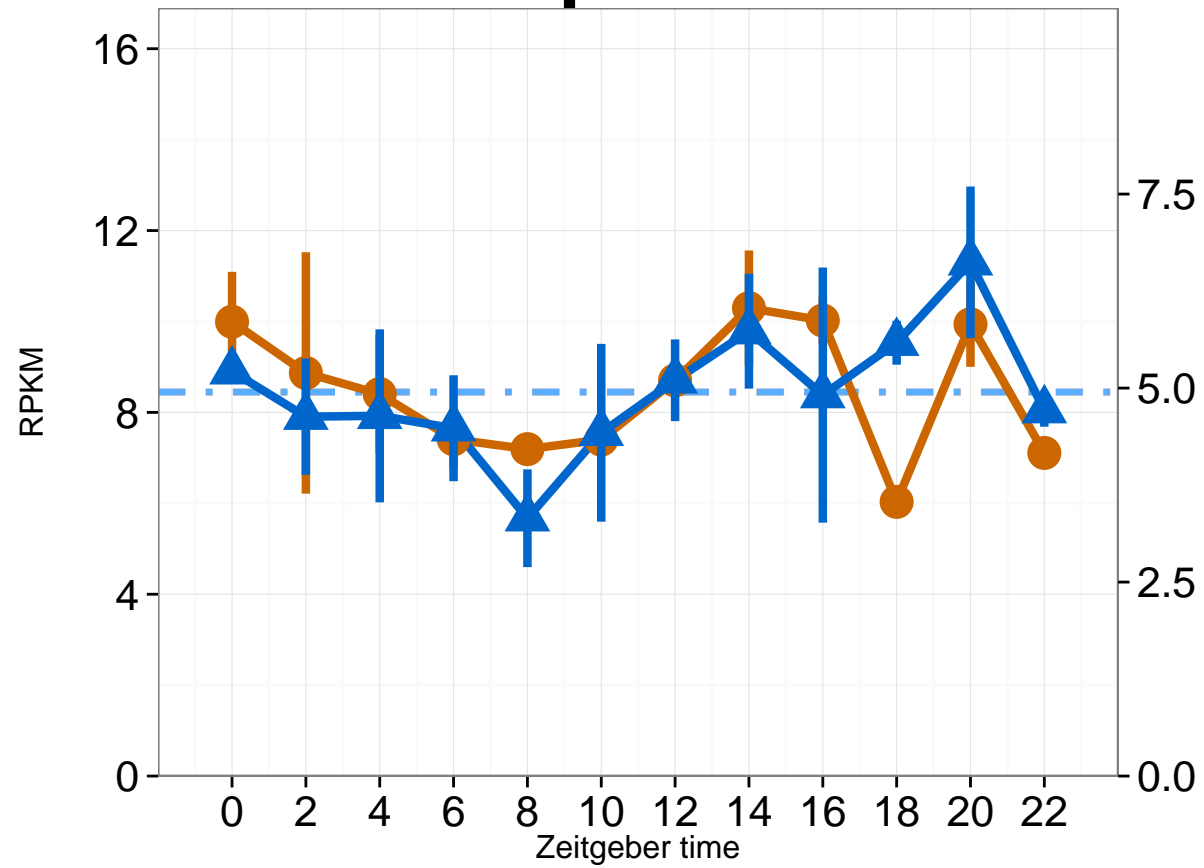

# Rprd1a

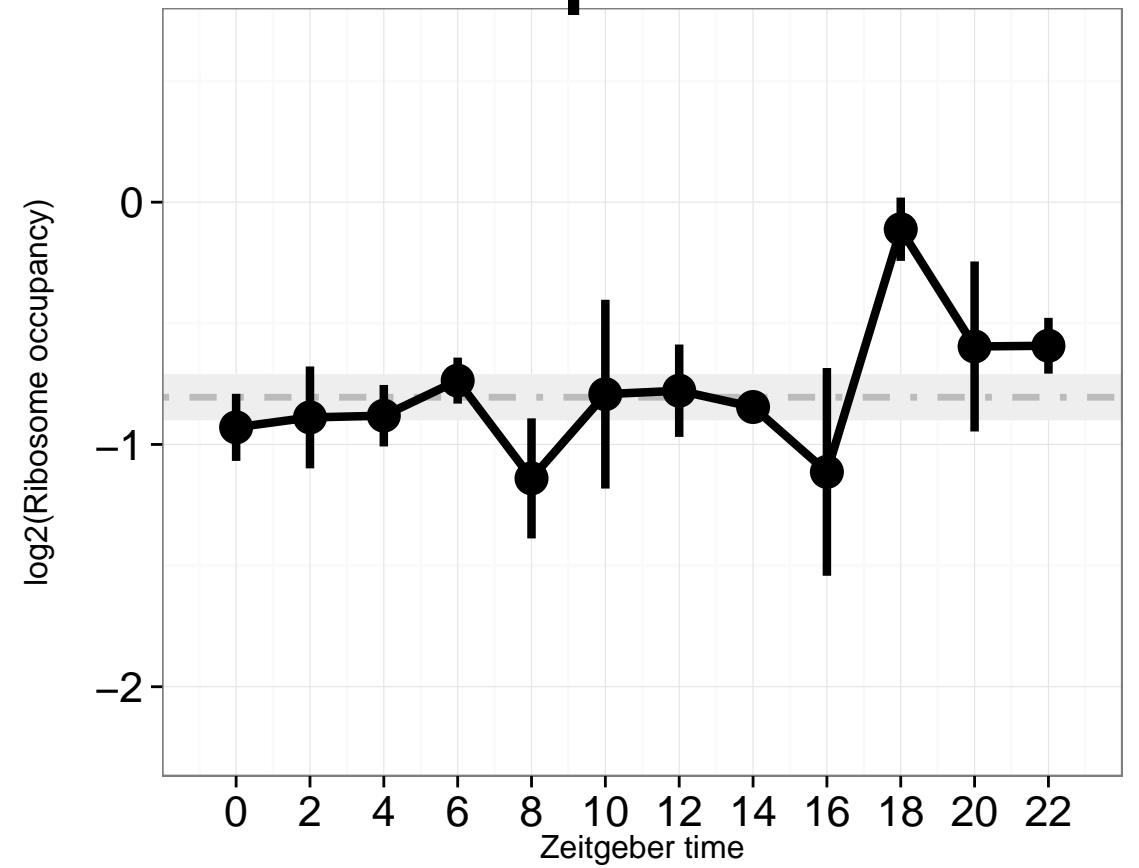

Supplement: SuppDataset_1.zip [file Rprd1a_set_A.pdf › Supplemental Dataset 1/A-mRNA_nonrhyth_translation_nonrhyth/Rprd1a_set_A.pdf]

# Rprd1b

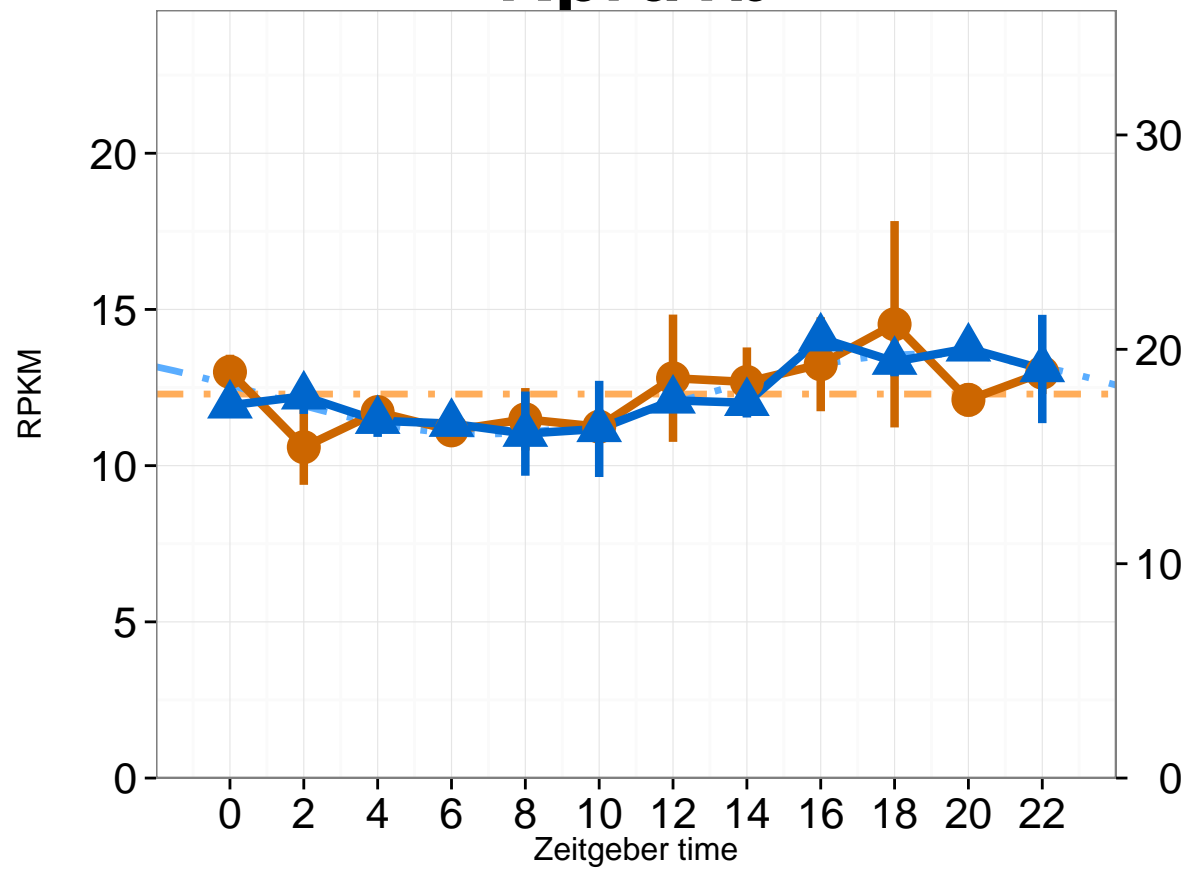

# Rprd1b

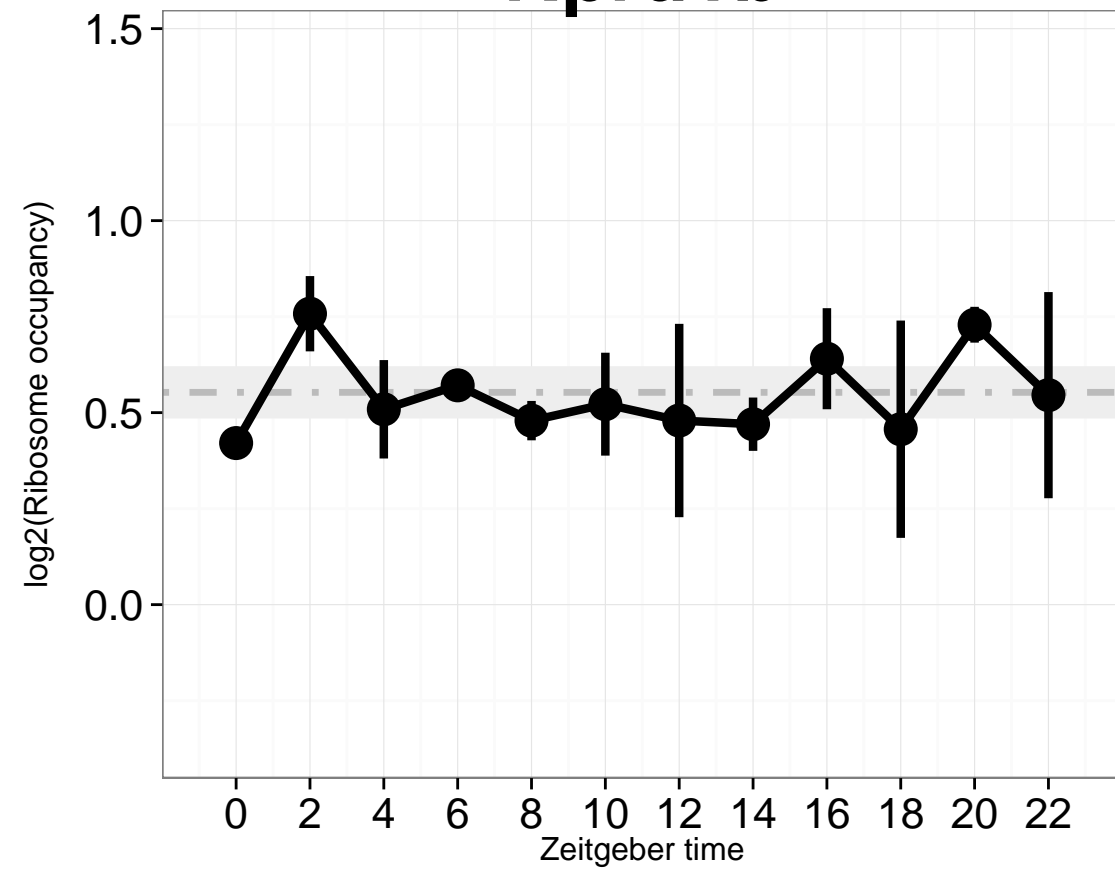

Supplement: SuppDataset_1.zip [file Rprd1b_set_A.pdf › Supplemental Dataset 1/A-mRNA_nonrhyth_translation_nonrhyth/Rprd1b_set_A.pdf]

## Rprd2

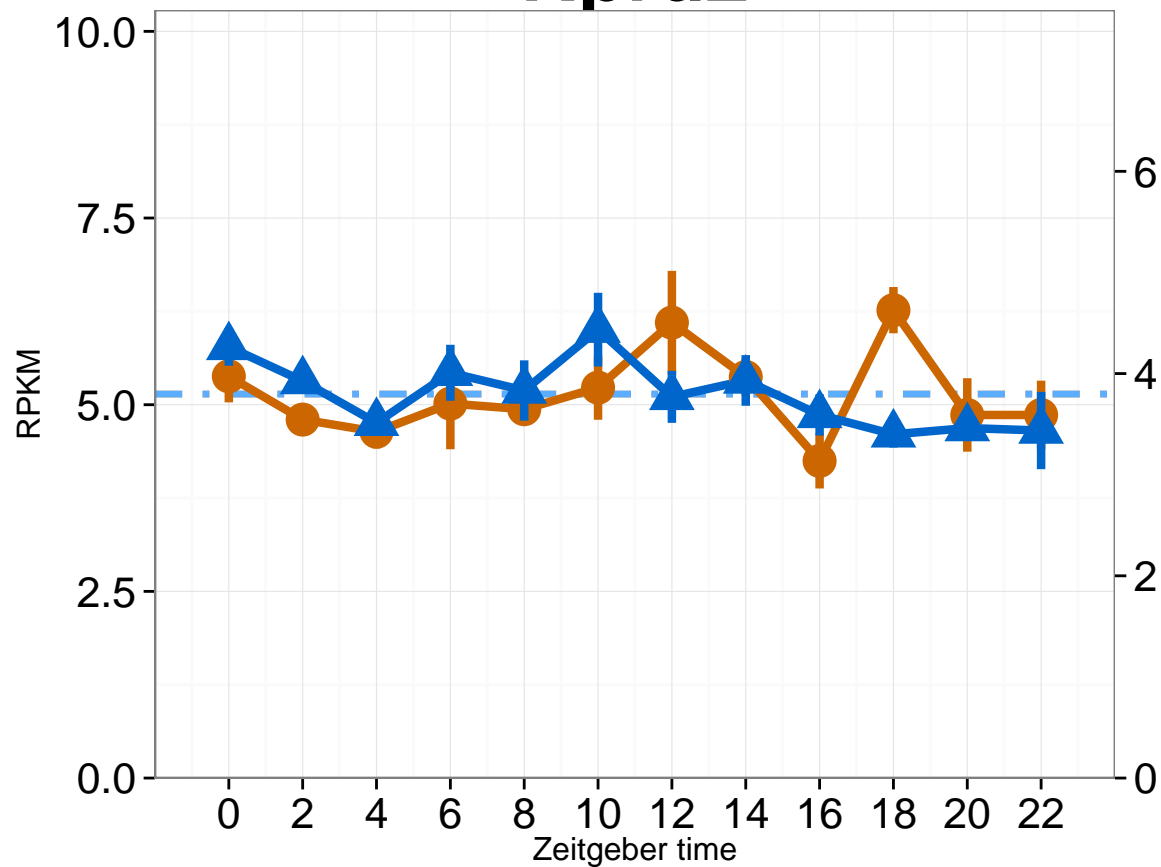

## Rprd2

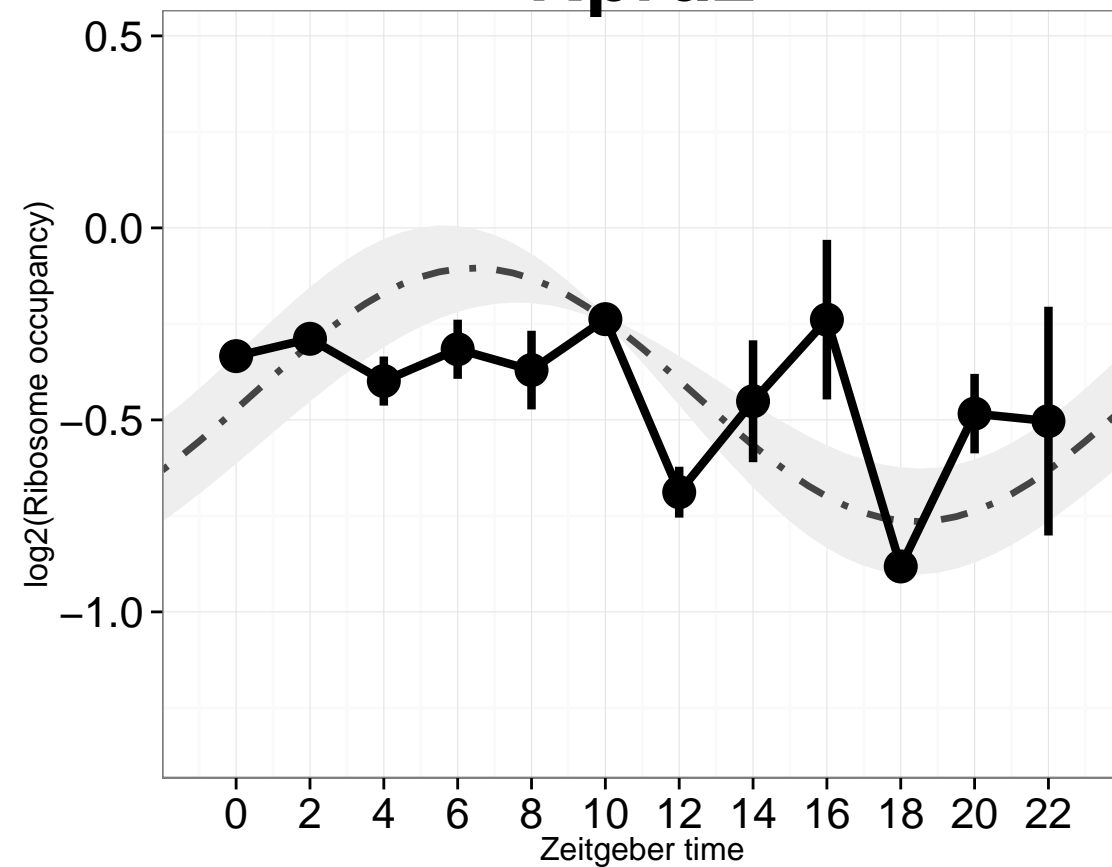

Supplement: SuppDataset_1.zip [file Rprd2_set_A.pdf › Supplemental Dataset 1/A-mRNA_nonrhyth_translation_nonrhyth/Rprd2_set_A.pdf]

# Rps14

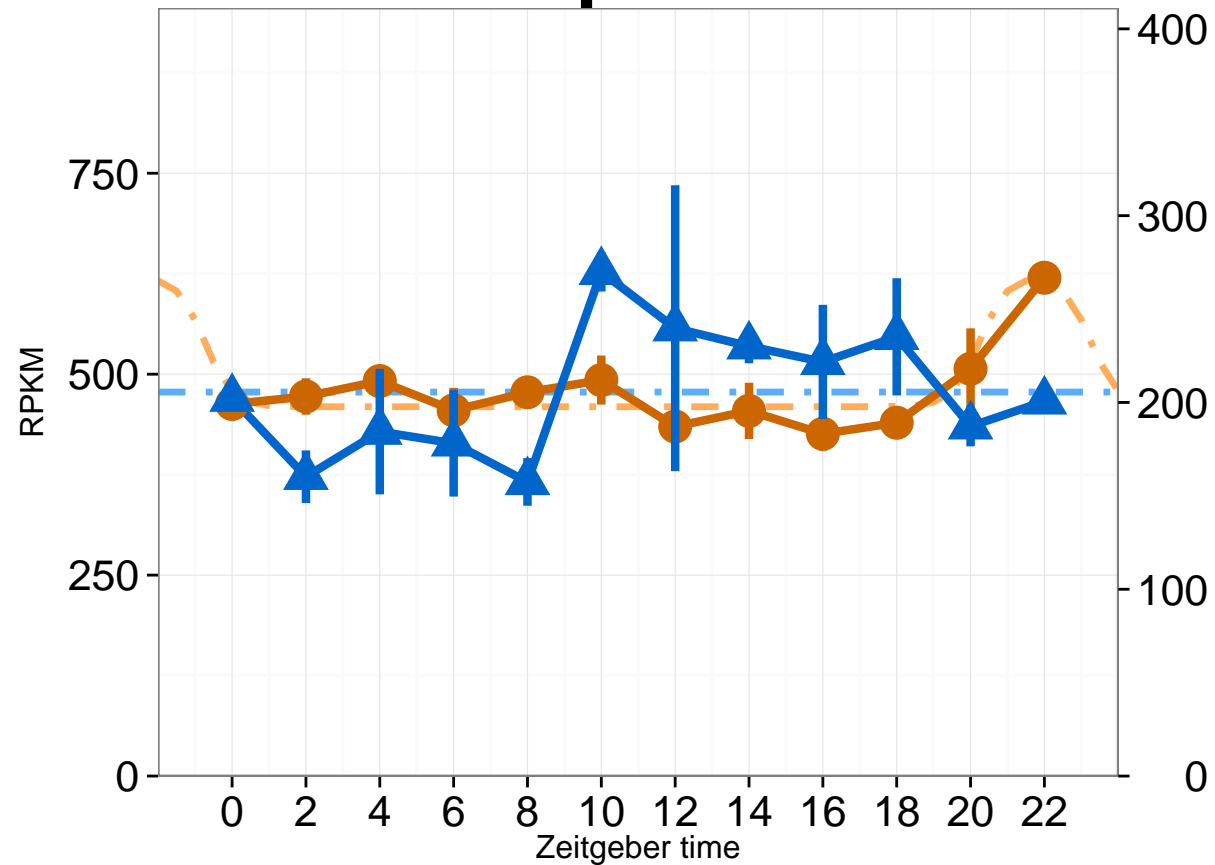

# Rps14

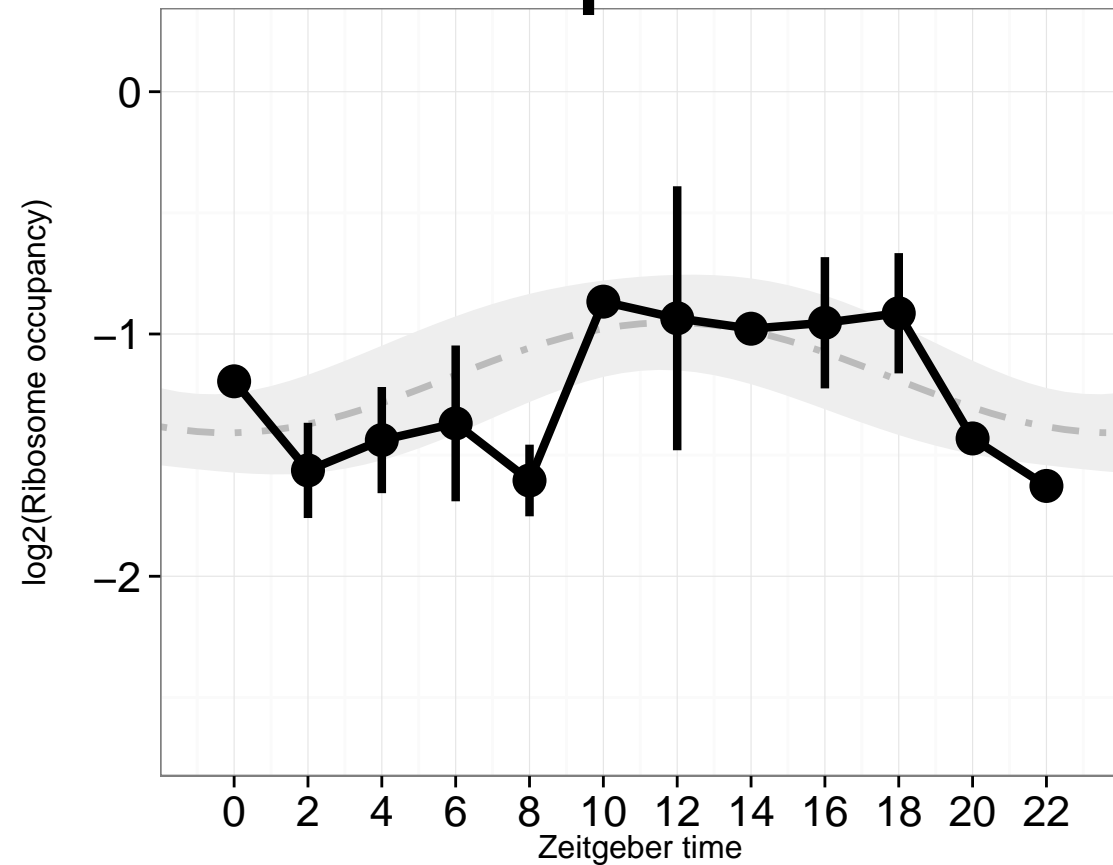

Supplement: SuppDataset_1.zip [file Rps14_set_A.pdf › Supplemental Dataset 1/A-mRNA_nonrhyth_translation_nonrhyth/Rps14_set_A.pdf]

# Rps15

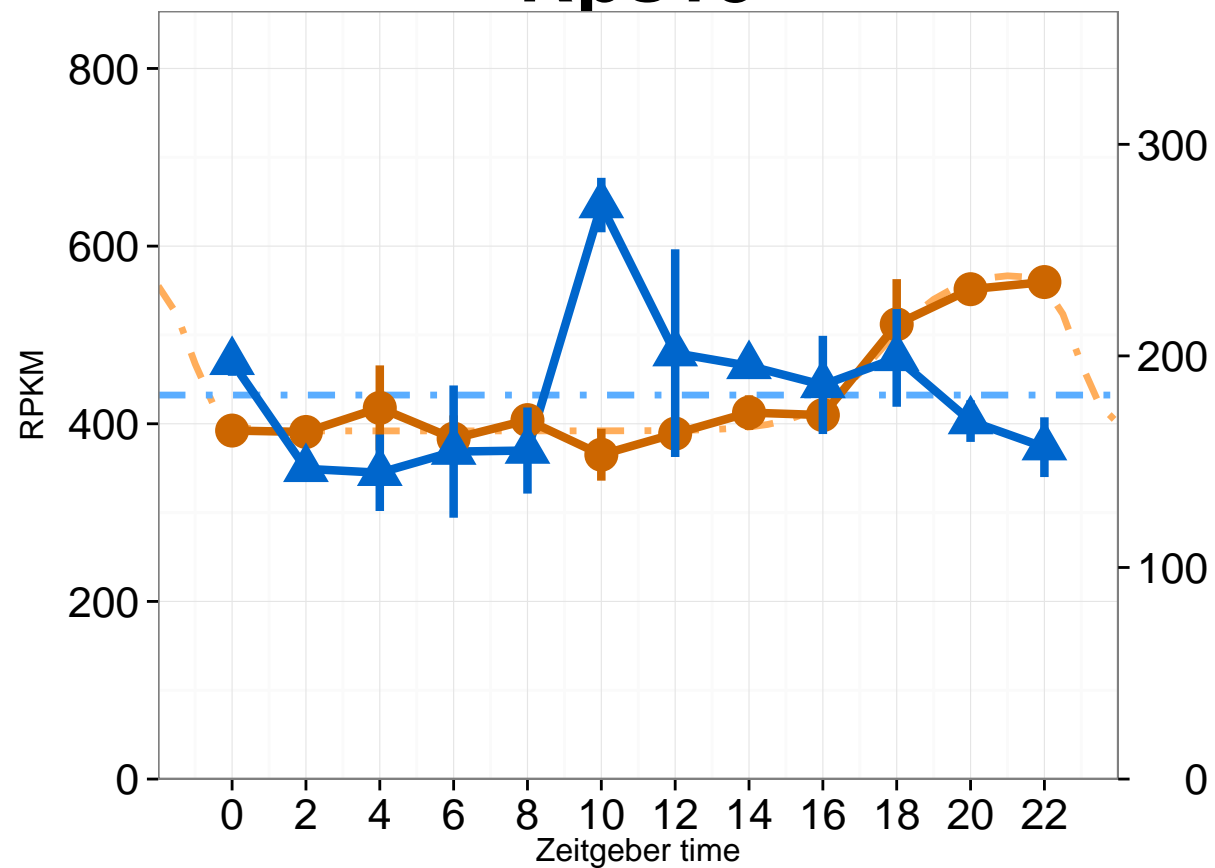

# Rps15

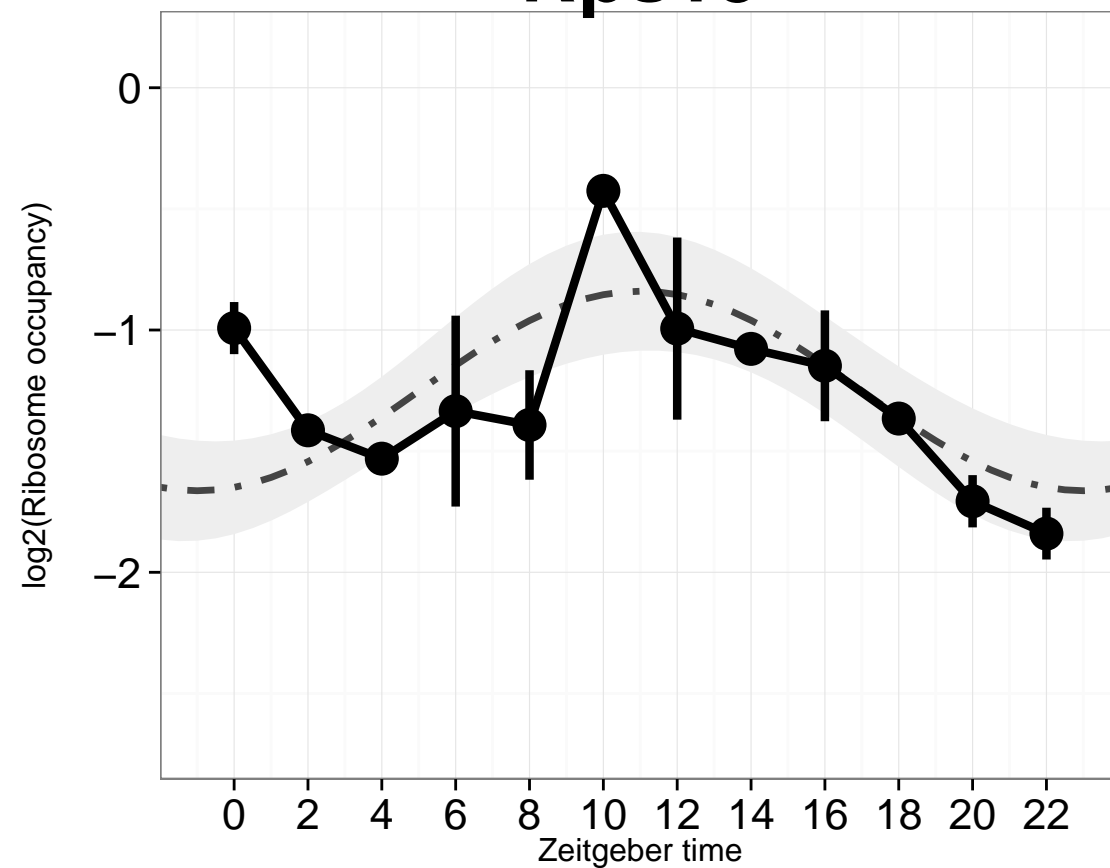

Supplement: SuppDataset_1.zip [file Rps15_set_A.pdf › Supplemental Dataset 1/A-mRNA_nonrhyth_translation_nonrhyth/Rps15_set_A.pdf]

# Rps19bp1

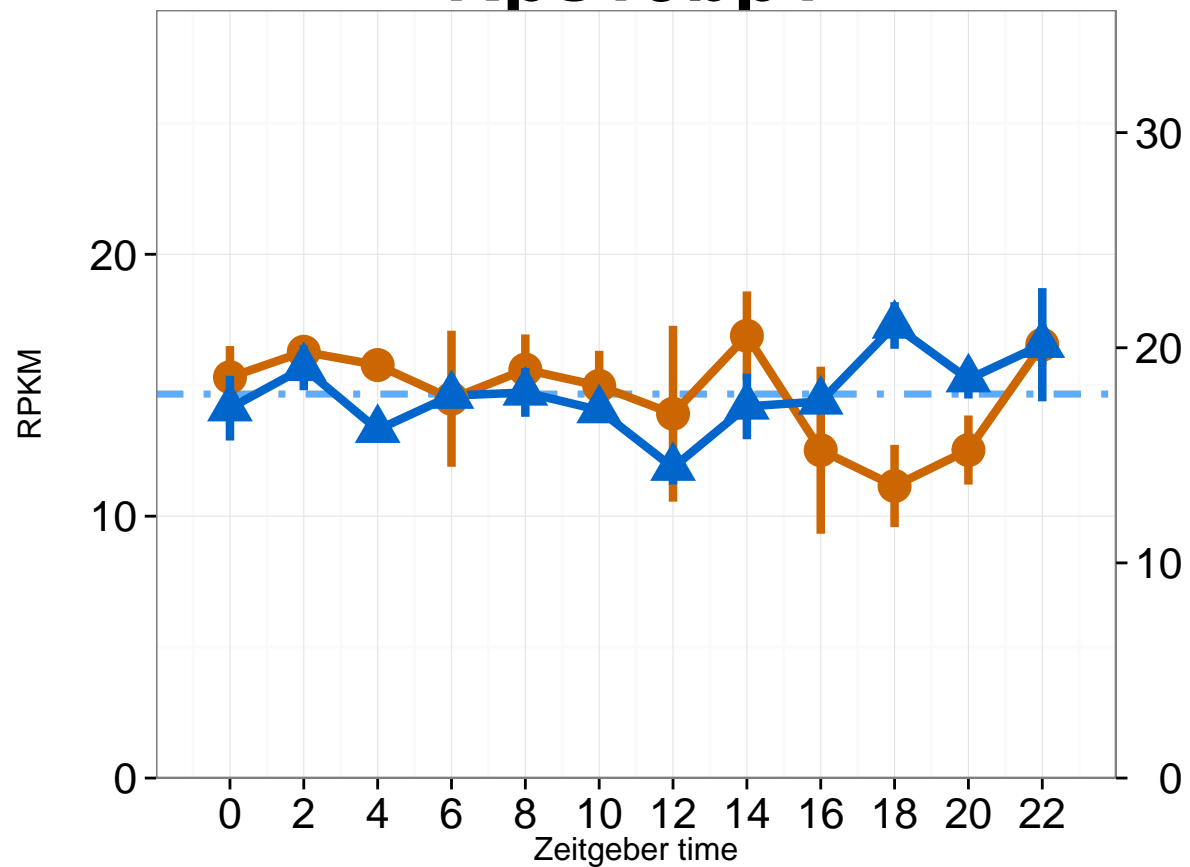

# Rps19bp1

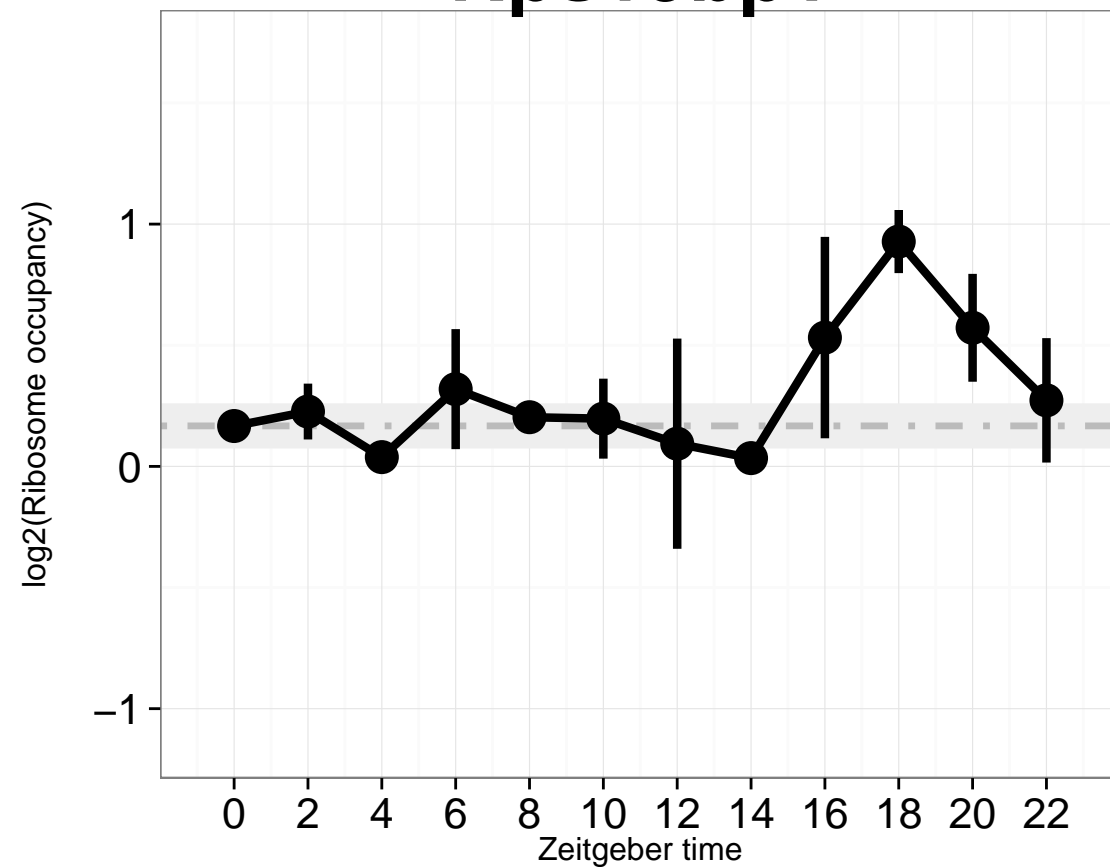

Supplement: SuppDataset_1.zip [file Rps19bp1_set_A.pdf › Supplemental Dataset 1/A-mRNA_nonrhyth_translation_nonrhyth/Rps19bp1_set_A.pdf]

## Rps21

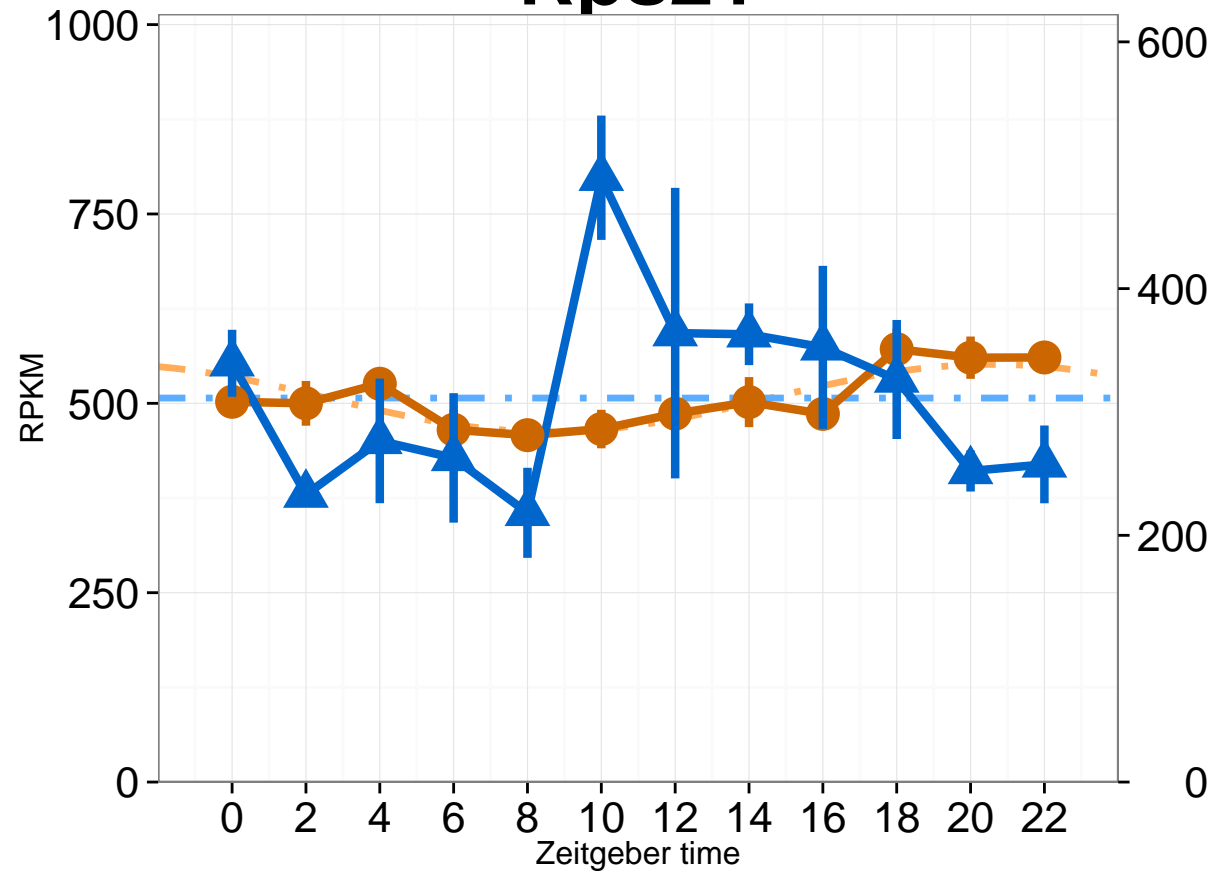

## Rps21

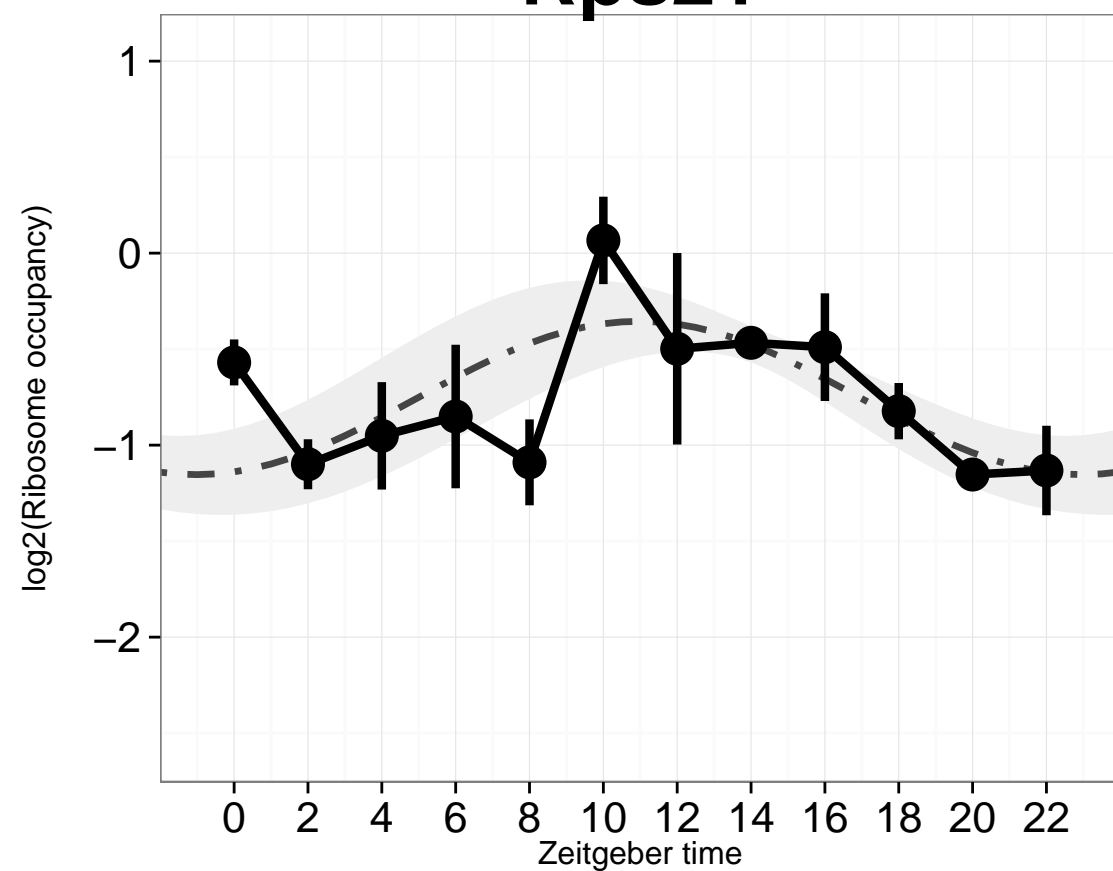

Supplement: SuppDataset_1.zip [file Rps21_set_A.pdf › Supplemental Dataset 1/A-mRNA_nonrhyth_translation_nonrhyth/Rps21_set_A.pdf]

# Rps23

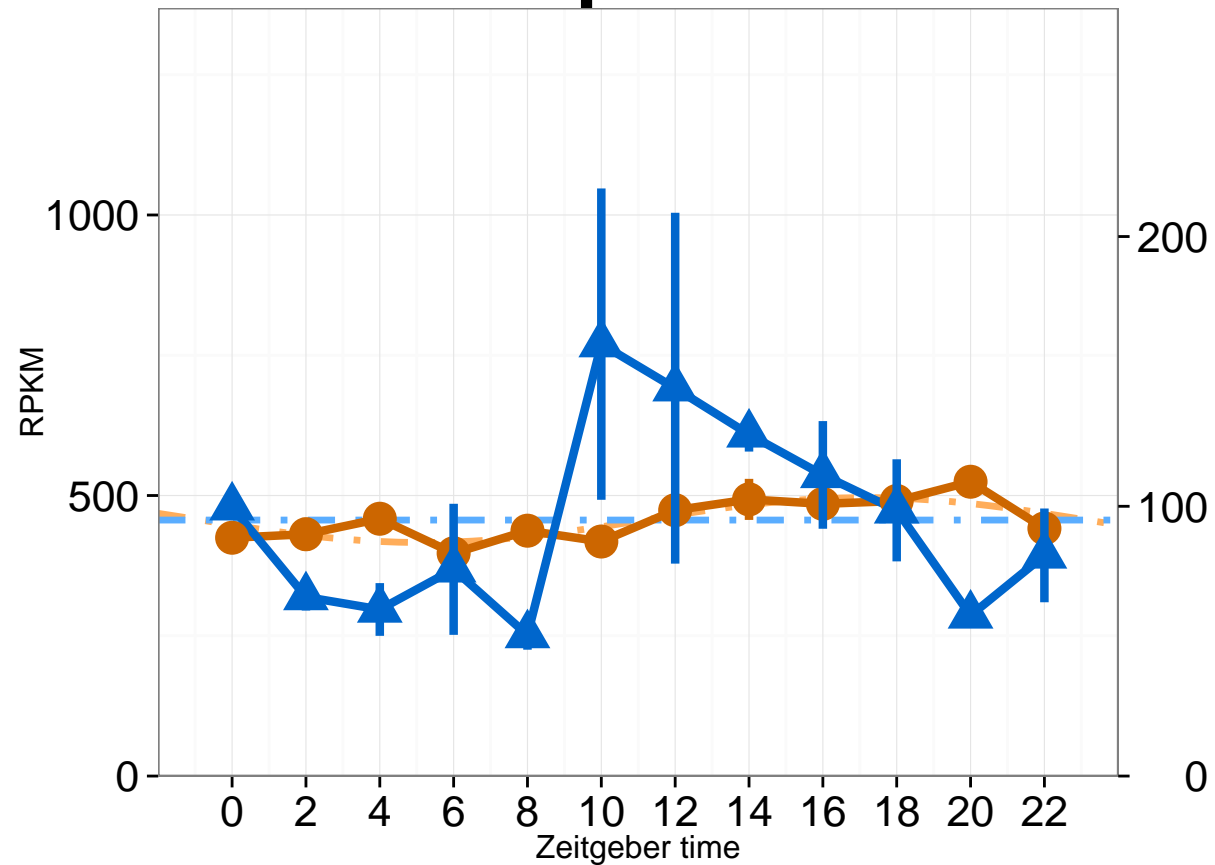

# Rps23

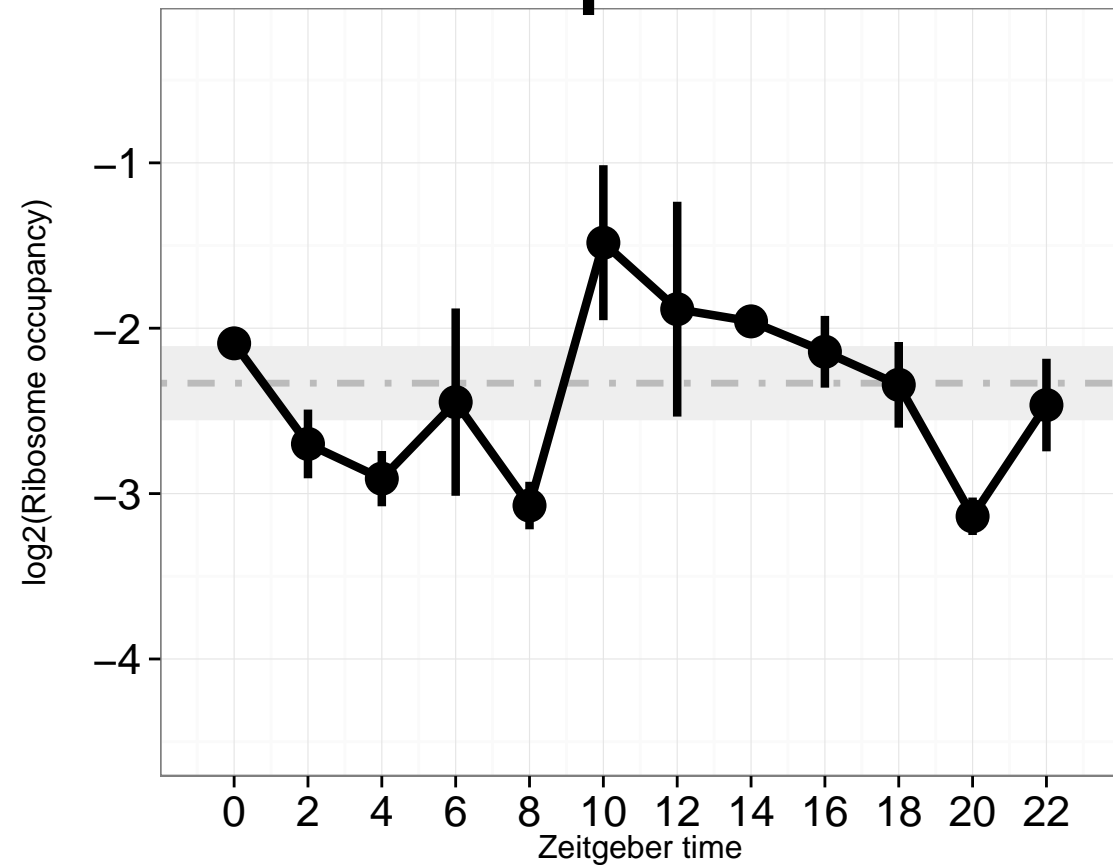

Supplement: SuppDataset_1.zip [file Rps23_set_A.pdf › Supplemental Dataset 1/A-mRNA_nonrhyth_translation_nonrhyth/Rps23_set_A.pdf]

# Rps27l

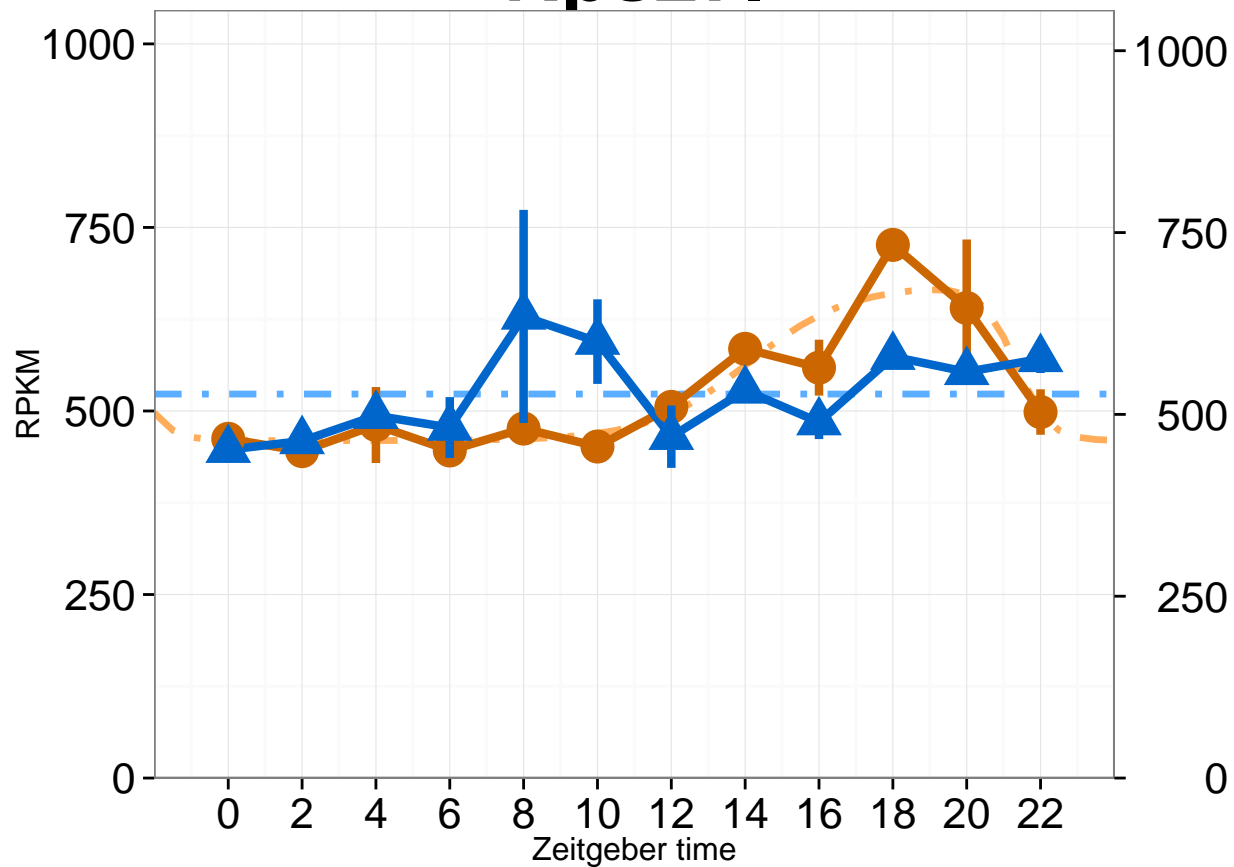

# Rps27l

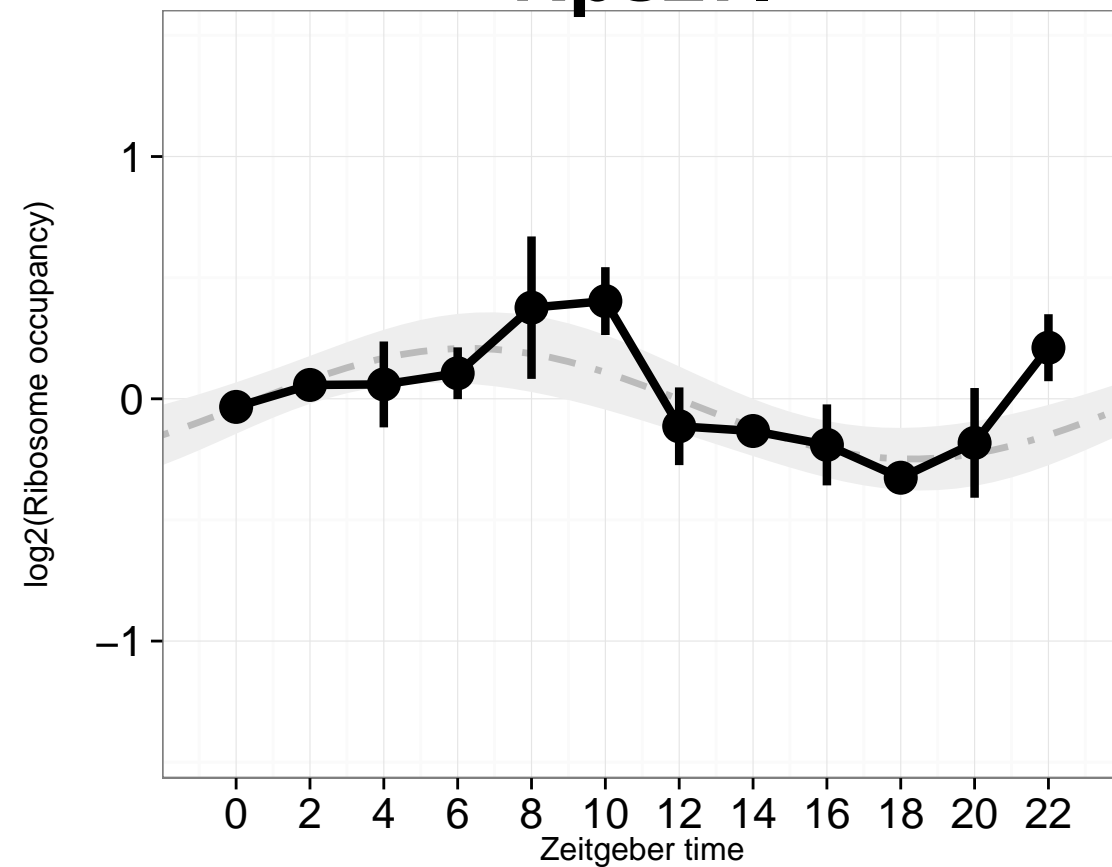

Supplement: SuppDataset_1.zip [file Rps27l_set_A.pdf › Supplemental Dataset 1/A-mRNA_nonrhyth_translation_nonrhyth/Rps27l_set_A.pdf]

# Rps29

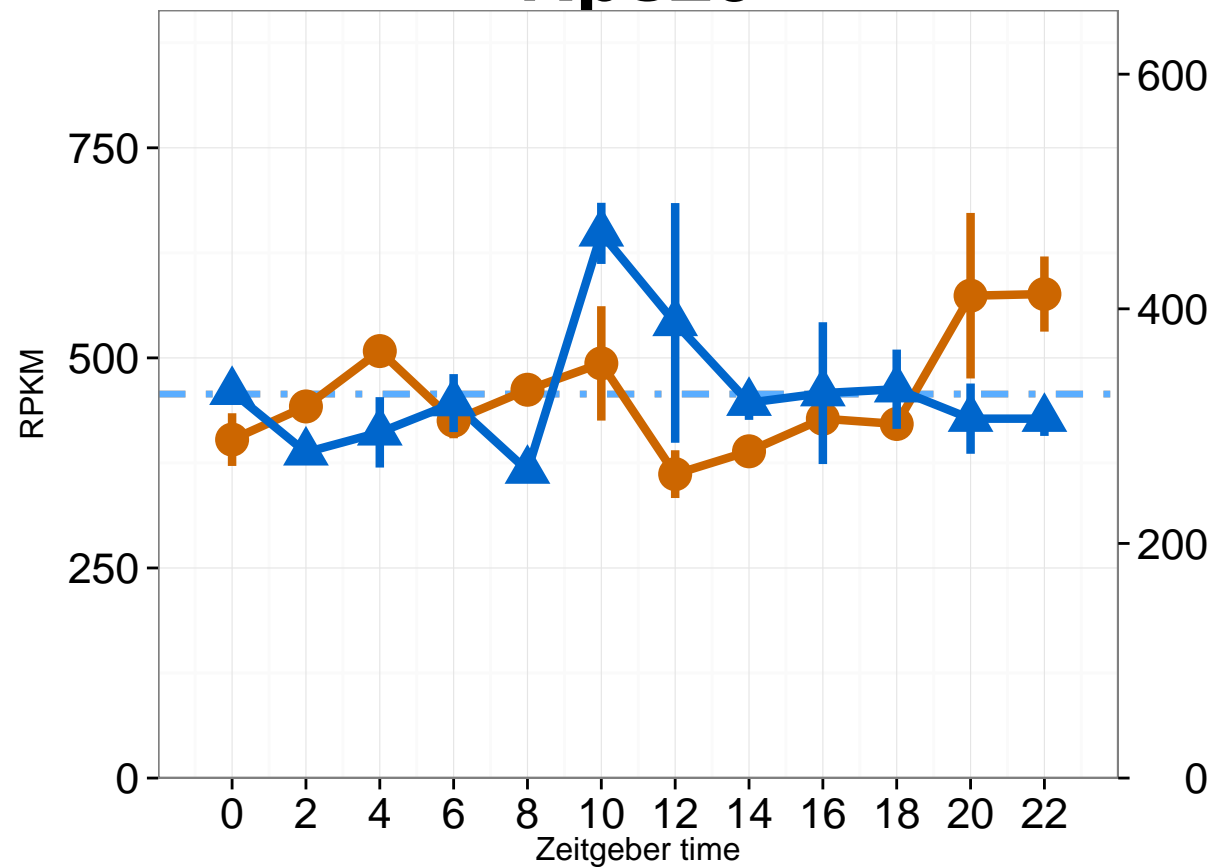

# Rps29

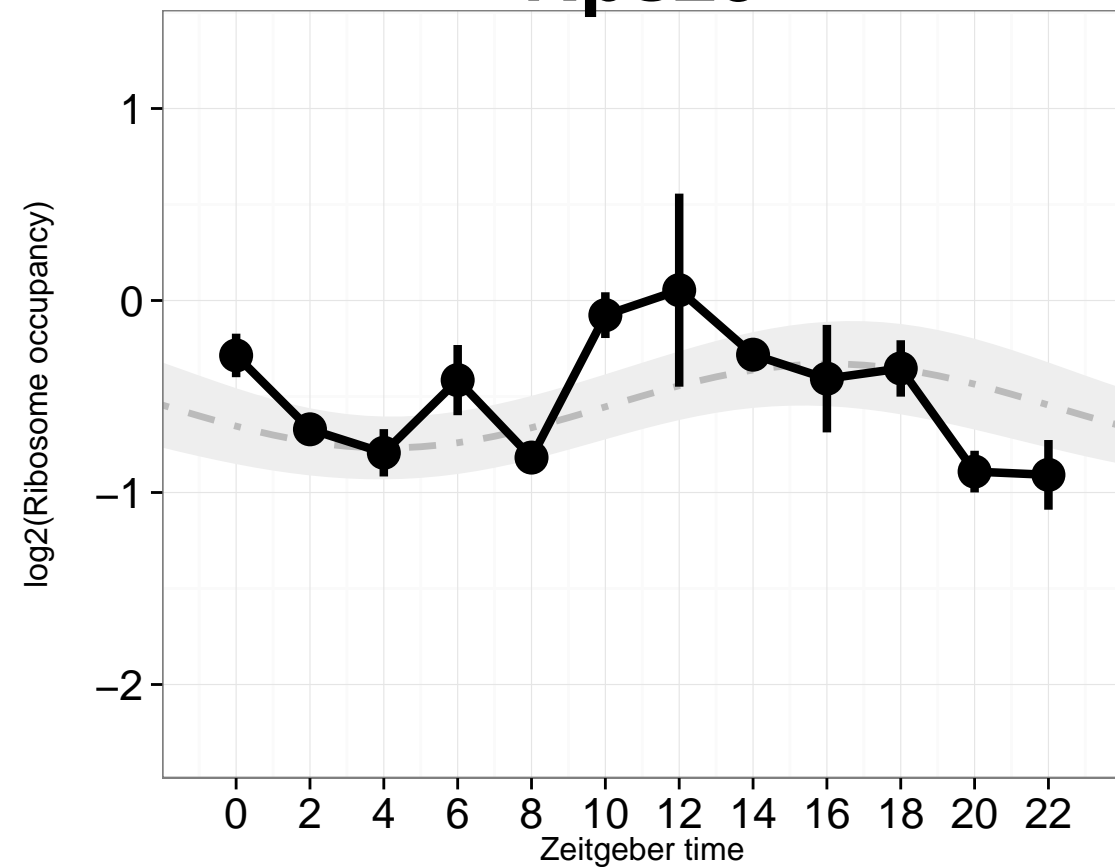

Supplement: SuppDataset_1.zip [file Rps29_set_A.pdf › Supplemental Dataset 1/A-mRNA_nonrhyth_translation_nonrhyth/Rps29_set_A.pdf]

# Rps2

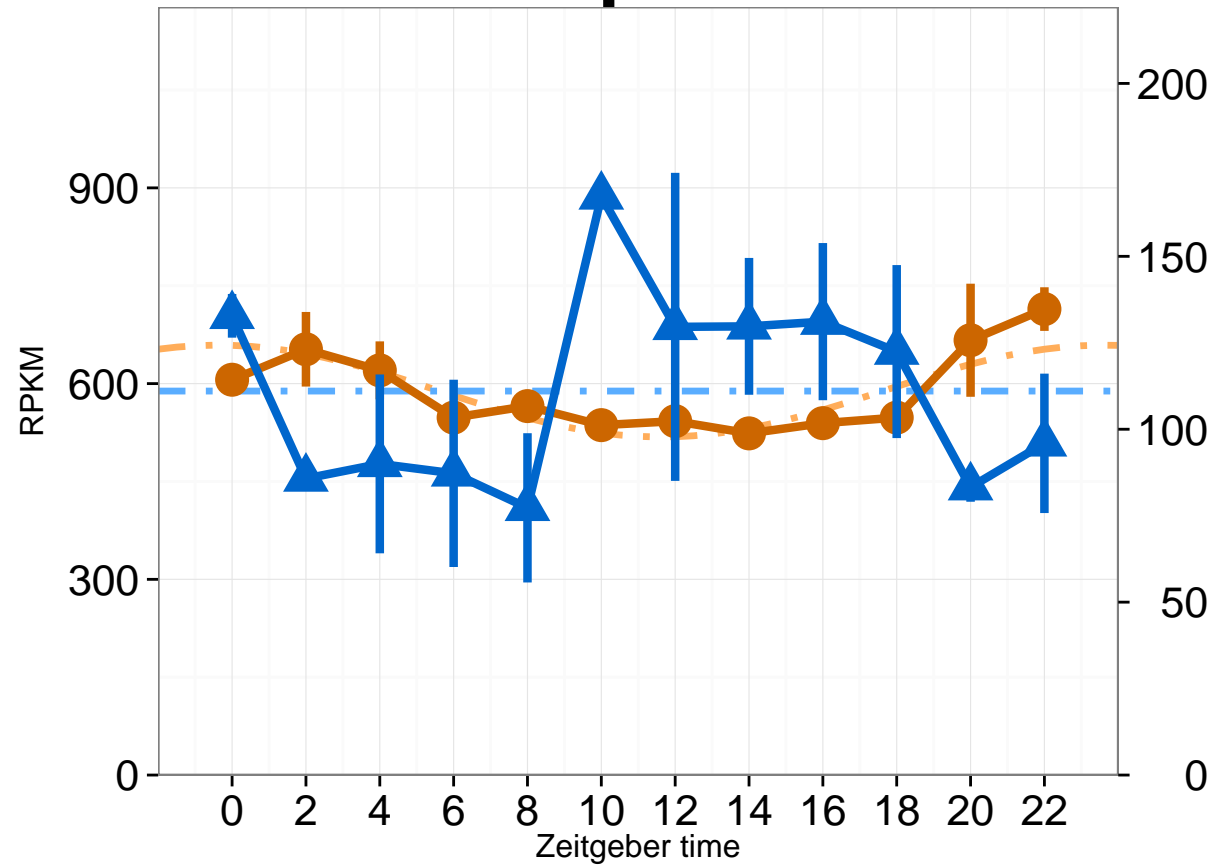

# Rps2

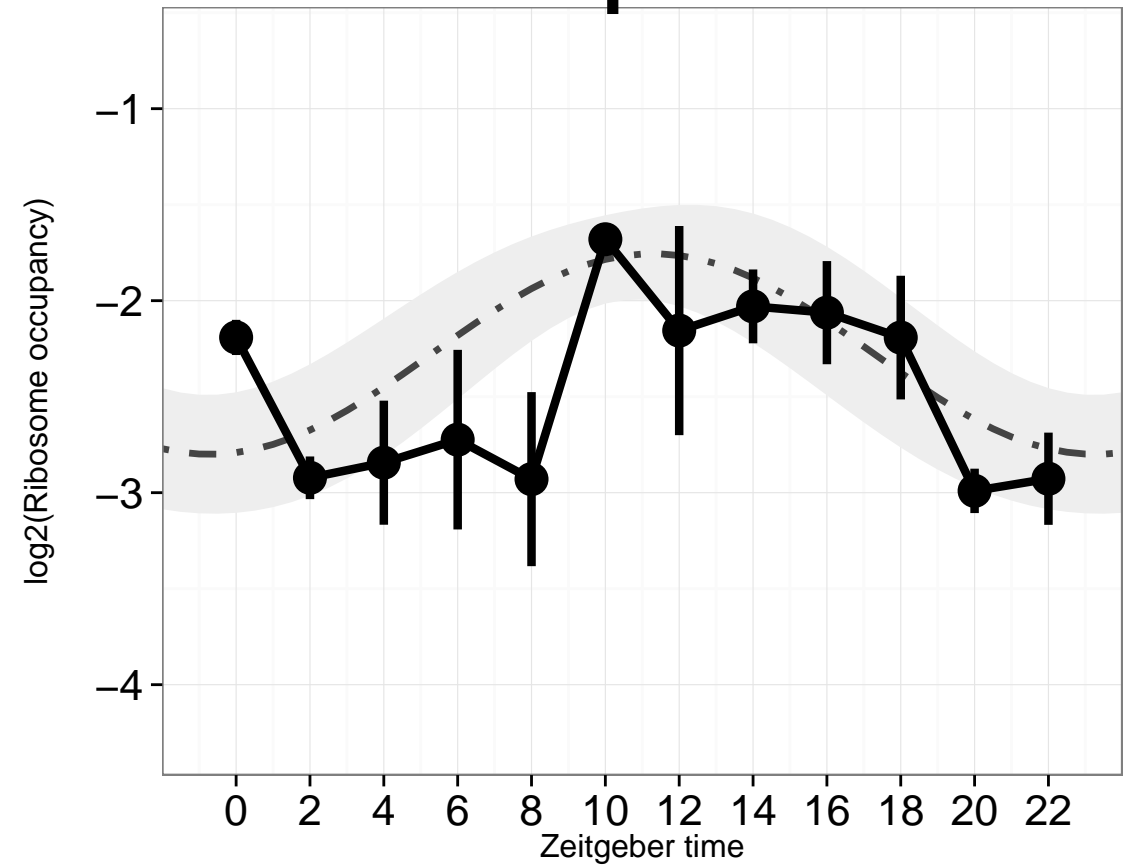

Supplement: SuppDataset_1.zip [file Rps2_set_A.pdf › Supplemental Dataset 1/A-mRNA_nonrhyth_translation_nonrhyth/Rps2_set_A.pdf]

## Rps3

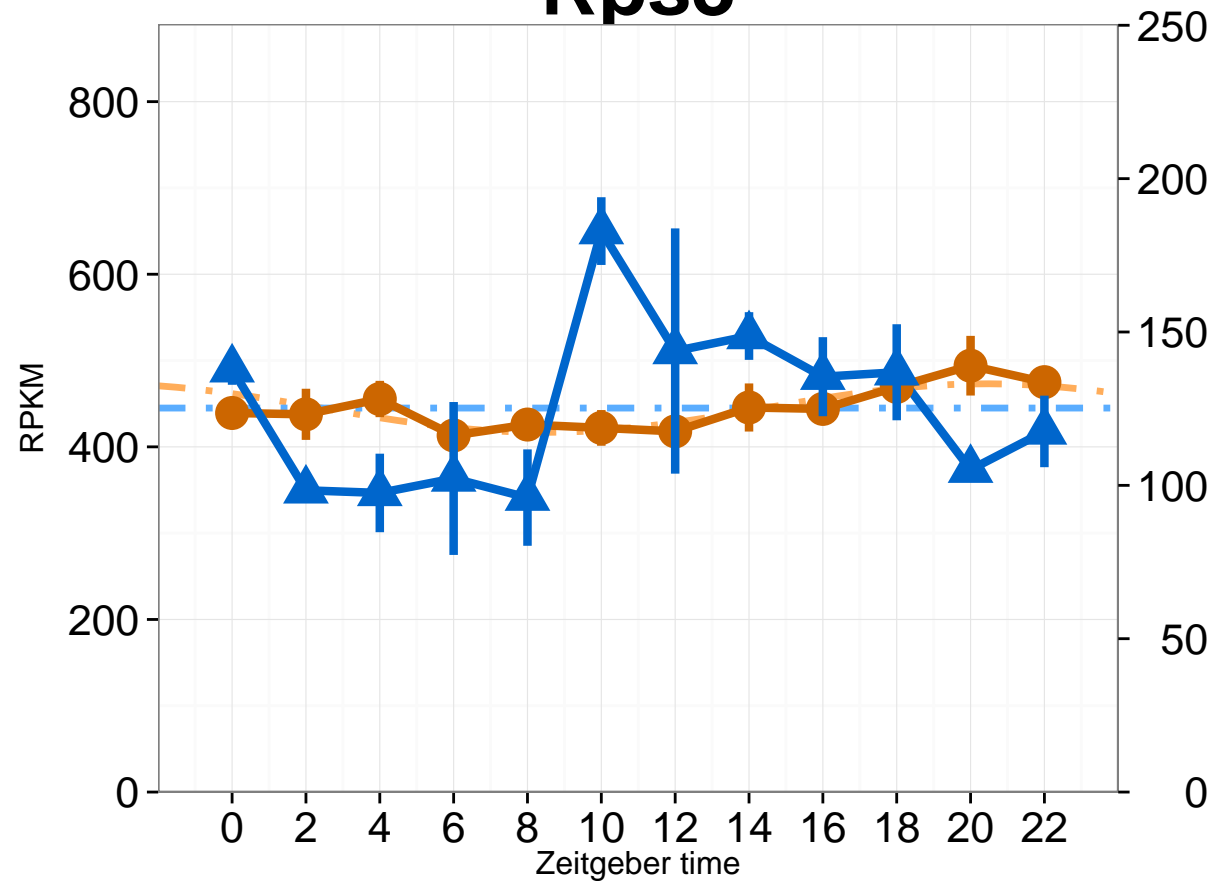

## Rps3

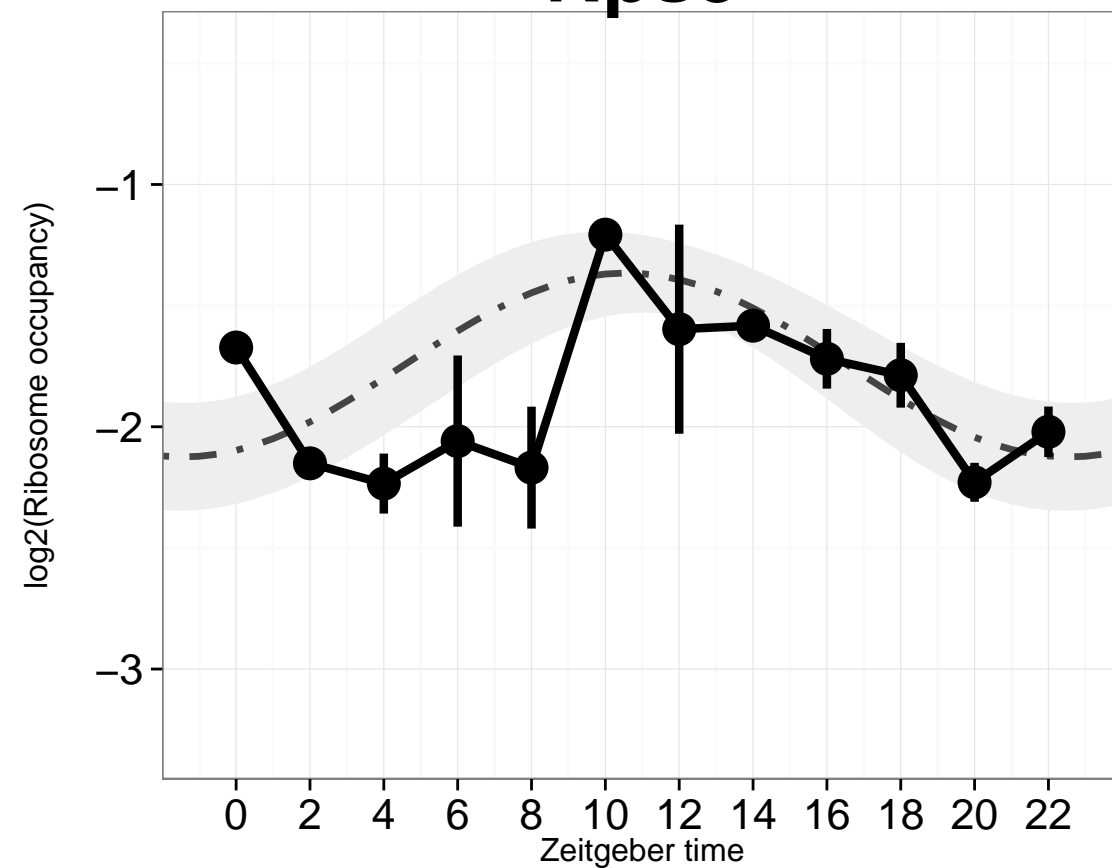

Supplement: SuppDataset_1.zip [file Rps3_set_A.pdf › Supplemental Dataset 1/A-mRNA_nonrhyth_translation_nonrhyth/Rps3_set_A.pdf]

# Rps4y2

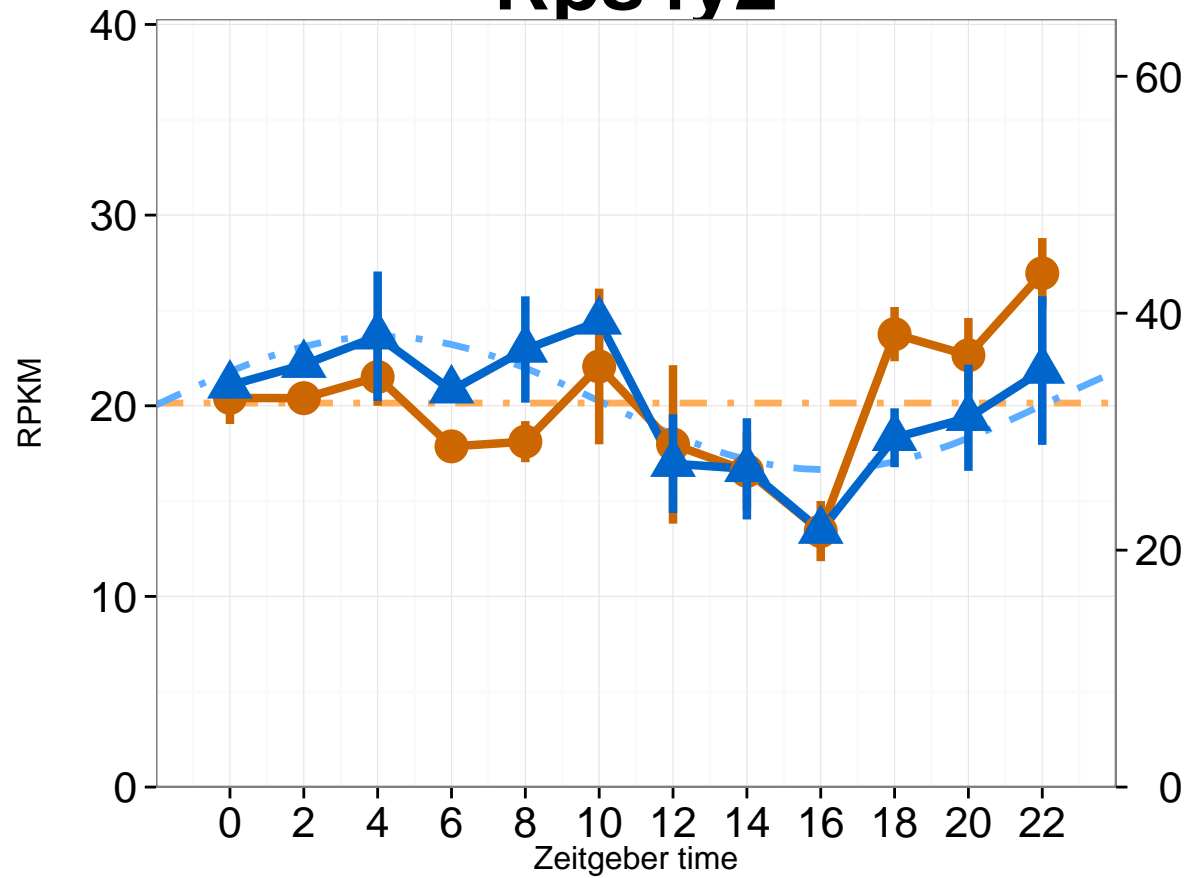

# Rps4y2

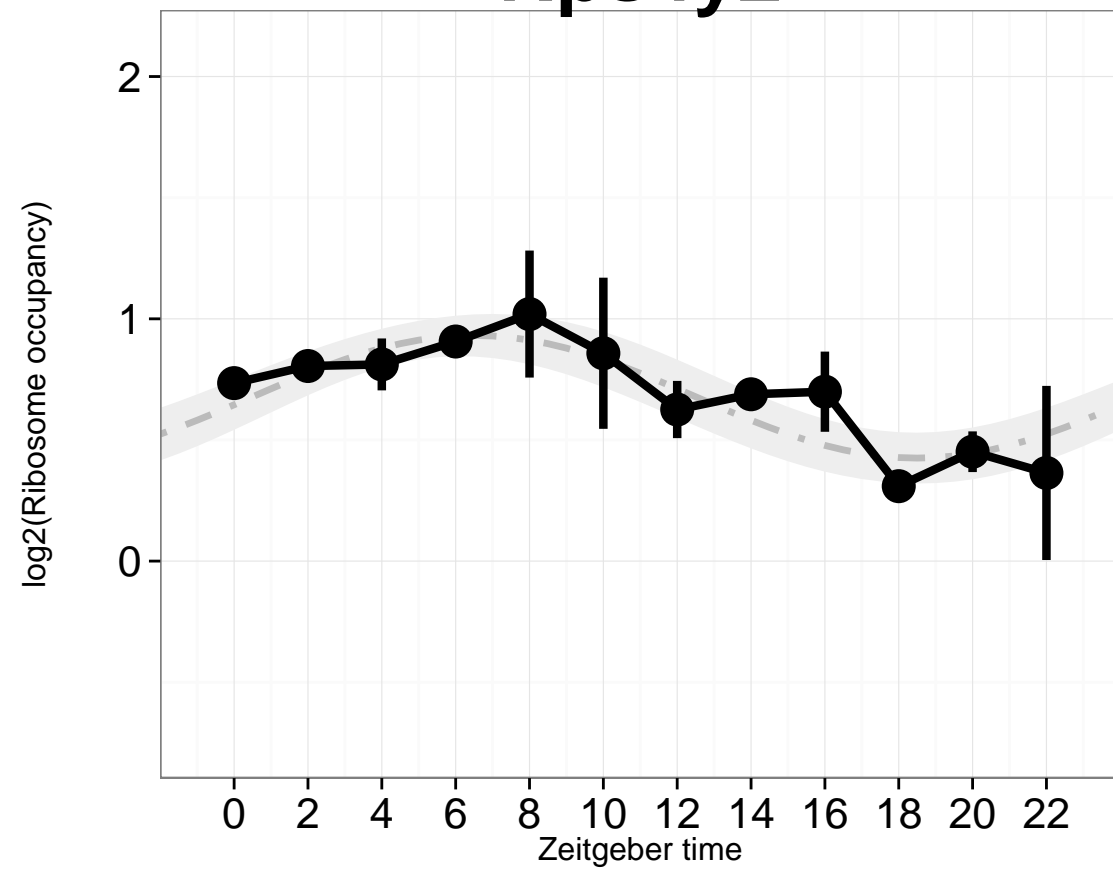

Supplement: SuppDataset_1.zip [file Rps4y2_set_A.pdf › Supplemental Dataset 1/A-mRNA_nonrhyth_translation_nonrhyth/Rps4y2_set_A.pdf]

# Rps6ka1

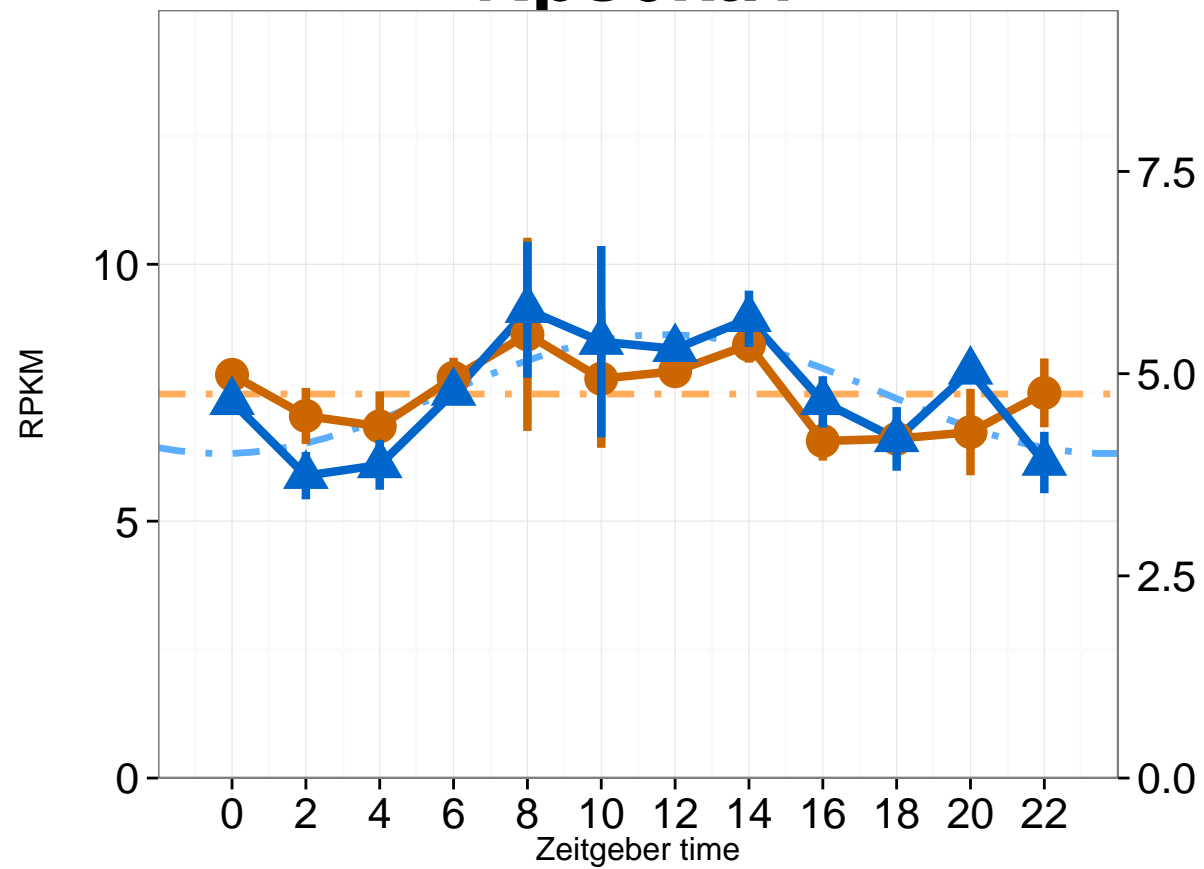

# Rps6ka1

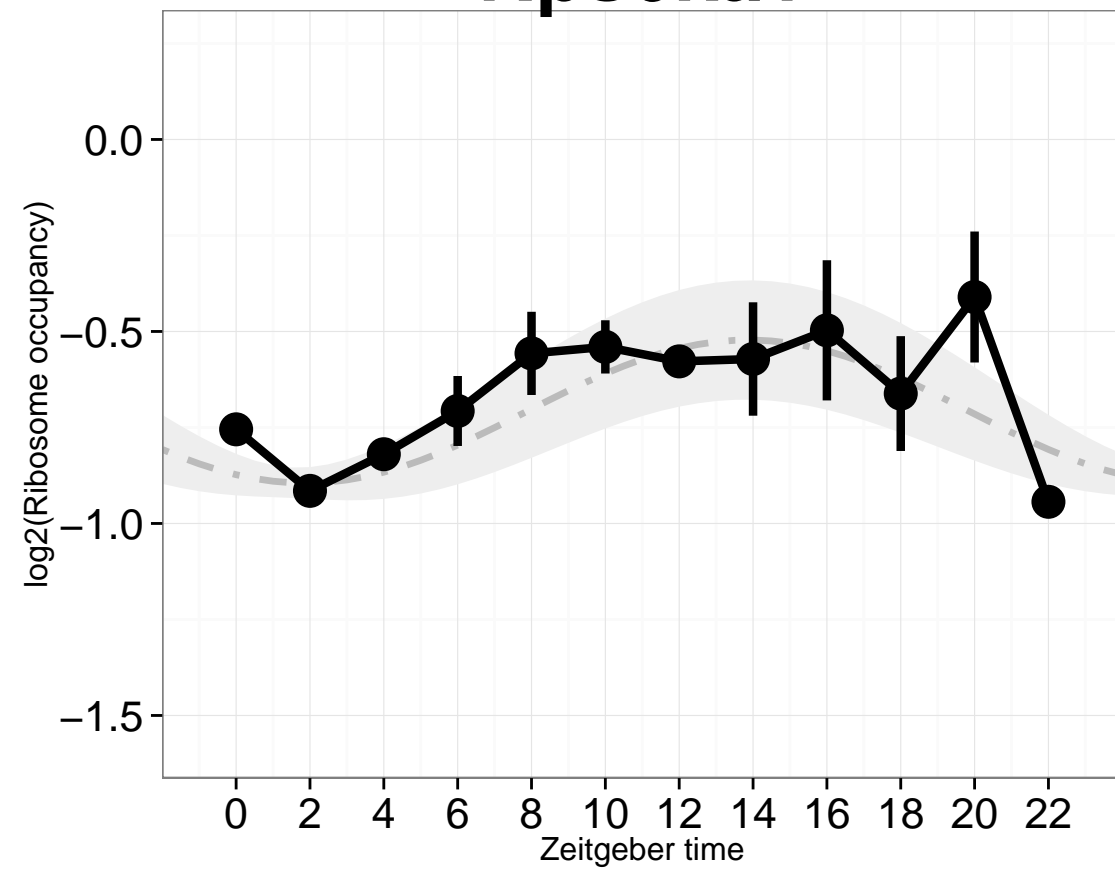

Supplement: SuppDataset_1.zip [file Rps6ka1_set_A.pdf › Supplemental Dataset 1/A-mRNA_nonrhyth_translation_nonrhyth/Rps6ka1_set_A.pdf]

# Rps6ka3

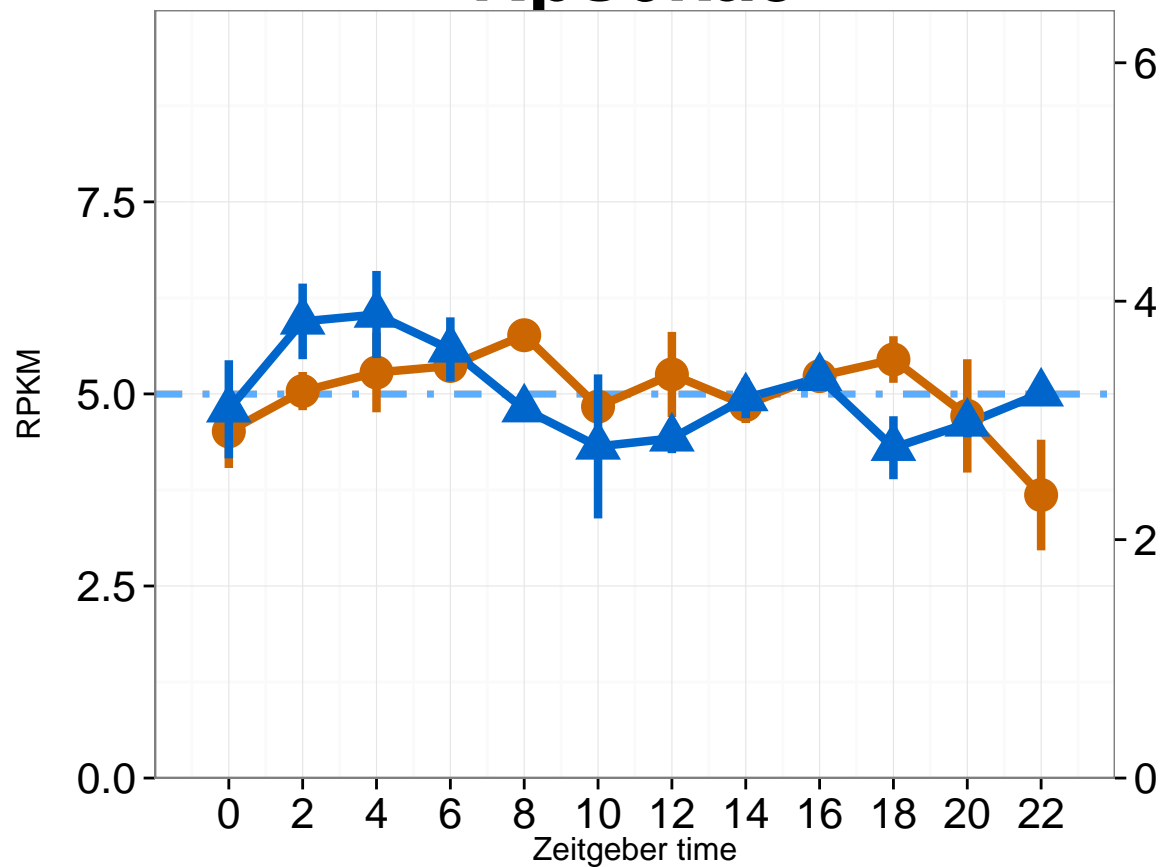

# Rps6ka3

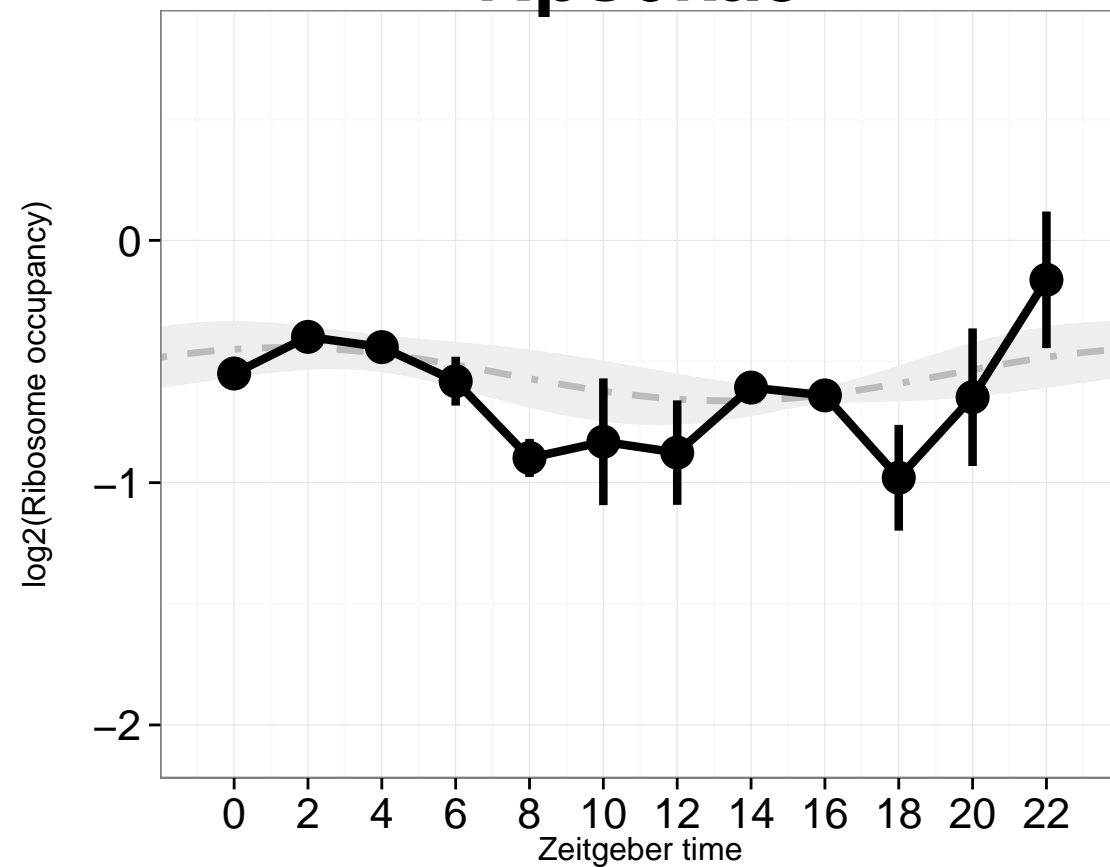

Supplement: SuppDataset_1.zip [file Rps6ka3_set_A.pdf › Supplemental Dataset 1/A-mRNA_nonrhyth_translation_nonrhyth/Rps6ka3_set_A.pdf]

# Rps6ka4

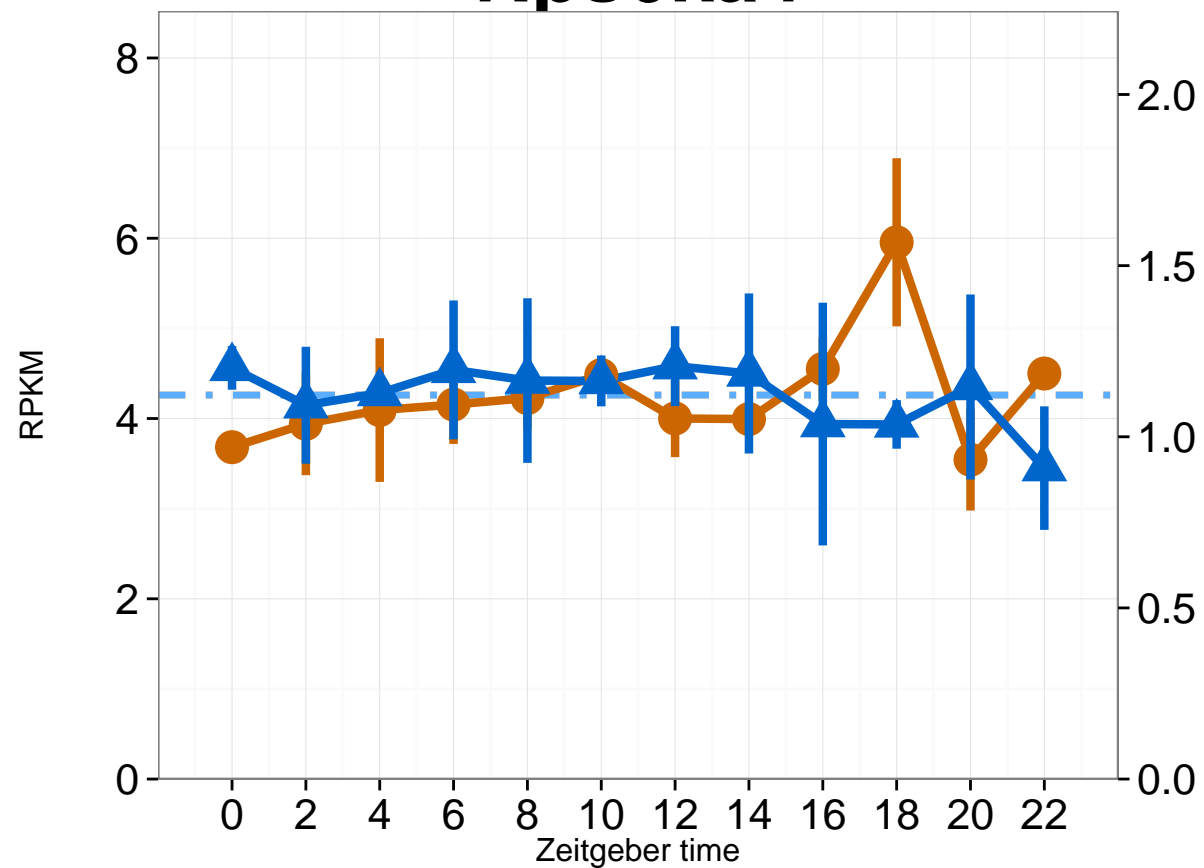

# Rps6ka4

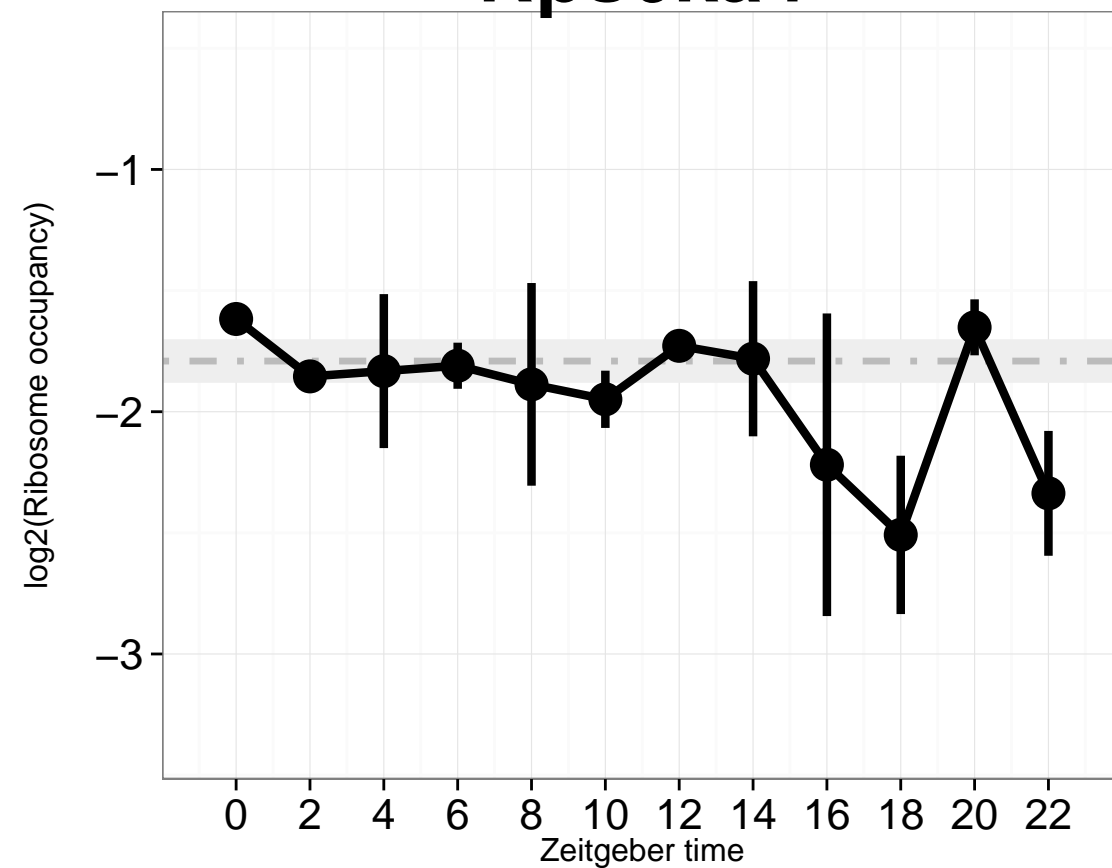

Supplement: SuppDataset_1.zip [file Rps6ka4_set_A.pdf › Supplemental Dataset 1/A-mRNA_nonrhyth_translation_nonrhyth/Rps6ka4_set_A.pdf]

# Rps6kb1

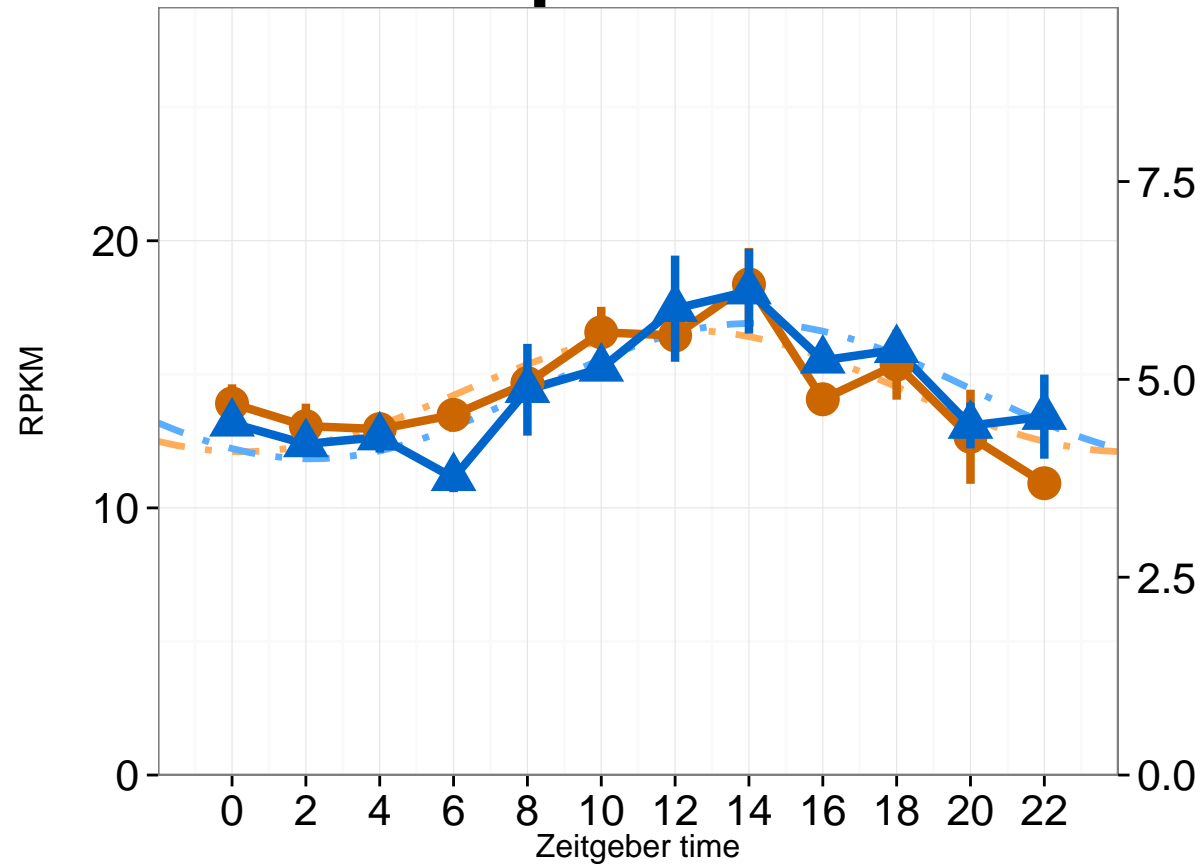

# Rps6kb1

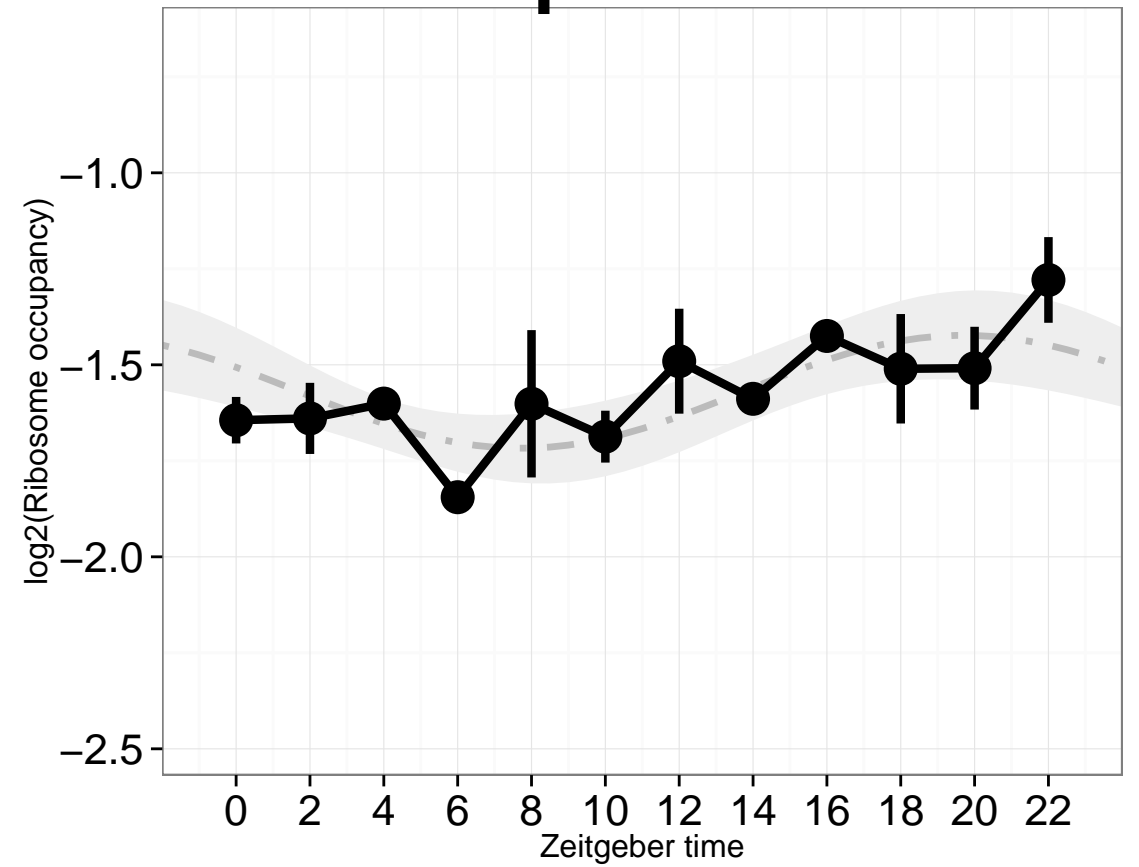

Supplement: SuppDataset_1.zip [file Rps6kb1_set_A.pdf › Supplemental Dataset 1/A-mRNA_nonrhyth_translation_nonrhyth/Rps6kb1_set_A.pdf]

# Rps6kc1

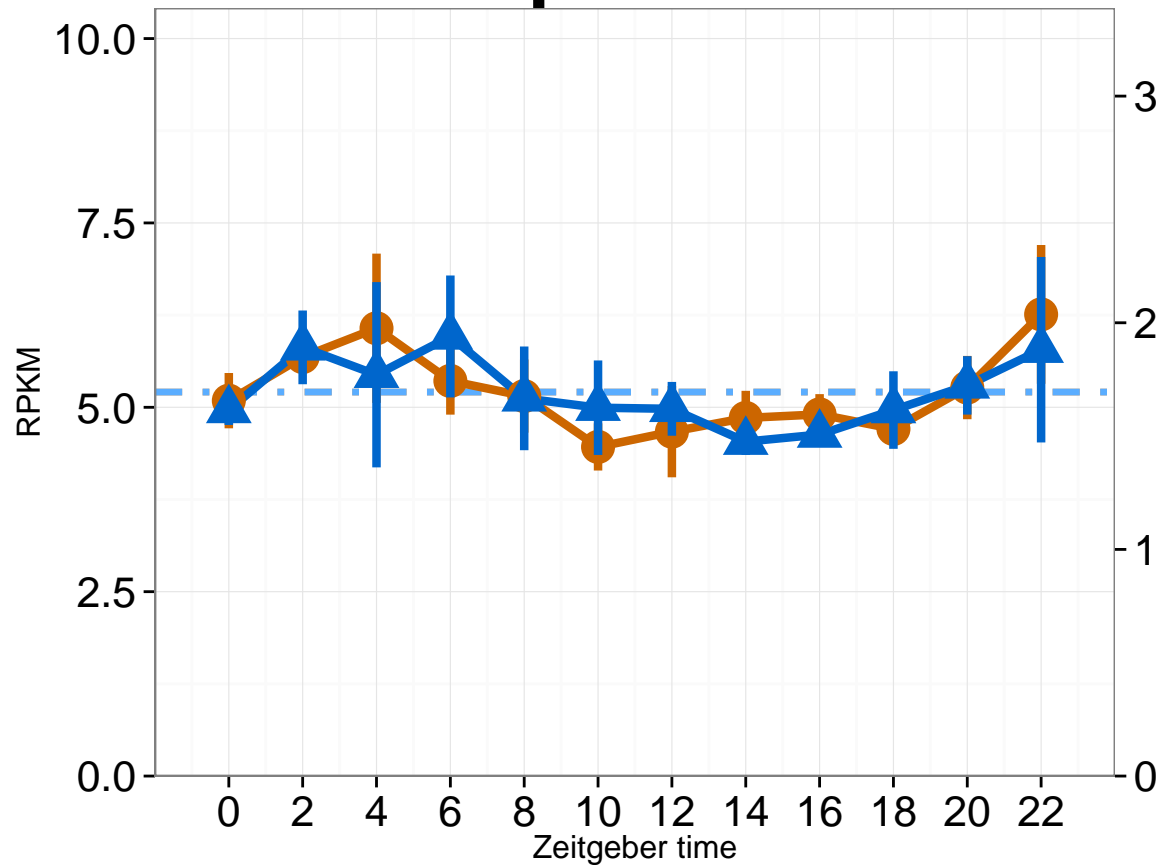

# Rps6kc1

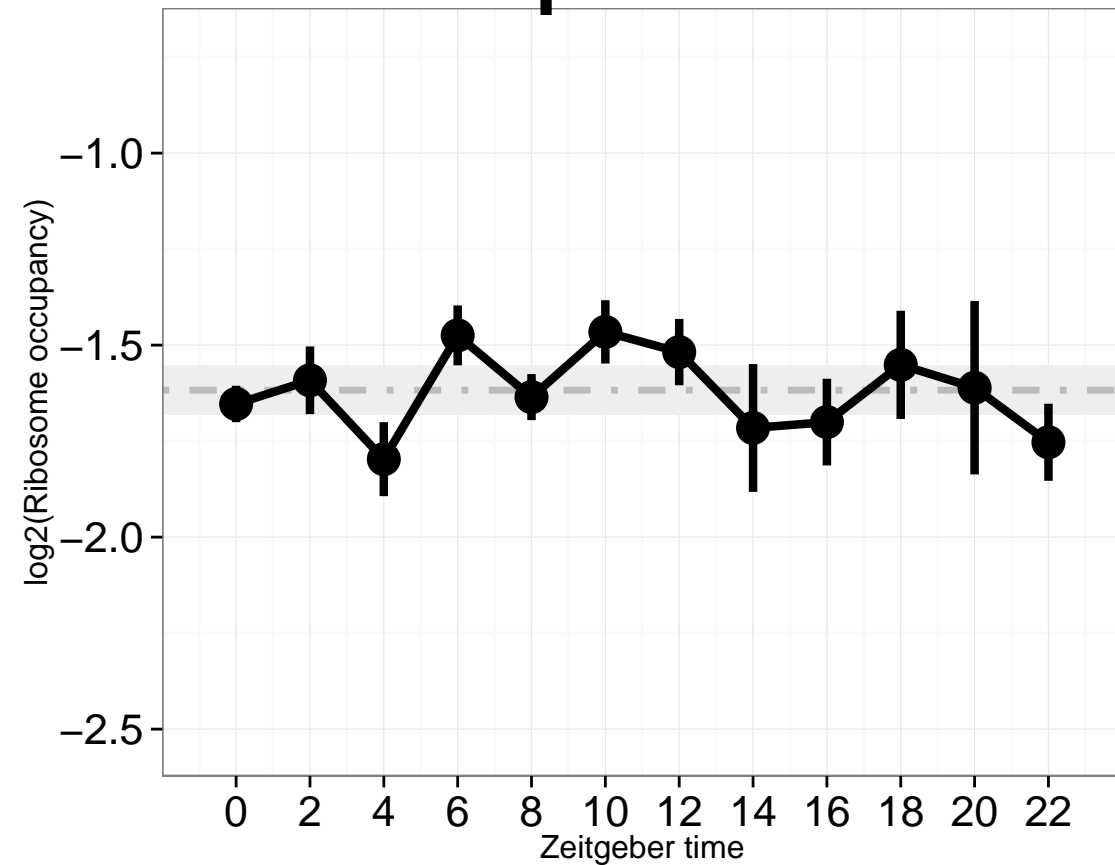

Supplement: SuppDataset_1.zip [file Rps6kc1_set_A.pdf › Supplemental Dataset 1/A-mRNA_nonrhyth_translation_nonrhyth/Rps6kc1_set_A.pdf]

# Rps7

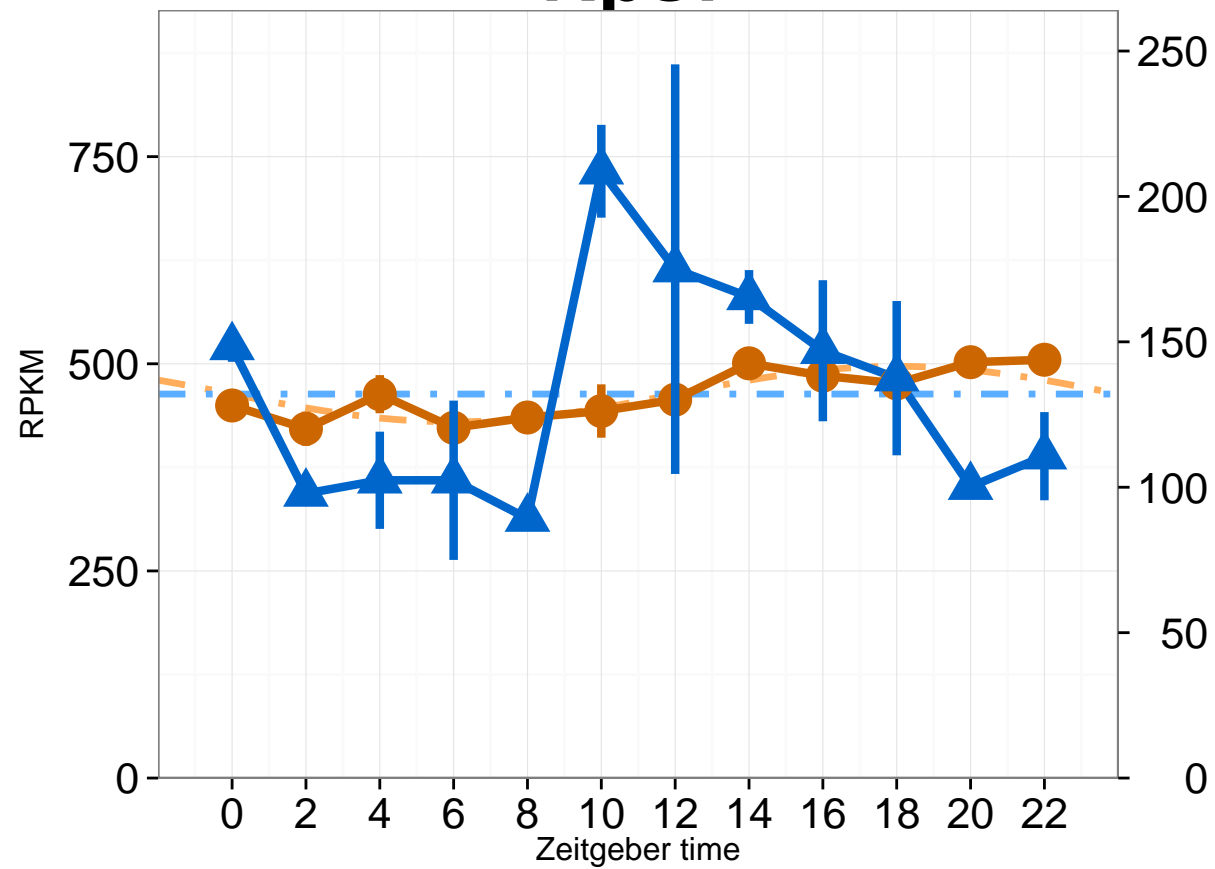

# Rps7

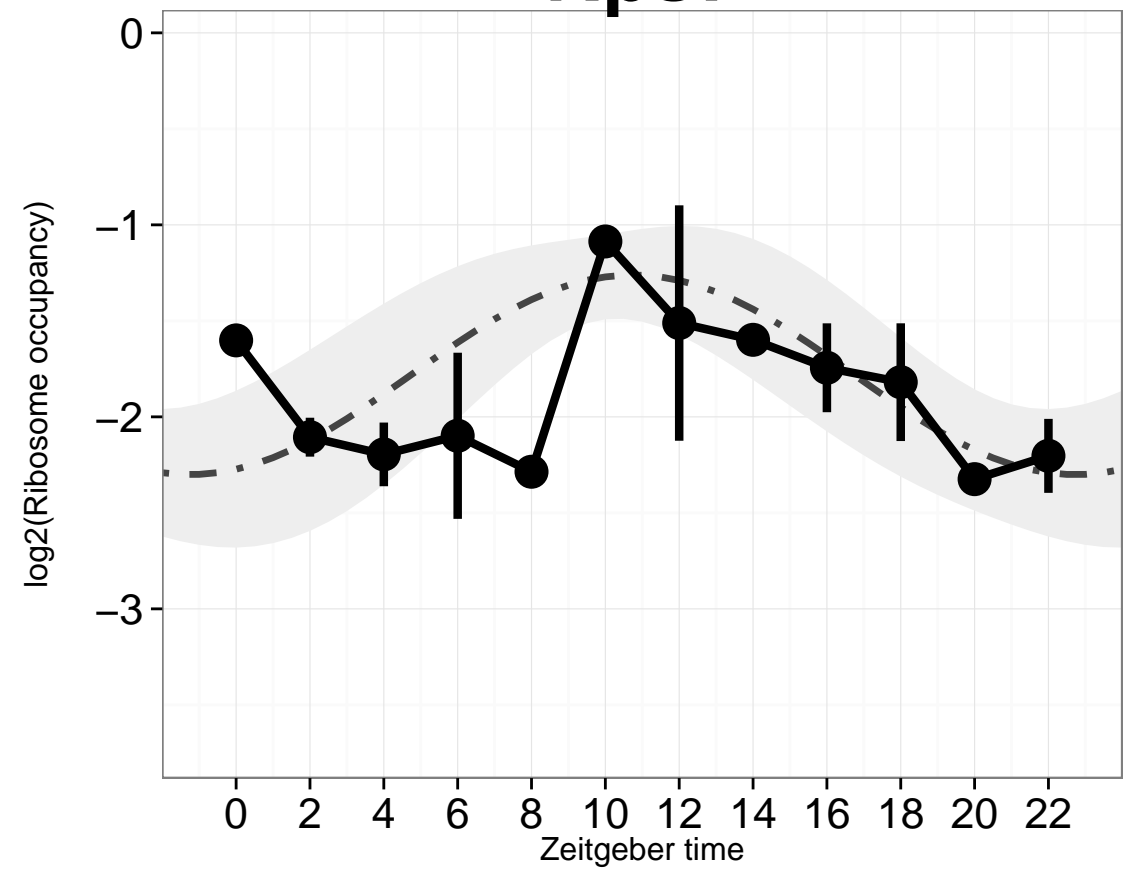

Supplement: SuppDataset_1.zip [file Rps7_set_A.pdf › Supplemental Dataset 1/A-mRNA_nonrhyth_translation_nonrhyth/Rps7_set_A.pdf]

# Rps9

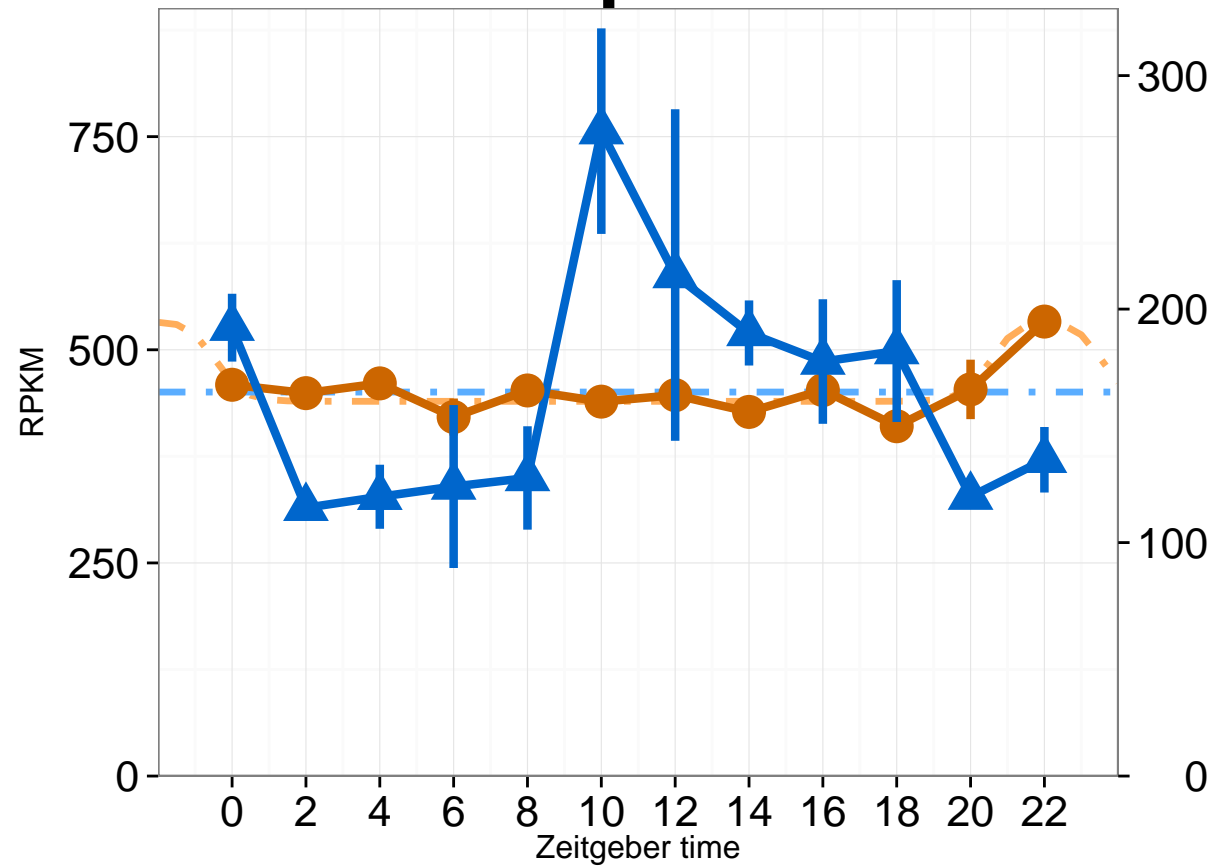

# Rps9

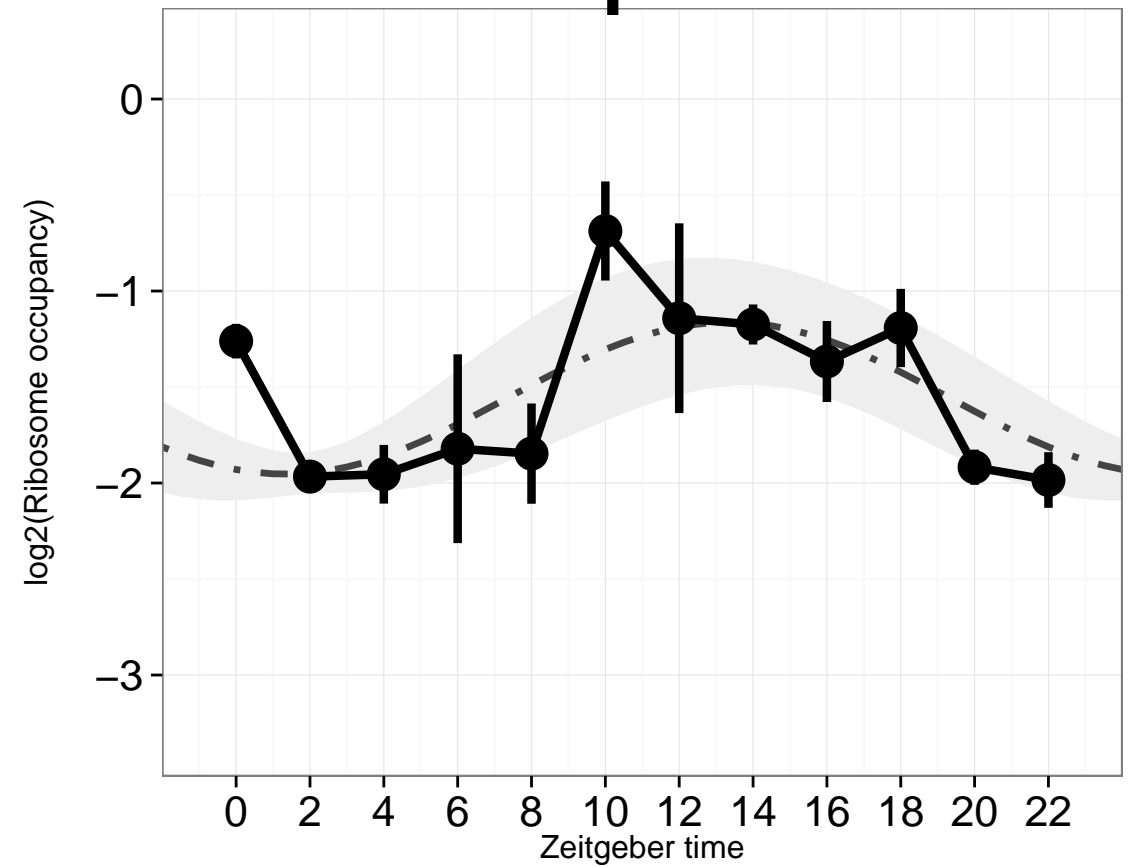

Supplement: SuppDataset_1.zip [file Rps9_set_A.pdf › Supplemental Dataset 1/A-mRNA_nonrhyth_translation_nonrhyth/Rps9_set_A.pdf]

# Rpsa

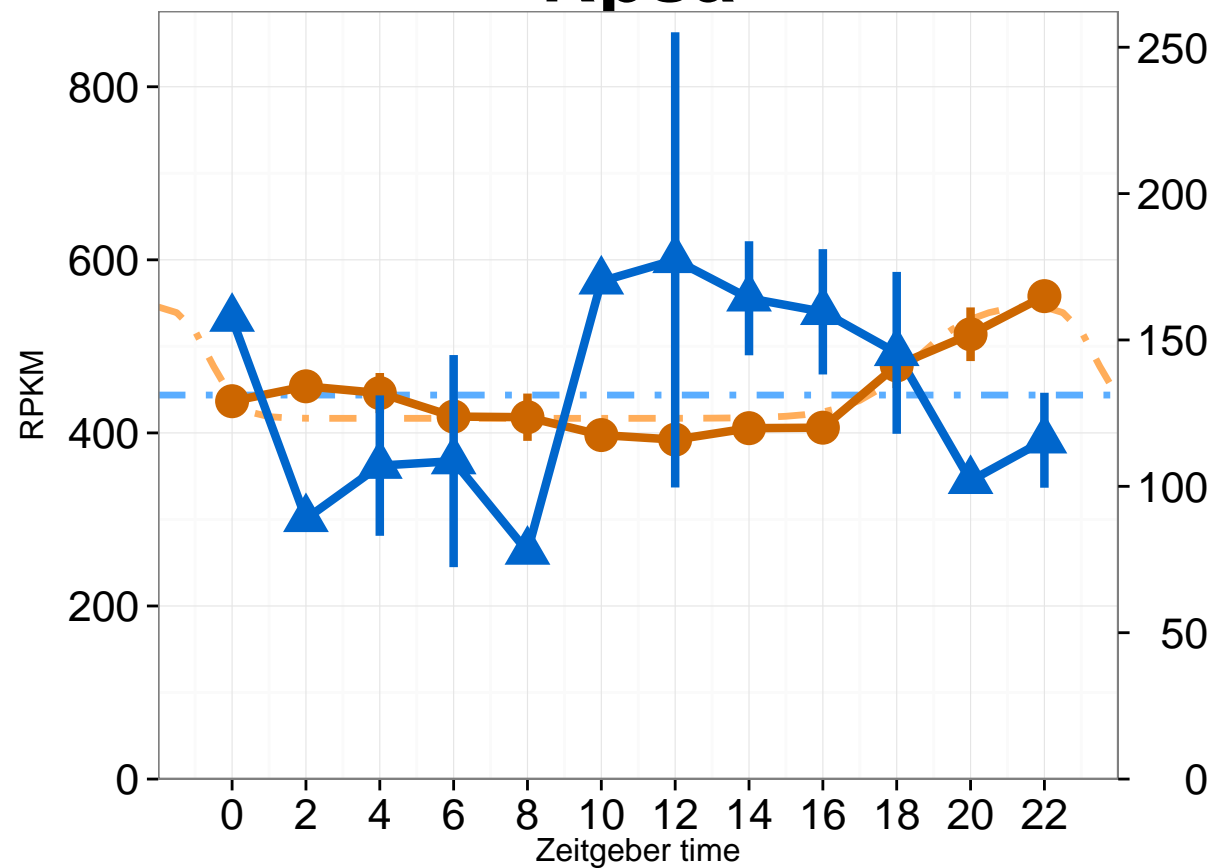

# Rpsa

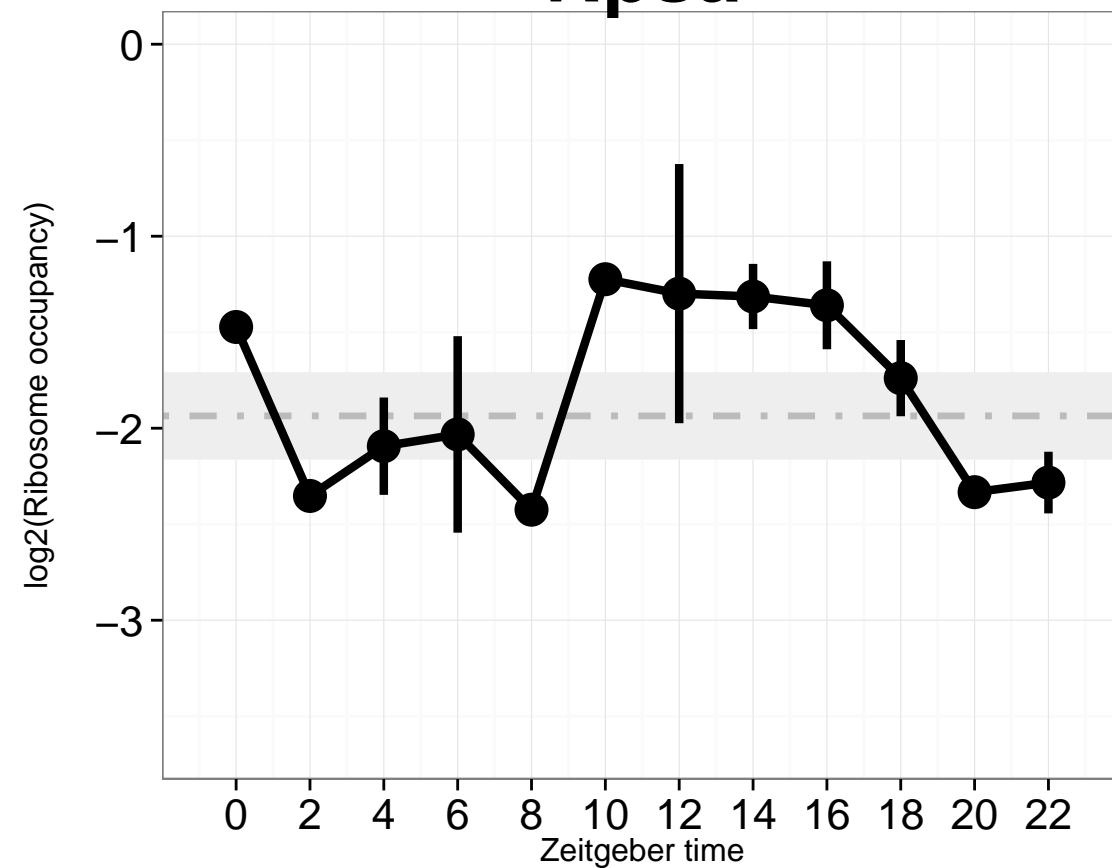

Supplement: SuppDataset_1.zip [file Rpsa_set_A.pdf › Supplemental Dataset 1/A-mRNA_nonrhyth_translation_nonrhyth/Rpsa_set_A.pdf]

## Rptor

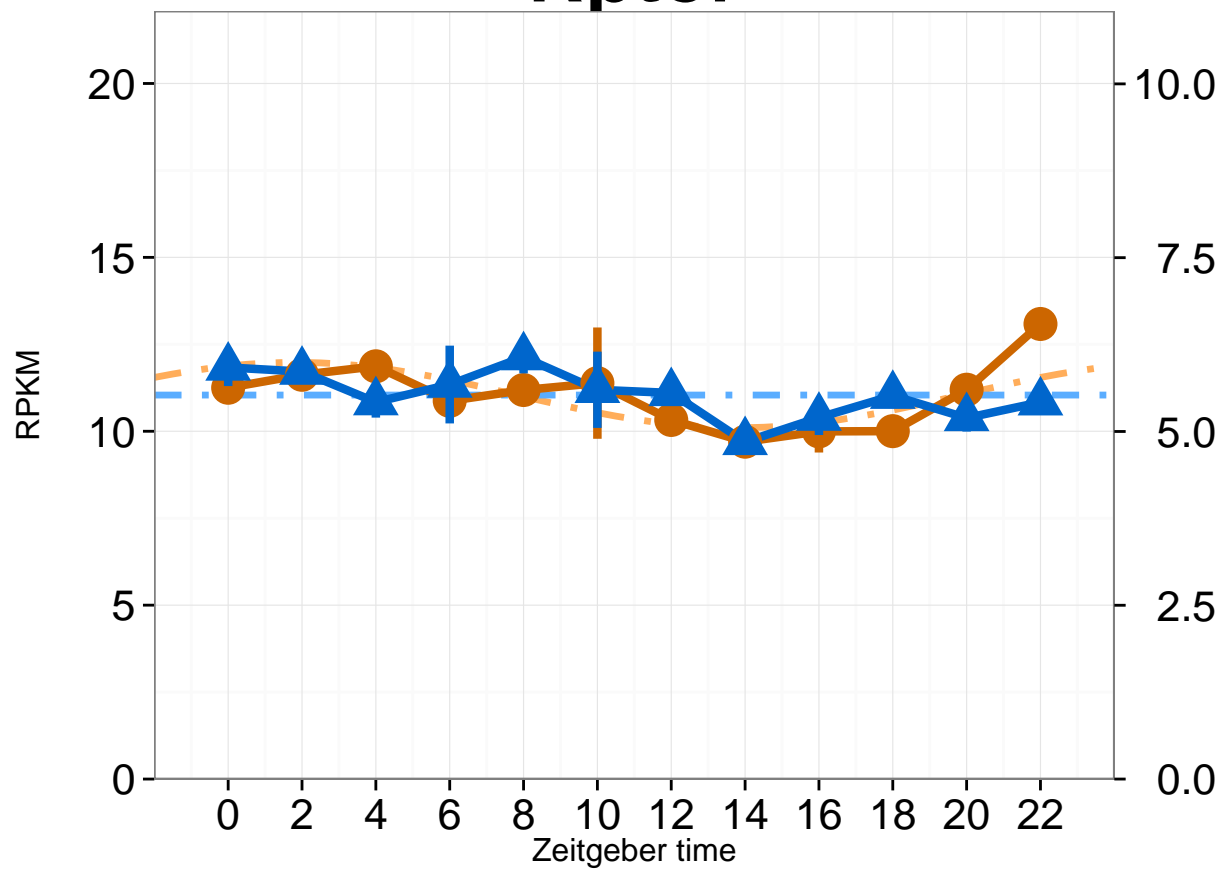

## Rptor

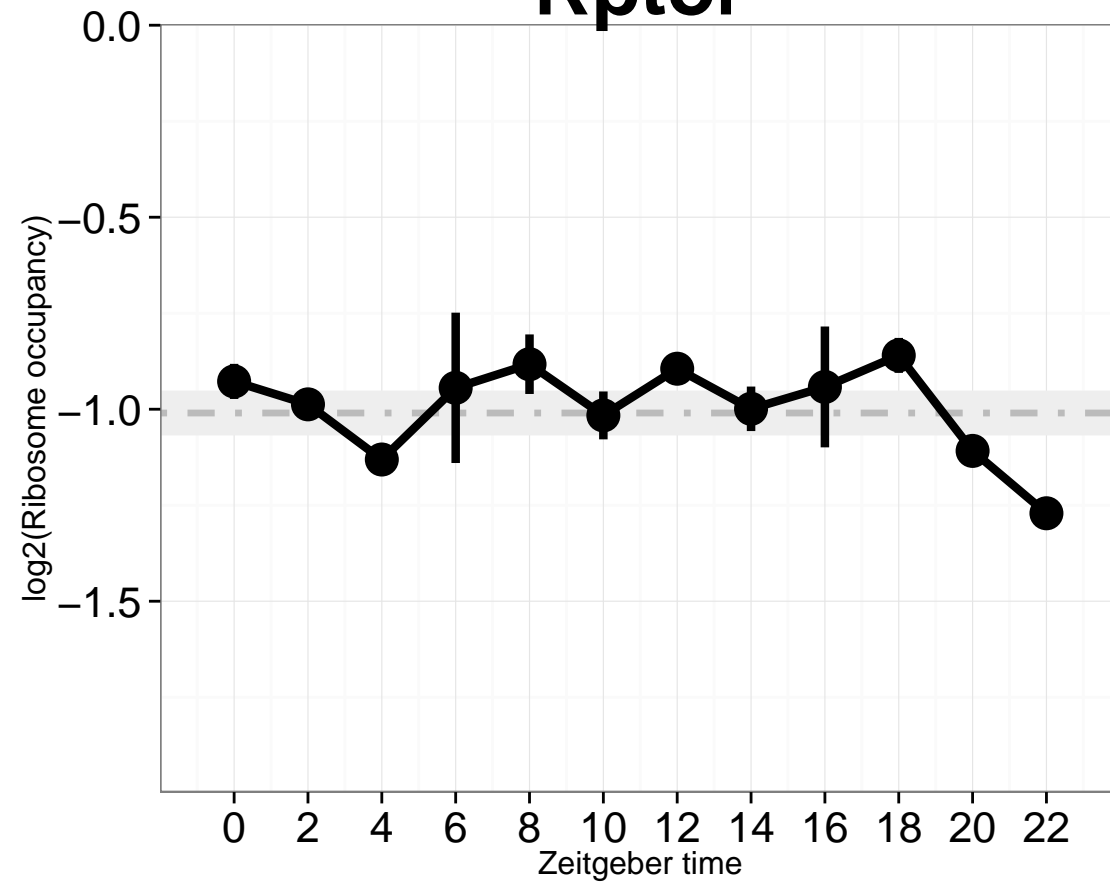

Supplement: SuppDataset_1.zip [file Rptor_set_A.pdf › Supplemental Dataset 1/A-mRNA_nonrhyth_translation_nonrhyth/Rptor_set_A.pdf]

# Rpusd1

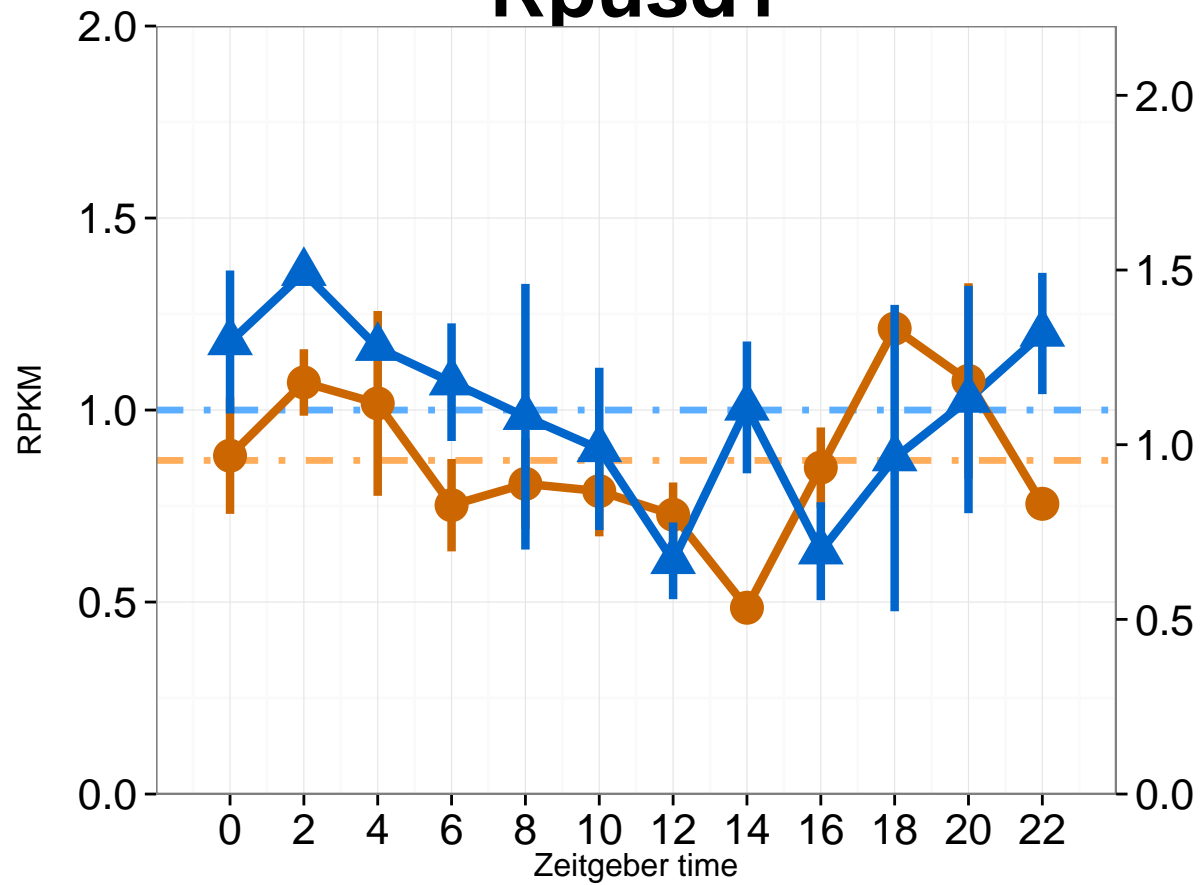

# Rpusd1

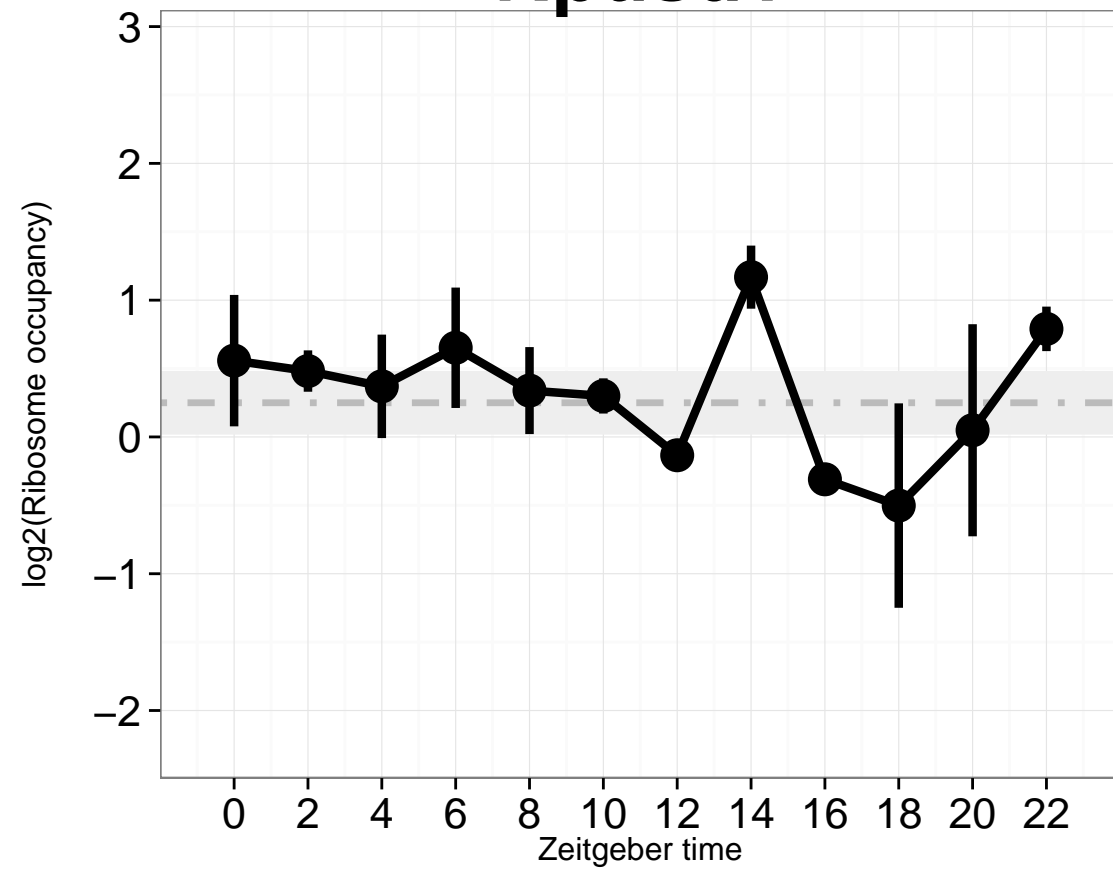

Supplement: SuppDataset_1.zip [file Rpusd1_set_A.pdf › Supplemental Dataset 1/A-mRNA_nonrhyth_translation_nonrhyth/Rpusd1_set_A.pdf]

## Rpusd2

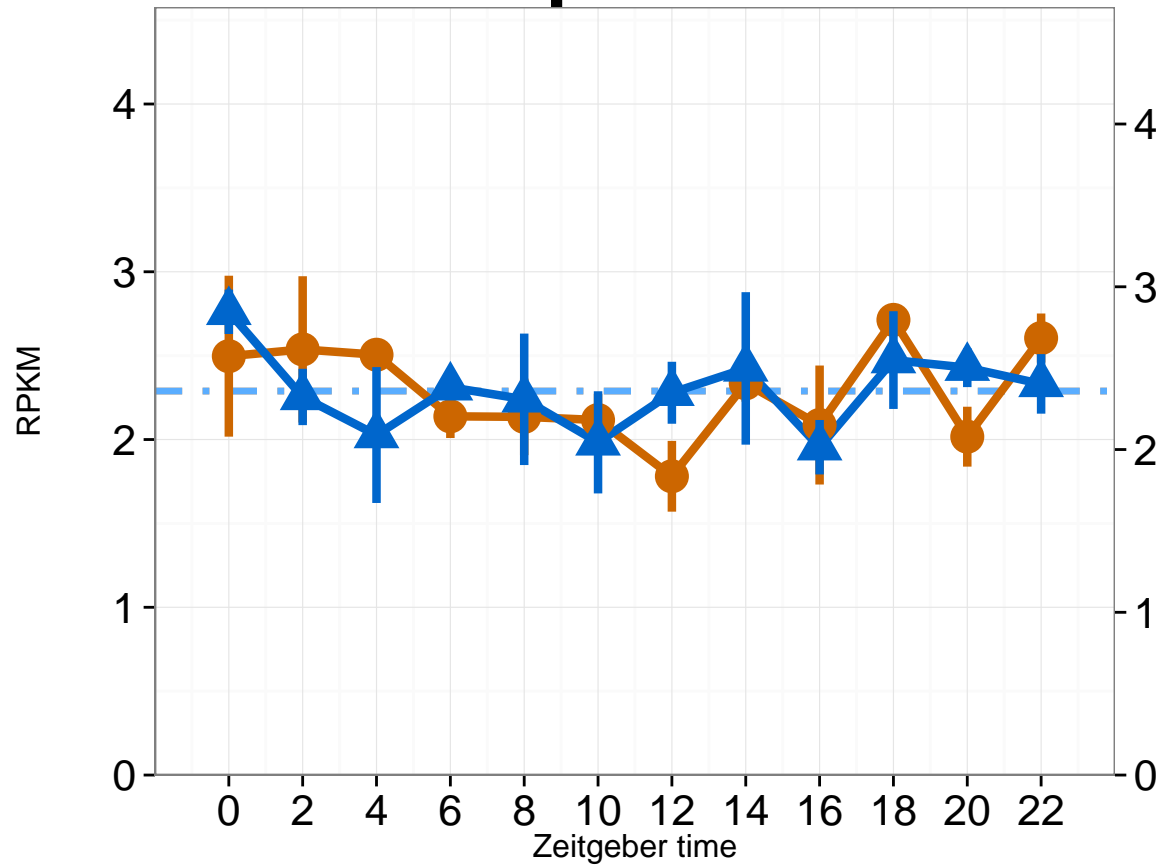

## Rpusd2

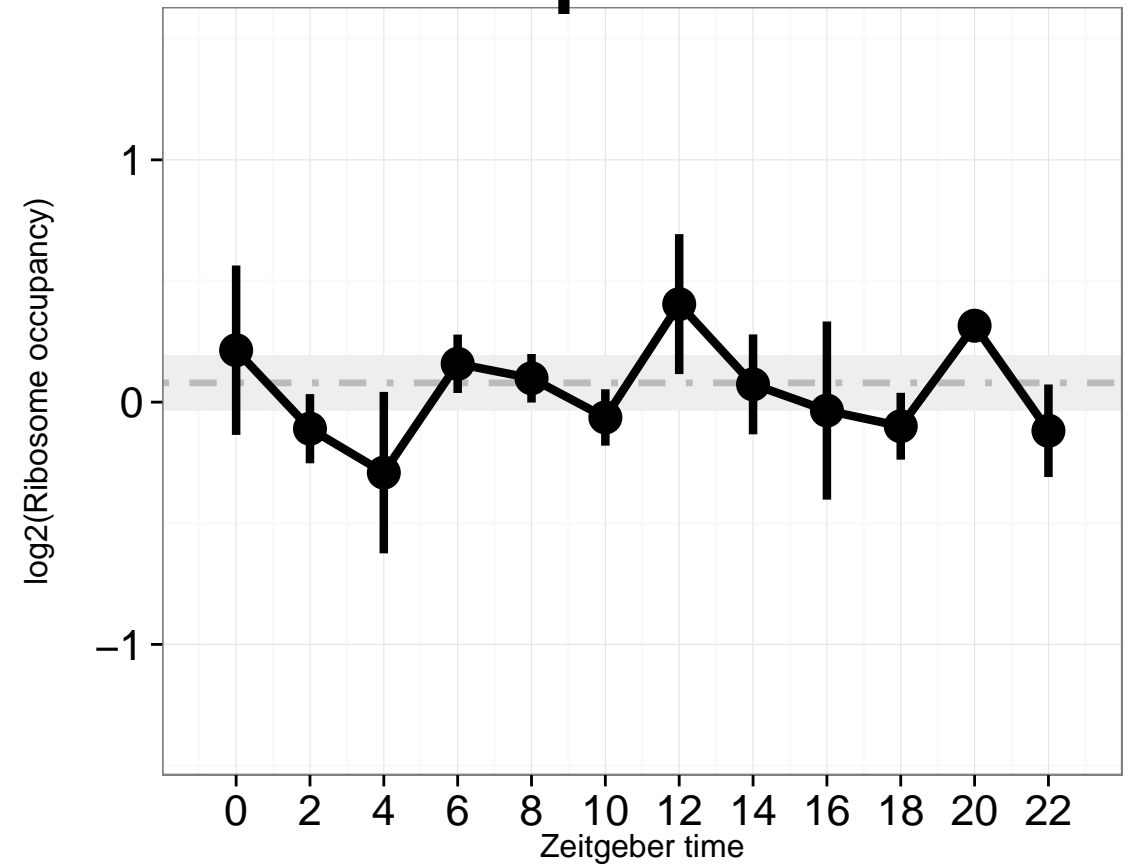

Supplement: SuppDataset_1.zip [file Rpusd2_set_A.pdf › Supplemental Dataset 1/A-mRNA_nonrhyth_translation_nonrhyth/Rpusd2_set_A.pdf]

## Rpusd3

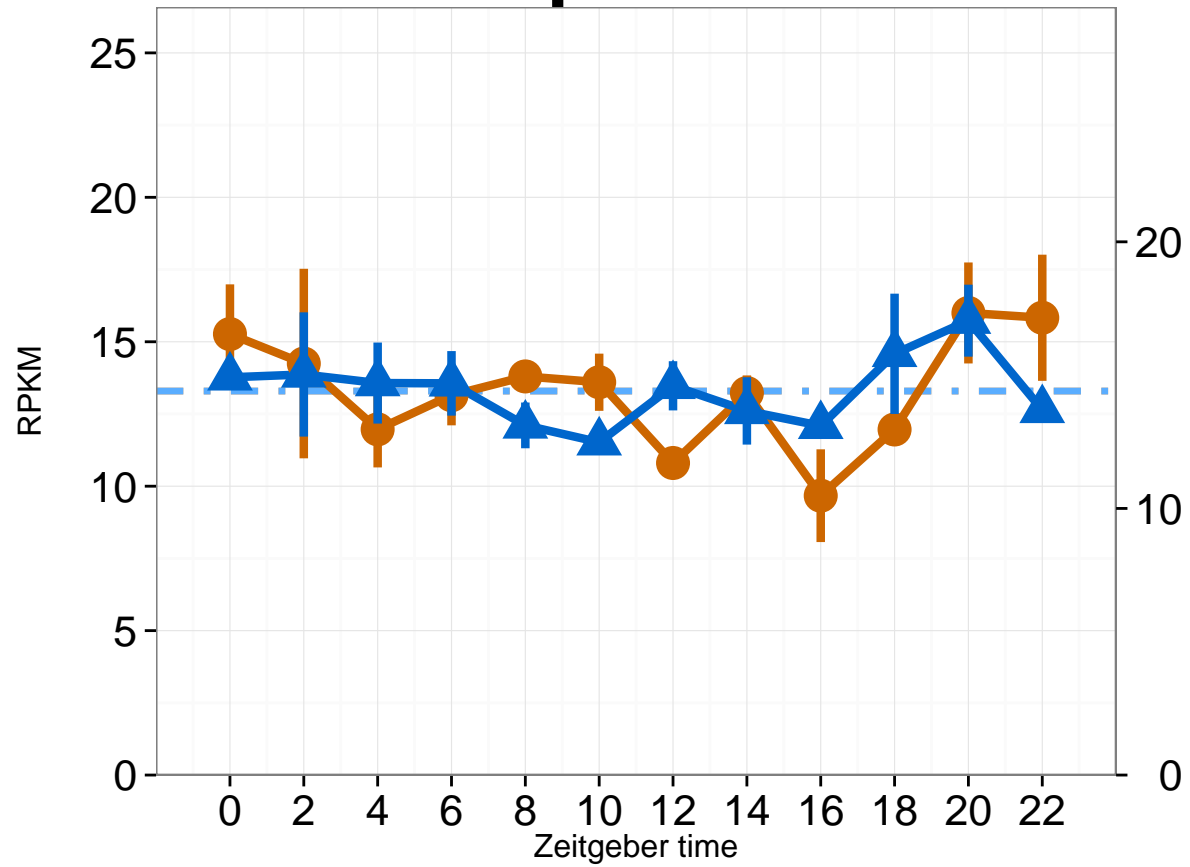

## Rpusd3

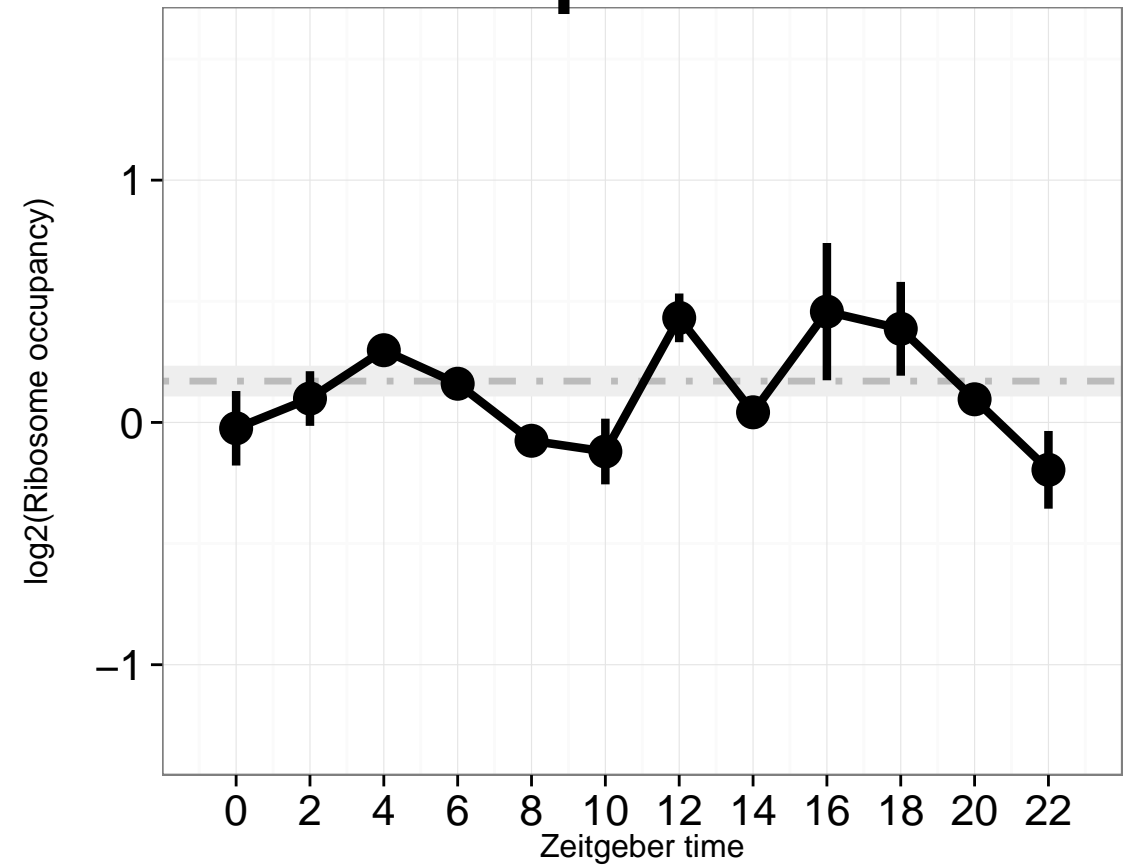

Supplement: SuppDataset_1.zip [file Rpusd3_set_A.pdf › Supplemental Dataset 1/A-mRNA_nonrhyth_translation_nonrhyth/Rpusd3_set_A.pdf]

# Rqcd1

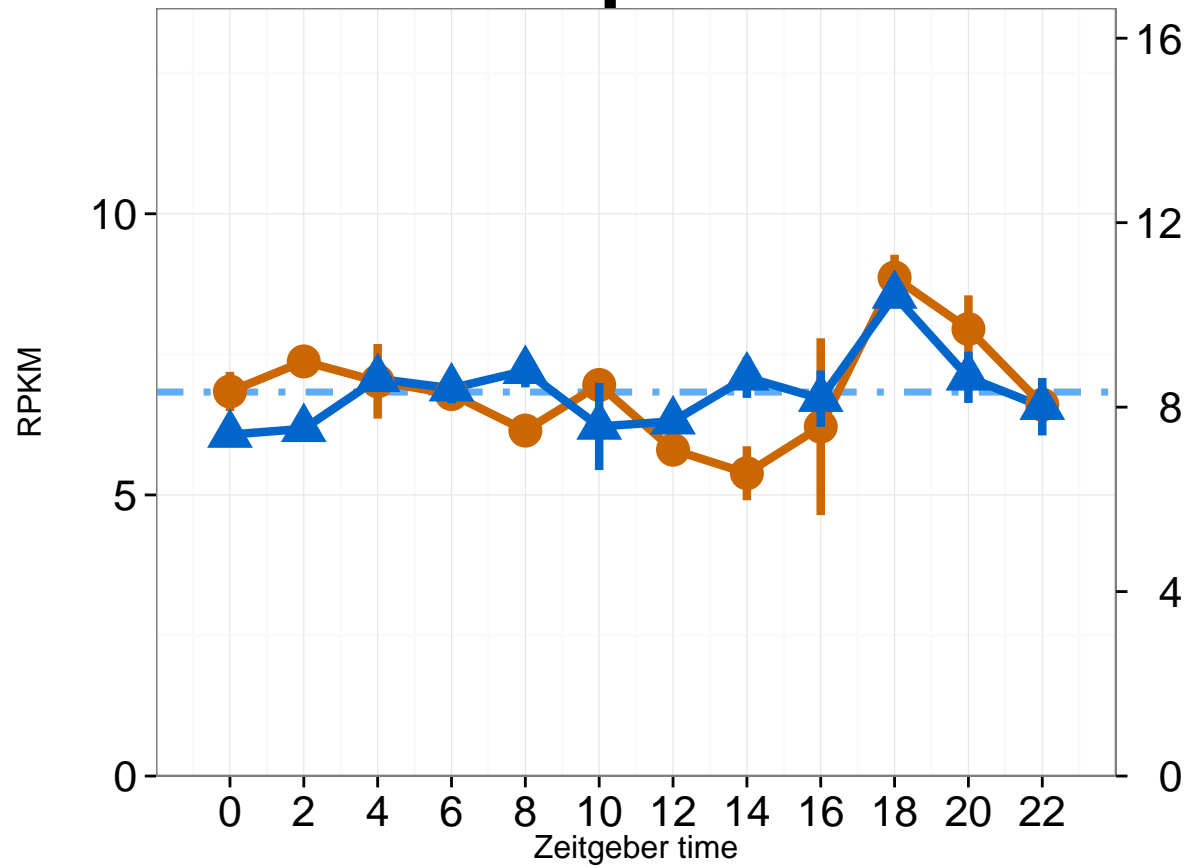

# Rqcd1

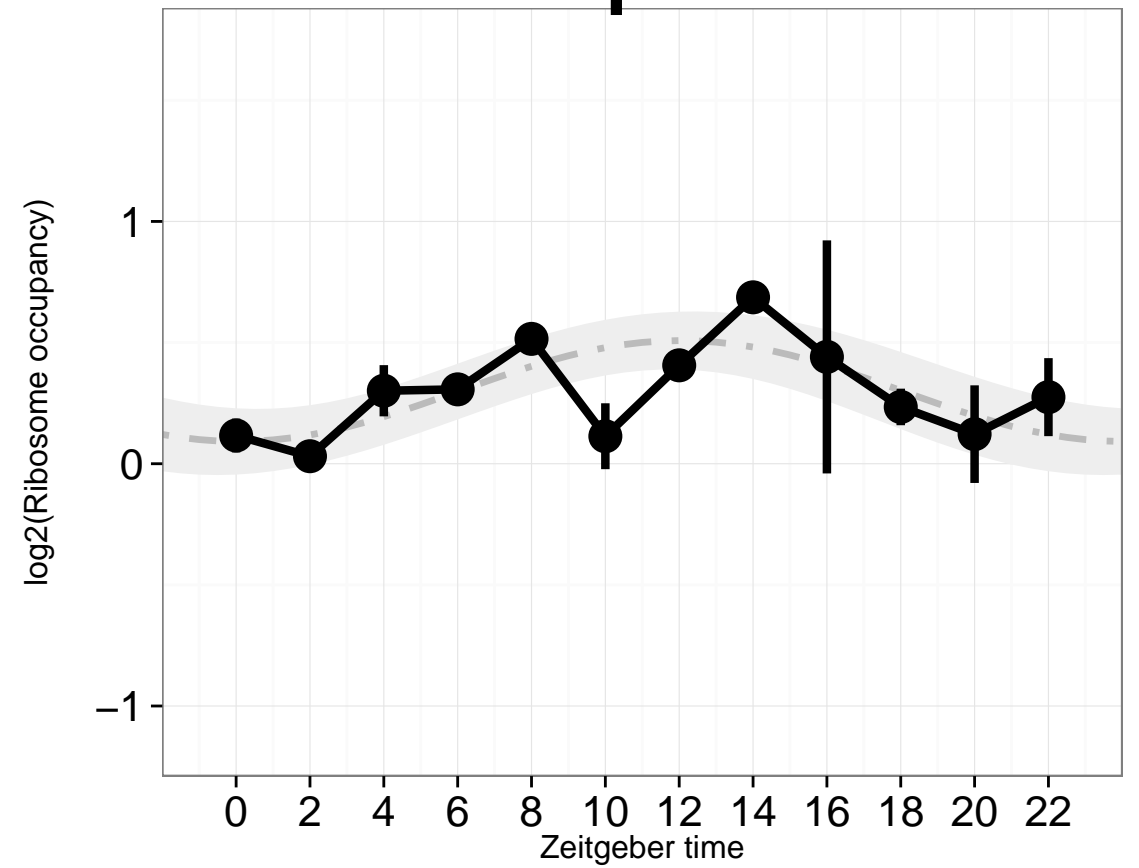

Supplement: SuppDataset_1.zip [file Rqcd1_set_A.pdf › Supplemental Dataset 1/A-mRNA_nonrhyth_translation_nonrhyth/Rqcd1_set_A.pdf]

## Rraga

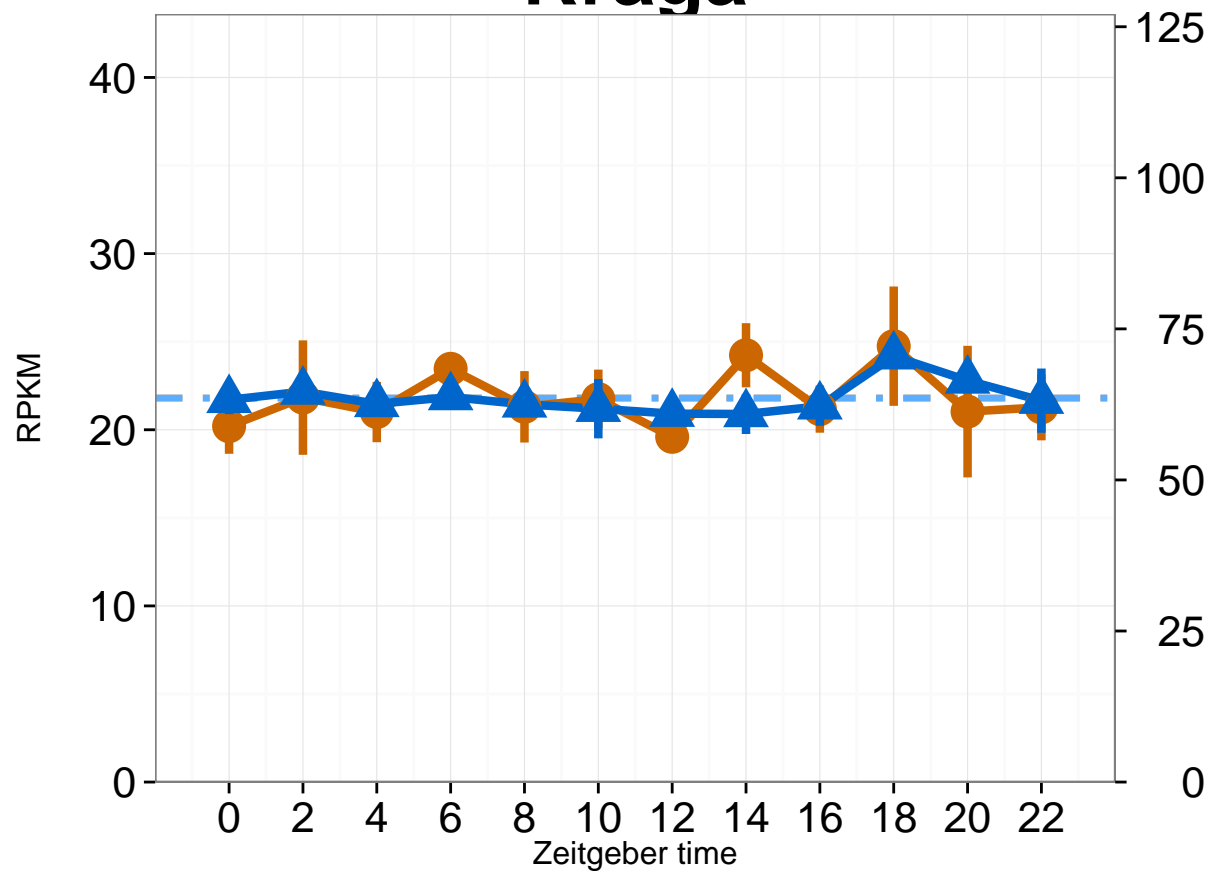

## Rraga

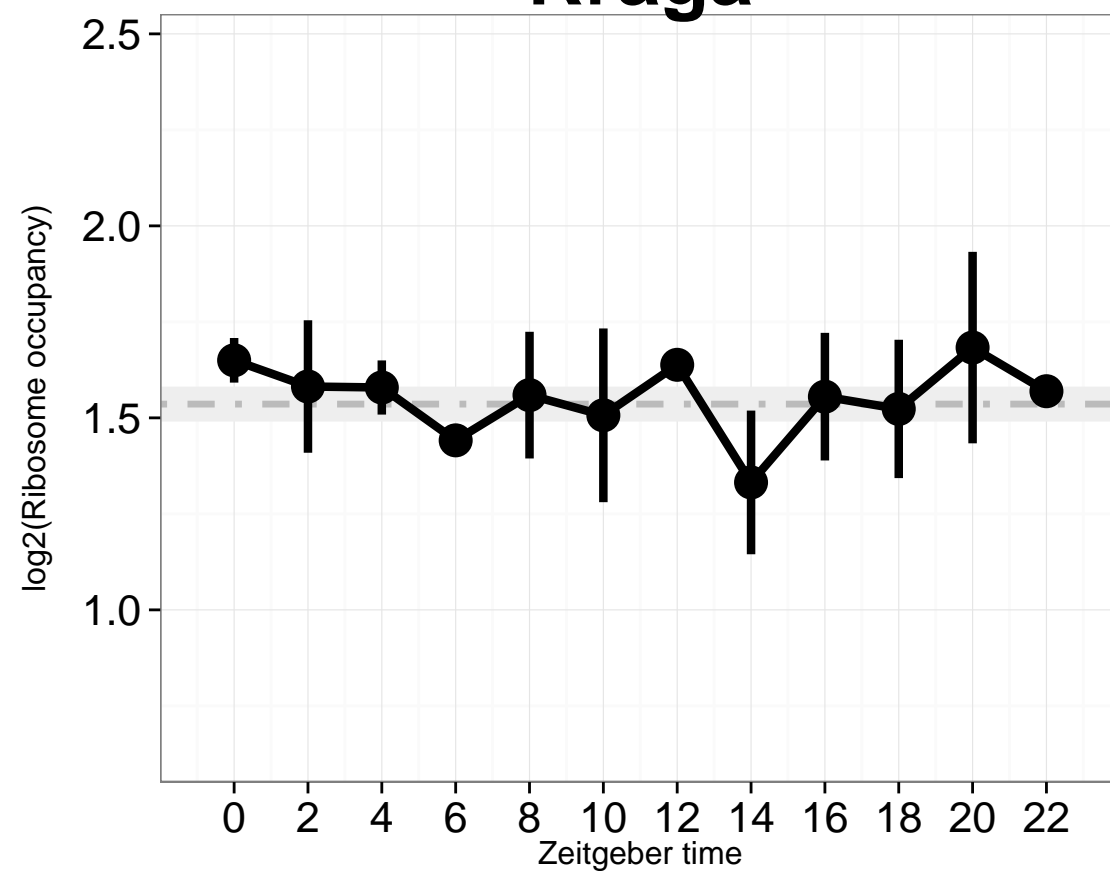

Supplement: SuppDataset_1.zip [file Rraga_set_A.pdf › Supplemental Dataset 1/A-mRNA_nonrhyth_translation_nonrhyth/Rraga_set_A.pdf]

# Rragc

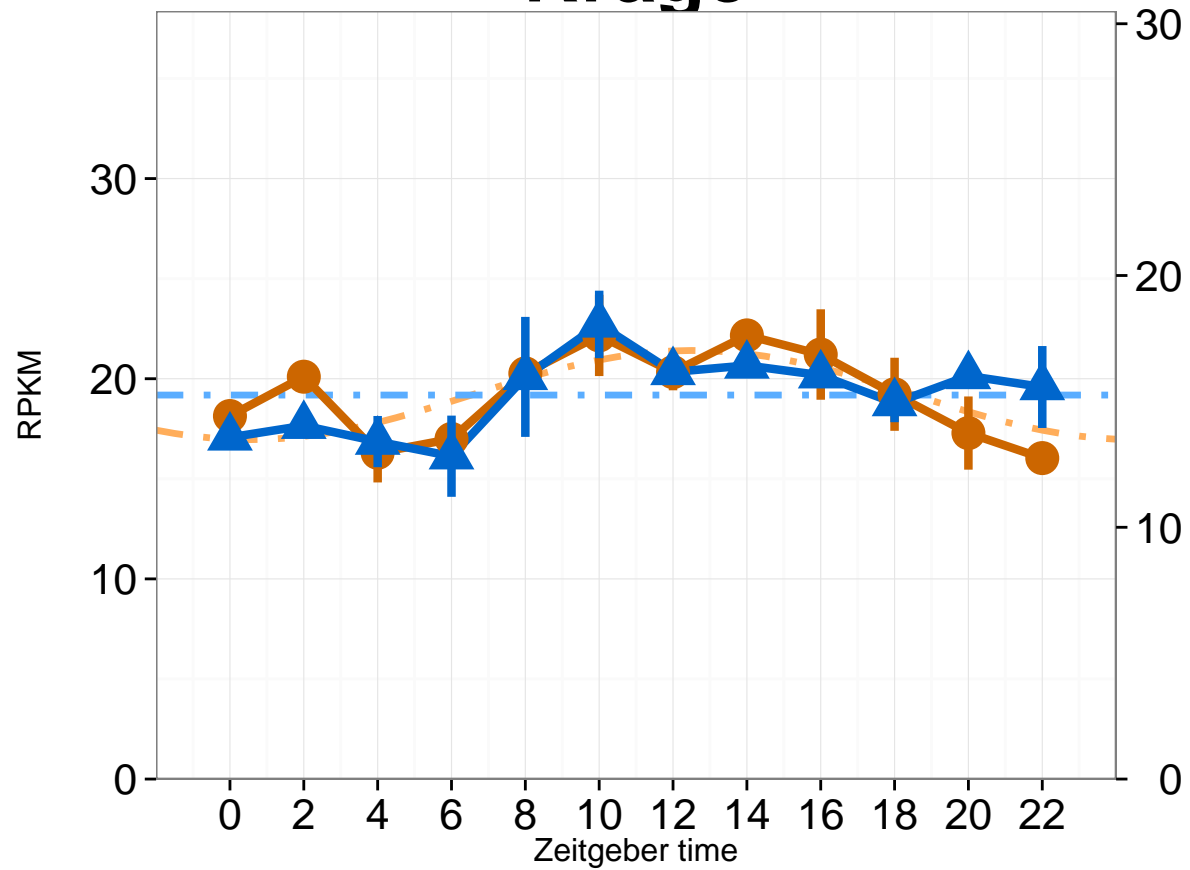

# Rragc

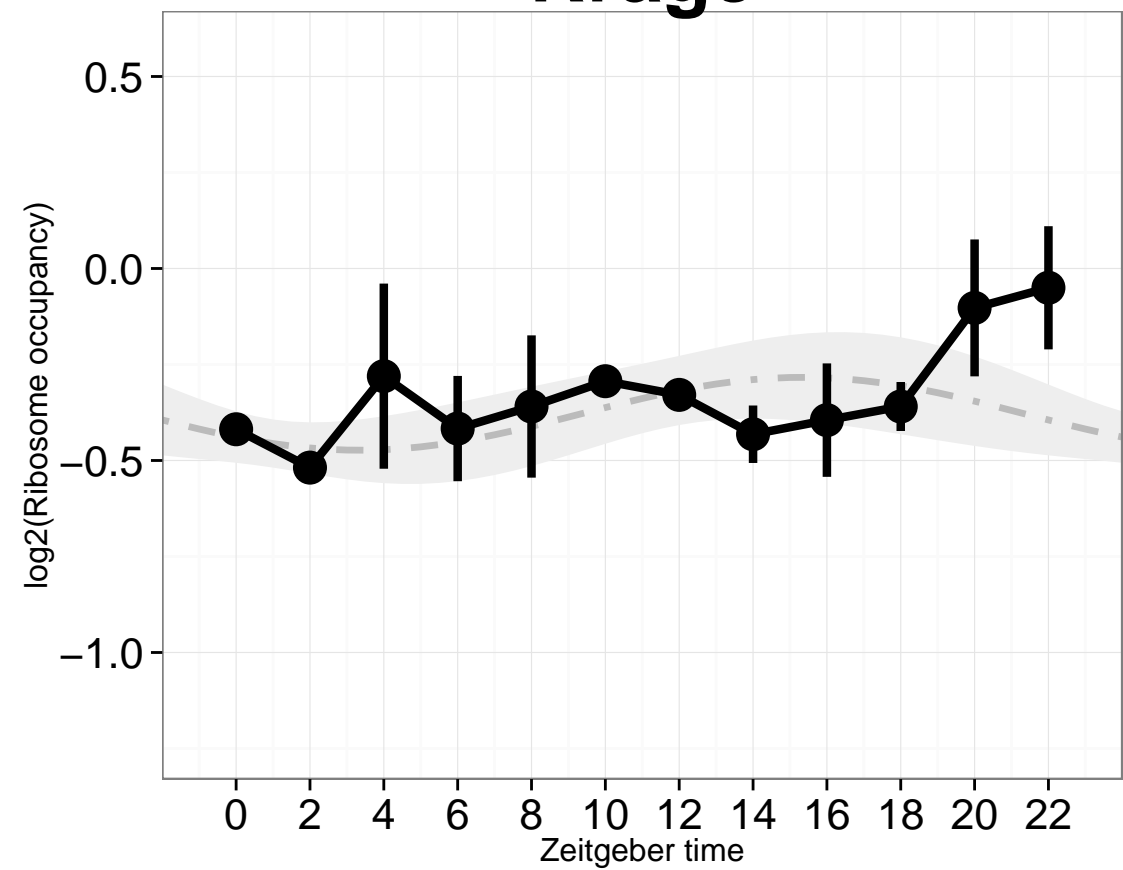

Supplement: SuppDataset_1.zip [file Rragc_set_A.pdf › Supplemental Dataset 1/A-mRNA_nonrhyth_translation_nonrhyth/Rragc_set_A.pdf]

## Rragd

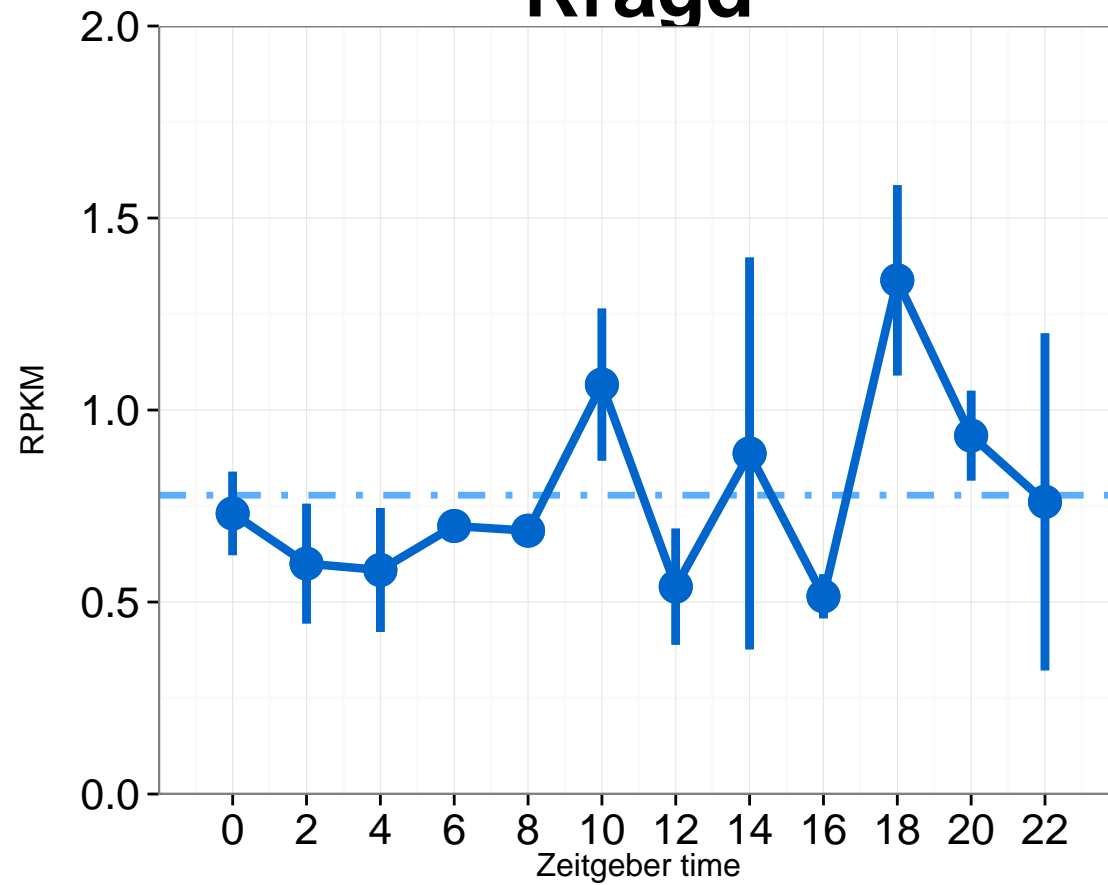

## Rragd log2(Ribosome occupancy

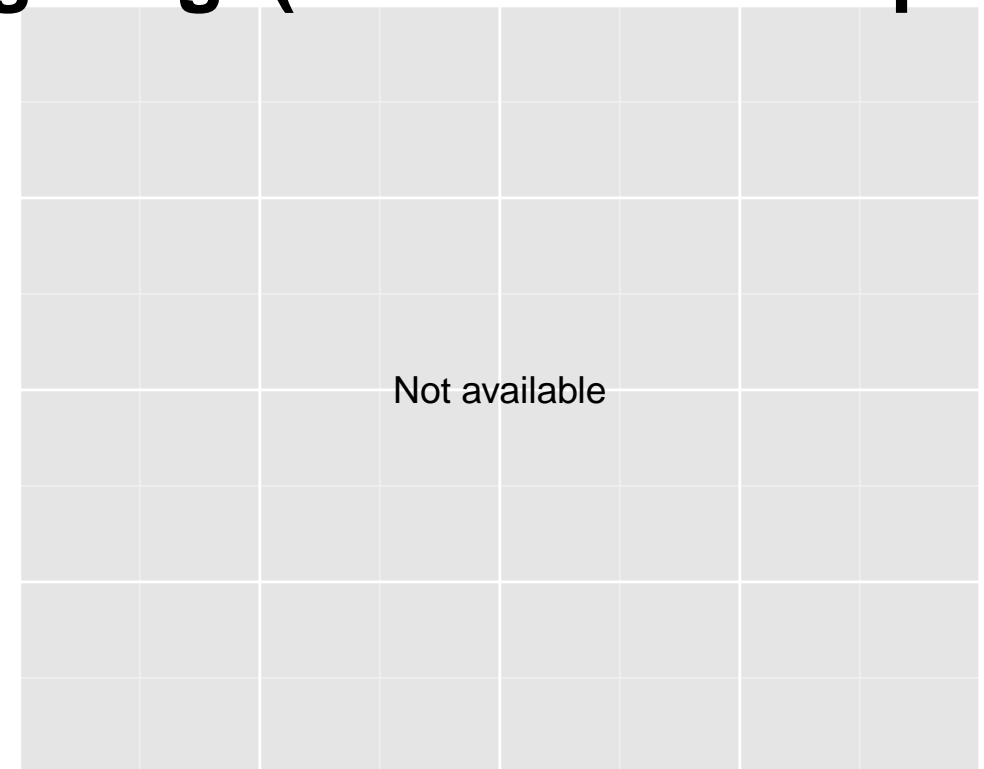

Supplement: SuppDataset_1.zip [file Rragd_set_A.pdf › Supplemental Dataset 1/A-mRNA_nonrhyth_translation_nonrhyth/Rragd_set_A.pdf]

## Rras2

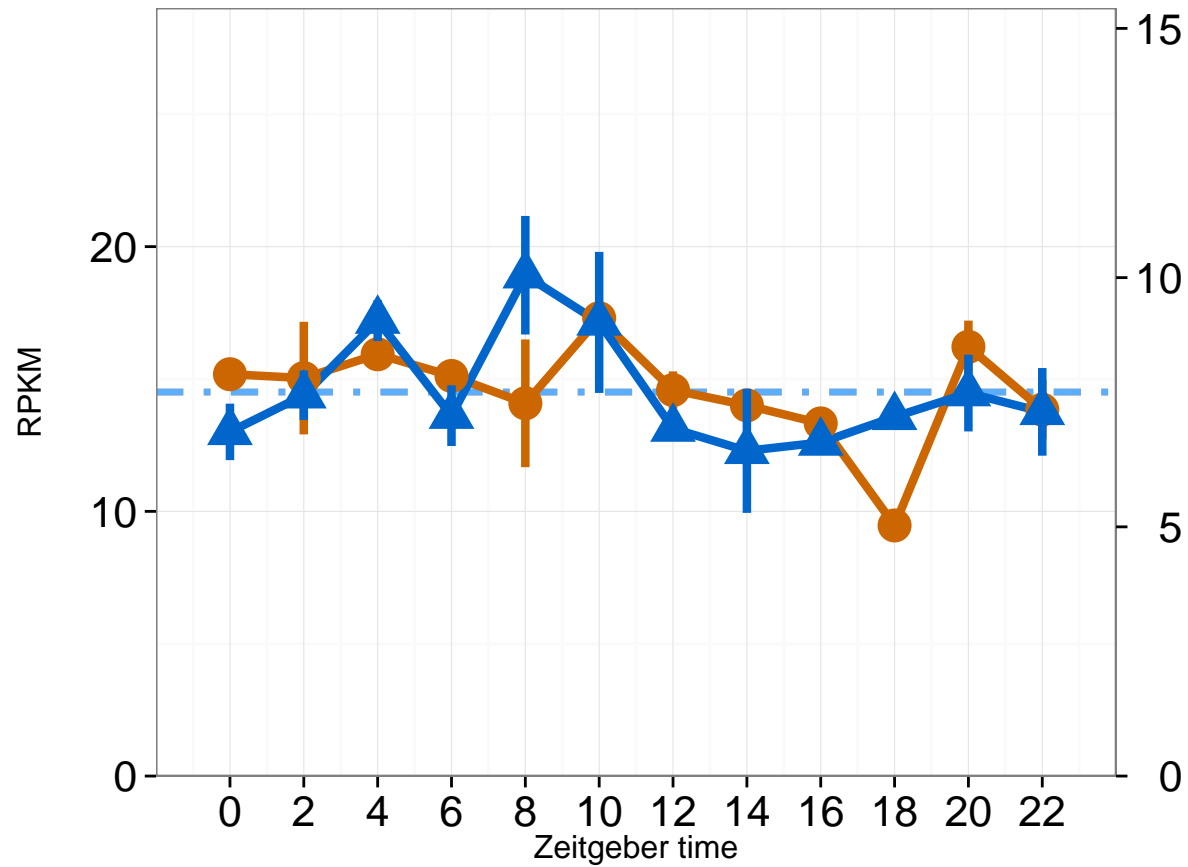

## Rras2

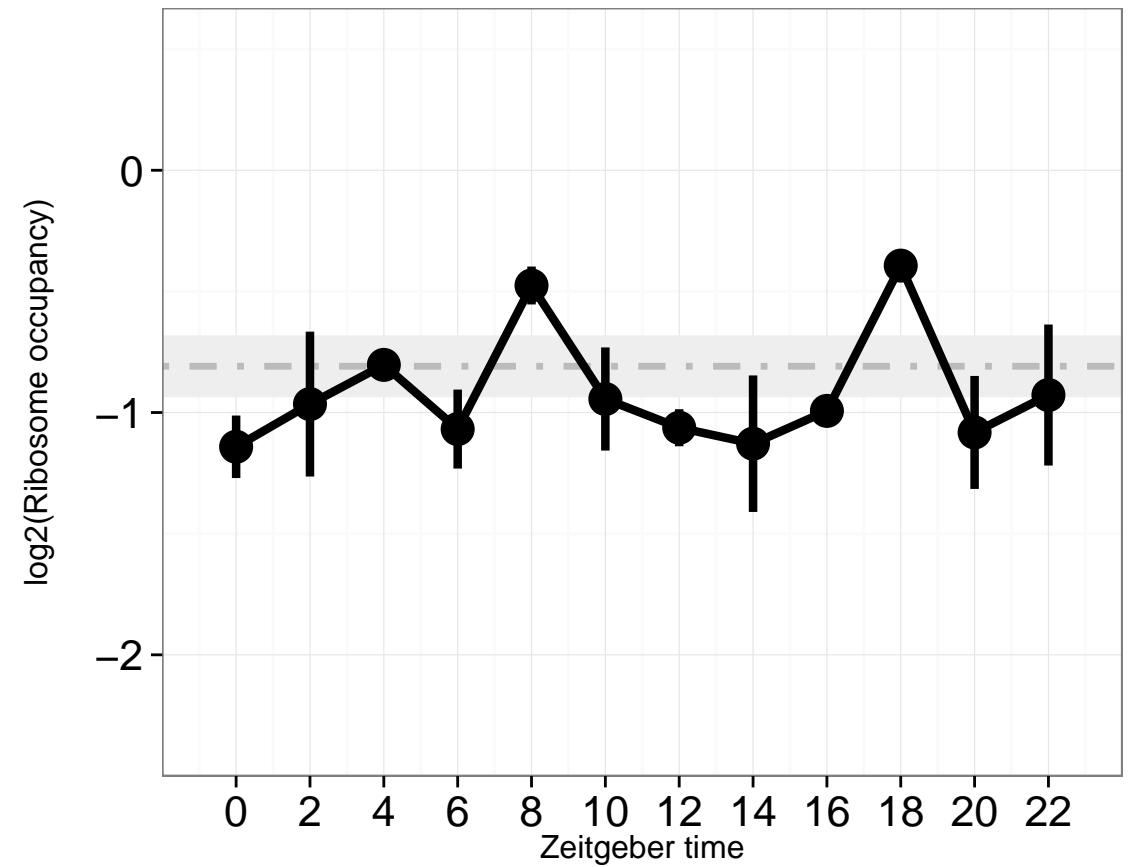

Supplement: SuppDataset_1.zip [file Rras2_set_A.pdf › Supplemental Dataset 1/A-mRNA_nonrhyth_translation_nonrhyth/Rras2_set_A.pdf]

## Rras

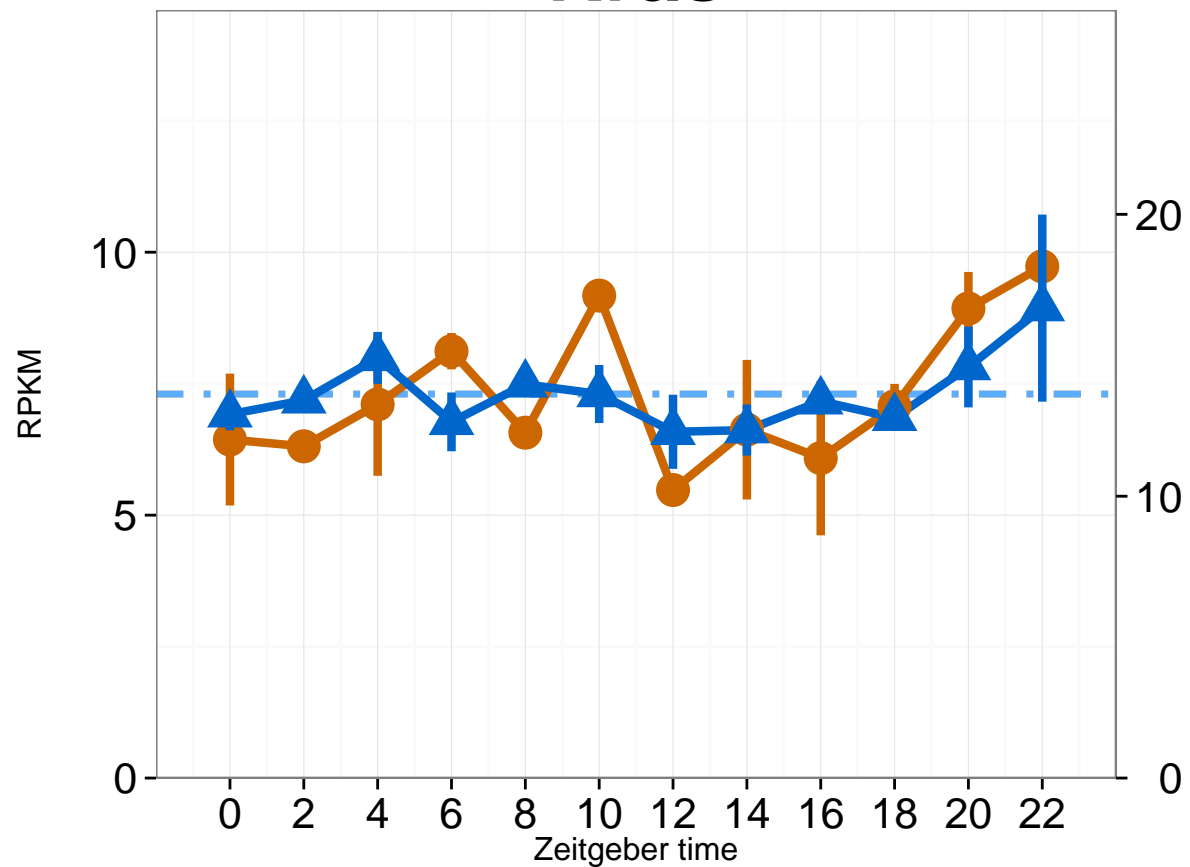

## Rras

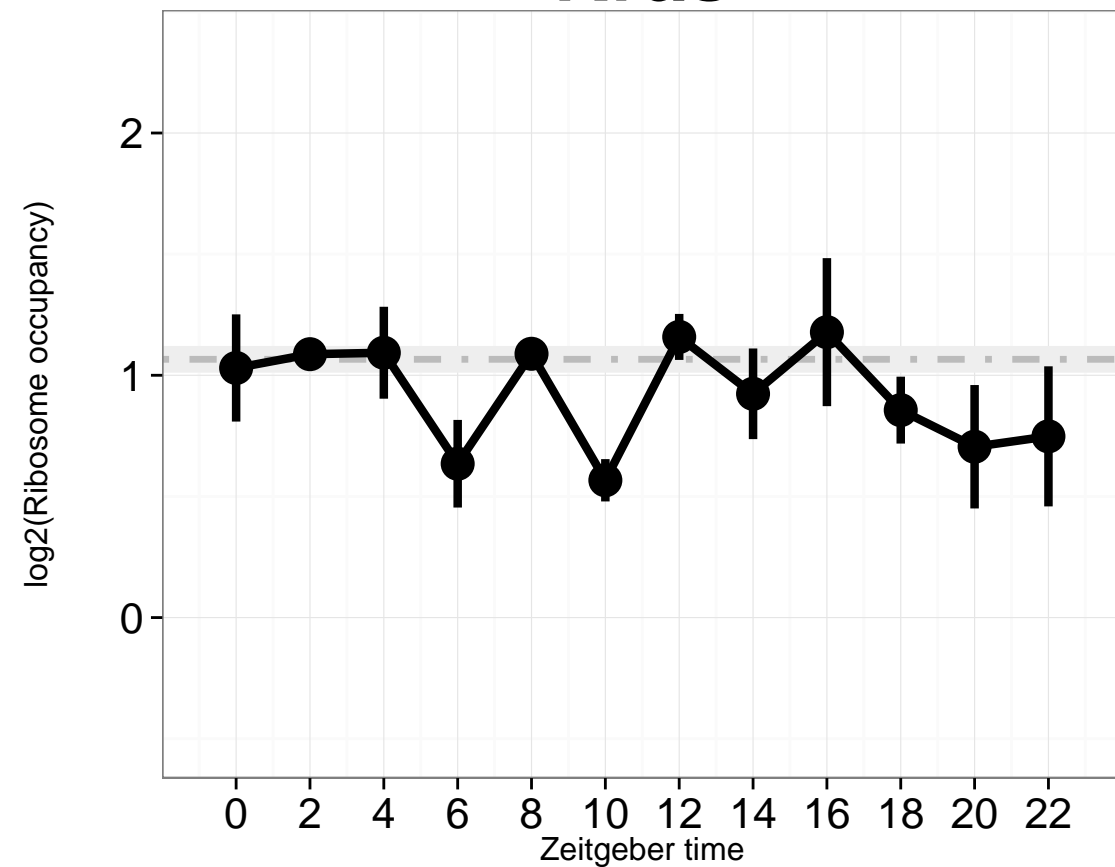

Supplement: SuppDataset_1.zip [file Rras_set_A.pdf › Supplemental Dataset 1/A-mRNA_nonrhyth_translation_nonrhyth/Rras_set_A.pdf]

## Rrbp1

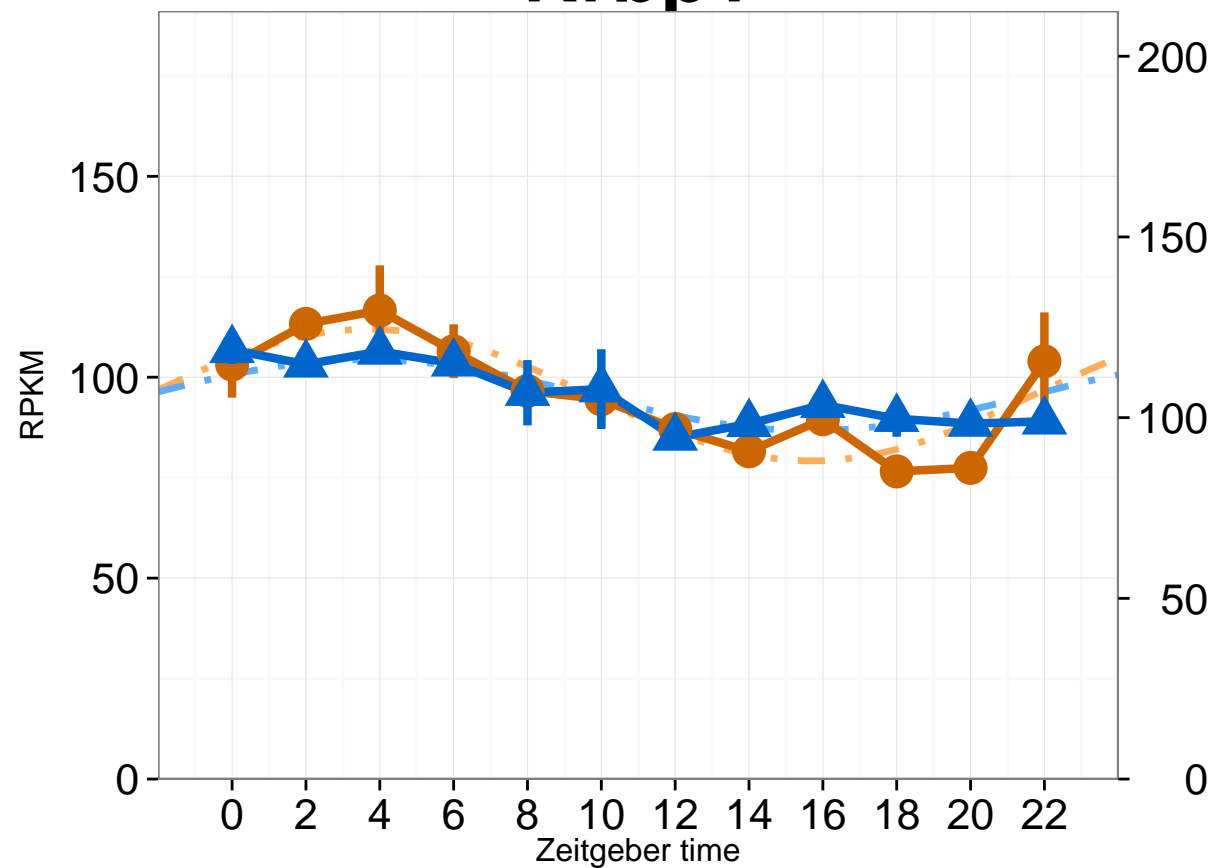

## Rrbp1

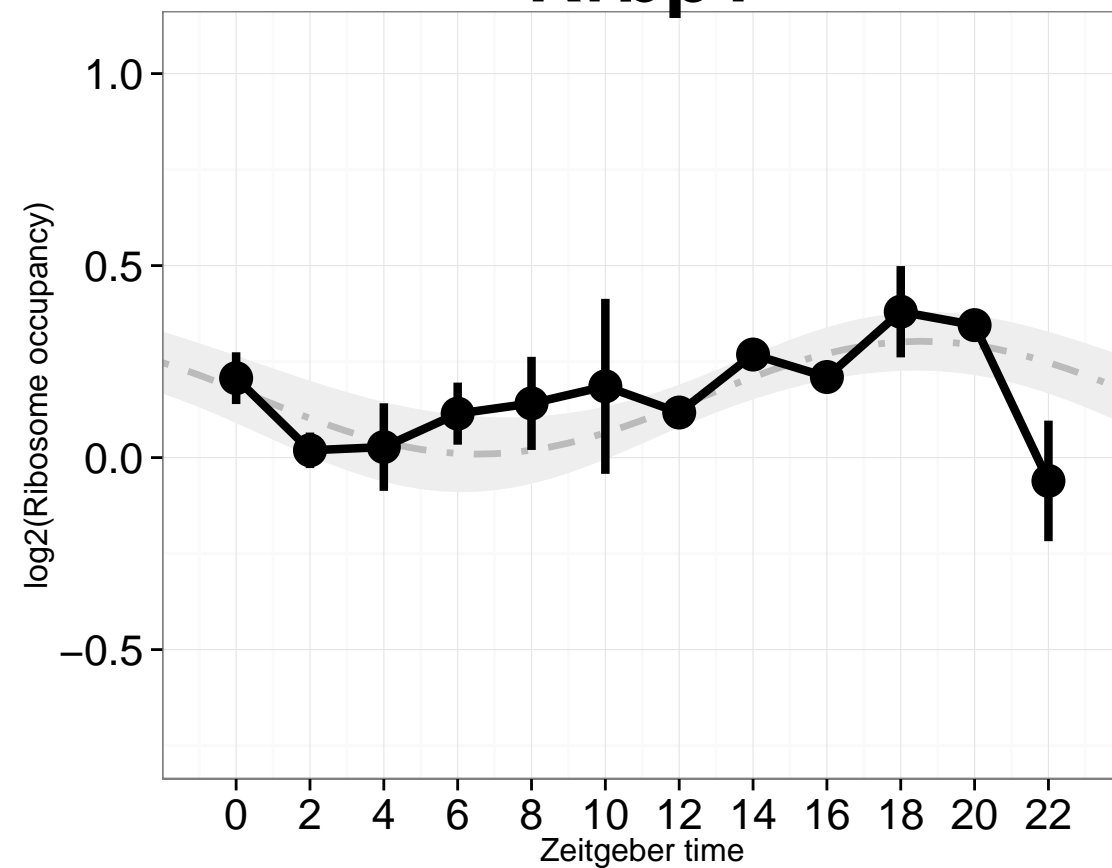

Supplement: SuppDataset_1.zip [file Rrbp1_set_A.pdf › Supplemental Dataset 1/A-mRNA_nonrhyth_translation_nonrhyth/Rrbp1_set_A.pdf]

# Rreb1

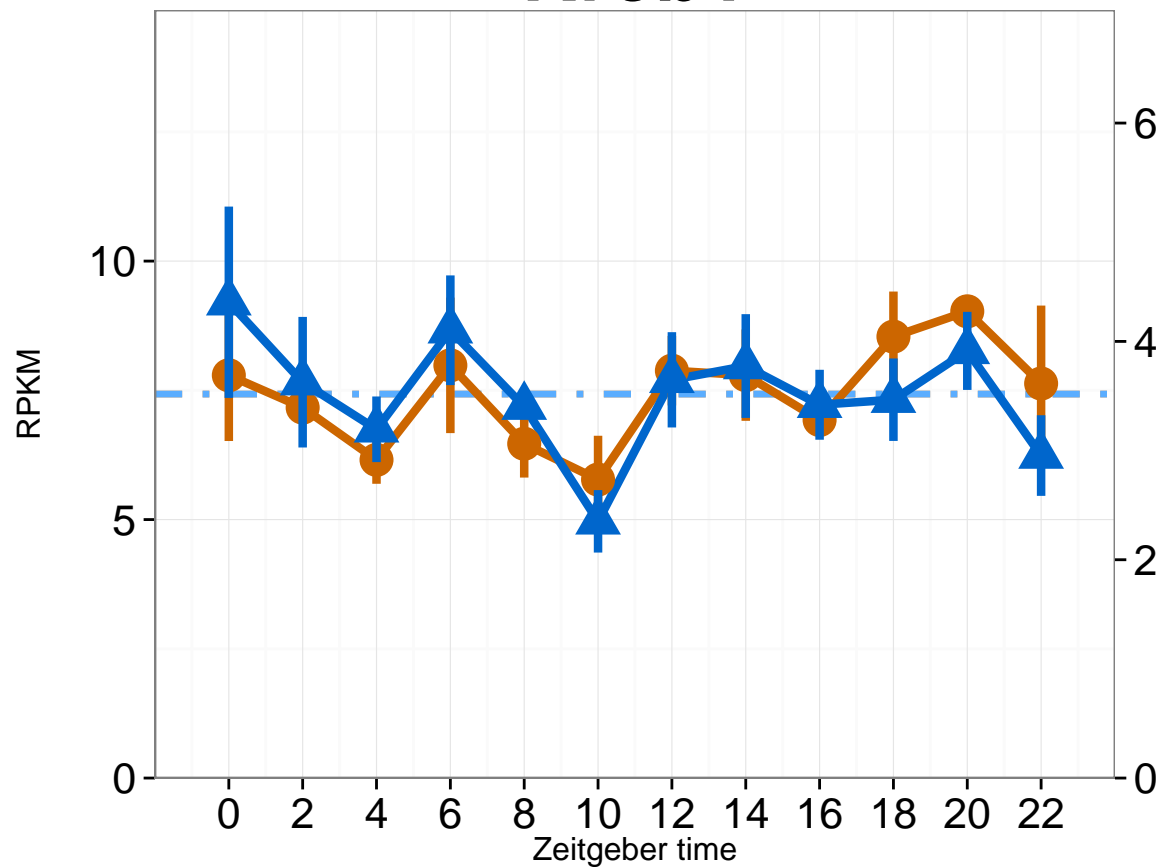

# Rreb1

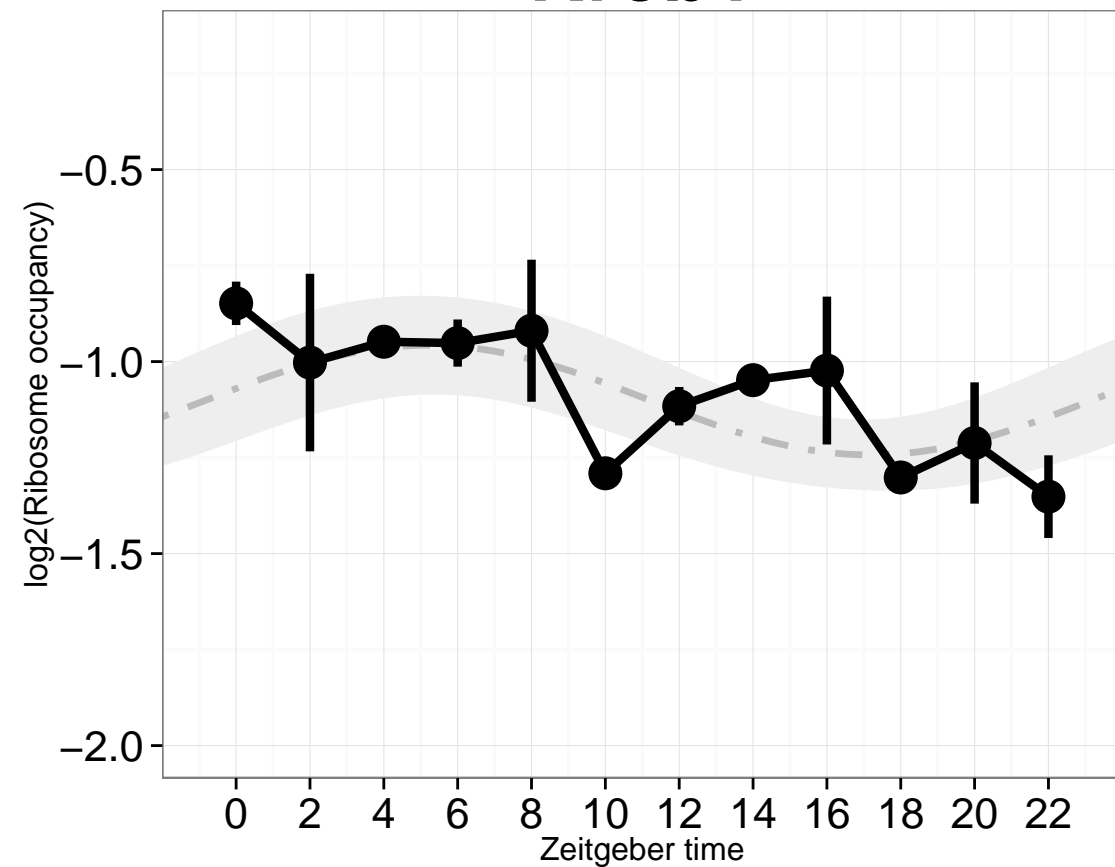

Supplement: SuppDataset_1.zip [file Rreb1_set_A.pdf › Supplemental Dataset 1/A-mRNA_nonrhyth_translation_nonrhyth/Rreb1_set_A.pdf]

# Rrm1

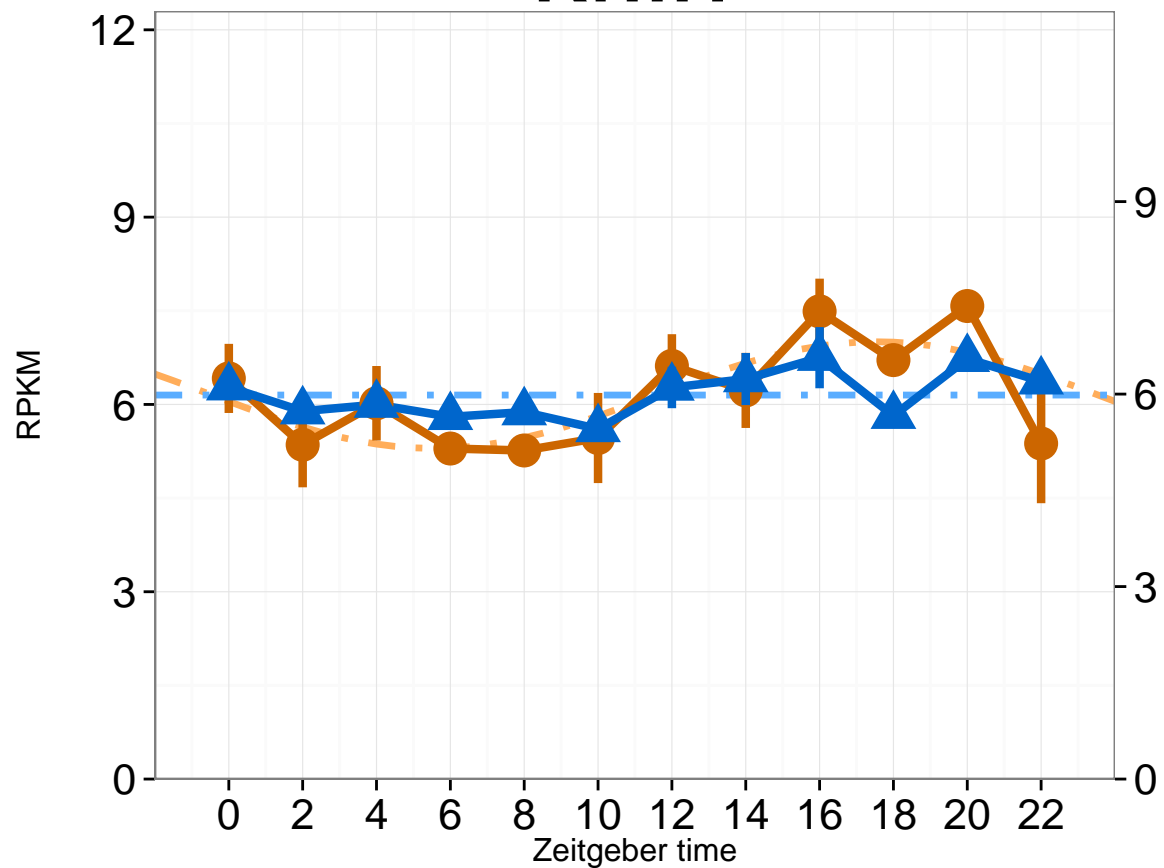

# Rrm1

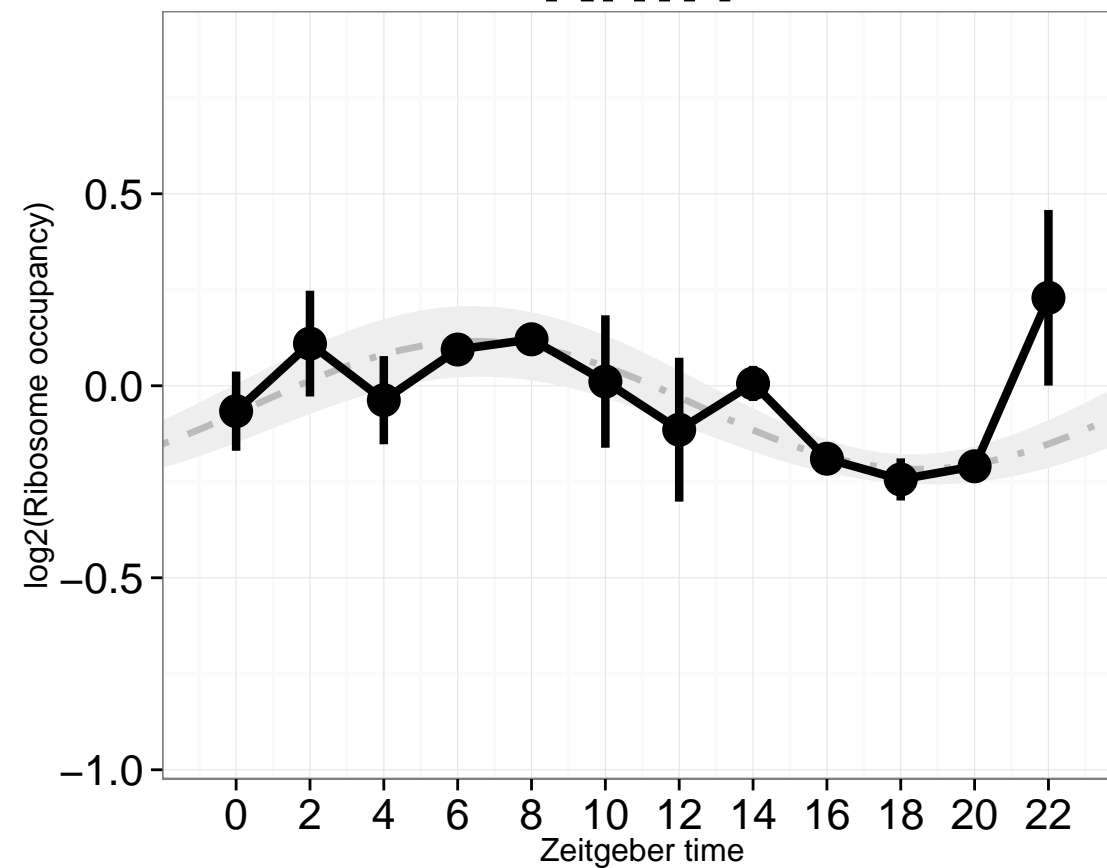

Supplement: SuppDataset_1.zip [file Rrm1_set_A.pdf › Supplemental Dataset 1/A-mRNA_nonrhyth_translation_nonrhyth/Rrm1_set_A.pdf]

# Rrm2b

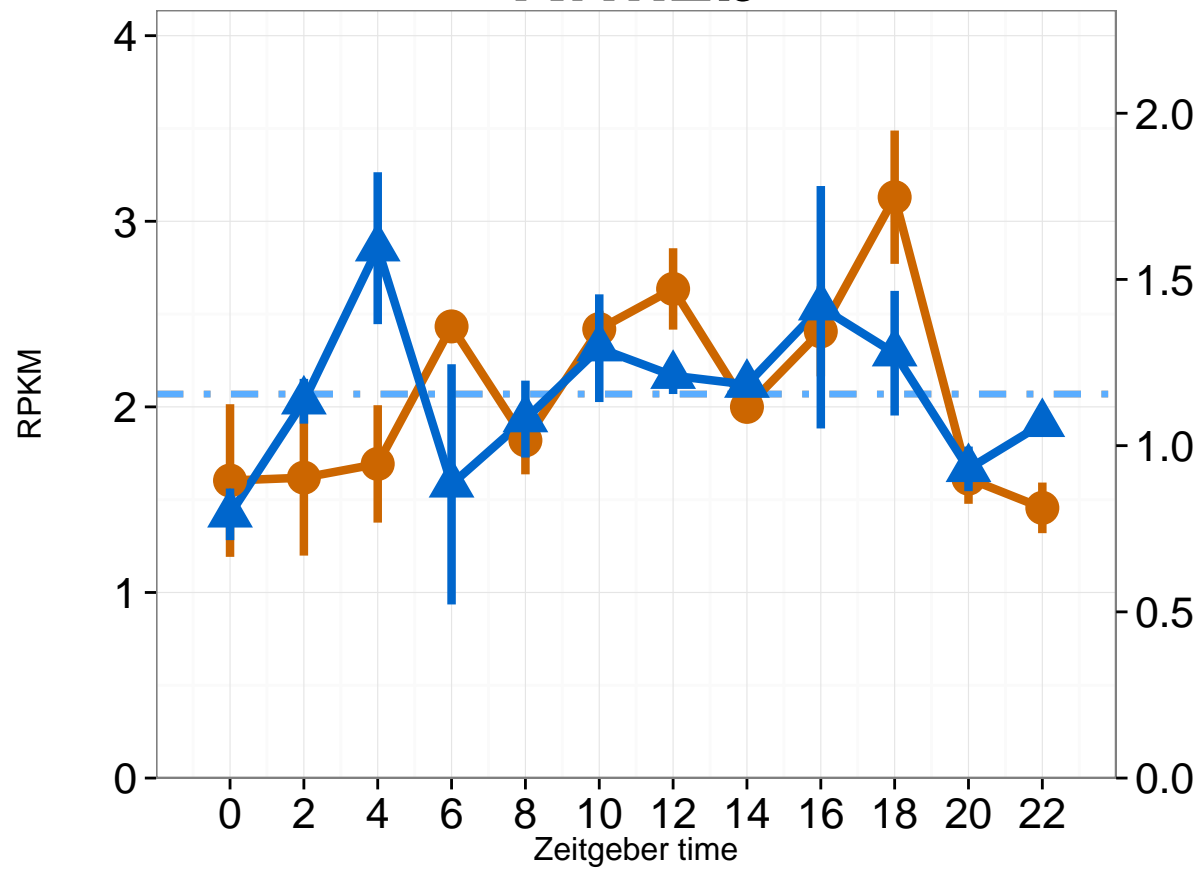

# Rrm2b

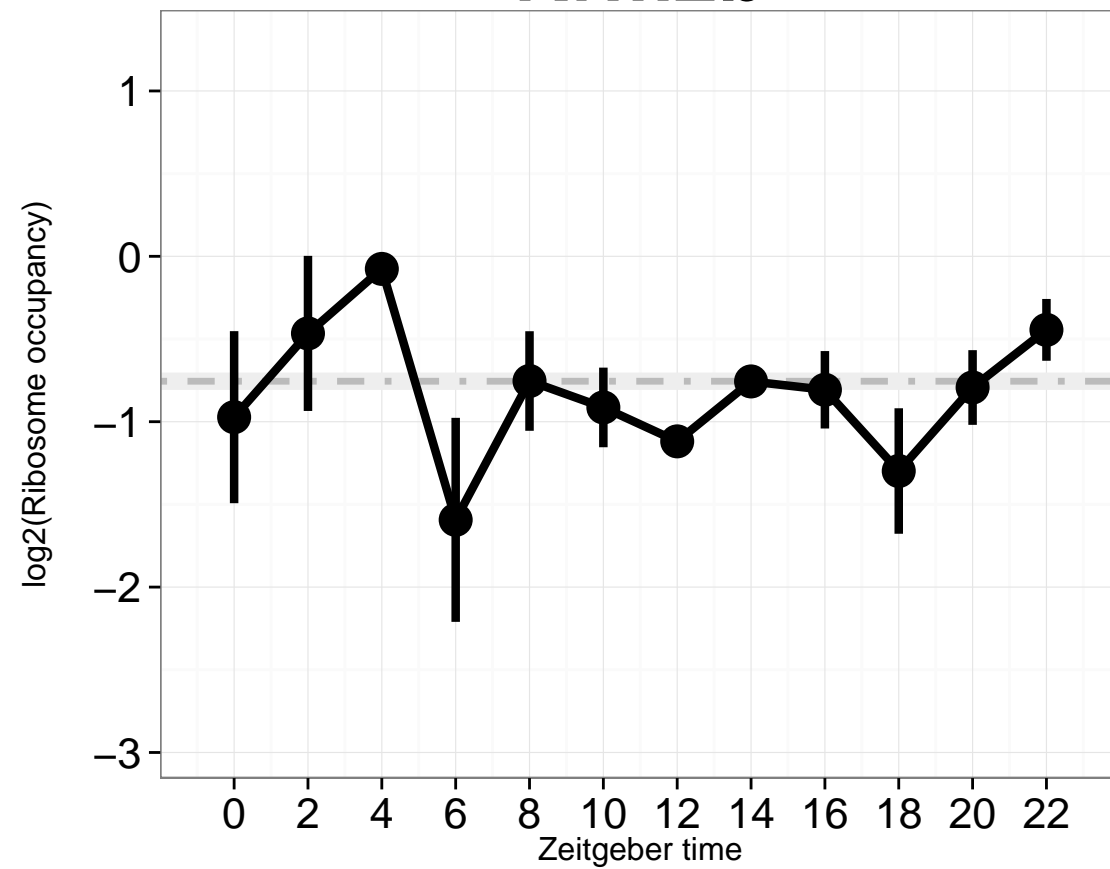

Supplement: SuppDataset_1.zip [file Rrm2b_set_A.pdf › Supplemental Dataset 1/A-mRNA_nonrhyth_translation_nonrhyth/Rrm2b_set_A.pdf]

# Rrnad1

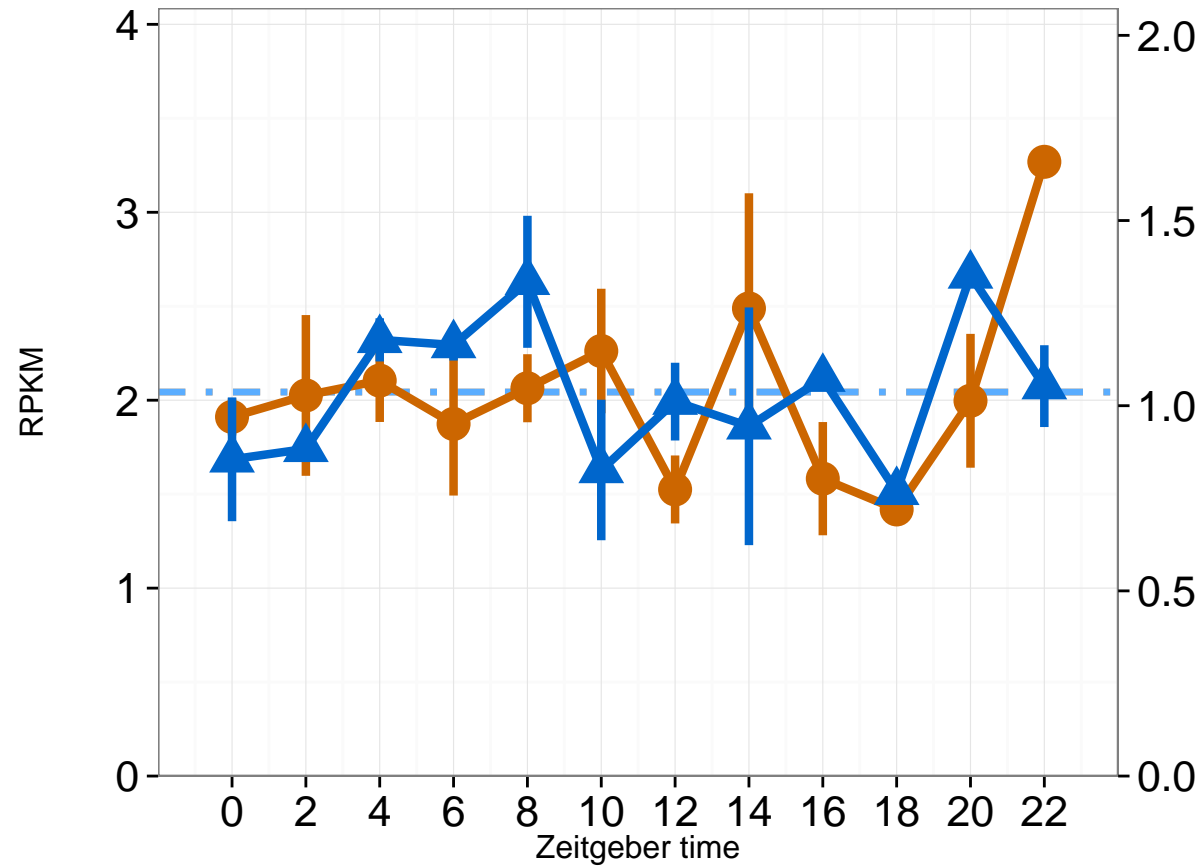

# Rrnad1

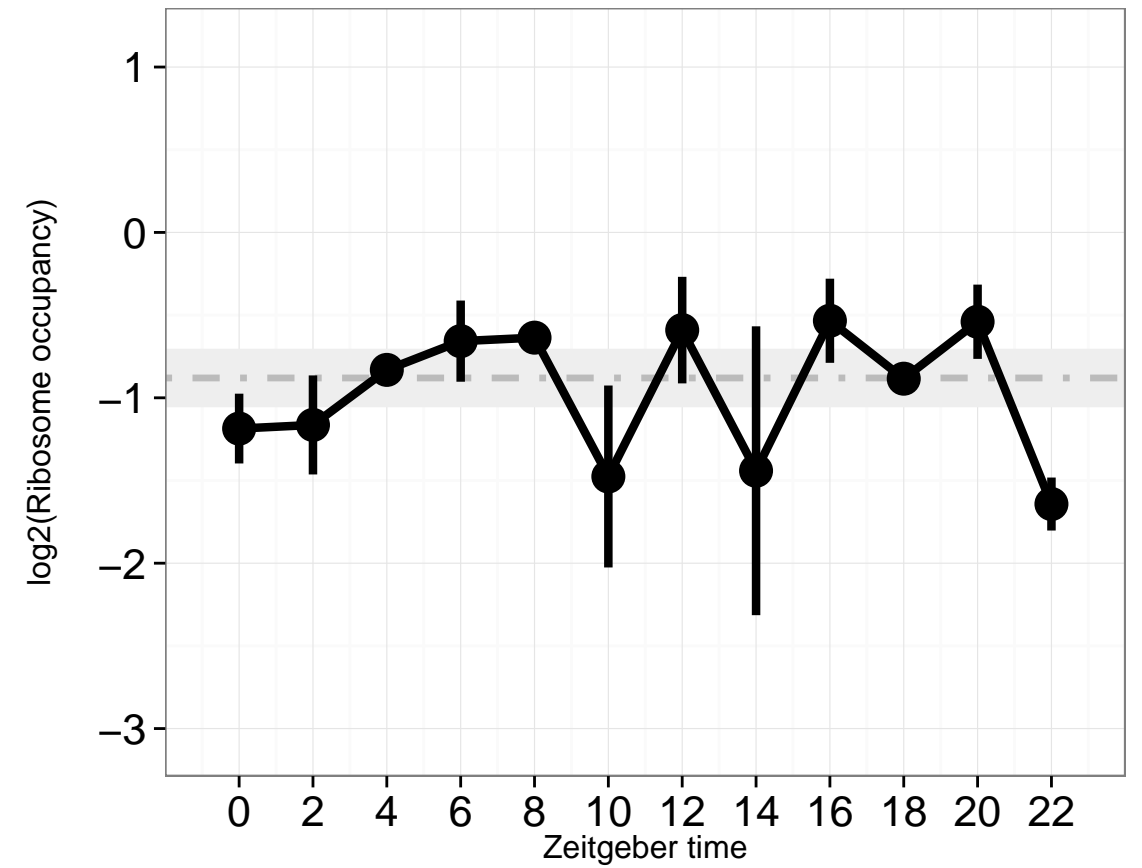

Supplement: SuppDataset_1.zip [file Rrnad1_set_A.pdf › Supplemental Dataset 1/A-mRNA_nonrhyth_translation_nonrhyth/Rrnad1_set_A.pdf]

# Rrp15

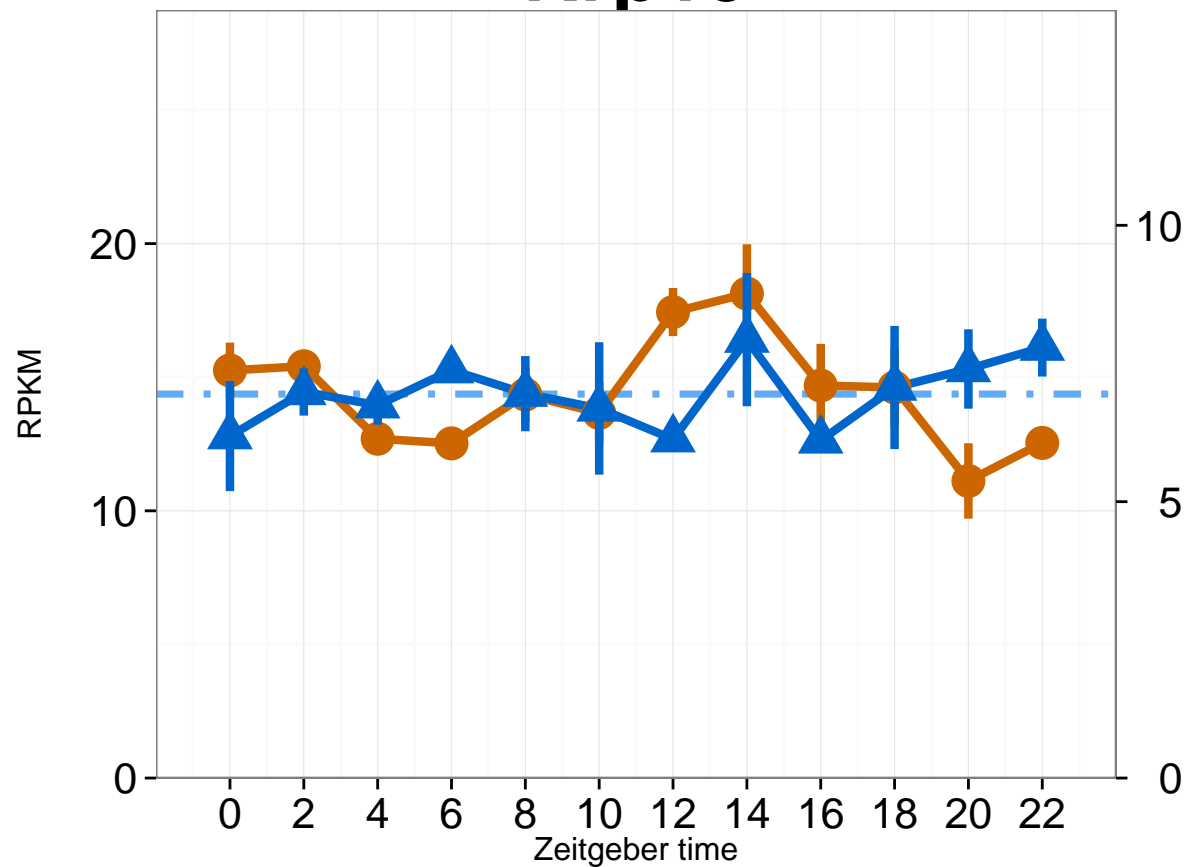

# Rrp15

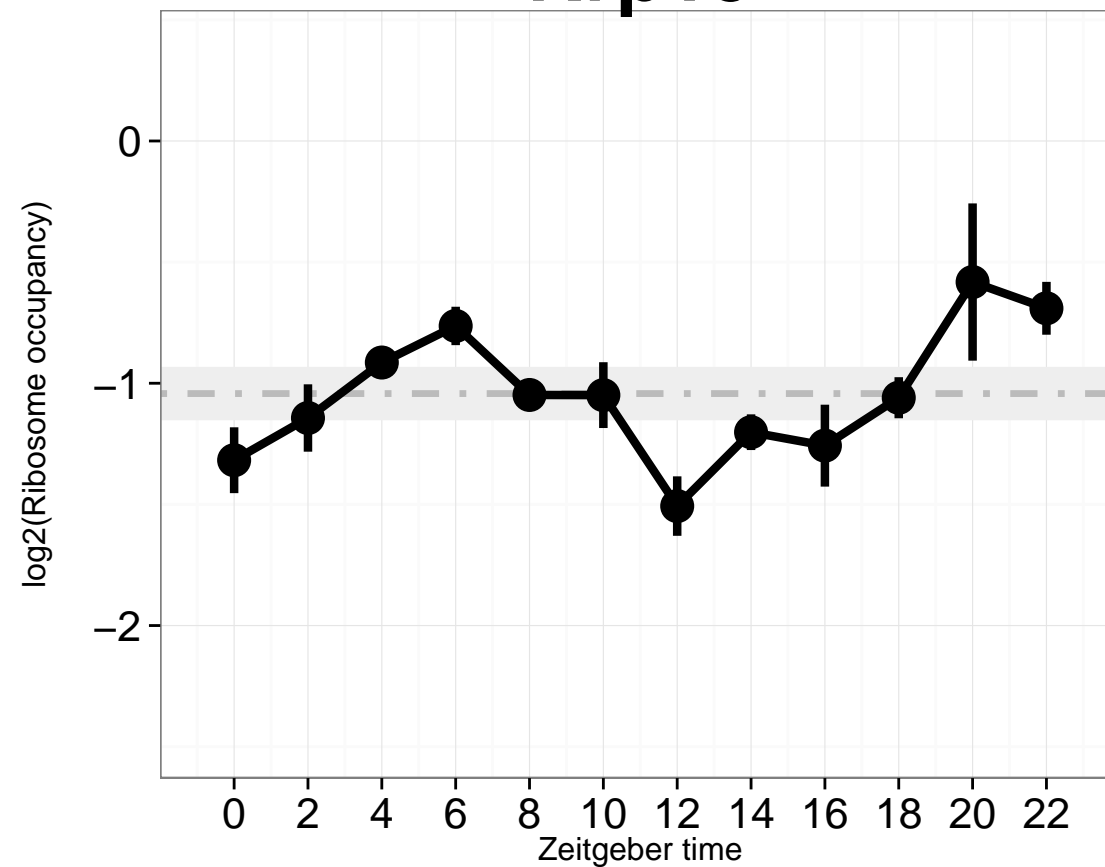

Supplement: SuppDataset_1.zip [file Rrp15_set_A.pdf › Supplemental Dataset 1/A-mRNA_nonrhyth_translation_nonrhyth/Rrp15_set_A.pdf]

## Rrp1

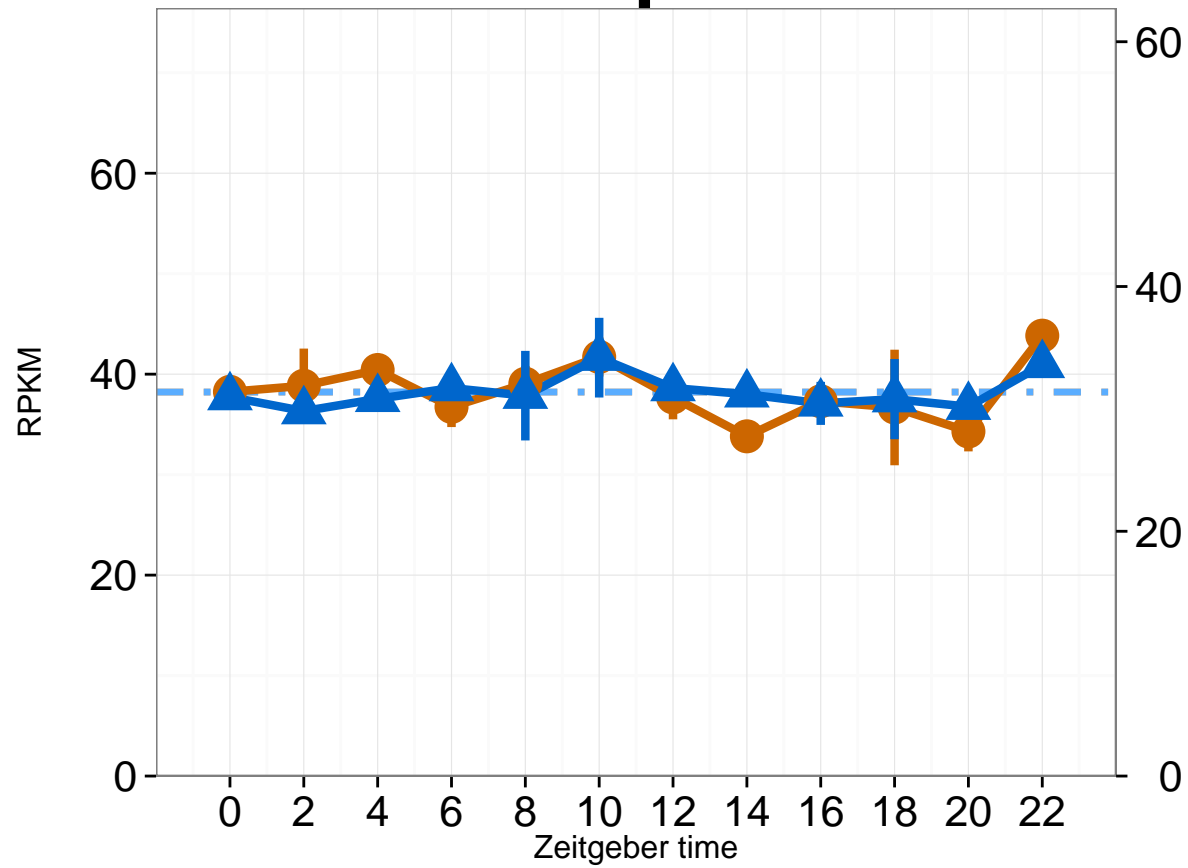

## Rrp1

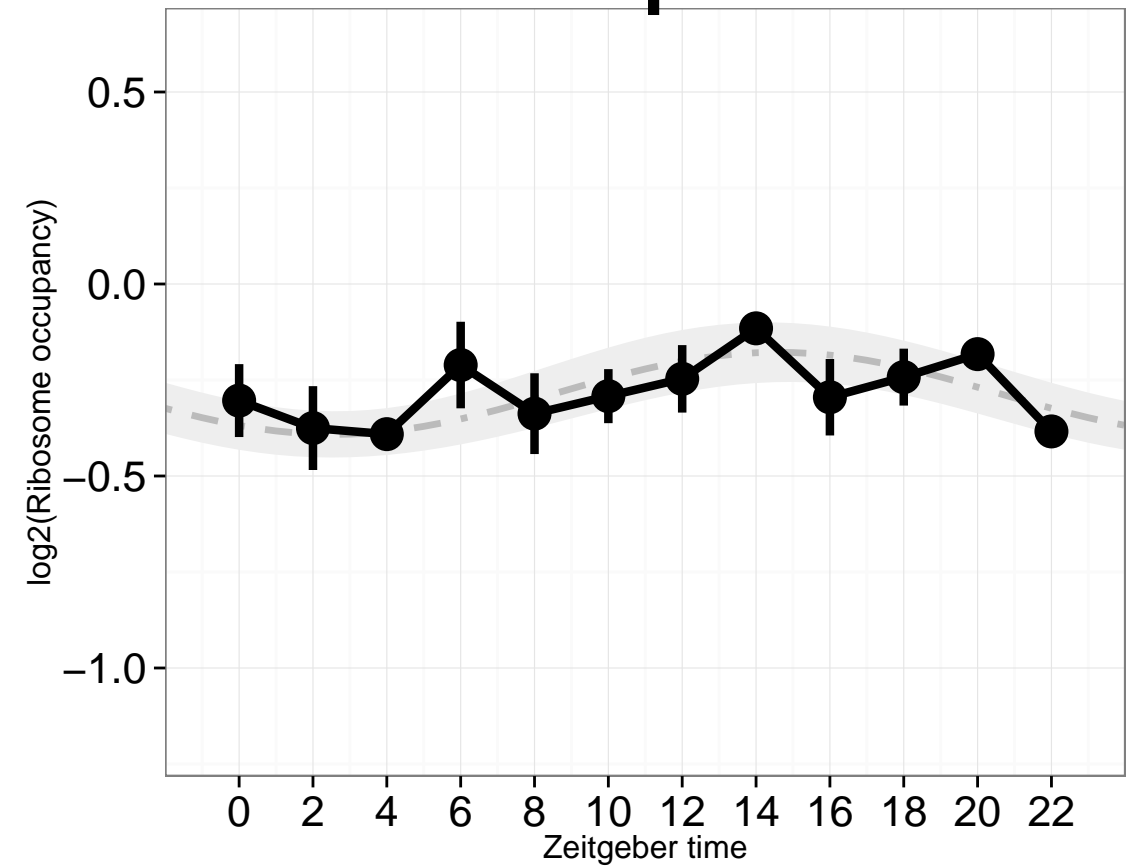

Supplement: SuppDataset_1.zip [file Rrp1_set_A.pdf › Supplemental Dataset 1/A-mRNA_nonrhyth_translation_nonrhyth/Rrp1_set_A.pdf]

# Rrp36

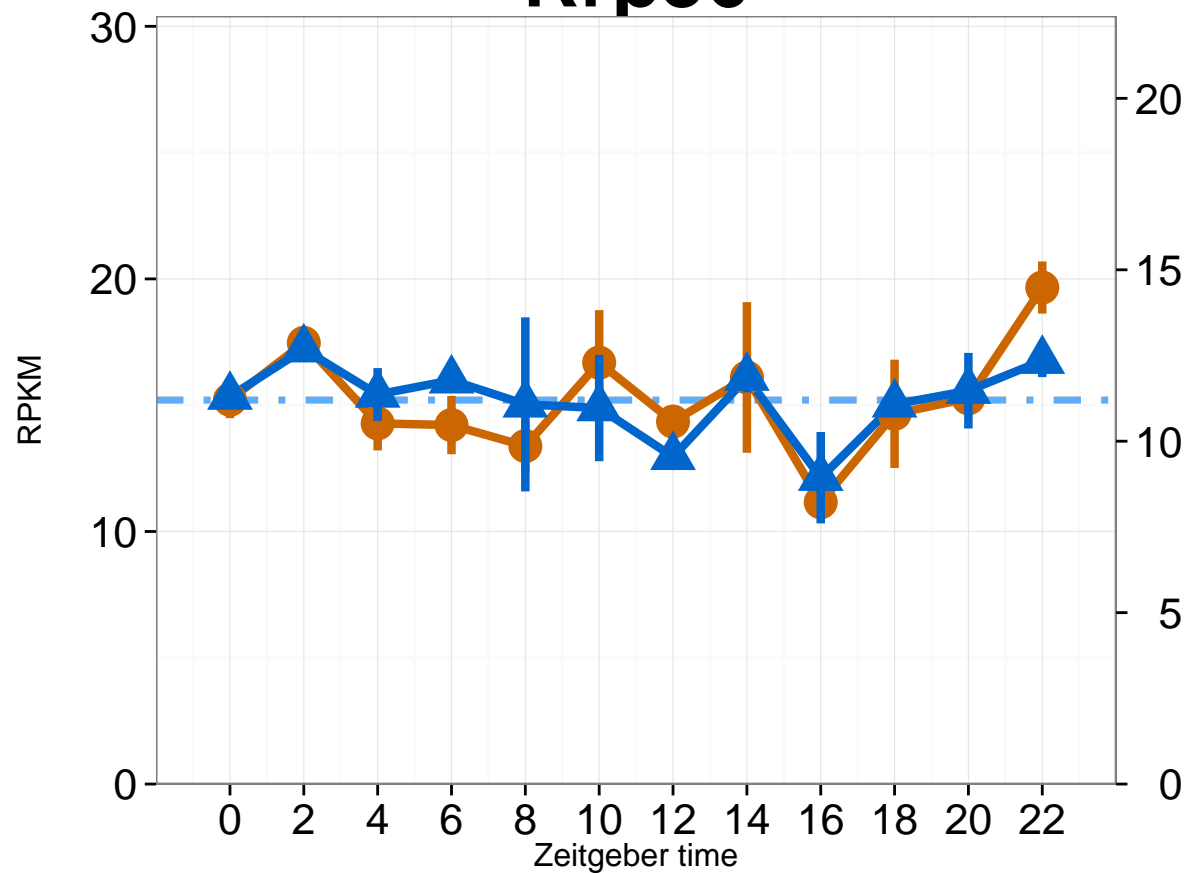

# Rrp36

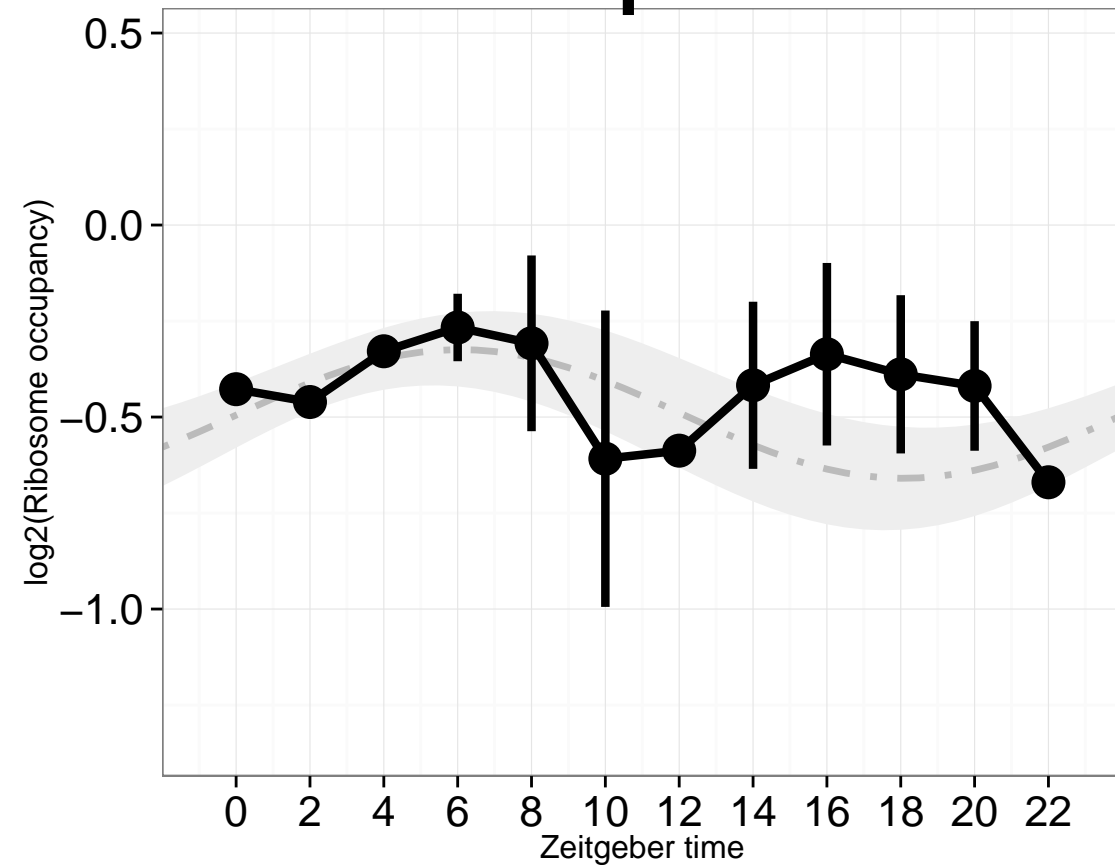

Supplement: SuppDataset_1.zip [file Rrp36_set_A.pdf › Supplemental Dataset 1/A-mRNA_nonrhyth_translation_nonrhyth/Rrp36_set_A.pdf]

# Rrp7a

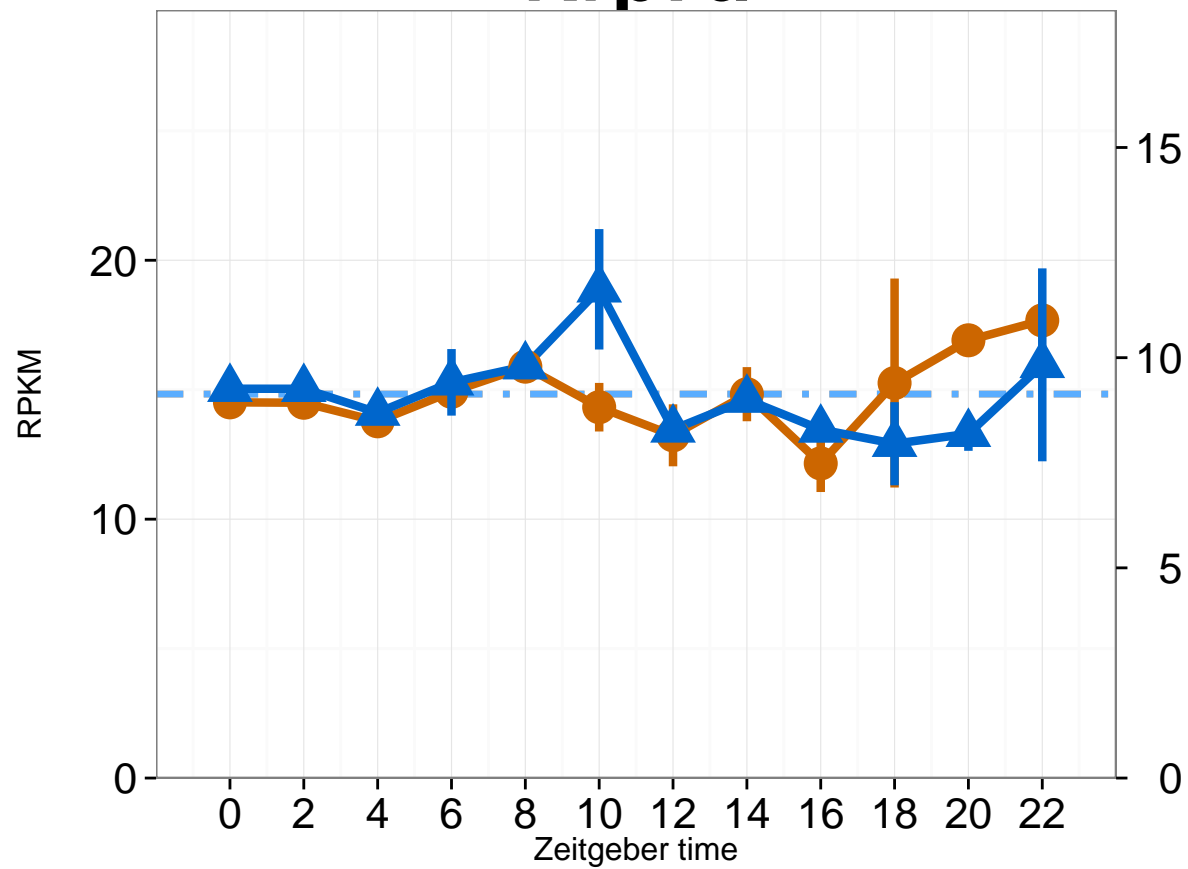

# Rrp7a

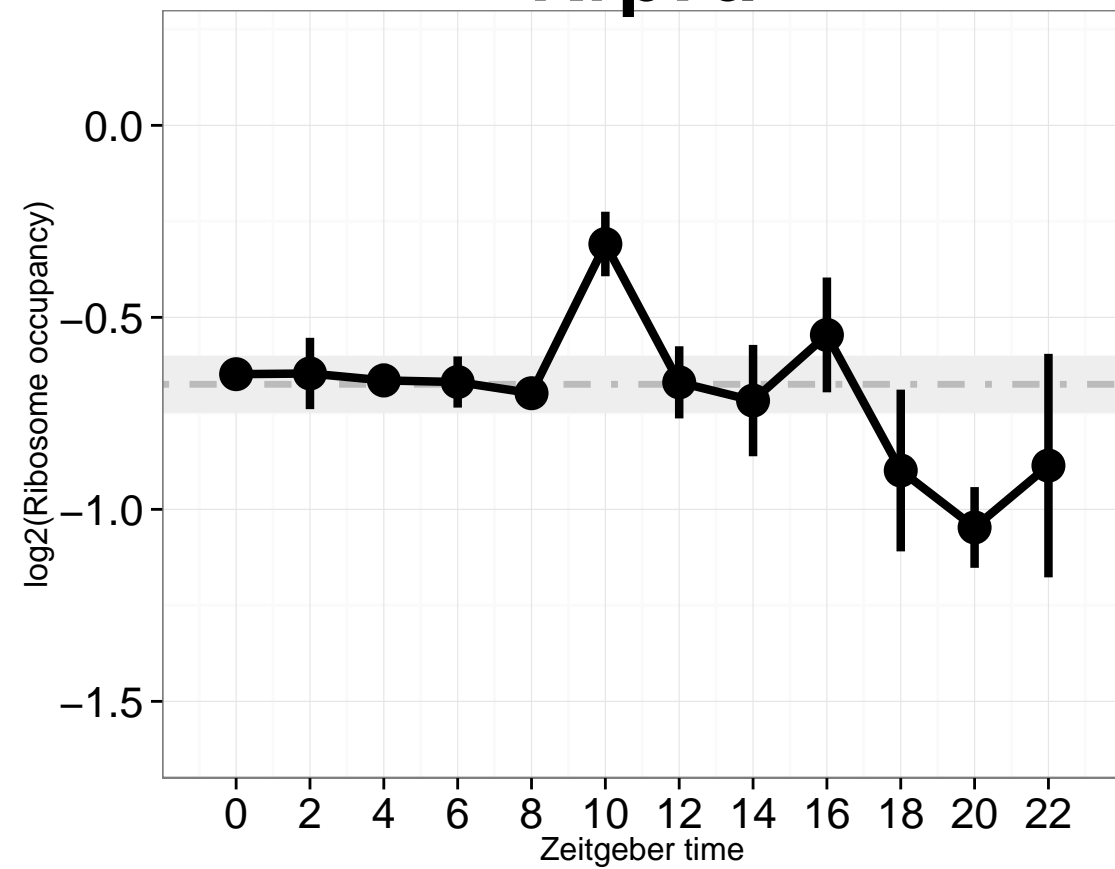

Supplement: SuppDataset_1.zip [file Rrp7a_set_A.pdf › Supplemental Dataset 1/A-mRNA_nonrhyth_translation_nonrhyth/Rrp7a_set_A.pdf]

# Rrp8

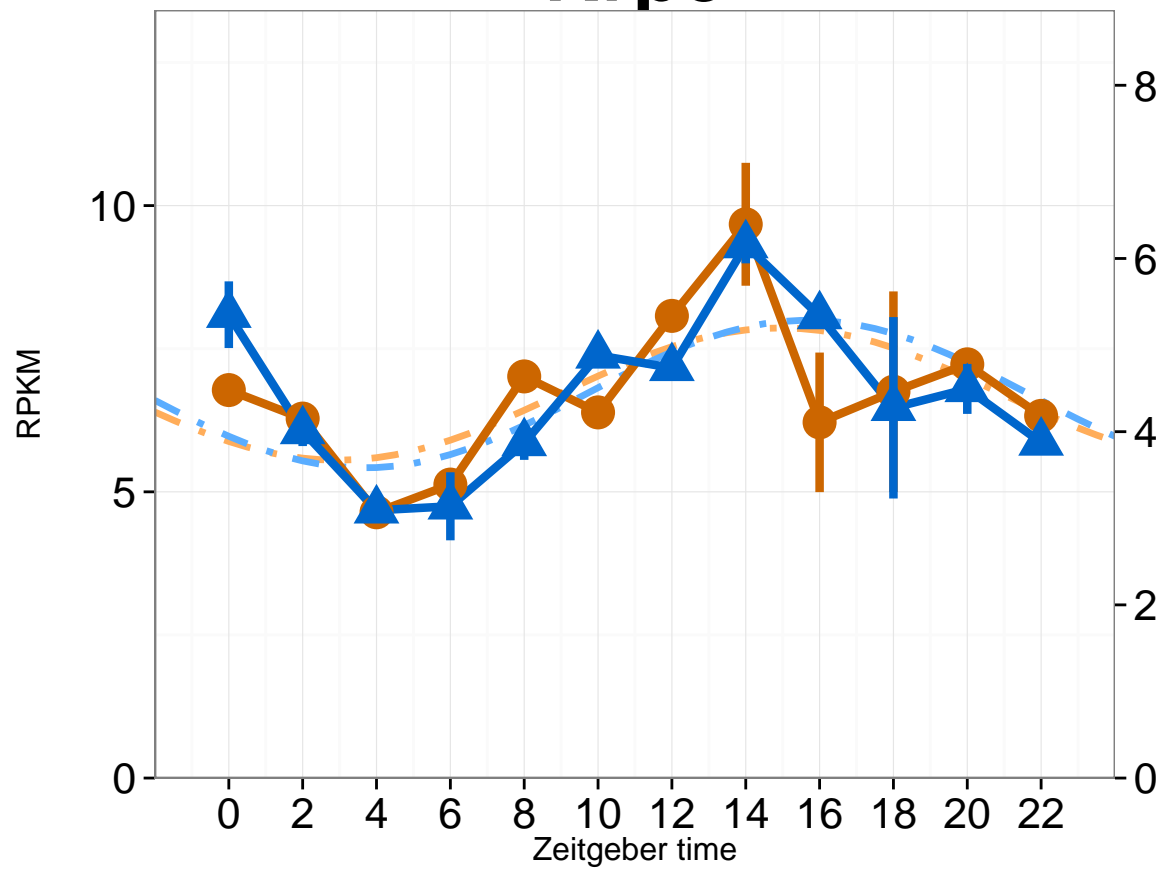

# Rrp8

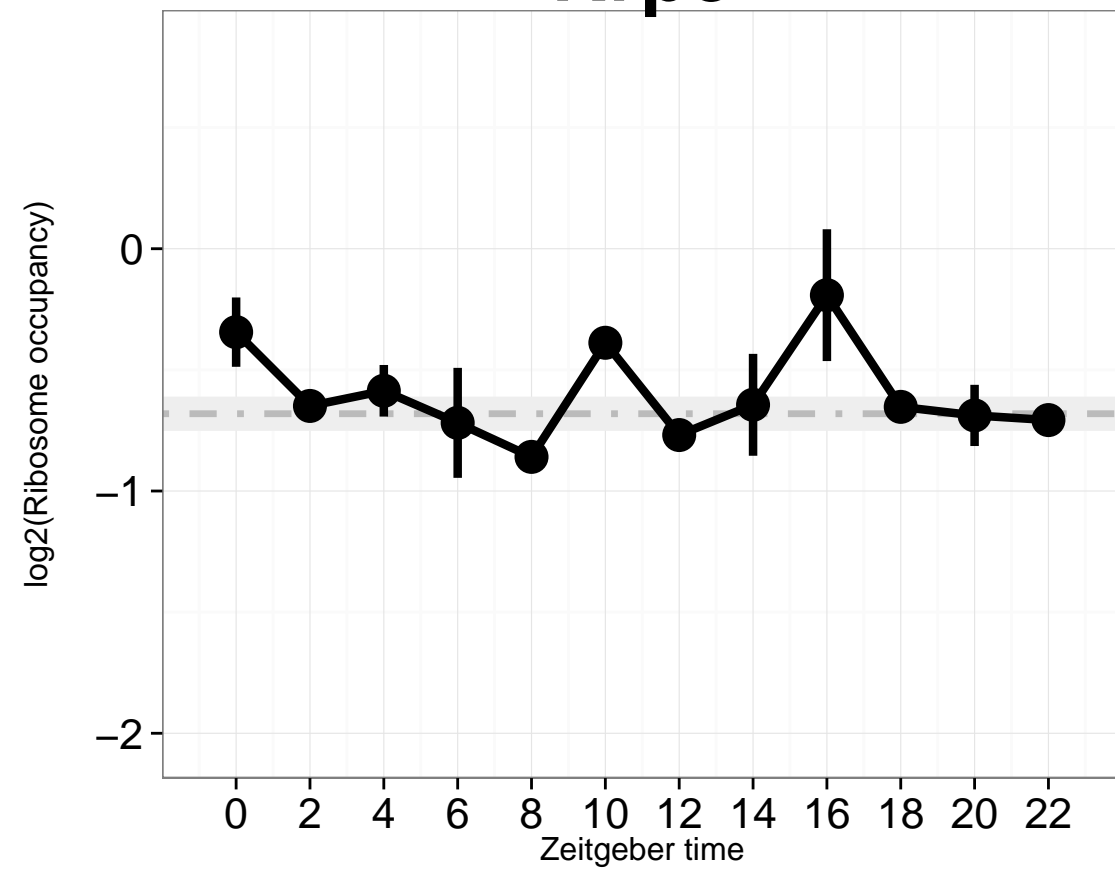

Supplement: SuppDataset_1.zip [file Rrp8_set_A.pdf › Supplemental Dataset 1/A-mRNA_nonrhyth_translation_nonrhyth/Rrp8_set_A.pdf]

# Rrs1

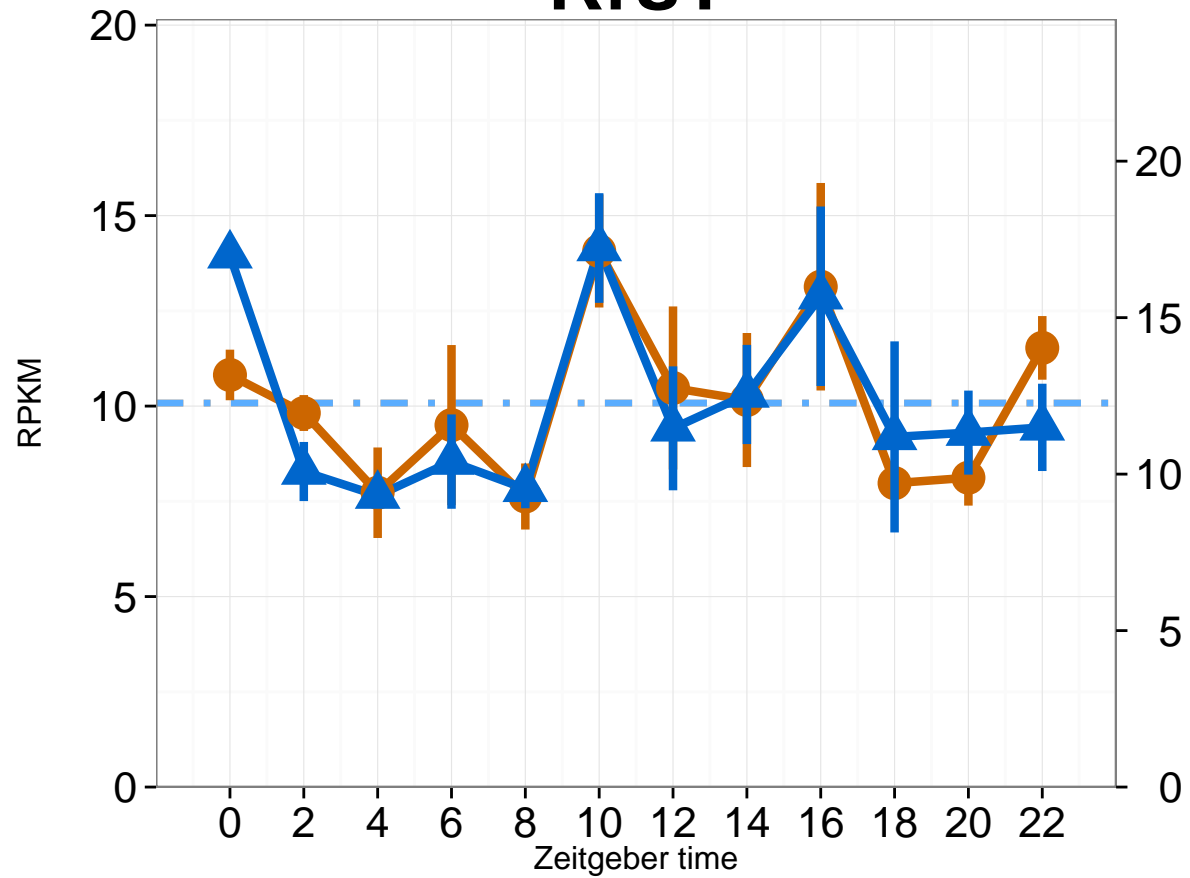

# Rrs1

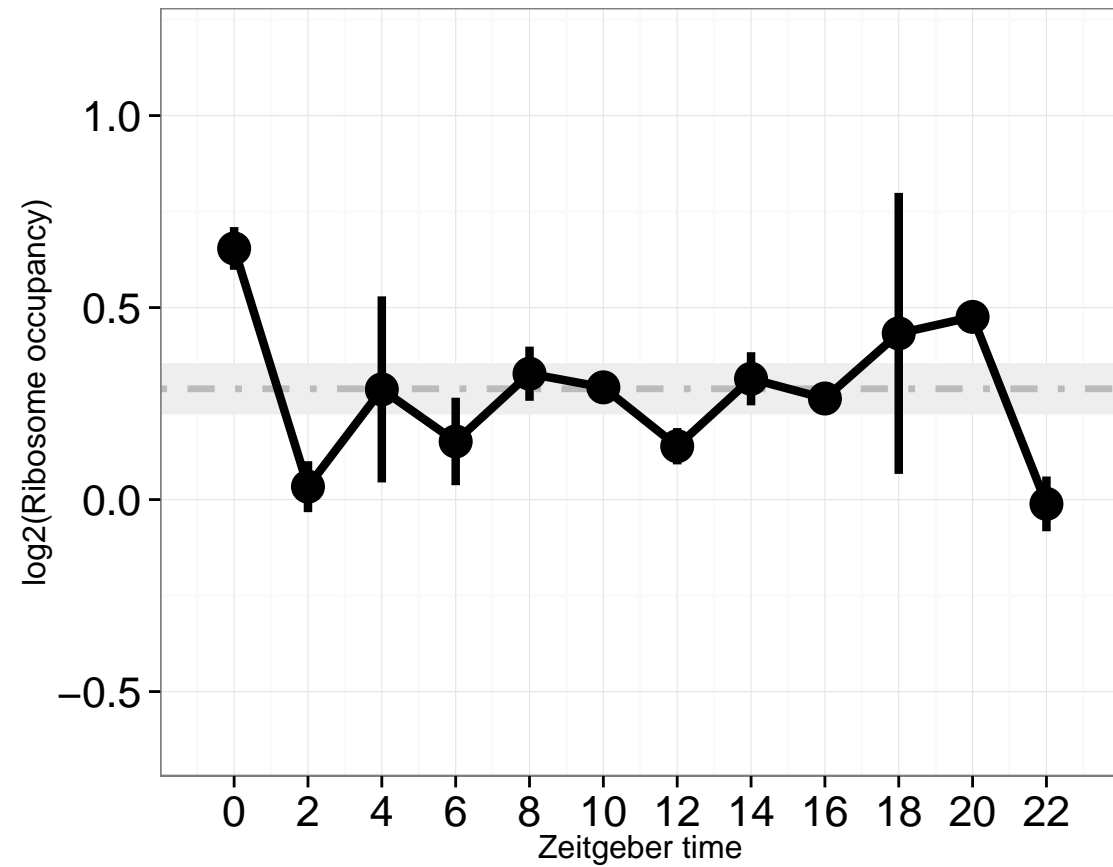

Supplement: SuppDataset_1.zip [file Rrs1_set_A.pdf › Supplemental Dataset 1/A-mRNA_nonrhyth_translation_nonrhyth/Rrs1_set_A.pdf]

# Rsad1

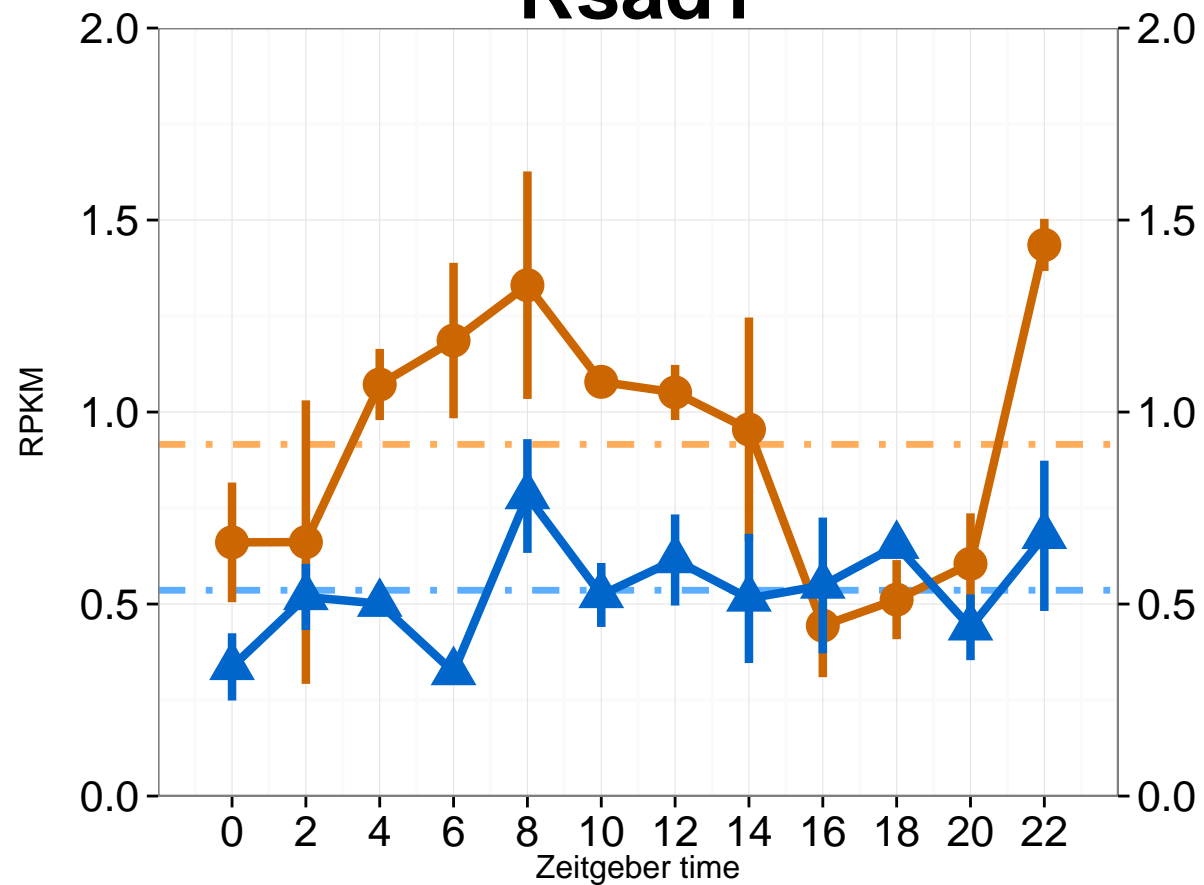

# Rsad1

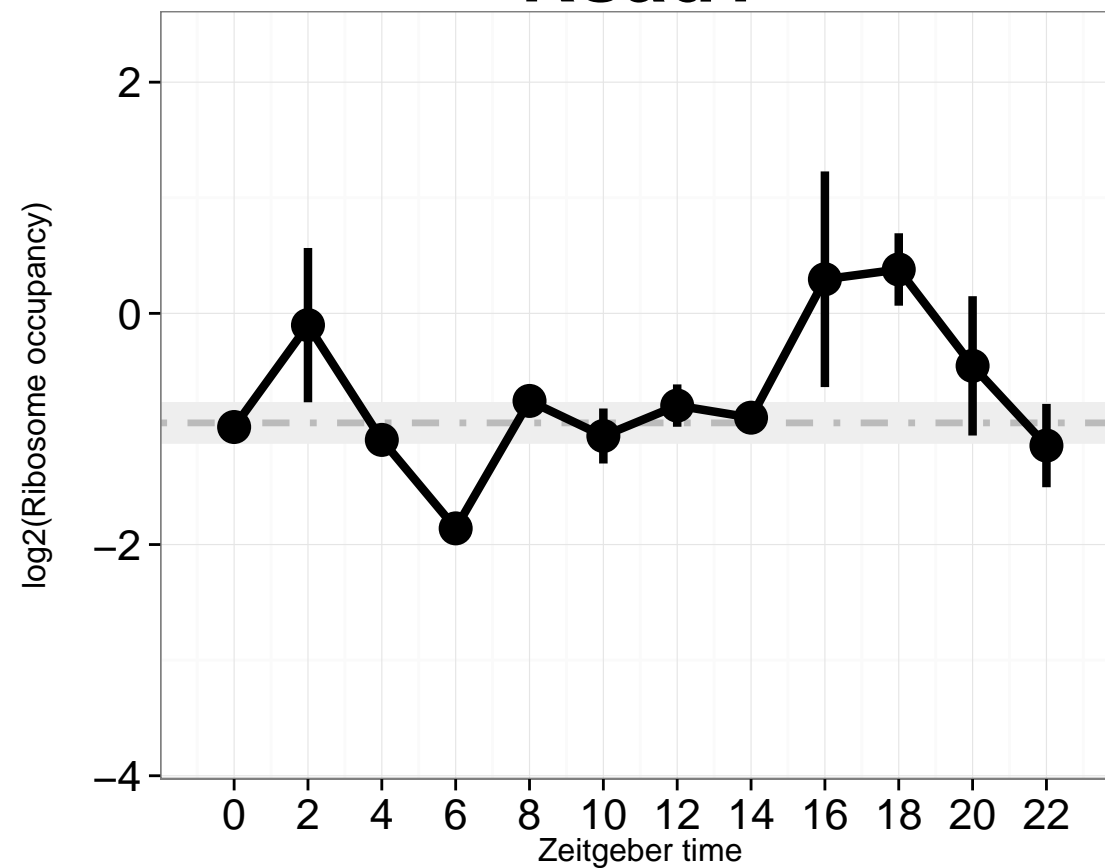

Supplement: SuppDataset_1.zip [file Rsad1_set_A.pdf › Supplemental Dataset 1/A-mRNA_nonrhyth_translation_nonrhyth/Rsad1_set_A.pdf]
