# Supplementary figures and images for: Ribosome profiling reveals the rhythmic liver translatome and circadian clock regulation by upstream open reading frames (part 64 of 113)
Source: HighWire-hosted journal article supplement (doi:10.1101/gr.195404.115), 2015-10-20

## Rsbn1l

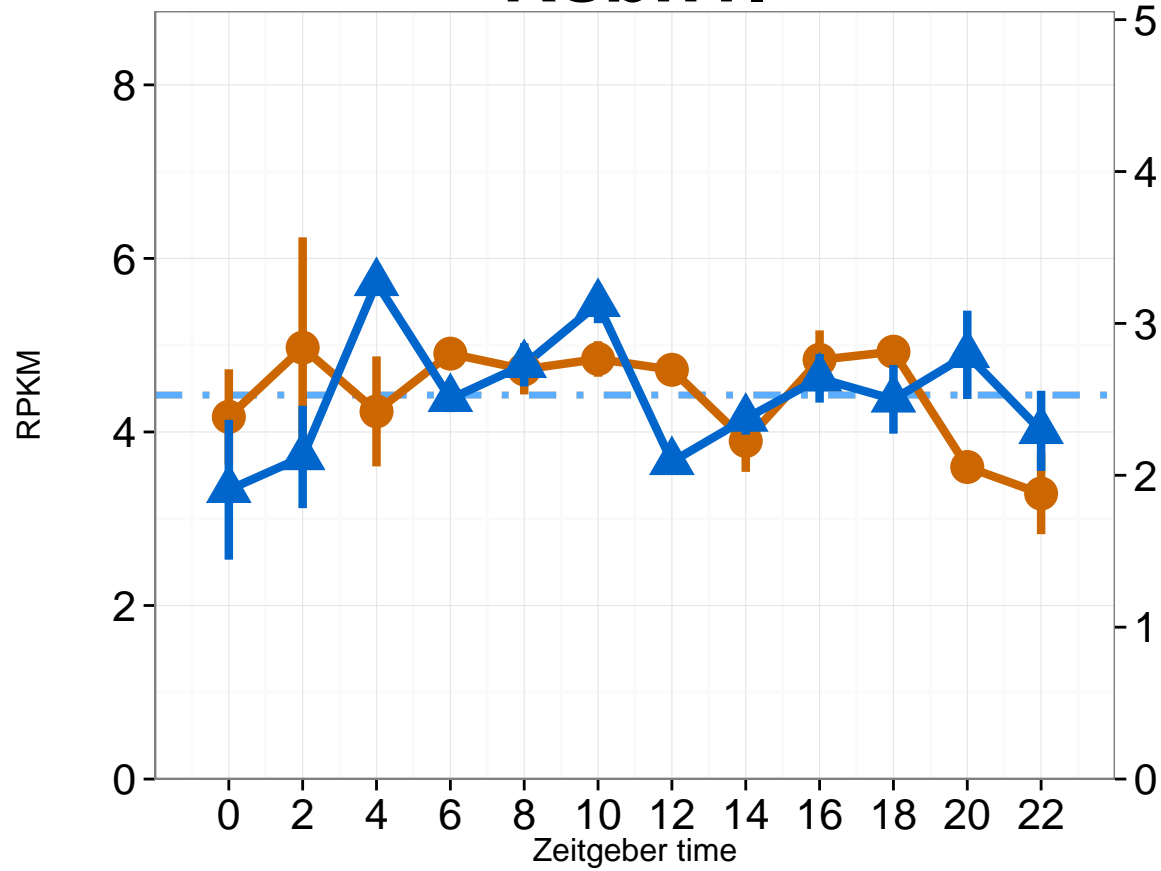

## Rsbn1l

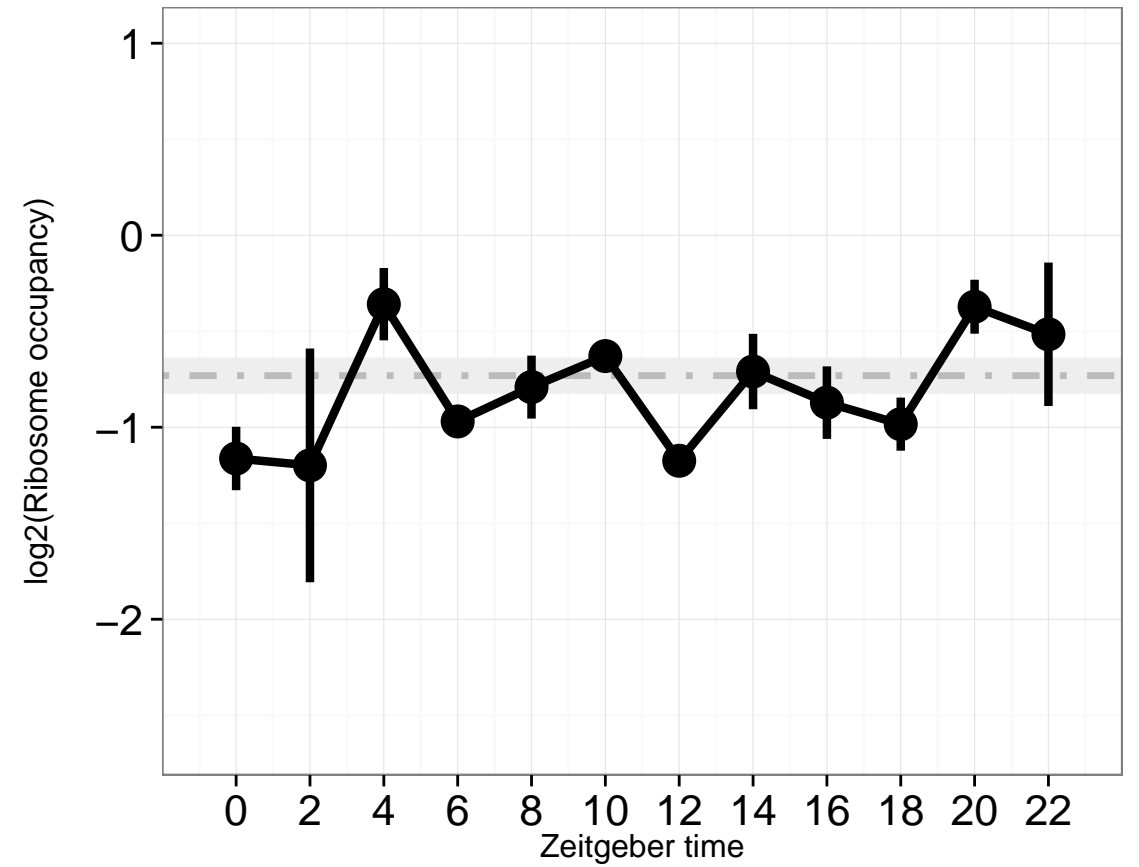

Supplement: SuppDataset_1.zip [file Rsbn1l_set_A.pdf › Supplemental Dataset 1/A-mRNA_nonrhyth_translation_nonrhyth/Rsbn1l_set_A.pdf]

## Rsf1

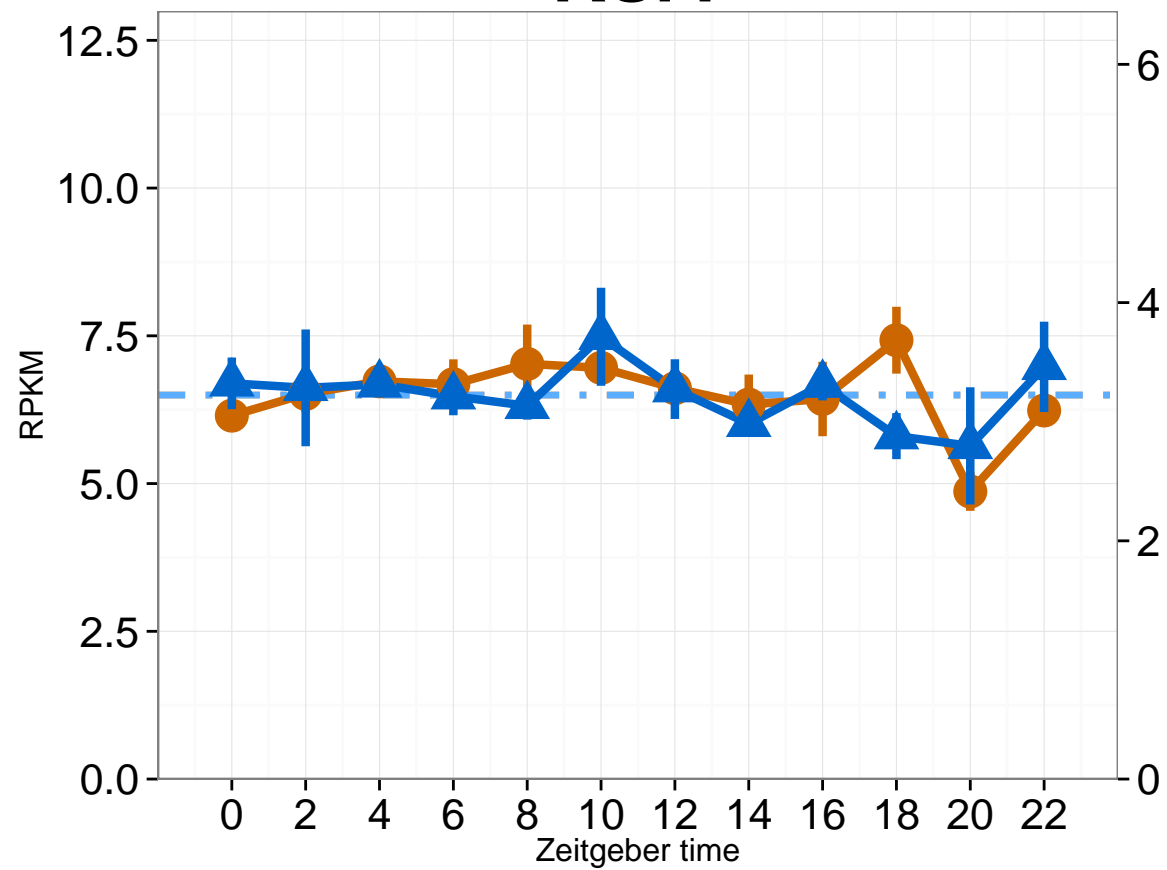

## Rsf1

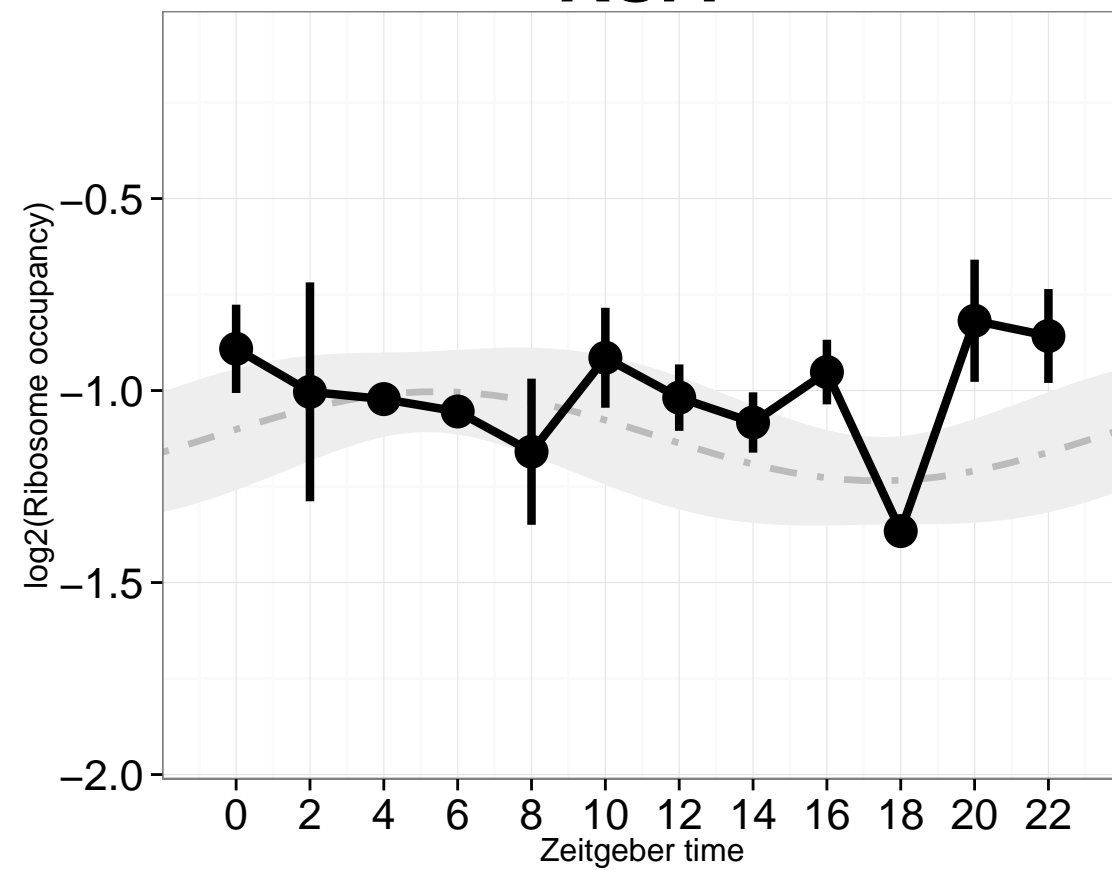

Supplement: SuppDataset_1.zip [file Rsf1_set_A.pdf › Supplemental Dataset 1/A-mRNA_nonrhyth_translation_nonrhyth/Rsf1_set_A.pdf]

## Rs1

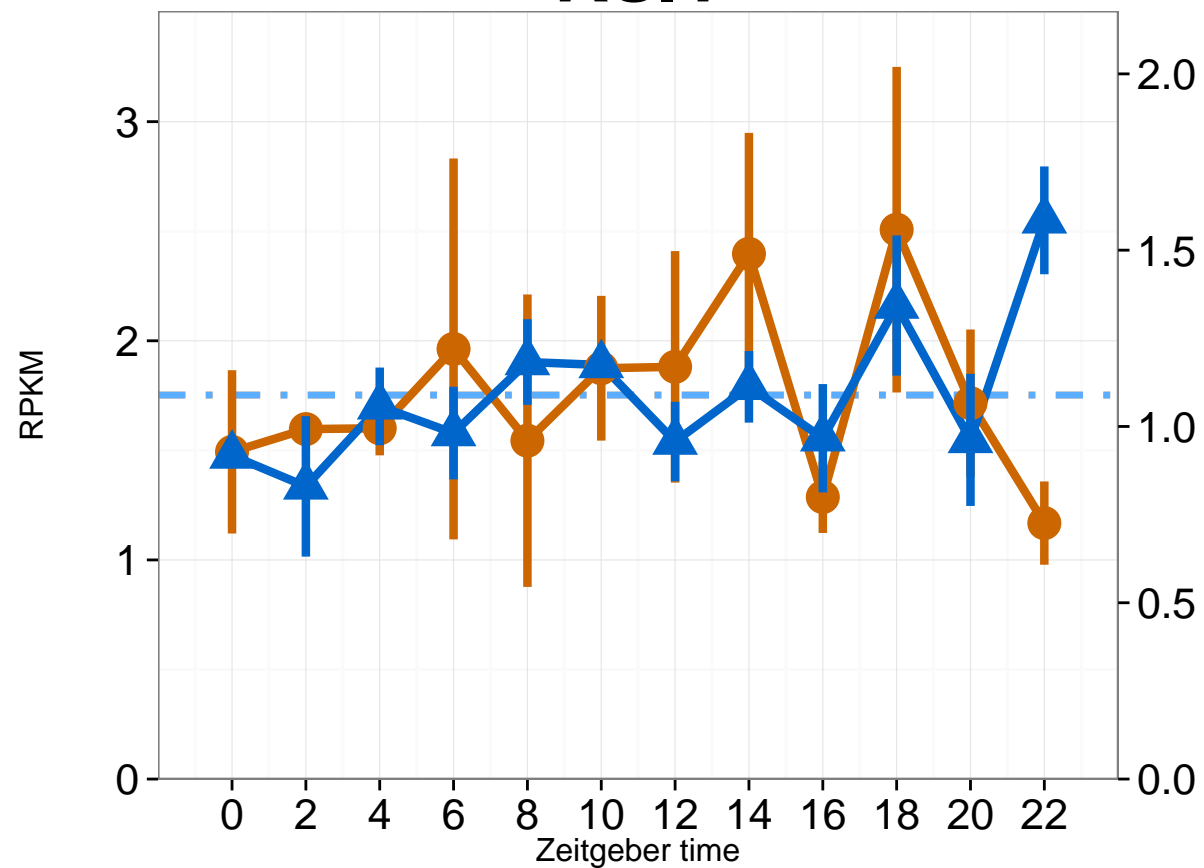

## Rs1

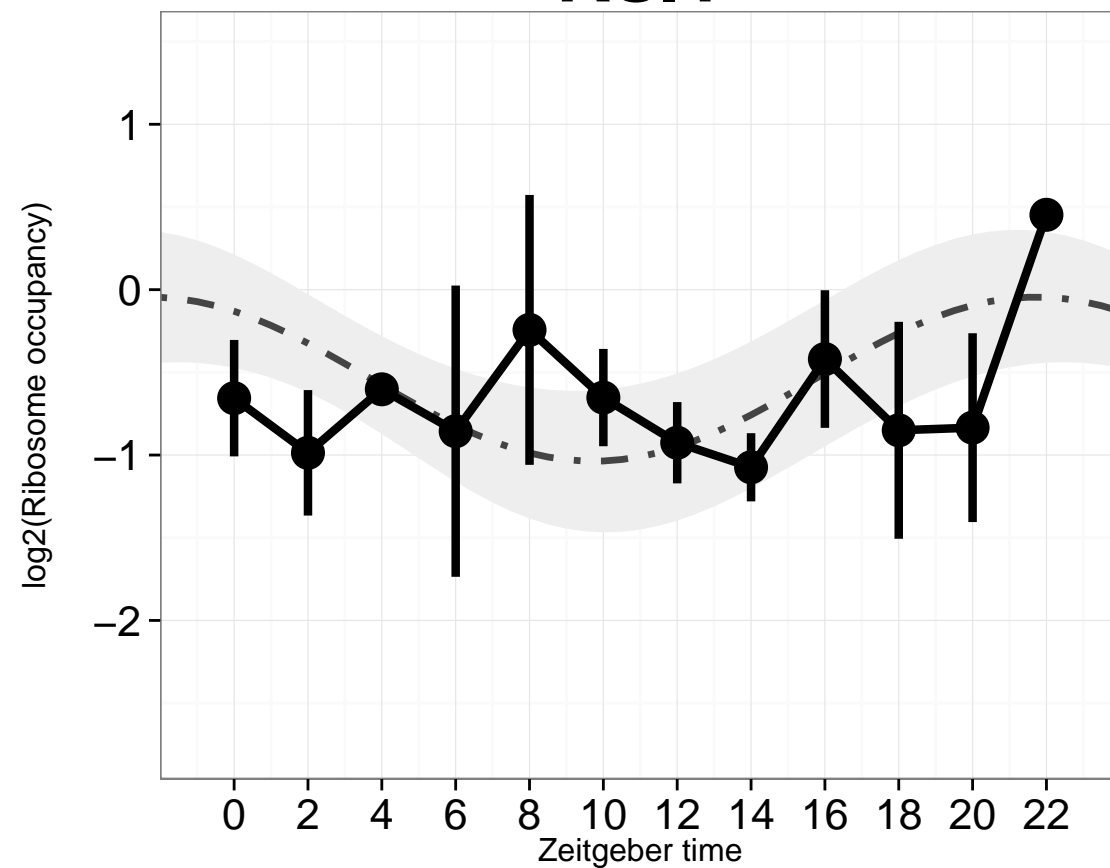

Supplement: SuppDataset_1.zip [file Rsl1_set_A.pdf › Supplemental Dataset 1/A-mRNA_nonrhyth_translation_nonrhyth/Rsl1_set_A.pdf]

# Rsl1d1

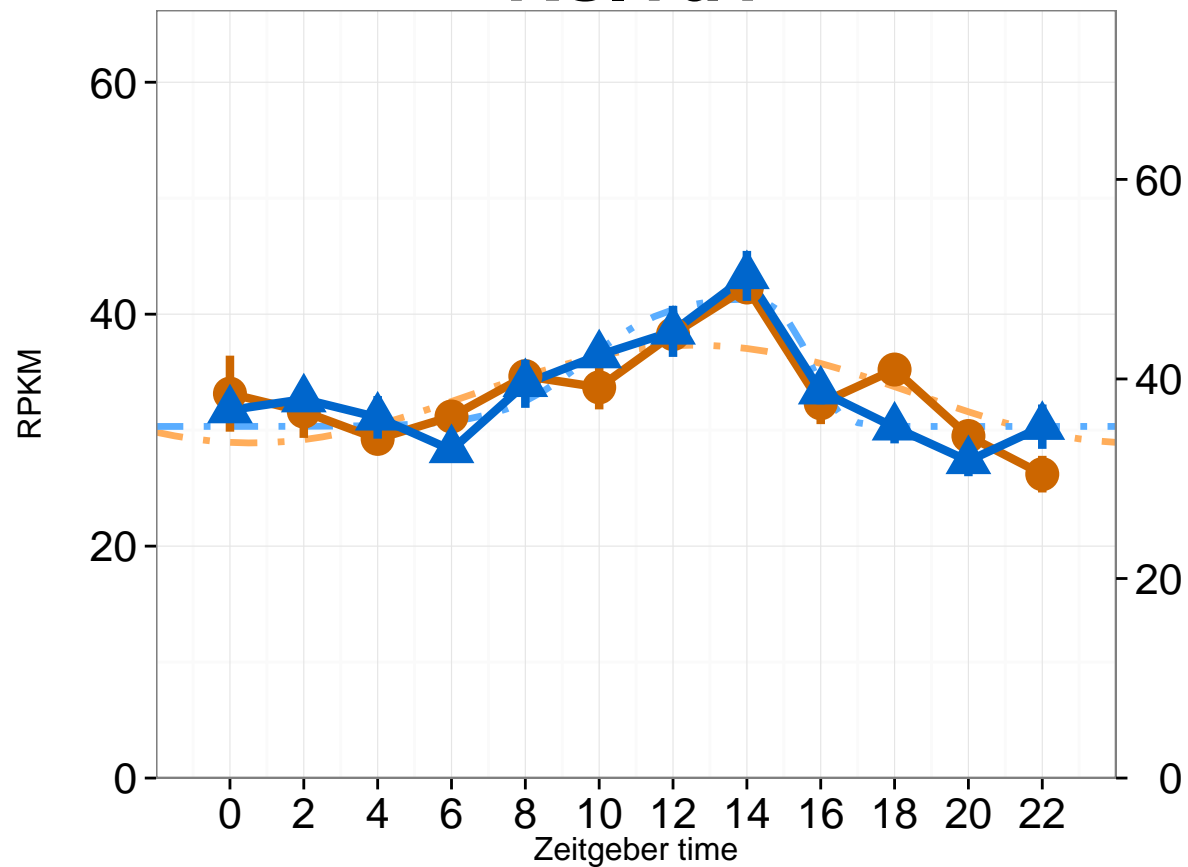

# Rsl1d1

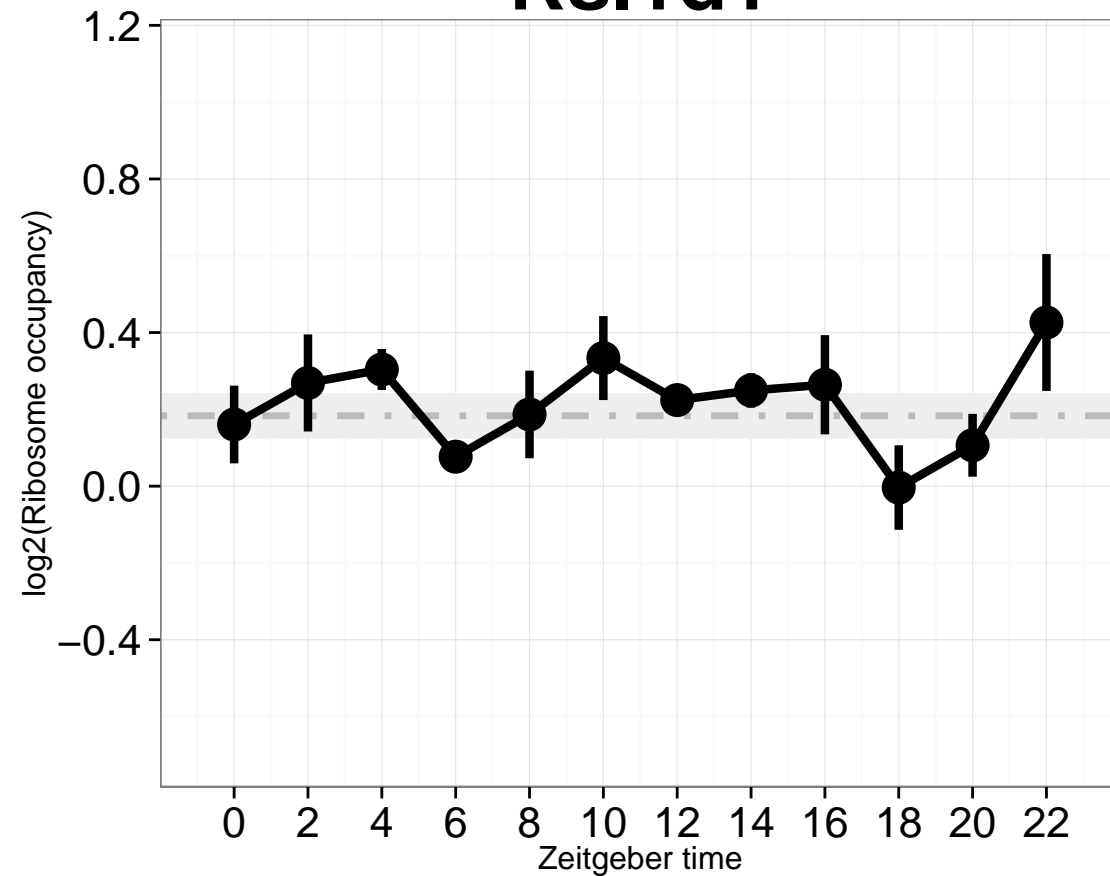

Supplement: SuppDataset_1.zip [file Rsl1d1_set_A.pdf › Supplemental Dataset 1/A-mRNA_nonrhyth_translation_nonrhyth/Rsl1d1_set_A.pdf]

# Rsl24d1

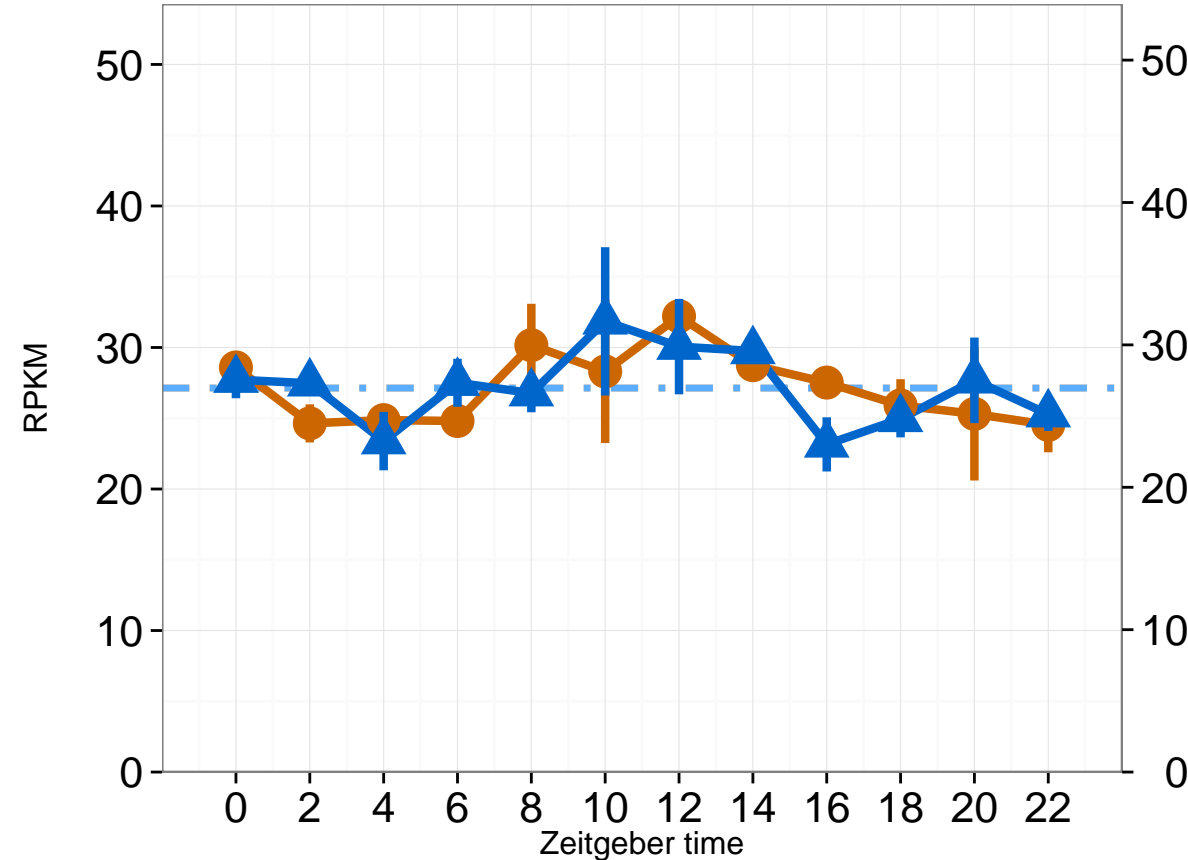

# Rsl24d1

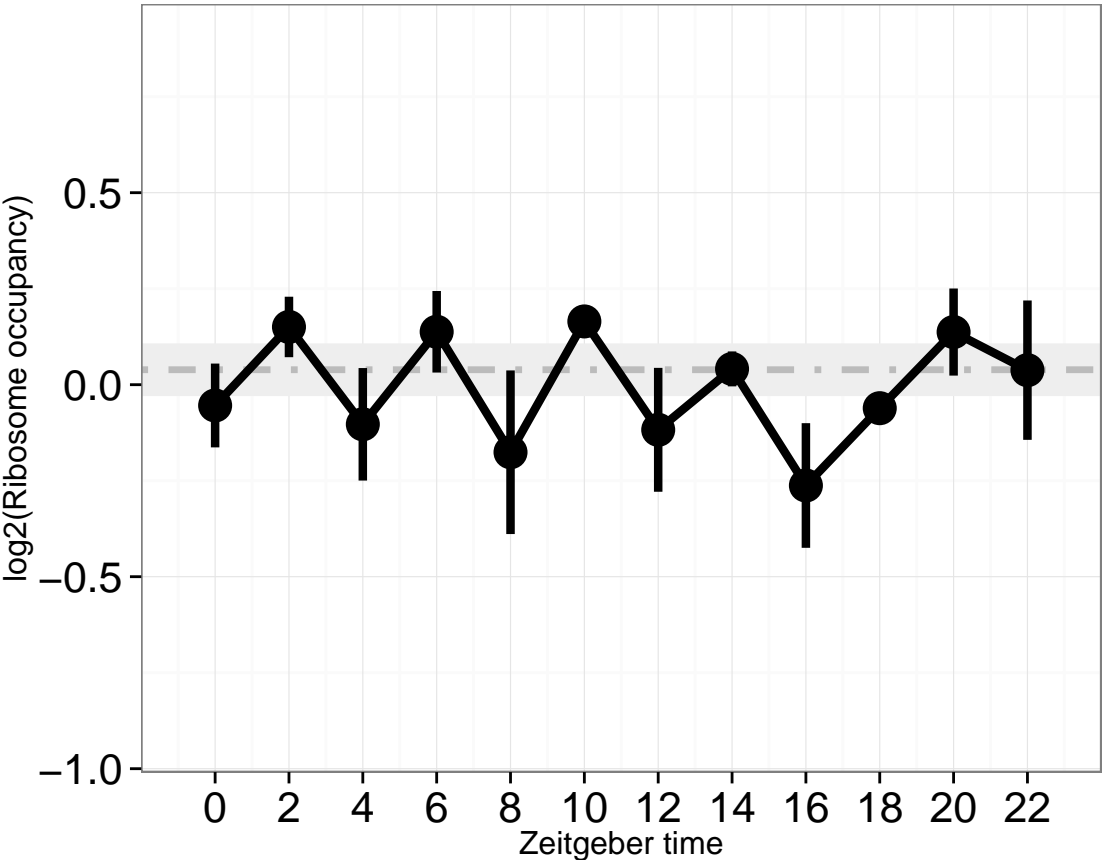

Supplement: SuppDataset_1.zip [file Rsl24d1_set_A.pdf › Supplemental Dataset 1/A-mRNA_nonrhyth_translation_nonrhyth/Rsl24d1_set_A.pdf]

## Rsph3a

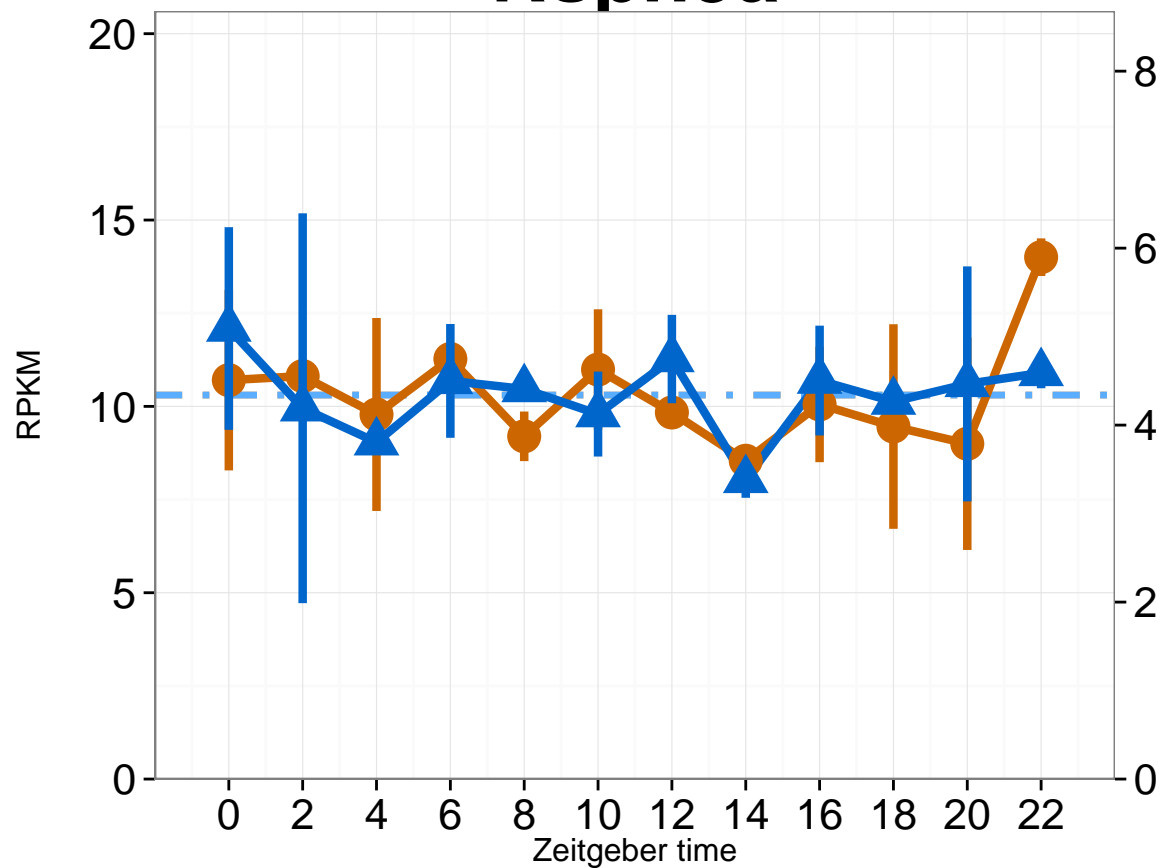

## Rsph3a

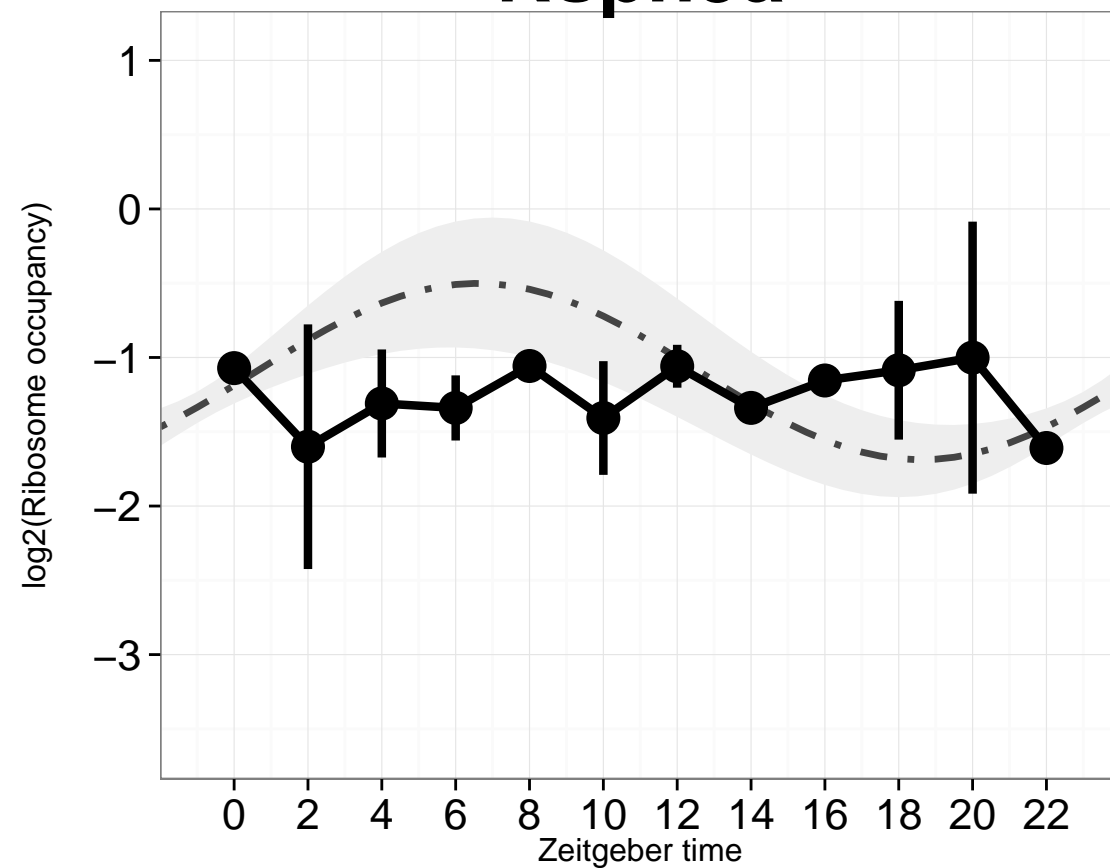

Supplement: SuppDataset_1.zip [file Rsph3a_set_A.pdf › Supplemental Dataset 1/A-mRNA_nonrhyth_translation_nonrhyth/Rsph3a_set_A.pdf]

## Rsph3b

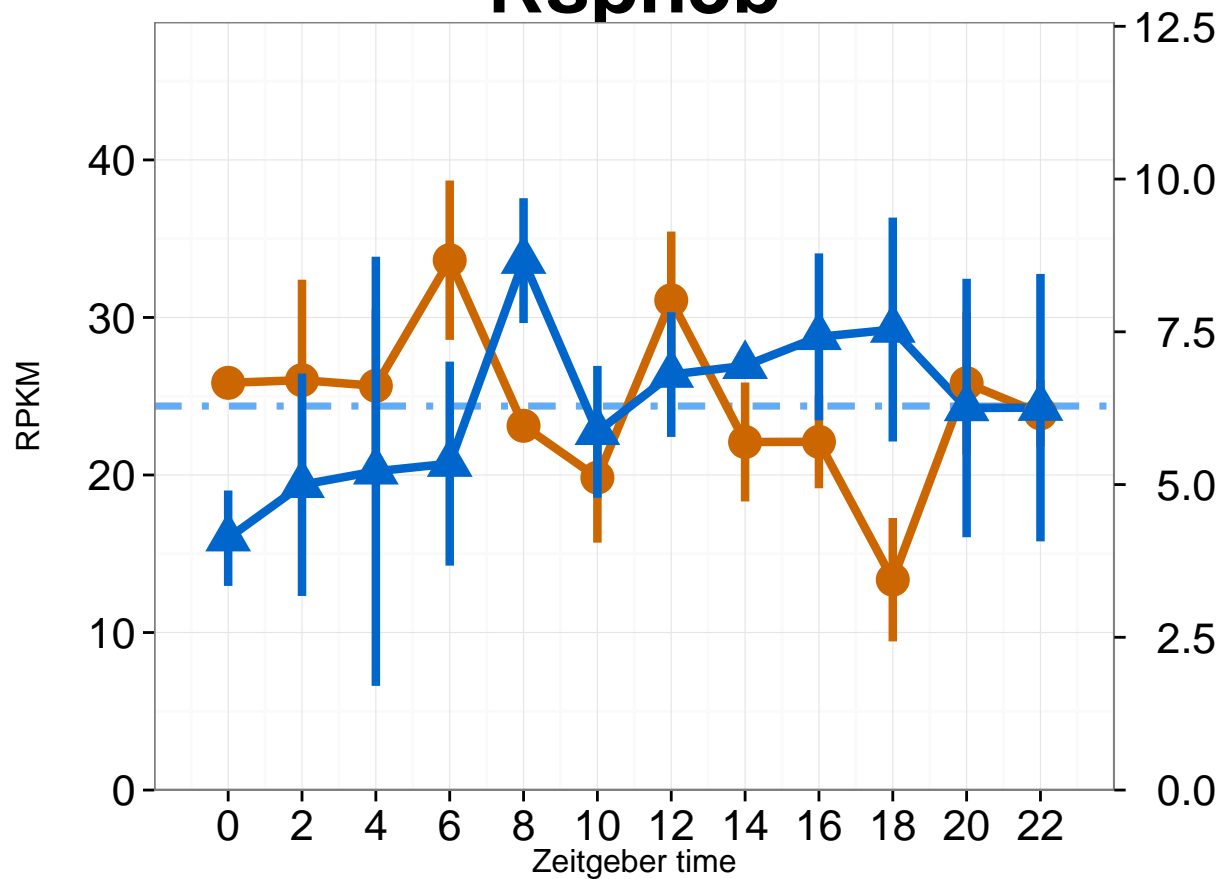

## Rsph3b

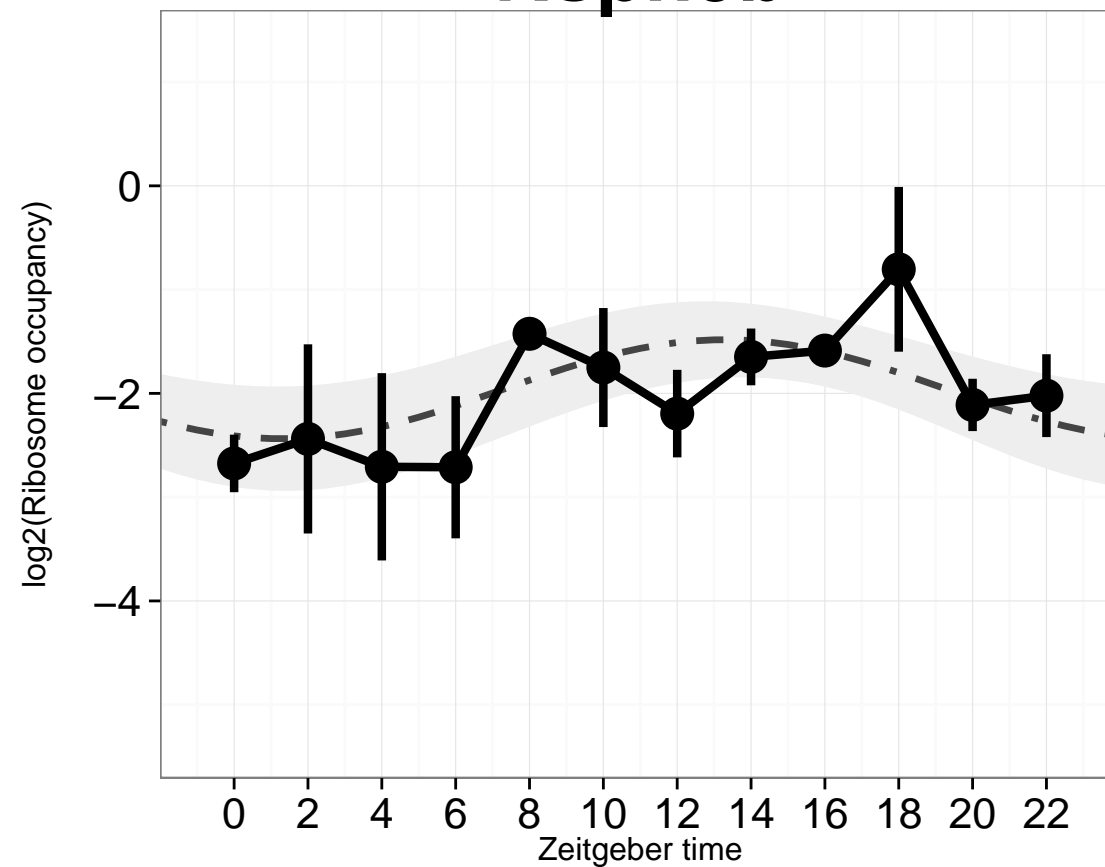

Supplement: SuppDataset_1.zip [file Rsph3b_set_A.pdf › Supplemental Dataset 1/A-mRNA_nonrhyth_translation_nonrhyth/Rsph3b_set_A.pdf]

**Rsph9 TR**

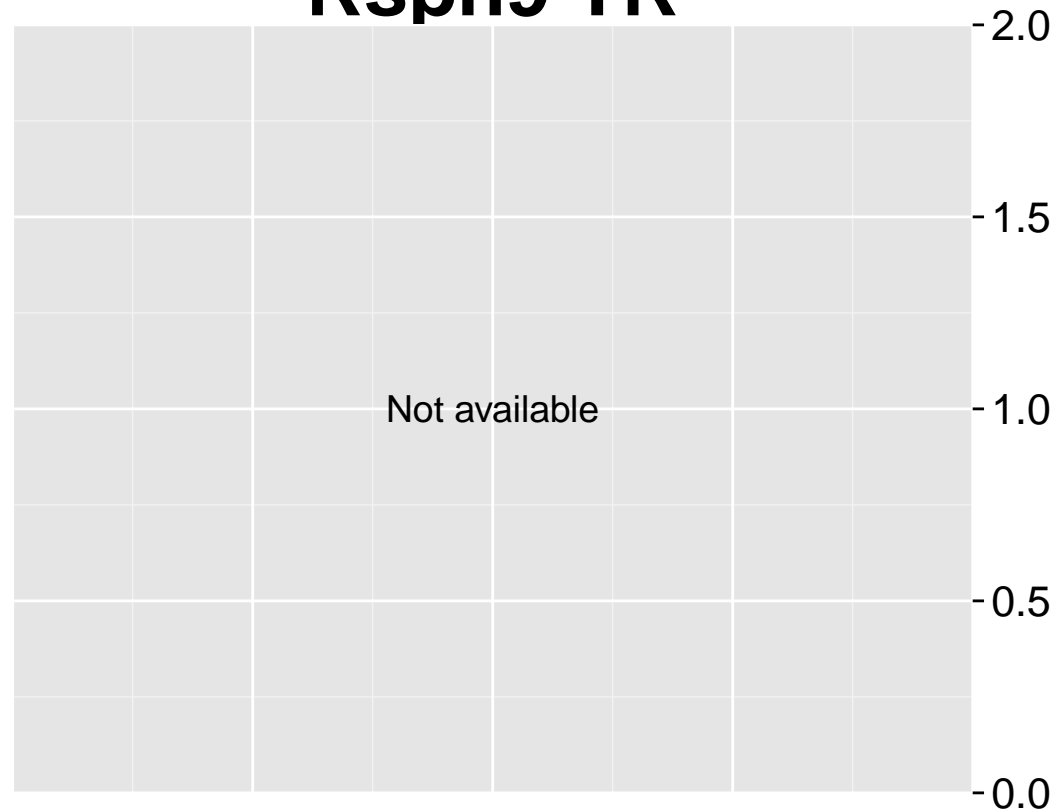

**Rsph9 log2(Ribosome occupancy**

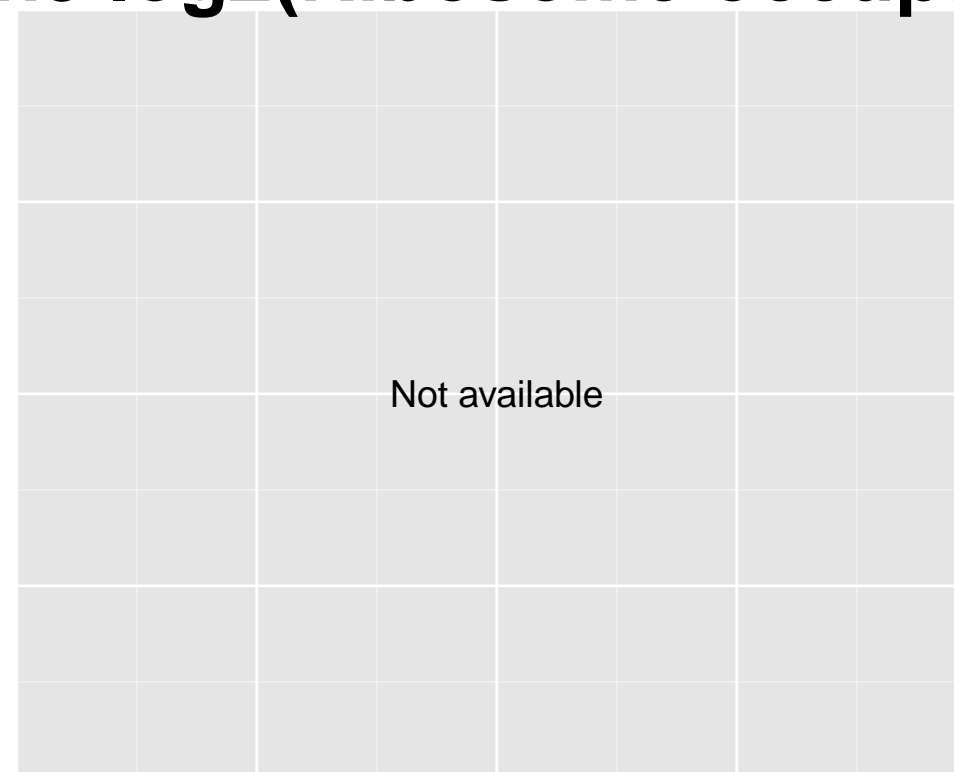

Supplement: SuppDataset_1.zip [file Rsph9_set_A.pdf › Supplemental Dataset 1/A-mRNA_nonrhyth_translation_nonrhyth/Rsph9_set_A.pdf]

## Rspo3

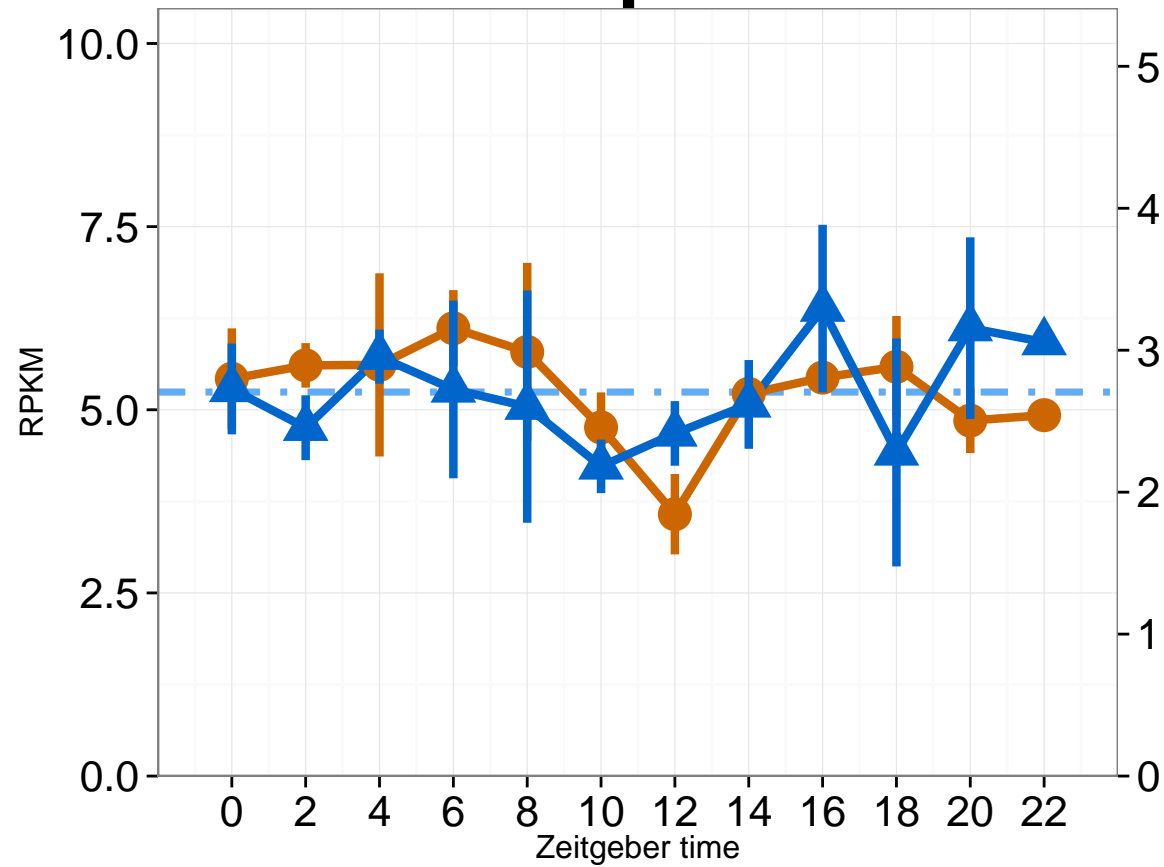

## Rspo3

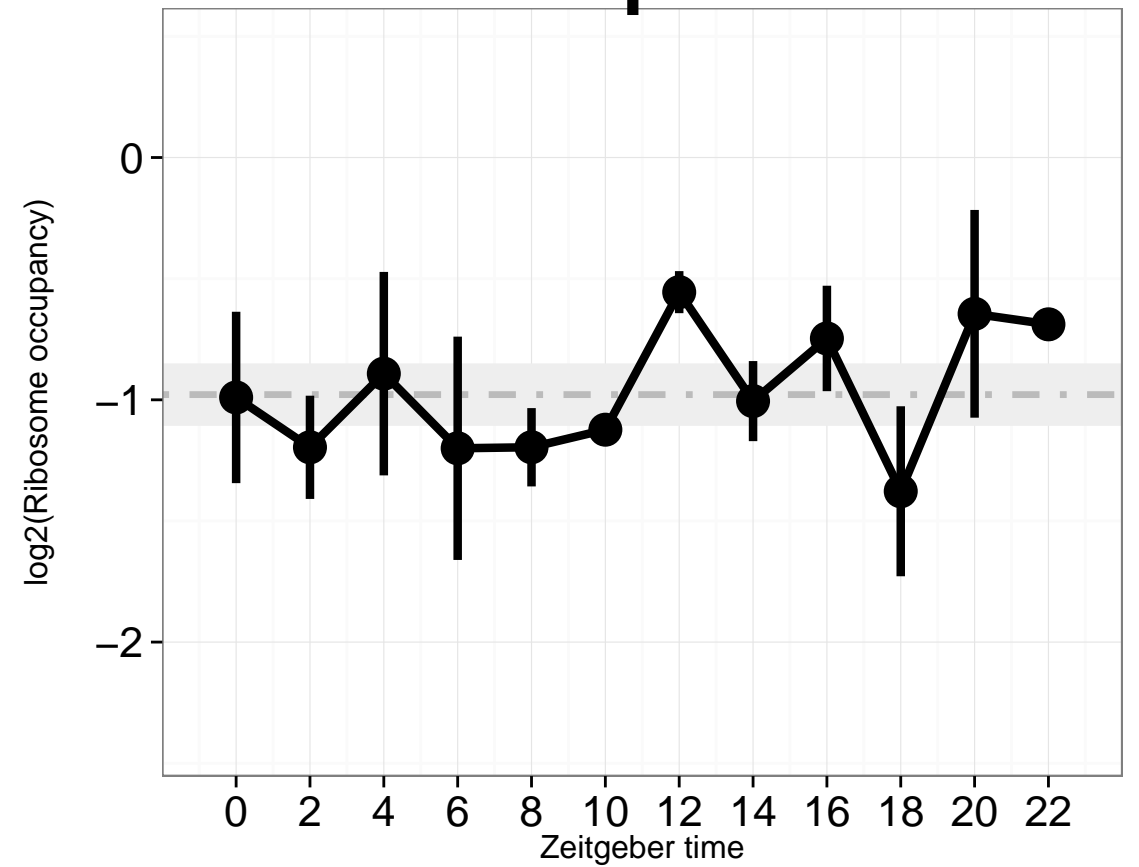

Supplement: SuppDataset_1.zip [file Rspo3_set_A.pdf › Supplemental Dataset 1/A-mRNA_nonrhyth_translation_nonrhyth/Rspo3_set_A.pdf]

# Rspry1

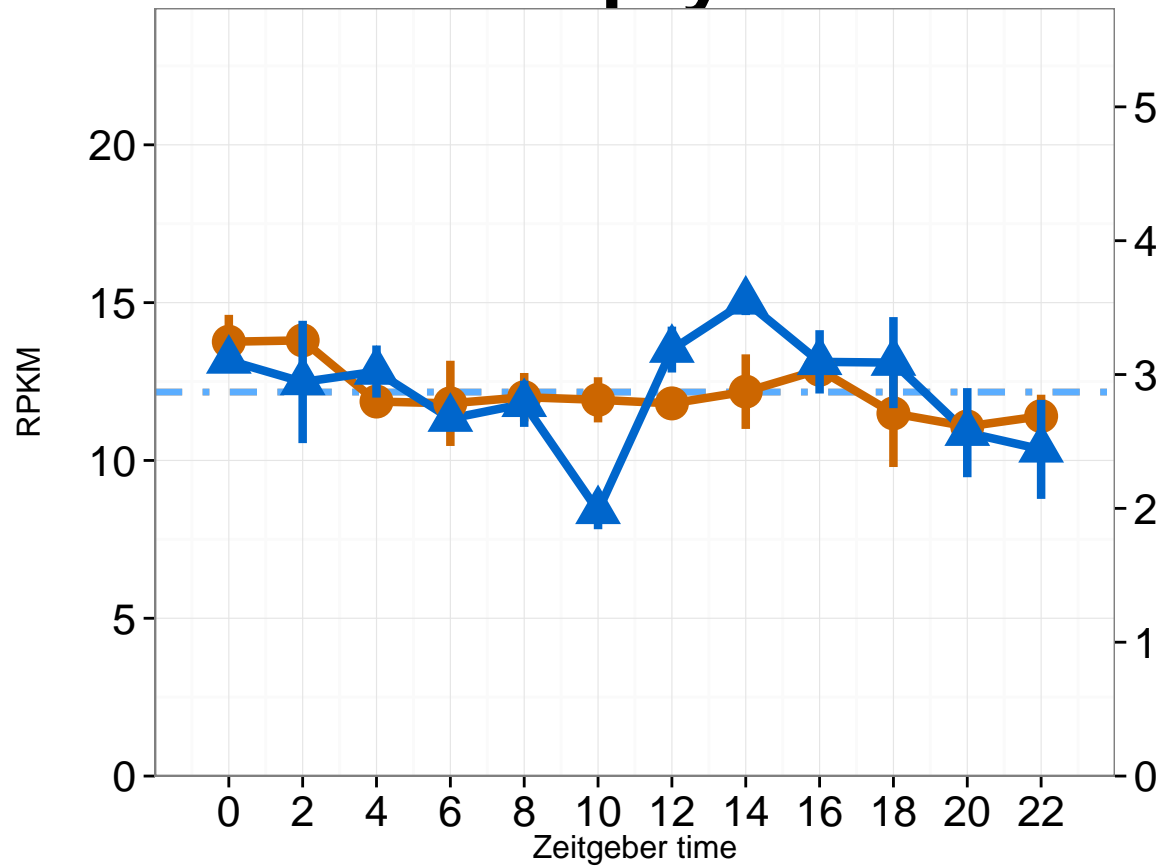

# Rspry1

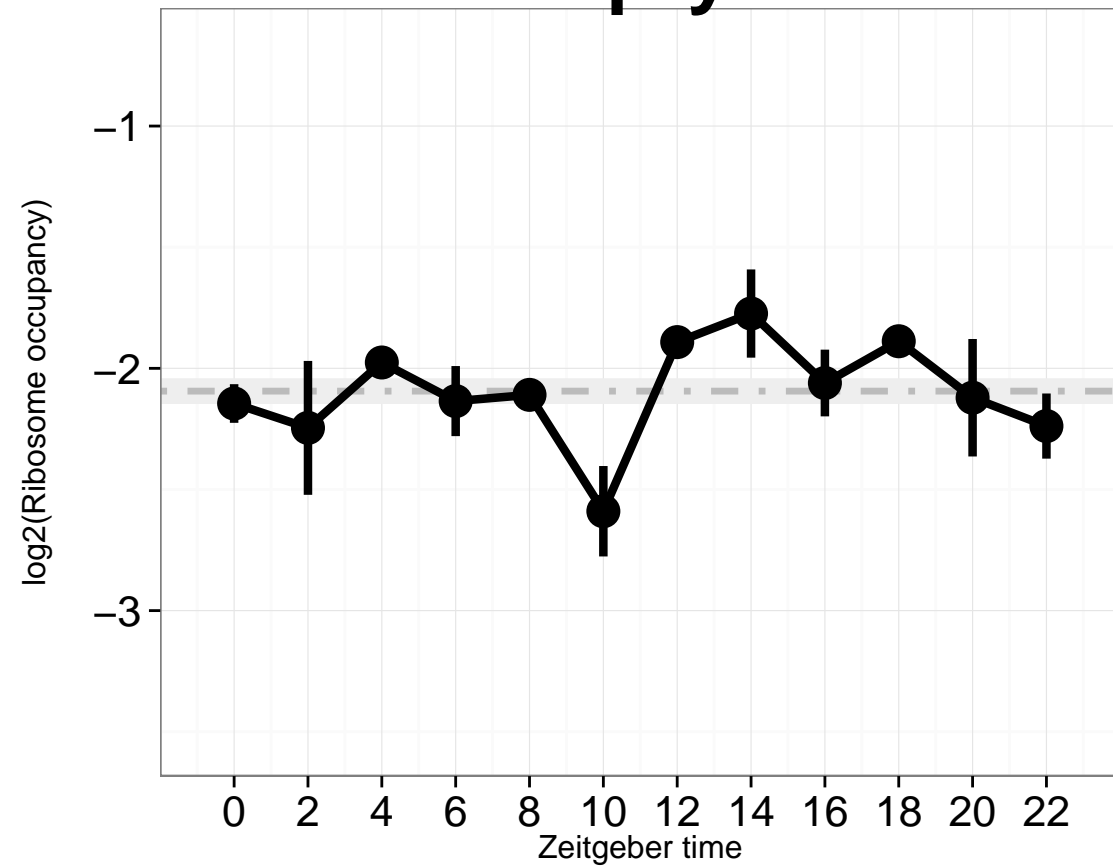

Supplement: SuppDataset_1.zip [file Rspry1_set_A.pdf › Supplemental Dataset 1/A-mRNA_nonrhyth_translation_nonrhyth/Rspry1_set_A.pdf]

# Rsrc1

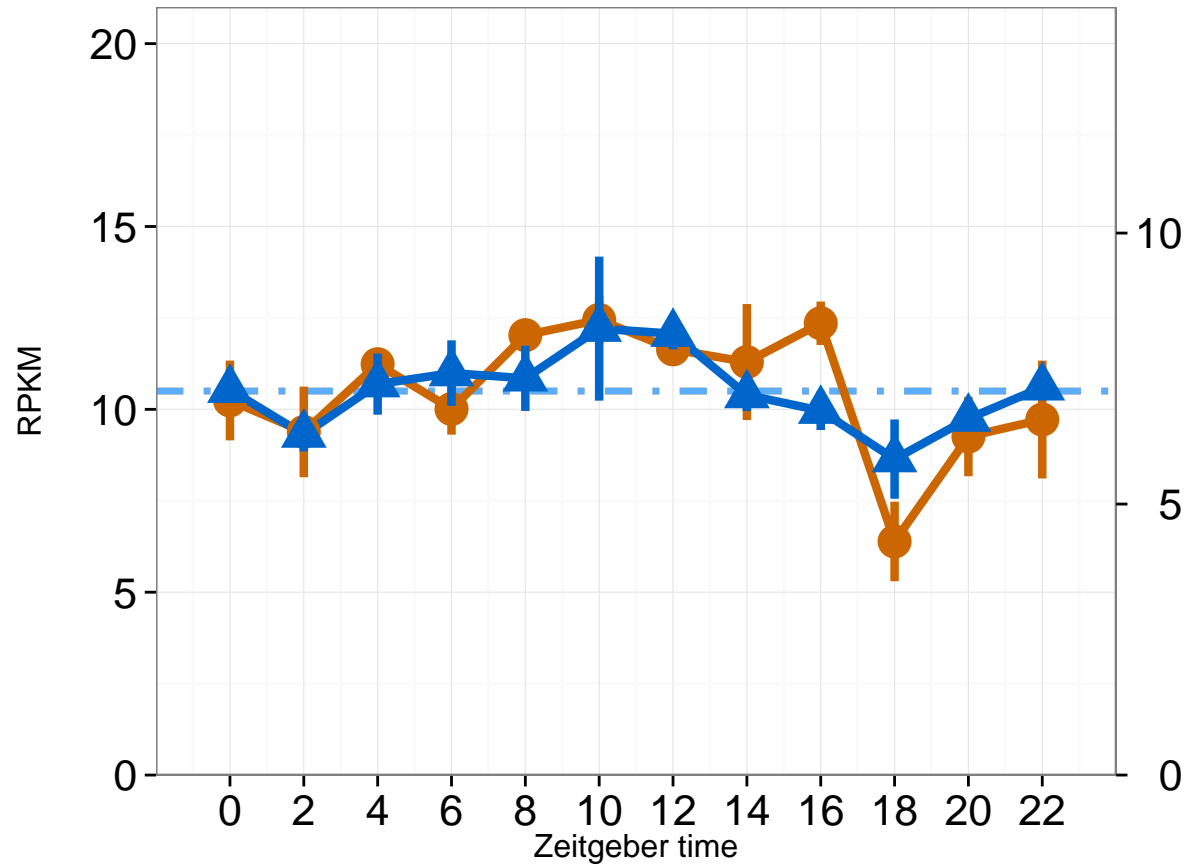

# Rsrc1

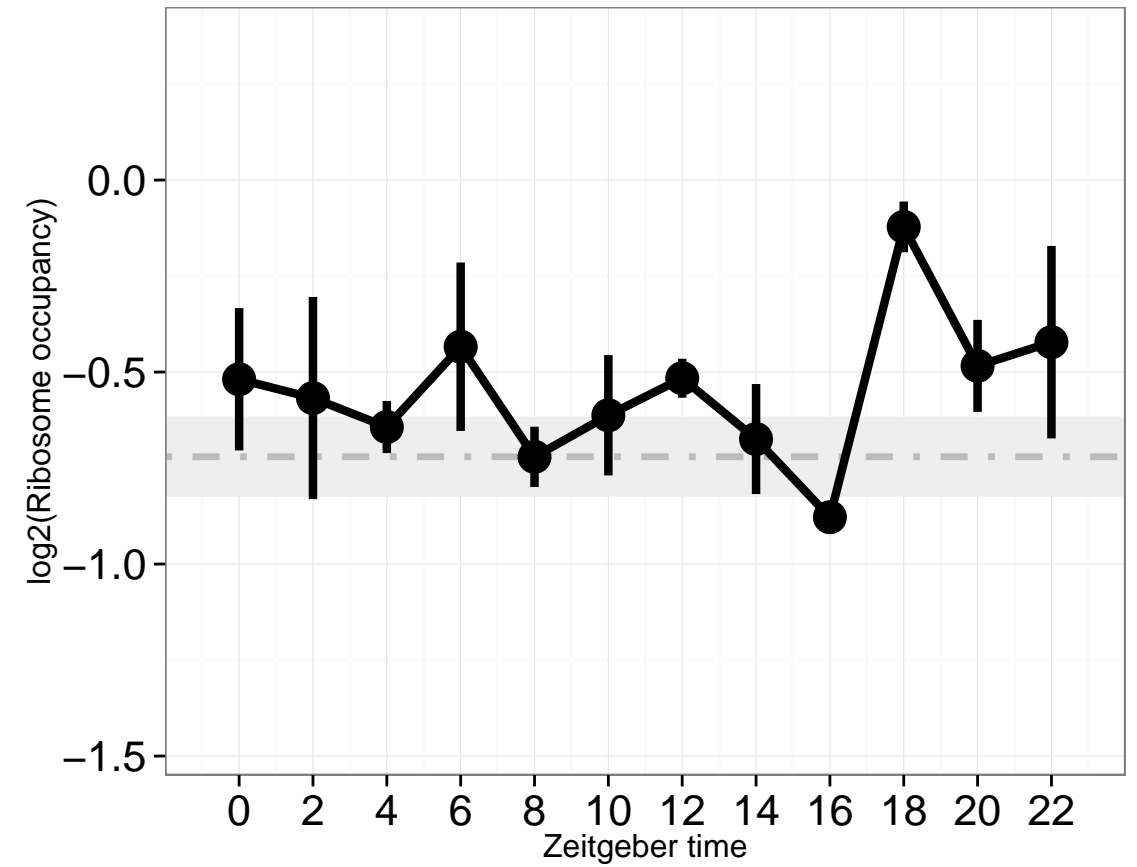

Supplement: SuppDataset_1.zip [file Rsrc1_set_A.pdf › Supplemental Dataset 1/A-mRNA_nonrhyth_translation_nonrhyth/Rsrc1_set_A.pdf]

## Rsrc2

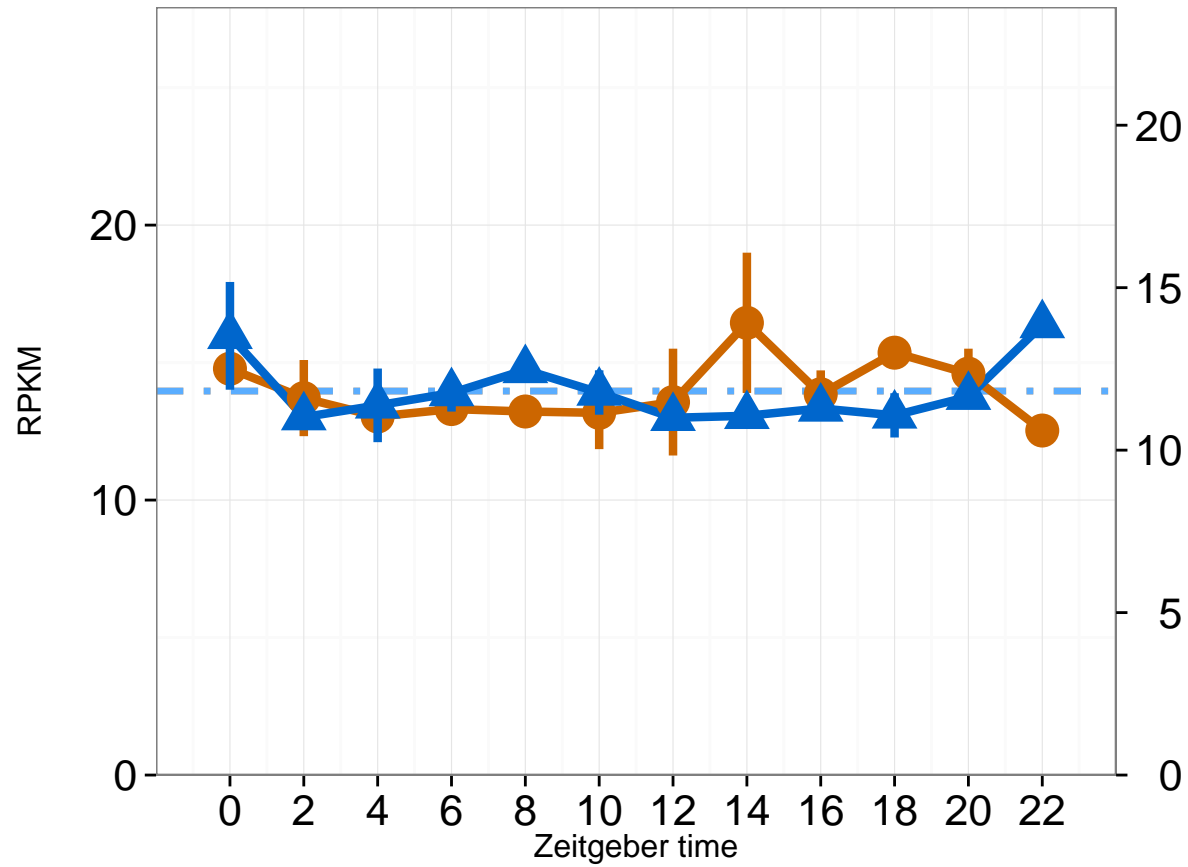

## Rsrc2

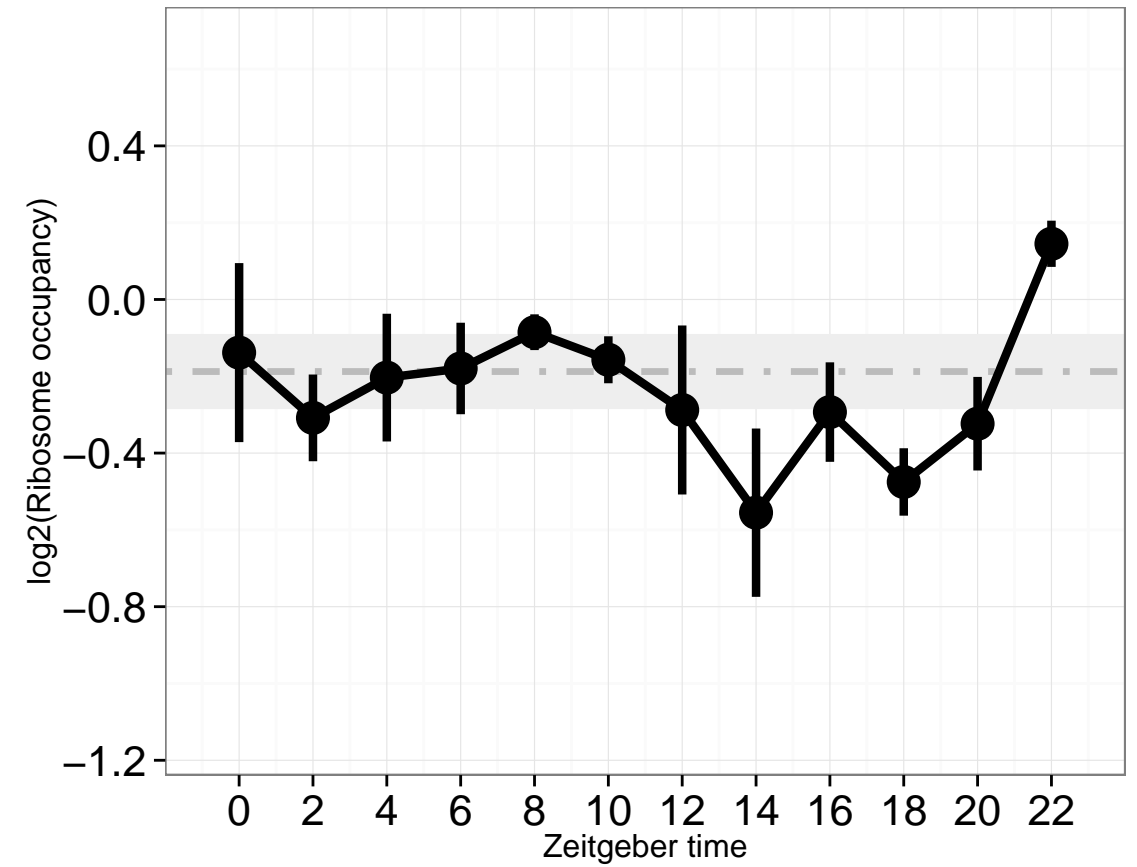

Supplement: SuppDataset_1.zip [file Rsrc2_set_A.pdf › Supplemental Dataset 1/A-mRNA_nonrhyth_translation_nonrhyth/Rsrc2_set_A.pdf]

## Rsu1

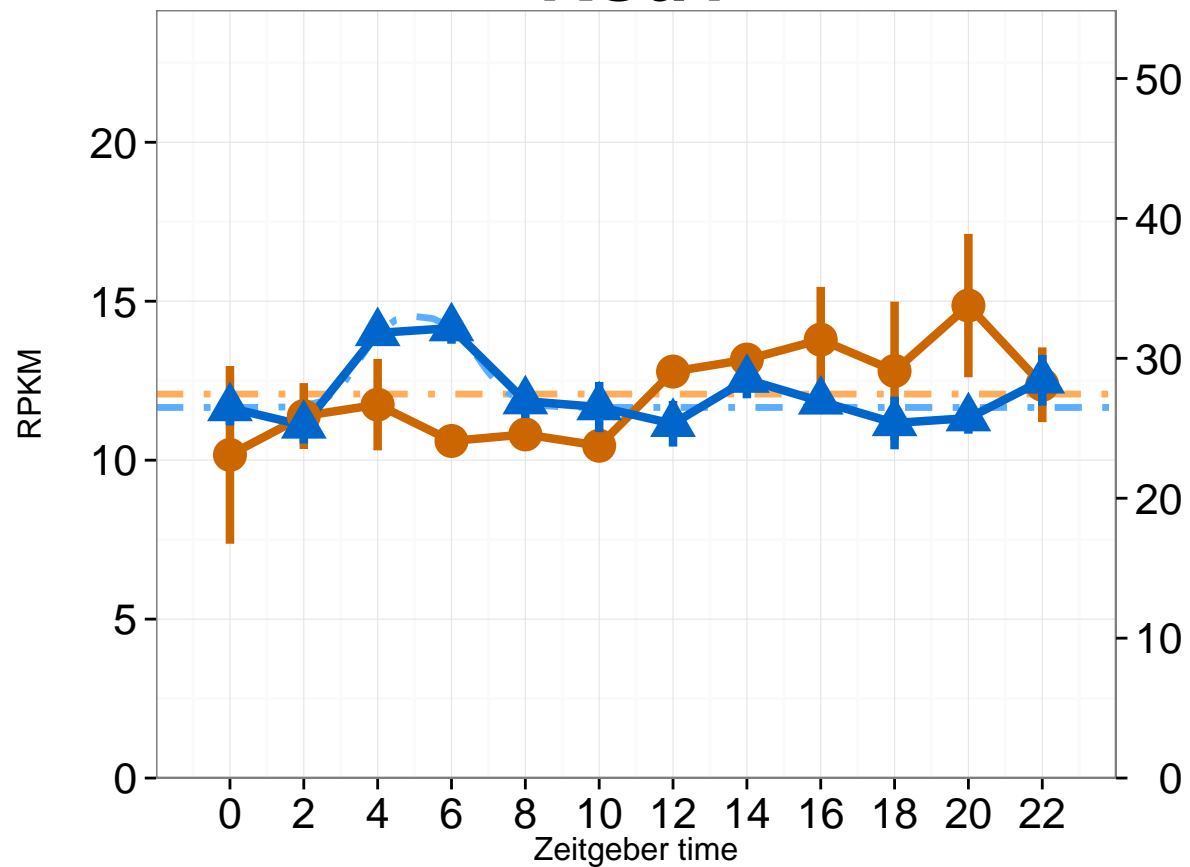

## Rsu1

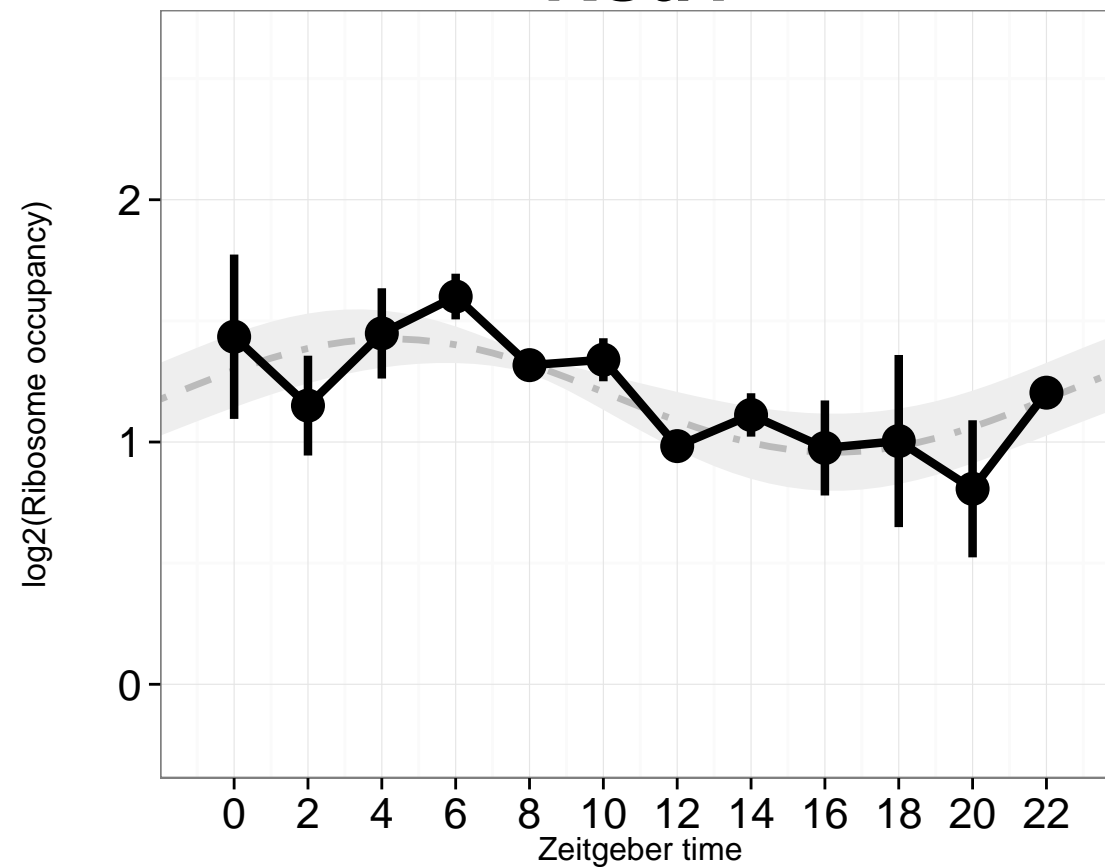

Supplement: SuppDataset_1.zip [file Rsu1_set_A.pdf › Supplemental Dataset 1/A-mRNA_nonrhyth_translation_nonrhyth/Rsu1_set_A.pdf]

## Rtca

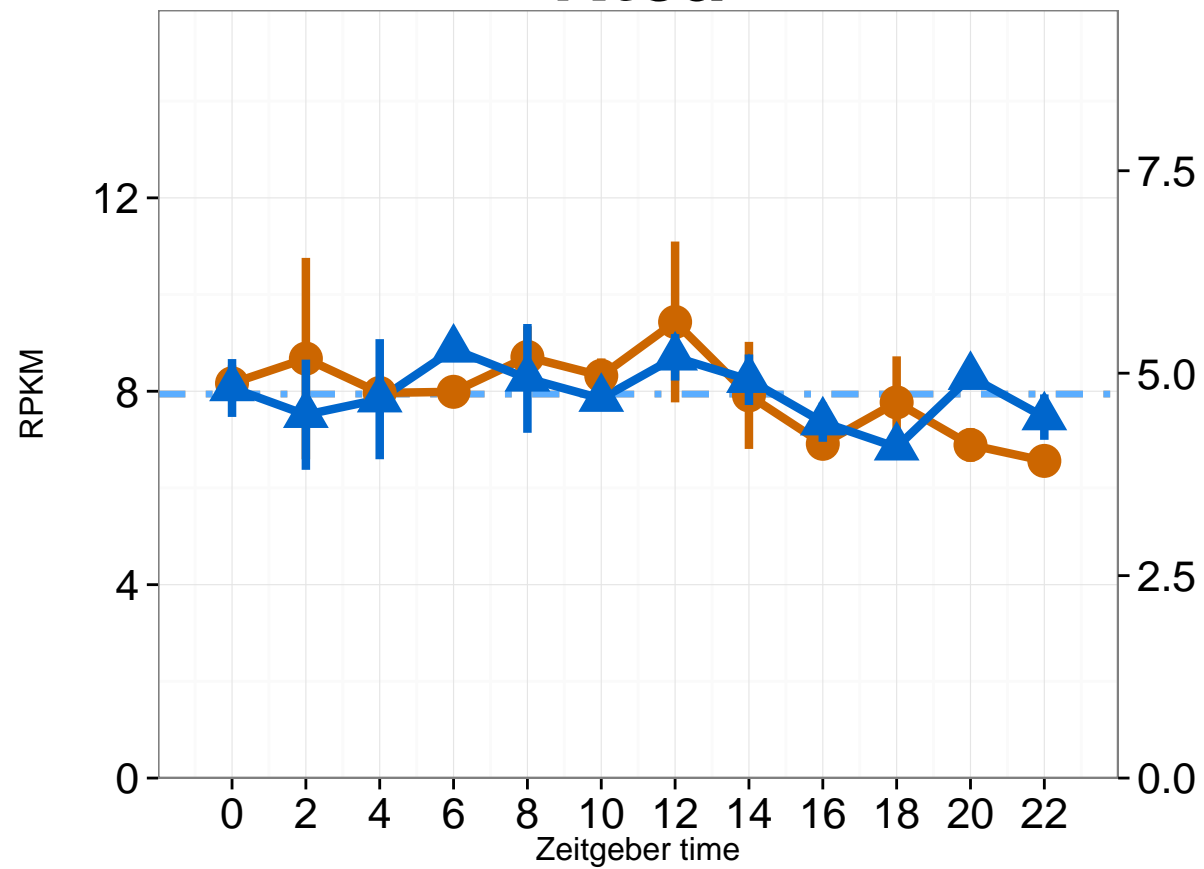

## Rtca

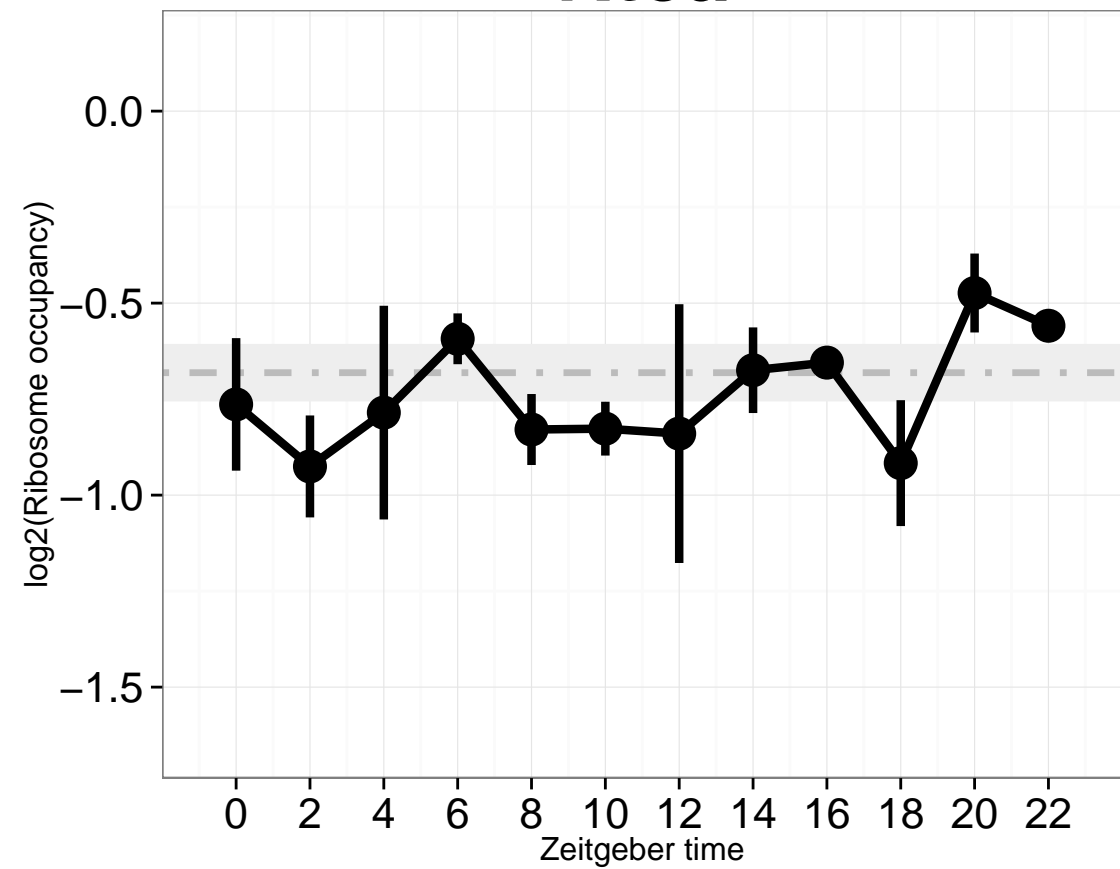

Supplement: SuppDataset_1.zip [file Rtca_set_A.pdf › Supplemental Dataset 1/A-mRNA_nonrhyth_translation_nonrhyth/Rtca_set_A.pdf]

## Rtcb

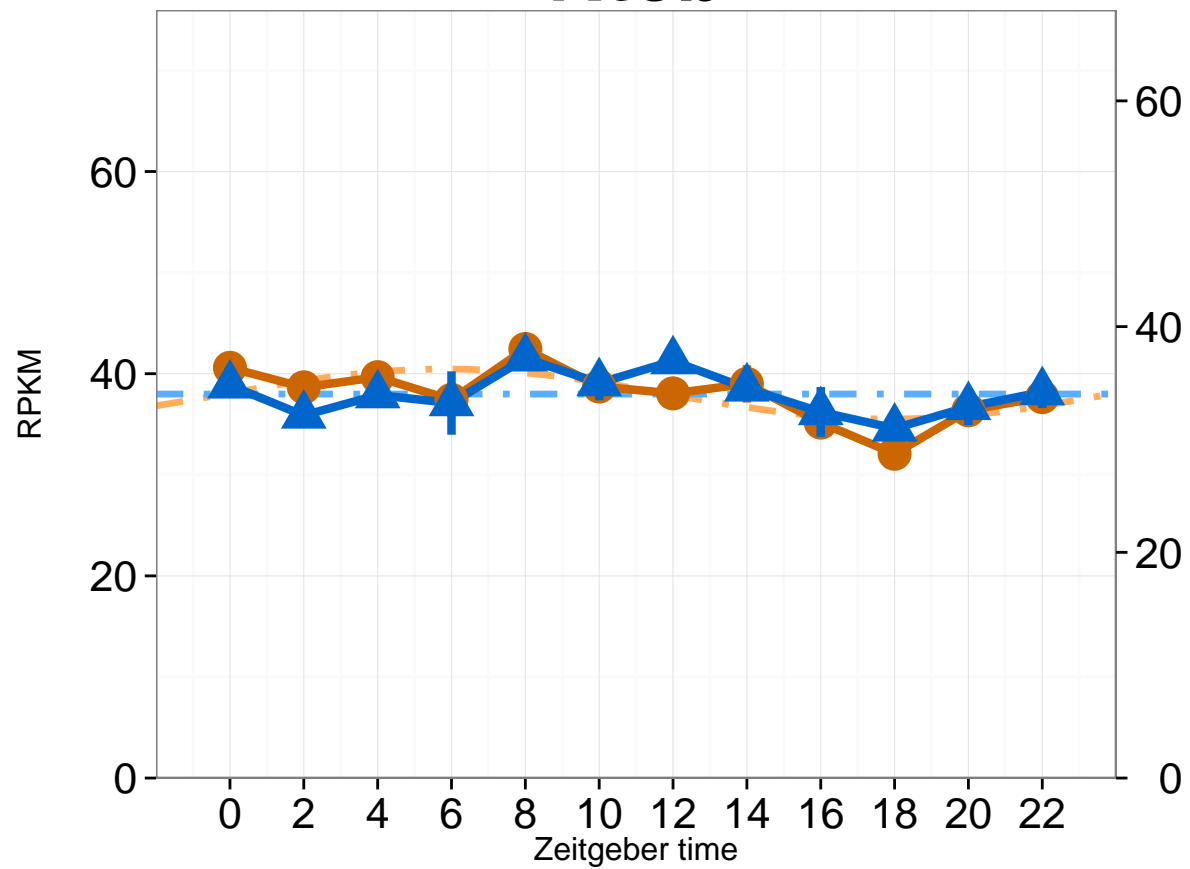

## Rtcb

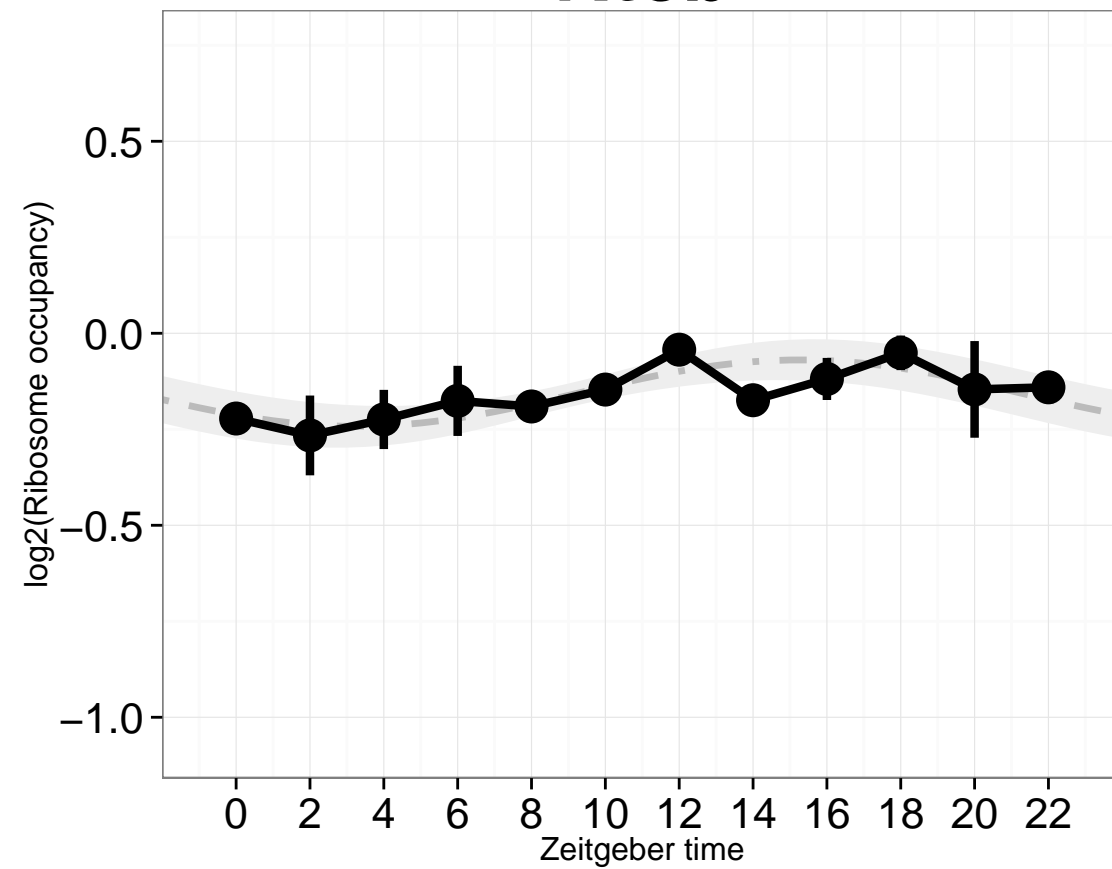

Supplement: SuppDataset_1.zip [file Rtcb_set_A.pdf › Supplemental Dataset 1/A-mRNA_nonrhyth_translation_nonrhyth/Rtcb_set_A.pdf]

# Rtfdc1

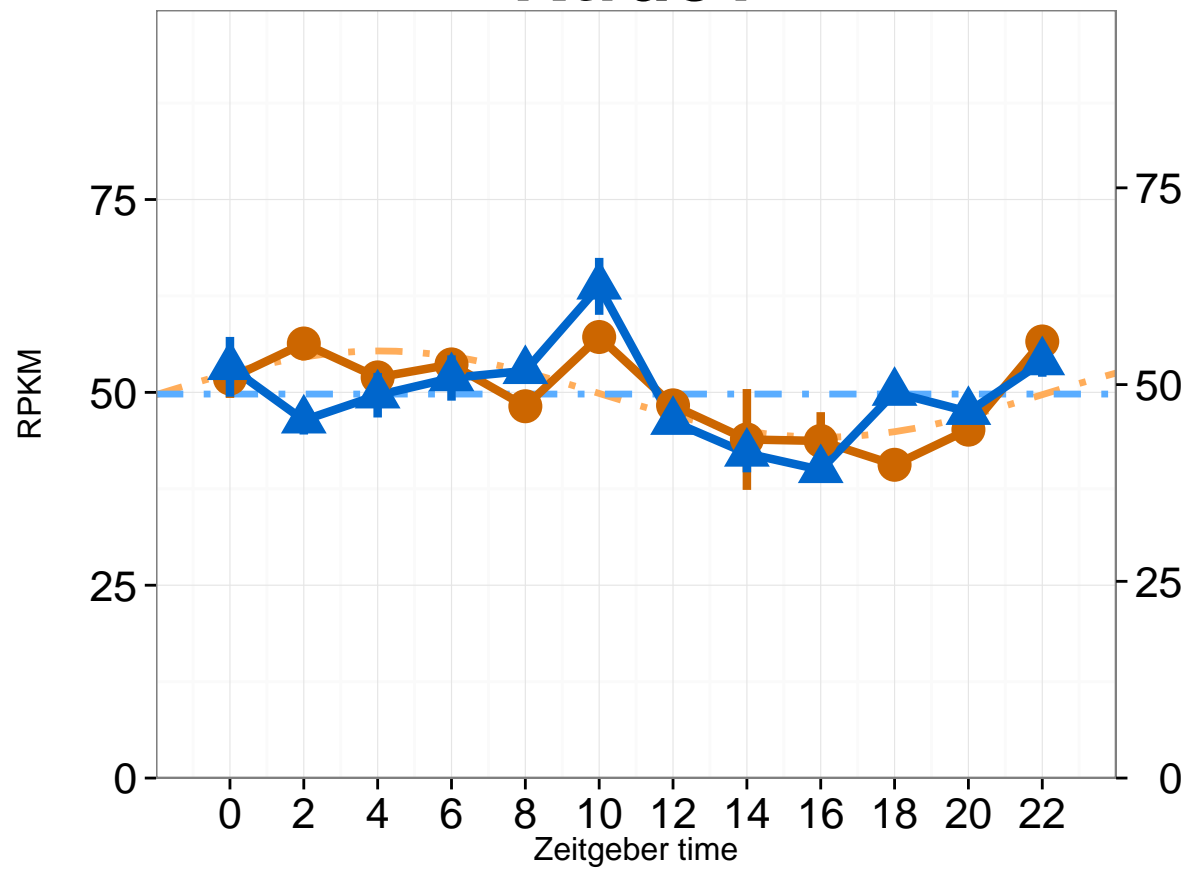

# Rtfdc1

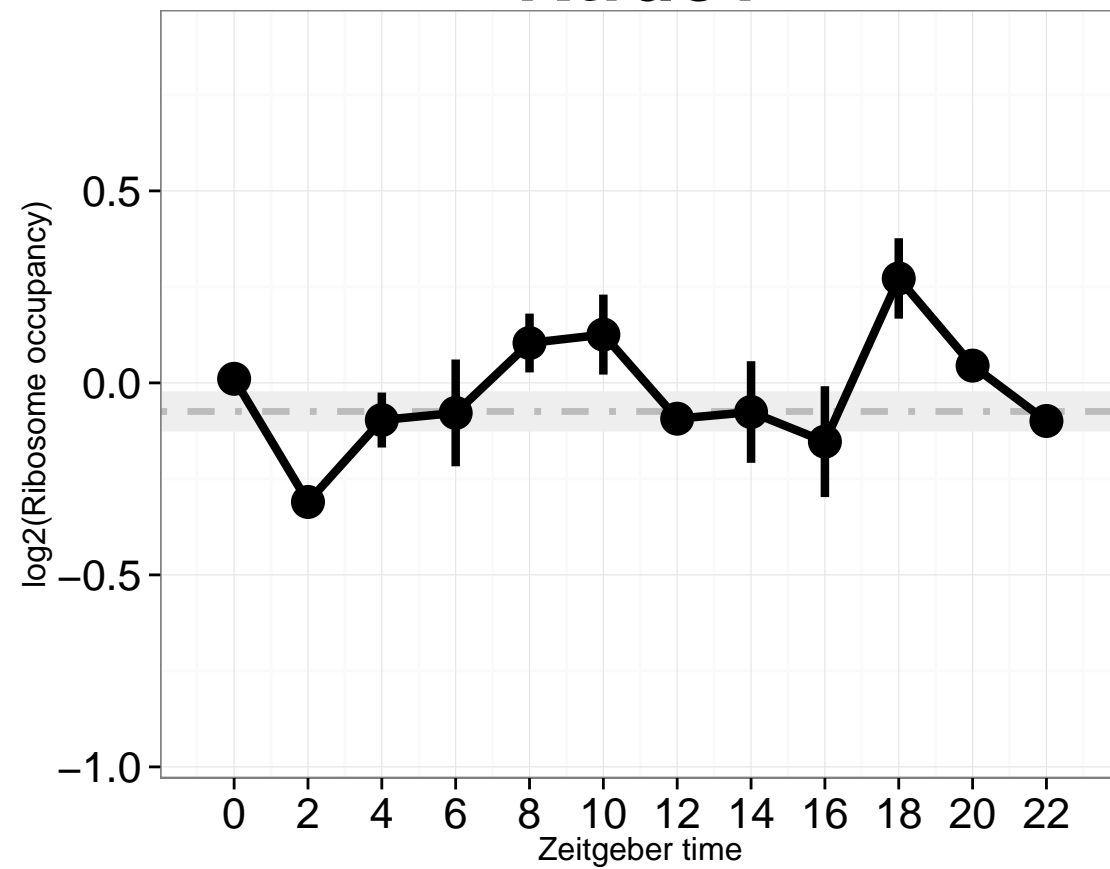

Supplement: SuppDataset_1.zip [file Rtfdc1_set_A.pdf › Supplemental Dataset 1/A-mRNA_nonrhyth_translation_nonrhyth/Rtfdc1_set_A.pdf]

## Rtkn

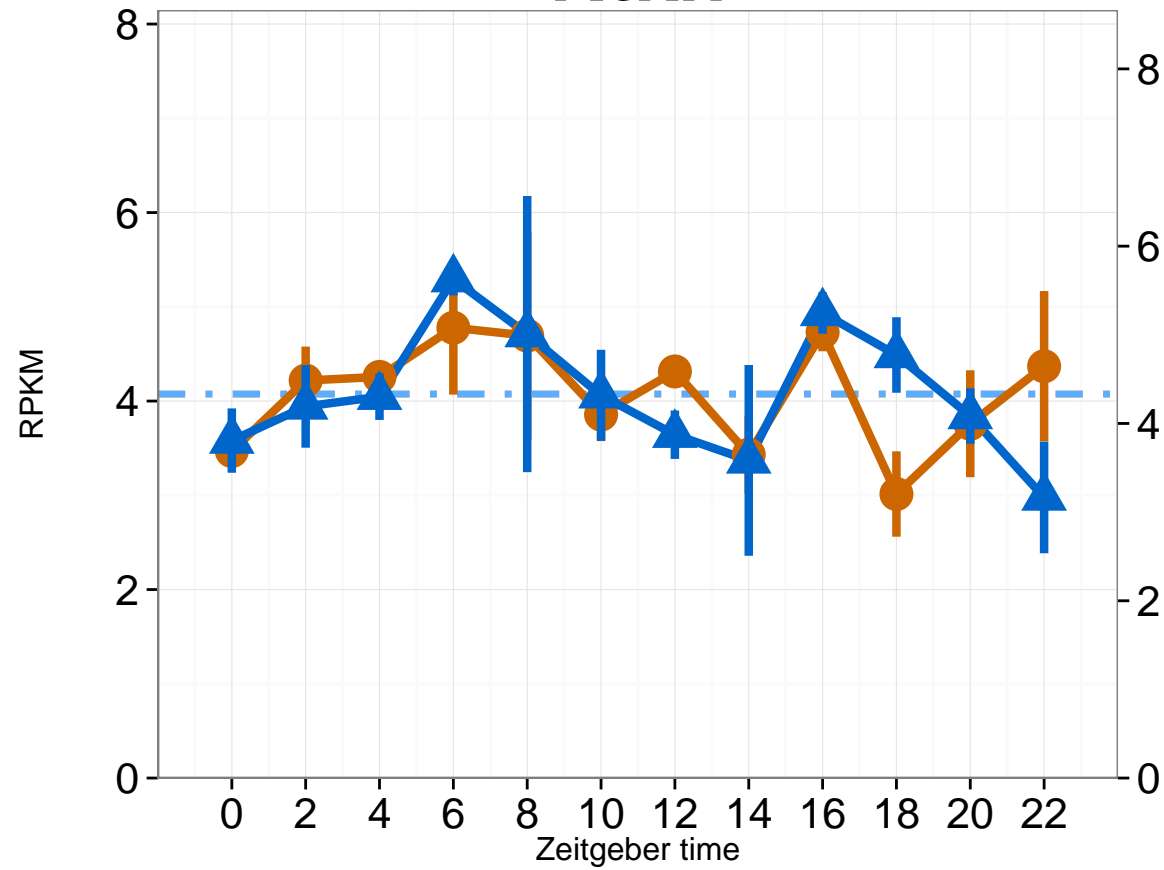

## Rtkn

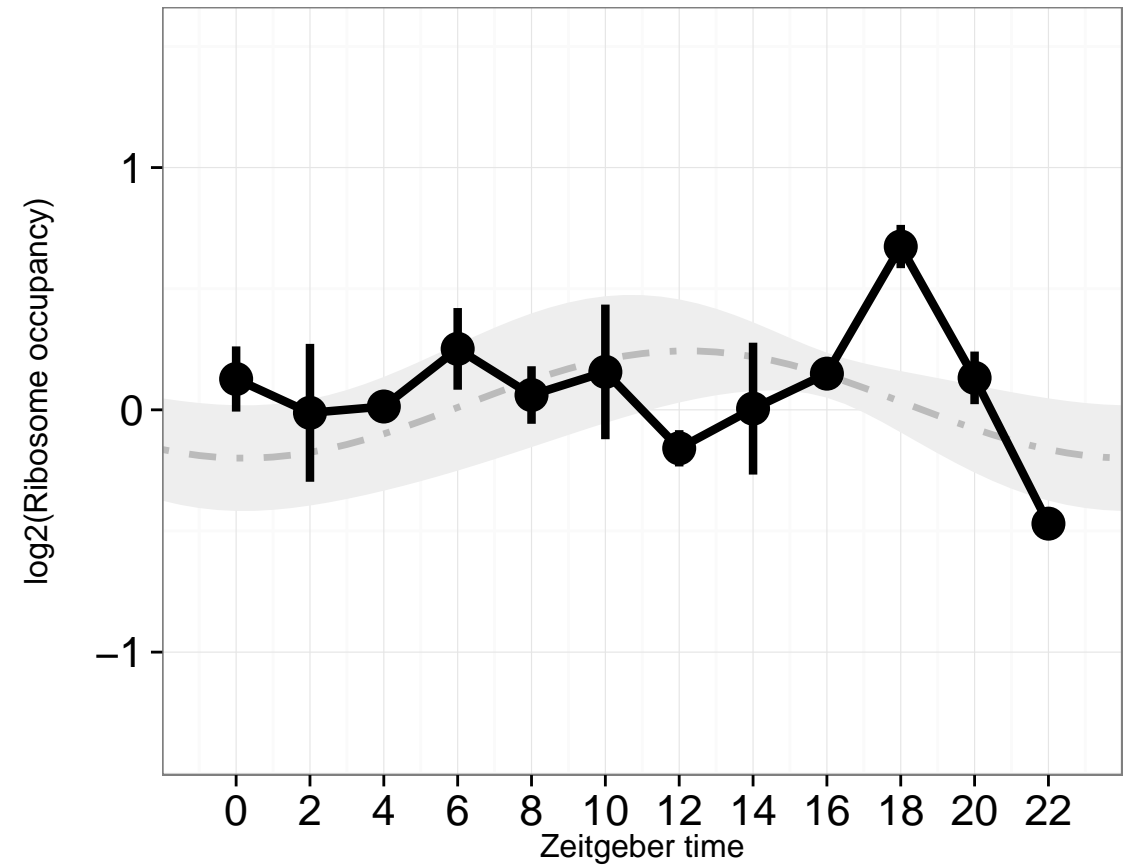

Supplement: SuppDataset_1.zip [file Rtkn_set_A.pdf › Supplemental Dataset 1/A-mRNA_nonrhyth_translation_nonrhyth/Rtkn_set_A.pdf]

# Rtn1

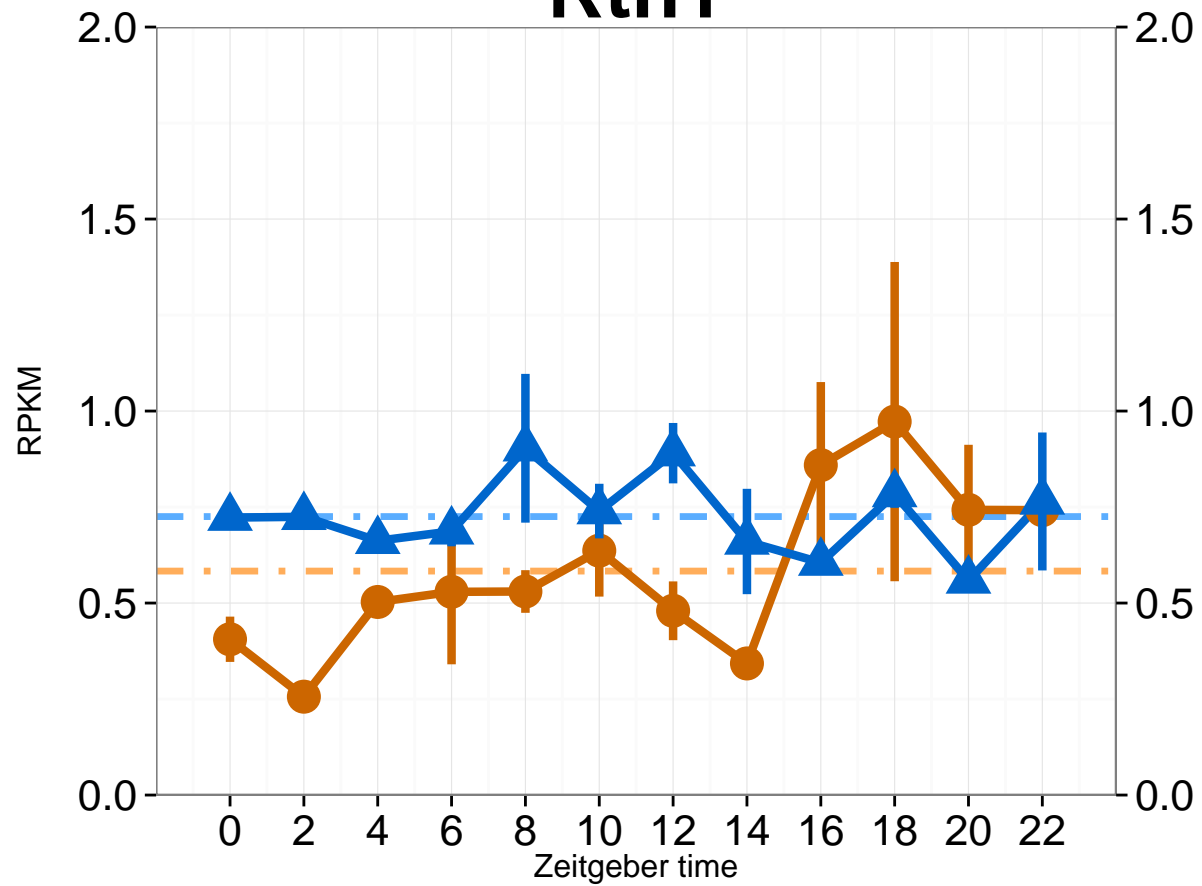

# Rtn1

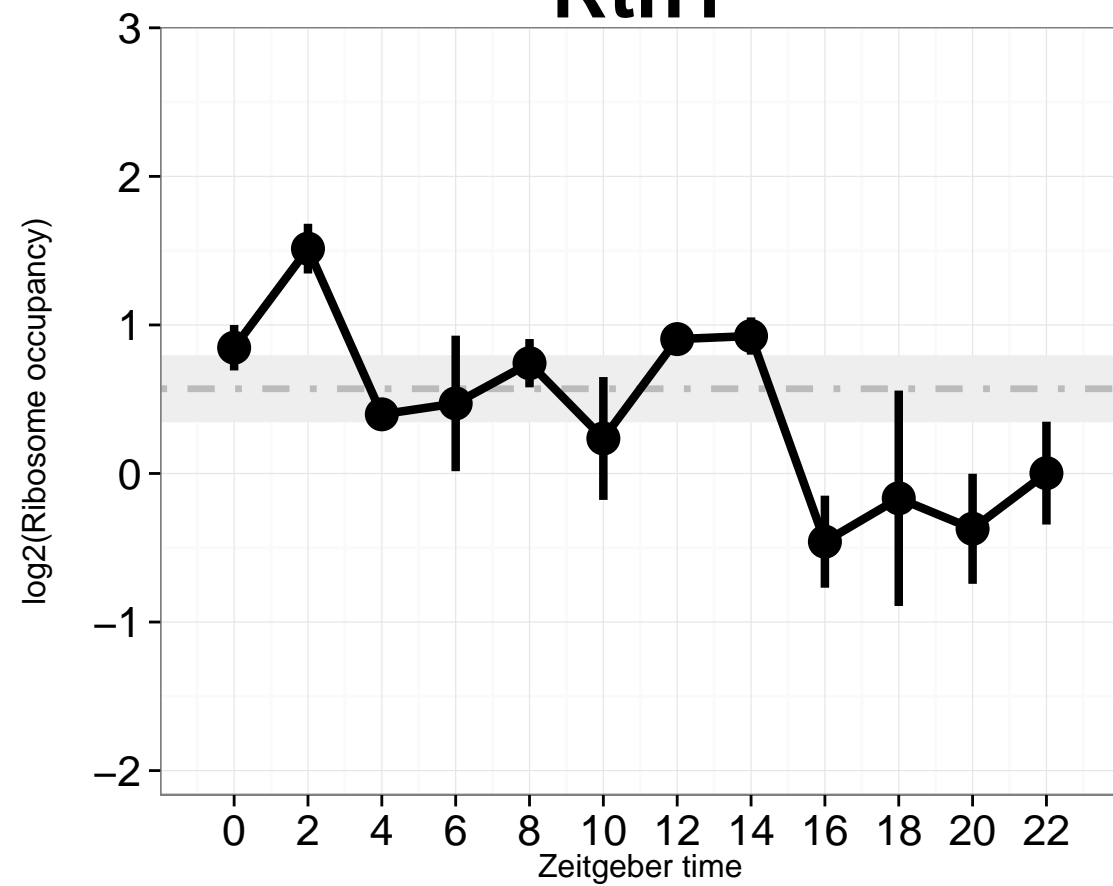

Supplement: SuppDataset_1.zip [file Rtn1_set_A.pdf › Supplemental Dataset 1/A-mRNA_nonrhyth_translation_nonrhyth/Rtn1_set_A.pdf]

# Rtn3

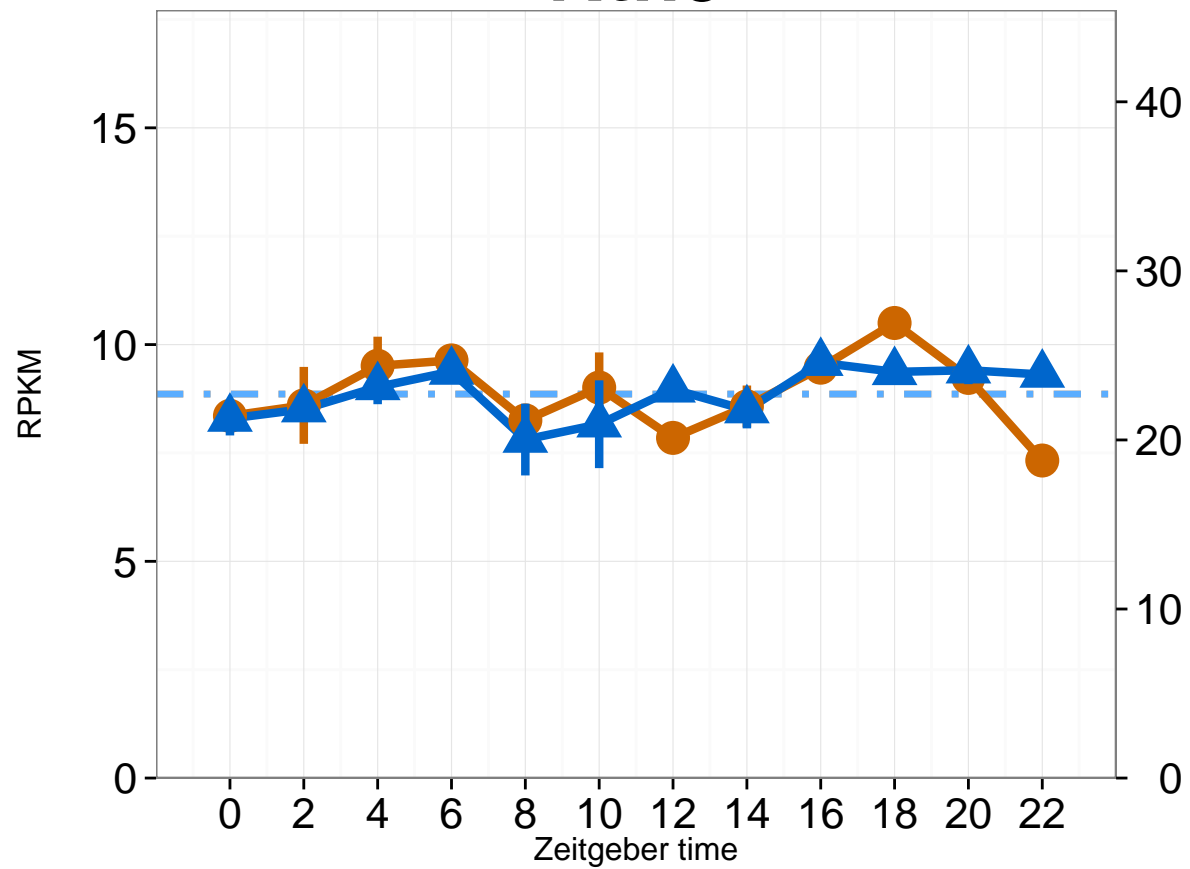

# Rtn3

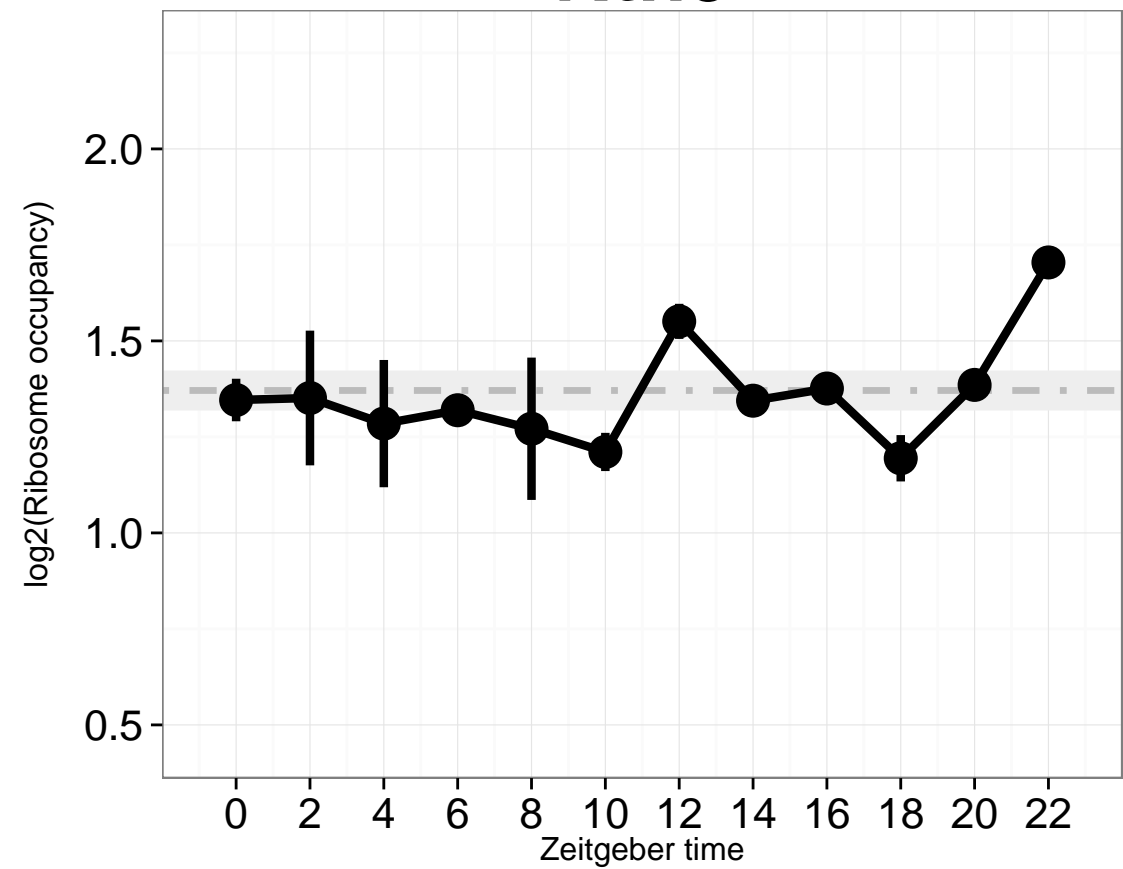

Supplement: SuppDataset_1.zip [file Rtn3_set_A.pdf › Supplemental Dataset 1/A-mRNA_nonrhyth_translation_nonrhyth/Rtn3_set_A.pdf]

# Rtn4

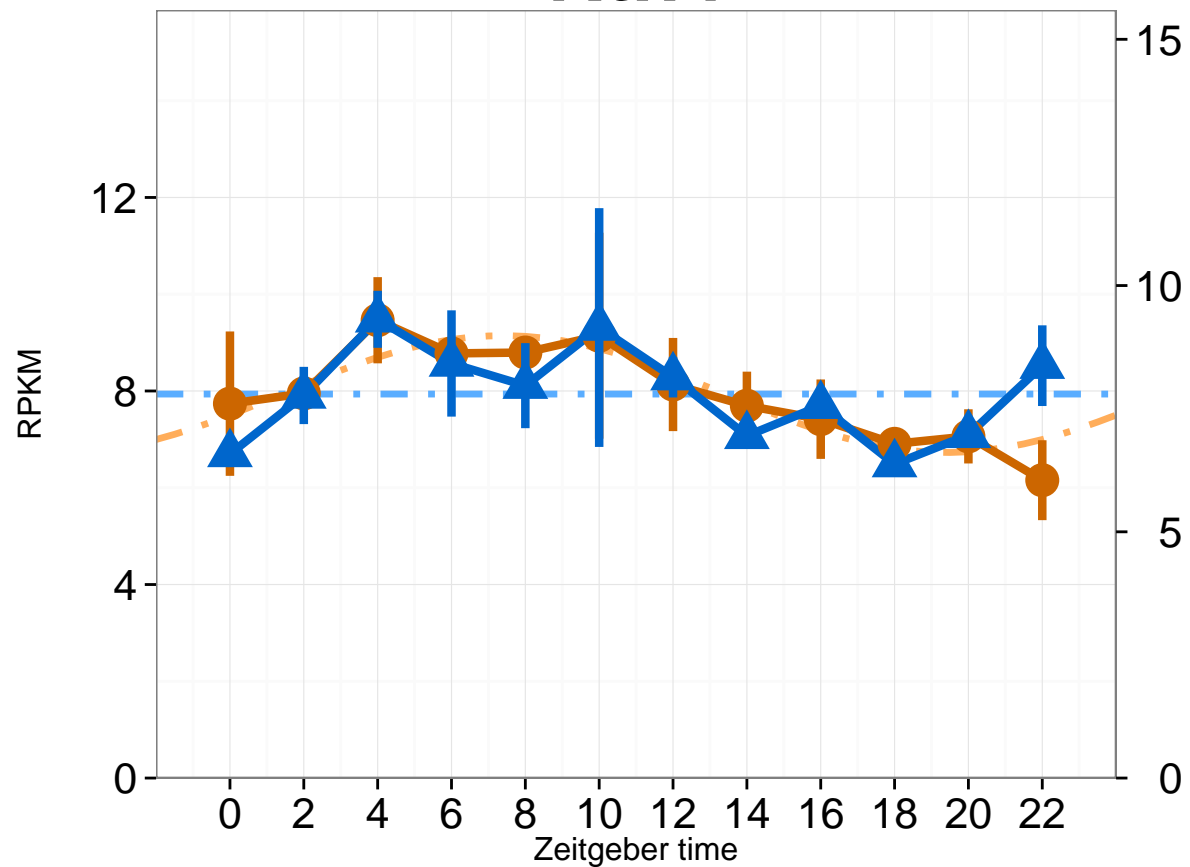

# Rtn4

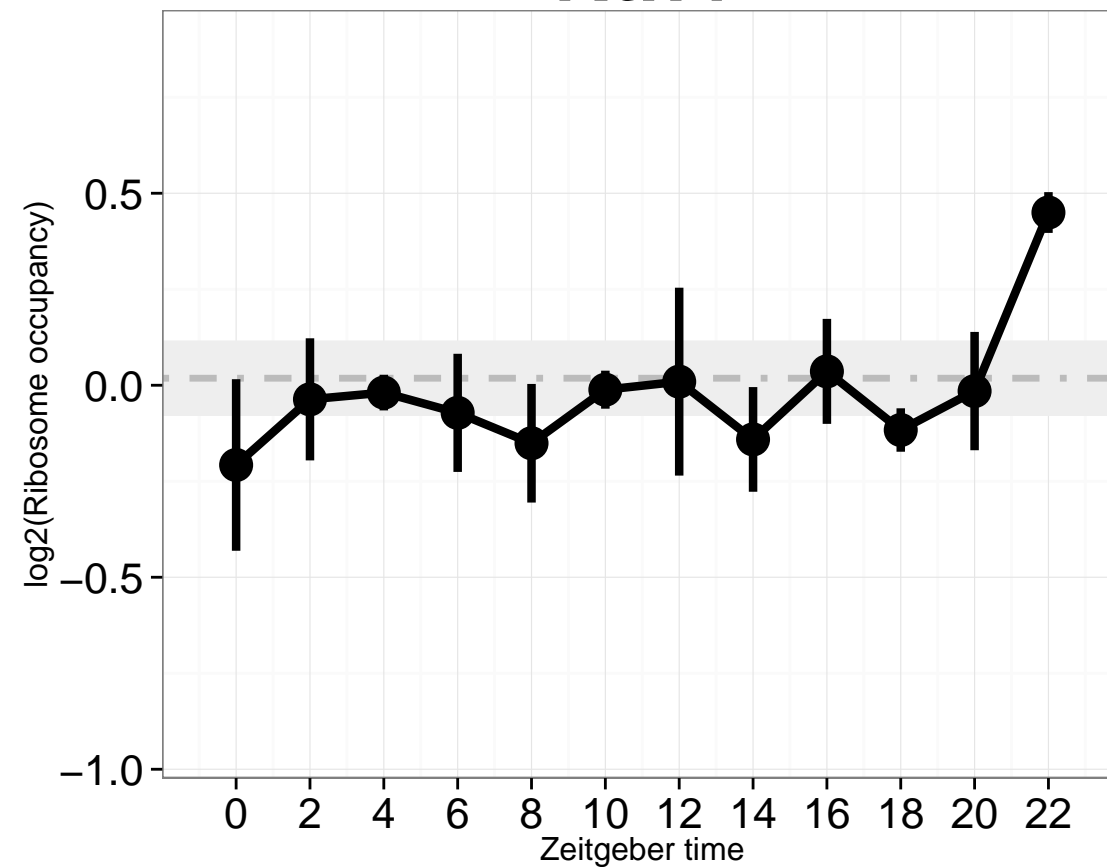

Supplement: SuppDataset_1.zip [file Rtn4_set_A.pdf › Supplemental Dataset 1/A-mRNA_nonrhyth_translation_nonrhyth/Rtn4_set_A.pdf]

# Rtn4ip1

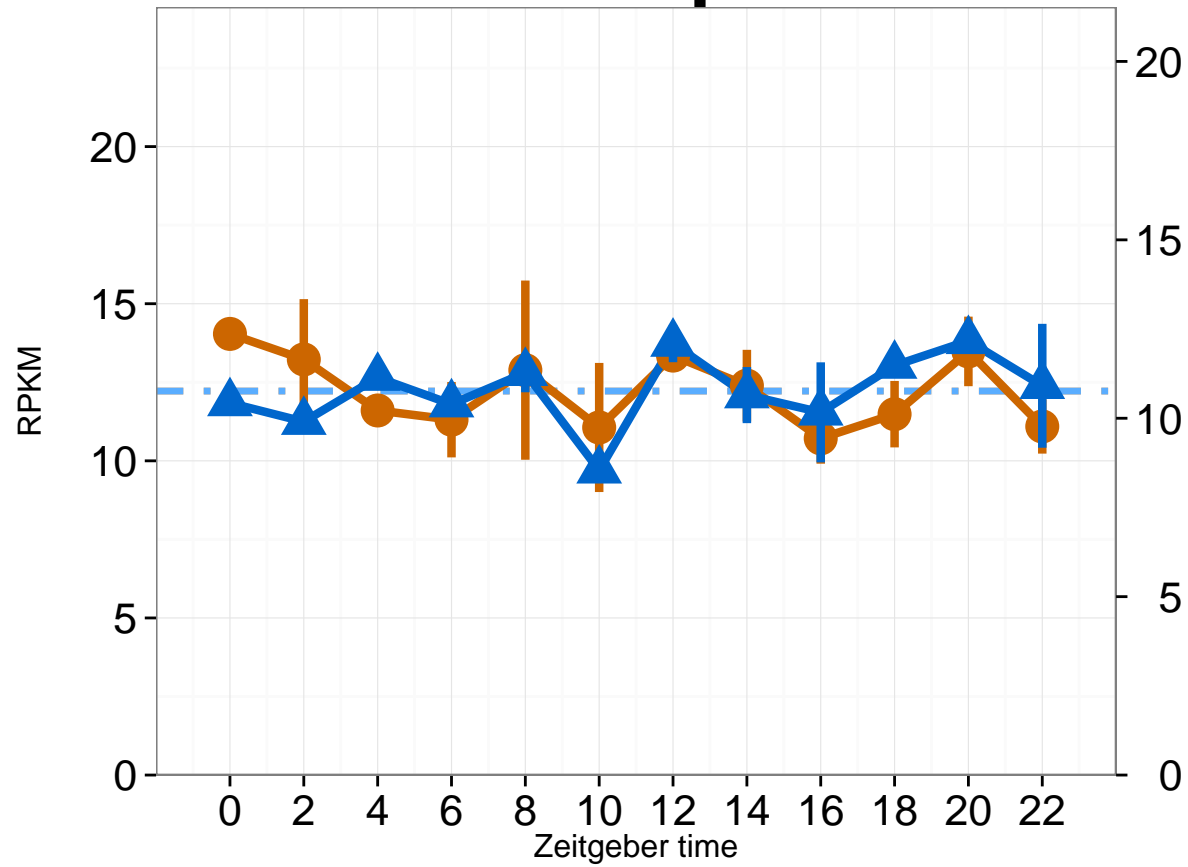

# Rtn4ip1

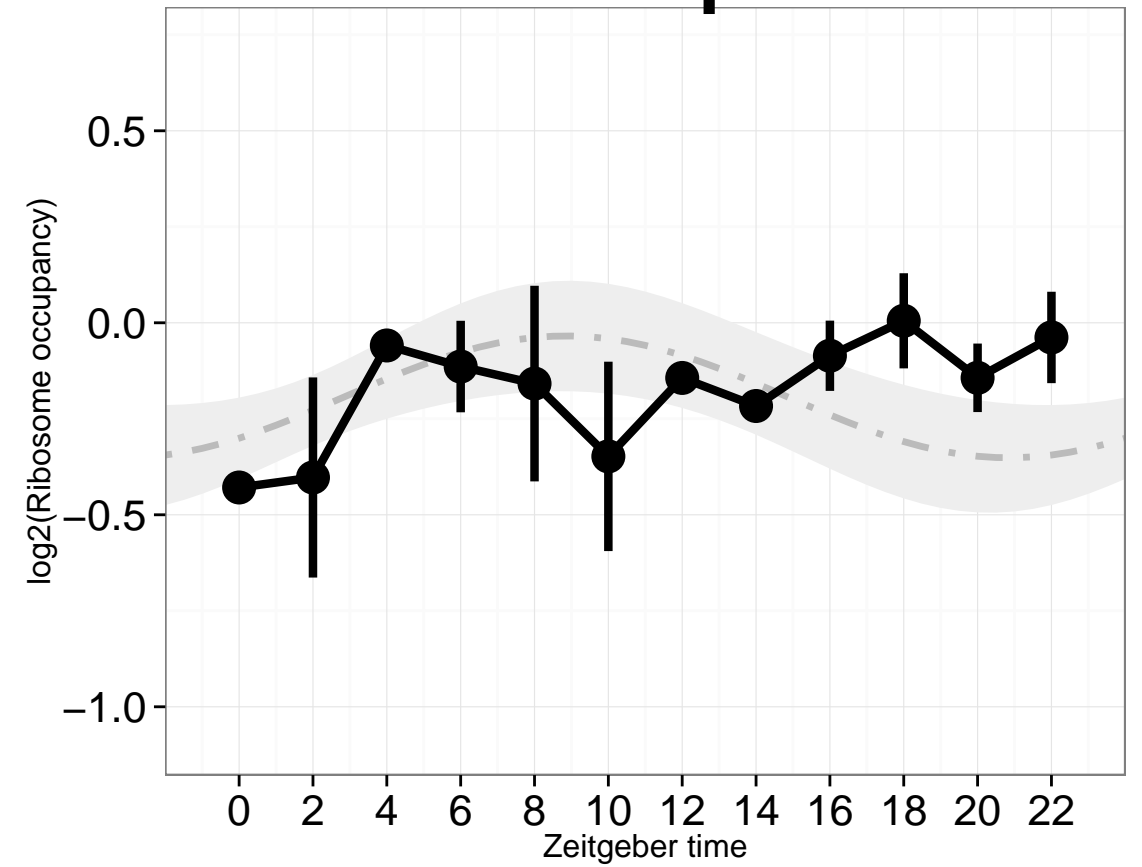

Supplement: SuppDataset_1.zip [file Rtn4ip1_set_A.pdf › Supplemental Dataset 1/A-mRNA_nonrhyth_translation_nonrhyth/Rtn4ip1_set_A.pdf]

# Rttn

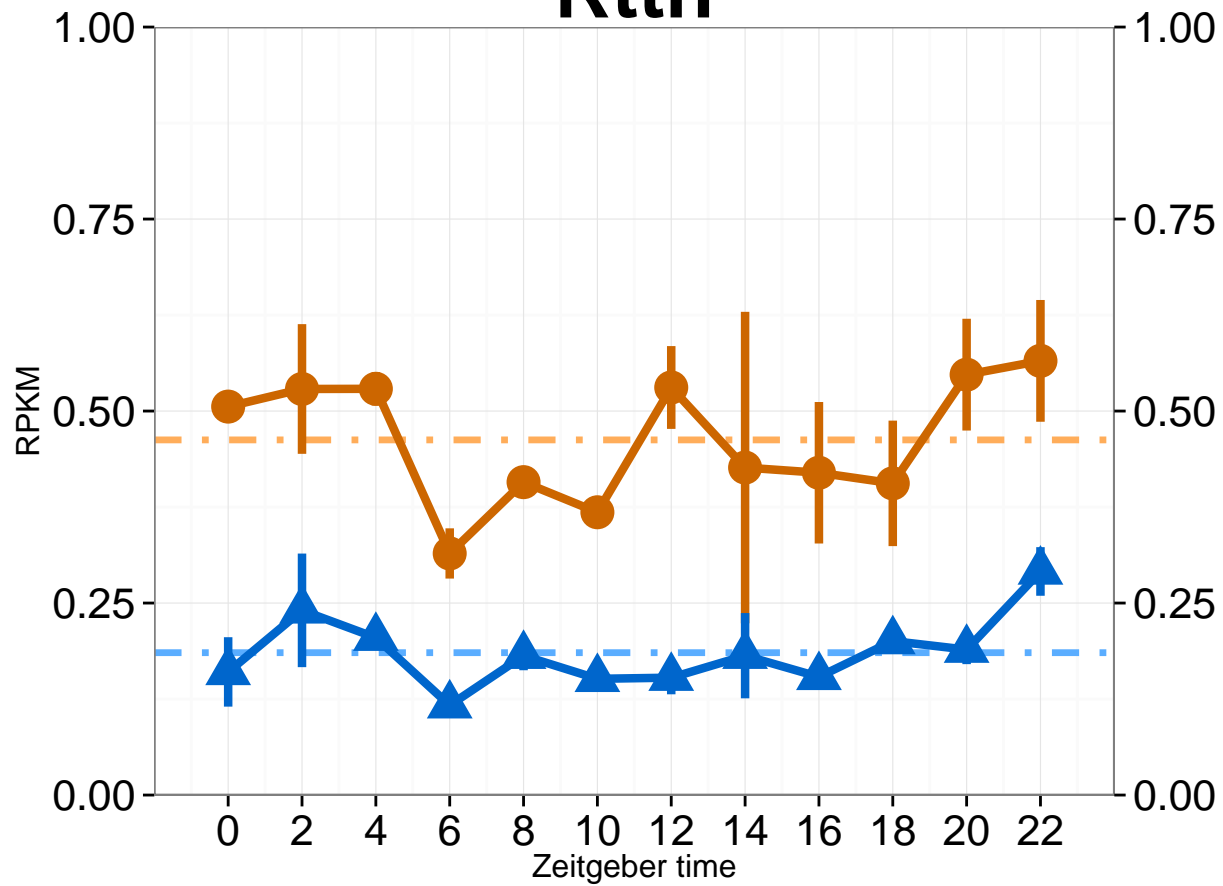

# Rttn

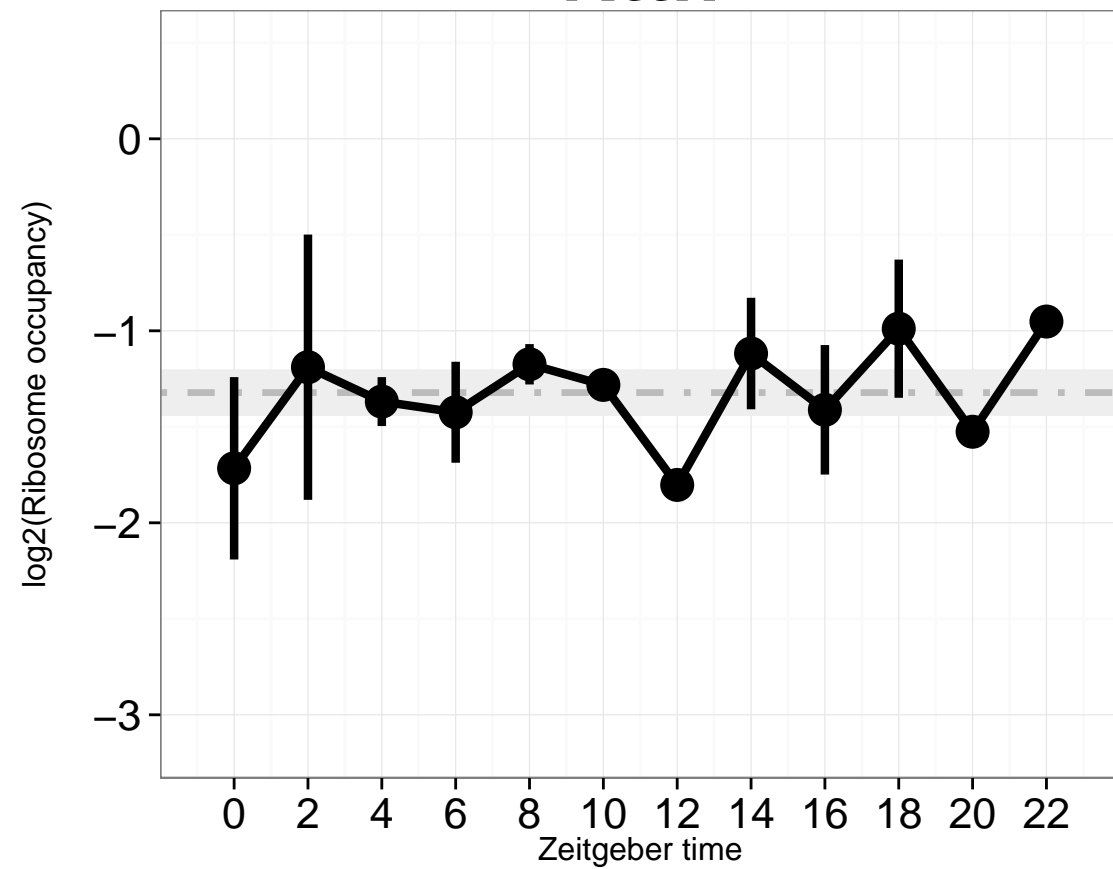

Supplement: SuppDataset_1.zip [file Rttn_set_A.pdf › Supplemental Dataset 1/A-mRNA_nonrhyth_translation_nonrhyth/Rttn_set_A.pdf]

# Rufy1

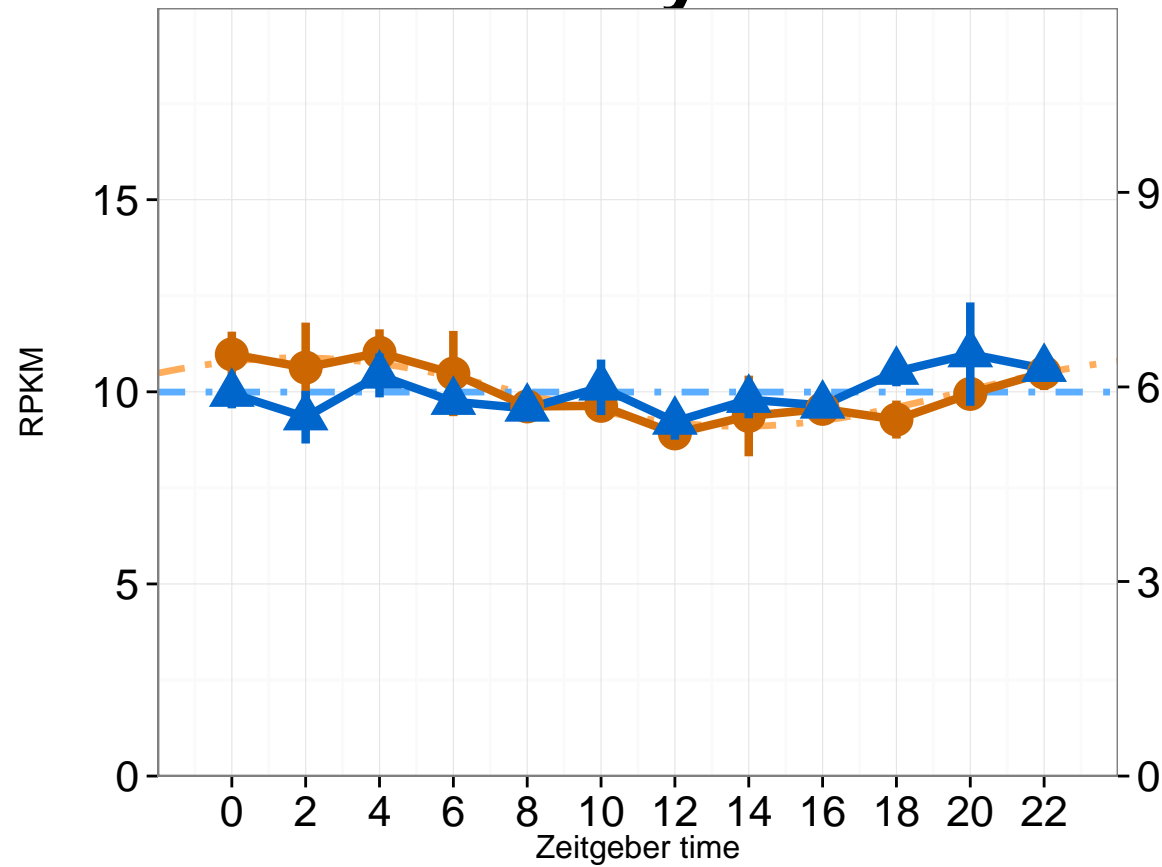

# Rufy1

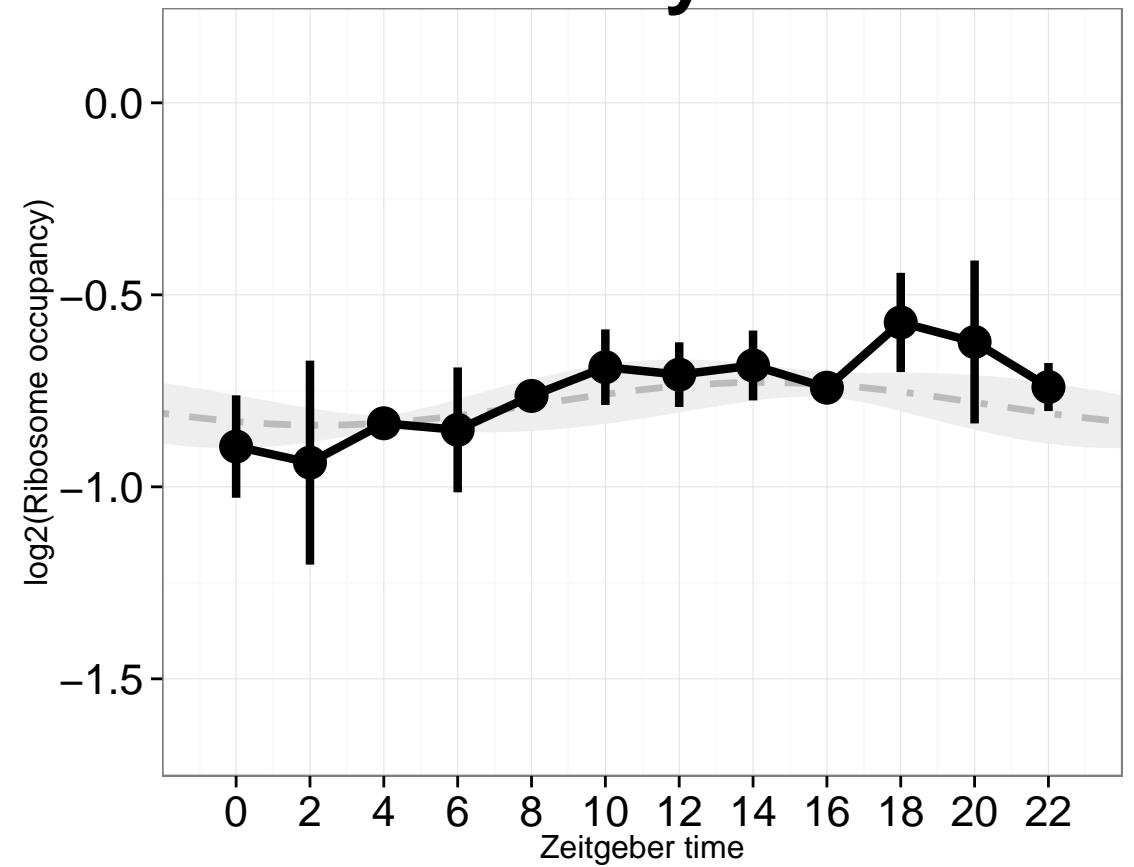

Supplement: SuppDataset_1.zip [file Rufy1_set_A.pdf › Supplemental Dataset 1/A-mRNA_nonrhyth_translation_nonrhyth/Rufy1_set_A.pdf]

## Rufy2

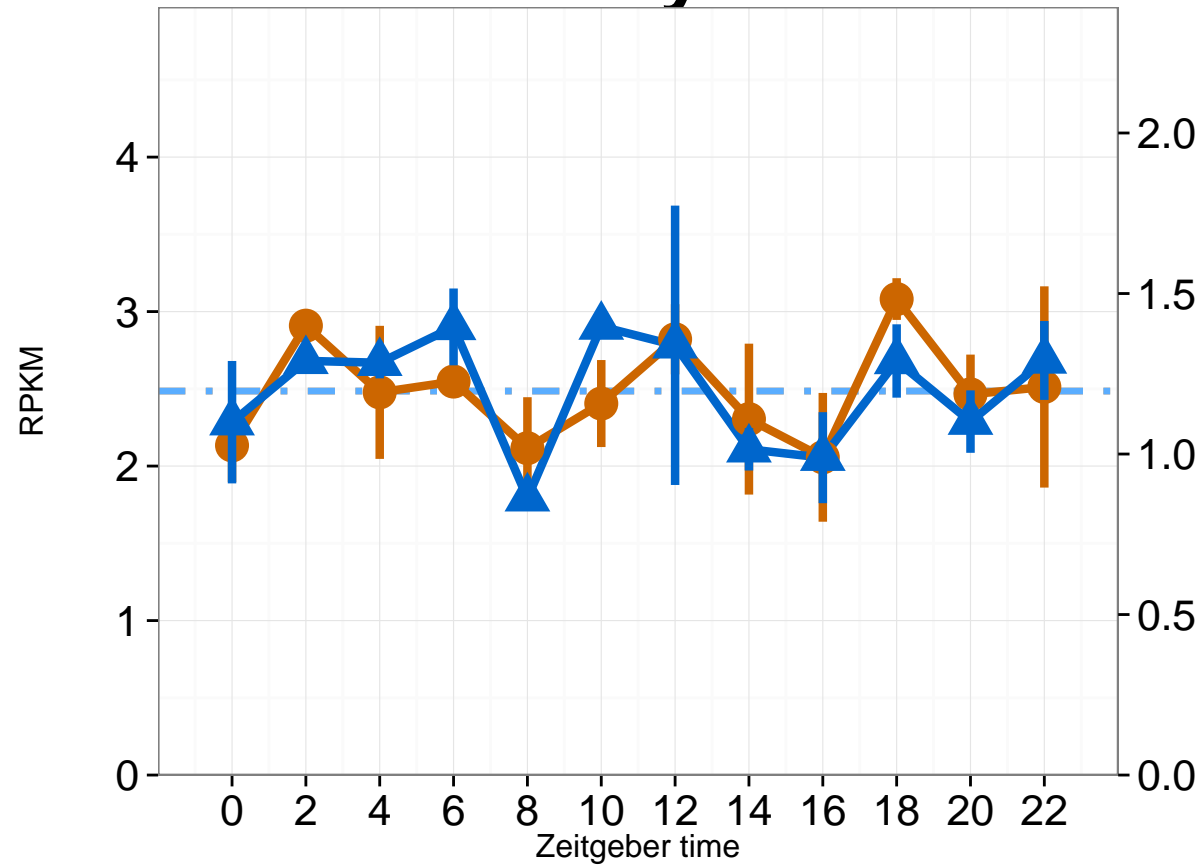

## Rufy2

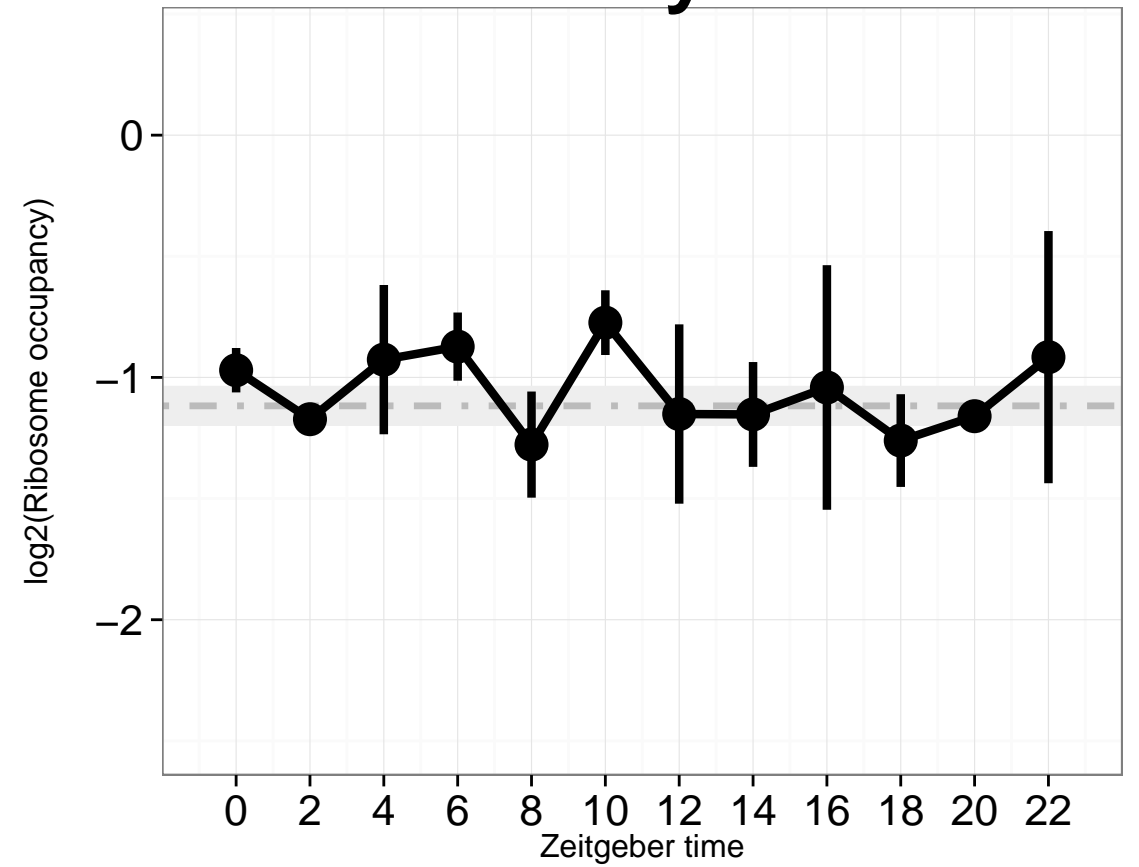

Supplement: SuppDataset_1.zip [file Rufy2_set_A.pdf › Supplemental Dataset 1/A-mRNA_nonrhyth_translation_nonrhyth/Rufy2_set_A.pdf]

## Rufy3

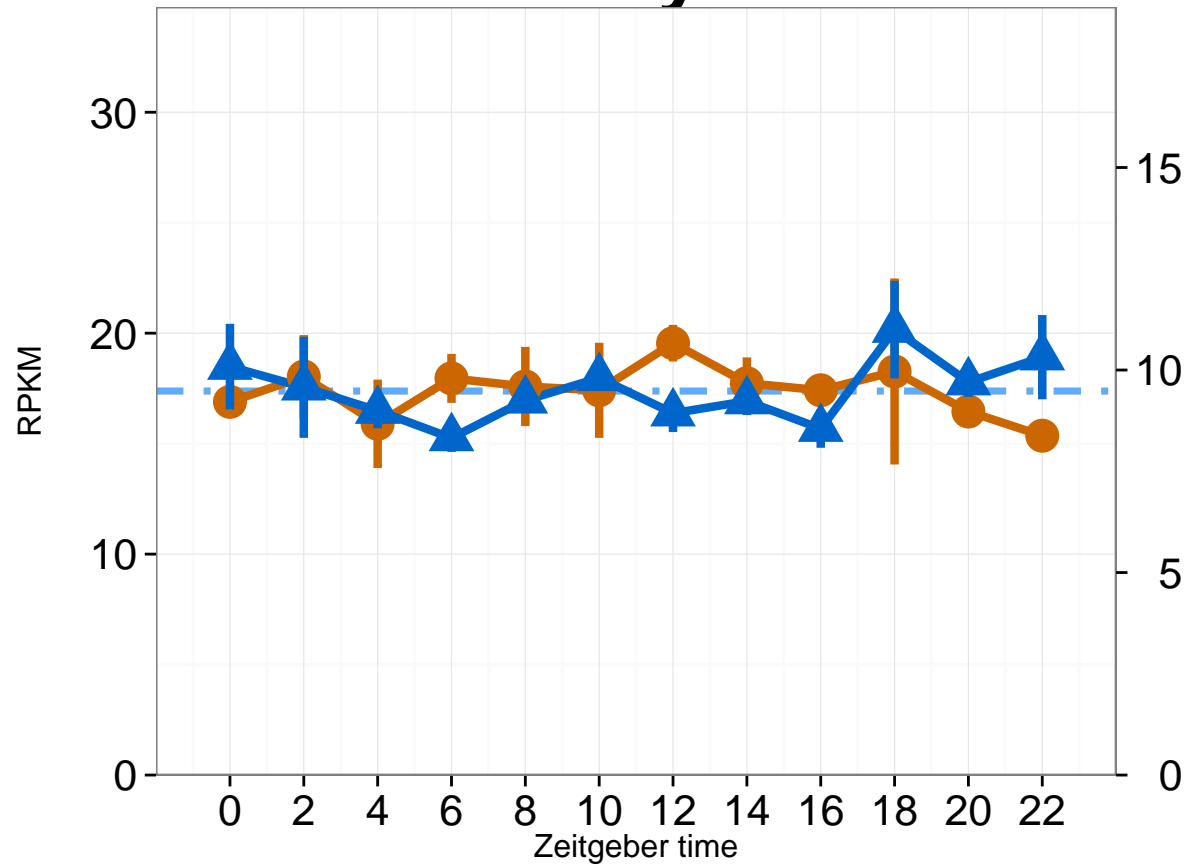

## Rufy3

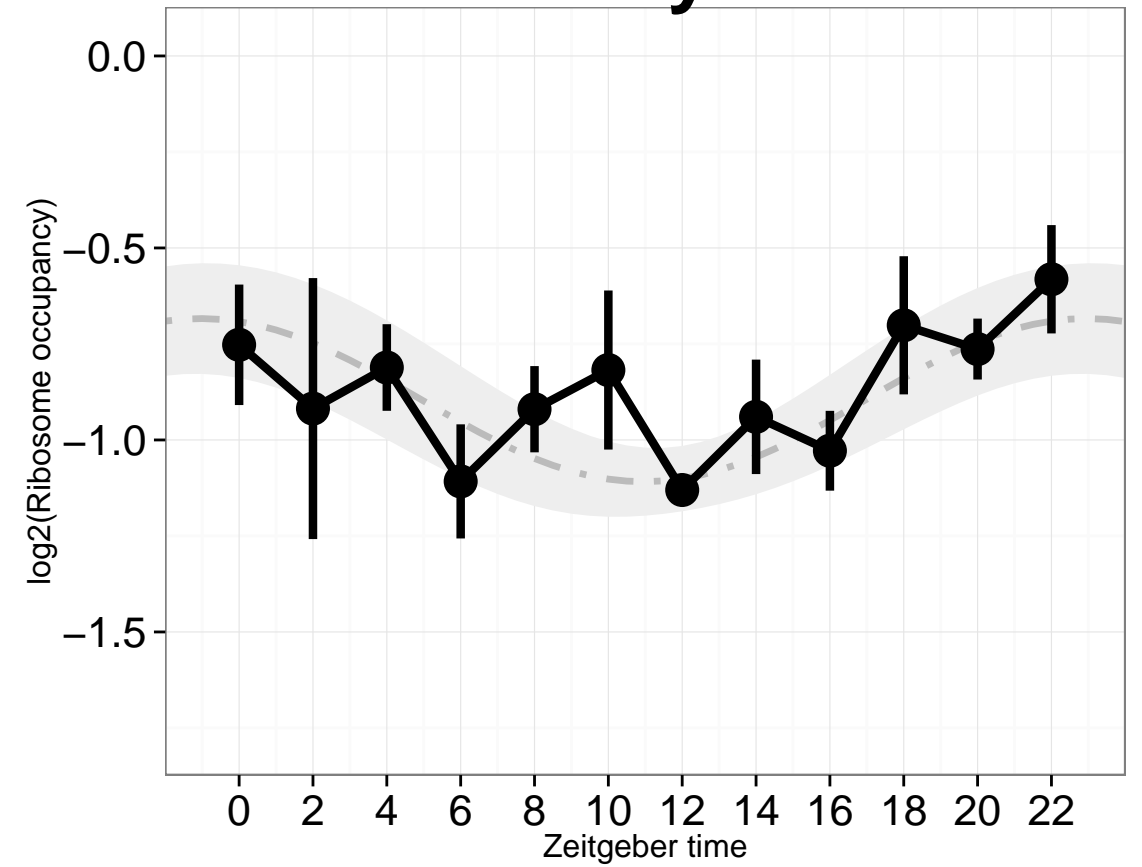

Supplement: SuppDataset_1.zip [file Rufy3_set_A.pdf › Supplemental Dataset 1/A-mRNA_nonrhyth_translation_nonrhyth/Rufy3_set_A.pdf]

# Rundc1

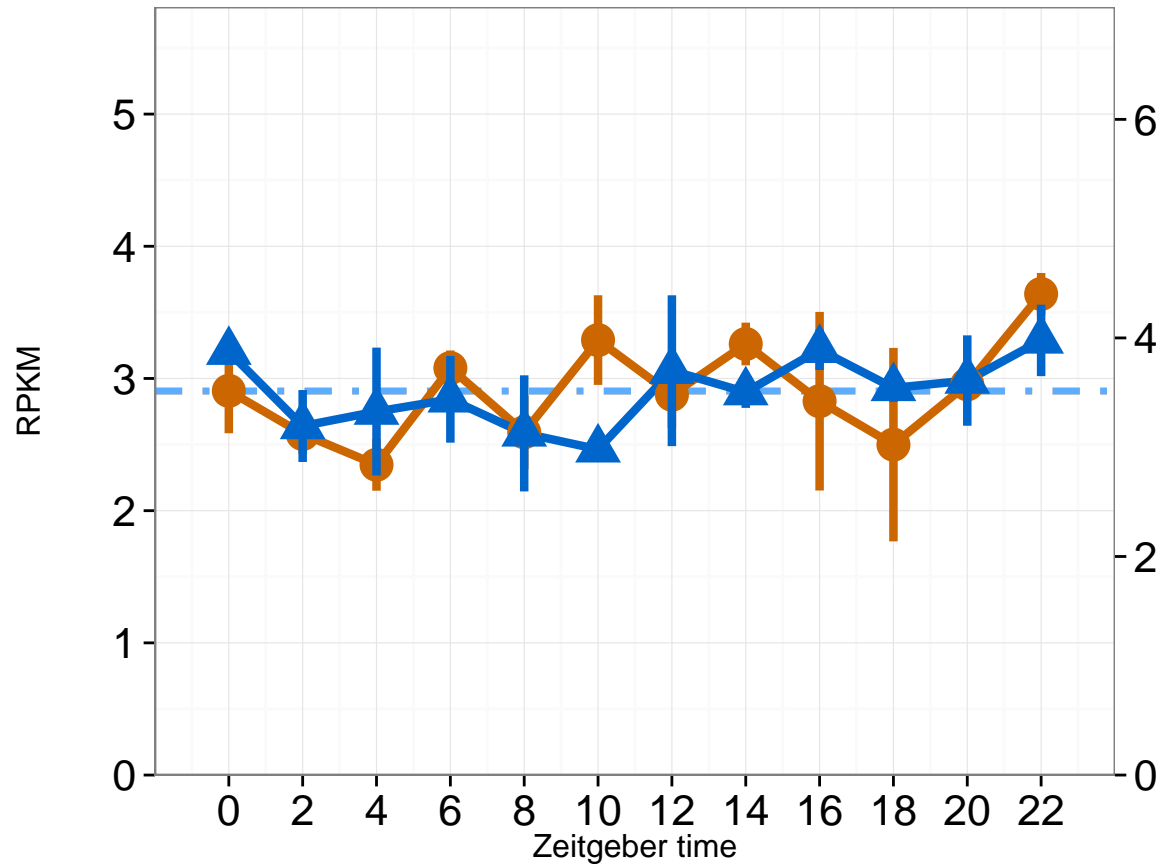

# Rundc1

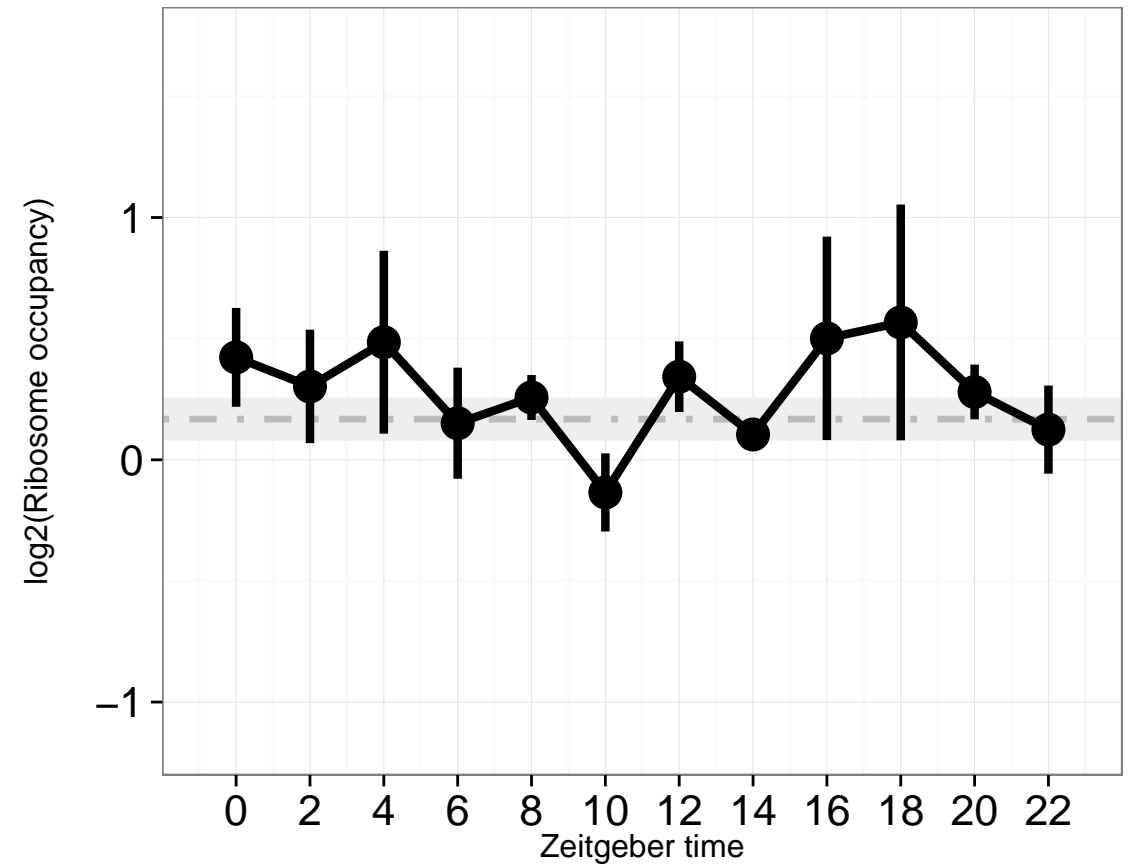

Supplement: SuppDataset_1.zip [file Rundc1_set_A.pdf › Supplemental Dataset 1/A-mRNA_nonrhyth_translation_nonrhyth/Rundc1_set_A.pdf]

## Rusc1

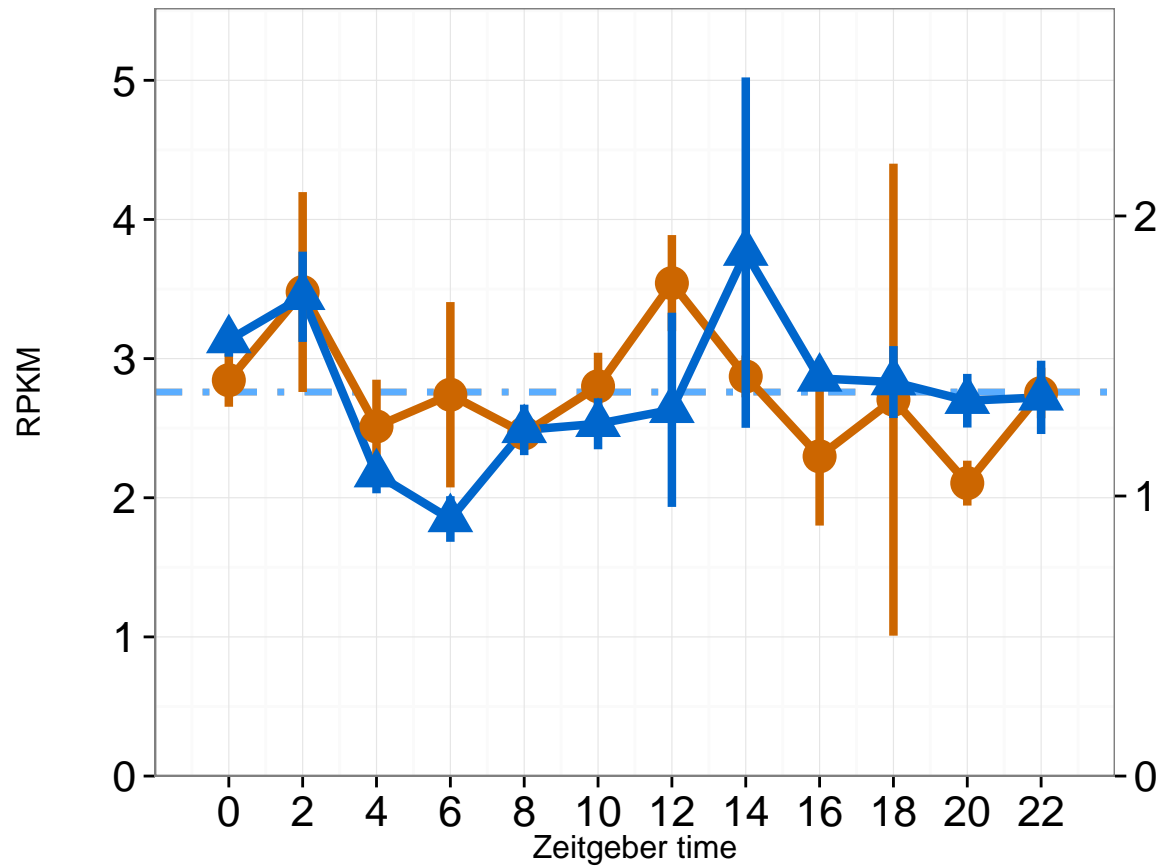

## Rusc1

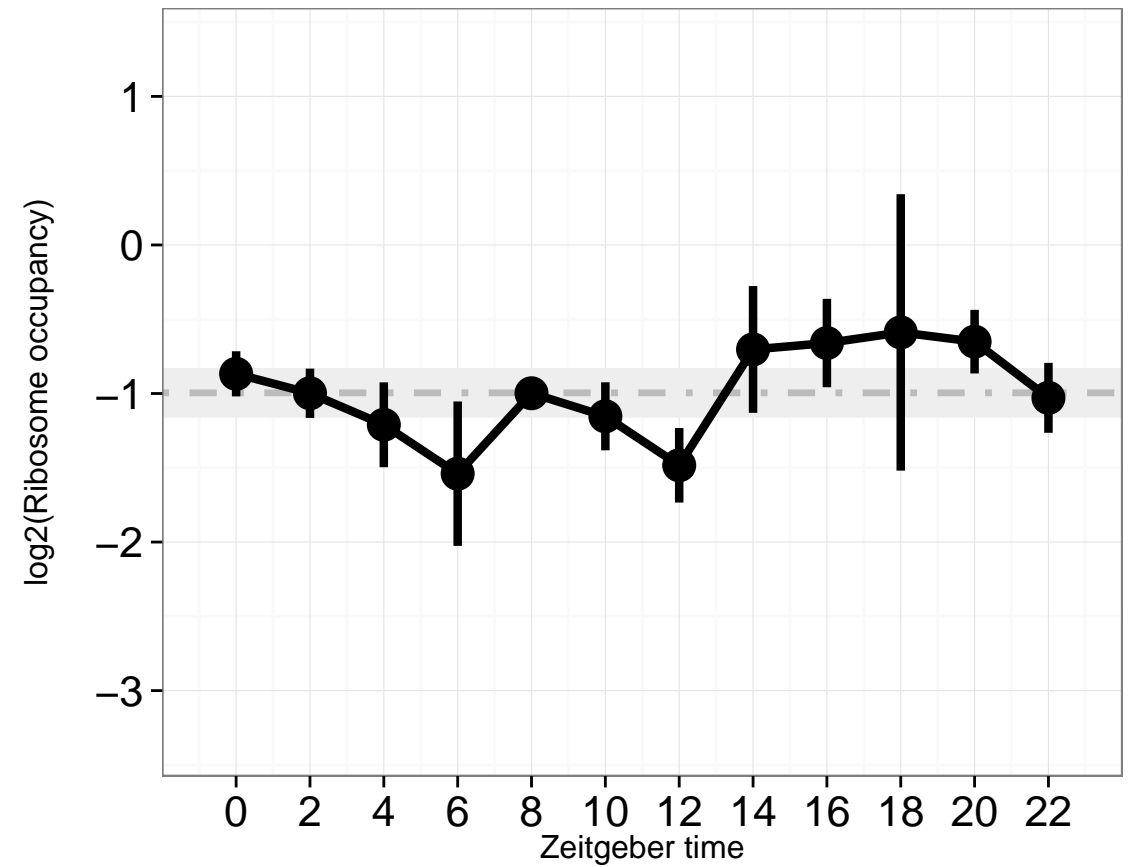

Supplement: SuppDataset_1.zip [file Rusc1_set_A.pdf › Supplemental Dataset 1/A-mRNA_nonrhyth_translation_nonrhyth/Rusc1_set_A.pdf]

## Ruvbl1

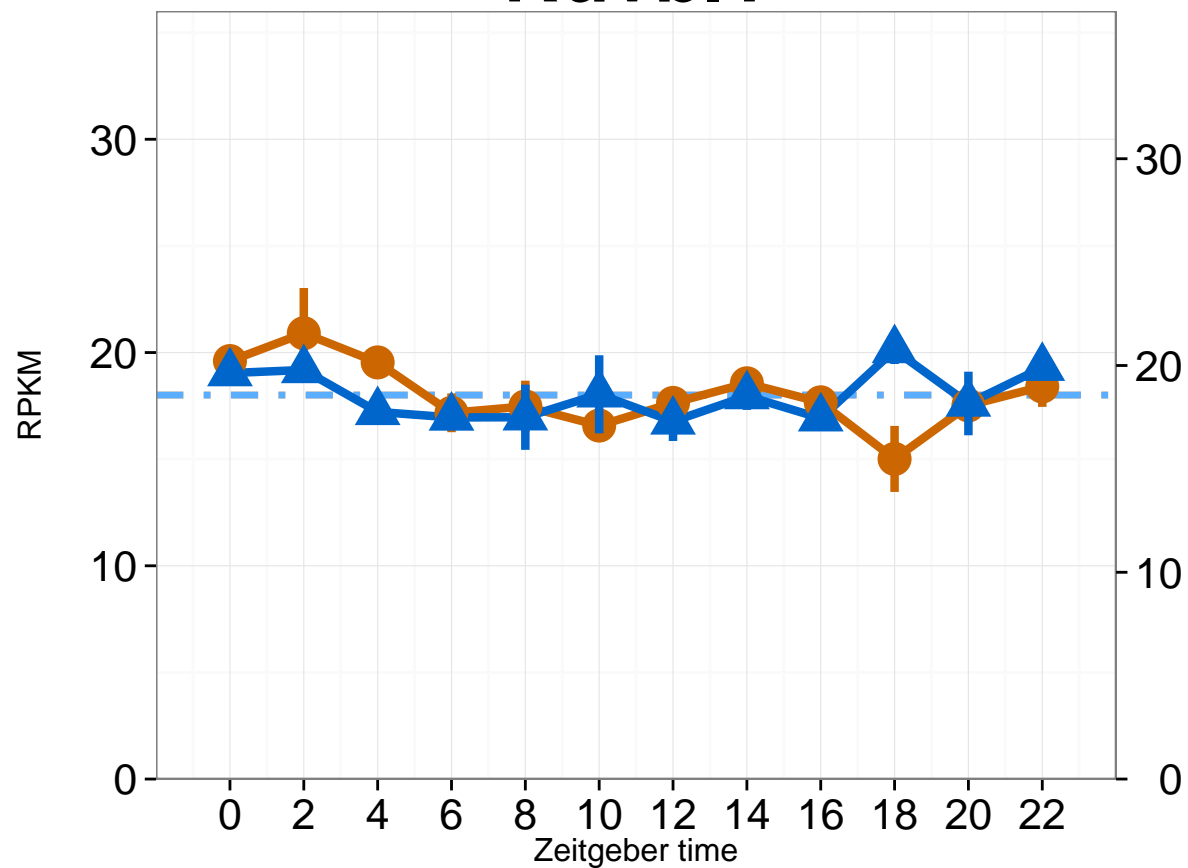

## Ruvbl1

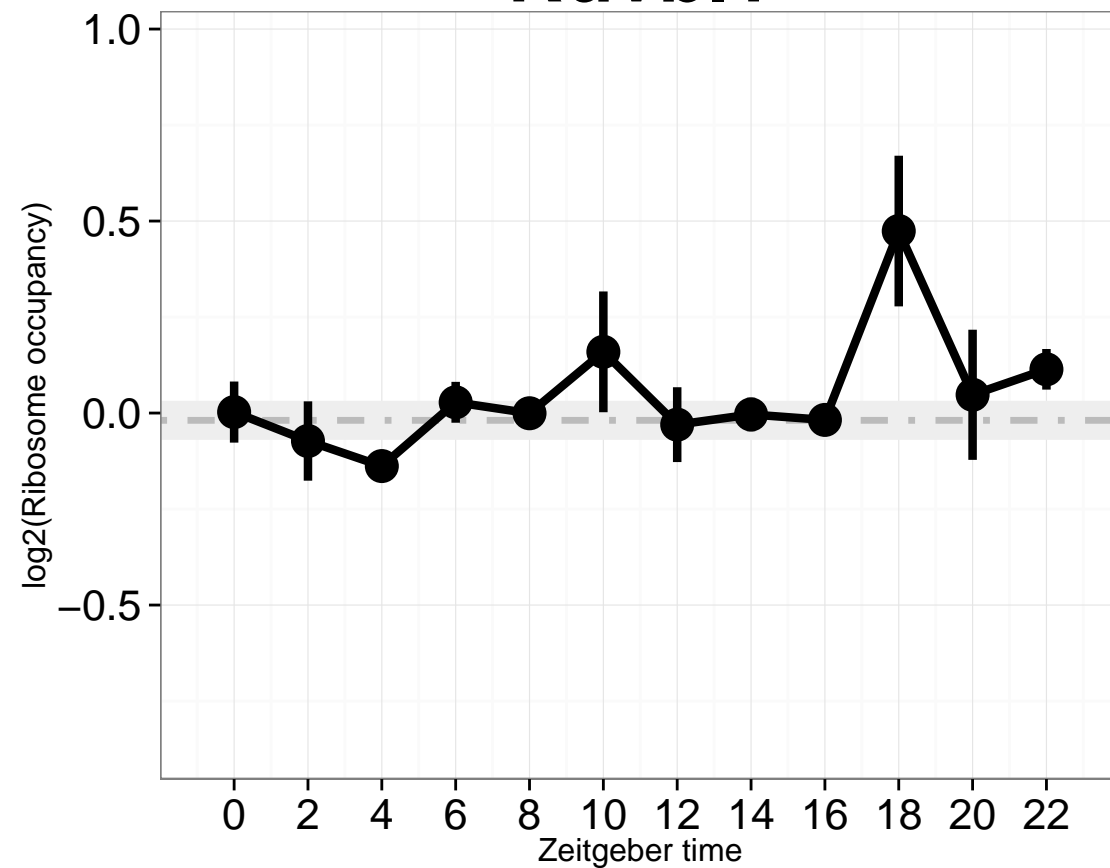

Supplement: SuppDataset_1.zip [file Ruvbl1_set_A.pdf › Supplemental Dataset 1/A-mRNA_nonrhyth_translation_nonrhyth/Ruvbl1_set_A.pdf]

## Ruvbl2

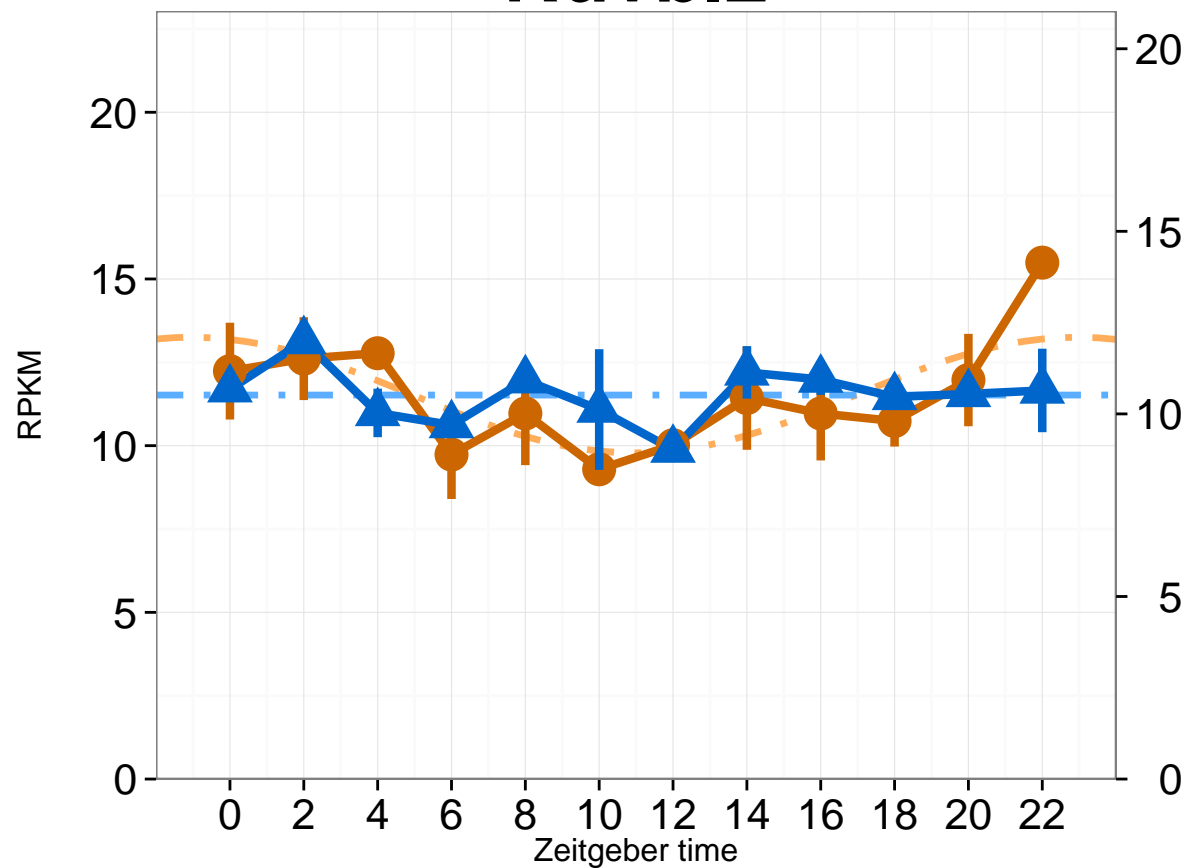

## Ruvbl2

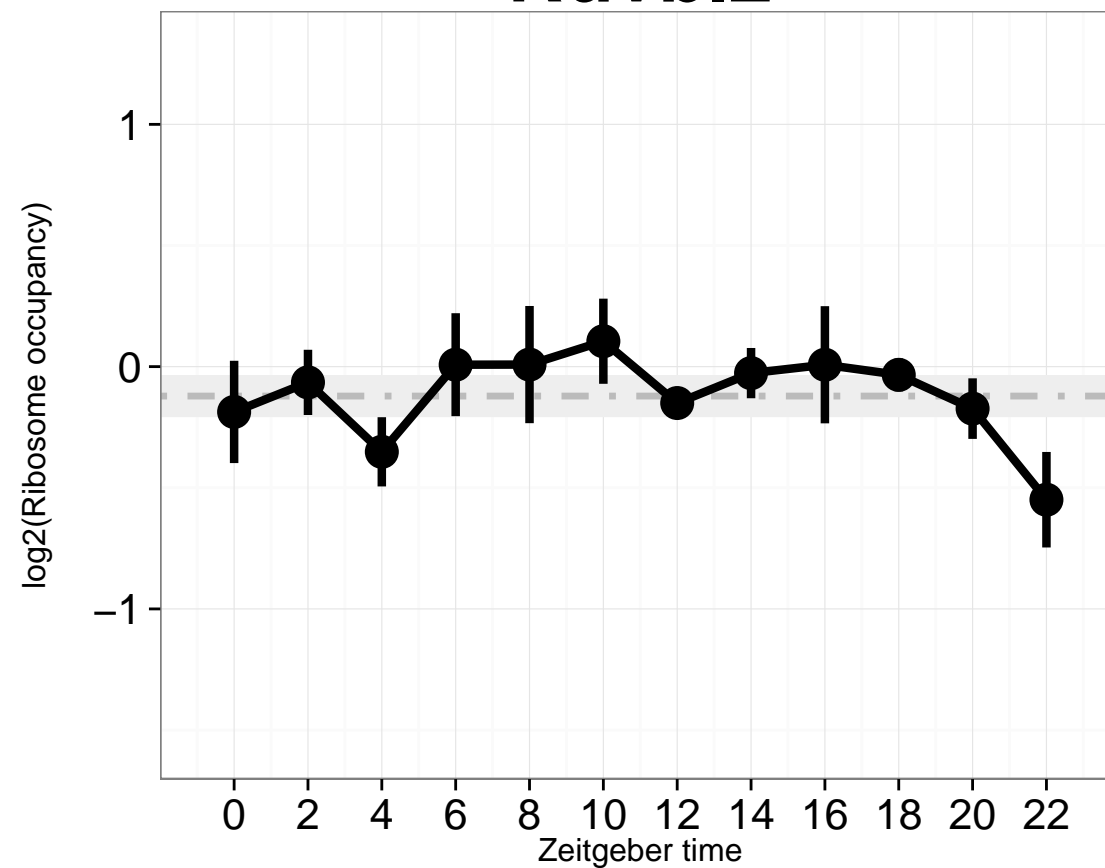

Supplement: SuppDataset_1.zip [file Ruvbl2_set_A.pdf › Supplemental Dataset 1/A-mRNA_nonrhyth_translation_nonrhyth/Ruvbl2_set_A.pdf]

## Rwdd1

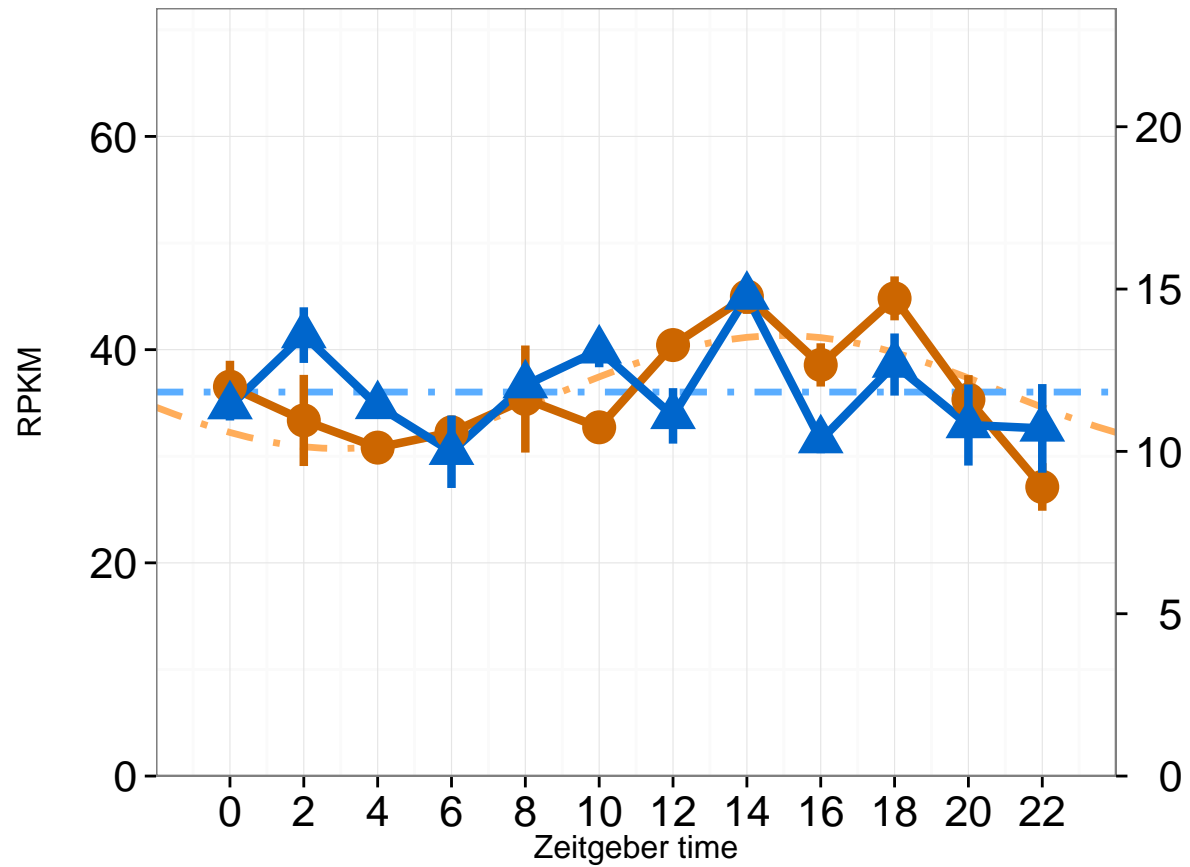

## Rwdd1

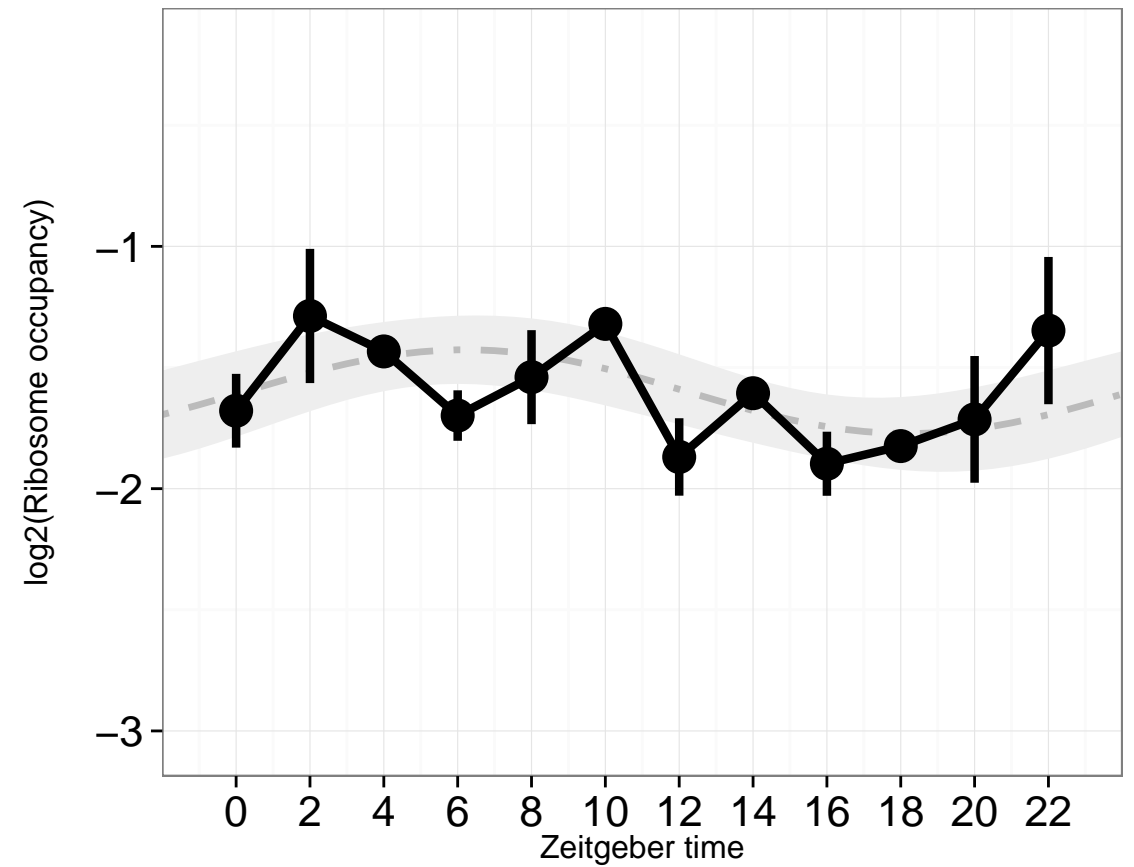

Supplement: SuppDataset_1.zip [file Rwdd1_set_A.pdf › Supplemental Dataset 1/A-mRNA_nonrhyth_translation_nonrhyth/Rwdd1_set_A.pdf]

# Rwdd2b

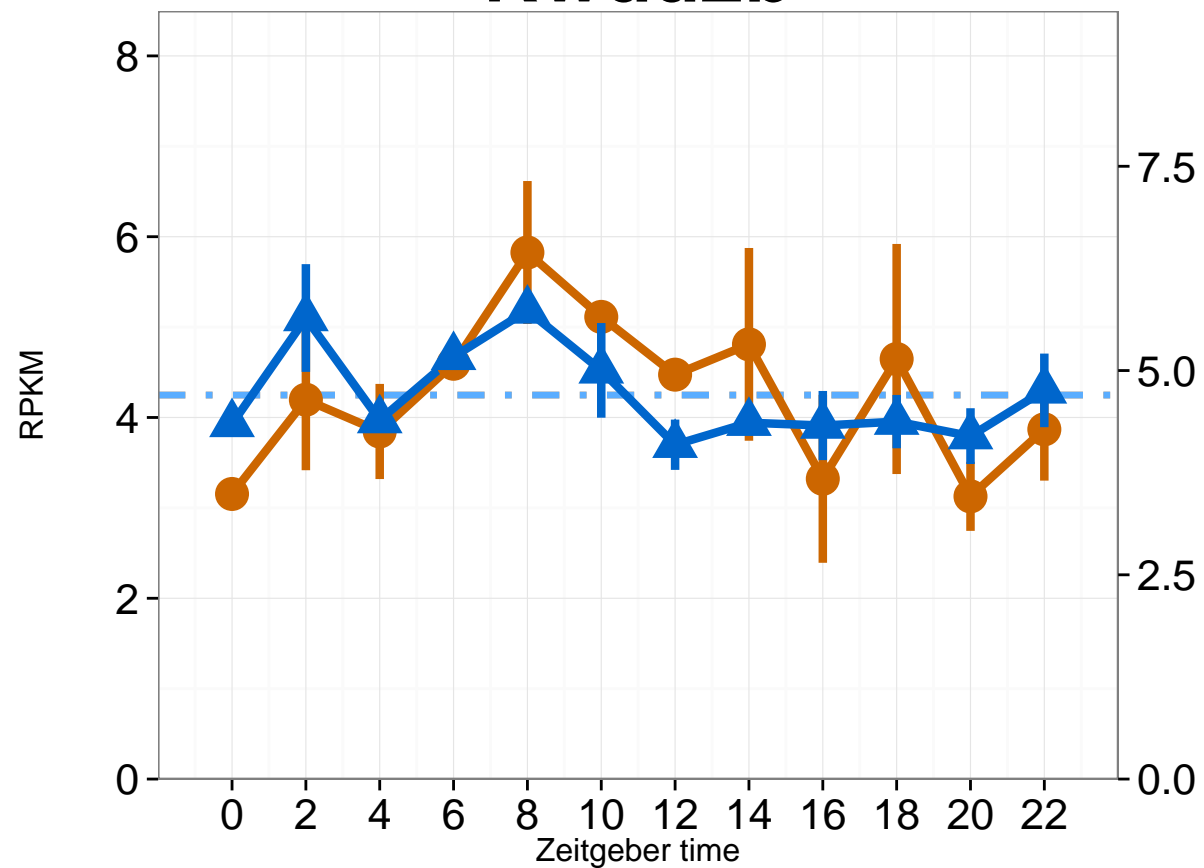

# Rwdd2b

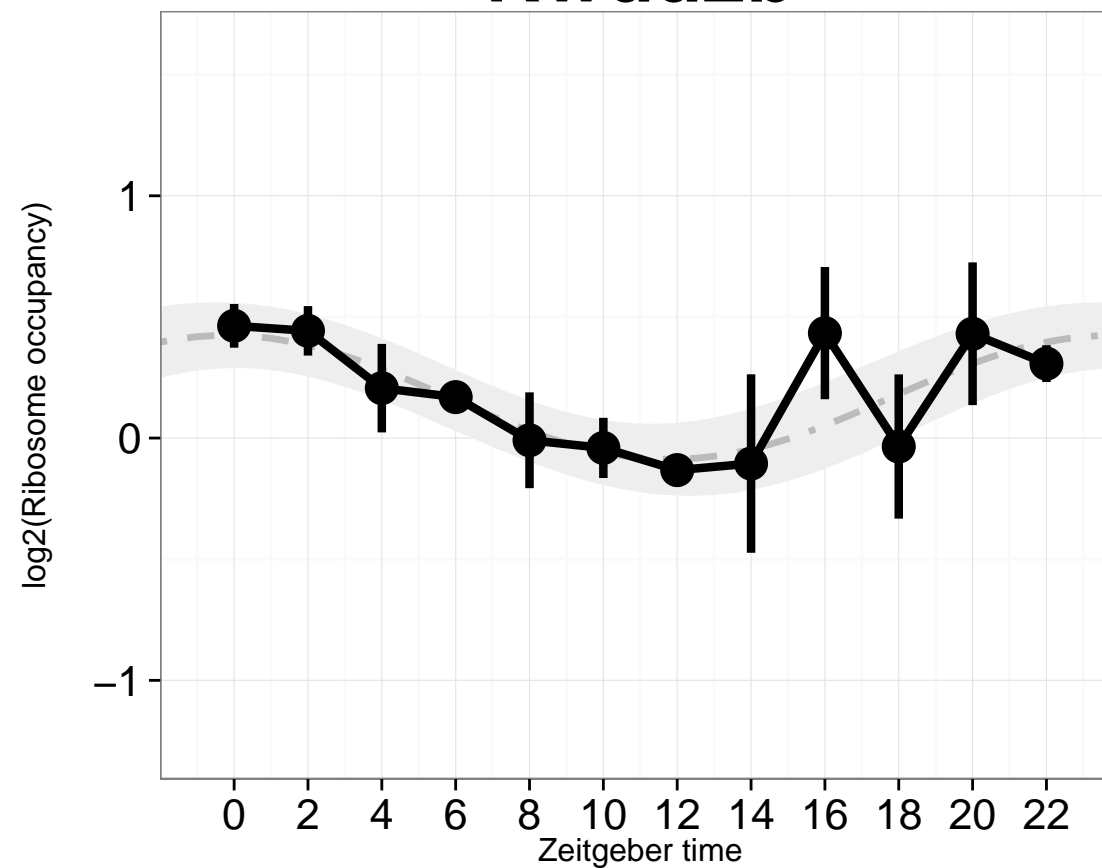

Supplement: SuppDataset_1.zip [file Rwdd2b_set_A.pdf › Supplemental Dataset 1/A-mRNA_nonrhyth_translation_nonrhyth/Rwdd2b_set_A.pdf]

# Rwdd3

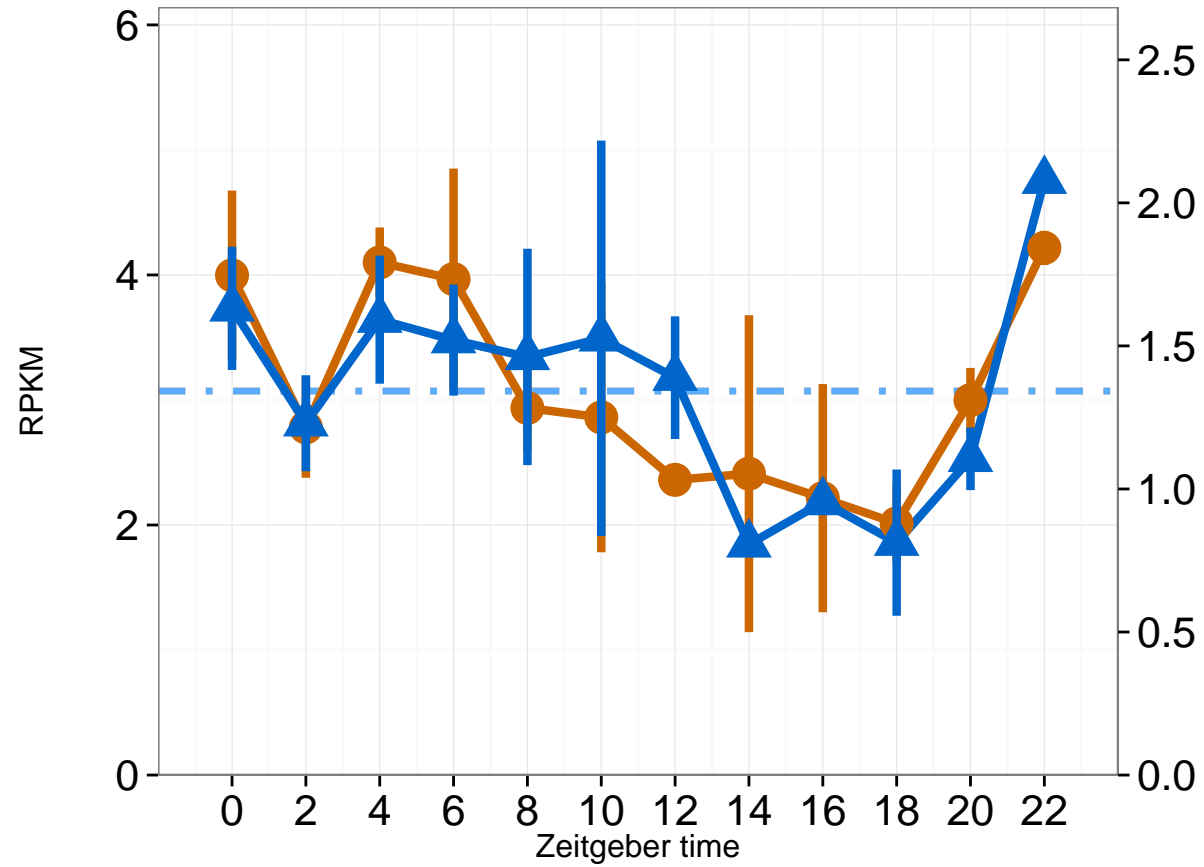

# Rwdd3

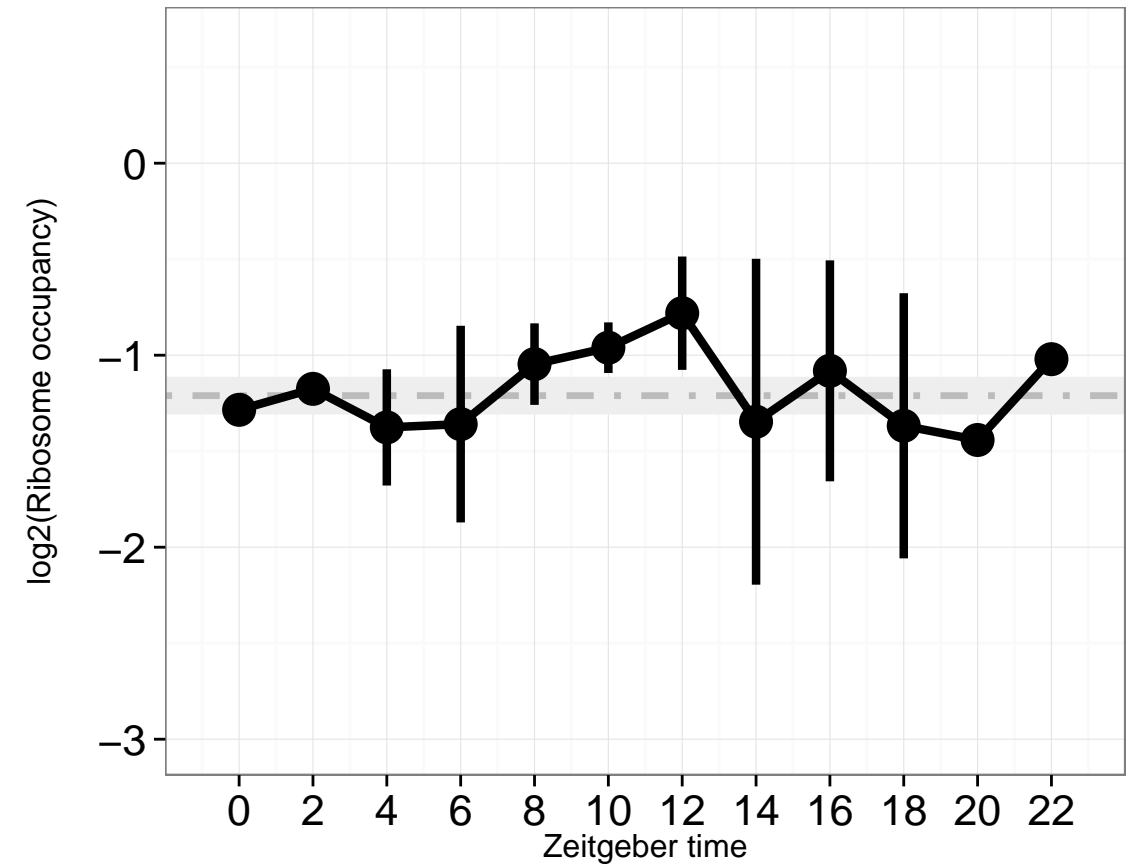

Supplement: SuppDataset_1.zip [file Rwdd3_set_A.pdf › Supplemental Dataset 1/A-mRNA_nonrhyth_translation_nonrhyth/Rwdd3_set_A.pdf]

# Rwdd4a

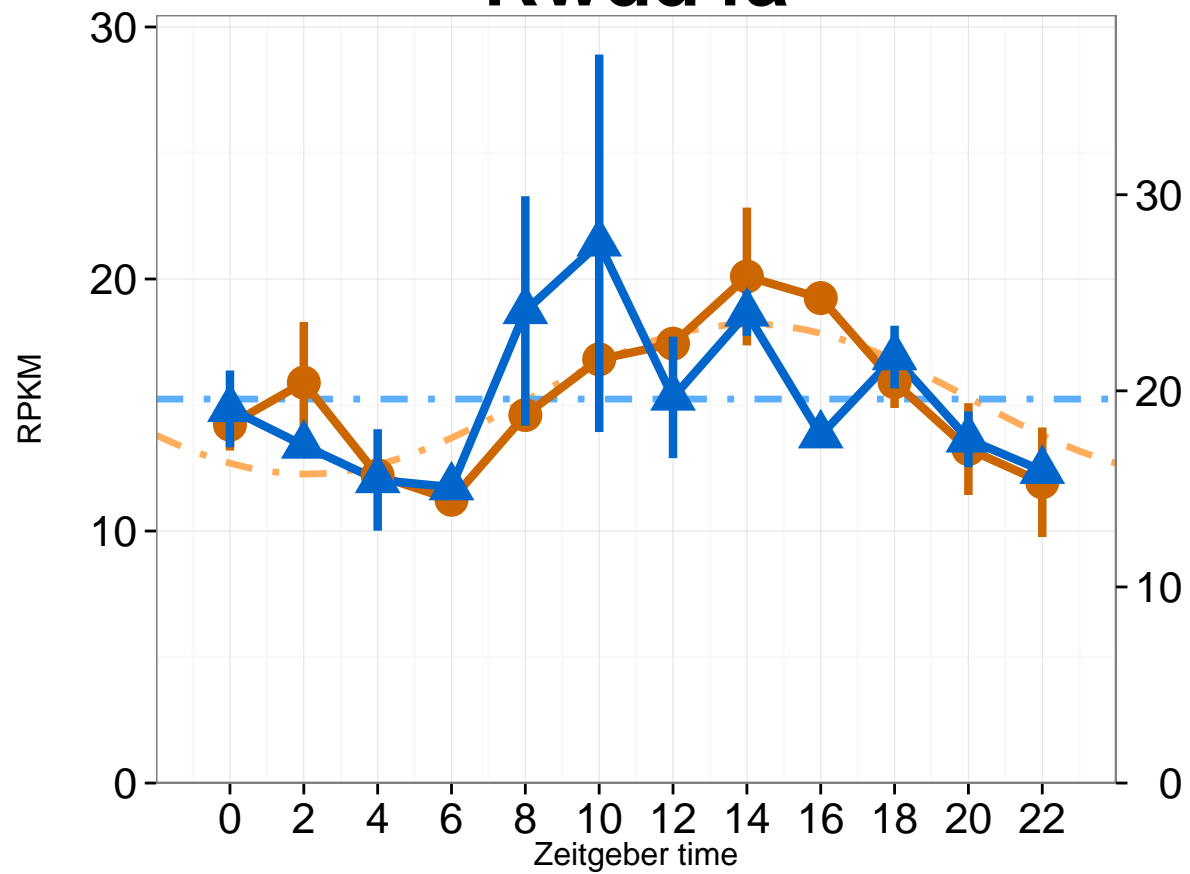

# Rwdd4a

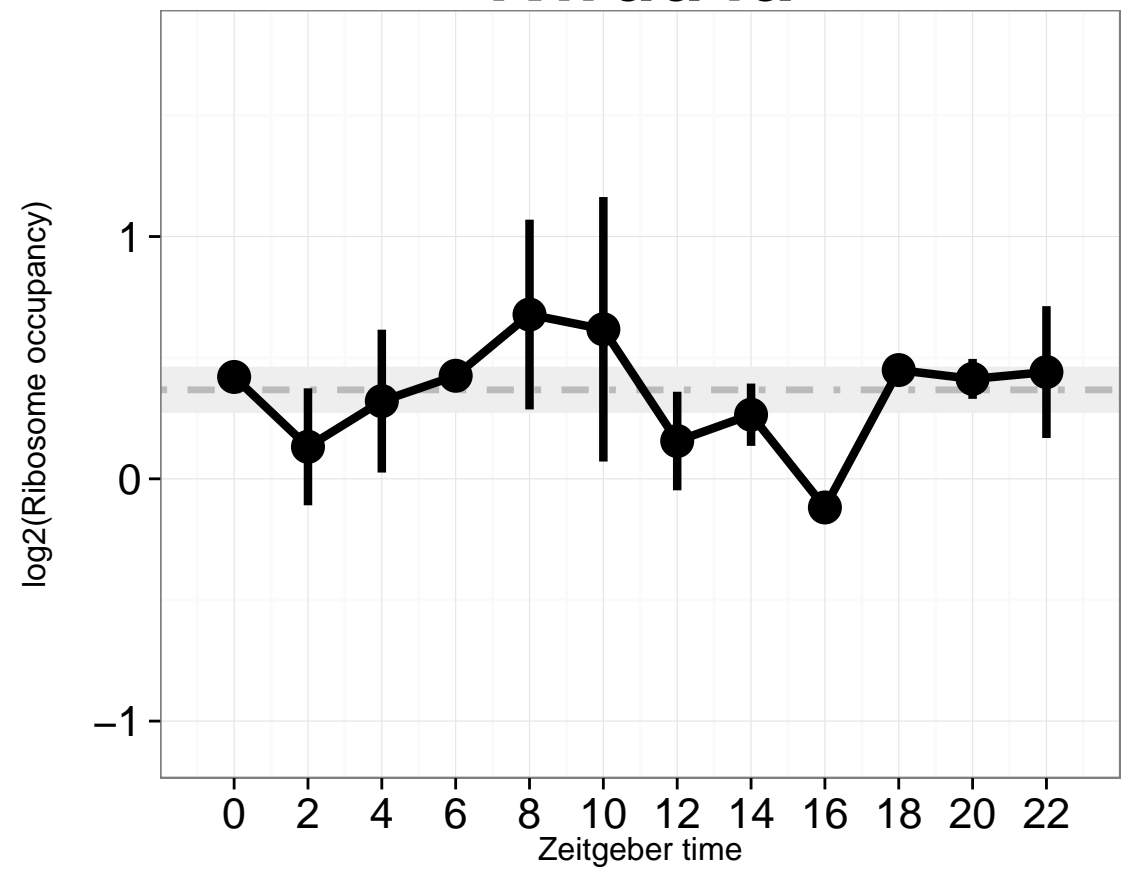

Supplement: SuppDataset_1.zip [file Rwdd4a_set_A.pdf › Supplemental Dataset 1/A-mRNA_nonrhyth_translation_nonrhyth/Rwdd4a_set_A.pdf]

## Rxra

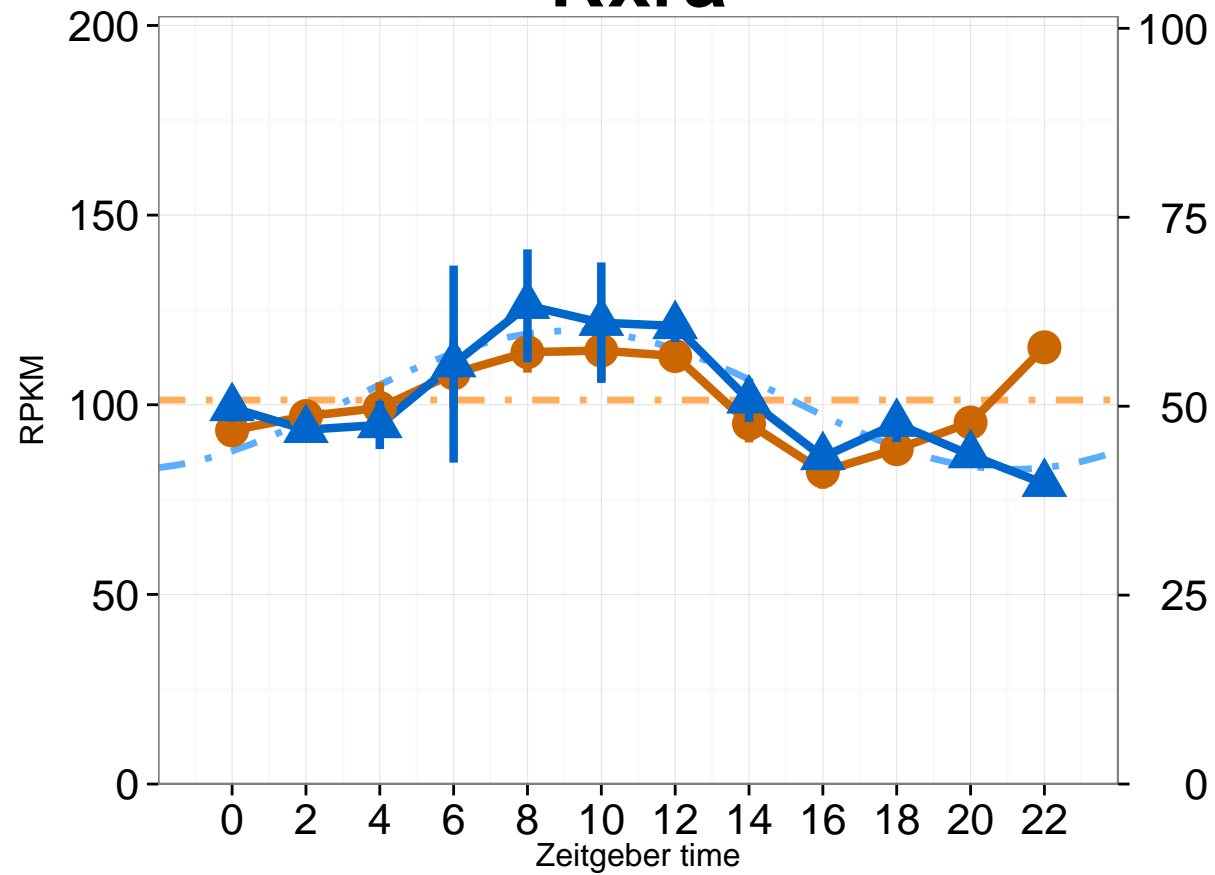

## Rxra

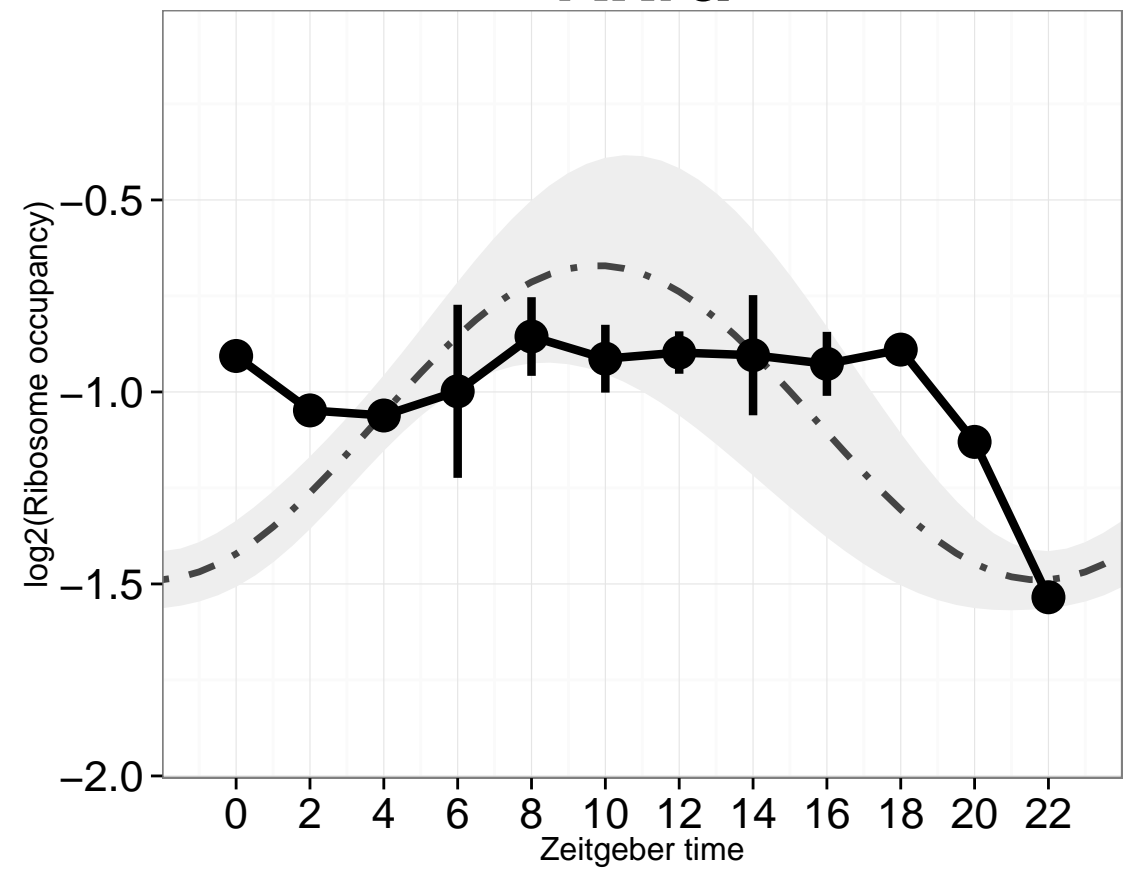

Supplement: SuppDataset_1.zip [file Rxra_set_A.pdf › Supplemental Dataset 1/A-mRNA_nonrhyth_translation_nonrhyth/Rxra_set_A.pdf]

## Rxrb

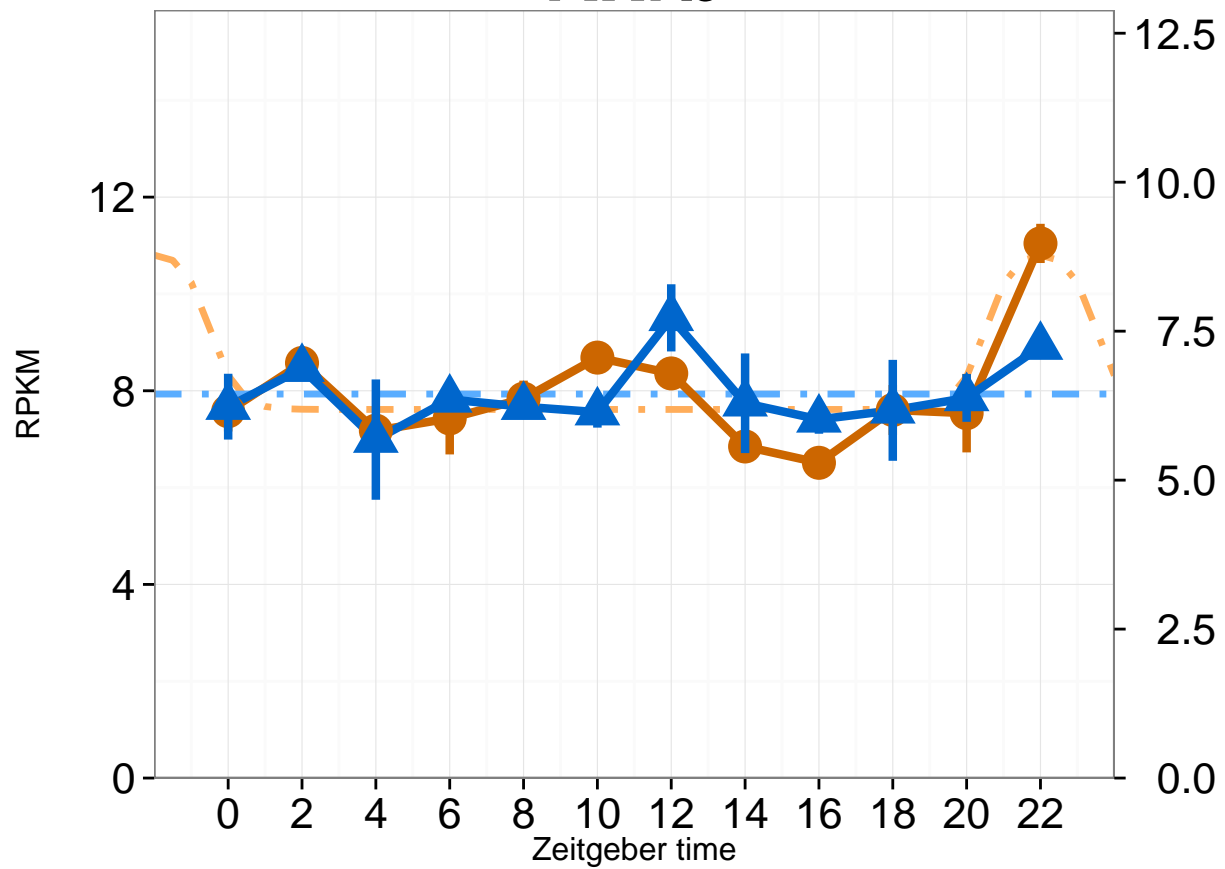

## Rxrb

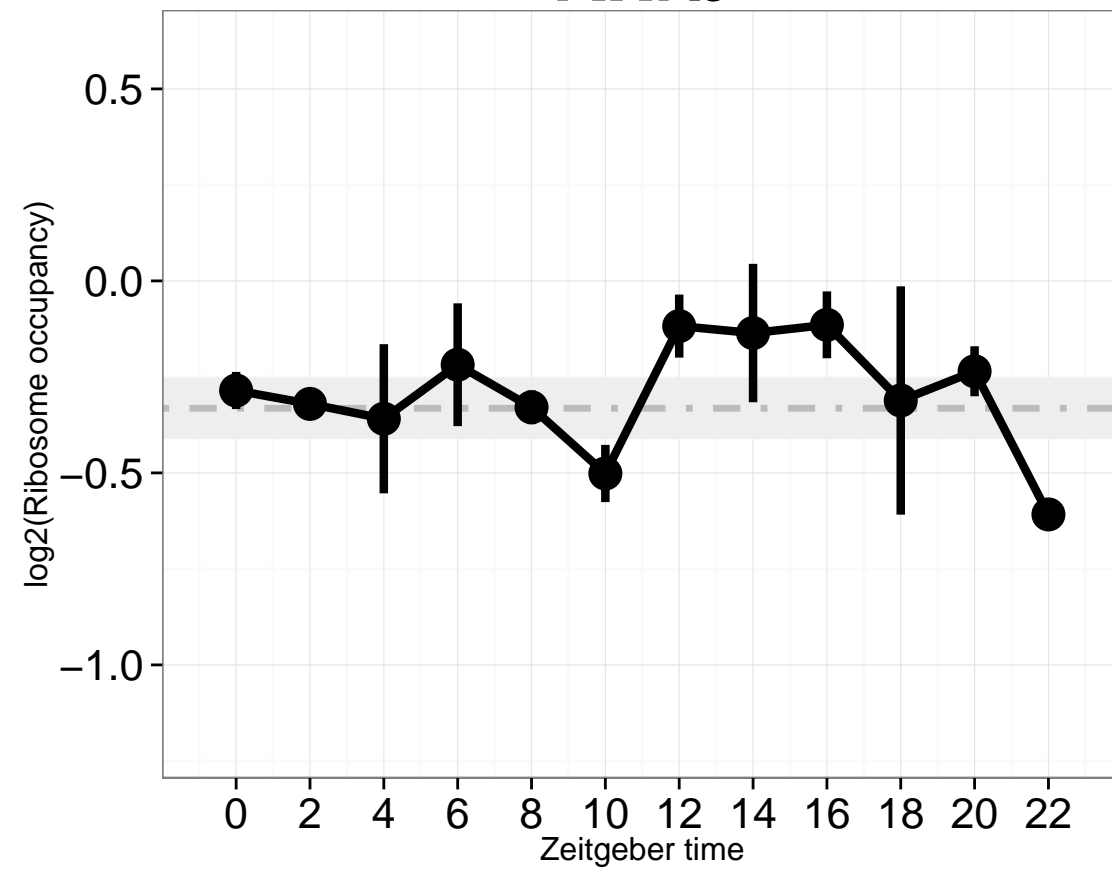

Supplement: SuppDataset_1.zip [file Rxrb_set_A.pdf › Supplemental Dataset 1/A-mRNA_nonrhyth_translation_nonrhyth/Rxrb_set_A.pdf]

## Rybp

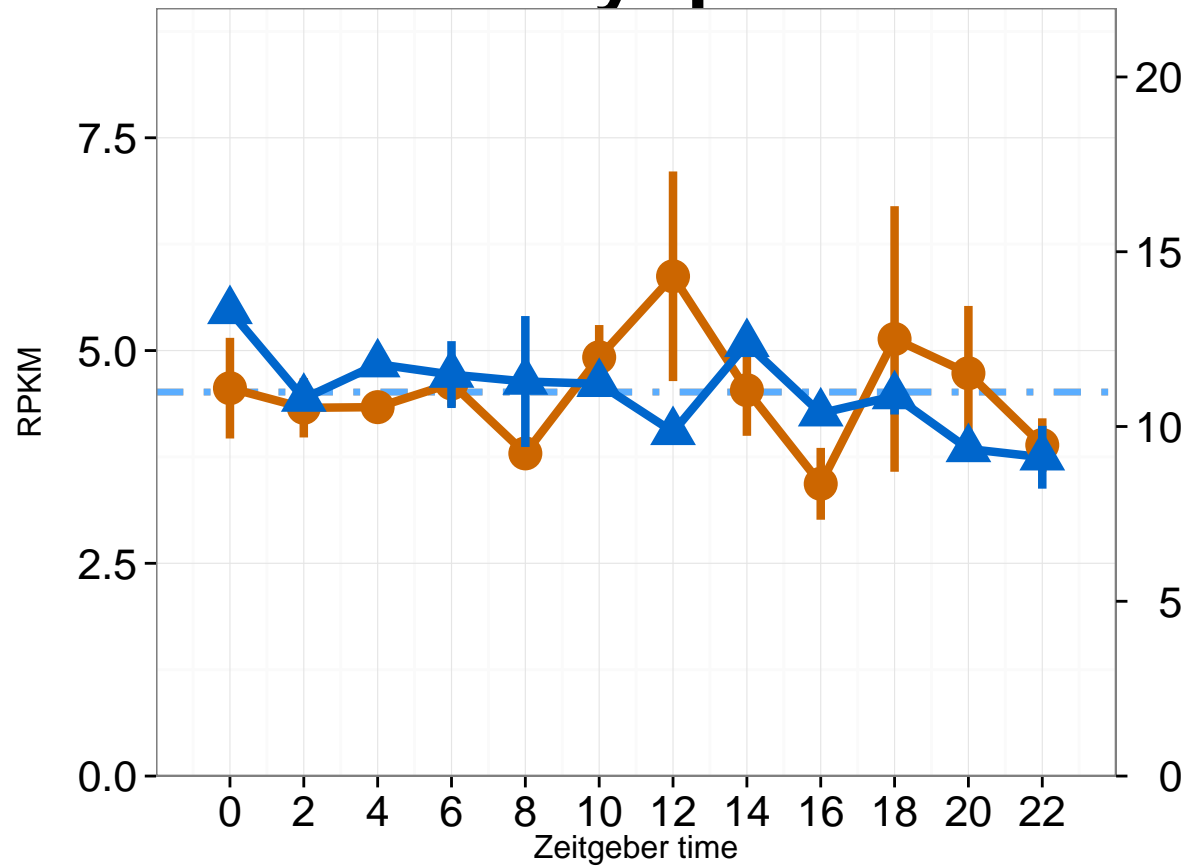

## Rybp

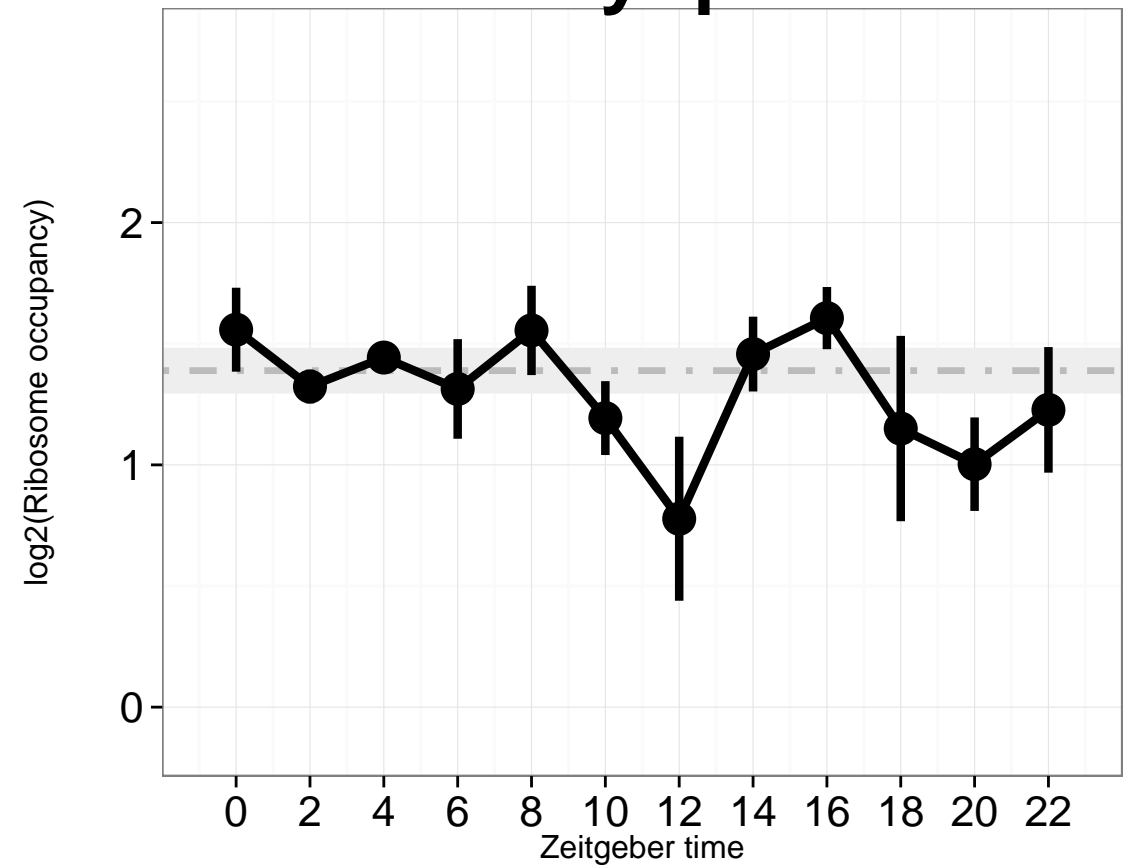

Supplement: SuppDataset_1.zip [file Rybp_set_A.pdf › Supplemental Dataset 1/A-mRNA_nonrhyth_translation_nonrhyth/Rybp_set_A.pdf]

# Ryk

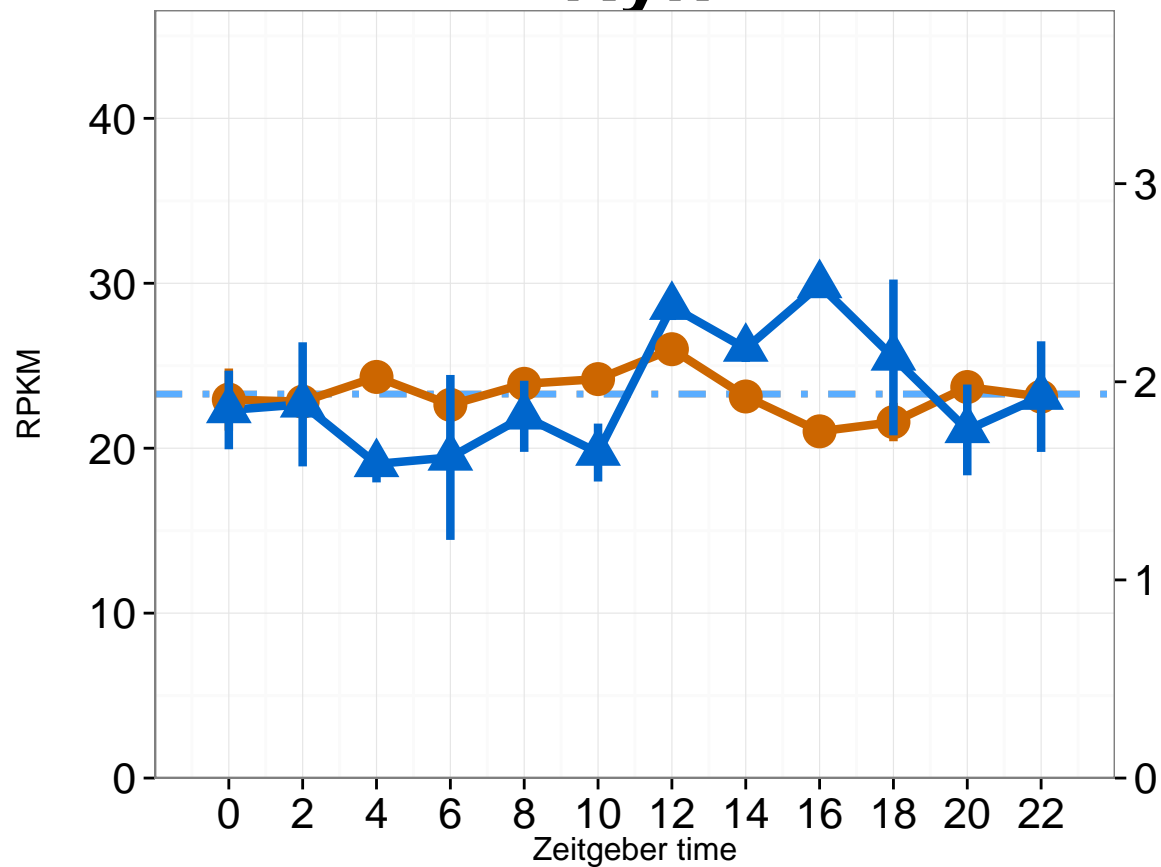

# Ryk

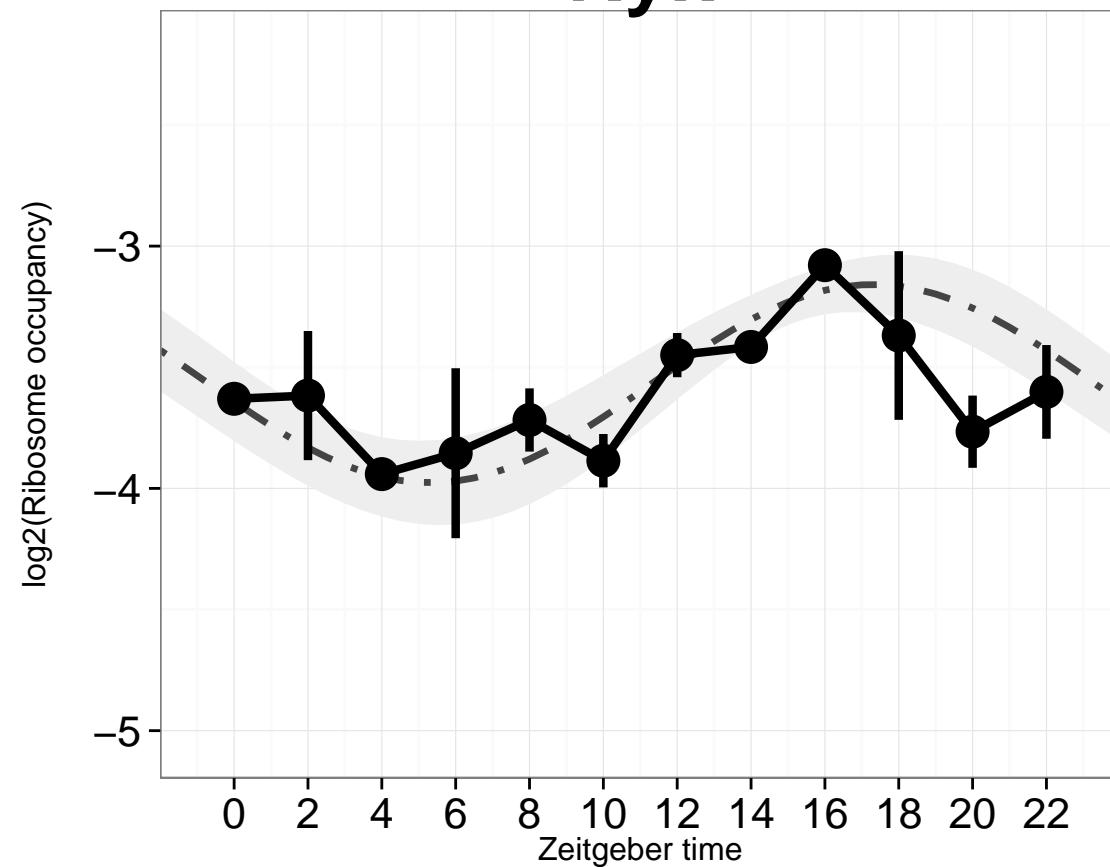

Supplement: SuppDataset_1.zip [file Ryk_set_A.pdf › Supplemental Dataset 1/A-mRNA_nonrhyth_translation_nonrhyth/Ryk_set_A.pdf]

# S100a11

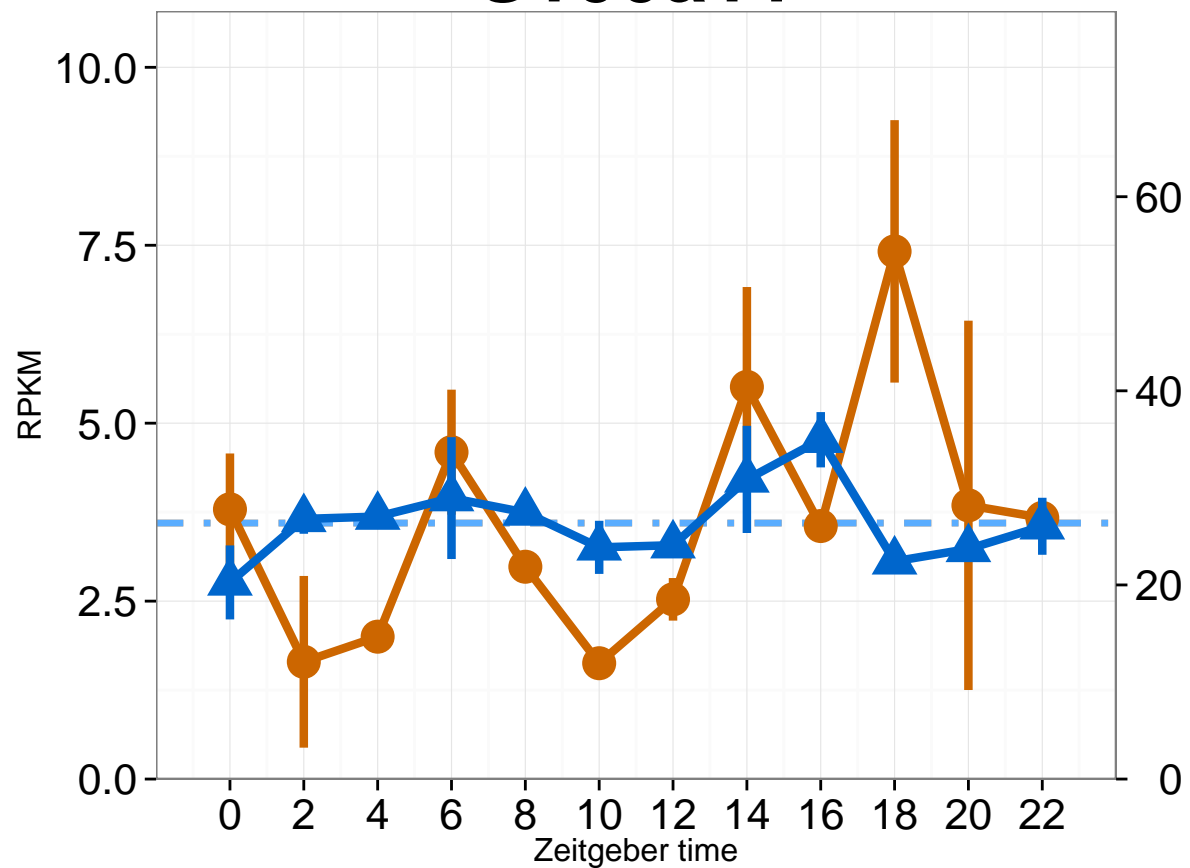

# S100a11

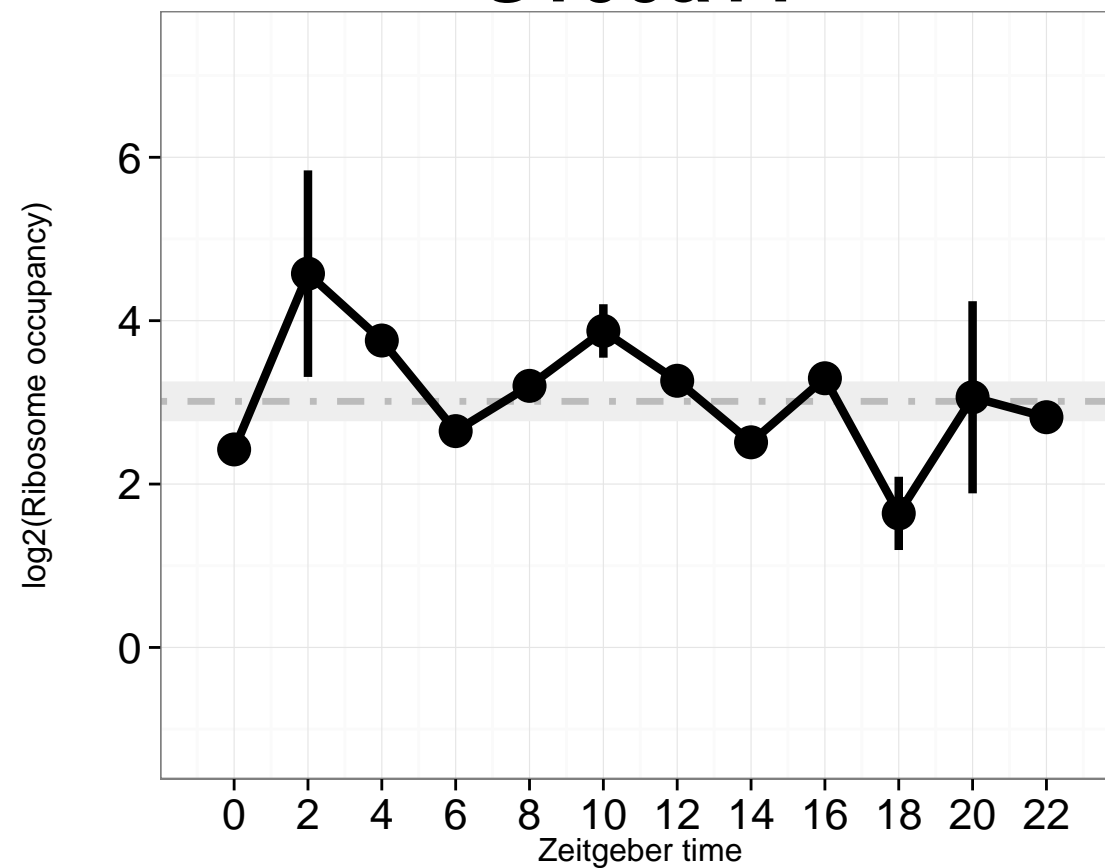

Supplement: SuppDataset_1.zip [file S100a11_set_A.pdf › Supplemental Dataset 1/A-mRNA_nonrhyth_translation_nonrhyth/S100a11_set_A.pdf]

# S100a1

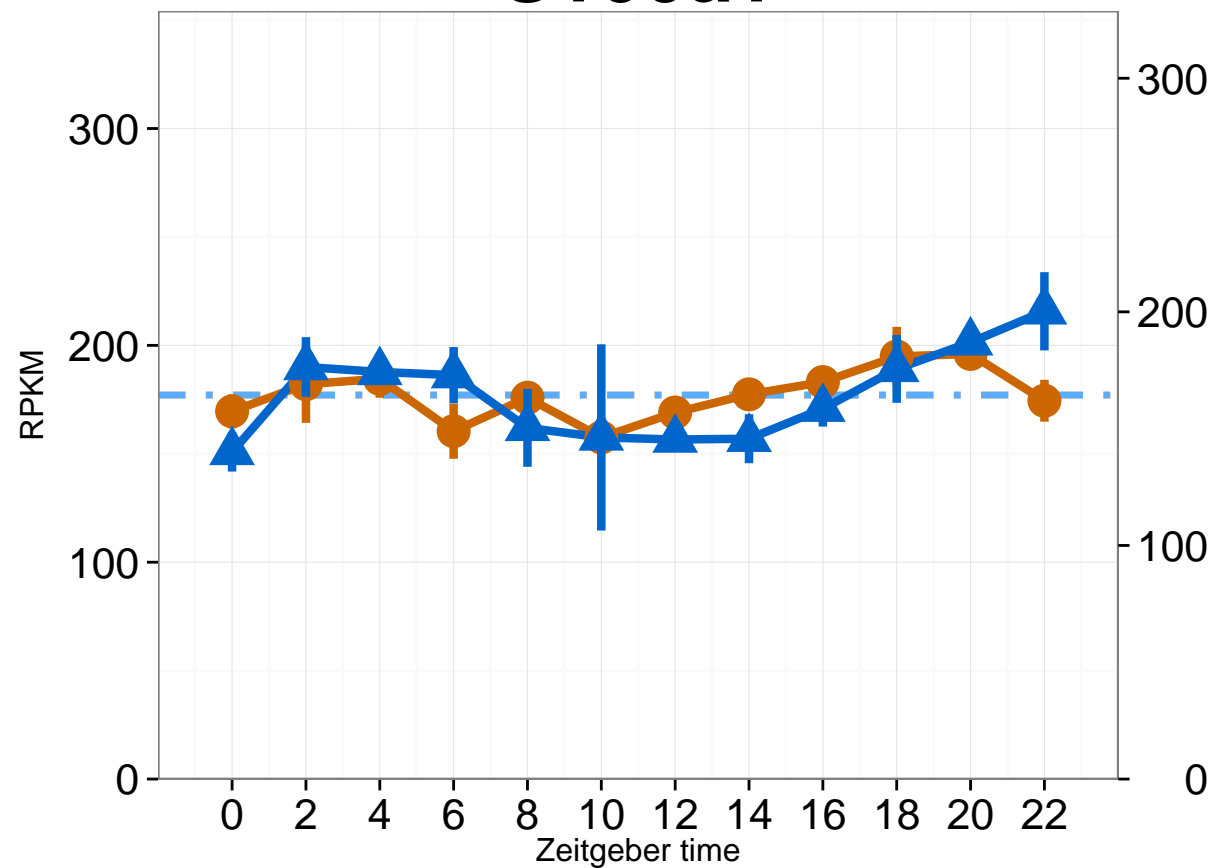

# S100a1

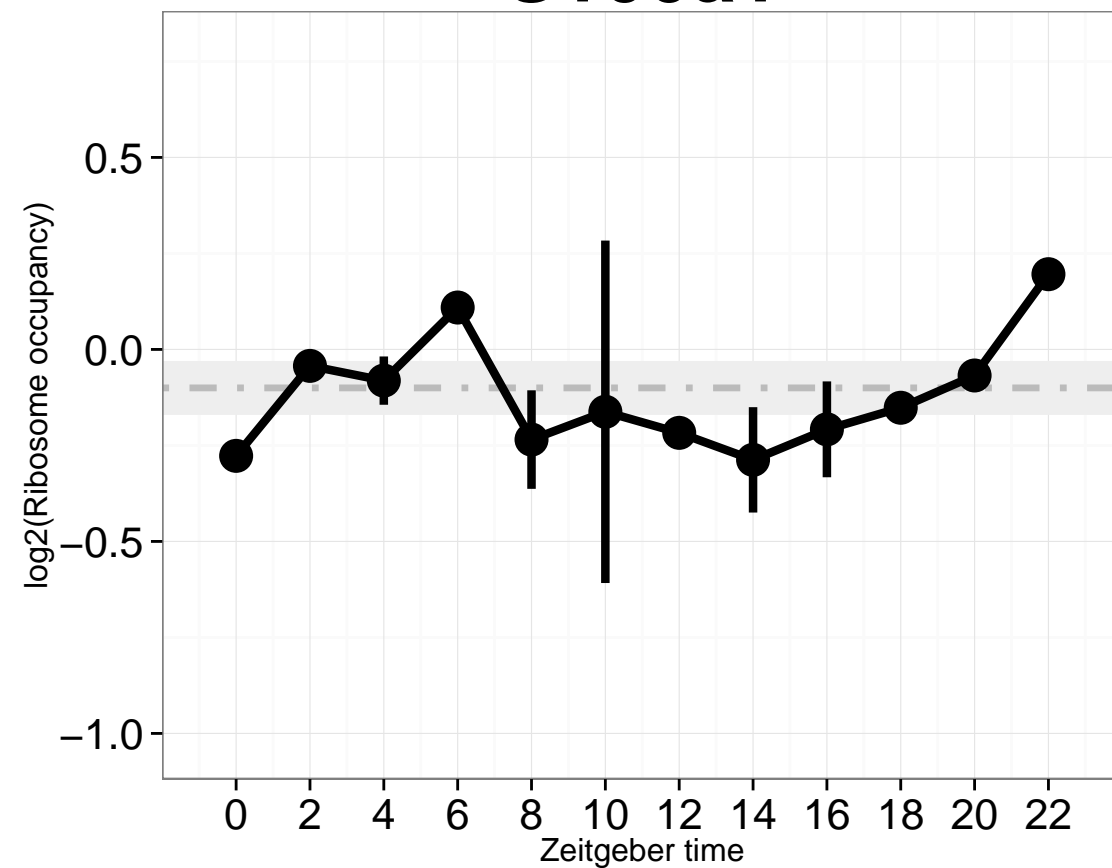

Supplement: SuppDataset_1.zip [file S100a1_set_A.pdf › Supplemental Dataset 1/A-mRNA_nonrhyth_translation_nonrhyth/S100a1_set_A.pdf]

# S100a6

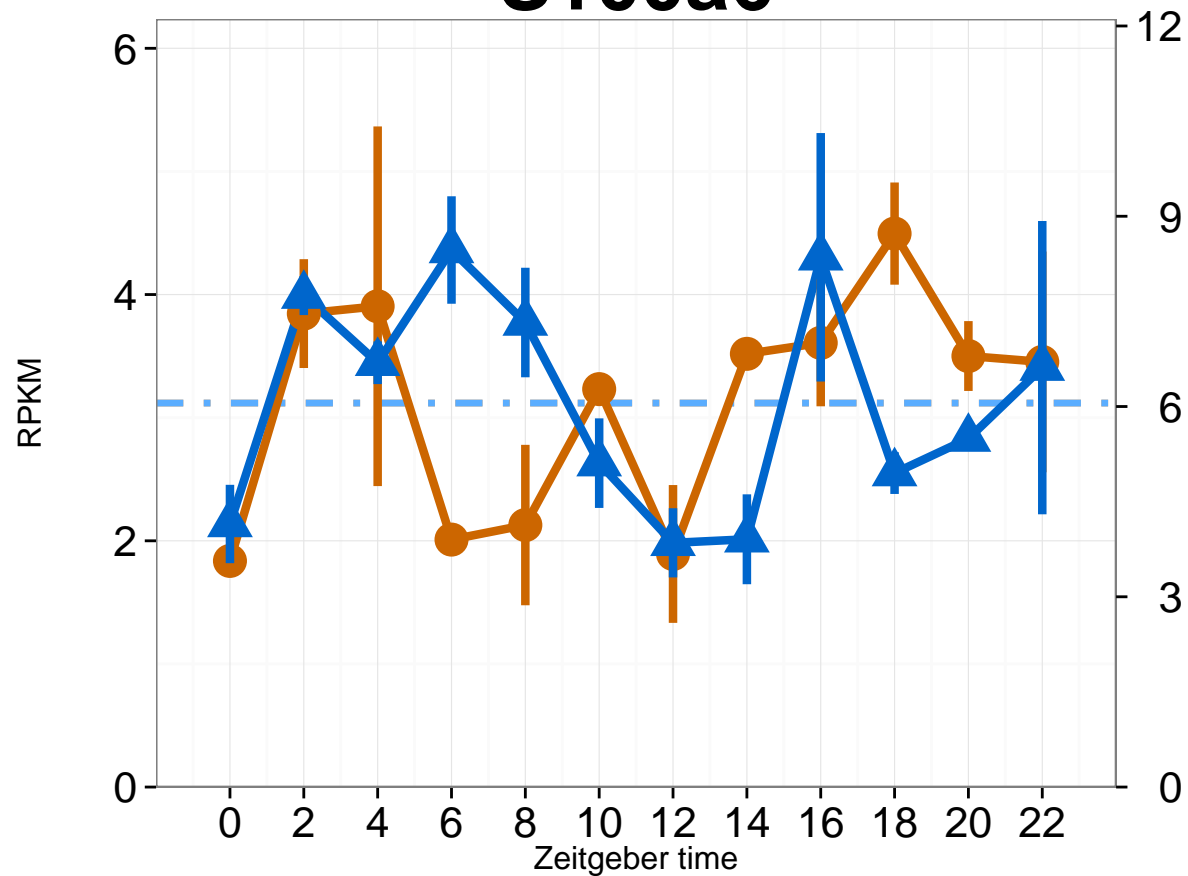

# S100a6

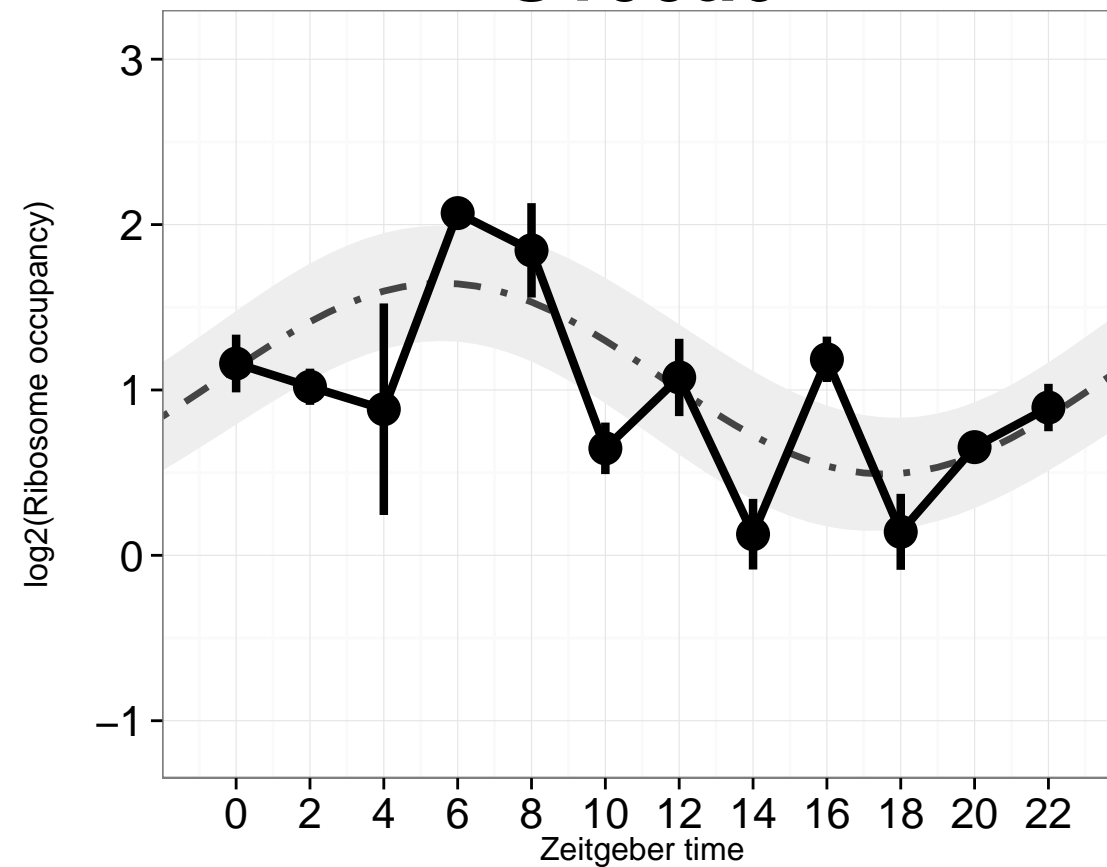

Supplement: SuppDataset_1.zip [file S100a6_set_A.pdf › Supplemental Dataset 1/A-mRNA_nonrhyth_translation_nonrhyth/S100a6_set_A.pdf]

# S100pbp

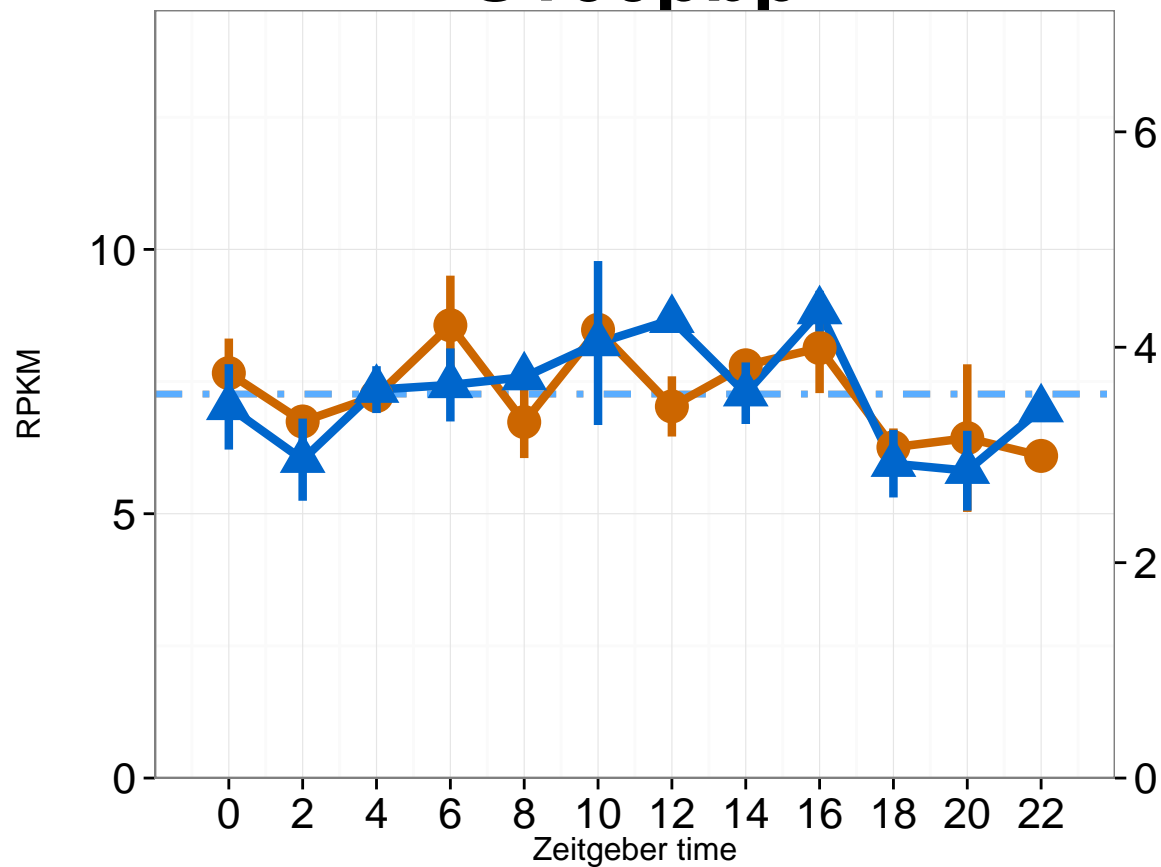

# S100pbp

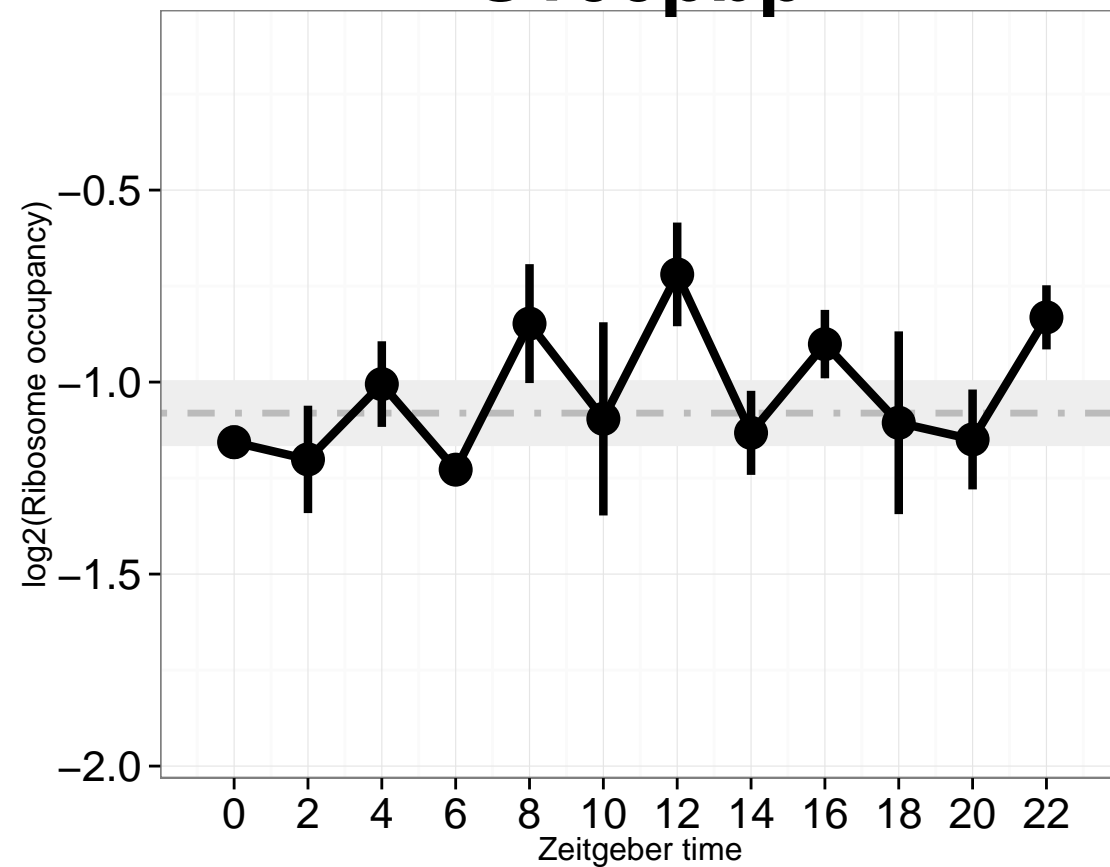

Supplement: SuppDataset_1.zip [file S100pbp_set_A.pdf › Supplemental Dataset 1/A-mRNA_nonrhyth_translation_nonrhyth/S100pbp_set_A.pdf]

# S1pr2

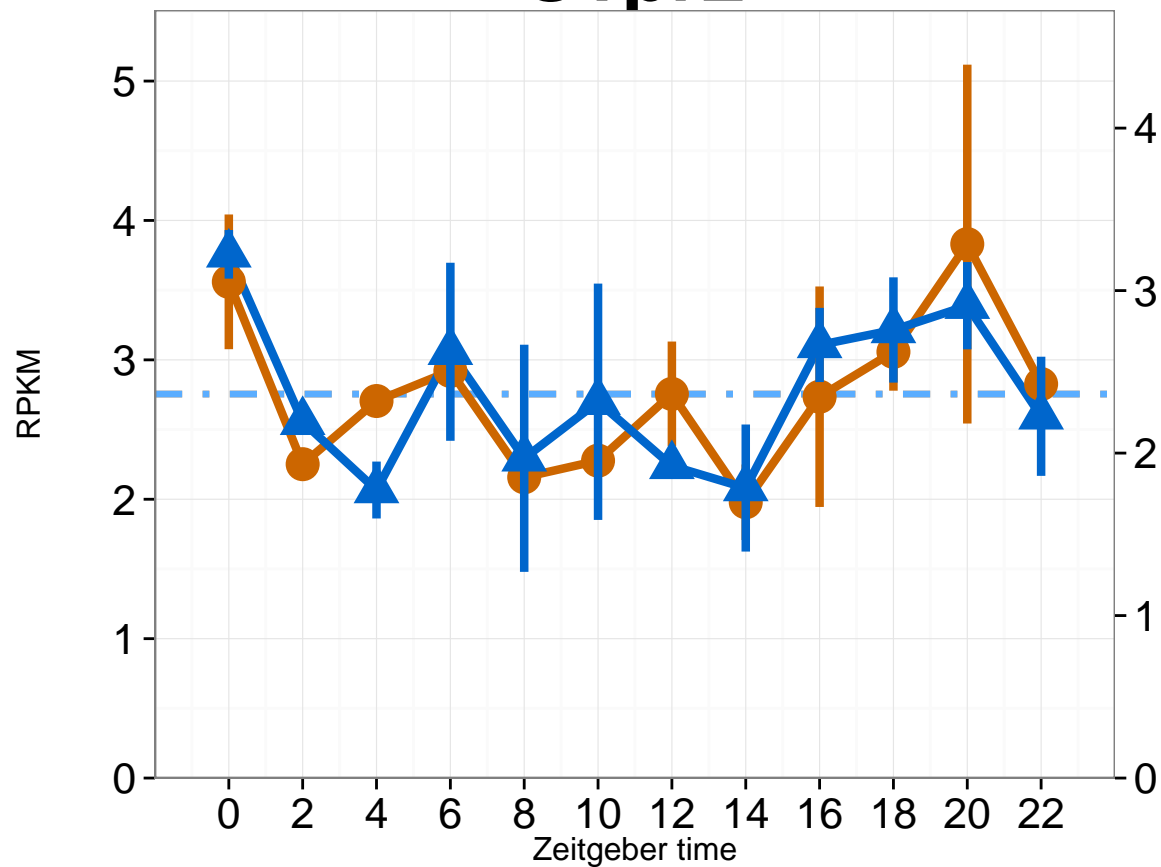

# S1pr2

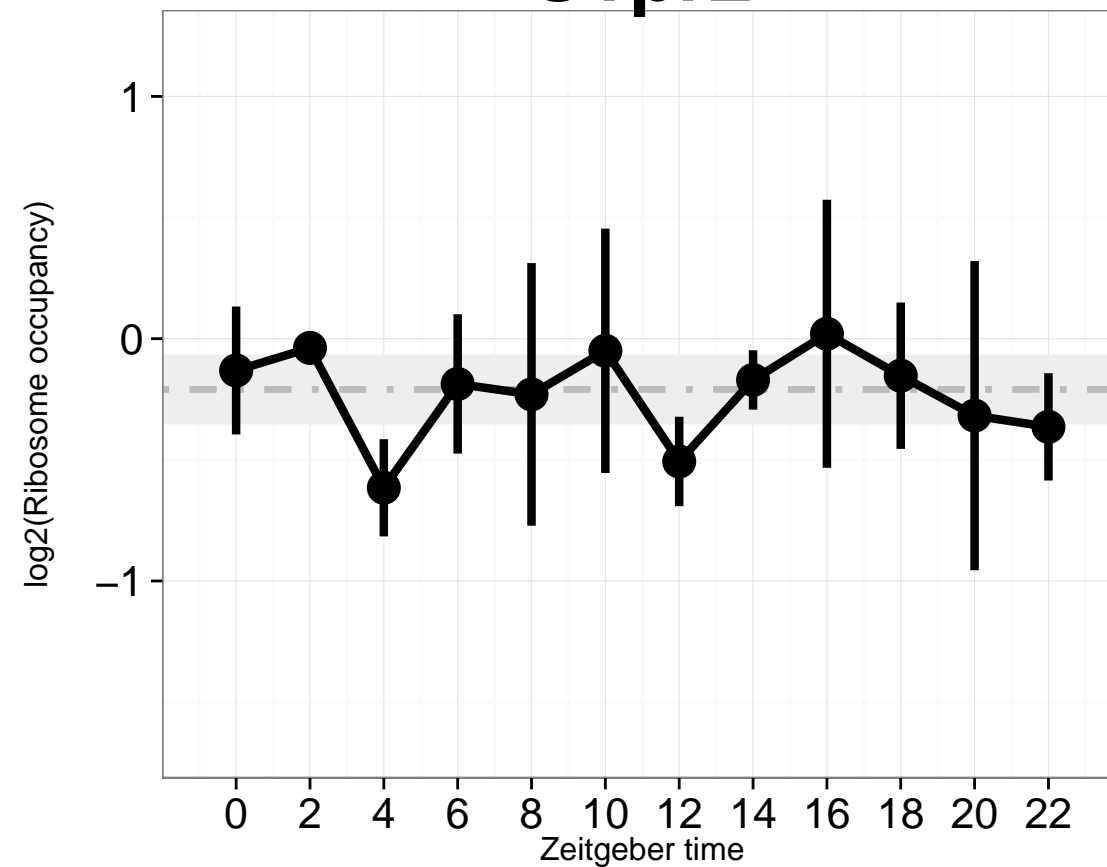

Supplement: SuppDataset_1.zip [file S1pr2_set_A.pdf › Supplemental Dataset 1/A-mRNA_nonrhyth_translation_nonrhyth/S1pr2_set_A.pdf]

# S1pr5

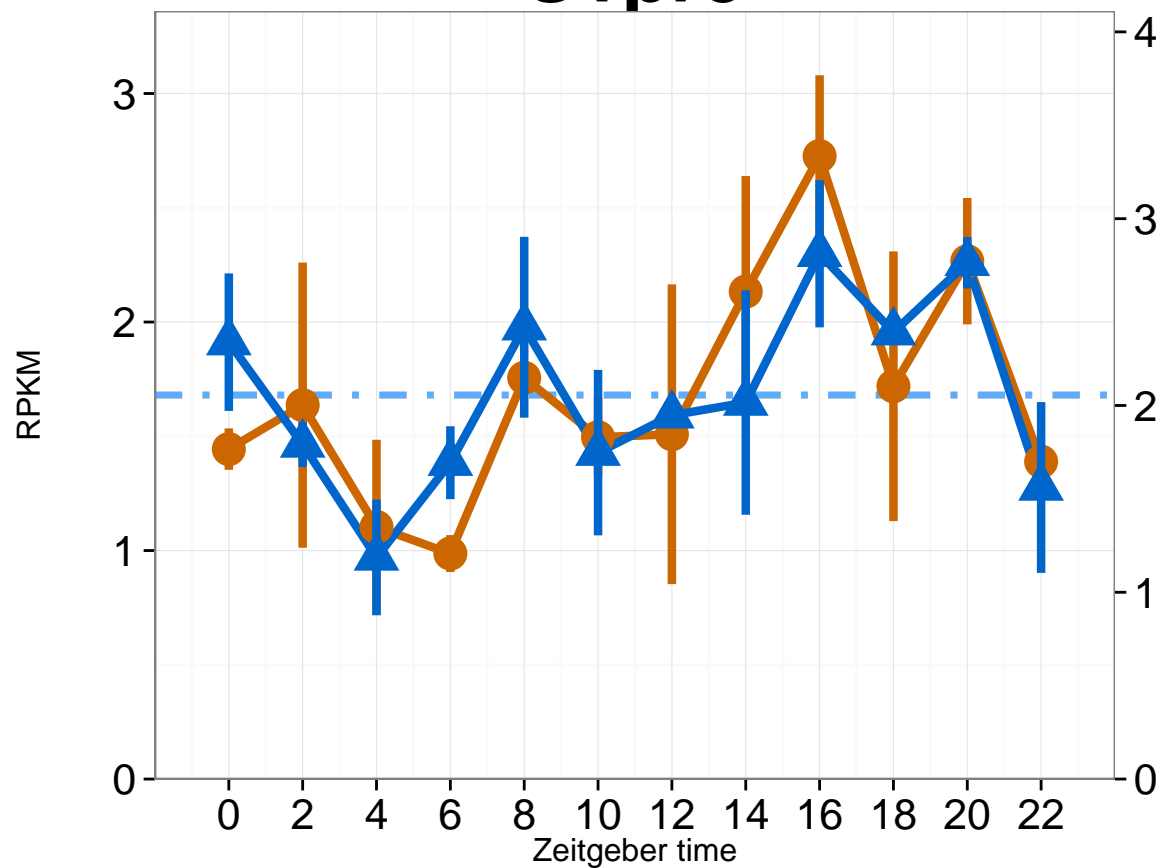

# S1pr5

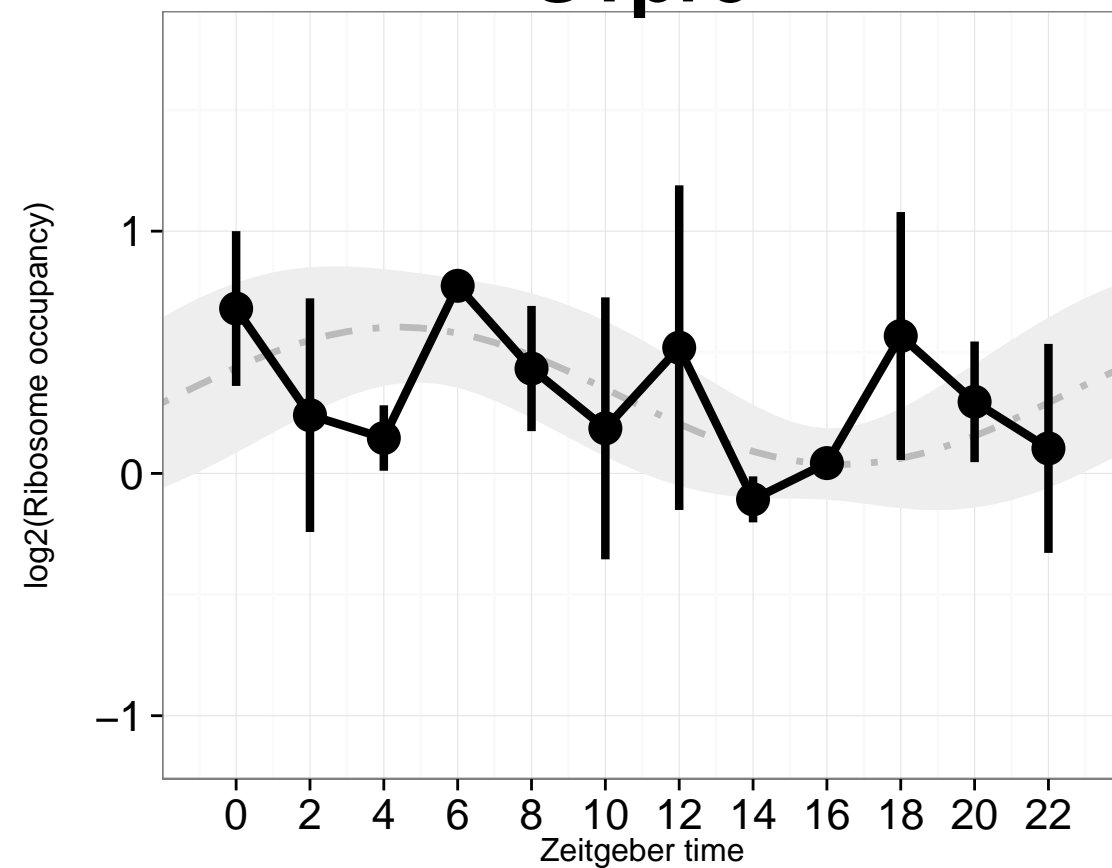

Supplement: SuppDataset_1.zip [file S1pr5_set_A.pdf › Supplemental Dataset 1/A-mRNA_nonrhyth_translation_nonrhyth/S1pr5_set_A.pdf]

## Saa3

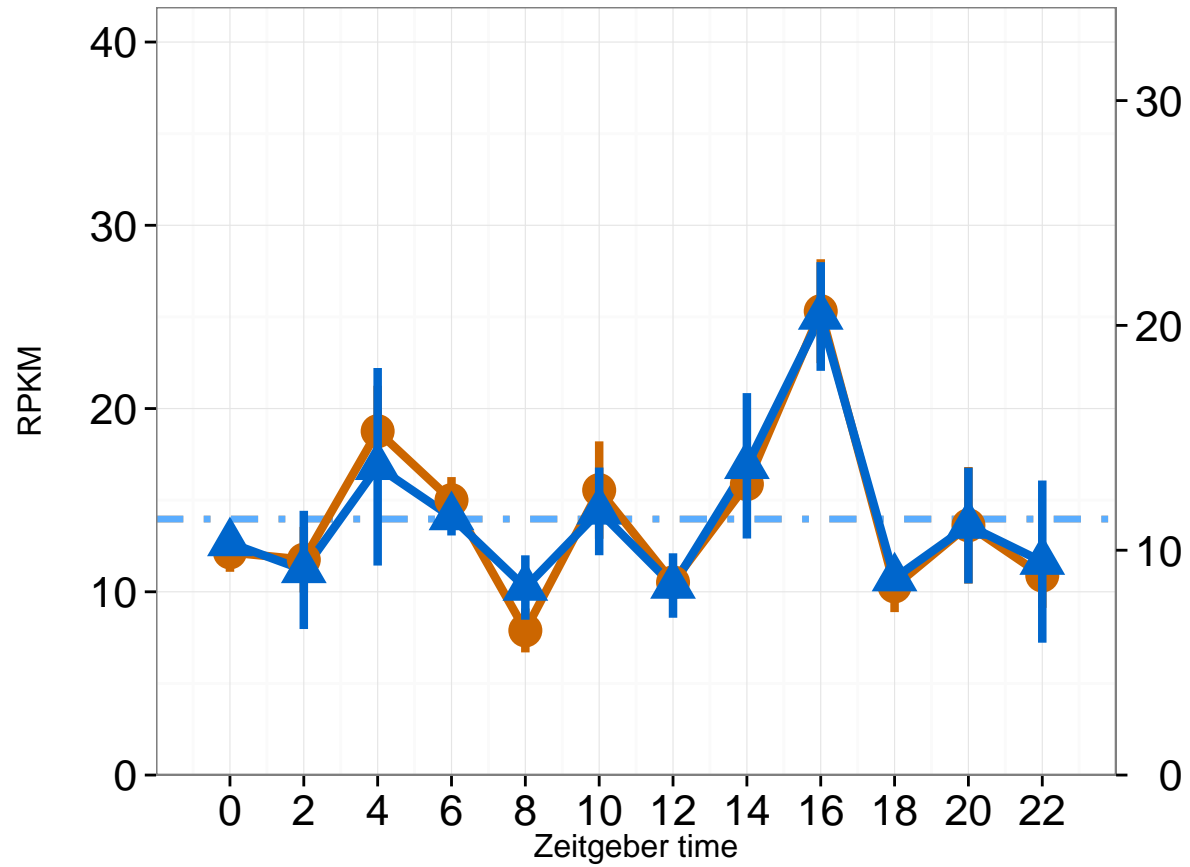

## Saa3

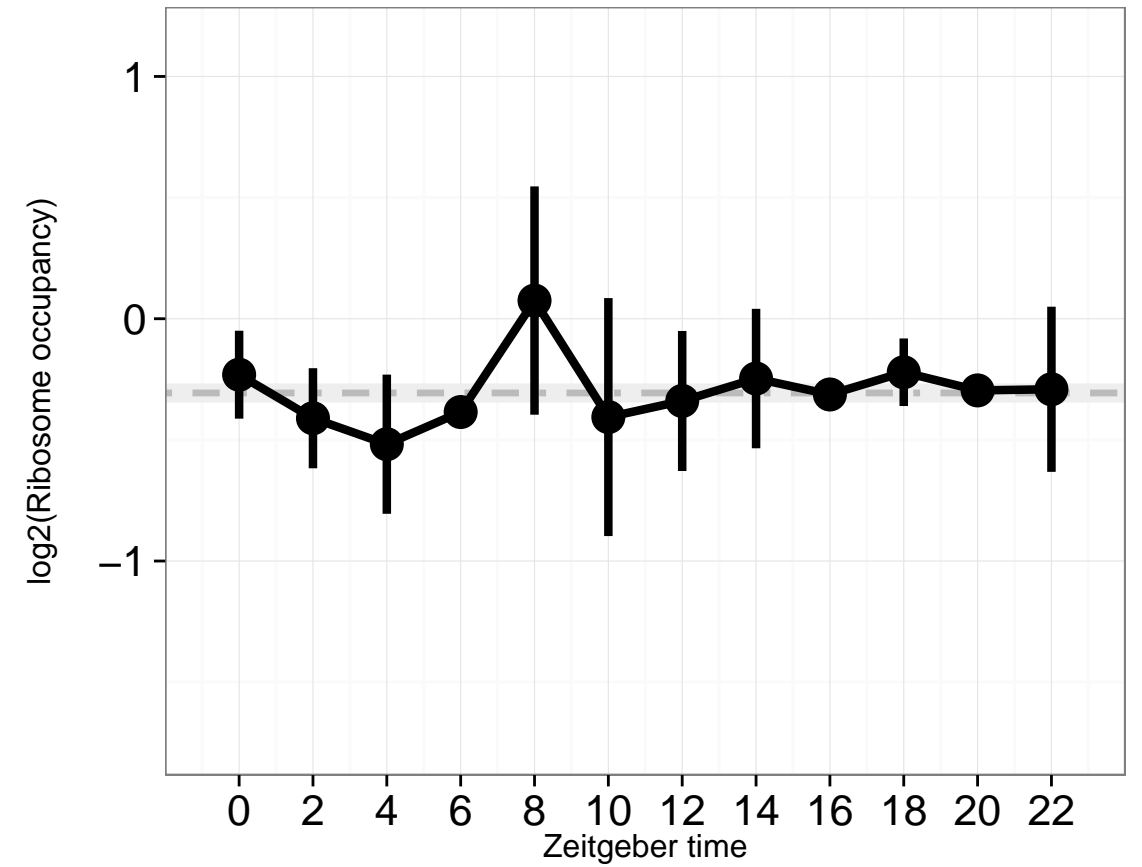

Supplement: SuppDataset_1.zip [file Saa3_set_A.pdf › Supplemental Dataset 1/A-mRNA_nonrhyth_translation_nonrhyth/Saa3_set_A.pdf]

# Saal1

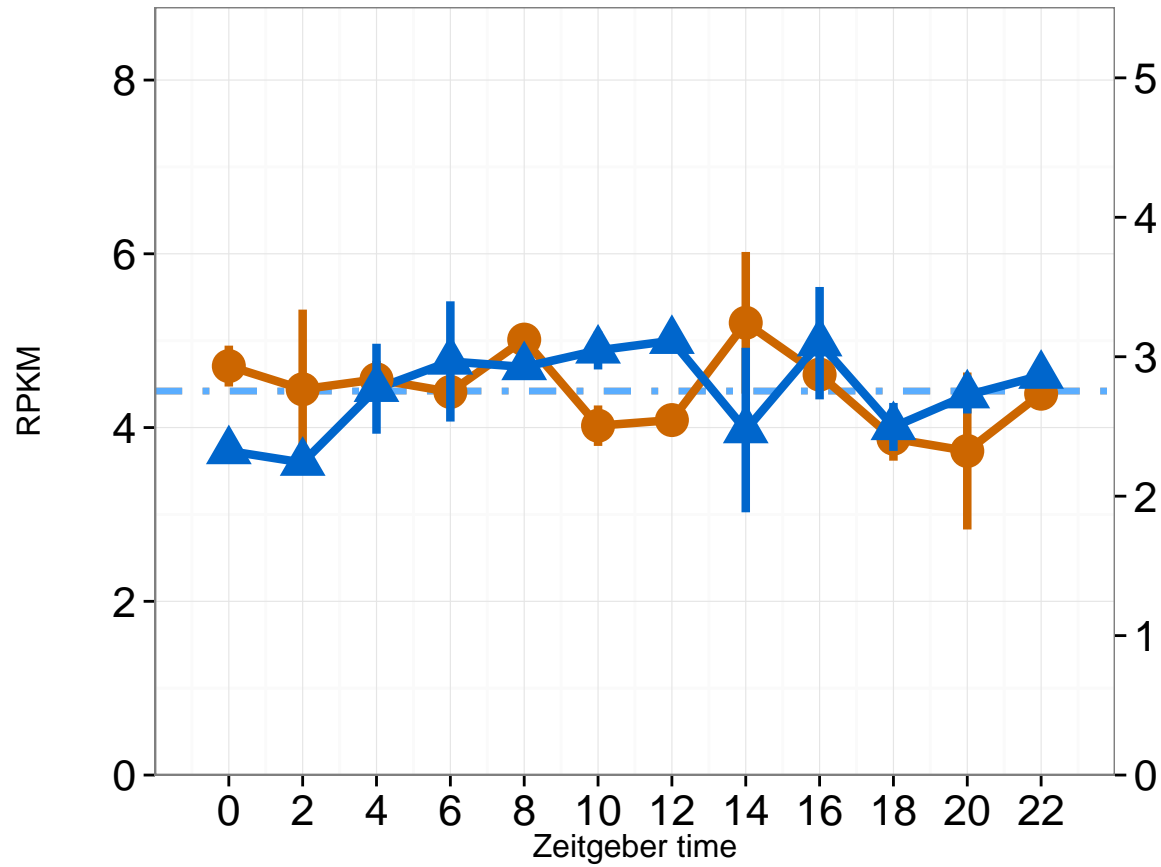

# Saal1

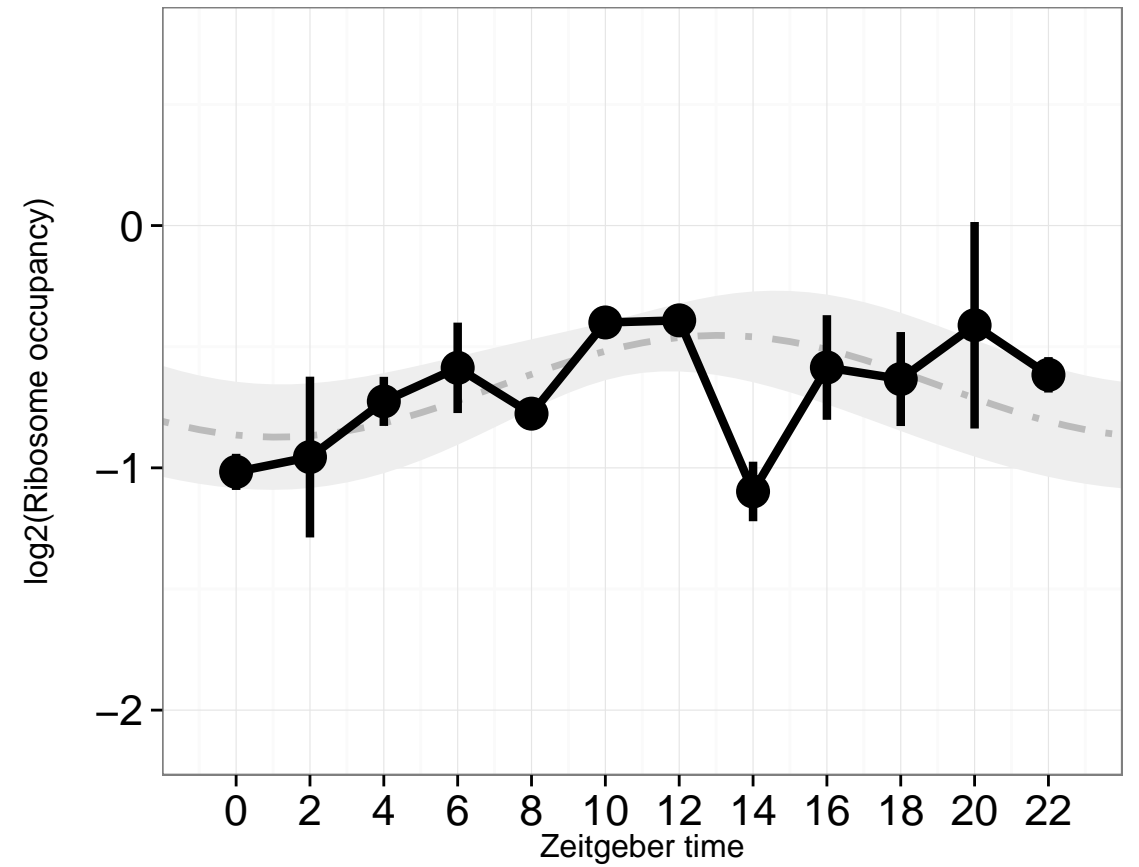

Supplement: SuppDataset_1.zip [file Saal1_set_A.pdf › Supplemental Dataset 1/A-mRNA_nonrhyth_translation_nonrhyth/Saal1_set_A.pdf]

# Sac3d1

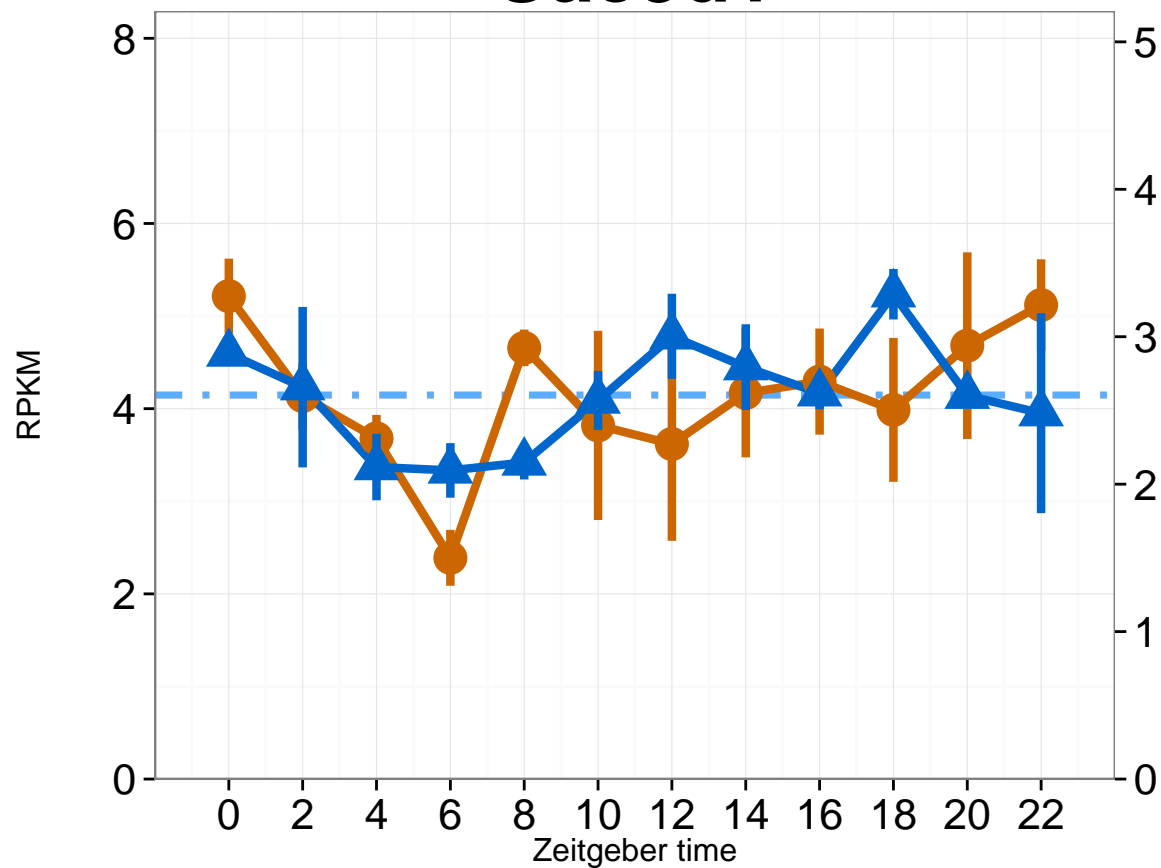

# Sac3d1

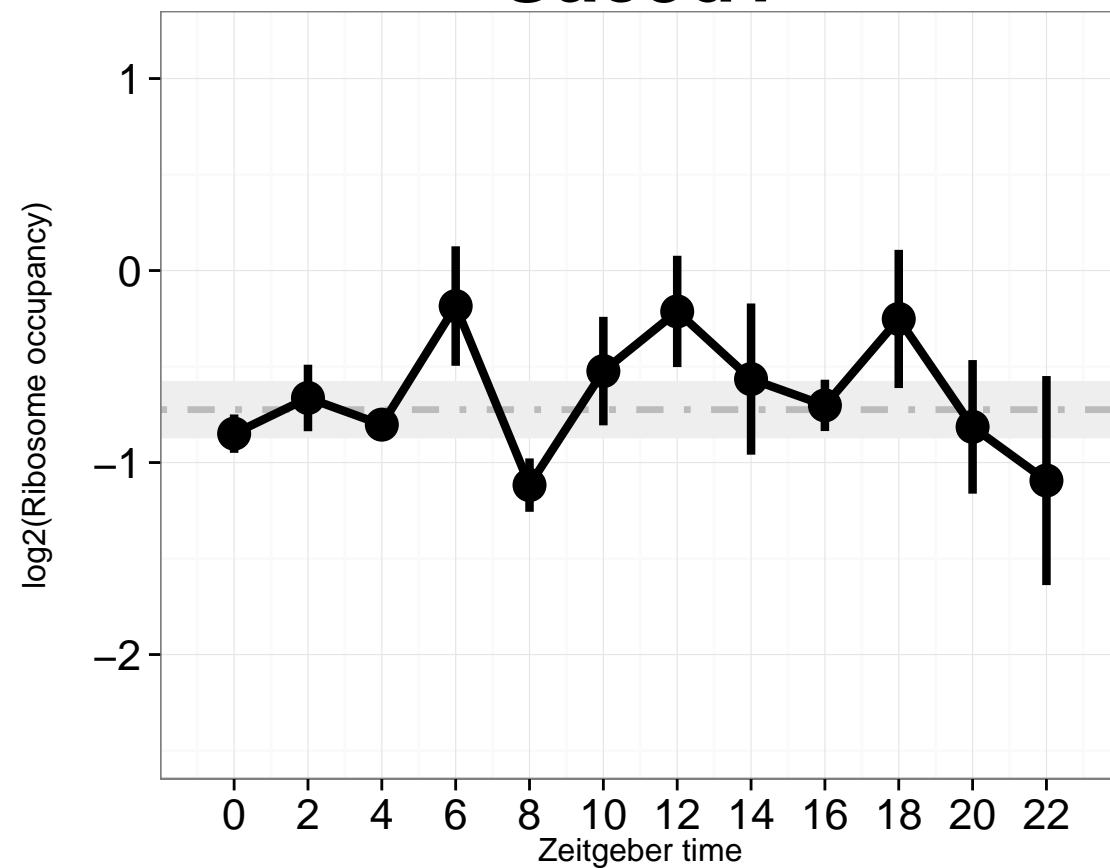

Supplement: SuppDataset_1.zip [file Sac3d1_set_A.pdf › Supplemental Dataset 1/A-mRNA_nonrhyth_translation_nonrhyth/Sac3d1_set_A.pdf]

## Sacm1l

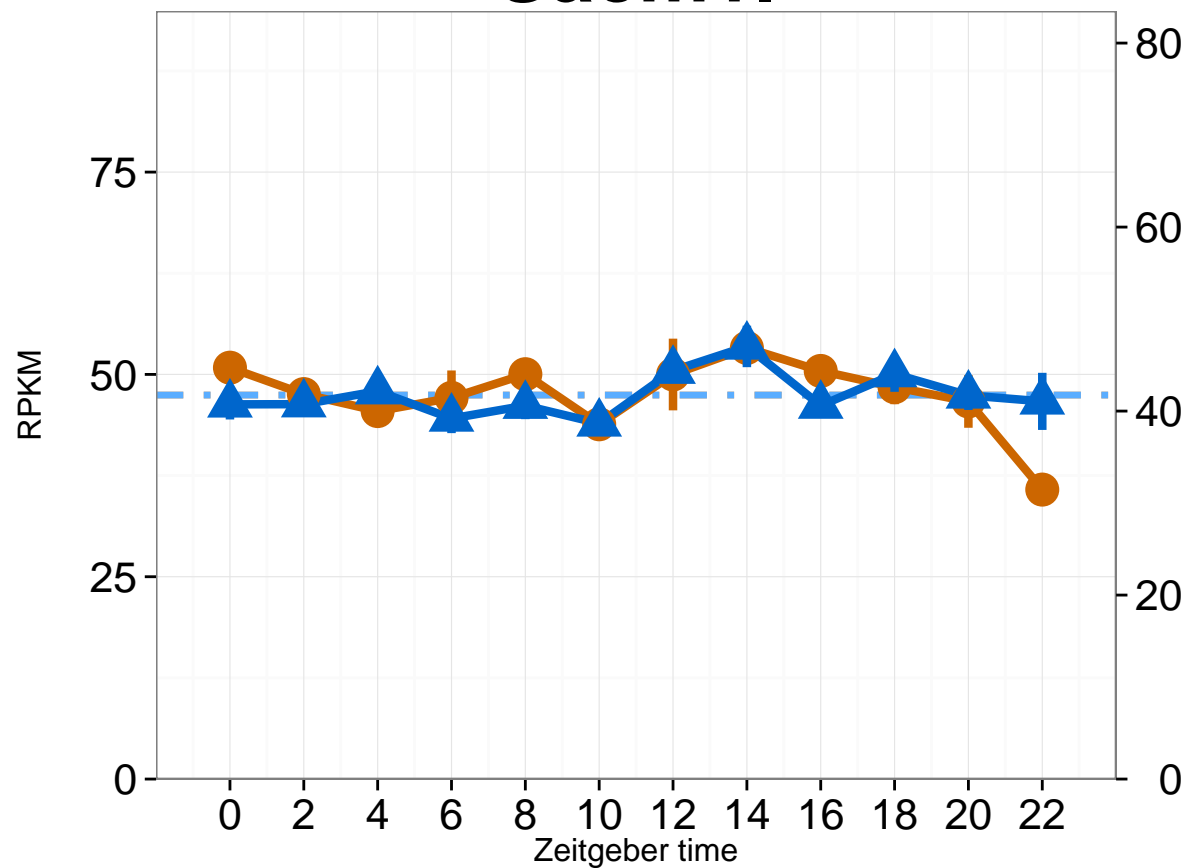

## Sacm1l

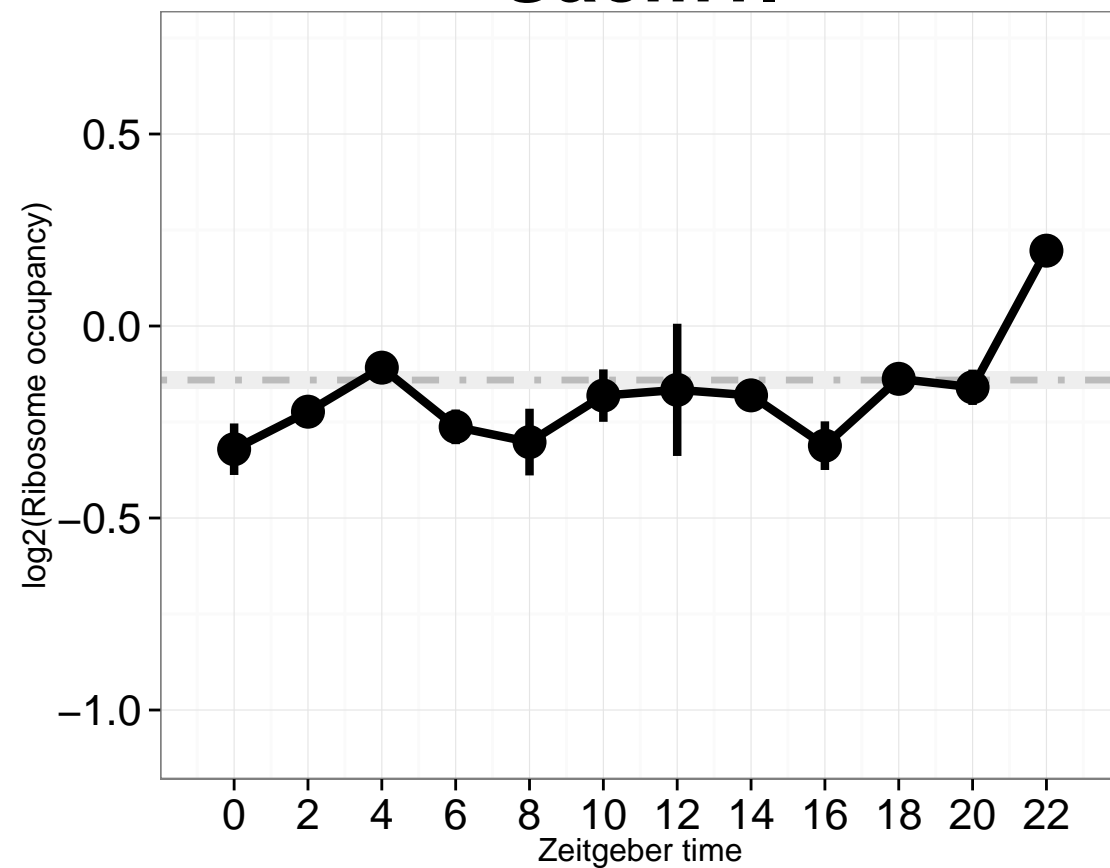

Supplement: SuppDataset_1.zip [file Sacm1l_set_A.pdf › Supplemental Dataset 1/A-mRNA_nonrhyth_translation_nonrhyth/Sacm1l_set_A.pdf]

## Sae1

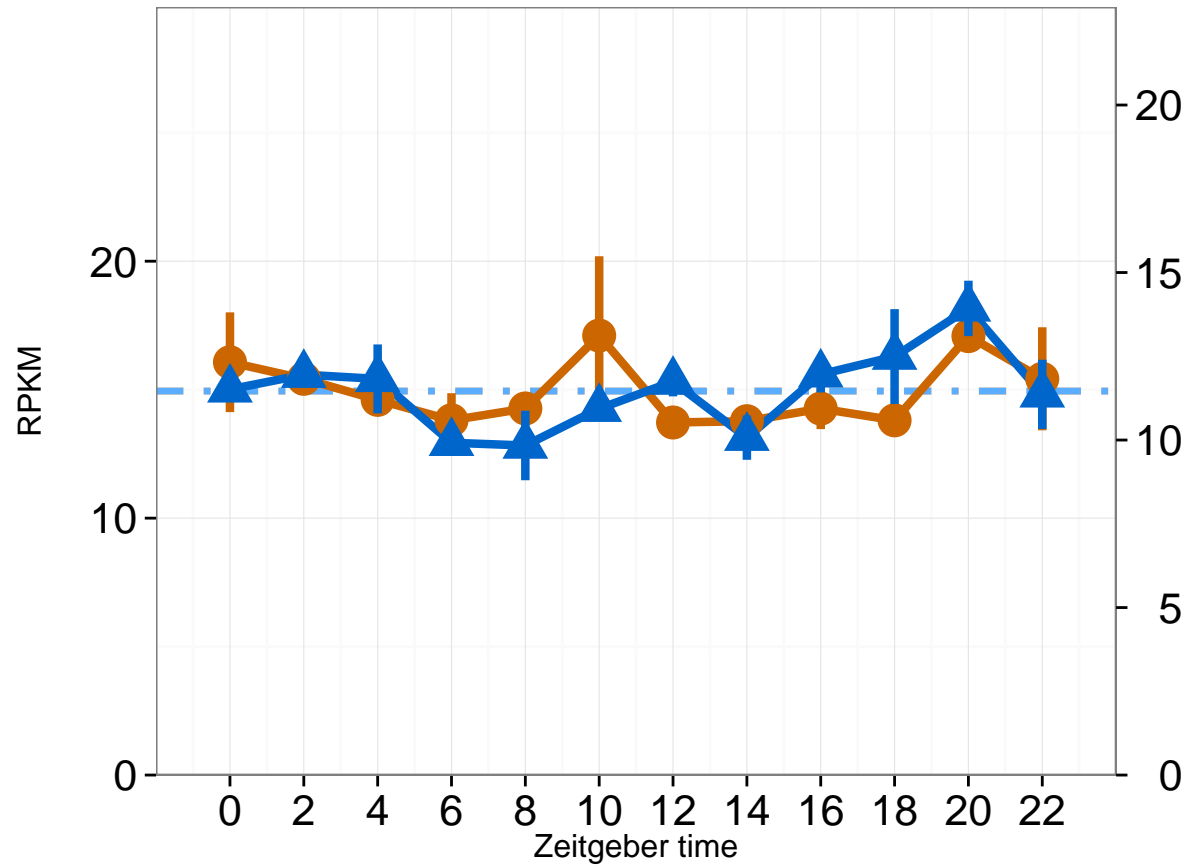

## Sae1

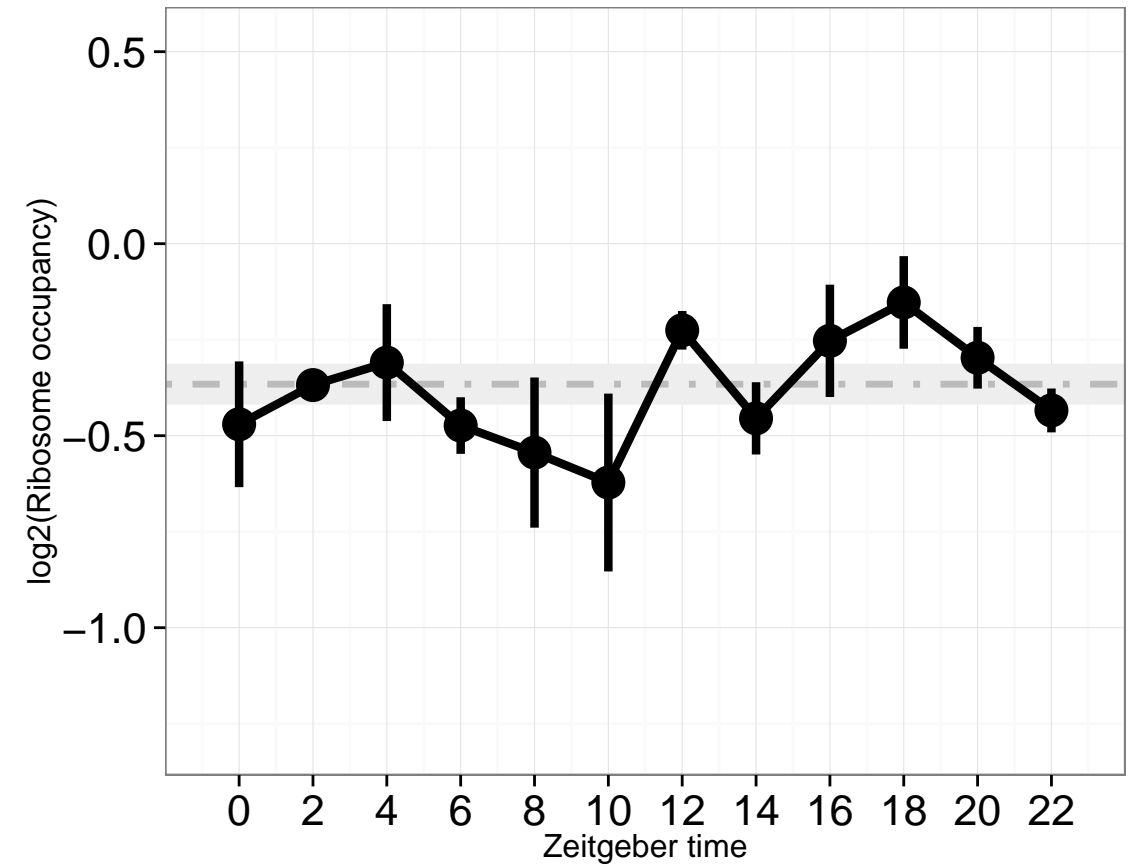

Supplement: SuppDataset_1.zip [file Sae1_set_A.pdf › Supplemental Dataset 1/A-mRNA_nonrhyth_translation_nonrhyth/Sae1_set_A.pdf]

## Safb2

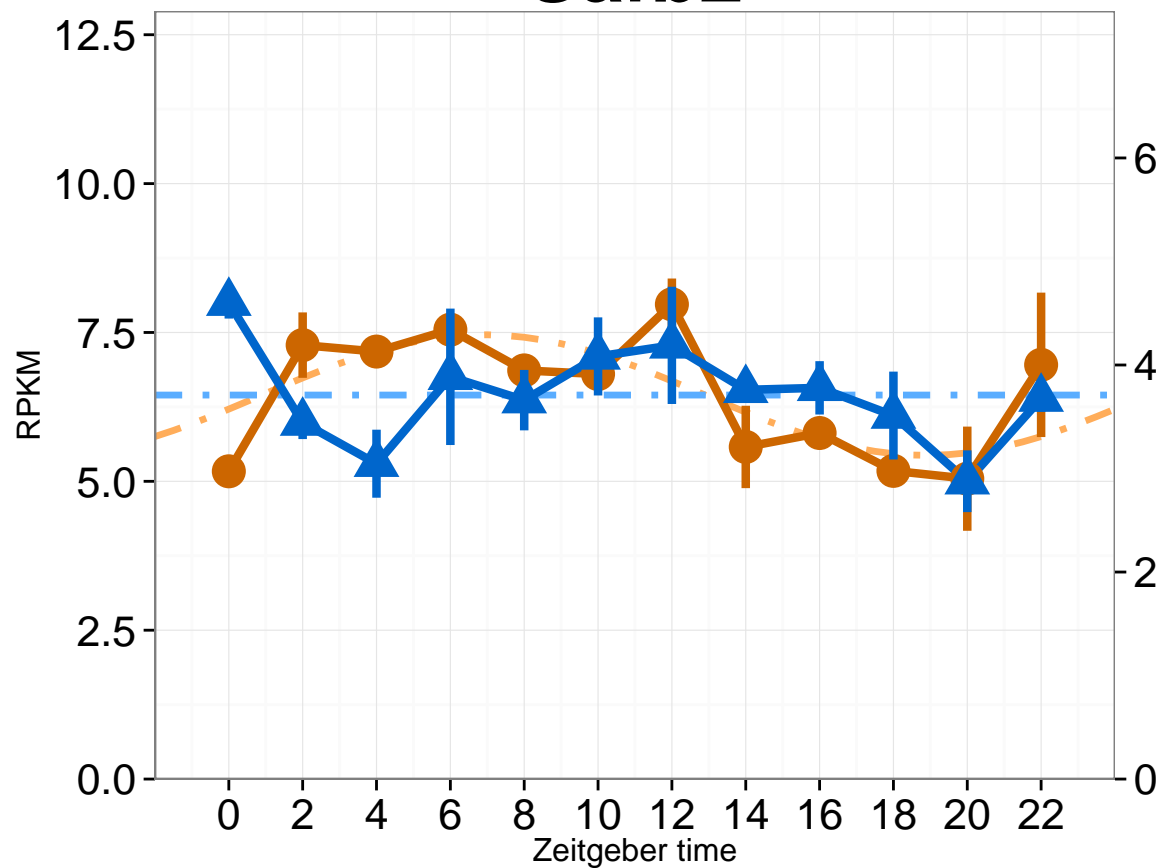

## Safb2

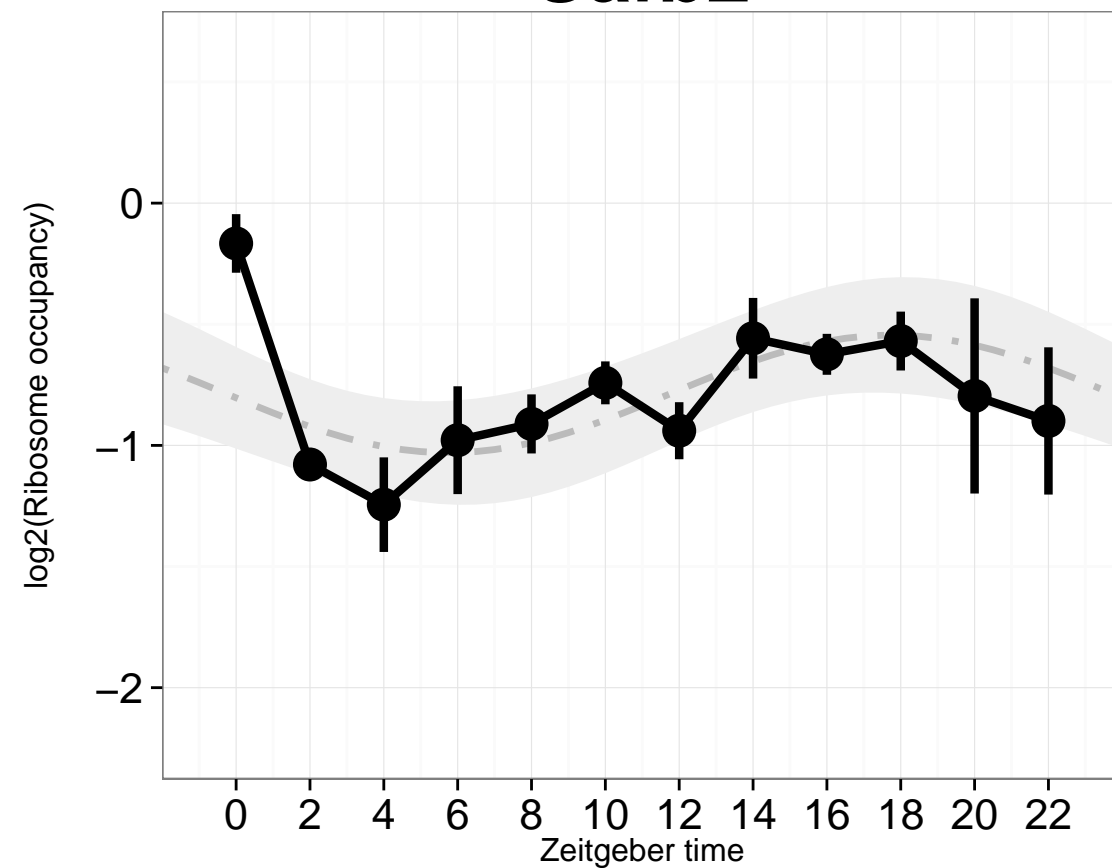

Supplement: SuppDataset_1.zip [file Safb2_set_A.pdf › Supplemental Dataset 1/A-mRNA_nonrhyth_translation_nonrhyth/Safb2_set_A.pdf]

## Safb

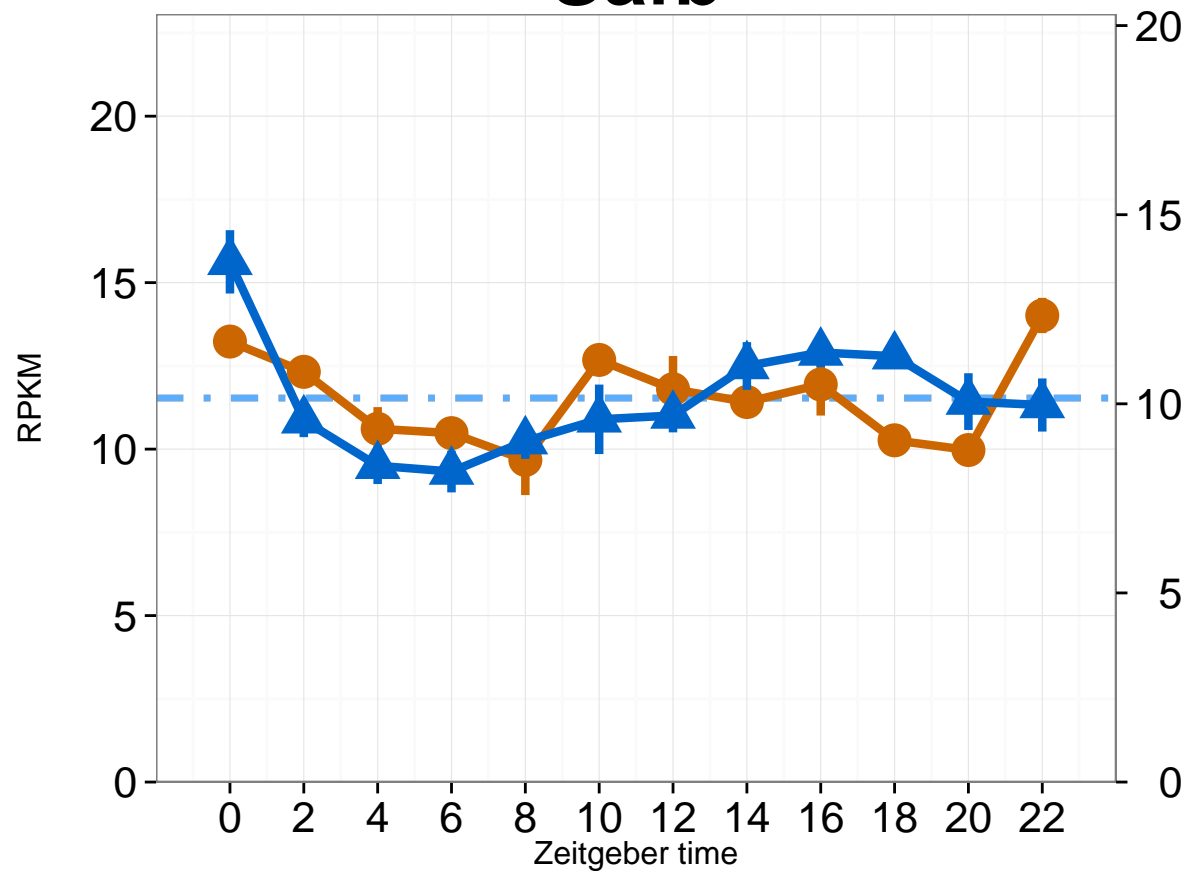

## Safb

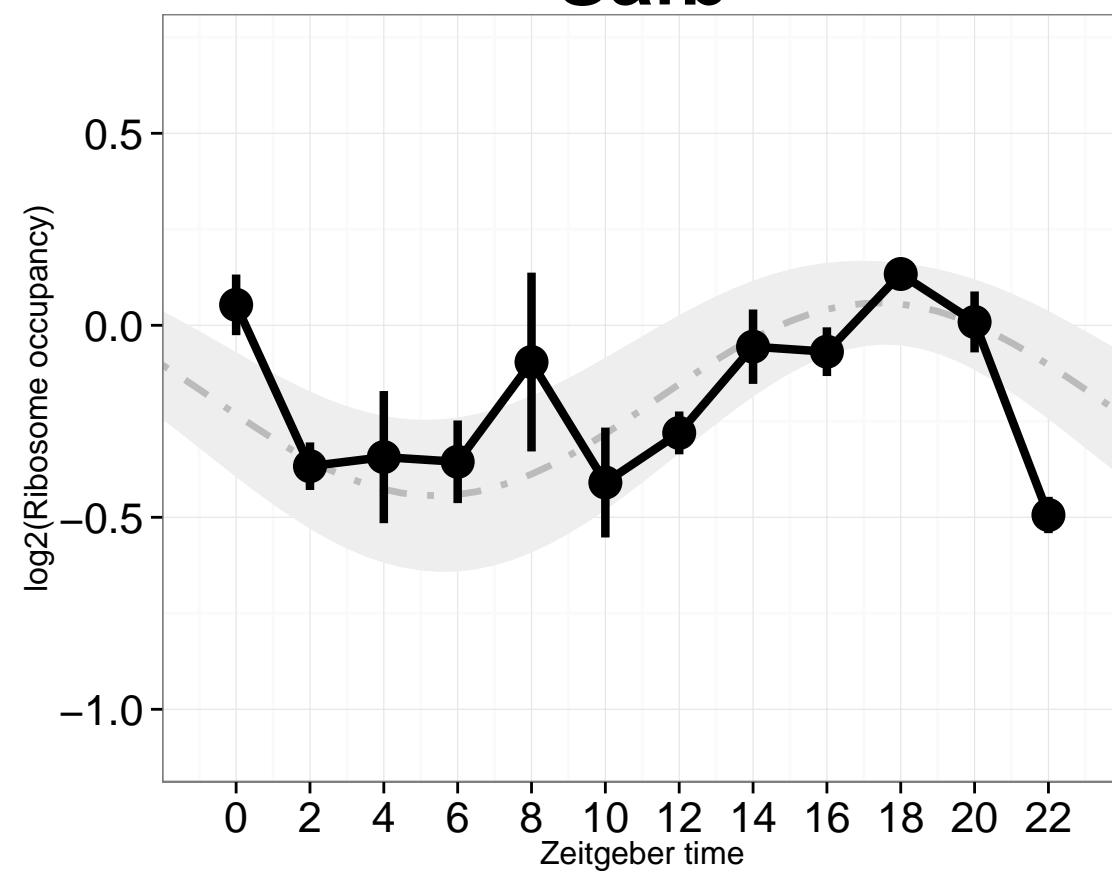

Supplement: SuppDataset_1.zip [file Safb_set_A.pdf › Supplemental Dataset 1/A-mRNA_nonrhyth_translation_nonrhyth/Safb_set_A.pdf]

# Samd4

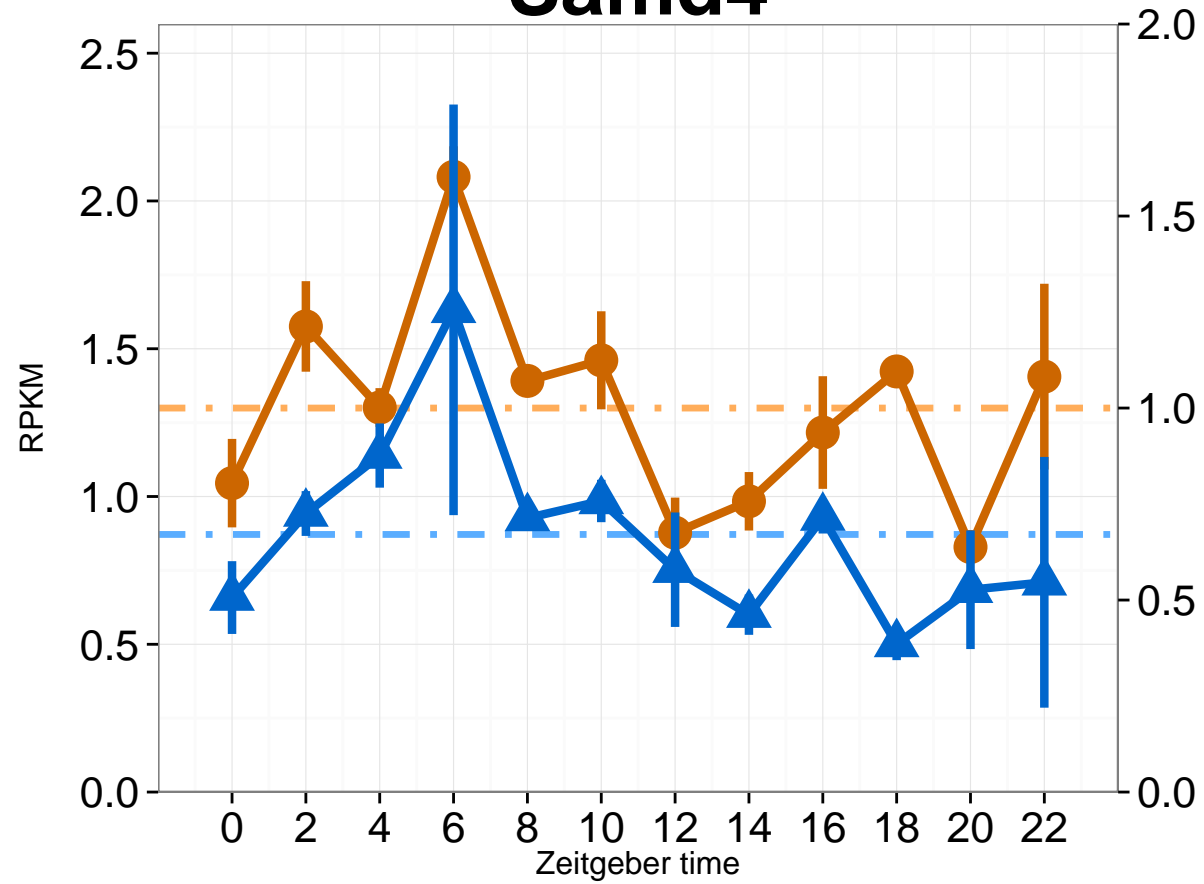

# Samd4

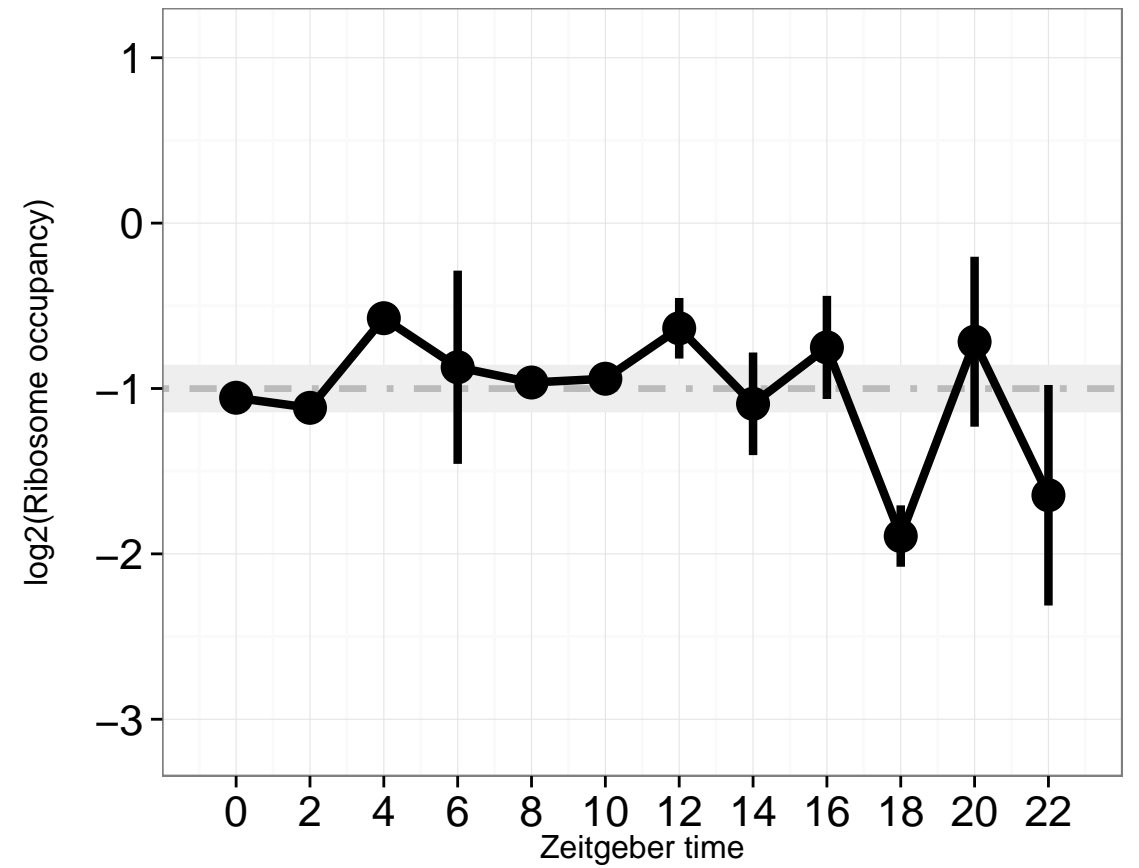

Supplement: SuppDataset_1.zip [file Samd4_set_A.pdf › Supplemental Dataset 1/A-mRNA_nonrhyth_translation_nonrhyth/Samd4_set_A.pdf]

# Samd4b

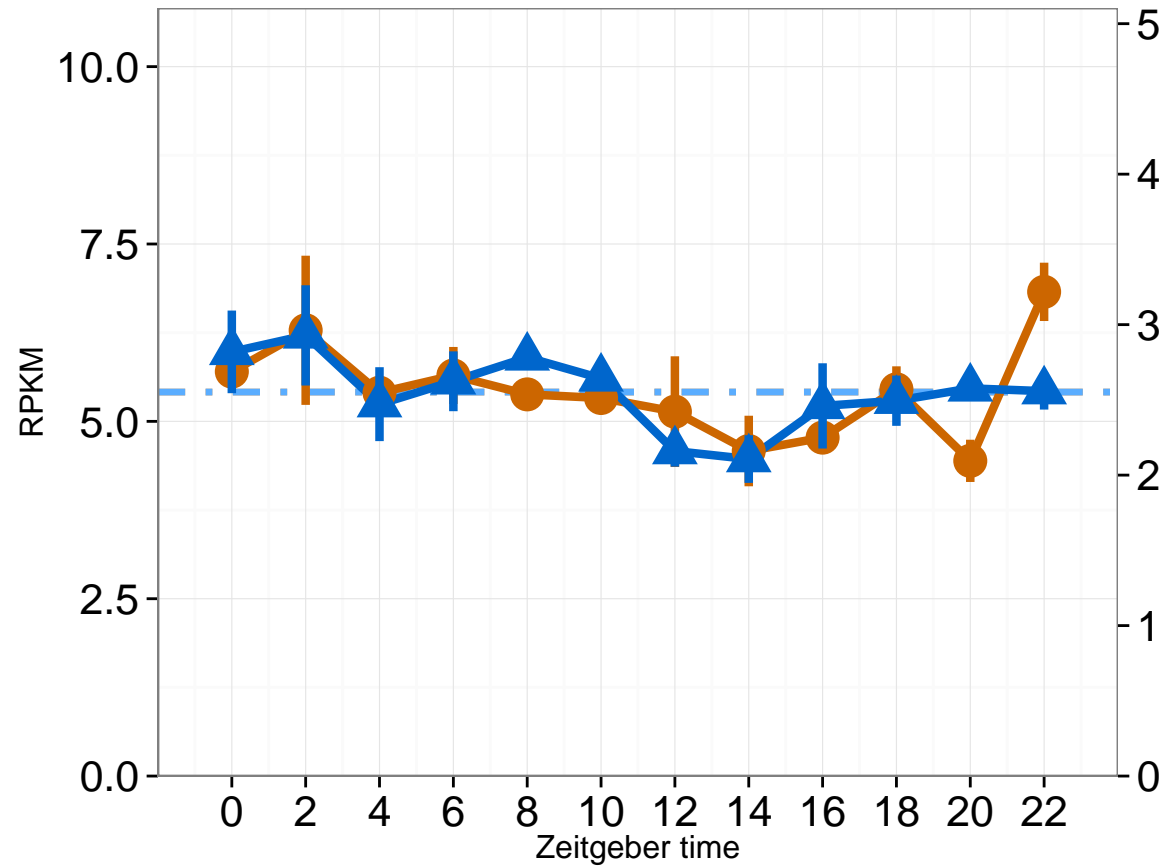

# Samd4b

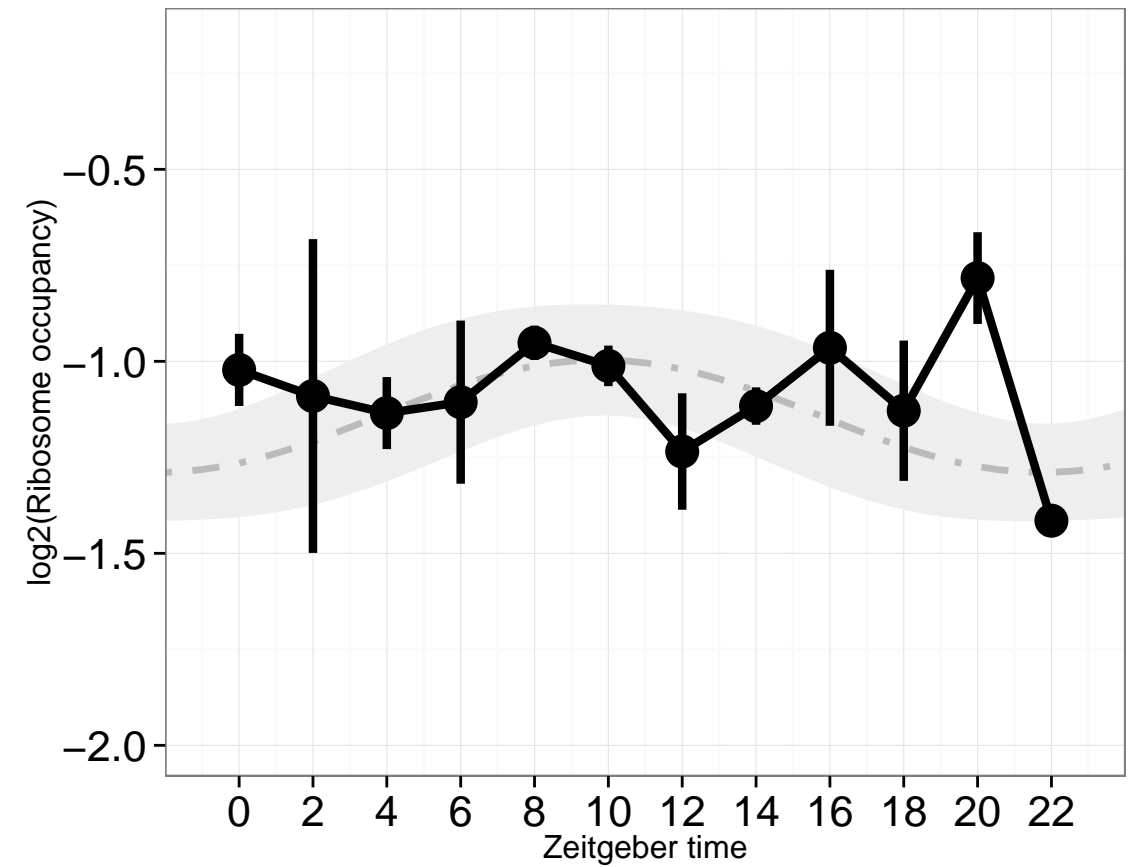

Supplement: SuppDataset_1.zip [file Samd4b_set_A.pdf › Supplemental Dataset 1/A-mRNA_nonrhyth_translation_nonrhyth/Samd4b_set_A.pdf]

# Samd8

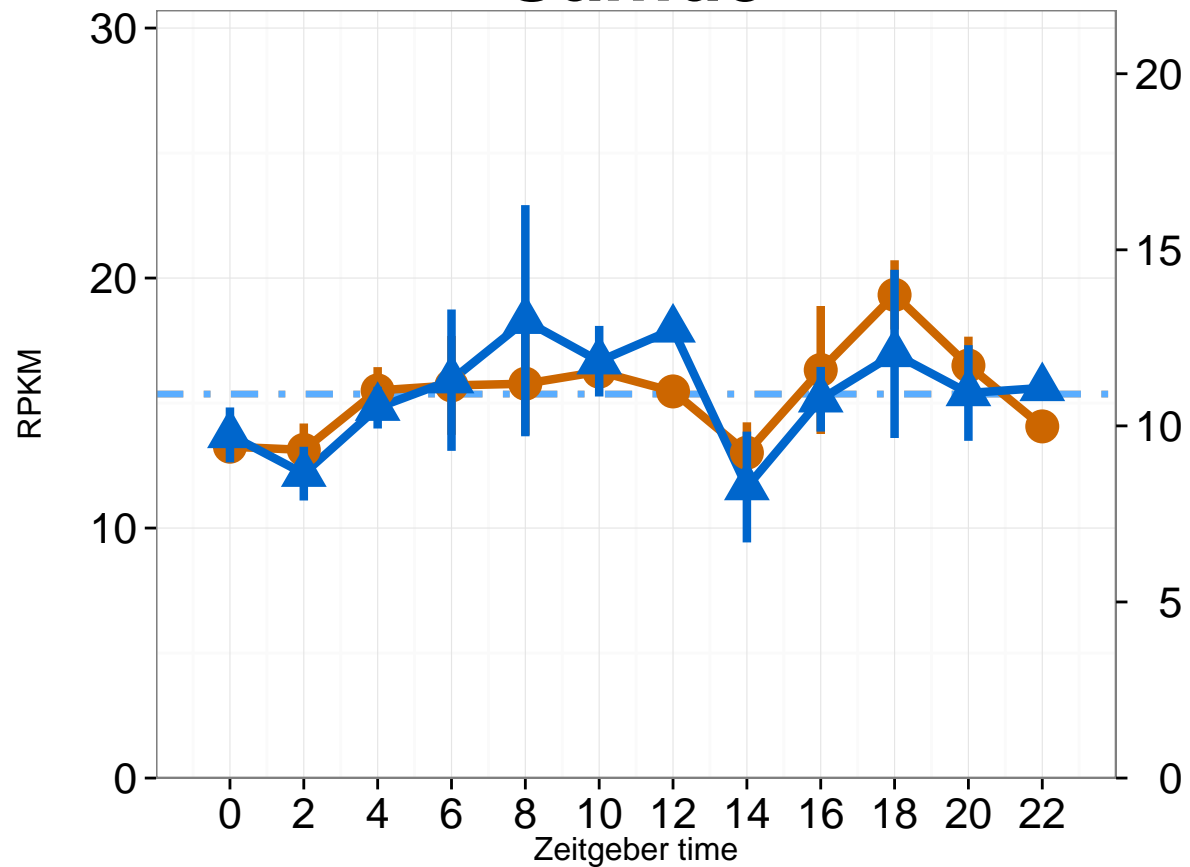

# Samd8

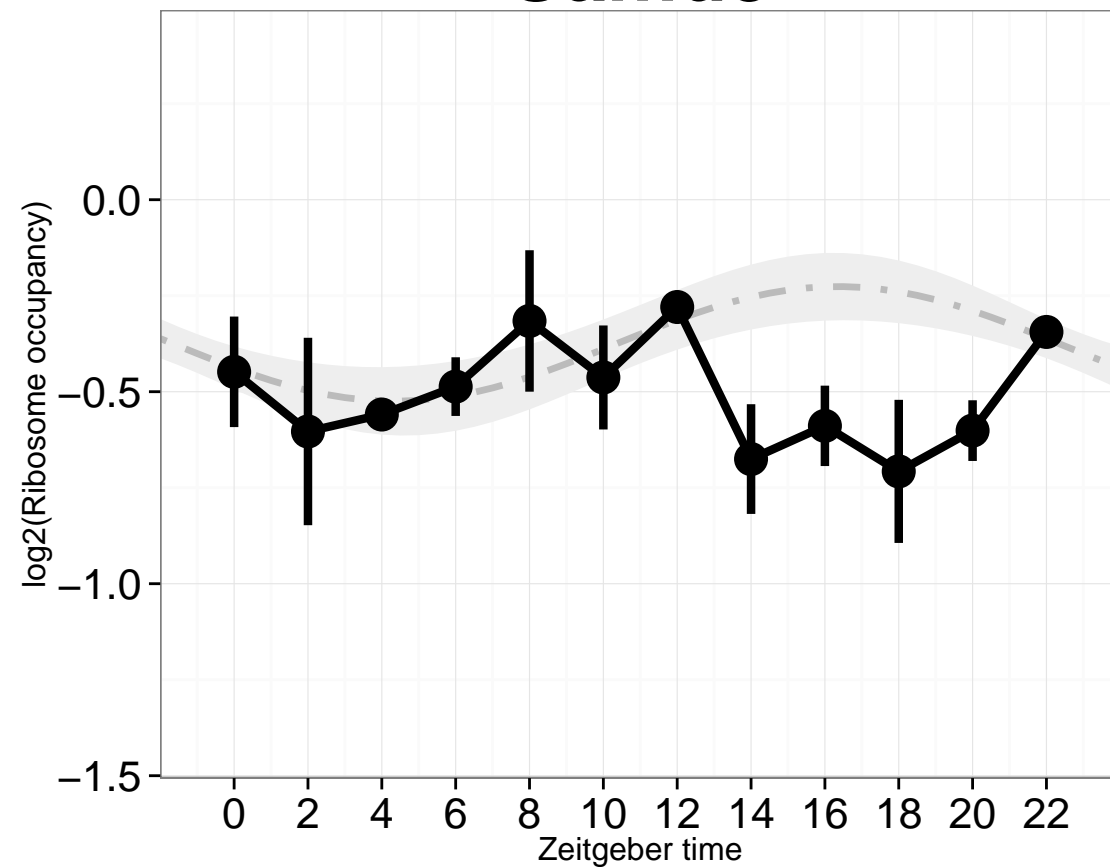

Supplement: SuppDataset_1.zip [file Samd8_set_A.pdf › Supplemental Dataset 1/A-mRNA_nonrhyth_translation_nonrhyth/Samd8_set_A.pdf]

## Samhd1

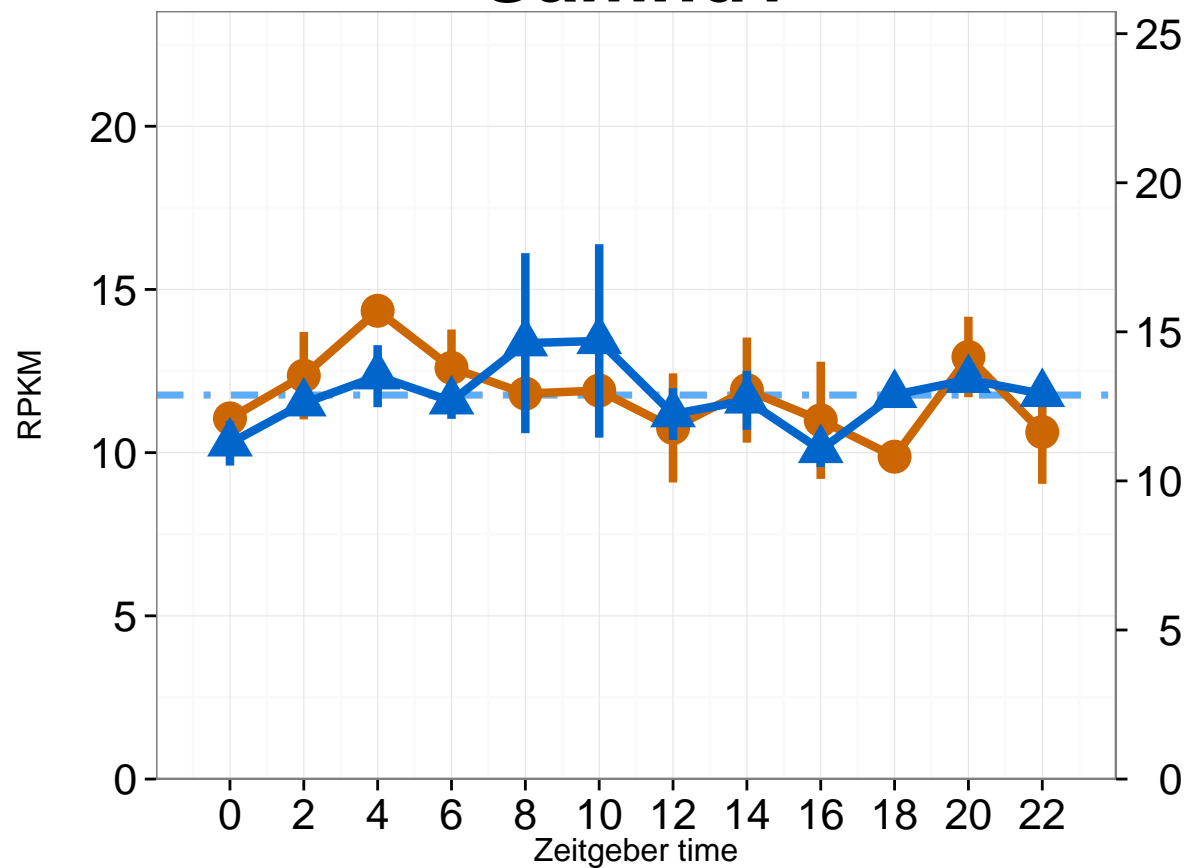

## Samhd1

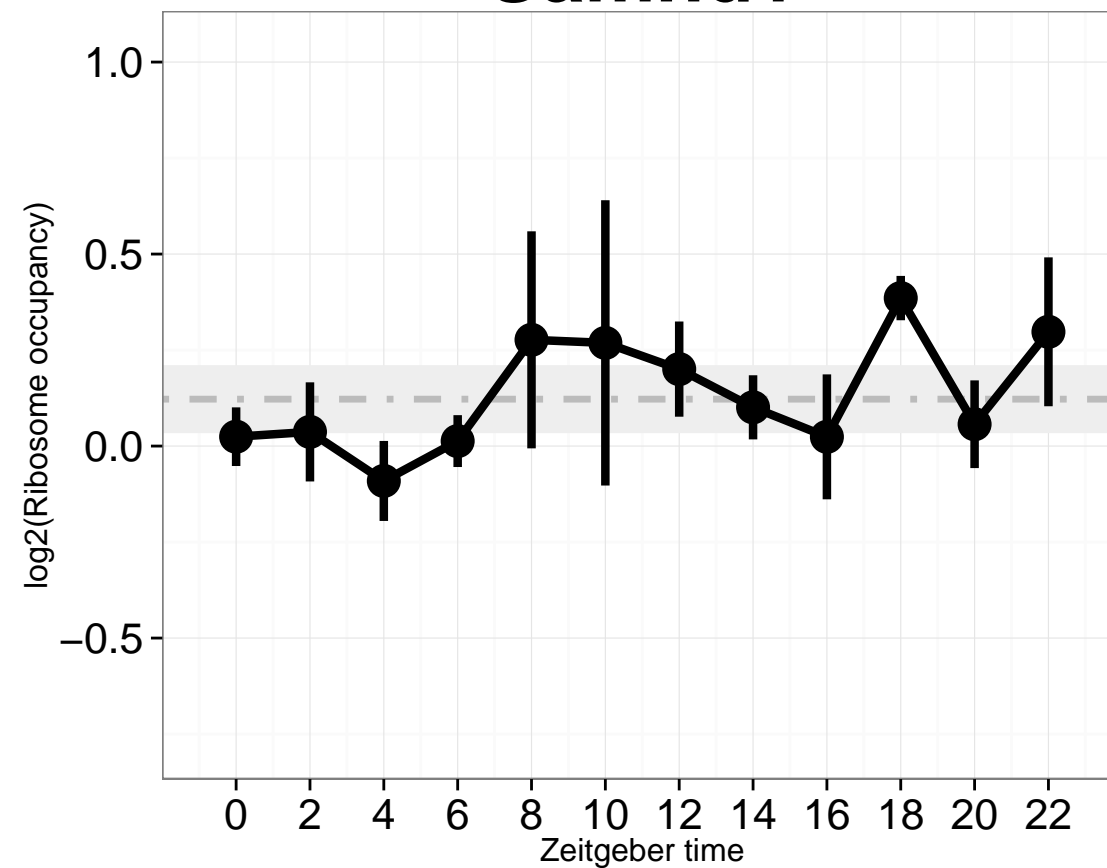

Supplement: SuppDataset_1.zip [file Samhd1_set_A.pdf › Supplemental Dataset 1/A-mRNA_nonrhyth_translation_nonrhyth/Samhd1_set_A.pdf]

## Samm50

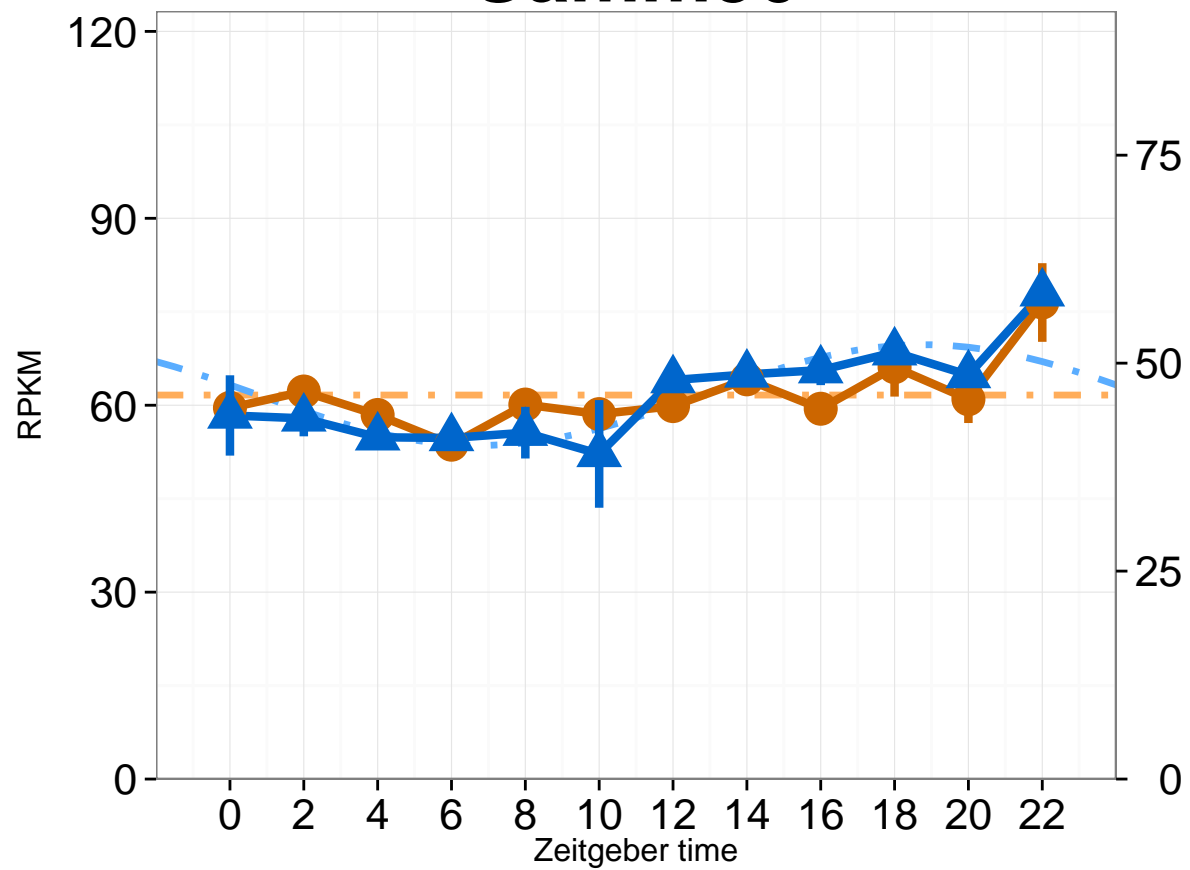

## Samm50

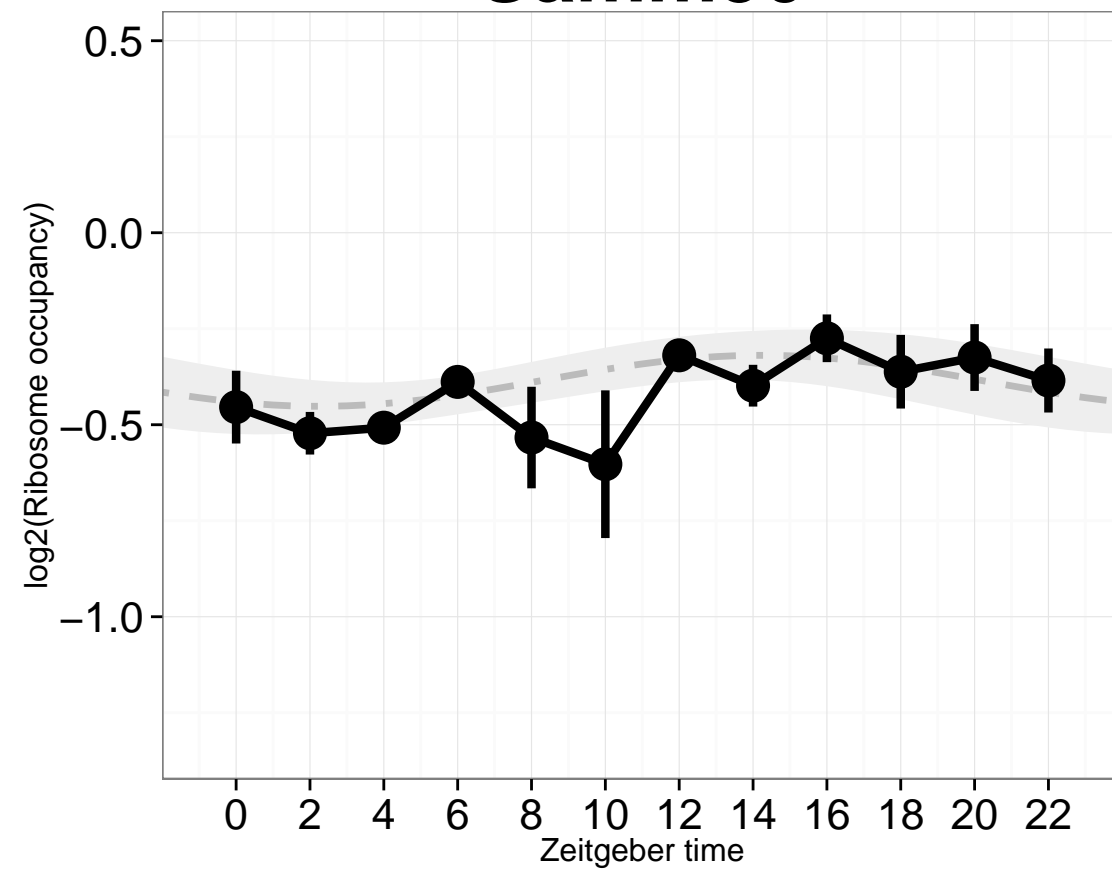

Supplement: SuppDataset_1.zip [file Samm50_set_A.pdf › Supplemental Dataset 1/A-mRNA_nonrhyth_translation_nonrhyth/Samm50_set_A.pdf]

## Sap130

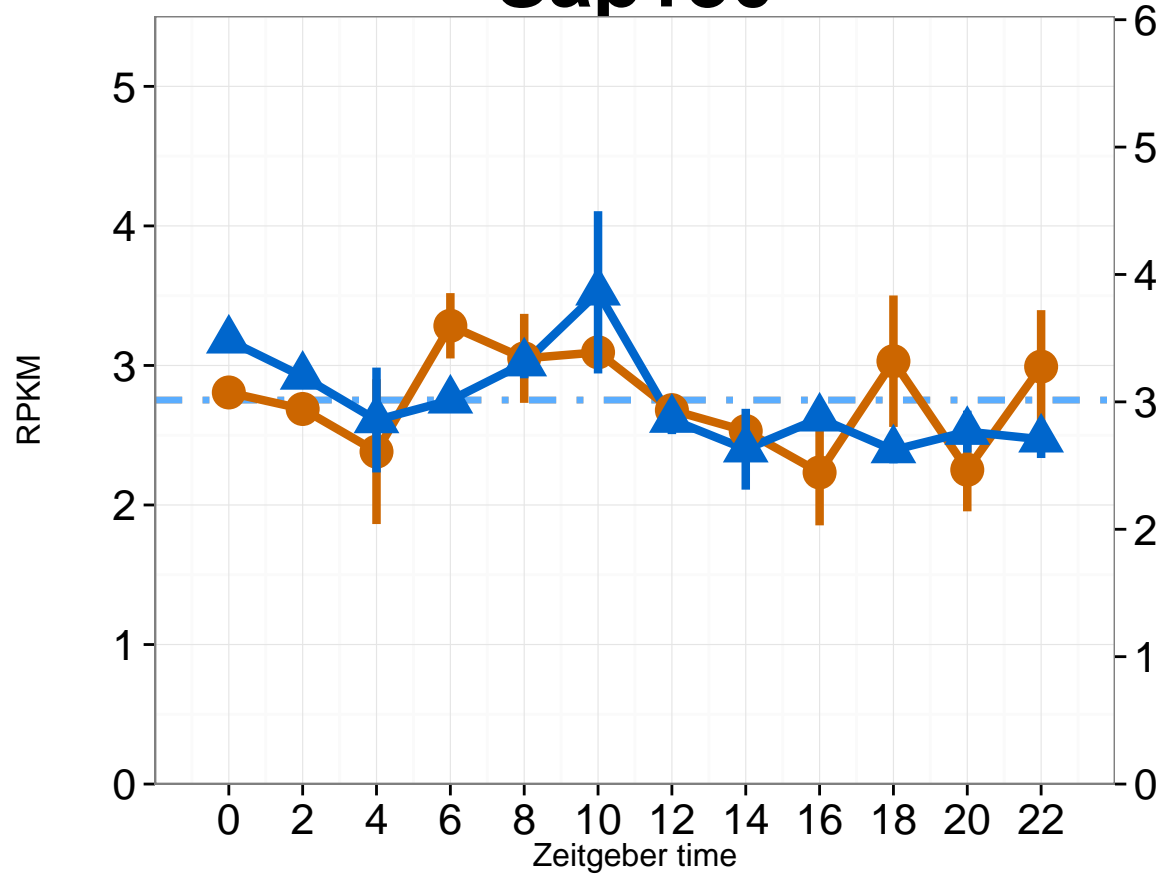

## Sap130

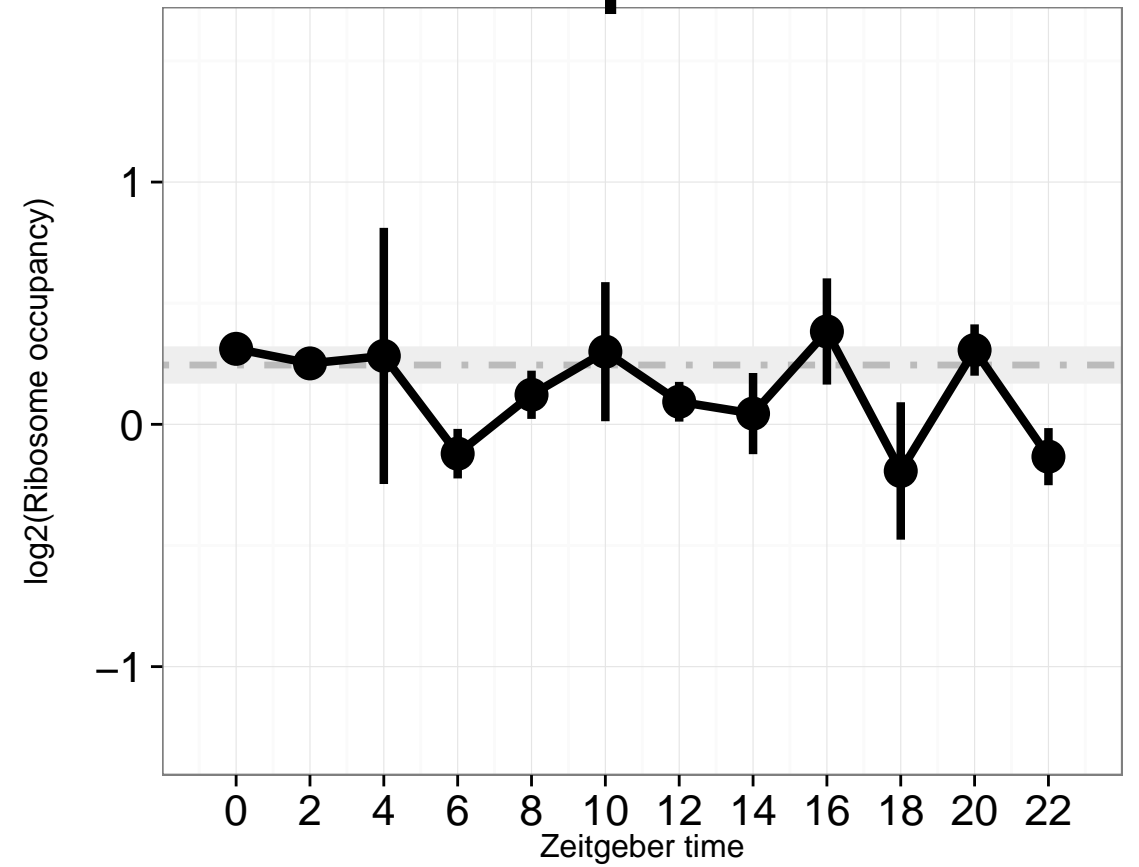

Supplement: SuppDataset_1.zip [file Sap130_set_A.pdf › Supplemental Dataset 1/A-mRNA_nonrhyth_translation_nonrhyth/Sap130_set_A.pdf]

## Sap18

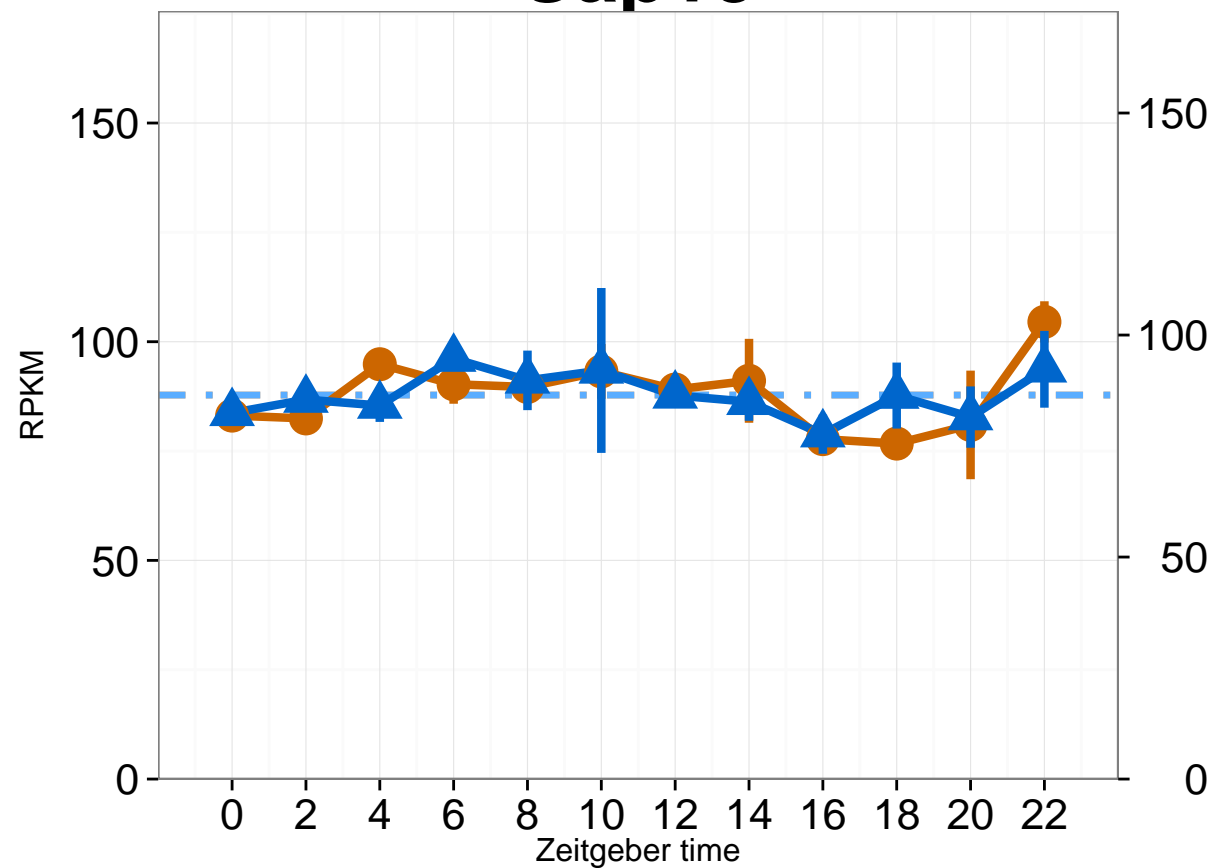

## Sap18

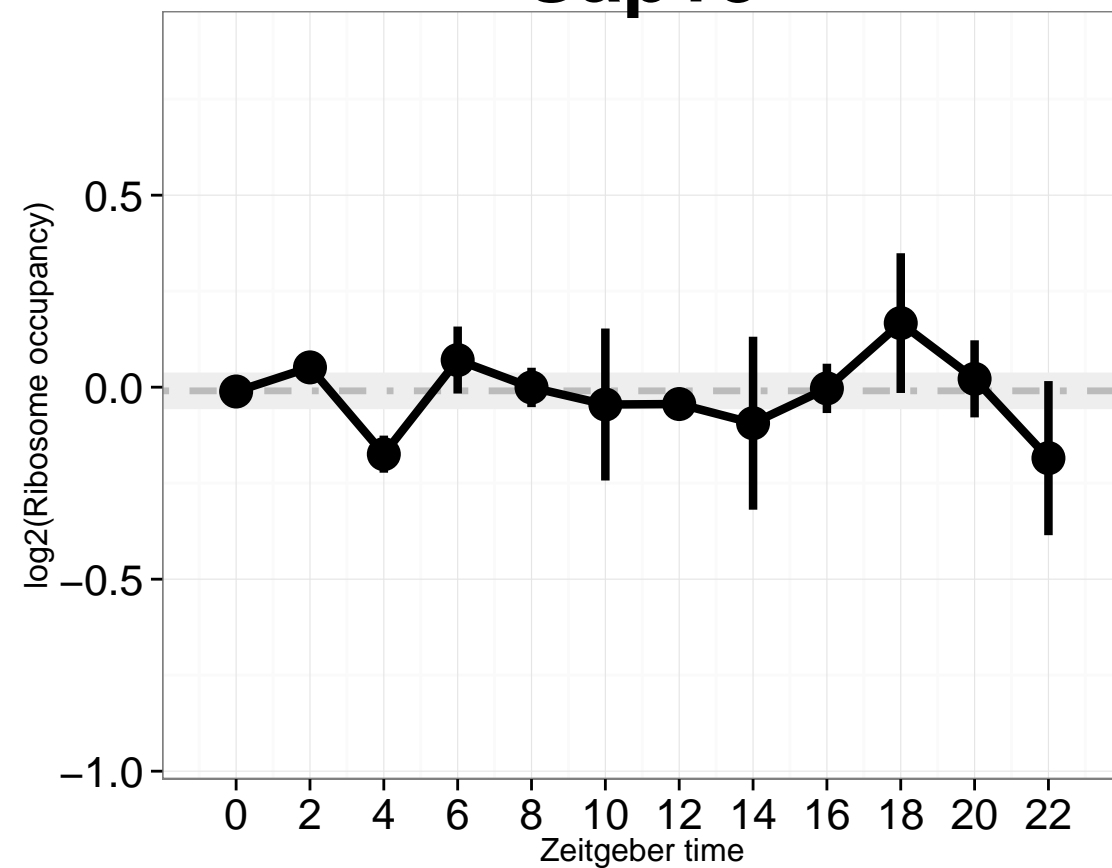

Supplement: SuppDataset_1.zip [file Sap18_set_A.pdf › Supplemental Dataset 1/A-mRNA_nonrhyth_translation_nonrhyth/Sap18_set_A.pdf]

# Sap30

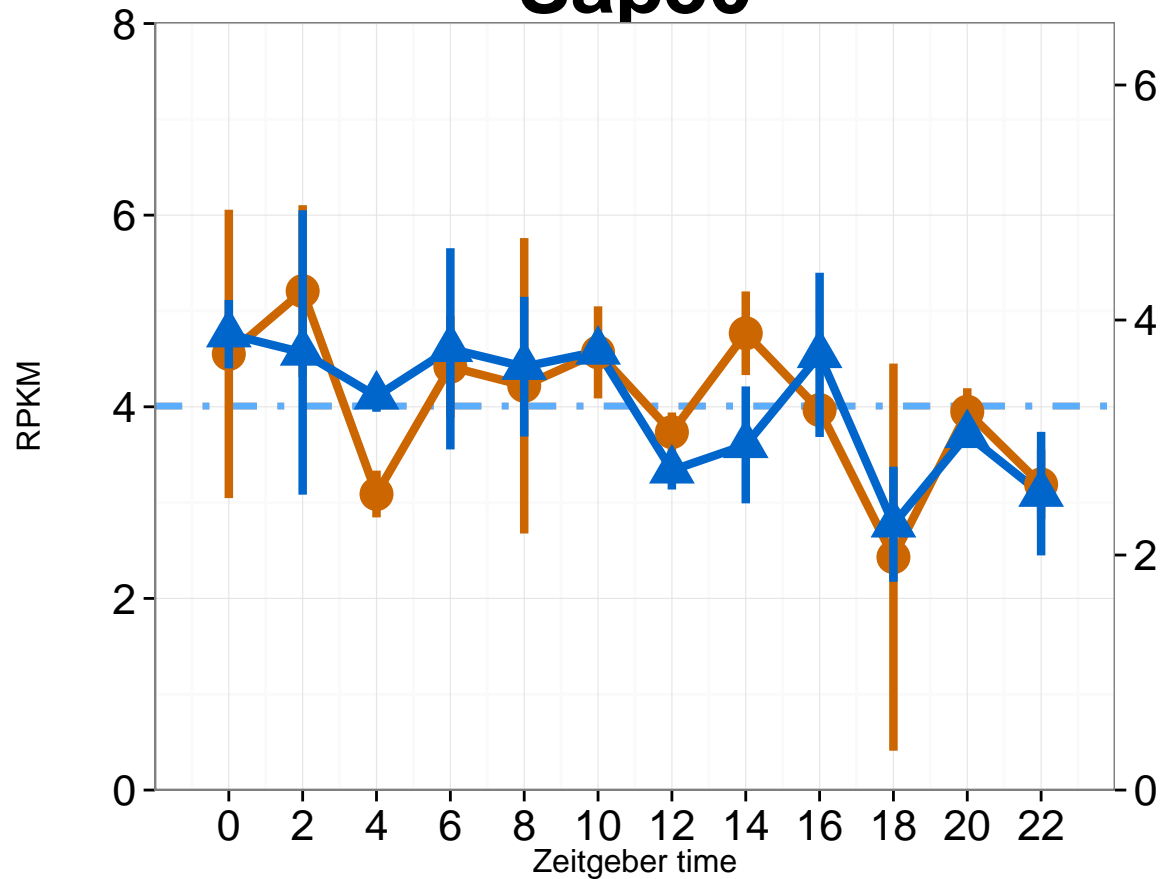

# Sap30

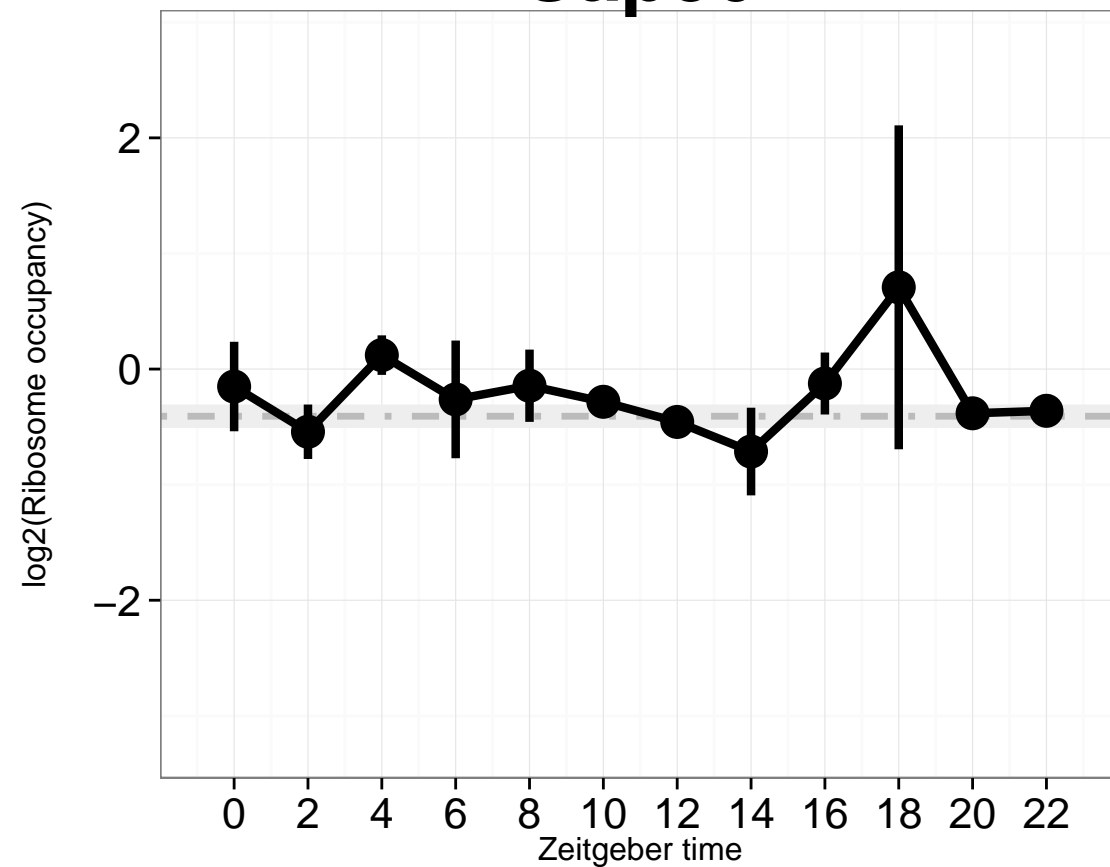

Supplement: SuppDataset_1.zip [file Sap30_set_A.pdf › Supplemental Dataset 1/A-mRNA_nonrhyth_translation_nonrhyth/Sap30_set_A.pdf]

# Sap30bp

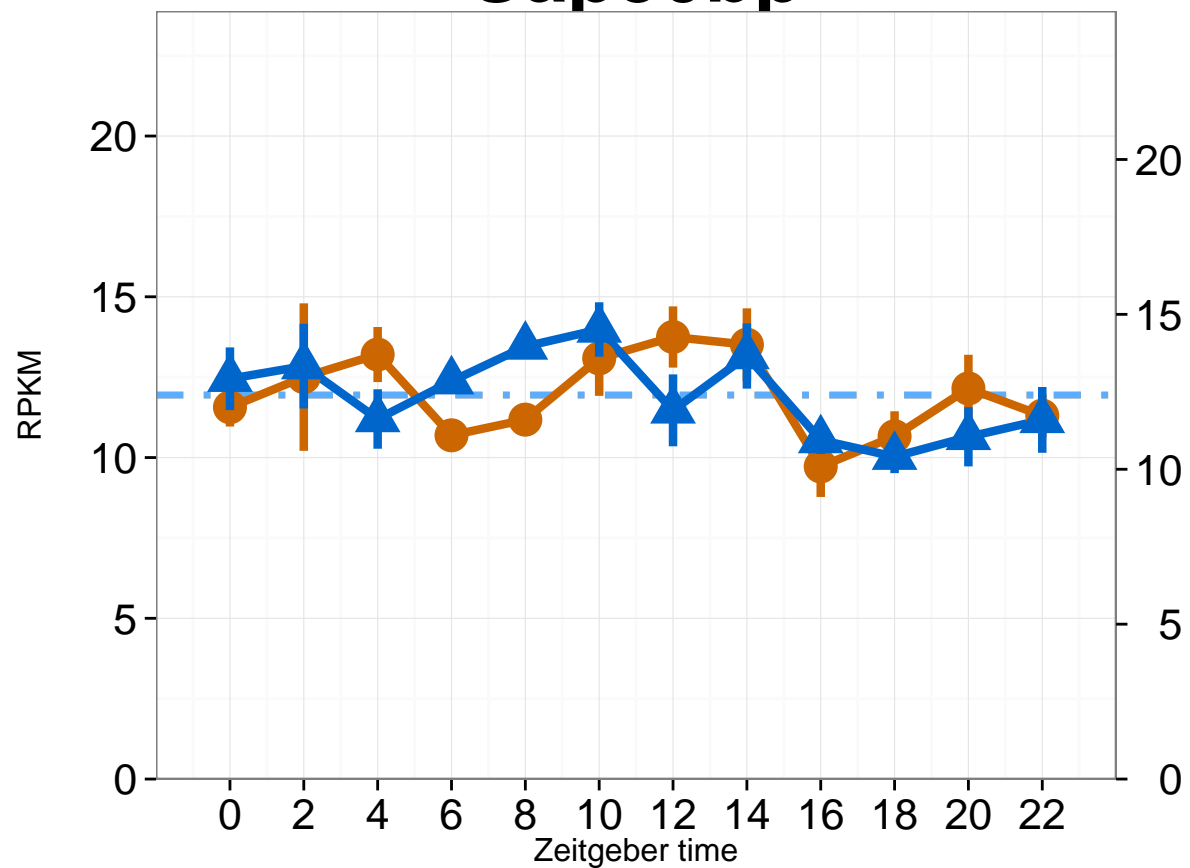

# Sap30bp

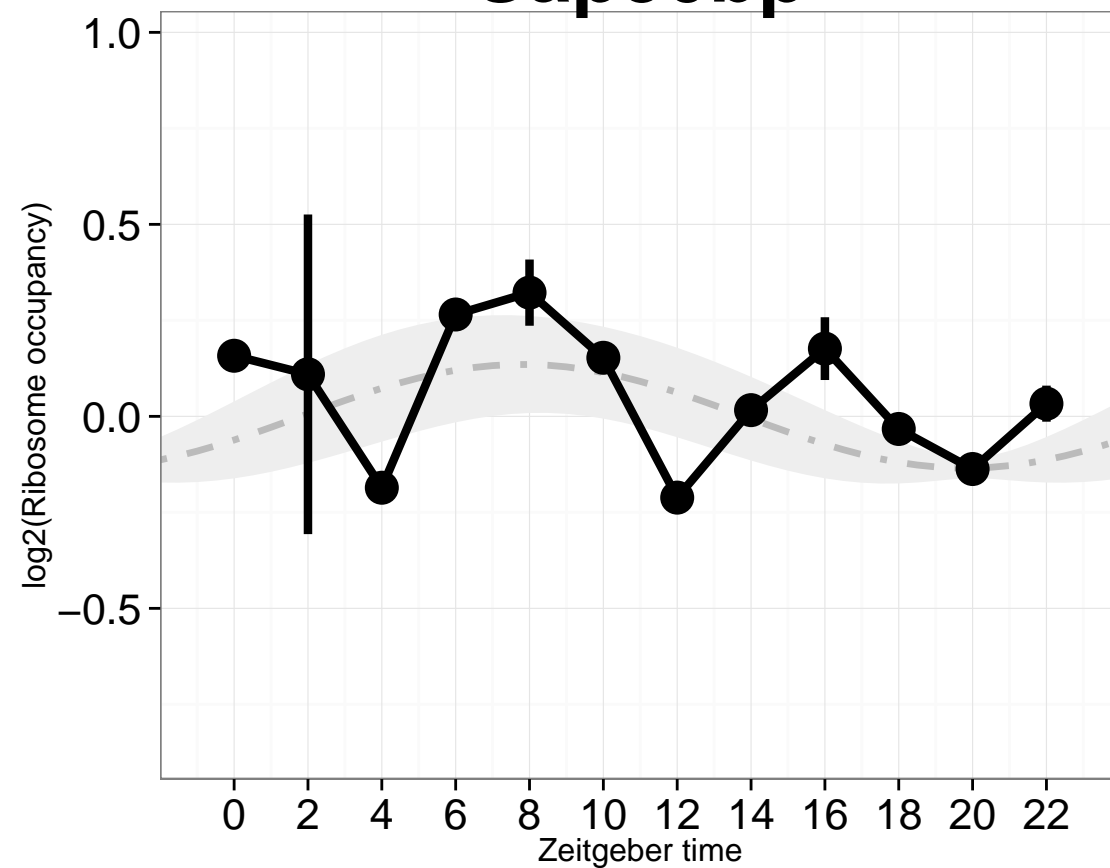

Supplement: SuppDataset_1.zip [file Sap30bp_set_A.pdf › Supplemental Dataset 1/A-mRNA_nonrhyth_translation_nonrhyth/Sap30bp_set_A.pdf]

## Sap30l

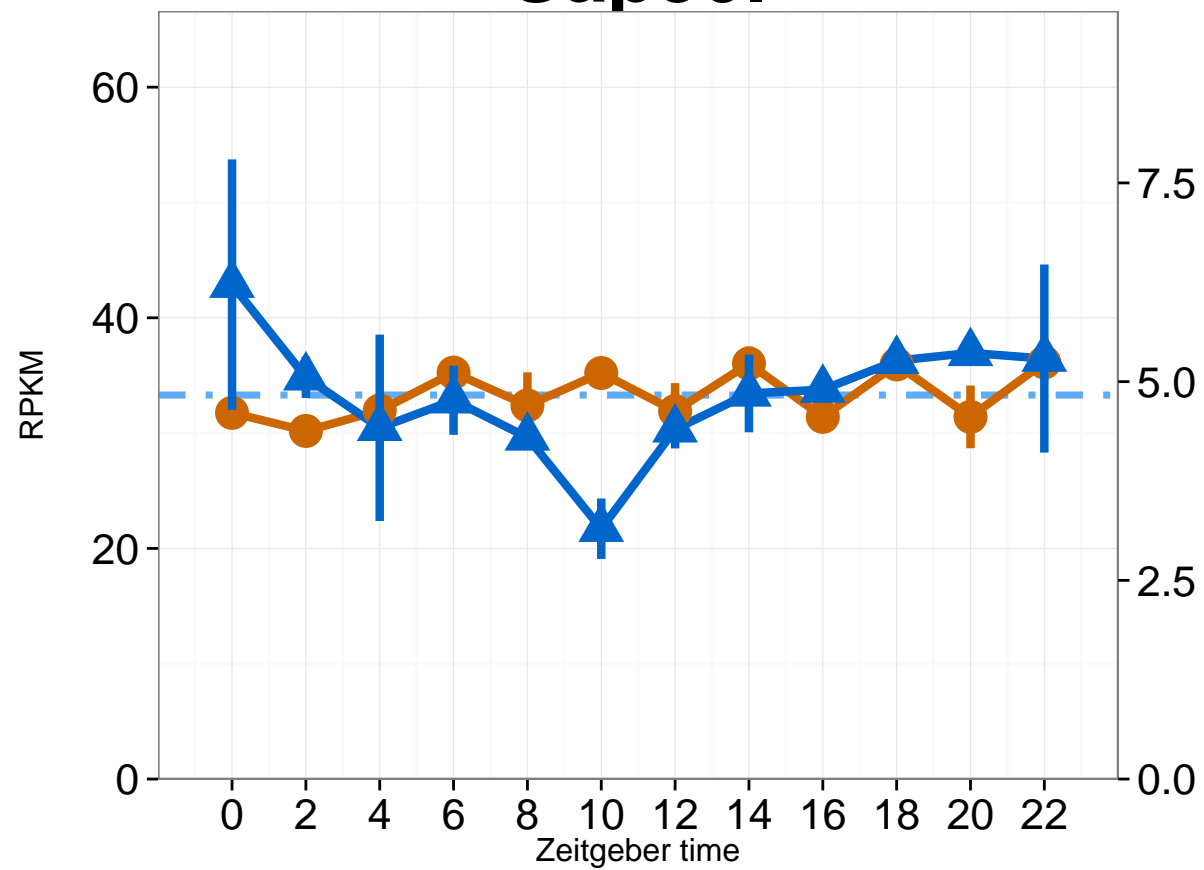

## Sap30l

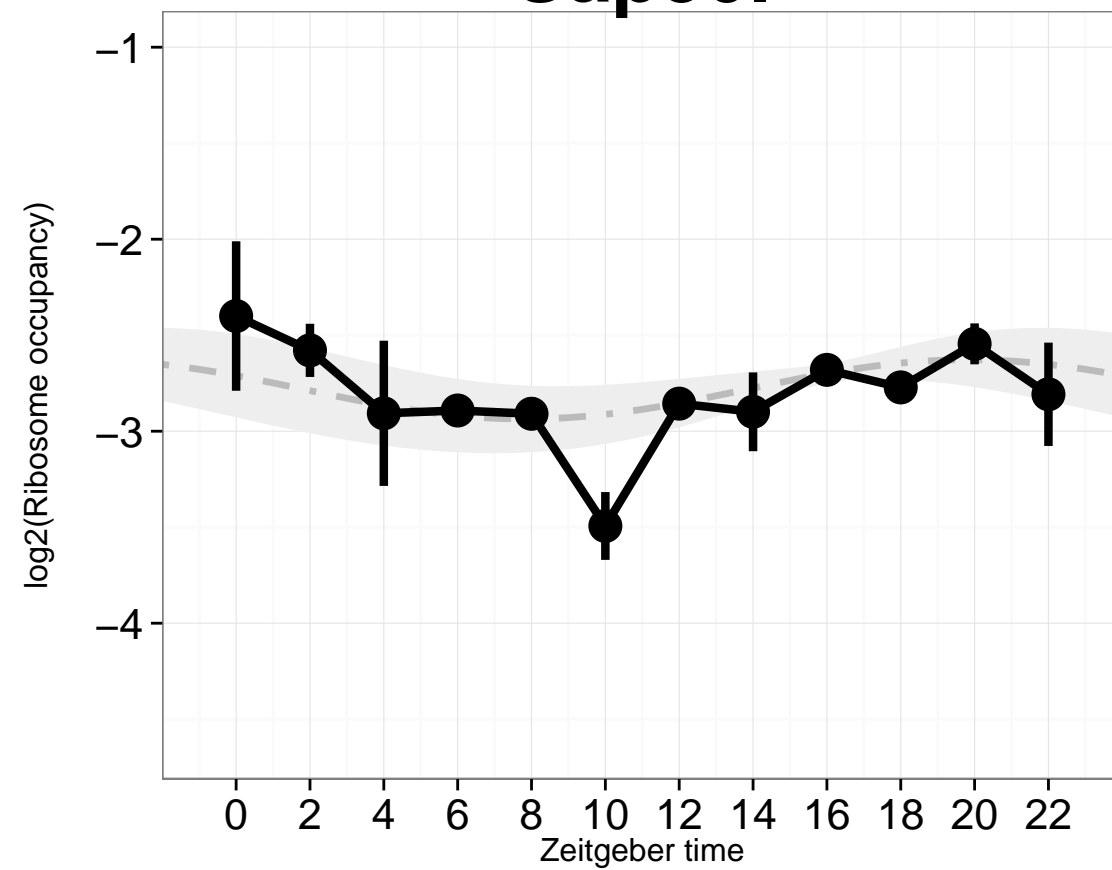

Supplement: SuppDataset_1.zip [file Sap30l_set_A.pdf › Supplemental Dataset 1/A-mRNA_nonrhyth_translation_nonrhyth/Sap30l_set_A.pdf]

# Sar1a

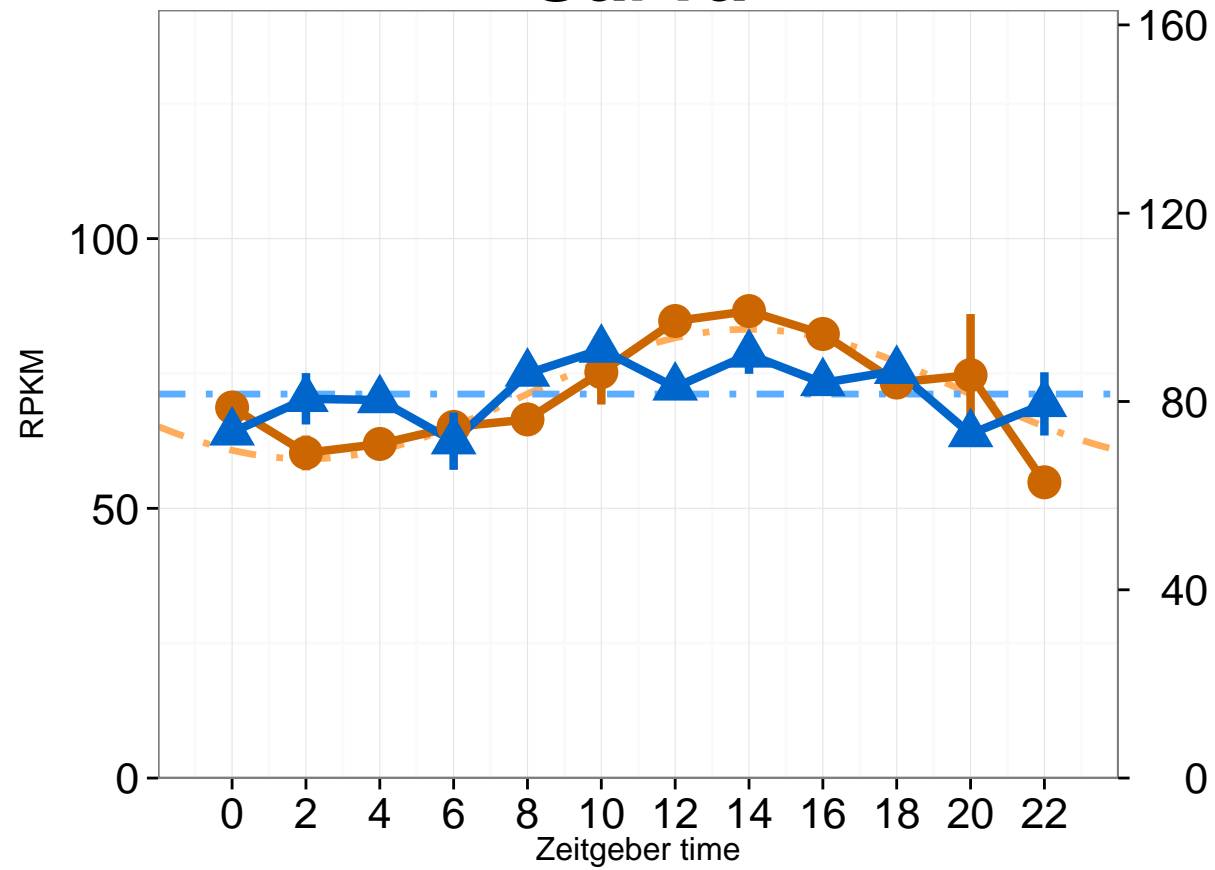

# Sar1a

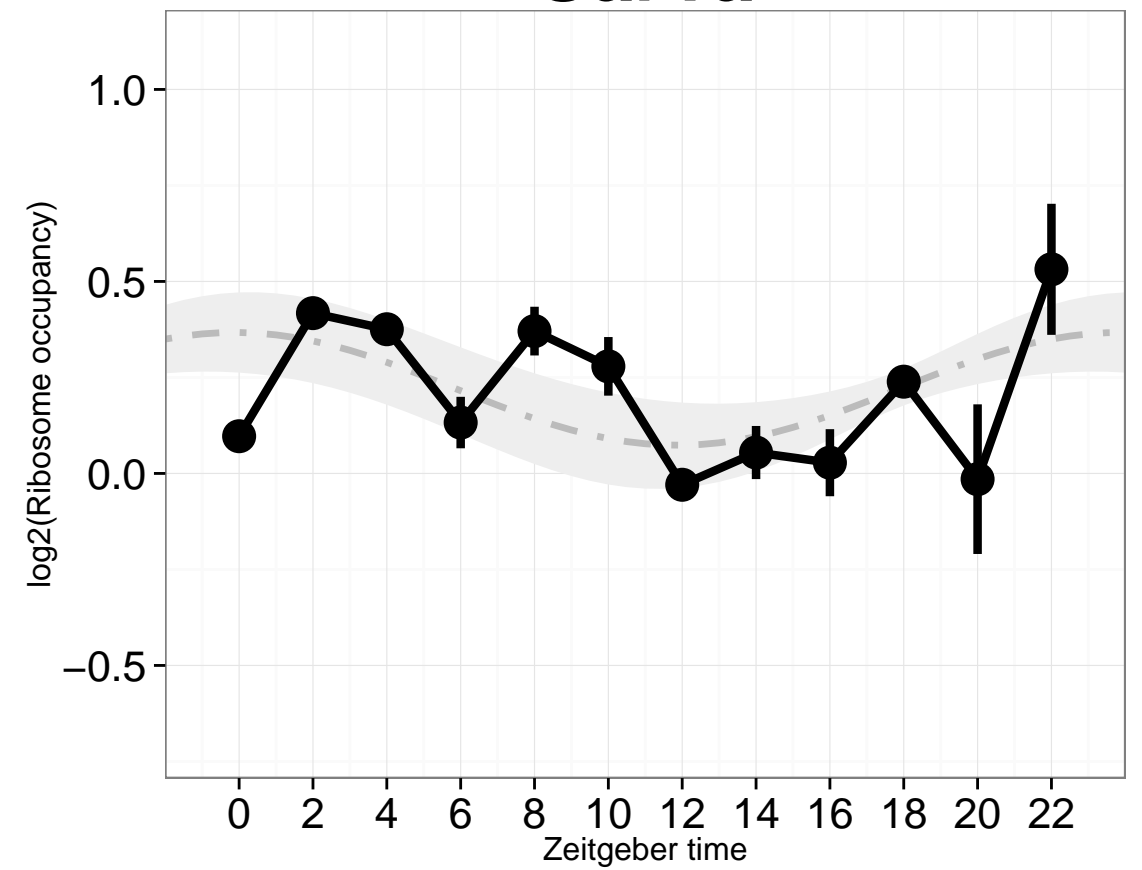

Supplement: SuppDataset_1.zip [file Sar1a_set_A.pdf › Supplemental Dataset 1/A-mRNA_nonrhyth_translation_nonrhyth/Sar1a_set_A.pdf]

# Sar1b

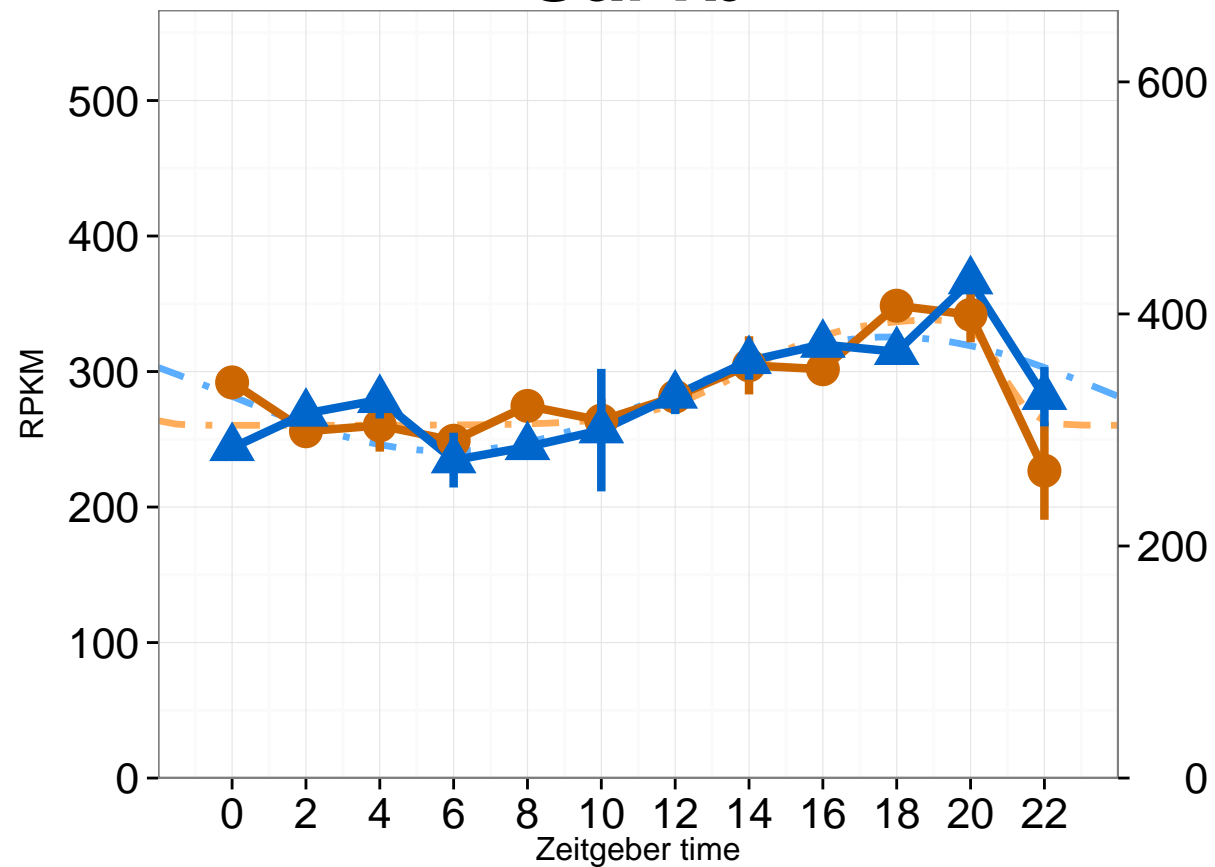

# Sar1b

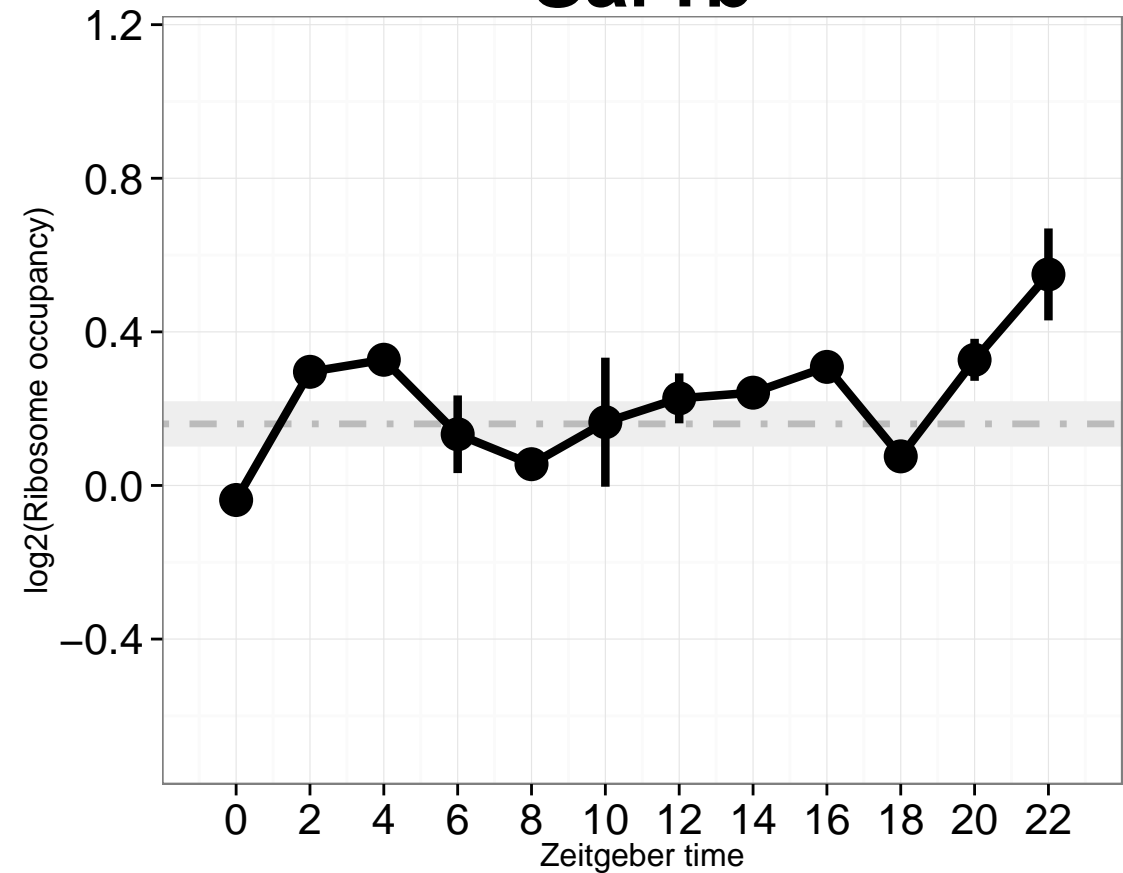

Supplement: SuppDataset_1.zip [file Sar1b_set_A.pdf › Supplemental Dataset 1/A-mRNA_nonrhyth_translation_nonrhyth/Sar1b_set_A.pdf]

## Sardh

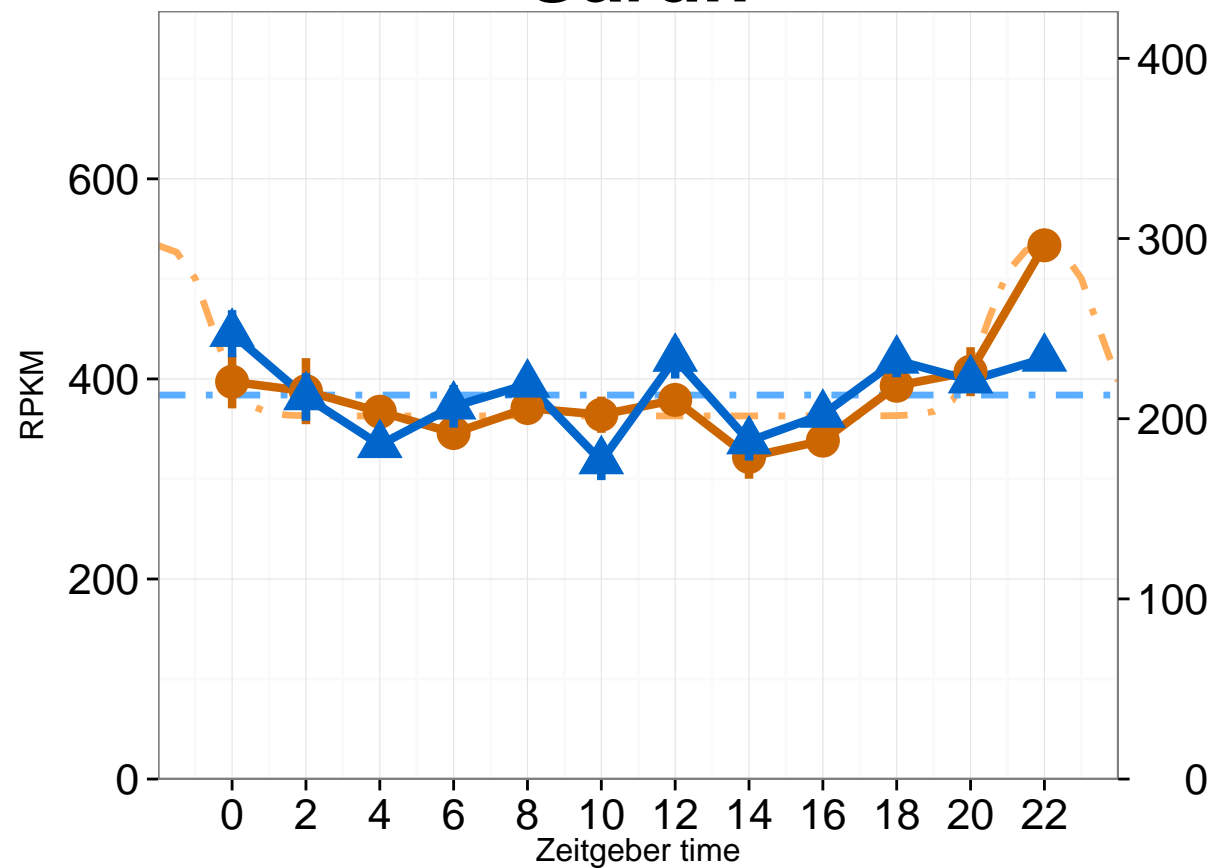

## Sardh

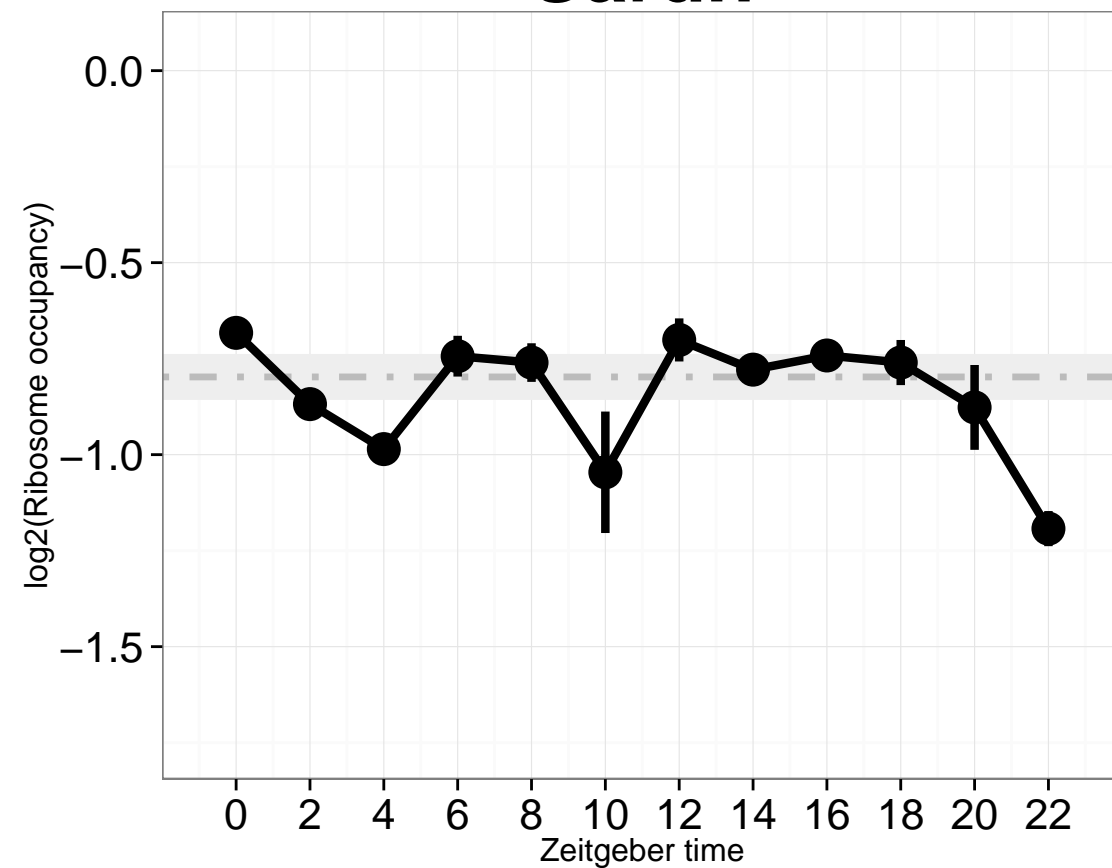

Supplement: SuppDataset_1.zip [file Sardh_set_A.pdf › Supplemental Dataset 1/A-mRNA_nonrhyth_translation_nonrhyth/Sardh_set_A.pdf]

## Sarnp

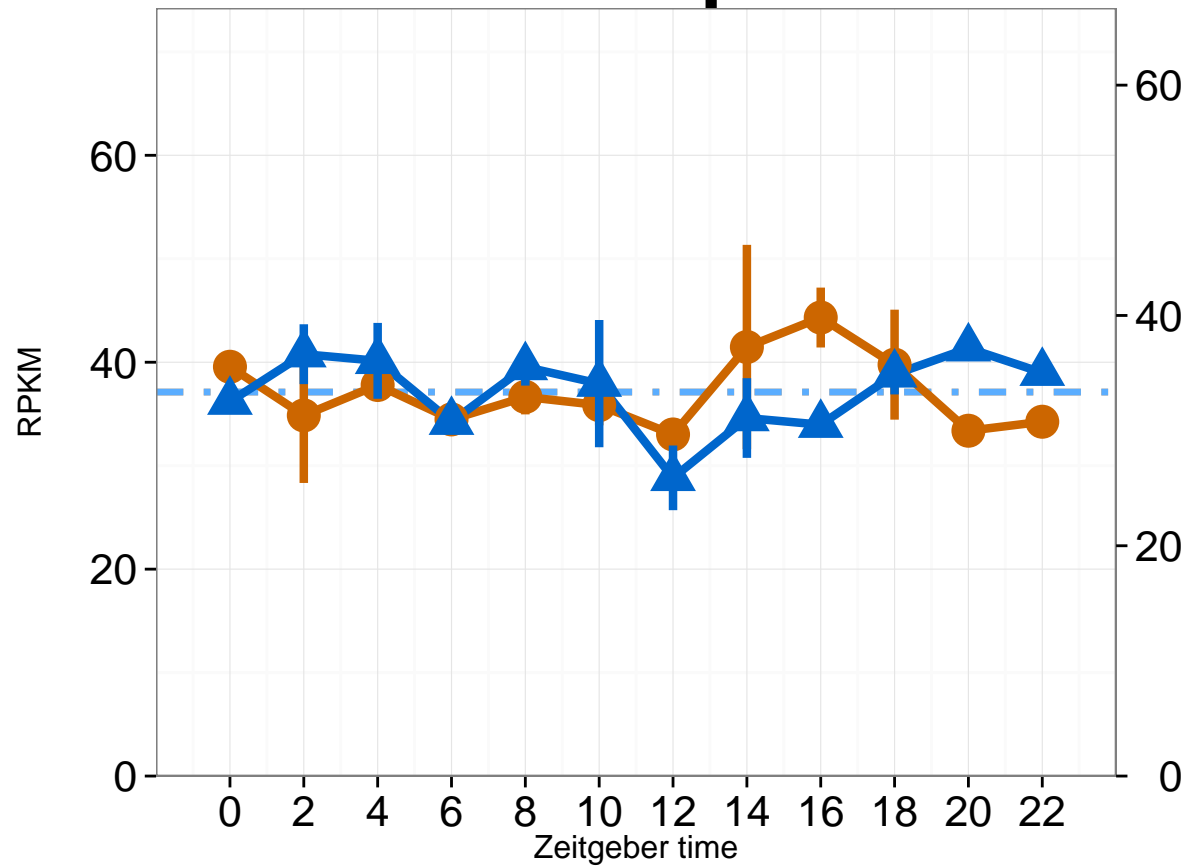

## Sarnp

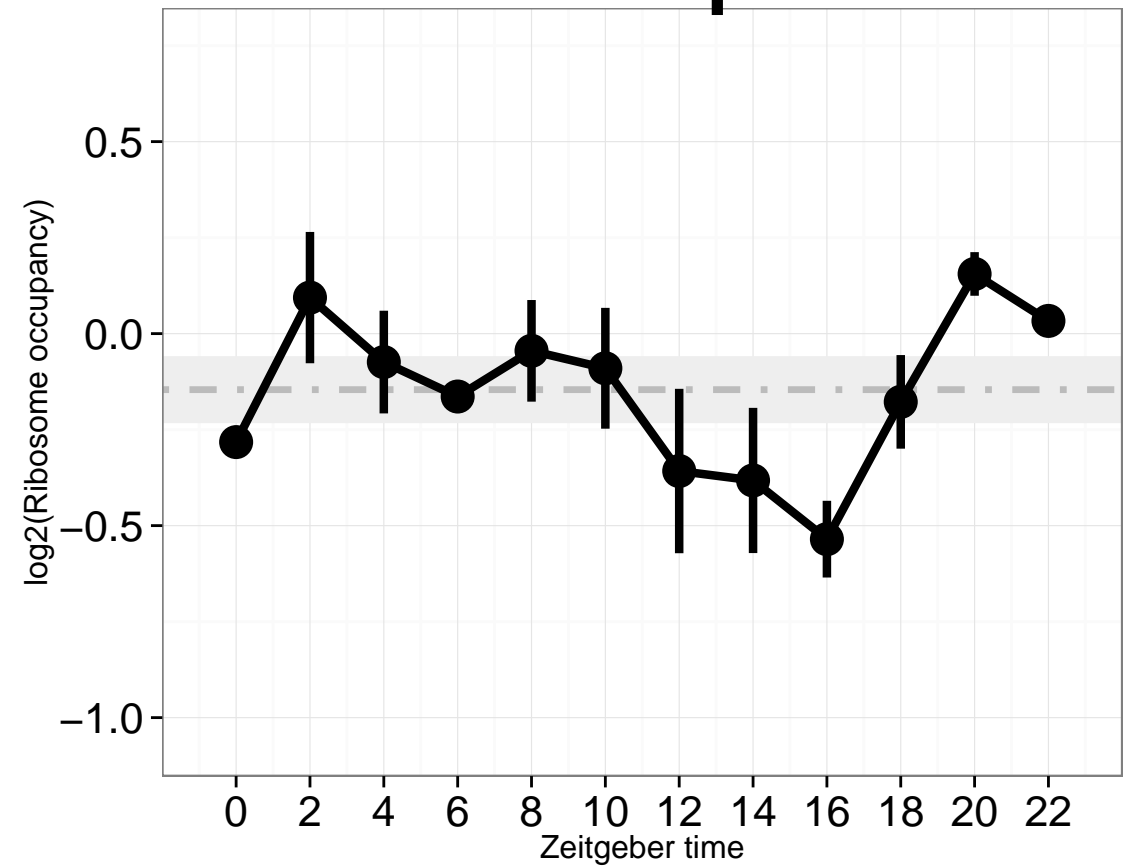

Supplement: SuppDataset_1.zip [file Sarnp_set_A.pdf › Supplemental Dataset 1/A-mRNA_nonrhyth_translation_nonrhyth/Sarnp_set_A.pdf]

## Sars

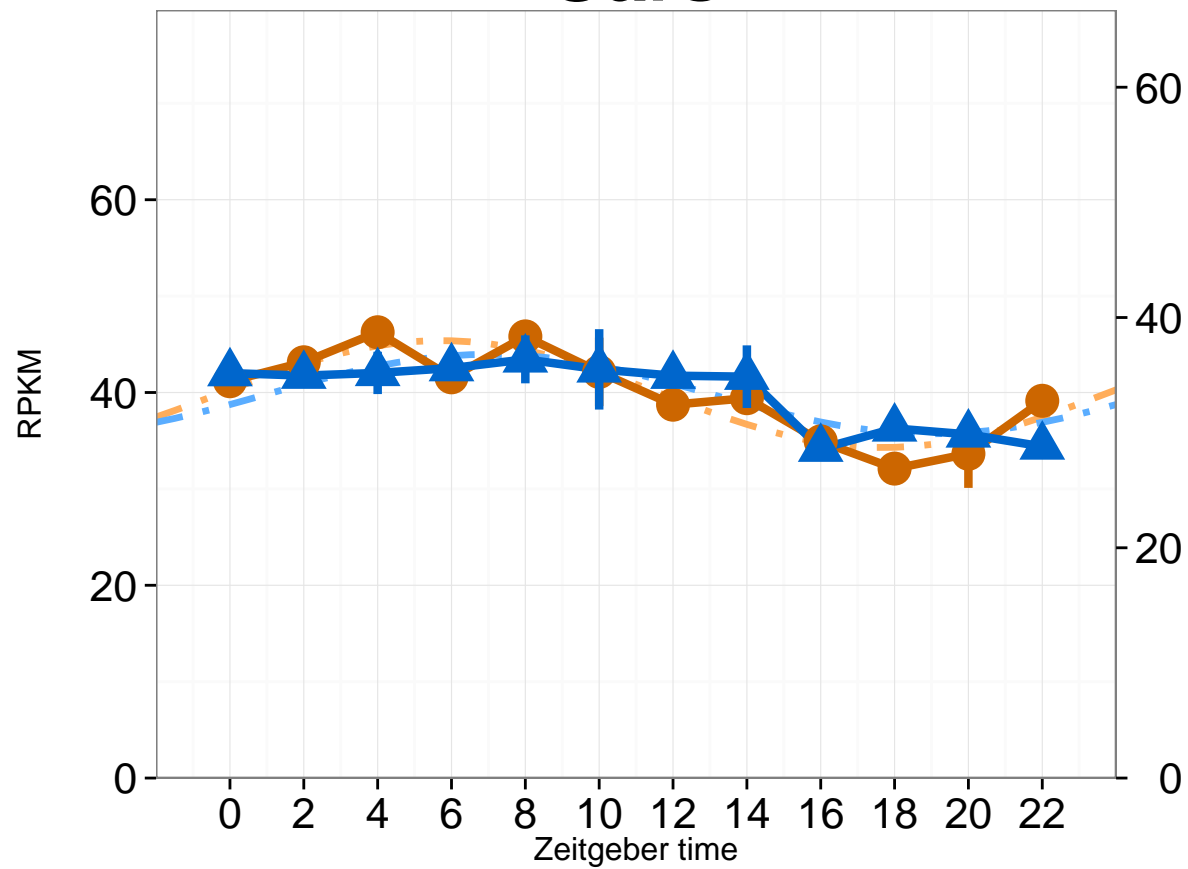

## Sars

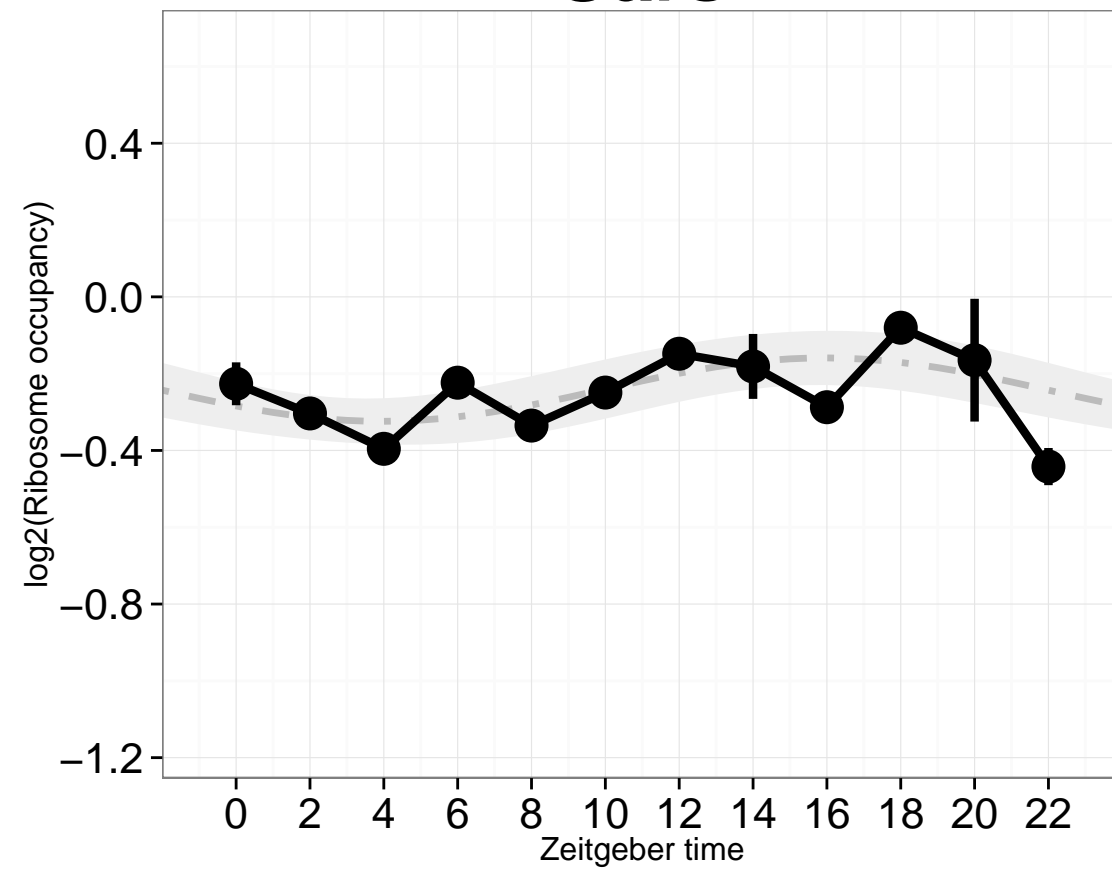

Supplement: SuppDataset_1.zip [file Sars_set_A.pdf › Supplemental Dataset 1/A-mRNA_nonrhyth_translation_nonrhyth/Sars_set_A.pdf]

# Sart1

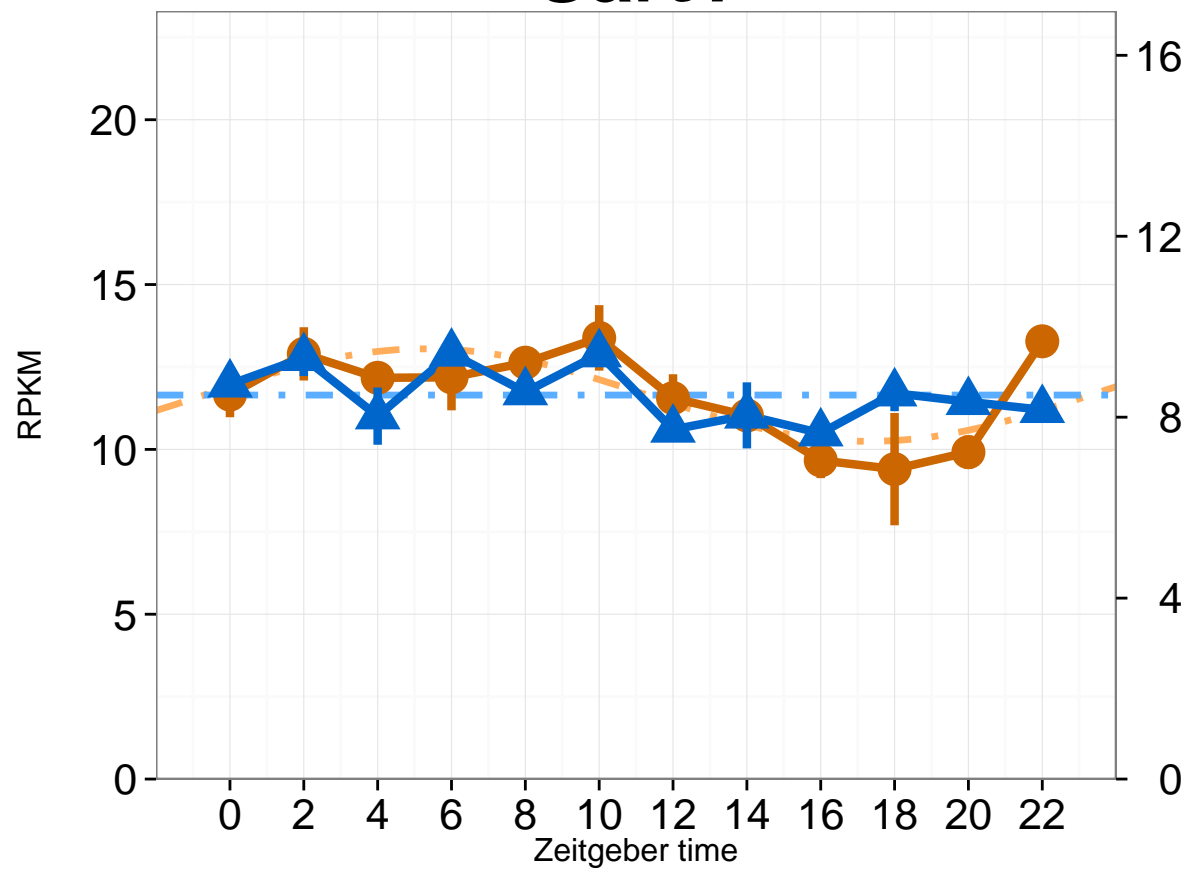

# Sart1

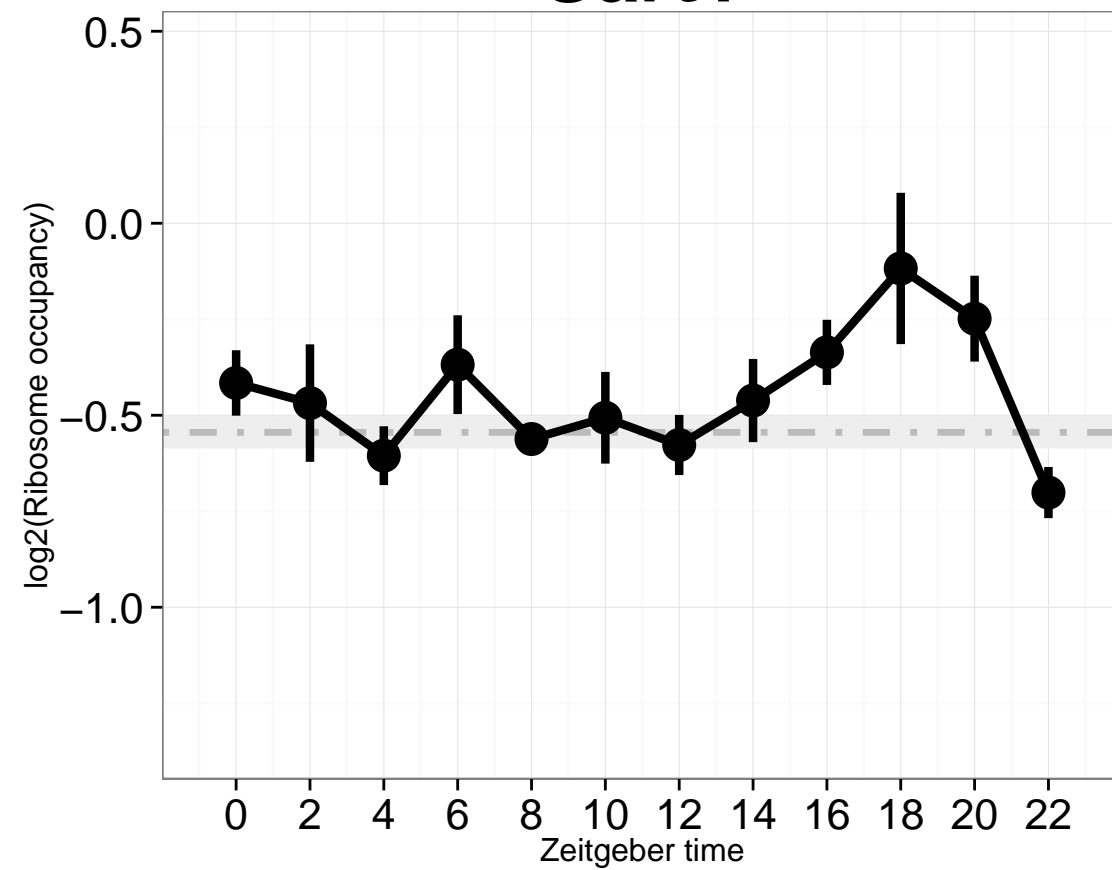

Supplement: SuppDataset_1.zip [file Sart1_set_A.pdf › Supplemental Dataset 1/A-mRNA_nonrhyth_translation_nonrhyth/Sart1_set_A.pdf]

# Sart3

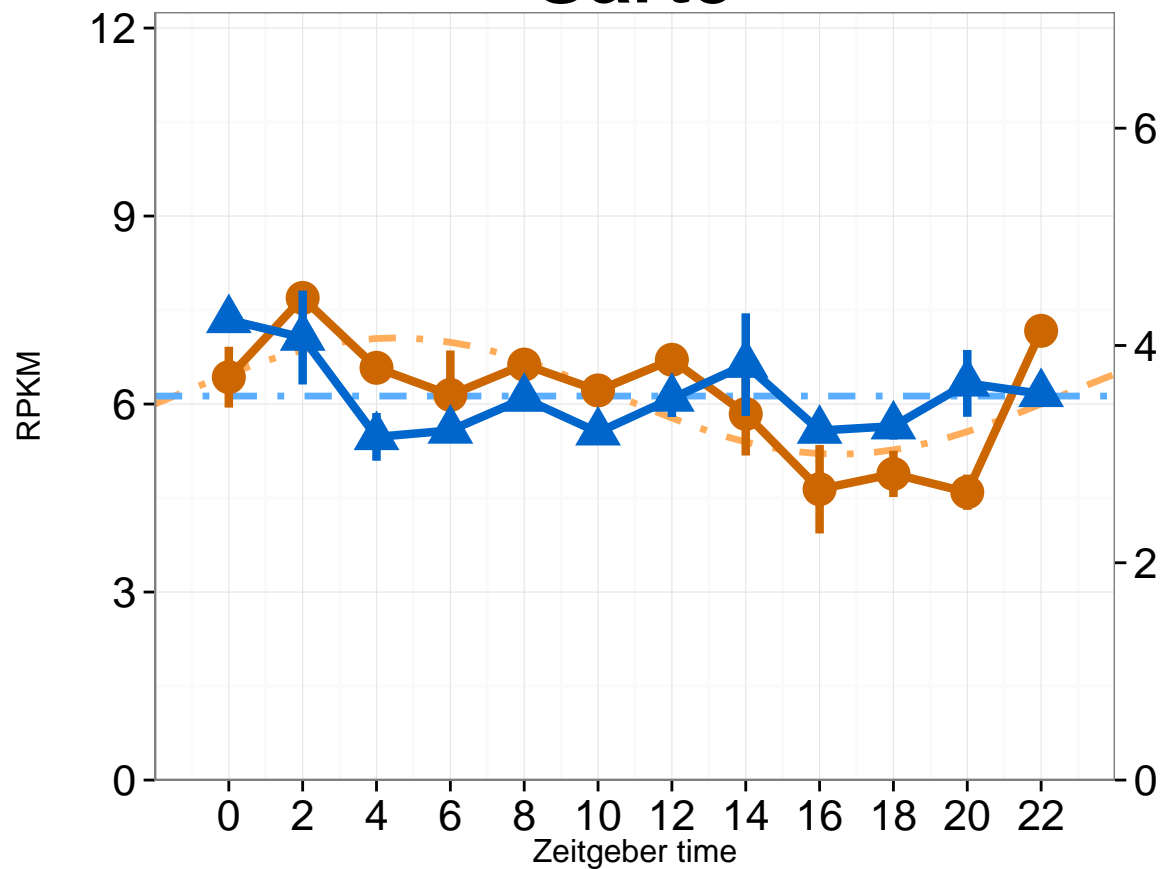

# Sart3

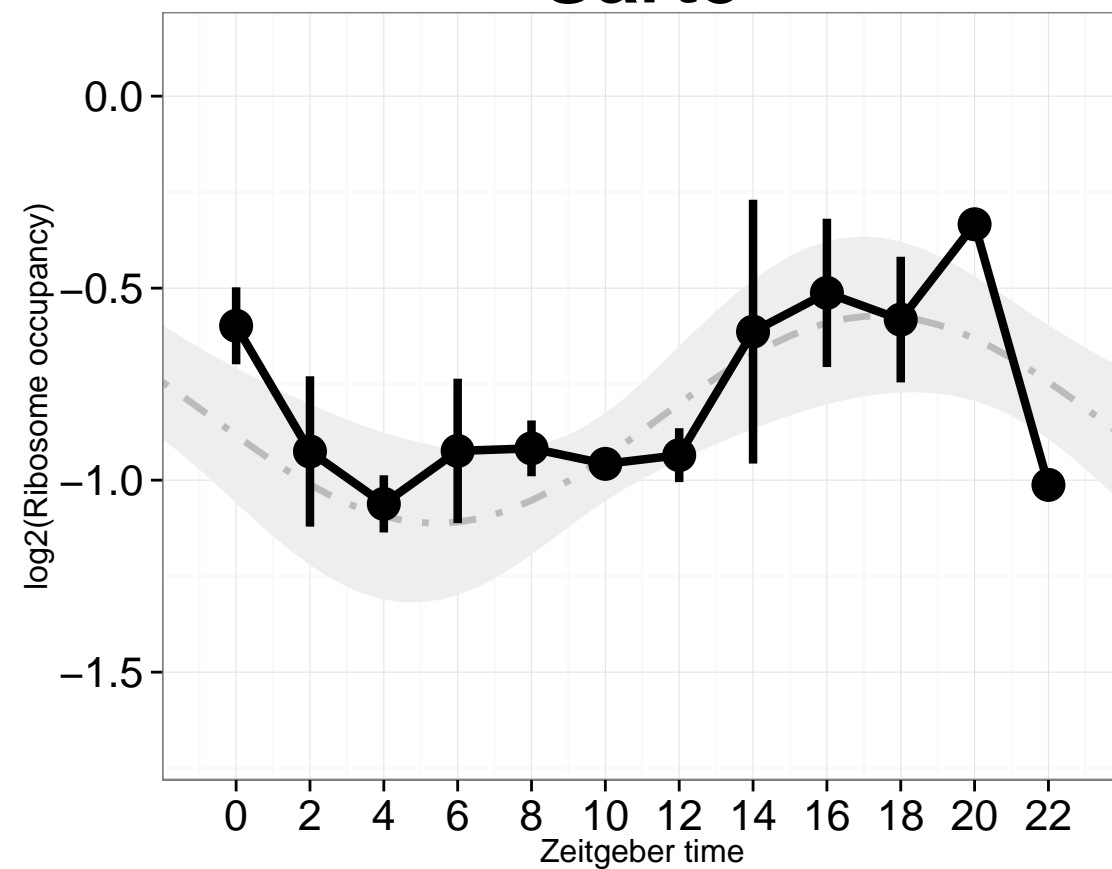

Supplement: SuppDataset_1.zip [file Sart3_set_A.pdf › Supplemental Dataset 1/A-mRNA_nonrhyth_translation_nonrhyth/Sart3_set_A.pdf]

## Sash1

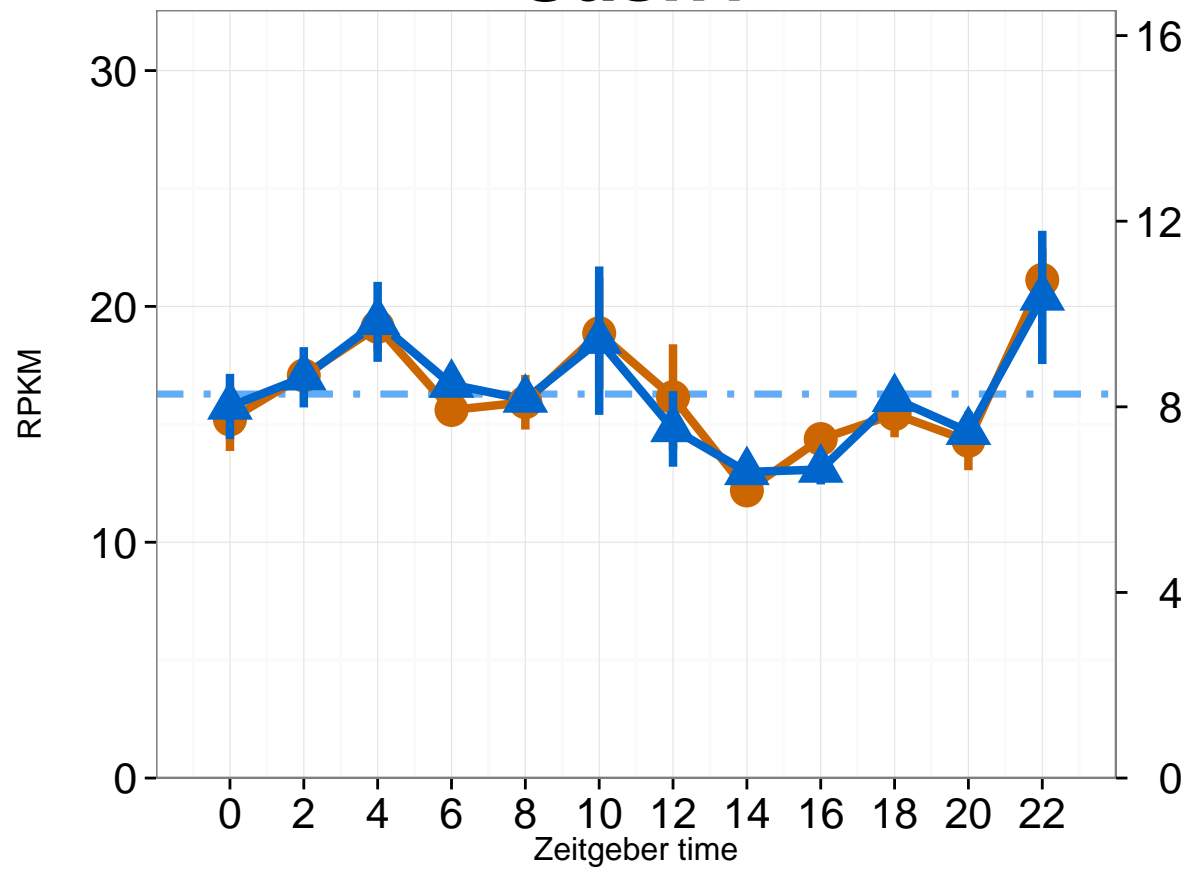

## Sash1

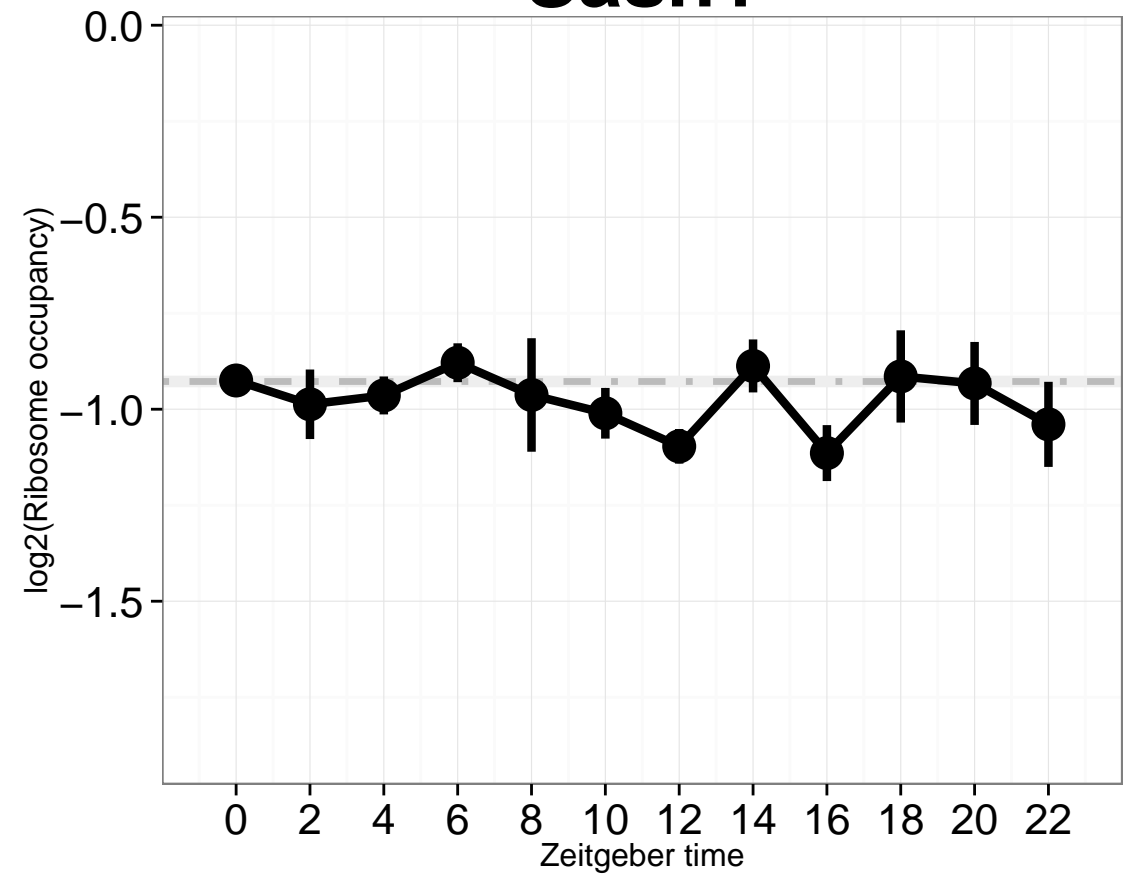

Supplement: SuppDataset_1.zip [file Sash1_set_A.pdf › Supplemental Dataset 1/A-mRNA_nonrhyth_translation_nonrhyth/Sash1_set_A.pdf]

# Sass6

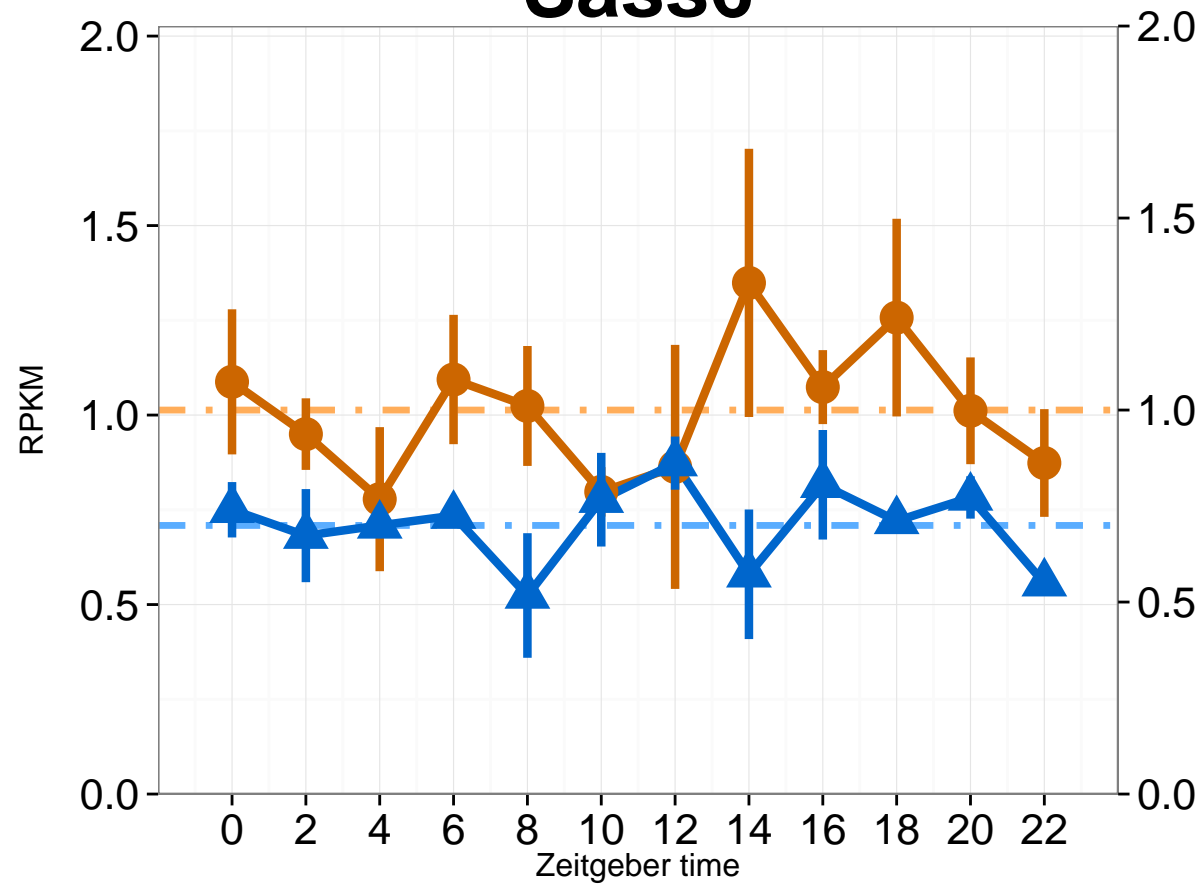

# Sass6

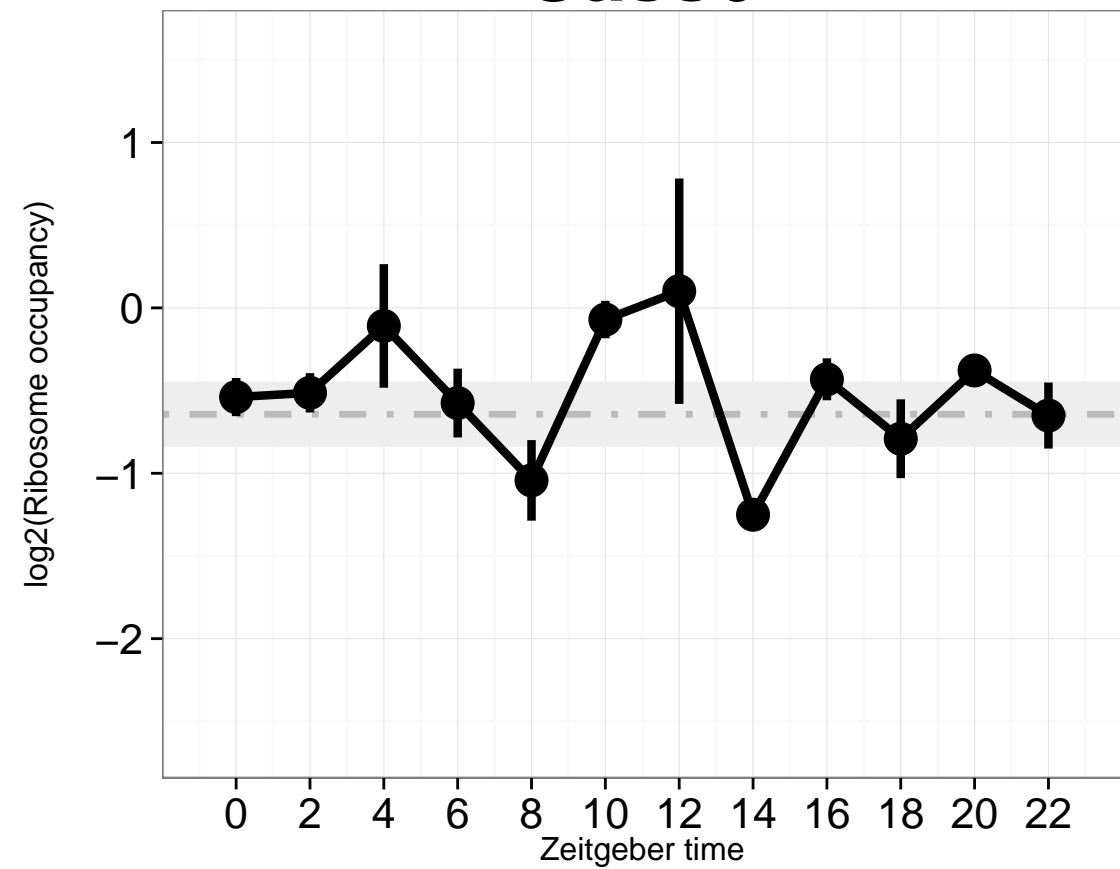

Supplement: SuppDataset_1.zip [file Sass6_set_A.pdf › Supplemental Dataset 1/A-mRNA_nonrhyth_translation_nonrhyth/Sass6_set_A.pdf]

# Sat1

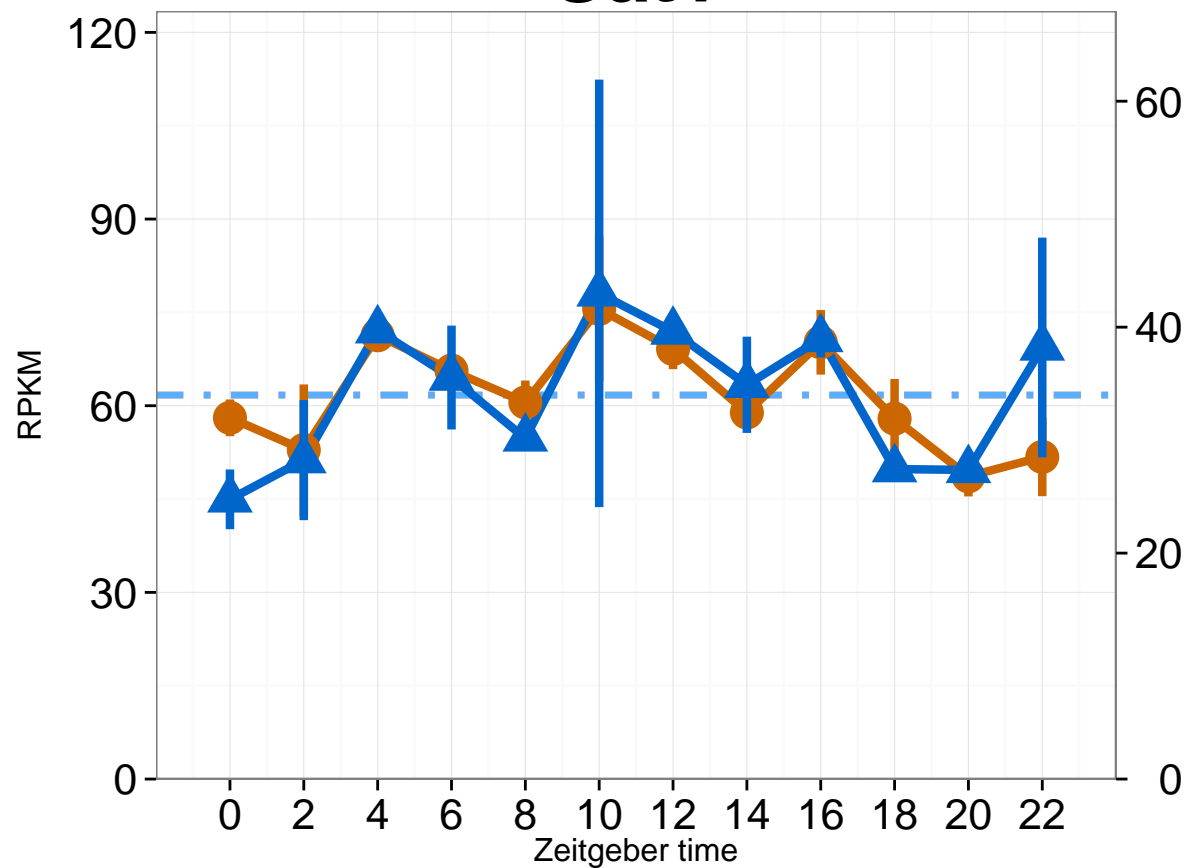

# Sat1

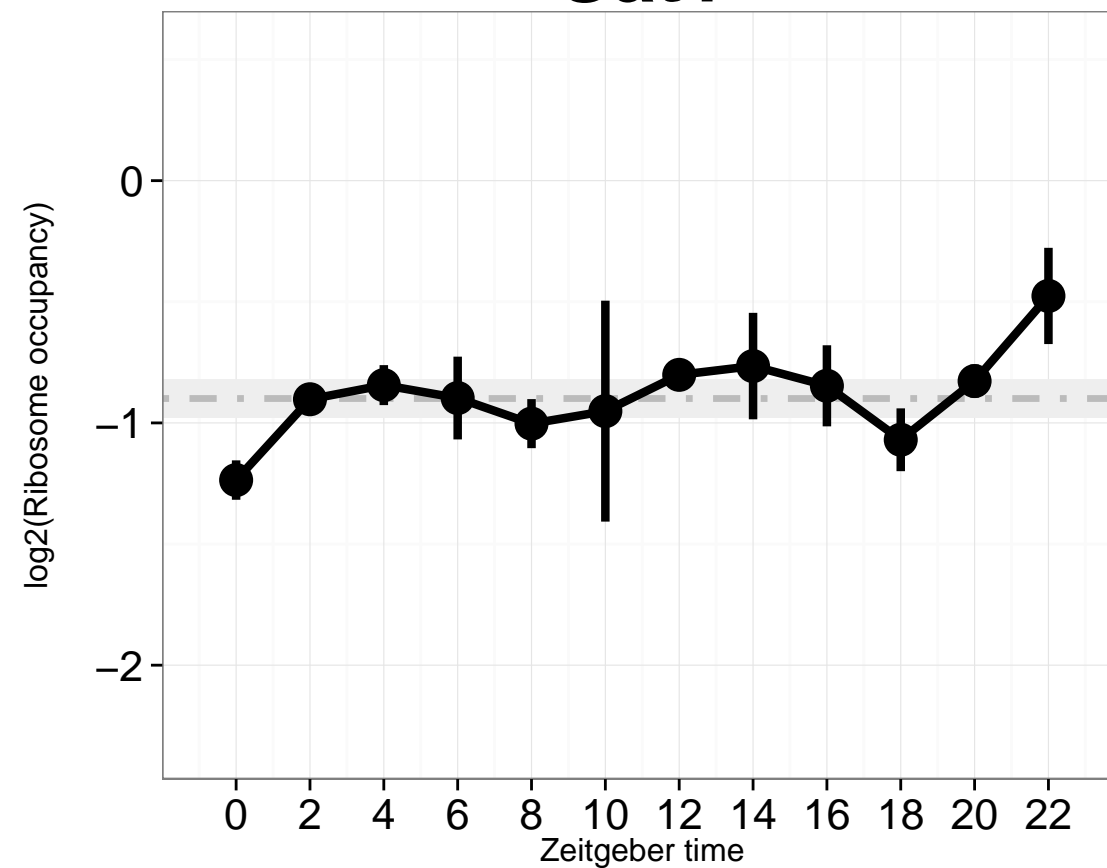

Supplement: SuppDataset_1.zip [file Sat1_set_A.pdf › Supplemental Dataset 1/A-mRNA_nonrhyth_translation_nonrhyth/Sat1_set_A.pdf]

# Sat2

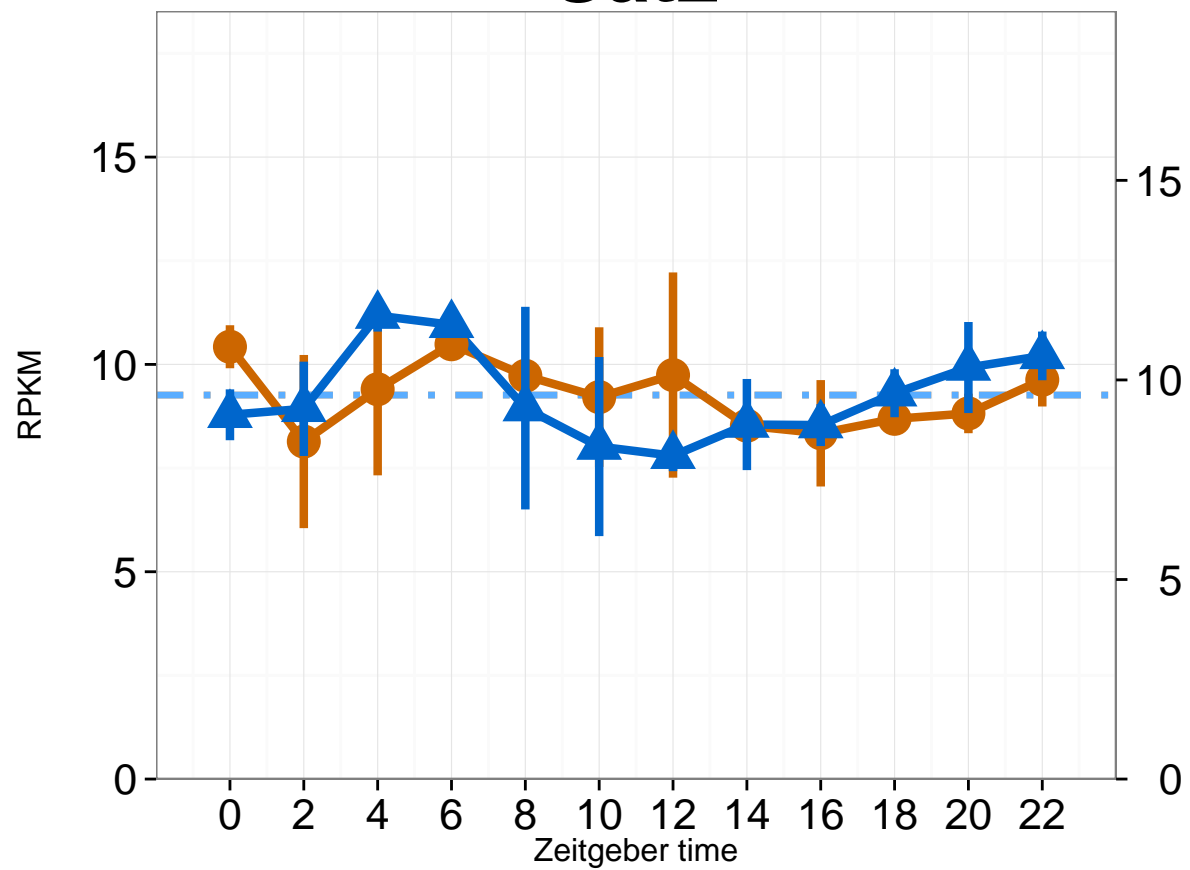

# Sat2

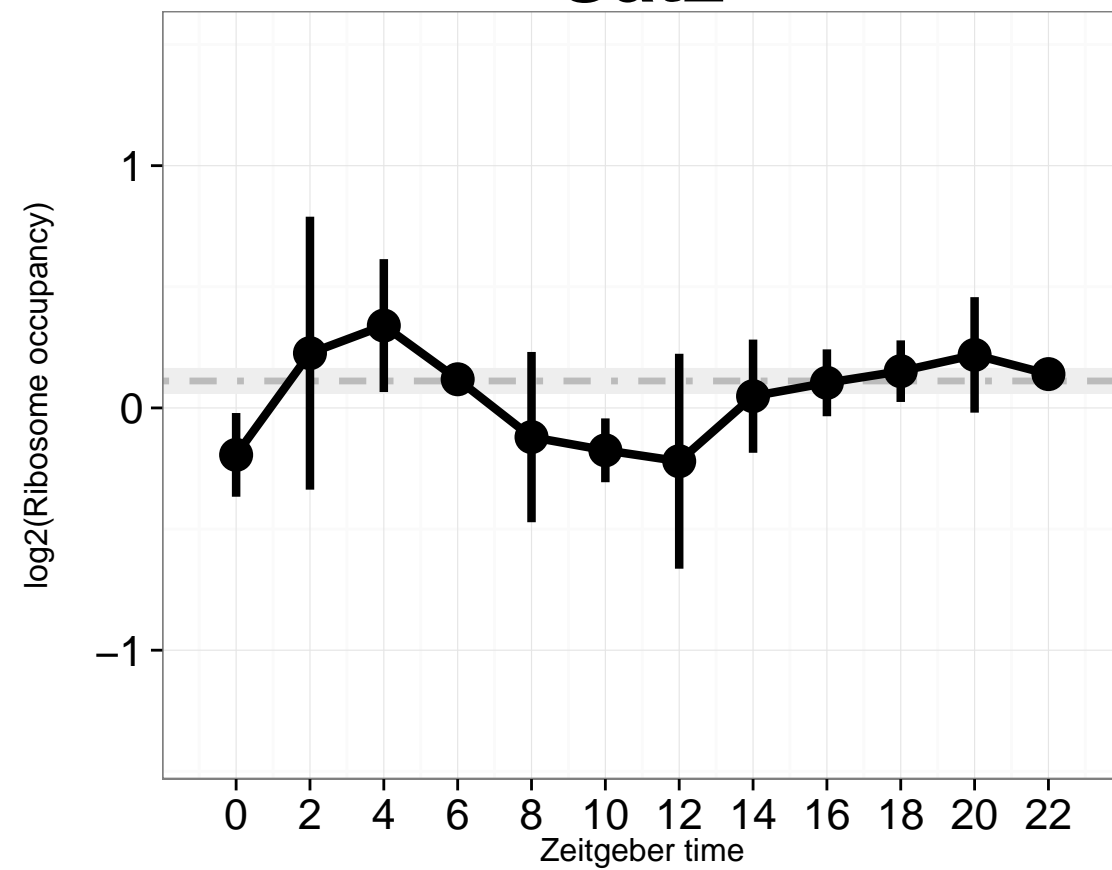

Supplement: SuppDataset_1.zip [file Sat2_set_A.pdf › Supplemental Dataset 1/A-mRNA_nonrhyth_translation_nonrhyth/Sat2_set_A.pdf]

## Sav1

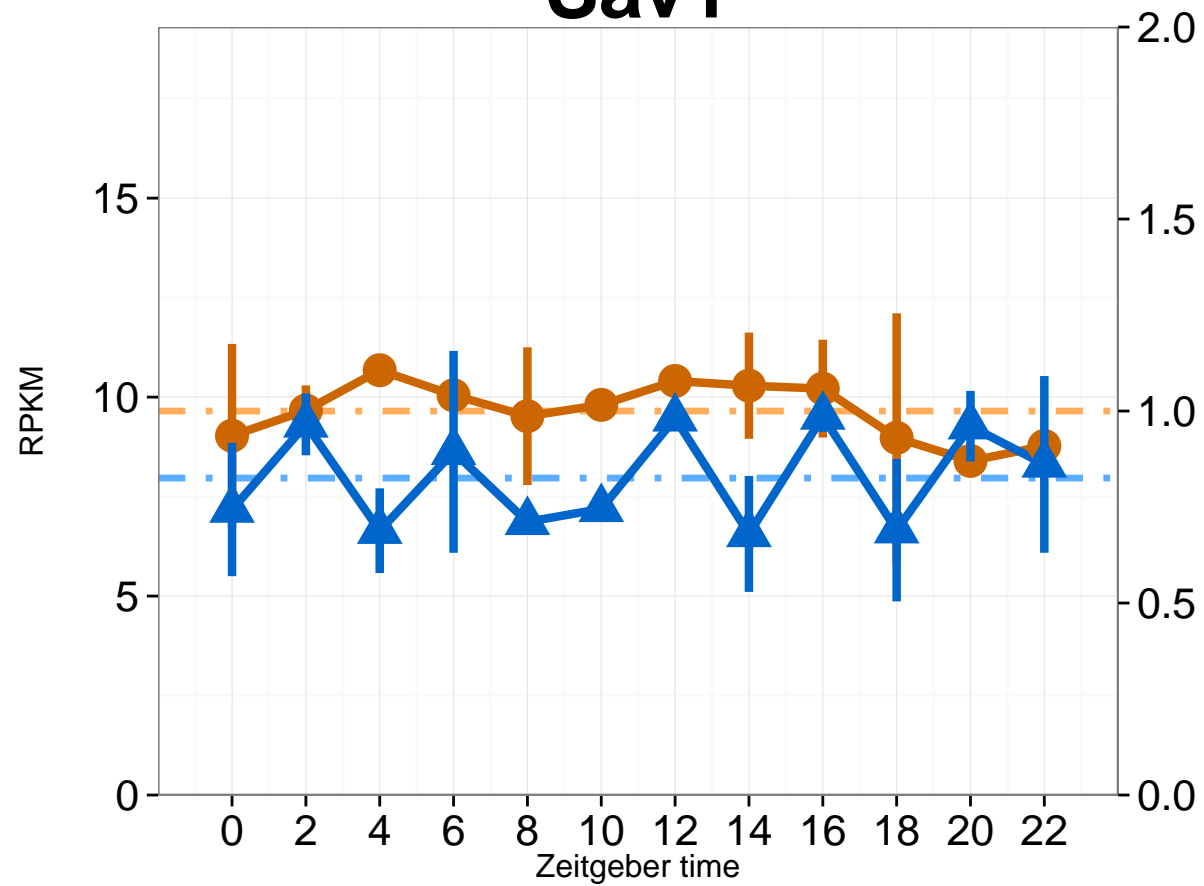

## Sav1

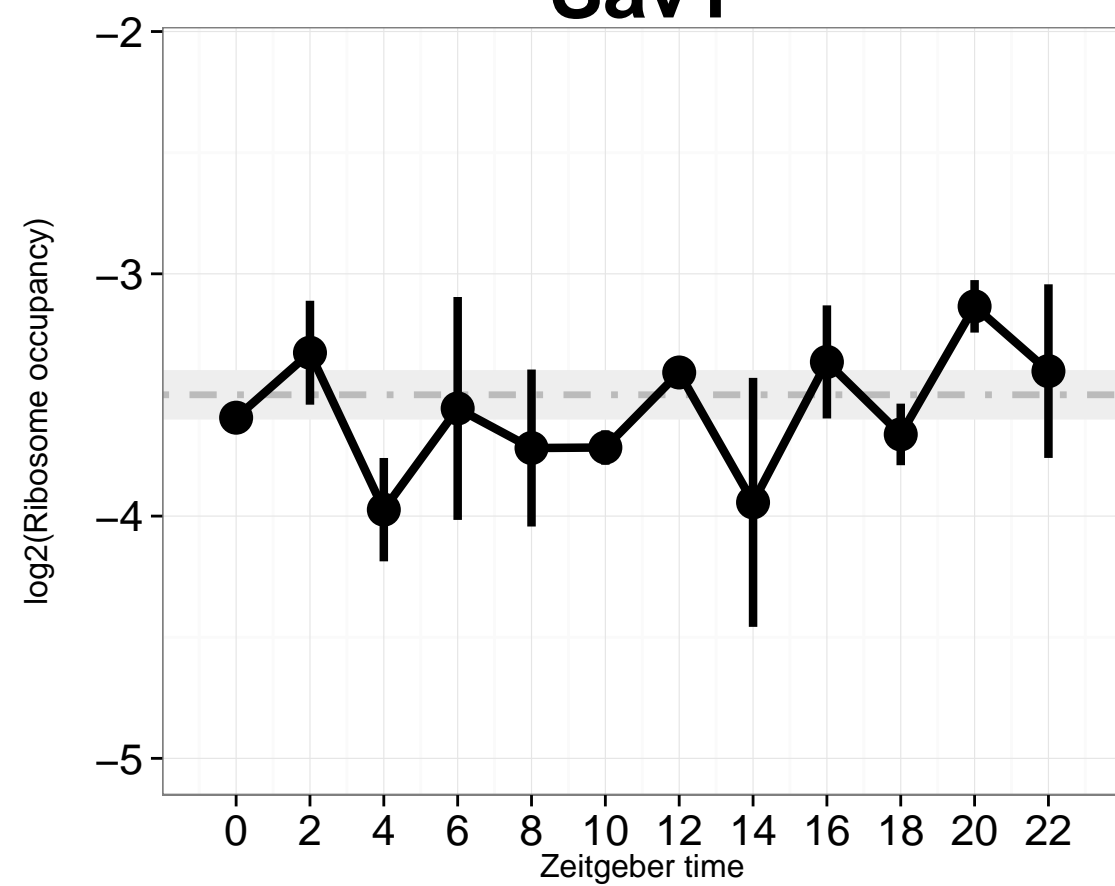

Supplement: SuppDataset_1.zip [file Sav1_set_A.pdf › Supplemental Dataset 1/A-mRNA_nonrhyth_translation_nonrhyth/Sav1_set_A.pdf]

# Saysd1

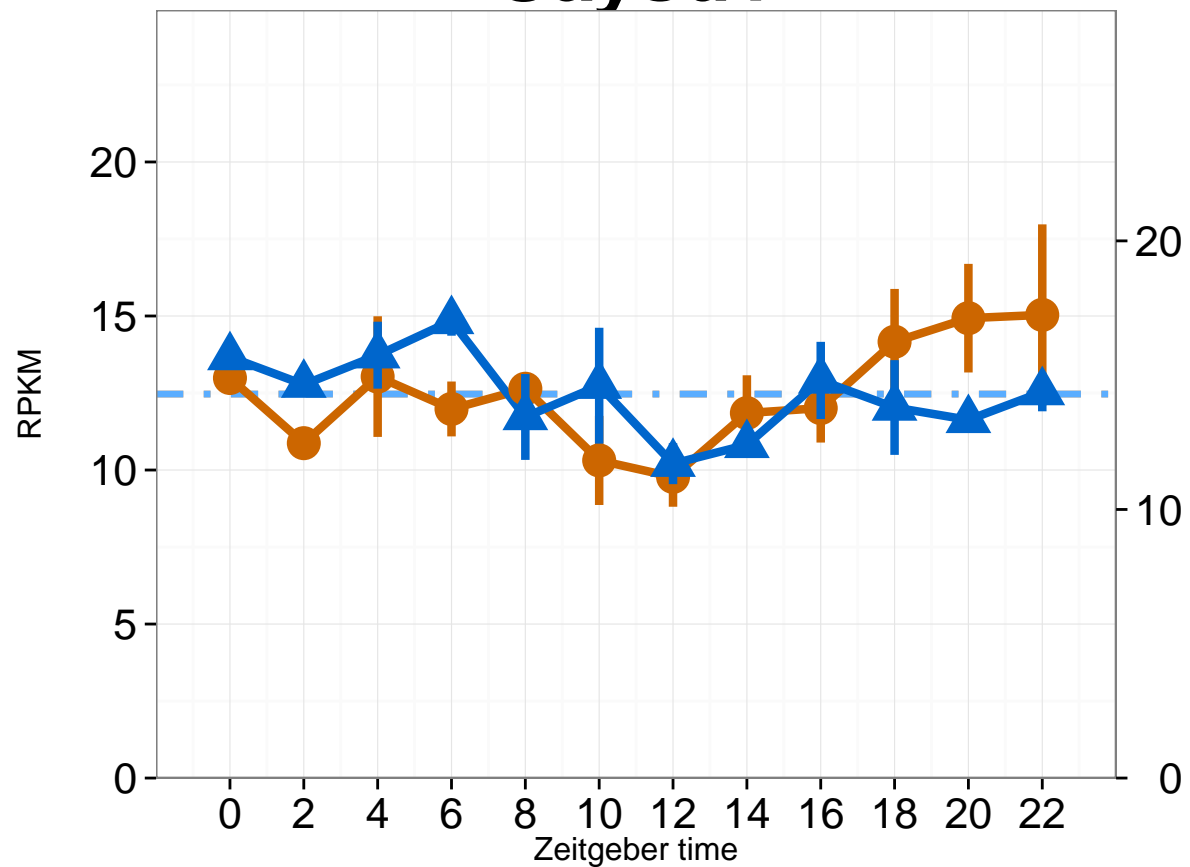

# Saysd1

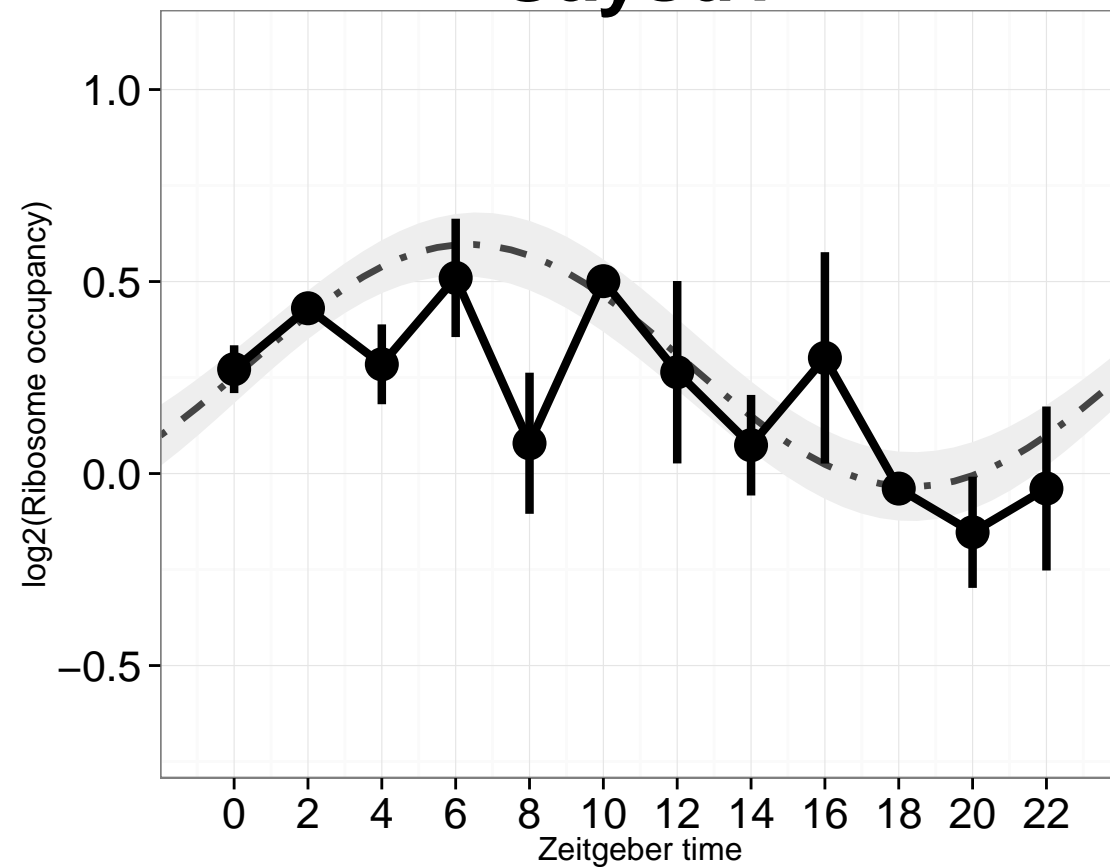

Supplement: SuppDataset_1.zip [file Saysd1_set_A.pdf › Supplemental Dataset 1/A-mRNA_nonrhyth_translation_nonrhyth/Saysd1_set_A.pdf]

## Sbds

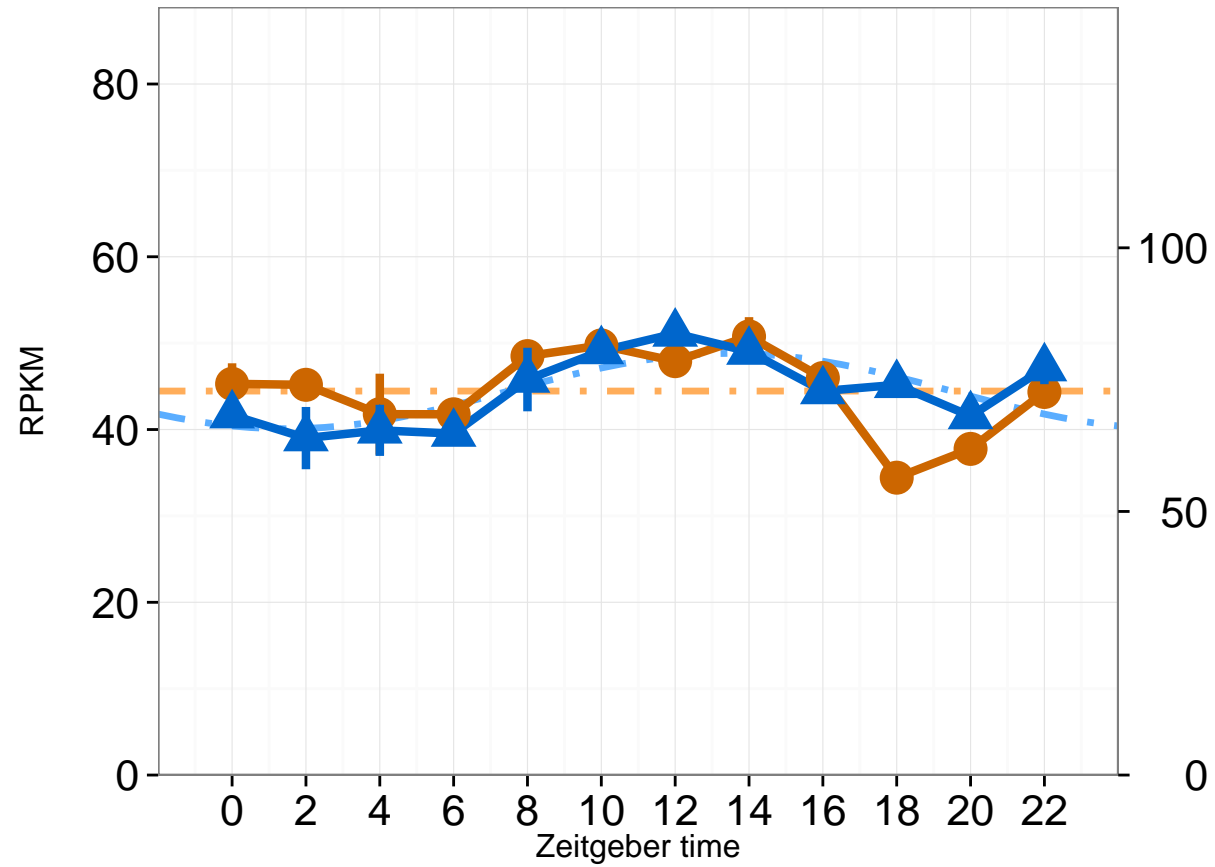

## Sbds

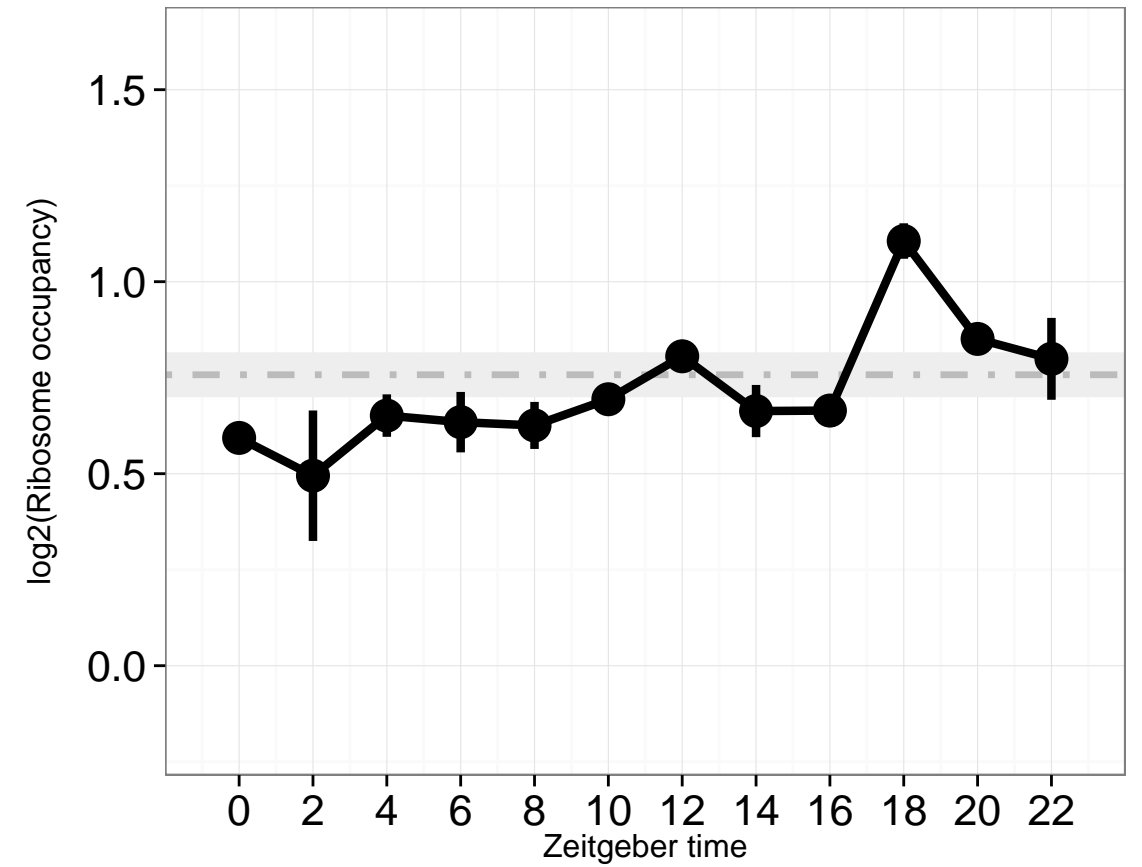

Supplement: SuppDataset_1.zip [file Sbds_set_A.pdf › Supplemental Dataset 1/A-mRNA_nonrhyth_translation_nonrhyth/Sbds_set_A.pdf]

## Sbf1

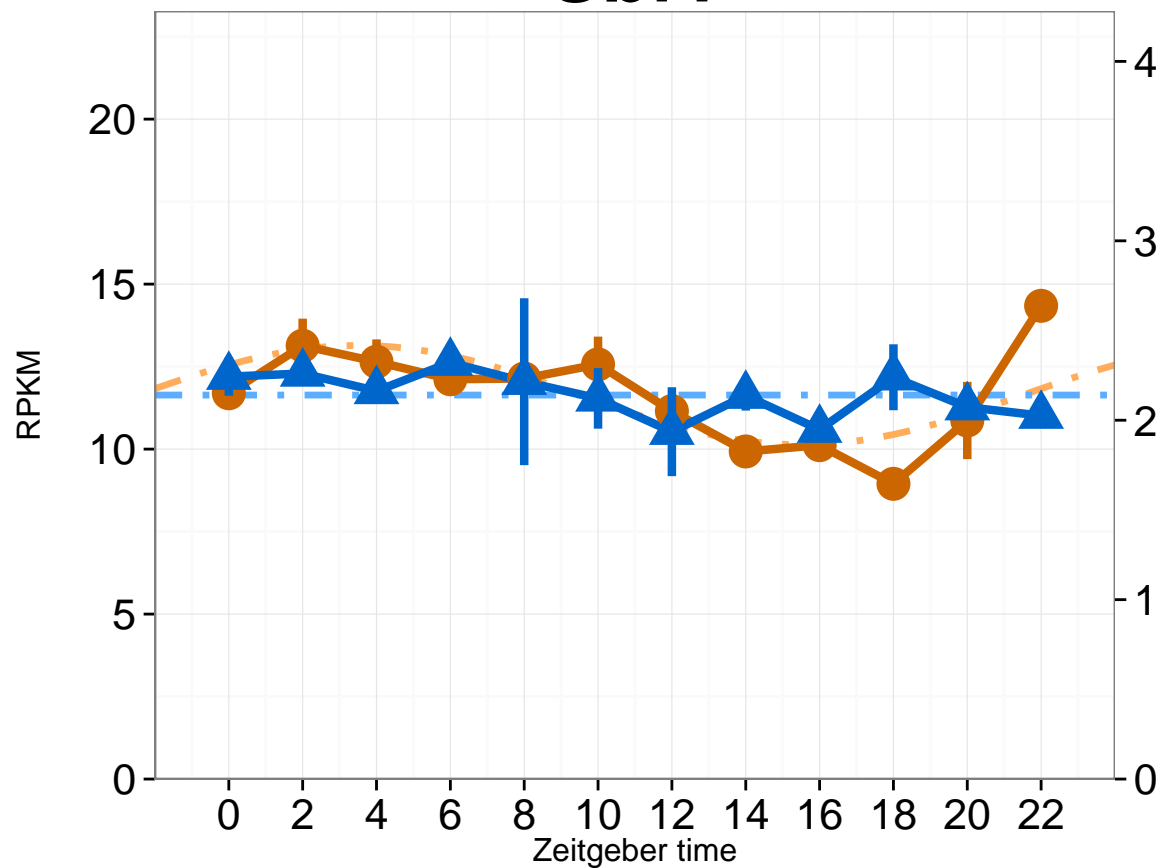

## Sbf1

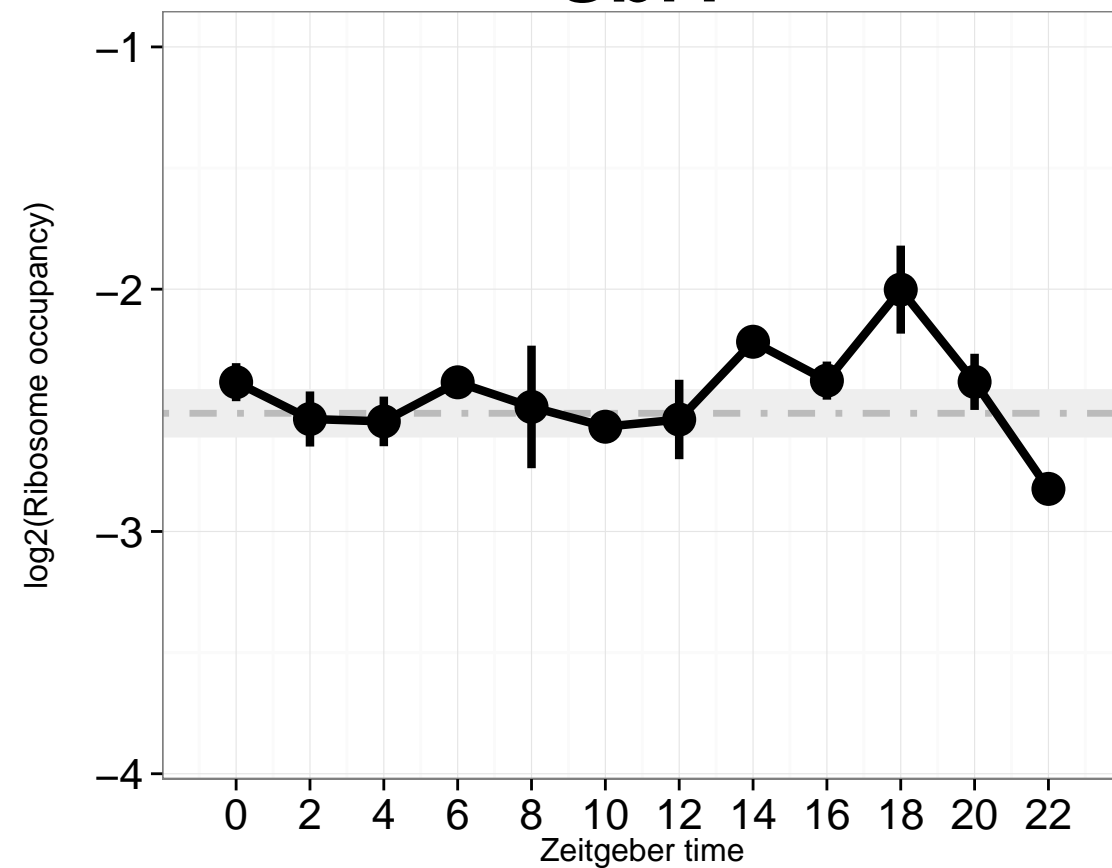

Supplement: SuppDataset_1.zip [file Sbf1_set_A.pdf › Supplemental Dataset 1/A-mRNA_nonrhyth_translation_nonrhyth/Sbf1_set_A.pdf]

## Sbf2

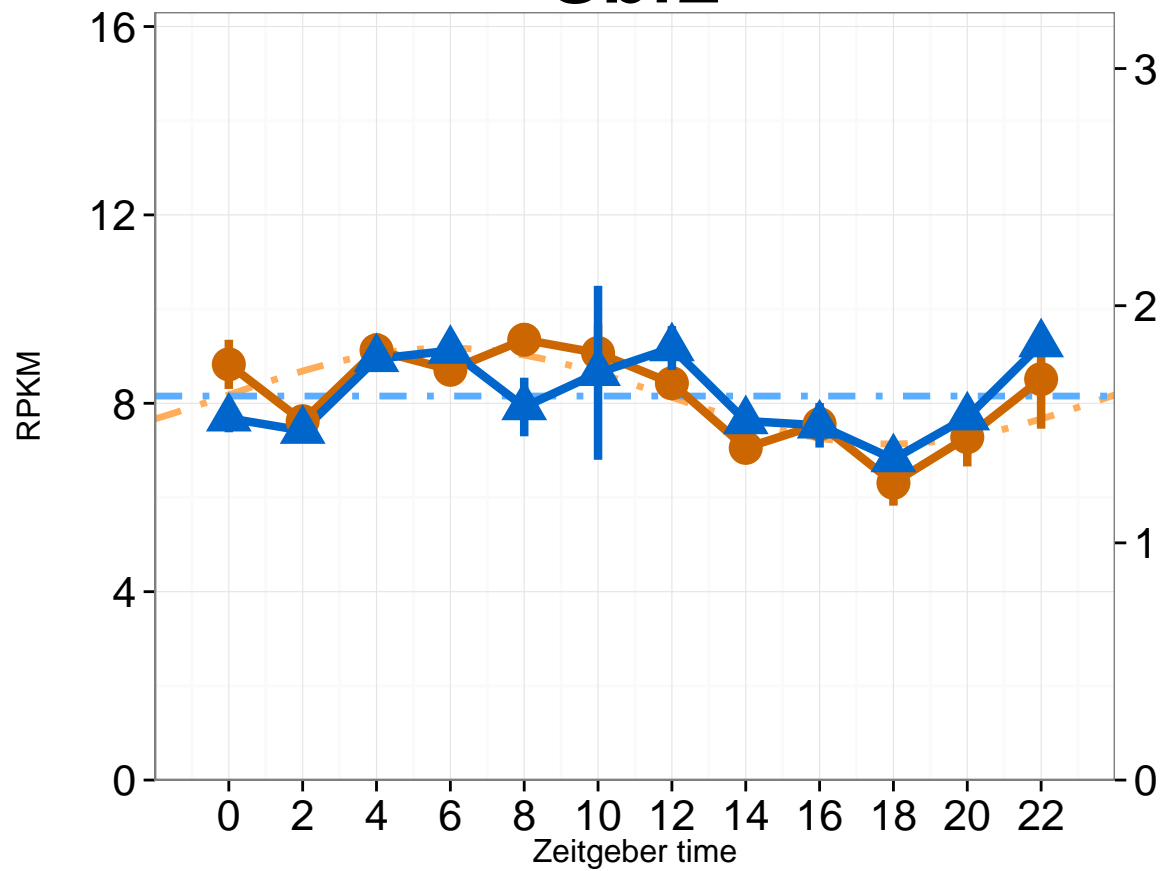

## Sbf2

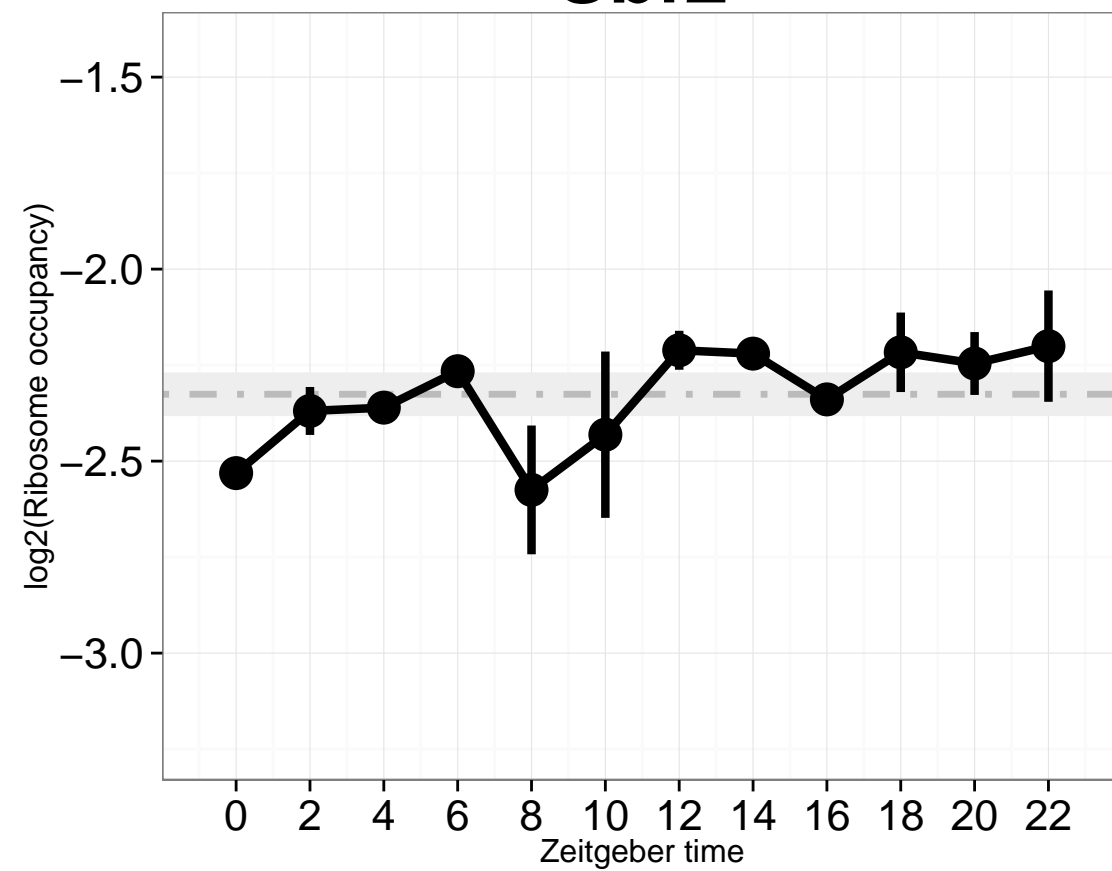

Supplement: SuppDataset_1.zip [file Sbf2_set_A.pdf › Supplemental Dataset 1/A-mRNA_nonrhyth_translation_nonrhyth/Sbf2_set_A.pdf]

## Sbno1

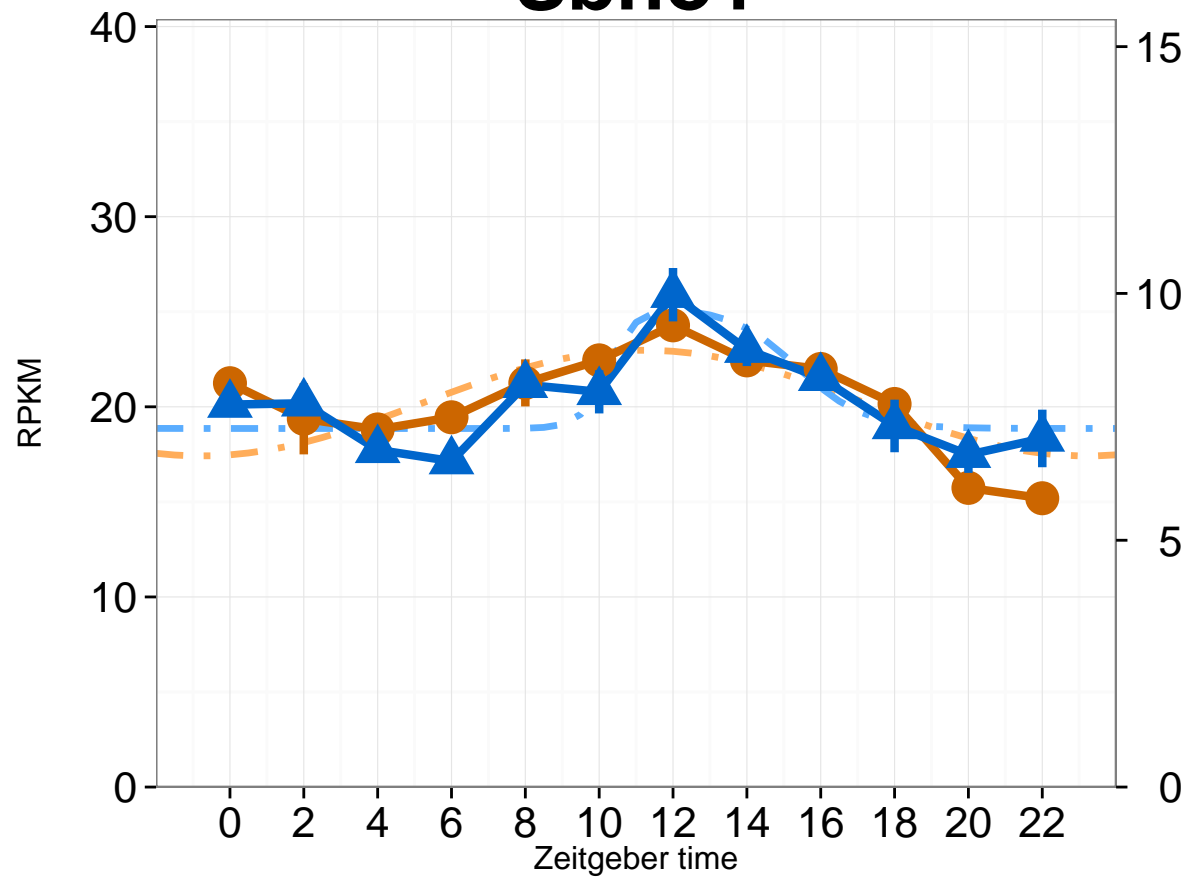

## Sbno1

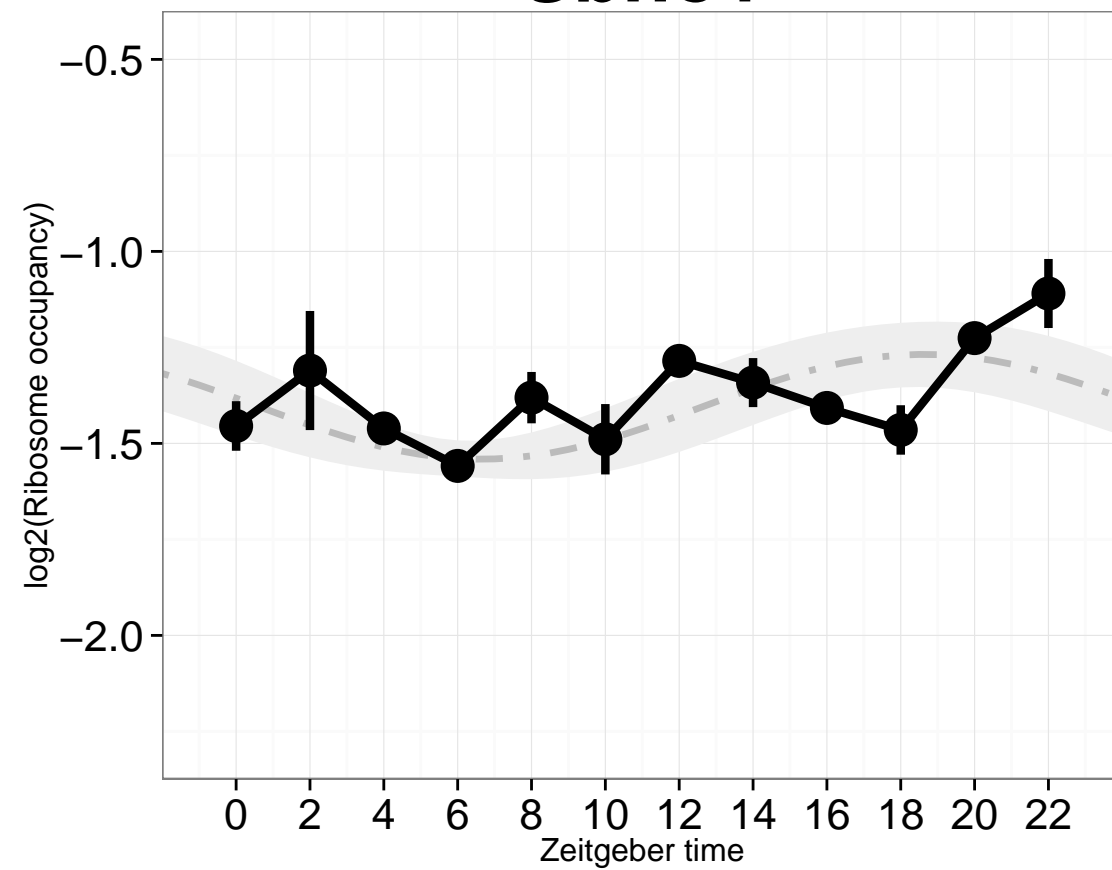

Supplement: SuppDataset_1.zip [file Sbno1_set_A.pdf › Supplemental Dataset 1/A-mRNA_nonrhyth_translation_nonrhyth/Sbno1_set_A.pdf]

## Sbno2

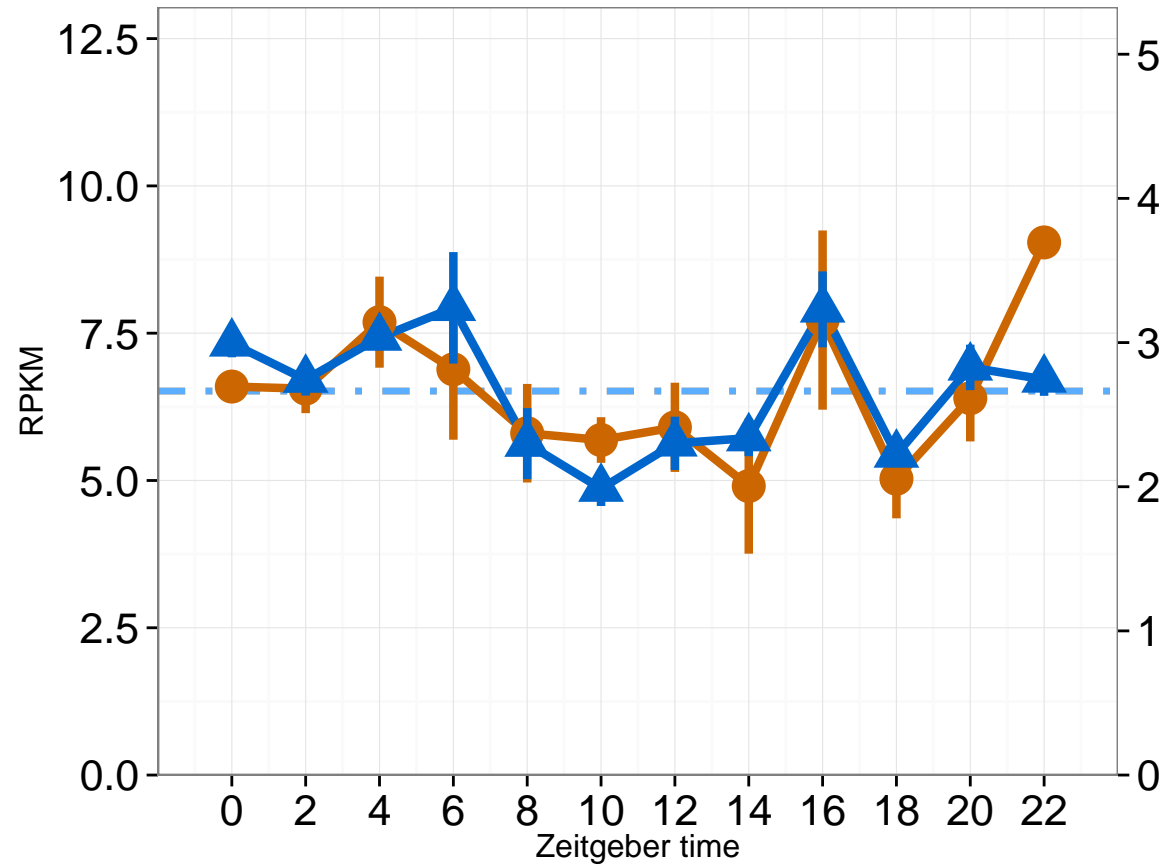

## Sbno2

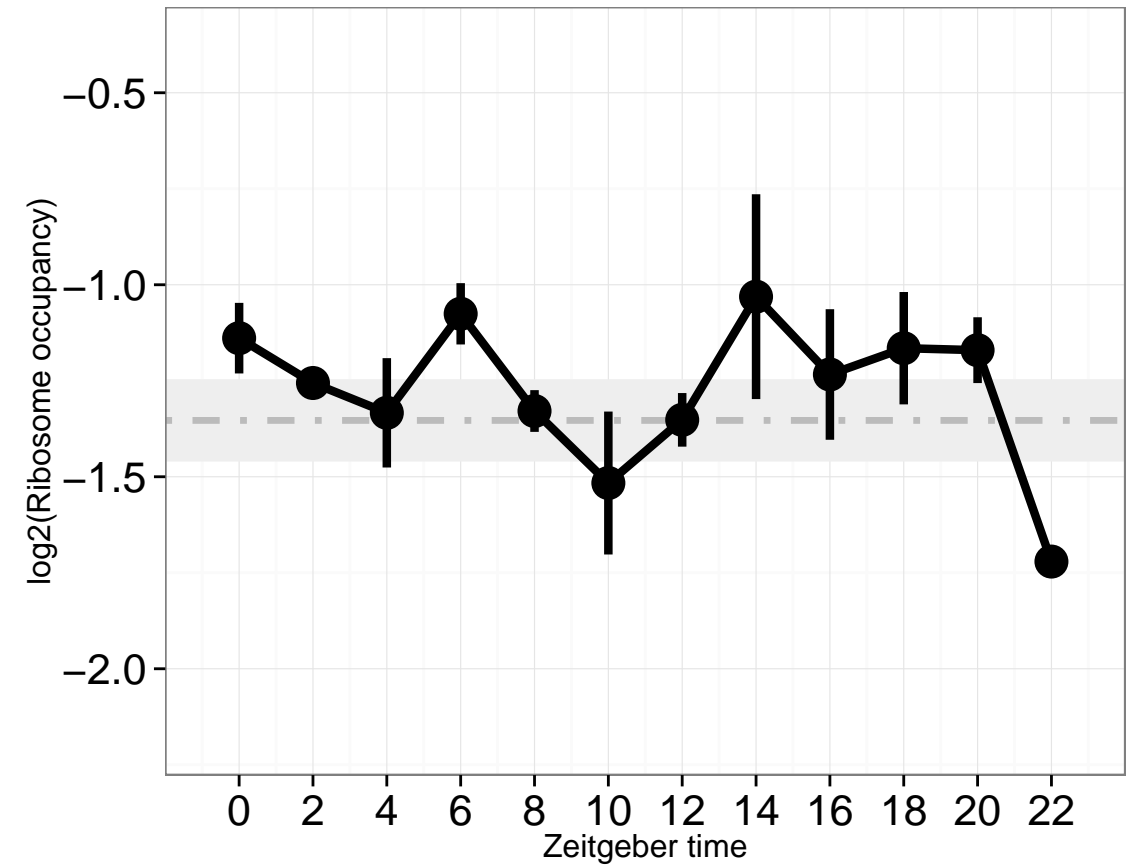

Supplement: SuppDataset_1.zip [file Sbno2_set_A.pdf › Supplemental Dataset 1/A-mRNA_nonrhyth_translation_nonrhyth/Sbno2_set_A.pdf]

## Sc4mol

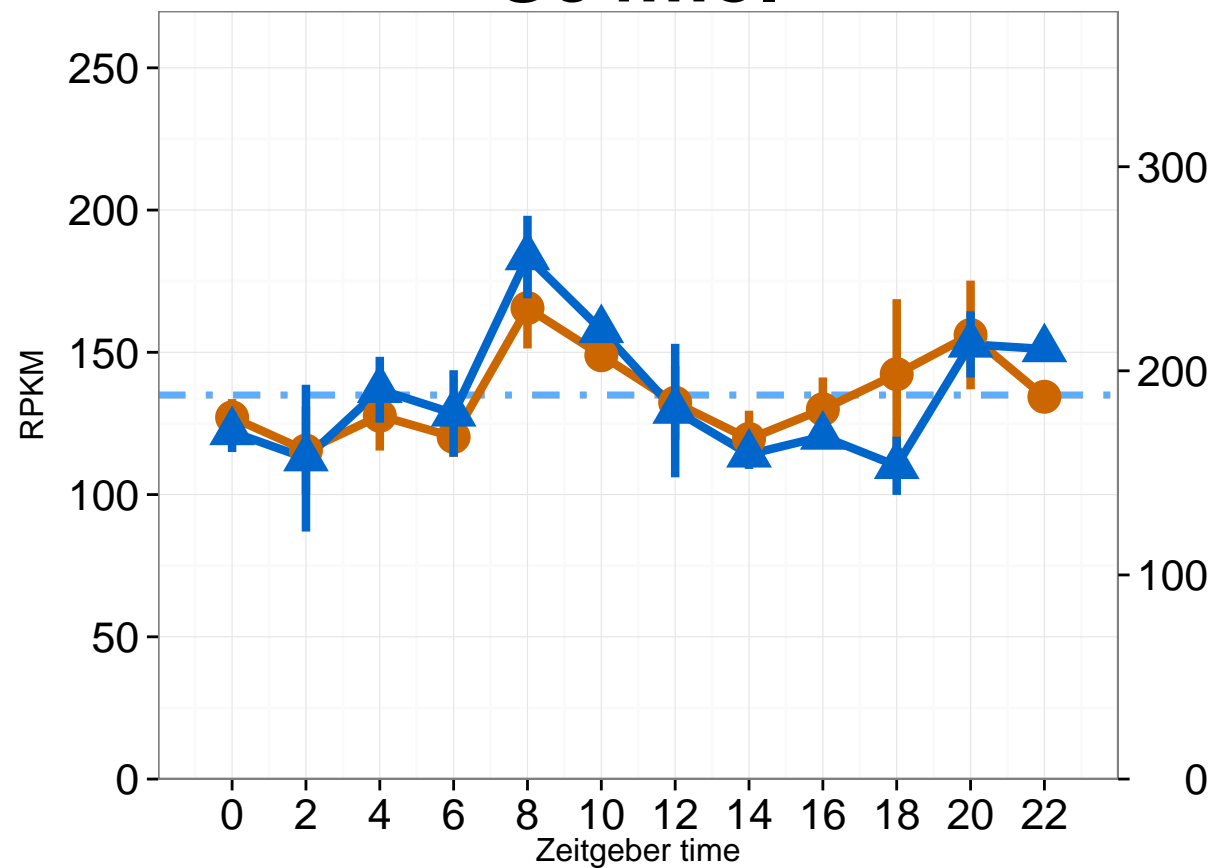

## Sc4mol

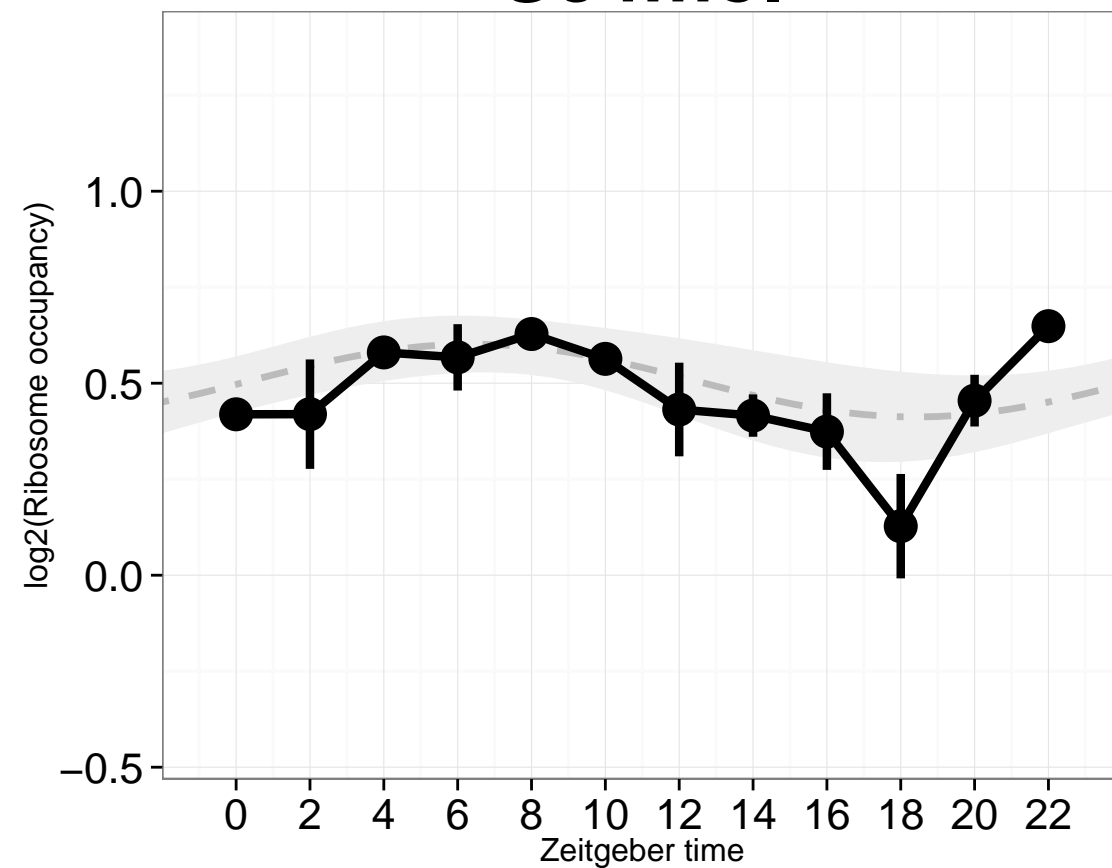

Supplement: SuppDataset_1.zip [file Sc4mol_set_A.pdf › Supplemental Dataset 1/A-mRNA_nonrhyth_translation_nonrhyth/Sc4mol_set_A.pdf]

# Sc5d

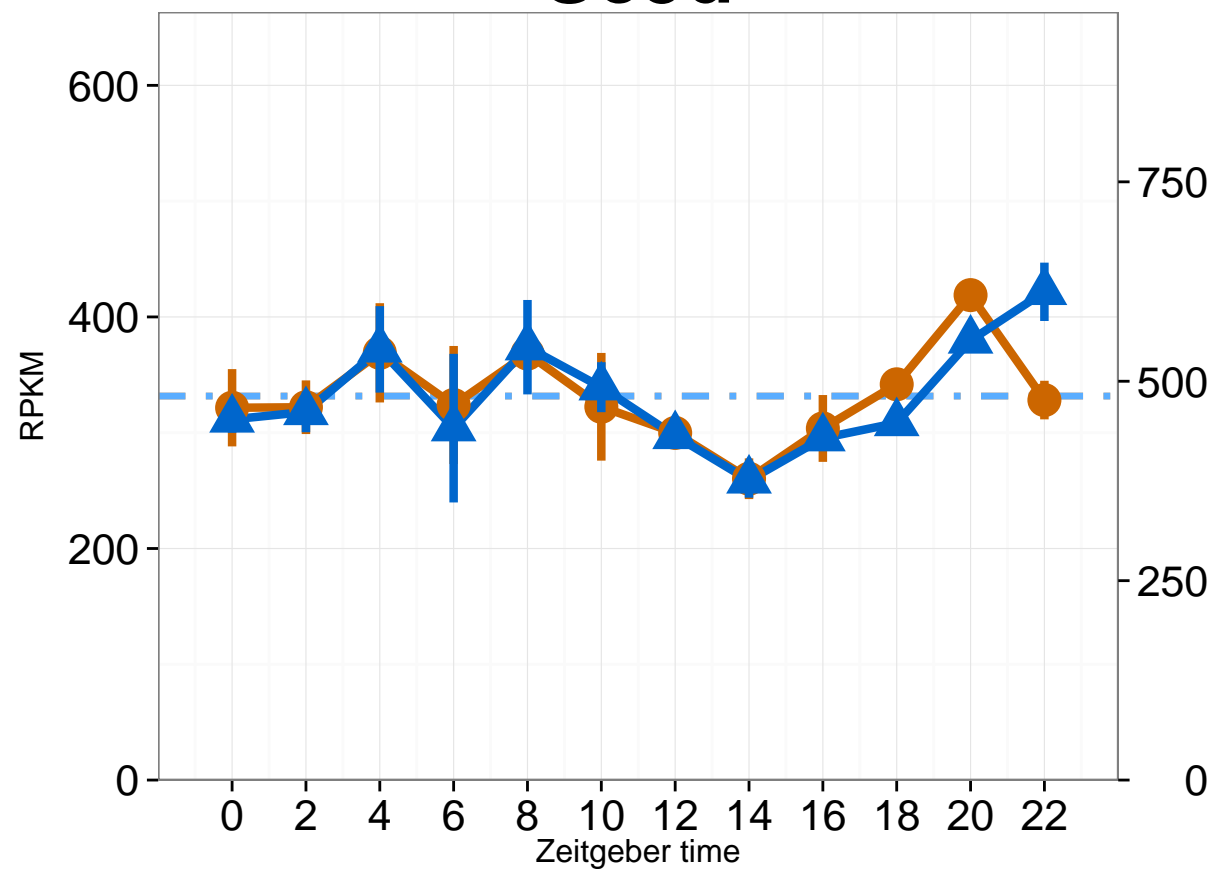

# Sc5d

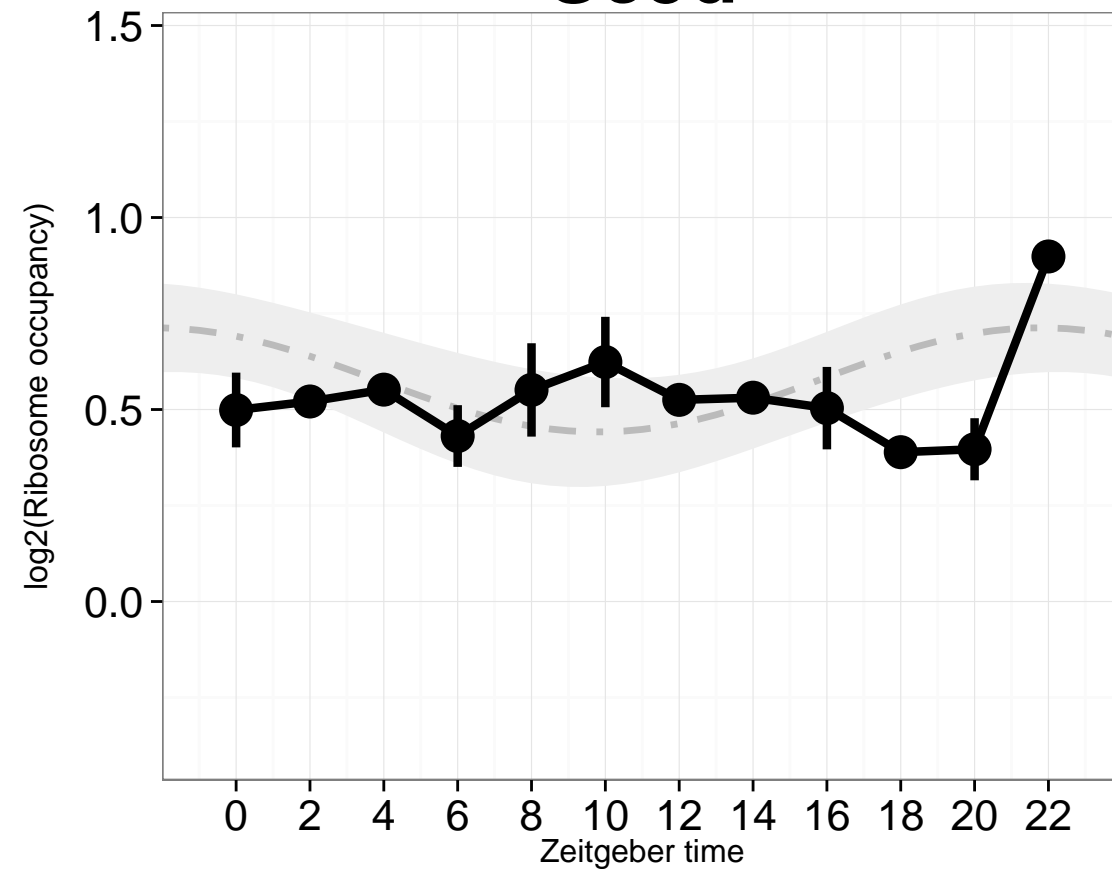

Supplement: SuppDataset_1.zip [file Sc5d_set_A.pdf › Supplemental Dataset 1/A-mRNA_nonrhyth_translation_nonrhyth/Sc5d_set_A.pdf]

# Scaf11

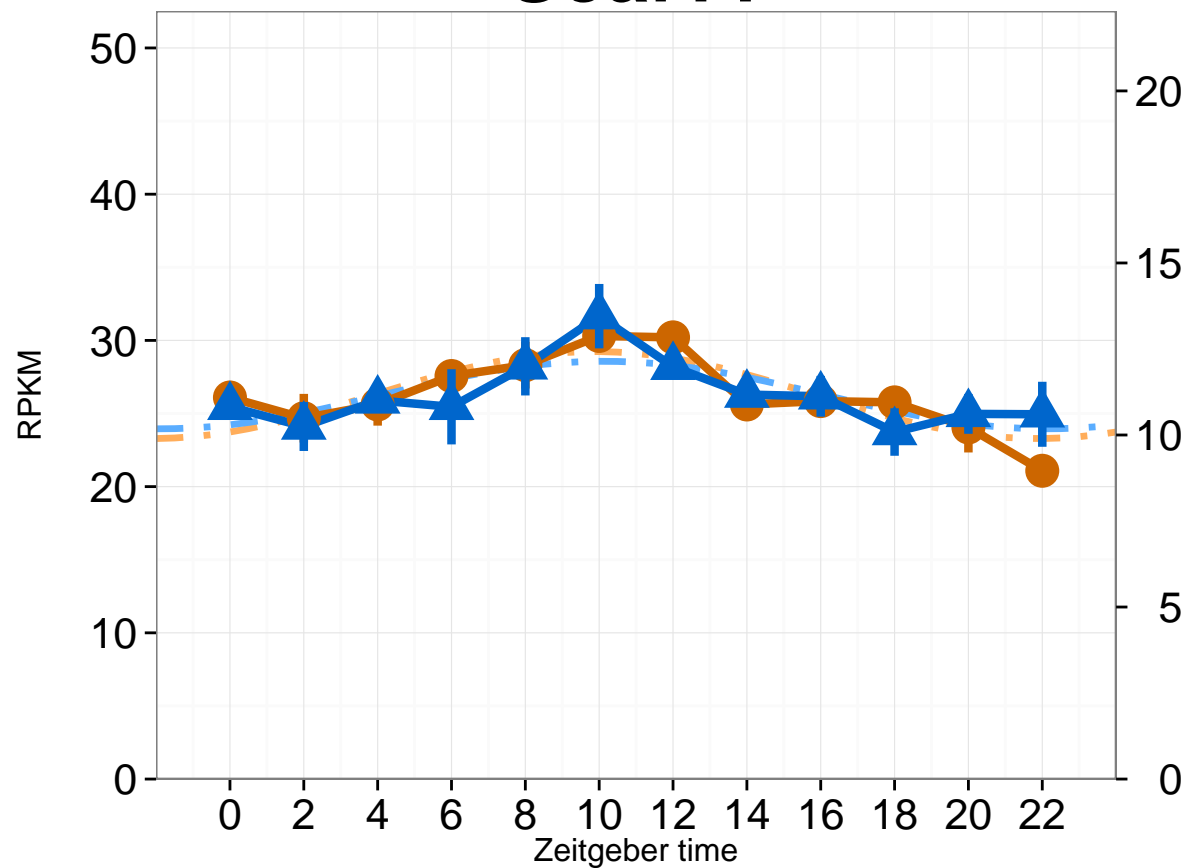

# Scaf11

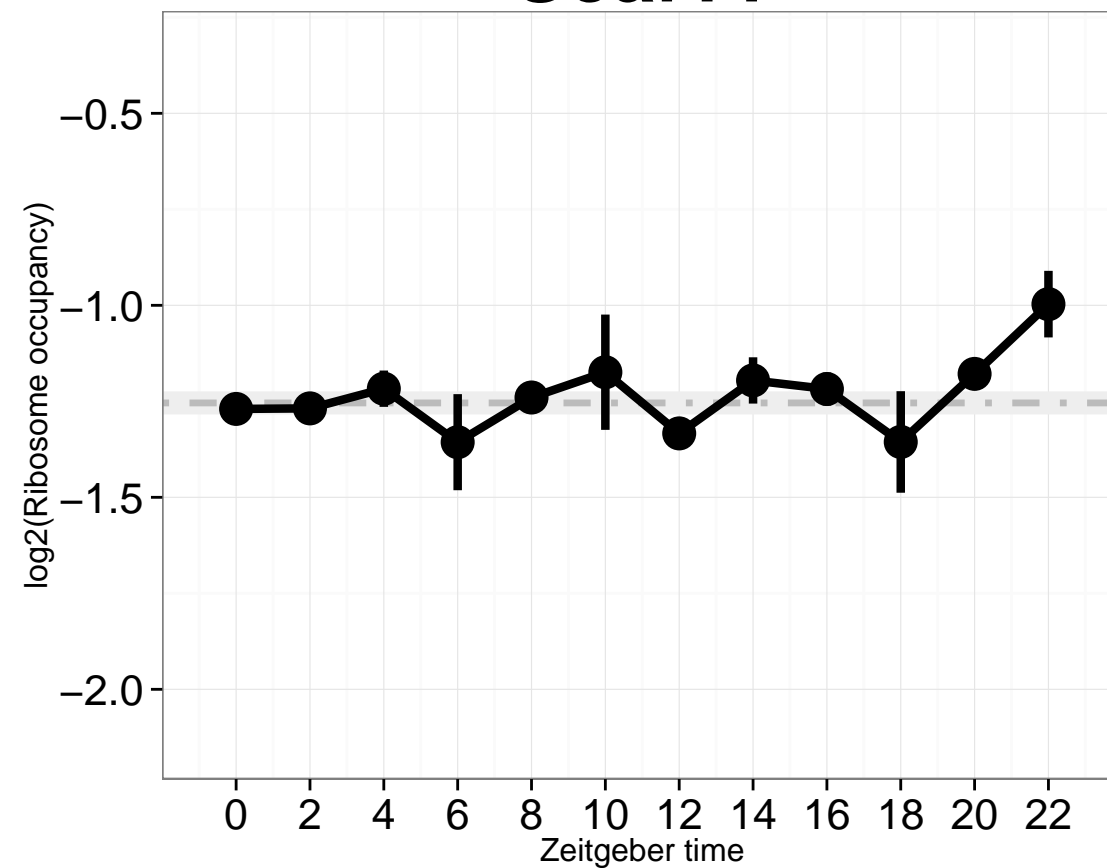

Supplement: SuppDataset_1.zip [file Scaf11_set_A.pdf › Supplemental Dataset 1/A-mRNA_nonrhyth_translation_nonrhyth/Scaf11_set_A.pdf]

# Scaf1

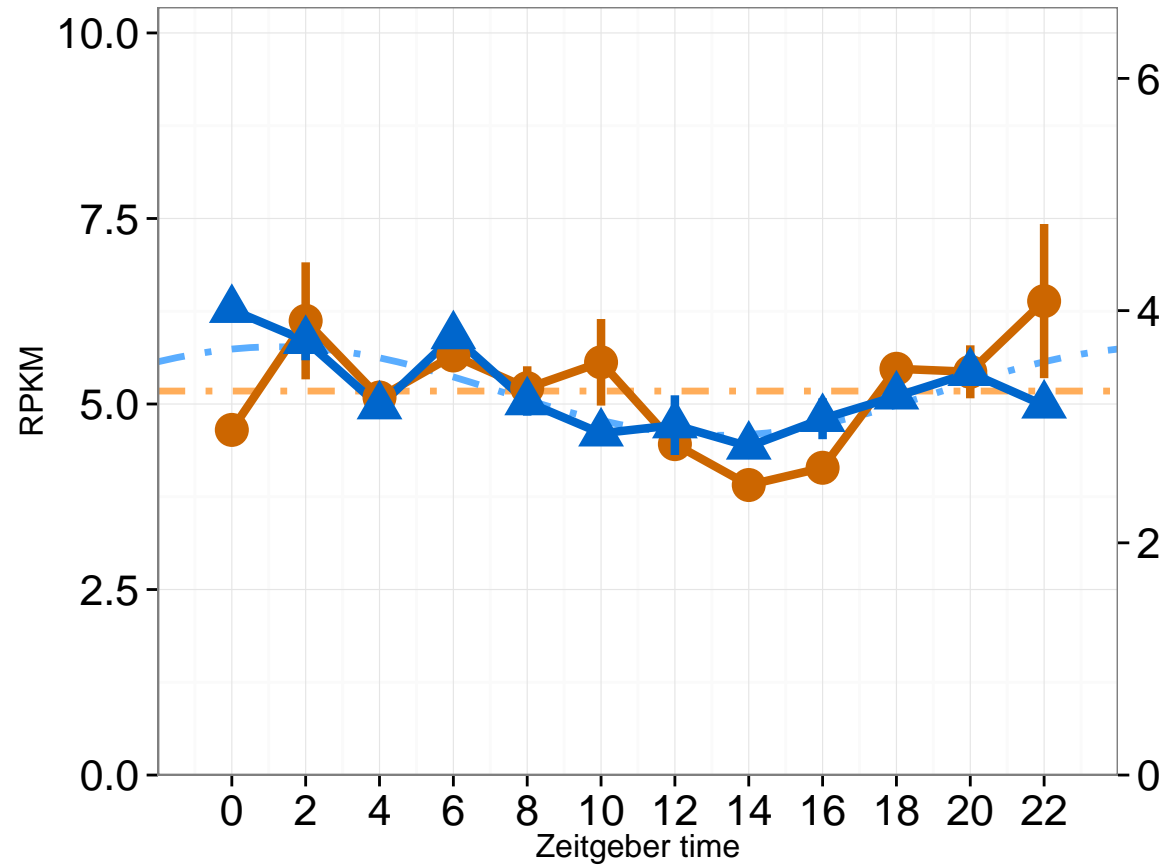

# Scaf1

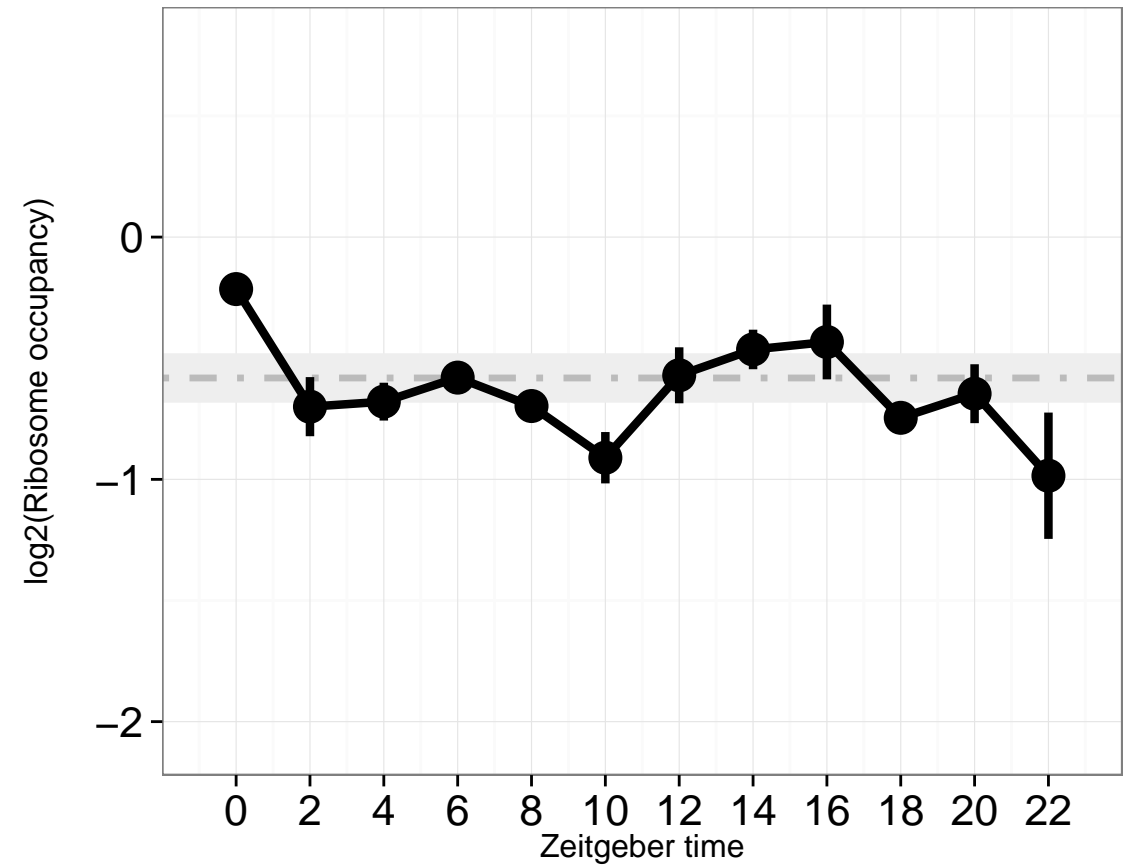

Supplement: SuppDataset_1.zip [file Scaf1_set_A.pdf › Supplemental Dataset 1/A-mRNA_nonrhyth_translation_nonrhyth/Scaf1_set_A.pdf]

# Scaf4

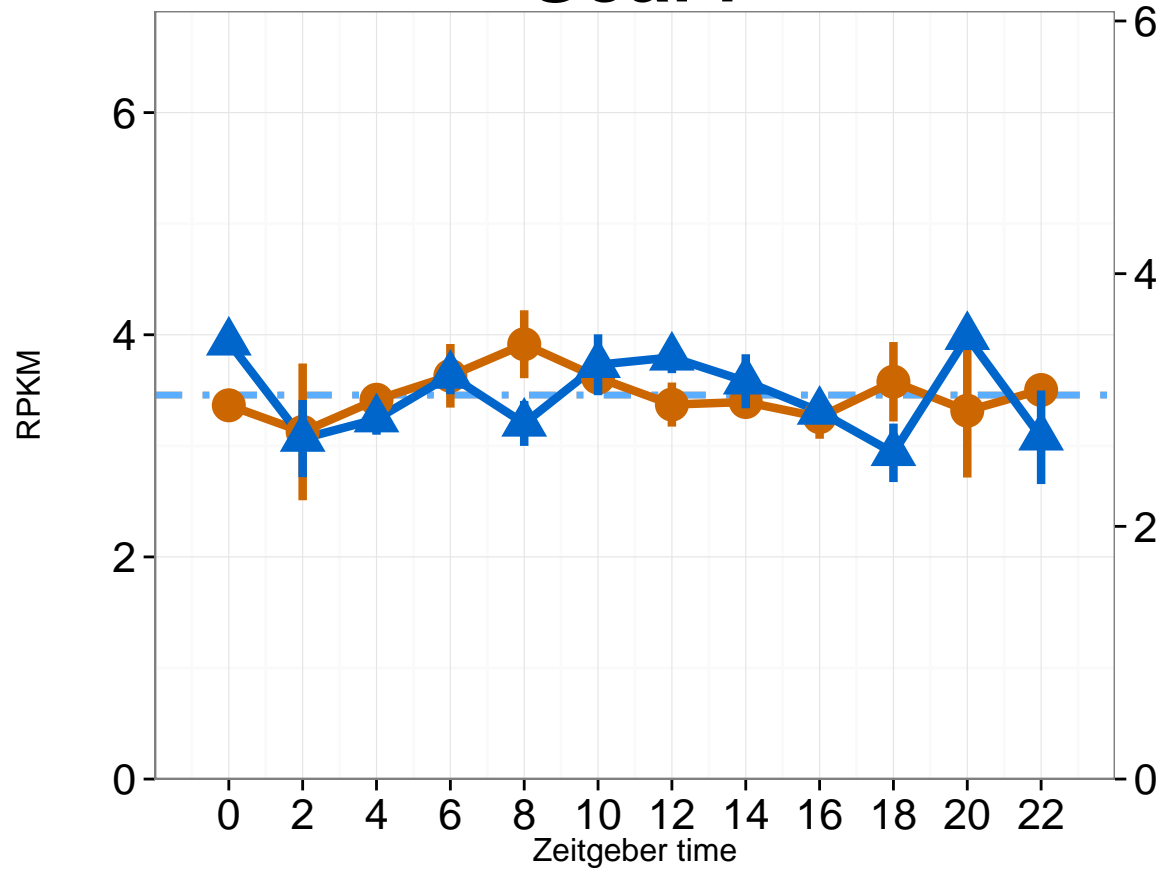

# Scaf4

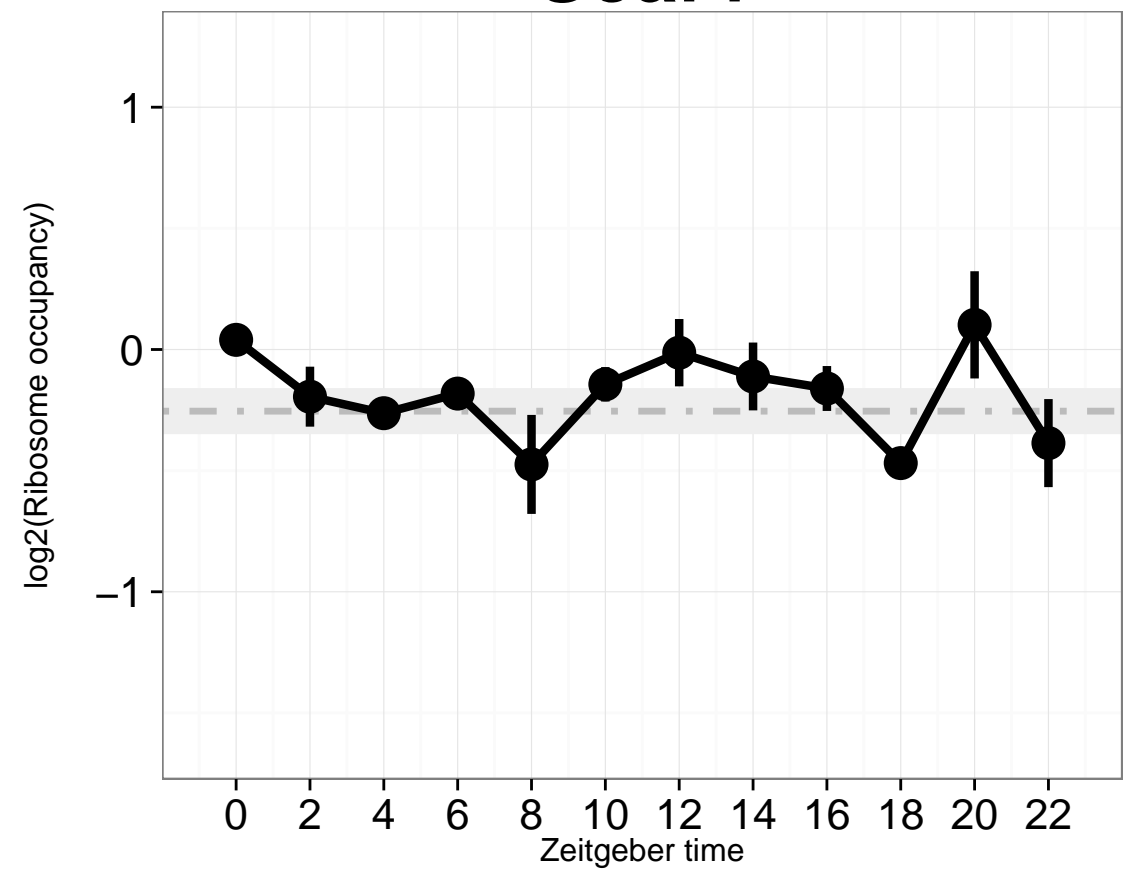

Supplement: SuppDataset_1.zip [file Scaf4_set_A.pdf › Supplemental Dataset 1/A-mRNA_nonrhyth_translation_nonrhyth/Scaf4_set_A.pdf]

# Scaf8

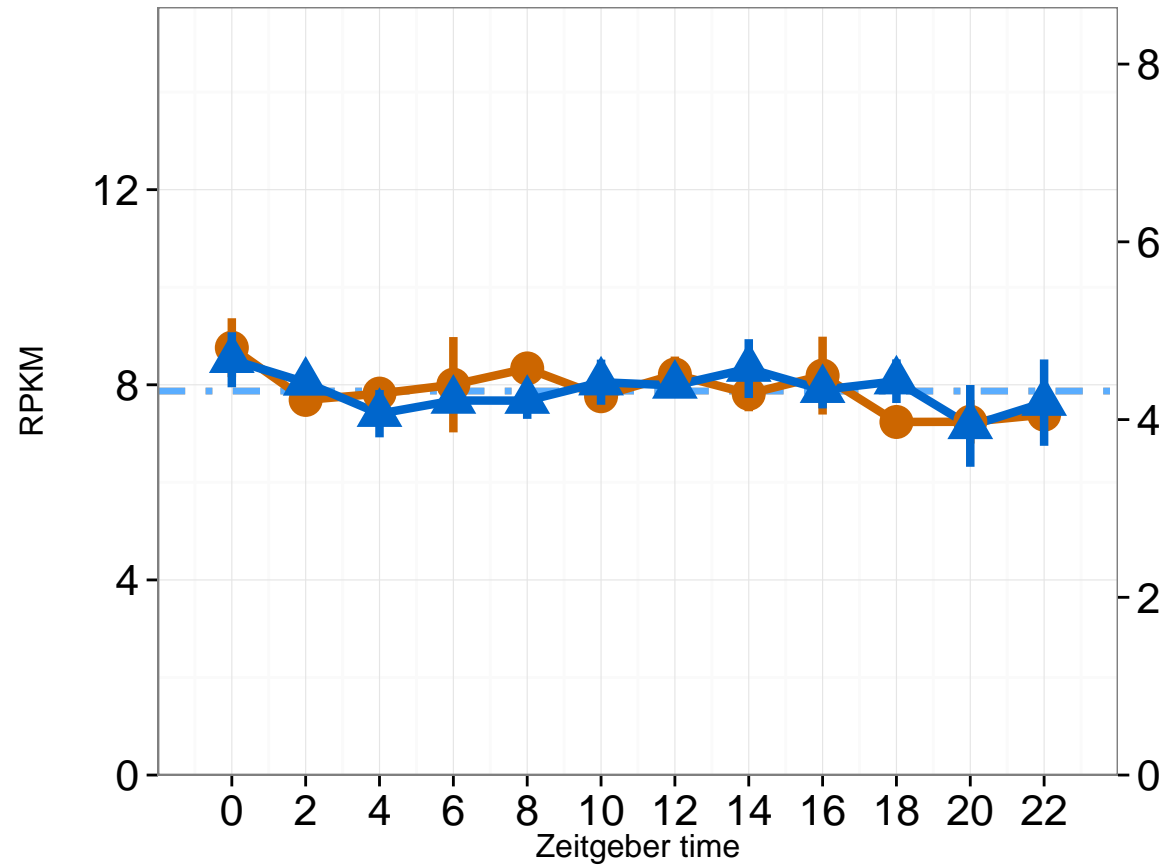

# Scaf8

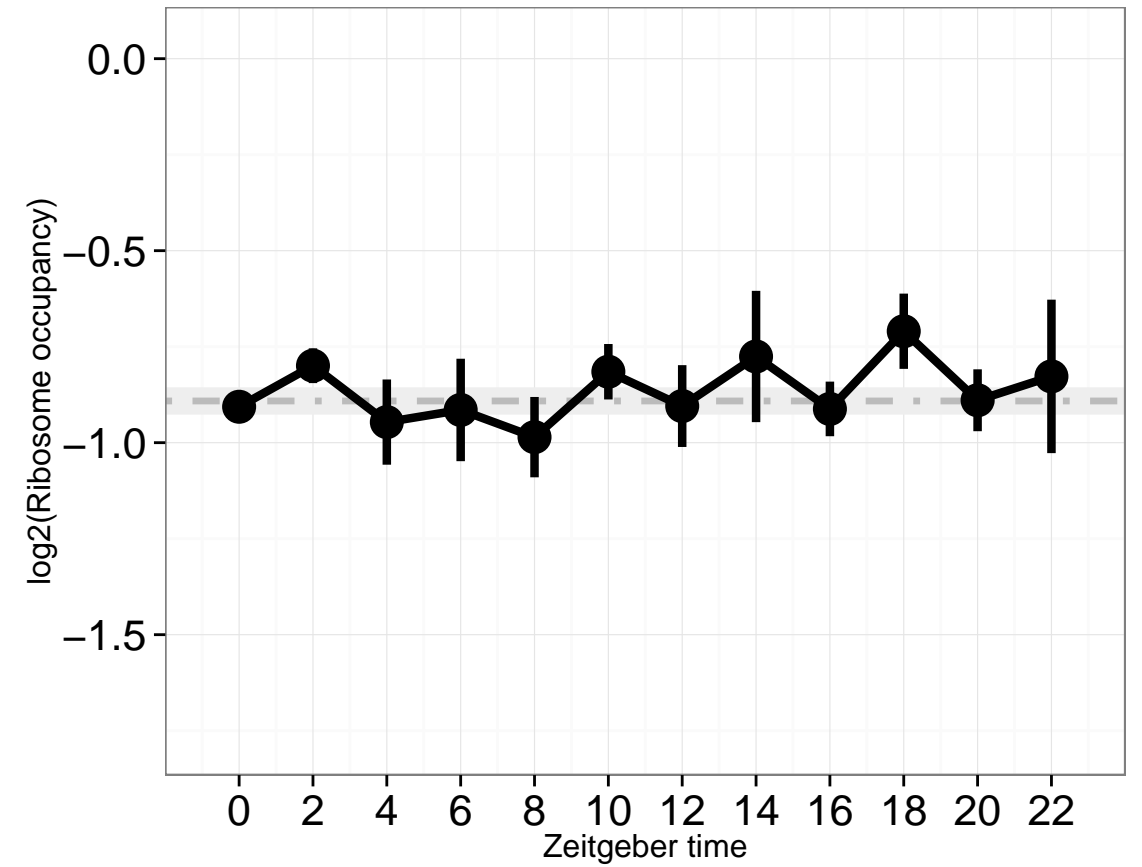

Supplement: SuppDataset_1.zip [file Scaf8_set_A.pdf › Supplemental Dataset 1/A-mRNA_nonrhyth_translation_nonrhyth/Scaf8_set_A.pdf]

## Scai

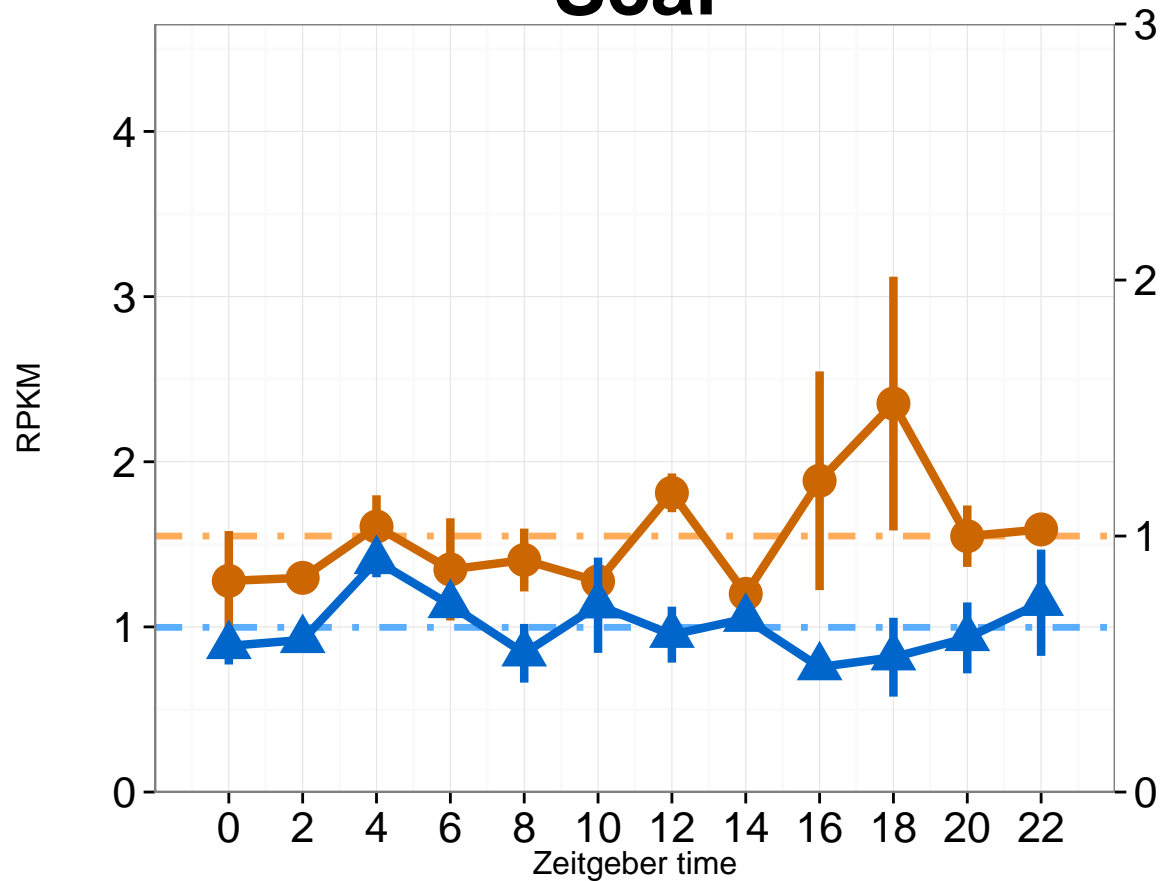

## Scai

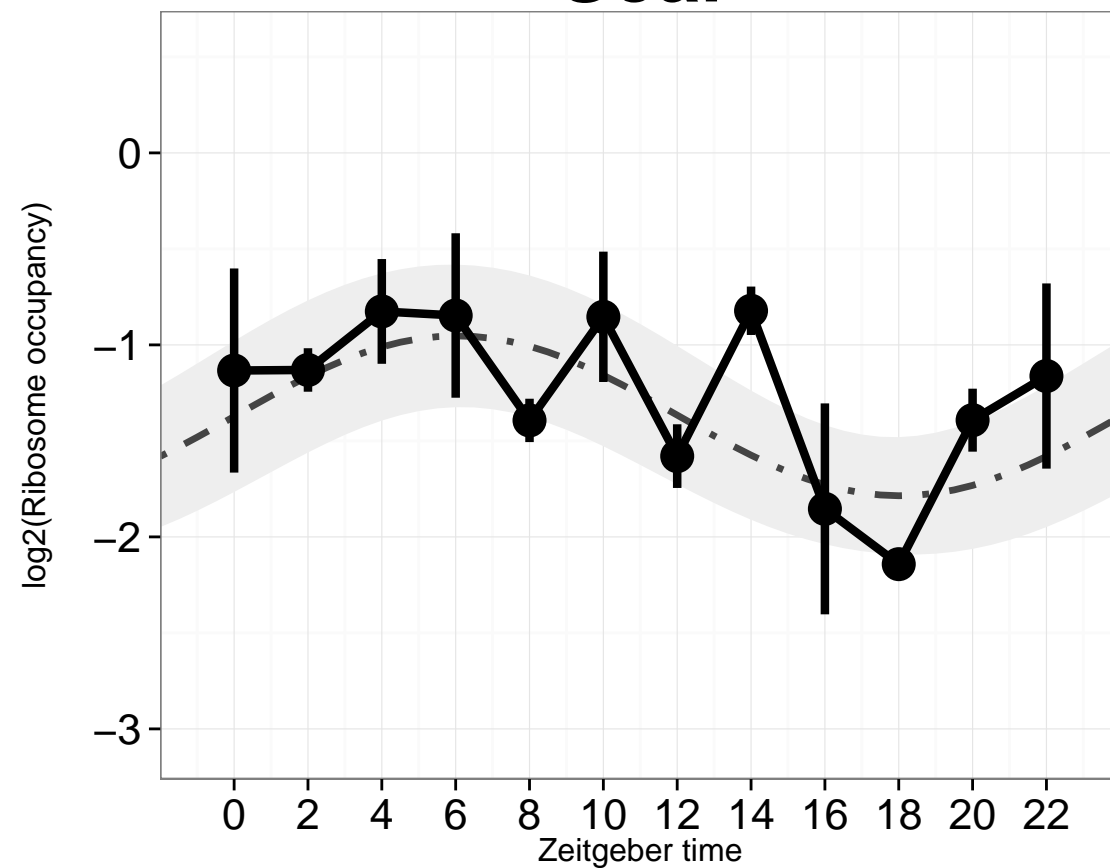

Supplement: SuppDataset_1.zip [file Scai_set_A.pdf › Supplemental Dataset 1/A-mRNA_nonrhyth_translation_nonrhyth/Scai_set_A.pdf]

Scamp2

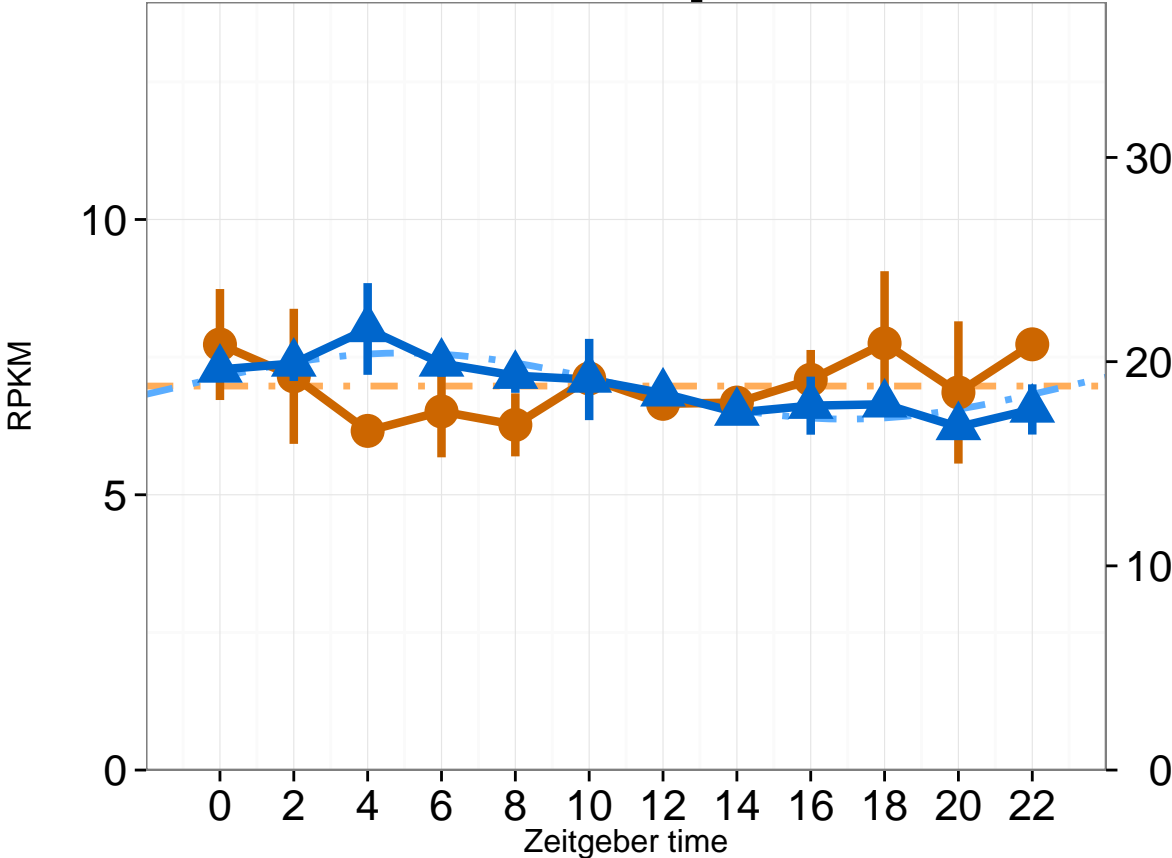

Scamp2

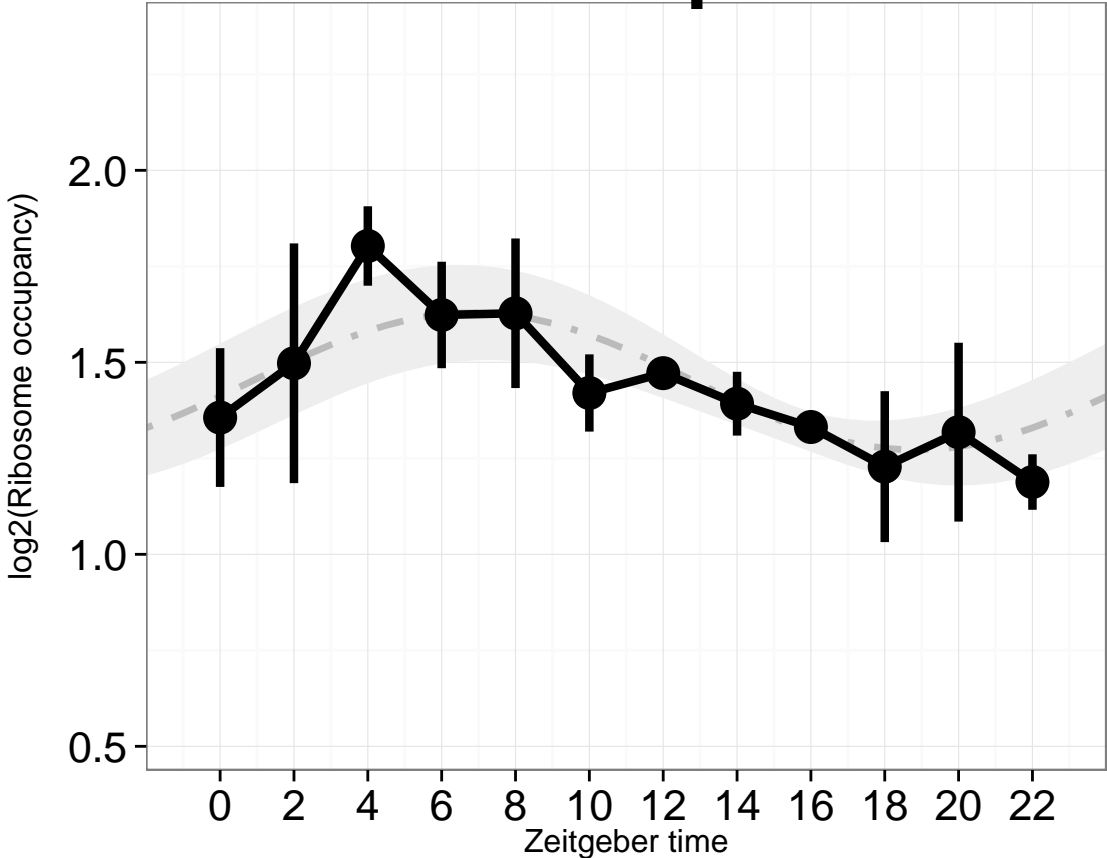

Supplement: SuppDataset_1.zip [file Scamp2_set_A.pdf › Supplemental Dataset 1/A-mRNA_nonrhyth_translation_nonrhyth/Scamp2_set_A.pdf]

Scamp5

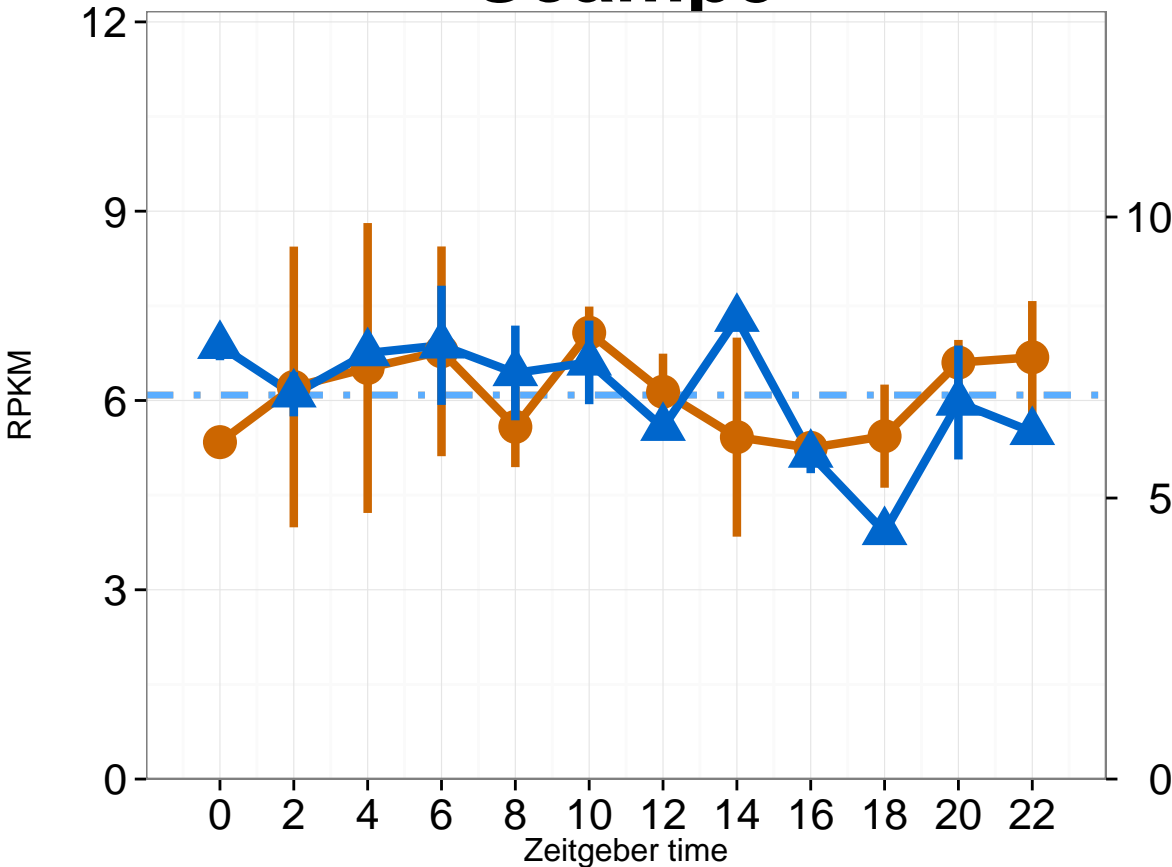

Scamp5

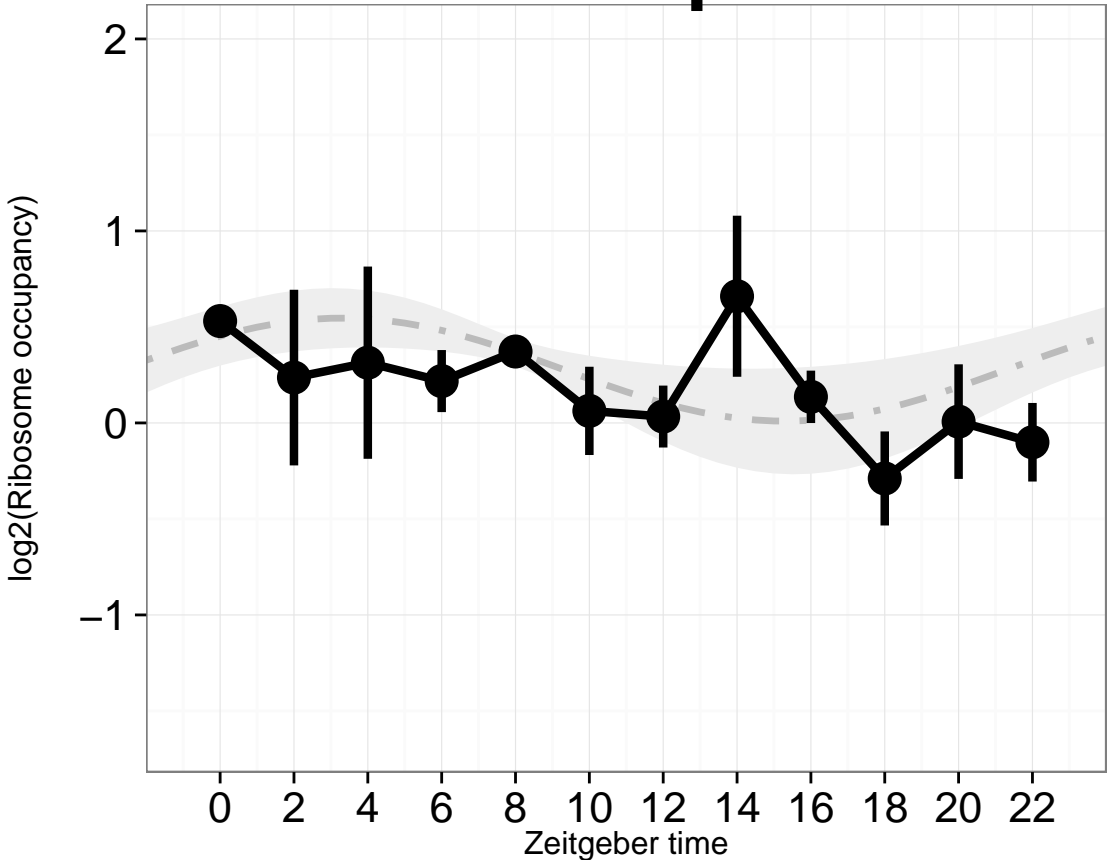

Supplement: SuppDataset_1.zip [file Scamp5_set_A.pdf › Supplemental Dataset 1/A-mRNA_nonrhyth_translation_nonrhyth/Scamp5_set_A.pdf]

# Scand1

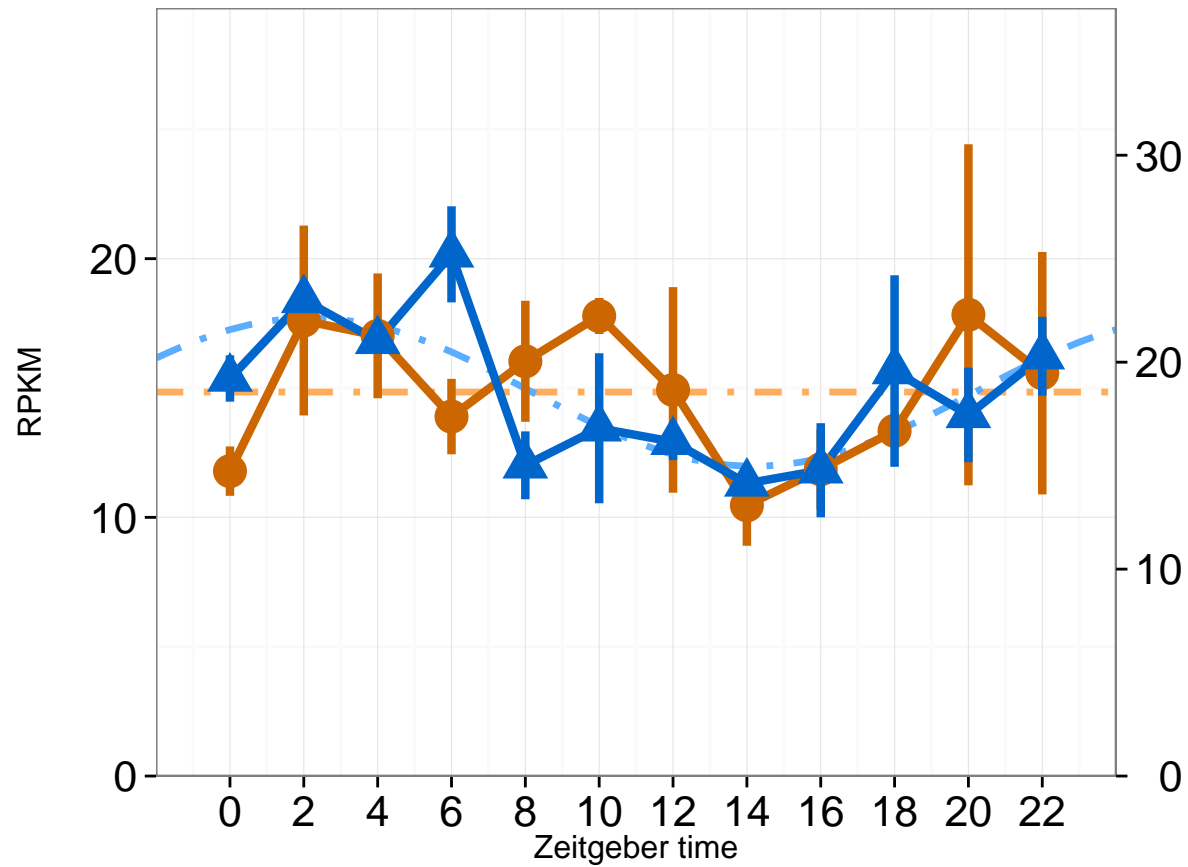

# Scand1

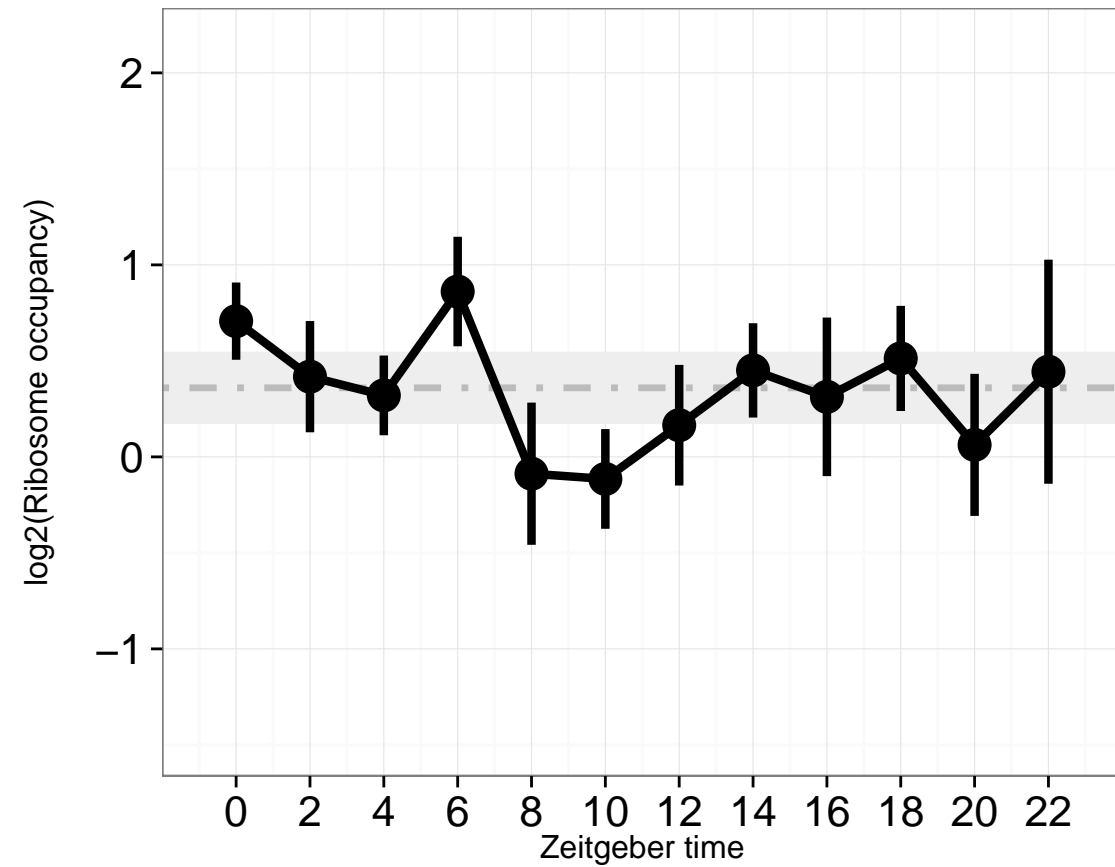

Supplement: SuppDataset_1.zip [file Scand1_set_A.pdf › Supplemental Dataset 1/A-mRNA_nonrhyth_translation_nonrhyth/Scand1_set_A.pdf]

## Scaper

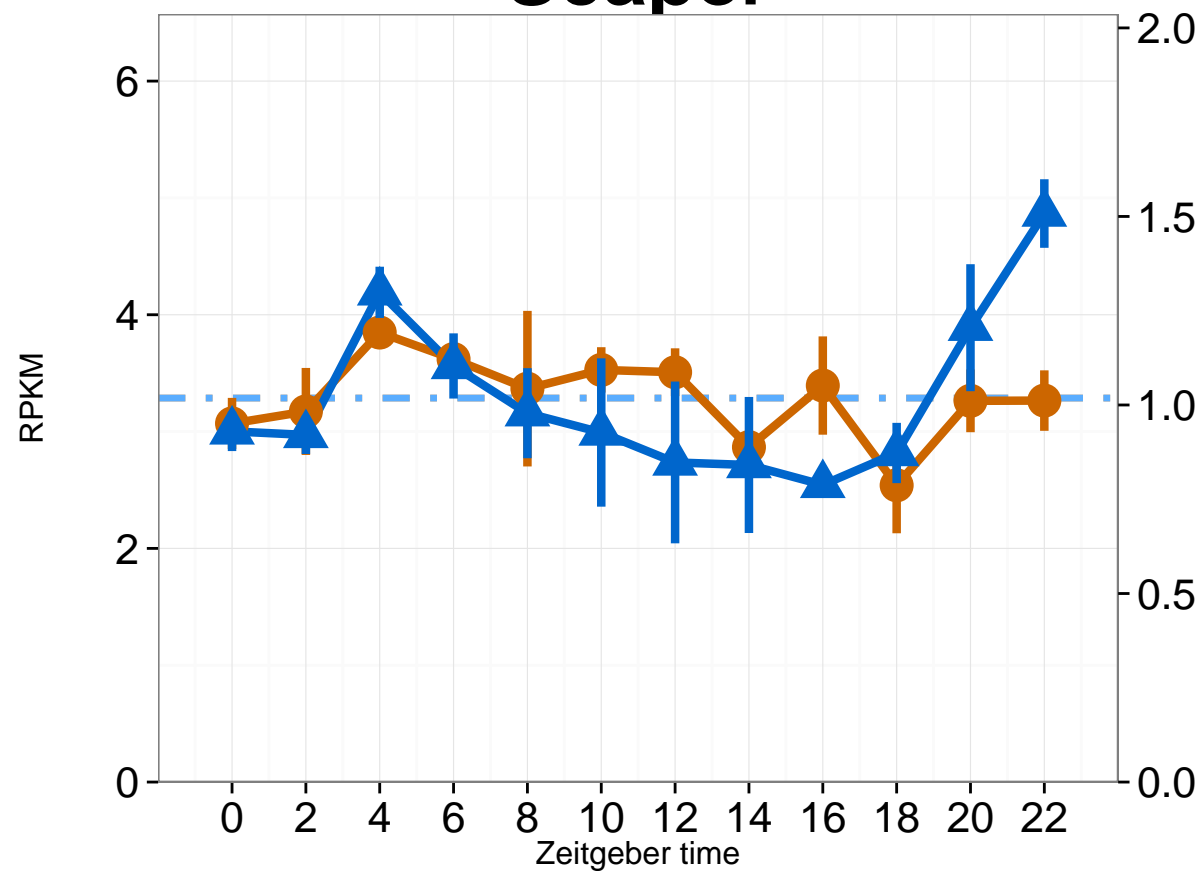

## Scaper

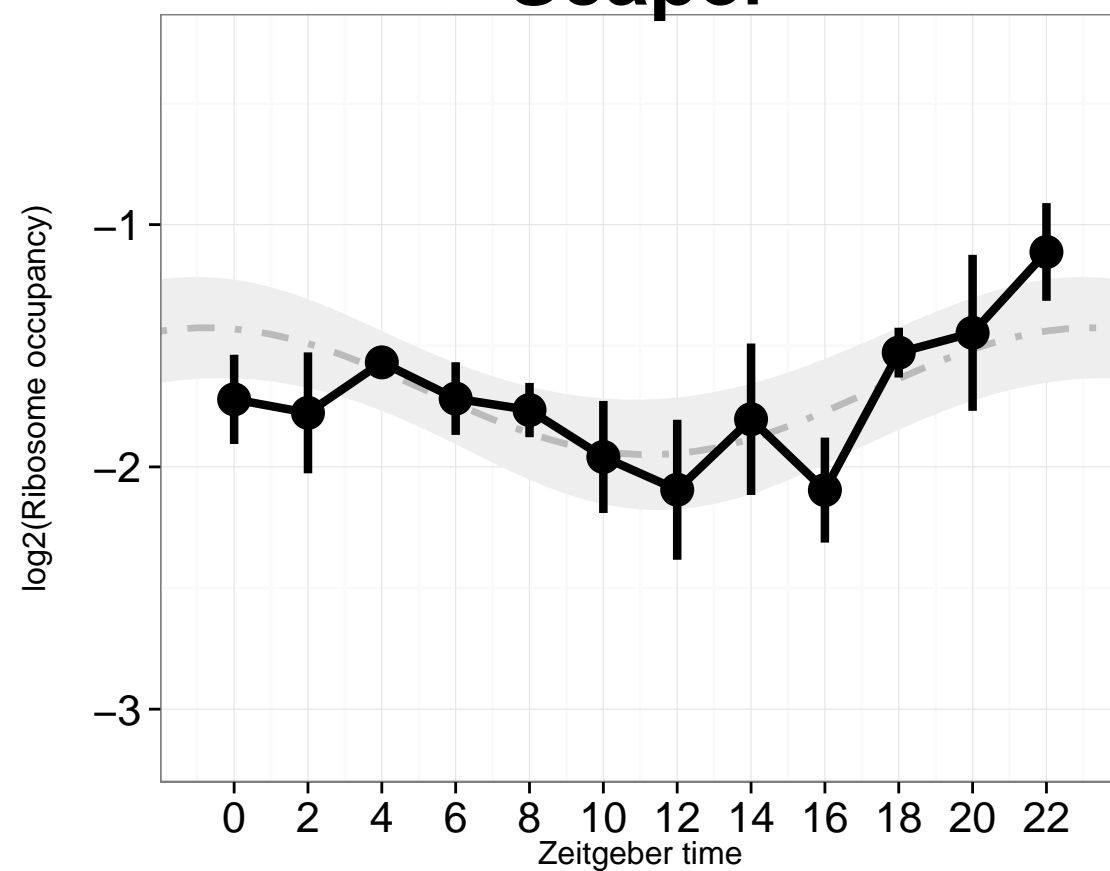

Supplement: SuppDataset_1.zip [file Scaper_set_A.pdf › Supplemental Dataset 1/A-mRNA_nonrhyth_translation_nonrhyth/Scaper_set_A.pdf]

## Scara3

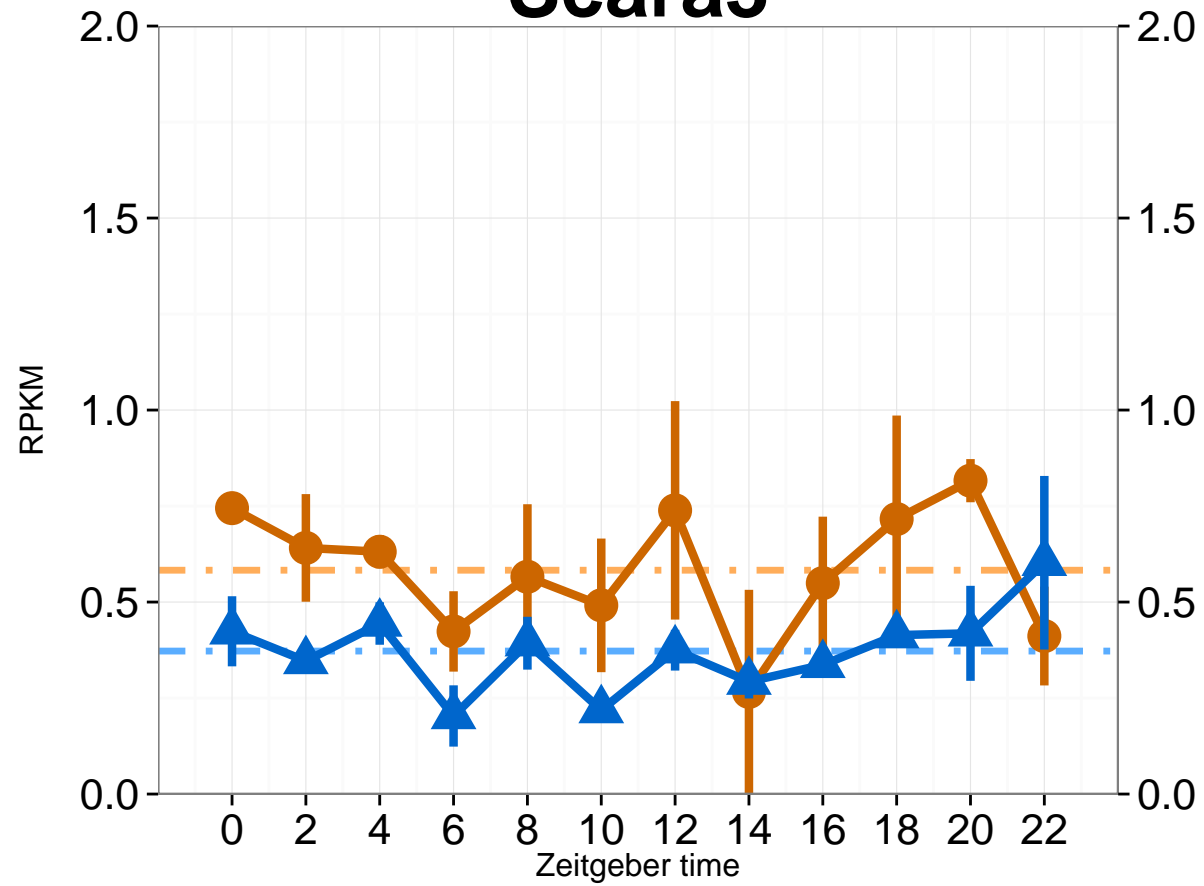

## Scara3

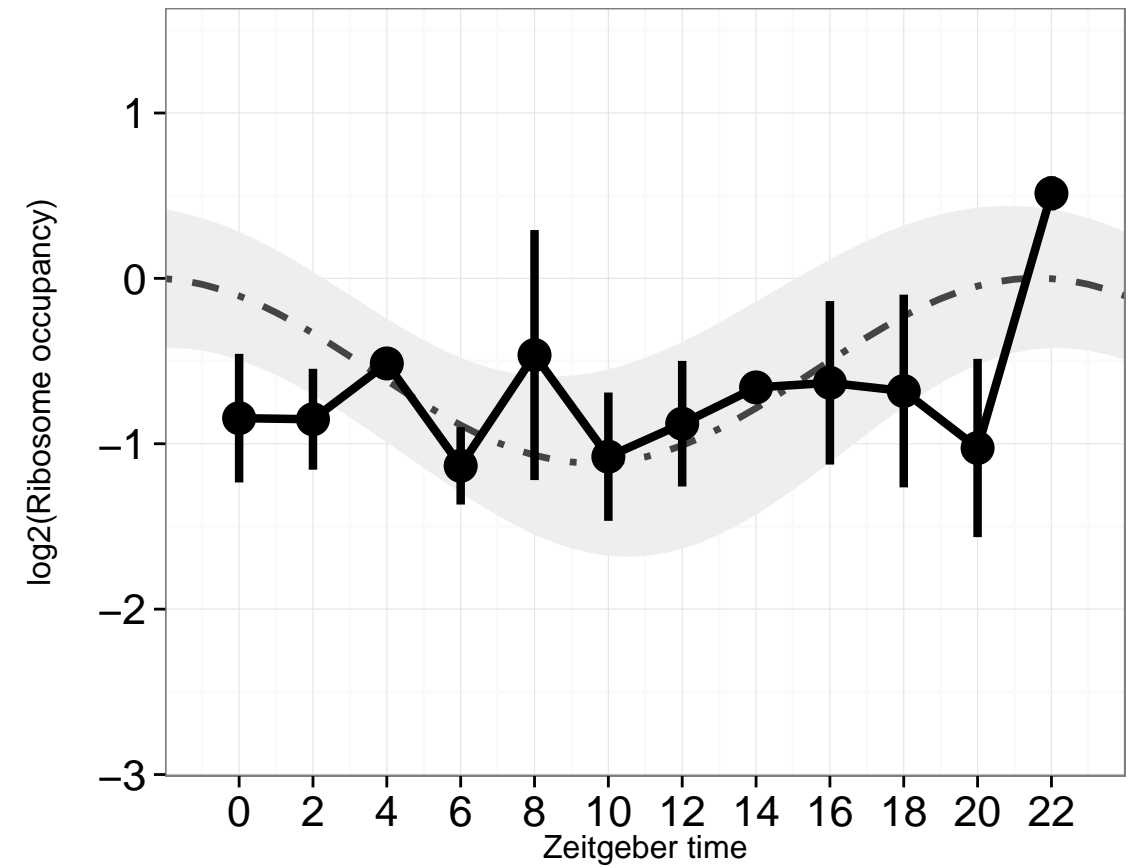

Supplement: SuppDataset_1.zip [file Scara3_set_A.pdf › Supplemental Dataset 1/A-mRNA_nonrhyth_translation_nonrhyth/Scara3_set_A.pdf]

# Scarb1

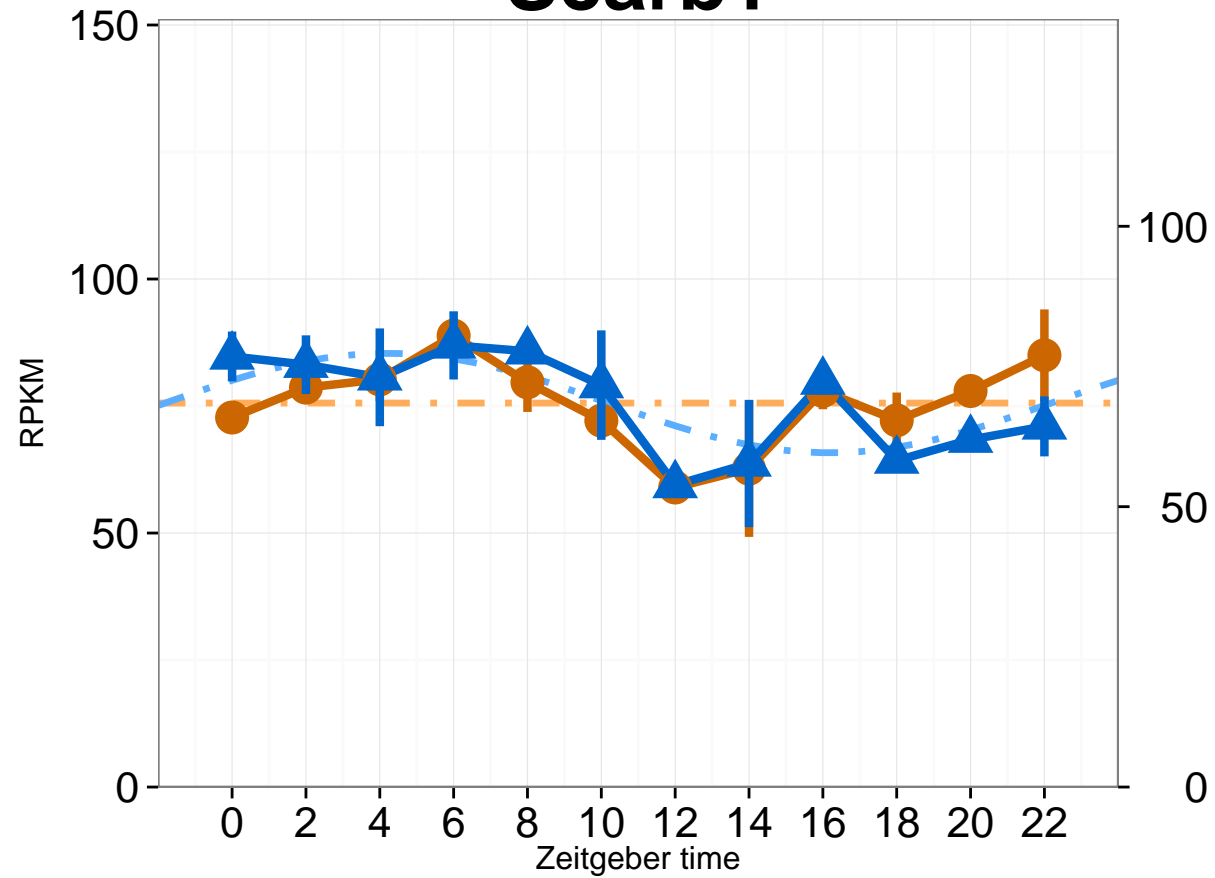

# Scarb1

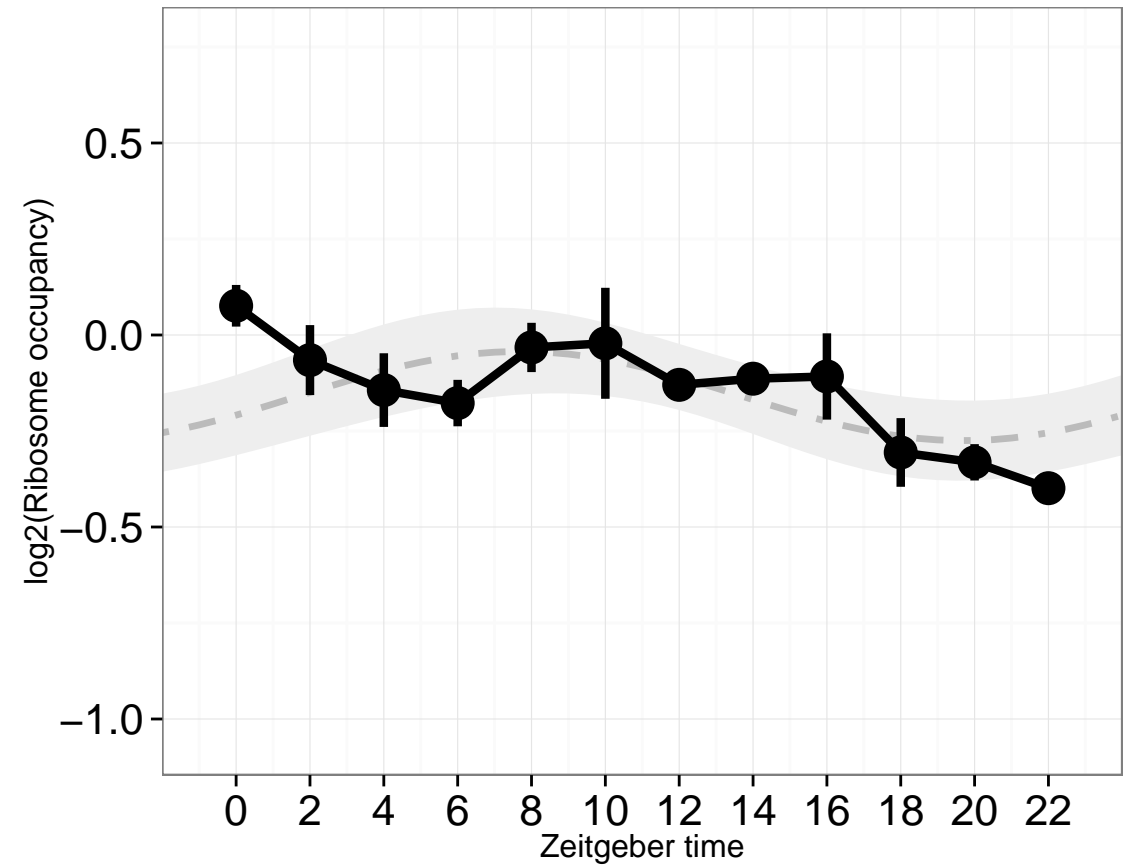

Supplement: SuppDataset_1.zip [file Scarb1_set_A.pdf › Supplemental Dataset 1/A-mRNA_nonrhyth_translation_nonrhyth/Scarb1_set_A.pdf]

## Scarb2

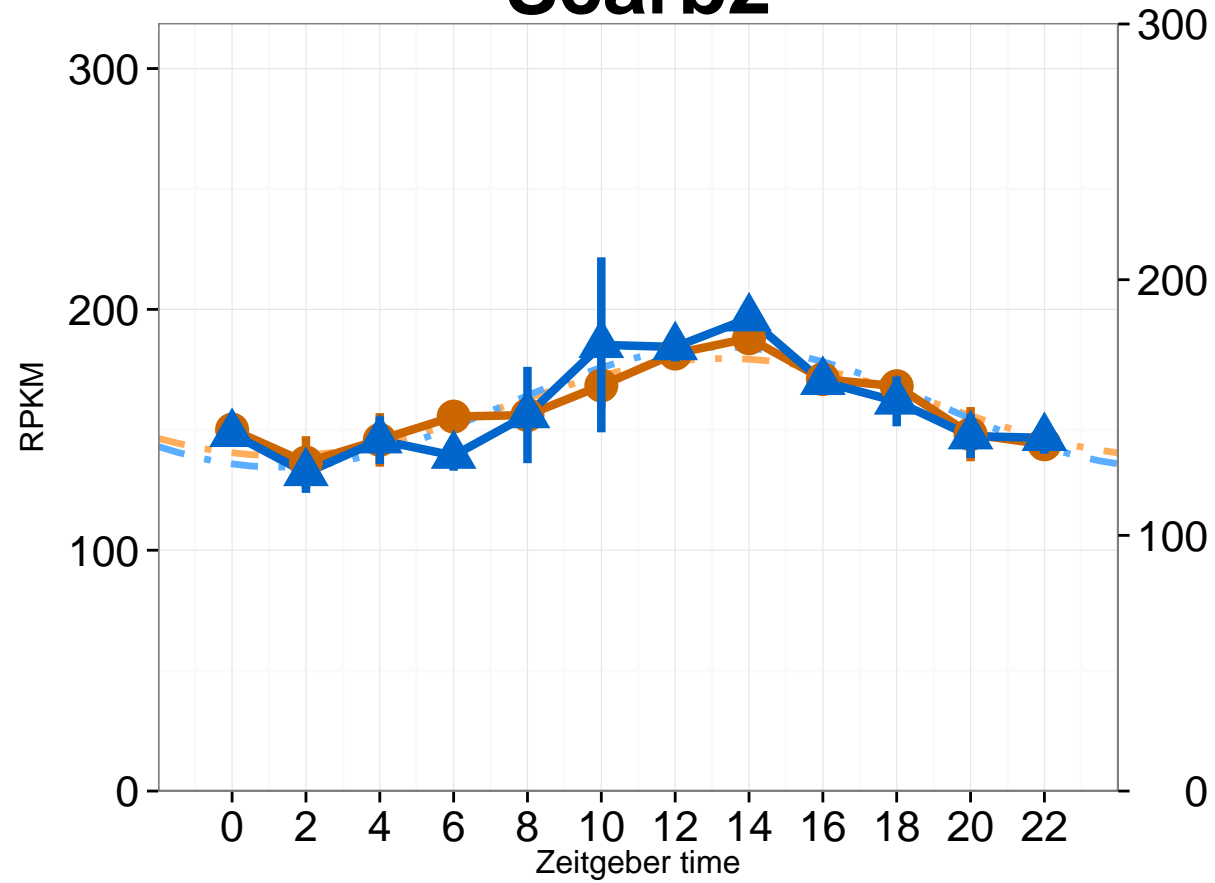

## Scarb2

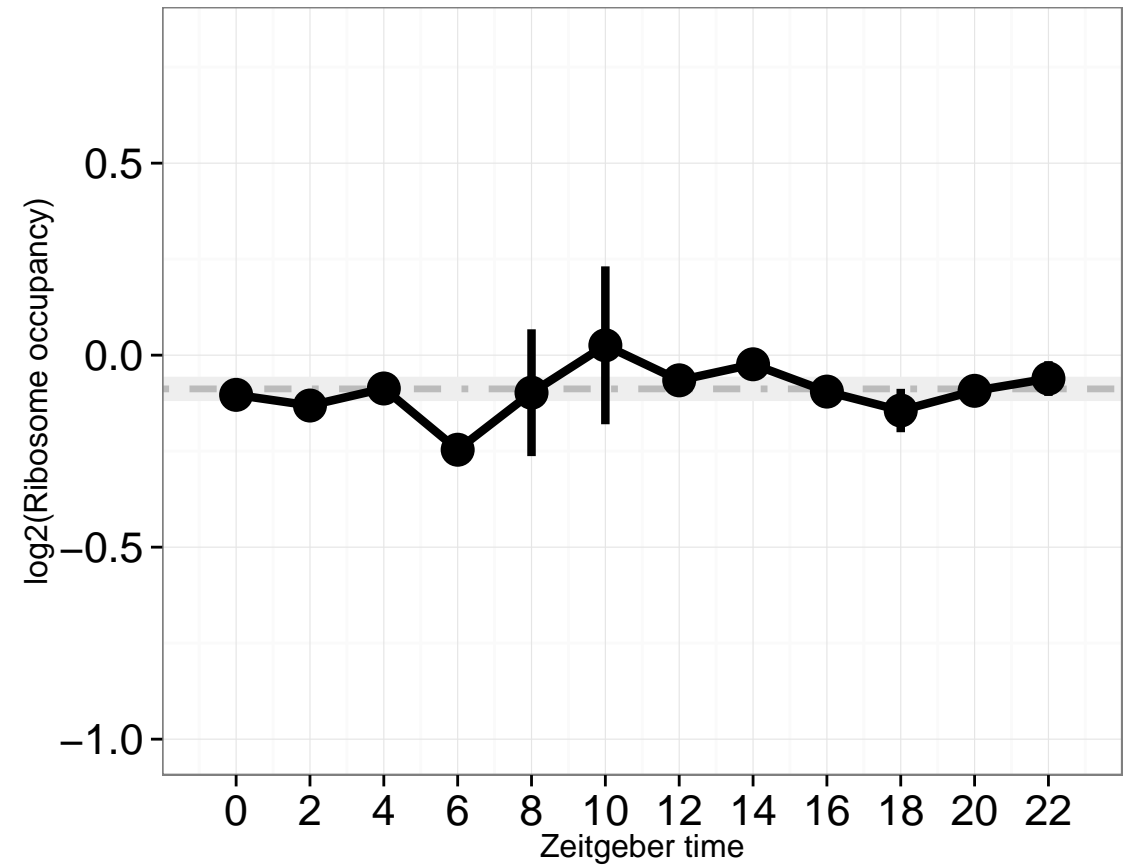

Supplement: SuppDataset_1.zip [file Scarb2_set_A.pdf › Supplemental Dataset 1/A-mRNA_nonrhyth_translation_nonrhyth/Scarb2_set_A.pdf]

# Scarf1

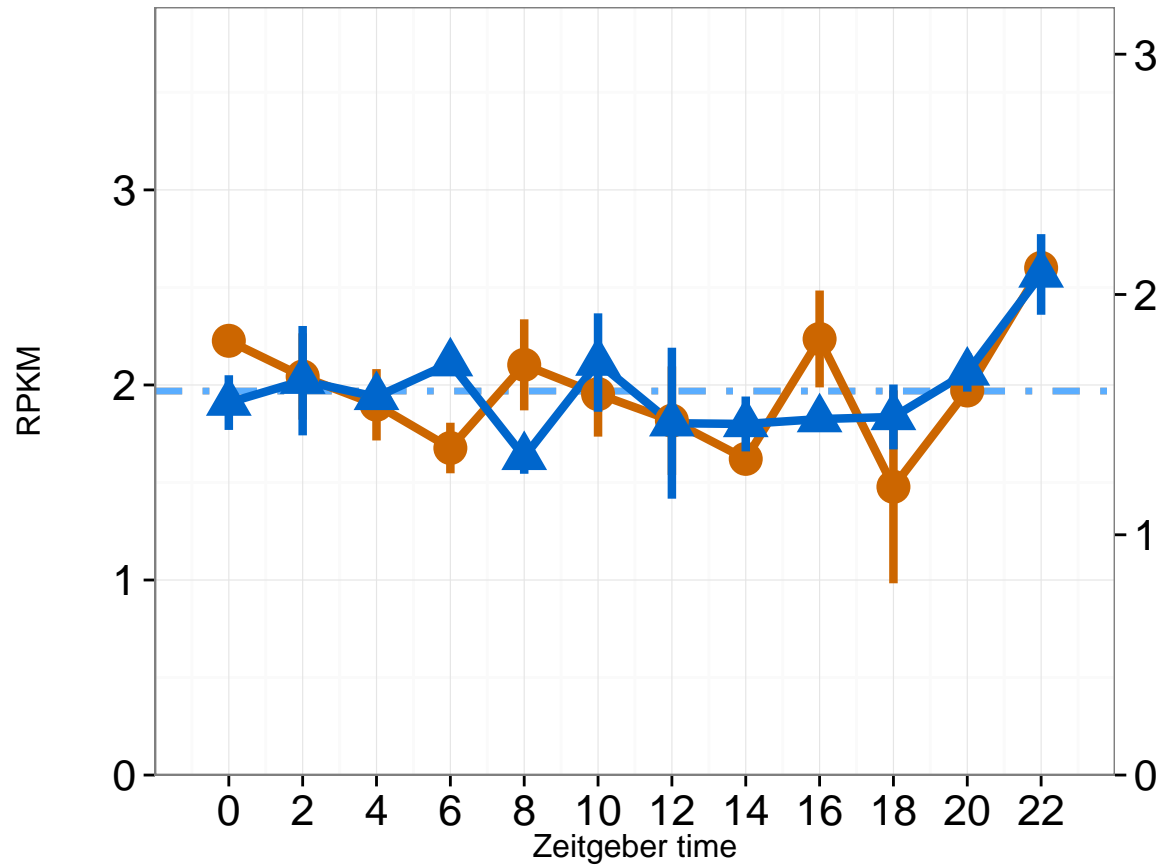

# Scarf1

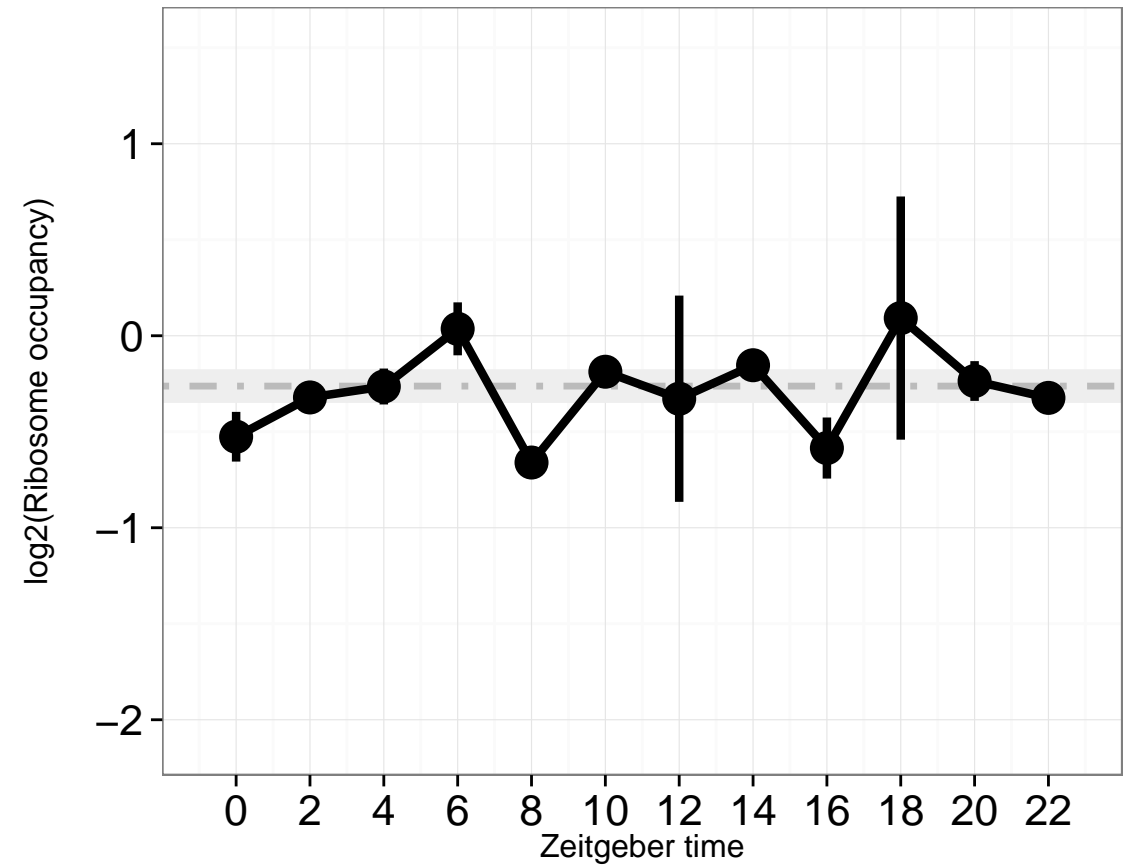

Supplement: SuppDataset_1.zip [file Scarf1_set_A.pdf › Supplemental Dataset 1/A-mRNA_nonrhyth_translation_nonrhyth/Scarf1_set_A.pdf]

## Scarf2

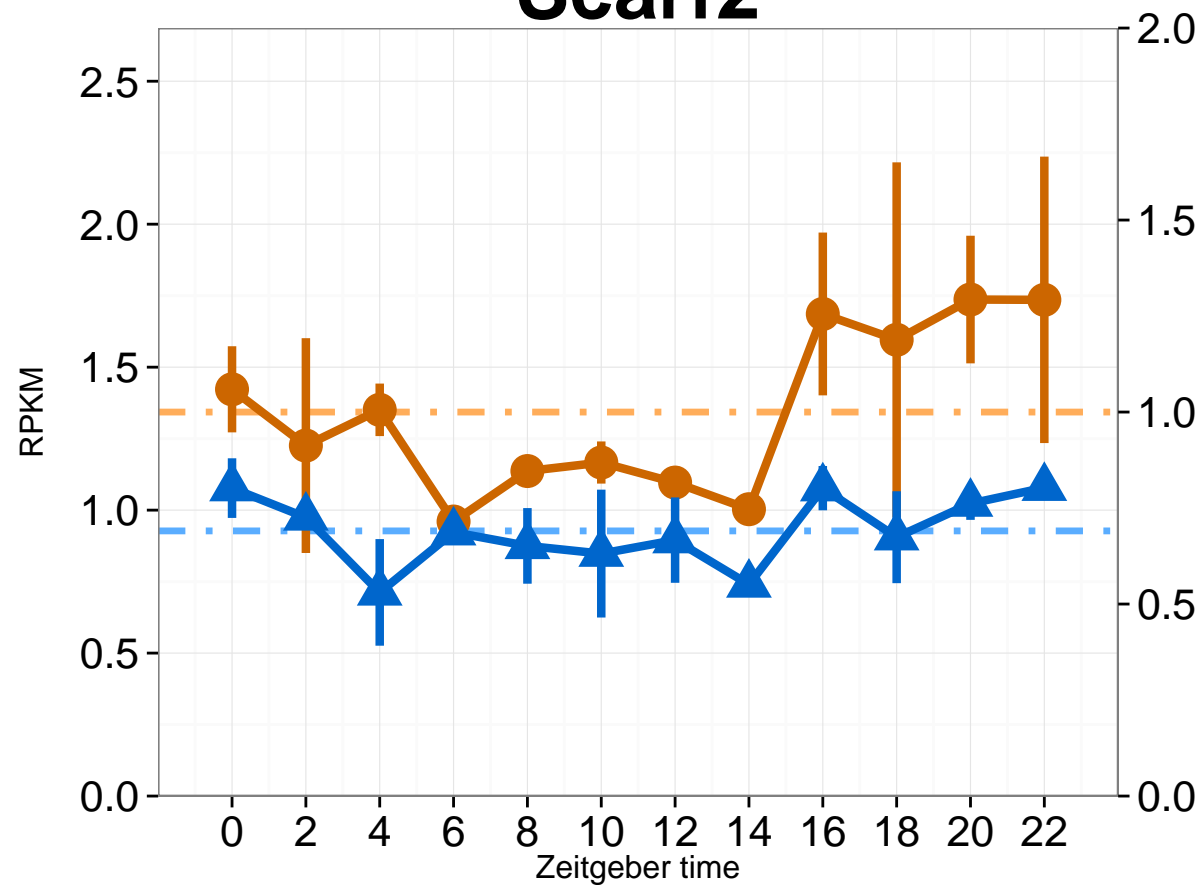

## Scarf2

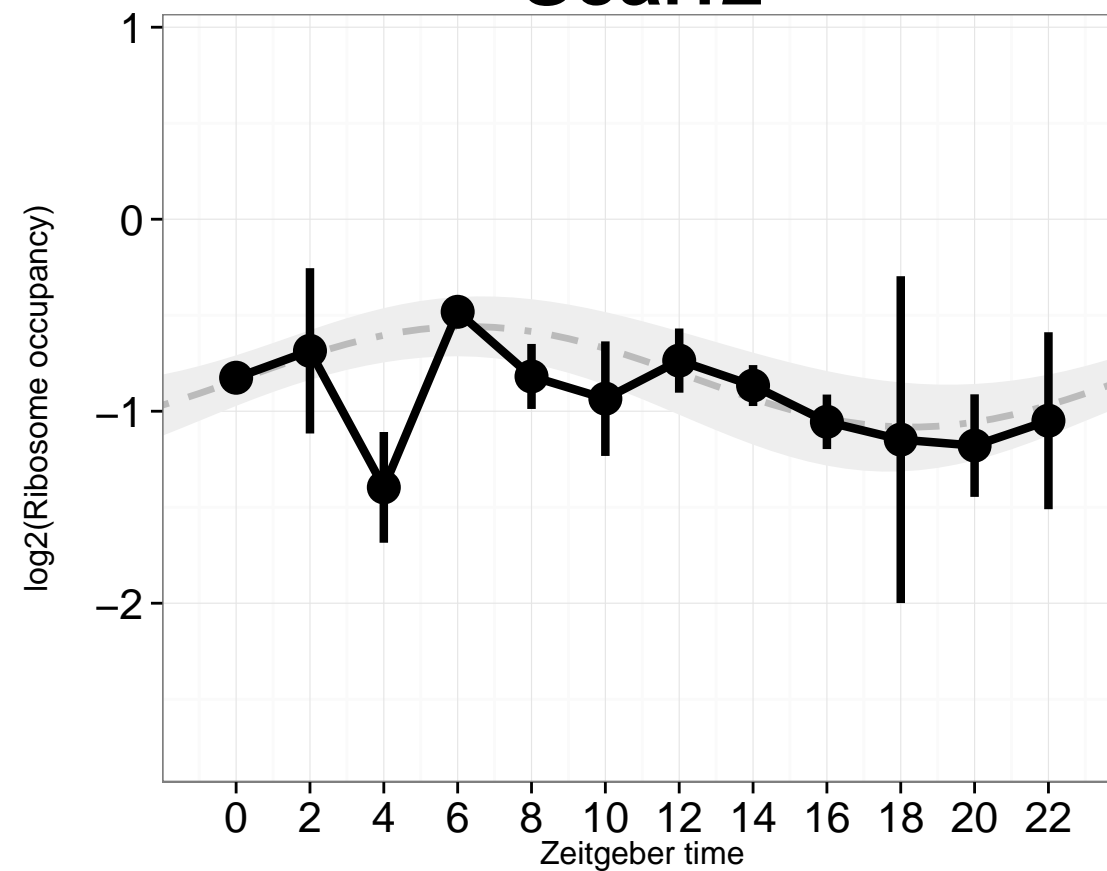

Supplement: SuppDataset_1.zip [file Scarf2_set_A.pdf › Supplemental Dataset 1/A-mRNA_nonrhyth_translation_nonrhyth/Scarf2_set_A.pdf]

## Sccpdh

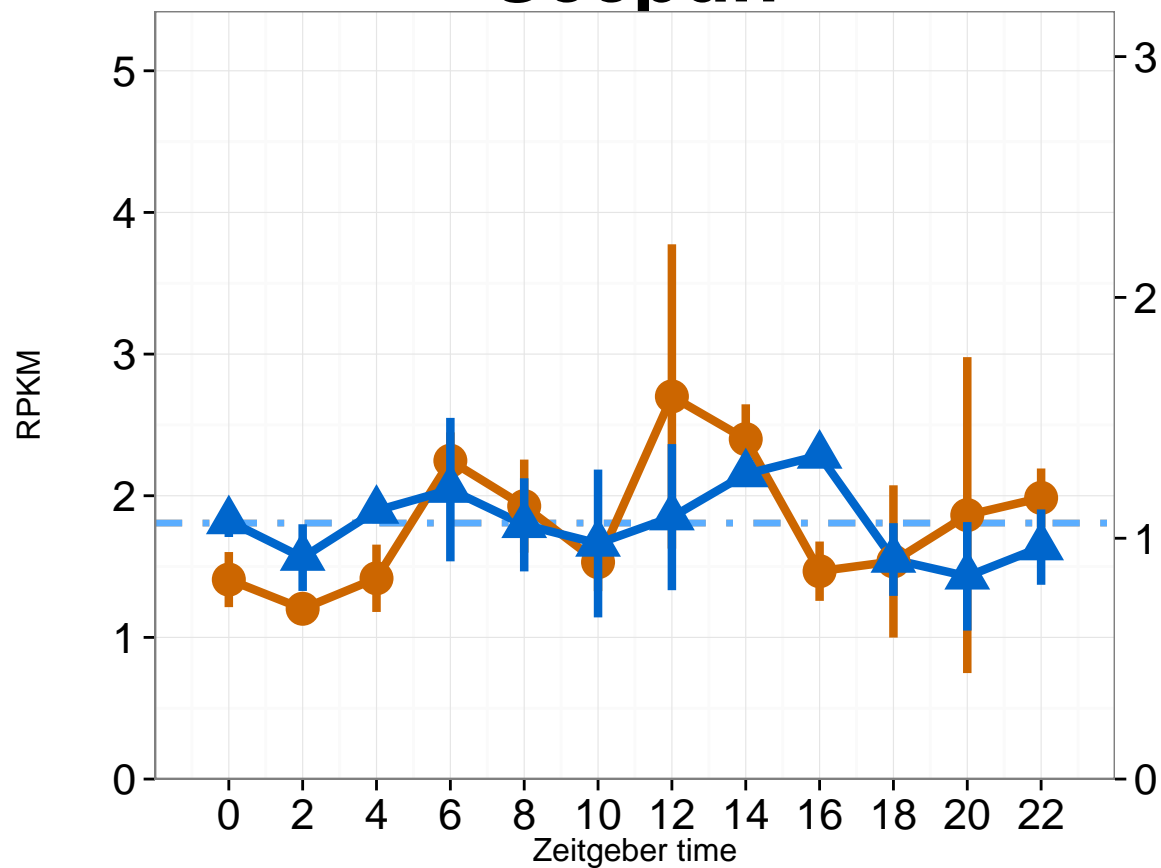

## Sccpdh

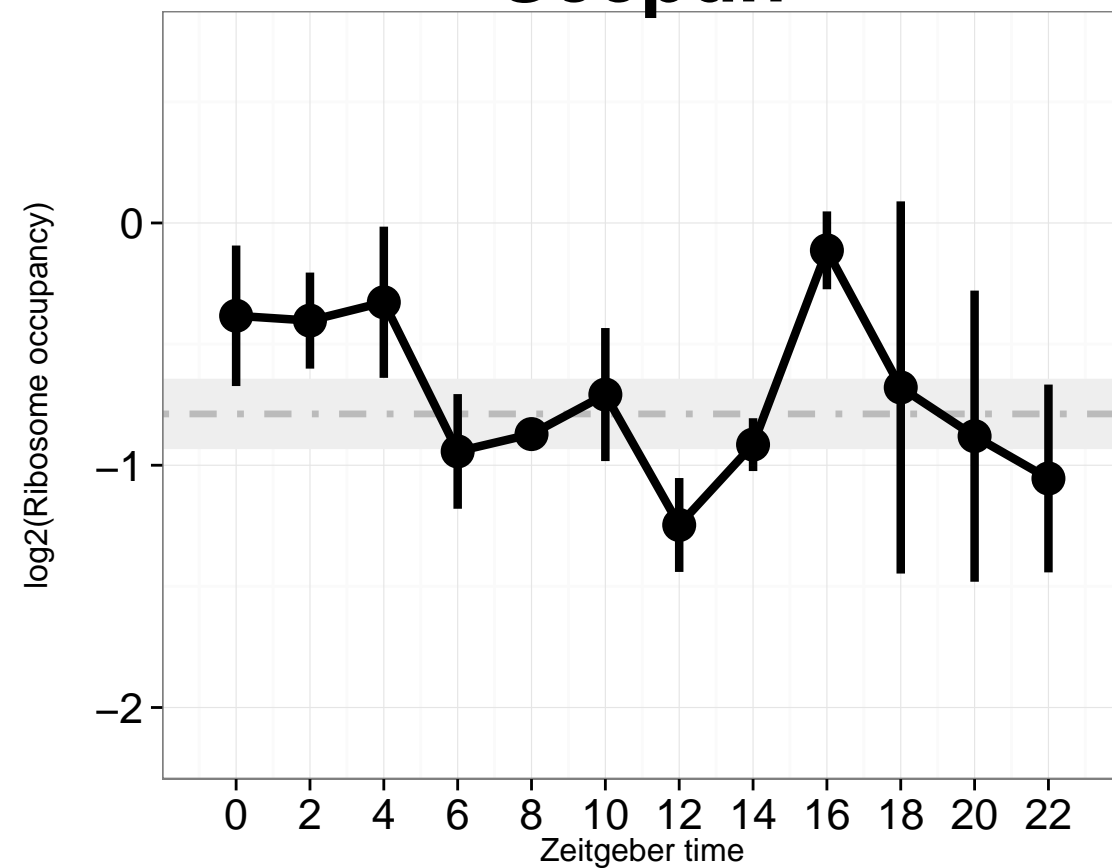

Supplement: SuppDataset_1.zip [file Sccpdh_set_A.pdf › Supplemental Dataset 1/A-mRNA_nonrhyth_translation_nonrhyth/Sccpdh_set_A.pdf]

## Scd2

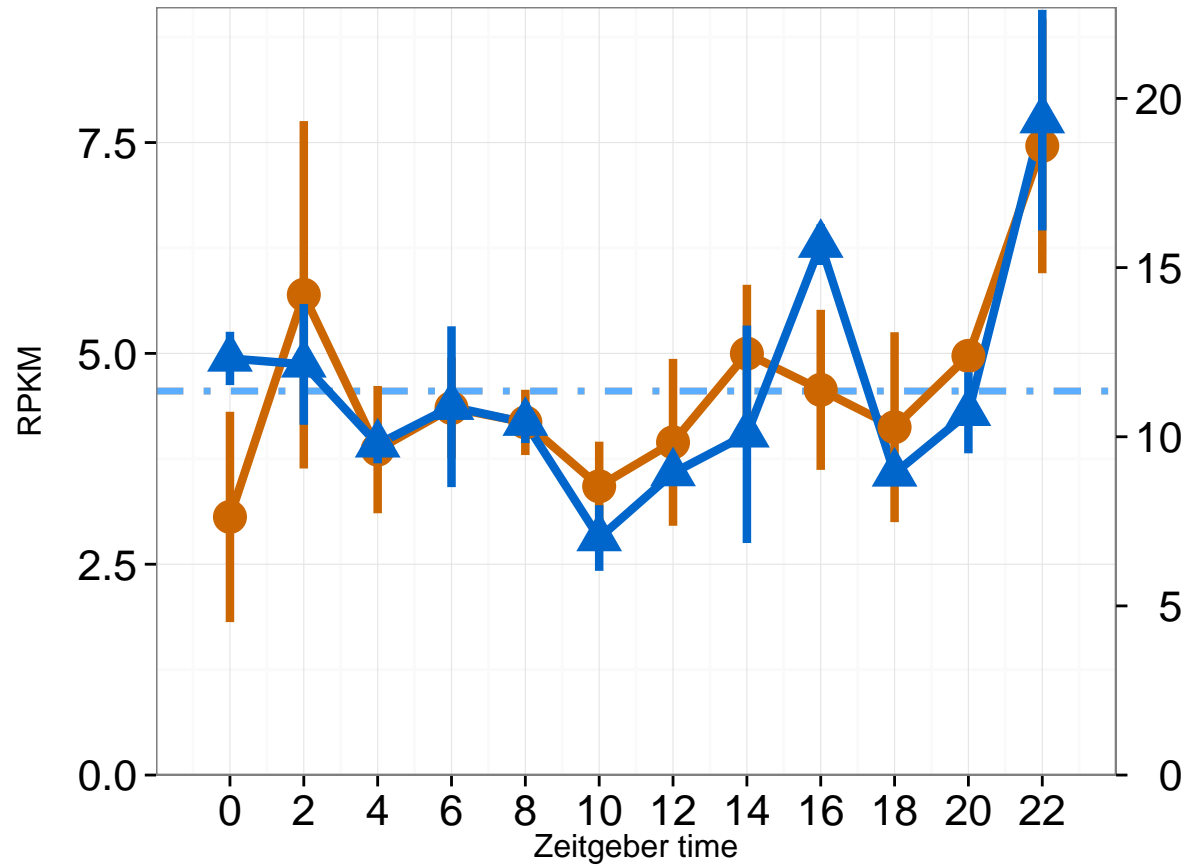

## Scd2

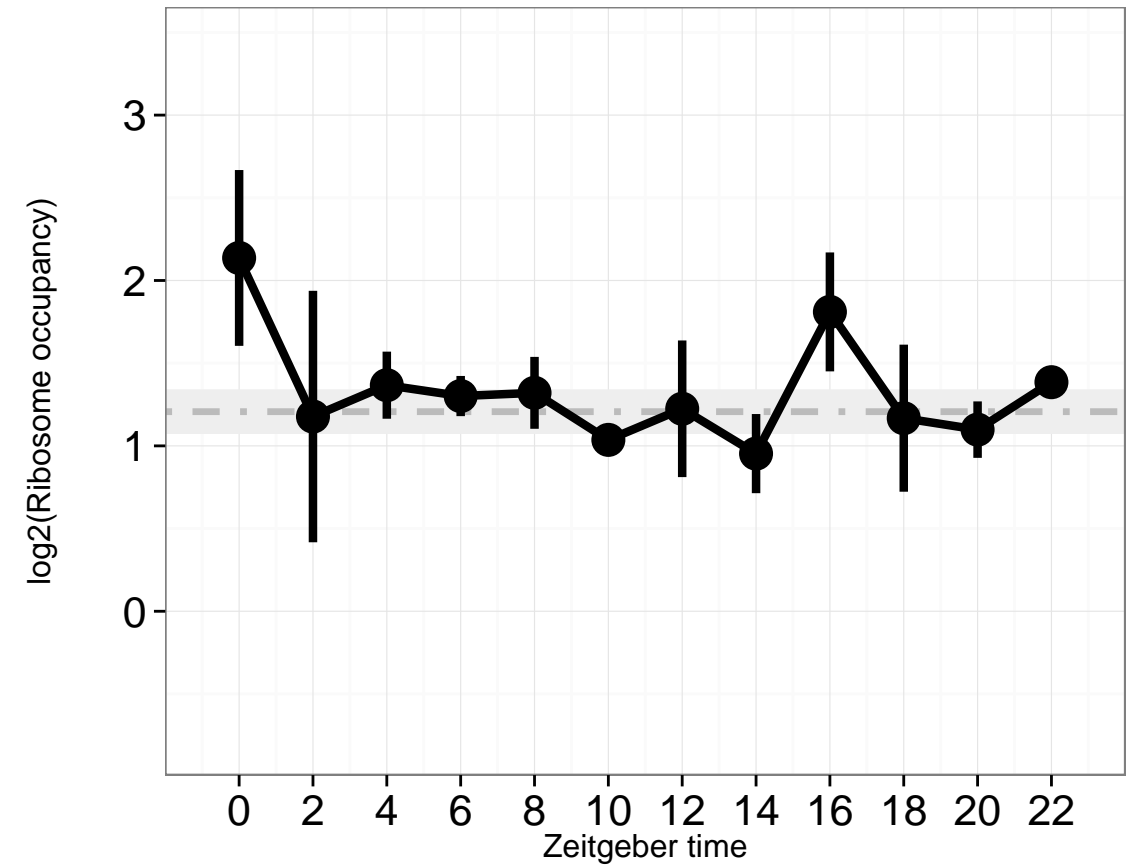

Supplement: SuppDataset_1.zip [file Scd2_set_A.pdf › Supplemental Dataset 1/A-mRNA_nonrhyth_translation_nonrhyth/Scd2_set_A.pdf]

# Scd3

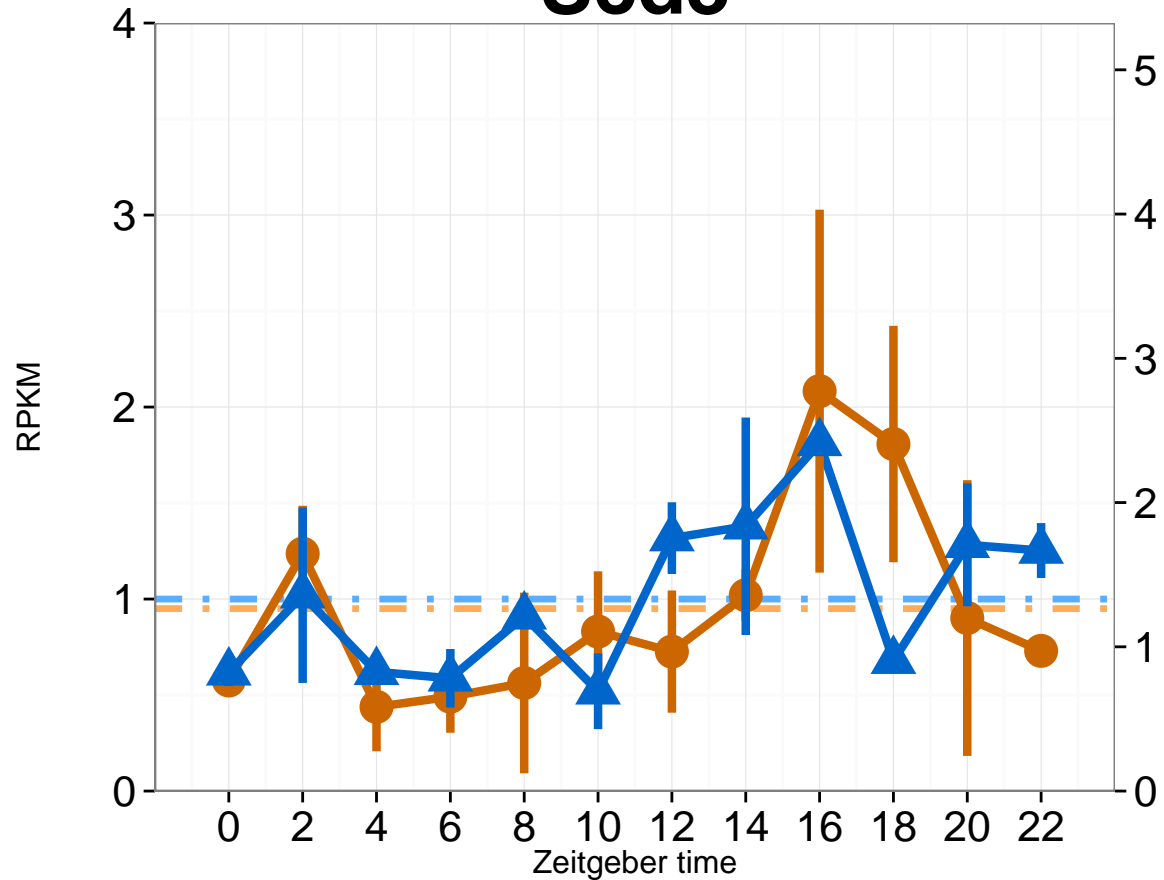

# Scd3

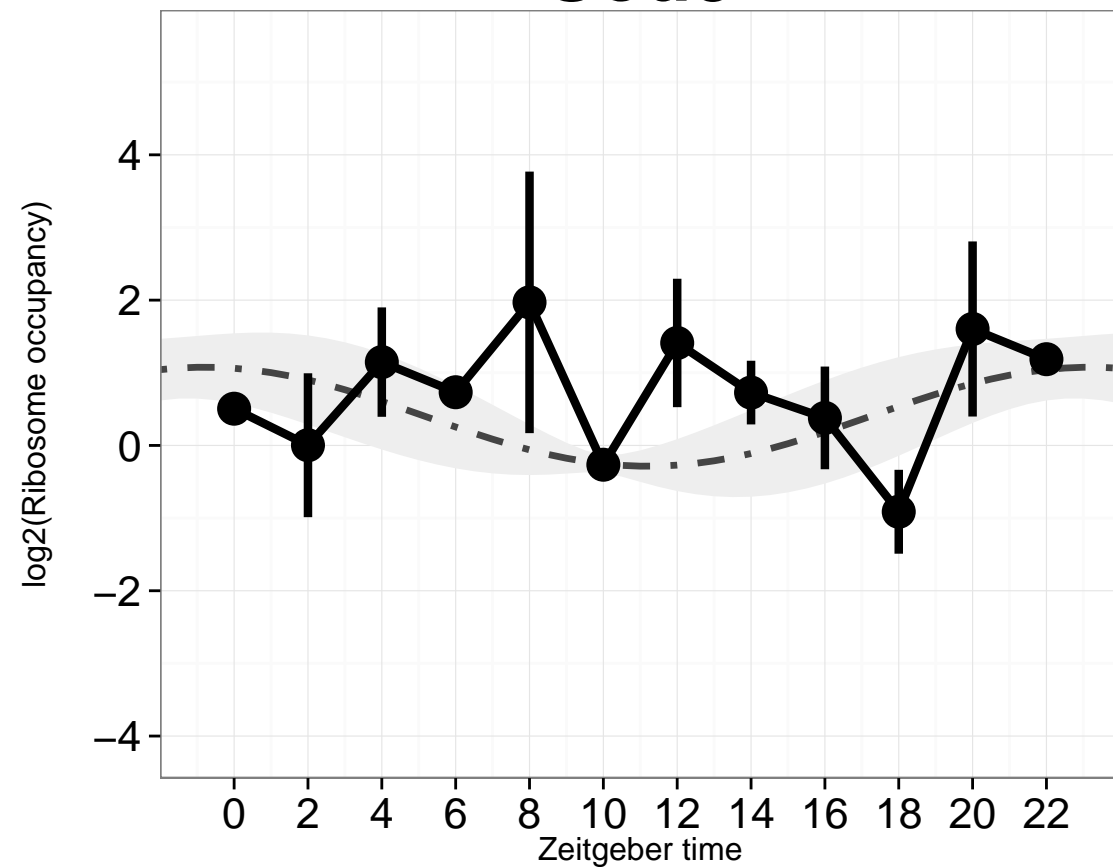

Supplement: SuppDataset_1.zip [file Scd3_set_A.pdf › Supplemental Dataset 1/A-mRNA_nonrhyth_translation_nonrhyth/Scd3_set_A.pdf]

# Scfd1

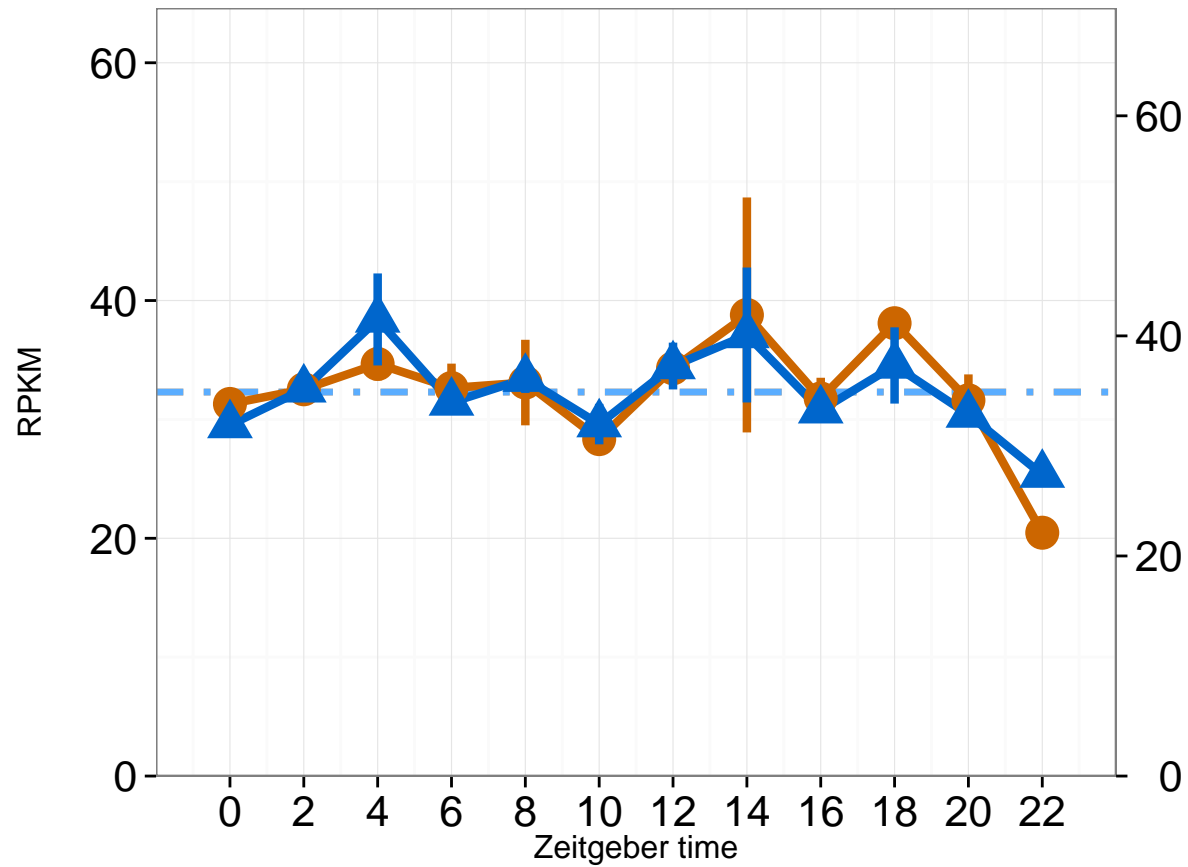

# Scfd1

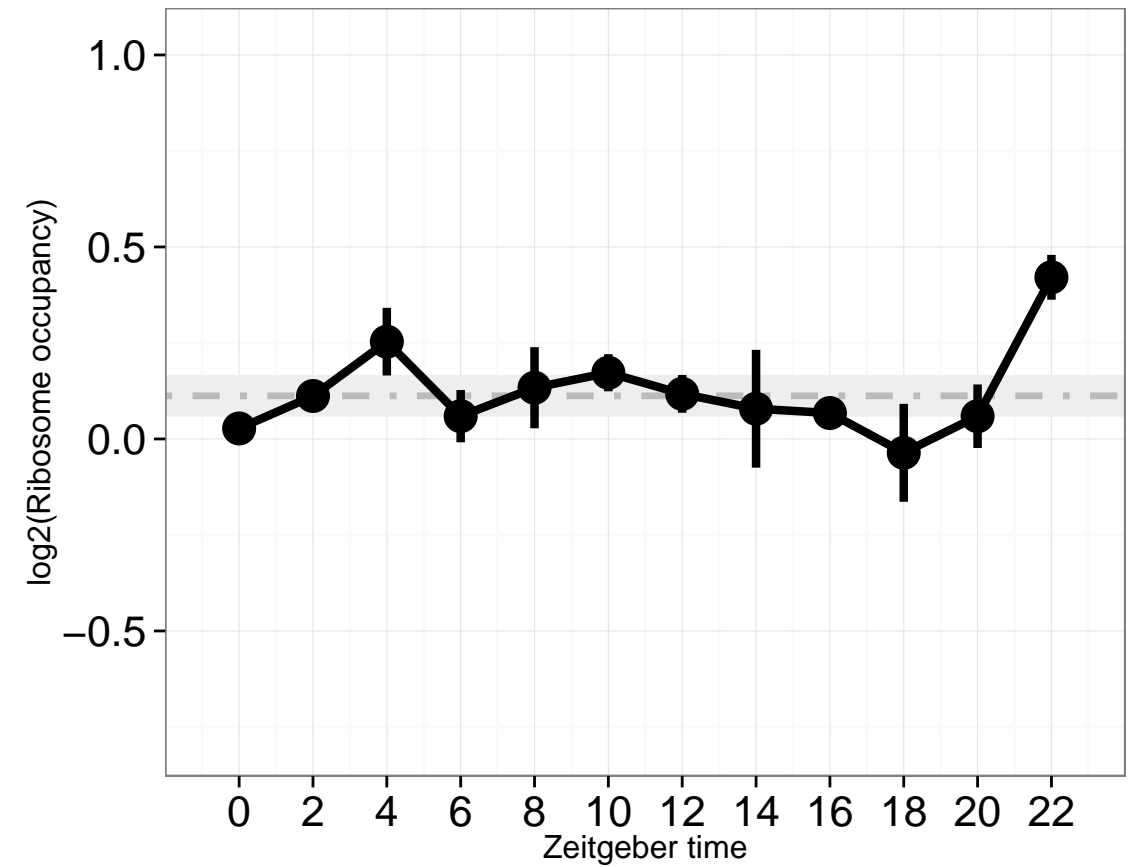

Supplement: SuppDataset_1.zip [file Scfd1_set_A.pdf › Supplemental Dataset 1/A-mRNA_nonrhyth_translation_nonrhyth/Scfd1_set_A.pdf]

# Scfd2

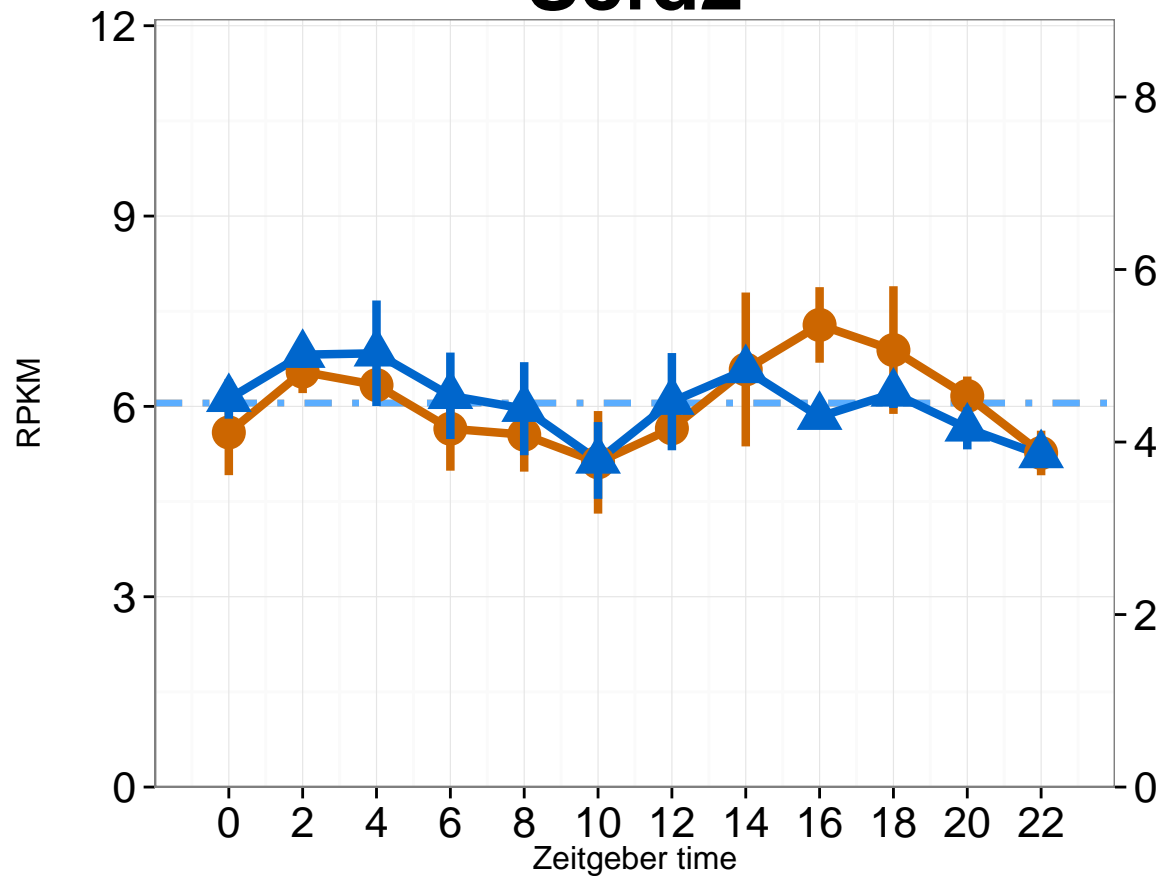

# Scfd2

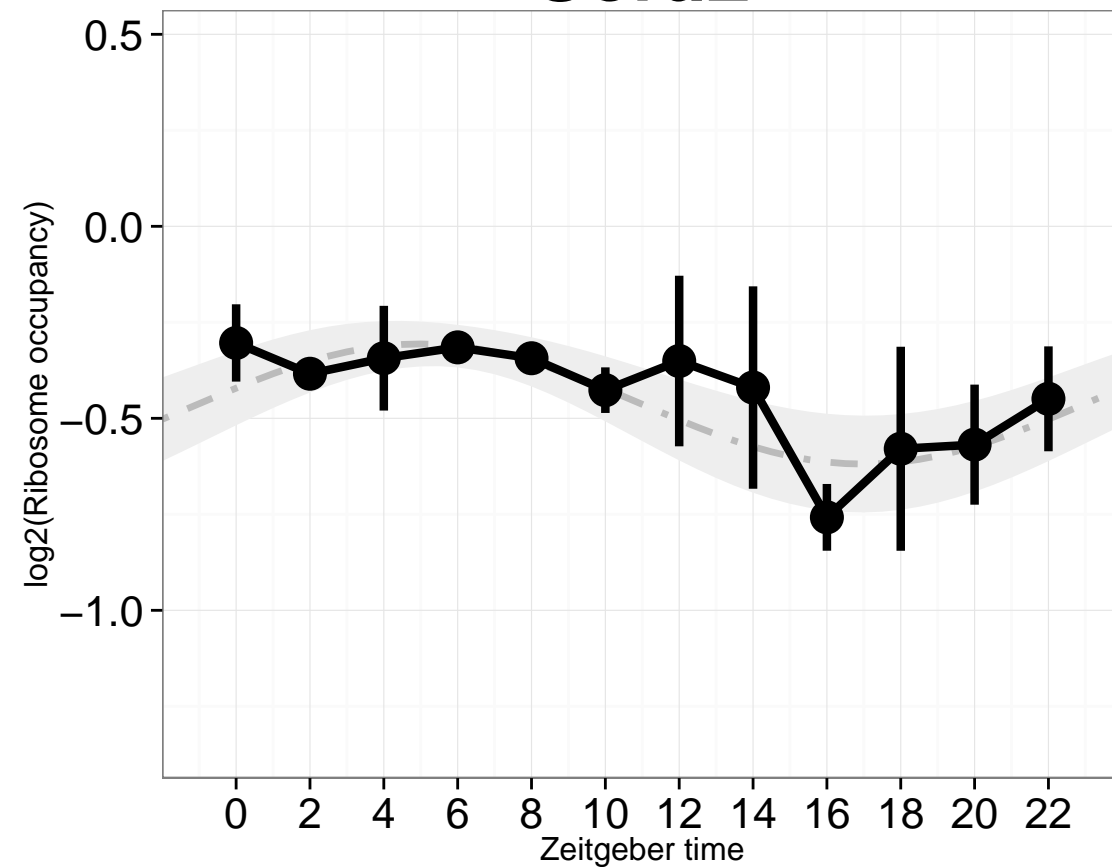

Supplement: SuppDataset_1.zip [file Scfd2_set_A.pdf › Supplemental Dataset 1/A-mRNA_nonrhyth_translation_nonrhyth/Scfd2_set_A.pdf]

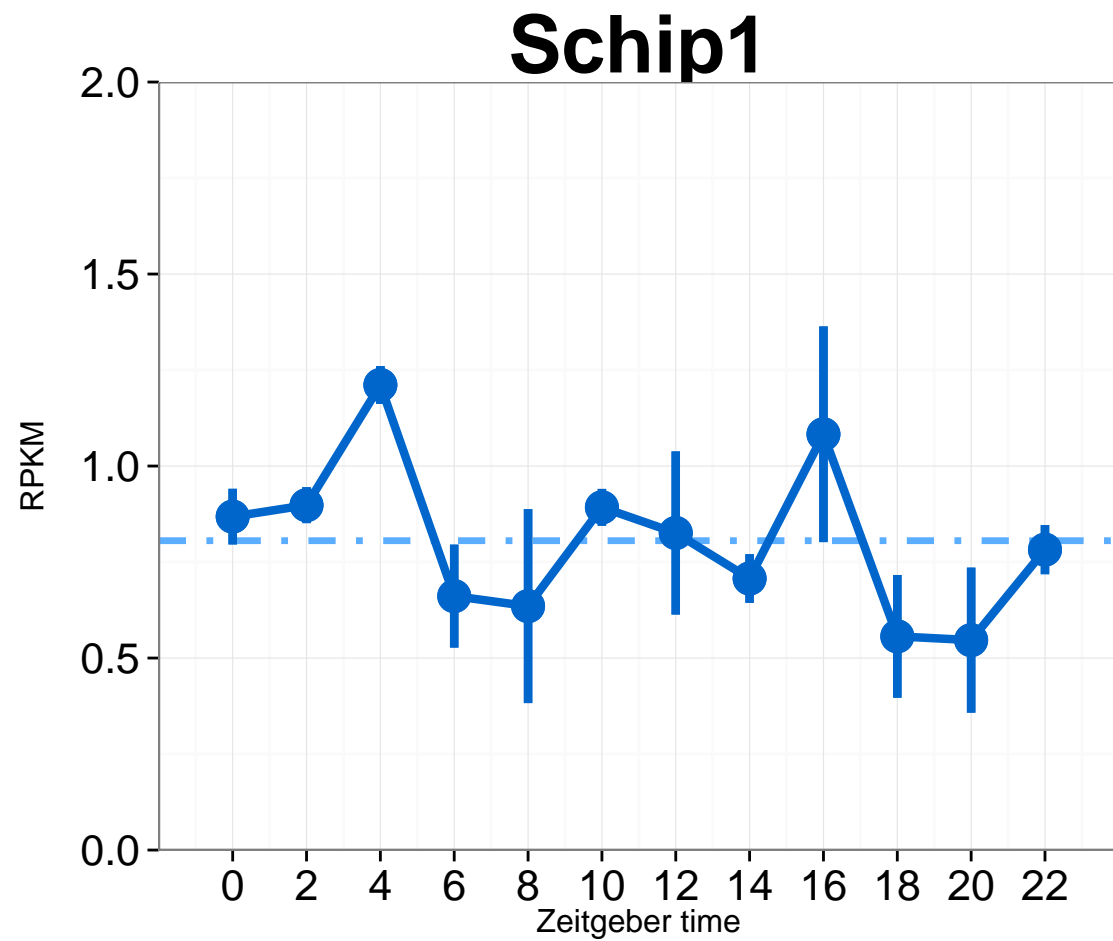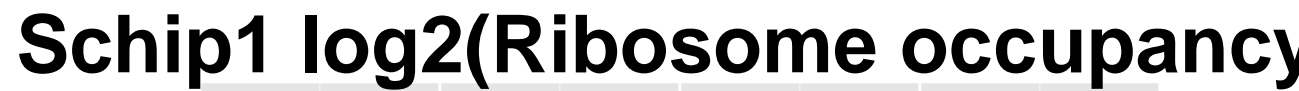

Supplement: SuppDataset_1.zip [file Schip1_set_A.pdf › Supplemental Dataset 1/A-mRNA_nonrhyth_translation_nonrhyth/Schip1_set_A.pdf]
