# Supplementary figures and images for: Ribosome profiling reveals the rhythmic liver translatome and circadian clock regulation by upstream open reading frames (part 100 of 113)
Source: HighWire-hosted journal article supplement (doi:10.1101/gr.195404.115), 2015-10-20

# S1pr3

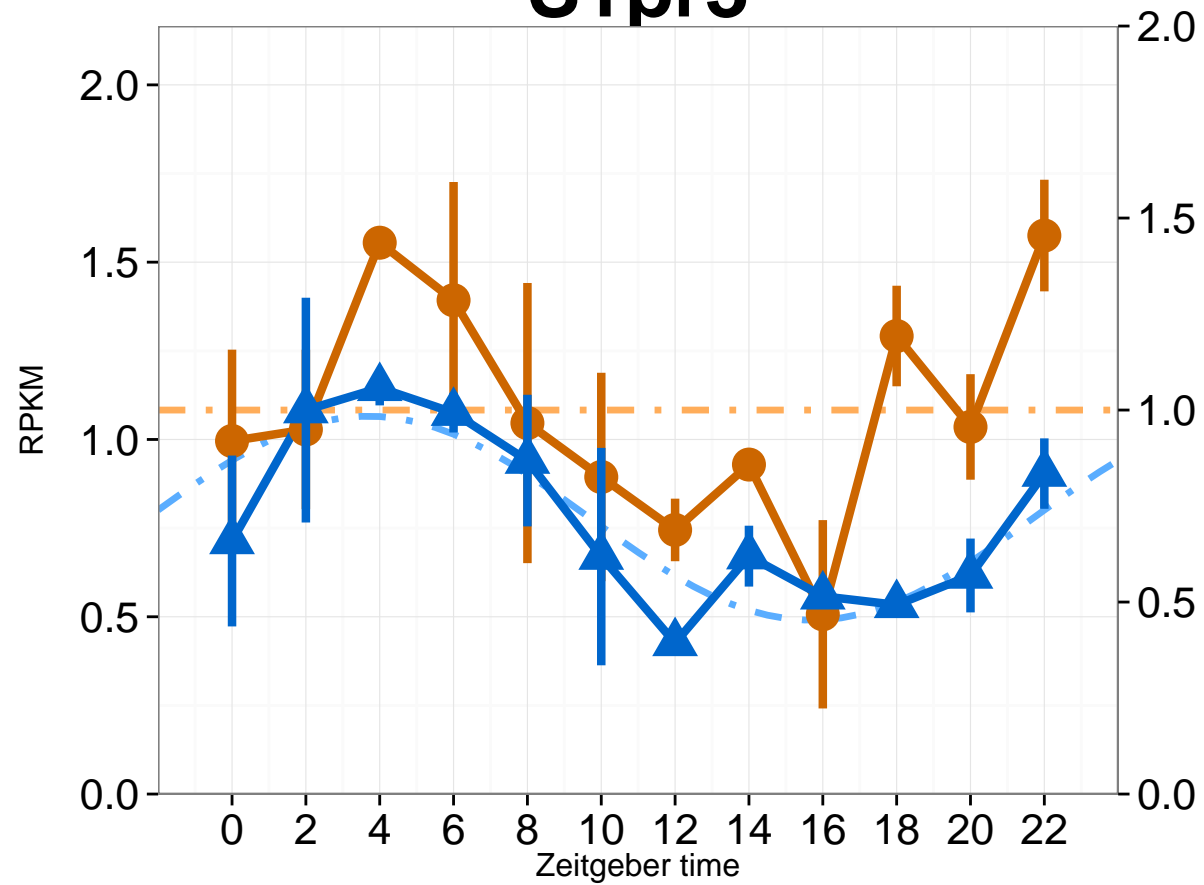

# S1pr3

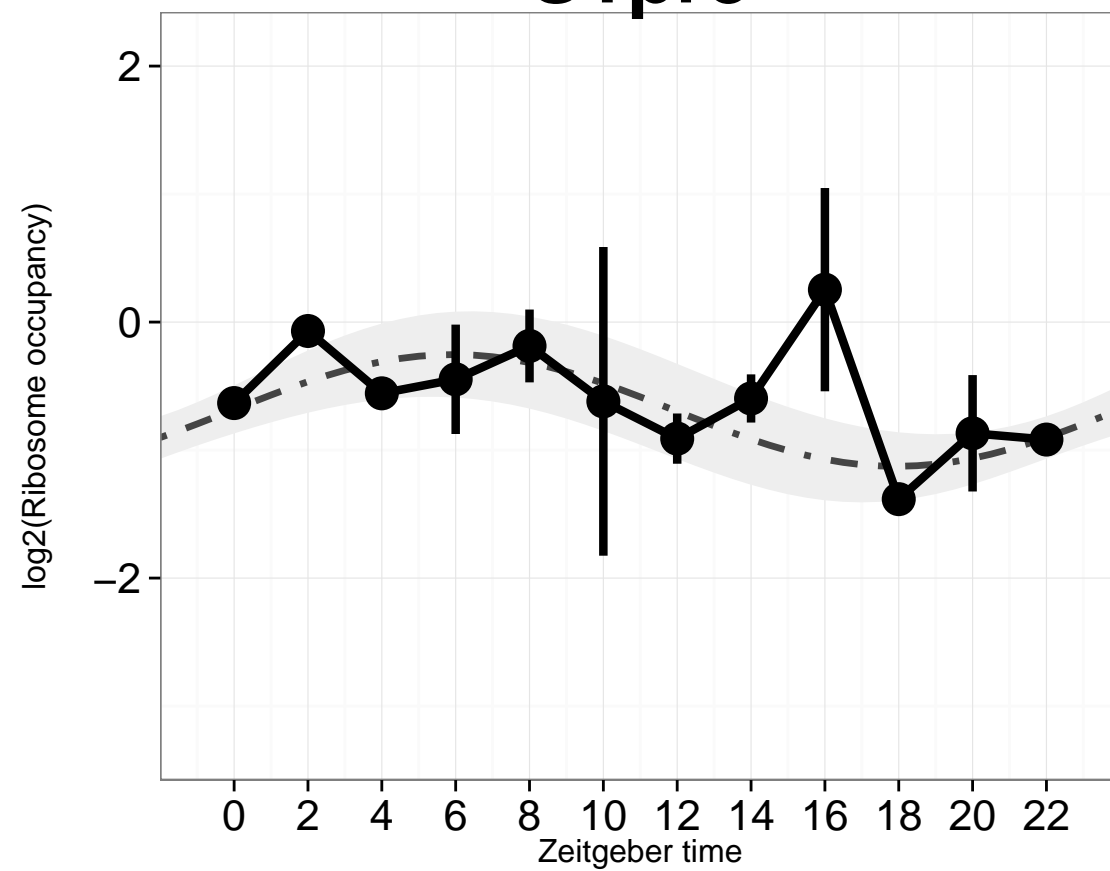

Supplement: SuppDataset_1.zip [file S1pr3_set_C.pdf › Supplemental Dataset 1/C-mRNA_nonrhythm_translation_rhyth/S1pr3_set_C.pdf]

## Samd9l

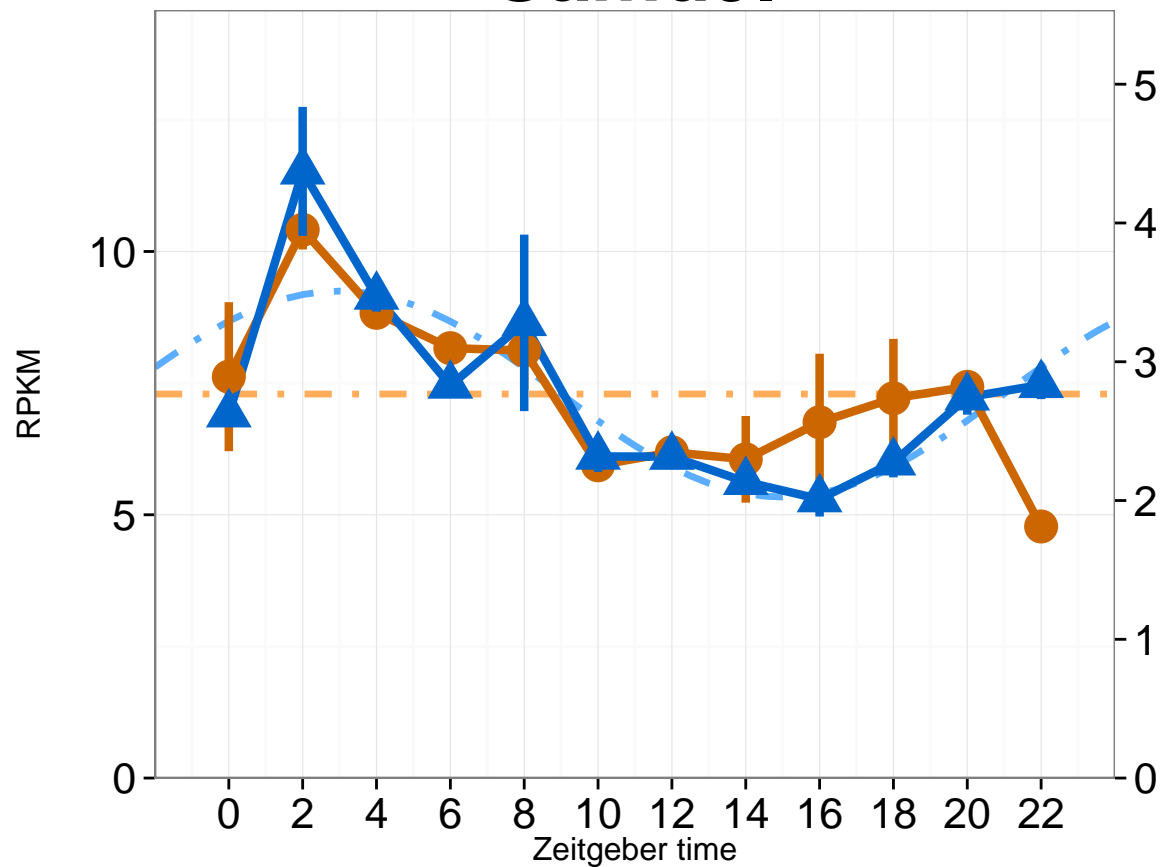

## Samd9l

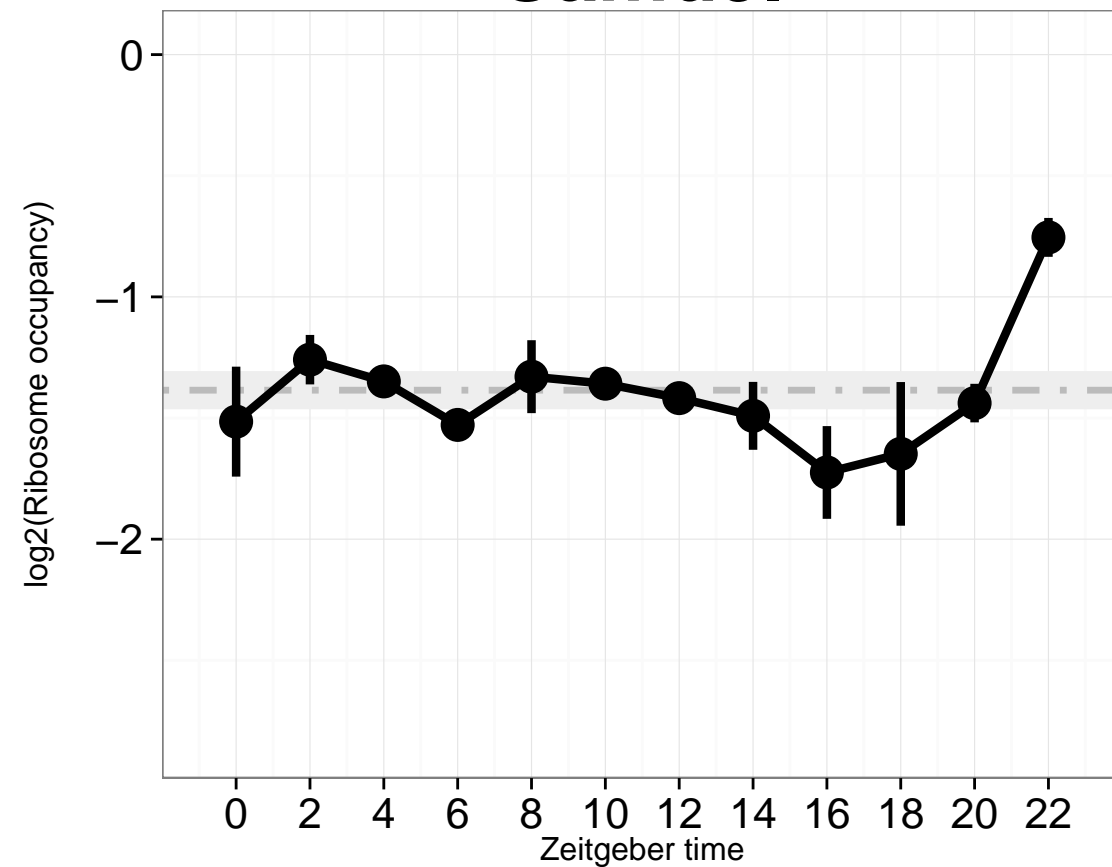

Supplement: SuppDataset_1.zip [file Samd9l_set_C.pdf › Supplemental Dataset 1/C-mRNA_nonrhythm_translation_rhyth/Samd9l_set_C.pdf]

# Sec22c

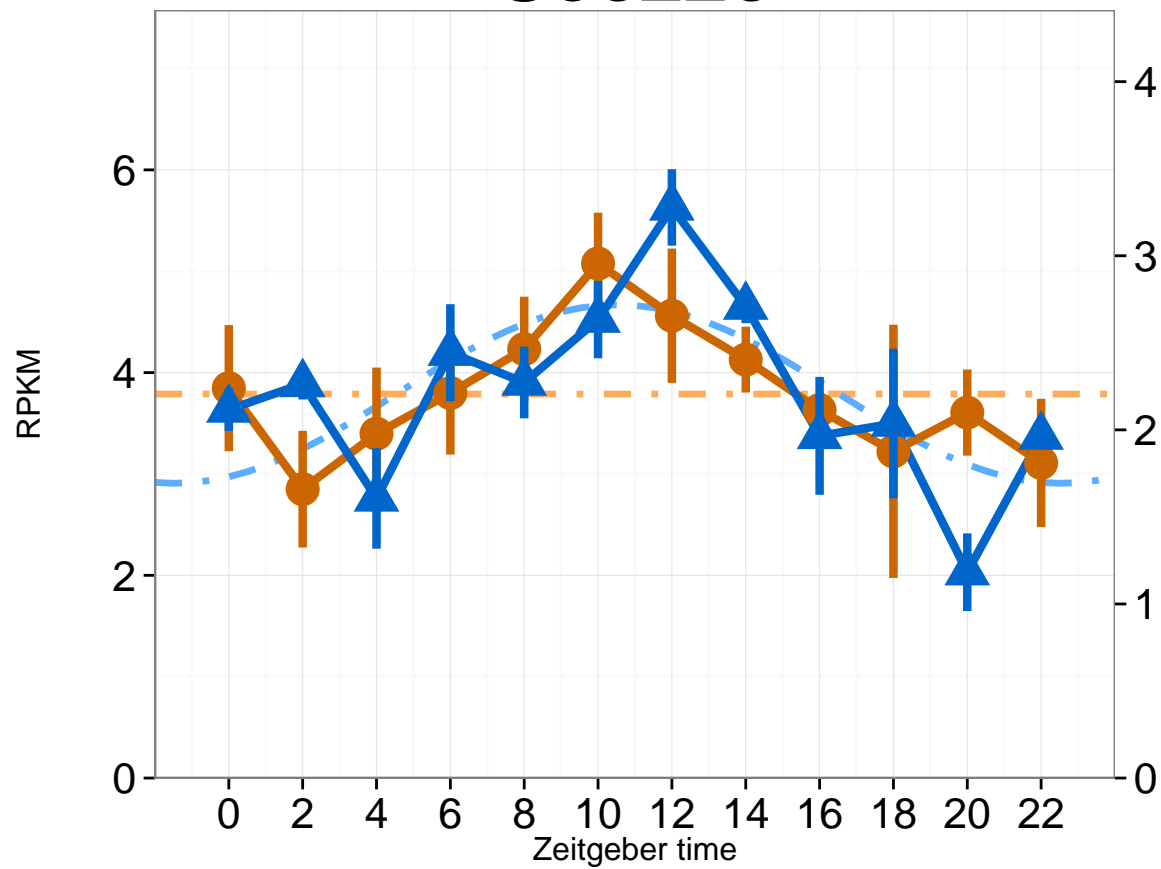

# Sec22c

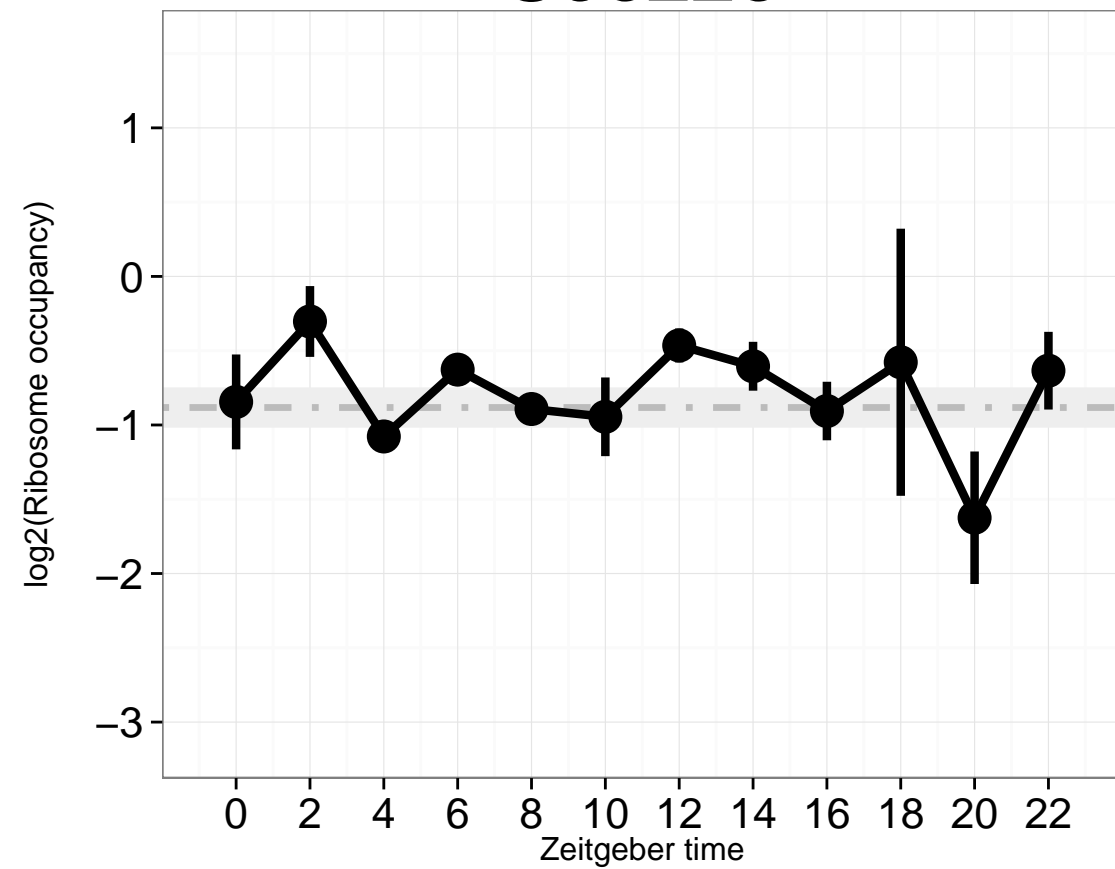

Supplement: SuppDataset_1.zip [file Sec22c_set_C.pdf › Supplemental Dataset 1/C-mRNA_nonrhythm_translation_rhyth/Sec22c_set_C.pdf]

## Selm

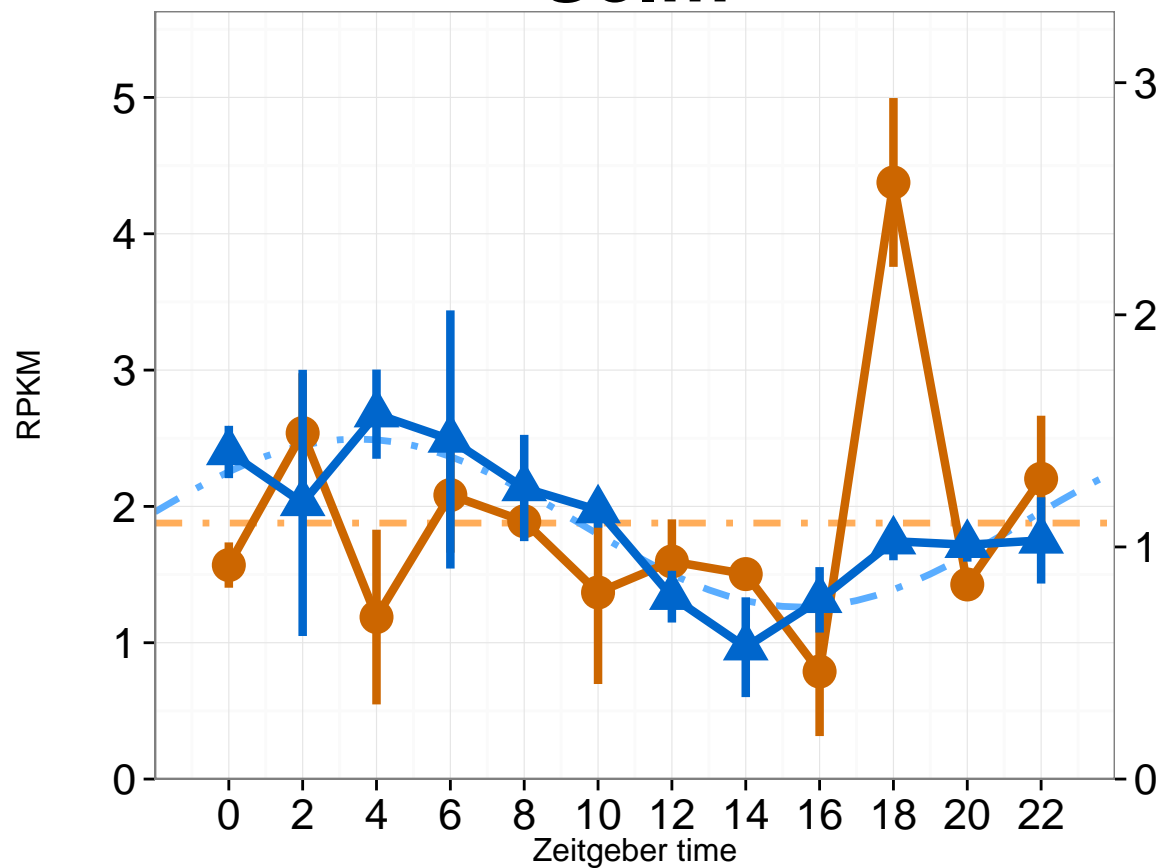

## Selm

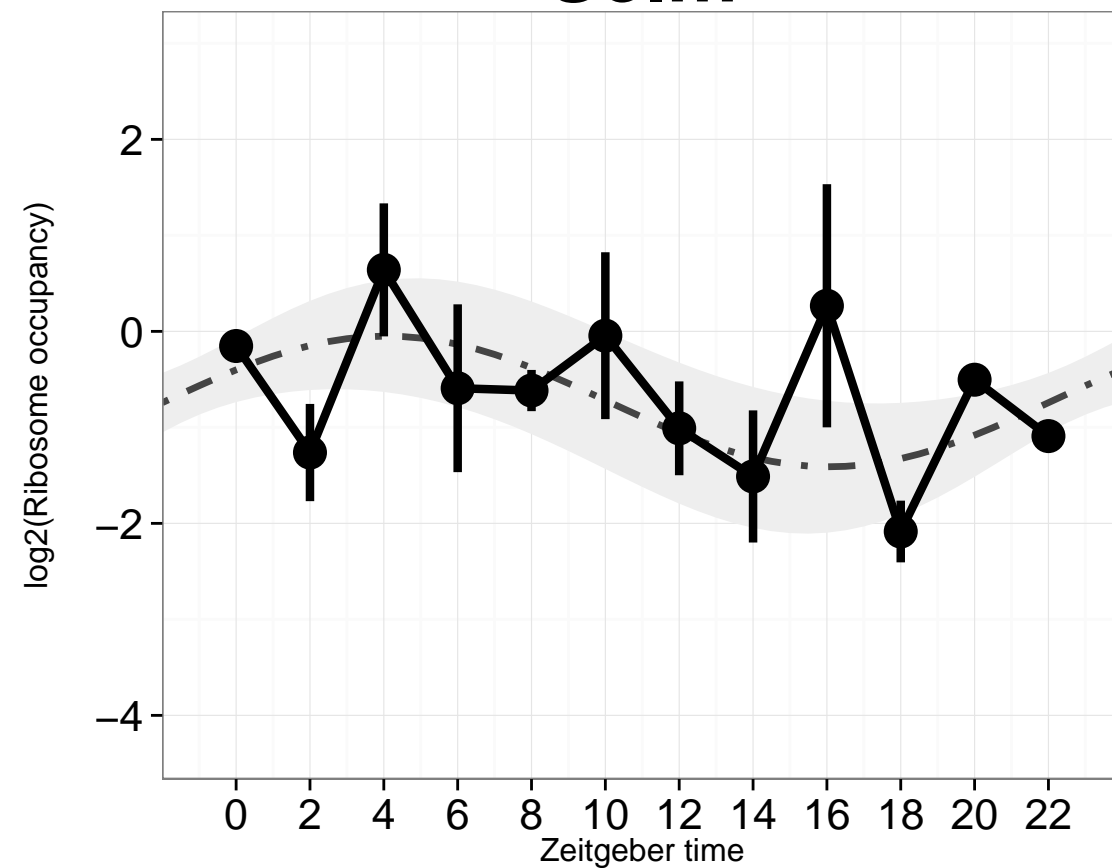

Supplement: SuppDataset_1.zip [file Selm_set_C.pdf › Supplemental Dataset 1/C-mRNA_nonrhythm_translation_rhyth/Selm_set_C.pdf]

## Serinc3

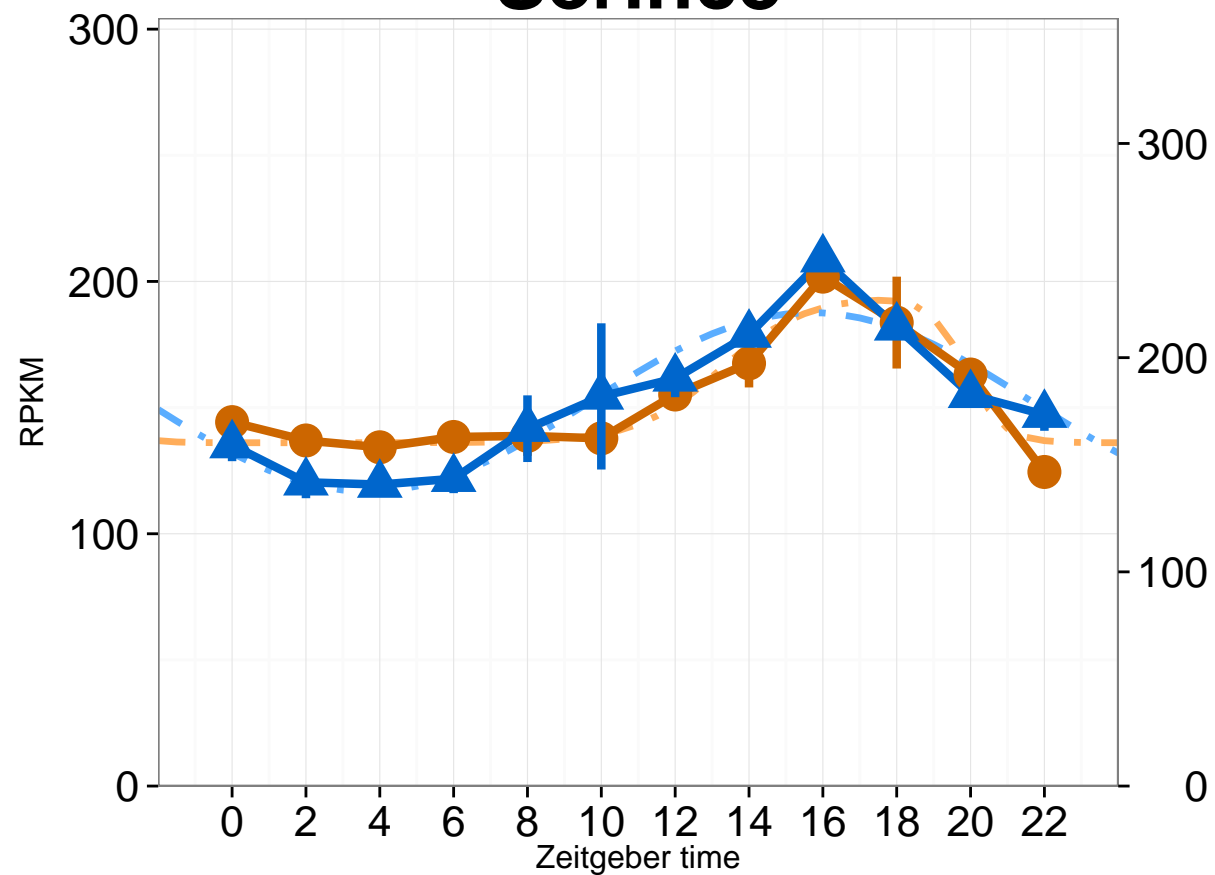

## Serinc3

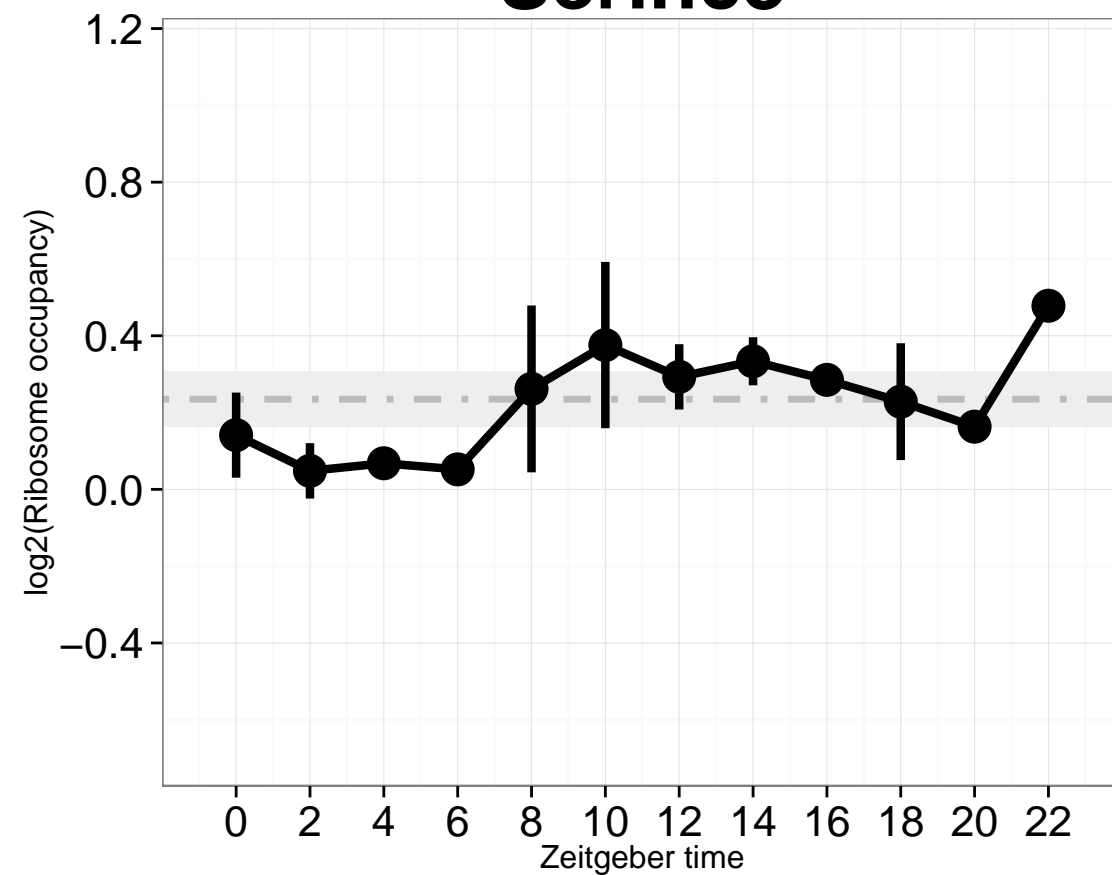

Supplement: SuppDataset_1.zip [file Serinc3_set_C.pdf › Supplemental Dataset 1/C-mRNA_nonrhythm_translation_rhyth/Serinc3_set_C.pdf]

**Serpina5 TR**

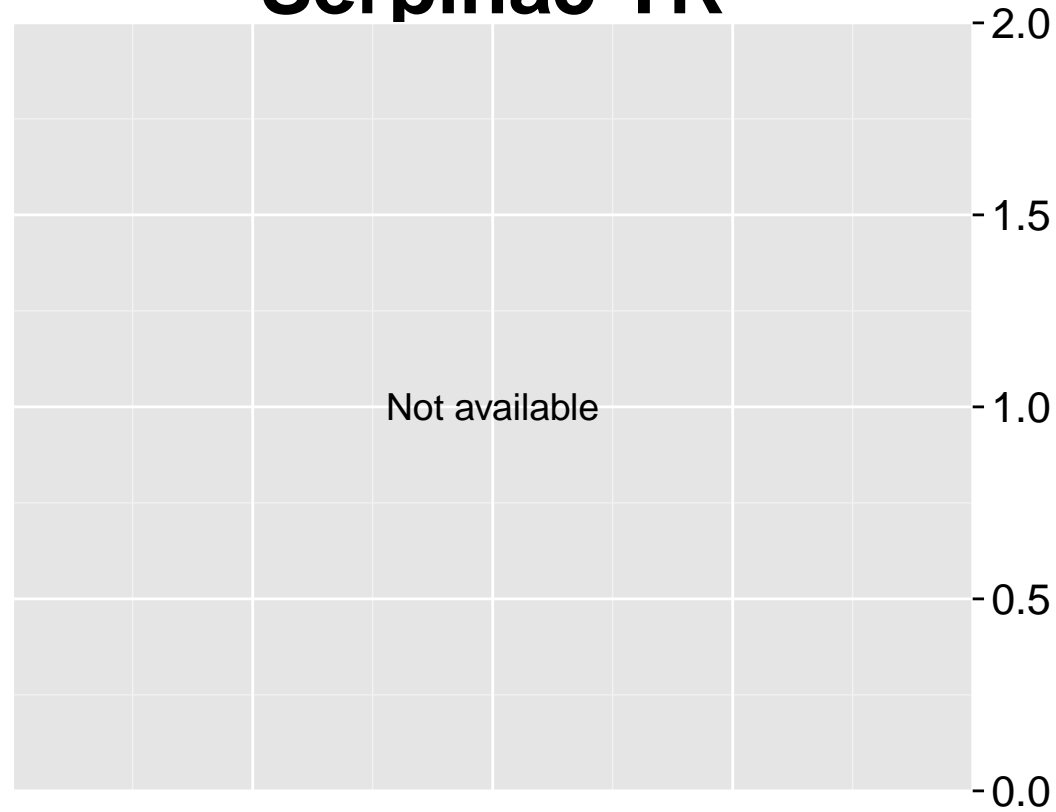

**Serpina5 log2(Ribosome occupanc**

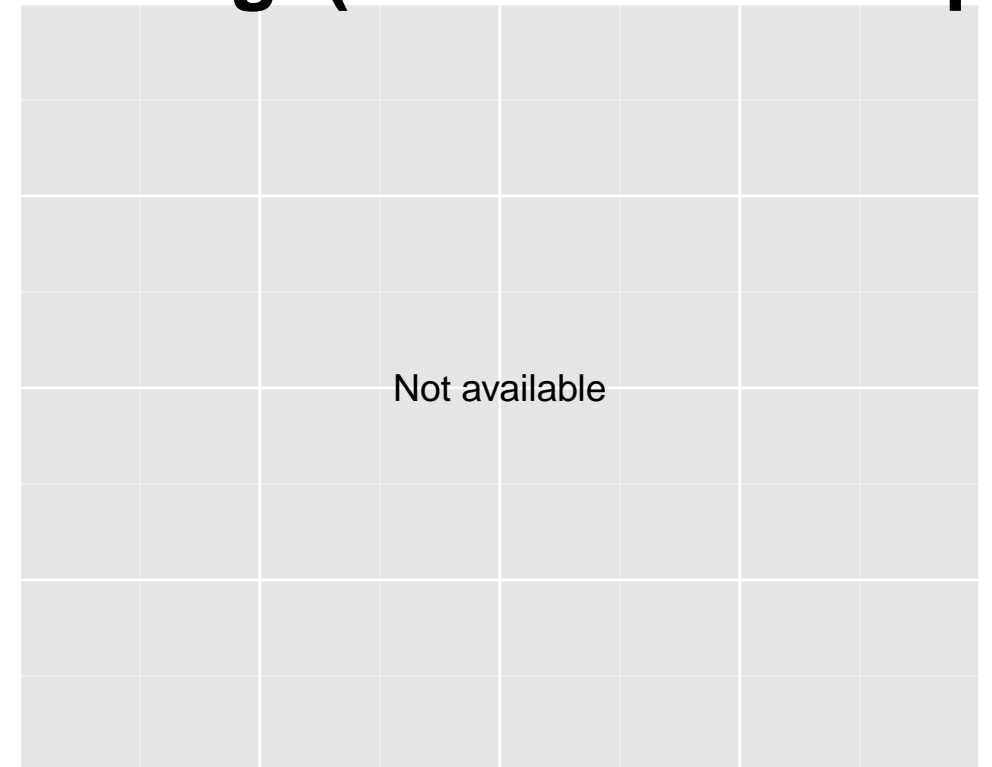

Supplement: SuppDataset_1.zip [file Serpina5_set_C.pdf › Supplemental Dataset 1/C-mRNA_nonrhythm_translation_rhyth/Serpina5_set_C.pdf]

# Serp**in**b8

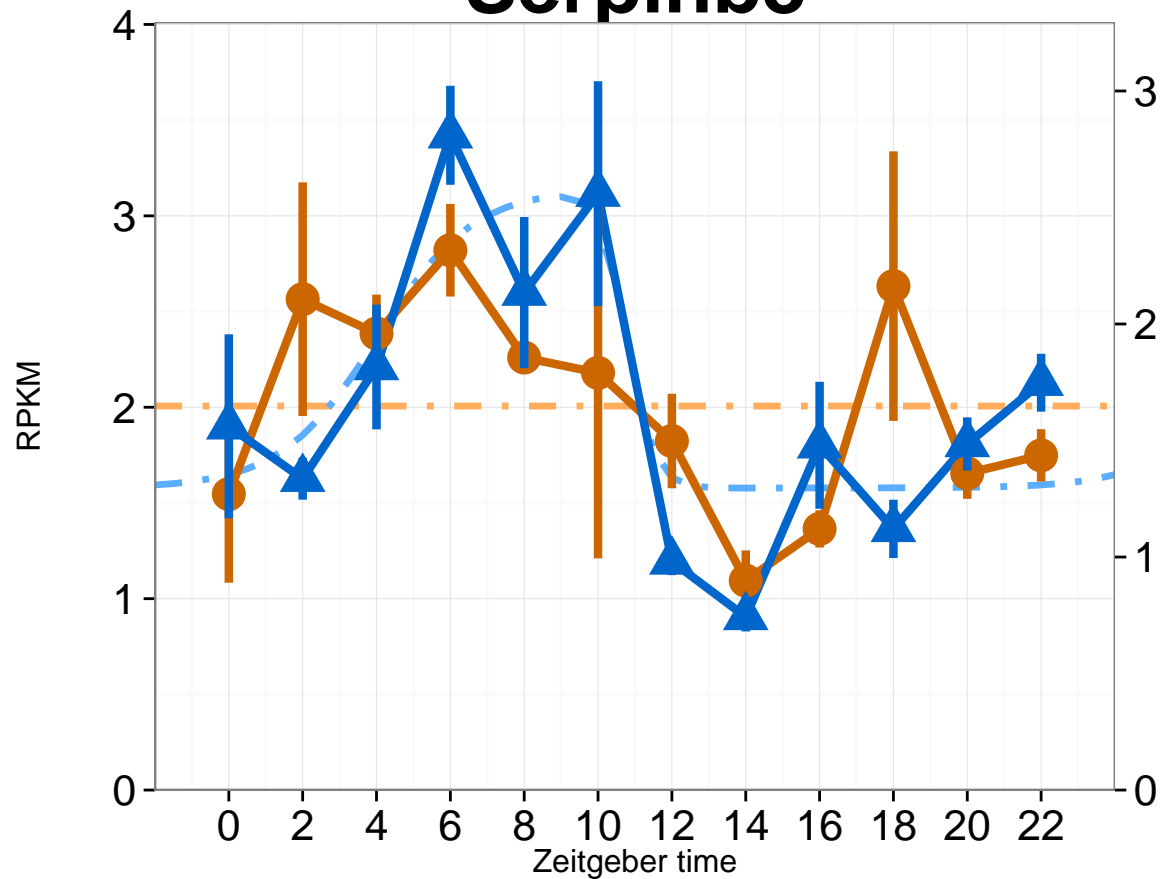

# Serp**in**b8

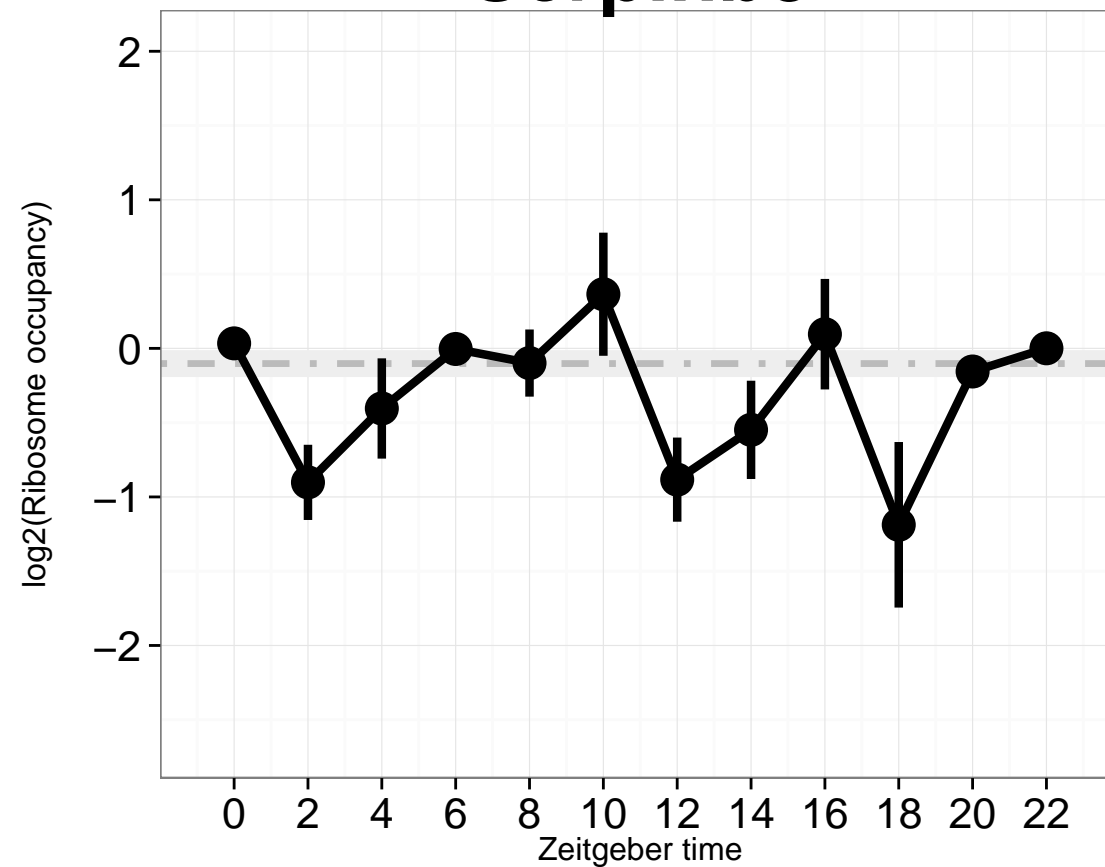

Supplement: SuppDataset_1.zip [file Serpinb8_set_C.pdf › Supplemental Dataset 1/C-mRNA_nonrhythm_translation_rhyth/Serpinb8_set_C.pdf]

# Serping1

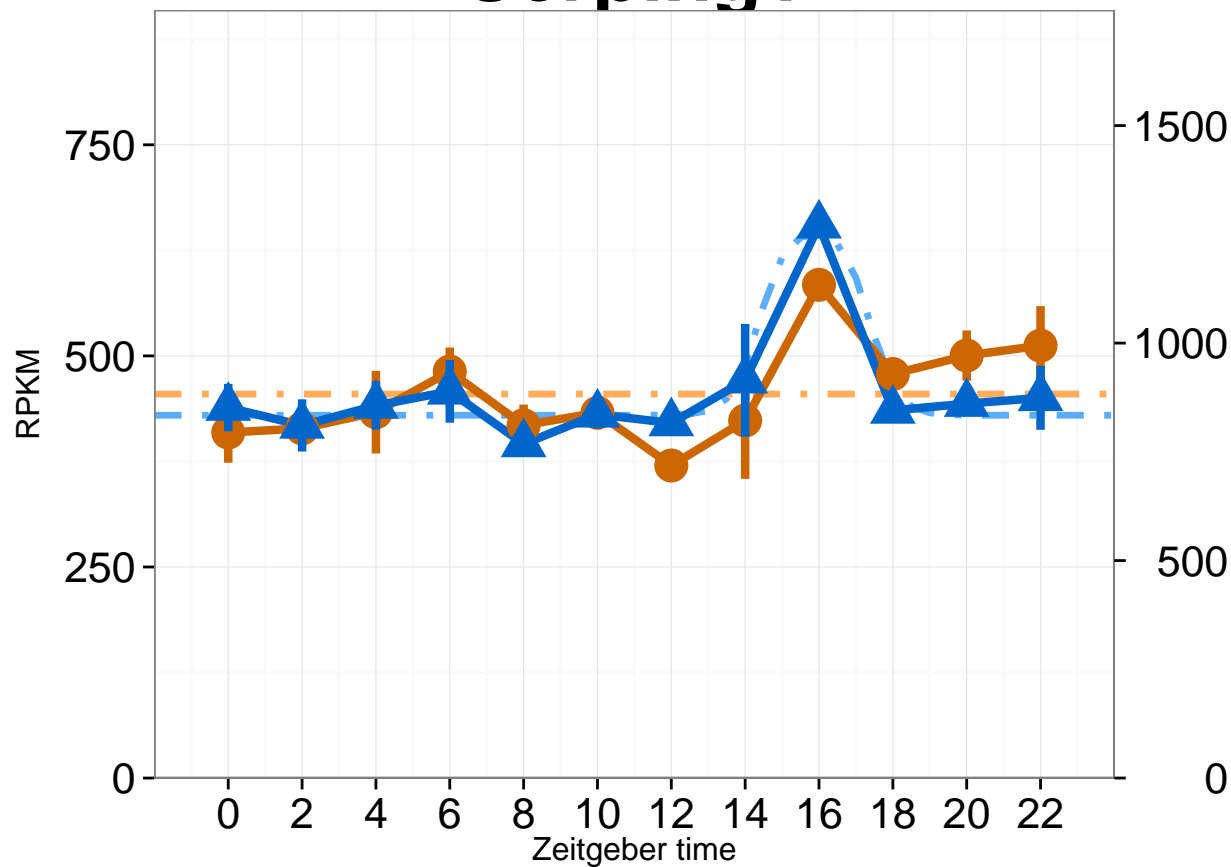

# Serping1

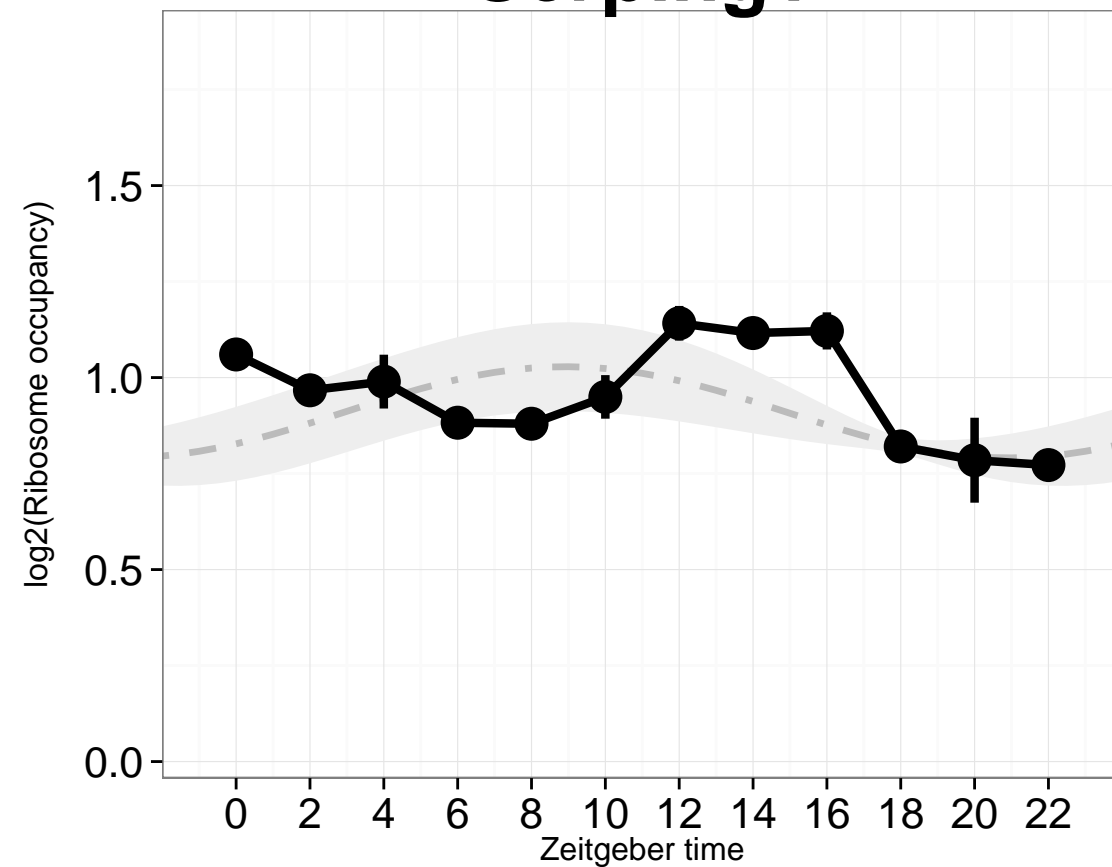

Supplement: SuppDataset_1.zip [file Serping1_set_C.pdf › Supplemental Dataset 1/C-mRNA_nonrhythm_translation_rhyth/Serping1_set_C.pdf]

## Sesn3

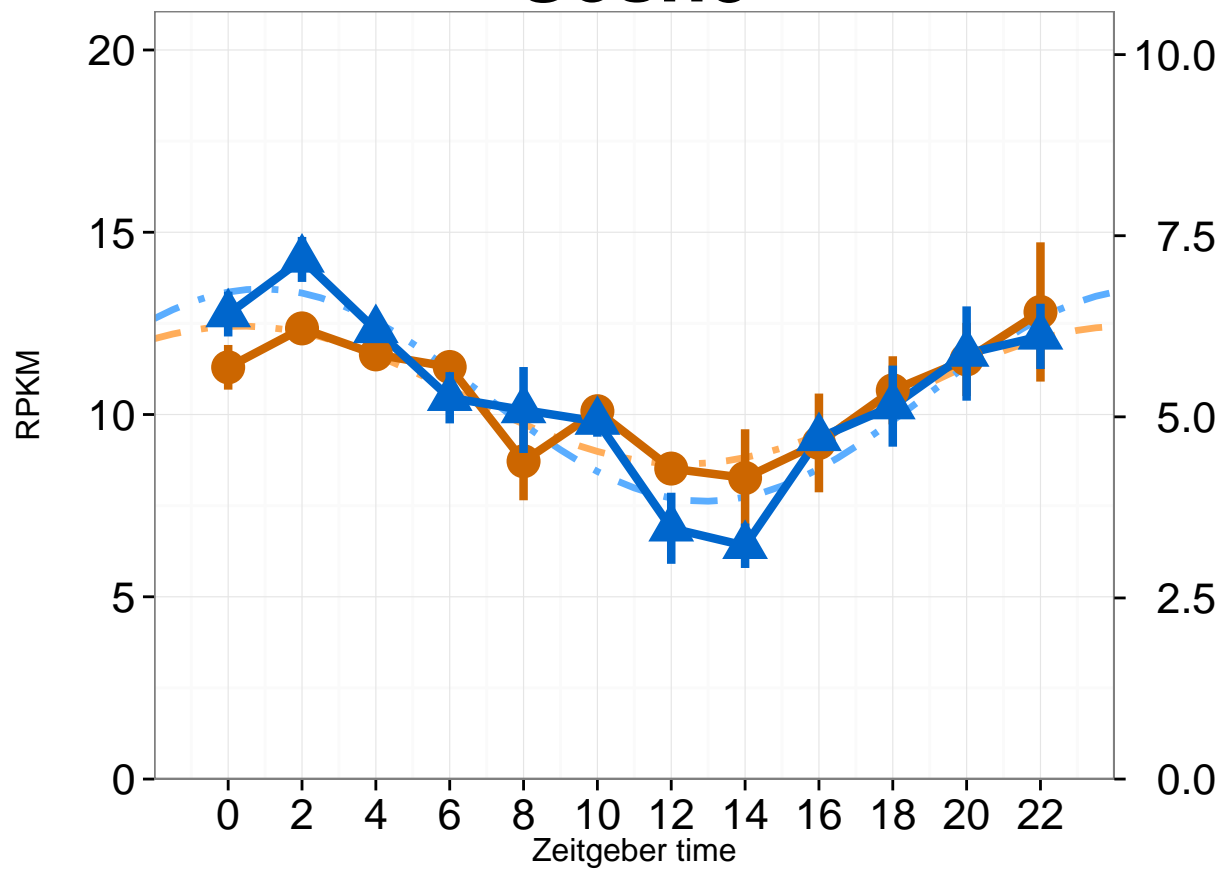

## Sesn3

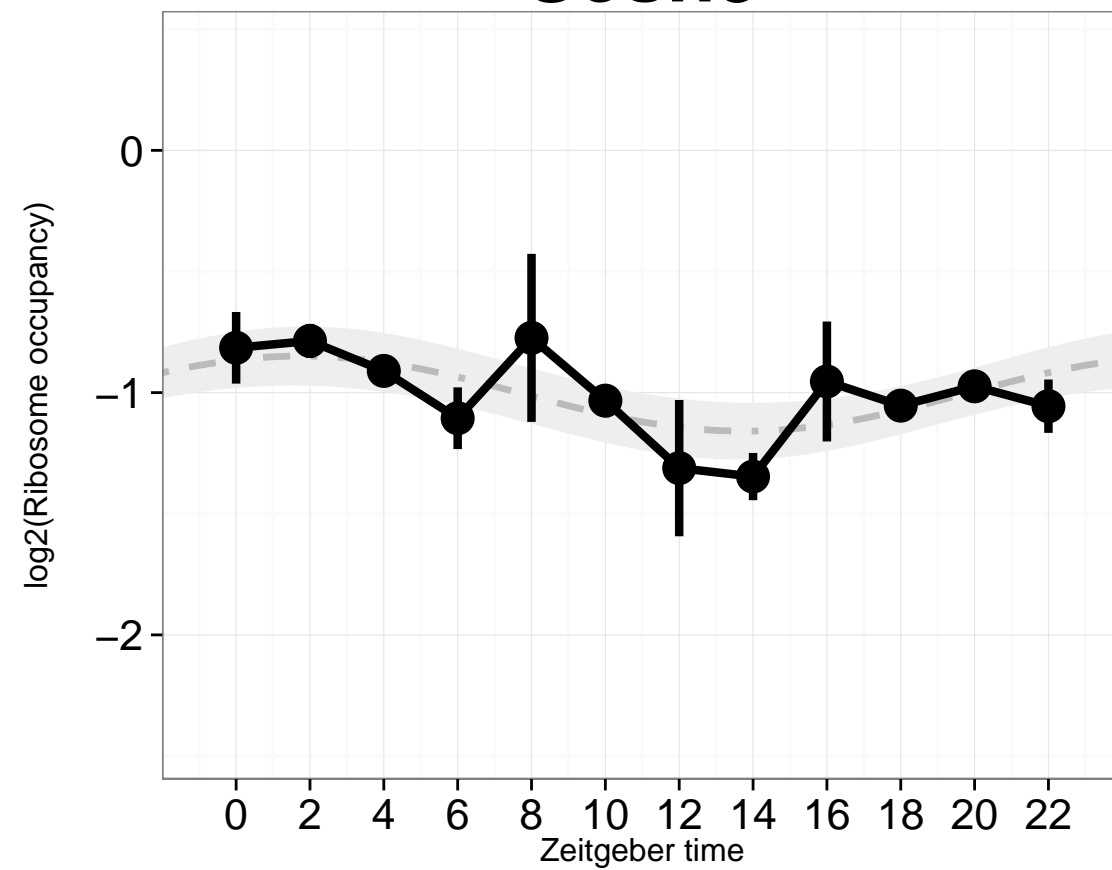

Supplement: SuppDataset_1.zip [file Sesn3_set_C.pdf › Supplemental Dataset 1/C-mRNA_nonrhythm_translation_rhyth/Sesn3_set_C.pdf]

# Sipa1l1

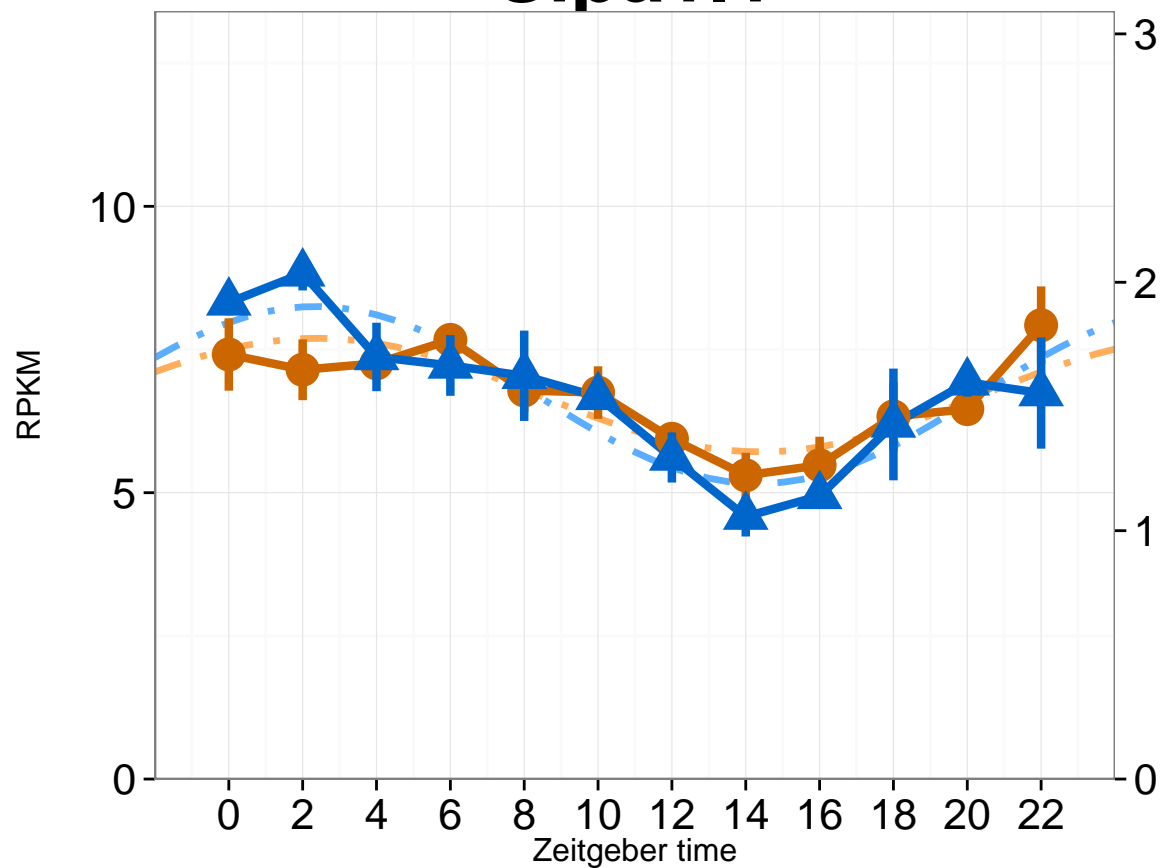

# Sipa1l1

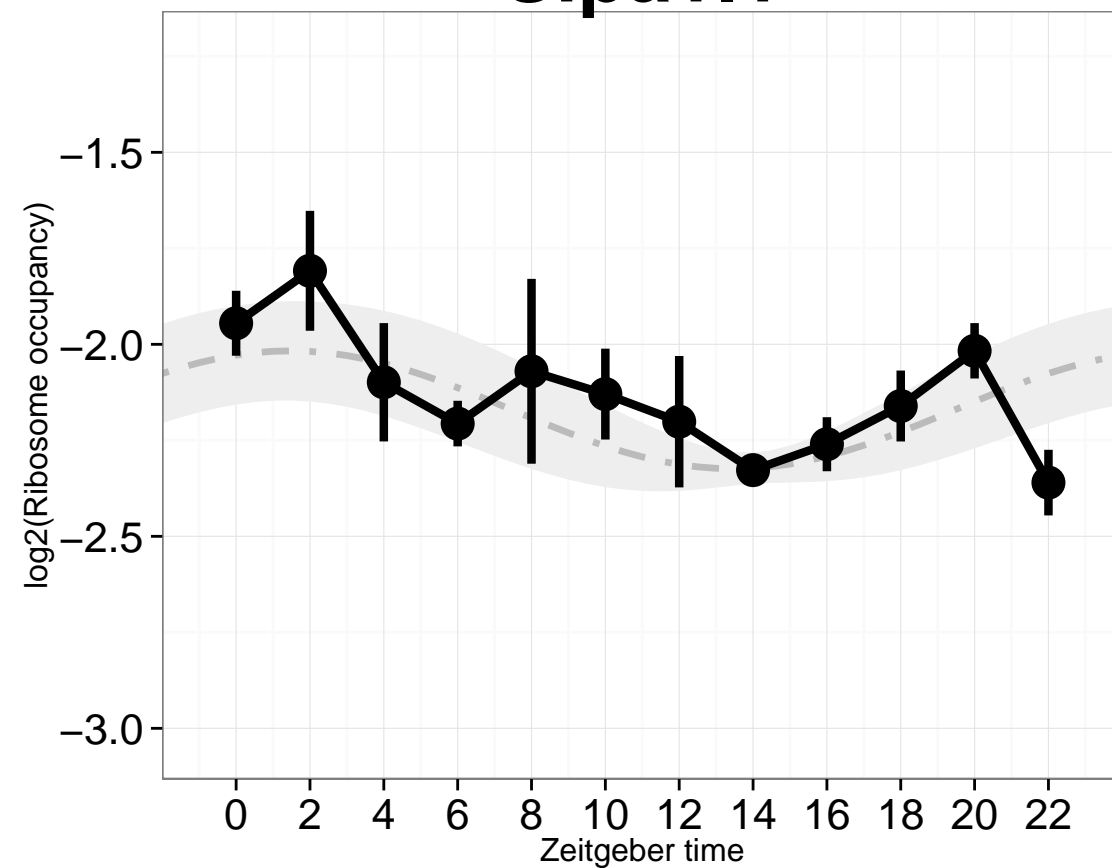

Supplement: SuppDataset_1.zip [file Sipa1l1_set_C.pdf › Supplemental Dataset 1/C-mRNA_nonrhythm_translation_rhyth/Sipa1l1_set_C.pdf]

# Siva1

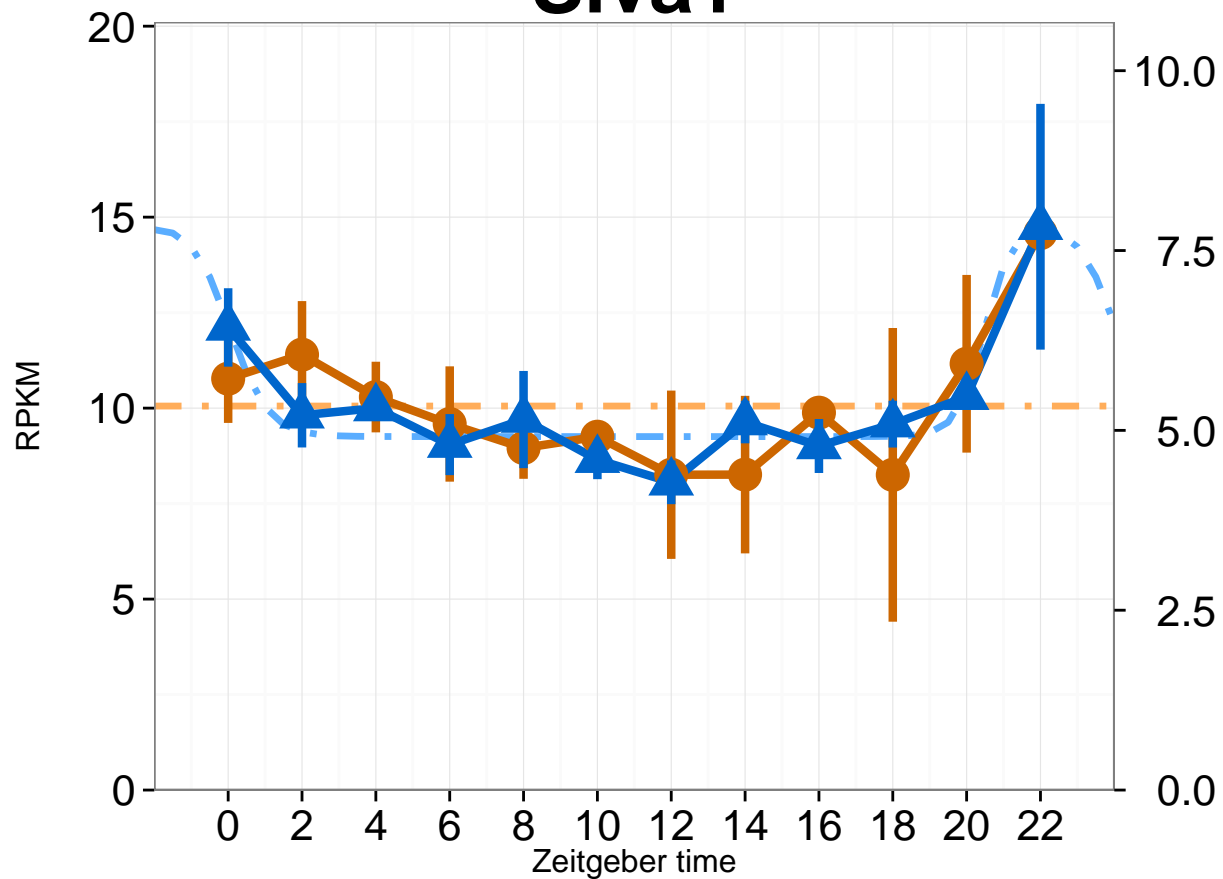

# Siva1

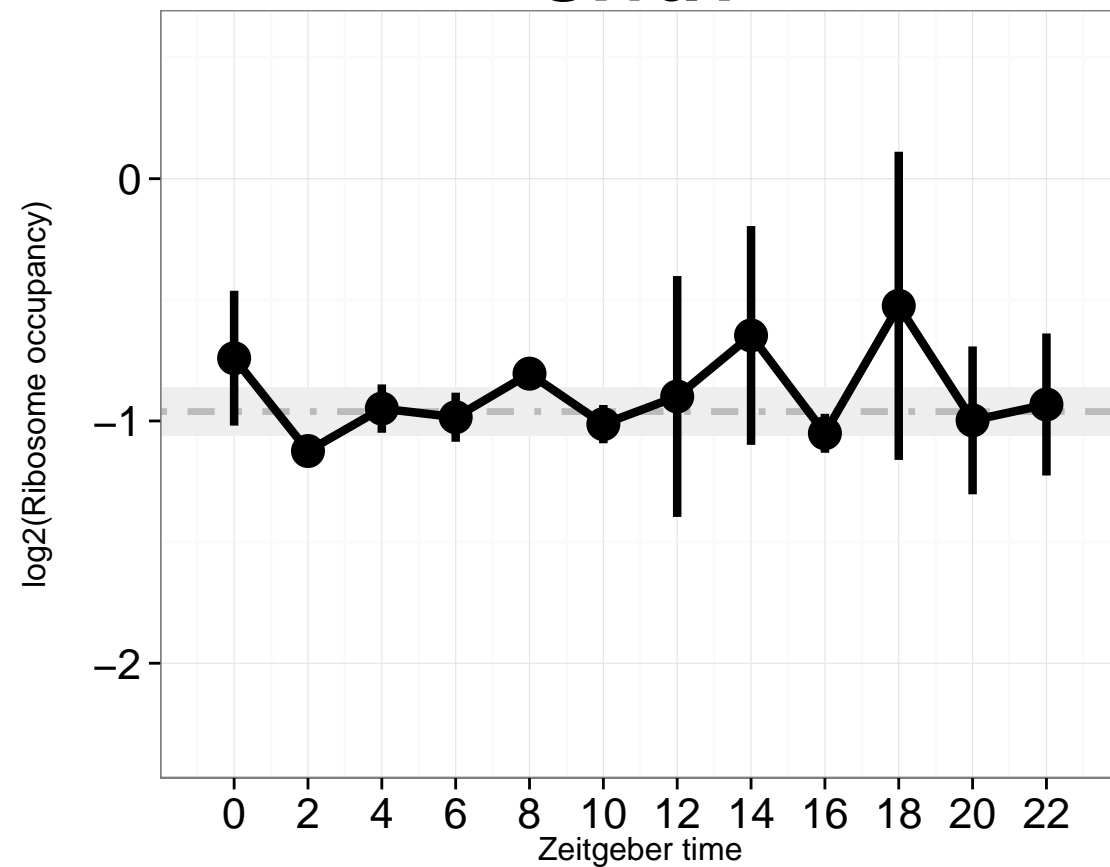

Supplement: SuppDataset_1.zip [file Siva1_set_C.pdf › Supplemental Dataset 1/C-mRNA_nonrhythm_translation_rhyth/Siva1_set_C.pdf]

## Ski

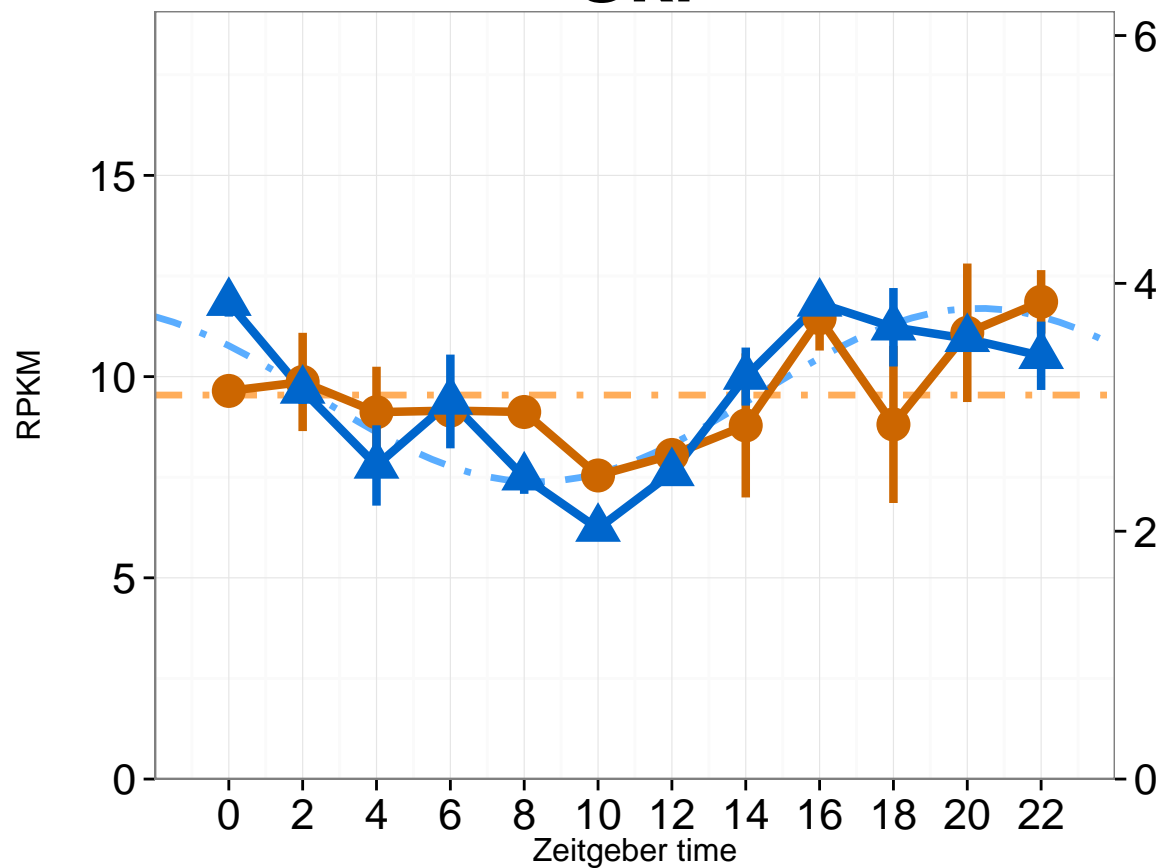

## Ski

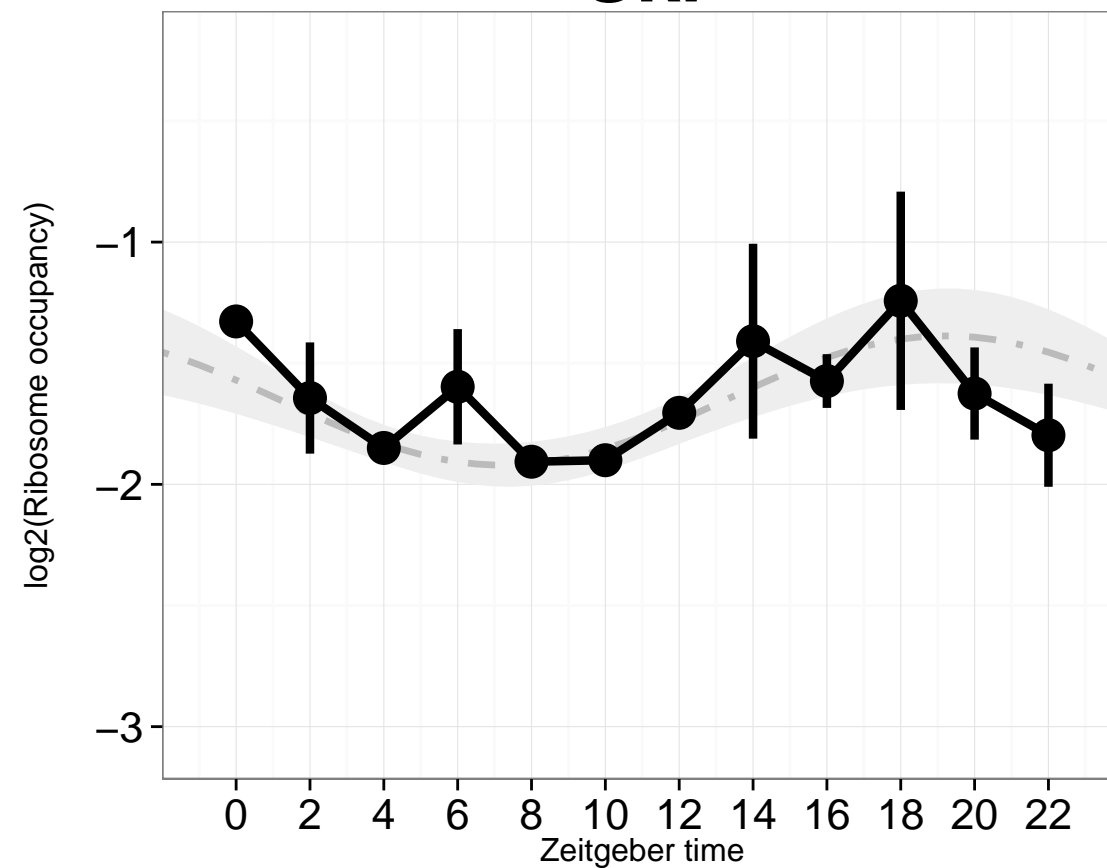

Supplement: SuppDataset_1.zip [file Ski_set_C.pdf › Supplemental Dataset 1/C-mRNA_nonrhythm_translation_rhyth/Ski_set_C.pdf]

**Slc16a13 TR**

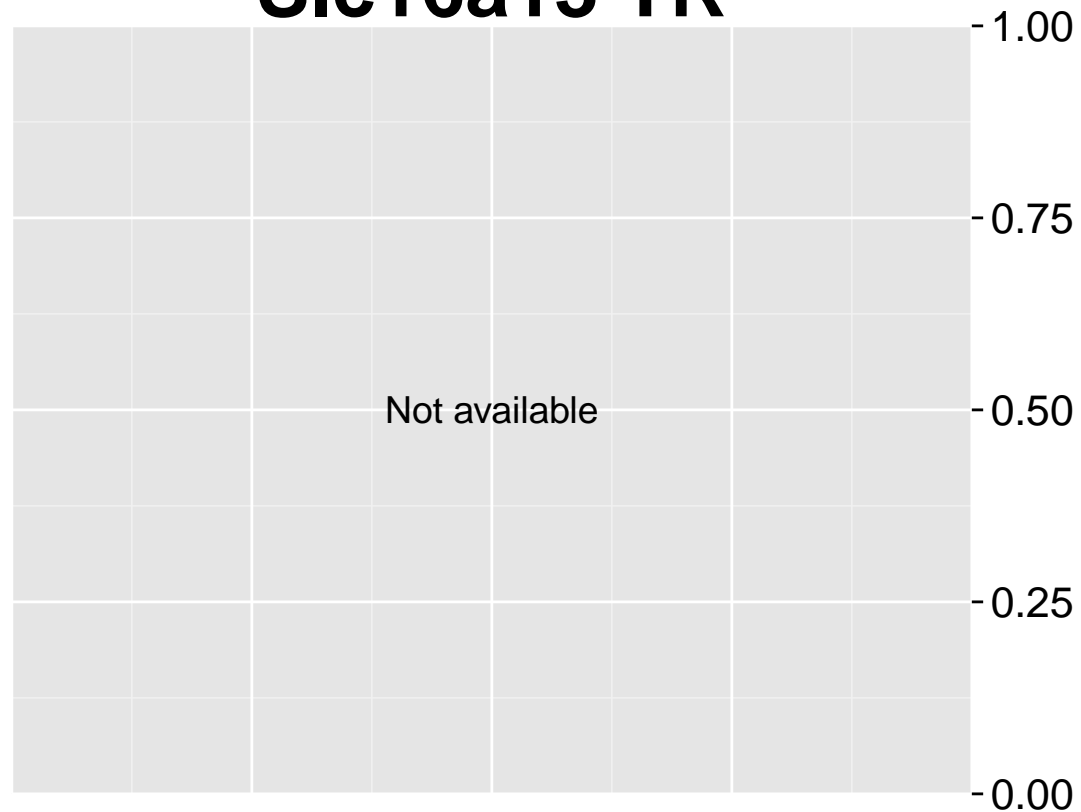

**Slc16a13 log2(Ribosome occupanc**

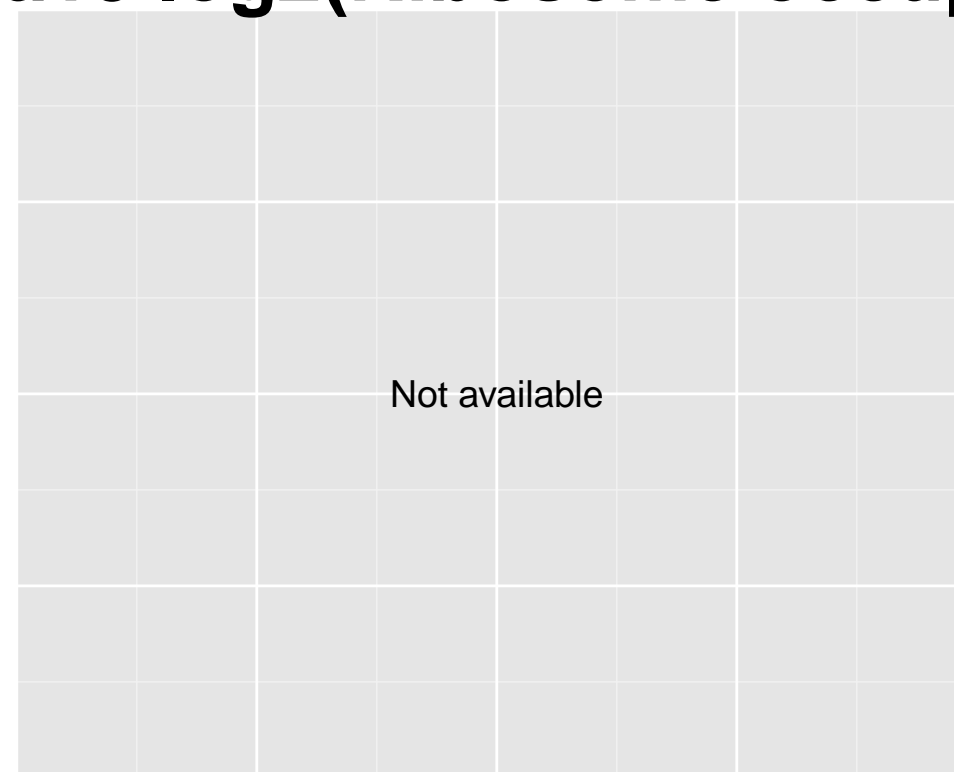

Supplement: SuppDataset_1.zip [file Slc16a13_set_C.pdf › Supplemental Dataset 1/C-mRNA_nonrhythm_translation_rhyth/Slc16a13_set_C.pdf]

# Slc17a9

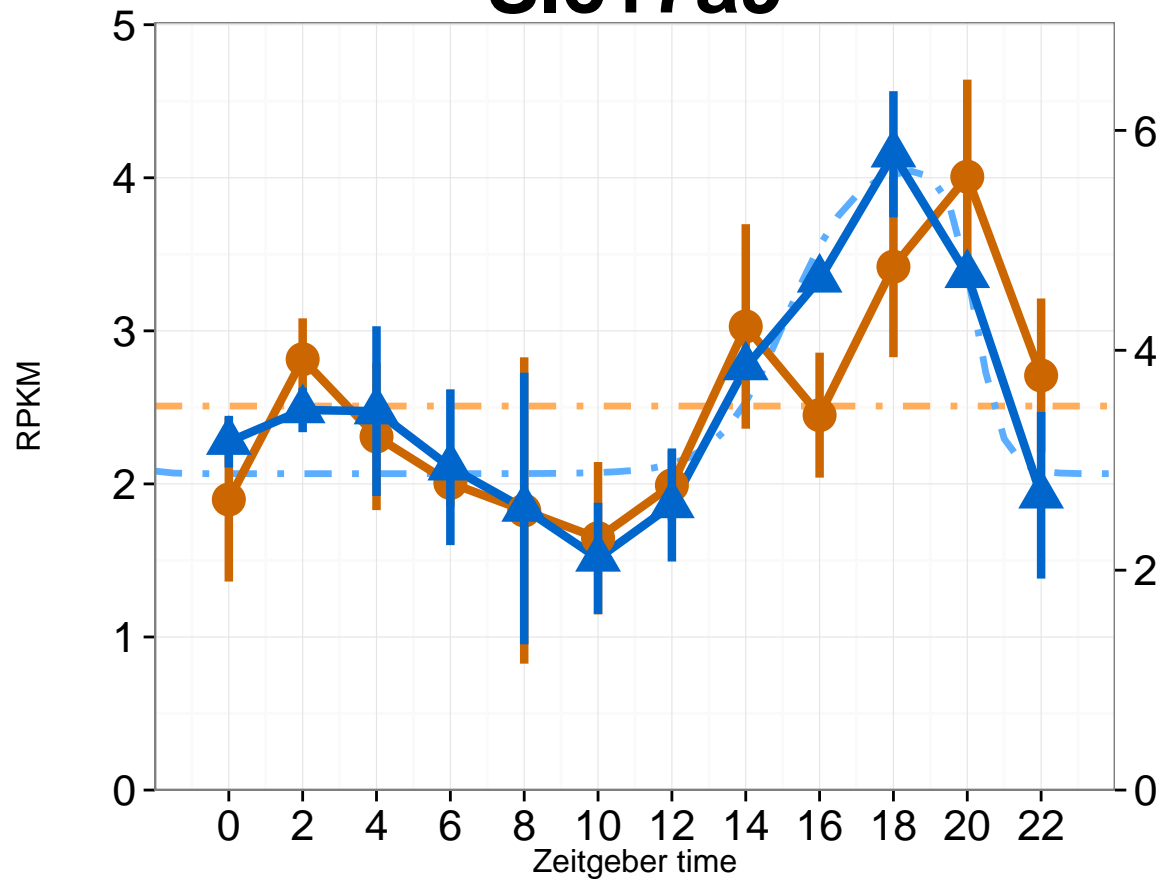

# Slc17a9

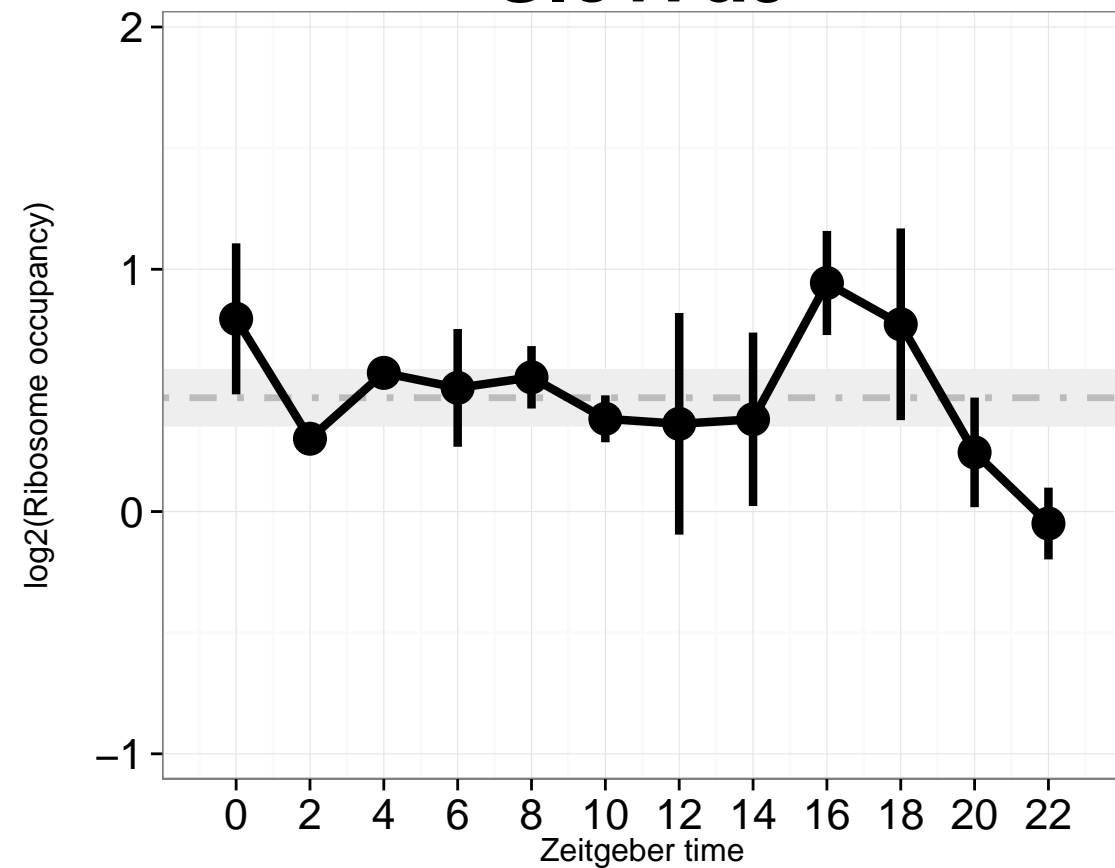

Supplement: SuppDataset_1.zip [file Slc17a9_set_C.pdf › Supplemental Dataset 1/C-mRNA_nonrhythm_translation_rhyth/Slc17a9_set_C.pdf]

# Slc22a5

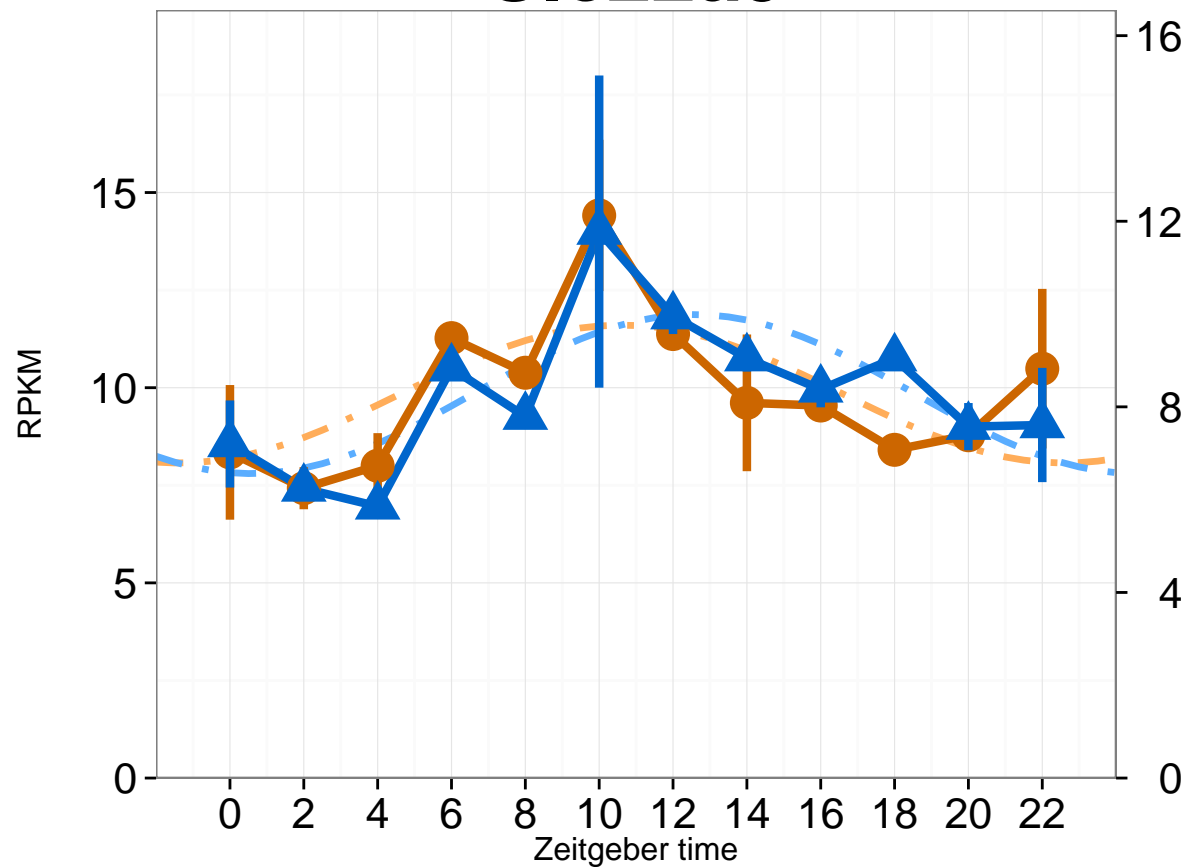

# Slc22a5

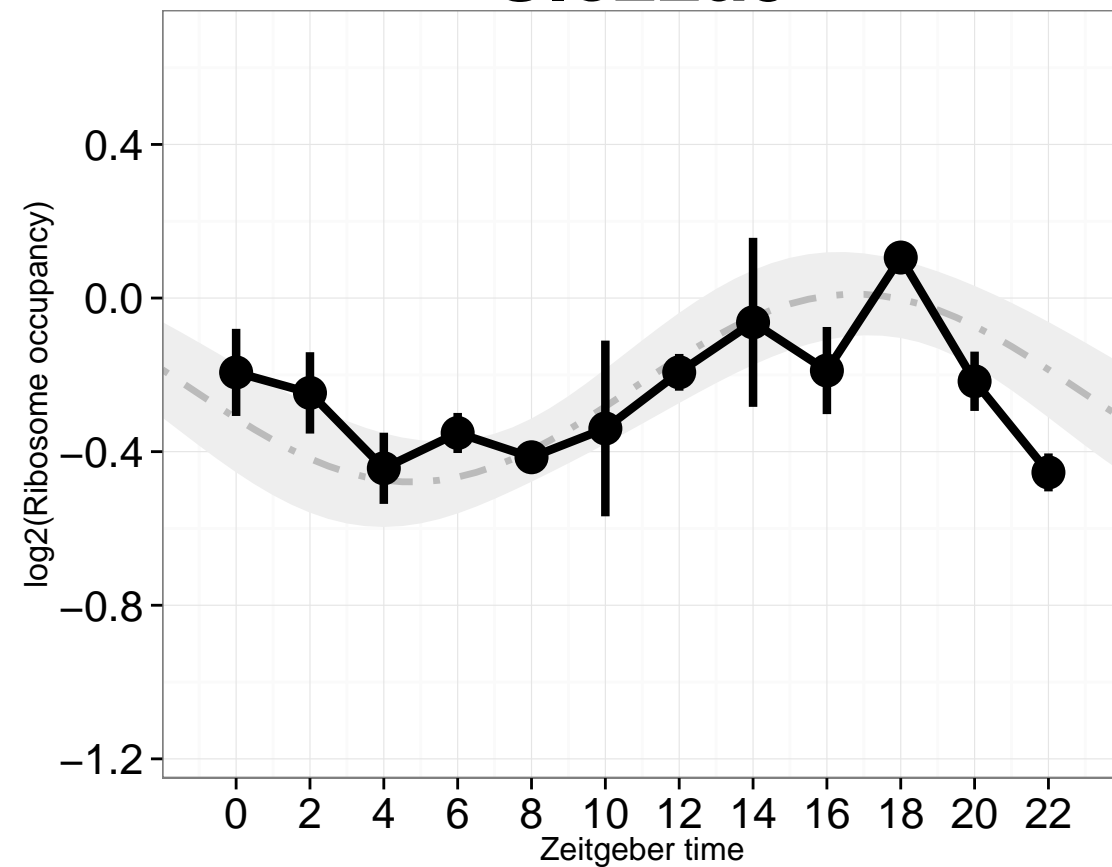

Supplement: SuppDataset_1.zip [file Slc22a5_set_C.pdf › Supplemental Dataset 1/C-mRNA_nonrhythm_translation_rhyth/Slc22a5_set_C.pdf]

## Slc25a29

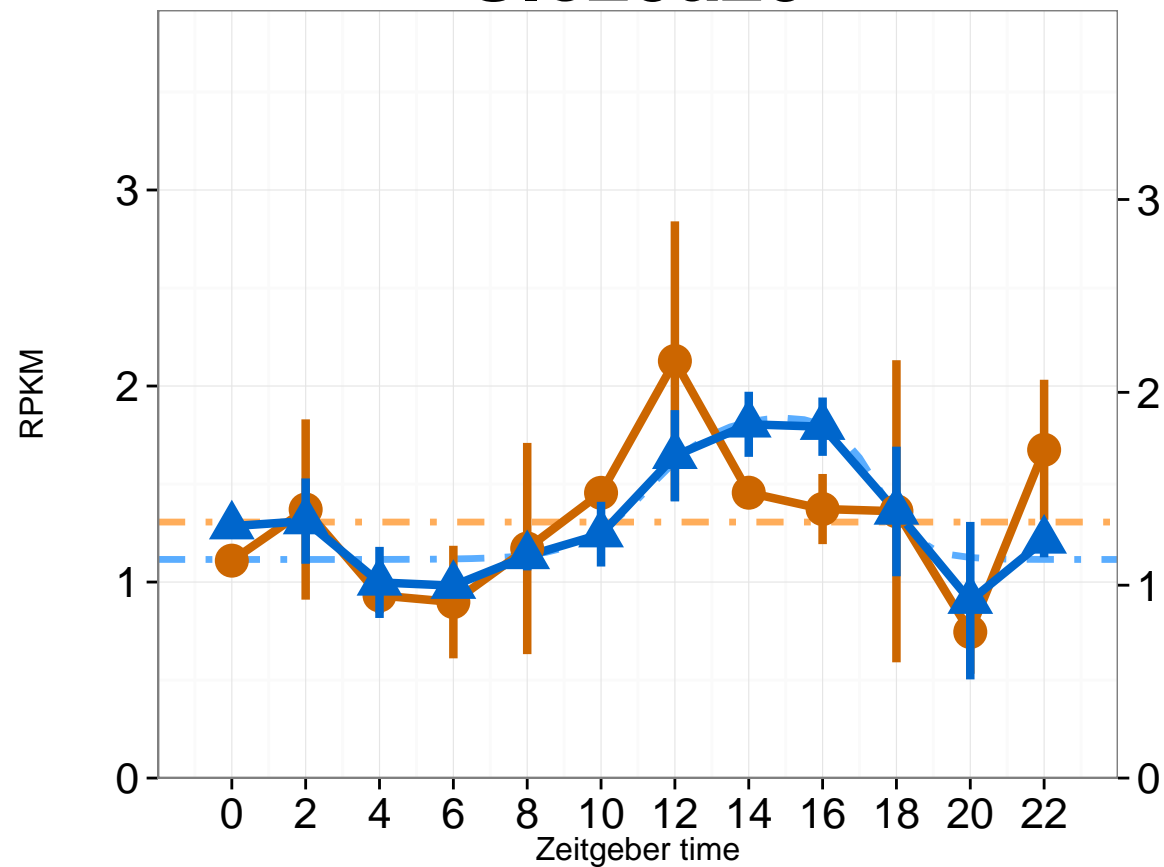

## Slc25a29

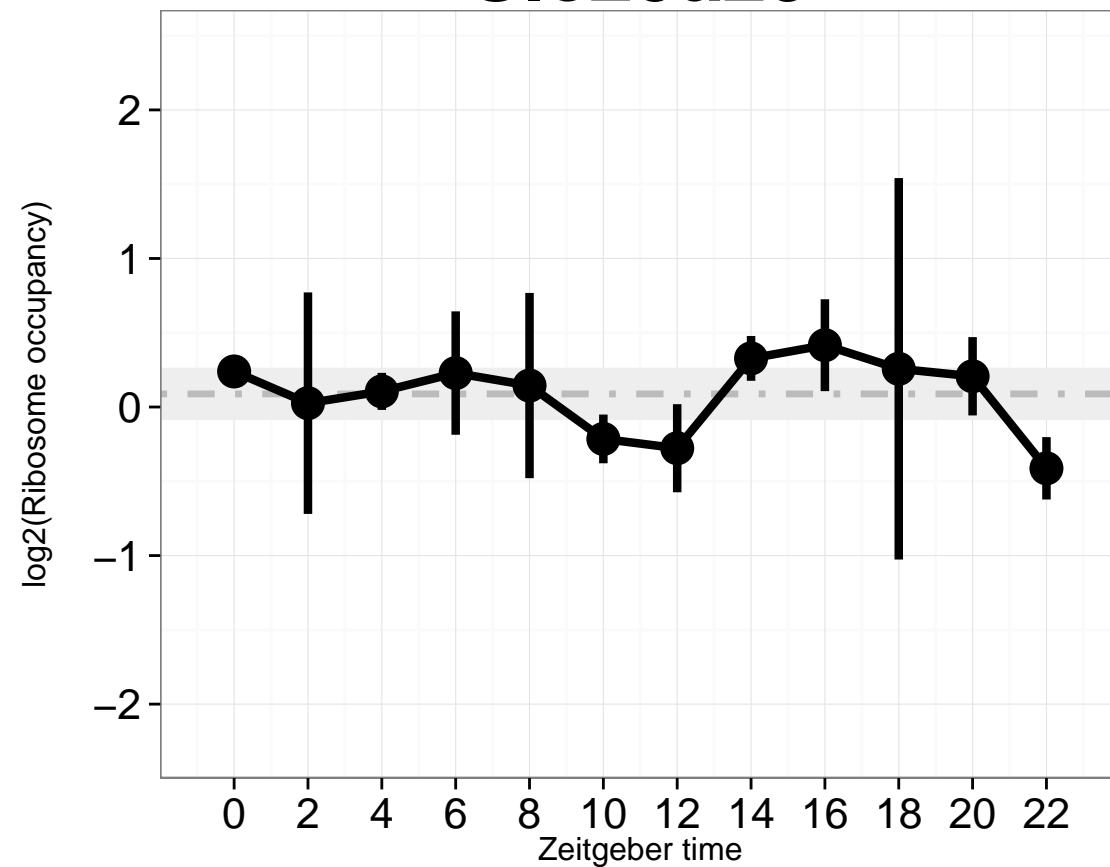

Supplement: SuppDataset_1.zip [file Slc25a29_set_C.pdf › Supplemental Dataset 1/C-mRNA_nonrhythm_translation_rhyth/Slc25a29_set_C.pdf]

# Slc25a47

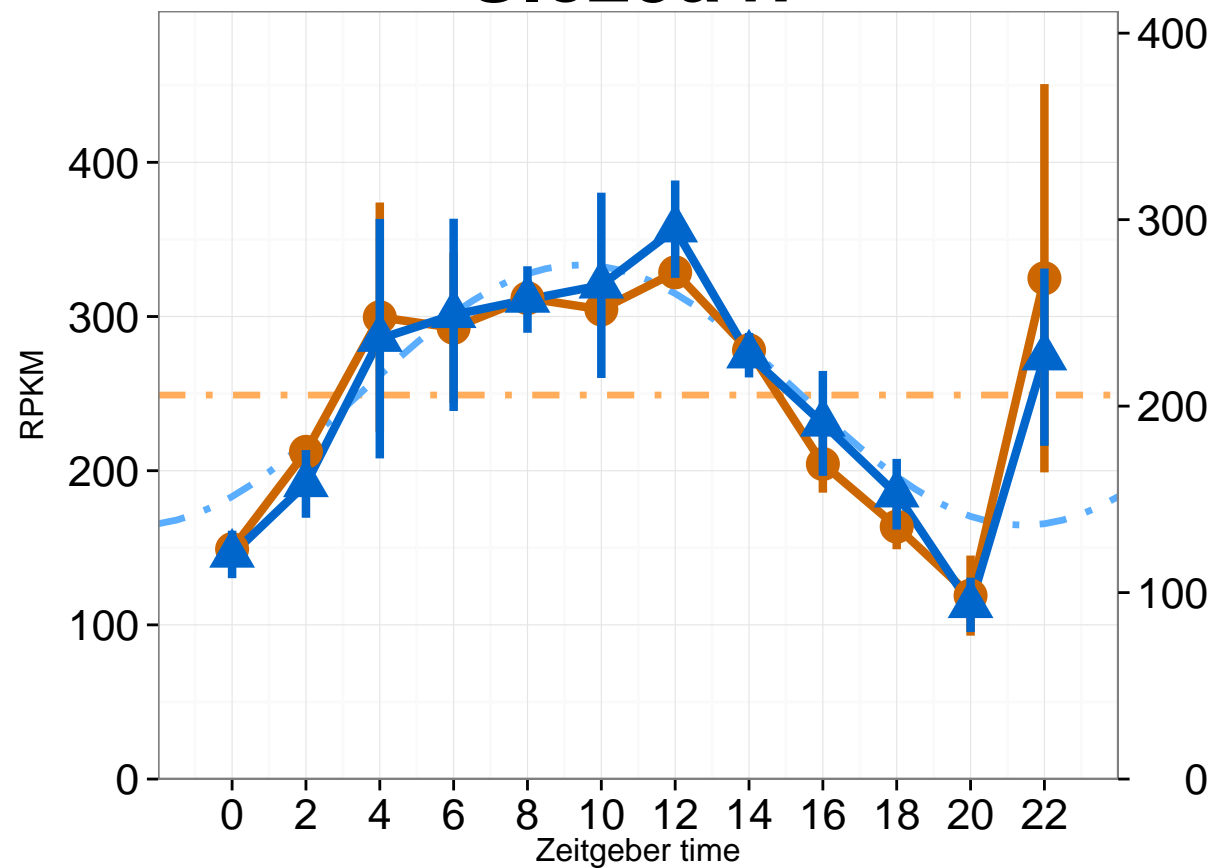

# Slc25a47

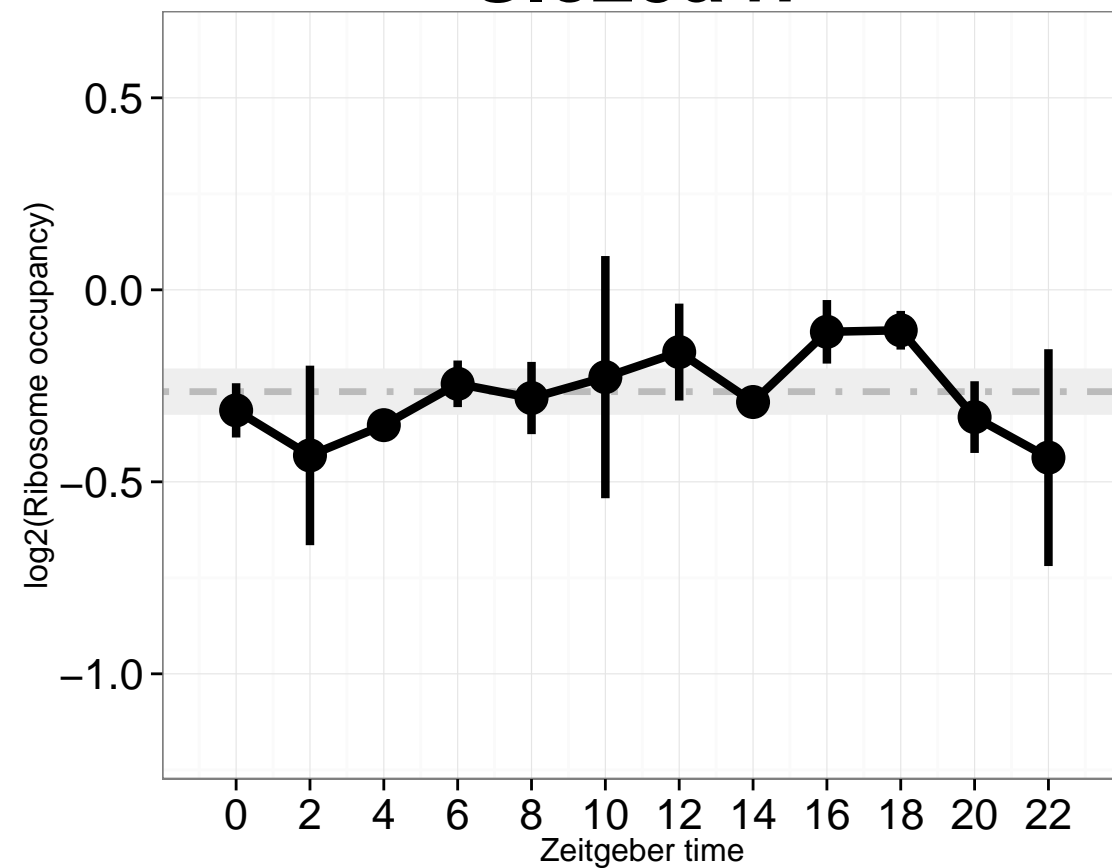

Supplement: SuppDataset_1.zip [file Slc25a47_set_C.pdf › Supplemental Dataset 1/C-mRNA_nonrhythm_translation_rhyth/Slc25a47_set_C.pdf]

# Slc25a51

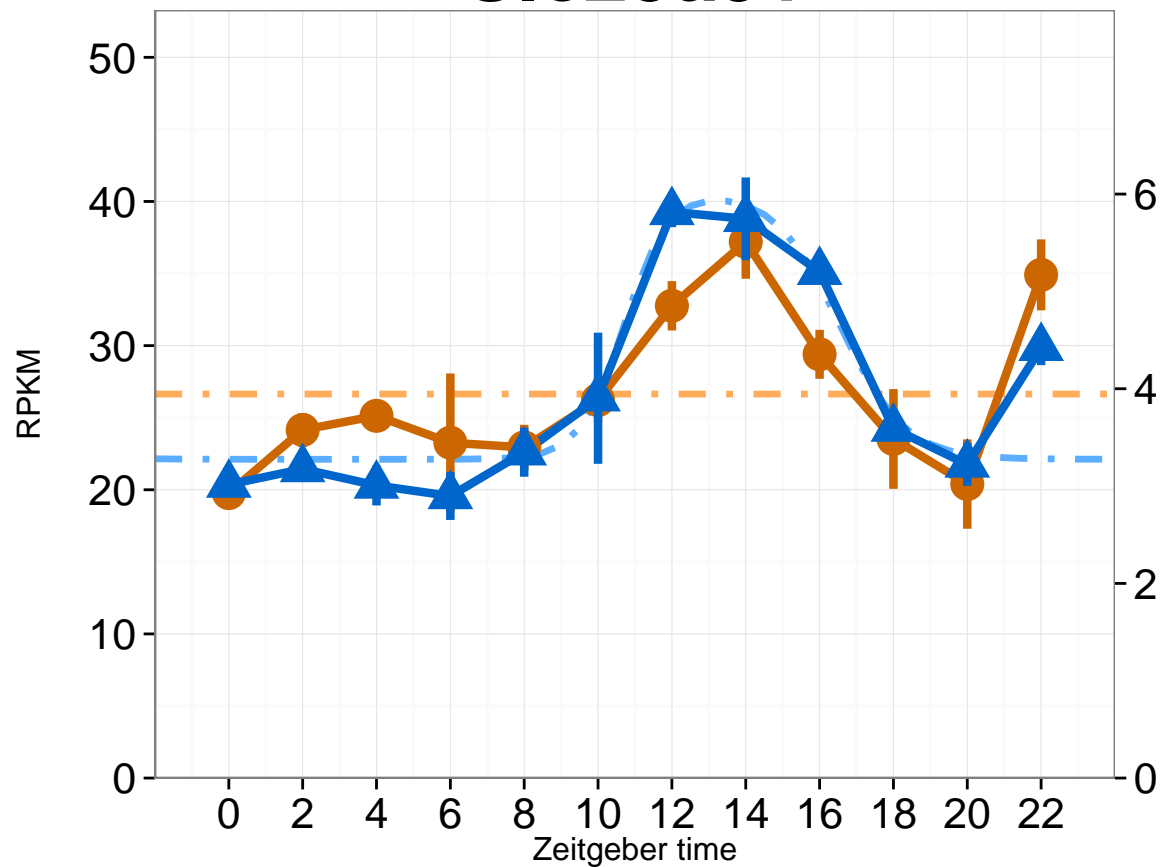

# Slc25a51

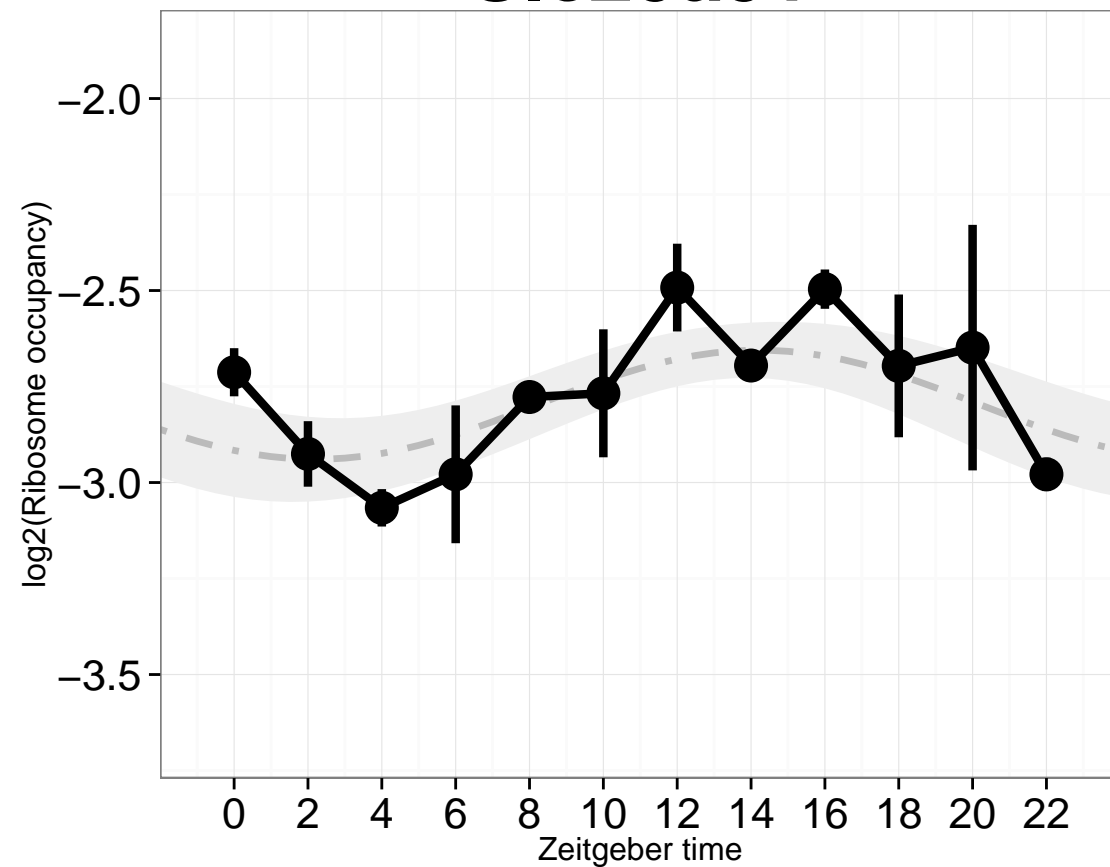

Supplement: SuppDataset_1.zip [file Slc25a51_set_C.pdf › Supplemental Dataset 1/C-mRNA_nonrhythm_translation_rhyth/Slc25a51_set_C.pdf]

## Slc26a10

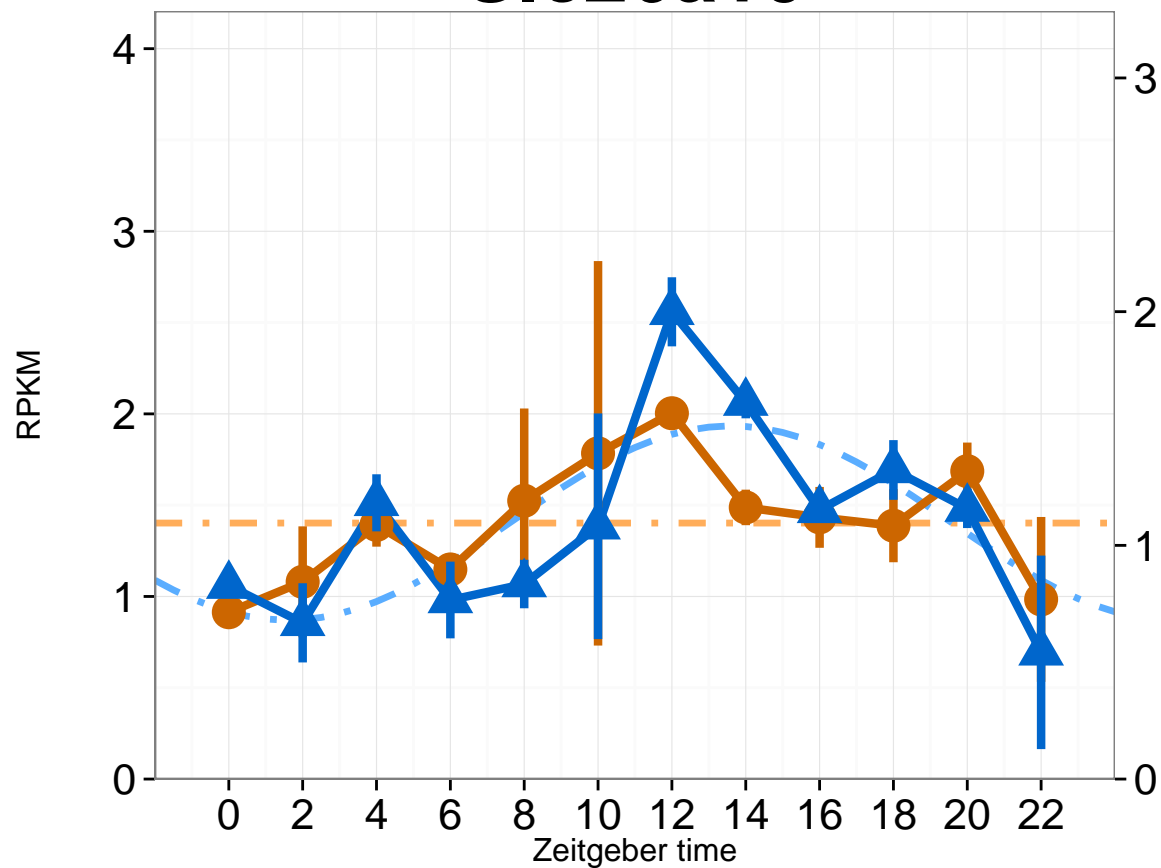

## Slc26a10

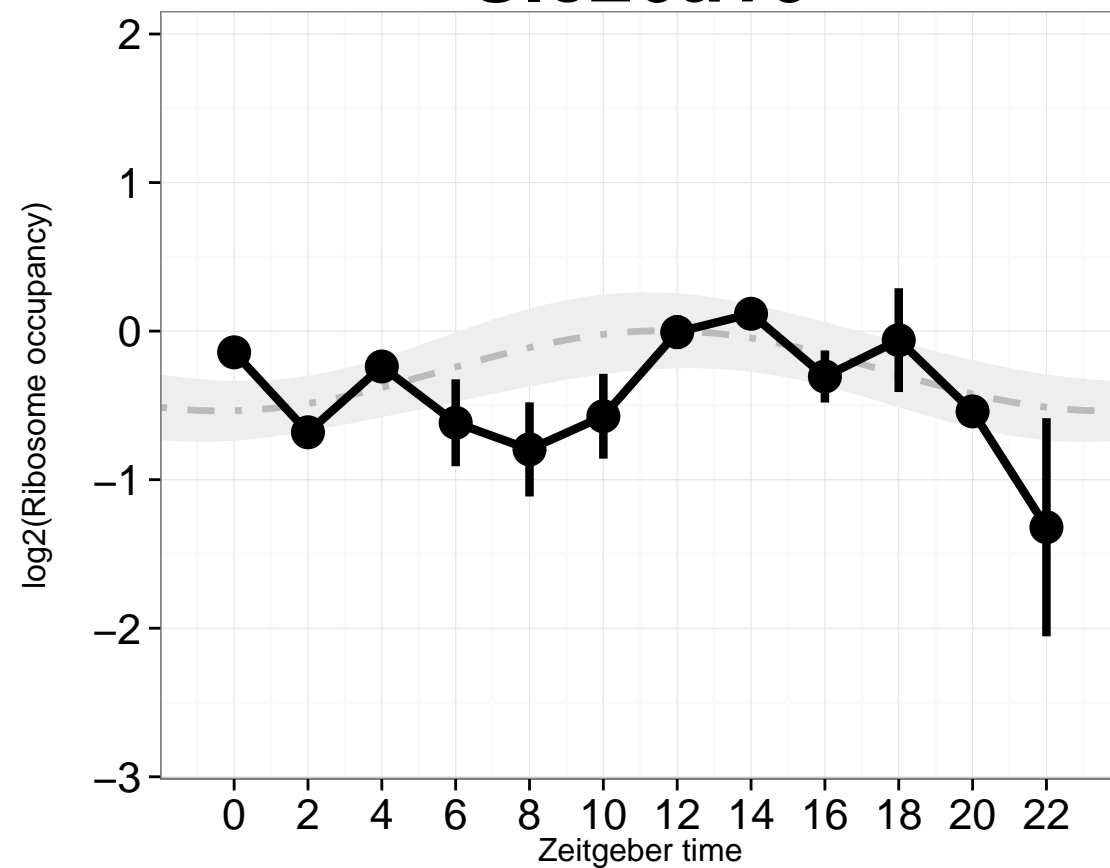

Supplement: SuppDataset_1.zip [file Slc26a10_set_C.pdf › Supplemental Dataset 1/C-mRNA_nonrhythm_translation_rhyth/Slc26a10_set_C.pdf]

## Slc26a6

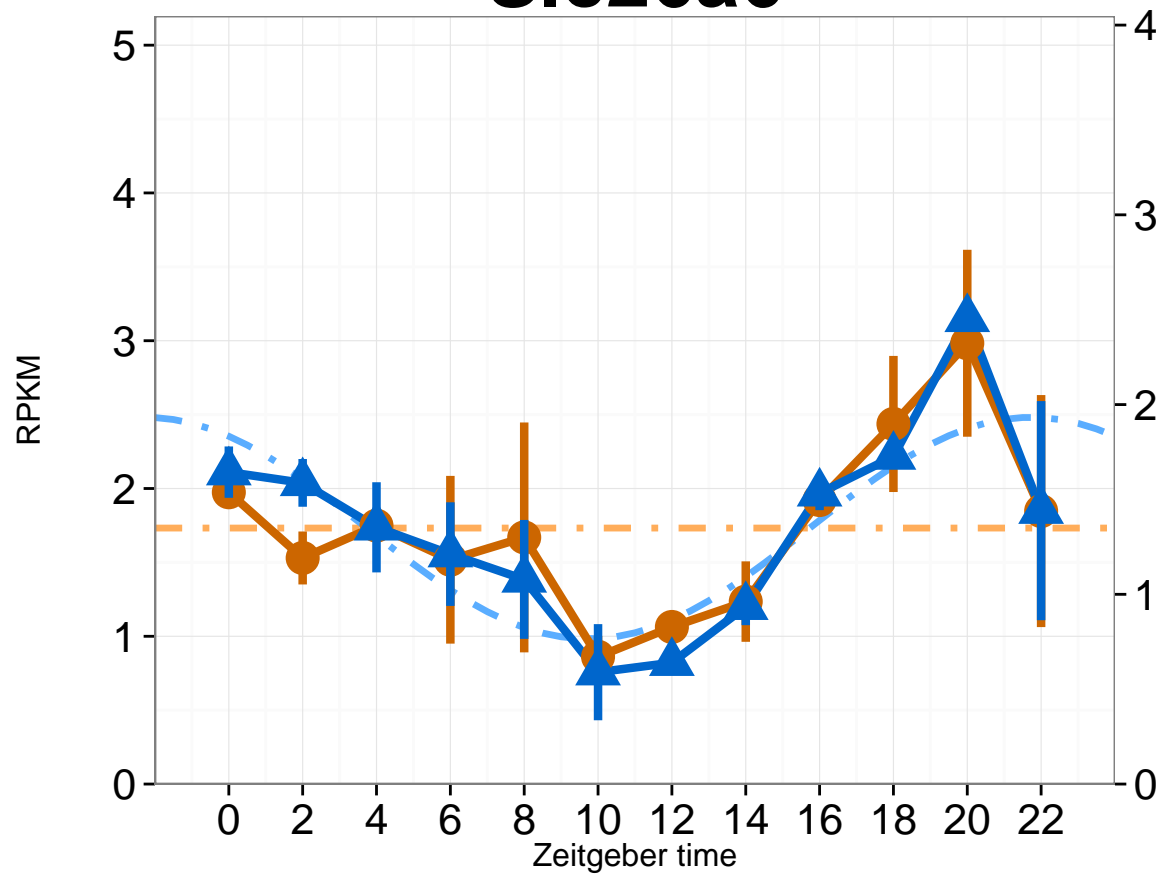

## Slc26a6

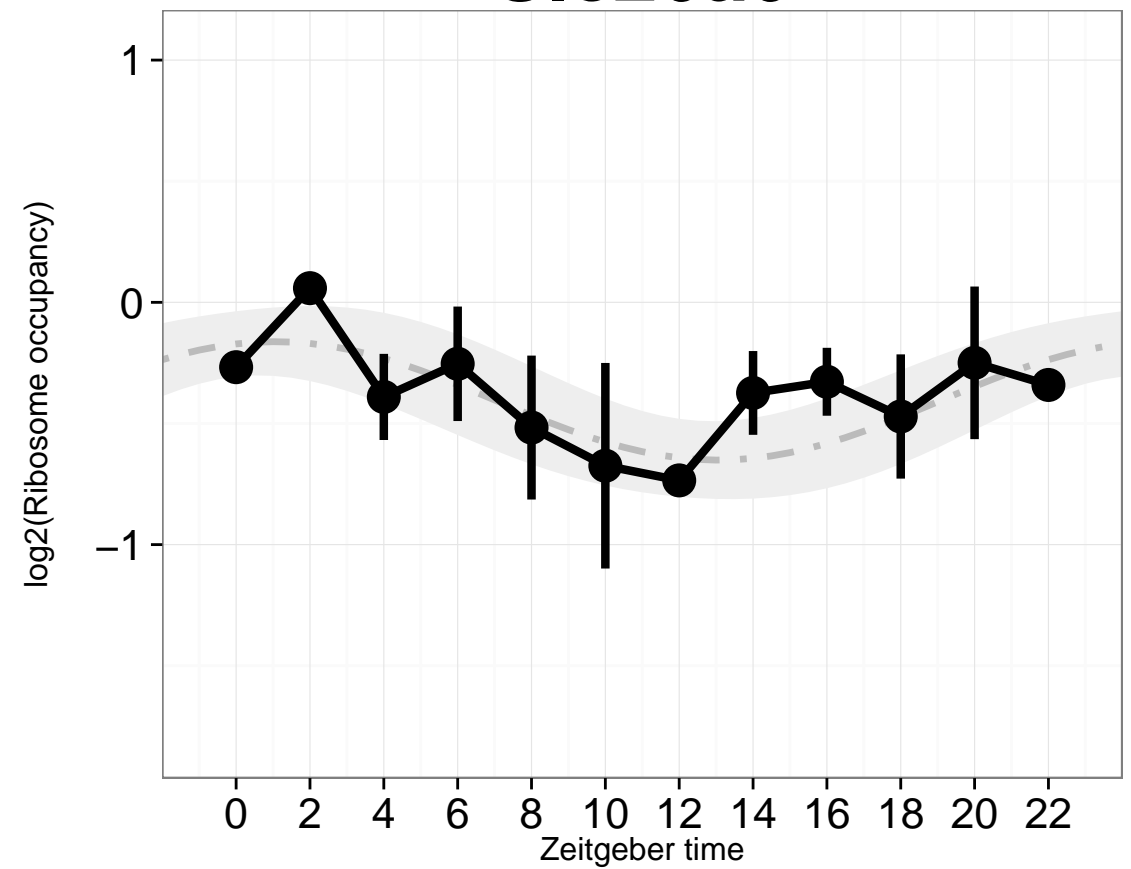

Supplement: SuppDataset_1.zip [file Slc26a6_set_C.pdf › Supplemental Dataset 1/C-mRNA_nonrhythm_translation_rhyth/Slc26a6_set_C.pdf]

## Slc2a9

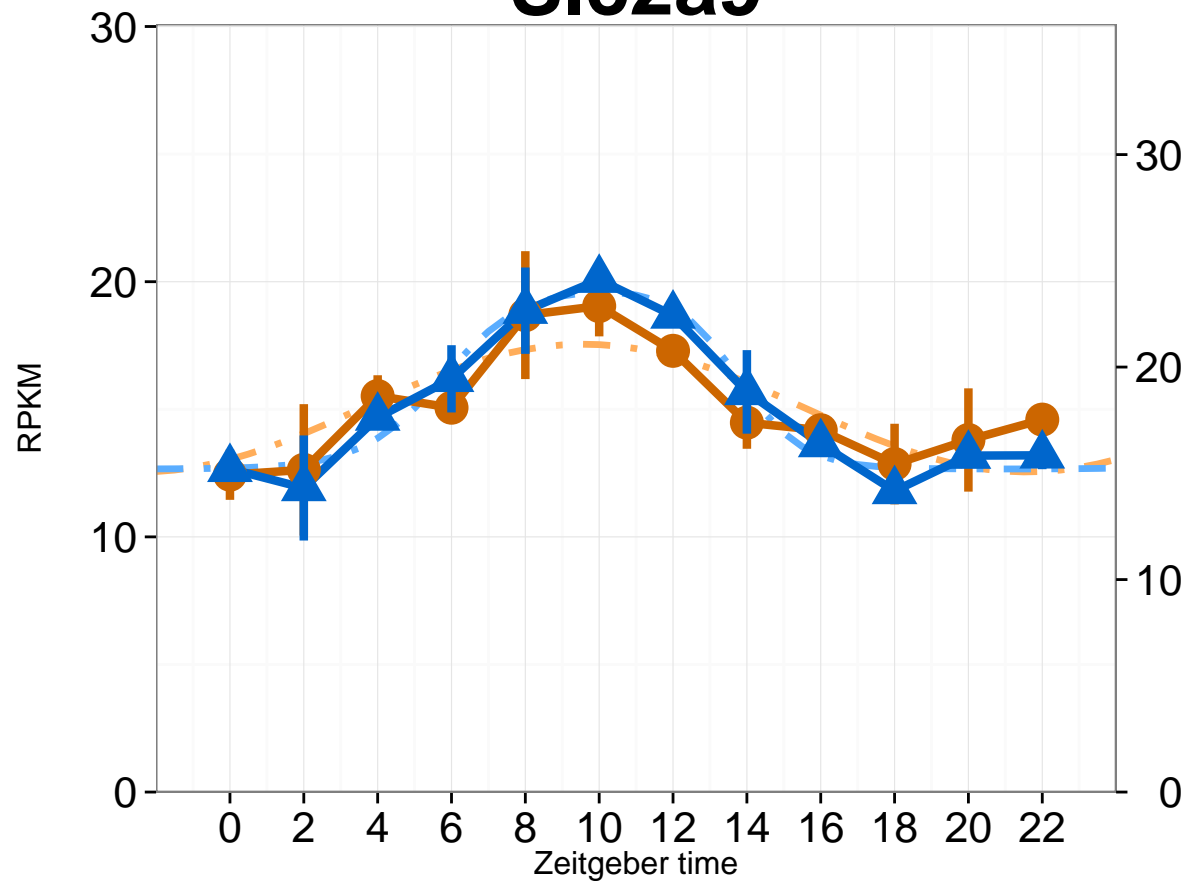

## Slc2a9

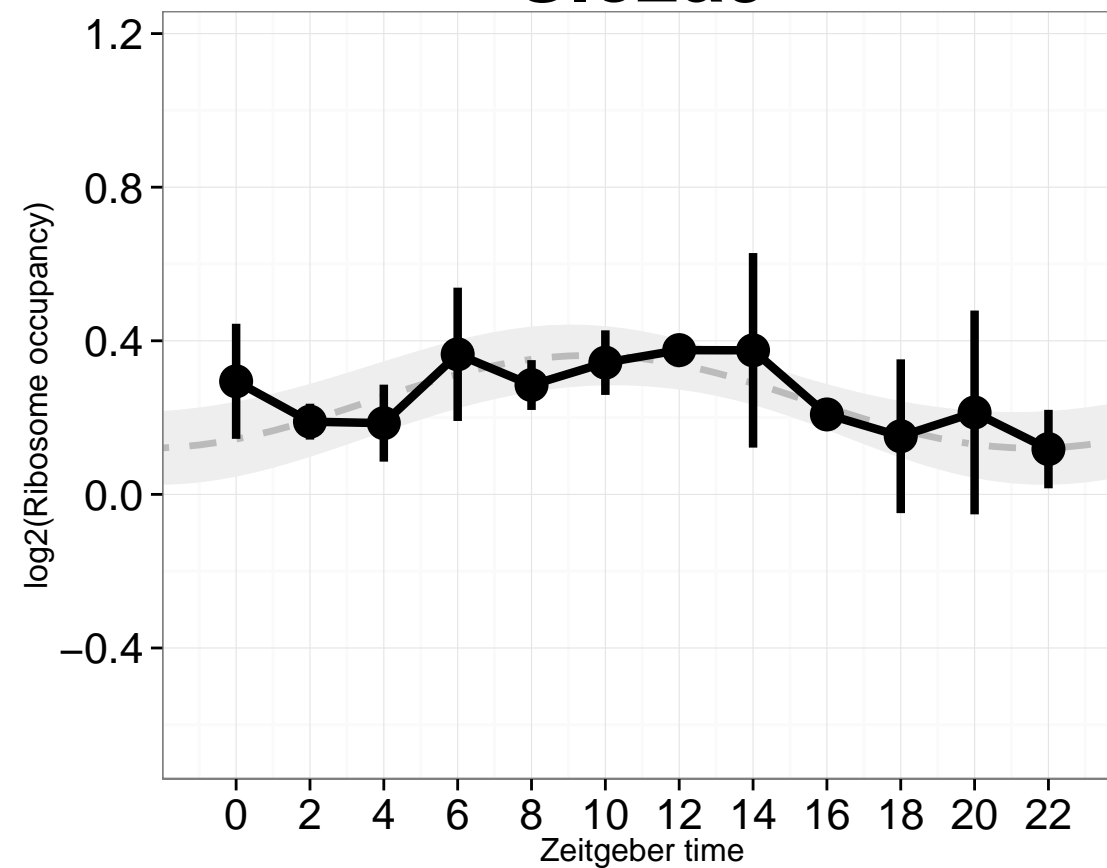

Supplement: SuppDataset_1.zip [file Slc2a9_set_C.pdf › Supplemental Dataset 1/C-mRNA_nonrhythm_translation_rhyth/Slc2a9_set_C.pdf]

# Slc30a1

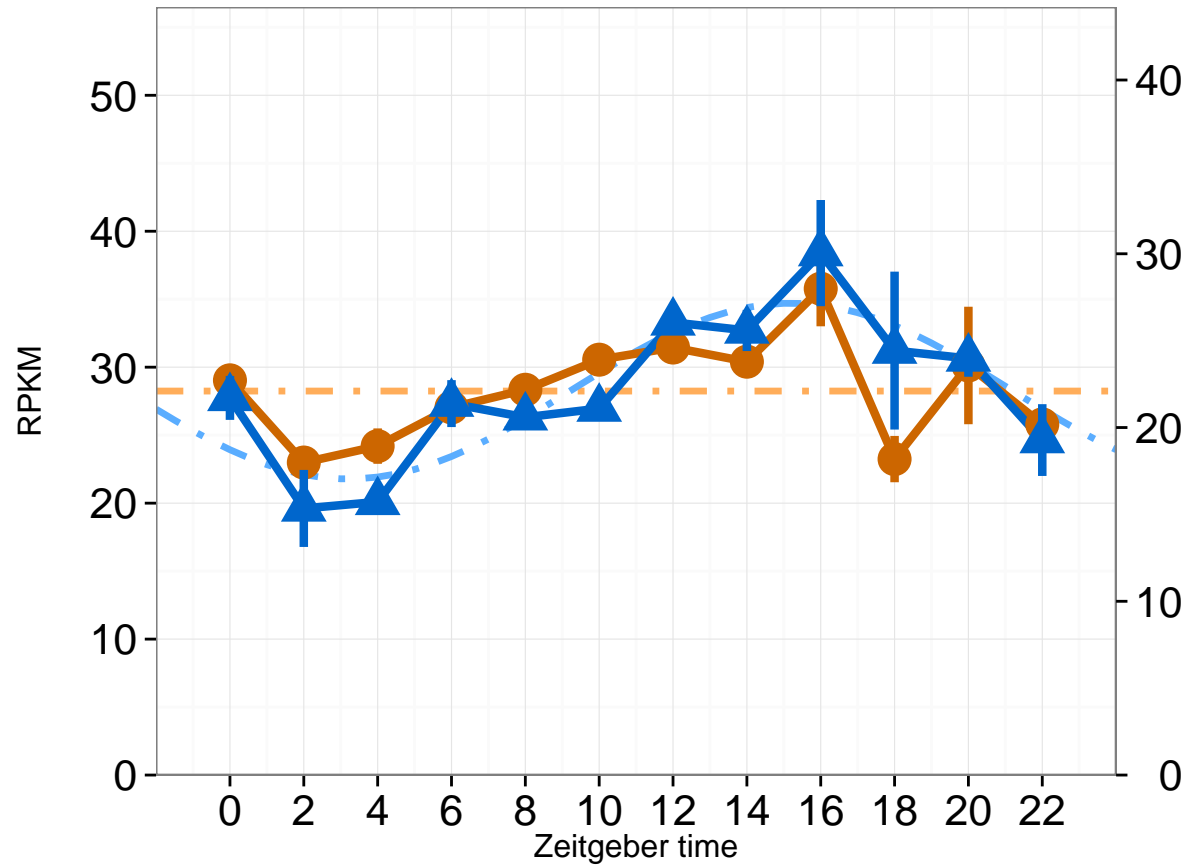

# Slc30a1

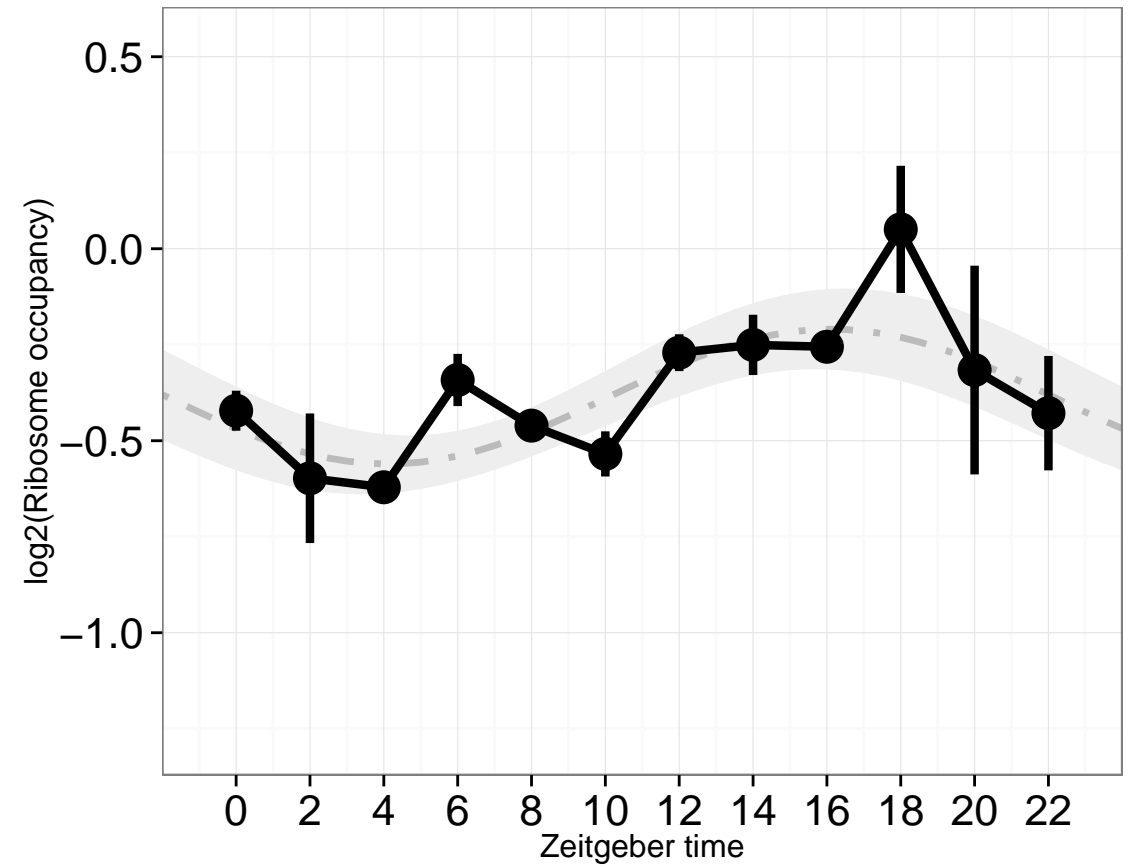

Supplement: SuppDataset_1.zip [file Slc30a1_set_C.pdf › Supplemental Dataset 1/C-mRNA_nonrhythm_translation_rhyth/Slc30a1_set_C.pdf]

# Slc30a4

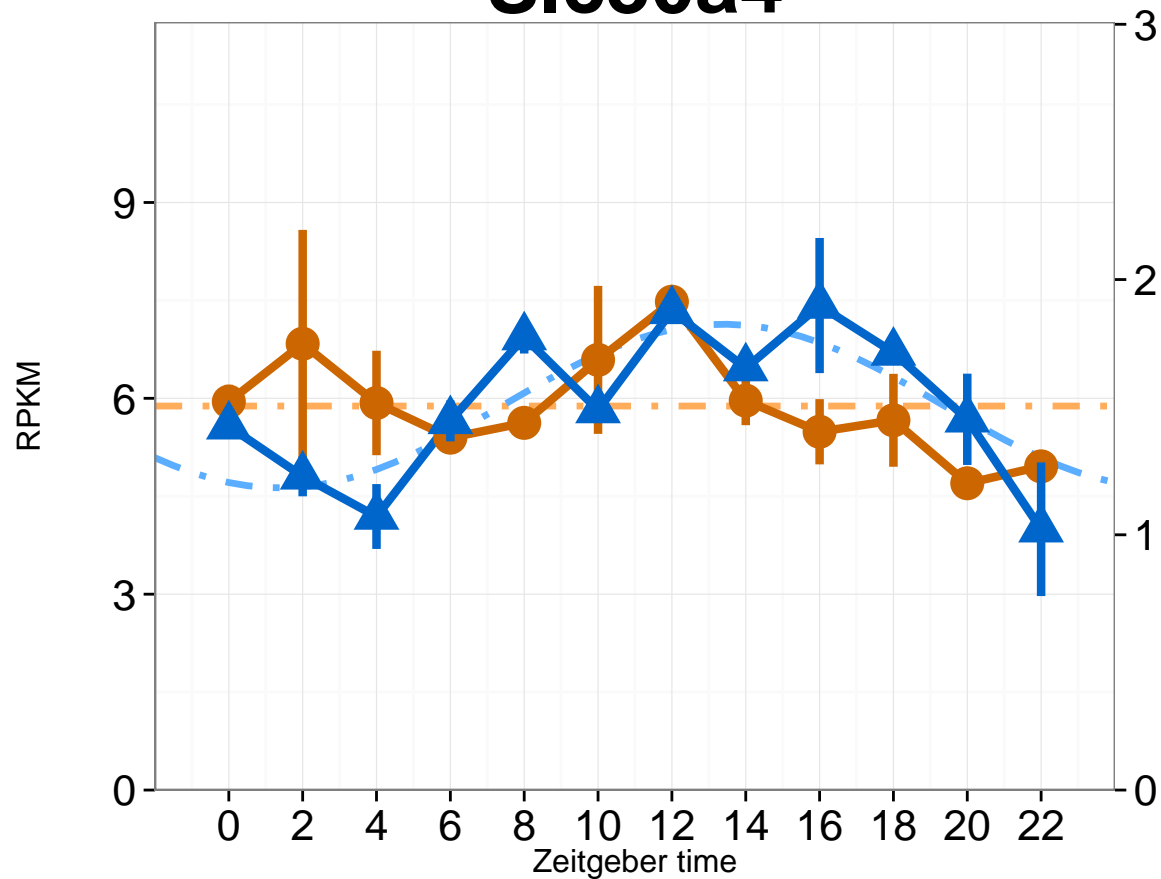

# Slc30a4

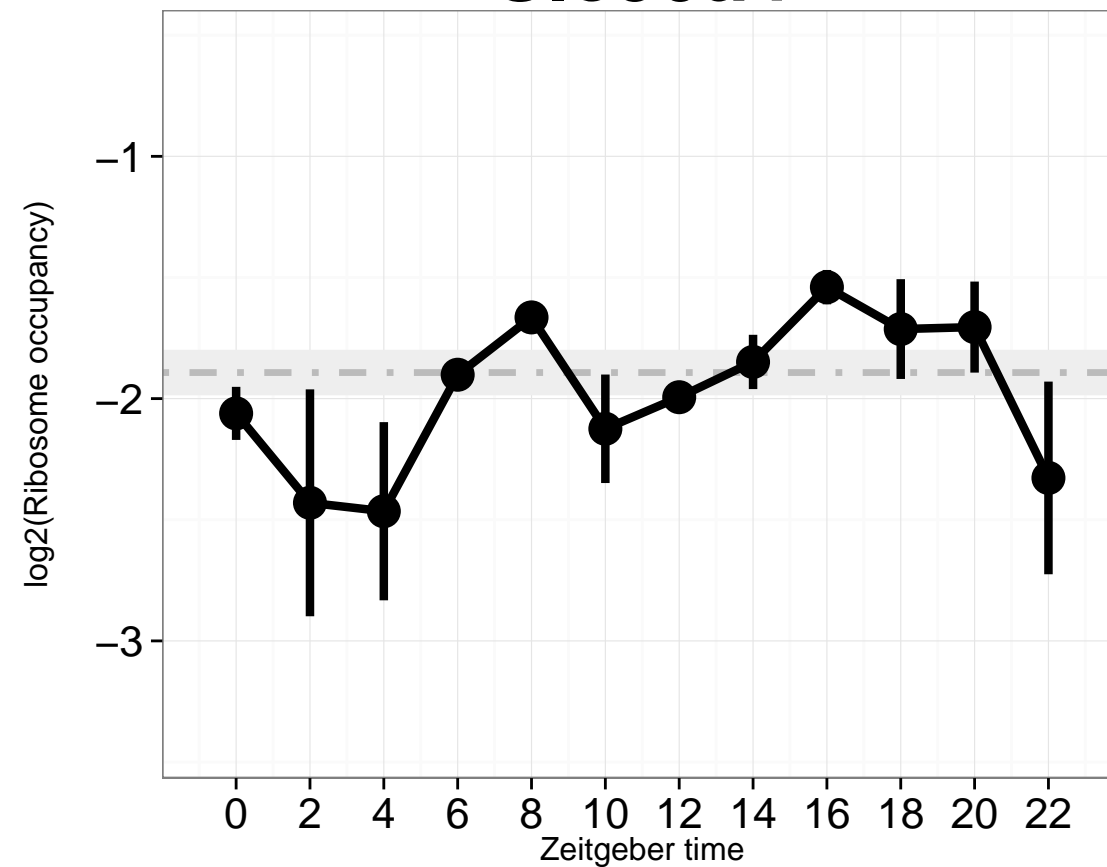

Supplement: SuppDataset_1.zip [file Slc30a4_set_C.pdf › Supplemental Dataset 1/C-mRNA_nonrhythm_translation_rhyth/Slc30a4_set_C.pdf]

## Slc30a5

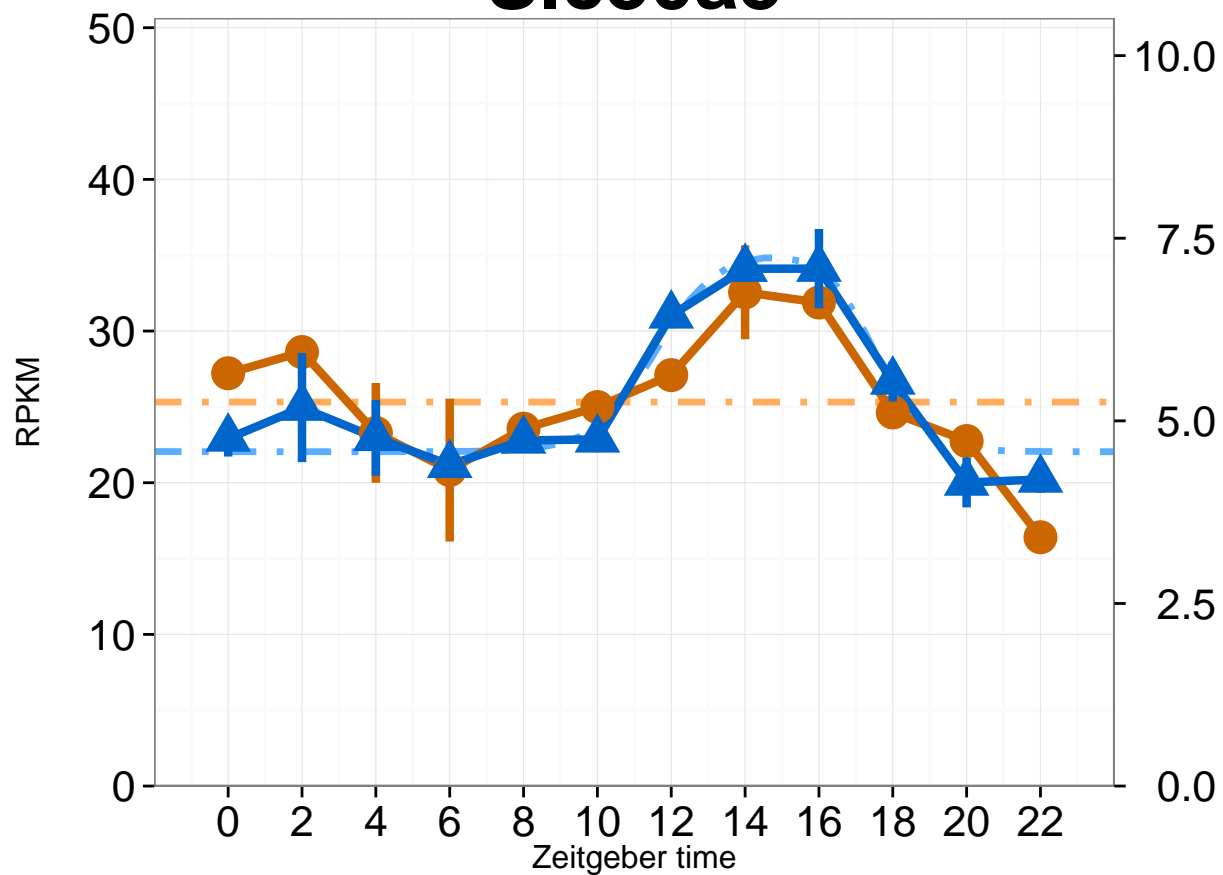

## Slc30a5

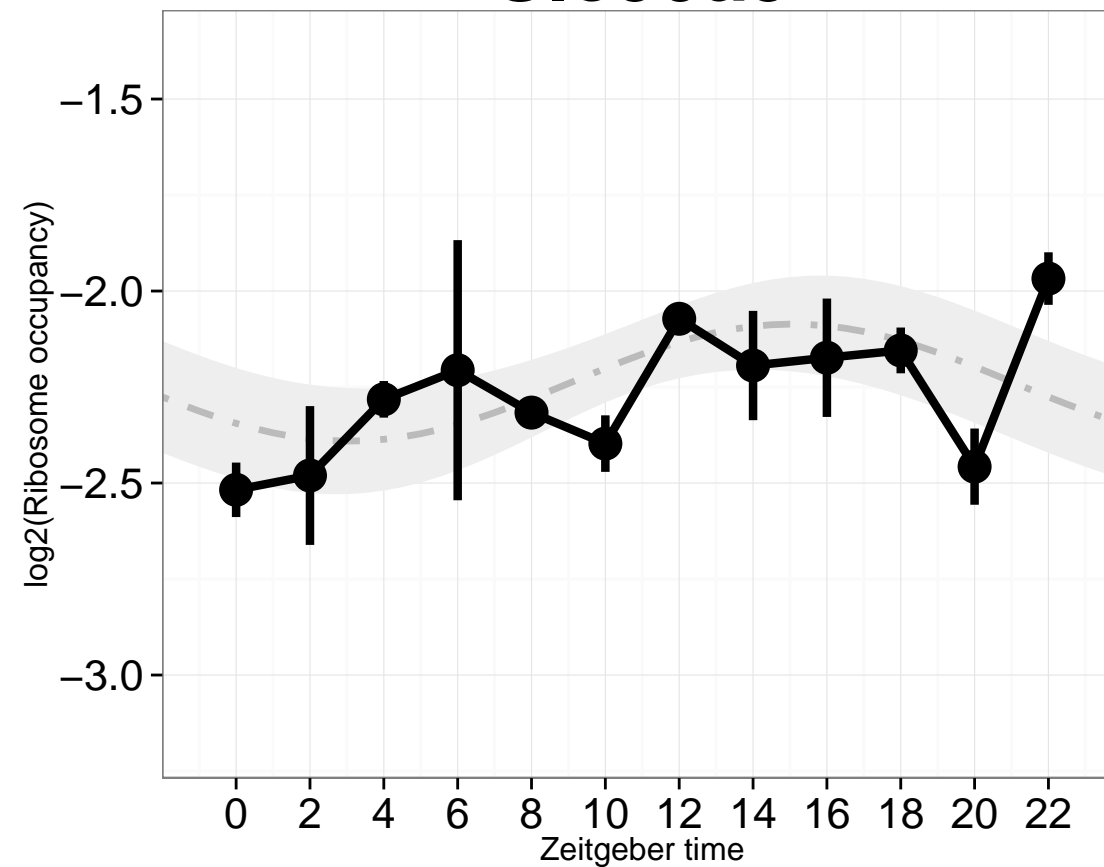

Supplement: SuppDataset_1.zip [file Slc30a5_set_C.pdf › Supplemental Dataset 1/C-mRNA_nonrhythm_translation_rhyth/Slc30a5_set_C.pdf]

## Slc35b4

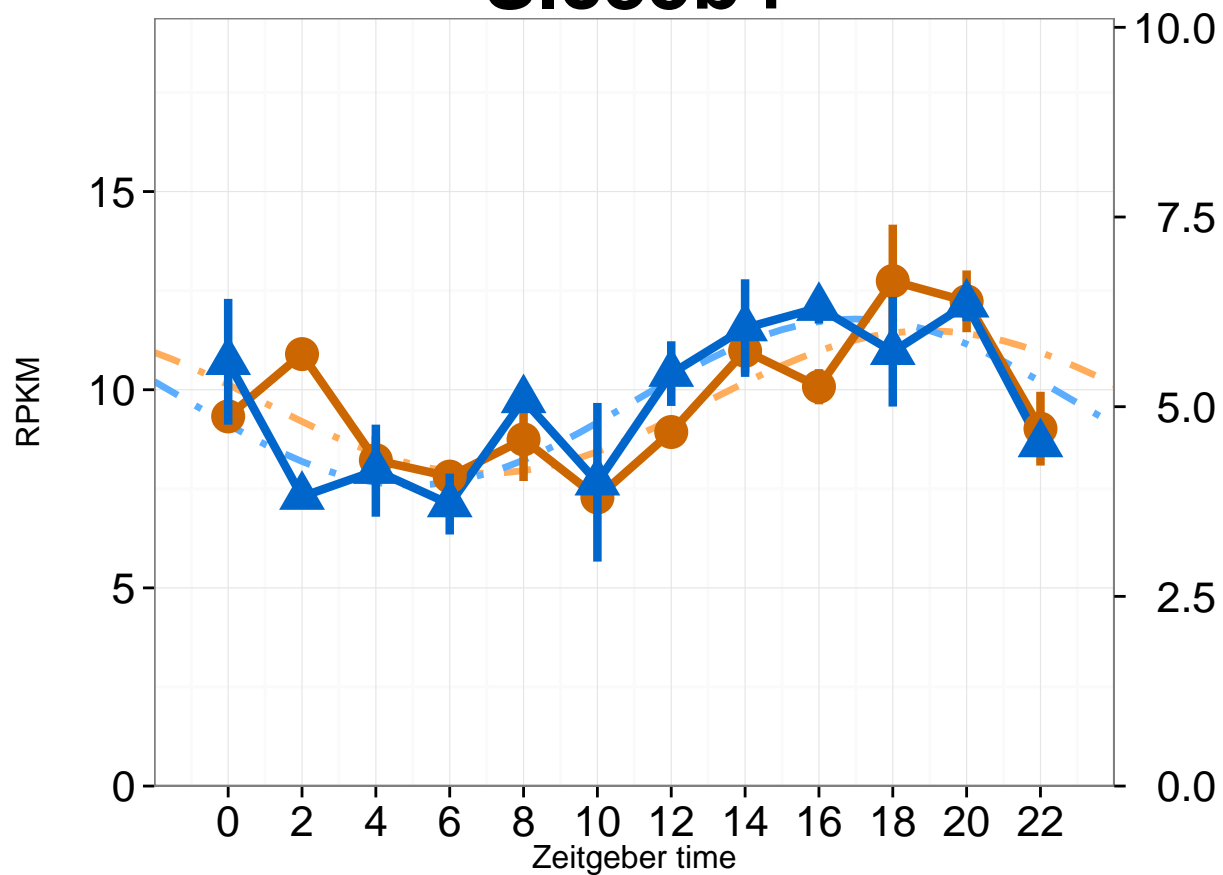

## Slc35b4

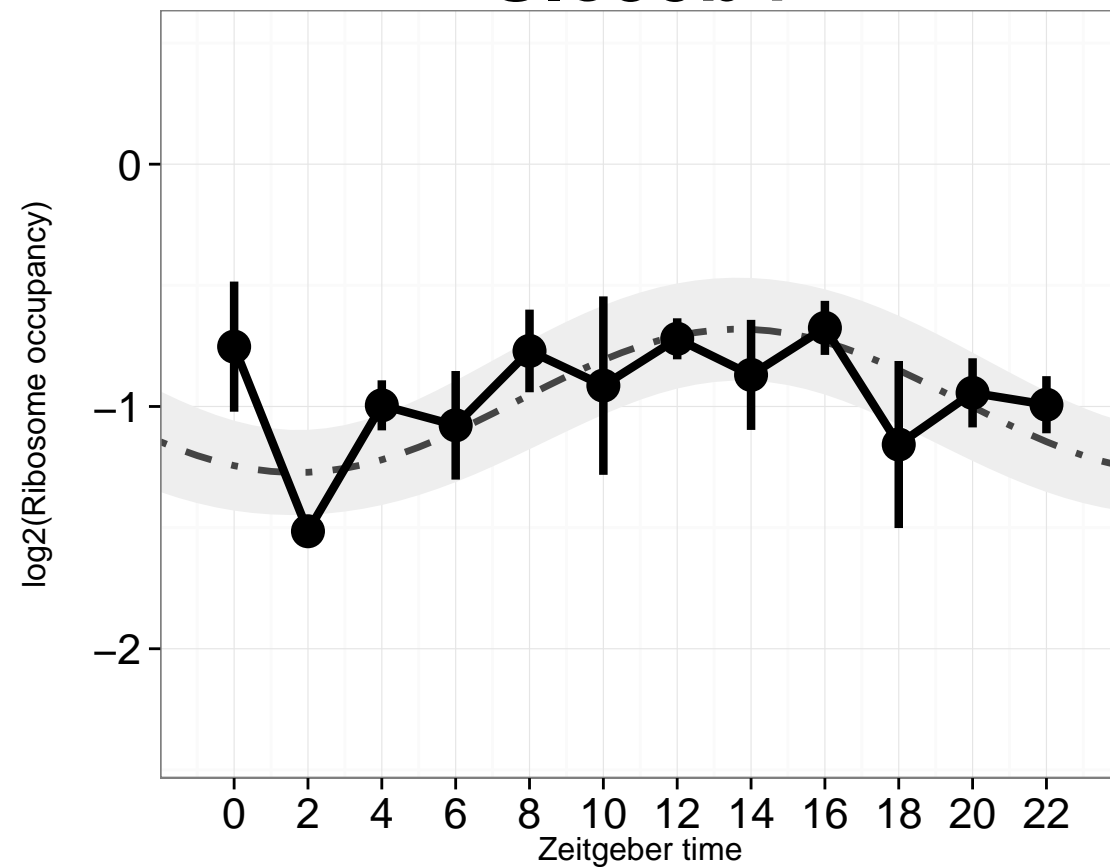

Supplement: SuppDataset_1.zip [file Slc35b4_set_C.pdf › Supplemental Dataset 1/C-mRNA_nonrhythm_translation_rhyth/Slc35b4_set_C.pdf]

# Slc35c1

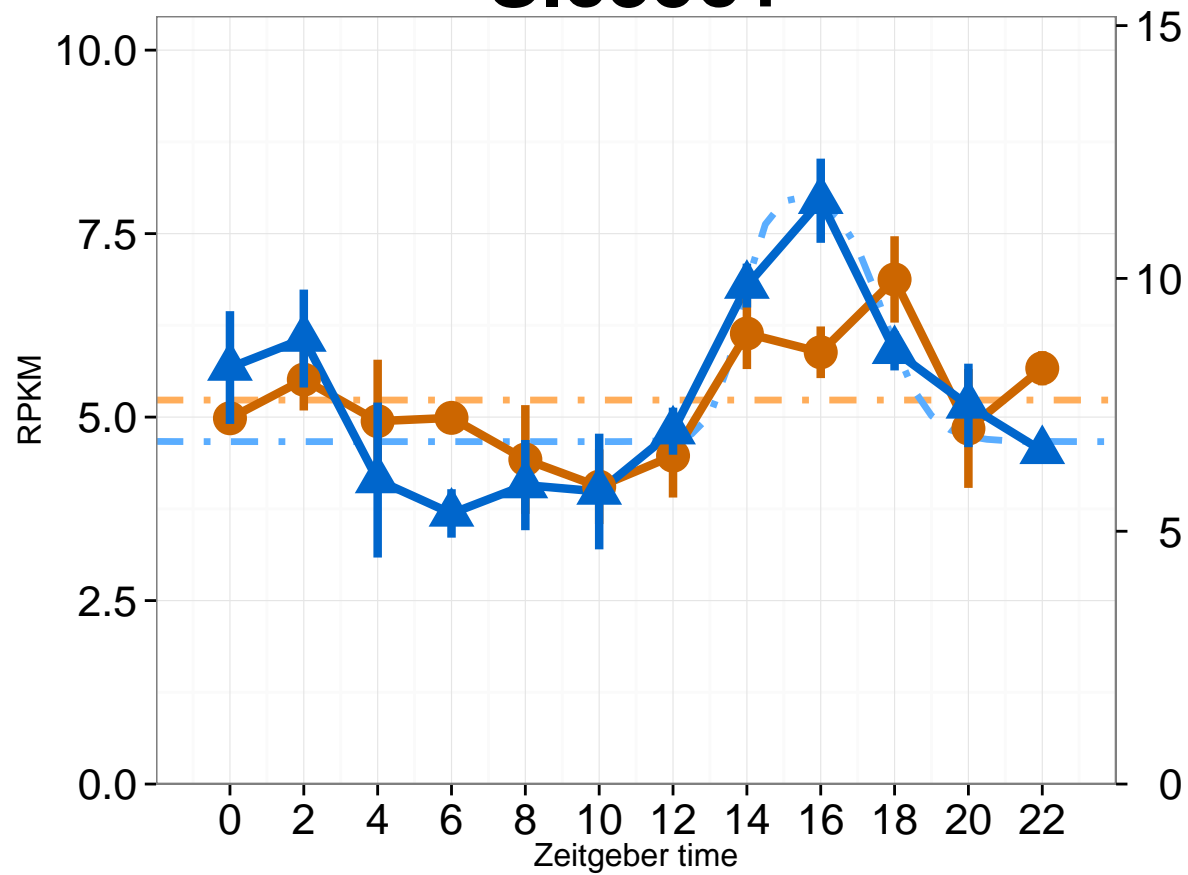

# Slc35c1

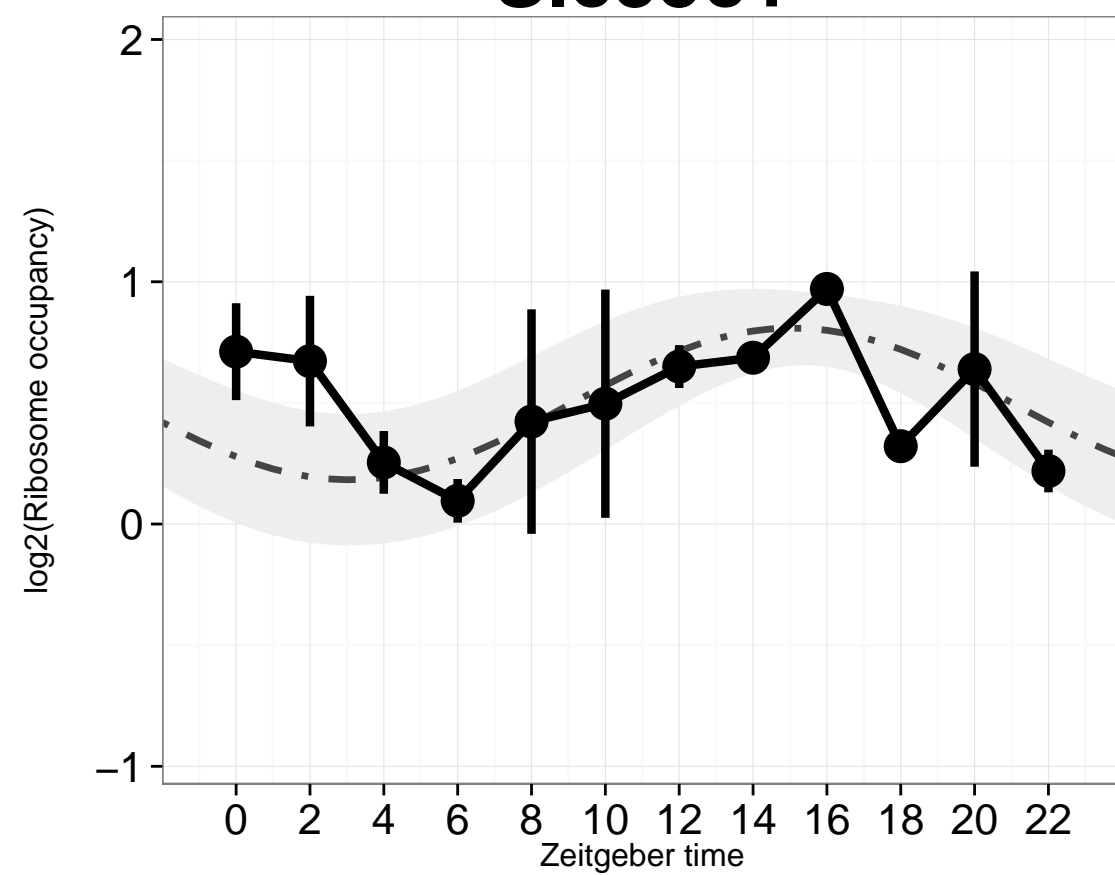

Supplement: SuppDataset_1.zip [file Slc35c1_set_C.pdf › Supplemental Dataset 1/C-mRNA_nonrhythm_translation_rhyth/Slc35c1_set_C.pdf]

**Slc37a2**

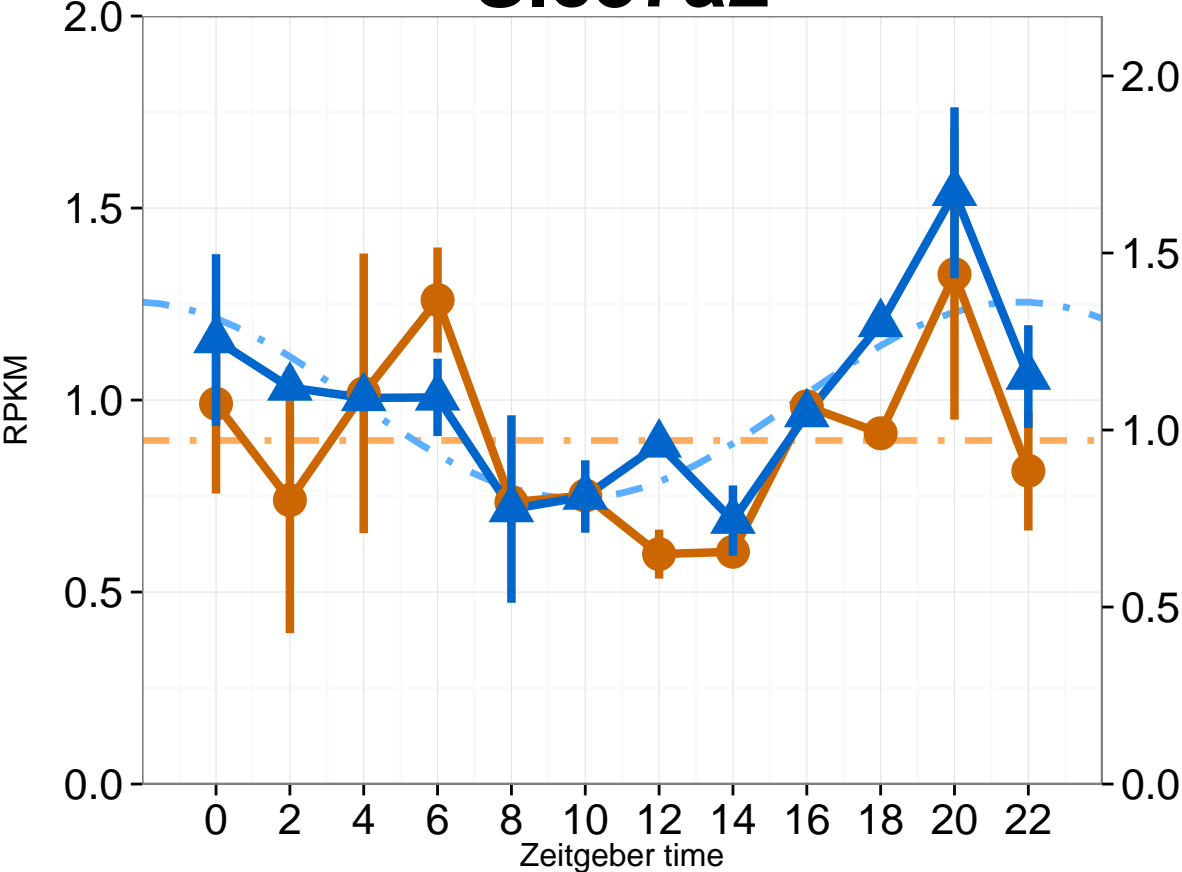

**Slc37a2**

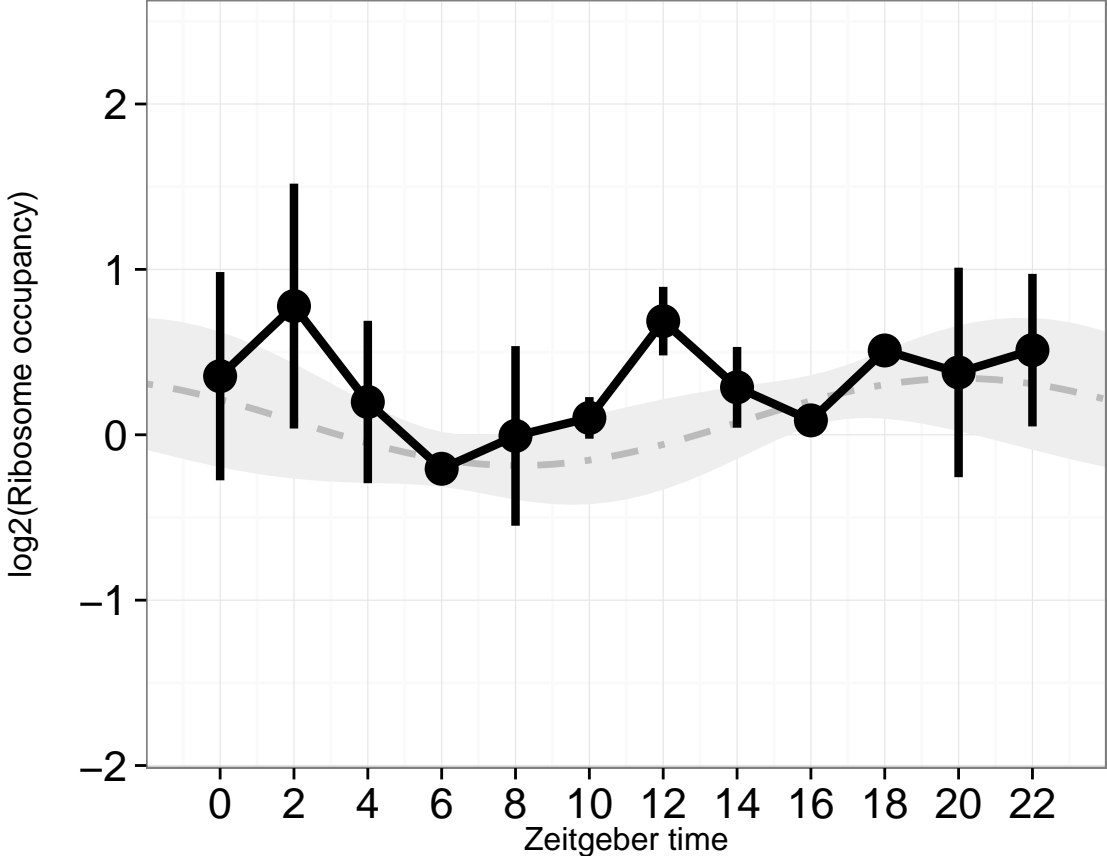

Supplement: SuppDataset_1.zip [file Slc37a2_set_C.pdf › Supplemental Dataset 1/C-mRNA_nonrhythm_translation_rhyth/Slc37a2_set_C.pdf]

## Slc38a4

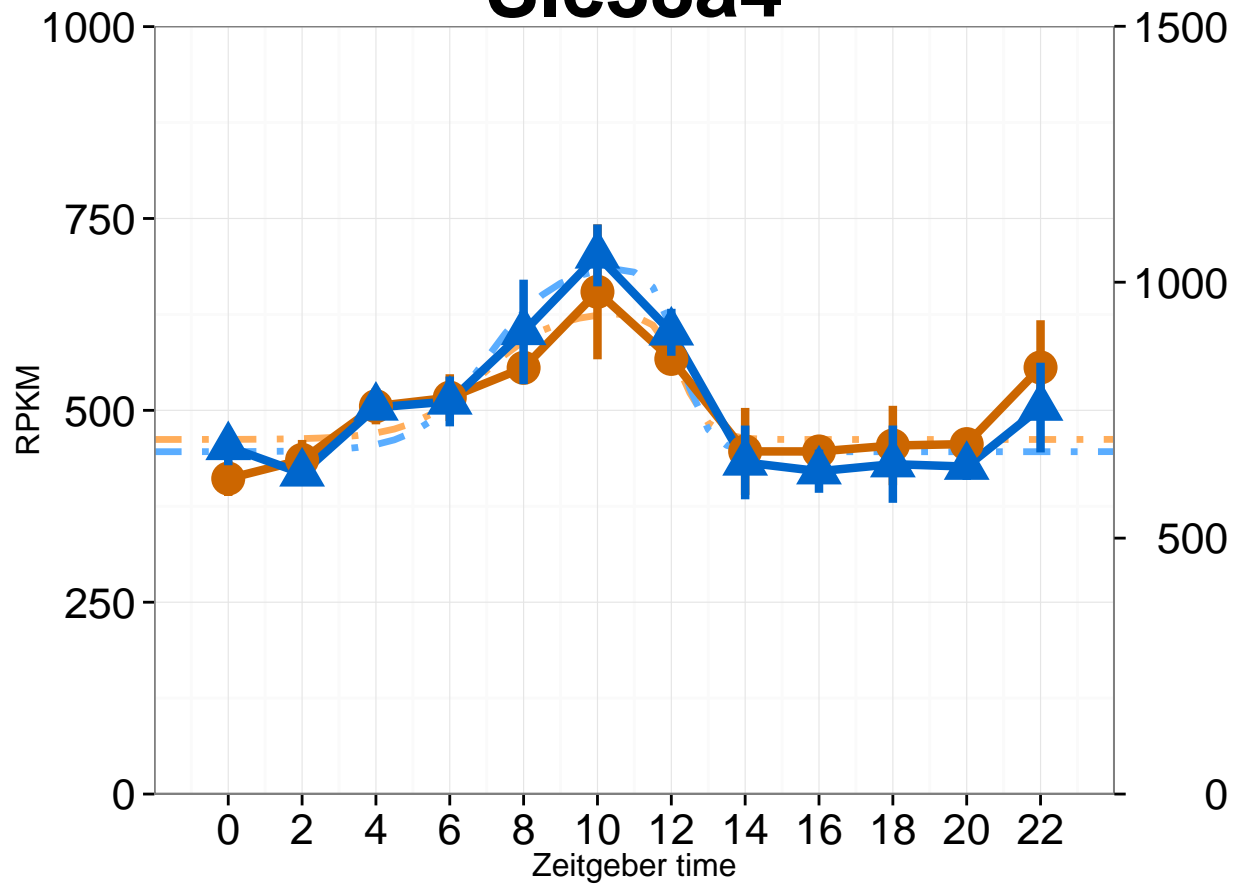

## Slc38a4

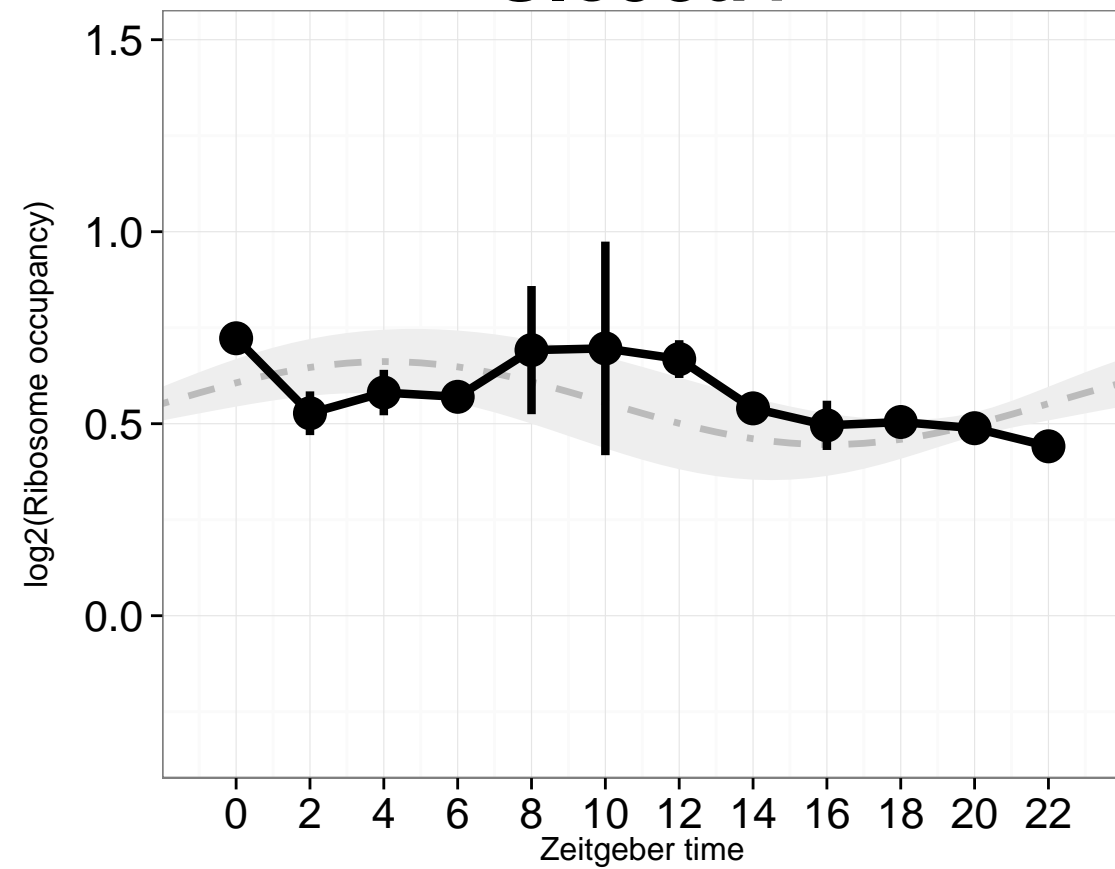

Supplement: SuppDataset_1.zip [file Slc38a4_set_C.pdf › Supplemental Dataset 1/C-mRNA_nonrhythm_translation_rhyth/Slc38a4_set_C.pdf]

# Slc39a6

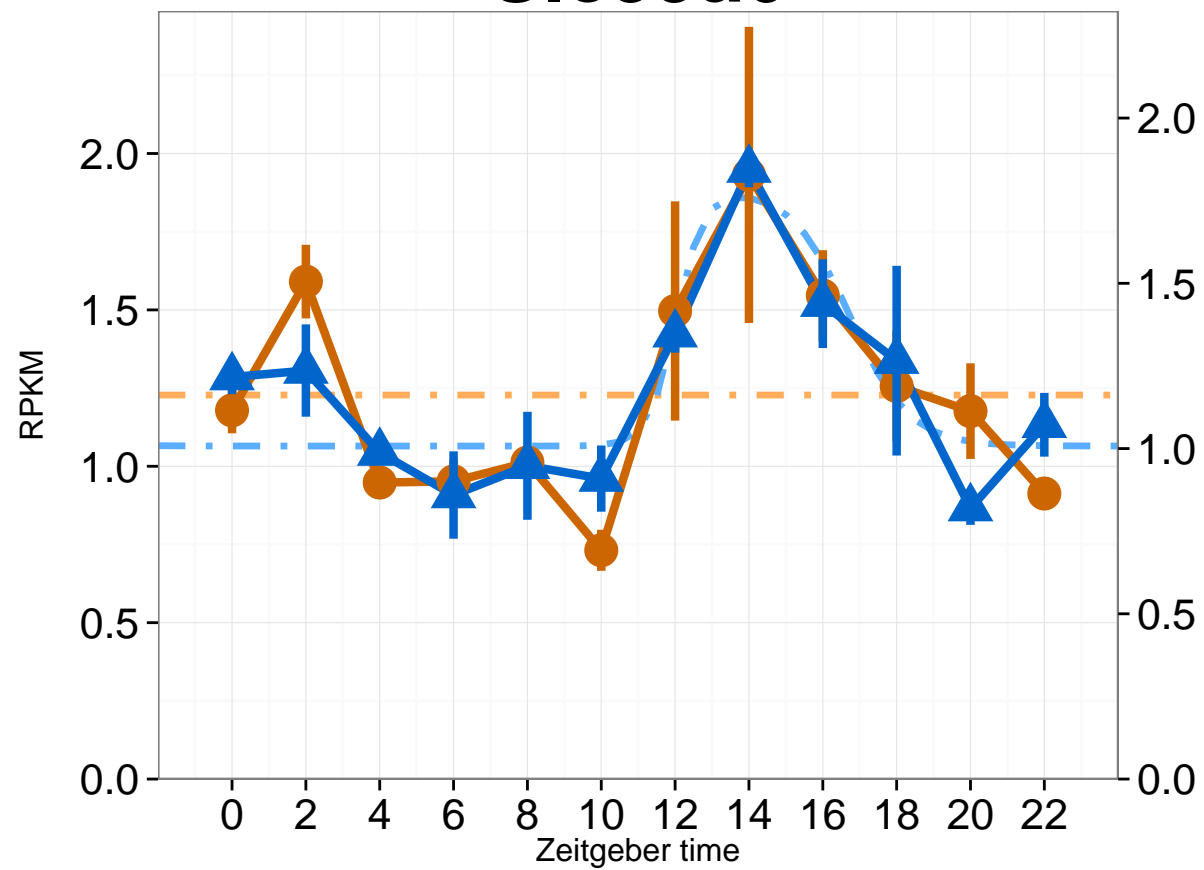

# Slc39a6

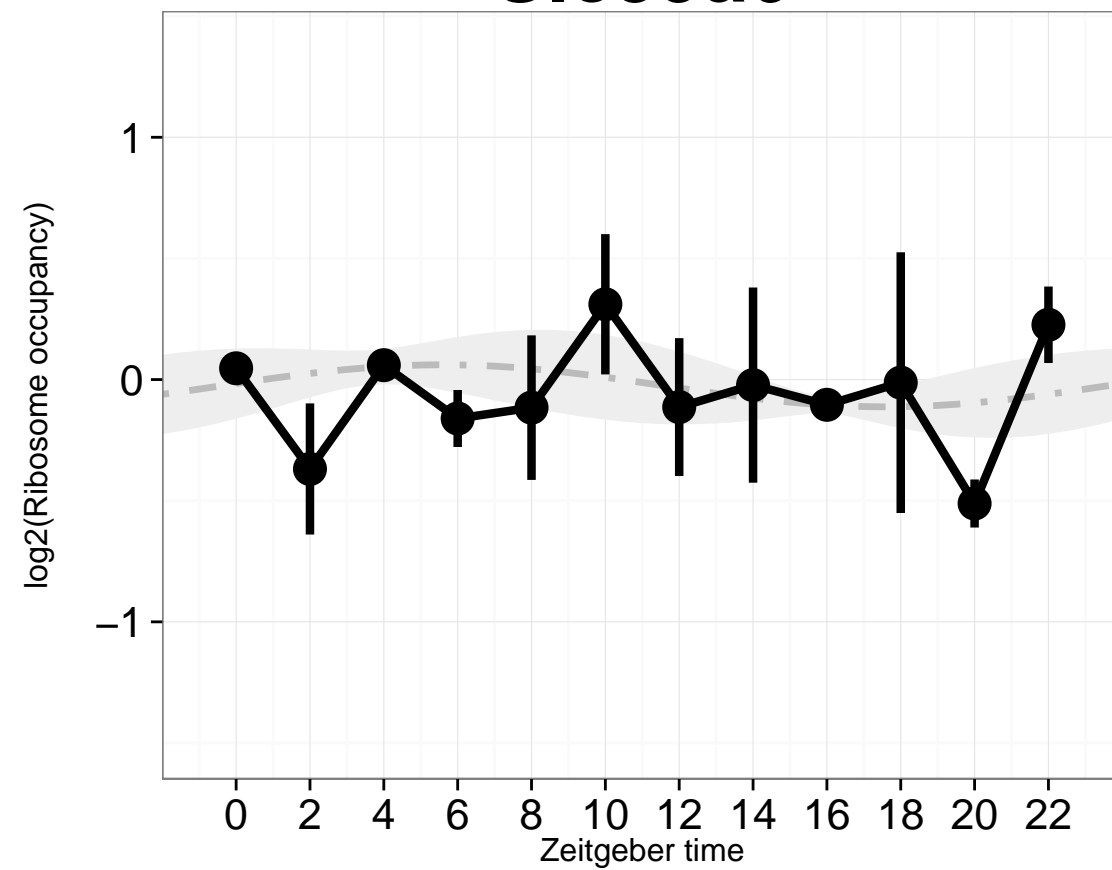

Supplement: SuppDataset_1.zip [file Slc39a6_set_C.pdf › Supplemental Dataset 1/C-mRNA_nonrhythm_translation_rhyth/Slc39a6_set_C.pdf]

**Slc41a1**

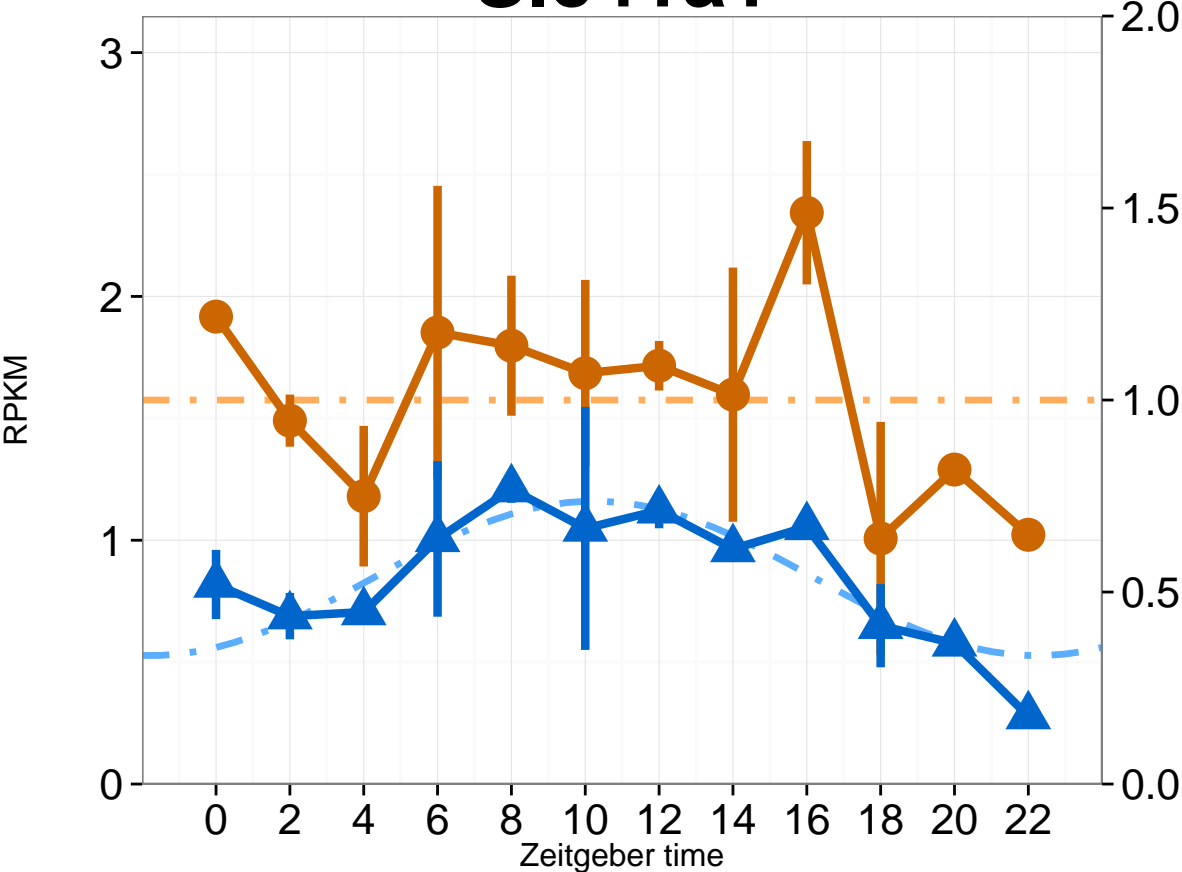

**Slc41a1**

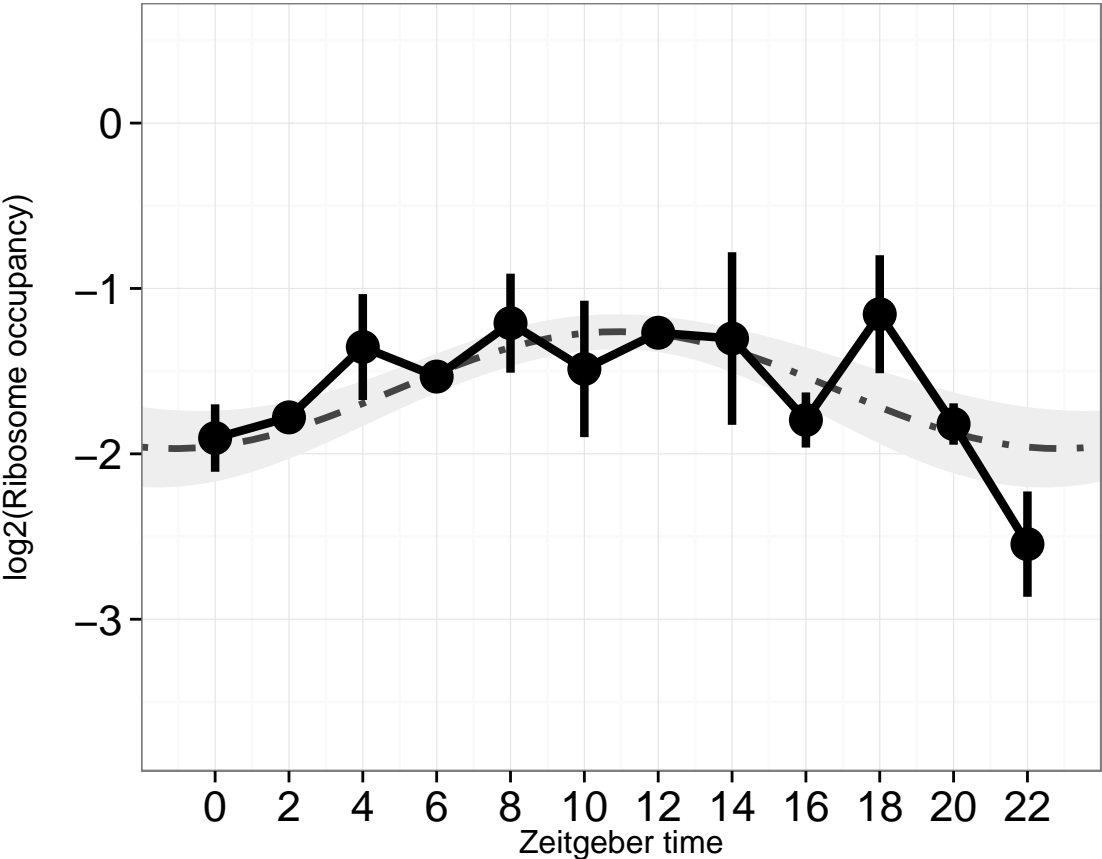

Supplement: SuppDataset_1.zip [file Slc41a1_set_C.pdf › Supplemental Dataset 1/C-mRNA_nonrhythm_translation_rhyth/Slc41a1_set_C.pdf]

## Slc43a2

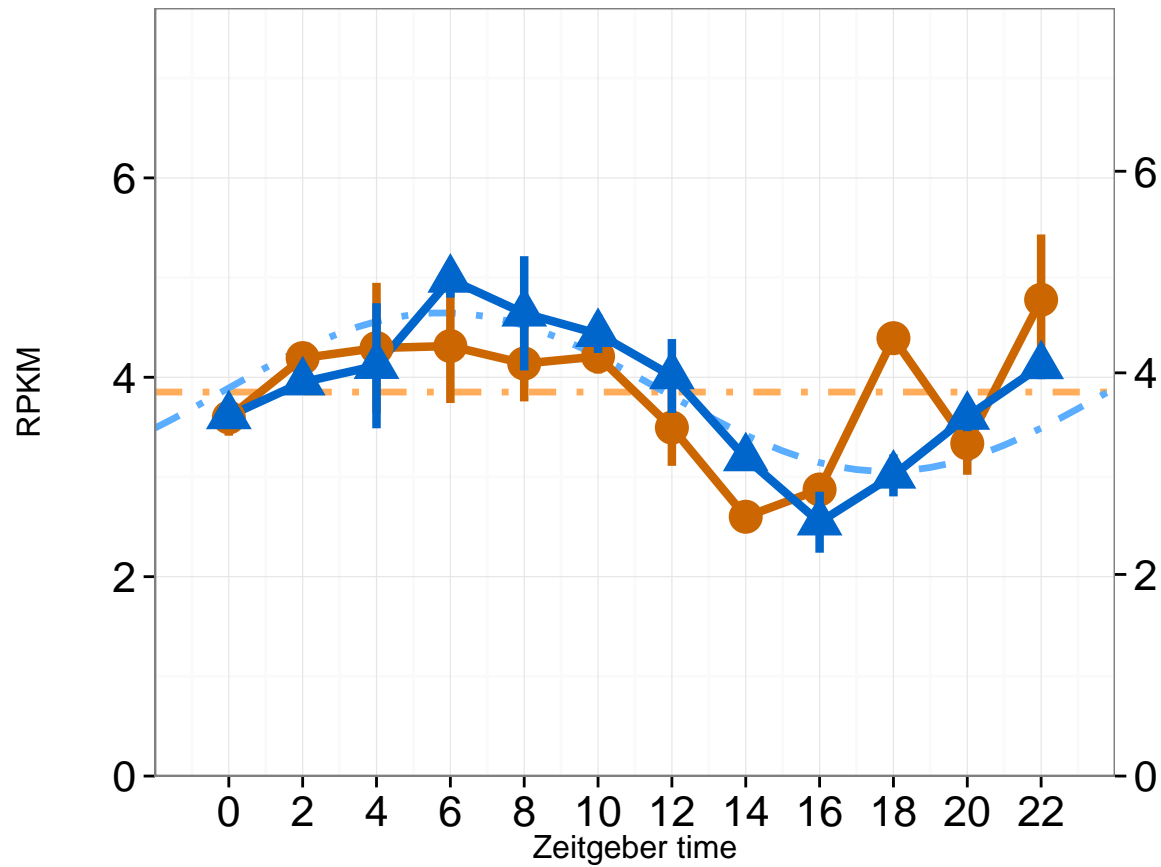

## Slc43a2

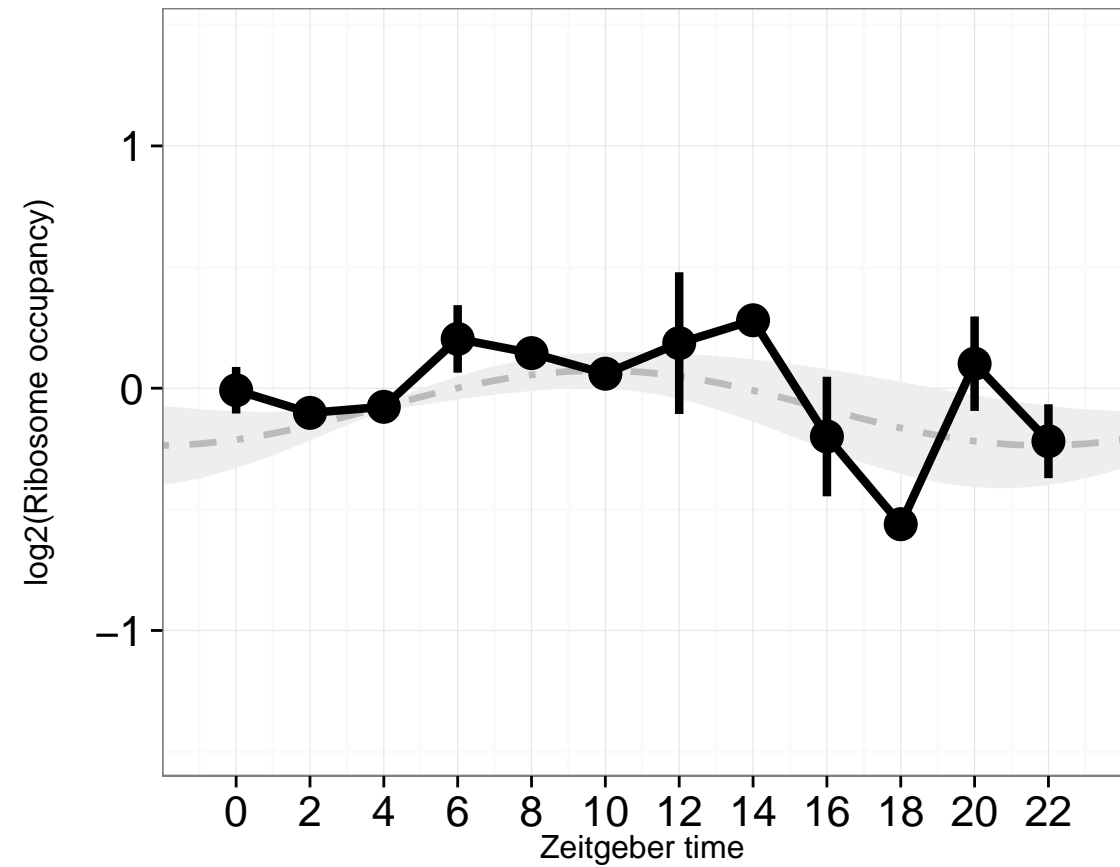

Supplement: SuppDataset_1.zip [file Slc43a2_set_C.pdf › Supplemental Dataset 1/C-mRNA_nonrhythm_translation_rhyth/Slc43a2_set_C.pdf]

## Slc44a3

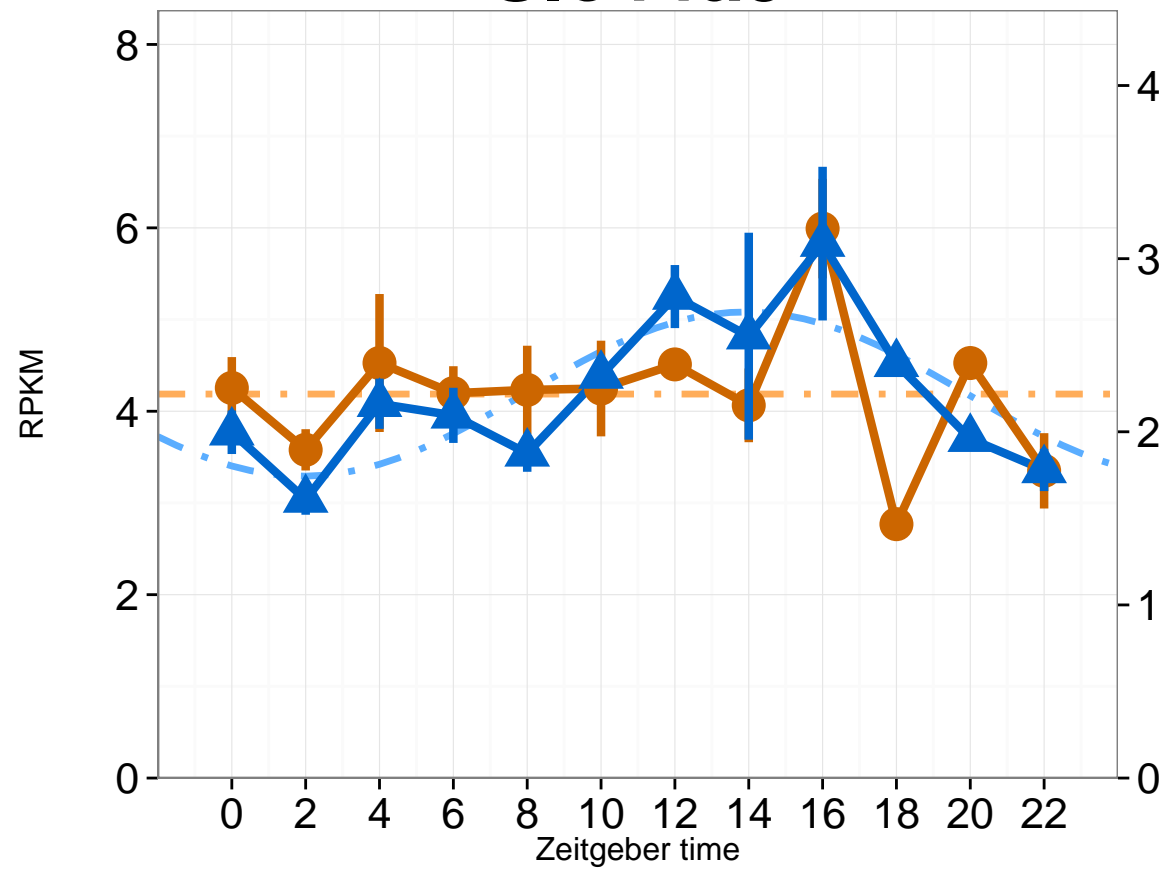

## Slc44a3

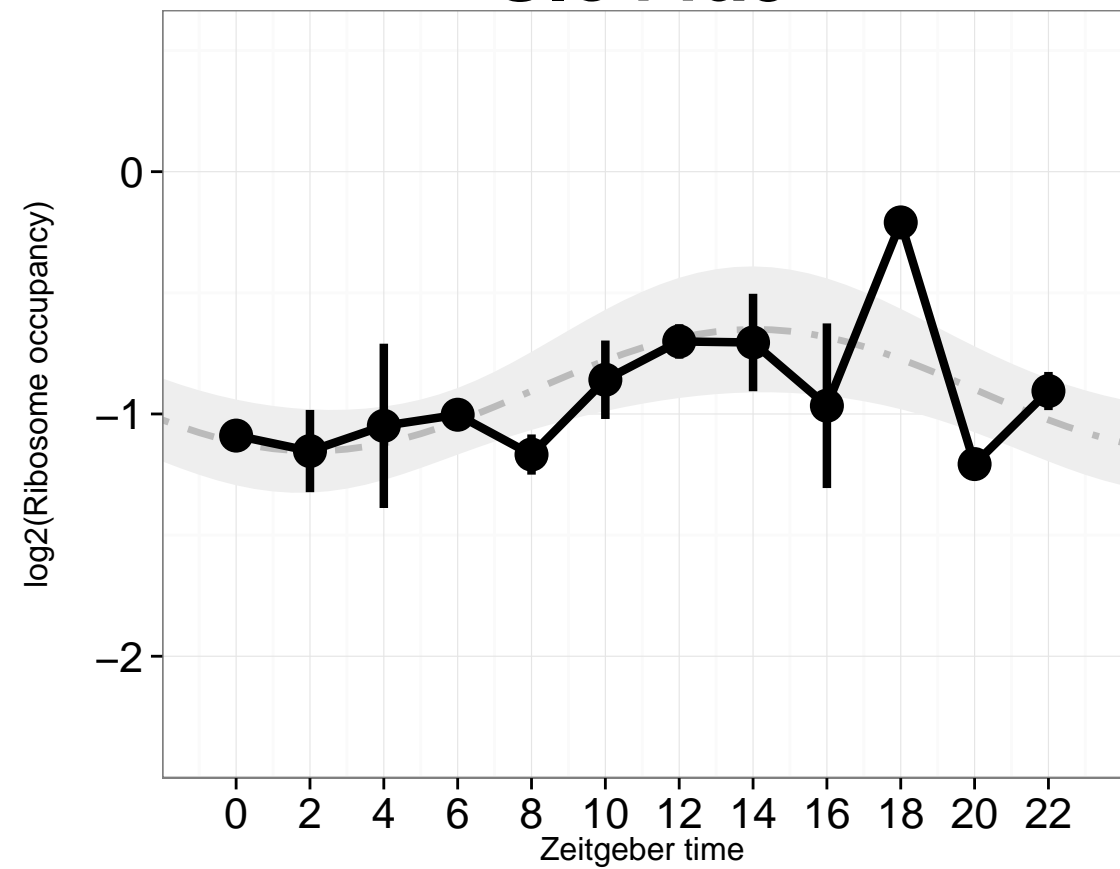

Supplement: SuppDataset_1.zip [file Slc44a3_set_C.pdf › Supplemental Dataset 1/C-mRNA_nonrhythm_translation_rhyth/Slc44a3_set_C.pdf]

## Slfn8

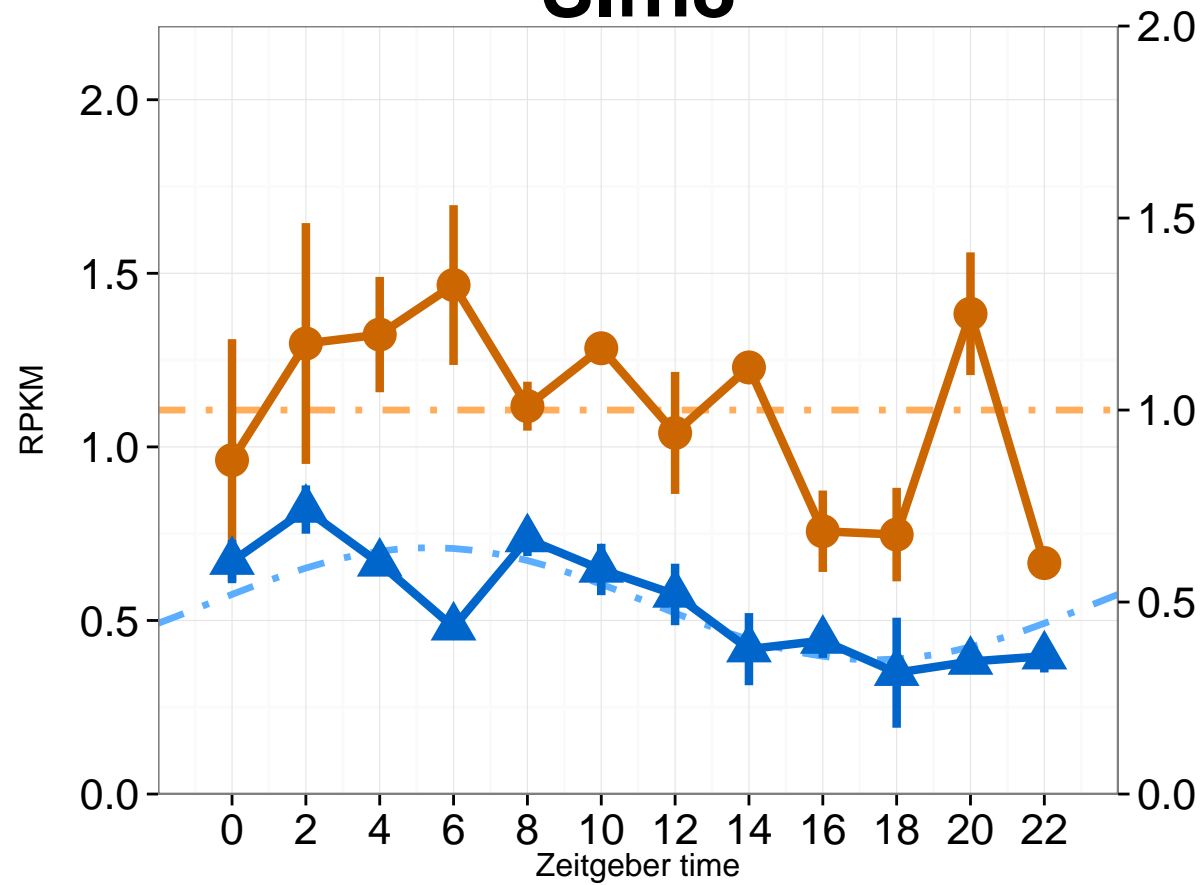

## Slfn8

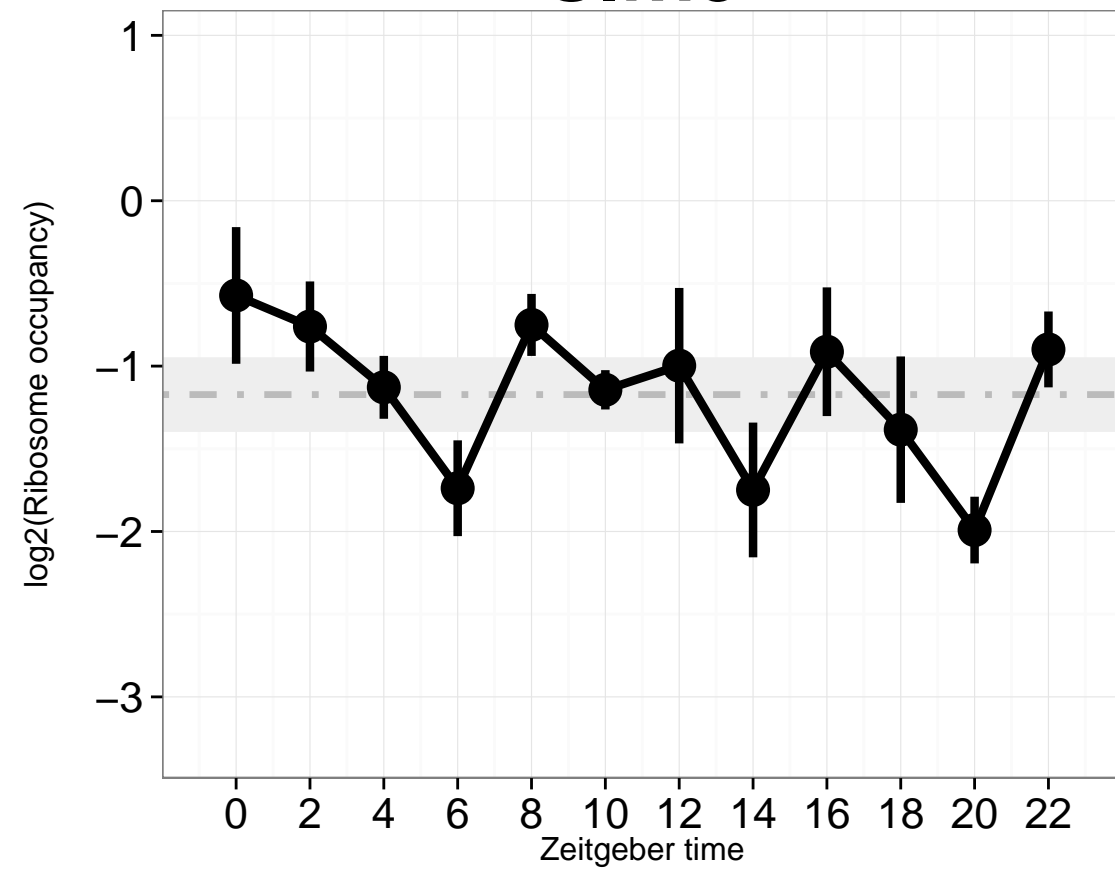

Supplement: SuppDataset_1.zip [file Slfn8_set_C.pdf › Supplemental Dataset 1/C-mRNA_nonrhythm_translation_rhyth/Slfn8_set_C.pdf]

## Slx4ip

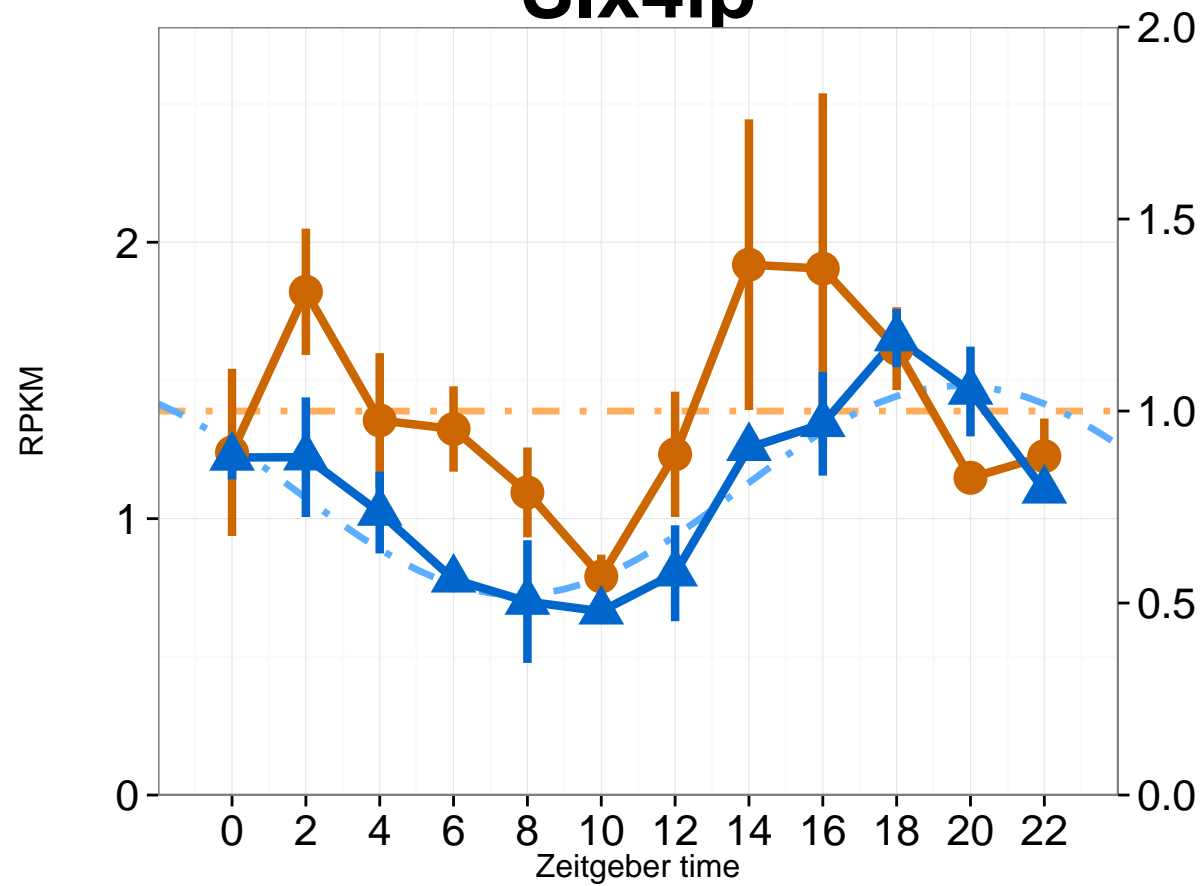

## Slx4ip

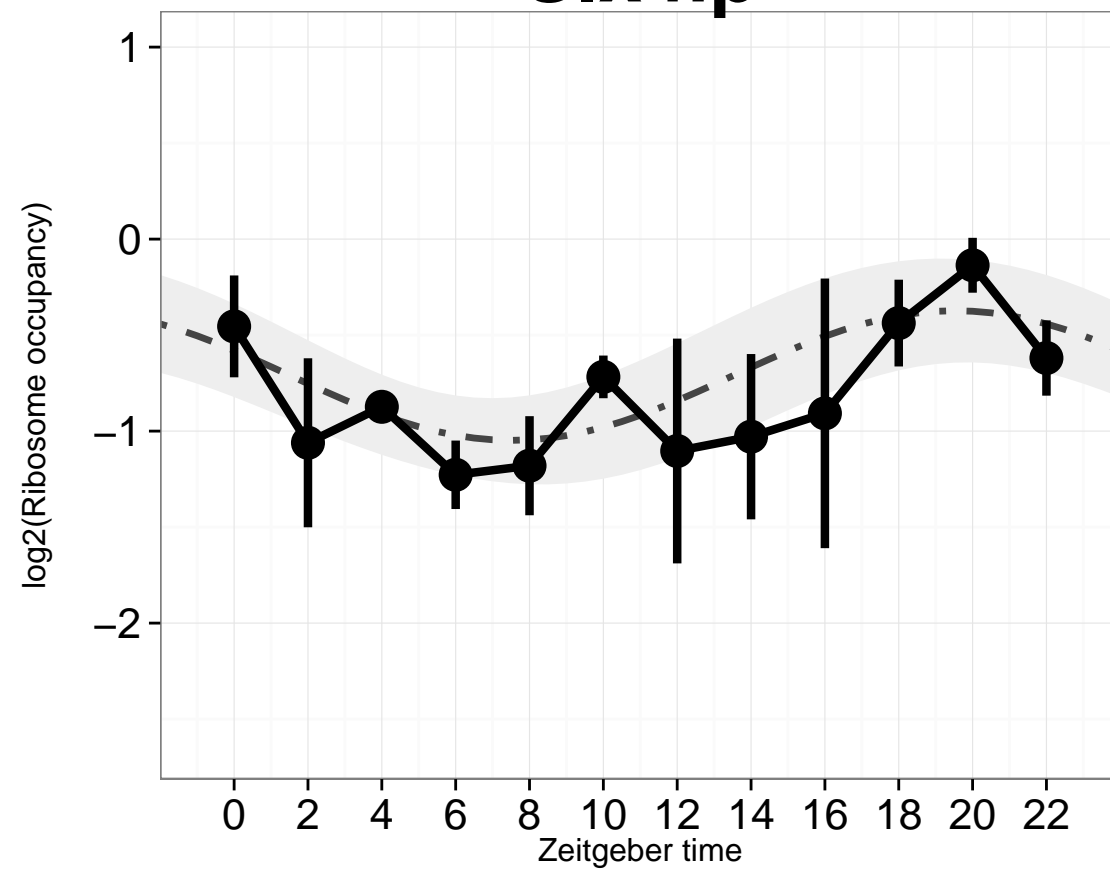

Supplement: SuppDataset_1.zip [file Slx4ip_set_C.pdf › Supplemental Dataset 1/C-mRNA_nonrhythm_translation_rhyth/Slx4ip_set_C.pdf]

## Smarca2

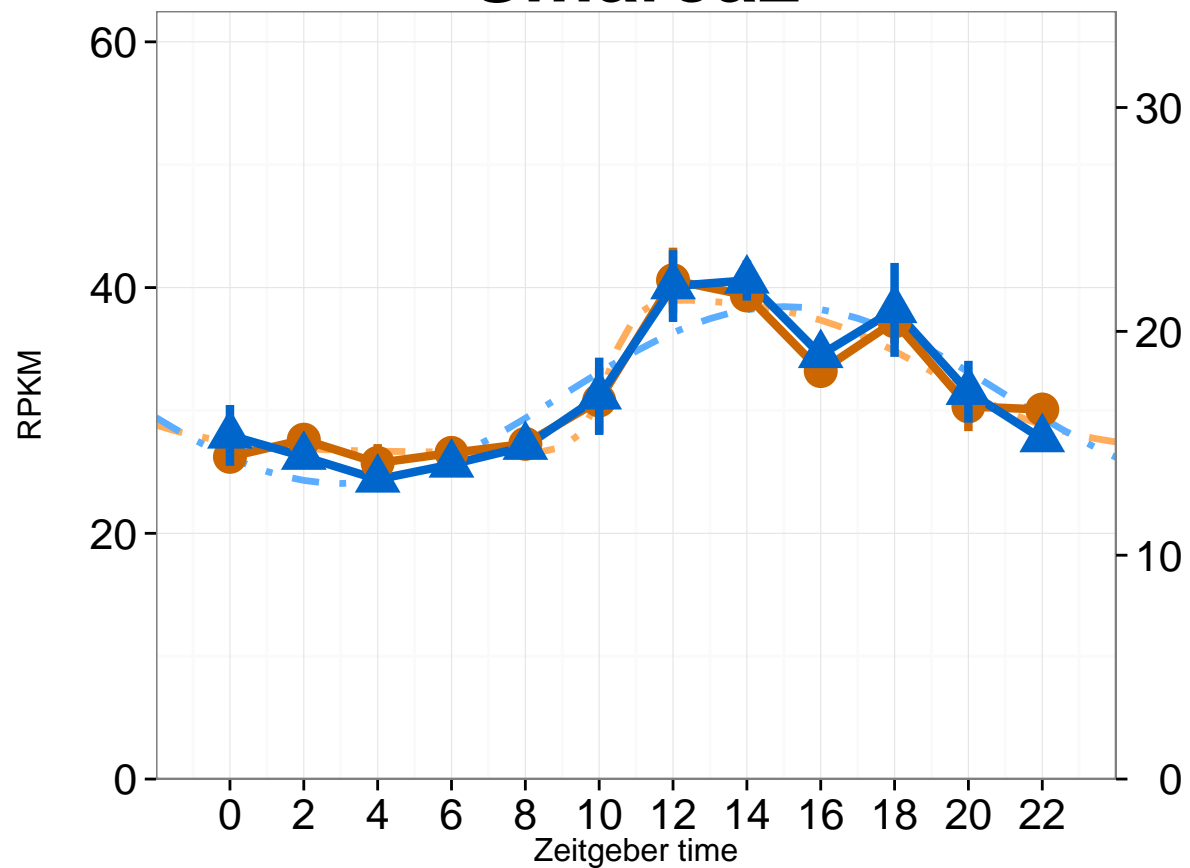

## Smarca2

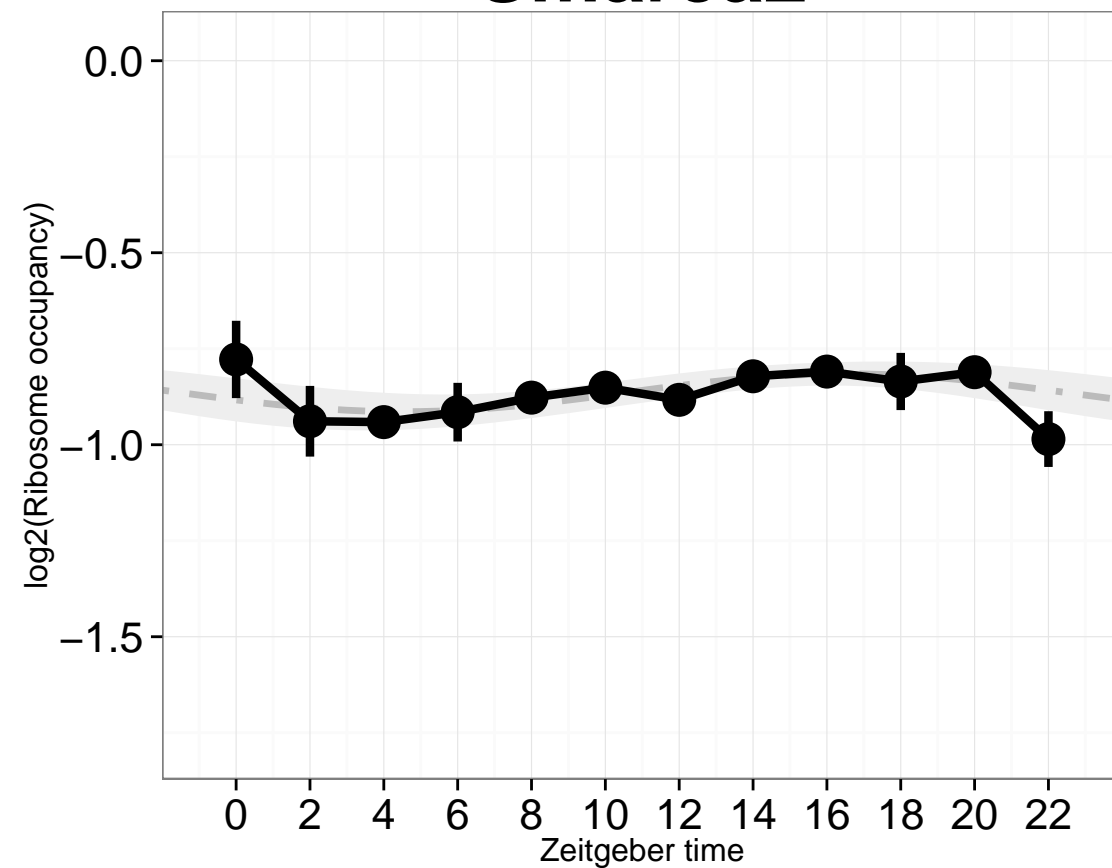

Supplement: SuppDataset_1.zip [file Smarca2_set_C.pdf › Supplemental Dataset 1/C-mRNA_nonrhythm_translation_rhyth/Smarca2_set_C.pdf]

## Smco4

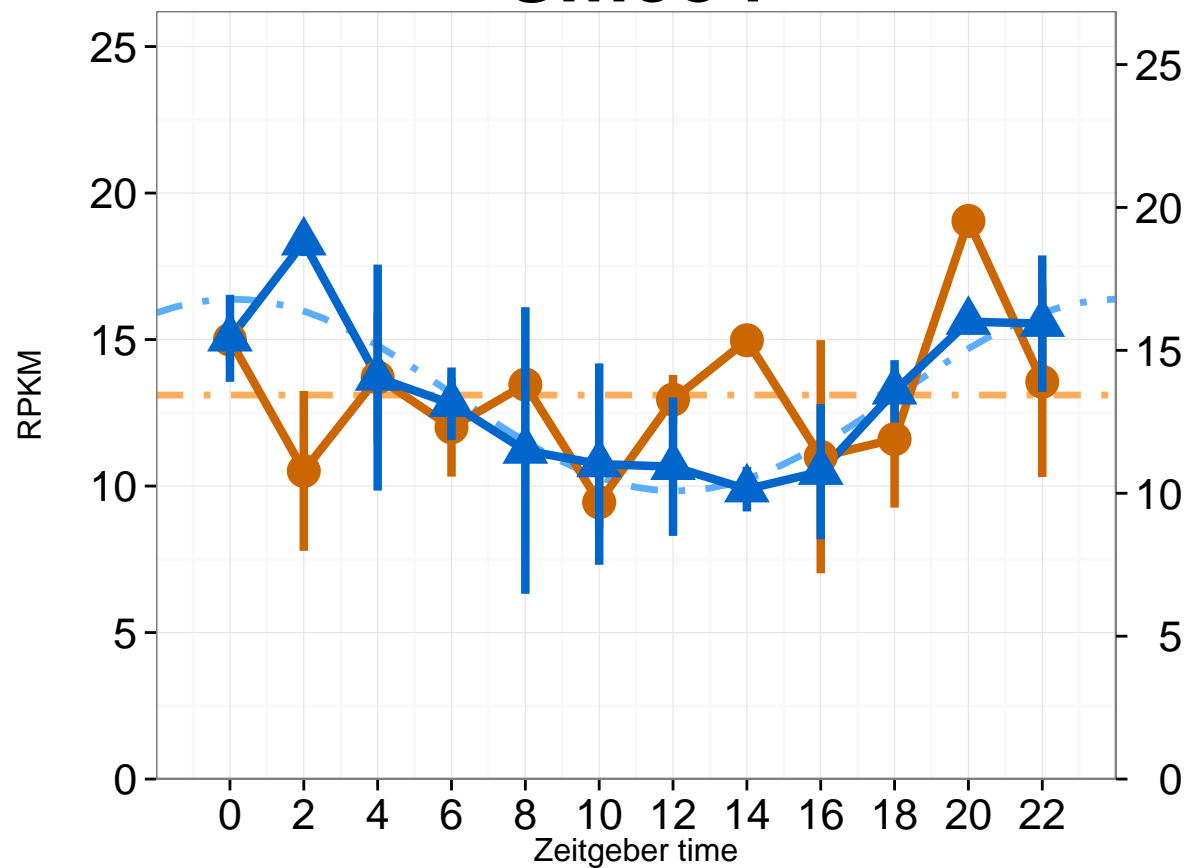

## Smco4

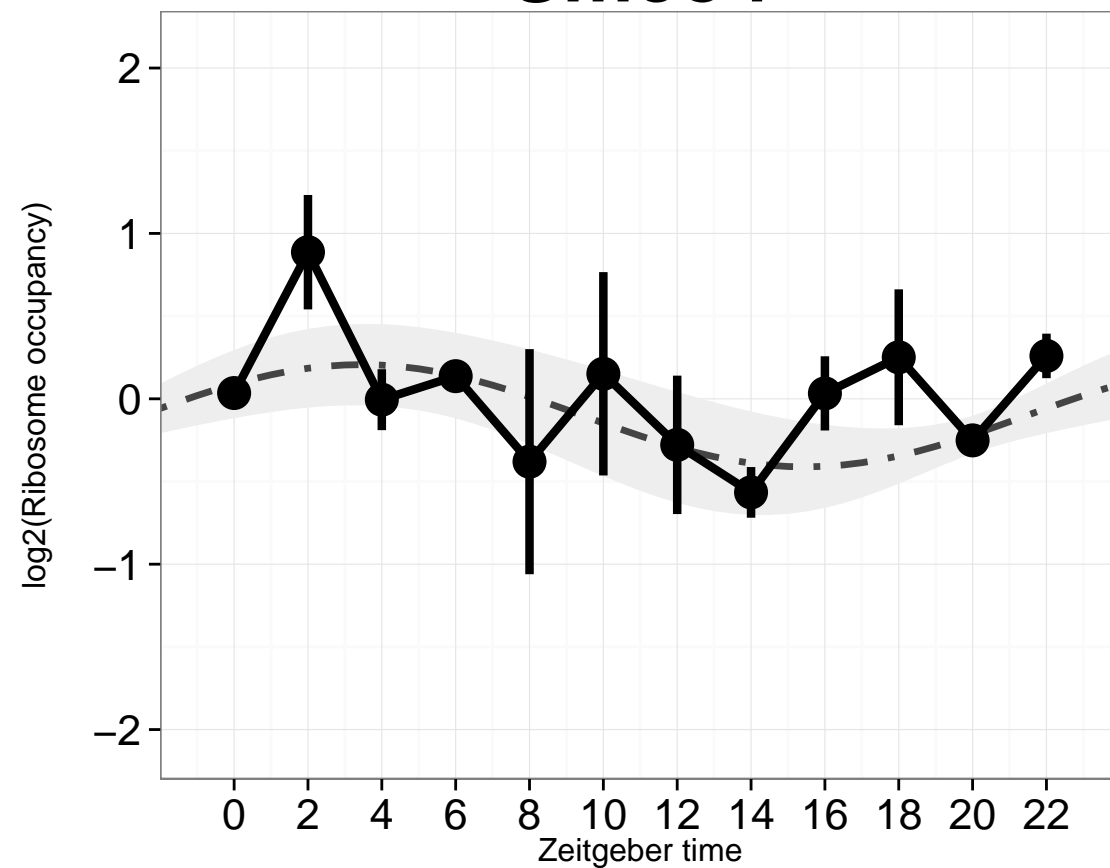

Supplement: SuppDataset_1.zip [file Smco4_set_C.pdf › Supplemental Dataset 1/C-mRNA_nonrhythm_translation_rhyth/Smco4_set_C.pdf]

## Smox

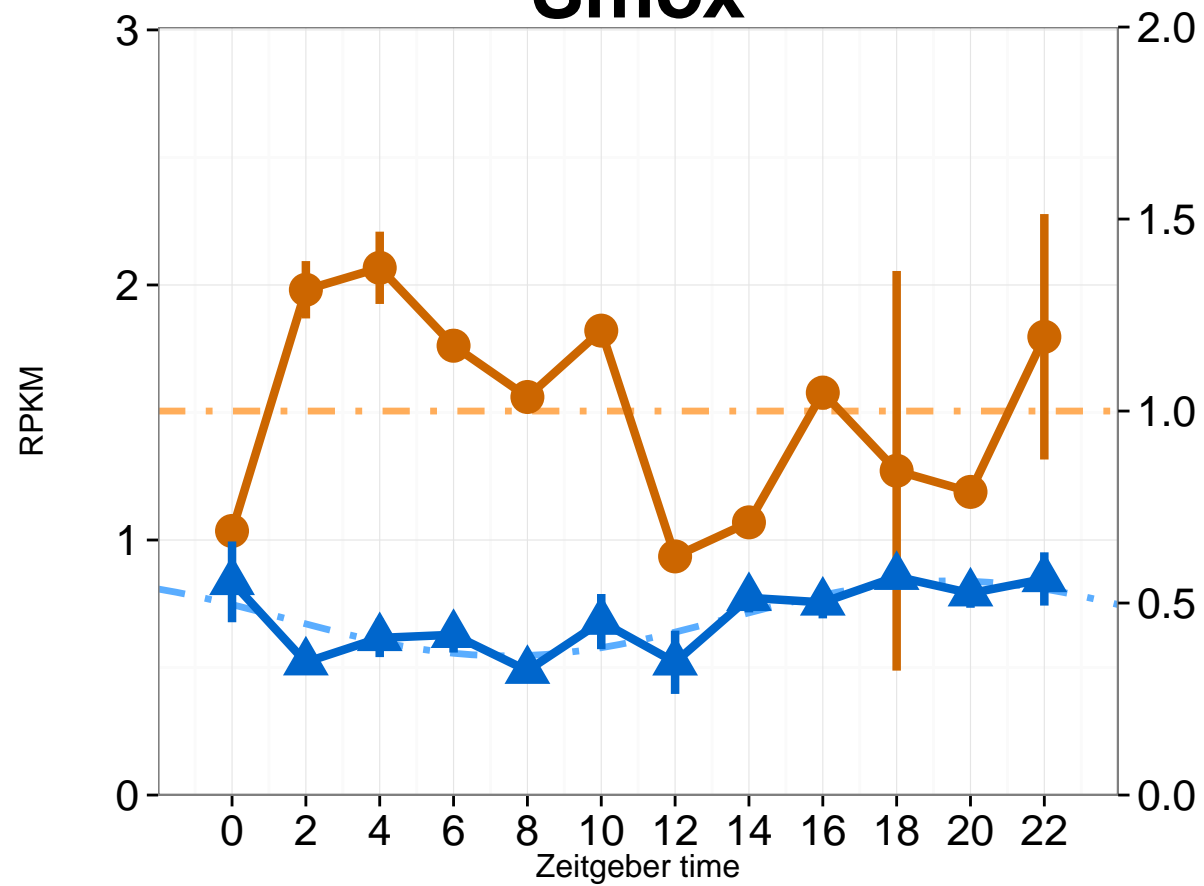

## Smox

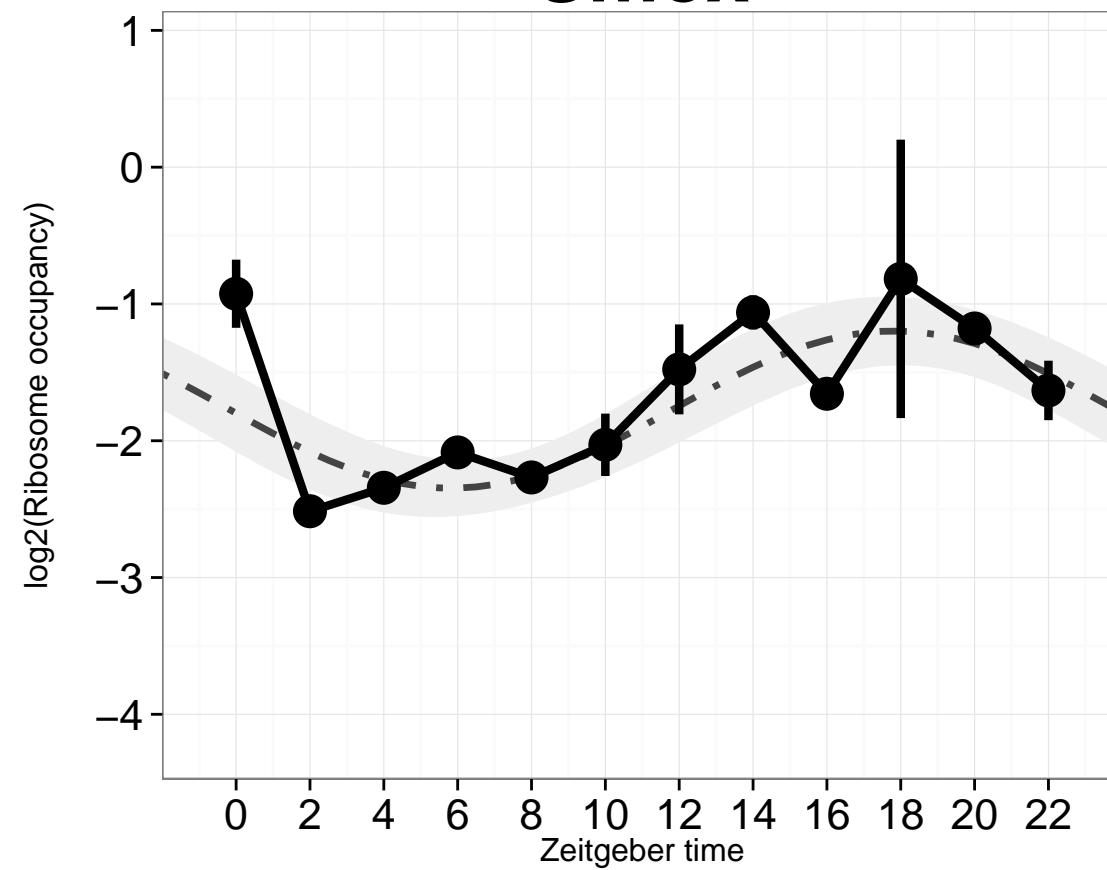

Supplement: SuppDataset_1.zip [file Smox_set_C.pdf › Supplemental Dataset 1/C-mRNA_nonrhythm_translation_rhyth/Smox_set_C.pdf]

## Smyd2

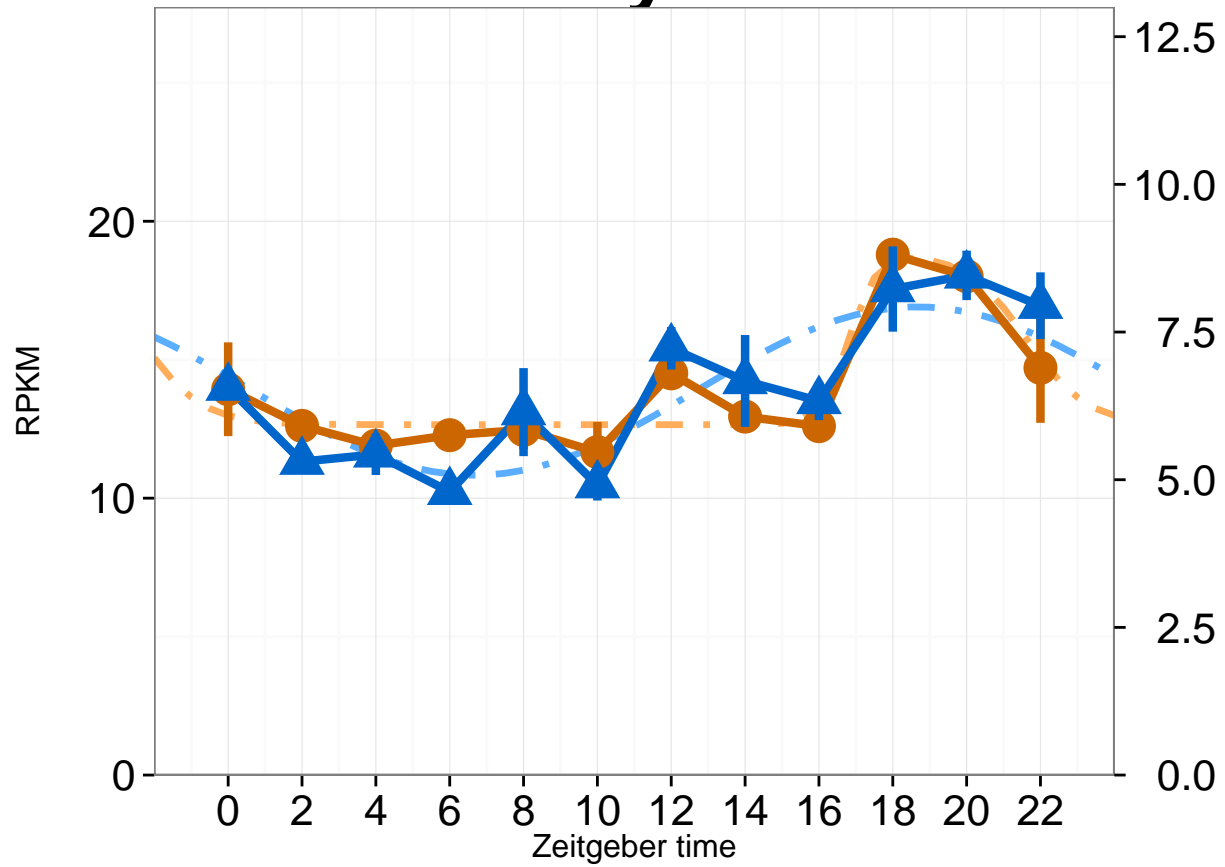

## Smyd2

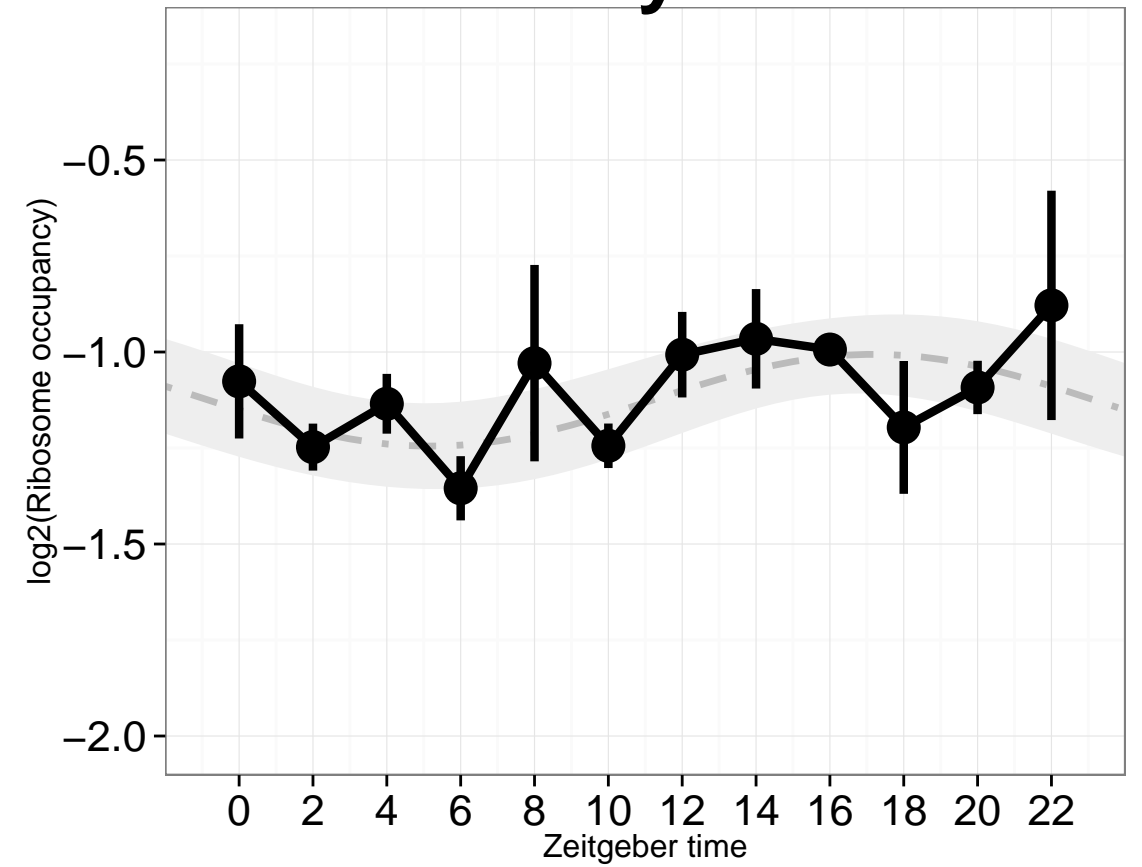

Supplement: SuppDataset_1.zip [file Smyd2_set_C.pdf › Supplemental Dataset 1/C-mRNA_nonrhythm_translation_rhyth/Smyd2_set_C.pdf]

## Snrk

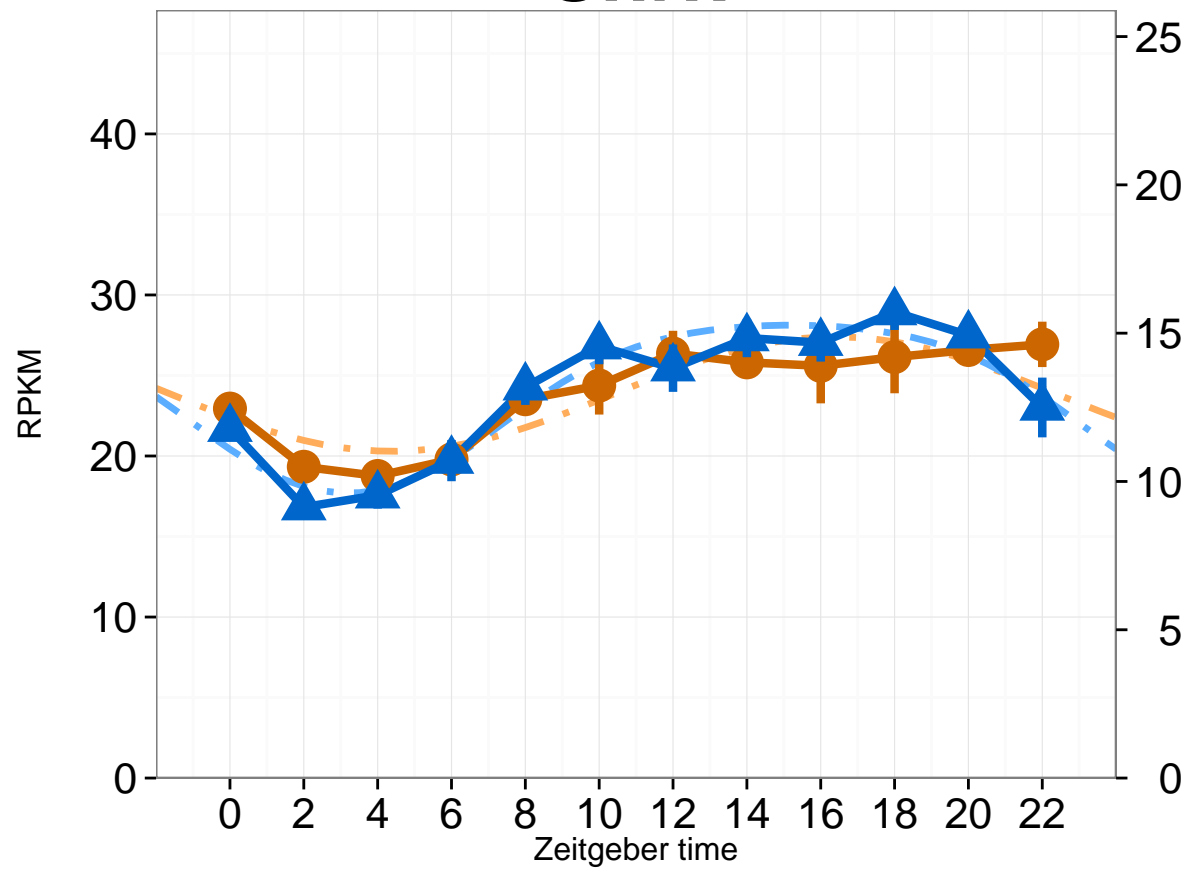

## Snrk

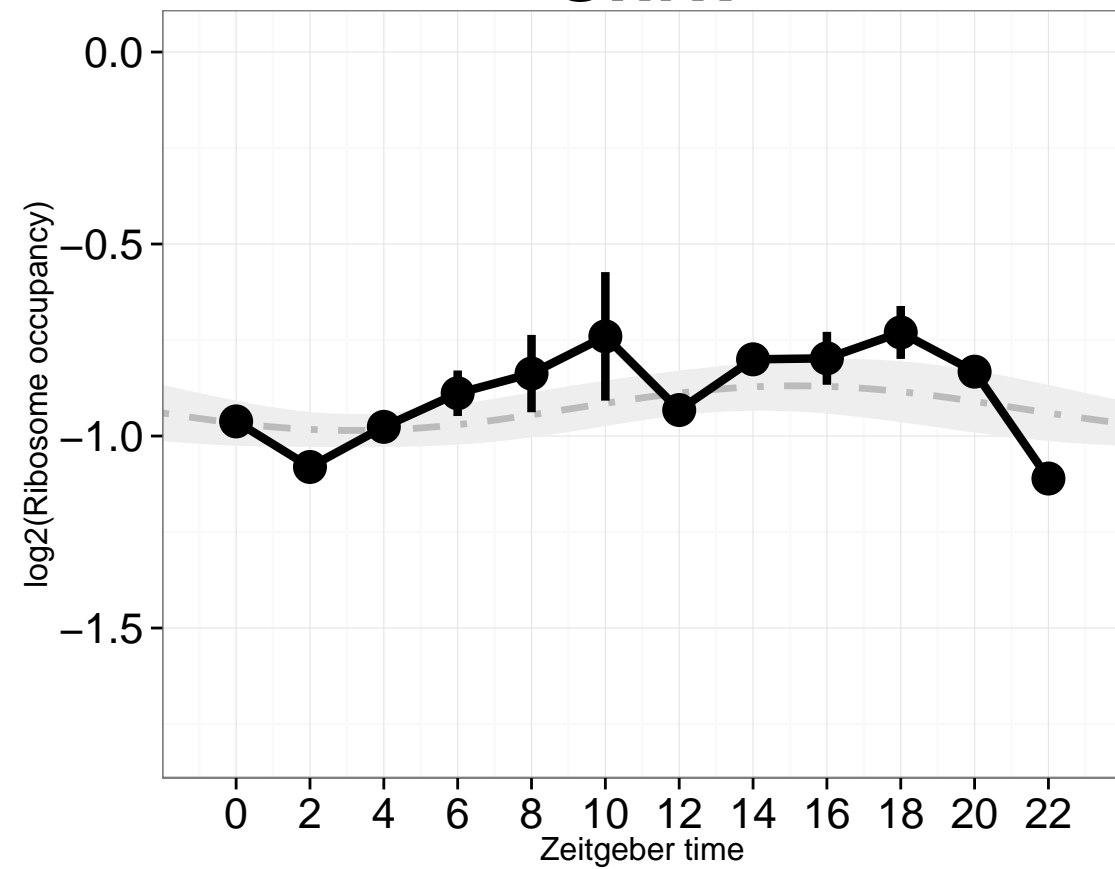

Supplement: SuppDataset_1.zip [file Snrk_set_C.pdf › Supplemental Dataset 1/C-mRNA_nonrhythm_translation_rhyth/Snrk_set_C.pdf]

## Snx24

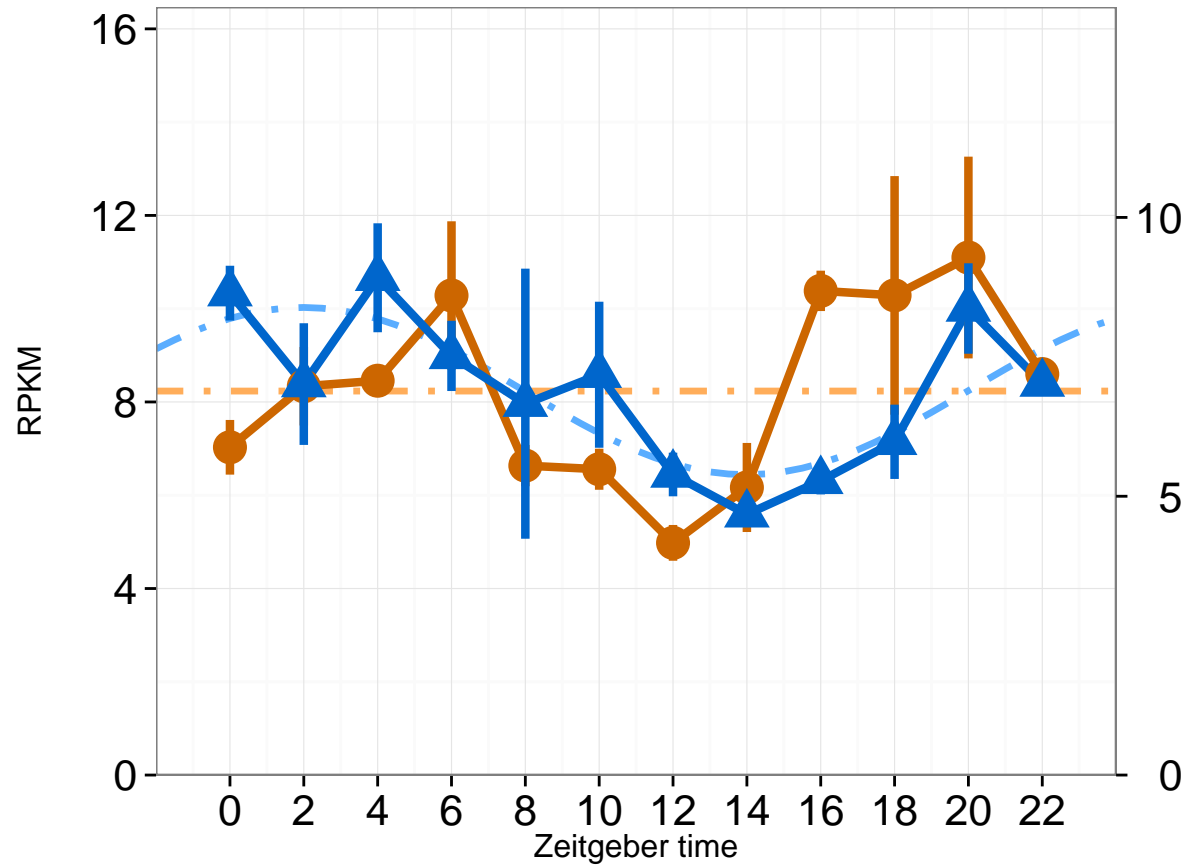

## Snx24

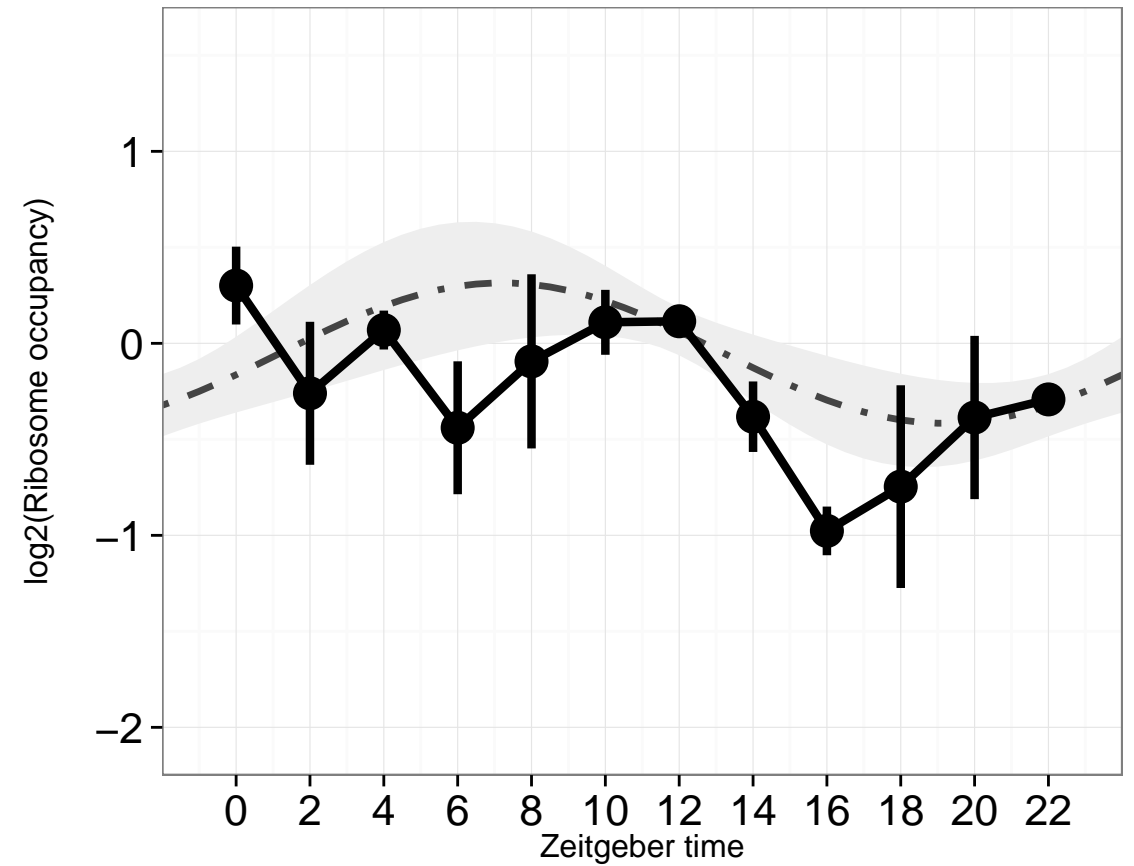

Supplement: SuppDataset_1.zip [file Snx24_set_C.pdf › Supplemental Dataset 1/C-mRNA_nonrhythm_translation_rhyth/Snx24_set_C.pdf]

# Snx8

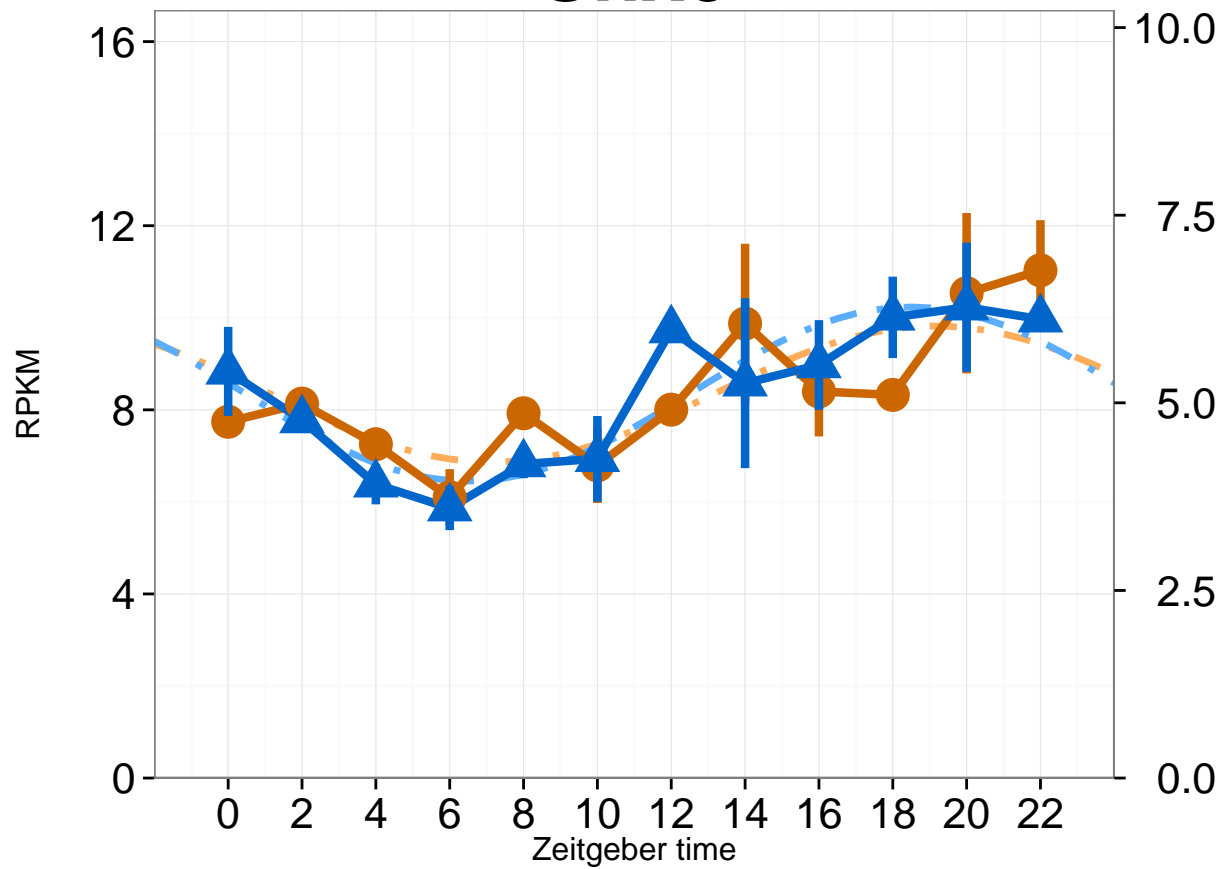

# Snx8

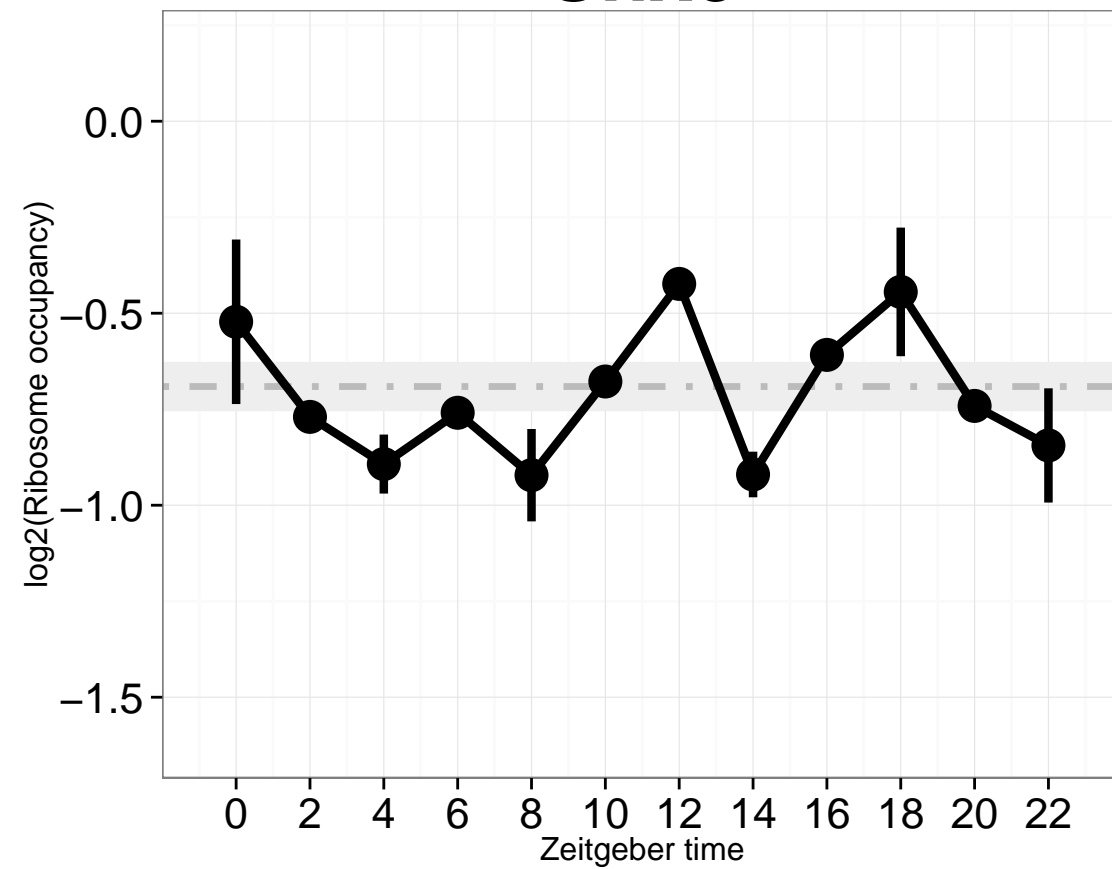

Supplement: SuppDataset_1.zip [file Snx8_set_C.pdf › Supplemental Dataset 1/C-mRNA_nonrhythm_translation_rhyth/Snx8_set_C.pdf]

## Sorbs3

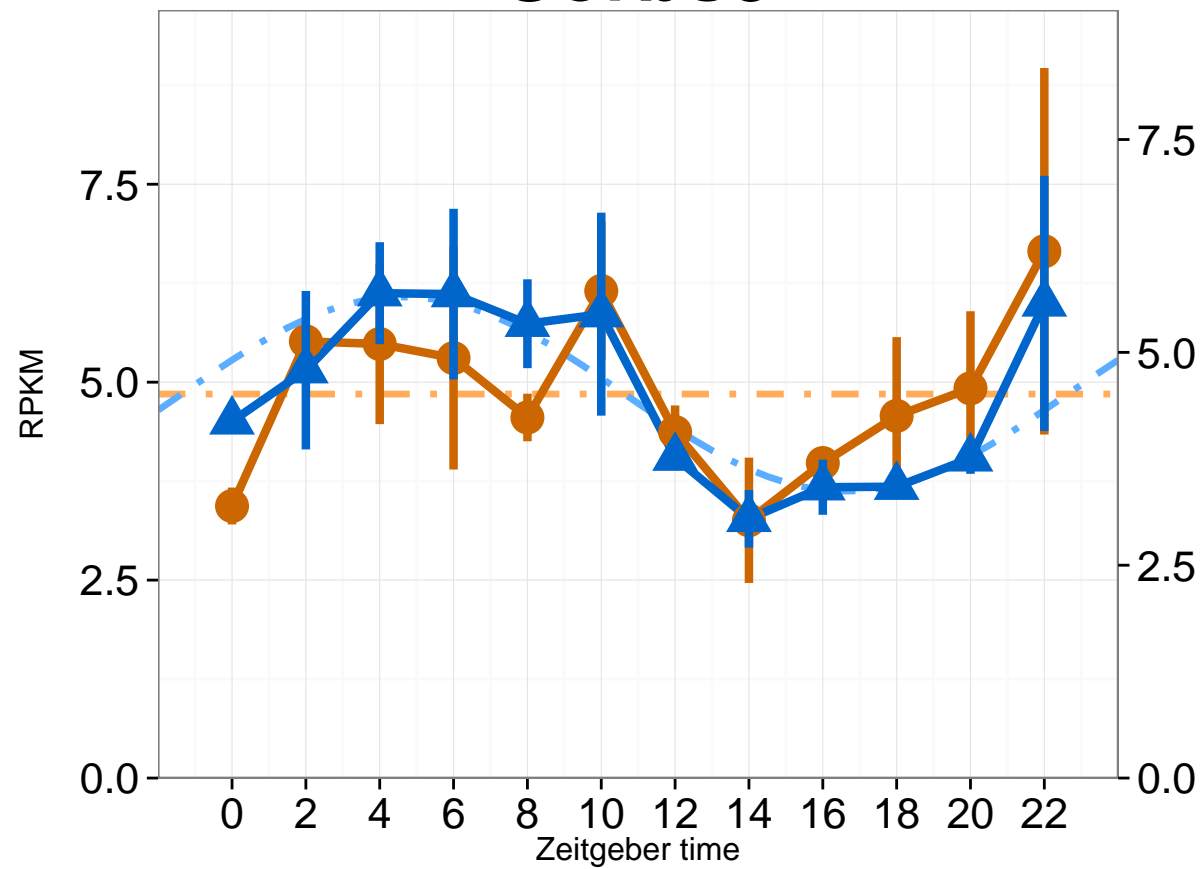

## Sorbs3

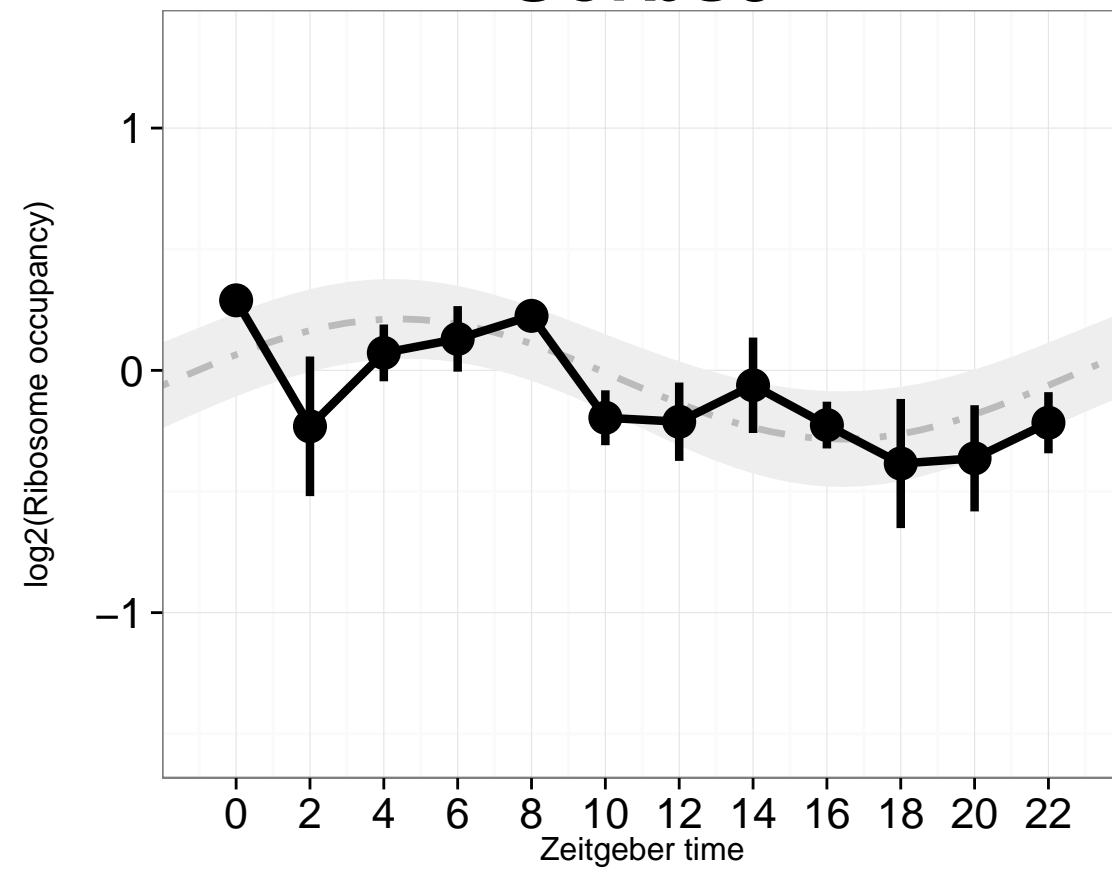

Supplement: SuppDataset_1.zip [file Sorbs3_set_C.pdf › Supplemental Dataset 1/C-mRNA_nonrhythm_translation_rhyth/Sorbs3_set_C.pdf]

## Sord

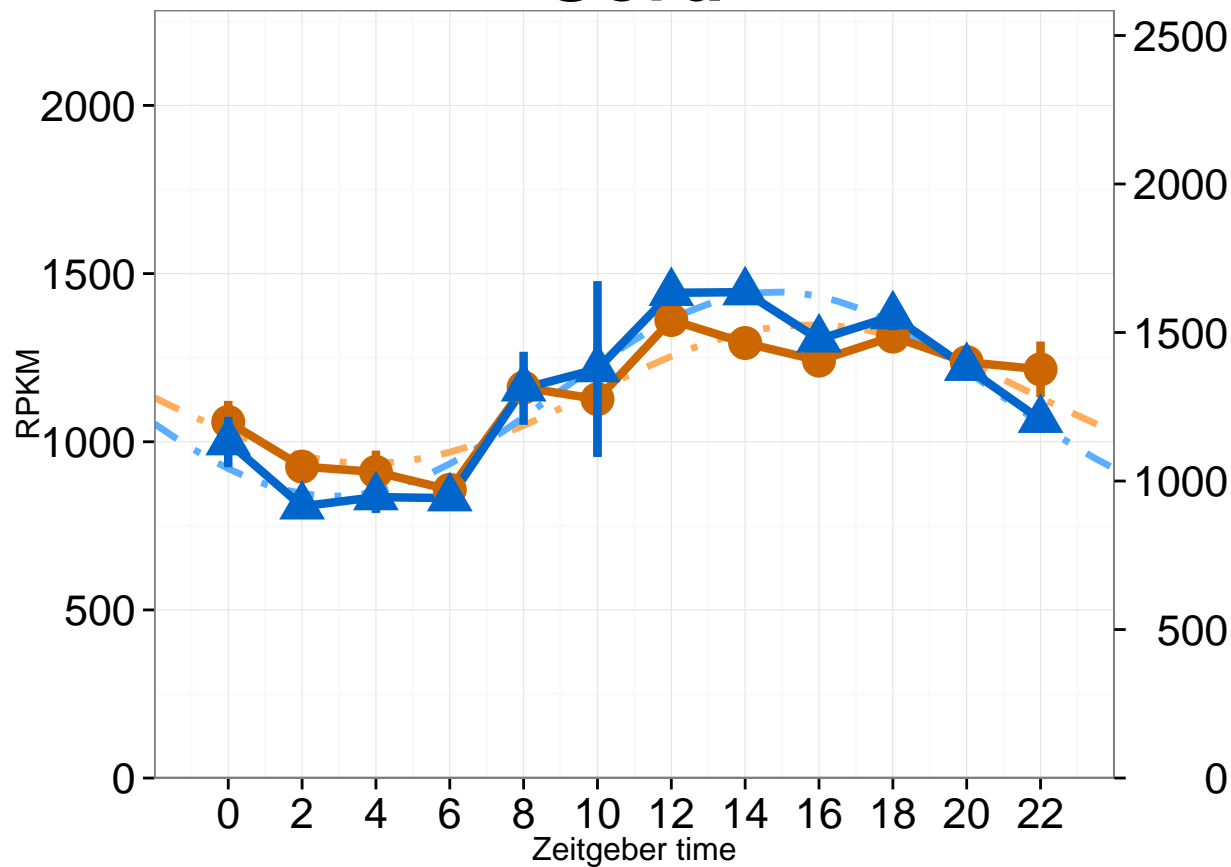

## Sord

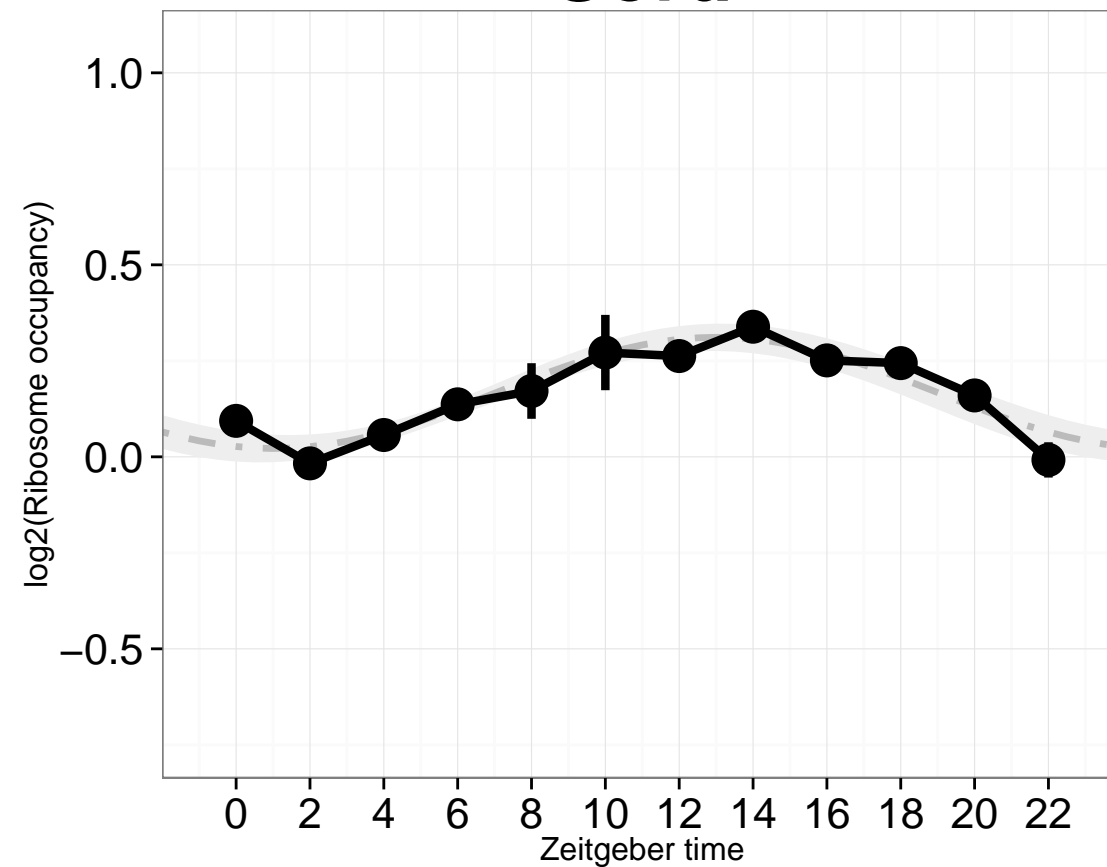

Supplement: SuppDataset_1.zip [file Sord_set_C.pdf › Supplemental Dataset 1/C-mRNA_nonrhythm_translation_rhyth/Sord_set_C.pdf]

## Sox5

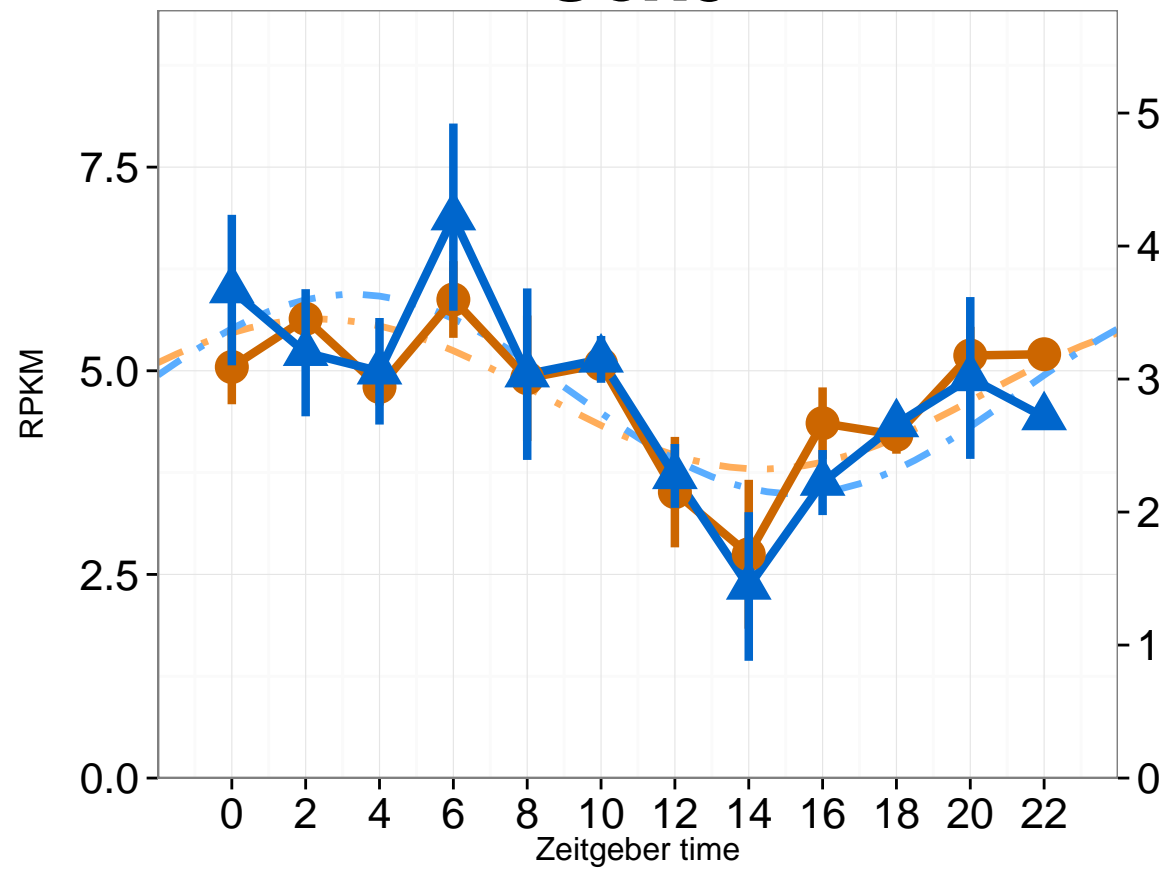

## Sox5

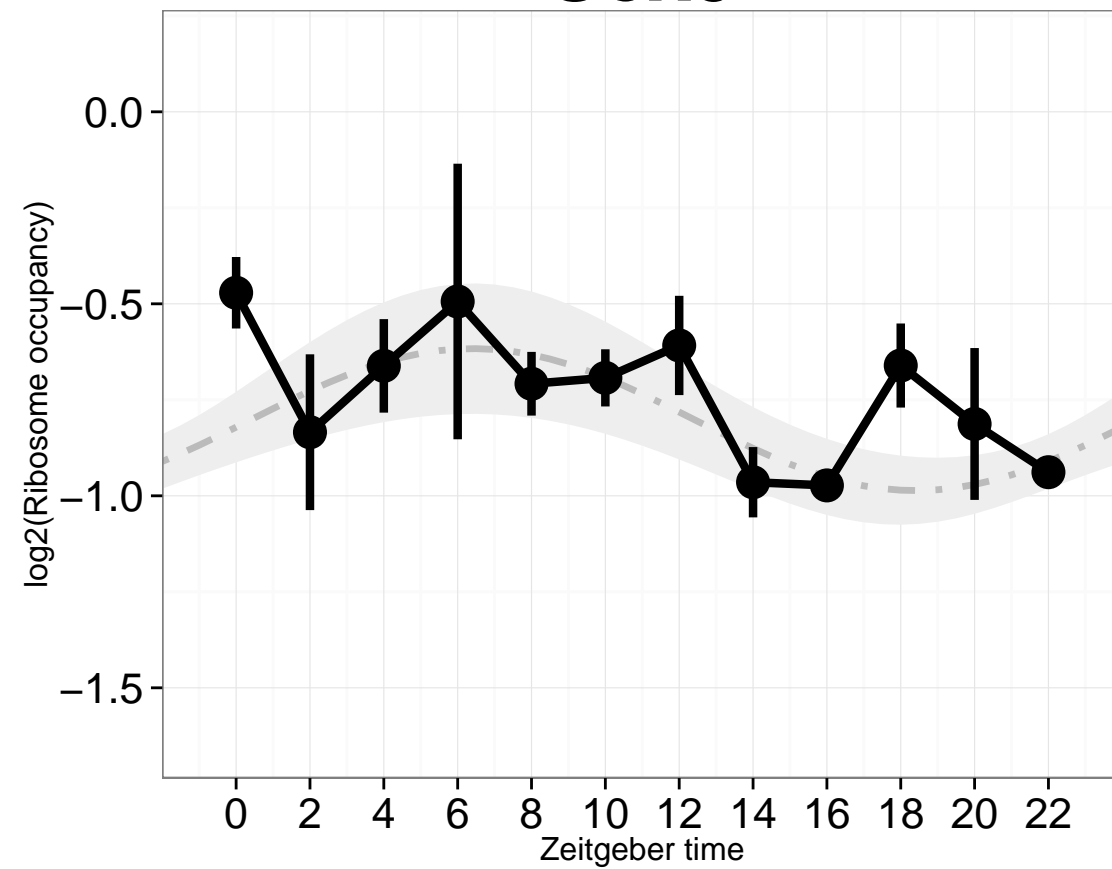

Supplement: SuppDataset_1.zip [file Sox5_set_C.pdf › Supplemental Dataset 1/C-mRNA_nonrhythm_translation_rhyth/Sox5_set_C.pdf]

## Sp2

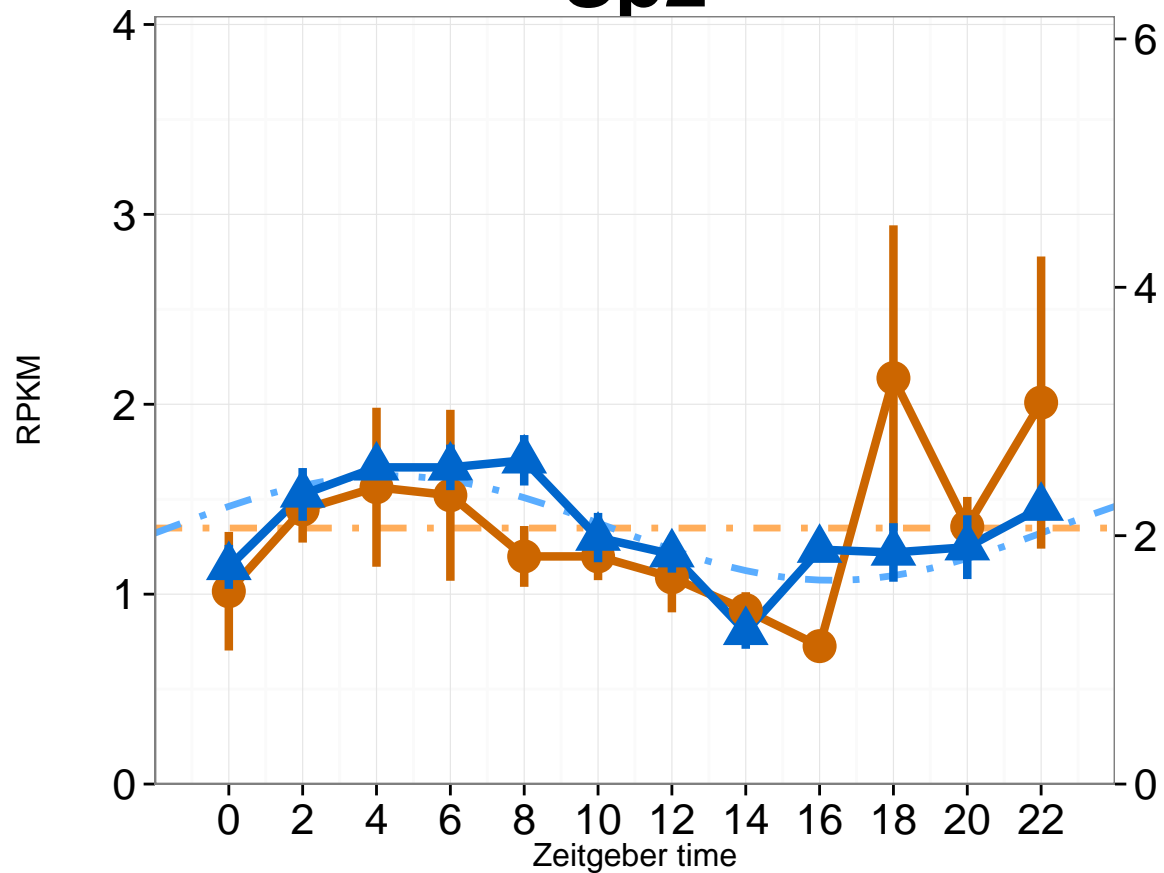

## Sp2

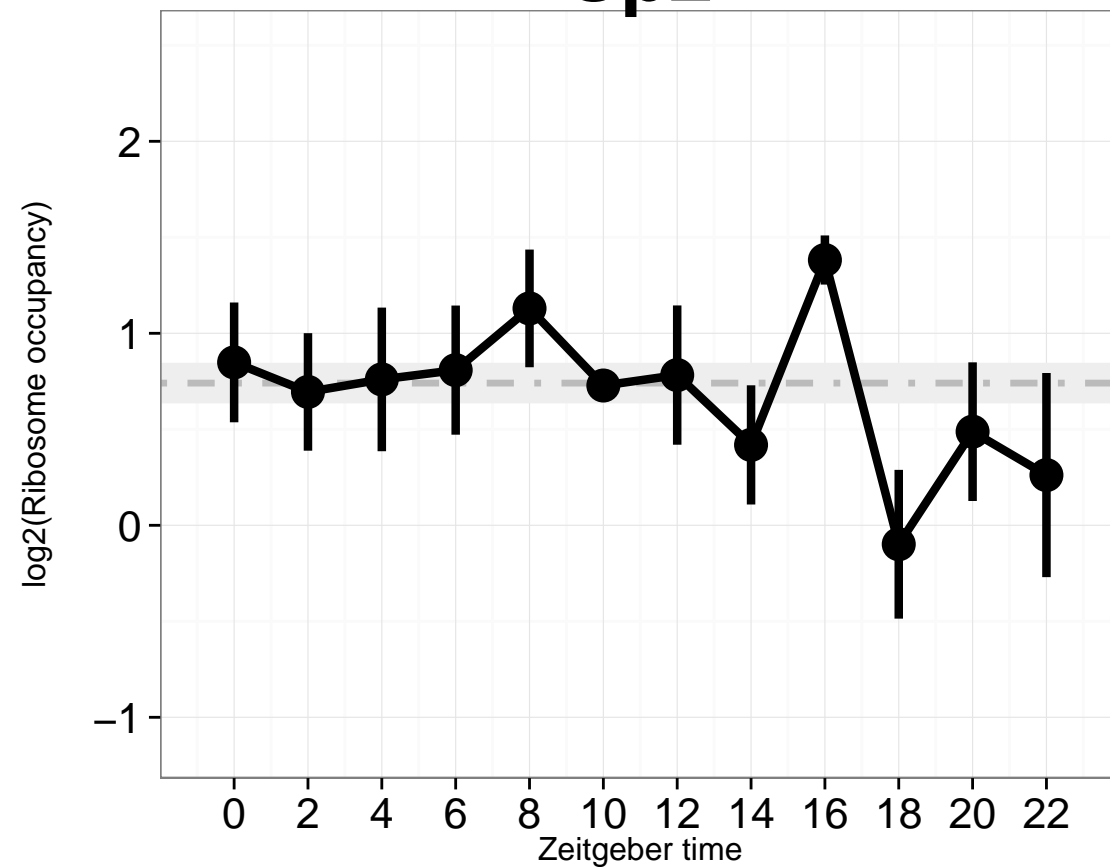

Supplement: SuppDataset_1.zip [file Sp2_set_C.pdf › Supplemental Dataset 1/C-mRNA_nonrhythm_translation_rhyth/Sp2_set_C.pdf]

# Spg21

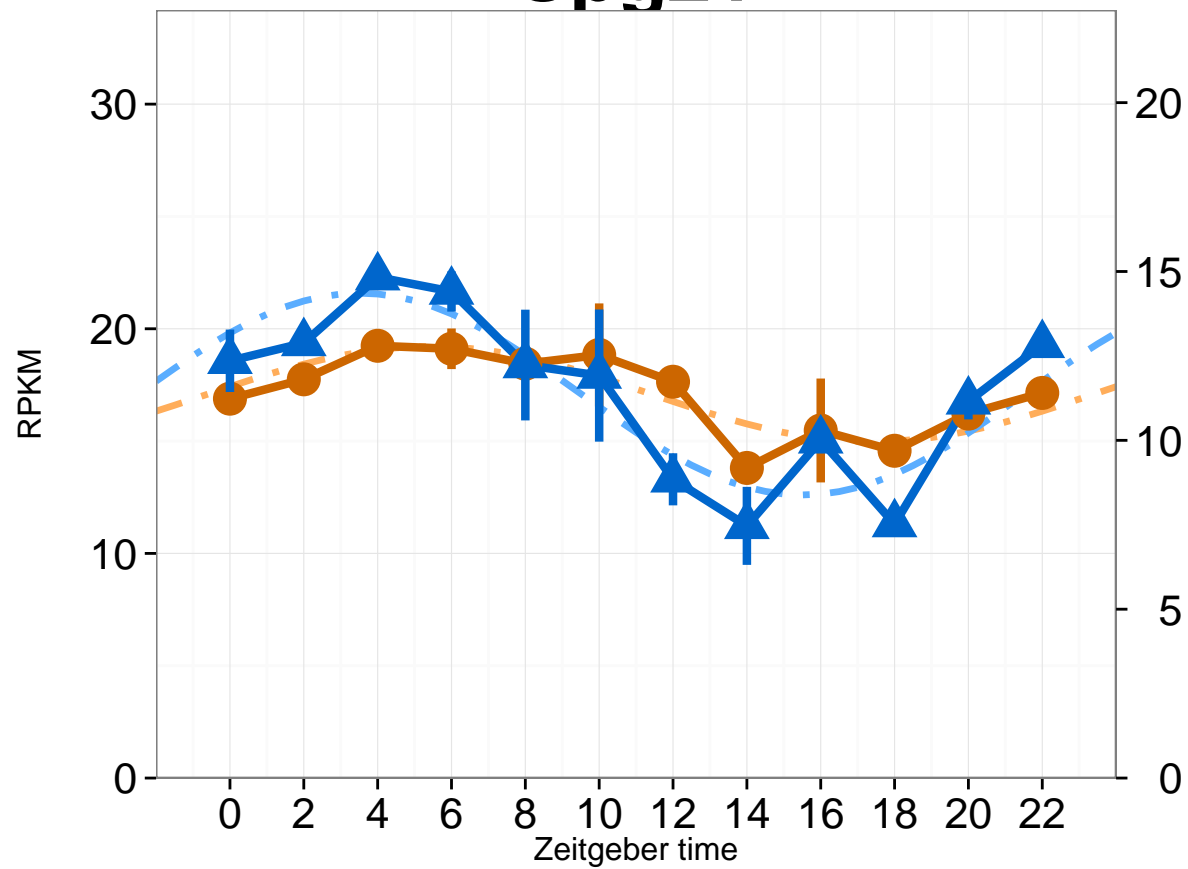

# Spg21

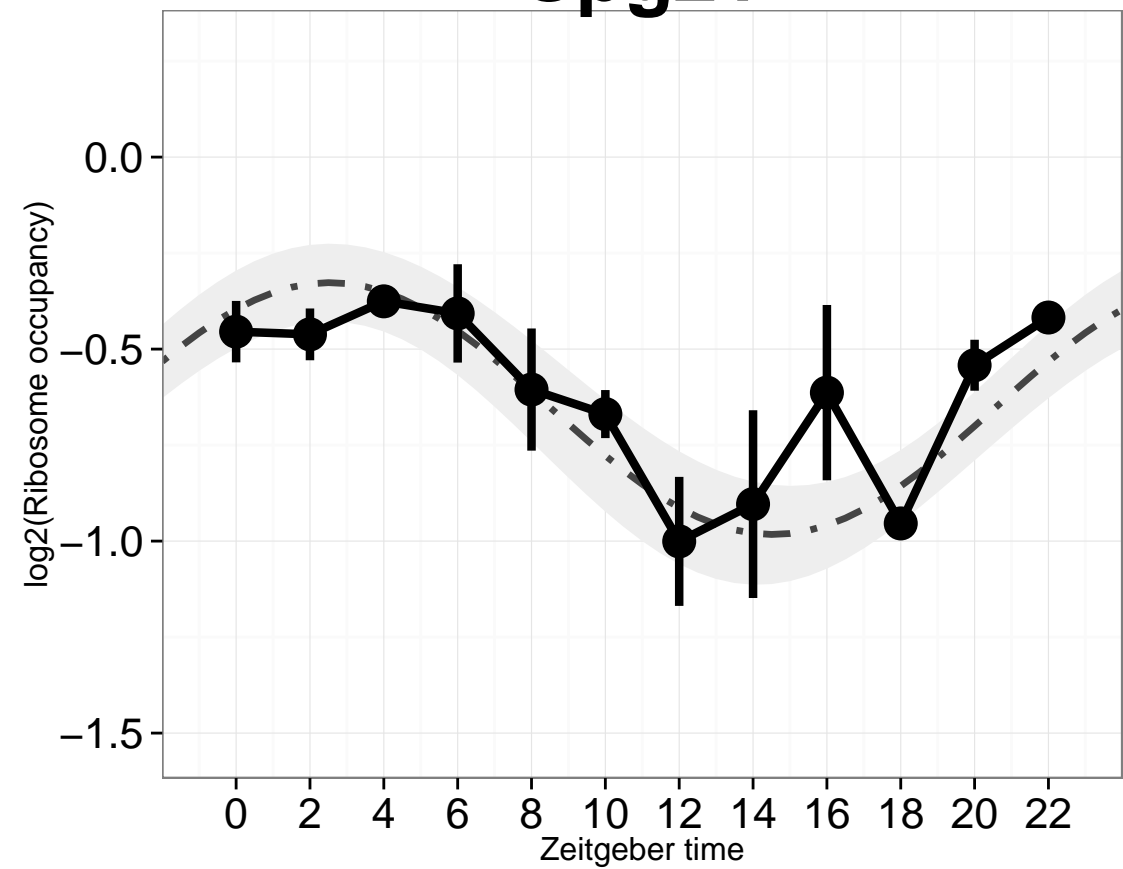

Supplement: SuppDataset_1.zip [file Spg21_set_C.pdf › Supplemental Dataset 1/C-mRNA_nonrhythm_translation_rhyth/Spg21_set_C.pdf]

# Spice1

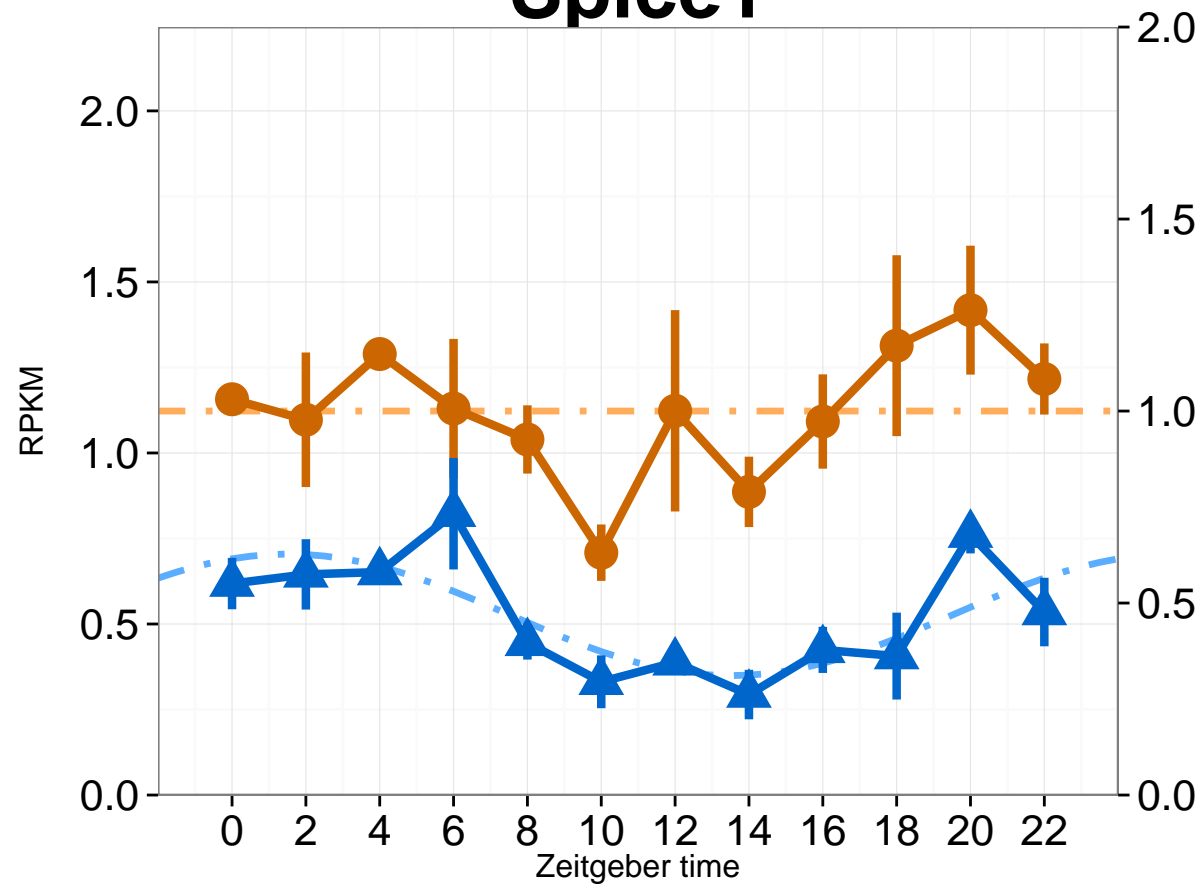

# Spice1

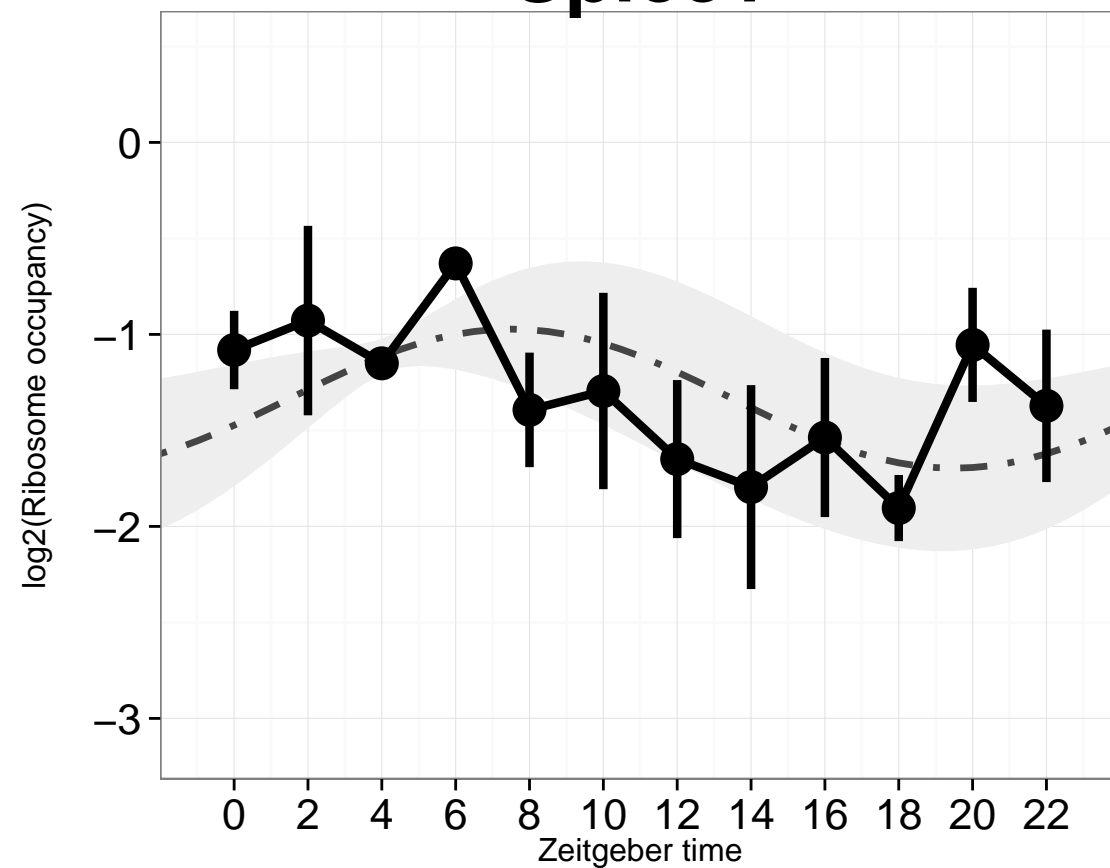

Supplement: SuppDataset_1.zip [file Spice1_set_C.pdf › Supplemental Dataset 1/C-mRNA_nonrhythm_translation_rhyth/Spice1_set_C.pdf]

## Spidr

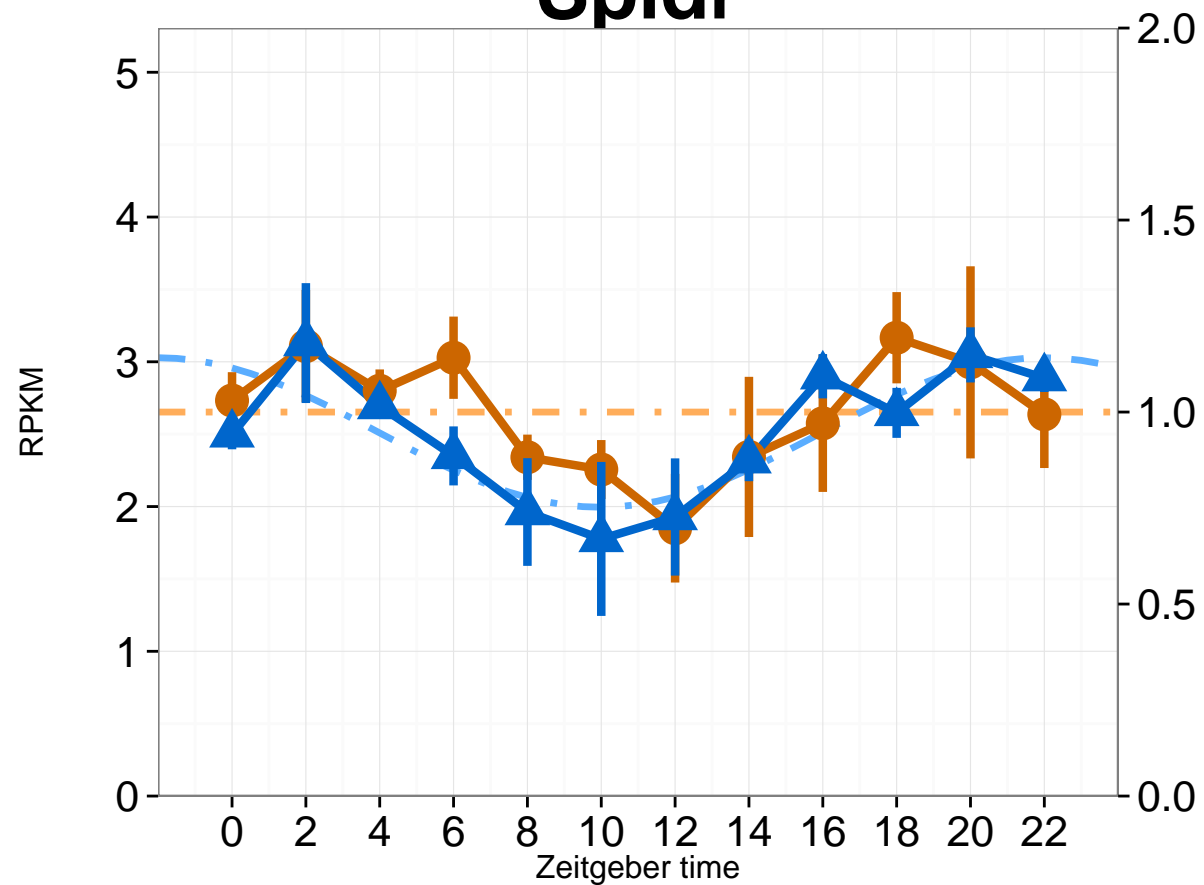

## Spidr

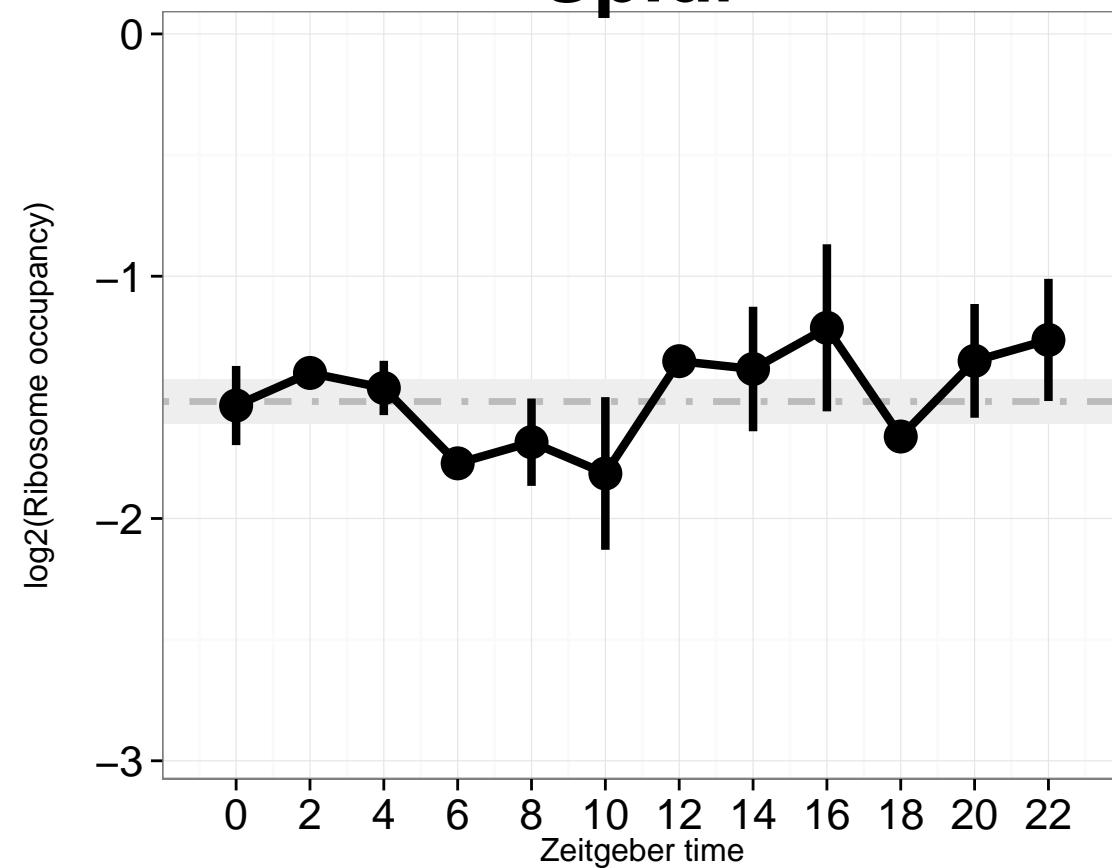

Supplement: SuppDataset_1.zip [file Spidr_set_C.pdf › Supplemental Dataset 1/C-mRNA_nonrhythm_translation_rhyth/Spidr_set_C.pdf]

# Spon1

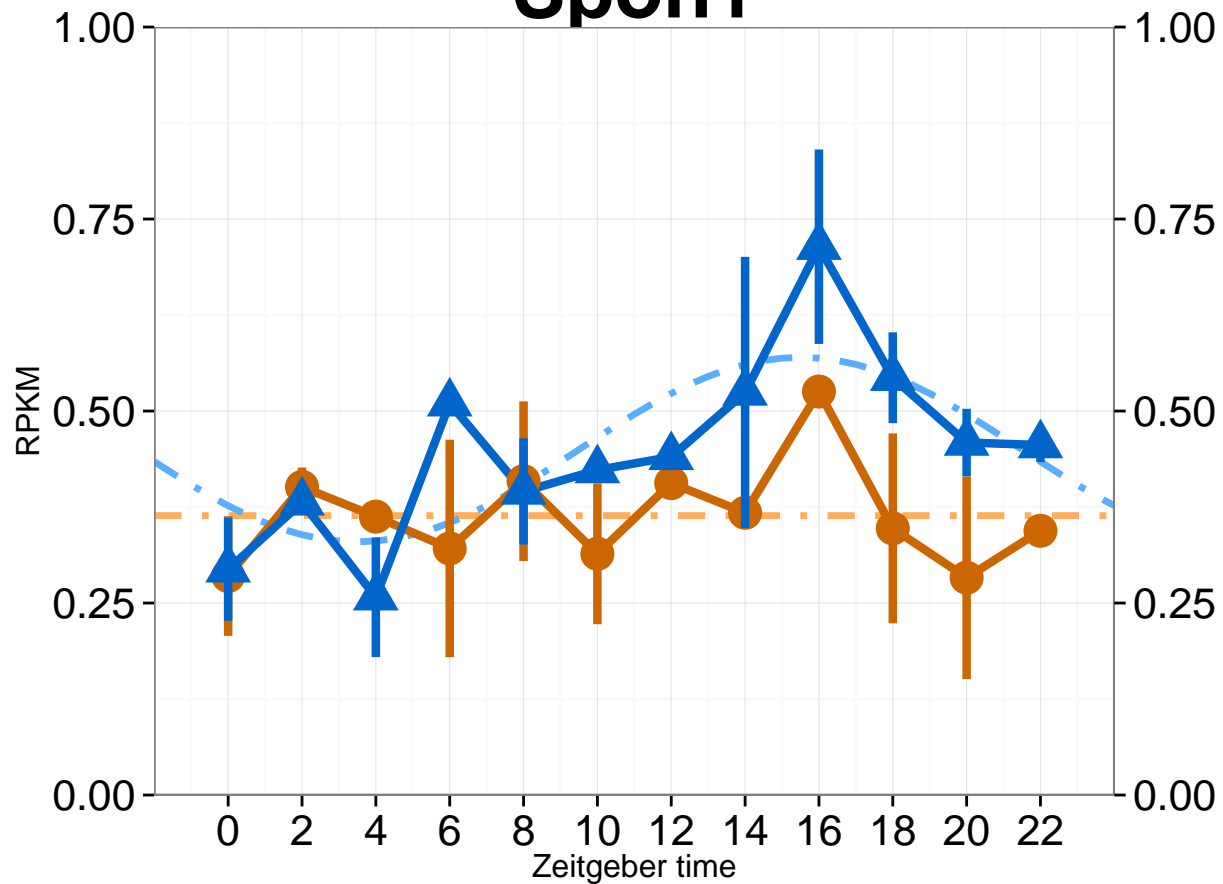

# Spon1

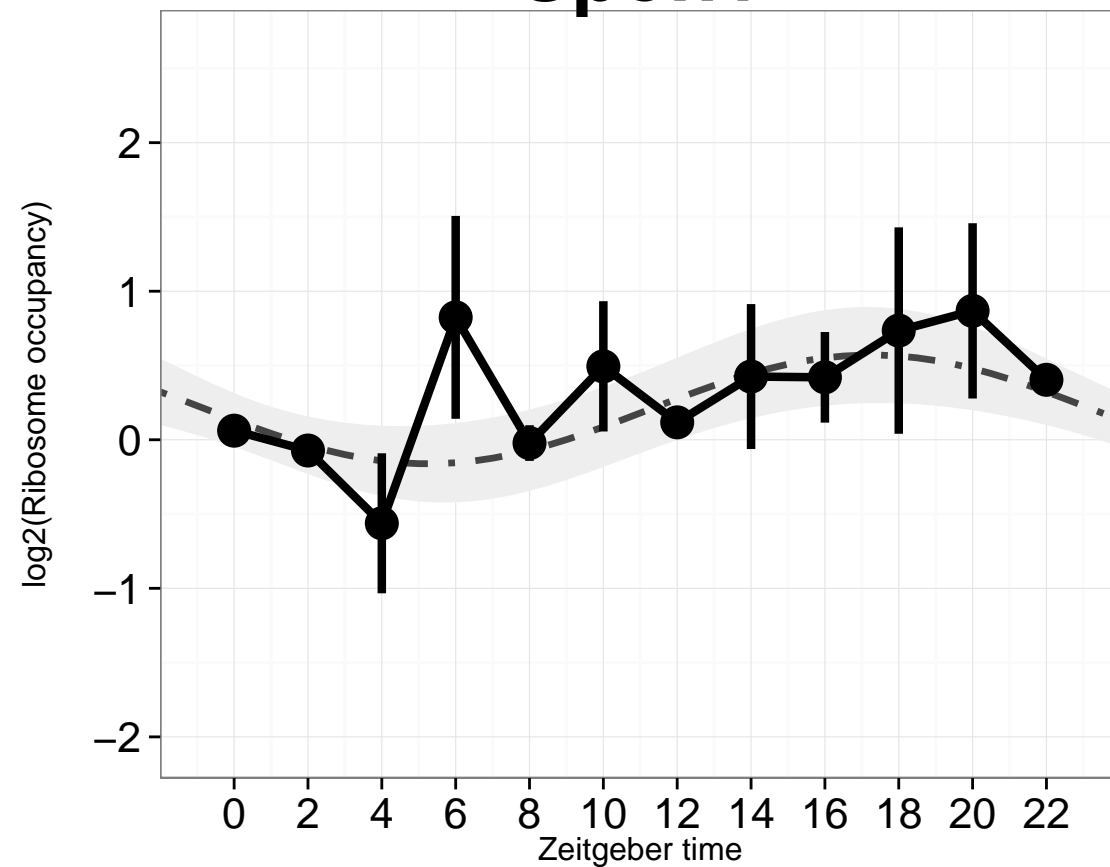

Supplement: SuppDataset_1.zip [file Spon1_set_C.pdf › Supplemental Dataset 1/C-mRNA_nonrhythm_translation_rhyth/Spon1_set_C.pdf]

# Spred1

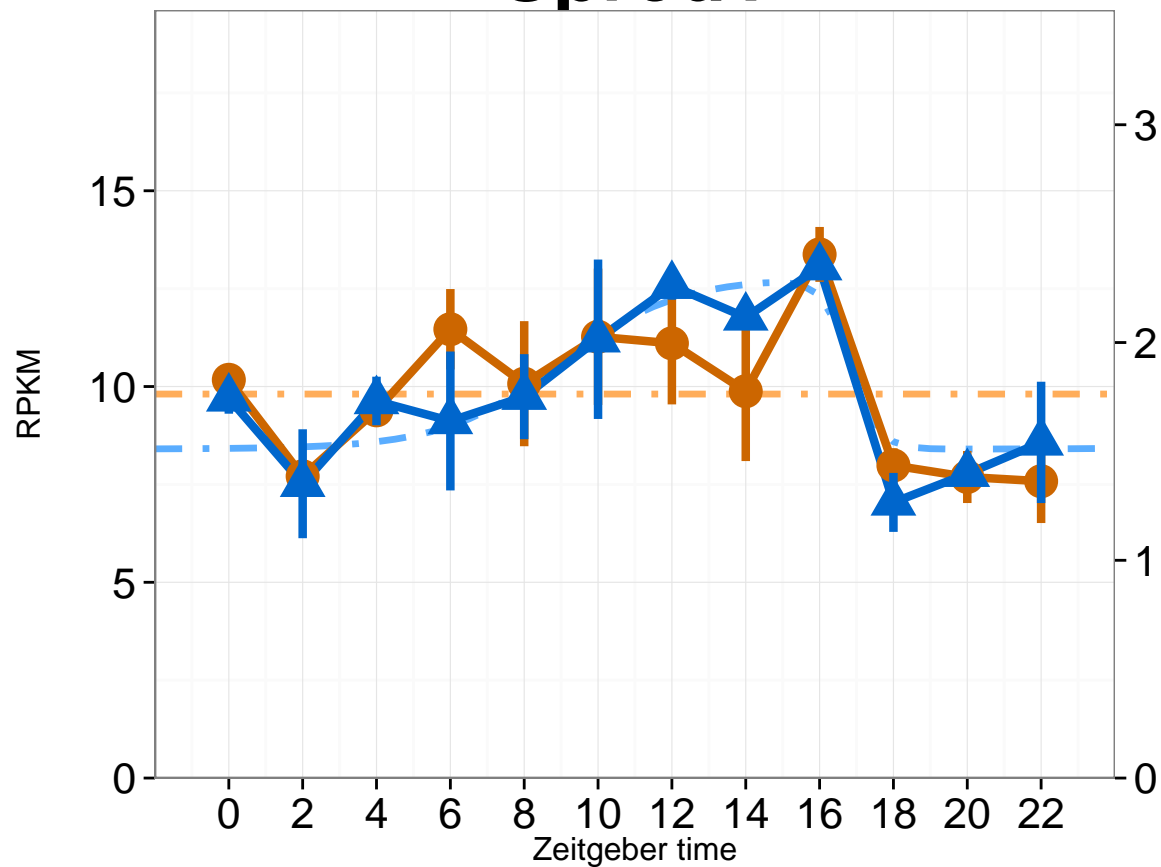

# Spred1

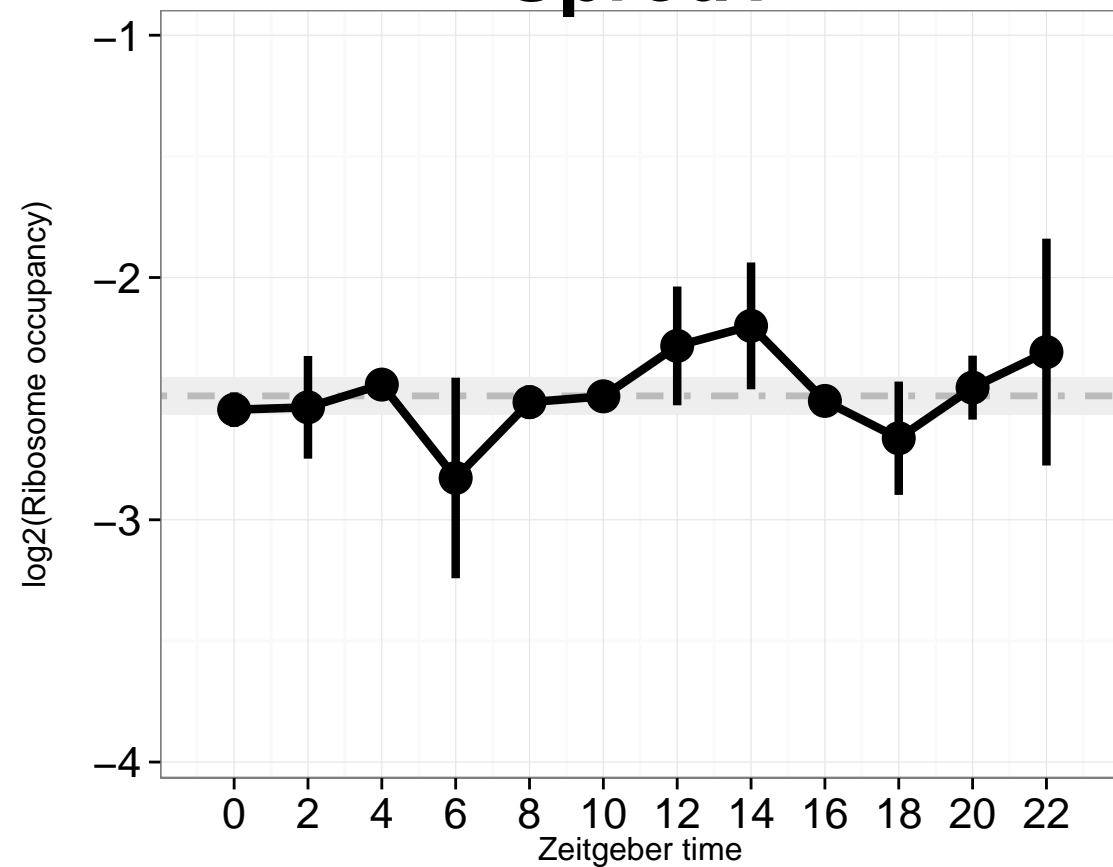

Supplement: SuppDataset_1.zip [file Spred1_set_C.pdf › Supplemental Dataset 1/C-mRNA_nonrhythm_translation_rhyth/Spred1_set_C.pdf]

## Spsb2

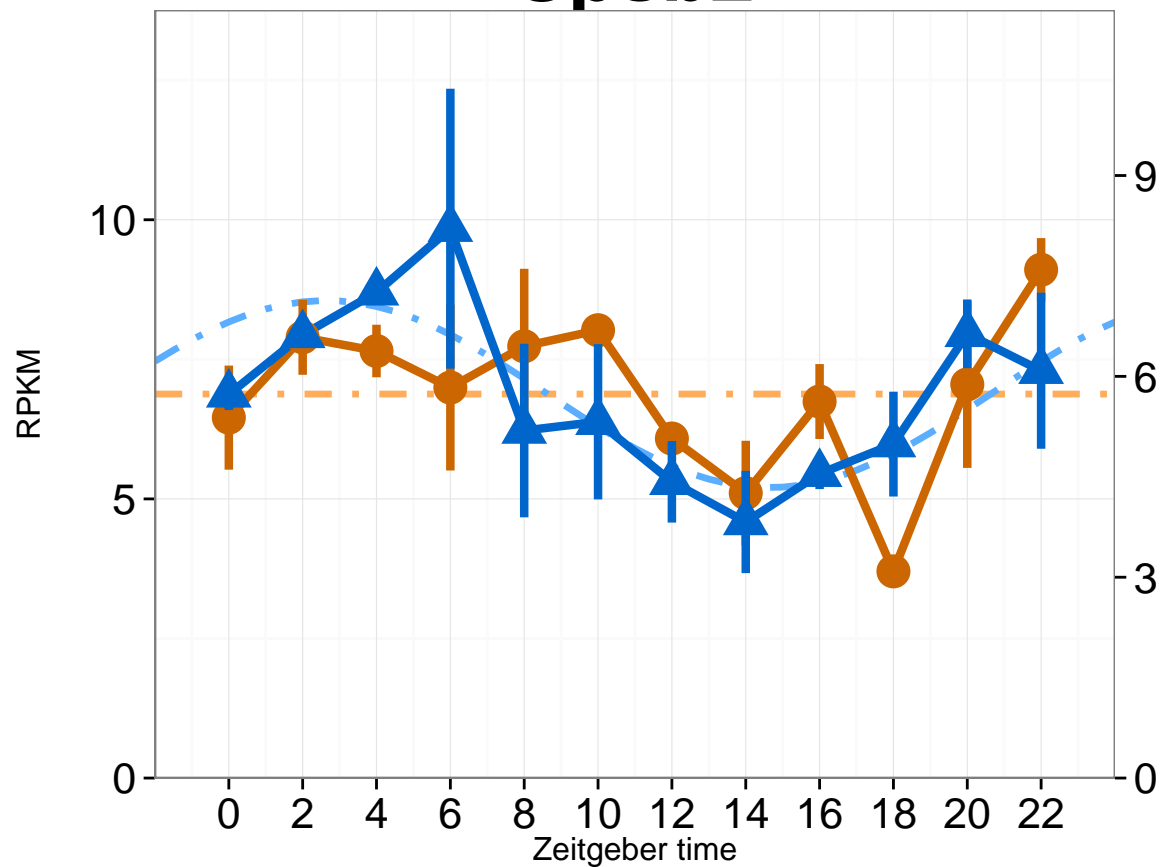

## Spsb2

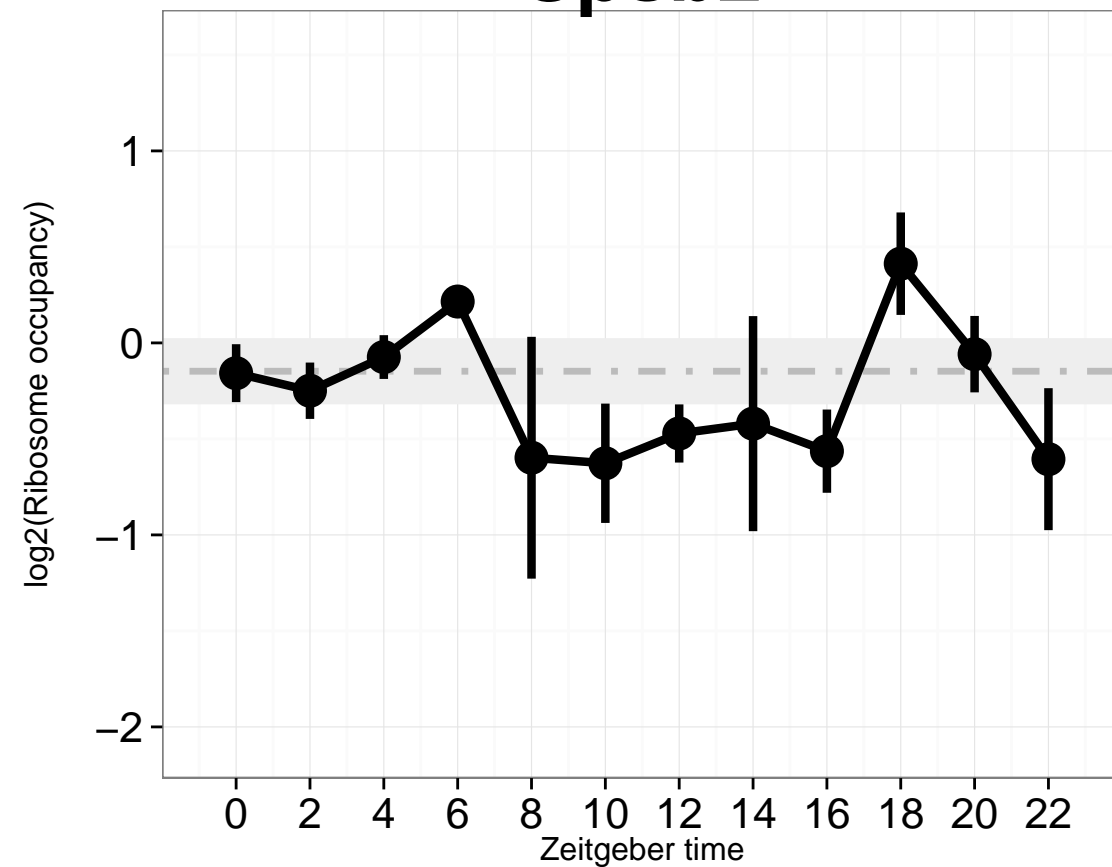

Supplement: SuppDataset_1.zip [file Spsb2_set_C.pdf › Supplemental Dataset 1/C-mRNA_nonrhythm_translation_rhyth/Spsb2_set_C.pdf]

# Sptbn2

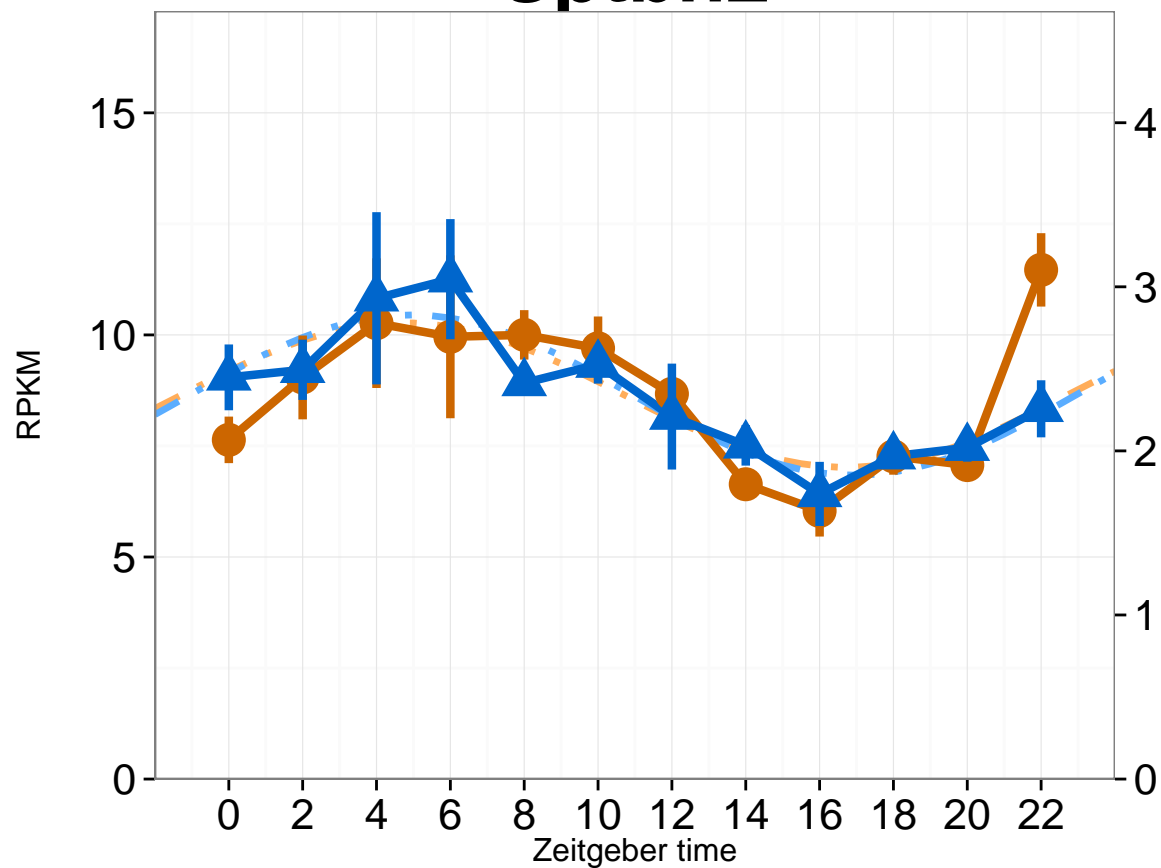

# Sptbn2

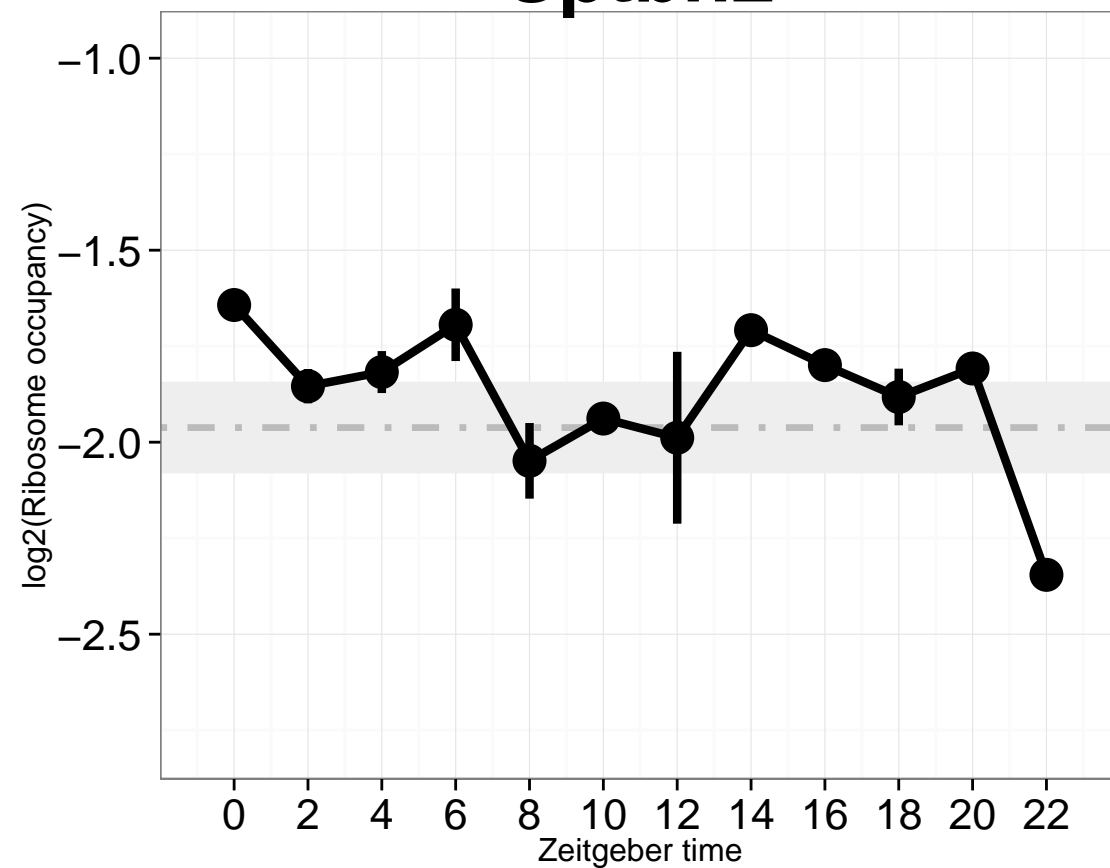

Supplement: SuppDataset_1.zip [file Sptbn2_set_C.pdf › Supplemental Dataset 1/C-mRNA_nonrhythm_translation_rhyth/Sptbn2_set_C.pdf]

## Sqle

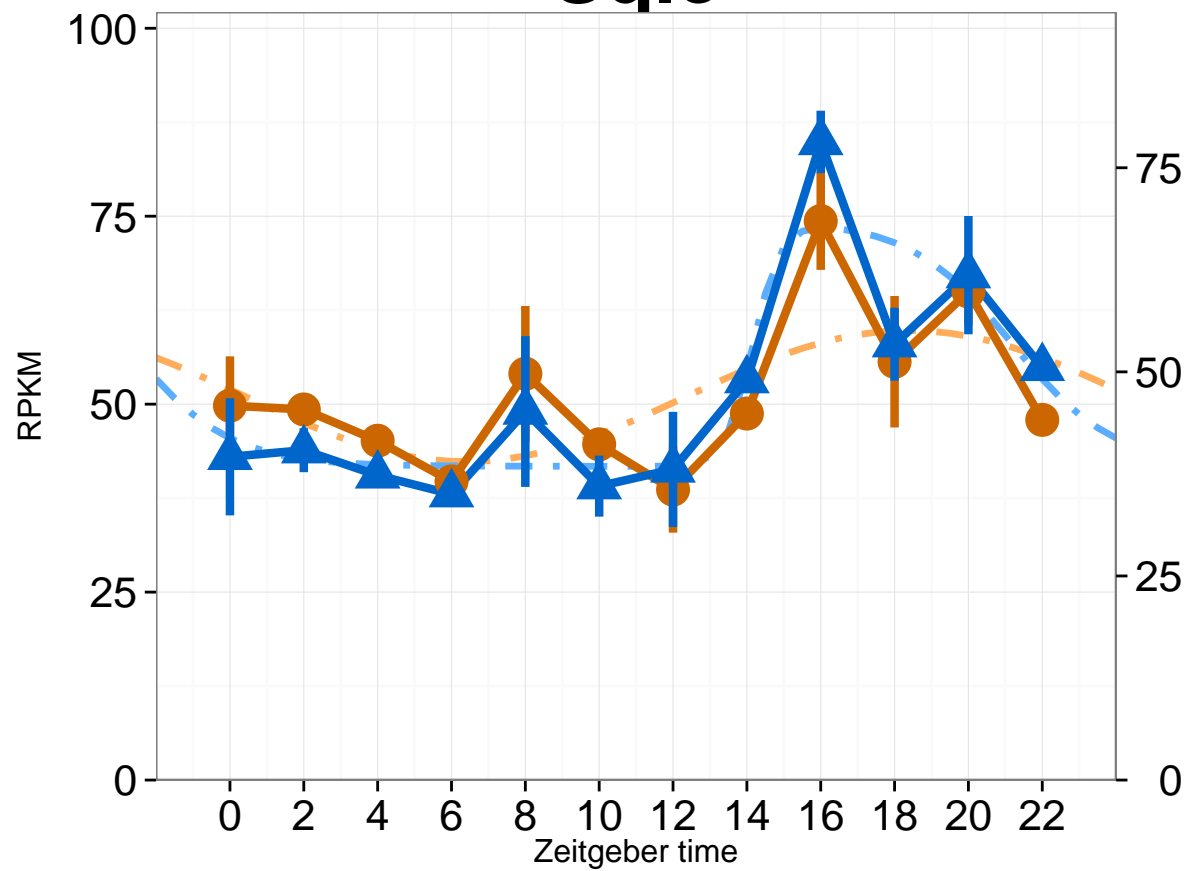

## Sqle

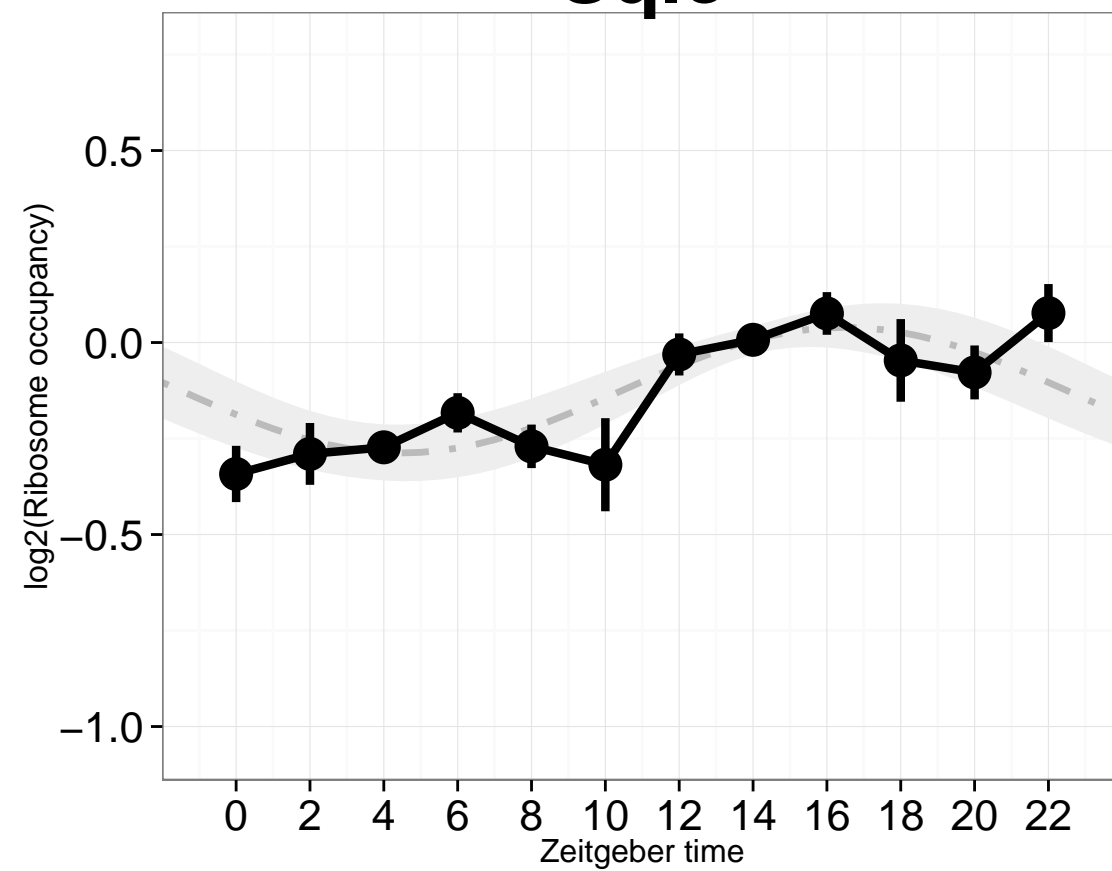

Supplement: SuppDataset_1.zip [file Sqle_set_C.pdf › Supplemental Dataset 1/C-mRNA_nonrhythm_translation_rhyth/Sqle_set_C.pdf]

# Srcap

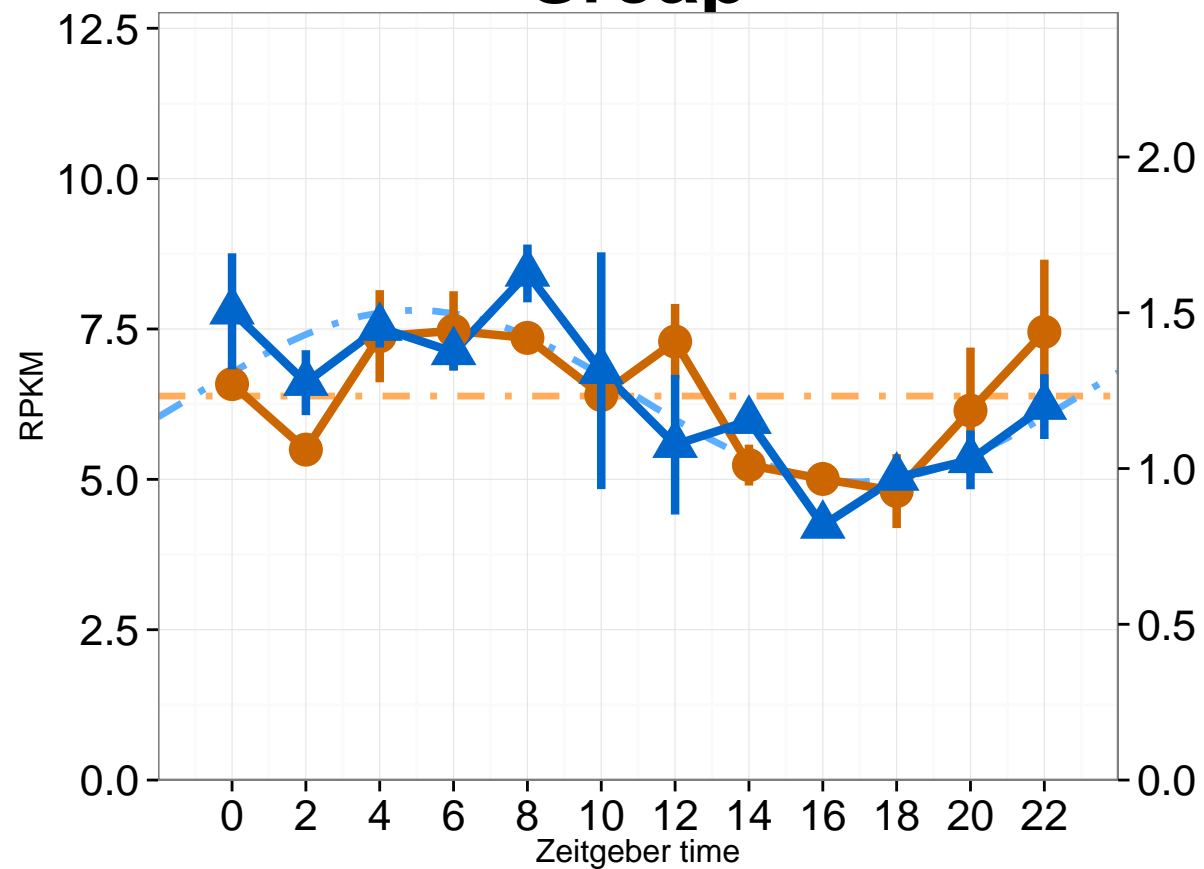

# Srcap

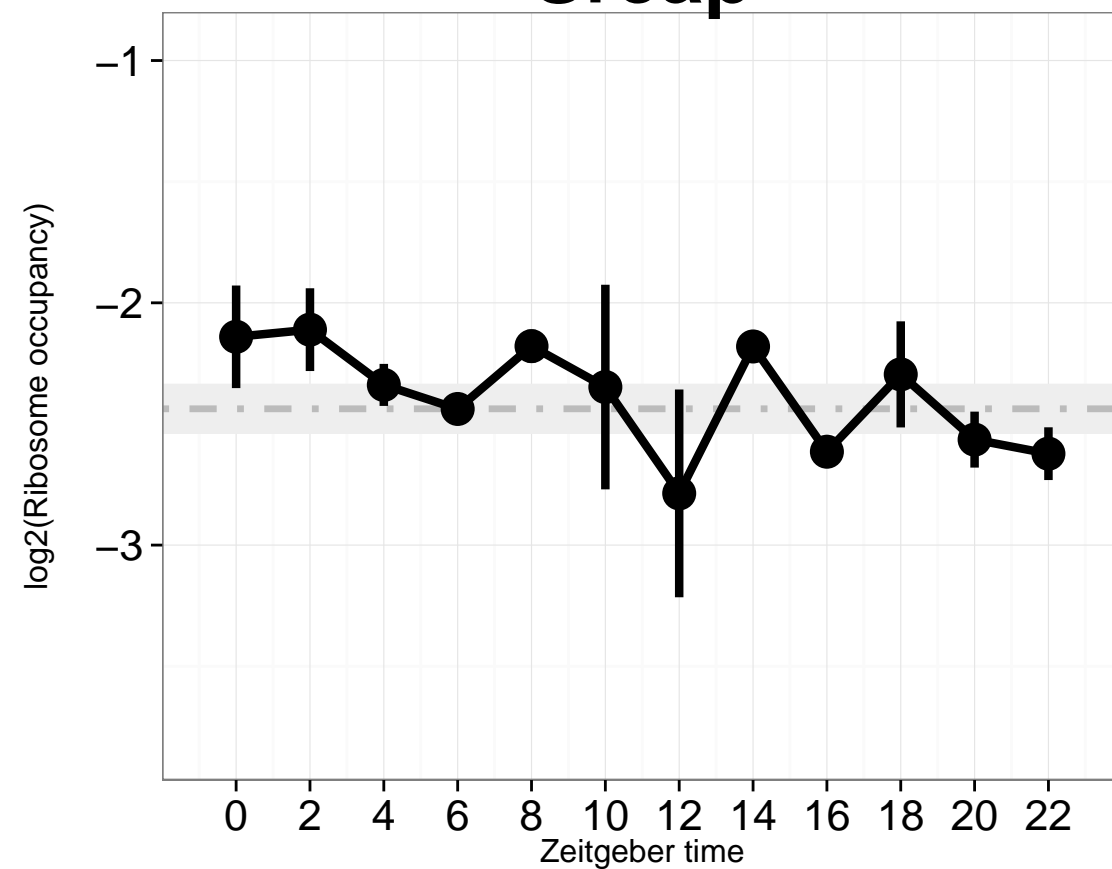

Supplement: SuppDataset_1.zip [file Srcap_set_C.pdf › Supplemental Dataset 1/C-mRNA_nonrhythm_translation_rhyth/Srcap_set_C.pdf]

## Srek1

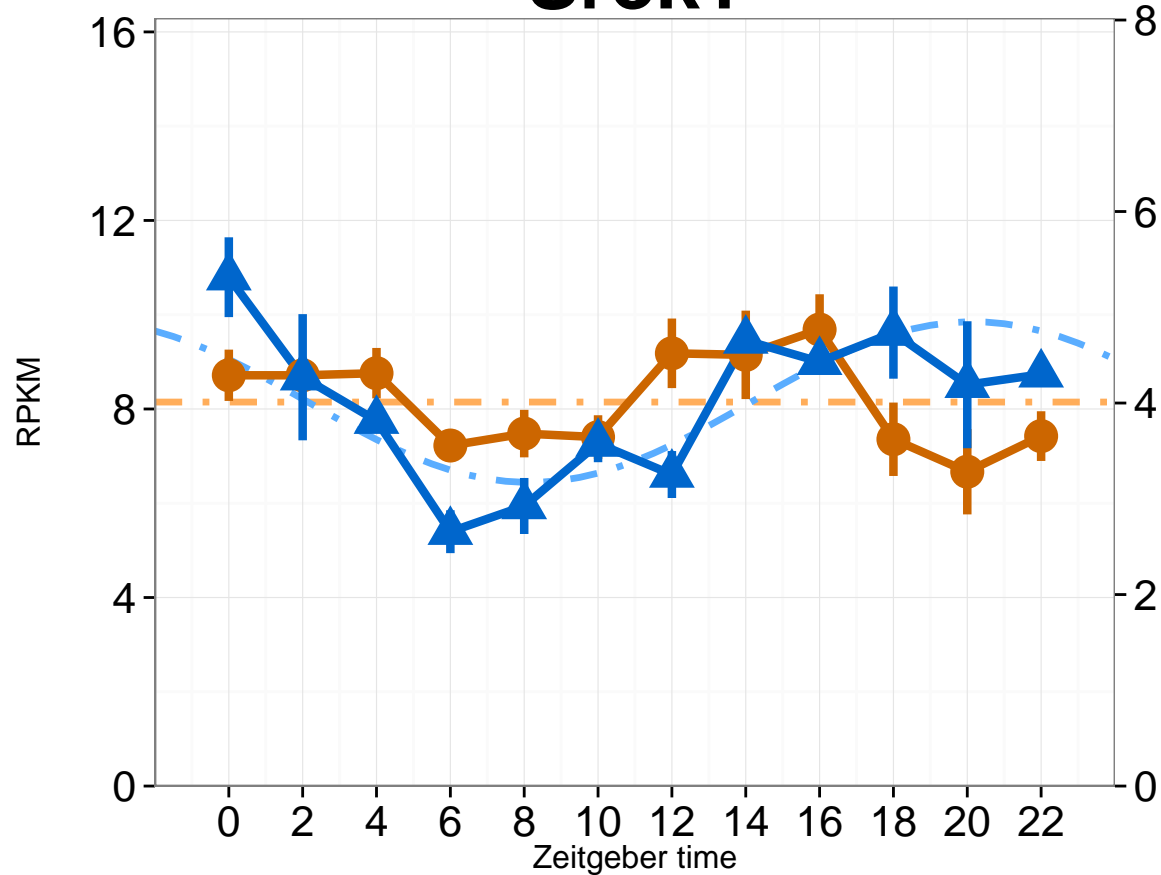

## Srek1

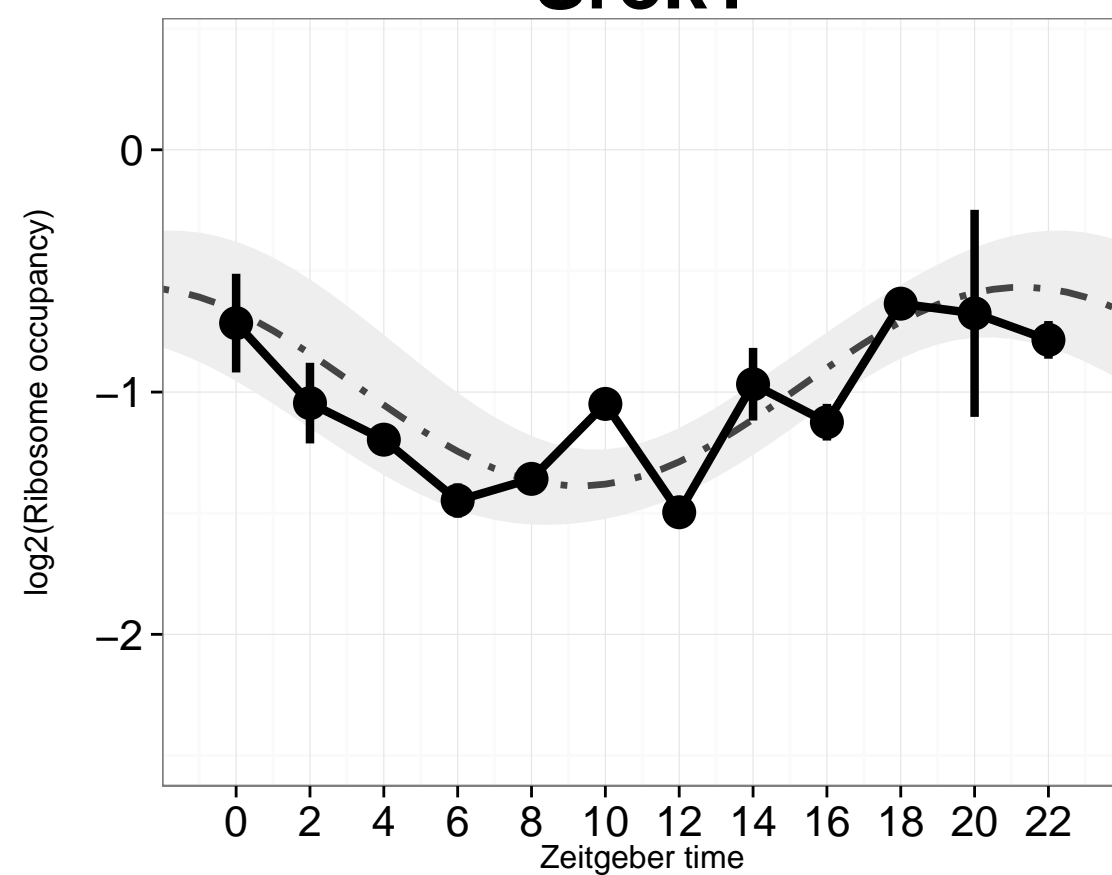

Supplement: SuppDataset_1.zip [file Srek1_set_C.pdf › Supplemental Dataset 1/C-mRNA_nonrhythm_translation_rhyth/Srek1_set_C.pdf]

# St6galnac3

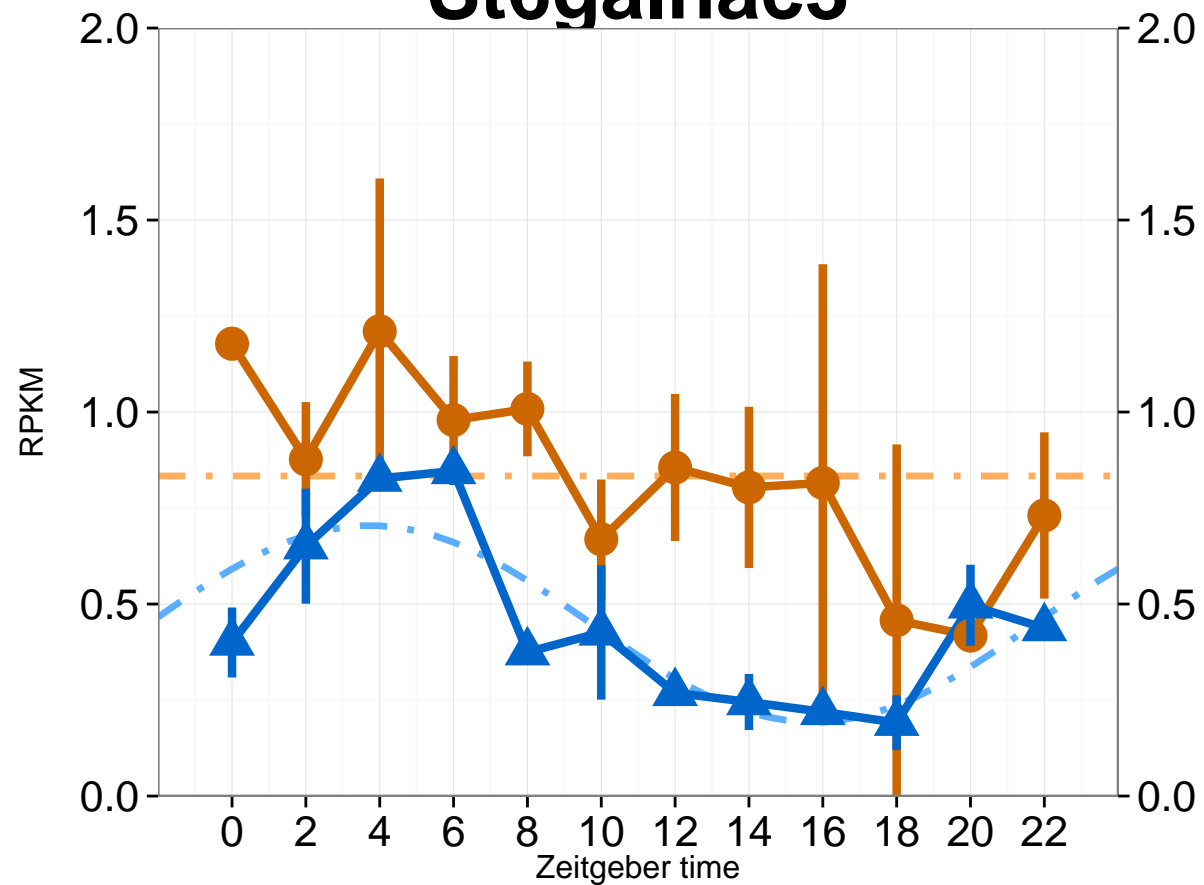

# St6galnac3

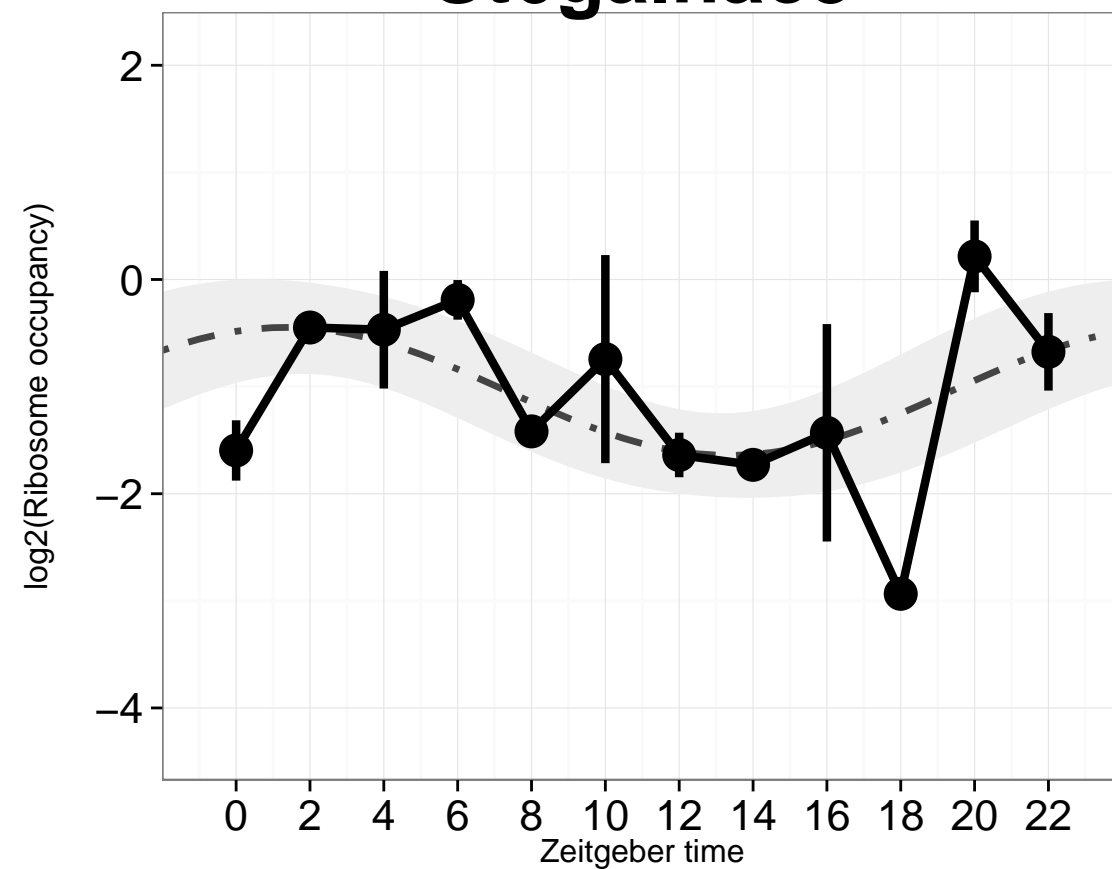

Supplement: SuppDataset_1.zip [file St6galnac3_set_C.pdf › Supplemental Dataset 1/C-mRNA_nonrhythm_translation_rhyth/St6galnac3_set_C.pdf]

## Stard5

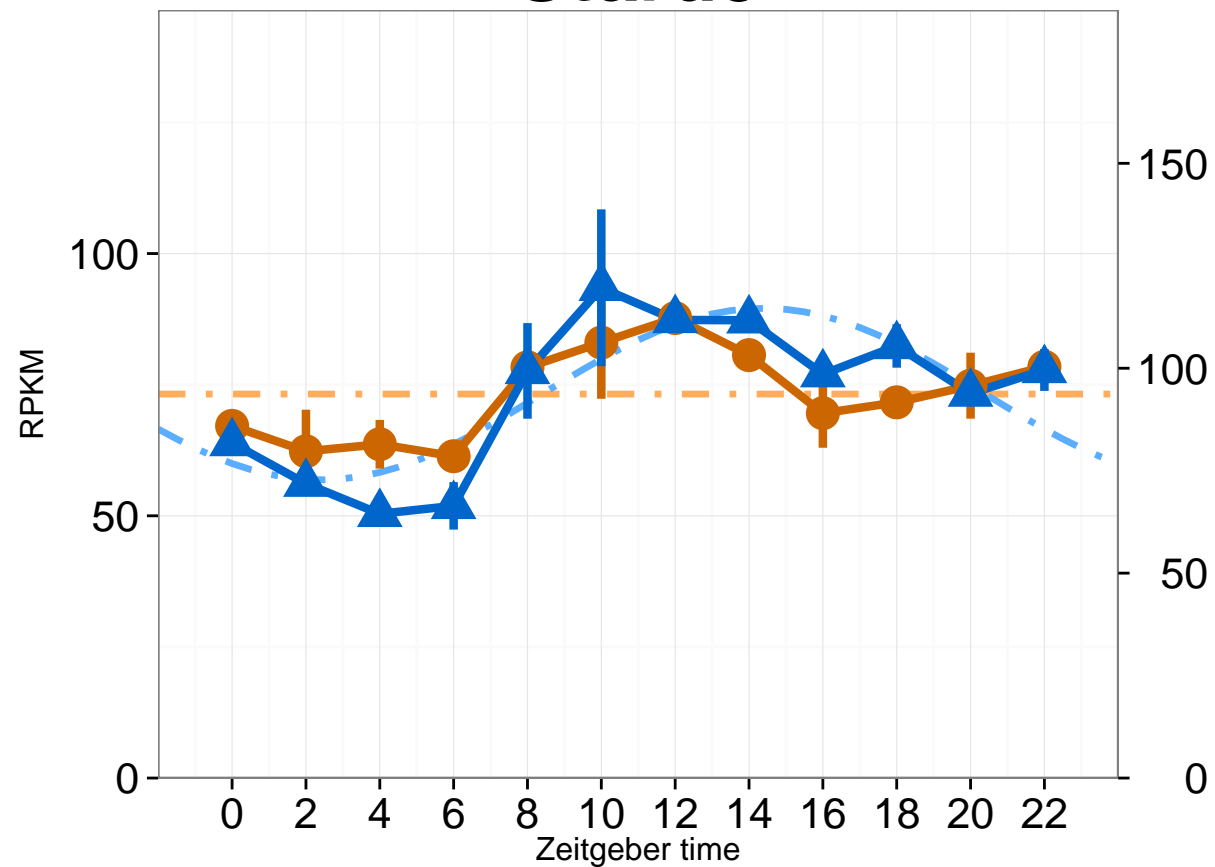

## Stard5

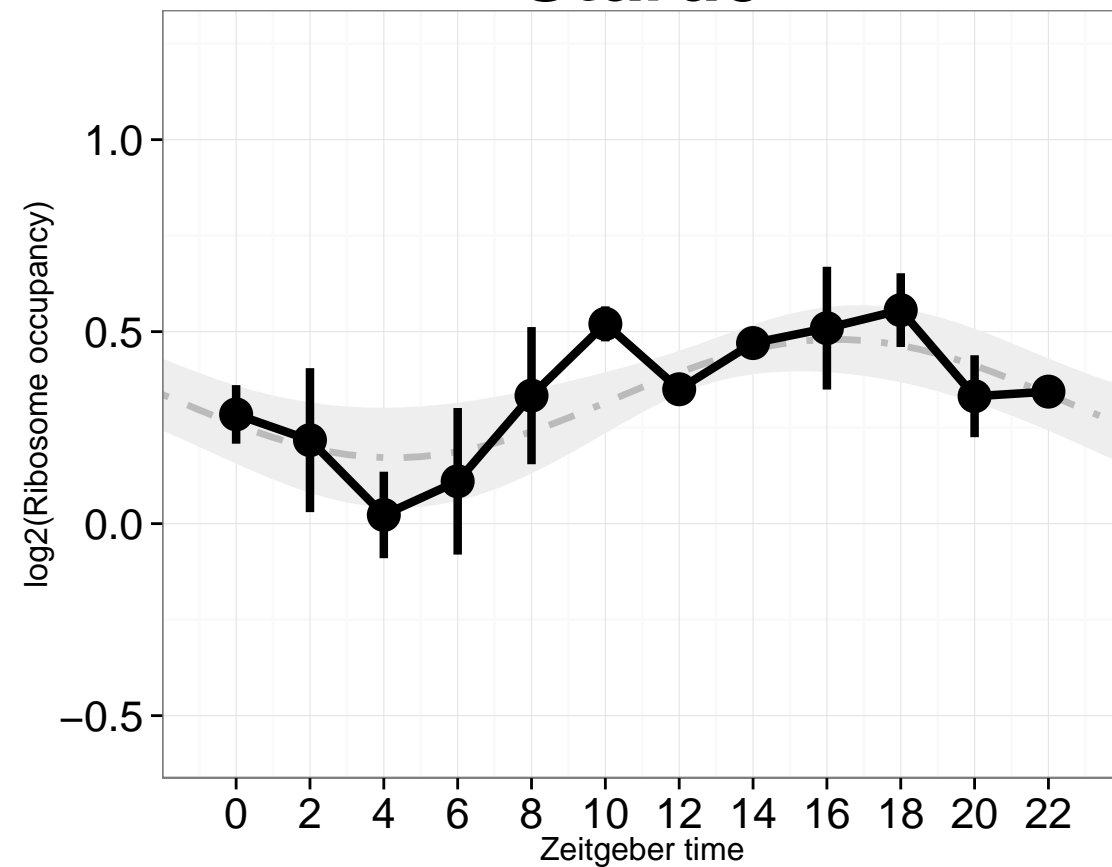

Supplement: SuppDataset_1.zip [file Stard5_set_C.pdf › Supplemental Dataset 1/C-mRNA_nonrhythm_translation_rhyth/Stard5_set_C.pdf]

# Stard9

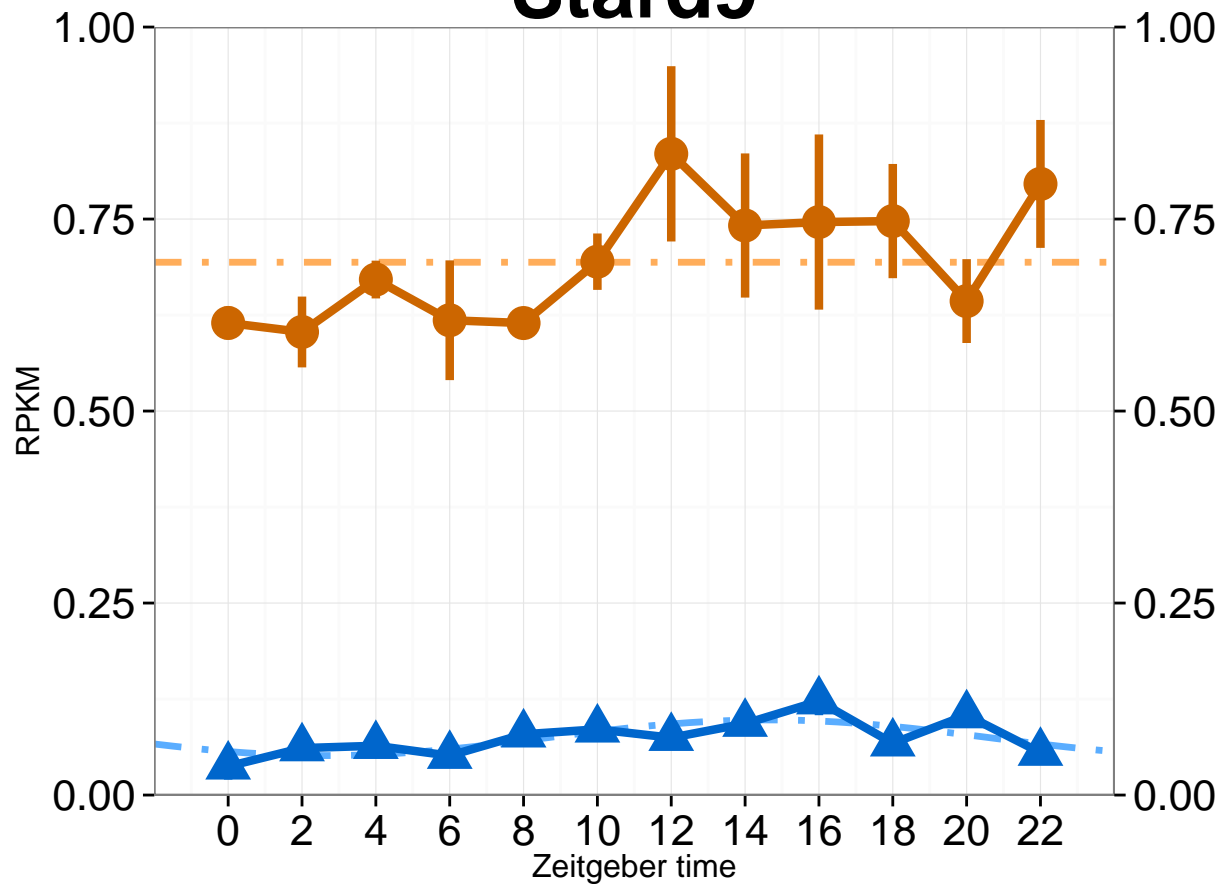

# Stard9

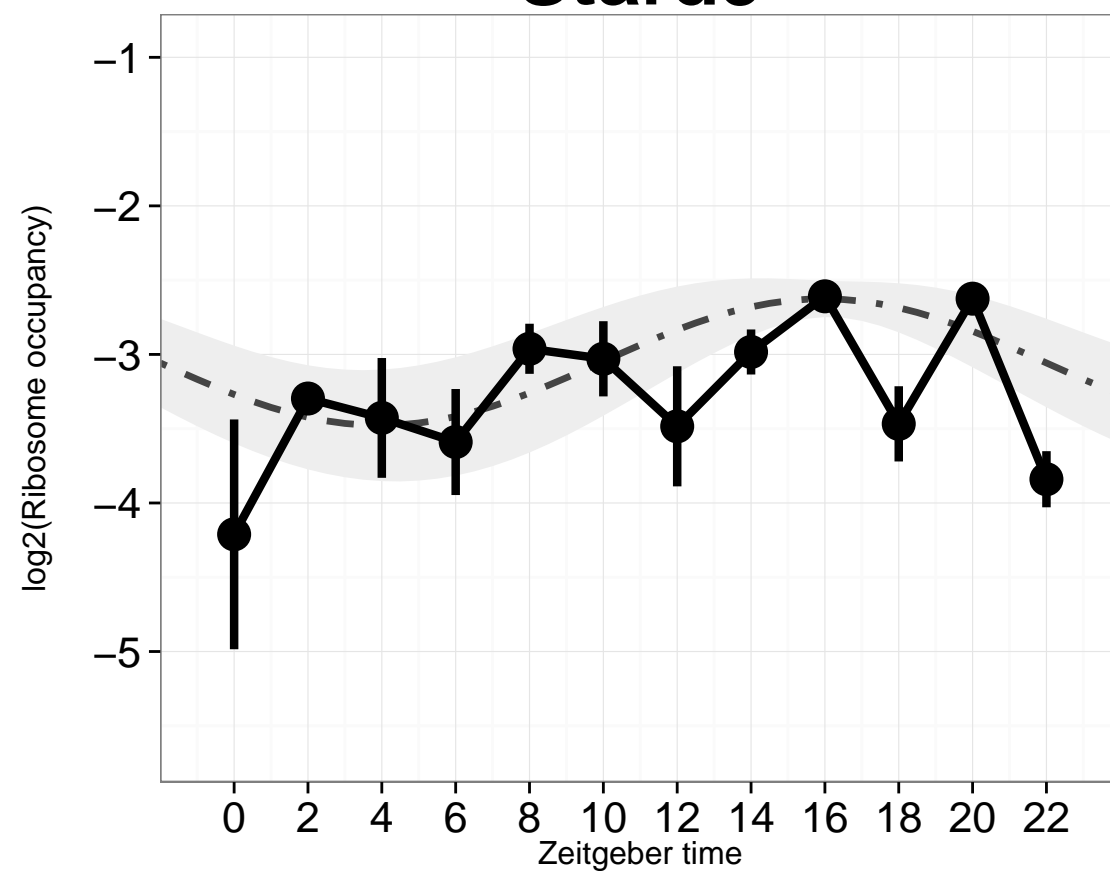

Supplement: SuppDataset_1.zip [file Stard9_set_C.pdf › Supplemental Dataset 1/C-mRNA_nonrhythm_translation_rhyth/Stard9_set_C.pdf]

## Stom

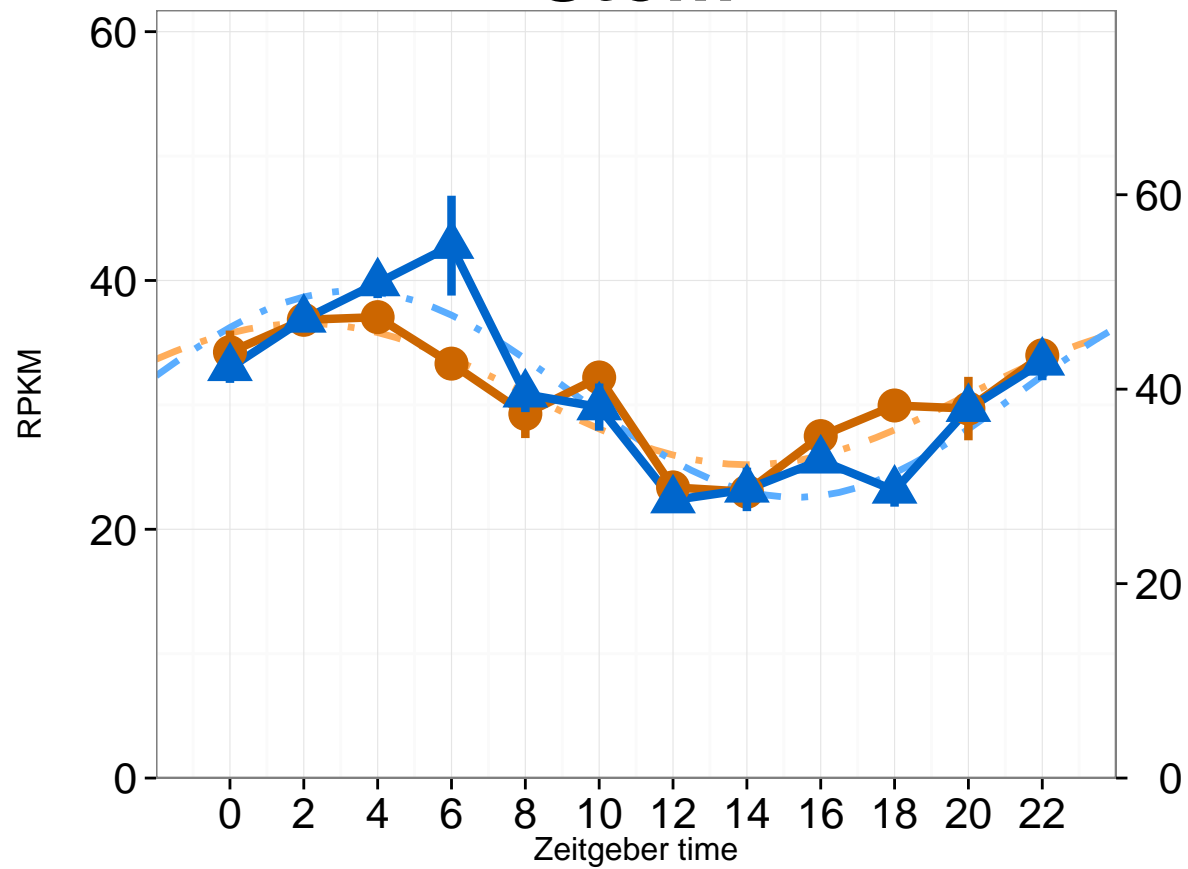

## Stom

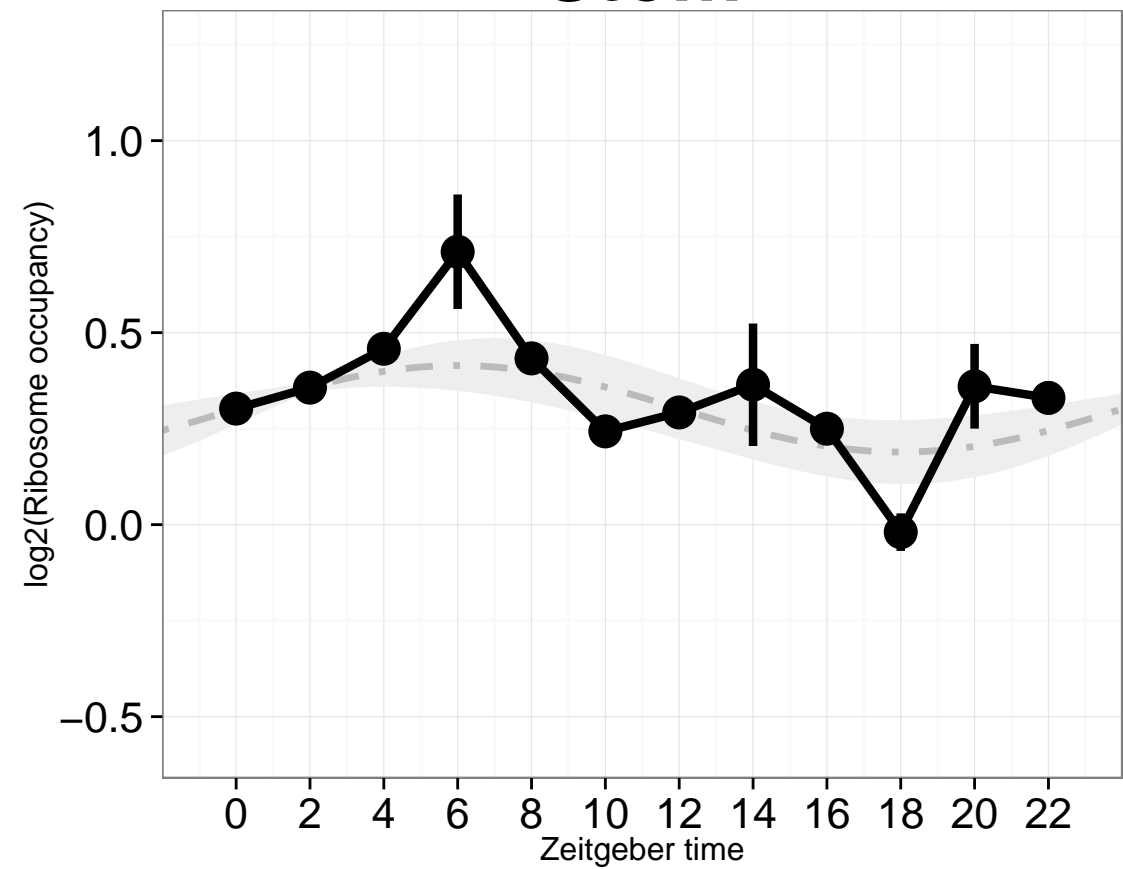

Supplement: SuppDataset_1.zip [file Stom_set_C.pdf › Supplemental Dataset 1/C-mRNA_nonrhythm_translation_rhyth/Stom_set_C.pdf]

## Stoml1

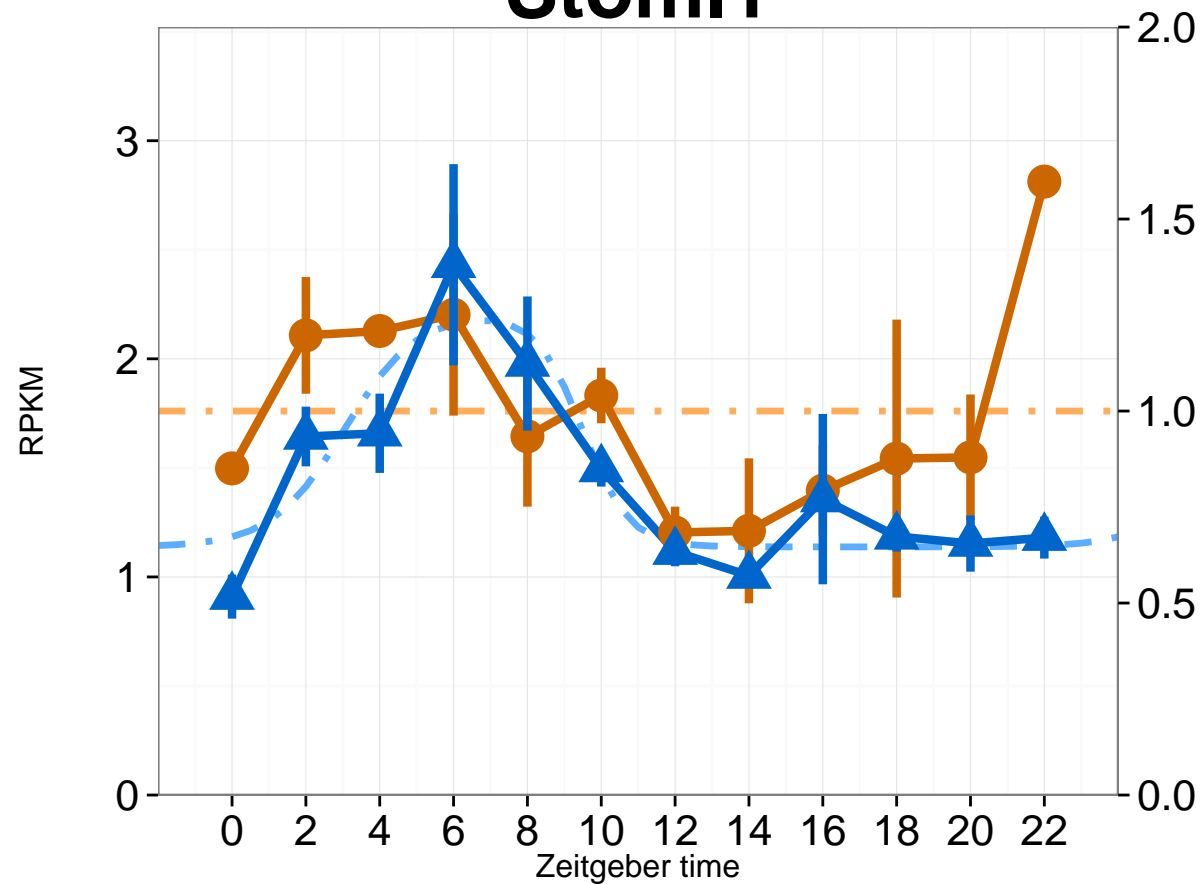

## Stoml1

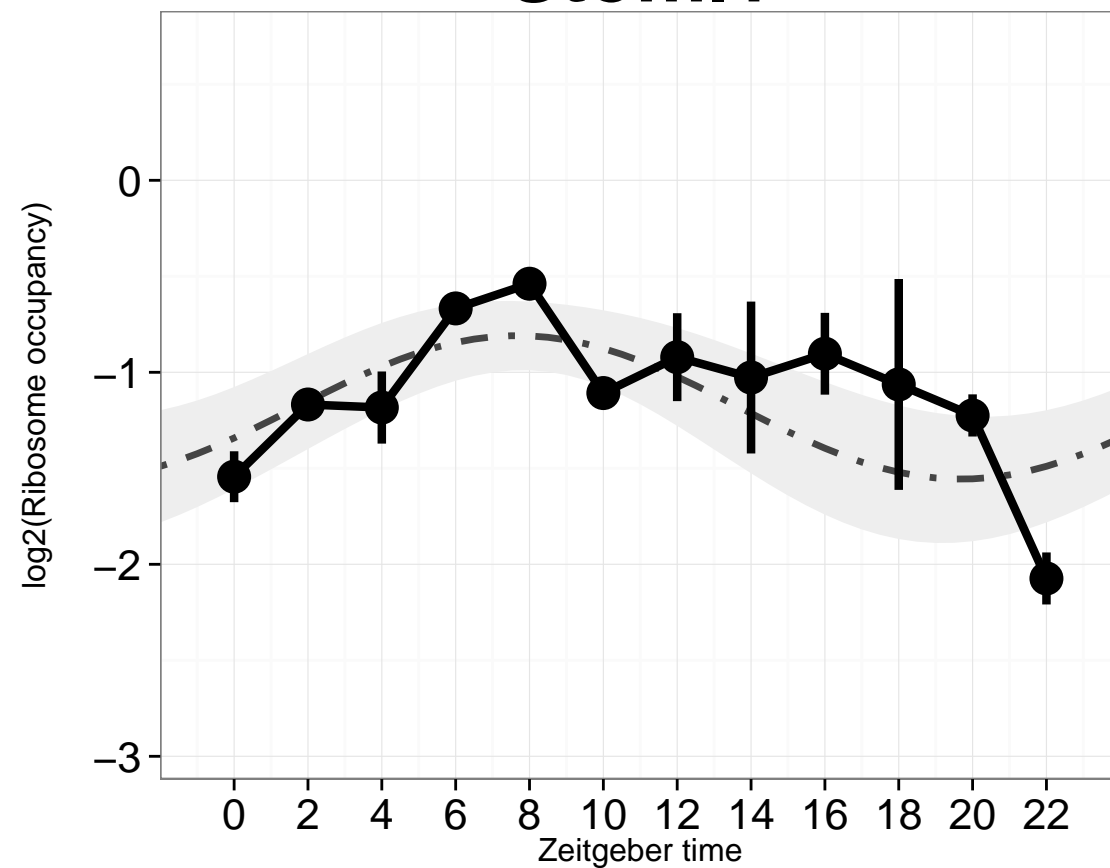

Supplement: SuppDataset_1.zip [file Stoml1_set_C.pdf › Supplemental Dataset 1/C-mRNA_nonrhythm_translation_rhyth/Stoml1_set_C.pdf]

## Suco

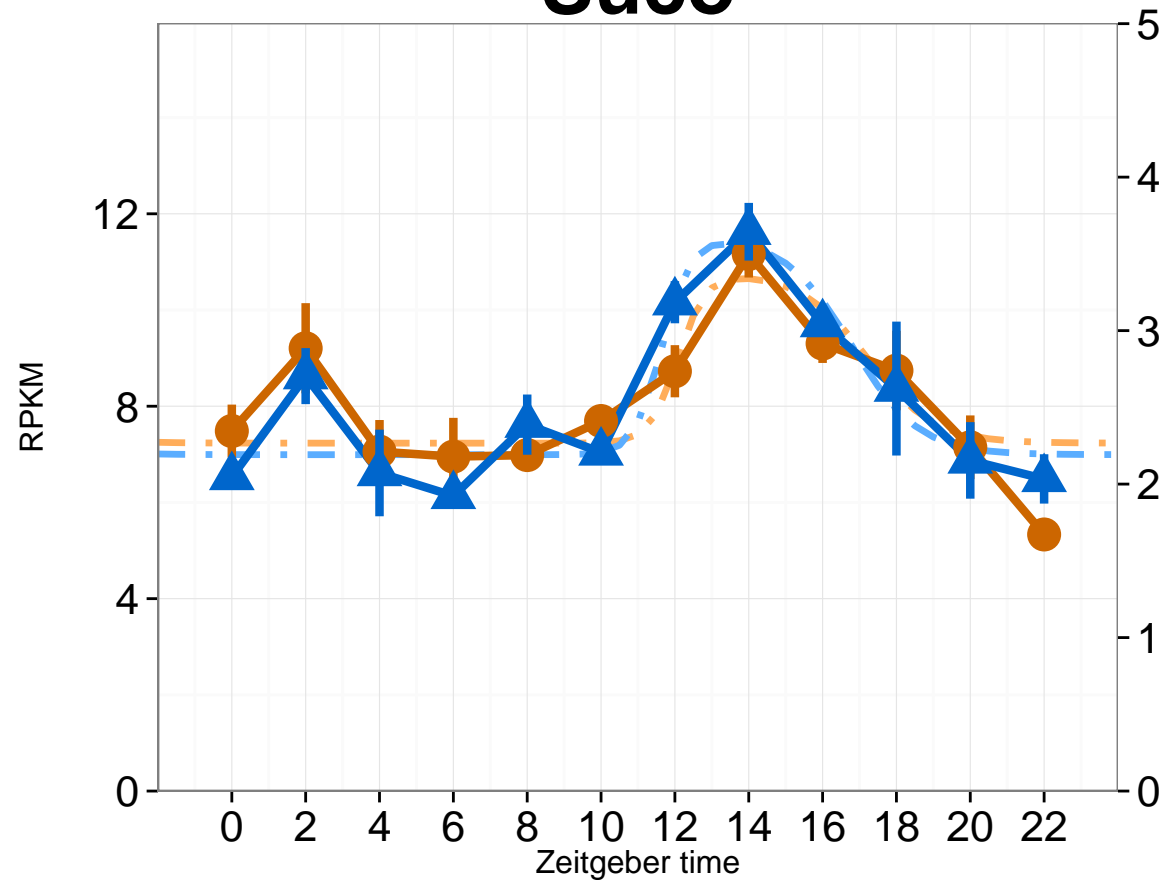

## Suco

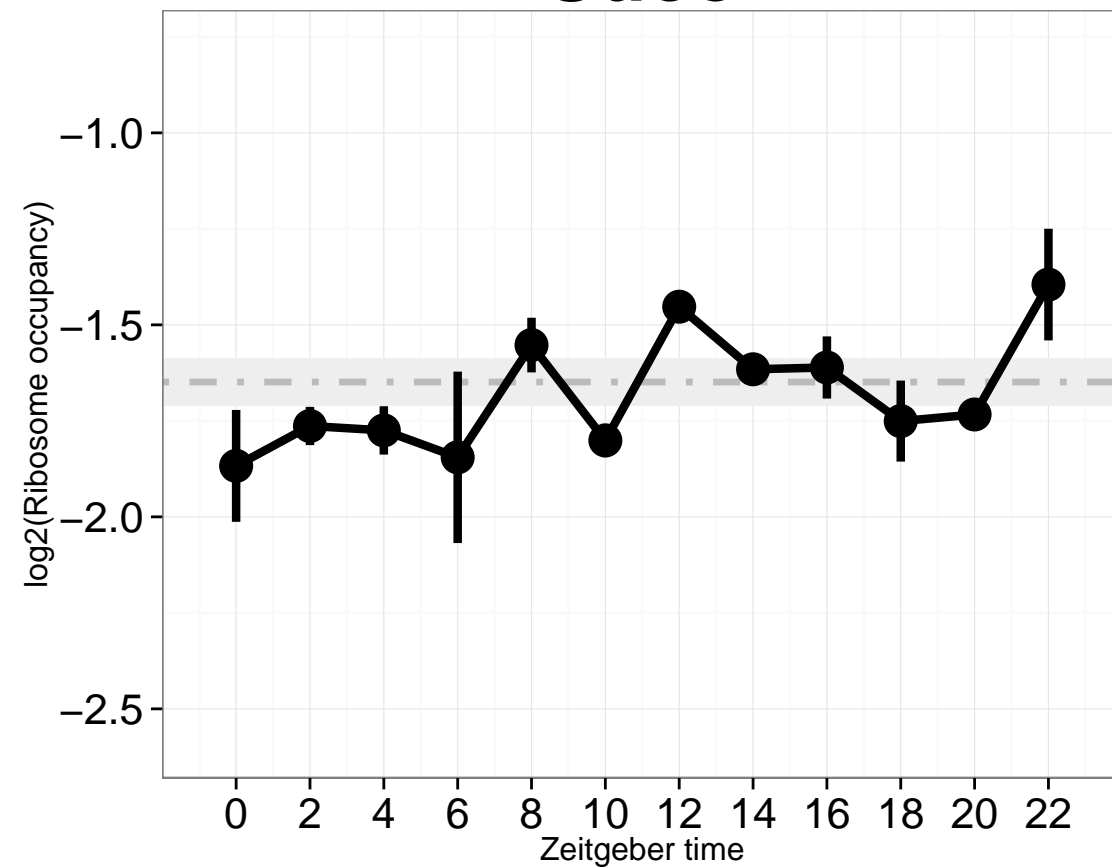

Supplement: SuppDataset_1.zip [file Suco_set_C.pdf › Supplemental Dataset 1/C-mRNA_nonrhythm_translation_rhyth/Suco_set_C.pdf]

## Susd1

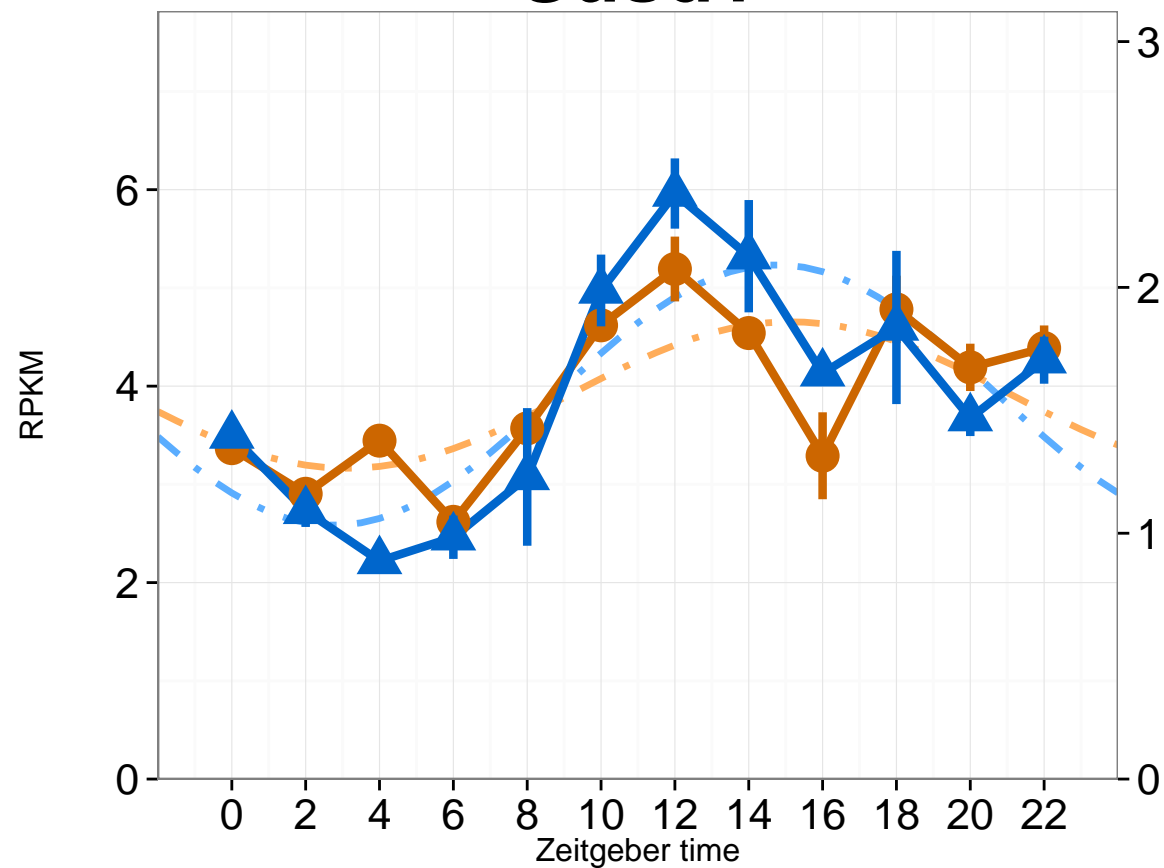

## Susd1

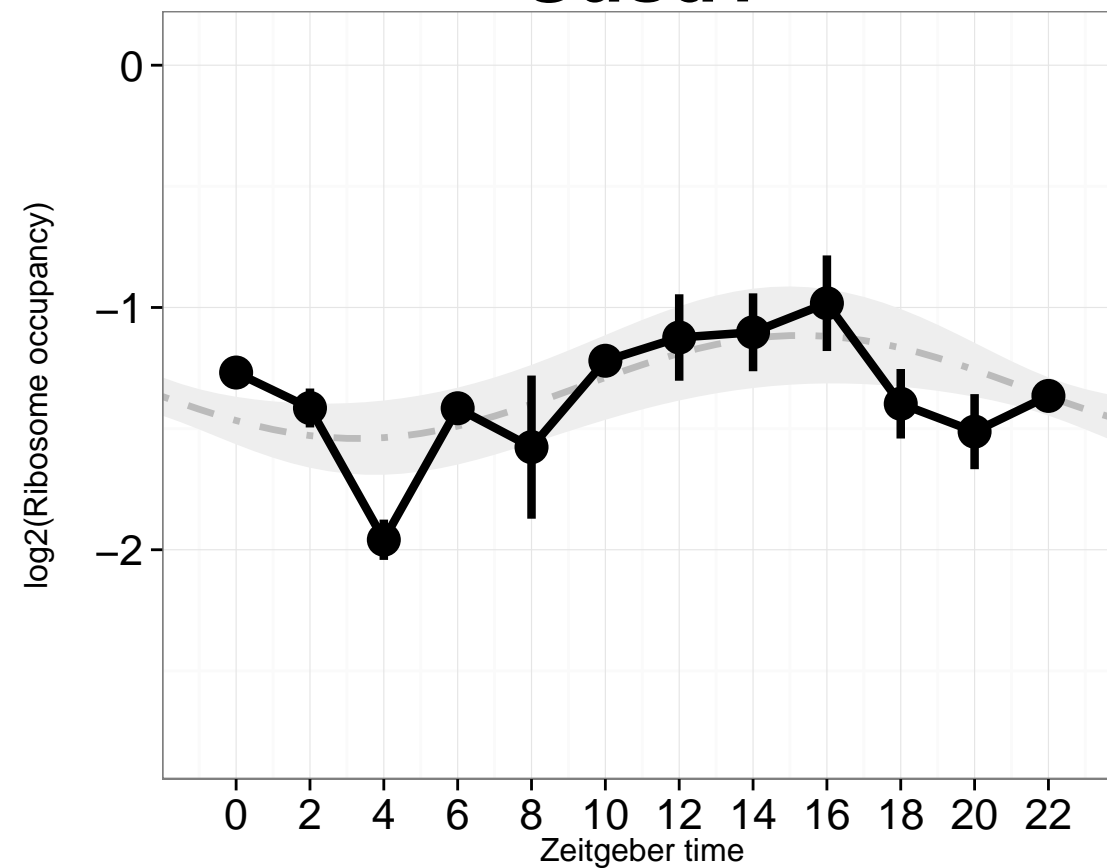

Supplement: SuppDataset_1.zip [file Susd1_set_C.pdf › Supplemental Dataset 1/C-mRNA_nonrhythm_translation_rhyth/Susd1_set_C.pdf]

## Syne2

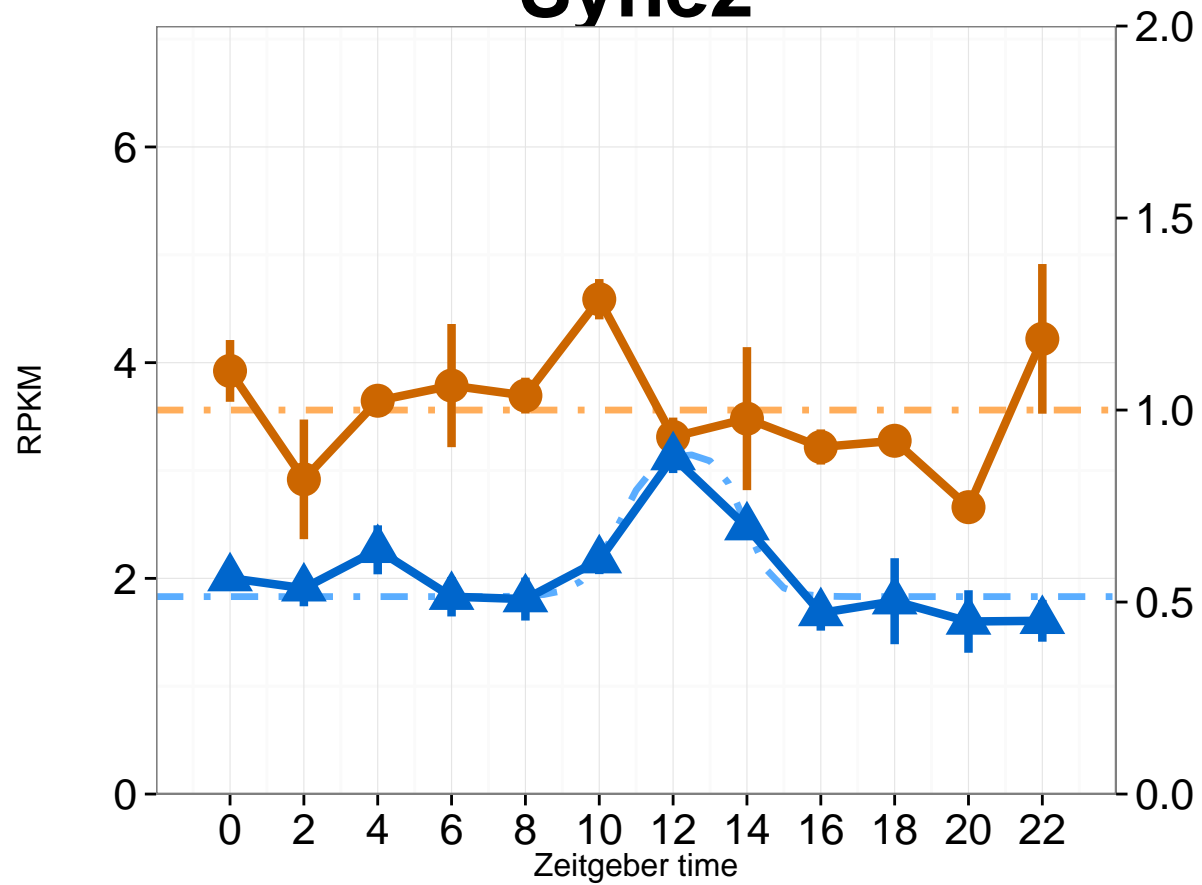

## Syne2

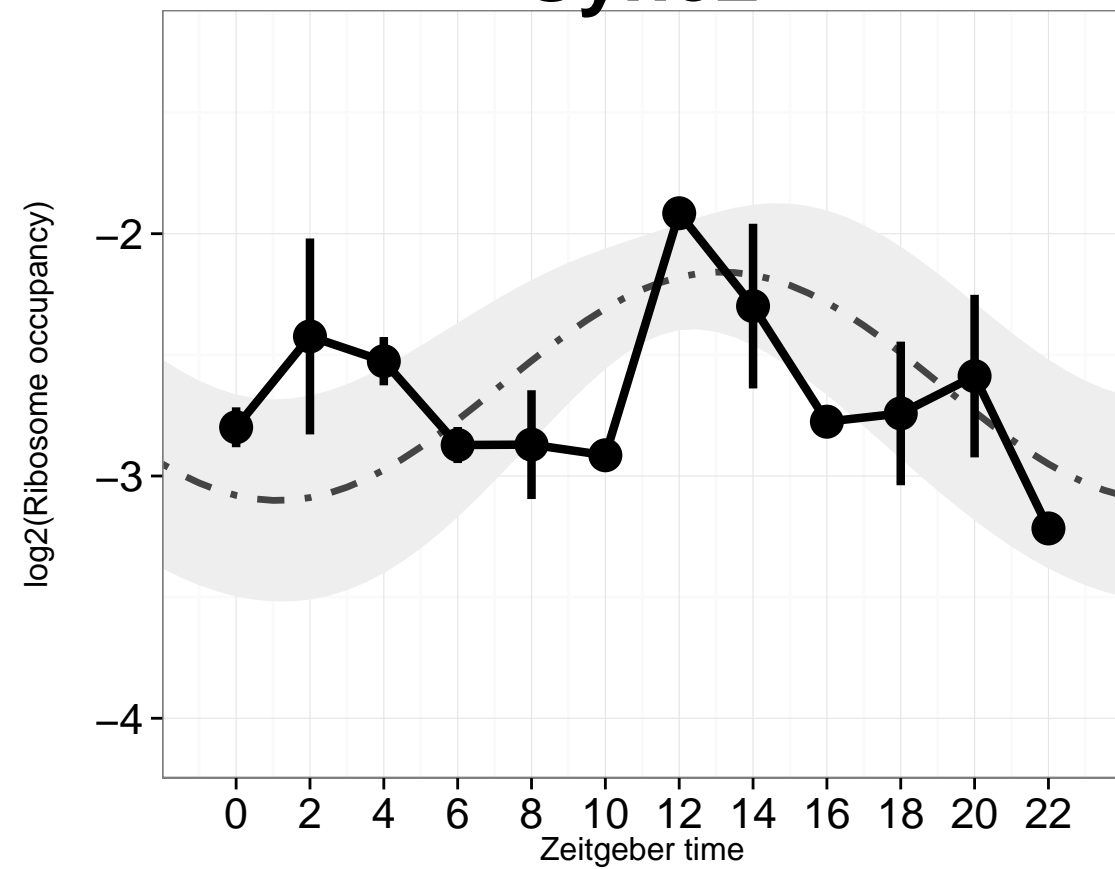

Supplement: SuppDataset_1.zip [file Syne2_set_C.pdf › Supplemental Dataset 1/C-mRNA_nonrhythm_translation_rhyth/Syne2_set_C.pdf]

## Syt14

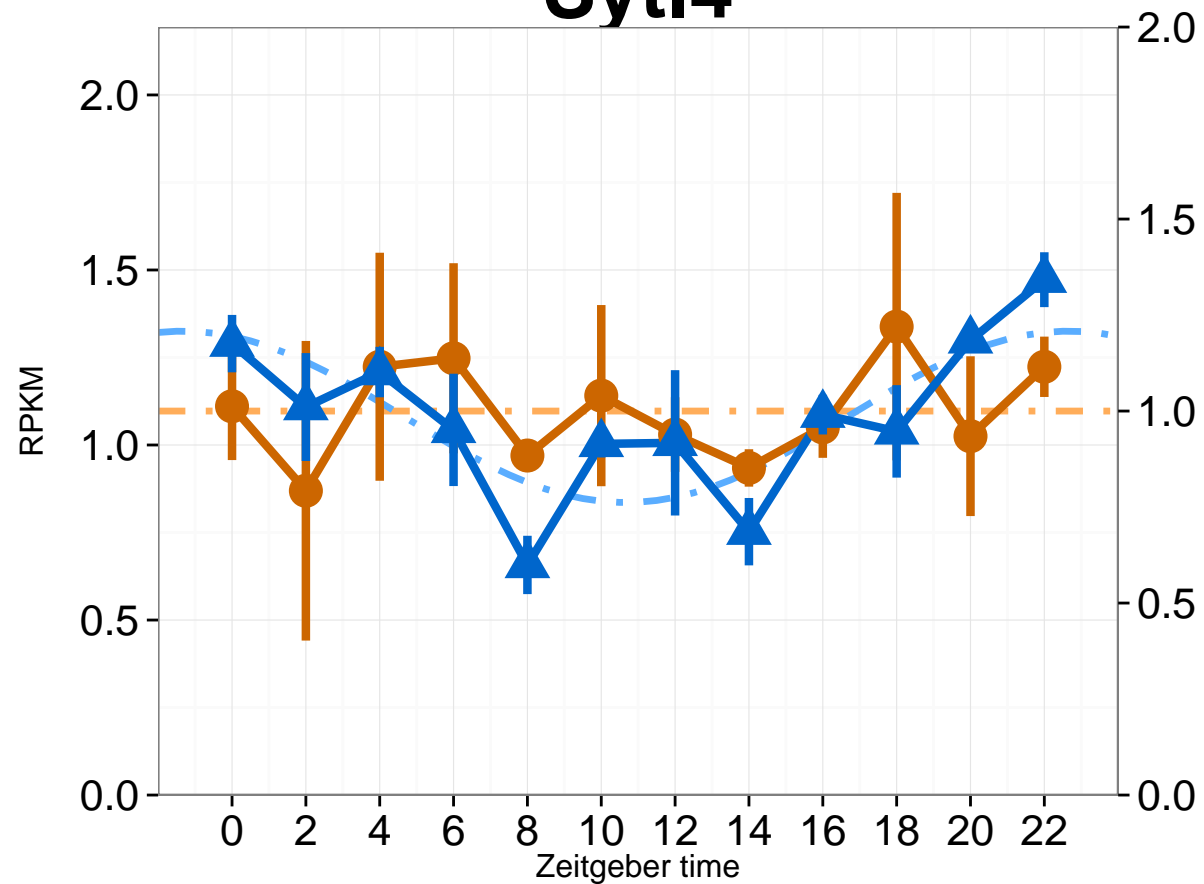

## Syt14

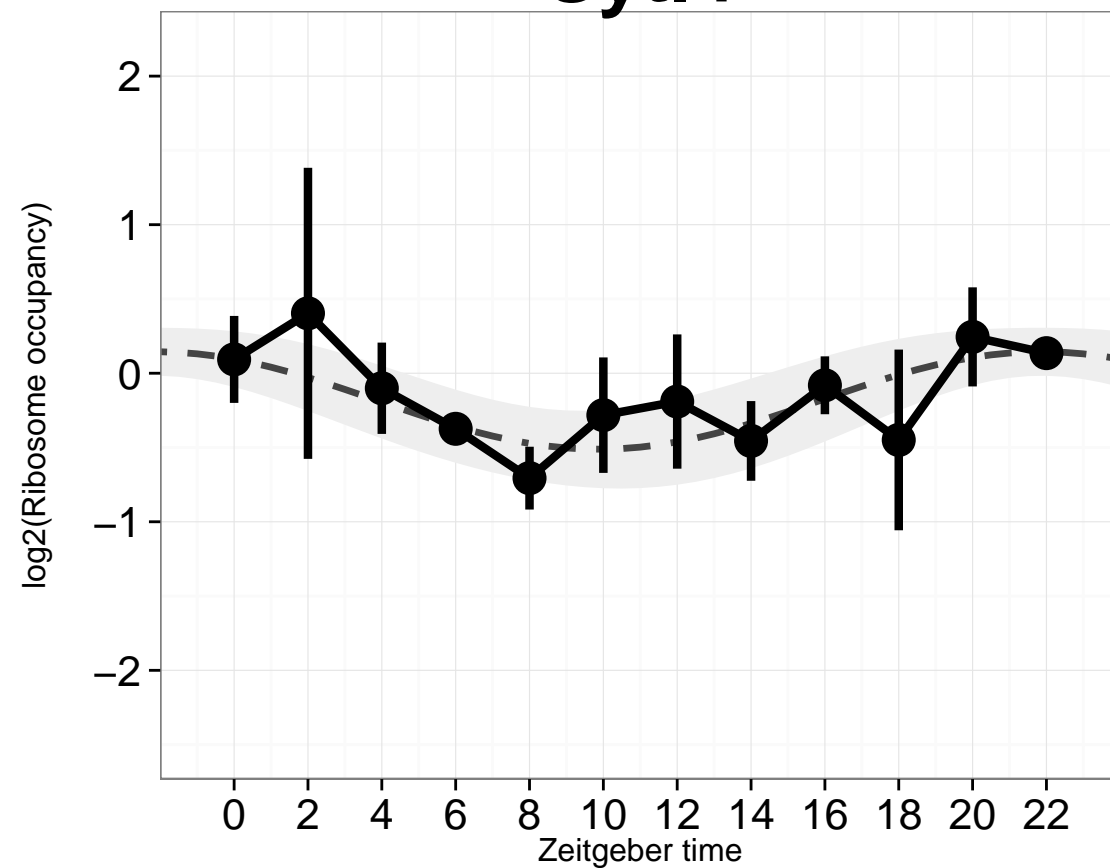

Supplement: SuppDataset_1.zip [file Sytl4_set_C.pdf › Supplemental Dataset 1/C-mRNA_nonrhythm_translation_rhyth/Sytl4_set_C.pdf]

# Taf2

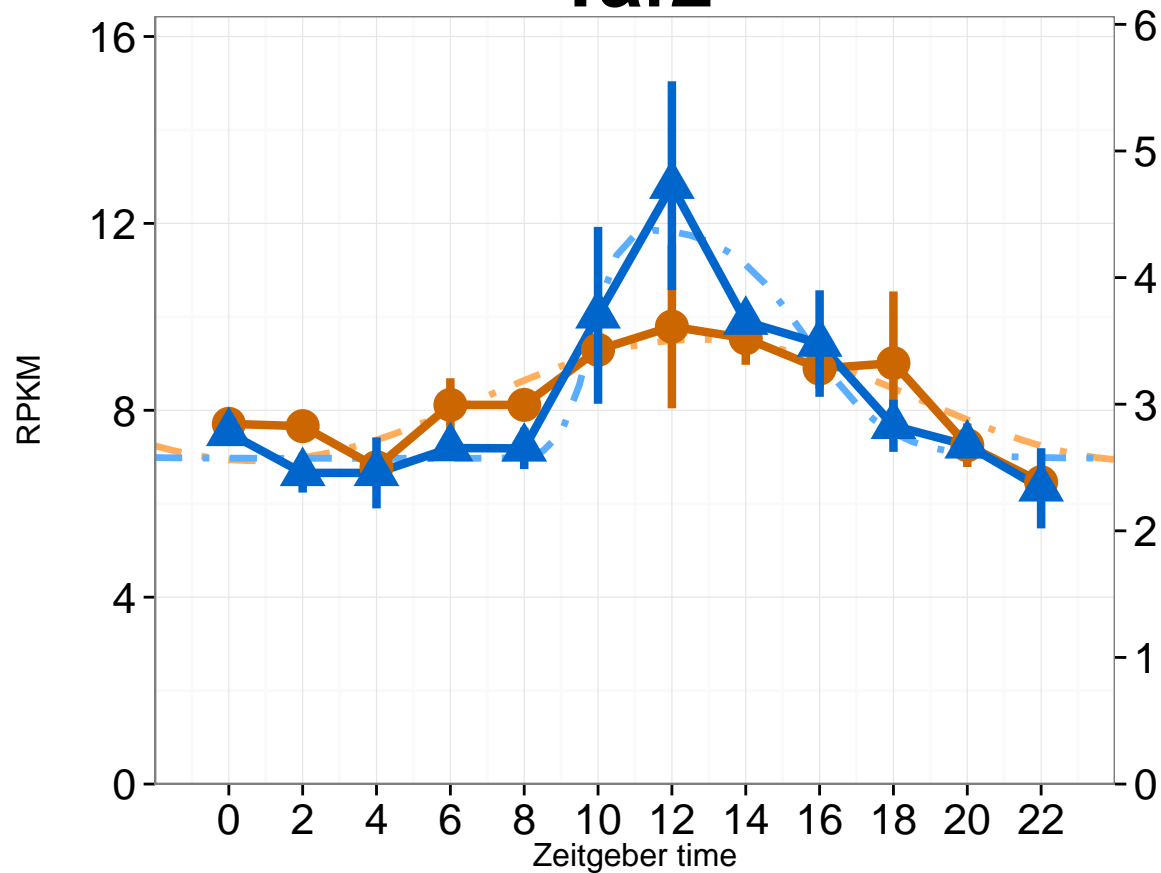

# Taf2

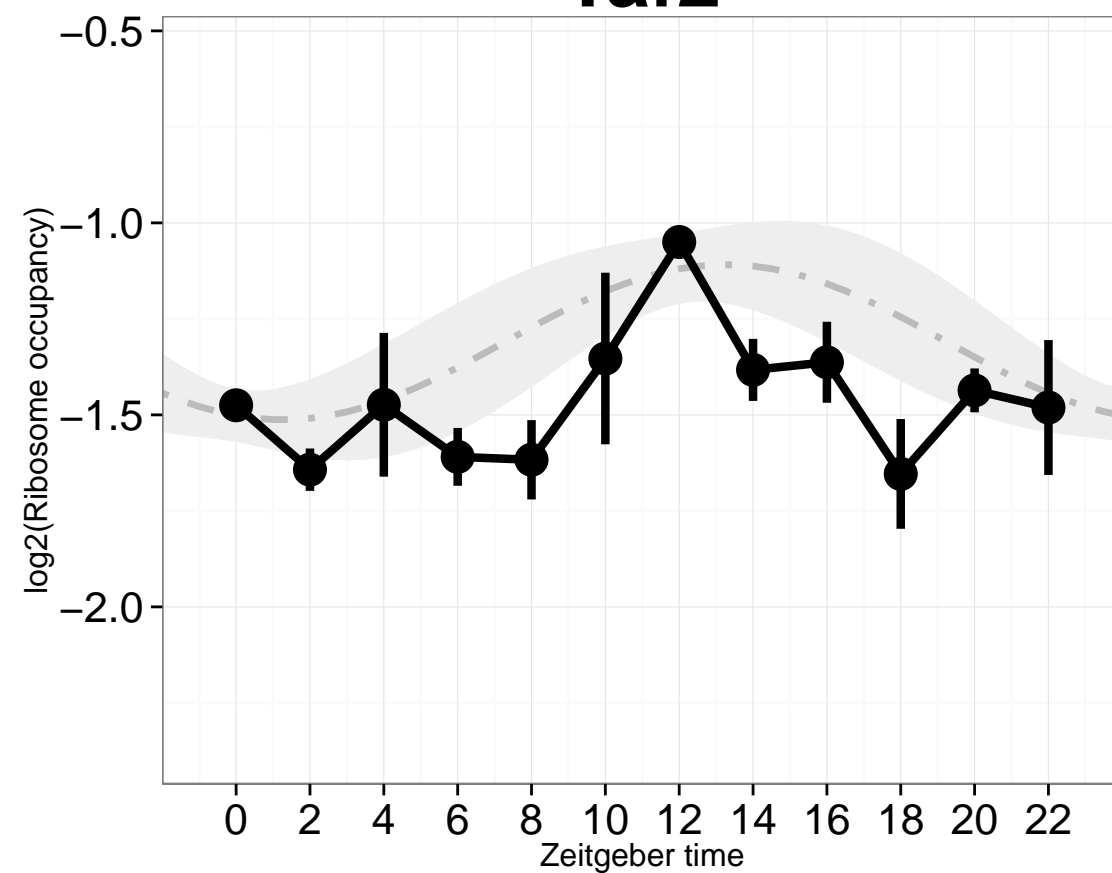

Supplement: SuppDataset_1.zip [file Taf2_set_C.pdf › Supplemental Dataset 1/C-mRNA_nonrhythm_translation_rhyth/Taf2_set_C.pdf]

# Taf4a

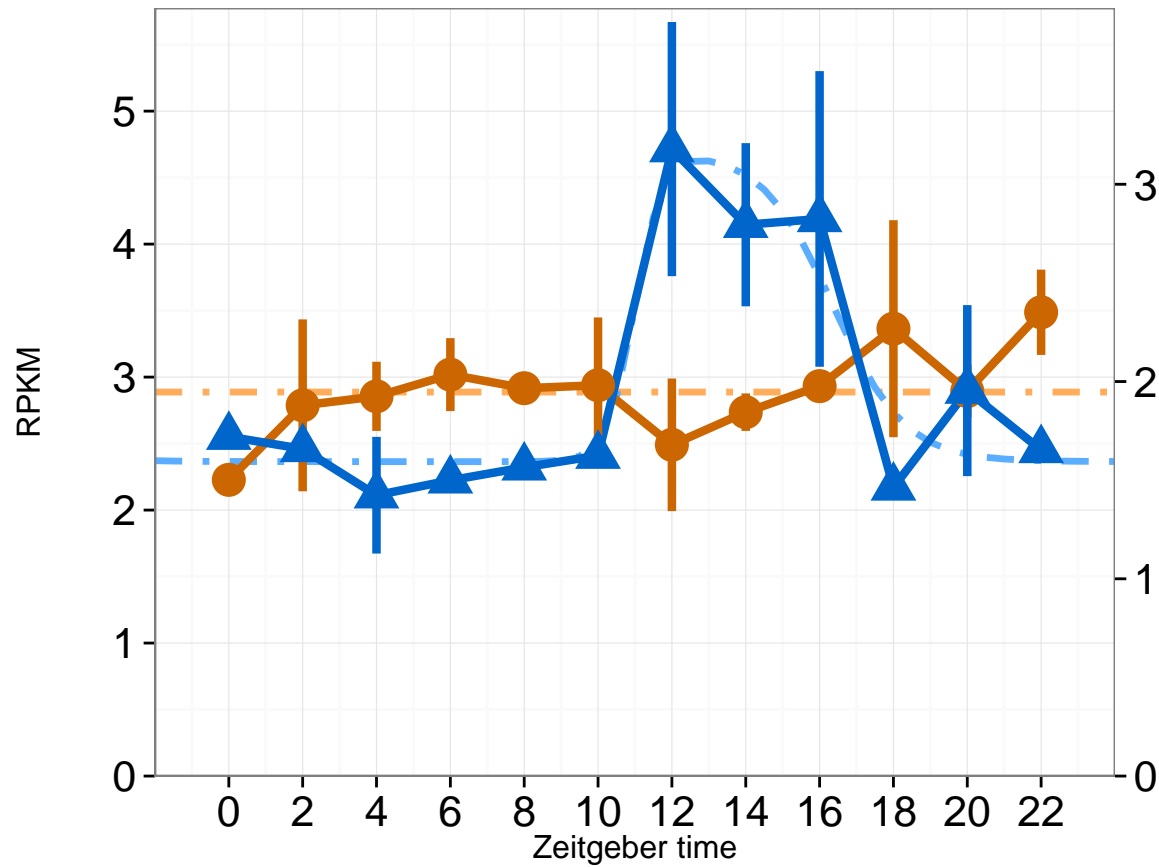

# Taf4a

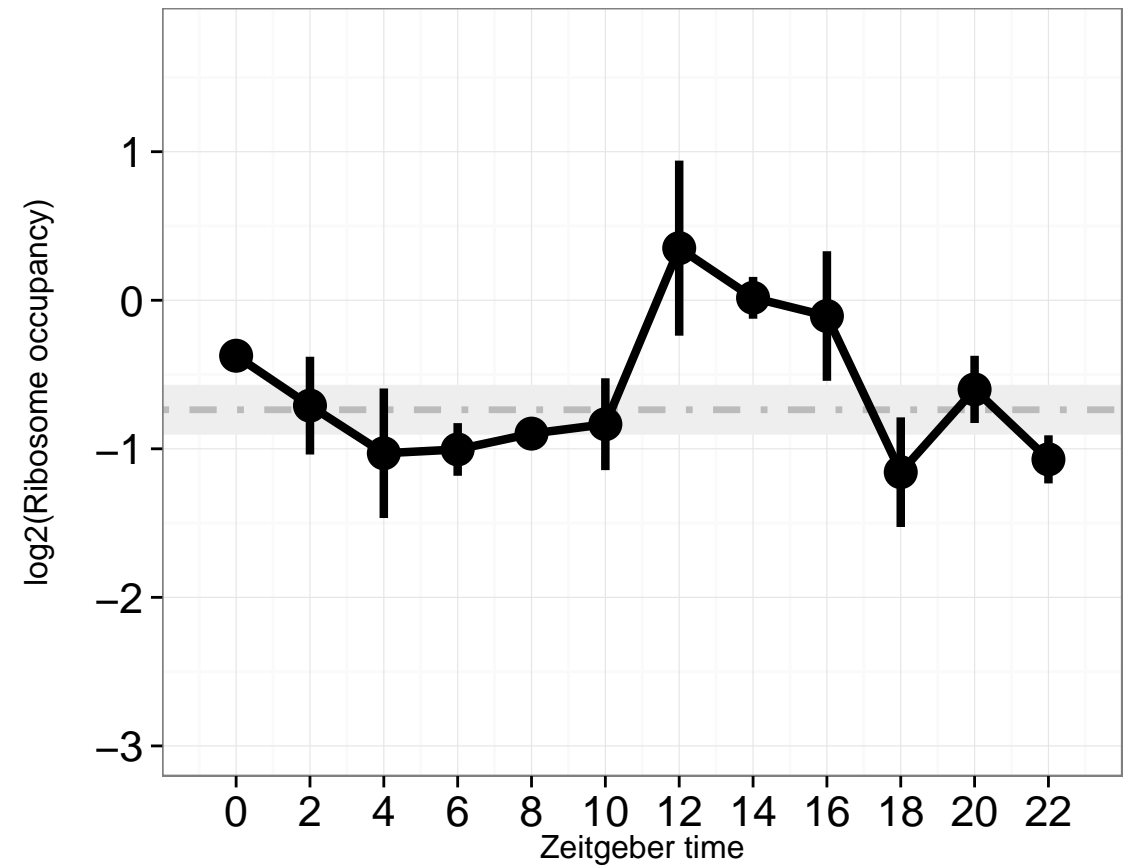

Supplement: SuppDataset_1.zip [file Taf4a_set_C.pdf › Supplemental Dataset 1/C-mRNA_nonrhythm_translation_rhyth/Taf4a_set_C.pdf]

# Taf4b

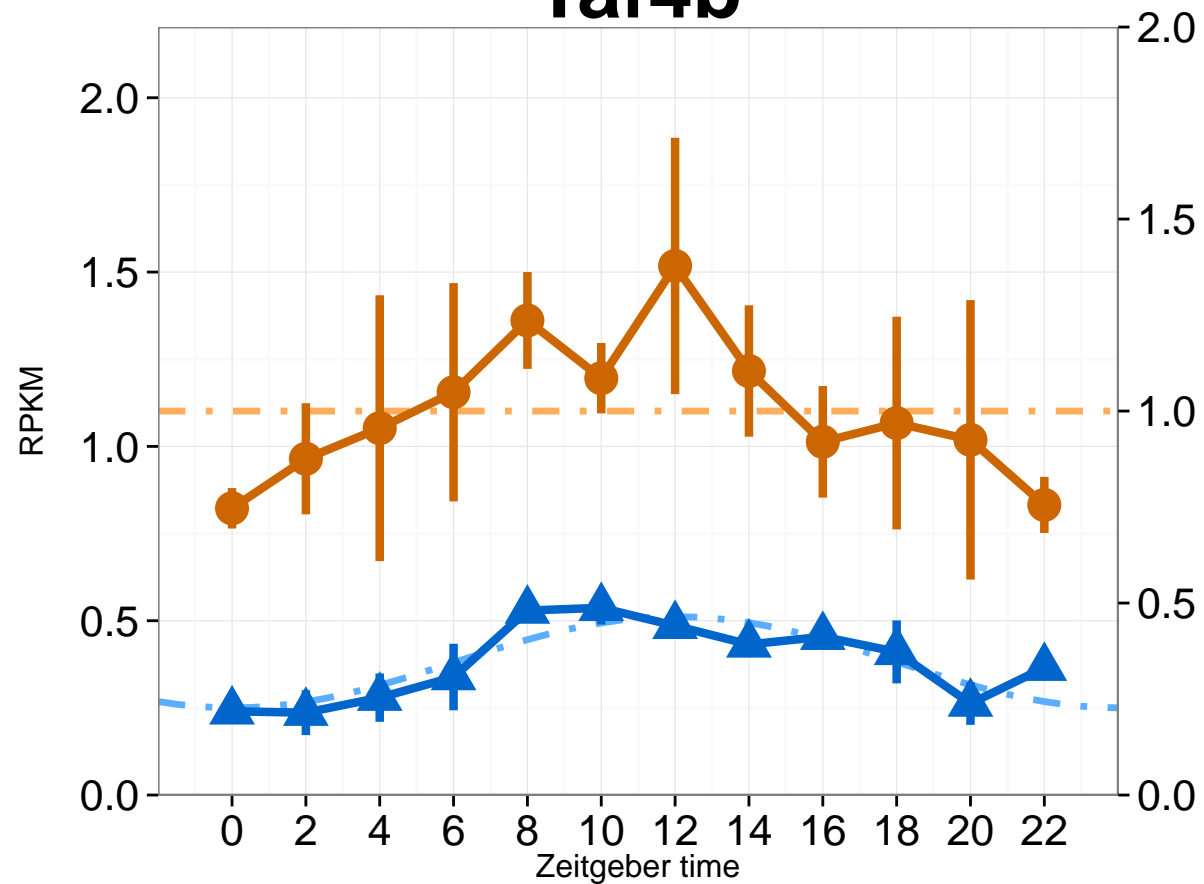

# Taf4b

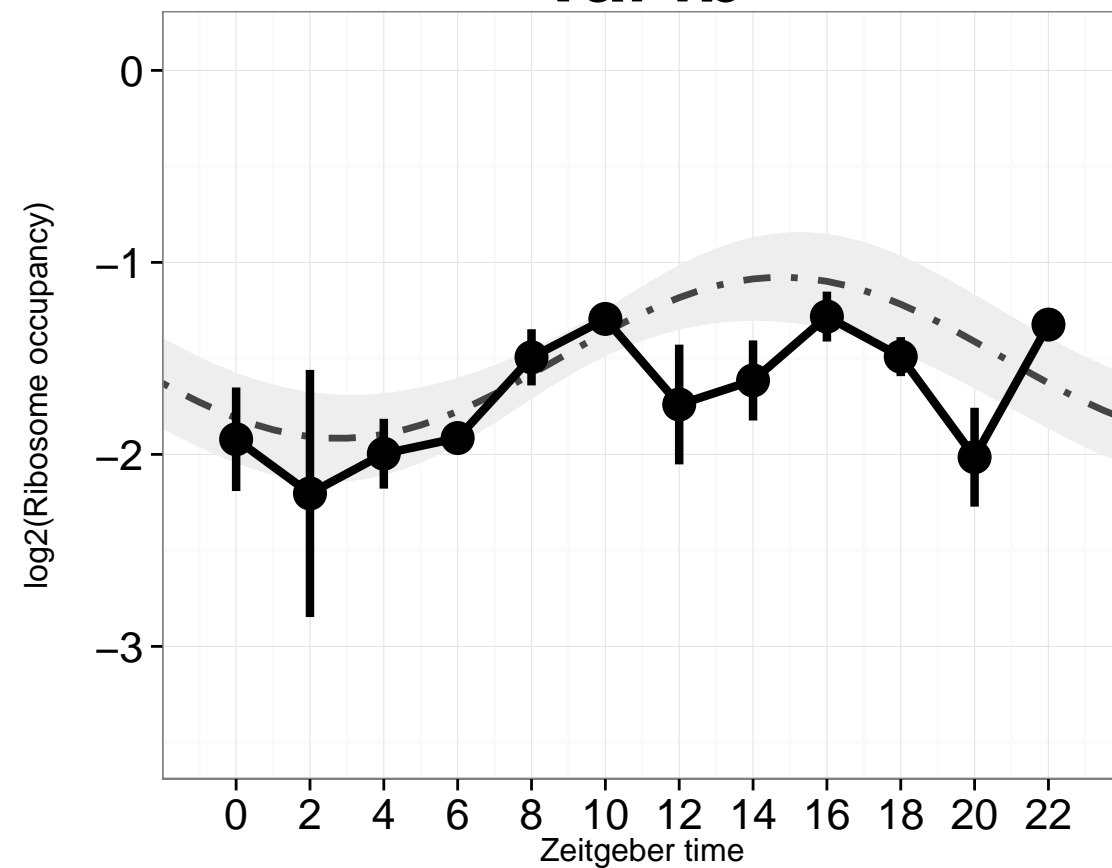

Supplement: SuppDataset_1.zip [file Taf4b_set_C.pdf › Supplemental Dataset 1/C-mRNA_nonrhythm_translation_rhyth/Taf4b_set_C.pdf]

# Tbc1d22b

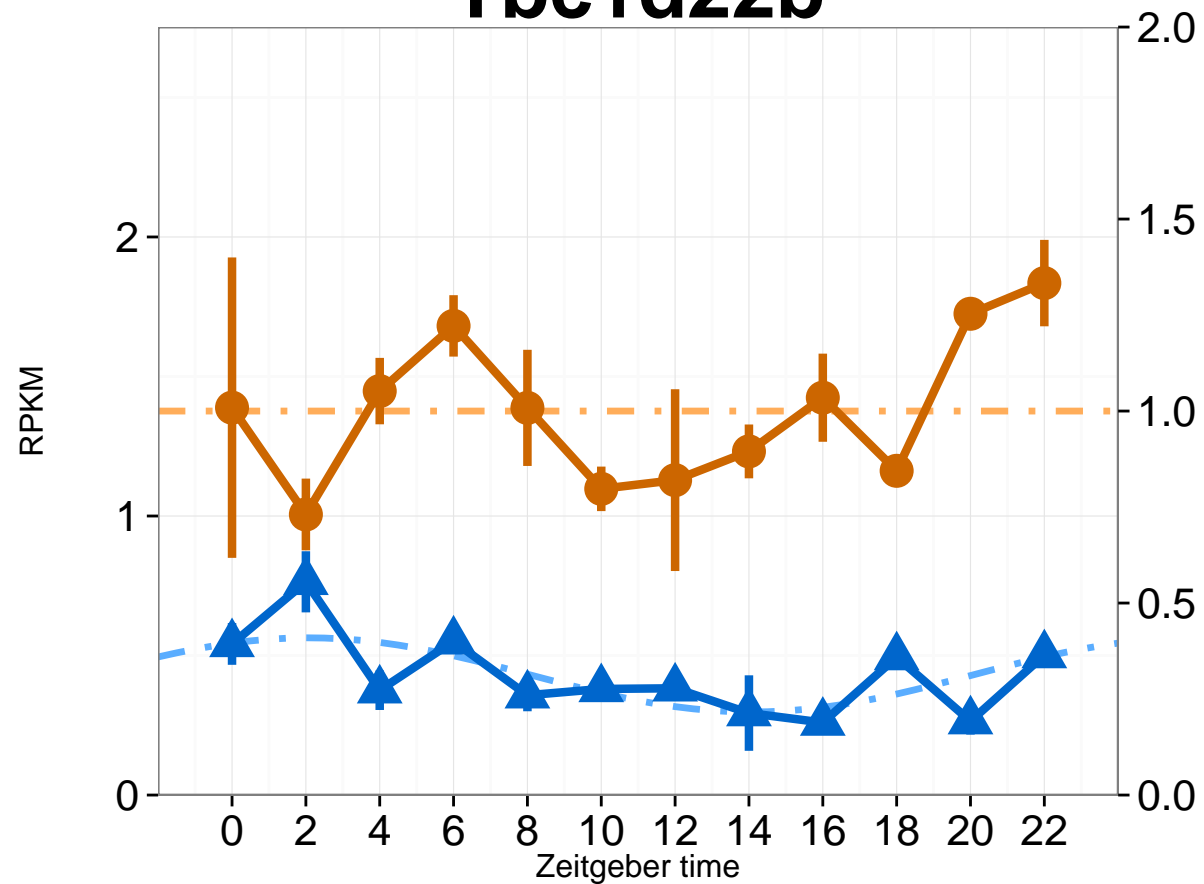

# Tbc1d22b

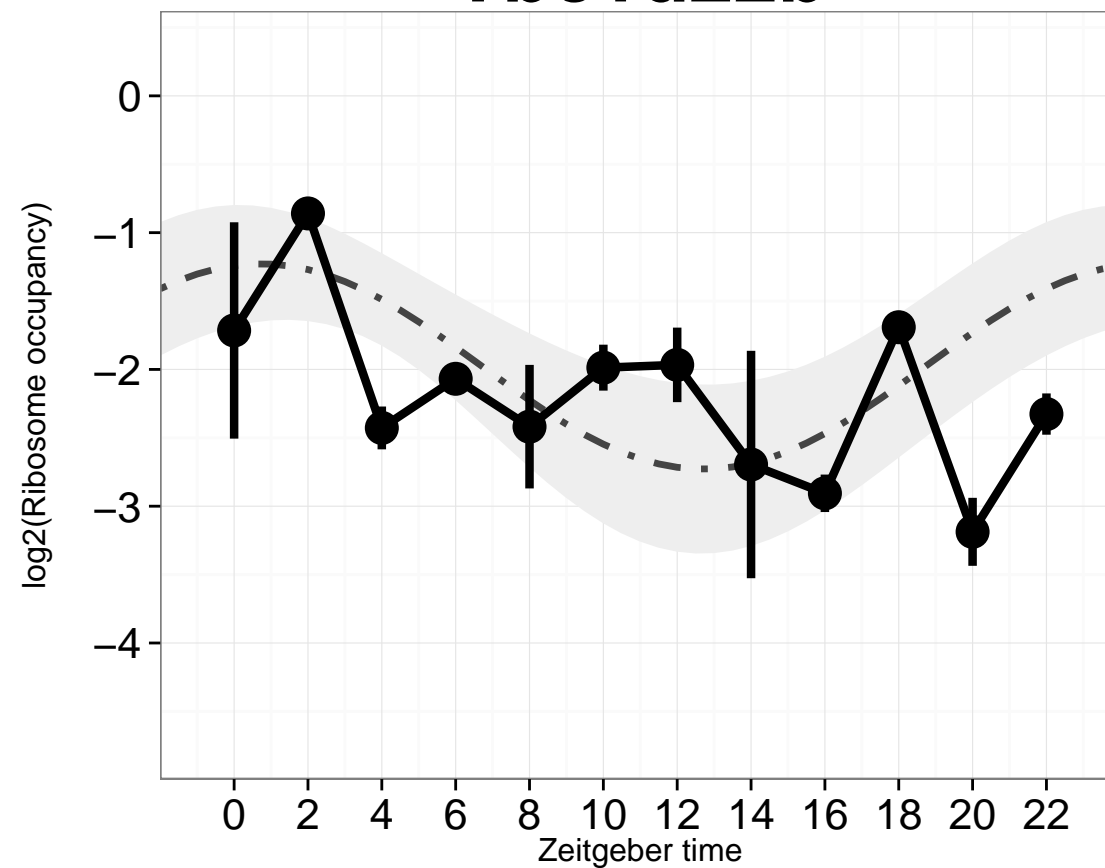

Supplement: SuppDataset_1.zip [file Tbc1d22b_set_C.pdf › Supplemental Dataset 1/C-mRNA_nonrhythm_translation_rhyth/Tbc1d22b_set_C.pdf]

# Tbc1d23

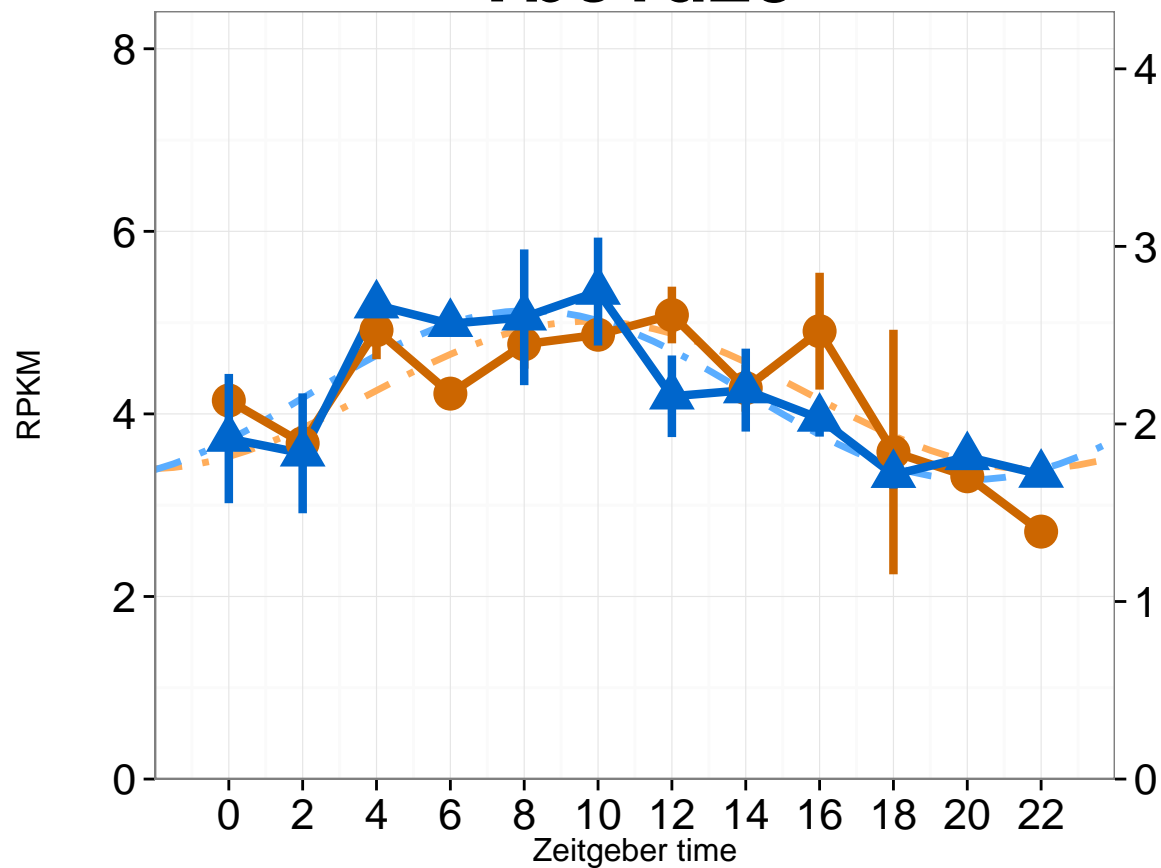

# Tbc1d23

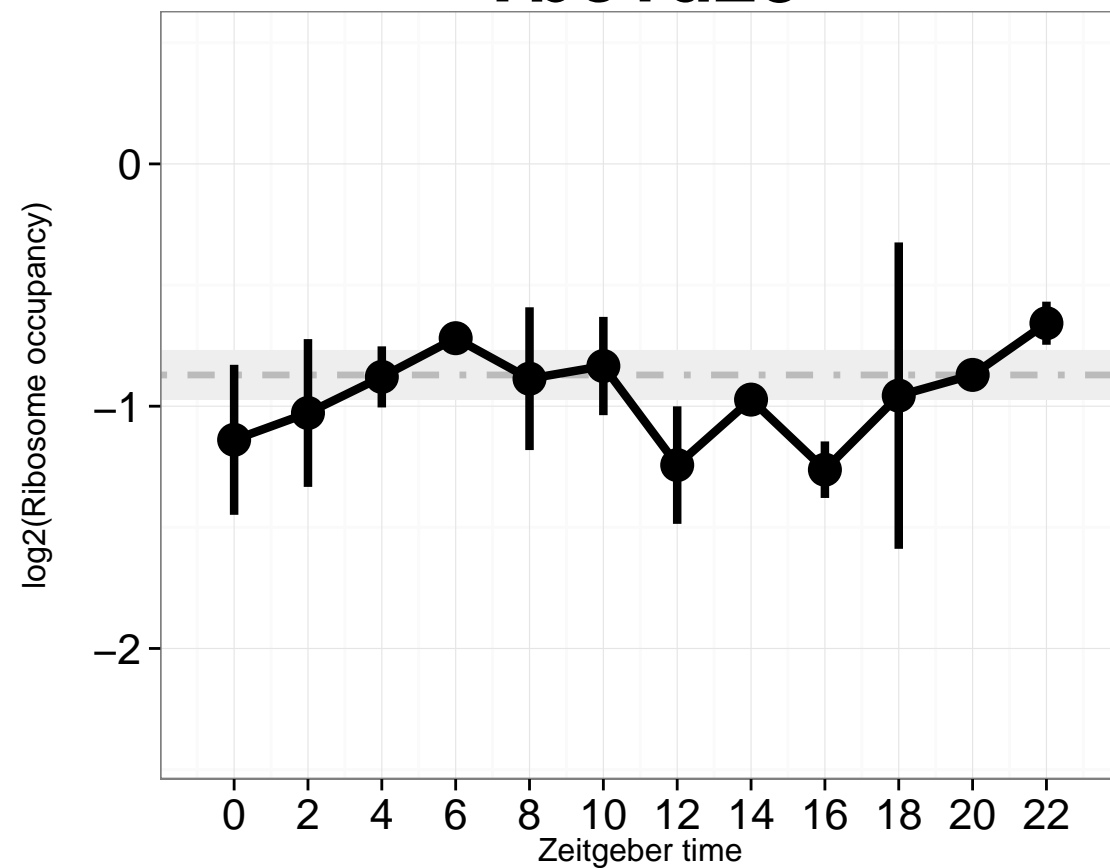

Supplement: SuppDataset_1.zip [file Tbc1d23_set_C.pdf › Supplemental Dataset 1/C-mRNA_nonrhythm_translation_rhyth/Tbc1d23_set_C.pdf]

# Tbc1d24

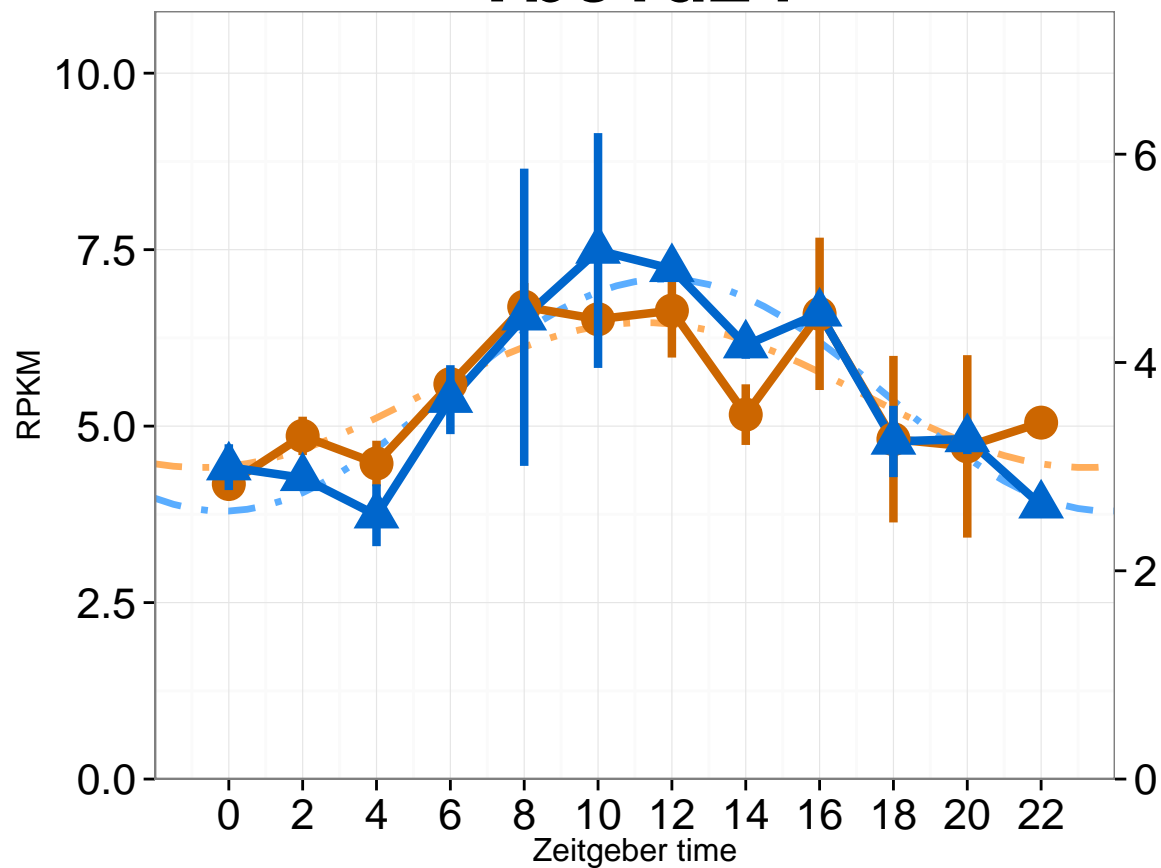

# Tbc1d24

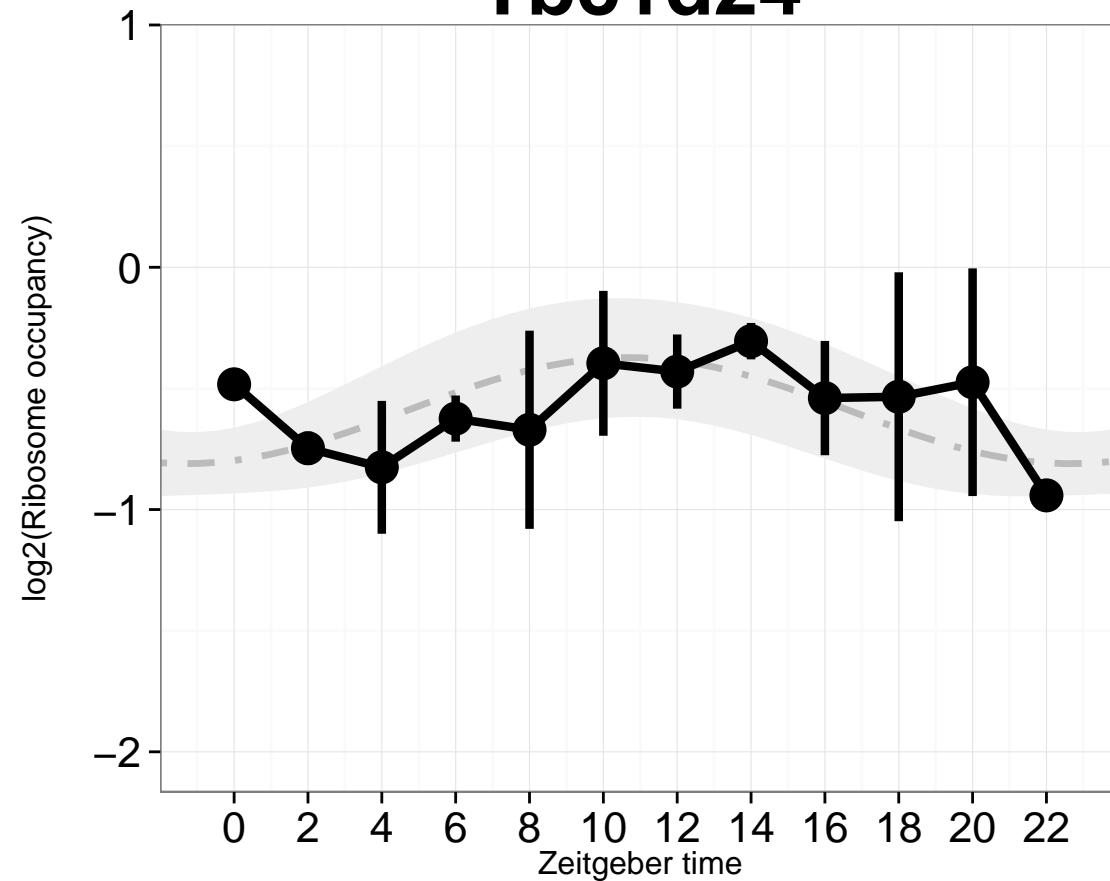

Supplement: SuppDataset_1.zip [file Tbc1d24_set_C.pdf › Supplemental Dataset 1/C-mRNA_nonrhythm_translation_rhyth/Tbc1d24_set_C.pdf]

# Tbkbp1

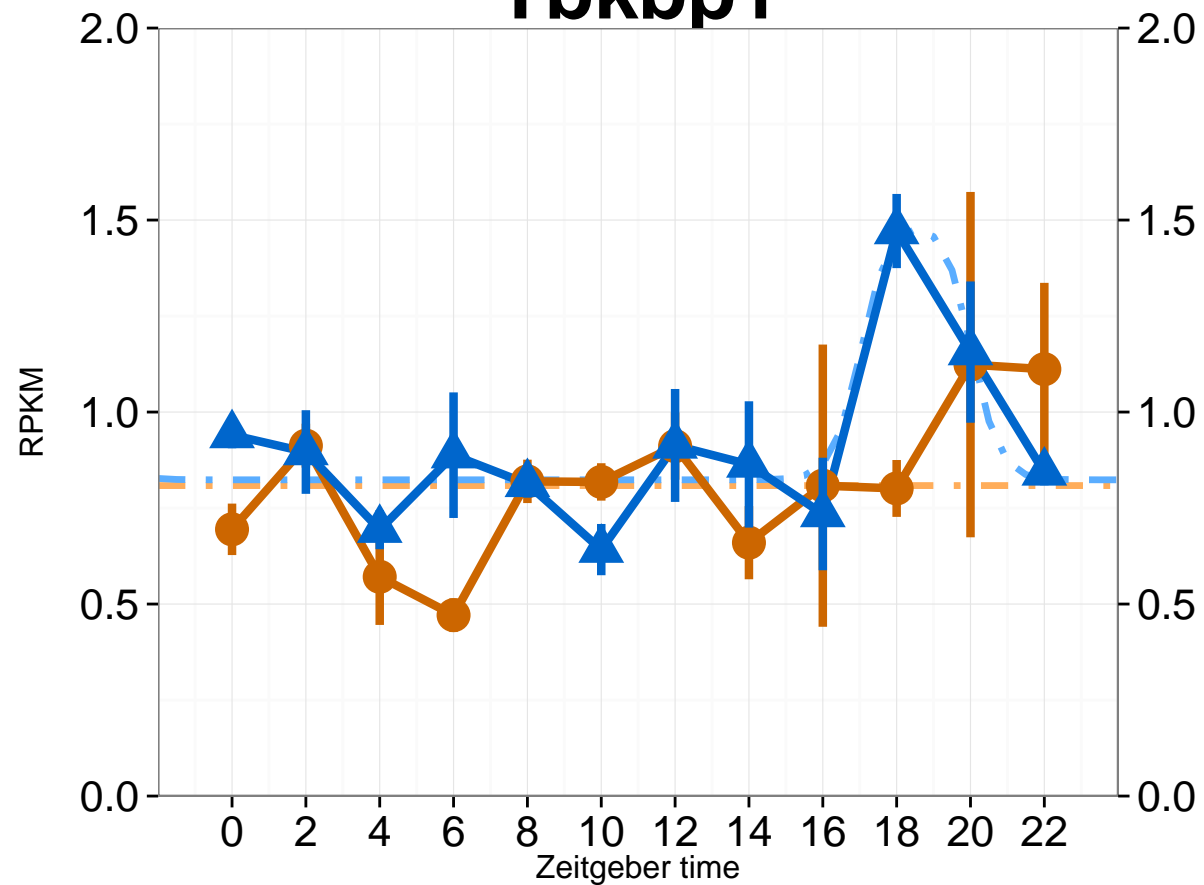

# Tbkbp1

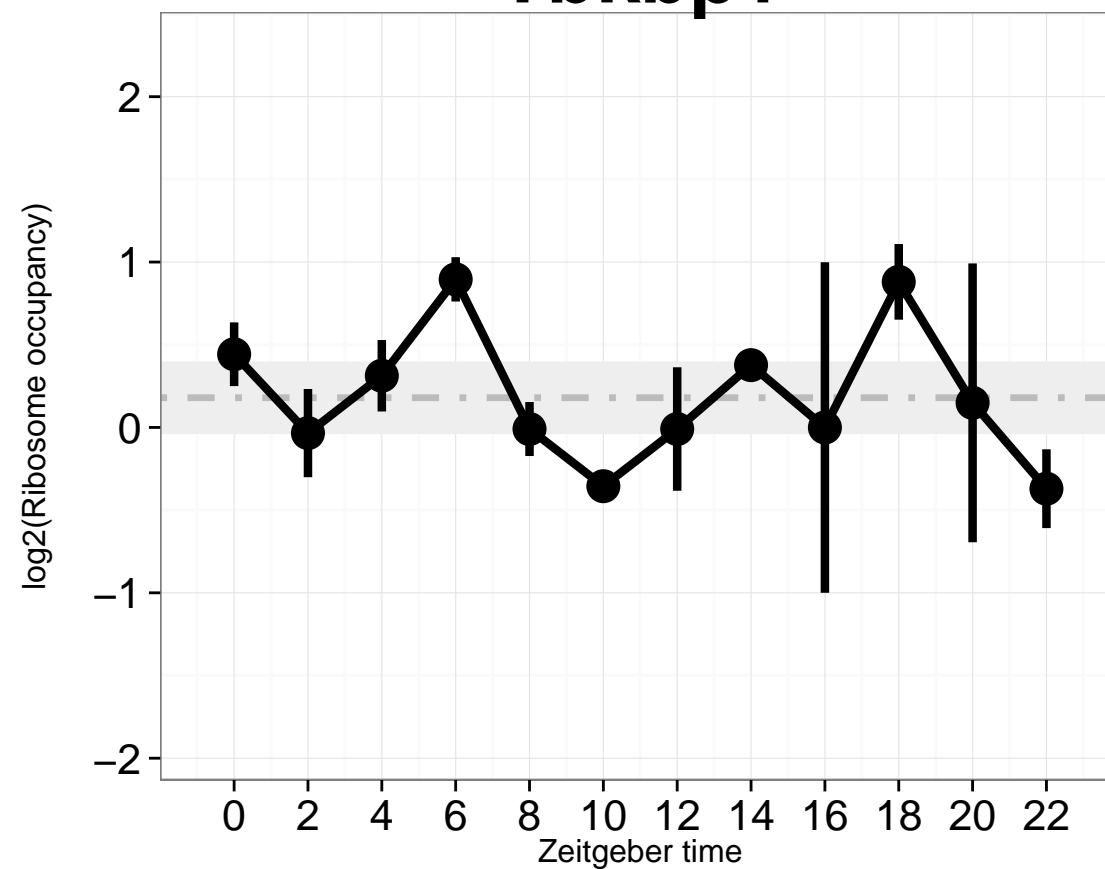

Supplement: SuppDataset_1.zip [file Tbkbp1_set_C.pdf › Supplemental Dataset 1/C-mRNA_nonrhythm_translation_rhyth/Tbkbp1_set_C.pdf]

# Tcp1

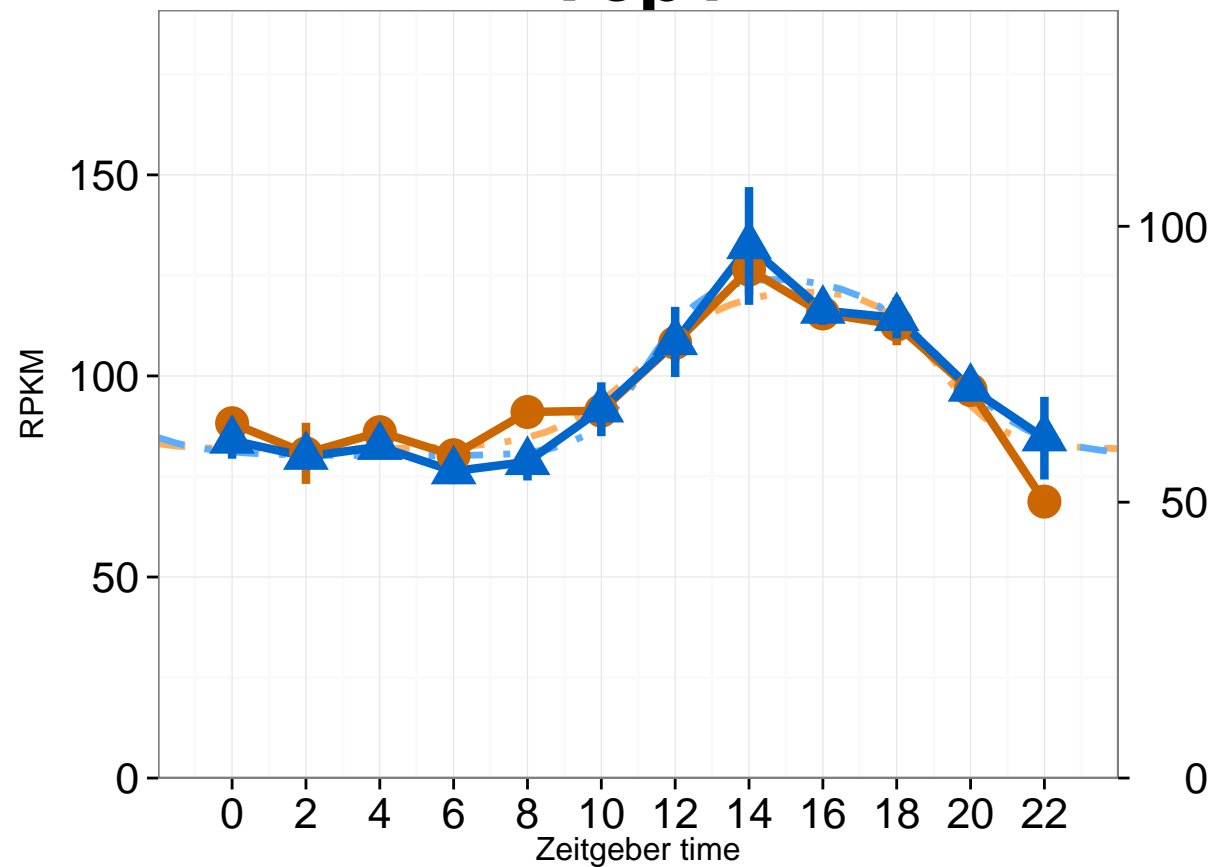

# Tcp1

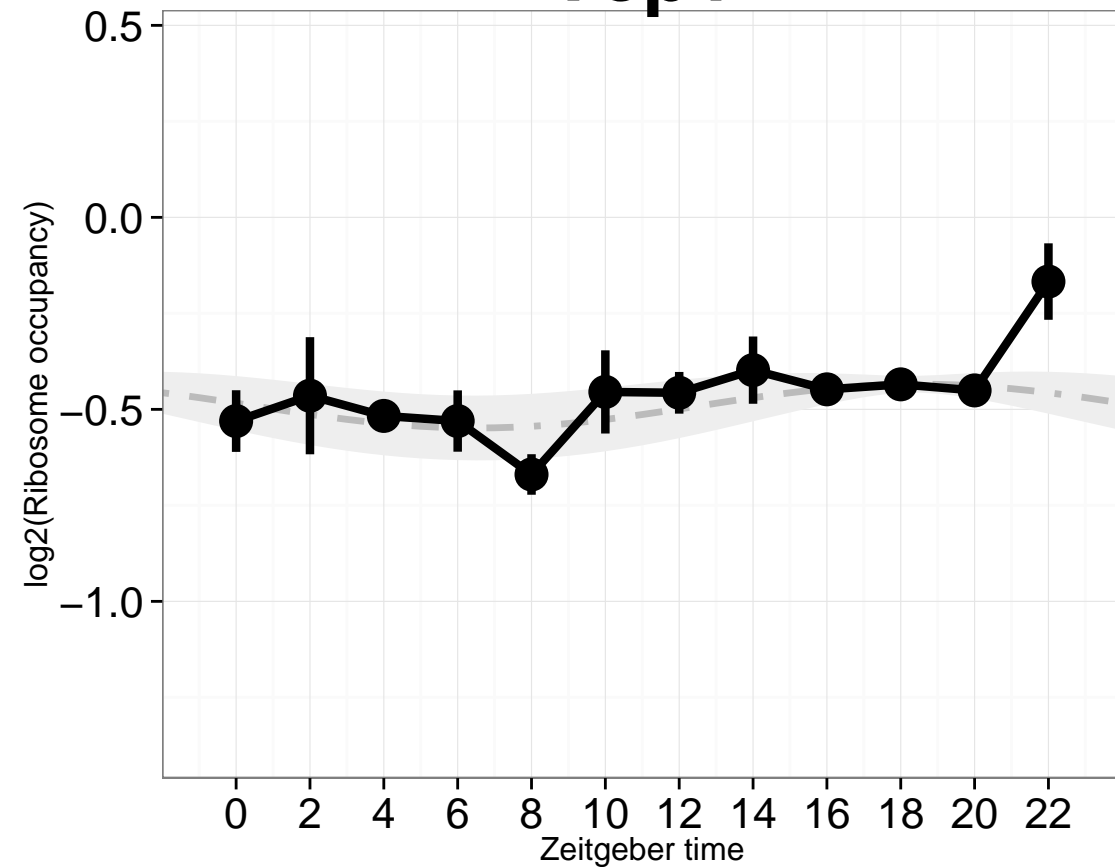

Supplement: SuppDataset_1.zip [file Tcp1_set_C.pdf › Supplemental Dataset 1/C-mRNA_nonrhythm_translation_rhyth/Tcp1_set_C.pdf]

## Tdrkh

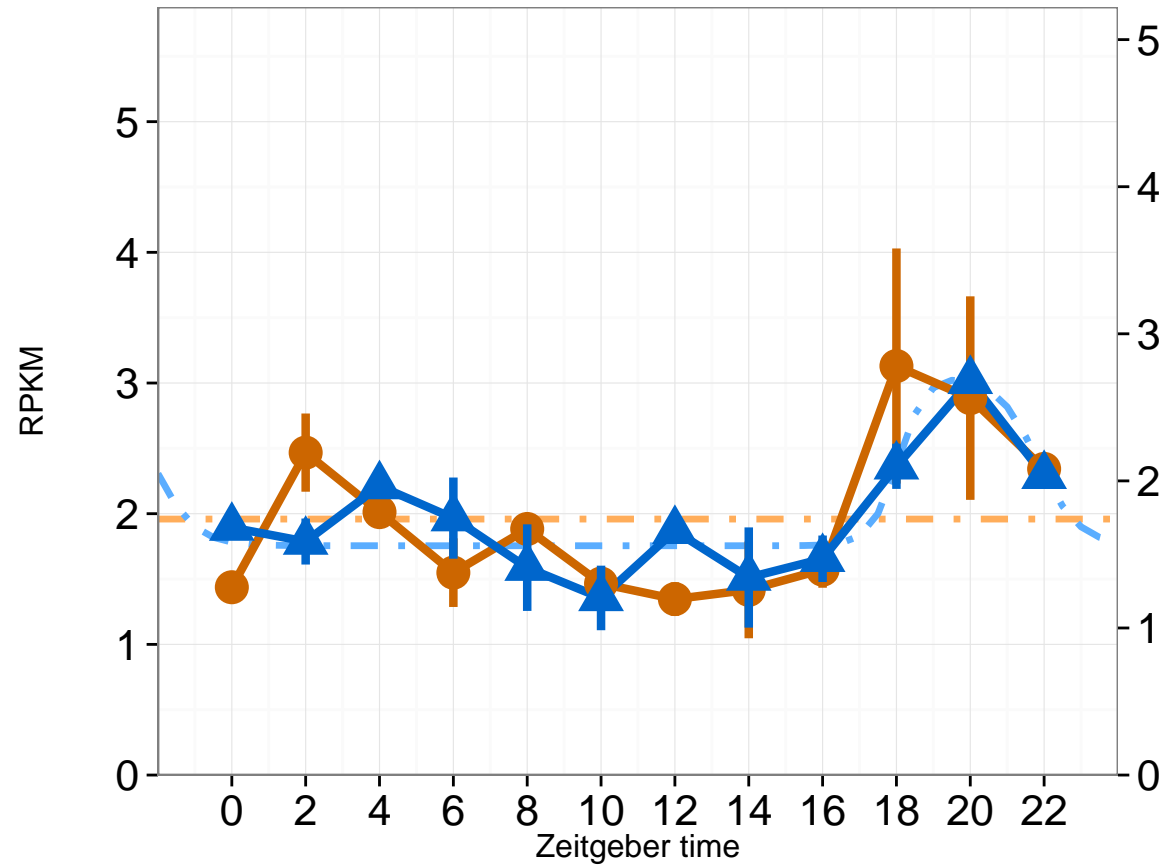

## Tdrkh

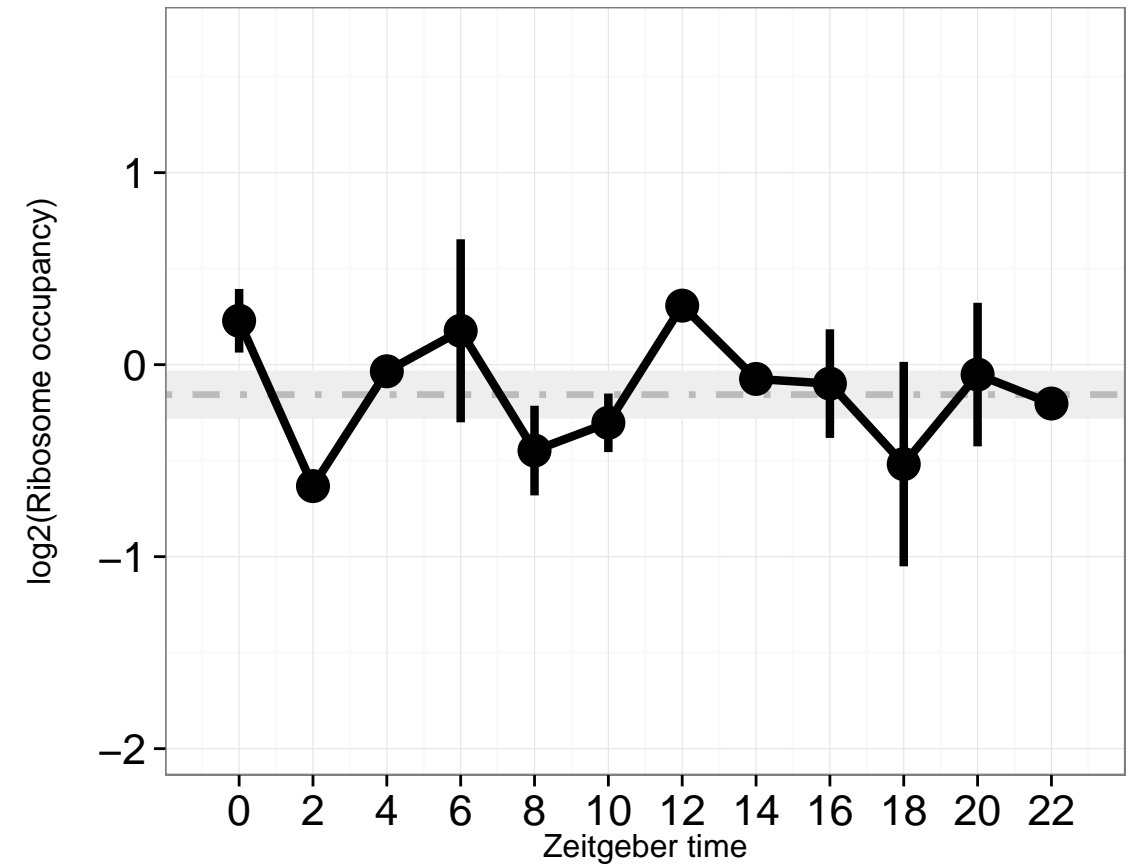

Supplement: SuppDataset_1.zip [file Tdrkh_set_C.pdf › Supplemental Dataset 1/C-mRNA_nonrhythm_translation_rhyth/Tdrkh_set_C.pdf]

## Tgfbr3

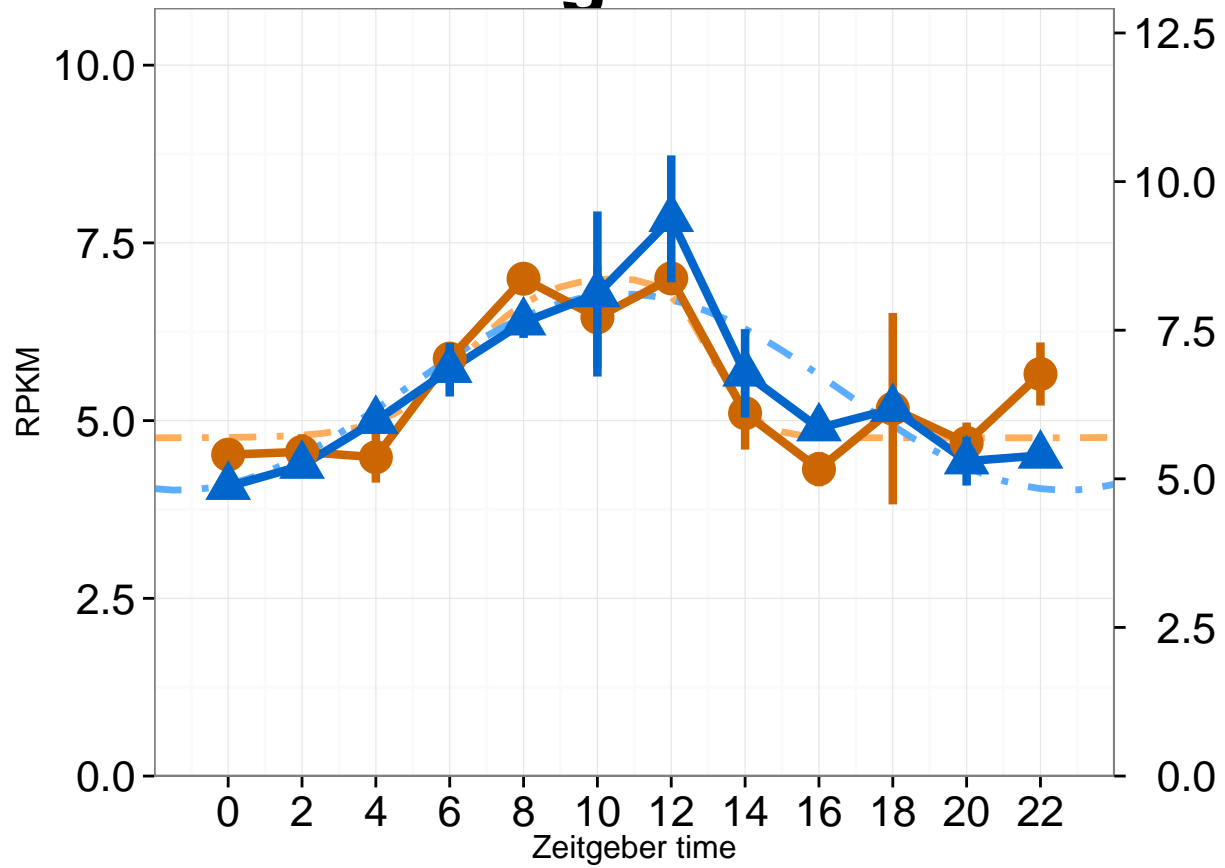

## Tgfbr3

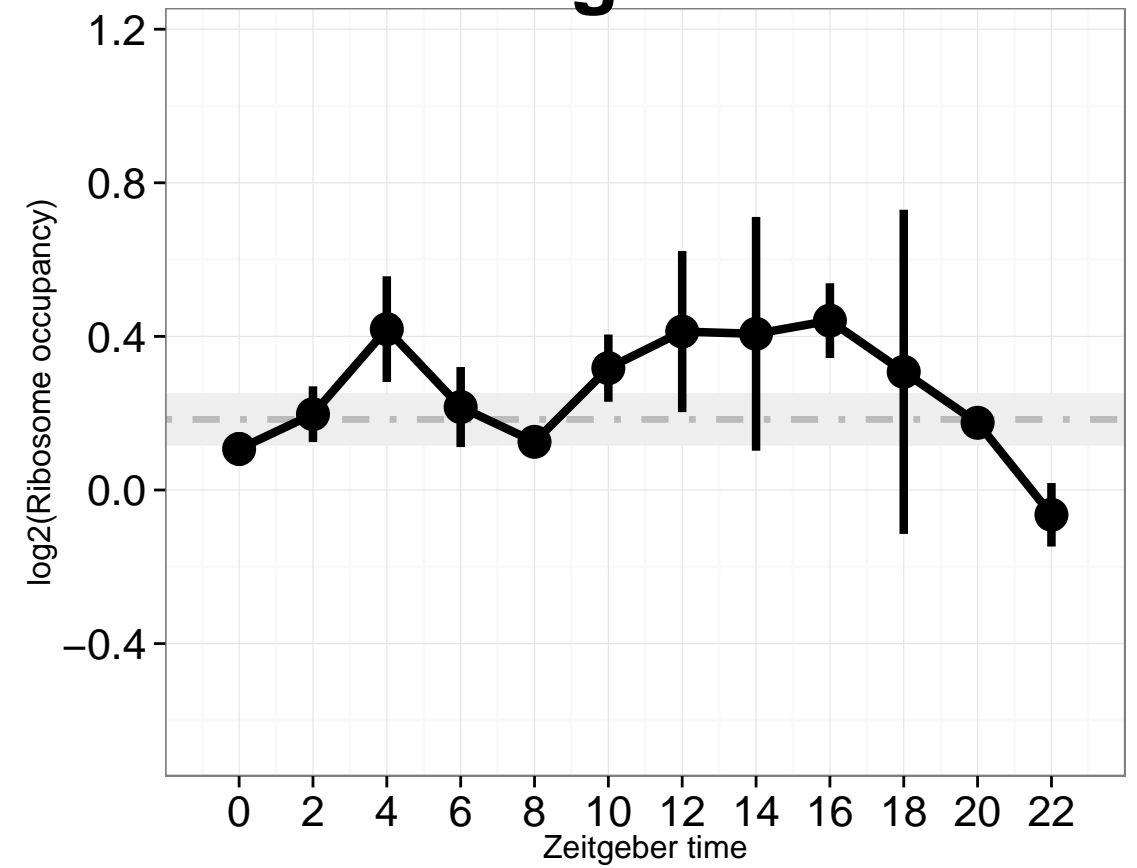

Supplement: SuppDataset_1.zip [file Tgfbr3_set_C.pdf › Supplemental Dataset 1/C-mRNA_nonrhythm_translation_rhyth/Tgfbr3_set_C.pdf]

# Tgoln1

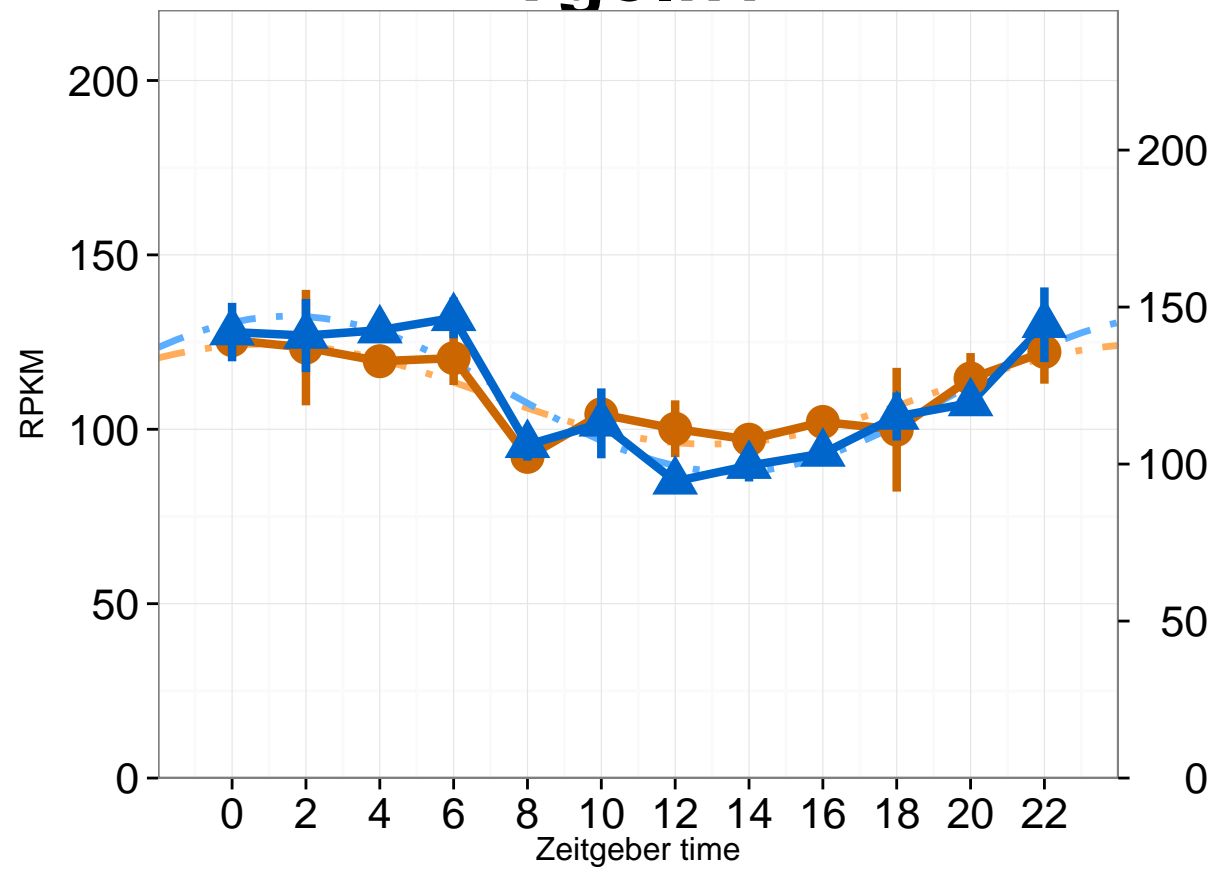

# Tgoln1

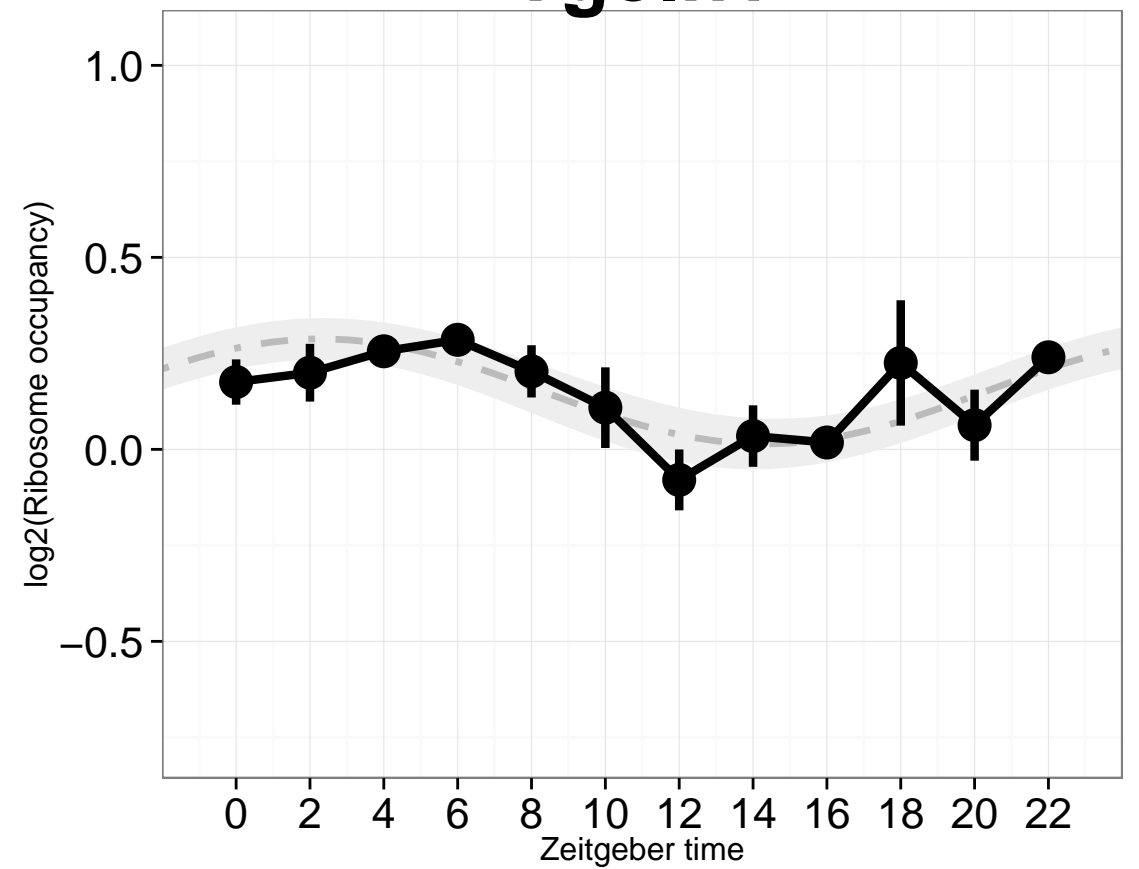

Supplement: SuppDataset_1.zip [file Tgoln1_set_C.pdf › Supplemental Dataset 1/C-mRNA_nonrhythm_translation_rhyth/Tgoln1_set_C.pdf]

# Tgtp1

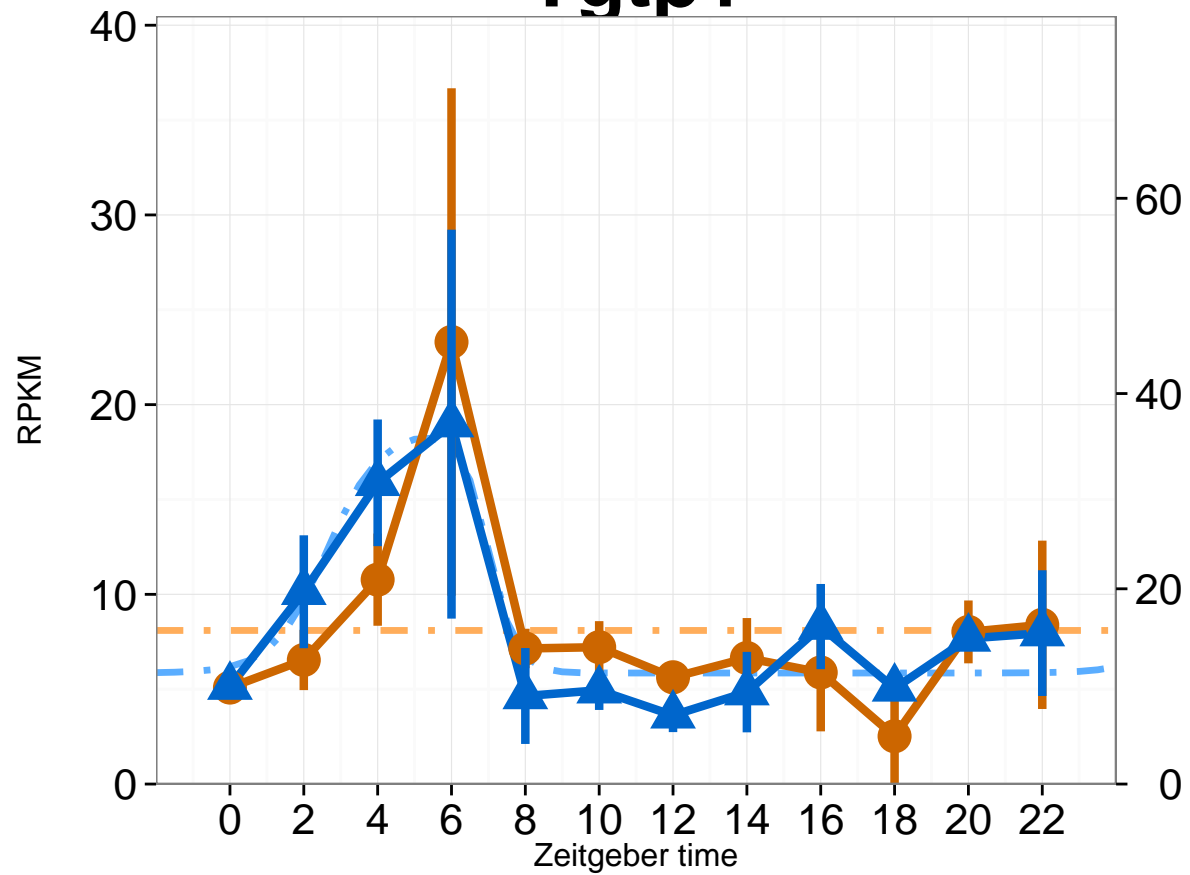

# Tgtp1

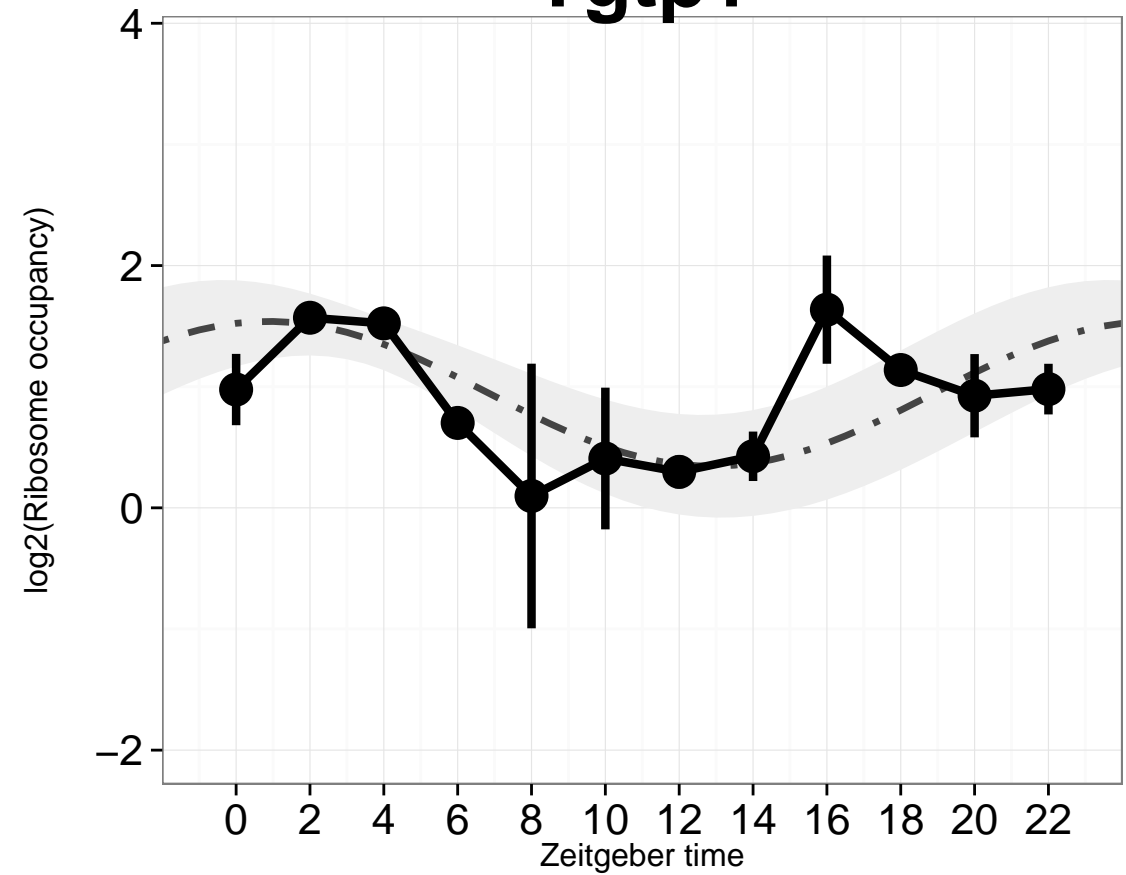

Supplement: SuppDataset_1.zip [file Tgtp1_set_C.pdf › Supplemental Dataset 1/C-mRNA_nonrhythm_translation_rhyth/Tgtp1_set_C.pdf]

# Them6

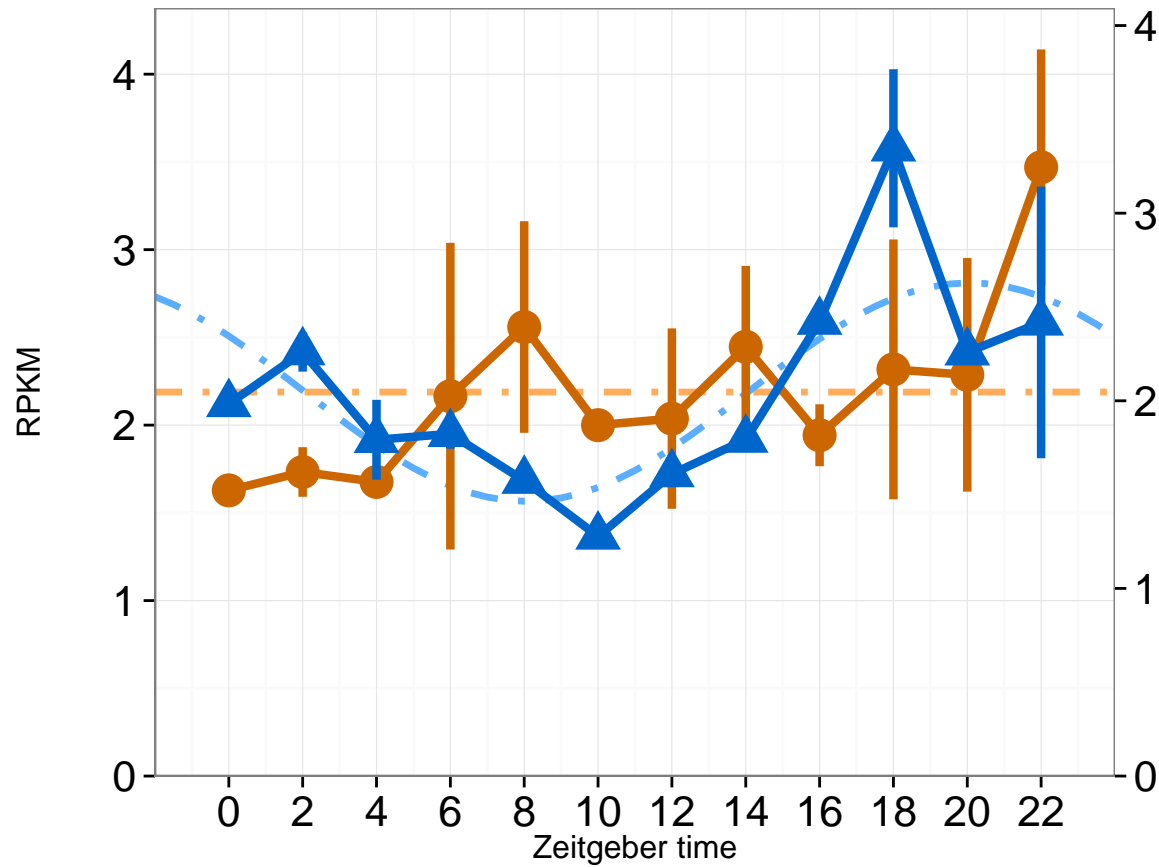

# Them6

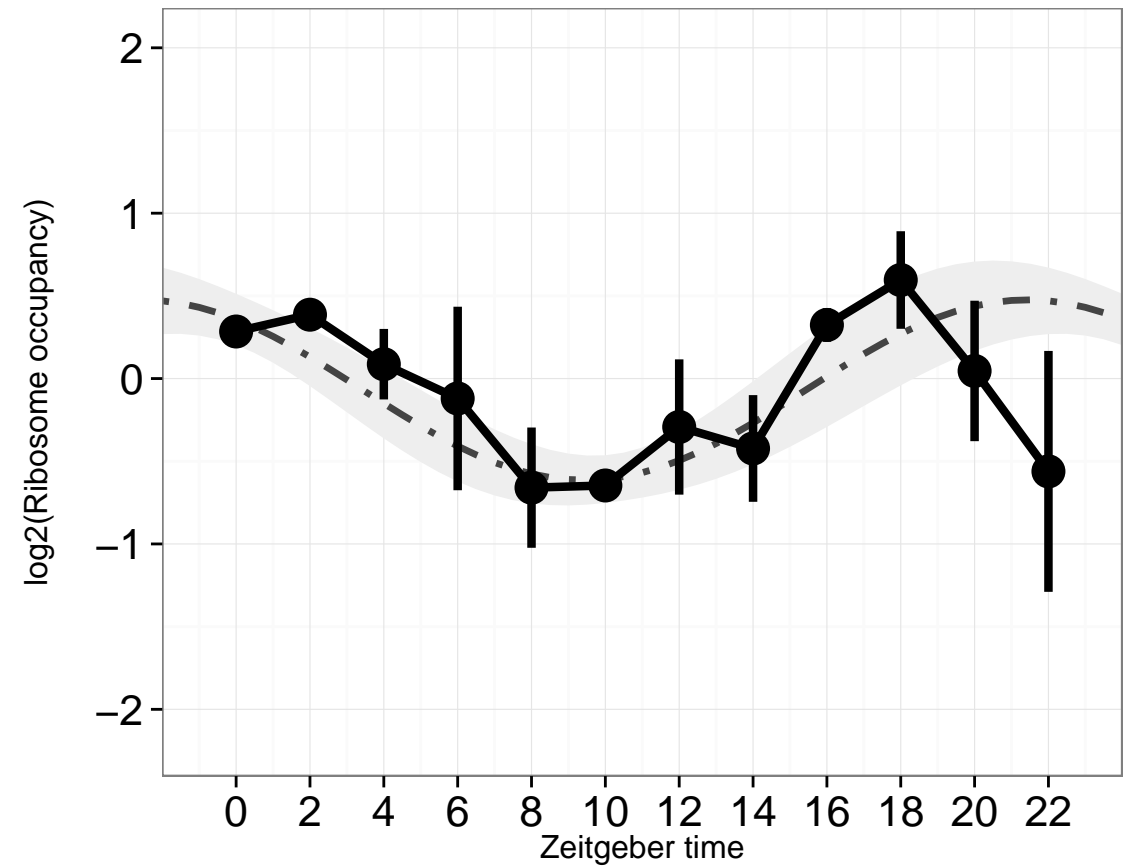

Supplement: SuppDataset_1.zip [file Them6_set_C.pdf › Supplemental Dataset 1/C-mRNA_nonrhythm_translation_rhyth/Them6_set_C.pdf]

# Tigd2

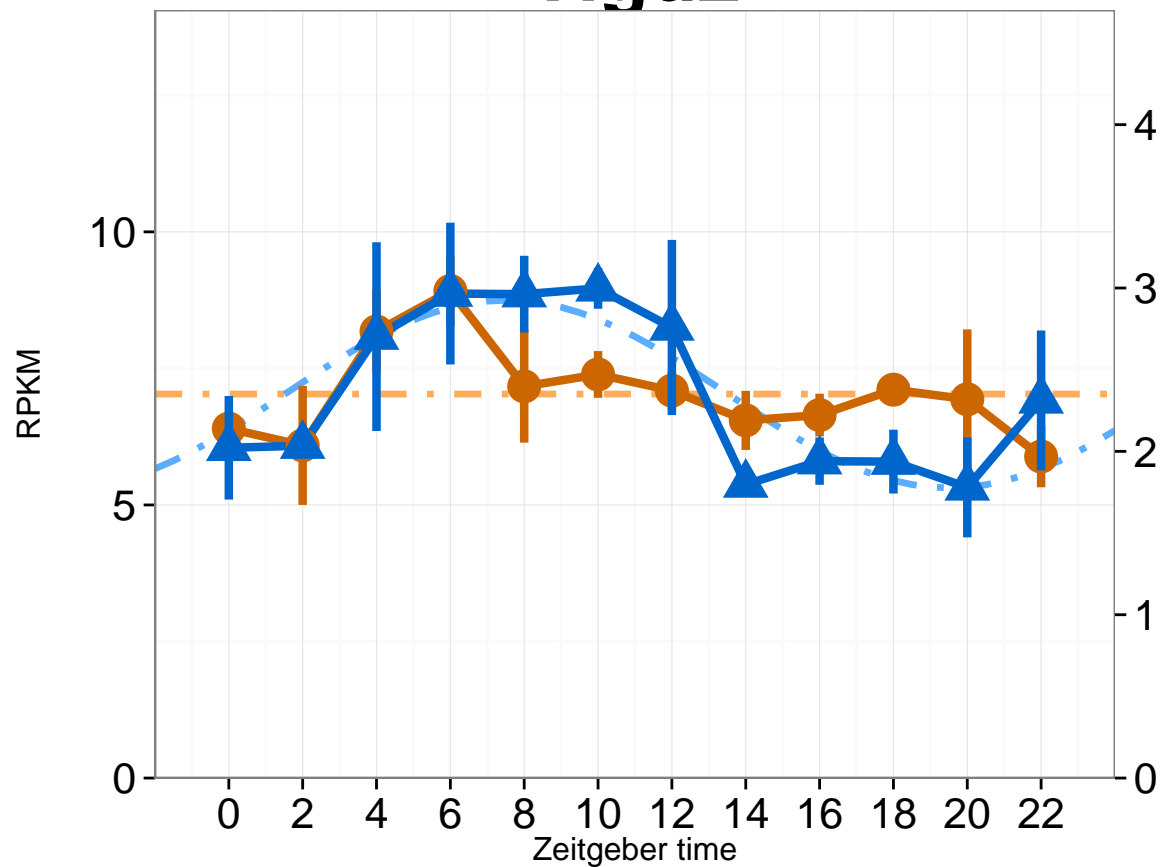

# Tigd2

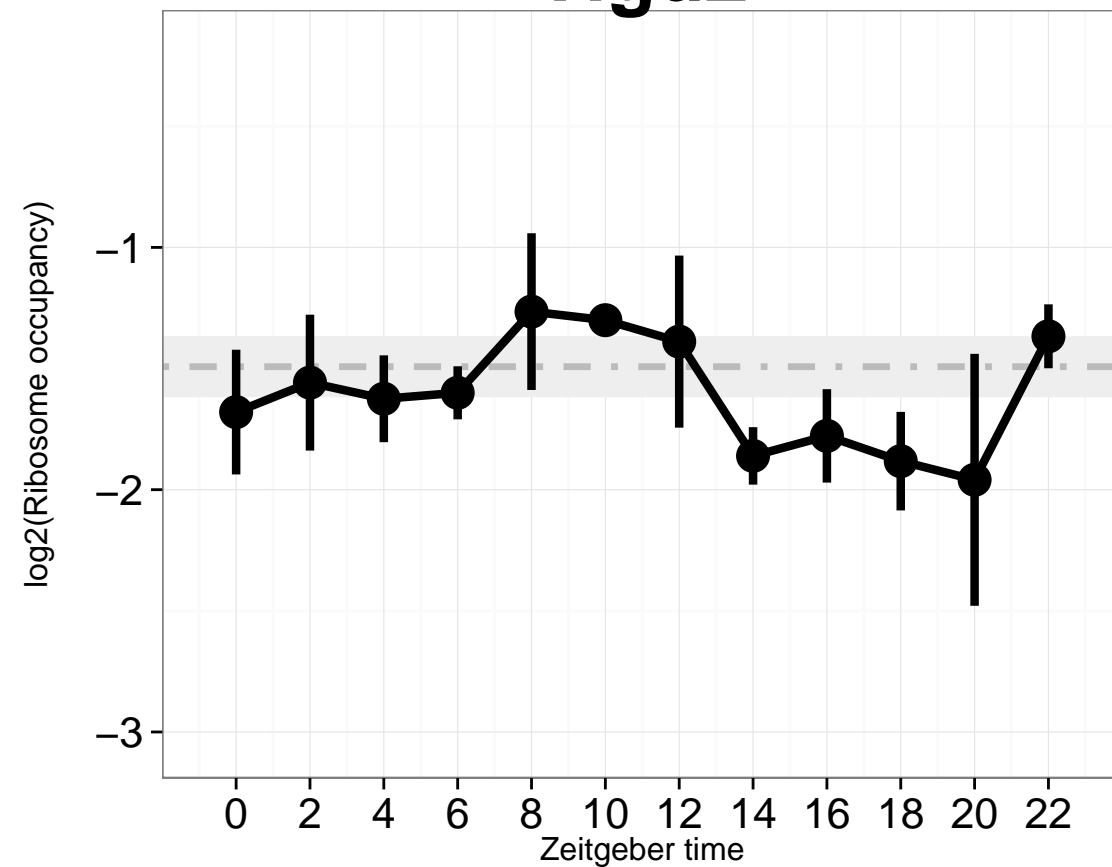

Supplement: SuppDataset_1.zip [file Tigd2_set_C.pdf › Supplemental Dataset 1/C-mRNA_nonrhythm_translation_rhyth/Tigd2_set_C.pdf]

# Timm17a

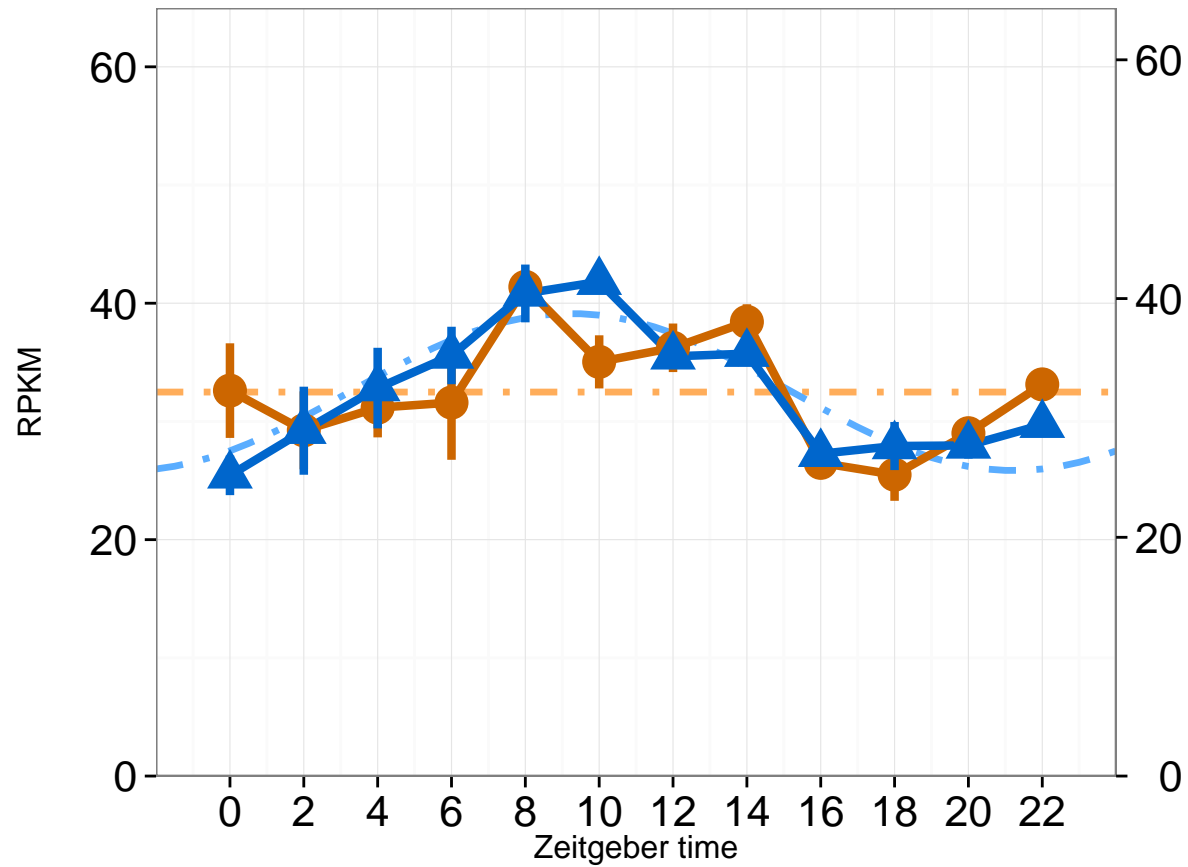

# Timm17a

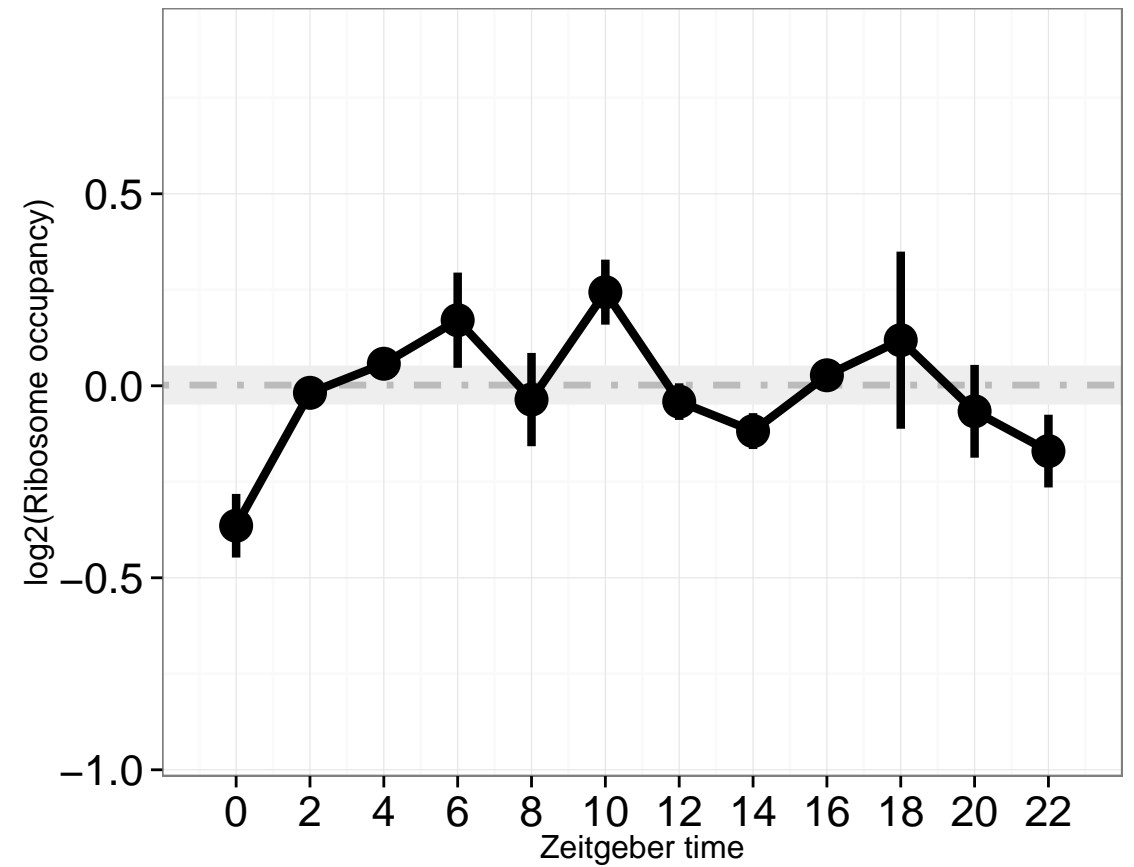

Supplement: SuppDataset_1.zip [file Timm17a_set_C.pdf › Supplemental Dataset 1/C-mRNA_nonrhythm_translation_rhyth/Timm17a_set_C.pdf]

# Timm23

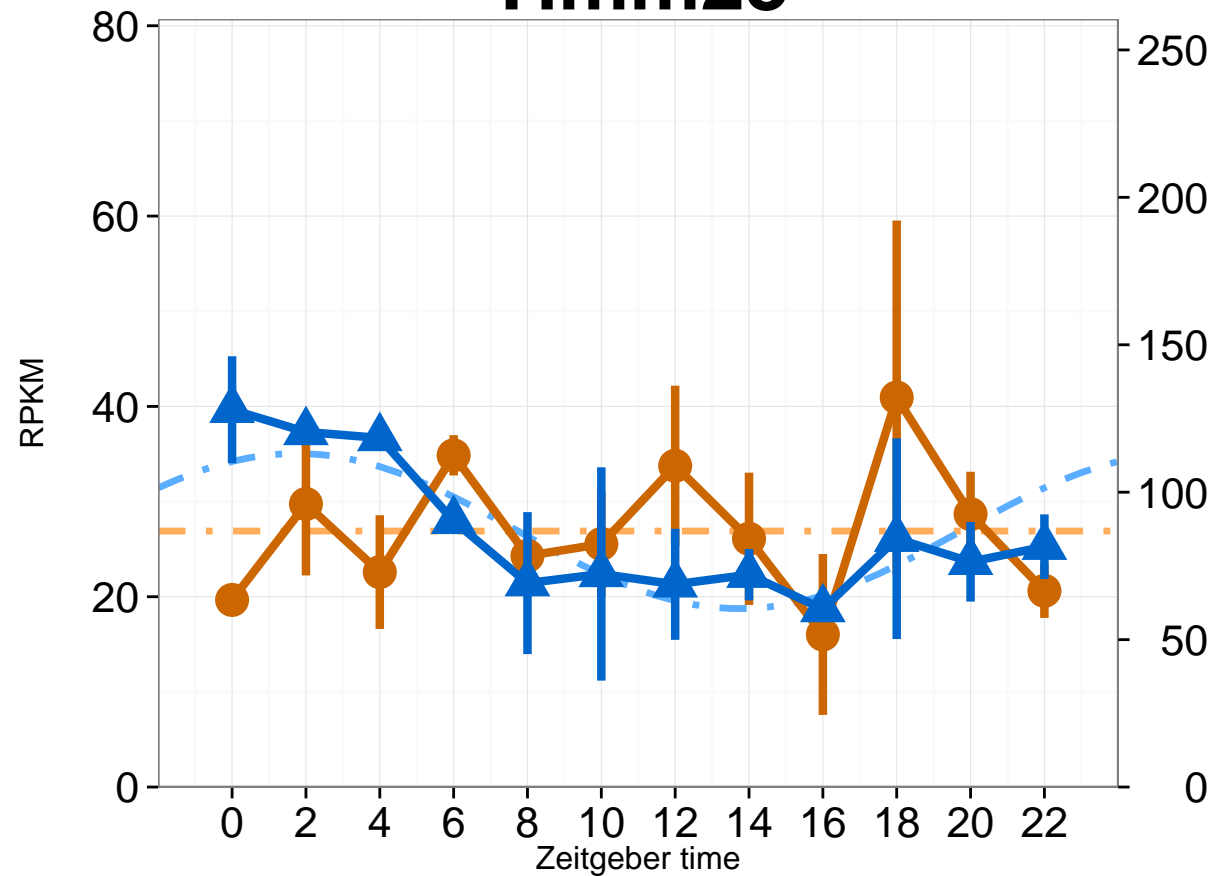

# Timm23

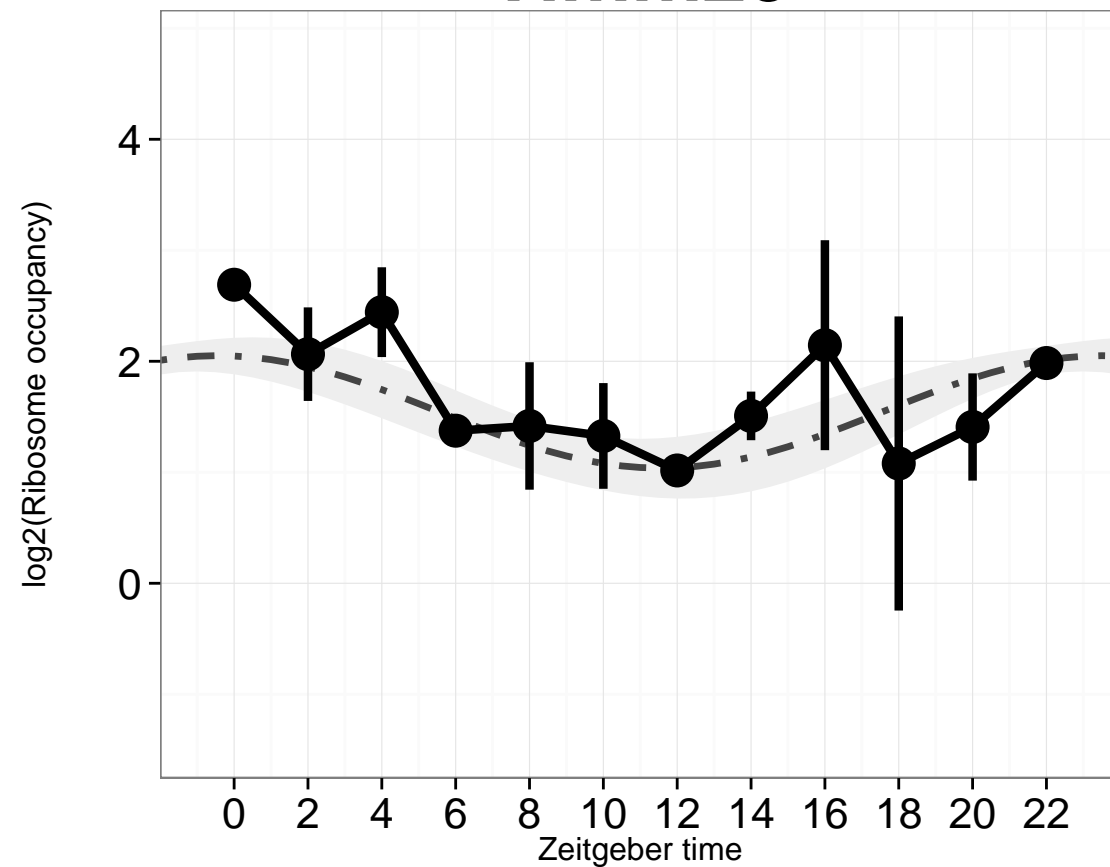

Supplement: SuppDataset_1.zip [file Timm23_set_C.pdf › Supplemental Dataset 1/C-mRNA_nonrhythm_translation_rhyth/Timm23_set_C.pdf]

# Timp3

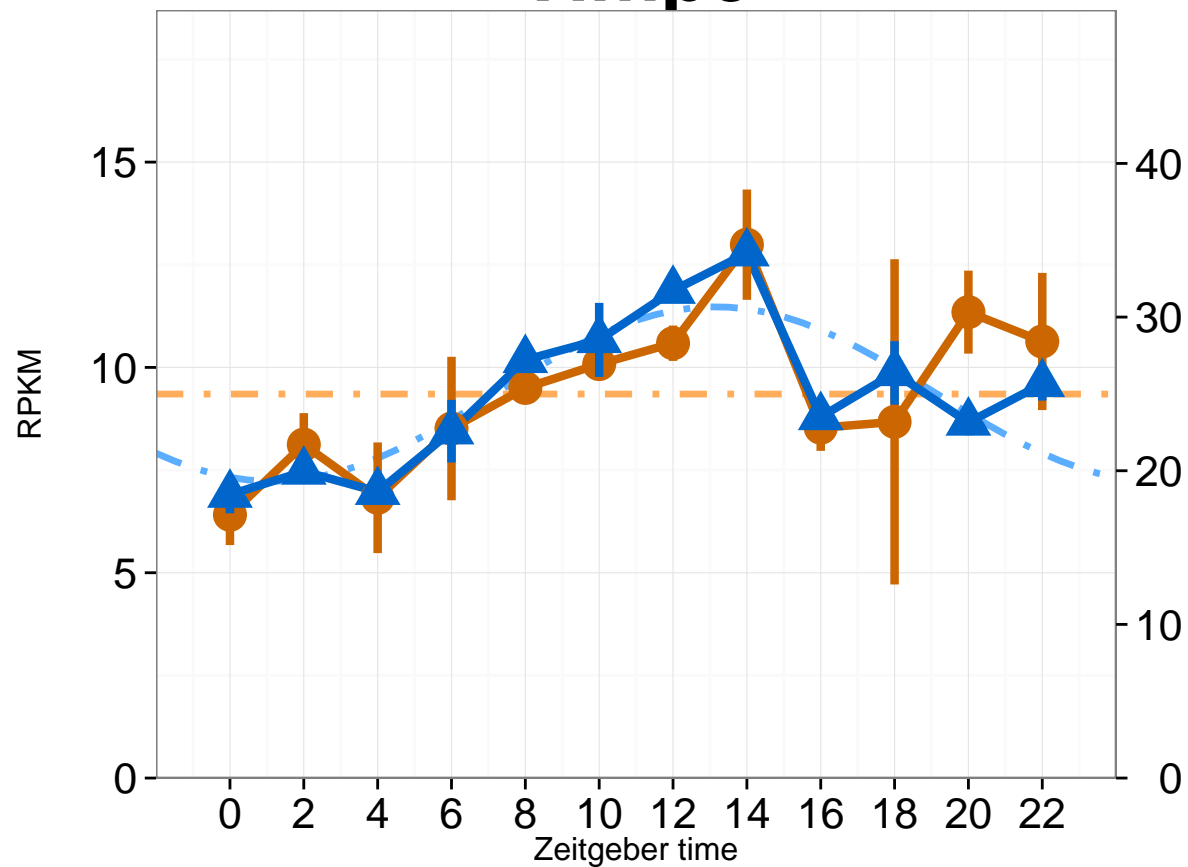

# Timp3

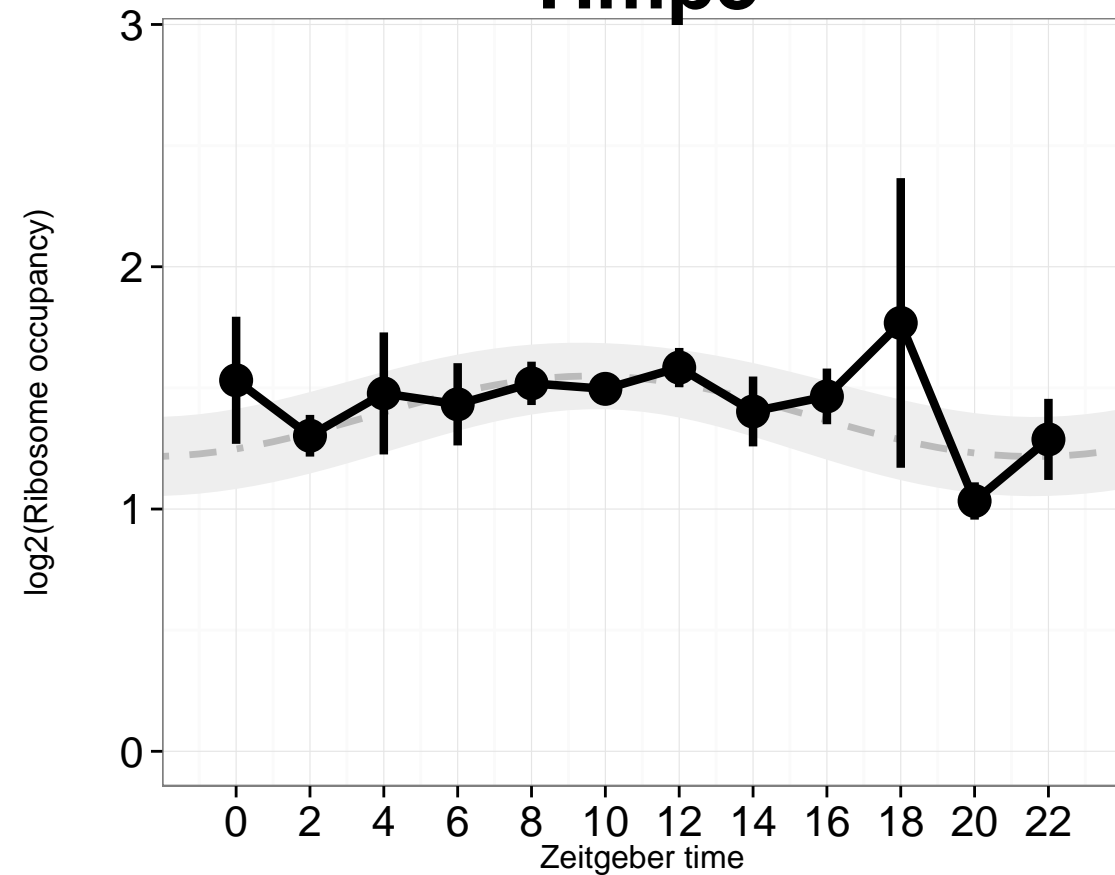

Supplement: SuppDataset_1.zip [file Timp3_set_C.pdf › Supplemental Dataset 1/C-mRNA_nonrhythm_translation_rhyth/Timp3_set_C.pdf]

## Tlr7

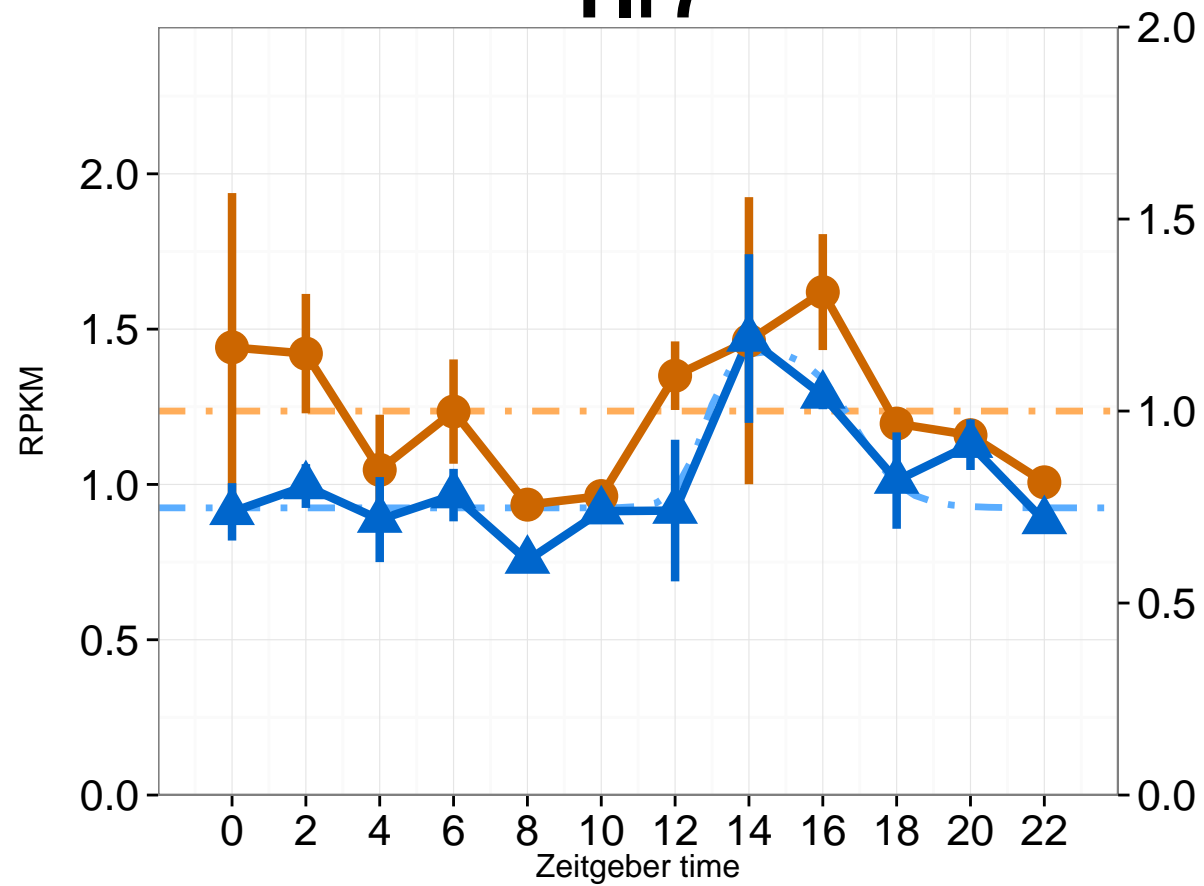

## Tlr7

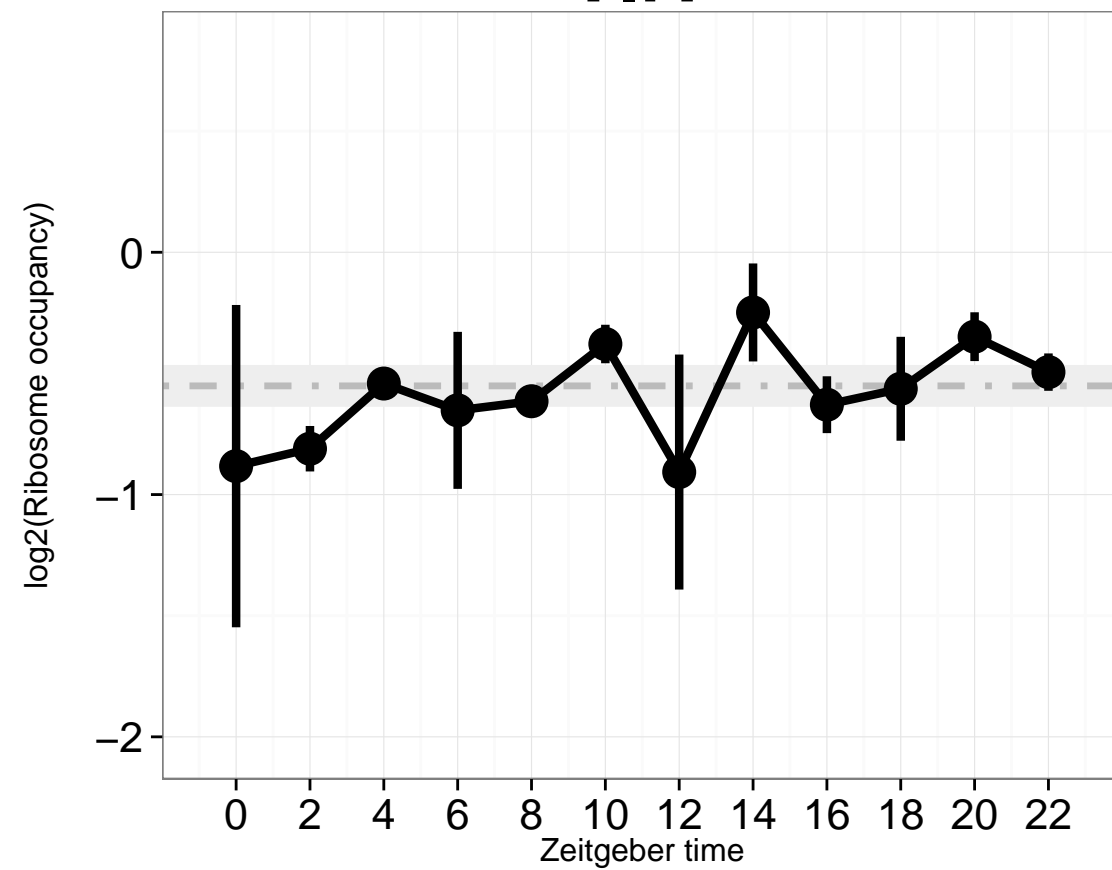

Supplement: SuppDataset_1.zip [file Tlr7_set_C.pdf › Supplemental Dataset 1/C-mRNA_nonrhythm_translation_rhyth/Tlr7_set_C.pdf]

## Tlr8

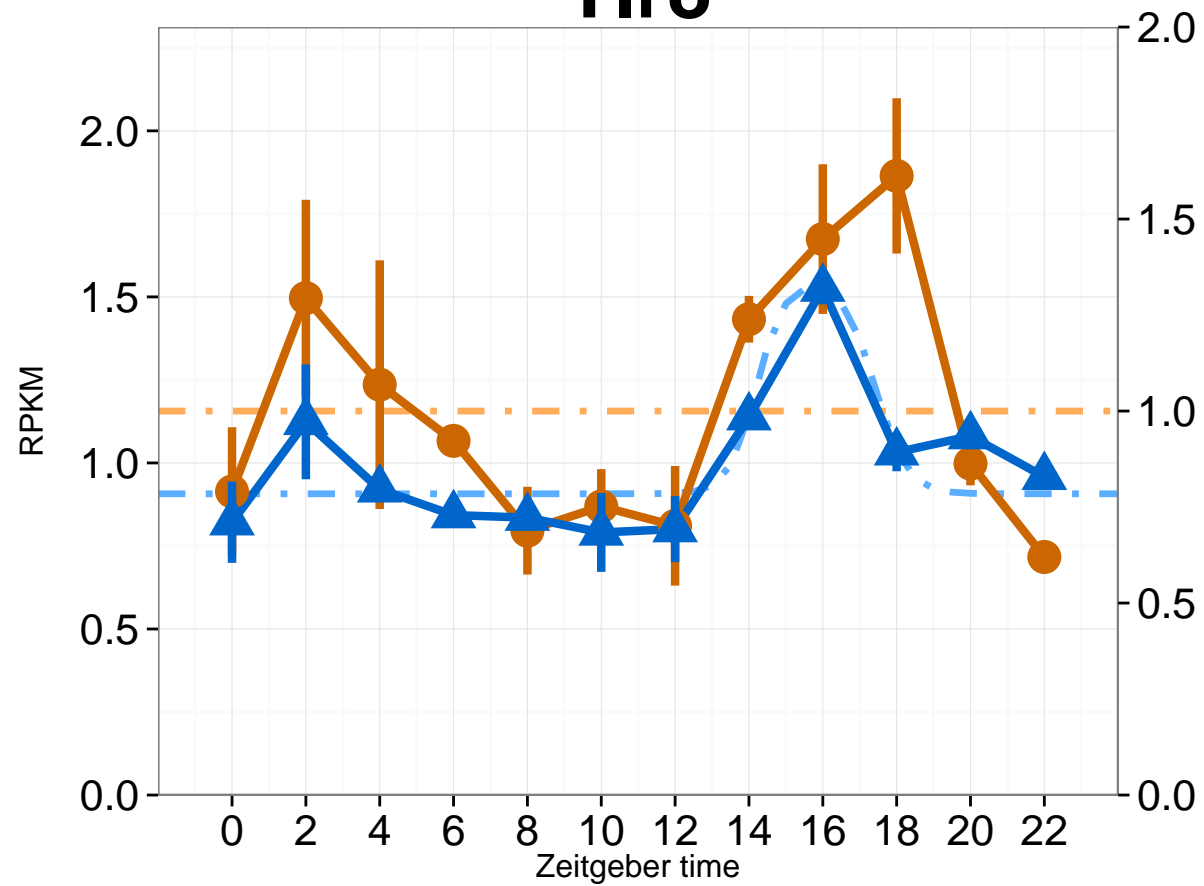

## Tlr8

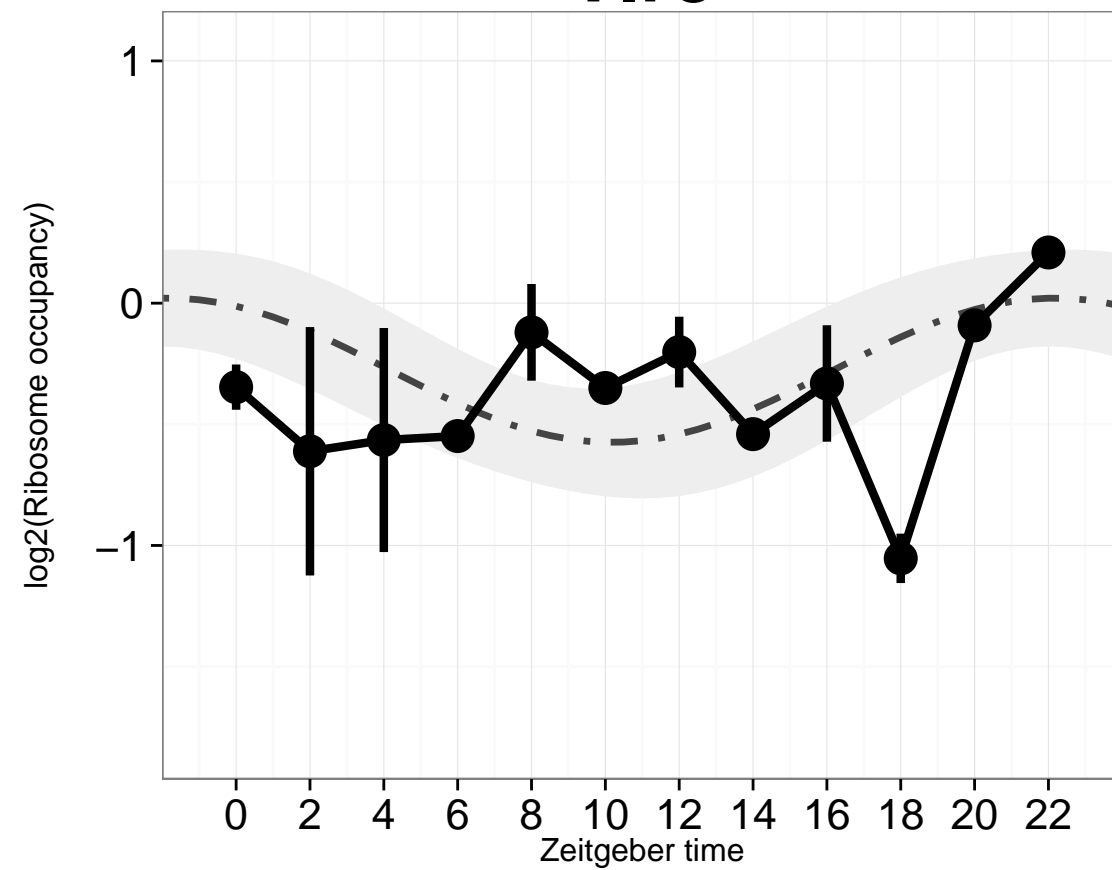

Supplement: SuppDataset_1.zip [file Tlr8_set_C.pdf › Supplemental Dataset 1/C-mRNA_nonrhythm_translation_rhyth/Tlr8_set_C.pdf]

# Tmem106a

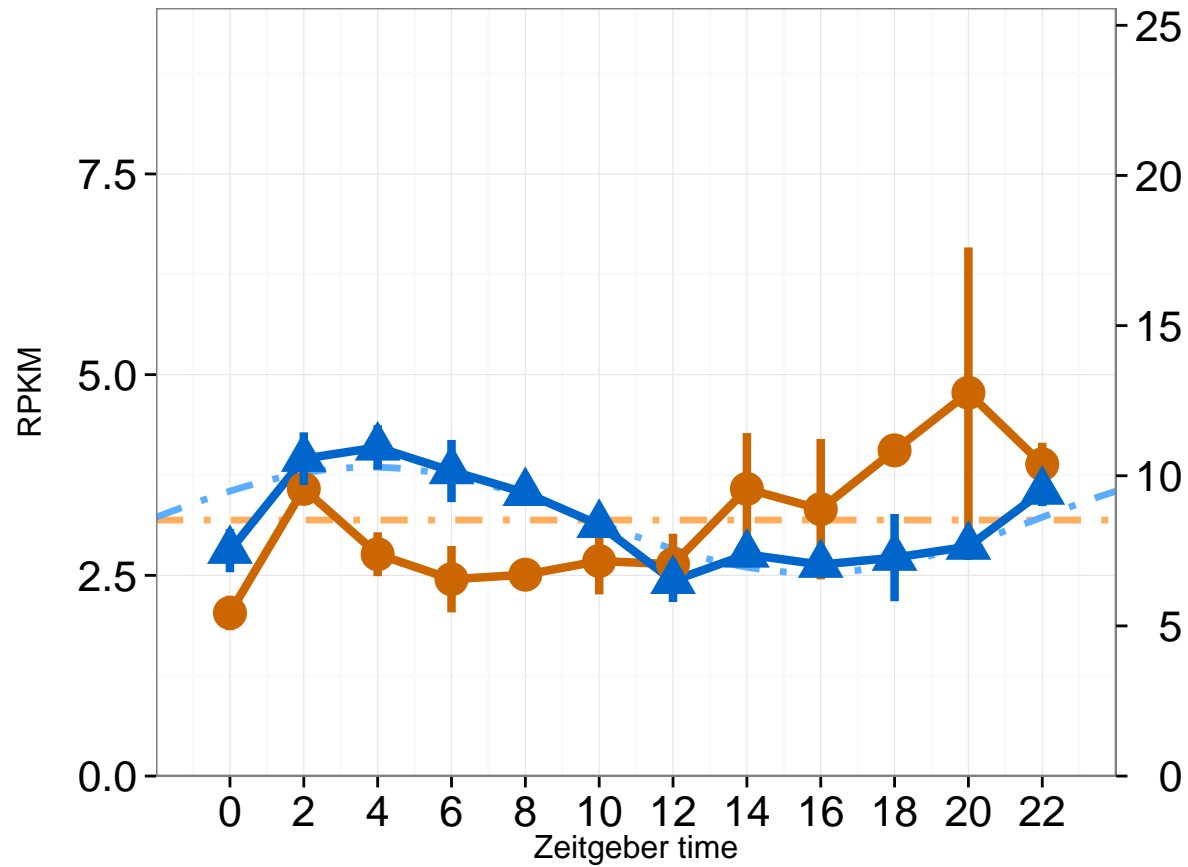

# Tmem106a

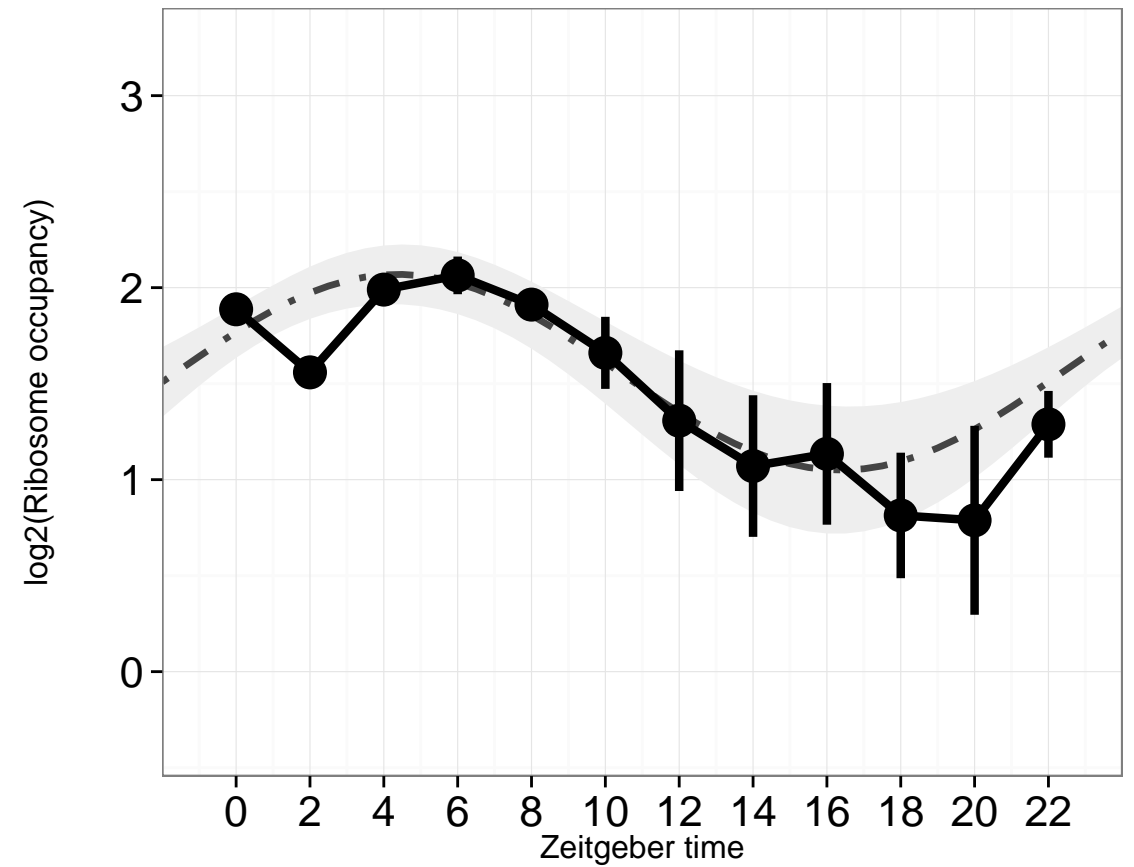

Supplement: SuppDataset_1.zip [file Tmem106a_set_C.pdf › Supplemental Dataset 1/C-mRNA_nonrhythm_translation_rhyth/Tmem106a_set_C.pdf]

# Tmem14a

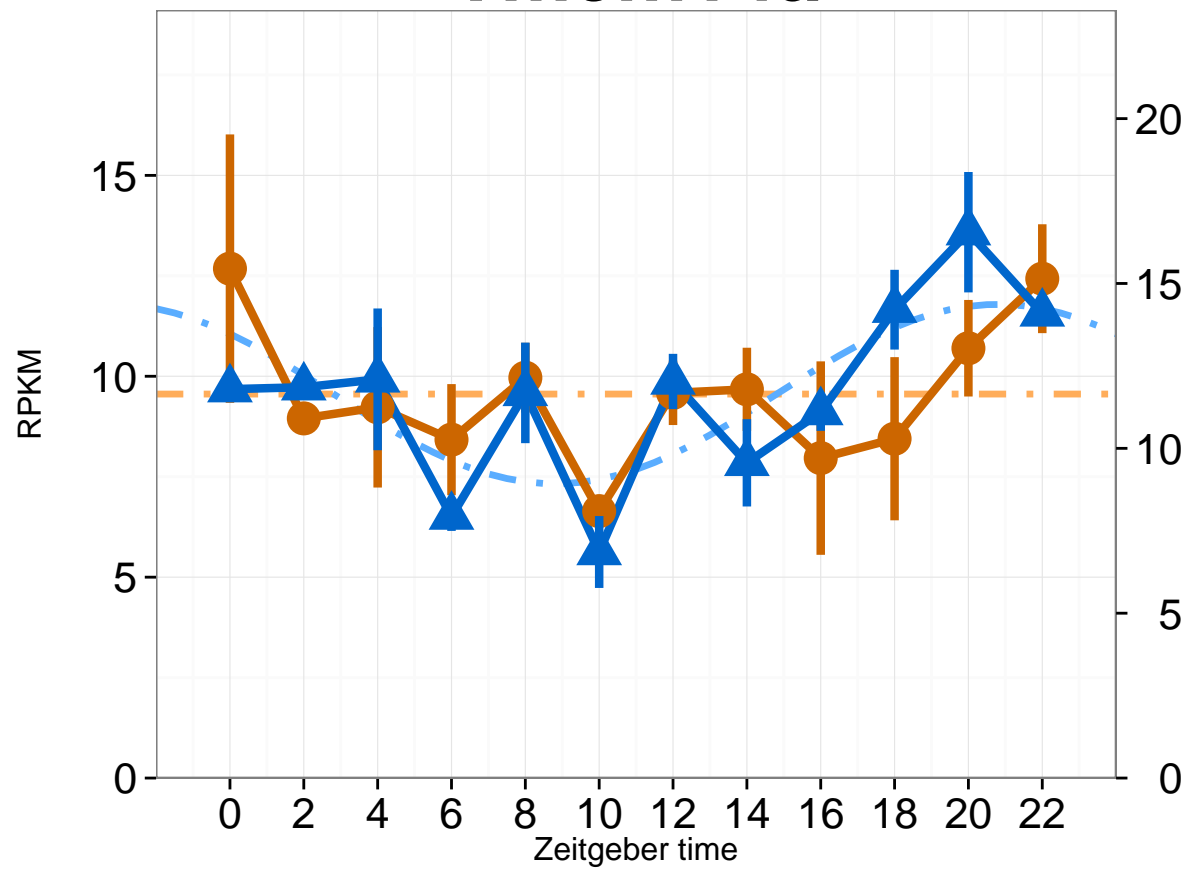

# Tmem14a

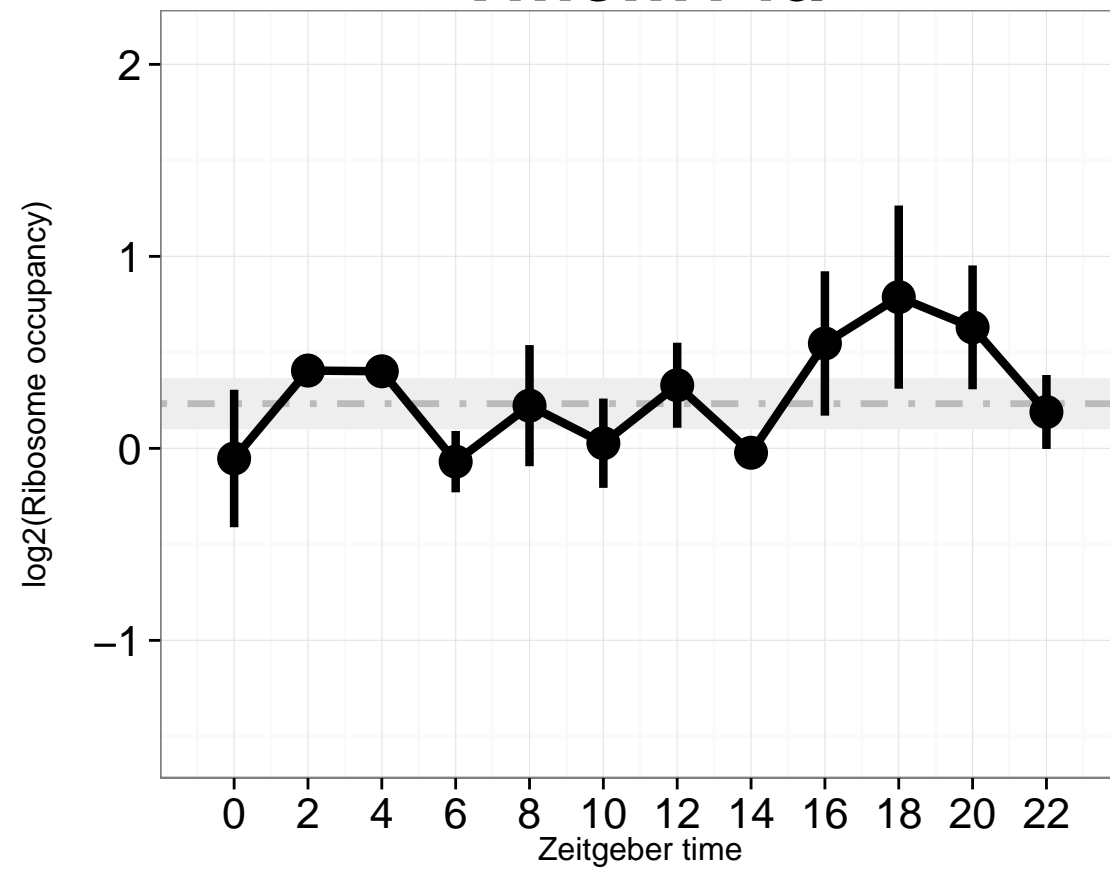

Supplement: SuppDataset_1.zip [file Tmem14a_set_C.pdf › Supplemental Dataset 1/C-mRNA_nonrhythm_translation_rhyth/Tmem14a_set_C.pdf]

# Tmem176a

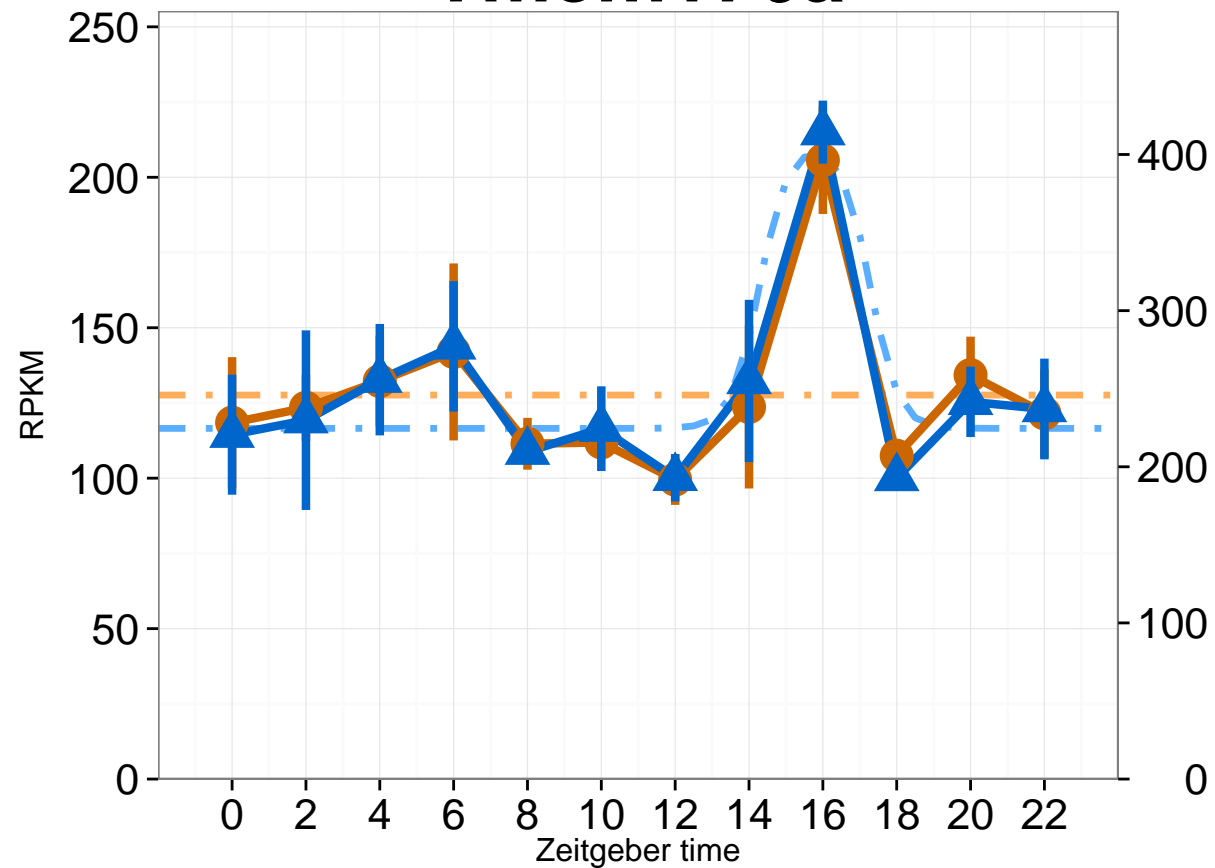

# Tmem176a

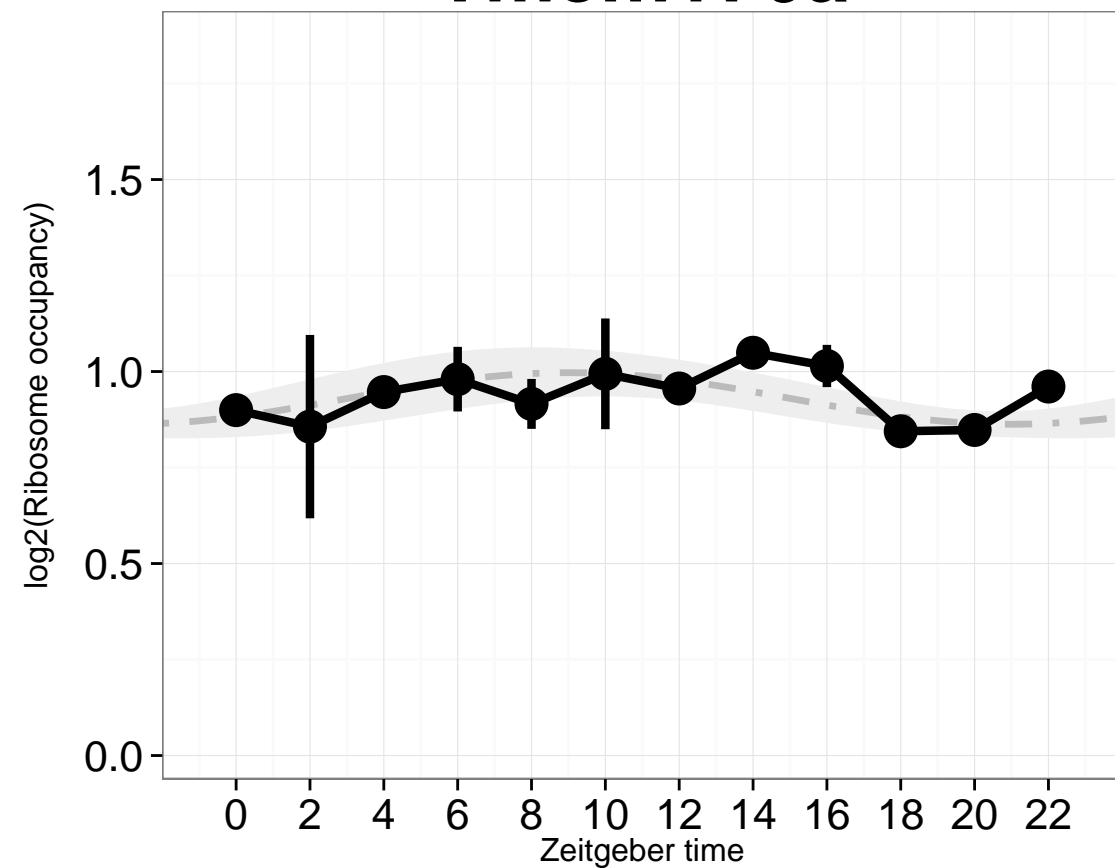

Supplement: SuppDataset_1.zip [file Tmem176a_set_C.pdf › Supplemental Dataset 1/C-mRNA_nonrhythm_translation_rhyth/Tmem176a_set_C.pdf]

# Tmem184a

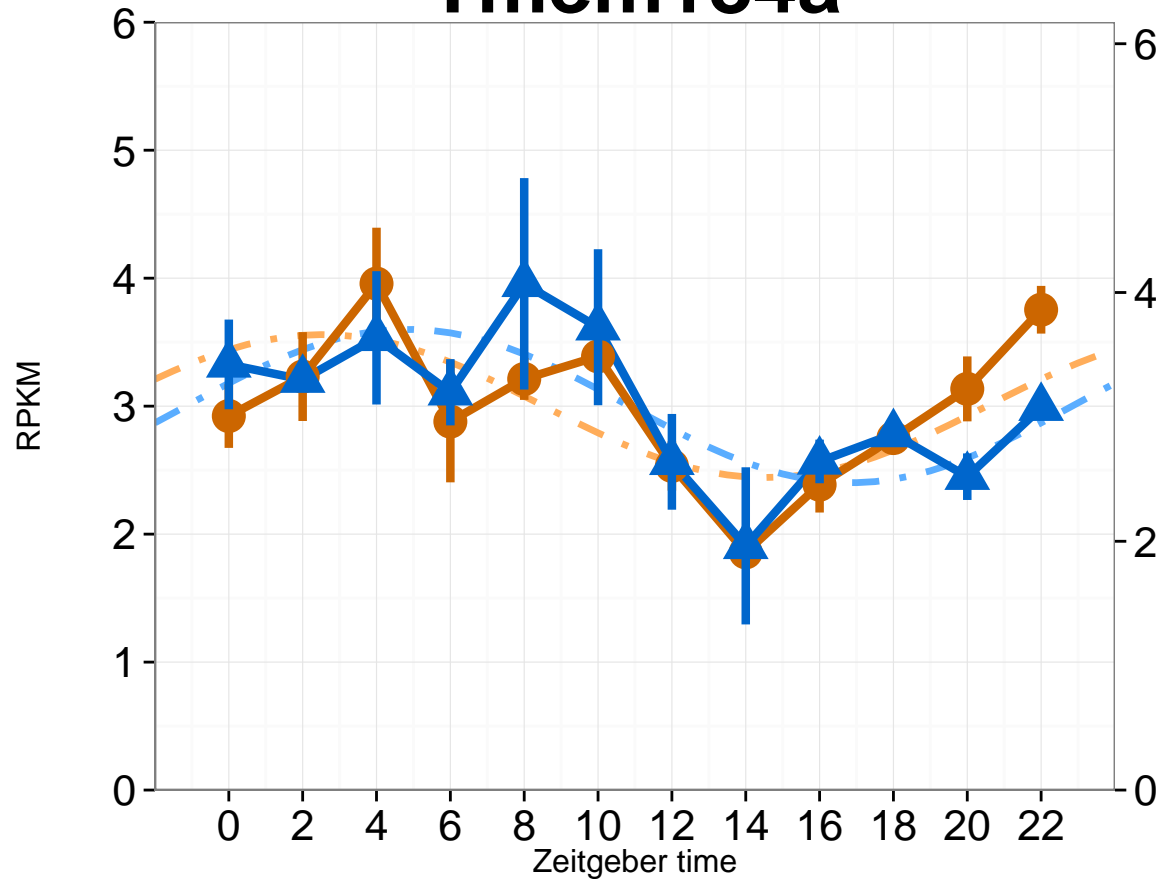

# Tmem184a

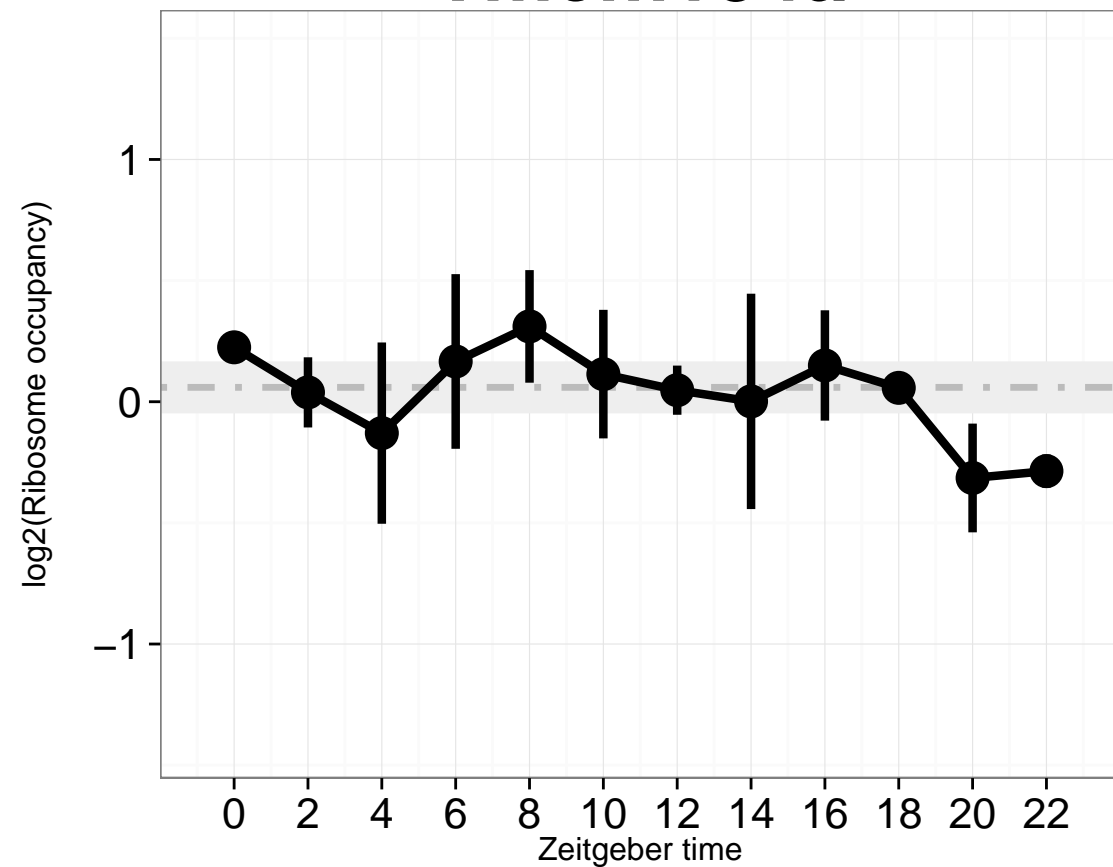

Supplement: SuppDataset_1.zip [file Tmem184a_set_C.pdf › Supplemental Dataset 1/C-mRNA_nonrhythm_translation_rhyth/Tmem184a_set_C.pdf]

# Tmem200b

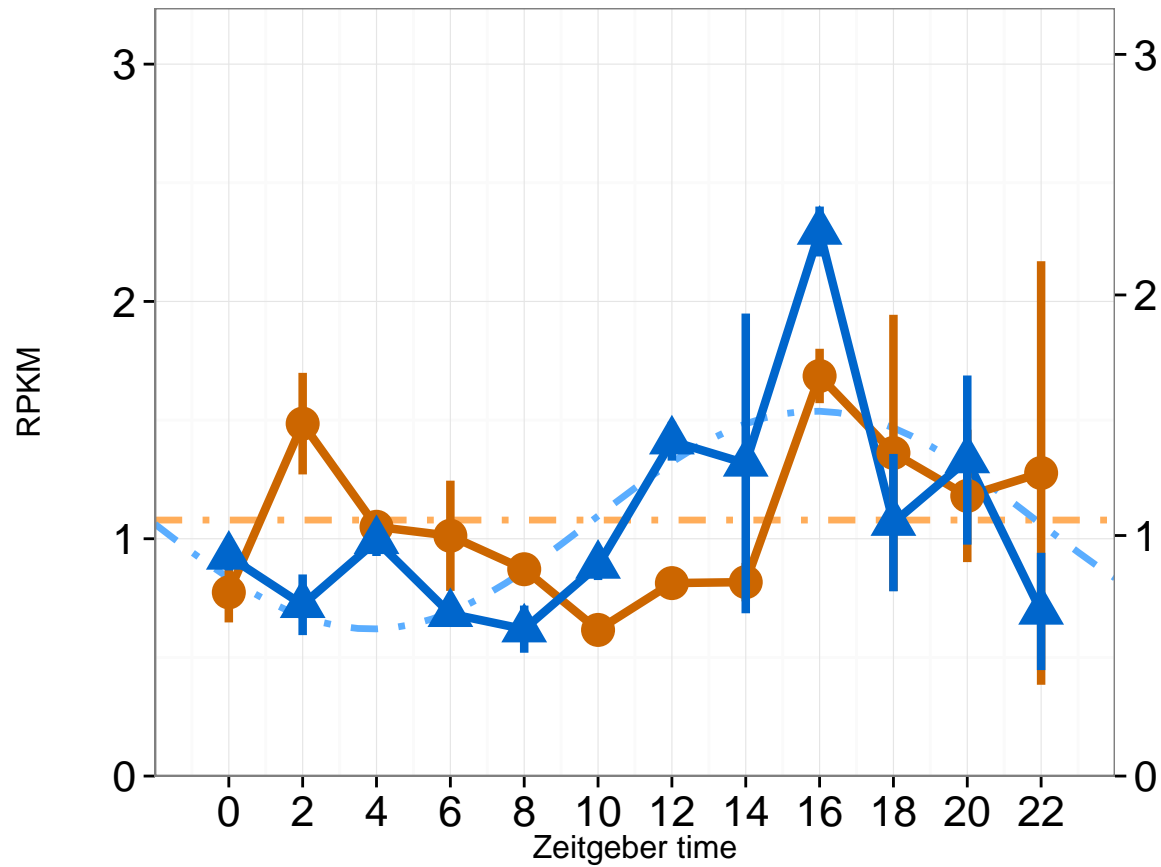

# Tmem200b

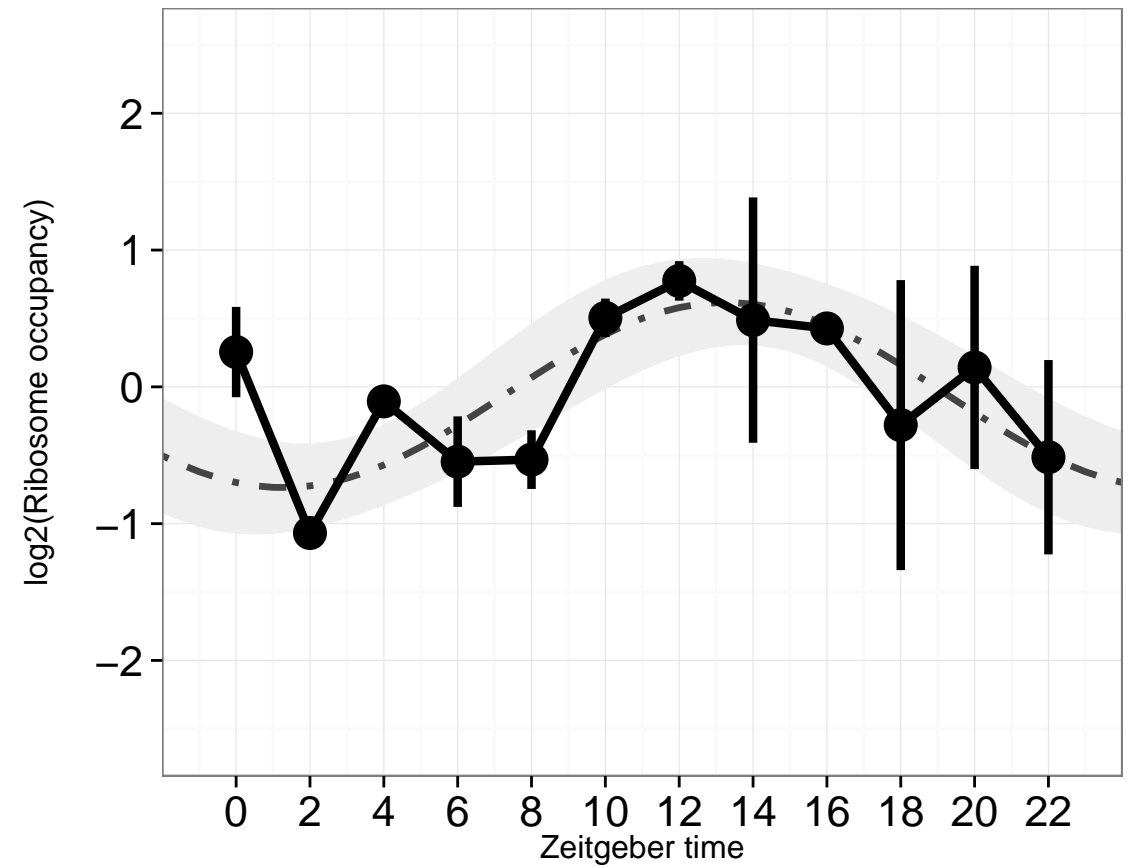

Supplement: SuppDataset_1.zip [file Tmem200b_set_C.pdf › Supplemental Dataset 1/C-mRNA_nonrhythm_translation_rhyth/Tmem200b_set_C.pdf]

# Tmem204

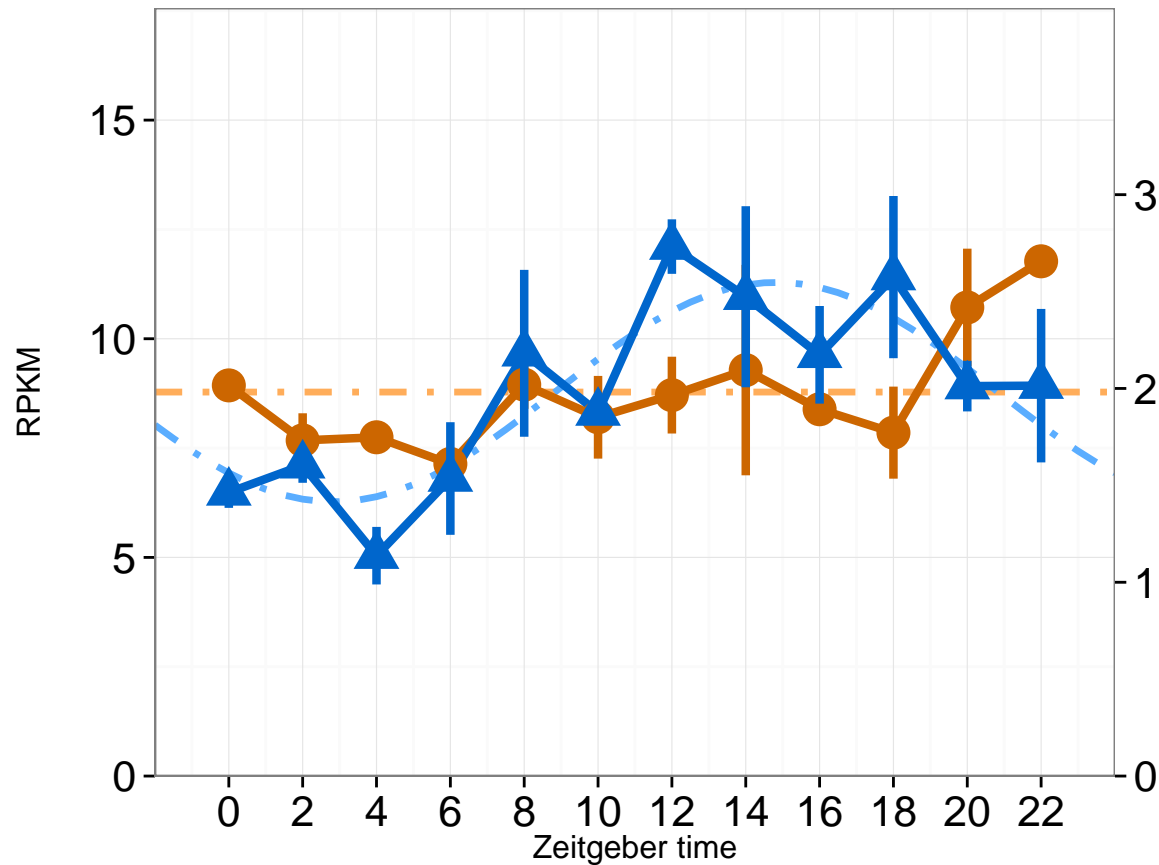

# Tmem204

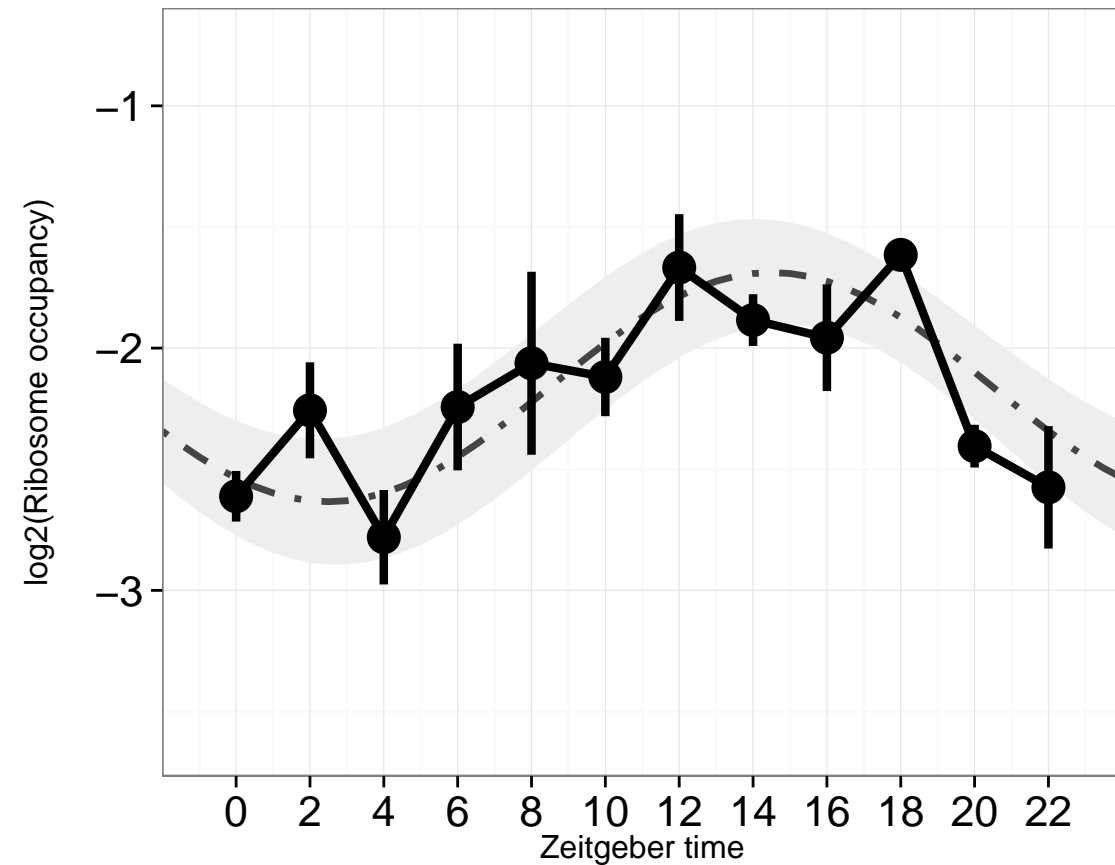

Supplement: SuppDataset_1.zip [file Tmem204_set_C.pdf › Supplemental Dataset 1/C-mRNA_nonrhythm_translation_rhyth/Tmem204_set_C.pdf]

# Tmem206

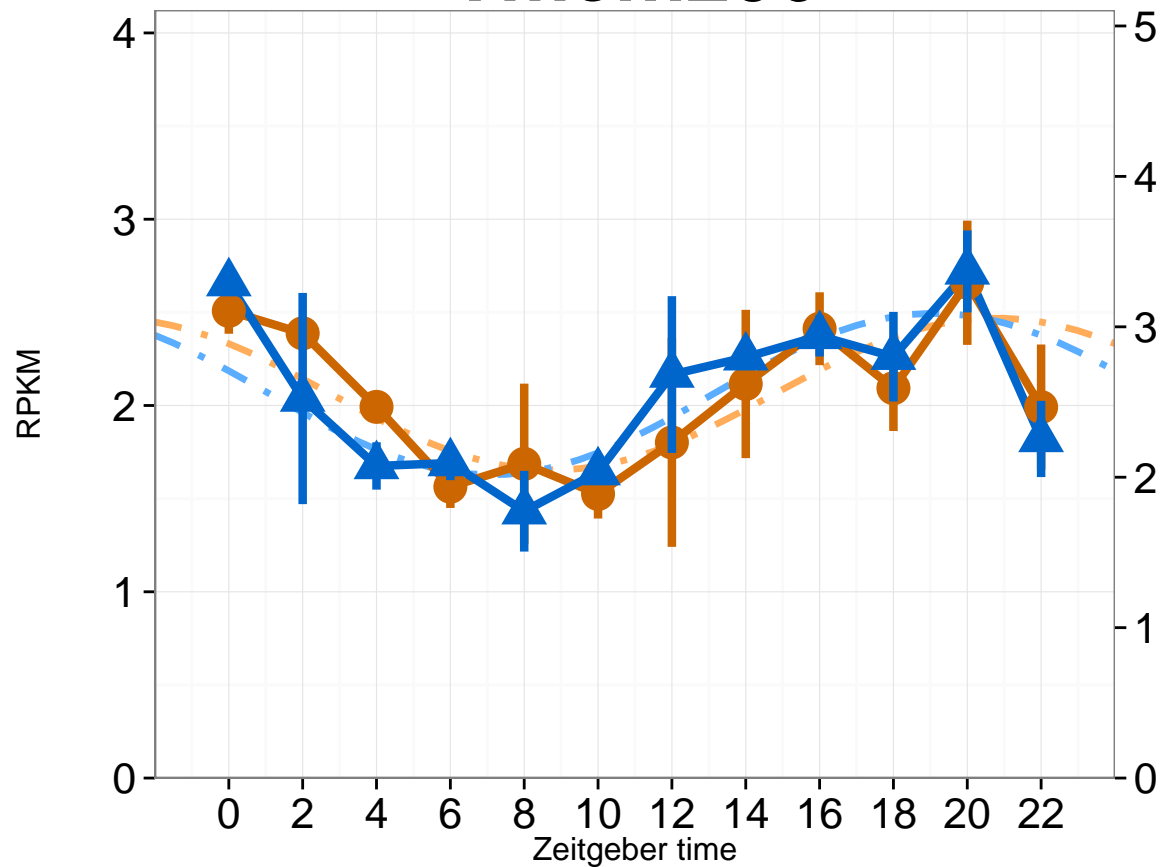

# Tmem206

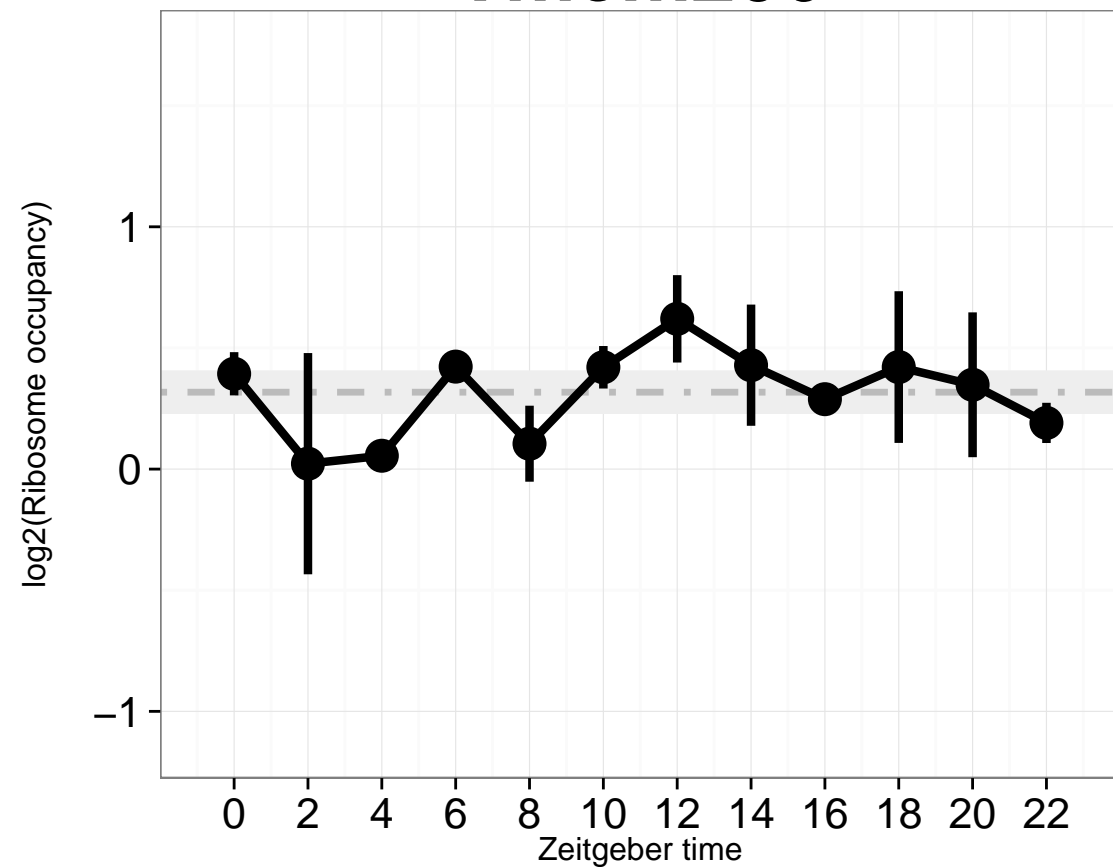

Supplement: SuppDataset_1.zip [file Tmem206_set_C.pdf › Supplemental Dataset 1/C-mRNA_nonrhythm_translation_rhyth/Tmem206_set_C.pdf]

# Tmem218

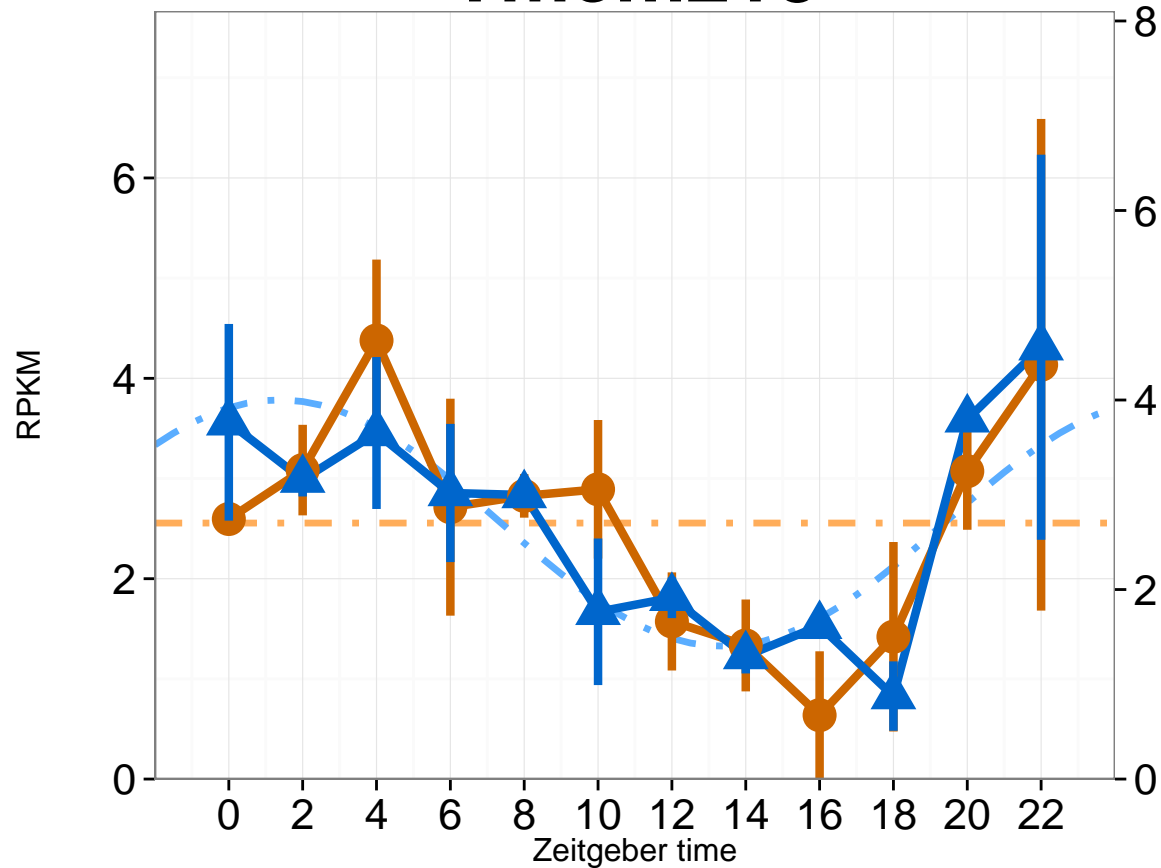

# Tmem218

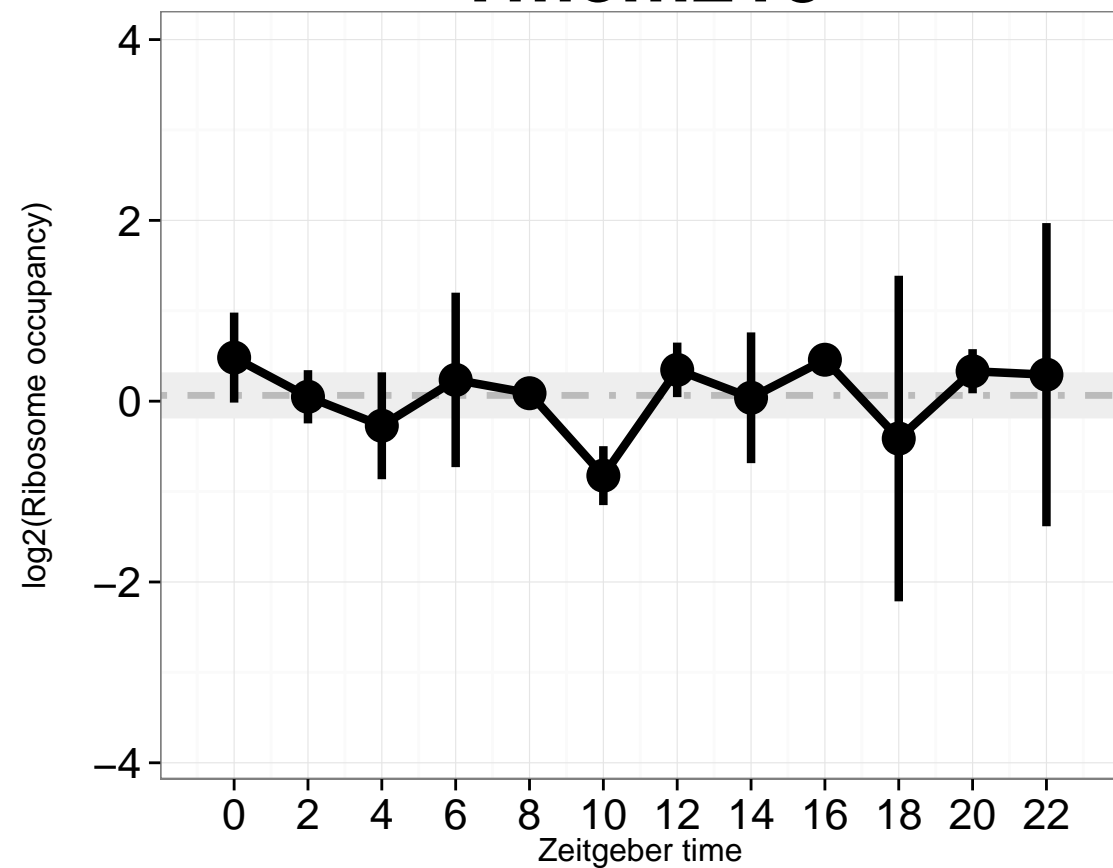

Supplement: SuppDataset_1.zip [file Tmem218_set_C.pdf › Supplemental Dataset 1/C-mRNA_nonrhythm_translation_rhyth/Tmem218_set_C.pdf]

# Tmem243

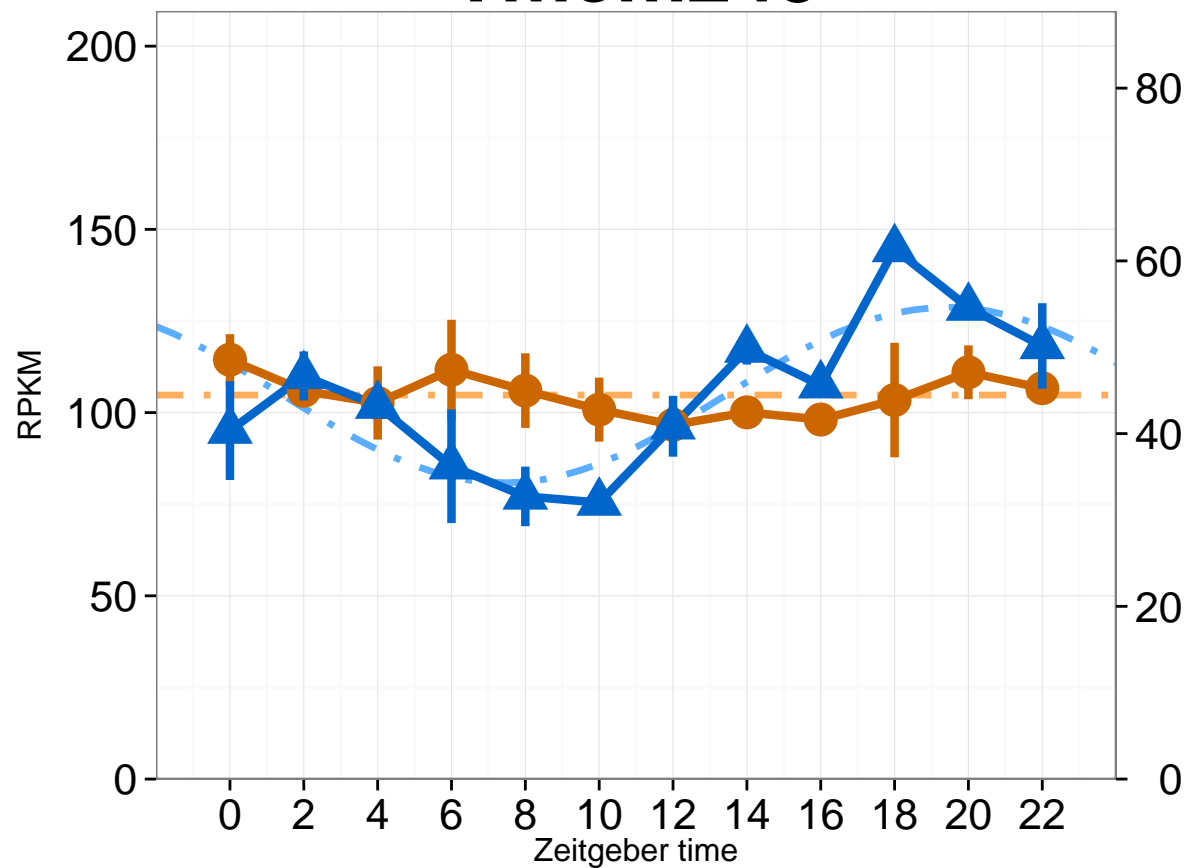

# Tmem243

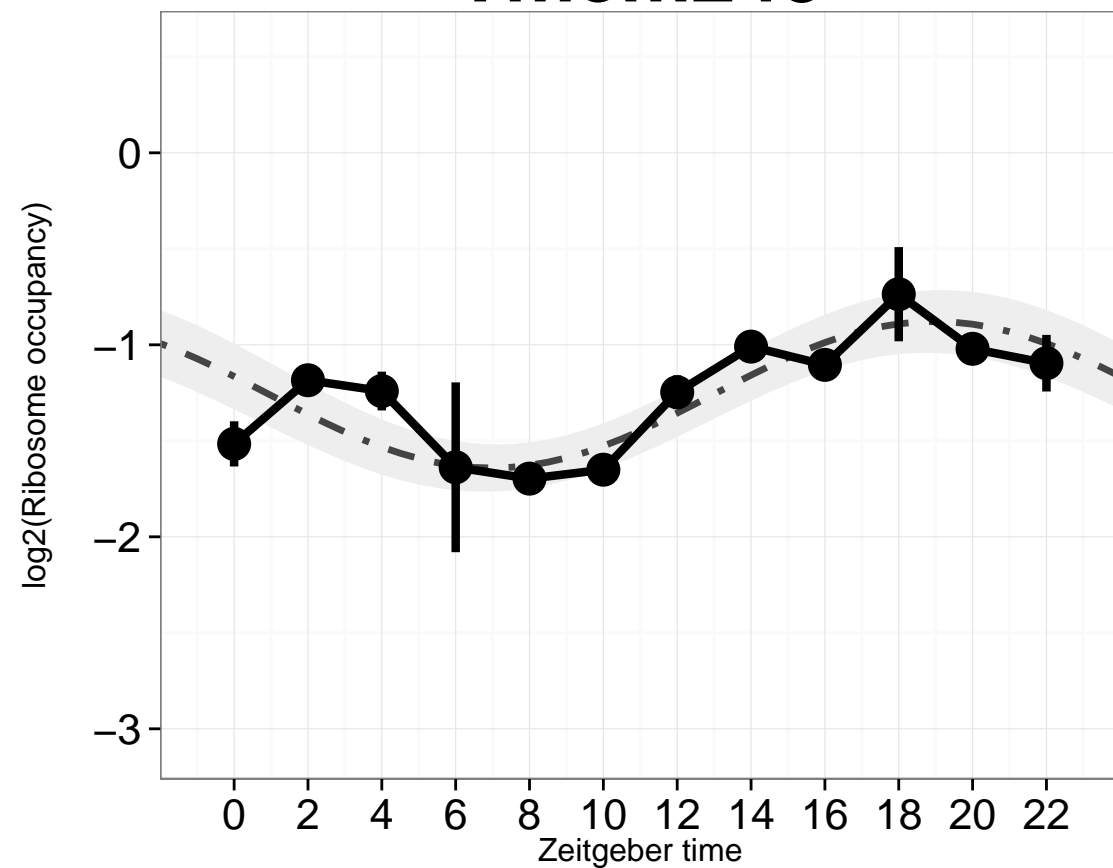

Supplement: SuppDataset_1.zip [file Tmem243_set_C.pdf › Supplemental Dataset 1/C-mRNA_nonrhythm_translation_rhyth/Tmem243_set_C.pdf]

# Tmem2

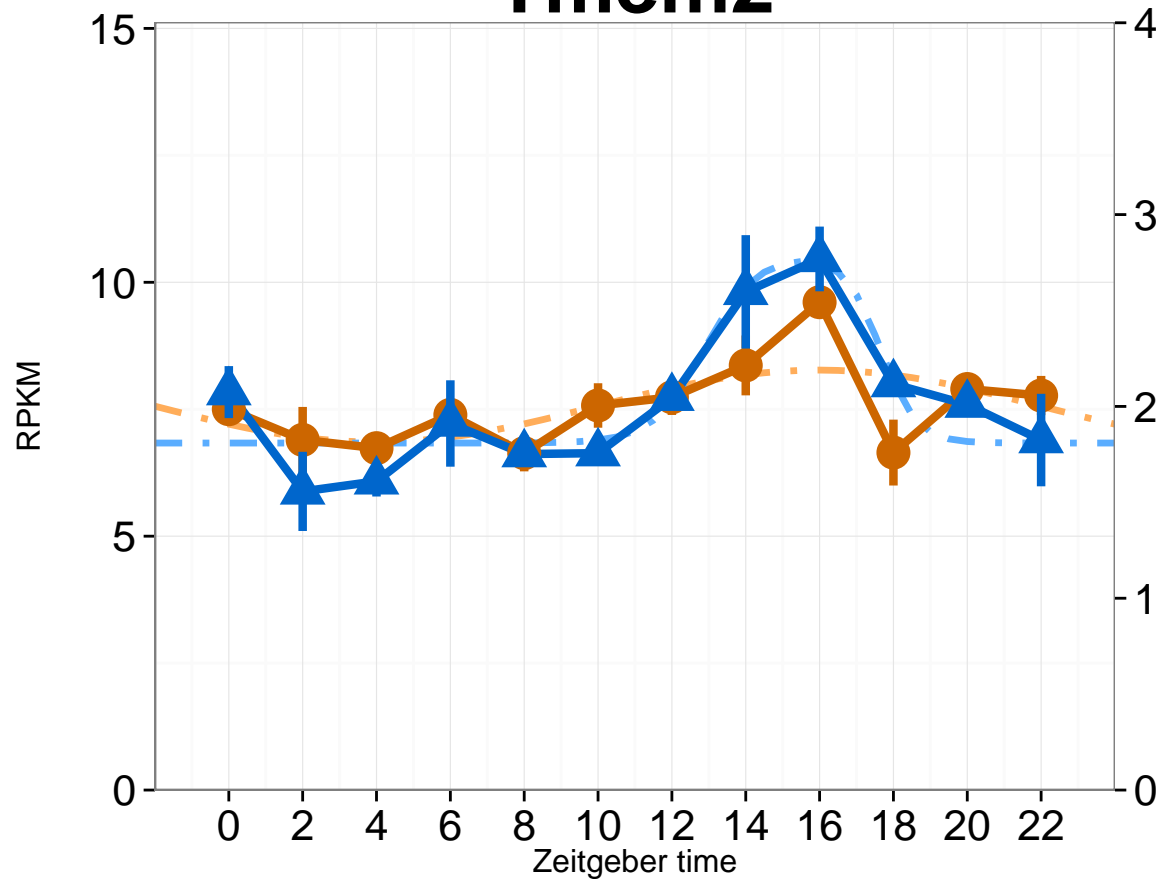

# Tmem2

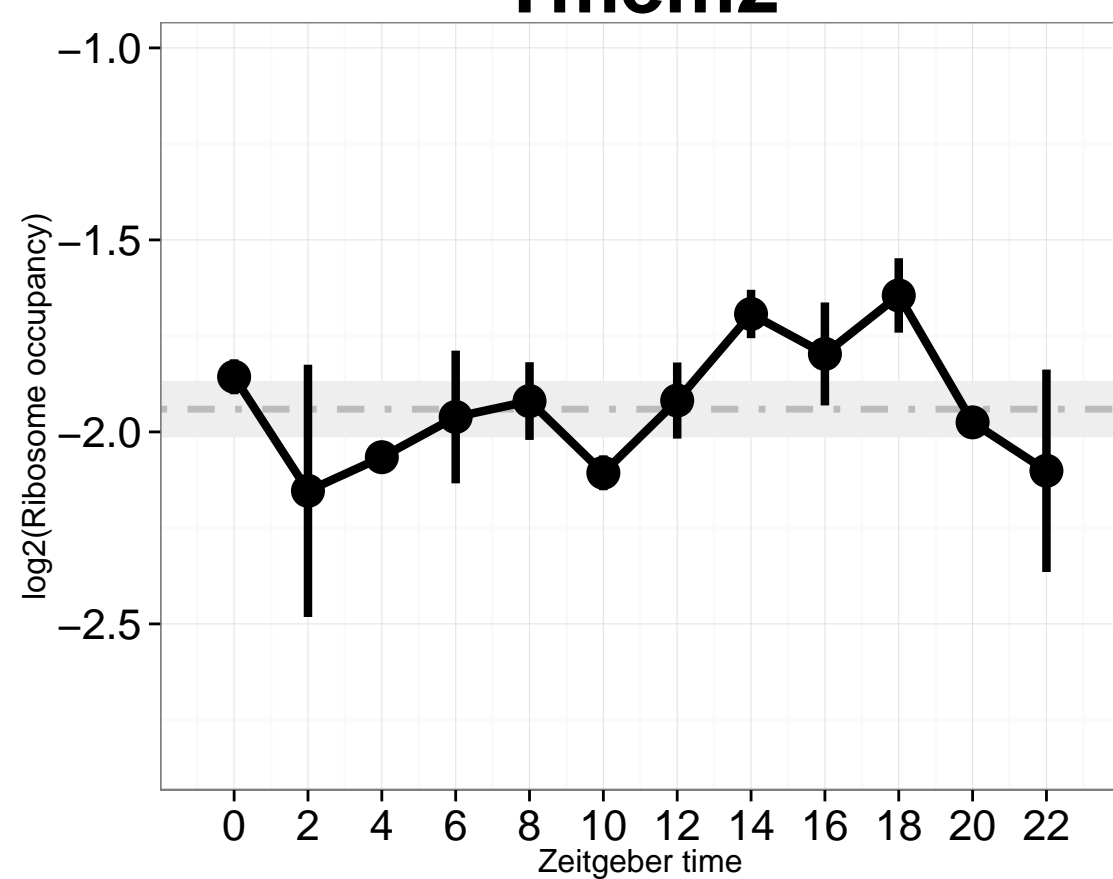

Supplement: SuppDataset_1.zip [file Tmem2_set_C.pdf › Supplemental Dataset 1/C-mRNA_nonrhythm_translation_rhyth/Tmem2_set_C.pdf]

## Tmem33

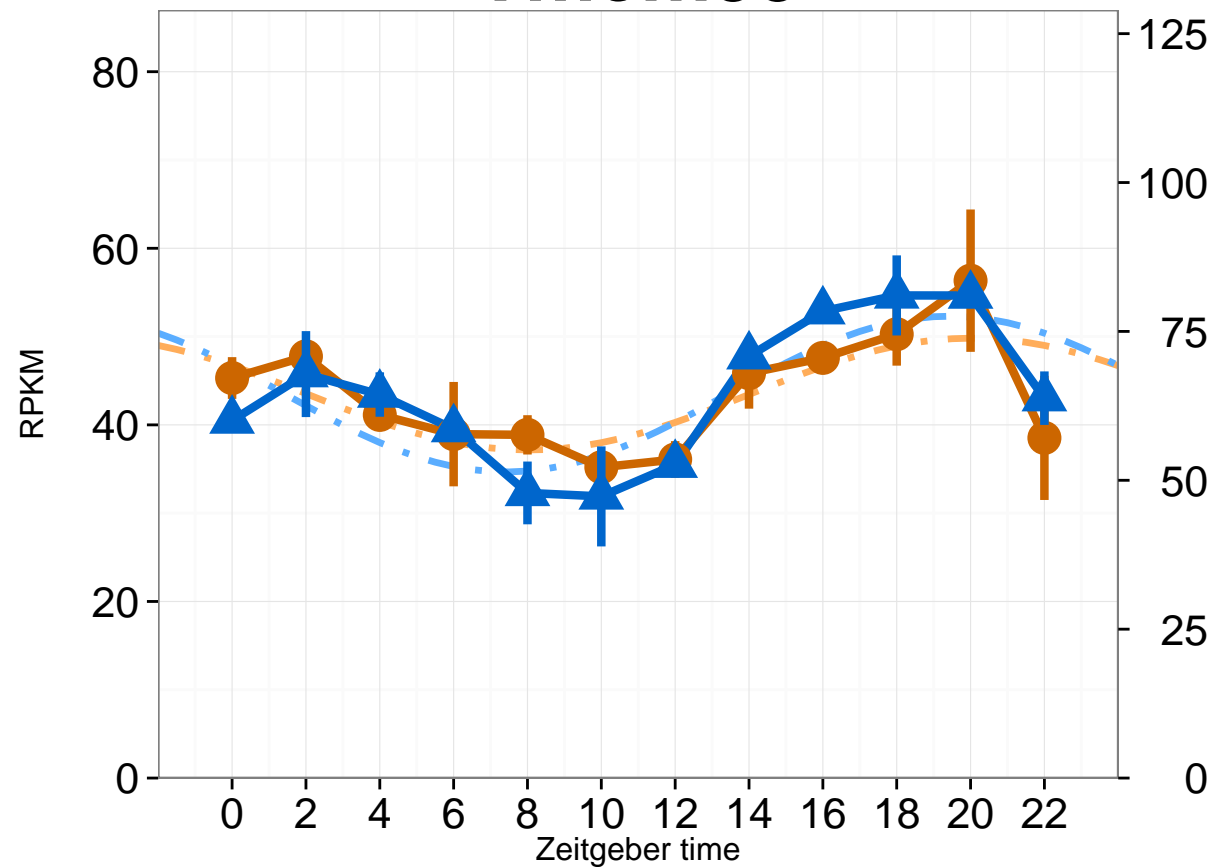

## Tmem33

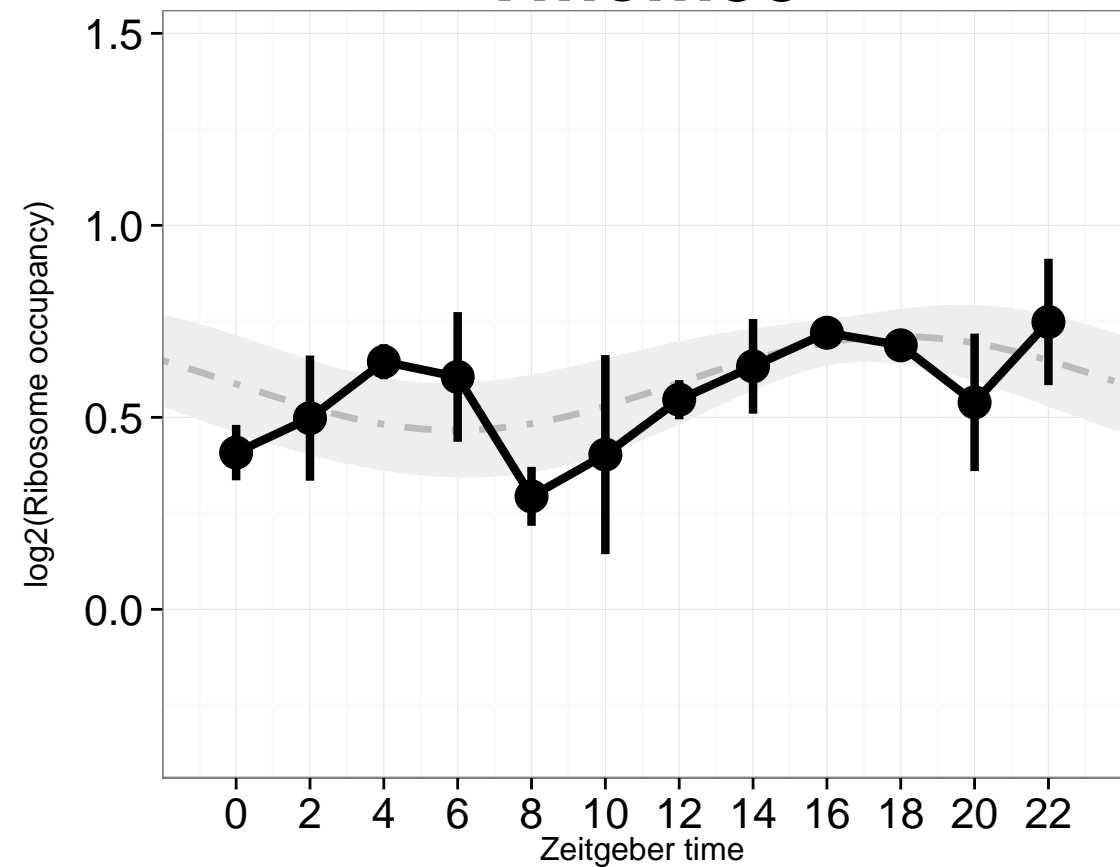

Supplement: SuppDataset_1.zip [file Tmem33_set_C.pdf › Supplemental Dataset 1/C-mRNA_nonrhythm_translation_rhyth/Tmem33_set_C.pdf]

# Tmem41b

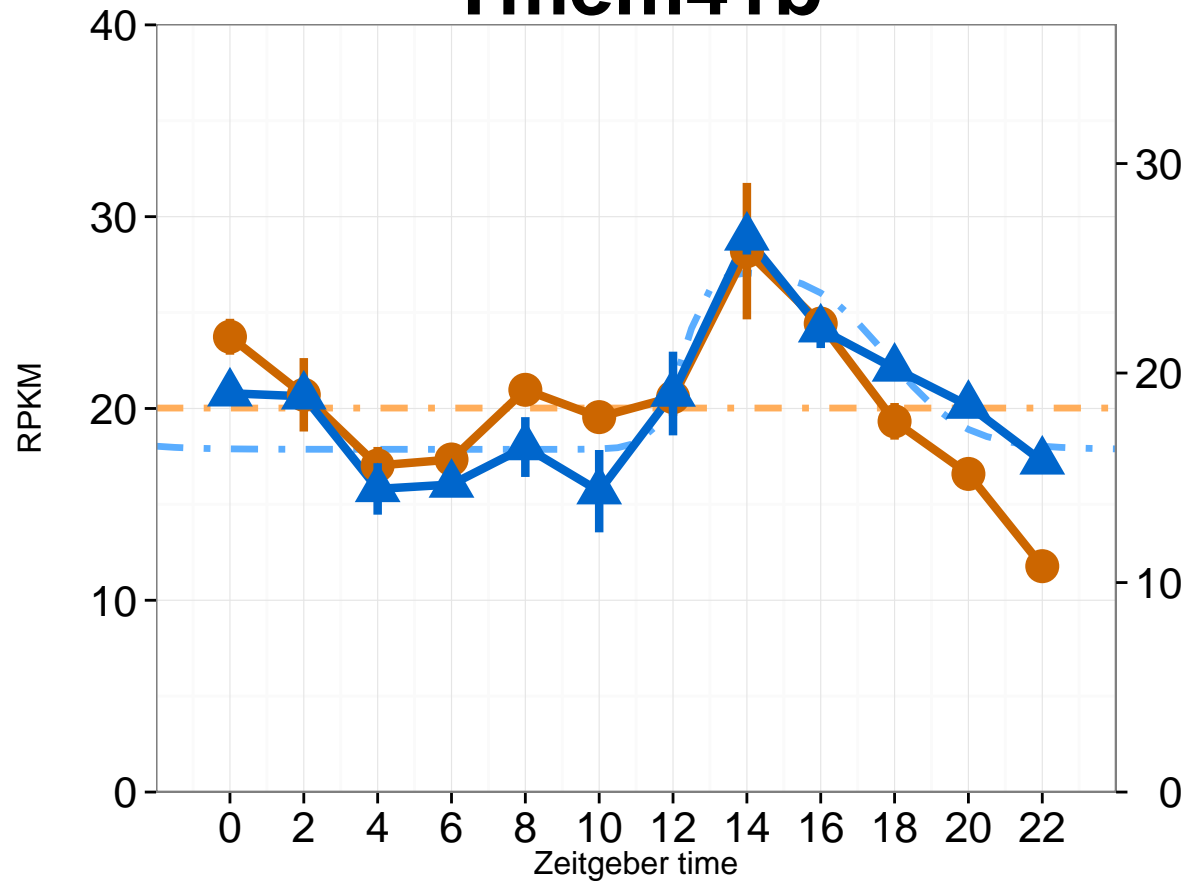

# Tmem41b

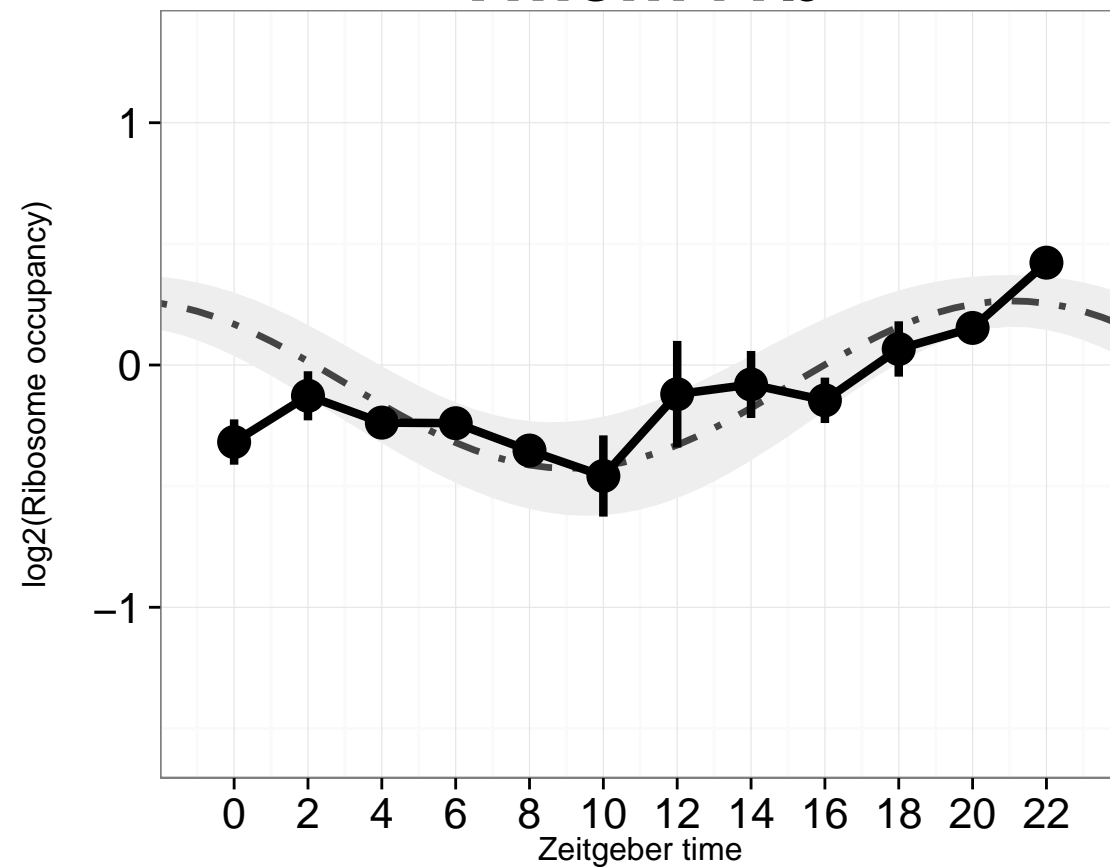

Supplement: SuppDataset_1.zip [file Tmem41b_set_C.pdf › Supplemental Dataset 1/C-mRNA_nonrhythm_translation_rhyth/Tmem41b_set_C.pdf]

**Tmem64**

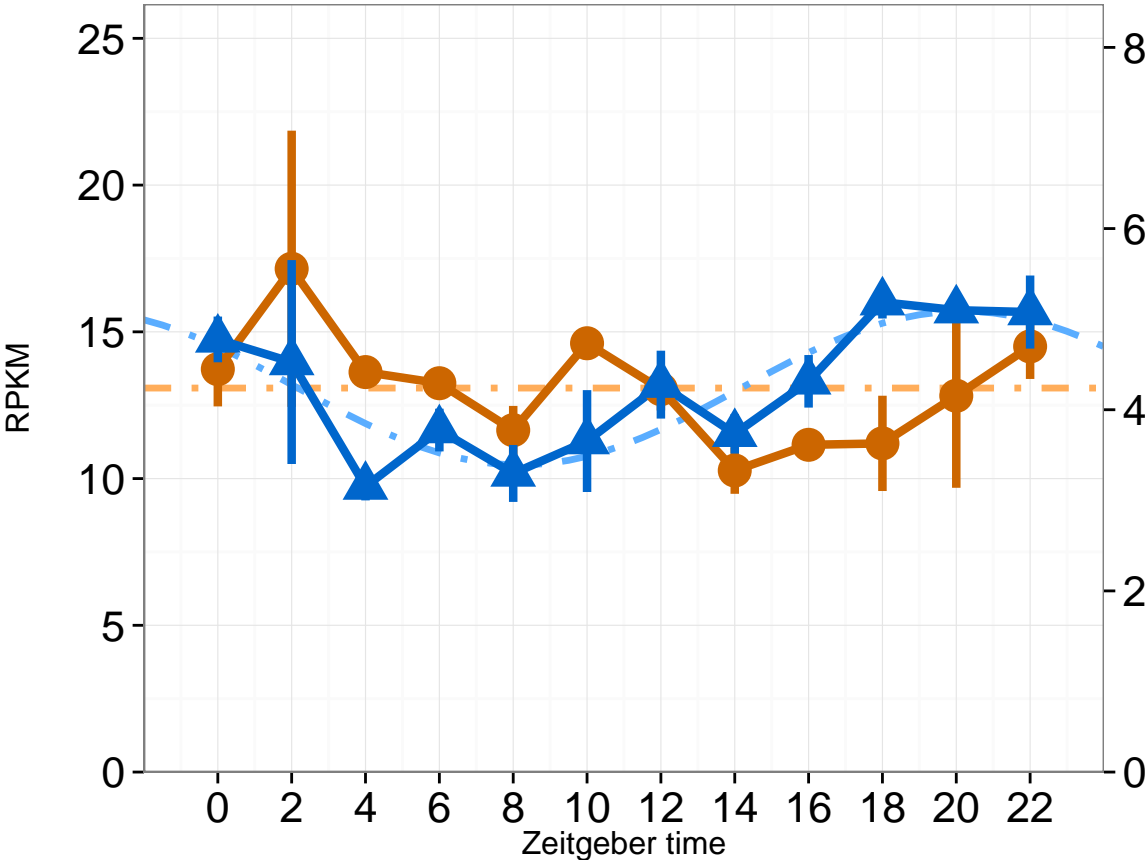

**Tmem64**

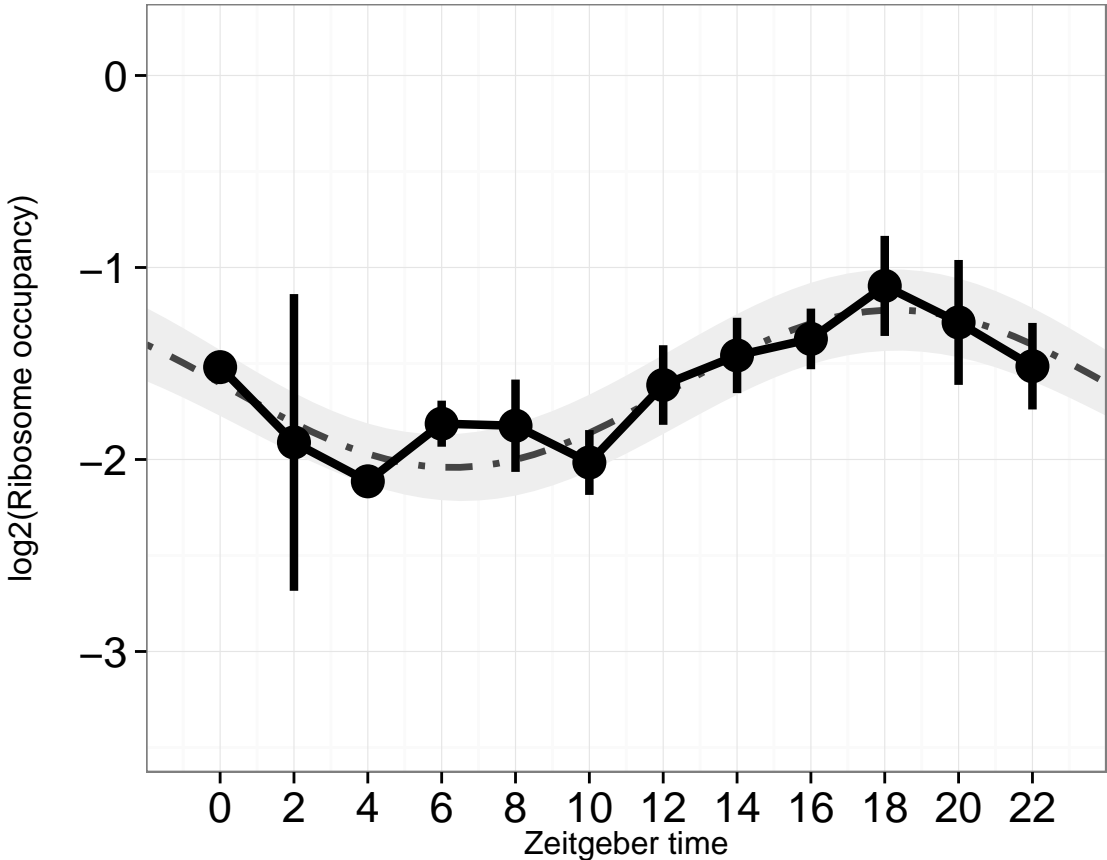

Supplement: SuppDataset_1.zip [file Tmem64_set_C.pdf › Supplemental Dataset 1/C-mRNA_nonrhythm_translation_rhyth/Tmem64_set_C.pdf]

# Tmem67

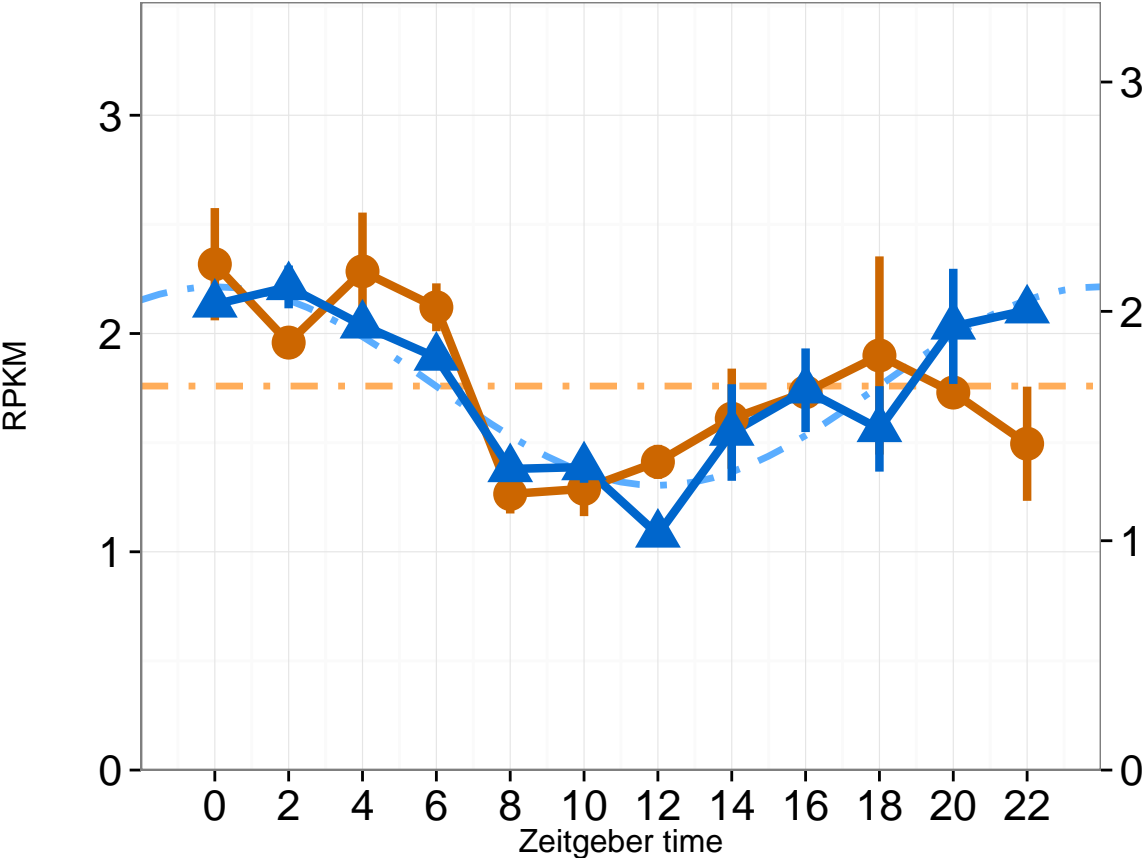

# Tmem67

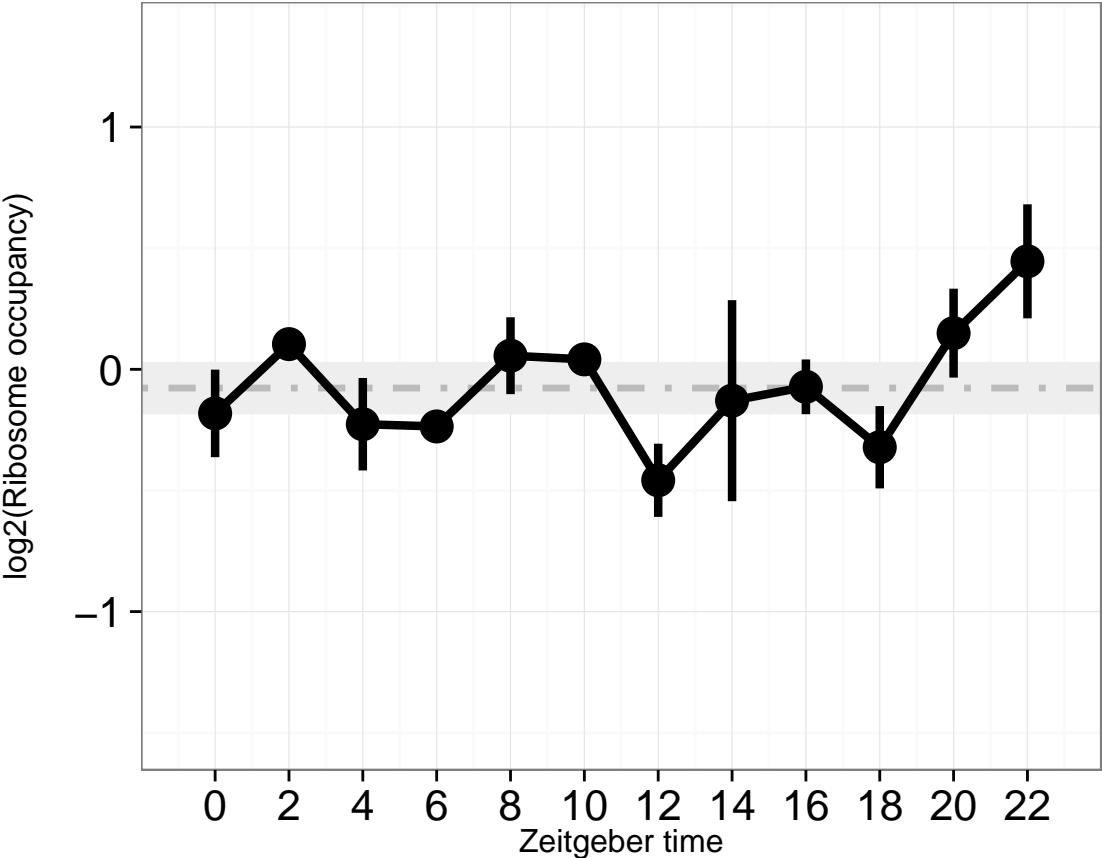

Supplement: SuppDataset_1.zip [file Tmem67_set_C.pdf › Supplemental Dataset 1/C-mRNA_nonrhythm_translation_rhyth/Tmem67_set_C.pdf]

## Tnfrsf11b

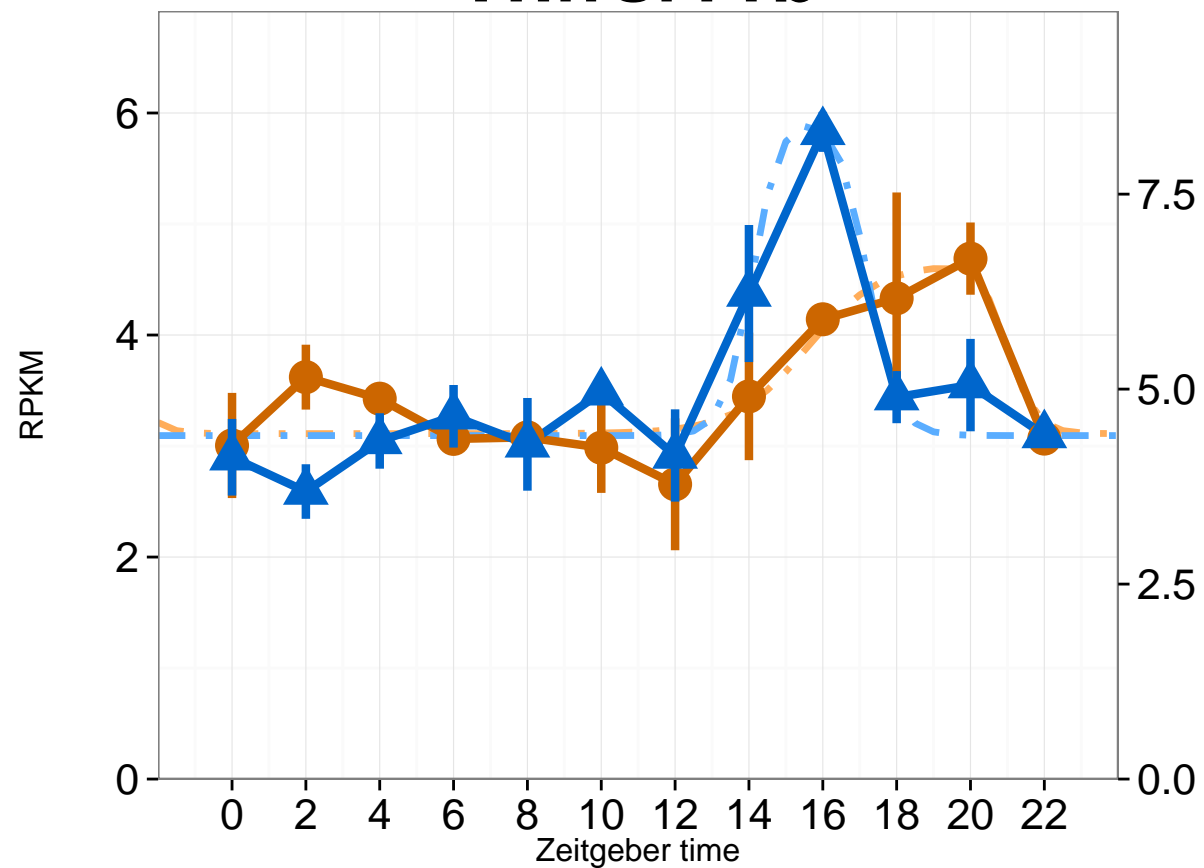

## Tnfrsf11b

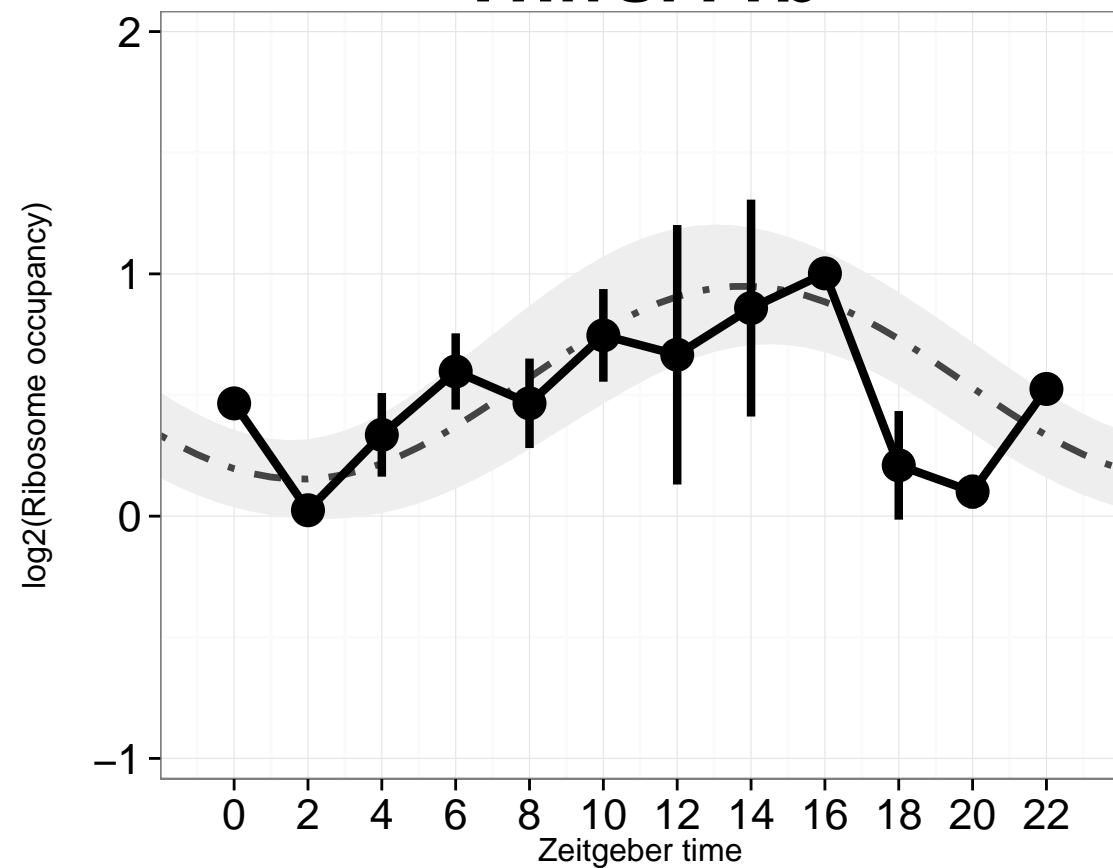

Supplement: SuppDataset_1.zip [file Tnfrsf11b_set_C.pdf › Supplemental Dataset 1/C-mRNA_nonrhythm_translation_rhyth/Tnfrsf11b_set_C.pdf]

# Tnks1bp1

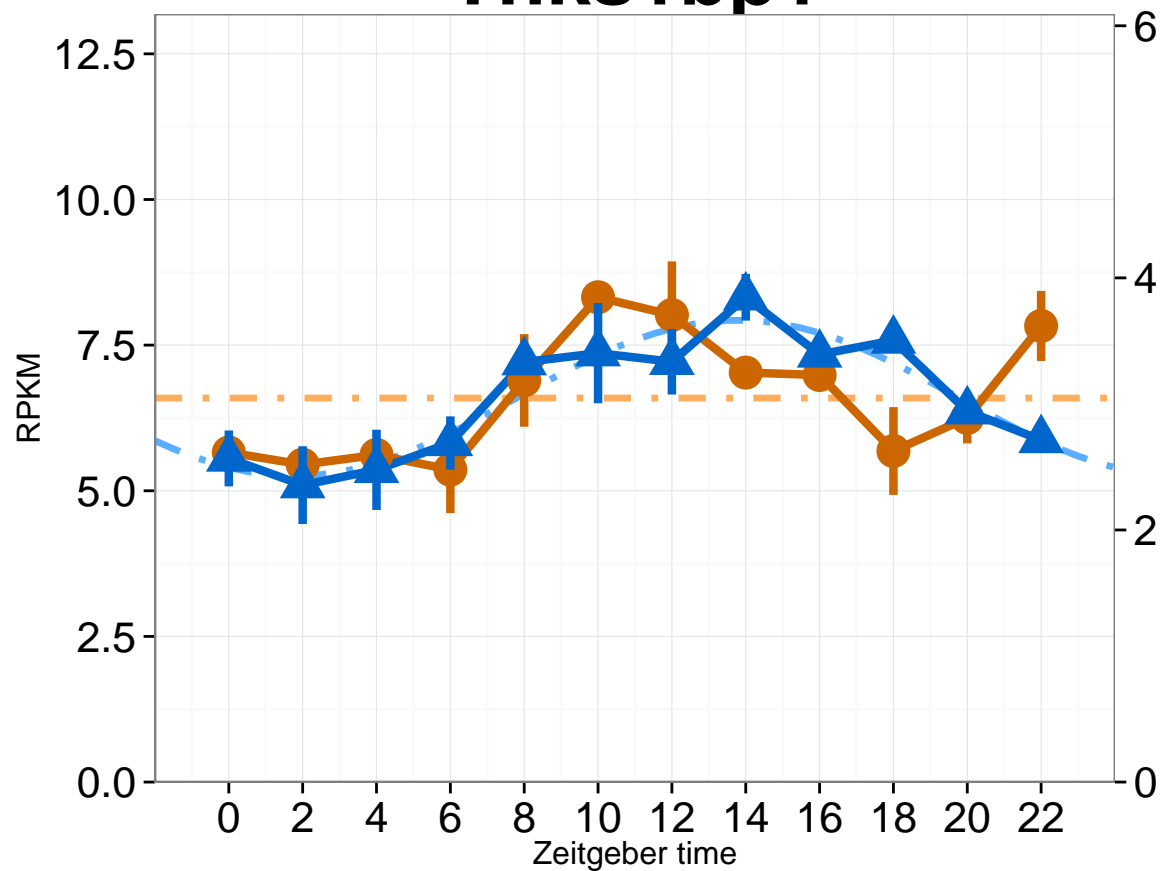

# Tnks1bp1

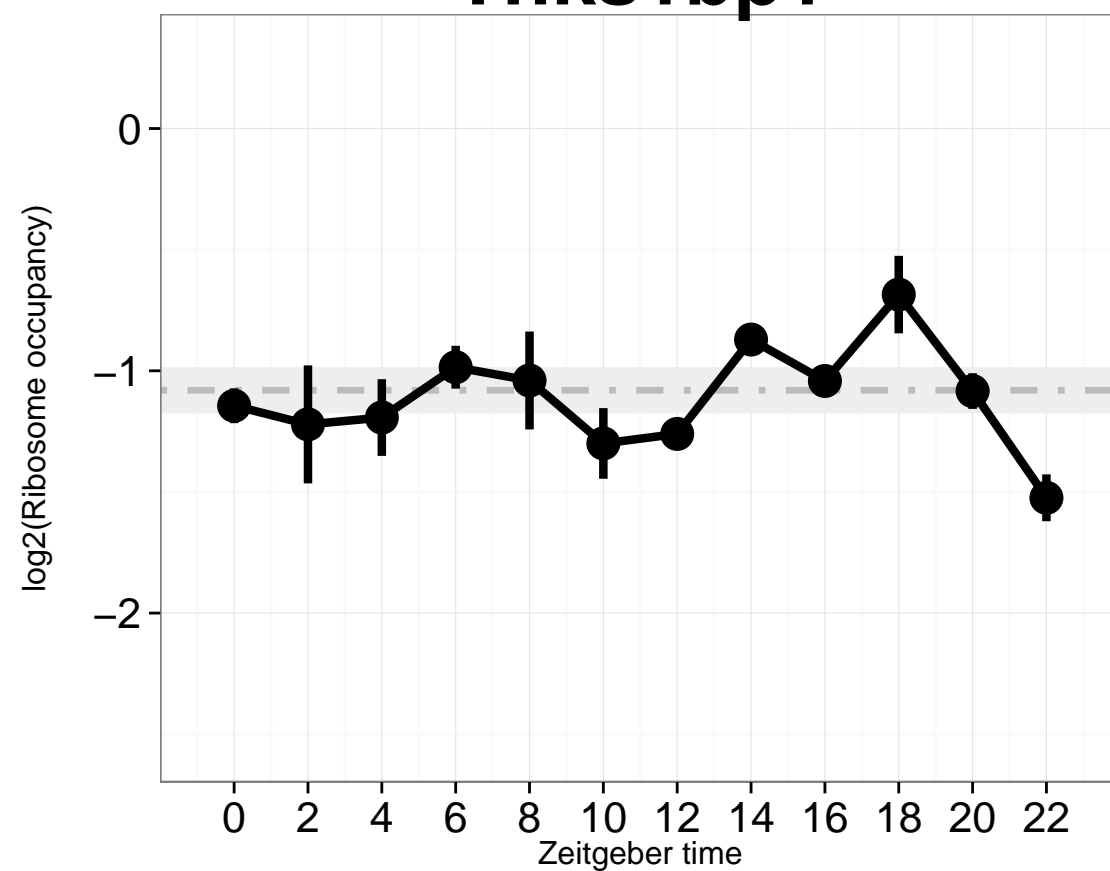

Supplement: SuppDataset_1.zip [file Tnks1bp1_set_C.pdf › Supplemental Dataset 1/C-mRNA_nonrhythm_translation_rhyth/Tnks1bp1_set_C.pdf]

## Tom1l2

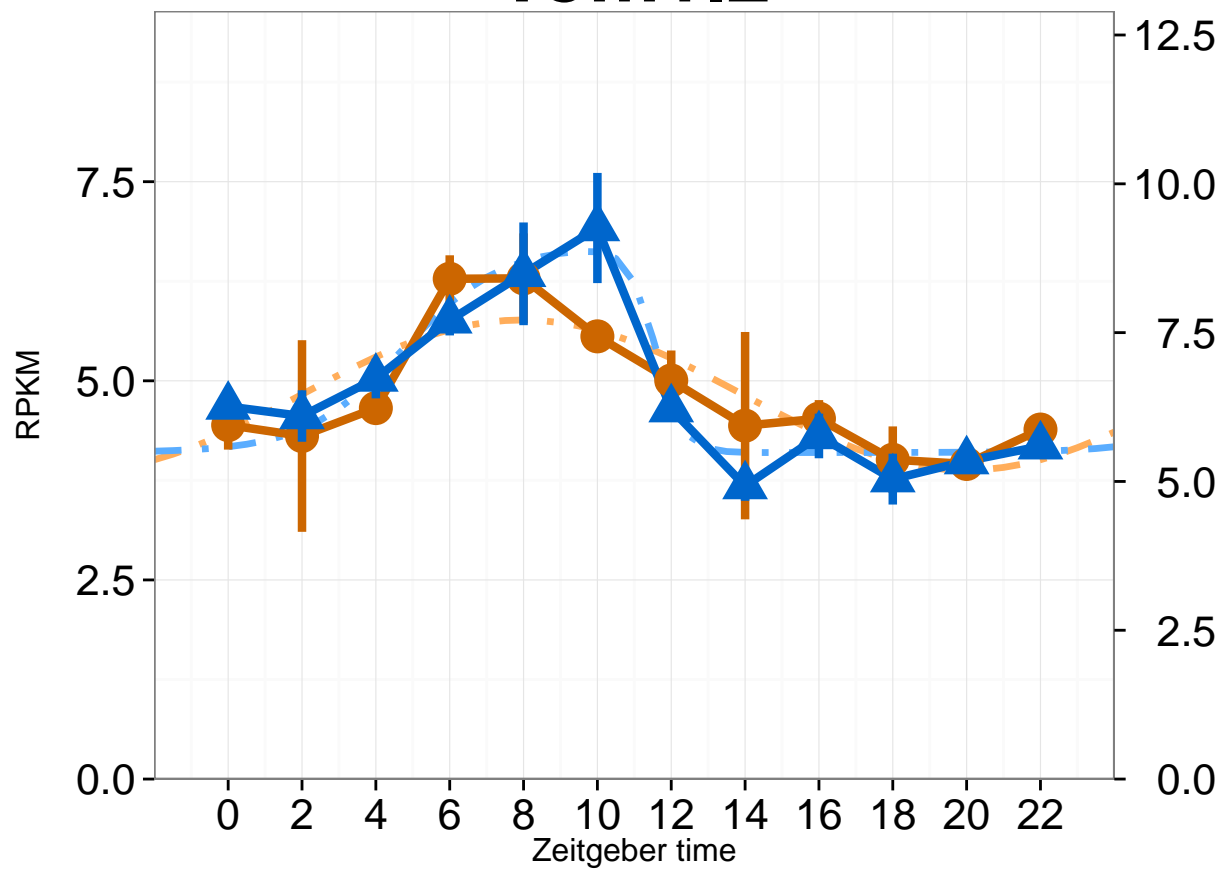

## Tom1l2

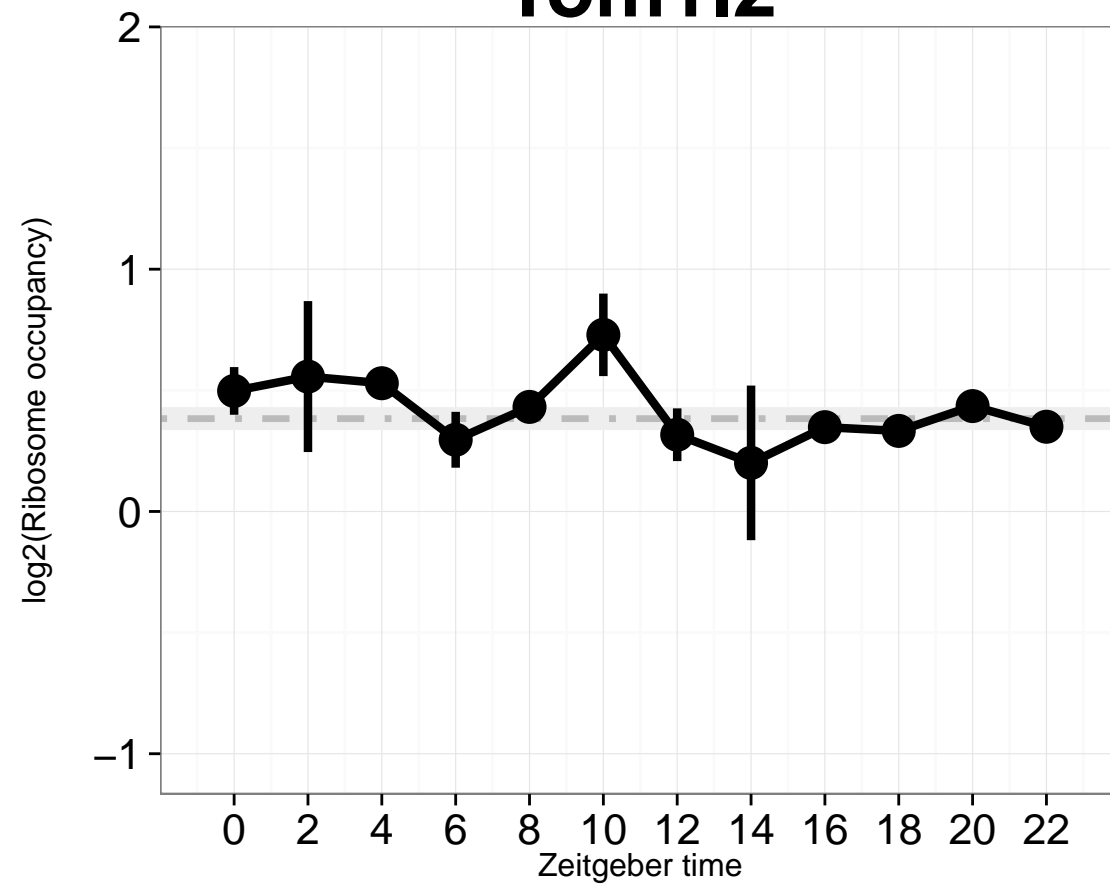

Supplement: SuppDataset_1.zip [file Tom1l2_set_C.pdf › Supplemental Dataset 1/C-mRNA_nonrhythm_translation_rhyth/Tom1l2_set_C.pdf]
