# Supplementary figures and images for: Ribosome profiling reveals the rhythmic liver translatome and circadian clock regulation by upstream open reading frames (part 65 of 113)
Source: HighWire-hosted journal article supplement (doi:10.1101/gr.195404.115), 2015-10-20

## Scimp

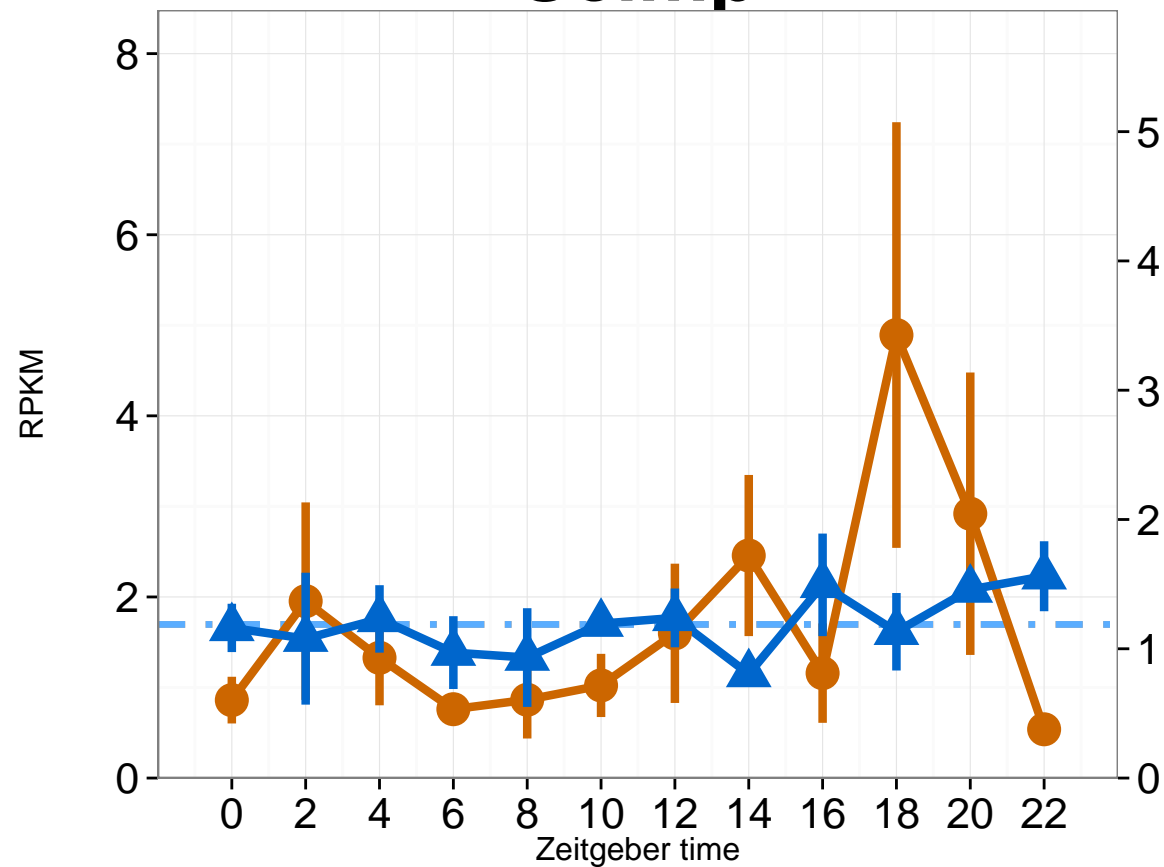

## Scimp

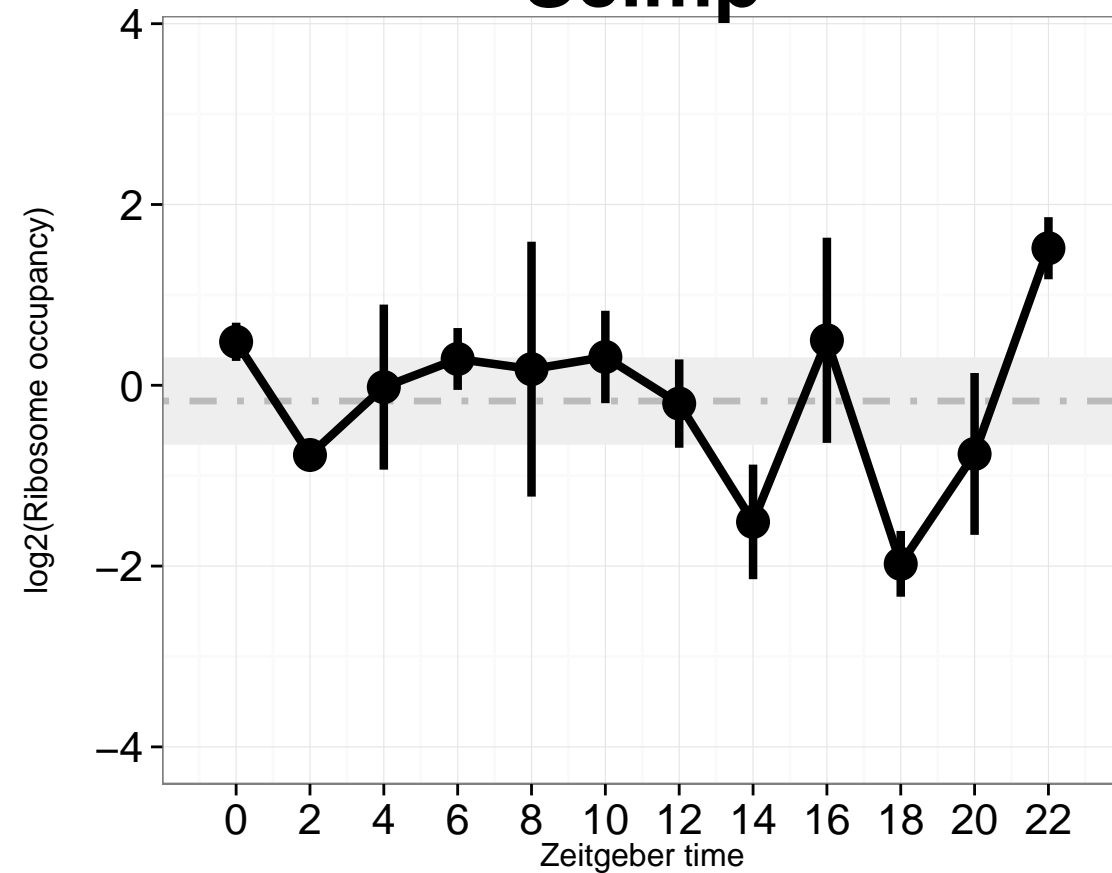

Supplement: SuppDataset_1.zip [file Scimp_set_A.pdf › Supplemental Dataset 1/A-mRNA_nonrhyth_translation_nonrhyth/Scimp_set_A.pdf]

# ScIt1

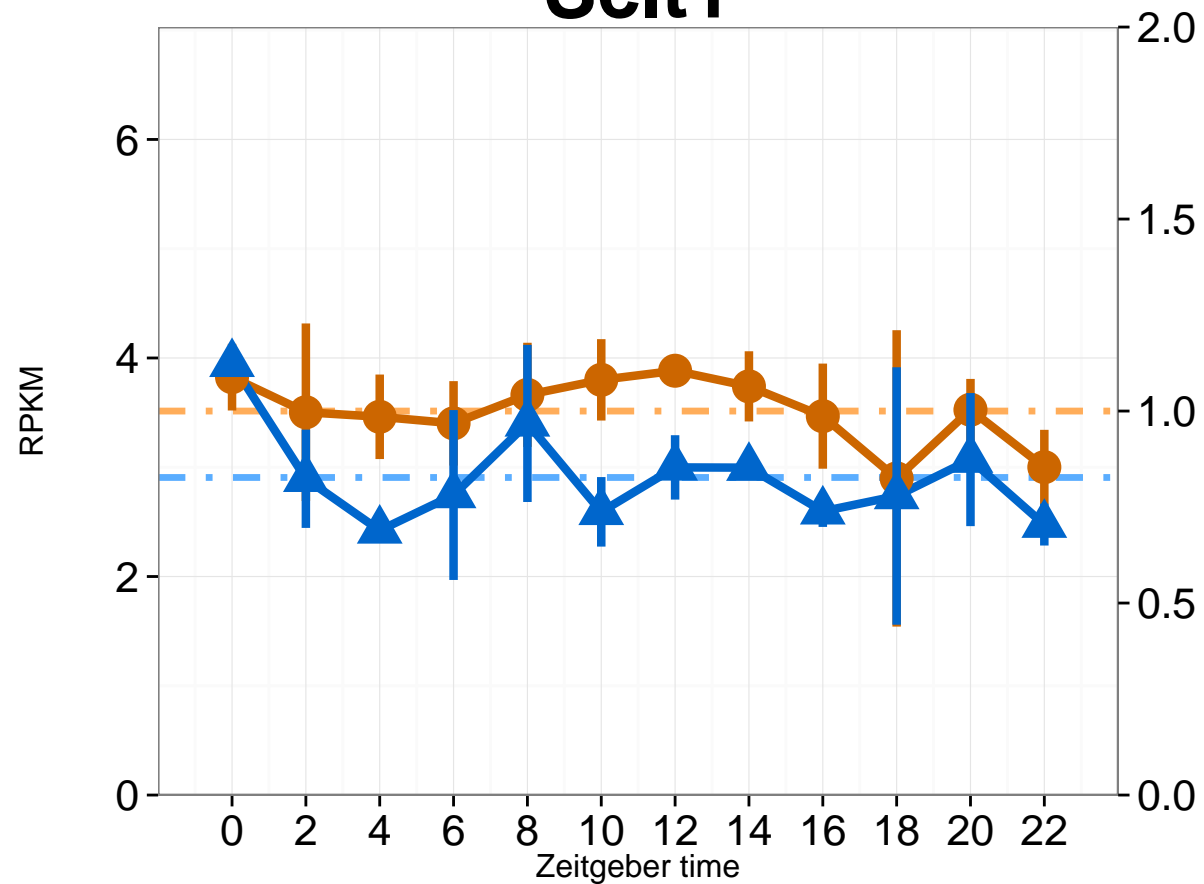

# ScIt1

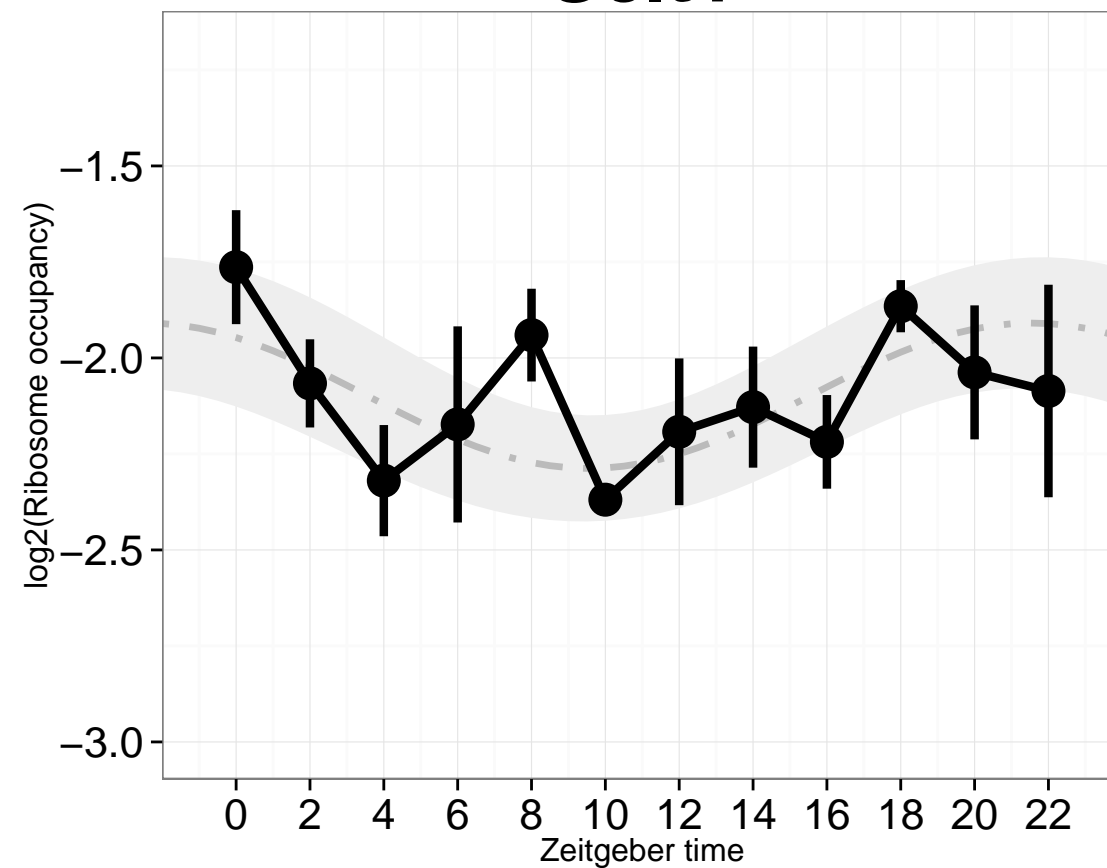

Supplement: SuppDataset_1.zip [file Sclt1_set_A.pdf › Supplemental Dataset 1/A-mRNA_nonrhyth_translation_nonrhyth/Sclt1_set_A.pdf]

## Scly

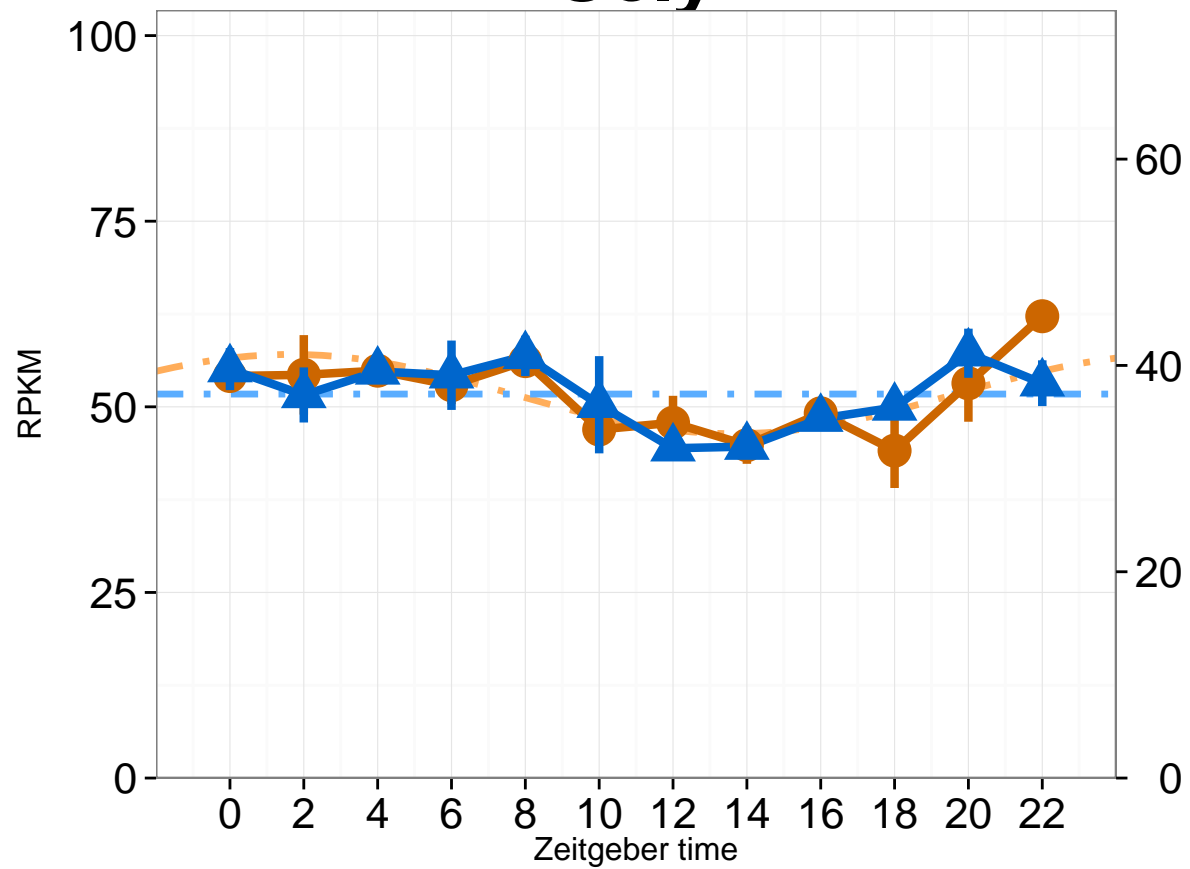

## Scly

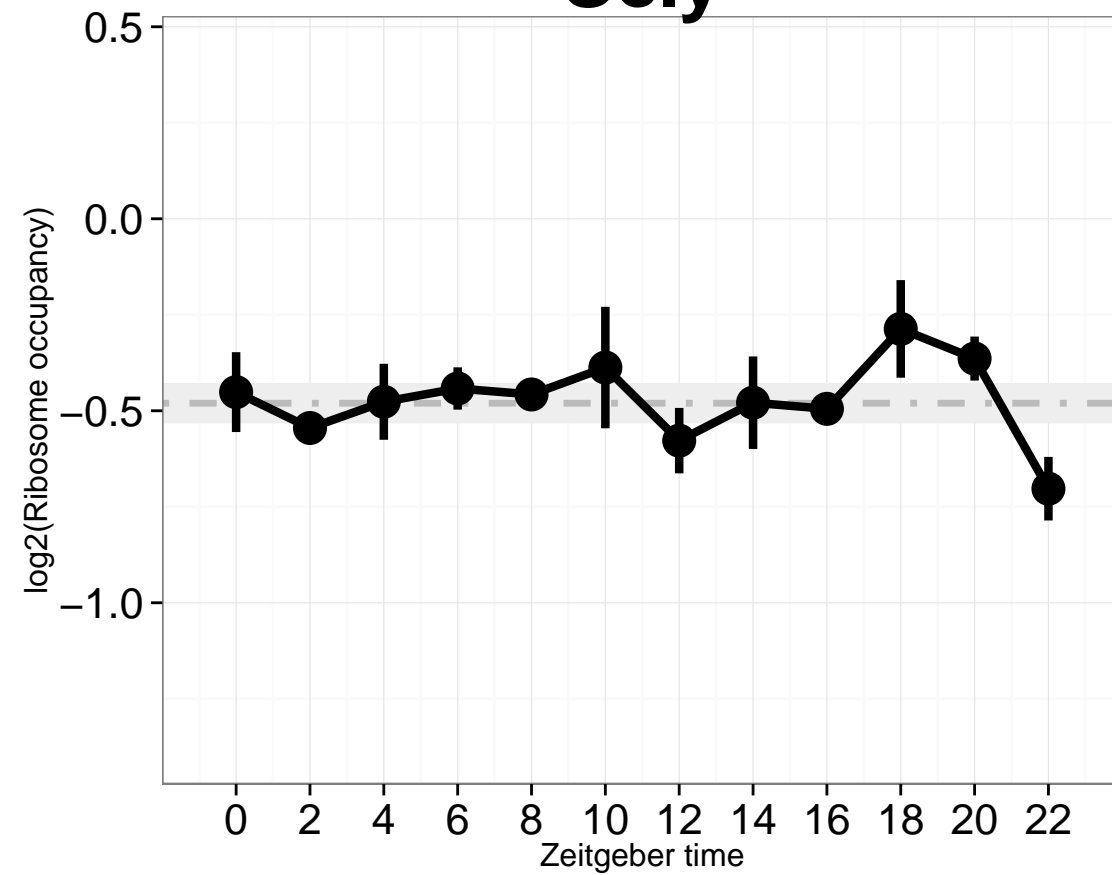

Supplement: SuppDataset_1.zip [file Scly_set_A.pdf › Supplemental Dataset 1/A-mRNA_nonrhyth_translation_nonrhyth/Scly_set_A.pdf]

## Scmh1

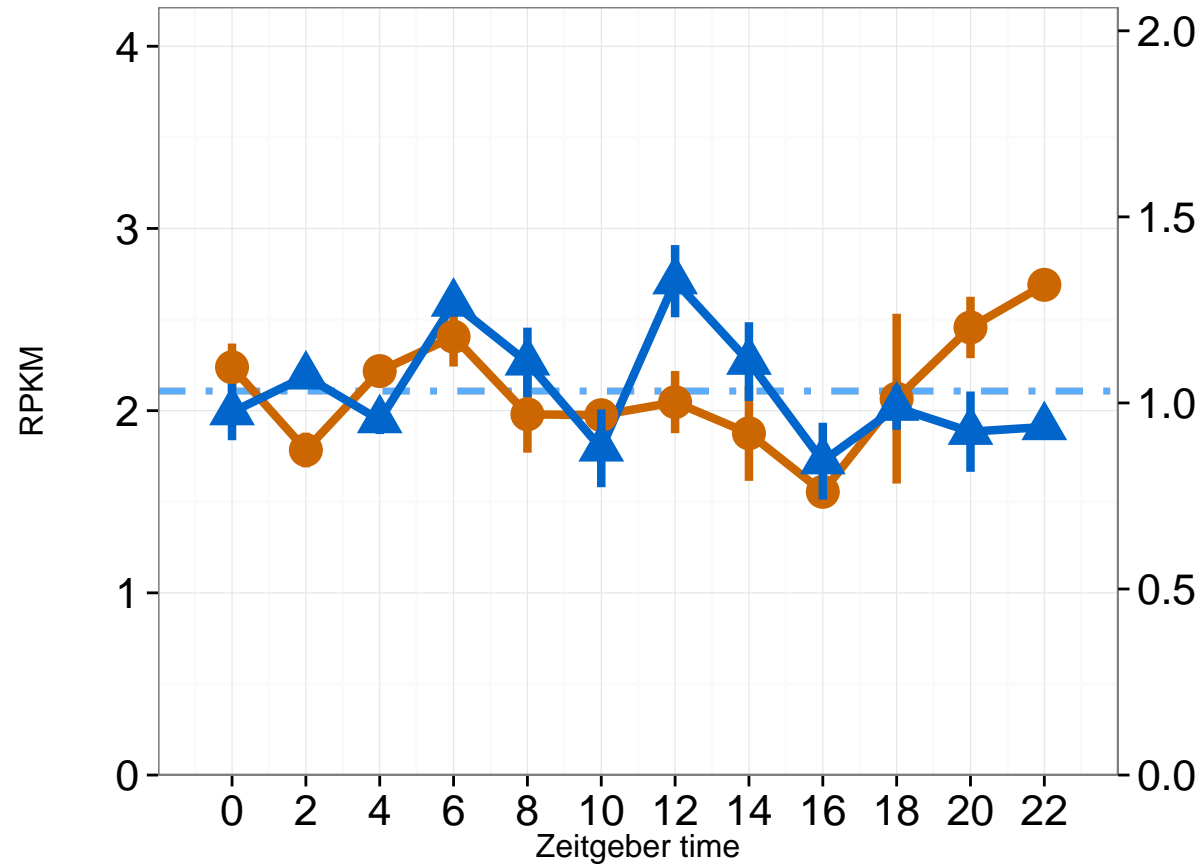

## Scmh1

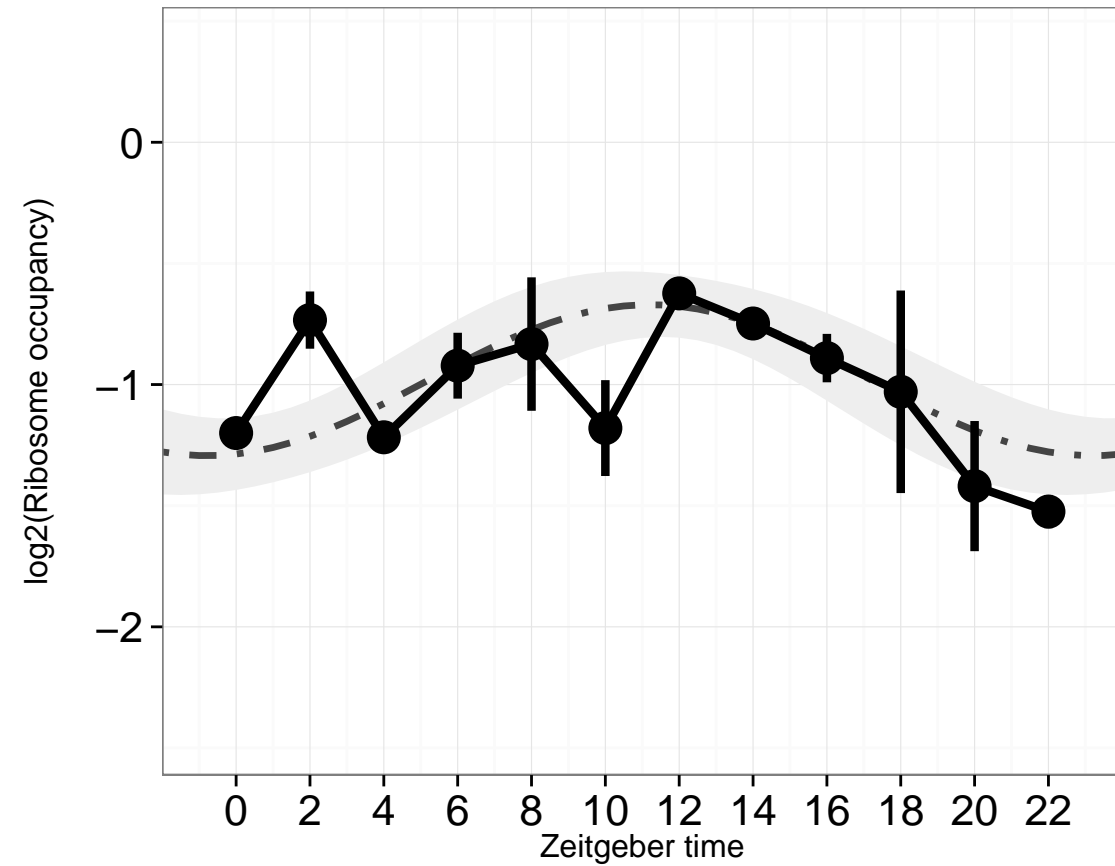

Supplement: SuppDataset_1.zip [file Scmh1_set_A.pdf › Supplemental Dataset 1/A-mRNA_nonrhyth_translation_nonrhyth/Scmh1_set_A.pdf]

# Scn1b

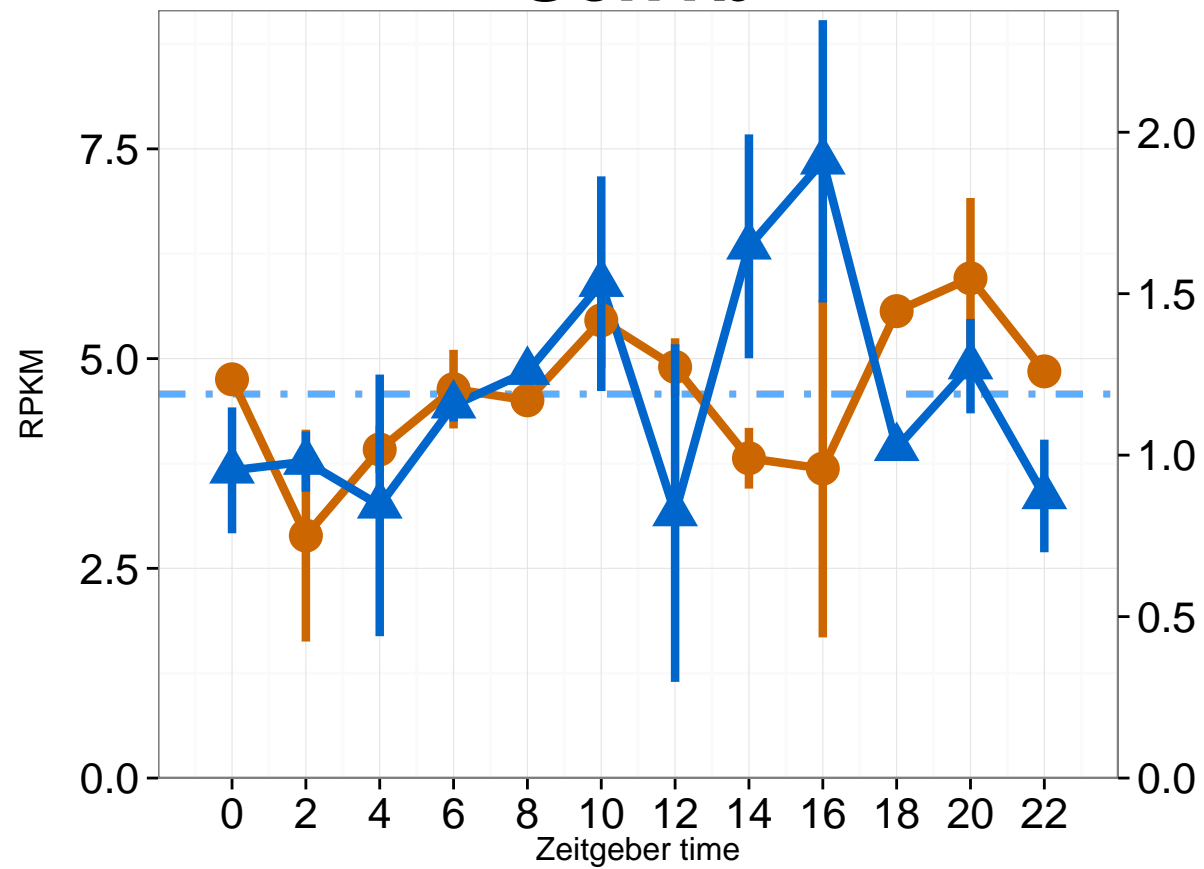

# Scn1b

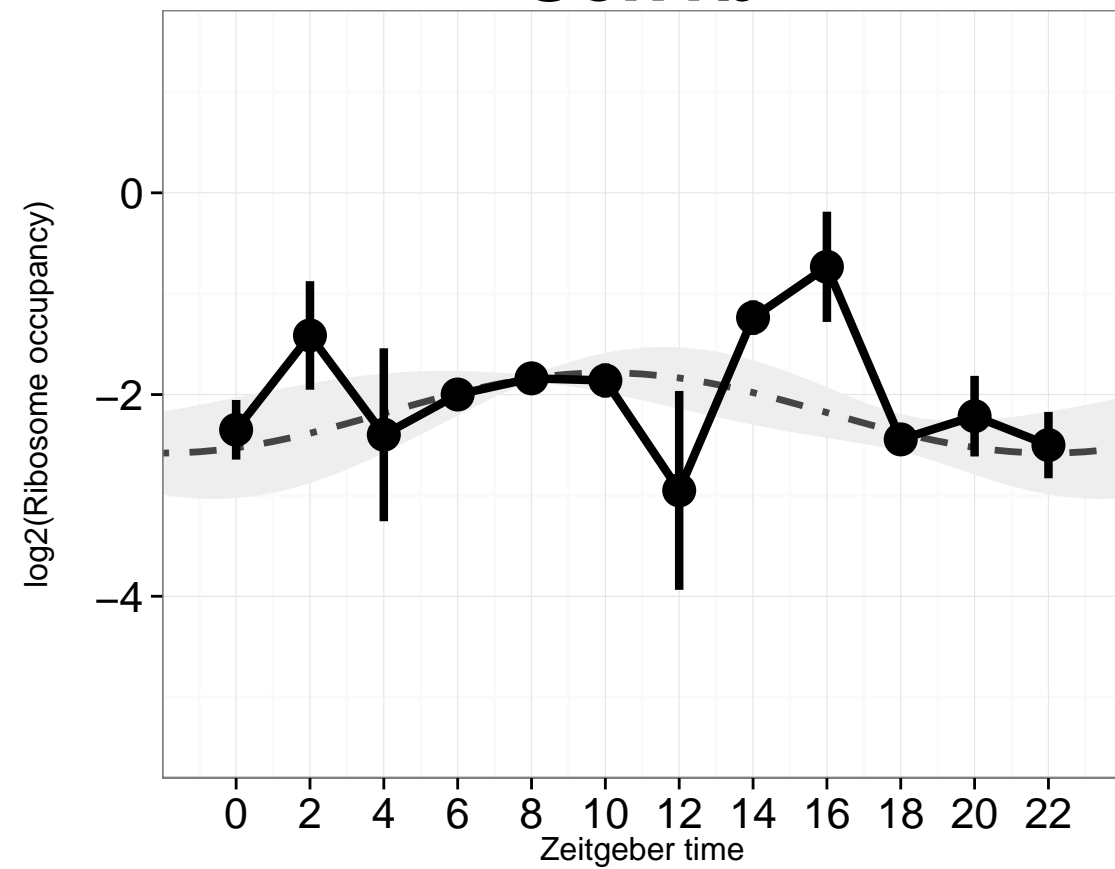

Supplement: SuppDataset_1.zip [file Scn1b_set_A.pdf › Supplemental Dataset 1/A-mRNA_nonrhyth_translation_nonrhyth/Scn1b_set_A.pdf]

# Scnn1a

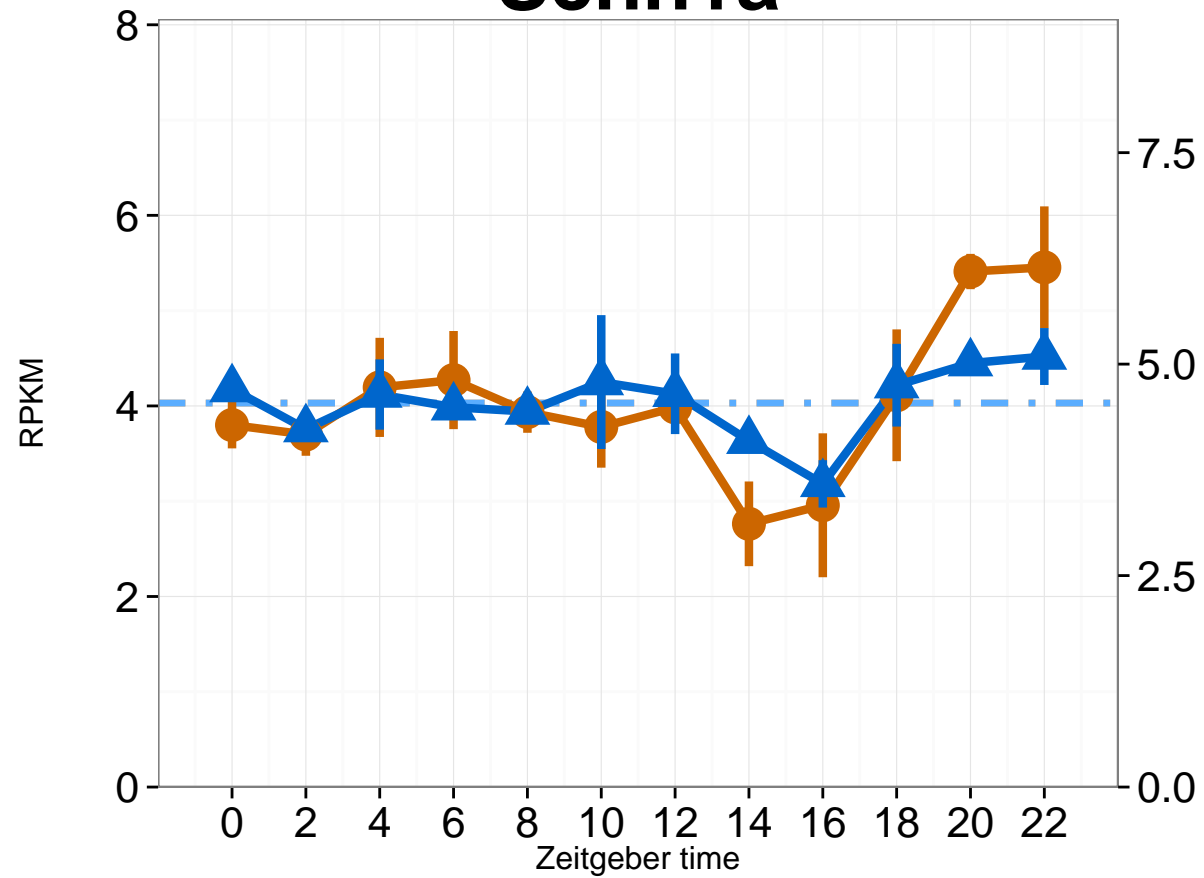

# Scnn1a

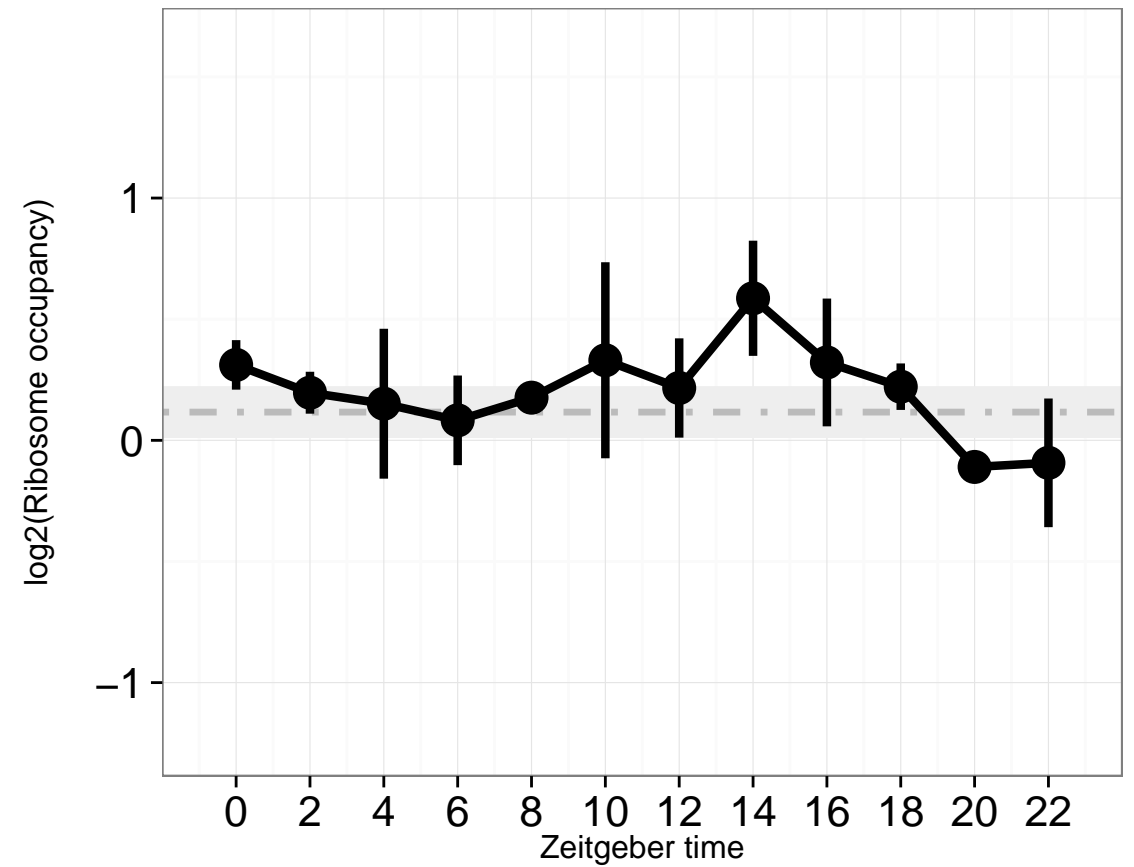

Supplement: SuppDataset_1.zip [file Scnn1a_set_A.pdf › Supplemental Dataset 1/A-mRNA_nonrhyth_translation_nonrhyth/Scnn1a_set_A.pdf]

## Sco1

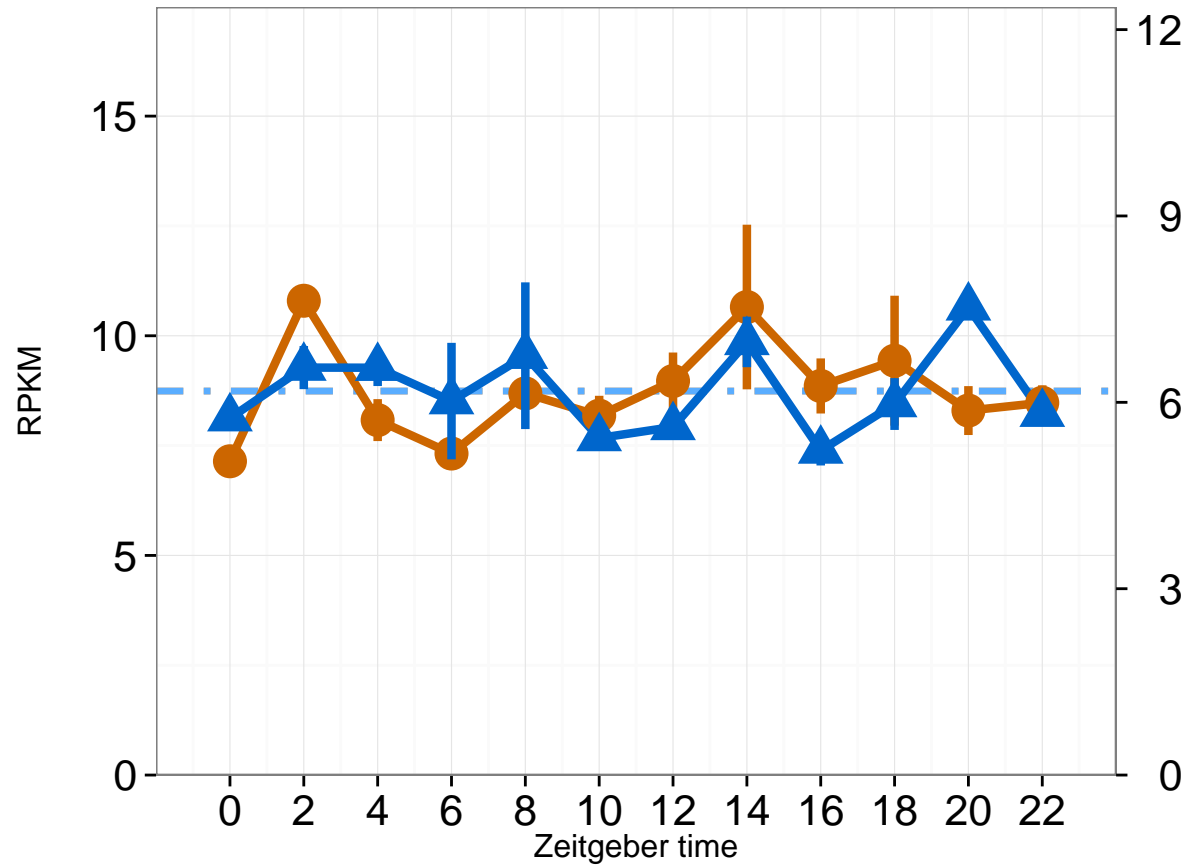

## Sco1

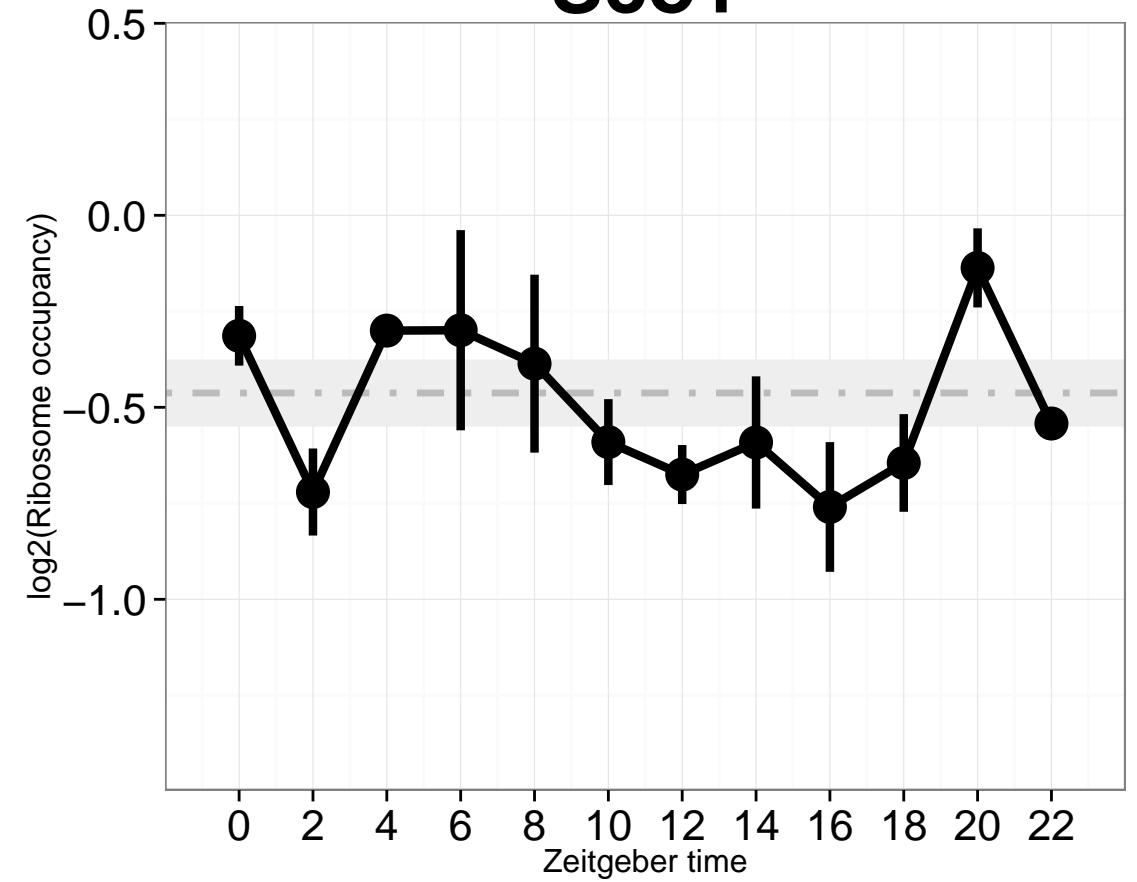

Supplement: SuppDataset_1.zip [file Sco1_set_A.pdf › Supplemental Dataset 1/A-mRNA_nonrhyth_translation_nonrhyth/Sco1_set_A.pdf]

## Scoc

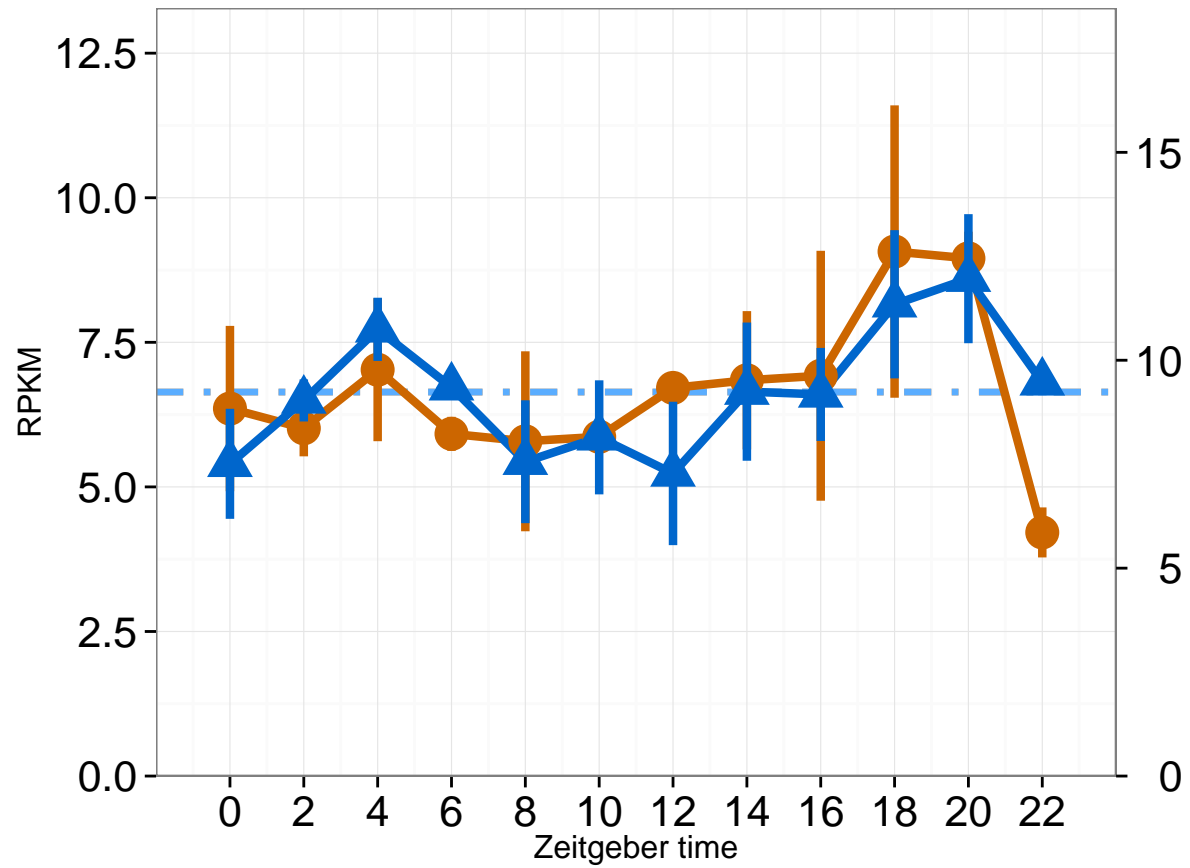

## Scoc

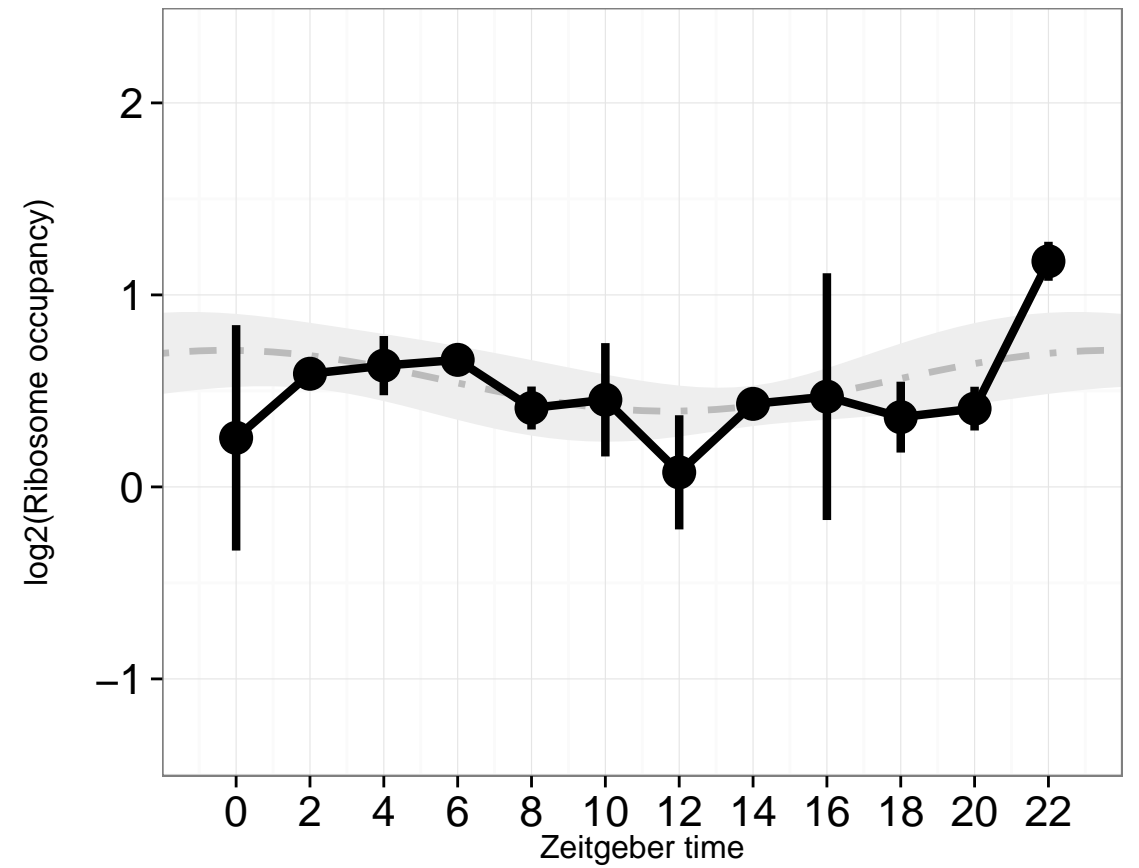

Supplement: SuppDataset_1.zip [file Scoc_set_A.pdf › Supplemental Dataset 1/A-mRNA_nonrhyth_translation_nonrhyth/Scoc_set_A.pdf]

## Scp2

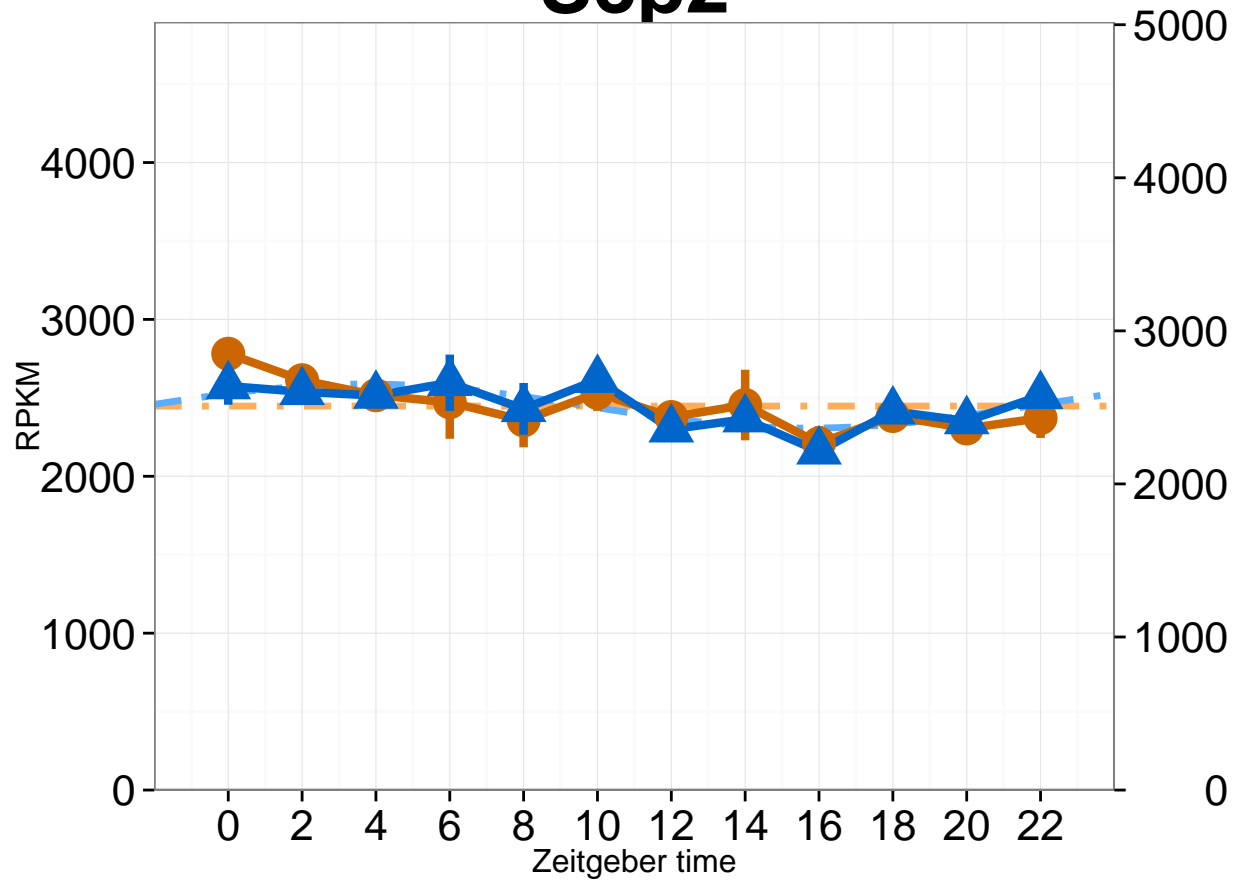

## Scp2

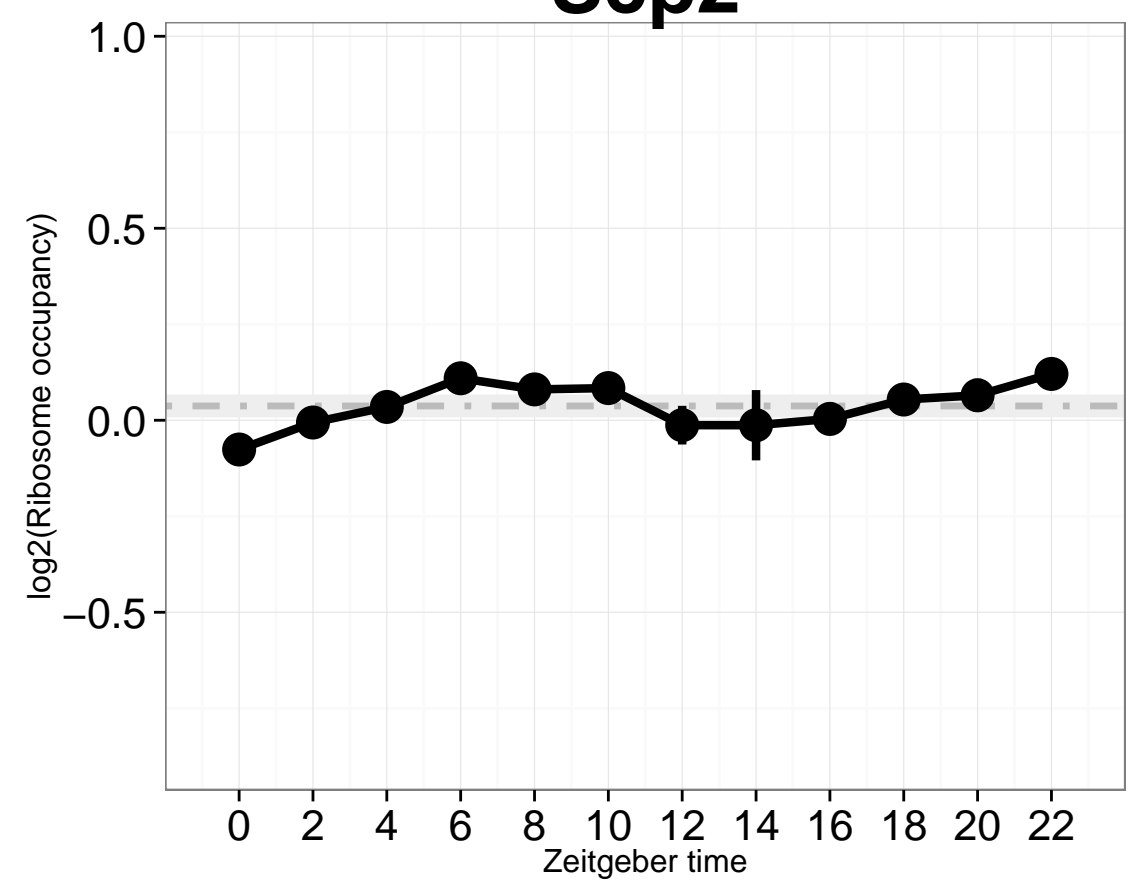

Supplement: SuppDataset_1.zip [file Scp2_set_A.pdf › Supplemental Dataset 1/A-mRNA_nonrhyth_translation_nonrhyth/Scp2_set_A.pdf]

# Scpep1

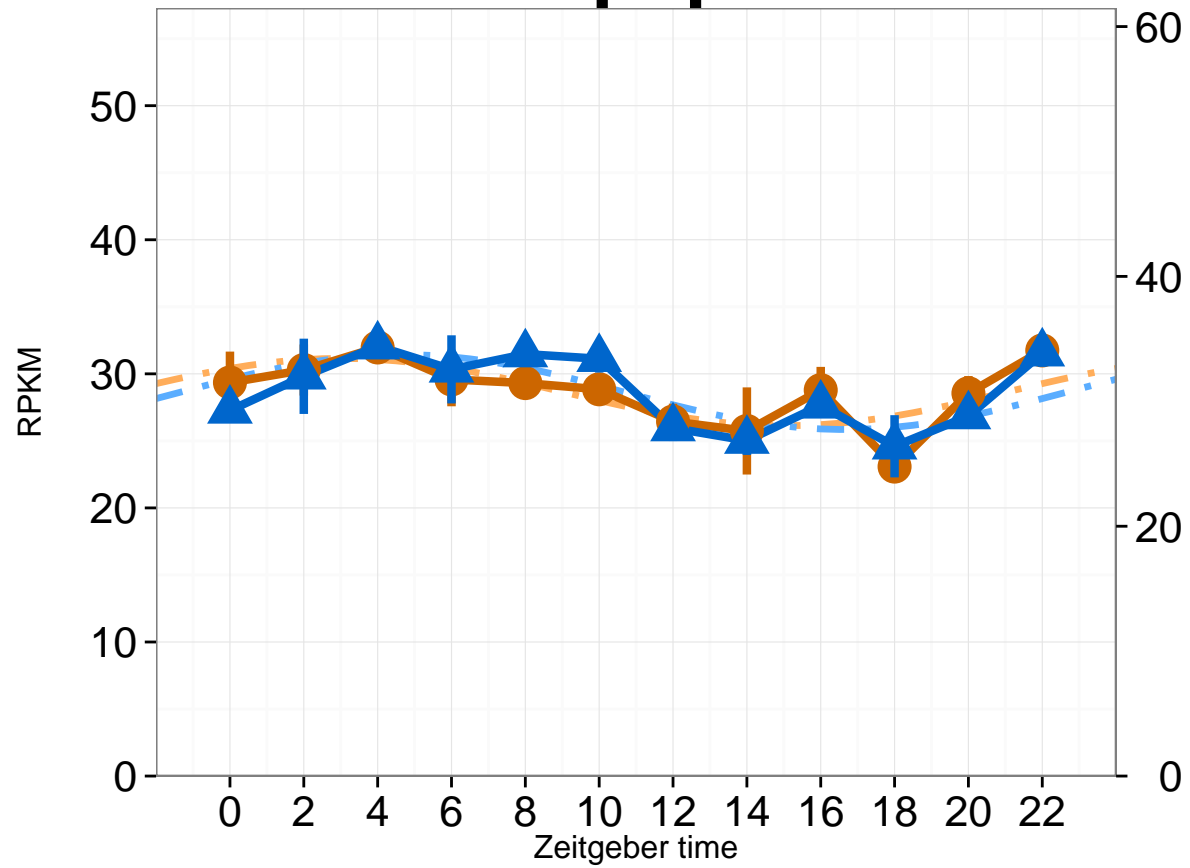

# Scpep1

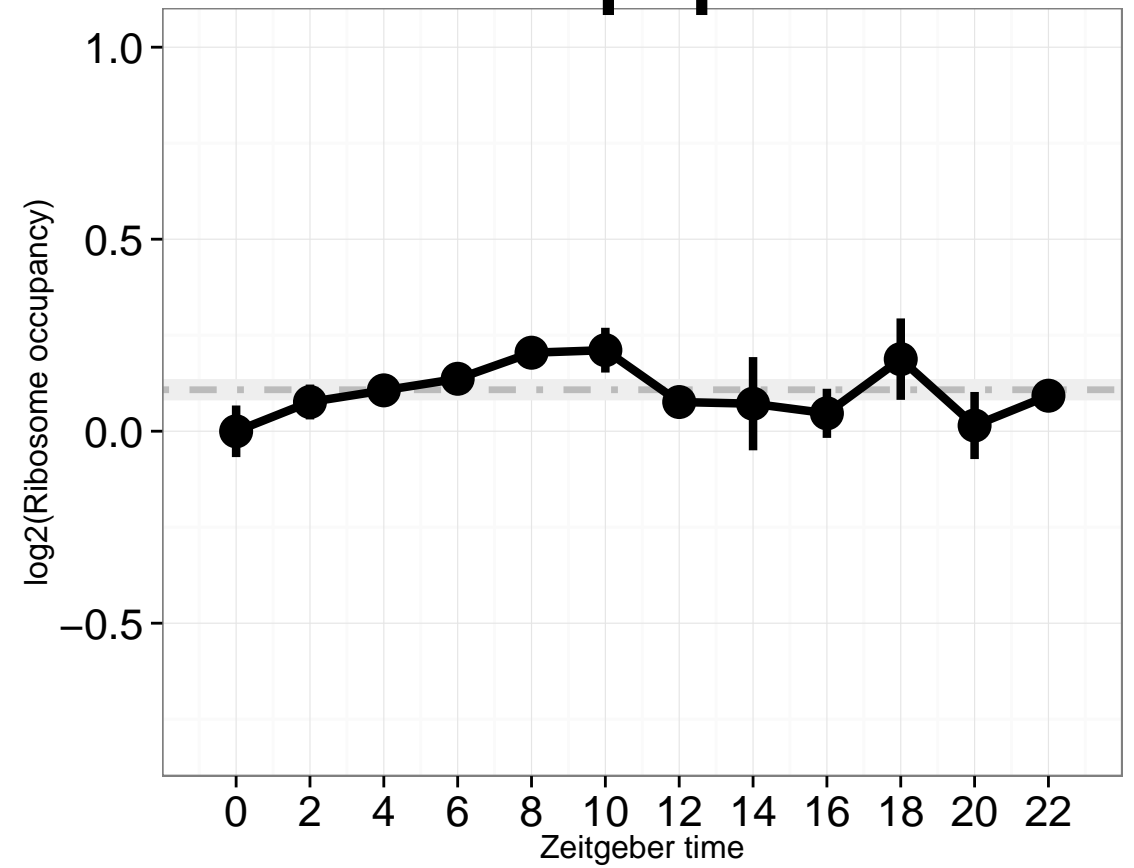

Supplement: SuppDataset_1.zip [file Scpep1_set_A.pdf › Supplemental Dataset 1/A-mRNA_nonrhyth_translation_nonrhyth/Scpep1_set_A.pdf]

## Scrib

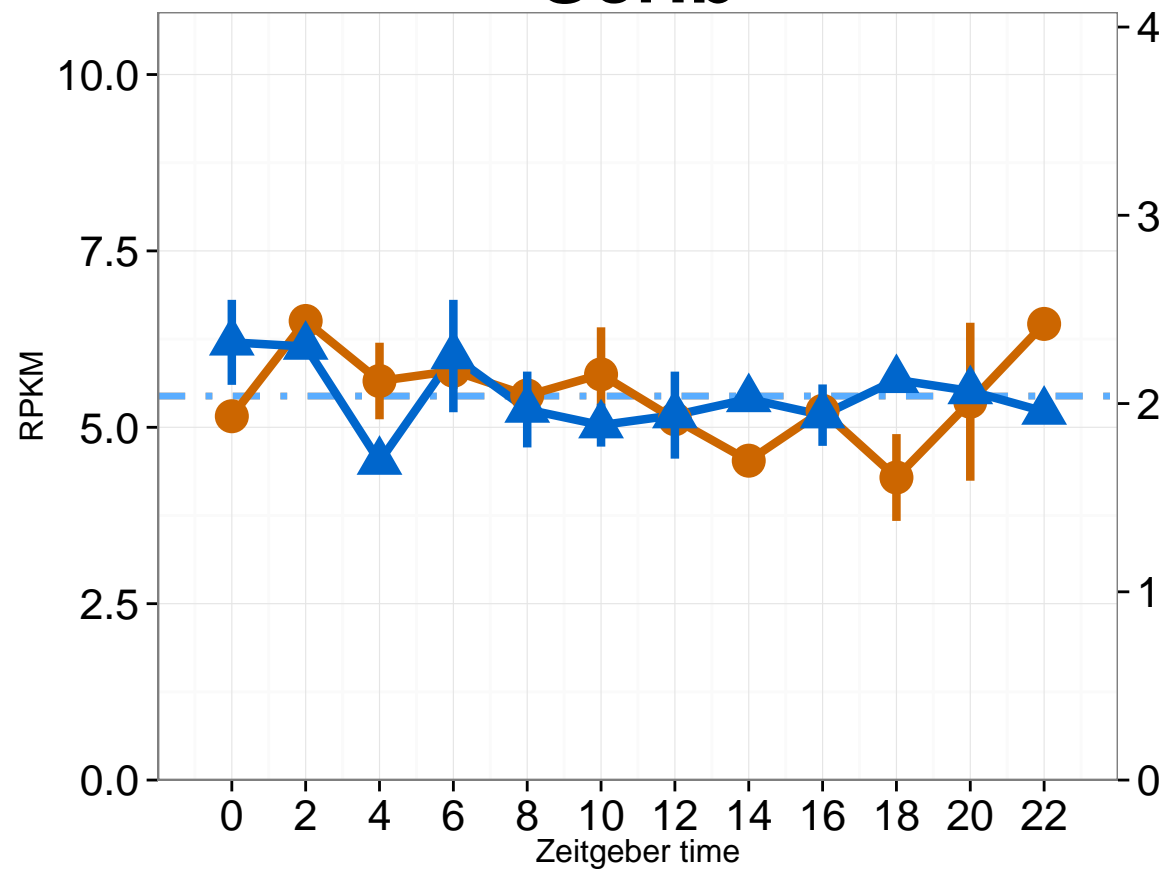

## Scrib

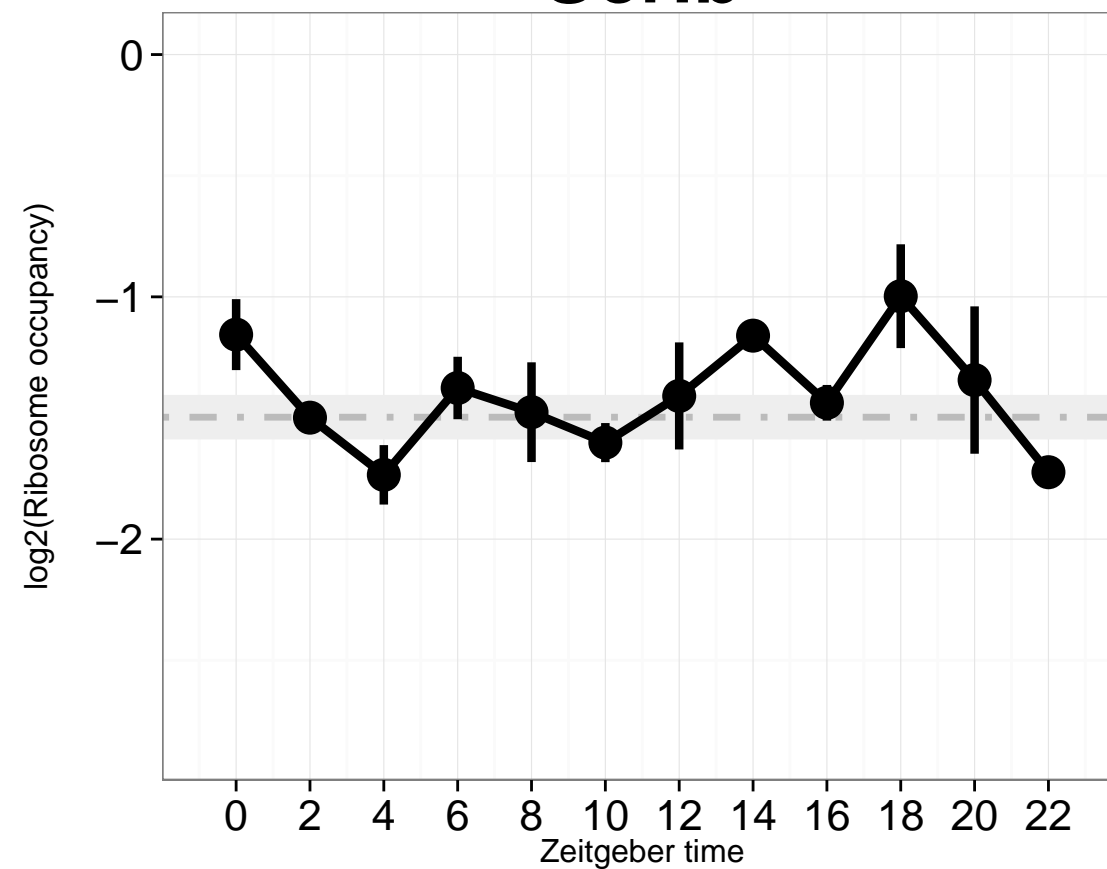

Supplement: SuppDataset_1.zip [file Scrib_set_A.pdf › Supplemental Dataset 1/A-mRNA_nonrhyth_translation_nonrhyth/Scrib_set_A.pdf]

## Scrn2

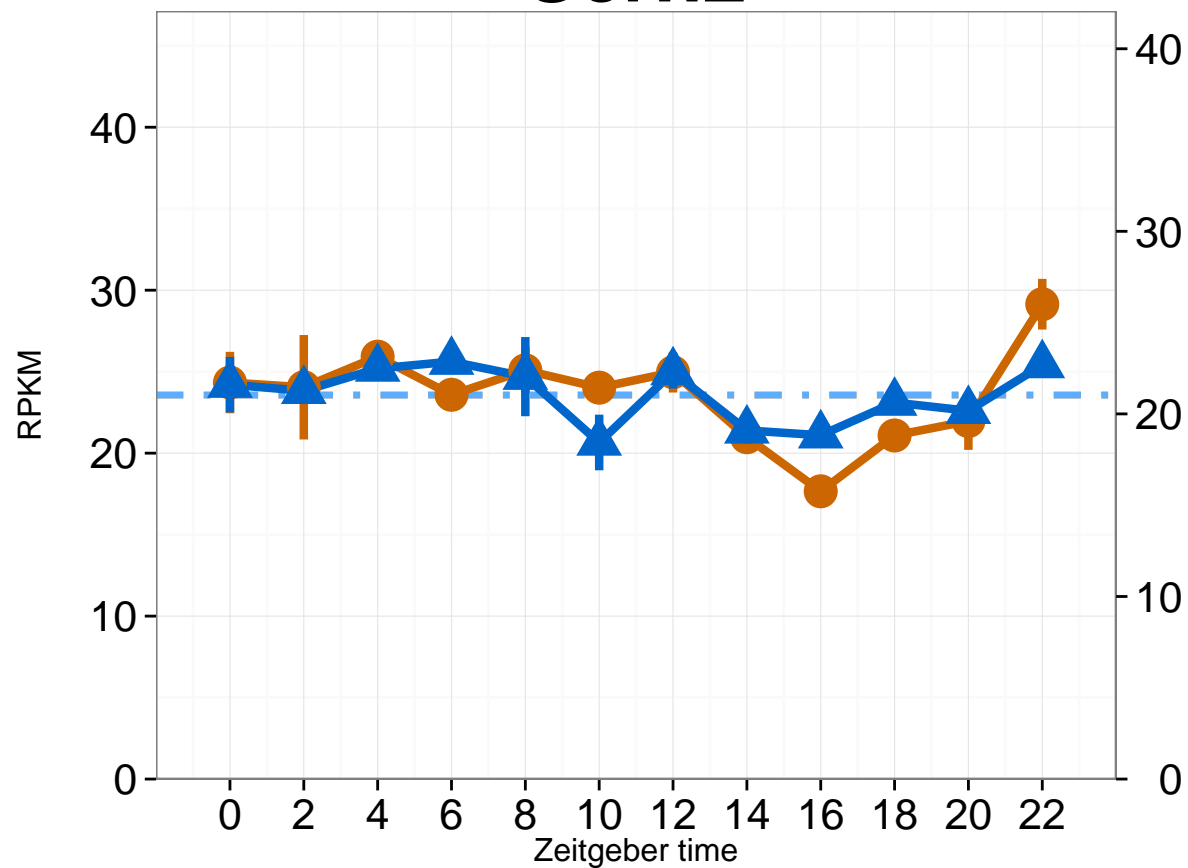

## Scrn2

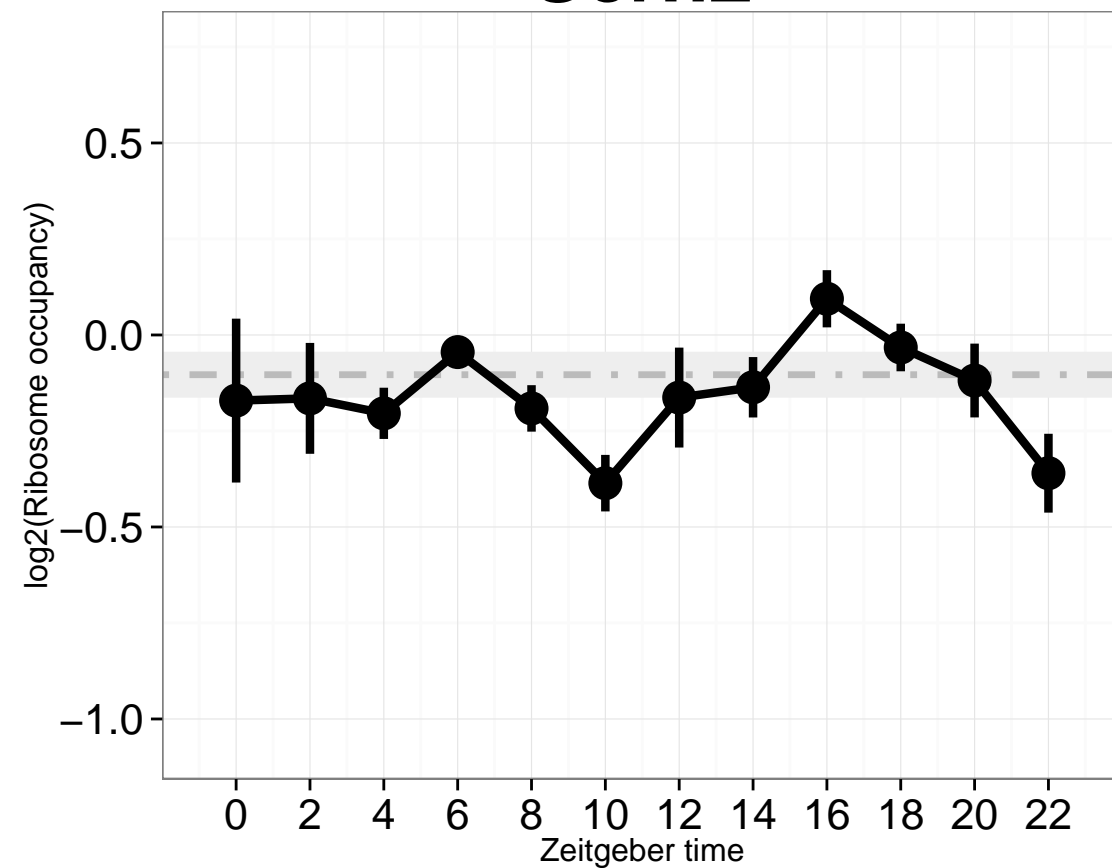

Supplement: SuppDataset_1.zip [file Scrn2_set_A.pdf › Supplemental Dataset 1/A-mRNA_nonrhyth_translation_nonrhyth/Scrn2_set_A.pdf]

## Scrn3

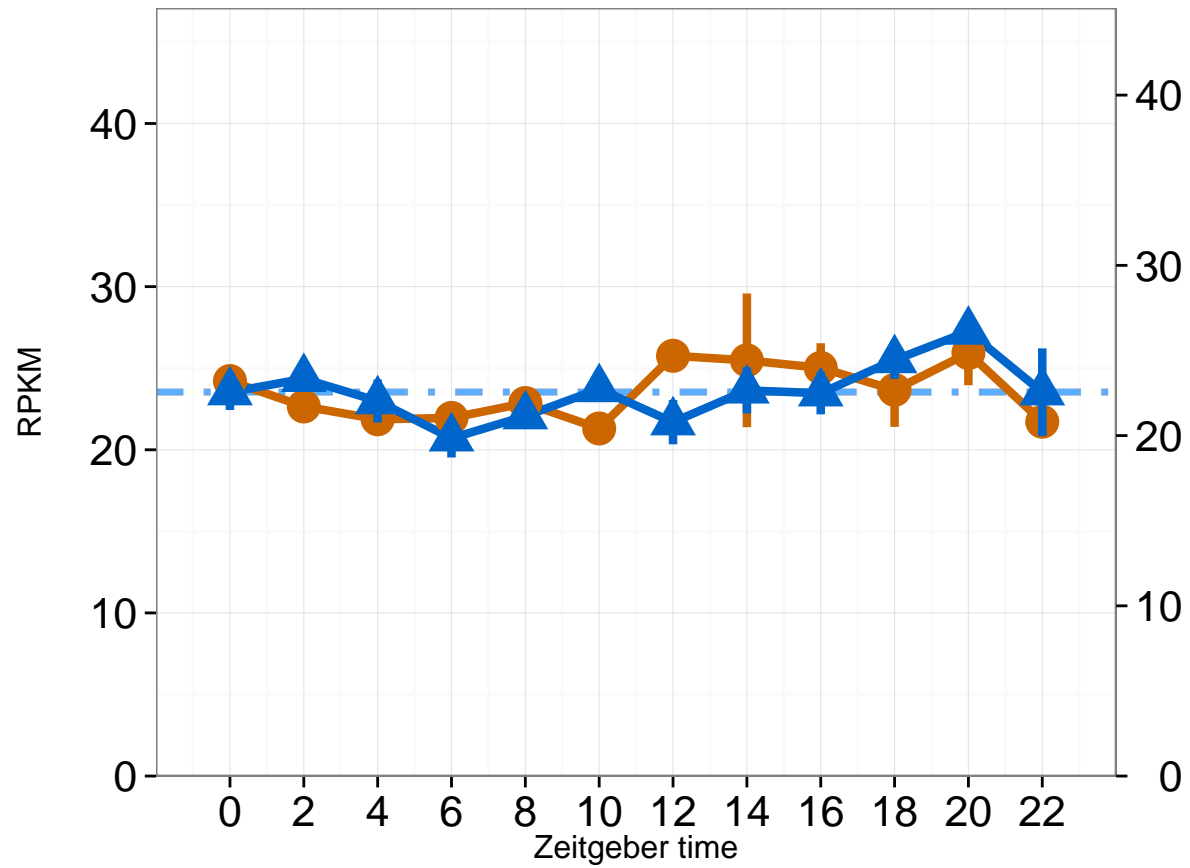

## Scrn3

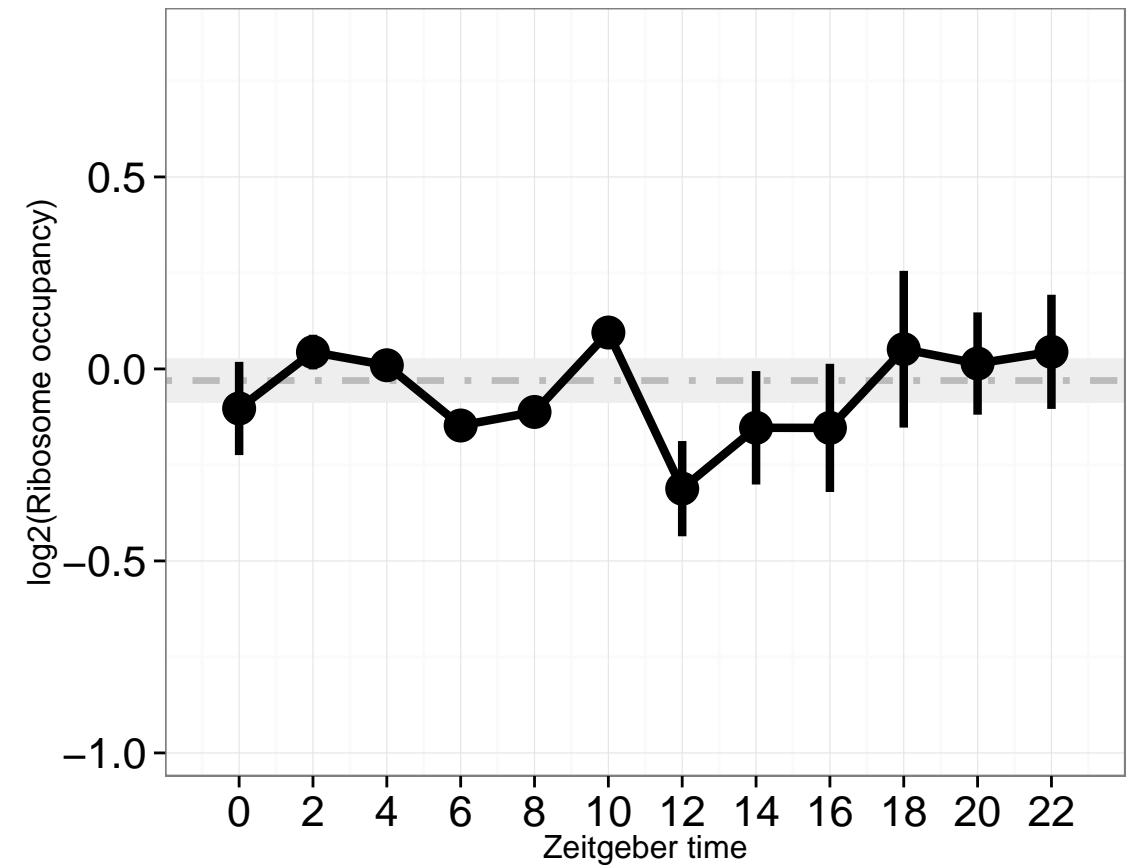

Supplement: SuppDataset_1.zip [file Scrn3_set_A.pdf › Supplemental Dataset 1/A-mRNA_nonrhyth_translation_nonrhyth/Scrn3_set_A.pdf]

## Scyl1

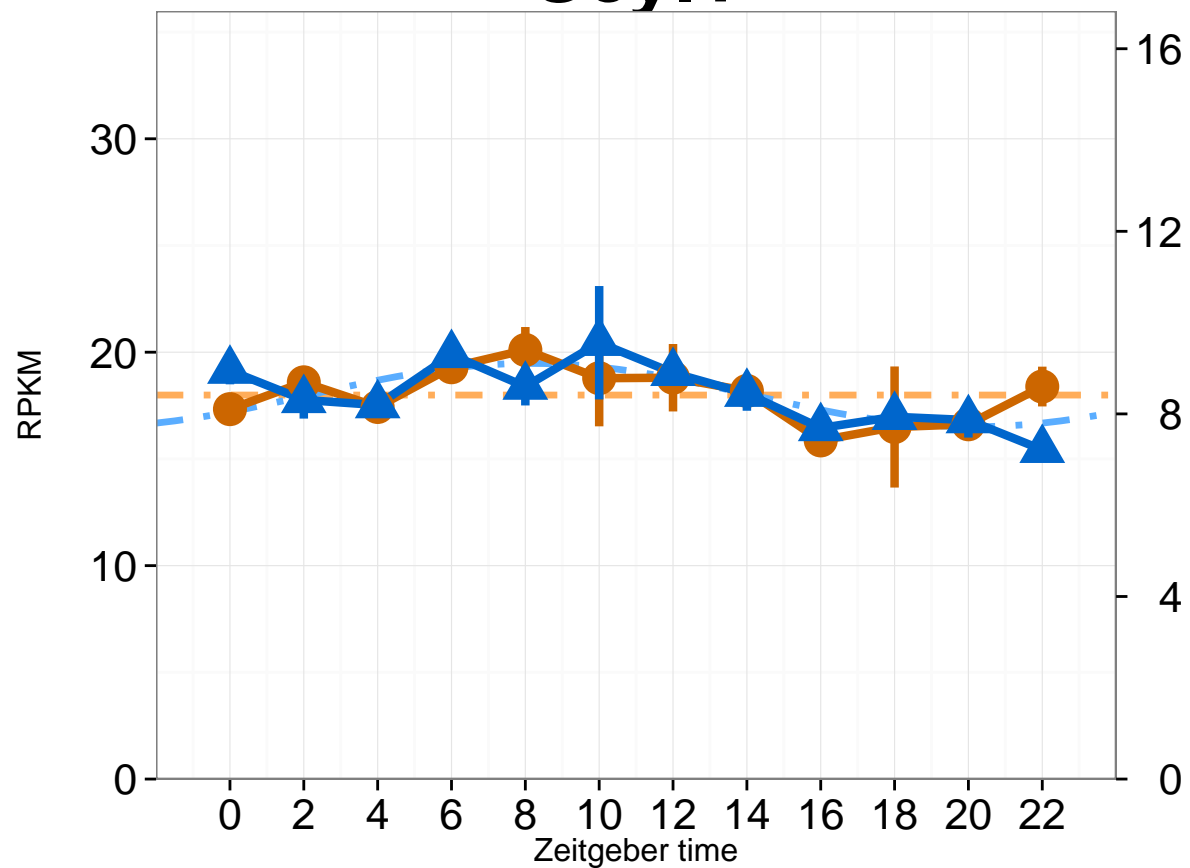

## Scyl1

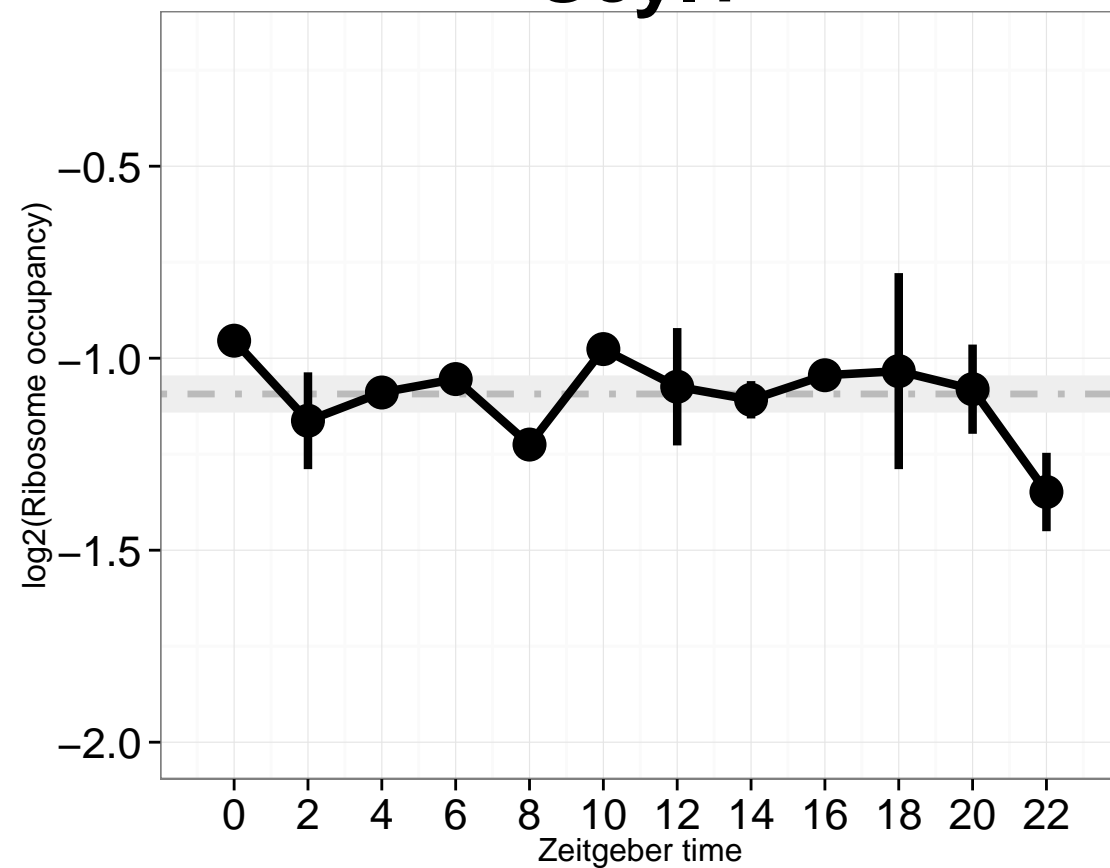

Supplement: SuppDataset_1.zip [file Scyl1_set_A.pdf › Supplemental Dataset 1/A-mRNA_nonrhyth_translation_nonrhyth/Scyl1_set_A.pdf]

## Scyl2

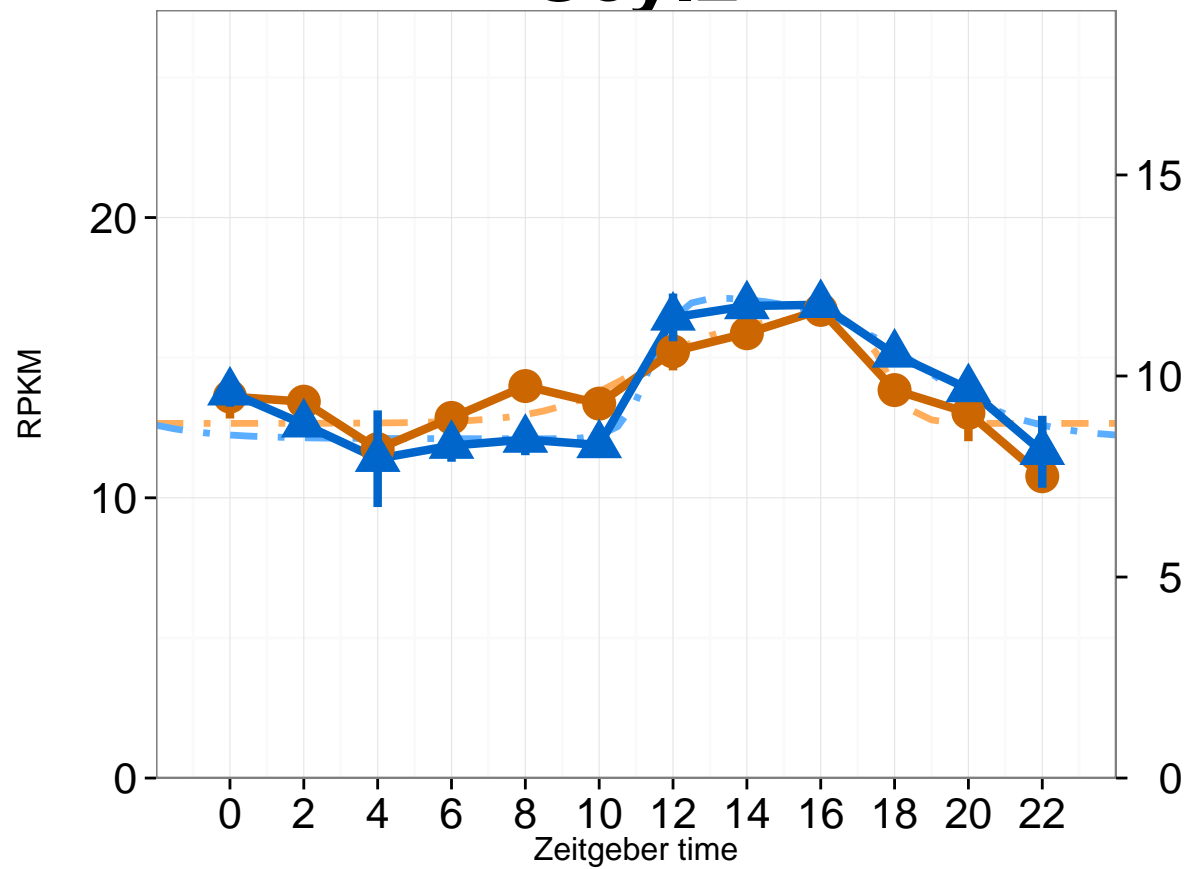

## Scyl2

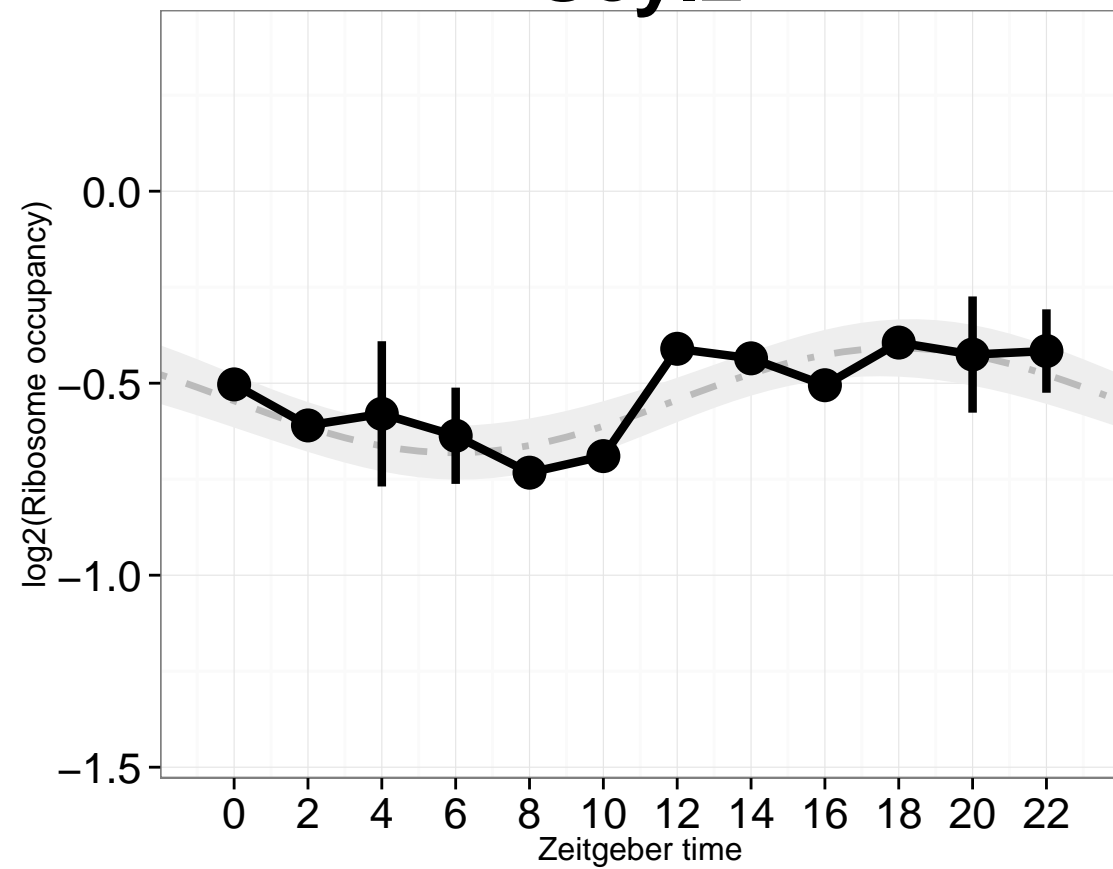

Supplement: SuppDataset_1.zip [file Scyl2_set_A.pdf › Supplemental Dataset 1/A-mRNA_nonrhyth_translation_nonrhyth/Scyl2_set_A.pdf]

## Scyl3

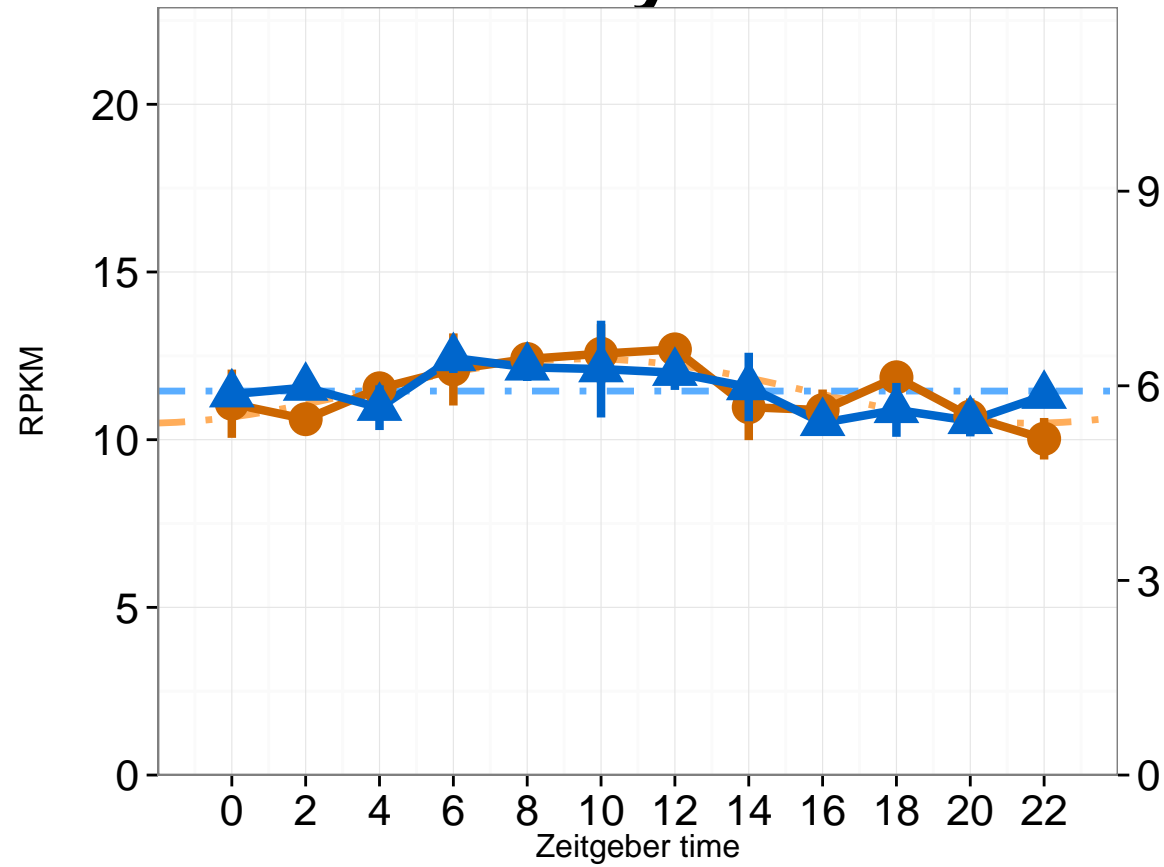

## Scyl3

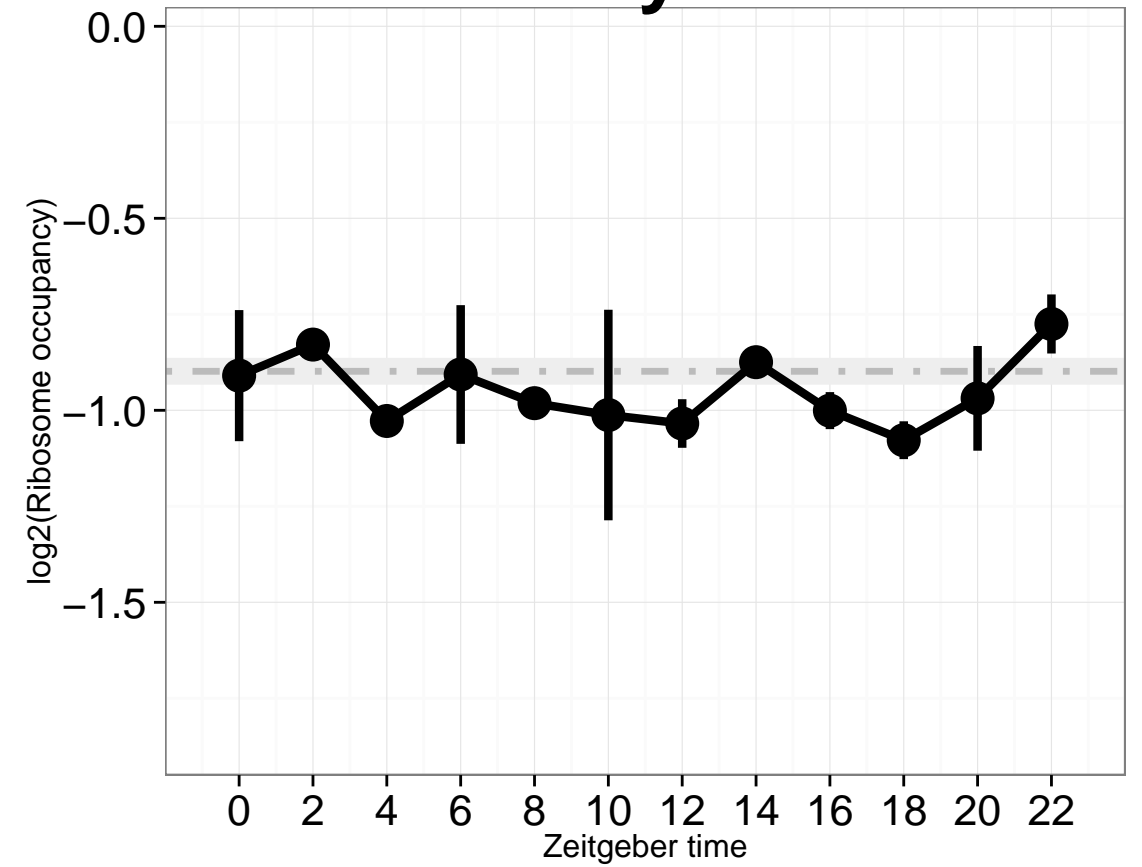

Supplement: SuppDataset_1.zip [file Scyl3_set_A.pdf › Supplemental Dataset 1/A-mRNA_nonrhyth_translation_nonrhyth/Scyl3_set_A.pdf]

# Sdad1

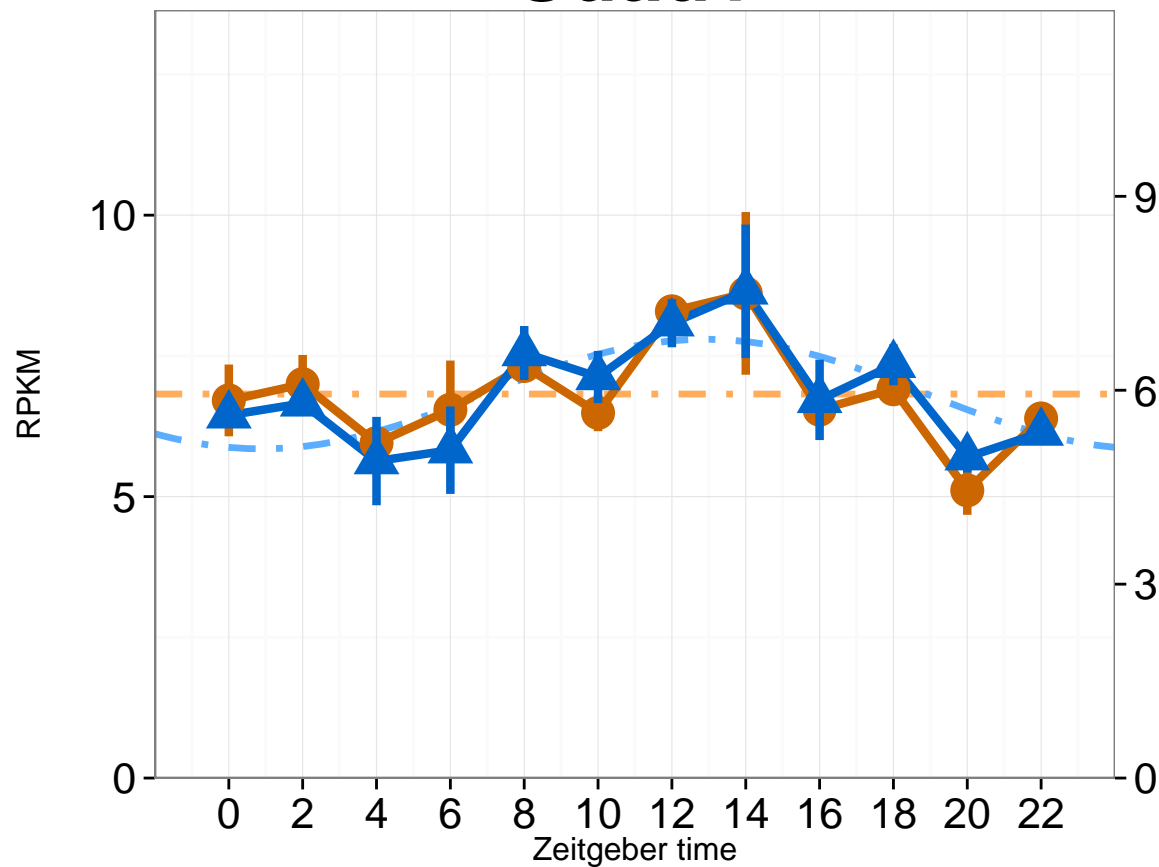

# Sdad1

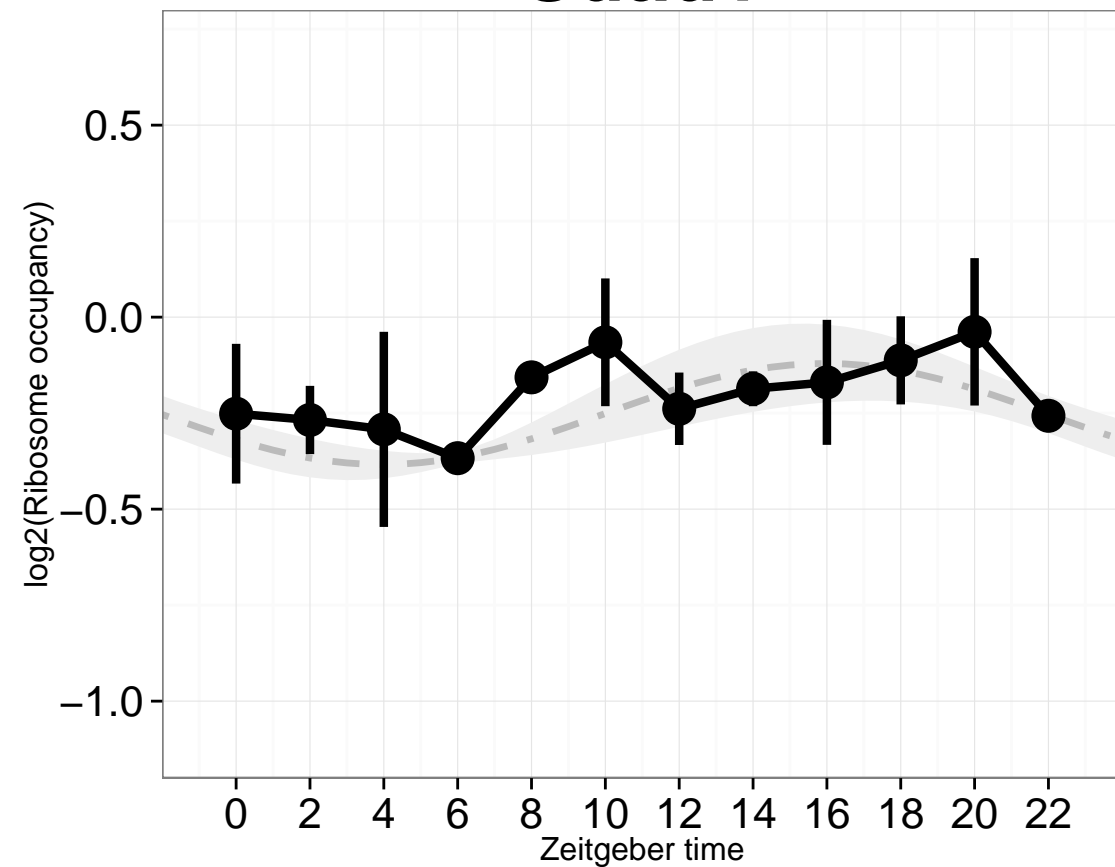

Supplement: SuppDataset_1.zip [file Sdad1_set_A.pdf › Supplemental Dataset 1/A-mRNA_nonrhyth_translation_nonrhyth/Sdad1_set_A.pdf]

## Sdc2

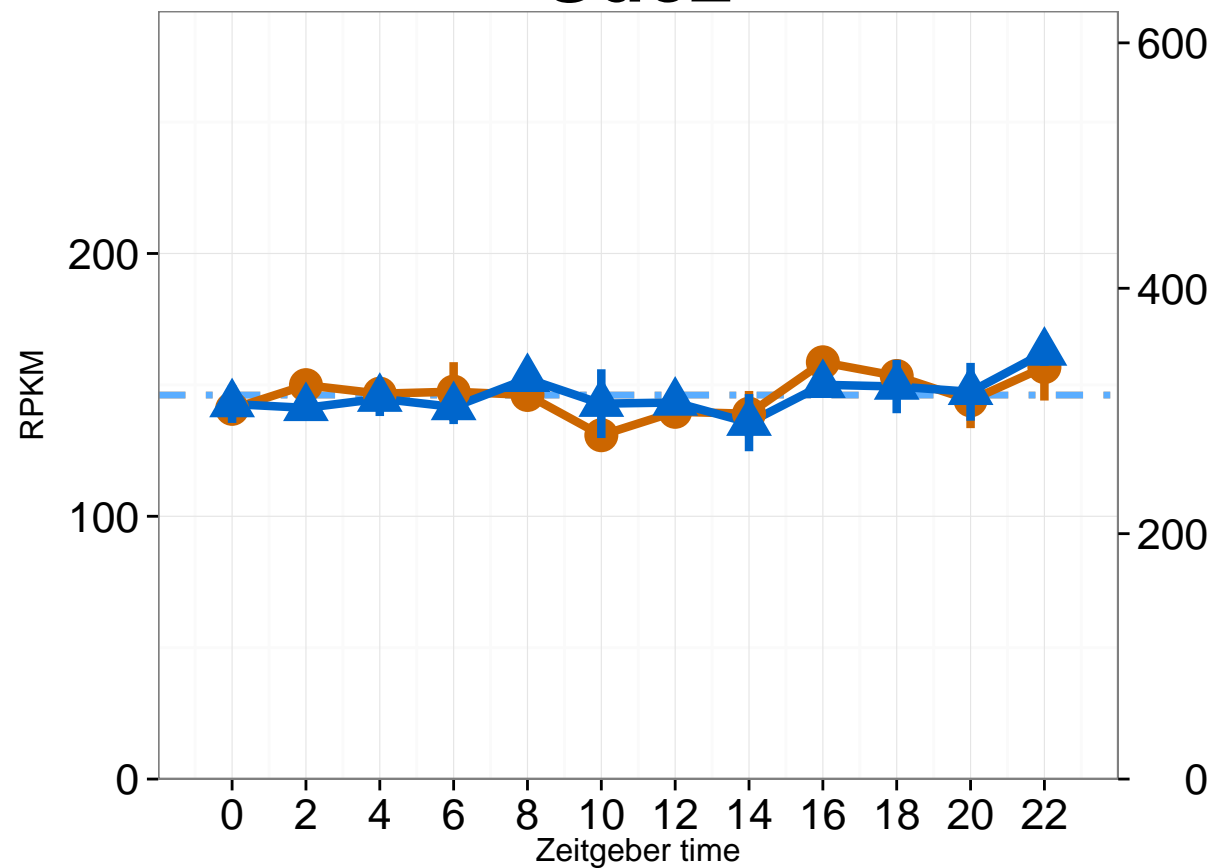

## Sdc2

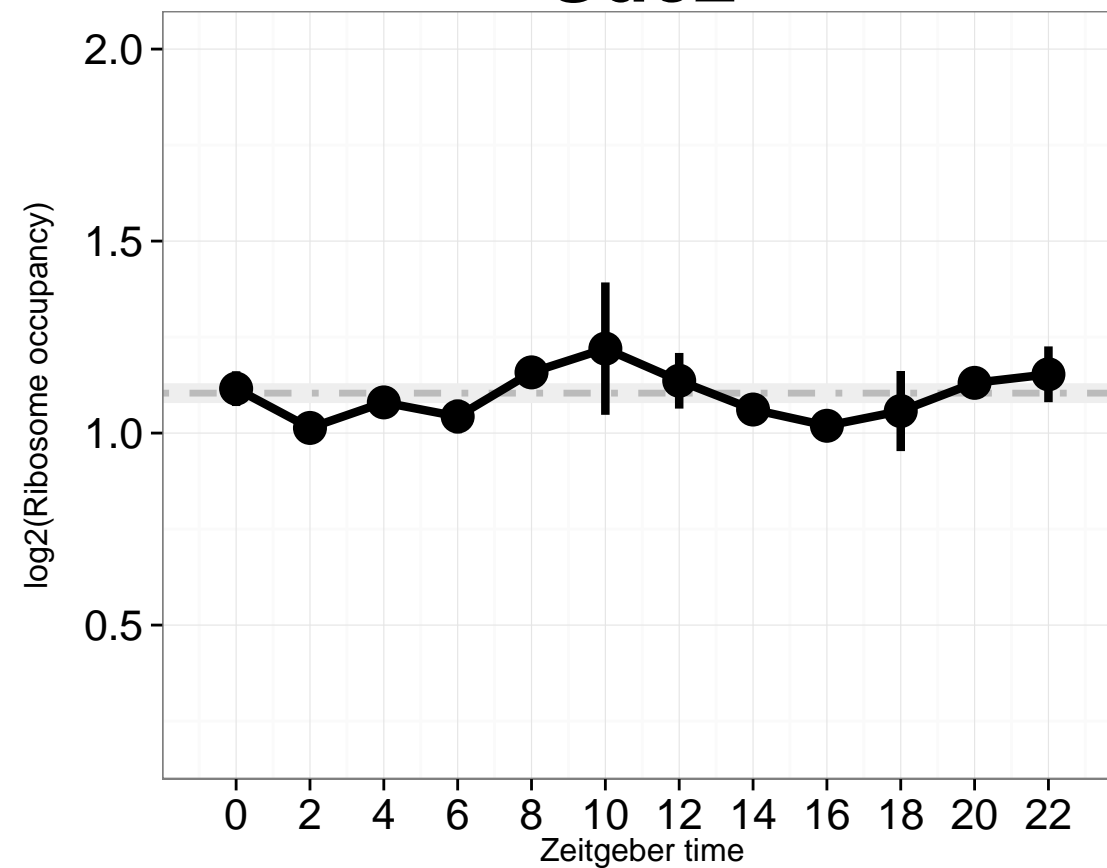

Supplement: SuppDataset_1.zip [file Sdc2_set_A.pdf › Supplemental Dataset 1/A-mRNA_nonrhyth_translation_nonrhyth/Sdc2_set_A.pdf]

## Sdc3

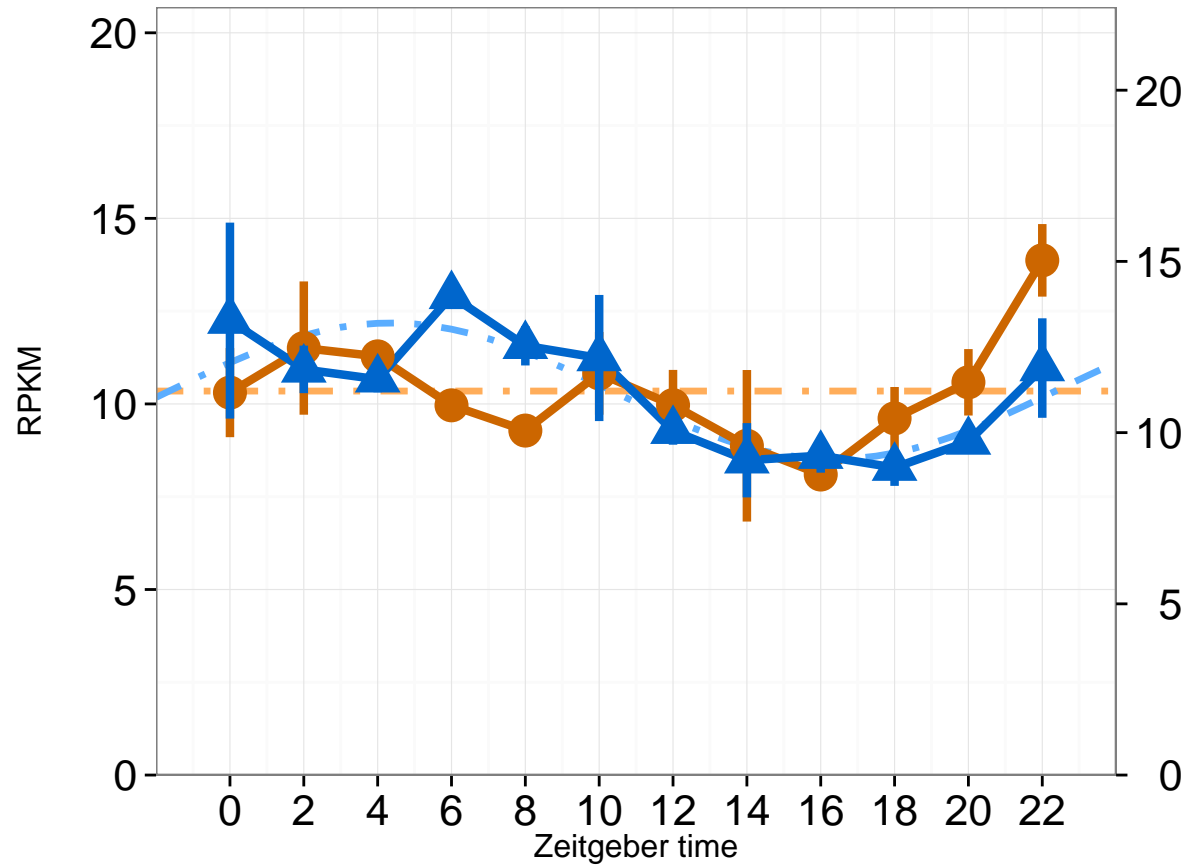

## Sdc3

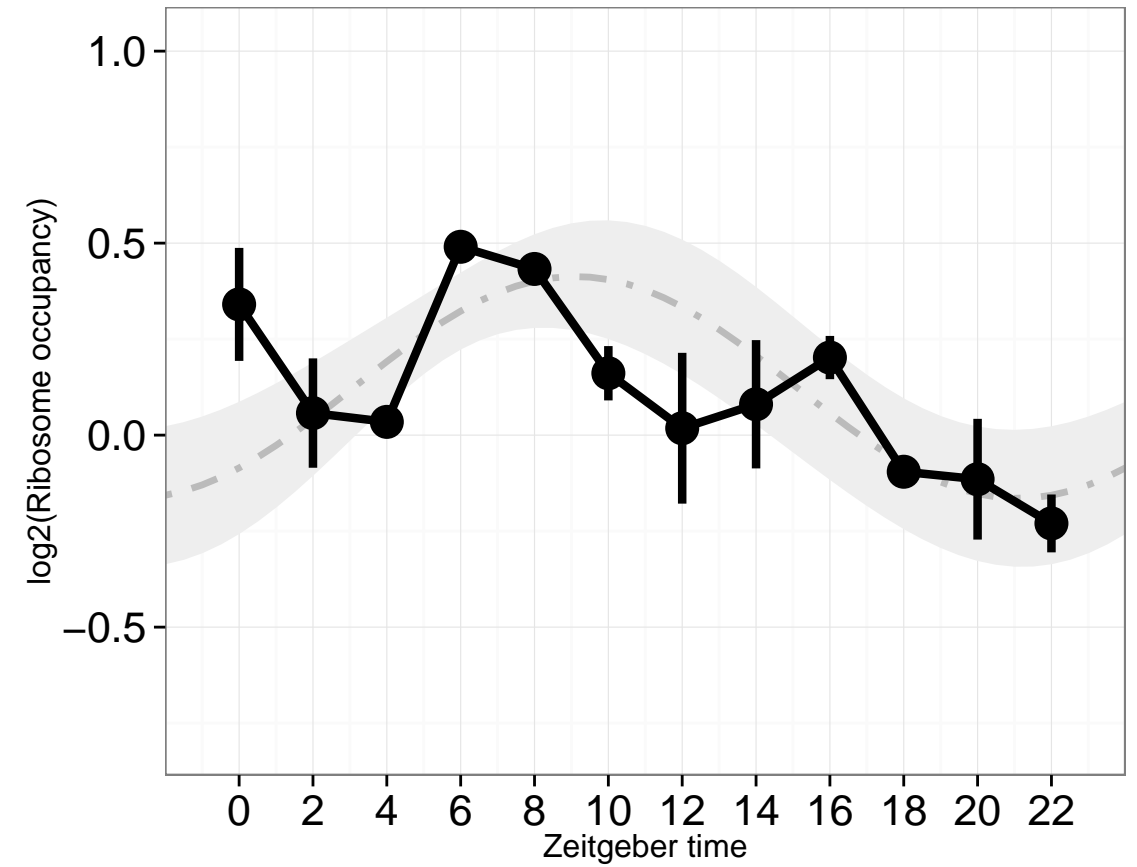

Supplement: SuppDataset_1.zip [file Sdc3_set_A.pdf › Supplemental Dataset 1/A-mRNA_nonrhyth_translation_nonrhyth/Sdc3_set_A.pdf]

## Sdc4

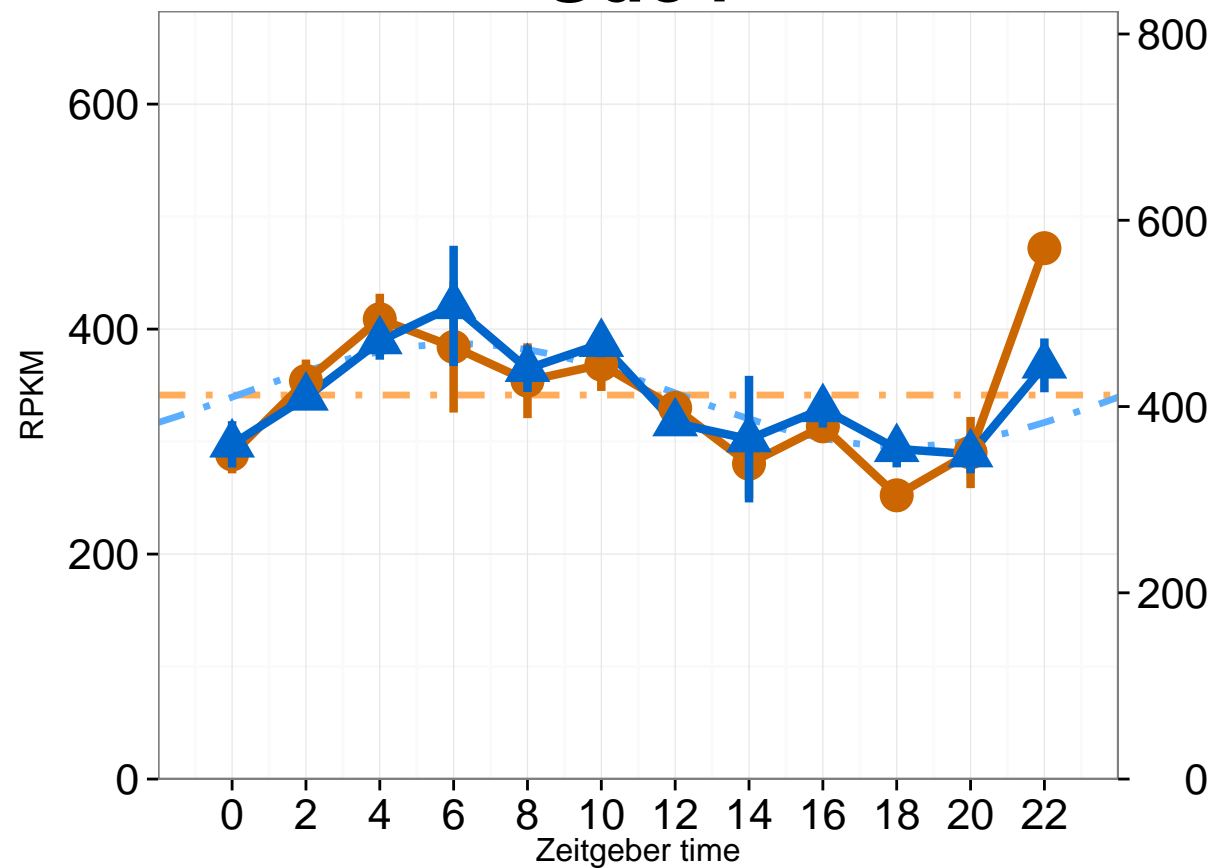

## Sdc4

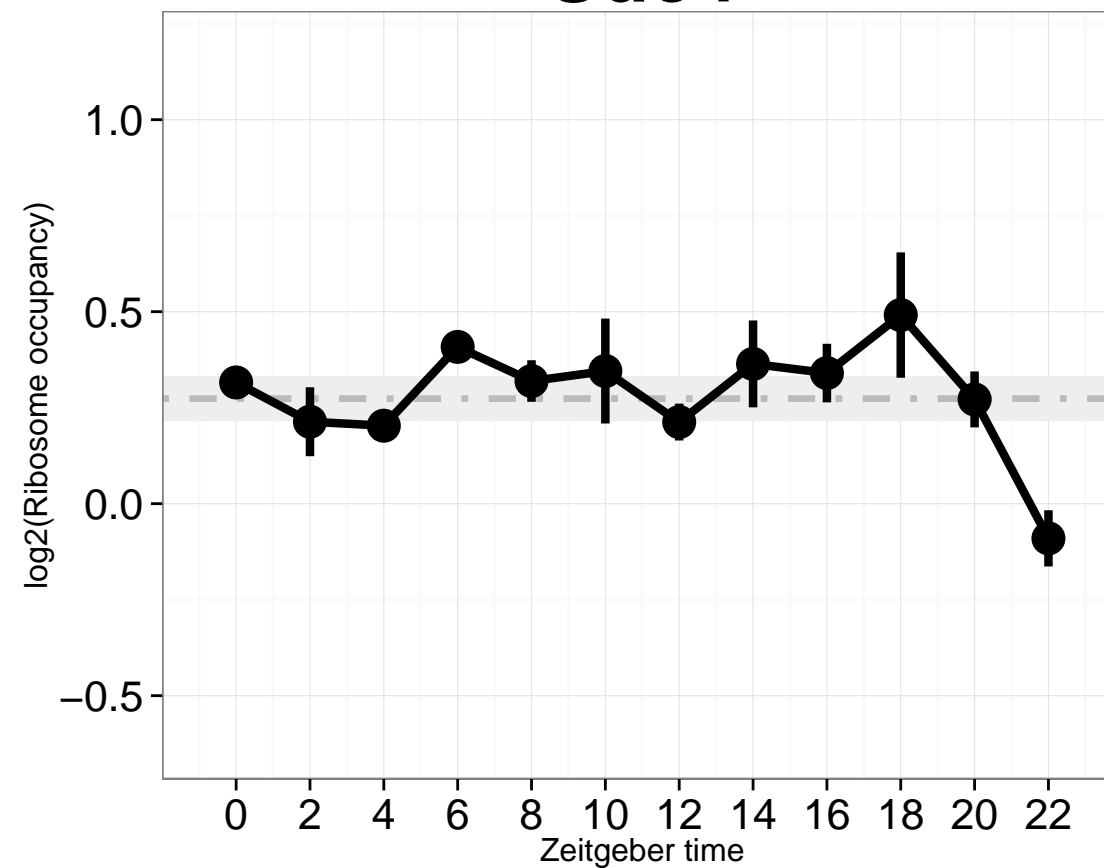

Supplement: SuppDataset_1.zip [file Sdc4_set_A.pdf › Supplemental Dataset 1/A-mRNA_nonrhyth_translation_nonrhyth/Sdc4_set_A.pdf]

## Sdcbp

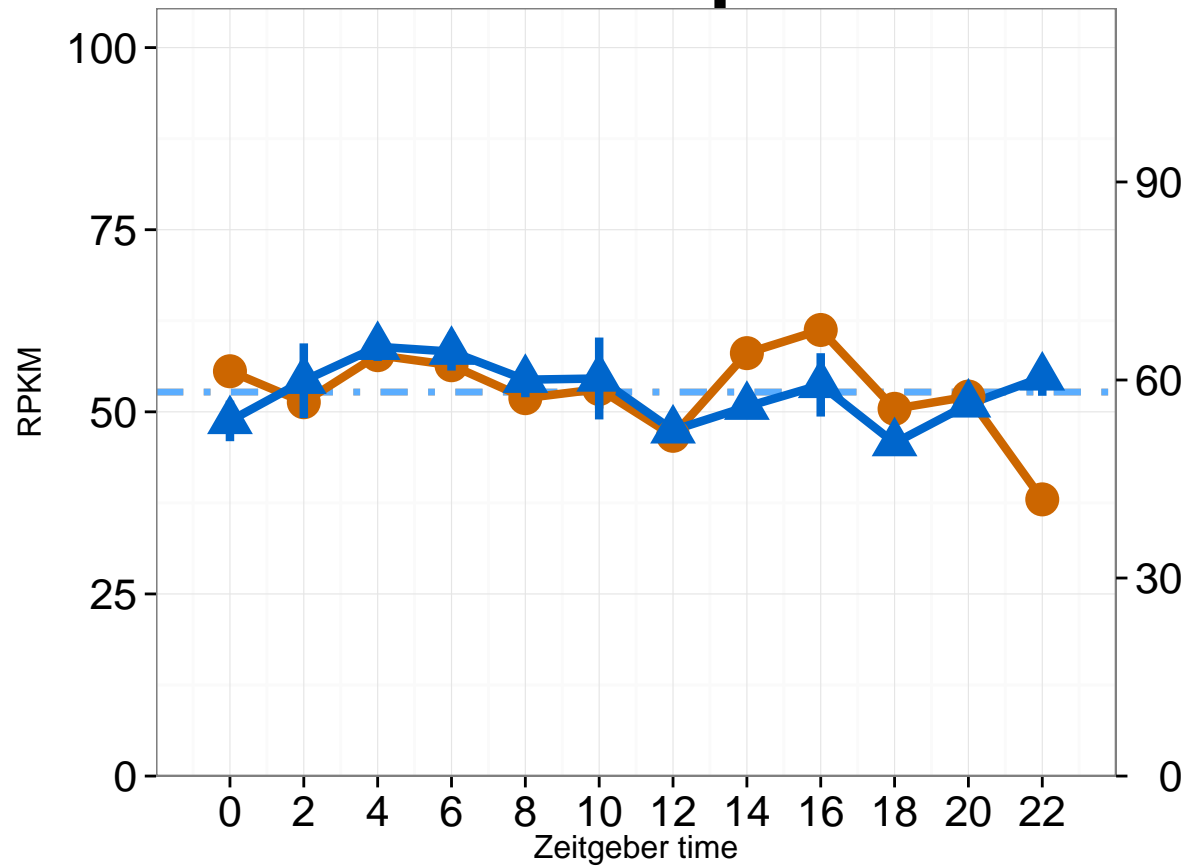

## Sdcbp

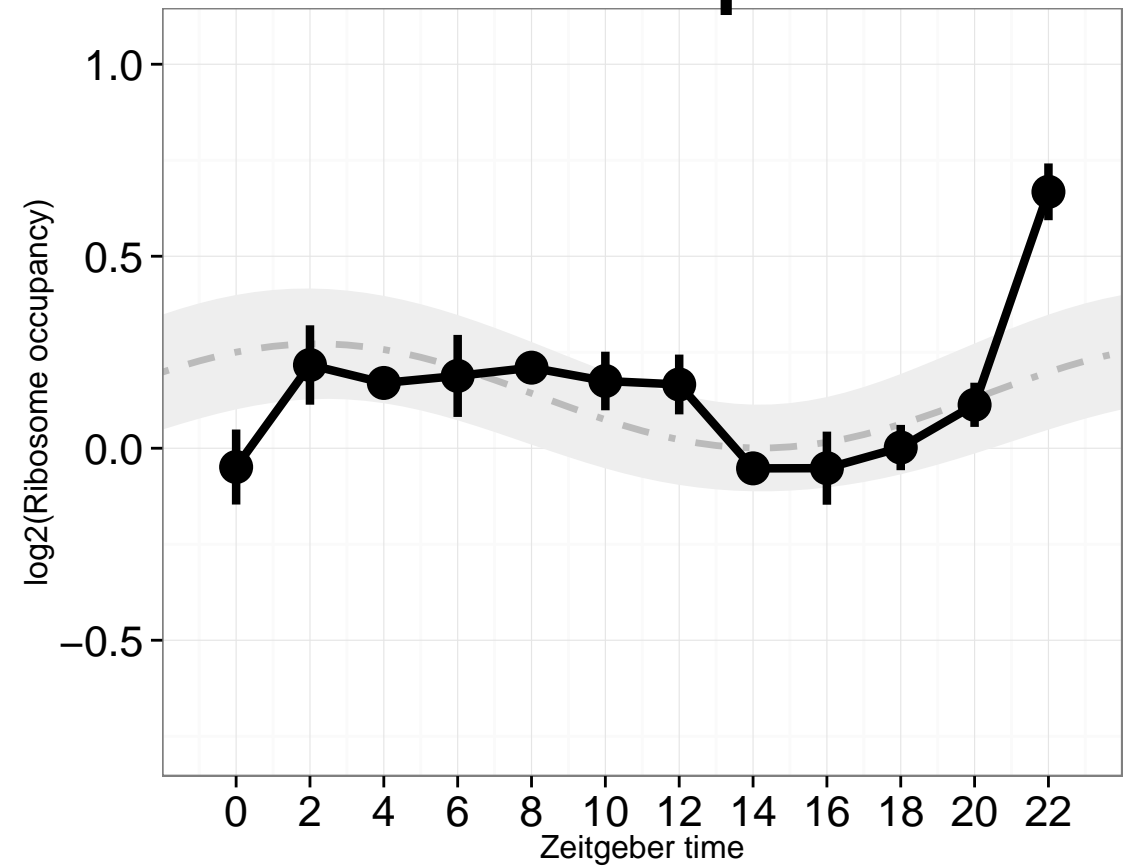

Supplement: SuppDataset_1.zip [file Sdcbp_set_A.pdf › Supplemental Dataset 1/A-mRNA_nonrhyth_translation_nonrhyth/Sdcbp_set_A.pdf]

# Sdccag3

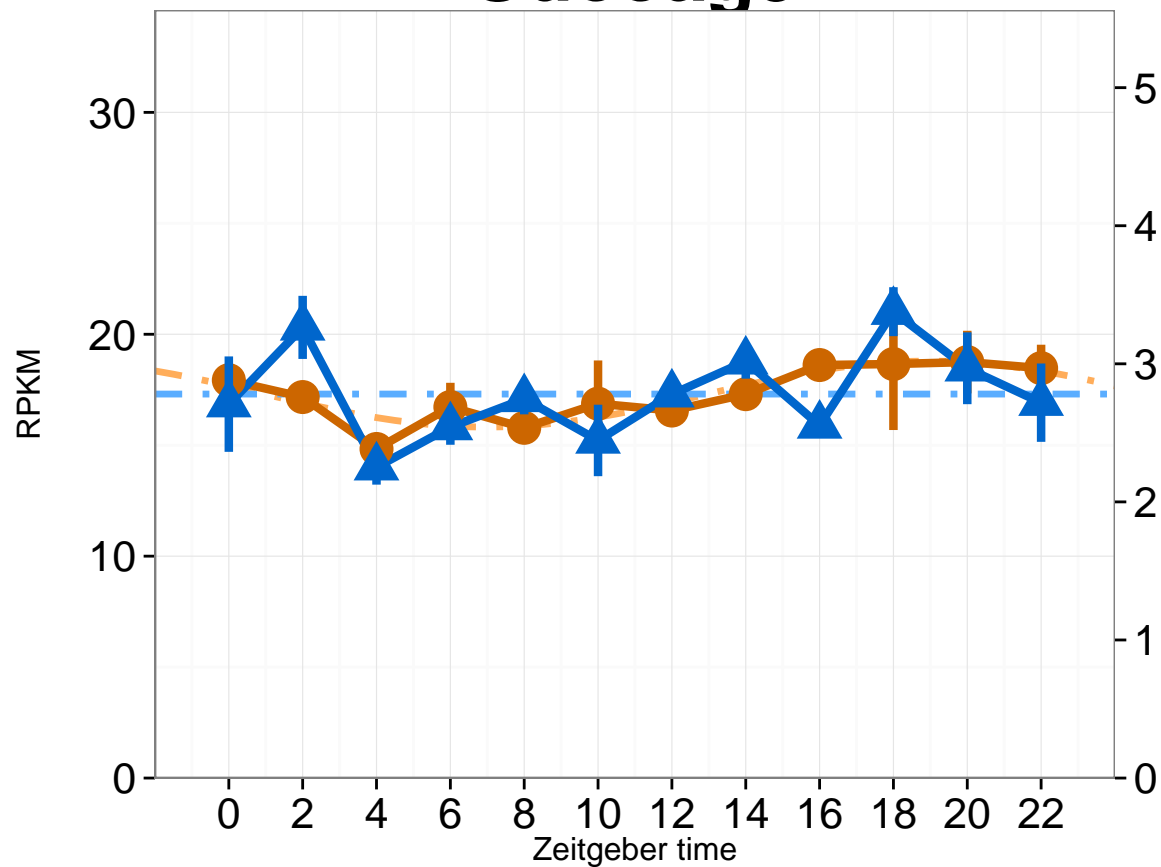

# Sdccag3

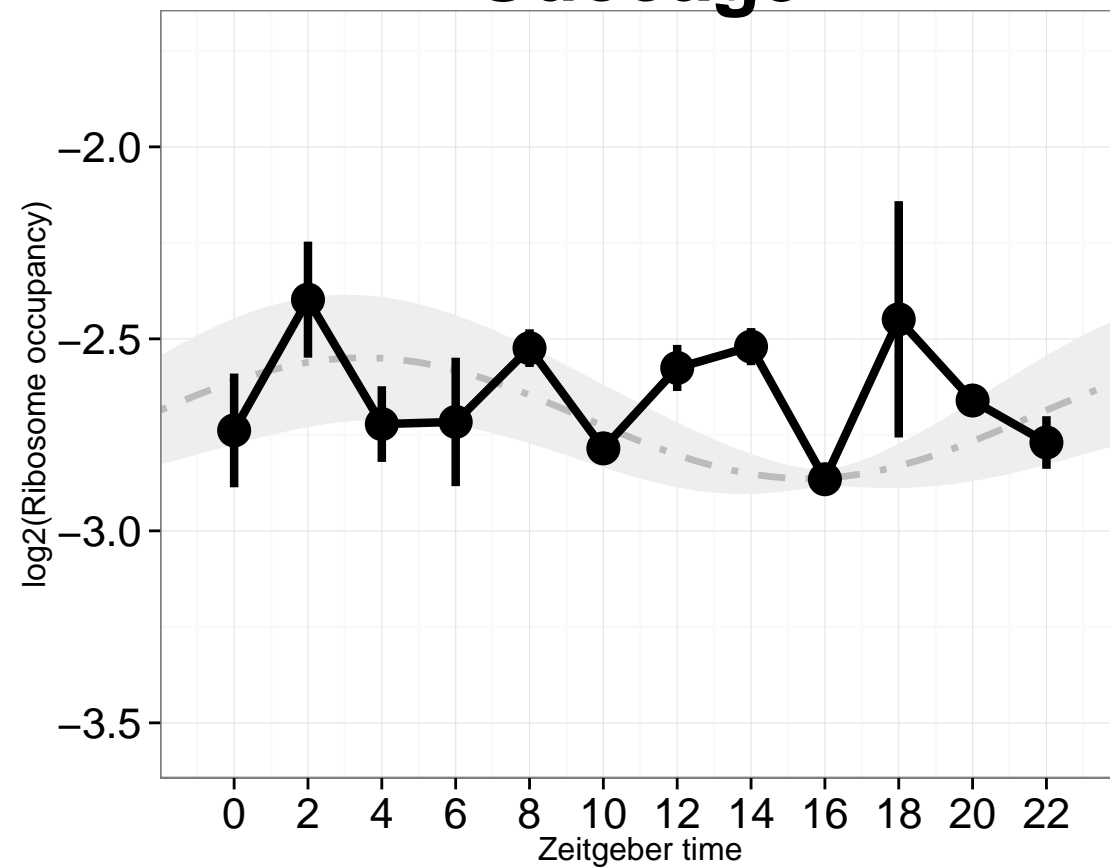

Supplement: SuppDataset_1.zip [file Sdccag3_set_A.pdf › Supplemental Dataset 1/A-mRNA_nonrhyth_translation_nonrhyth/Sdccag3_set_A.pdf]

# Sdccag8

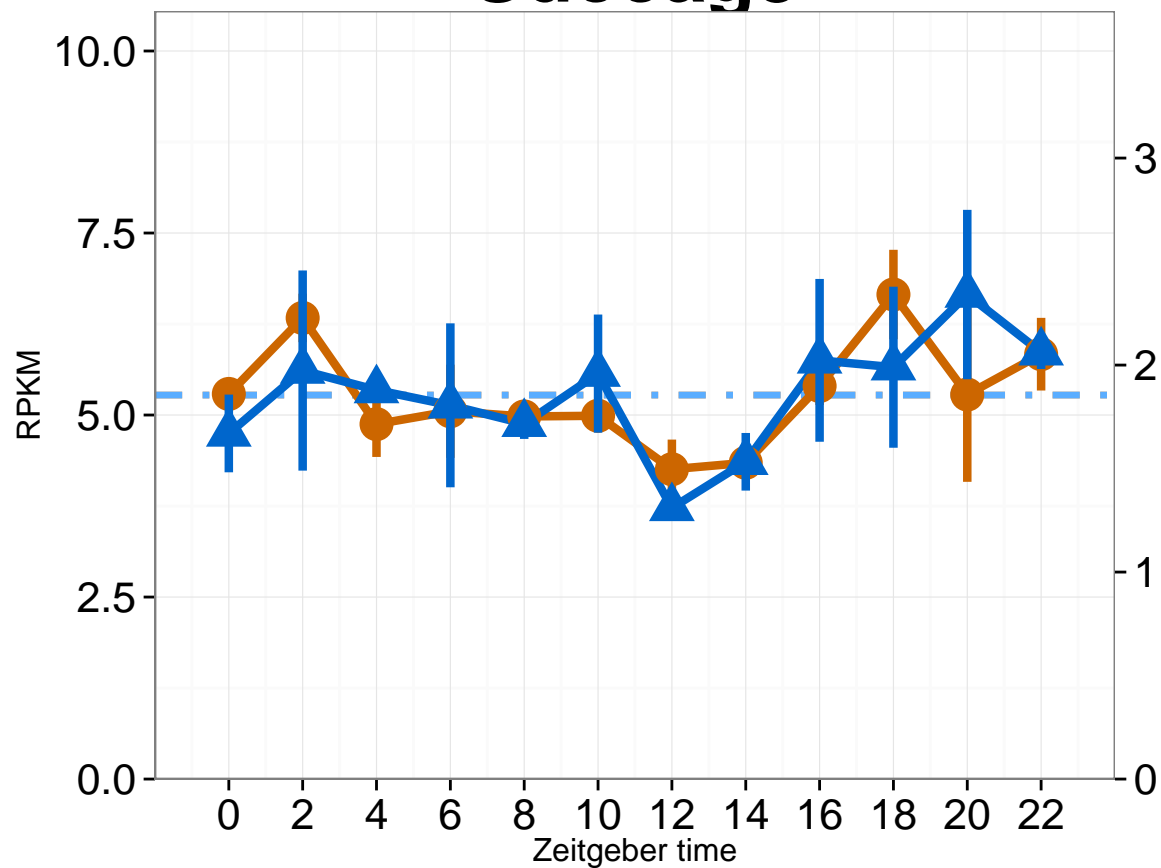

# Sdccag8

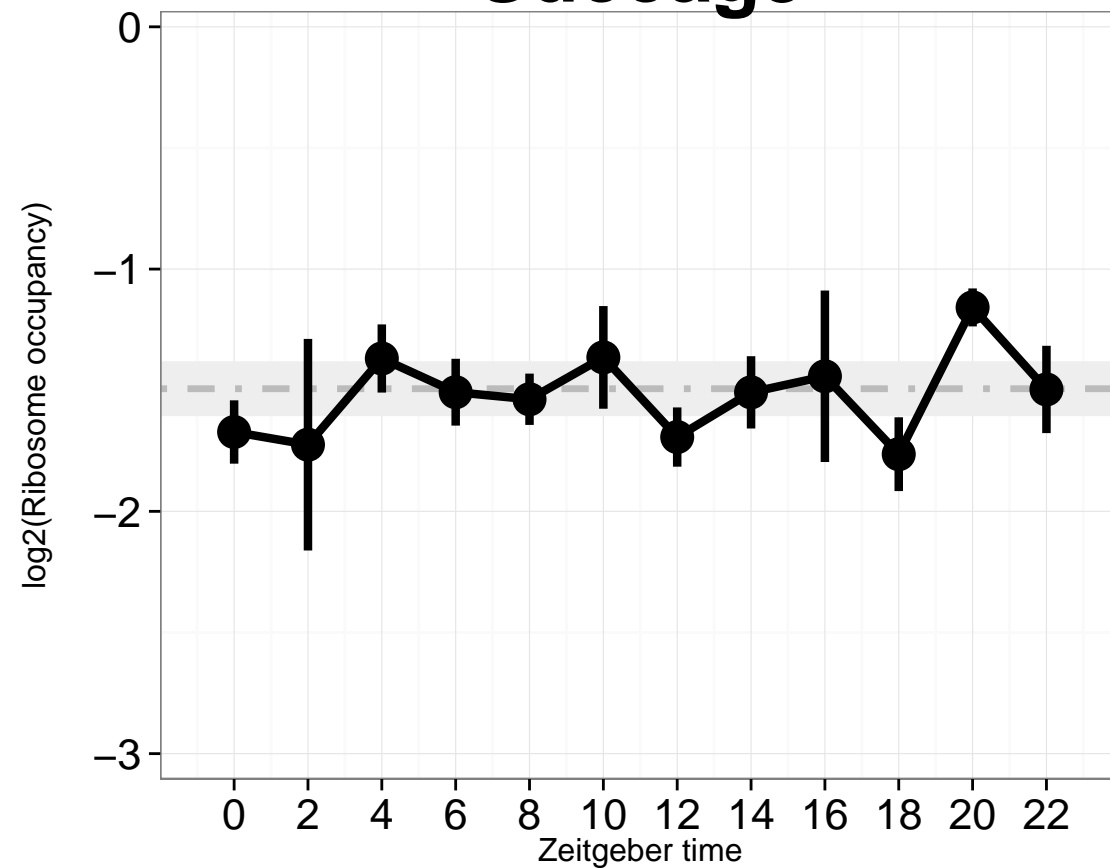

Supplement: SuppDataset_1.zip [file Sdccag8_set_A.pdf › Supplemental Dataset 1/A-mRNA_nonrhyth_translation_nonrhyth/Sdccag8_set_A.pdf]

## Sde2

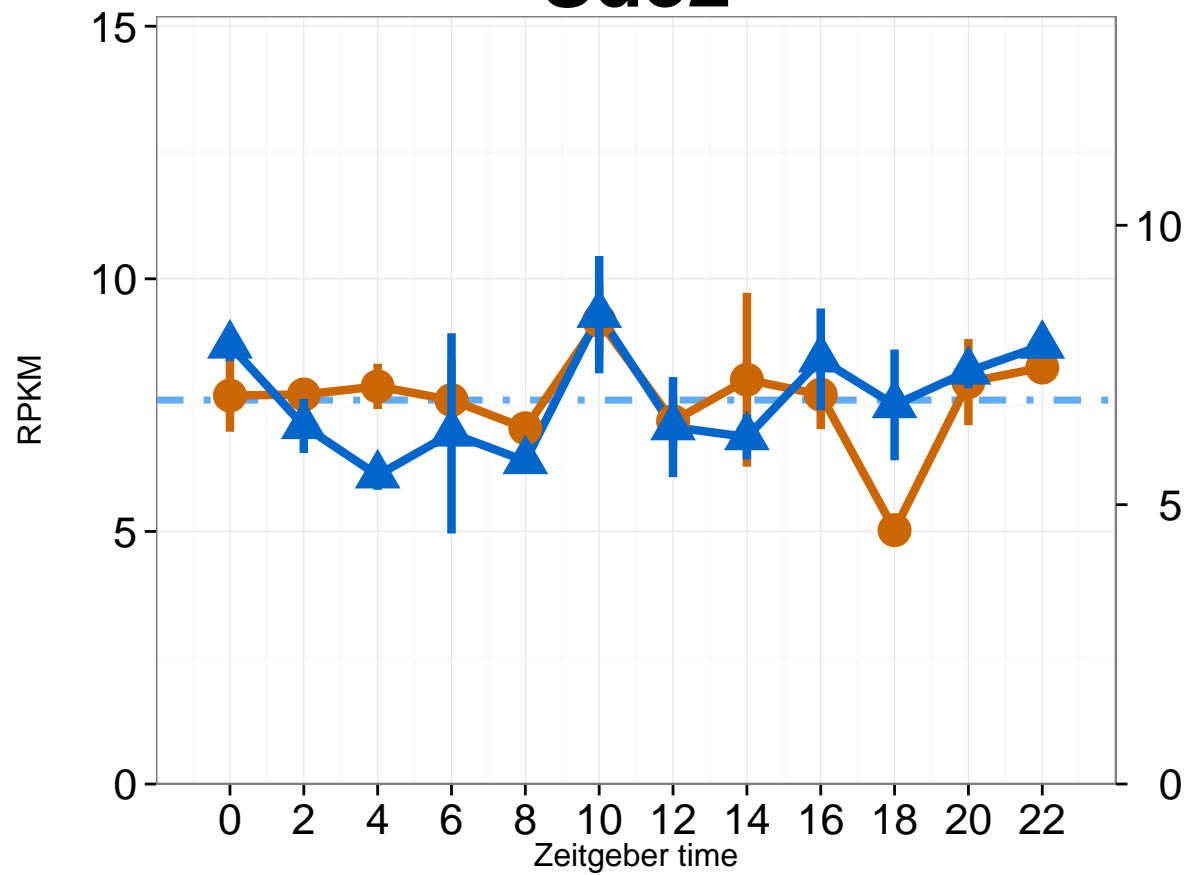

## Sde2

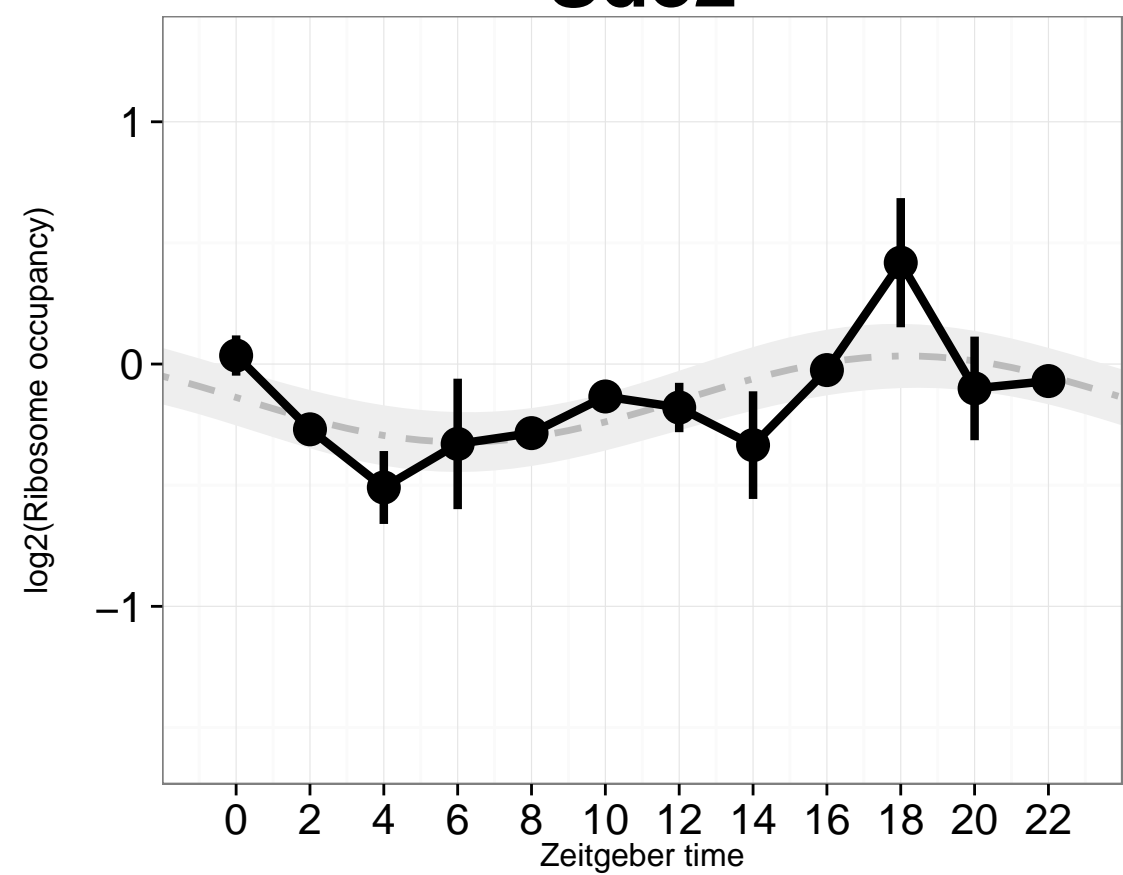

Supplement: SuppDataset_1.zip [file Sde2_set_A.pdf › Supplemental Dataset 1/A-mRNA_nonrhyth_translation_nonrhyth/Sde2_set_A.pdf]

## Sdf2

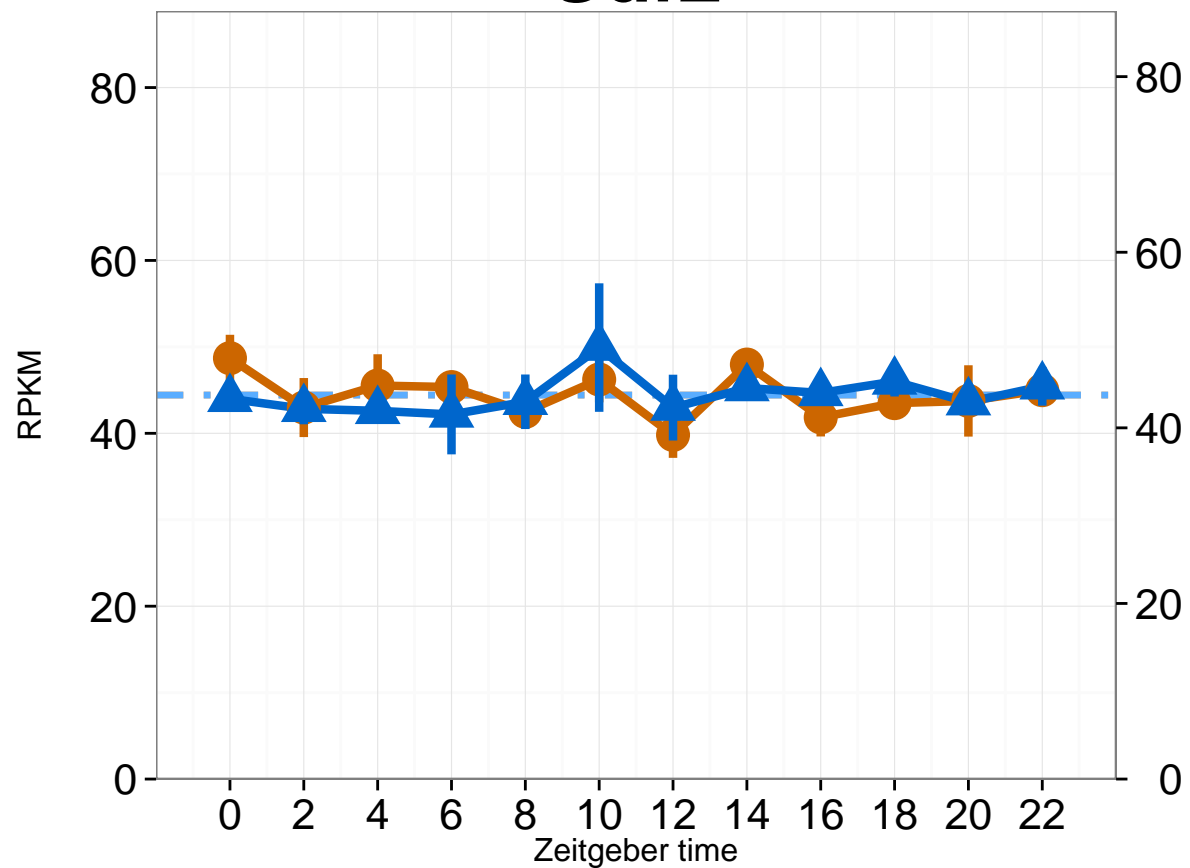

## Sdf2

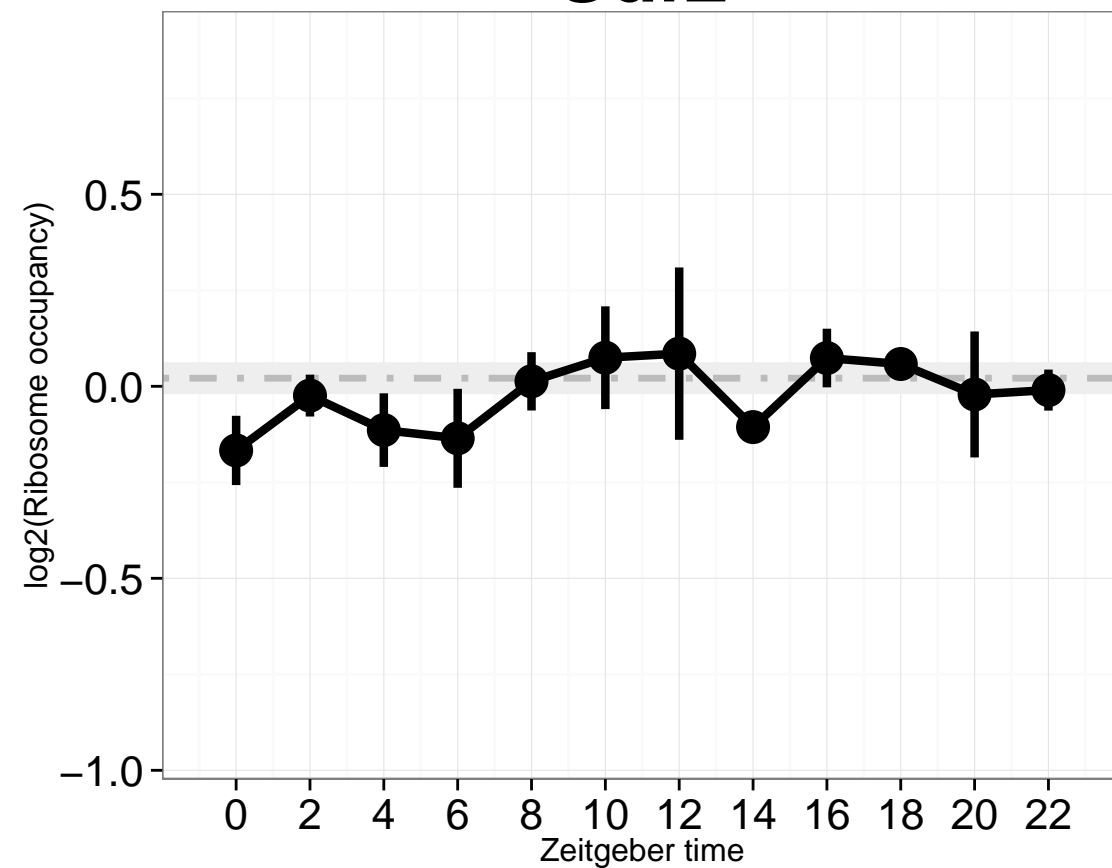

Supplement: SuppDataset_1.zip [file Sdf2_set_A.pdf › Supplemental Dataset 1/A-mRNA_nonrhyth_translation_nonrhyth/Sdf2_set_A.pdf]

## Sdf4

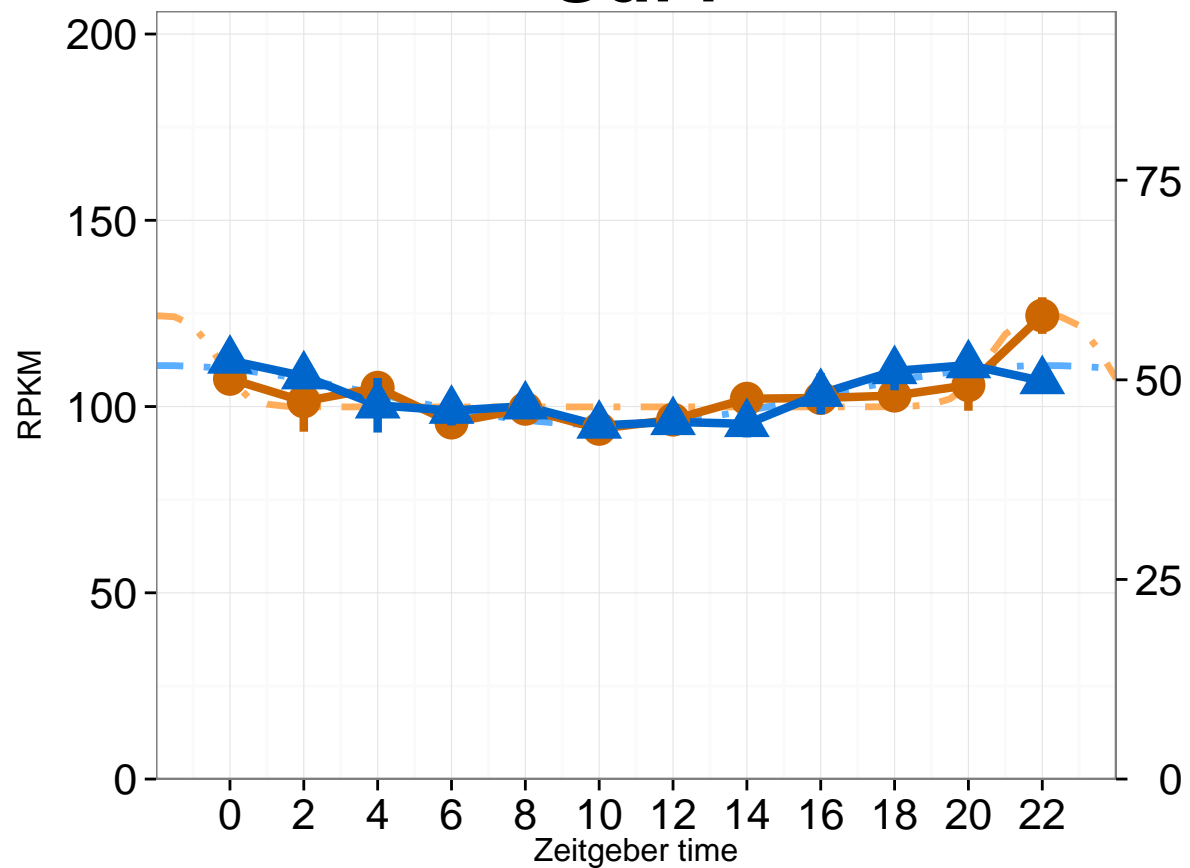

## Sdf4

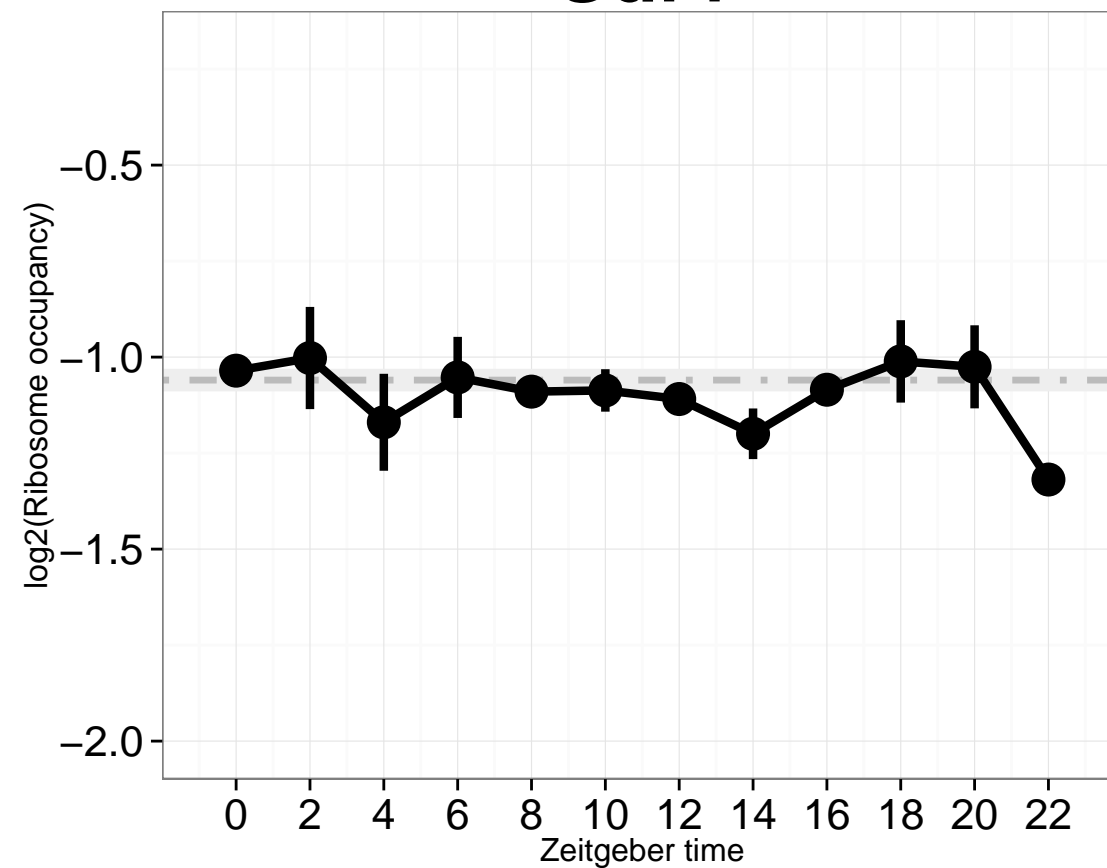

Supplement: SuppDataset_1.zip [file Sdf4_set_A.pdf › Supplemental Dataset 1/A-mRNA_nonrhyth_translation_nonrhyth/Sdf4_set_A.pdf]

## Sdha

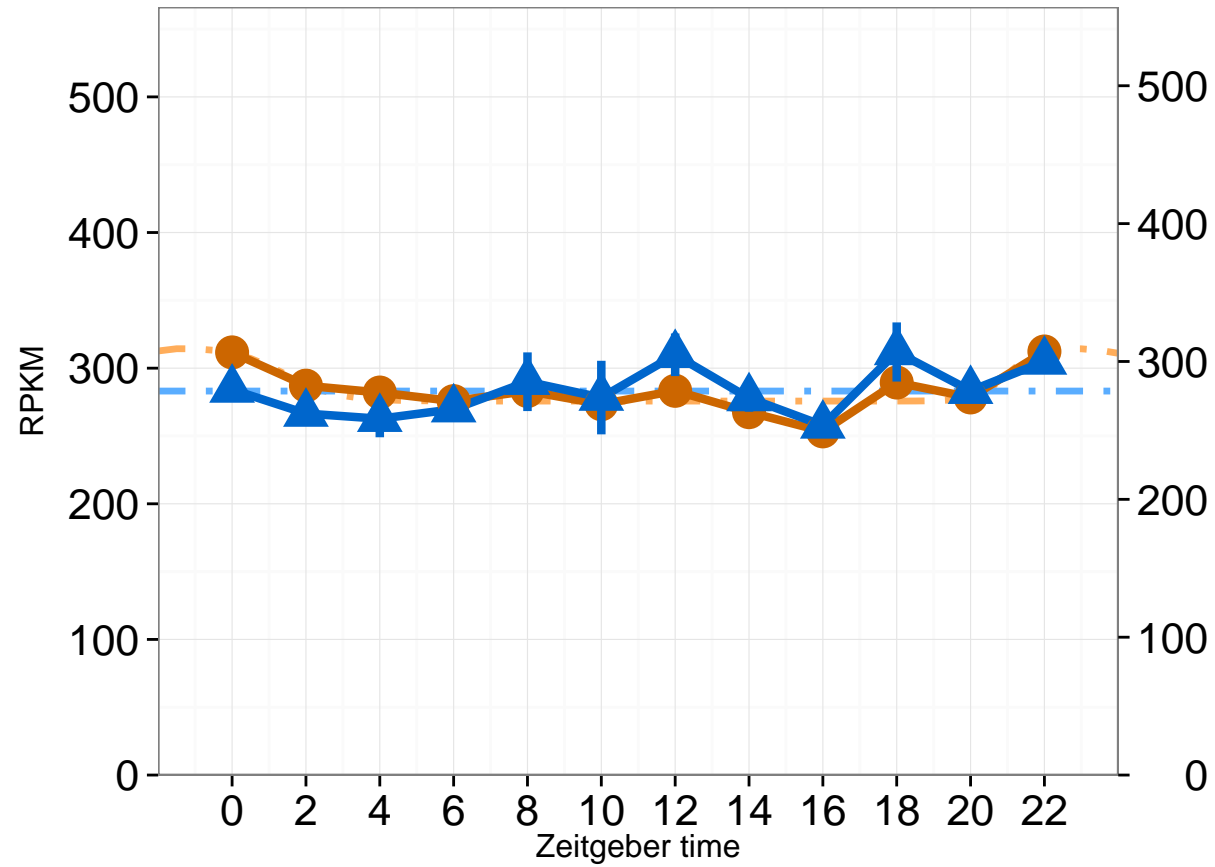

## Sdha

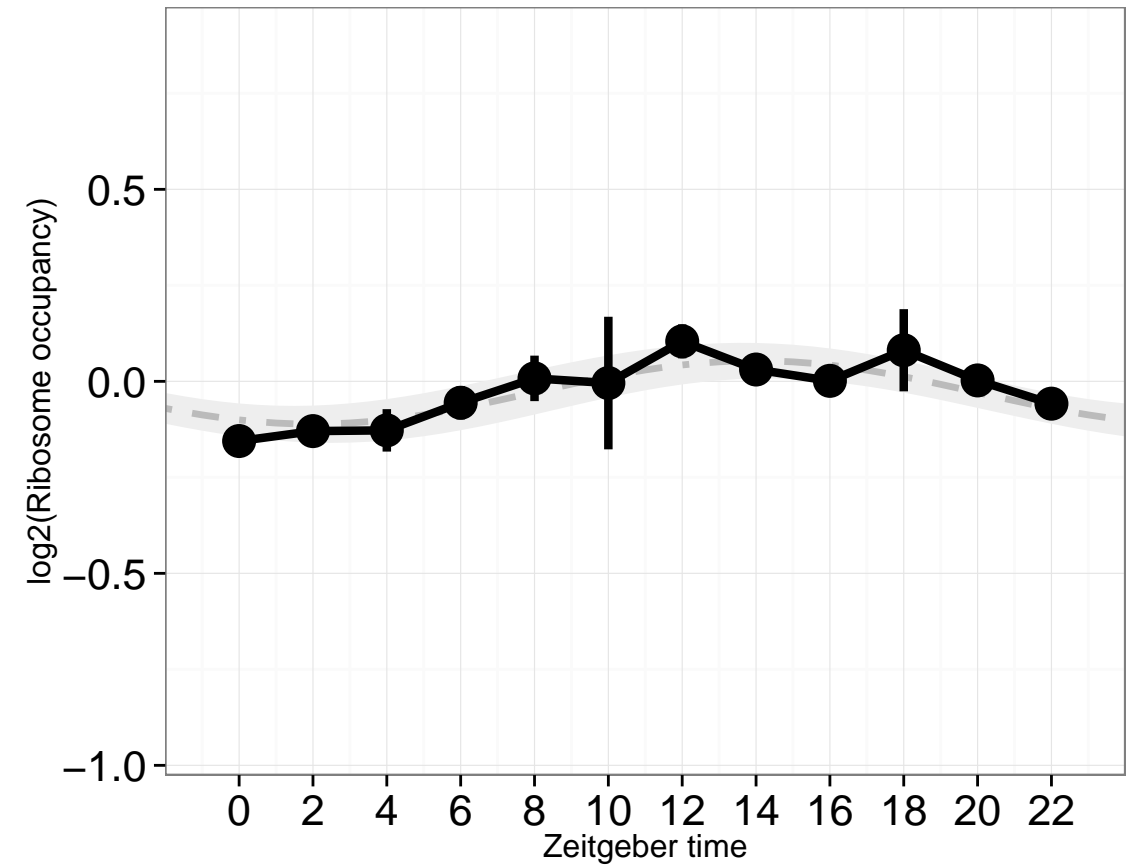

Supplement: SuppDataset_1.zip [file Sdha_set_A.pdf › Supplemental Dataset 1/A-mRNA_nonrhyth_translation_nonrhyth/Sdha_set_A.pdf]

## Sdhaf2

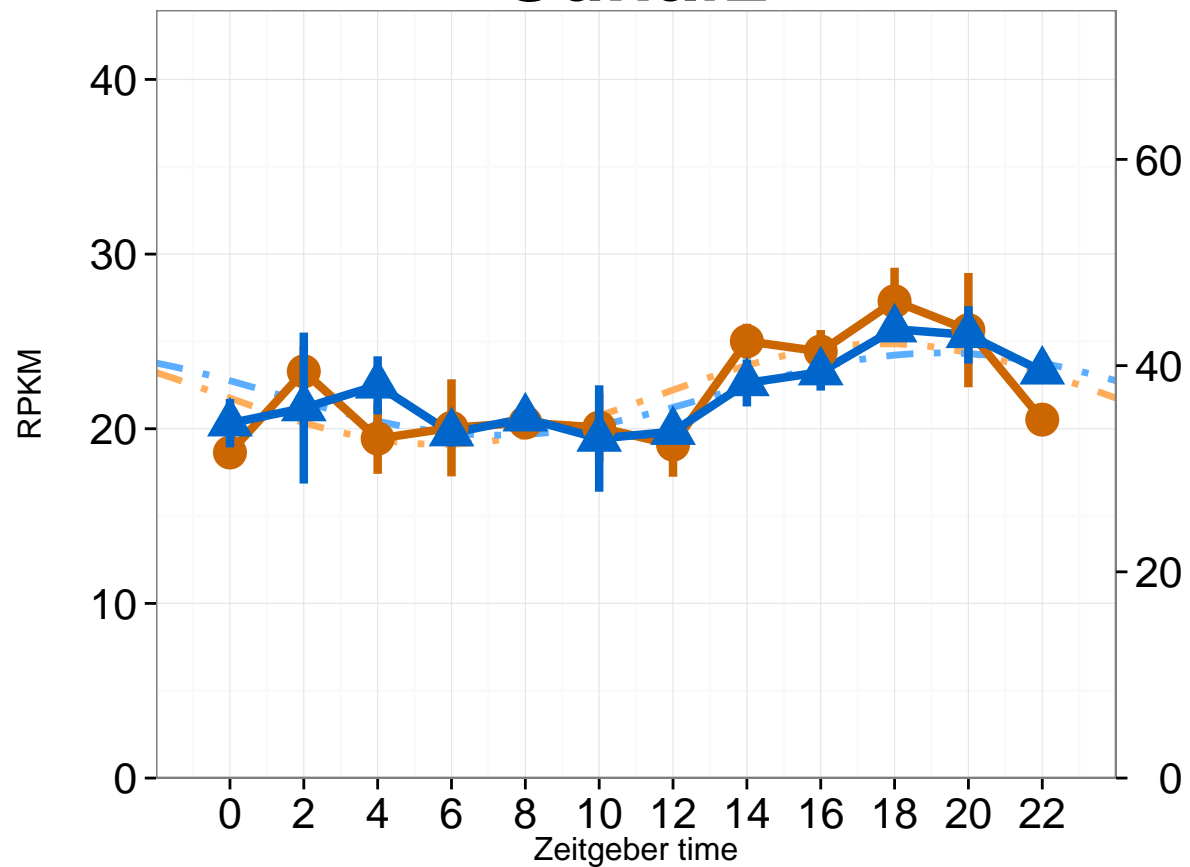

## Sdhaf2

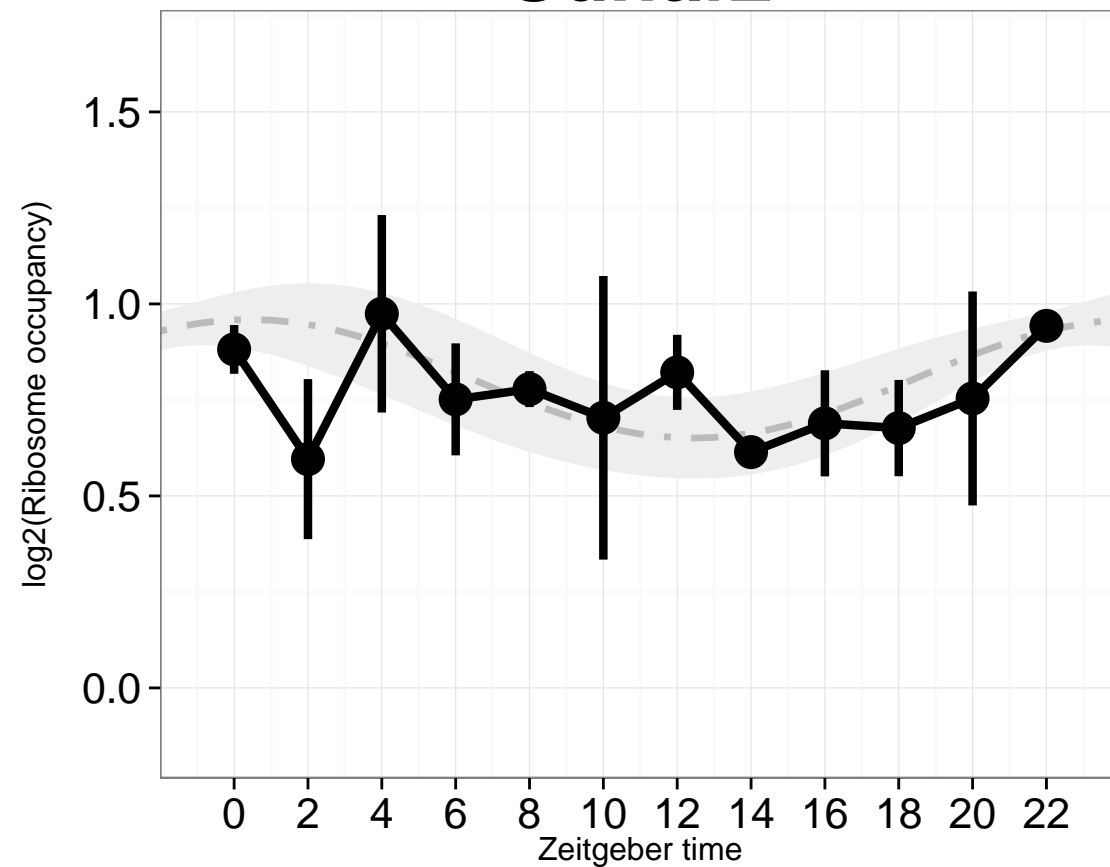

Supplement: SuppDataset_1.zip [file Sdhaf2_set_A.pdf › Supplemental Dataset 1/A-mRNA_nonrhyth_translation_nonrhyth/Sdhaf2_set_A.pdf]

## Sdhb

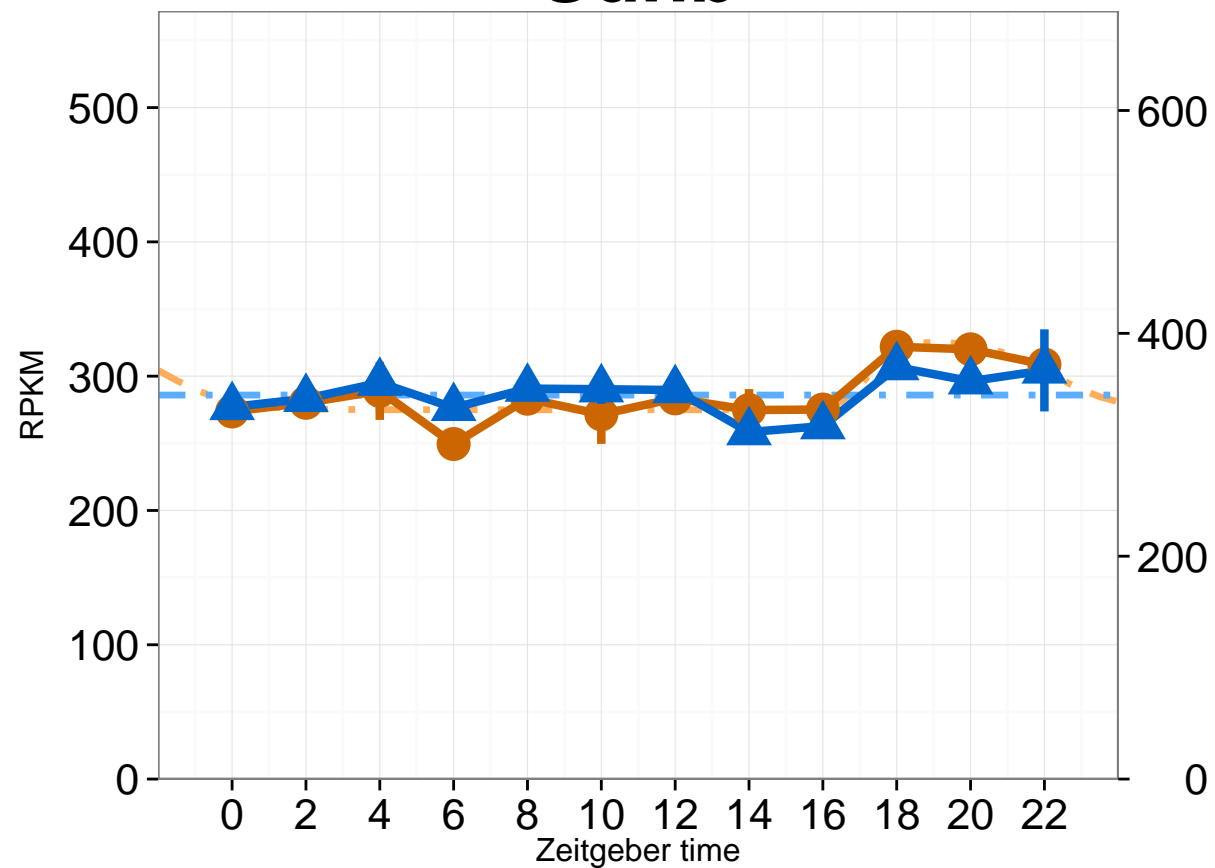

## Sdhb

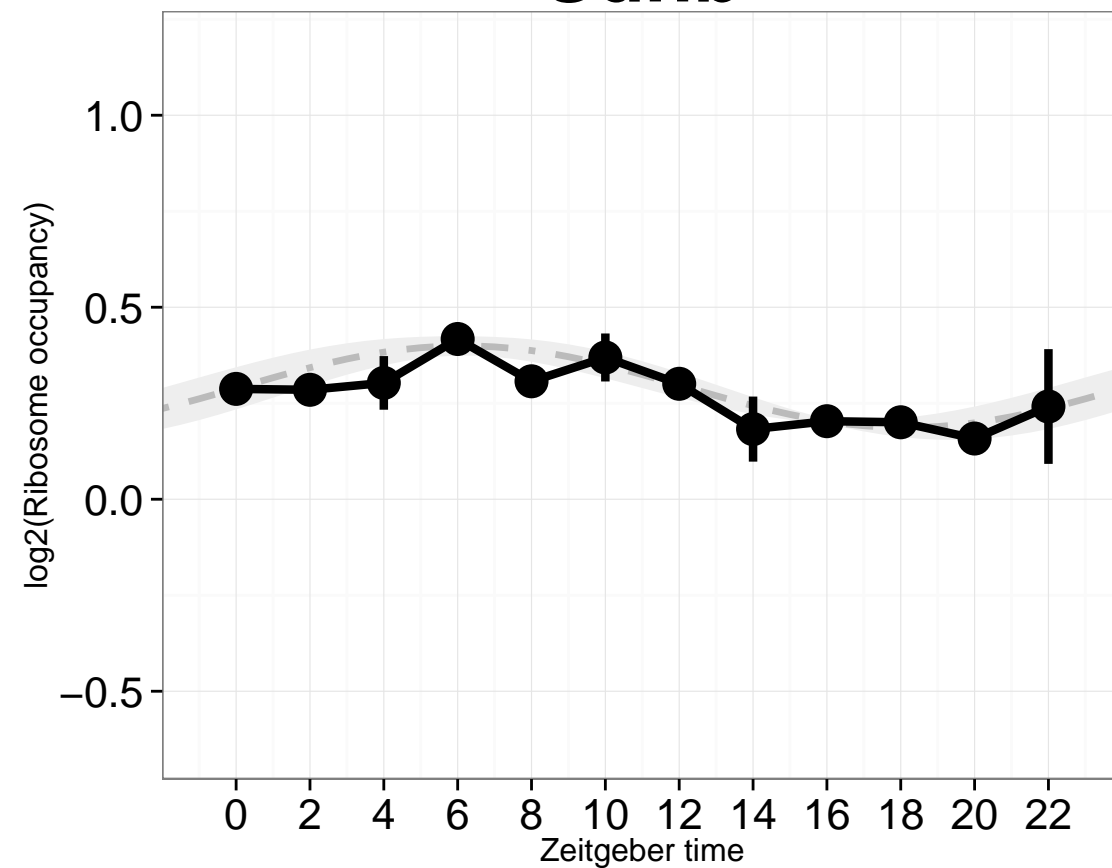

Supplement: SuppDataset_1.zip [file Sdhb_set_A.pdf › Supplemental Dataset 1/A-mRNA_nonrhyth_translation_nonrhyth/Sdhb_set_A.pdf]

## Sdhc

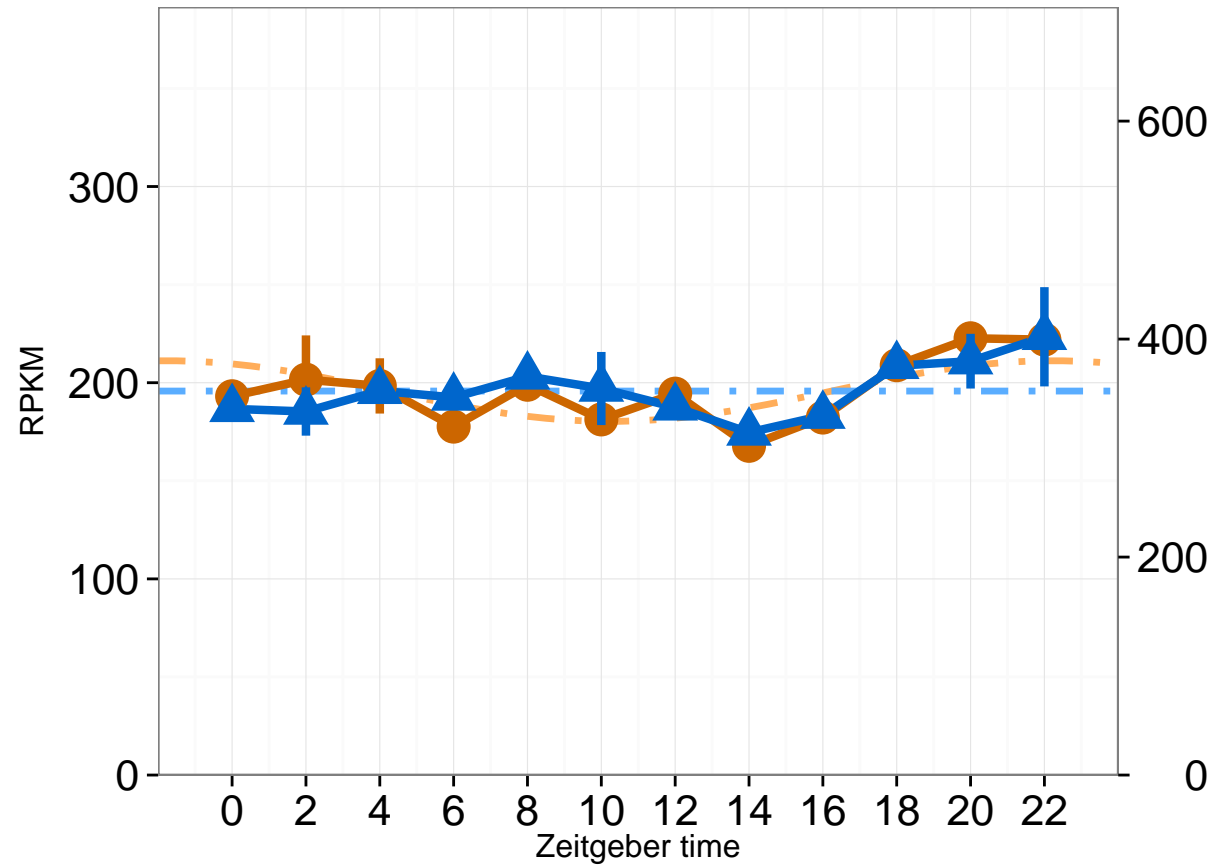

## Sdhc

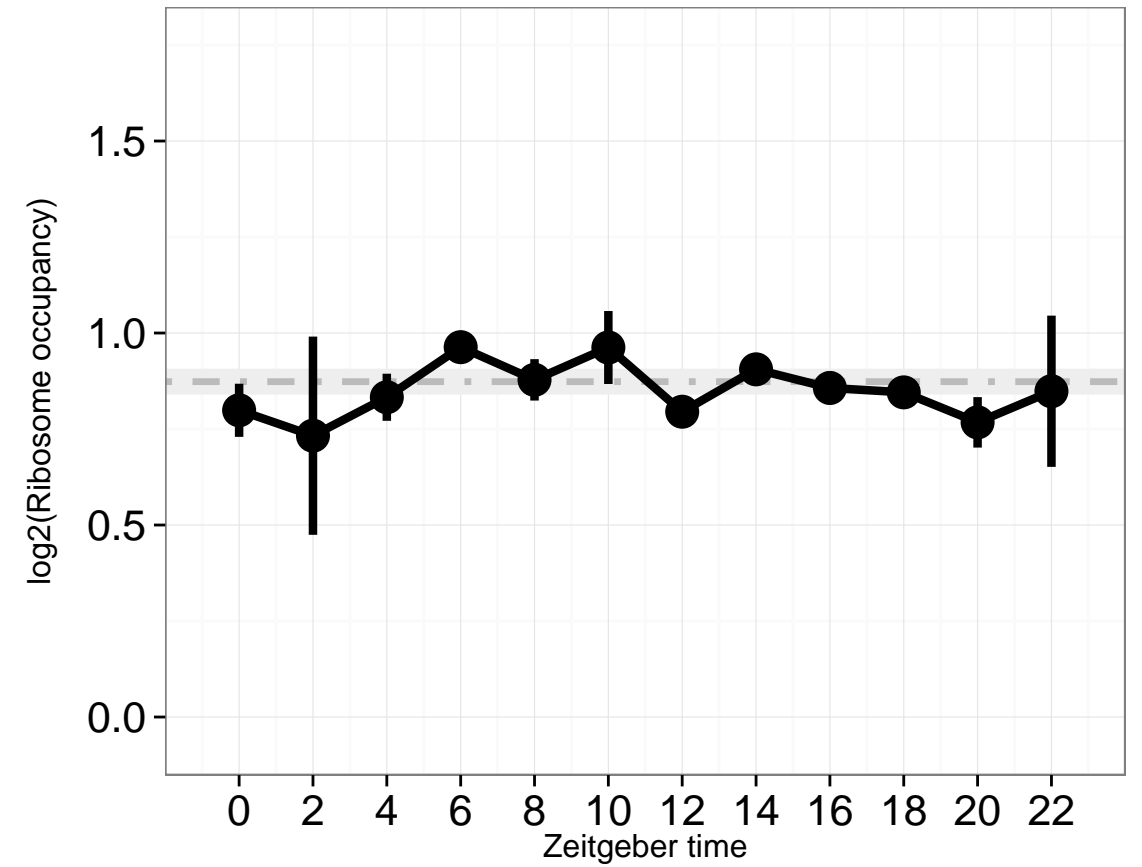

Supplement: SuppDataset_1.zip [file Sdhc_set_A.pdf › Supplemental Dataset 1/A-mRNA_nonrhyth_translation_nonrhyth/Sdhc_set_A.pdf]

## Sdhd

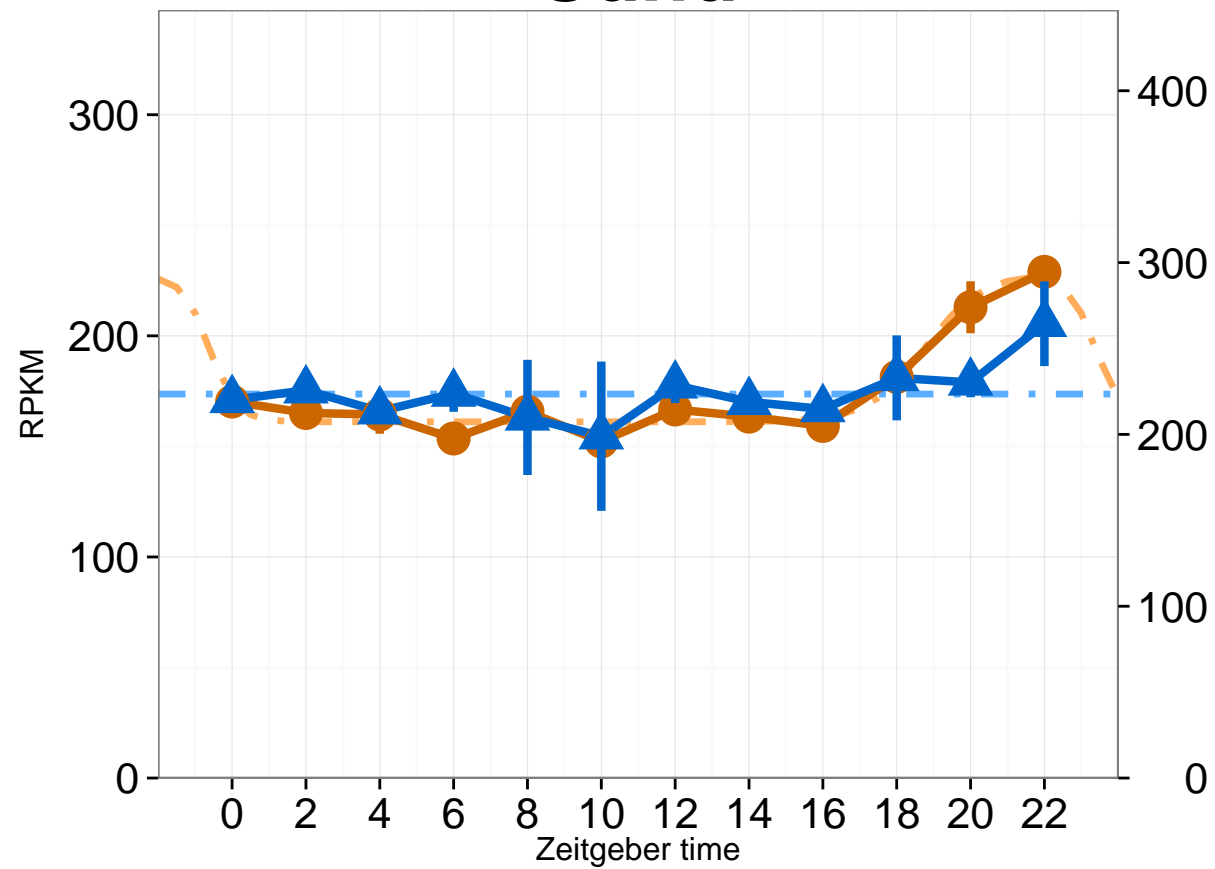

## Sdhd

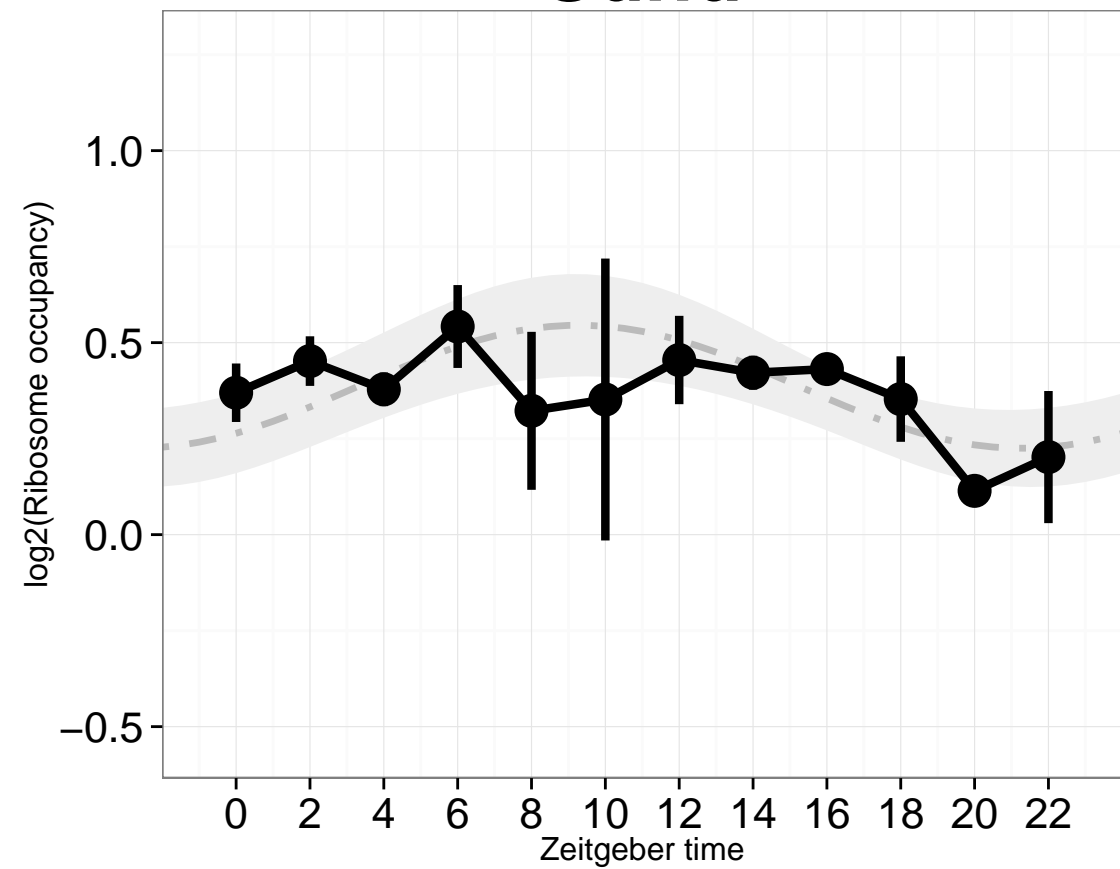

Supplement: SuppDataset_1.zip [file Sdhd_set_A.pdf › Supplemental Dataset 1/A-mRNA_nonrhyth_translation_nonrhyth/Sdhd_set_A.pdf]

## Sdpr

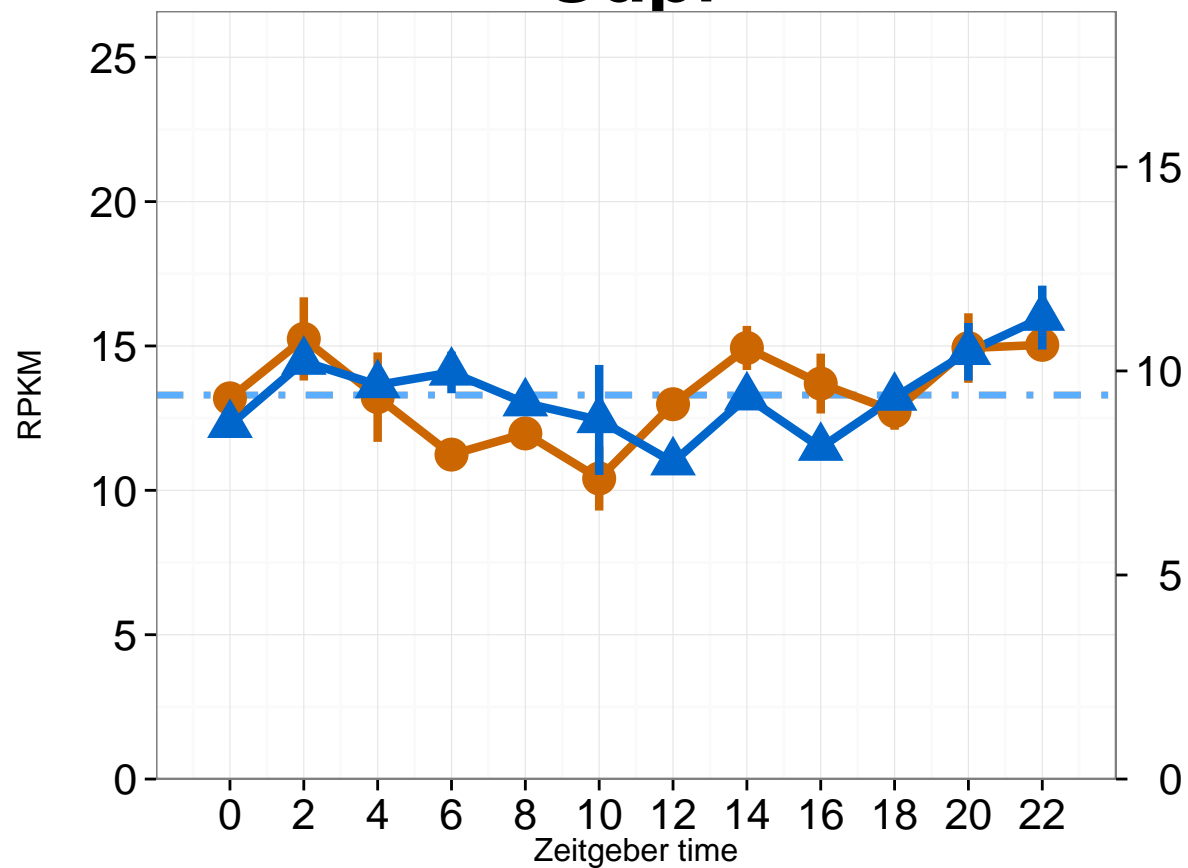

## Sdpr

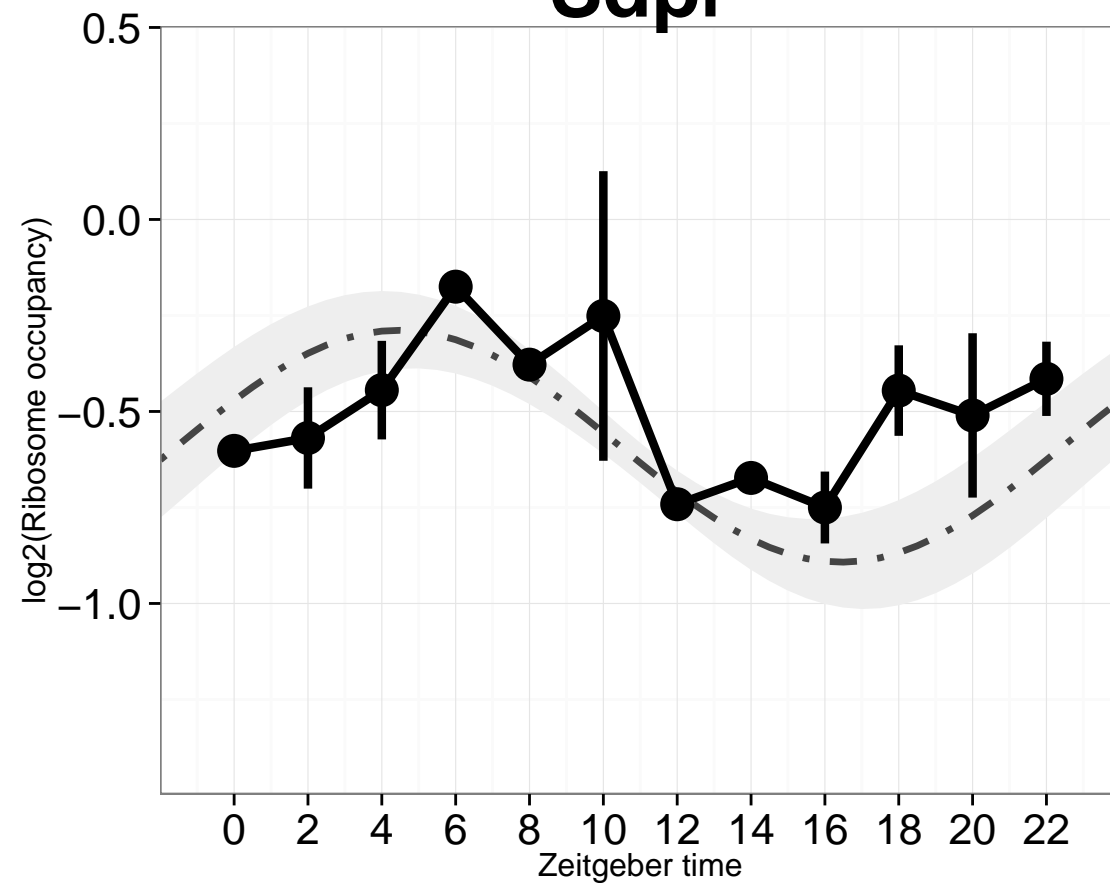

Supplement: SuppDataset_1.zip [file Sdpr_set_A.pdf › Supplemental Dataset 1/A-mRNA_nonrhyth_translation_nonrhyth/Sdpr_set_A.pdf]

# Sdr39u1

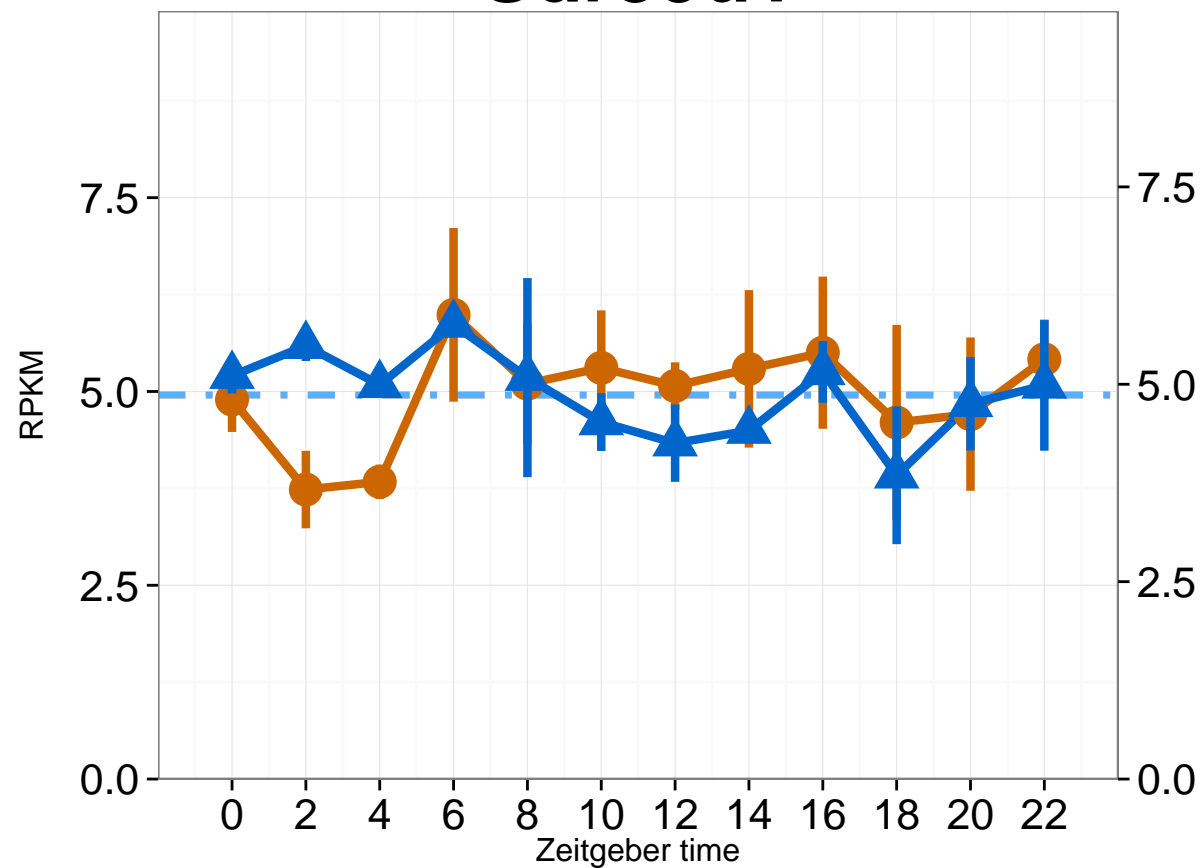

# Sdr39u1

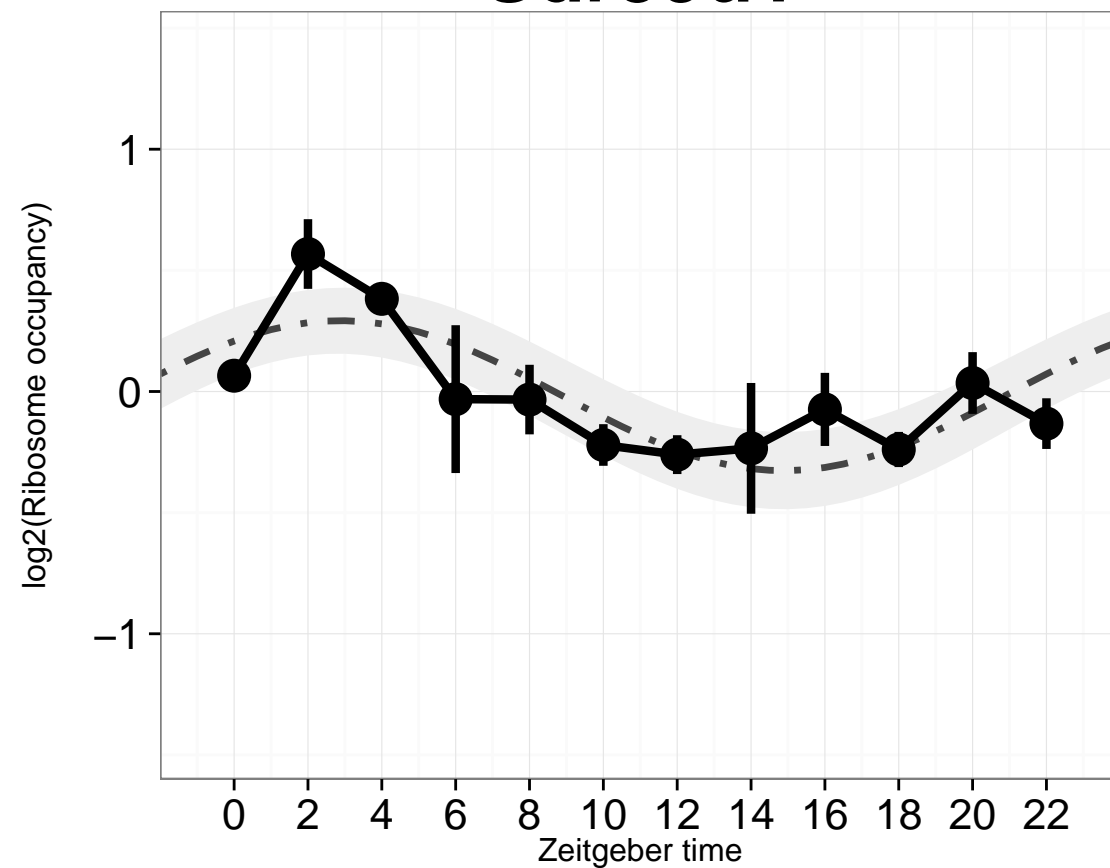

Supplement: SuppDataset_1.zip [file Sdr39u1_set_A.pdf › Supplemental Dataset 1/A-mRNA_nonrhyth_translation_nonrhyth/Sdr39u1_set_A.pdf]

## Sds

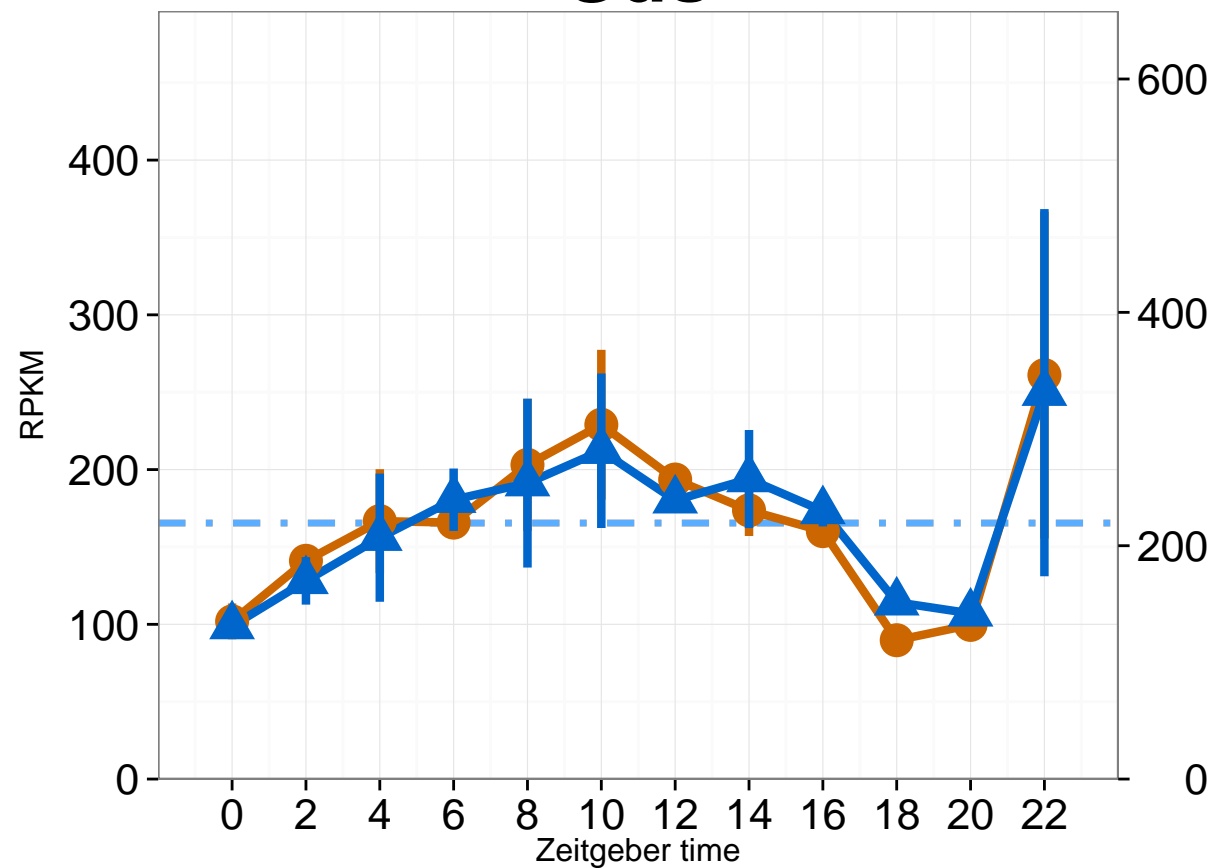

## Sds

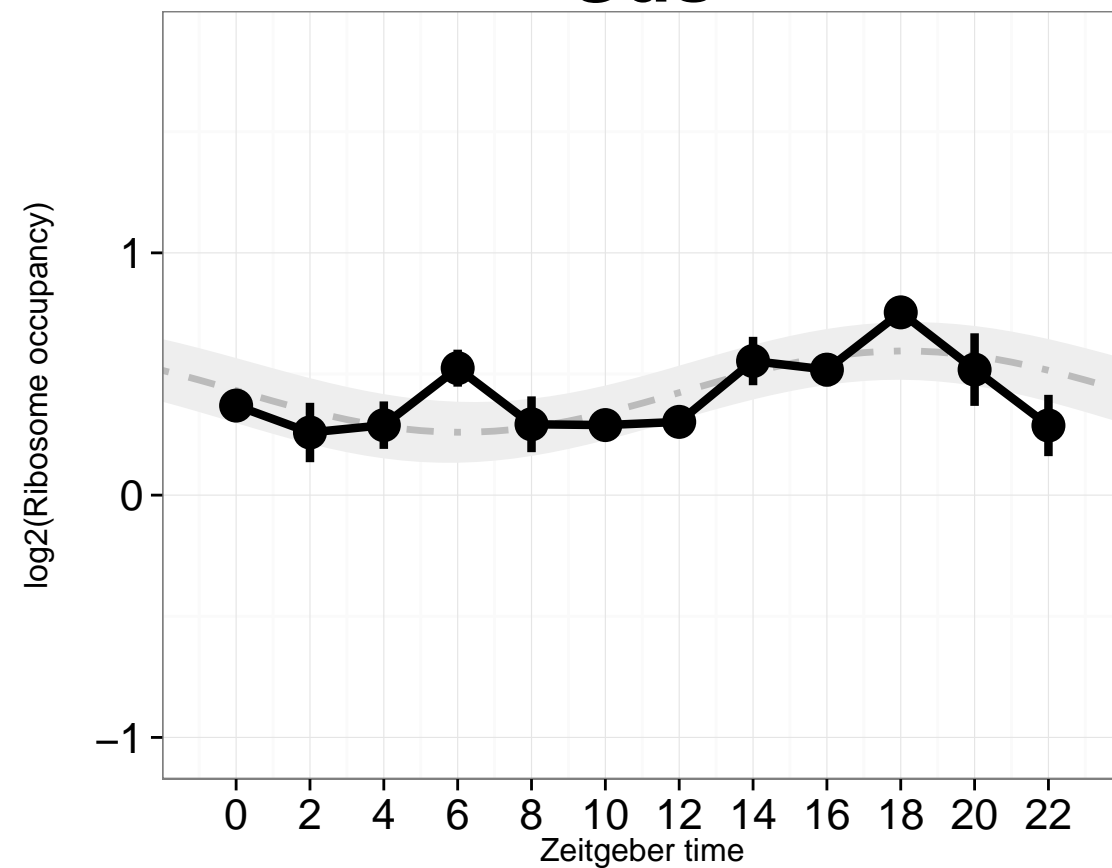

Supplement: SuppDataset_1.zip [file Sds_set_A.pdf › Supplemental Dataset 1/A-mRNA_nonrhyth_translation_nonrhyth/Sds_set_A.pdf]

## Sdsl

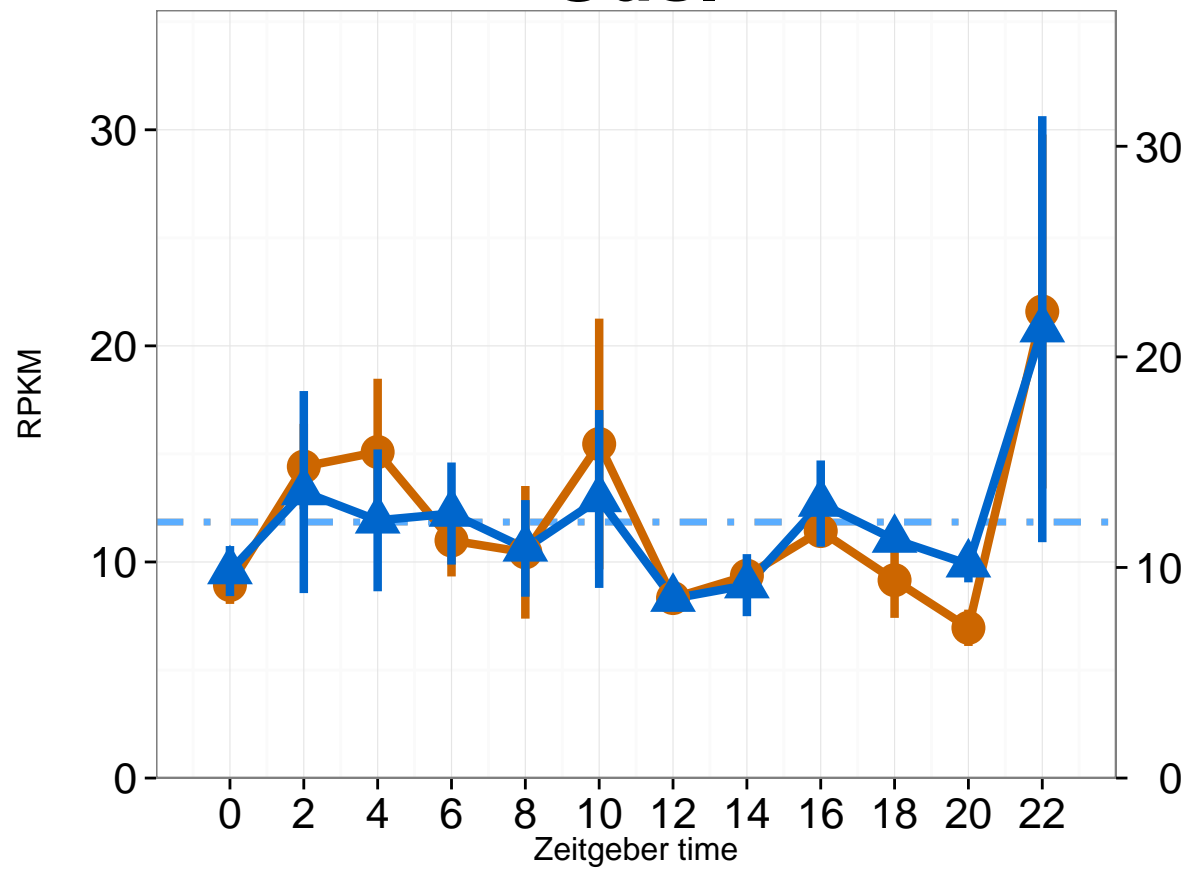

## SdsI

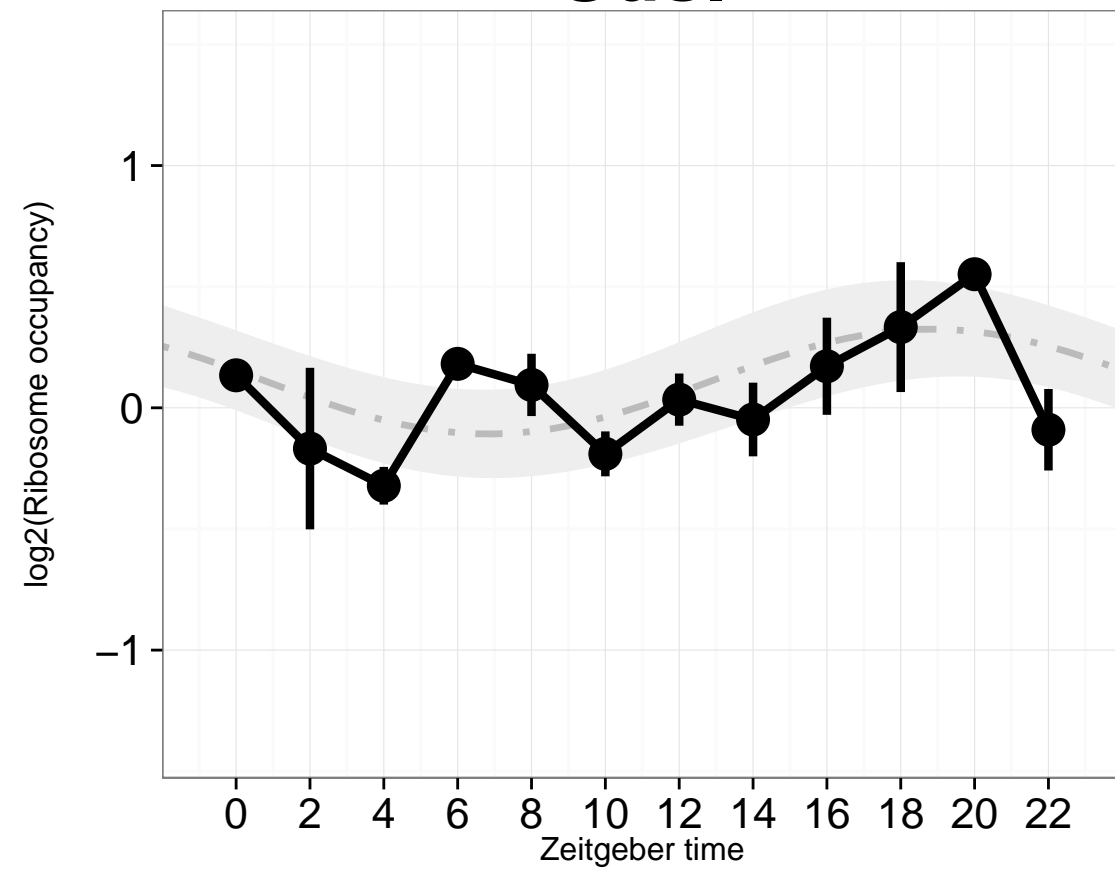

Supplement: SuppDataset_1.zip [file Sdsl_set_A.pdf › Supplemental Dataset 1/A-mRNA_nonrhyth_translation_nonrhyth/Sdsl_set_A.pdf]

# Sec11a

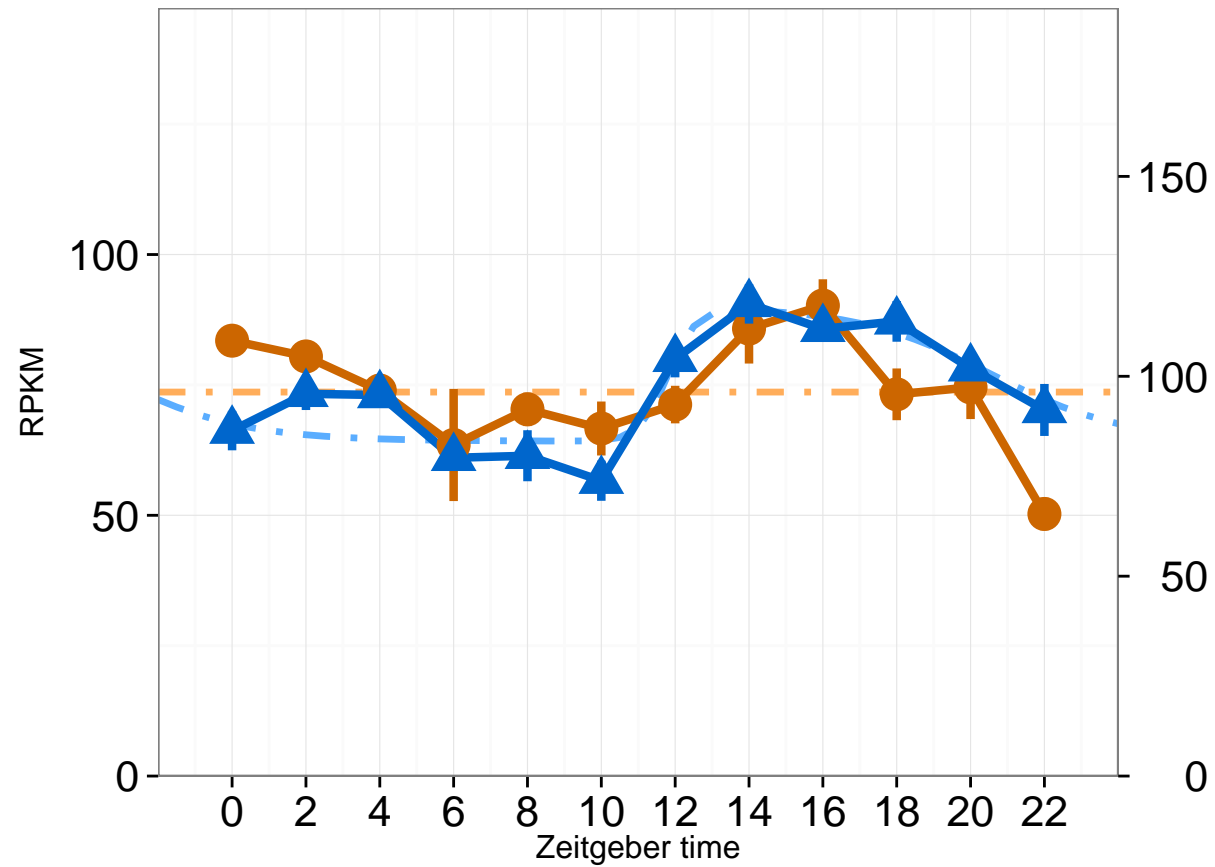

# Sec11a

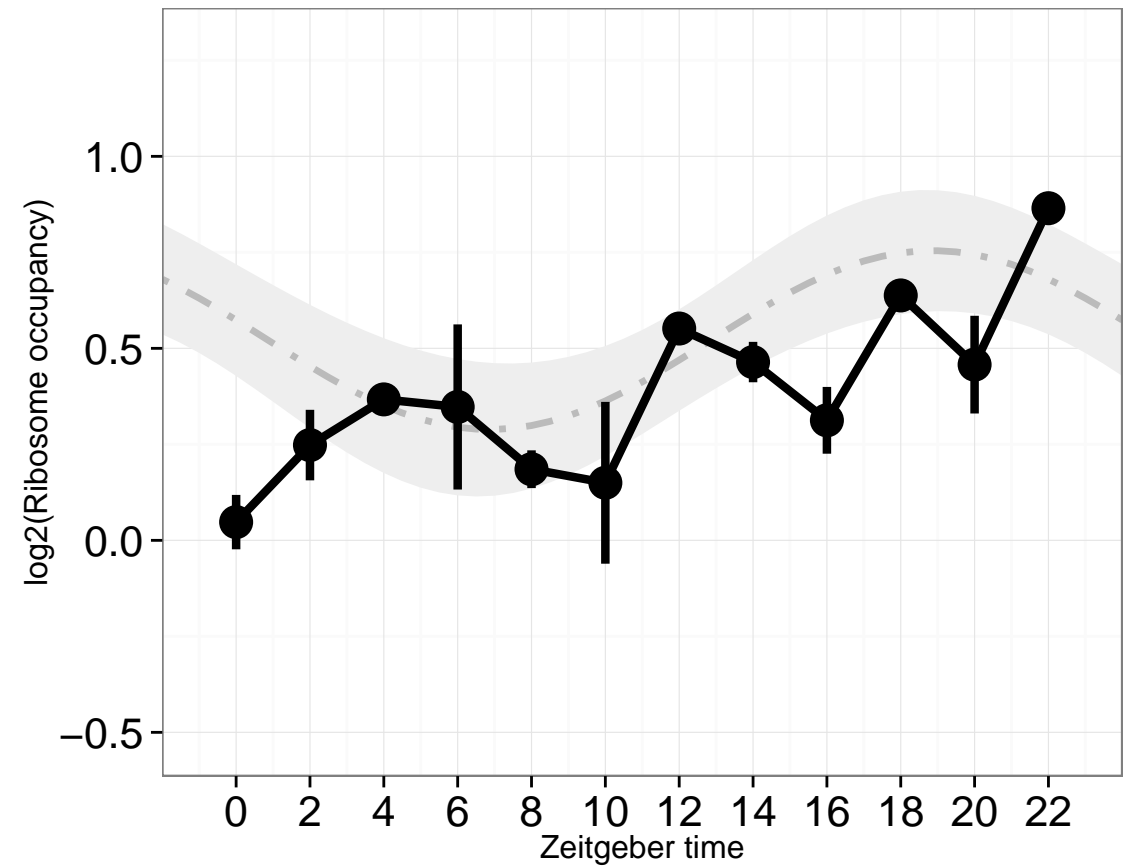

Supplement: SuppDataset_1.zip [file Sec11a_set_A.pdf › Supplemental Dataset 1/A-mRNA_nonrhyth_translation_nonrhyth/Sec11a_set_A.pdf]

# Sec11c

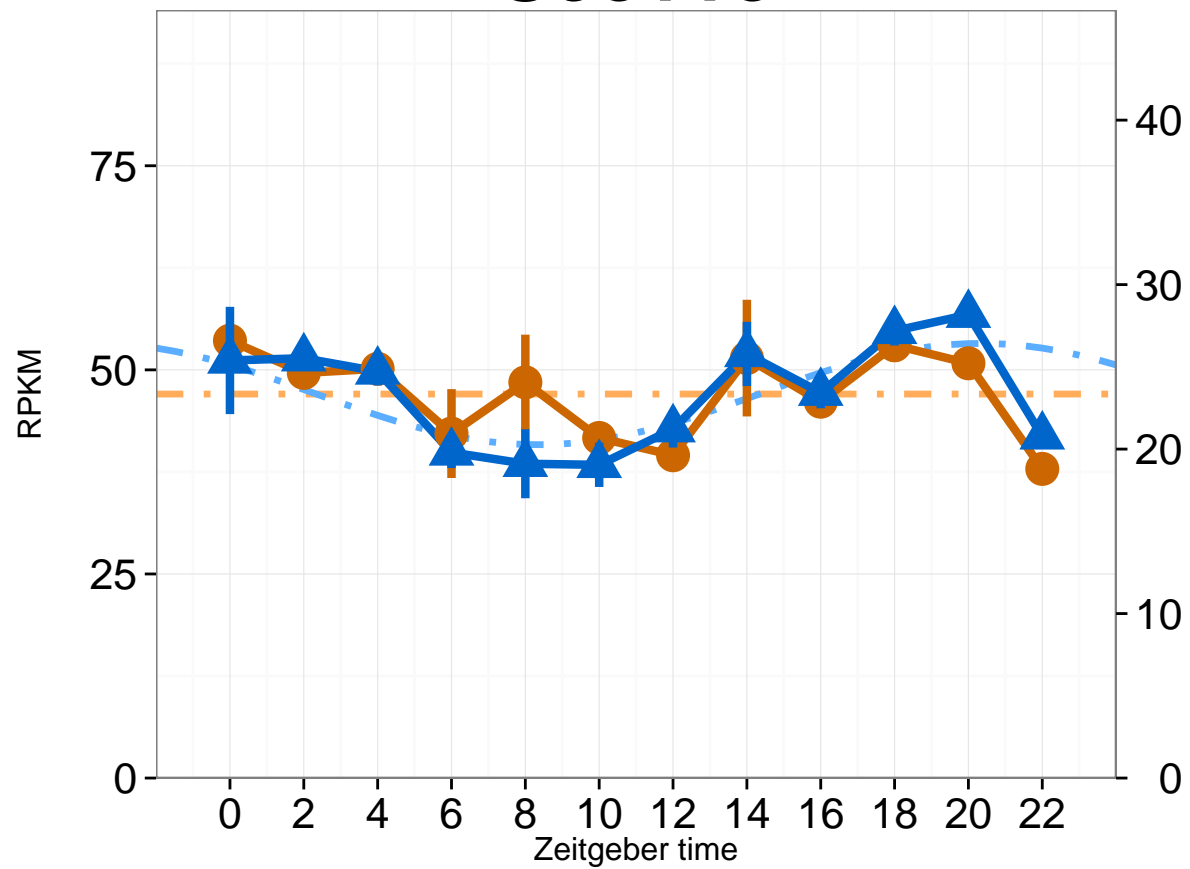

# Sec11c

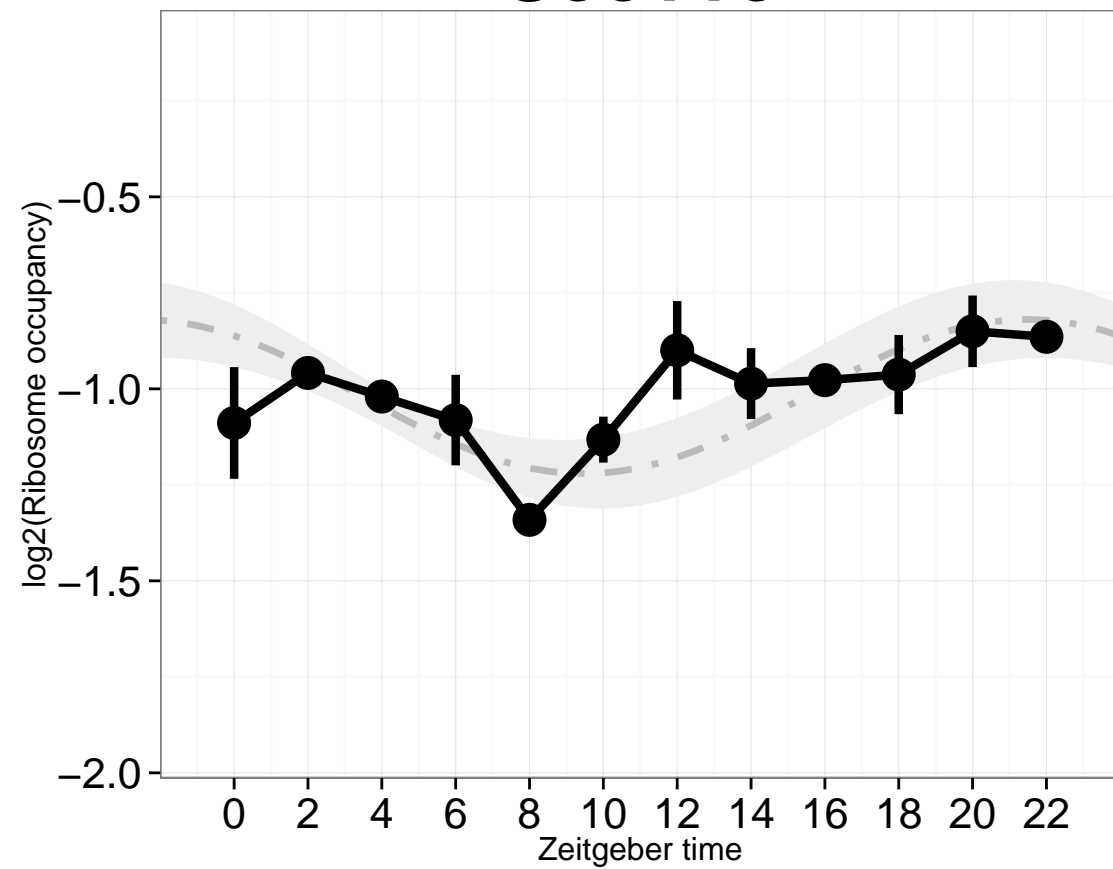

Supplement: SuppDataset_1.zip [file Sec11c_set_A.pdf › Supplemental Dataset 1/A-mRNA_nonrhyth_translation_nonrhyth/Sec11c_set_A.pdf]

# Sec13

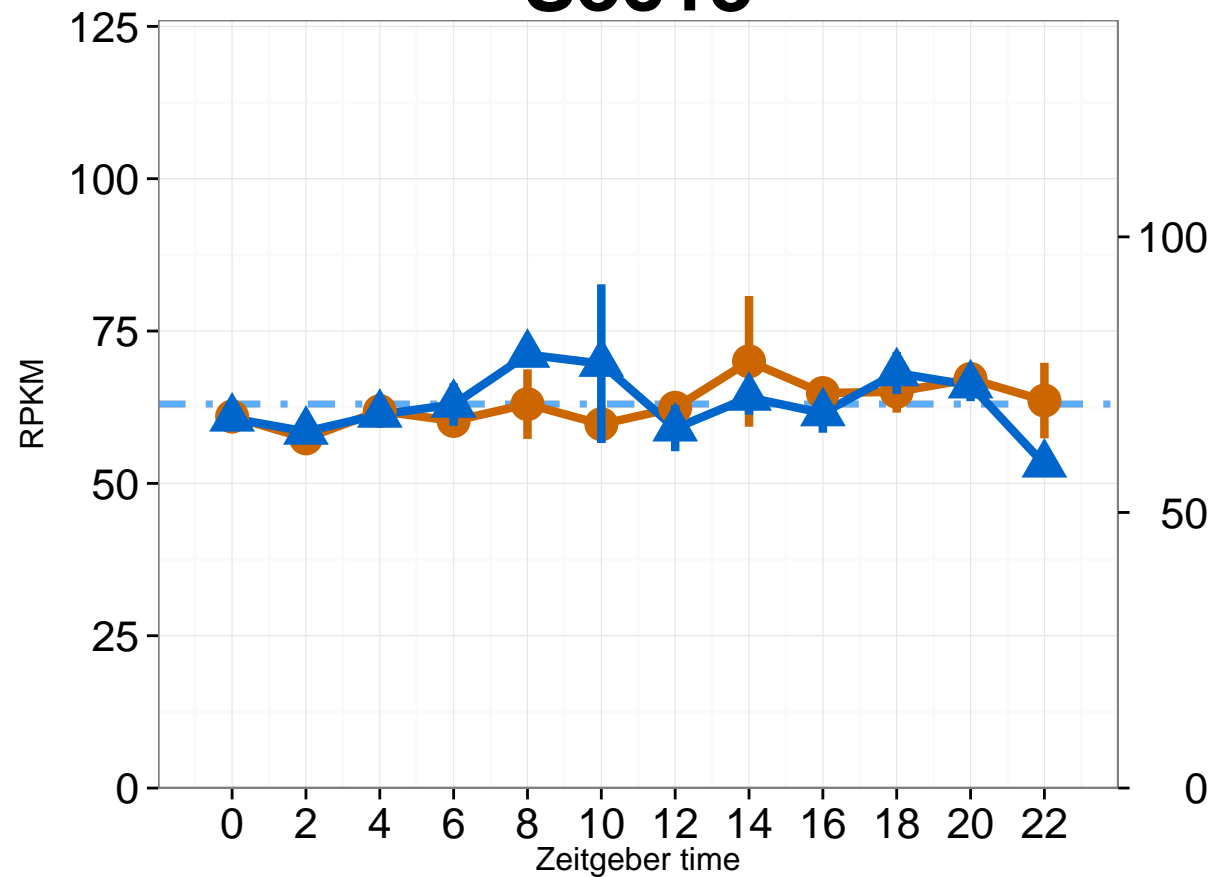

# Sec13

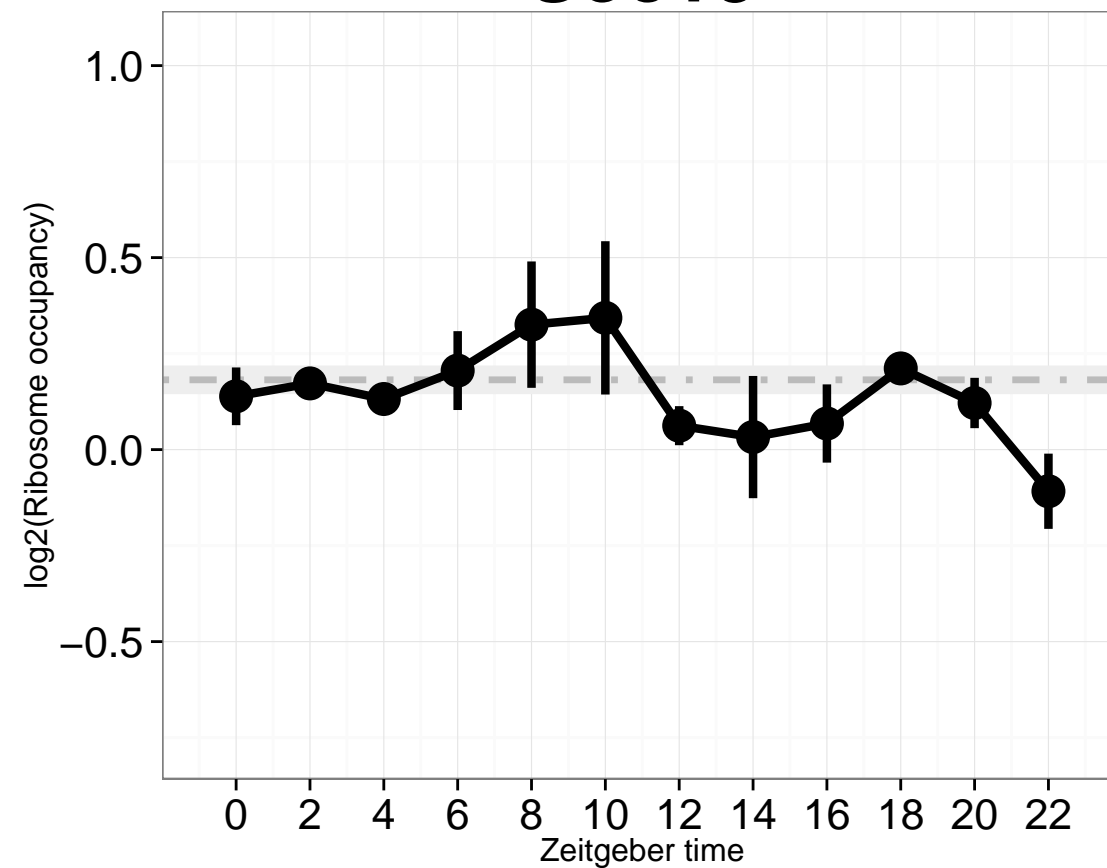

Supplement: SuppDataset_1.zip [file Sec13_set_A.pdf › Supplemental Dataset 1/A-mRNA_nonrhyth_translation_nonrhyth/Sec13_set_A.pdf]

## Sec14l4

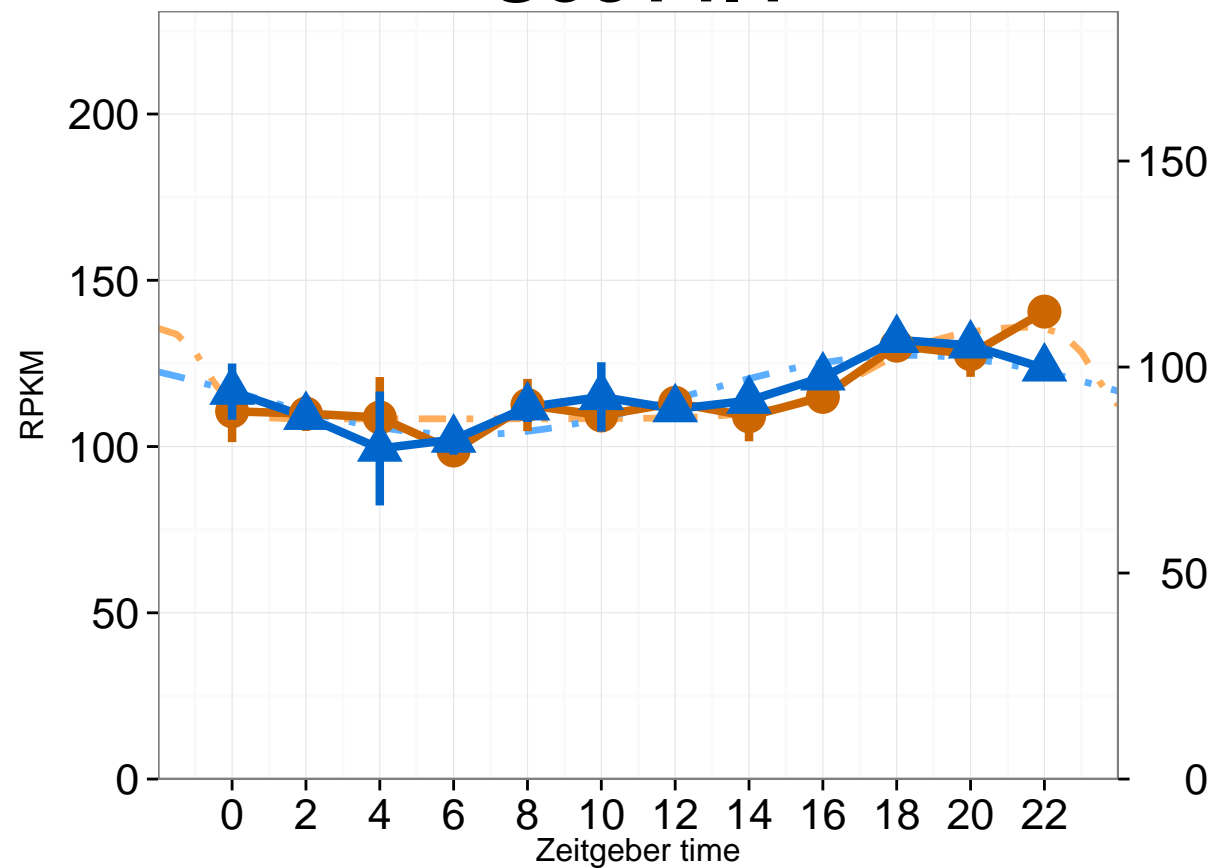

## Sec14l4

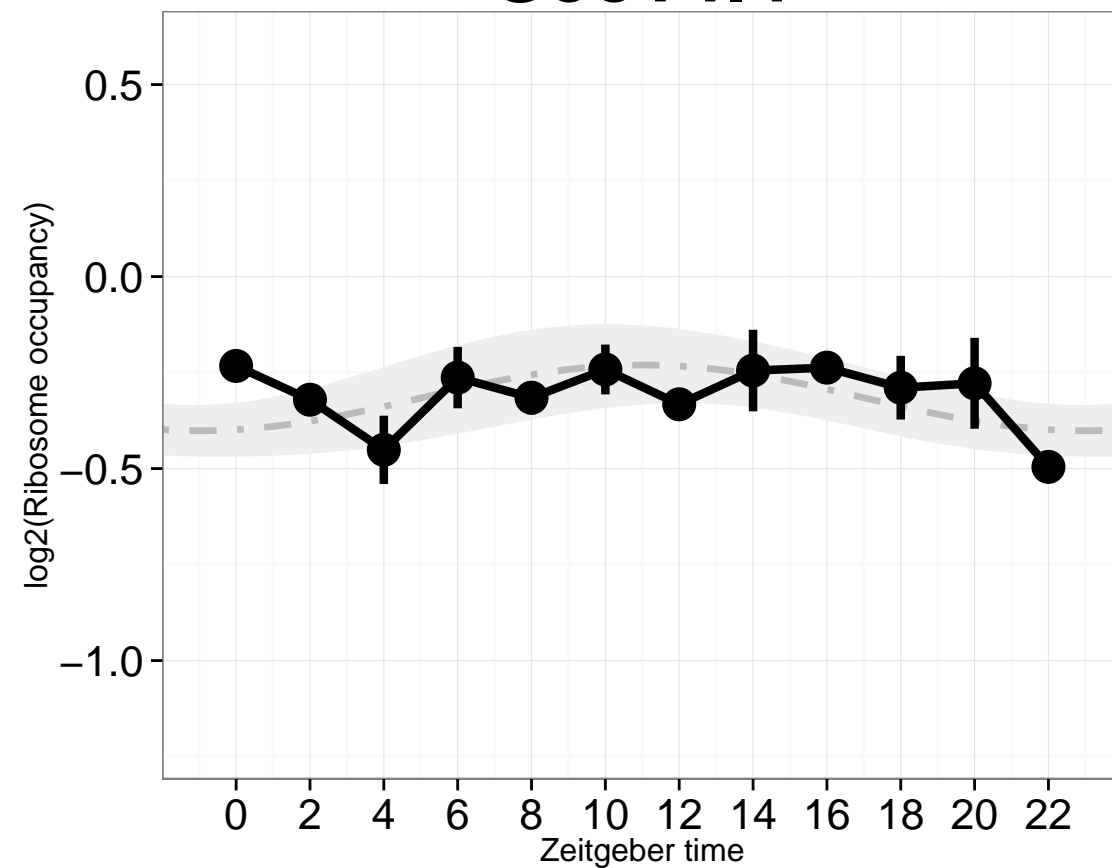

Supplement: SuppDataset_1.zip [file Sec14l4_set_A.pdf › Supplemental Dataset 1/A-mRNA_nonrhyth_translation_nonrhyth/Sec14l4_set_A.pdf]

# Sec16a

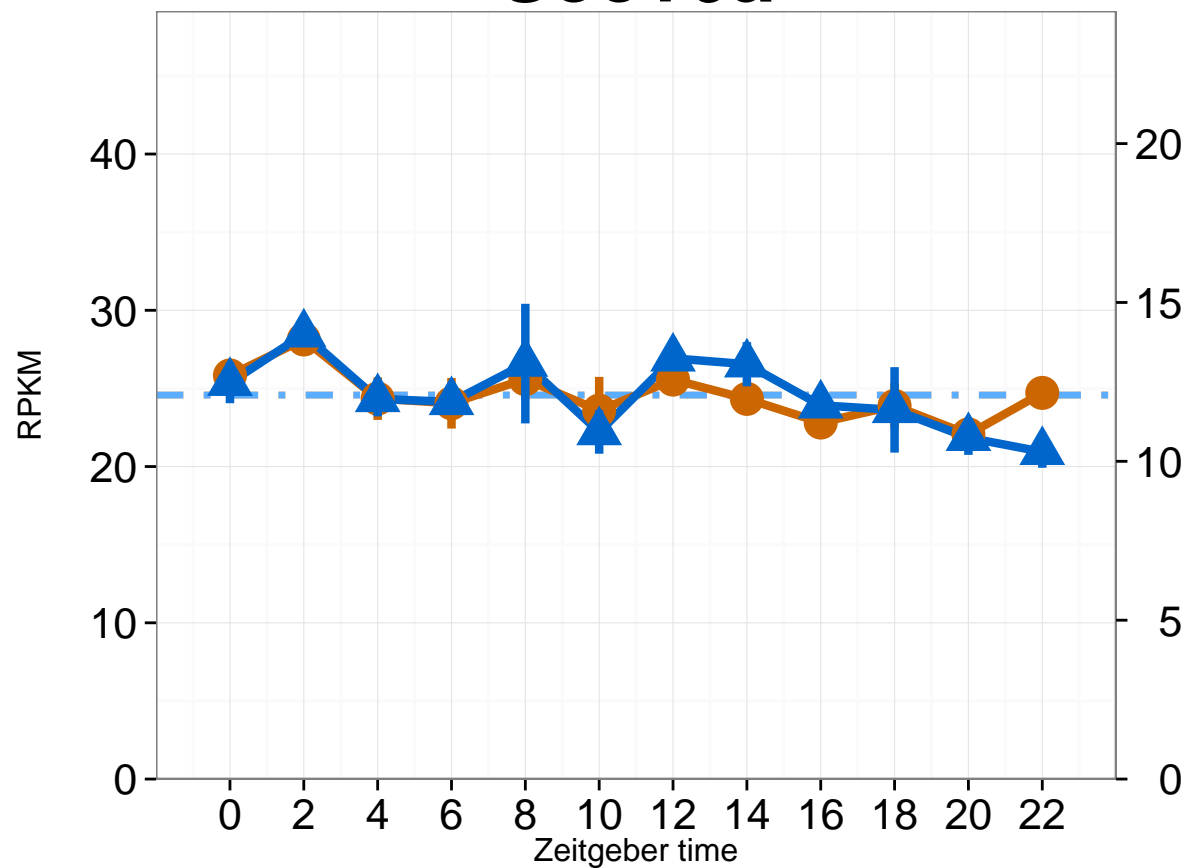

# Sec16a

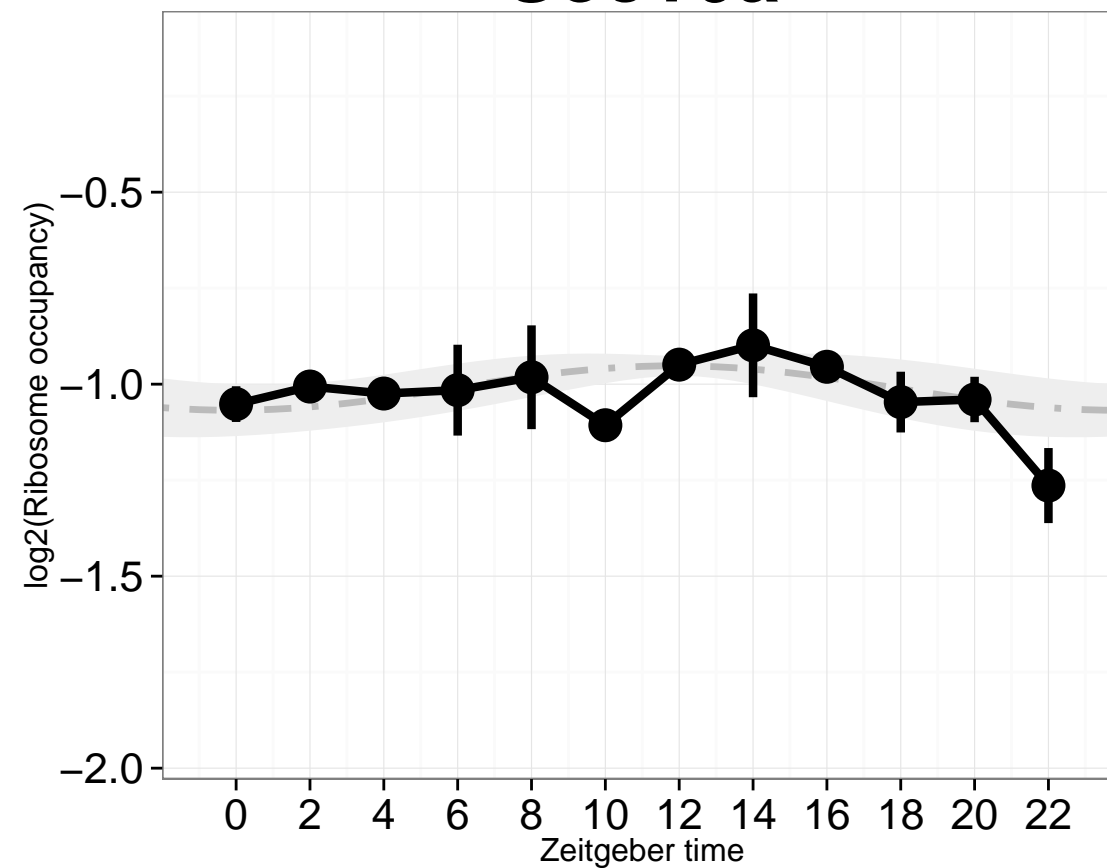

Supplement: SuppDataset_1.zip [file Sec16a_set_A.pdf › Supplemental Dataset 1/A-mRNA_nonrhyth_translation_nonrhyth/Sec16a_set_A.pdf]

# Sec16b

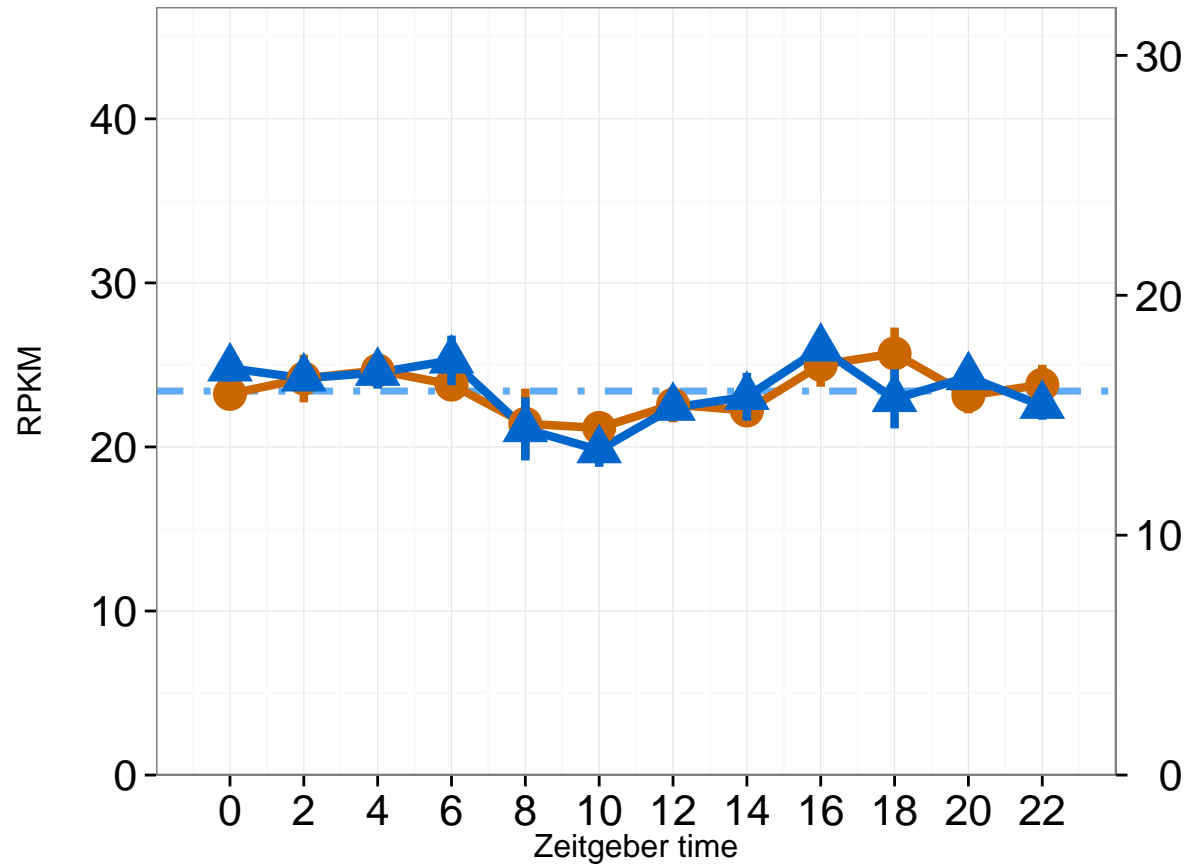

# Sec16b

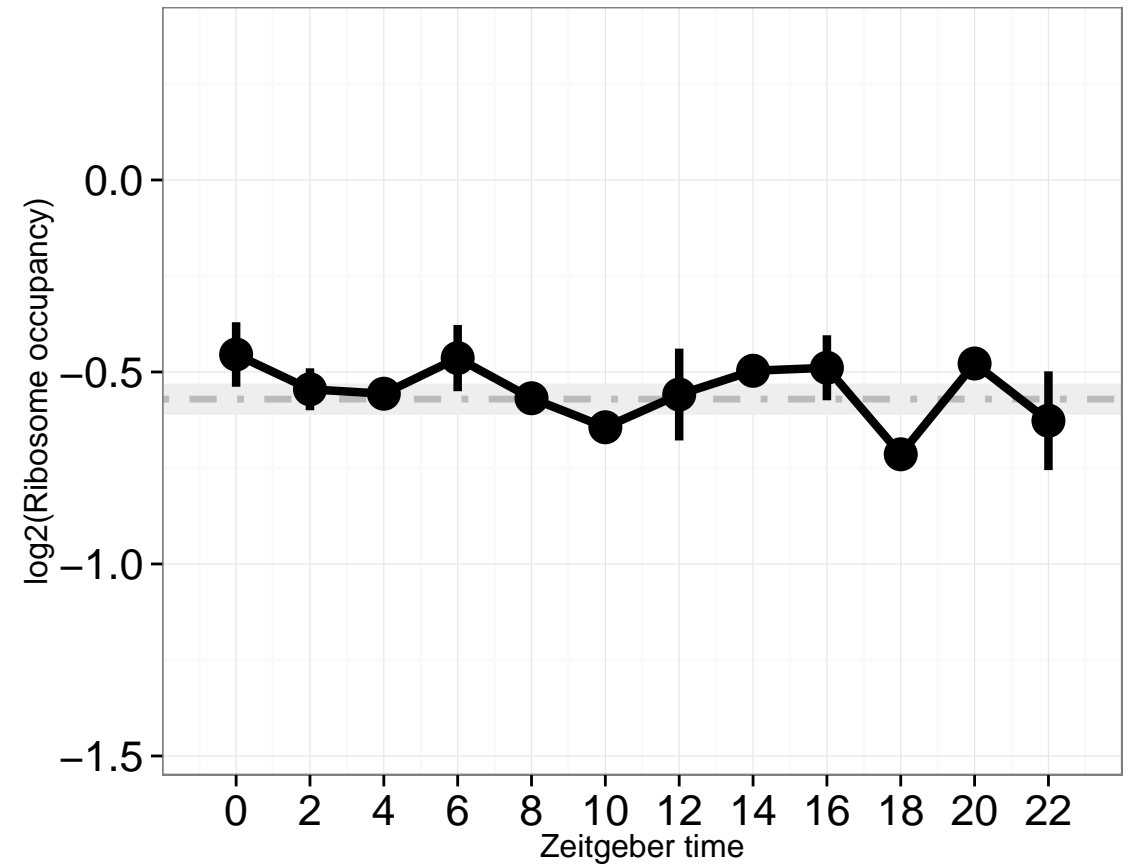

Supplement: SuppDataset_1.zip [file Sec16b_set_A.pdf › Supplemental Dataset 1/A-mRNA_nonrhyth_translation_nonrhyth/Sec16b_set_A.pdf]

# Sec22a

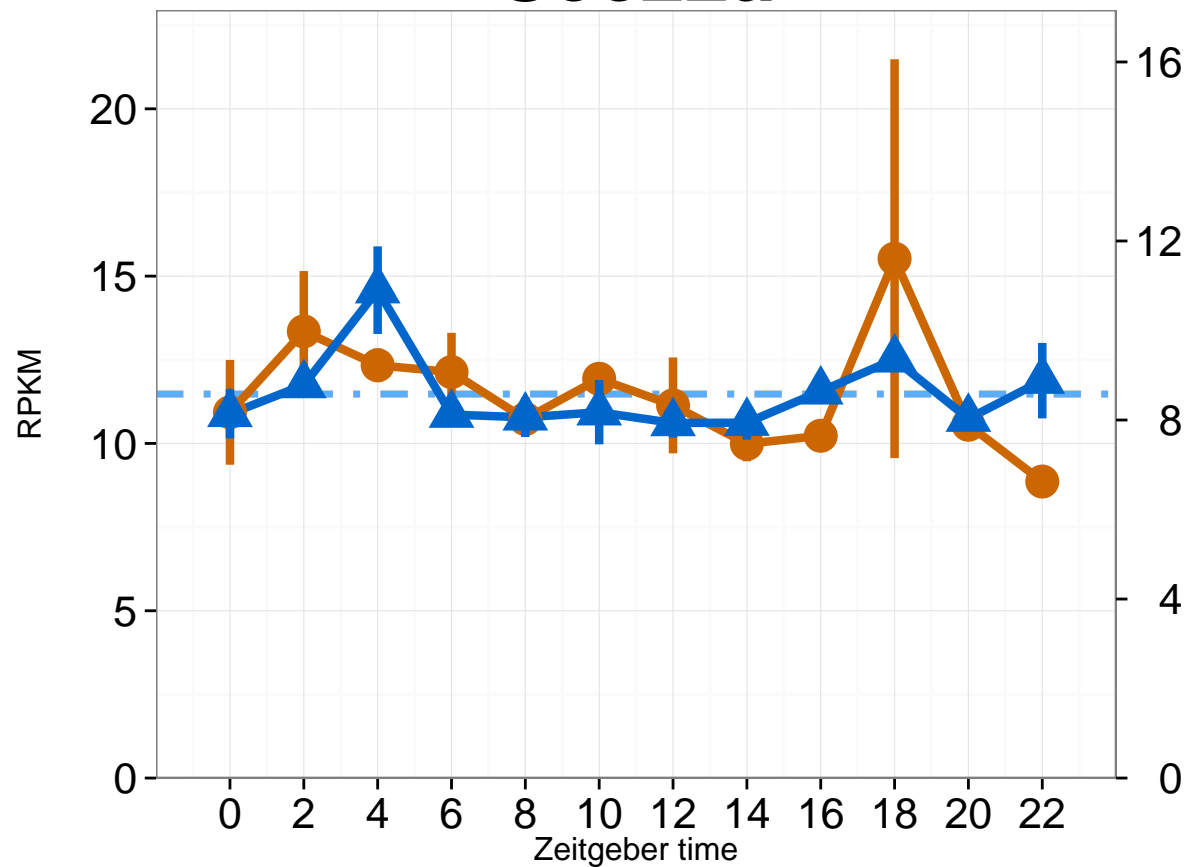

# Sec22a

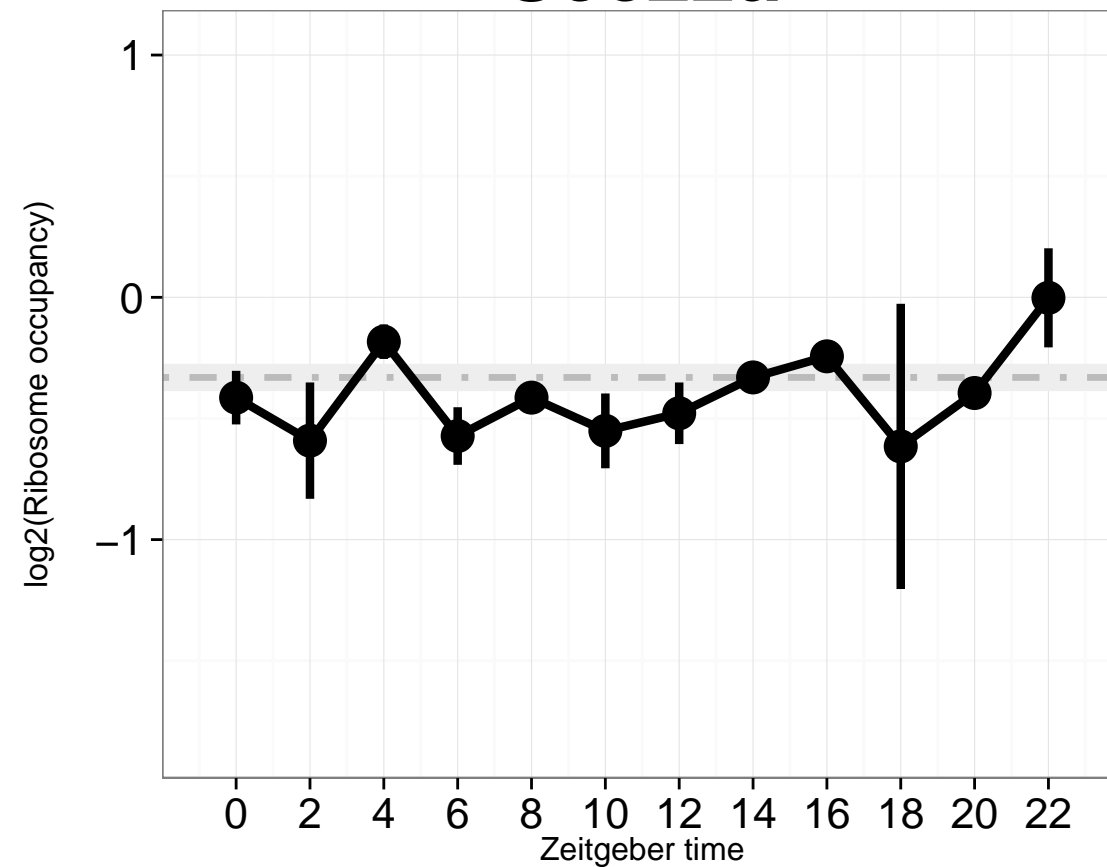

Supplement: SuppDataset_1.zip [file Sec22a_set_A.pdf › Supplemental Dataset 1/A-mRNA_nonrhyth_translation_nonrhyth/Sec22a_set_A.pdf]

## Sec22b

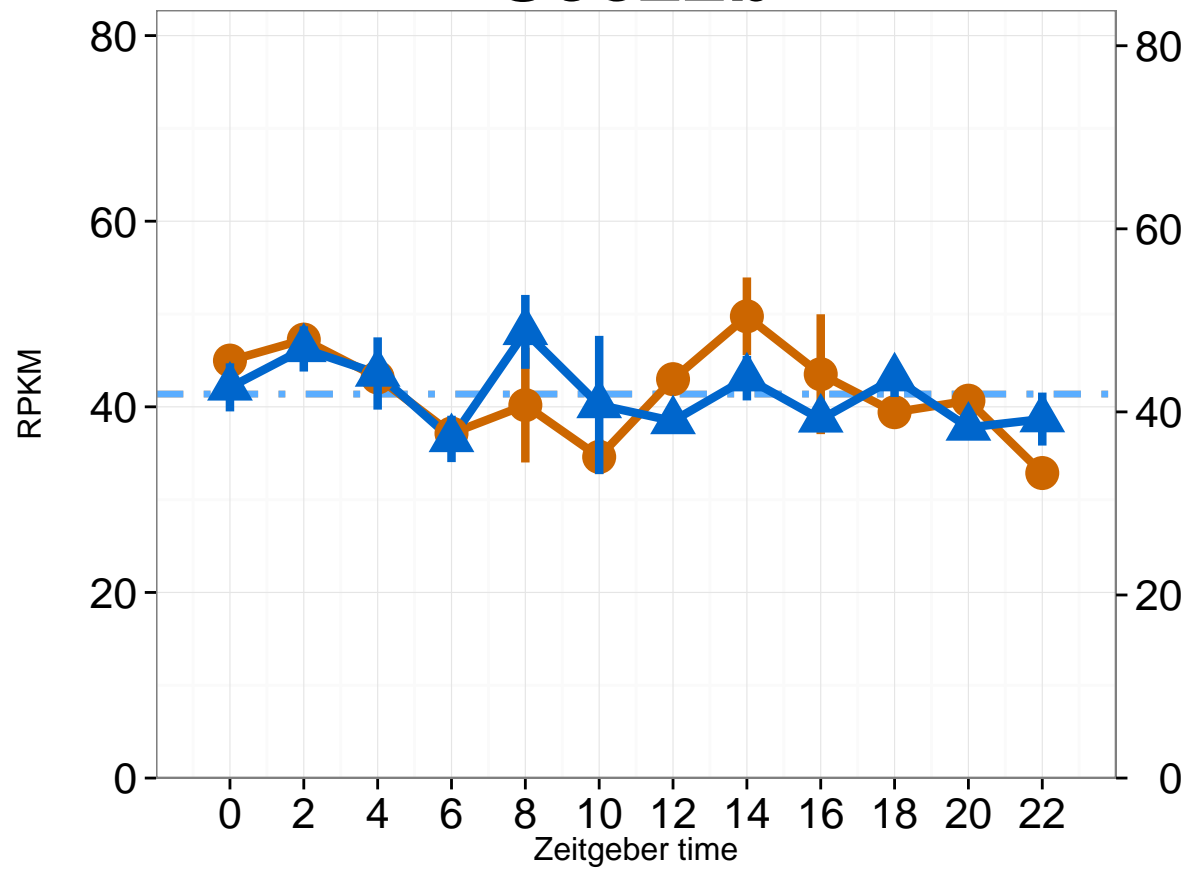

## Sec22b

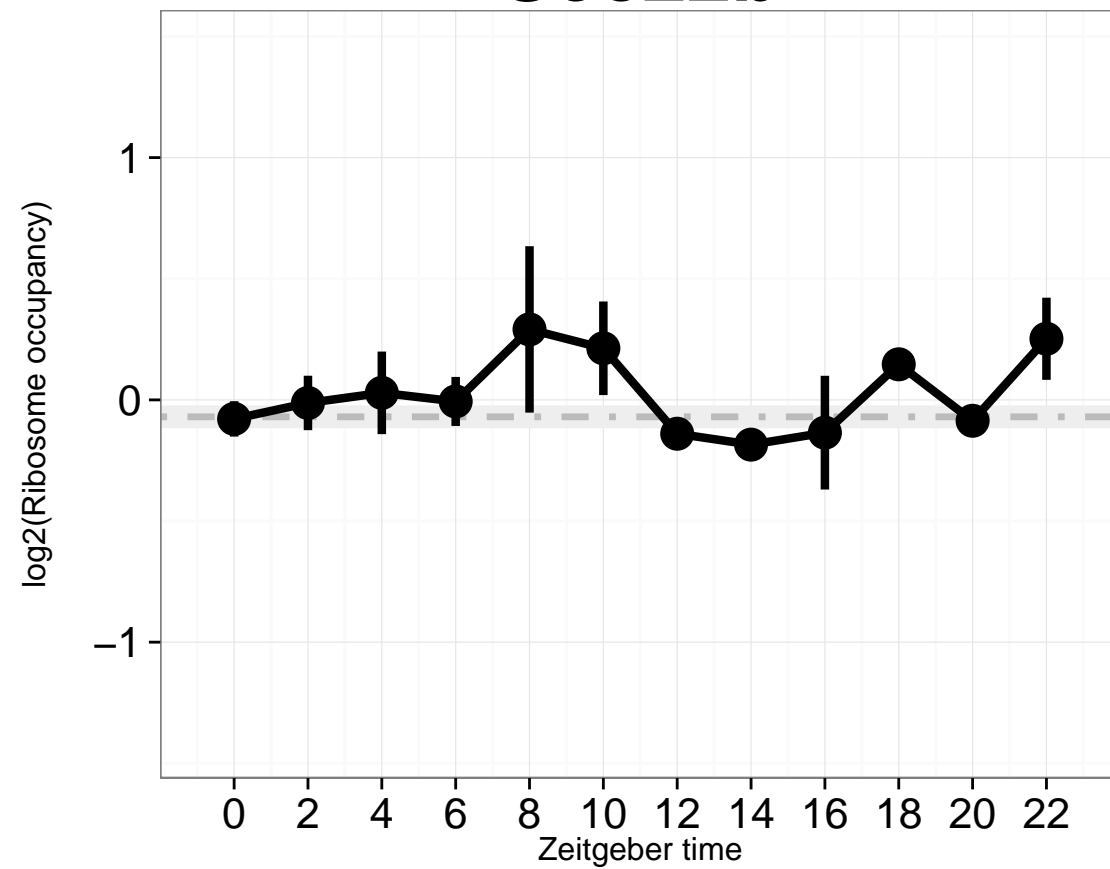

Supplement: SuppDataset_1.zip [file Sec22b_set_A.pdf › Supplemental Dataset 1/A-mRNA_nonrhyth_translation_nonrhyth/Sec22b_set_A.pdf]

# Sec23a

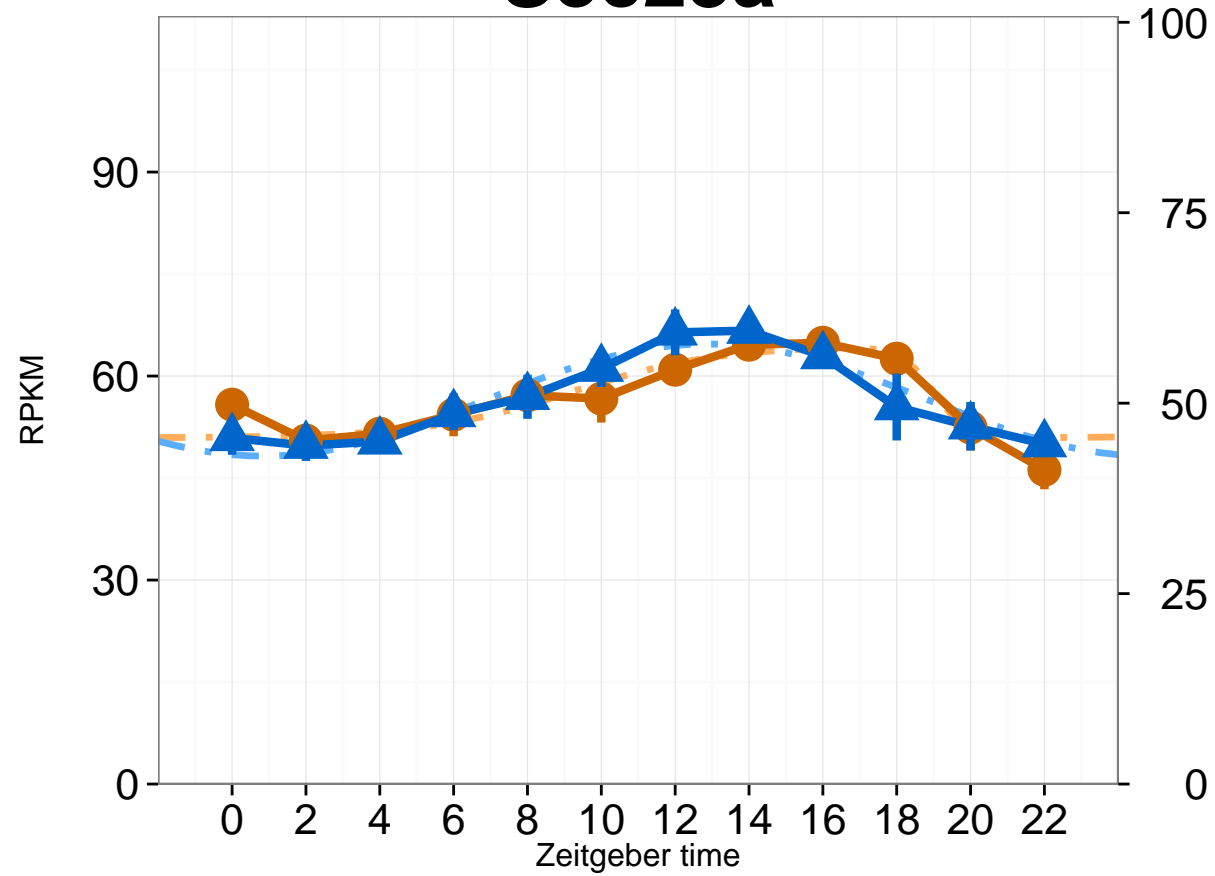

# Sec23a

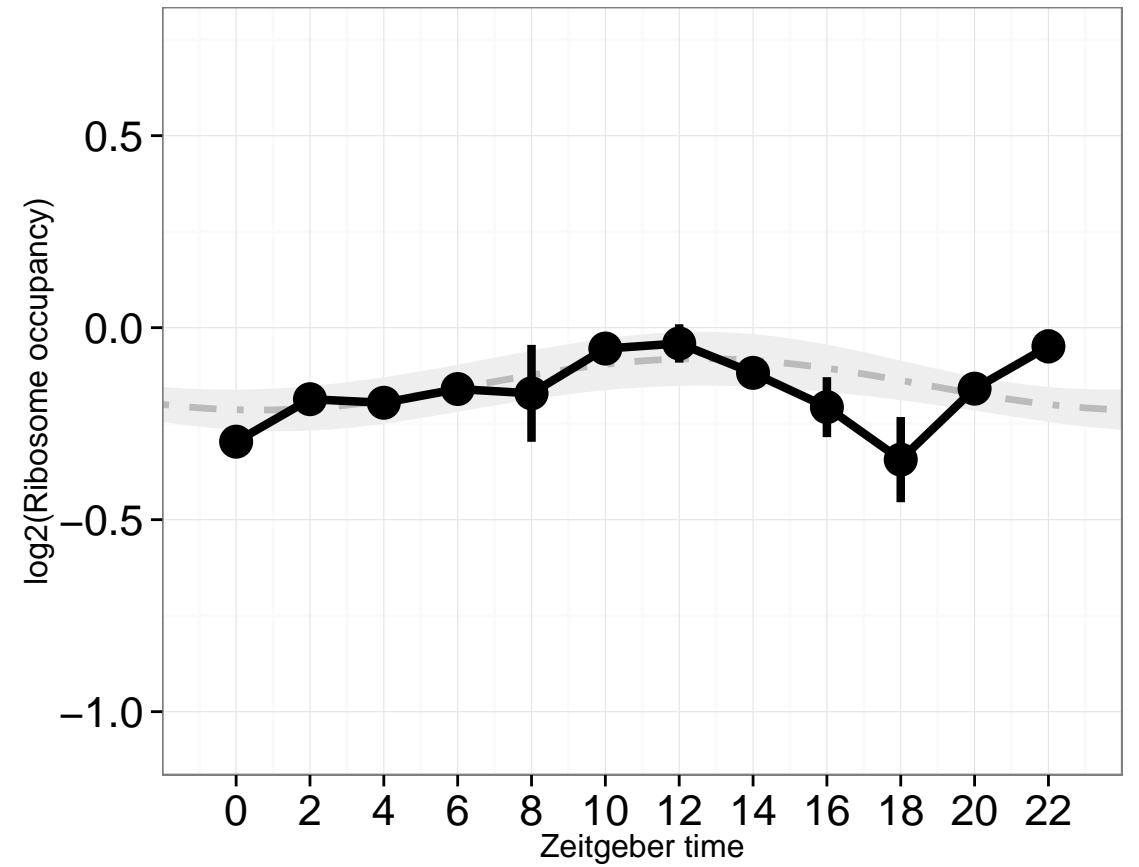

Supplement: SuppDataset_1.zip [file Sec23a_set_A.pdf › Supplemental Dataset 1/A-mRNA_nonrhyth_translation_nonrhyth/Sec23a_set_A.pdf]

# Sec23b

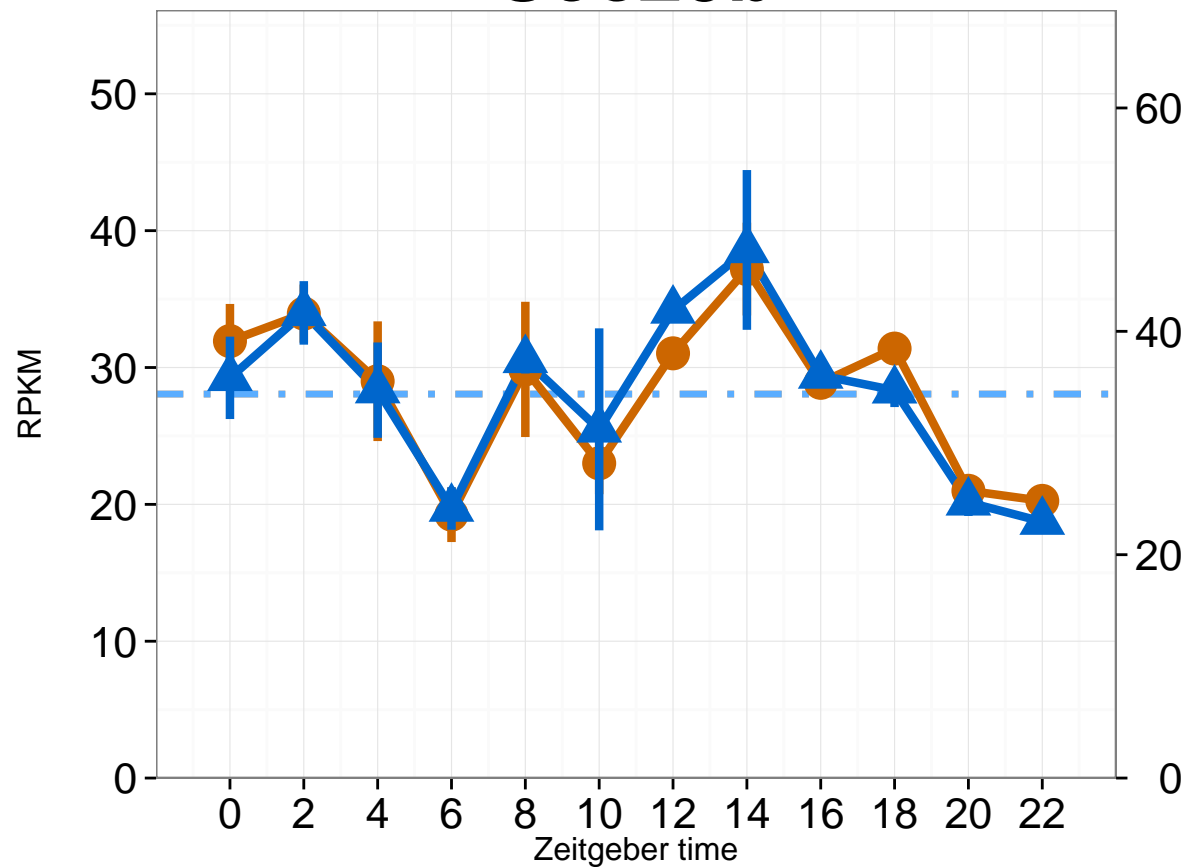

# Sec23b

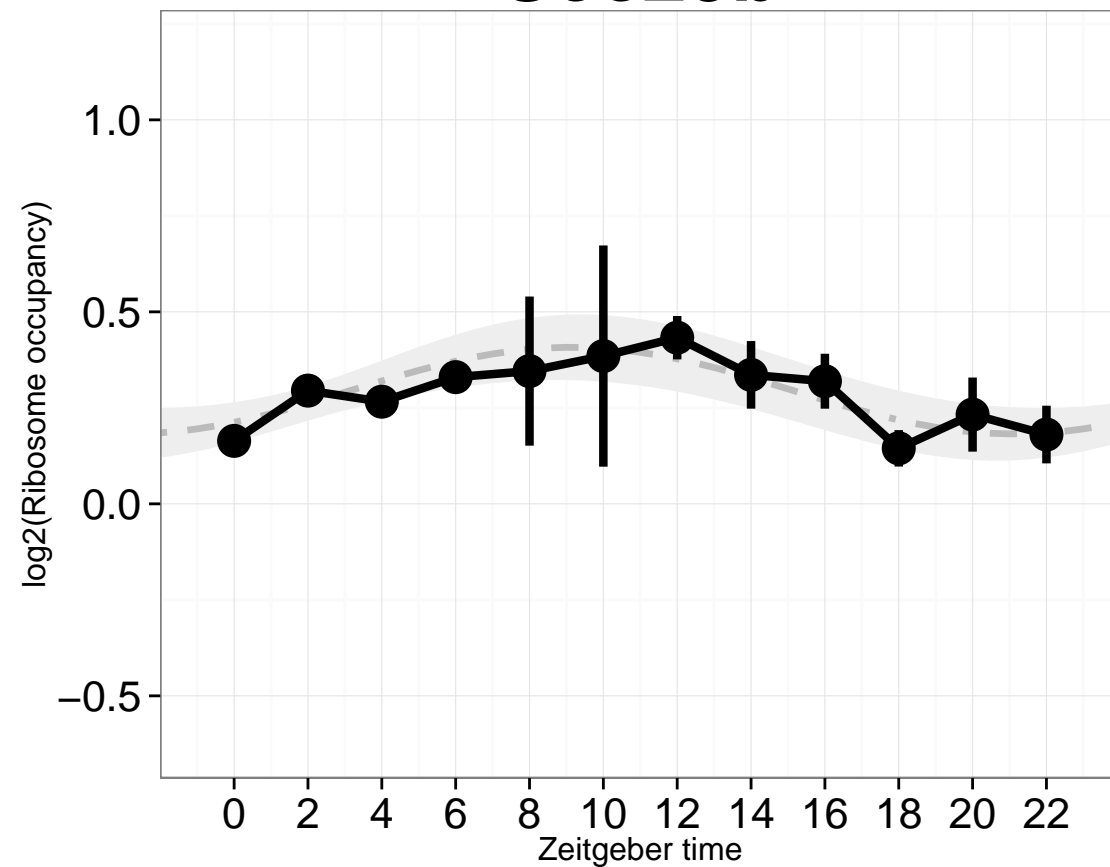

Supplement: SuppDataset_1.zip [file Sec23b_set_A.pdf › Supplemental Dataset 1/A-mRNA_nonrhyth_translation_nonrhyth/Sec23b_set_A.pdf]

# Sec23ip

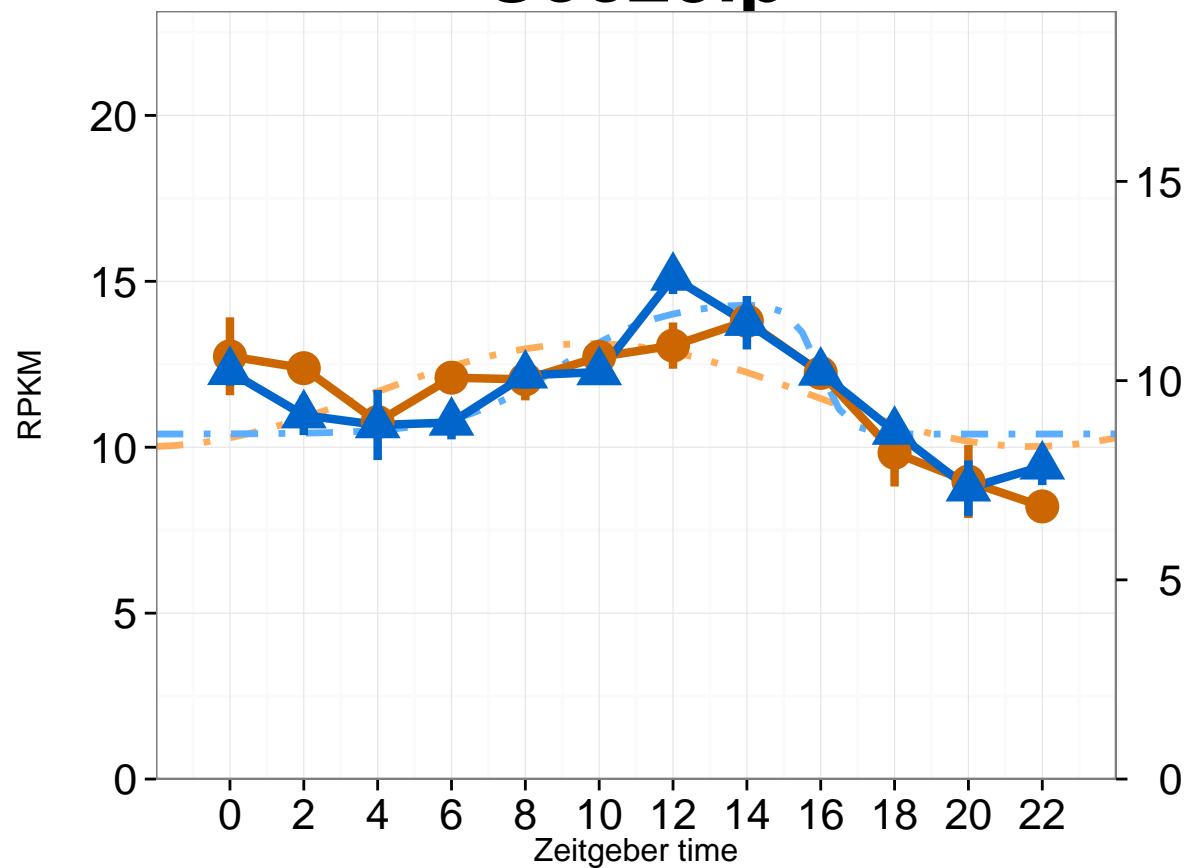

# Sec23ip

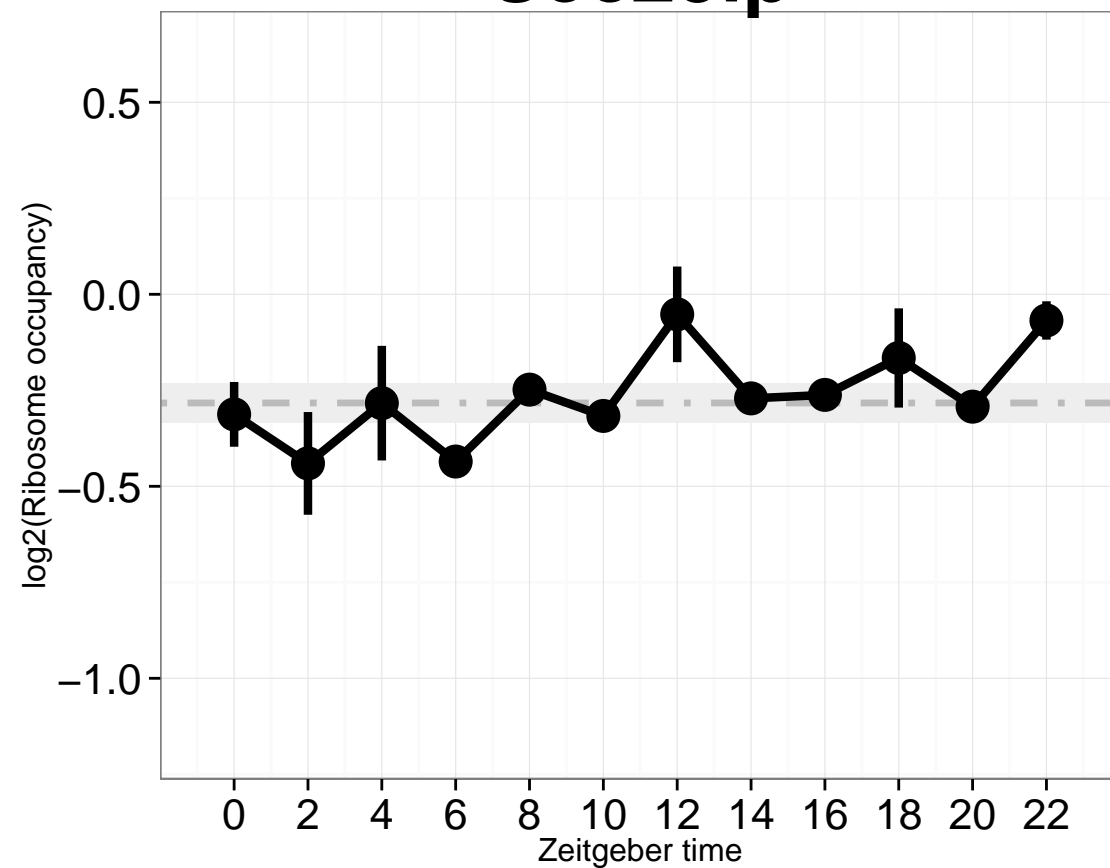

Supplement: SuppDataset_1.zip [file Sec23ip_set_A.pdf › Supplemental Dataset 1/A-mRNA_nonrhyth_translation_nonrhyth/Sec23ip_set_A.pdf]

# Sec24a

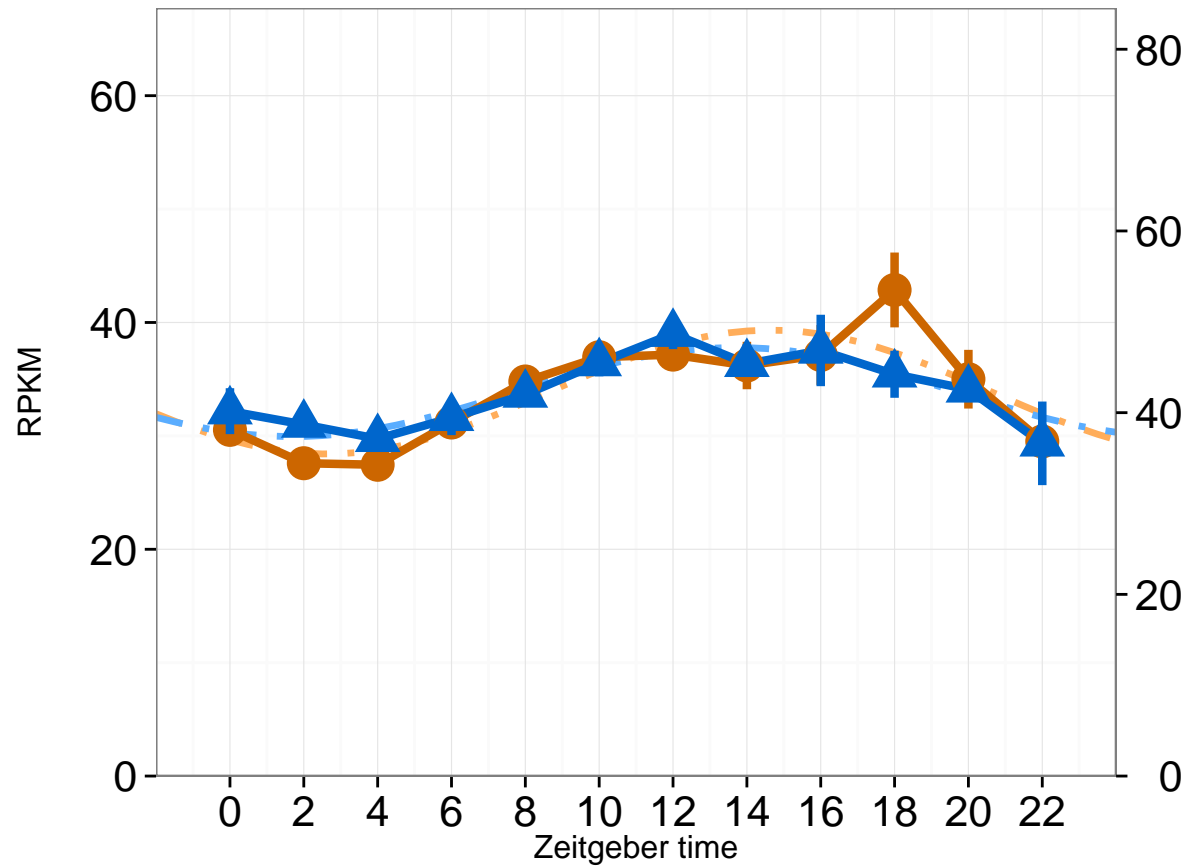

# Sec24a

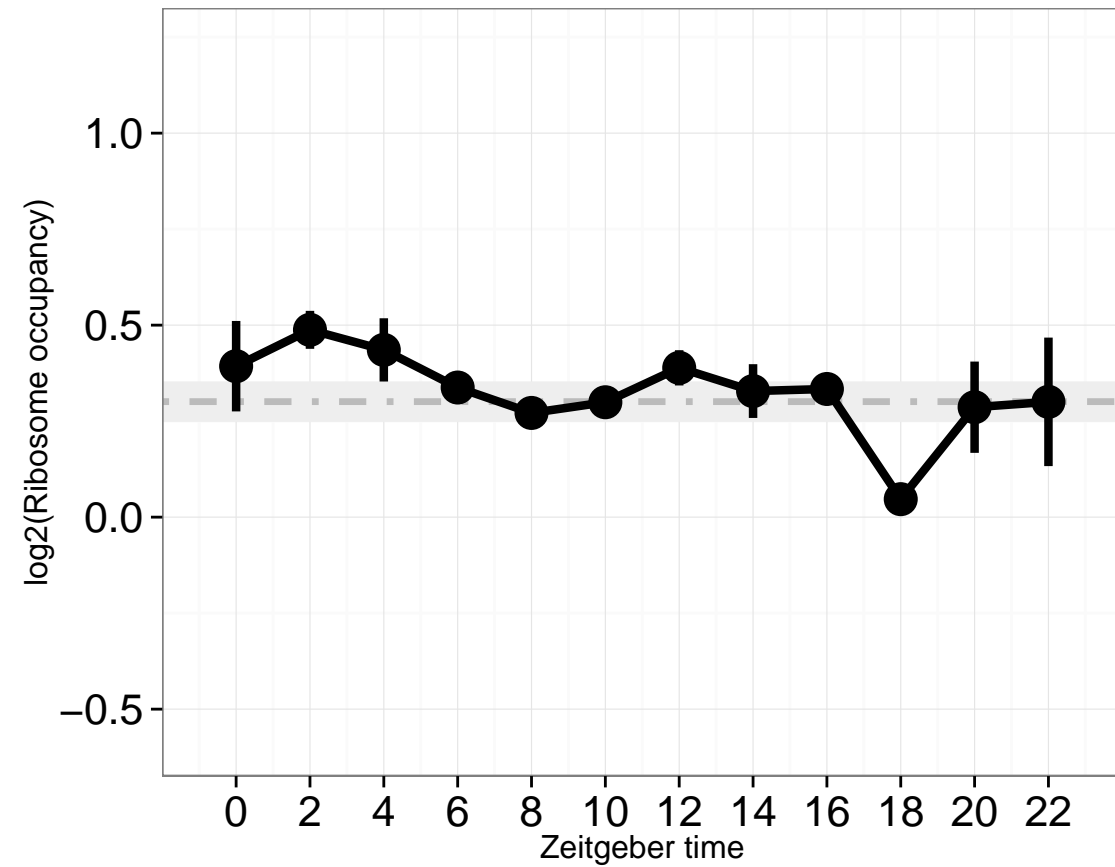

Supplement: SuppDataset_1.zip [file Sec24a_set_A.pdf › Supplemental Dataset 1/A-mRNA_nonrhyth_translation_nonrhyth/Sec24a_set_A.pdf]

# Sec24b

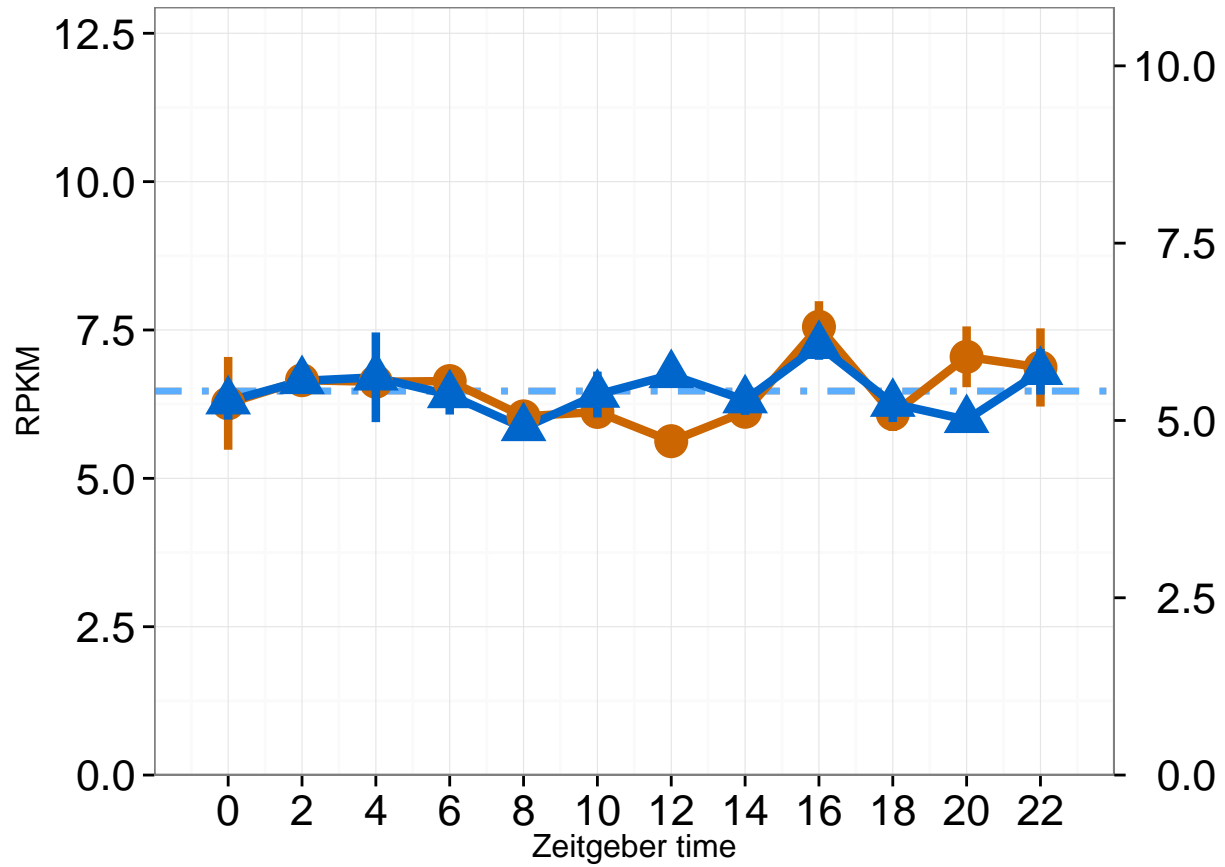

# Sec24b

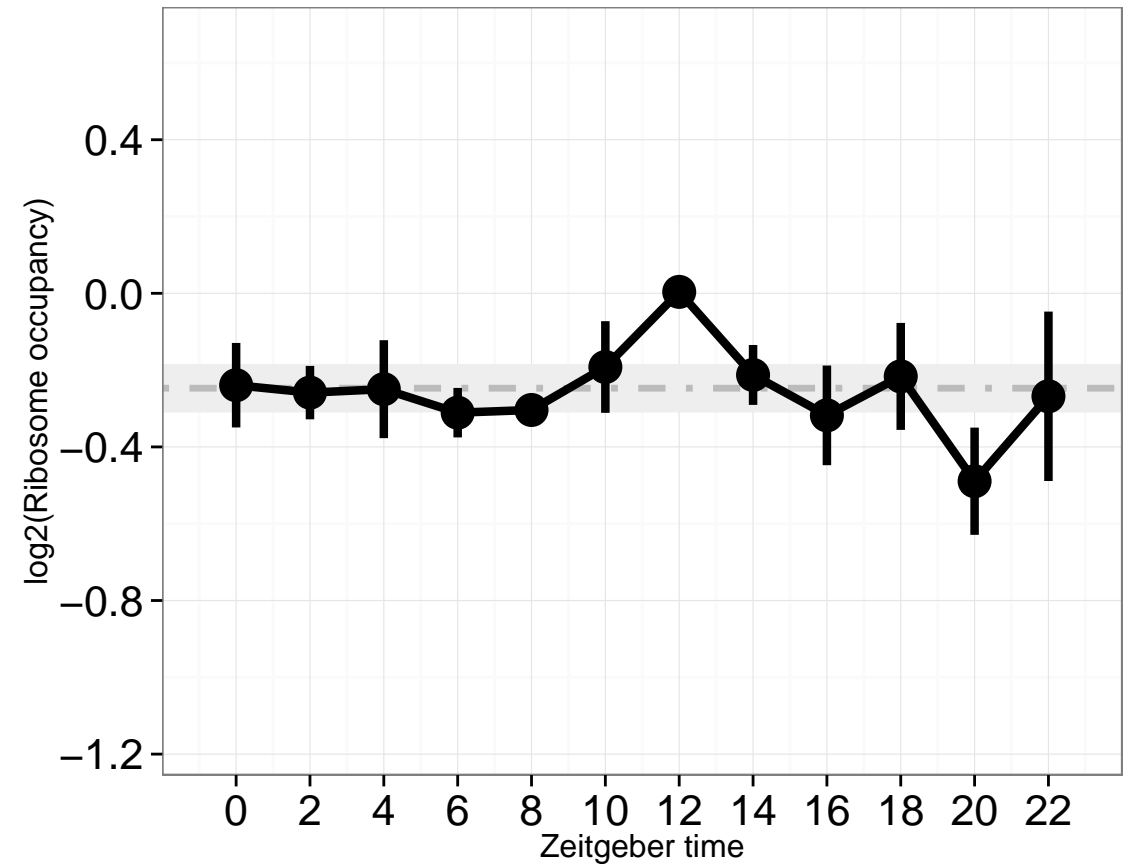

Supplement: SuppDataset_1.zip [file Sec24b_set_A.pdf › Supplemental Dataset 1/A-mRNA_nonrhyth_translation_nonrhyth/Sec24b_set_A.pdf]

## Sec24c

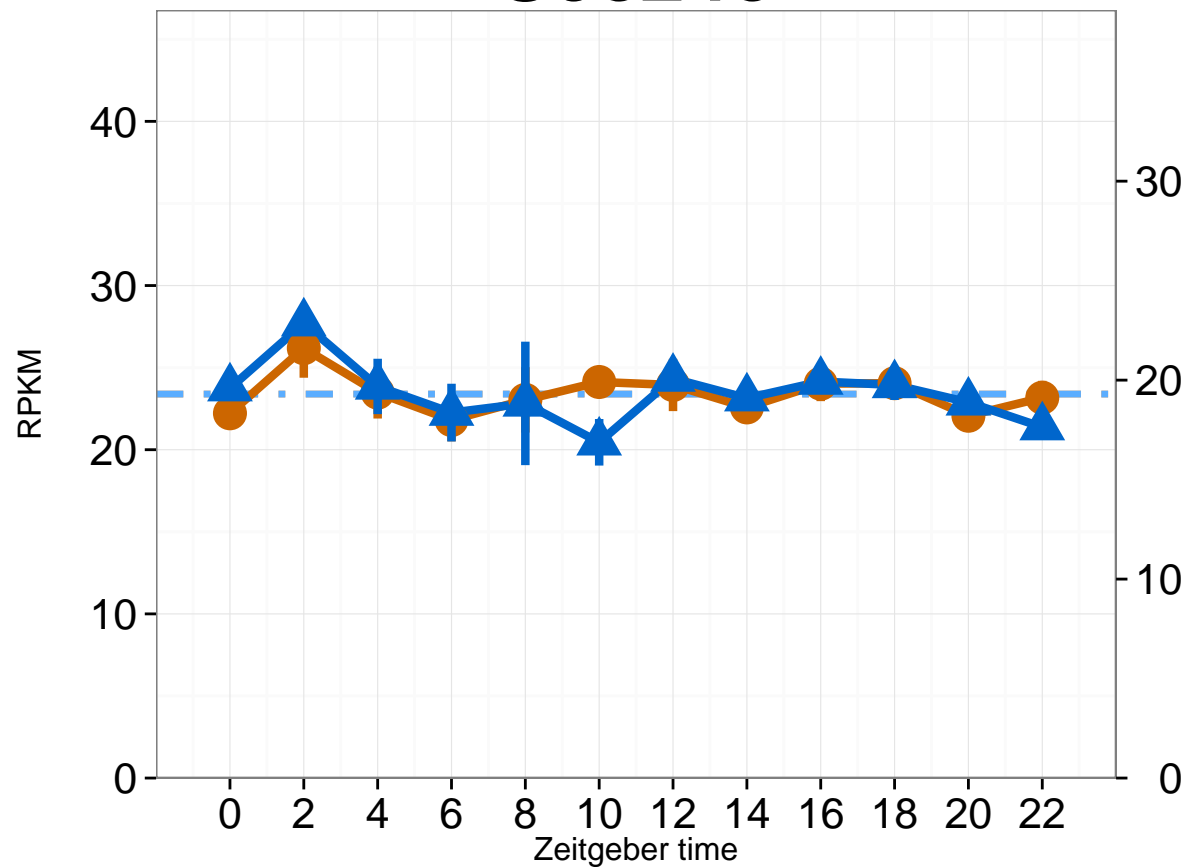

## Sec24c

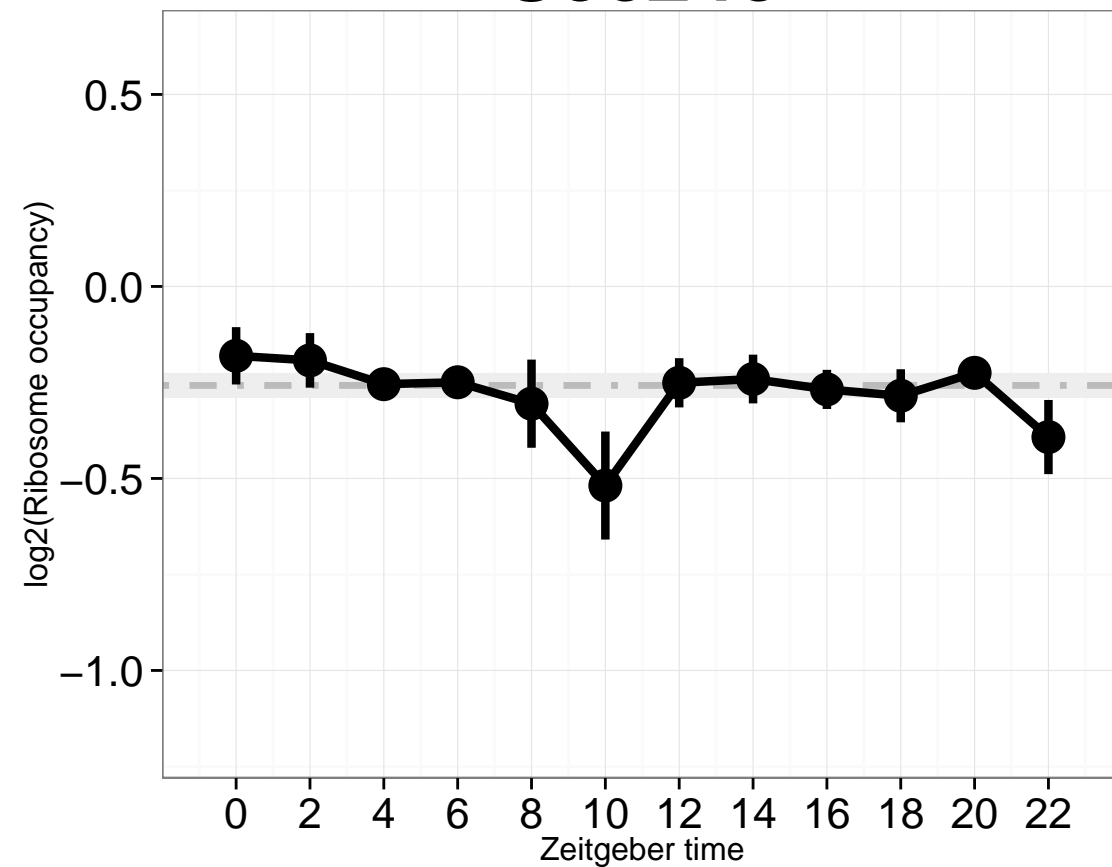

Supplement: SuppDataset_1.zip [file Sec24c_set_A.pdf › Supplemental Dataset 1/A-mRNA_nonrhyth_translation_nonrhyth/Sec24c_set_A.pdf]

## Sec24d

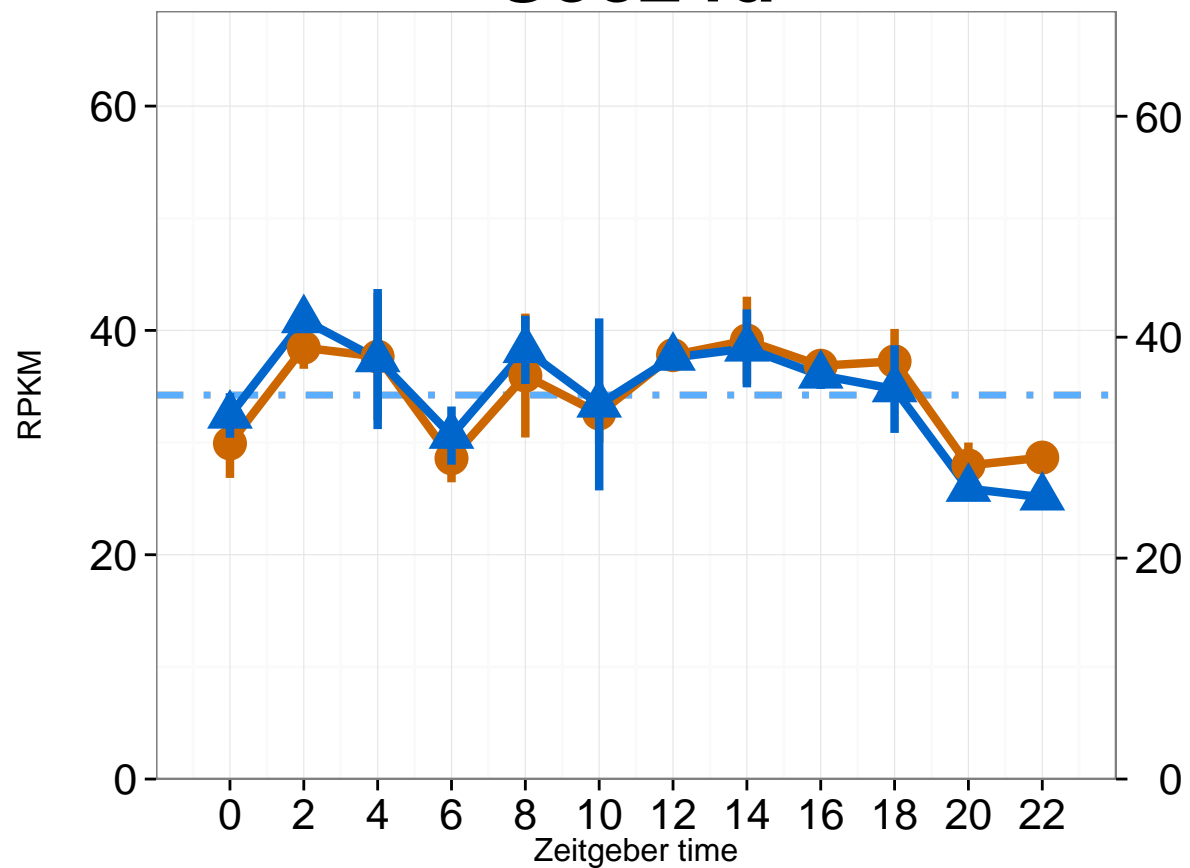

## Sec24d

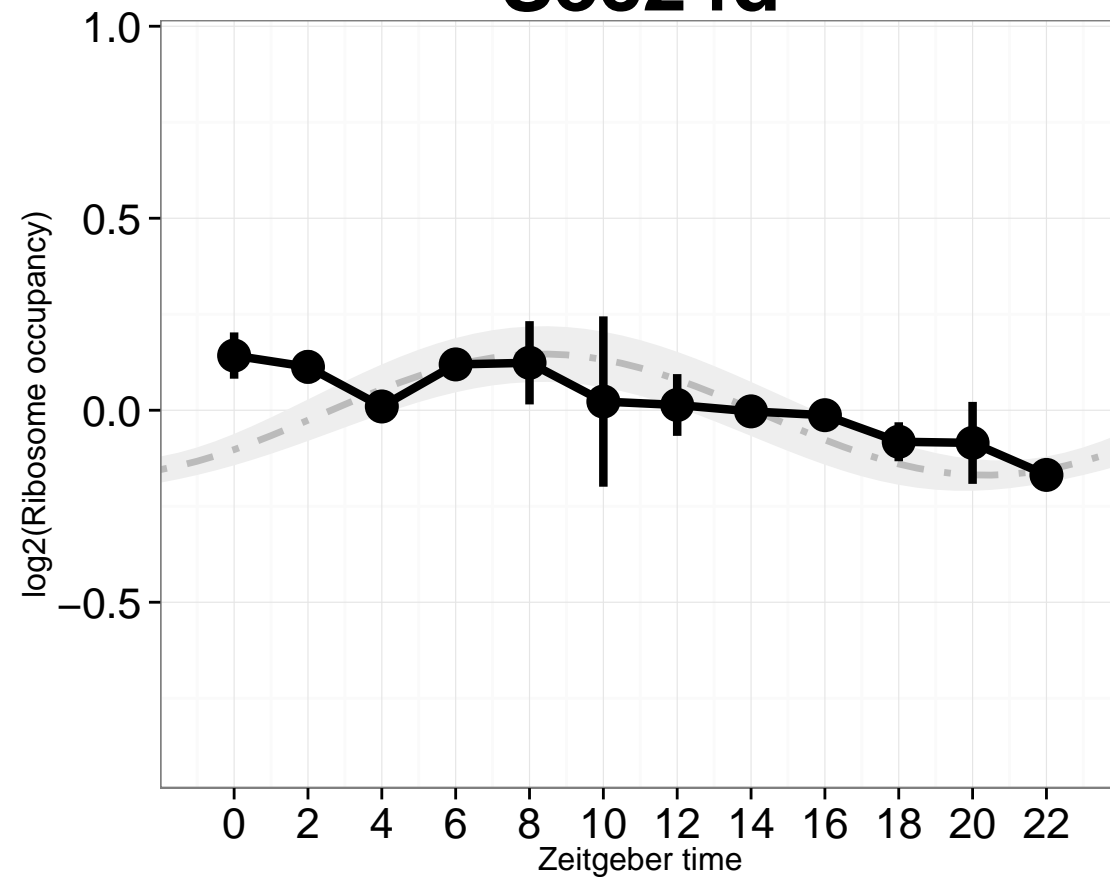

Supplement: SuppDataset_1.zip [file Sec24d_set_A.pdf › Supplemental Dataset 1/A-mRNA_nonrhyth_translation_nonrhyth/Sec24d_set_A.pdf]

## Sec31a

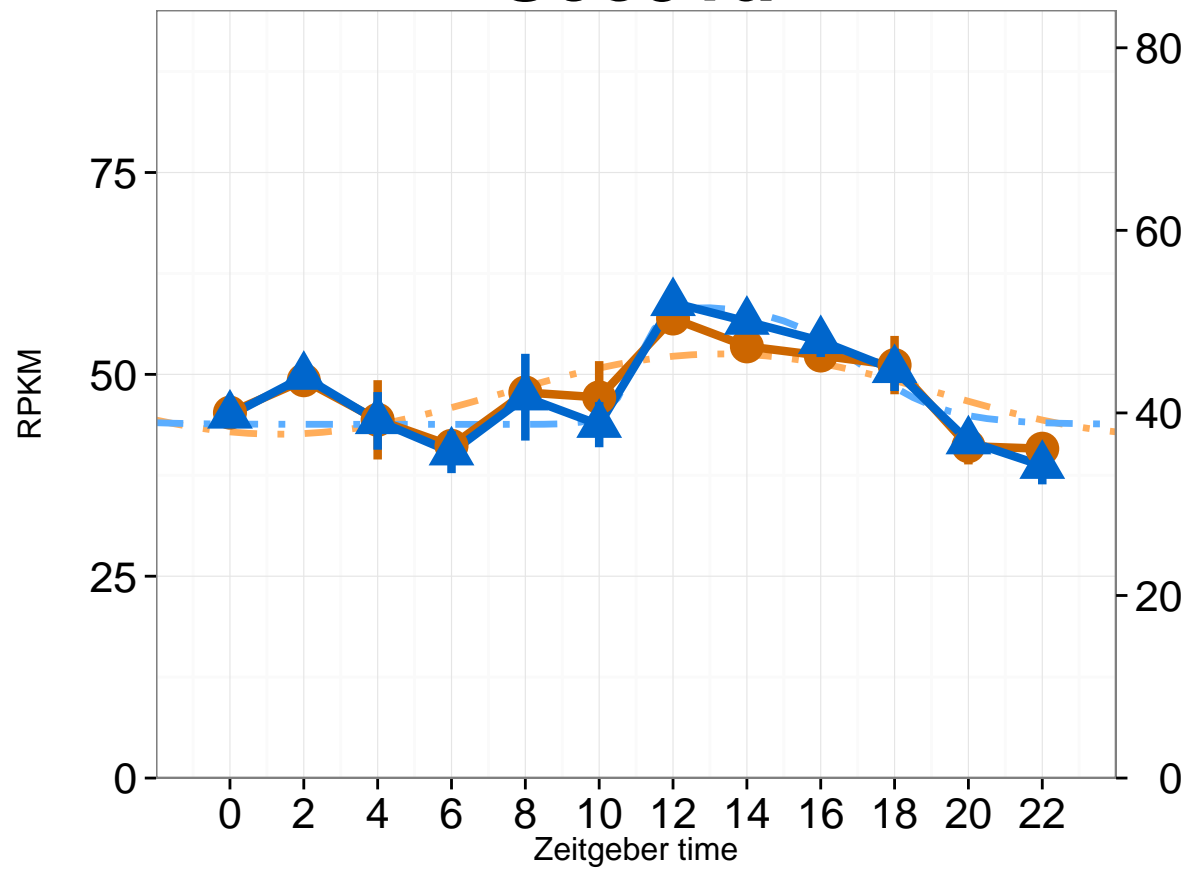

## Sec31a

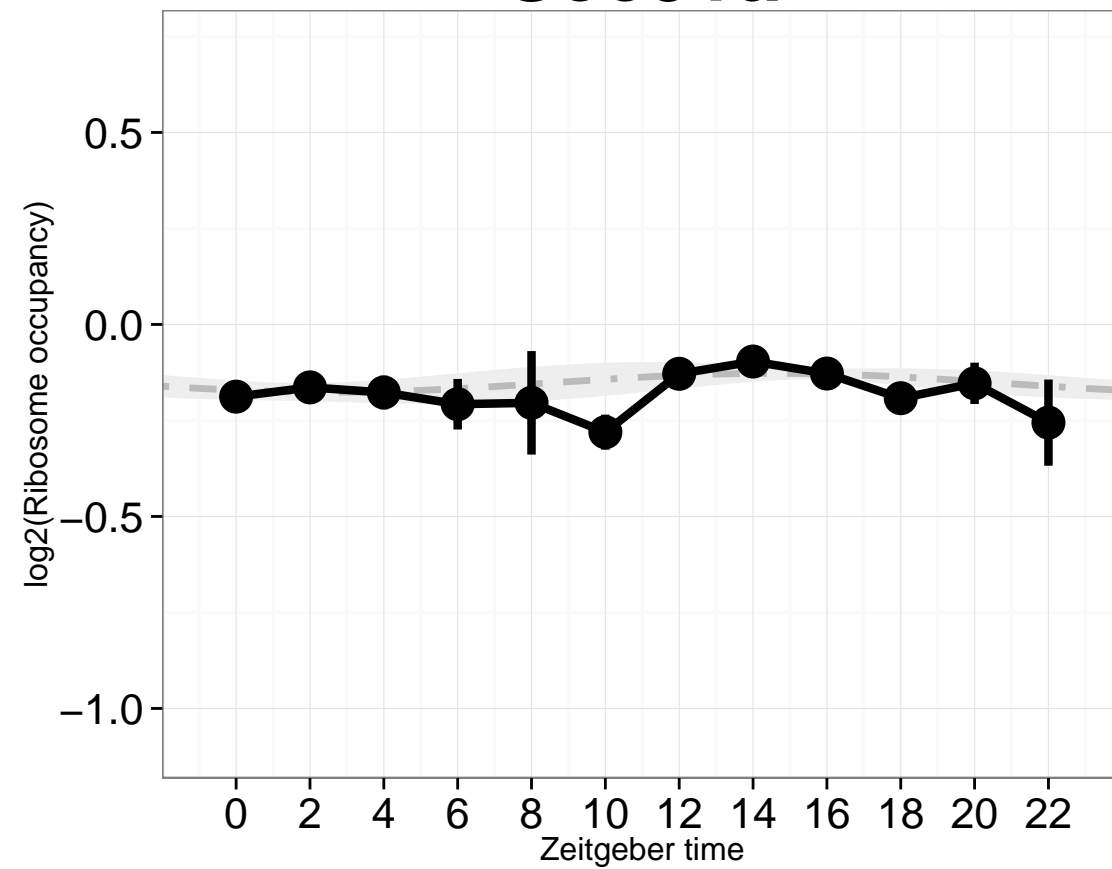

Supplement: SuppDataset_1.zip [file Sec31a_set_A.pdf › Supplemental Dataset 1/A-mRNA_nonrhyth_translation_nonrhyth/Sec31a_set_A.pdf]

# Sec31b

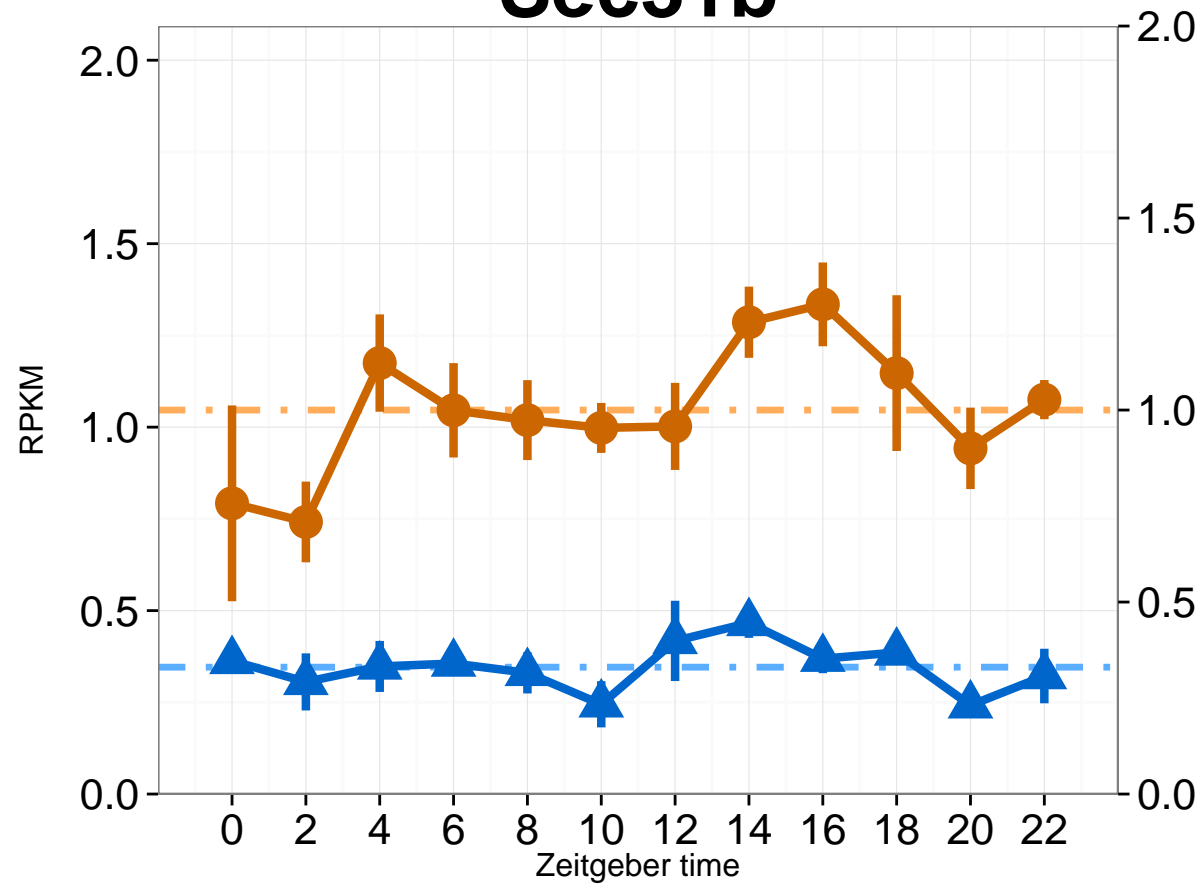

# Sec31b

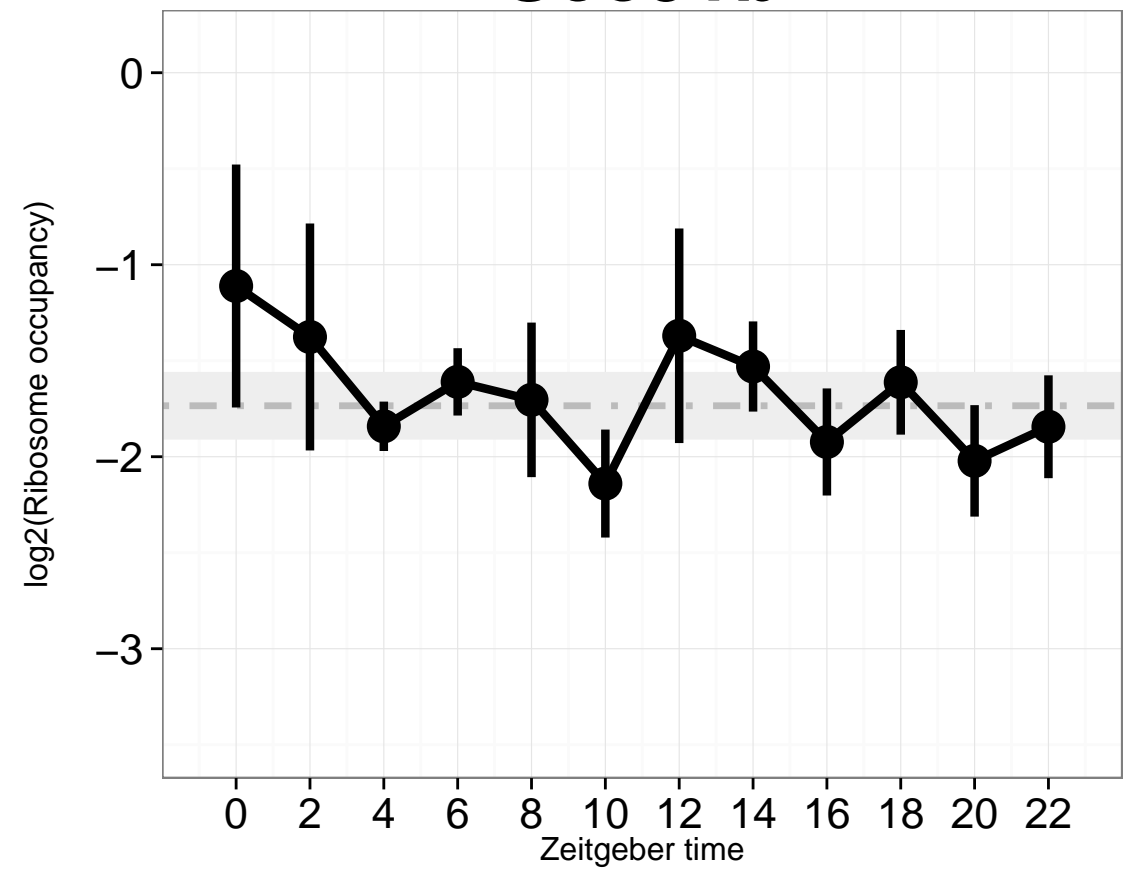

Supplement: SuppDataset_1.zip [file Sec31b_set_A.pdf › Supplemental Dataset 1/A-mRNA_nonrhyth_translation_nonrhyth/Sec31b_set_A.pdf]

## Sec61a1

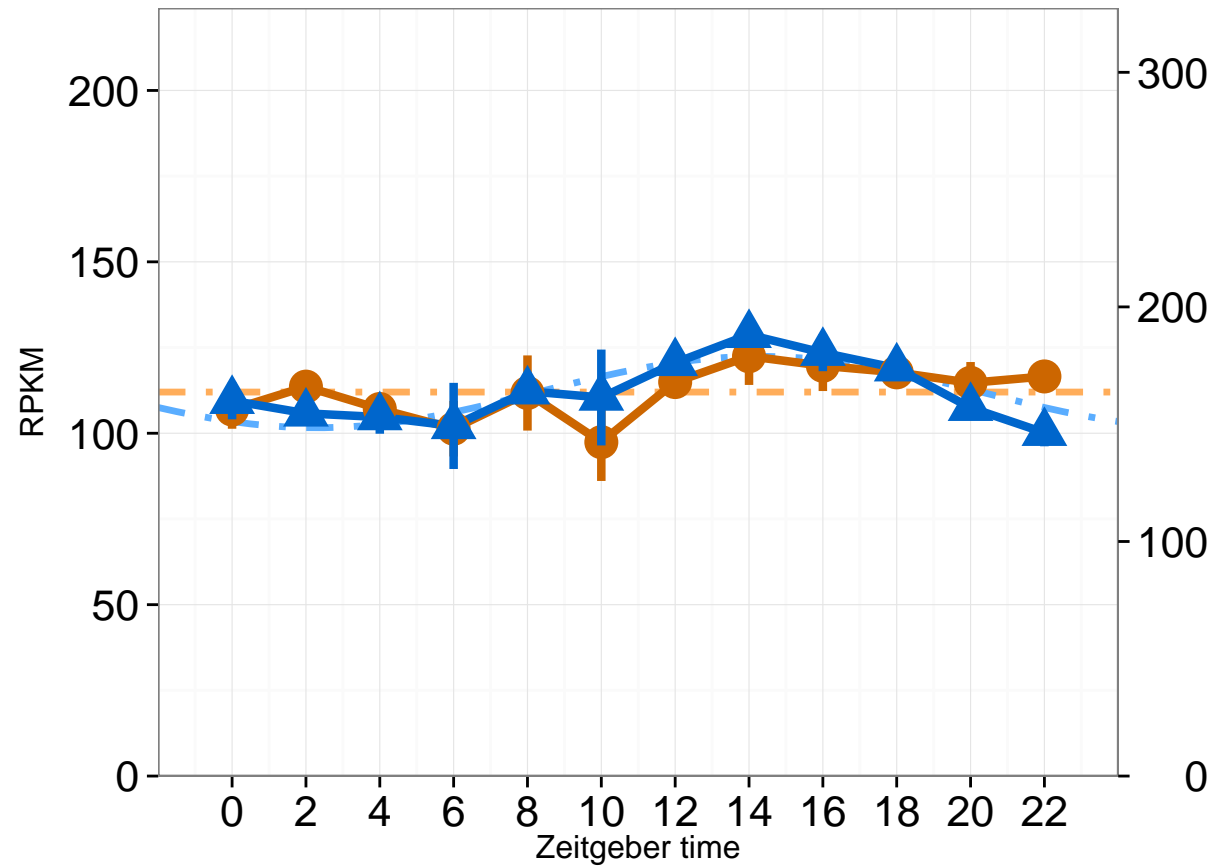

## Sec61a1

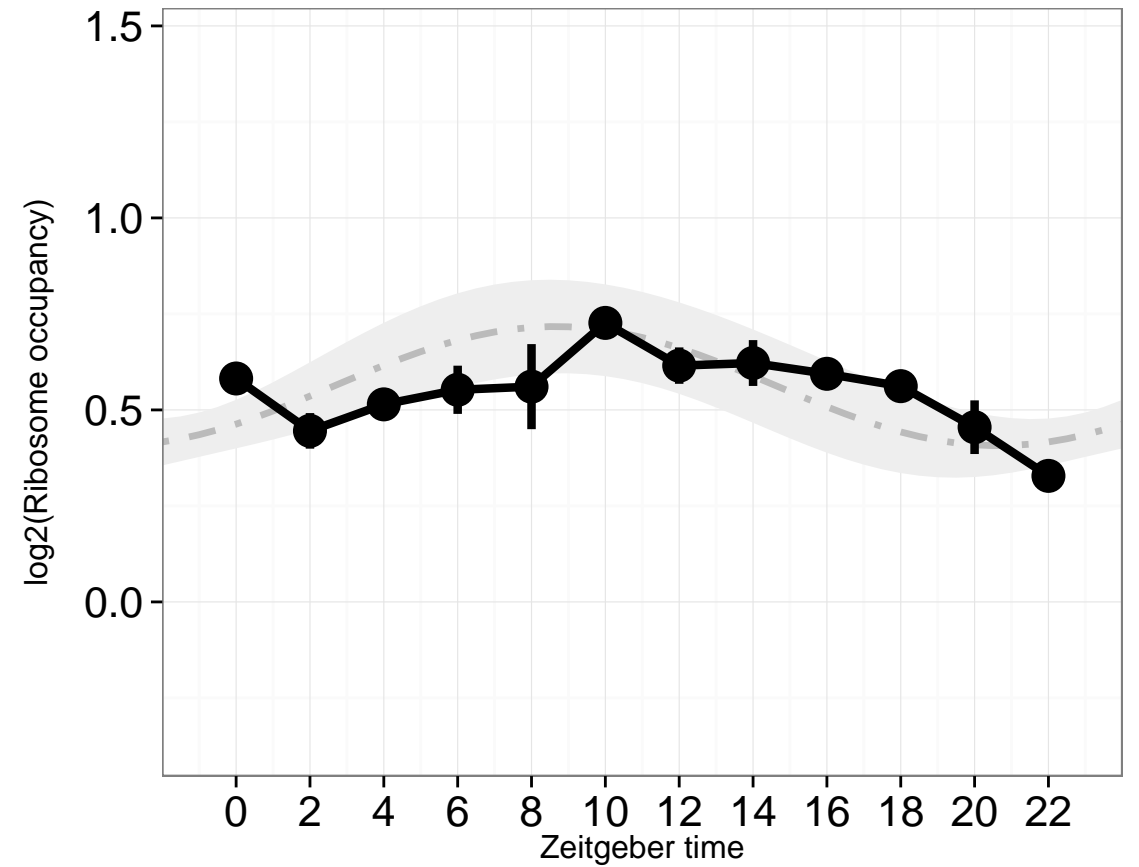

Supplement: SuppDataset_1.zip [file Sec61a1_set_A.pdf › Supplemental Dataset 1/A-mRNA_nonrhyth_translation_nonrhyth/Sec61a1_set_A.pdf]

## Sec61a2

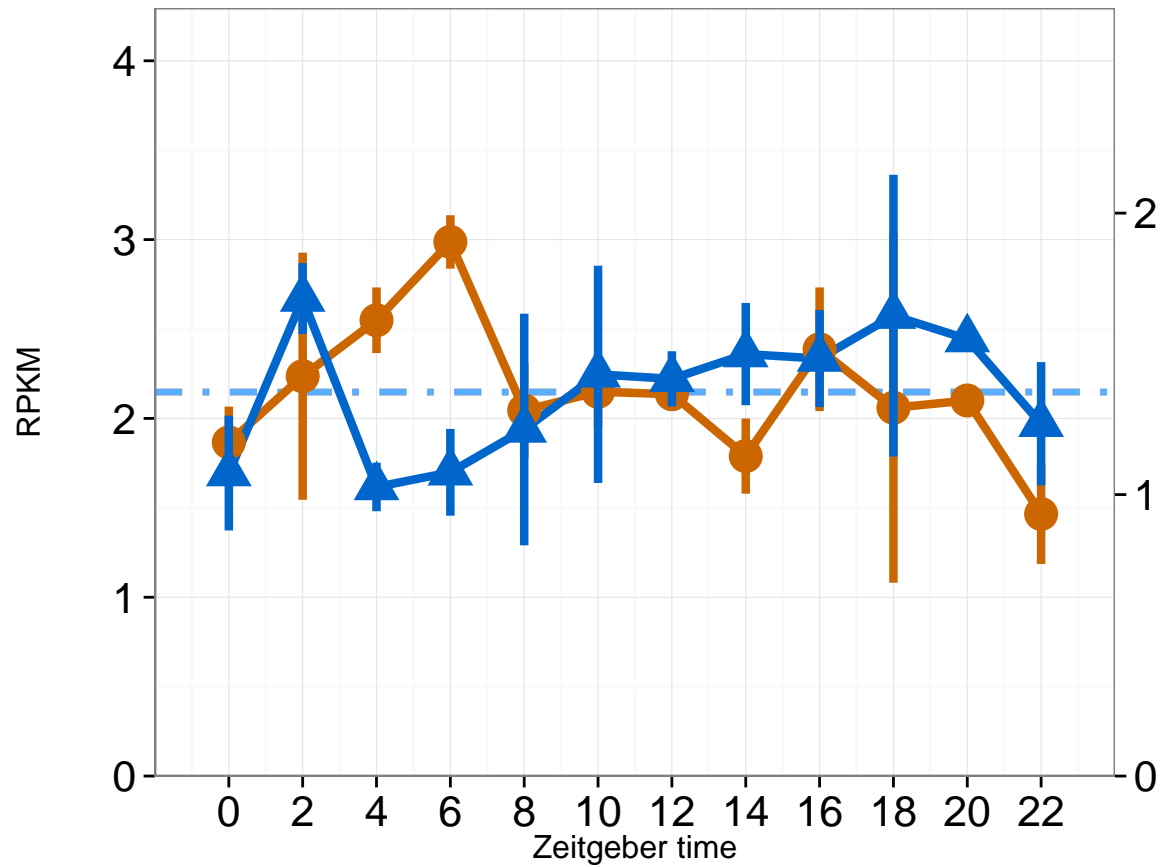

## Sec61a2

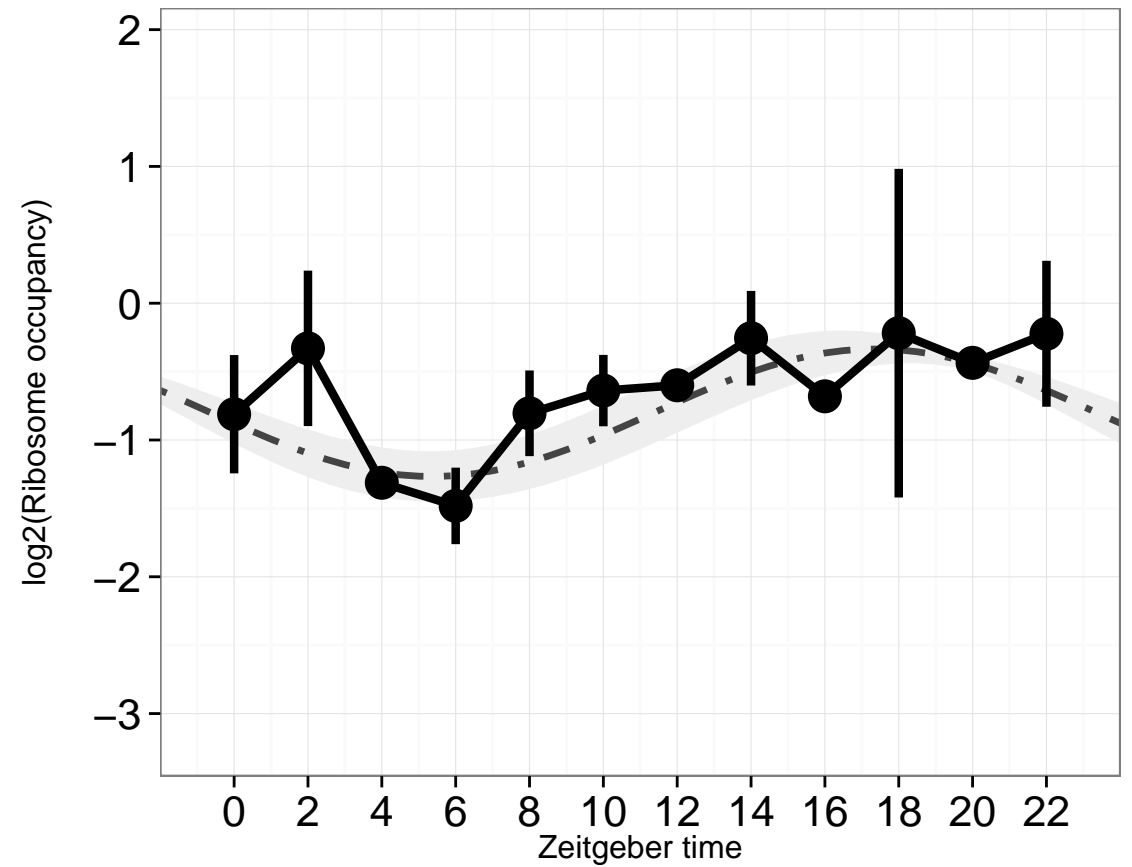

Supplement: SuppDataset_1.zip [file Sec61a2_set_A.pdf › Supplemental Dataset 1/A-mRNA_nonrhyth_translation_nonrhyth/Sec61a2_set_A.pdf]

## Sec61b

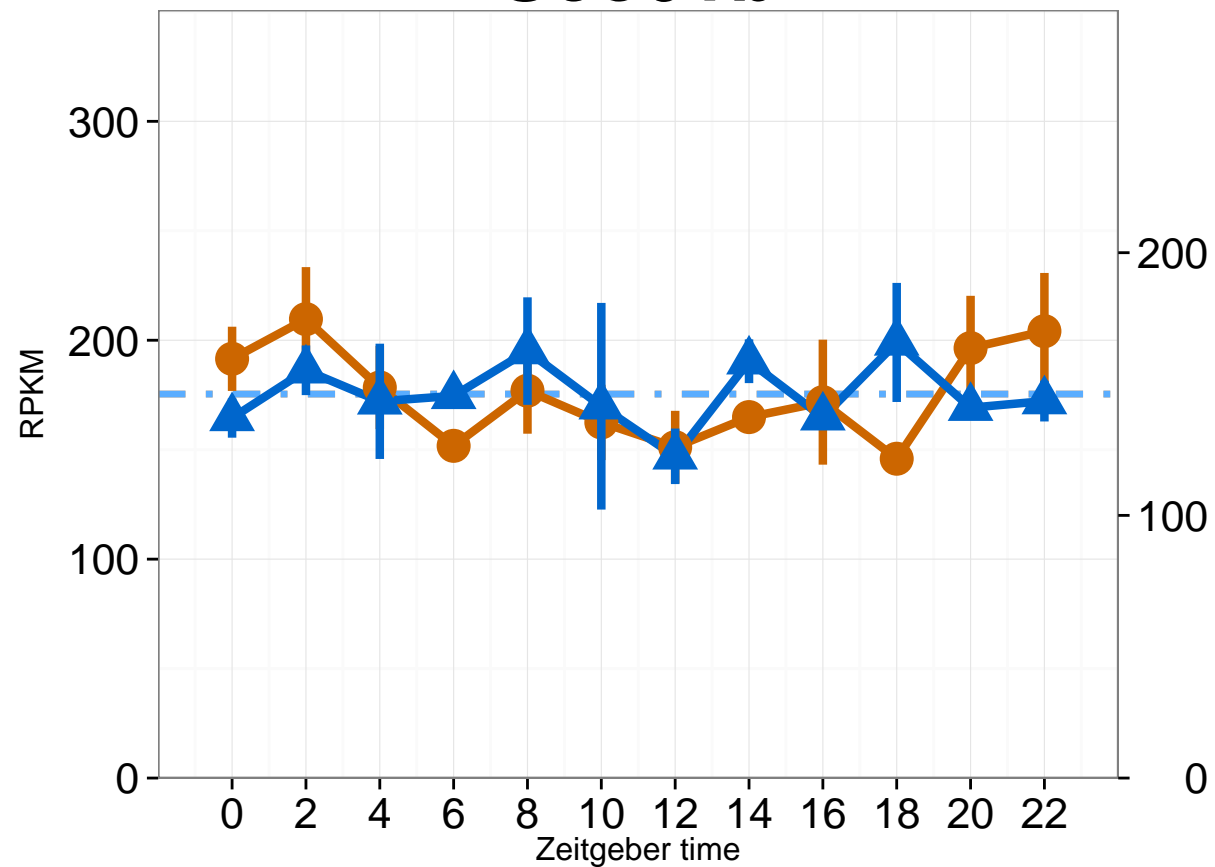

## Sec61b

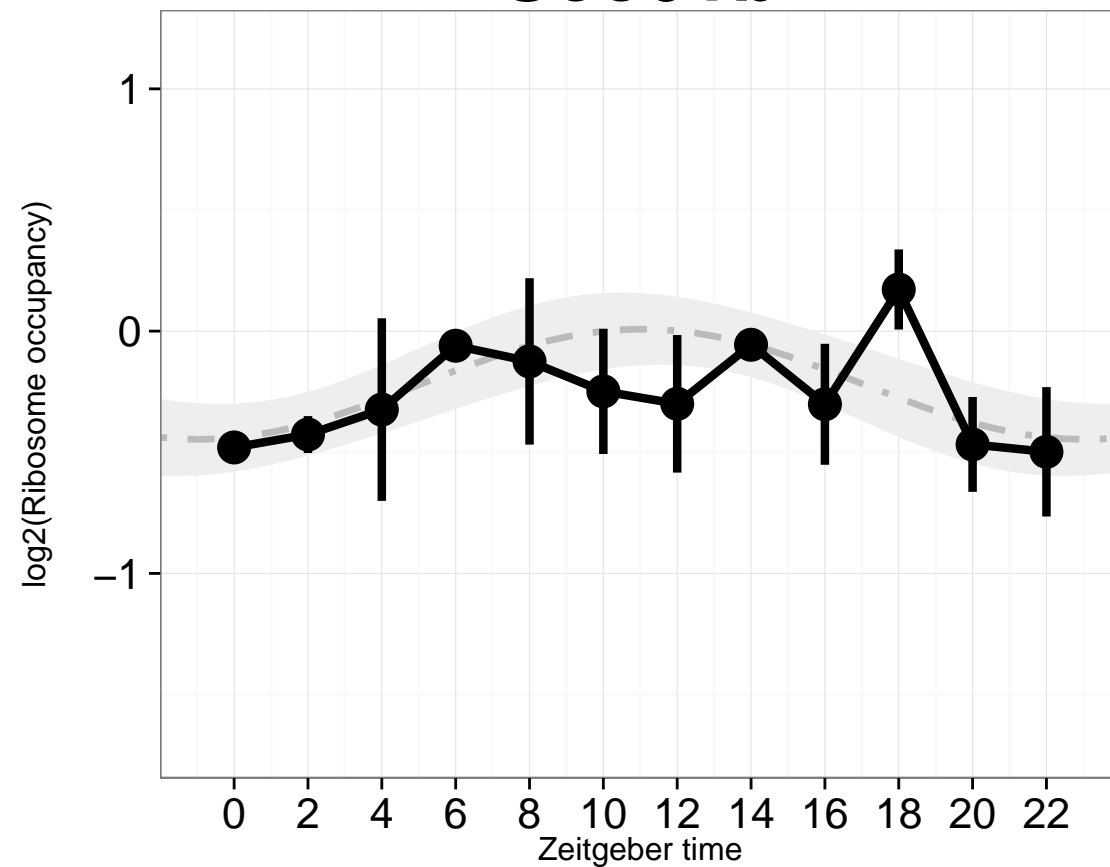

Supplement: SuppDataset_1.zip [file Sec61b_set_A.pdf › Supplemental Dataset 1/A-mRNA_nonrhyth_translation_nonrhyth/Sec61b_set_A.pdf]

## Sec62

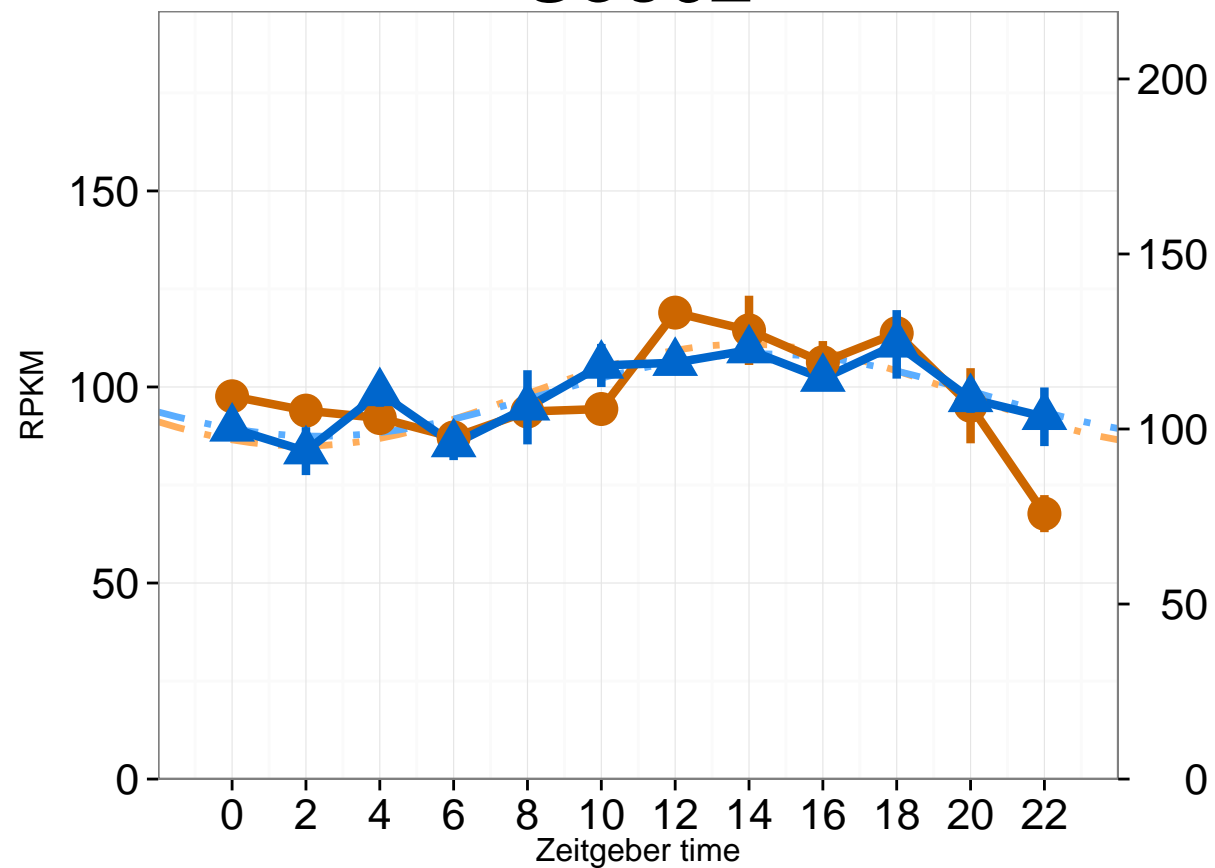

## Sec62

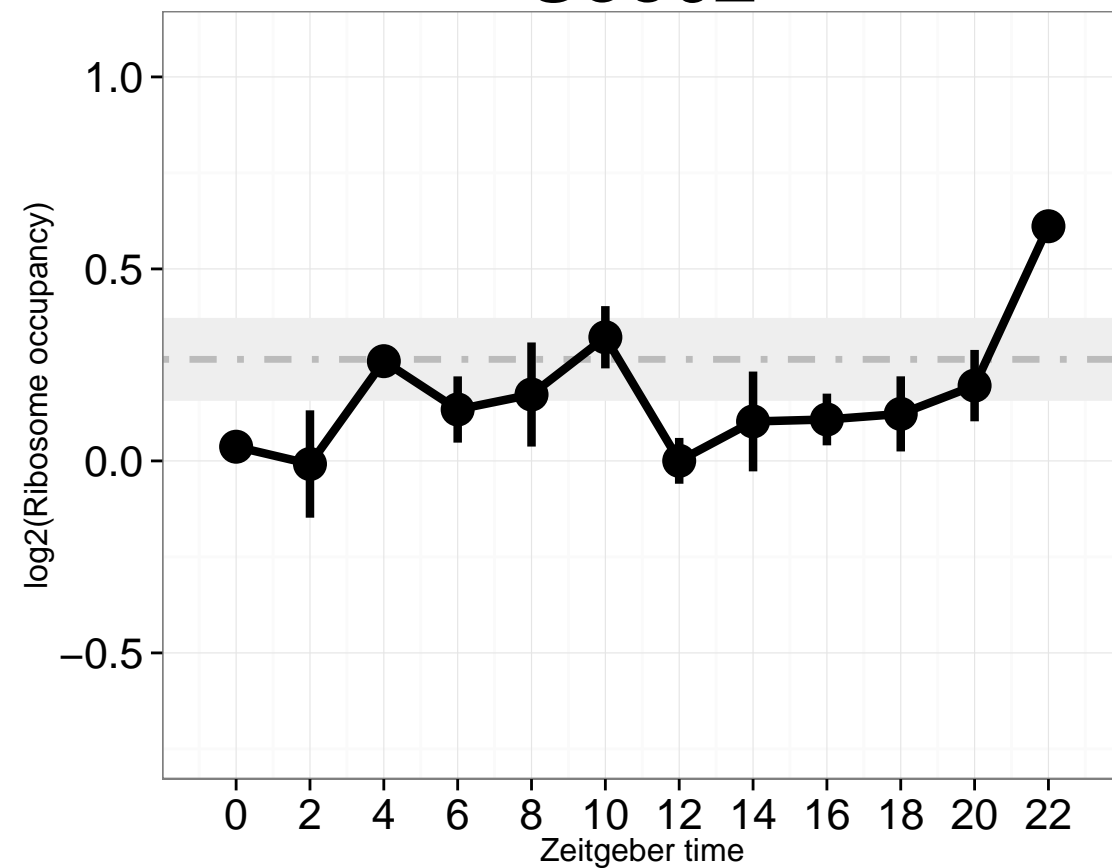

Supplement: SuppDataset_1.zip [file Sec62_set_A.pdf › Supplemental Dataset 1/A-mRNA_nonrhyth_translation_nonrhyth/Sec62_set_A.pdf]

## Sec63

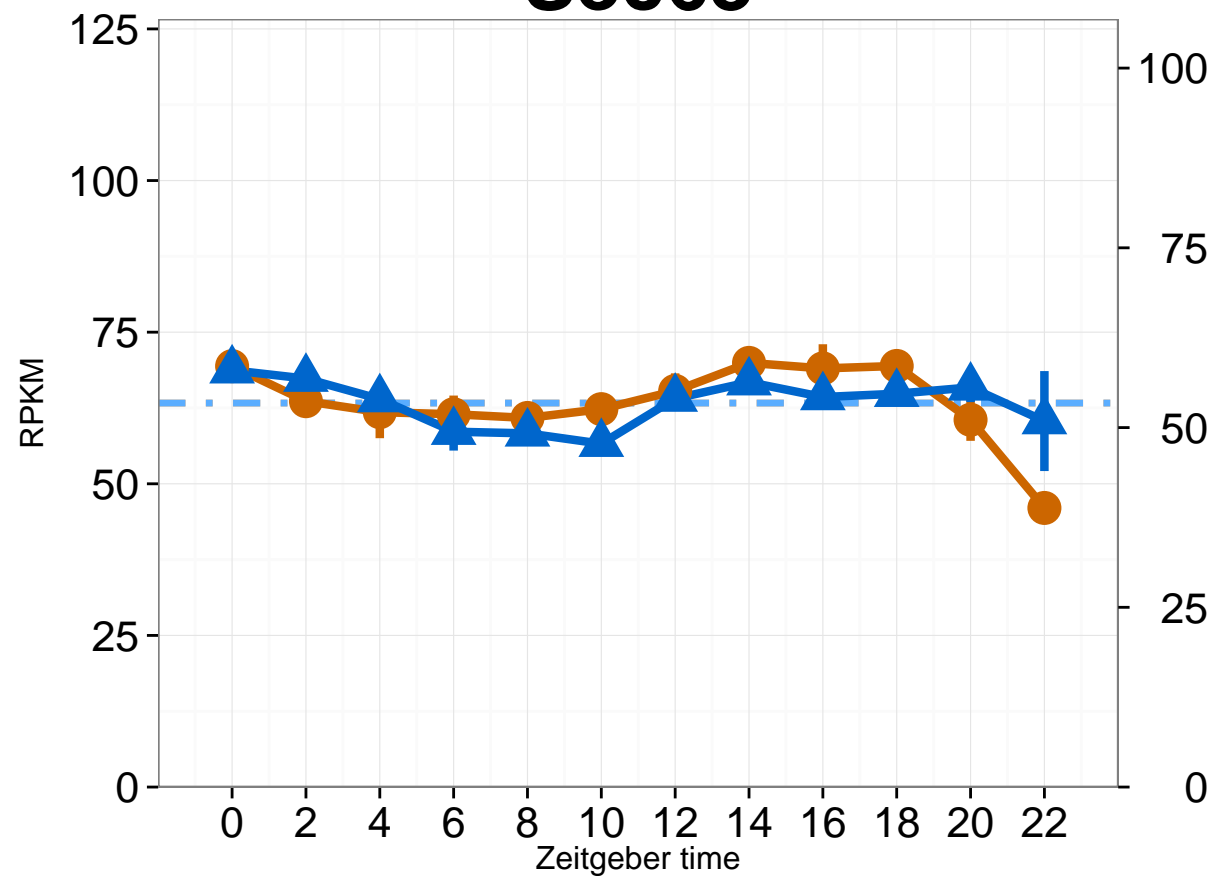

## Sec63

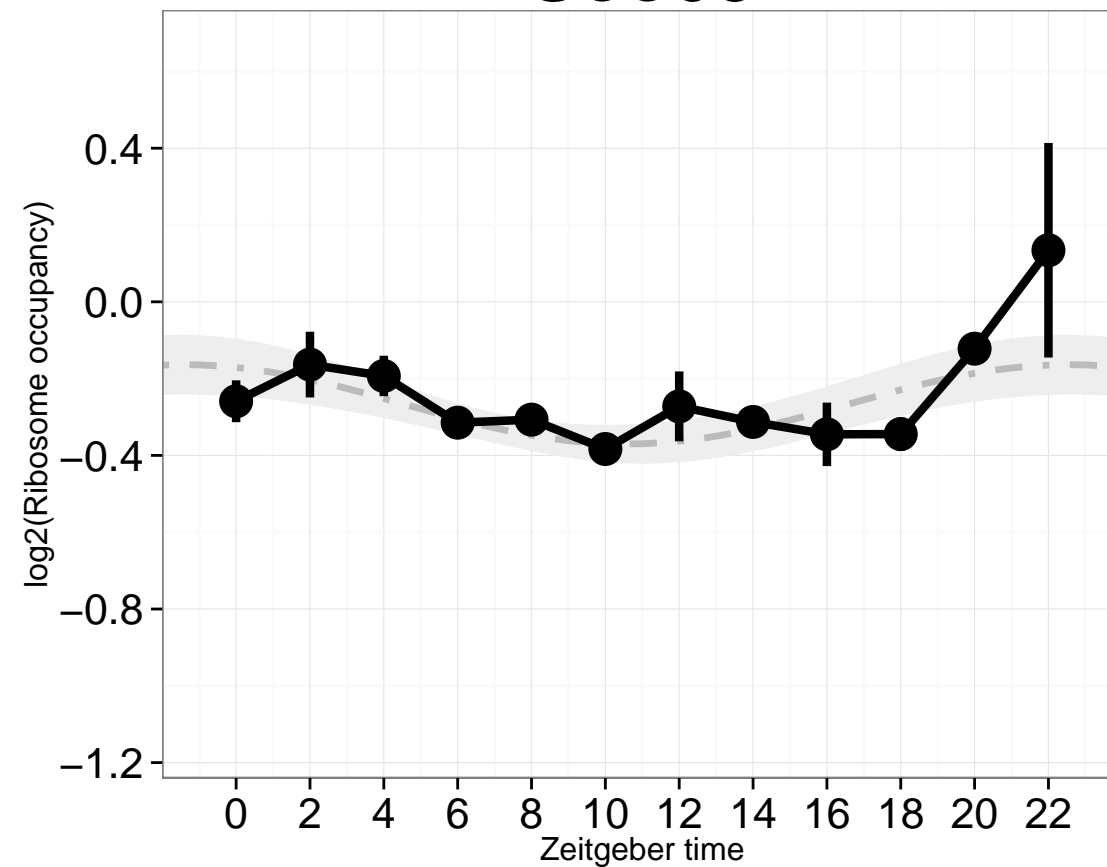

Supplement: SuppDataset_1.zip [file Sec63_set_A.pdf › Supplemental Dataset 1/A-mRNA_nonrhyth_translation_nonrhyth/Sec63_set_A.pdf]

## Secisbp2l

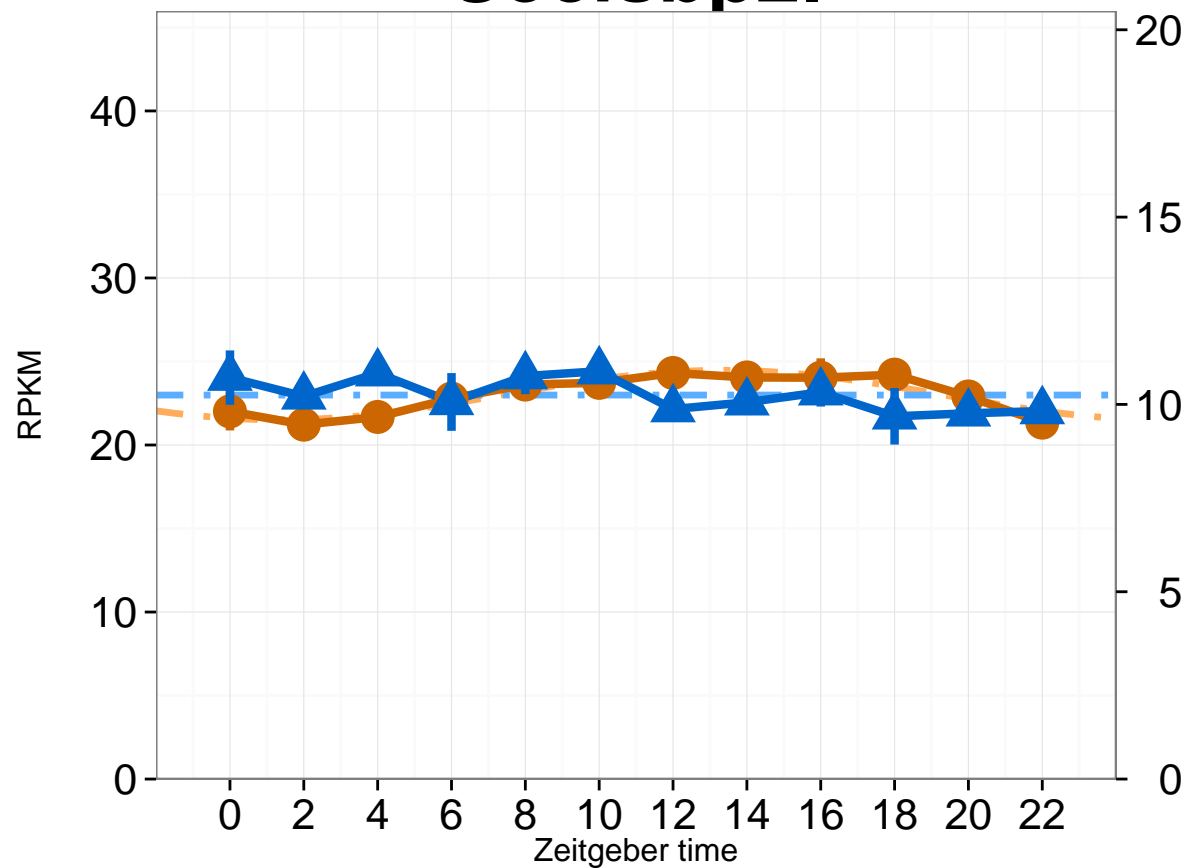

## Secisbp2l

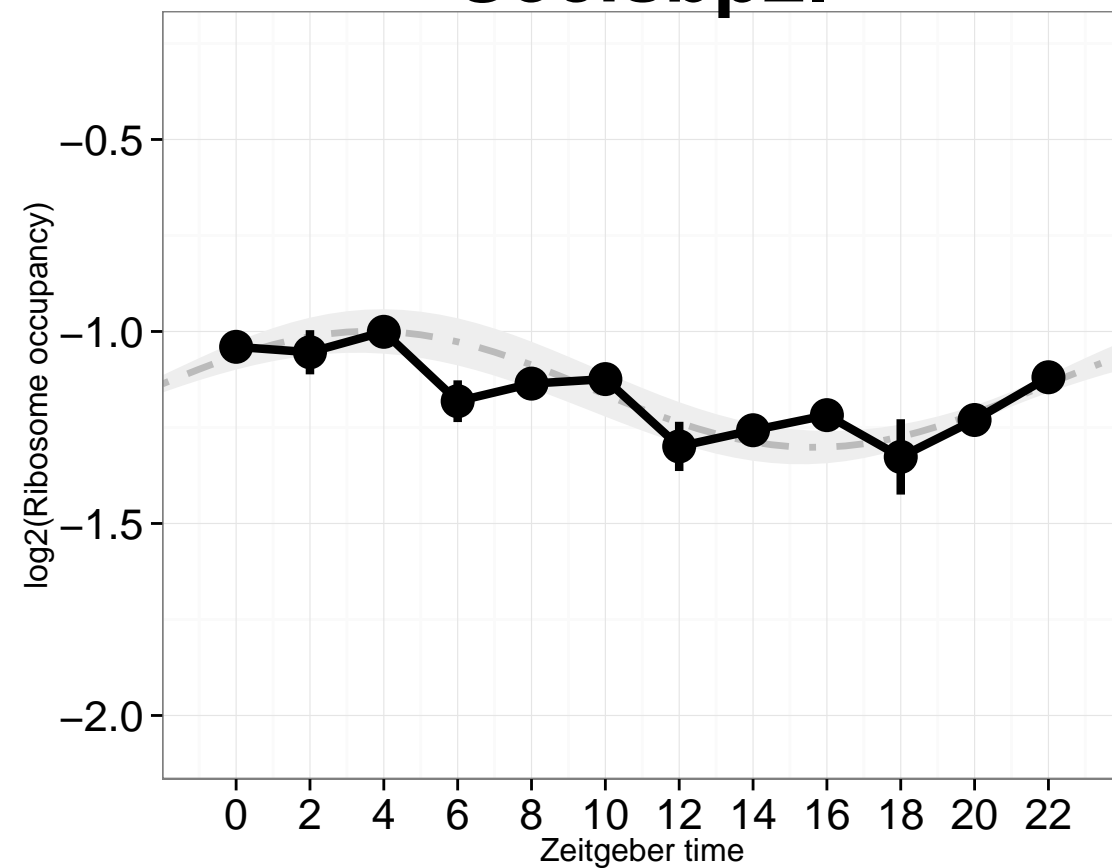

Supplement: SuppDataset_1.zip [file Secisbp2l_set_A.pdf › Supplemental Dataset 1/A-mRNA_nonrhyth_translation_nonrhyth/Secisbp2l_set_A.pdf]

## Seh1l

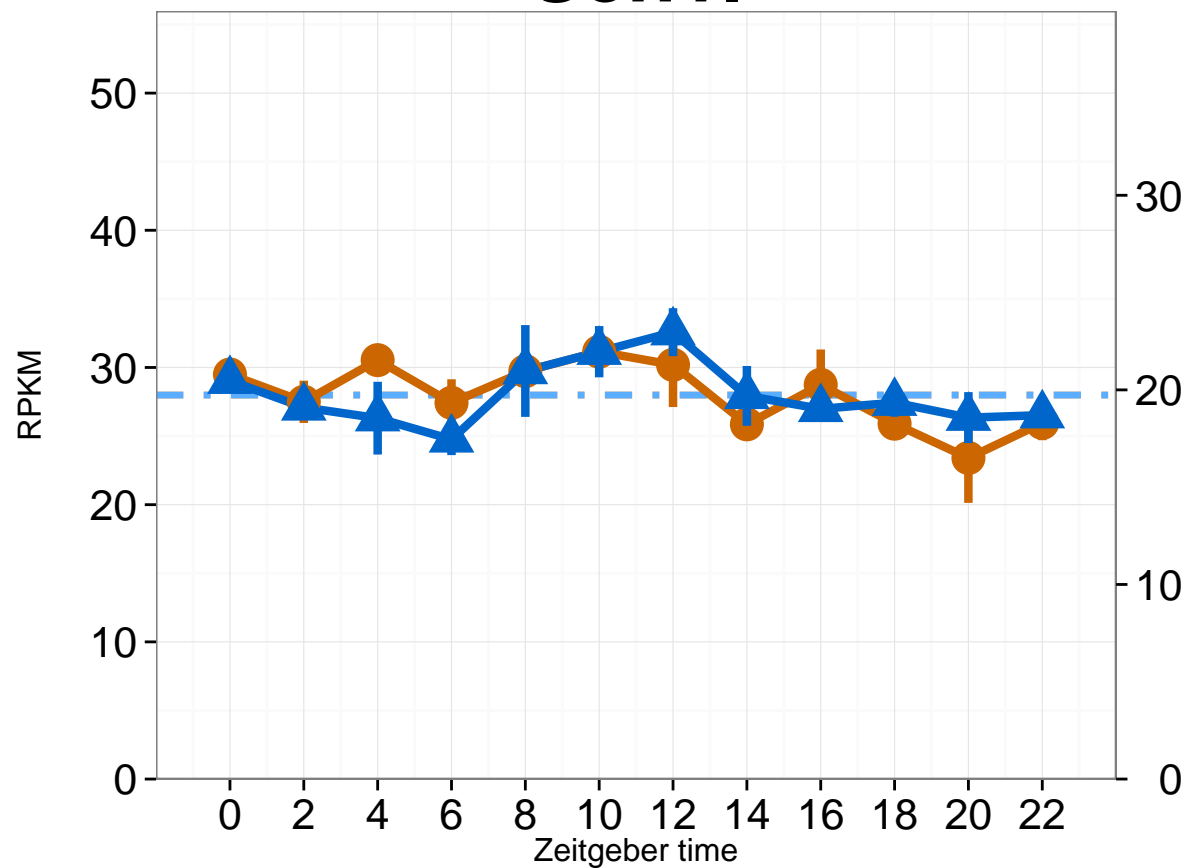

## Seh1l

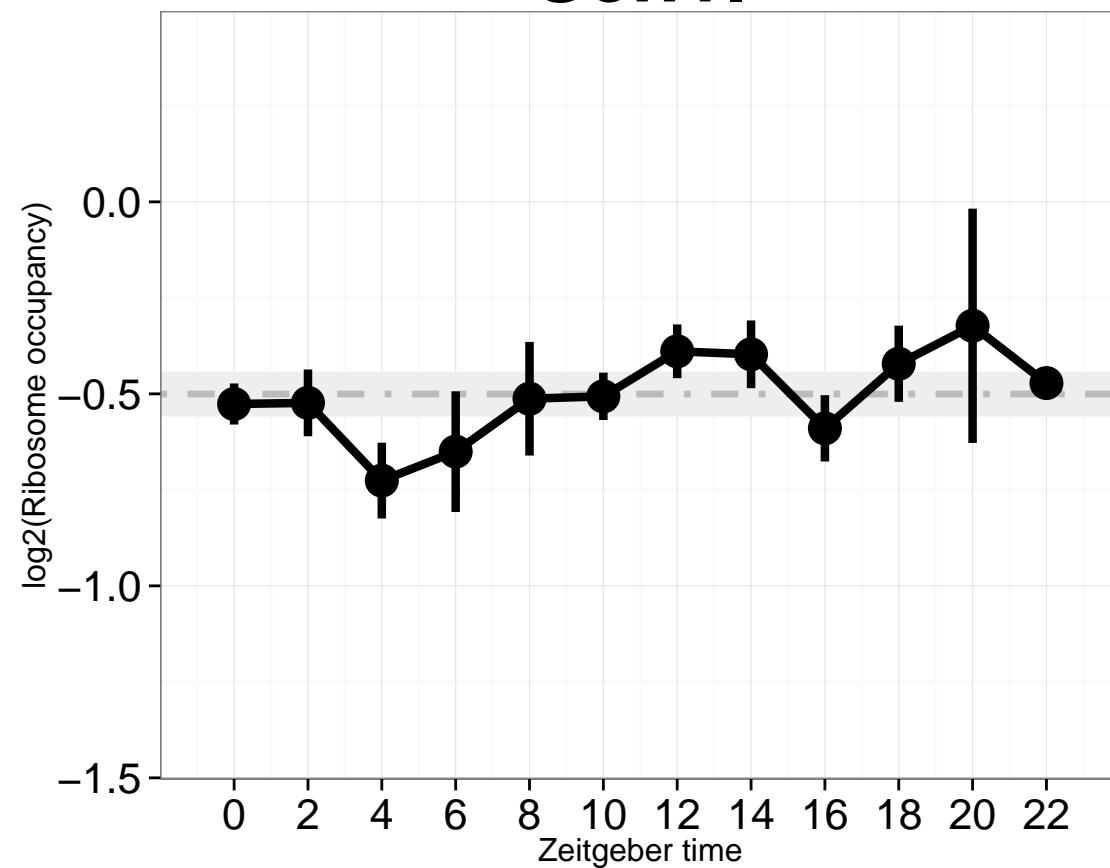

Supplement: SuppDataset_1.zip [file Seh1l_set_A.pdf › Supplemental Dataset 1/A-mRNA_nonrhyth_translation_nonrhyth/Seh1l_set_A.pdf]

## Sel1l3

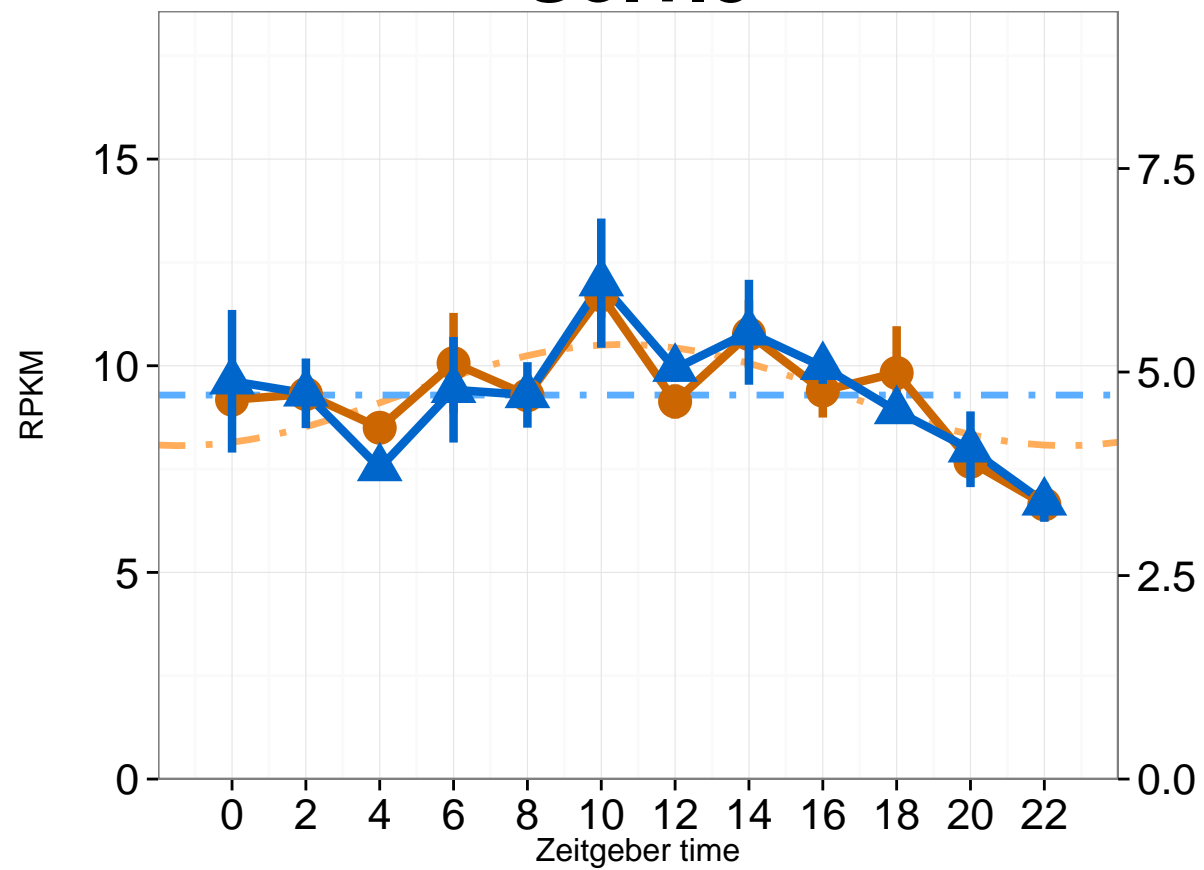

## Sel1l3

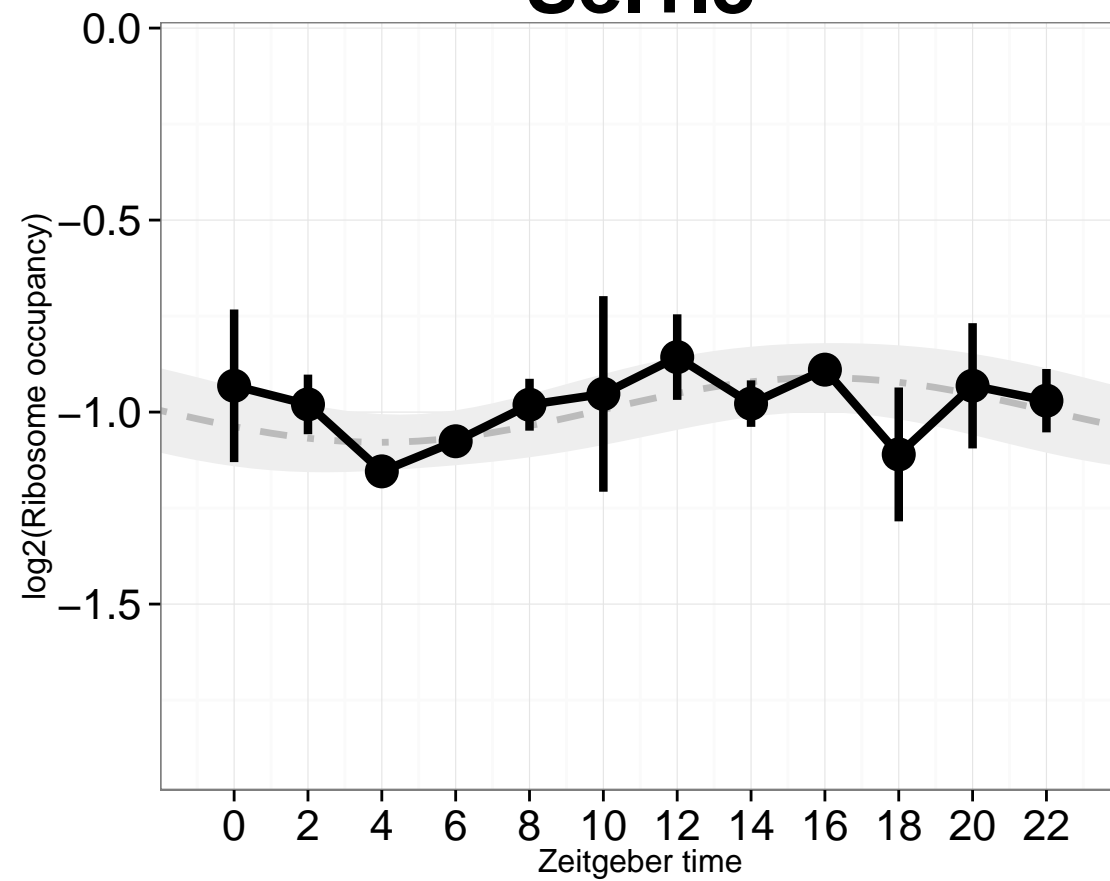

Supplement: SuppDataset_1.zip [file Sel1l3_set_A.pdf › Supplemental Dataset 1/A-mRNA_nonrhyth_translation_nonrhyth/Sel1l3_set_A.pdf]

## Sel1l

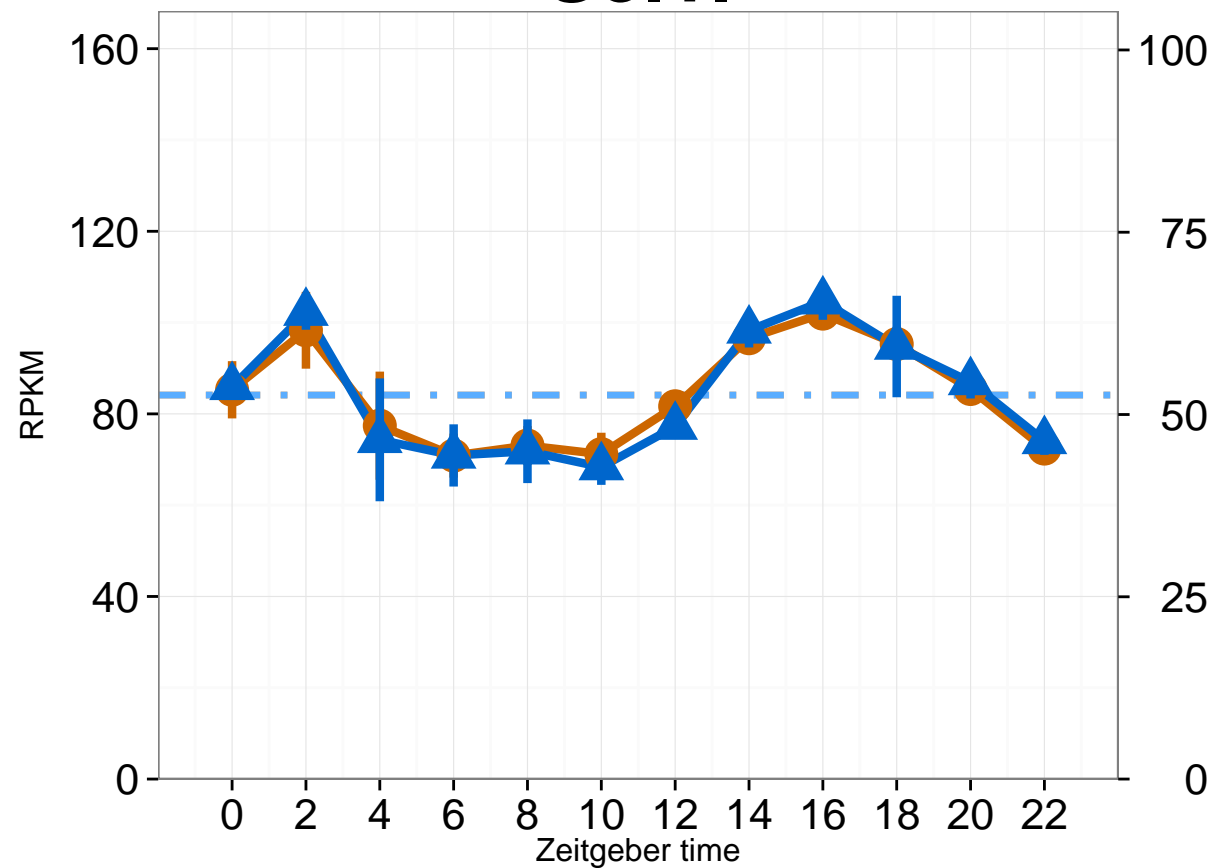

## Sel1l

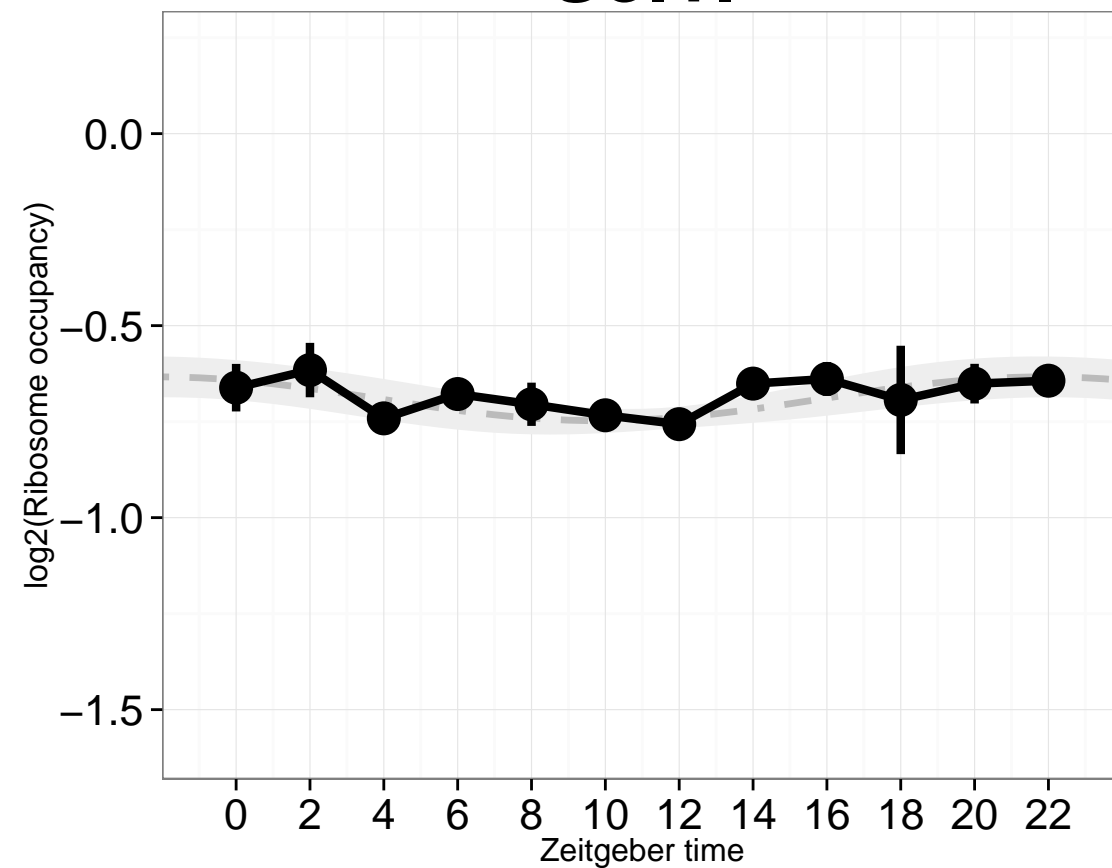

Supplement: SuppDataset_1.zip [file Sel1l_set_A.pdf › Supplemental Dataset 1/A-mRNA_nonrhyth_translation_nonrhyth/Sel1l_set_A.pdf]

# Selenbp1

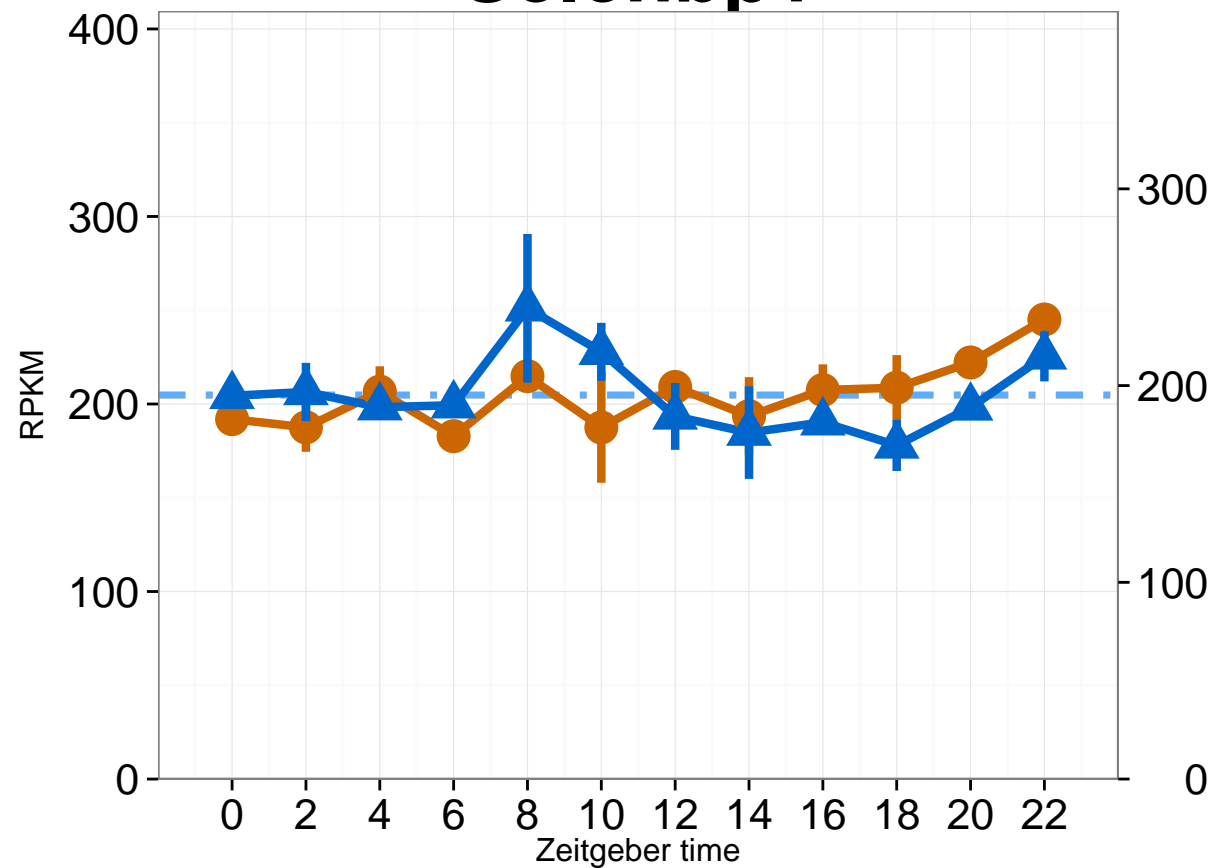

# Selenbp1

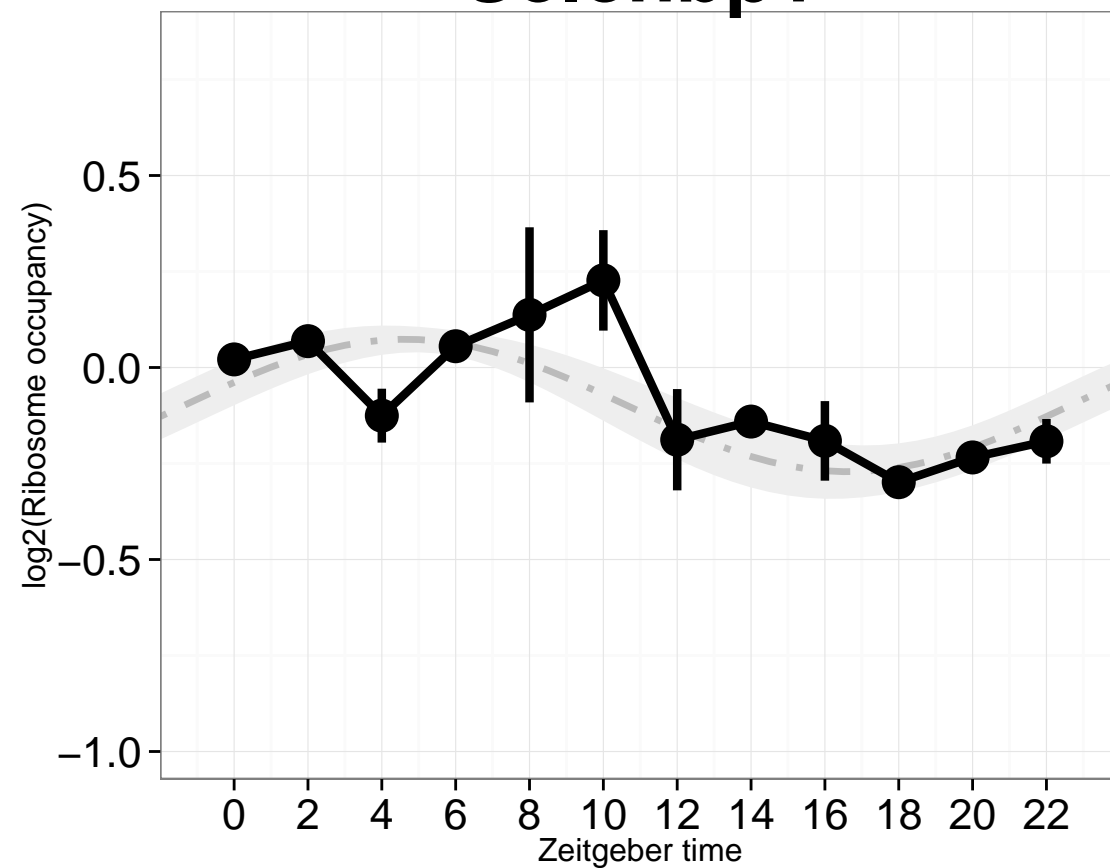

Supplement: SuppDataset_1.zip [file Selenbp1_set_A.pdf › Supplemental Dataset 1/A-mRNA_nonrhyth_translation_nonrhyth/Selenbp1_set_A.pdf]

# Selenbp2

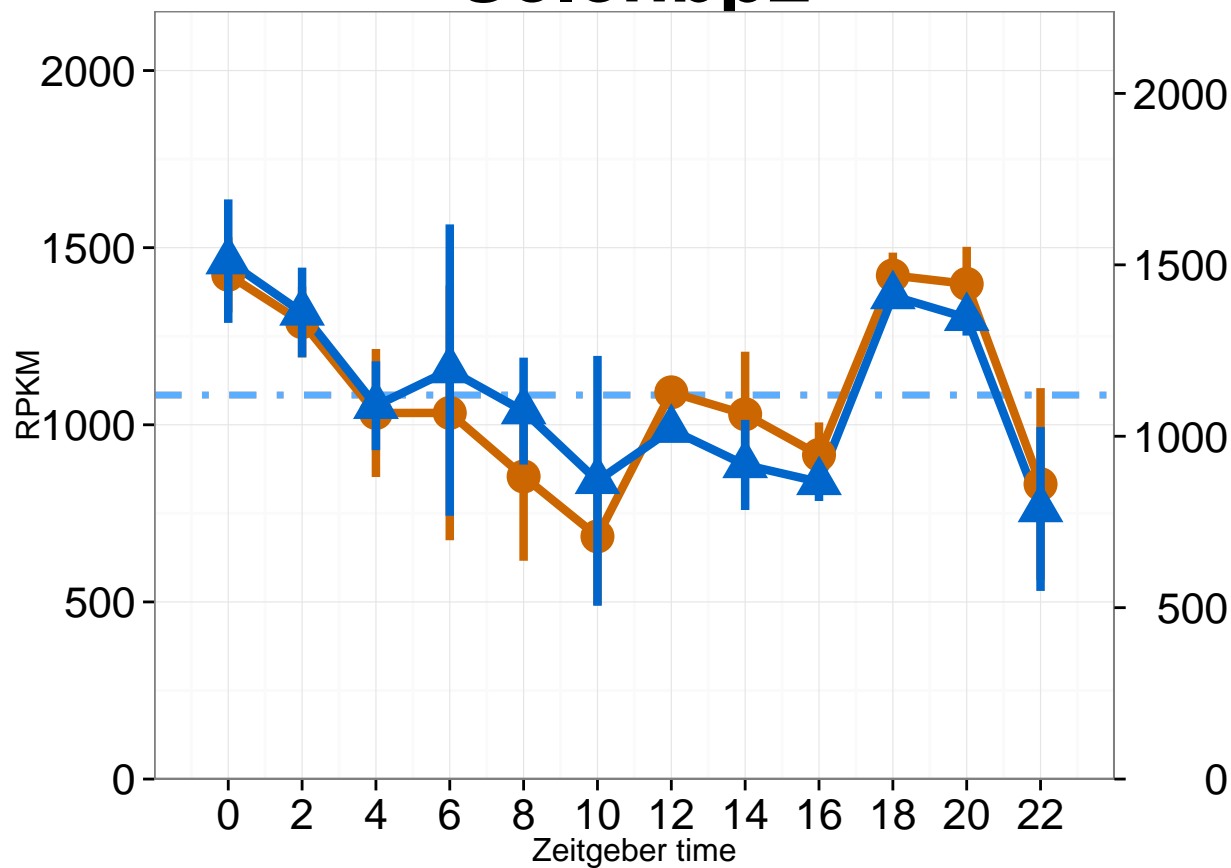

# Selenbp2

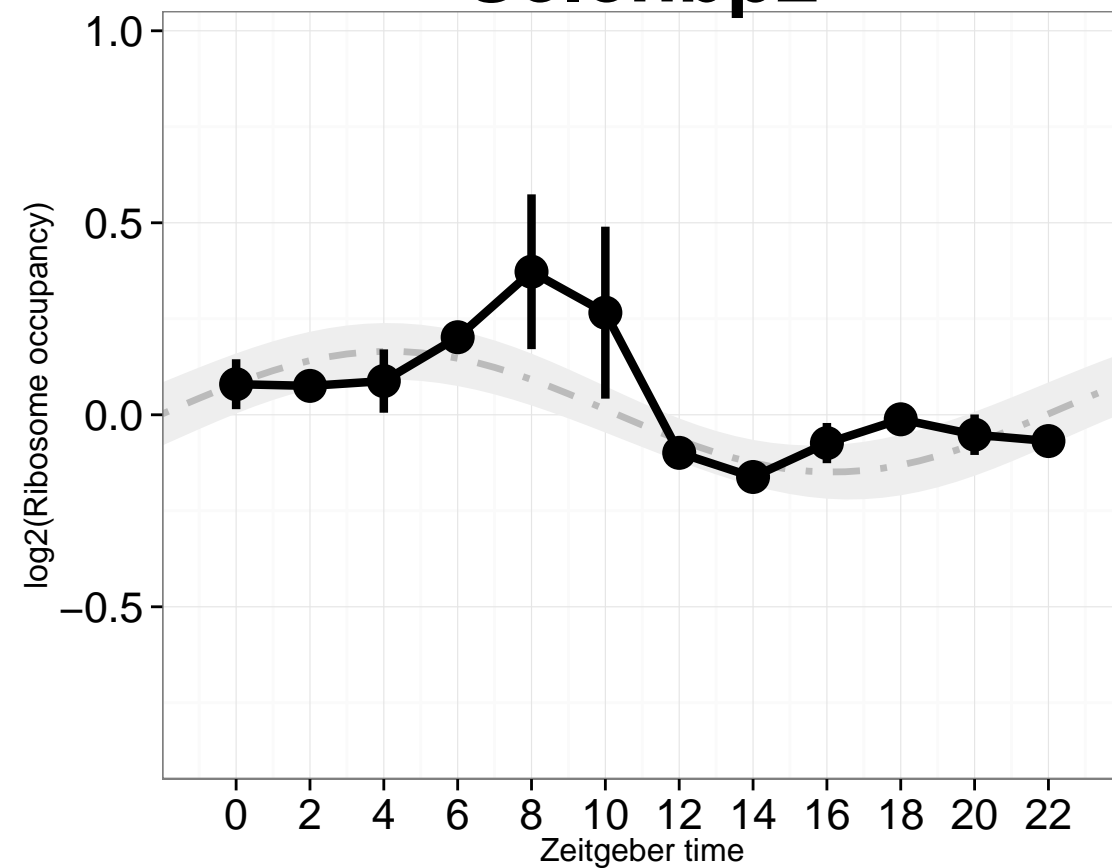

Supplement: SuppDataset_1.zip [file Selenbp2_set_A.pdf › Supplemental Dataset 1/A-mRNA_nonrhyth_translation_nonrhyth/Selenbp2_set_A.pdf]

## Selk

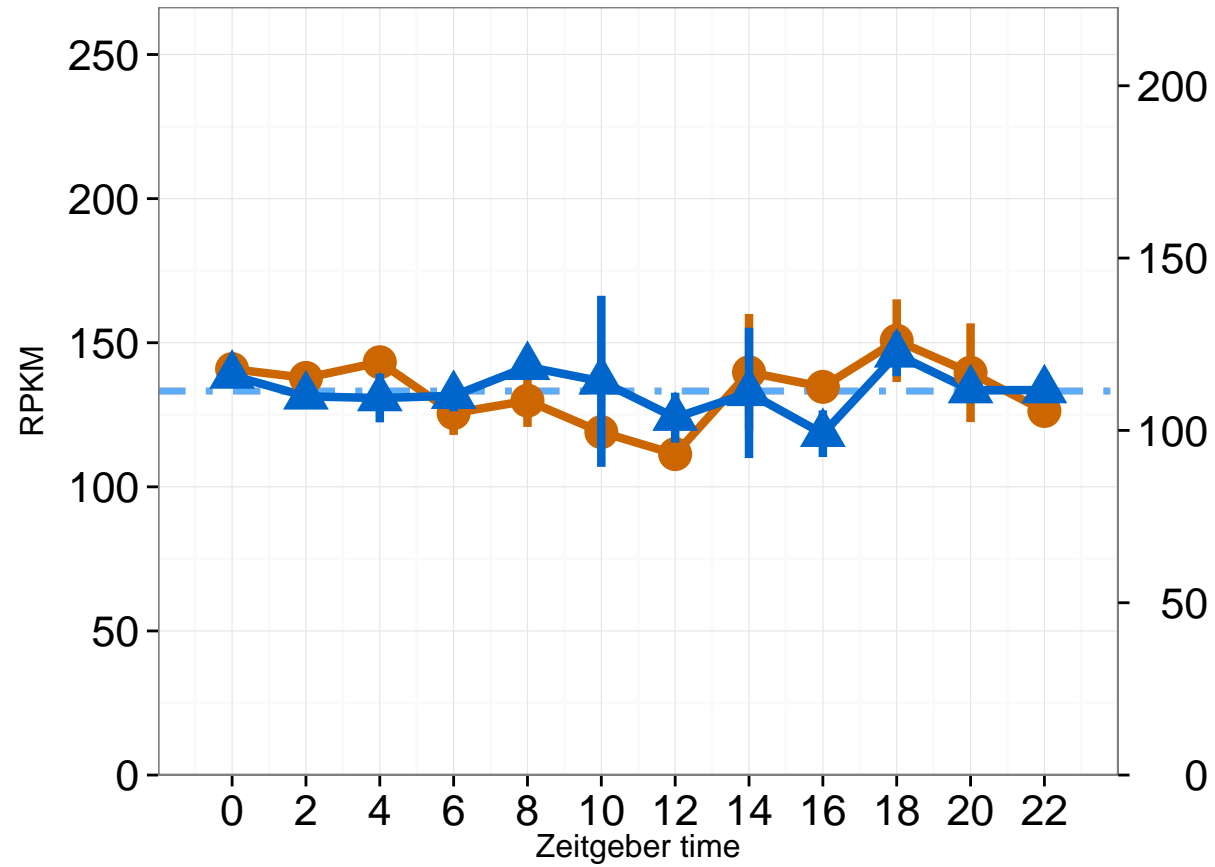

## Selk

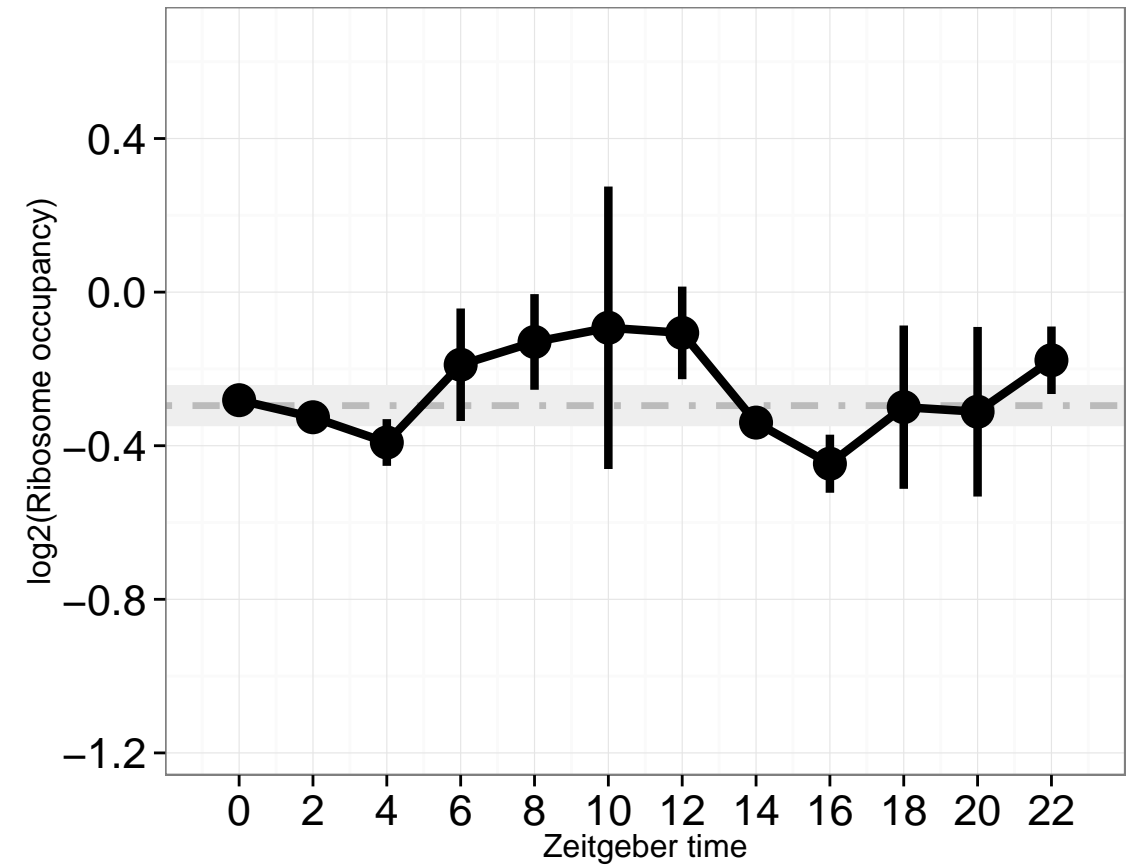

Supplement: SuppDataset_1.zip [file Selk_set_A.pdf › Supplemental Dataset 1/A-mRNA_nonrhyth_translation_nonrhyth/Selk_set_A.pdf]

## Sell

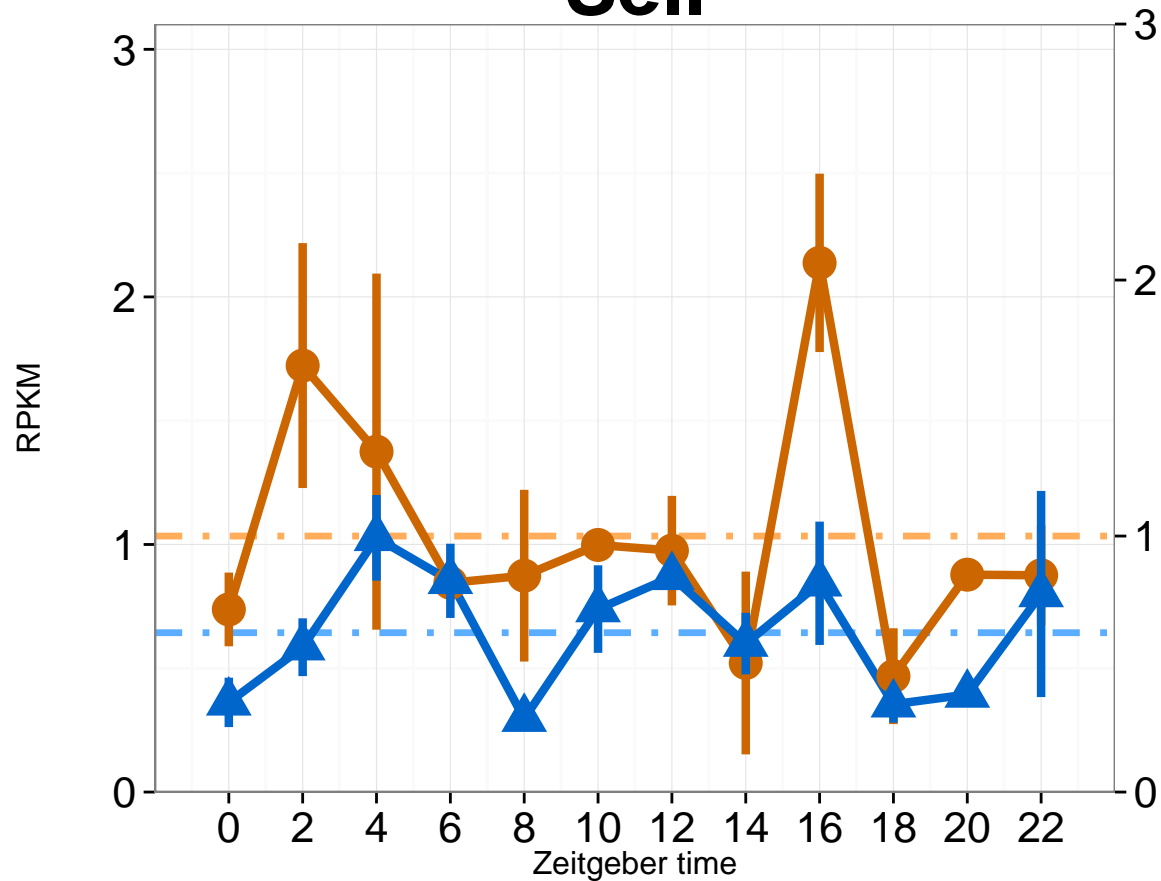

## Sell

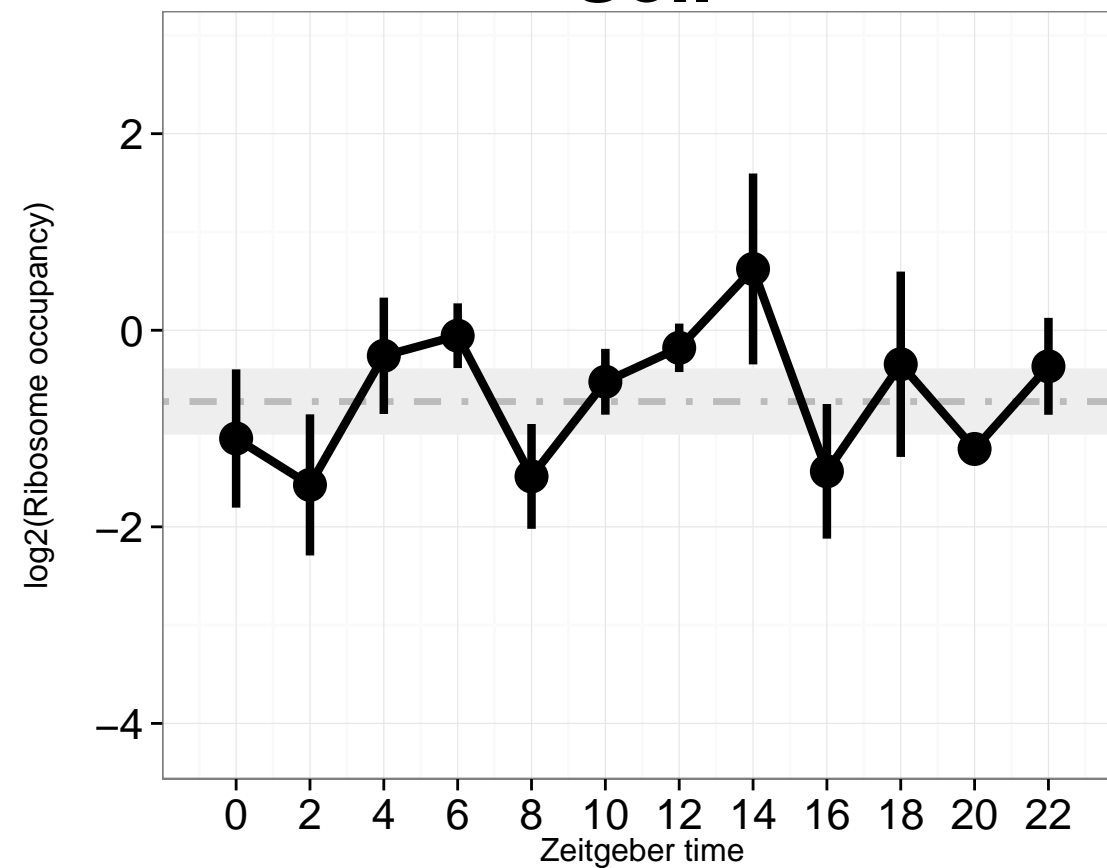

Supplement: SuppDataset_1.zip [file Sell_set_A.pdf › Supplemental Dataset 1/A-mRNA_nonrhyth_translation_nonrhyth/Sell_set_A.pdf]

## Selo

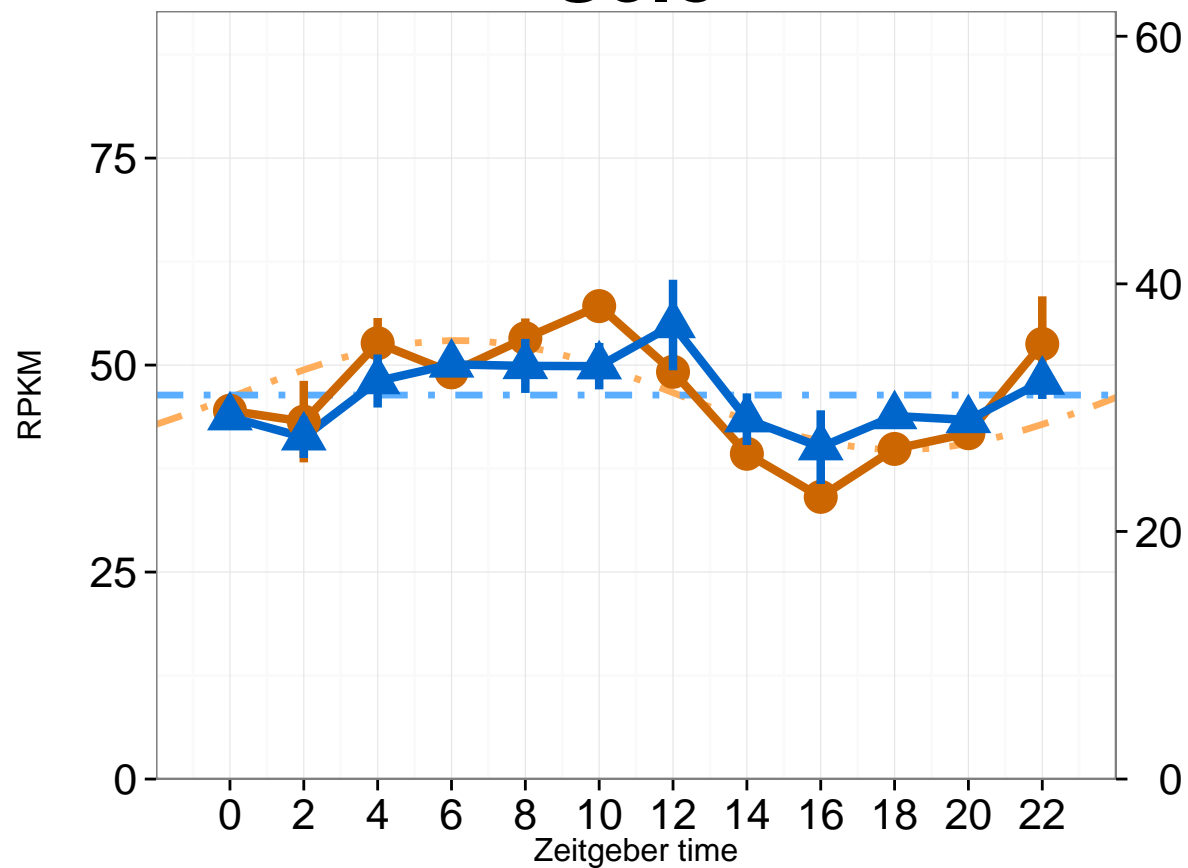

## Selo

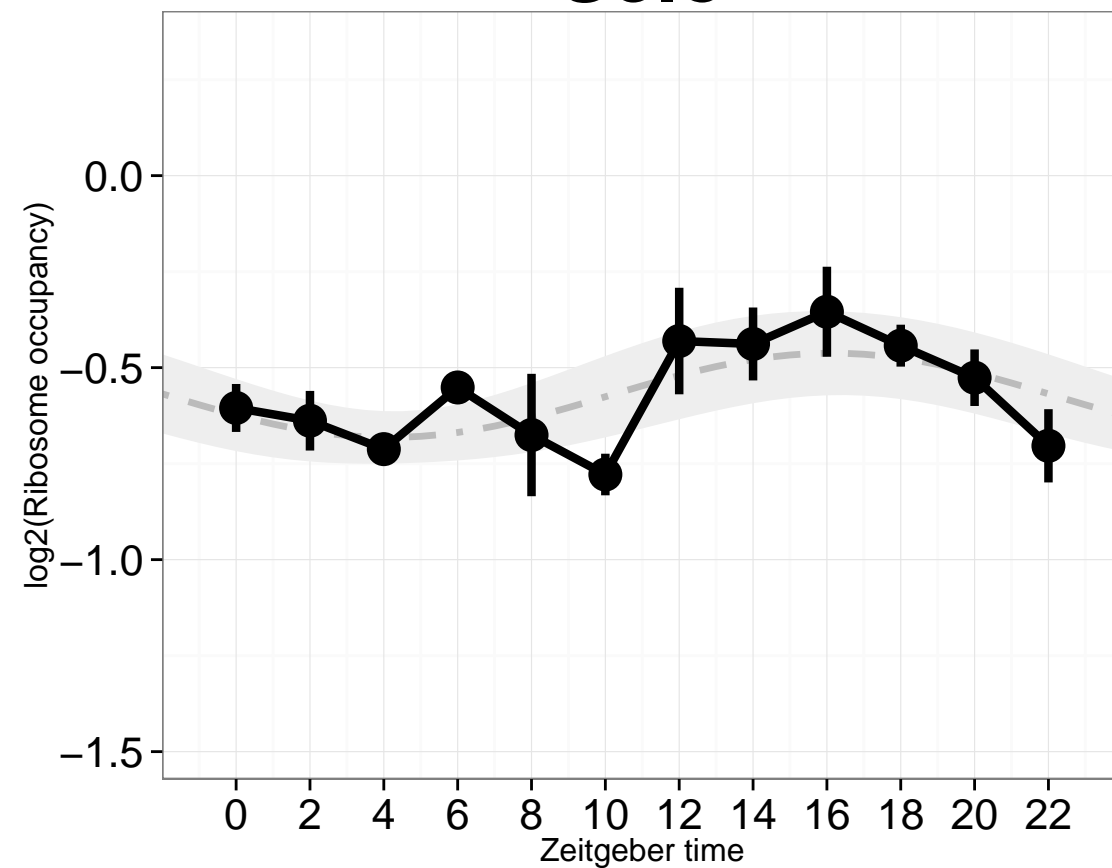

Supplement: SuppDataset_1.zip [file Selo_set_A.pdf › Supplemental Dataset 1/A-mRNA_nonrhyth_translation_nonrhyth/Selo_set_A.pdf]

## Selp

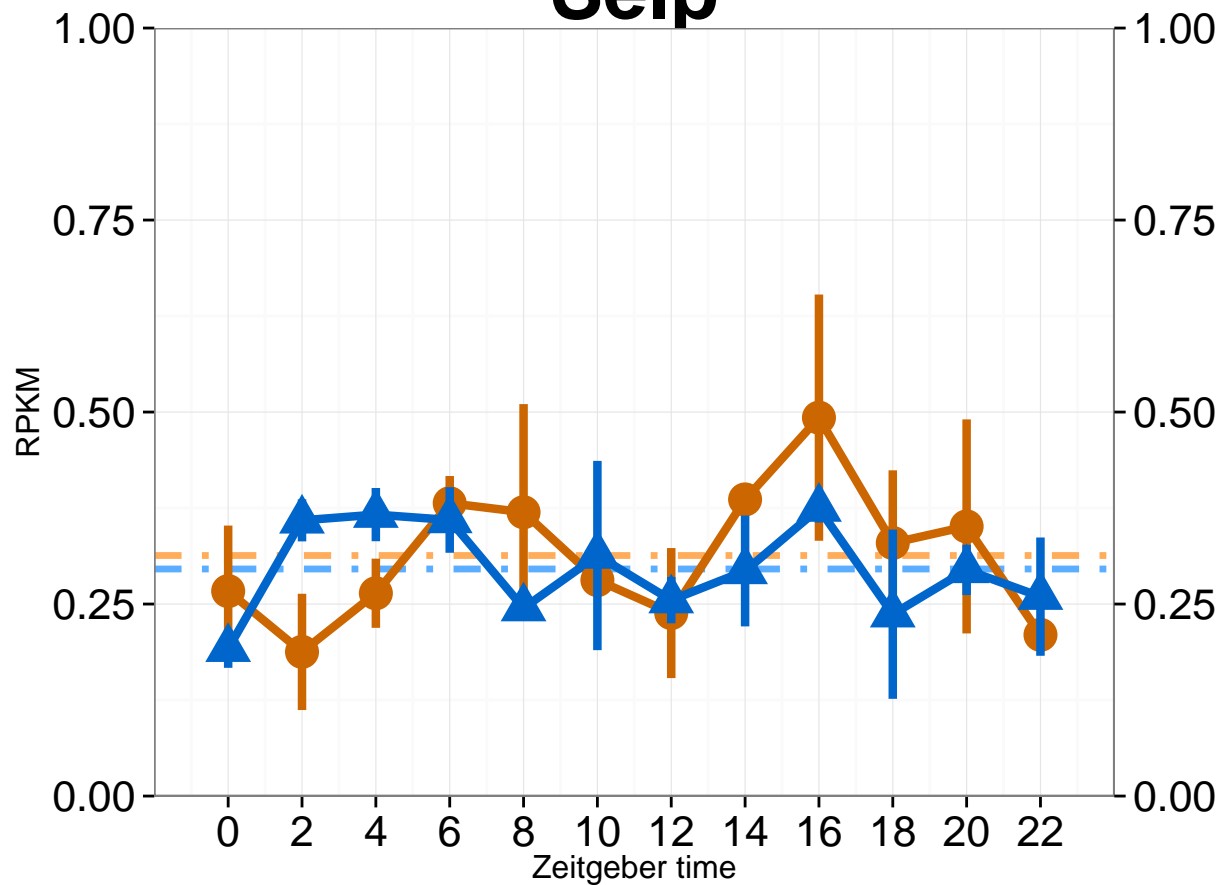

## Selp

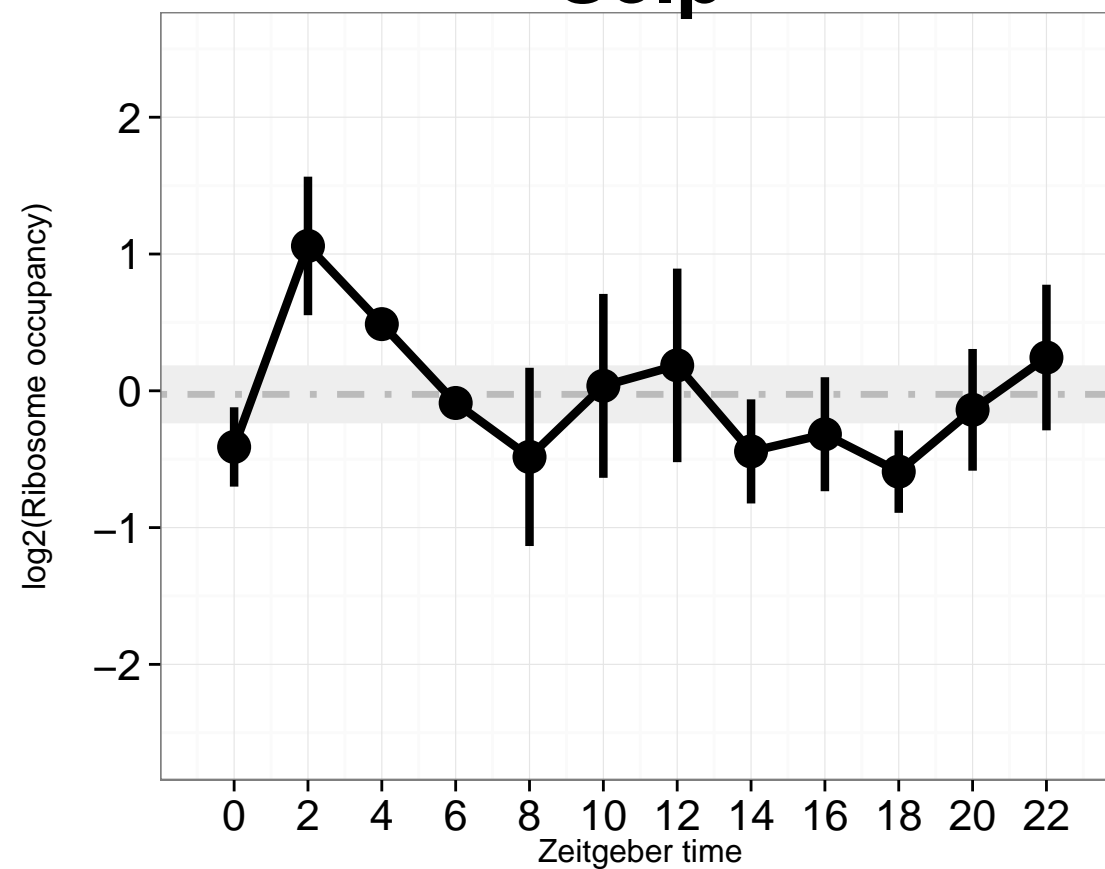

Supplement: SuppDataset_1.zip [file Selp_set_A.pdf › Supplemental Dataset 1/A-mRNA_nonrhyth_translation_nonrhyth/Selp_set_A.pdf]

## Selp1g

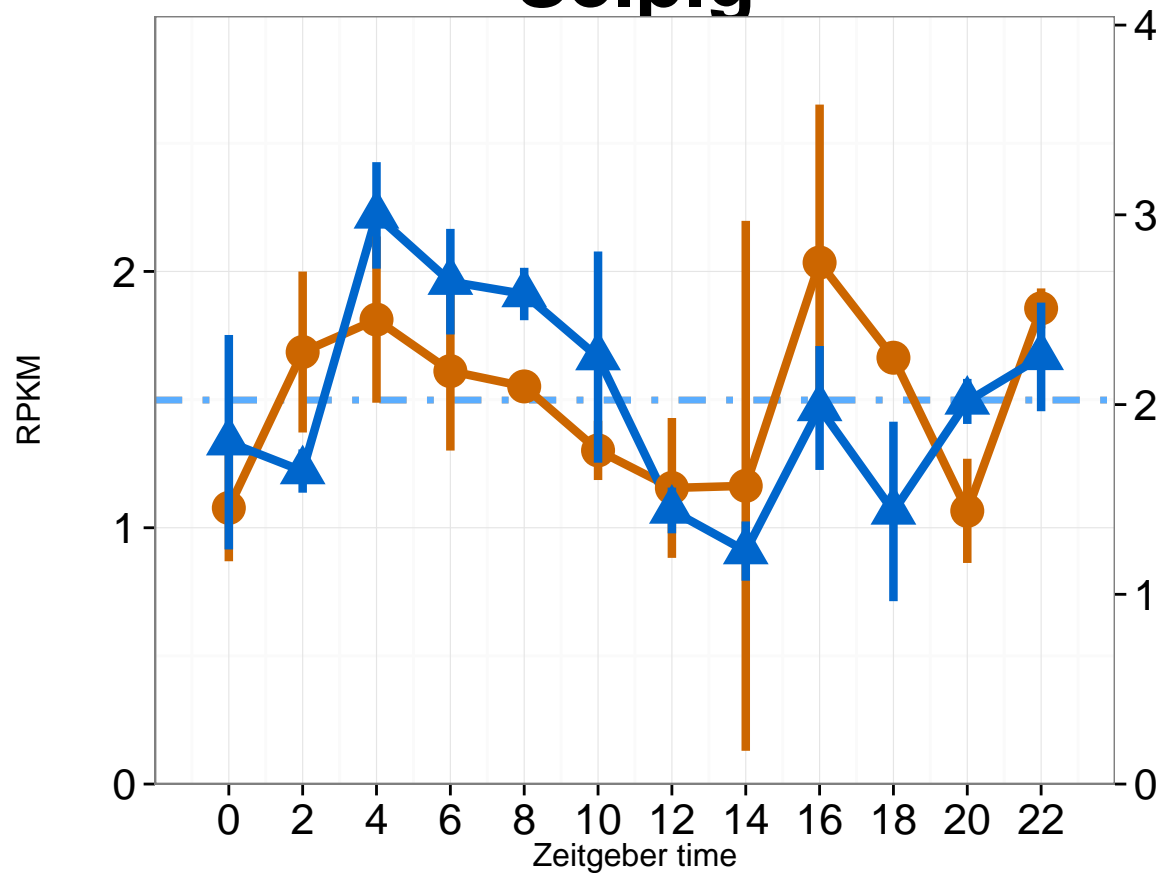

## Selp1g

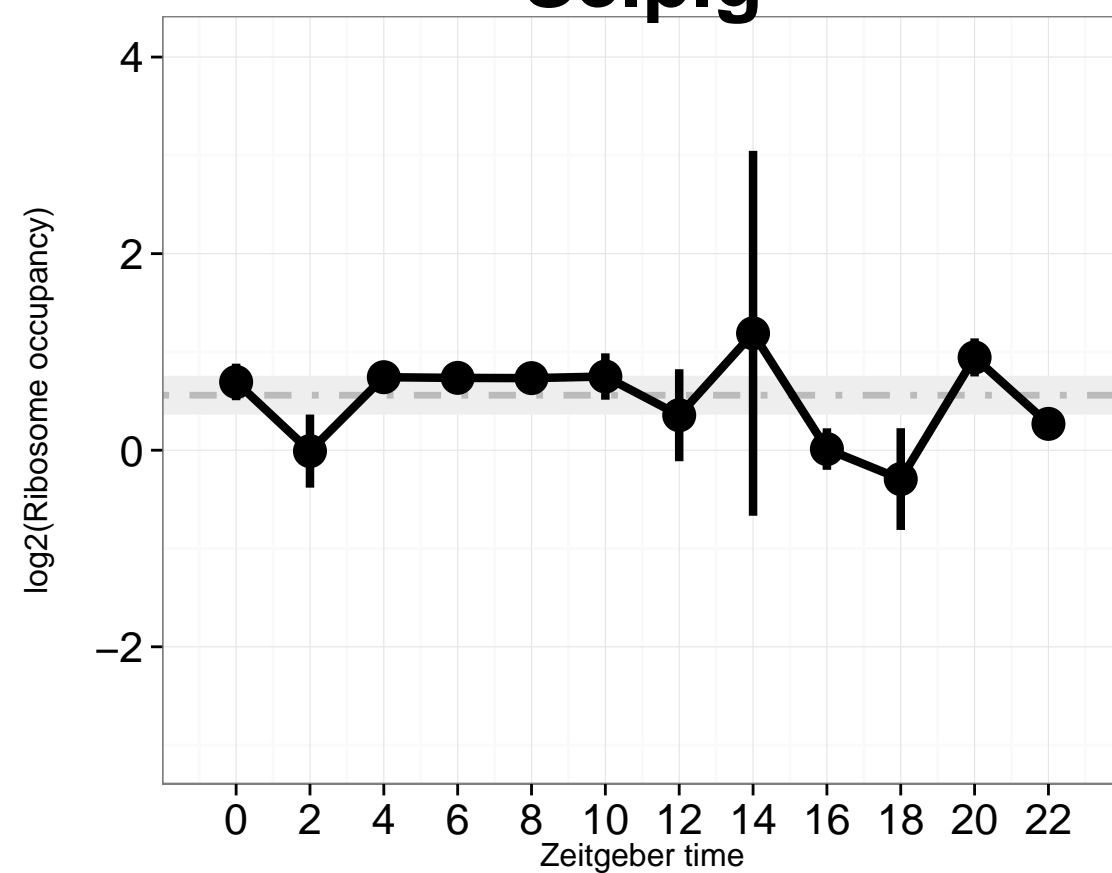

Supplement: SuppDataset_1.zip [file Selplg_set_A.pdf › Supplemental Dataset 1/A-mRNA_nonrhyth_translation_nonrhyth/Selplg_set_A.pdf]

# Selrc1

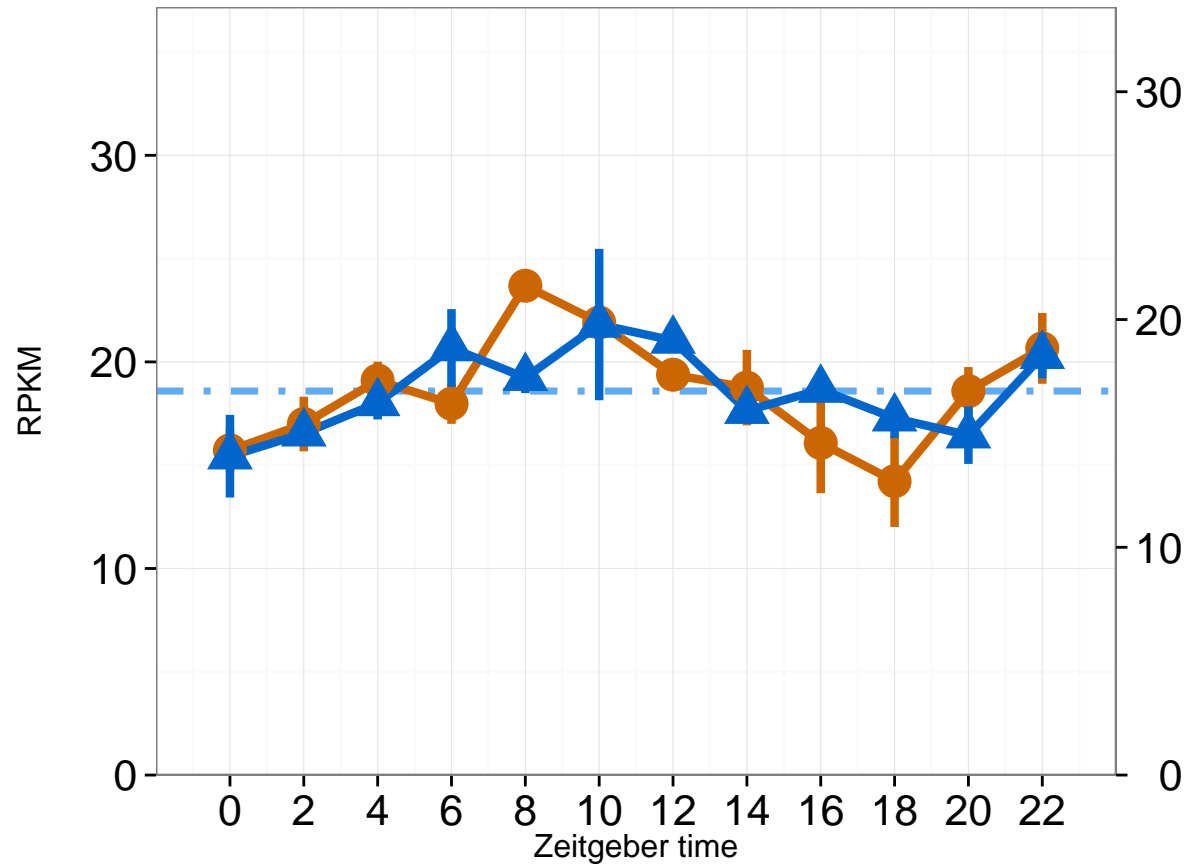

# Selrc1

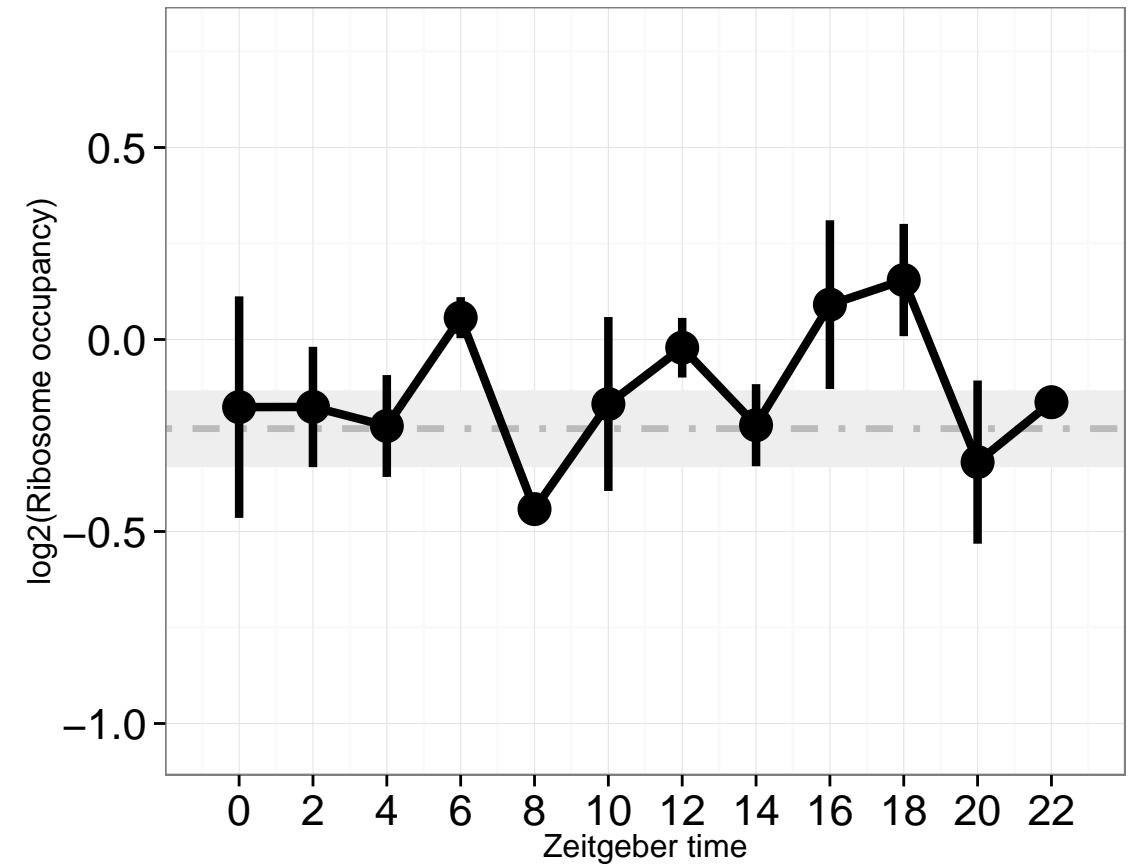

Supplement: SuppDataset_1.zip [file Selrc1_set_A.pdf › Supplemental Dataset 1/A-mRNA_nonrhyth_translation_nonrhyth/Selrc1_set_A.pdf]

## Selt

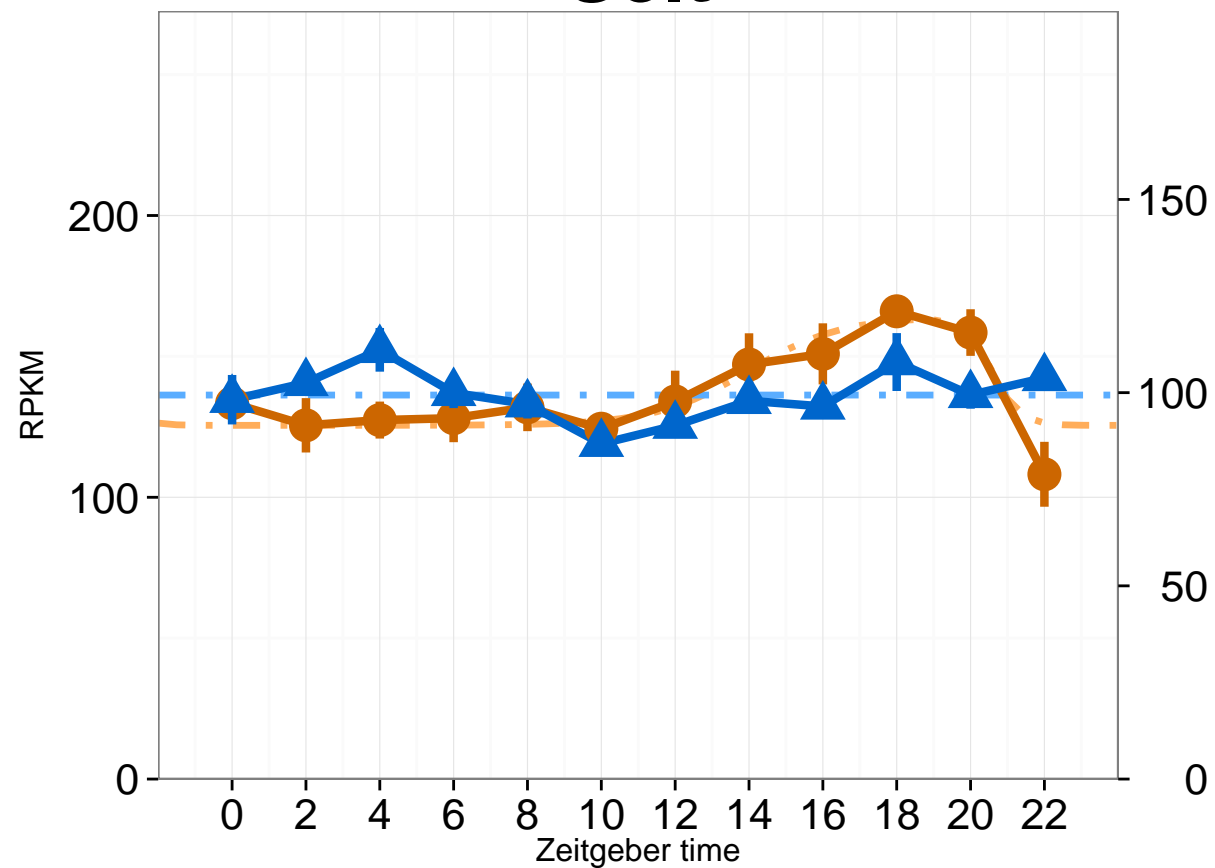

## Selt

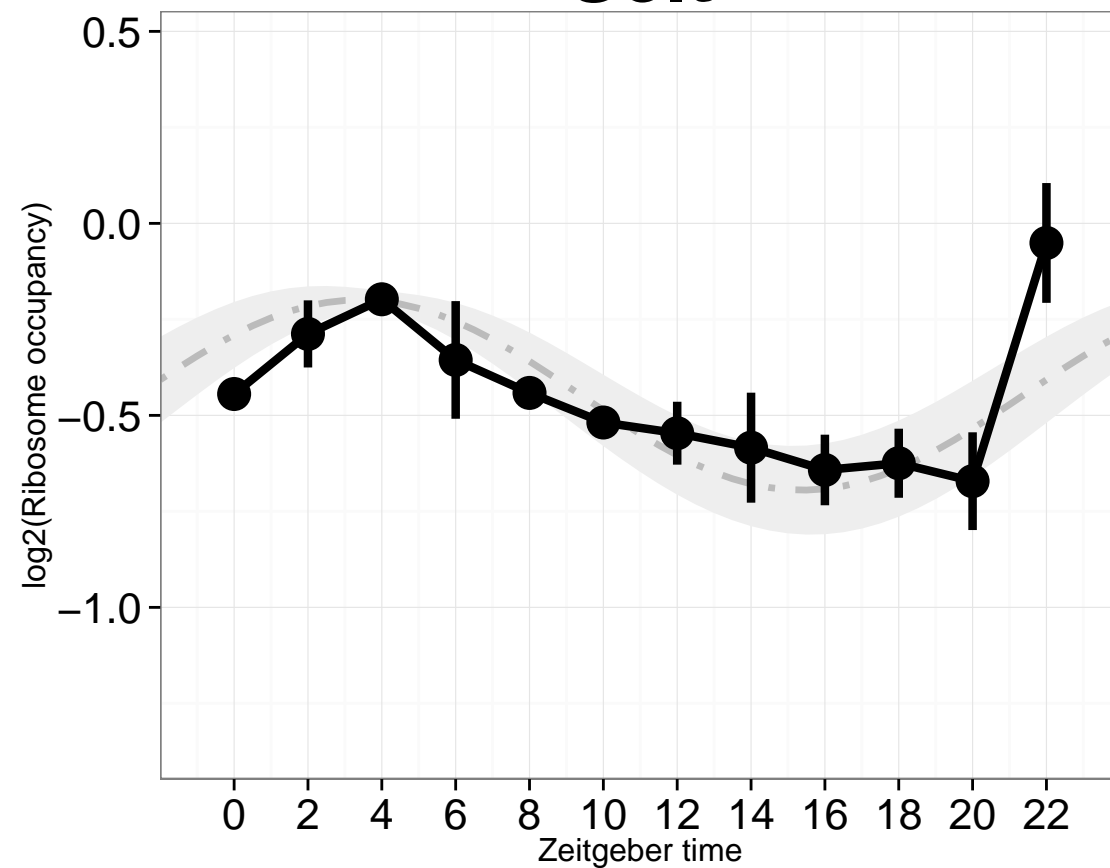

Supplement: SuppDataset_1.zip [file Selt_set_A.pdf › Supplemental Dataset 1/A-mRNA_nonrhyth_translation_nonrhyth/Selt_set_A.pdf]

Sema3c

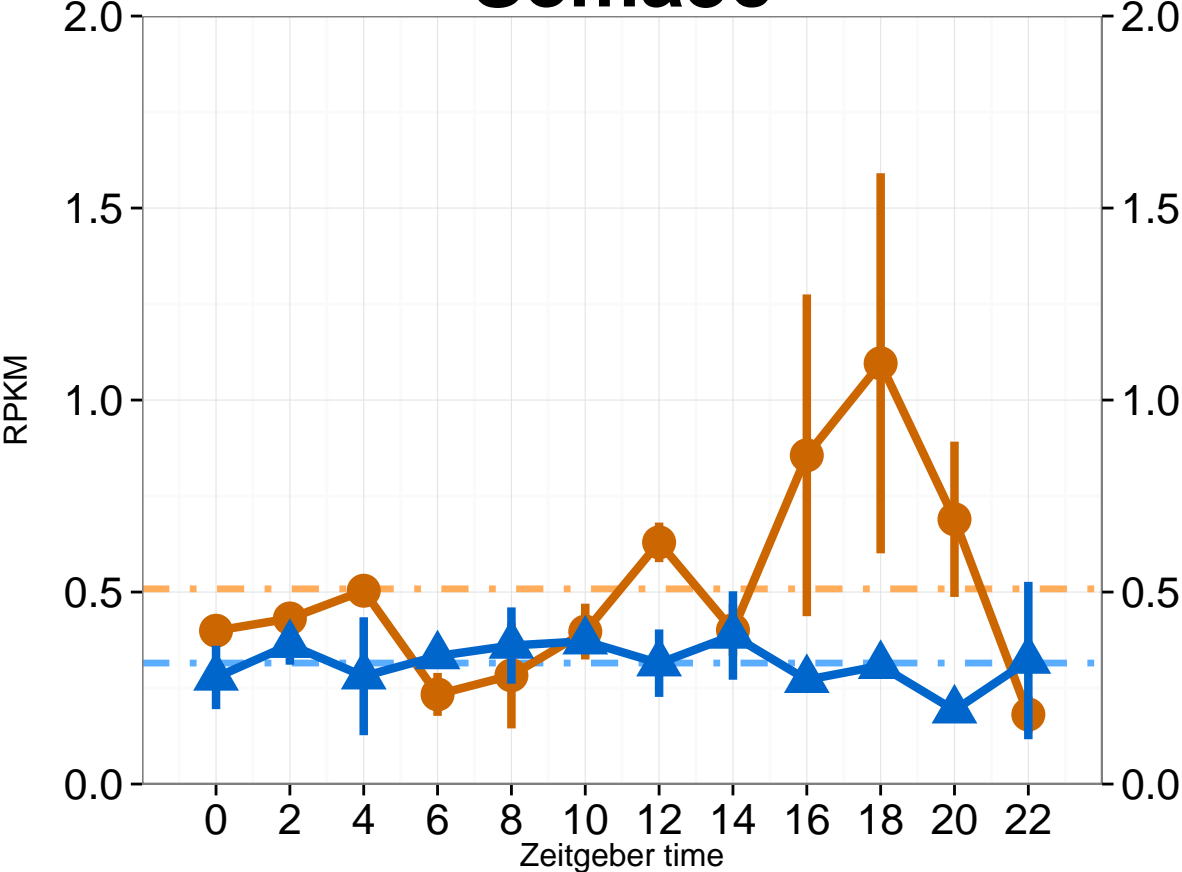

Sema3c

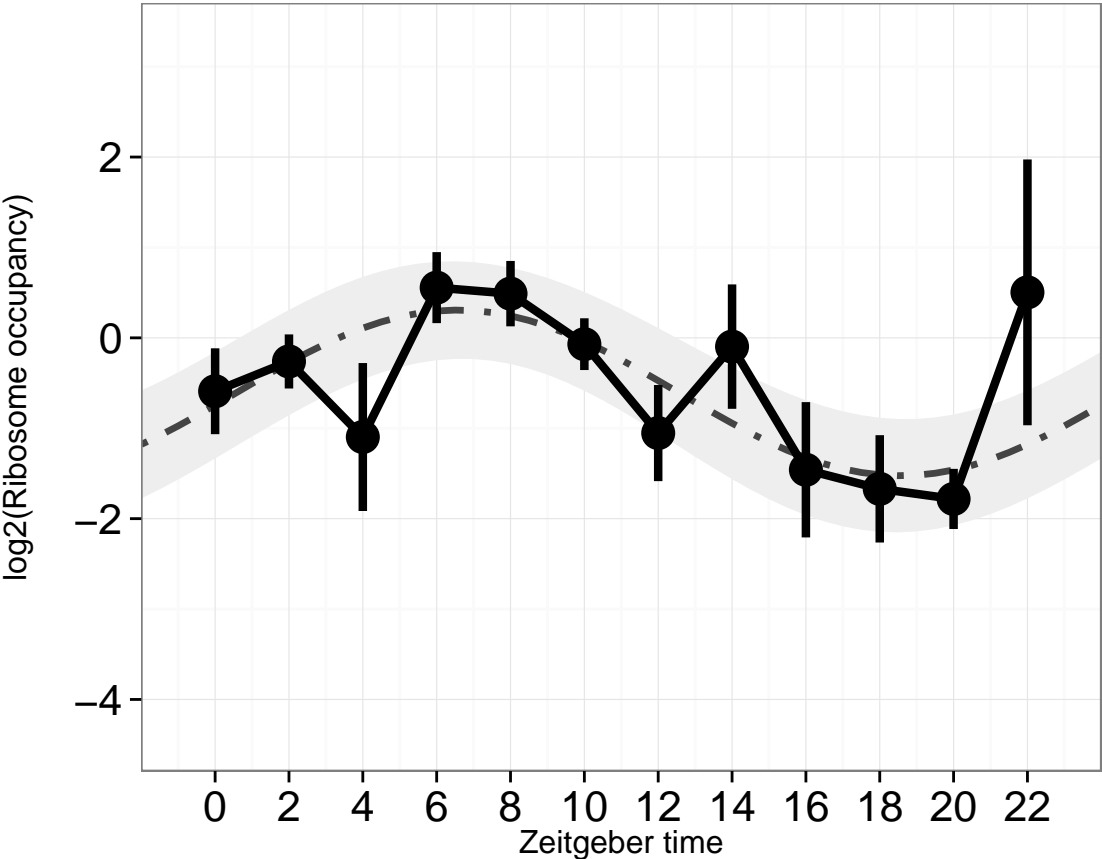

Supplement: SuppDataset_1.zip [file Sema3c_set_A.pdf › Supplemental Dataset 1/A-mRNA_nonrhyth_translation_nonrhyth/Sema3c_set_A.pdf]

## Sema3d

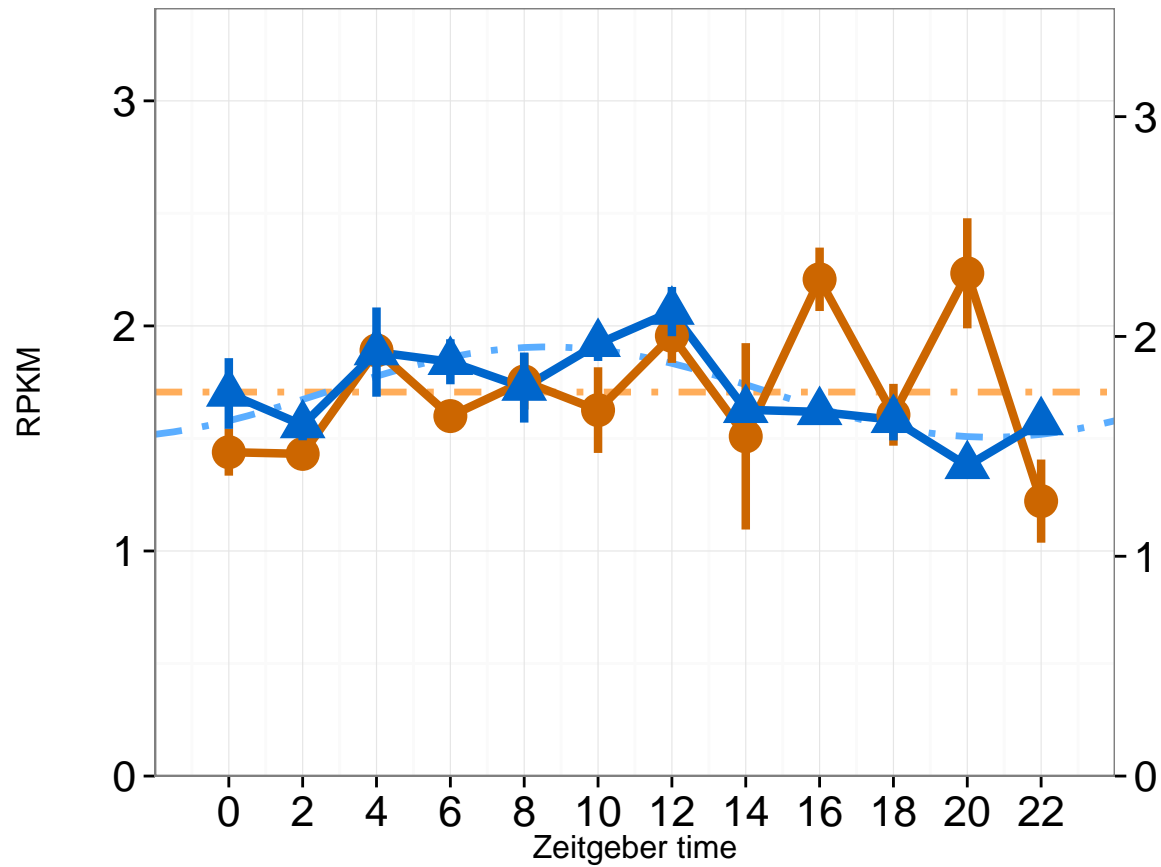

## Sema3d

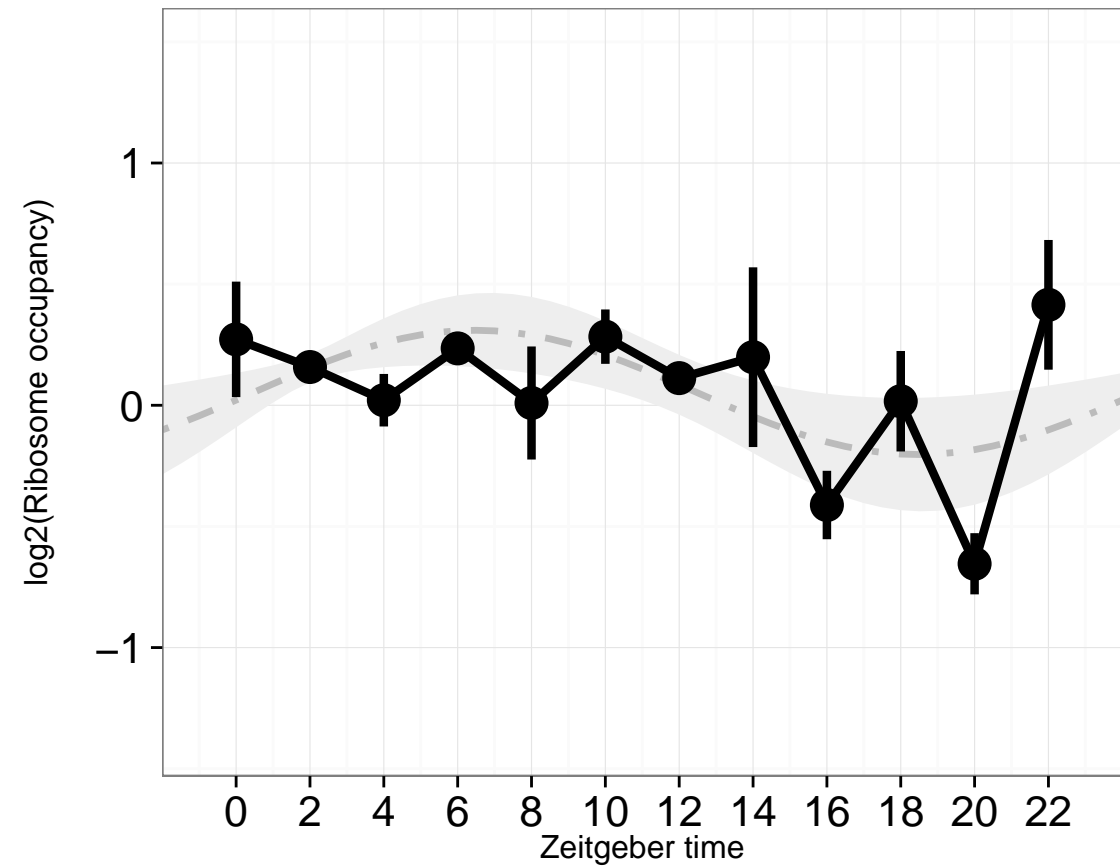

Supplement: SuppDataset_1.zip [file Sema3d_set_A.pdf › Supplemental Dataset 1/A-mRNA_nonrhyth_translation_nonrhyth/Sema3d_set_A.pdf]

# Sema3f

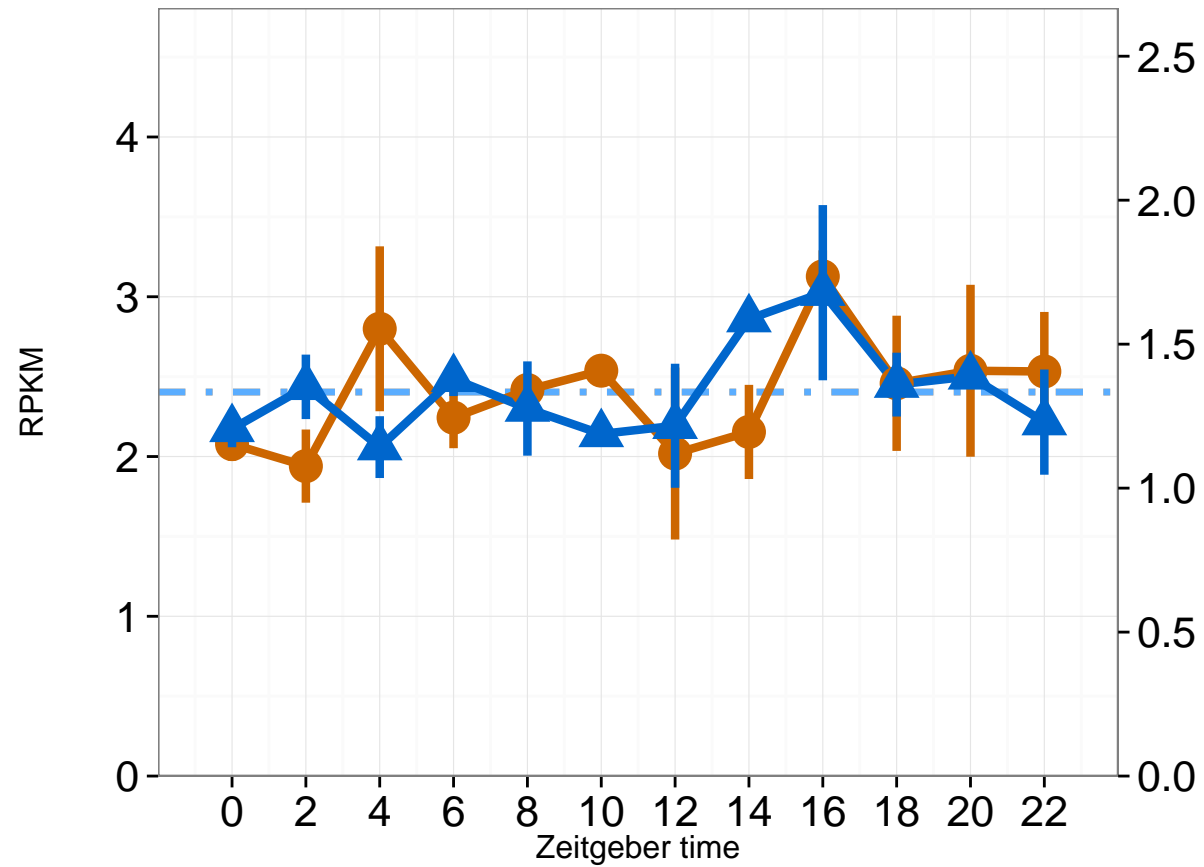

# Sema3f

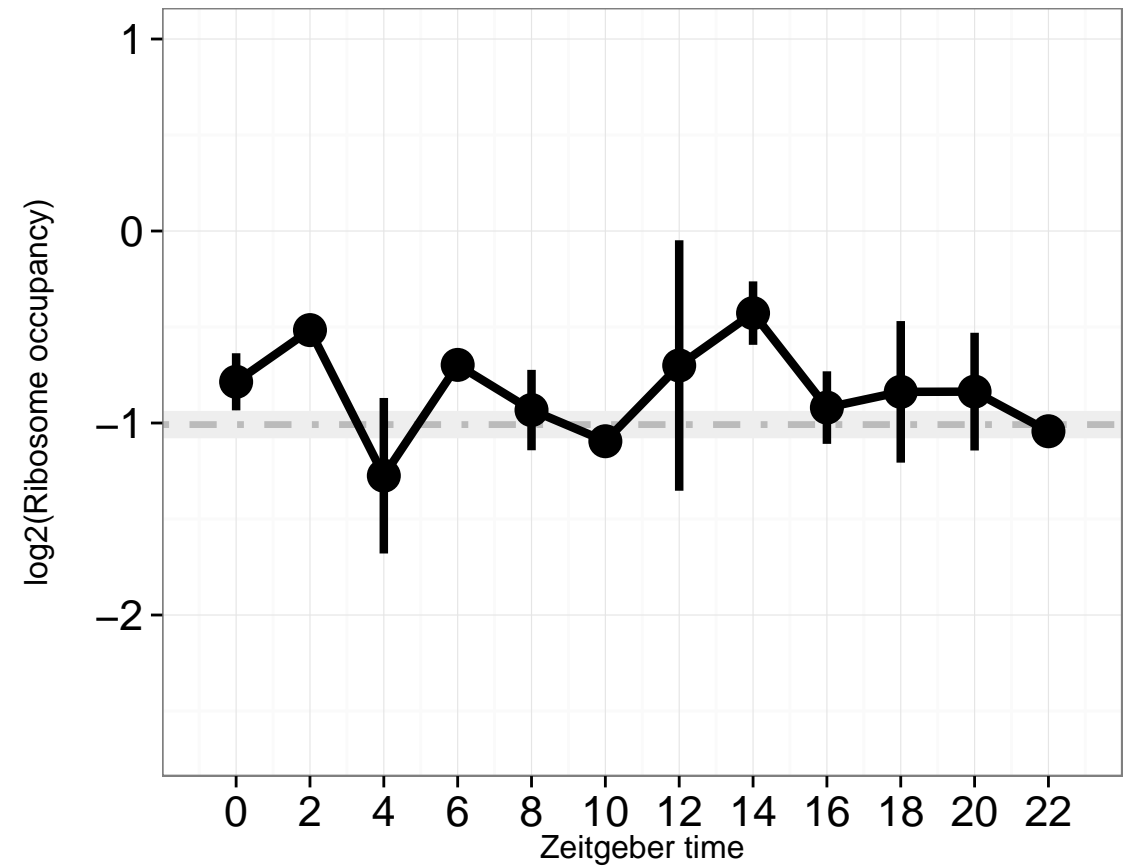

Supplement: SuppDataset_1.zip [file Sema3f_set_A.pdf › Supplemental Dataset 1/A-mRNA_nonrhyth_translation_nonrhyth/Sema3f_set_A.pdf]

# Sema4a

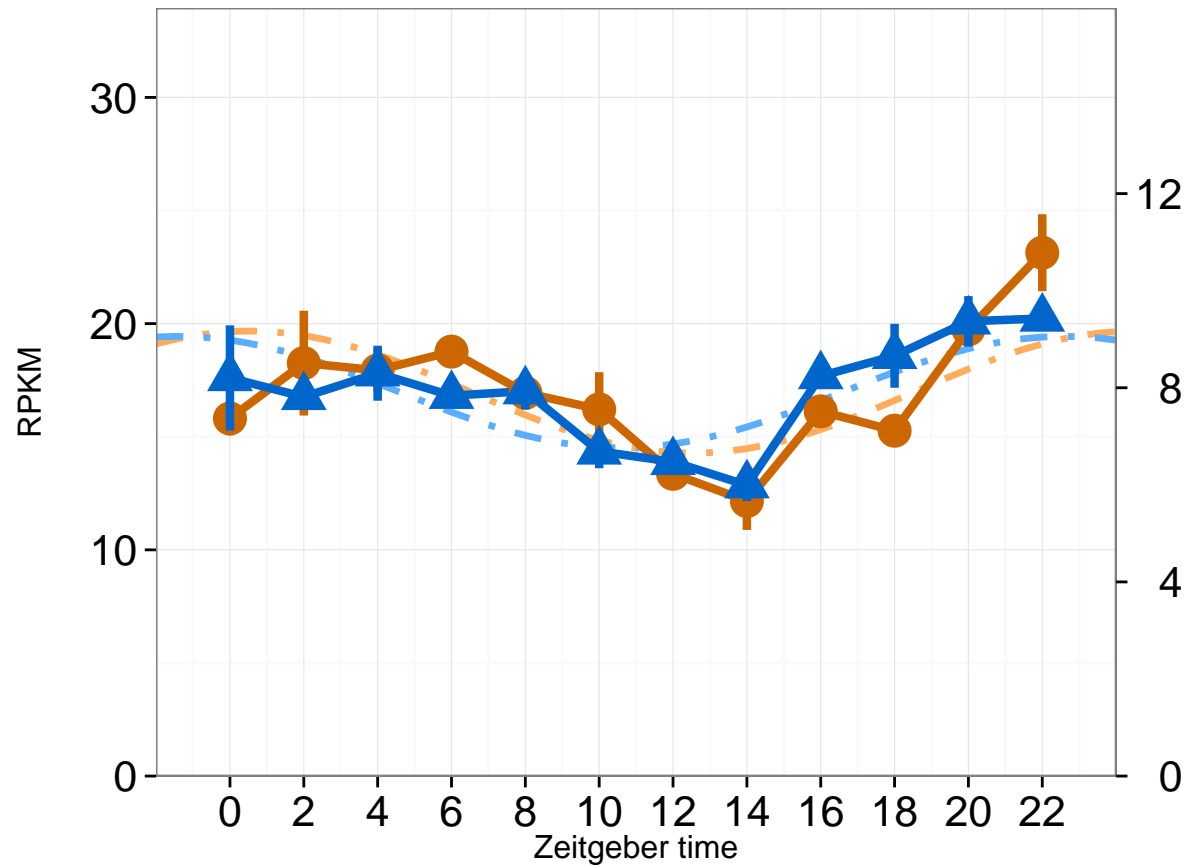

# Sema4a

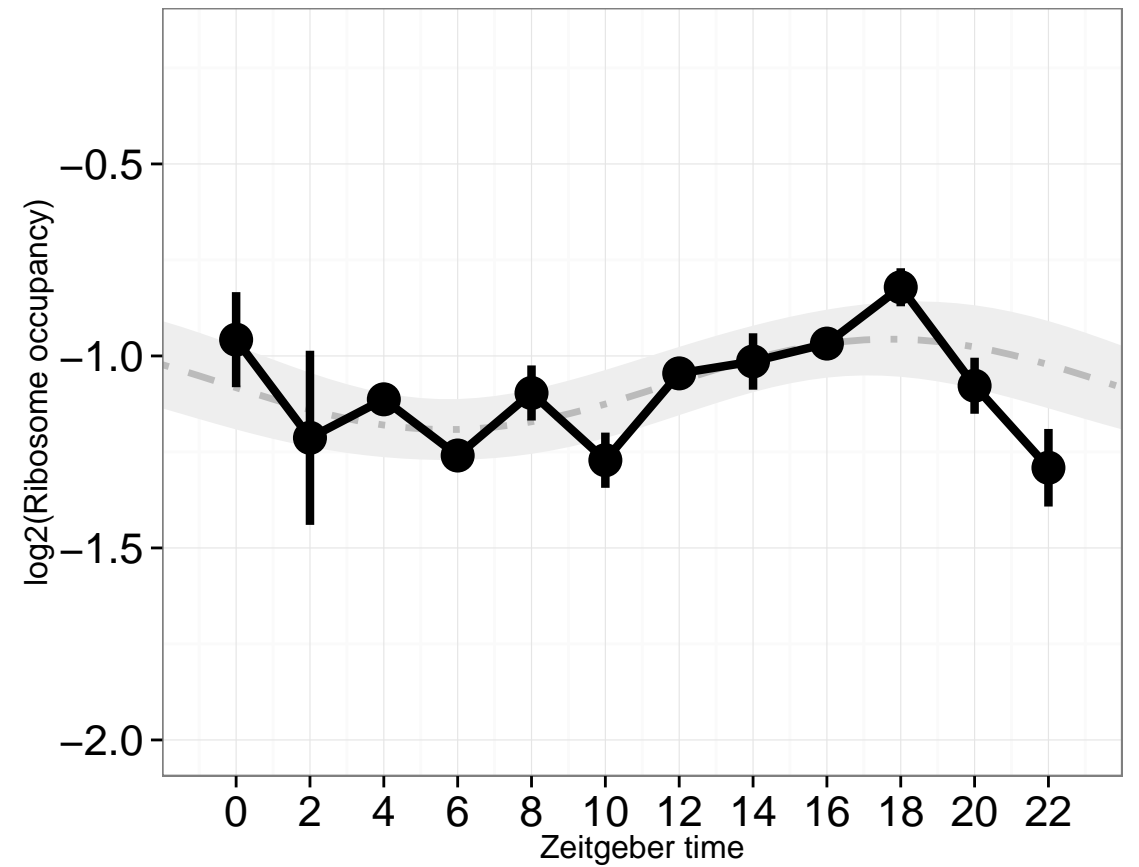

Supplement: SuppDataset_1.zip [file Sema4a_set_A.pdf › Supplemental Dataset 1/A-mRNA_nonrhyth_translation_nonrhyth/Sema4a_set_A.pdf]

## Sema4b

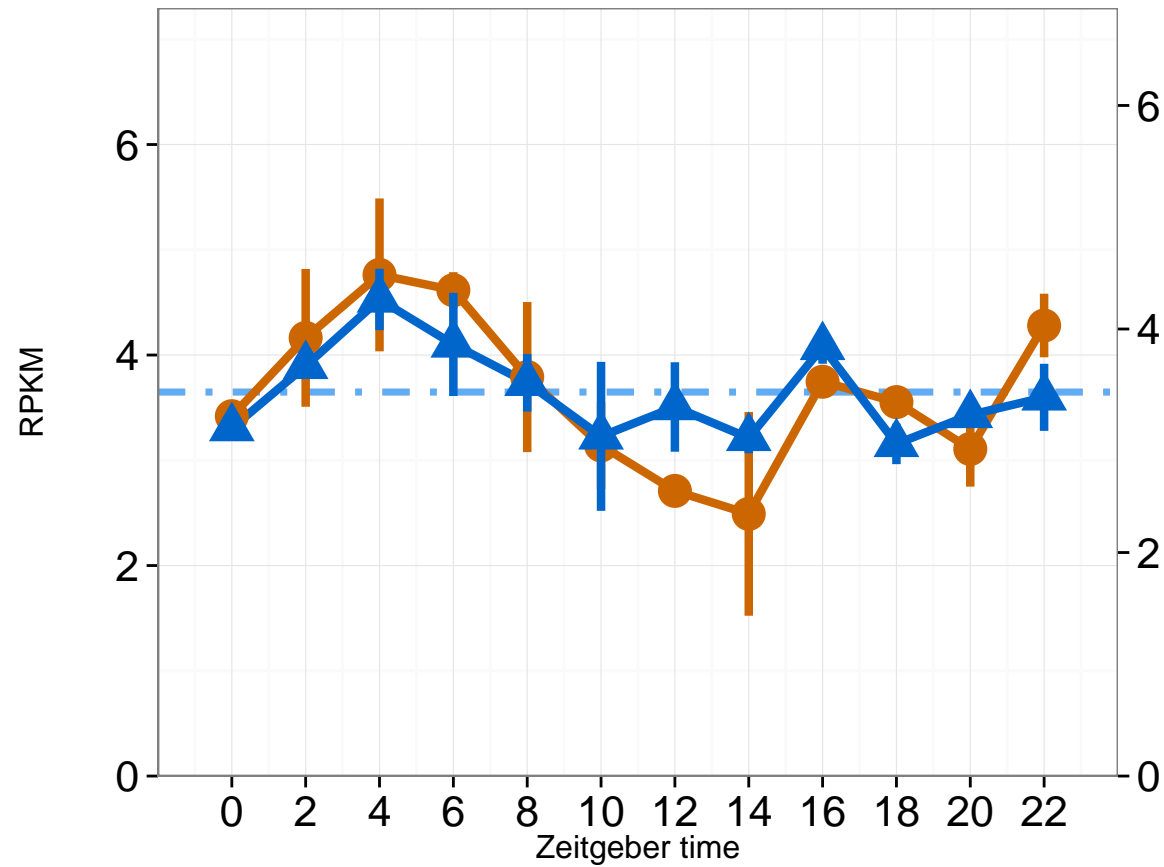

## Sema4b

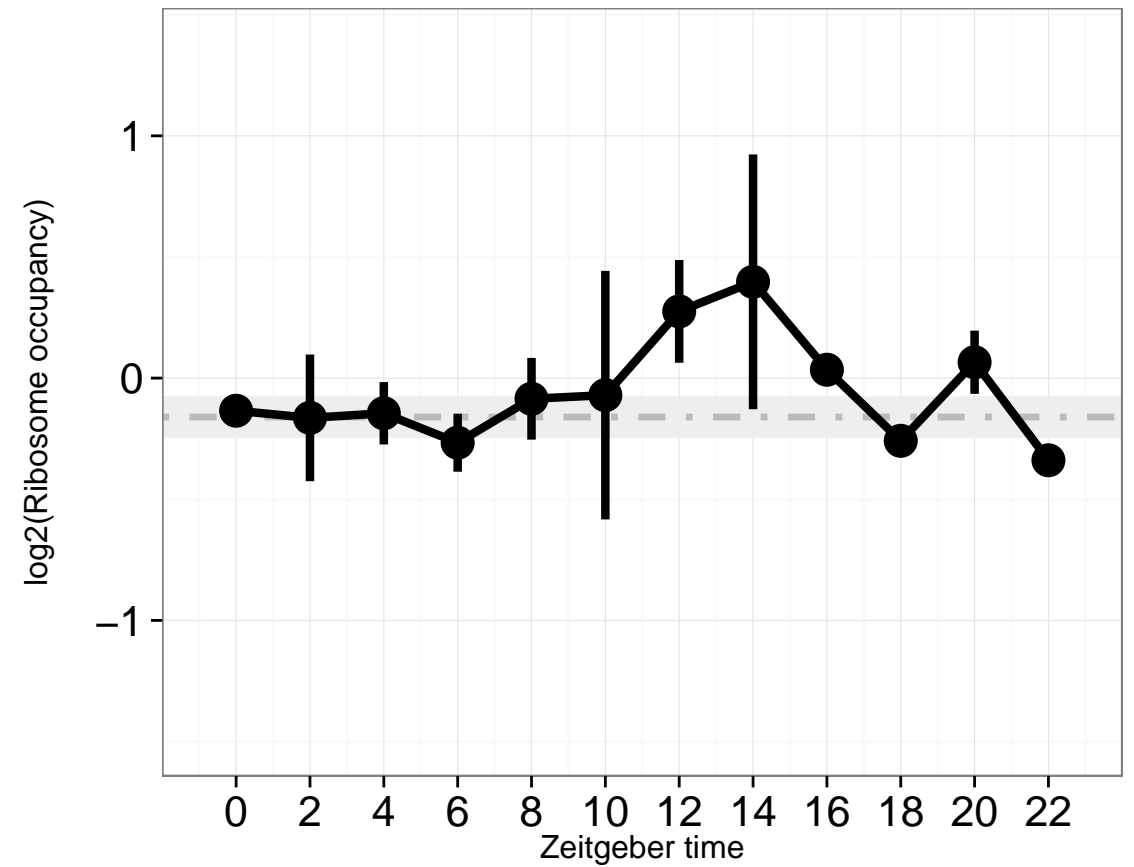

Supplement: SuppDataset_1.zip [file Sema4b_set_A.pdf › Supplemental Dataset 1/A-mRNA_nonrhyth_translation_nonrhyth/Sema4b_set_A.pdf]

## Sema4c

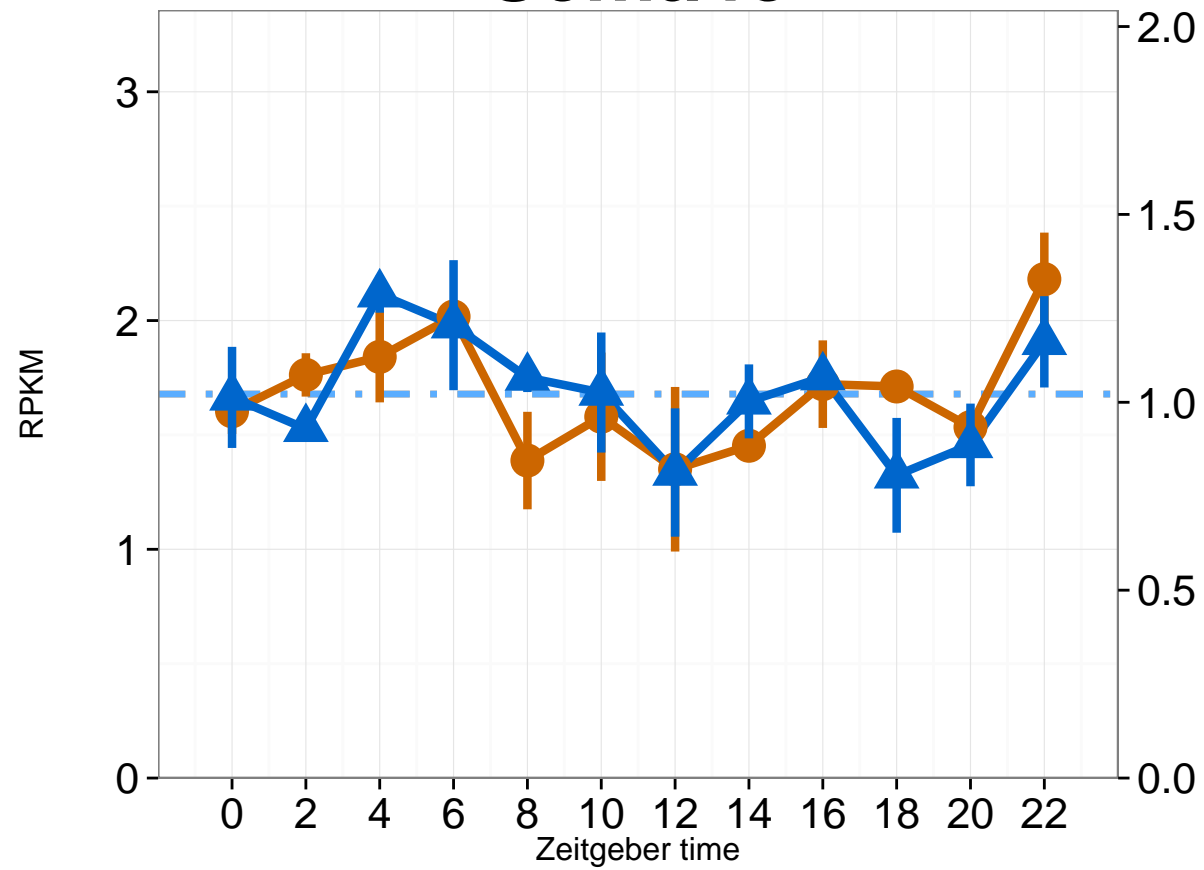

## Sema4c

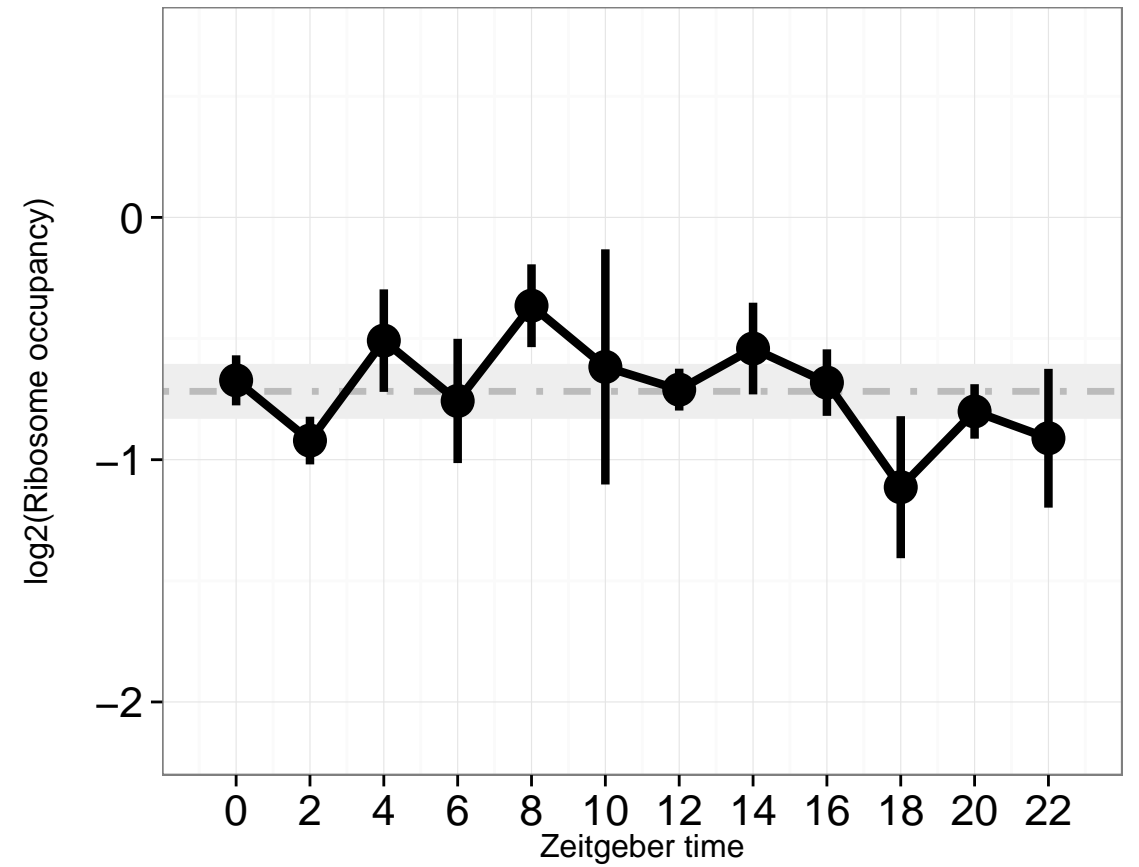

Supplement: SuppDataset_1.zip [file Sema4c_set_A.pdf › Supplemental Dataset 1/A-mRNA_nonrhyth_translation_nonrhyth/Sema4c_set_A.pdf]

**Sema4g**

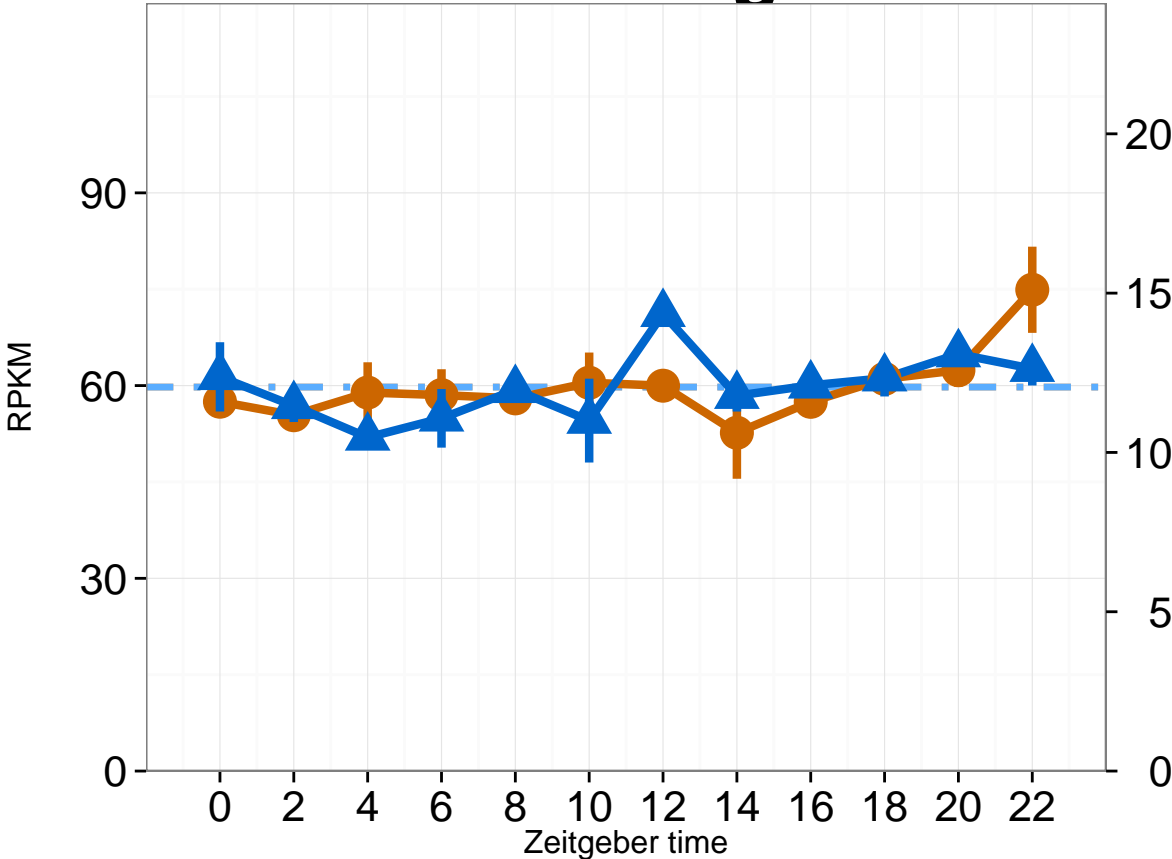

**Sema4g**

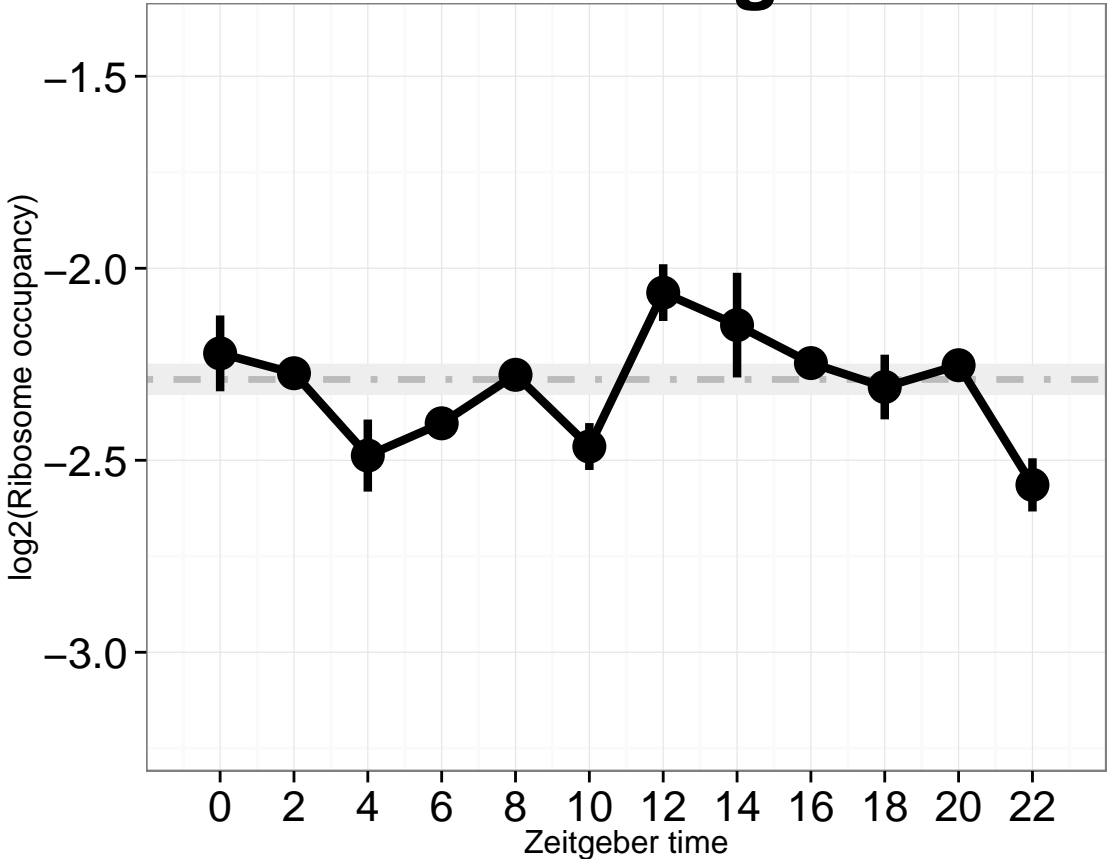

Supplement: SuppDataset_1.zip [file Sema4g_set_A.pdf › Supplemental Dataset 1/A-mRNA_nonrhyth_translation_nonrhyth/Sema4g_set_A.pdf]

## Sema6a

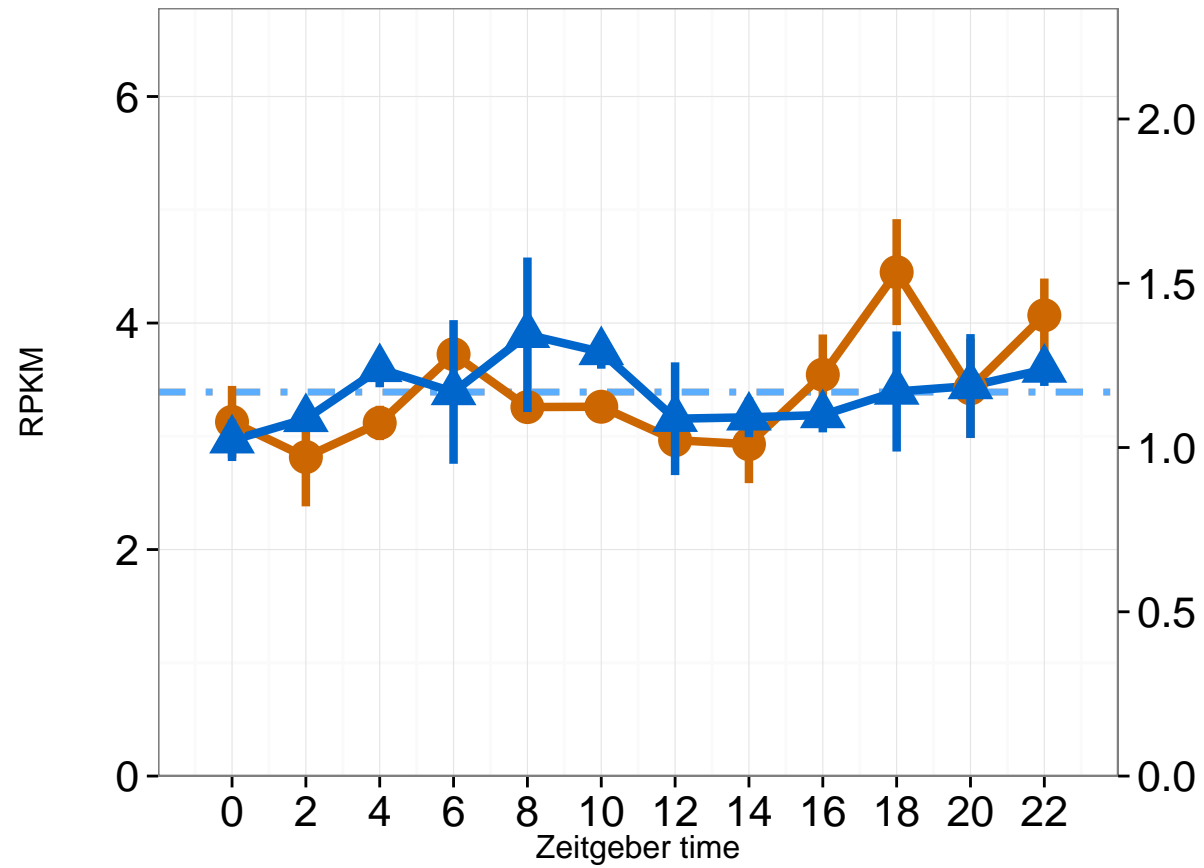

## Sema6a

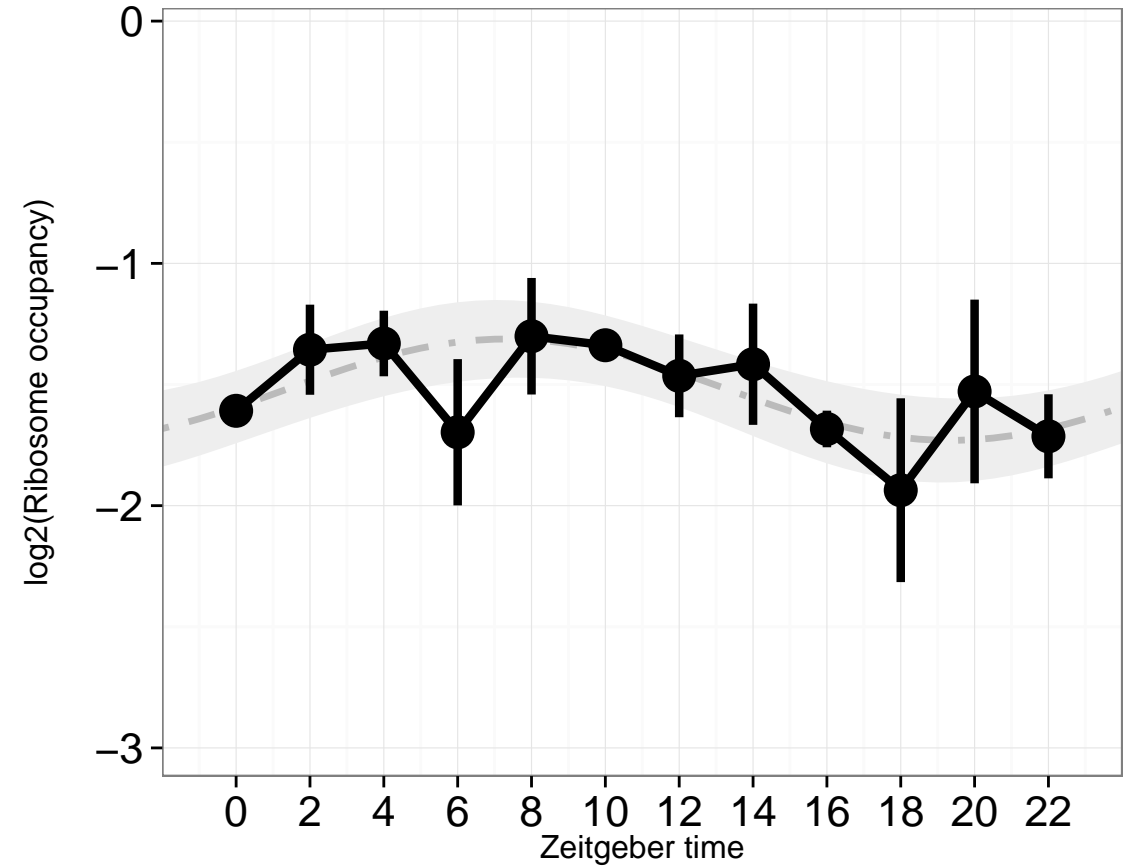

Supplement: SuppDataset_1.zip [file Sema6a_set_A.pdf › Supplemental Dataset 1/A-mRNA_nonrhyth_translation_nonrhyth/Sema6a_set_A.pdf]

# Sema6b

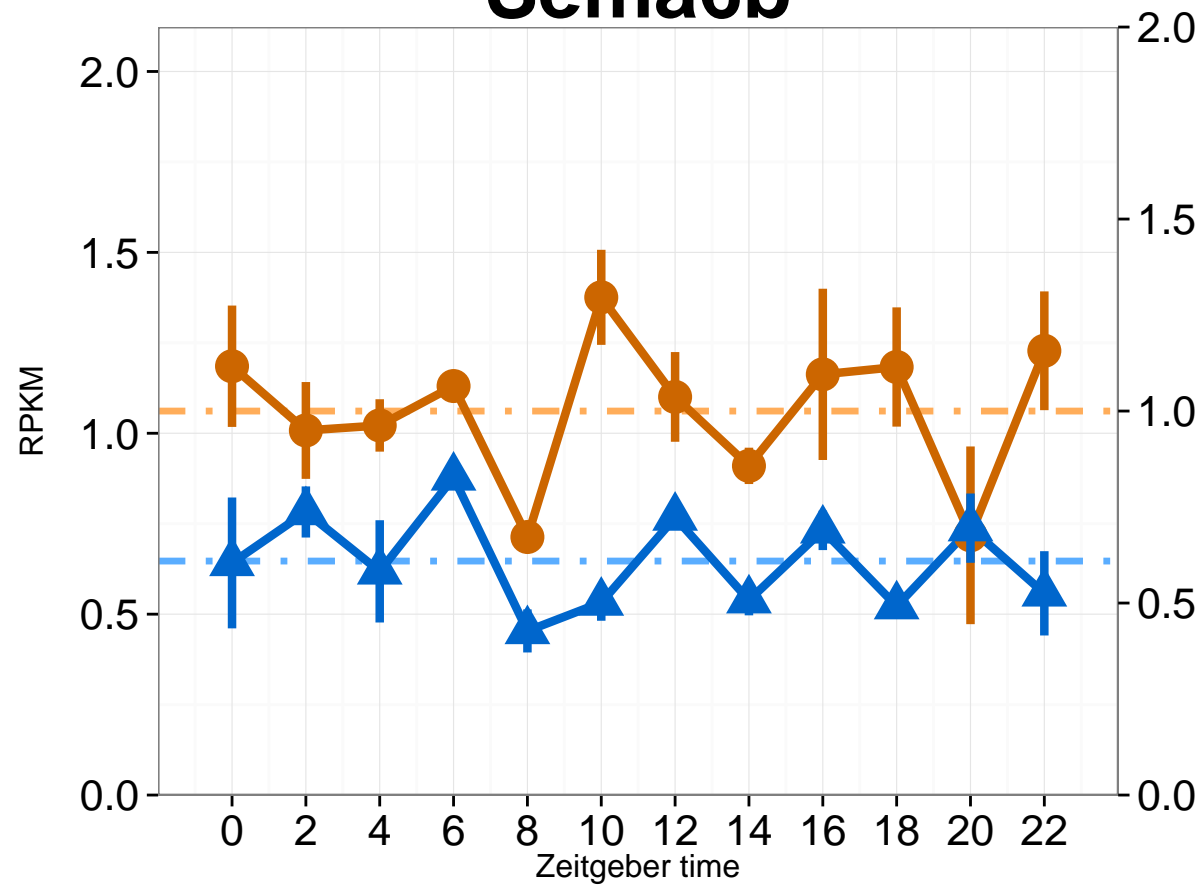

# Sema6b

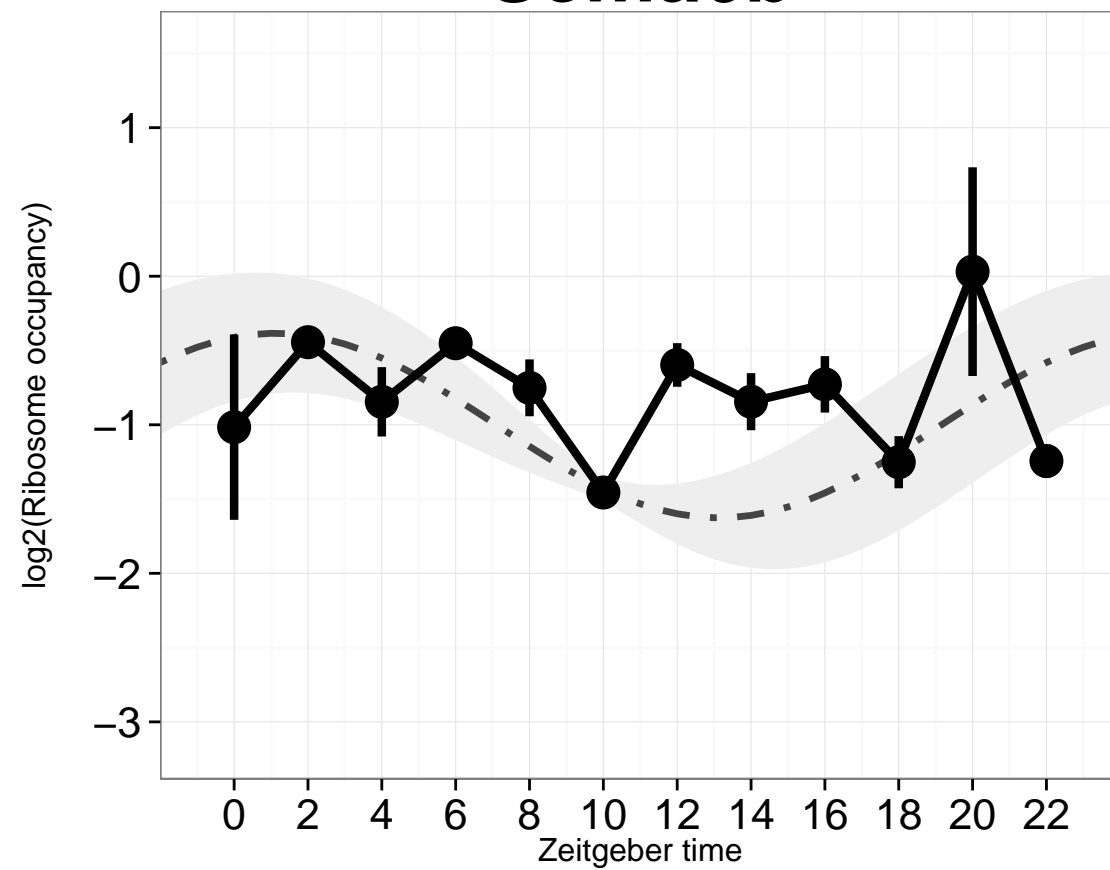

Supplement: SuppDataset_1.zip [file Sema6b_set_A.pdf › Supplemental Dataset 1/A-mRNA_nonrhyth_translation_nonrhyth/Sema6b_set_A.pdf]

# Sema6d

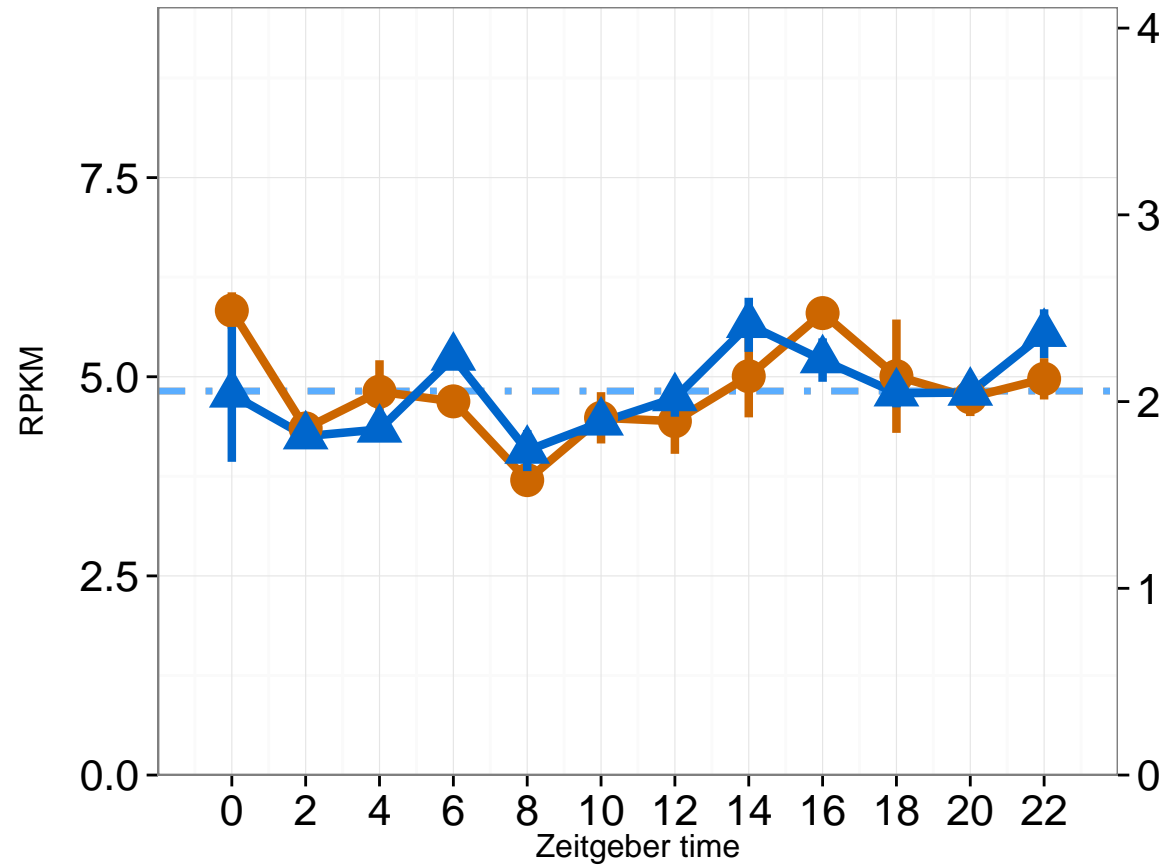

# Sema6d

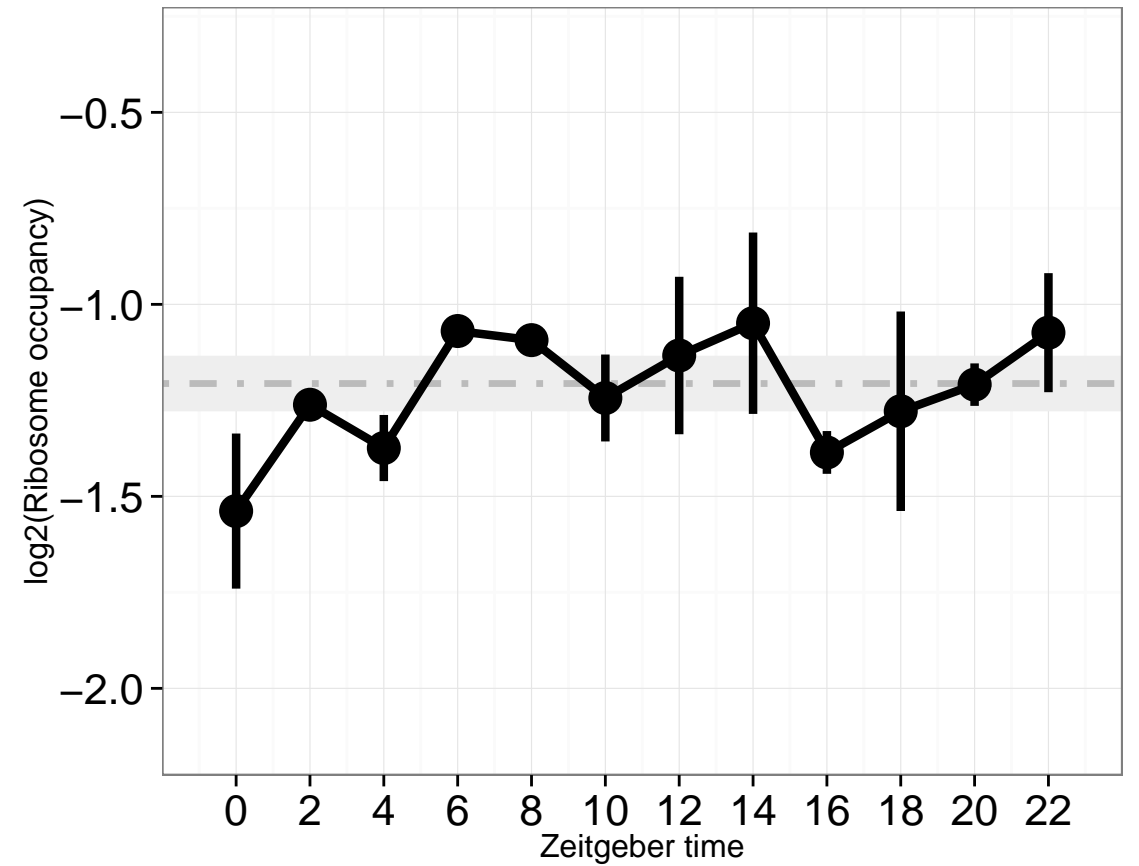

Supplement: SuppDataset_1.zip [file Sema6d_set_A.pdf › Supplemental Dataset 1/A-mRNA_nonrhyth_translation_nonrhyth/Sema6d_set_A.pdf]

# Senp1

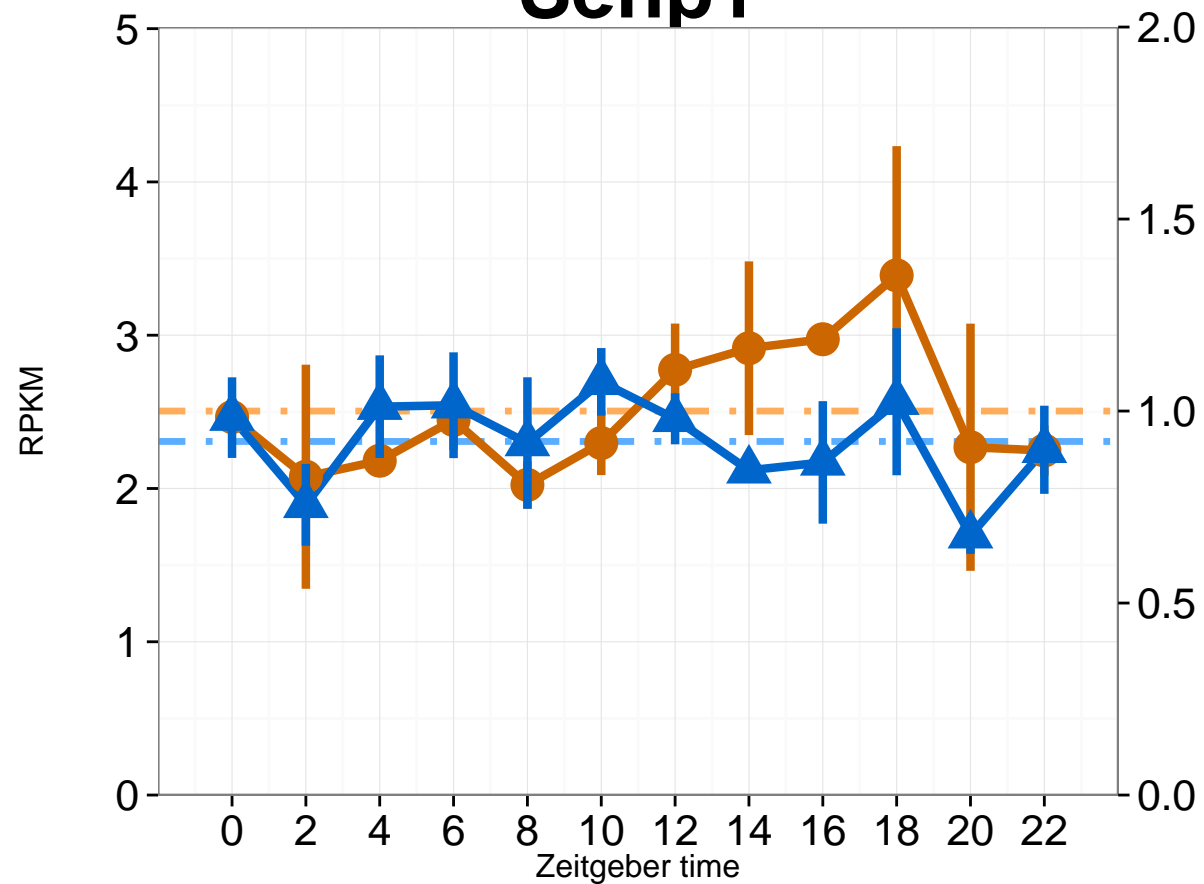

# Senp1

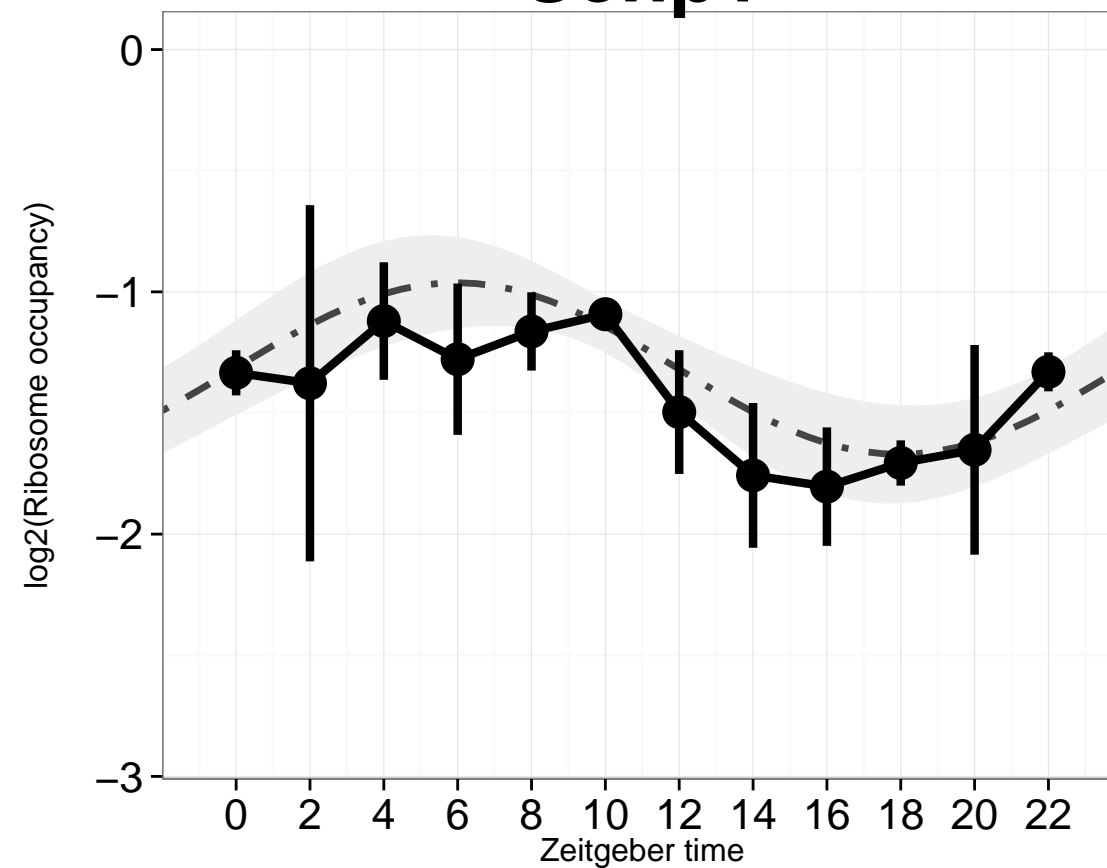

Supplement: SuppDataset_1.zip [file Senp1_set_A.pdf › Supplemental Dataset 1/A-mRNA_nonrhyth_translation_nonrhyth/Senp1_set_A.pdf]

## Senp2

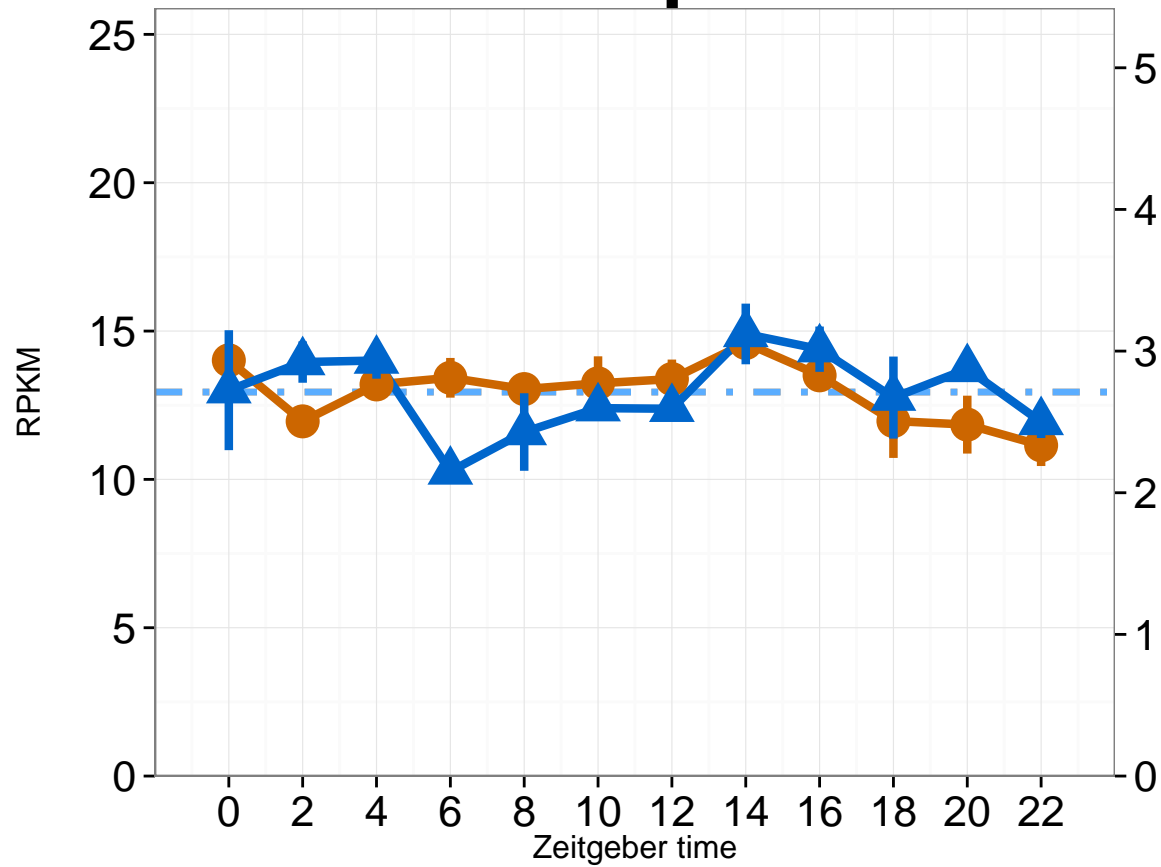

## Senp2

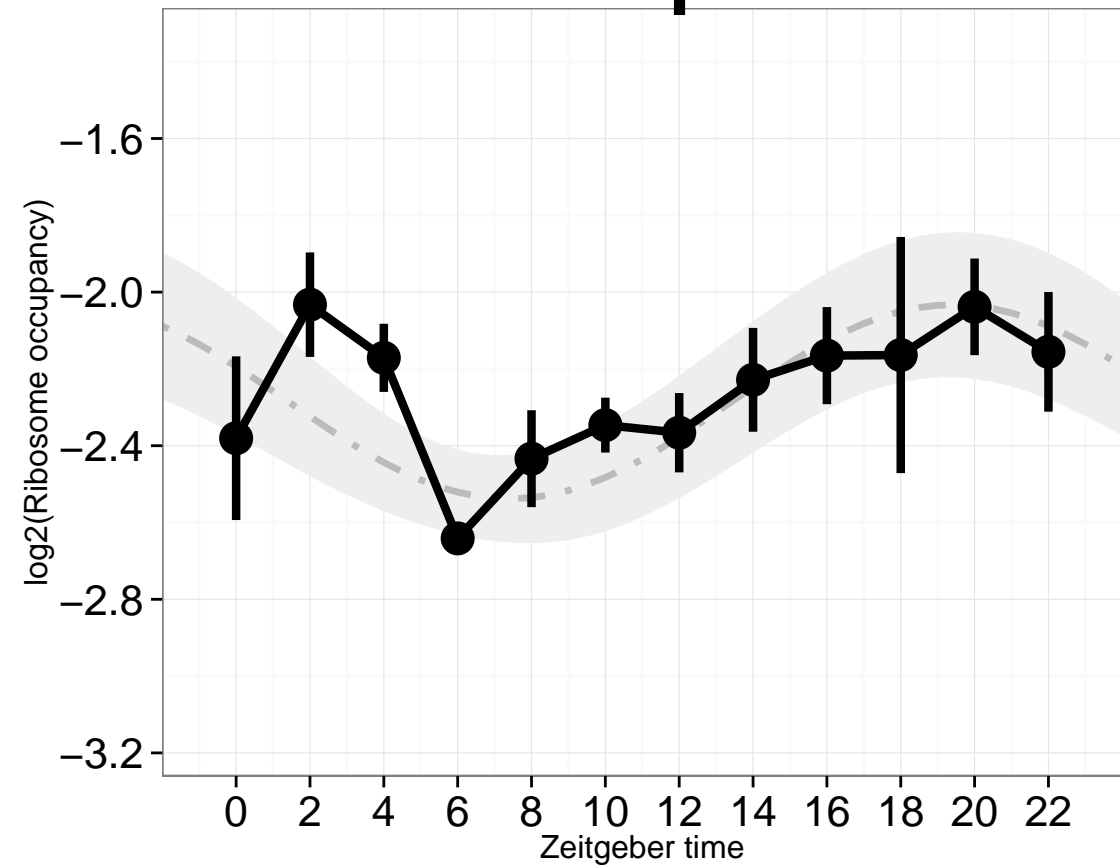

Supplement: SuppDataset_1.zip [file Senp2_set_A.pdf › Supplemental Dataset 1/A-mRNA_nonrhyth_translation_nonrhyth/Senp2_set_A.pdf]

## Senp3

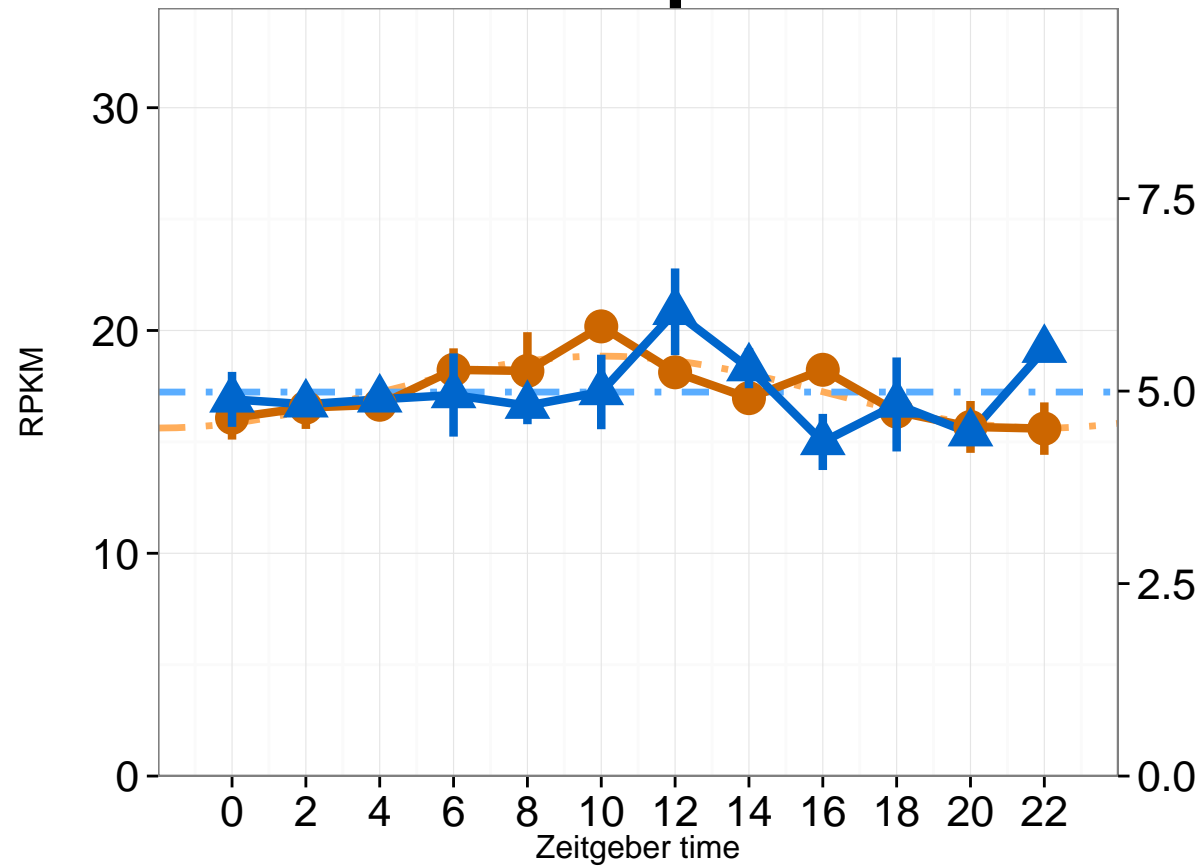

## Senp3

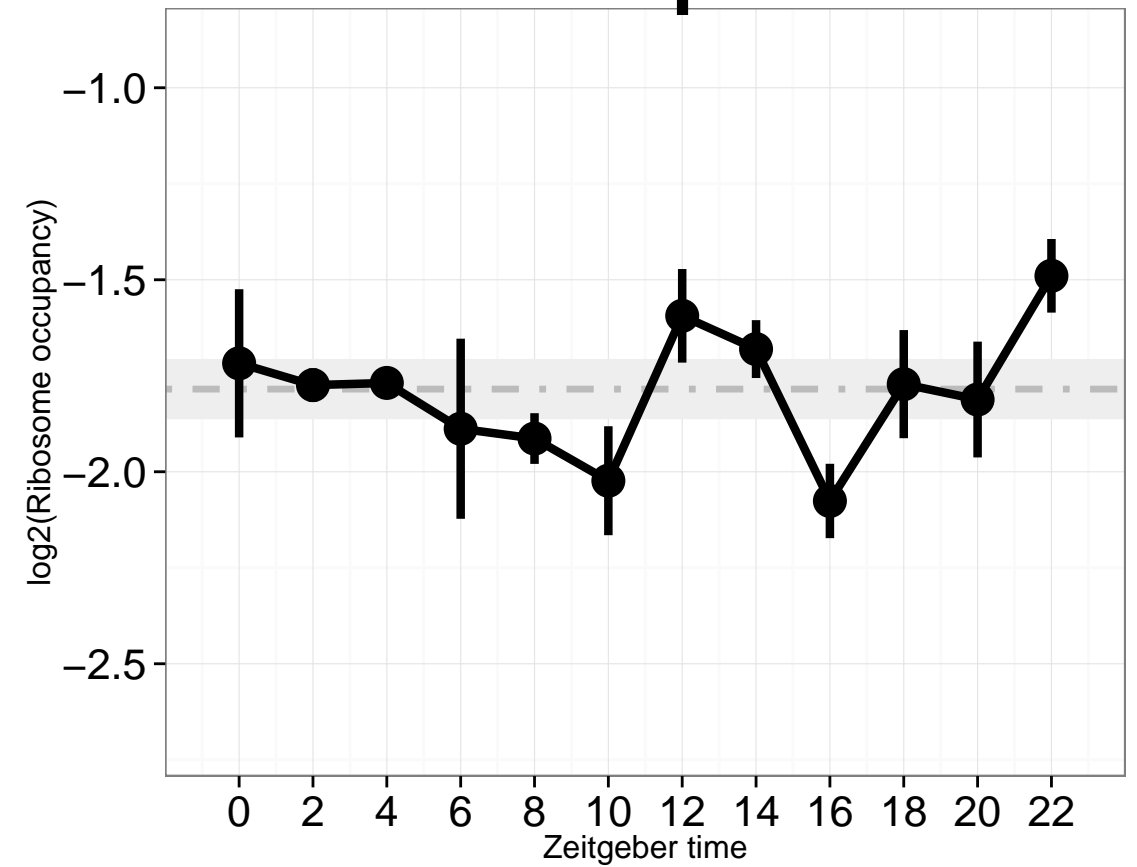

Supplement: SuppDataset_1.zip [file Senp3_set_A.pdf › Supplemental Dataset 1/A-mRNA_nonrhyth_translation_nonrhyth/Senp3_set_A.pdf]

## Senp5

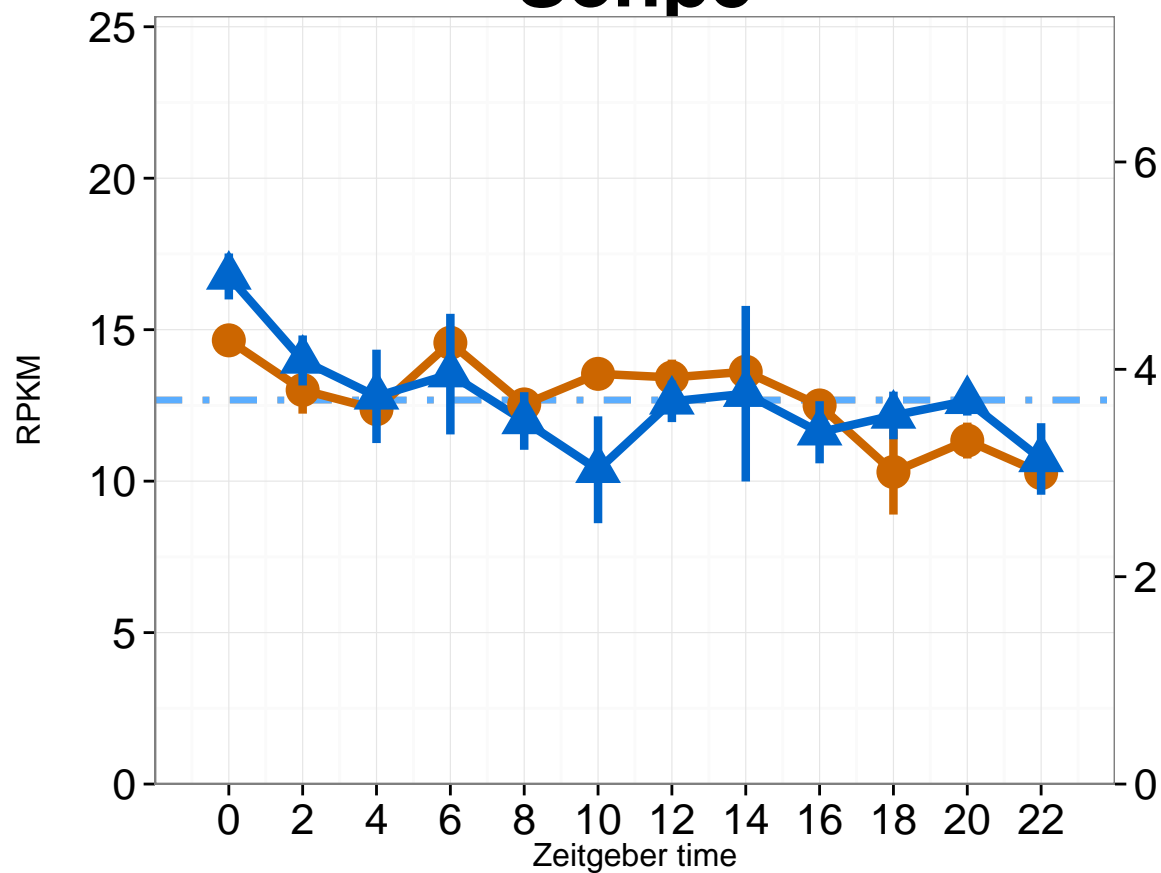

## Senp5

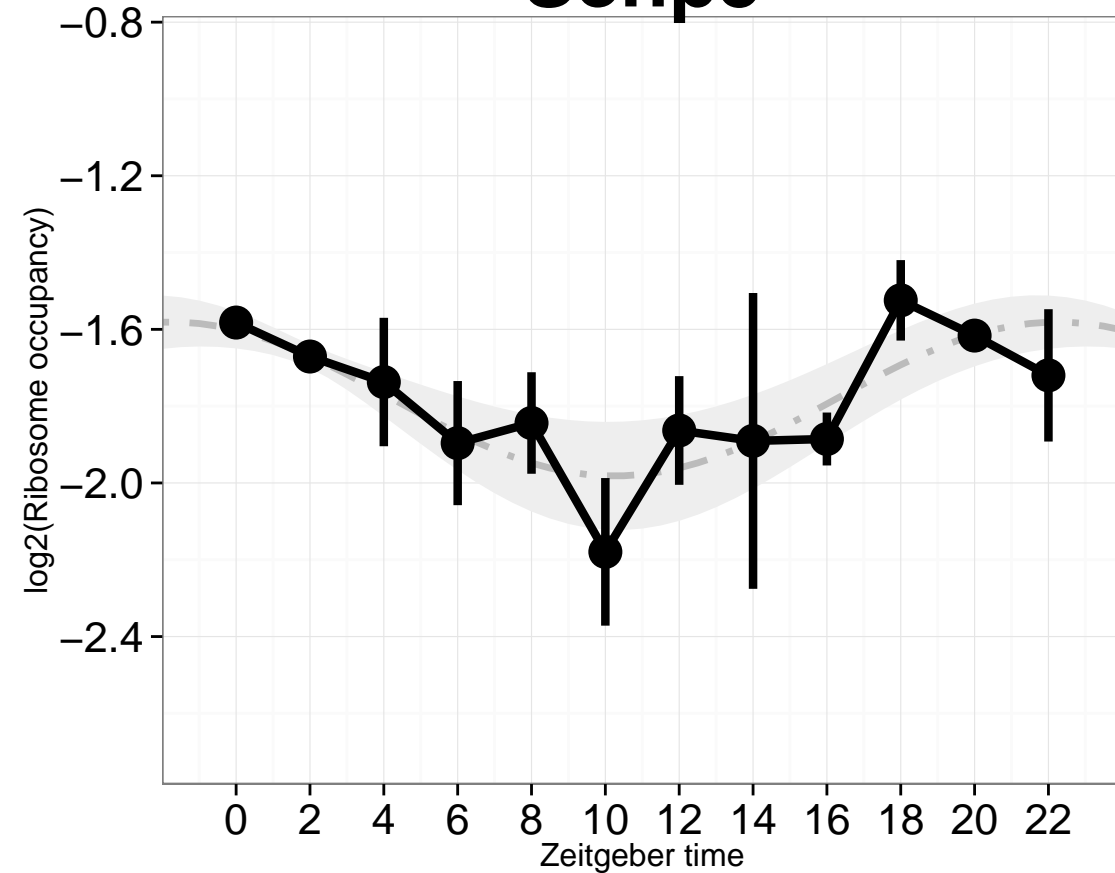

Supplement: SuppDataset_1.zip [file Senp5_set_A.pdf › Supplemental Dataset 1/A-mRNA_nonrhyth_translation_nonrhyth/Senp5_set_A.pdf]

## Senp6

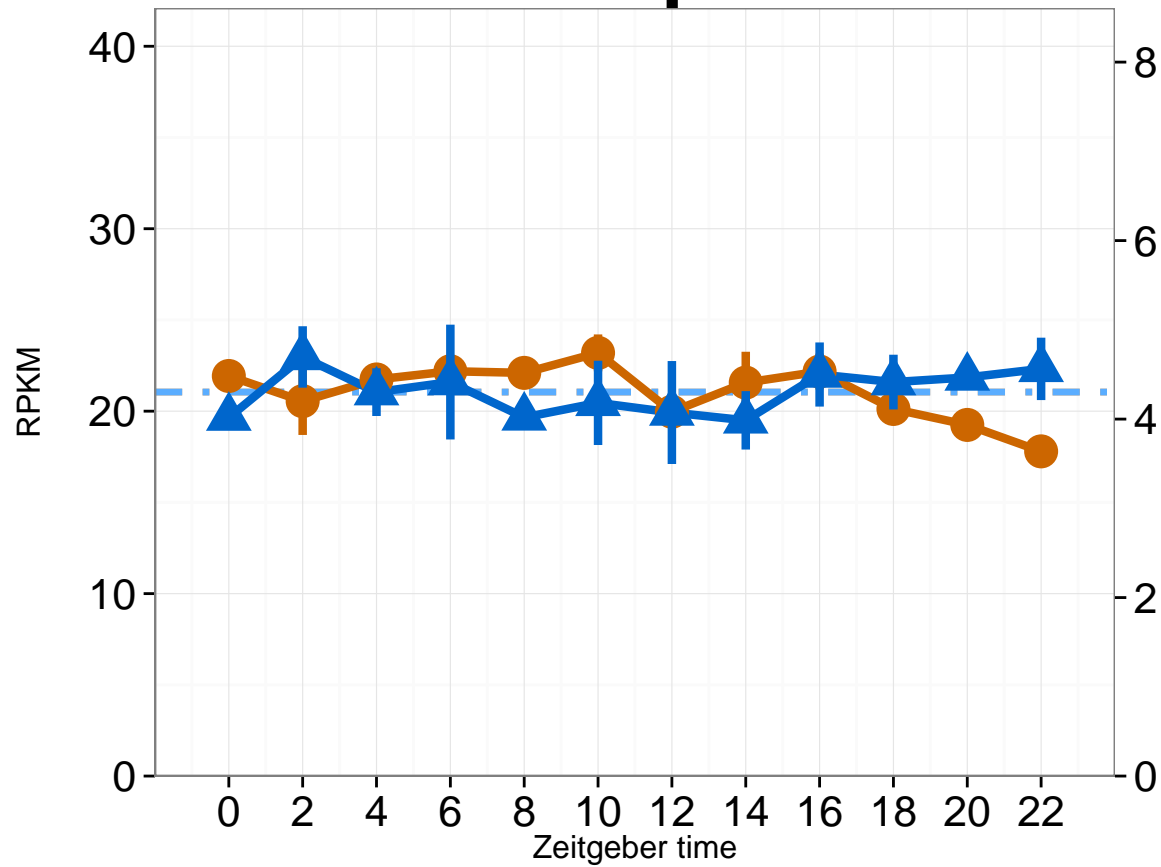

## Senp6

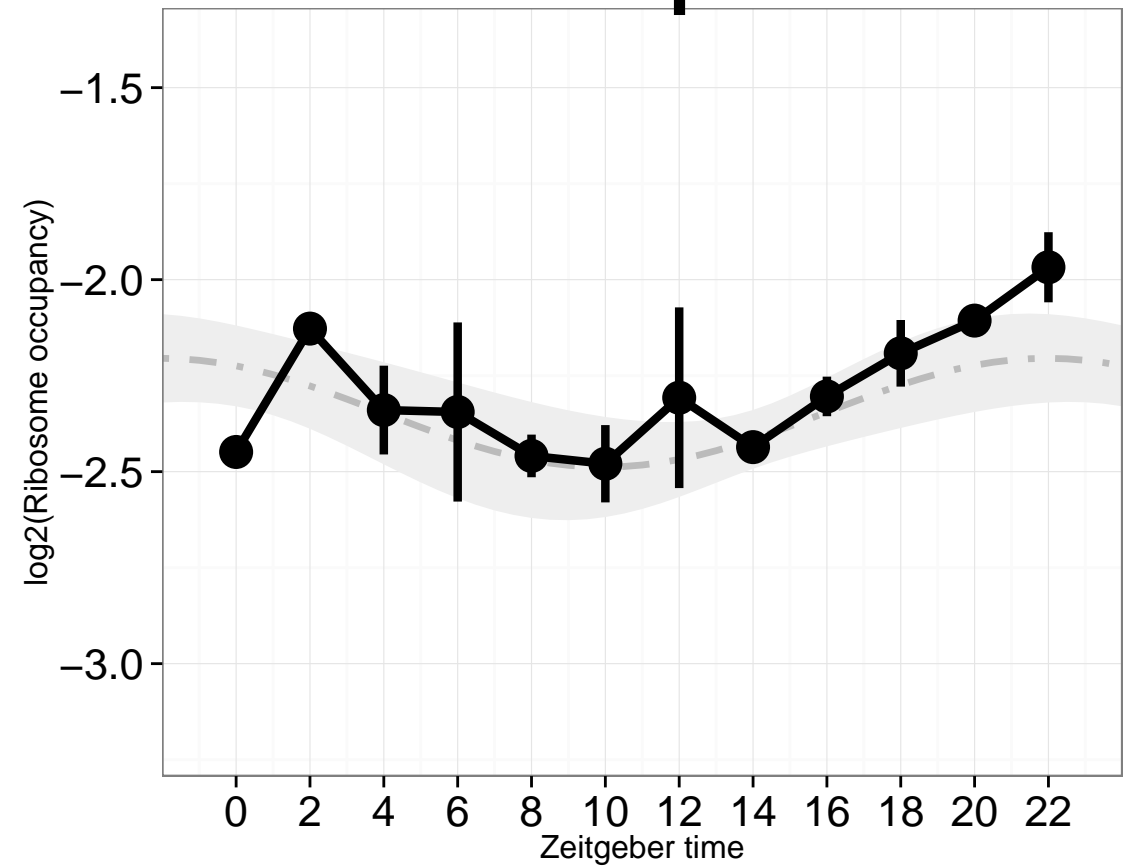

Supplement: SuppDataset_1.zip [file Senp6_set_A.pdf › Supplemental Dataset 1/A-mRNA_nonrhyth_translation_nonrhyth/Senp6_set_A.pdf]

## Senp7

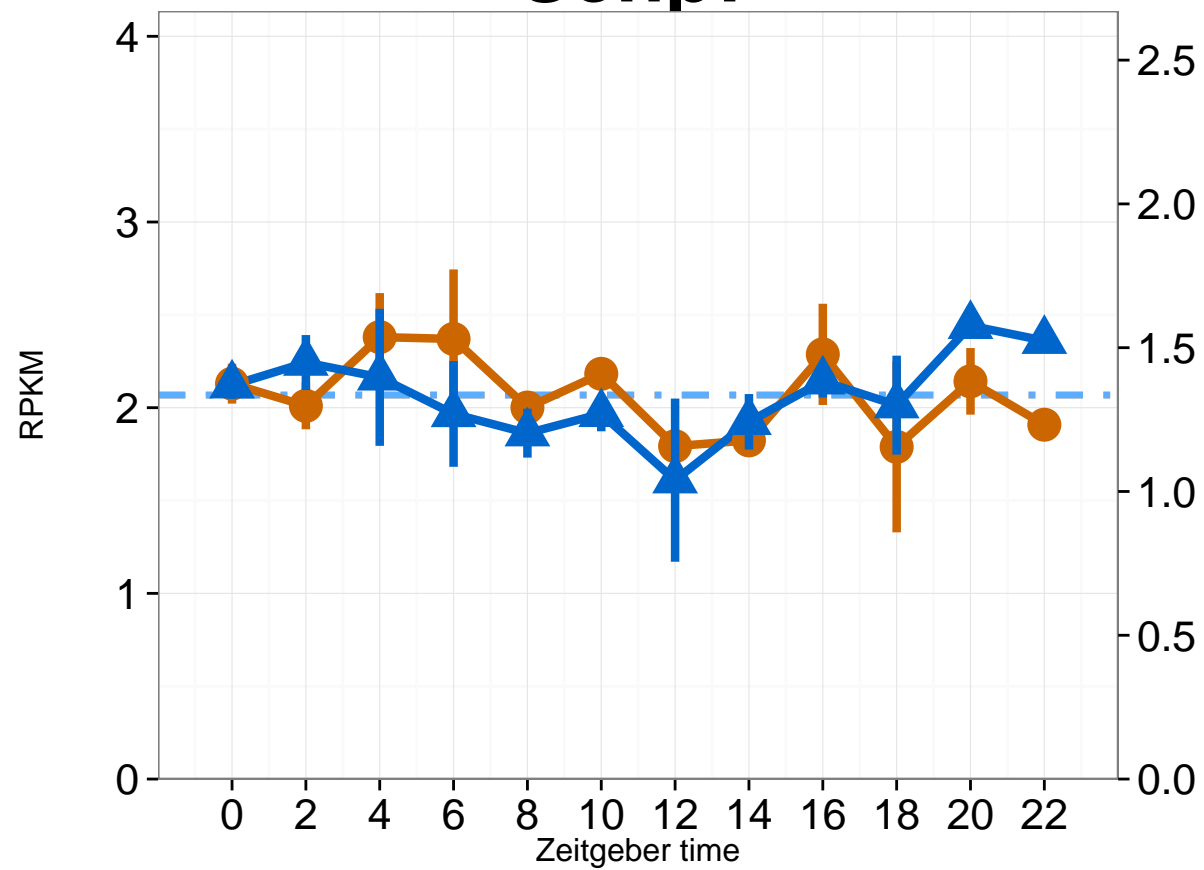

## Senp7

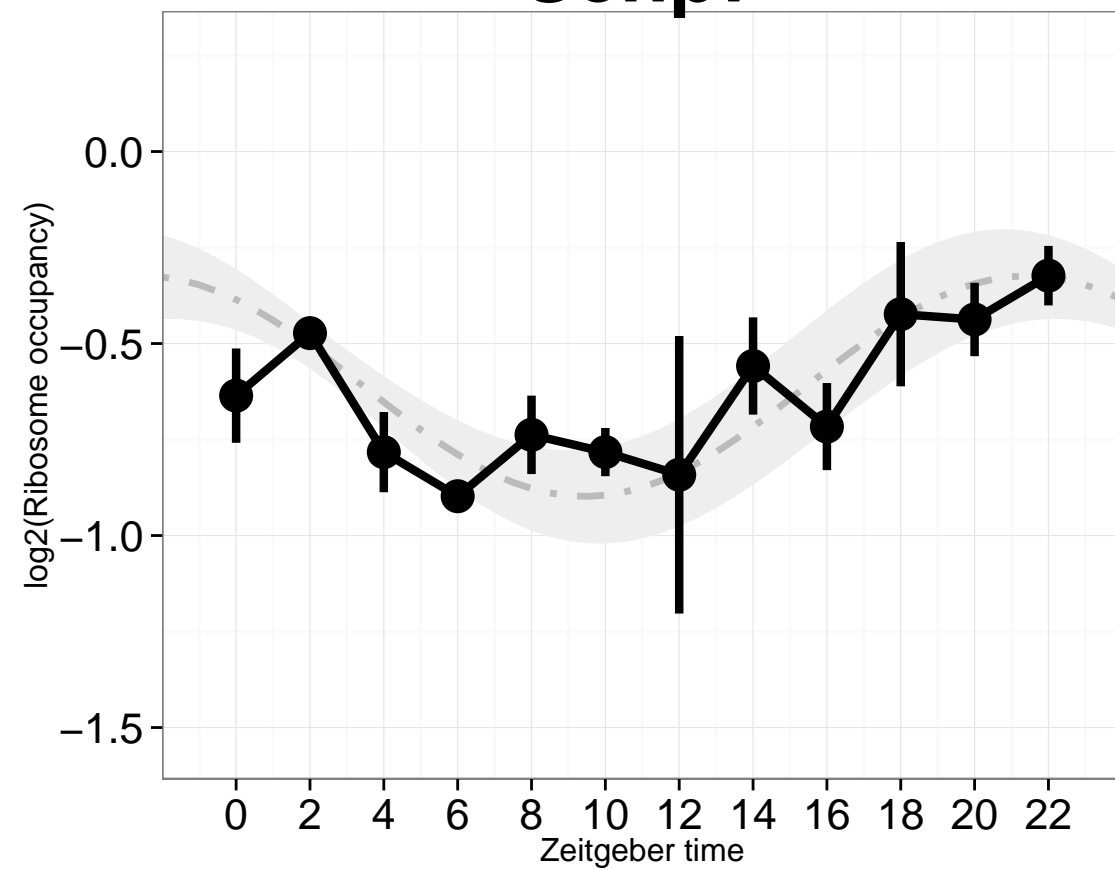

Supplement: SuppDataset_1.zip [file Senp7_set_A.pdf › Supplemental Dataset 1/A-mRNA_nonrhyth_translation_nonrhyth/Senp7_set_A.pdf]

# Senp8

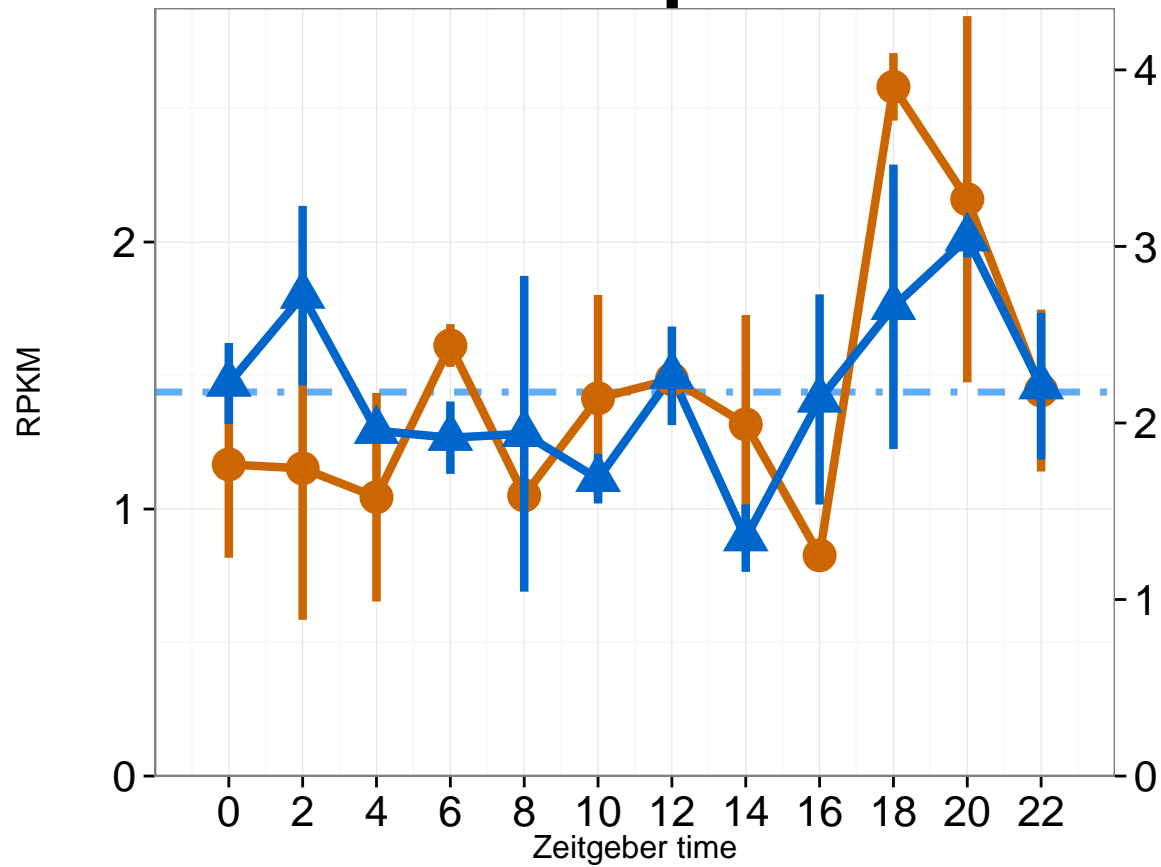

# Senp8

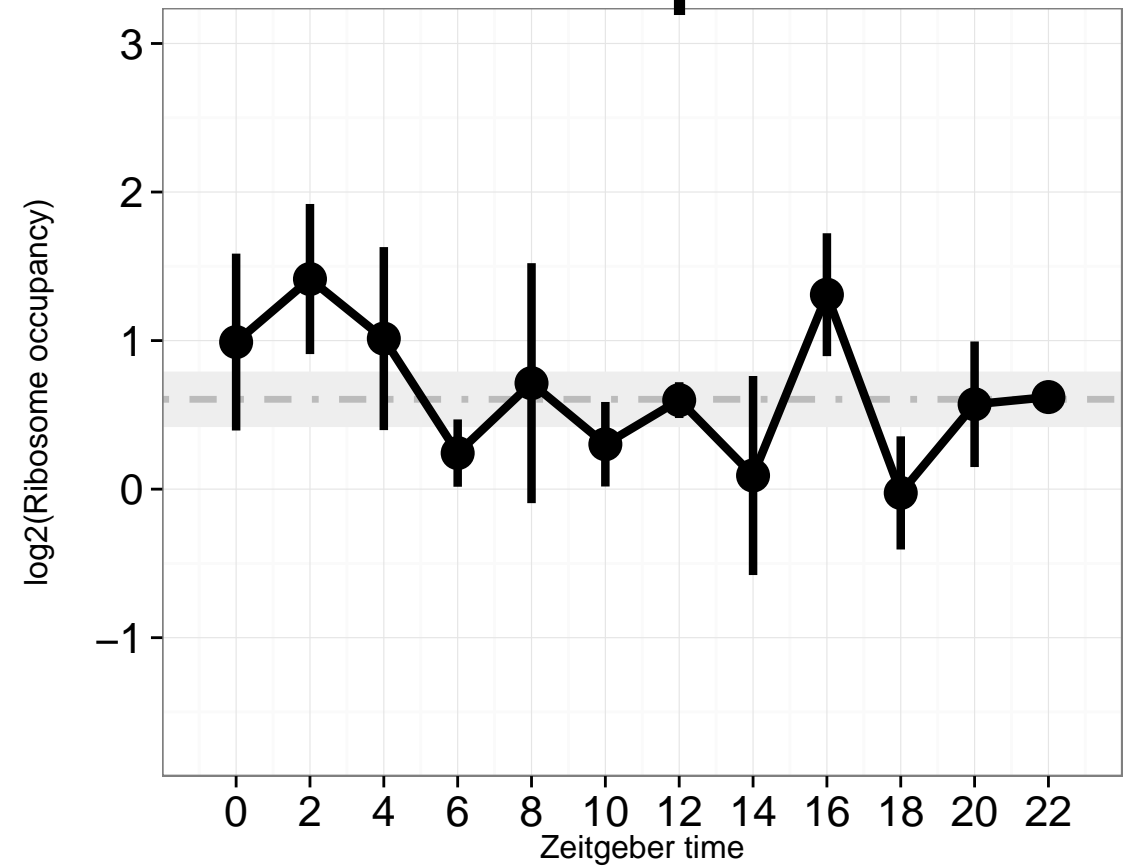

Supplement: SuppDataset_1.zip [file Senp8_set_A.pdf › Supplemental Dataset 1/A-mRNA_nonrhyth_translation_nonrhyth/Senp8_set_A.pdf]

Sep15

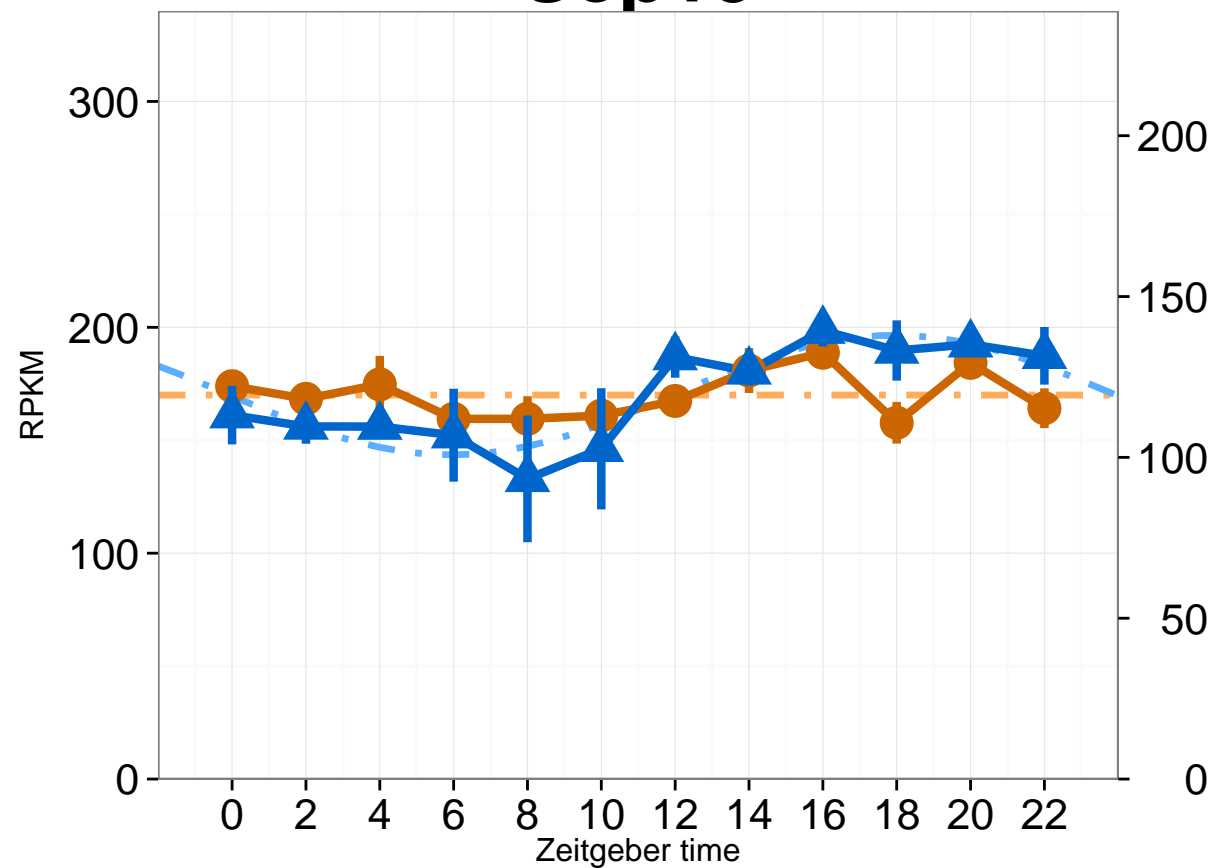

Sep15

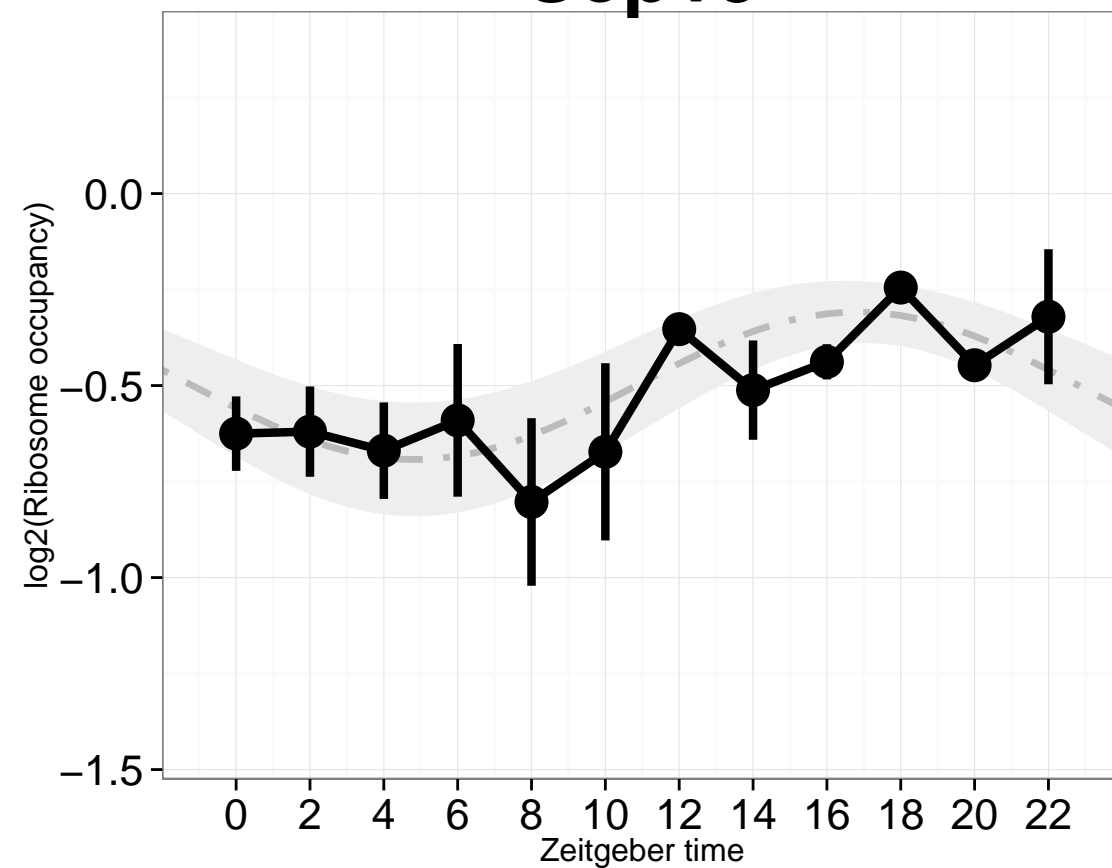

Supplement: SuppDataset_1.zip [file Sep15_set_A.pdf › Supplemental Dataset 1/A-mRNA_nonrhyth_translation_nonrhyth/Sep15_set_A.pdf]

# Sephs1

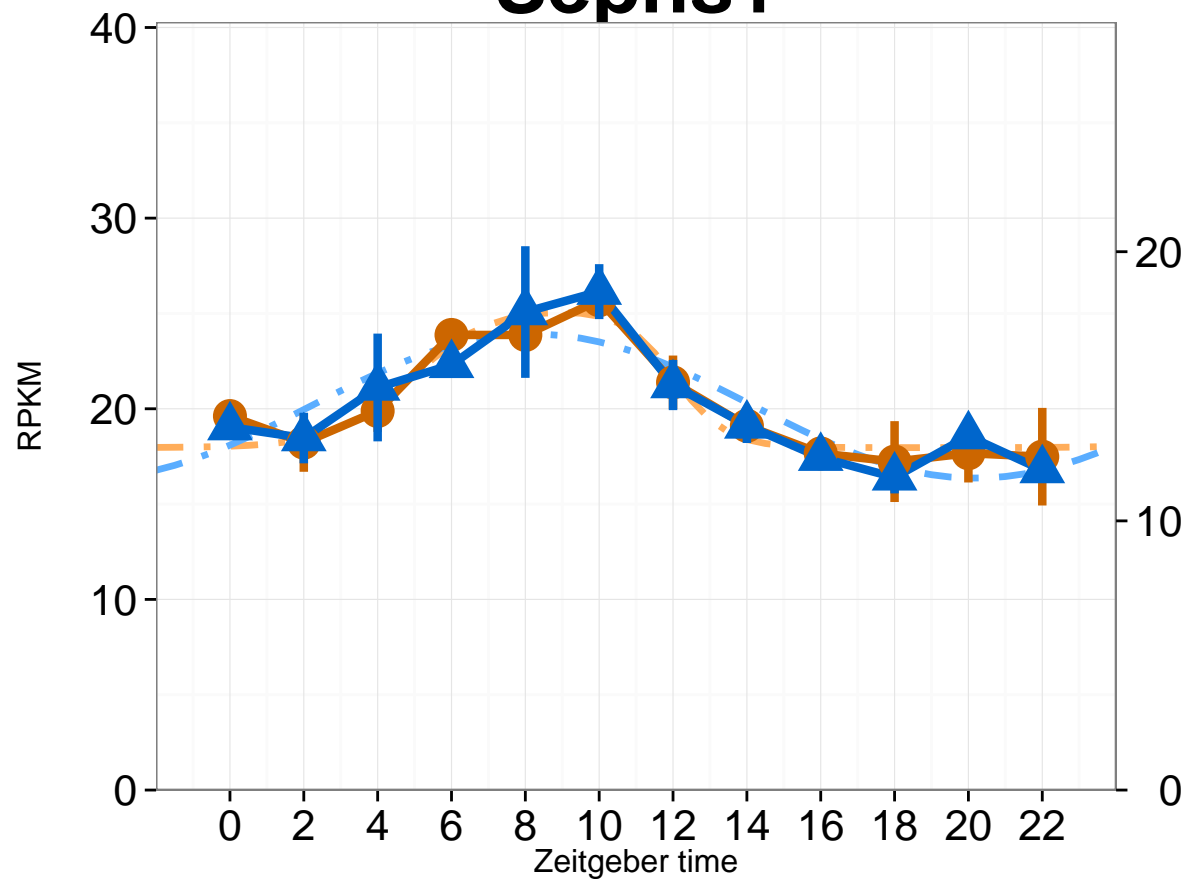

# Sephs1

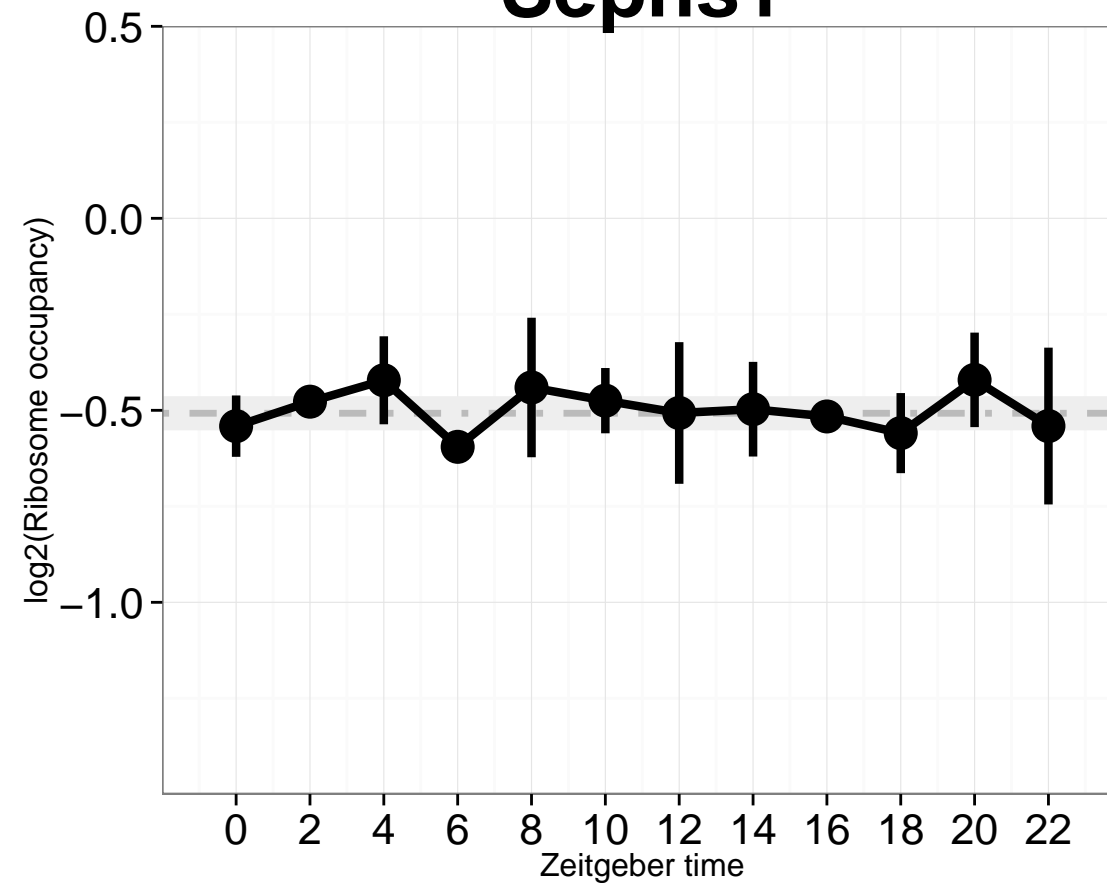

Supplement: SuppDataset_1.zip [file Sephs1_set_A.pdf › Supplemental Dataset 1/A-mRNA_nonrhyth_translation_nonrhyth/Sephs1_set_A.pdf]

# Sephs2

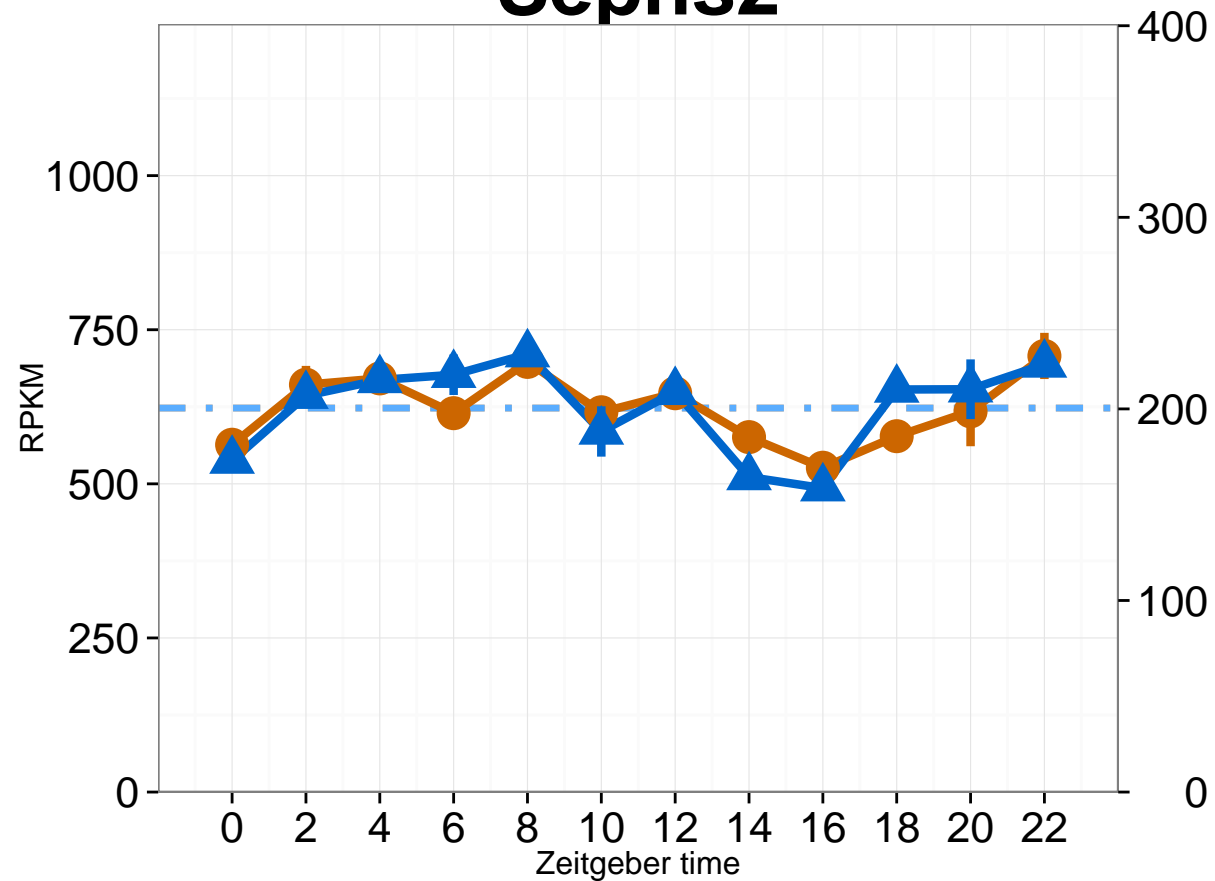

# Sephs2

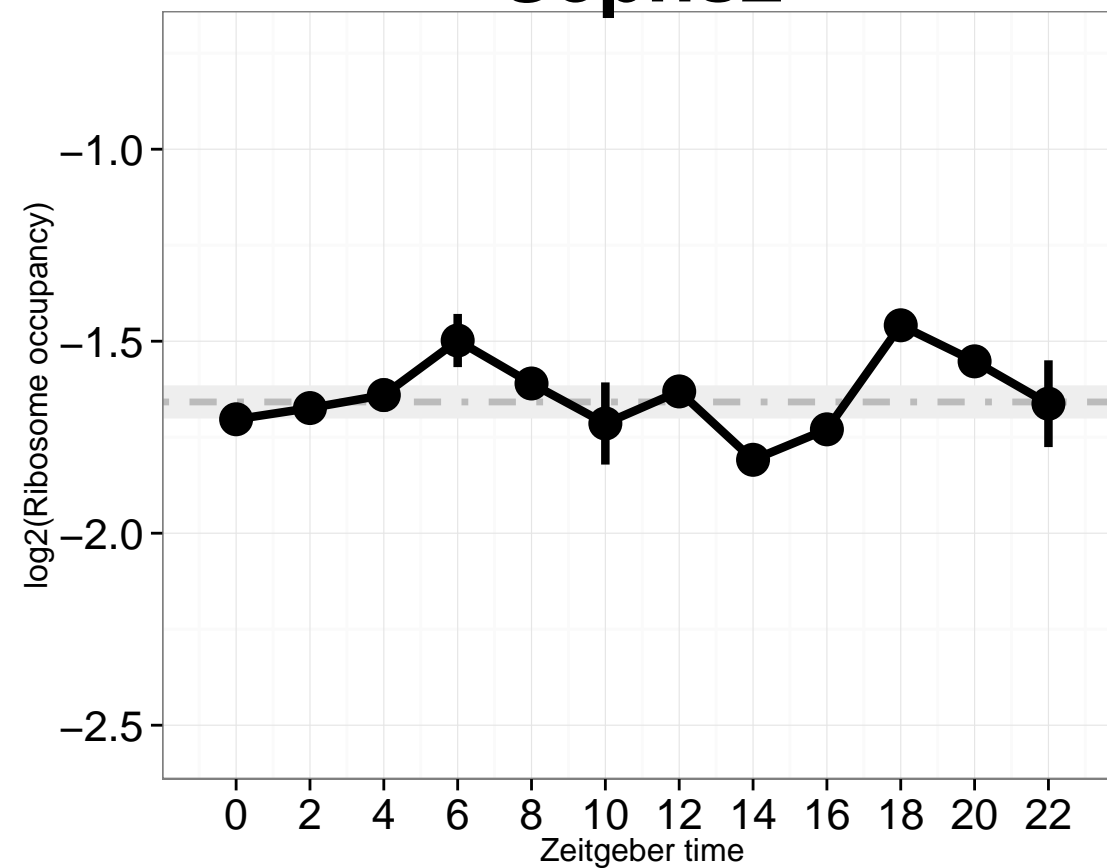

Supplement: SuppDataset_1.zip [file Sephs2_set_A.pdf › Supplemental Dataset 1/A-mRNA_nonrhyth_translation_nonrhyth/Sephs2_set_A.pdf]

# Sepn1

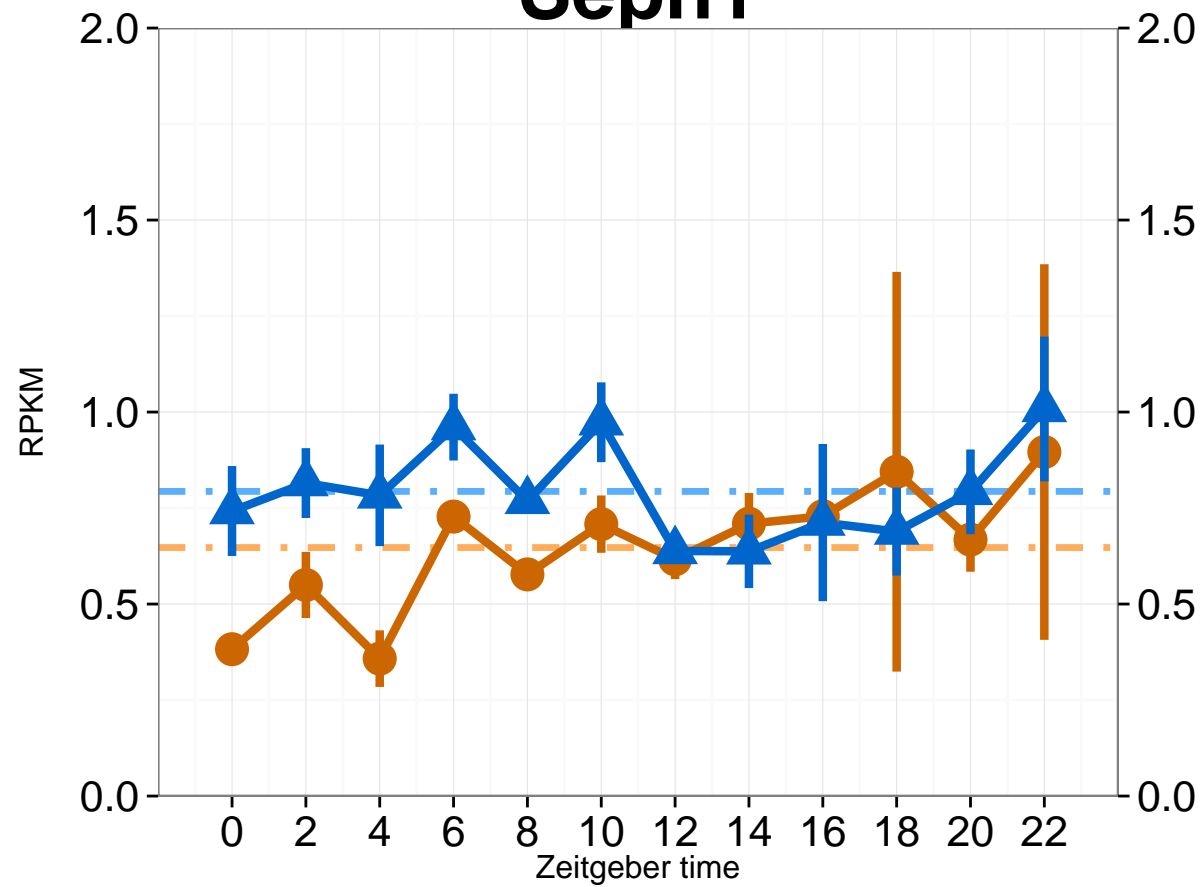

# Sepn1

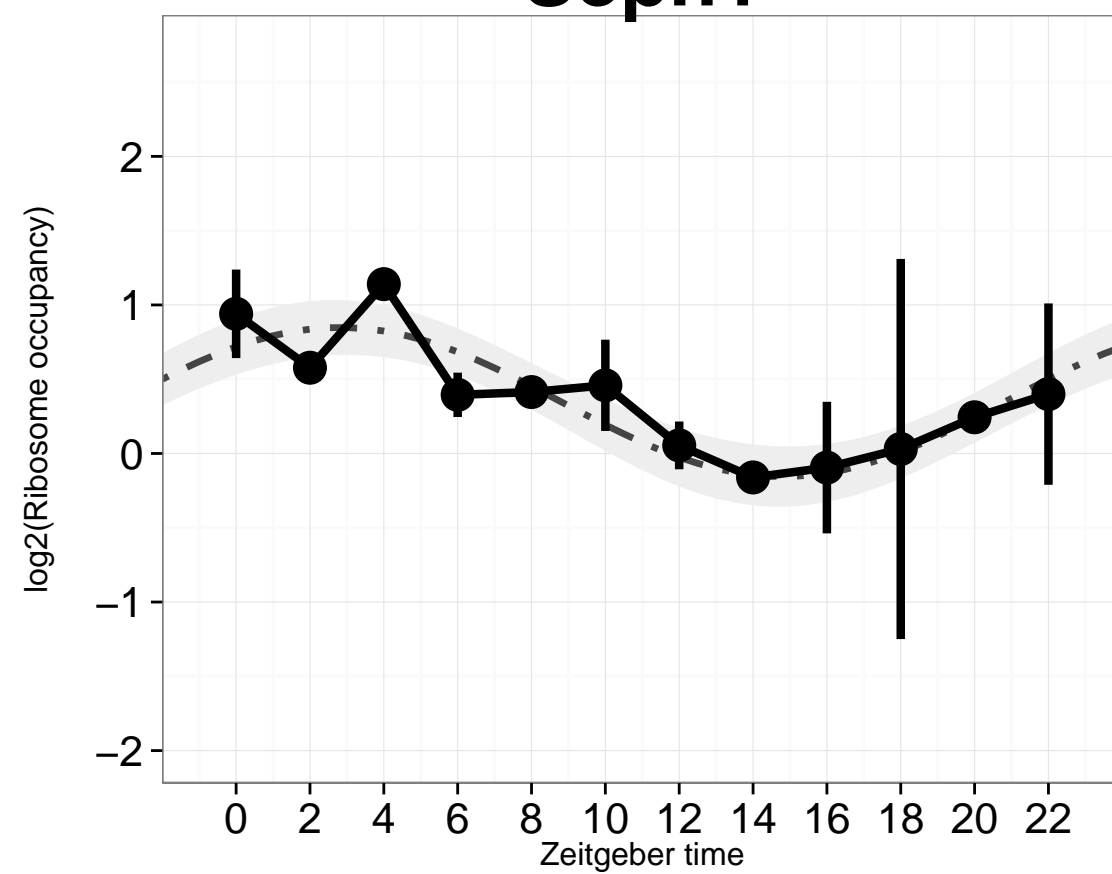

Supplement: SuppDataset_1.zip [file Sepn1_set_A.pdf › Supplemental Dataset 1/A-mRNA_nonrhyth_translation_nonrhyth/Sepn1_set_A.pdf]

# Sepp1

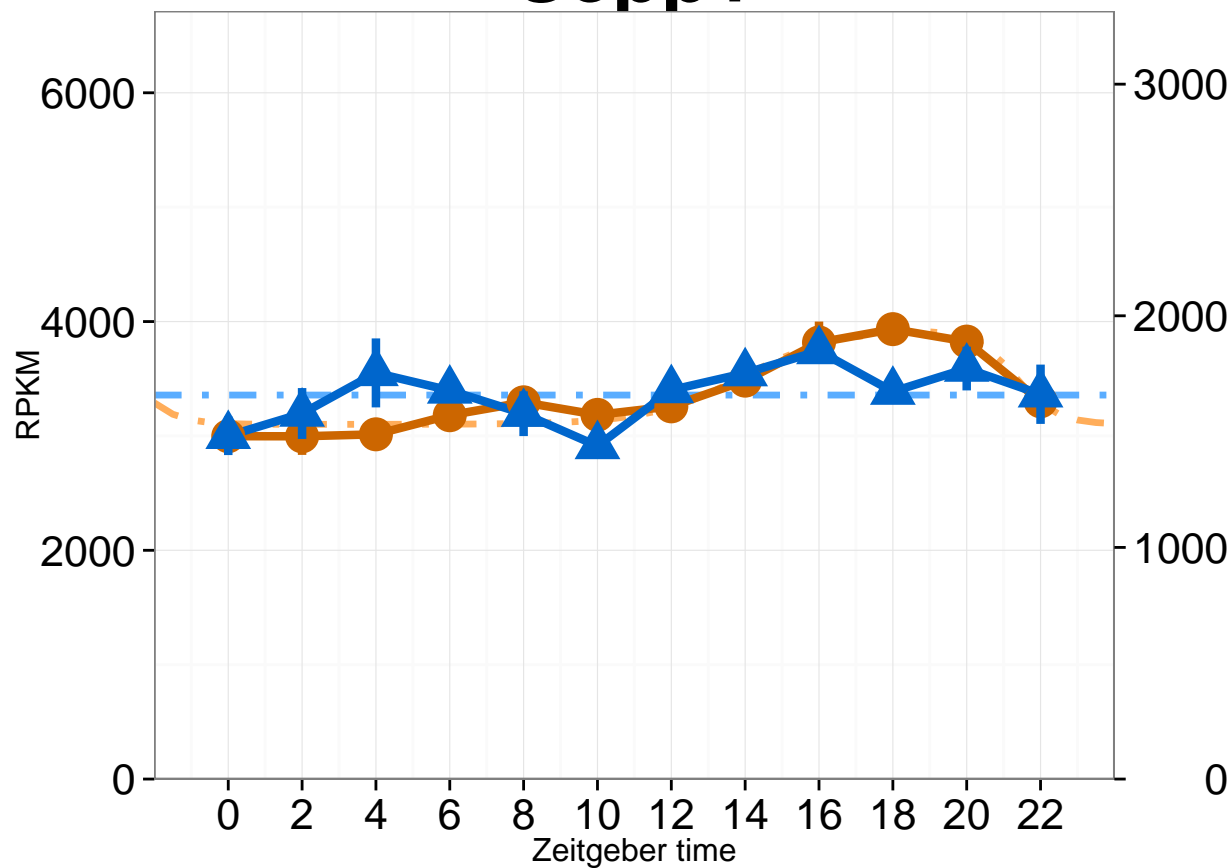

# Sepp1

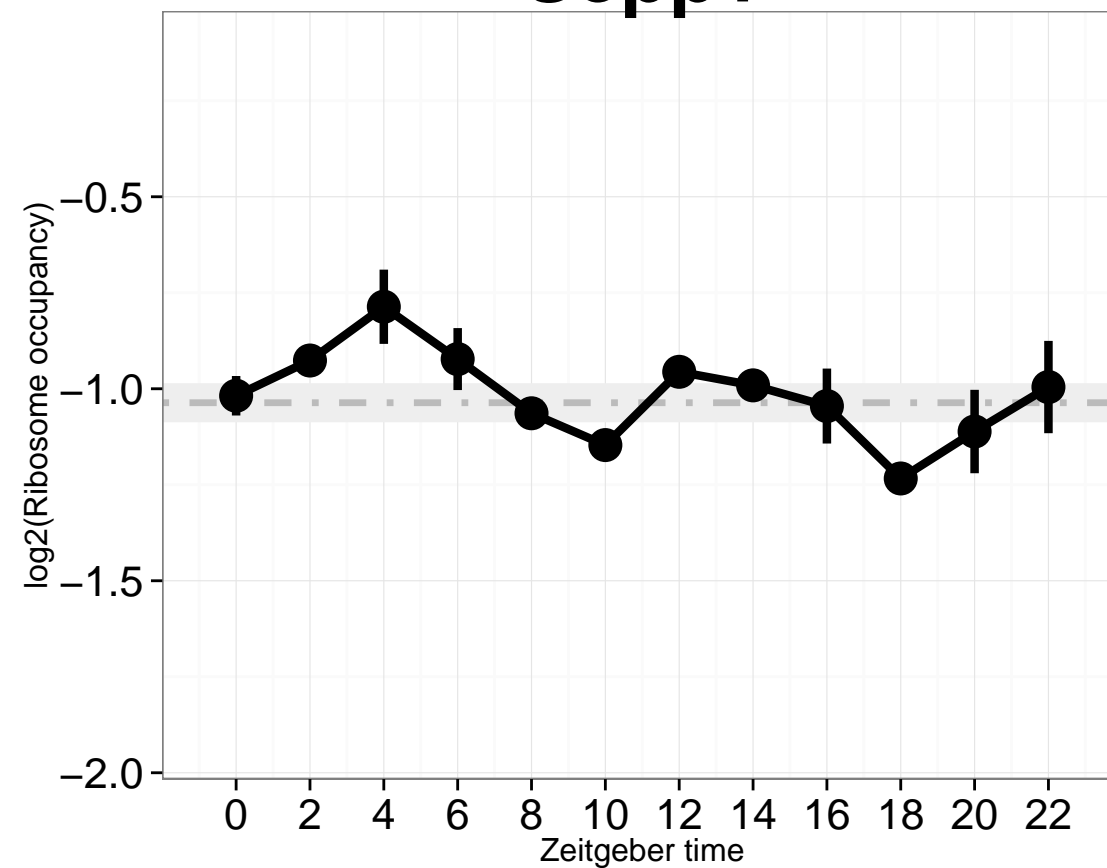

Supplement: SuppDataset_1.zip [file Sepp1_set_A.pdf › Supplemental Dataset 1/A-mRNA_nonrhyth_translation_nonrhyth/Sepp1_set_A.pdf]

## Sepsecs

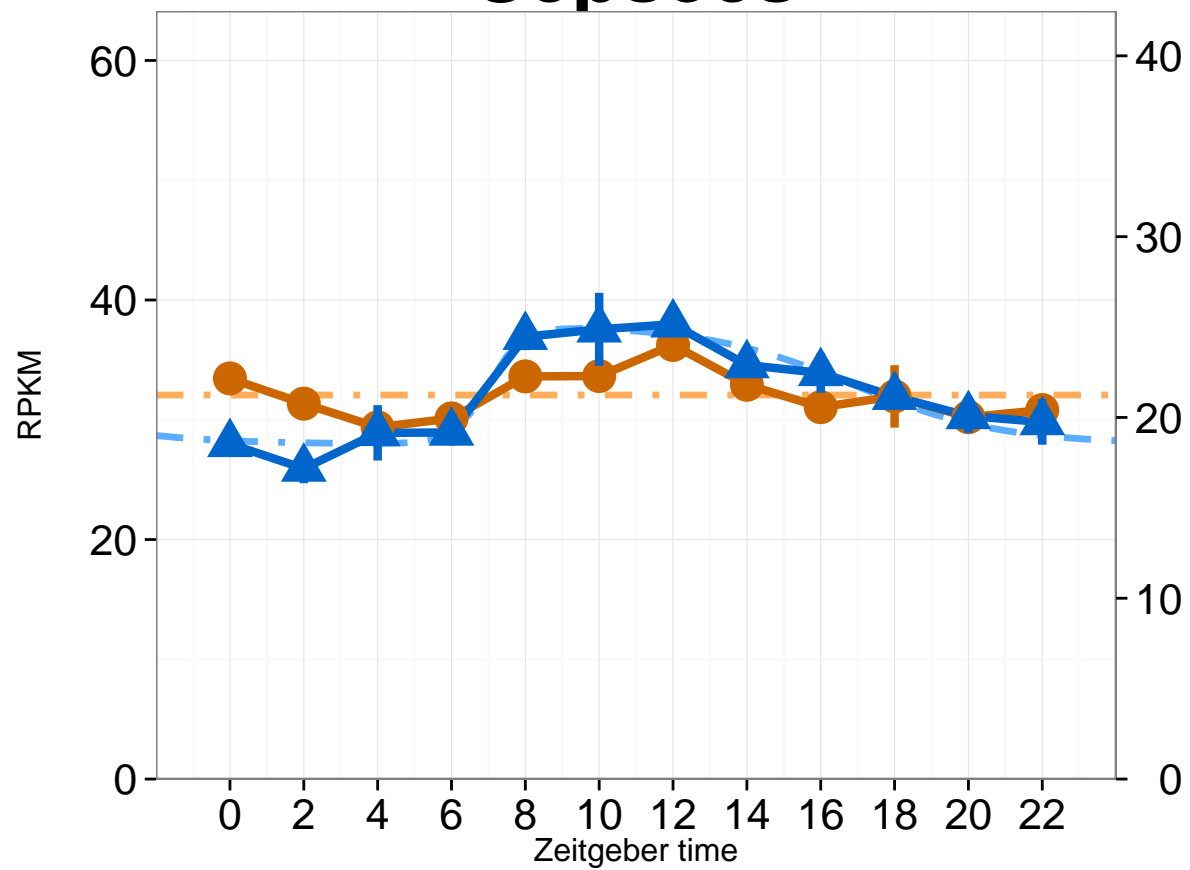

## Sepsecs

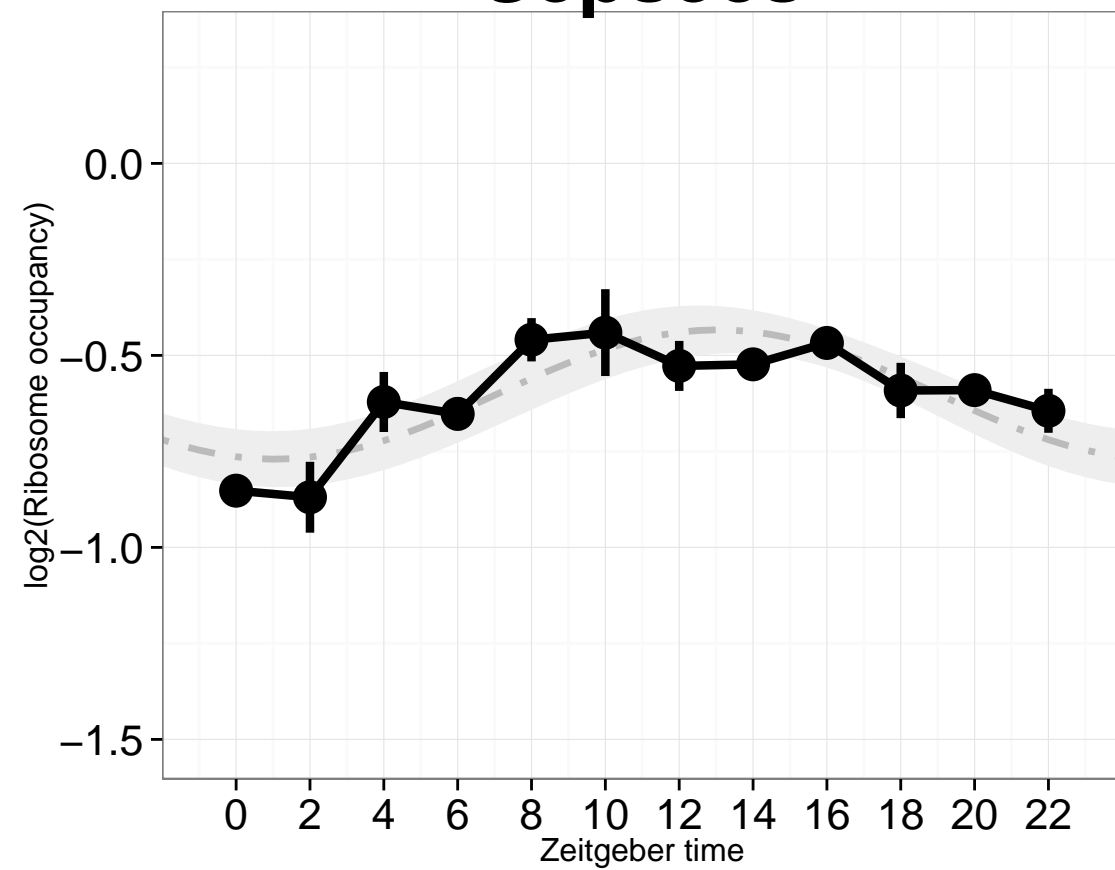

Supplement: SuppDataset_1.zip [file Sepsecs_set_A.pdf › Supplemental Dataset 1/A-mRNA_nonrhyth_translation_nonrhyth/Sepsecs_set_A.pdf]

# Sept10

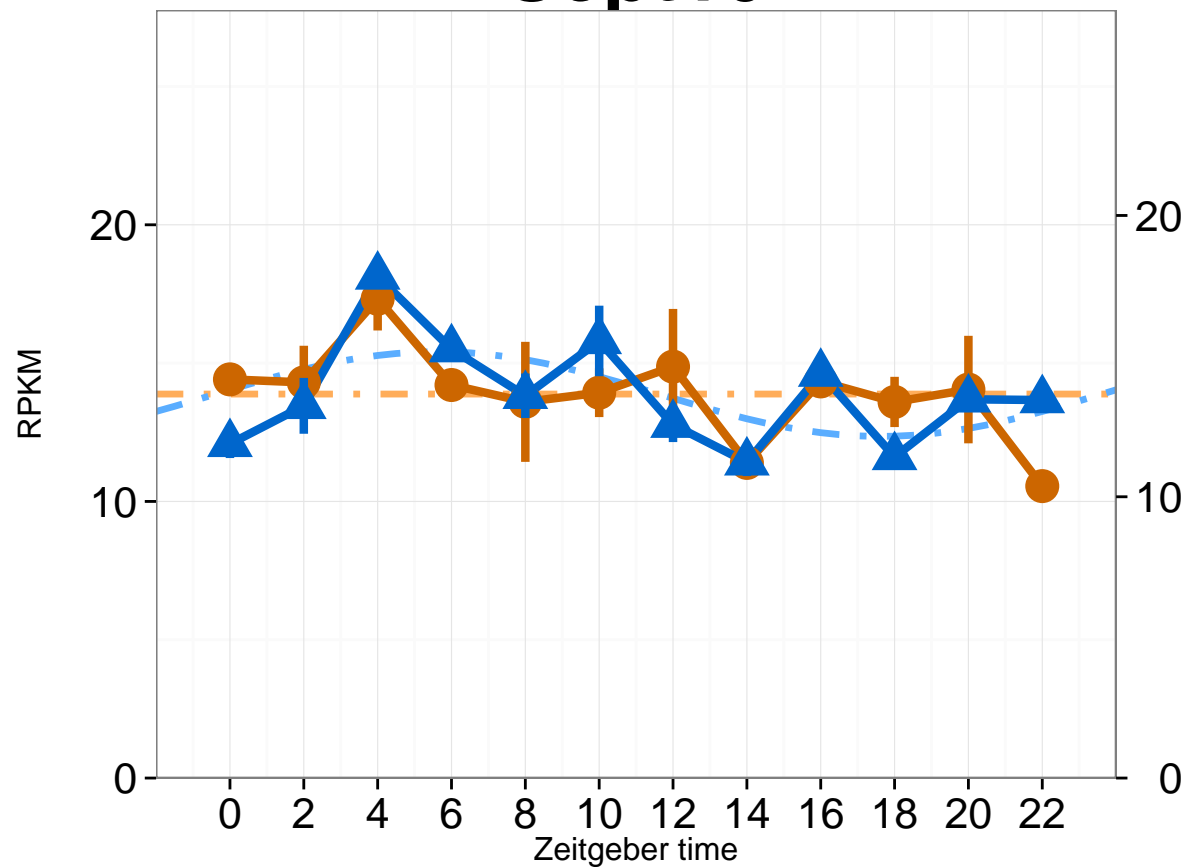

# Sept10

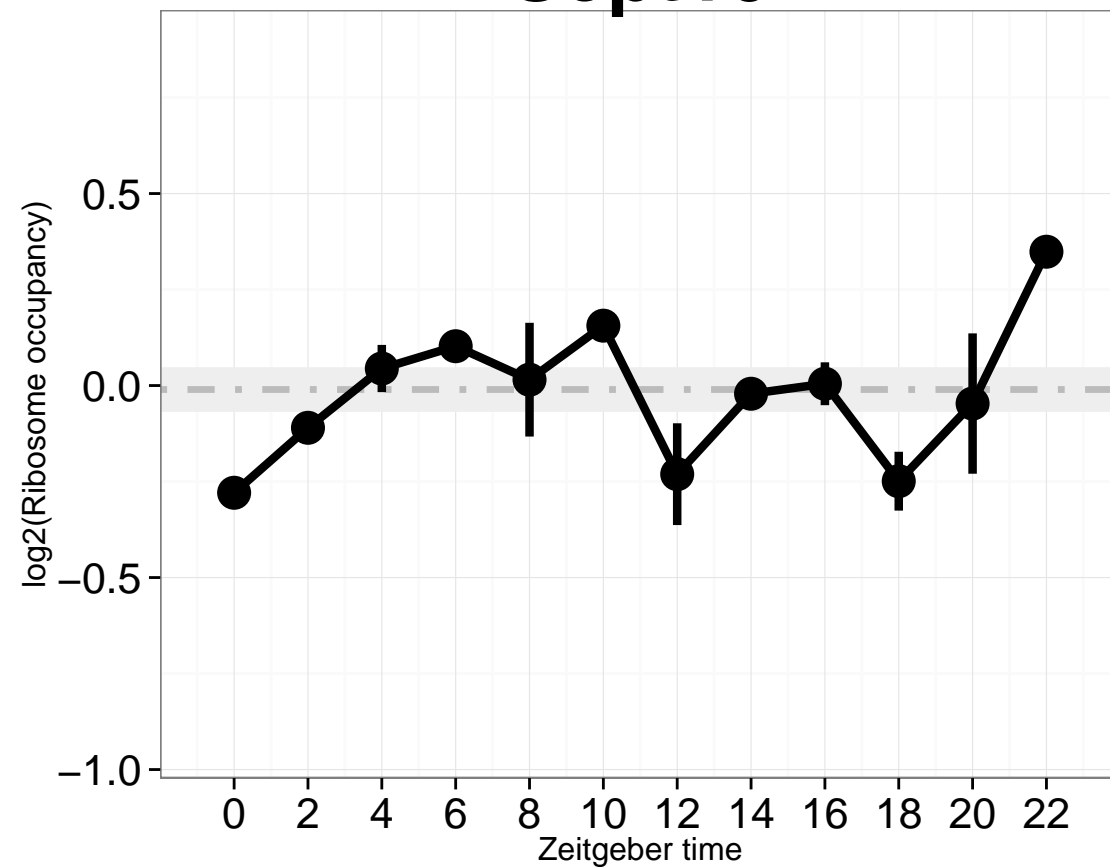

Supplement: SuppDataset_1.zip [file Sept10_set_A.pdf › Supplemental Dataset 1/A-mRNA_nonrhyth_translation_nonrhyth/Sept10_set_A.pdf]

**Sept2**

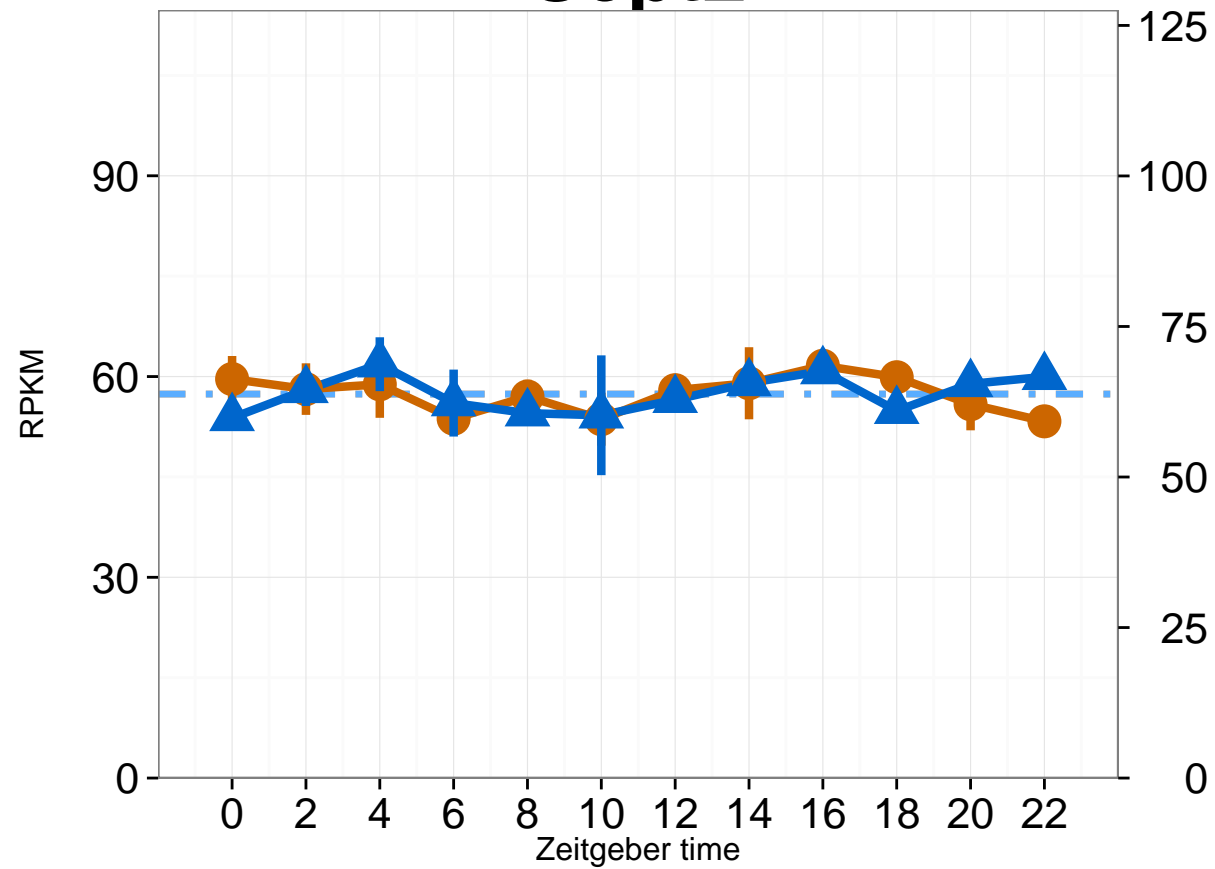

**Sept2**

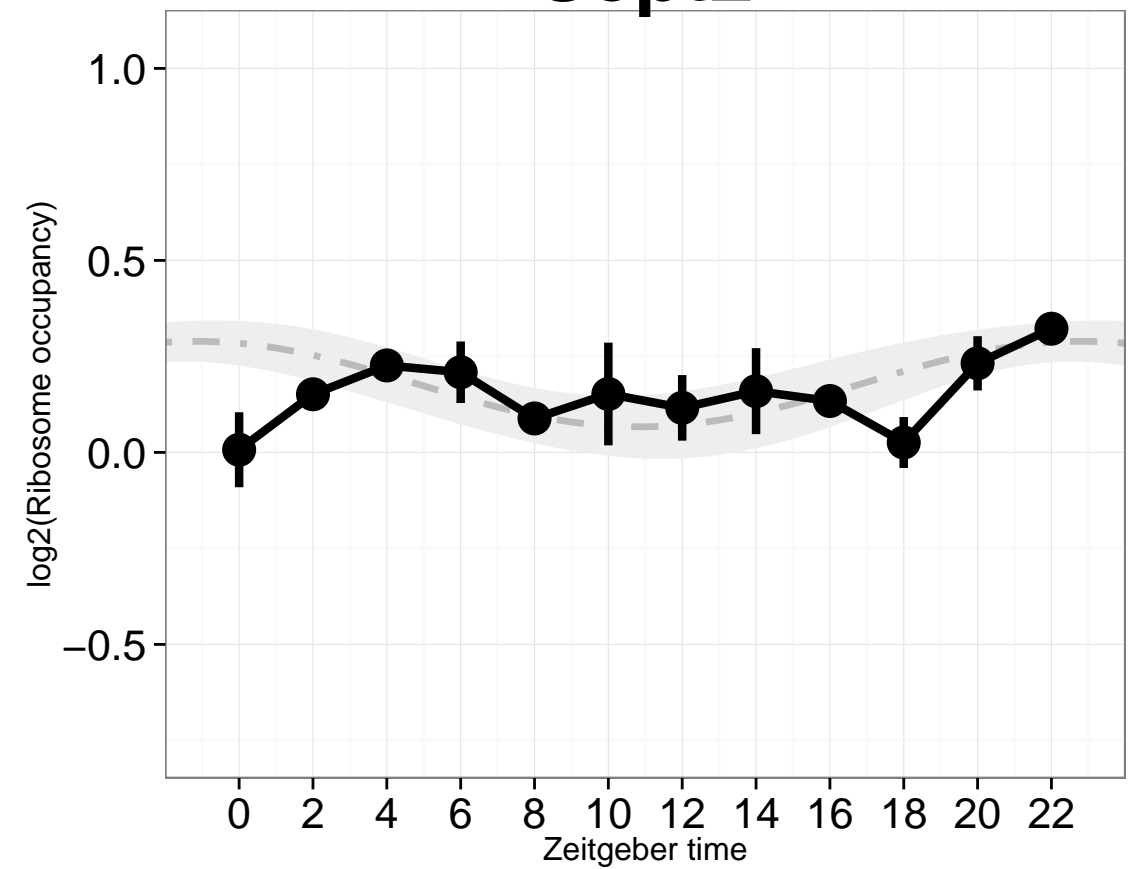

Supplement: SuppDataset_1.zip [file Sept2_set_A.pdf › Supplemental Dataset 1/A-mRNA_nonrhyth_translation_nonrhyth/Sept2_set_A.pdf]

**Sept5**

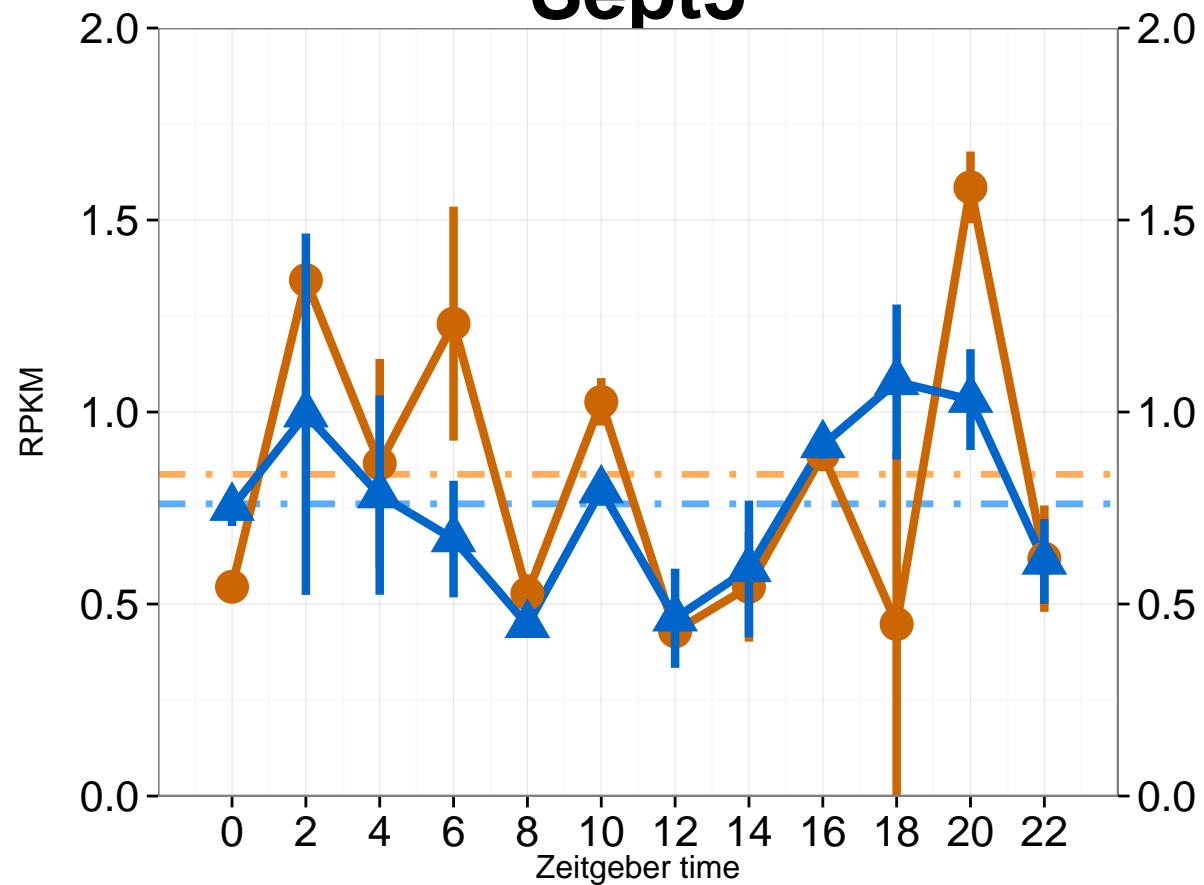

**Sept5**

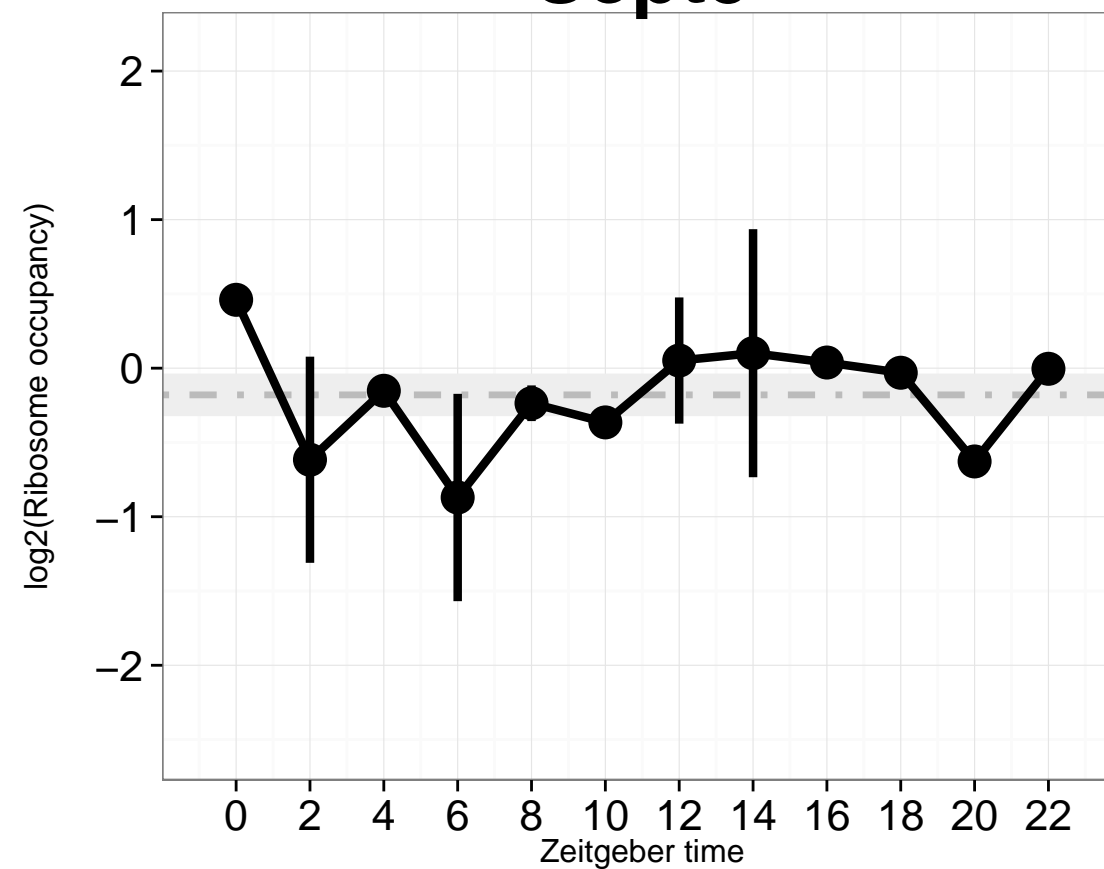

Supplement: SuppDataset_1.zip [file Sept5_set_A.pdf › Supplemental Dataset 1/A-mRNA_nonrhyth_translation_nonrhyth/Sept5_set_A.pdf]

**Sept6**

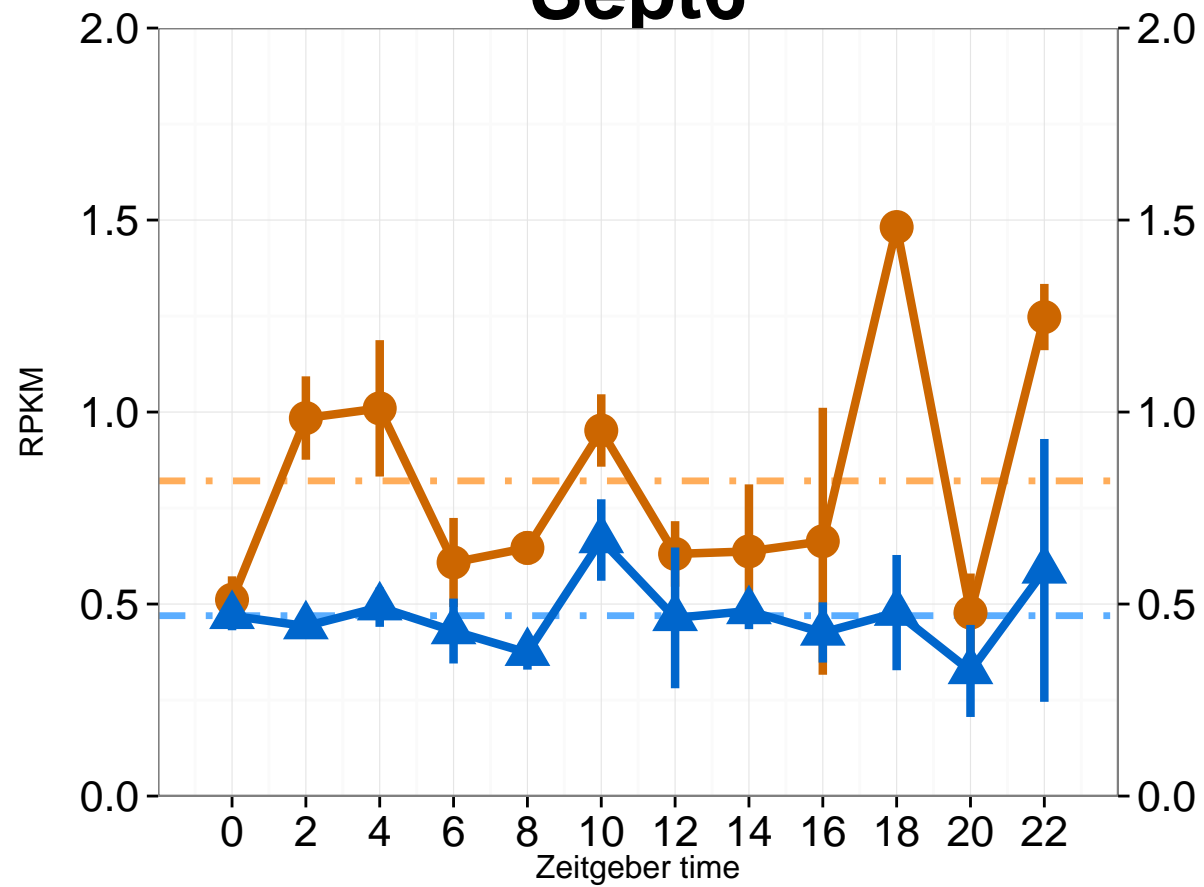

**Sept6**

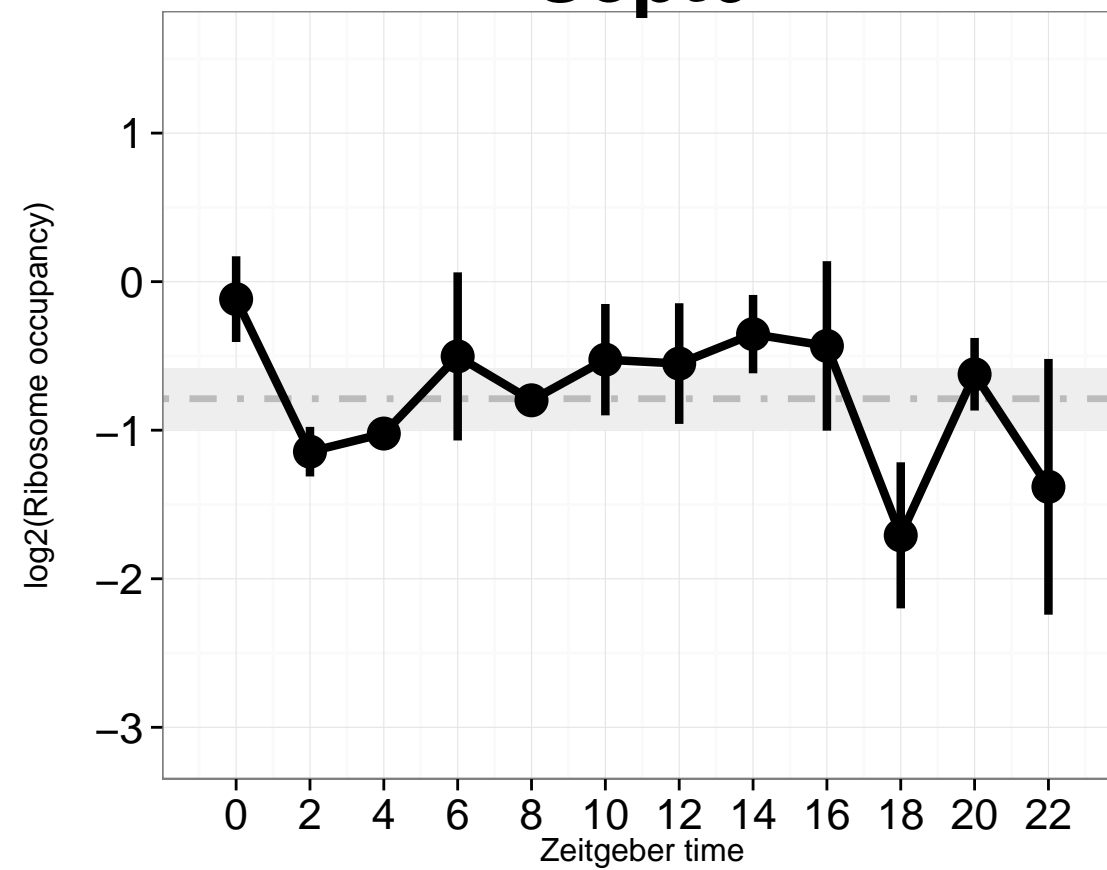

Supplement: SuppDataset_1.zip [file Sept6_set_A.pdf › Supplemental Dataset 1/A-mRNA_nonrhyth_translation_nonrhyth/Sept6_set_A.pdf]

**Sept7**

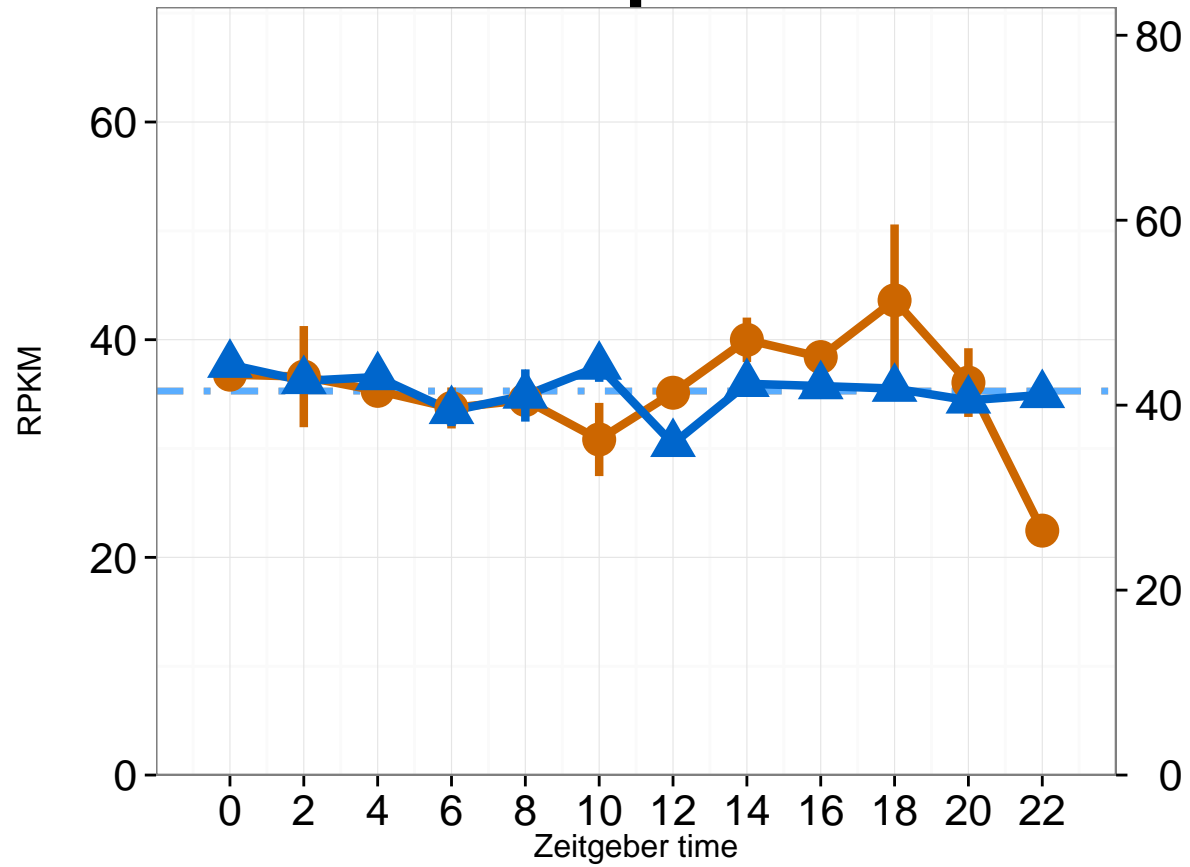

**Sept7**

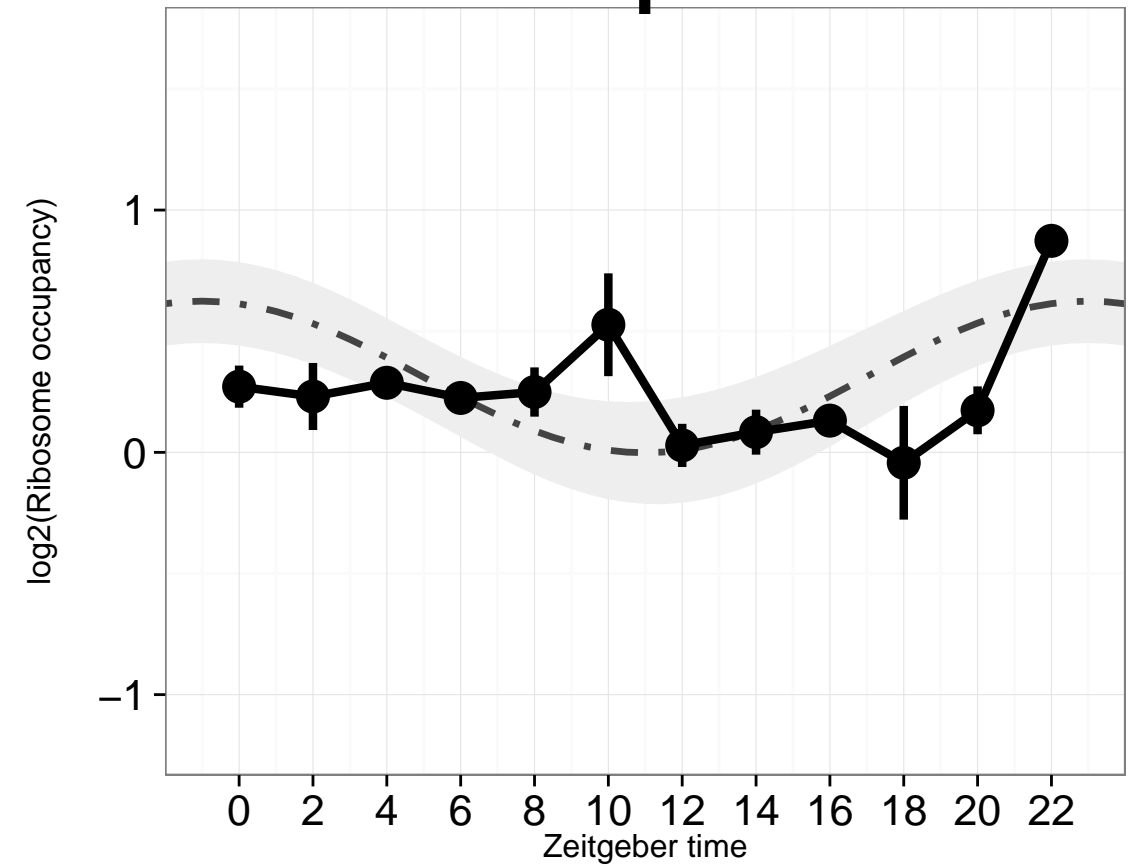

Supplement: SuppDataset_1.zip [file Sept7_set_A.pdf › Supplemental Dataset 1/A-mRNA_nonrhyth_translation_nonrhyth/Sept7_set_A.pdf]

**Sept8**

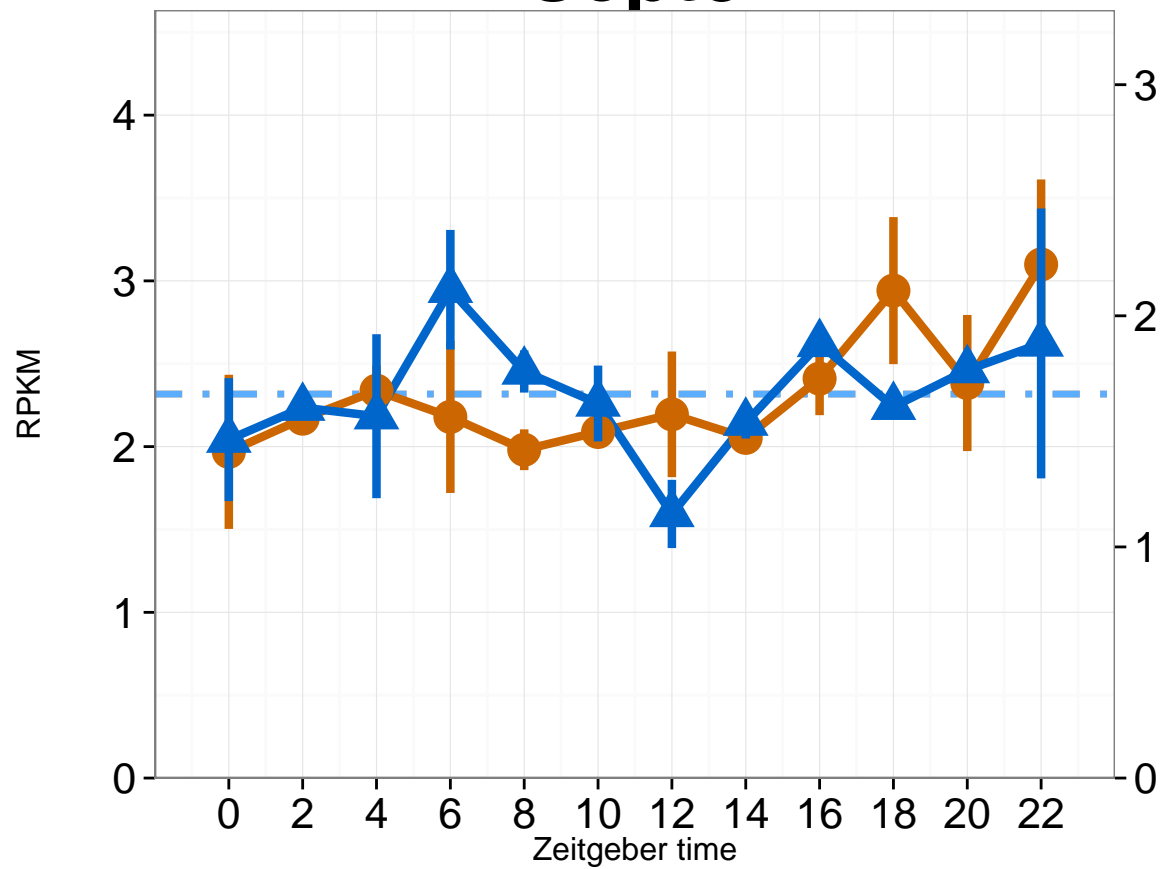

**Sept8**

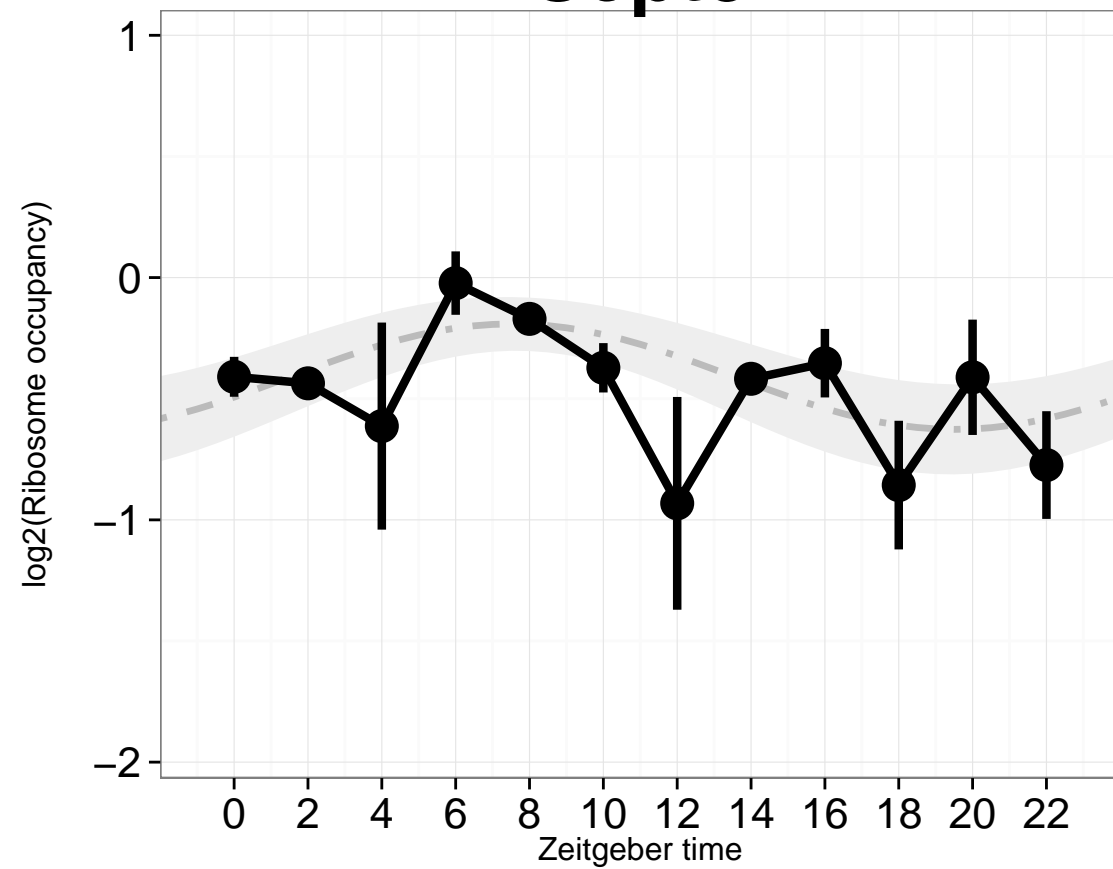

Supplement: SuppDataset_1.zip [file Sept8_set_A.pdf › Supplemental Dataset 1/A-mRNA_nonrhyth_translation_nonrhyth/Sept8_set_A.pdf]

# Sepw1

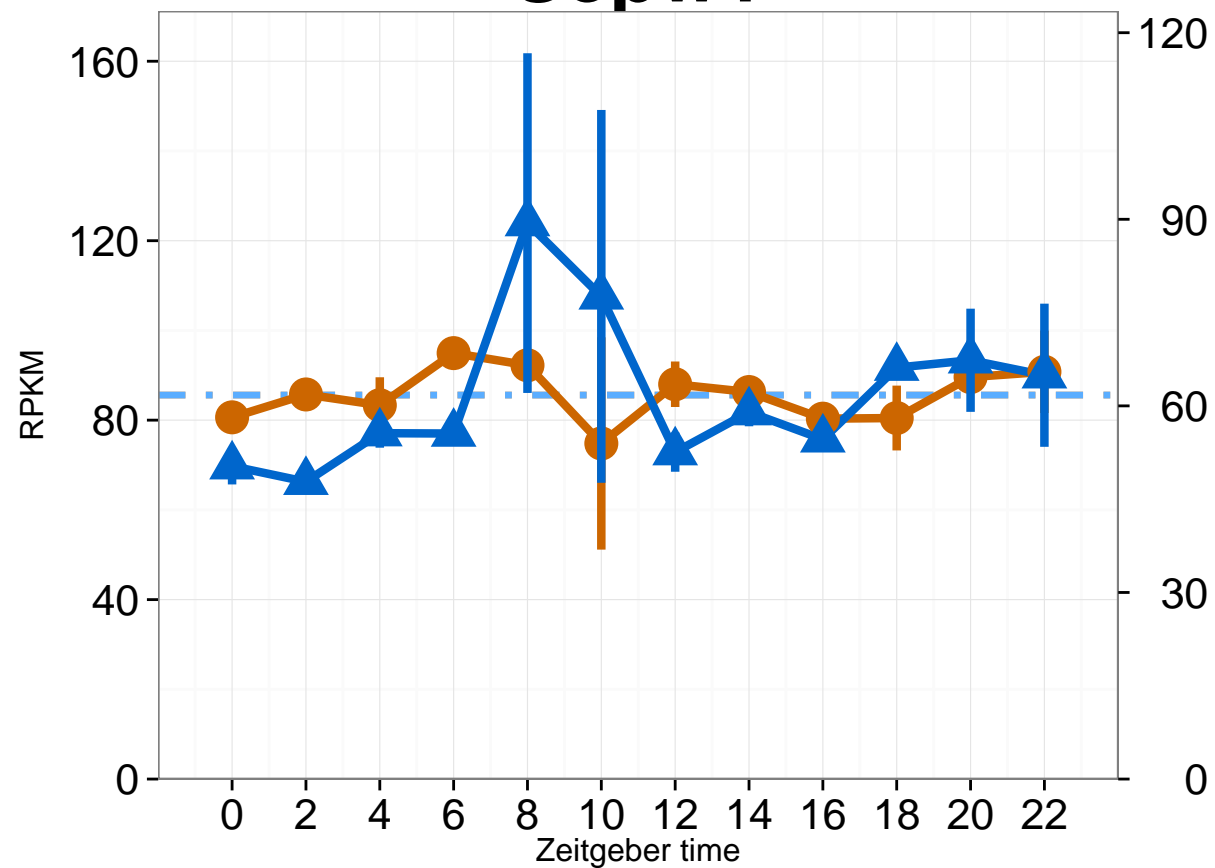

# Sepw1

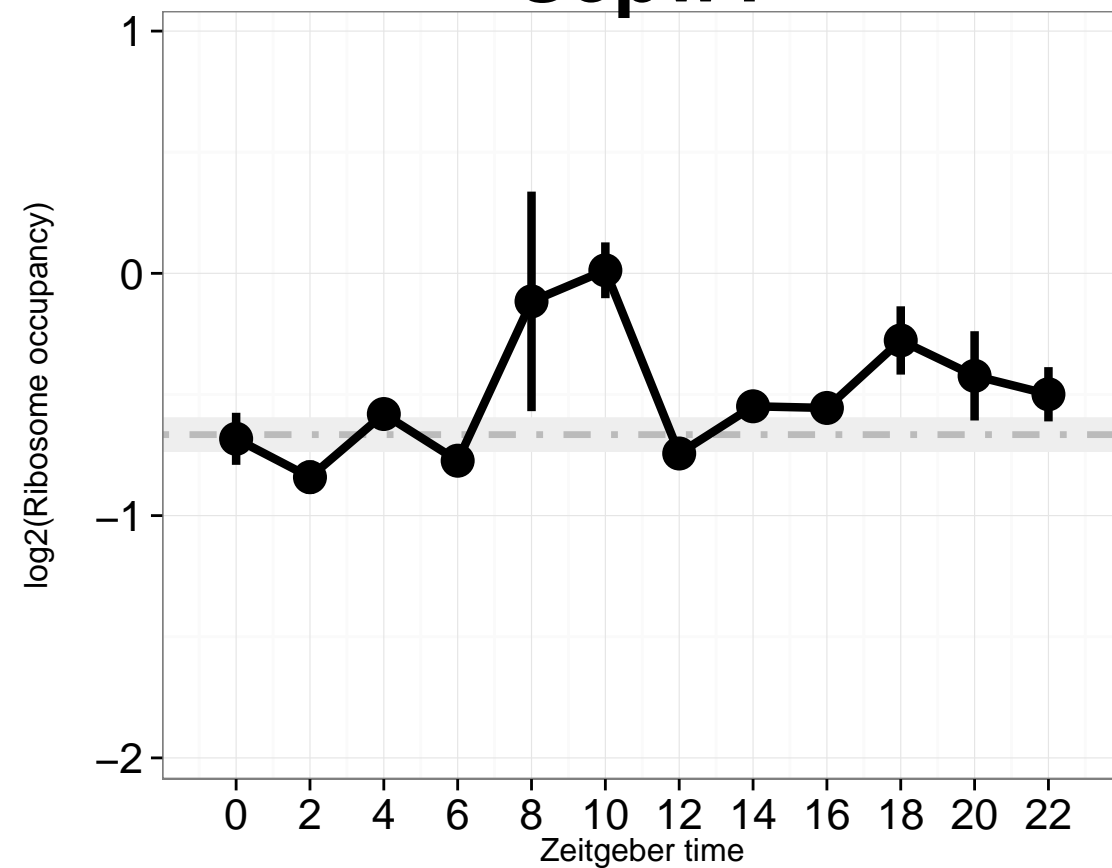

Supplement: SuppDataset_1.zip [file Sepw1_set_A.pdf › Supplemental Dataset 1/A-mRNA_nonrhyth_translation_nonrhyth/Sepw1_set_A.pdf]
