# Supplementary figures and images for: Ribosome profiling reveals the rhythmic liver translatome and circadian clock regulation by upstream open reading frames (part 93 of 113)
Source: HighWire-hosted journal article supplement (doi:10.1101/gr.195404.115), 2015-10-20

## Sec14l2

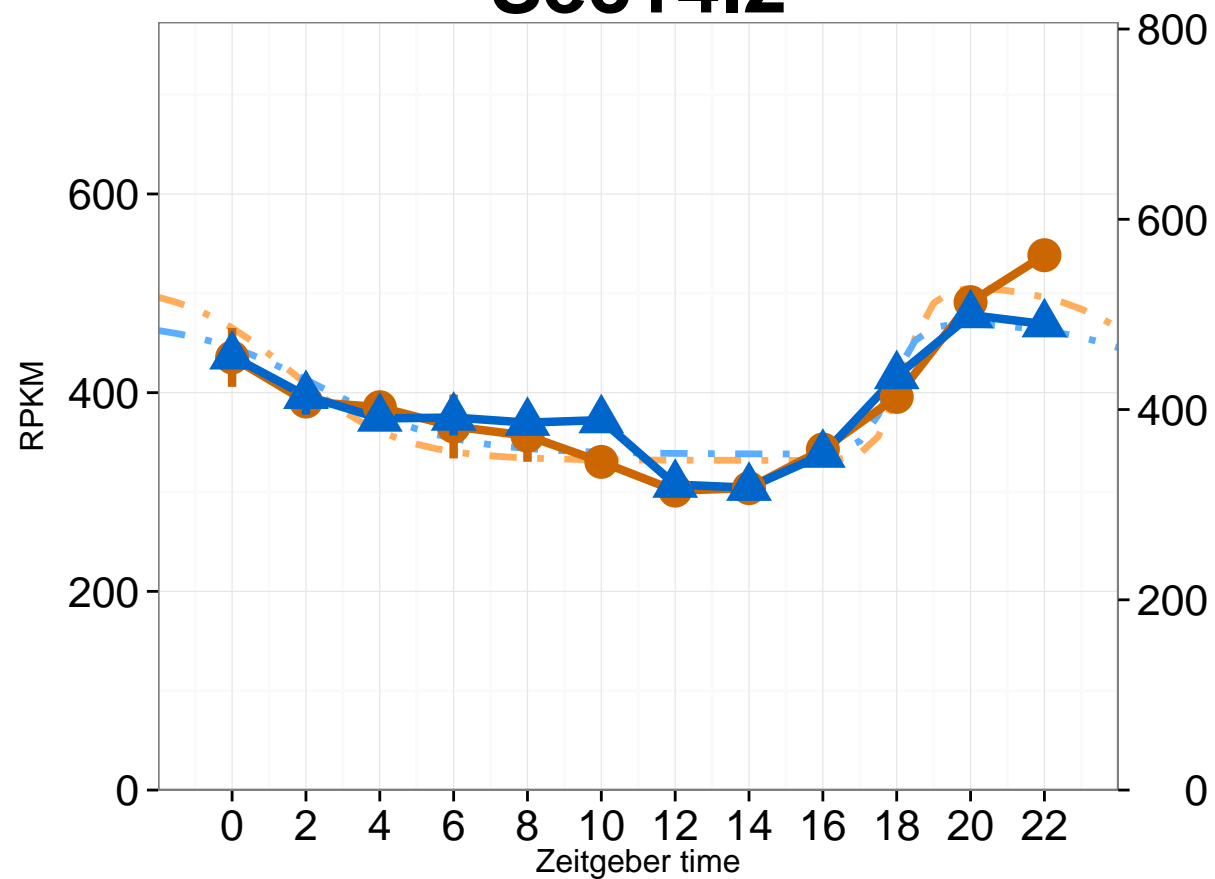

## Sec14l2

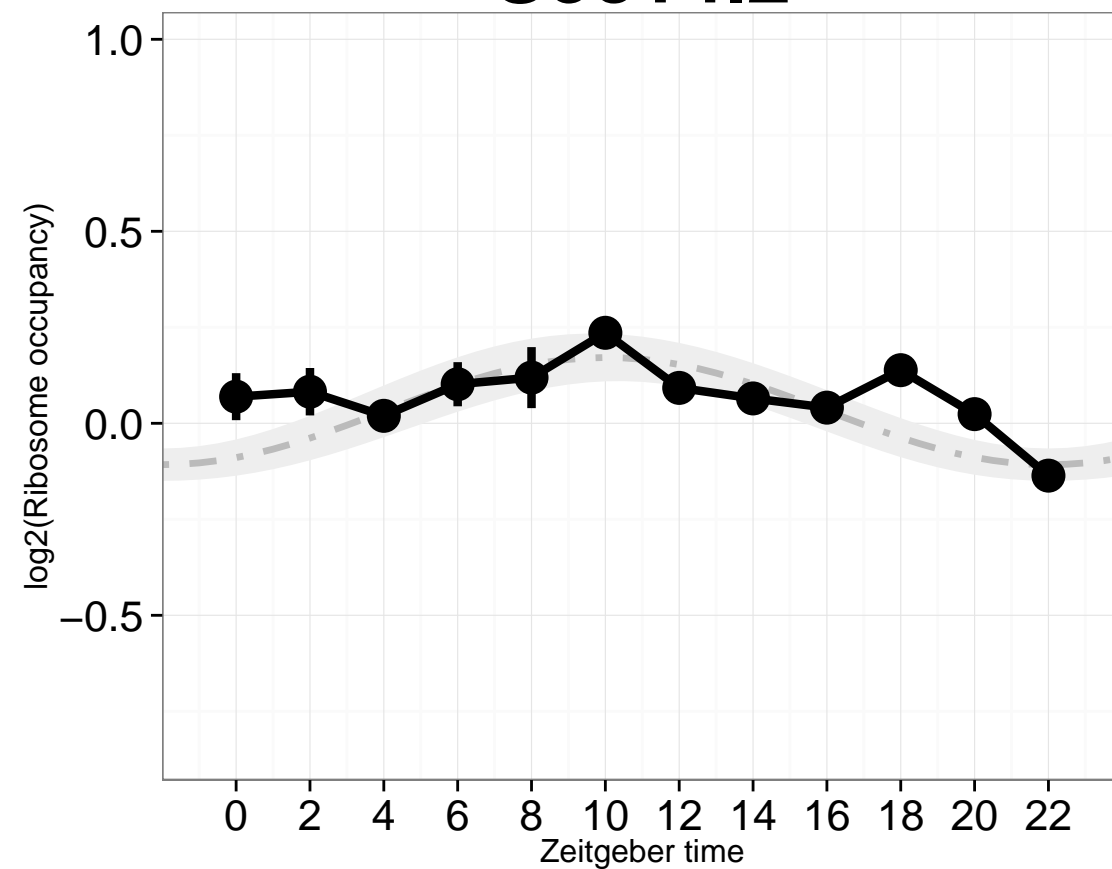

Supplement: SuppDataset_1.zip [file Sec14l2_set_B.pdf › Supplemental Dataset 1/B-mRNA_rhythm_translation_nonrhyth/Sec14l2_set_B.pdf]

# Sec61g

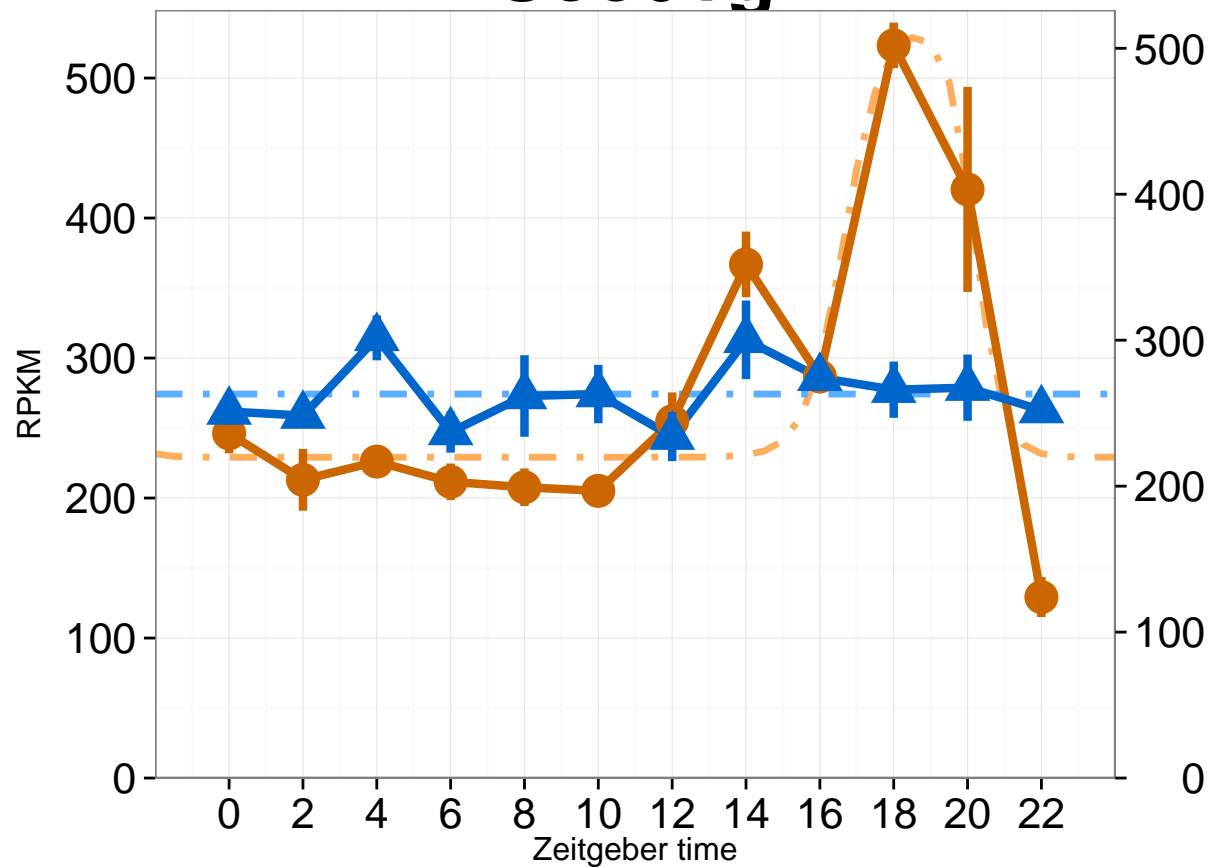

# Sec61g

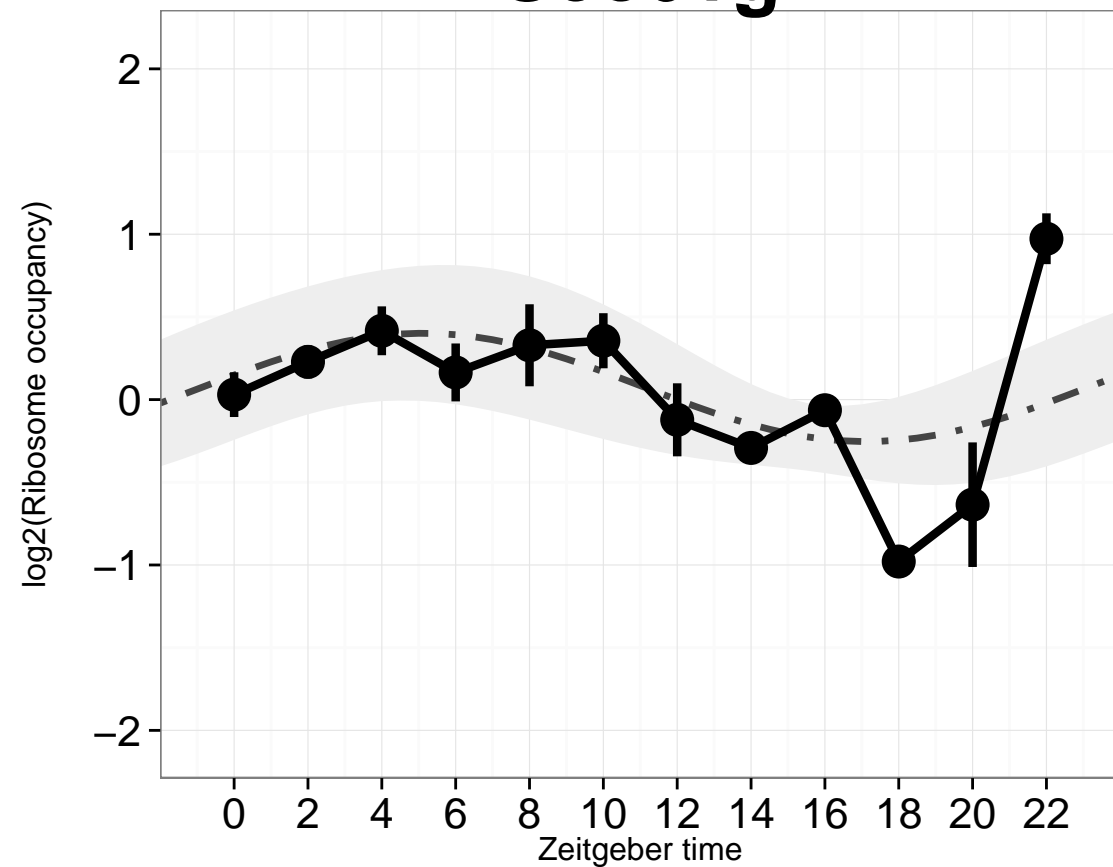

Supplement: SuppDataset_1.zip [file Sec61g_set_B.pdf › Supplemental Dataset 1/B-mRNA_rhythm_translation_nonrhyth/Sec61g_set_B.pdf]

## Sema4d

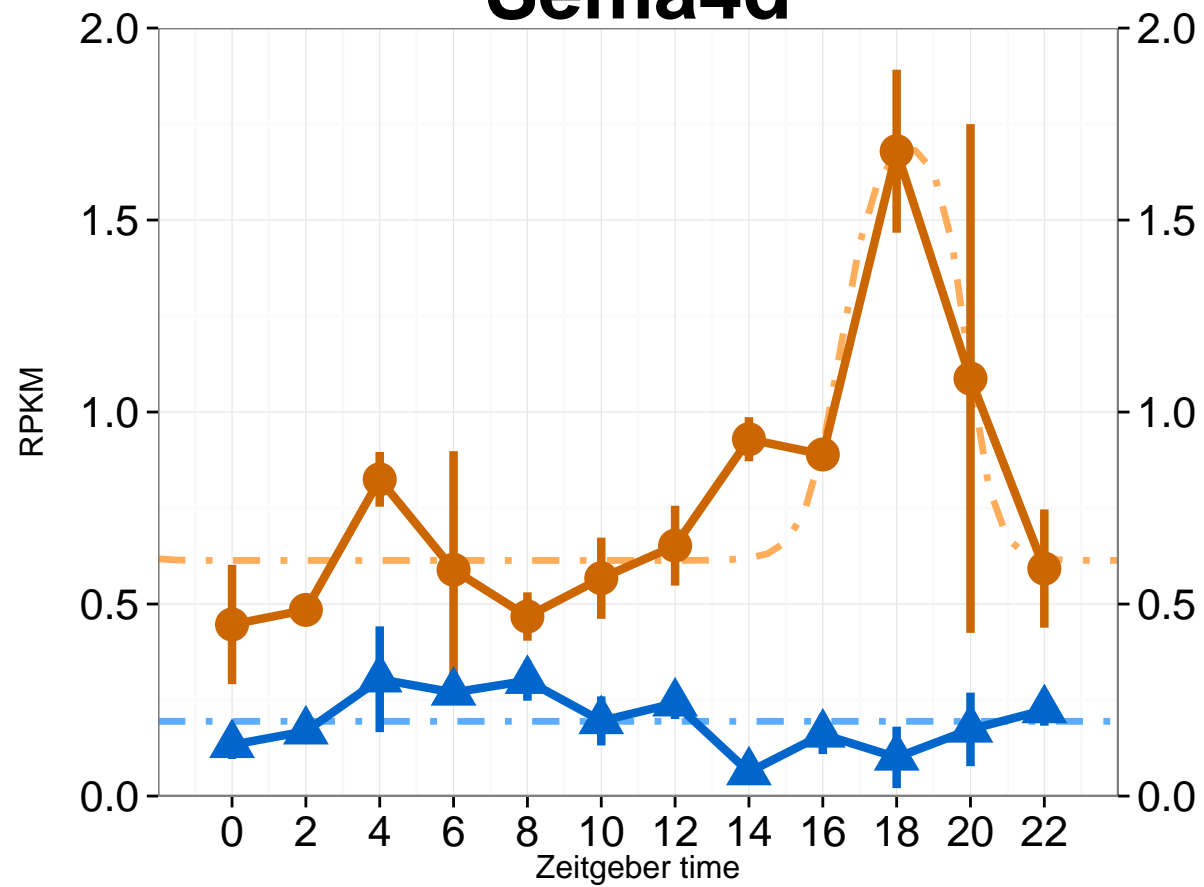

## Sema4d

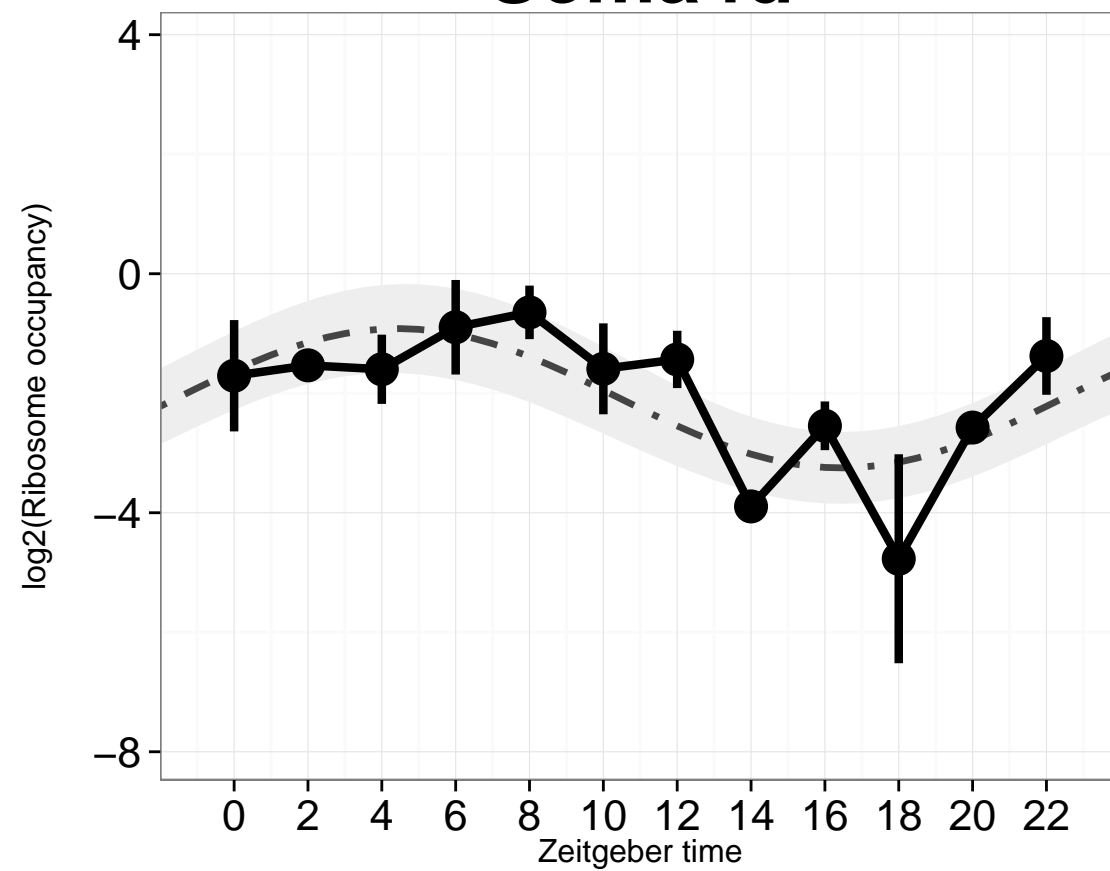

Supplement: SuppDataset_1.zip [file Sema4d_set_B.pdf › Supplemental Dataset 1/B-mRNA_rhythm_translation_nonrhyth/Sema4d_set_B.pdf]

## Sema5a

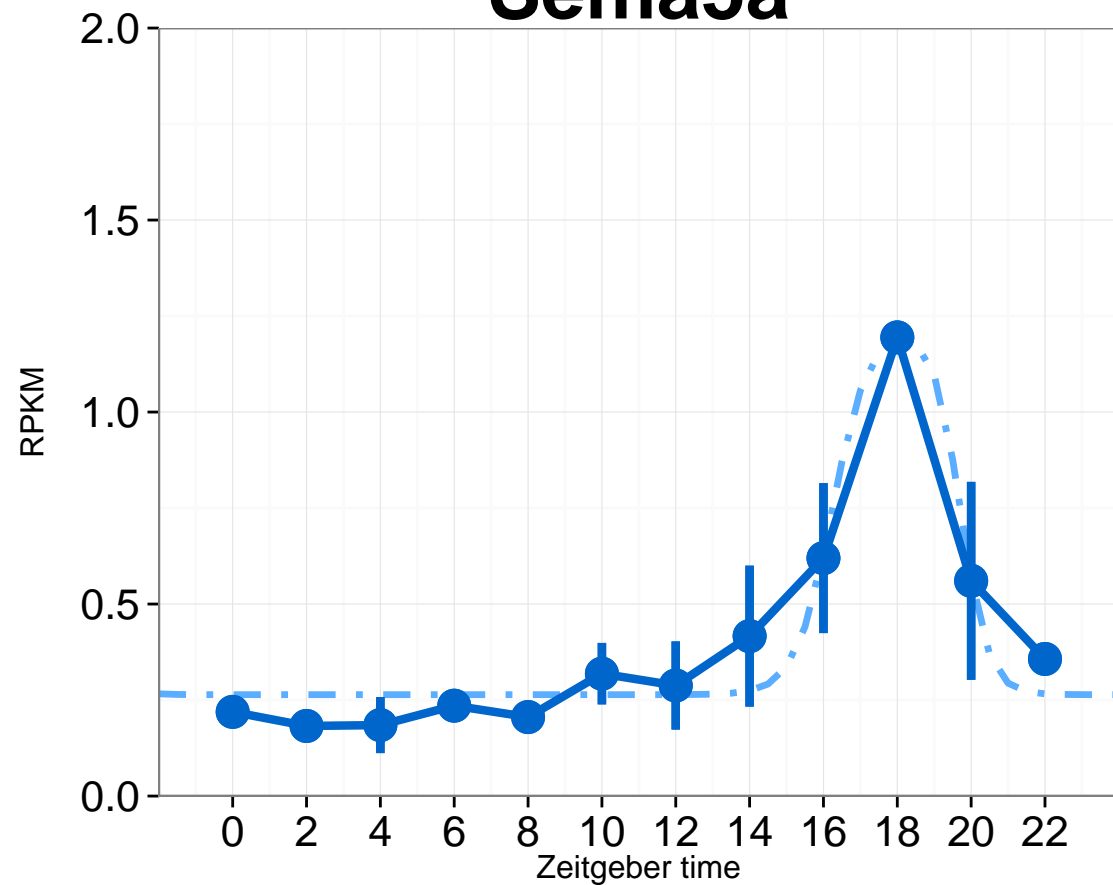

## Sema5a log2(Ribosome occupancy)

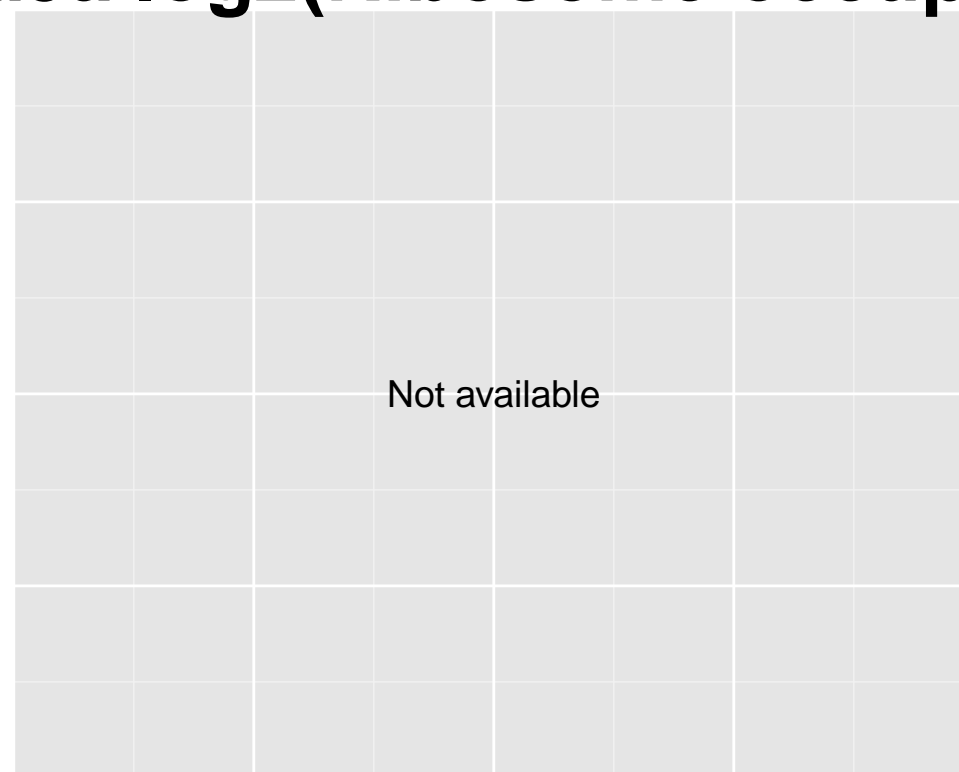

Supplement: SuppDataset_1.zip [file Sema5a_set_B.pdf › Supplemental Dataset 1/B-mRNA_rhythm_translation_nonrhyth/Sema5a_set_B.pdf]

# Serp1

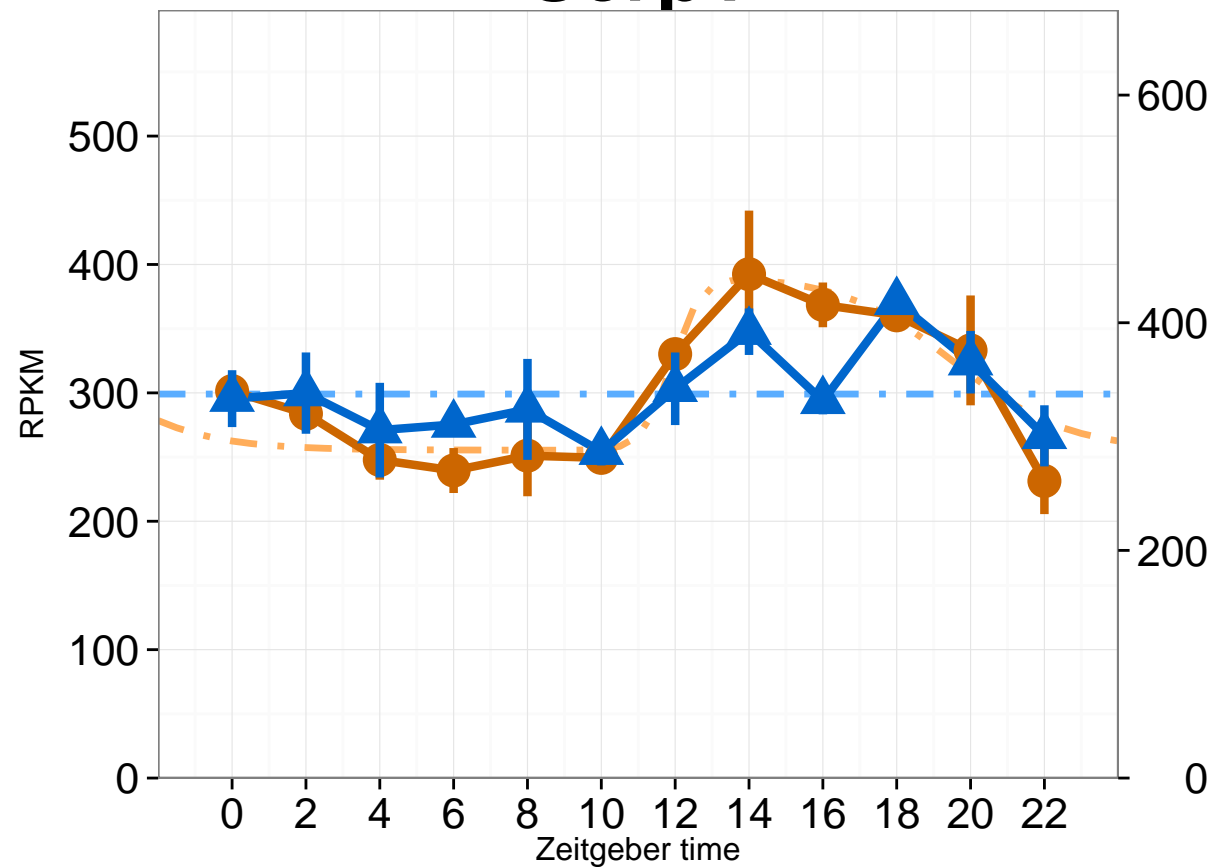

# Serp1

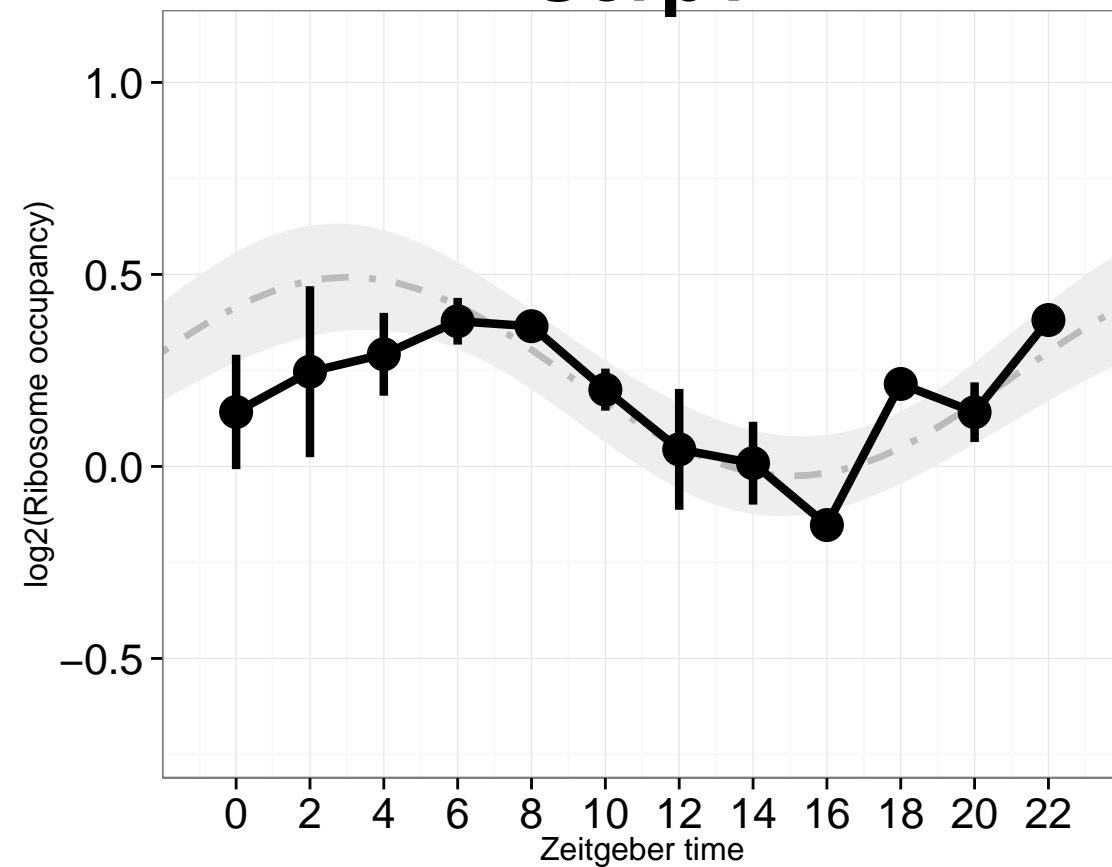

Supplement: SuppDataset_1.zip [file Serp1_set_B.pdf › Supplemental Dataset 1/B-mRNA_rhythm_translation_nonrhyth/Serp1_set_B.pdf]

# Serpina3c

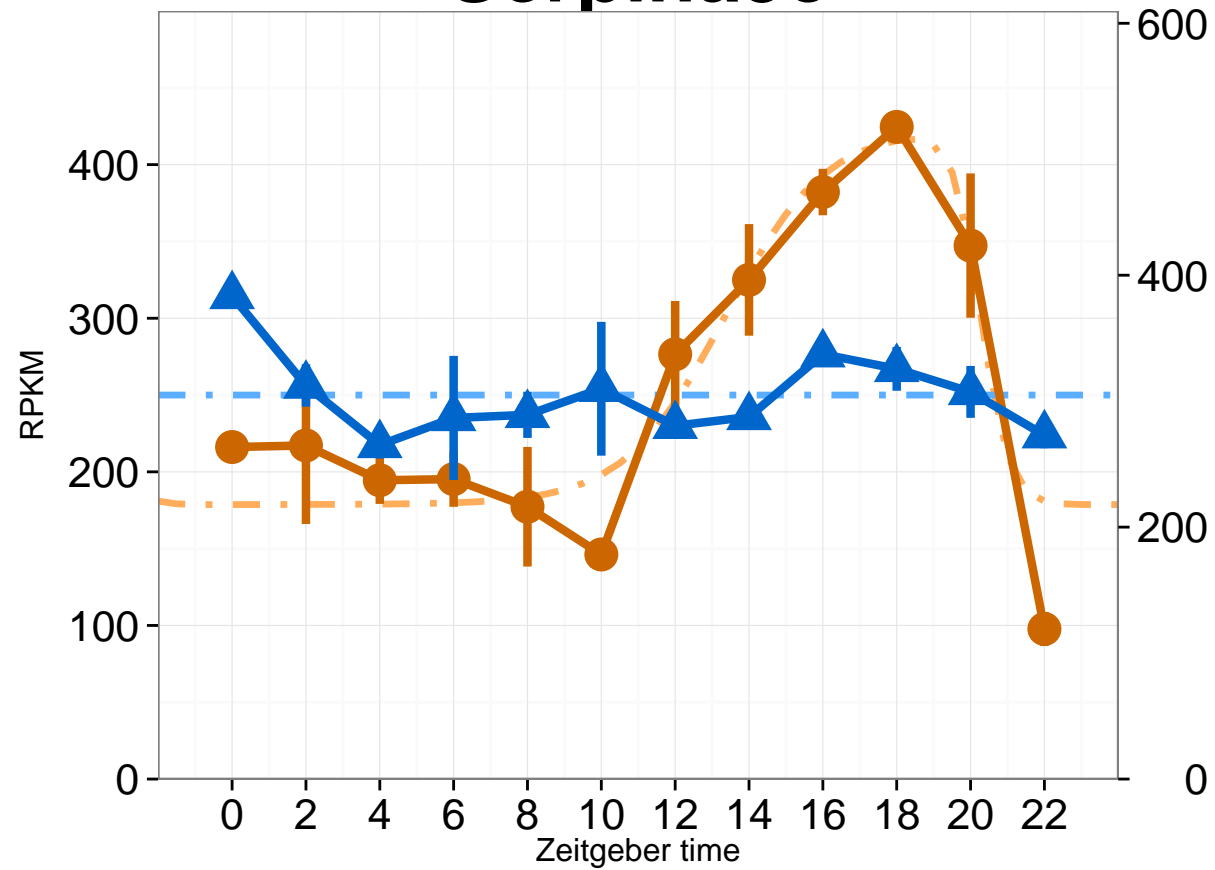

# Serpina3c

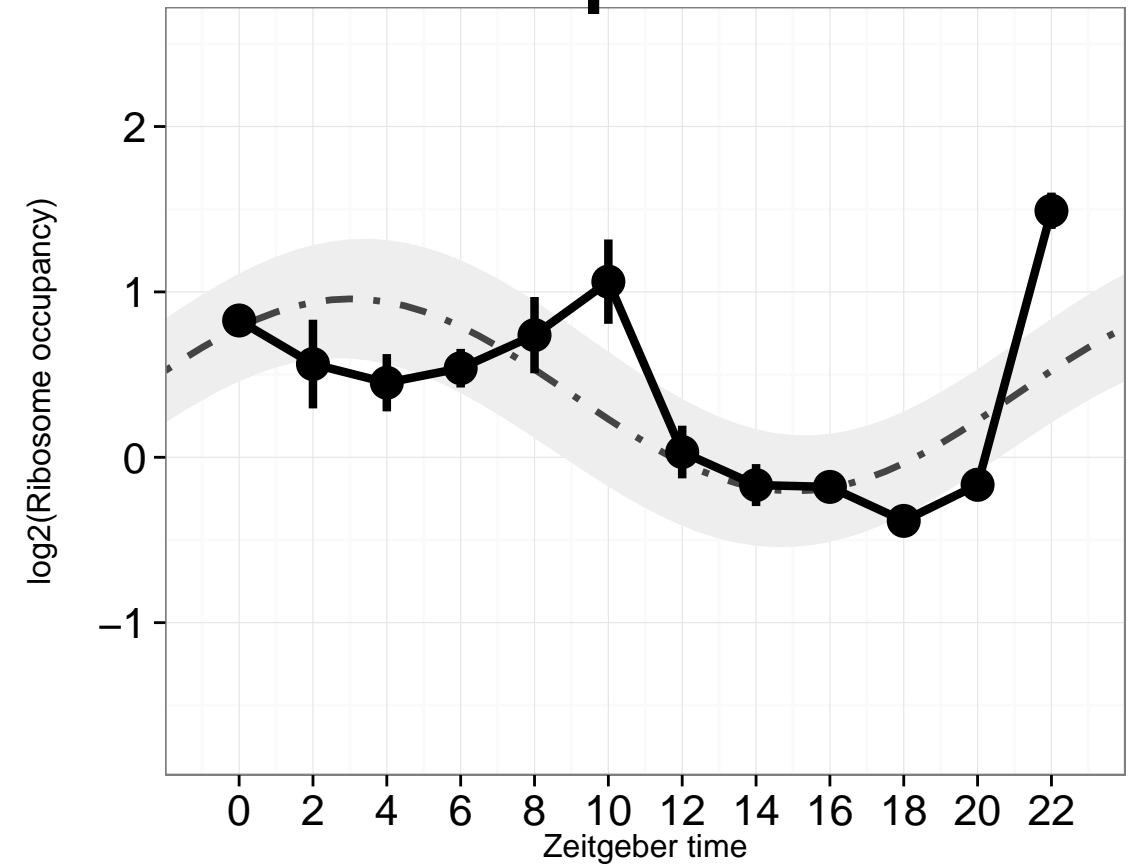

Supplement: SuppDataset_1.zip [file Serpina3c_set_B.pdf › Supplemental Dataset 1/B-mRNA_rhythm_translation_nonrhyth/Serpina3c_set_B.pdf]

## Serpinf1

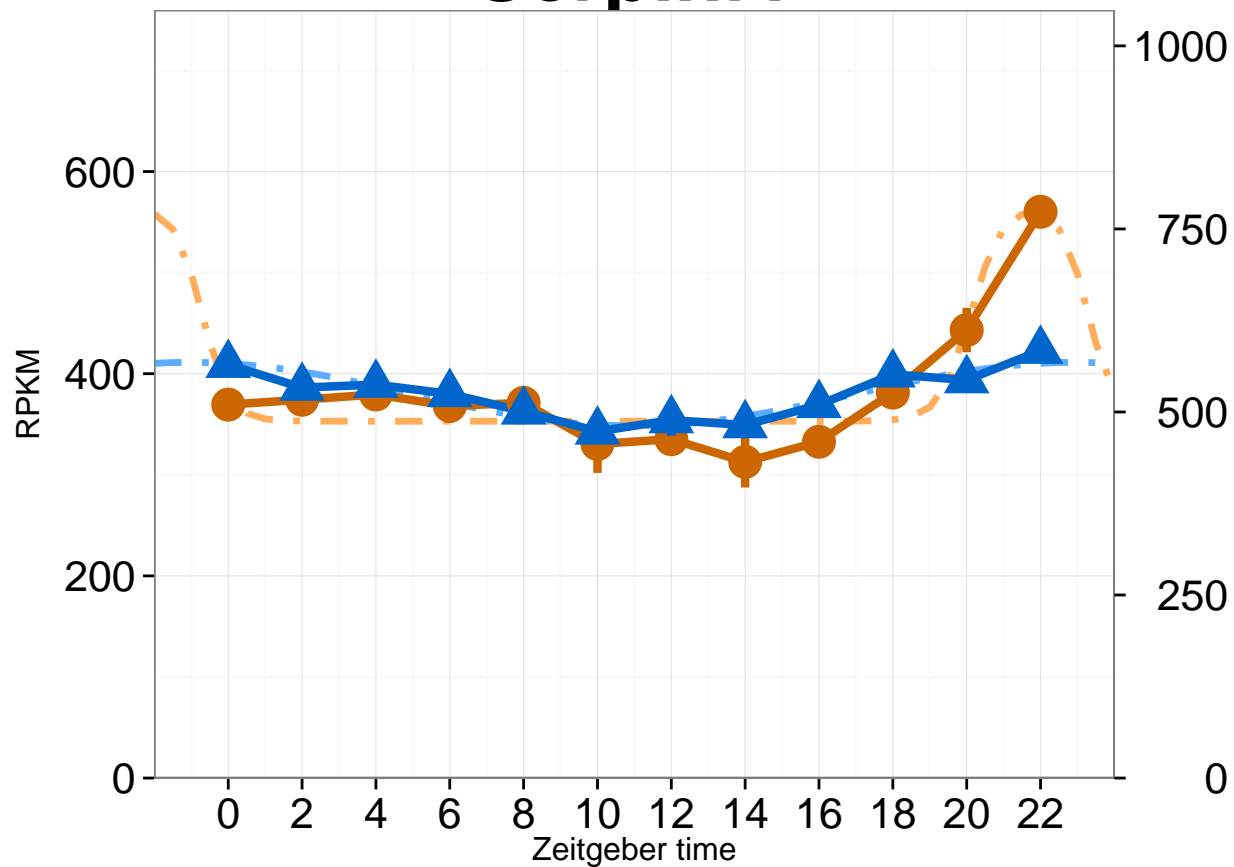

## Serpinf1

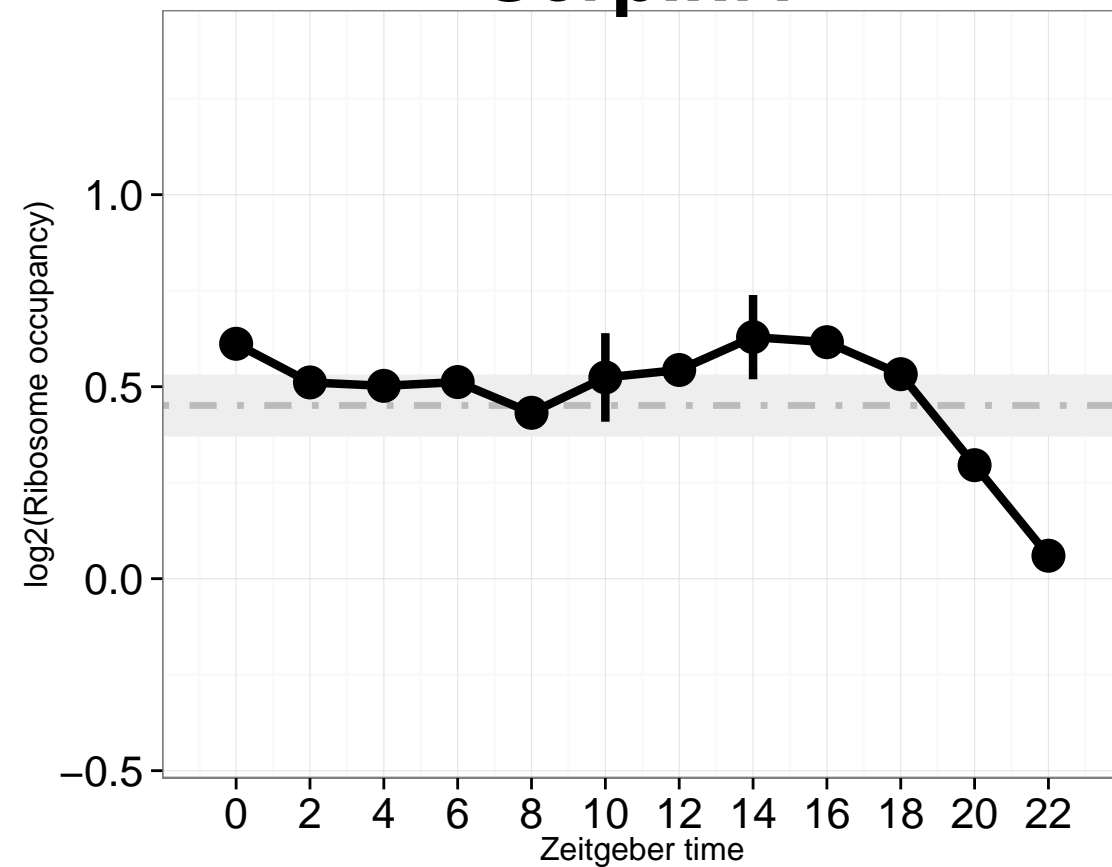

Supplement: SuppDataset_1.zip [file Serpinf1_set_B.pdf › Supplemental Dataset 1/B-mRNA_rhythm_translation_nonrhyth/Serpinf1_set_B.pdf]

## Sft2d3

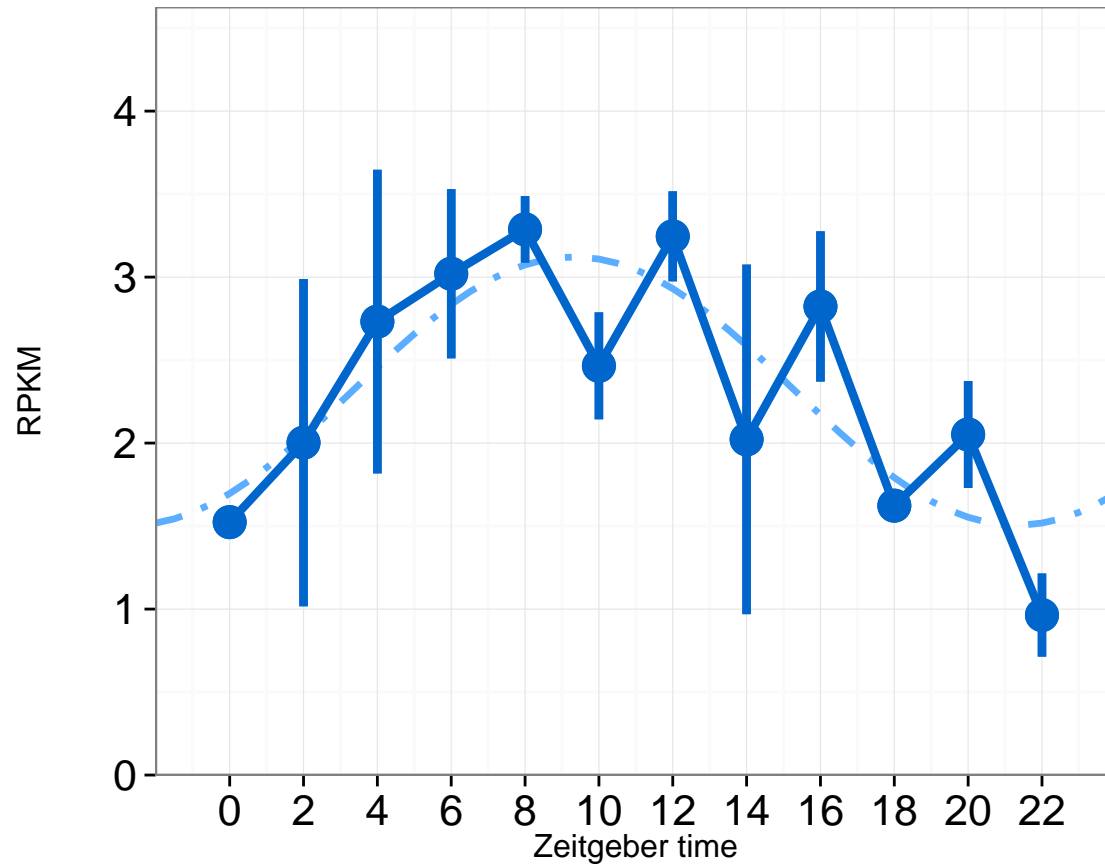

## Sft2d3 log2(Ribosome occupancy

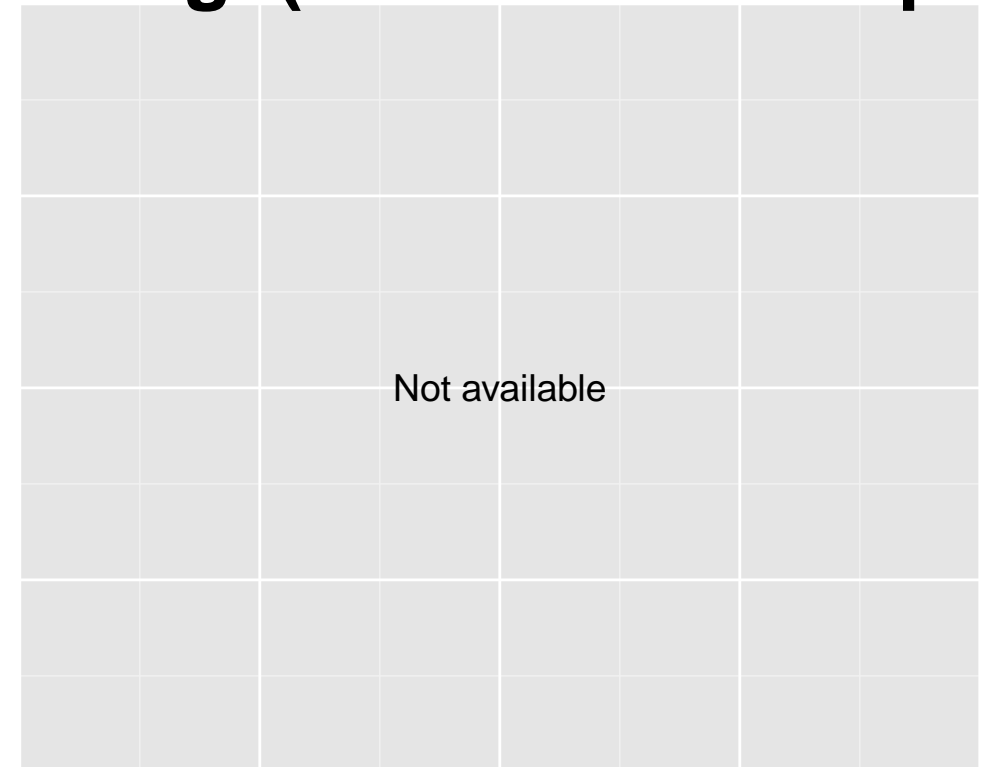

Supplement: SuppDataset_1.zip [file Sft2d3_set_B.pdf › Supplemental Dataset 1/B-mRNA_rhythm_translation_nonrhyth/Sft2d3_set_B.pdf]

# Sgms1

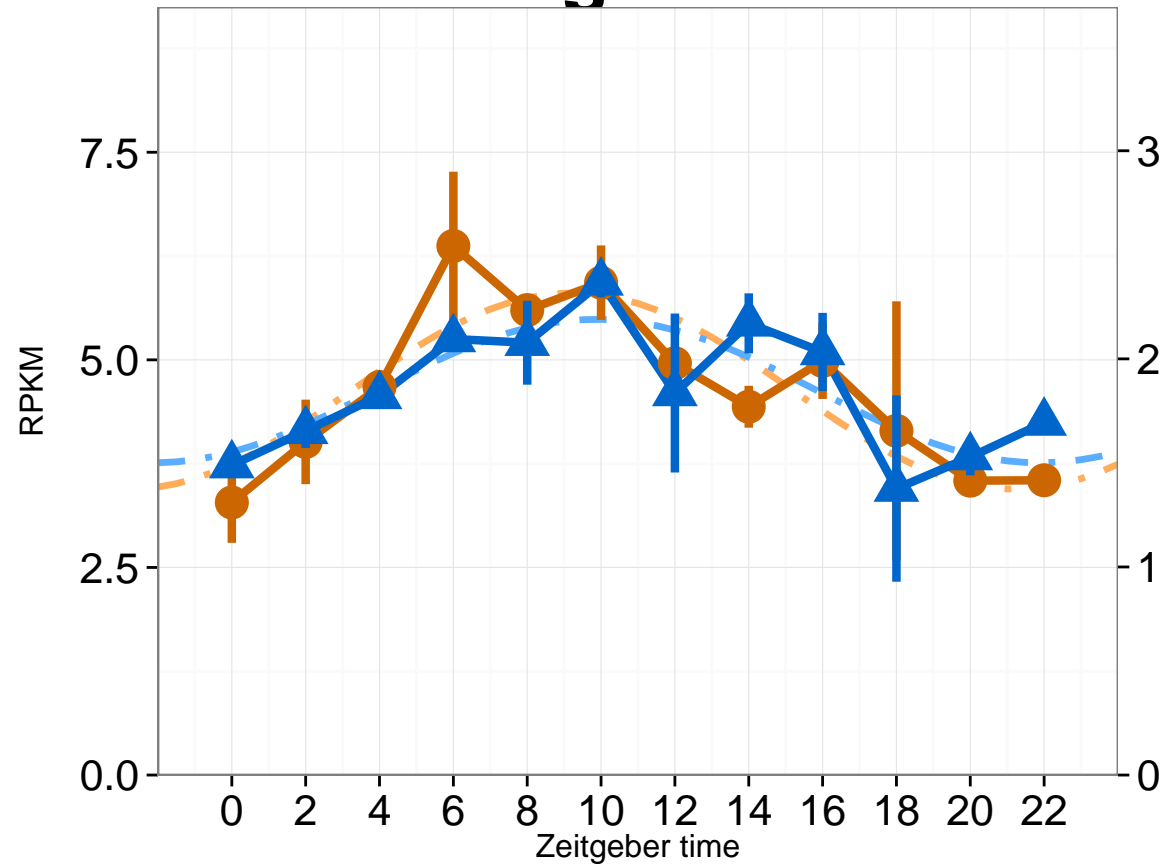

# Sgms1

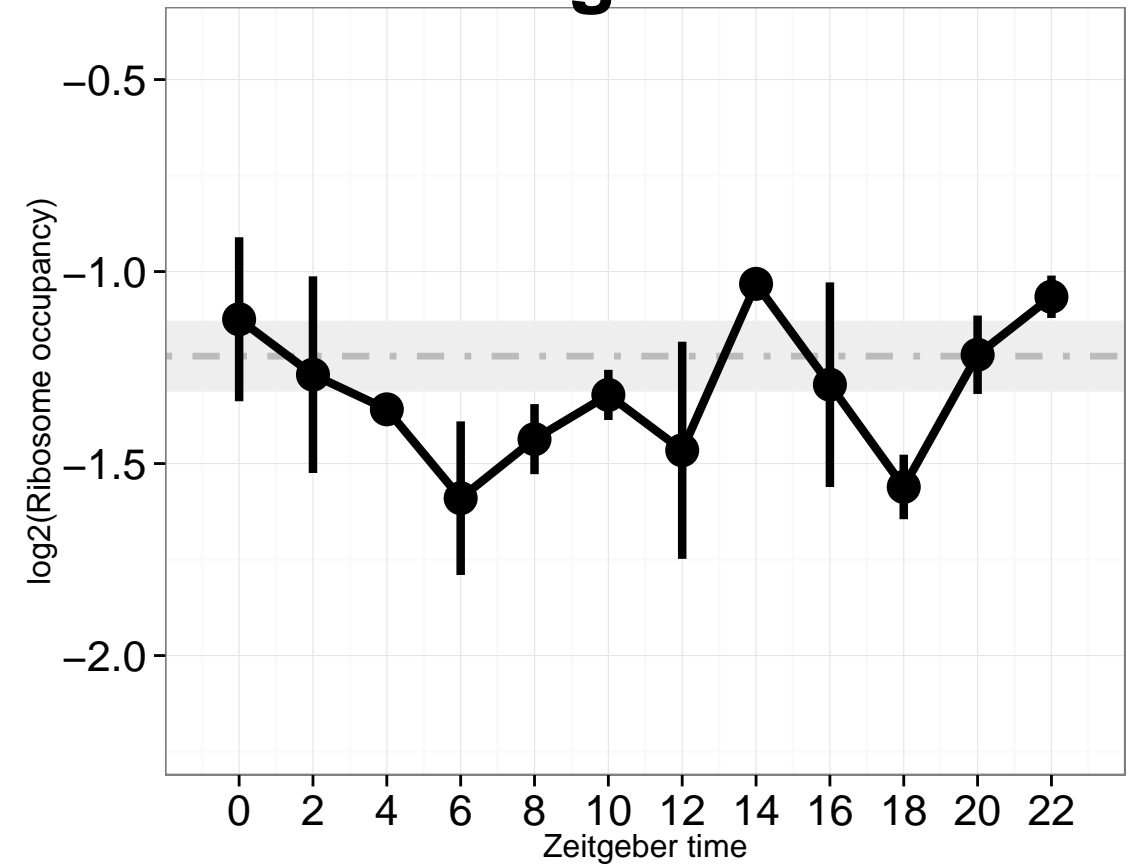

Supplement: SuppDataset_1.zip [file Sgms1_set_B.pdf › Supplemental Dataset 1/B-mRNA_rhythm_translation_nonrhyth/Sgms1_set_B.pdf]

# Sh2d3c

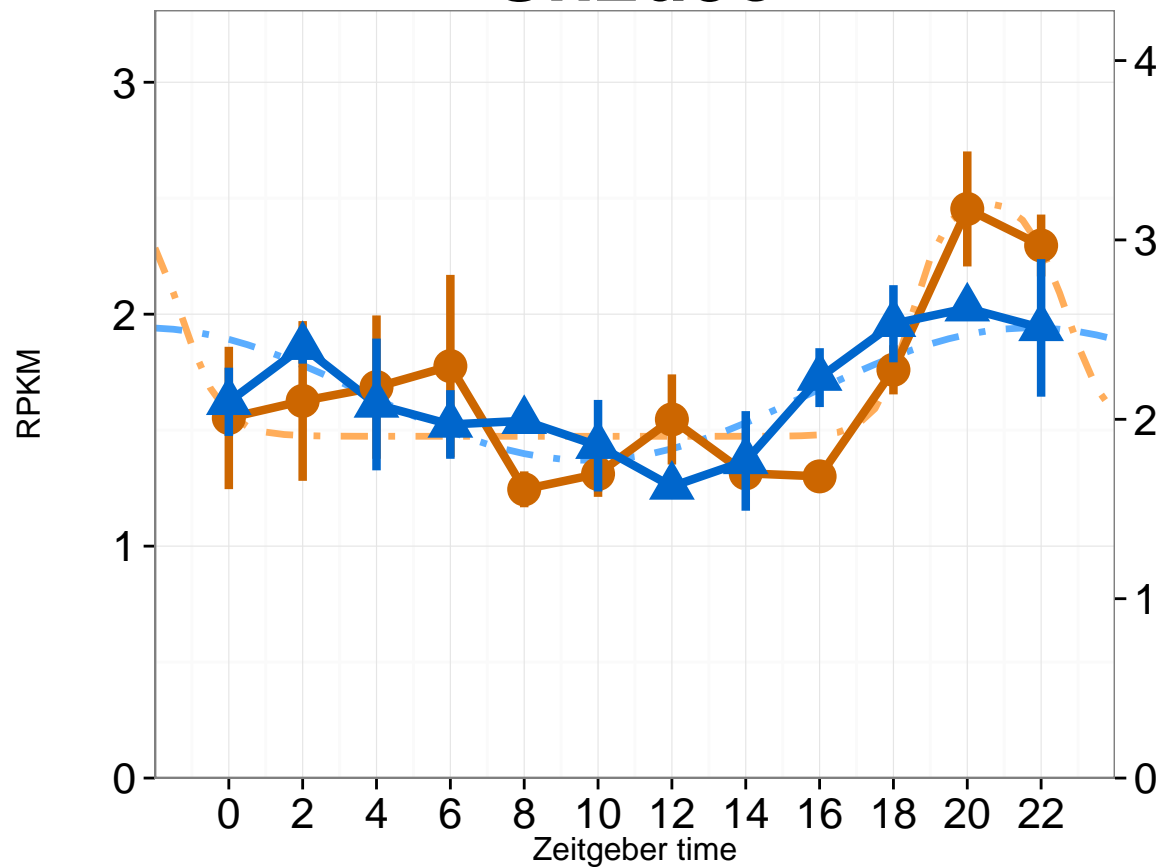

# Sh2d3c

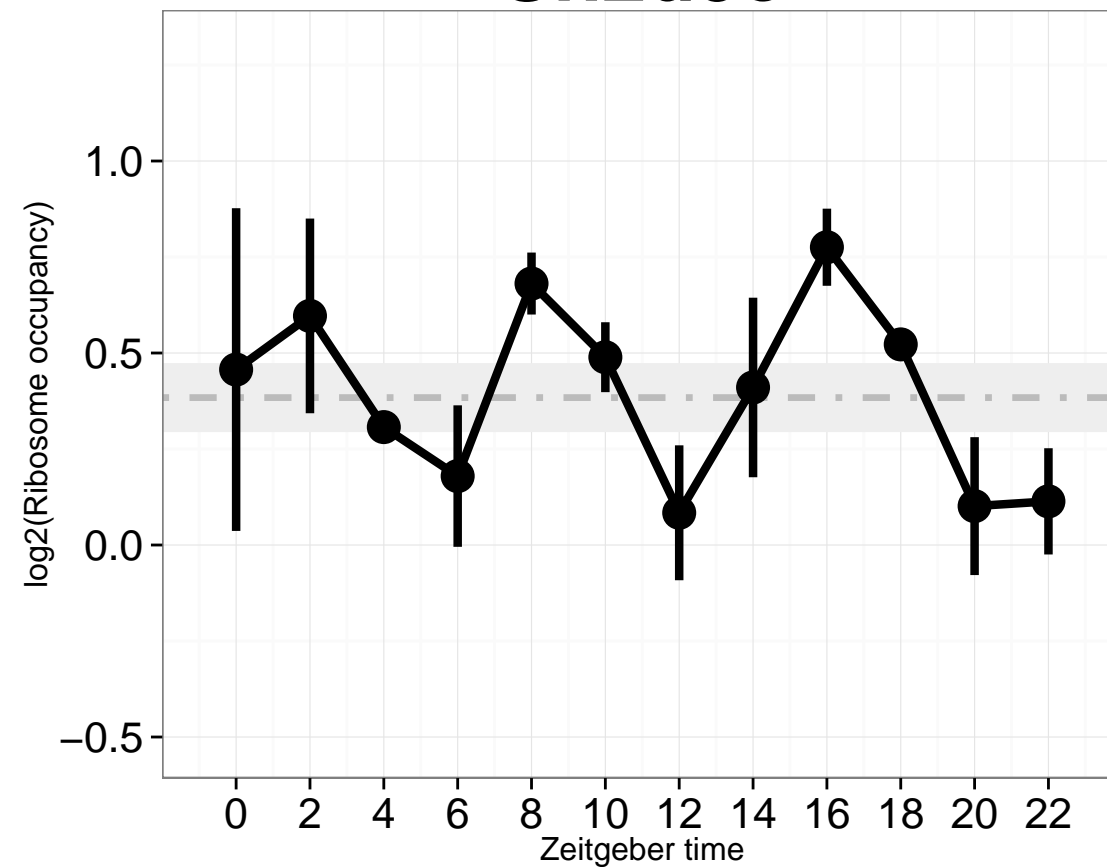

Supplement: SuppDataset_1.zip [file Sh2d3c_set_B.pdf › Supplemental Dataset 1/B-mRNA_rhythm_translation_nonrhyth/Sh2d3c_set_B.pdf]

# Shkbp1

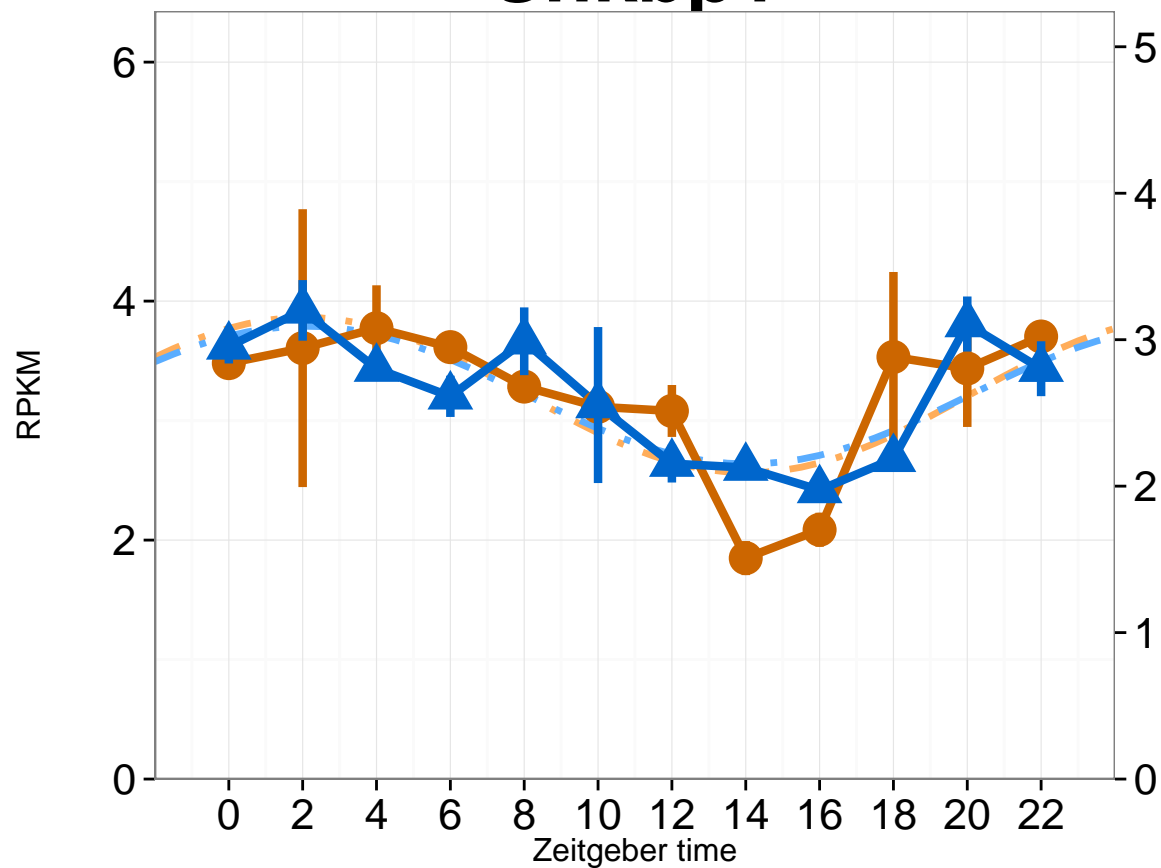

# Shkbp1

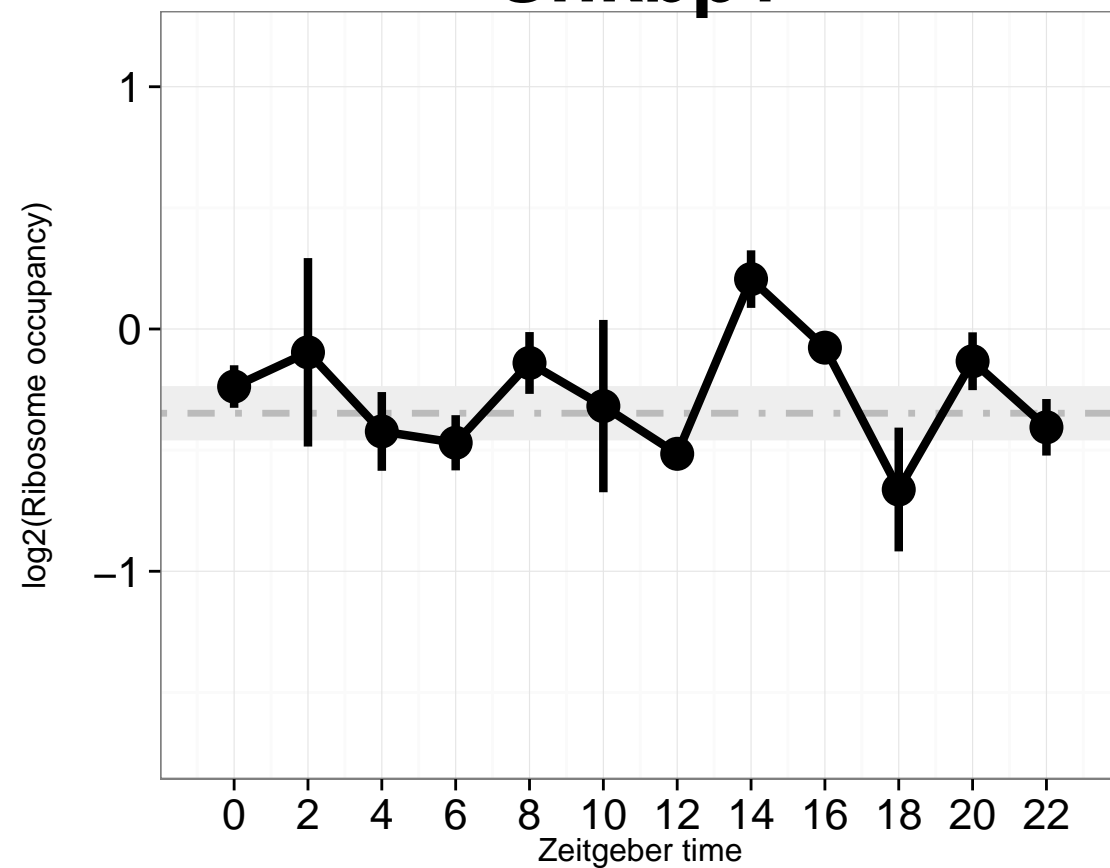

Supplement: SuppDataset_1.zip [file Shkbp1_set_B.pdf › Supplemental Dataset 1/B-mRNA_rhythm_translation_nonrhyth/Shkbp1_set_B.pdf]

# Shroom4

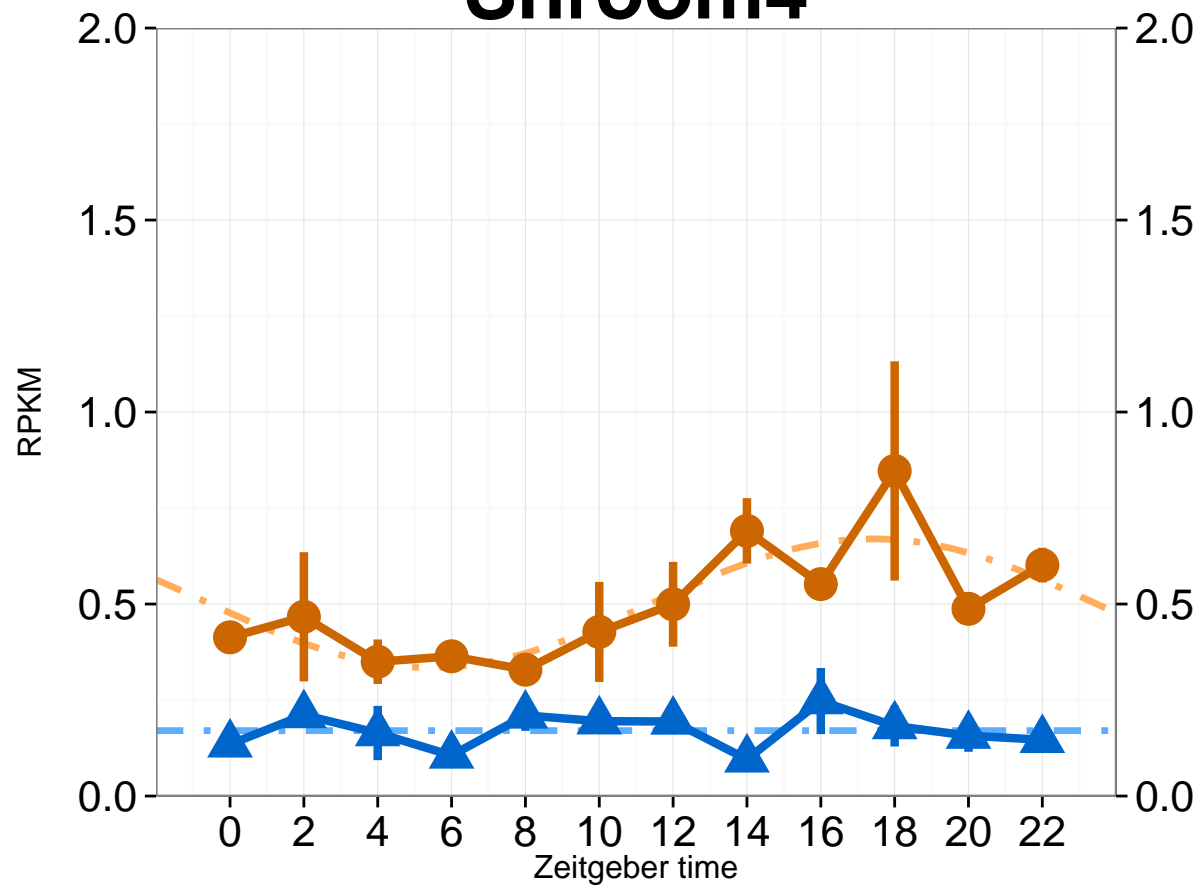

# Shroom4

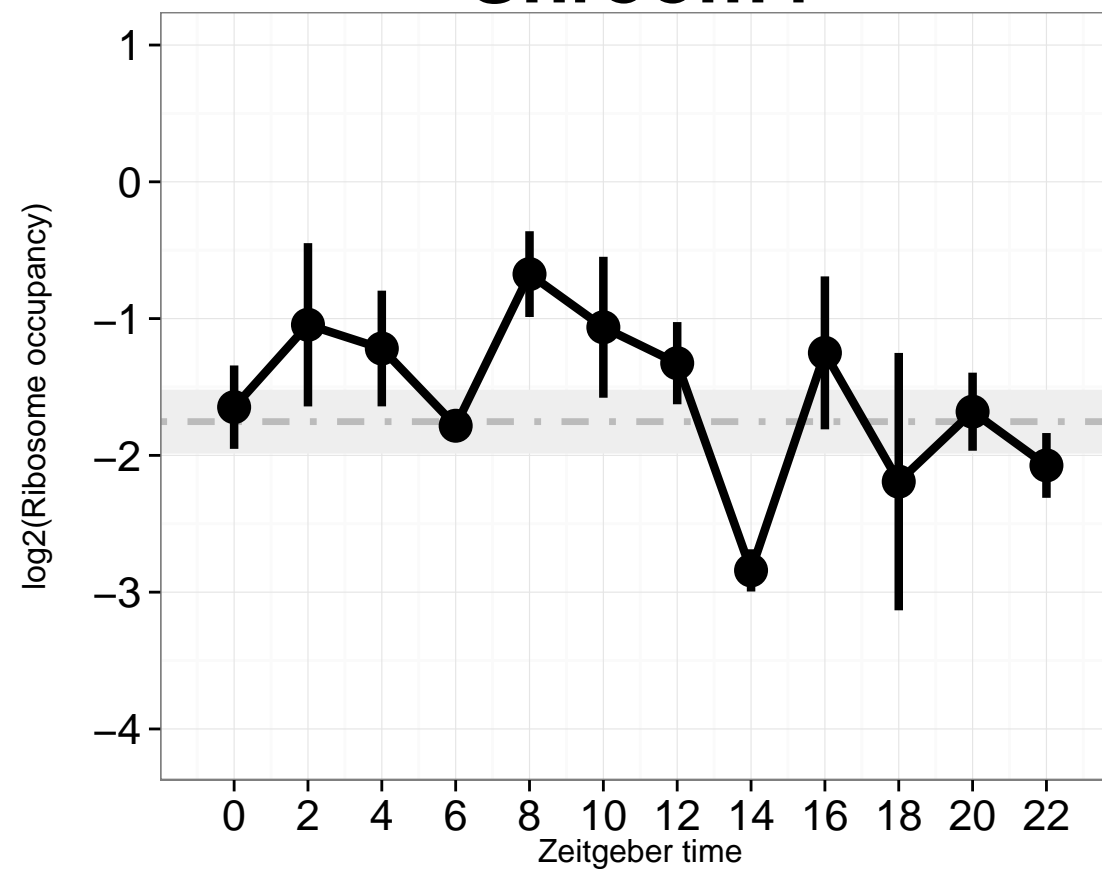

Supplement: SuppDataset_1.zip [file Shroom4_set_B.pdf › Supplemental Dataset 1/B-mRNA_rhythm_translation_nonrhyth/Shroom4_set_B.pdf]

# Sigirr

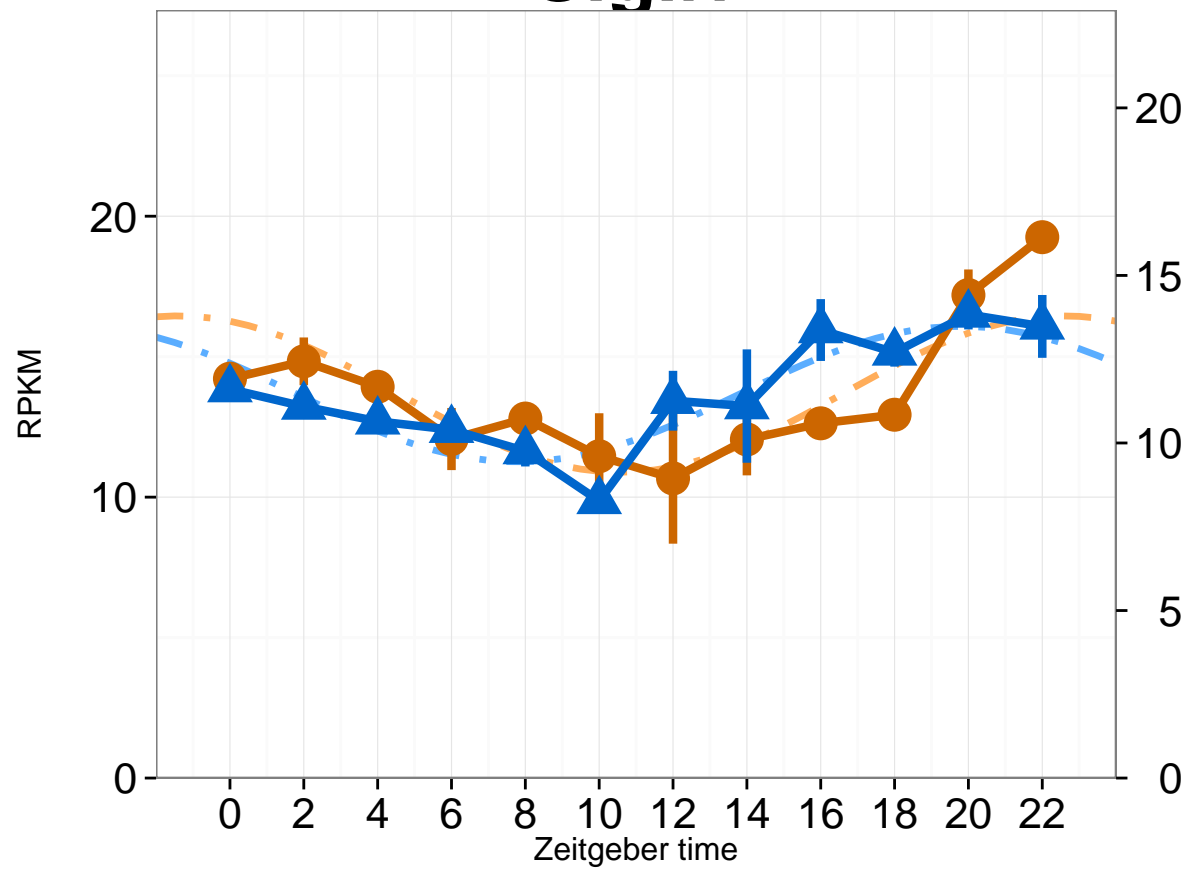

# Sigirr

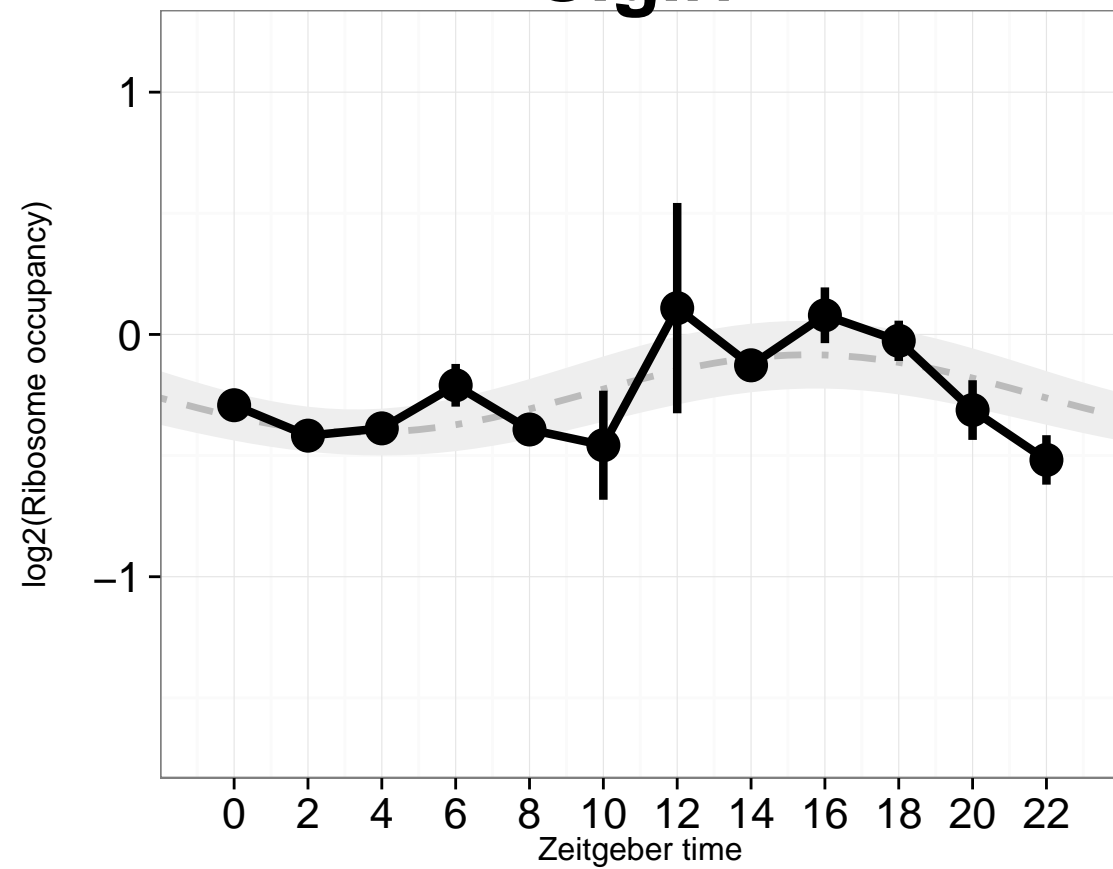

Supplement: SuppDataset_1.zip [file Sigirr_set_B.pdf › Supplemental Dataset 1/B-mRNA_rhythm_translation_nonrhyth/Sigirr_set_B.pdf]

## Sipa1

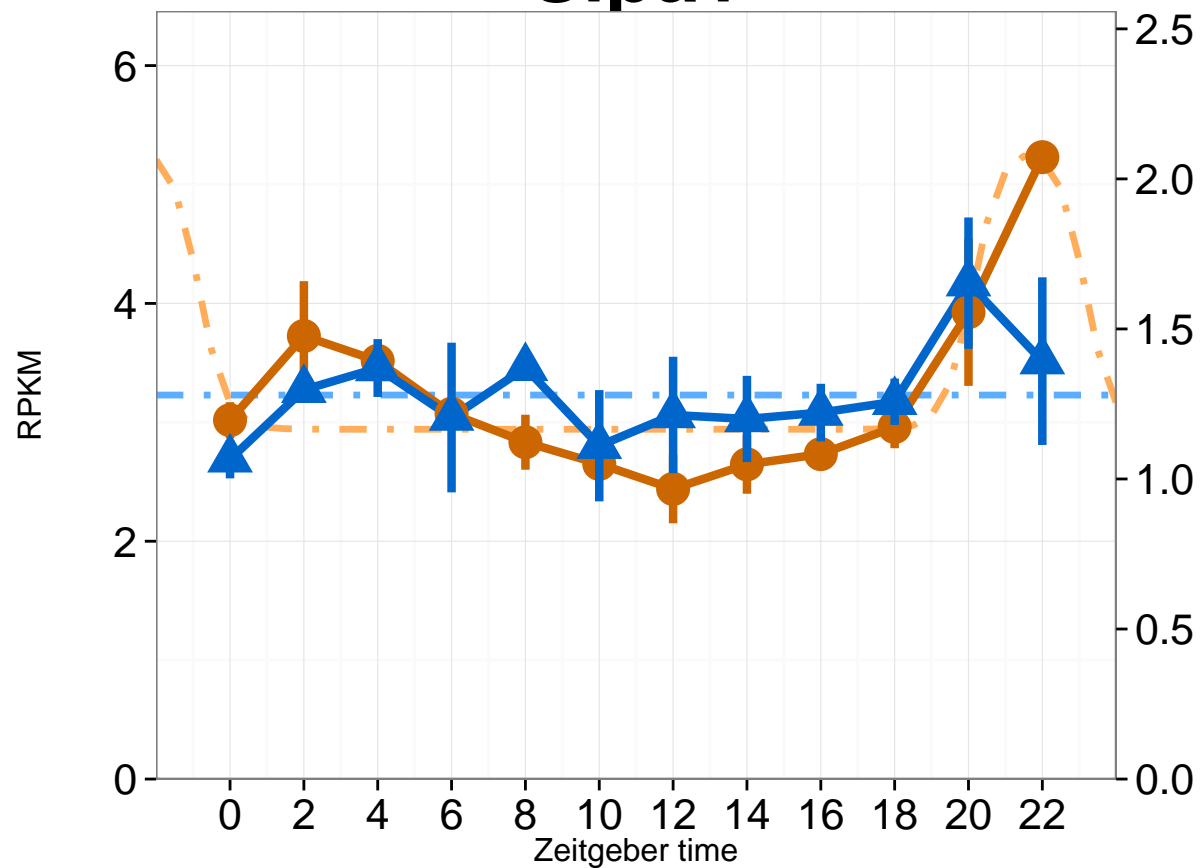

## Sipa1

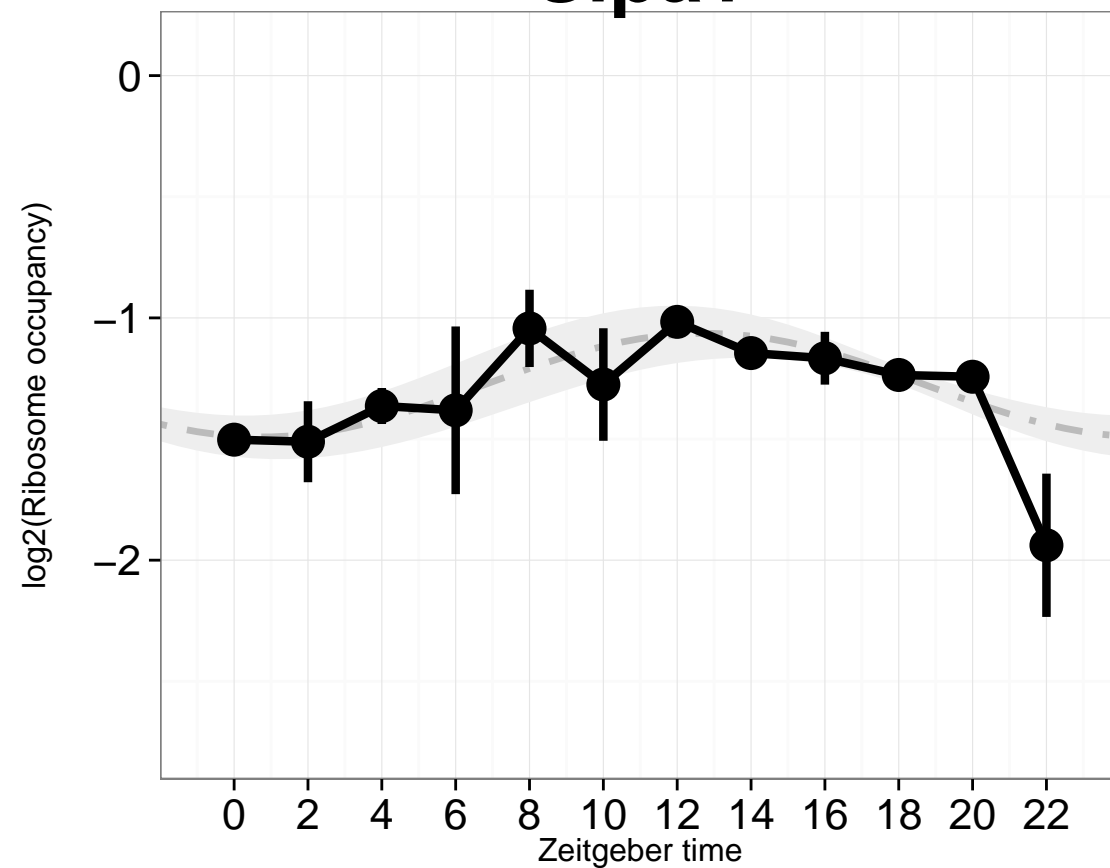

Supplement: SuppDataset_1.zip [file Sipa1_set_B.pdf › Supplemental Dataset 1/B-mRNA_rhythm_translation_nonrhyth/Sipa1_set_B.pdf]

## Skida1

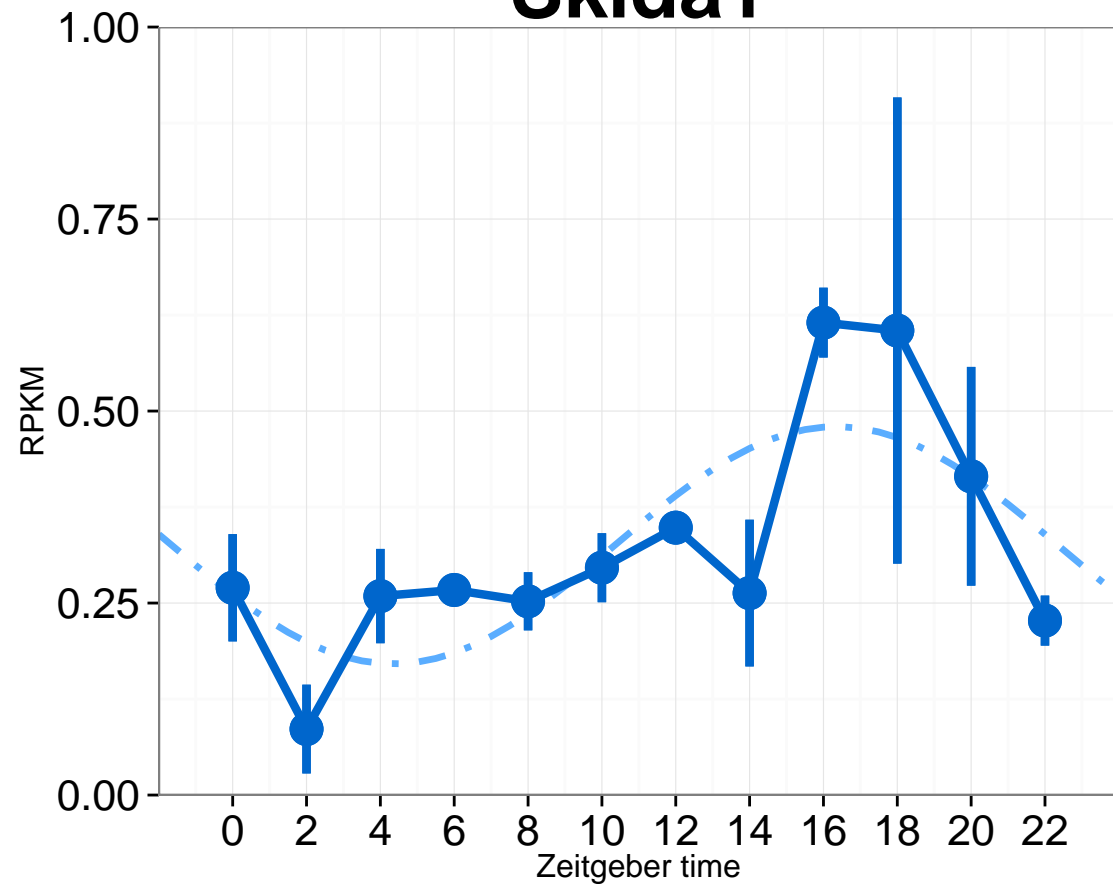

## Skida1 log2(Ribosome occupancy

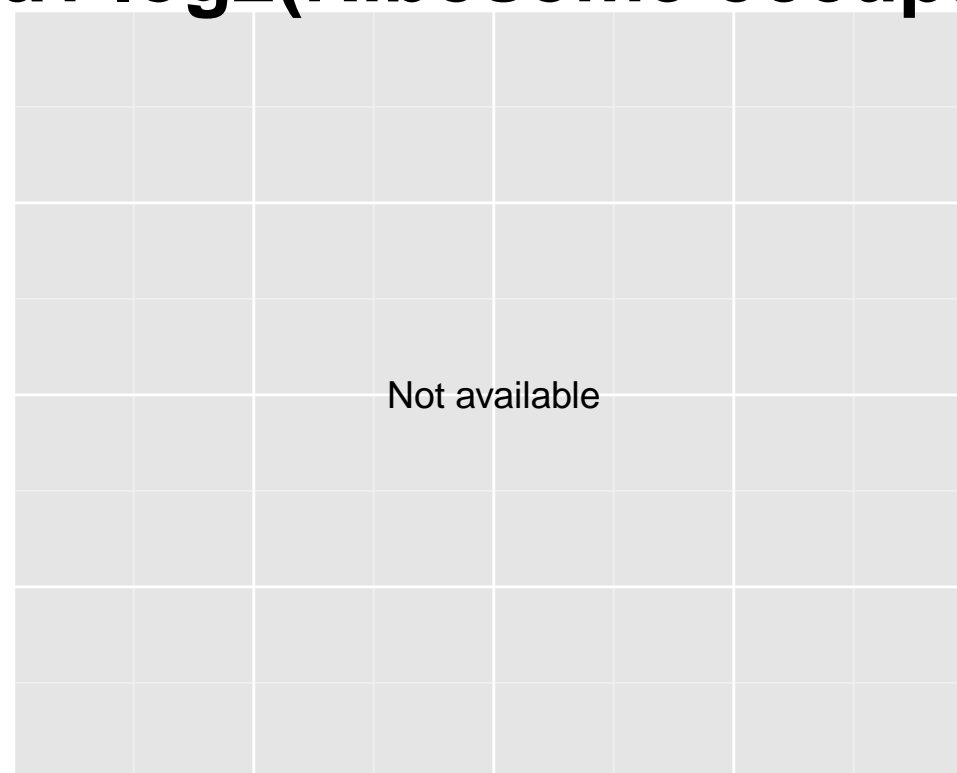

Supplement: SuppDataset_1.zip [file Skida1_set_B.pdf › Supplemental Dataset 1/B-mRNA_rhythm_translation_nonrhyth/Skida1_set_B.pdf]

## Skp2

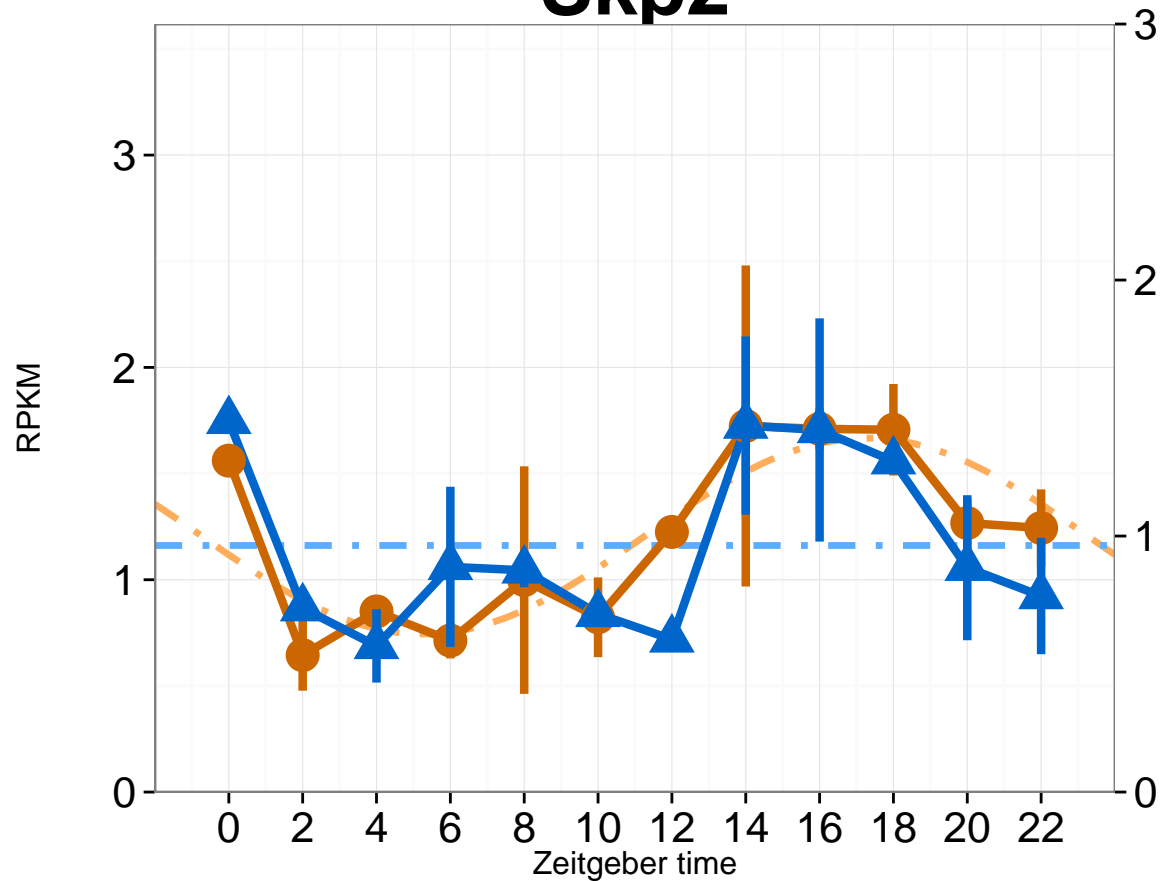

## Skp2

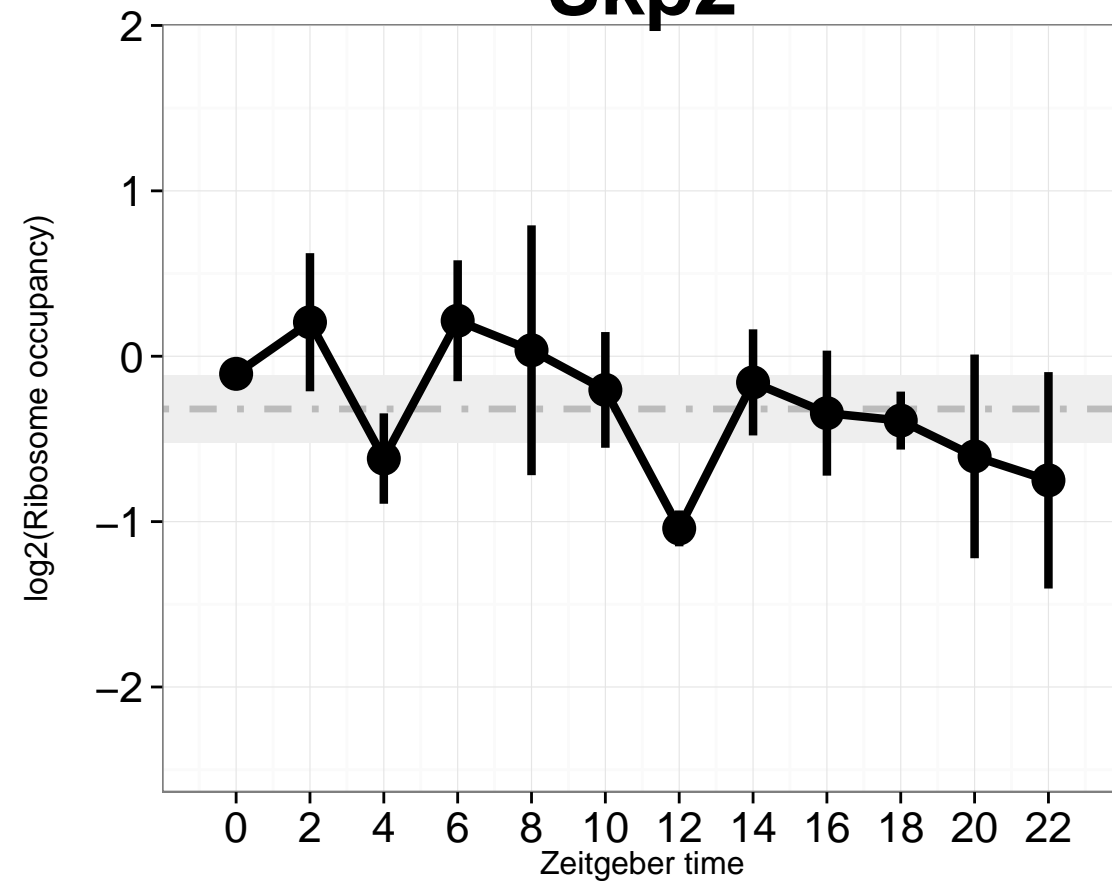

Supplement: SuppDataset_1.zip [file Skp2_set_B.pdf › Supplemental Dataset 1/B-mRNA_rhythm_translation_nonrhyth/Skp2_set_B.pdf]

# Slc12a9

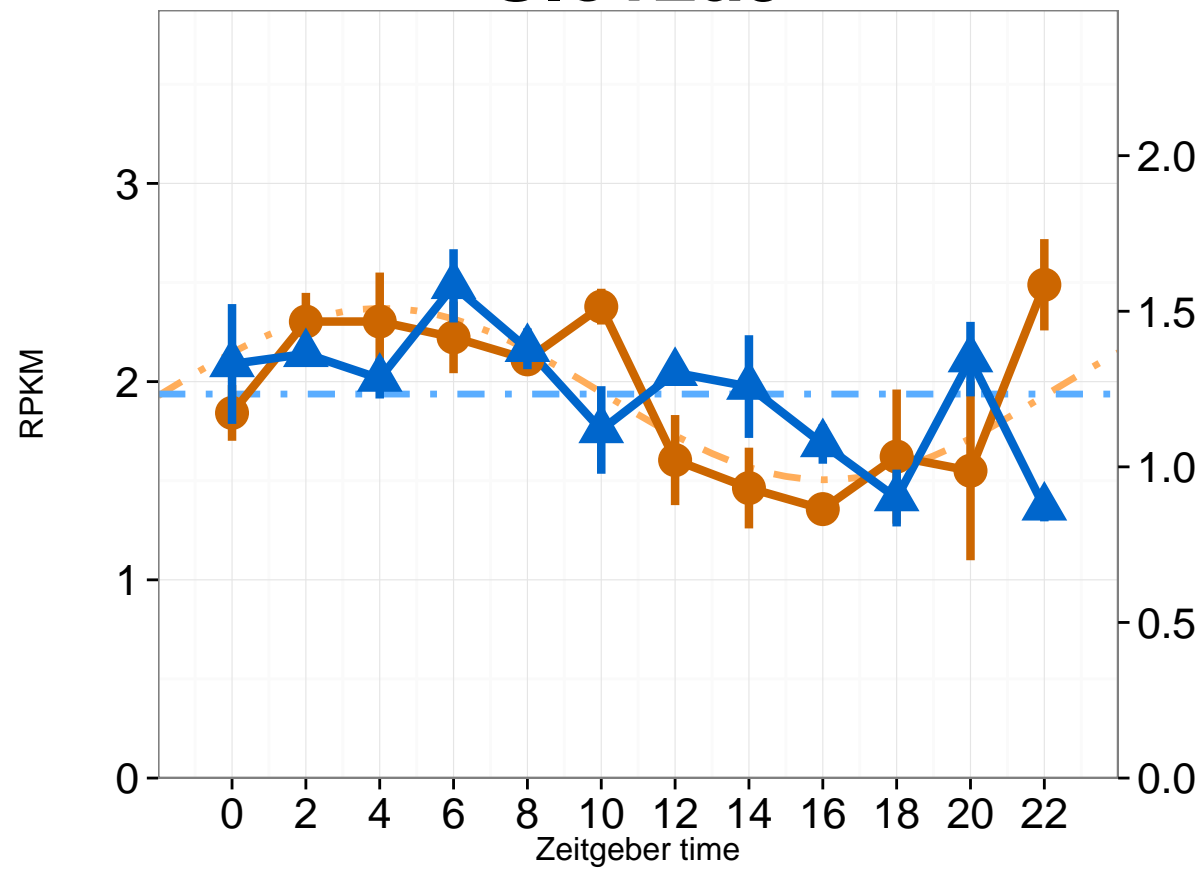

# Slc12a9

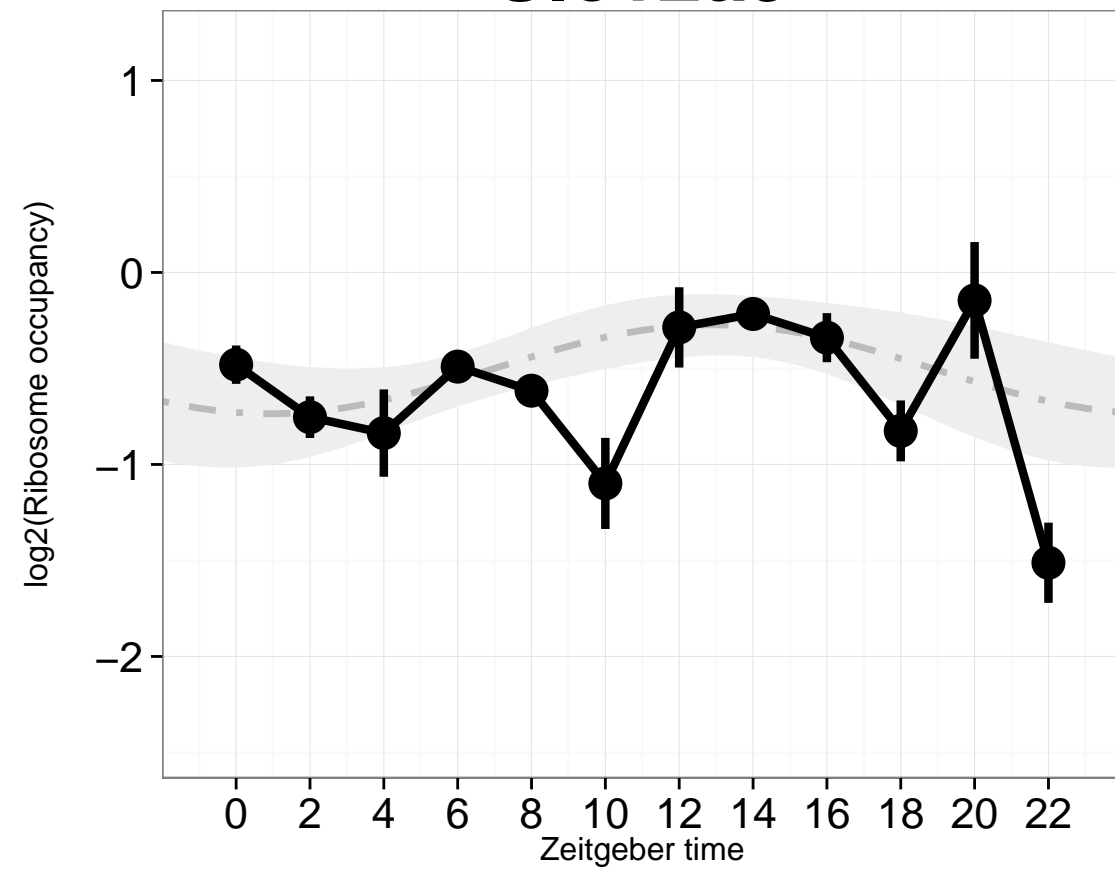

Supplement: SuppDataset_1.zip [file Slc12a9_set_B.pdf › Supplemental Dataset 1/B-mRNA_rhythm_translation_nonrhyth/Slc12a9_set_B.pdf]

## Slc19a2

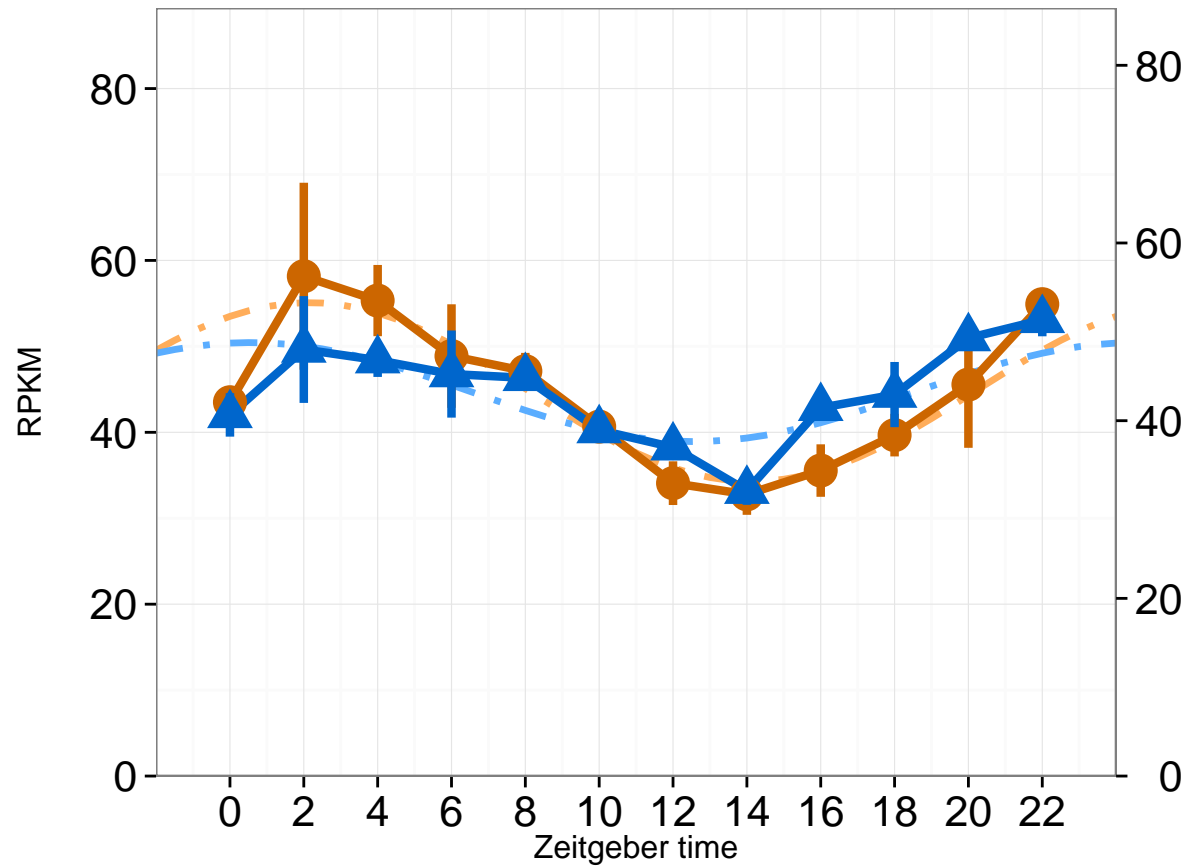

## Slc19a2

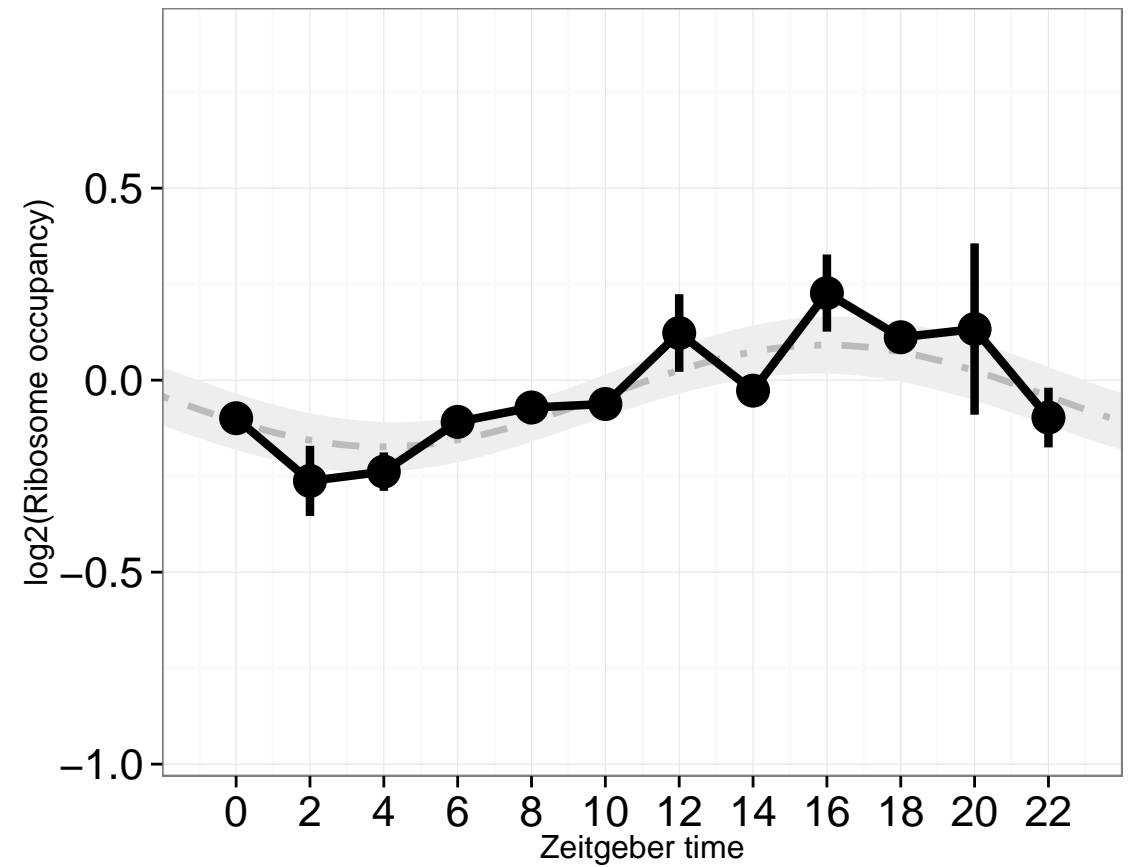

Supplement: SuppDataset_1.zip [file Slc19a2_set_B.pdf › Supplemental Dataset 1/B-mRNA_rhythm_translation_nonrhyth/Slc19a2_set_B.pdf]

# Slc25a24

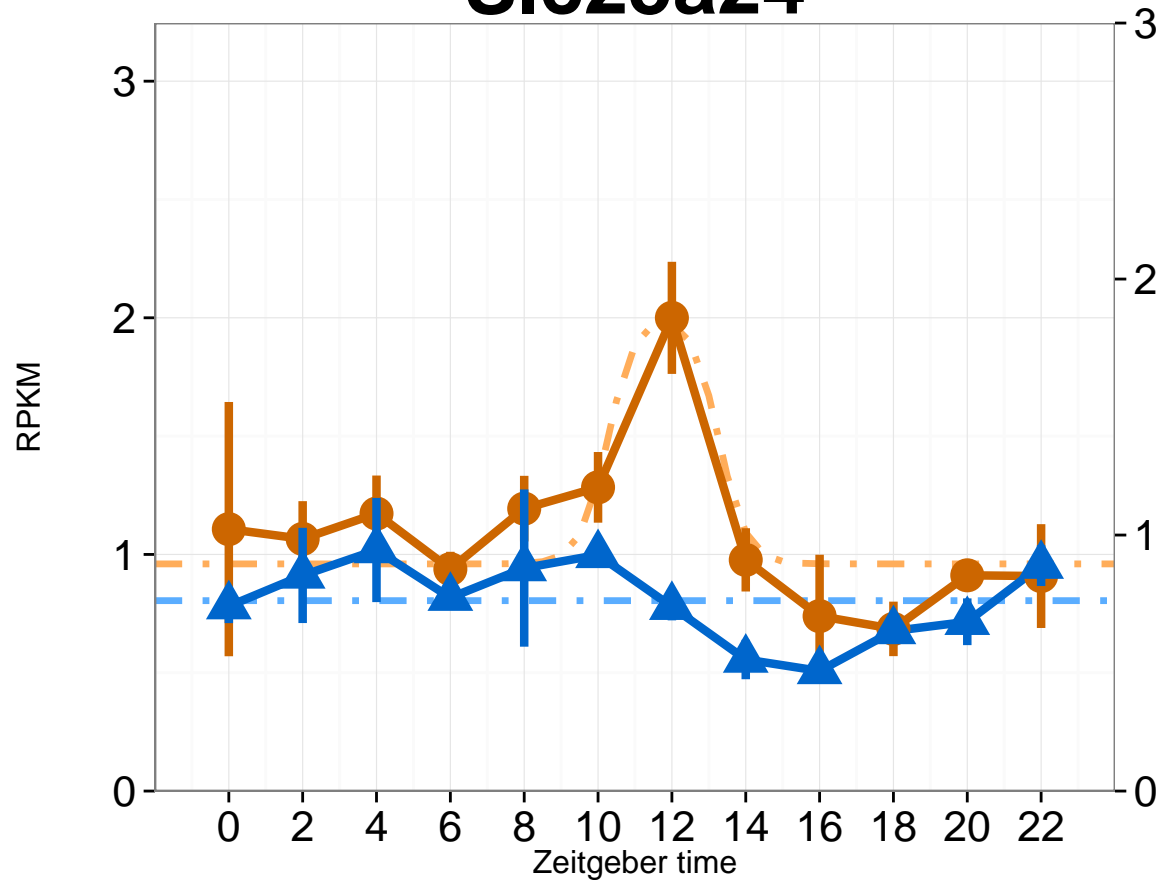

# Slc25a24

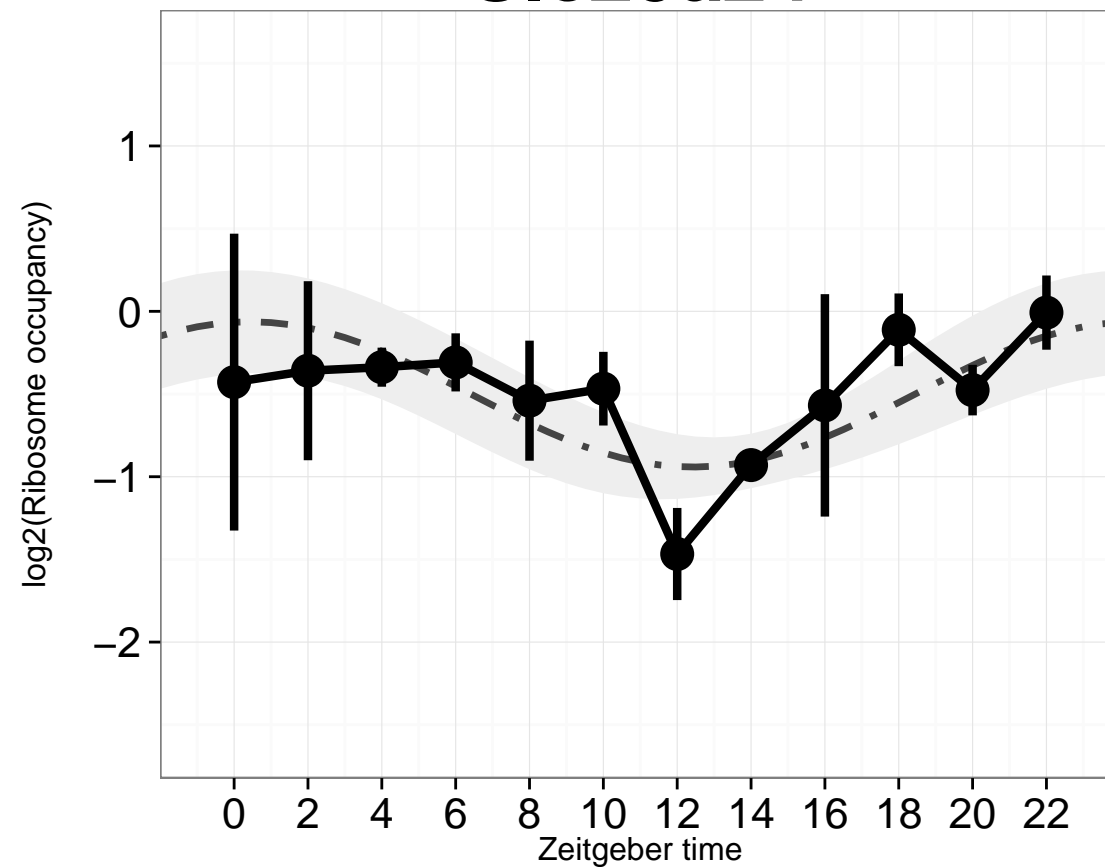

Supplement: SuppDataset_1.zip [file Slc25a24_set_B.pdf › Supplemental Dataset 1/B-mRNA_rhythm_translation_nonrhyth/Slc25a24_set_B.pdf]

## Slc25a30

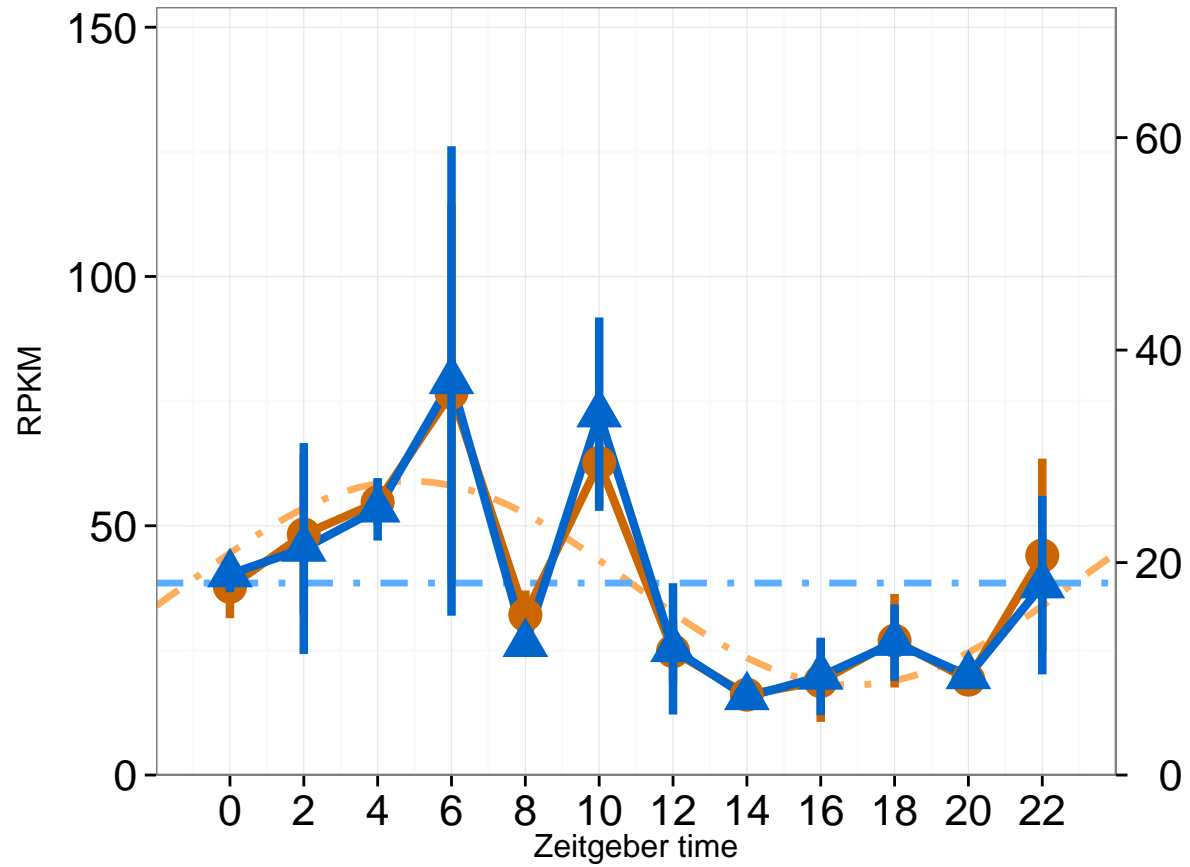

## Slc25a30

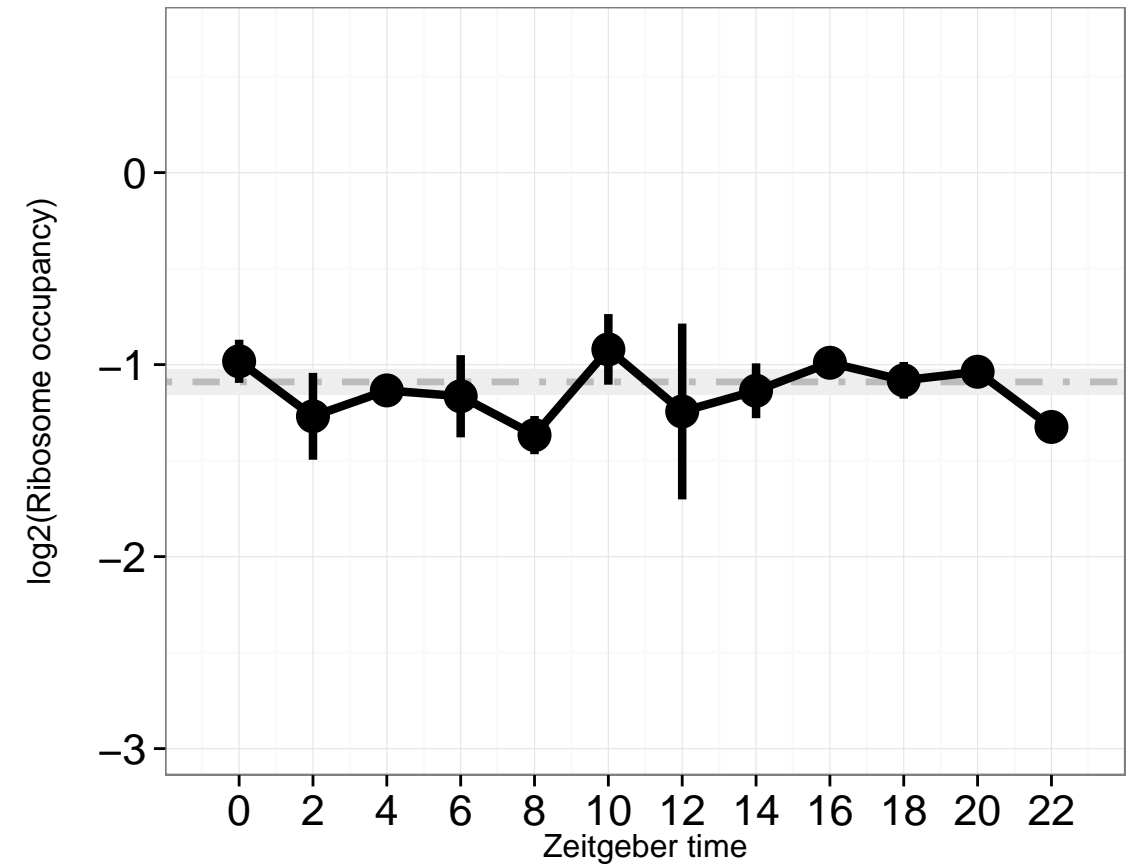

Supplement: SuppDataset_1.zip [file Slc25a30_set_B.pdf › Supplemental Dataset 1/B-mRNA_rhythm_translation_nonrhyth/Slc25a30_set_B.pdf]

# Slc25a38

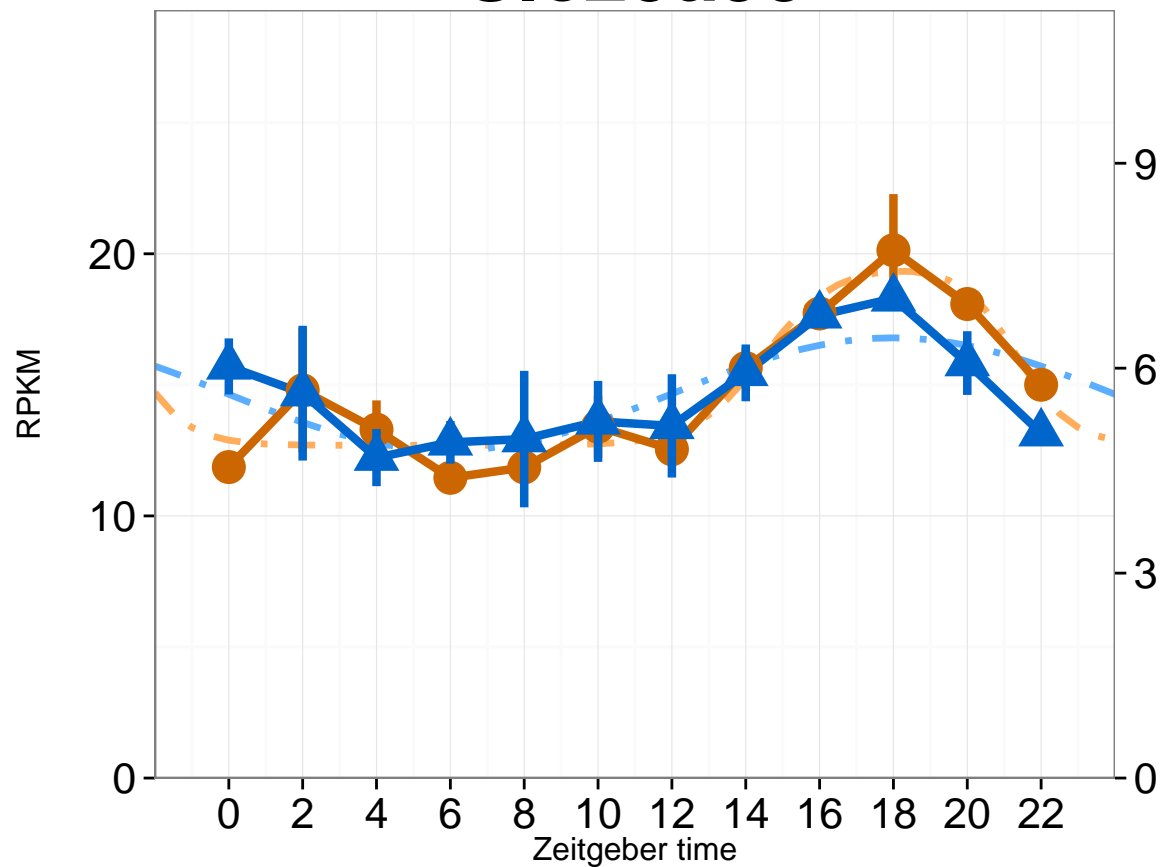

# Slc25a38

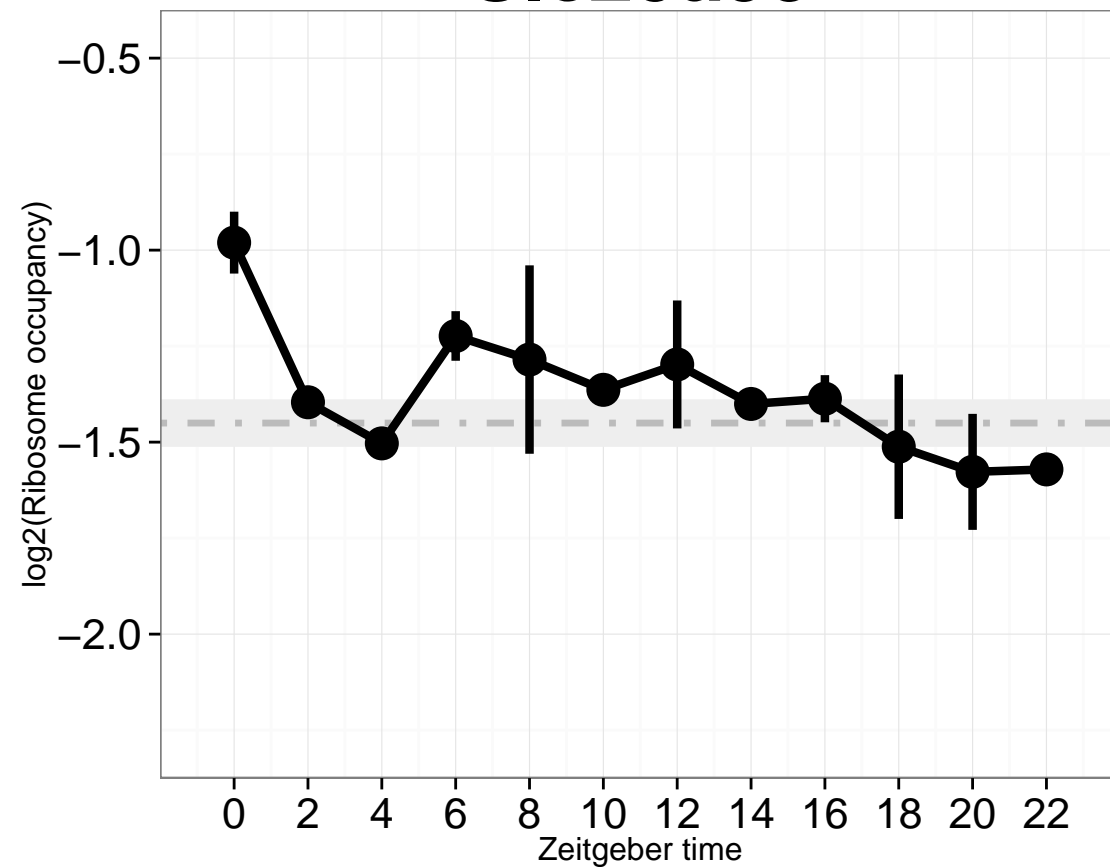

Supplement: SuppDataset_1.zip [file Slc25a38_set_B.pdf › Supplemental Dataset 1/B-mRNA_rhythm_translation_nonrhyth/Slc25a38_set_B.pdf]

## Slc25a44

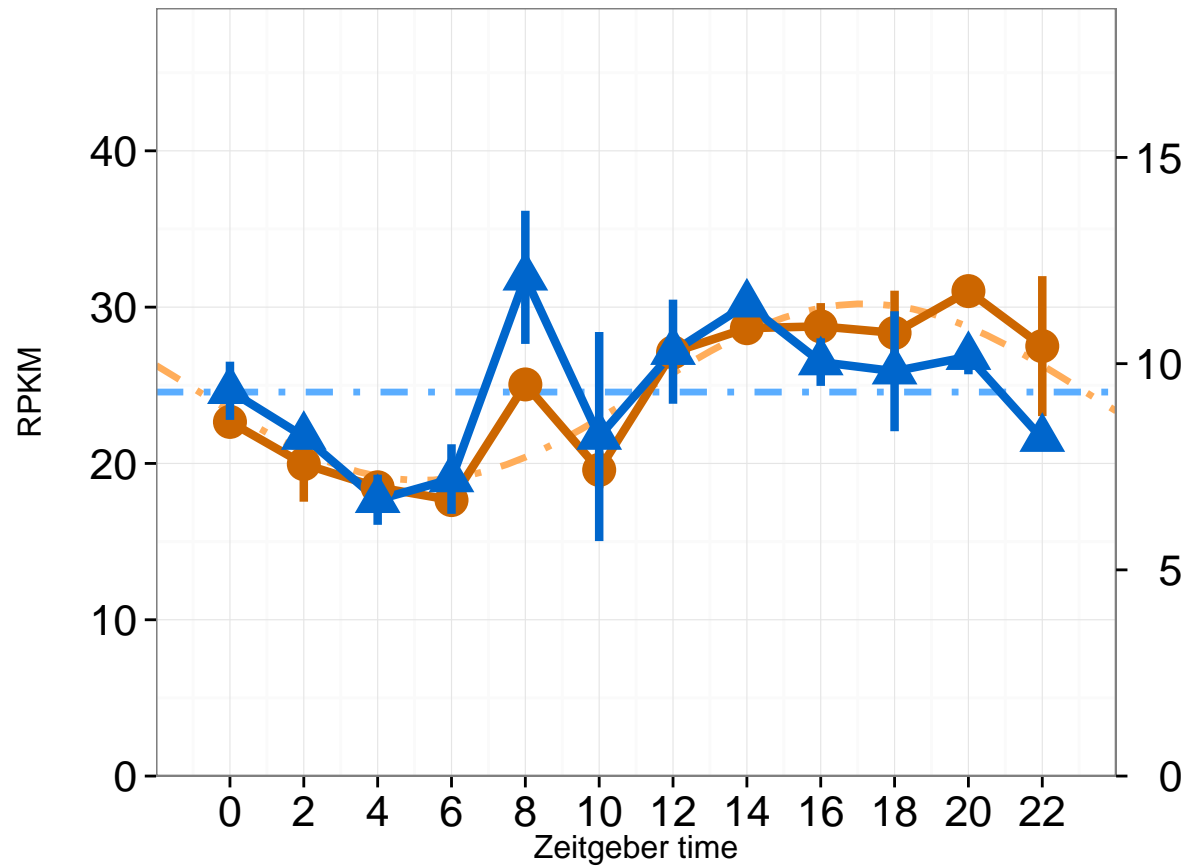

## Slc25a44

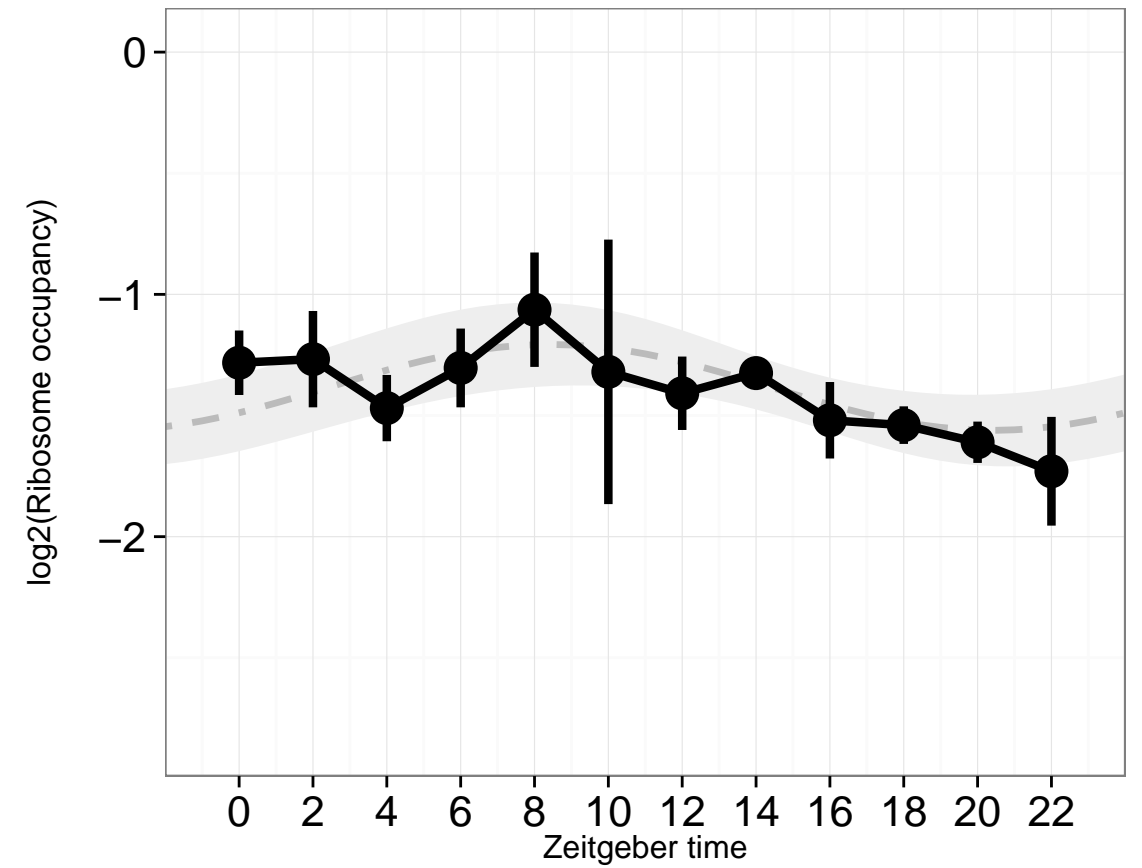

Supplement: SuppDataset_1.zip [file Slc25a44_set_B.pdf › Supplemental Dataset 1/B-mRNA_rhythm_translation_nonrhyth/Slc25a44_set_B.pdf]

## Slc29a3

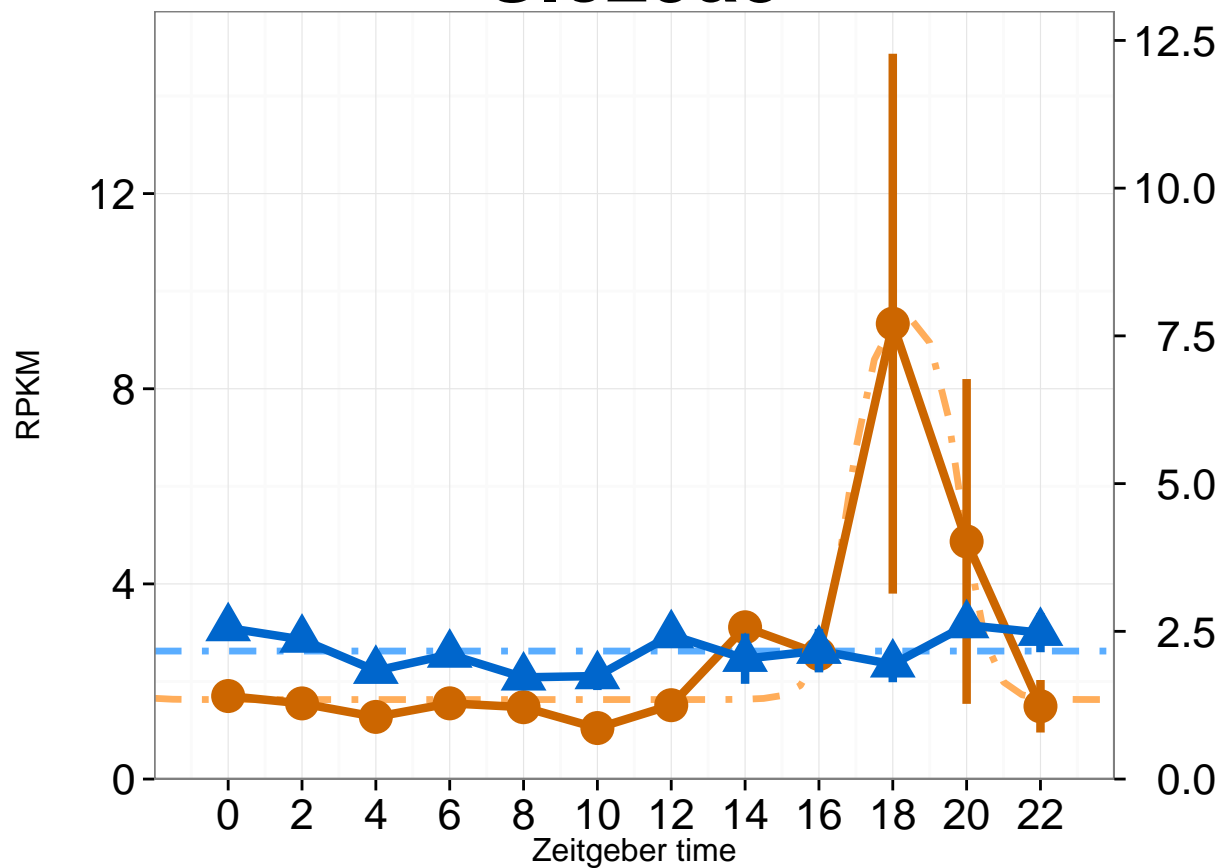

## Slc29a3

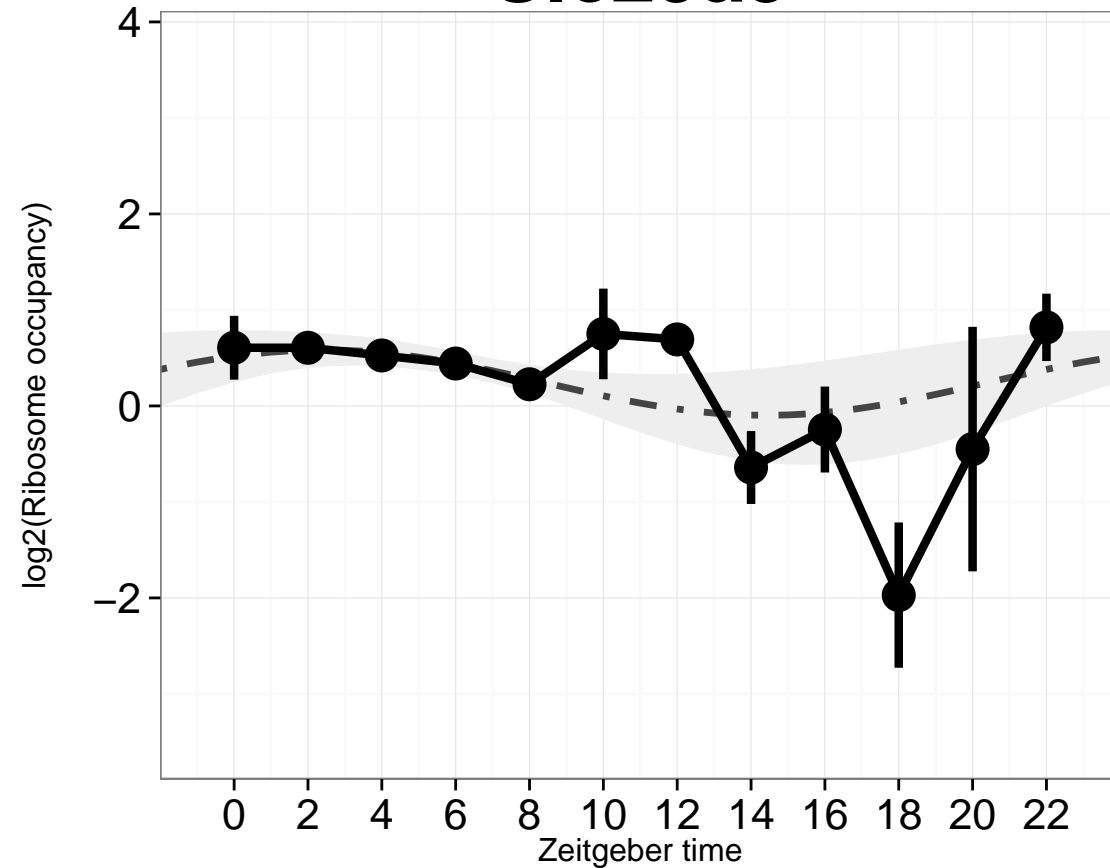

Supplement: SuppDataset_1.zip [file Slc29a3_set_B.pdf › Supplemental Dataset 1/B-mRNA_rhythm_translation_nonrhyth/Slc29a3_set_B.pdf]

## Slc2a1

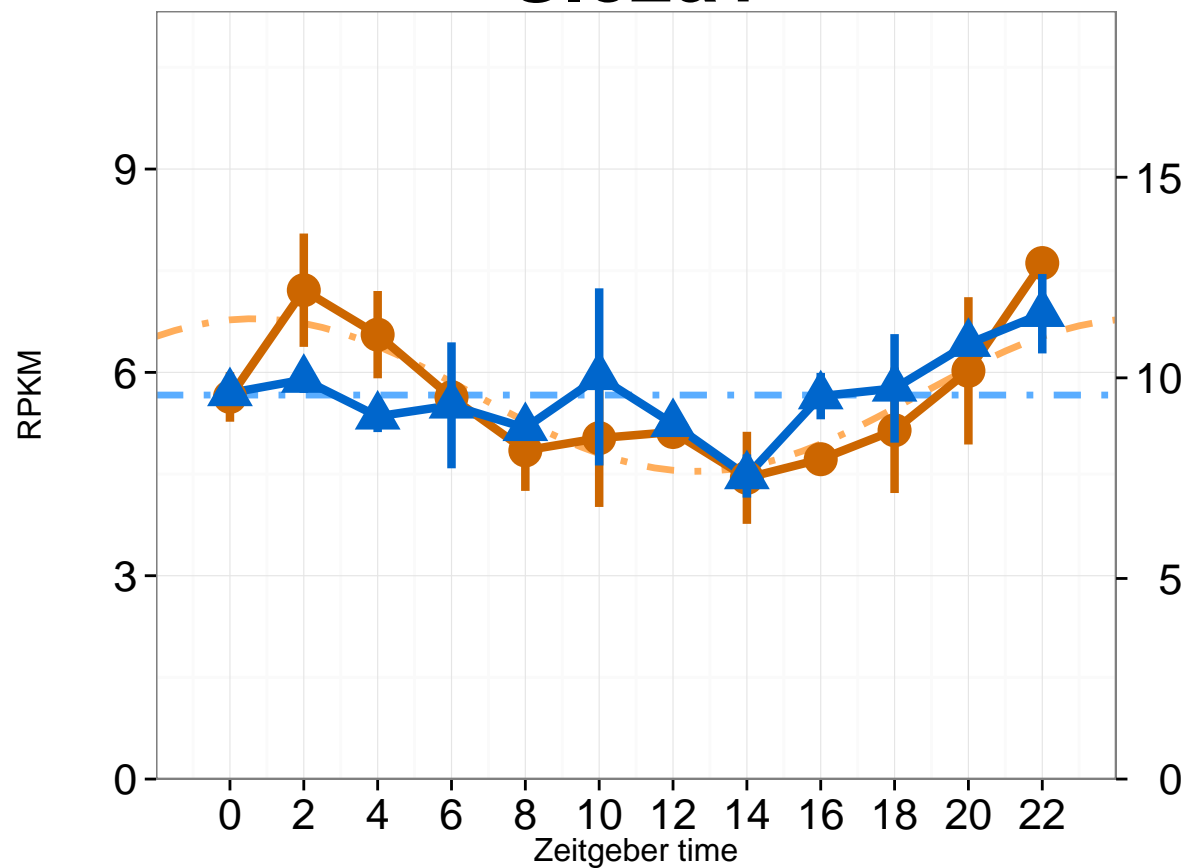

## Slc2a1

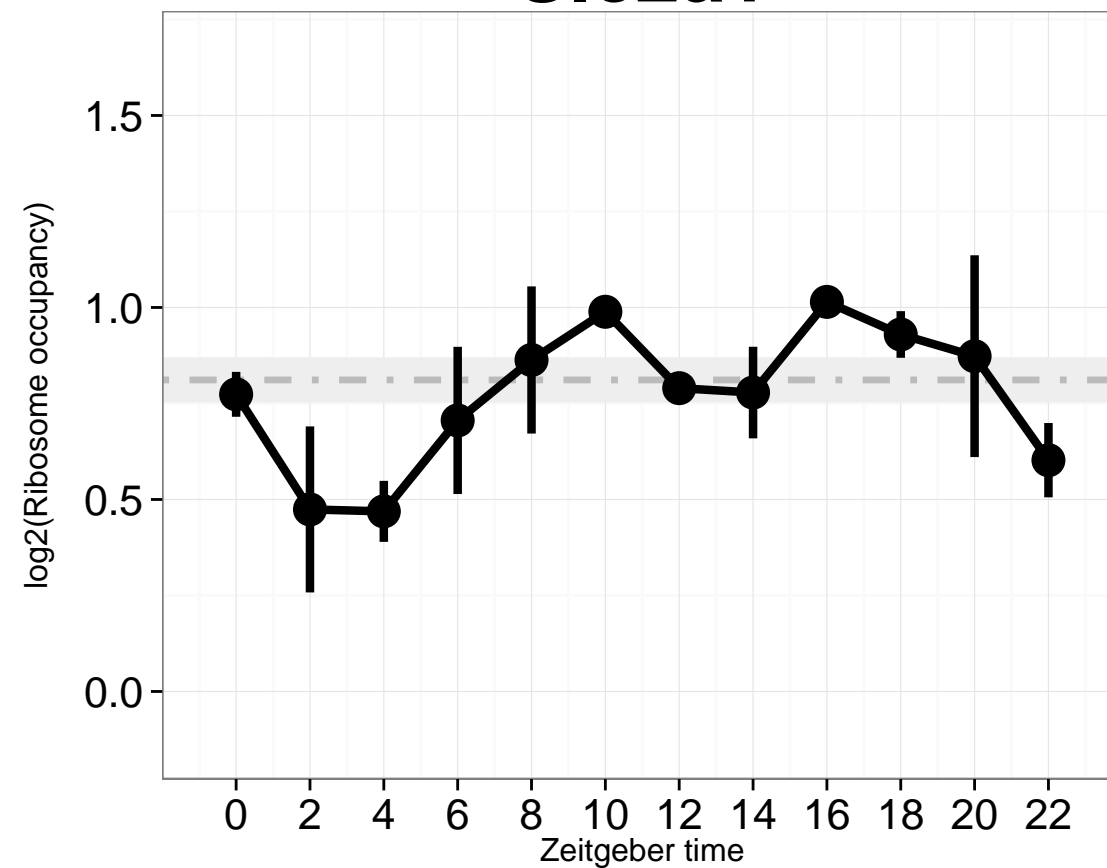

Supplement: SuppDataset_1.zip [file Slc2a1_set_B.pdf › Supplemental Dataset 1/B-mRNA_rhythm_translation_nonrhyth/Slc2a1_set_B.pdf]

## Slc35d1

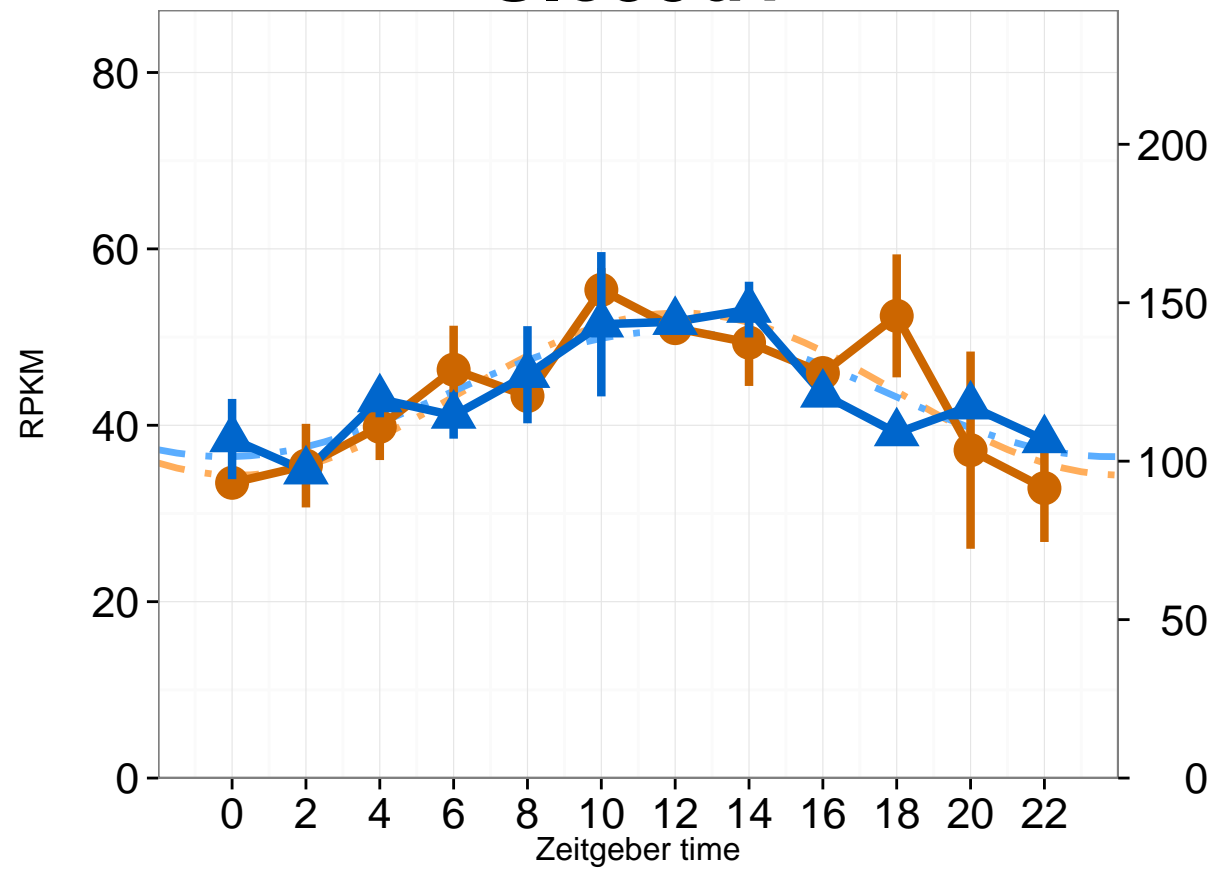

## Slc35d1

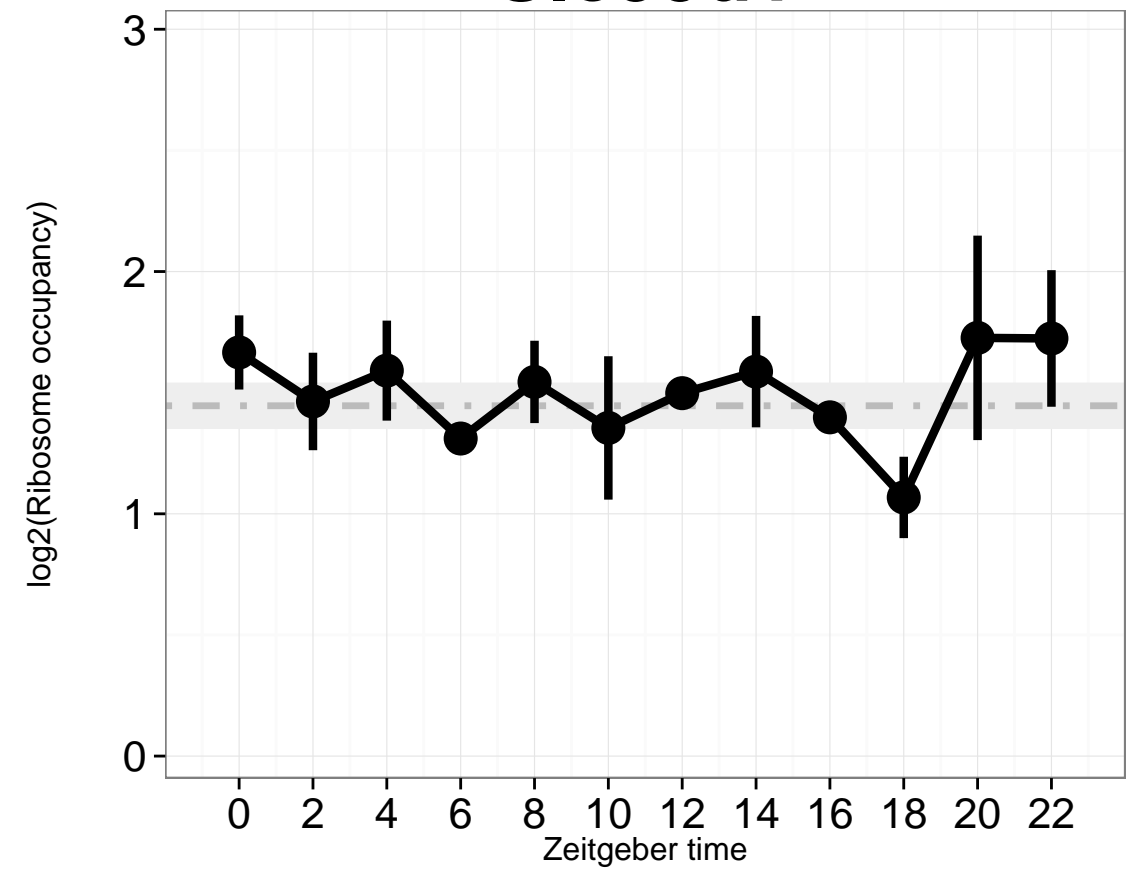

Supplement: SuppDataset_1.zip [file Slc35d1_set_B.pdf › Supplemental Dataset 1/B-mRNA_rhythm_translation_nonrhyth/Slc35d1_set_B.pdf]

# Slc43a1

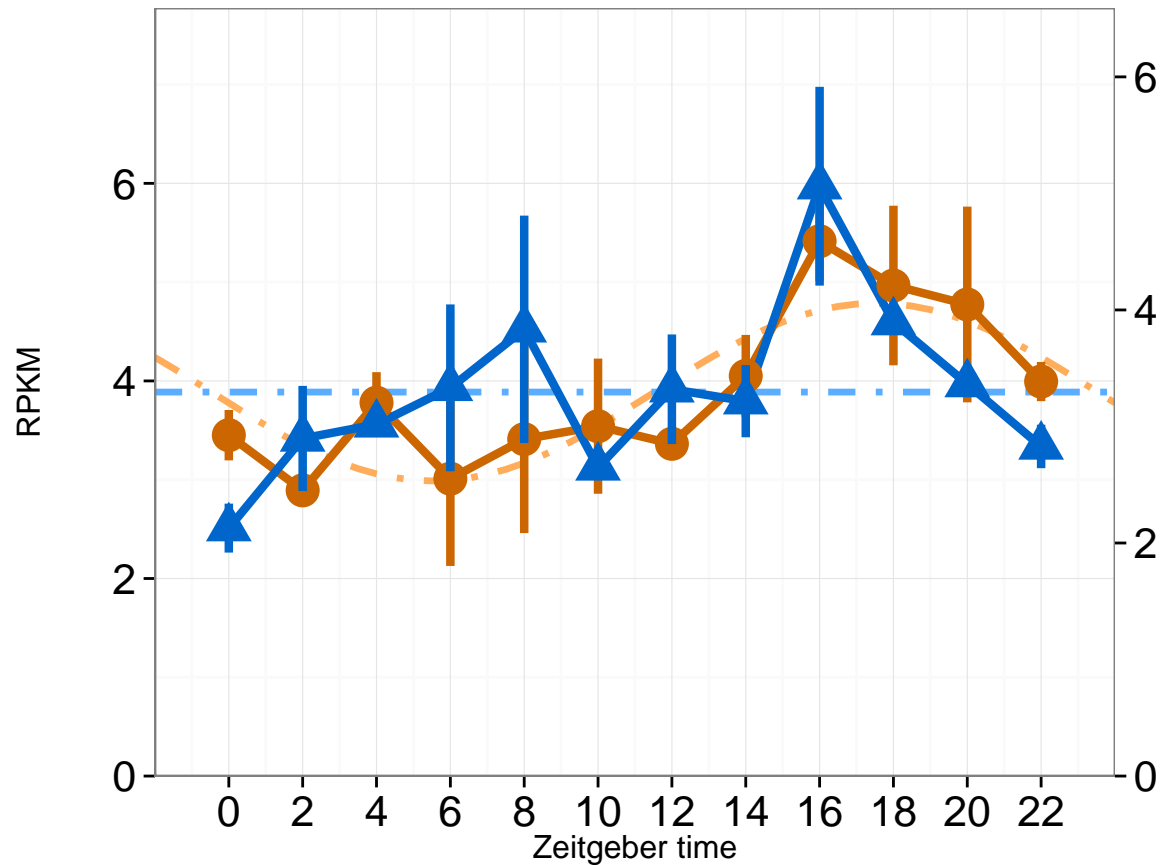

# Slc43a1

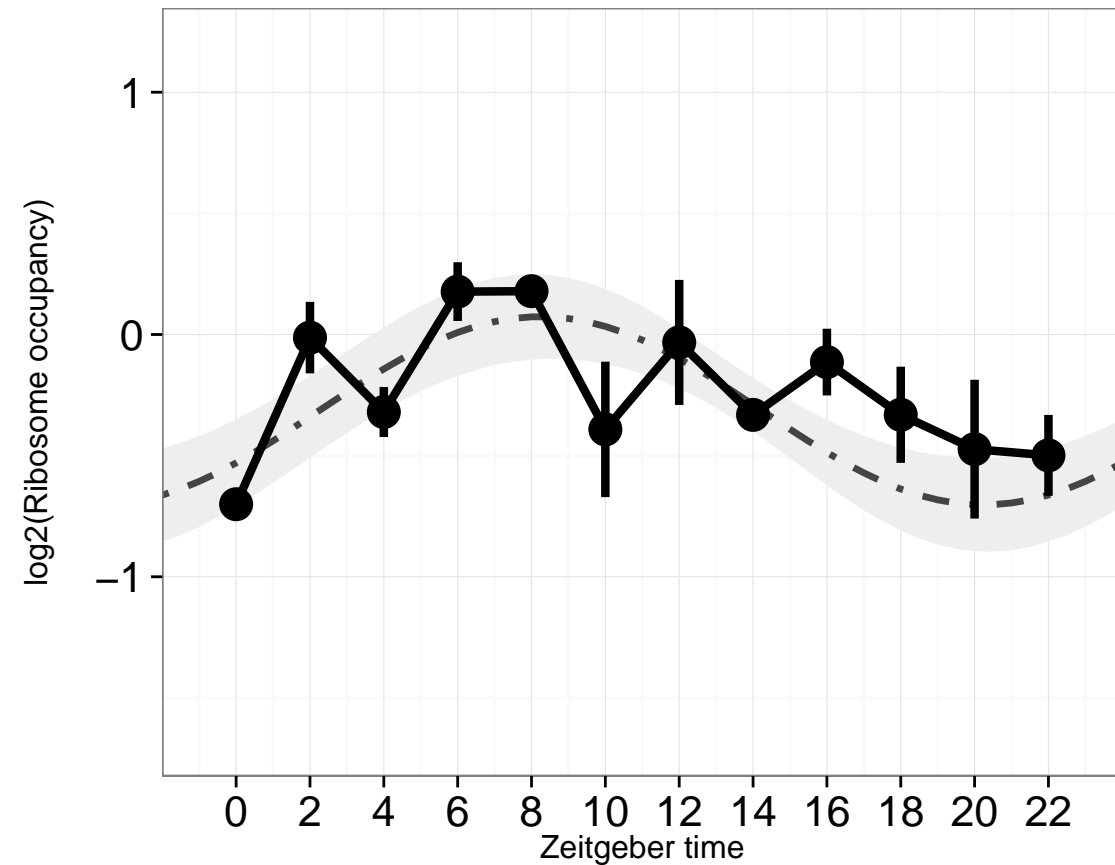

Supplement: SuppDataset_1.zip [file Slc43a1_set_B.pdf › Supplemental Dataset 1/B-mRNA_rhythm_translation_nonrhyth/Slc43a1_set_B.pdf]

# Slc50a1

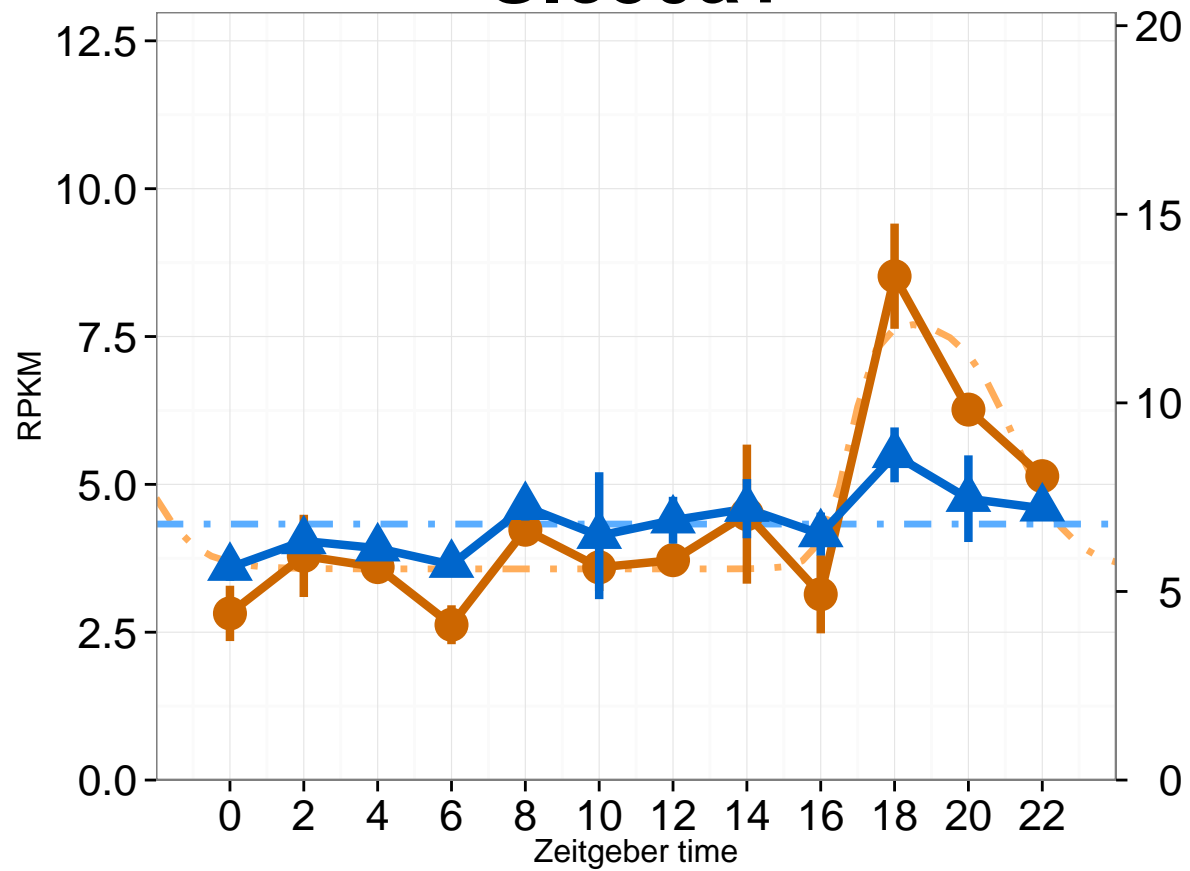

# Slc50a1

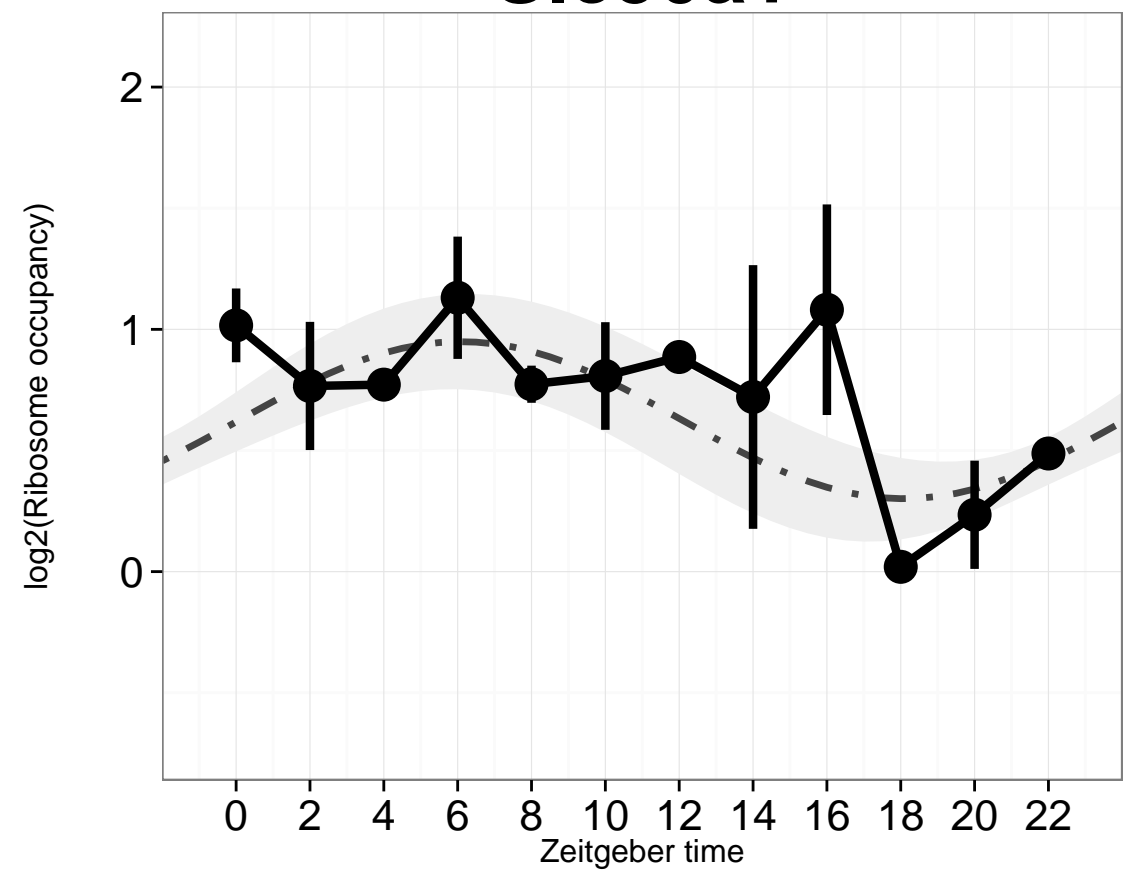

Supplement: SuppDataset_1.zip [file Slc50a1_set_B.pdf › Supplemental Dataset 1/B-mRNA_rhythm_translation_nonrhyth/Slc50a1_set_B.pdf]

## Slco2b1

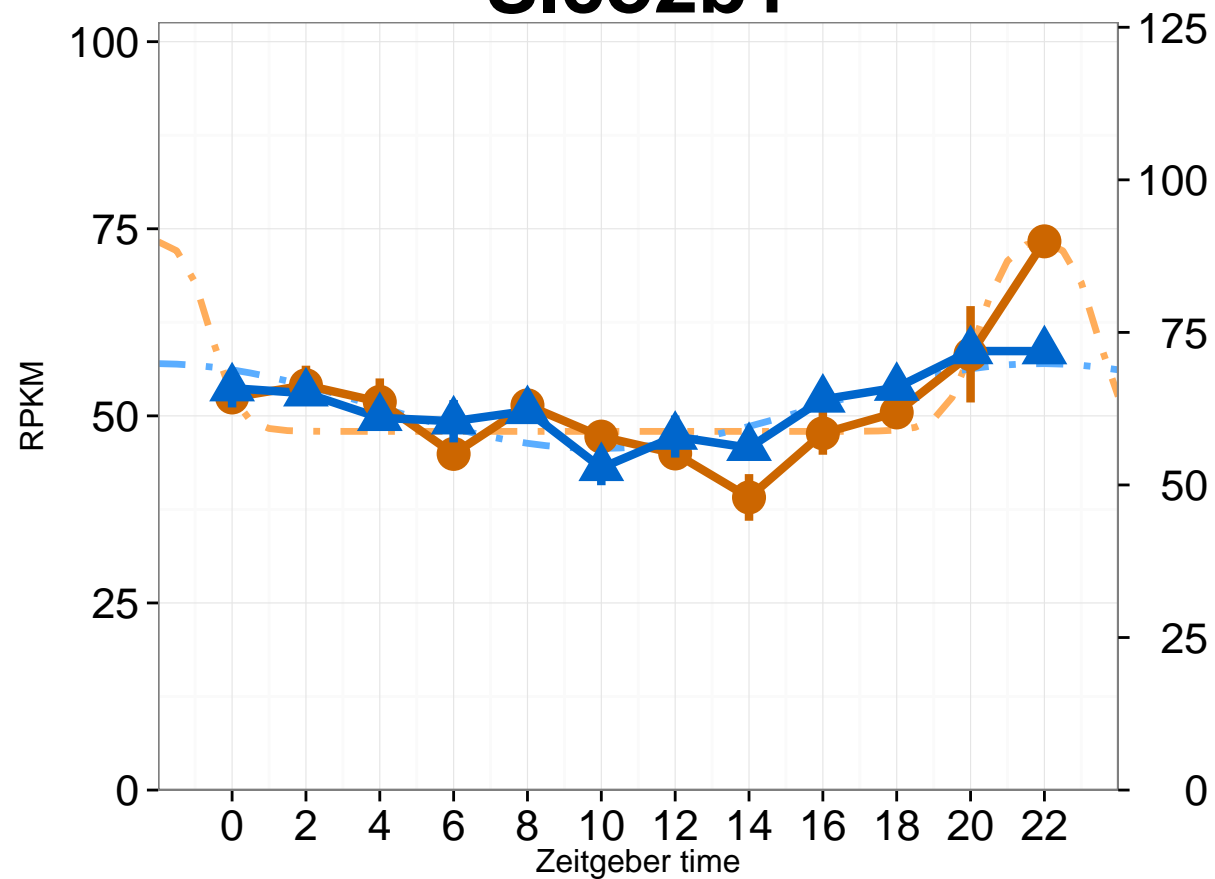

## Slco2b1

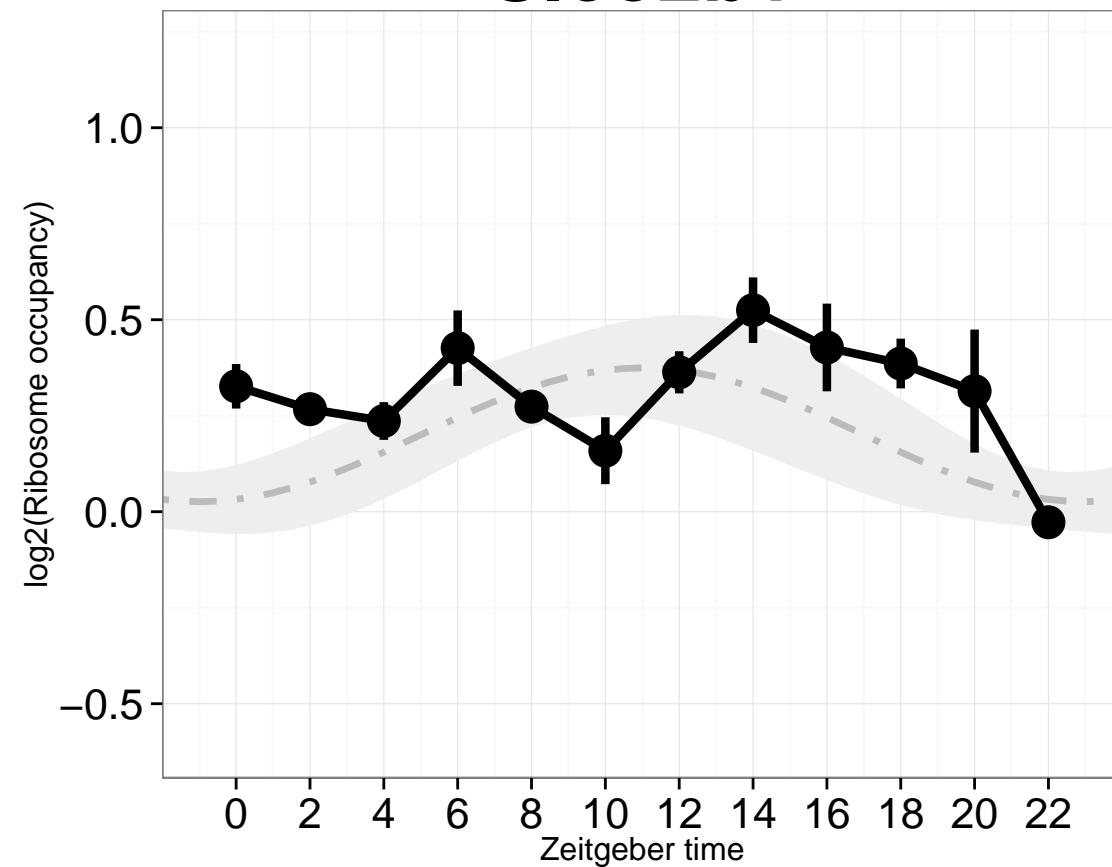

Supplement: SuppDataset_1.zip [file Slco2b1_set_B.pdf › Supplemental Dataset 1/B-mRNA_rhythm_translation_nonrhyth/Slco2b1_set_B.pdf]

## Slirp

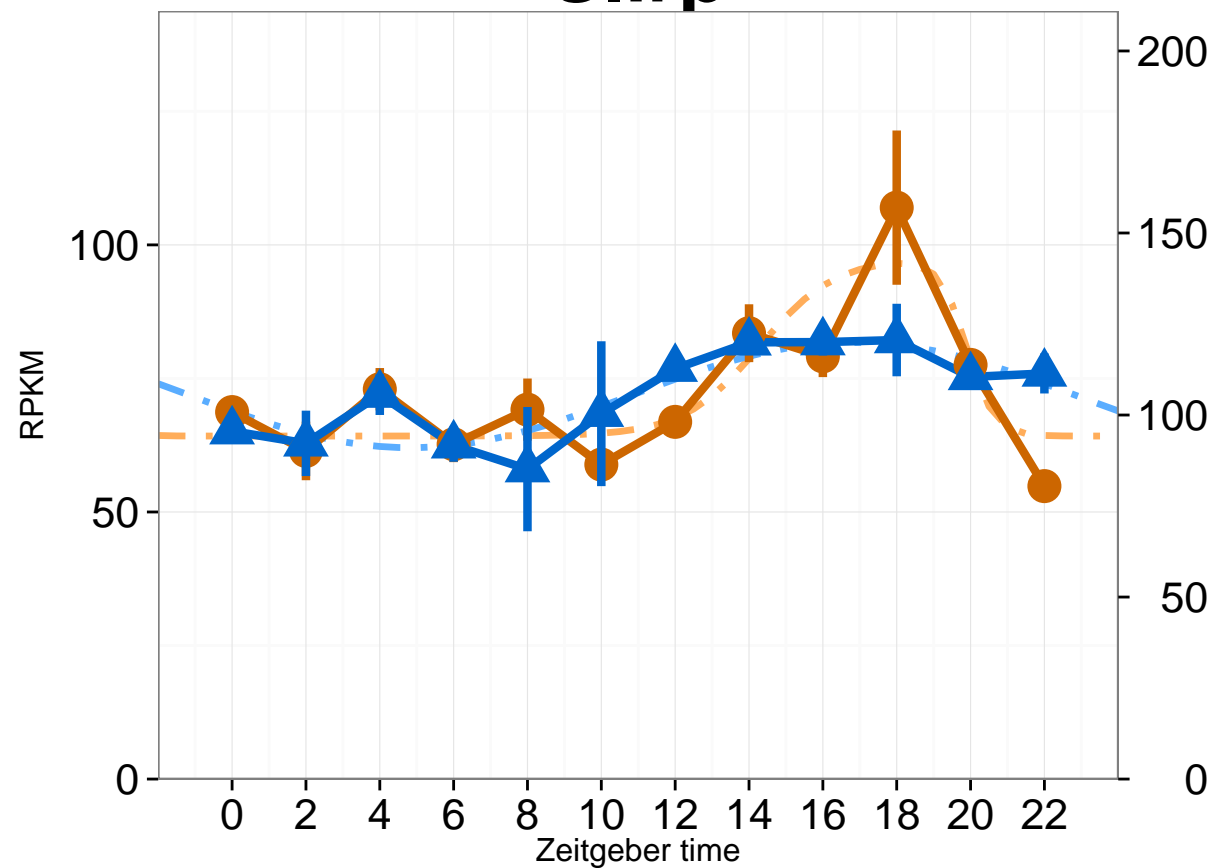

## Slirp

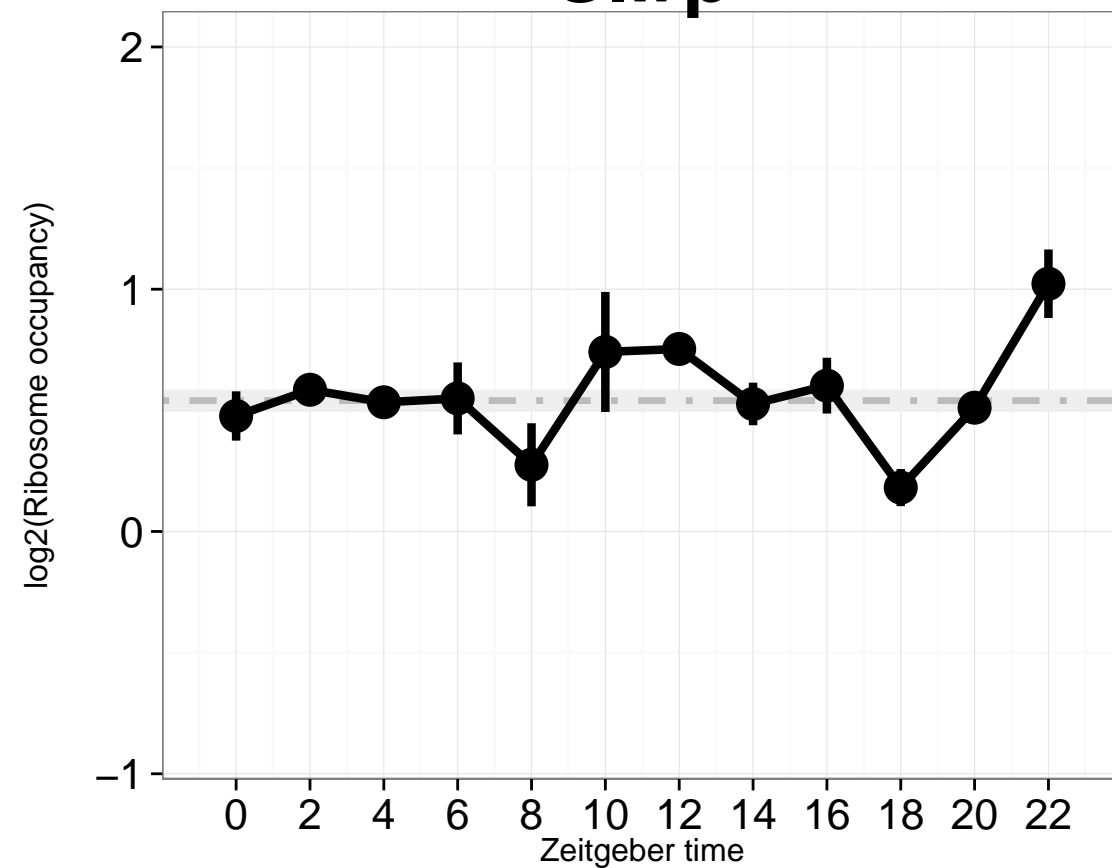

Supplement: SuppDataset_1.zip [file Slirp_set_B.pdf › Supplemental Dataset 1/B-mRNA_rhythm_translation_nonrhyth/Slirp_set_B.pdf]

## Slmo2

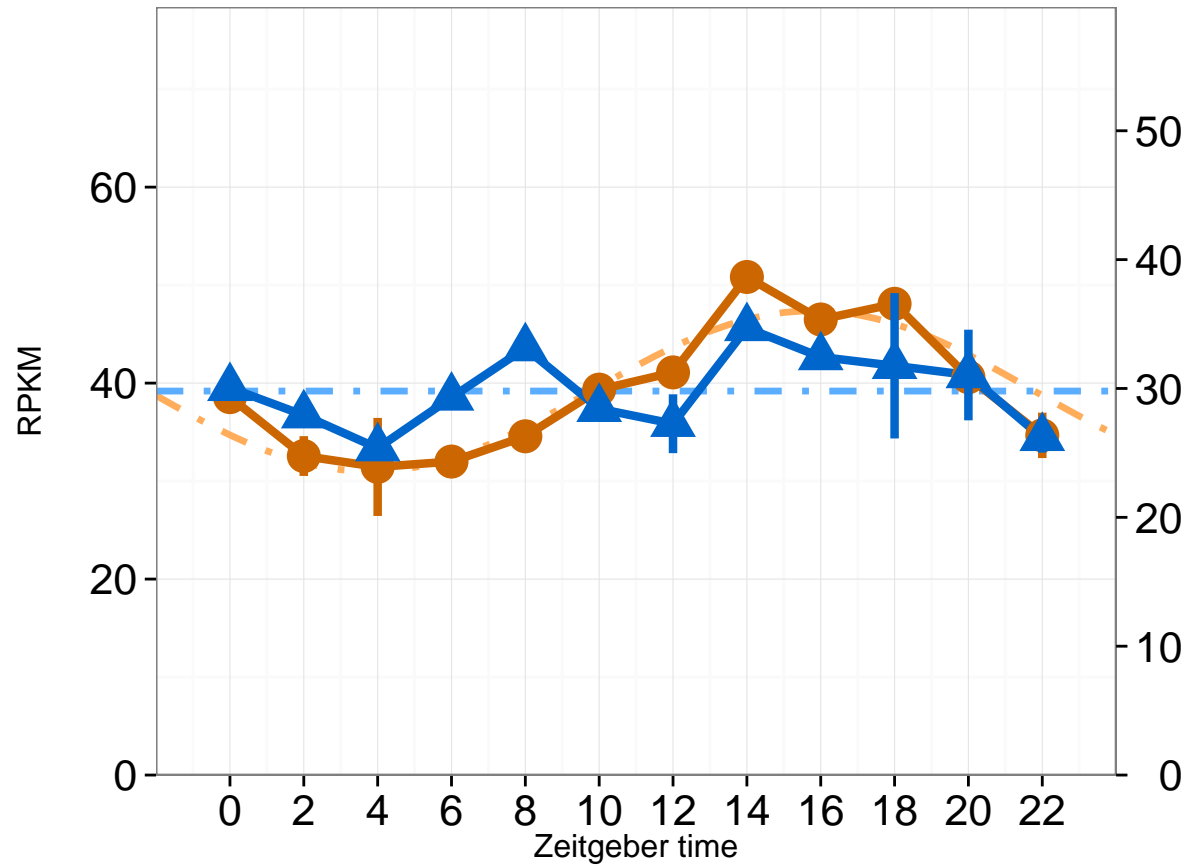

## Slmo2

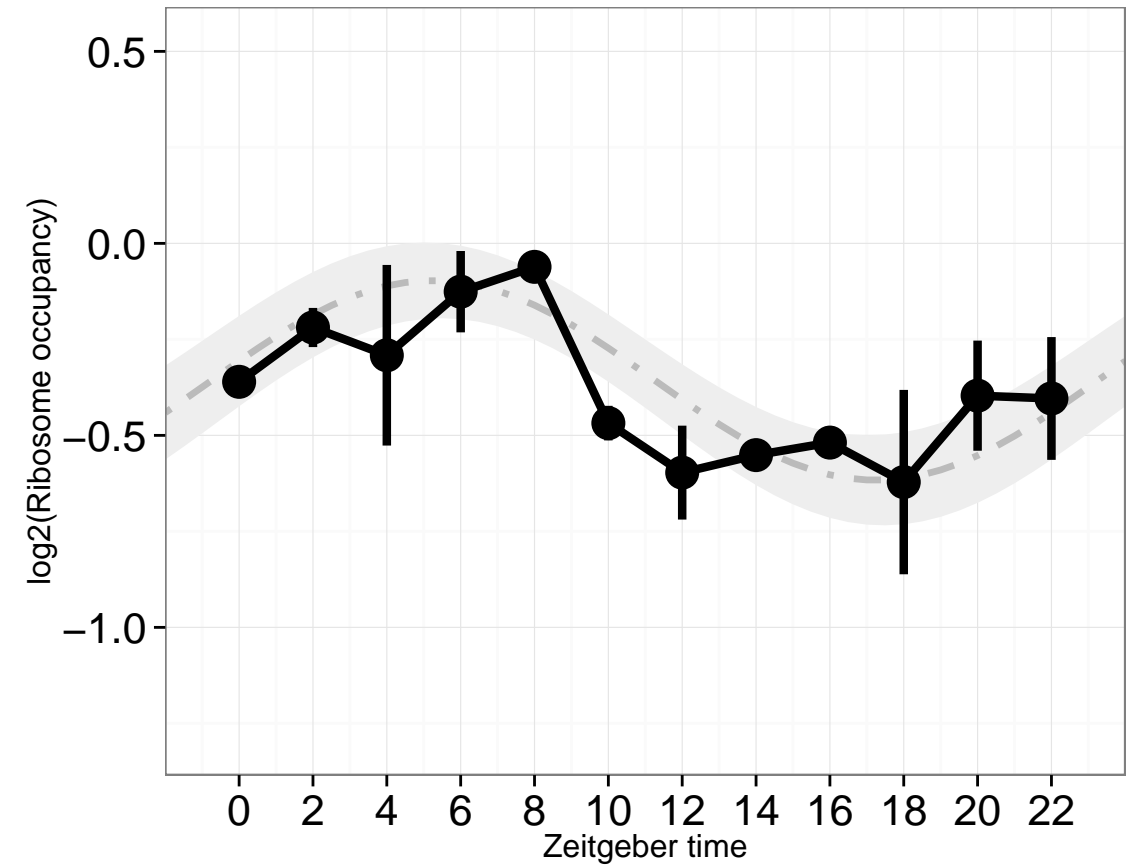

Supplement: SuppDataset_1.zip [file Slmo2_set_B.pdf › Supplemental Dataset 1/B-mRNA_rhythm_translation_nonrhyth/Slmo2_set_B.pdf]

## Slpi

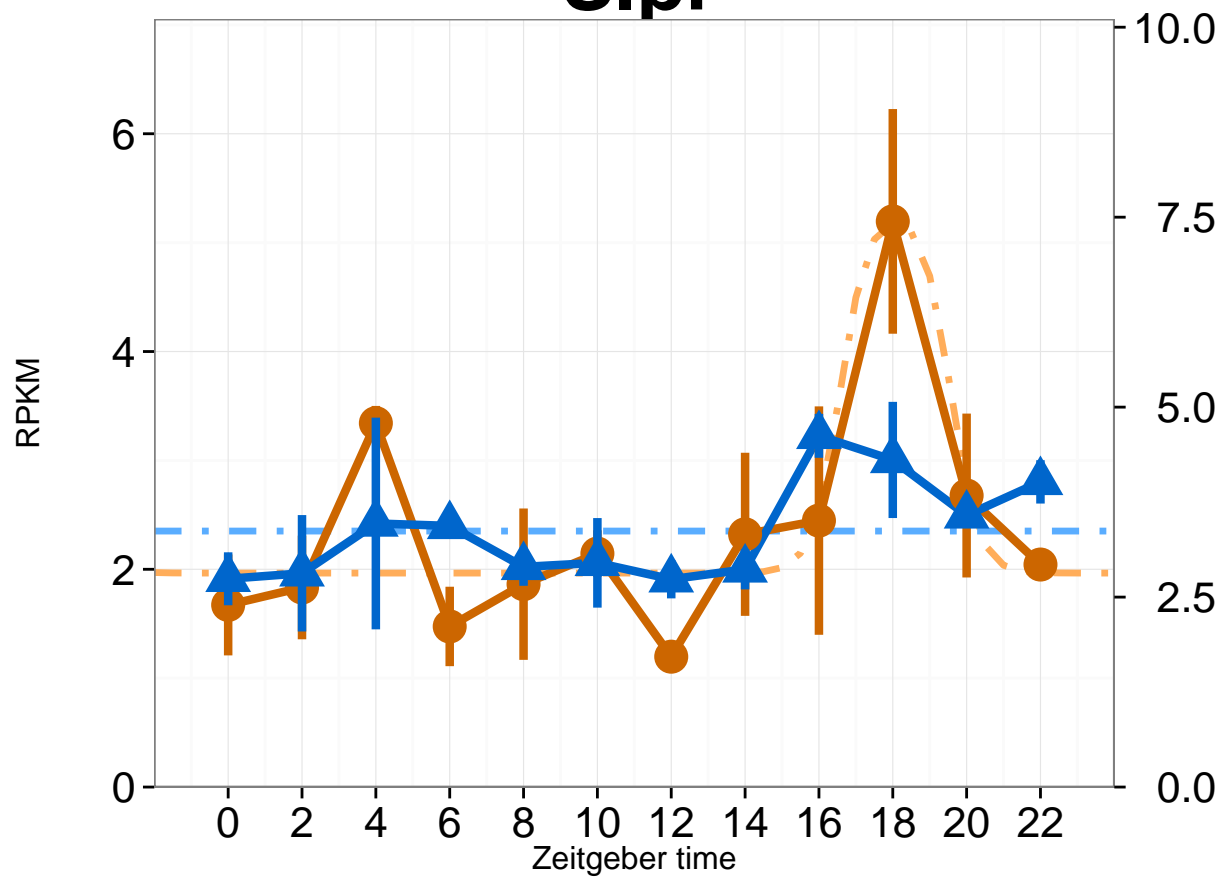

## Slpi

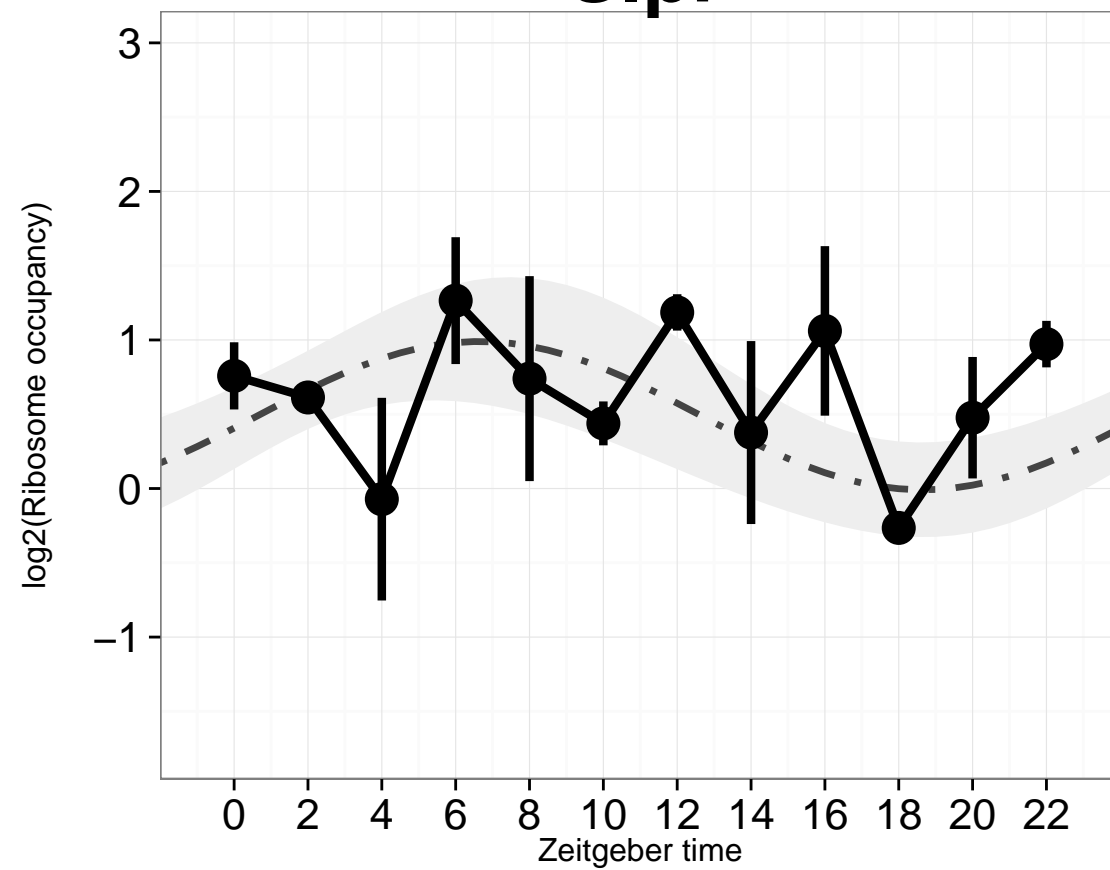

Supplement: SuppDataset_1.zip [file Slpi_set_B.pdf › Supplemental Dataset 1/B-mRNA_rhythm_translation_nonrhyth/Slpi_set_B.pdf]

# Smad9

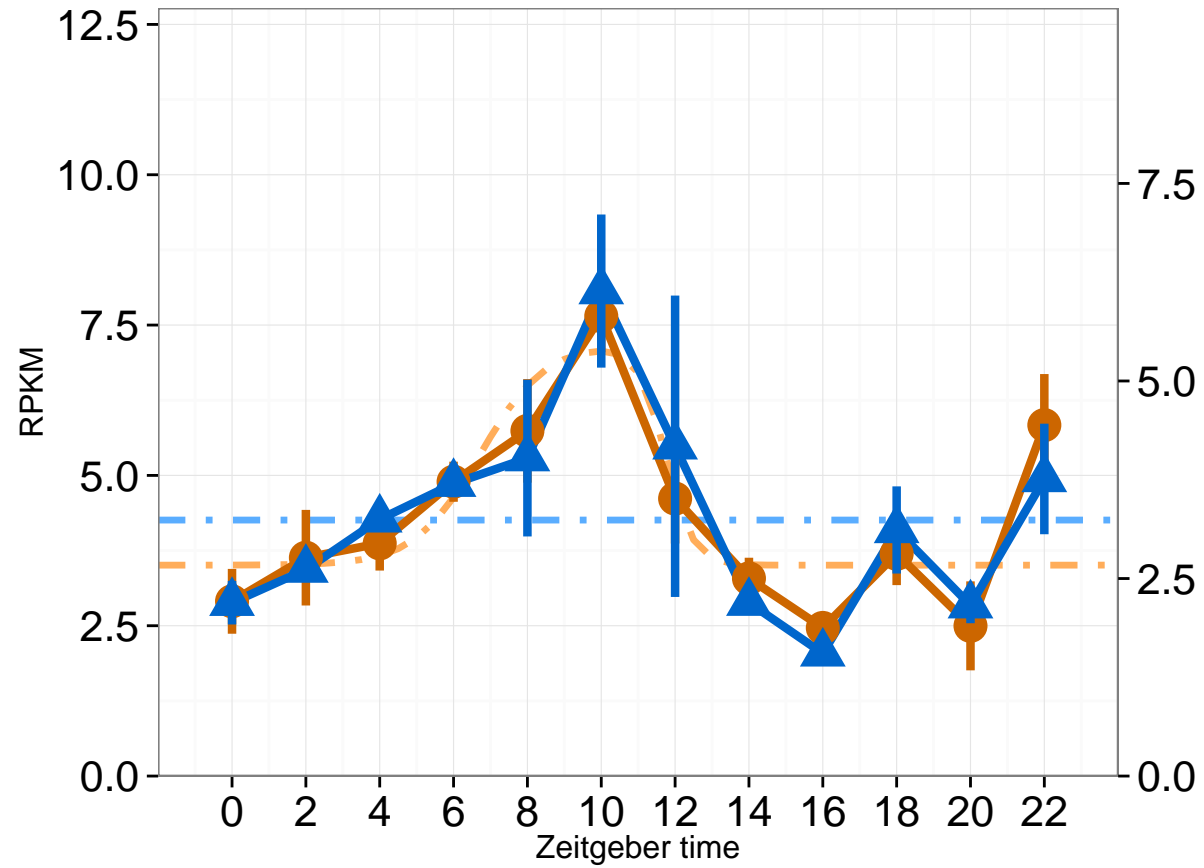

# Smad9

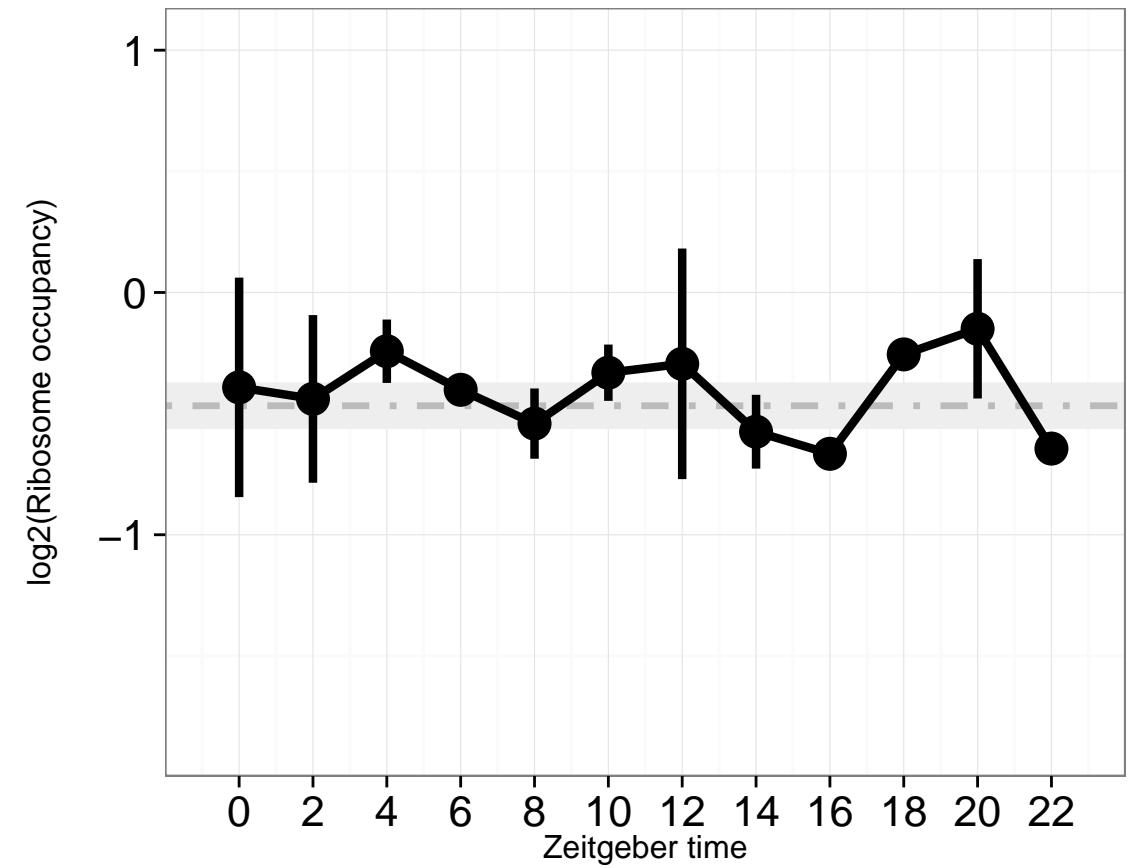

Supplement: SuppDataset_1.zip [file Smad9_set_B.pdf › Supplemental Dataset 1/B-mRNA_rhythm_translation_nonrhyth/Smad9_set_B.pdf]

## Smc1b

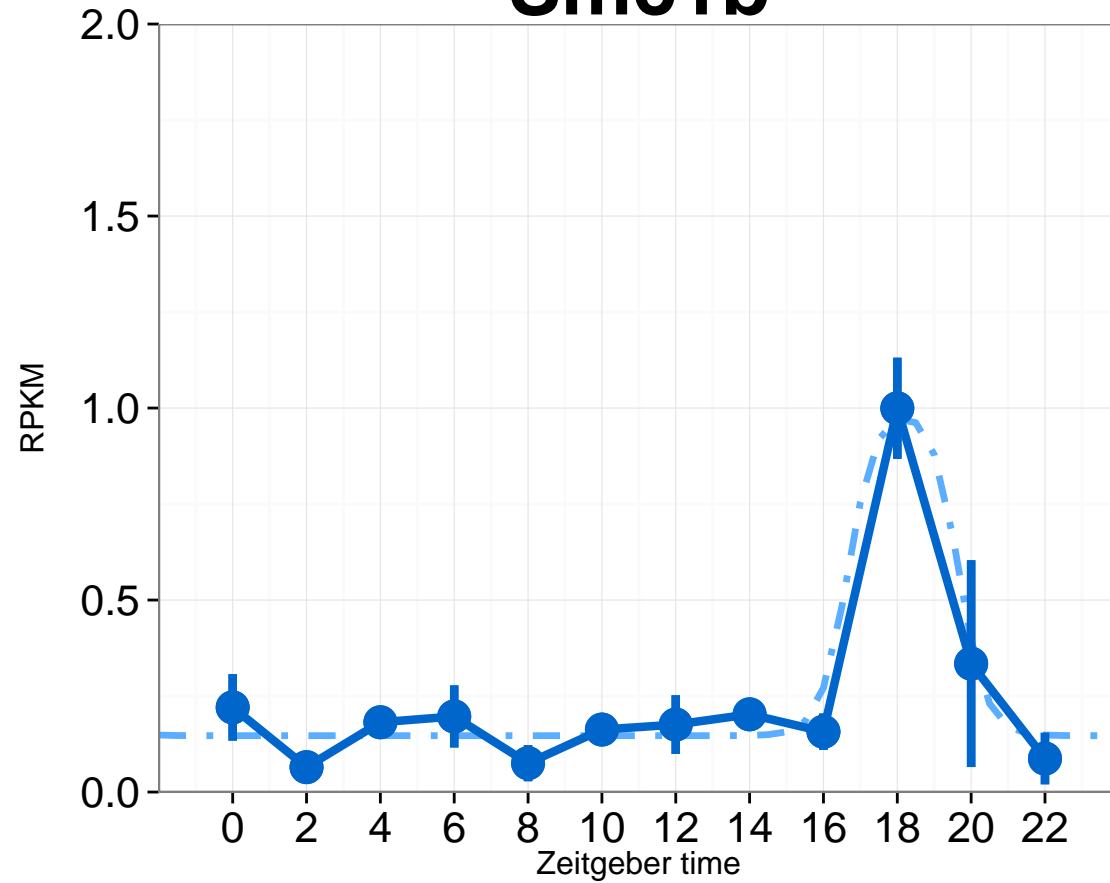

## Smc1b log2(Ribosome occupancy

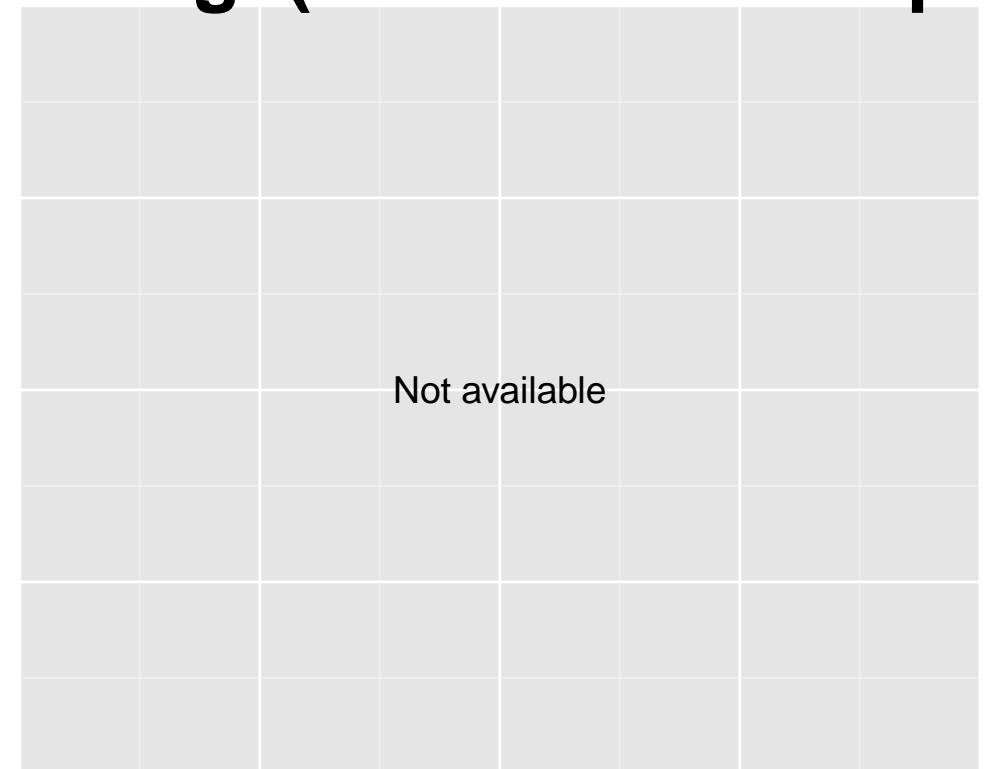

Supplement: SuppDataset_1.zip [file Smc1b_set_B.pdf › Supplemental Dataset 1/B-mRNA_rhythm_translation_nonrhyth/Smc1b_set_B.pdf]

## Smc2

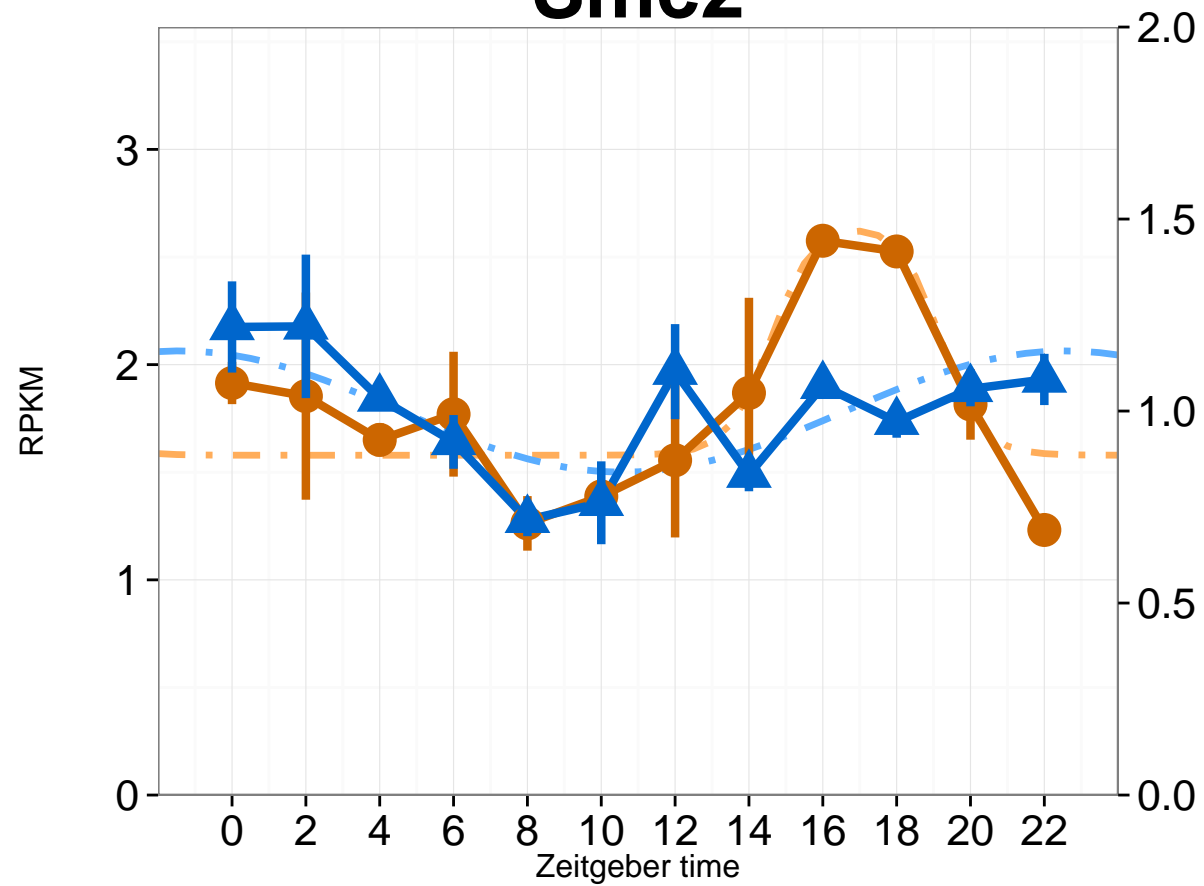

## Smc2

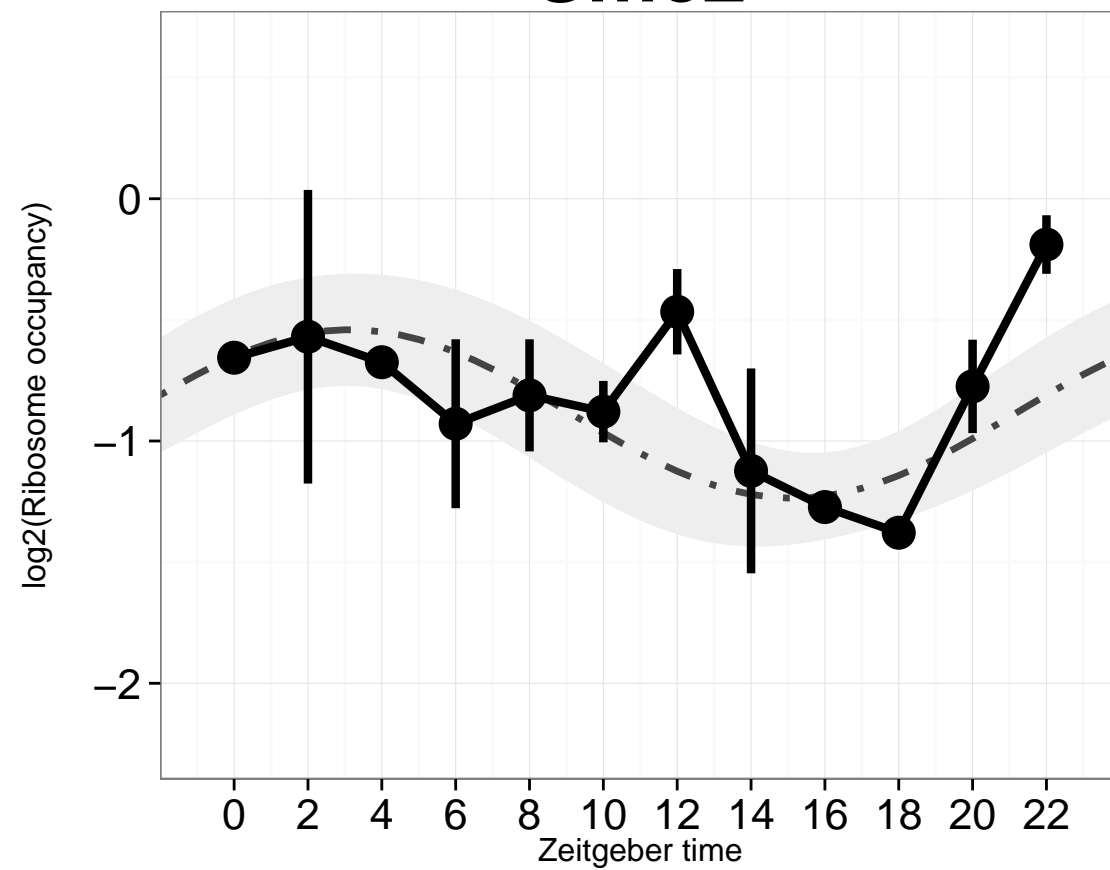

Supplement: SuppDataset_1.zip [file Smc2_set_B.pdf › Supplemental Dataset 1/B-mRNA_rhythm_translation_nonrhyth/Smc2_set_B.pdf]

# Smc6

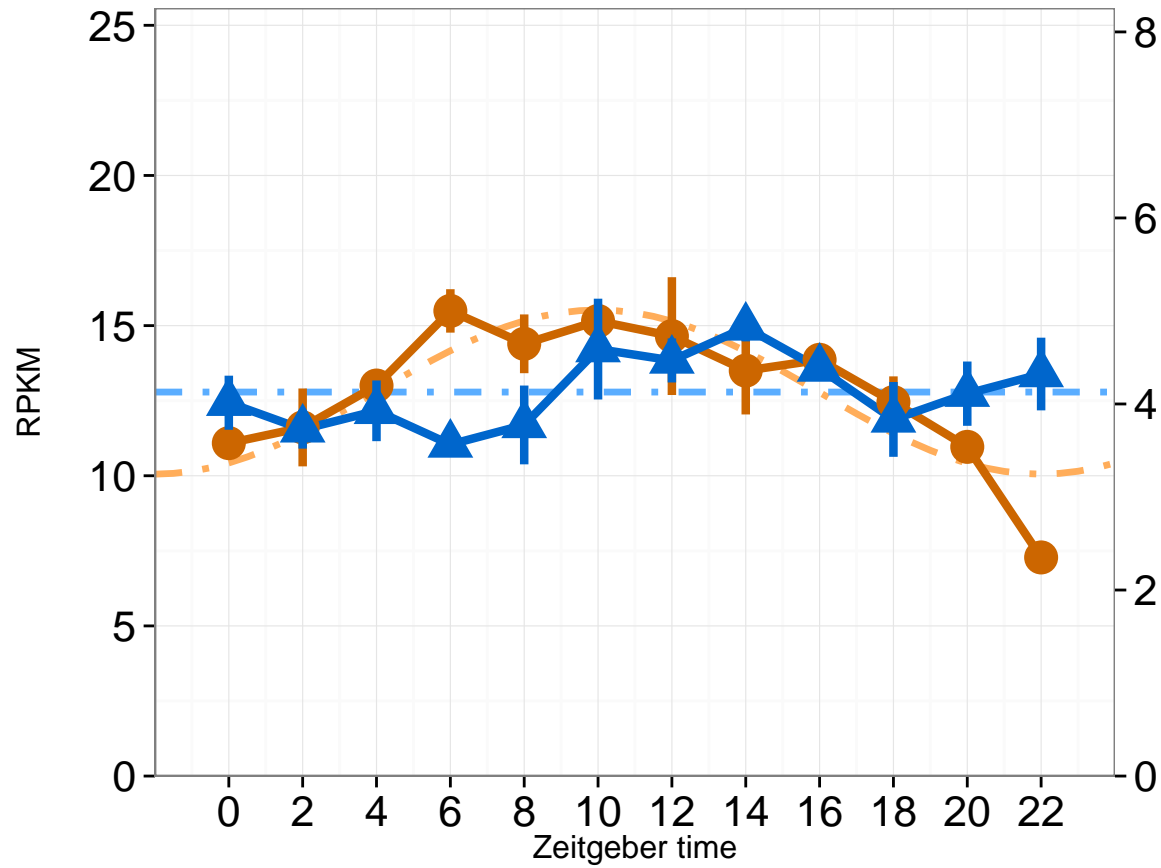

# Smc6

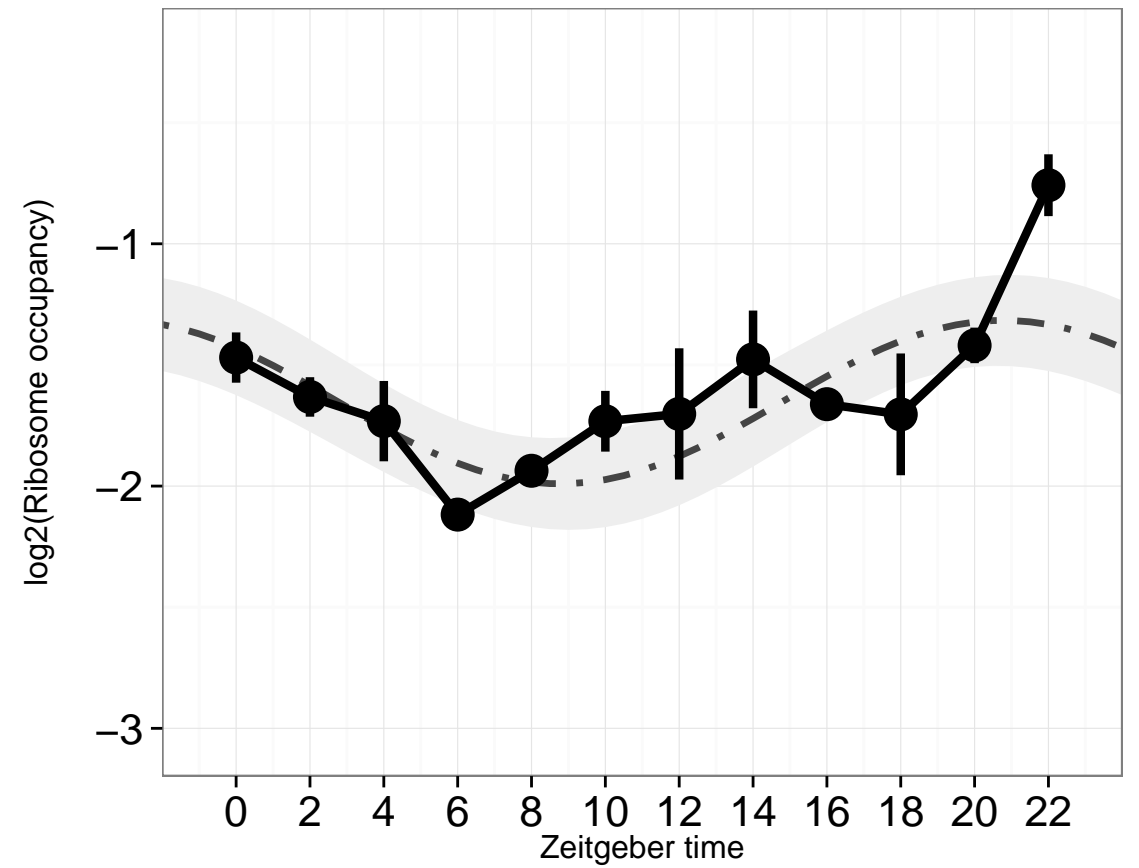

Supplement: SuppDataset_1.zip [file Smc6_set_B.pdf › Supplemental Dataset 1/B-mRNA_rhythm_translation_nonrhyth/Smc6_set_B.pdf]

## Smim1

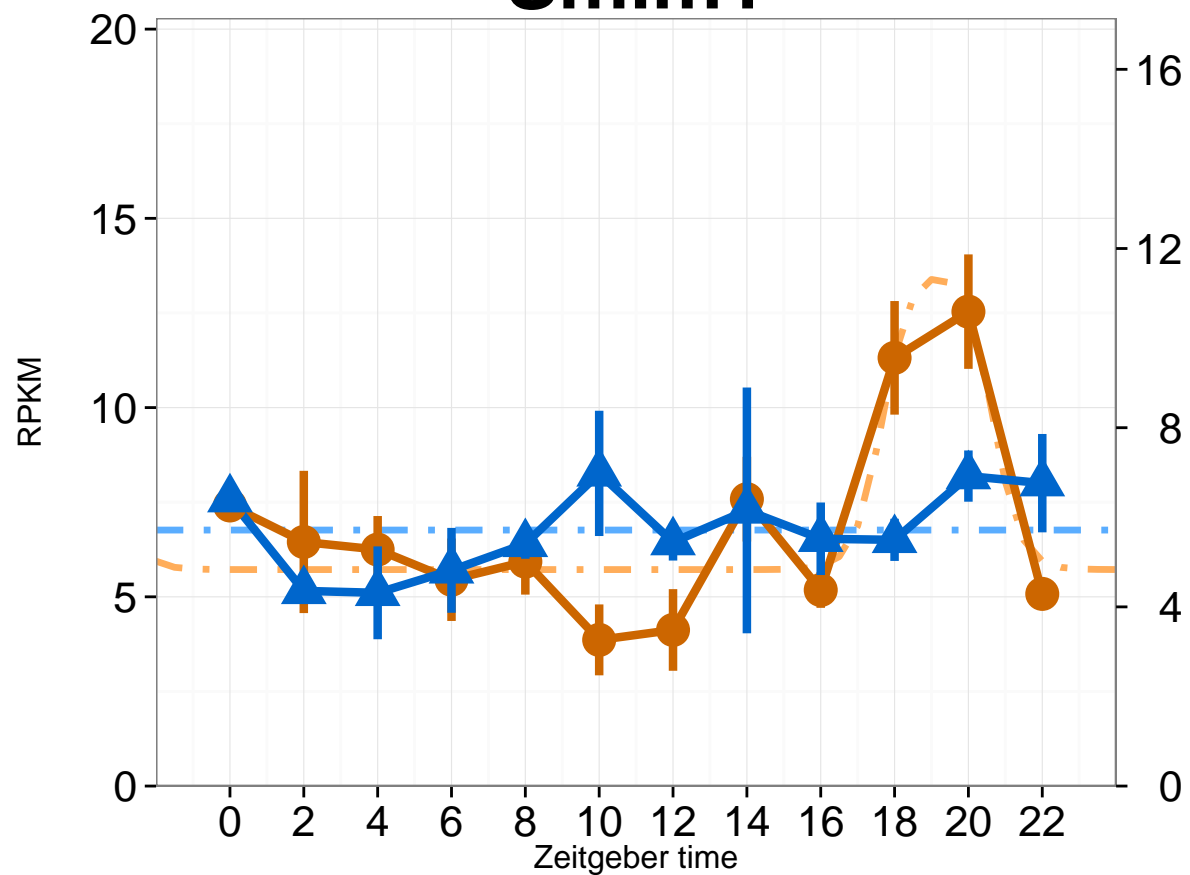

## Smim1

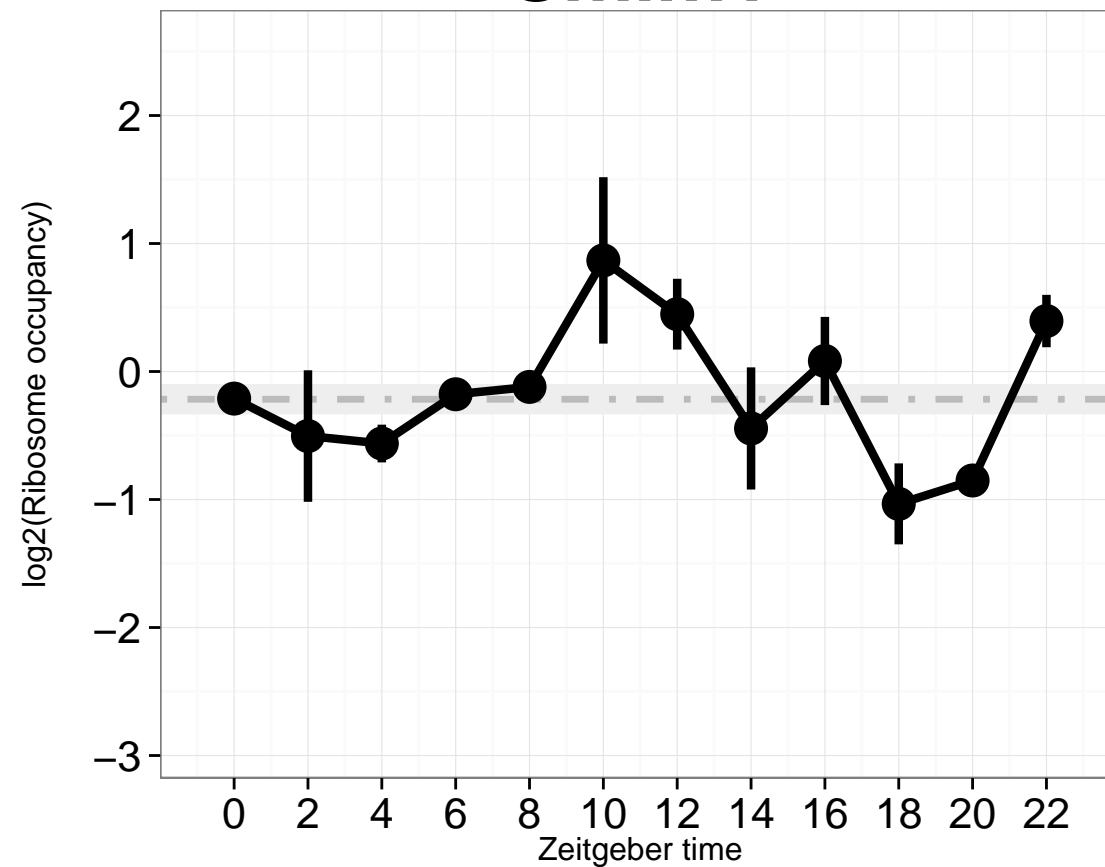

Supplement: SuppDataset_1.zip [file Smim1_set_B.pdf › Supplemental Dataset 1/B-mRNA_rhythm_translation_nonrhyth/Smim1_set_B.pdf]

## Snrpa

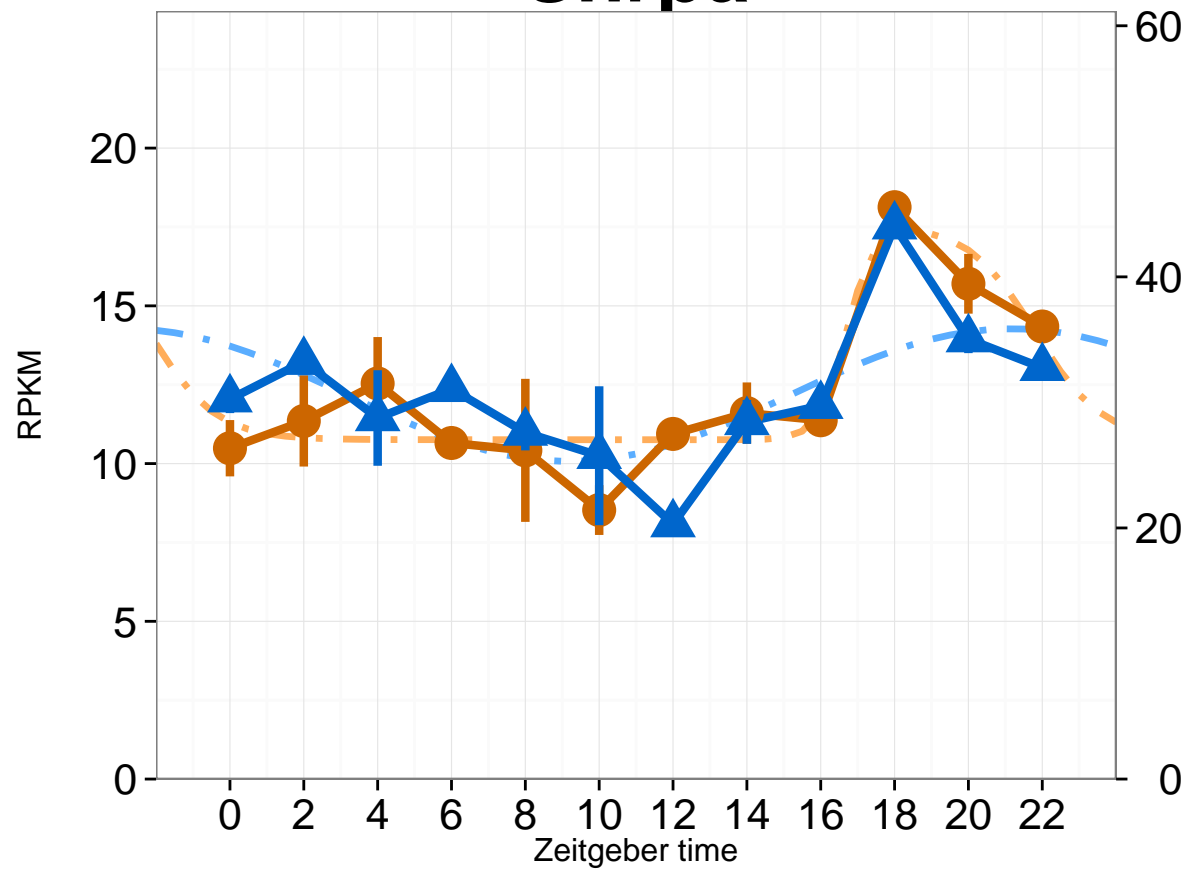

## Snrpa

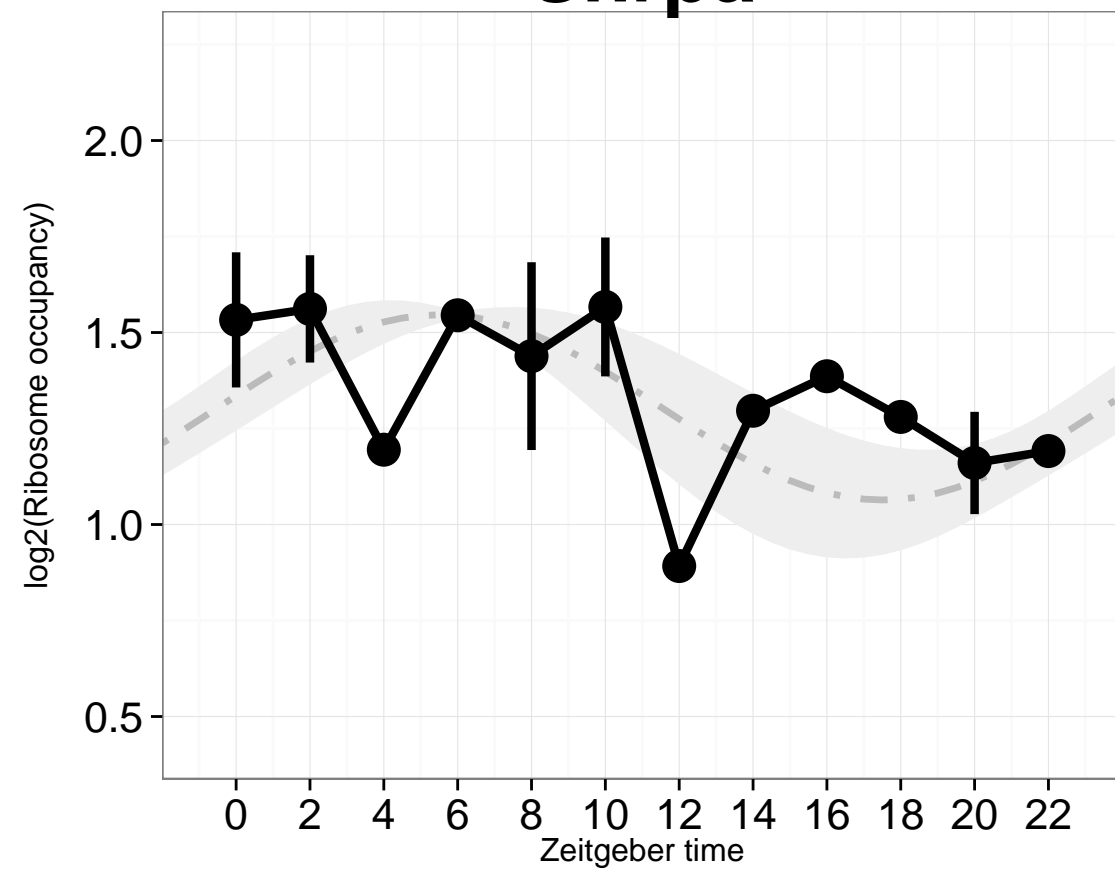

Supplement: SuppDataset_1.zip [file Snrpa_set_B.pdf › Supplemental Dataset 1/B-mRNA_rhythm_translation_nonrhyth/Snrpa_set_B.pdf]

## Snx21

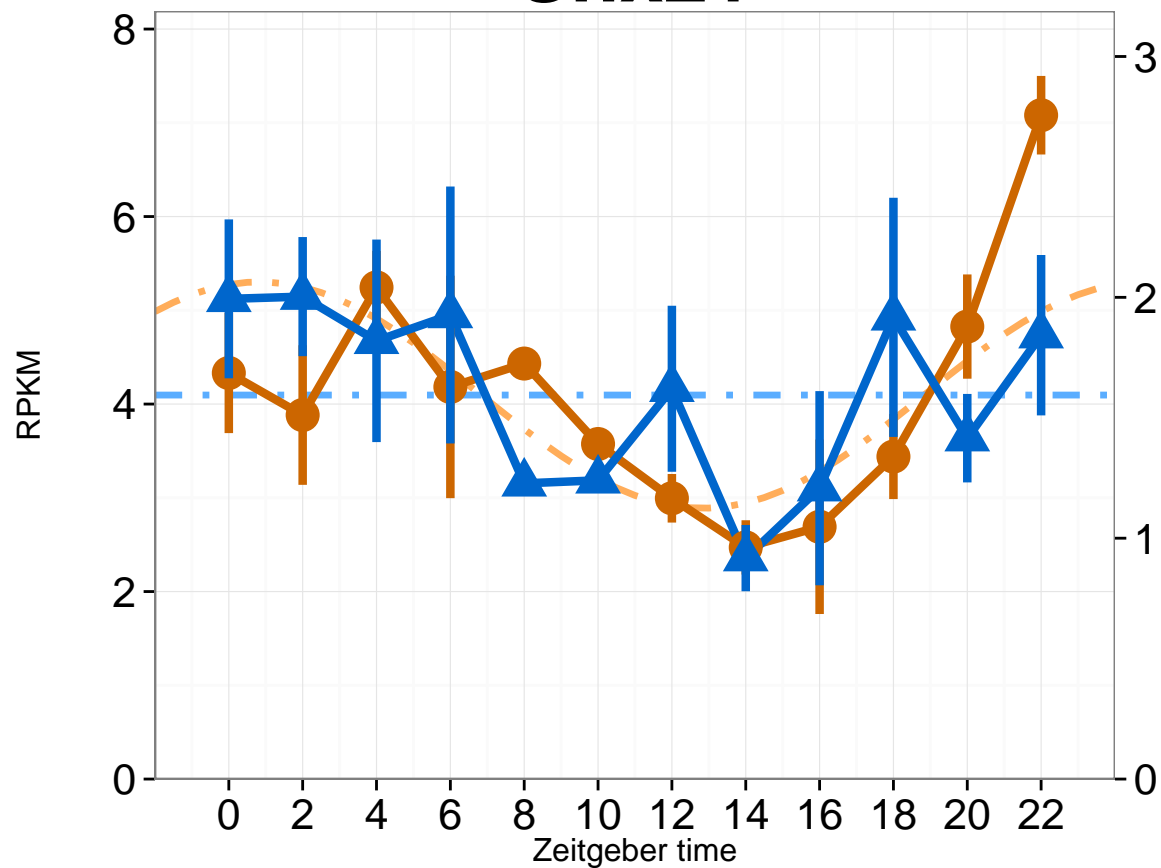

## Snx21

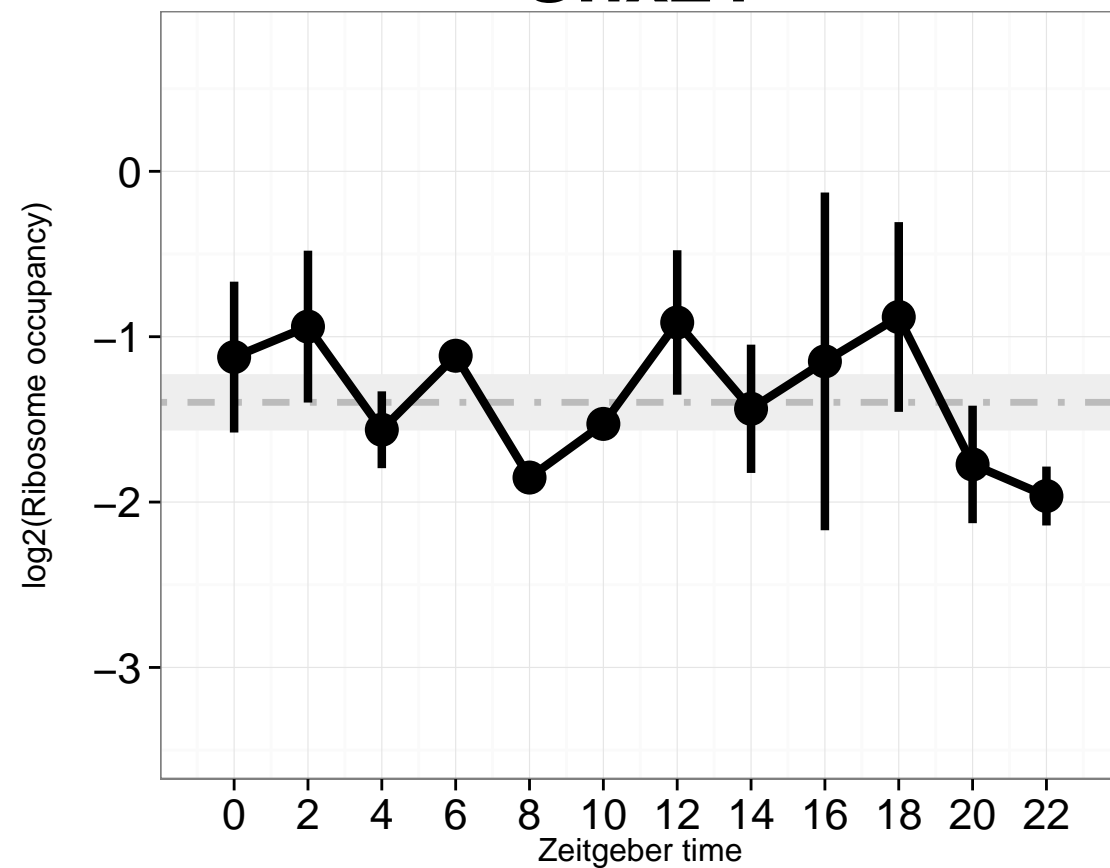

Supplement: SuppDataset_1.zip [file Snx21_set_B.pdf › Supplemental Dataset 1/B-mRNA_rhythm_translation_nonrhyth/Snx21_set_B.pdf]

# Snx30

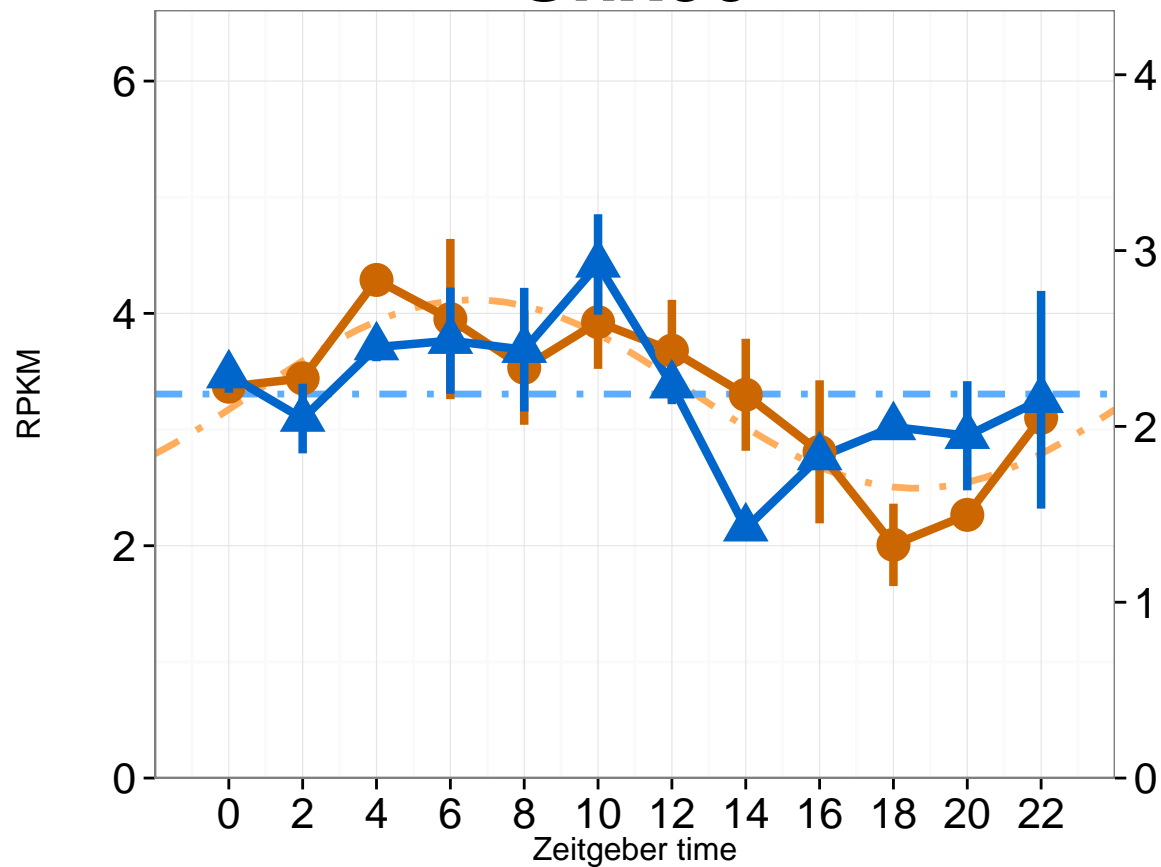

# Snx30

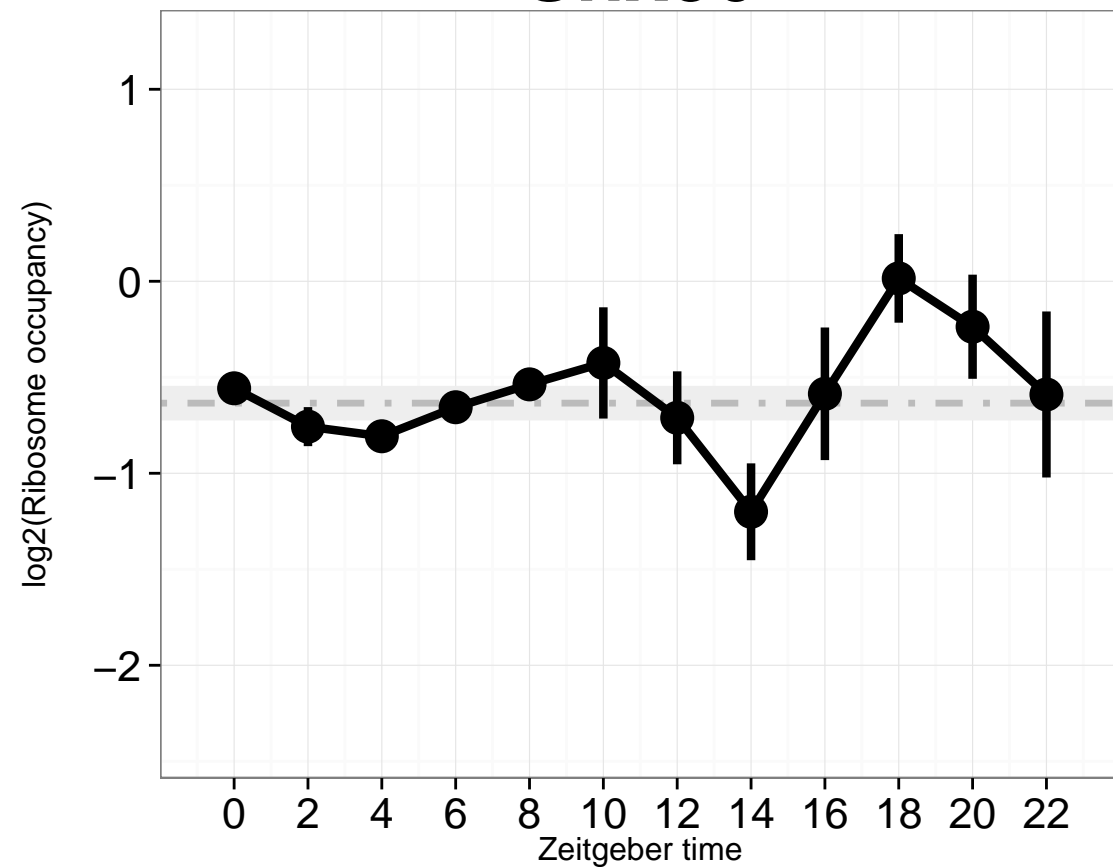

Supplement: SuppDataset_1.zip [file Snx30_set_B.pdf › Supplemental Dataset 1/B-mRNA_rhythm_translation_nonrhyth/Snx30_set_B.pdf]

## Snx32

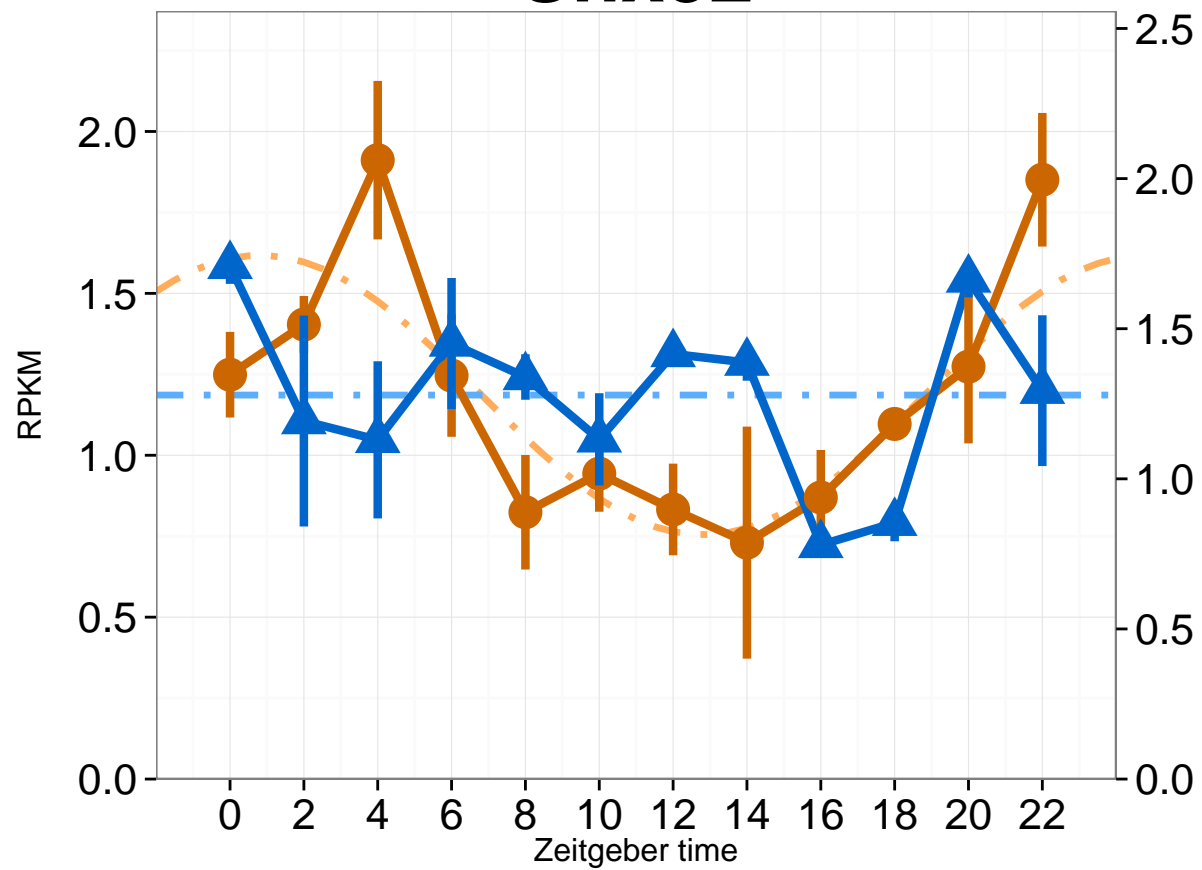

## Snx32

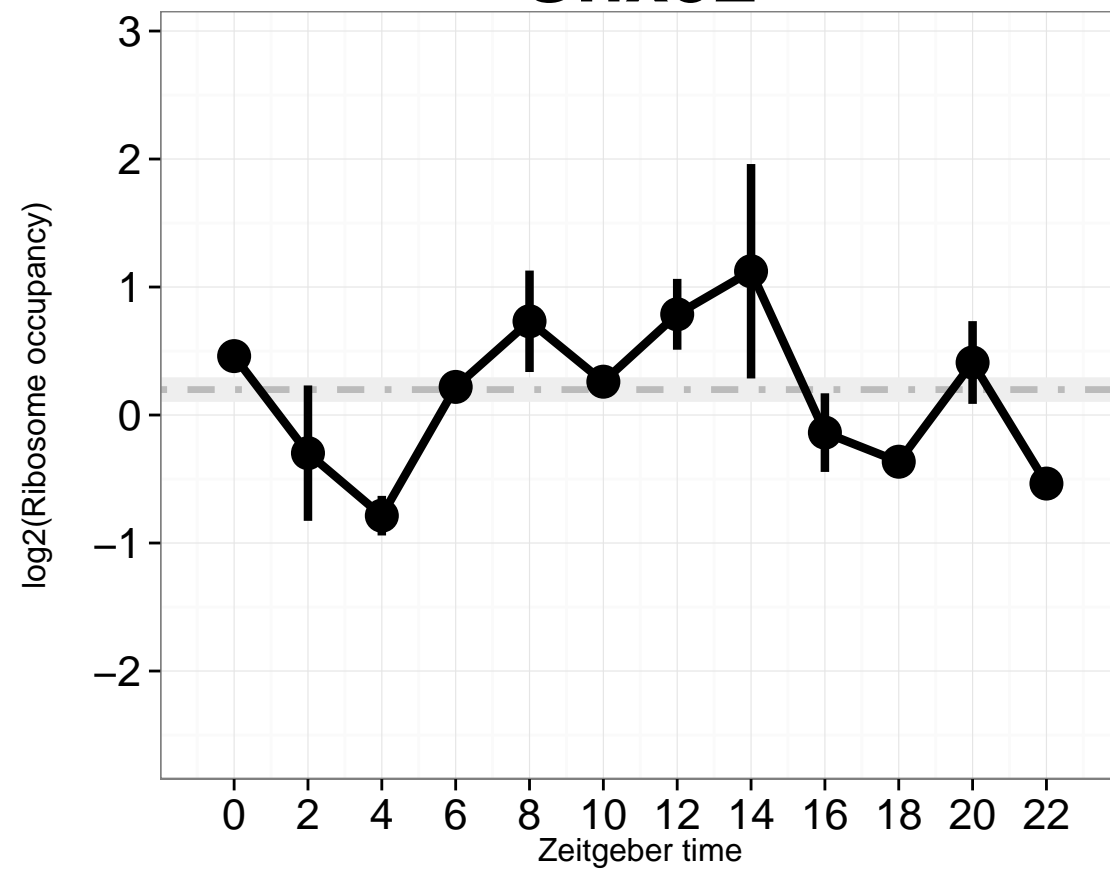

Supplement: SuppDataset_1.zip [file Snx32_set_B.pdf › Supplemental Dataset 1/B-mRNA_rhythm_translation_nonrhyth/Snx32_set_B.pdf]

## Snx33

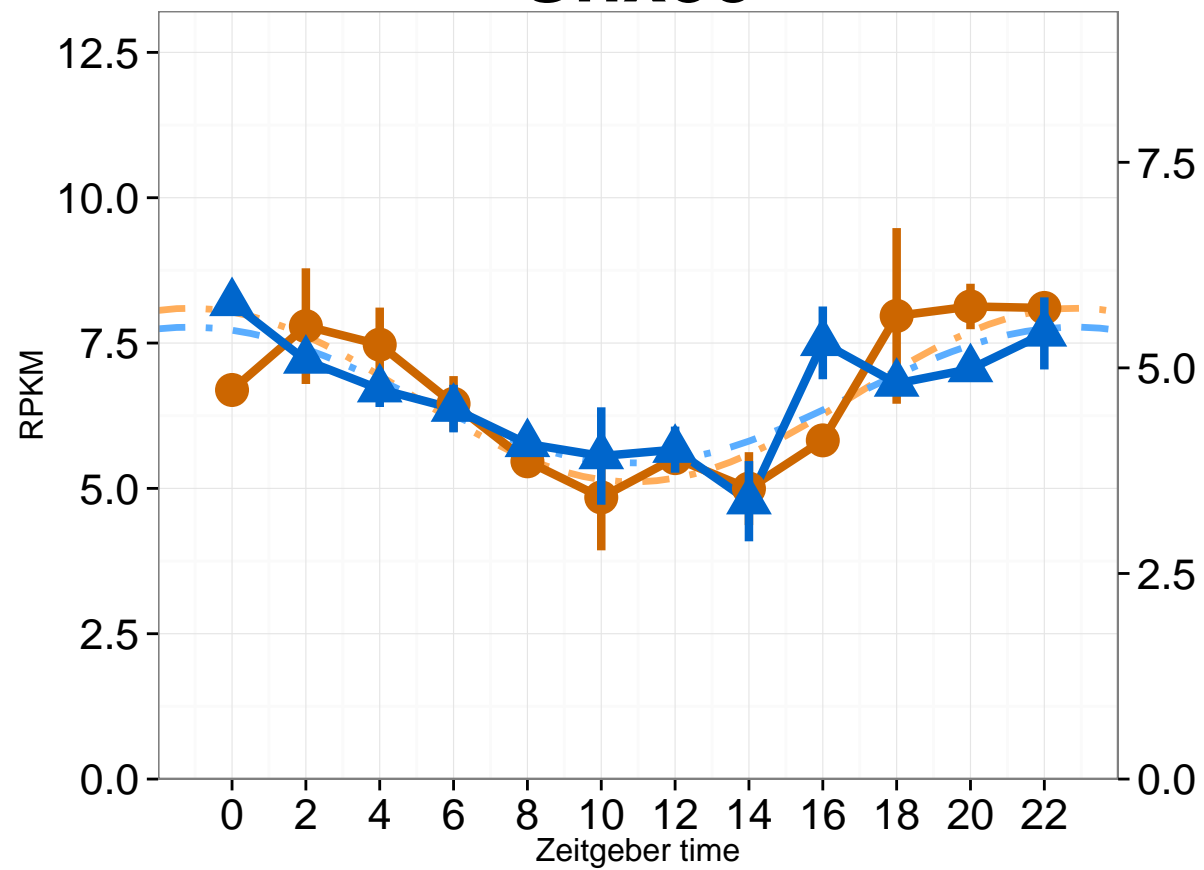

## Snx33

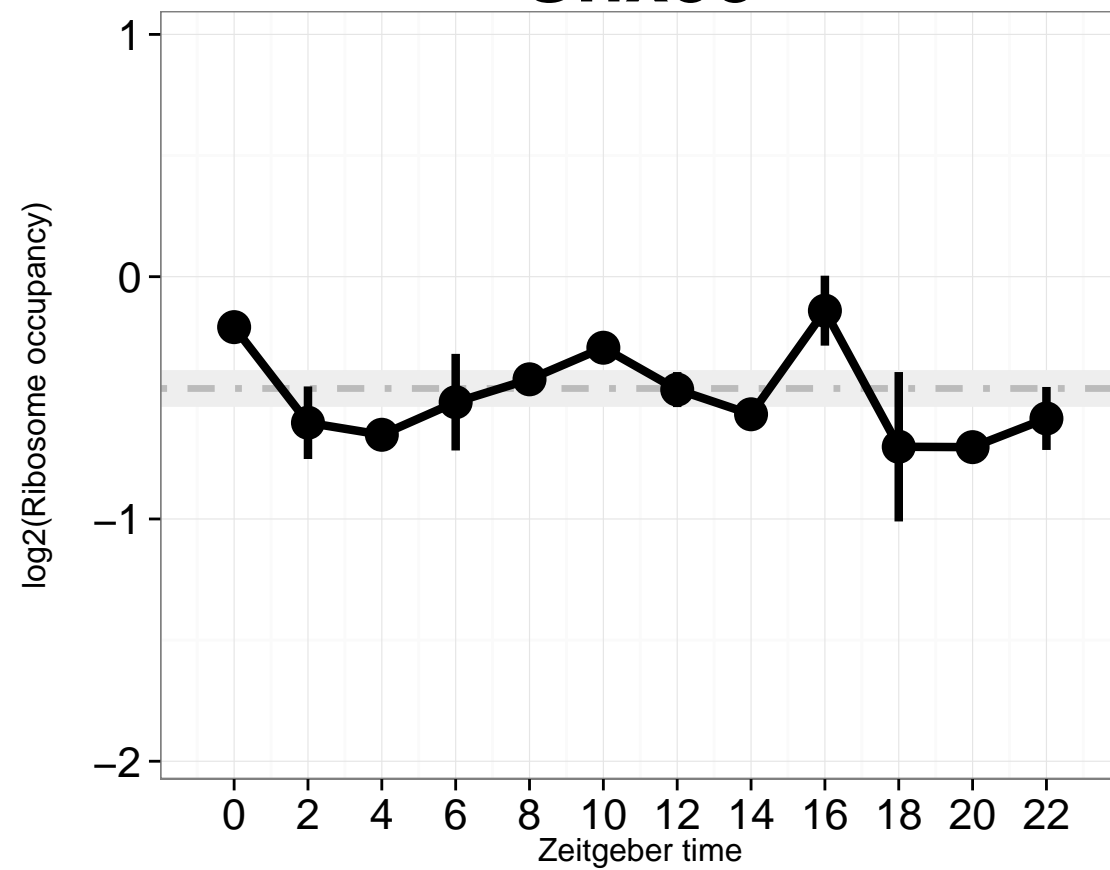

Supplement: SuppDataset_1.zip [file Snx33_set_B.pdf › Supplemental Dataset 1/B-mRNA_rhythm_translation_nonrhyth/Snx33_set_B.pdf]

## Socs4

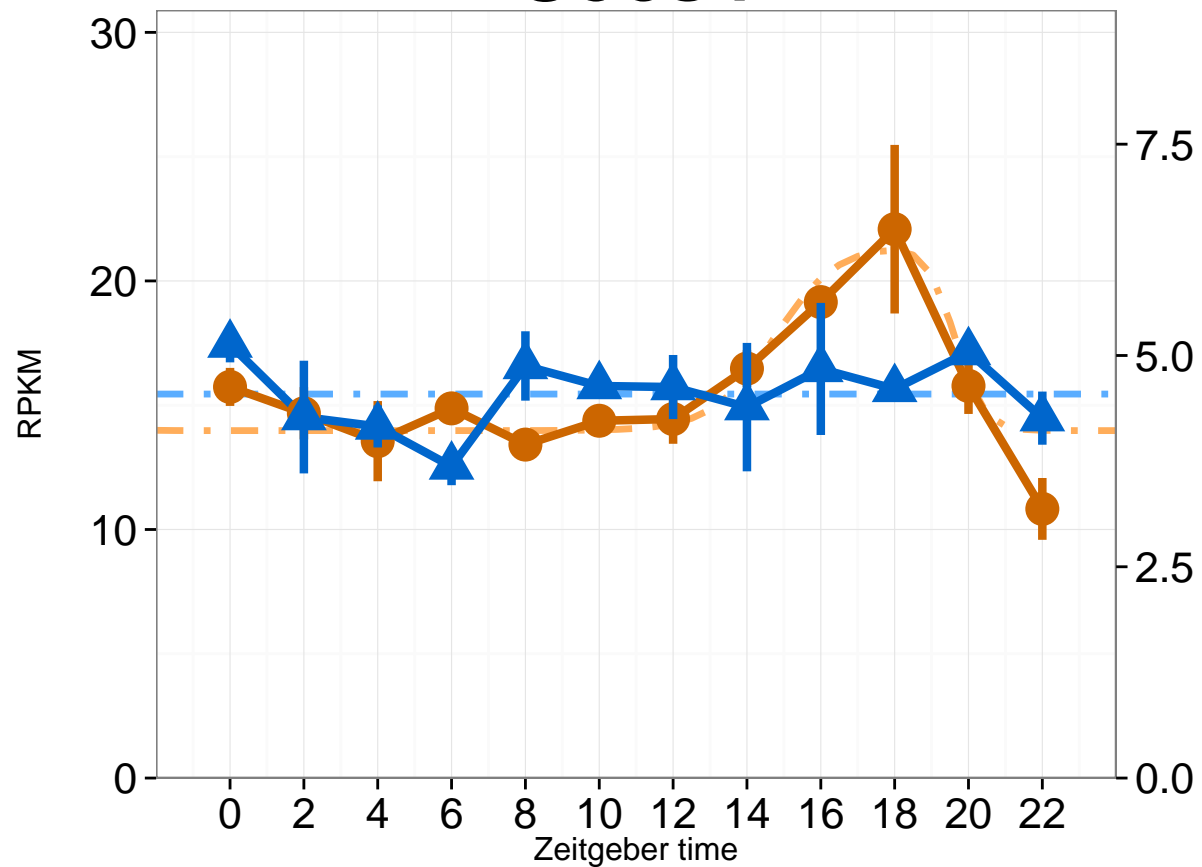

## Socs4

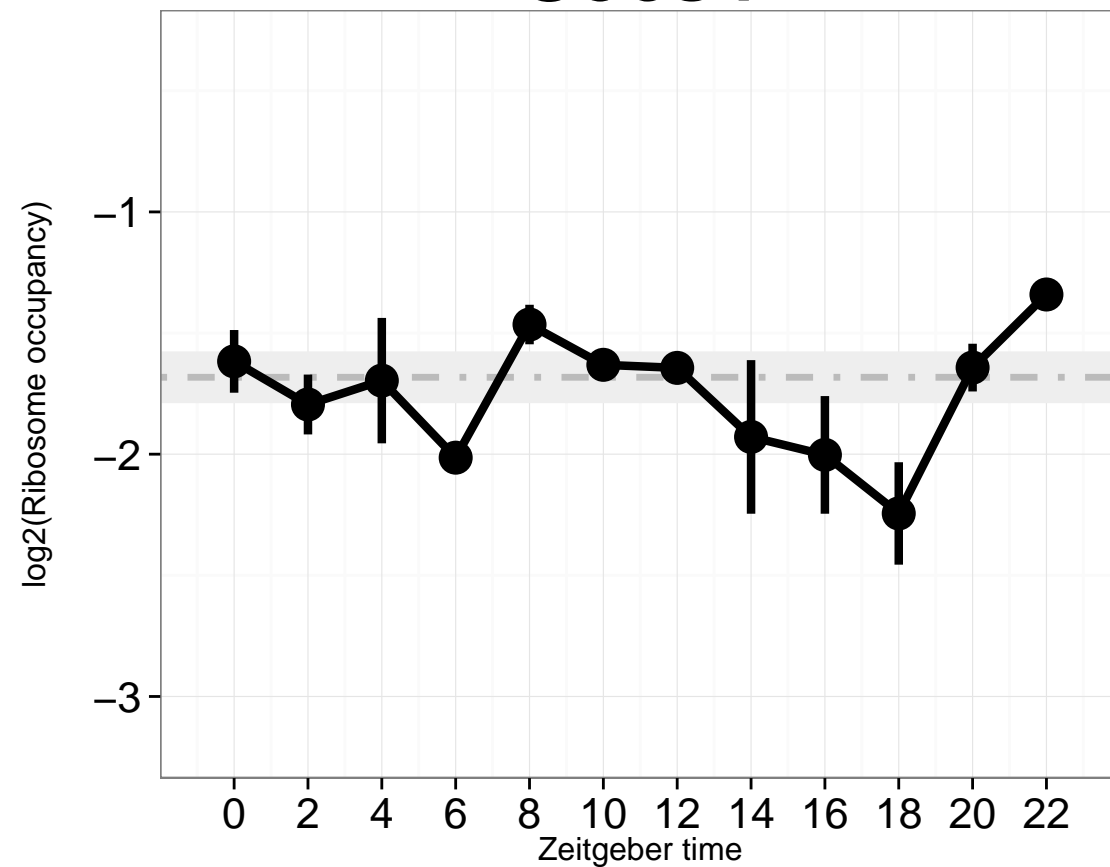

Supplement: SuppDataset_1.zip [file Socs4_set_B.pdf › Supplemental Dataset 1/B-mRNA_rhythm_translation_nonrhyth/Socs4_set_B.pdf]

## Sox4

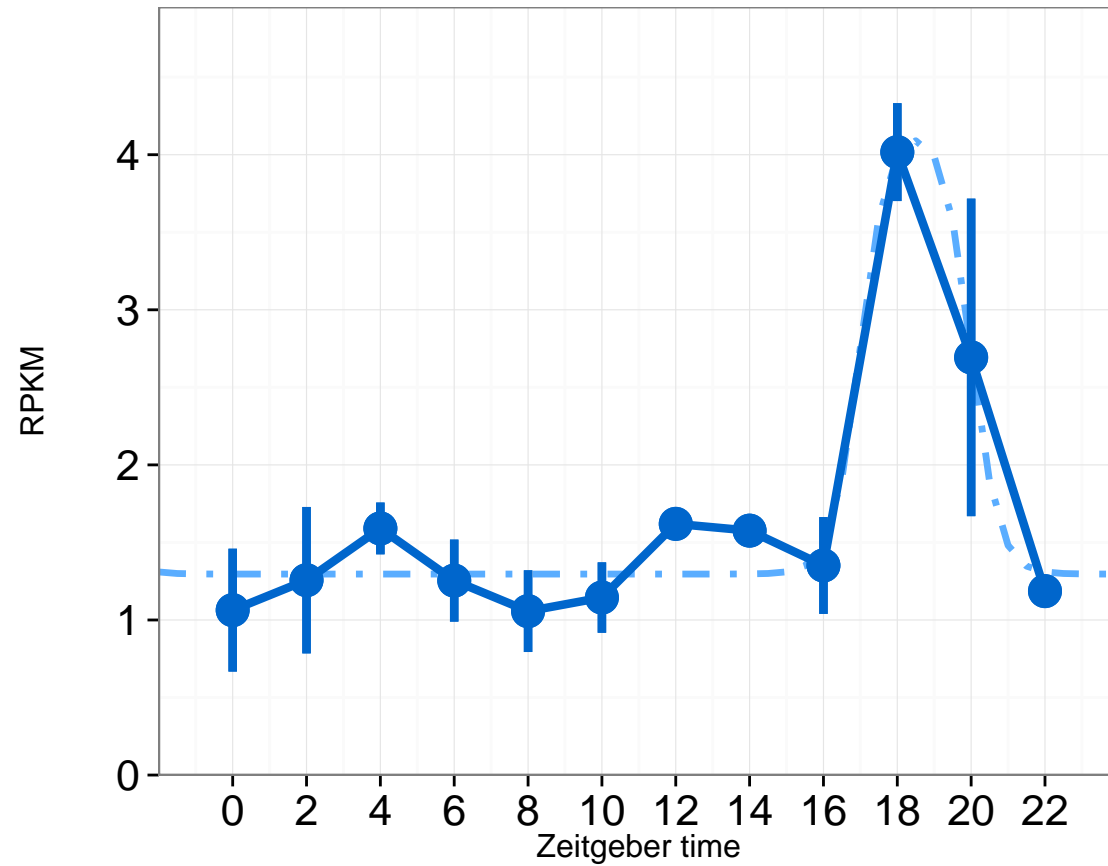

## Sox4 log2(Ribosome occupancy)

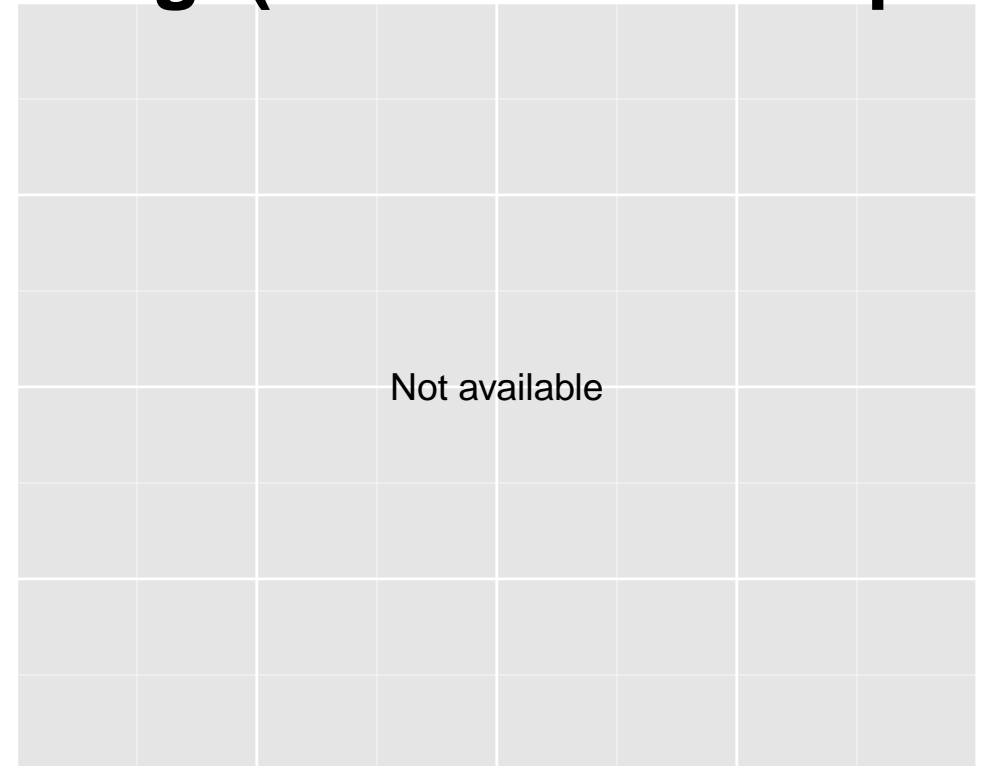

Supplement: SuppDataset_1.zip [file Sox4_set_B.pdf › Supplemental Dataset 1/B-mRNA_rhythm_translation_nonrhyth/Sox4_set_B.pdf]

## Spag1

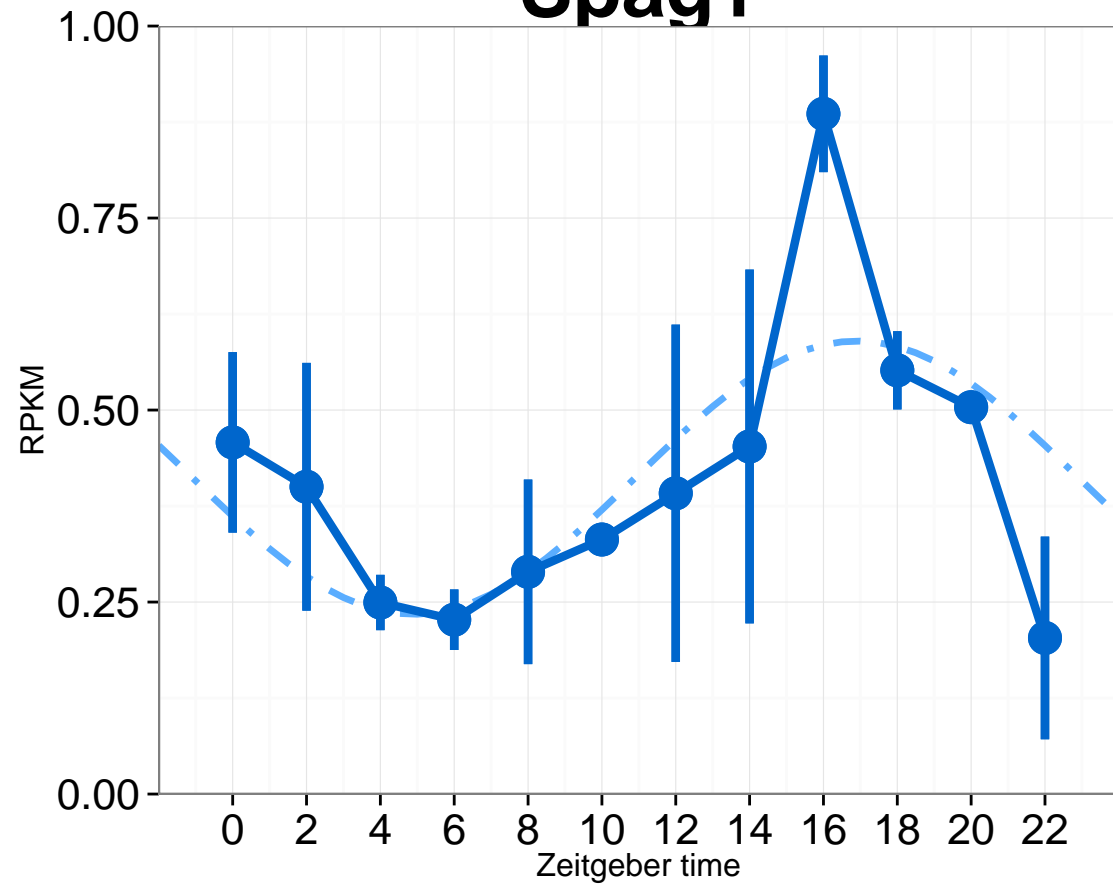

## Spag1 log2(Ribosome occupancy

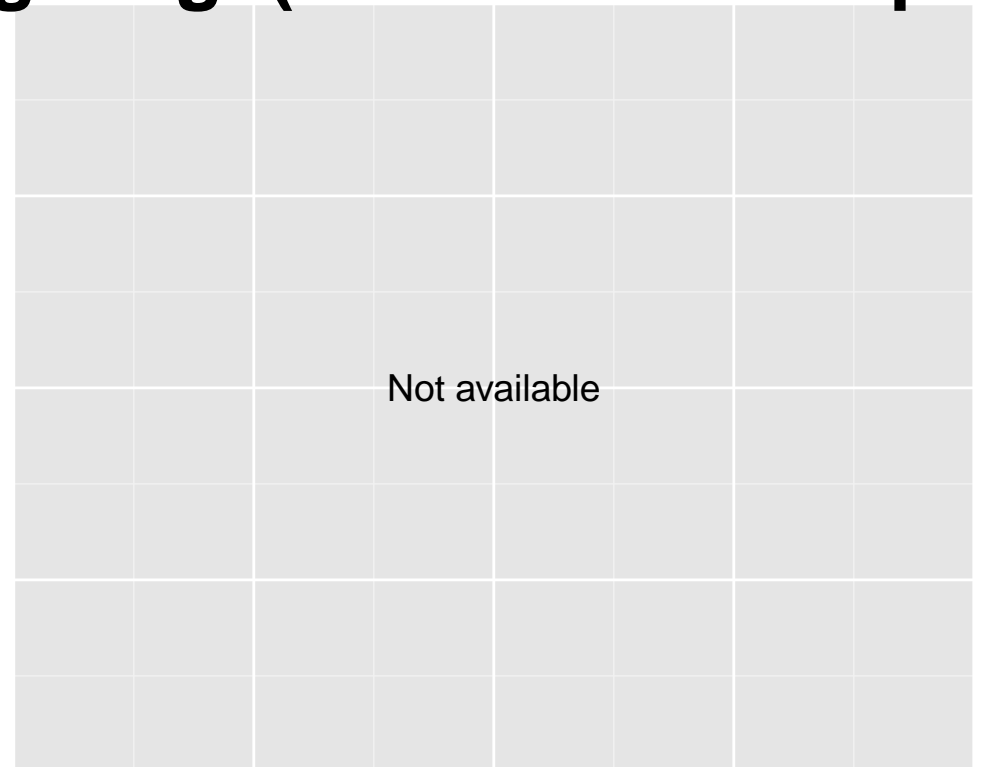

Supplement: SuppDataset_1.zip [file Spag1_set_B.pdf › Supplemental Dataset 1/B-mRNA_rhythm_translation_nonrhyth/Spag1_set_B.pdf]

## Spag4

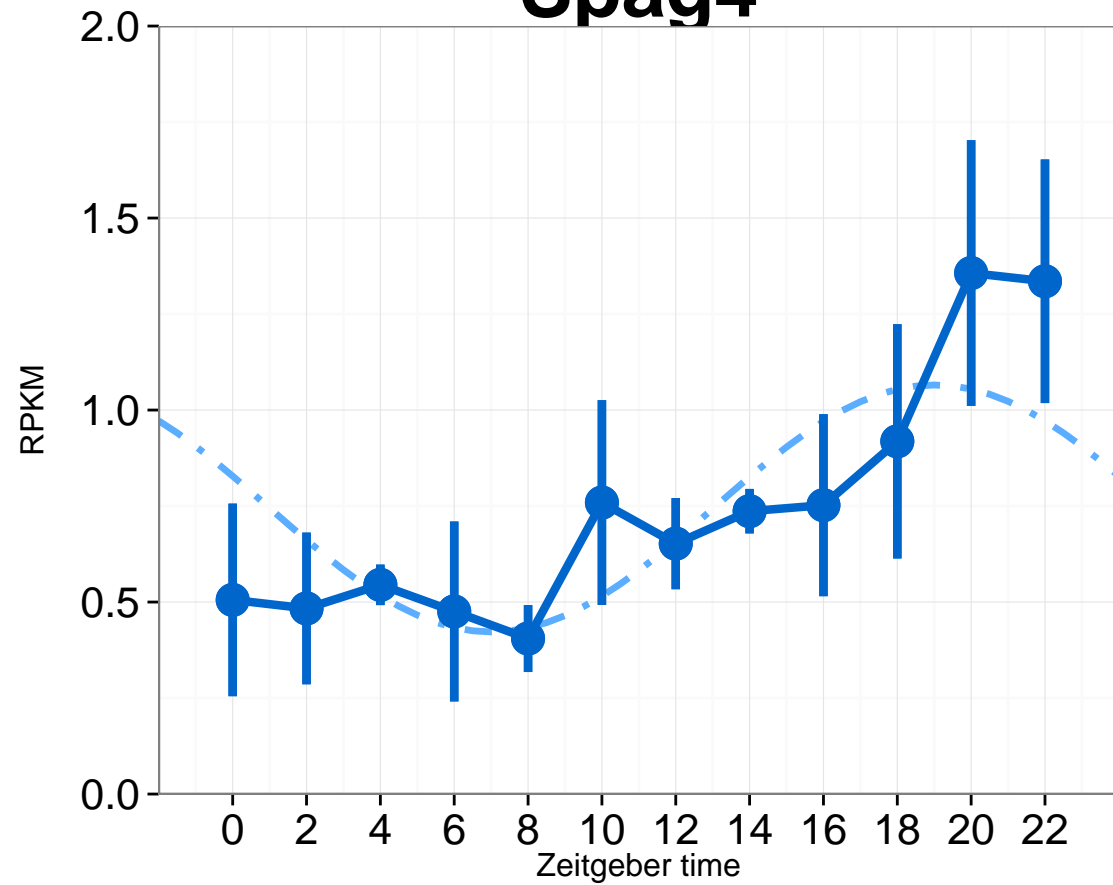

## Spag4 log2(Ribosome occupancy



Supplement: SuppDataset_1.zip [file Spag4_set_B.pdf › Supplemental Dataset 1/B-mRNA_rhythm_translation_nonrhyth/Spag4_set_B.pdf]

## Spag5

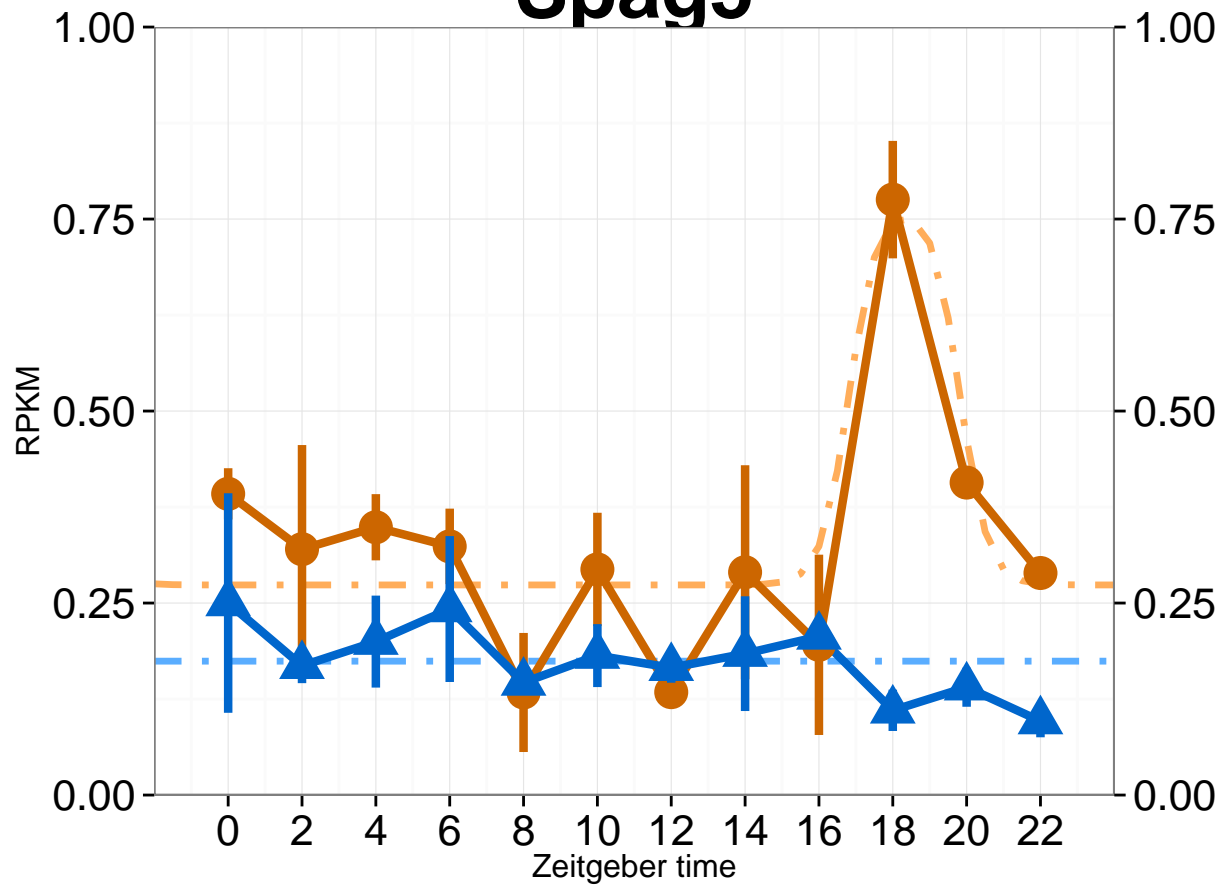

## Spag5

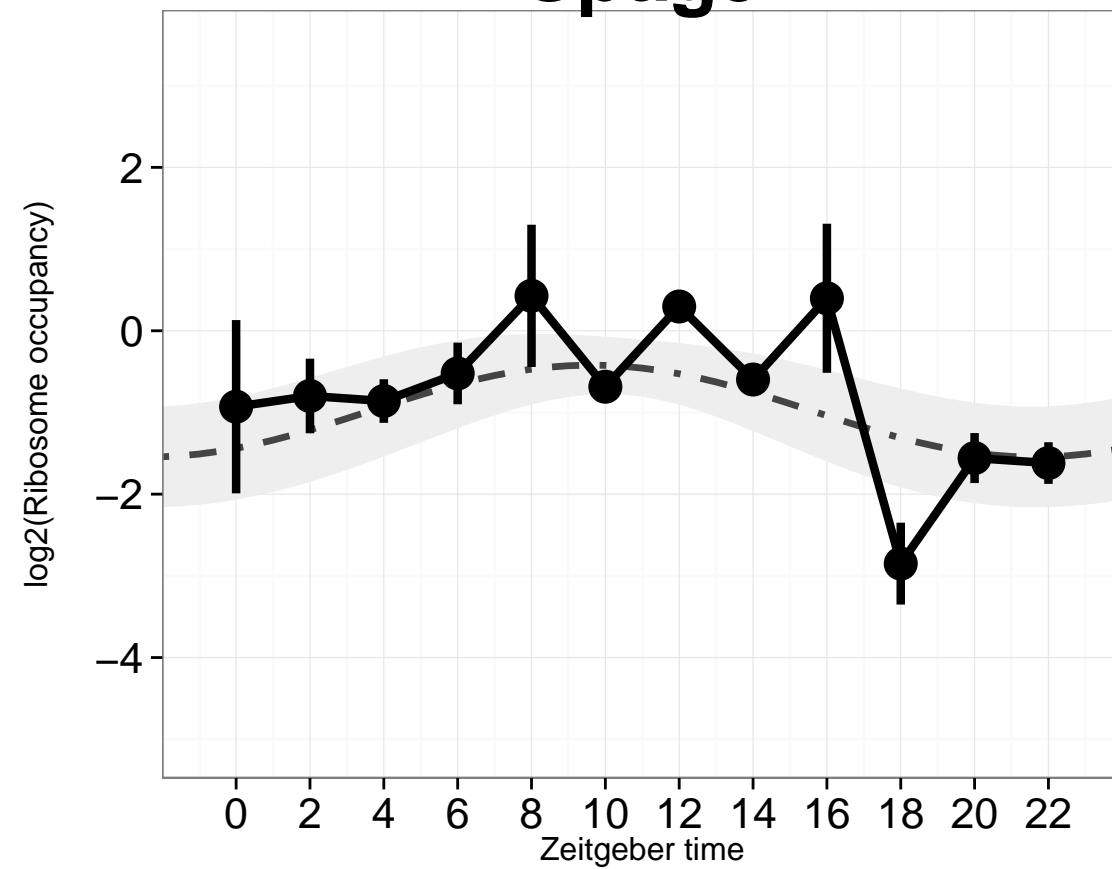

Supplement: SuppDataset_1.zip [file Spag5_set_B.pdf › Supplemental Dataset 1/B-mRNA_rhythm_translation_nonrhyth/Spag5_set_B.pdf]

# Sppl2b

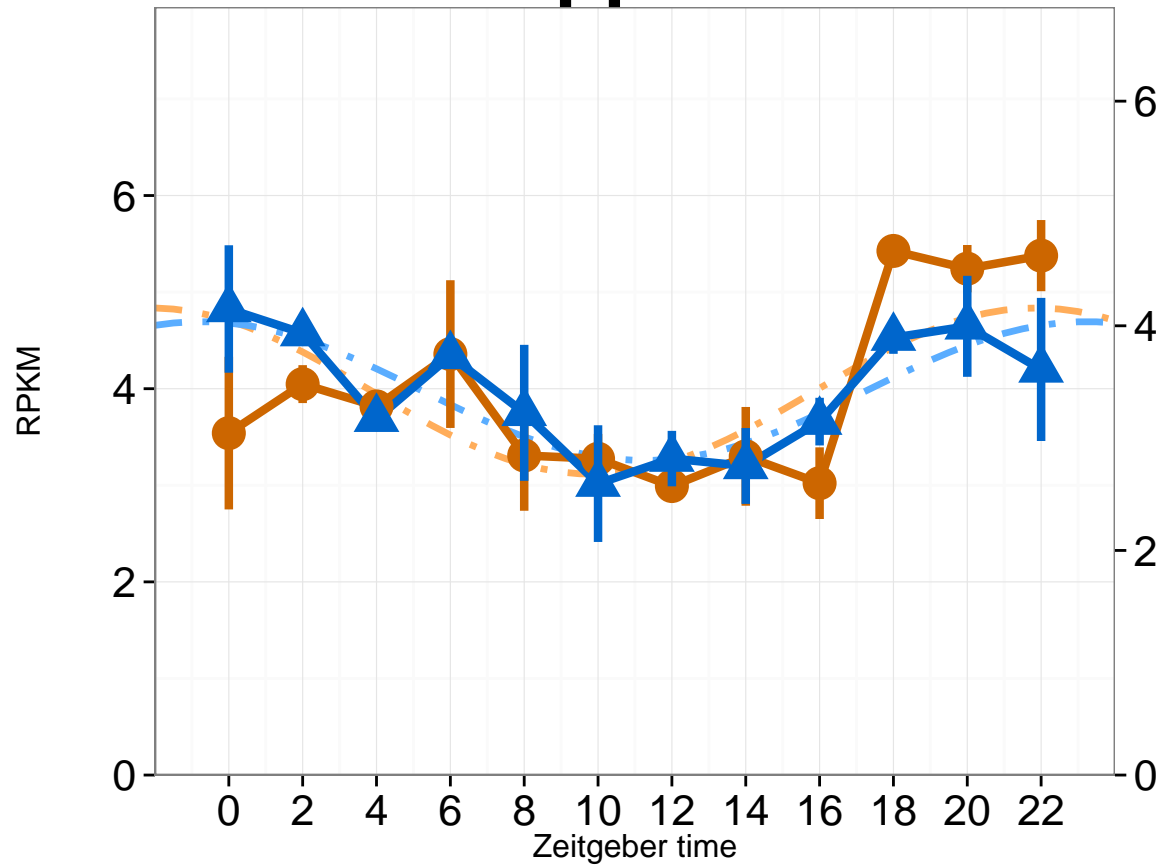

# Sppl2b

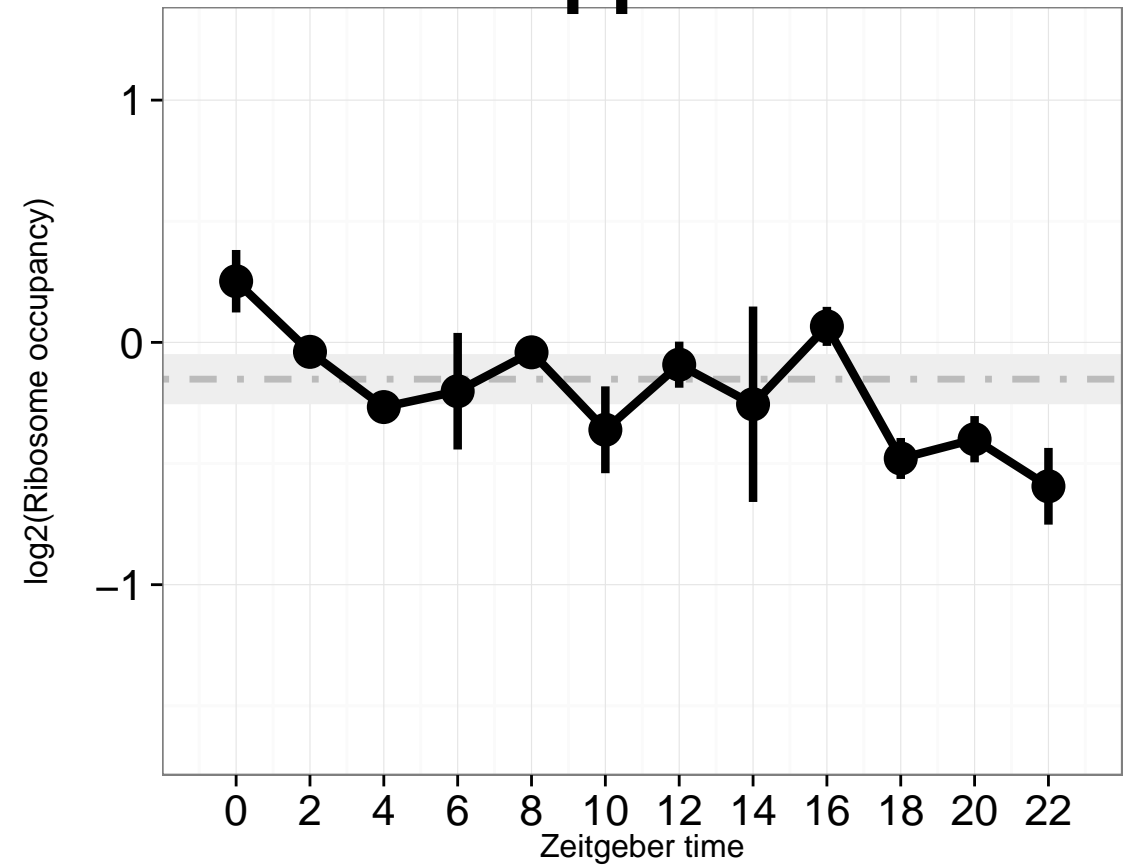

Supplement: SuppDataset_1.zip [file Sppl2b_set_B.pdf › Supplemental Dataset 1/B-mRNA_rhythm_translation_nonrhyth/Sppl2b_set_B.pdf]

# Spry1

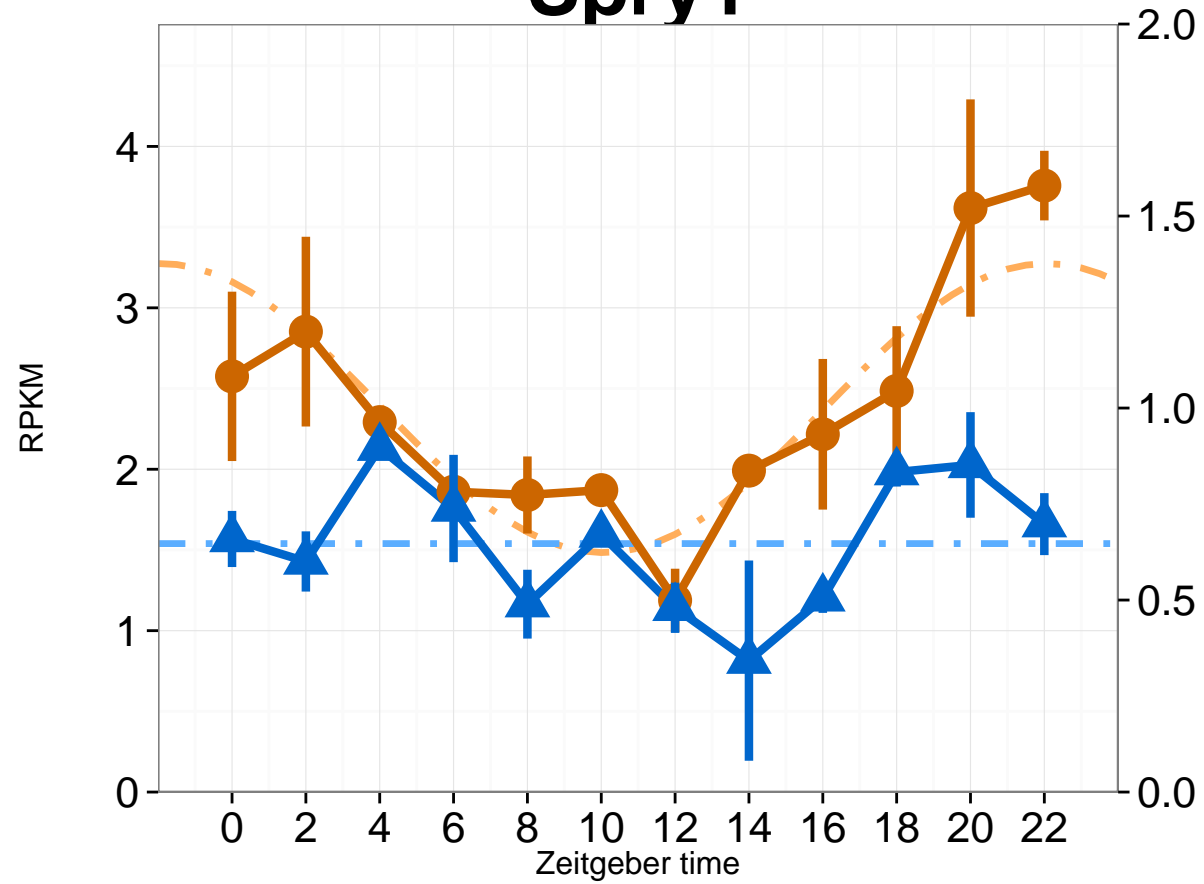

# Spry1

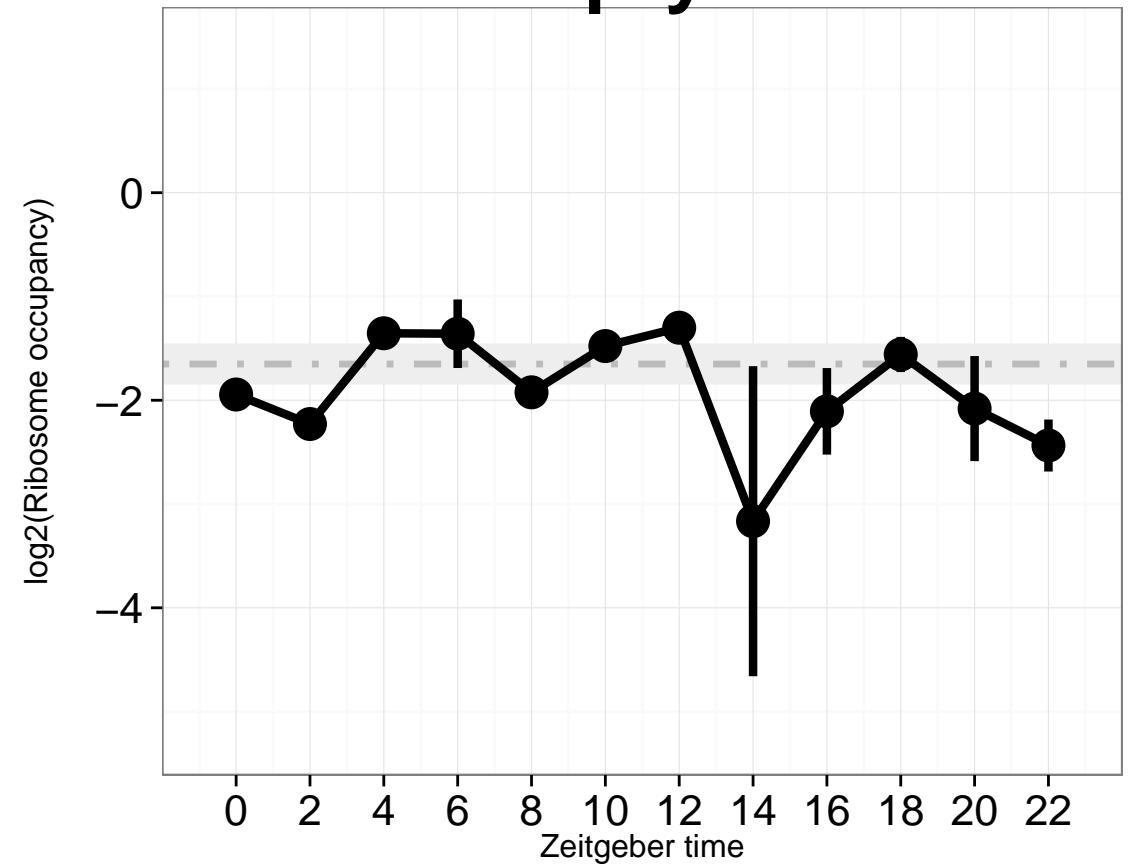

Supplement: SuppDataset_1.zip [file Spry1_set_B.pdf › Supplemental Dataset 1/B-mRNA_rhythm_translation_nonrhyth/Spry1_set_B.pdf]

# Sqstm1

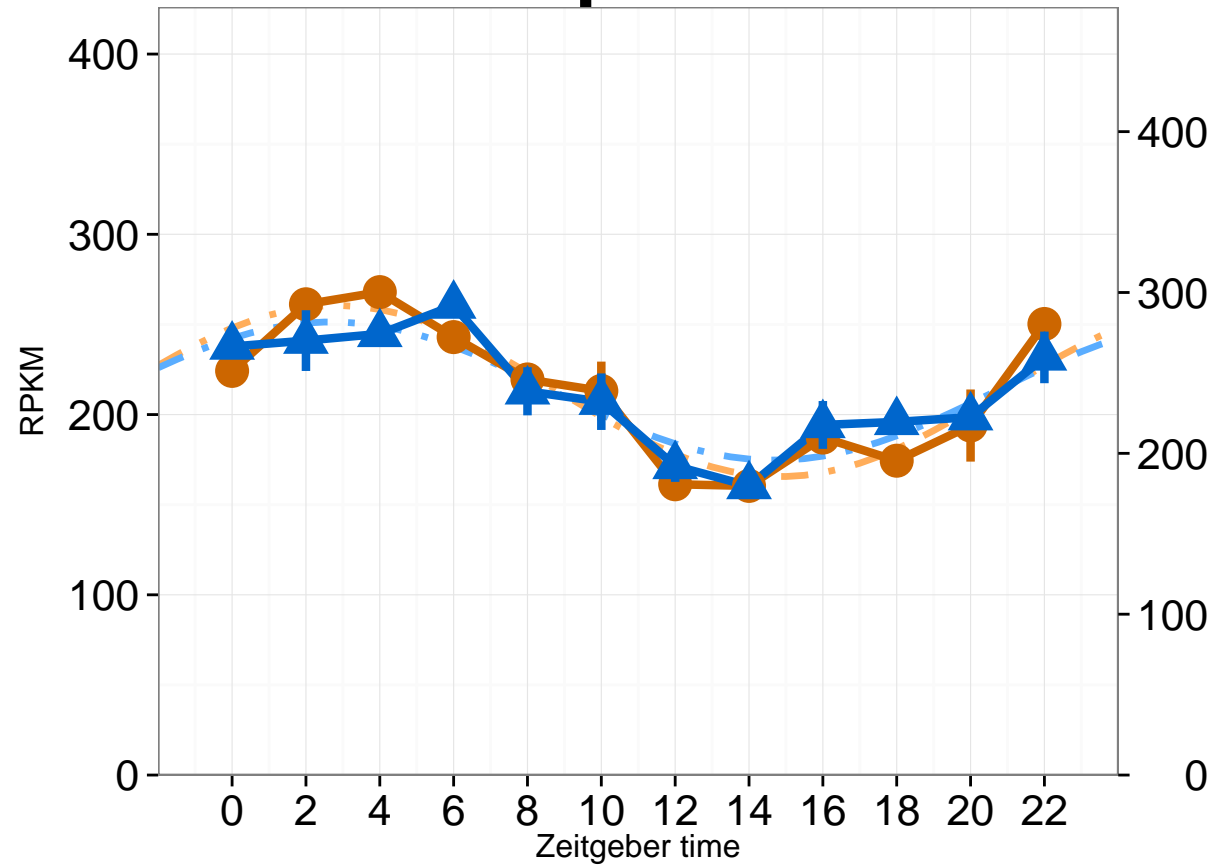

# Sqstm1

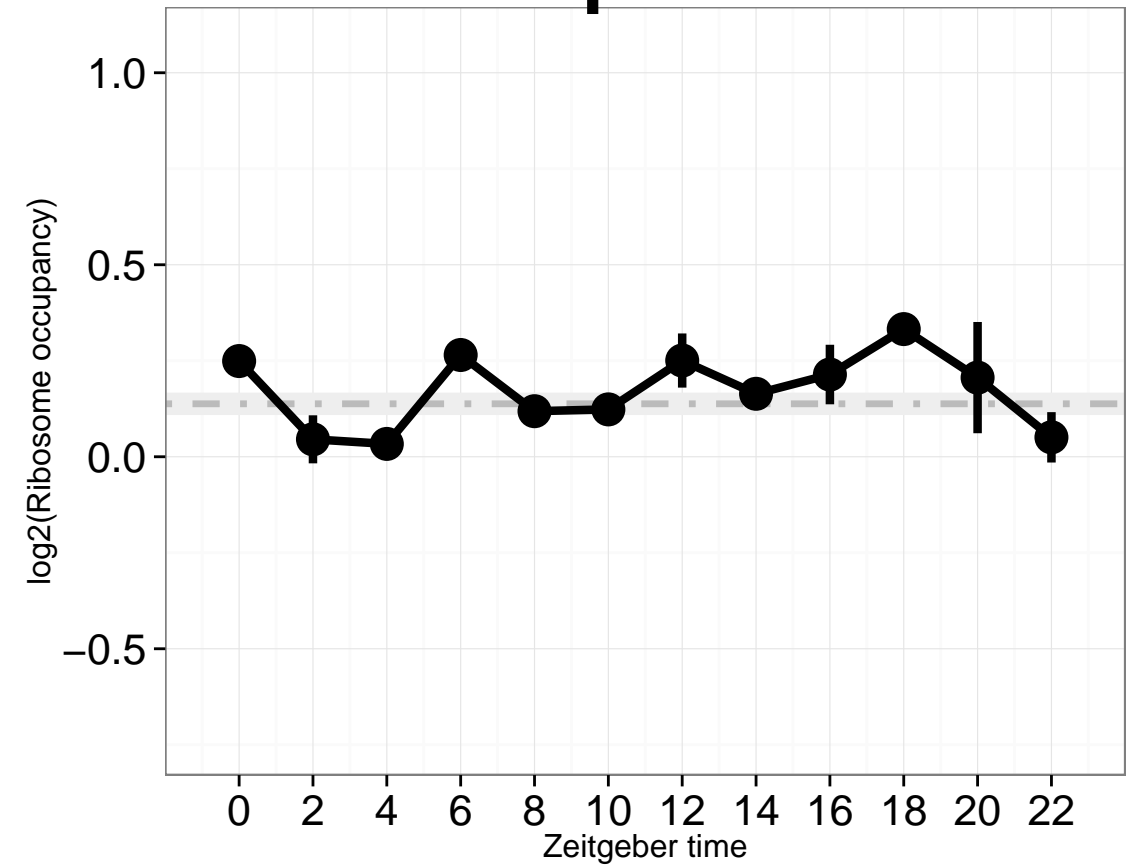

Supplement: SuppDataset_1.zip [file Sqstm1_set_B.pdf › Supplemental Dataset 1/B-mRNA_rhythm_translation_nonrhyth/Sqstm1_set_B.pdf]

# Srek1ip1

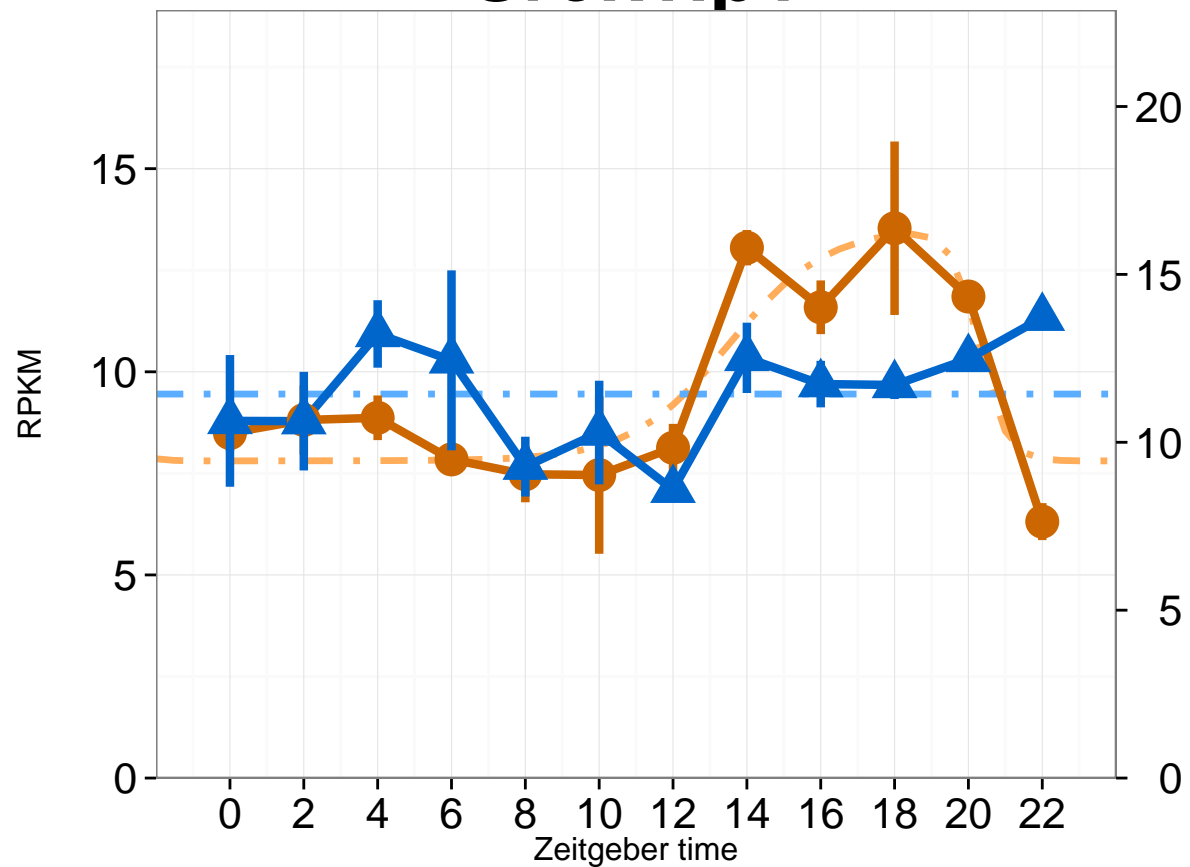

# Srek1ip1

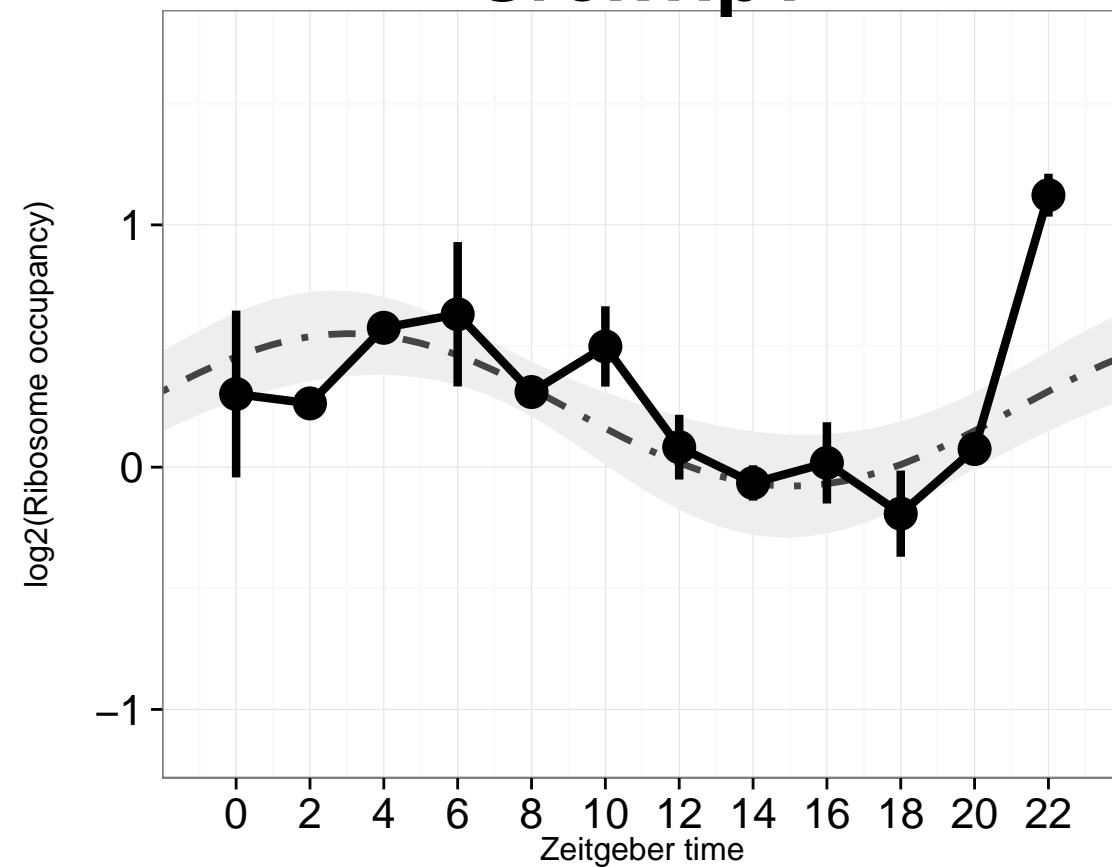

Supplement: SuppDataset_1.zip [file Srek1ip1_set_B.pdf › Supplemental Dataset 1/B-mRNA_rhythm_translation_nonrhyth/Srek1ip1_set_B.pdf]

## Srp19

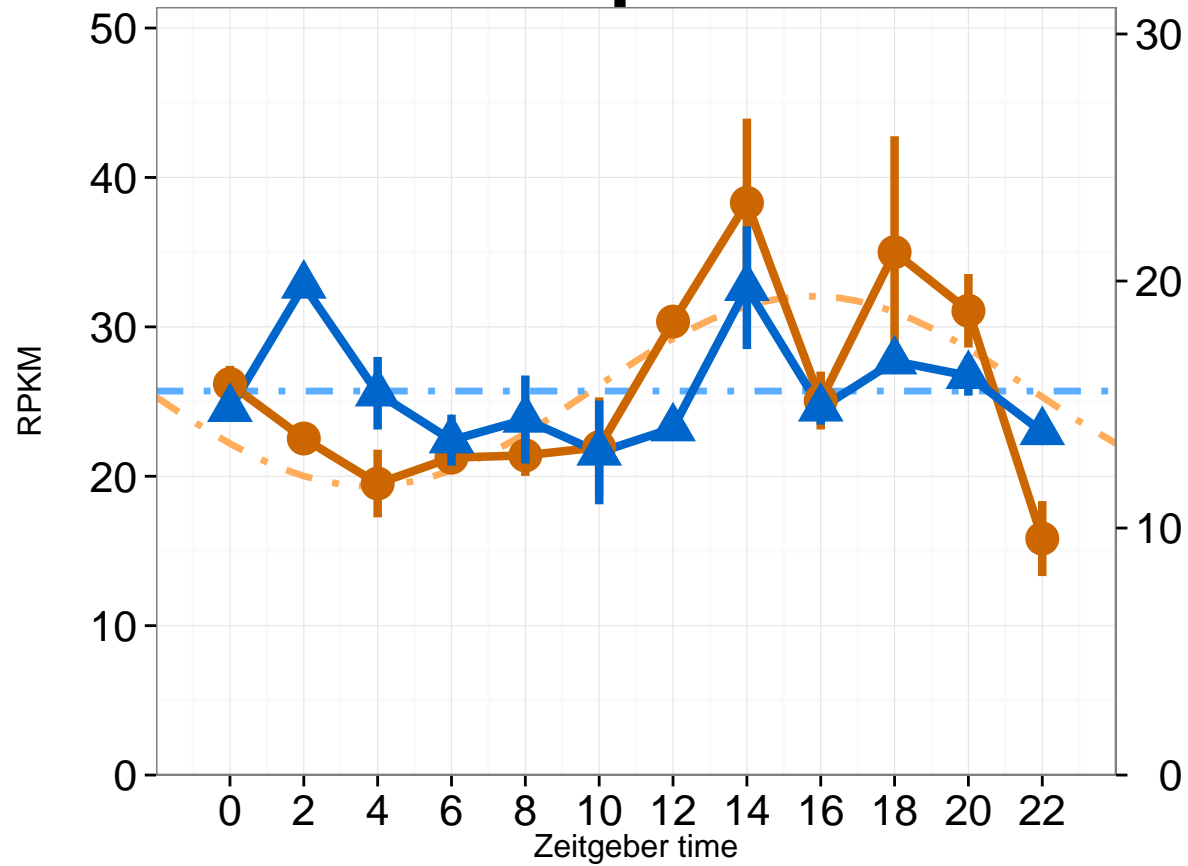

## Srp19

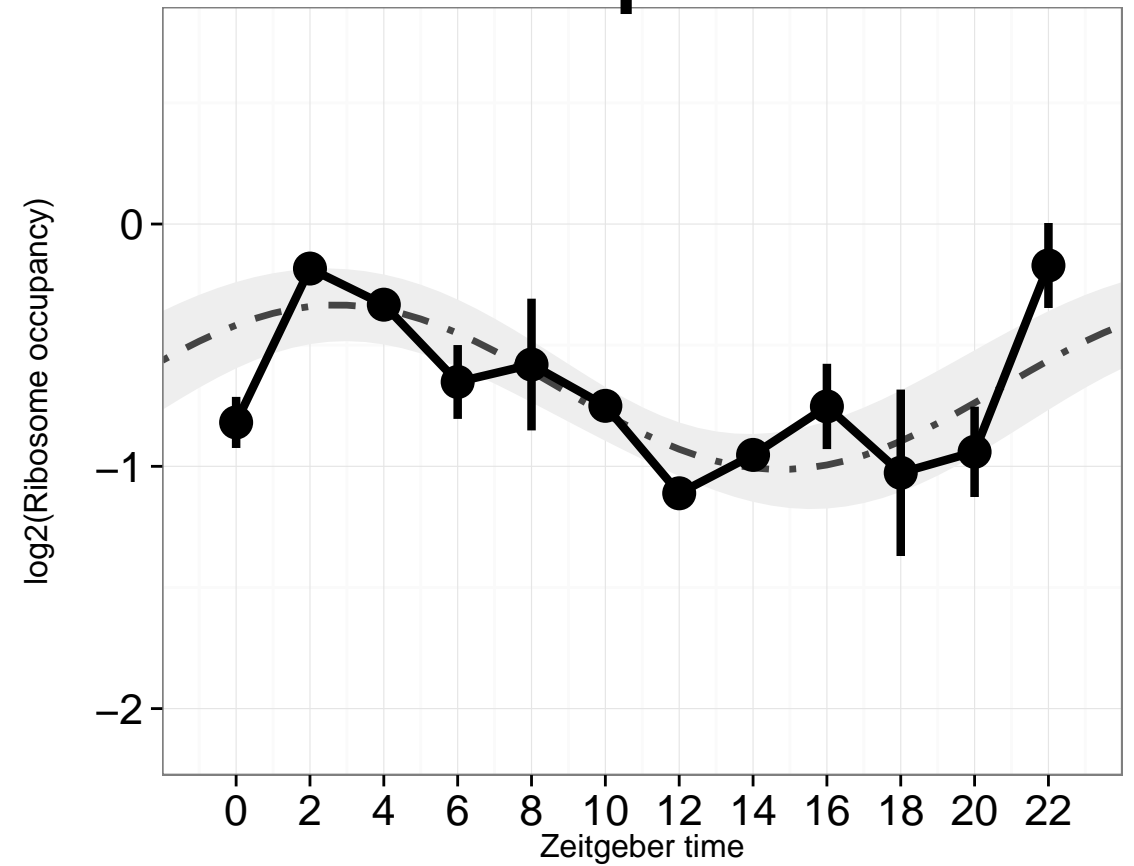

Supplement: SuppDataset_1.zip [file Srp19_set_B.pdf › Supplemental Dataset 1/B-mRNA_rhythm_translation_nonrhyth/Srp19_set_B.pdf]

## Srxn1

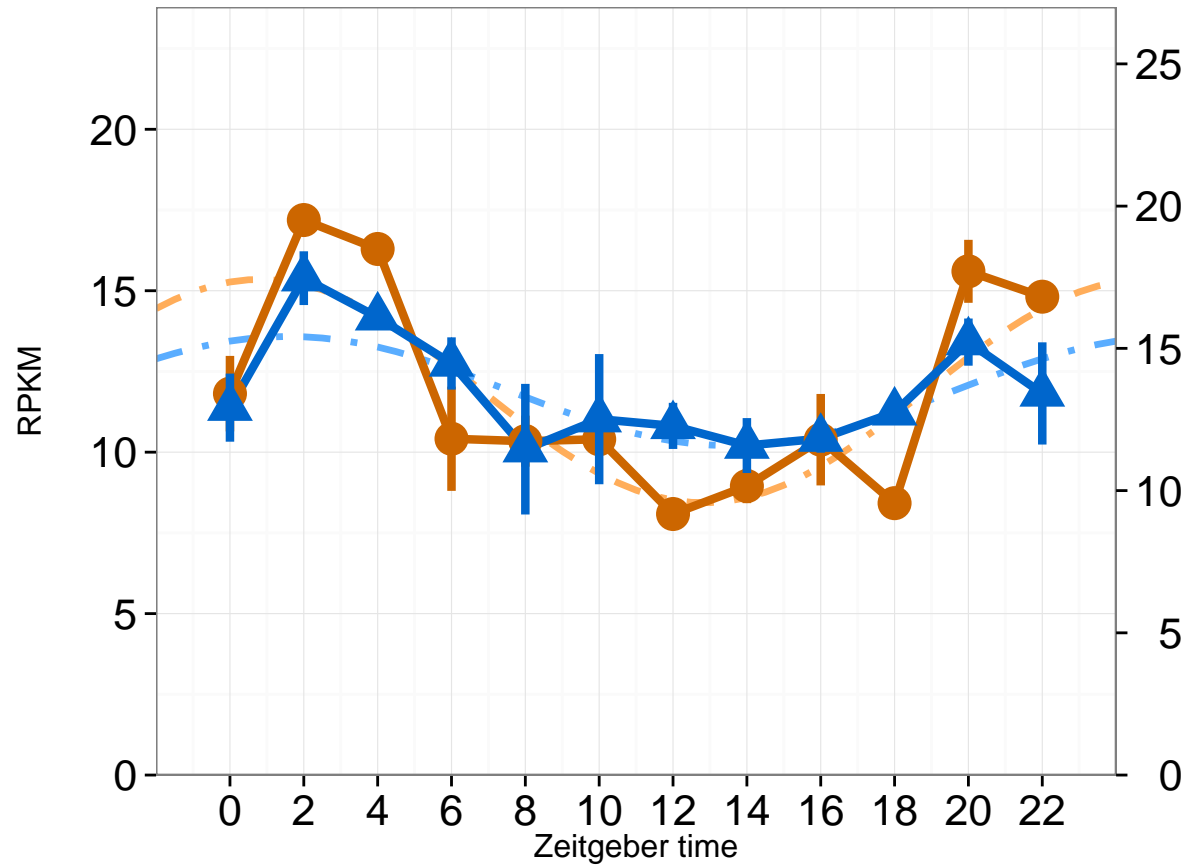

## Srxn1

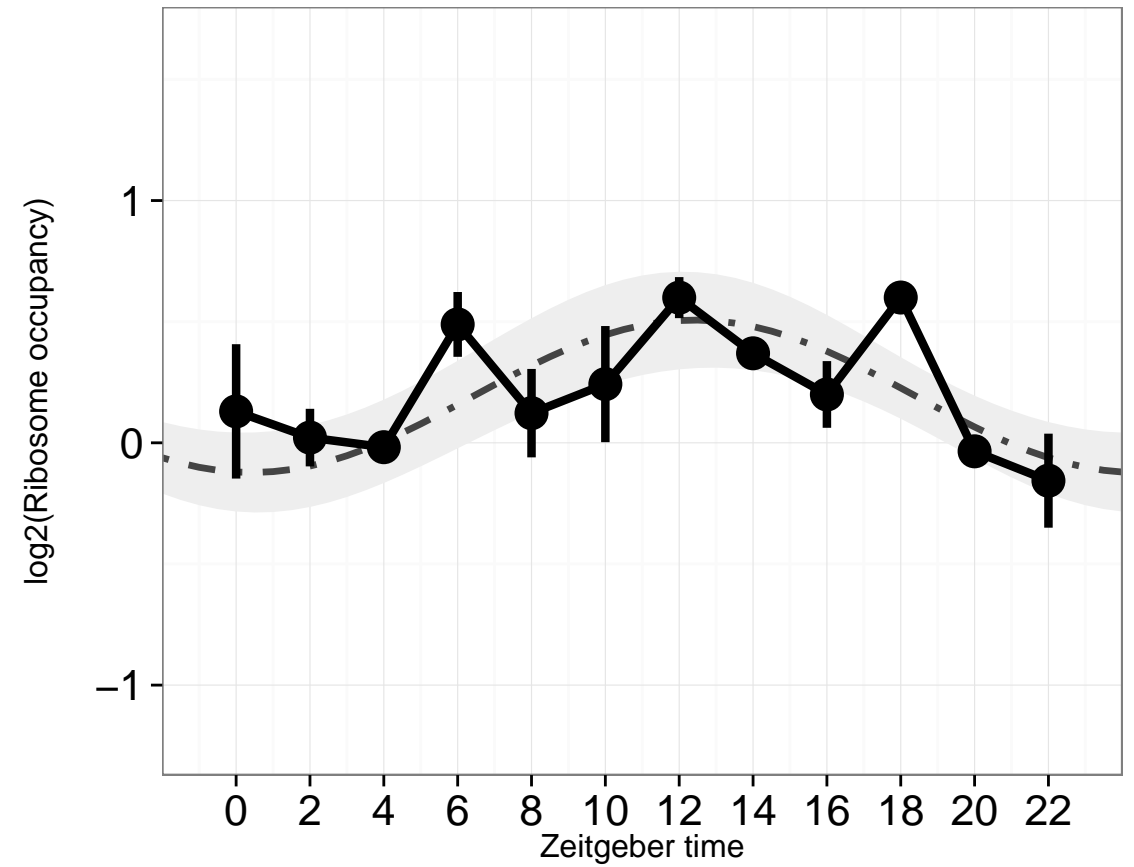

Supplement: SuppDataset_1.zip [file Srxn1_set_B.pdf › Supplemental Dataset 1/B-mRNA_rhythm_translation_nonrhyth/Srxn1_set_B.pdf]

# St3gal6

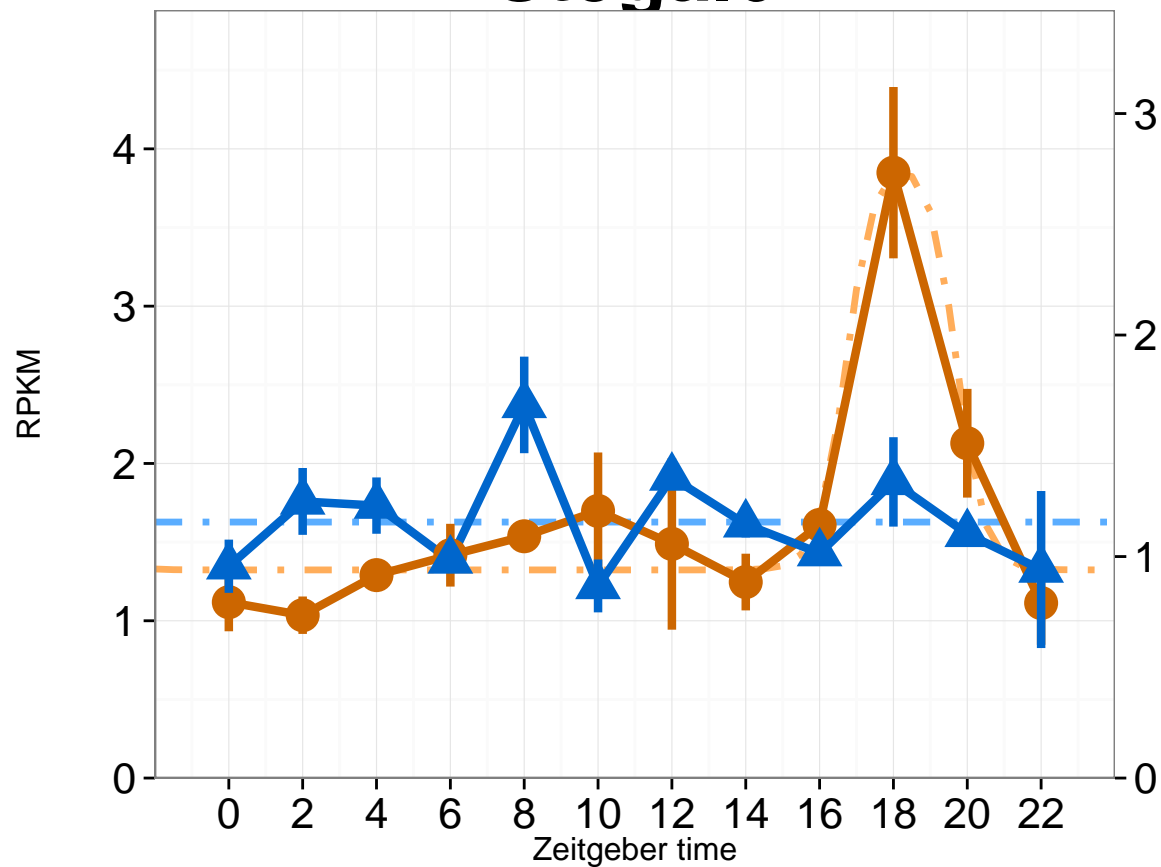

# St3gal6

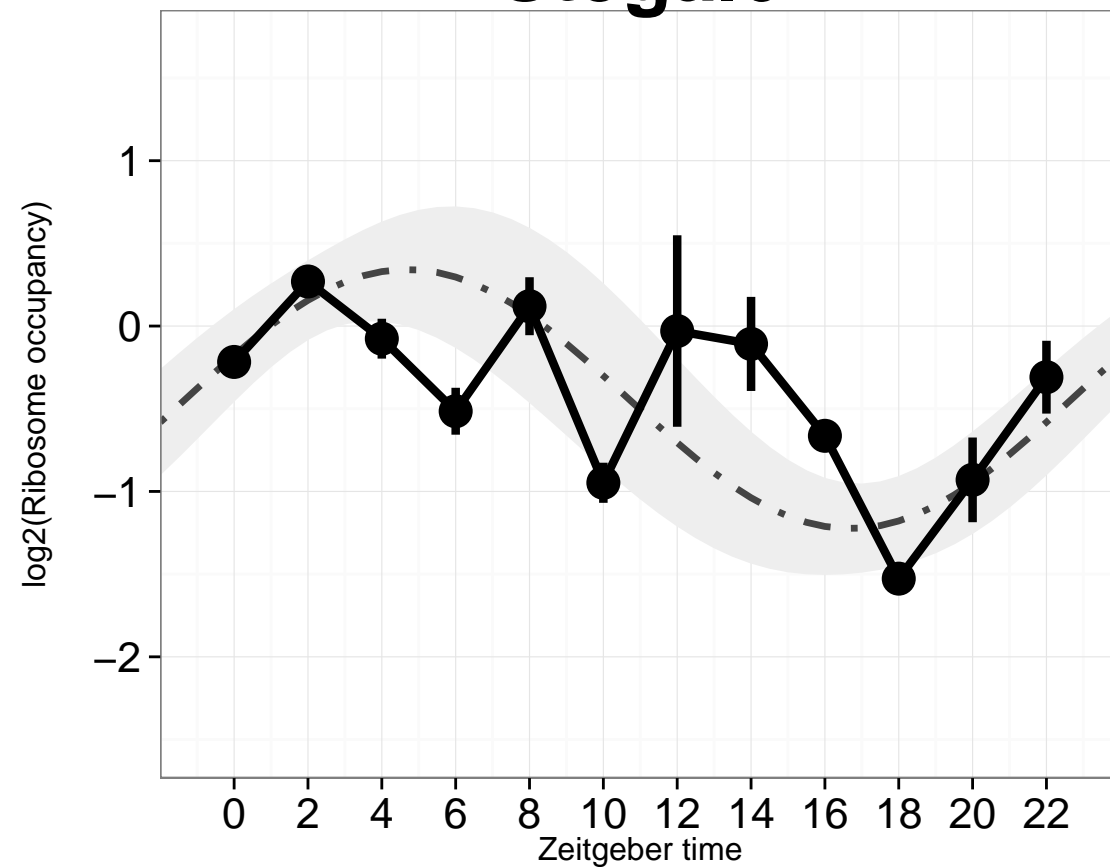

Supplement: SuppDataset_1.zip [file St3gal6_set_B.pdf › Supplemental Dataset 1/B-mRNA_rhythm_translation_nonrhyth/St3gal6_set_B.pdf]

## Stard8

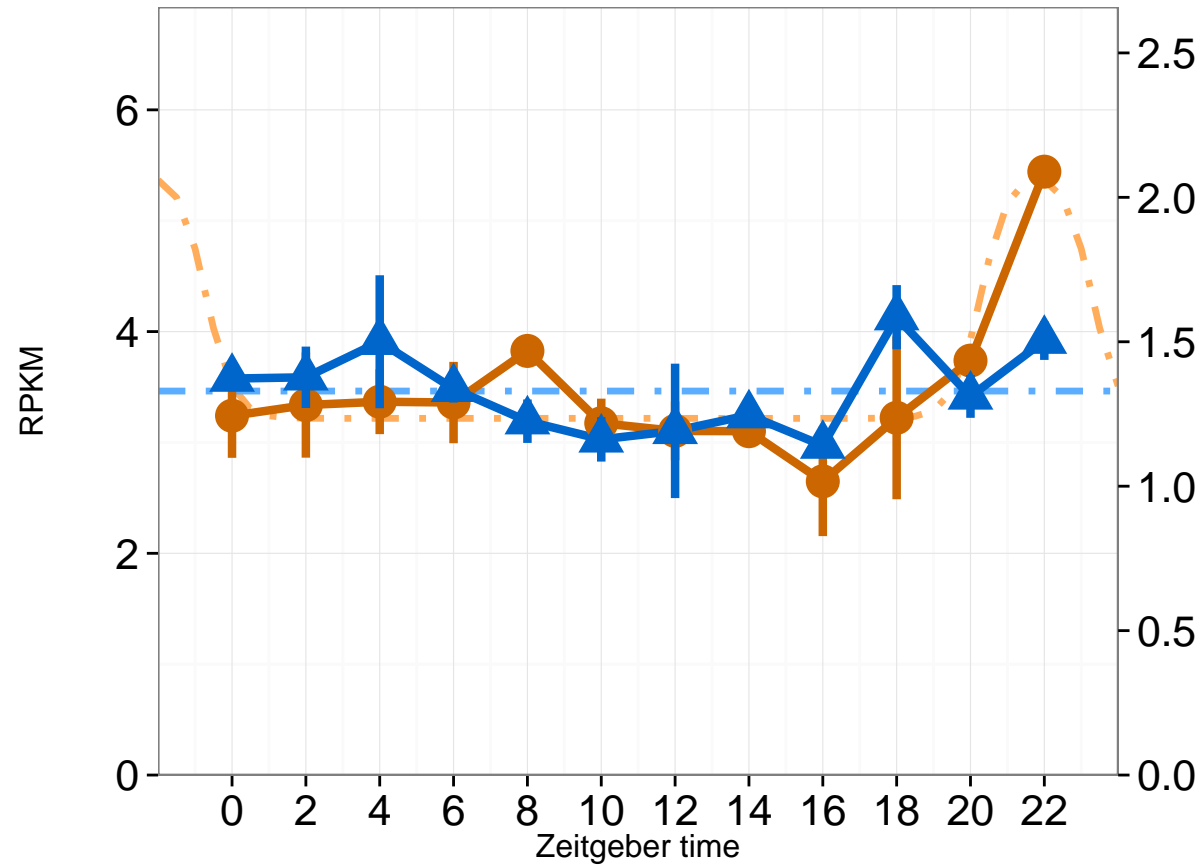

## Stard8

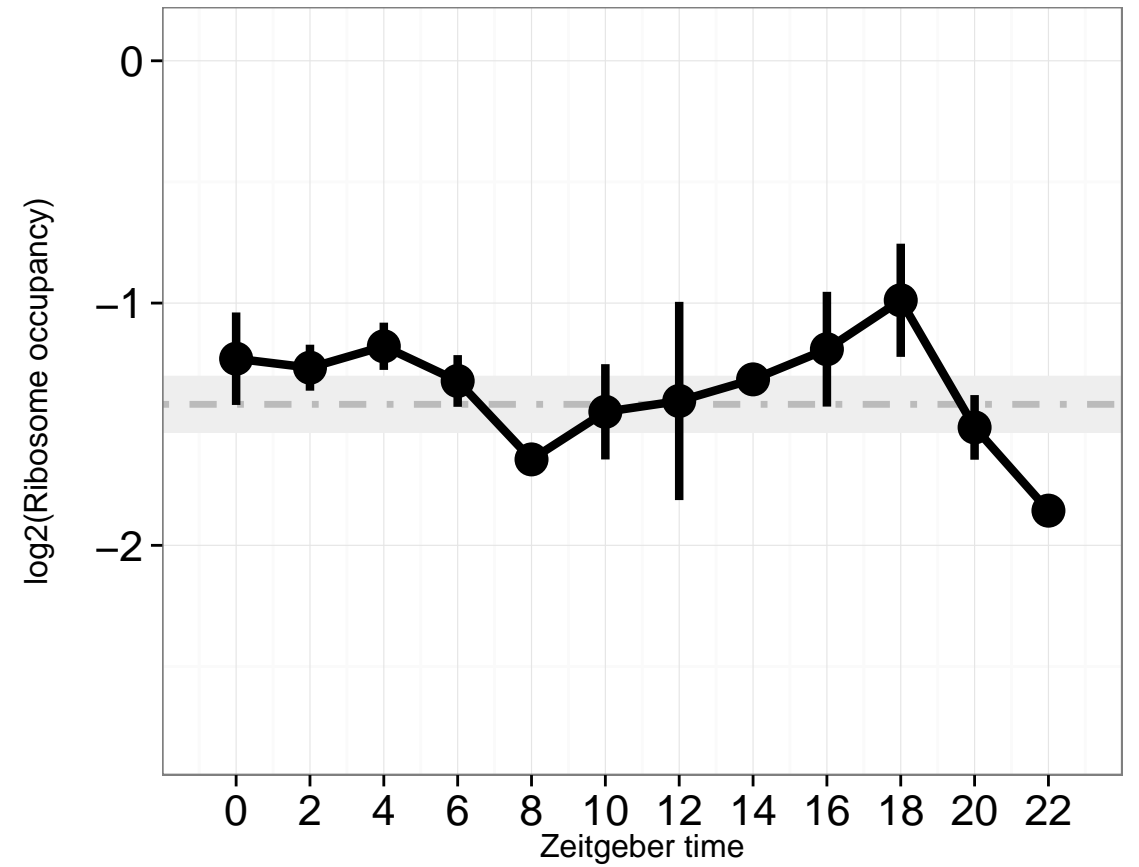

Supplement: SuppDataset_1.zip [file Stard8_set_B.pdf › Supplemental Dataset 1/B-mRNA_rhythm_translation_nonrhyth/Stard8_set_B.pdf]

# Stk35

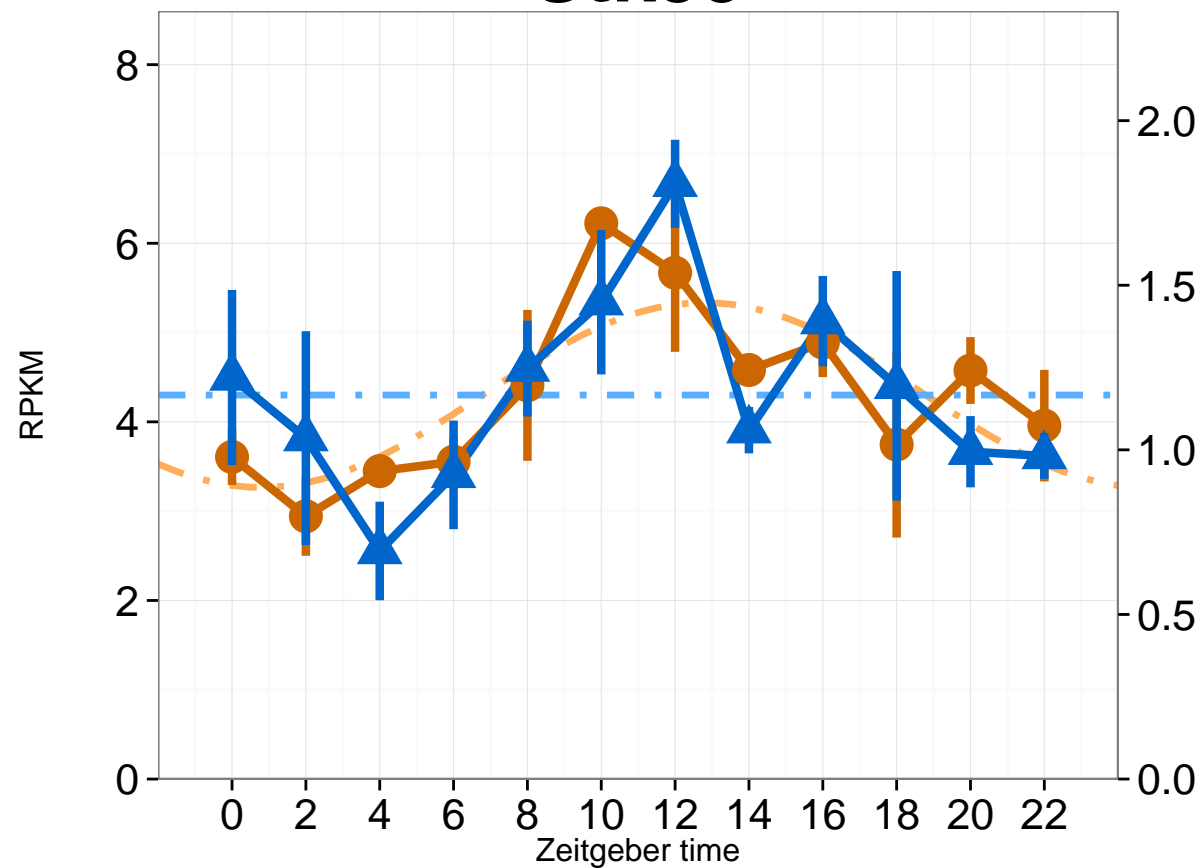

# Stk35

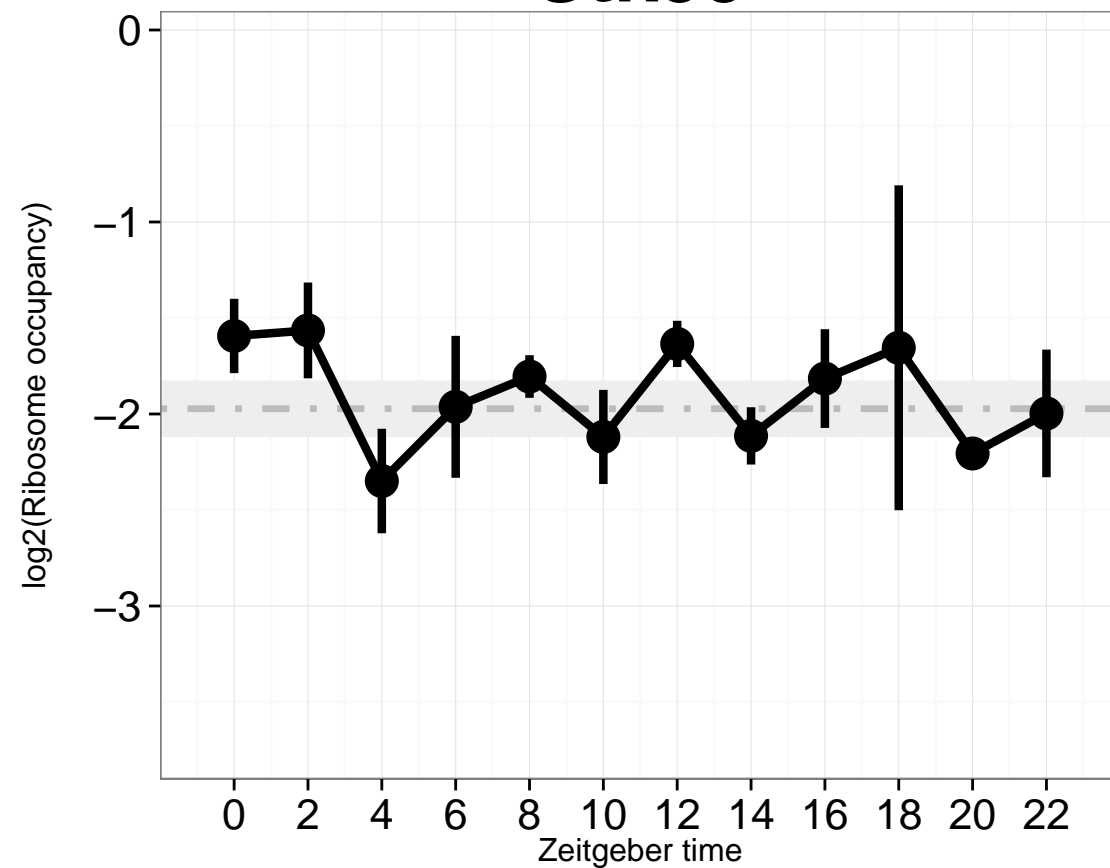

Supplement: SuppDataset_1.zip [file Stk35_set_B.pdf › Supplemental Dataset 1/B-mRNA_rhythm_translation_nonrhyth/Stk35_set_B.pdf]

# Stmn1

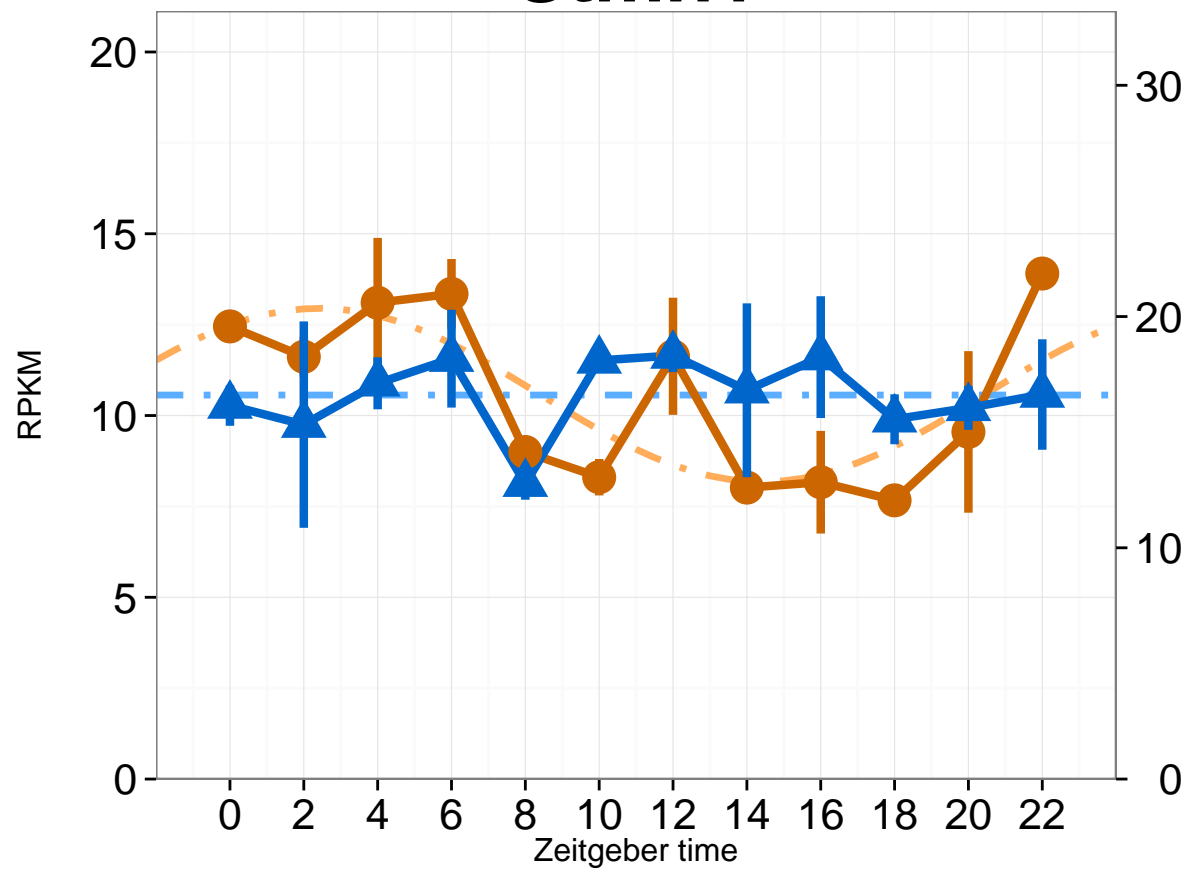

# Stmn1

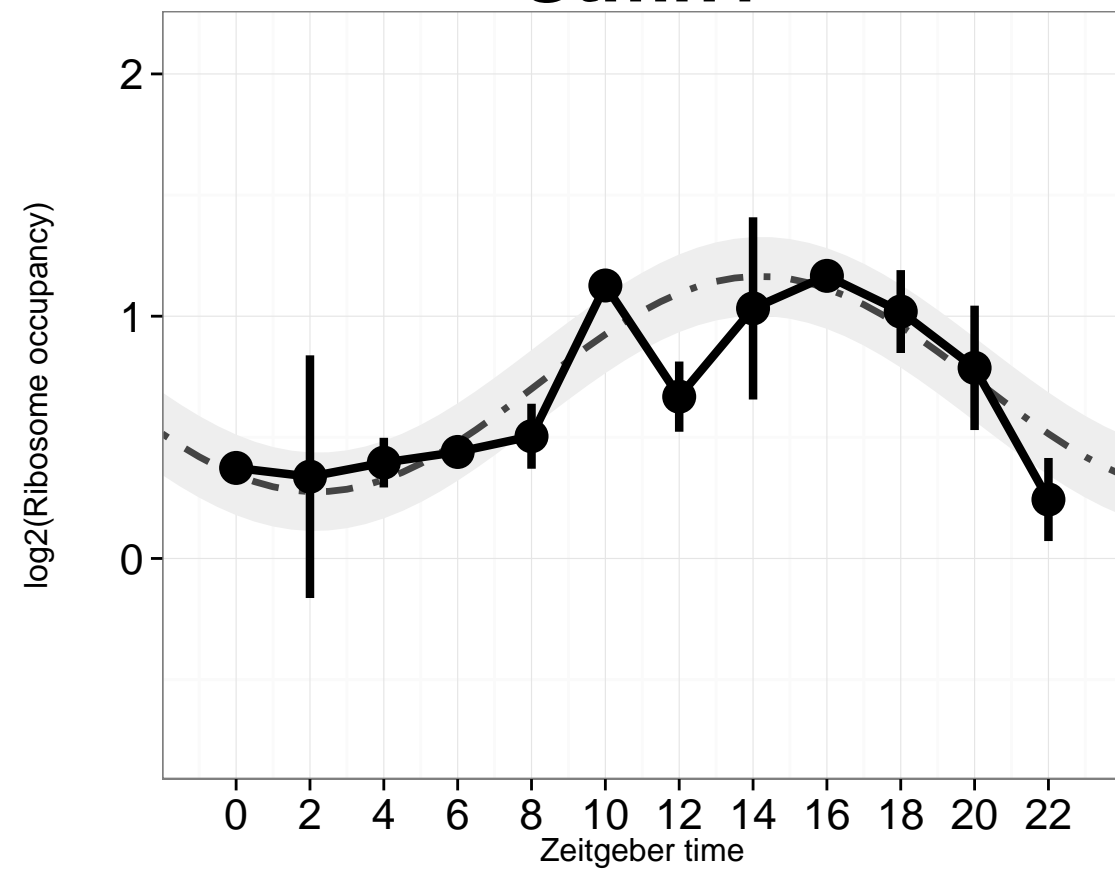

Supplement: SuppDataset_1.zip [file Stmn1_set_B.pdf › Supplemental Dataset 1/B-mRNA_rhythm_translation_nonrhyth/Stmn1_set_B.pdf]

## Ston2

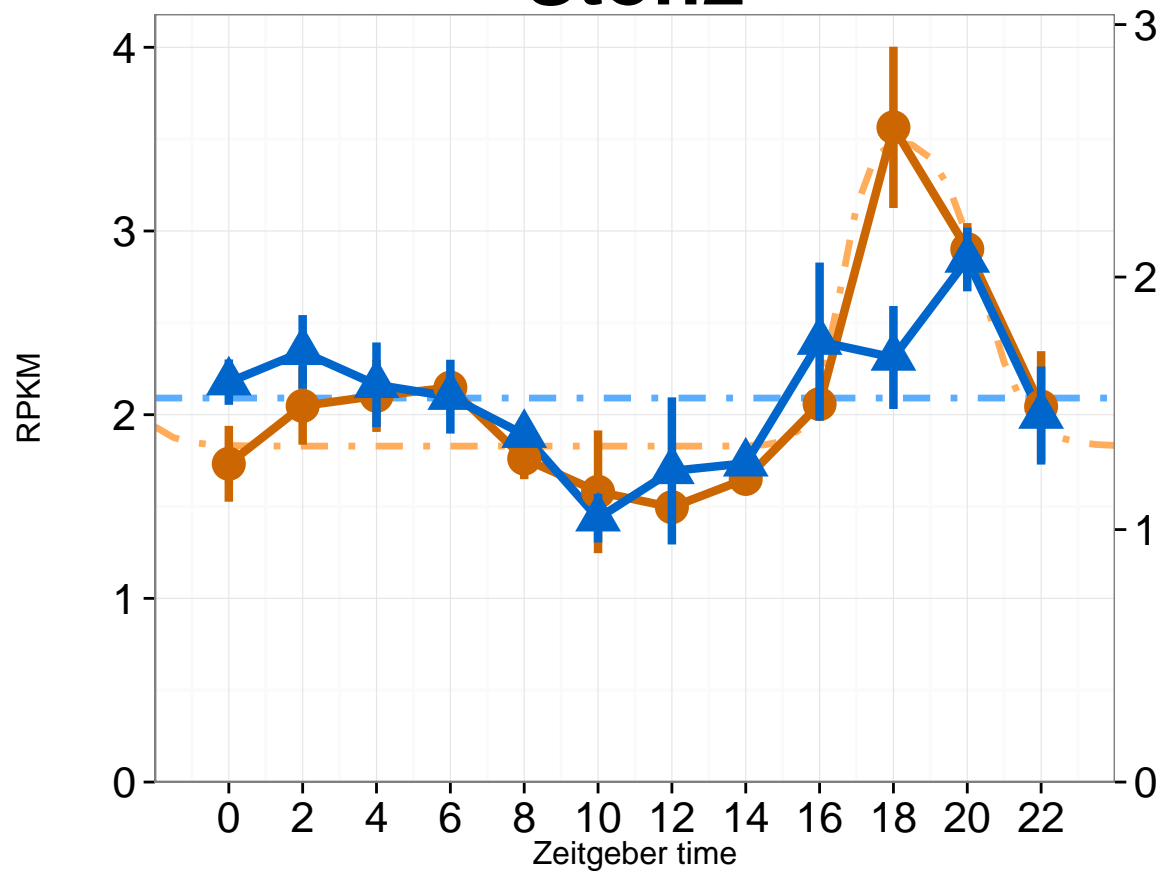

## Ston2

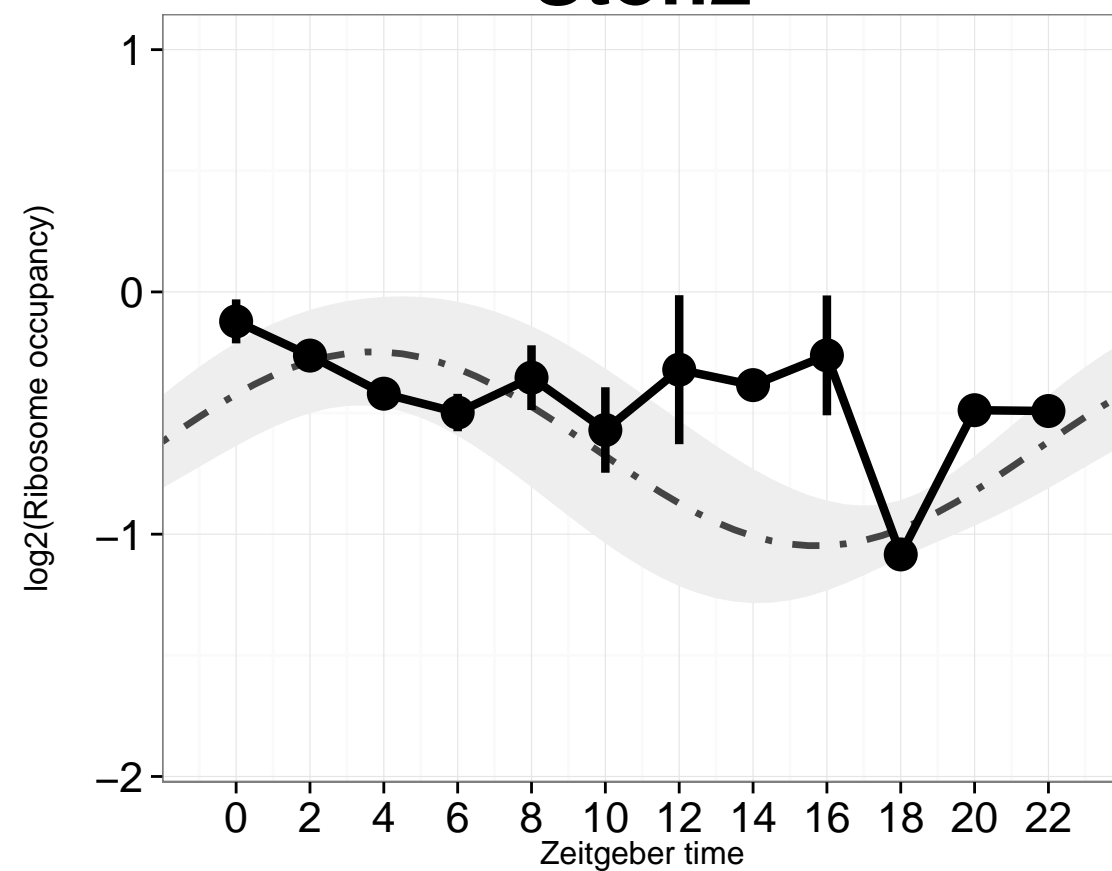

Supplement: SuppDataset_1.zip [file Ston2_set_B.pdf › Supplemental Dataset 1/B-mRNA_rhythm_translation_nonrhyth/Ston2_set_B.pdf]

## Strat13

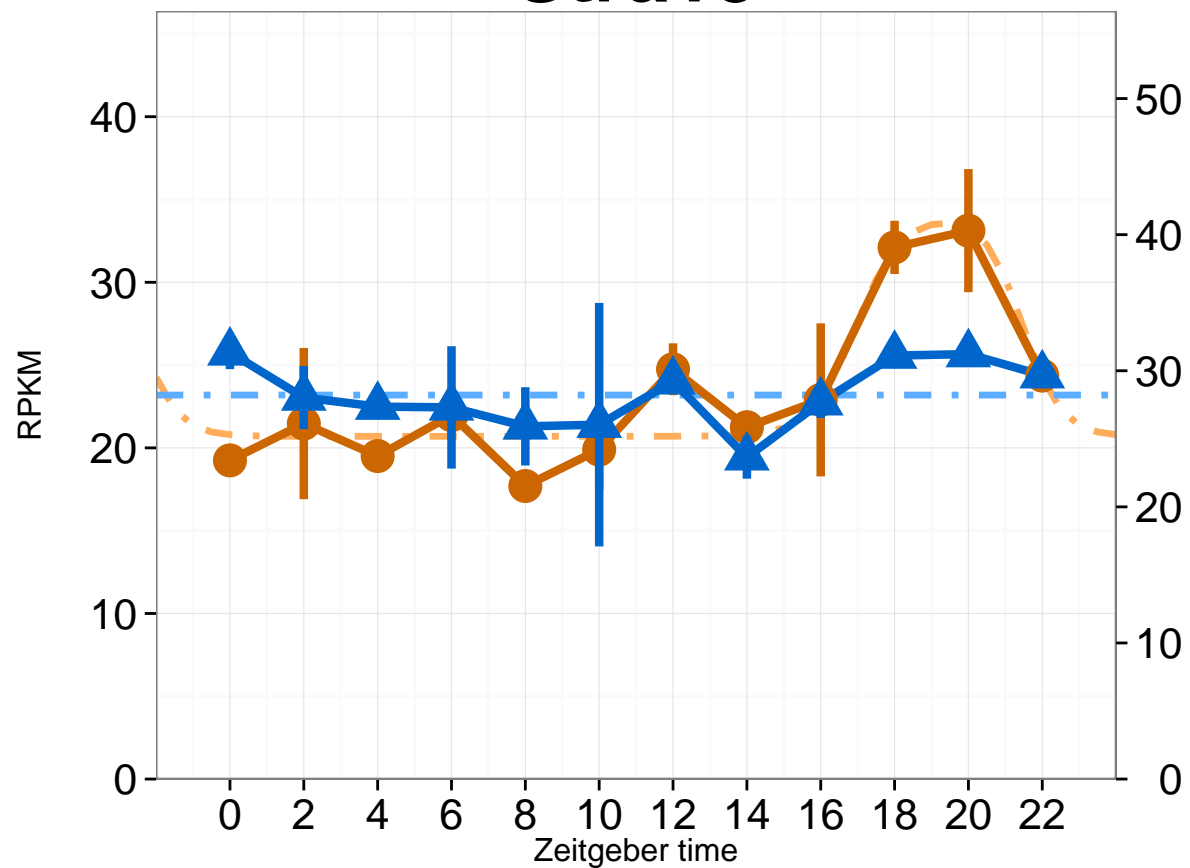

## Strat13

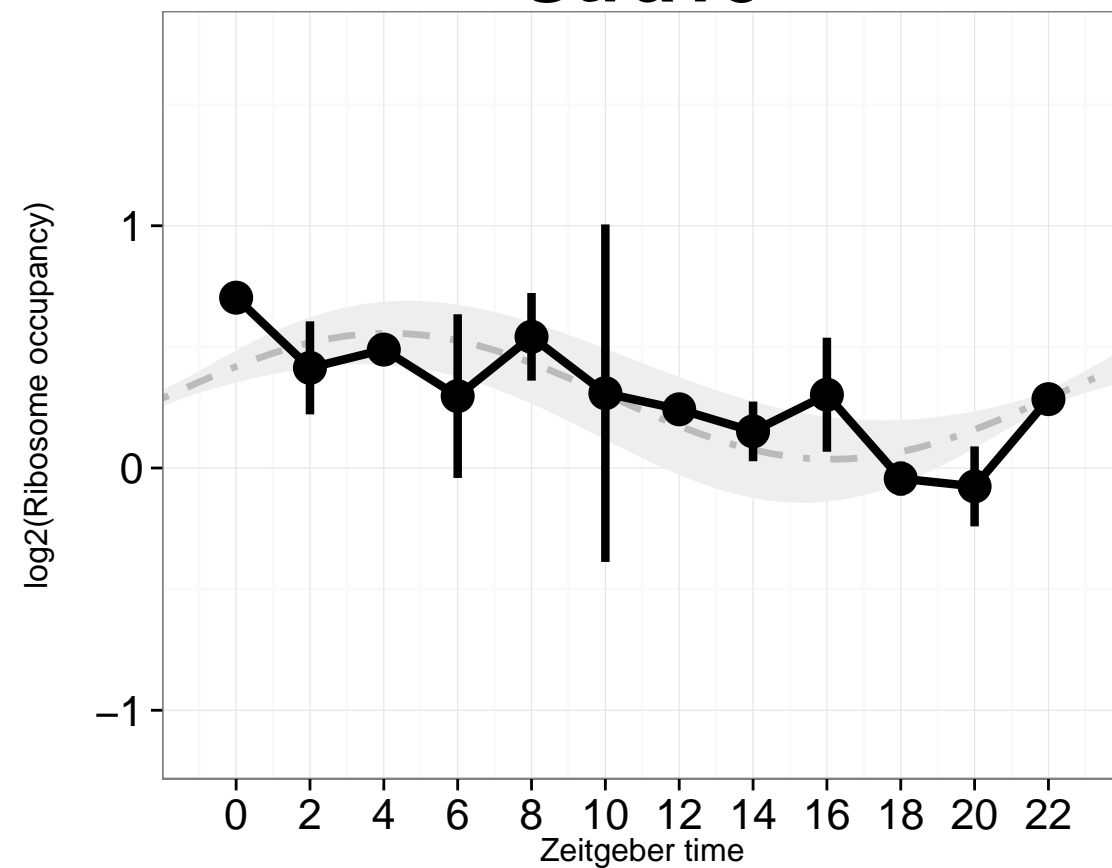

Supplement: SuppDataset_1.zip [file Stra13_set_B.pdf › Supplemental Dataset 1/B-mRNA_rhythm_translation_nonrhyth/Stra13_set_B.pdf]

## Stx1b

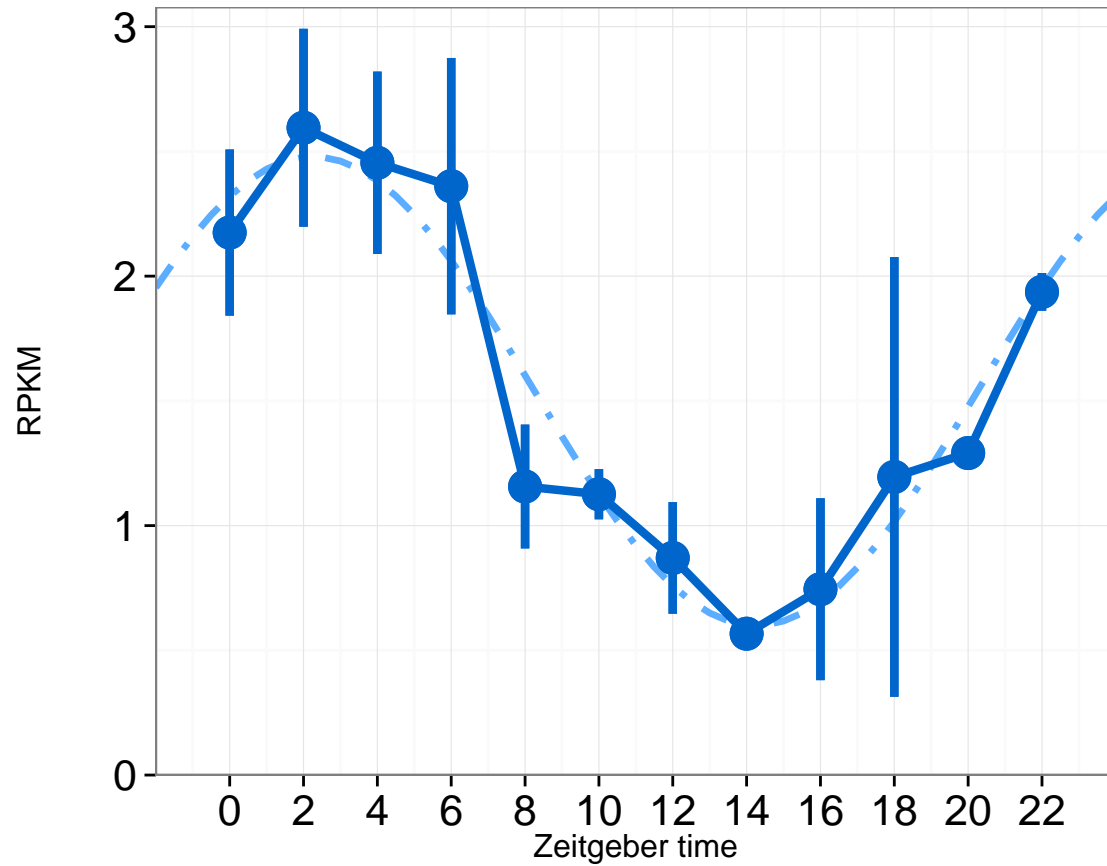

## Stx1b log2(Ribosome occupancy)

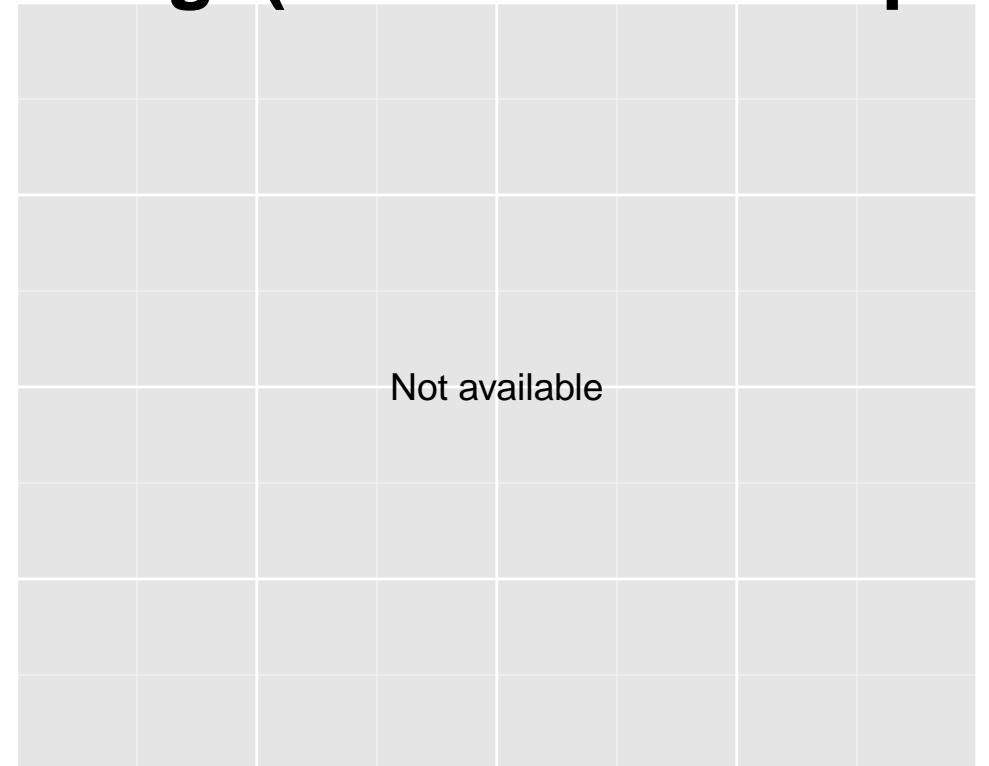

Supplement: SuppDataset_1.zip [file Stx1b_set_B.pdf › Supplemental Dataset 1/B-mRNA_rhythm_translation_nonrhyth/Stx1b_set_B.pdf]

## Stxbp4

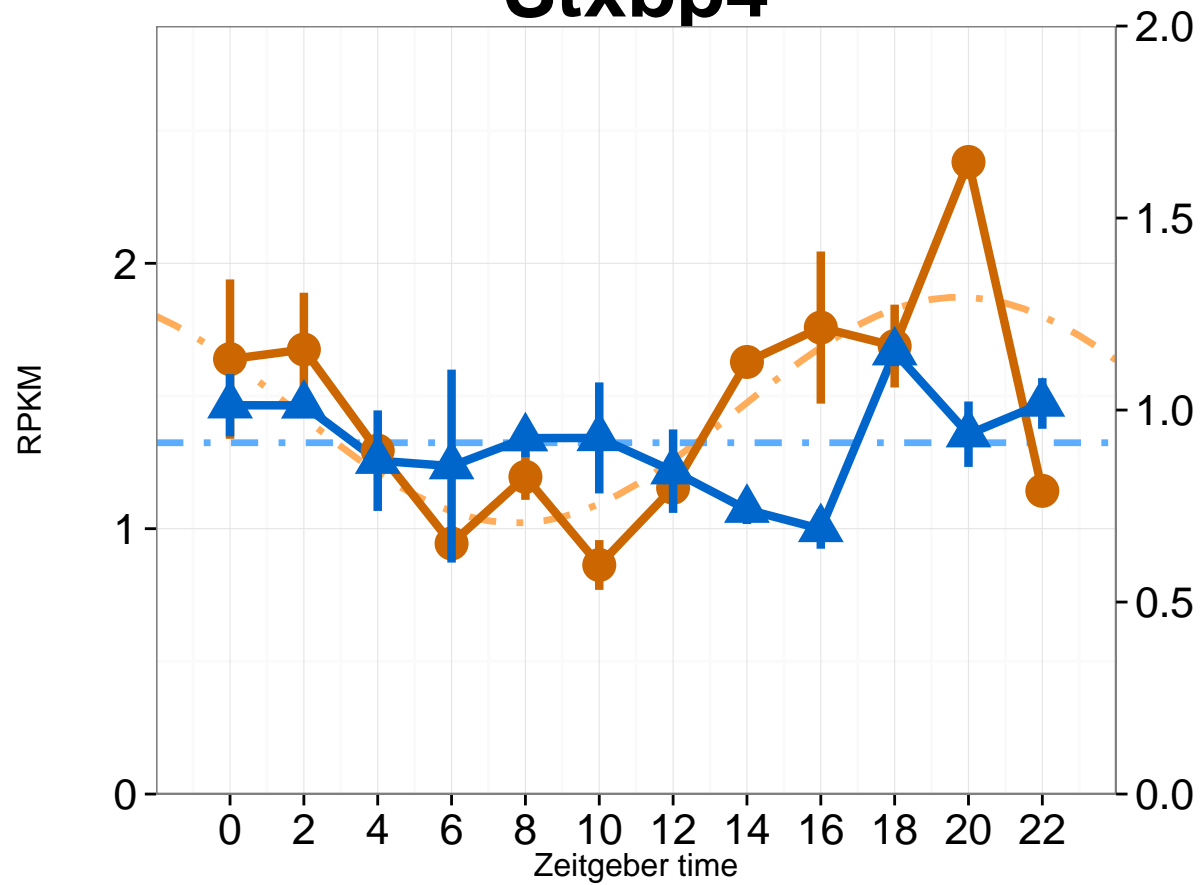

## Stxbp4

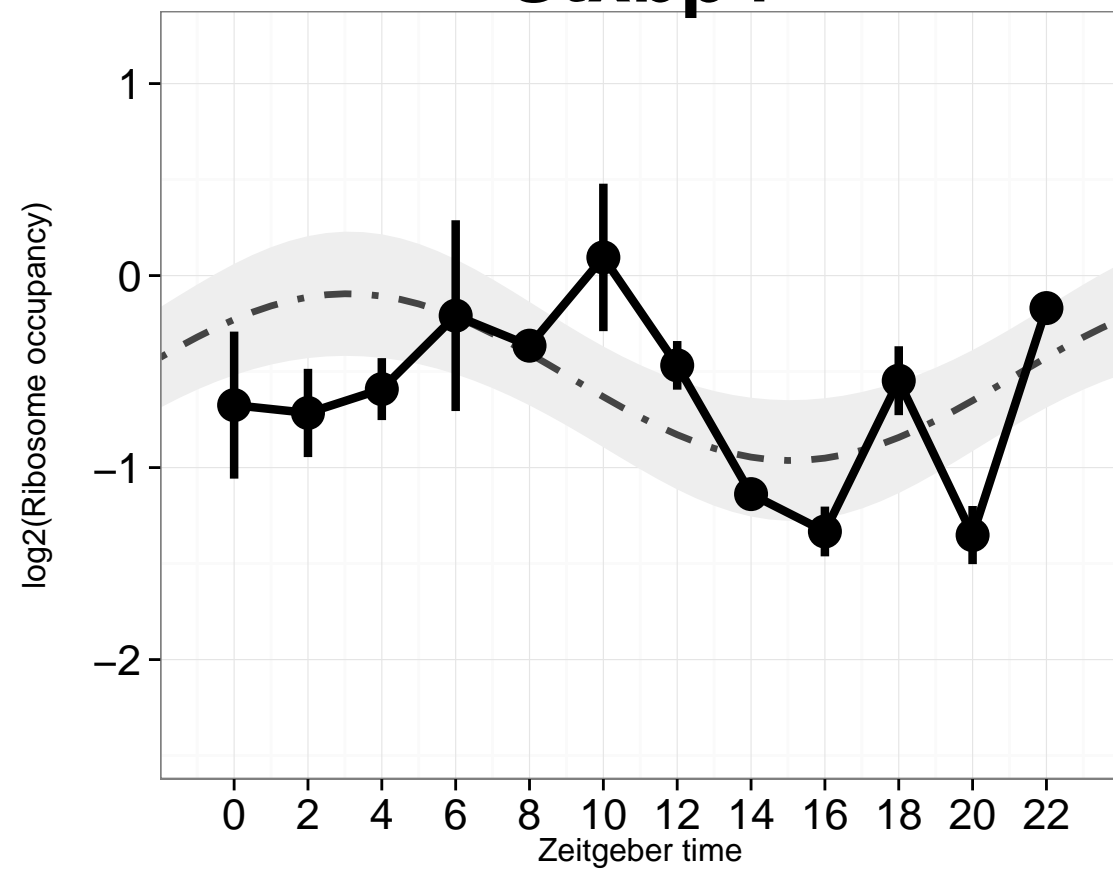

Supplement: SuppDataset_1.zip [file Stxbp4_set_B.pdf › Supplemental Dataset 1/B-mRNA_rhythm_translation_nonrhyth/Stxbp4_set_B.pdf]

## Sulf1

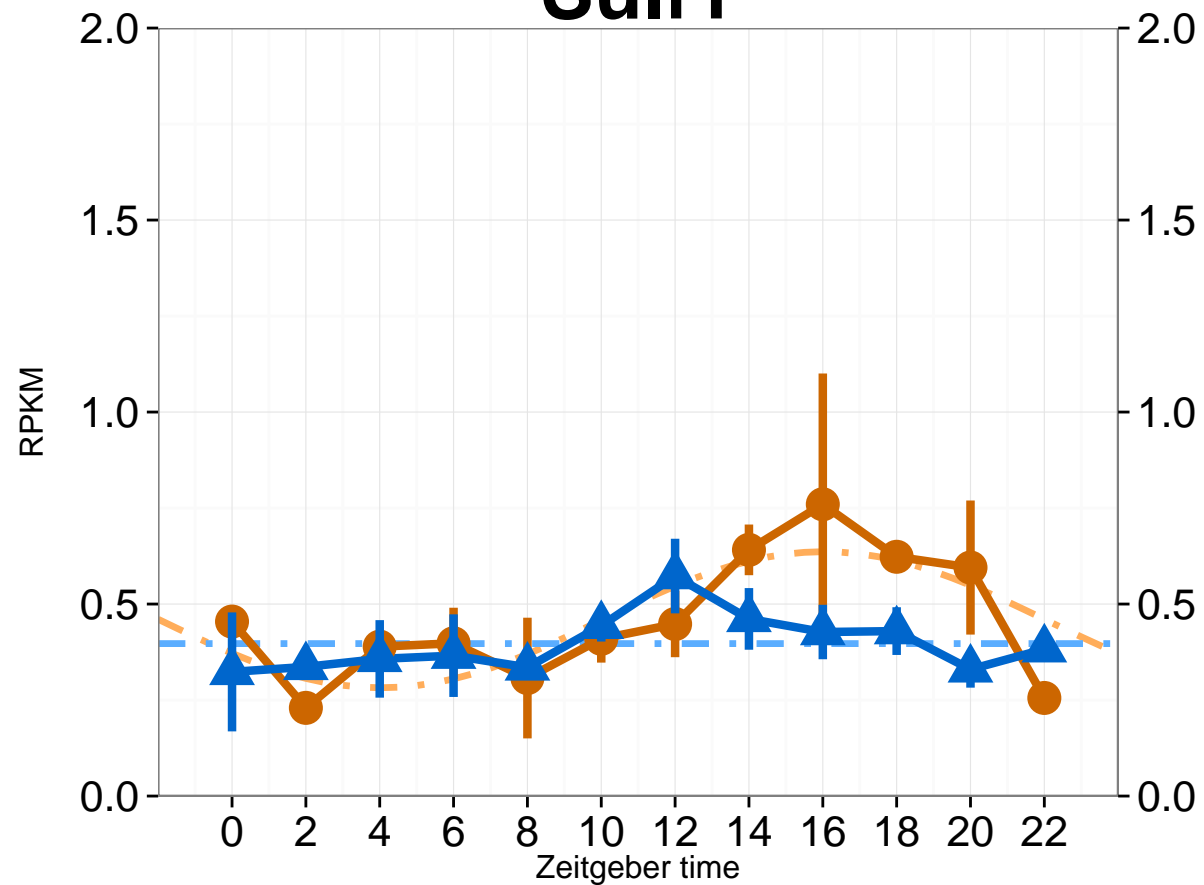

## Sulf1

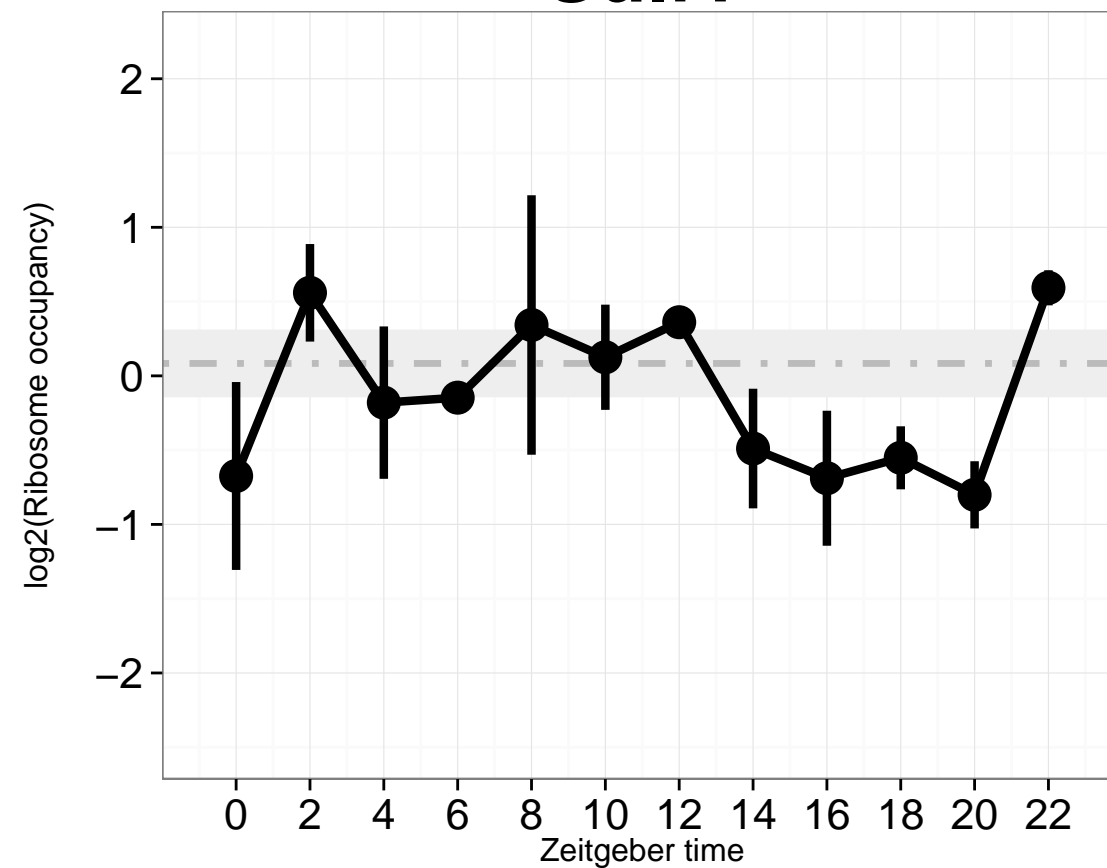

Supplement: SuppDataset_1.zip [file Sulf1_set_B.pdf › Supplemental Dataset 1/B-mRNA_rhythm_translation_nonrhyth/Sulf1_set_B.pdf]

# Sult1c2

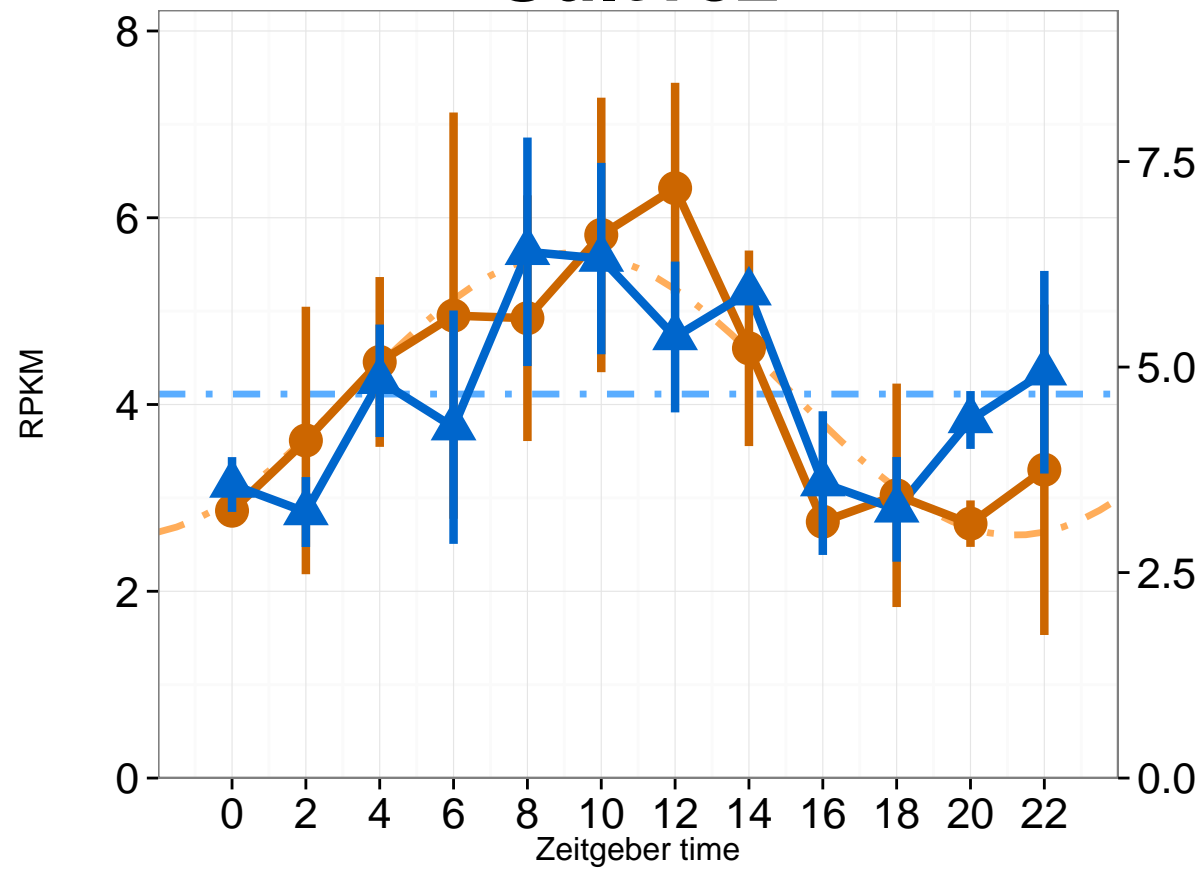

# Sult1c2

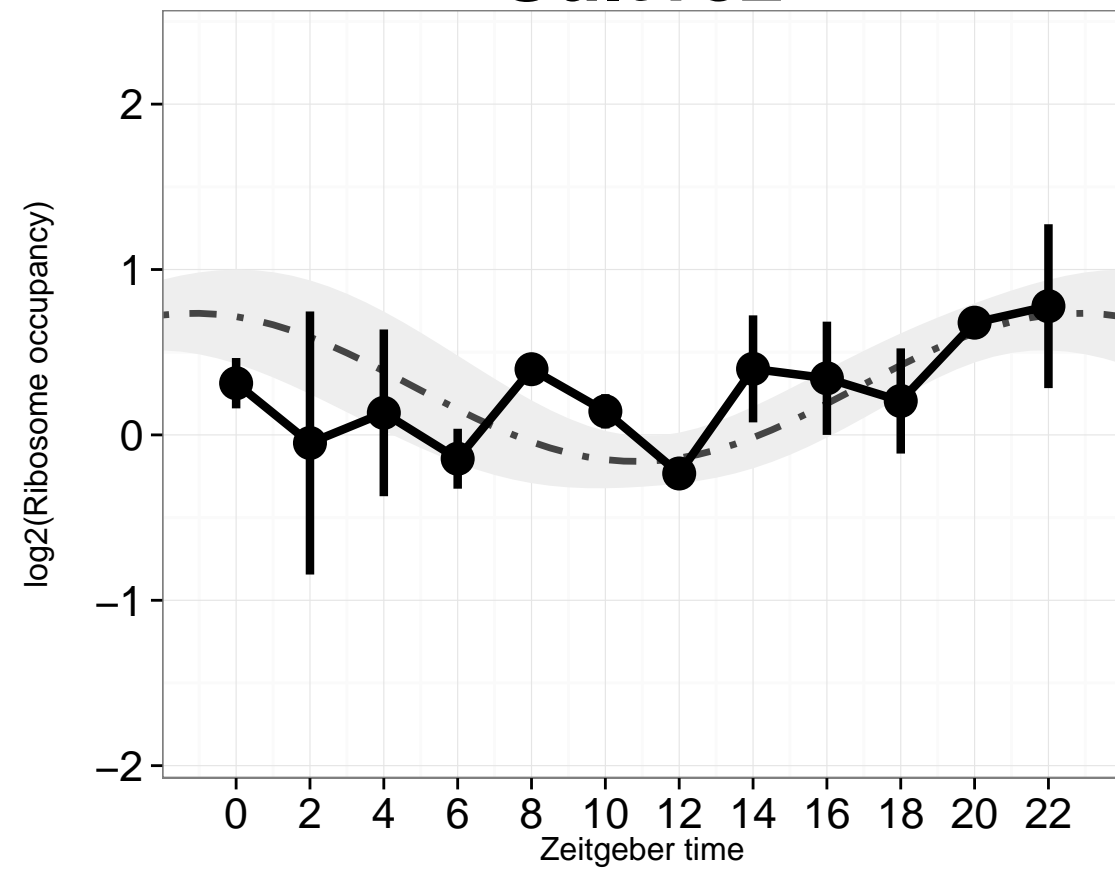

Supplement: SuppDataset_1.zip [file Sult1c2_set_B.pdf › Supplemental Dataset 1/B-mRNA_rhythm_translation_nonrhyth/Sult1c2_set_B.pdf]

## Surf2

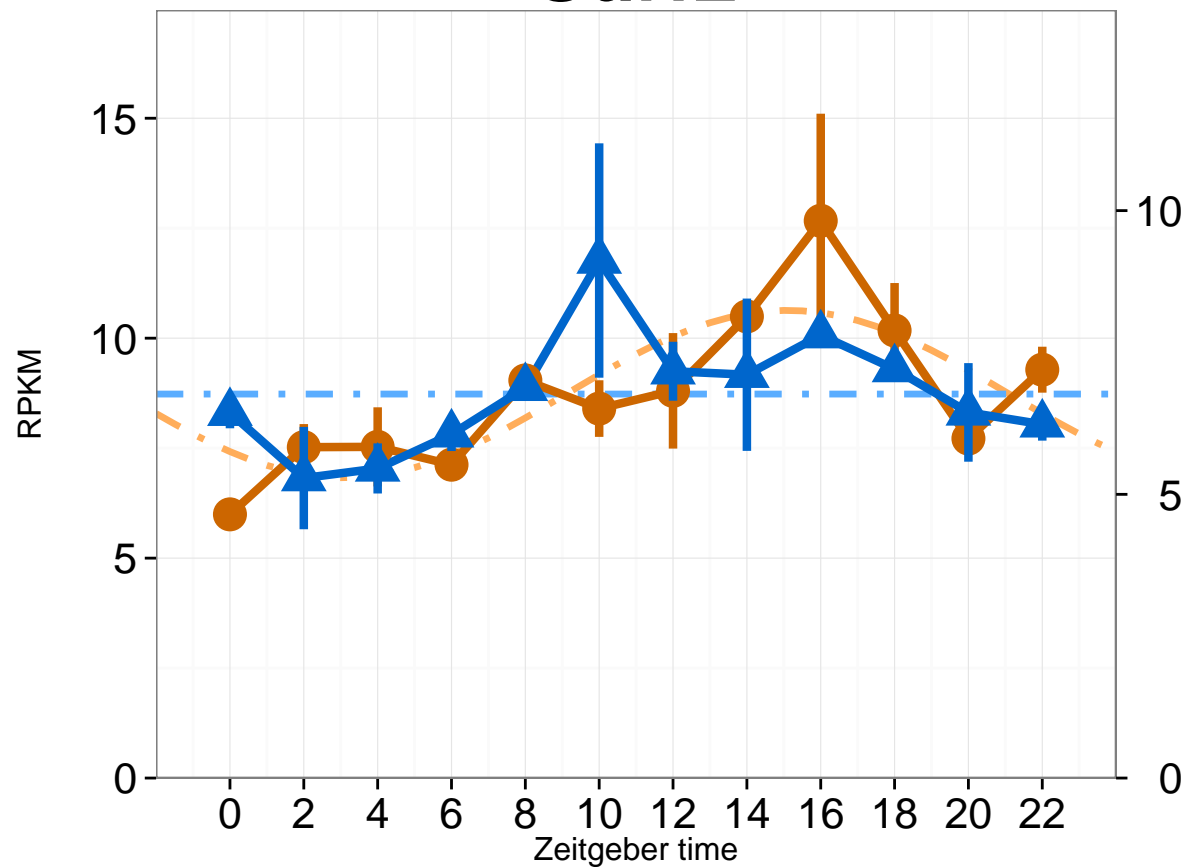

## Surf2

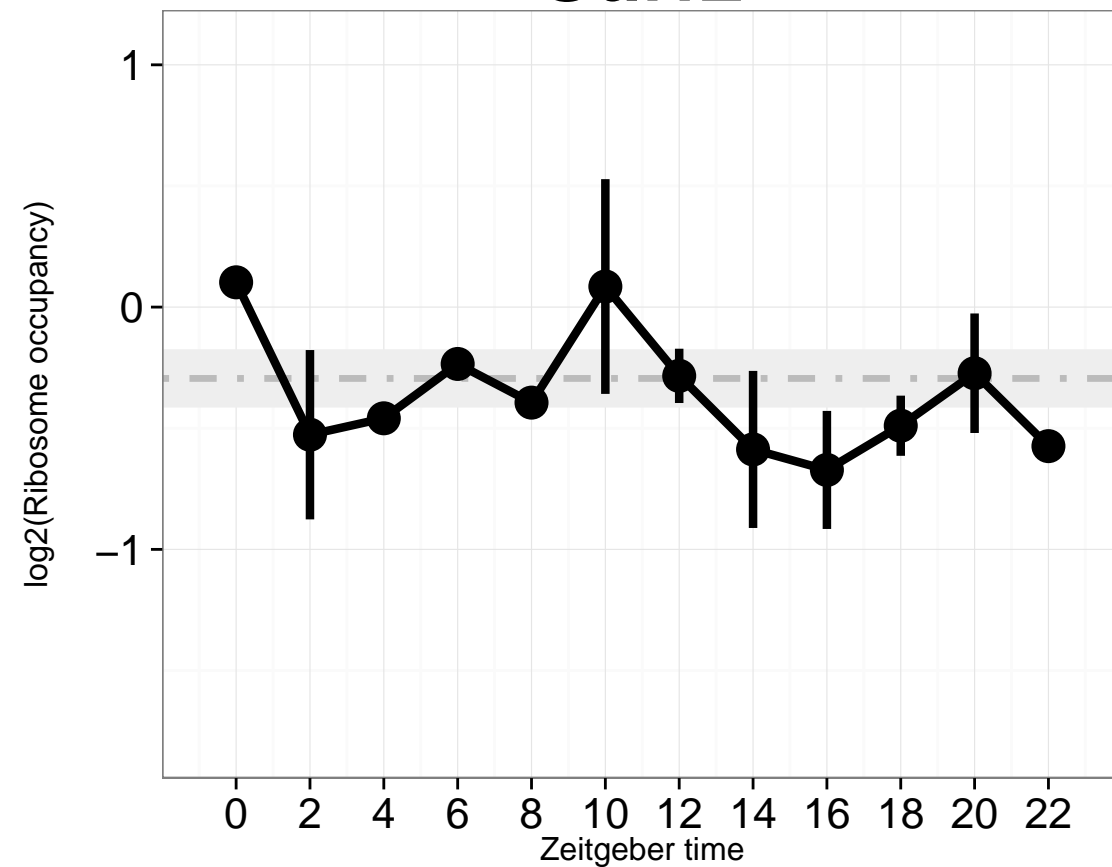

Supplement: SuppDataset_1.zip [file Surf2_set_B.pdf › Supplemental Dataset 1/B-mRNA_rhythm_translation_nonrhyth/Surf2_set_B.pdf]

## Susd2

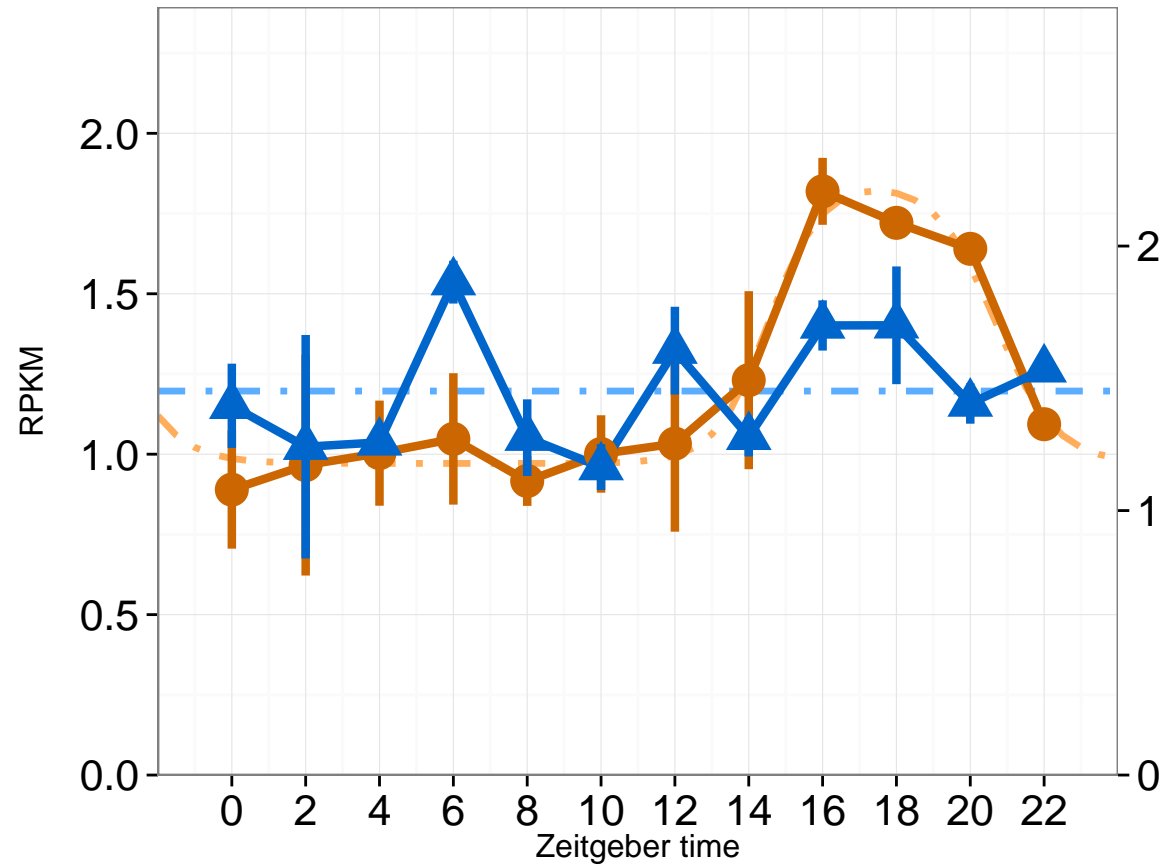

## Susd2

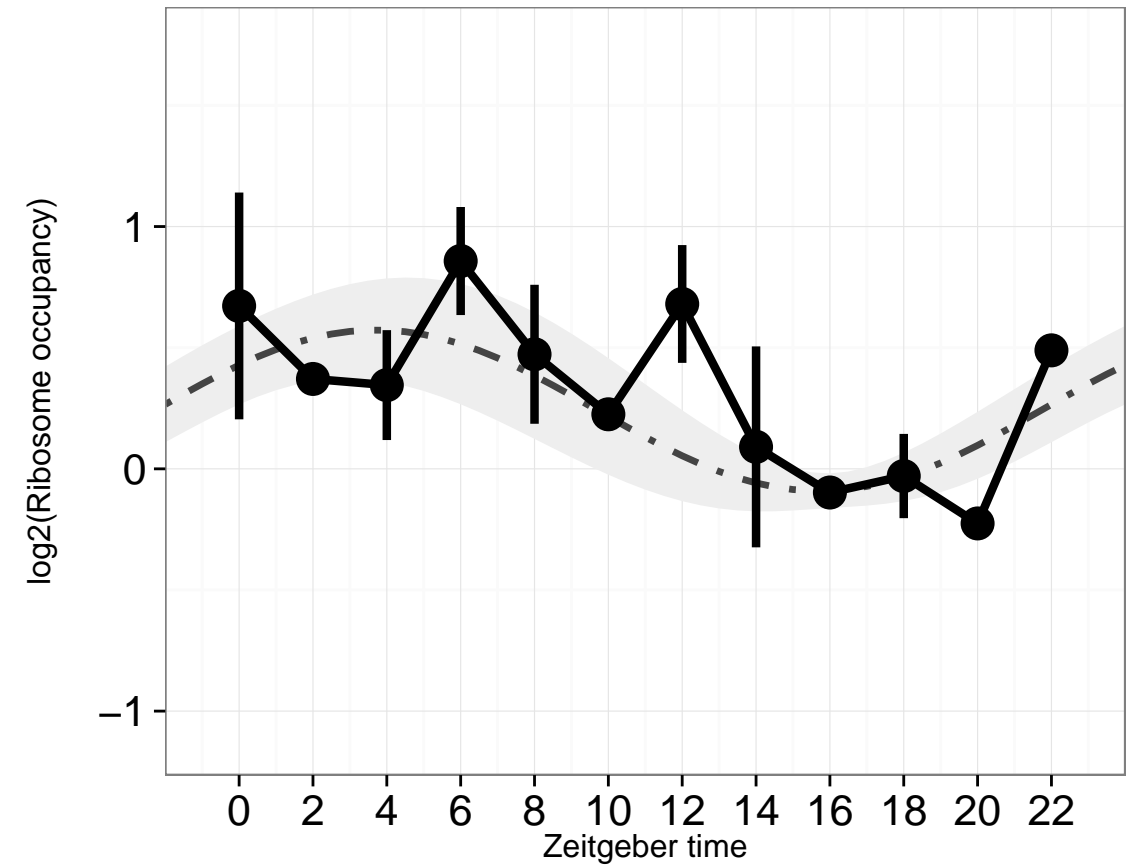

Supplement: SuppDataset_1.zip [file Susd2_set_B.pdf › Supplemental Dataset 1/B-mRNA_rhythm_translation_nonrhyth/Susd2_set_B.pdf]

# Svep1

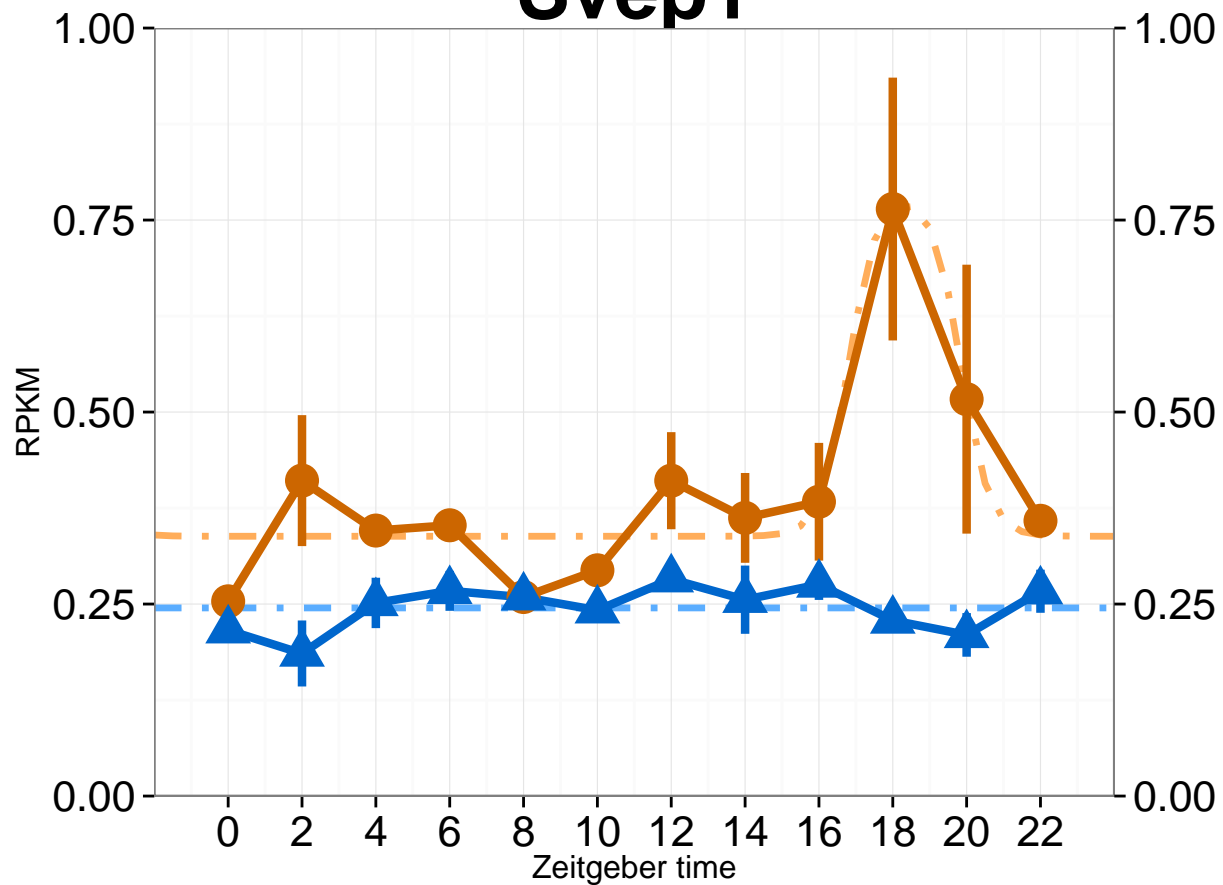

# Svep1

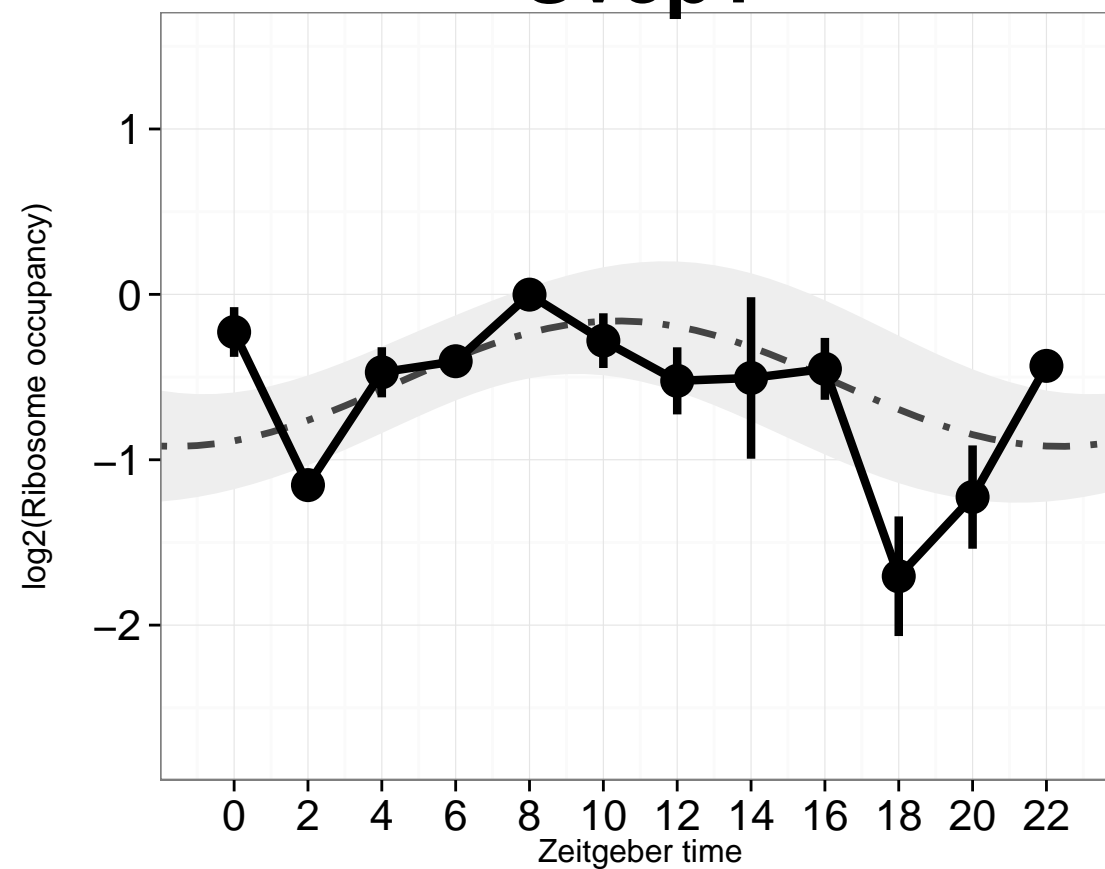

Supplement: SuppDataset_1.zip [file Svep1_set_B.pdf › Supplemental Dataset 1/B-mRNA_rhythm_translation_nonrhyth/Svep1_set_B.pdf]

## Swt1

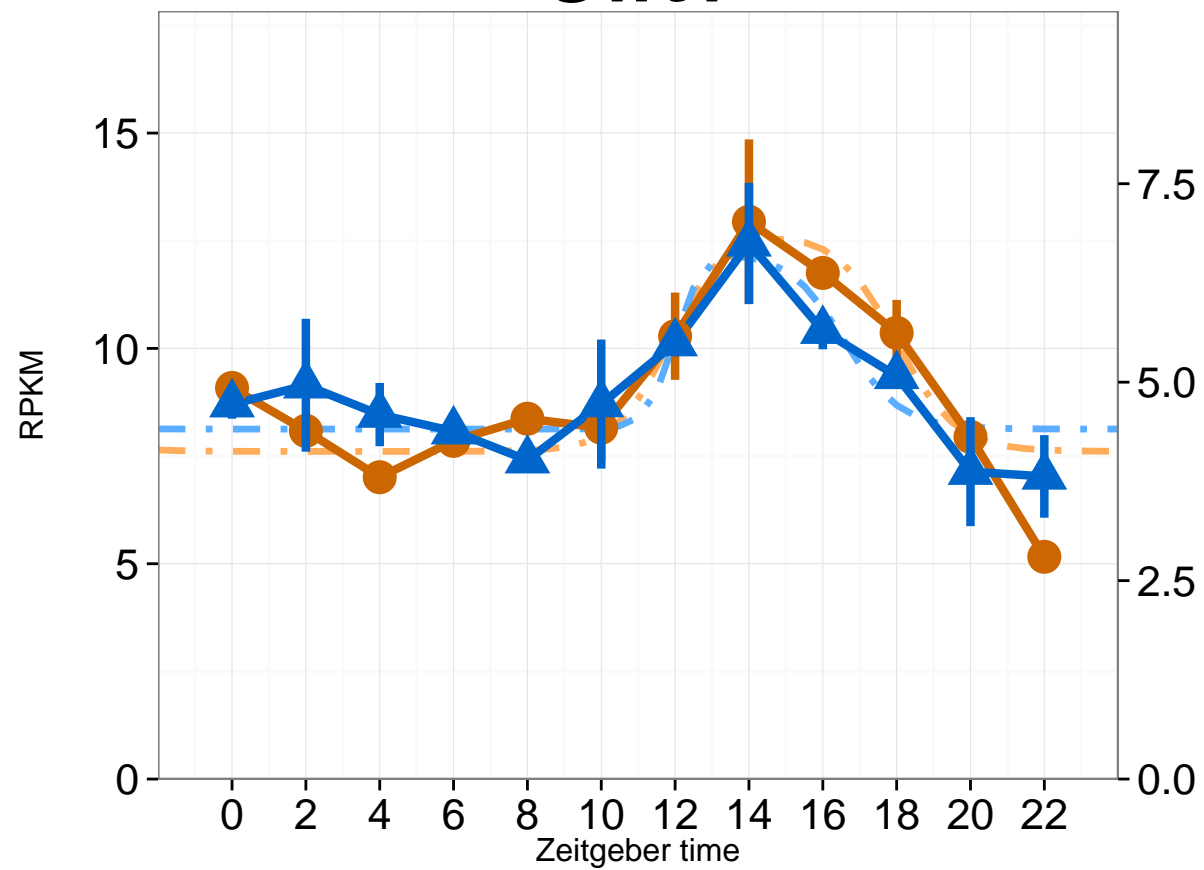

## Swt1

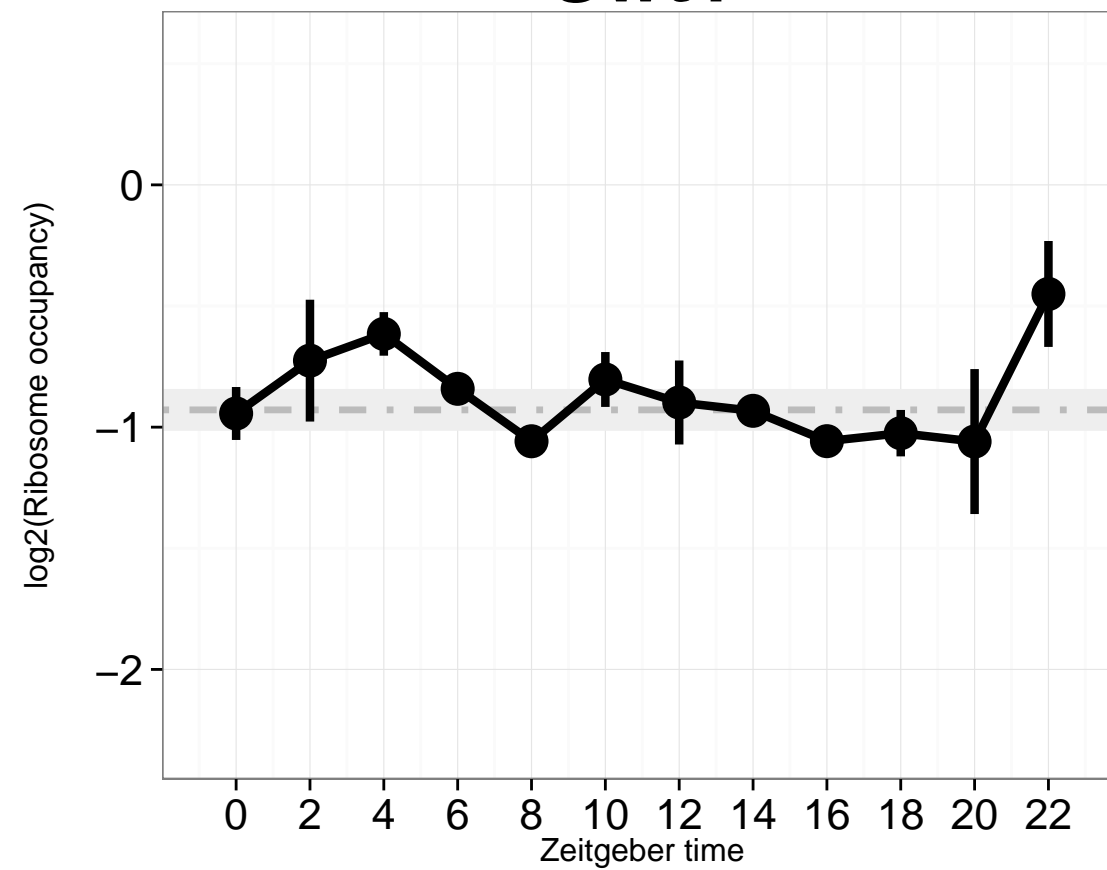

Supplement: SuppDataset_1.zip [file Swt1_set_B.pdf › Supplemental Dataset 1/B-mRNA_rhythm_translation_nonrhyth/Swt1_set_B.pdf]

## Syt9

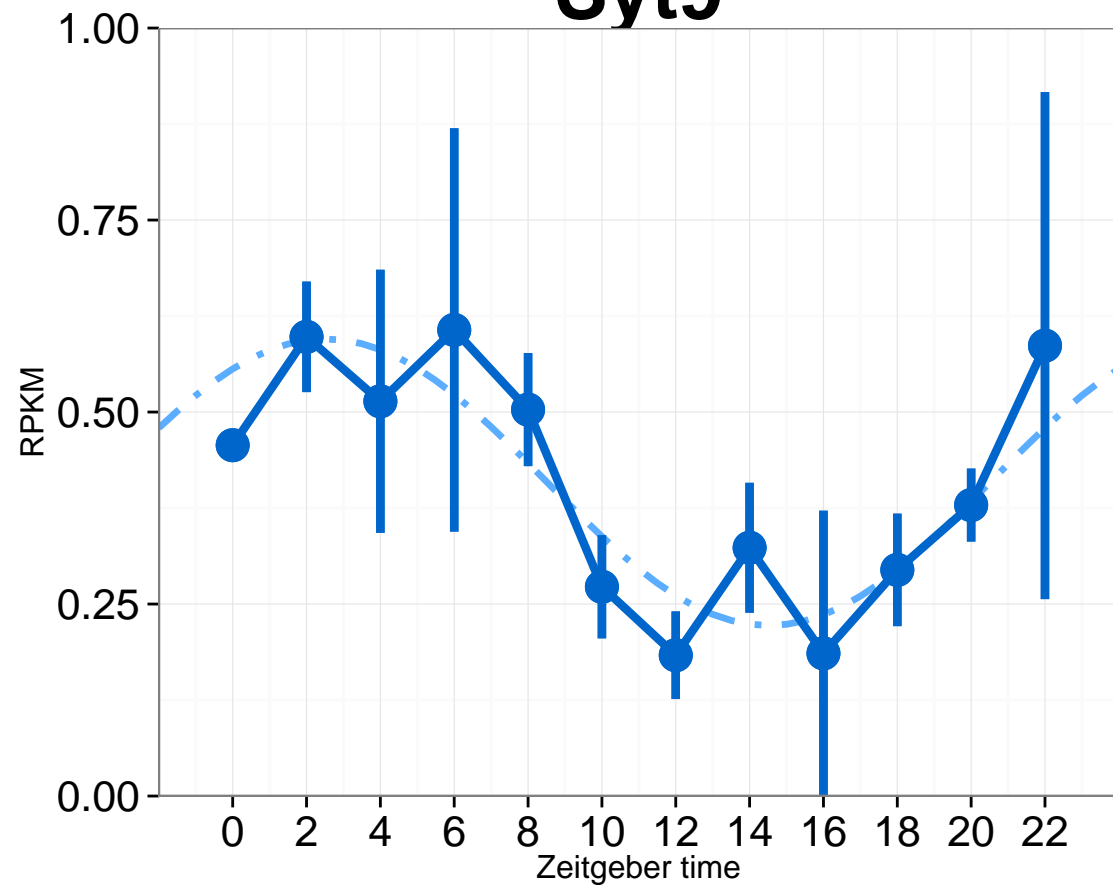

## Syt9 log2(Ribosome occupancy)

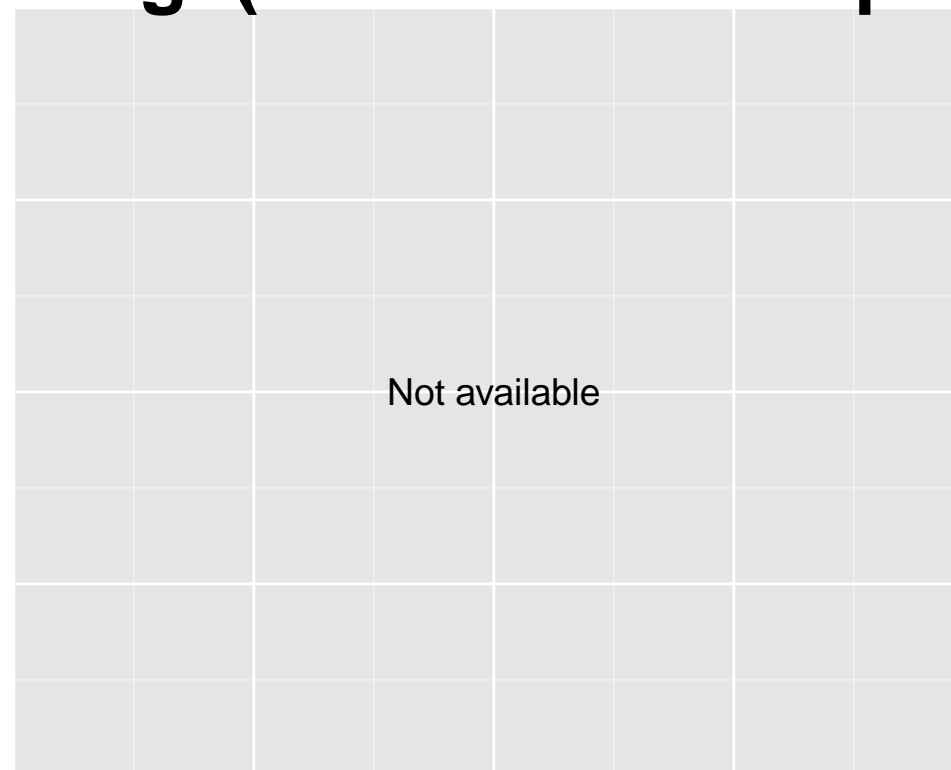

Supplement: SuppDataset_1.zip [file Syt9_set_B.pdf › Supplemental Dataset 1/B-mRNA_rhythm_translation_nonrhyth/Syt9_set_B.pdf]

# Tada2a

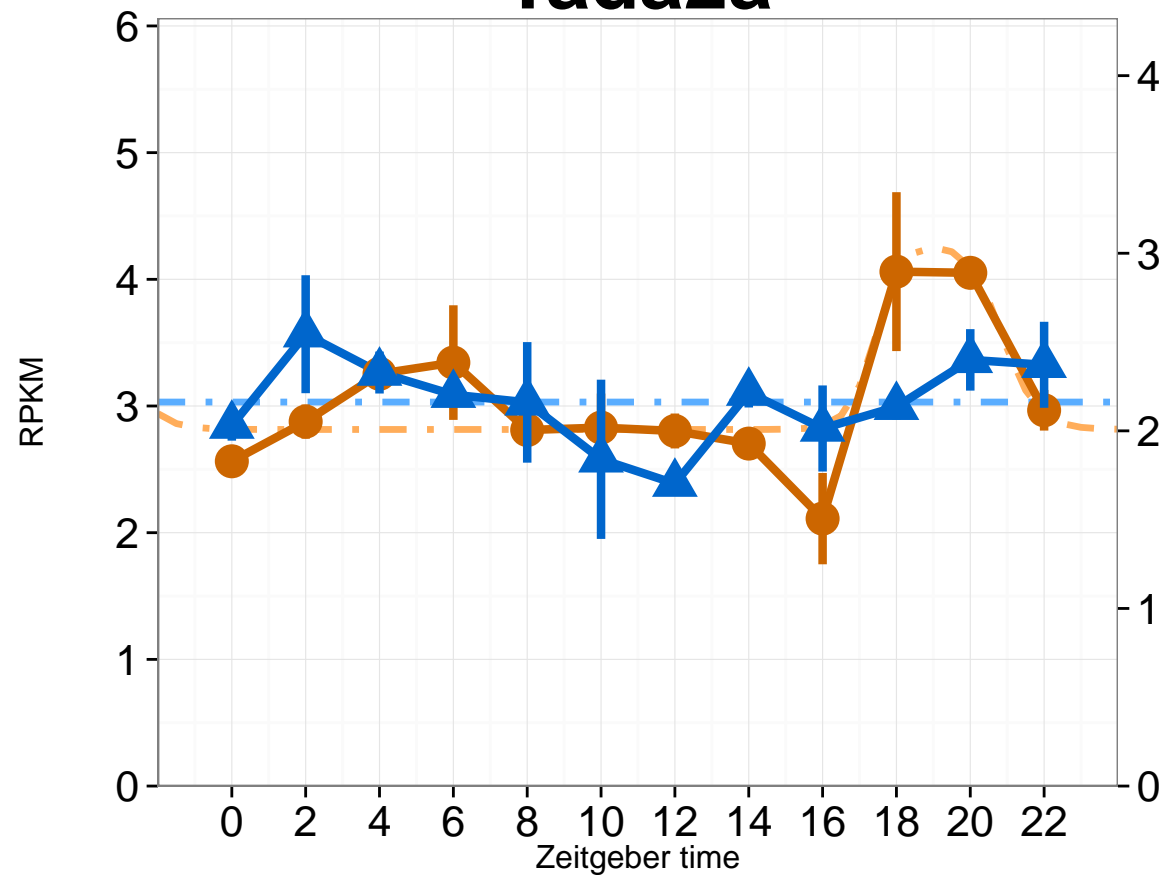

# Tada2a

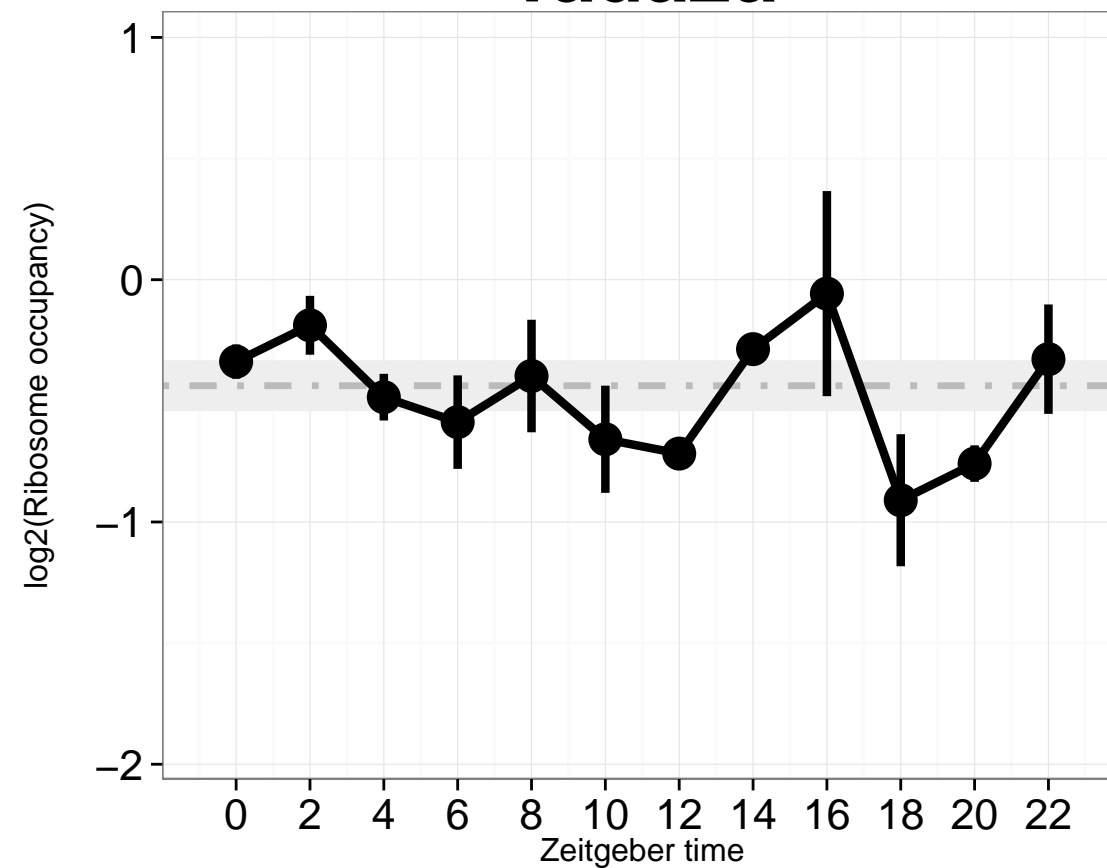

Supplement: SuppDataset_1.zip [file Tada2a_set_B.pdf › Supplemental Dataset 1/B-mRNA_rhythm_translation_nonrhyth/Tada2a_set_B.pdf]

## Tap1

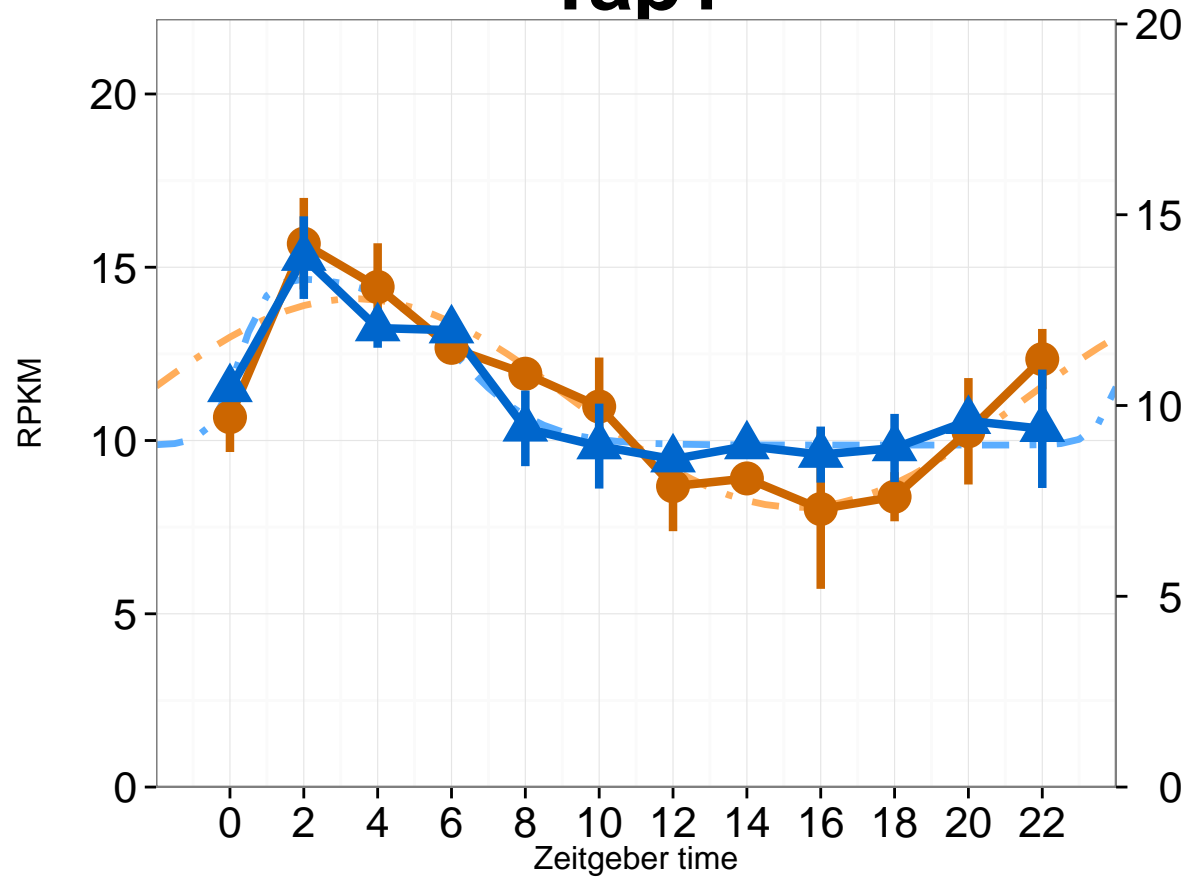

## Tap1

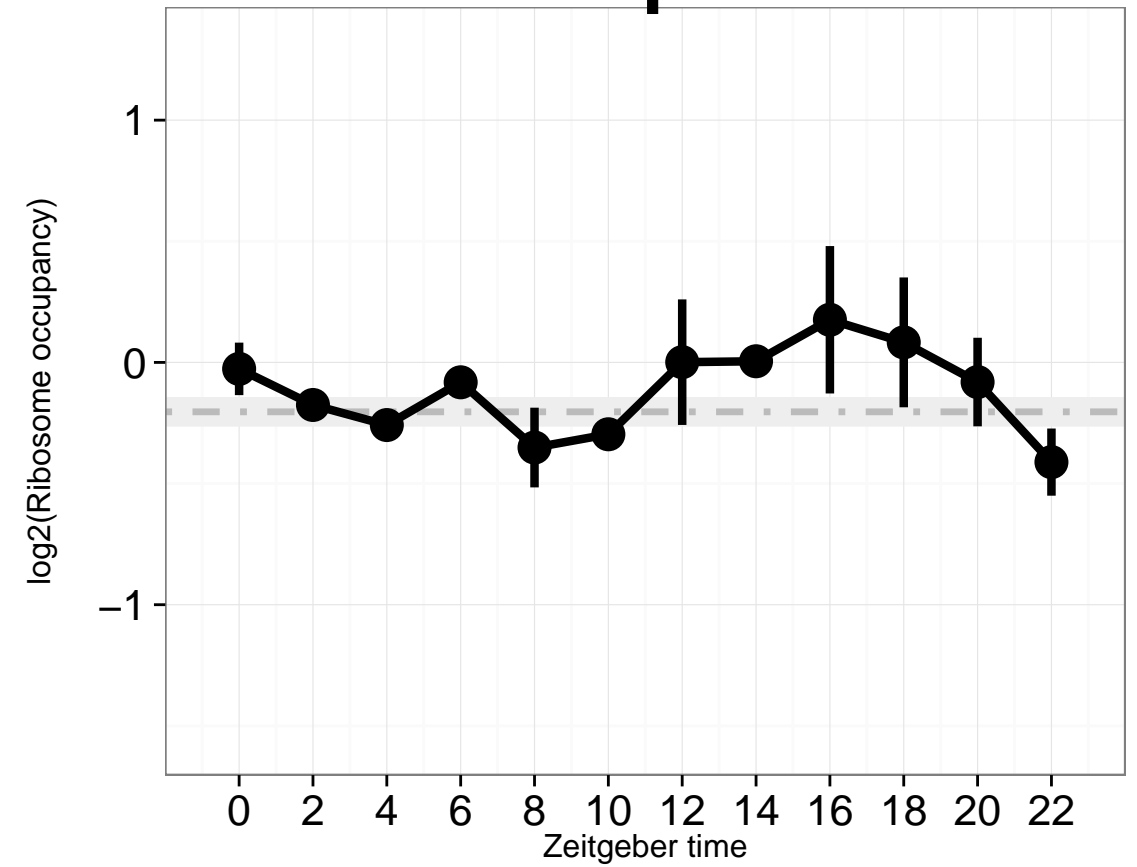

Supplement: SuppDataset_1.zip [file Tap1_set_B.pdf › Supplemental Dataset 1/B-mRNA_rhythm_translation_nonrhyth/Tap1_set_B.pdf]

## Tbc1d15

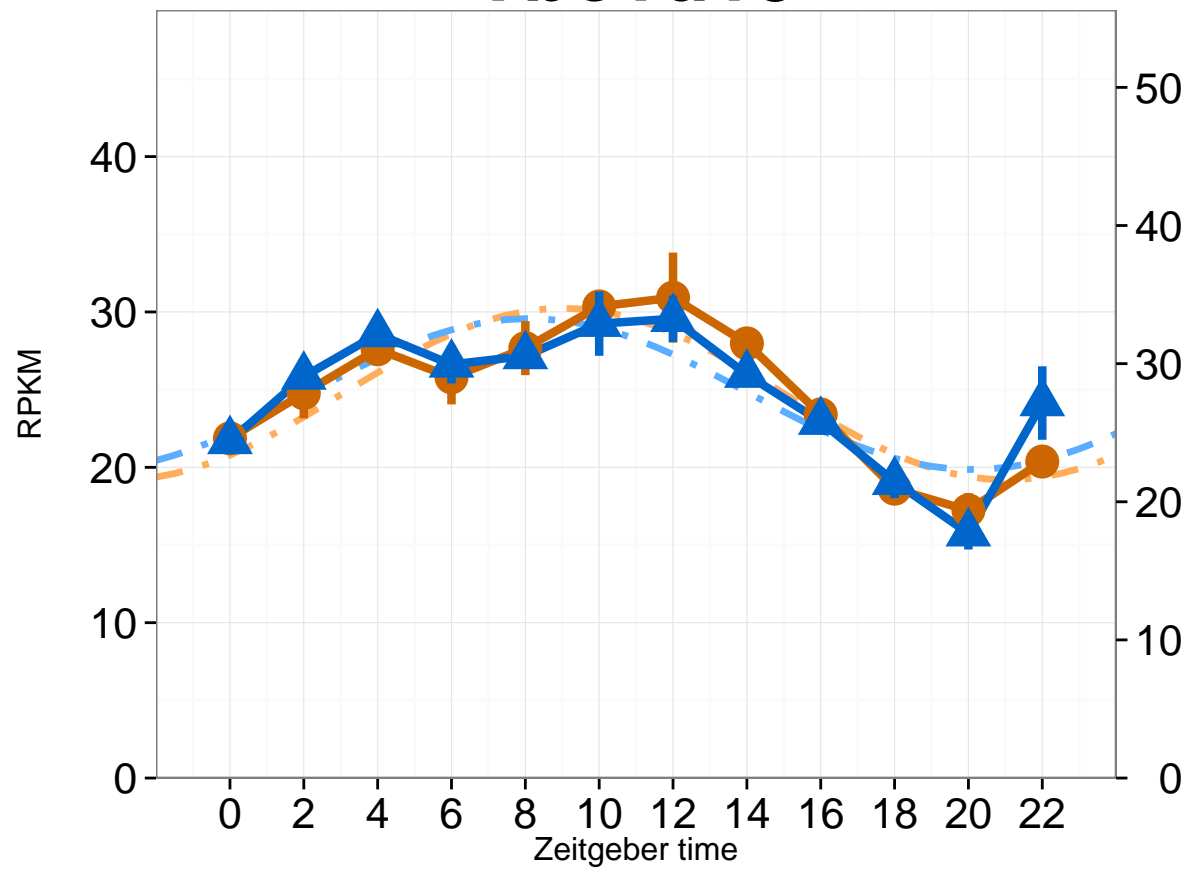

## Tbc1d15

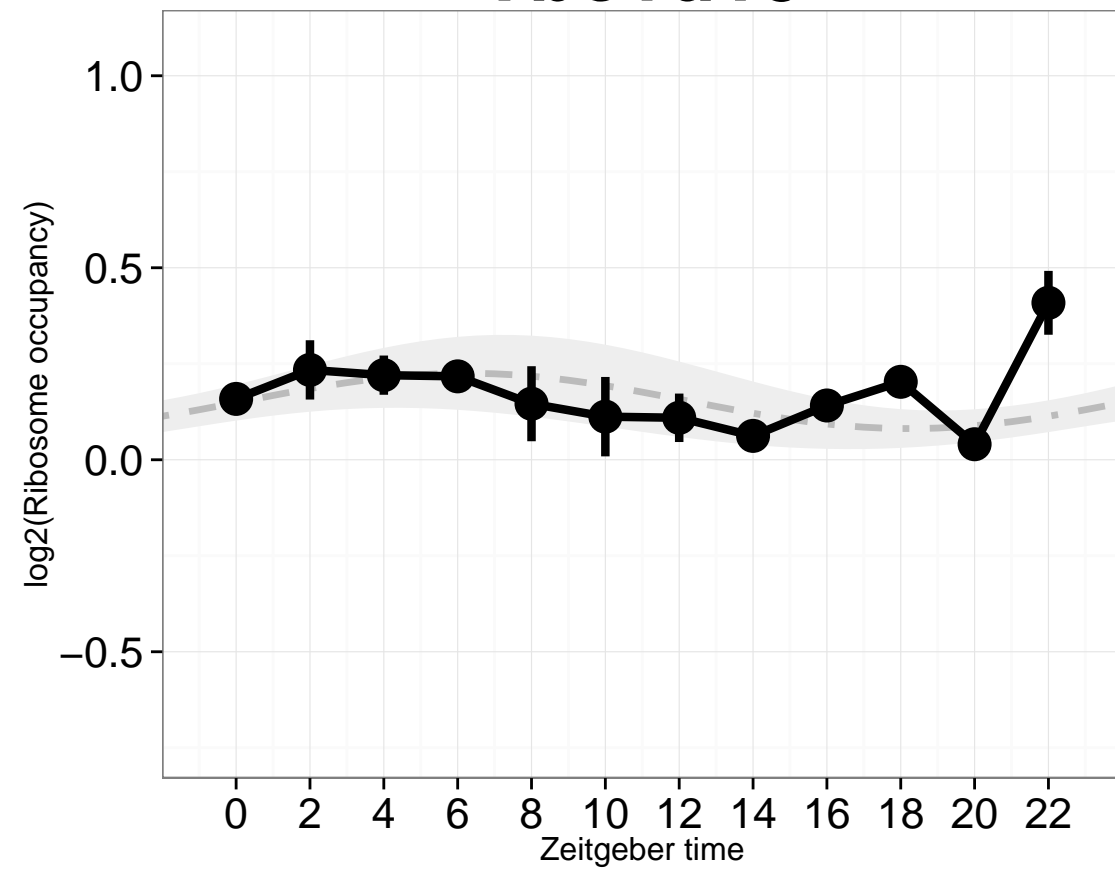

Supplement: SuppDataset_1.zip [file Tbc1d15_set_B.pdf › Supplemental Dataset 1/B-mRNA_rhythm_translation_nonrhyth/Tbc1d15_set_B.pdf]

## Tceb2

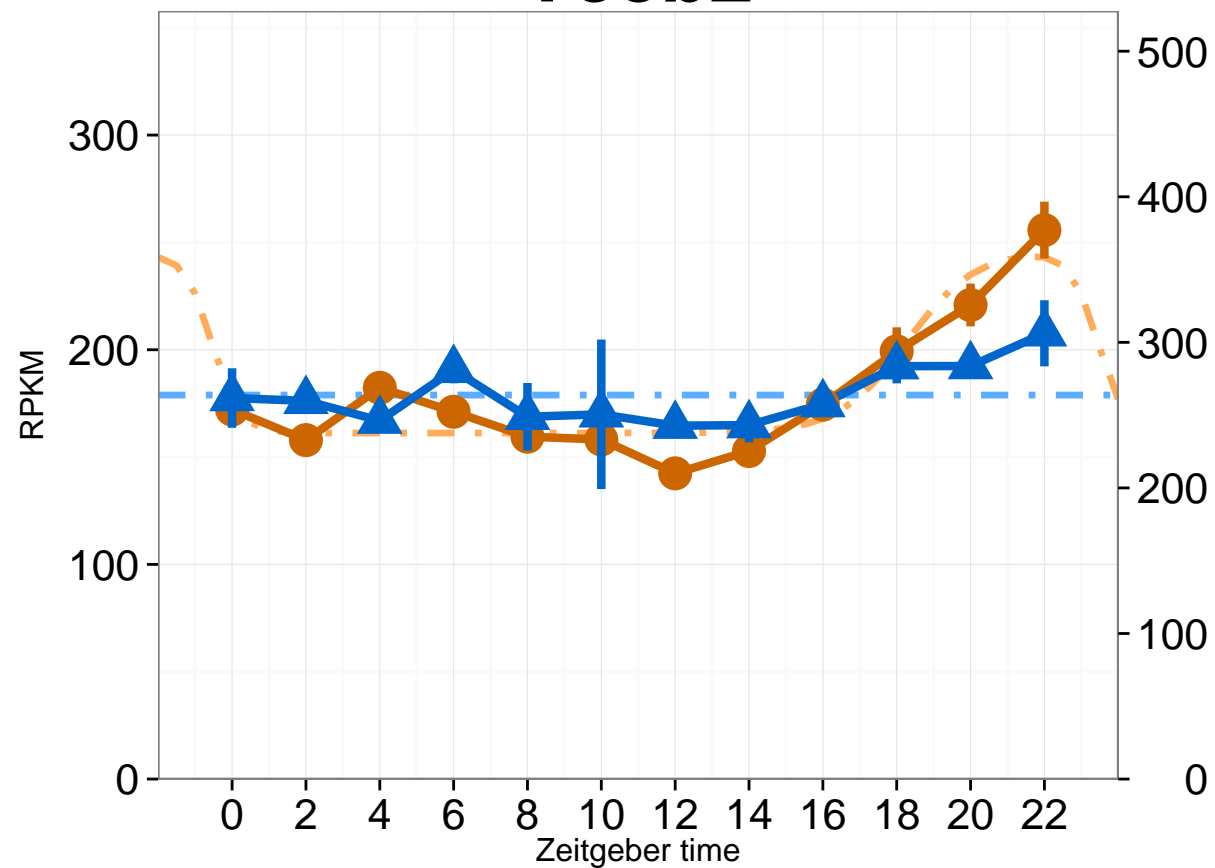

## Tceb2

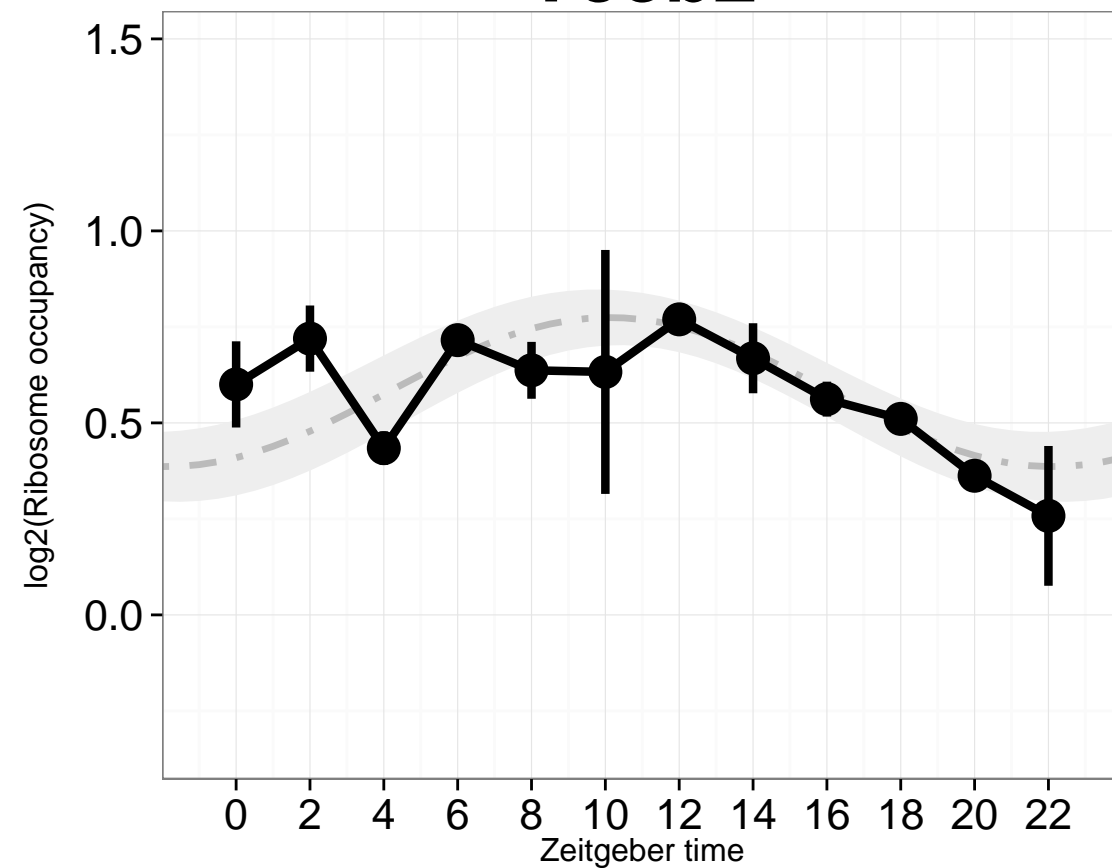

Supplement: SuppDataset_1.zip [file Tceb2_set_B.pdf › Supplemental Dataset 1/B-mRNA_rhythm_translation_nonrhyth/Tceb2_set_B.pdf]

# Tctn3

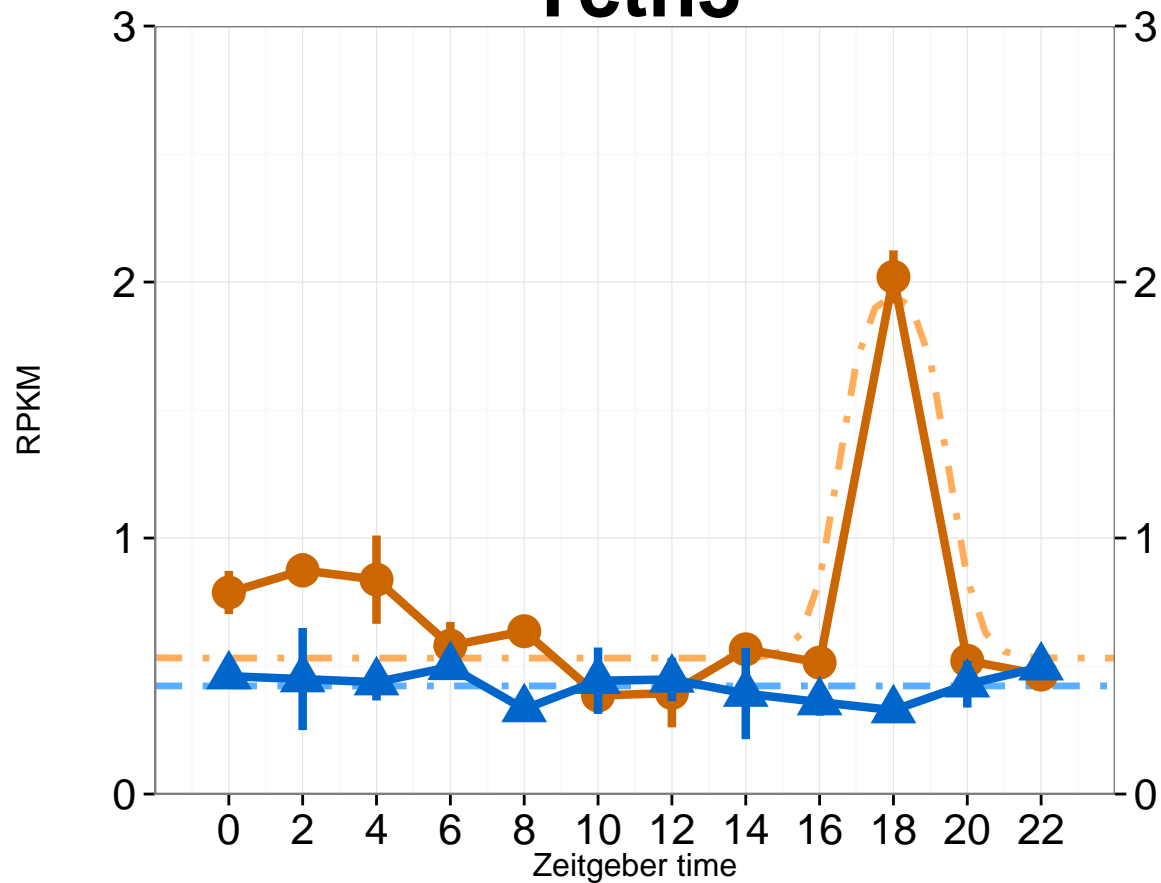

# Tctn3

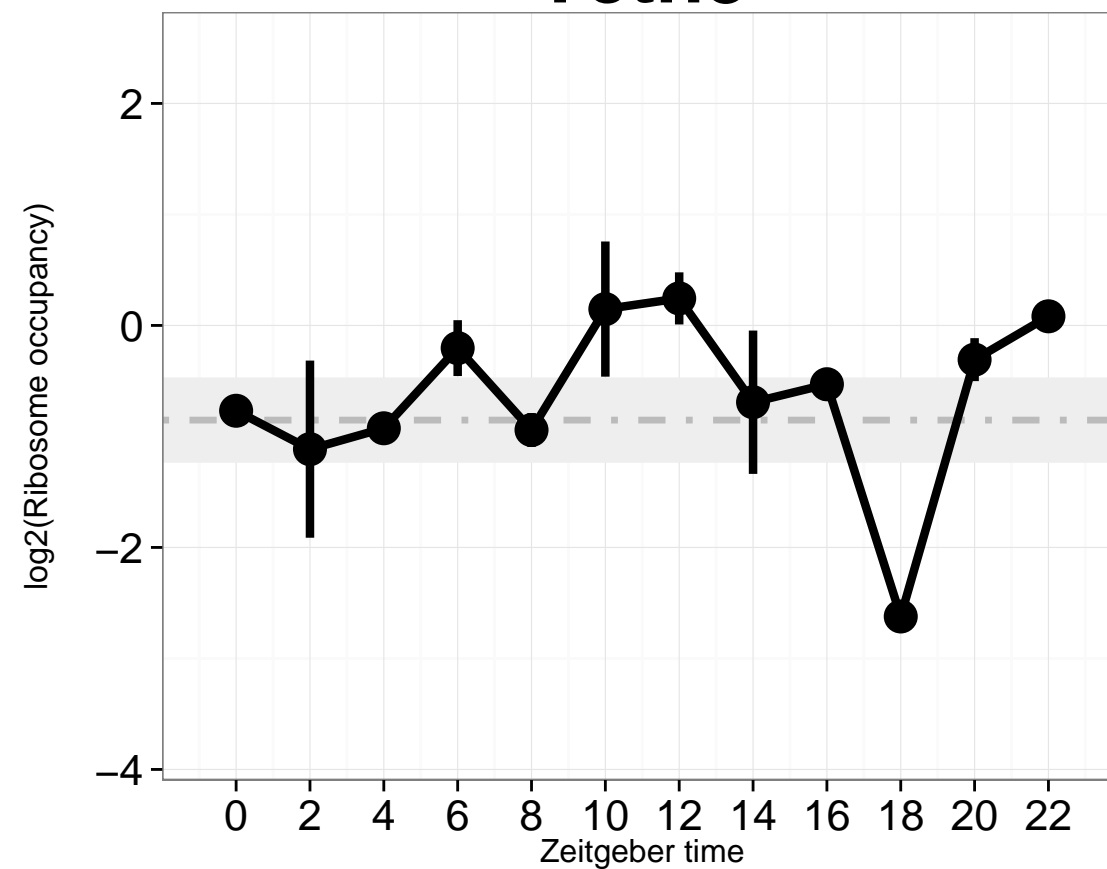

Supplement: SuppDataset_1.zip [file Tctn3_set_B.pdf › Supplemental Dataset 1/B-mRNA_rhythm_translation_nonrhyth/Tctn3_set_B.pdf]

# Tecpr2

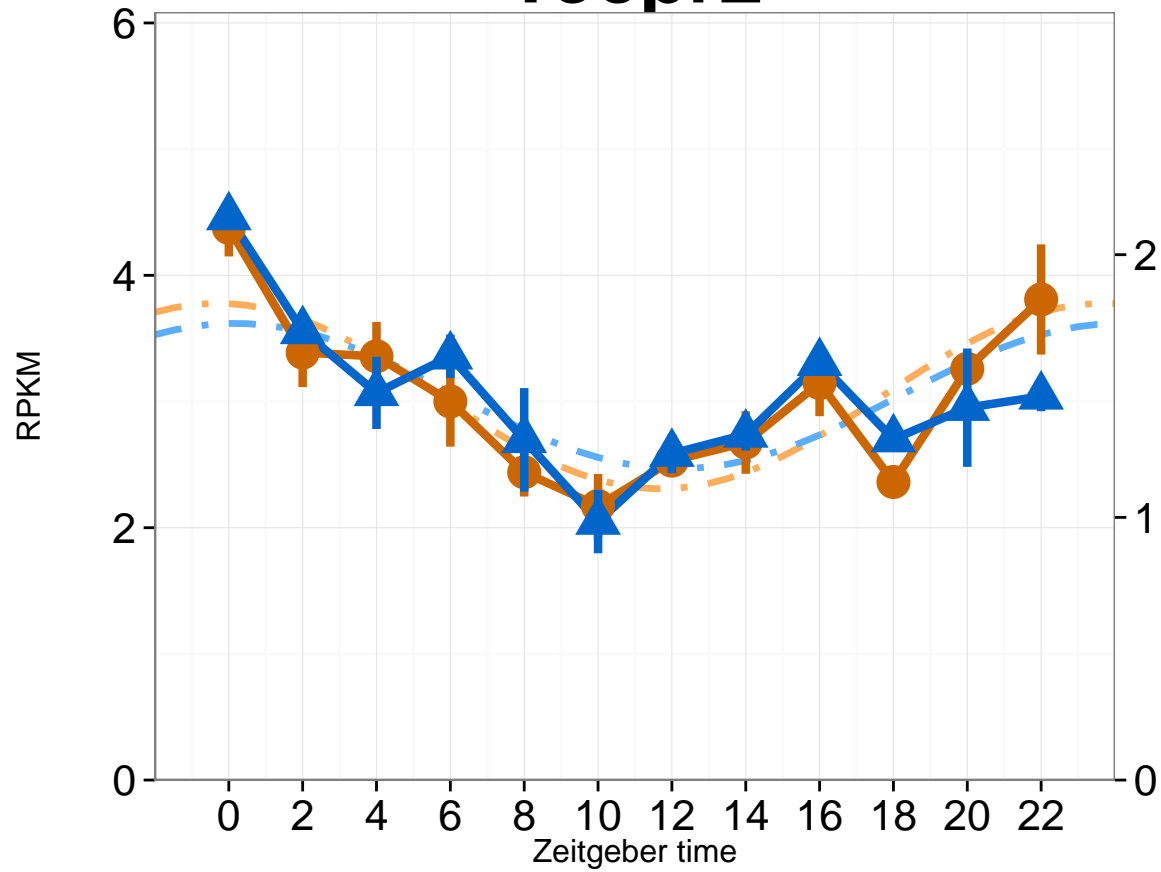

# Tecpr2

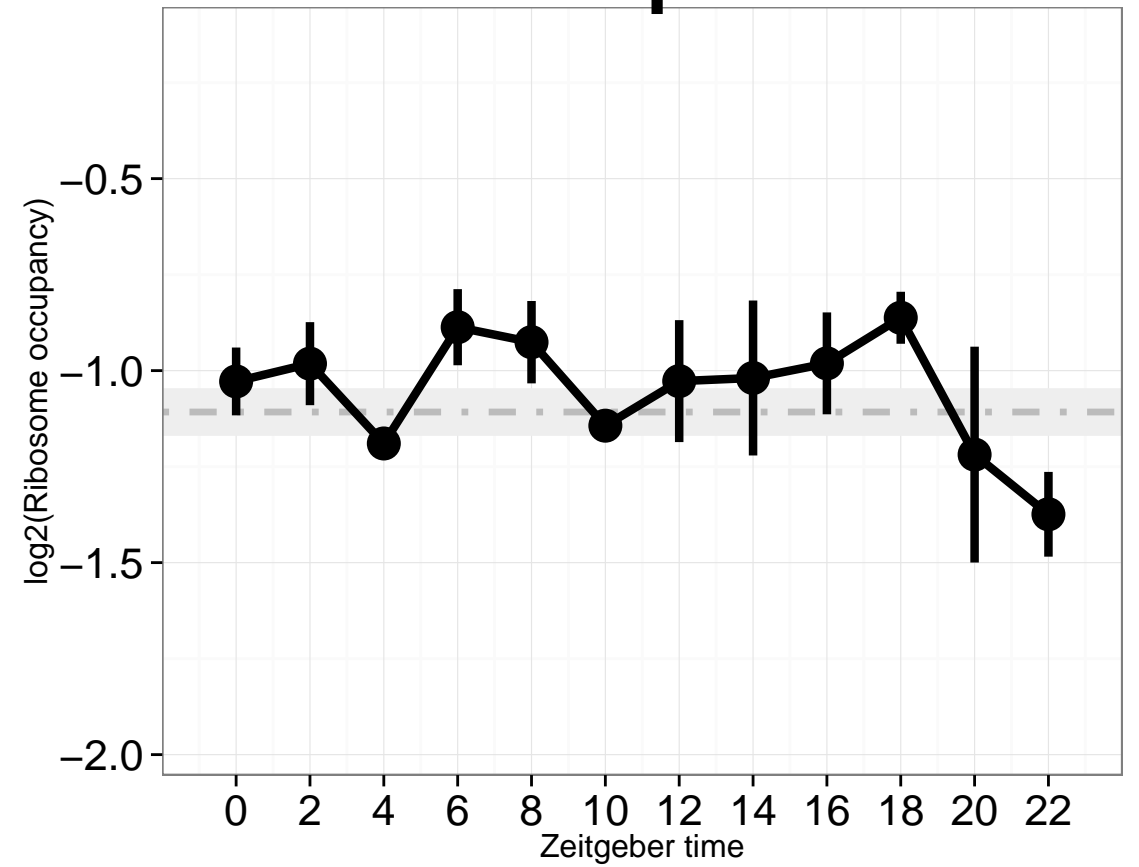

Supplement: SuppDataset_1.zip [file Tecpr2_set_B.pdf › Supplemental Dataset 1/B-mRNA_rhythm_translation_nonrhyth/Tecpr2_set_B.pdf]

## Tgm2

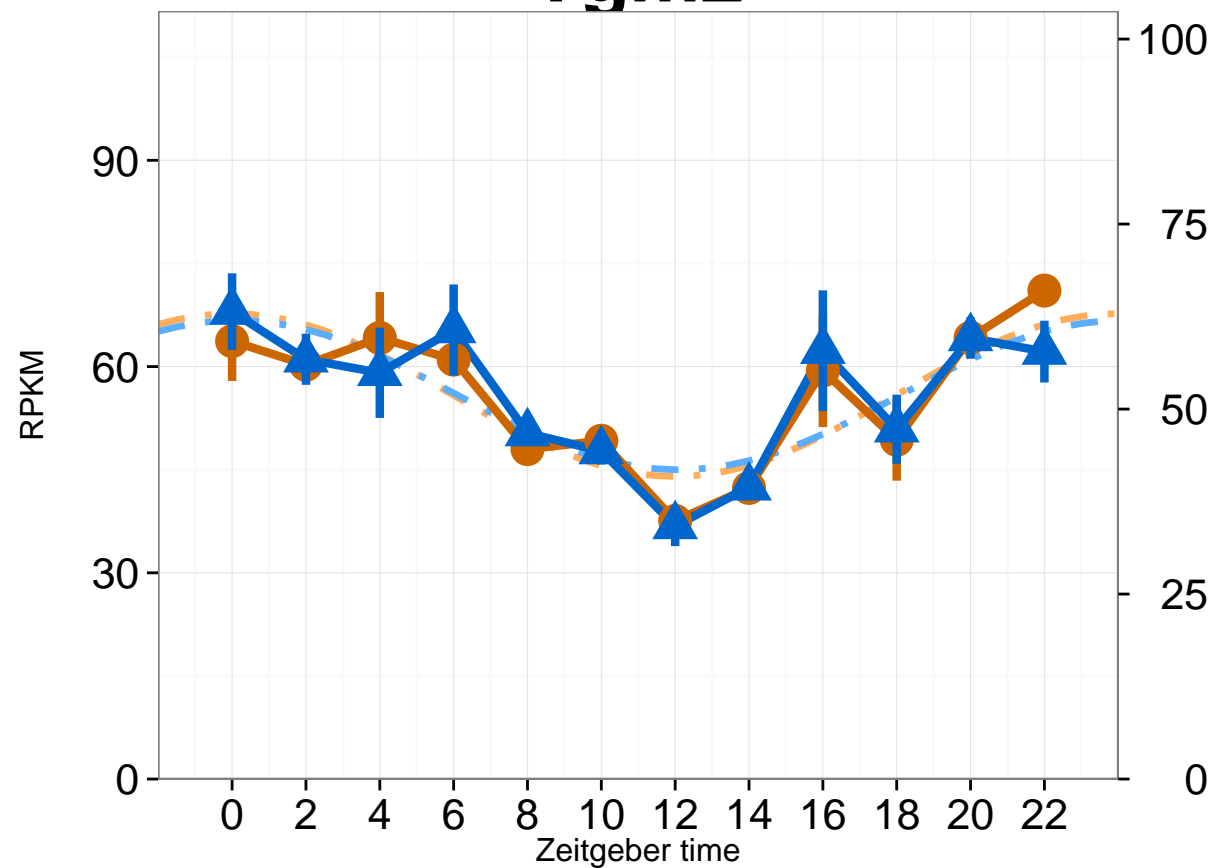

## Tgm2

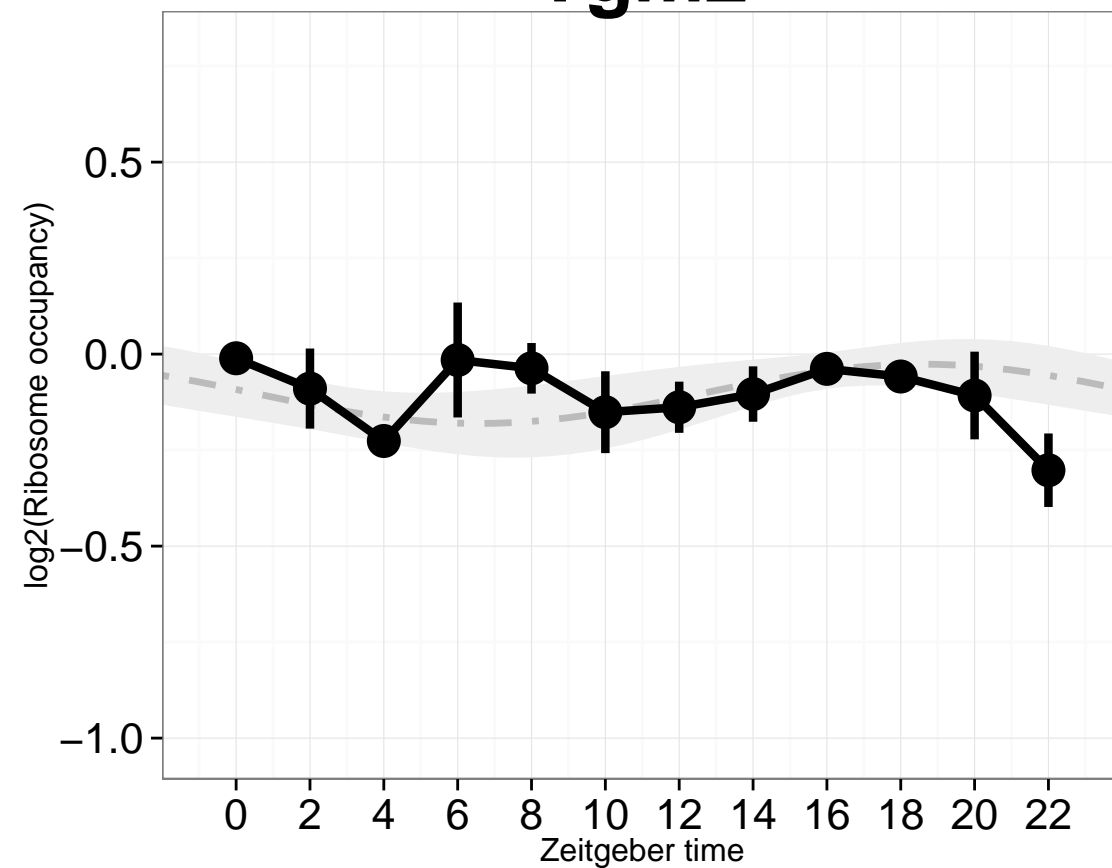

Supplement: SuppDataset_1.zip [file Tgm2_set_B.pdf › Supplemental Dataset 1/B-mRNA_rhythm_translation_nonrhyth/Tgm2_set_B.pdf]

# Thap1

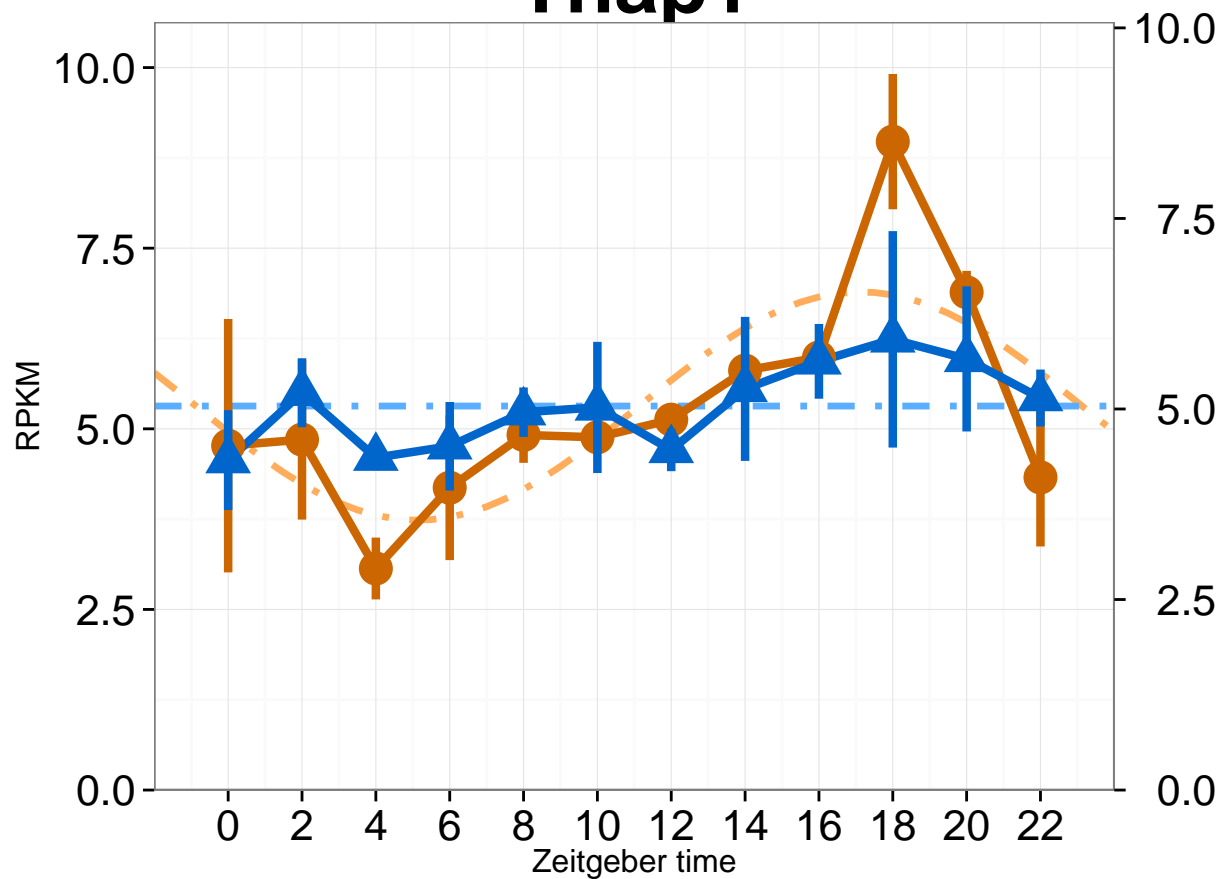

# Thap1

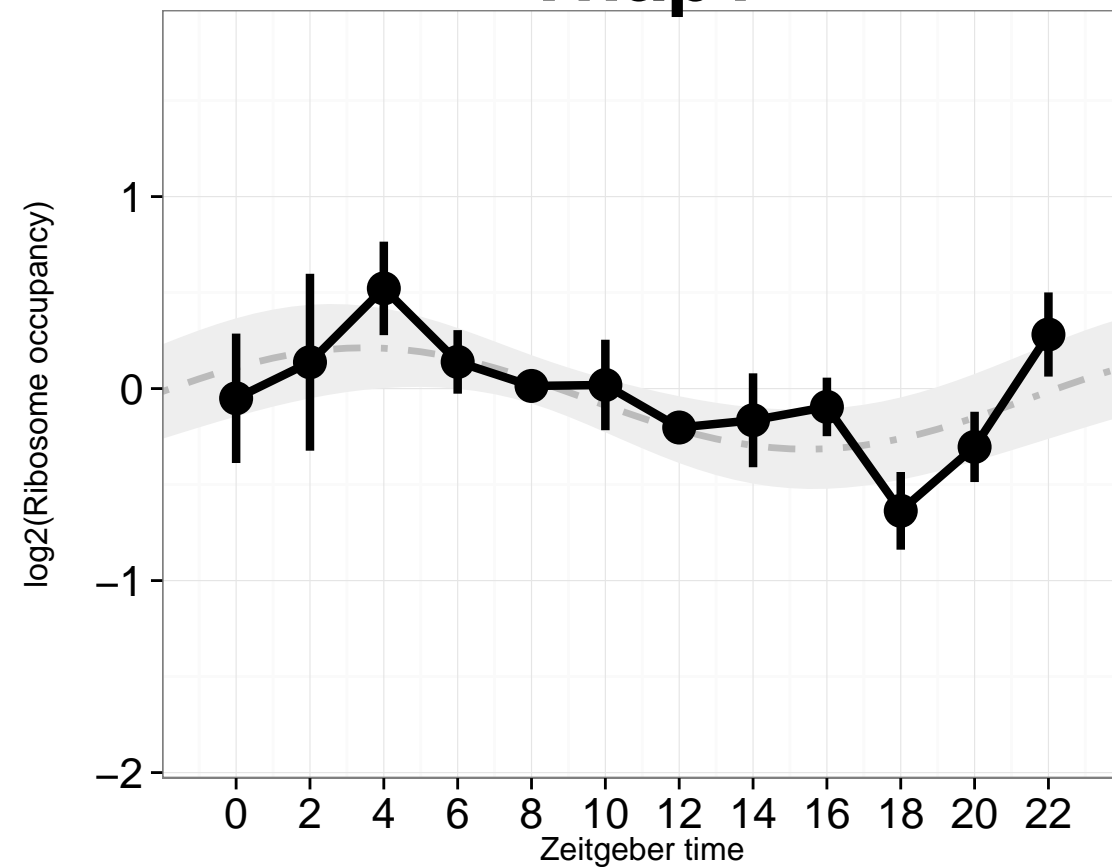

Supplement: SuppDataset_1.zip [file Thap1_set_B.pdf › Supplemental Dataset 1/B-mRNA_rhythm_translation_nonrhyth/Thap1_set_B.pdf]

# Thbd

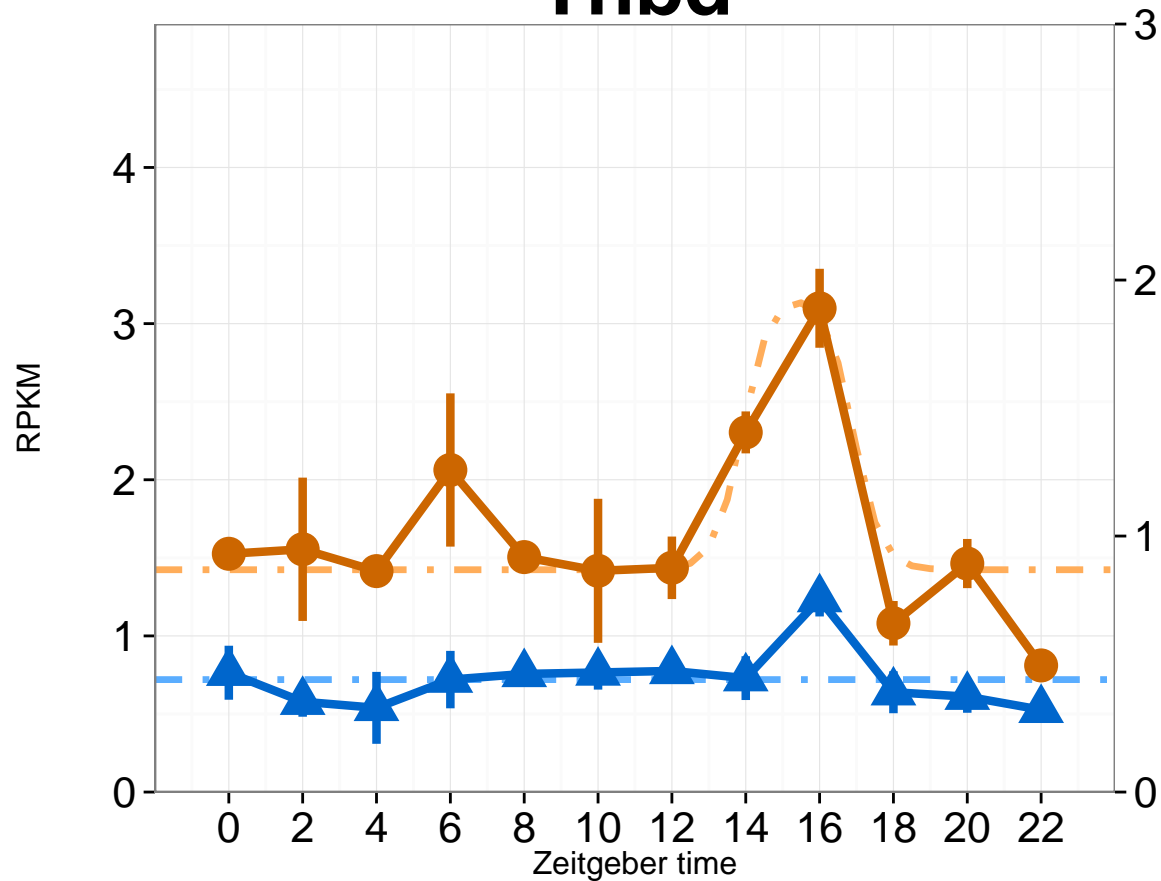

# Thbd

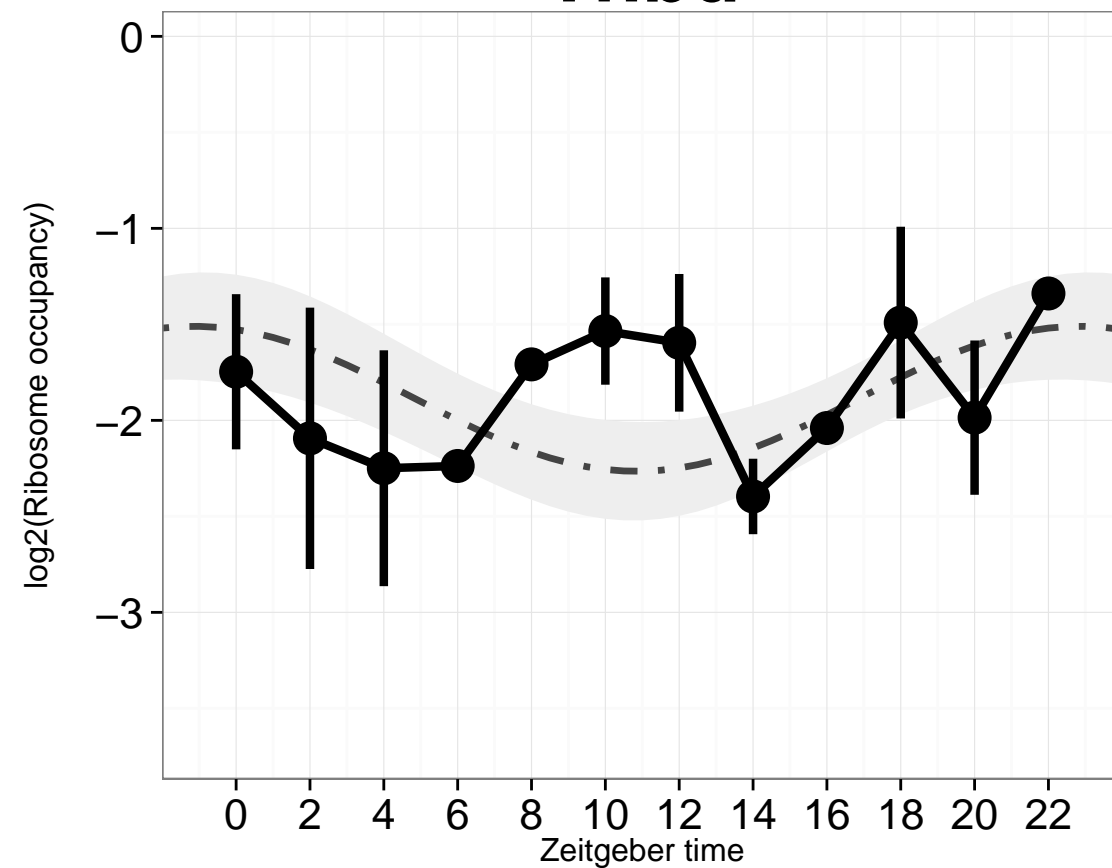

Supplement: SuppDataset_1.zip [file Thbd_set_B.pdf › Supplemental Dataset 1/B-mRNA_rhythm_translation_nonrhyth/Thbd_set_B.pdf]

## Thoc6

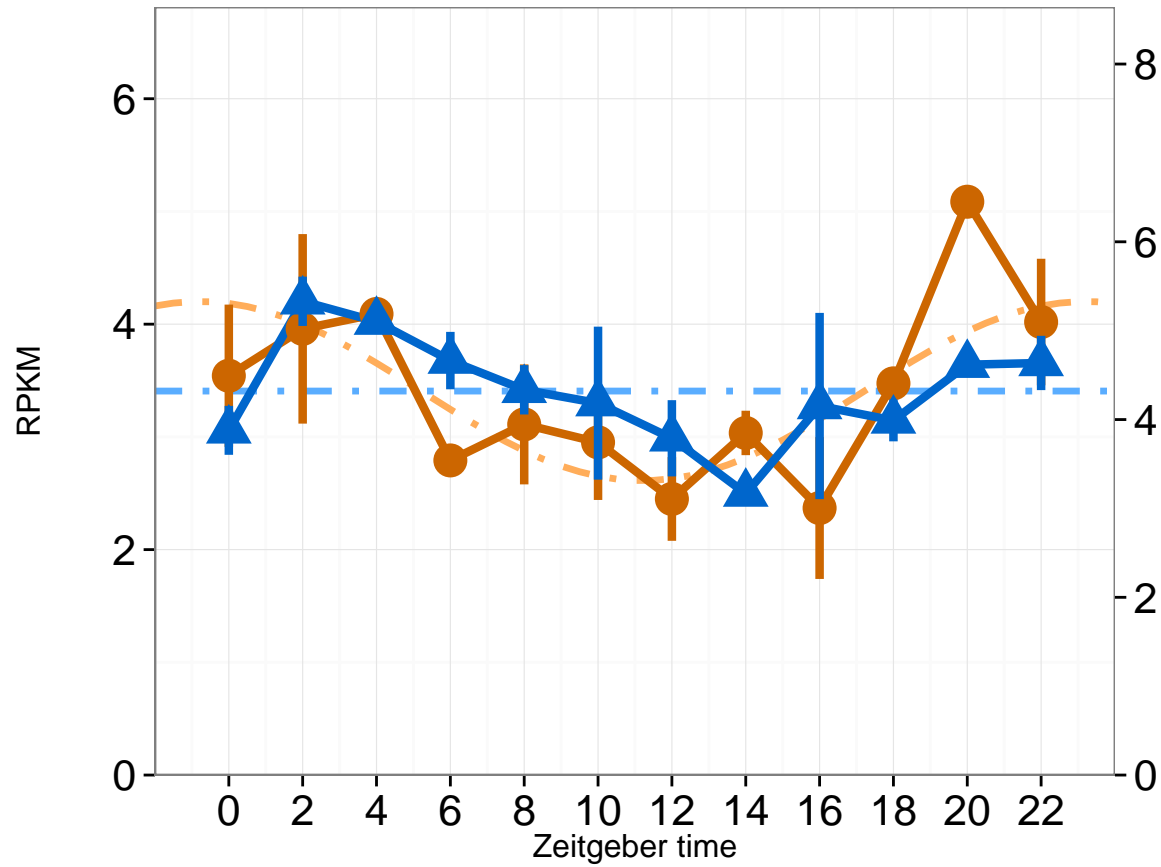

## Thoc6

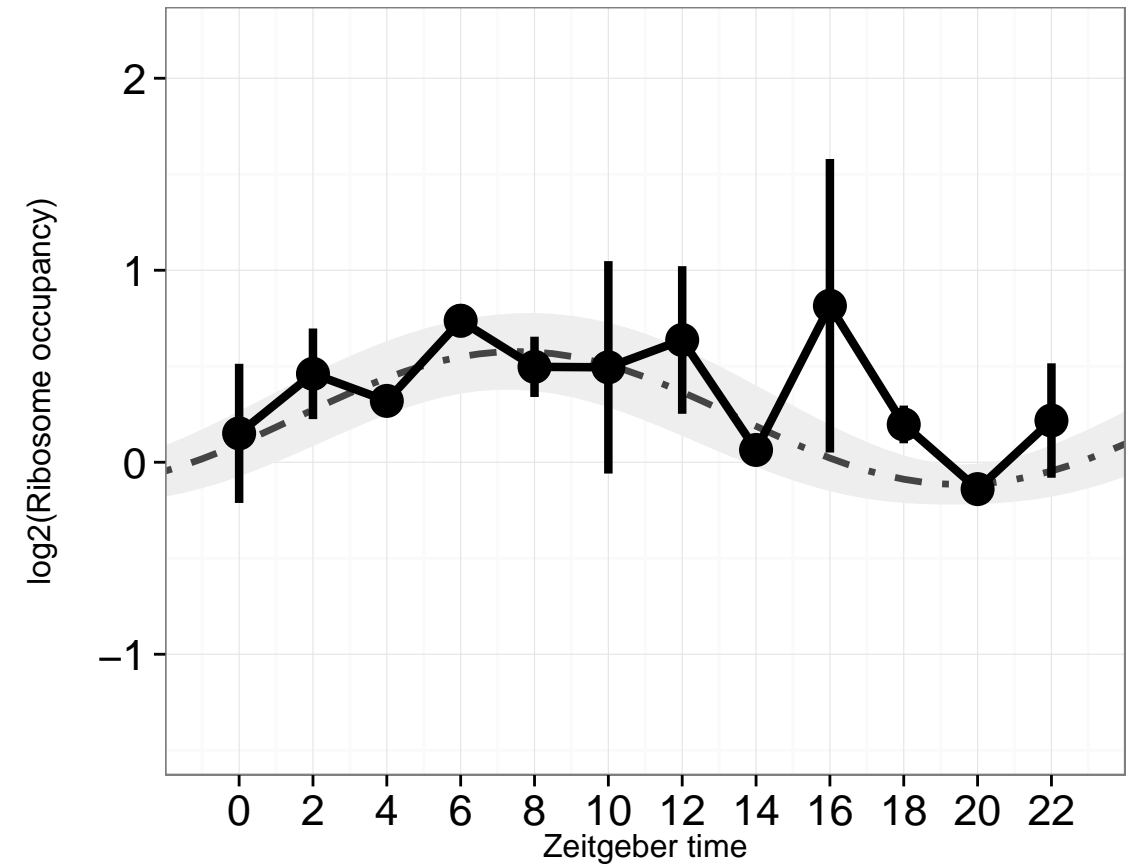

Supplement: SuppDataset_1.zip [file Thoc6_set_B.pdf › Supplemental Dataset 1/B-mRNA_rhythm_translation_nonrhyth/Thoc6_set_B.pdf]

# Tiam1

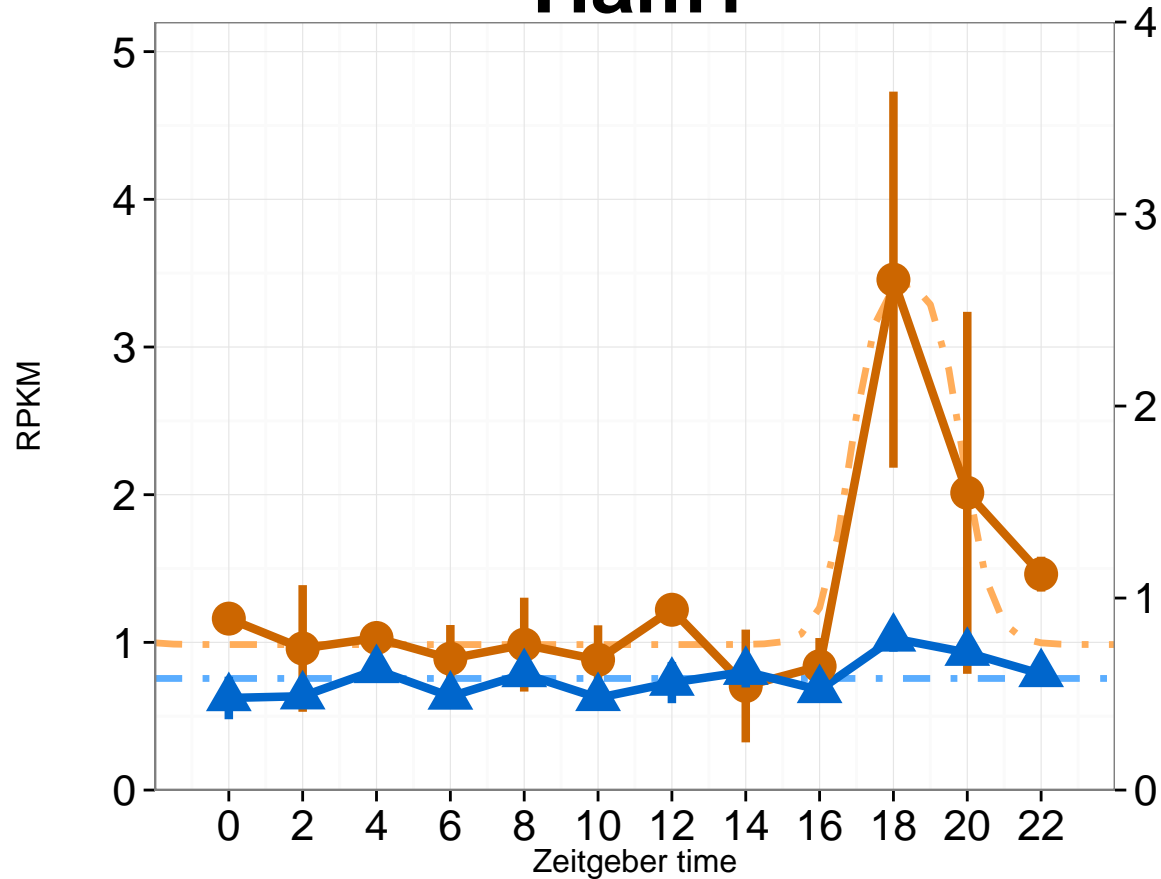

# Tiam1

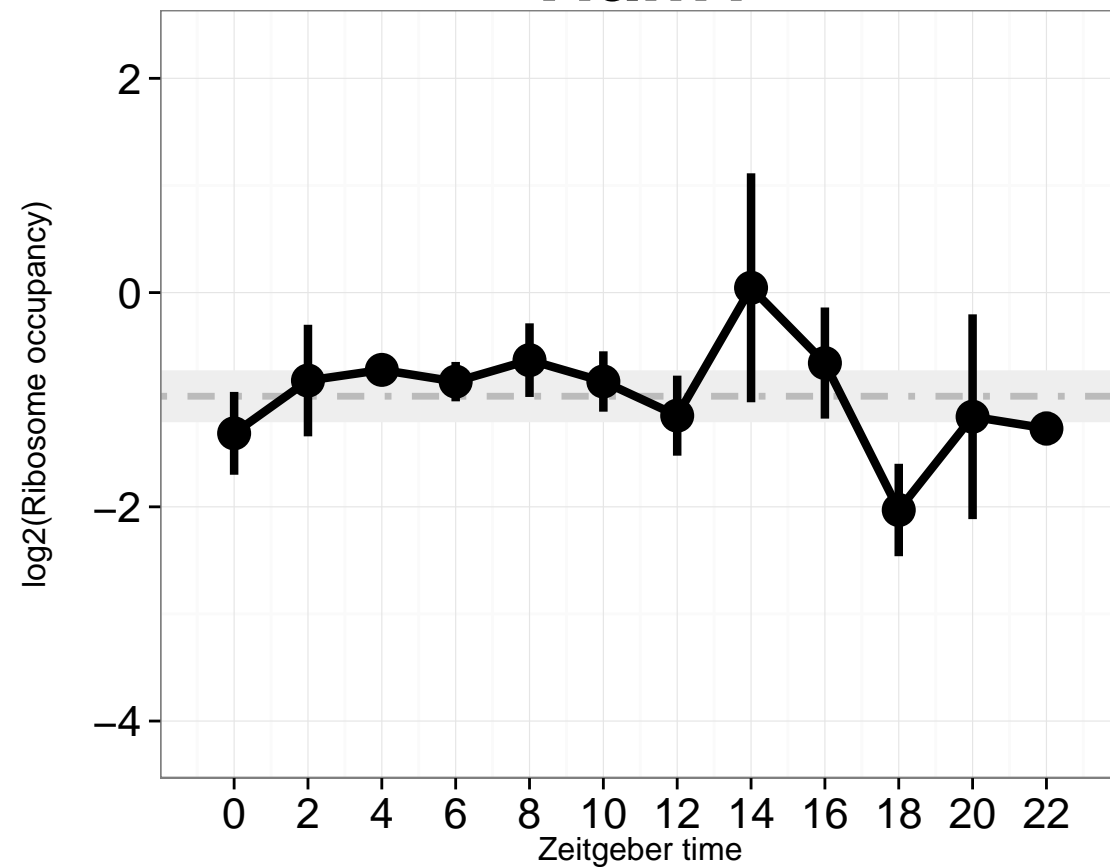

Supplement: SuppDataset_1.zip [file Tiam1_set_B.pdf › Supplemental Dataset 1/B-mRNA_rhythm_translation_nonrhyth/Tiam1_set_B.pdf]

# Timm8a1

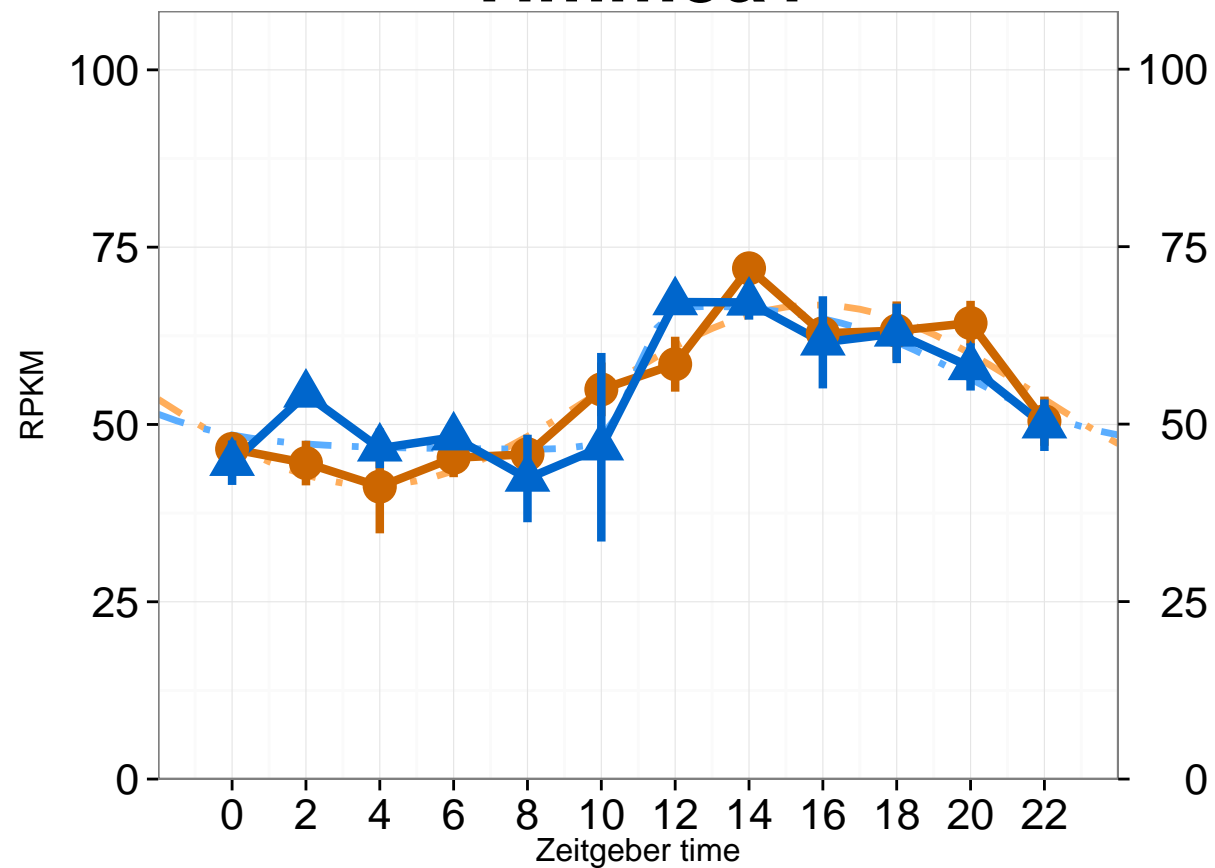

# Timm8a1

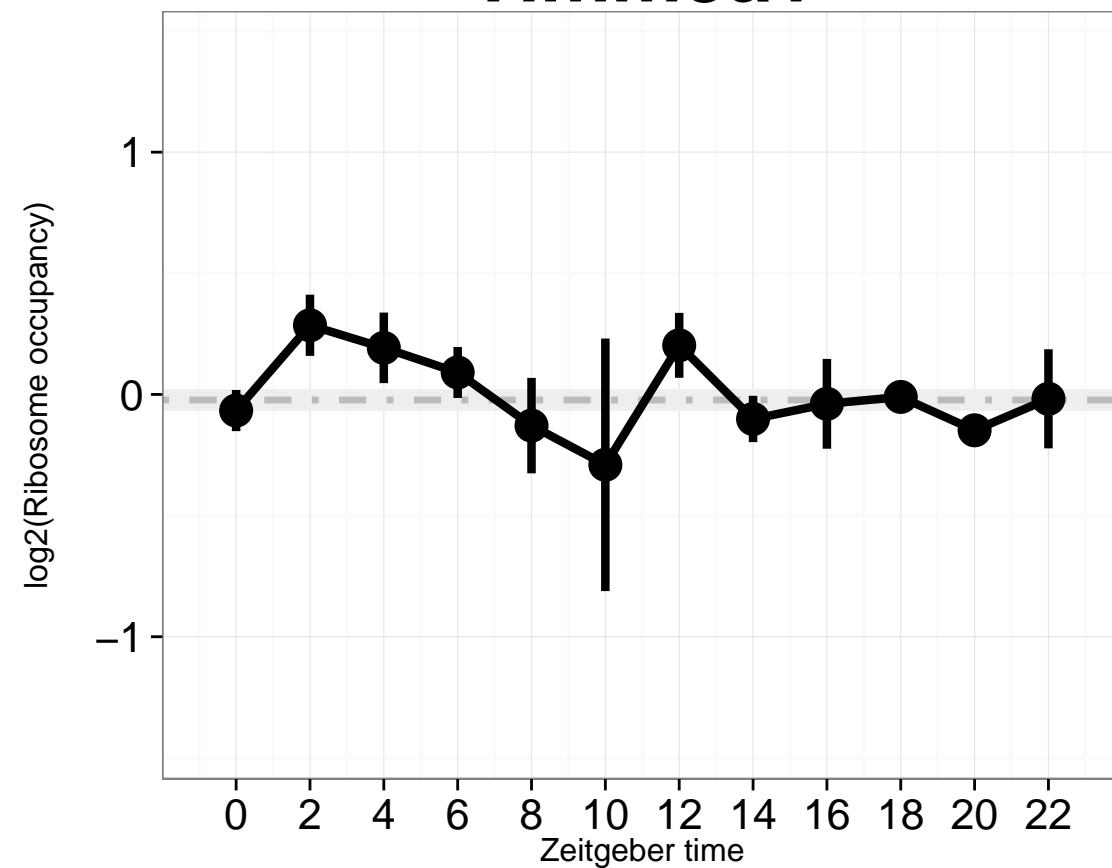

Supplement: SuppDataset_1.zip [file Timm8a1_set_B.pdf › Supplemental Dataset 1/B-mRNA_rhythm_translation_nonrhyth/Timm8a1_set_B.pdf]

# Timm9

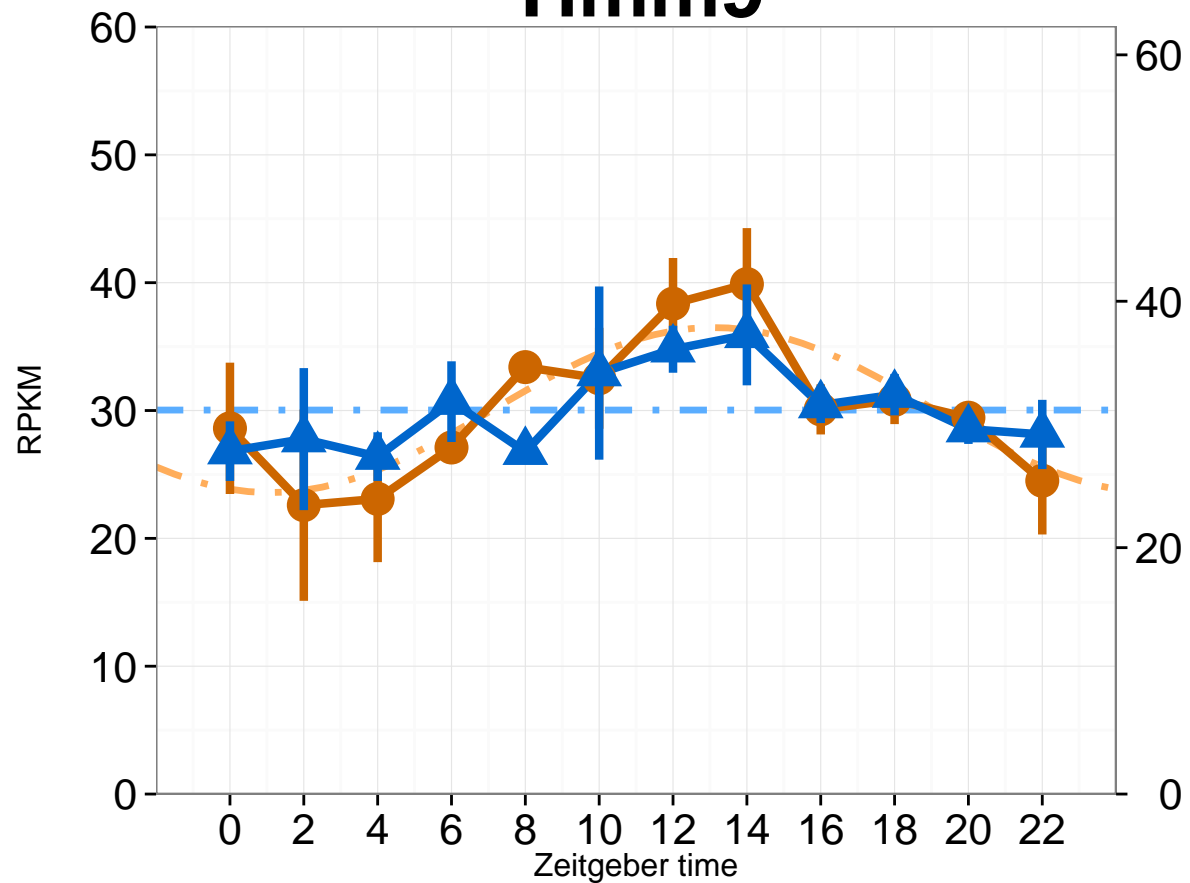

# Timm9

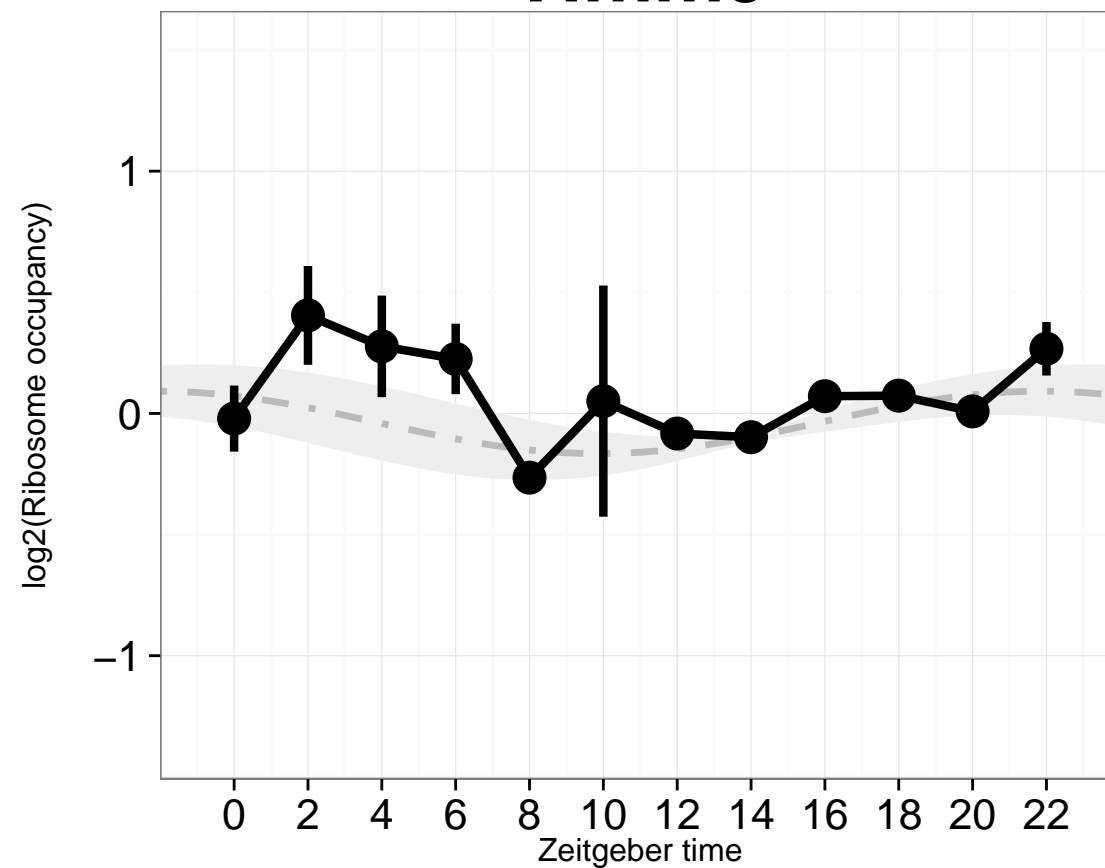

Supplement: SuppDataset_1.zip [file Timm9_set_B.pdf › Supplemental Dataset 1/B-mRNA_rhythm_translation_nonrhyth/Timm9_set_B.pdf]

# Tm4sf1

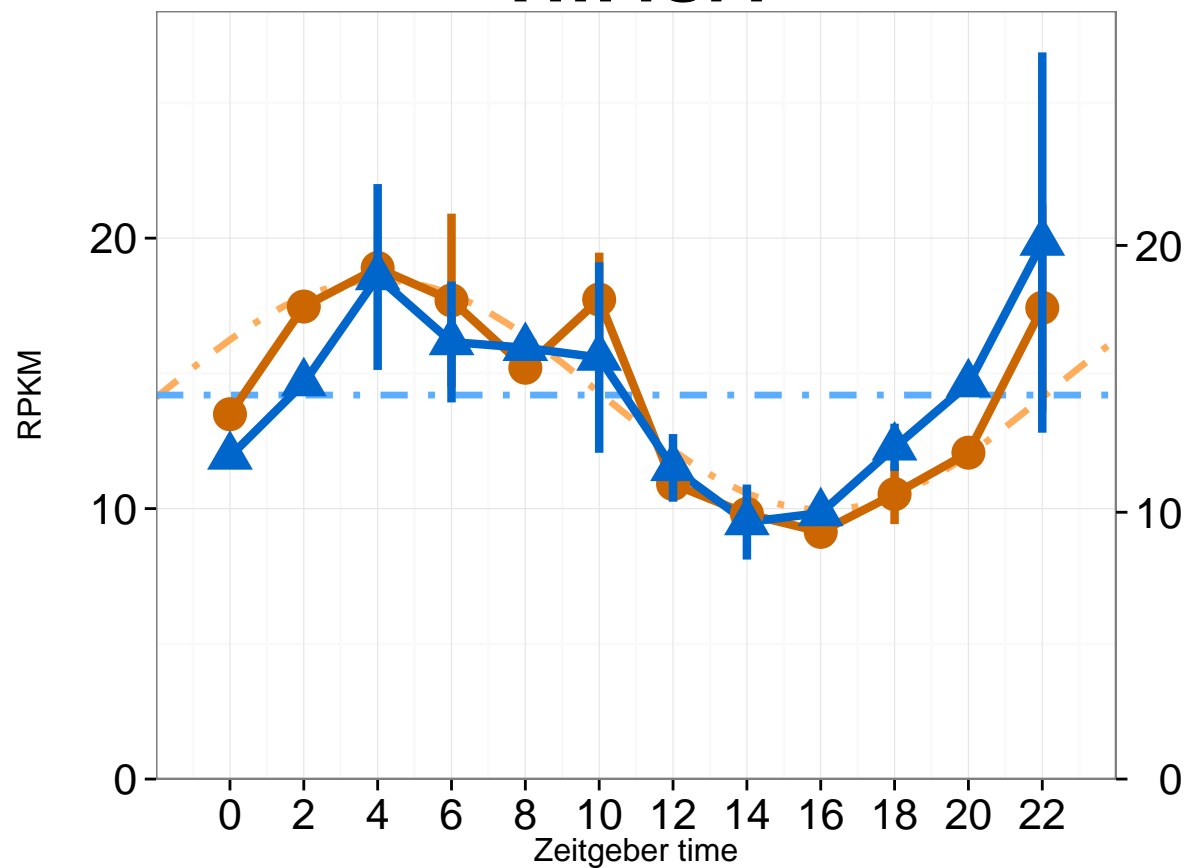

# Tm4sf1

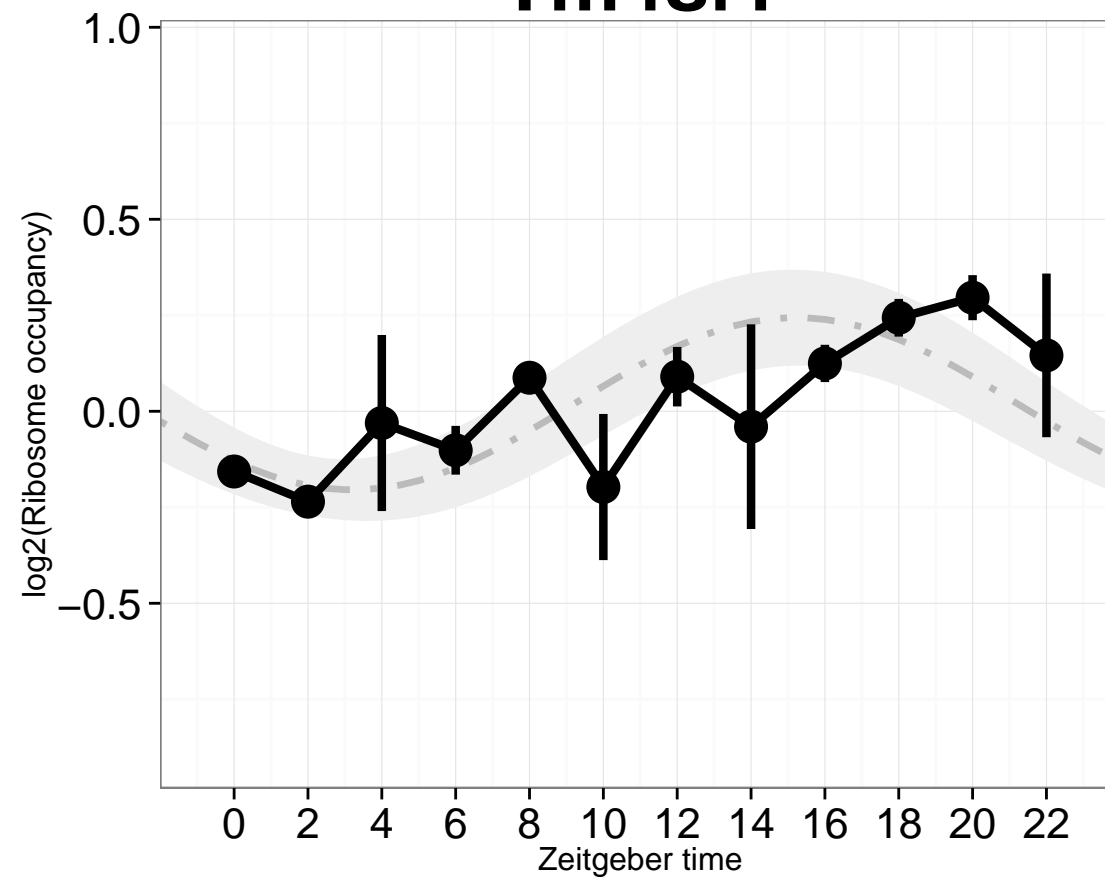

Supplement: SuppDataset_1.zip [file Tm4sf1_set_B.pdf › Supplemental Dataset 1/B-mRNA_rhythm_translation_nonrhyth/Tm4sf1_set_B.pdf]

## Tmc8

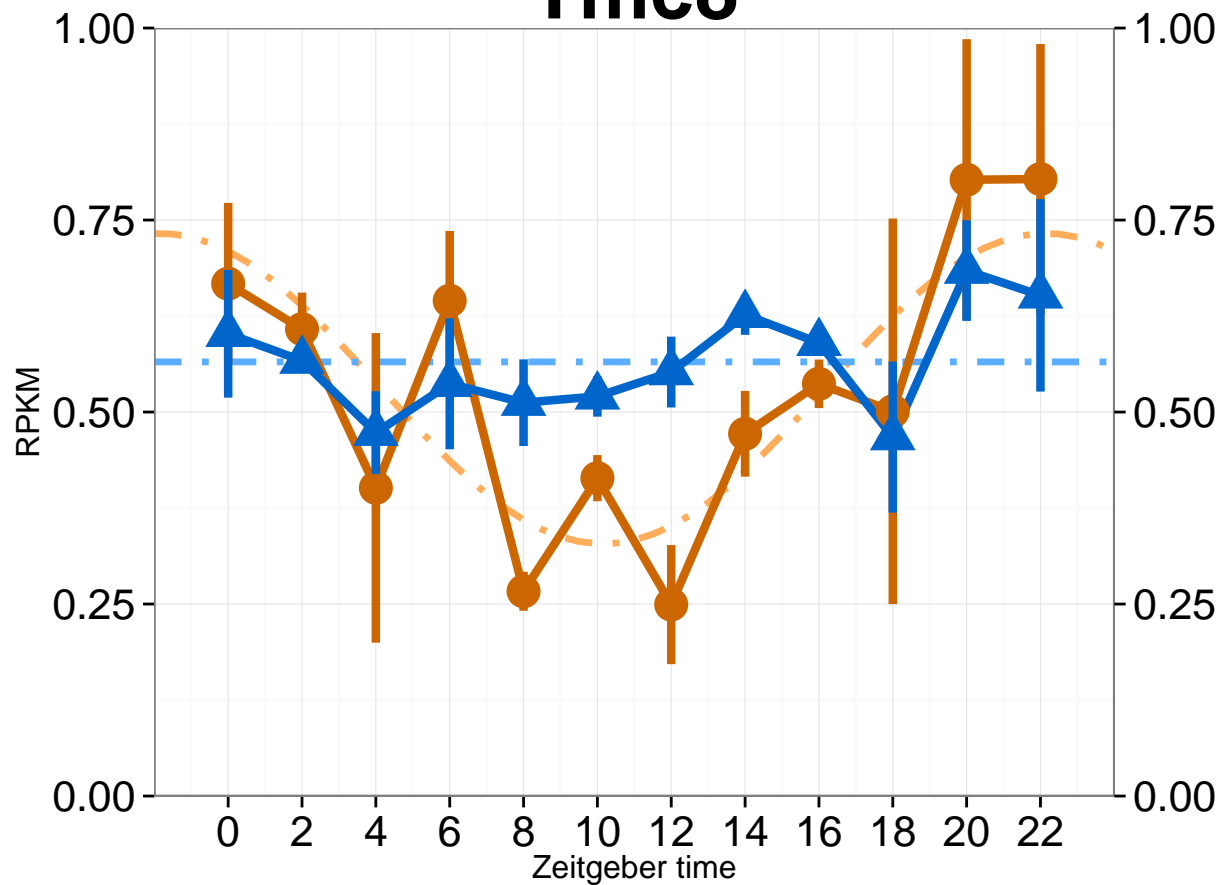

## Tmc8

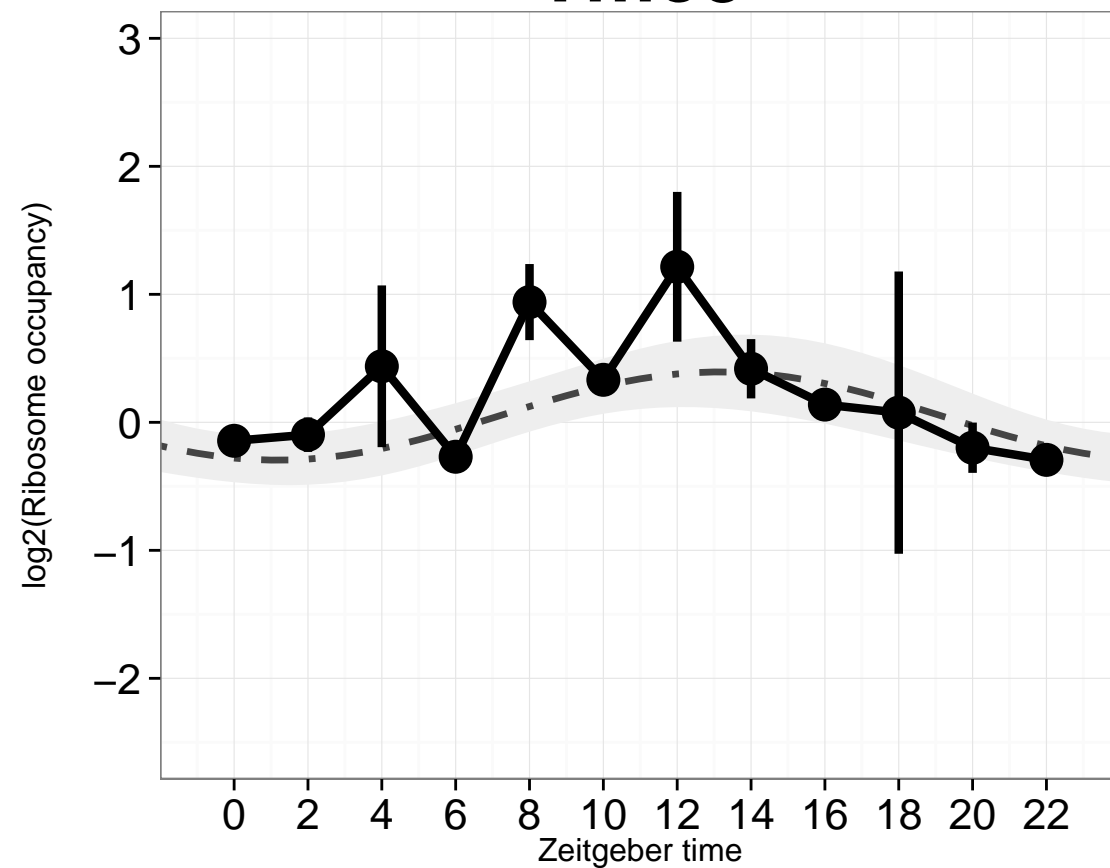

Supplement: SuppDataset_1.zip [file Tmc8_set_B.pdf › Supplemental Dataset 1/B-mRNA_rhythm_translation_nonrhyth/Tmc8_set_B.pdf]

# Tmem144

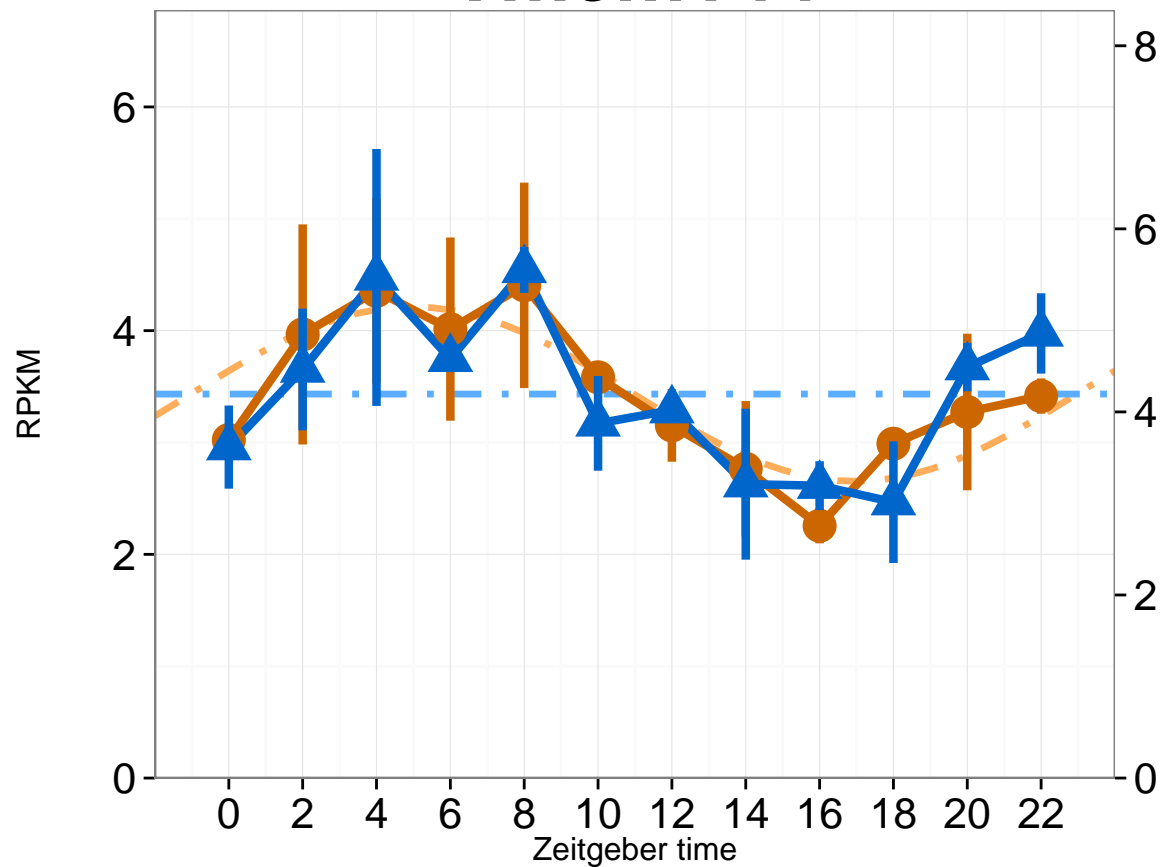

# Tmem144

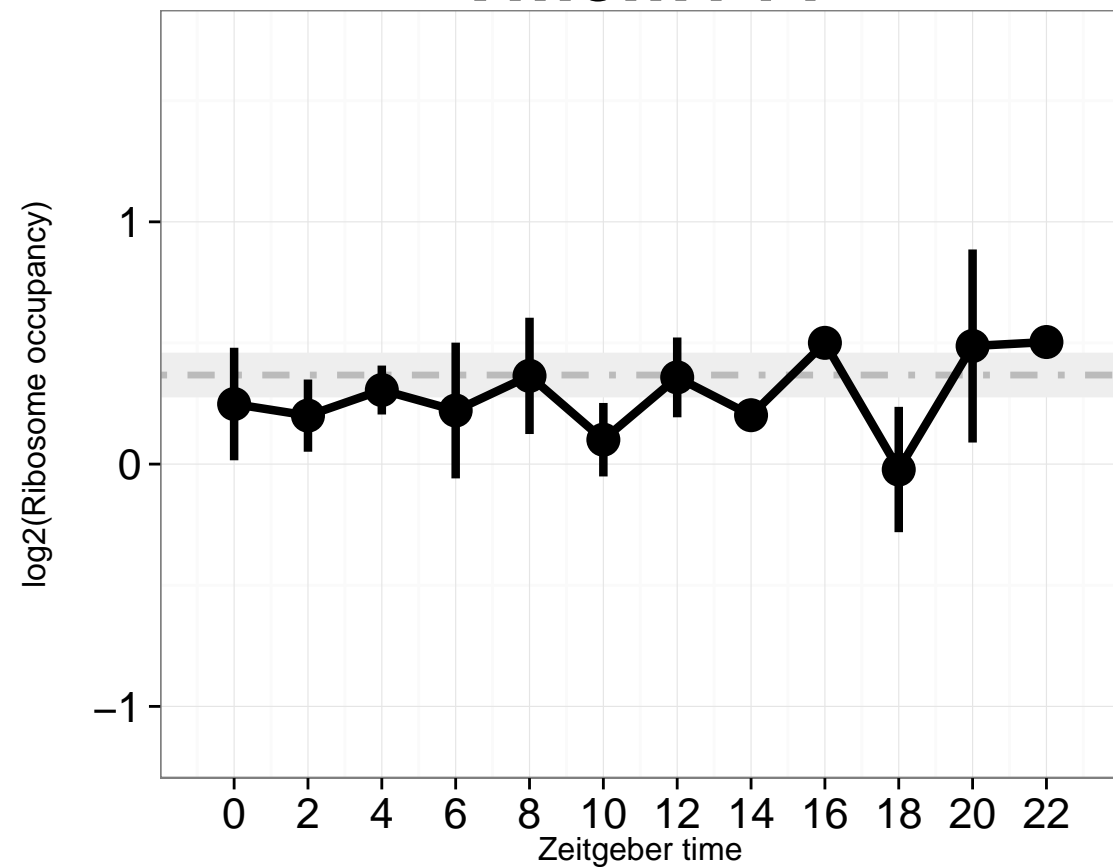

Supplement: SuppDataset_1.zip [file Tmem144_set_B.pdf › Supplemental Dataset 1/B-mRNA_rhythm_translation_nonrhyth/Tmem144_set_B.pdf]

# Tmem177

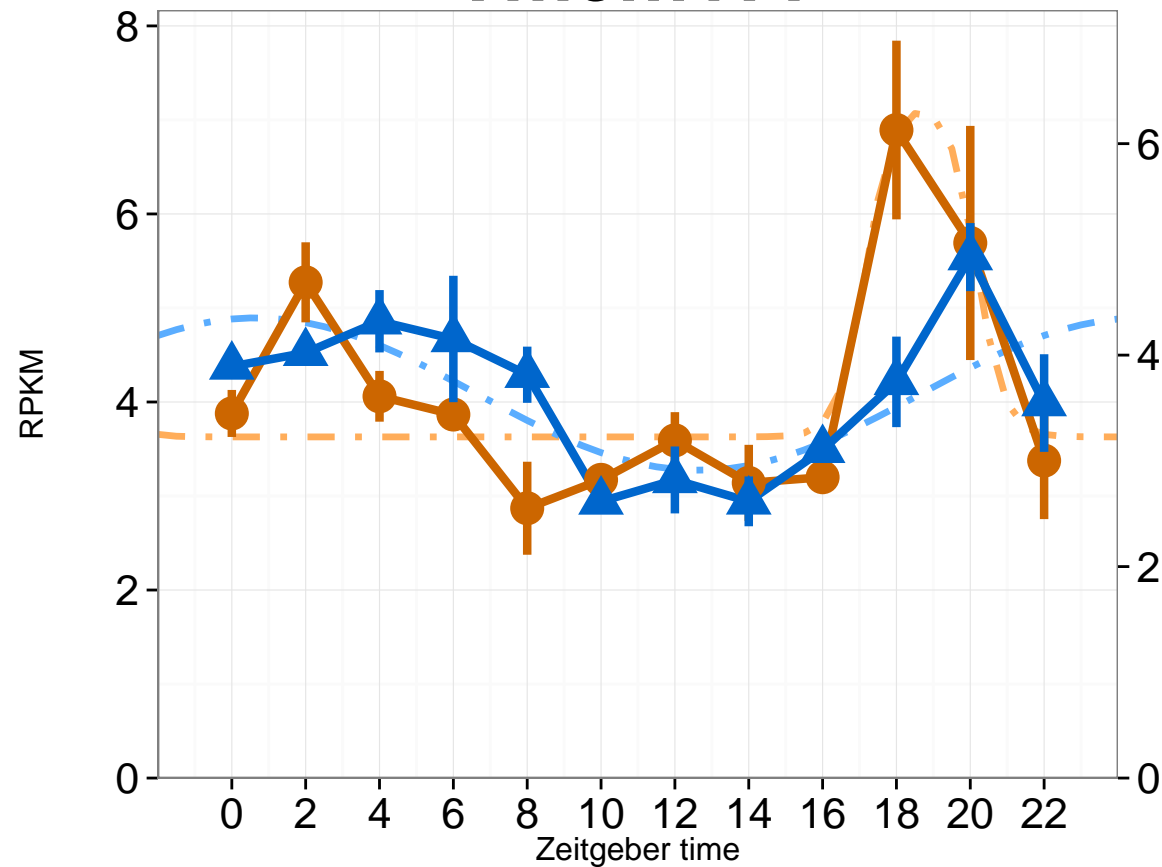

# Tmem177

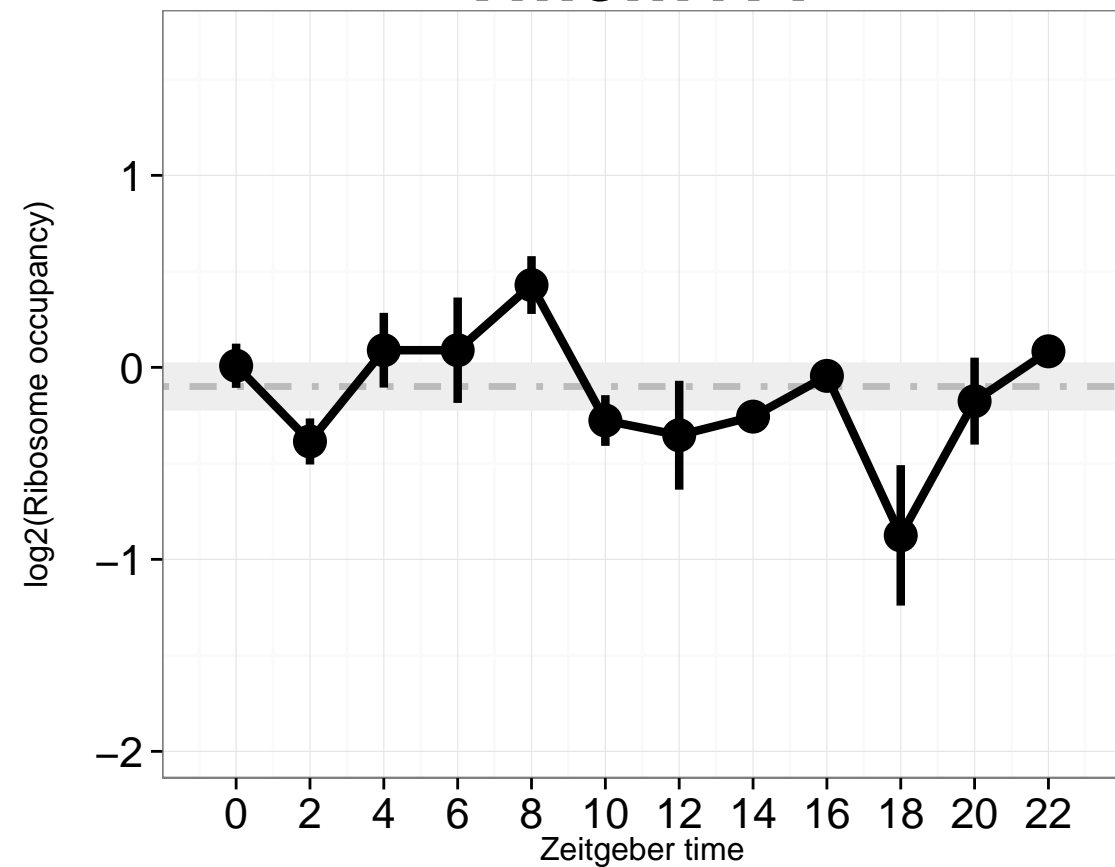

Supplement: SuppDataset_1.zip [file Tmem177_set_B.pdf › Supplemental Dataset 1/B-mRNA_rhythm_translation_nonrhyth/Tmem177_set_B.pdf]

# Tmem194

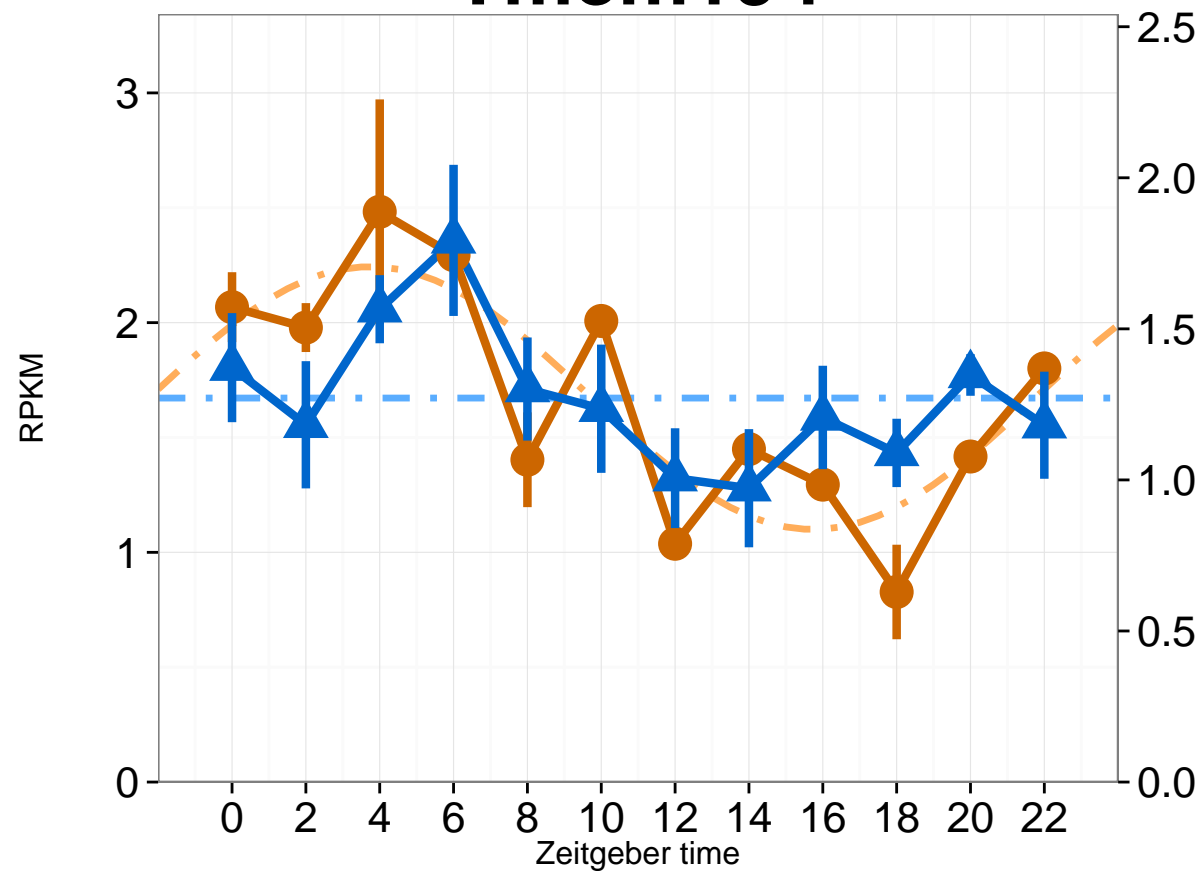

# Tmem194

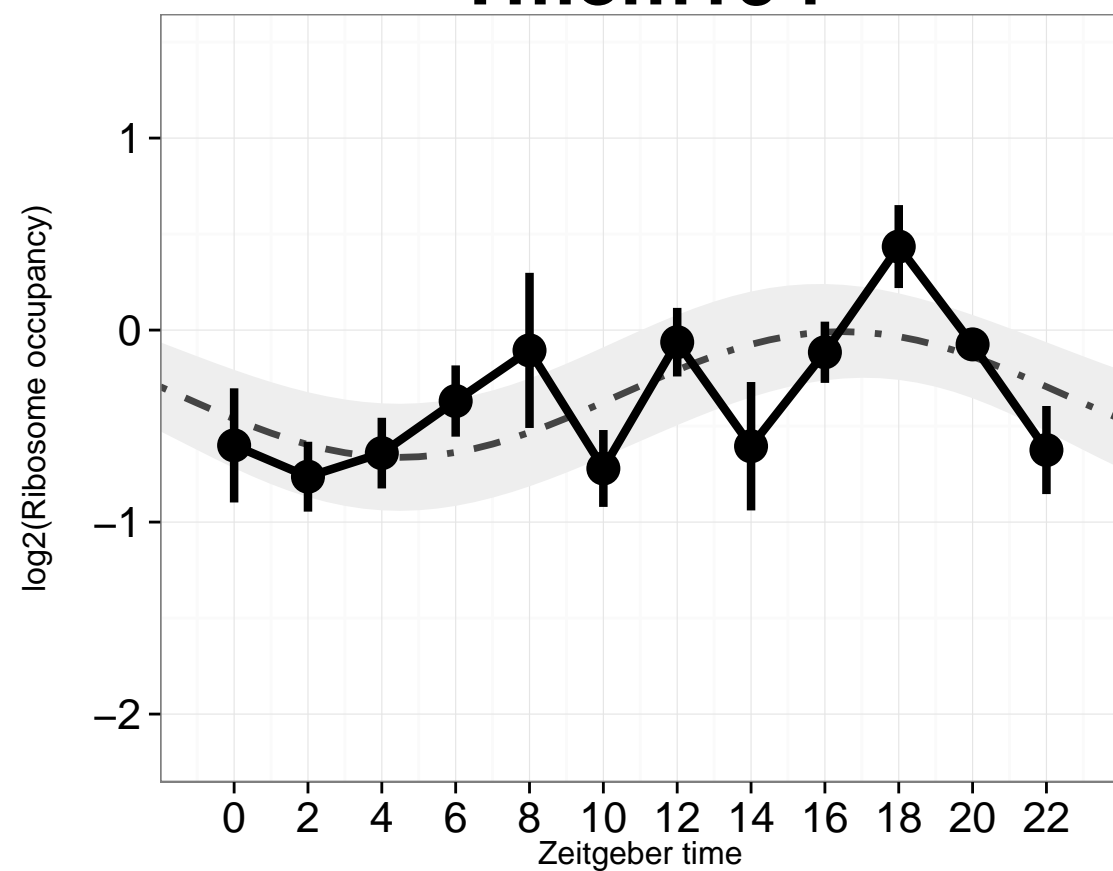

Supplement: SuppDataset_1.zip [file Tmem194_set_B.pdf › Supplemental Dataset 1/B-mRNA_rhythm_translation_nonrhyth/Tmem194_set_B.pdf]

# Tmem256

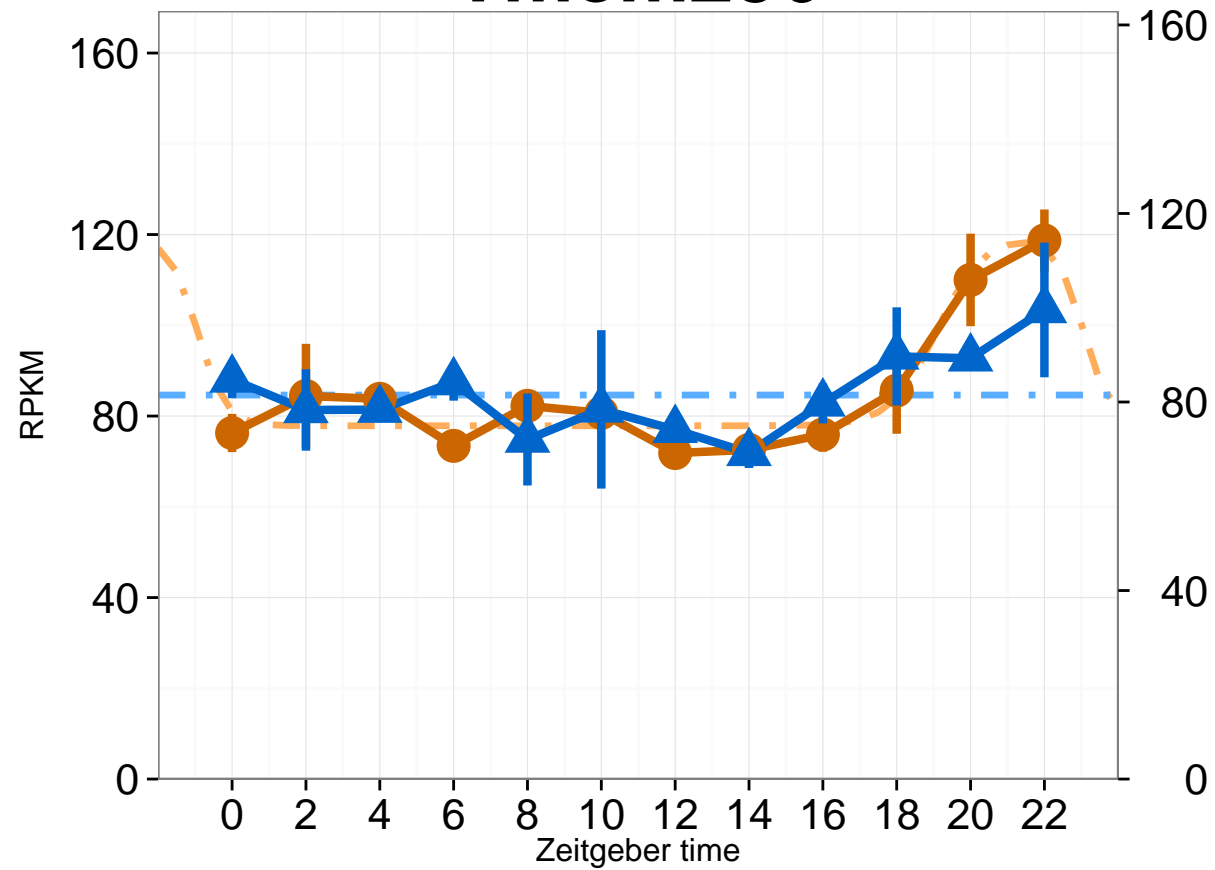

# Tmem256

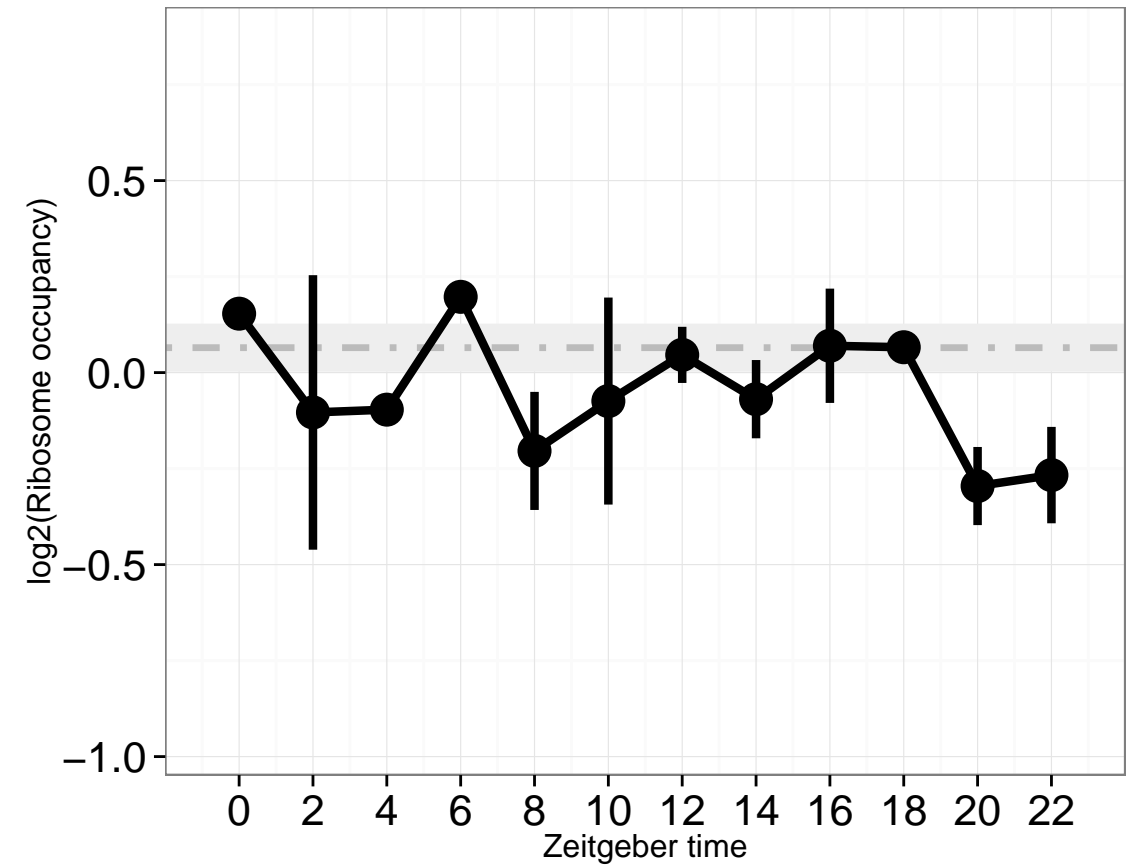

Supplement: SuppDataset_1.zip [file Tmem256_set_B.pdf › Supplemental Dataset 1/B-mRNA_rhythm_translation_nonrhyth/Tmem256_set_B.pdf]

# Tmem25

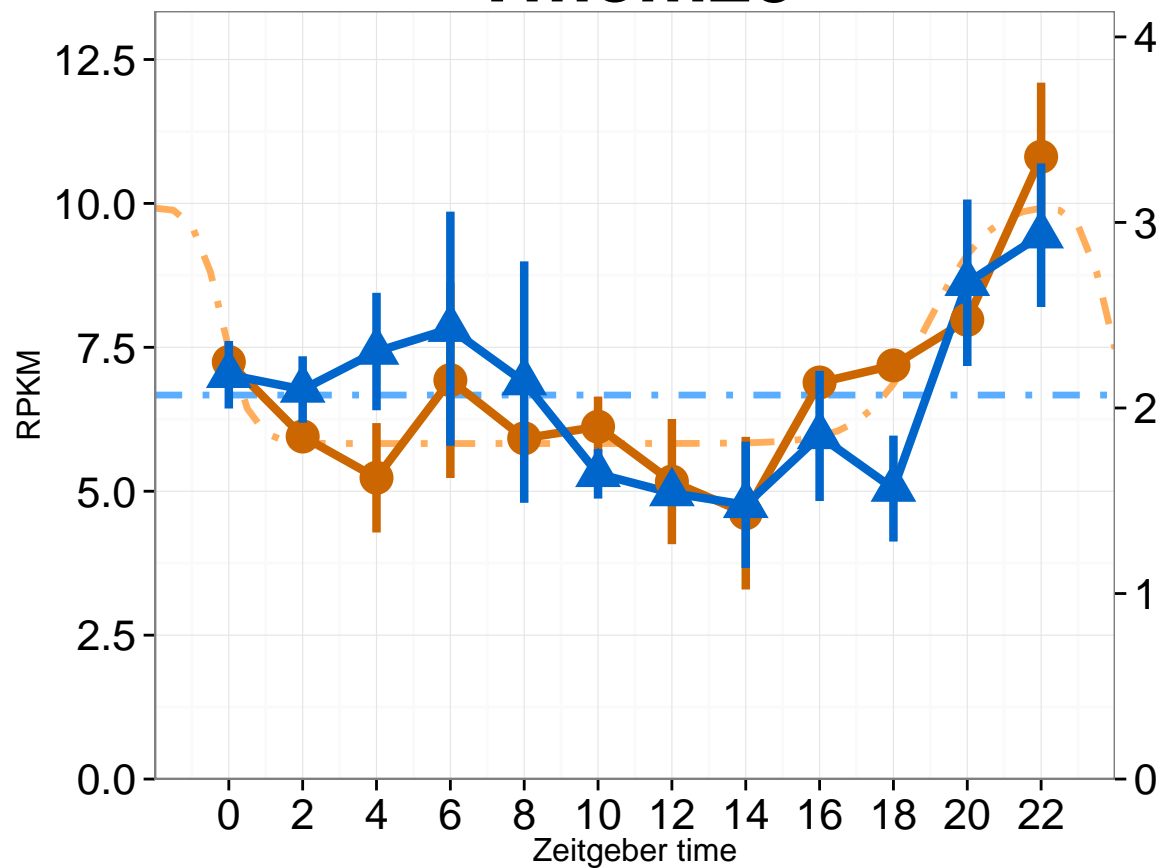

# Tmem25

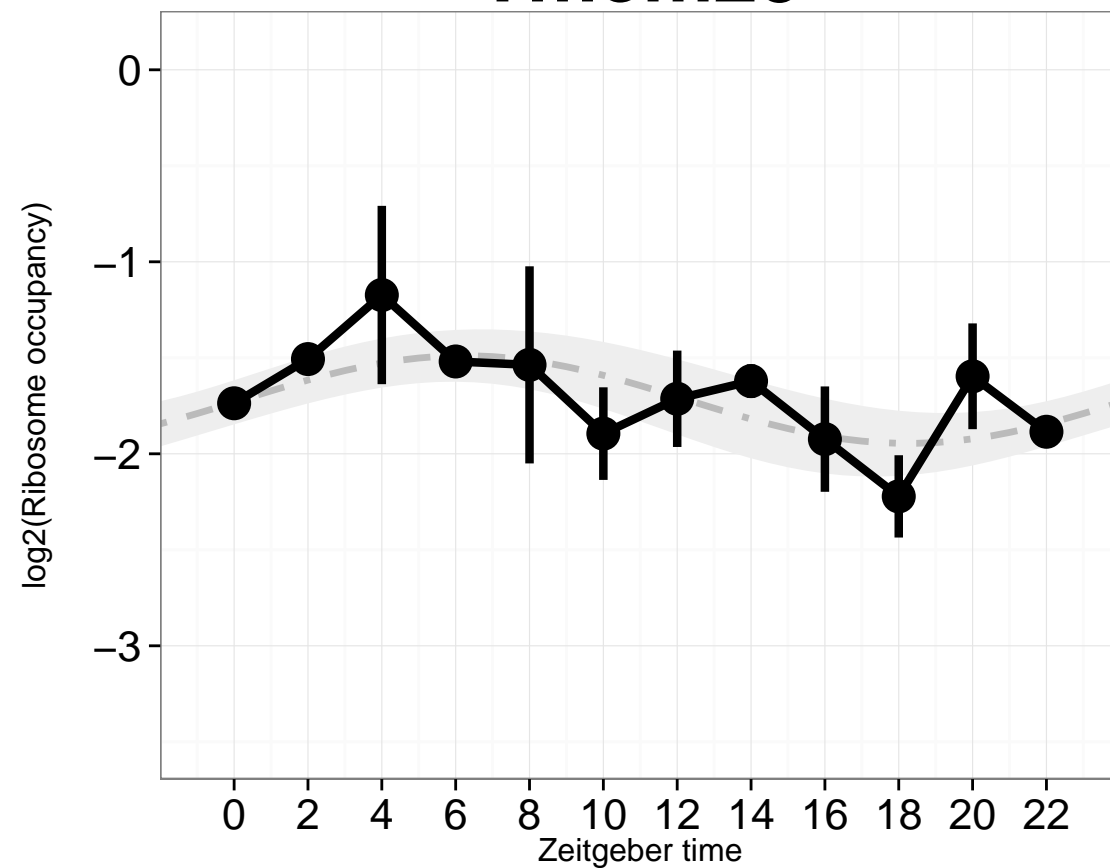

Supplement: SuppDataset_1.zip [file Tmem25_set_B.pdf › Supplemental Dataset 1/B-mRNA_rhythm_translation_nonrhyth/Tmem25_set_B.pdf]

## Tmem60

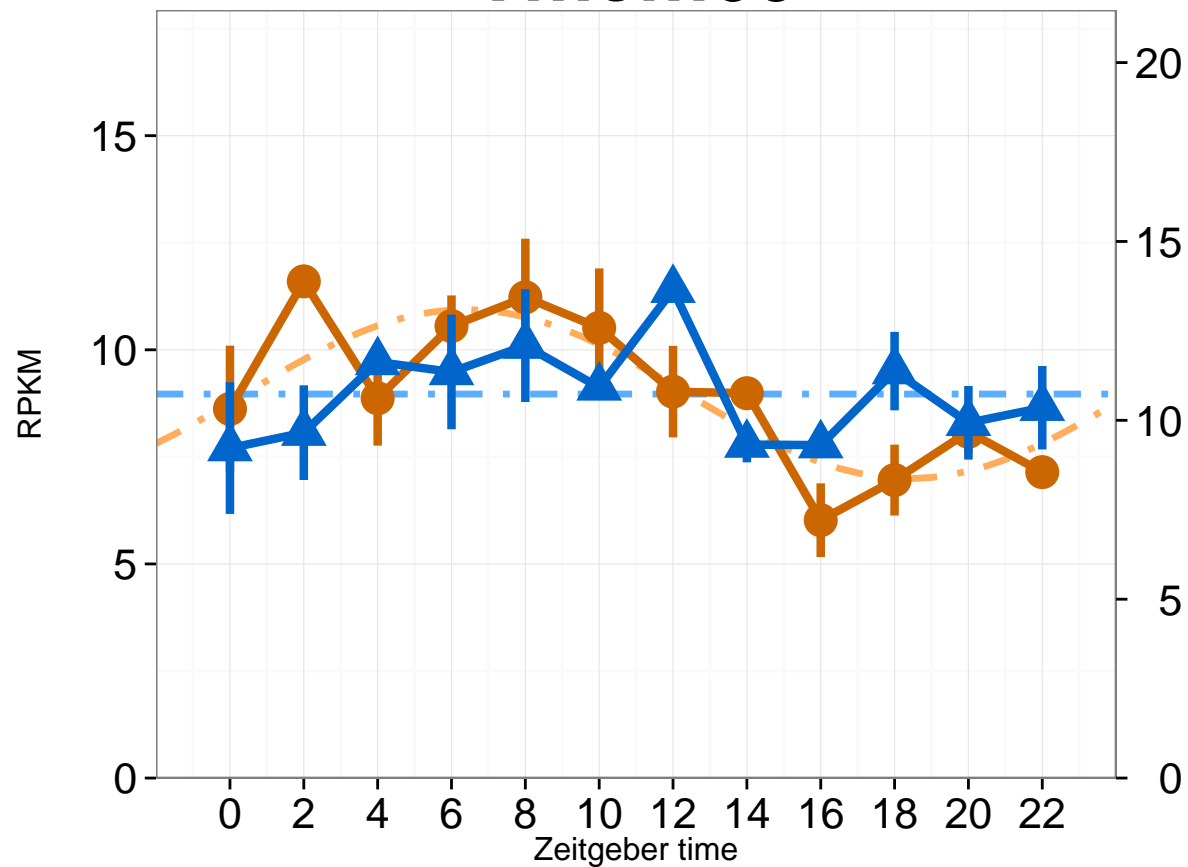

## Tmem60

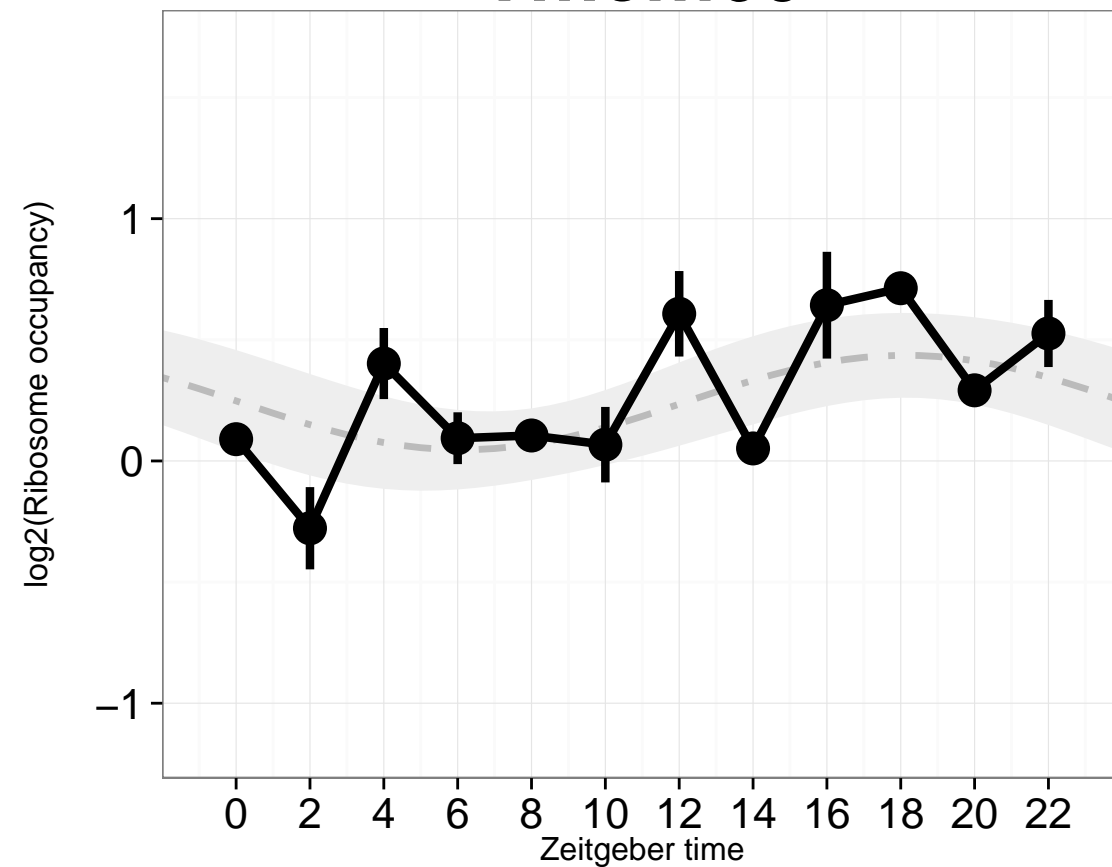

Supplement: SuppDataset_1.zip [file Tmem60_set_B.pdf › Supplemental Dataset 1/B-mRNA_rhythm_translation_nonrhyth/Tmem60_set_B.pdf]

# Tmem68

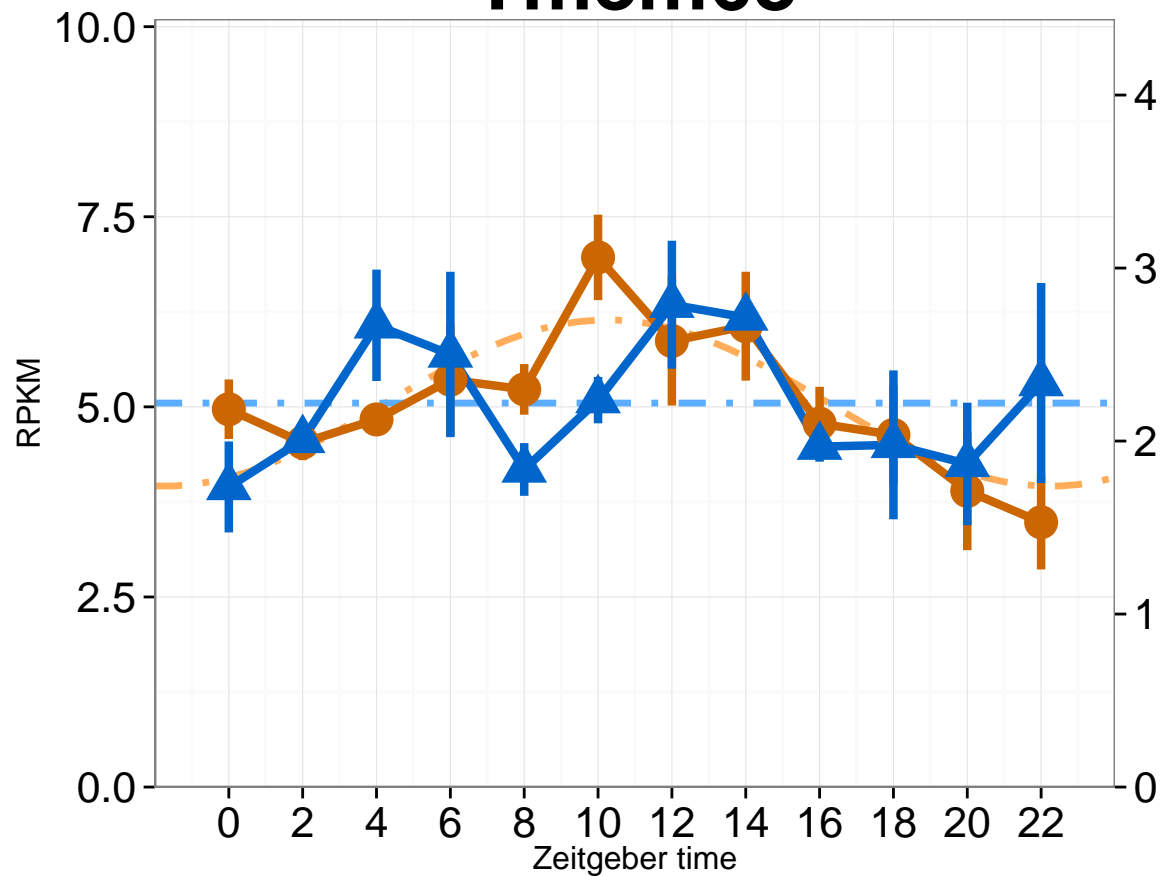

# Tmem68

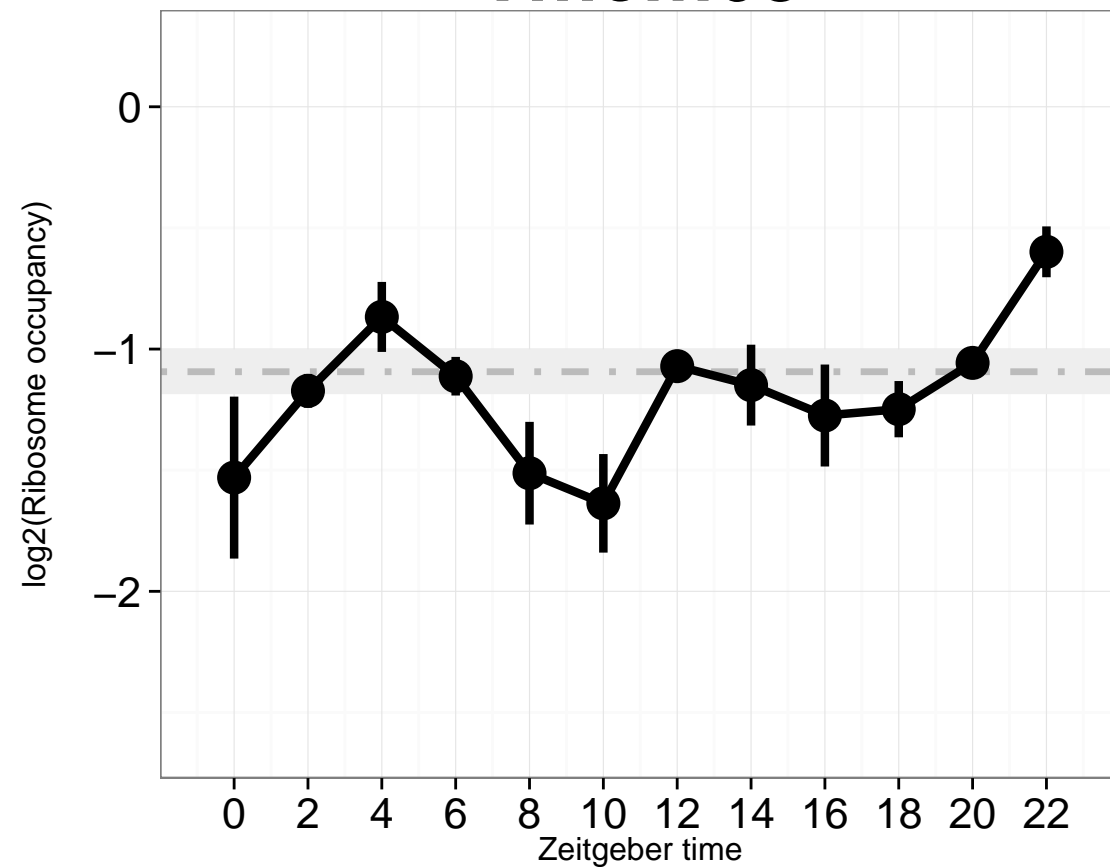

Supplement: SuppDataset_1.zip [file Tmem68_set_B.pdf › Supplemental Dataset 1/B-mRNA_rhythm_translation_nonrhyth/Tmem68_set_B.pdf]

# Tmem69

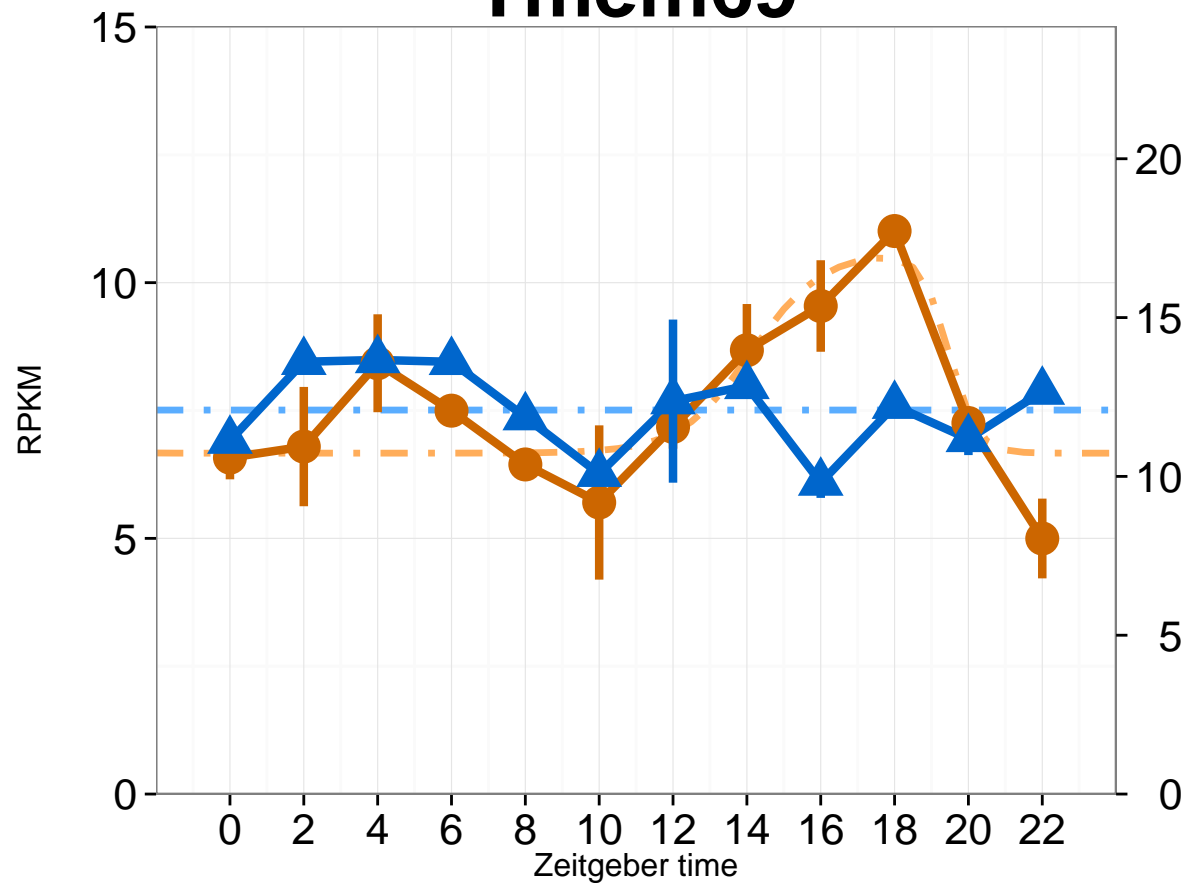

# Tmem69

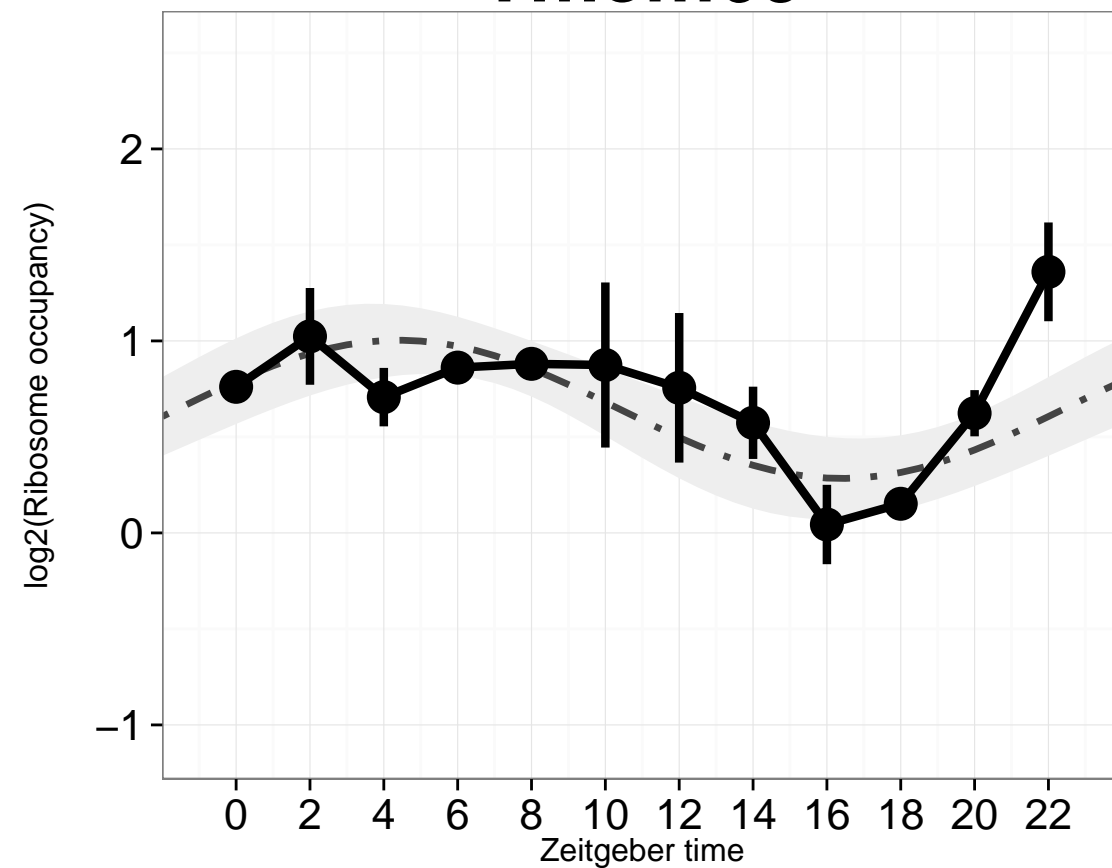

Supplement: SuppDataset_1.zip [file Tmem69_set_B.pdf › Supplemental Dataset 1/B-mRNA_rhythm_translation_nonrhyth/Tmem69_set_B.pdf]

# Tmem87b

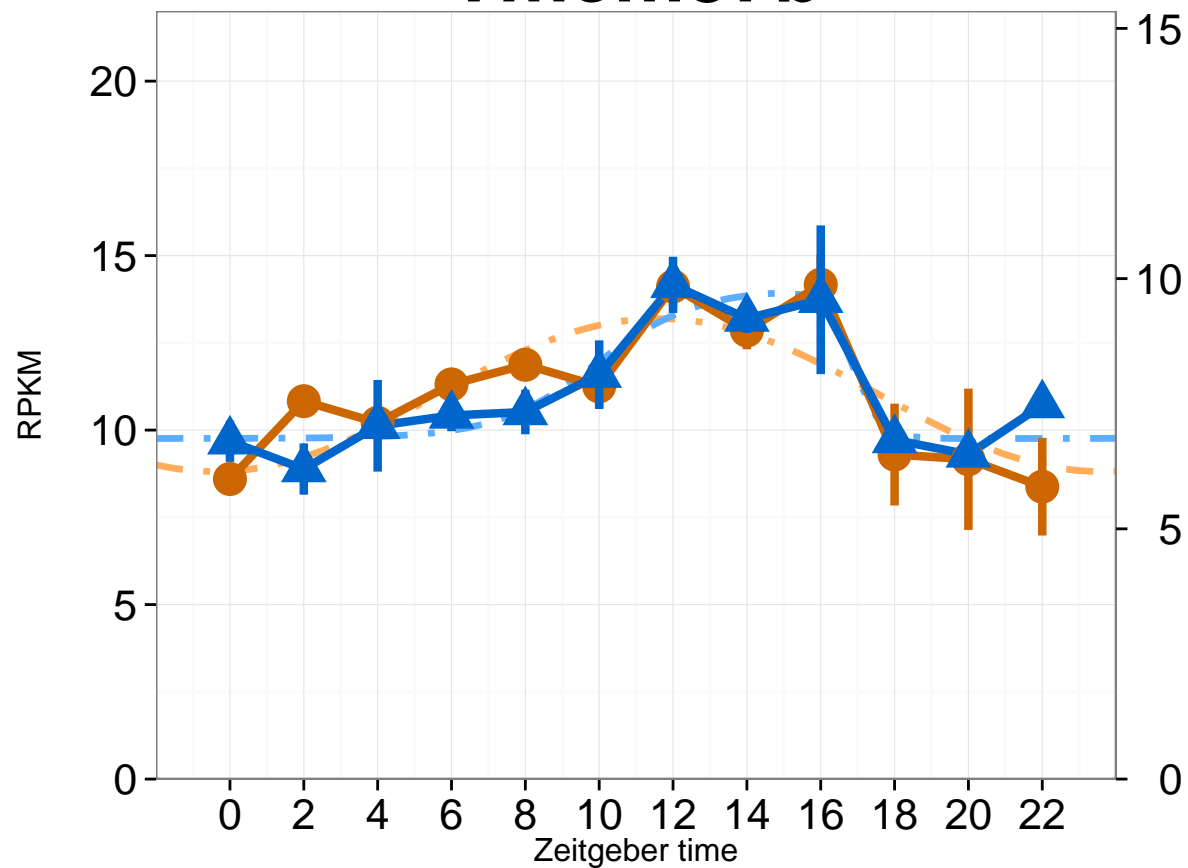

# Tmem87b

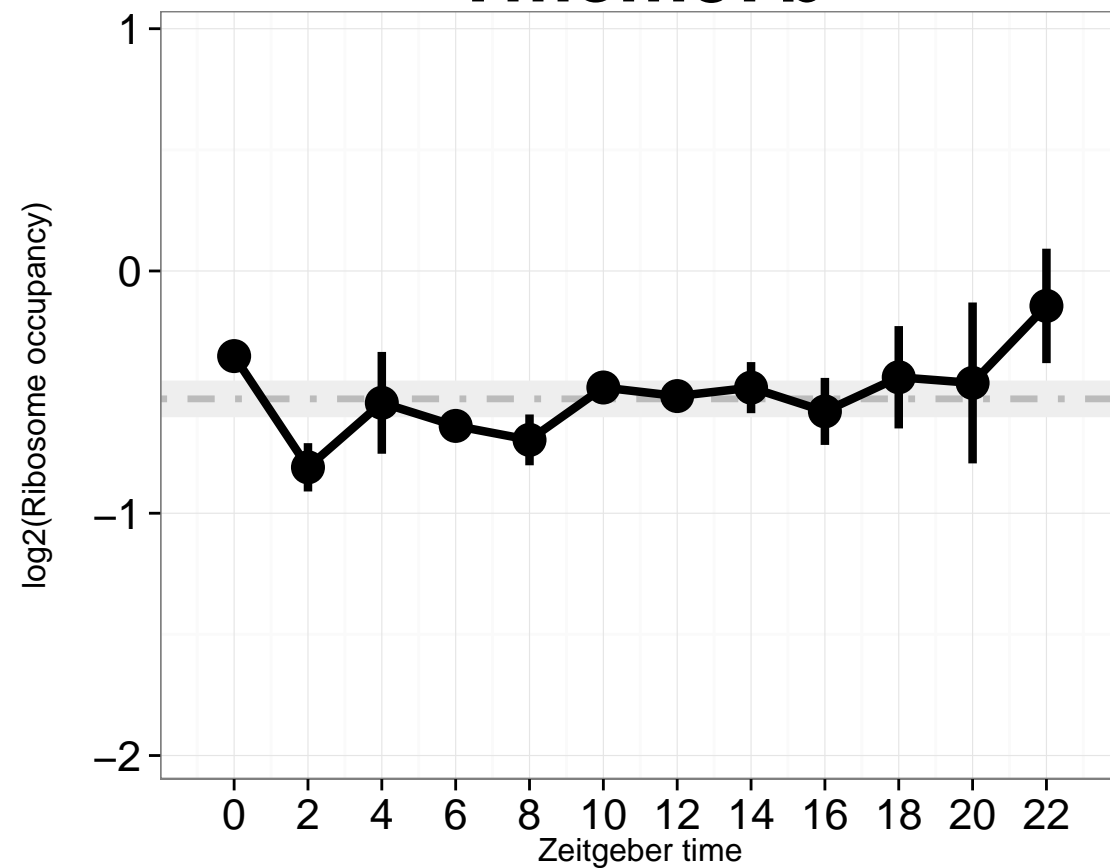

Supplement: SuppDataset_1.zip [file Tmem87b_set_B.pdf › Supplemental Dataset 1/B-mRNA_rhythm_translation_nonrhyth/Tmem87b_set_B.pdf]

# Tmem98

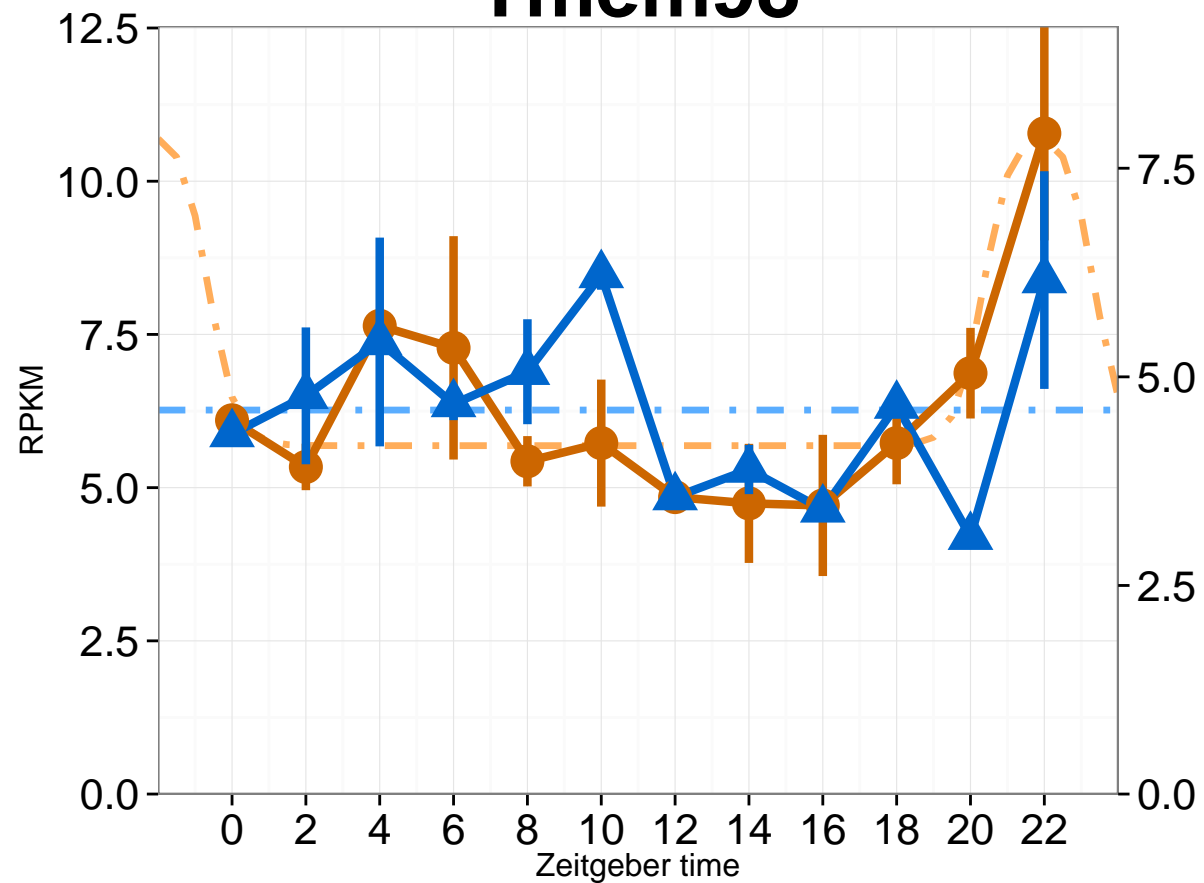

# Tmem98

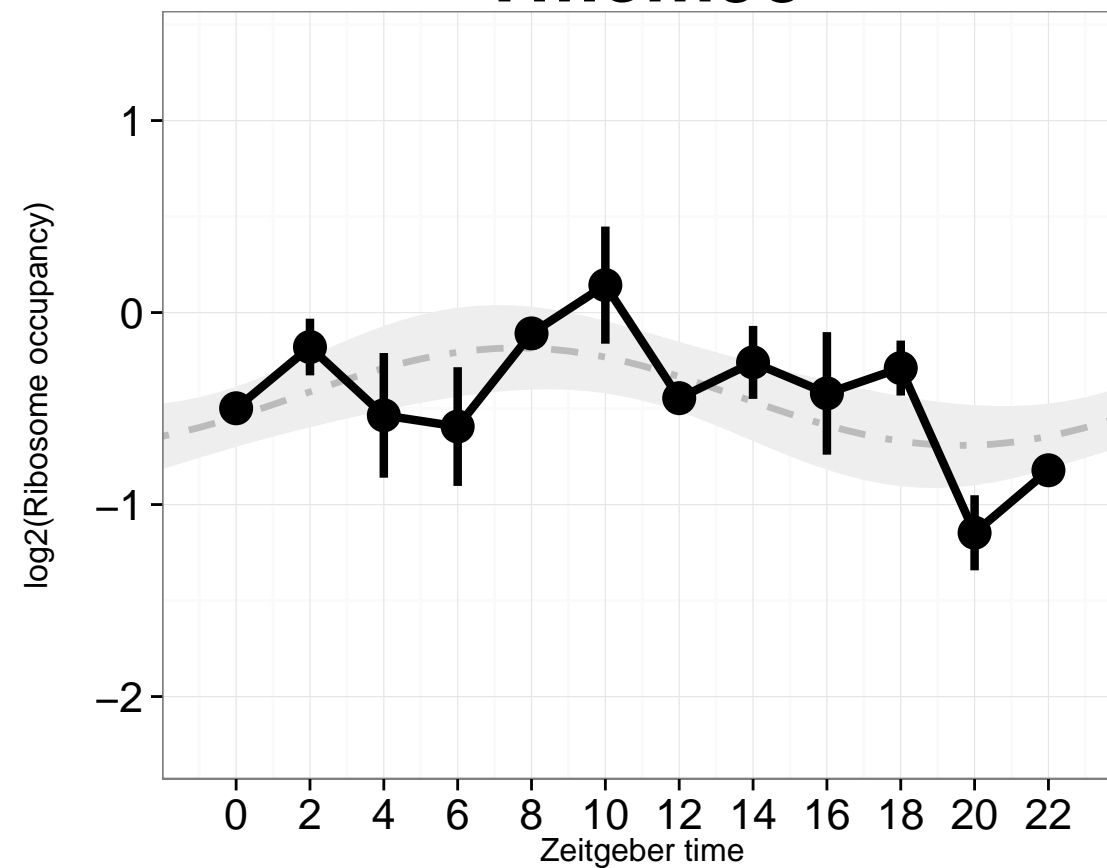

Supplement: SuppDataset_1.zip [file Tmem98_set_B.pdf › Supplemental Dataset 1/B-mRNA_rhythm_translation_nonrhyth/Tmem98_set_B.pdf]

# Tmem9

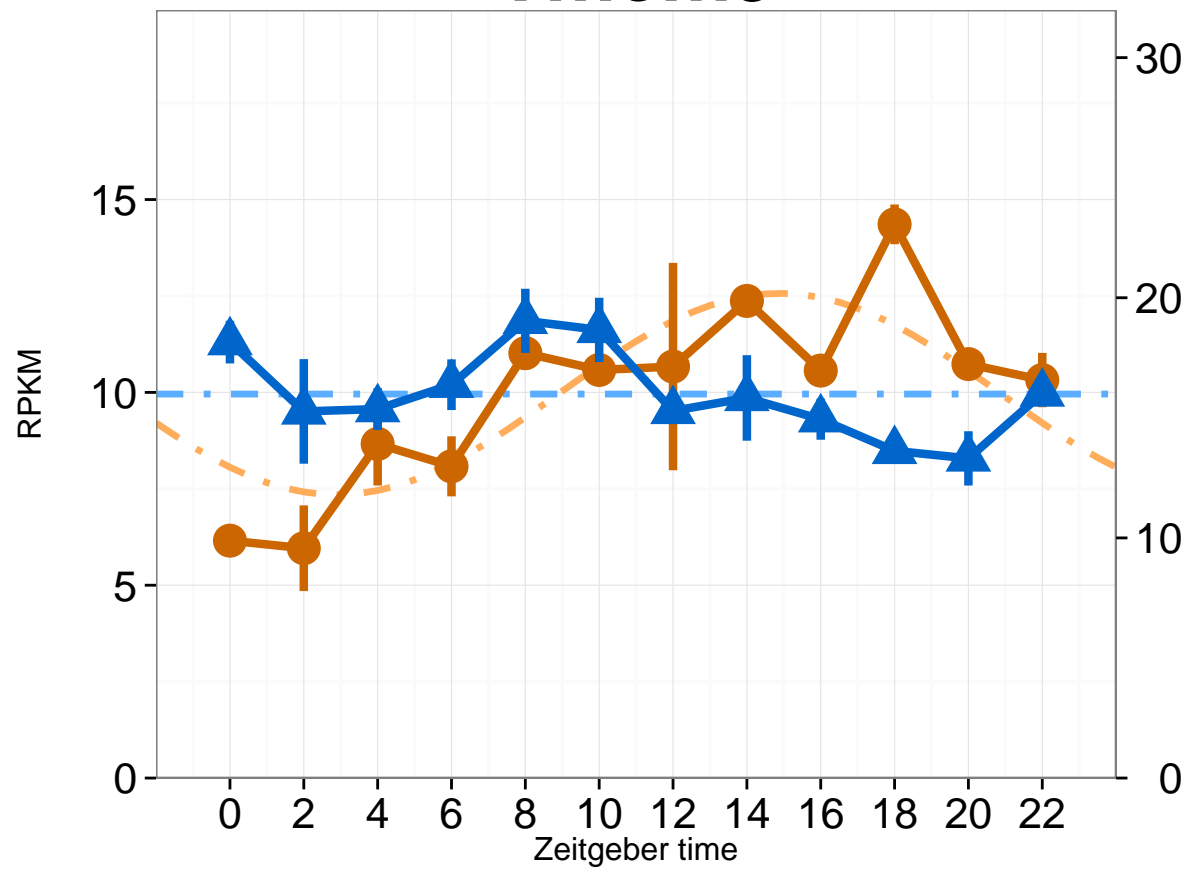

# Tmem9

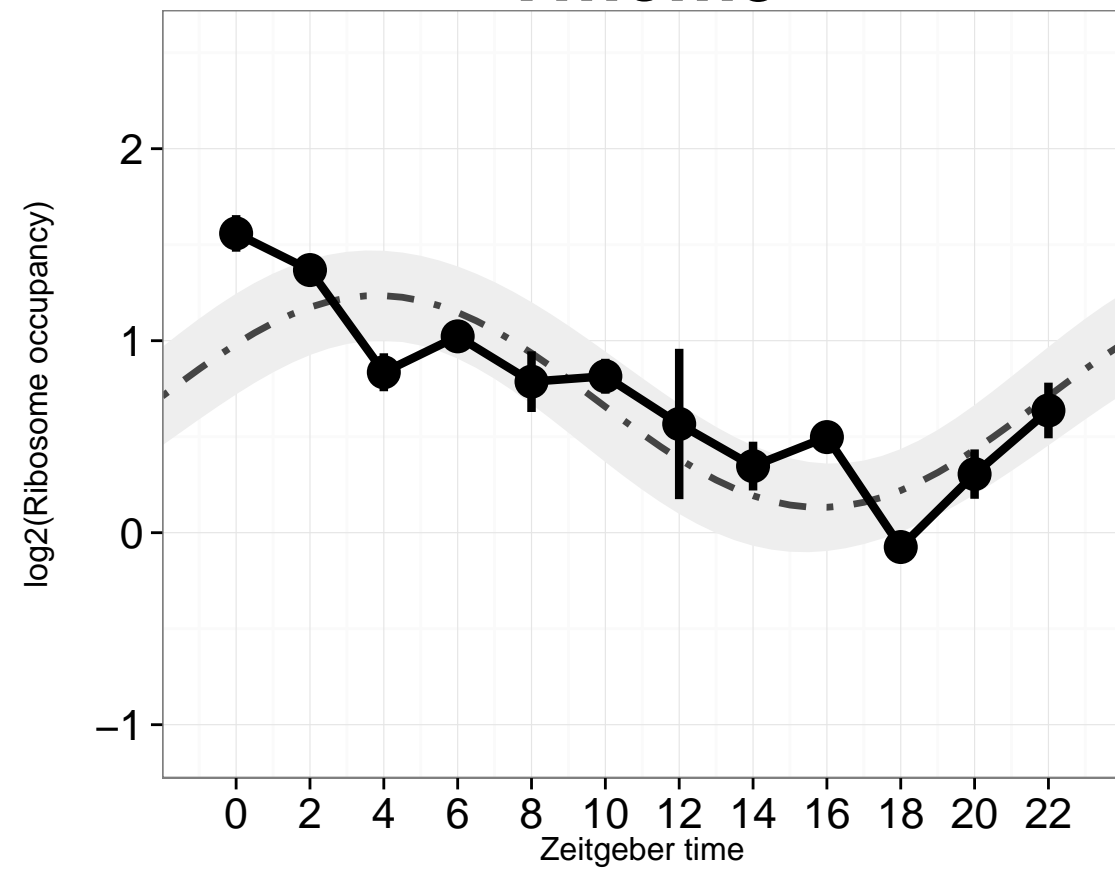

Supplement: SuppDataset_1.zip [file Tmem9_set_B.pdf › Supplemental Dataset 1/B-mRNA_rhythm_translation_nonrhyth/Tmem9_set_B.pdf]

# Tmsb4x

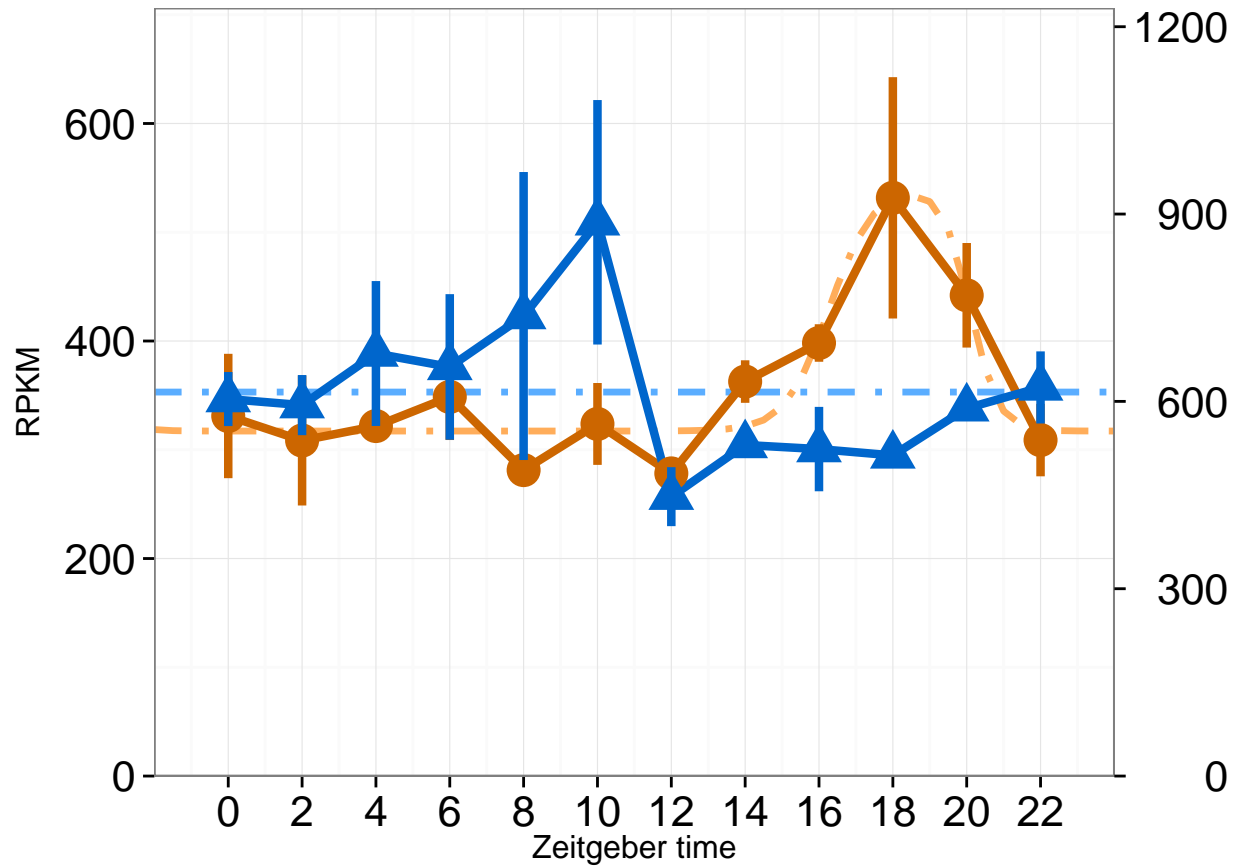

# Tmsb4x

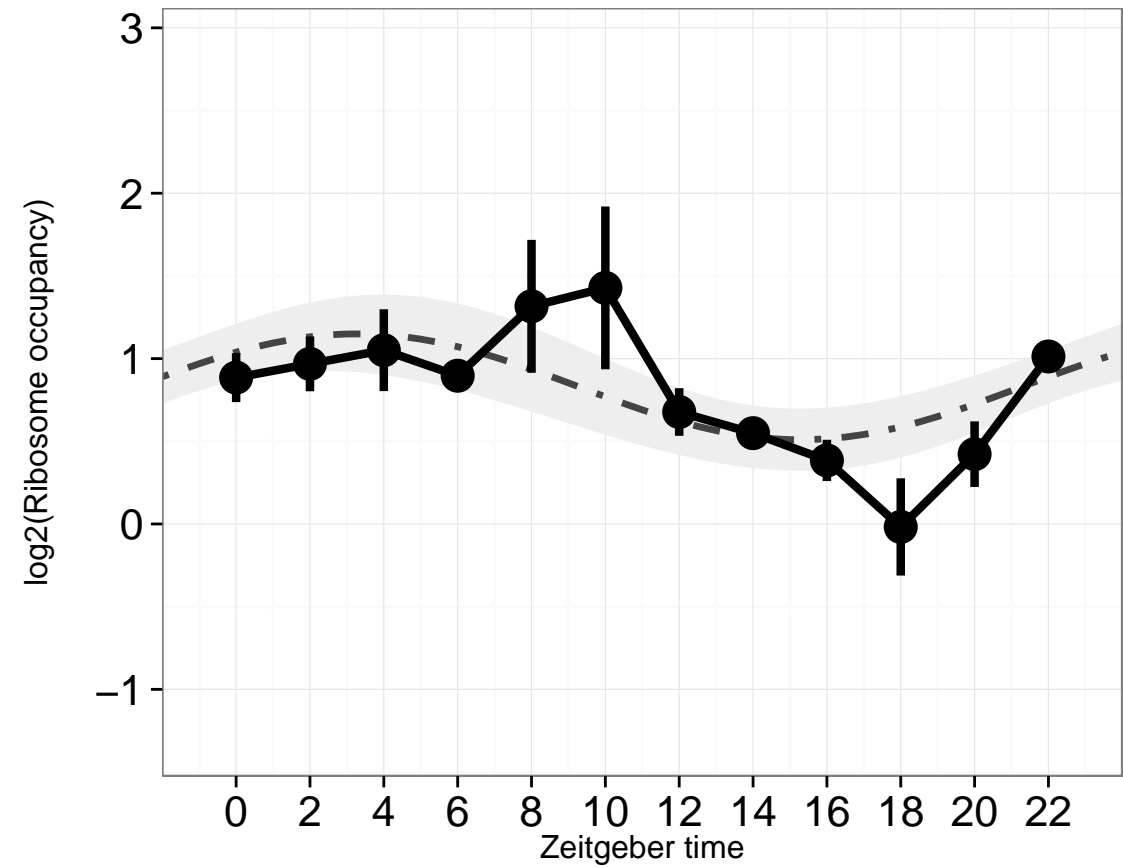

Supplement: SuppDataset_1.zip [file Tmsb4x_set_B.pdf › Supplemental Dataset 1/B-mRNA_rhythm_translation_nonrhyth/Tmsb4x_set_B.pdf]

## Tmtc4

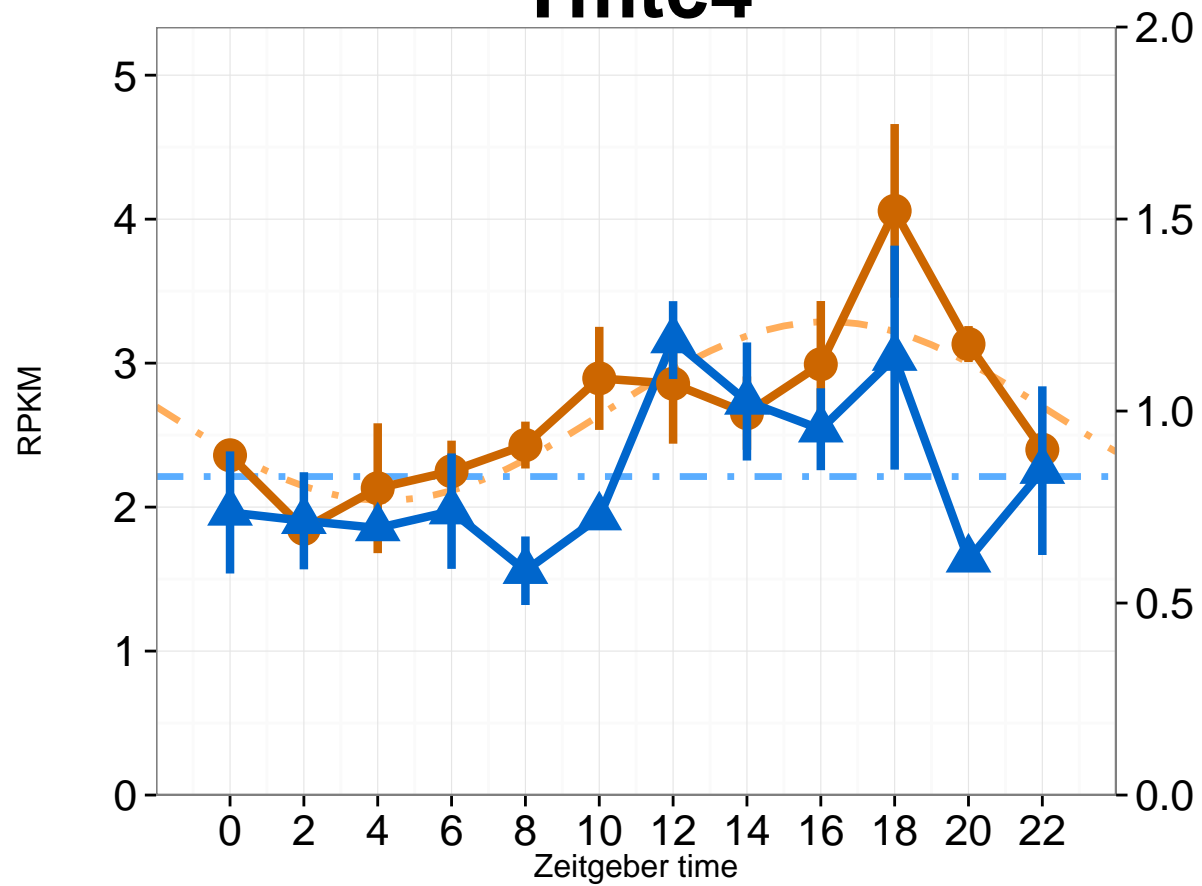

## Tmtc4

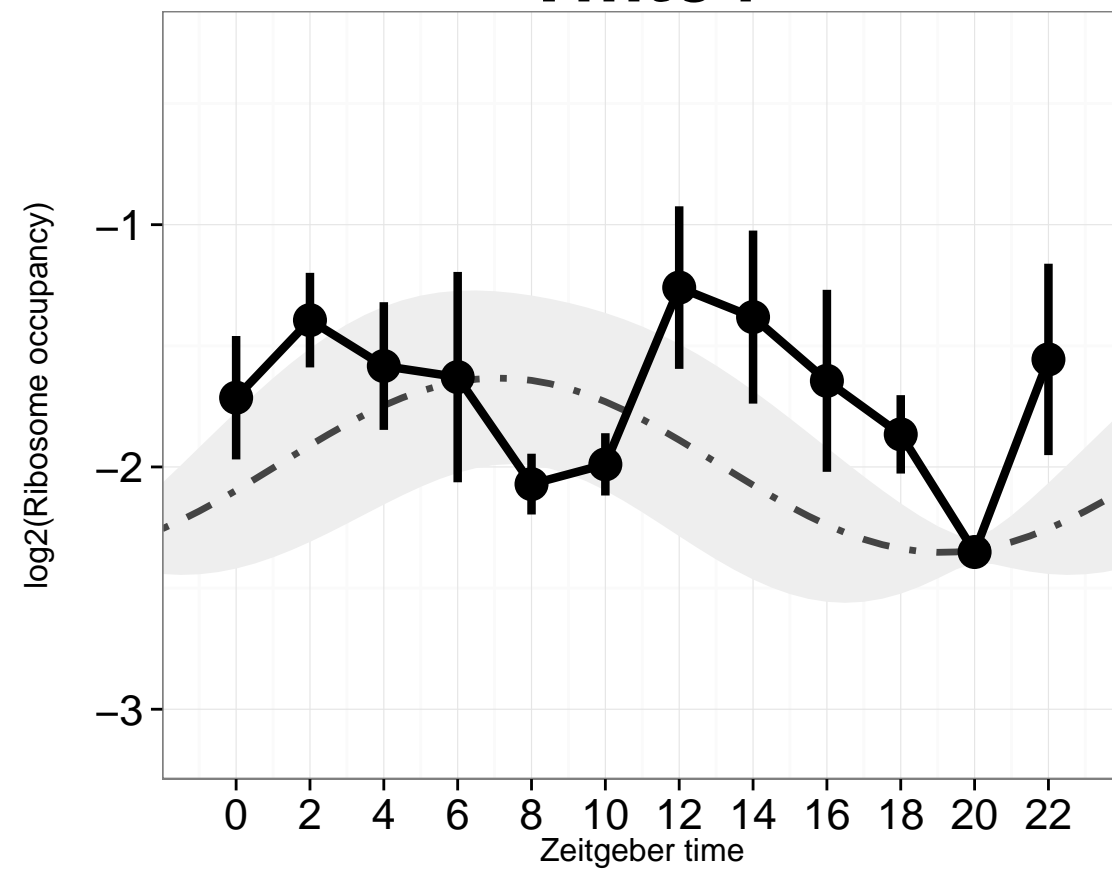

Supplement: SuppDataset_1.zip [file Tmtc4_set_B.pdf › Supplemental Dataset 1/B-mRNA_rhythm_translation_nonrhyth/Tmtc4_set_B.pdf]

# Tmub1

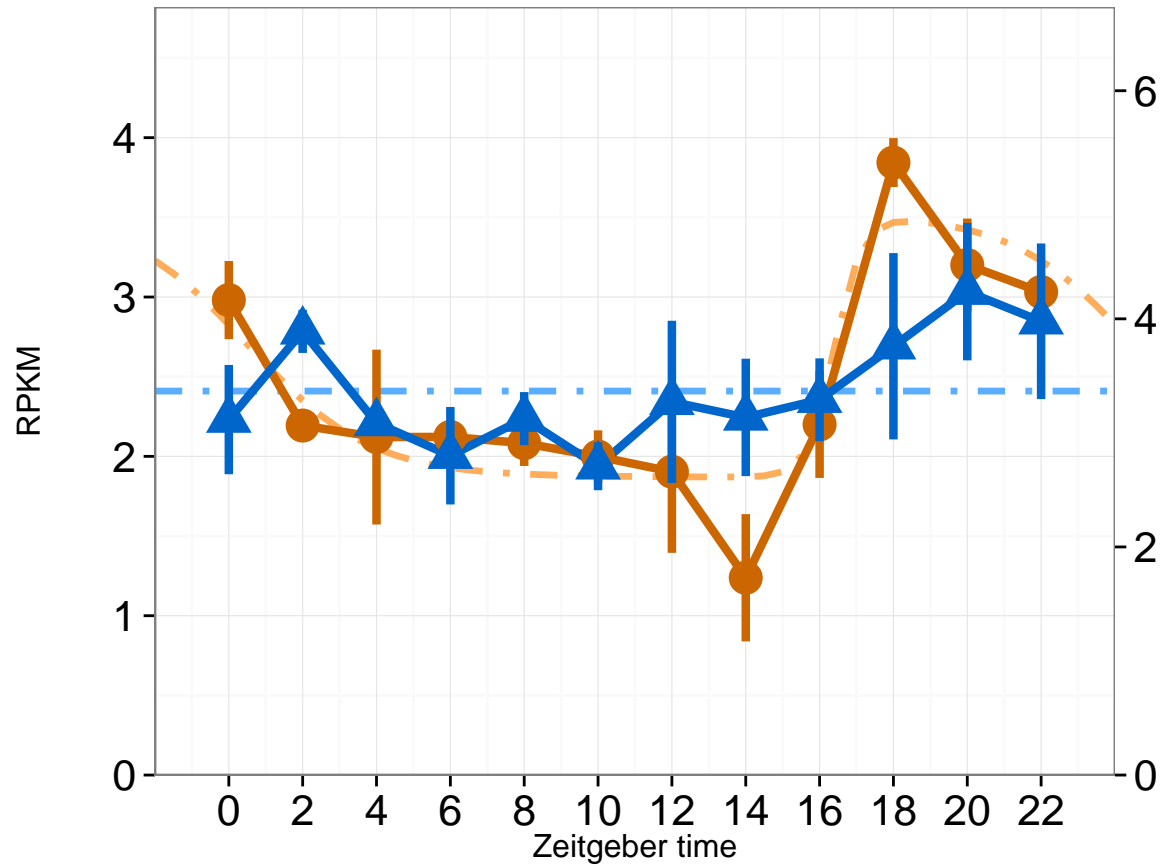

# Tmub1

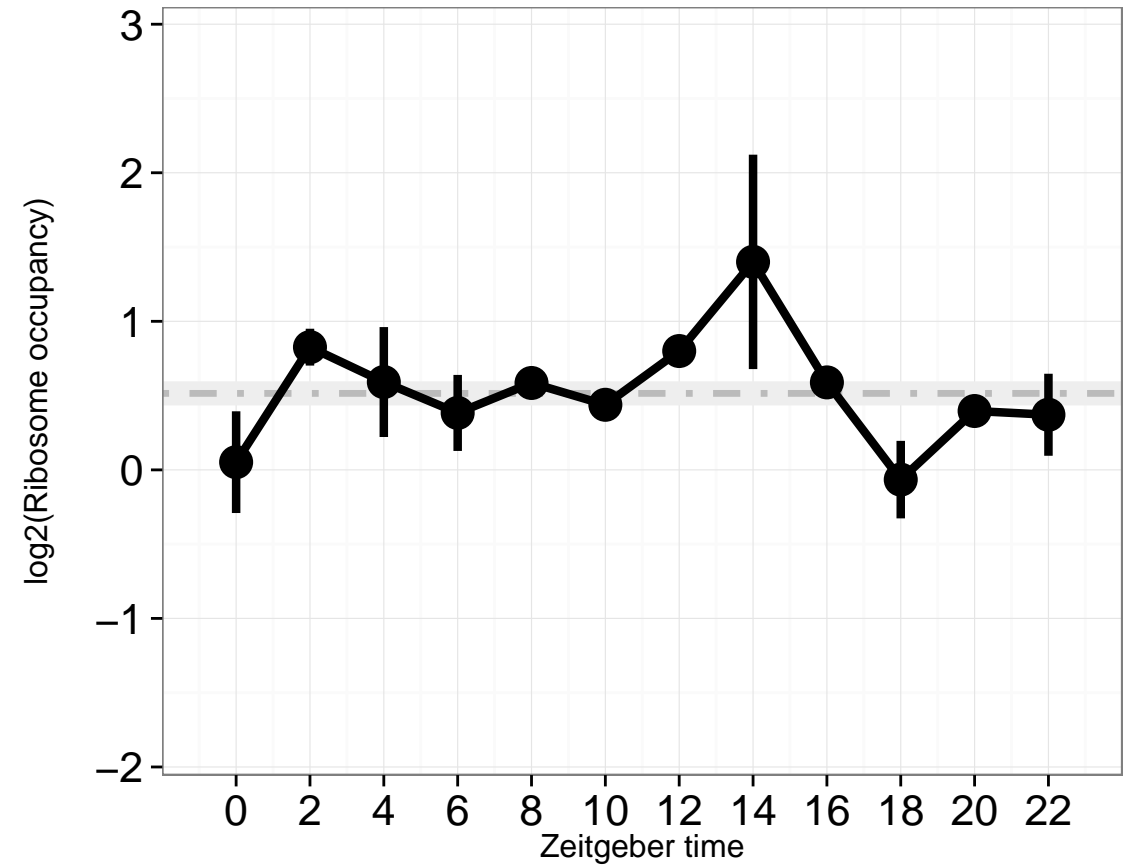

Supplement: SuppDataset_1.zip [file Tmub1_set_B.pdf › Supplemental Dataset 1/B-mRNA_rhythm_translation_nonrhyth/Tmub1_set_B.pdf]

# Tnip1

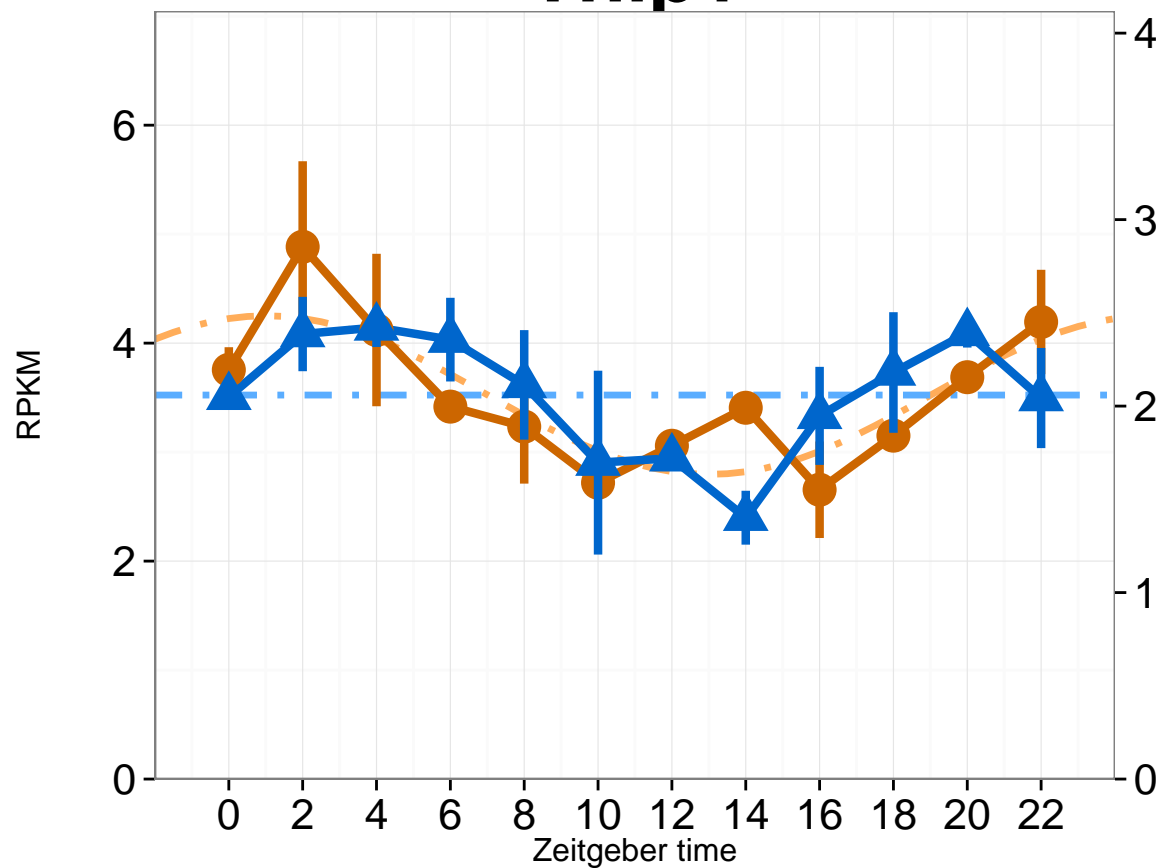

# Tnip1

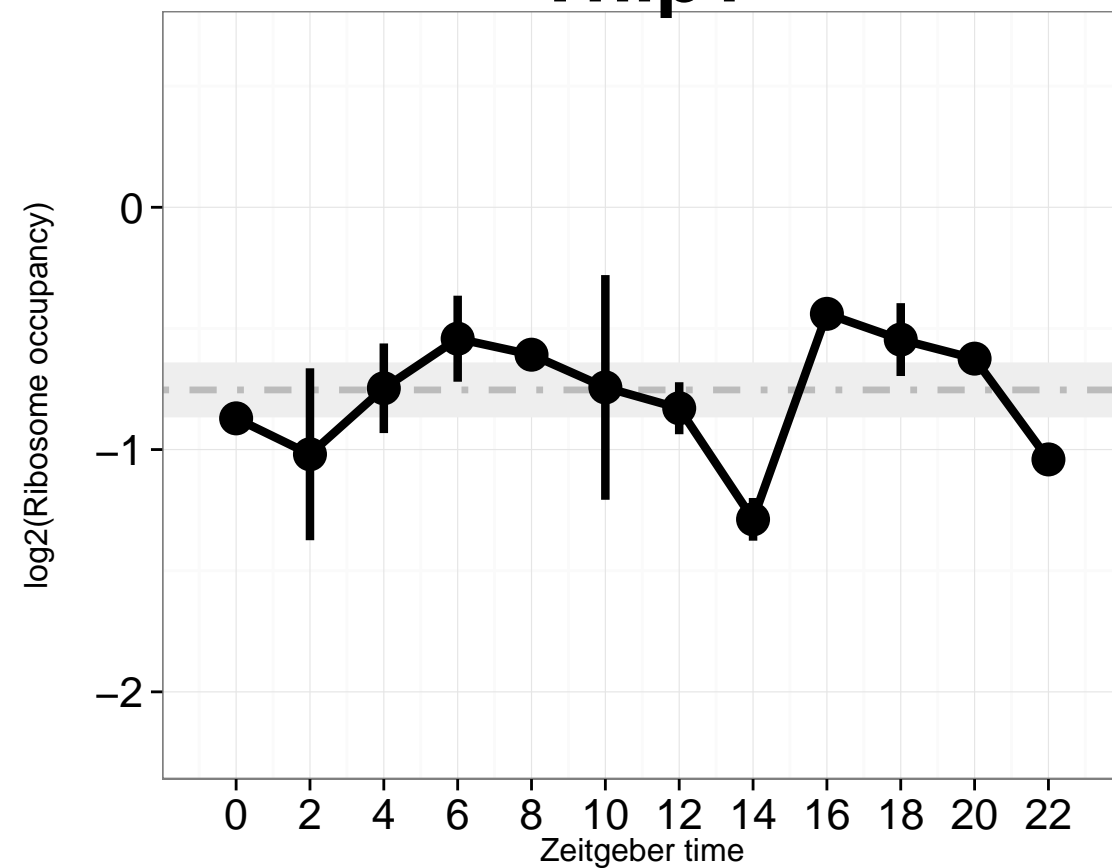

Supplement: SuppDataset_1.zip [file Tnip1_set_B.pdf › Supplemental Dataset 1/B-mRNA_rhythm_translation_nonrhyth/Tnip1_set_B.pdf]

## Tnip2

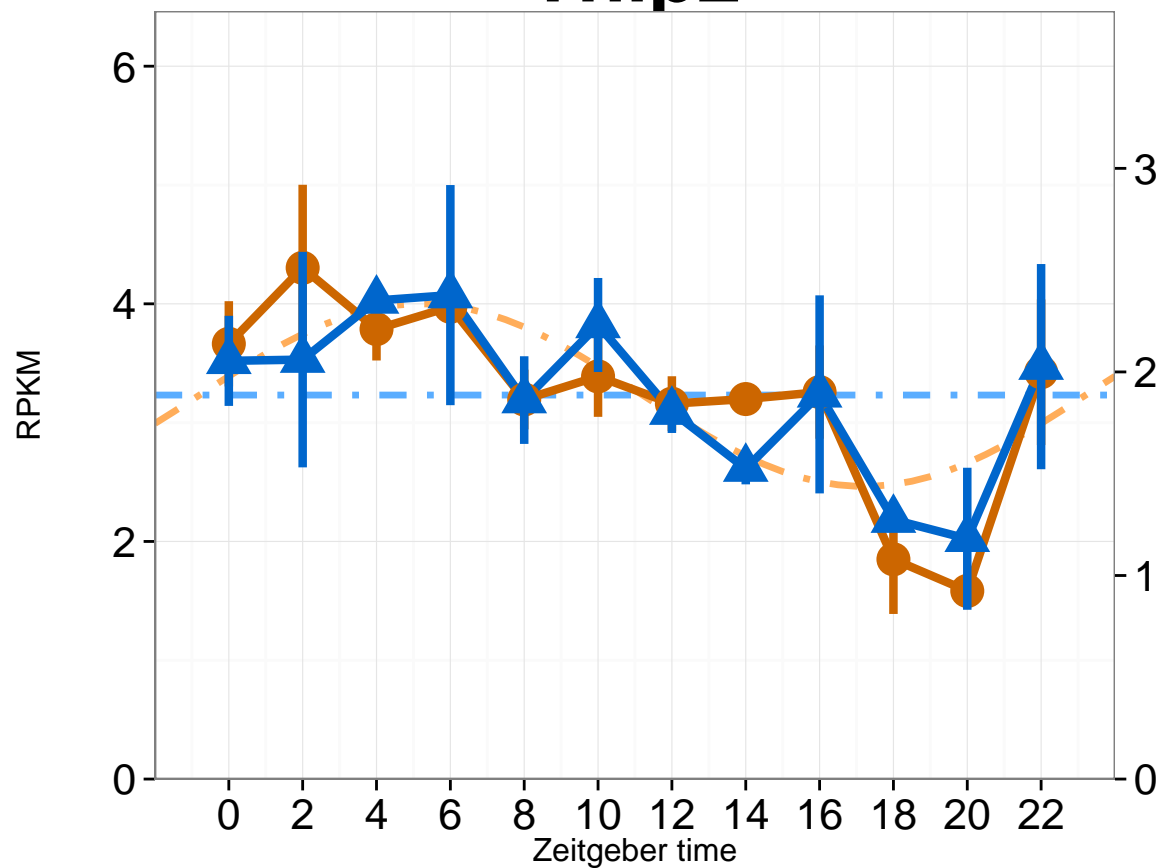

## Tnip2

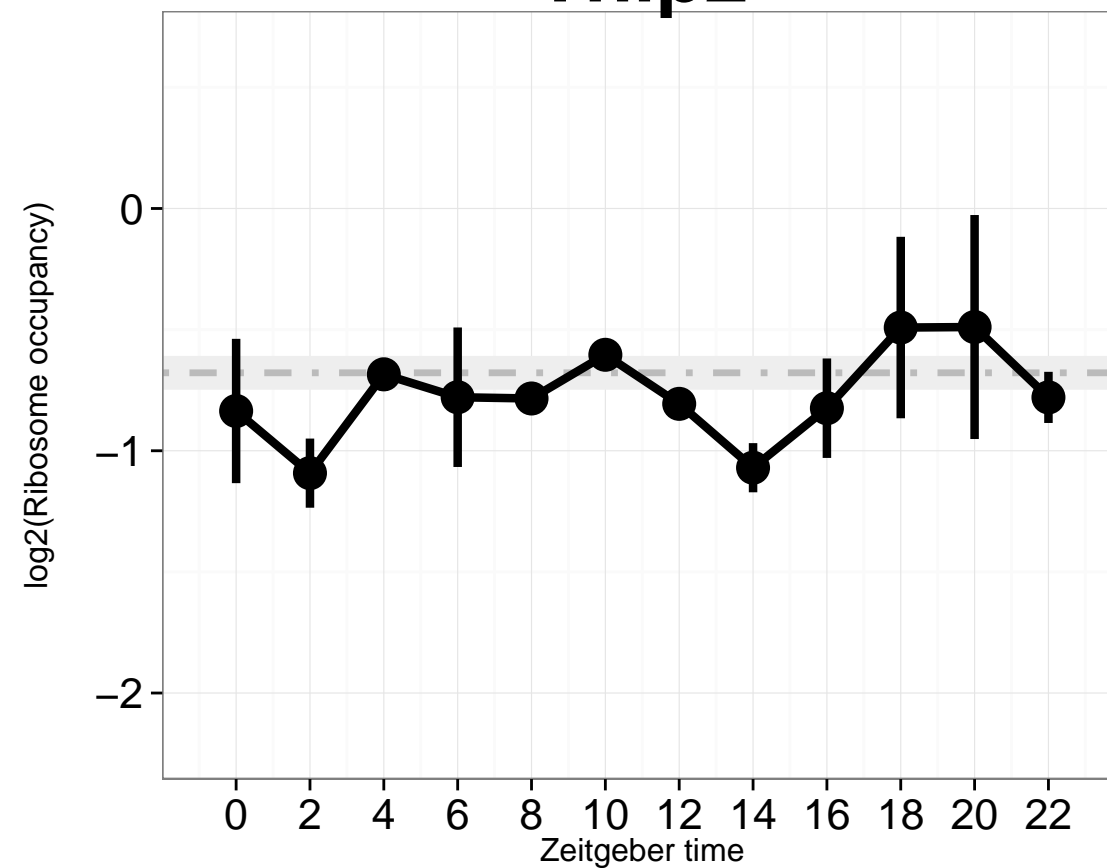

Supplement: SuppDataset_1.zip [file Tnip2_set_B.pdf › Supplemental Dataset 1/B-mRNA_rhythm_translation_nonrhyth/Tnip2_set_B.pdf]

## Tnnc1

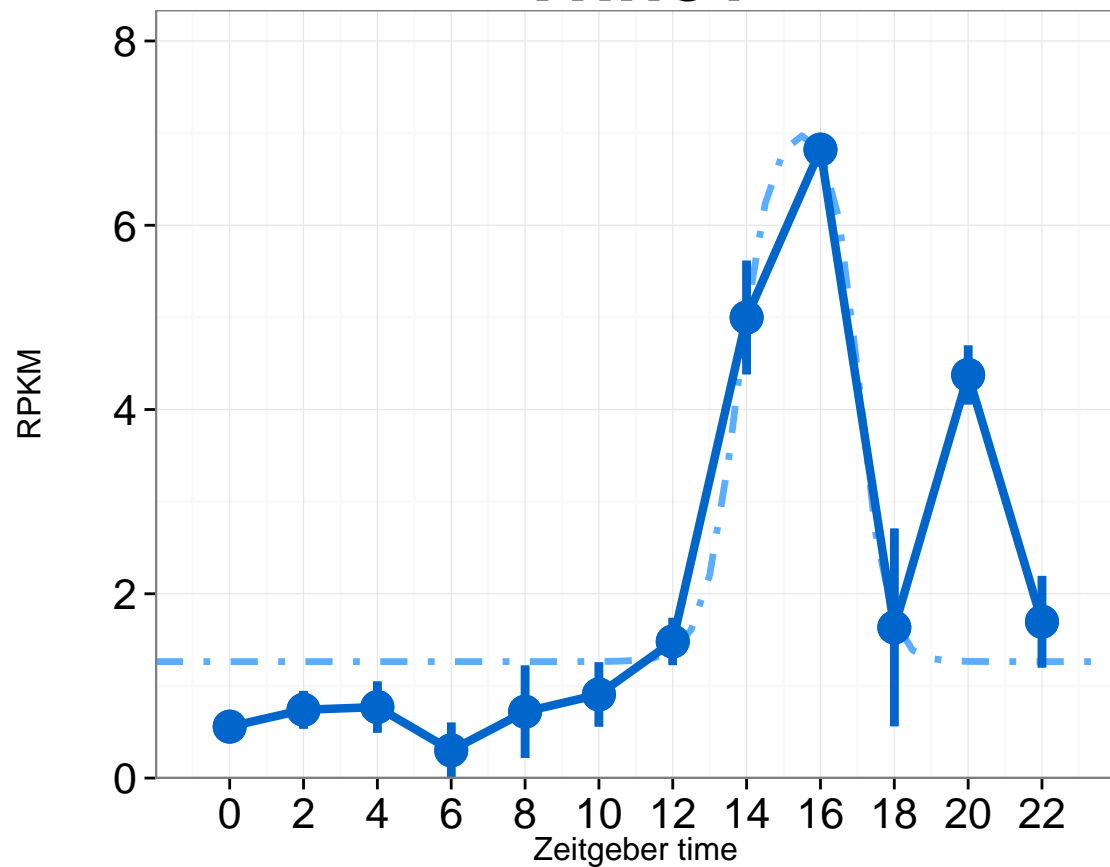

## Tnnc1 log2(Ribosome occupancy

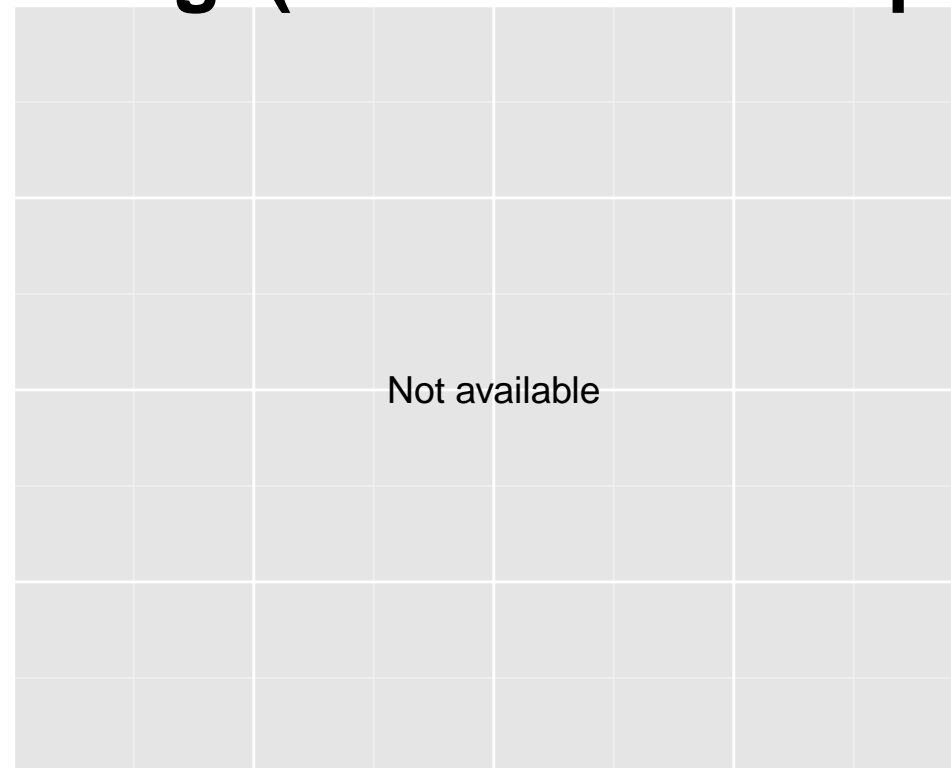

Supplement: SuppDataset_1.zip [file Tnnc1_set_B.pdf › Supplemental Dataset 1/B-mRNA_rhythm_translation_nonrhyth/Tnnc1_set_B.pdf]

# Tomm40l

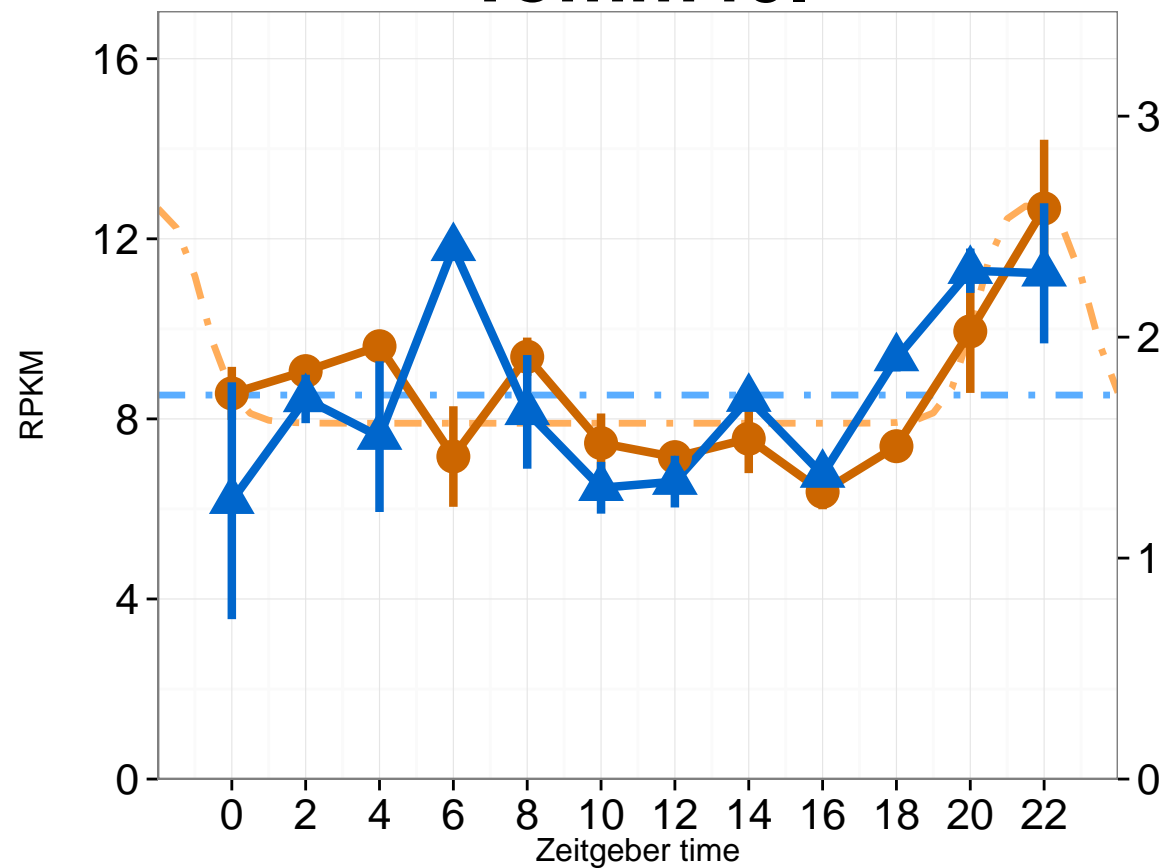

# Tomm40l

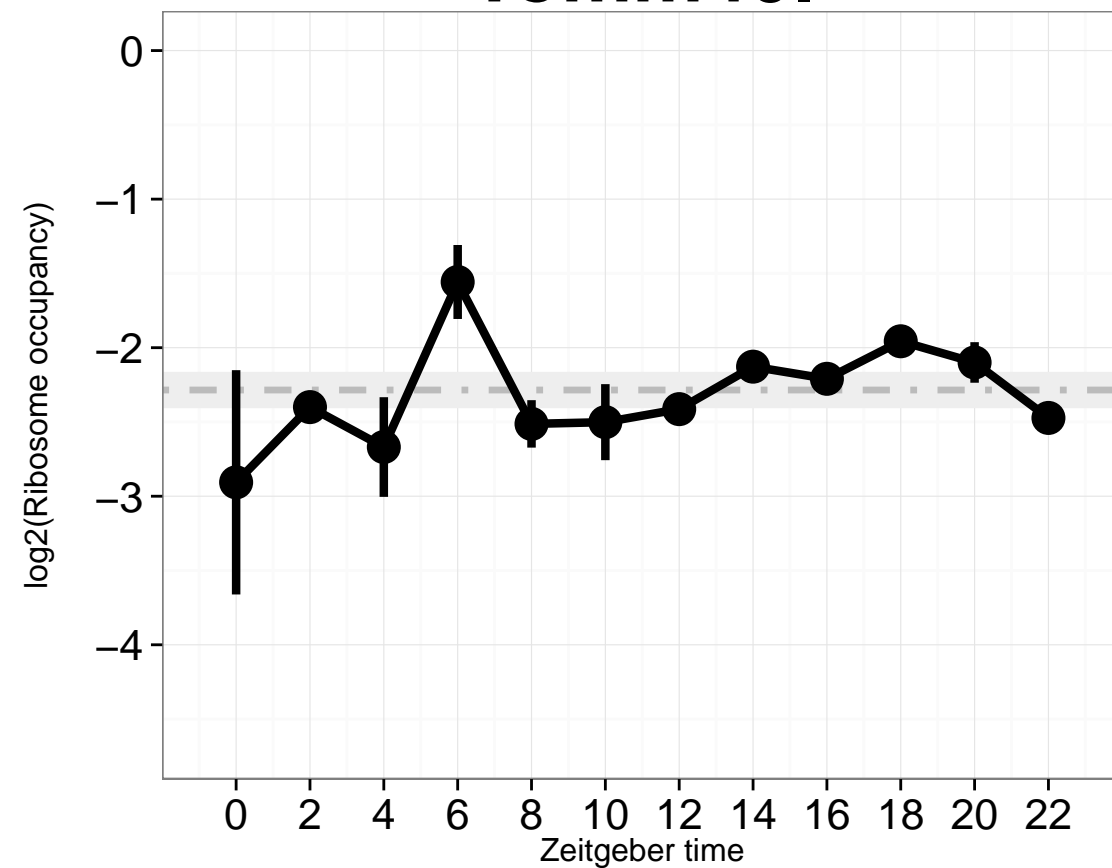

Supplement: SuppDataset_1.zip [file Tomm40l_set_B.pdf › Supplemental Dataset 1/B-mRNA_rhythm_translation_nonrhyth/Tomm40l_set_B.pdf]
