# Supplementary figures and images for: Ribosome profiling reveals the rhythmic liver translatome and circadian clock regulation by upstream open reading frames (part 66 of 113)
Source: HighWire-hosted journal article supplement (doi:10.1101/gr.195404.115), 2015-10-20

## Serac1

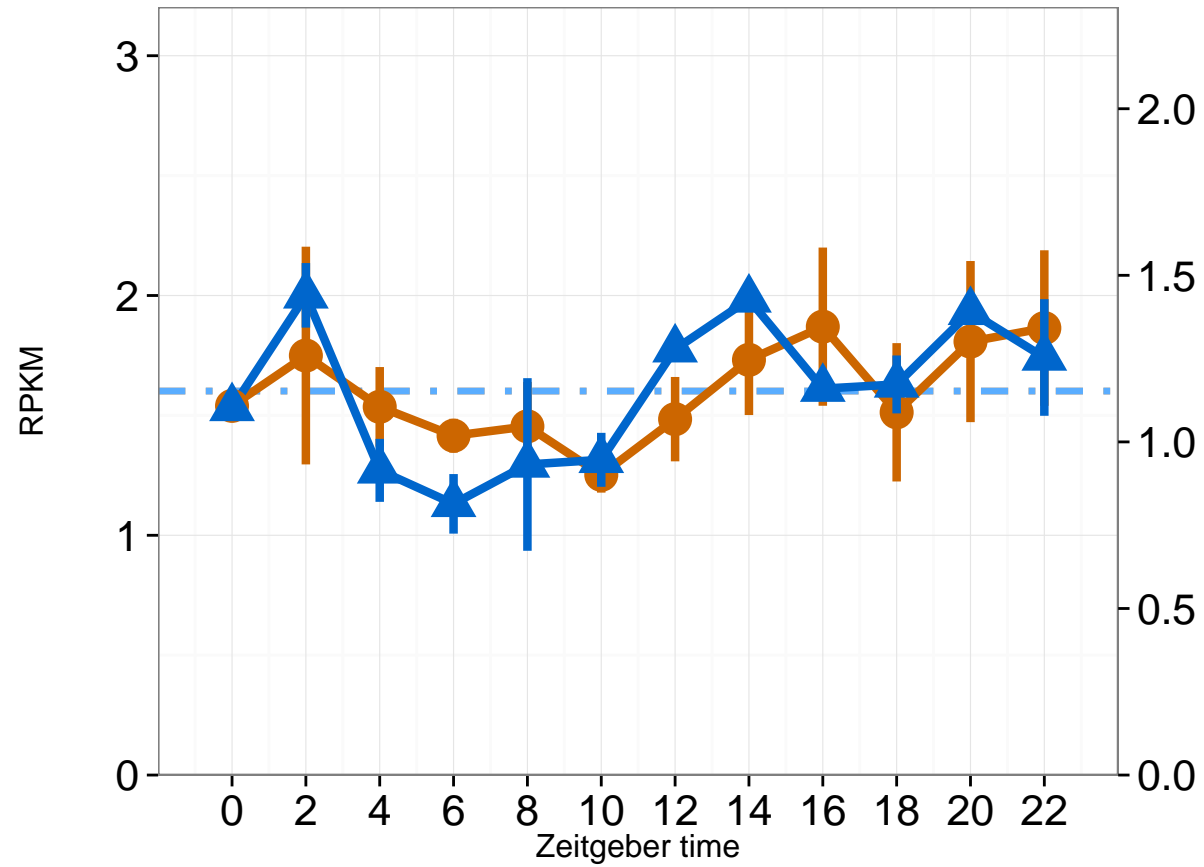

## Serac1

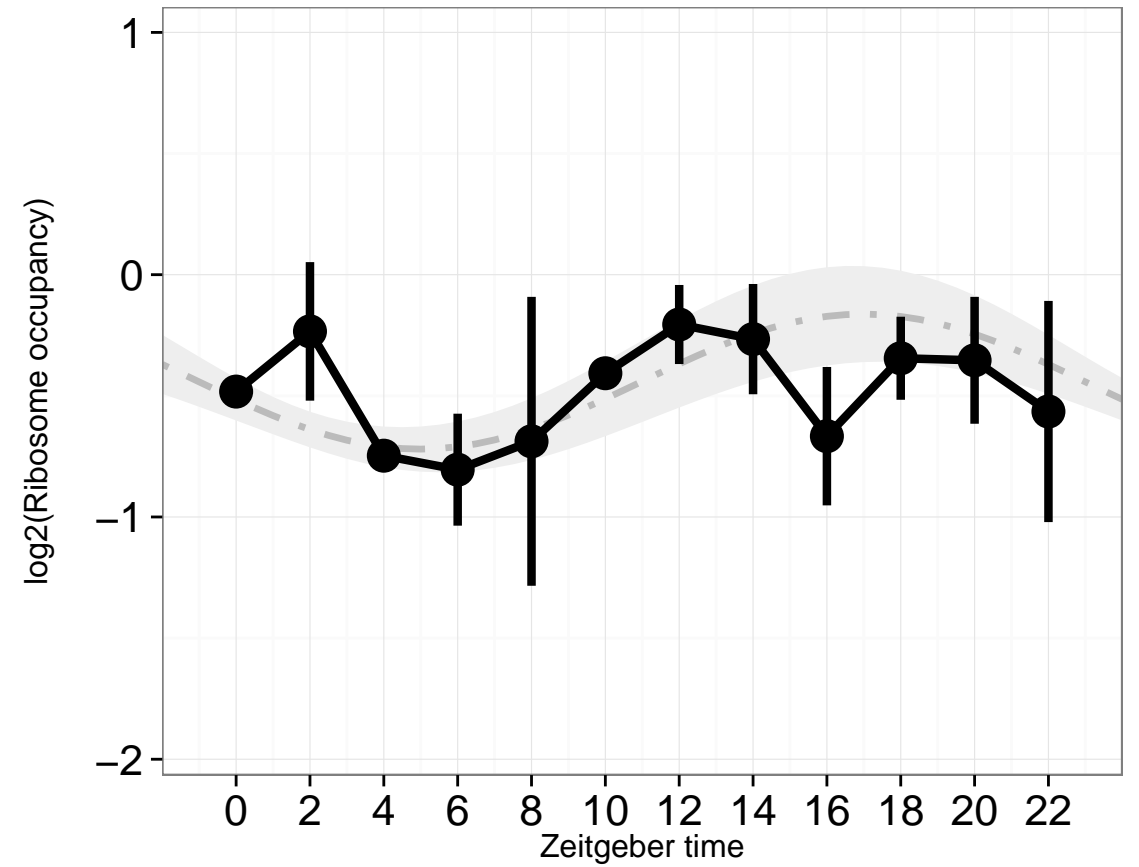

Supplement: SuppDataset_1.zip [file Serac1_set_A.pdf › Supplemental Dataset 1/A-mRNA_nonrhyth_translation_nonrhyth/Serac1_set_A.pdf]

## Serbp1

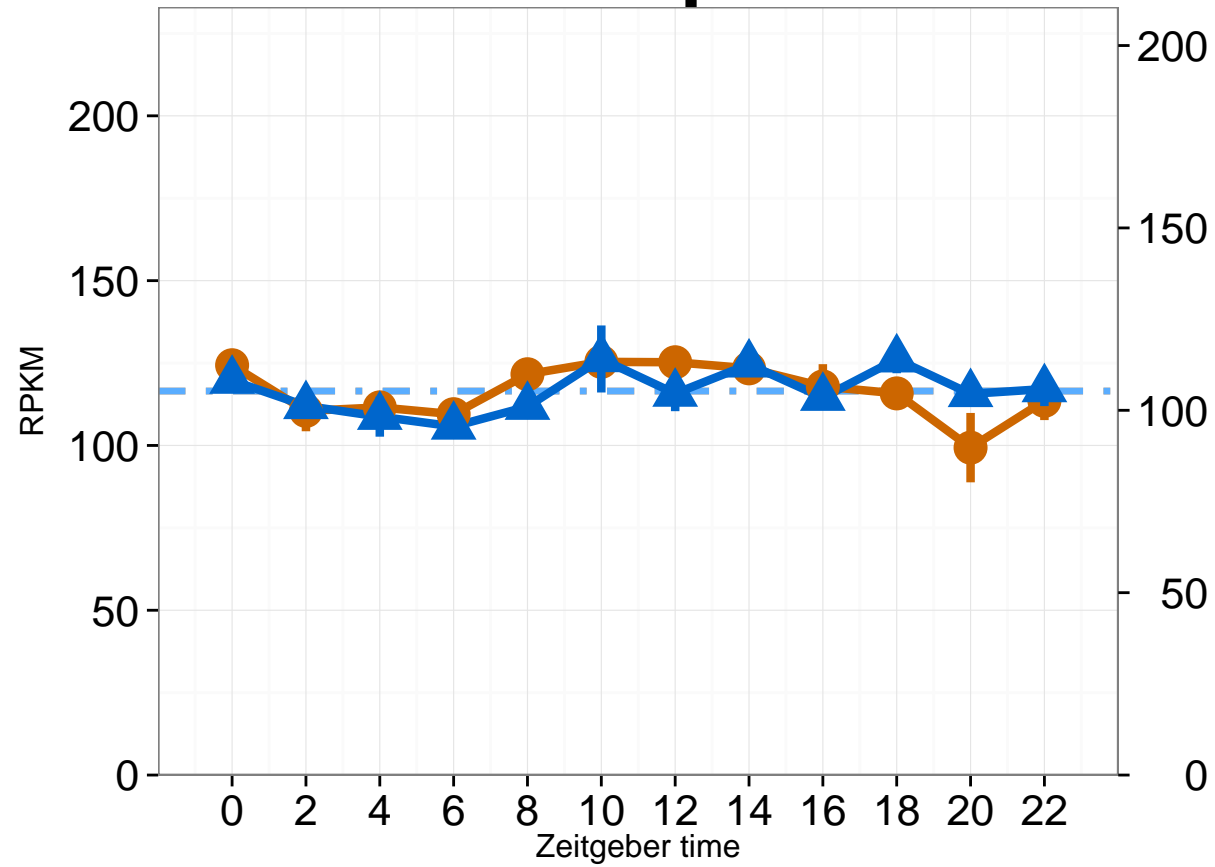

## Serbp1

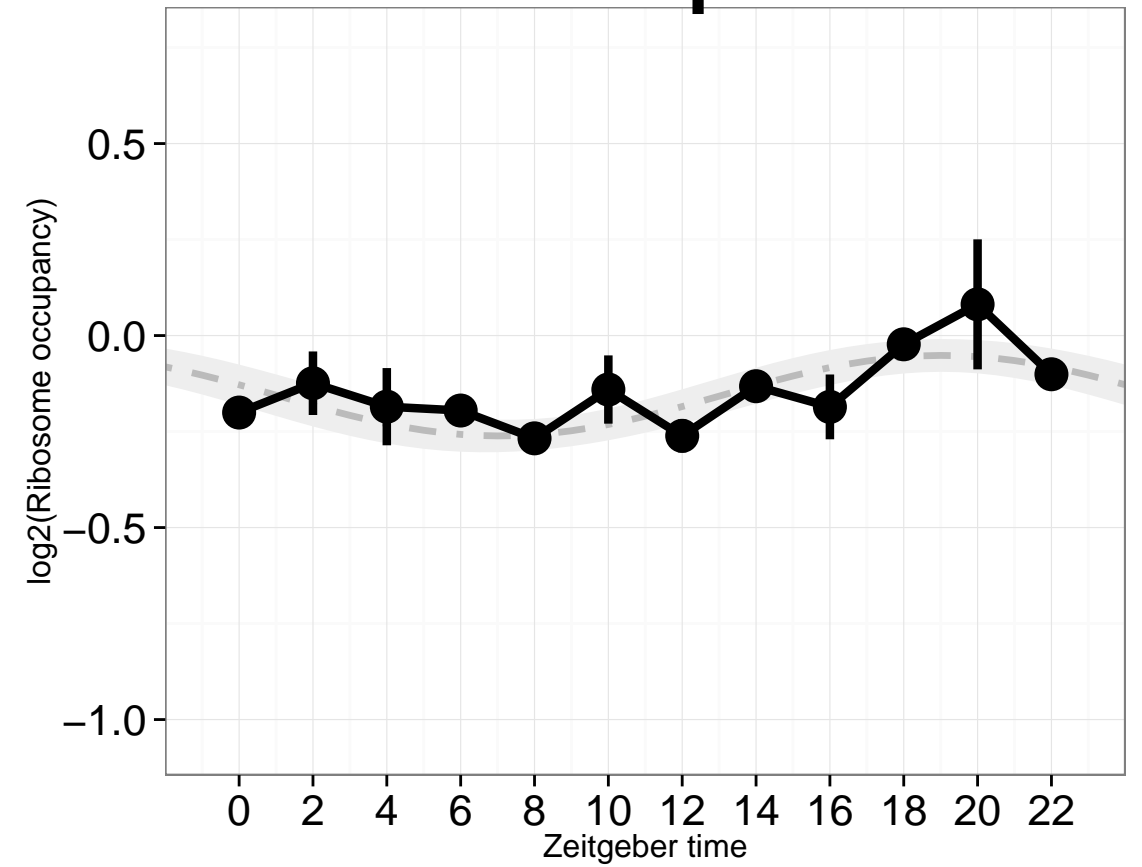

Supplement: SuppDataset_1.zip [file Serbp1_set_A.pdf › Supplemental Dataset 1/A-mRNA_nonrhyth_translation_nonrhyth/Serbp1_set_A.pdf]

## Serf1

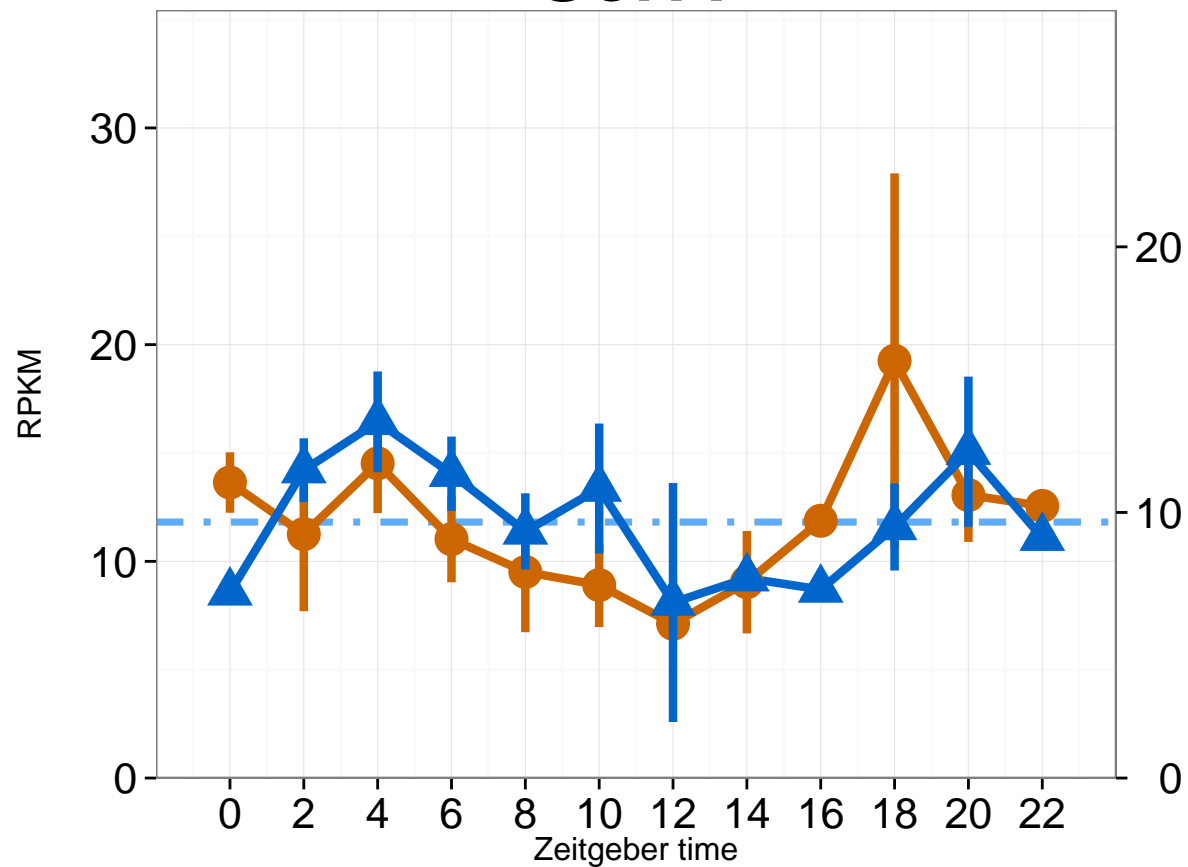

## Serf1

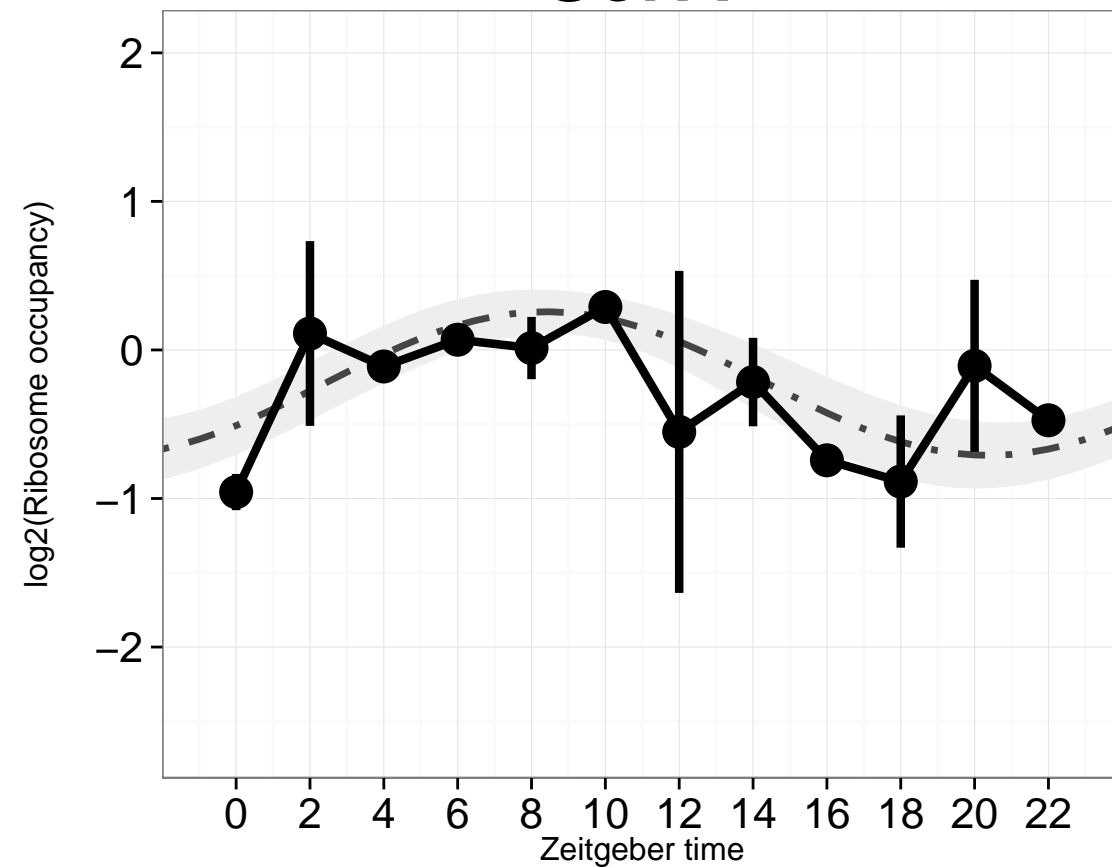

Supplement: SuppDataset_1.zip [file Serf1_set_A.pdf › Supplemental Dataset 1/A-mRNA_nonrhyth_translation_nonrhyth/Serf1_set_A.pdf]

## Serf2

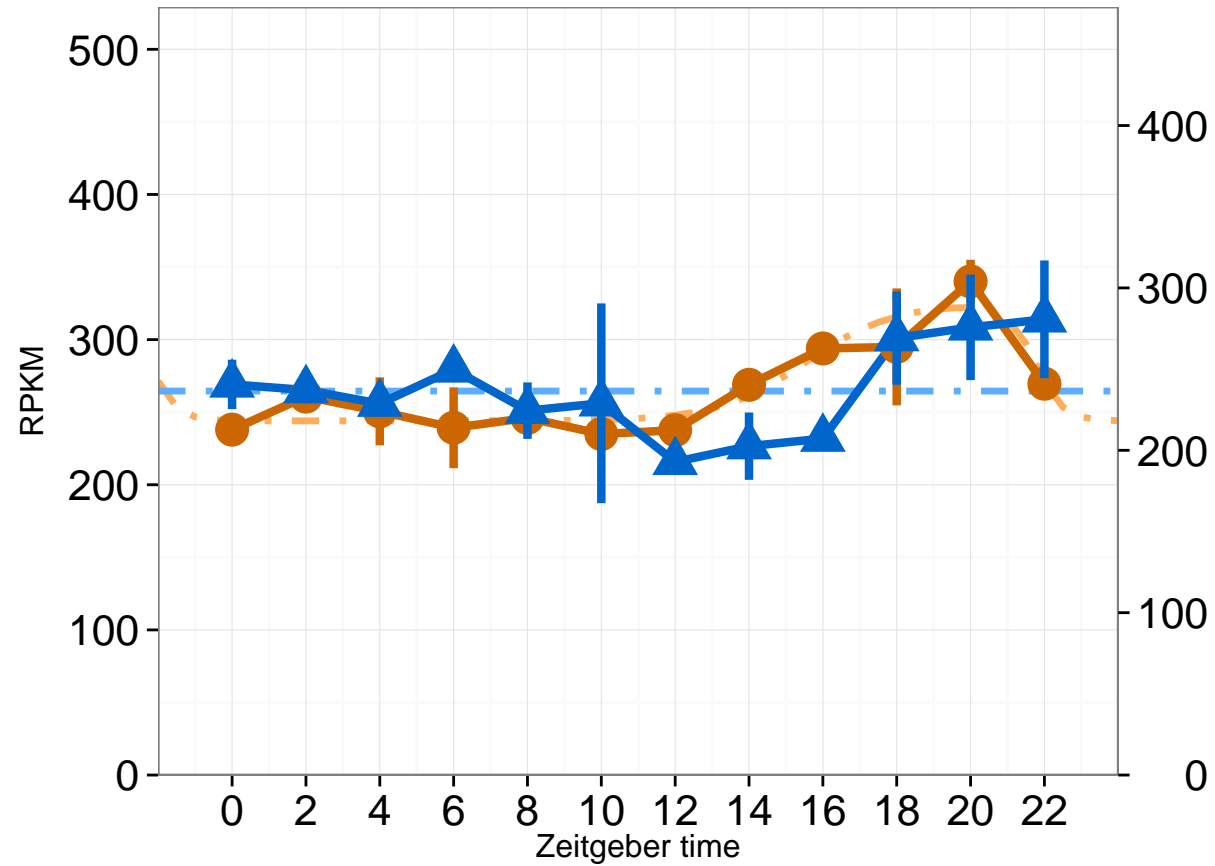

## Serf2

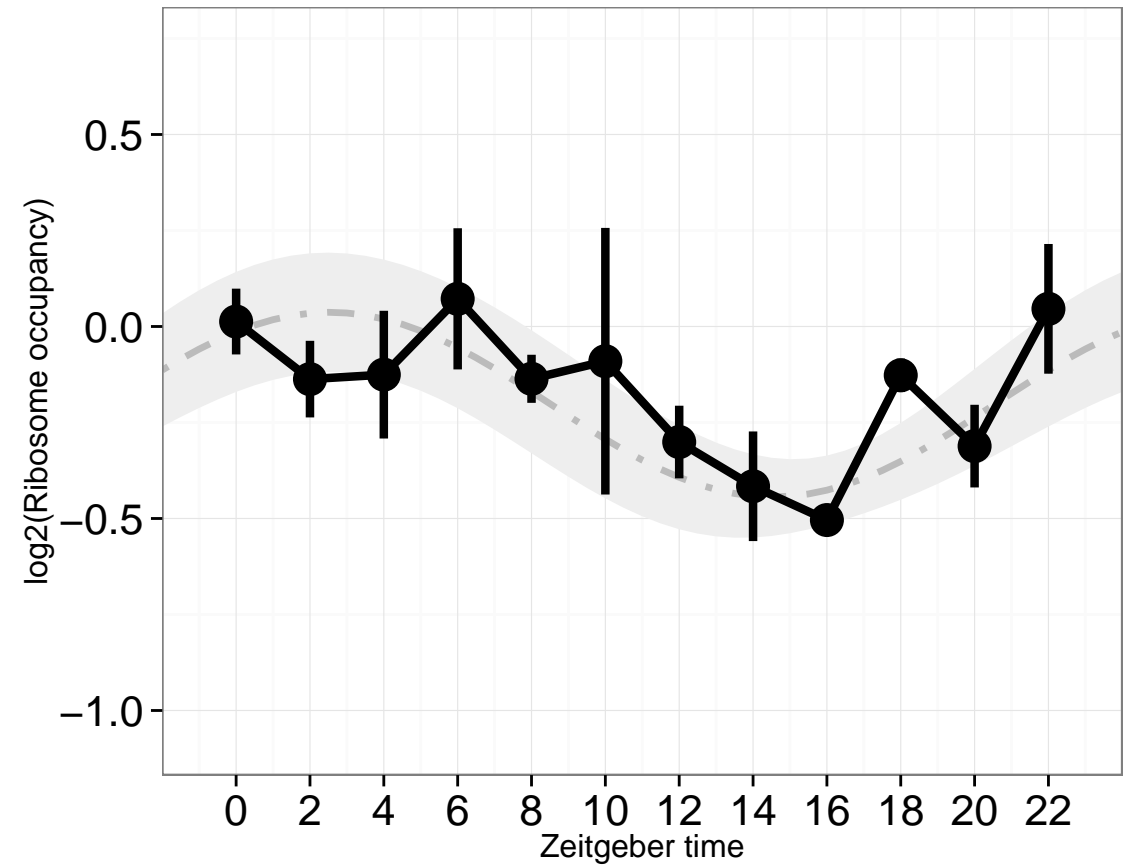

Supplement: SuppDataset_1.zip [file Serf2_set_A.pdf › Supplemental Dataset 1/A-mRNA_nonrhyth_translation_nonrhyth/Serf2_set_A.pdf]

## Sergef

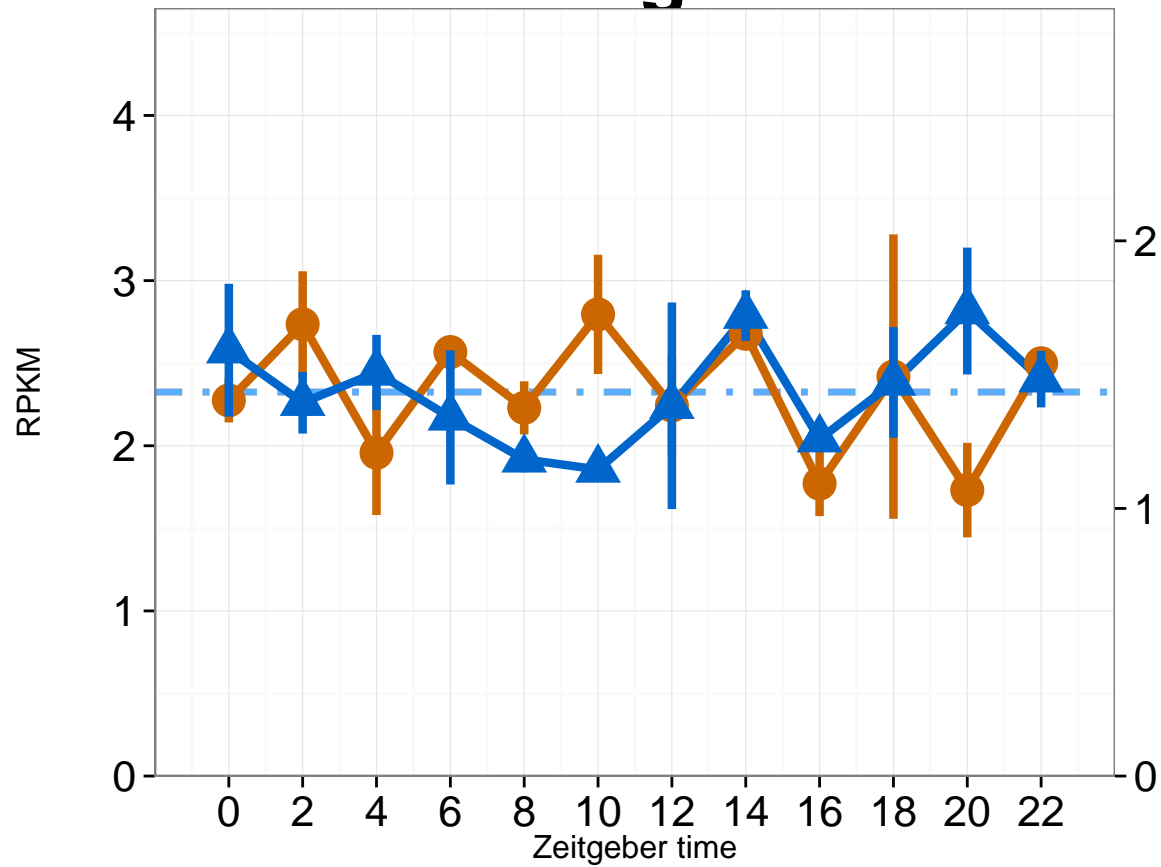

## Sergef

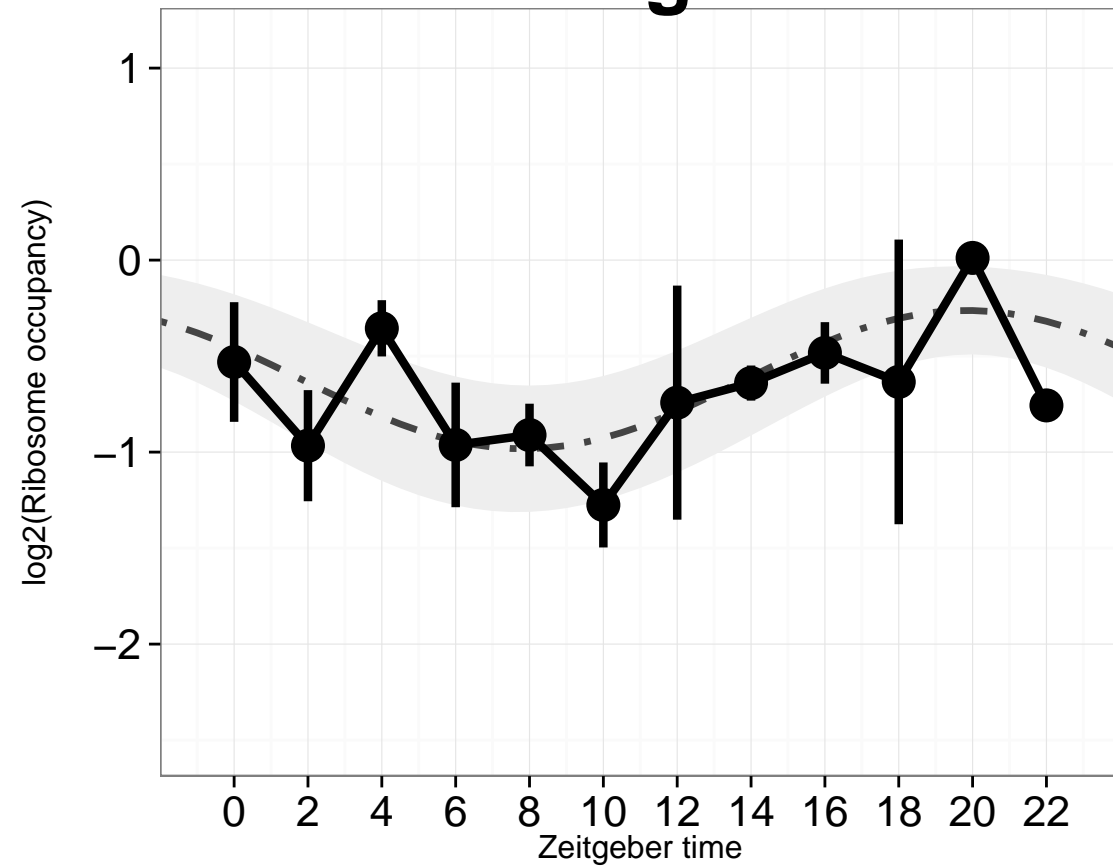

Supplement: SuppDataset_1.zip [file Sergef_set_A.pdf › Supplemental Dataset 1/A-mRNA_nonrhyth_translation_nonrhyth/Sergef_set_A.pdf]

## Serhl

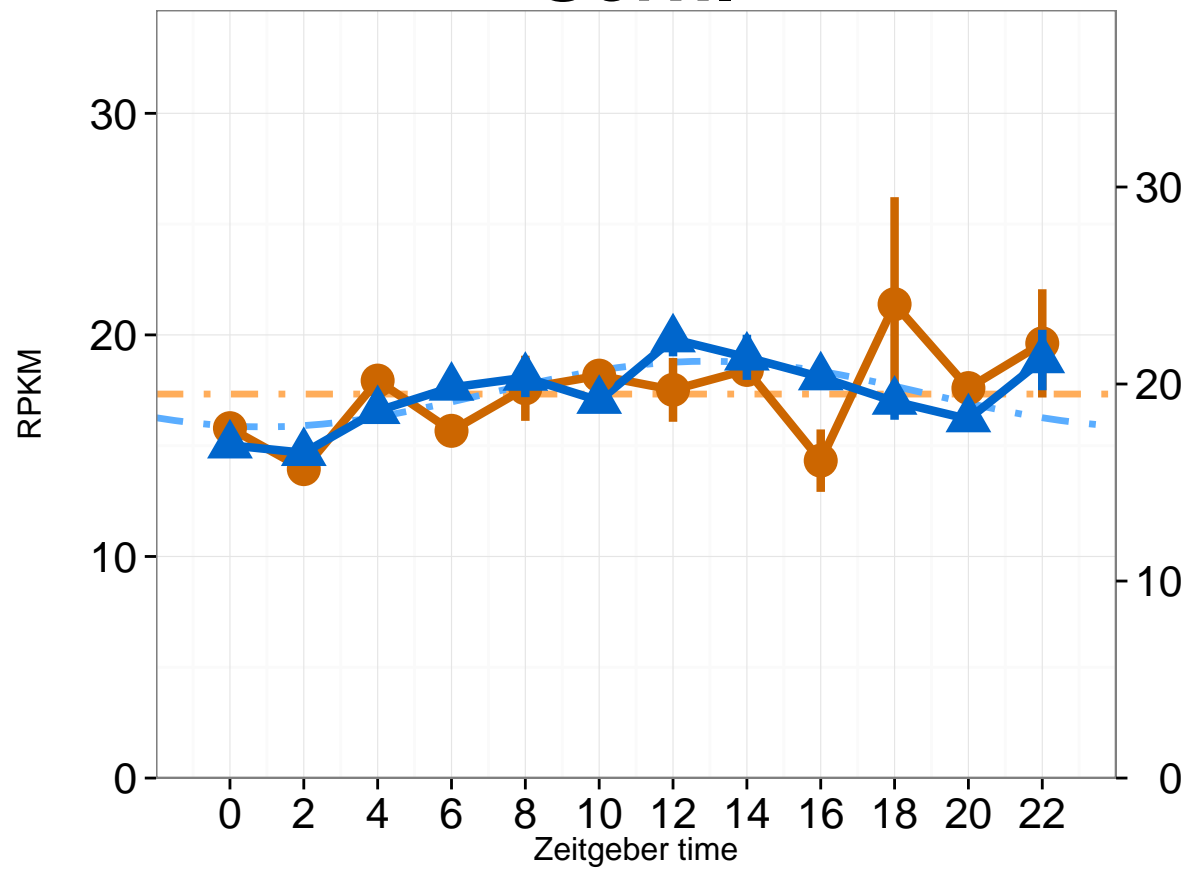

## Serhl

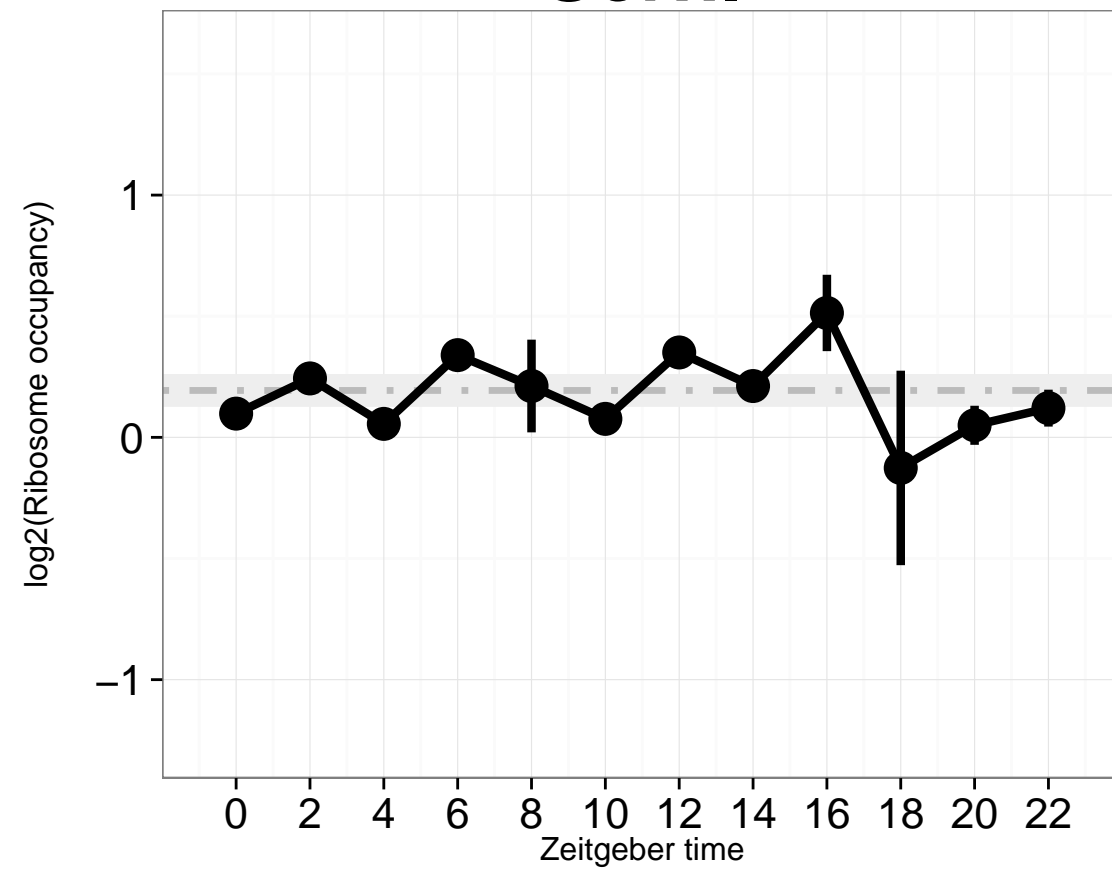

Supplement: SuppDataset_1.zip [file Serhl_set_A.pdf › Supplemental Dataset 1/A-mRNA_nonrhyth_translation_nonrhyth/Serhl_set_A.pdf]

## Serinc1

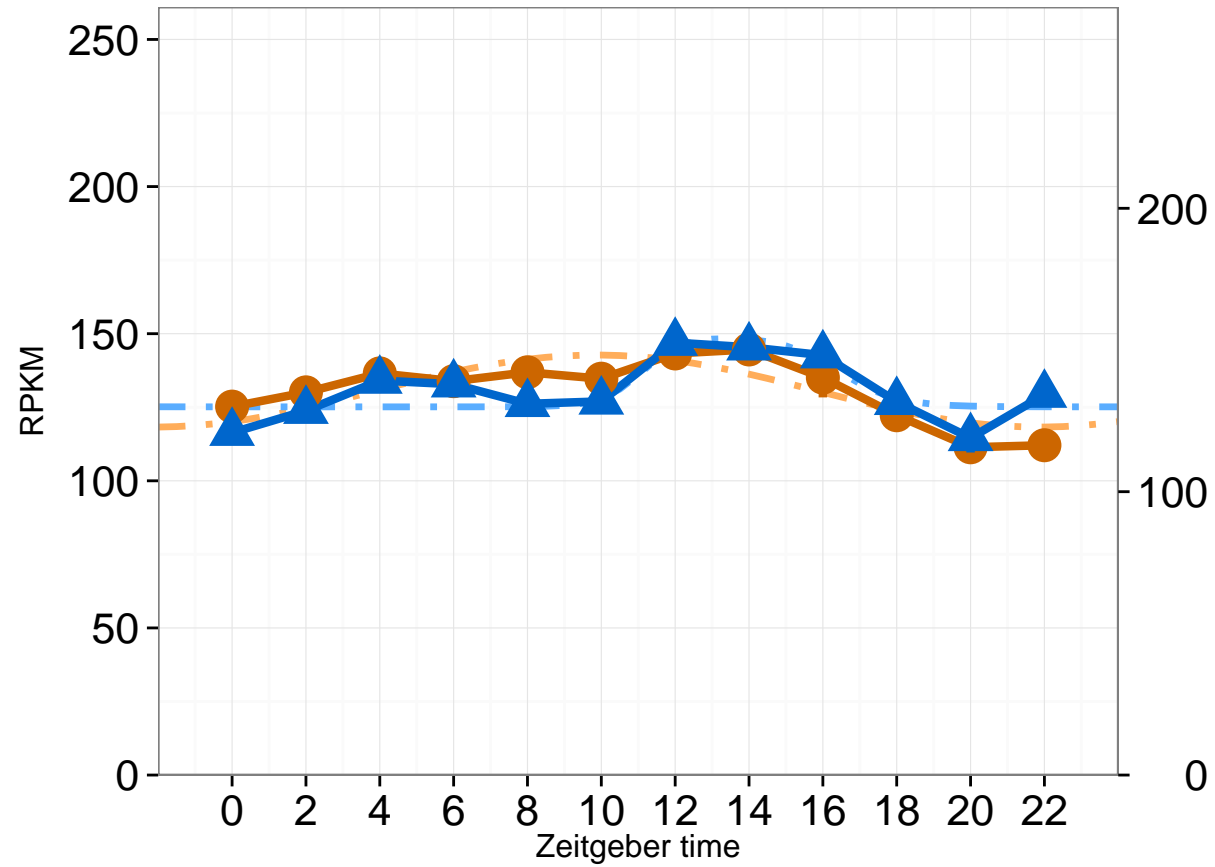

## Serinc1

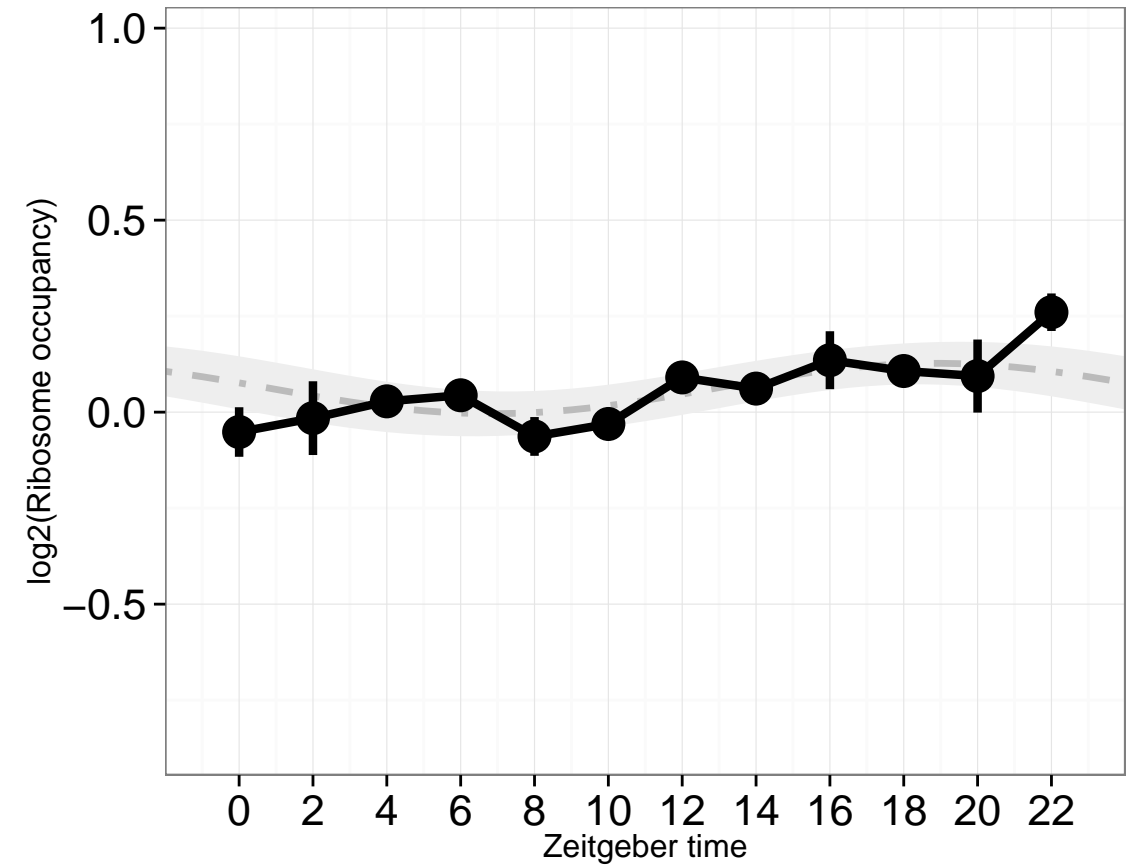

Supplement: SuppDataset_1.zip [file Serinc1_set_A.pdf › Supplemental Dataset 1/A-mRNA_nonrhyth_translation_nonrhyth/Serinc1_set_A.pdf]

## Serinc2

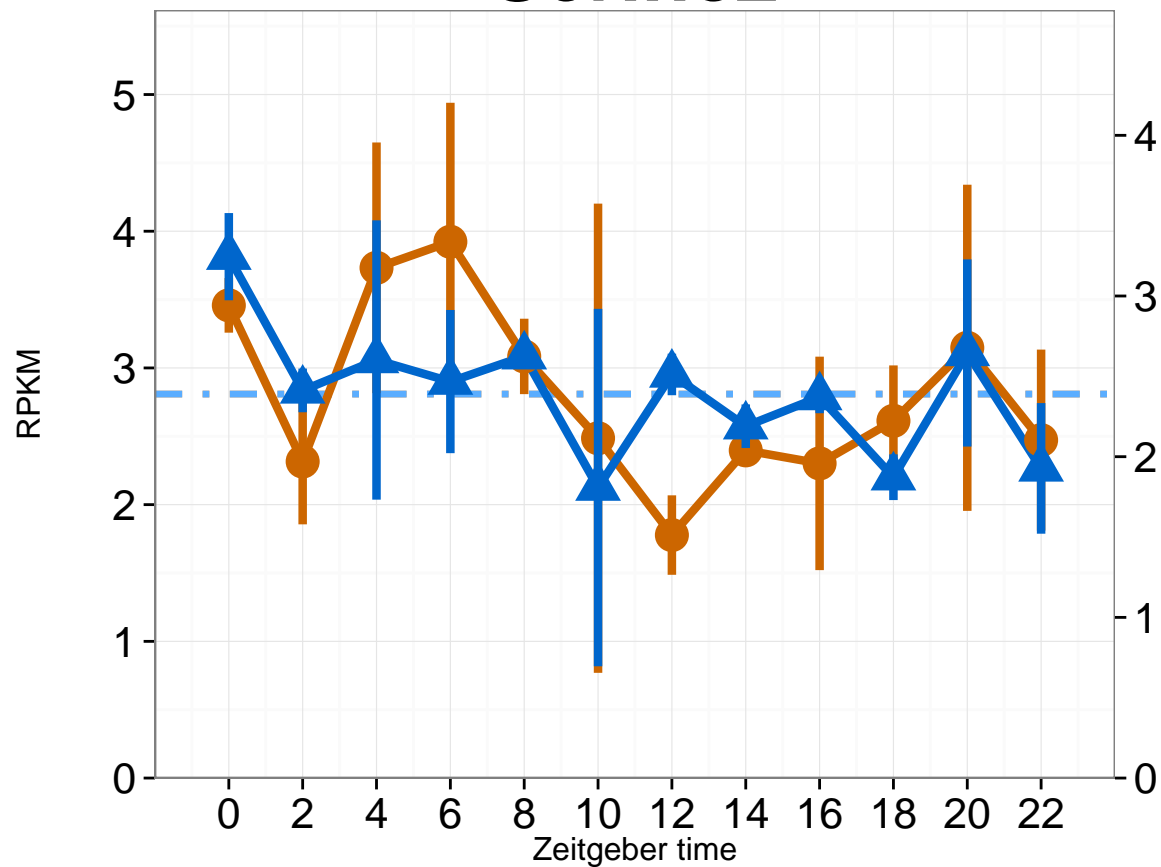

## Serinc2

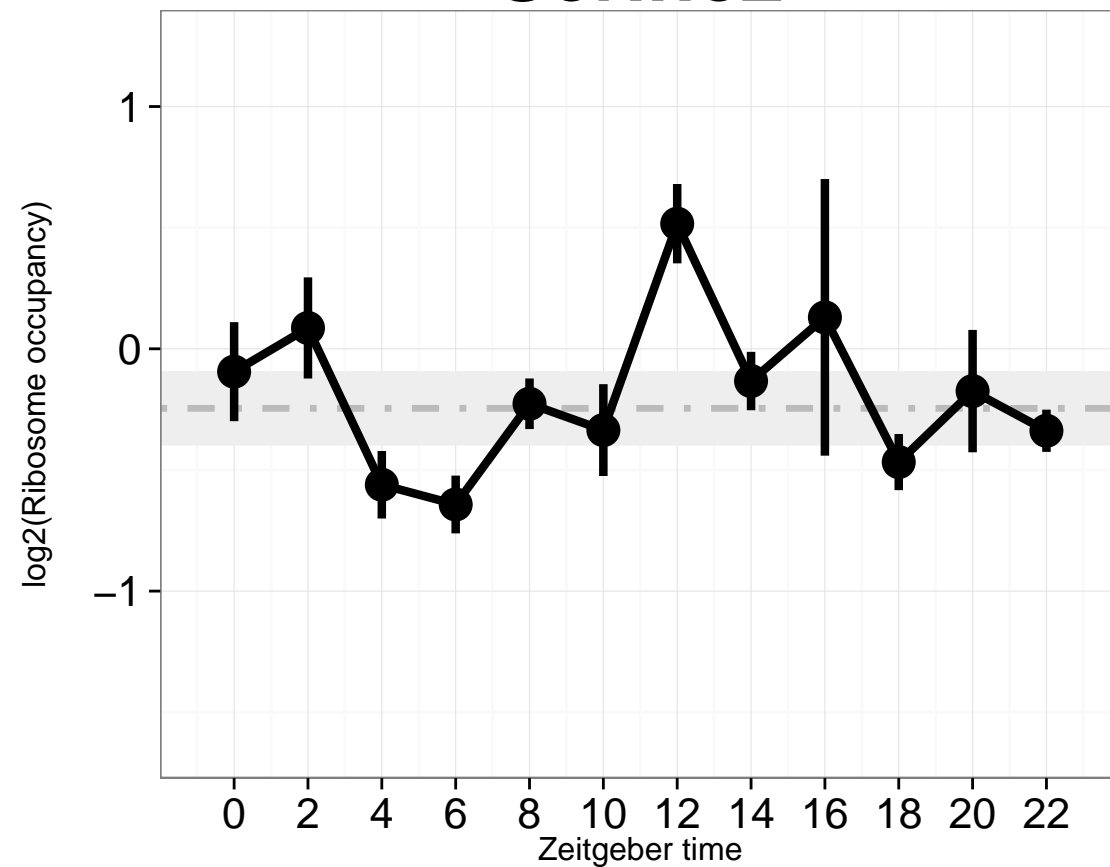

Supplement: SuppDataset_1.zip [file Serinc2_set_A.pdf › Supplemental Dataset 1/A-mRNA_nonrhyth_translation_nonrhyth/Serinc2_set_A.pdf]

## Serinc5

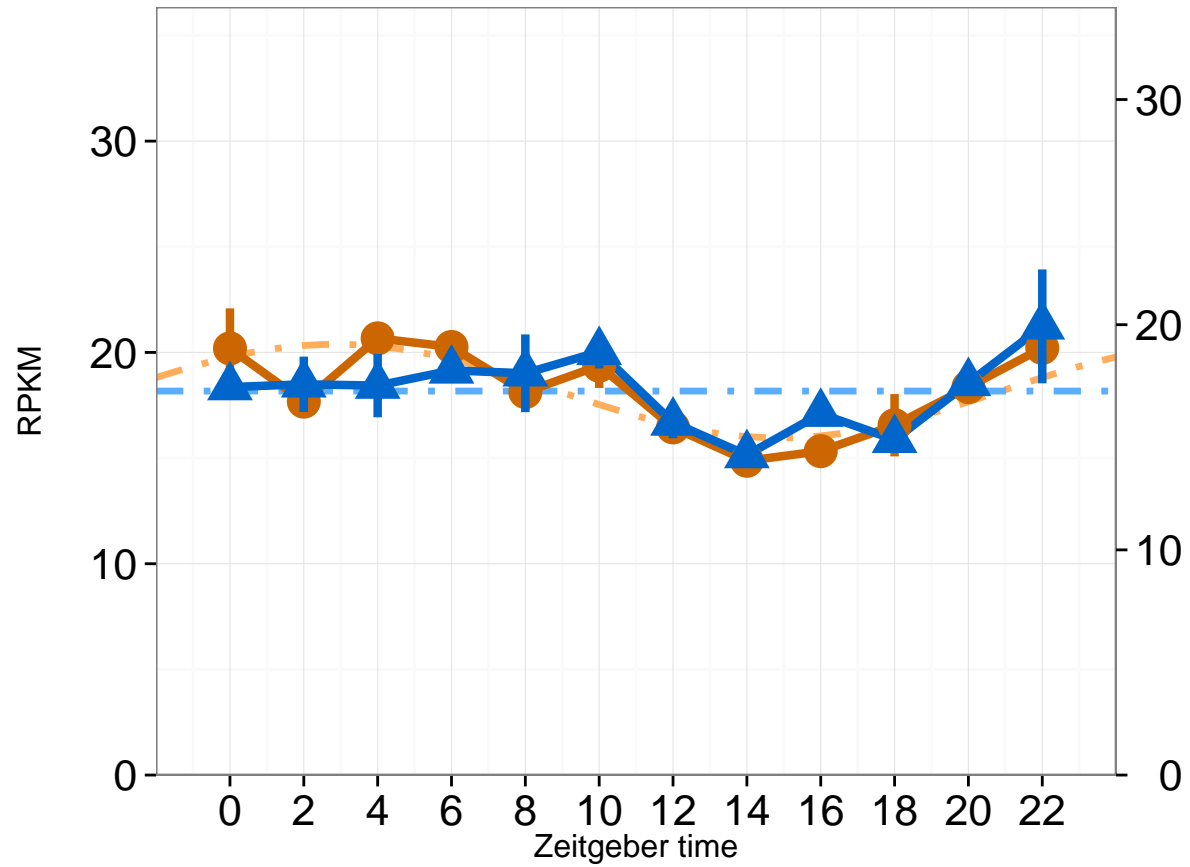

## Serinc5

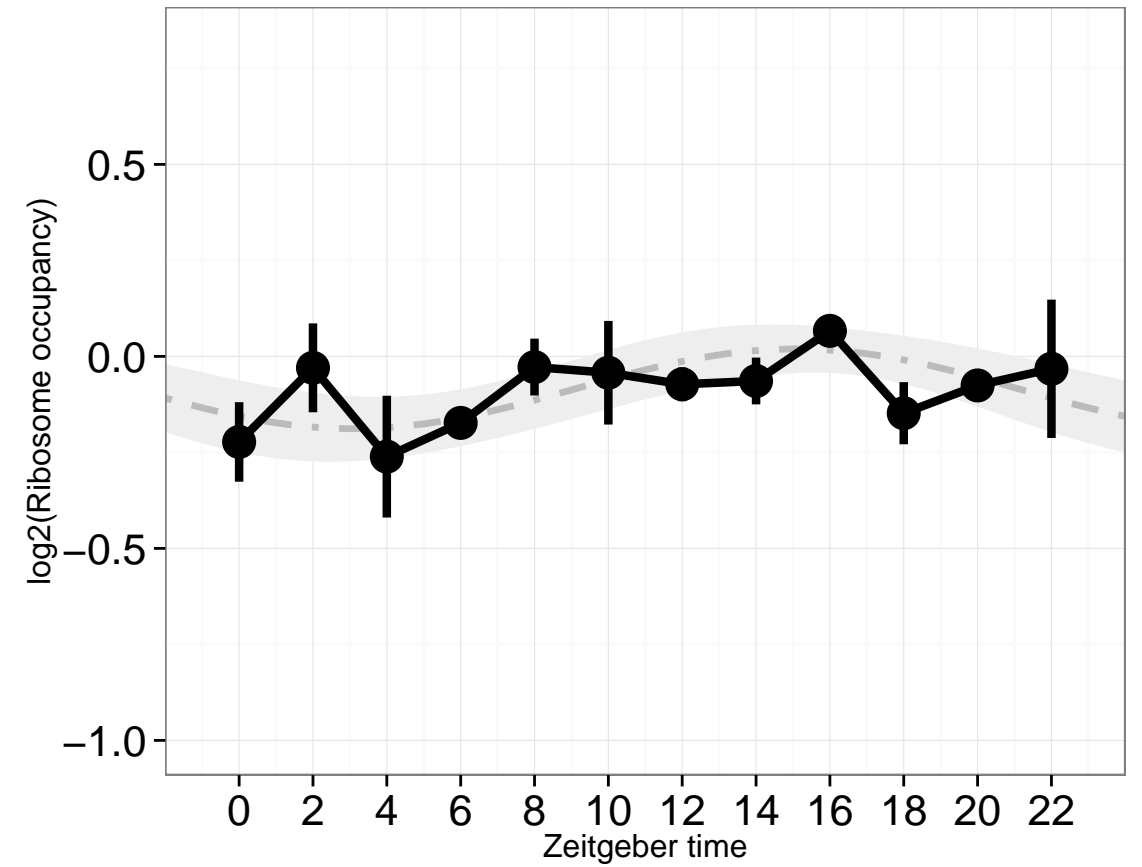

Supplement: SuppDataset_1.zip [file Serinc5_set_A.pdf › Supplemental Dataset 1/A-mRNA_nonrhyth_translation_nonrhyth/Serinc5_set_A.pdf]

# Serpina11

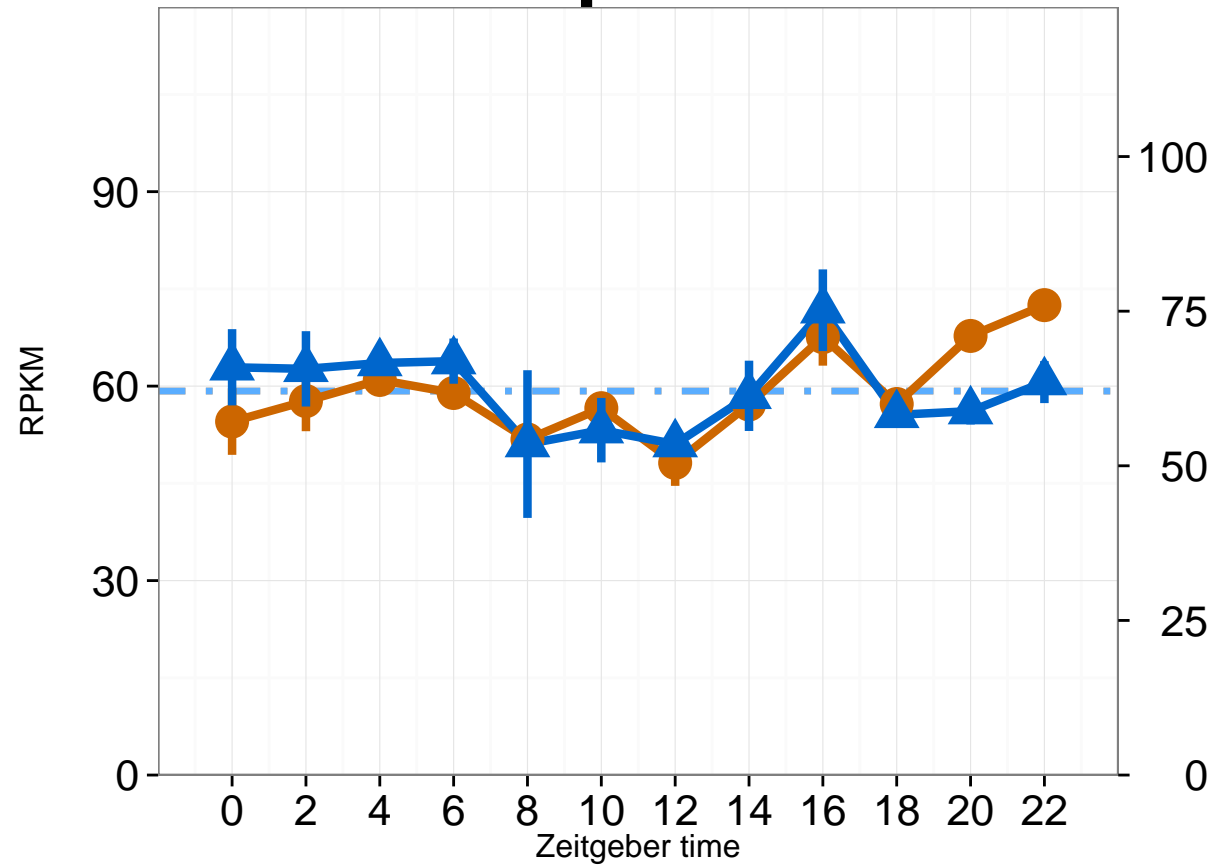

# Serpina11

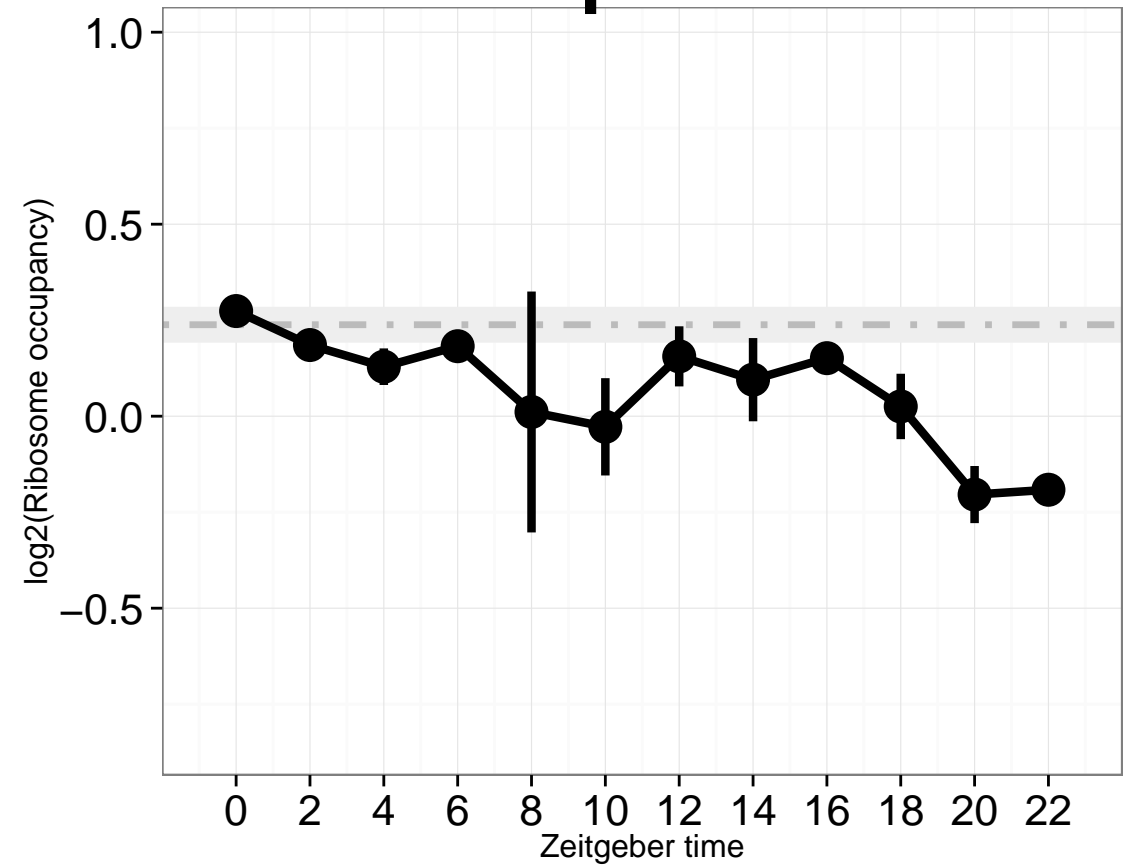

Supplement: SuppDataset_1.zip [file Serpina11_set_A.pdf › Supplemental Dataset 1/A-mRNA_nonrhyth_translation_nonrhyth/Serpina11_set_A.pdf]

## Serpina12

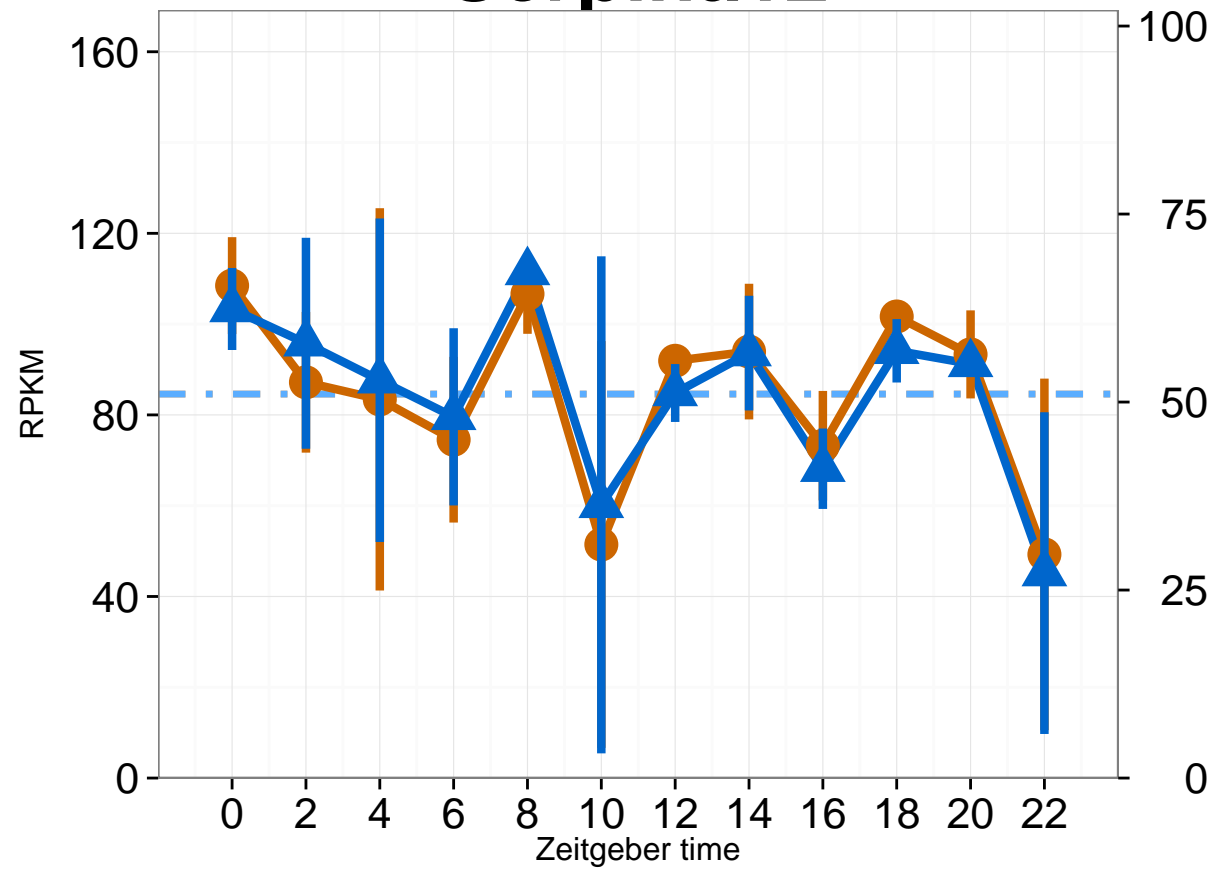

## Serpina12

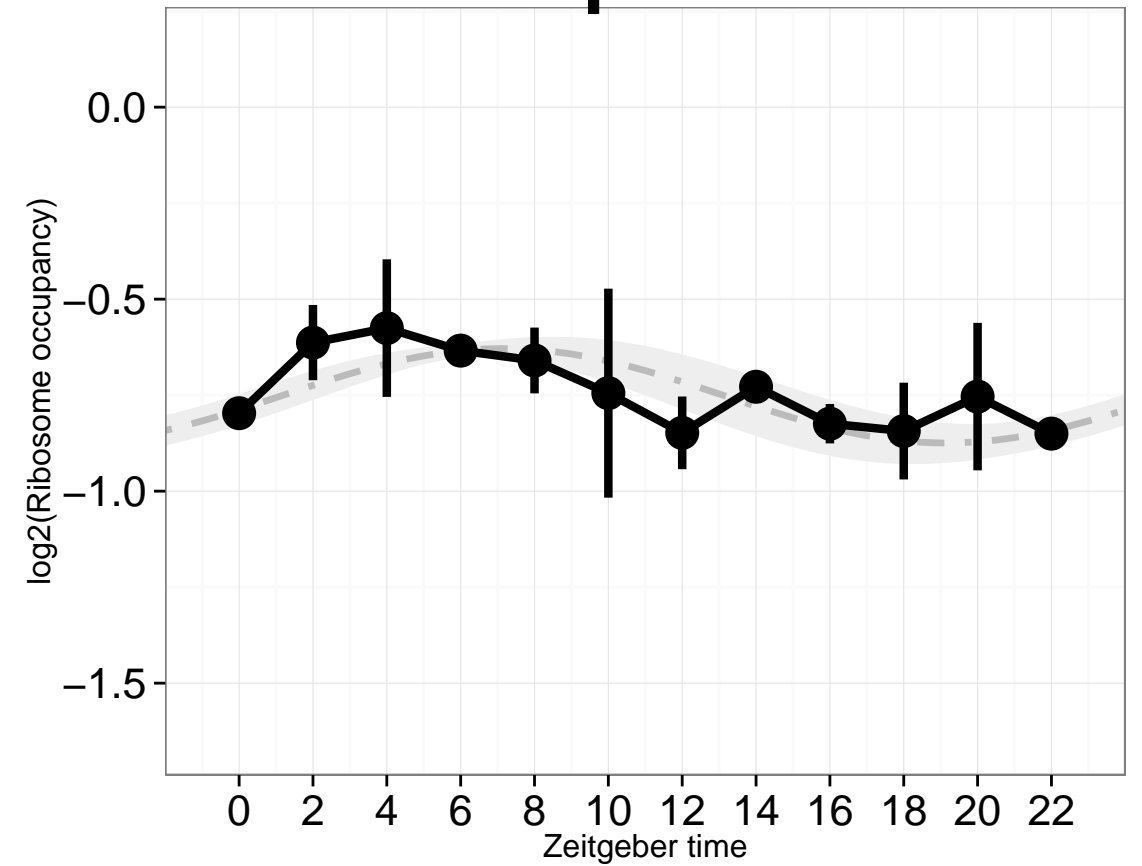

Supplement: SuppDataset_1.zip [file Serpina12_set_A.pdf › Supplemental Dataset 1/A-mRNA_nonrhyth_translation_nonrhyth/Serpina12_set_A.pdf]

# Serpina1a

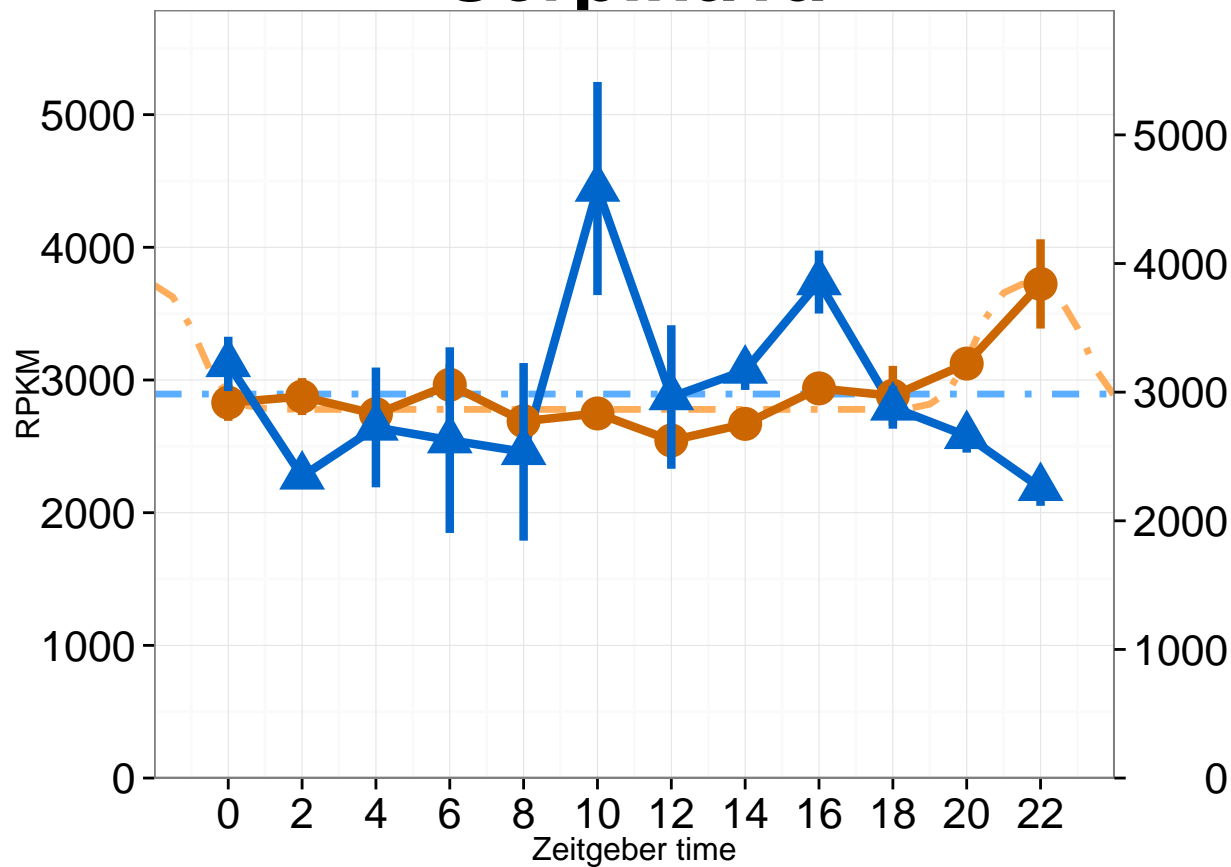

# Serpina1a

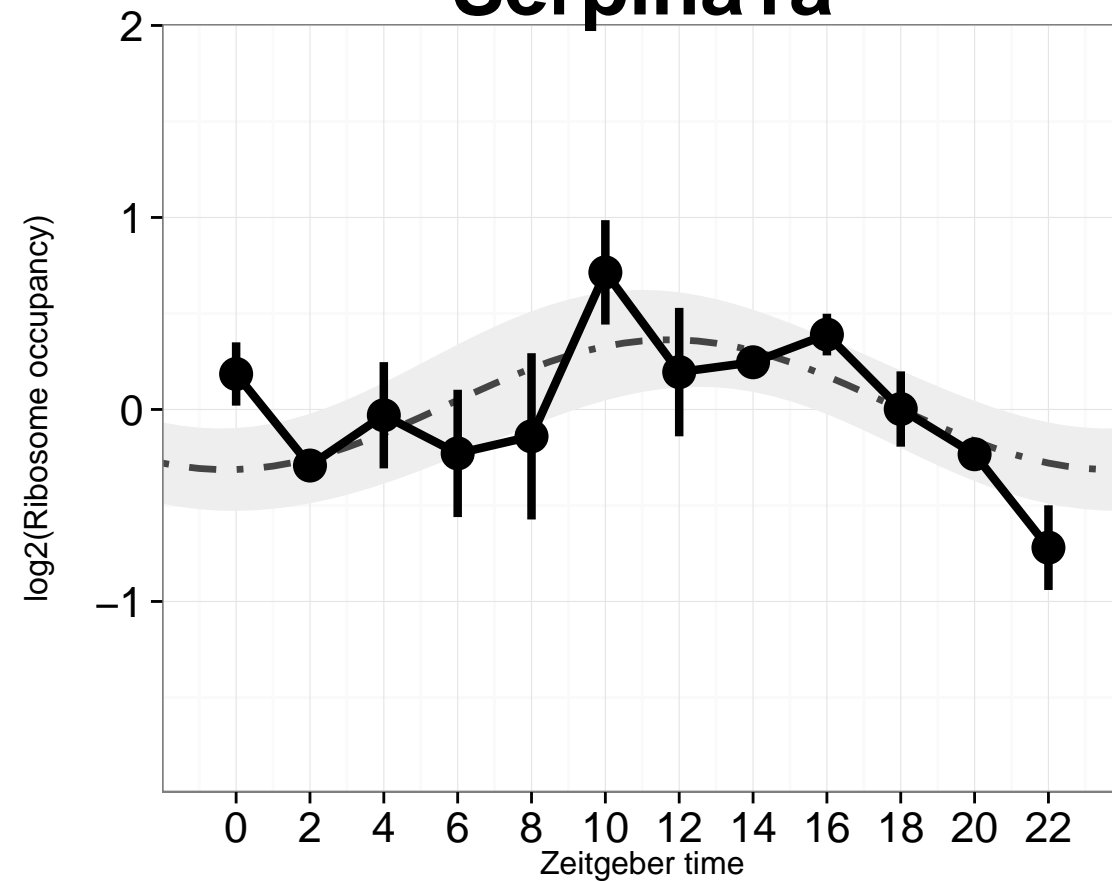

Supplement: SuppDataset_1.zip [file Serpina1a_set_A.pdf › Supplemental Dataset 1/A-mRNA_nonrhyth_translation_nonrhyth/Serpina1a_set_A.pdf]

# Serpina1b

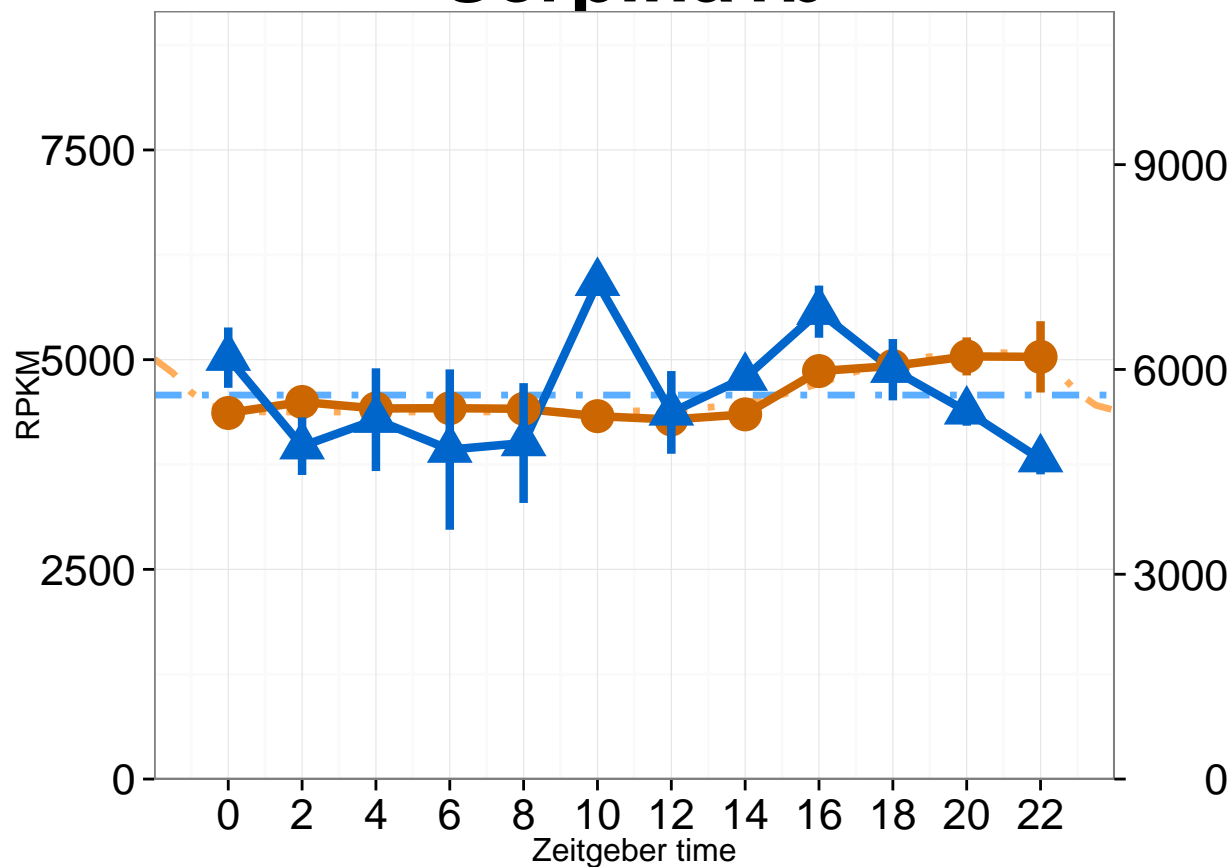

# Serpina1b

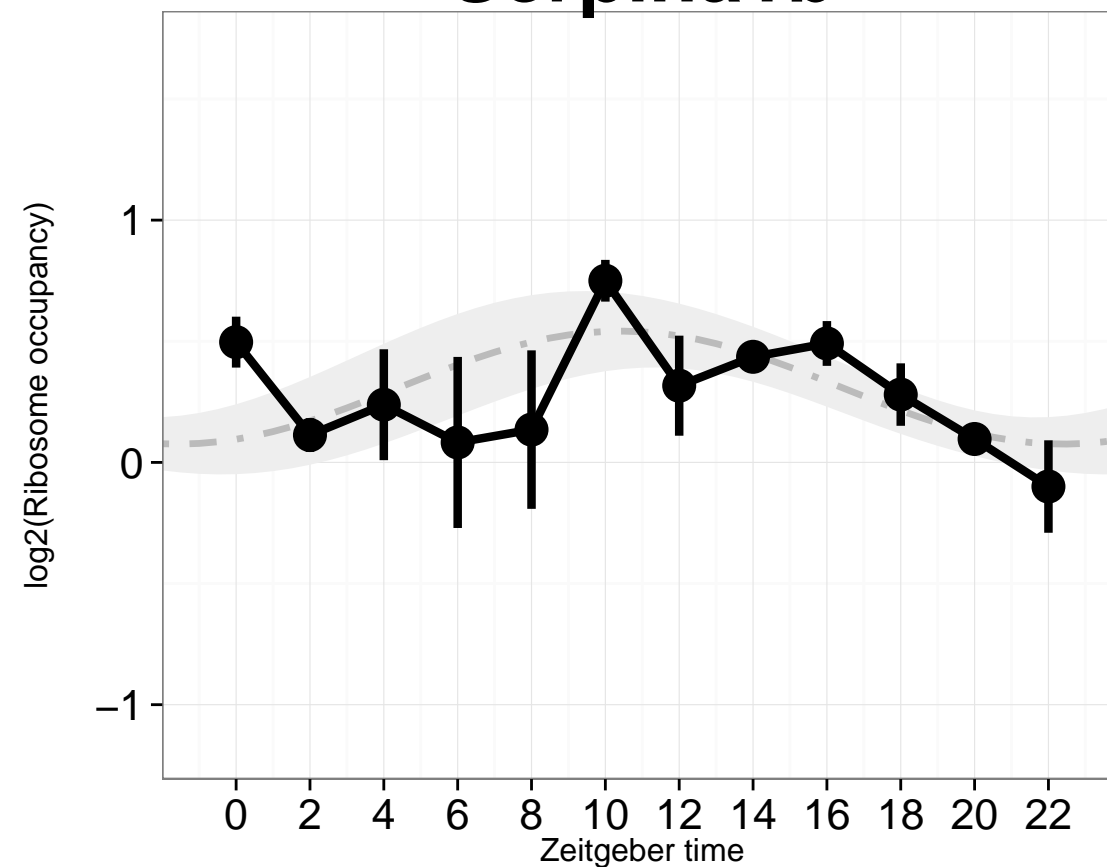

Supplement: SuppDataset_1.zip [file Serpina1b_set_A.pdf › Supplemental Dataset 1/A-mRNA_nonrhyth_translation_nonrhyth/Serpina1b_set_A.pdf]

# Serpina1c

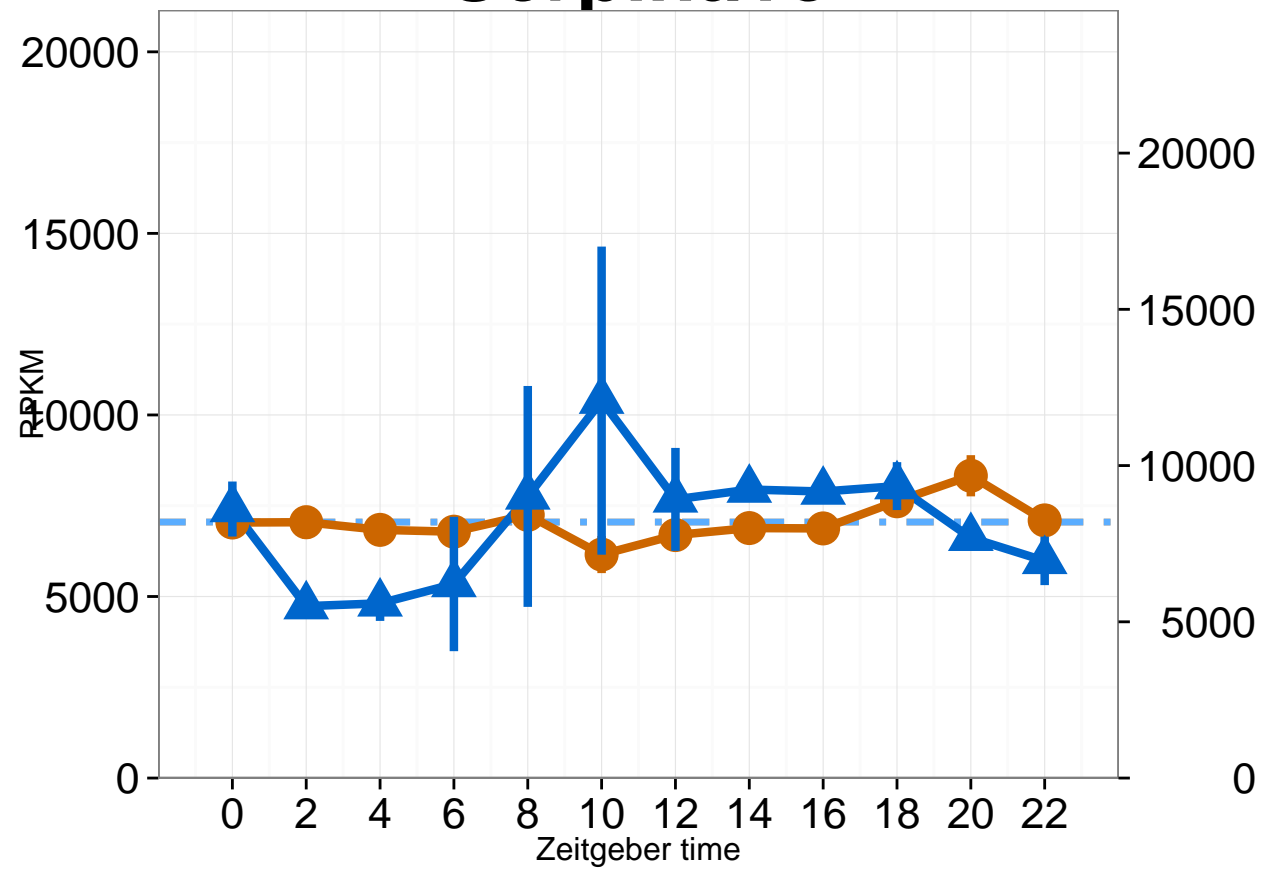

# Serpina1c

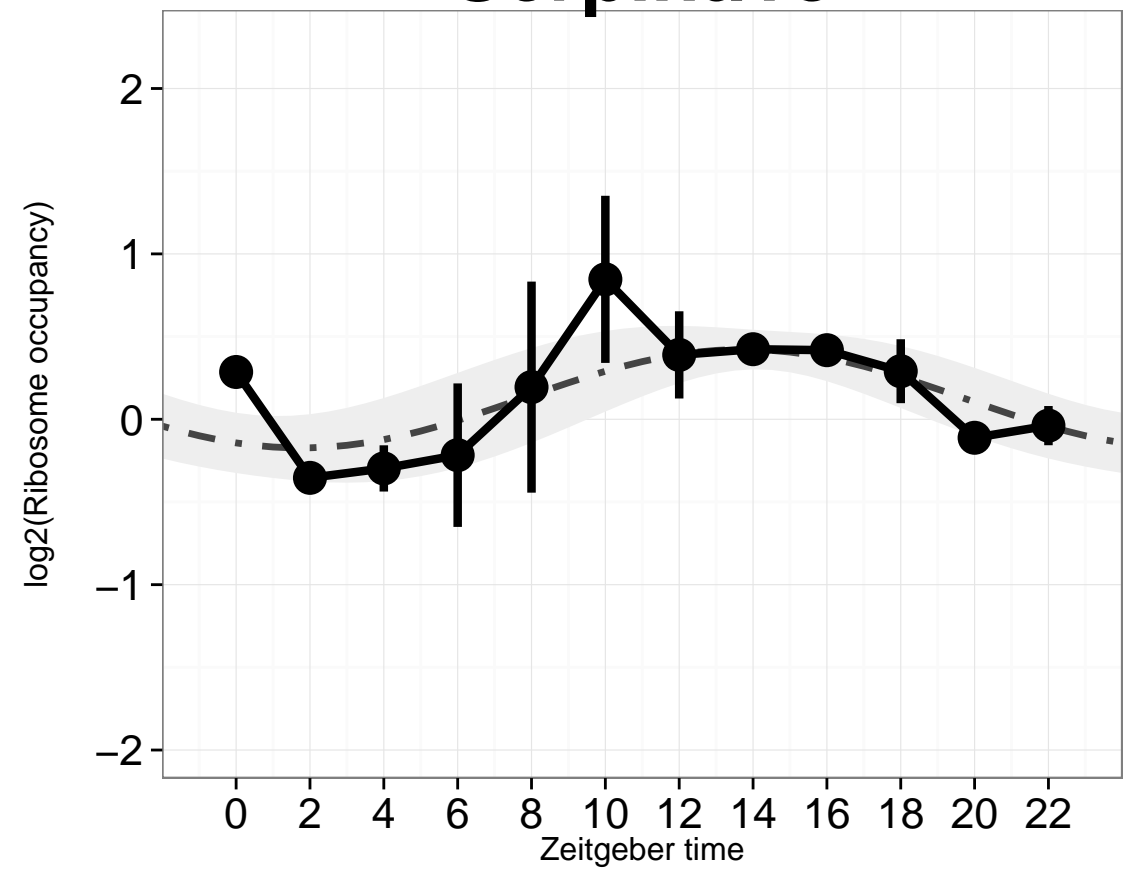

Supplement: SuppDataset_1.zip [file Serpina1c_set_A.pdf › Supplemental Dataset 1/A-mRNA_nonrhyth_translation_nonrhyth/Serpina1c_set_A.pdf]

# Serpina1d

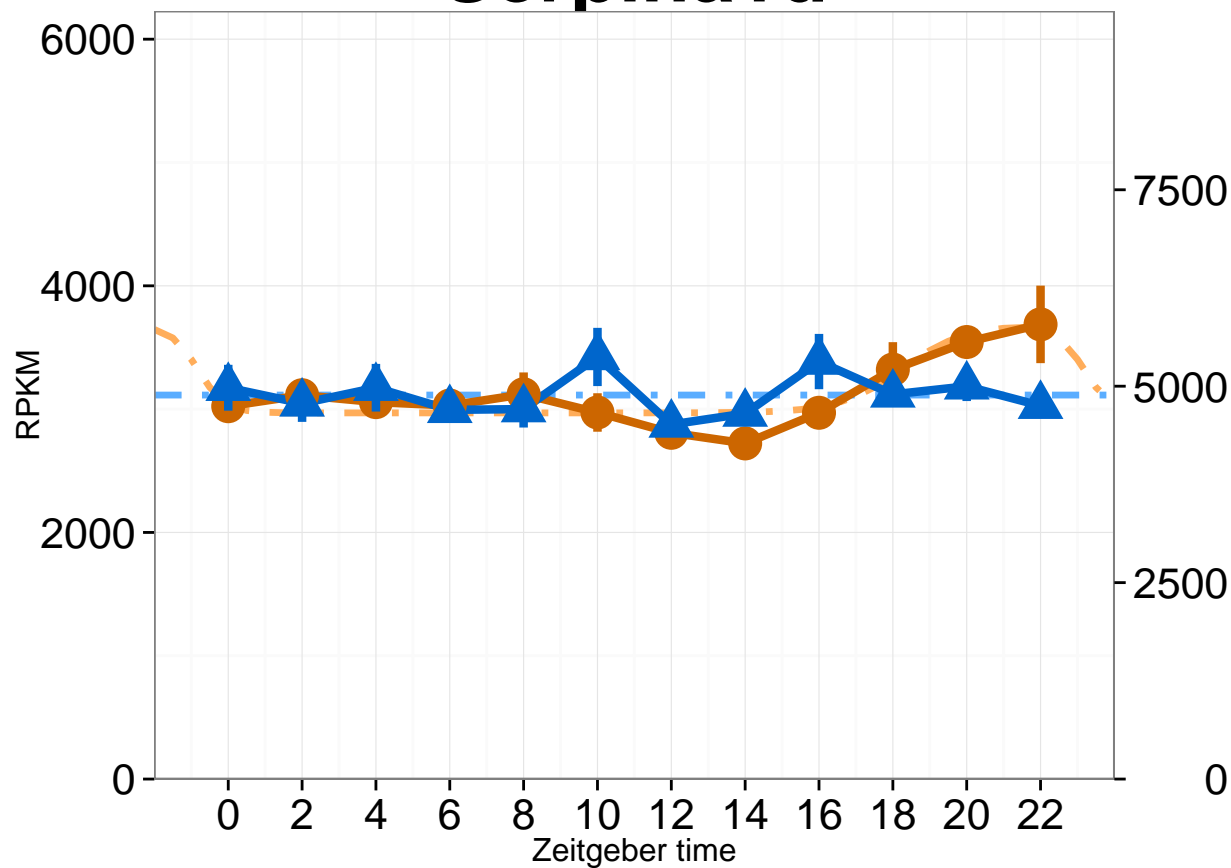

# Serpina1d

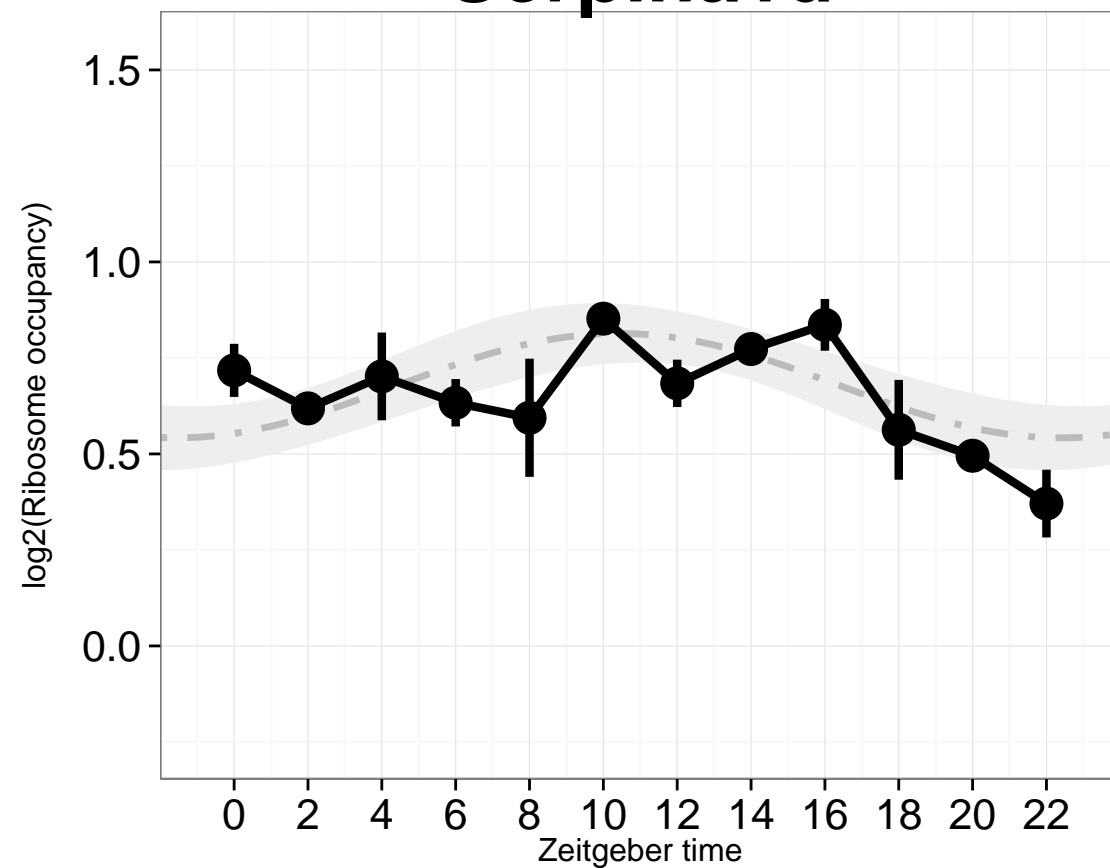

Supplement: SuppDataset_1.zip [file Serpina1d_set_A.pdf › Supplemental Dataset 1/A-mRNA_nonrhyth_translation_nonrhyth/Serpina1d_set_A.pdf]

# Serpina1e

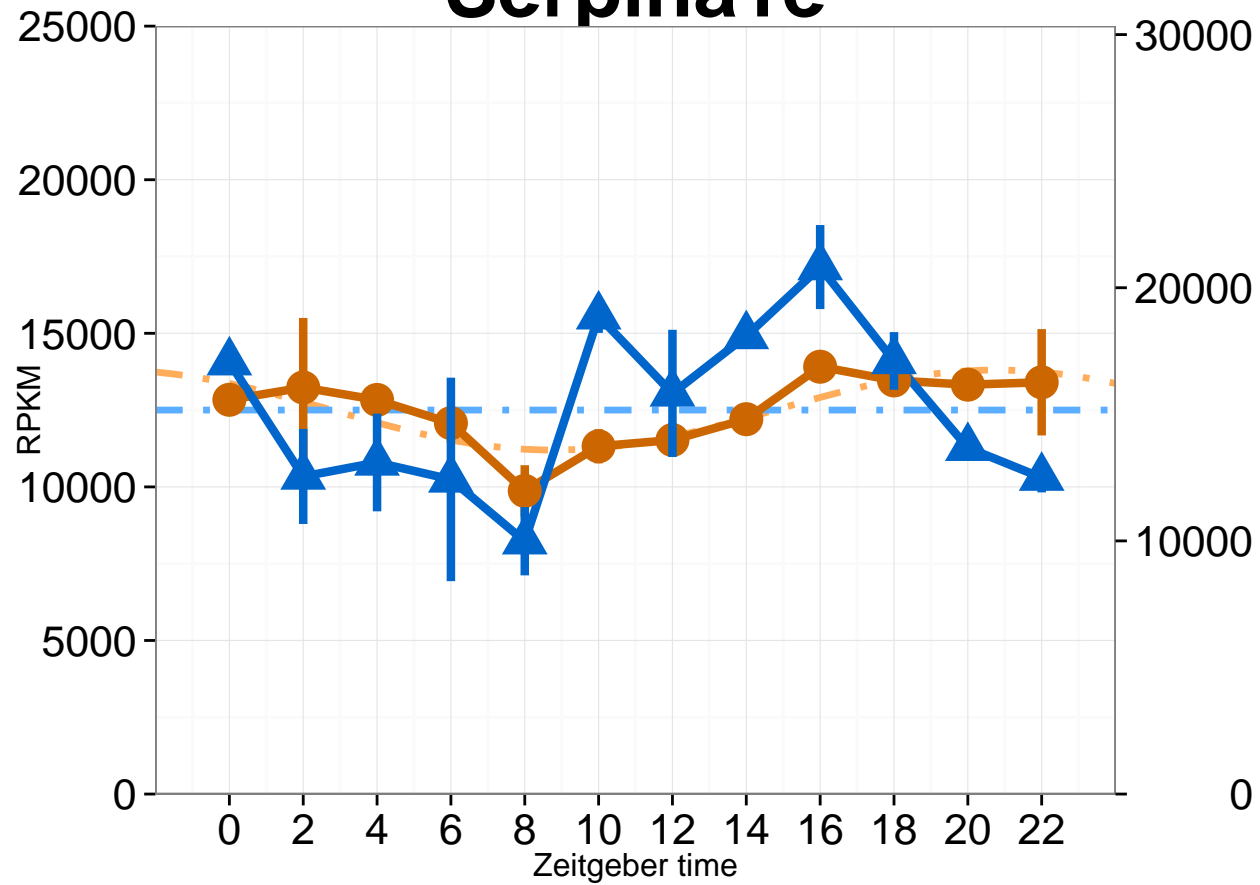

# Serpina1e

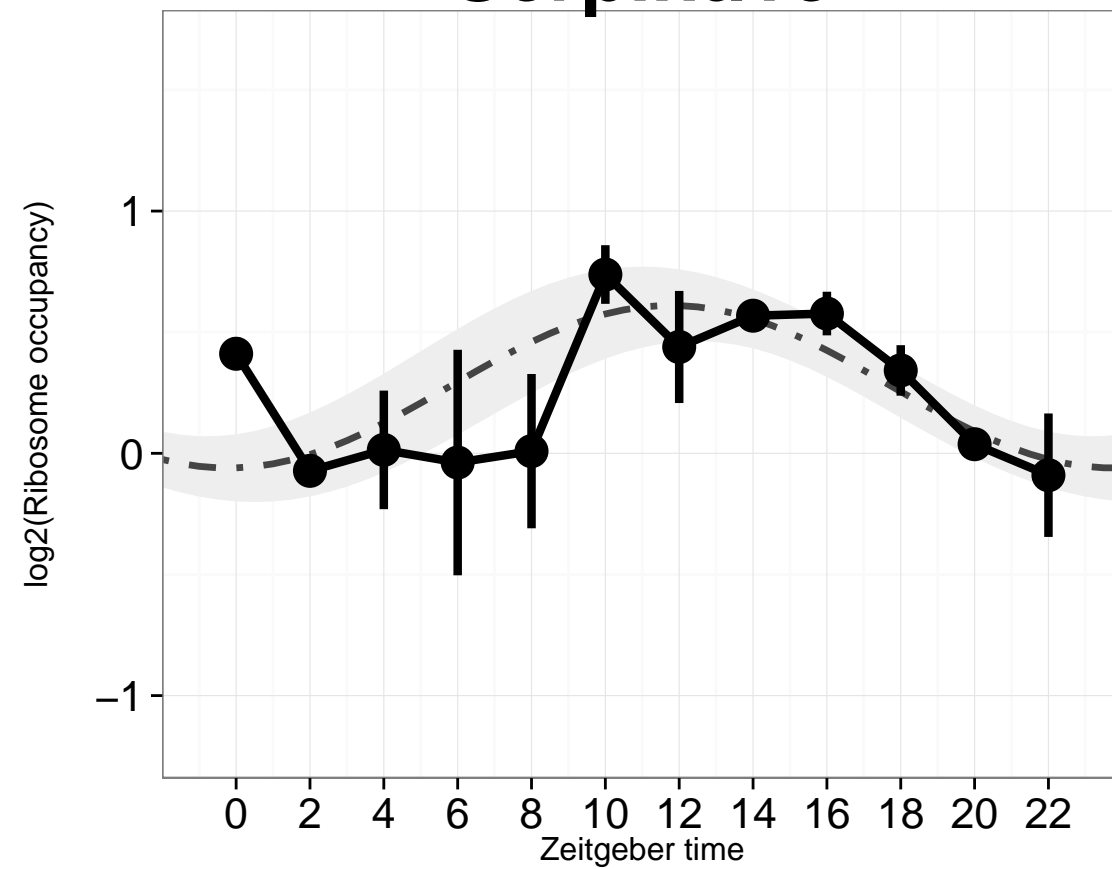

Supplement: SuppDataset_1.zip [file Serpina1e_set_A.pdf › Supplemental Dataset 1/A-mRNA_nonrhyth_translation_nonrhyth/Serpina1e_set_A.pdf]

# Serpina3f

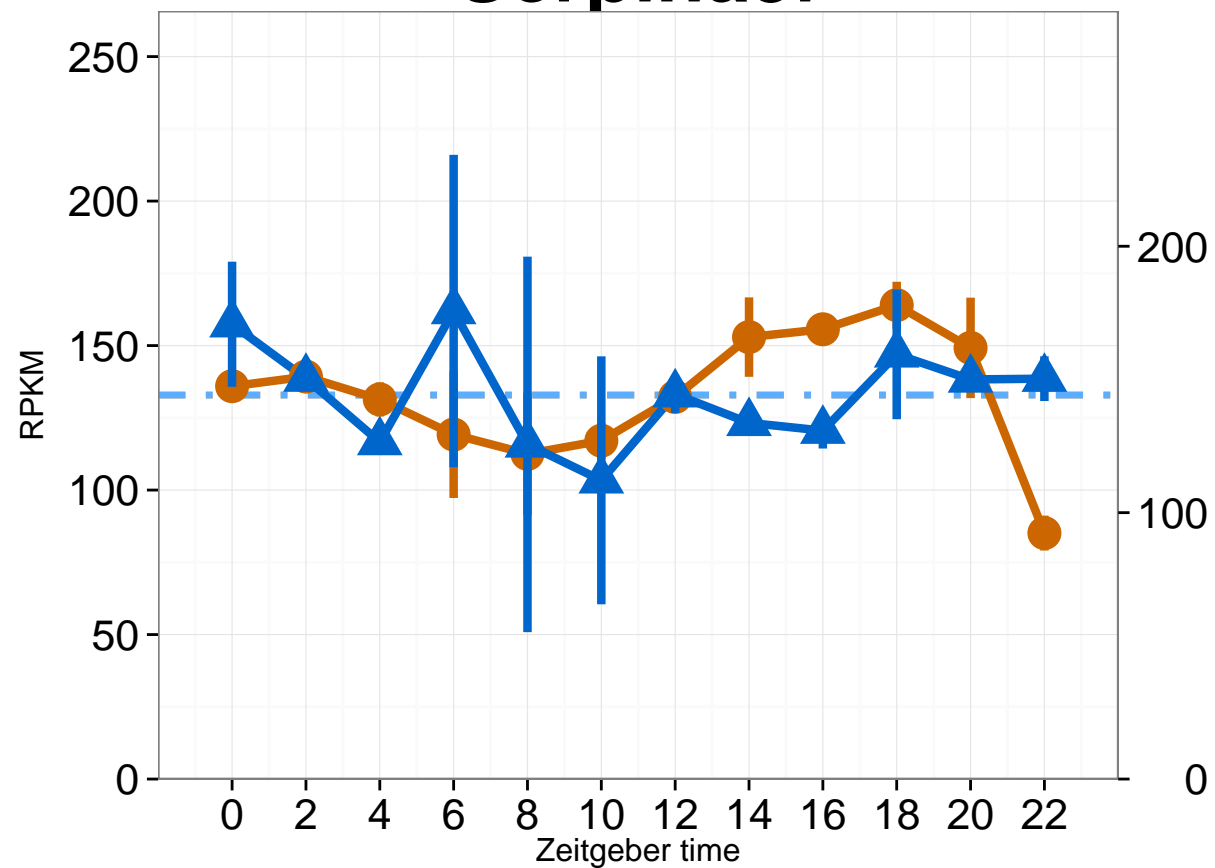

# Serpina3f

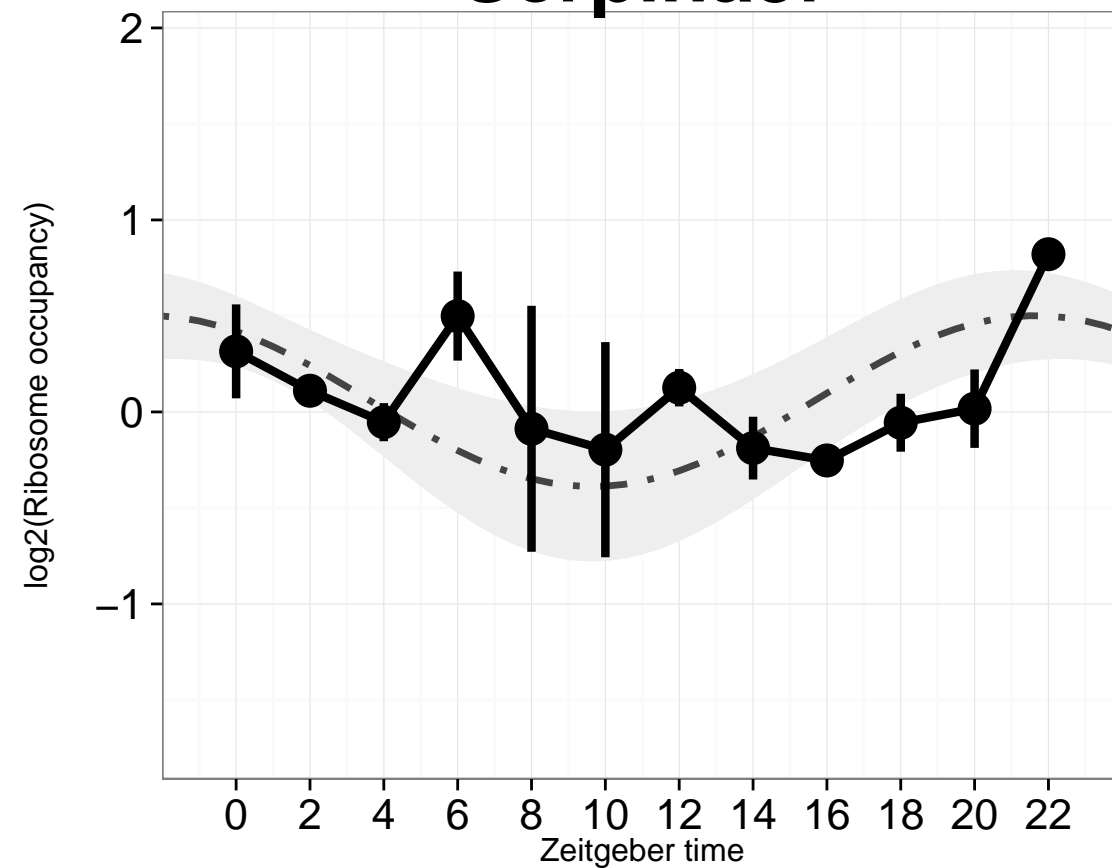

Supplement: SuppDataset_1.zip [file Serpina3f_set_A.pdf › Supplemental Dataset 1/A-mRNA_nonrhyth_translation_nonrhyth/Serpina3f_set_A.pdf]

## Serpina7

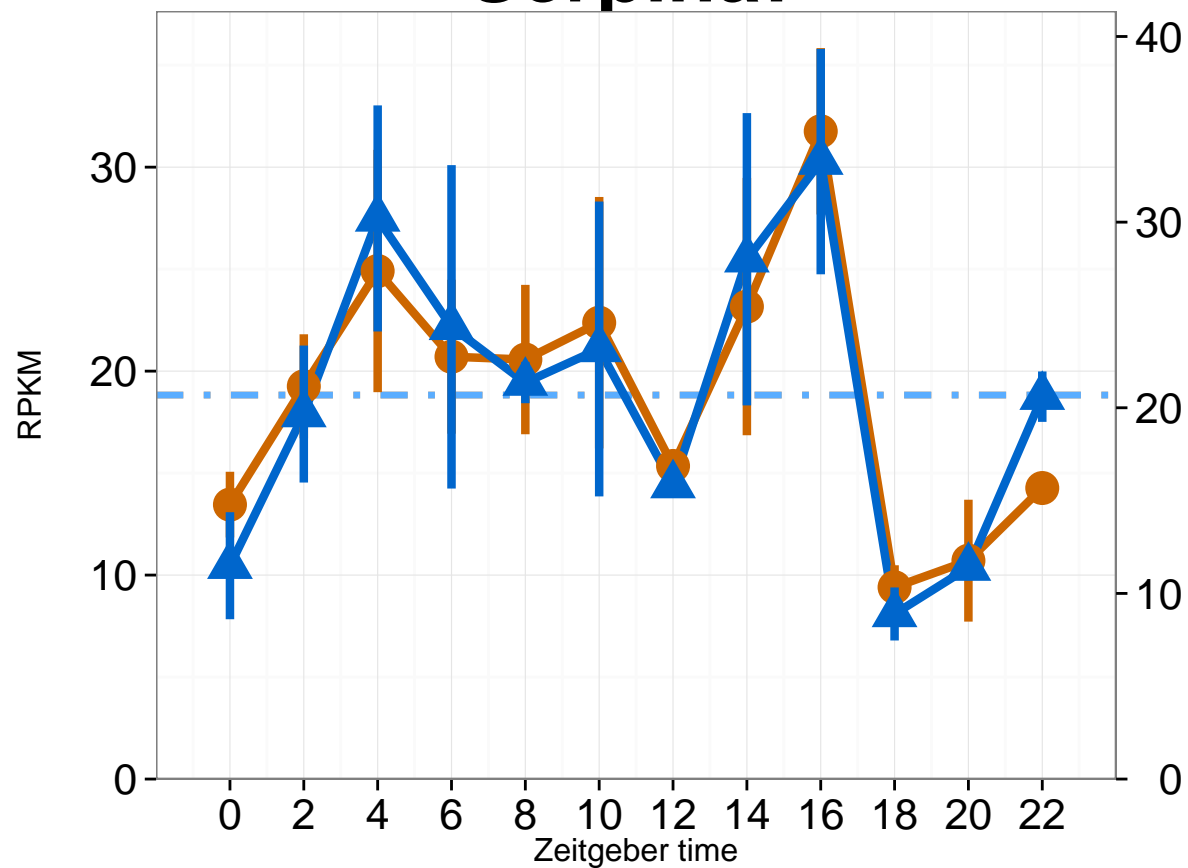

## Serpina7

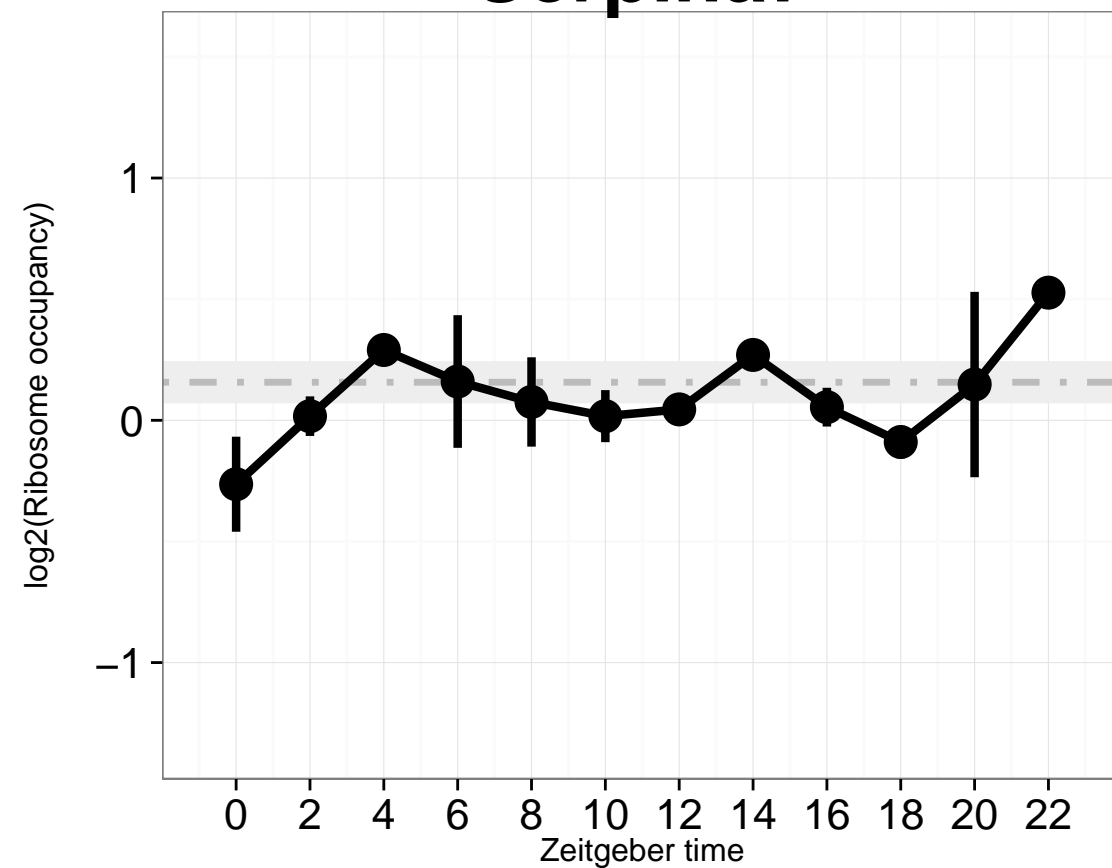

Supplement: SuppDataset_1.zip [file Serpina7_set_A.pdf › Supplemental Dataset 1/A-mRNA_nonrhyth_translation_nonrhyth/Serpina7_set_A.pdf]

# Serpina9

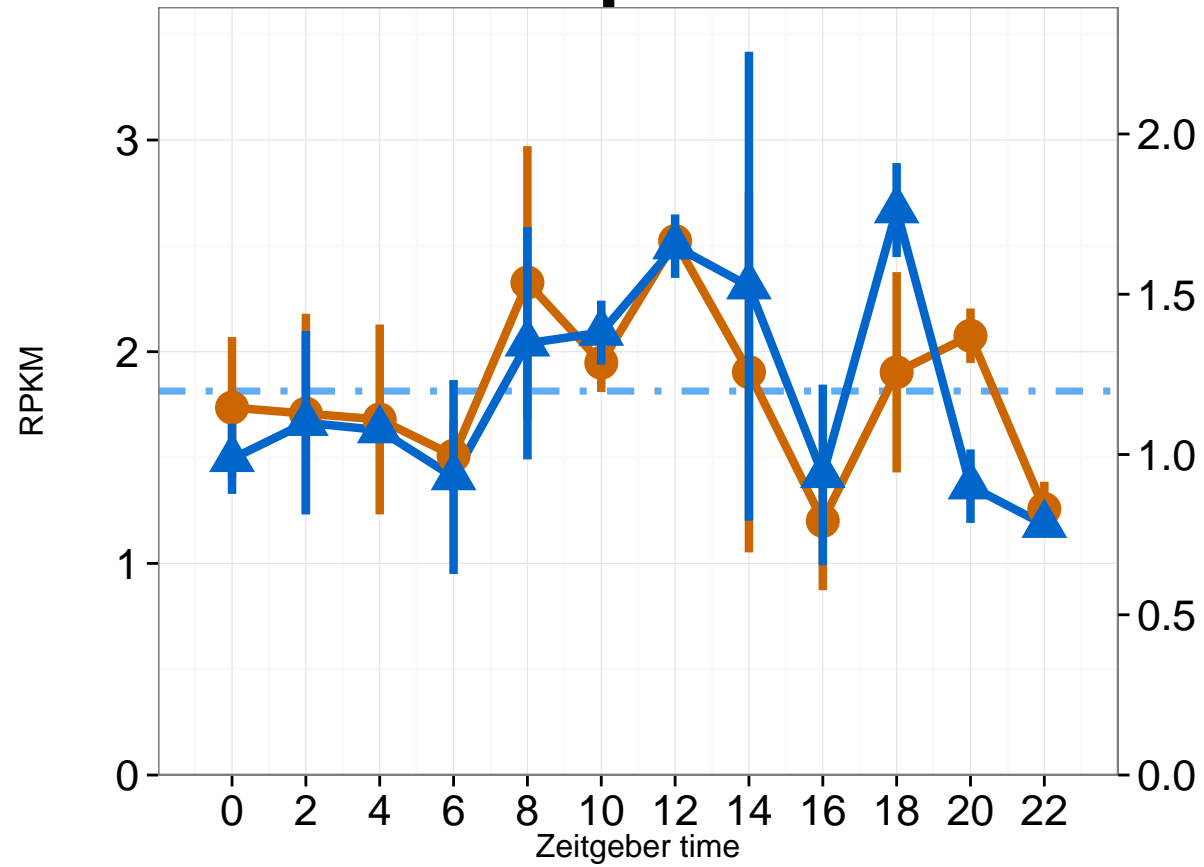

# Serpina9

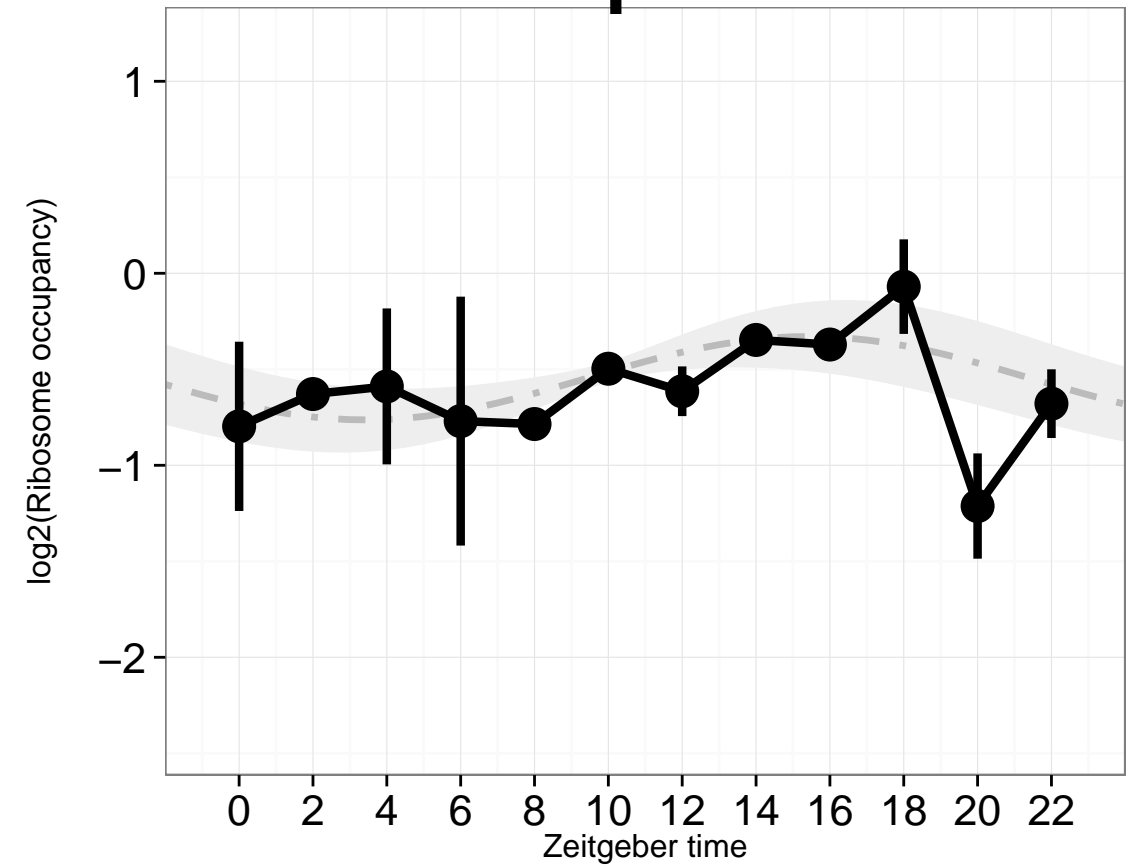

Supplement: SuppDataset_1.zip [file Serpina9_set_A.pdf › Supplemental Dataset 1/A-mRNA_nonrhyth_translation_nonrhyth/Serpina9_set_A.pdf]

# Serpina6a

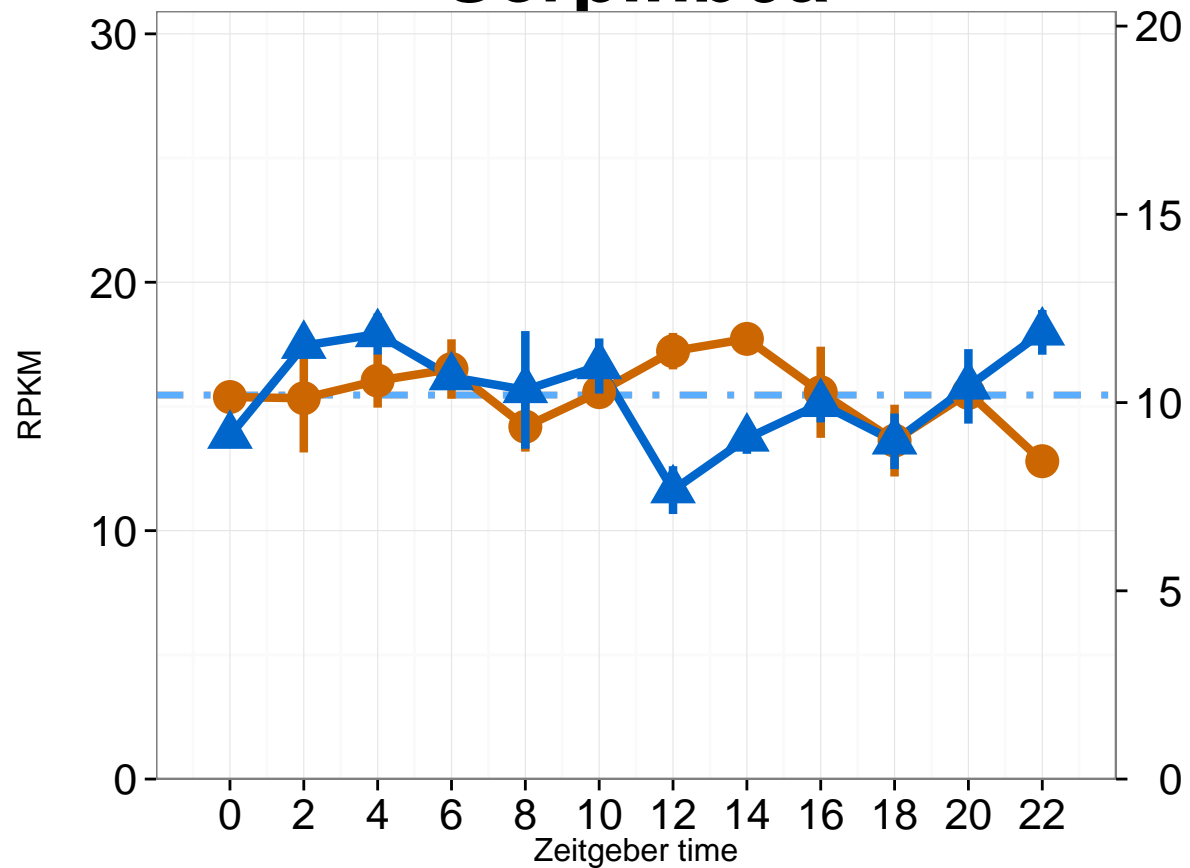

# Serpina6a

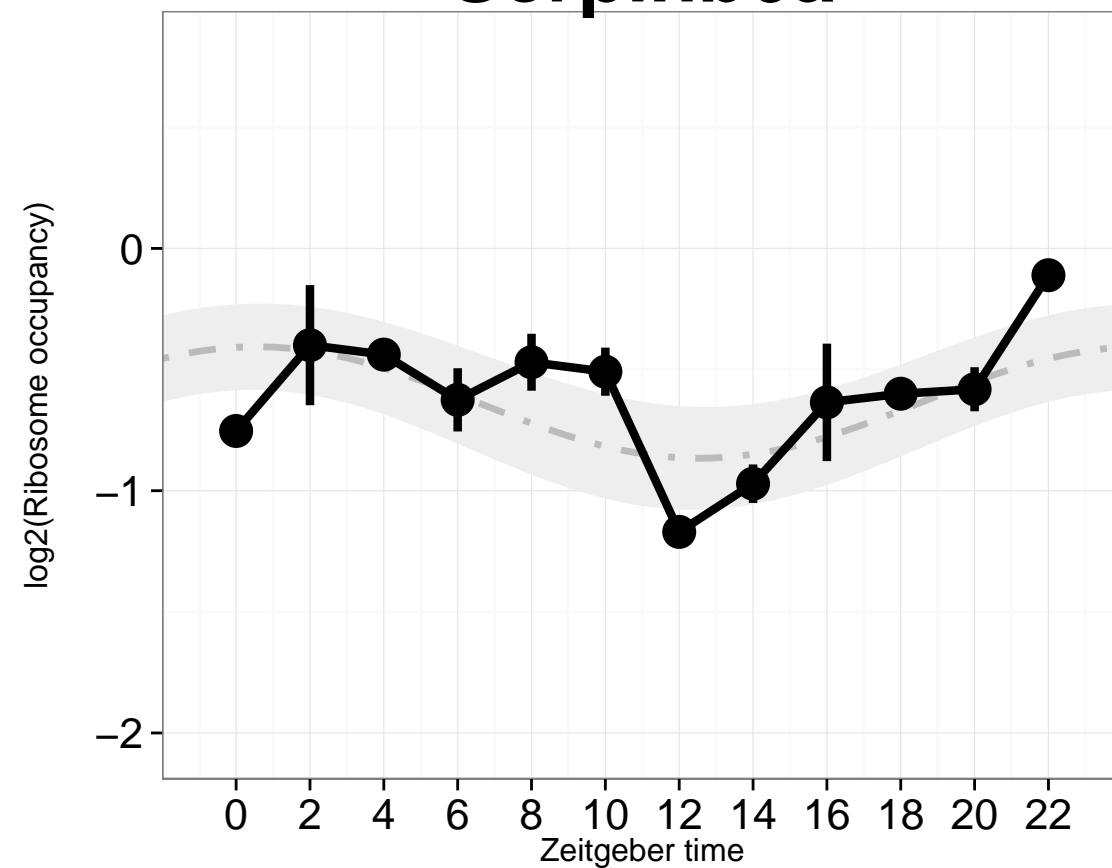

Supplement: SuppDataset_1.zip [file Serpinb6a_set_A.pdf › Supplemental Dataset 1/A-mRNA_nonrhyth_translation_nonrhyth/Serpinb6a_set_A.pdf]

# Serpinc1

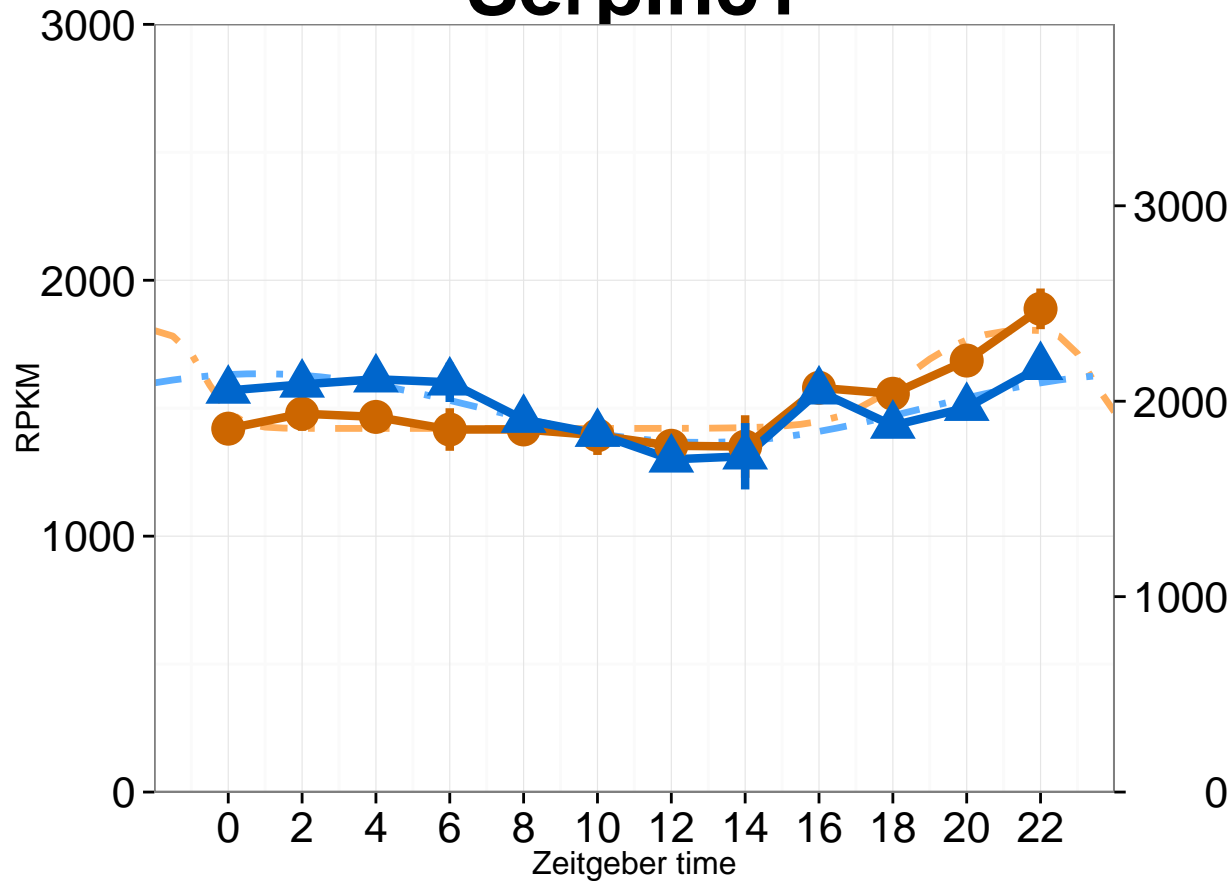

# Serpinc1

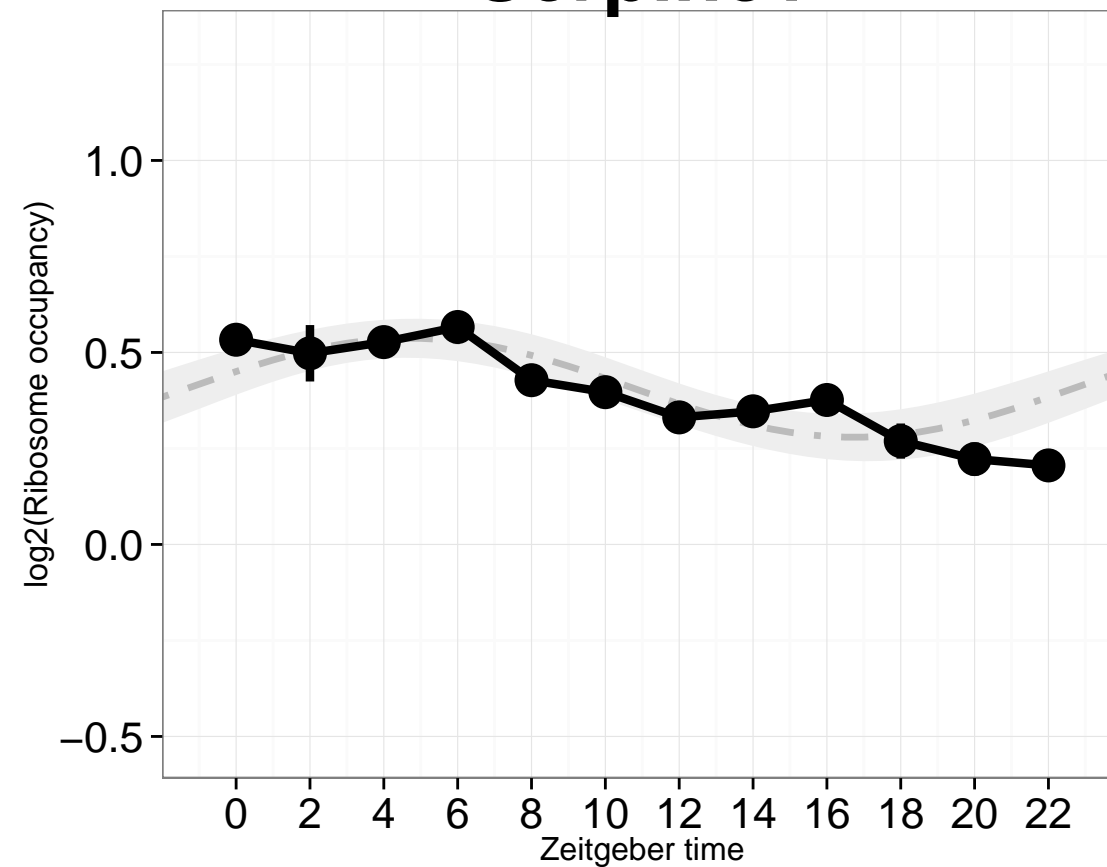

Supplement: SuppDataset_1.zip [file Serpinc1_set_A.pdf › Supplemental Dataset 1/A-mRNA_nonrhyth_translation_nonrhyth/Serpinc1_set_A.pdf]

## Serpind1

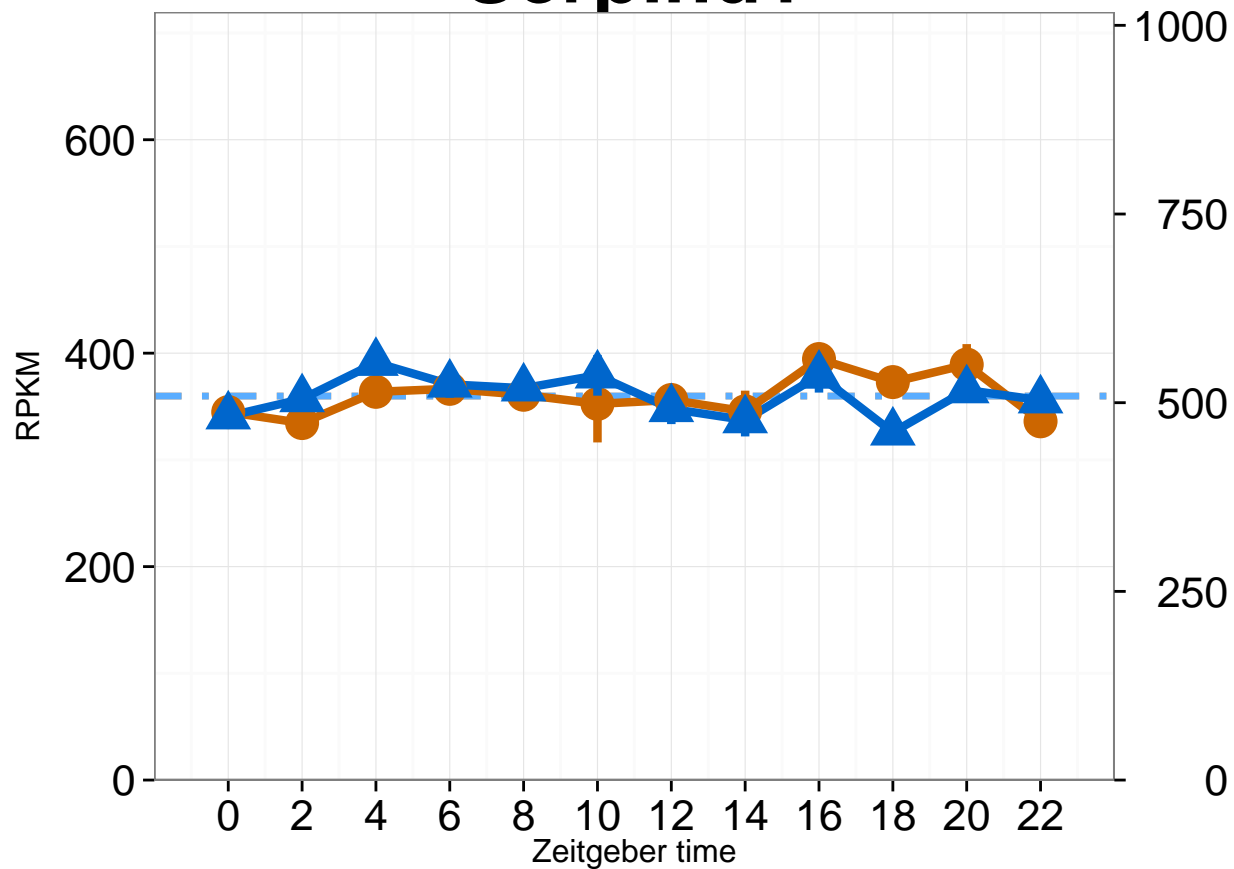

## Serpind1

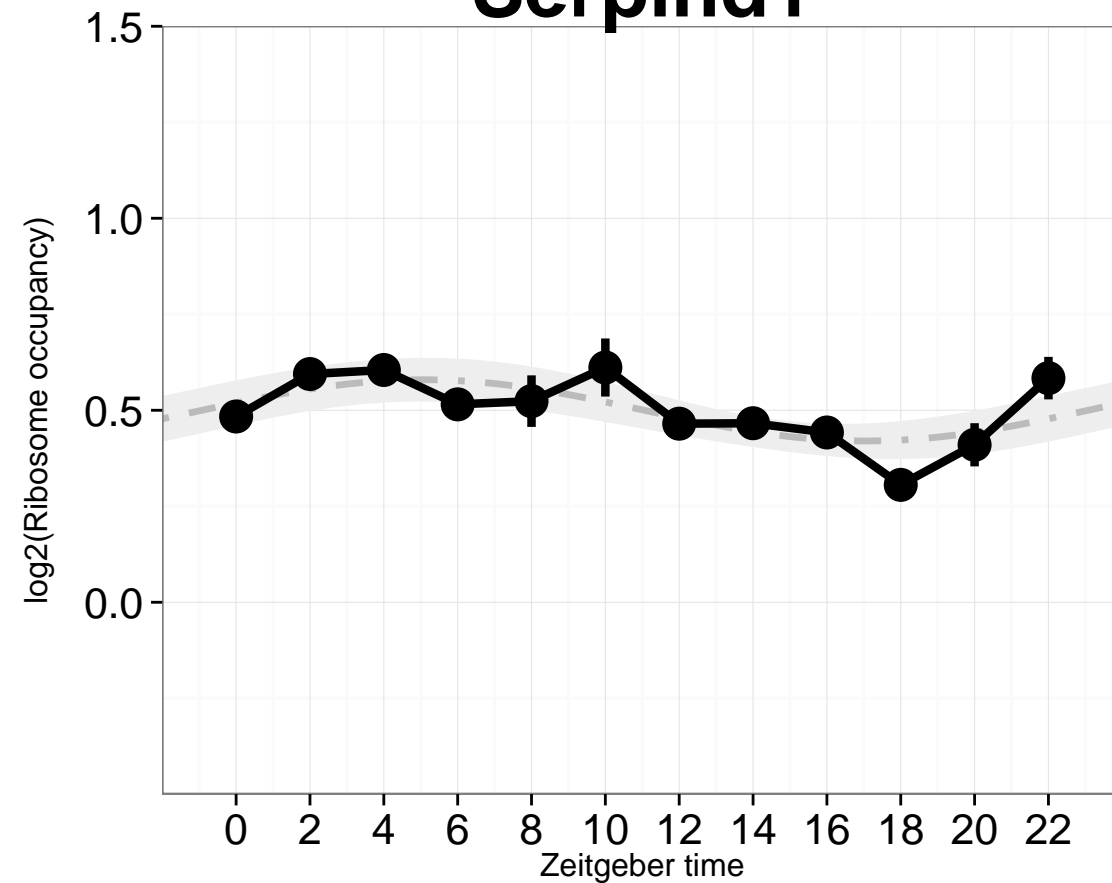

Supplement: SuppDataset_1.zip [file Serpind1_set_A.pdf › Supplemental Dataset 1/A-mRNA_nonrhyth_translation_nonrhyth/Serpind1_set_A.pdf]

**Serpine1 TR**

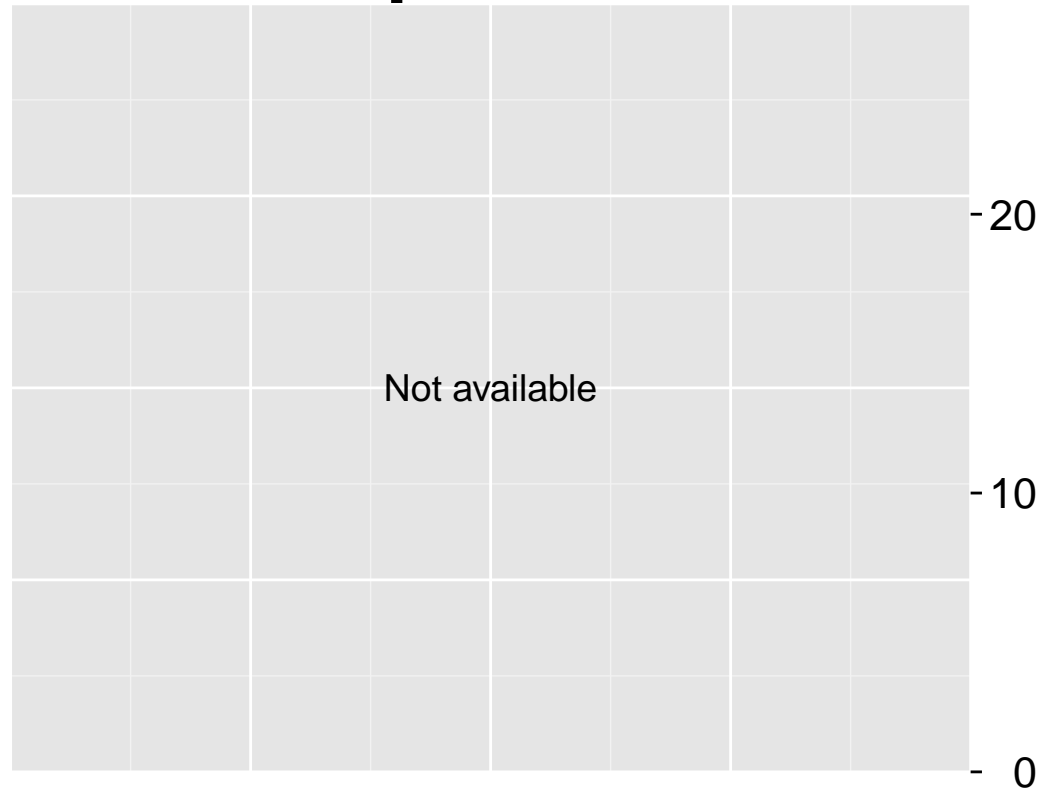

**Serpine1 log2(Ribosome occupanc**

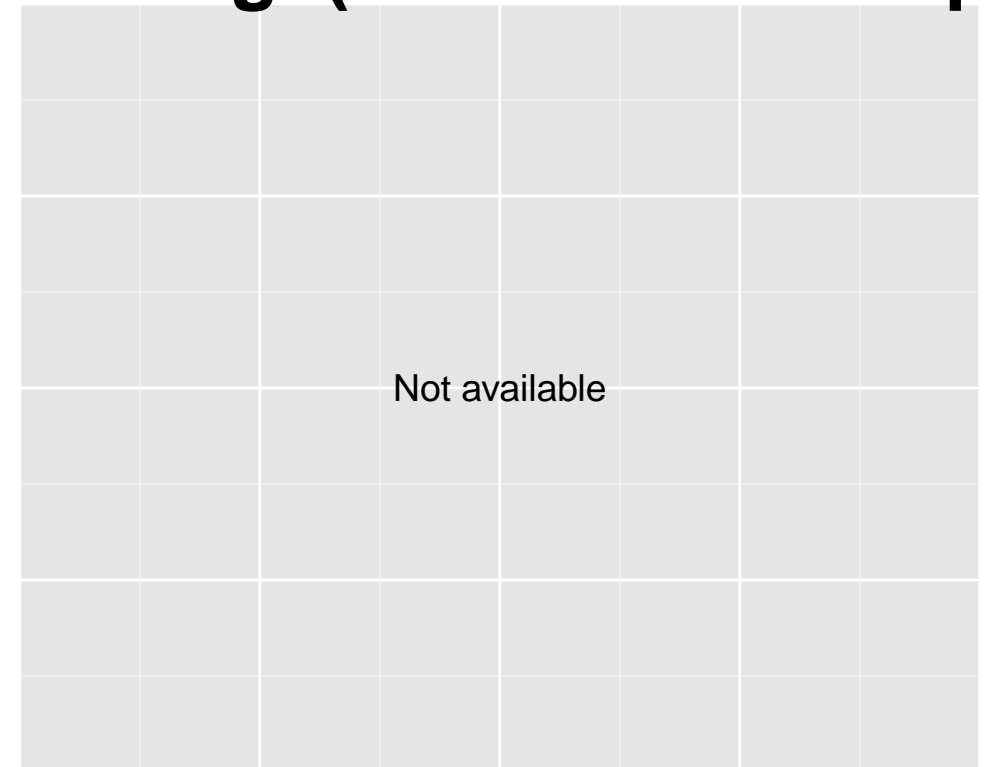

Supplement: SuppDataset_1.zip [file Serpine1_set_A.pdf › Supplemental Dataset 1/A-mRNA_nonrhyth_translation_nonrhyth/Serpine1_set_A.pdf]

# Sertad1

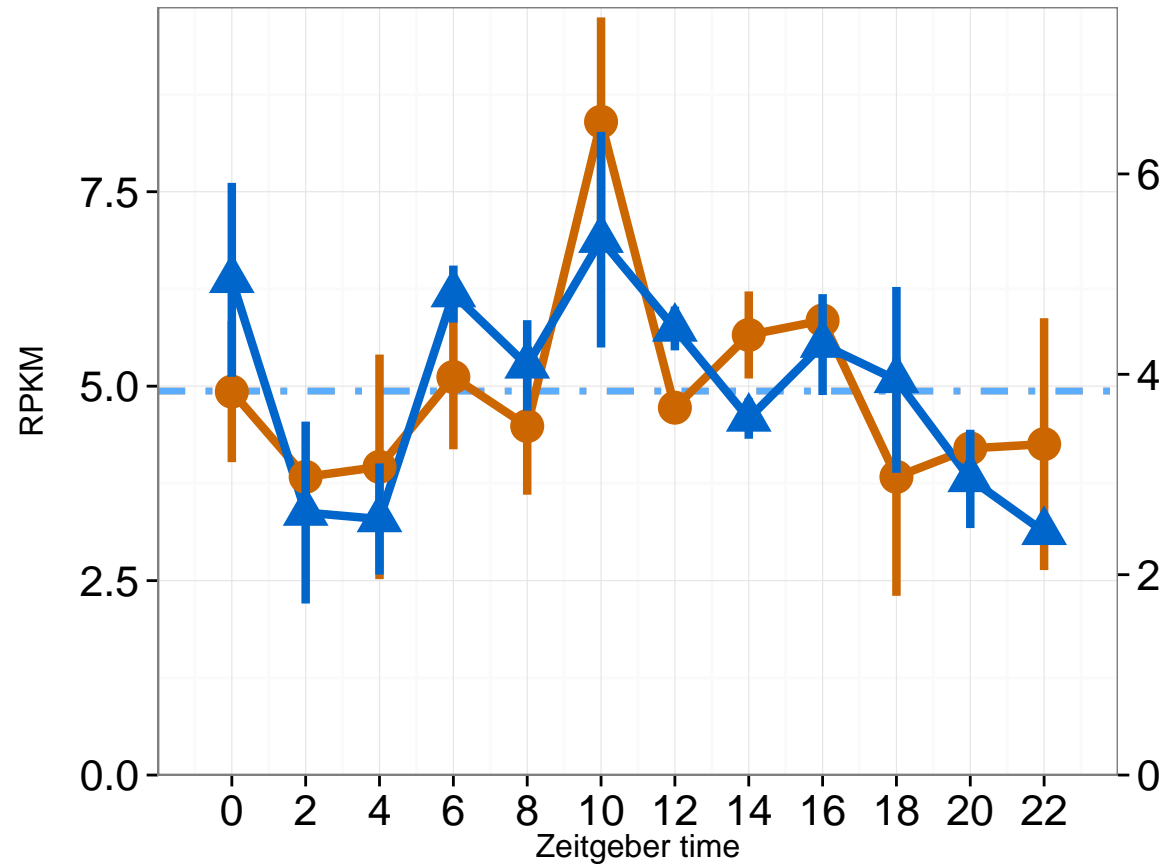

# Sertad1

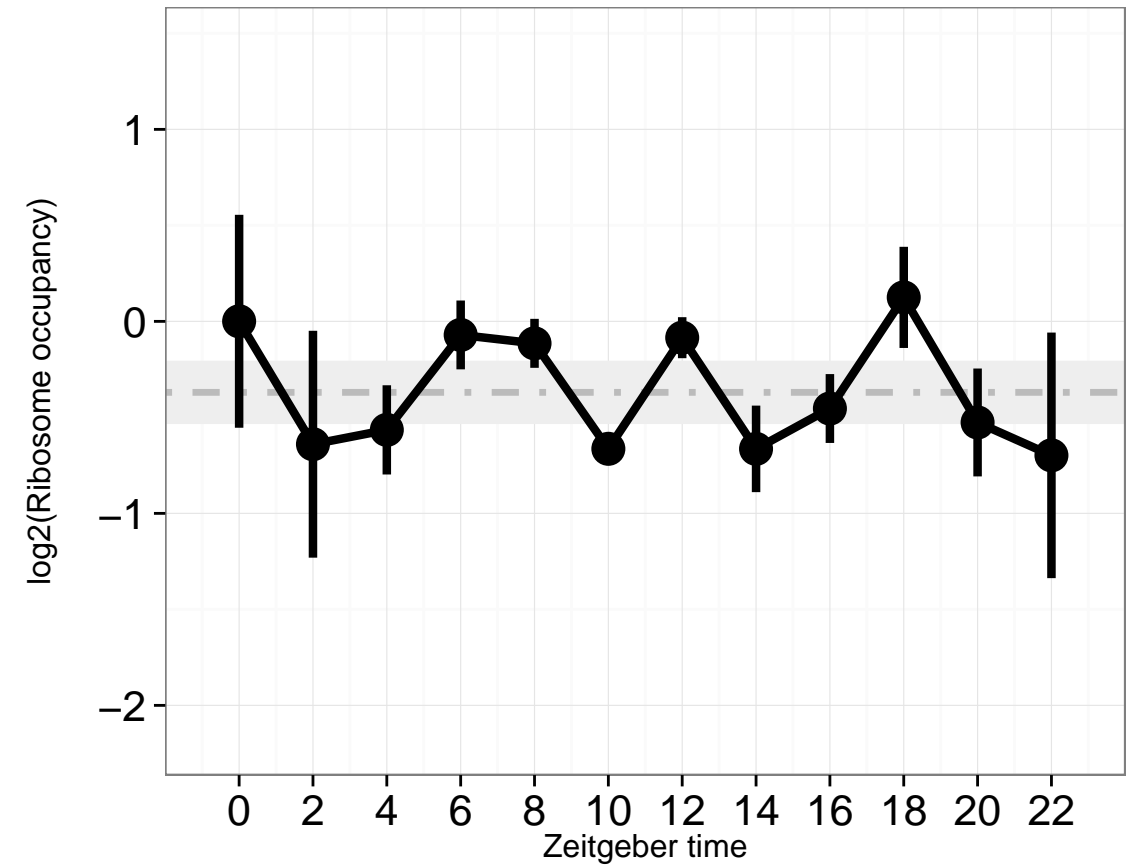

Supplement: SuppDataset_1.zip [file Sertad1_set_A.pdf › Supplemental Dataset 1/A-mRNA_nonrhyth_translation_nonrhyth/Sertad1_set_A.pdf]

## Sertad2

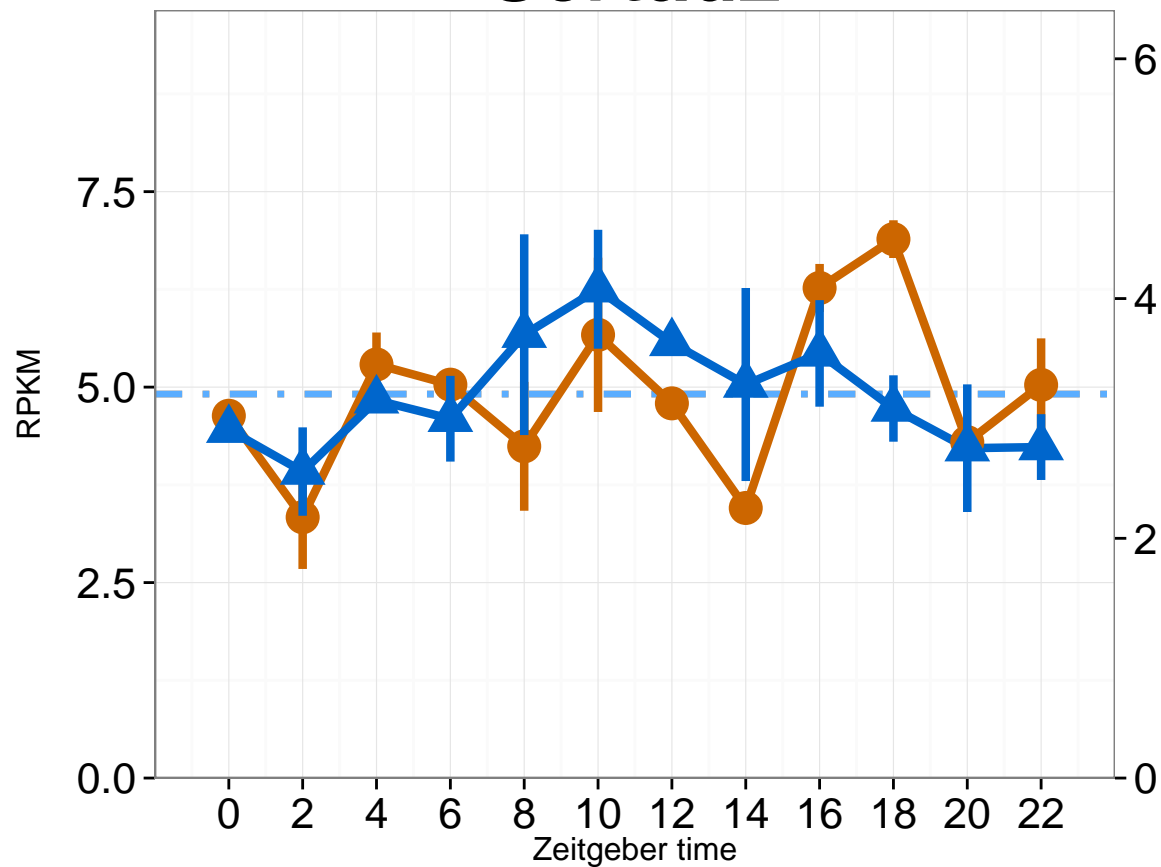

## Sertad2

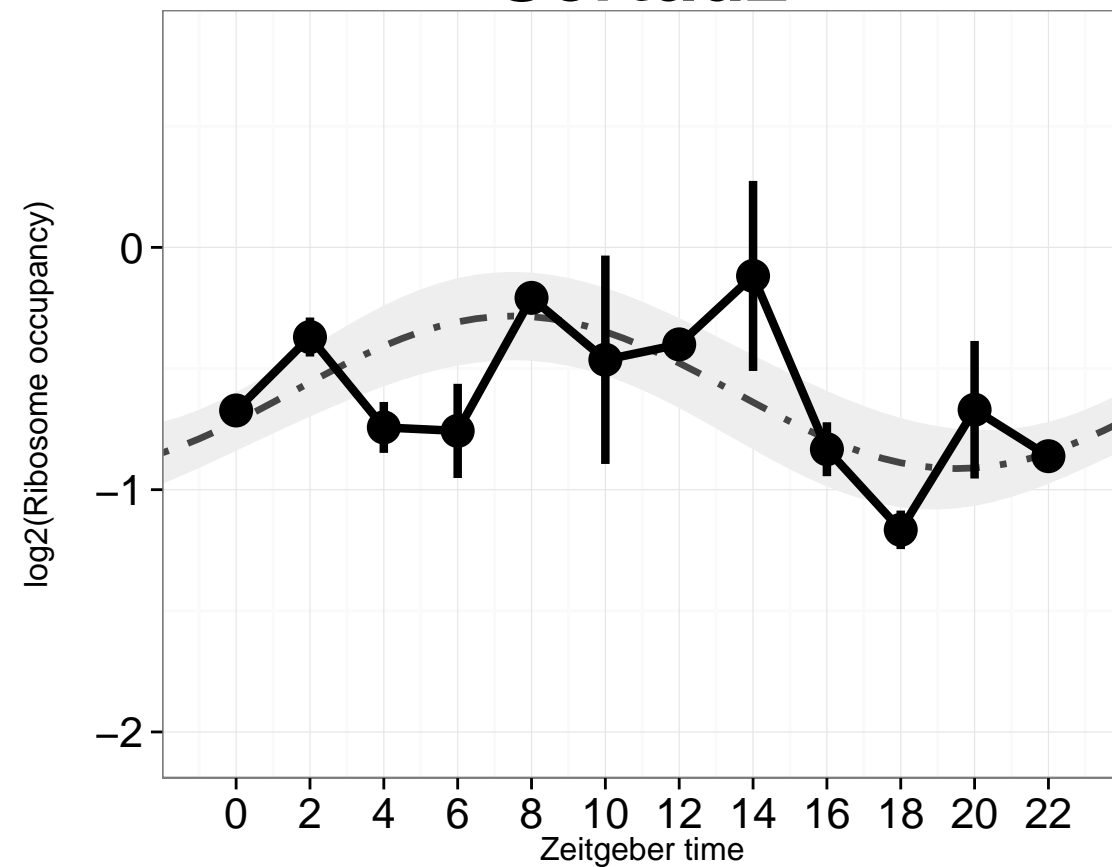

Supplement: SuppDataset_1.zip [file Sertad2_set_A.pdf › Supplemental Dataset 1/A-mRNA_nonrhyth_translation_nonrhyth/Sertad2_set_A.pdf]

## Sertad3

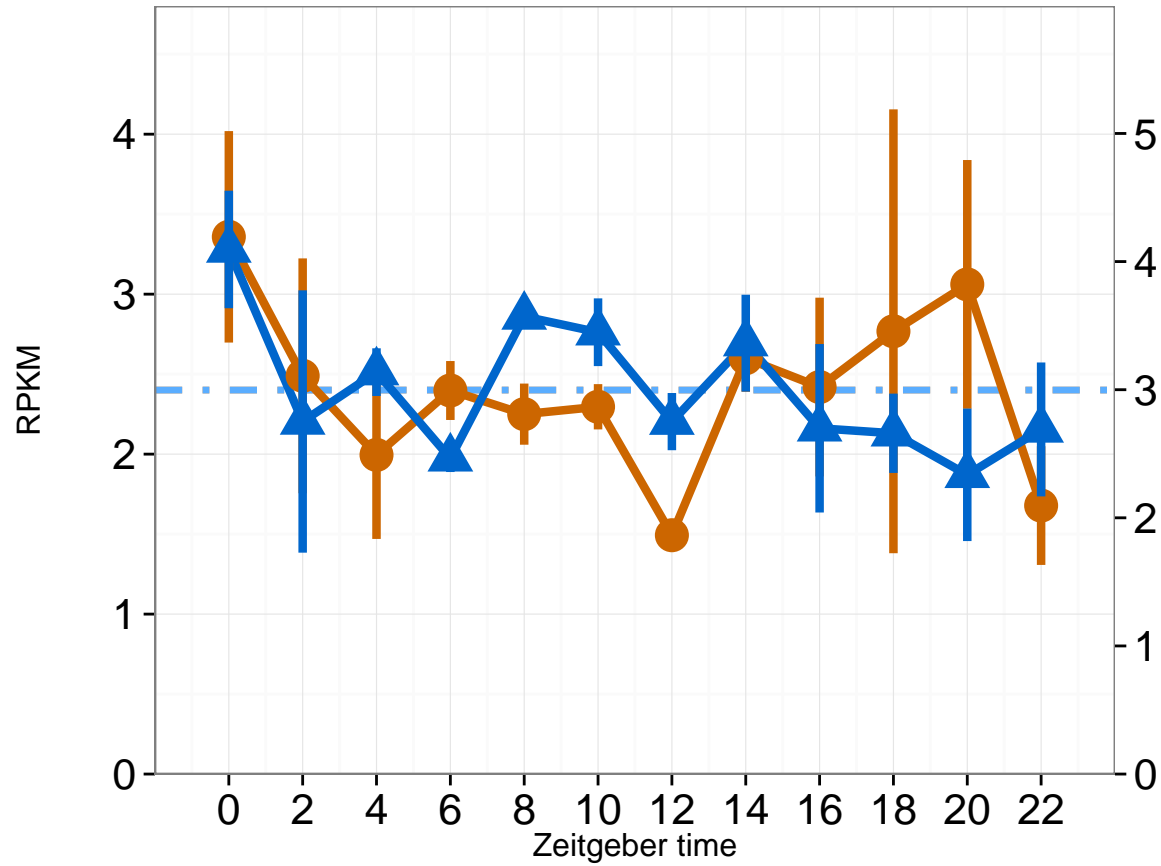

## Sertad3

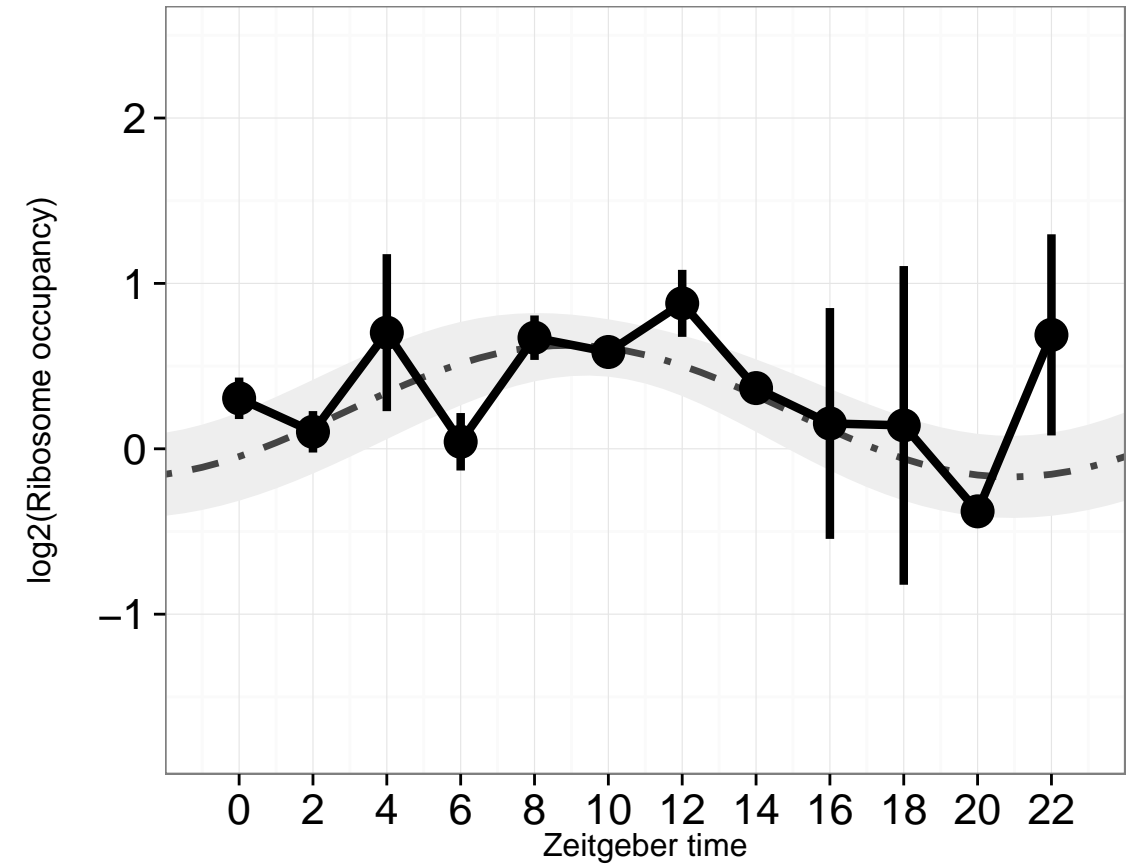

Supplement: SuppDataset_1.zip [file Sertad3_set_A.pdf › Supplemental Dataset 1/A-mRNA_nonrhyth_translation_nonrhyth/Sertad3_set_A.pdf]

# Sesn1

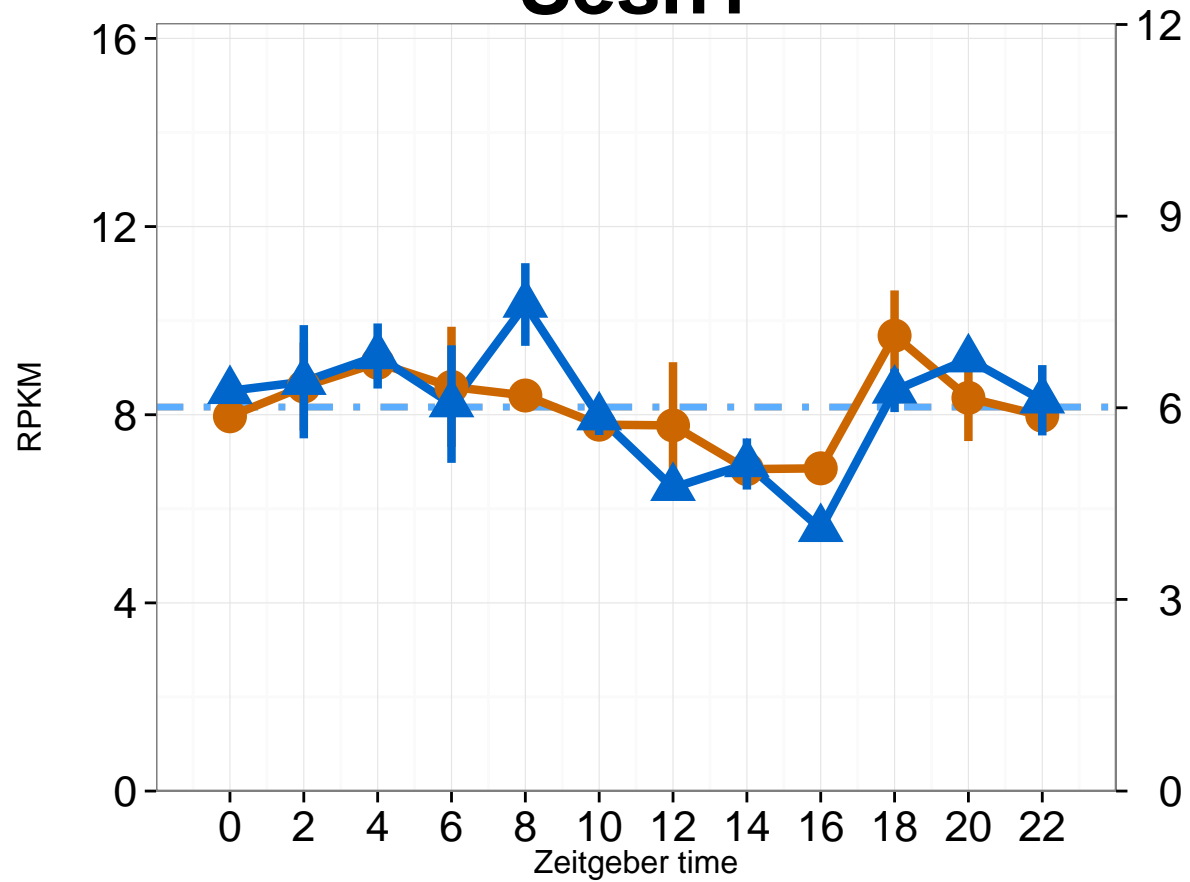

# Sesn1

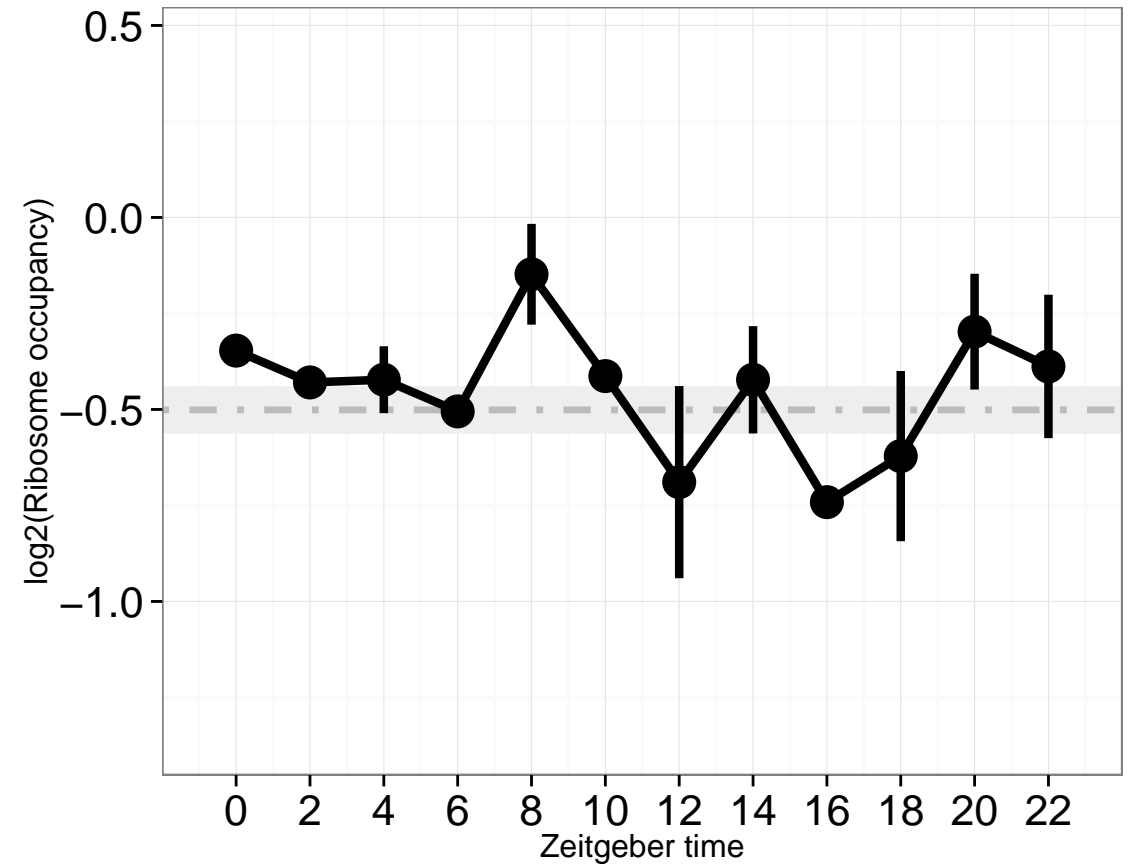

Supplement: SuppDataset_1.zip [file Sesn1_set_A.pdf › Supplemental Dataset 1/A-mRNA_nonrhyth_translation_nonrhyth/Sesn1_set_A.pdf]

# Sesn2

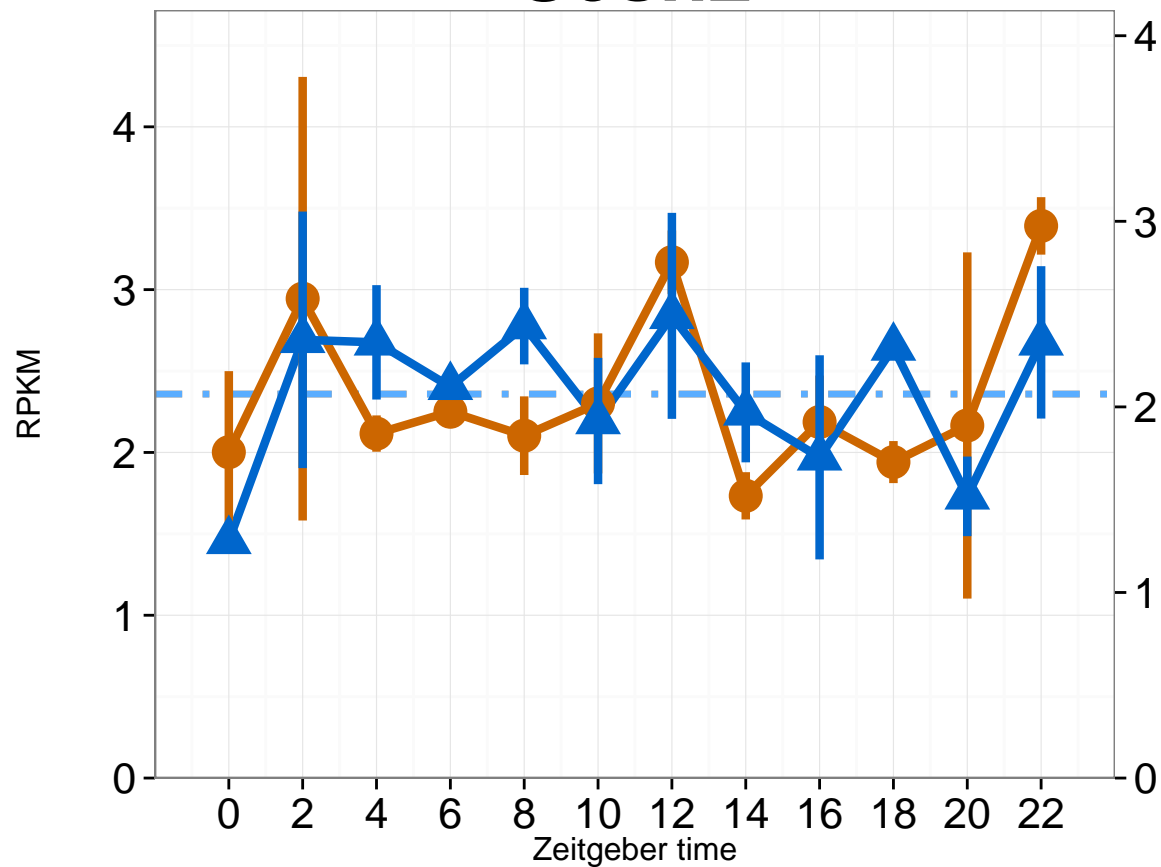

# Sesn2

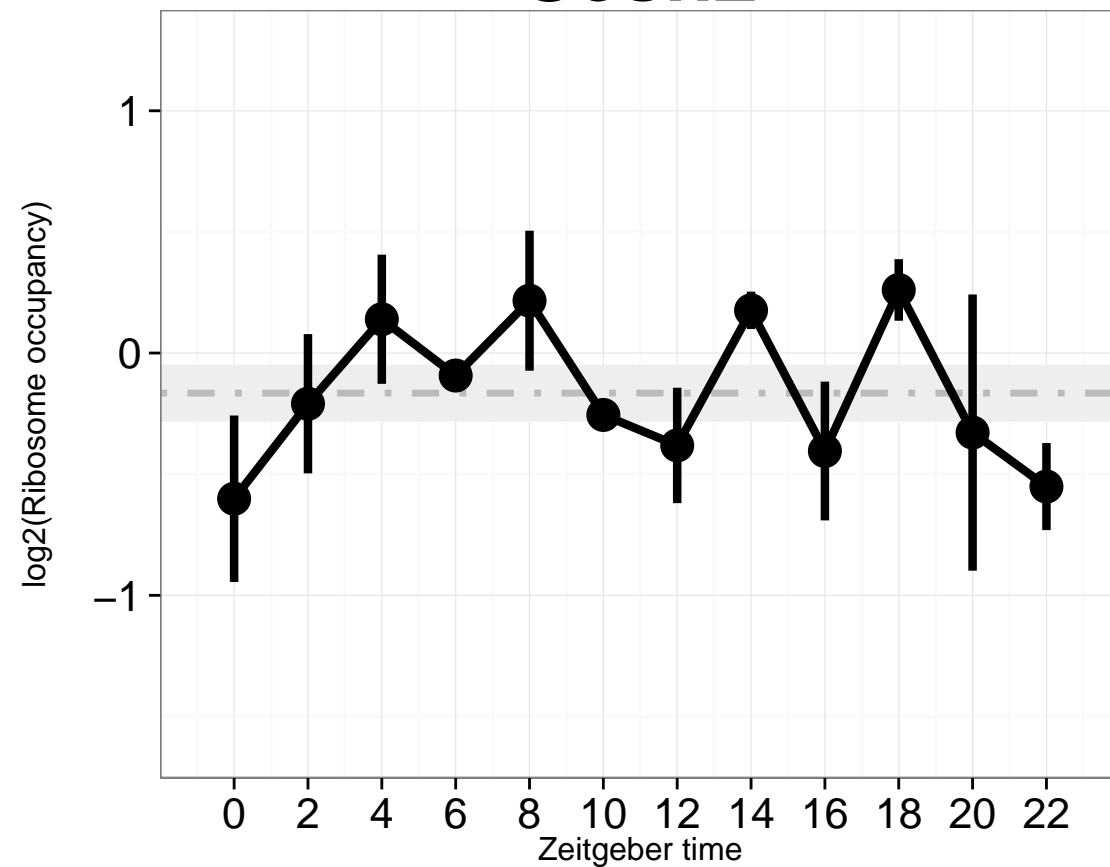

Supplement: SuppDataset_1.zip [file Sesn2_set_A.pdf › Supplemental Dataset 1/A-mRNA_nonrhyth_translation_nonrhyth/Sesn2_set_A.pdf]

# Sestd1

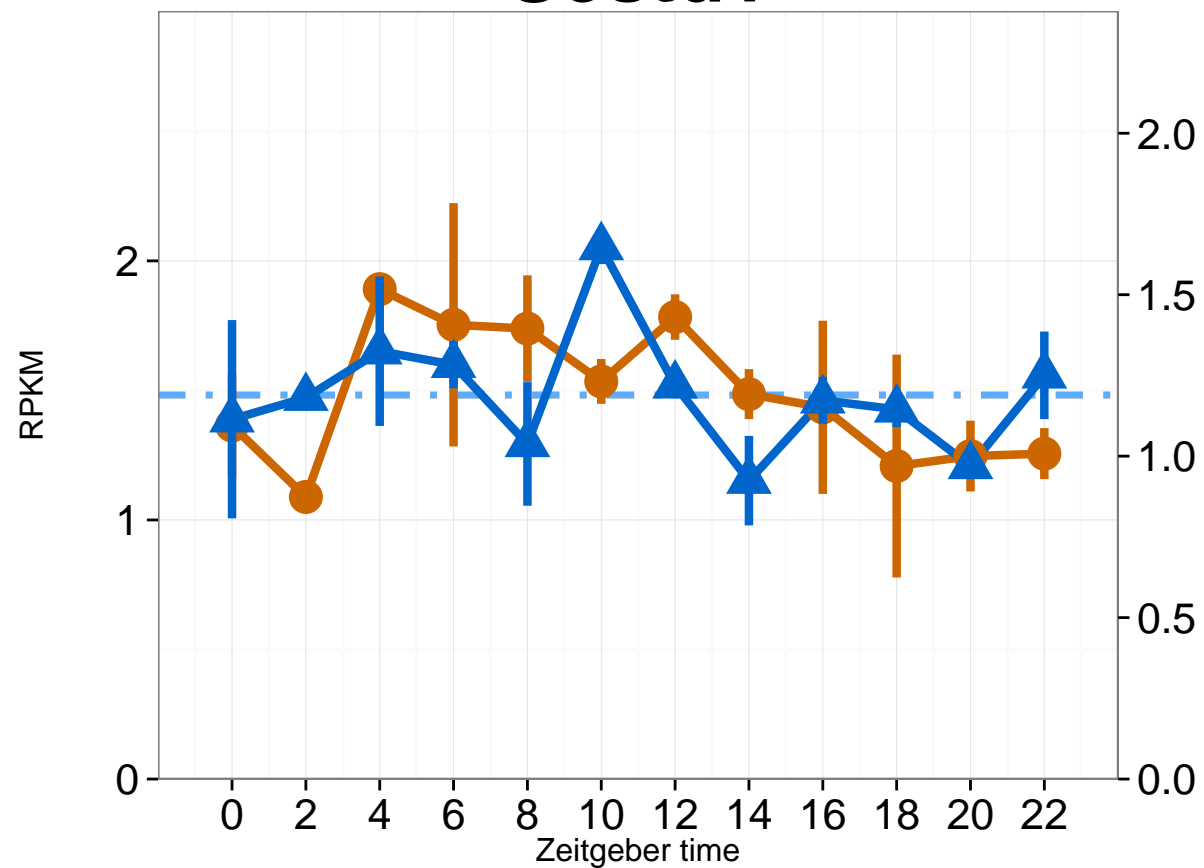

# Sestd1

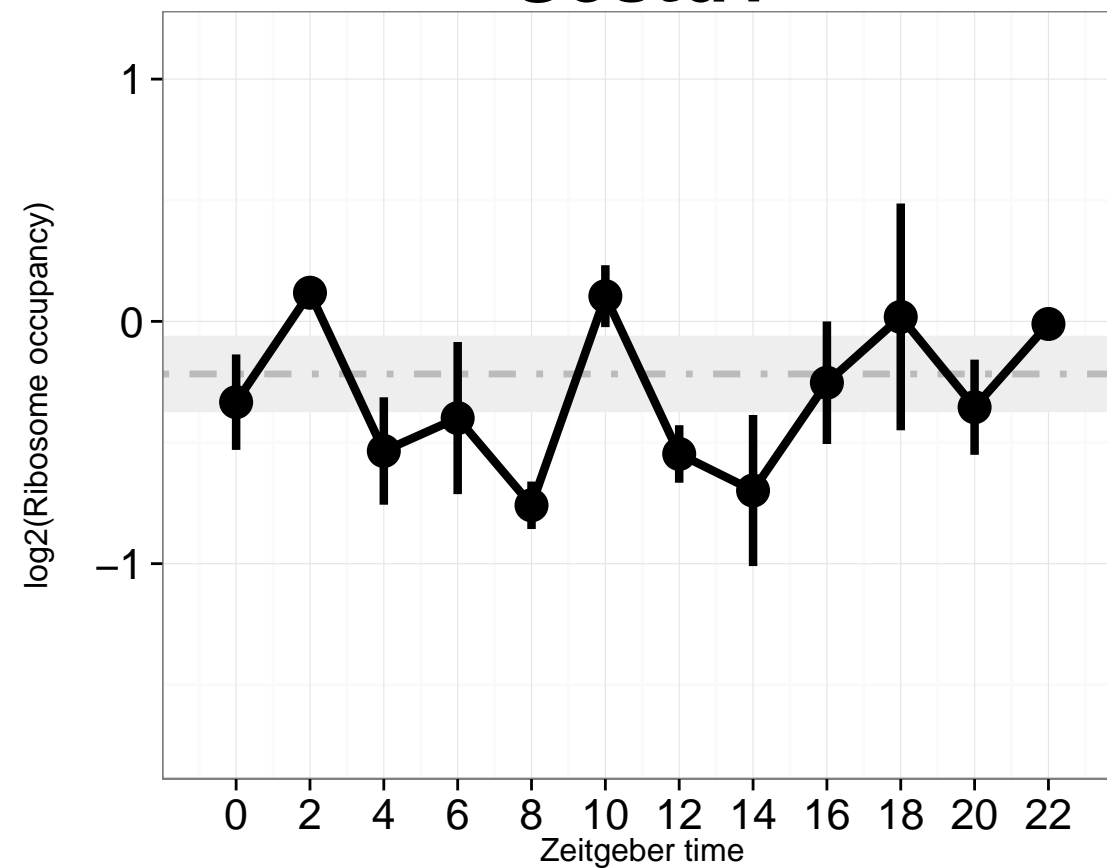

Supplement: SuppDataset_1.zip [file Sestd1_set_A.pdf › Supplemental Dataset 1/A-mRNA_nonrhyth_translation_nonrhyth/Sestd1_set_A.pdf]

## Set

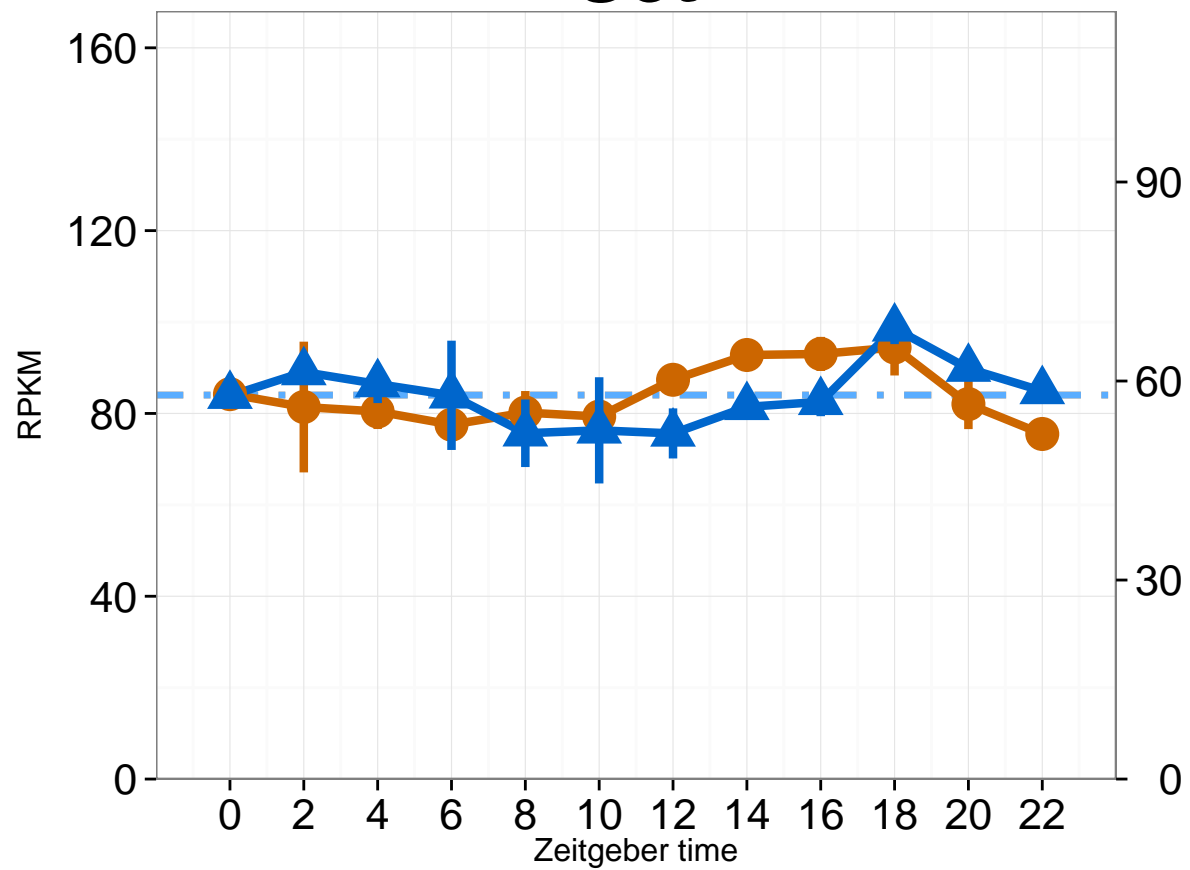

## Set

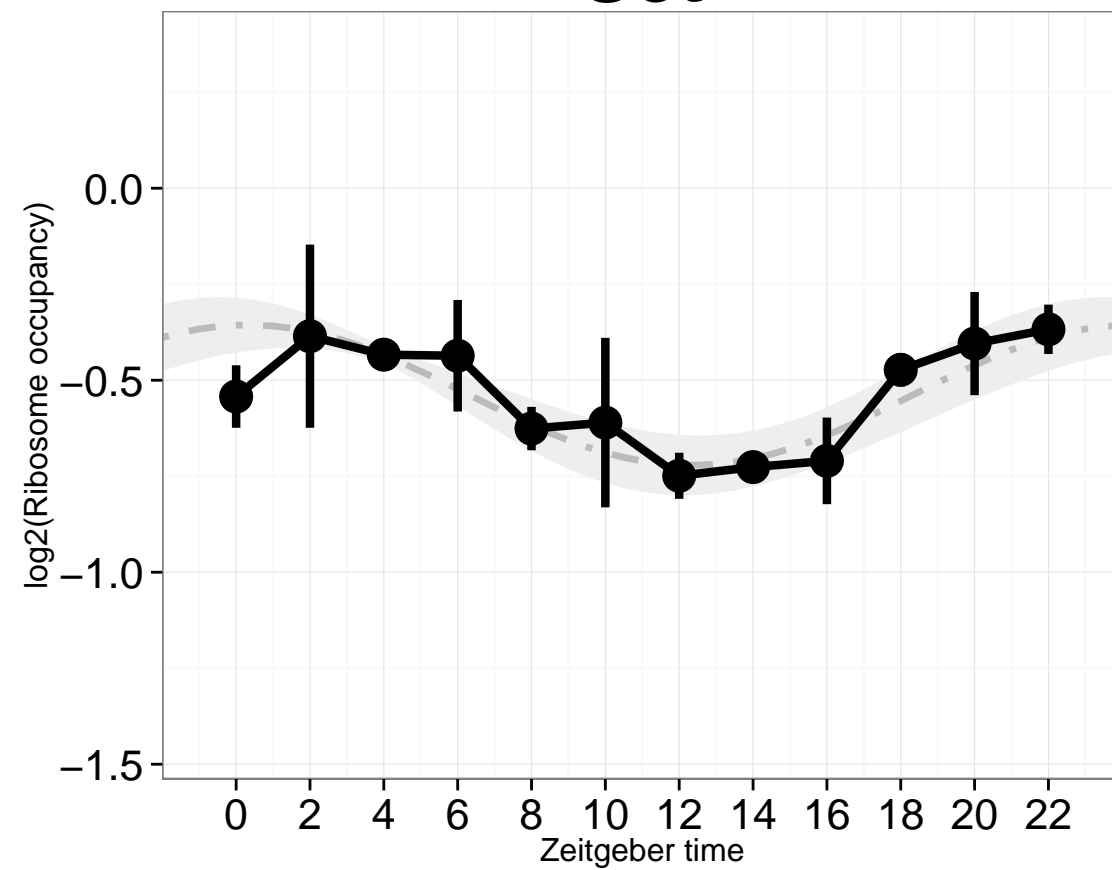

Supplement: SuppDataset_1.zip [file Set_set_A.pdf › Supplemental Dataset 1/A-mRNA_nonrhyth_translation_nonrhyth/Set_set_A.pdf]

## Setbp1

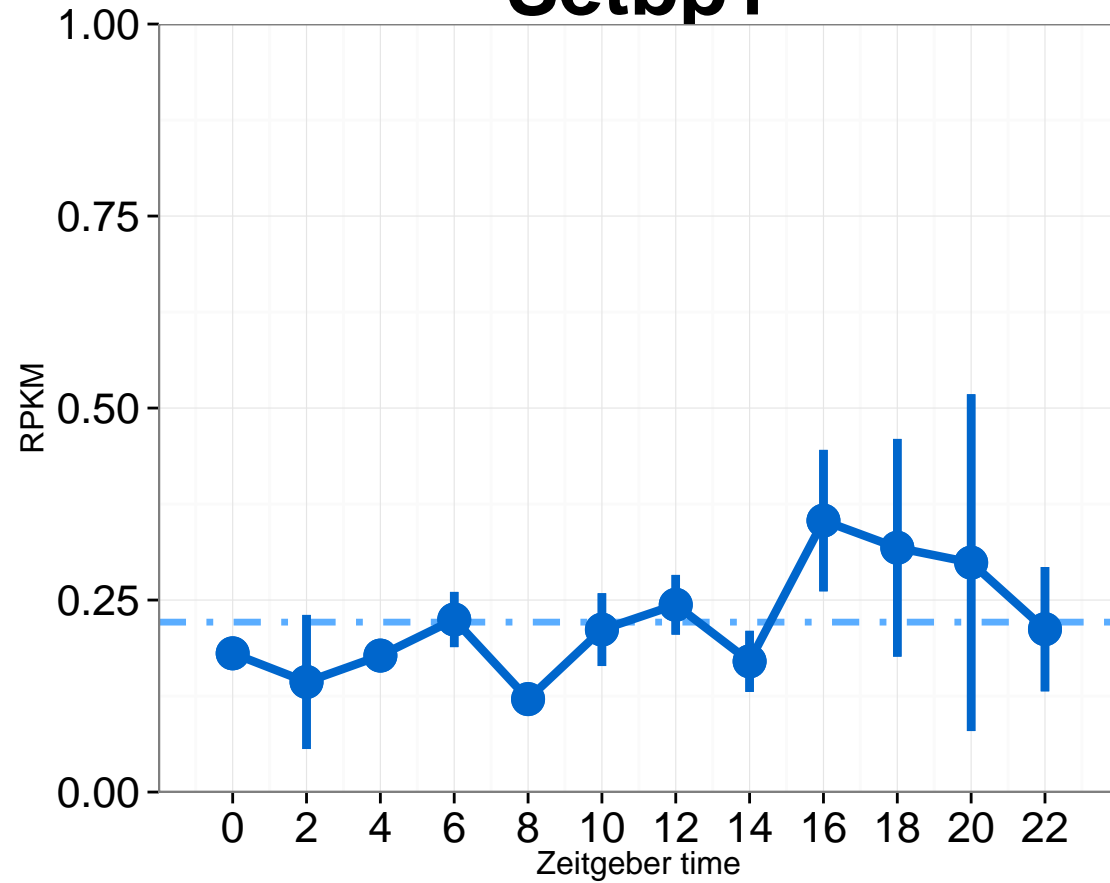

## Setbp1 log2(Ribosome occupancy

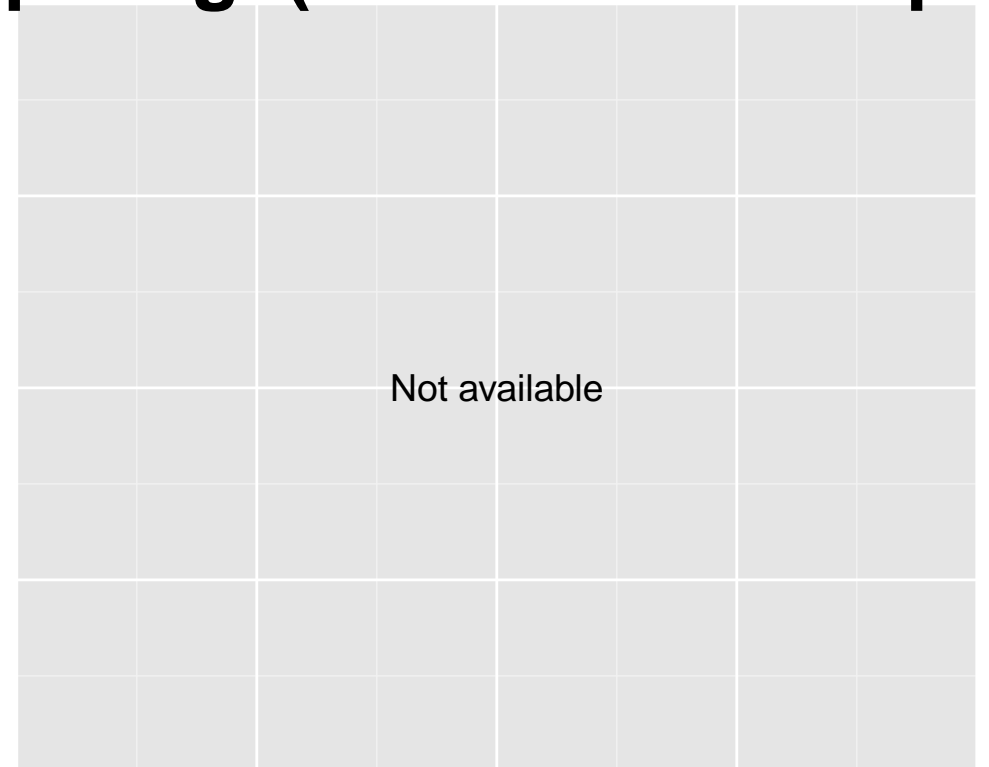

Supplement: SuppDataset_1.zip [file Setbp1_set_A.pdf › Supplemental Dataset 1/A-mRNA_nonrhyth_translation_nonrhyth/Setbp1_set_A.pdf]

# Setd1a

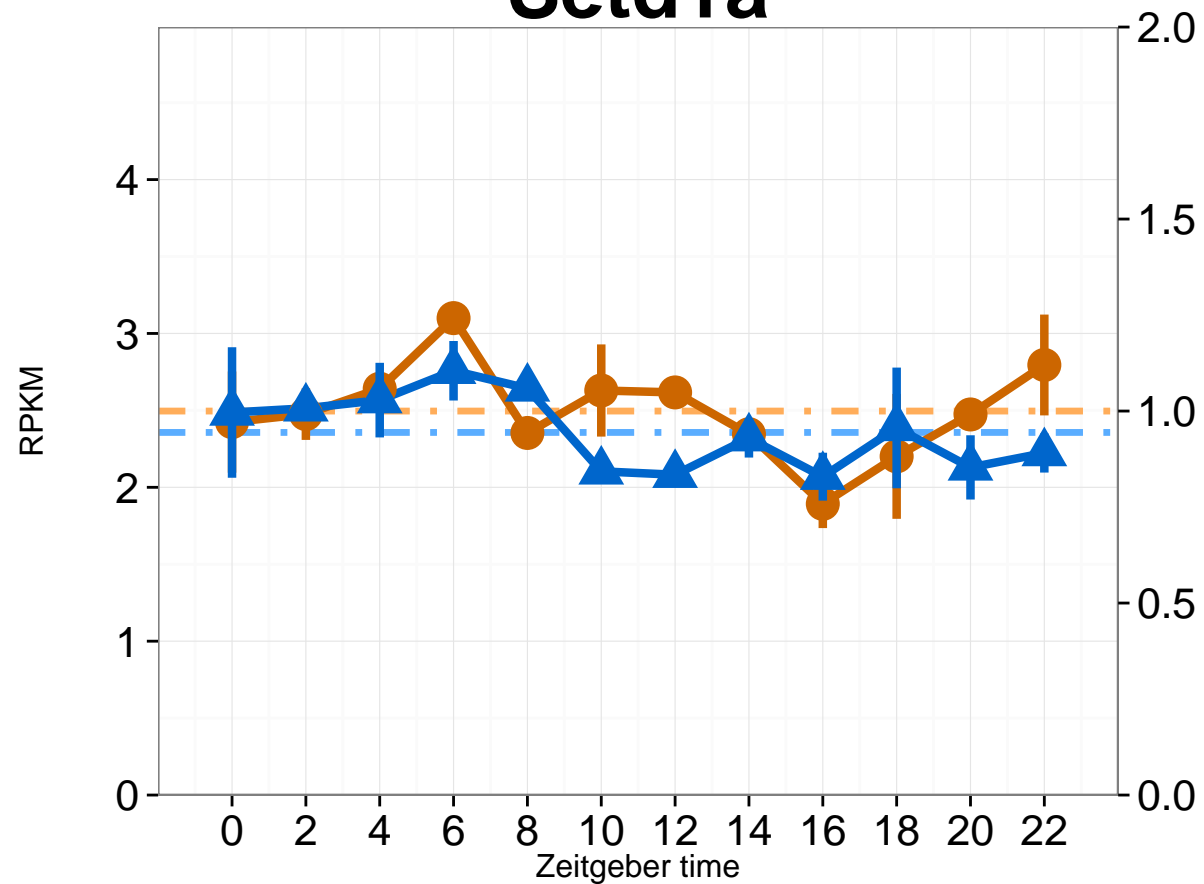

# Setd1a

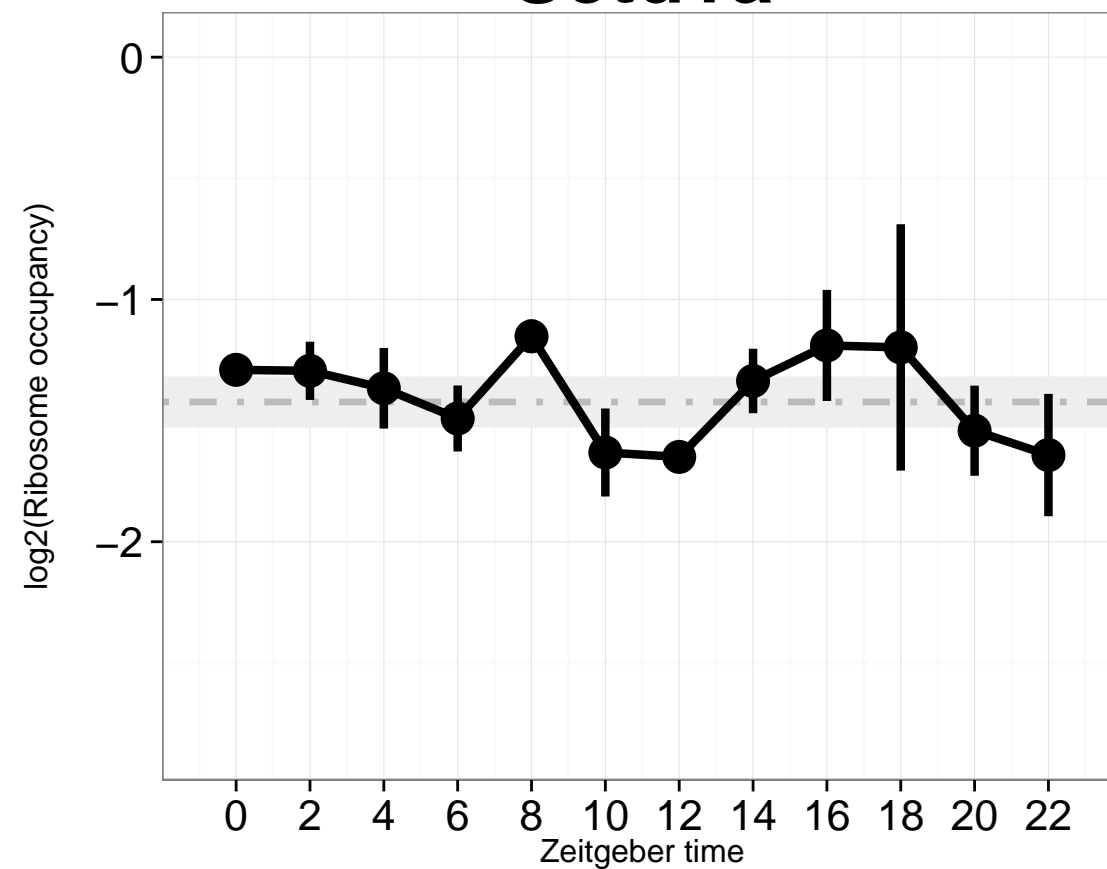

Supplement: SuppDataset_1.zip [file Setd1a_set_A.pdf › Supplemental Dataset 1/A-mRNA_nonrhyth_translation_nonrhyth/Setd1a_set_A.pdf]

## Setd2

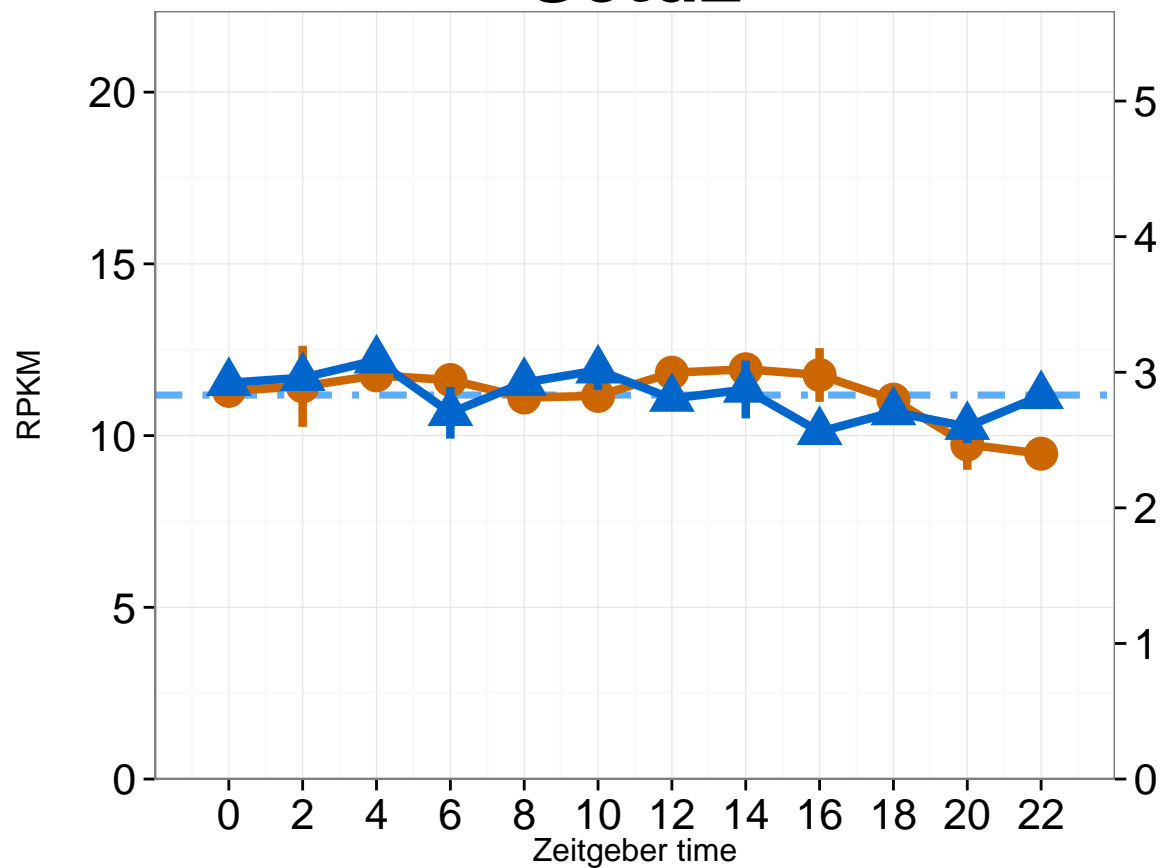

## Setd2

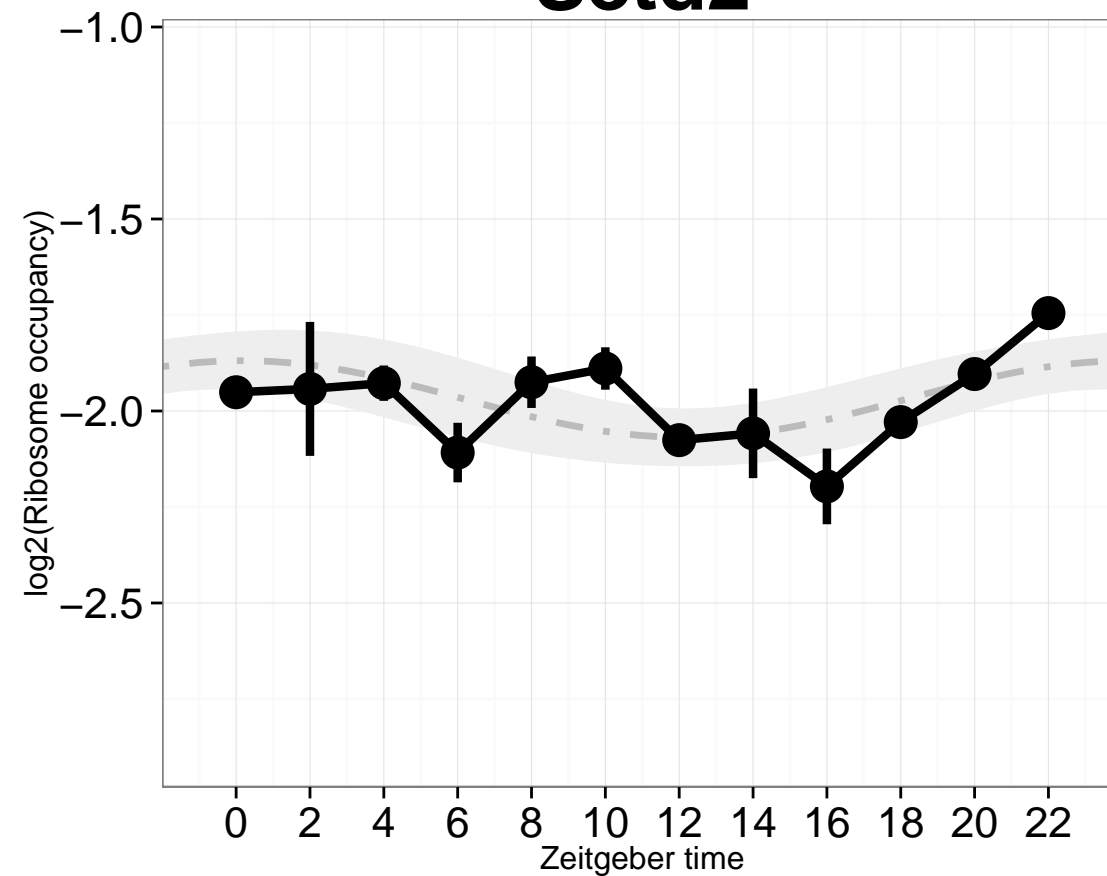

Supplement: SuppDataset_1.zip [file Setd2_set_A.pdf › Supplemental Dataset 1/A-mRNA_nonrhyth_translation_nonrhyth/Setd2_set_A.pdf]

## Setd3

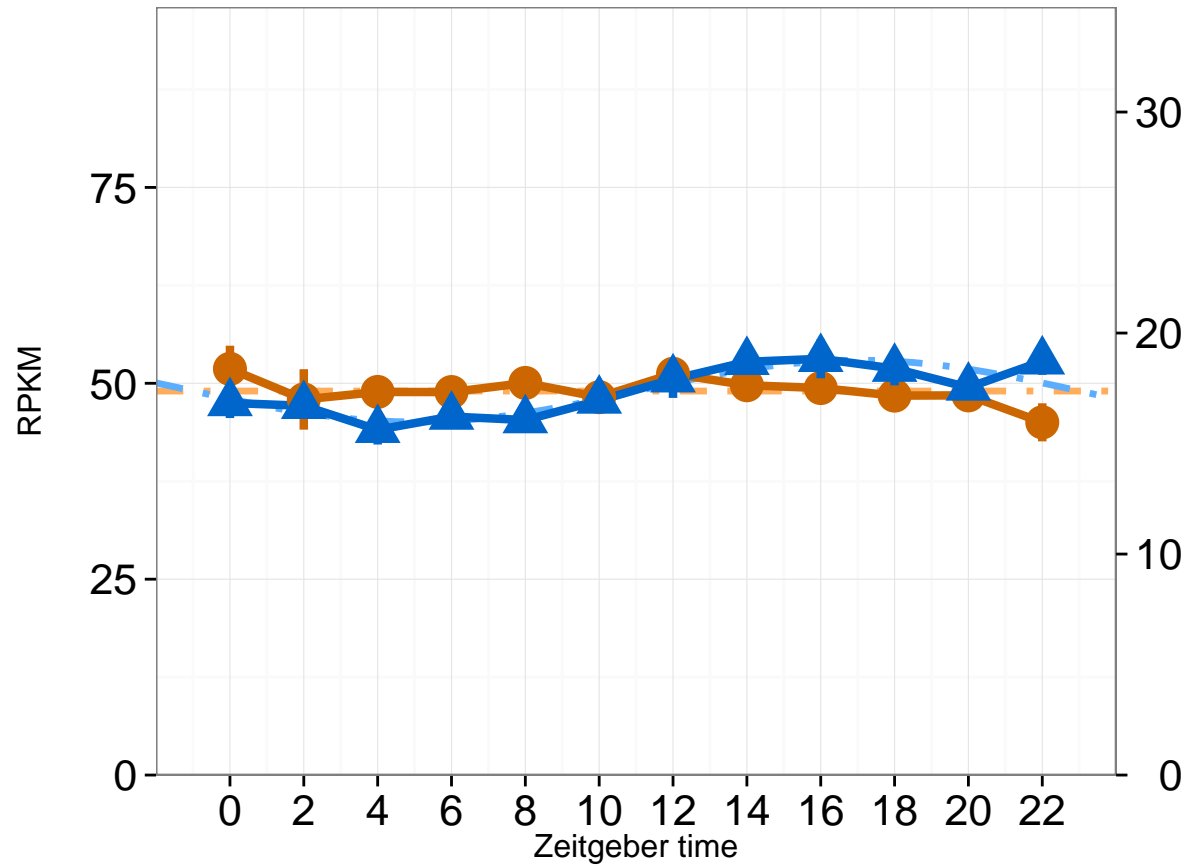

## Setd3

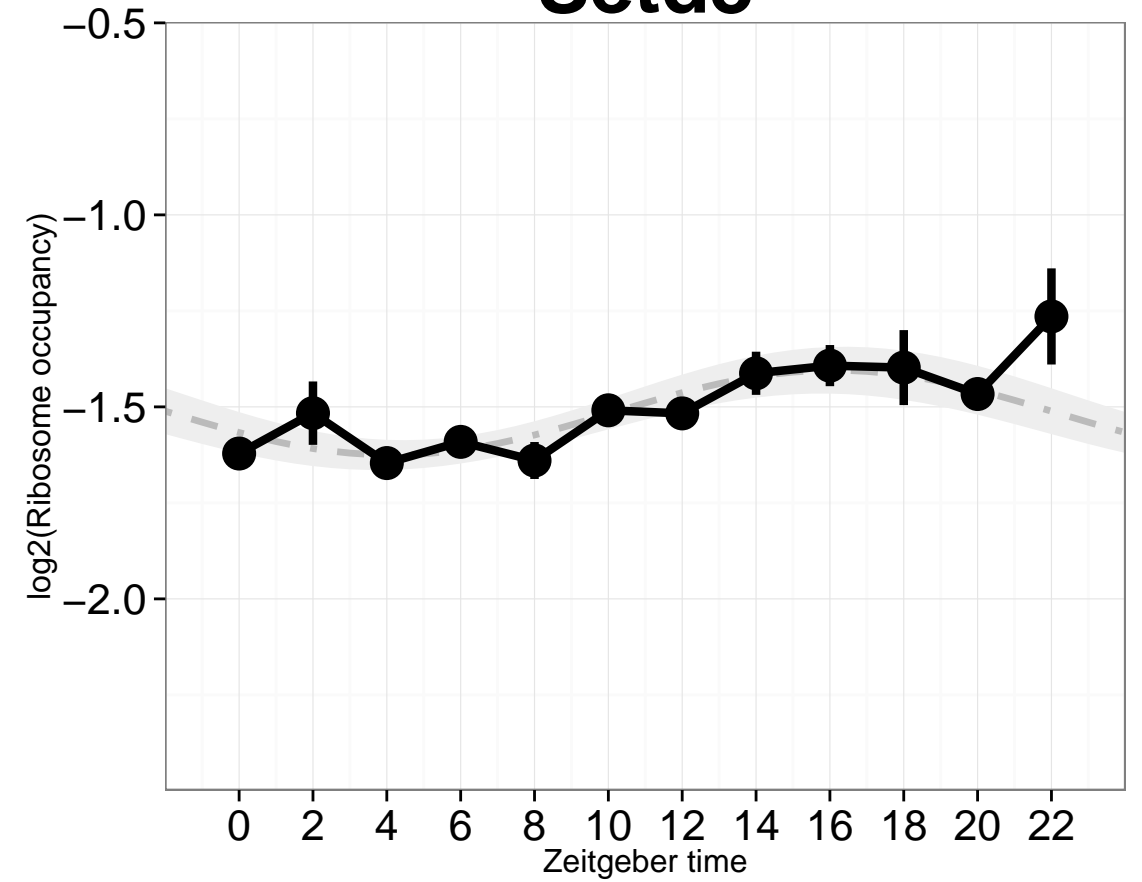

Supplement: SuppDataset_1.zip [file Setd3_set_A.pdf › Supplemental Dataset 1/A-mRNA_nonrhyth_translation_nonrhyth/Setd3_set_A.pdf]

# Setd4

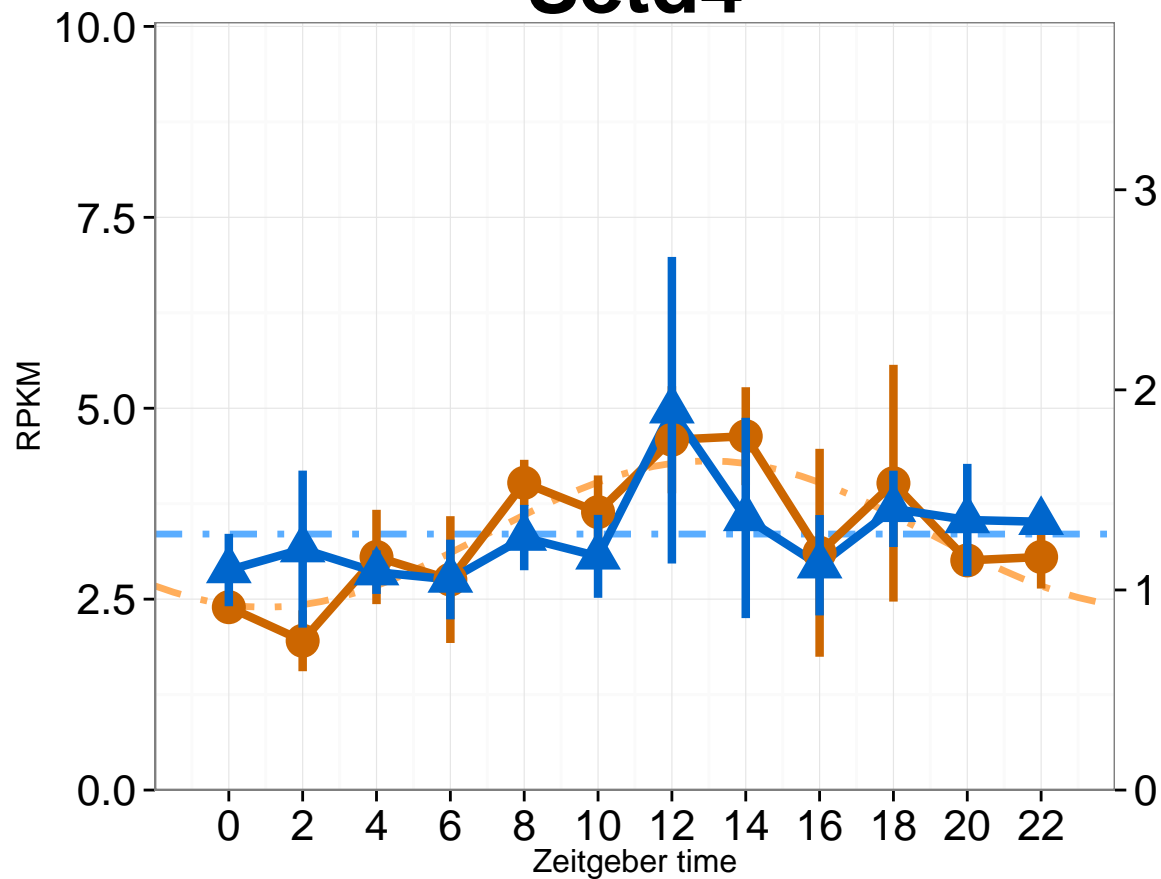

# Setd4

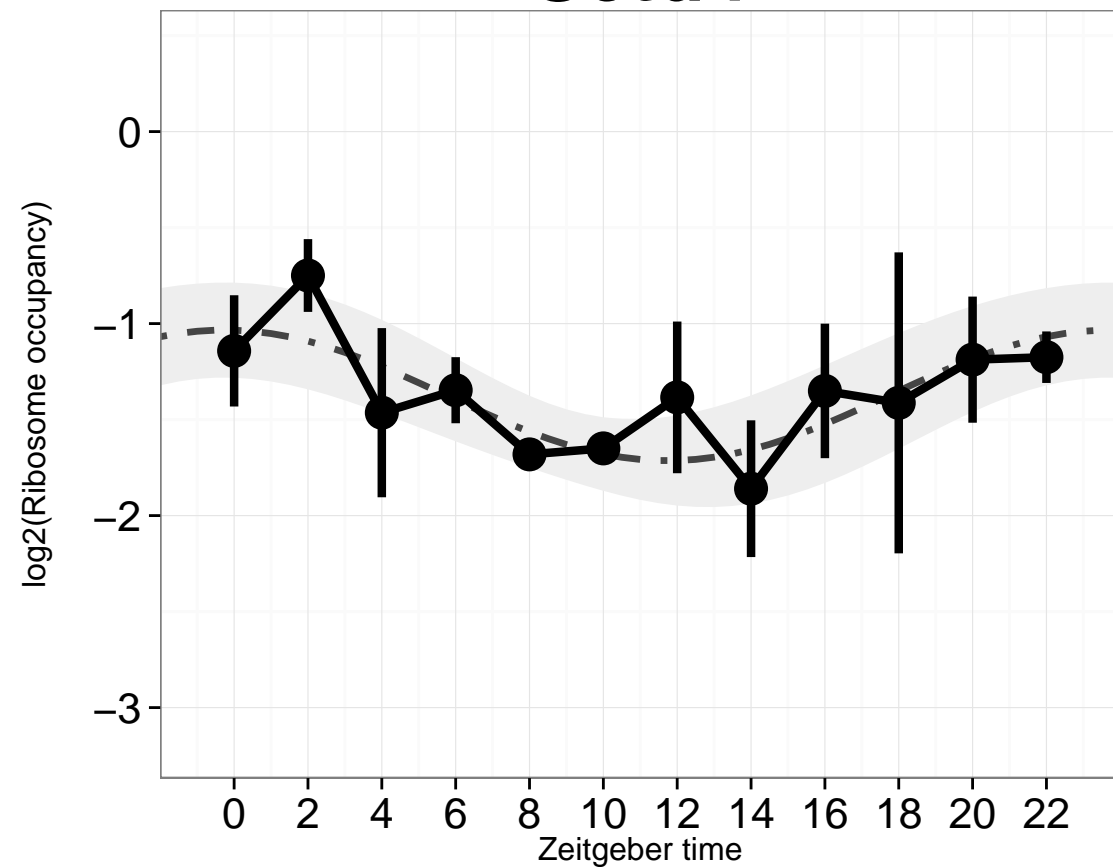

Supplement: SuppDataset_1.zip [file Setd4_set_A.pdf › Supplemental Dataset 1/A-mRNA_nonrhyth_translation_nonrhyth/Setd4_set_A.pdf]

# Setd5

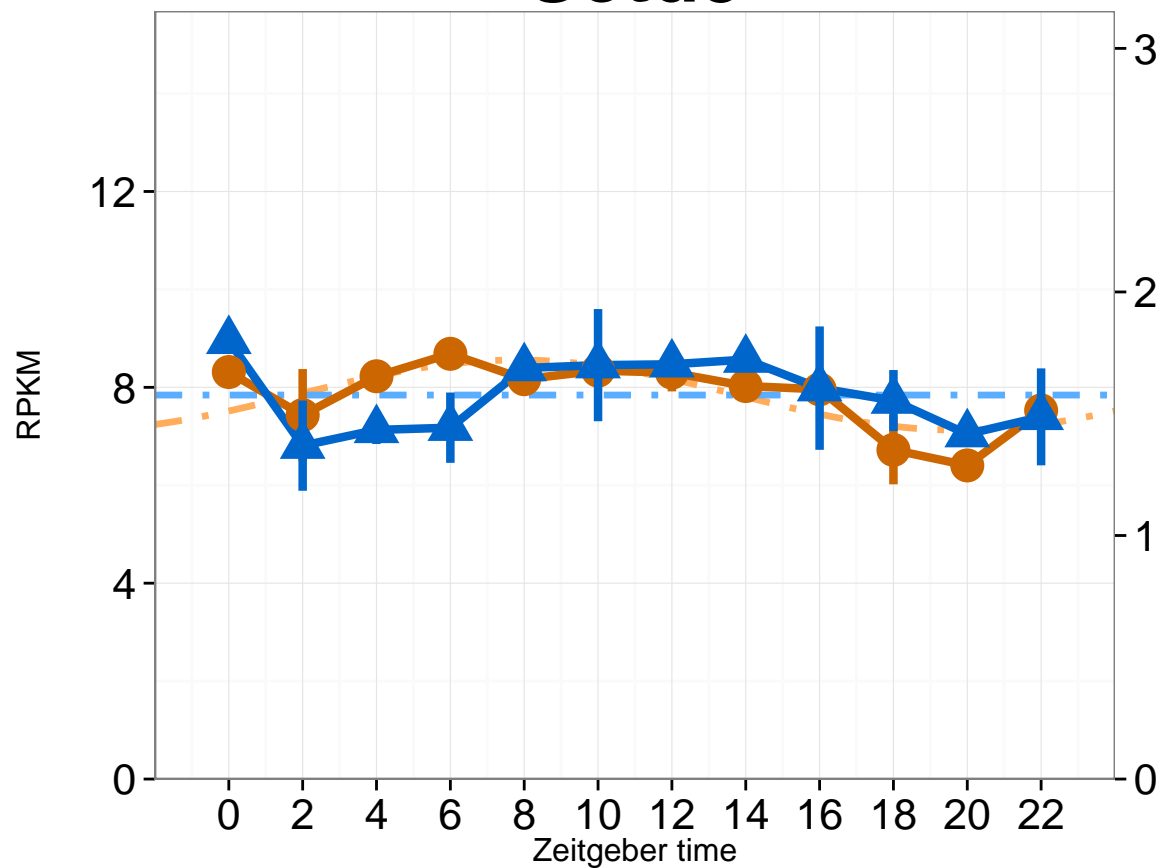

# Setd5

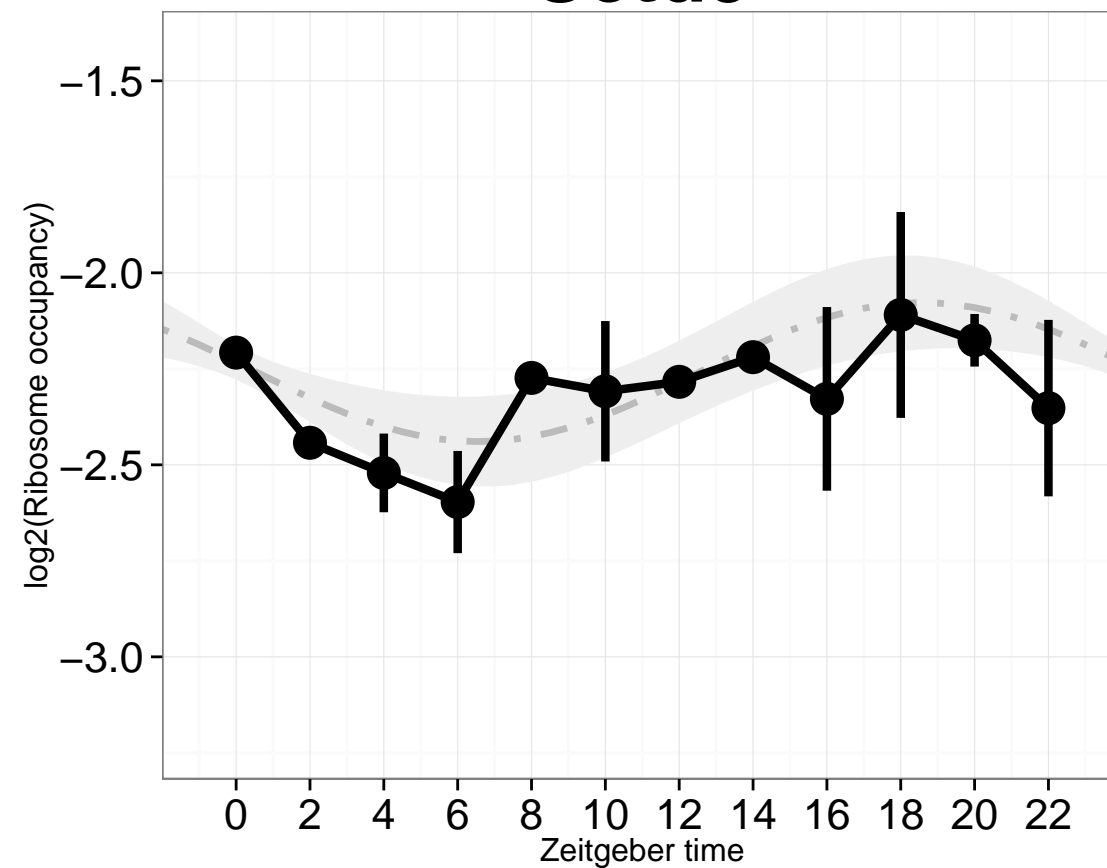

Supplement: SuppDataset_1.zip [file Setd5_set_A.pdf › Supplemental Dataset 1/A-mRNA_nonrhyth_translation_nonrhyth/Setd5_set_A.pdf]

# Setd6

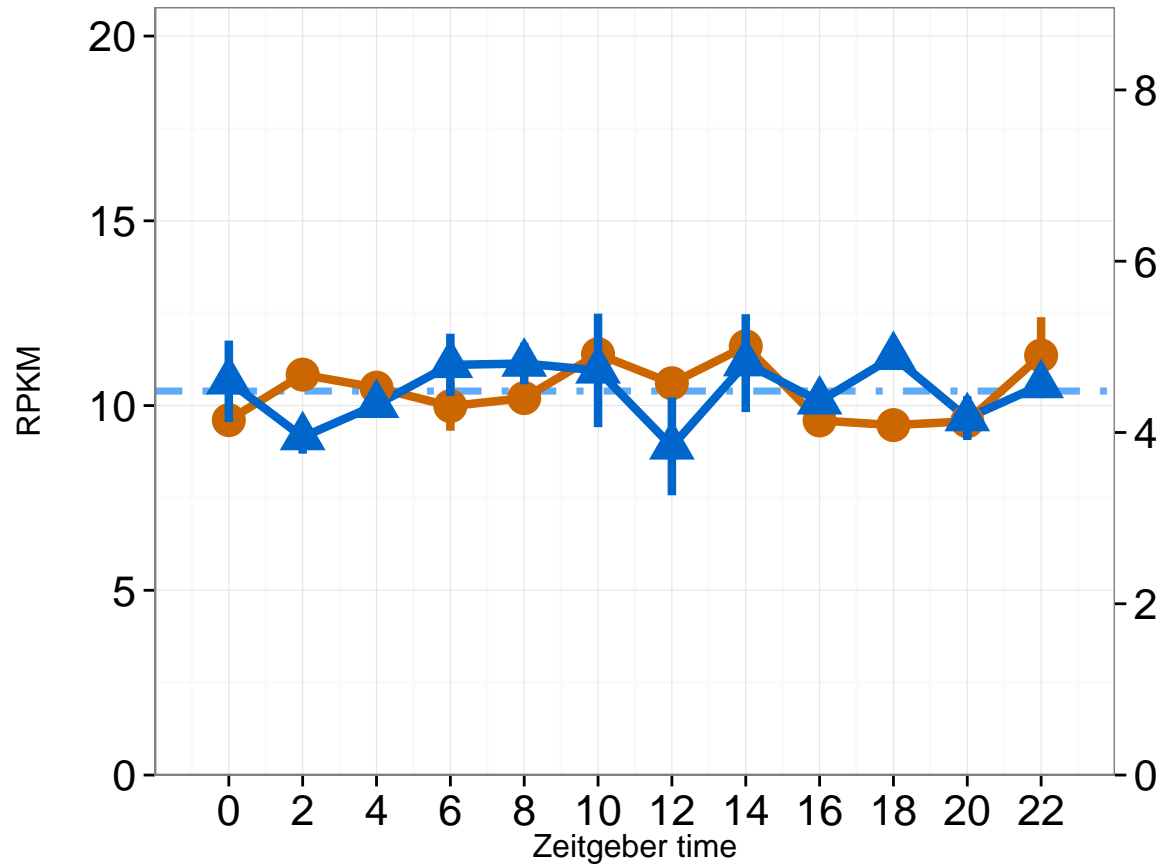

# Setd6

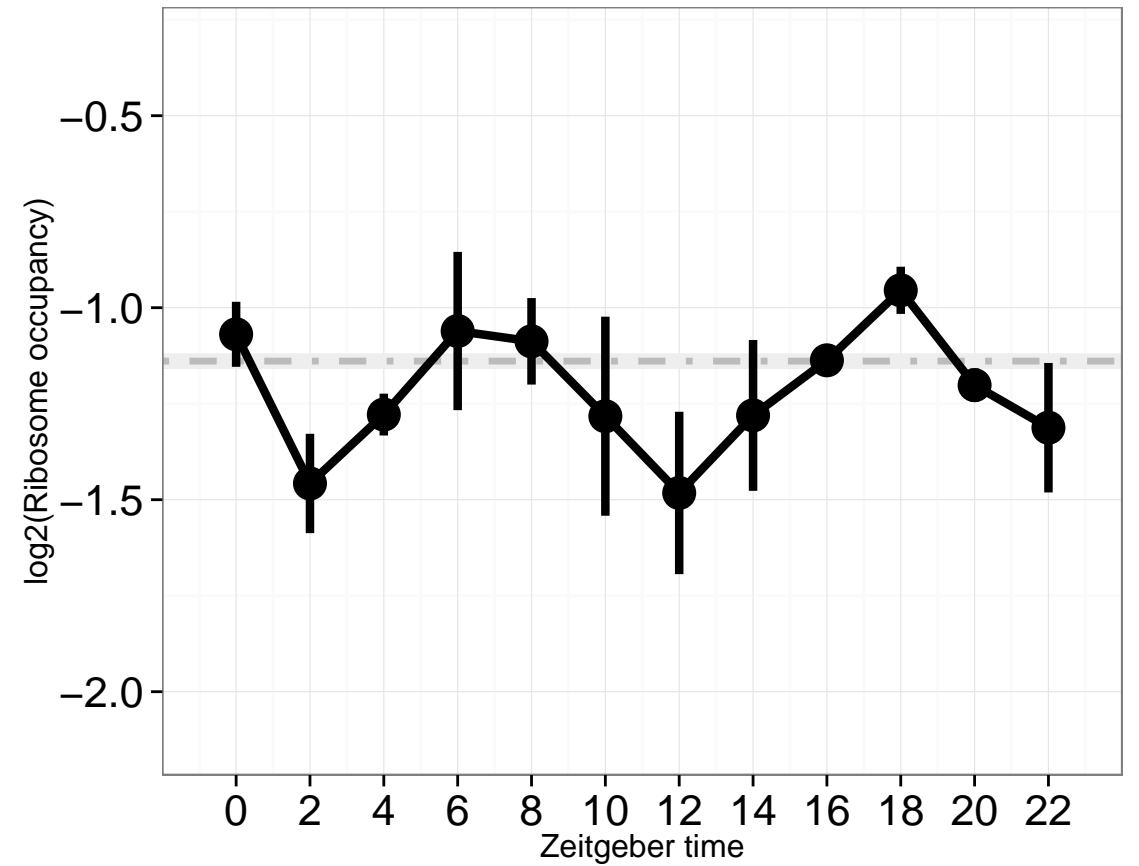

Supplement: SuppDataset_1.zip [file Setd6_set_A.pdf › Supplemental Dataset 1/A-mRNA_nonrhyth_translation_nonrhyth/Setd6_set_A.pdf]

# Setd7

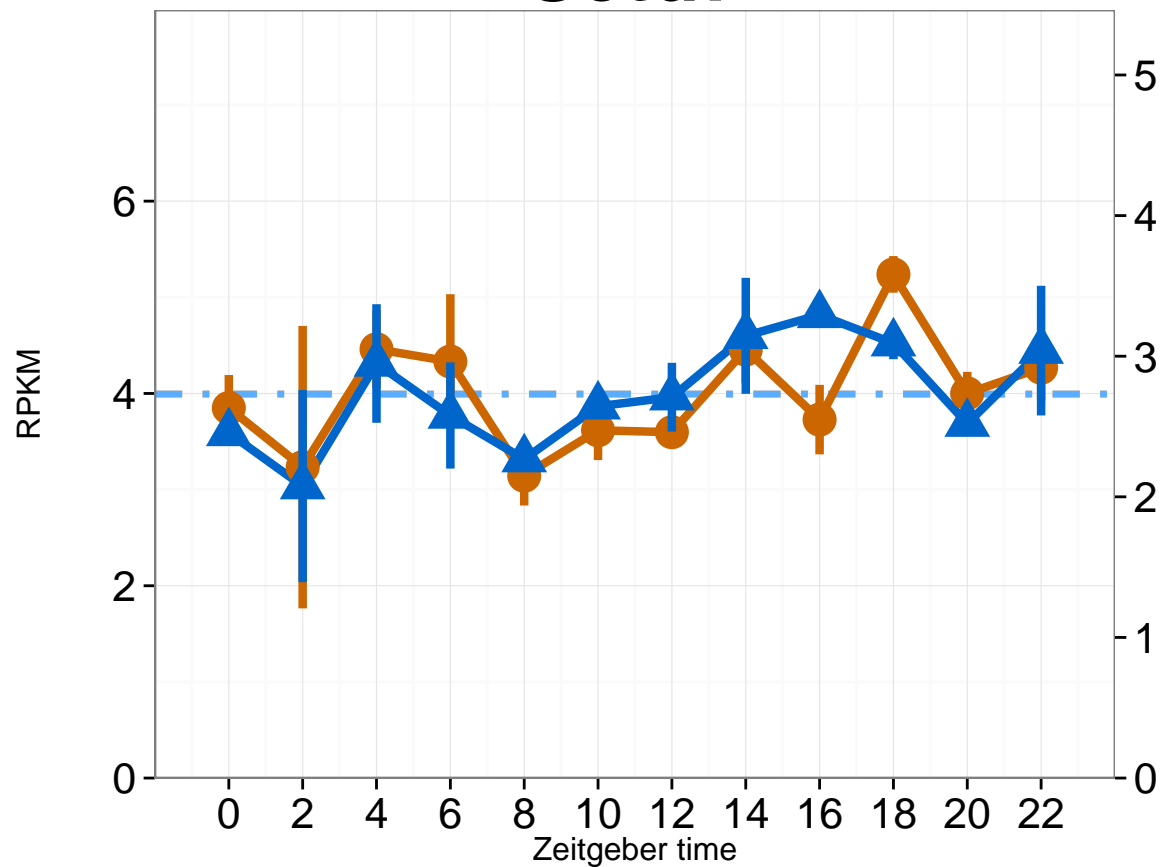

# Setd7

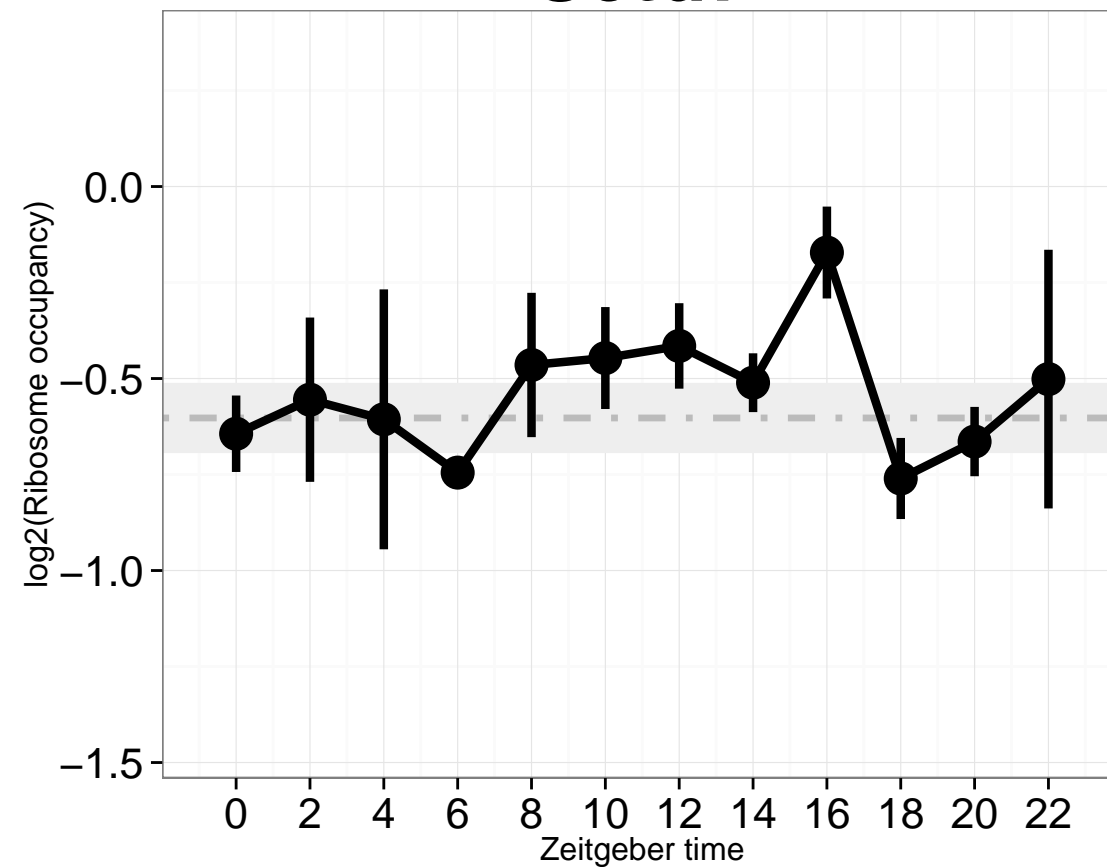

Supplement: SuppDataset_1.zip [file Setd7_set_A.pdf › Supplemental Dataset 1/A-mRNA_nonrhyth_translation_nonrhyth/Setd7_set_A.pdf]

# Setd8

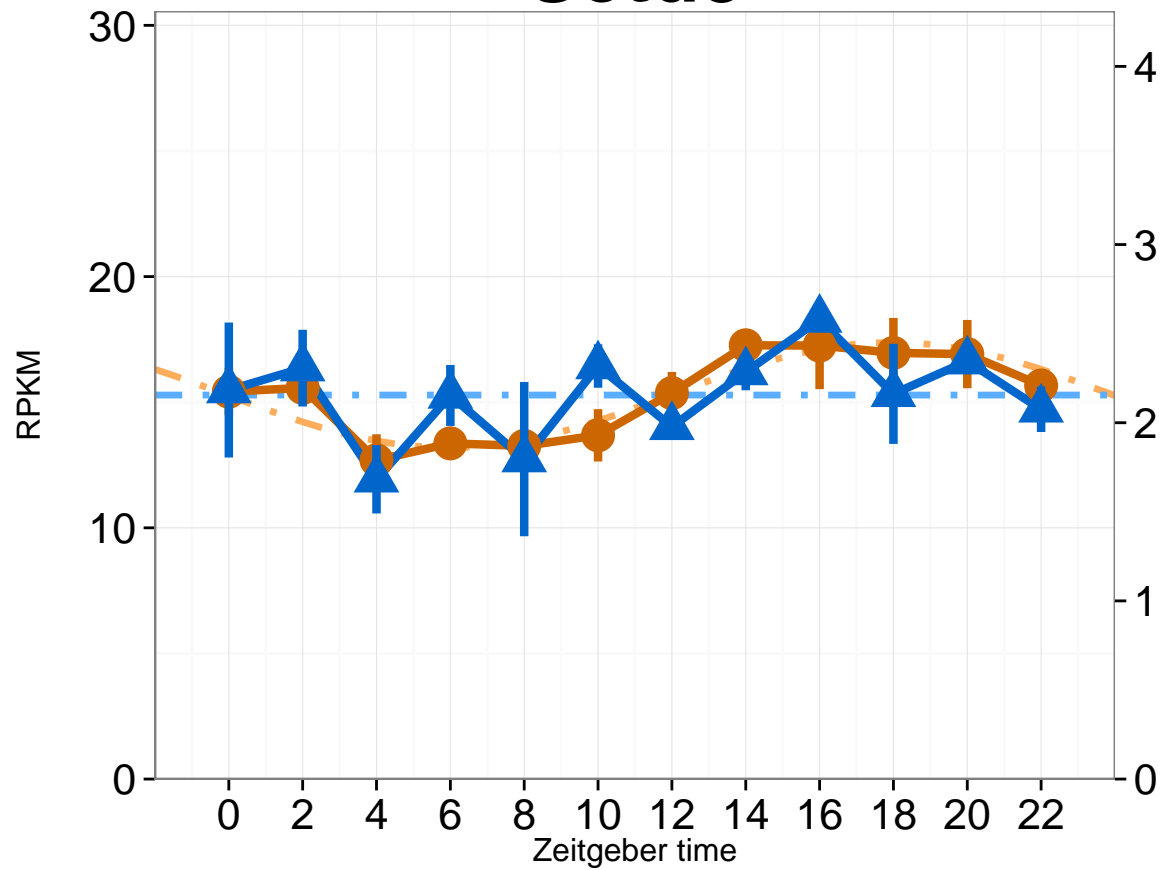

# Setd8

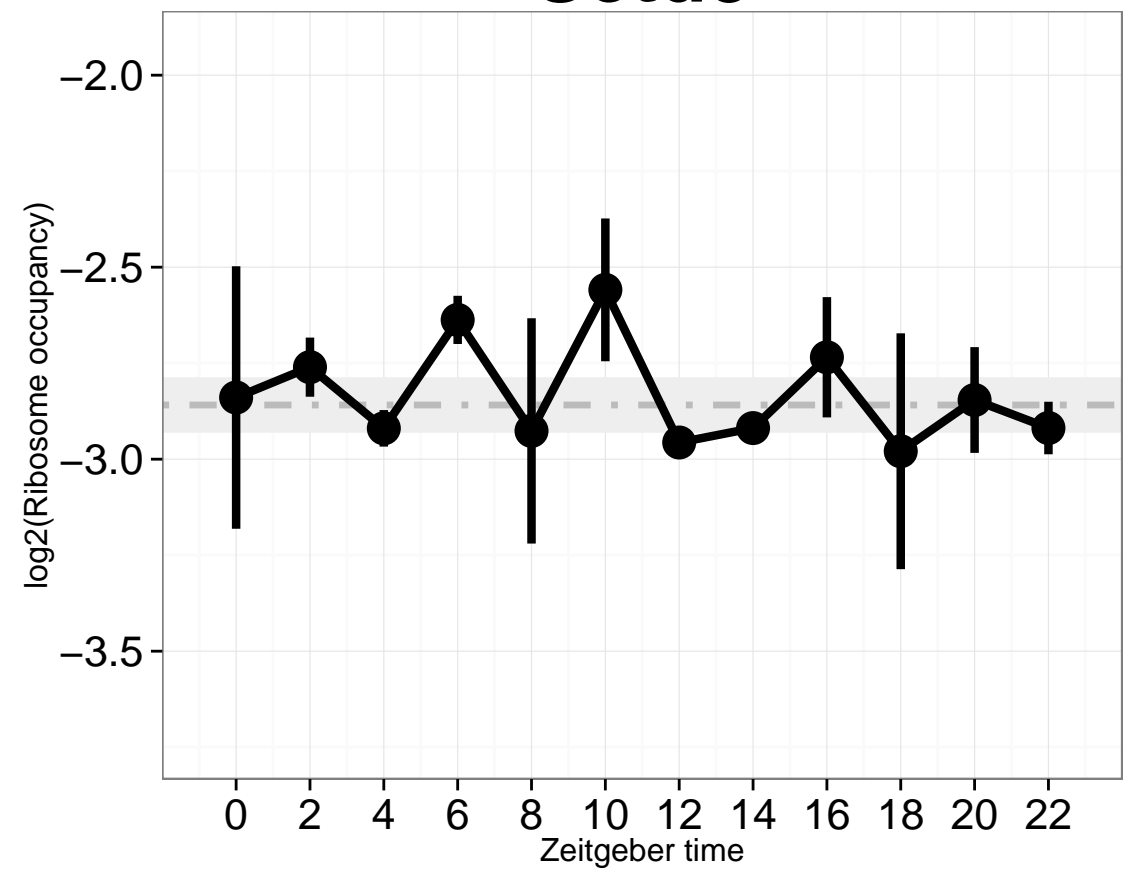

Supplement: SuppDataset_1.zip [file Setd8_set_A.pdf › Supplemental Dataset 1/A-mRNA_nonrhyth_translation_nonrhyth/Setd8_set_A.pdf]

# Setdb1

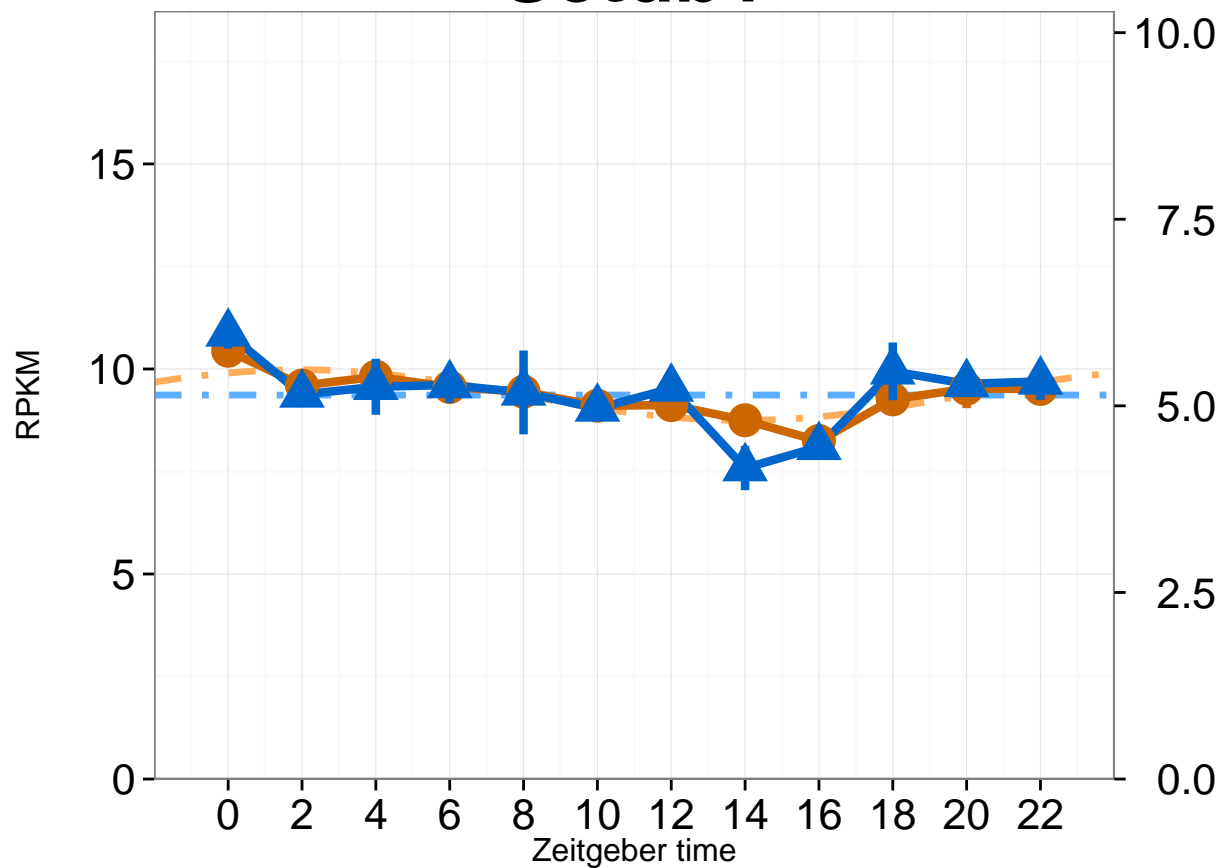

# Setdb1

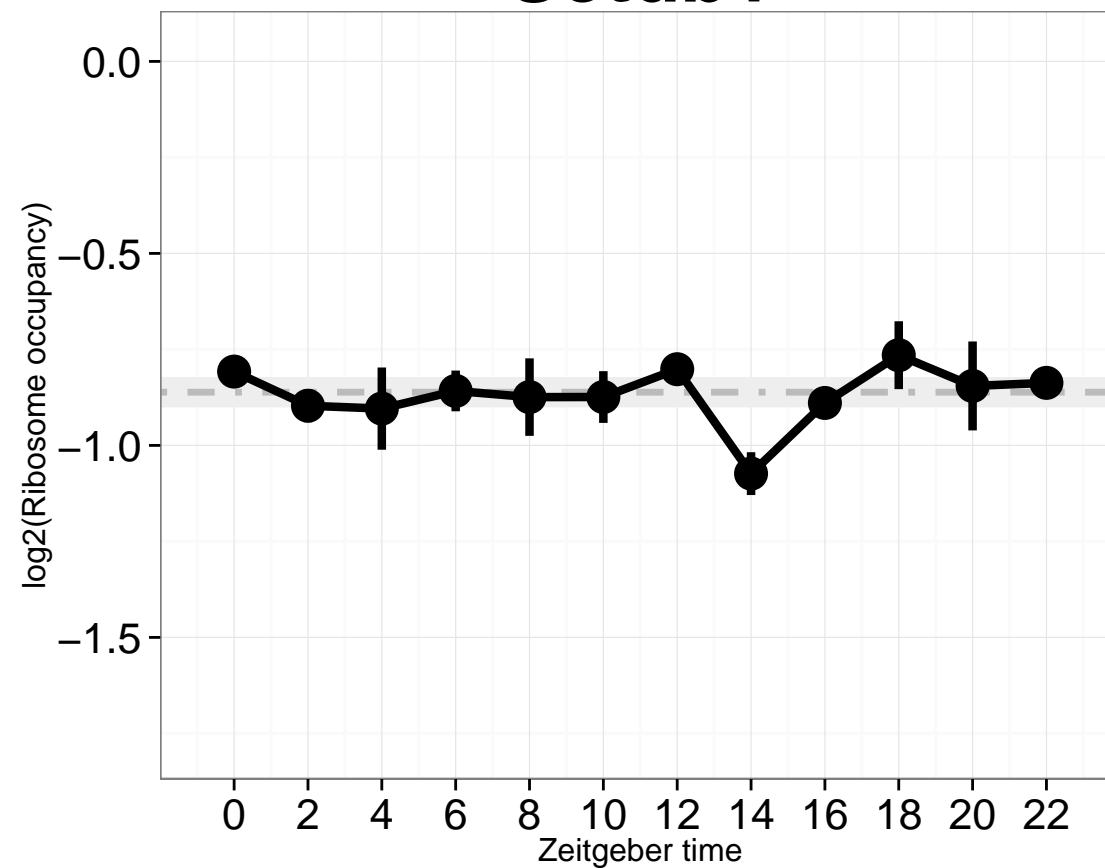

Supplement: SuppDataset_1.zip [file Setdb1_set_A.pdf › Supplemental Dataset 1/A-mRNA_nonrhyth_translation_nonrhyth/Setdb1_set_A.pdf]

## Setmar

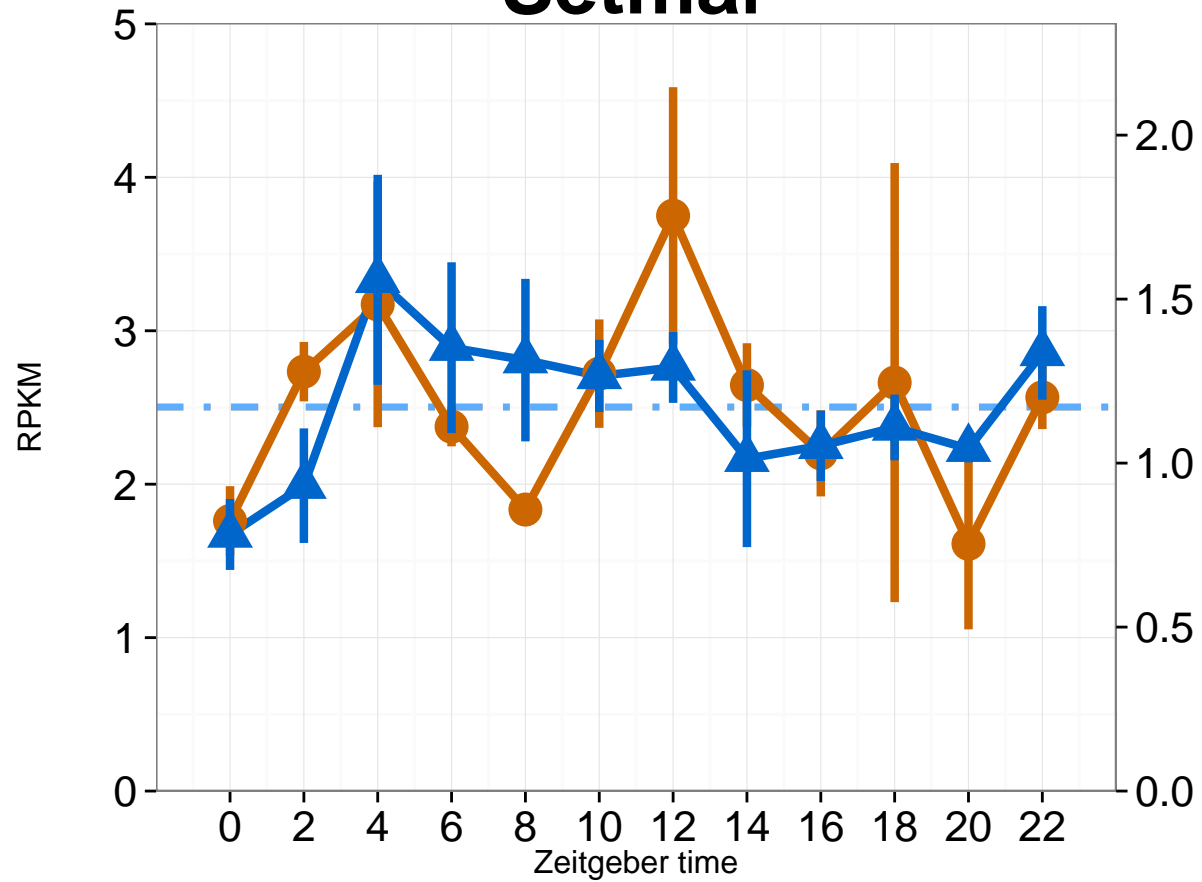

## Setmar

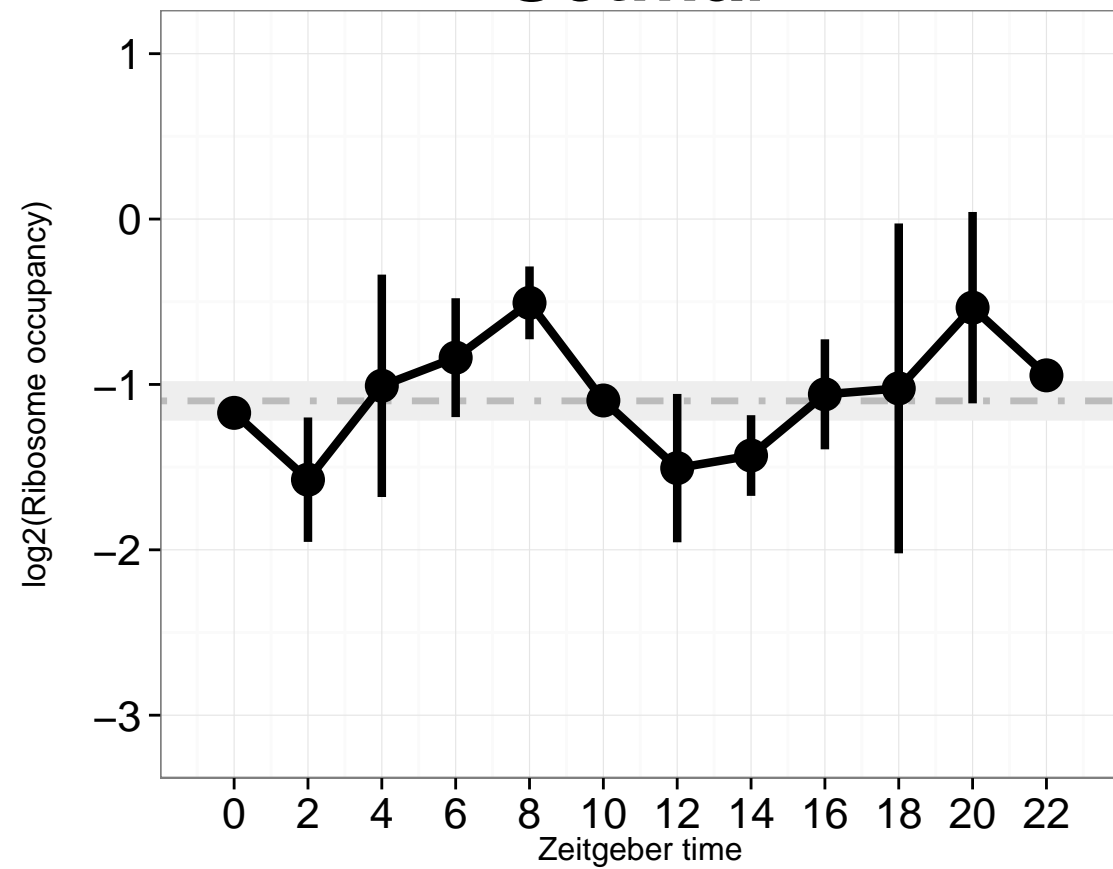

Supplement: SuppDataset_1.zip [file Setmar_set_A.pdf › Supplemental Dataset 1/A-mRNA_nonrhyth_translation_nonrhyth/Setmar_set_A.pdf]

## Setx

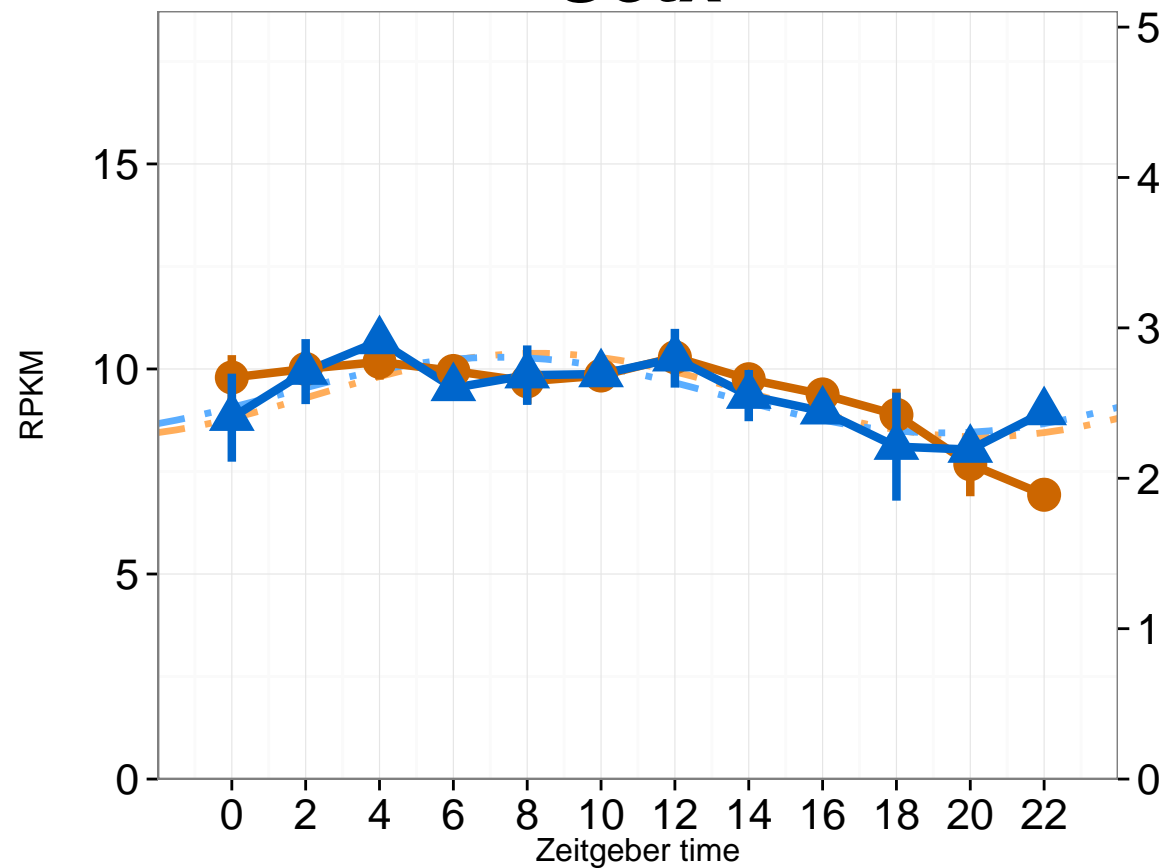

## Setx

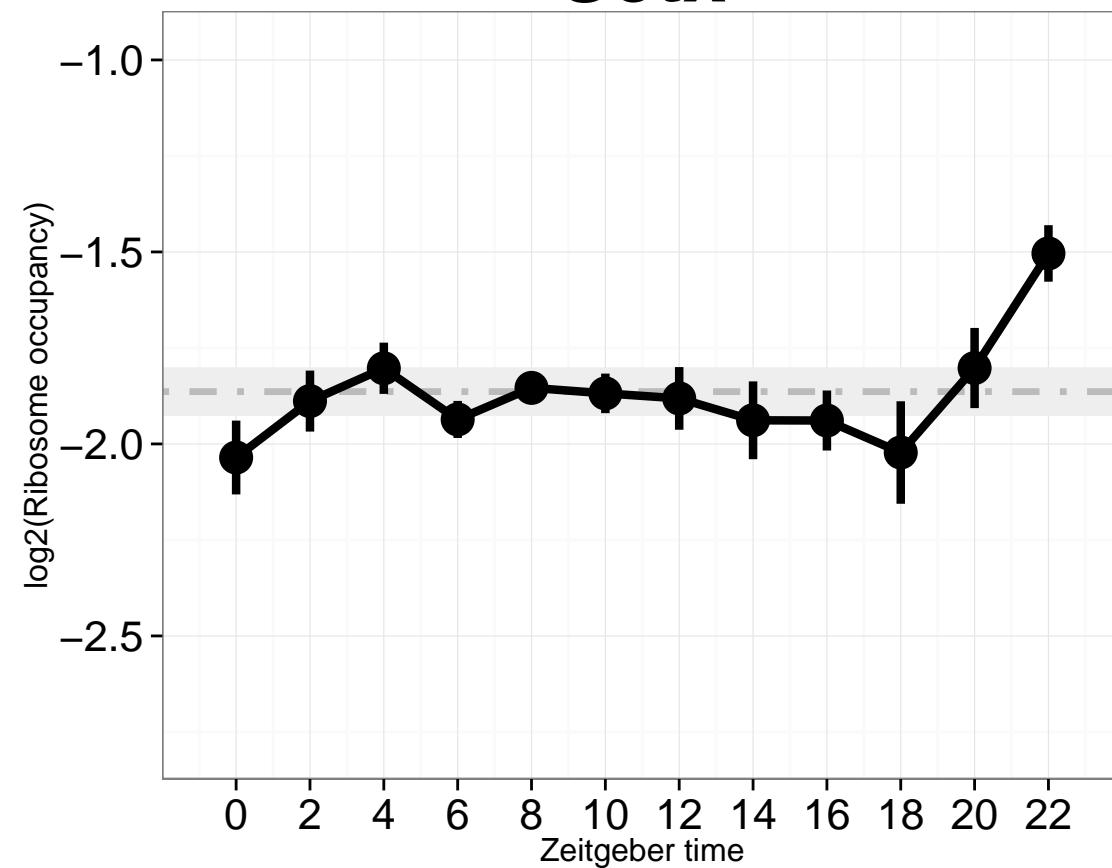

Supplement: SuppDataset_1.zip [file Setx_set_A.pdf › Supplemental Dataset 1/A-mRNA_nonrhyth_translation_nonrhyth/Setx_set_A.pdf]

## Sf1

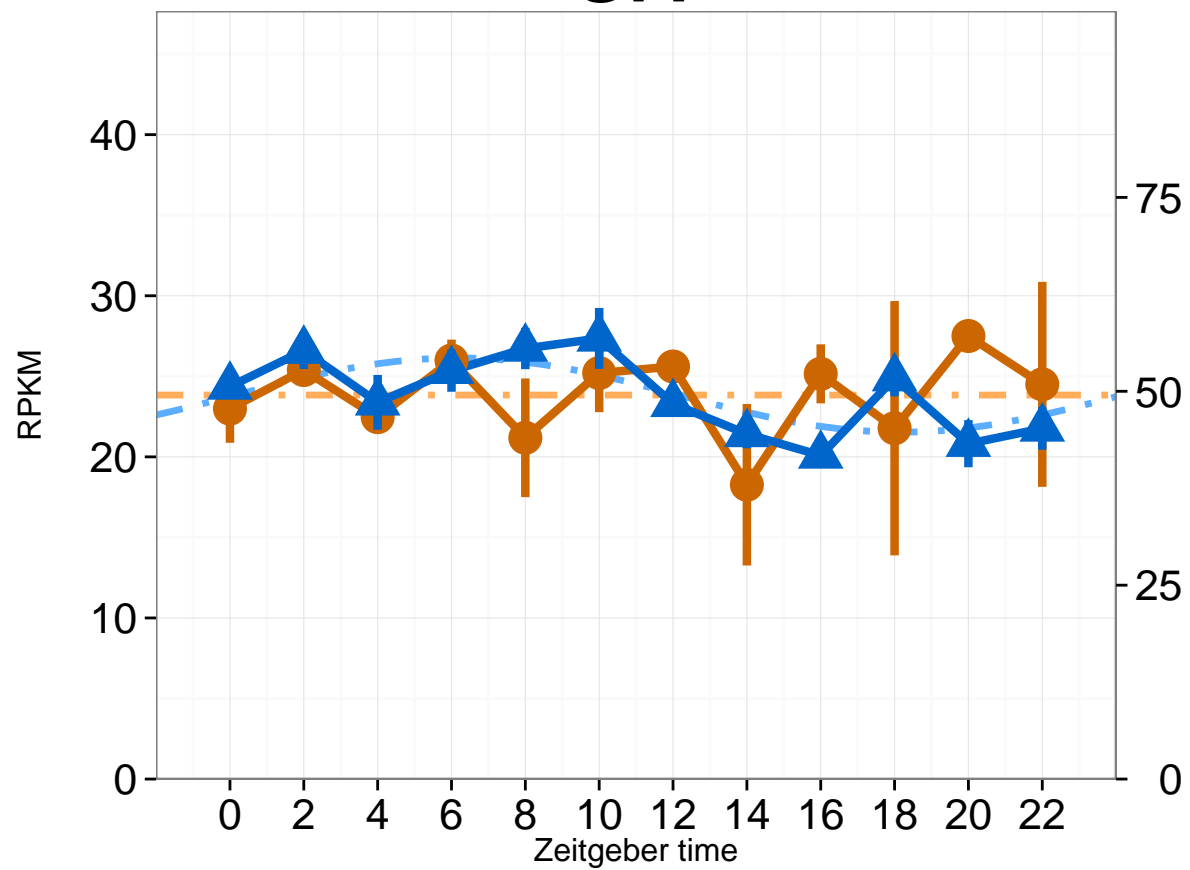

## Sf1

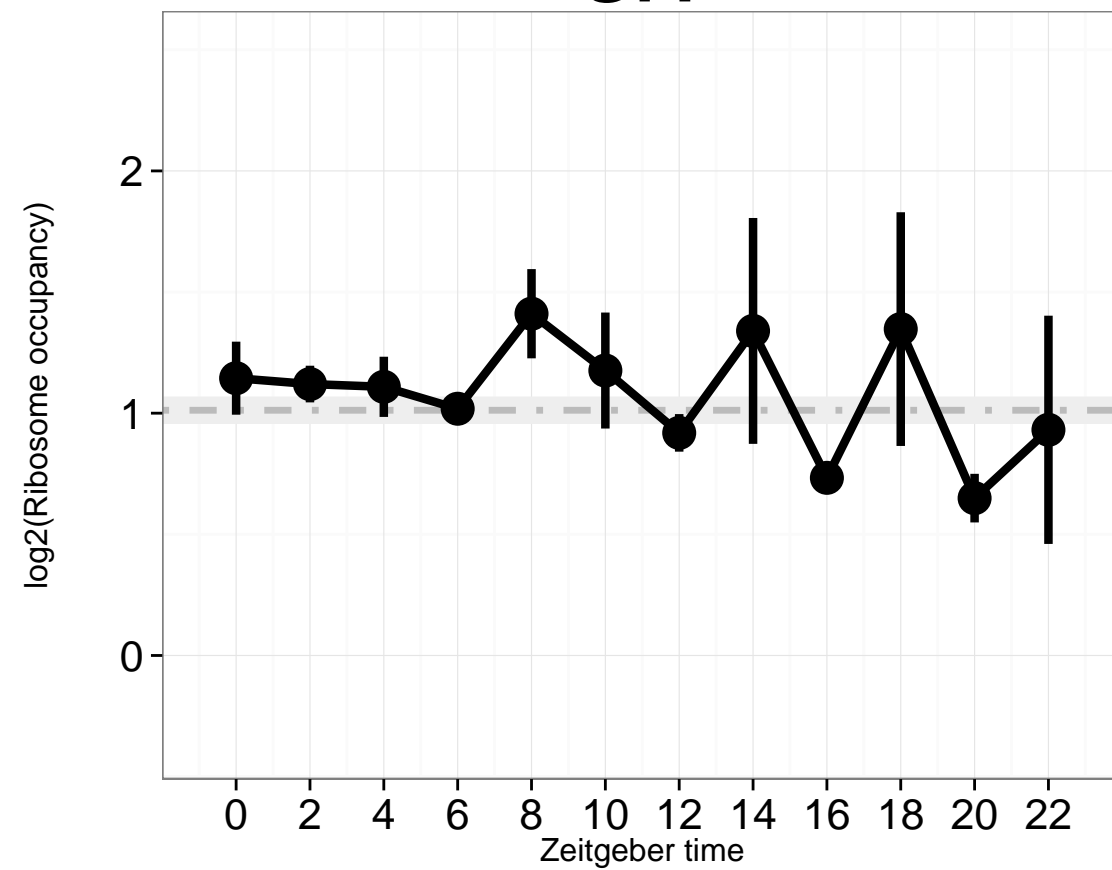

Supplement: SuppDataset_1.zip [file Sf1_set_A.pdf › Supplemental Dataset 1/A-mRNA_nonrhyth_translation_nonrhyth/Sf1_set_A.pdf]

# Sf3a1

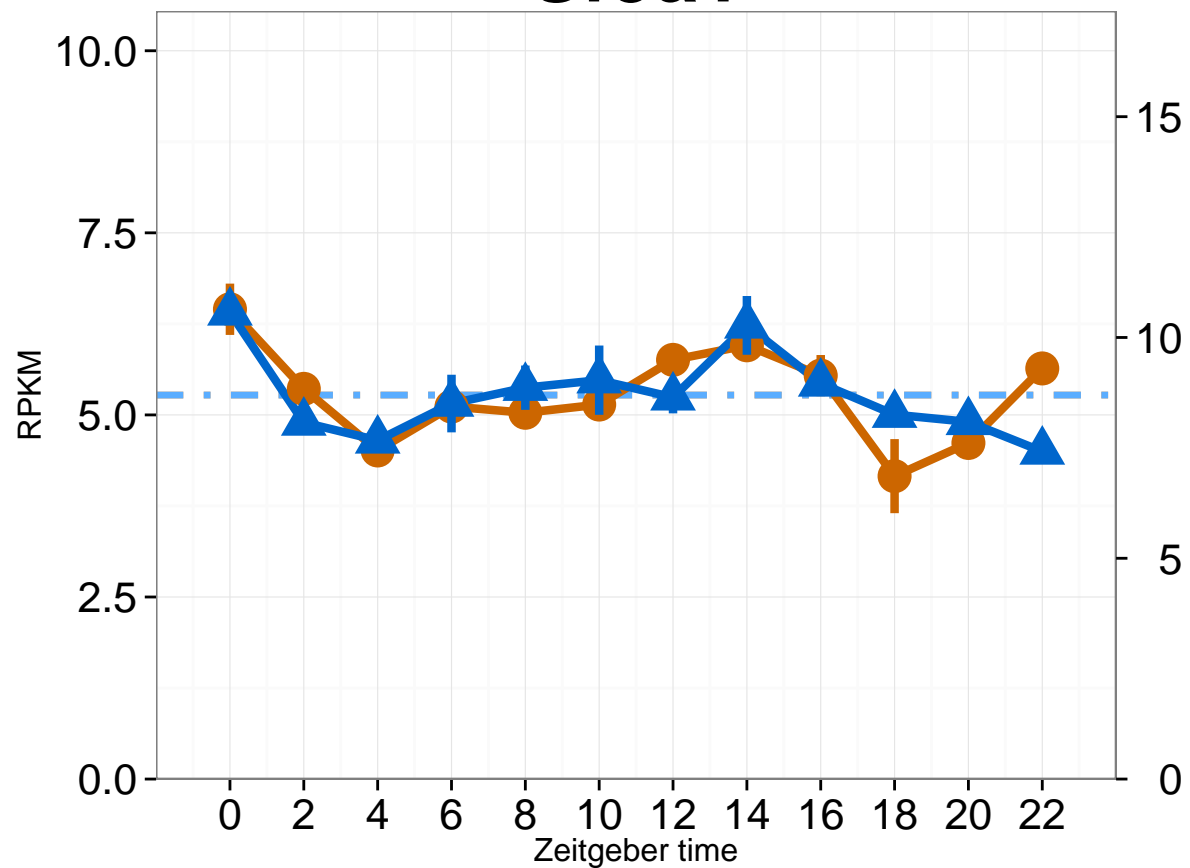

# Sf3a1

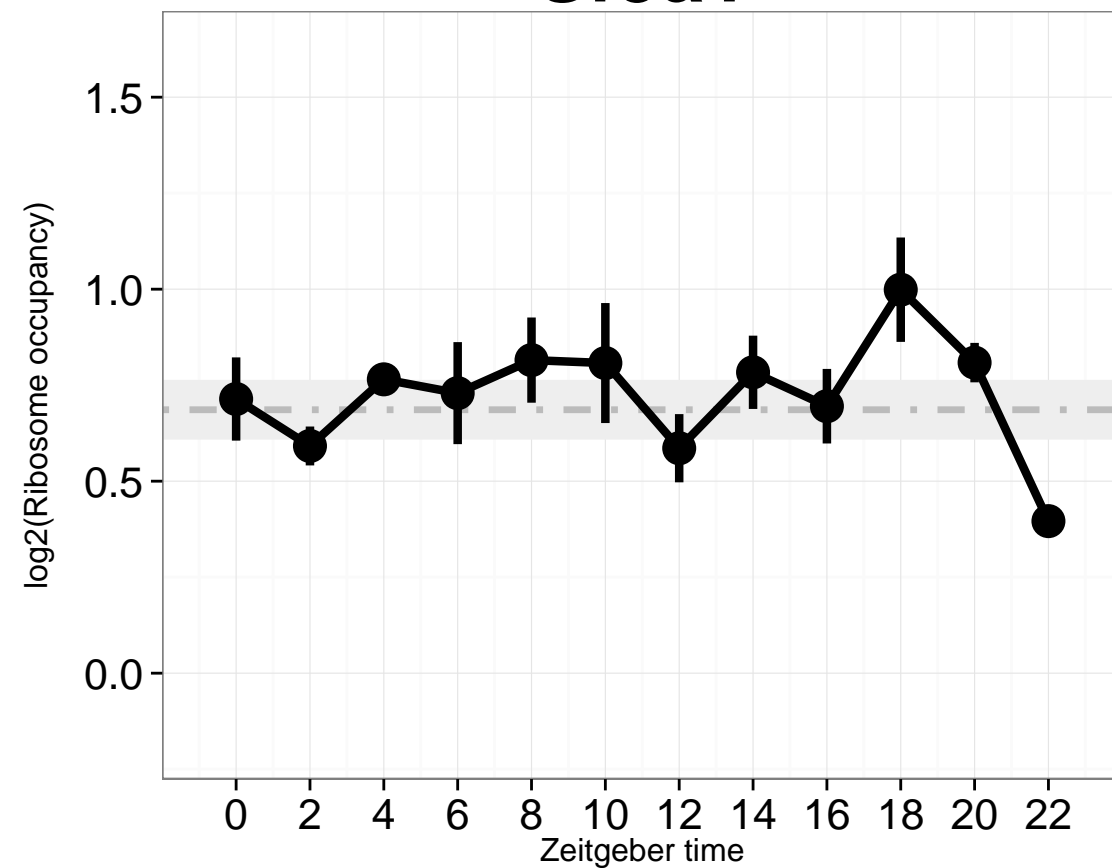

Supplement: SuppDataset_1.zip [file Sf3a1_set_A.pdf › Supplemental Dataset 1/A-mRNA_nonrhyth_translation_nonrhyth/Sf3a1_set_A.pdf]

## Sf3a2

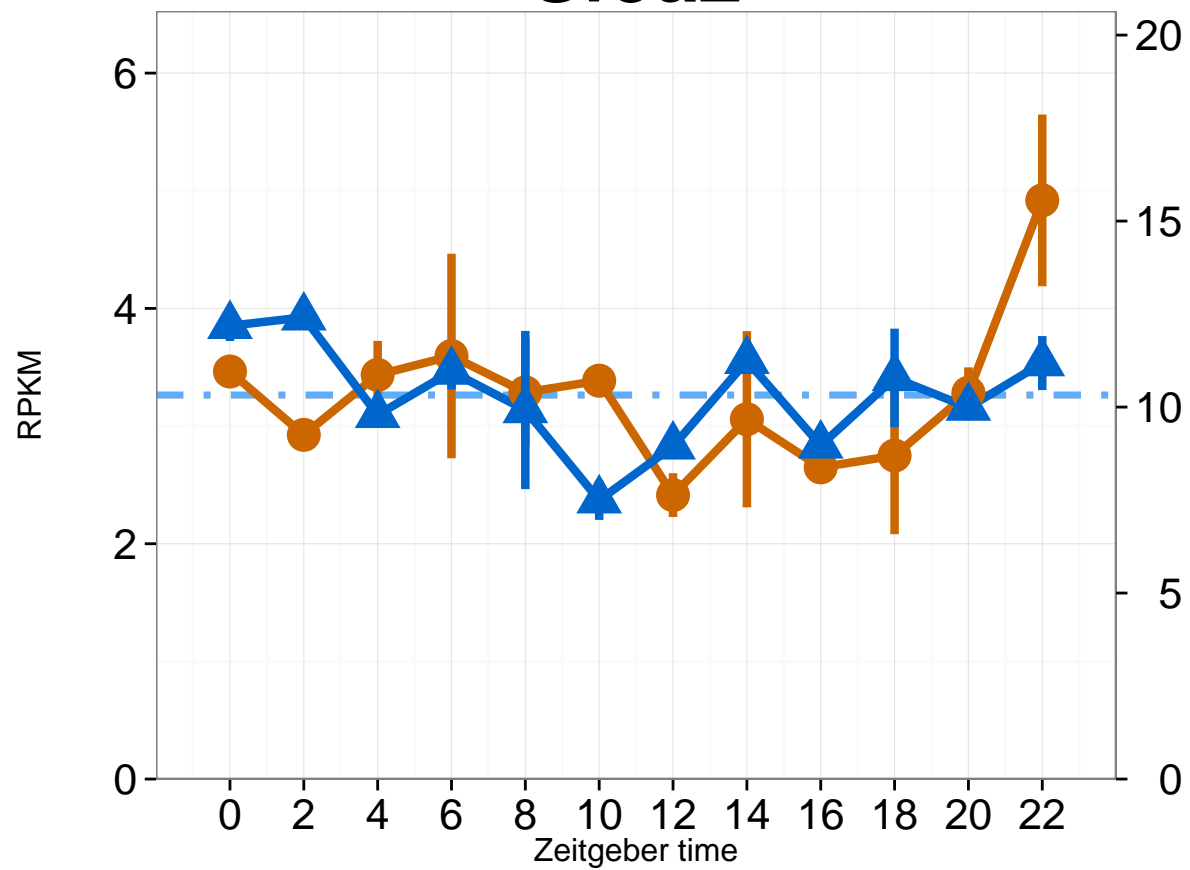

## Sf3a2

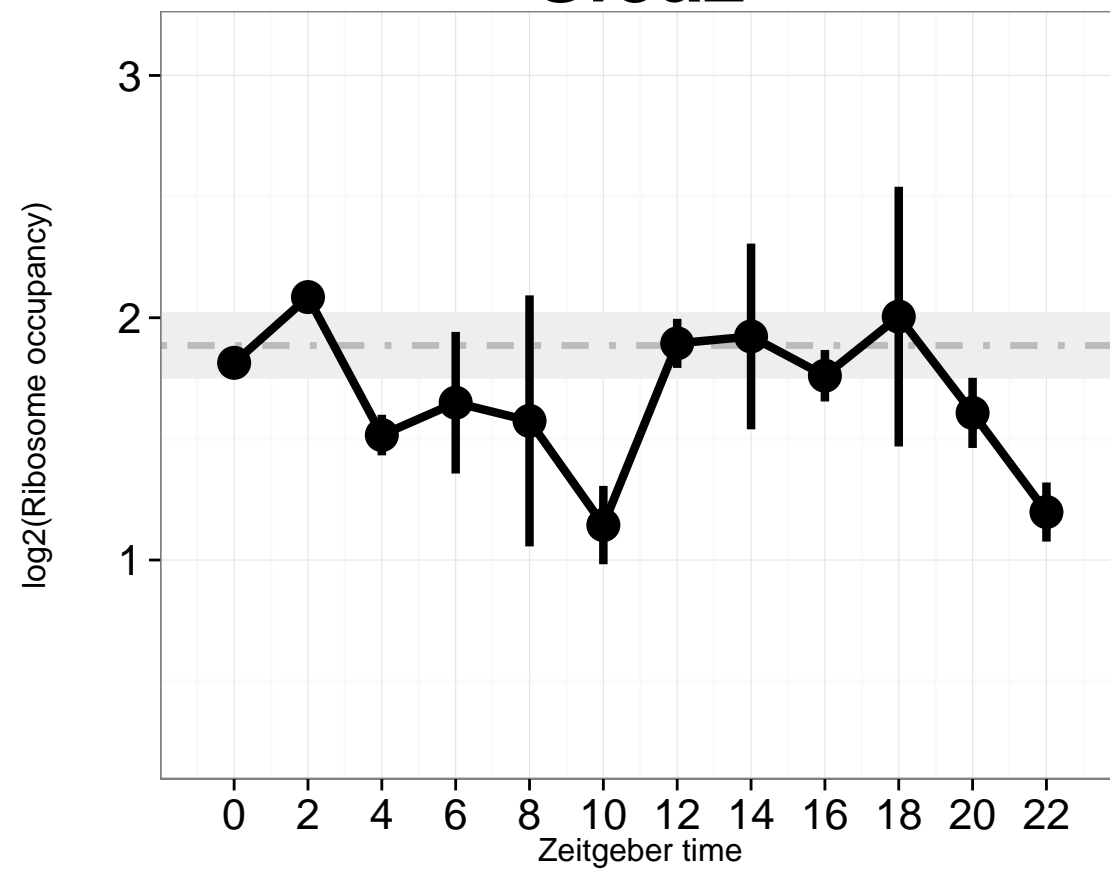

Supplement: SuppDataset_1.zip [file Sf3a2_set_A.pdf › Supplemental Dataset 1/A-mRNA_nonrhyth_translation_nonrhyth/Sf3a2_set_A.pdf]

## Sf3a3

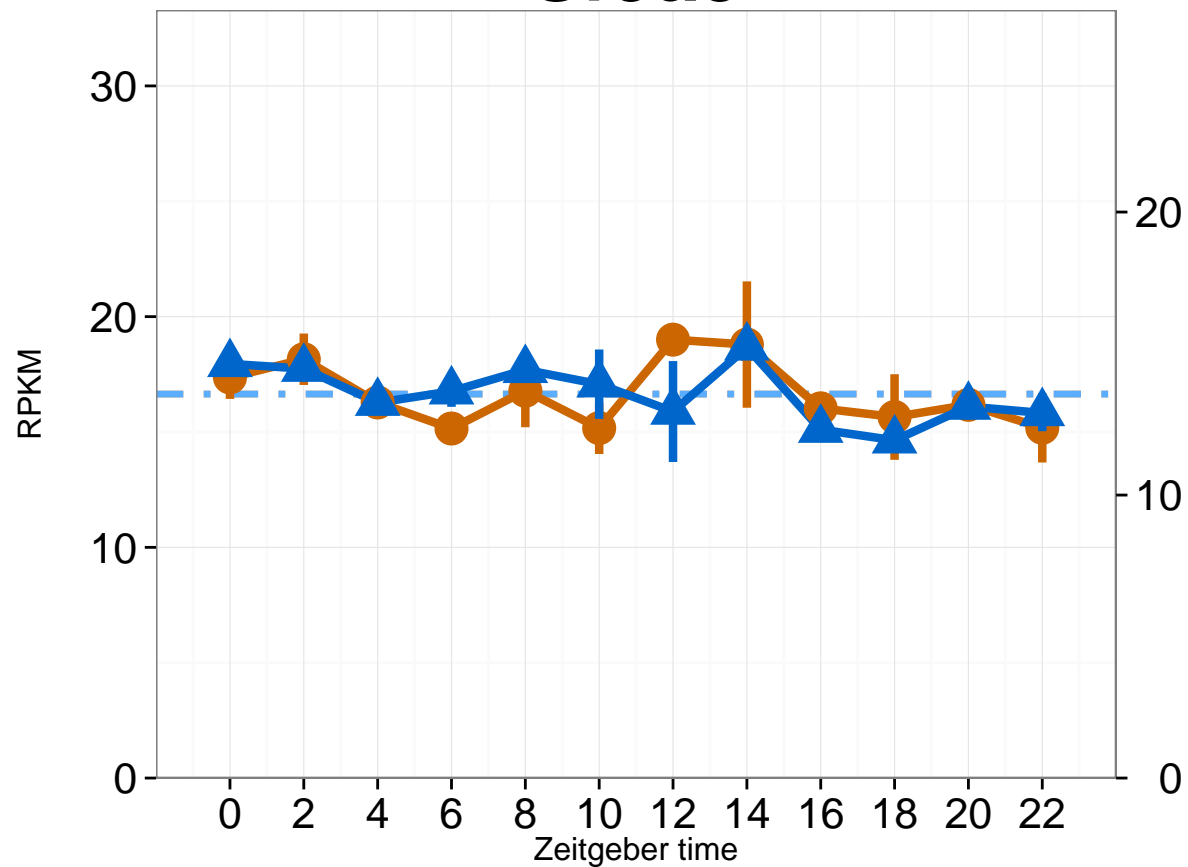

## Sf3a3

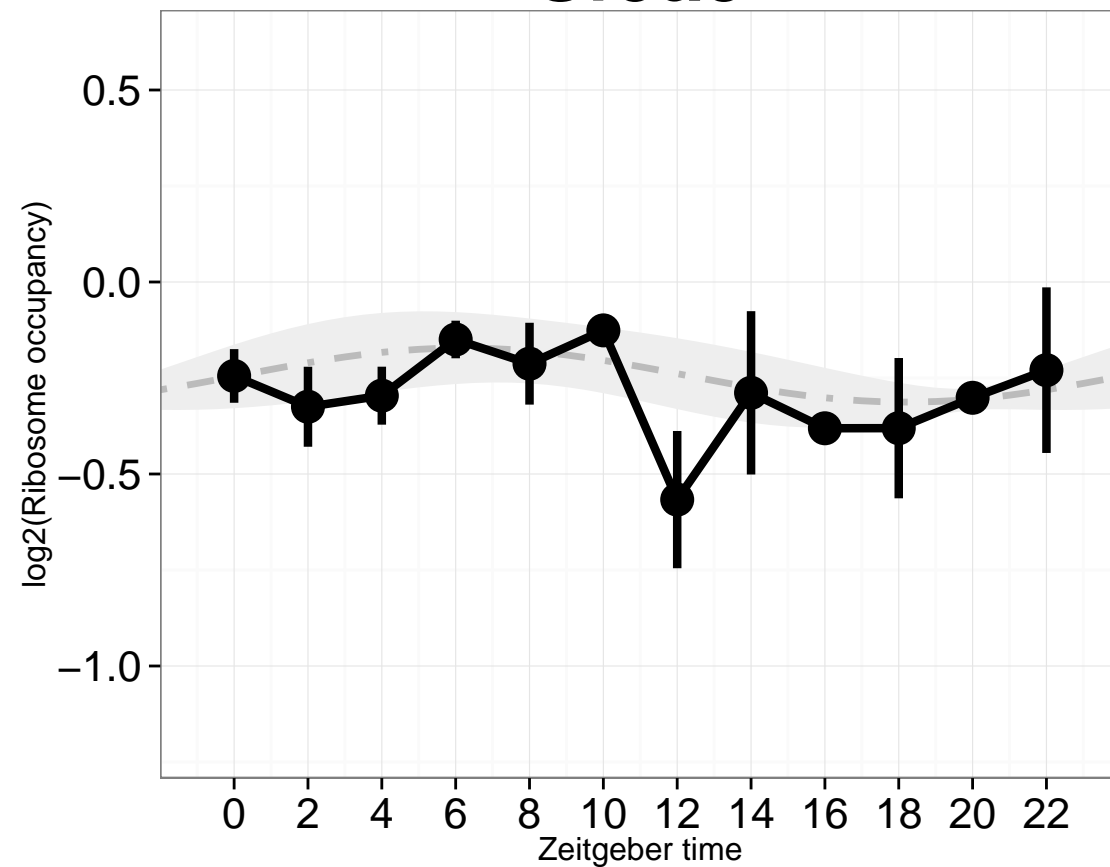

Supplement: SuppDataset_1.zip [file Sf3a3_set_A.pdf › Supplemental Dataset 1/A-mRNA_nonrhyth_translation_nonrhyth/Sf3a3_set_A.pdf]

# Sf3b1

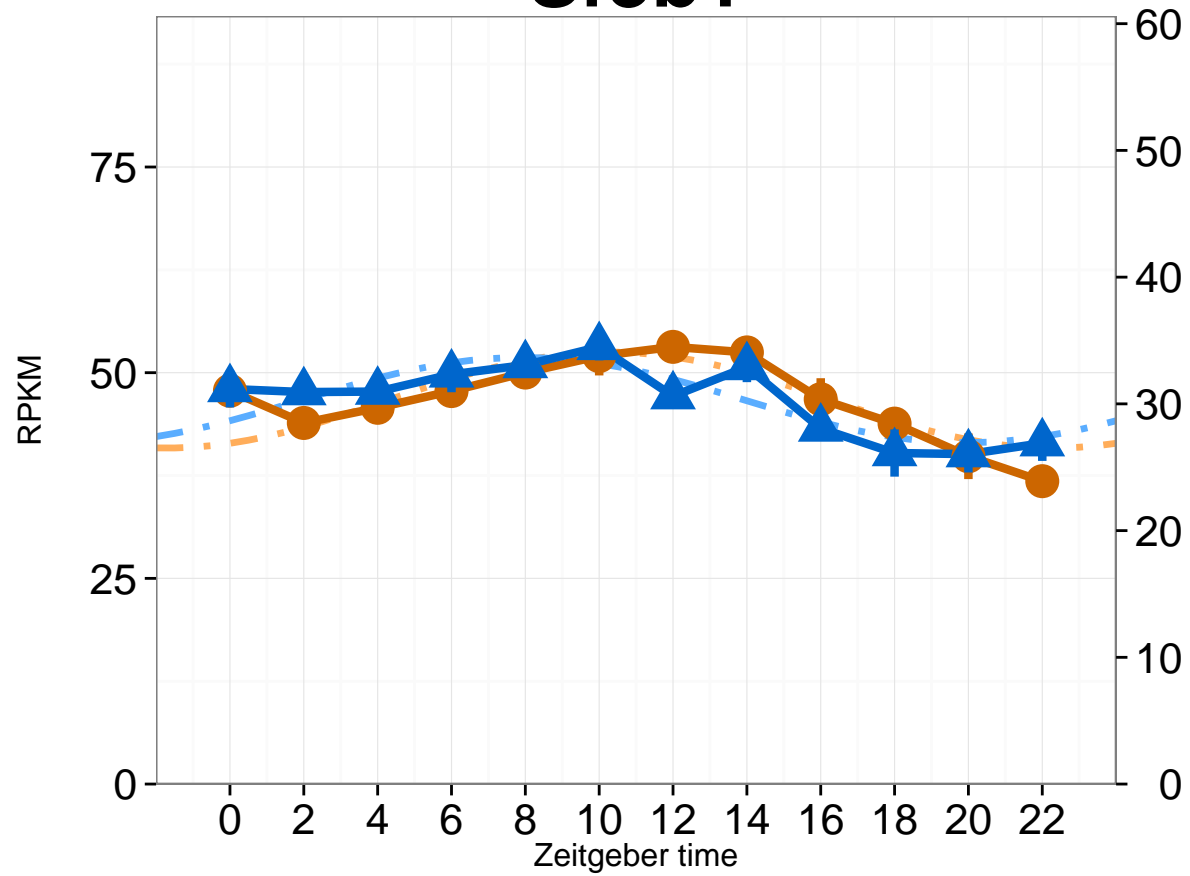

# Sf3b1

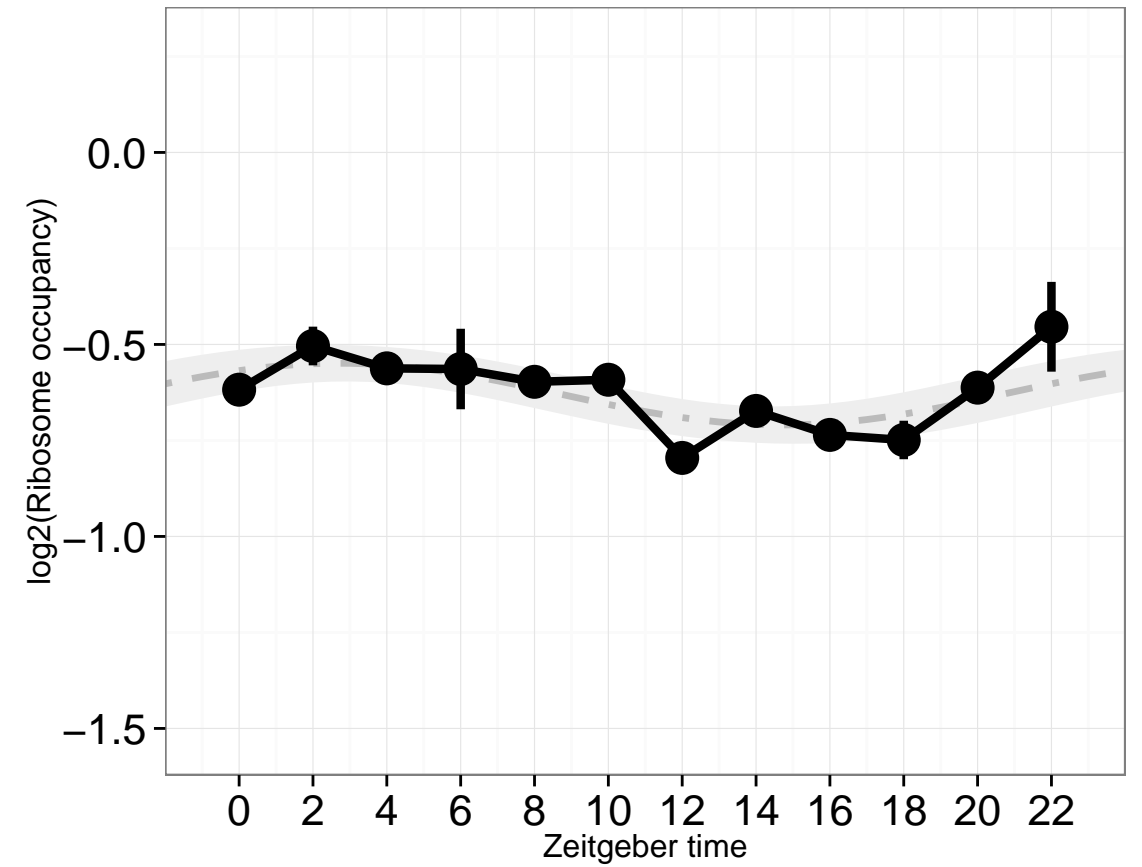

Supplement: SuppDataset_1.zip [file Sf3b1_set_A.pdf › Supplemental Dataset 1/A-mRNA_nonrhyth_translation_nonrhyth/Sf3b1_set_A.pdf]

## Sf3b2

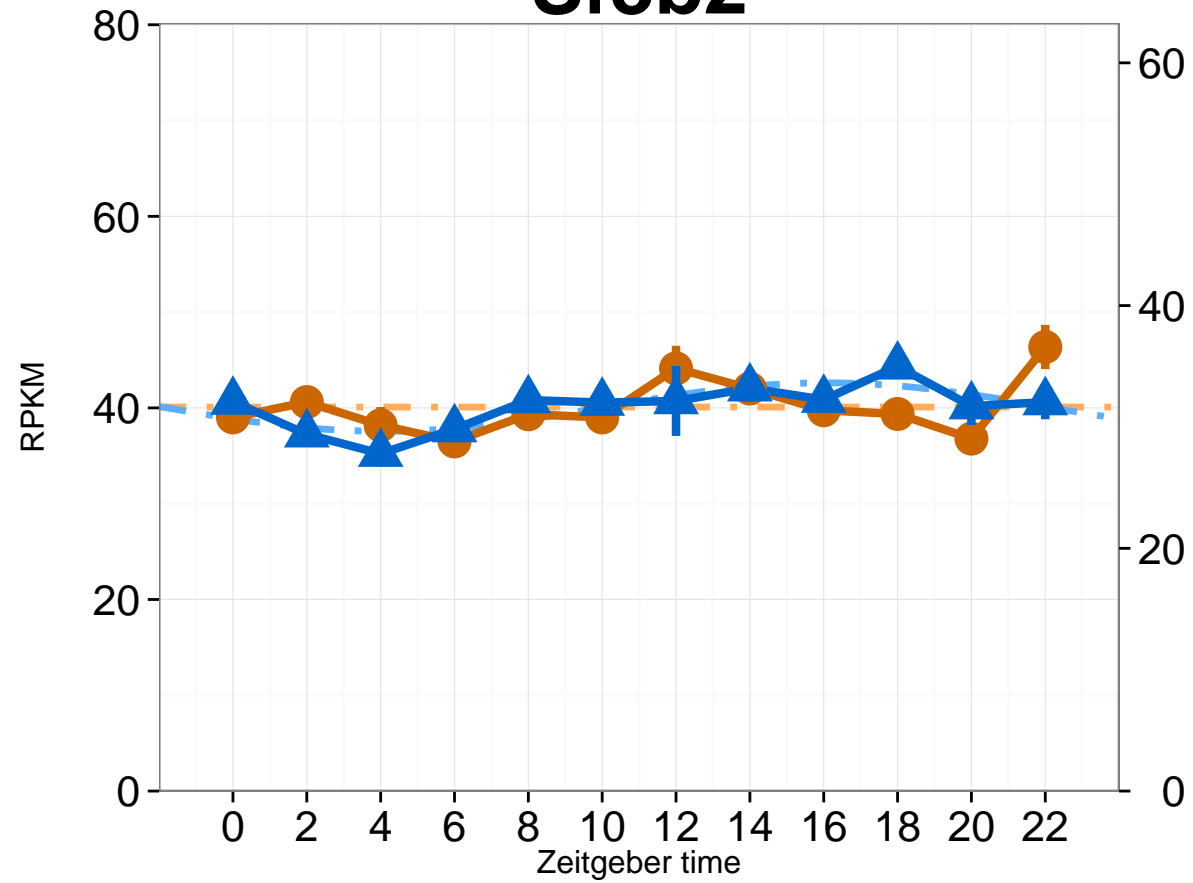

## Sf3b2

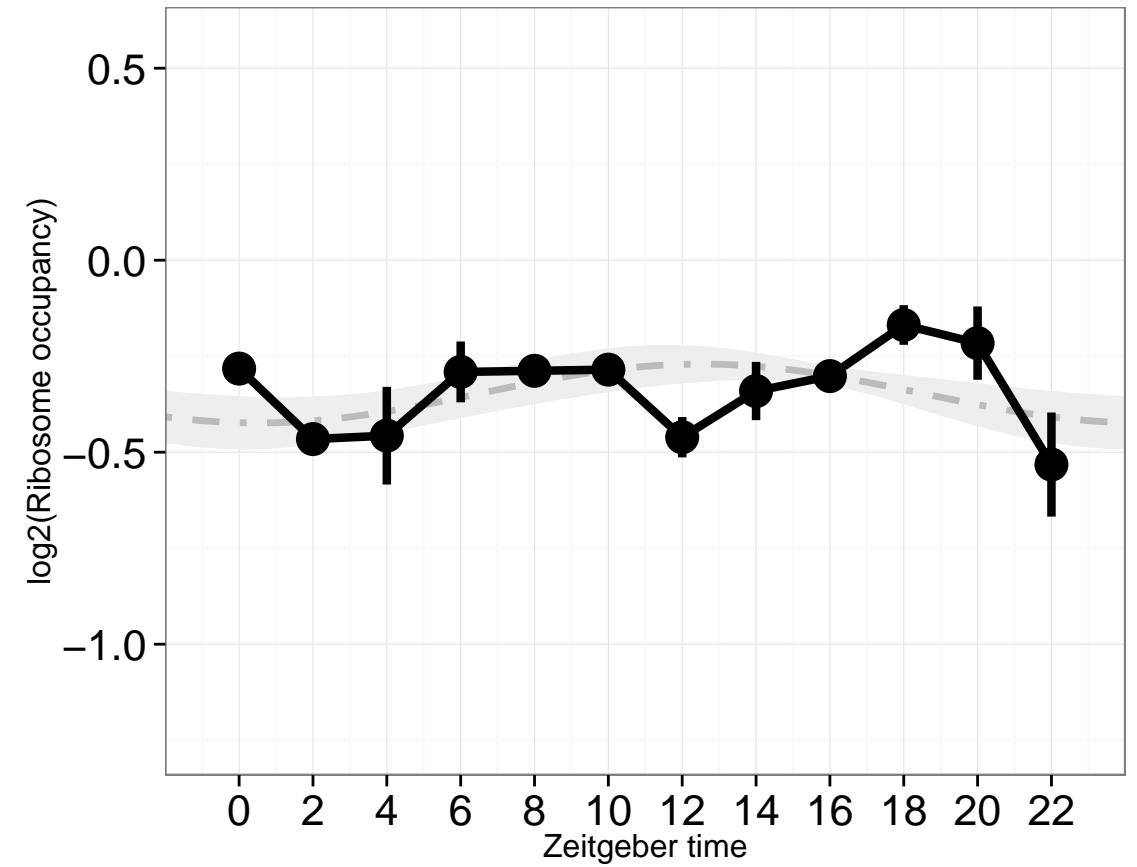

Supplement: SuppDataset_1.zip [file Sf3b2_set_A.pdf › Supplemental Dataset 1/A-mRNA_nonrhyth_translation_nonrhyth/Sf3b2_set_A.pdf]

## Sf3b3

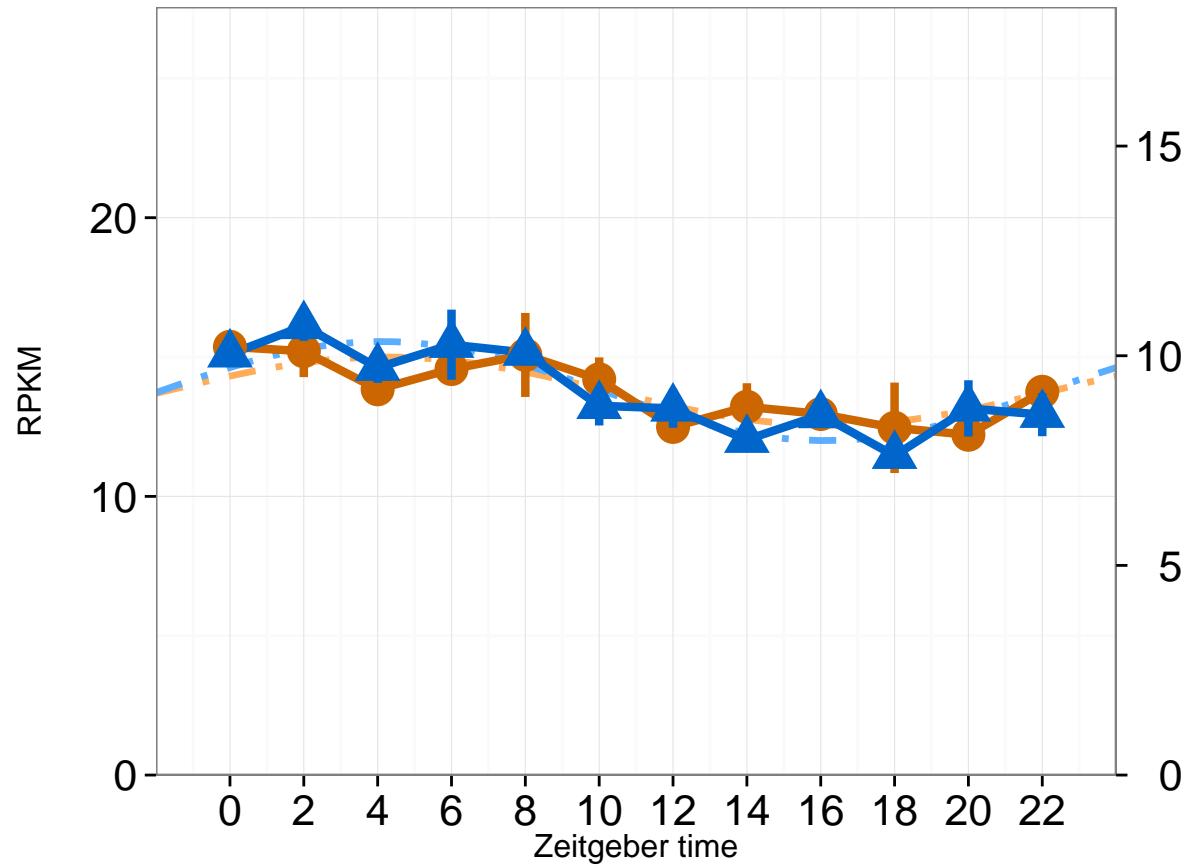

## Sf3b3

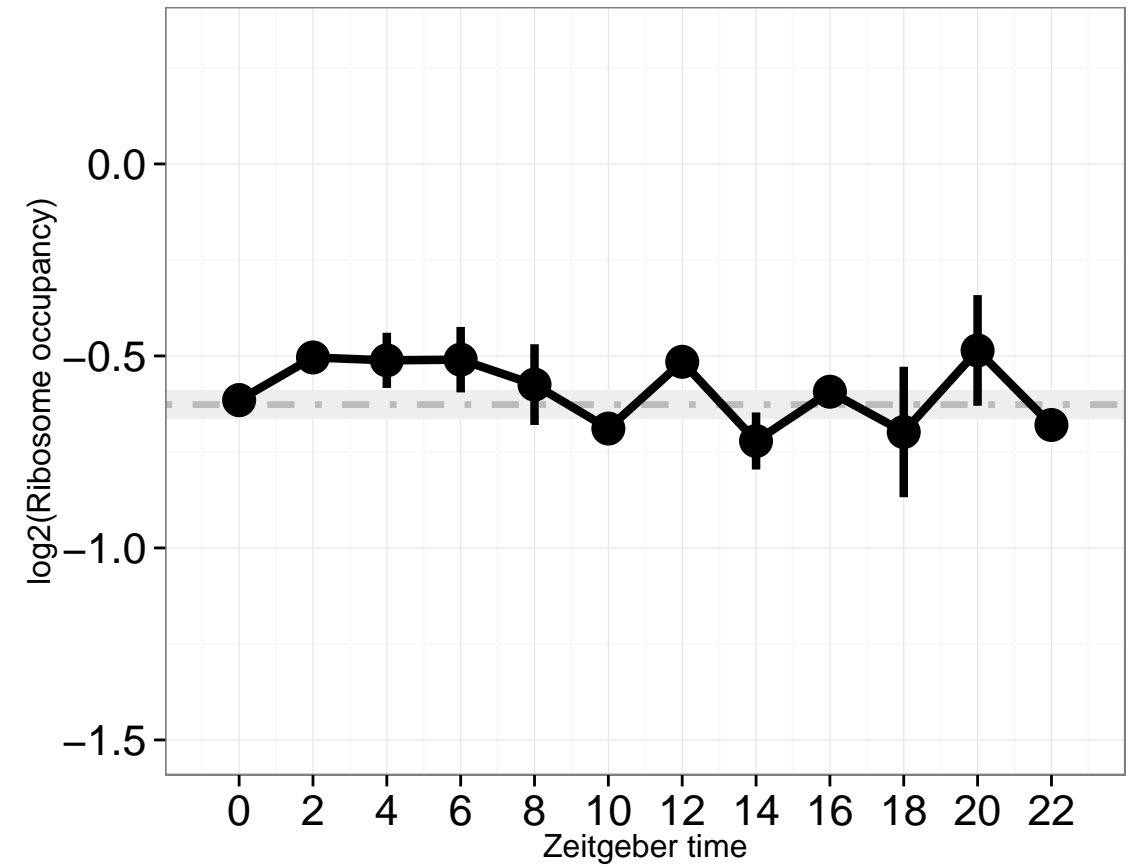

Supplement: SuppDataset_1.zip [file Sf3b3_set_A.pdf › Supplemental Dataset 1/A-mRNA_nonrhyth_translation_nonrhyth/Sf3b3_set_A.pdf]

## Sf3b4

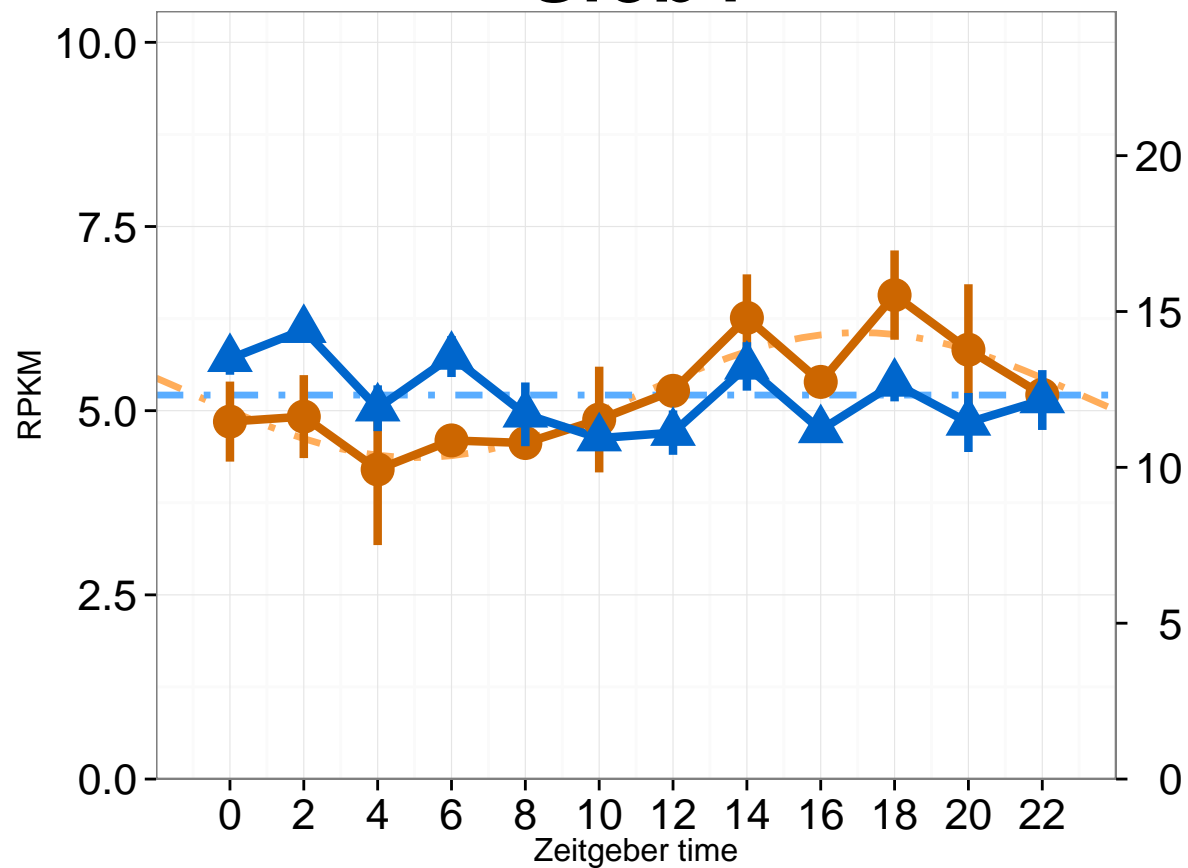

## Sf3b4

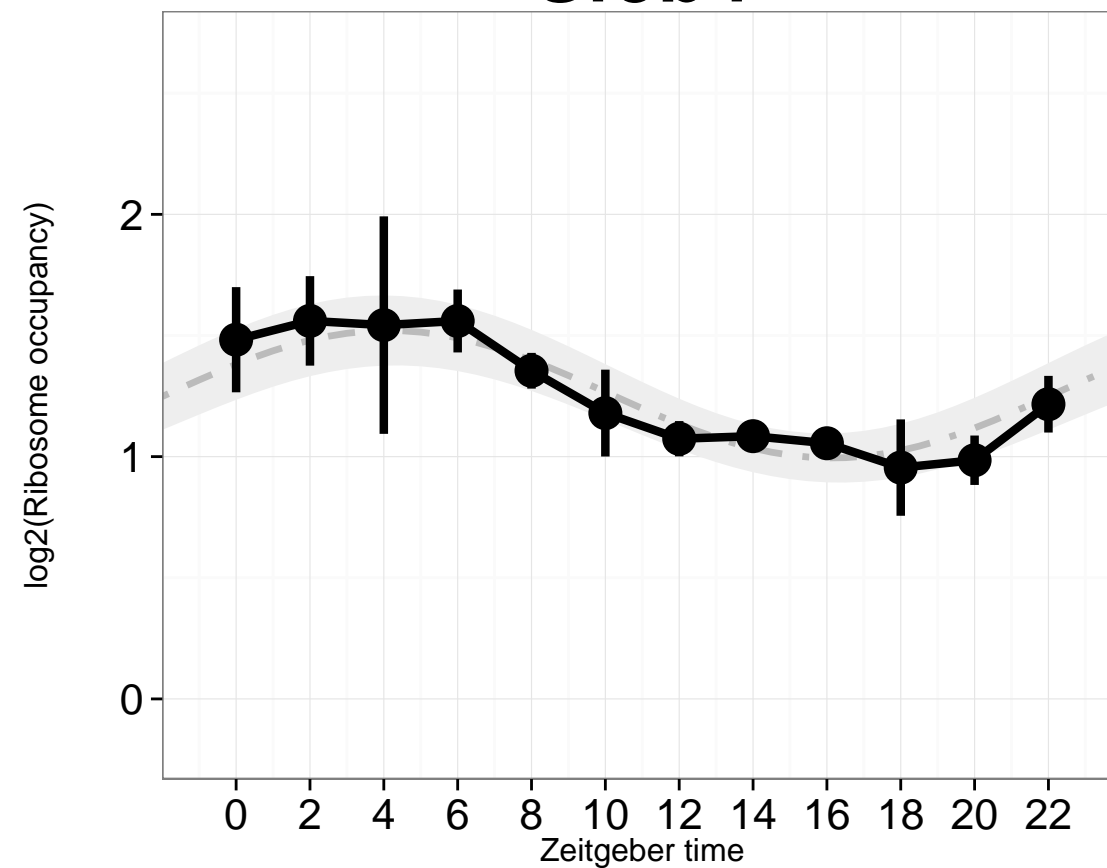

Supplement: SuppDataset_1.zip [file Sf3b4_set_A.pdf › Supplemental Dataset 1/A-mRNA_nonrhyth_translation_nonrhyth/Sf3b4_set_A.pdf]

## Sf3b5

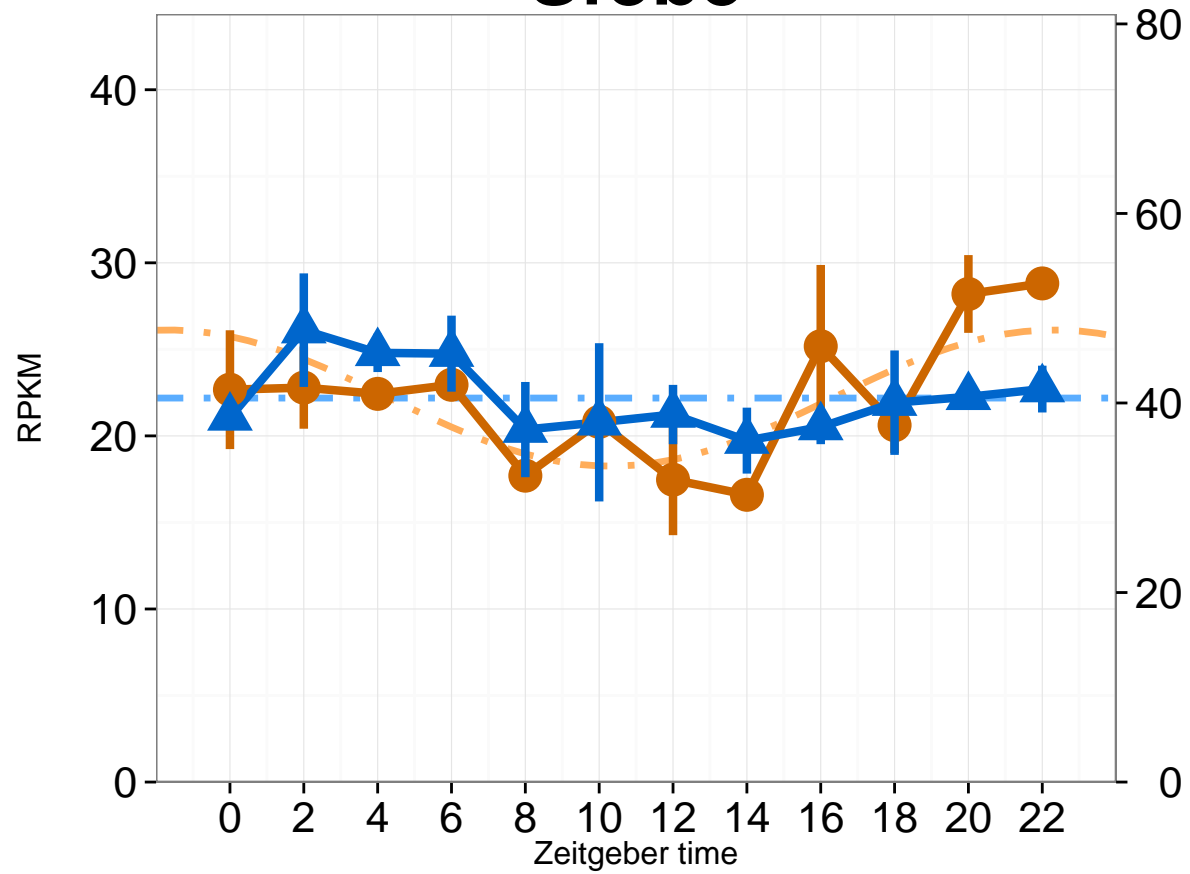

## Sf3b5

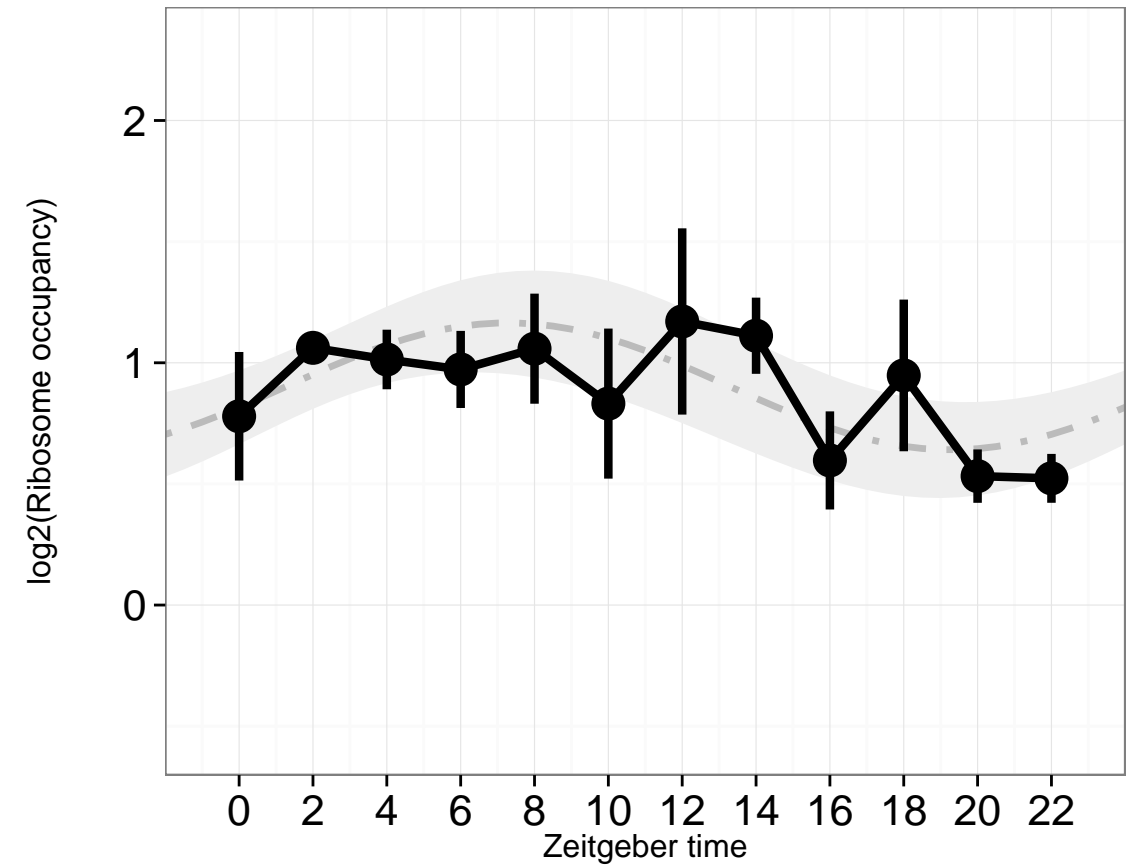

Supplement: SuppDataset_1.zip [file Sf3b5_set_A.pdf › Supplemental Dataset 1/A-mRNA_nonrhyth_translation_nonrhyth/Sf3b5_set_A.pdf]

## Sfi1

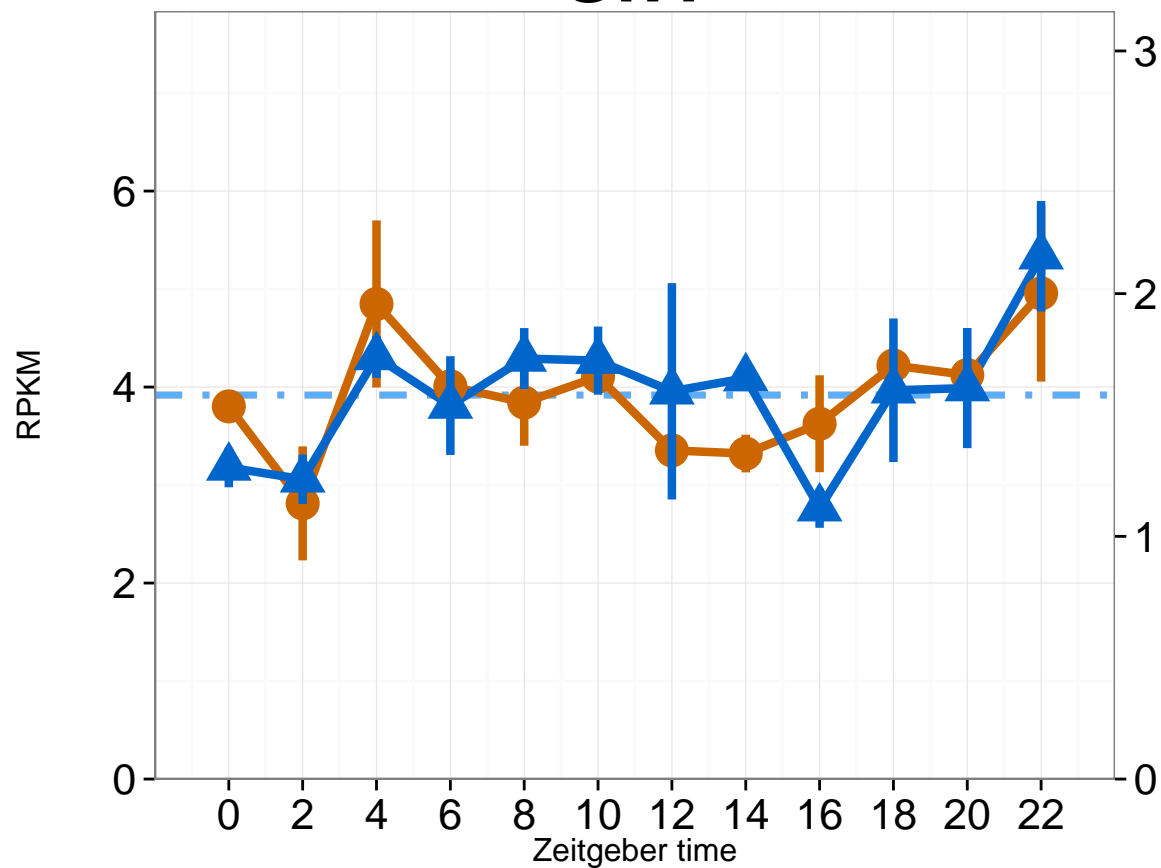

## Sfi1

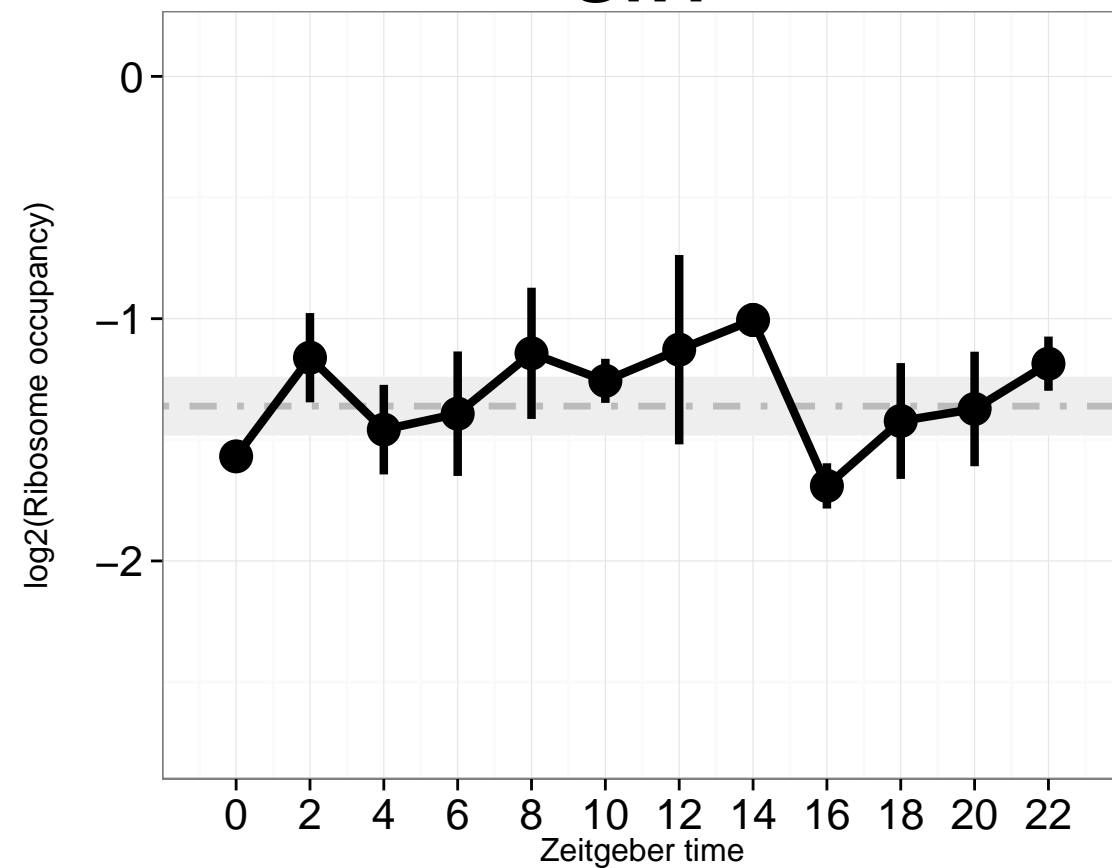

Supplement: SuppDataset_1.zip [file Sfi1_set_A.pdf › Supplemental Dataset 1/A-mRNA_nonrhyth_translation_nonrhyth/Sfi1_set_A.pdf]

# Sfmbt1

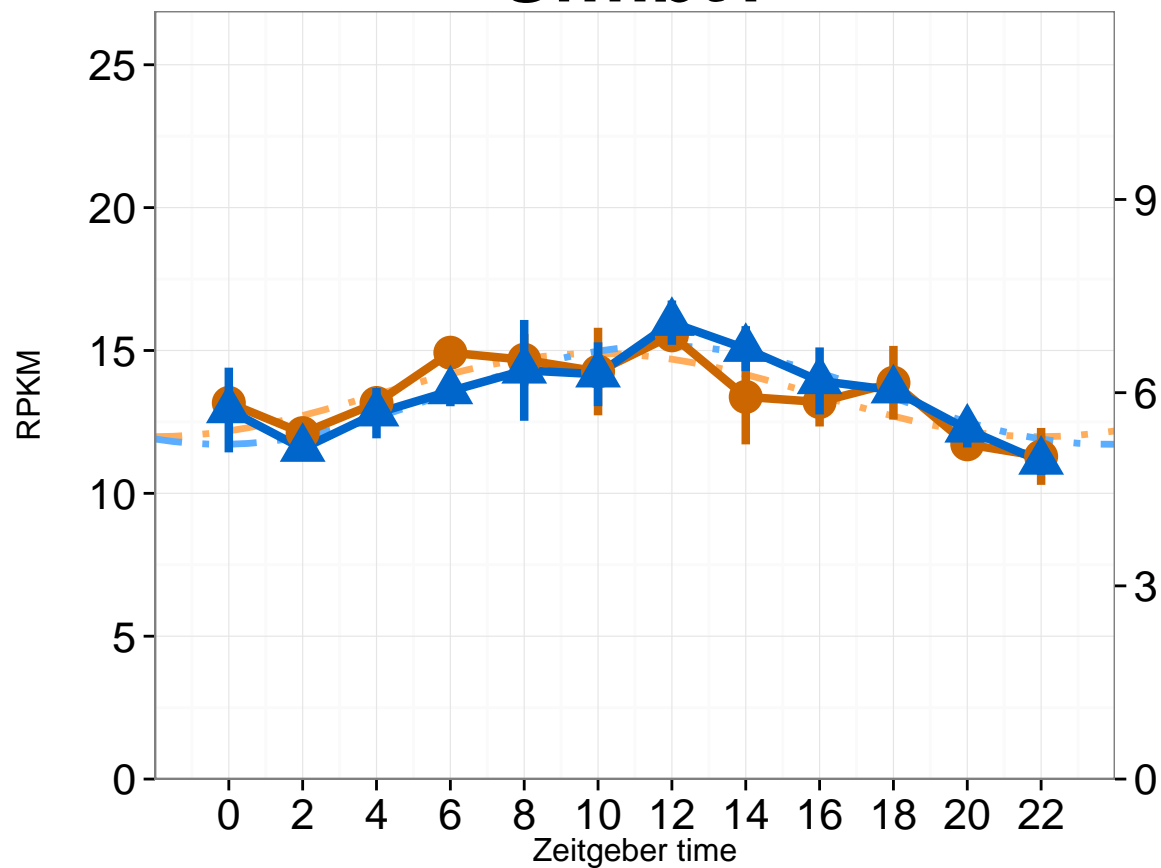

# Sfmbt1

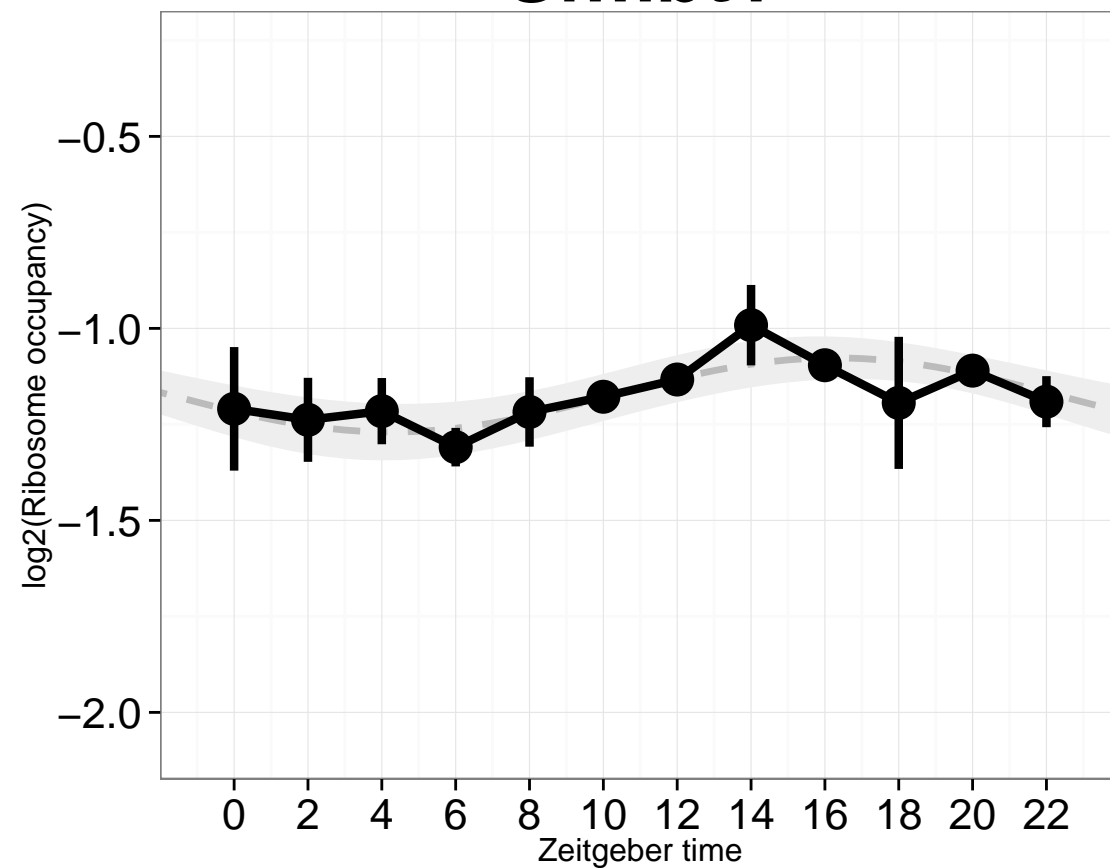

Supplement: SuppDataset_1.zip [file Sfmbt1_set_A.pdf › Supplemental Dataset 1/A-mRNA_nonrhyth_translation_nonrhyth/Sfmbt1_set_A.pdf]

## Sfr1

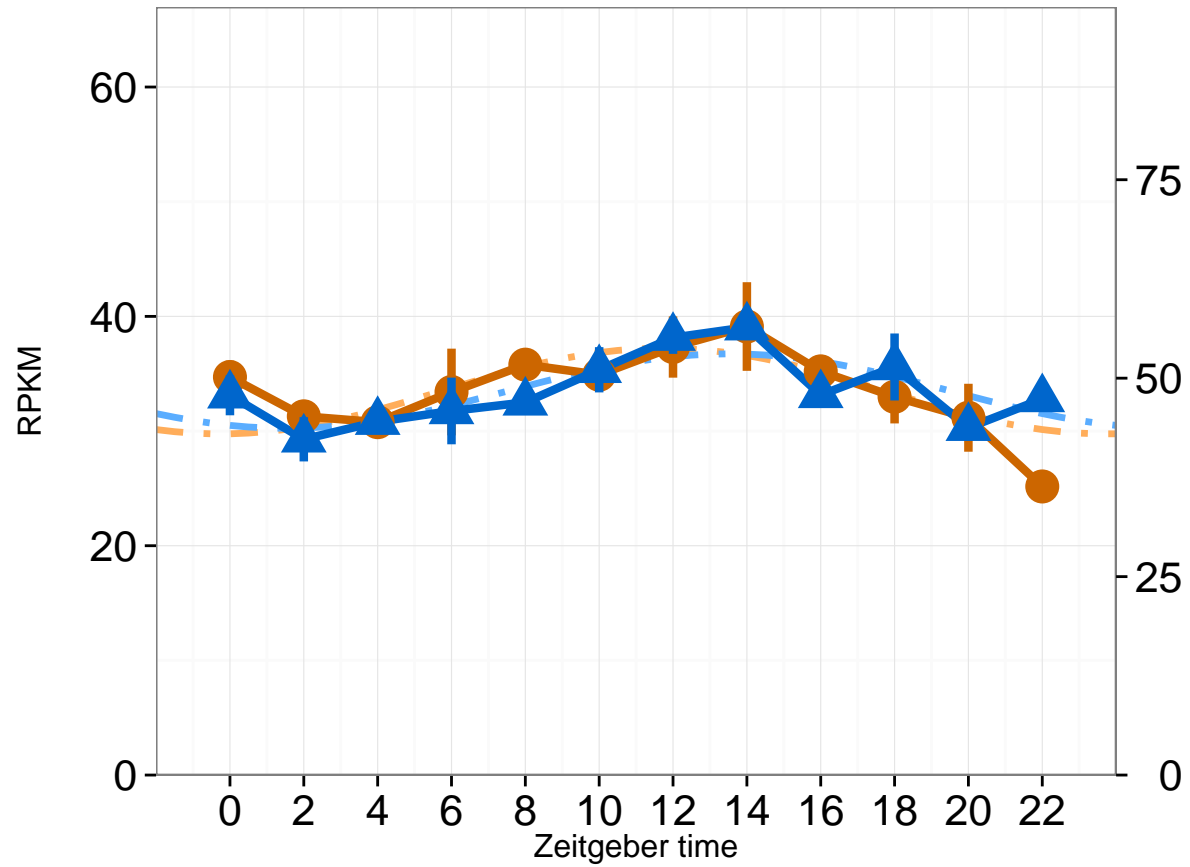

## Sfr1

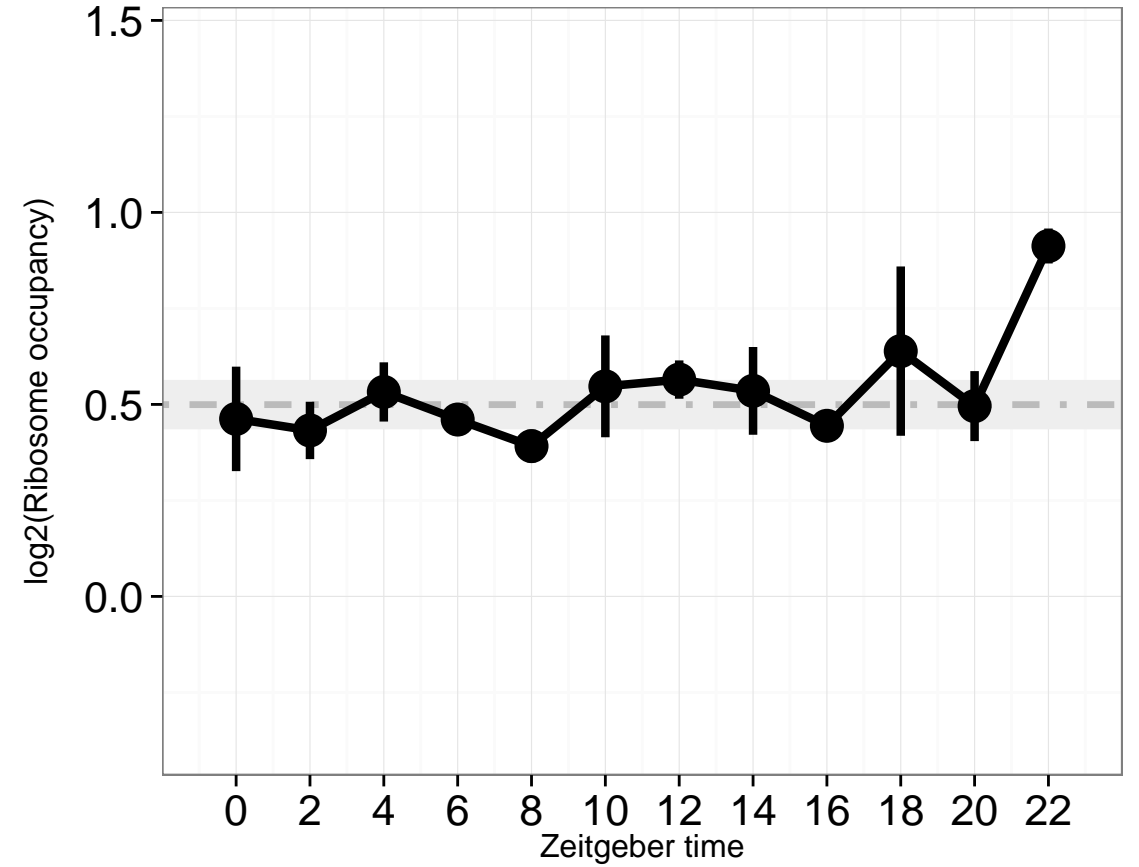

Supplement: SuppDataset_1.zip [file Sfr1_set_A.pdf › Supplemental Dataset 1/A-mRNA_nonrhyth_translation_nonrhyth/Sfr1_set_A.pdf]

**Sfrp1 TR**

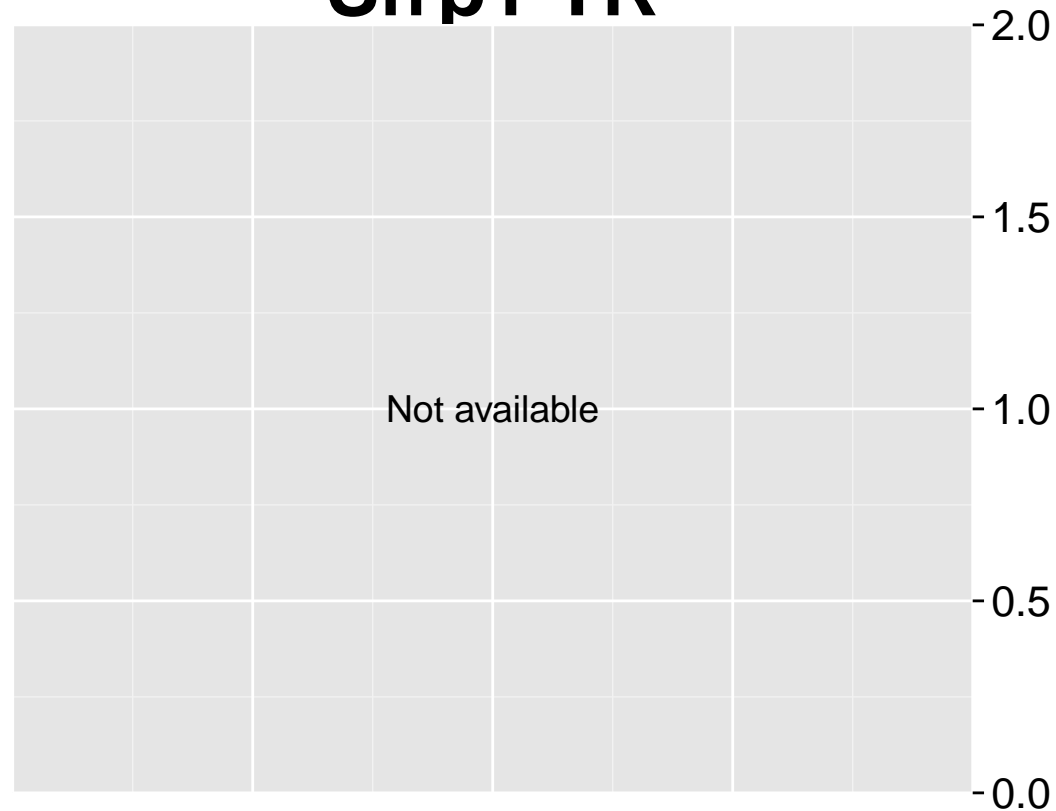

**Sfrp1 log2(Ribosome occupancy)**

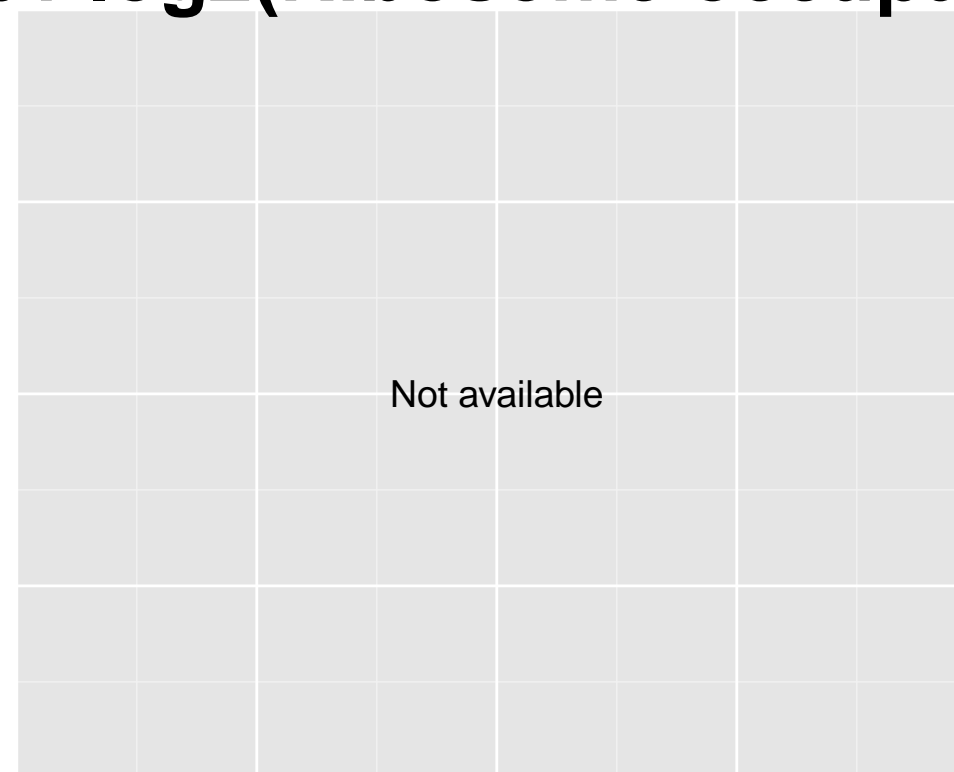

Supplement: SuppDataset_1.zip [file Sfrp1_set_A.pdf › Supplemental Dataset 1/A-mRNA_nonrhyth_translation_nonrhyth/Sfrp1_set_A.pdf]

# Sfrs18

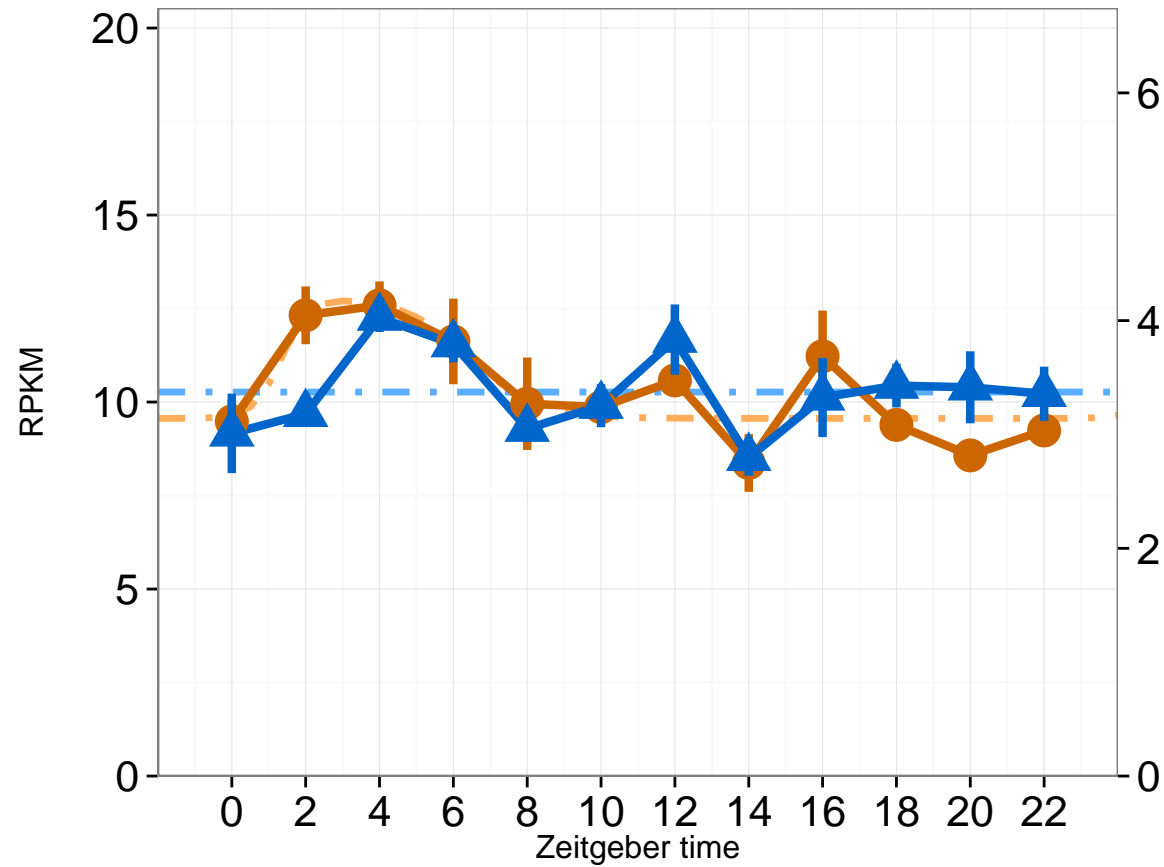

# Sfrs18

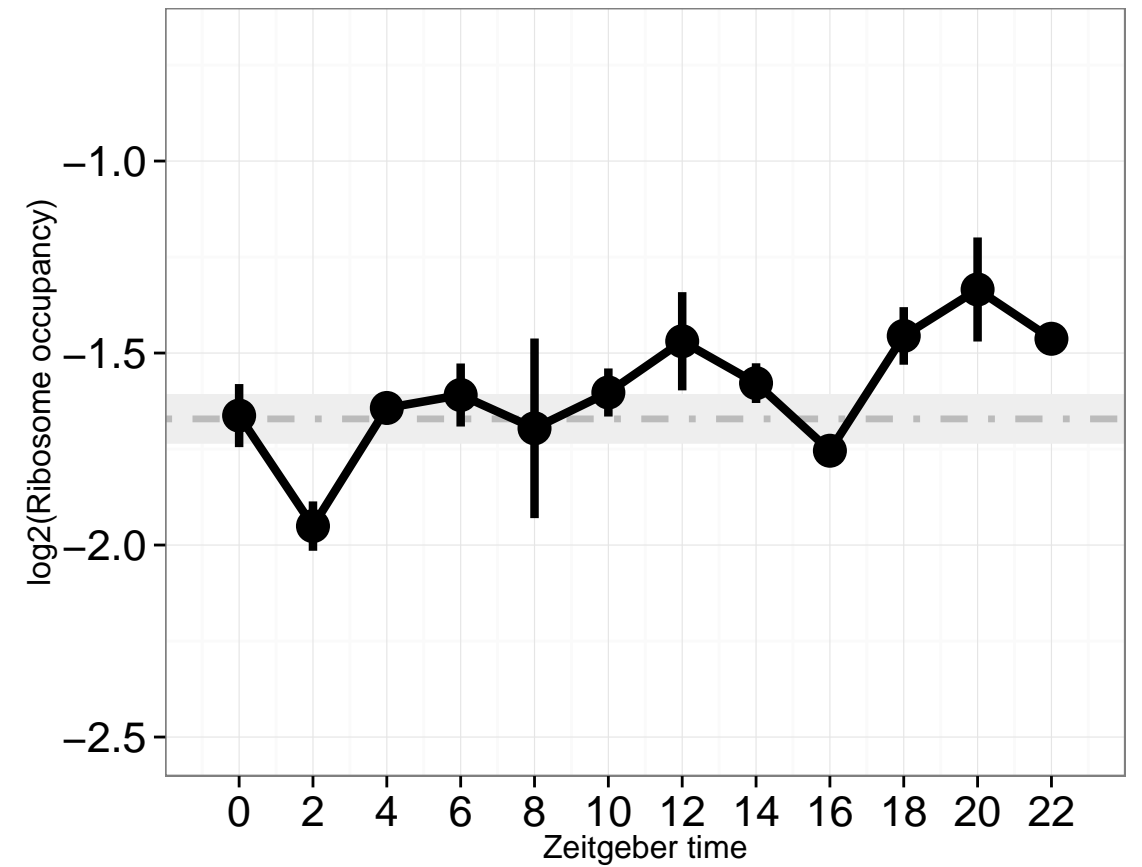

Supplement: SuppDataset_1.zip [file Sfrs18_set_A.pdf › Supplemental Dataset 1/A-mRNA_nonrhyth_translation_nonrhyth/Sfrs18_set_A.pdf]

## Sfswap

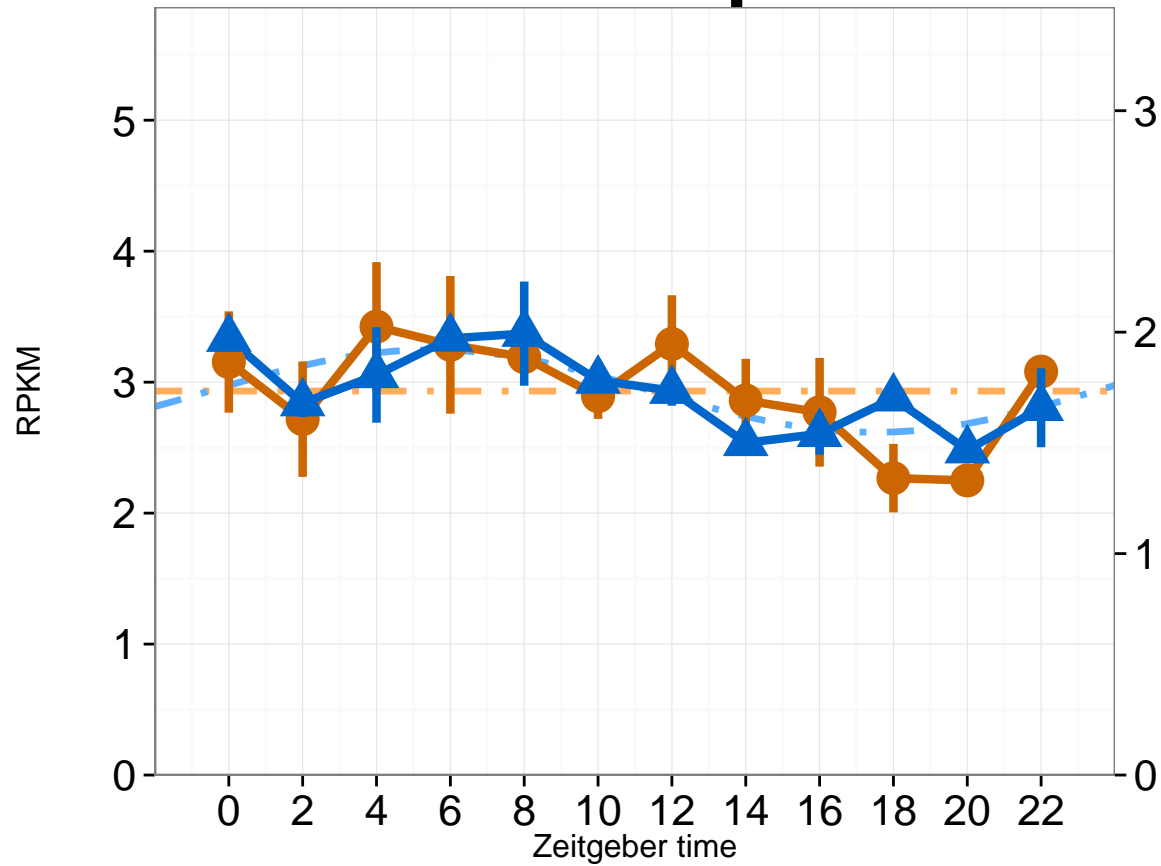

## Sfswap

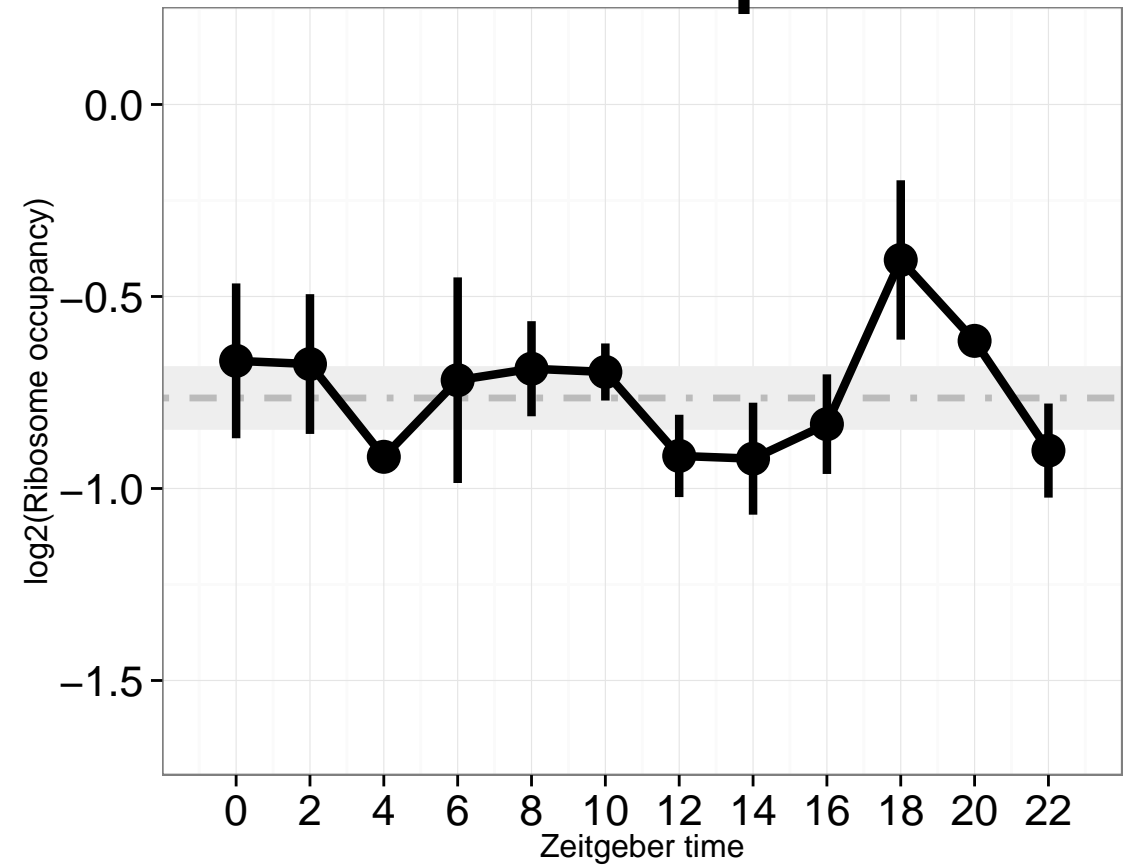

Supplement: SuppDataset_1.zip [file Sfswap_set_A.pdf › Supplemental Dataset 1/A-mRNA_nonrhyth_translation_nonrhyth/Sfswap_set_A.pdf]

# Sft2d1

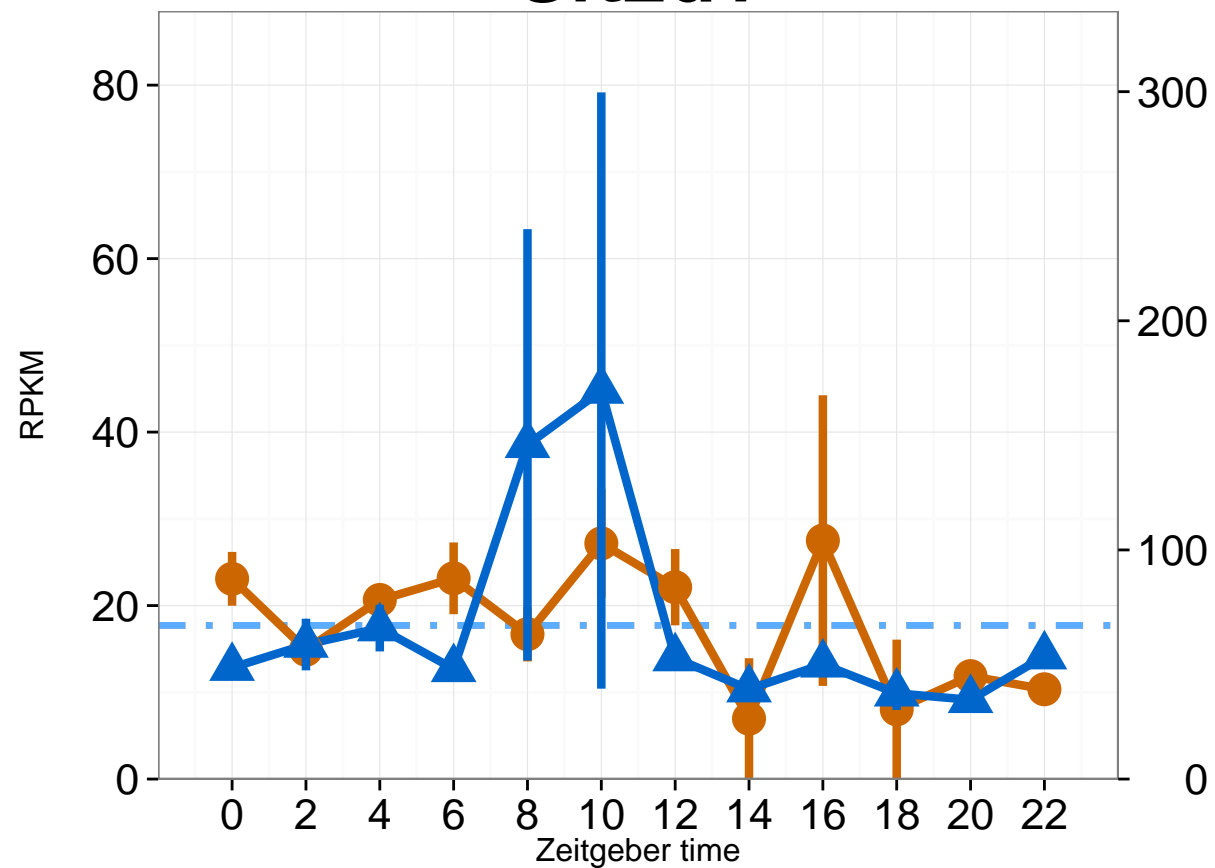

# Sft2d1

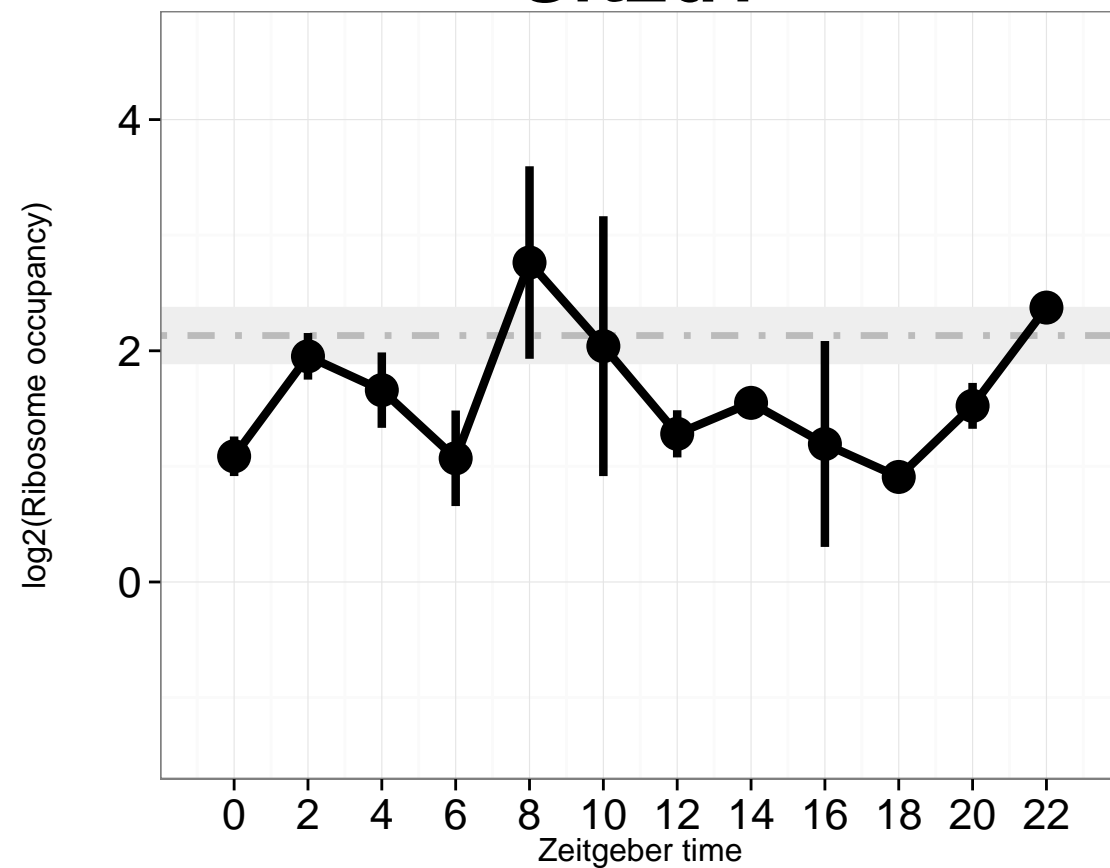

Supplement: SuppDataset_1.zip [file Sft2d1_set_A.pdf › Supplemental Dataset 1/A-mRNA_nonrhyth_translation_nonrhyth/Sft2d1_set_A.pdf]

## Sft2d2

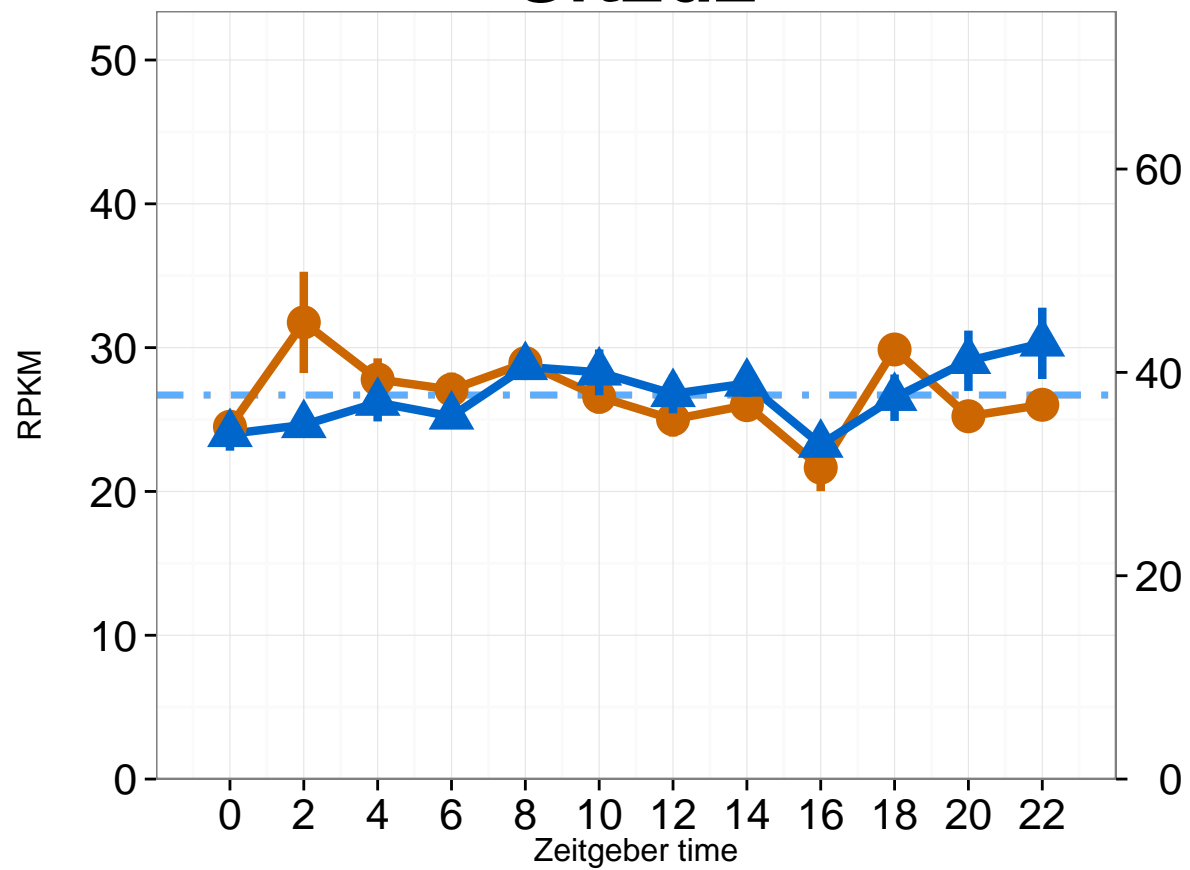

## Sft2d2

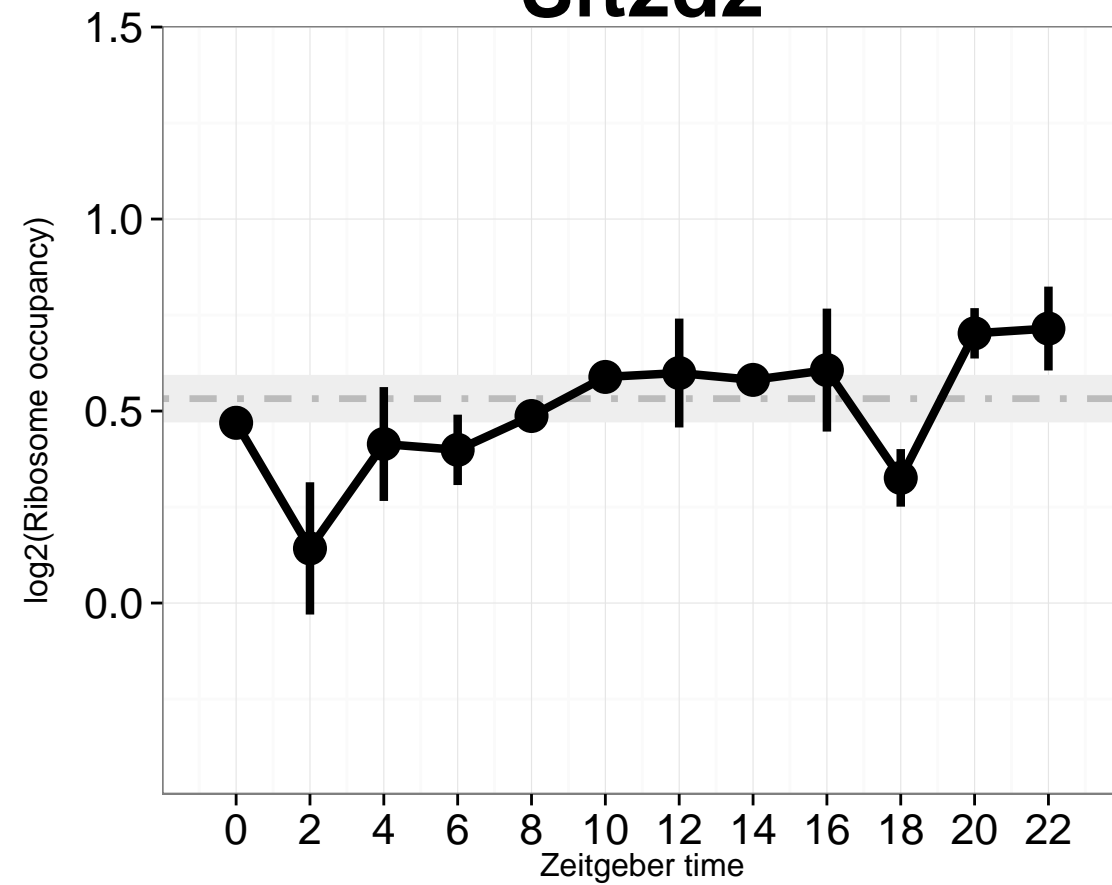

Supplement: SuppDataset_1.zip [file Sft2d2_set_A.pdf › Supplemental Dataset 1/A-mRNA_nonrhyth_translation_nonrhyth/Sft2d2_set_A.pdf]

# Sfxn1

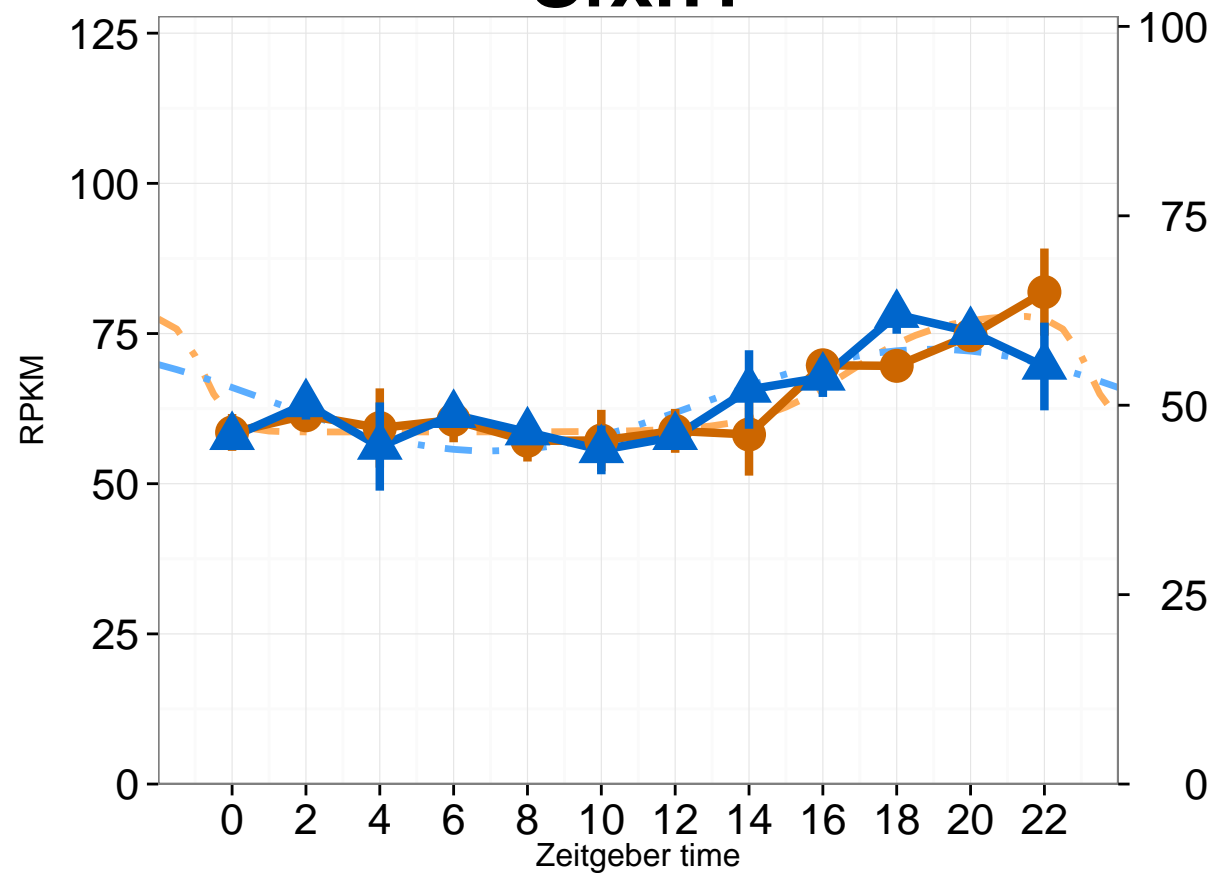

# Sfxn1

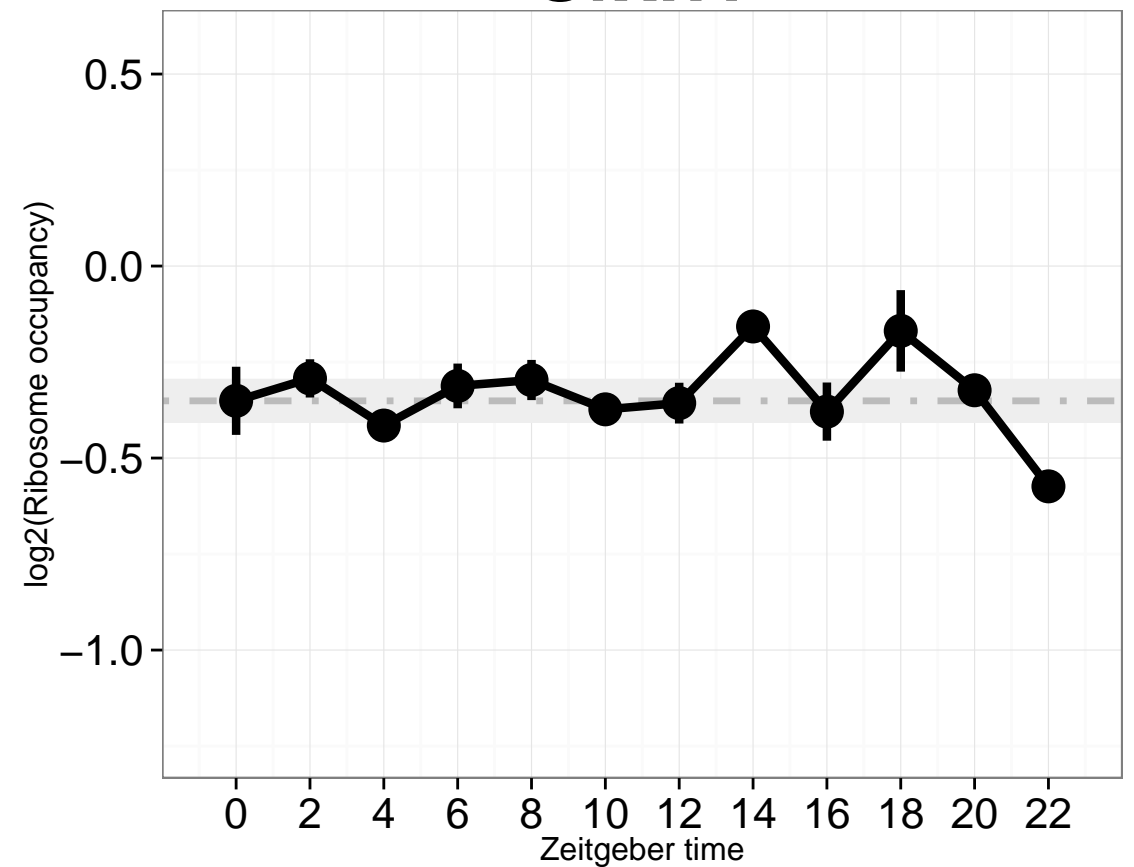

Supplement: SuppDataset_1.zip [file Sfxn1_set_A.pdf › Supplemental Dataset 1/A-mRNA_nonrhyth_translation_nonrhyth/Sfxn1_set_A.pdf]

## Sfxn2

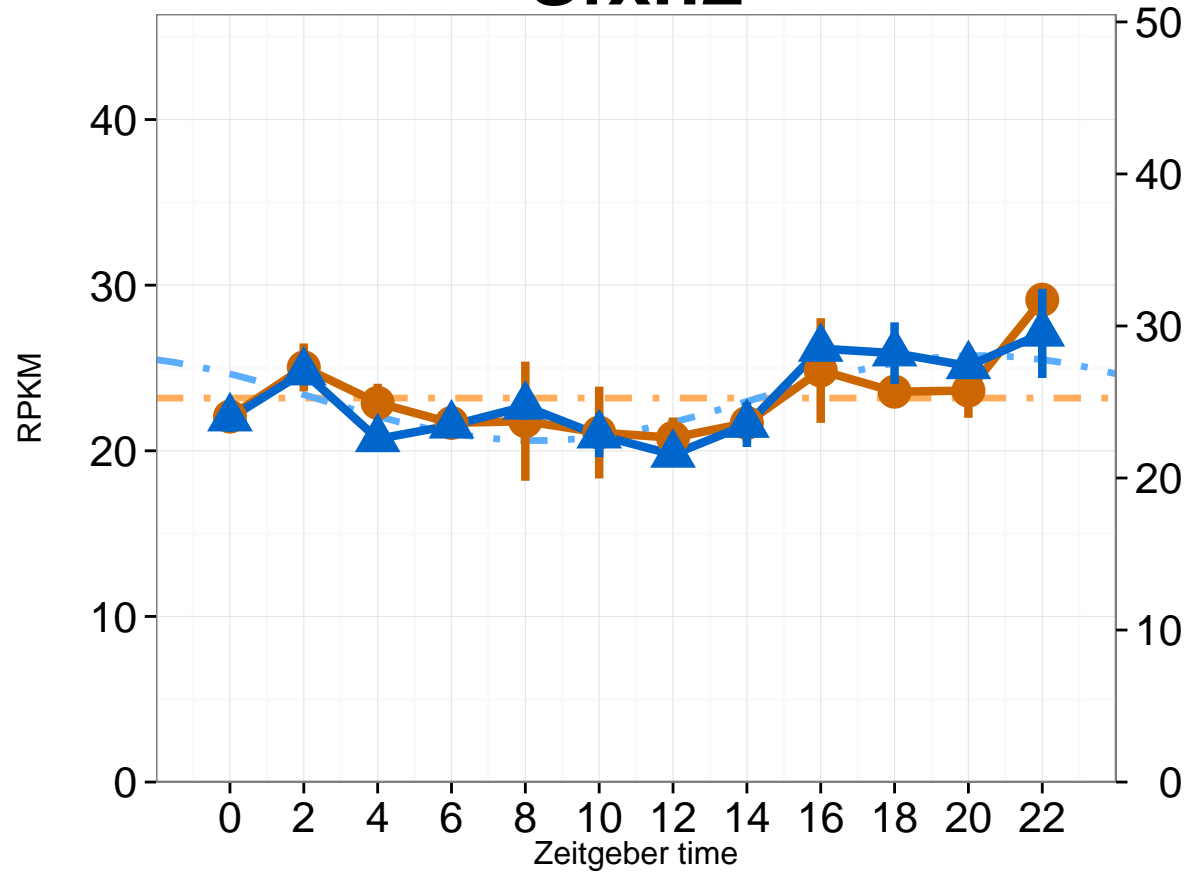

## Sfxn2

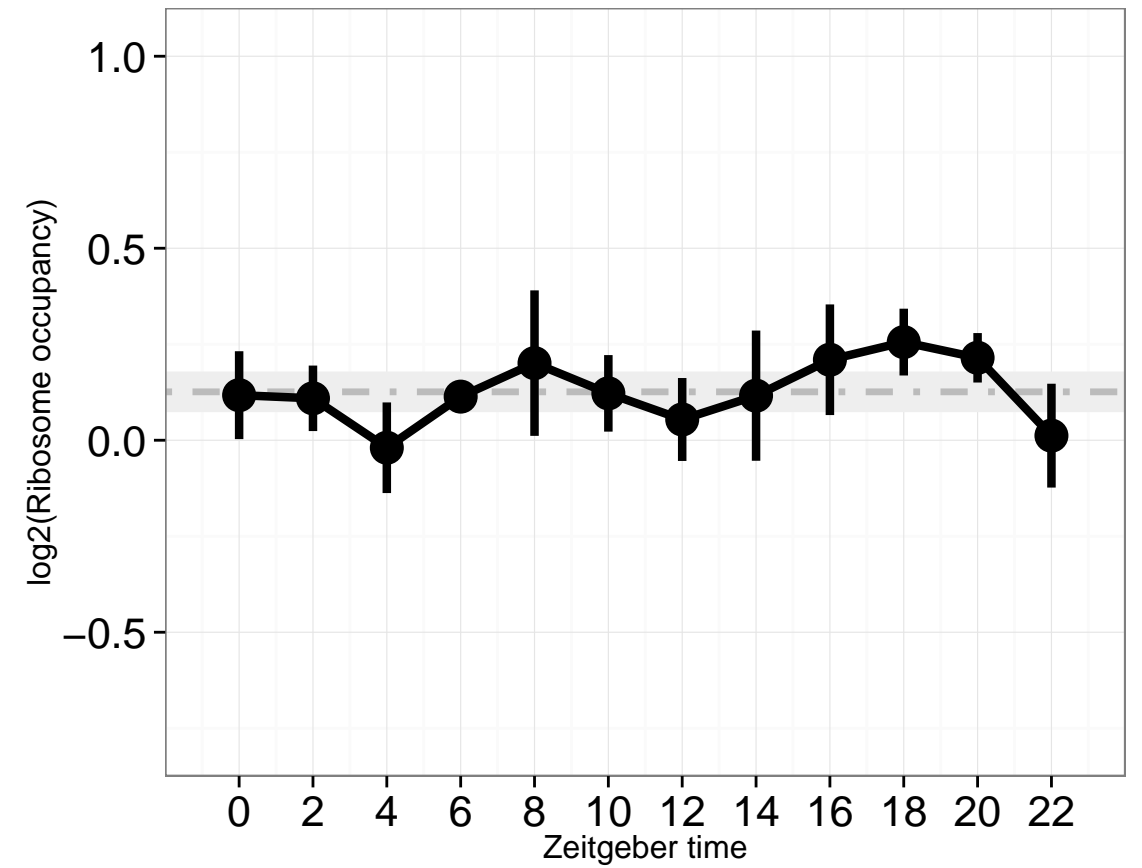

Supplement: SuppDataset_1.zip [file Sfxn2_set_A.pdf › Supplemental Dataset 1/A-mRNA_nonrhyth_translation_nonrhyth/Sfxn2_set_A.pdf]

## Sfxn3 TR

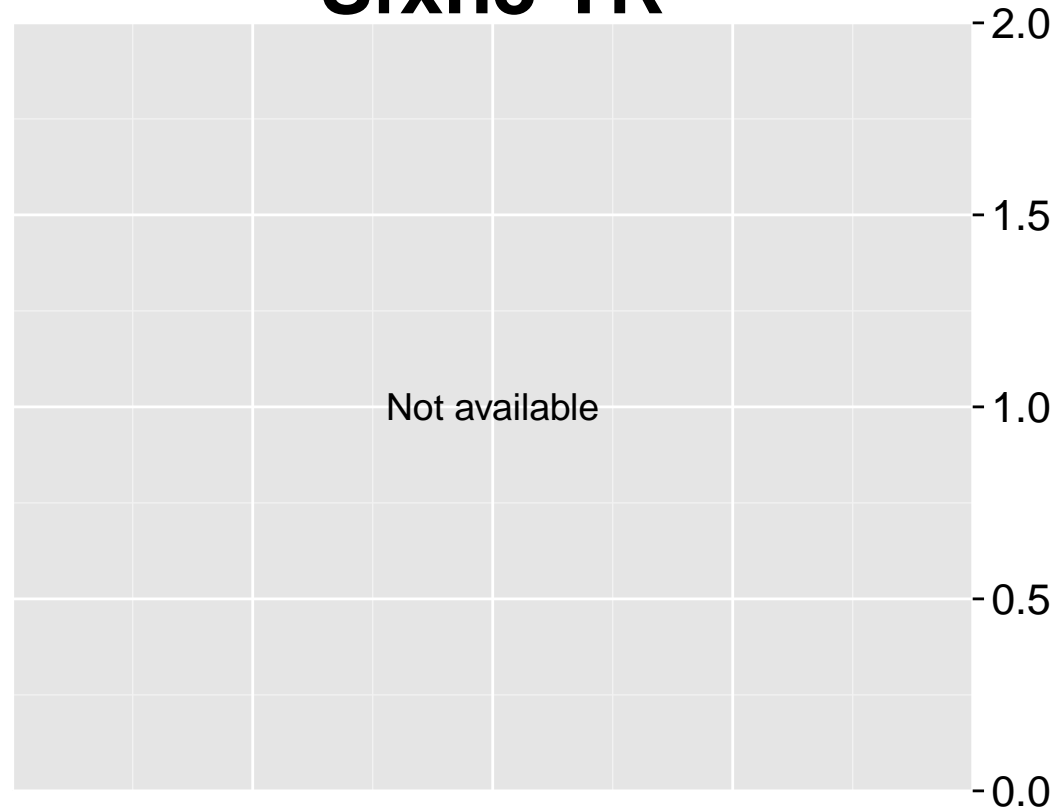

## Sfxn3 log2(Ribosome occupancy)

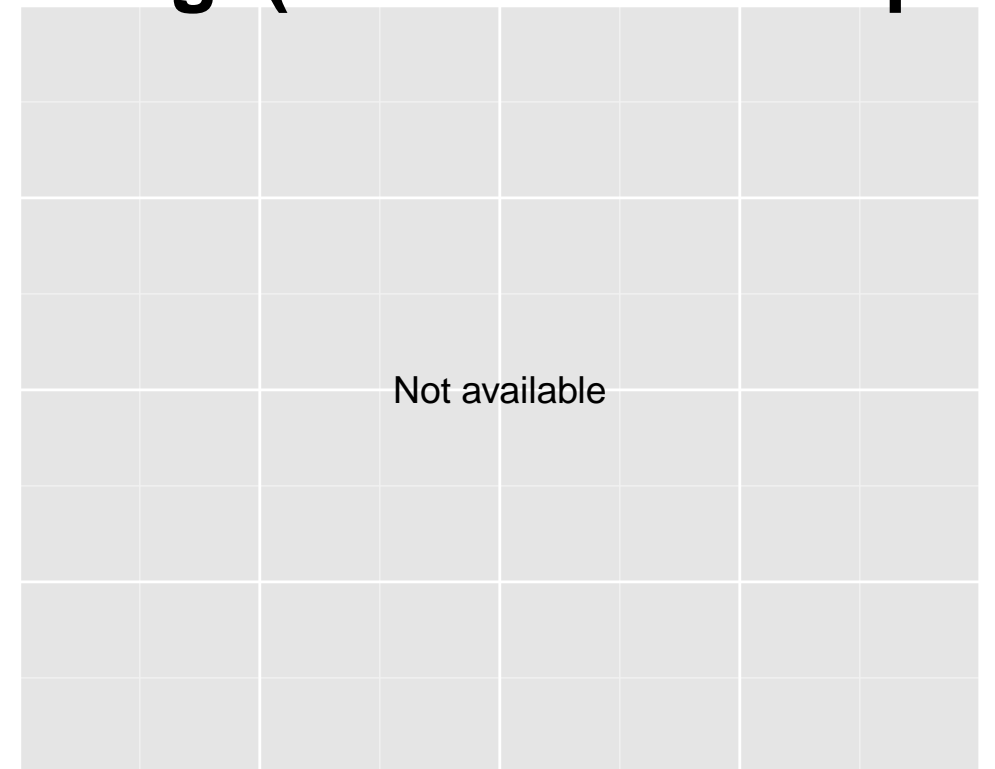

Supplement: SuppDataset_1.zip [file Sfxn3_set_A.pdf › Supplemental Dataset 1/A-mRNA_nonrhyth_translation_nonrhyth/Sfxn3_set_A.pdf]

# Sfxn5

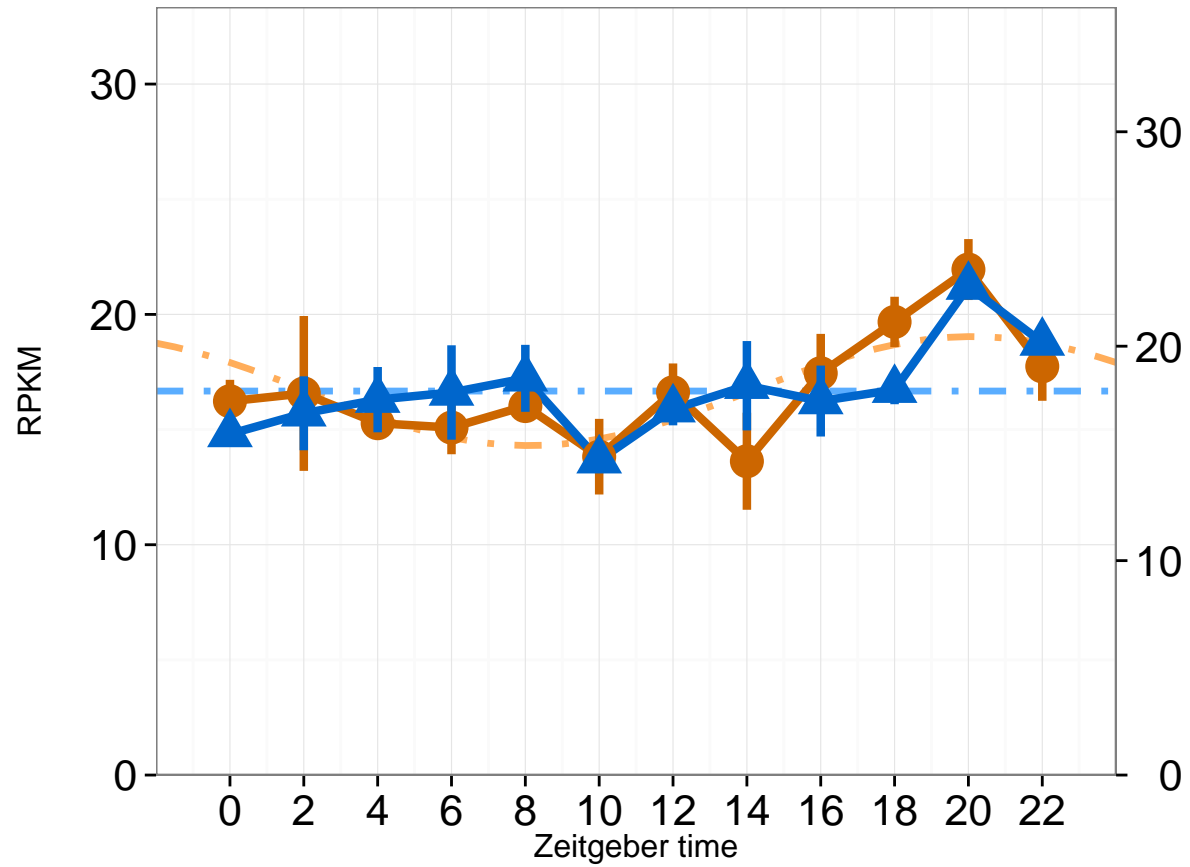

# Sfxn5

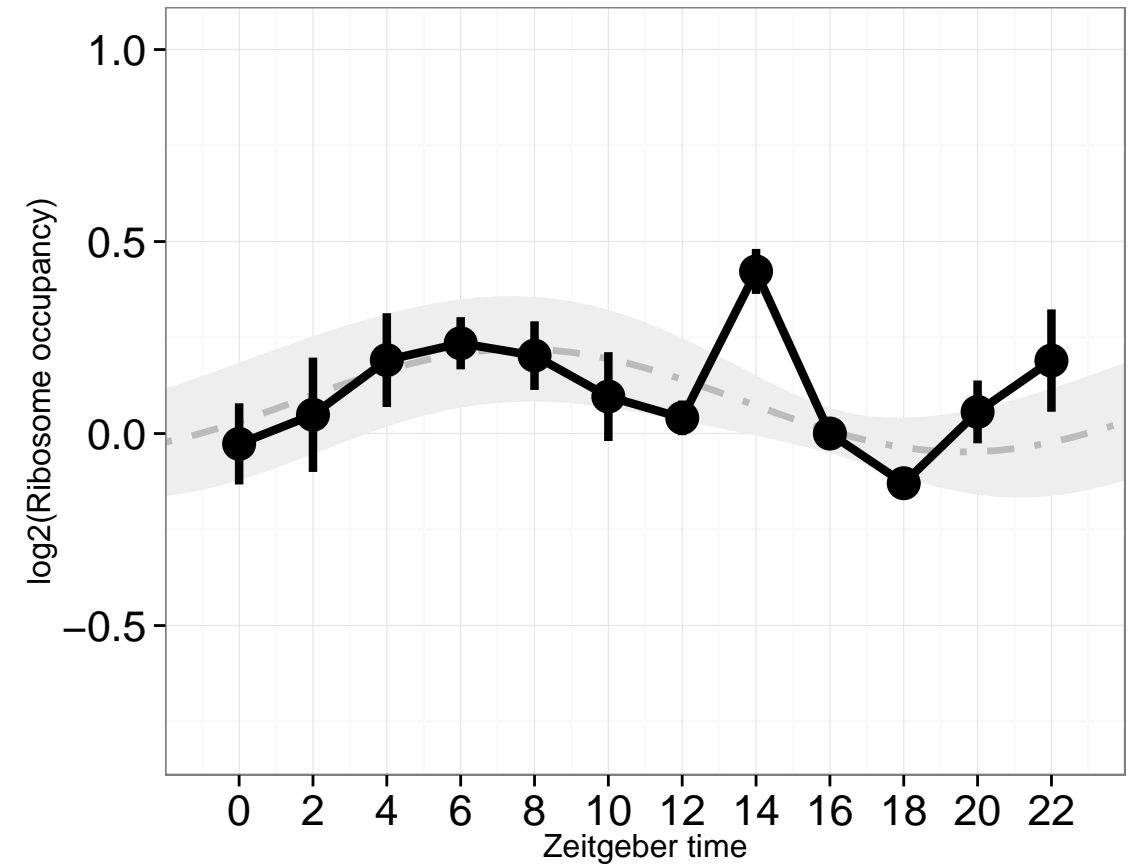

Supplement: SuppDataset_1.zip [file Sfxn5_set_A.pdf › Supplemental Dataset 1/A-mRNA_nonrhyth_translation_nonrhyth/Sfxn5_set_A.pdf]

## Sgcb

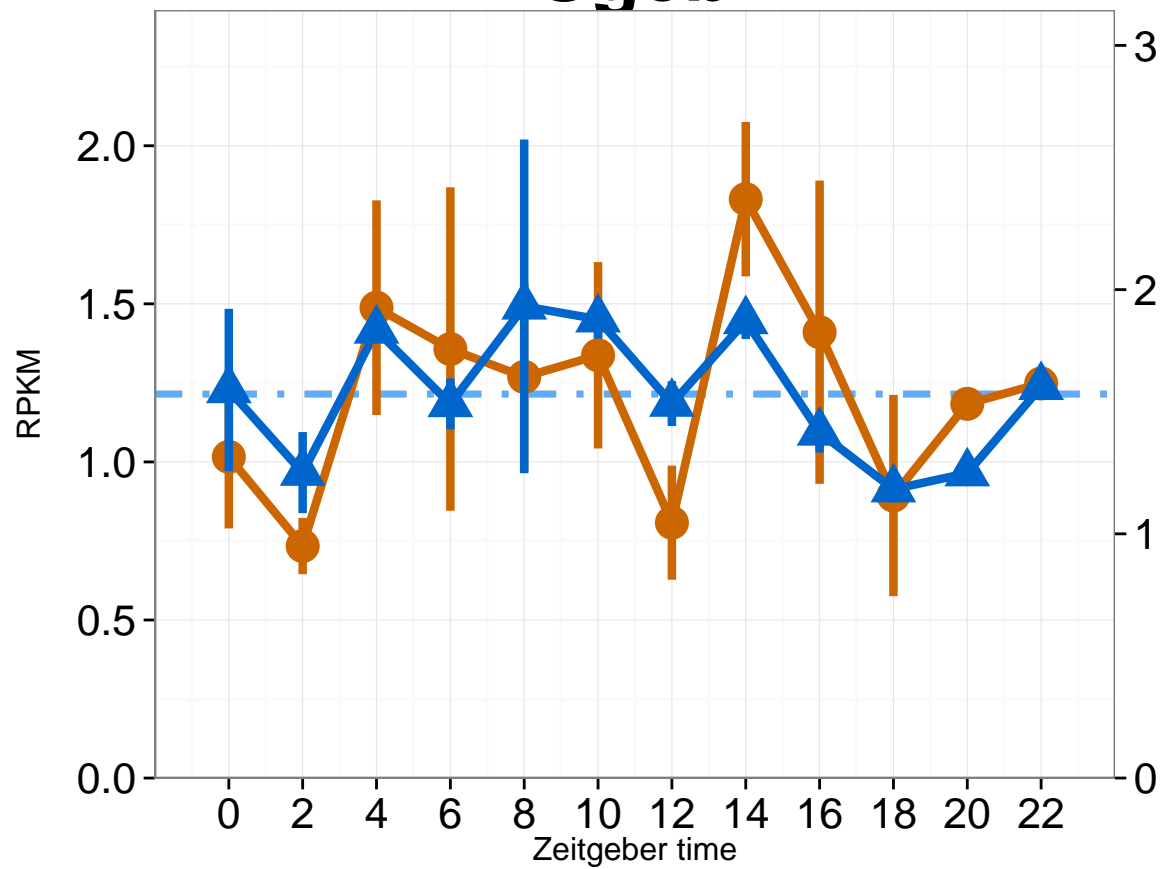

## Sgcb

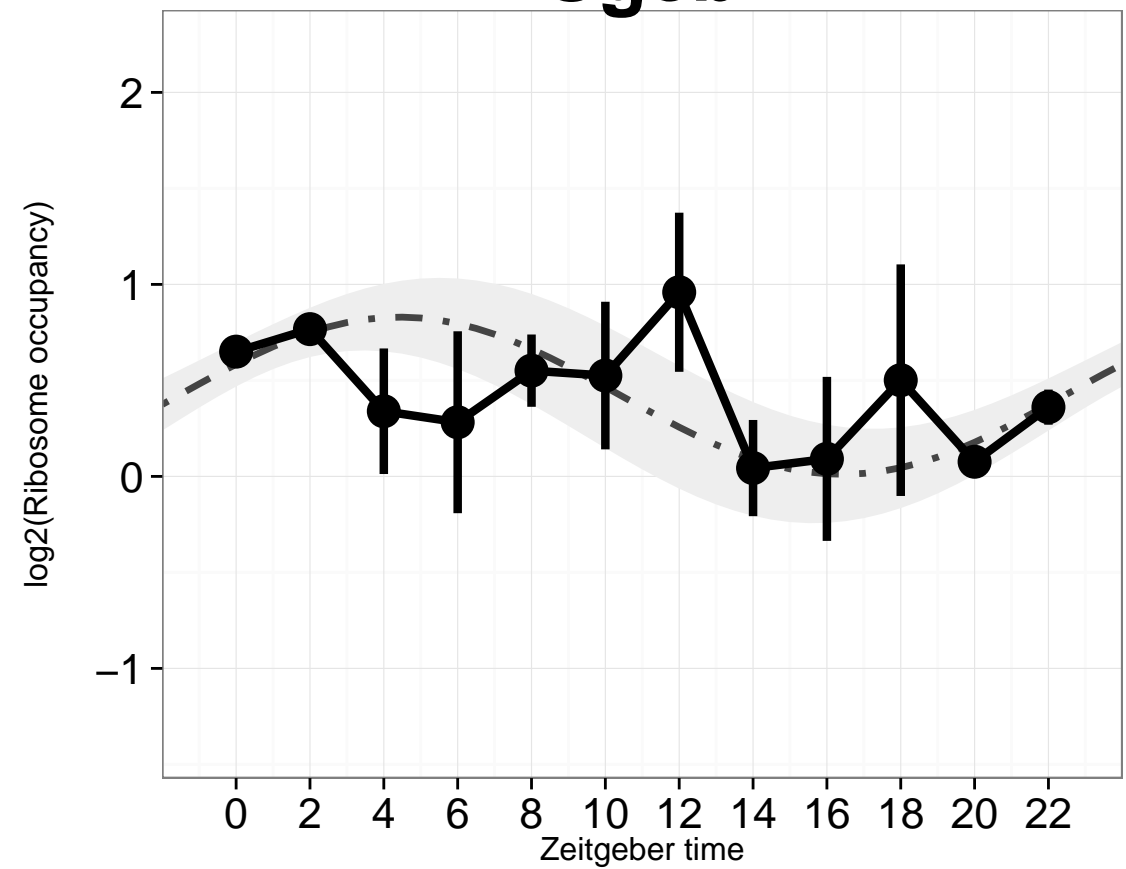

Supplement: SuppDataset_1.zip [file Sgcb_set_A.pdf › Supplemental Dataset 1/A-mRNA_nonrhyth_translation_nonrhyth/Sgcb_set_A.pdf]

## Sgce

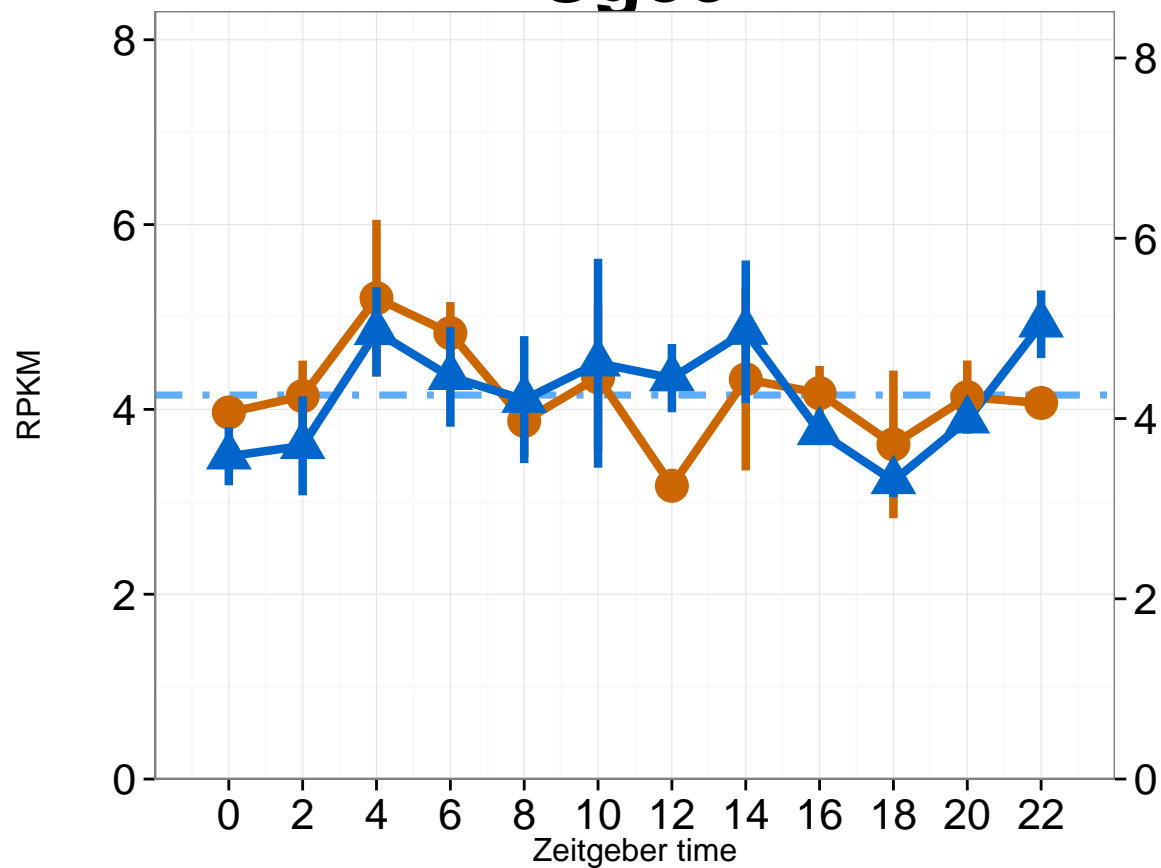

## Sgce

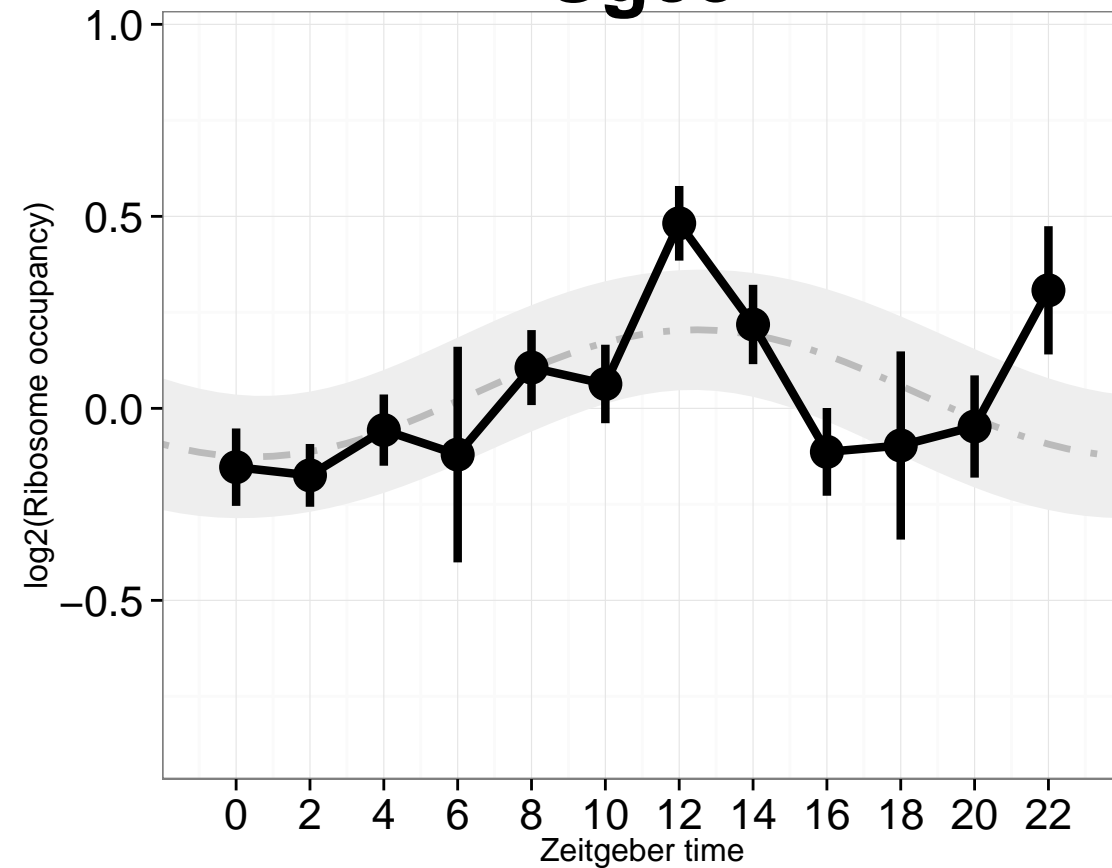

Supplement: SuppDataset_1.zip [file Sgce_set_A.pdf › Supplemental Dataset 1/A-mRNA_nonrhyth_translation_nonrhyth/Sgce_set_A.pdf]

## Sgk1

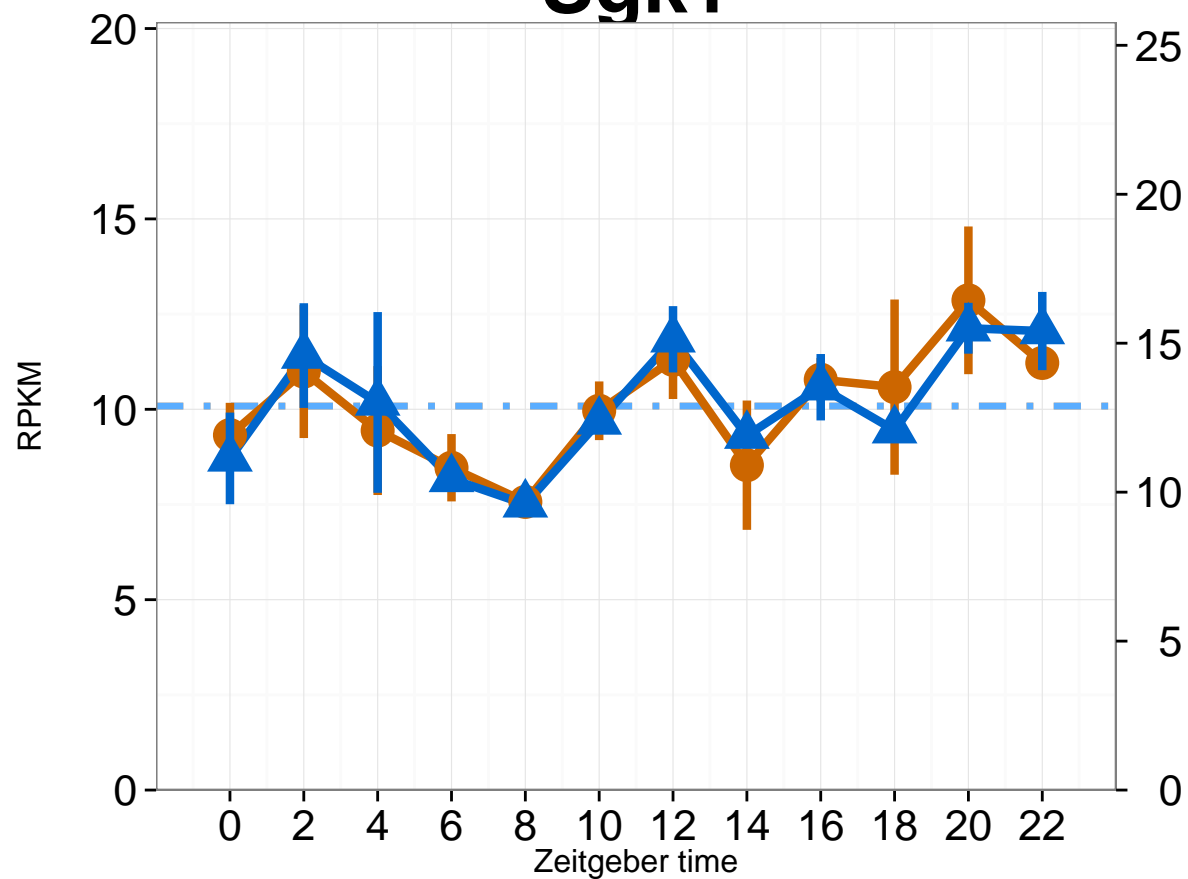

## Sgk1

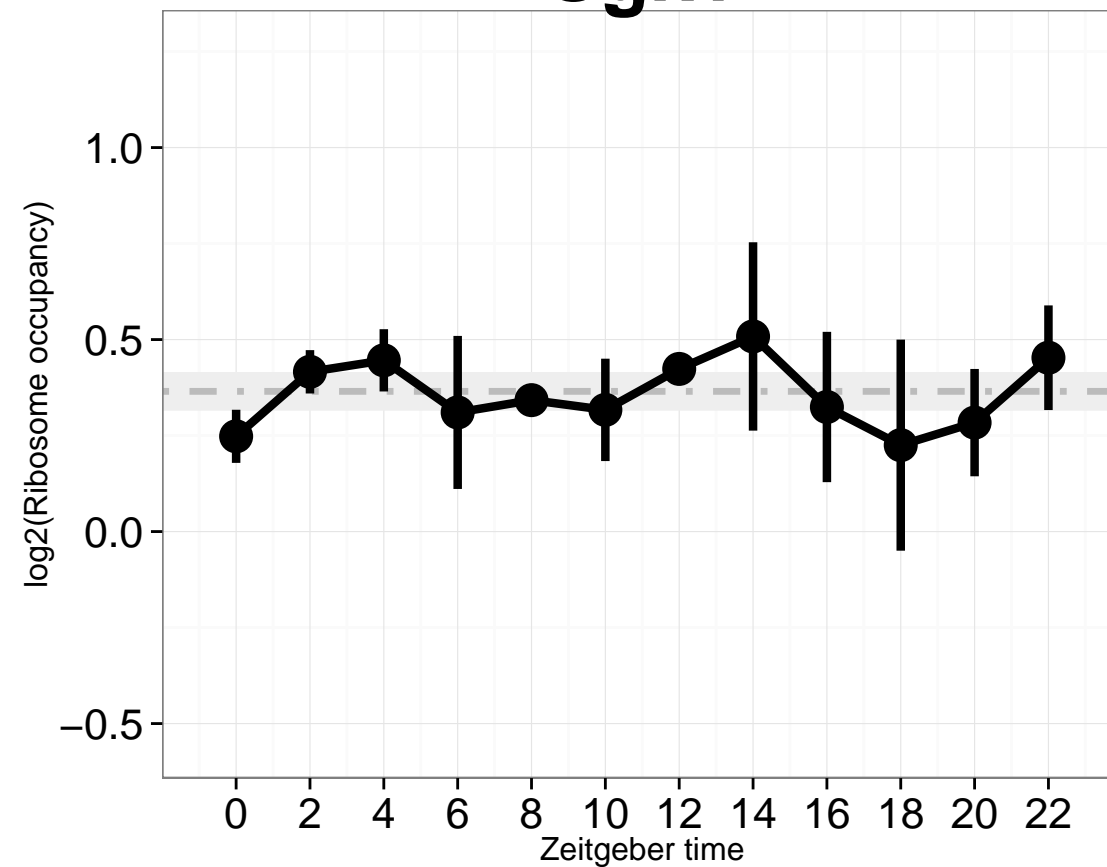

Supplement: SuppDataset_1.zip [file Sgk1_set_A.pdf › Supplemental Dataset 1/A-mRNA_nonrhyth_translation_nonrhyth/Sgk1_set_A.pdf]

## Sgk3

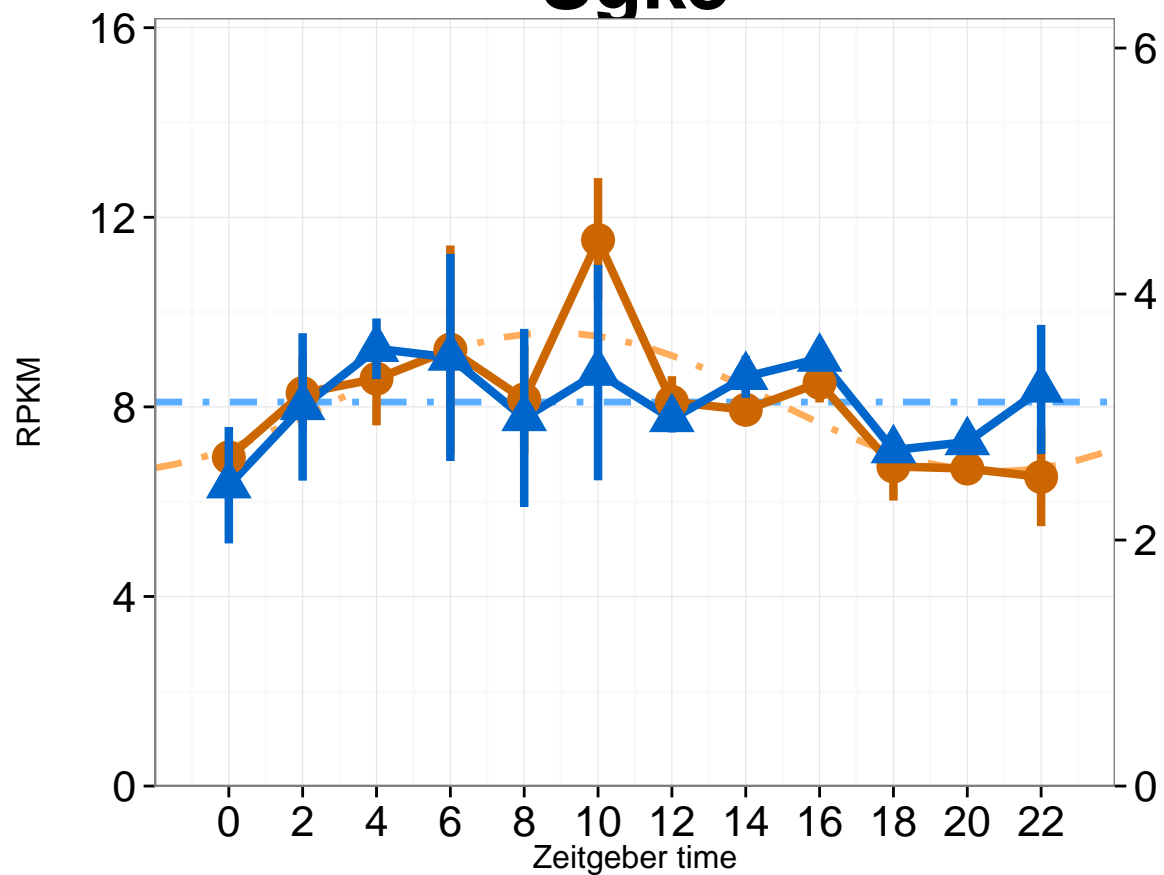

## Sgk3

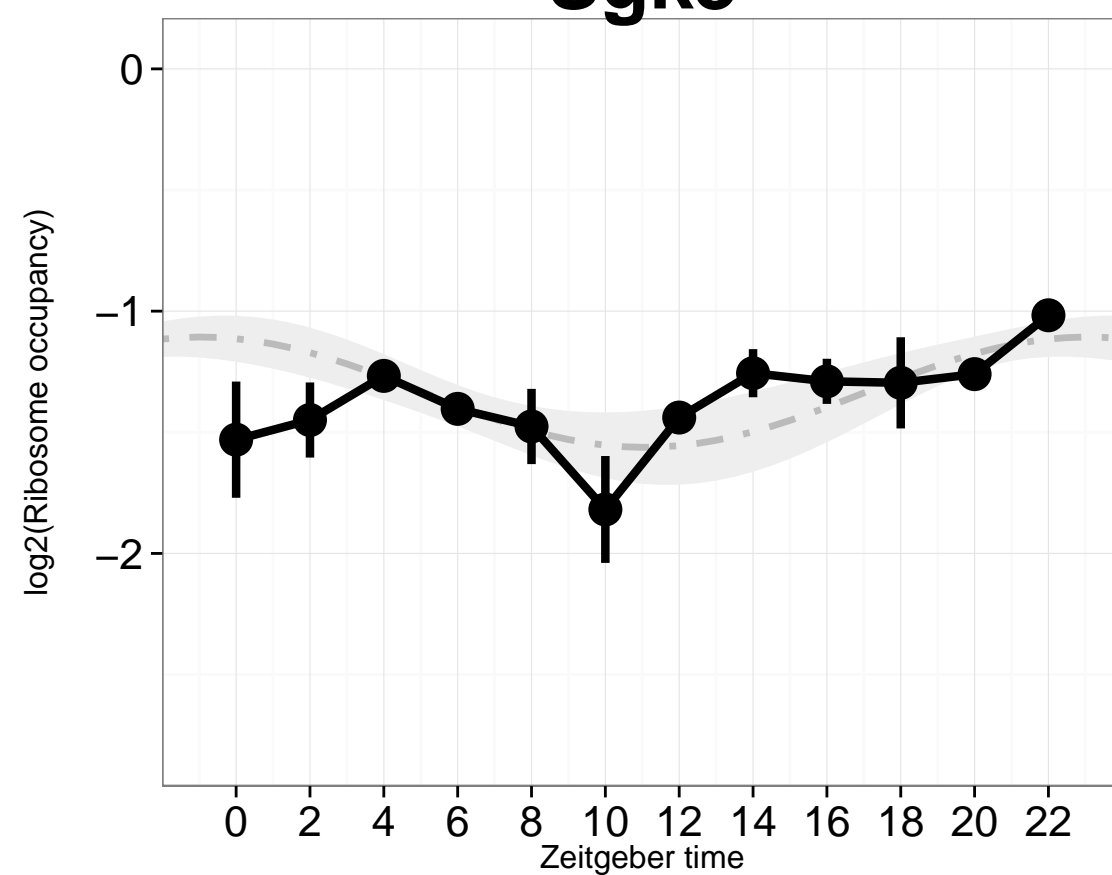

Supplement: SuppDataset_1.zip [file Sgk3_set_A.pdf › Supplemental Dataset 1/A-mRNA_nonrhyth_translation_nonrhyth/Sgk3_set_A.pdf]

## Sgol2

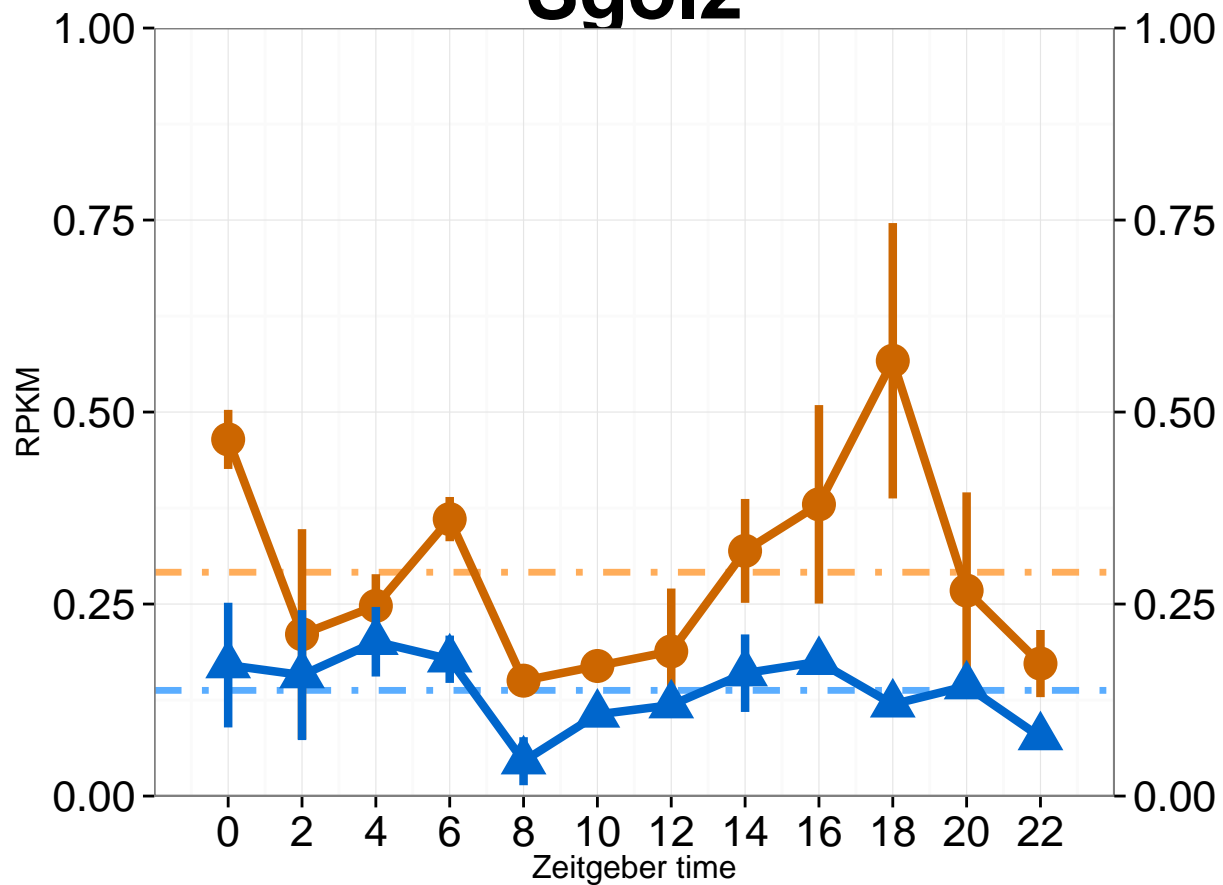

## Sgol2

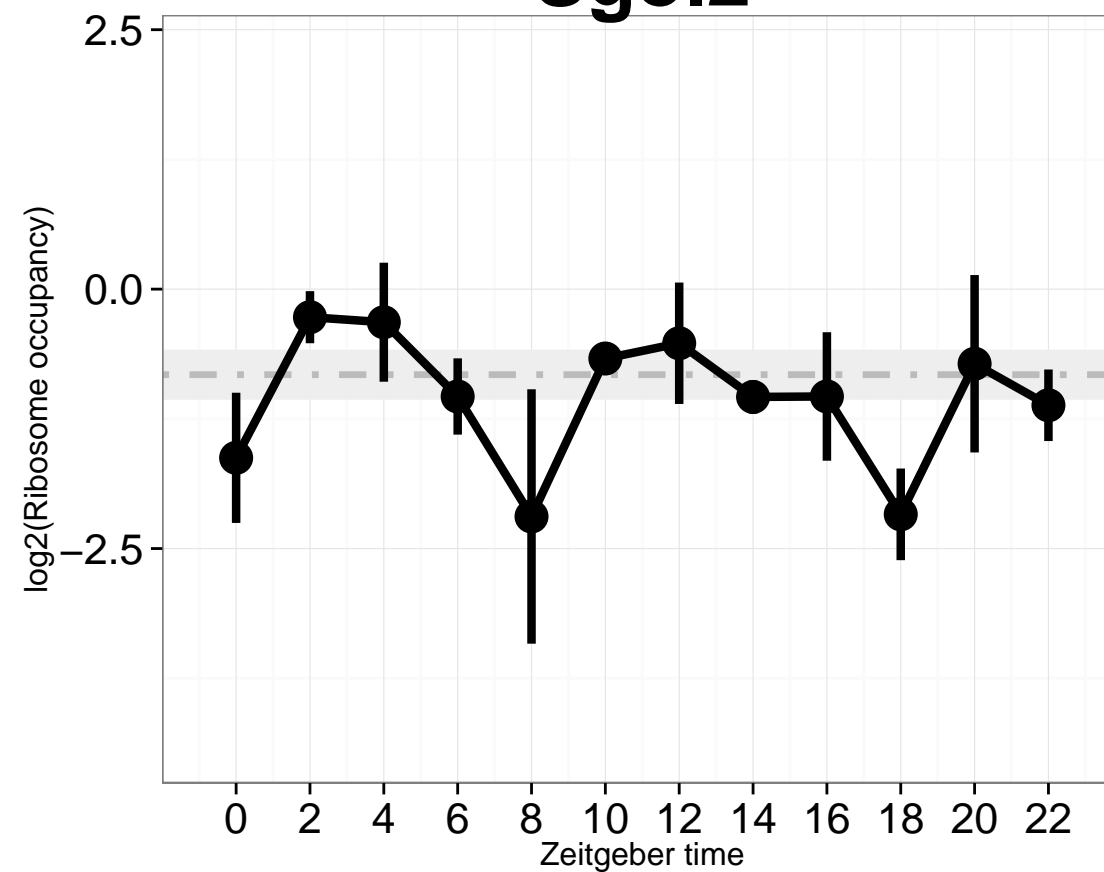

Supplement: SuppDataset_1.zip [file Sgol2_set_A.pdf › Supplemental Dataset 1/A-mRNA_nonrhyth_translation_nonrhyth/Sgol2_set_A.pdf]

## Sgpp1

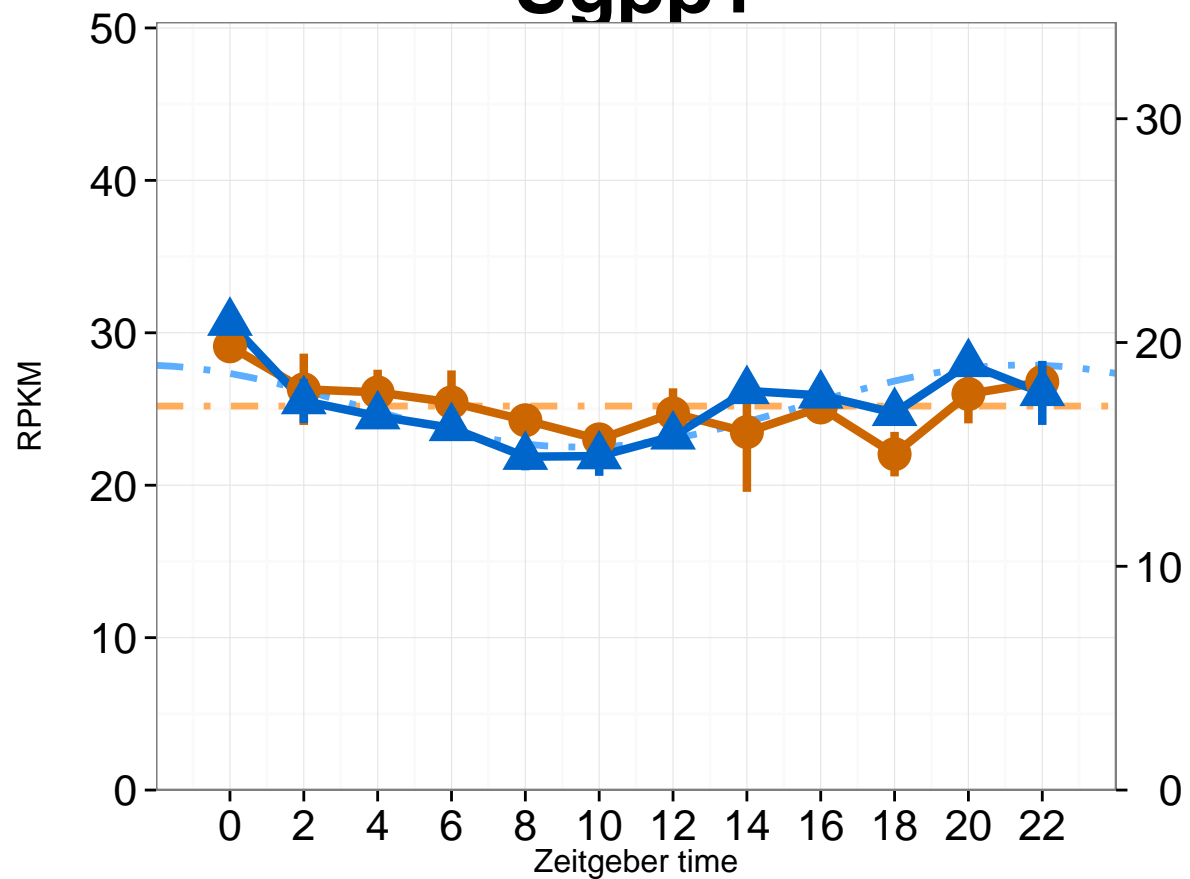

## Sgpp1

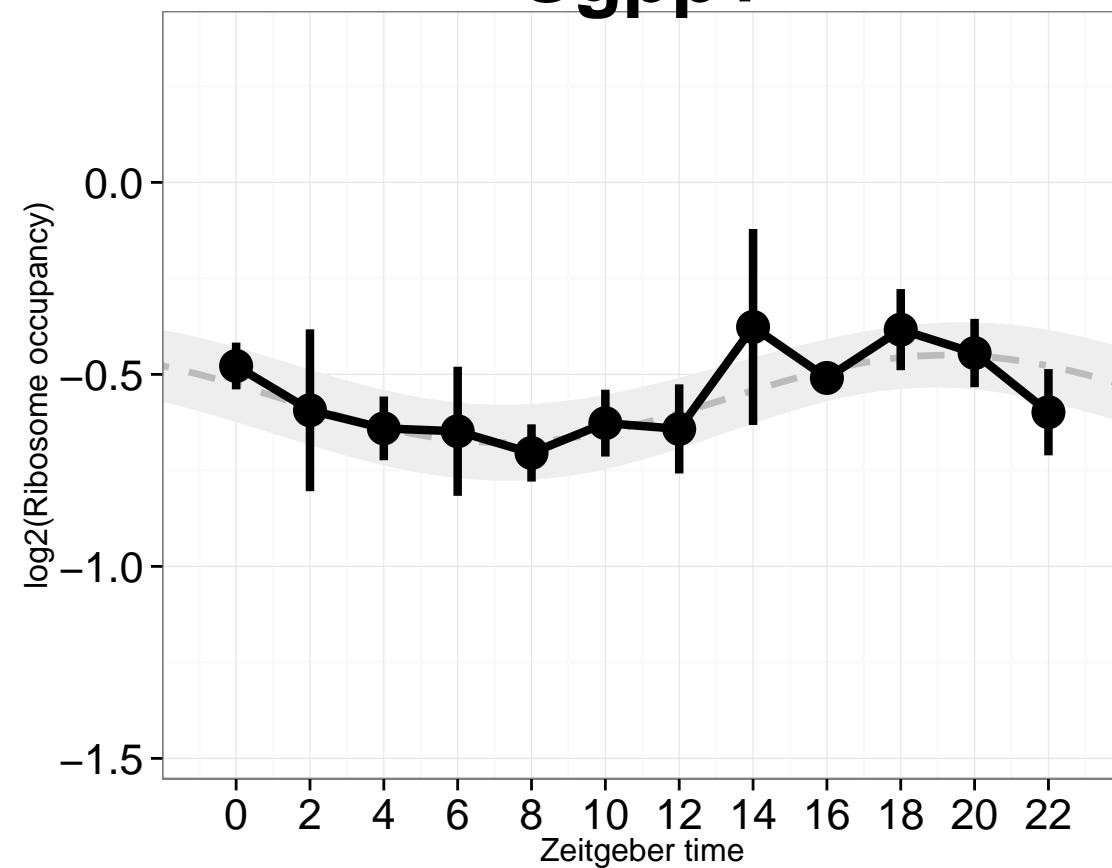

Supplement: SuppDataset_1.zip [file Sgpp1_set_A.pdf › Supplemental Dataset 1/A-mRNA_nonrhyth_translation_nonrhyth/Sgpp1_set_A.pdf]

## Sgsh

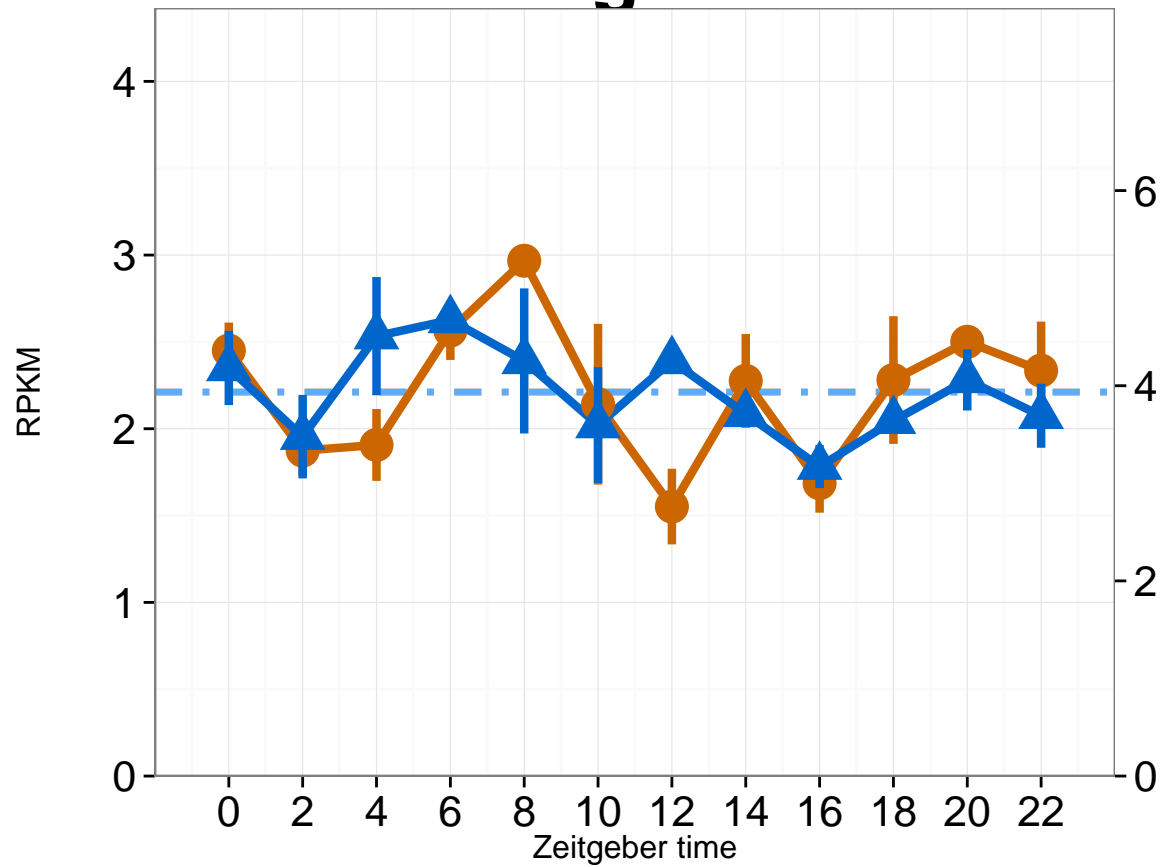

## Sgsh

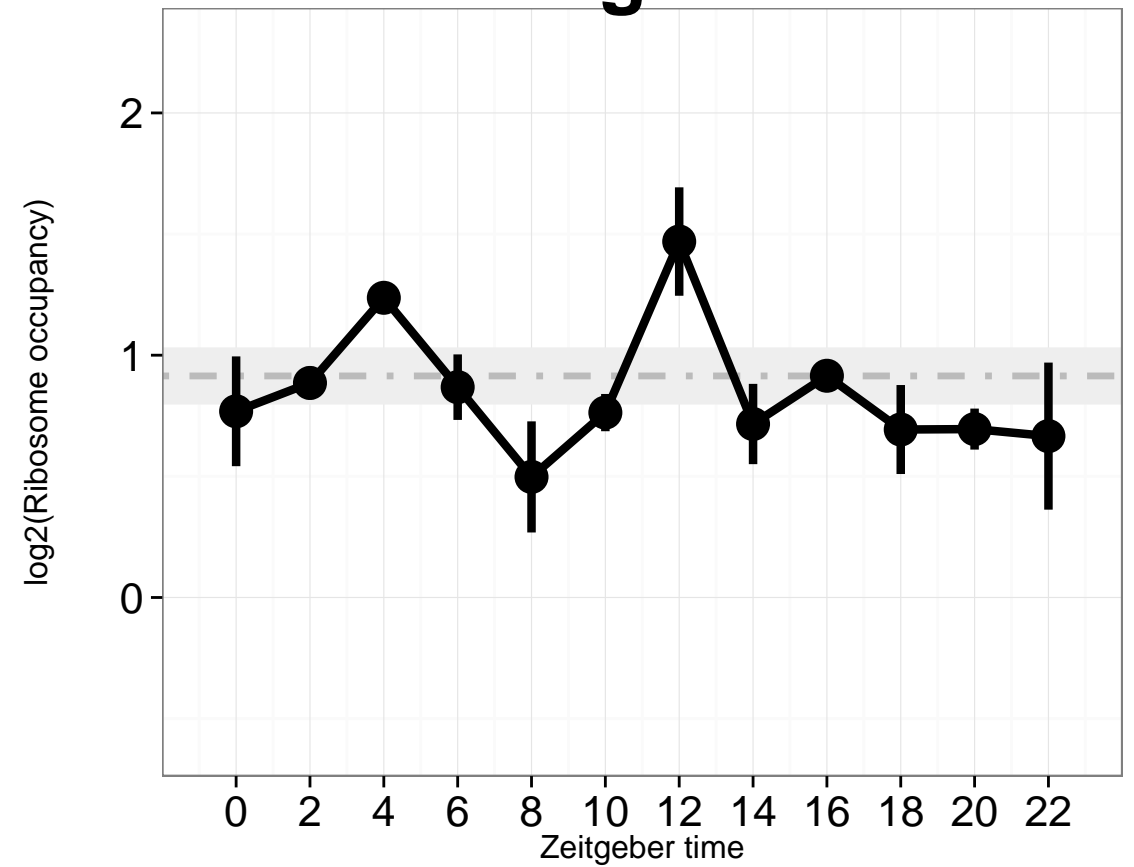

Supplement: SuppDataset_1.zip [file Sgsh_set_A.pdf › Supplemental Dataset 1/A-mRNA_nonrhyth_translation_nonrhyth/Sgsh_set_A.pdf]

# Sgsm1

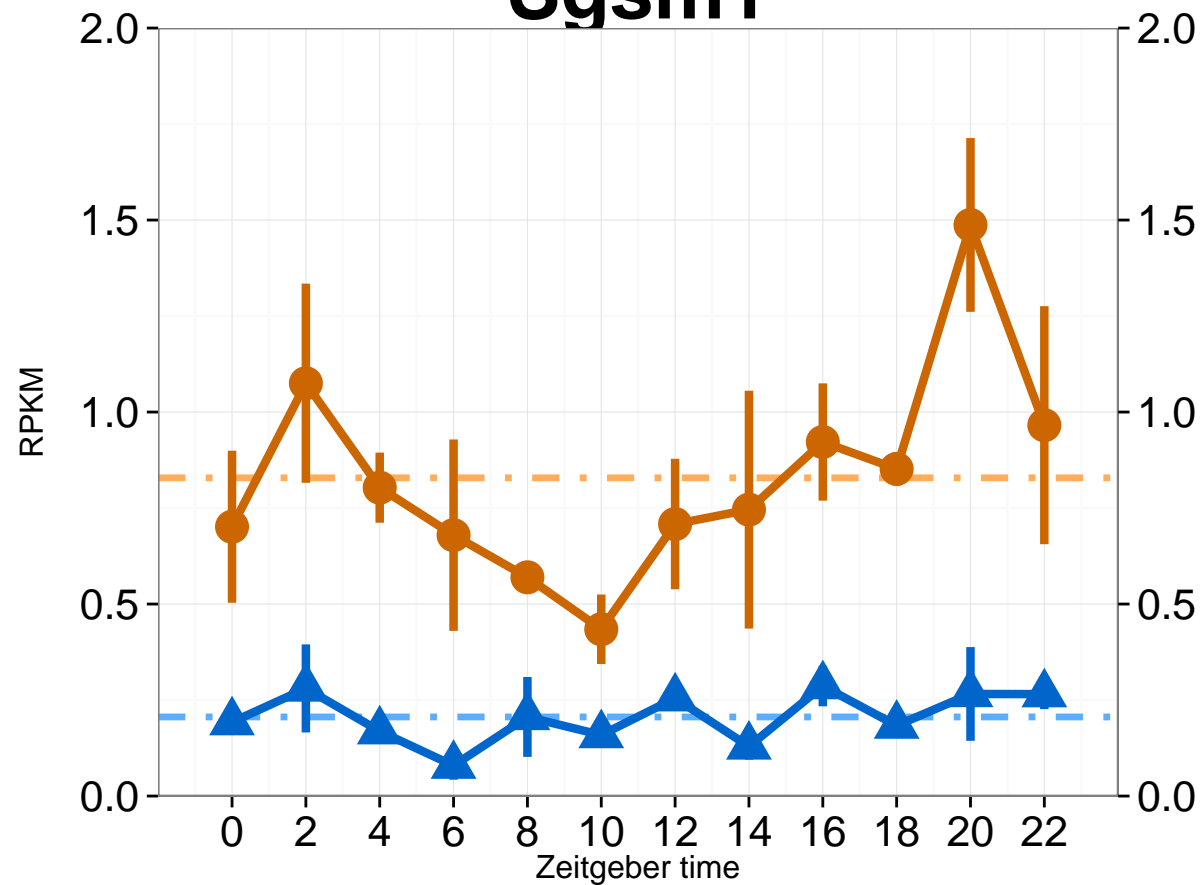

# Sgsm1

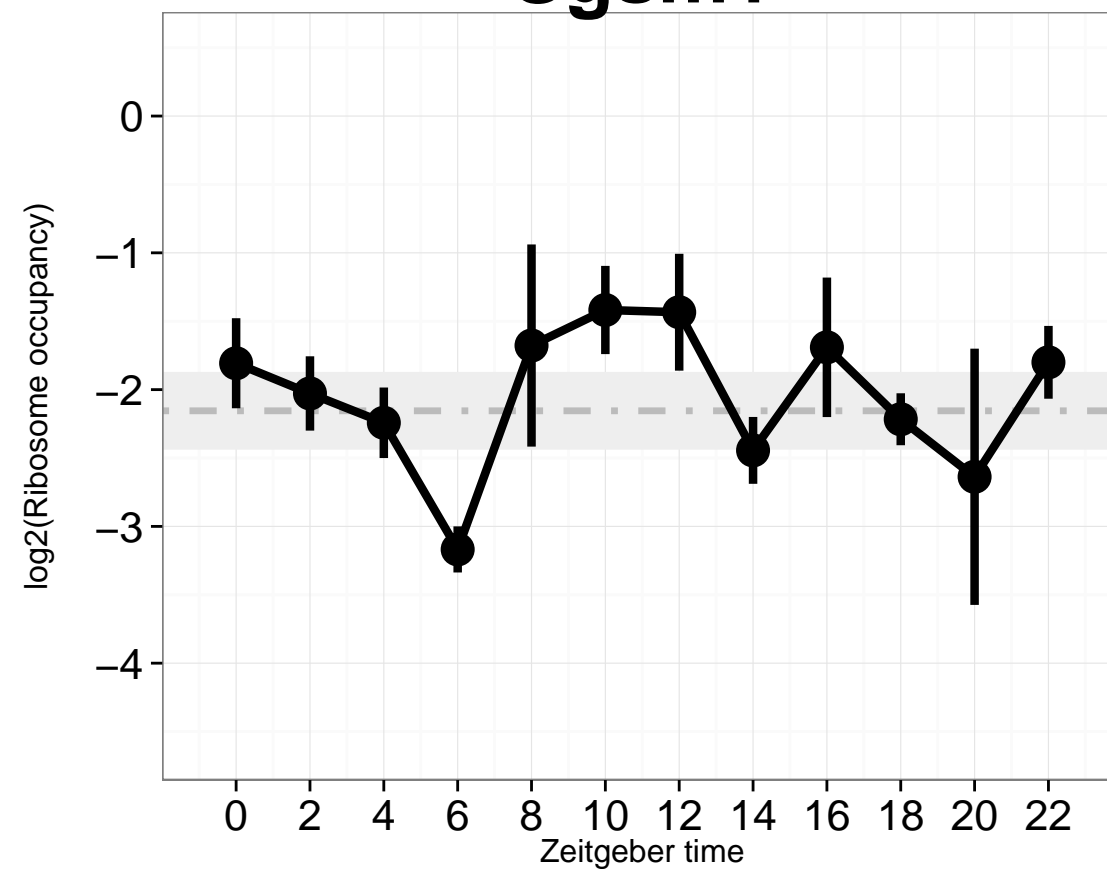

Supplement: SuppDataset_1.zip [file Sgsm1_set_A.pdf › Supplemental Dataset 1/A-mRNA_nonrhyth_translation_nonrhyth/Sgsm1_set_A.pdf]

# Sgsm2

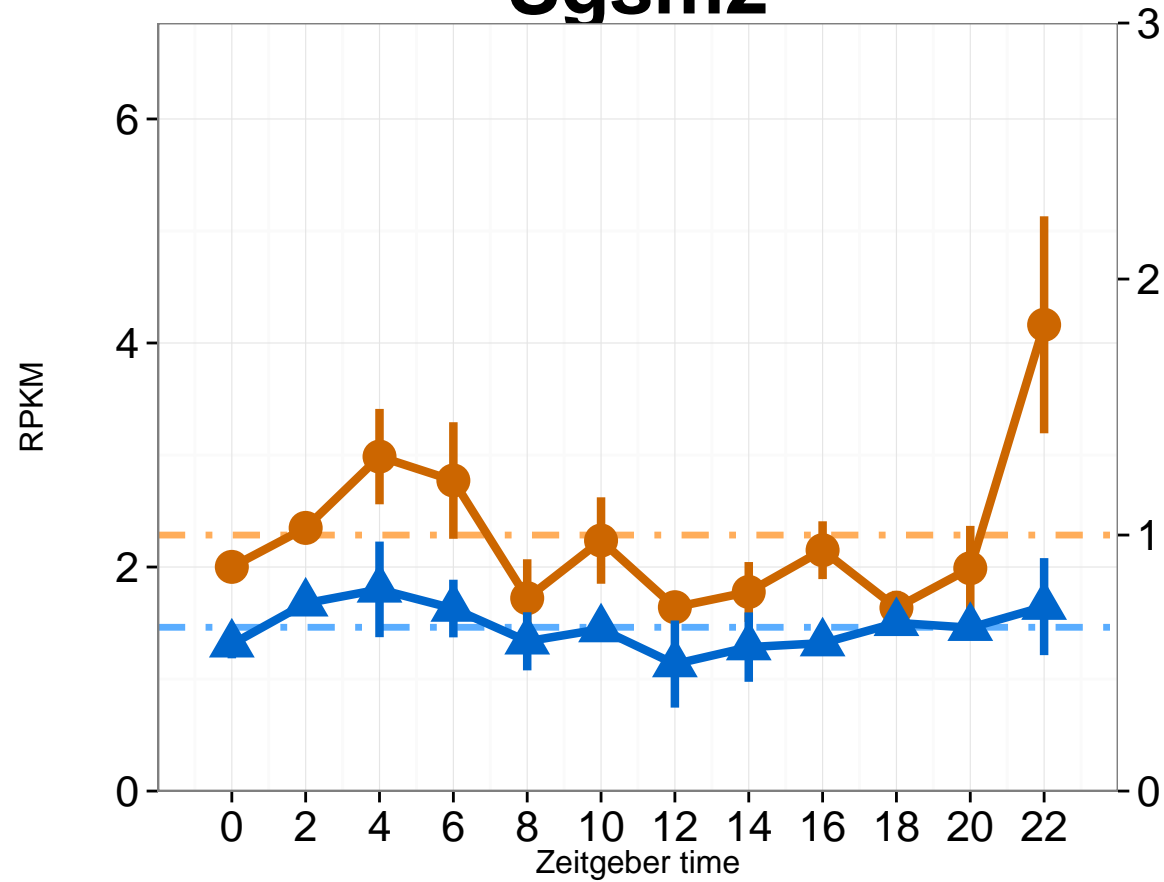

# Sgsm2

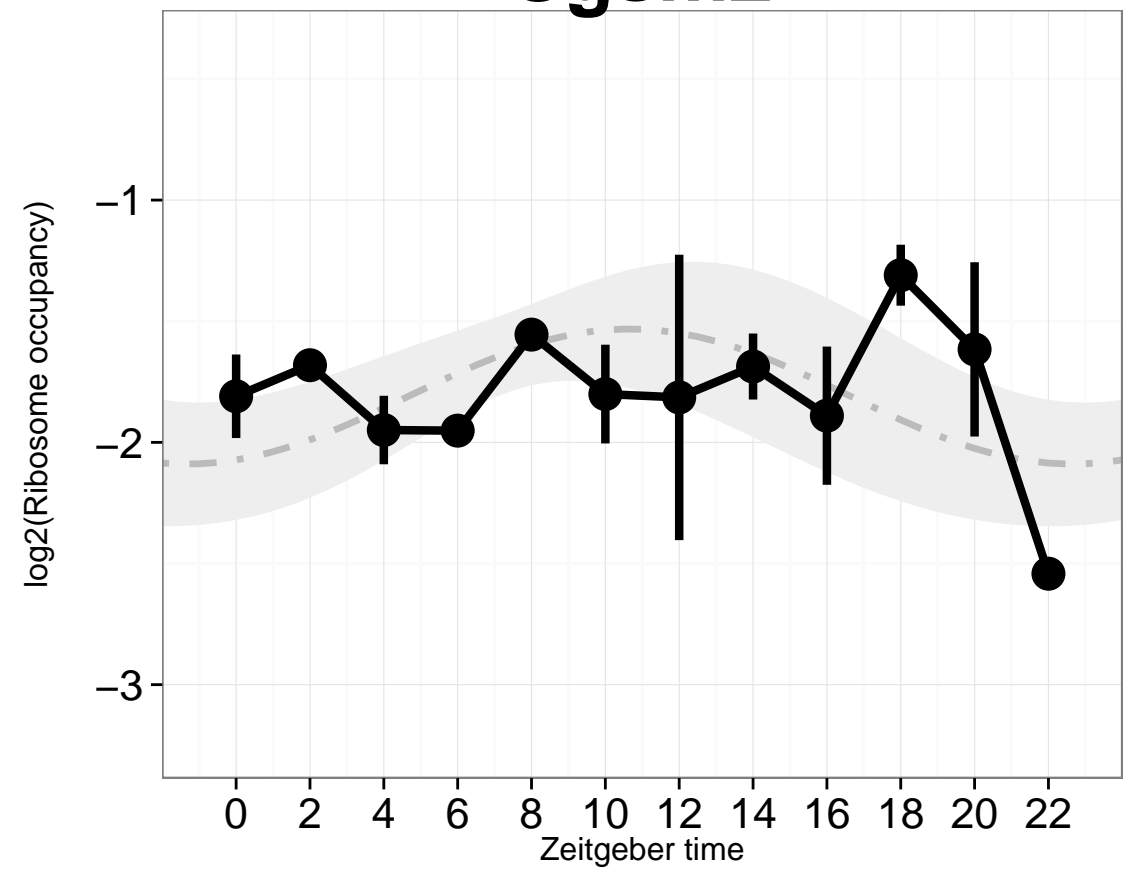

Supplement: SuppDataset_1.zip [file Sgsm2_set_A.pdf › Supplemental Dataset 1/A-mRNA_nonrhyth_translation_nonrhyth/Sgsm2_set_A.pdf]

## Sgsm3

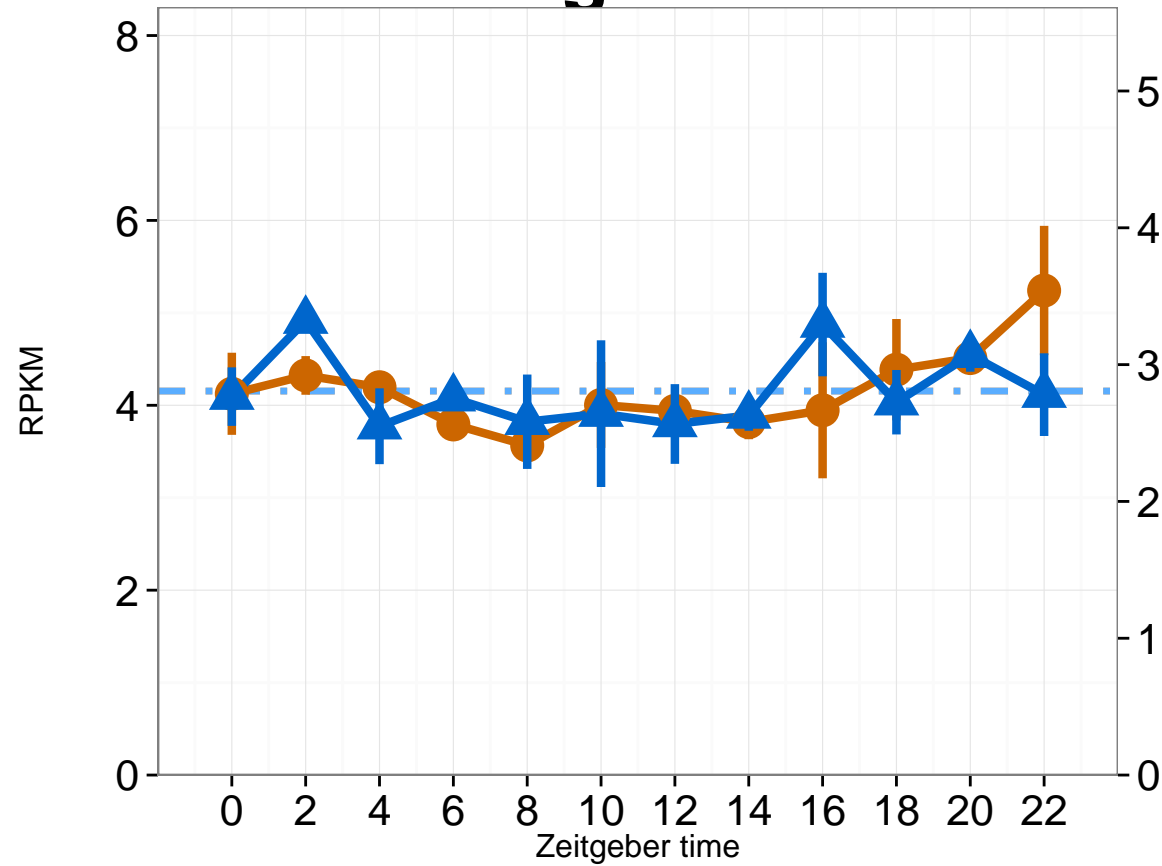

## Sgsm3

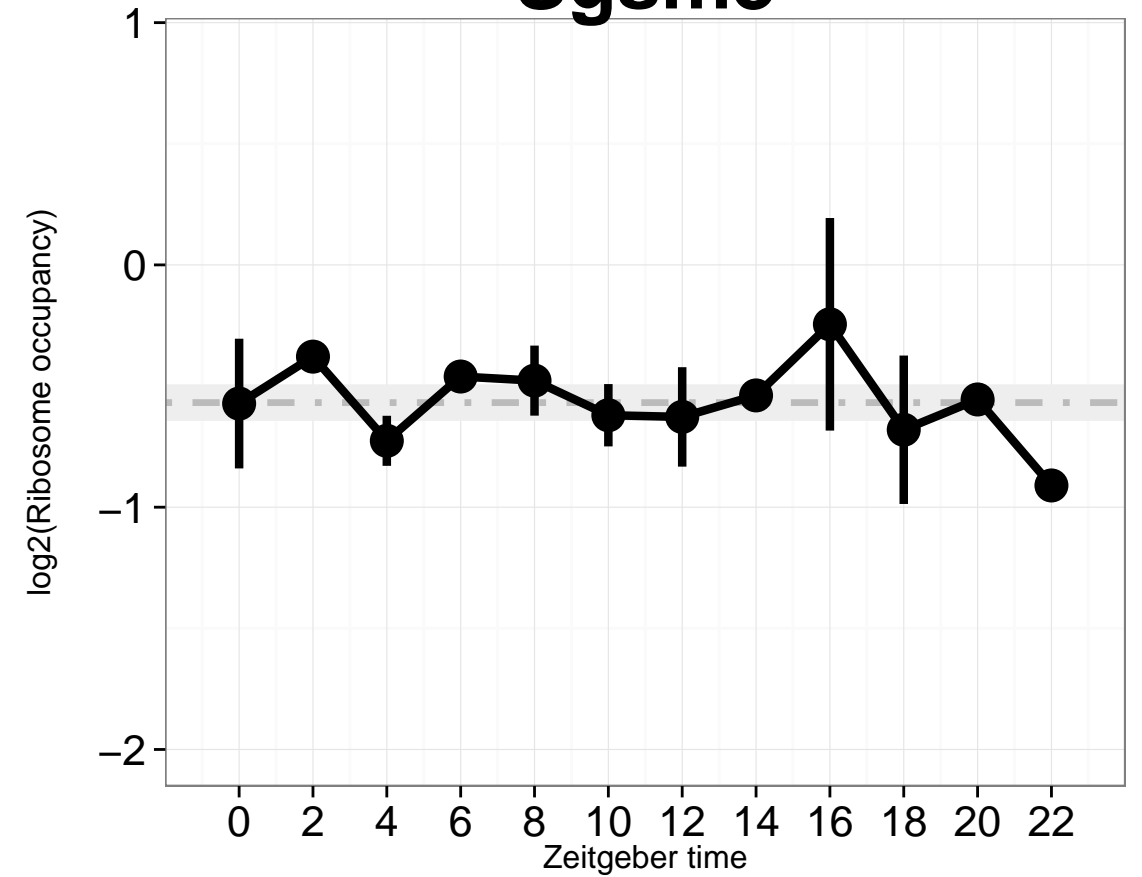

Supplement: SuppDataset_1.zip [file Sgsm3_set_A.pdf › Supplemental Dataset 1/A-mRNA_nonrhyth_translation_nonrhyth/Sgsm3_set_A.pdf]

## Sgta

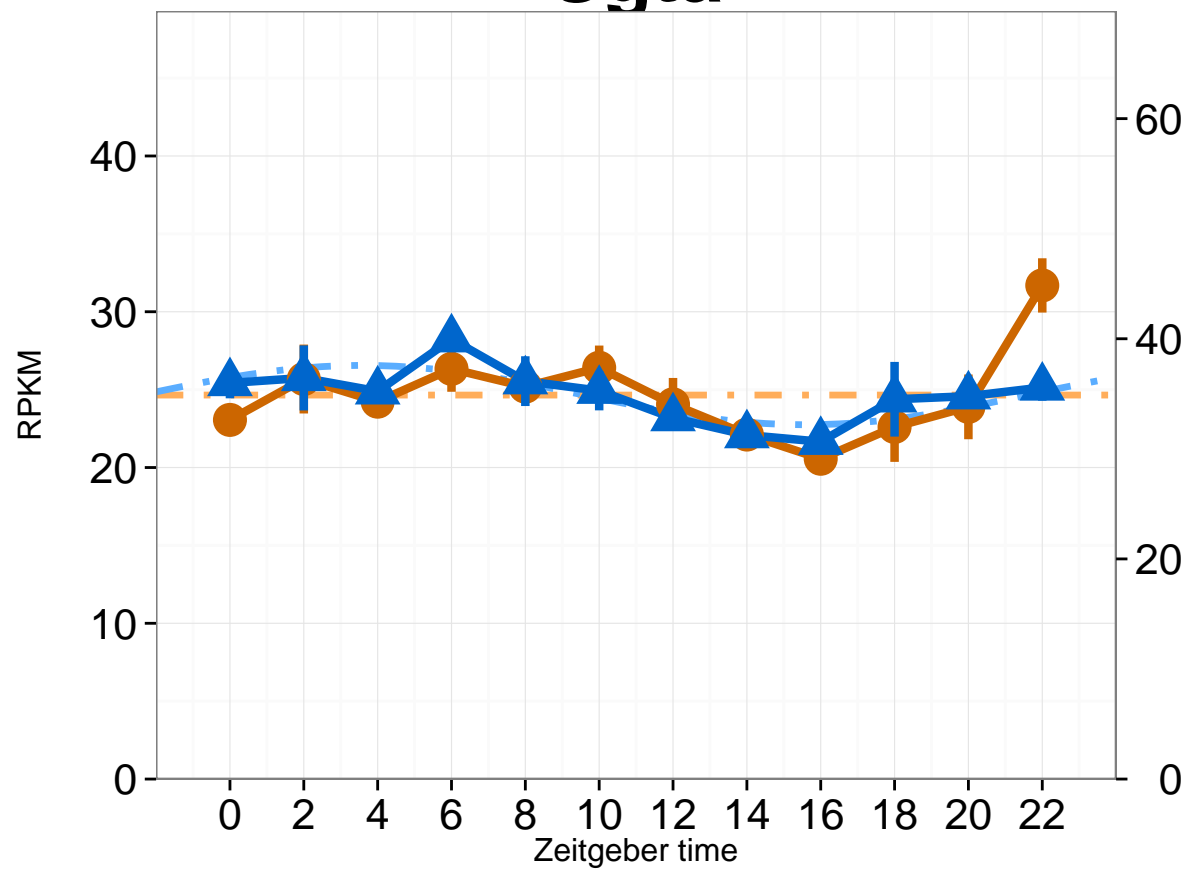

## Sgta

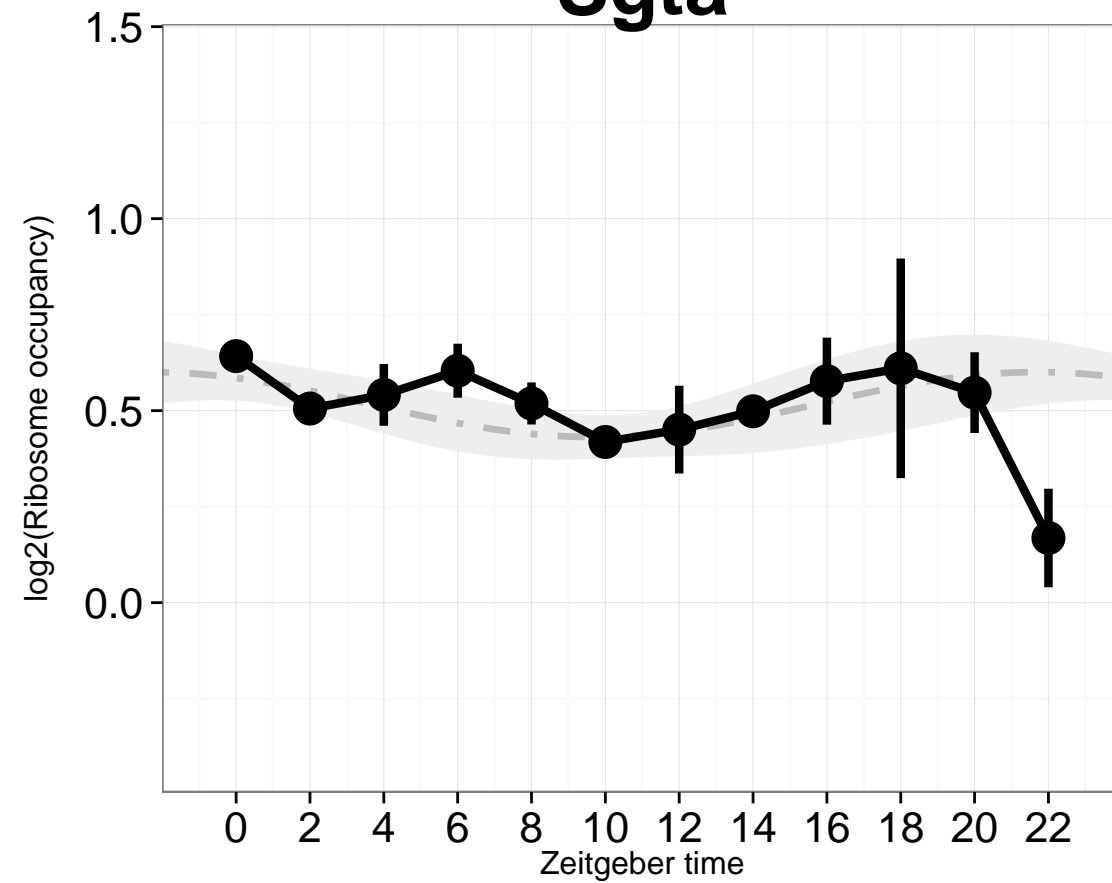

Supplement: SuppDataset_1.zip [file Sgta_set_A.pdf › Supplemental Dataset 1/A-mRNA_nonrhyth_translation_nonrhyth/Sgta_set_A.pdf]

## Sgtb

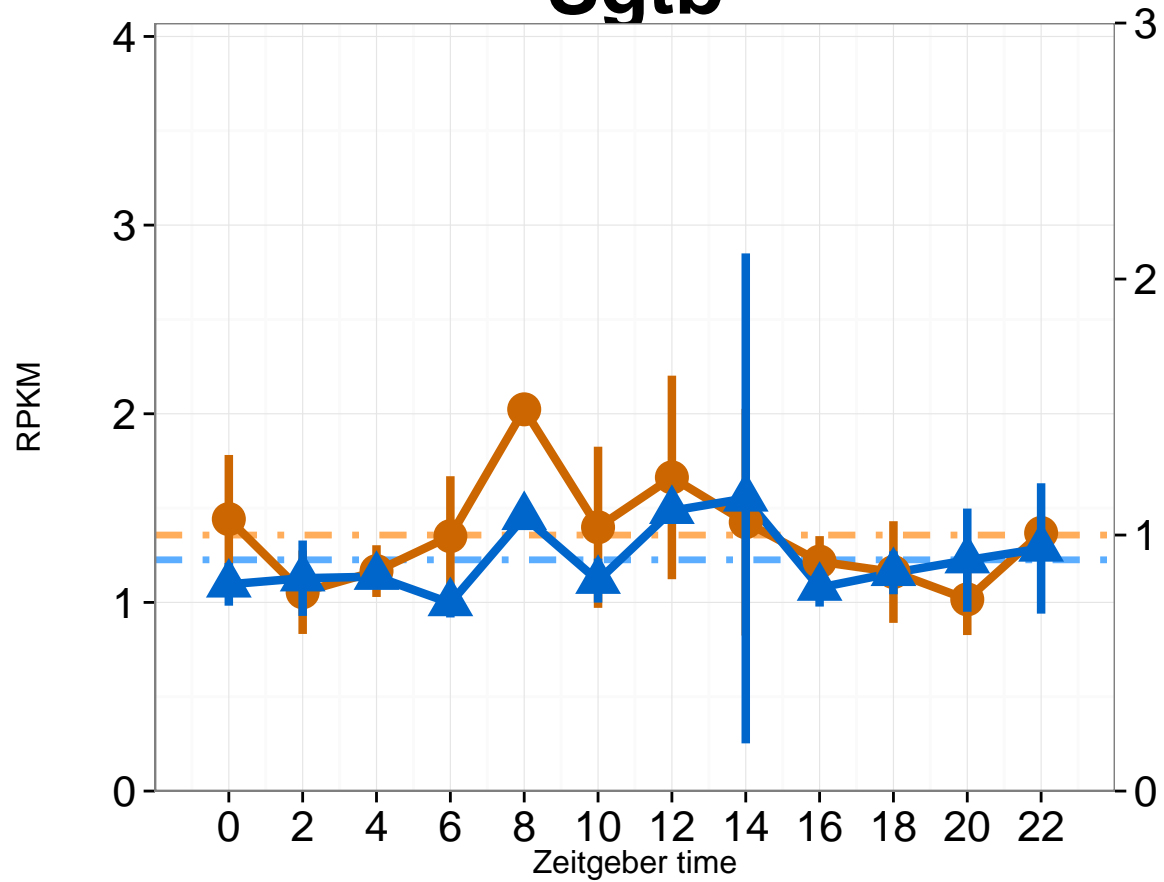

## Sgtb

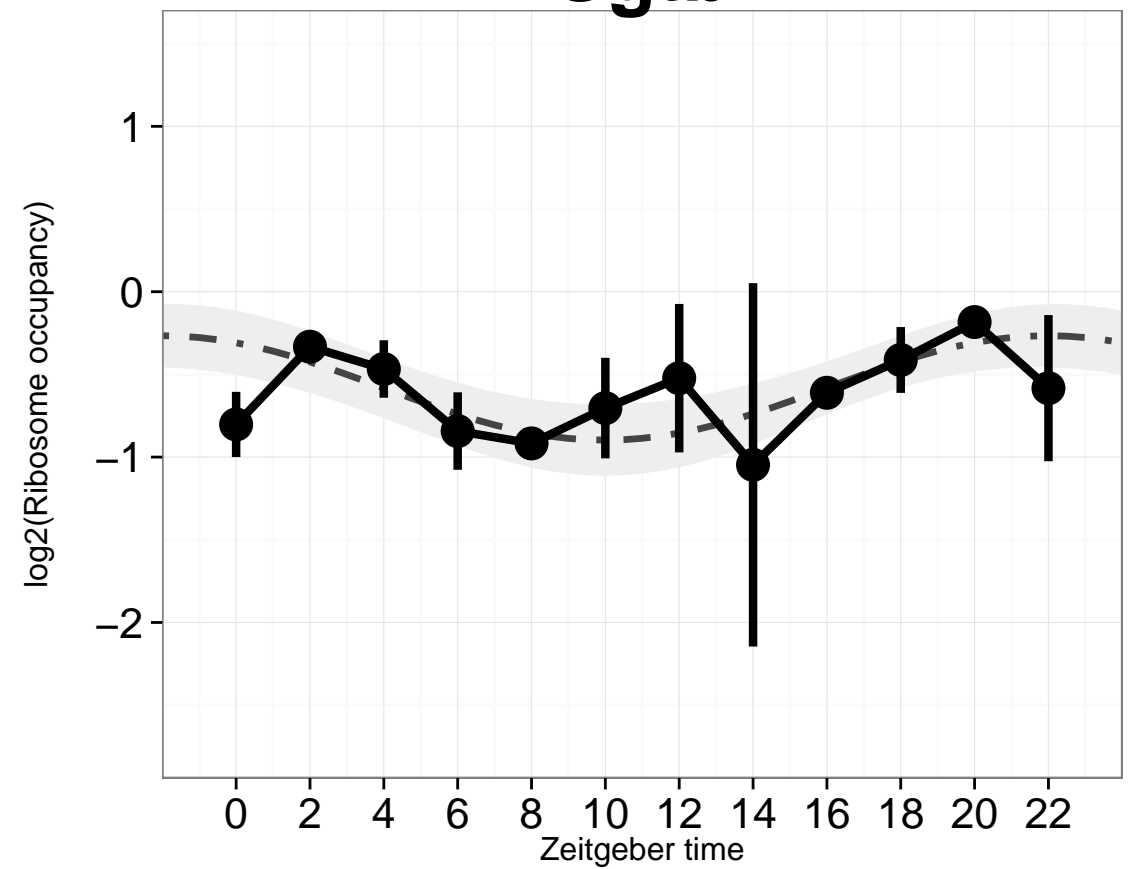

Supplement: SuppDataset_1.zip [file Sgtb_set_A.pdf › Supplemental Dataset 1/A-mRNA_nonrhyth_translation_nonrhyth/Sgtb_set_A.pdf]

# Sh2b1

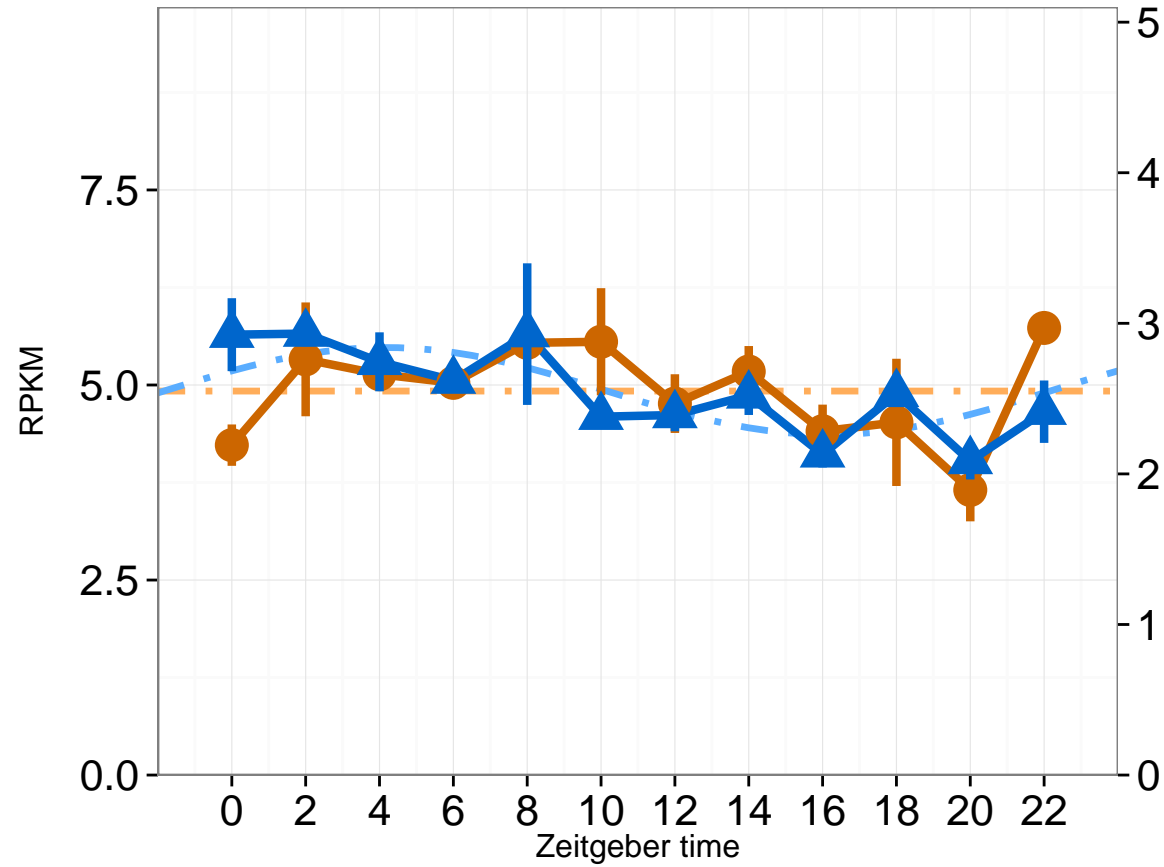

# Sh2b1

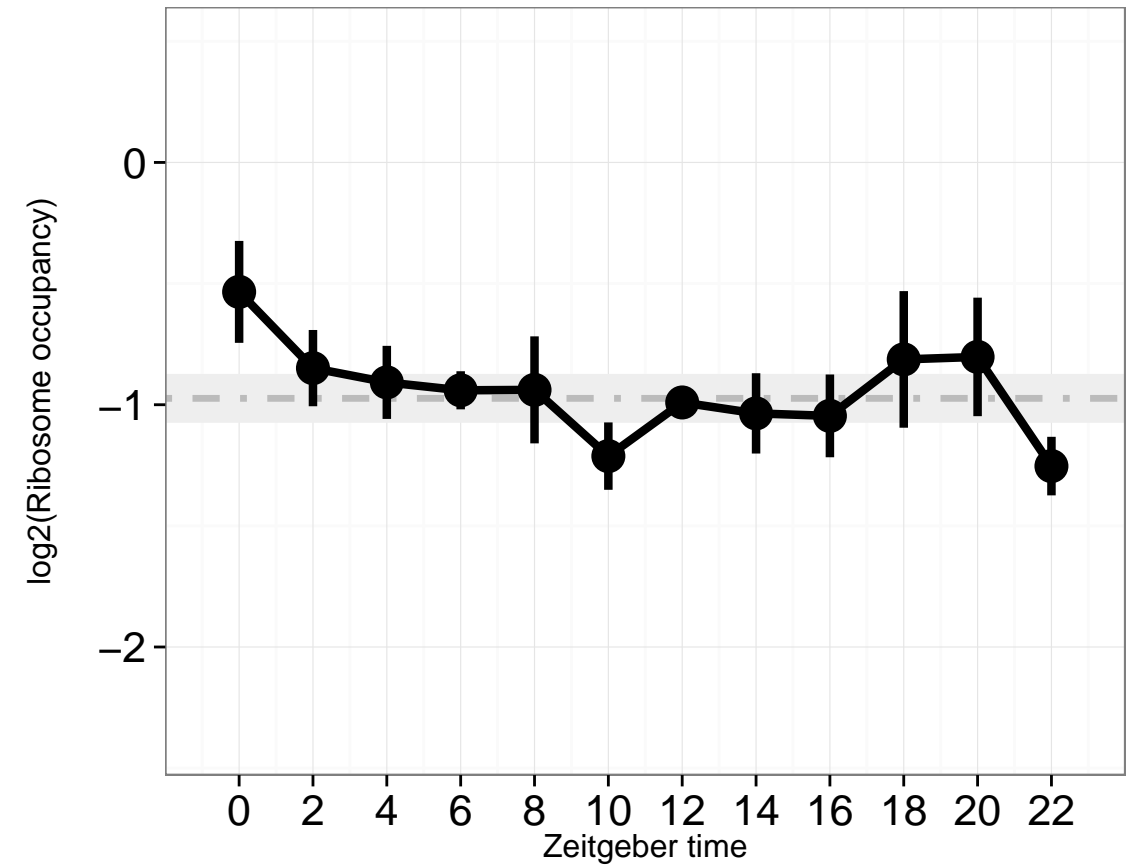

Supplement: SuppDataset_1.zip [file Sh2b1_set_A.pdf › Supplemental Dataset 1/A-mRNA_nonrhyth_translation_nonrhyth/Sh2b1_set_A.pdf]

# Sh2b2

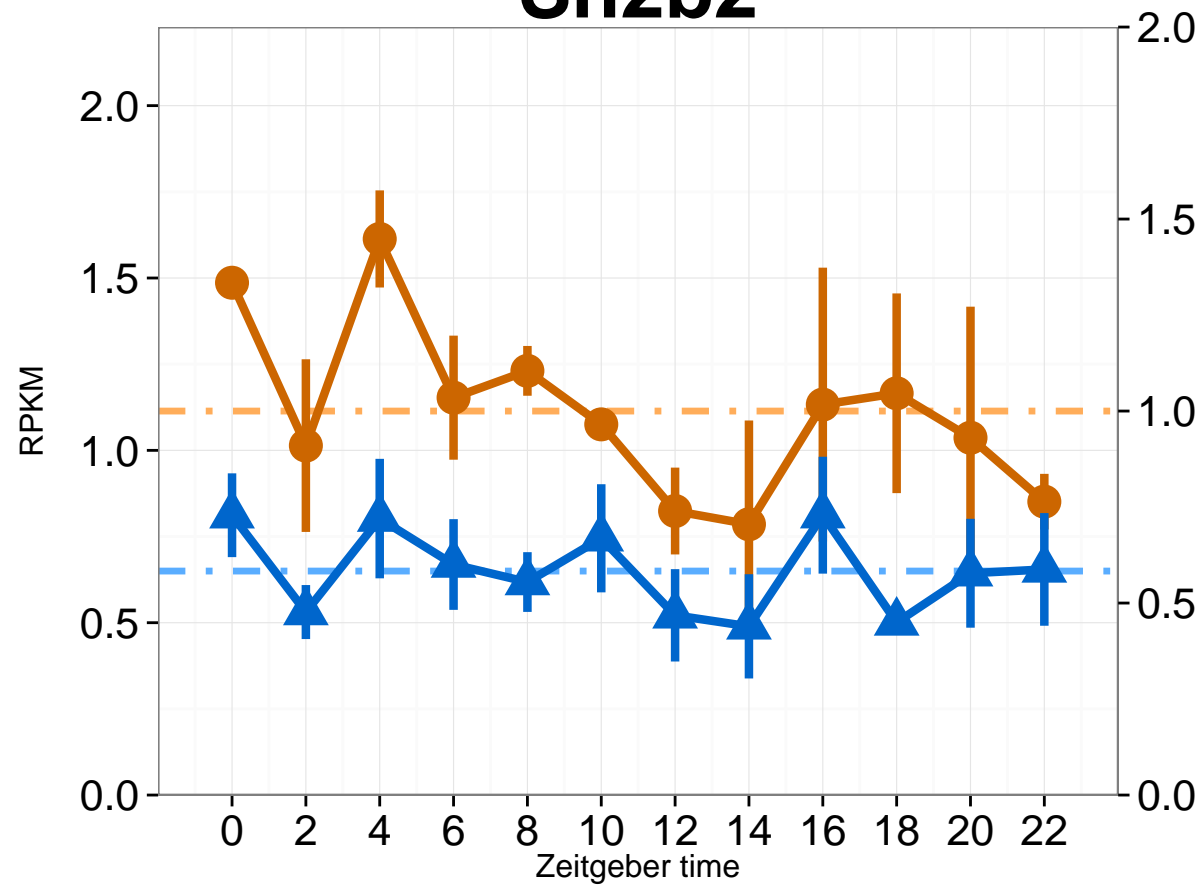

# Sh2b2

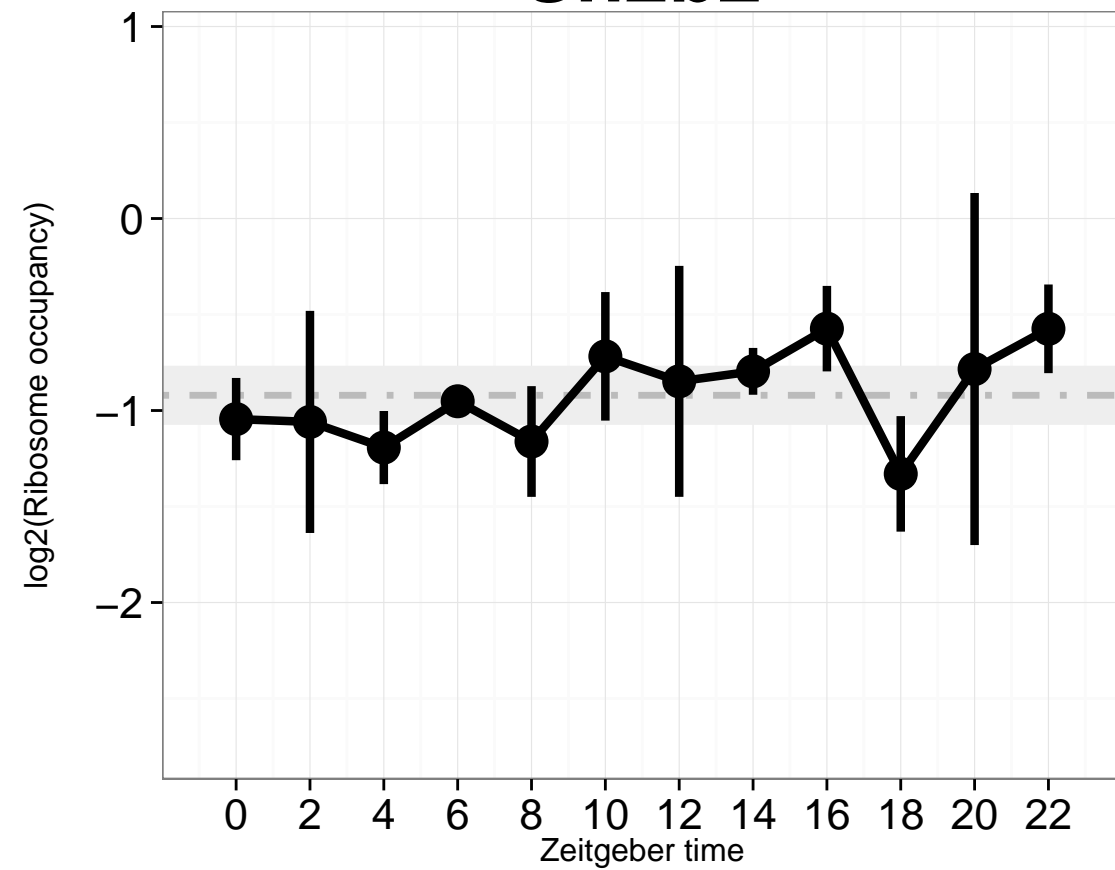

Supplement: SuppDataset_1.zip [file Sh2b2_set_A.pdf › Supplemental Dataset 1/A-mRNA_nonrhyth_translation_nonrhyth/Sh2b2_set_A.pdf]

# Sh2b3

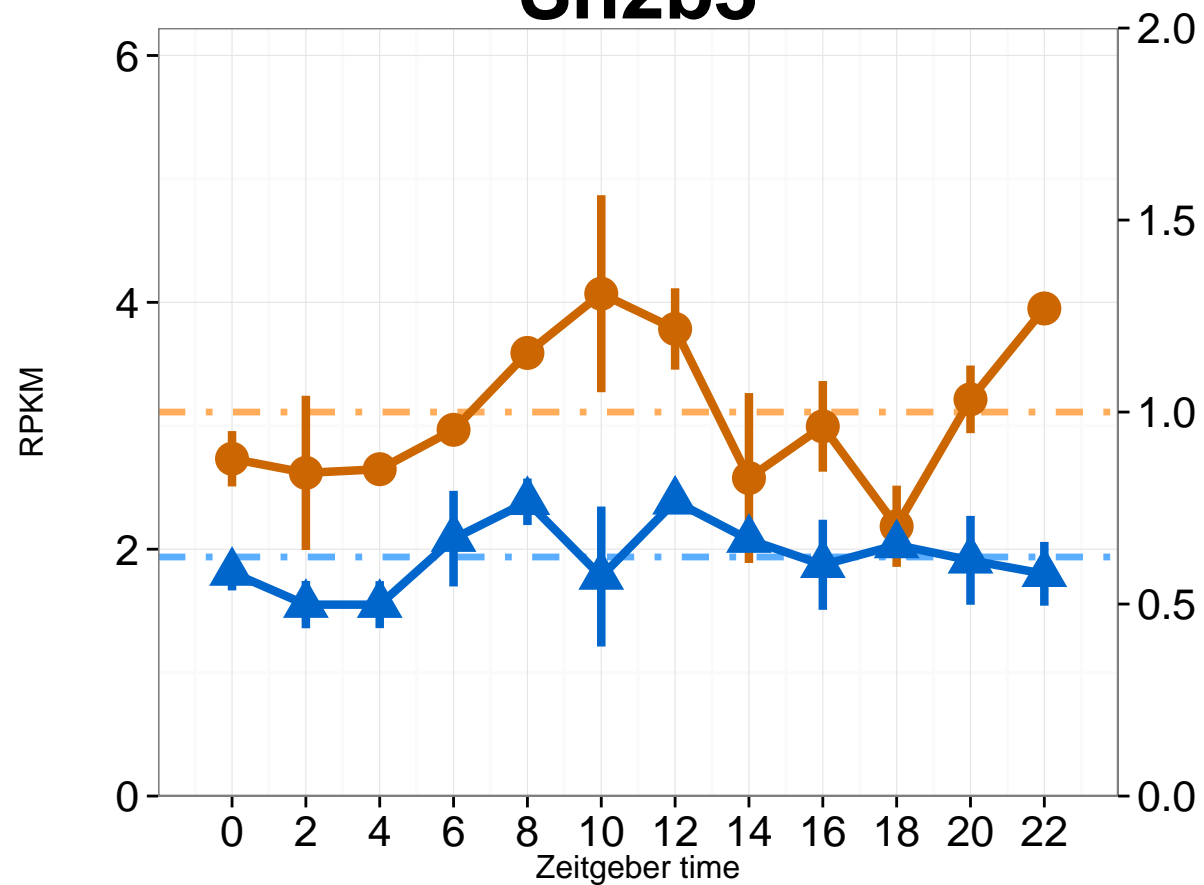

# Sh2b3

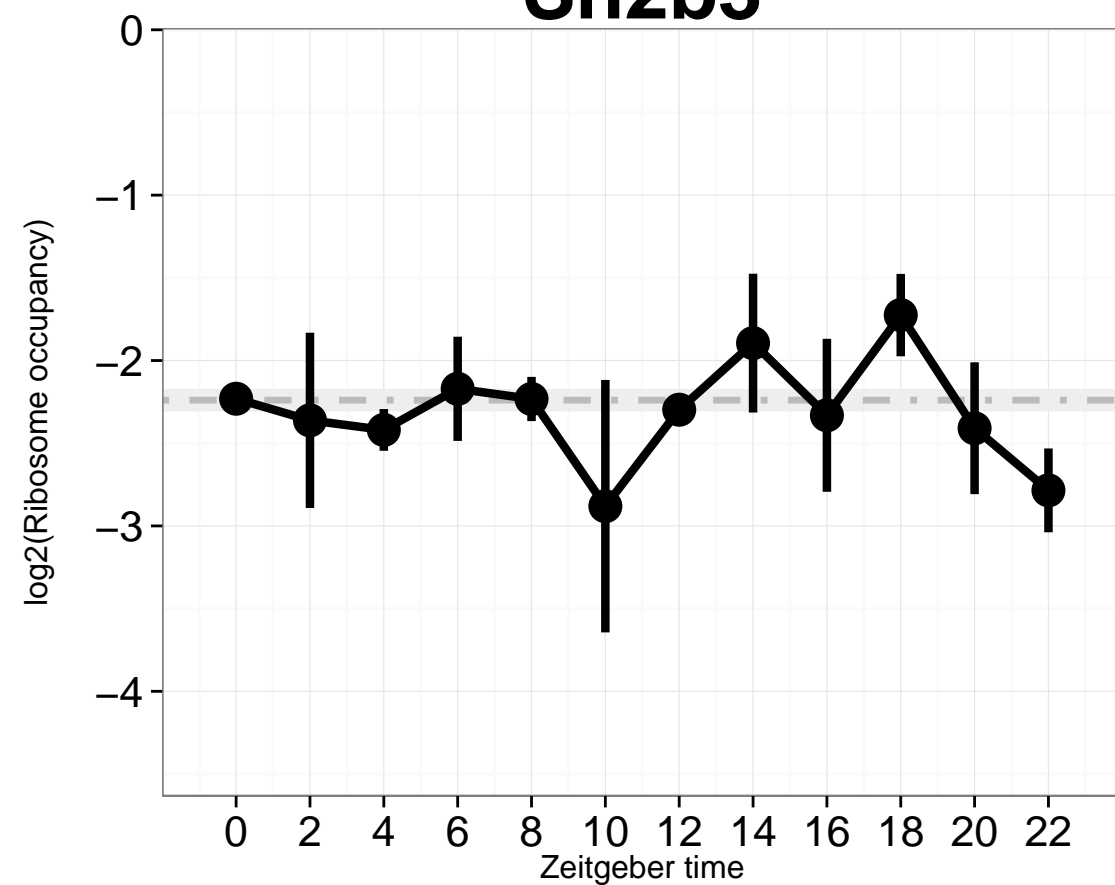

Supplement: SuppDataset_1.zip [file Sh2b3_set_A.pdf › Supplemental Dataset 1/A-mRNA_nonrhyth_translation_nonrhyth/Sh2b3_set_A.pdf]

# Sh2d4a

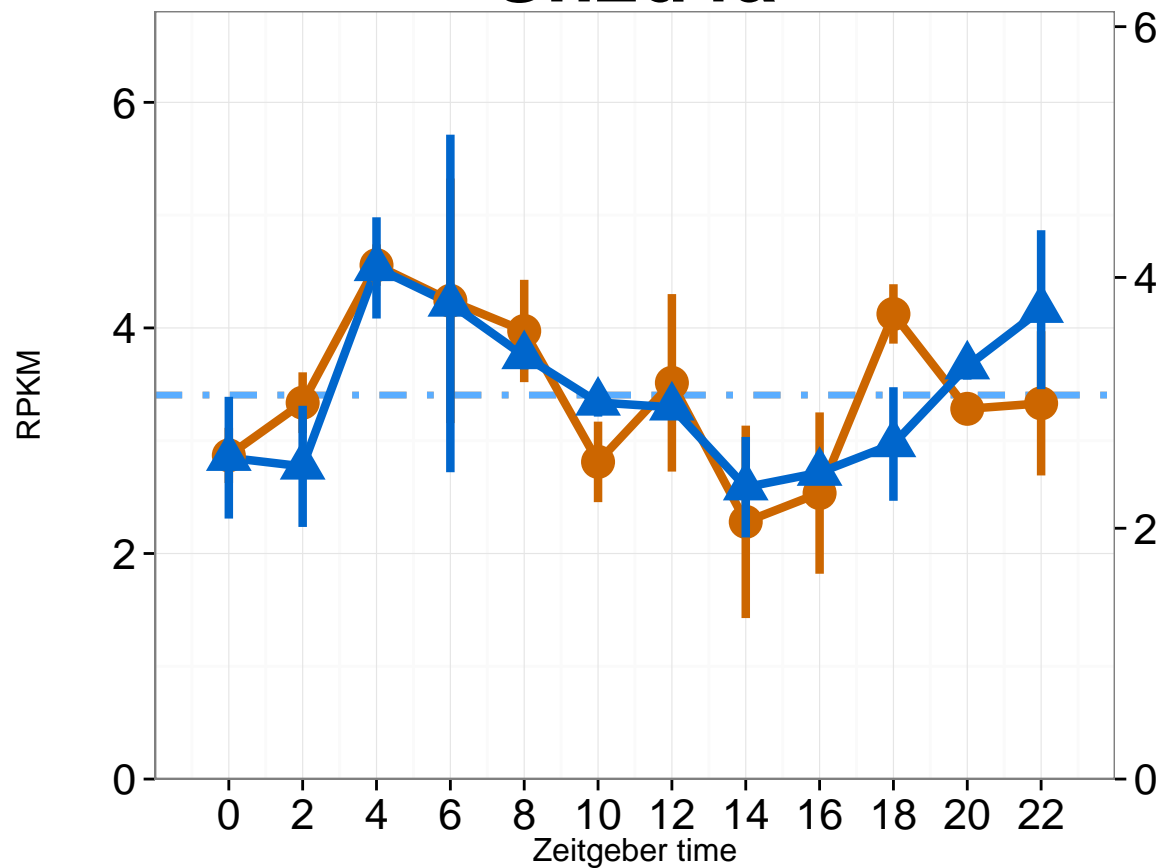

# Sh2d4a

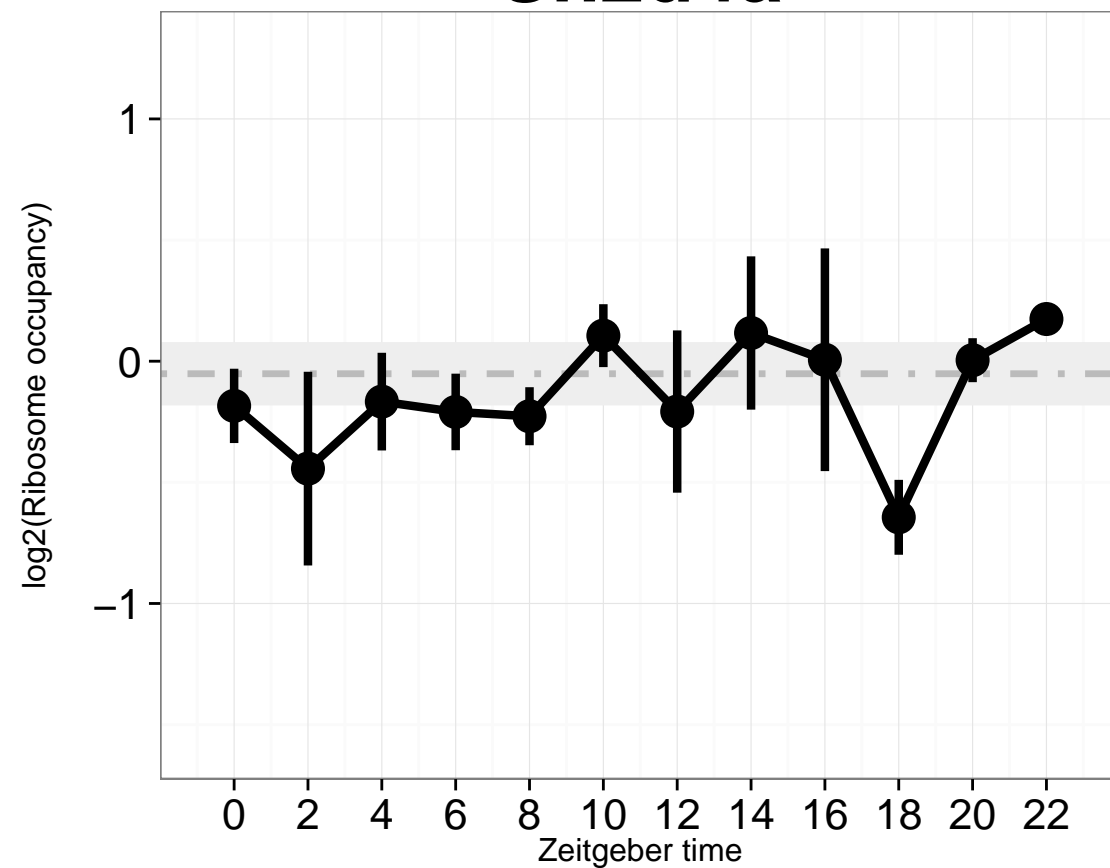

Supplement: SuppDataset_1.zip [file Sh2d4a_set_A.pdf › Supplemental Dataset 1/A-mRNA_nonrhyth_translation_nonrhyth/Sh2d4a_set_A.pdf]

## Sh3bgrl3

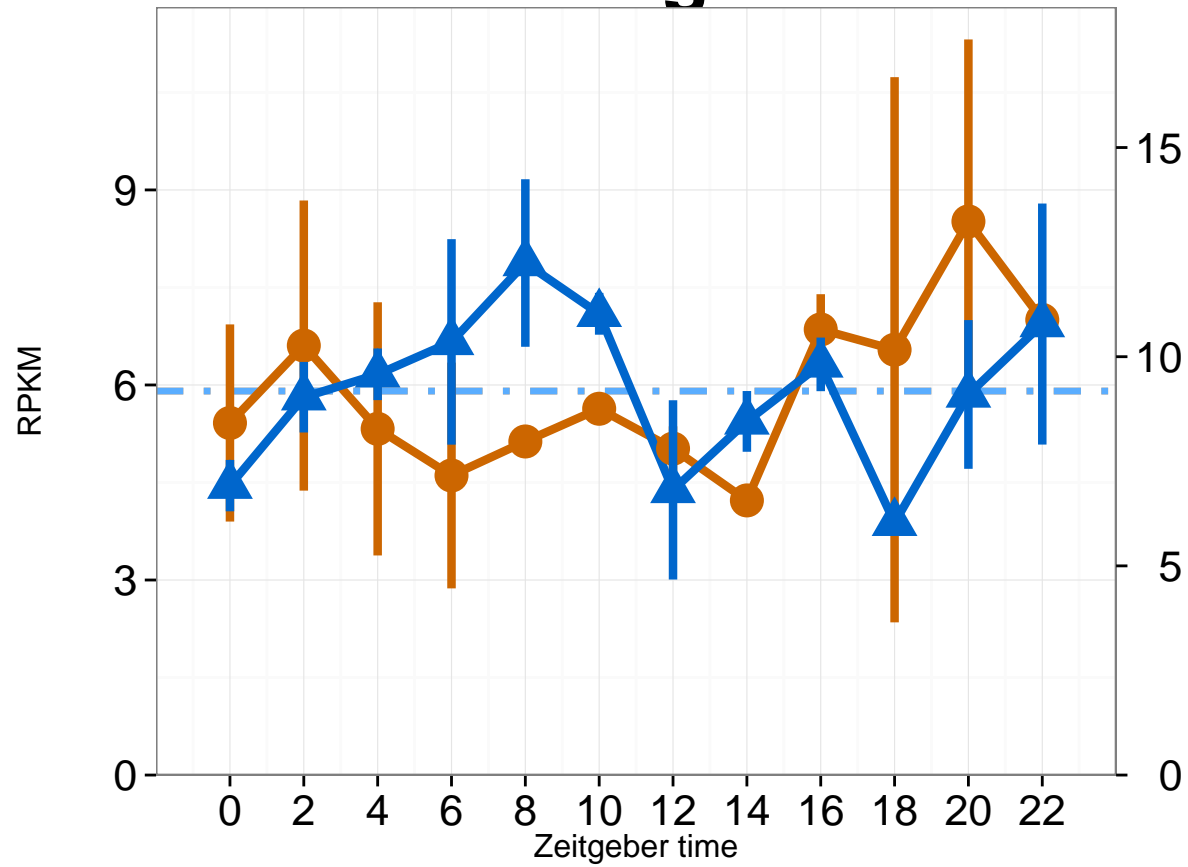

## Sh3bgrl3

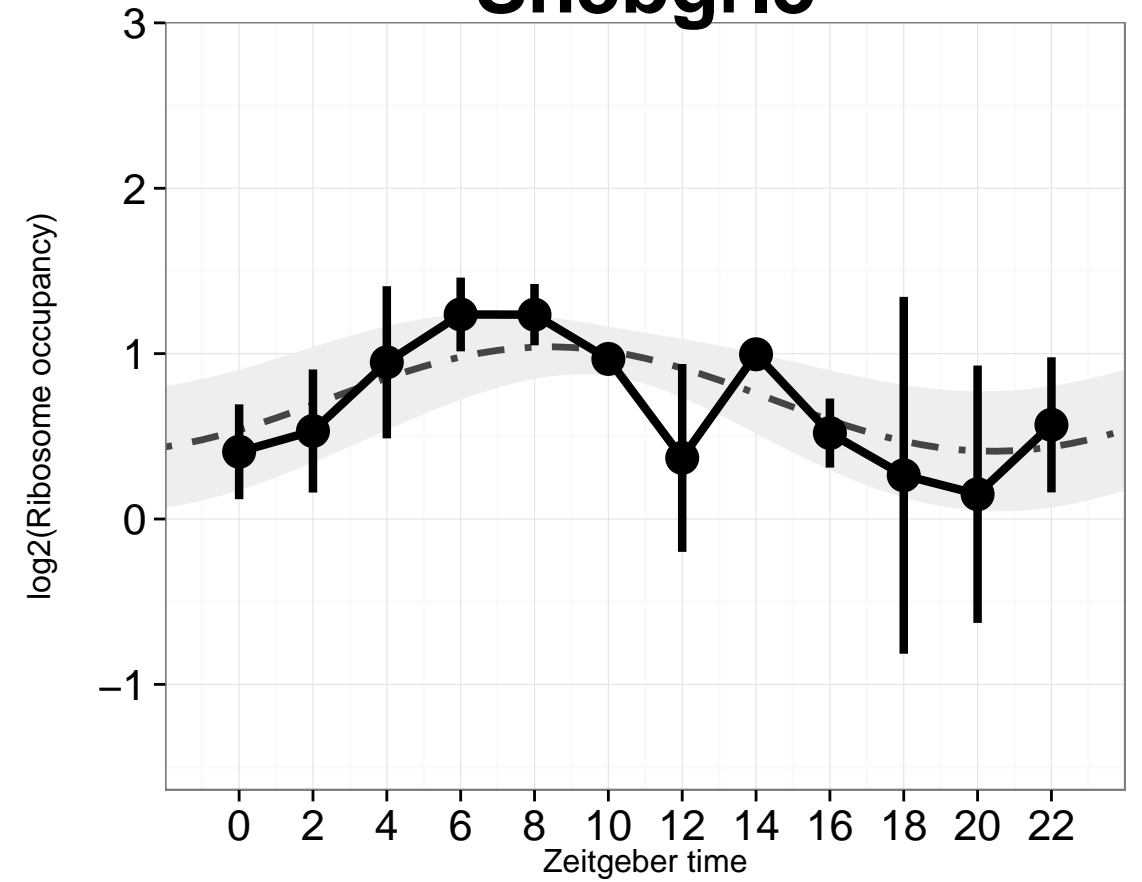

Supplement: SuppDataset_1.zip [file Sh3bgrl3_set_A.pdf › Supplemental Dataset 1/A-mRNA_nonrhyth_translation_nonrhyth/Sh3bgrl3_set_A.pdf]

# Sh3bgrl

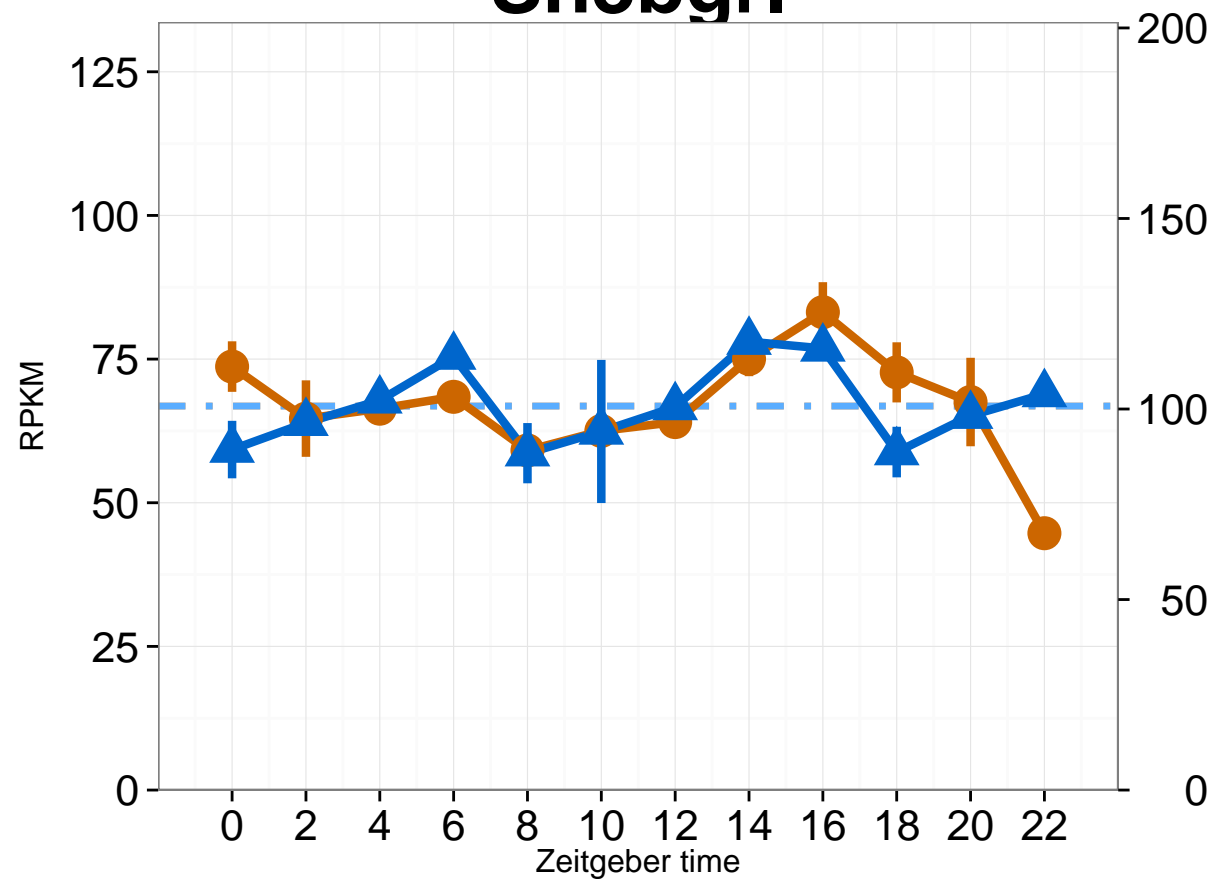

# Sh3bgrl

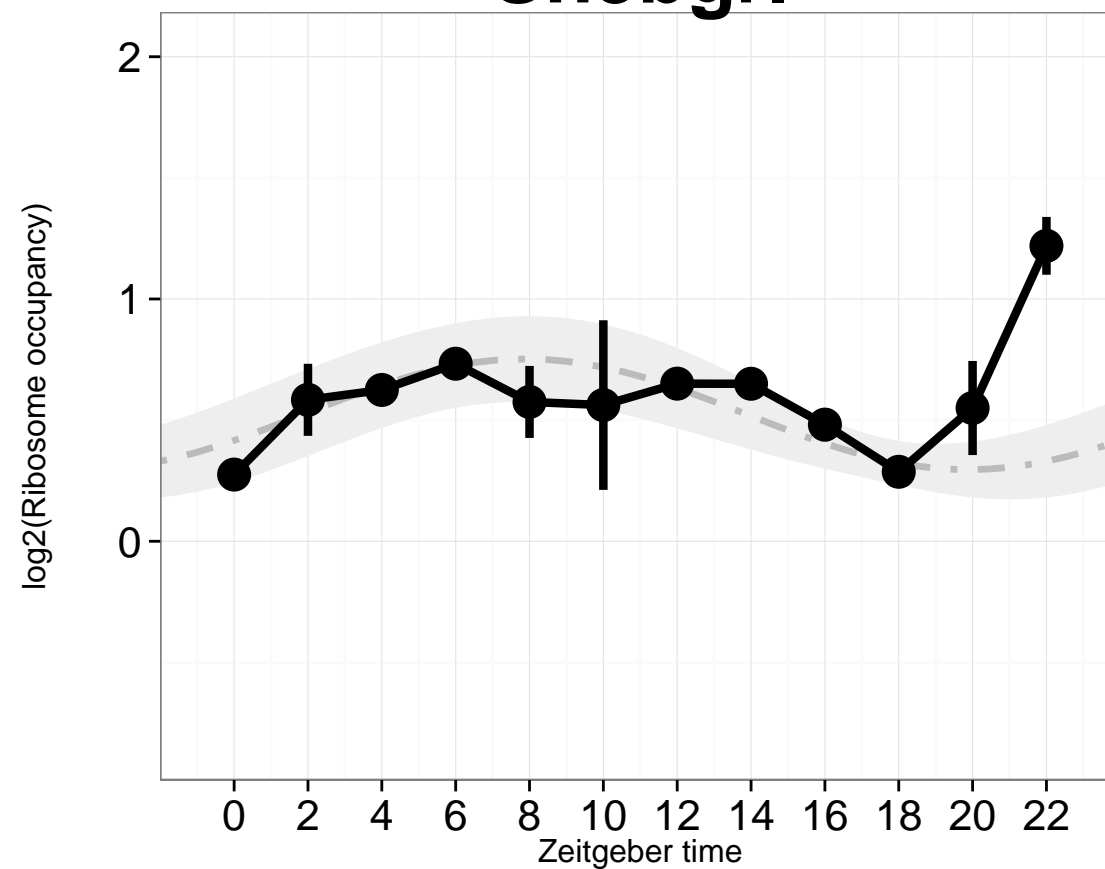

Supplement: SuppDataset_1.zip [file Sh3bgrl_set_A.pdf › Supplemental Dataset 1/A-mRNA_nonrhyth_translation_nonrhyth/Sh3bgrl_set_A.pdf]

## Sh3bp2

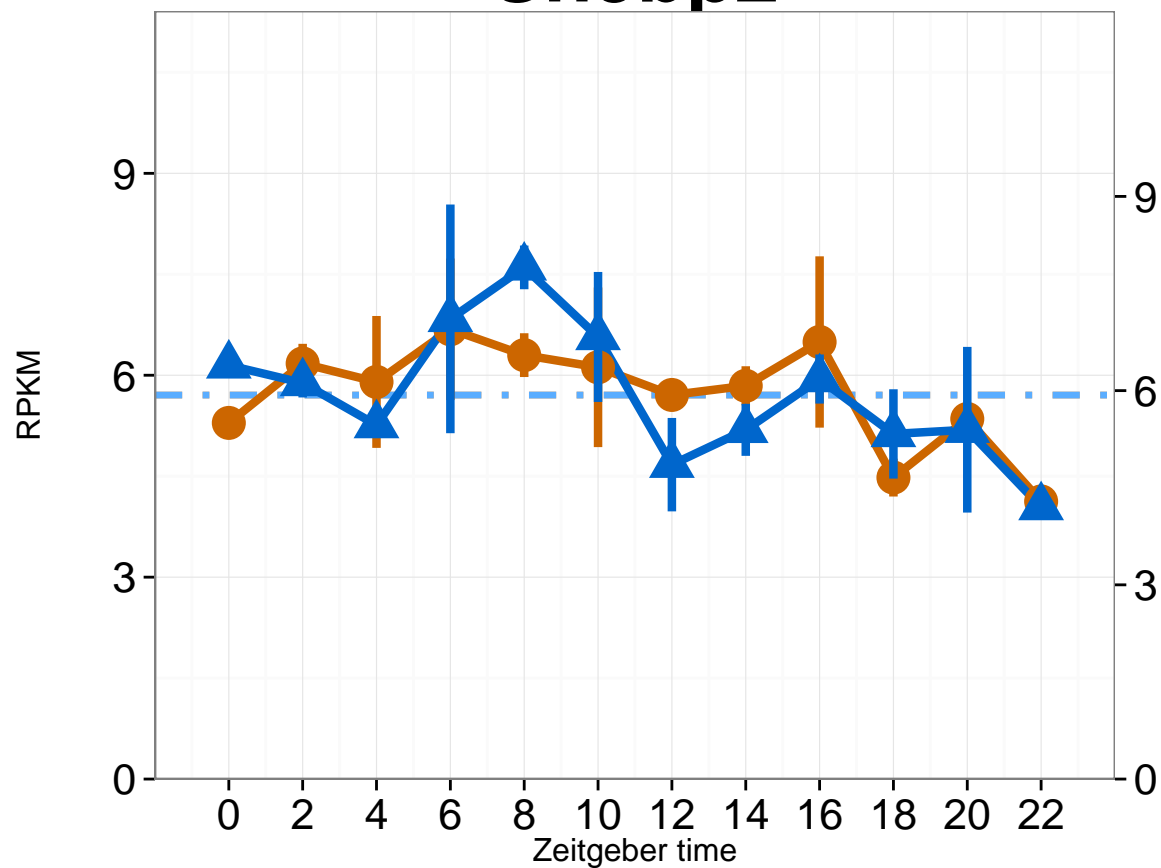

## Sh3bp2

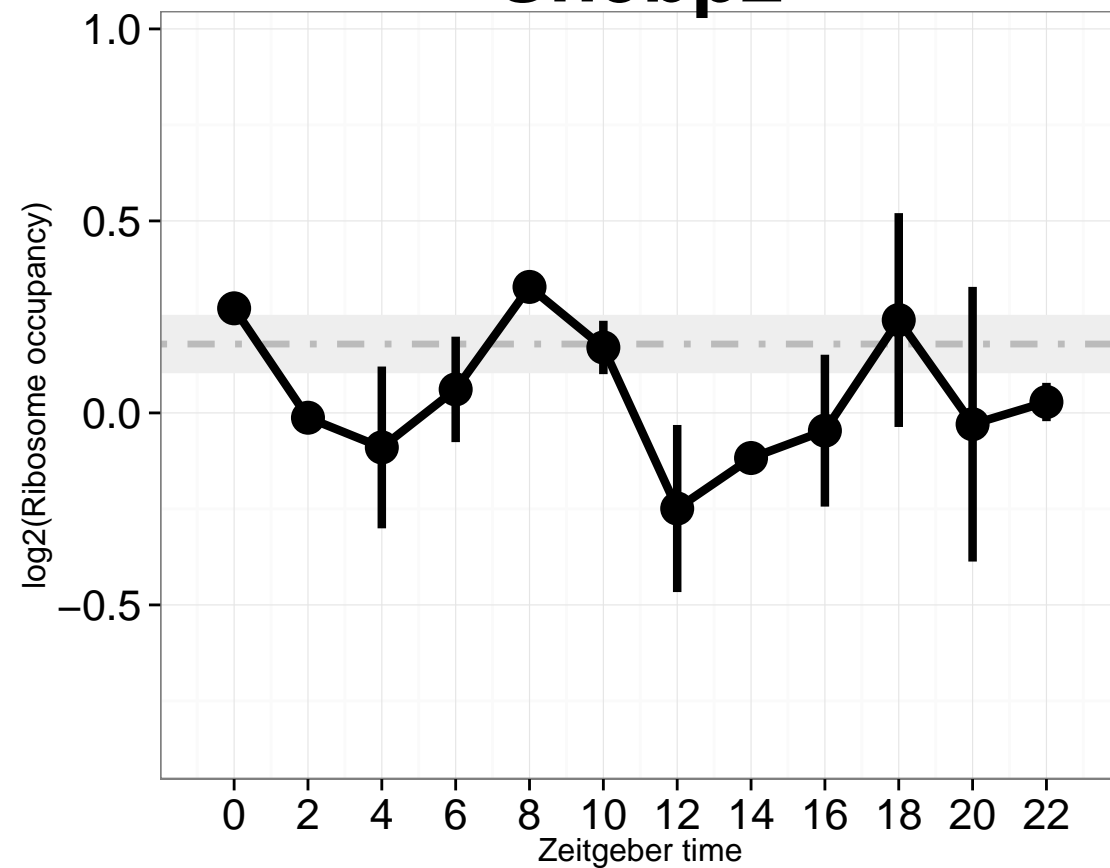

Supplement: SuppDataset_1.zip [file Sh3bp2_set_A.pdf › Supplemental Dataset 1/A-mRNA_nonrhyth_translation_nonrhyth/Sh3bp2_set_A.pdf]

## Sh3bp4

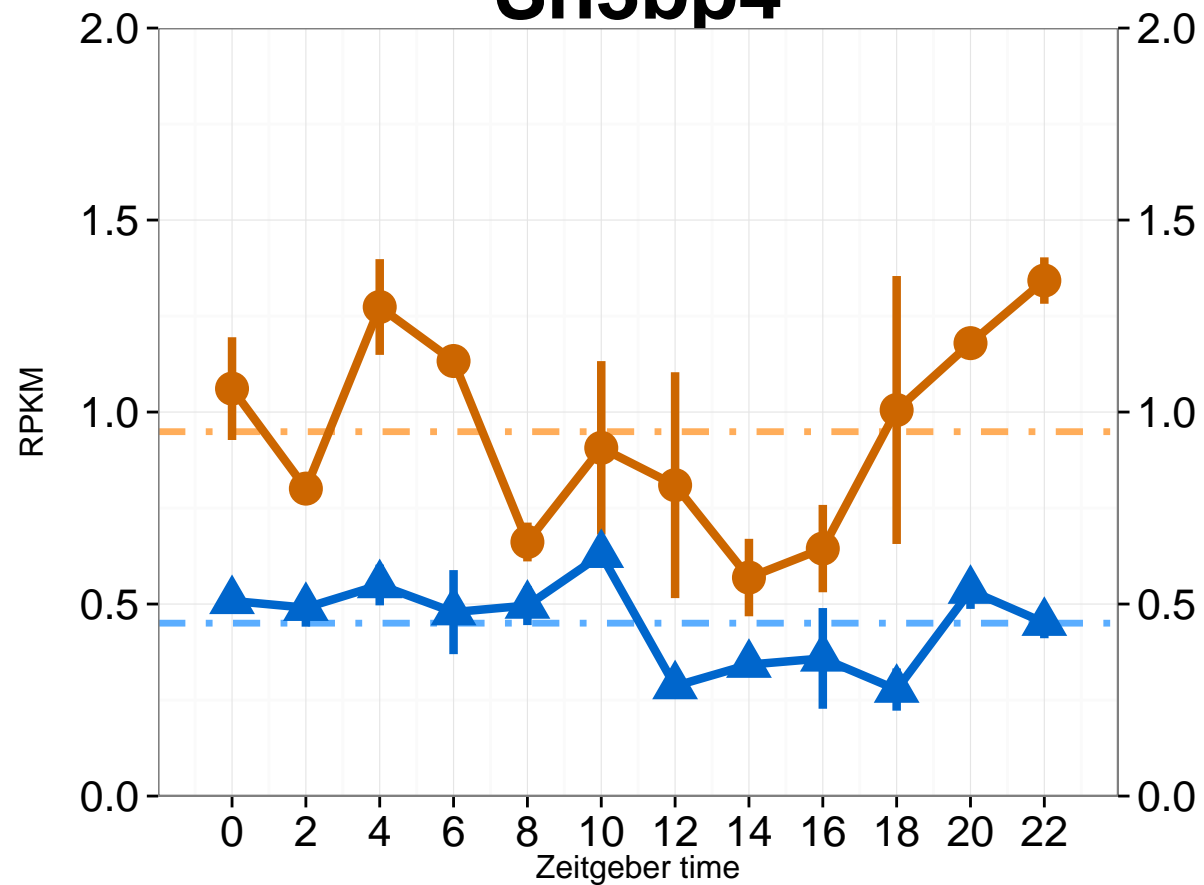

## Sh3bp4

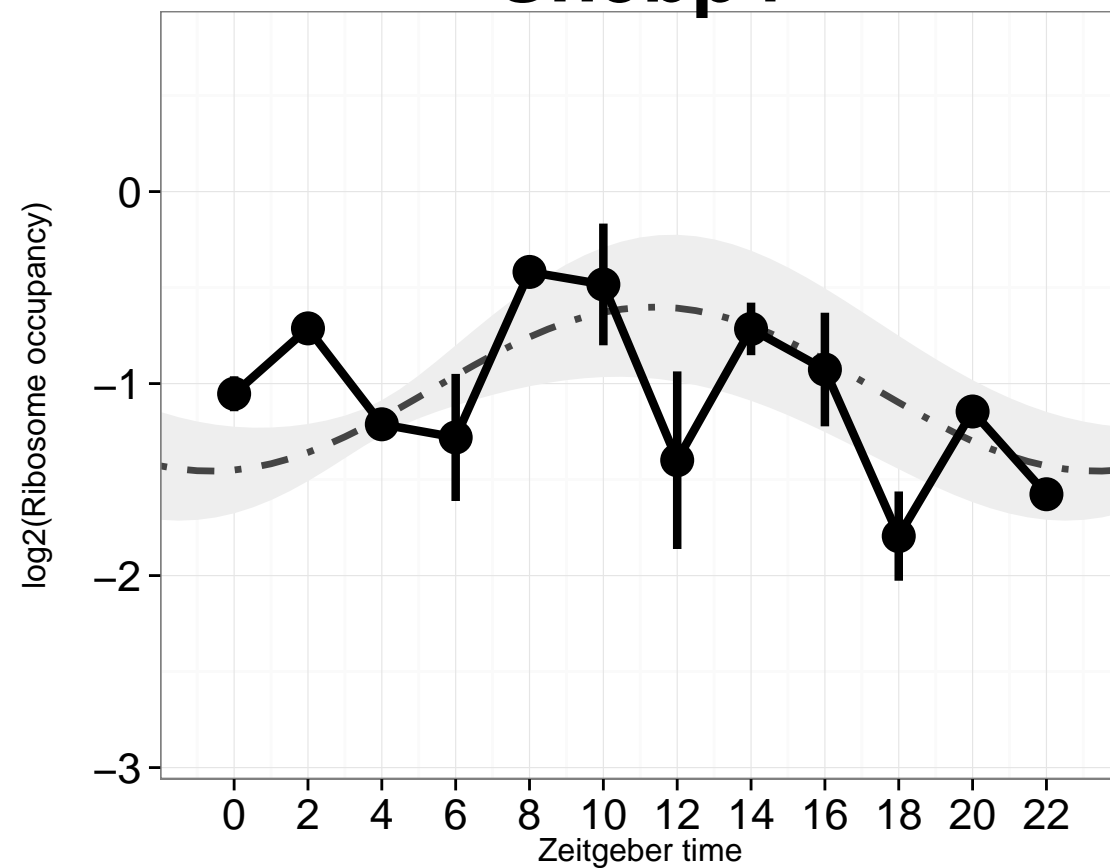

Supplement: SuppDataset_1.zip [file Sh3bp4_set_A.pdf › Supplemental Dataset 1/A-mRNA_nonrhyth_translation_nonrhyth/Sh3bp4_set_A.pdf]

## Sh3bp5

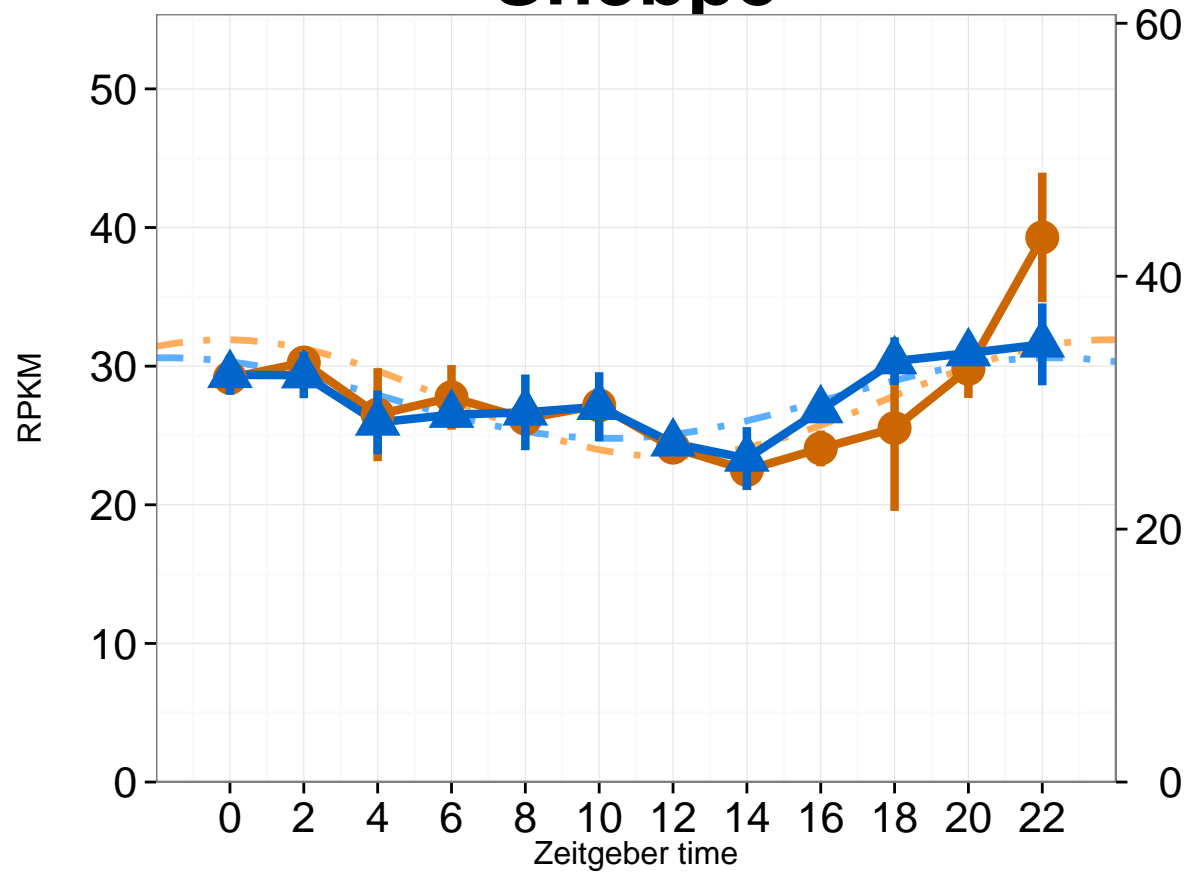

## Sh3bp5

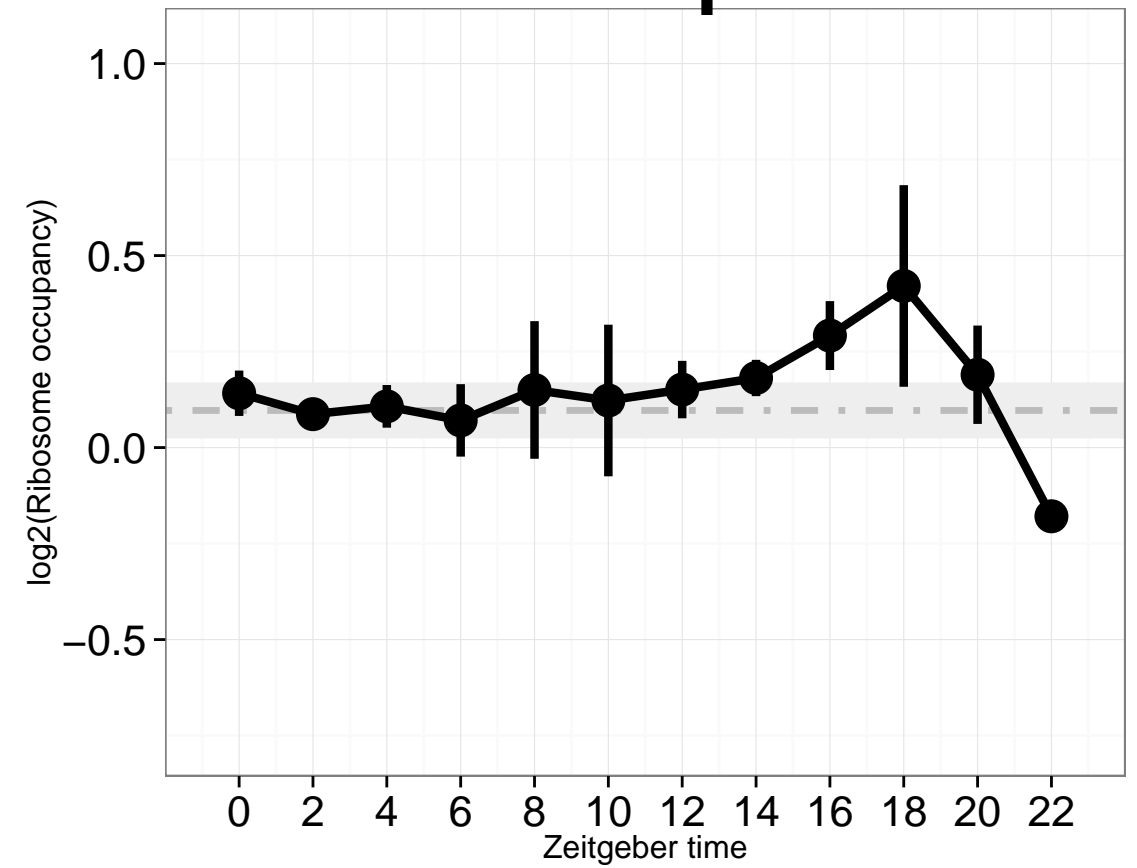

Supplement: SuppDataset_1.zip [file Sh3bp5_set_A.pdf › Supplemental Dataset 1/A-mRNA_nonrhyth_translation_nonrhyth/Sh3bp5_set_A.pdf]

# Sh3bp5l

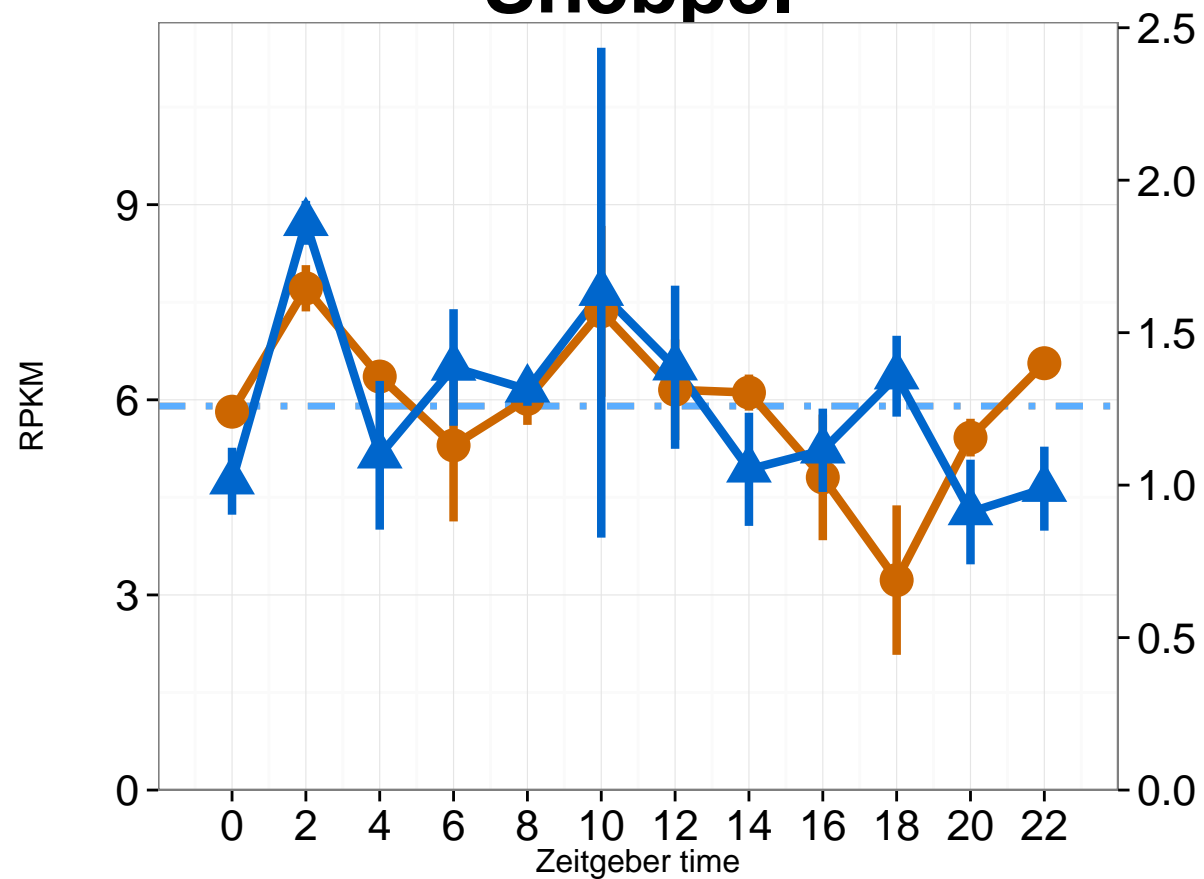

# Sh3bp5l

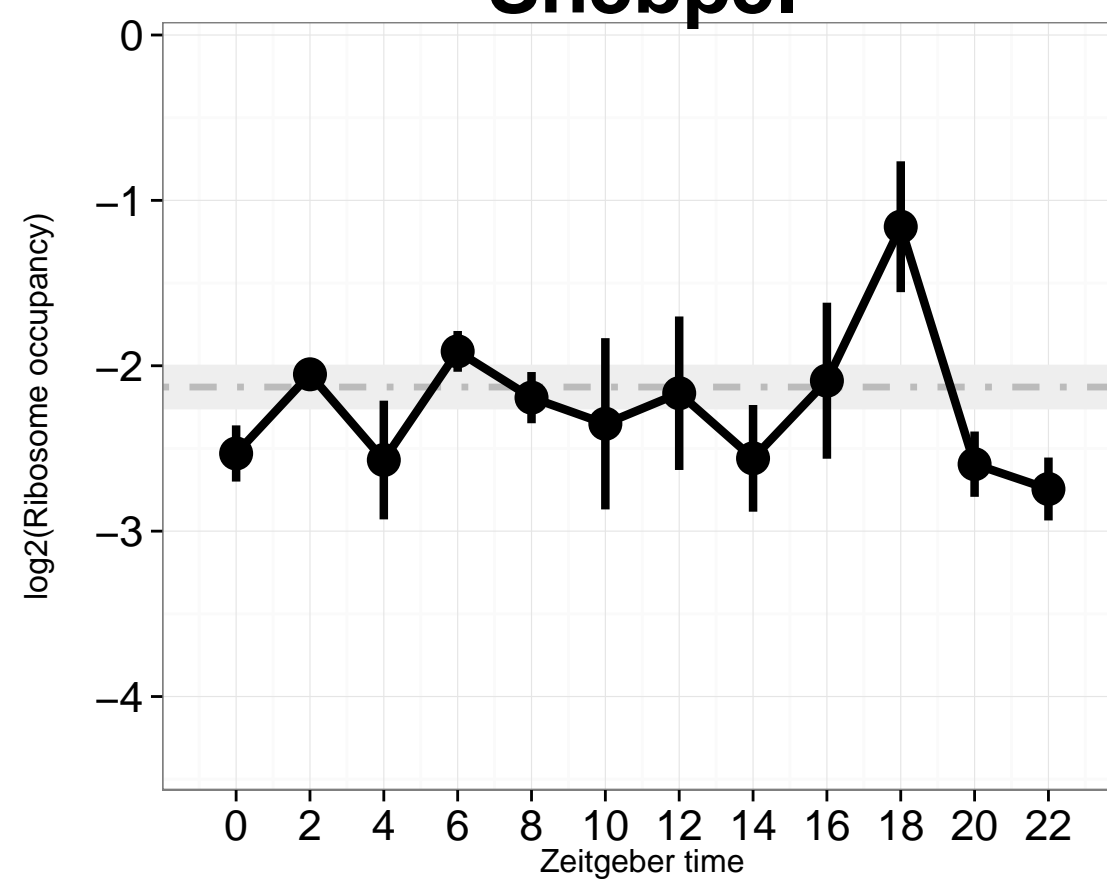

Supplement: SuppDataset_1.zip [file Sh3bp5l_set_A.pdf › Supplemental Dataset 1/A-mRNA_nonrhyth_translation_nonrhyth/Sh3bp5l_set_A.pdf]

# Sh3d19

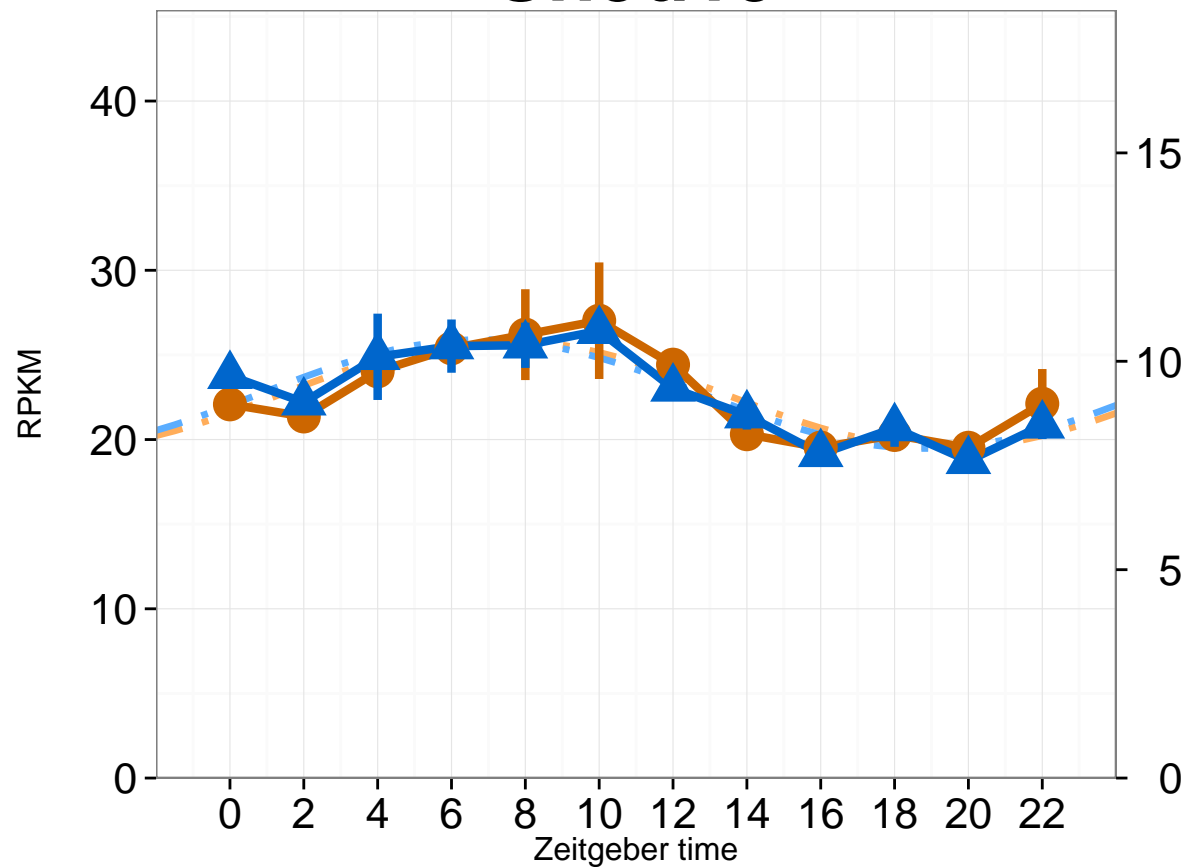

# Sh3d19

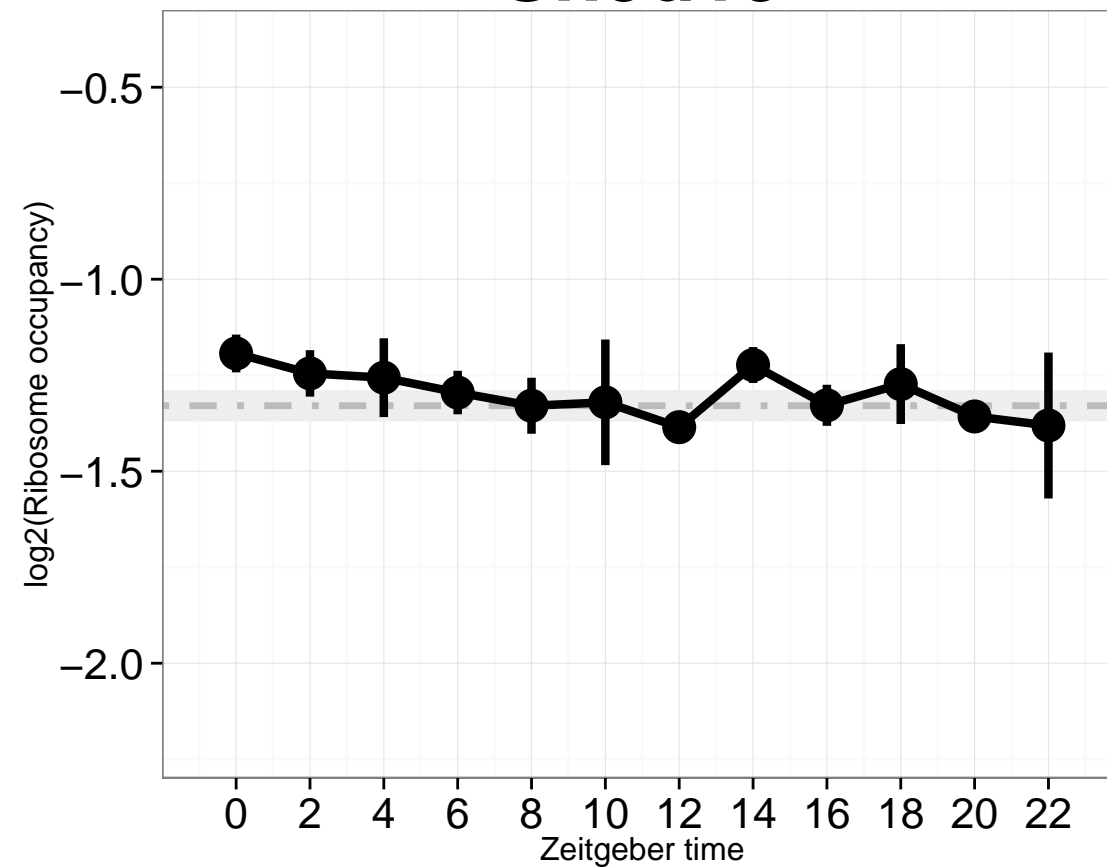

Supplement: SuppDataset_1.zip [file Sh3d19_set_A.pdf › Supplemental Dataset 1/A-mRNA_nonrhyth_translation_nonrhyth/Sh3d19_set_A.pdf]

## Sh3gl1

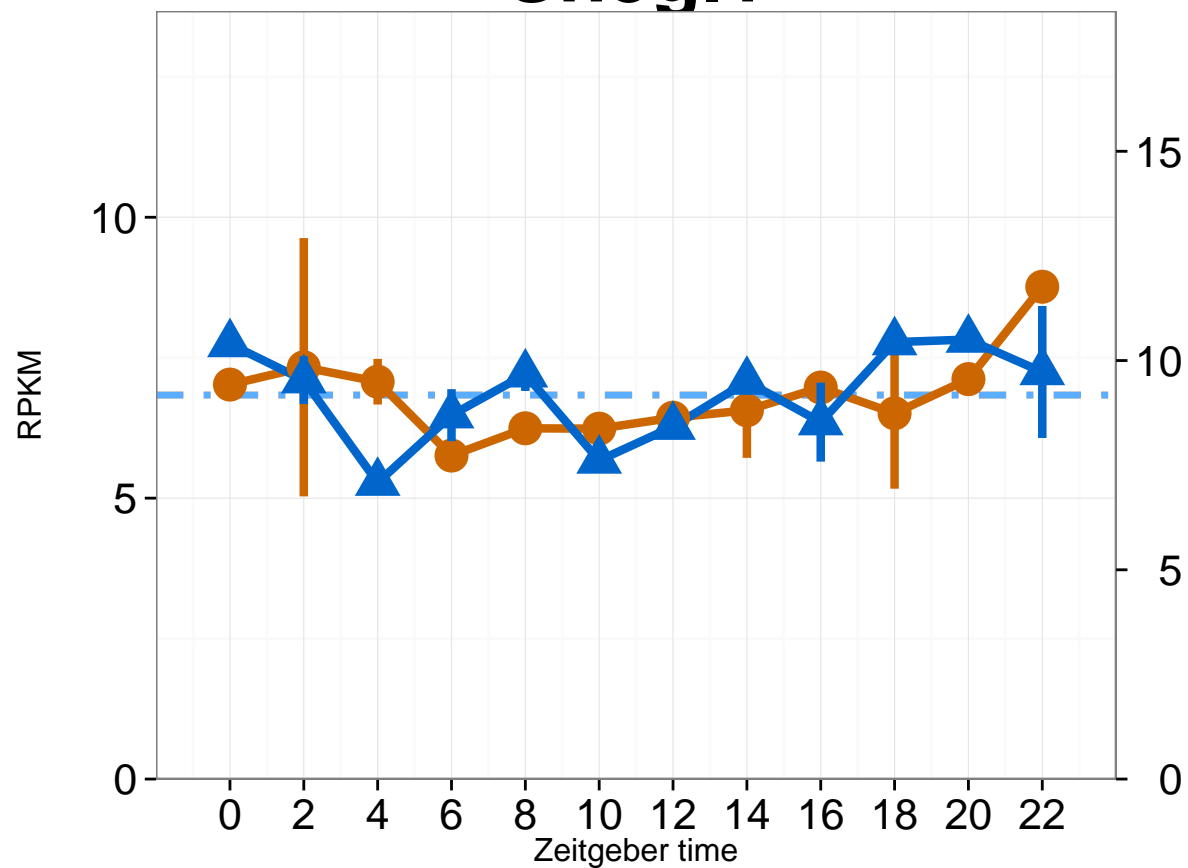

## Sh3gl1

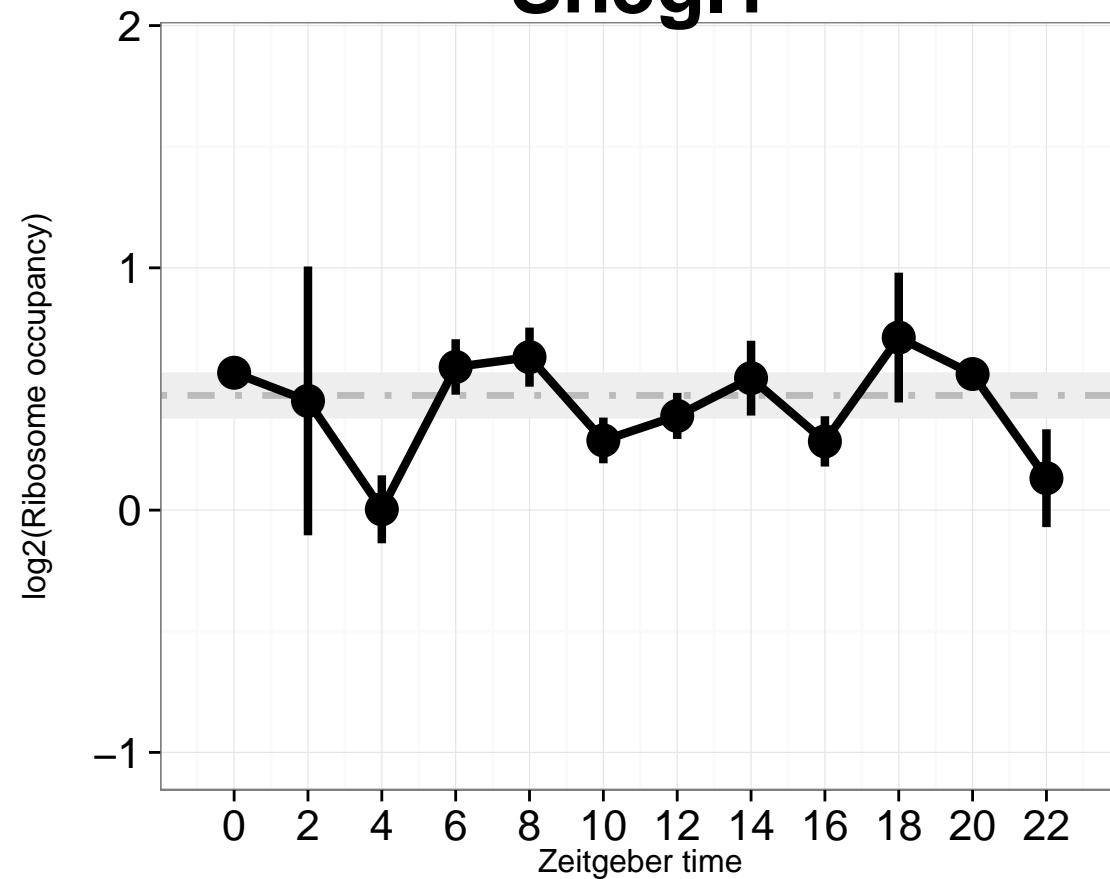

Supplement: SuppDataset_1.zip [file Sh3gl1_set_A.pdf › Supplemental Dataset 1/A-mRNA_nonrhyth_translation_nonrhyth/Sh3gl1_set_A.pdf]

## Sh3glb1

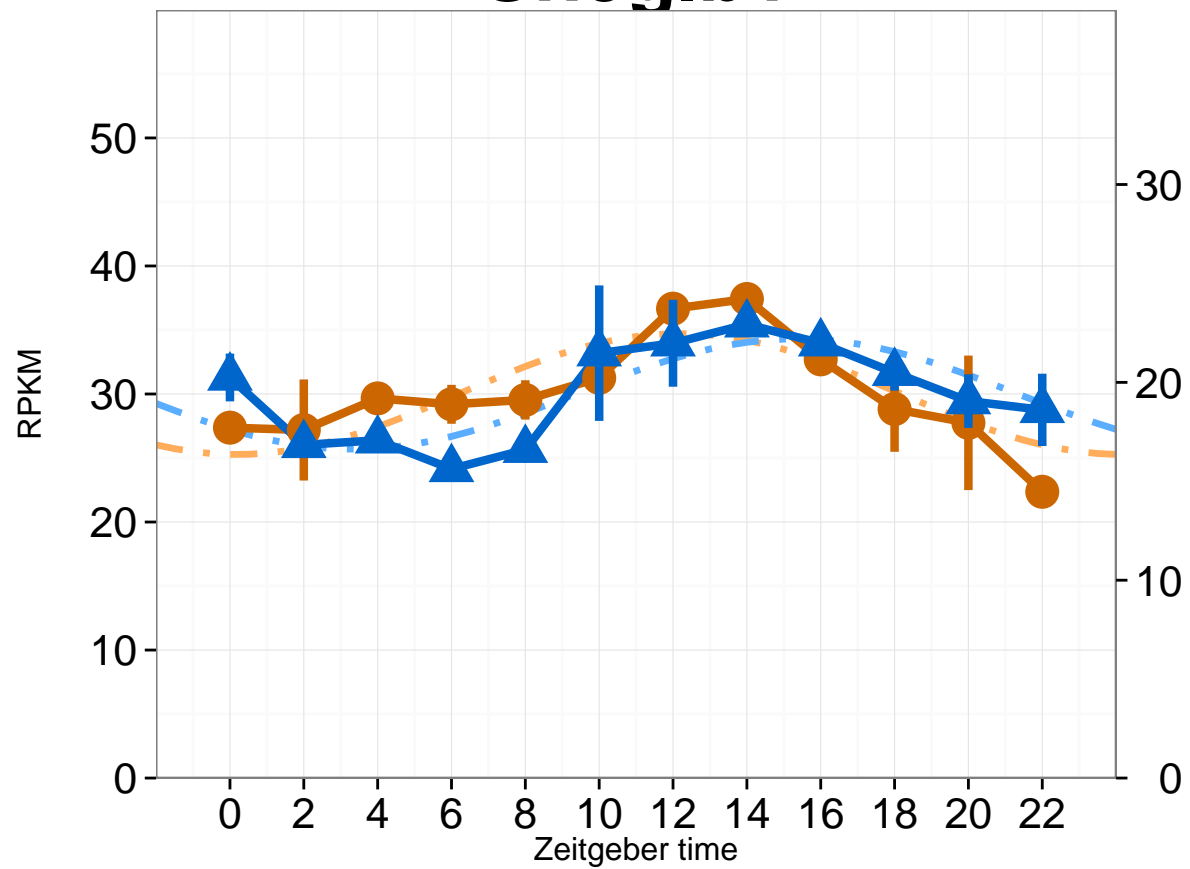

## Sh3glb1

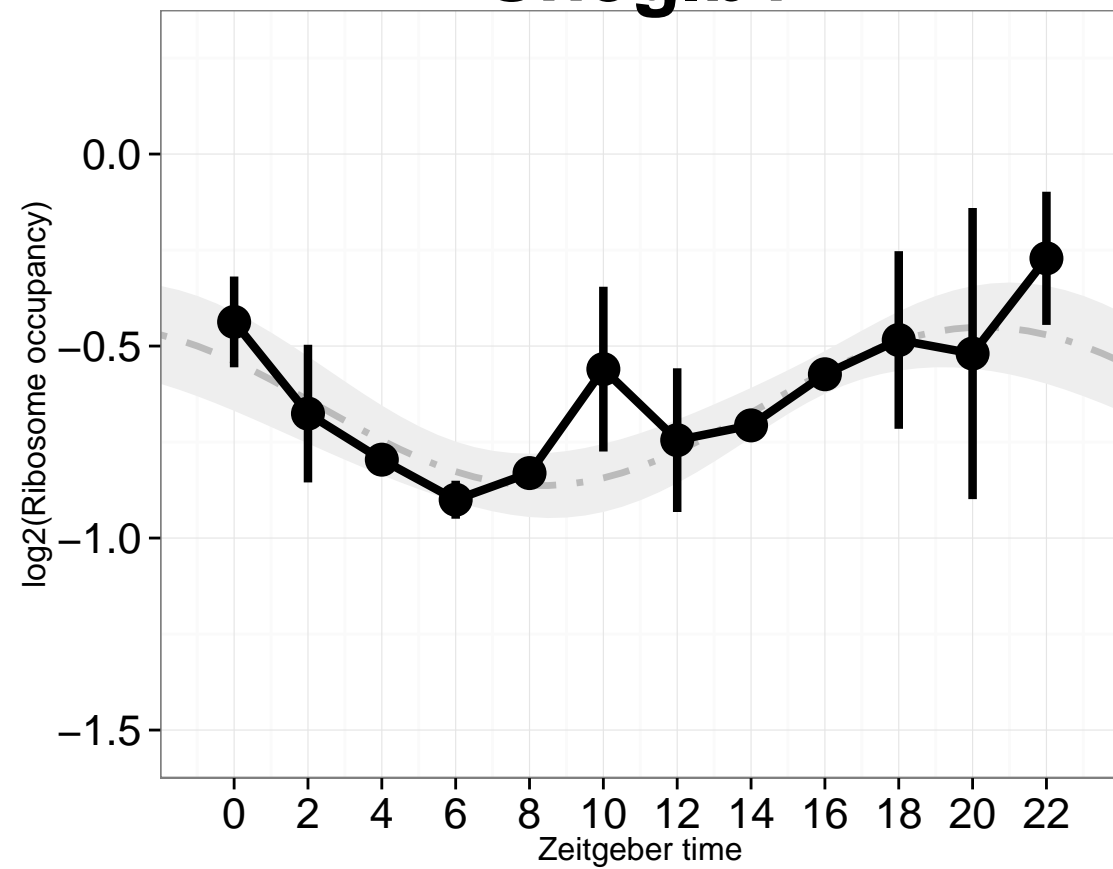

Supplement: SuppDataset_1.zip [file Sh3glb1_set_A.pdf › Supplemental Dataset 1/A-mRNA_nonrhyth_translation_nonrhyth/Sh3glb1_set_A.pdf]

## Sh3glb2

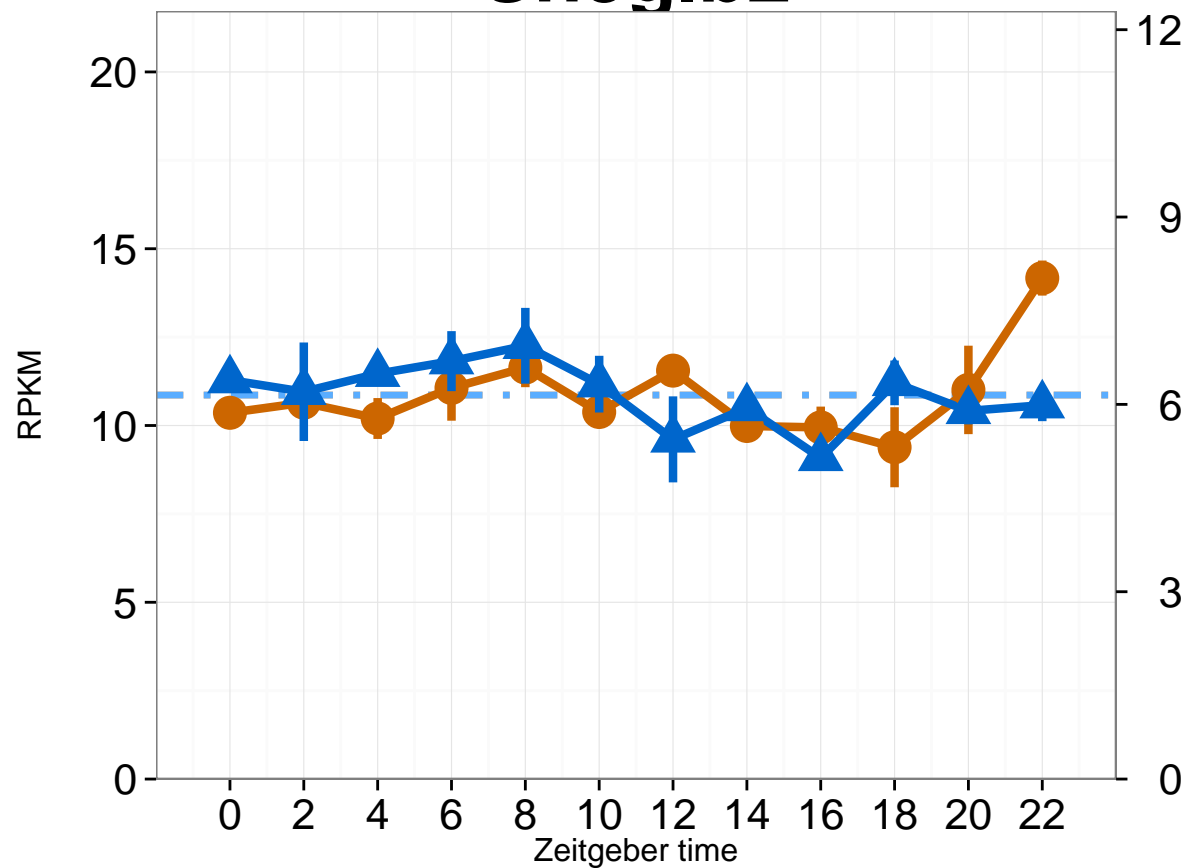

## Sh3glb2

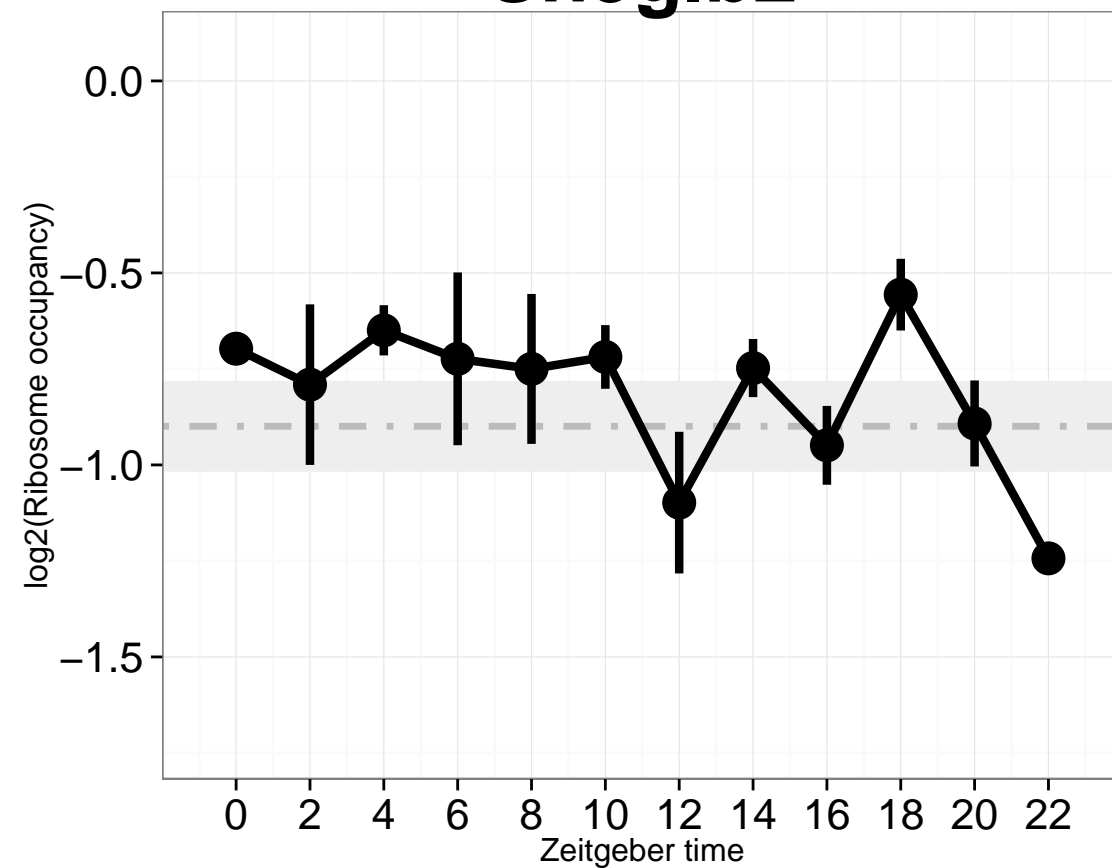

Supplement: SuppDataset_1.zip [file Sh3glb2_set_A.pdf › Supplemental Dataset 1/A-mRNA_nonrhyth_translation_nonrhyth/Sh3glb2_set_A.pdf]

## Sh3kbp1

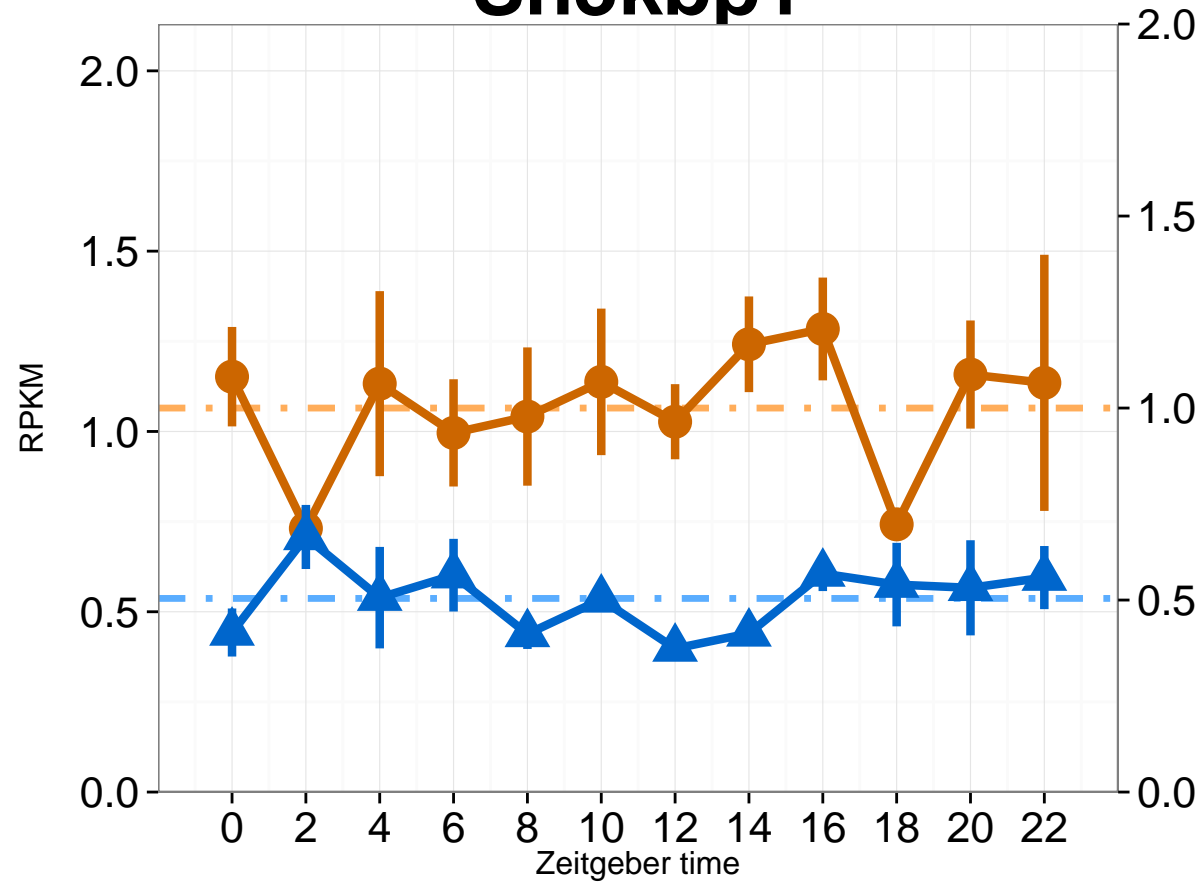

## Sh3kbp1

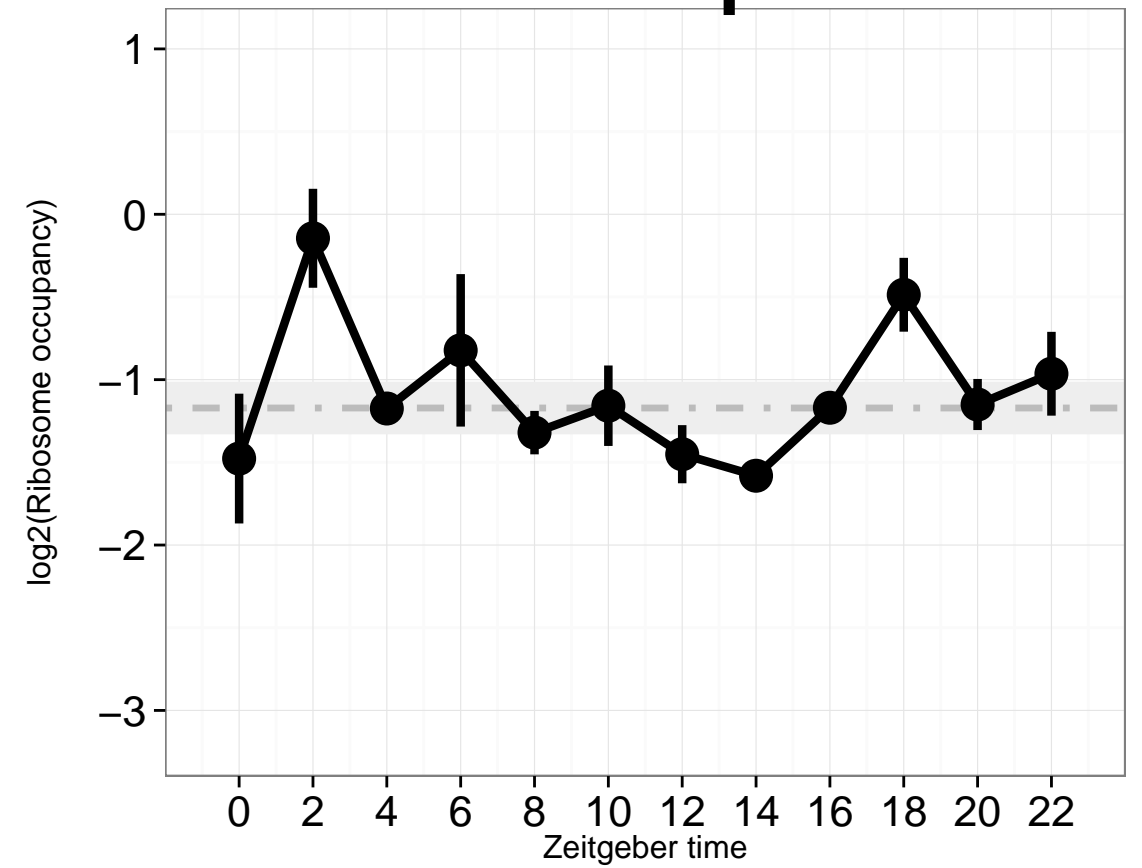

Supplement: SuppDataset_1.zip [file Sh3kbp1_set_A.pdf › Supplemental Dataset 1/A-mRNA_nonrhyth_translation_nonrhyth/Sh3kbp1_set_A.pdf]

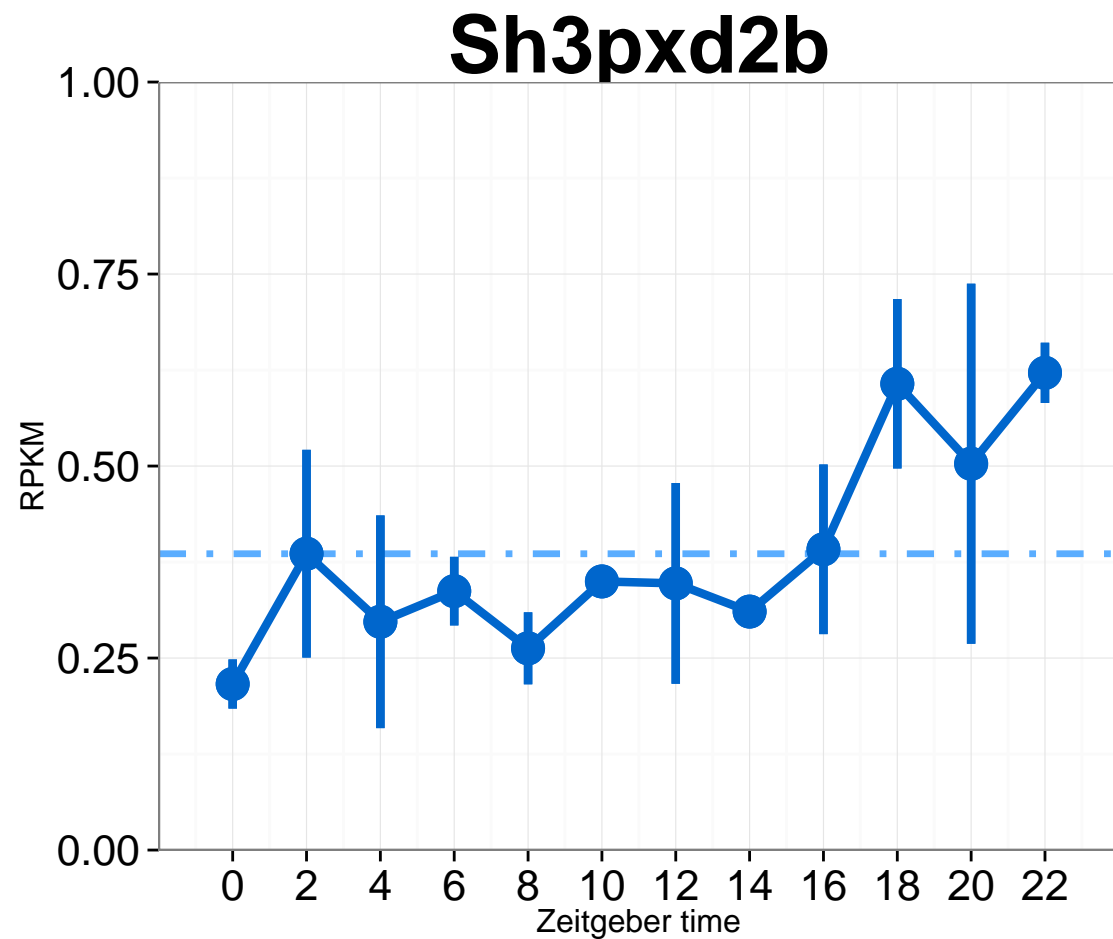

### Sh3pxd2b log<sub>2</sub>(Ribosome occupancy)

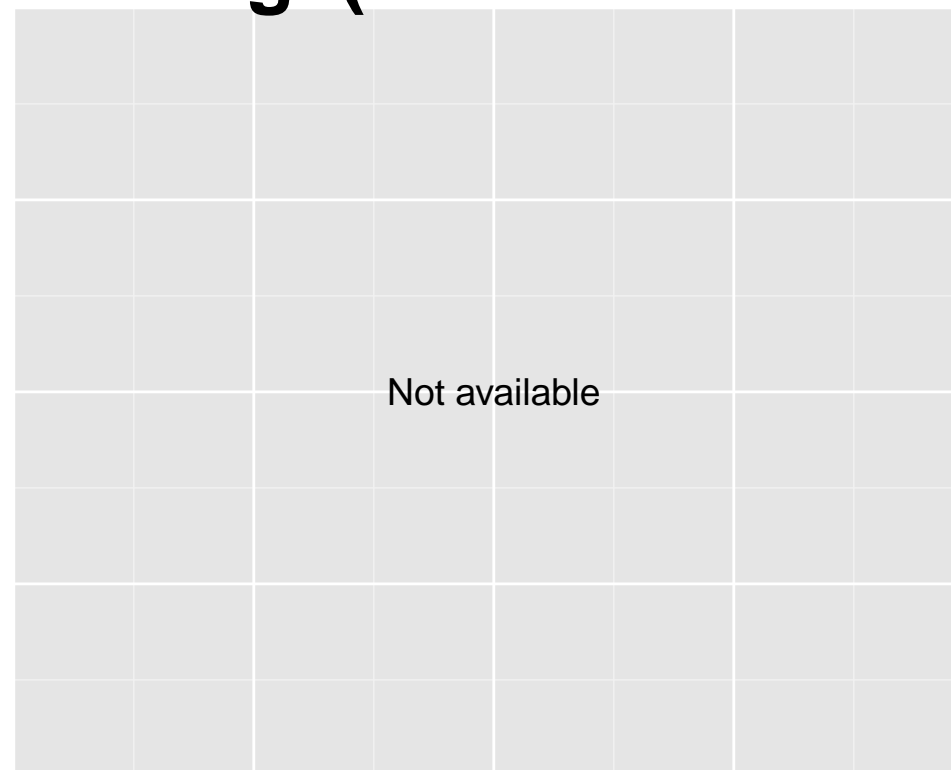

Supplement: SuppDataset_1.zip [file Sh3pxd2b_set_A.pdf › Supplemental Dataset 1/A-mRNA_nonrhyth_translation_nonrhyth/Sh3pxd2b_set_A.pdf]

## Sh3rf1

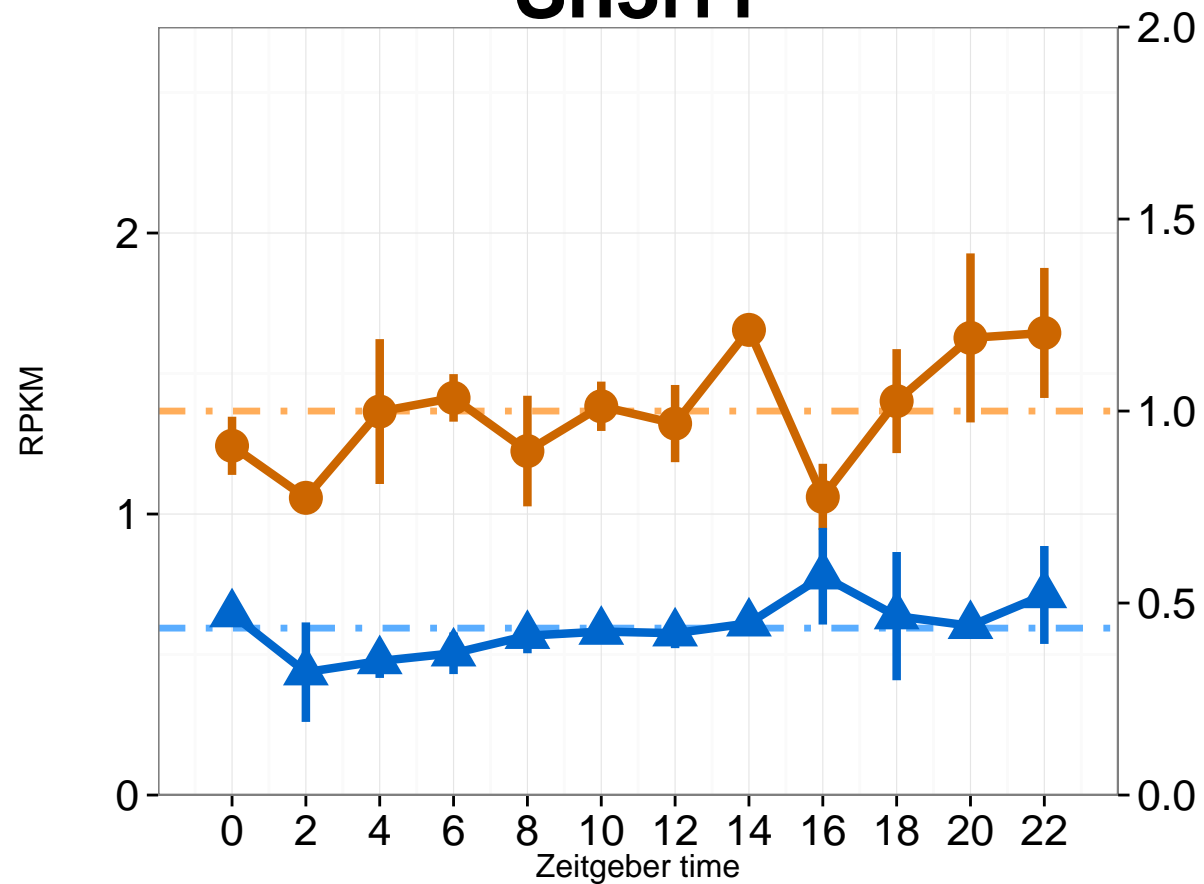

## Sh3rf1

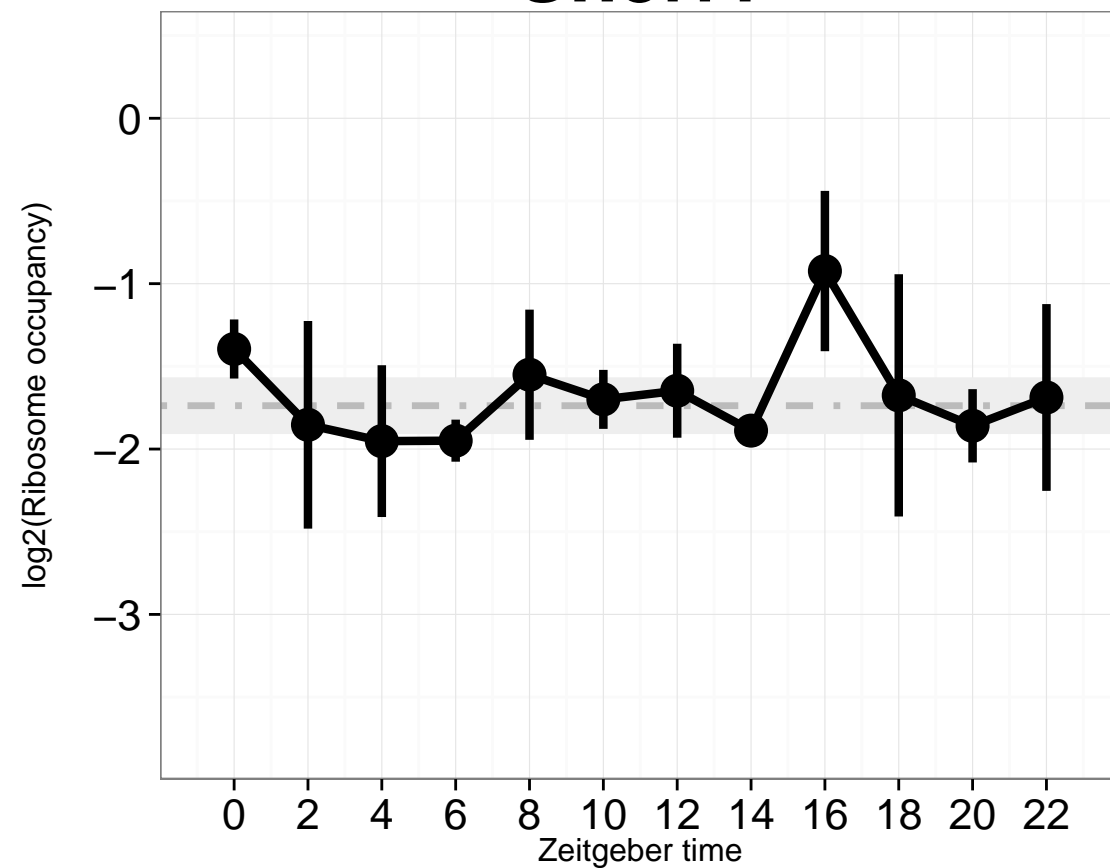

Supplement: SuppDataset_1.zip [file Sh3rf1_set_A.pdf › Supplemental Dataset 1/A-mRNA_nonrhyth_translation_nonrhyth/Sh3rf1_set_A.pdf]

# Sh3tc2

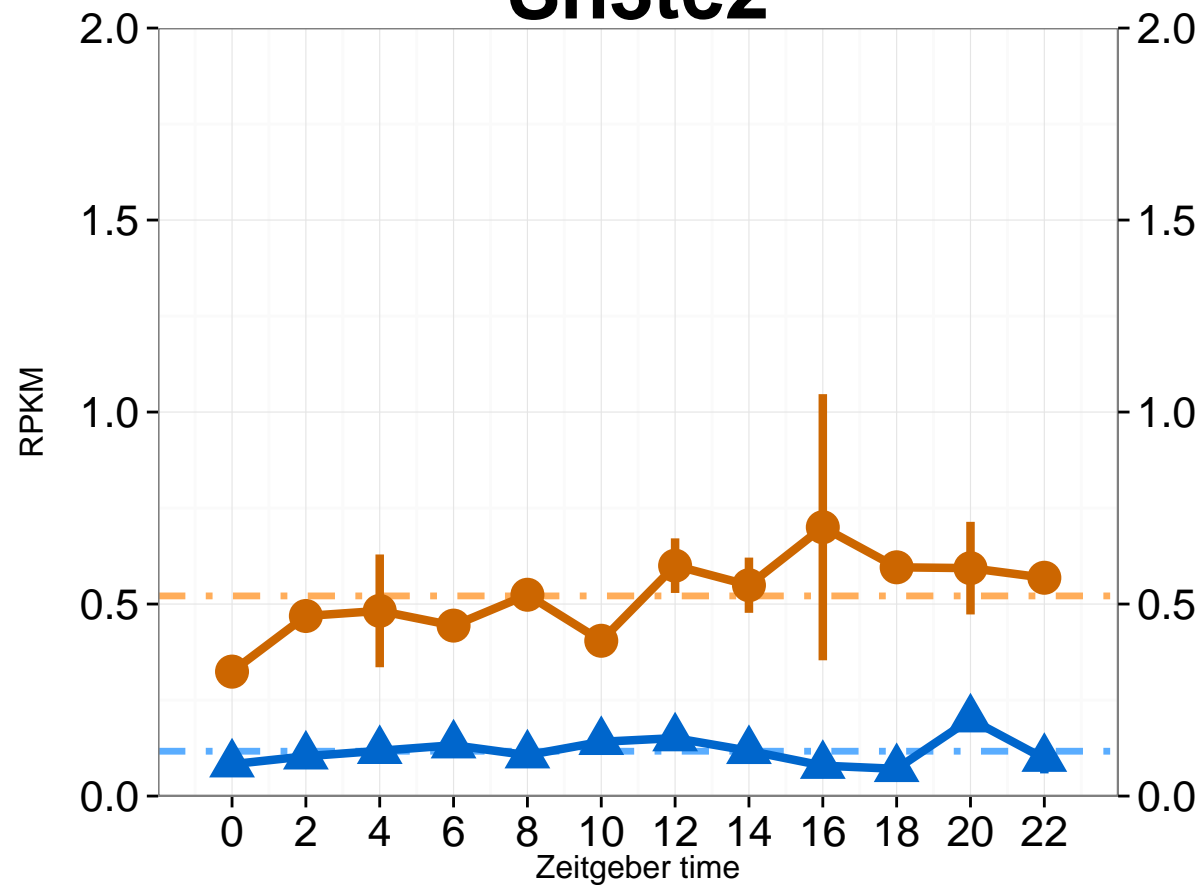

# Sh3tc2

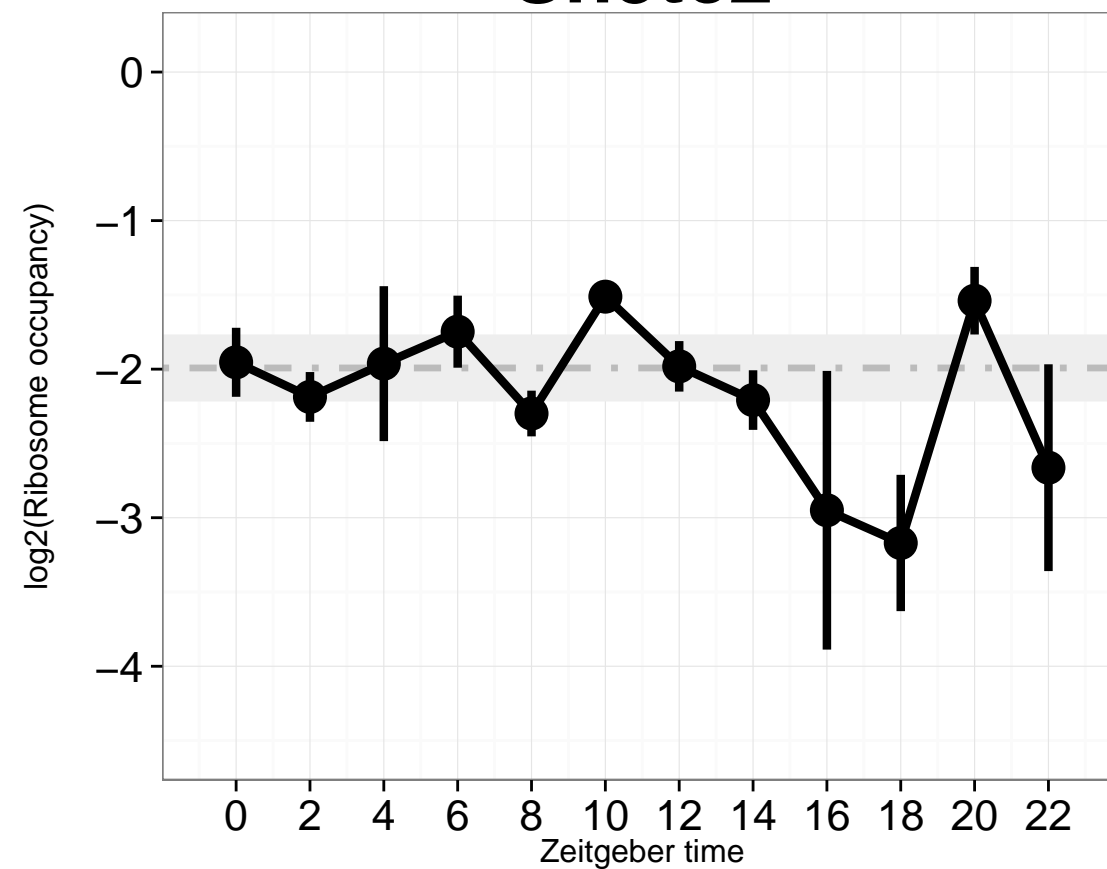

Supplement: SuppDataset_1.zip [file Sh3tc2_set_A.pdf › Supplemental Dataset 1/A-mRNA_nonrhyth_translation_nonrhyth/Sh3tc2_set_A.pdf]

# Sh3yl1

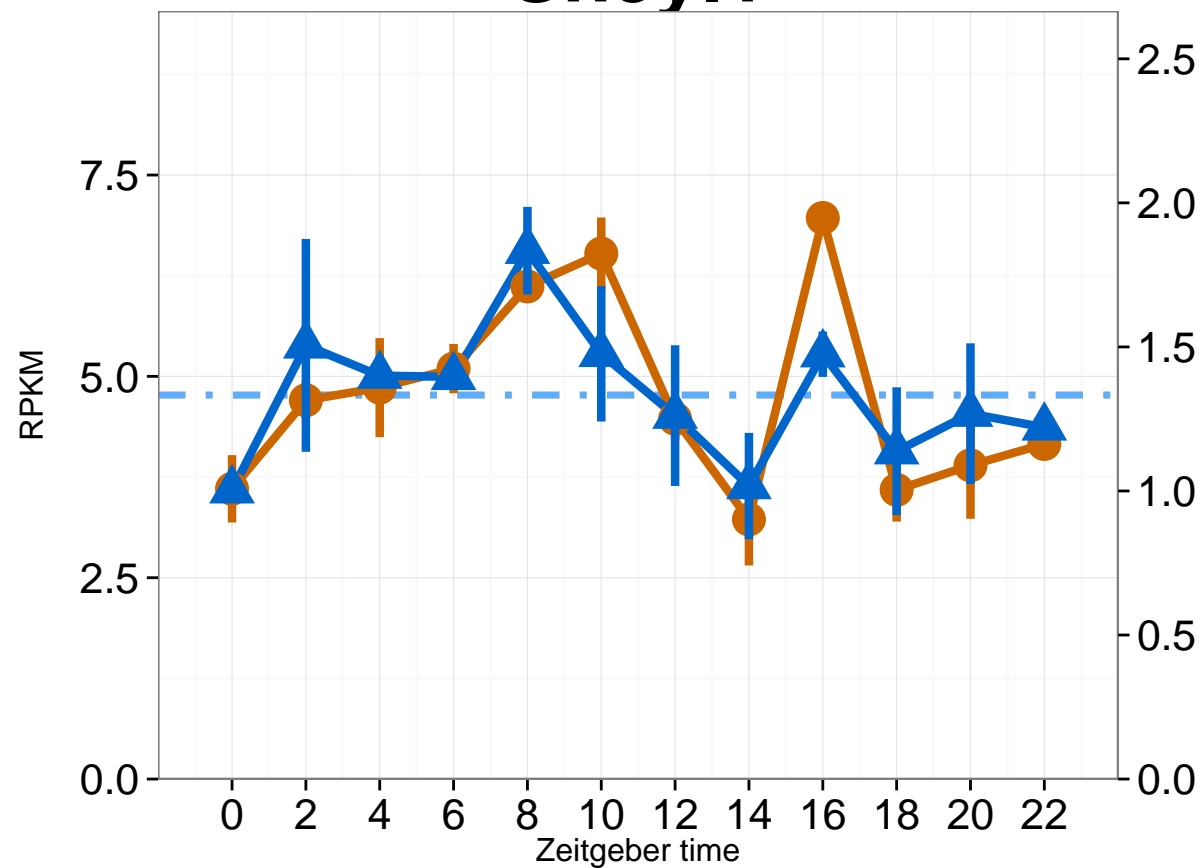

# Sh3yl1

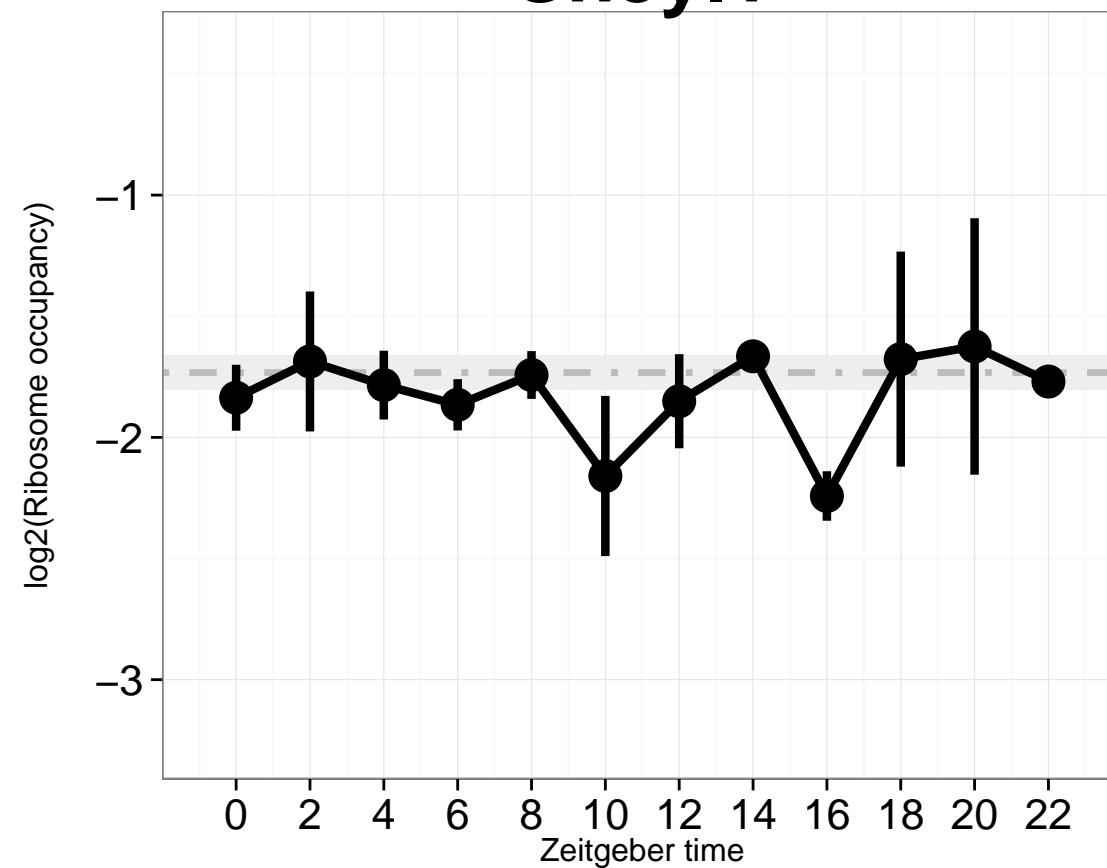

Supplement: SuppDataset_1.zip [file Sh3yl1_set_A.pdf › Supplemental Dataset 1/A-mRNA_nonrhyth_translation_nonrhyth/Sh3yl1_set_A.pdf]

# Sharpin

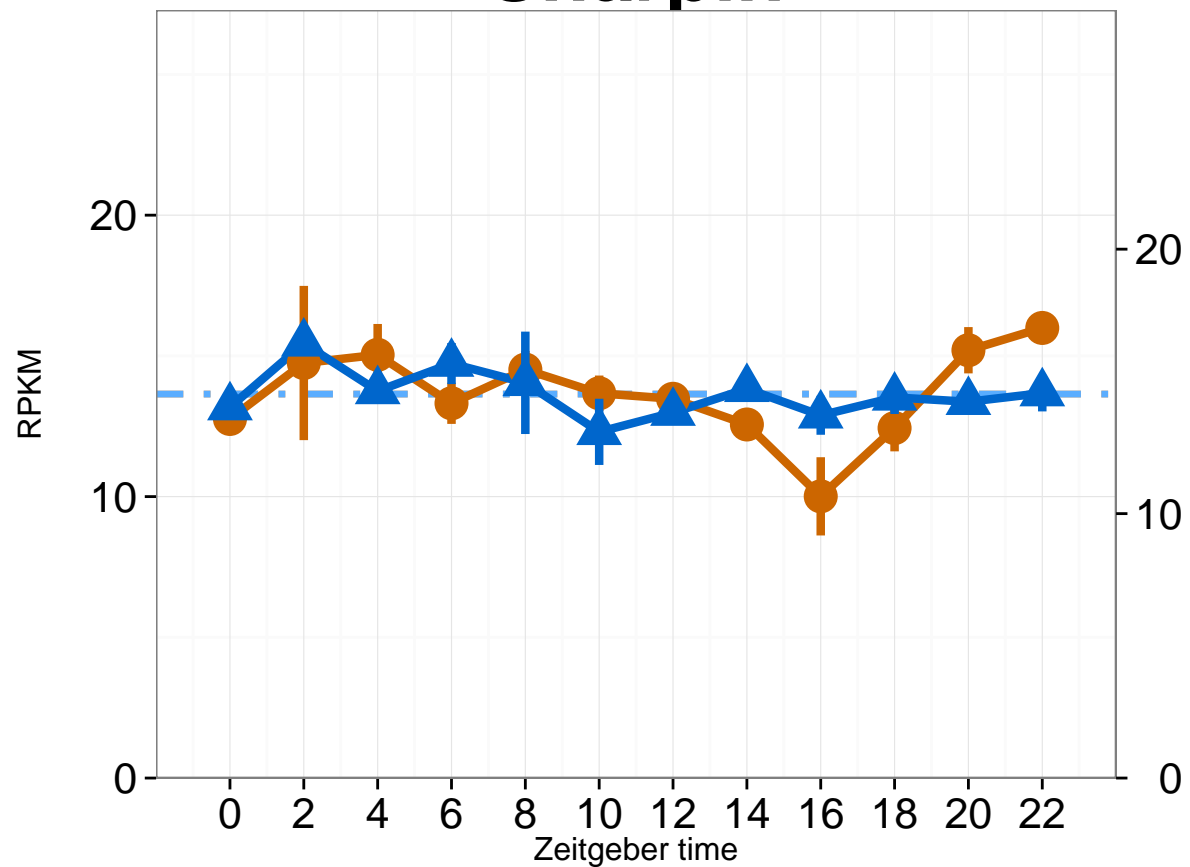

# Sharpin

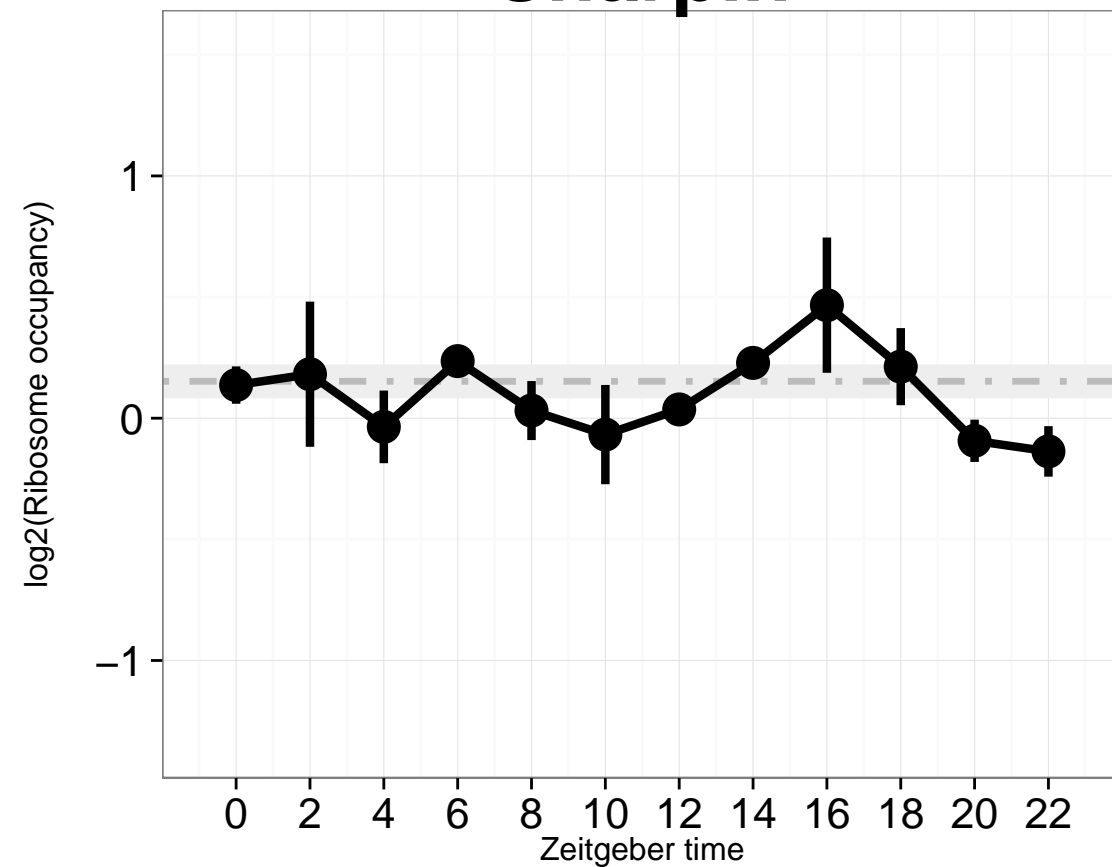

Supplement: SuppDataset_1.zip [file Sharpin_set_A.pdf › Supplemental Dataset 1/A-mRNA_nonrhyth_translation_nonrhyth/Sharpin_set_A.pdf]

## Shc1

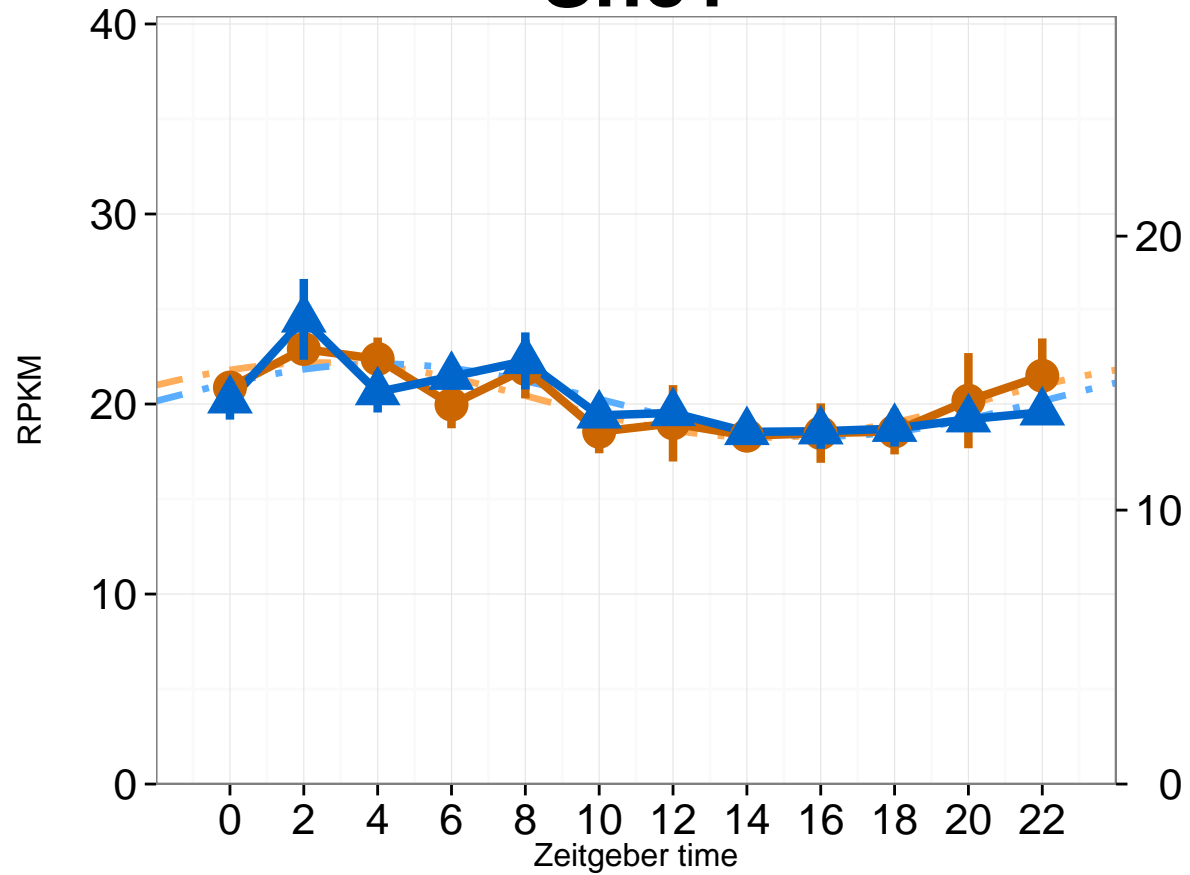

## Shc1

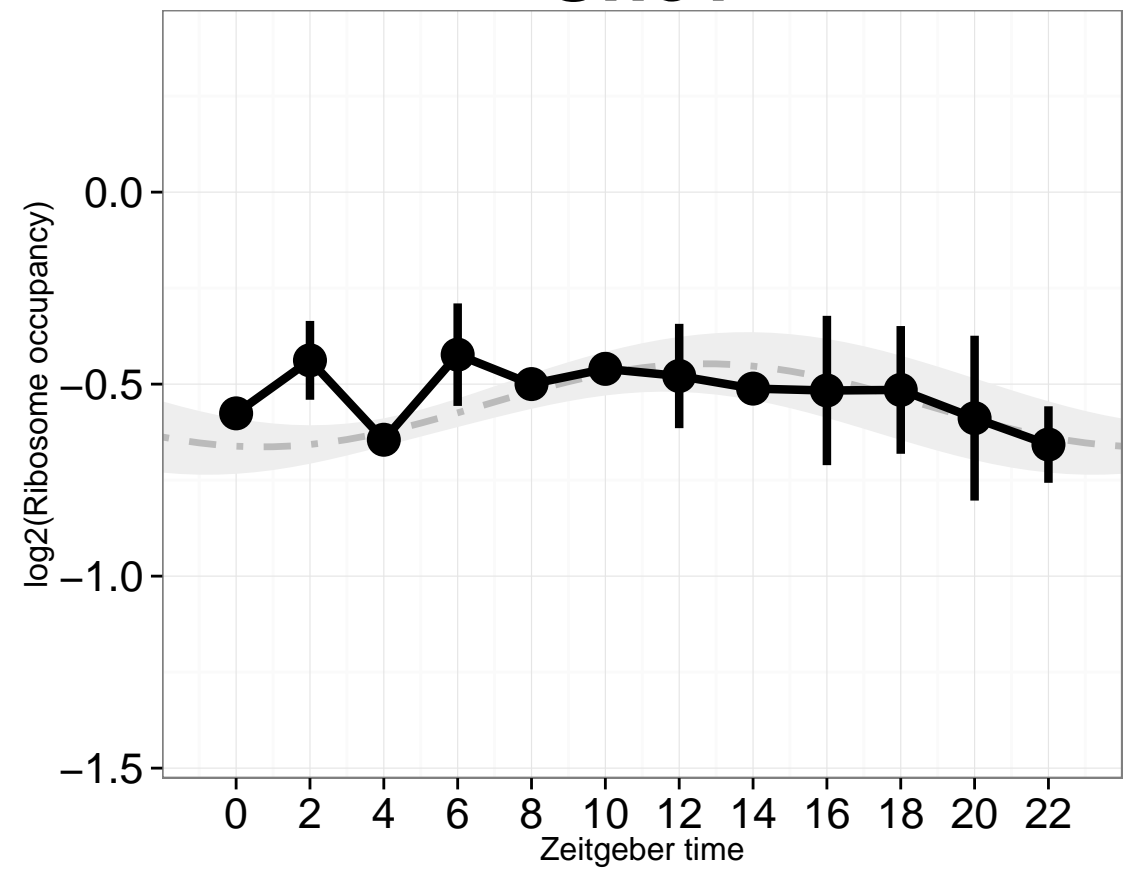

Supplement: SuppDataset_1.zip [file Shc1_set_A.pdf › Supplemental Dataset 1/A-mRNA_nonrhyth_translation_nonrhyth/Shc1_set_A.pdf]

# Shcbp1

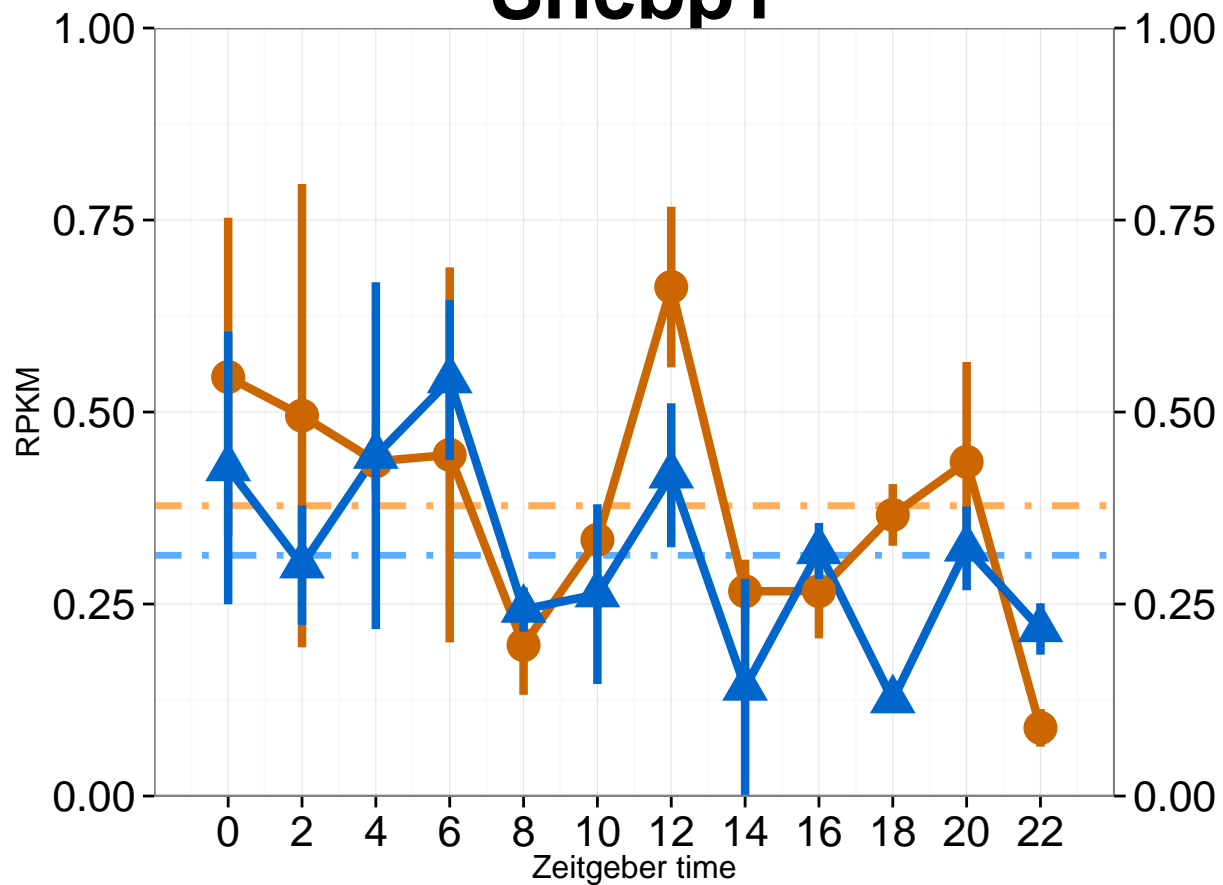

# Shcbp1

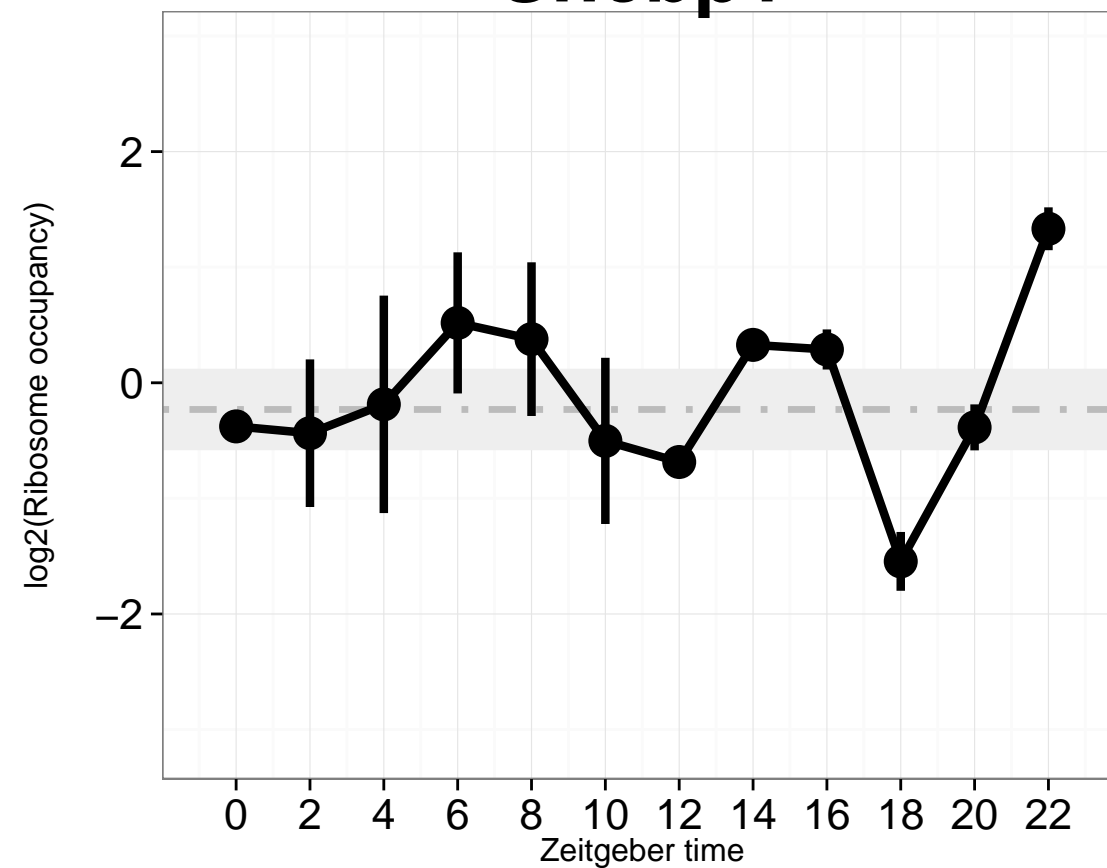

Supplement: SuppDataset_1.zip [file Shcbp1_set_A.pdf › Supplemental Dataset 1/A-mRNA_nonrhyth_translation_nonrhyth/Shcbp1_set_A.pdf]

## She

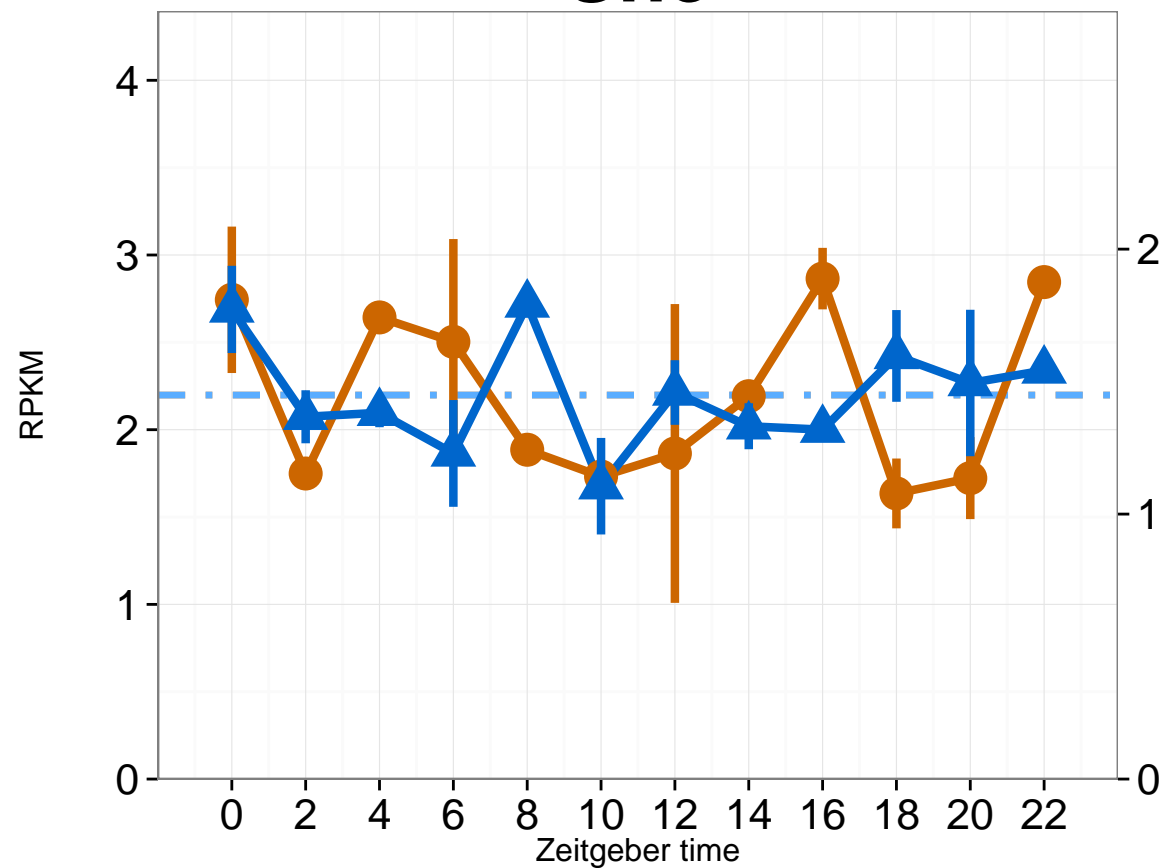

## She

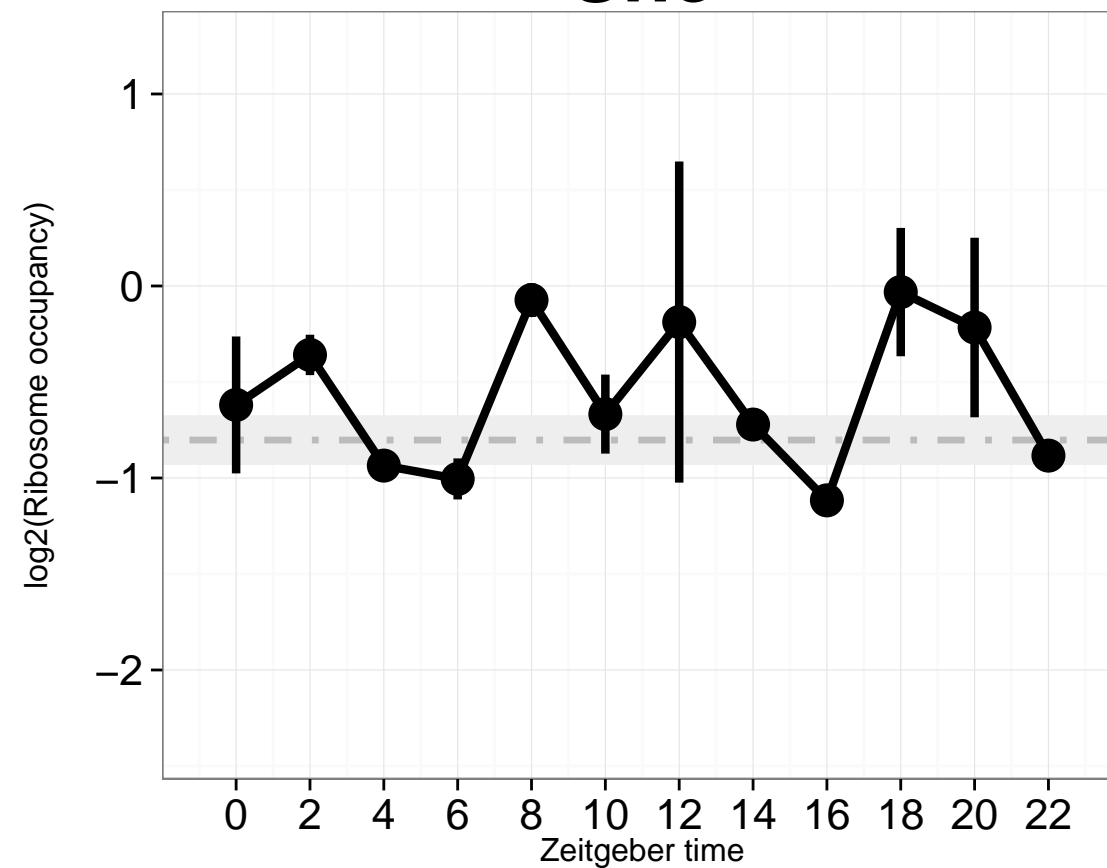

Supplement: SuppDataset_1.zip [file She_set_A.pdf › Supplemental Dataset 1/A-mRNA_nonrhyth_translation_nonrhyth/She_set_A.pdf]

## Shf

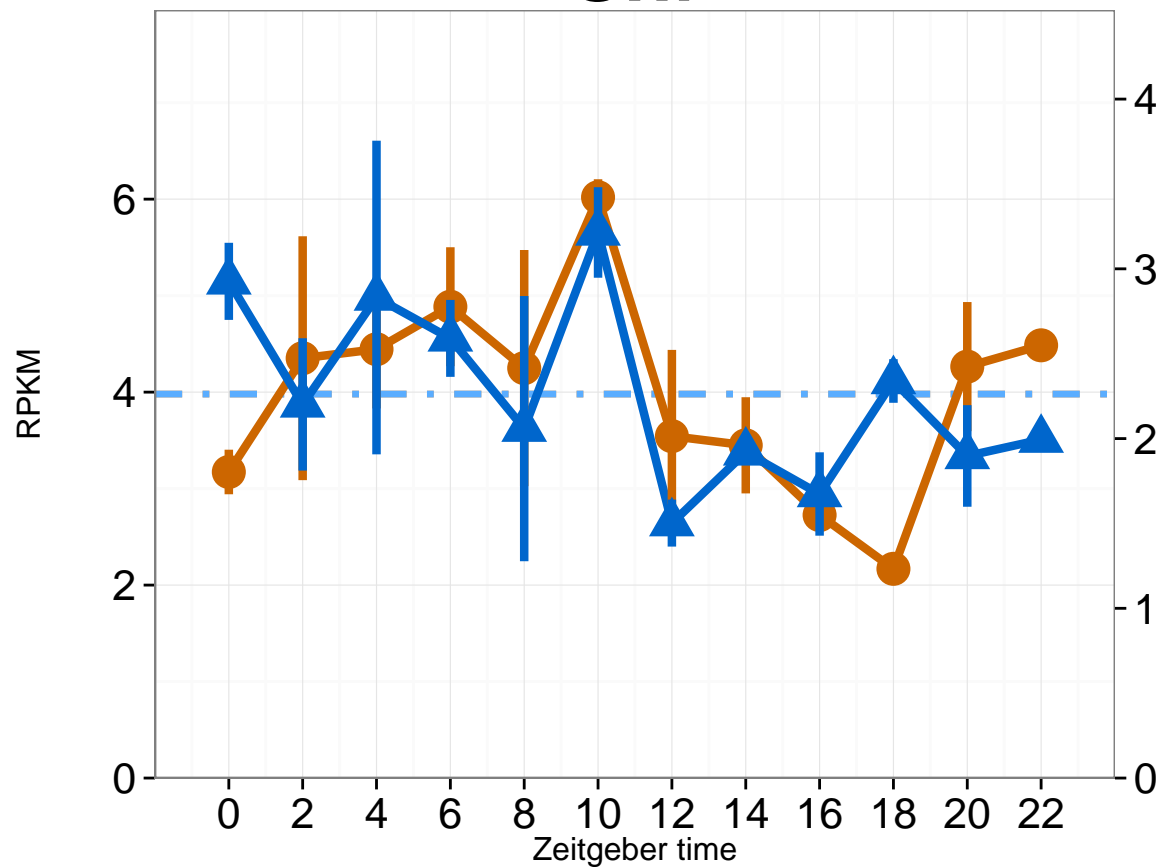

## Shf

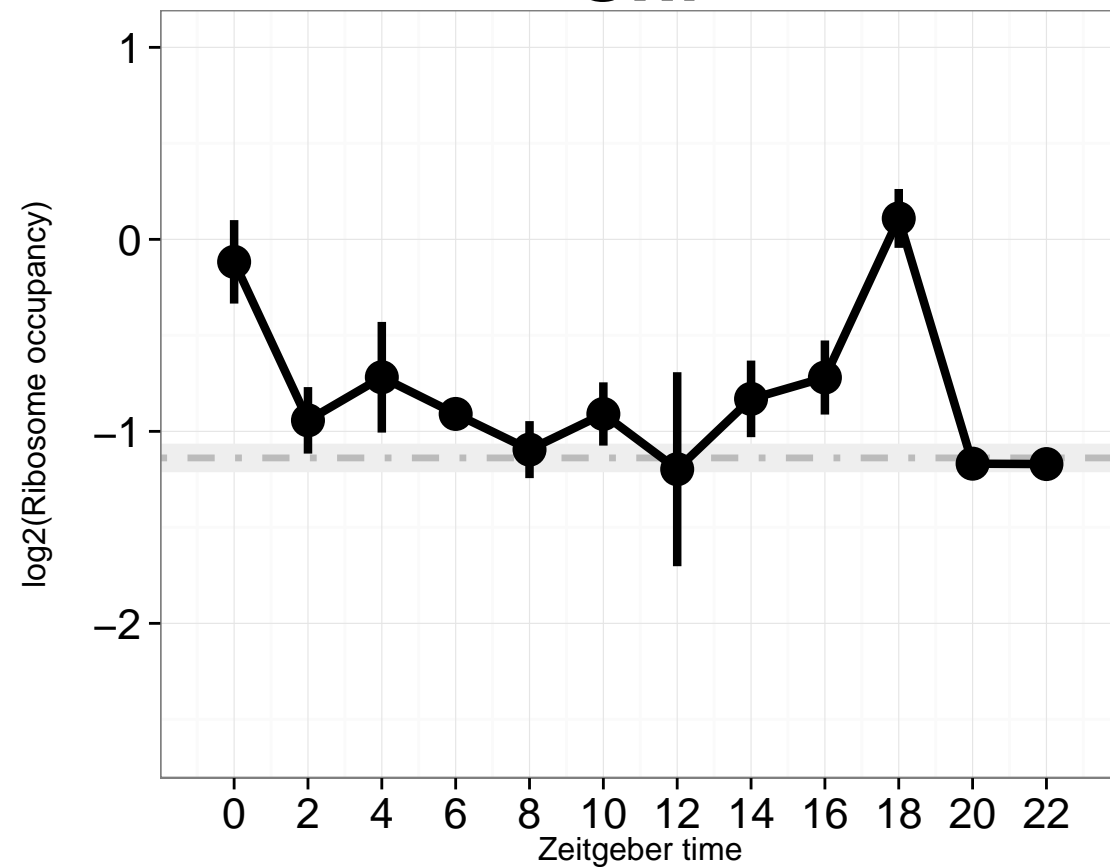

Supplement: SuppDataset_1.zip [file Shf_set_A.pdf › Supplemental Dataset 1/A-mRNA_nonrhyth_translation_nonrhyth/Shf_set_A.pdf]

# Shfm1

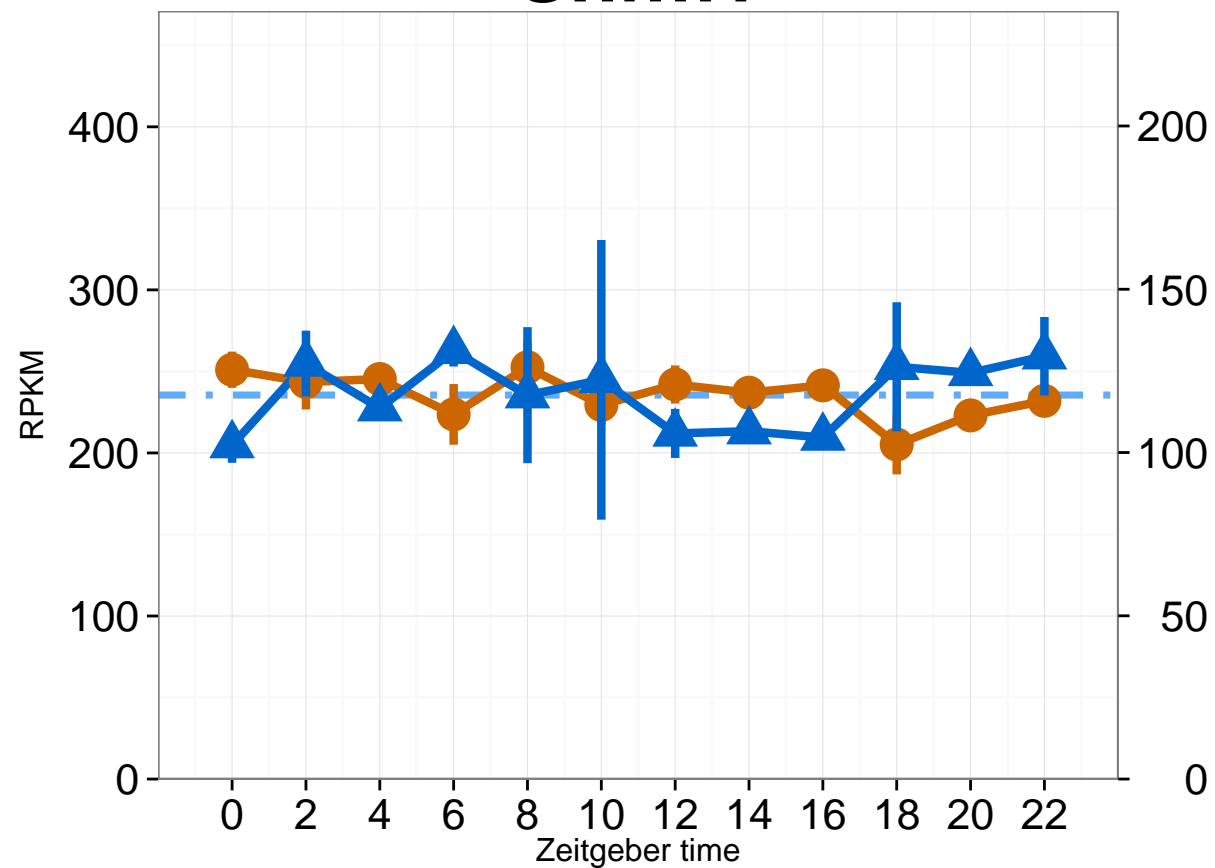

# Shfm1

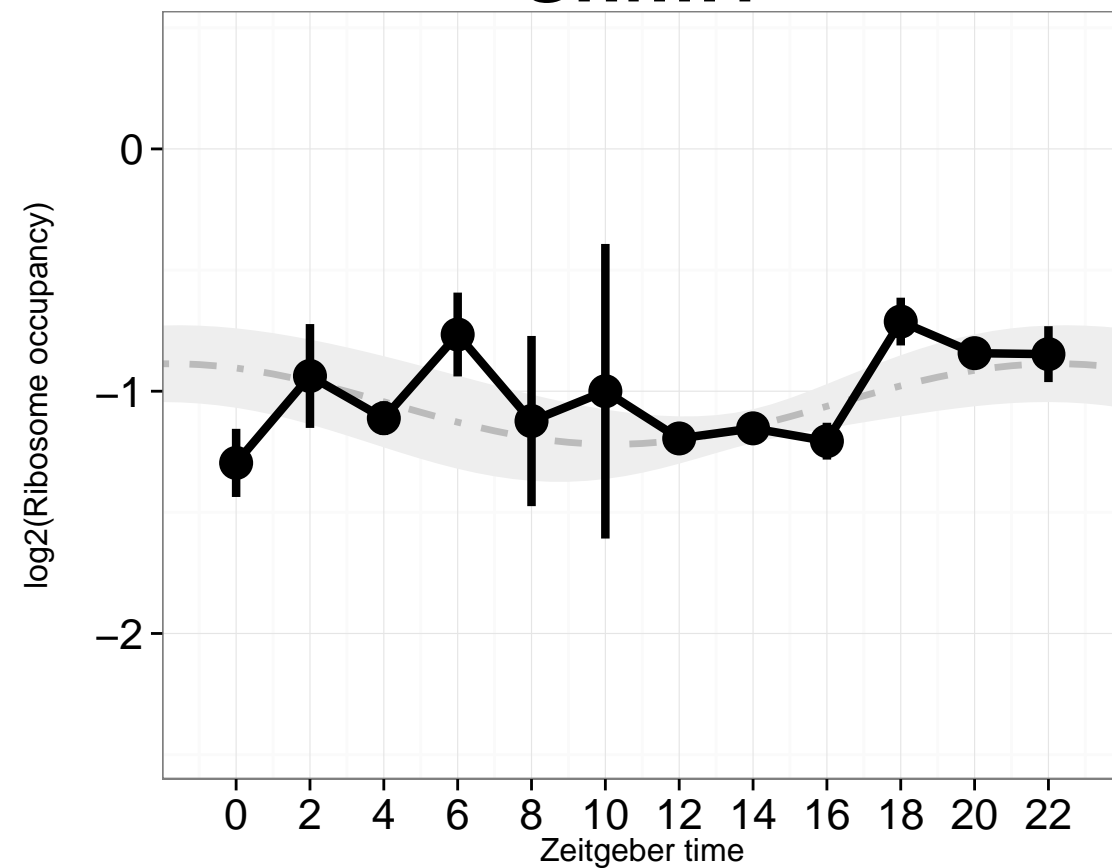

Supplement: SuppDataset_1.zip [file Shfm1_set_A.pdf › Supplemental Dataset 1/A-mRNA_nonrhyth_translation_nonrhyth/Shfm1_set_A.pdf]
