# Supplementary figures and images for: Ribosome profiling reveals the rhythmic liver translatome and circadian clock regulation by upstream open reading frames (part 111 of 113)
Source: HighWire-hosted journal article supplement (doi:10.1101/gr.195404.115), 2015-10-20

# Sh3bgrl2

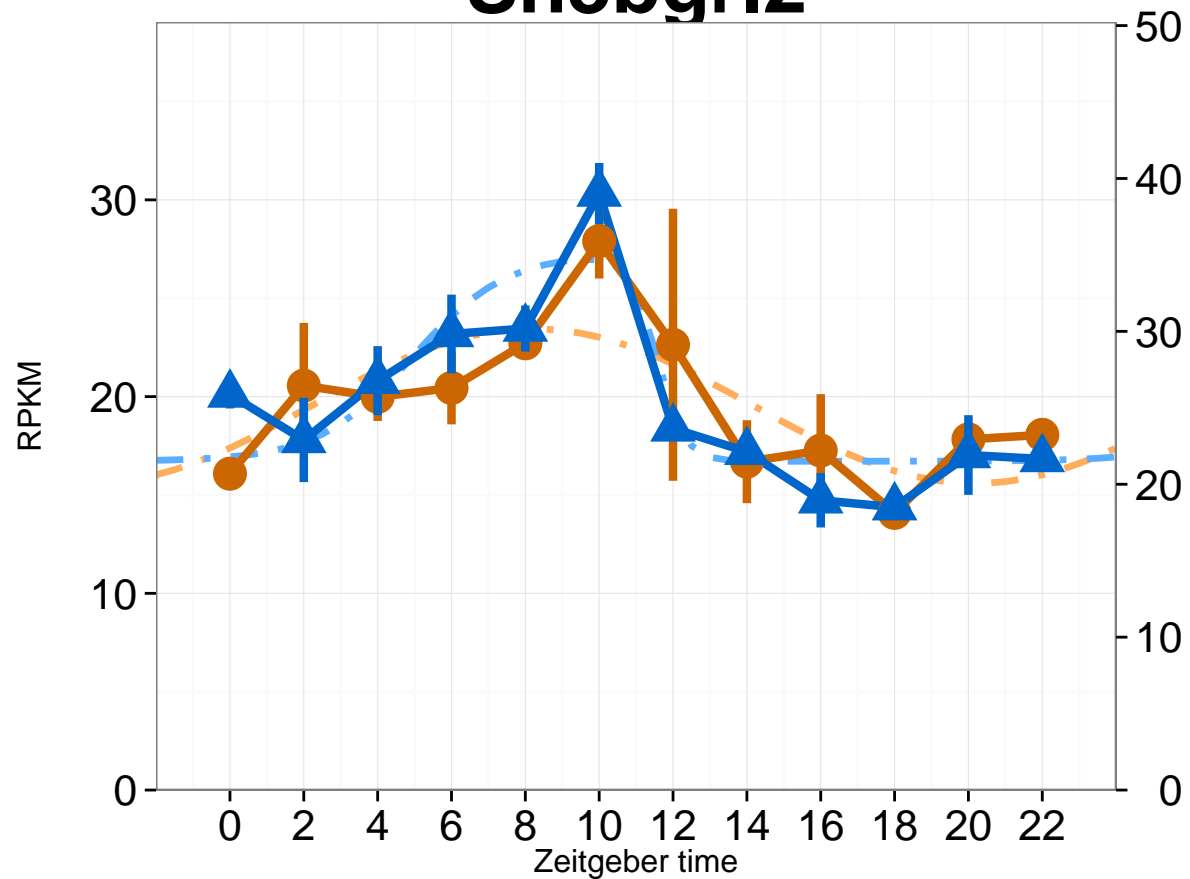

# Sh3bgrl2

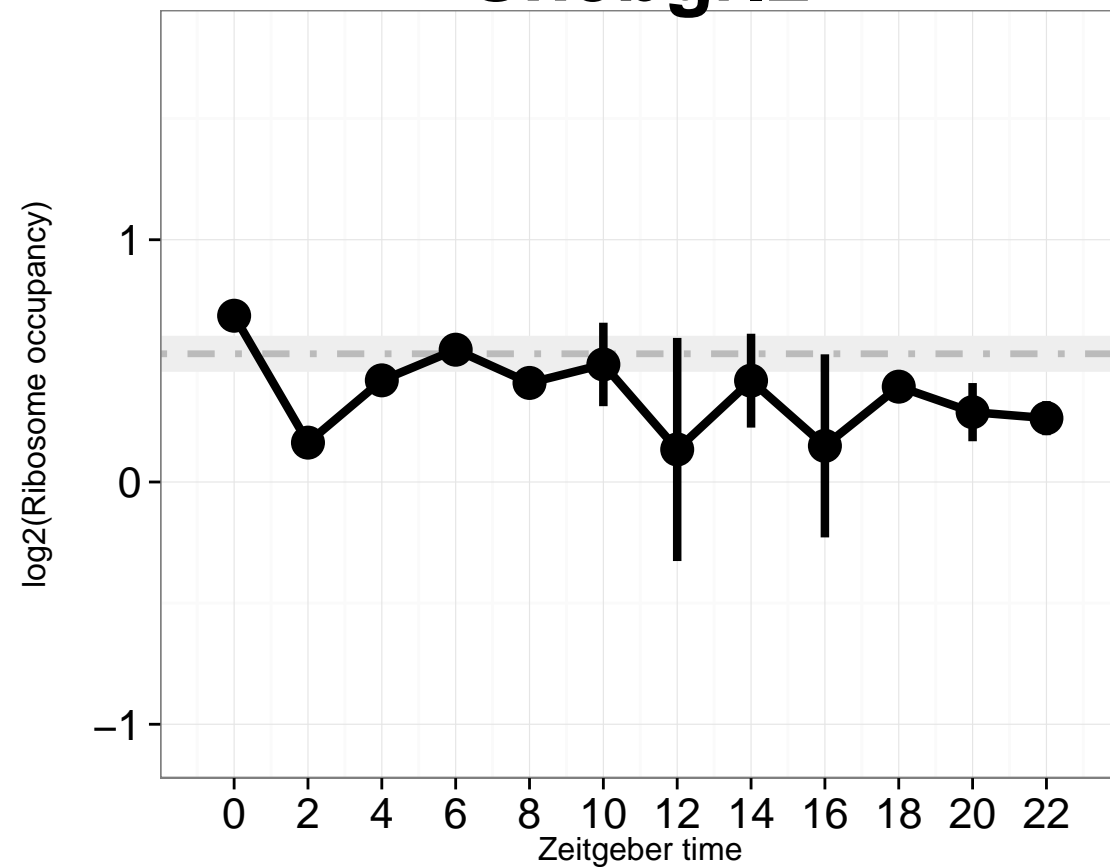

Supplement: SuppDataset_1.zip [file Sh3bgrl2_set_D.pdf › Supplemental Dataset 1/D-mRNA_rhythm_translation_rhyth/Sh3bgrl2_set_D.pdf]

# Sh3pxd2a

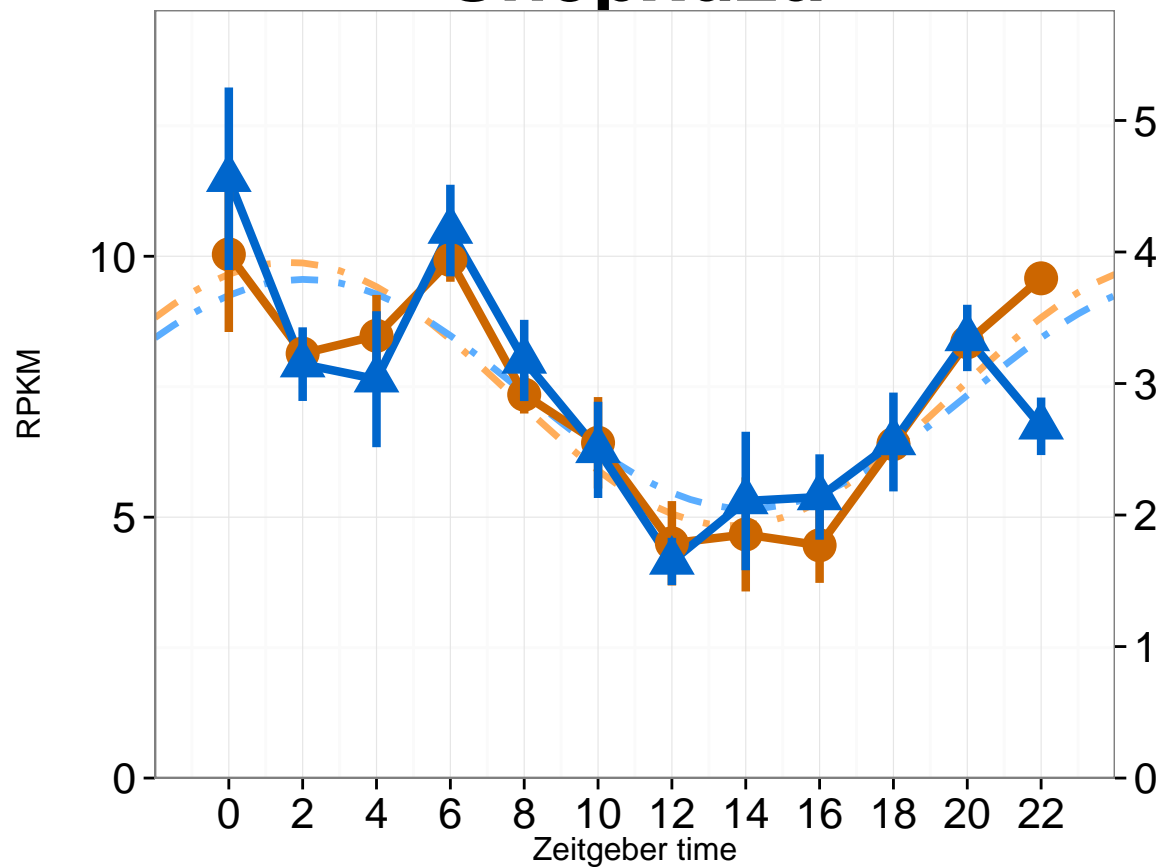

# Sh3pxd2a

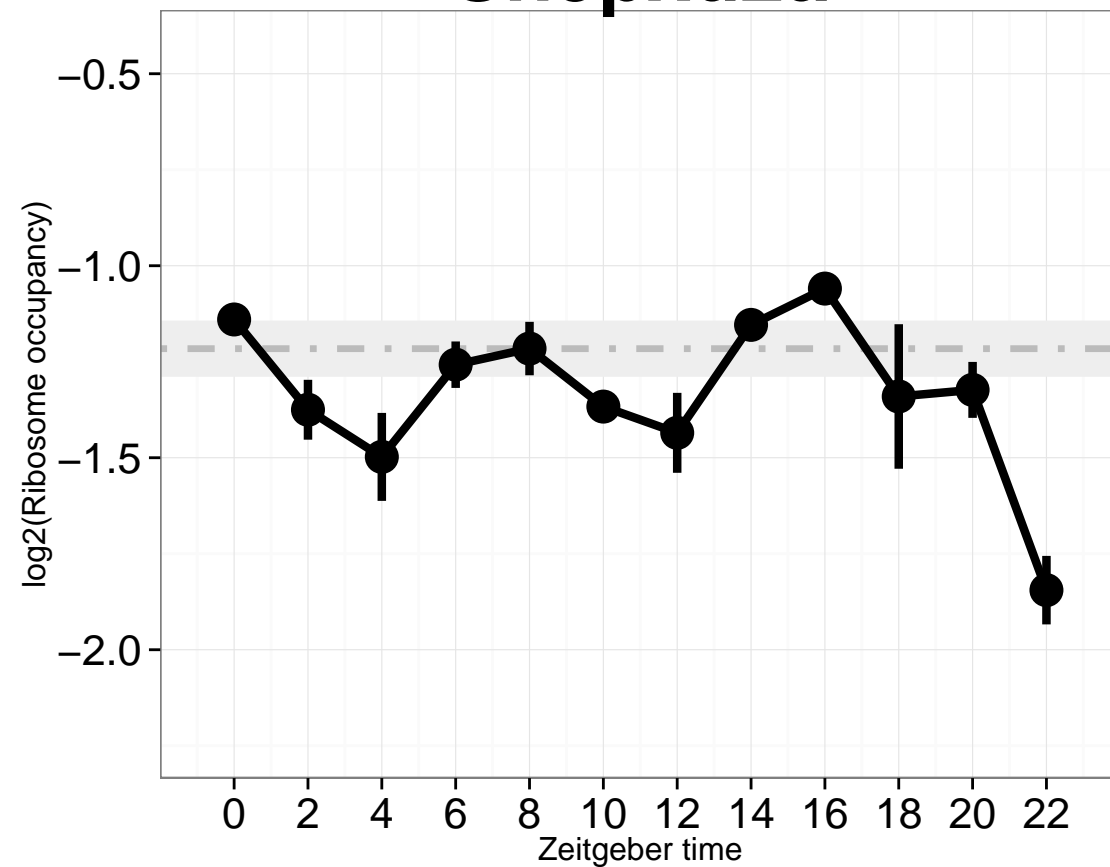

Supplement: SuppDataset_1.zip [file Sh3pxd2a_set_D.pdf › Supplemental Dataset 1/D-mRNA_rhythm_translation_rhyth/Sh3pxd2a_set_D.pdf]

## Shank2

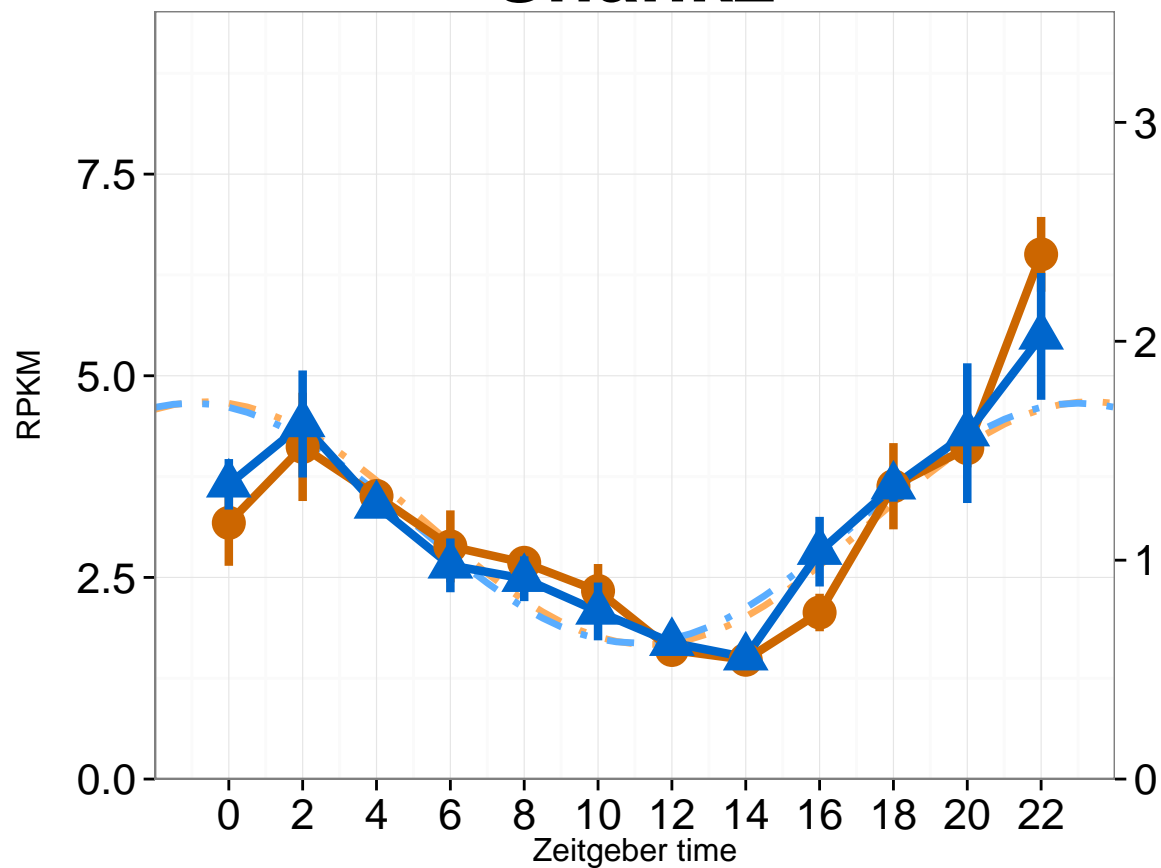

## Shank2

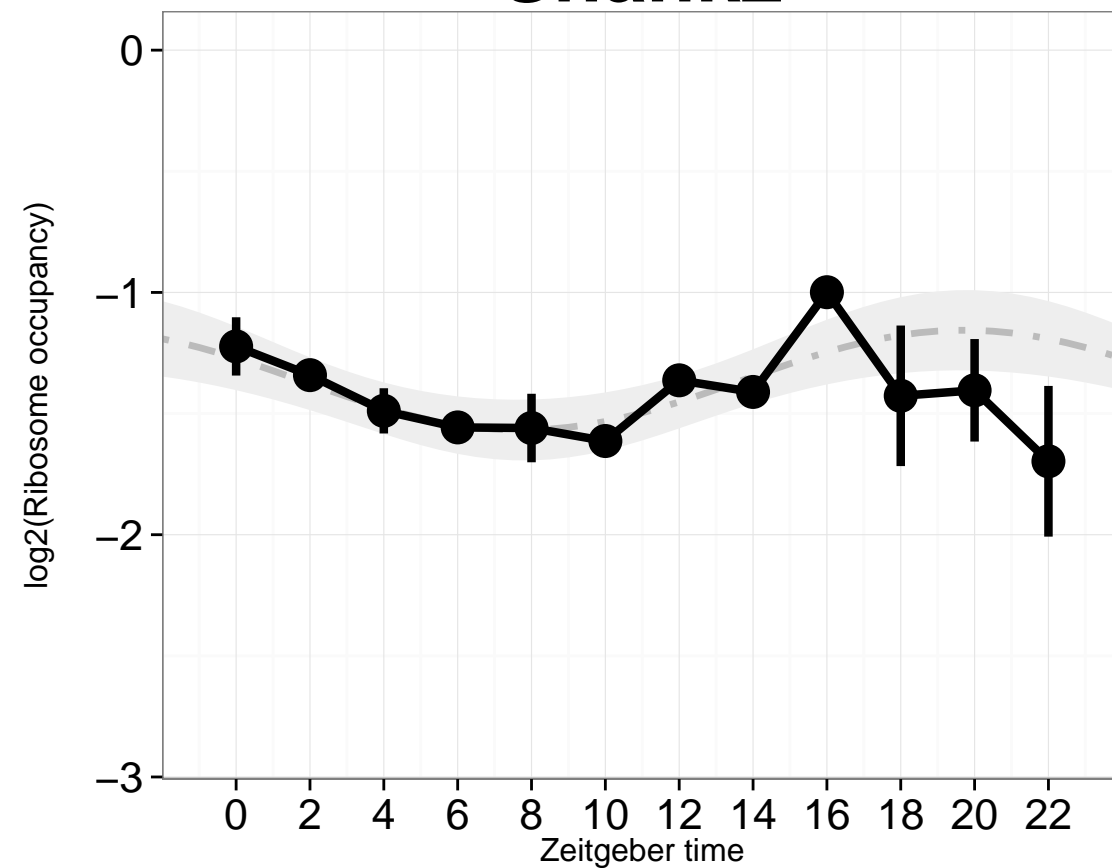

Supplement: SuppDataset_1.zip [file Shank2_set_D.pdf › Supplemental Dataset 1/D-mRNA_rhythm_translation_rhyth/Shank2_set_D.pdf]

## Shb

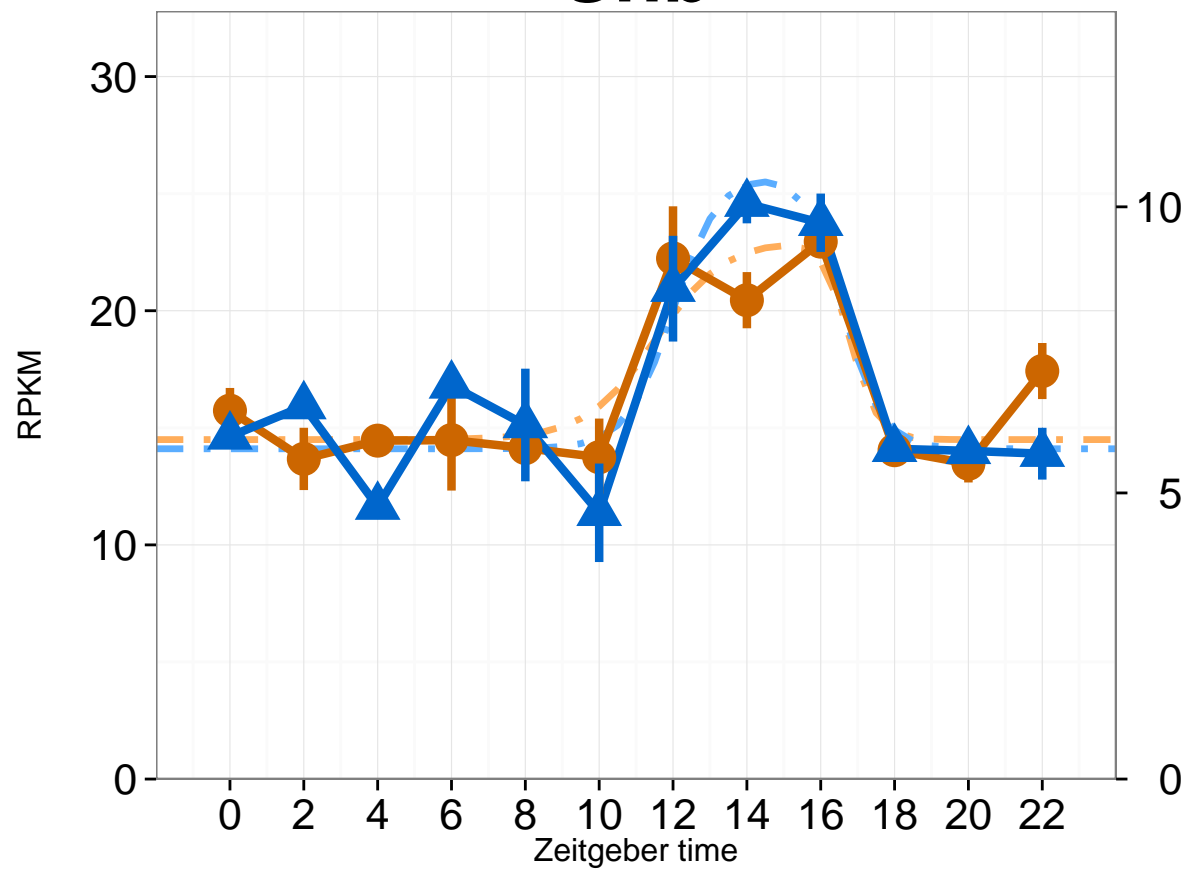

## Shb

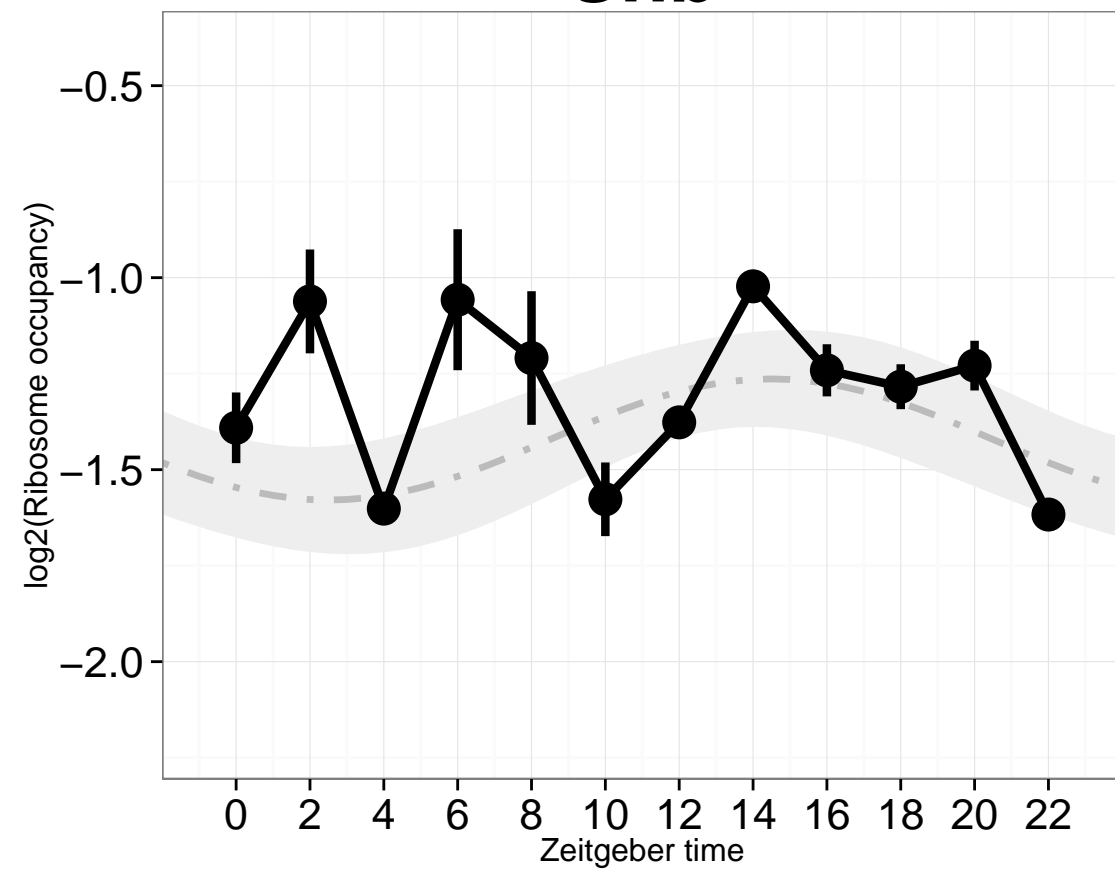

Supplement: SuppDataset_1.zip [file Shb_set_D.pdf › Supplemental Dataset 1/D-mRNA_rhythm_translation_rhyth/Shb_set_D.pdf]

## Sigmar1

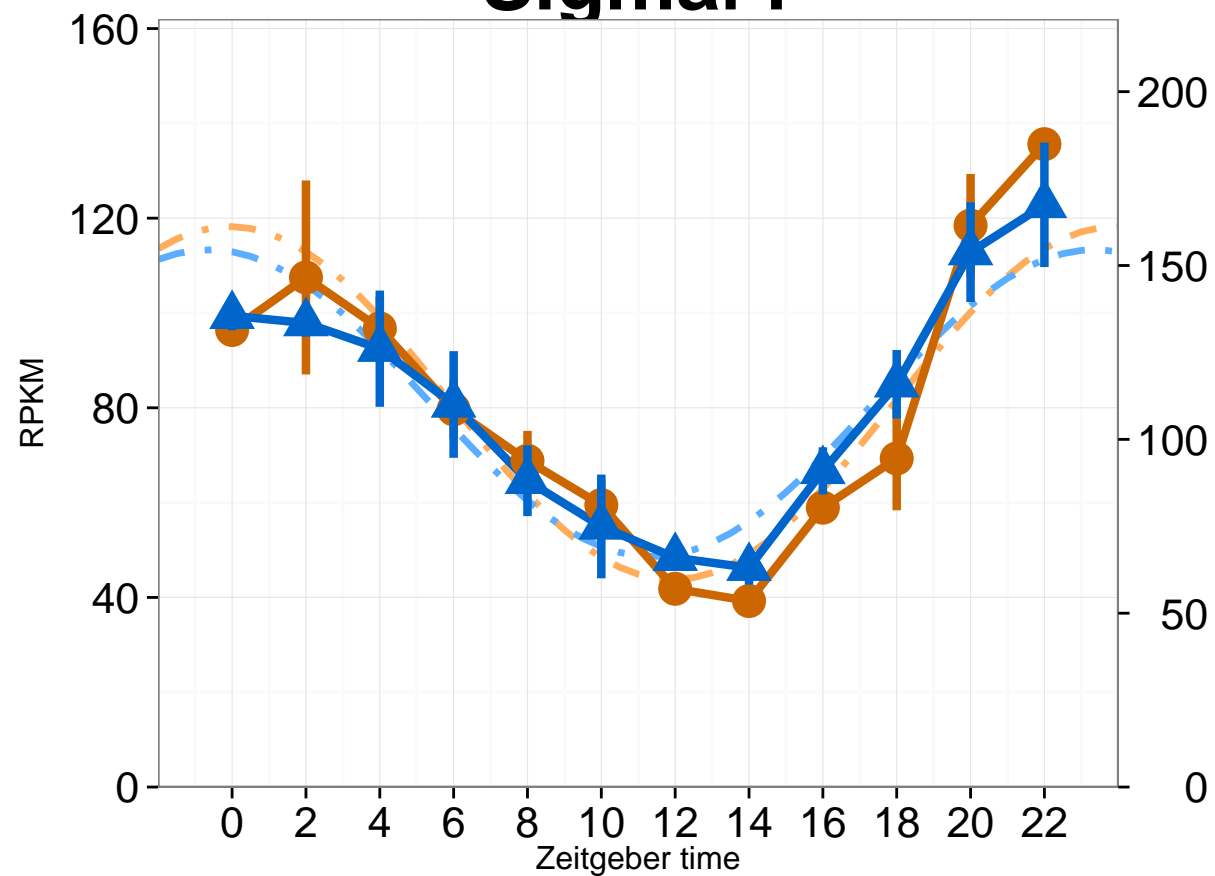

## Sigmar1

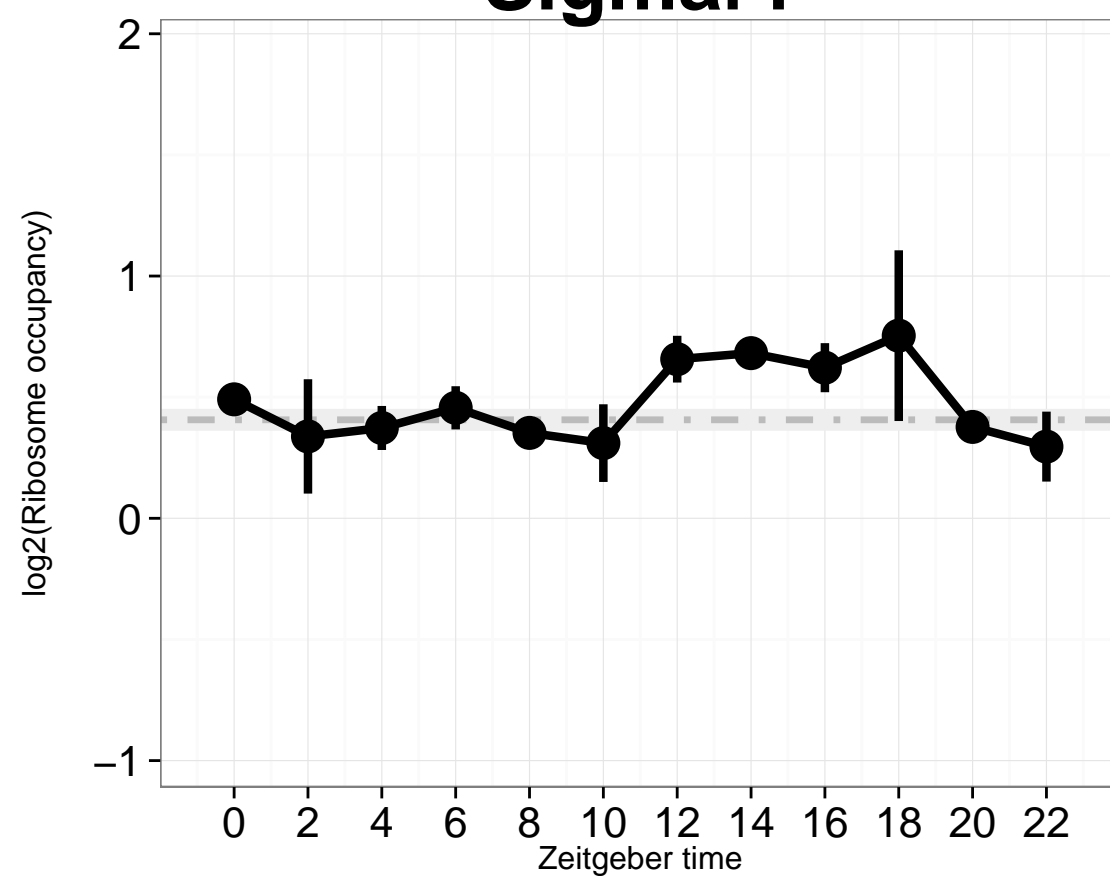

Supplement: SuppDataset_1.zip [file Sigmar1_set_D.pdf › Supplemental Dataset 1/D-mRNA_rhythm_translation_rhyth/Sigmar1_set_D.pdf]

## Sirt5

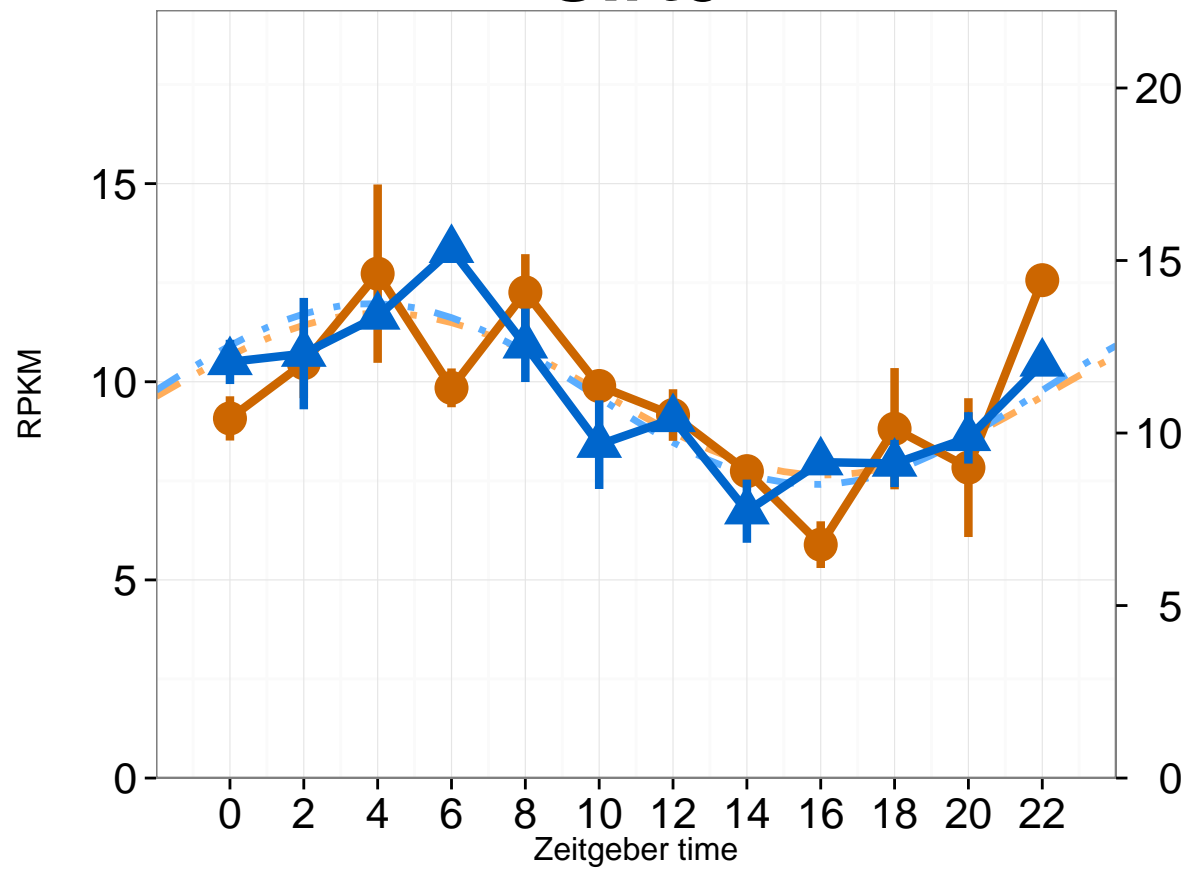

## Sirt5

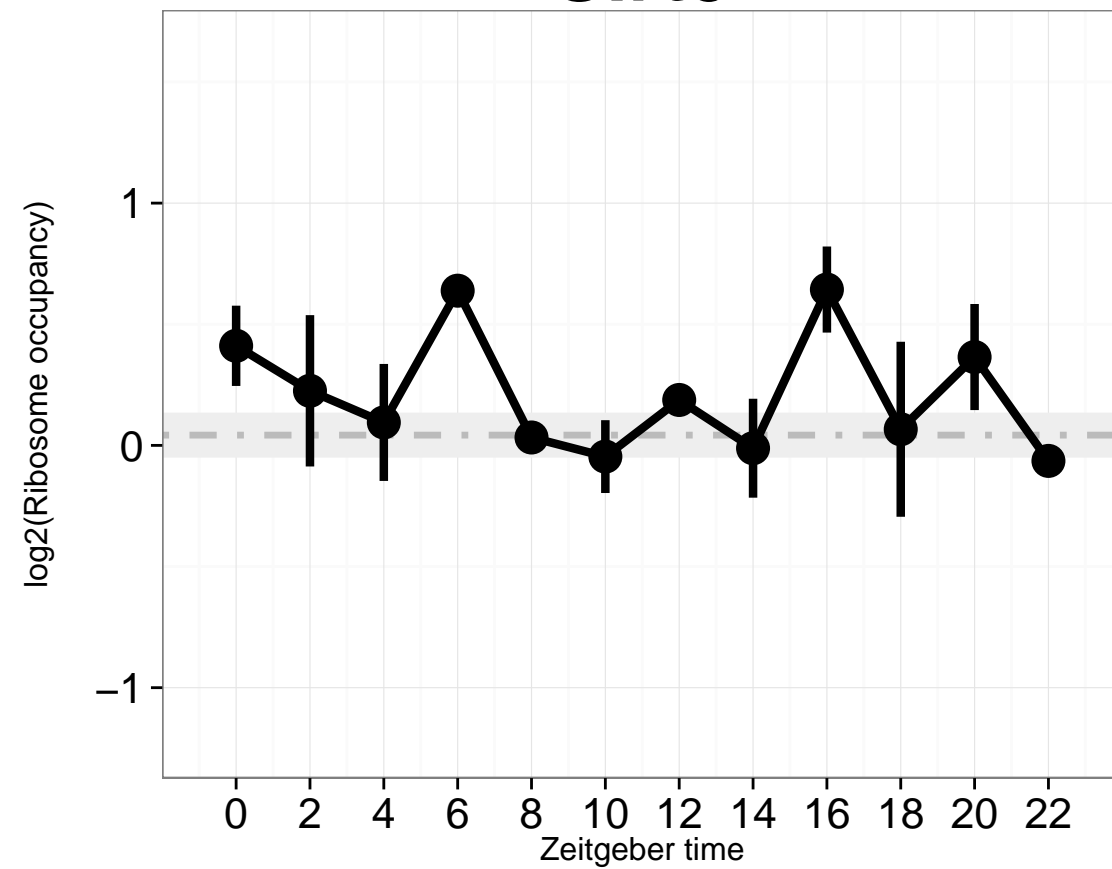

Supplement: SuppDataset_1.zip [file Sirt5_set_D.pdf › Supplemental Dataset 1/D-mRNA_rhythm_translation_rhyth/Sirt5_set_D.pdf]

## Skil

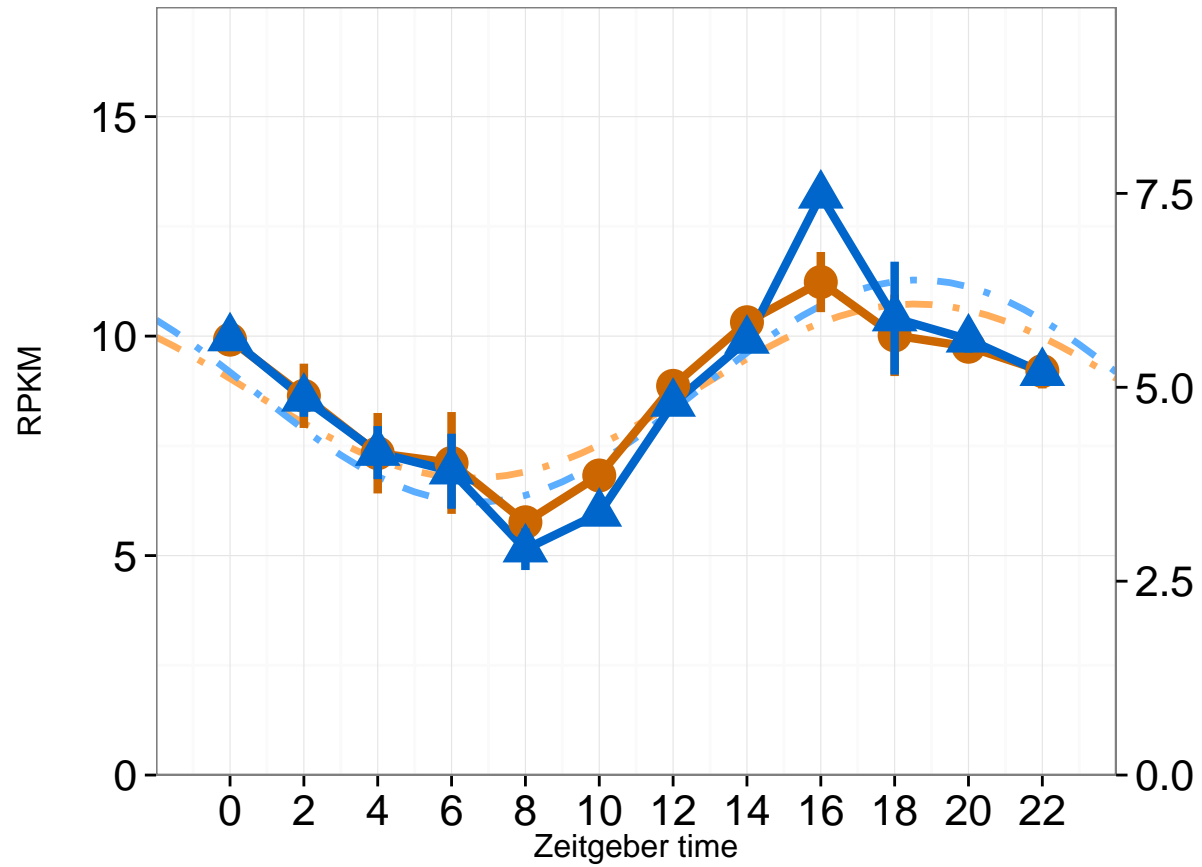

## Skil

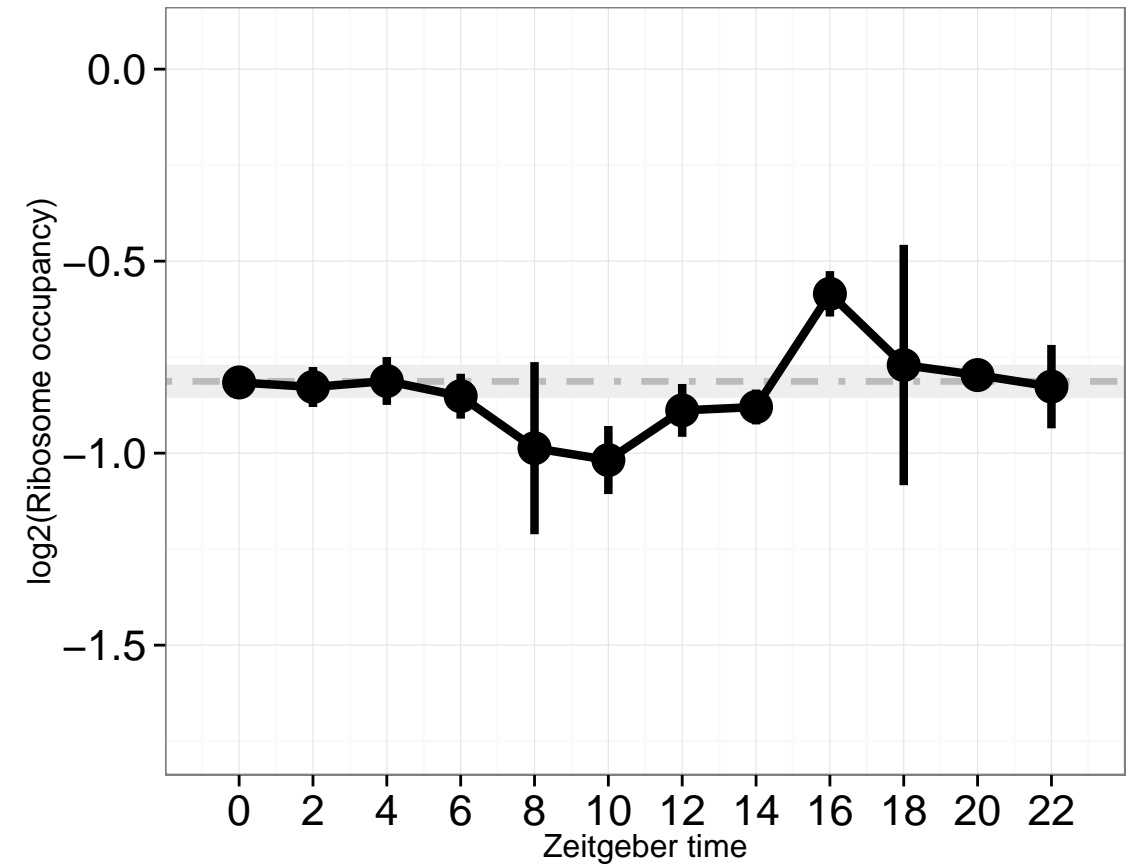

Supplement: SuppDataset_1.zip [file Skil_set_D.pdf › Supplemental Dataset 1/D-mRNA_rhythm_translation_rhyth/Skil_set_D.pdf]

# Slc10a2

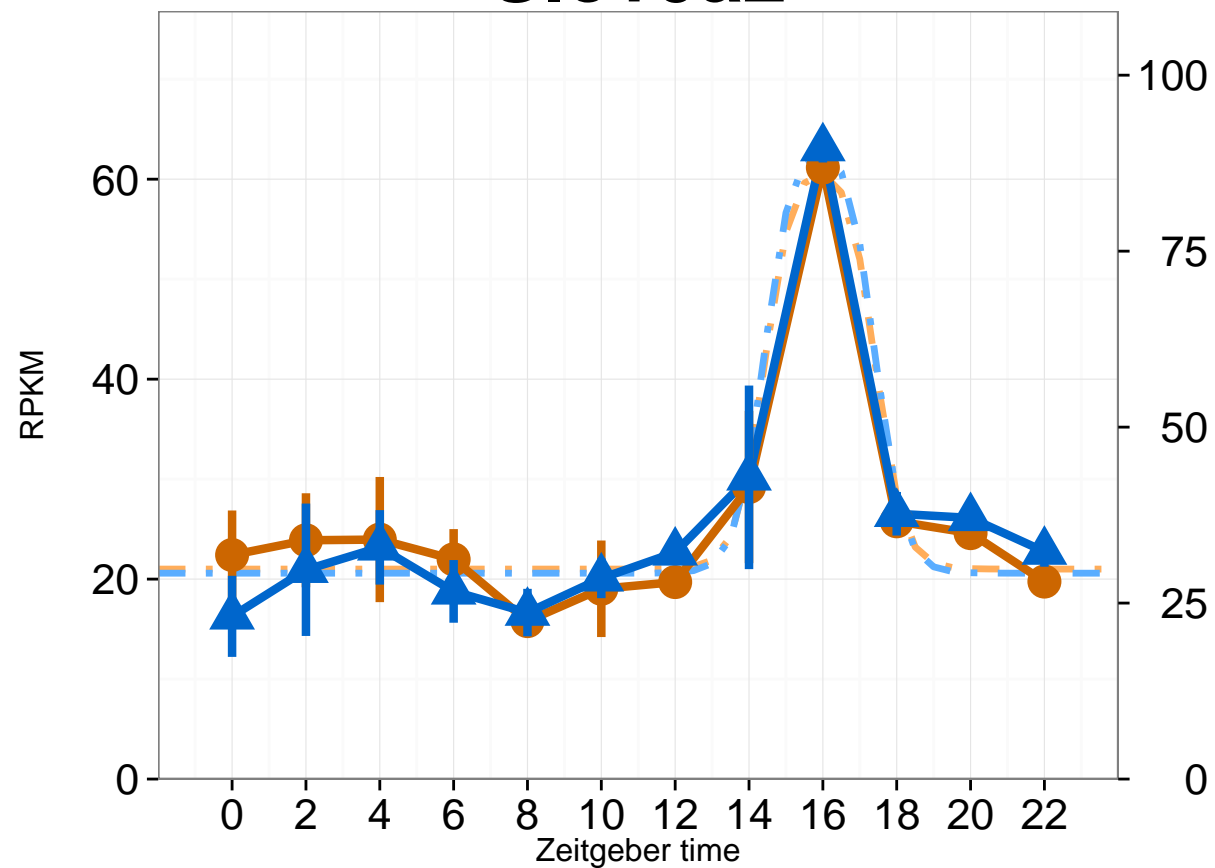

# Slc10a2

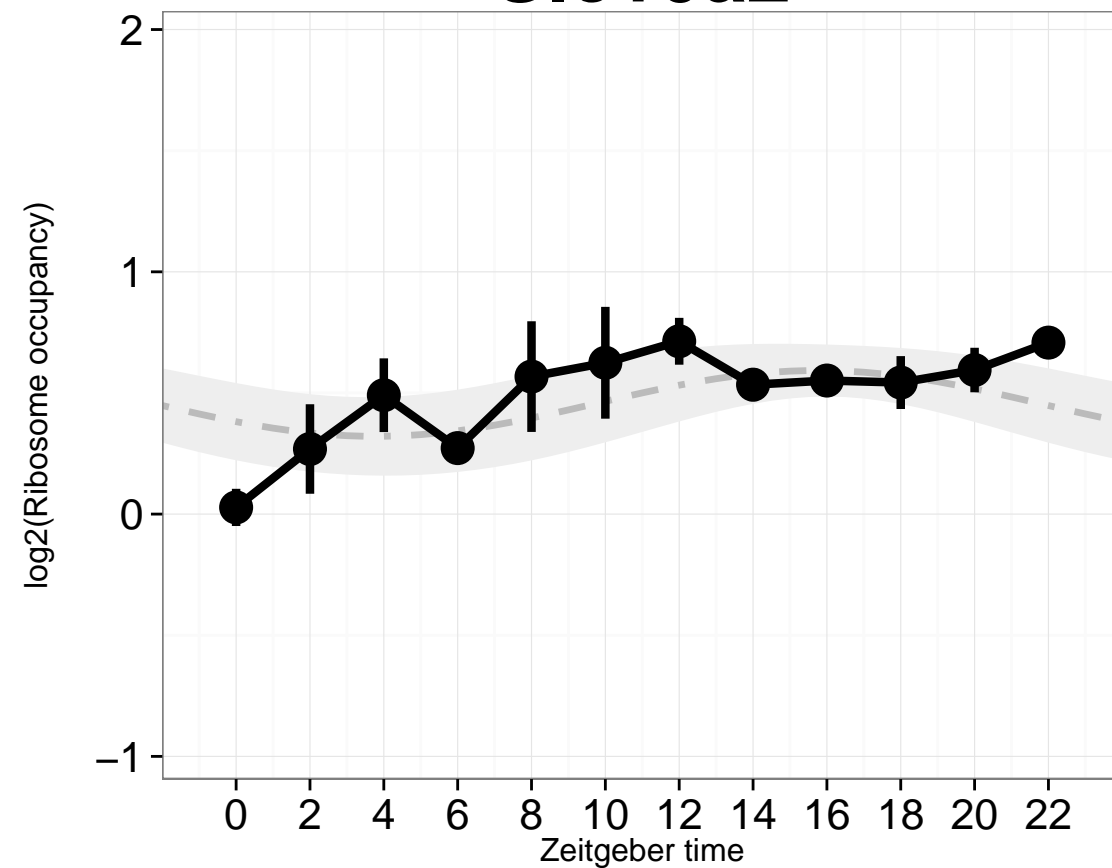

Supplement: SuppDataset_1.zip [file Slc10a2_set_D.pdf › Supplemental Dataset 1/D-mRNA_rhythm_translation_rhyth/Slc10a2_set_D.pdf]

## Slc12a2

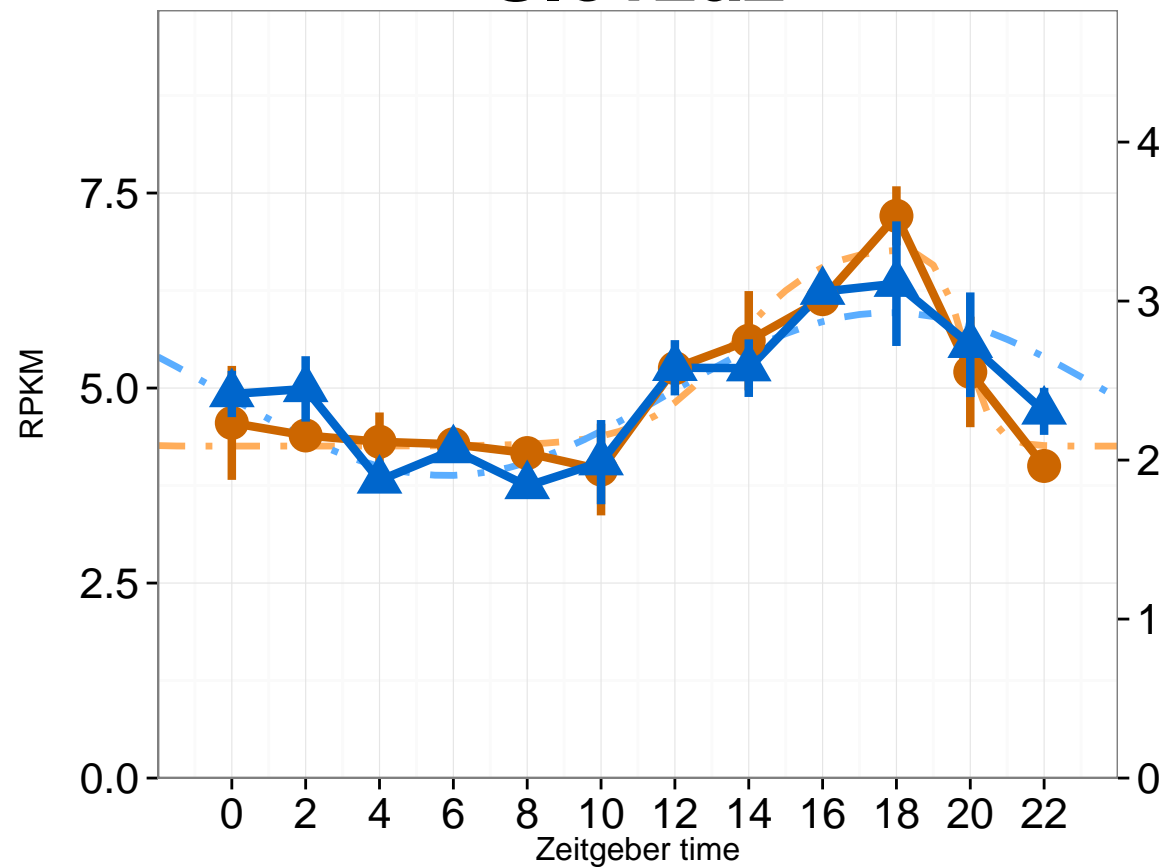

## Slc12a2

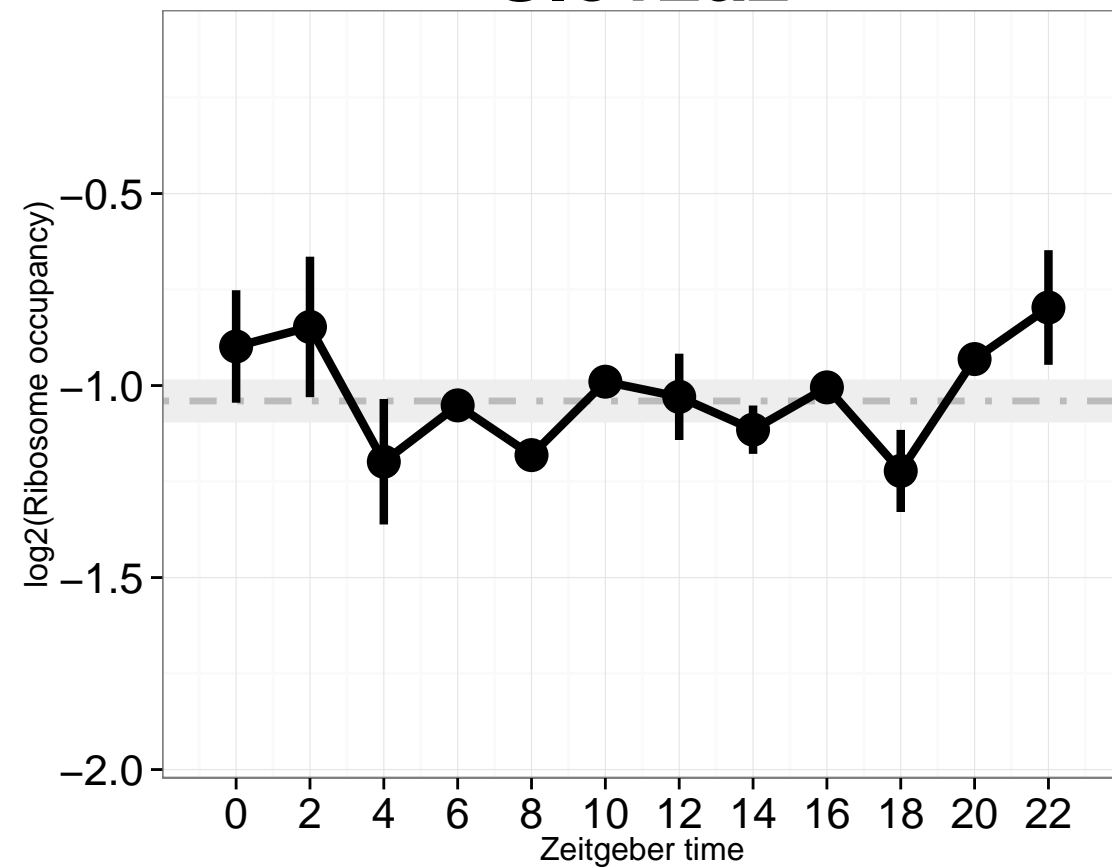

Supplement: SuppDataset_1.zip [file Slc12a2_set_D.pdf › Supplemental Dataset 1/D-mRNA_rhythm_translation_rhyth/Slc12a2_set_D.pdf]

# Slc13a2

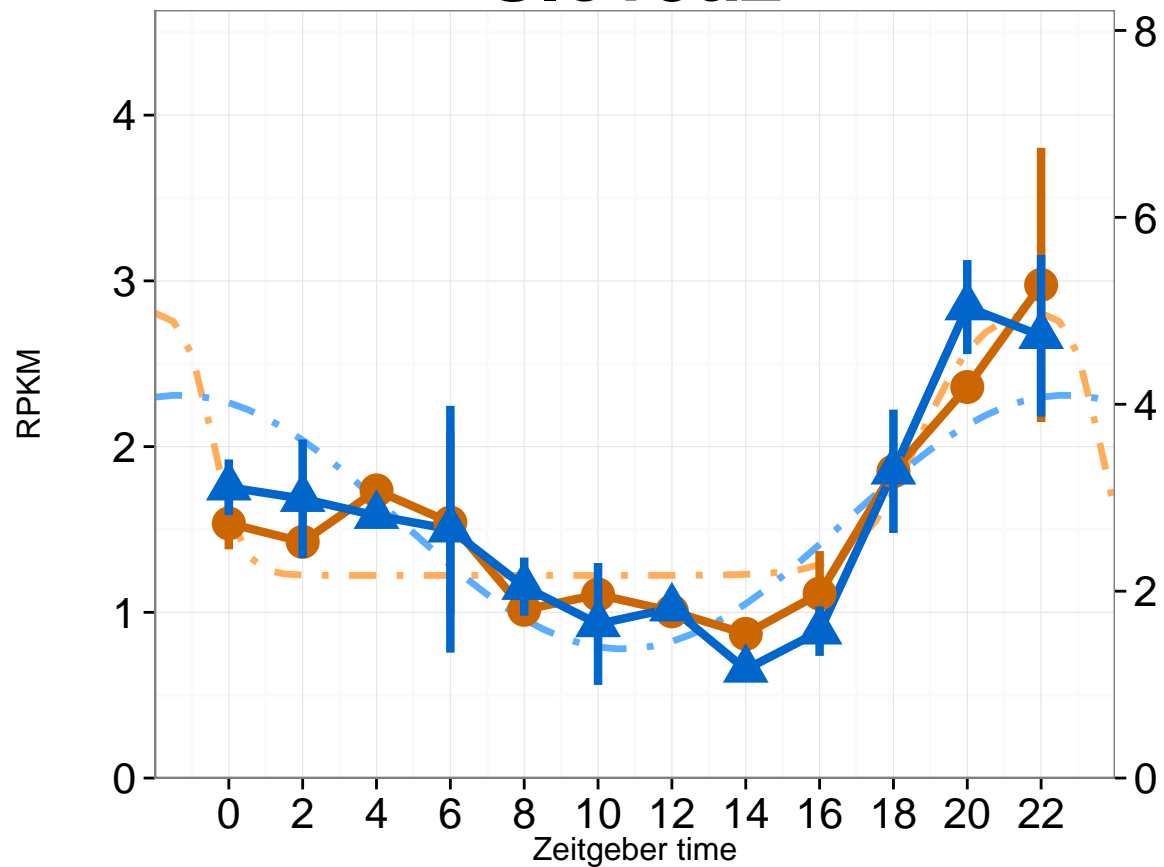

# Slc13a2

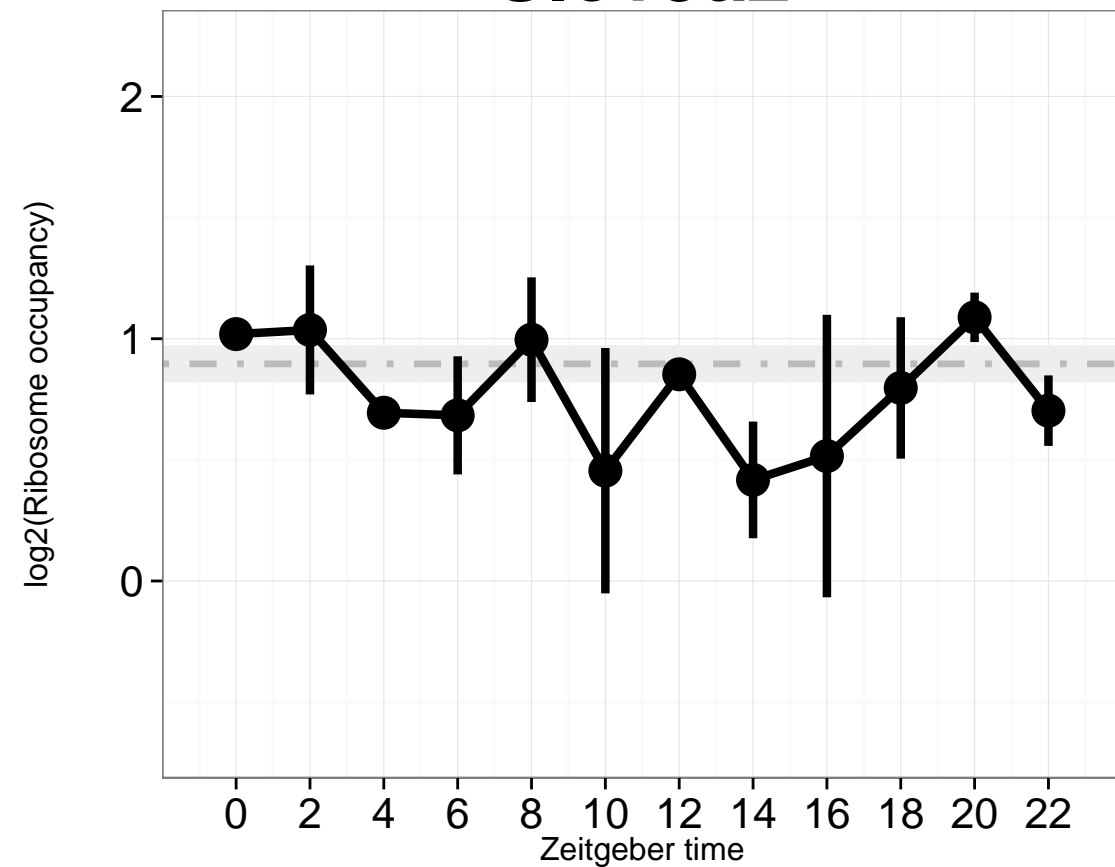

Supplement: SuppDataset_1.zip [file Slc13a2_set_D.pdf › Supplemental Dataset 1/D-mRNA_rhythm_translation_rhyth/Slc13a2_set_D.pdf]

# Slc13a3

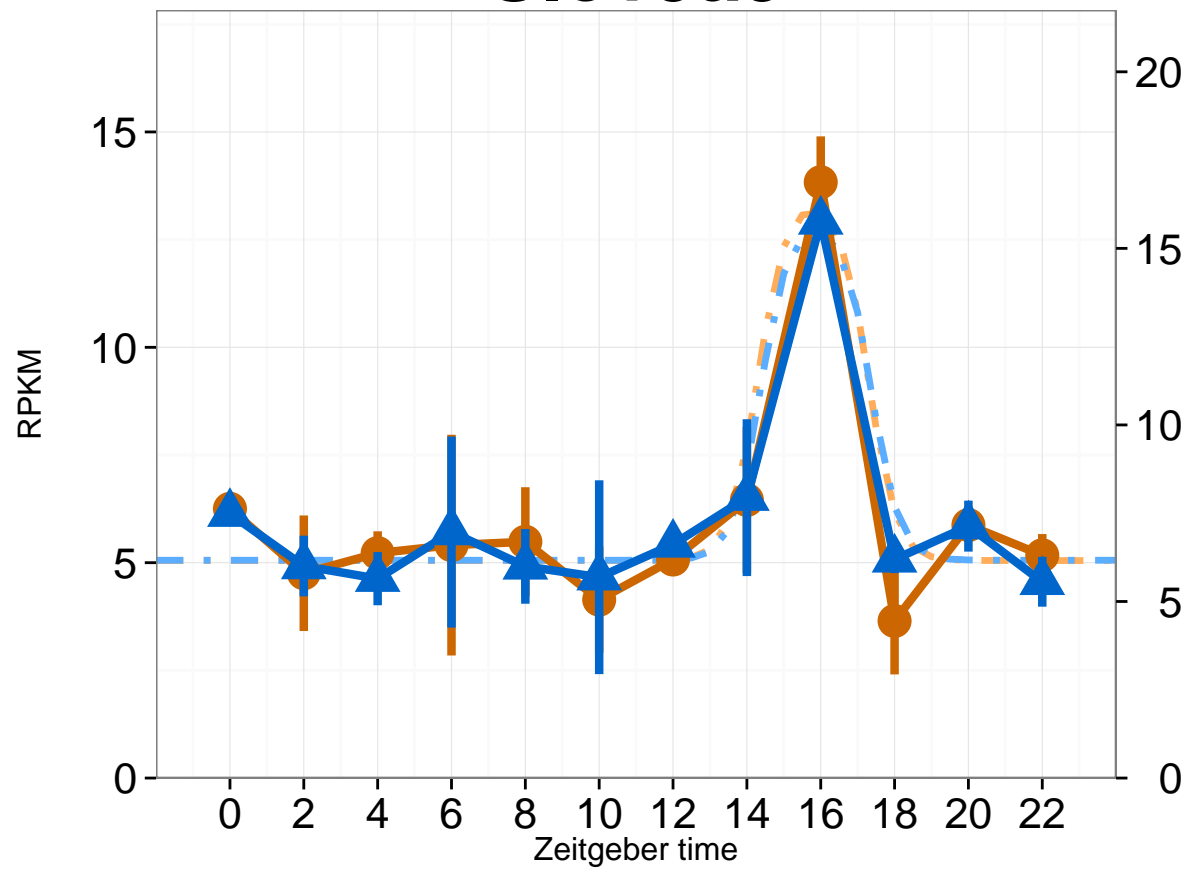

# Slc13a3

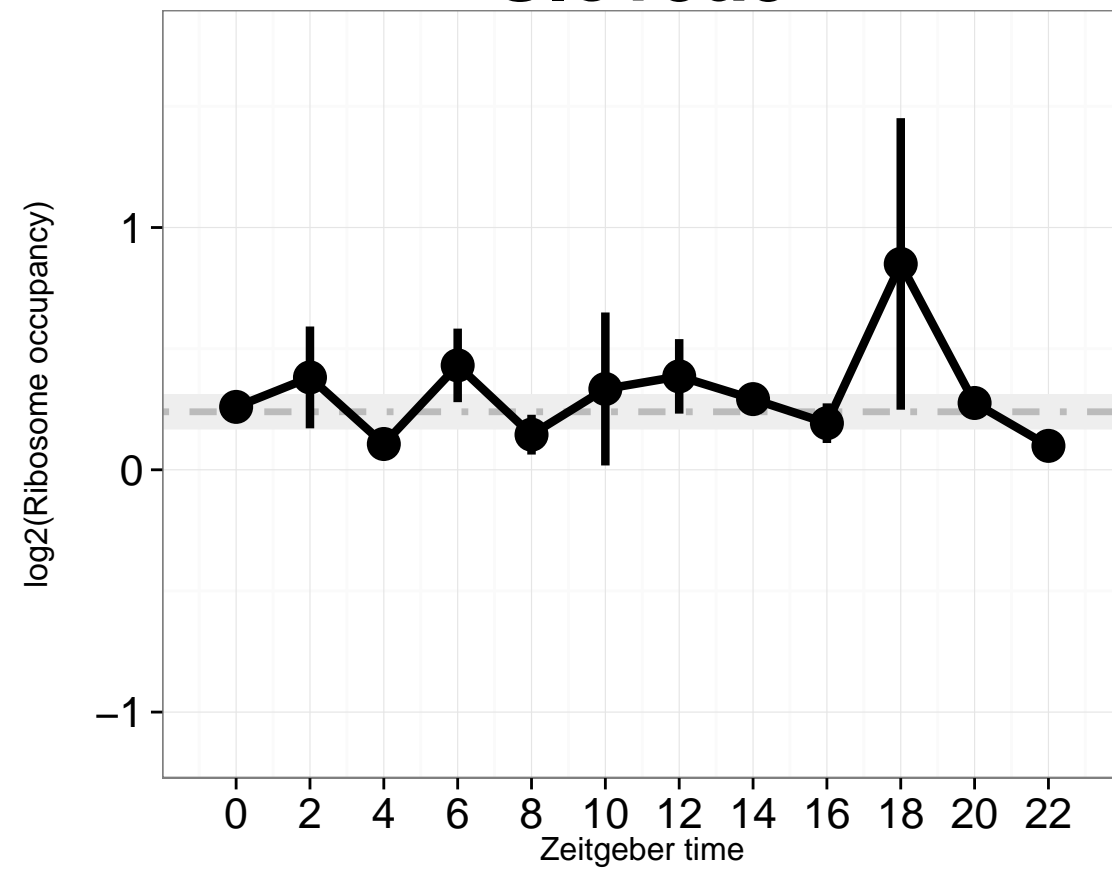

Supplement: SuppDataset_1.zip [file Slc13a3_set_D.pdf › Supplemental Dataset 1/D-mRNA_rhythm_translation_rhyth/Slc13a3_set_D.pdf]

## Slc13a5

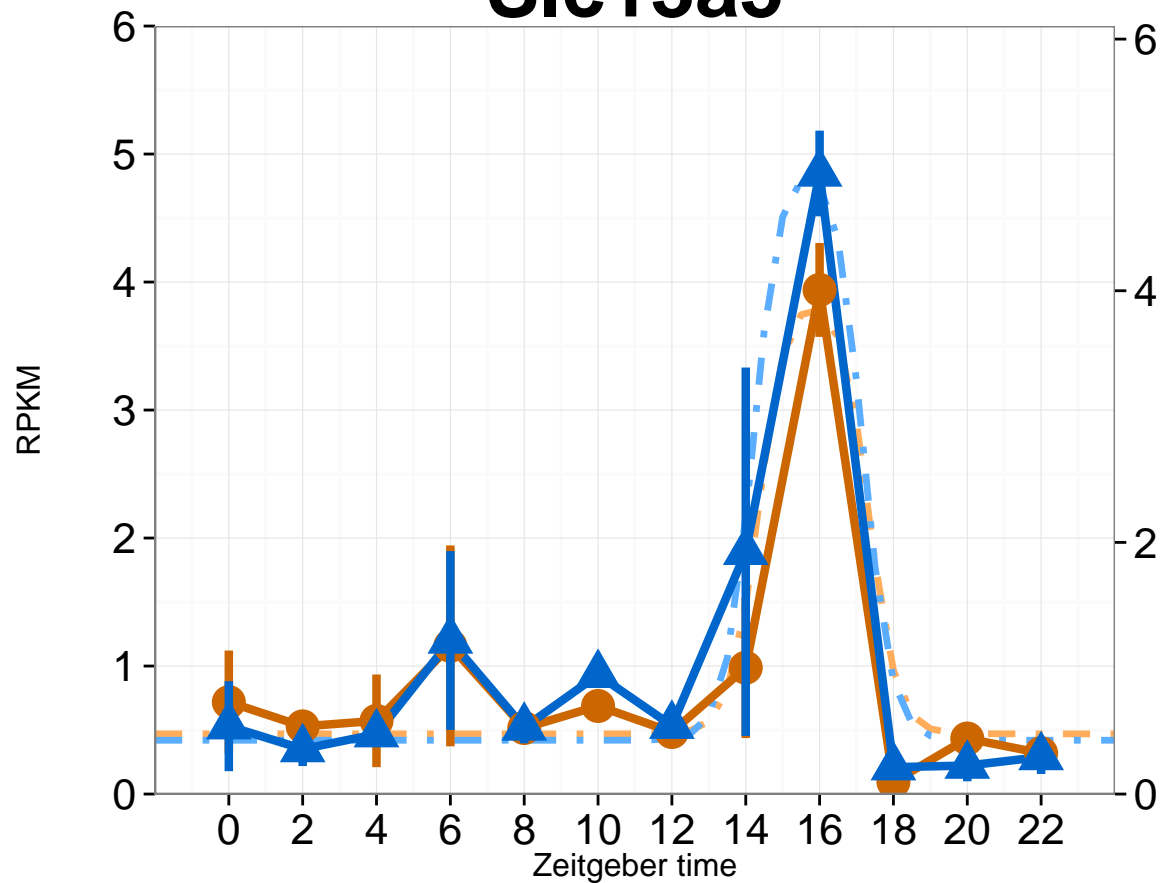

## Slc13a5

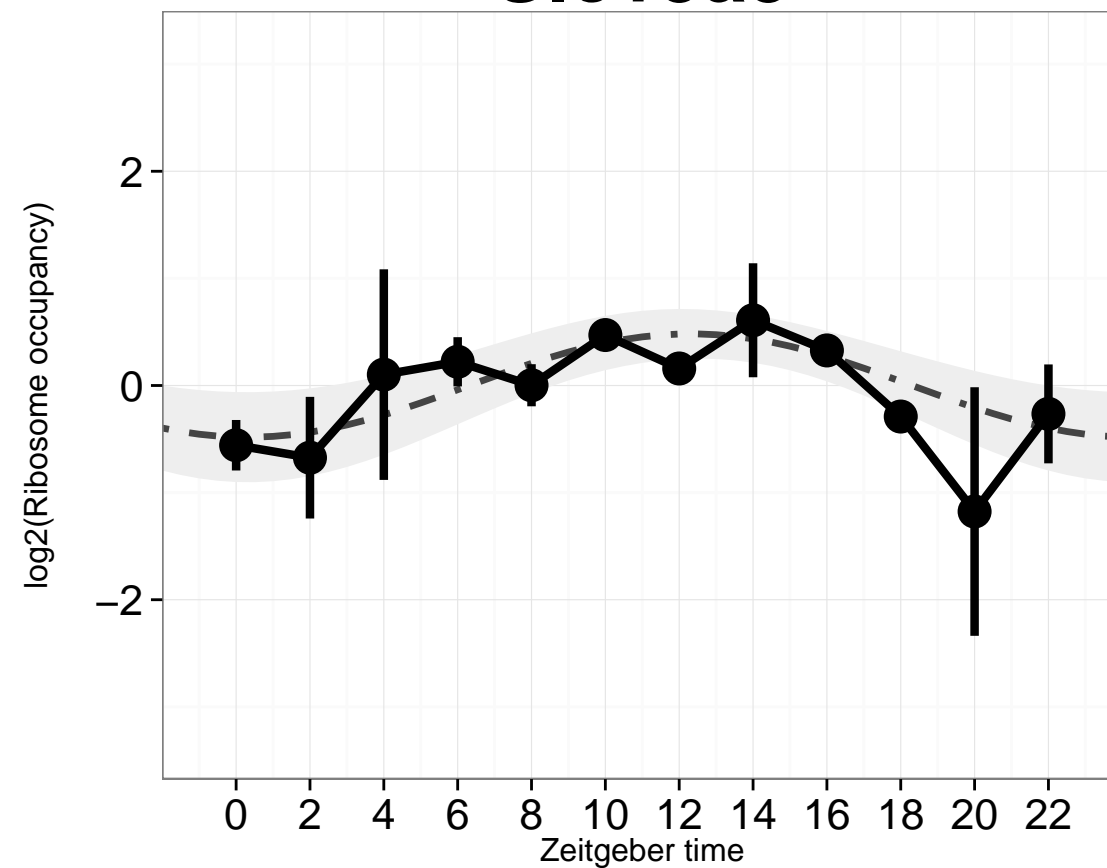

Supplement: SuppDataset_1.zip [file Slc13a5_set_D.pdf › Supplemental Dataset 1/D-mRNA_rhythm_translation_rhyth/Slc13a5_set_D.pdf]

## Slc15a3

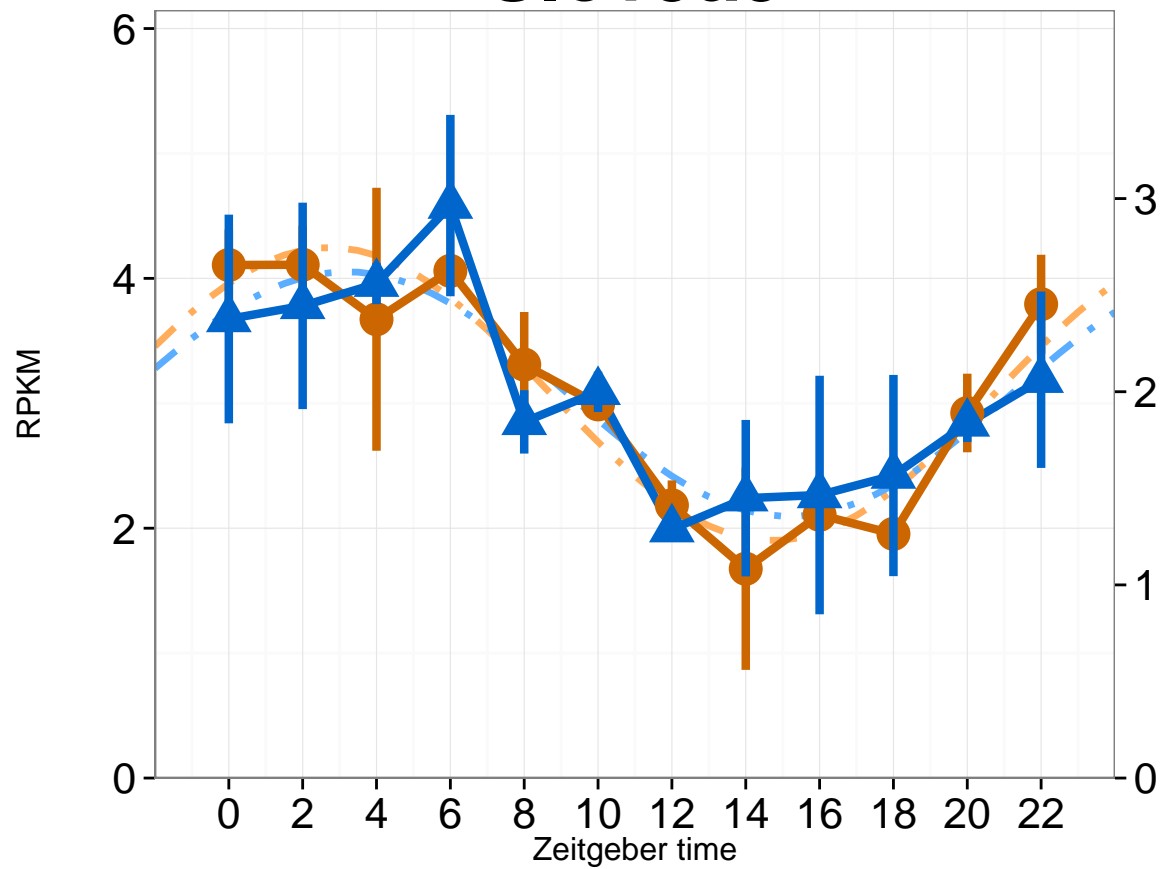

## Slc15a3

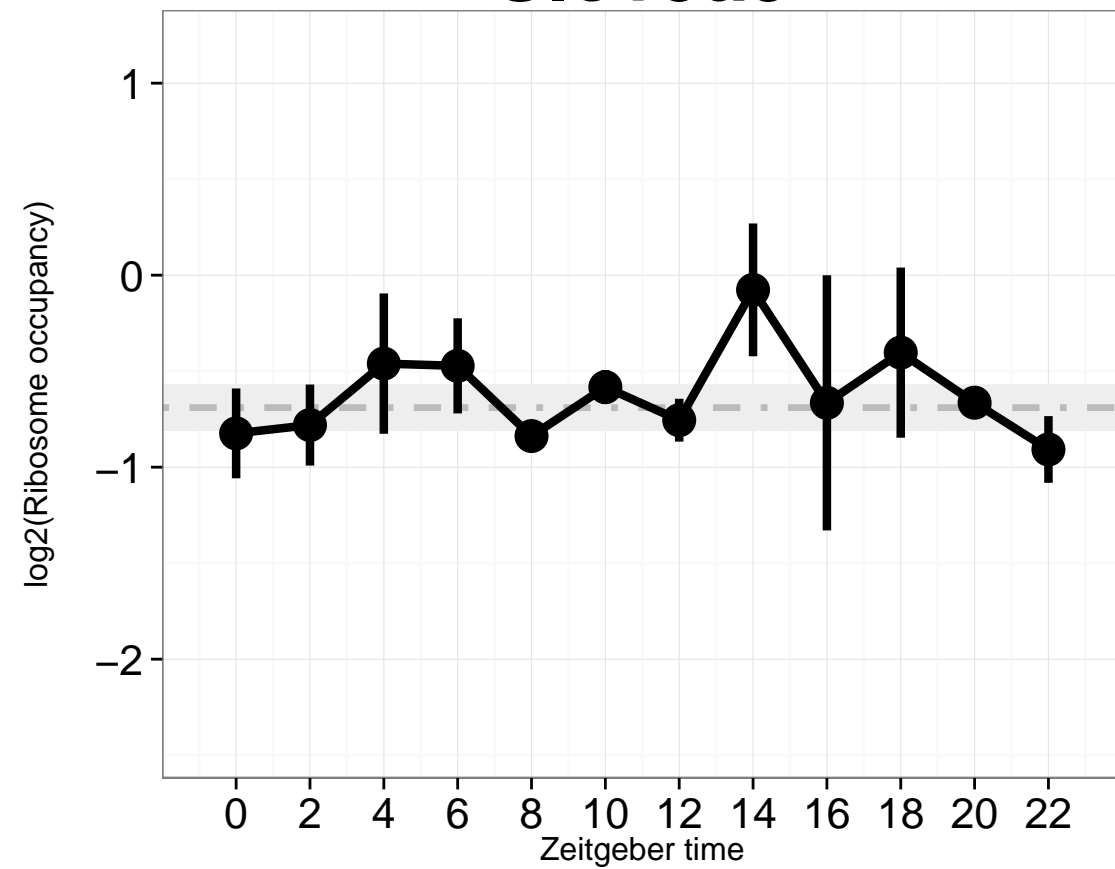

Supplement: SuppDataset_1.zip [file Slc15a3_set_D.pdf › Supplemental Dataset 1/D-mRNA_rhythm_translation_rhyth/Slc15a3_set_D.pdf]

## Slc16a12

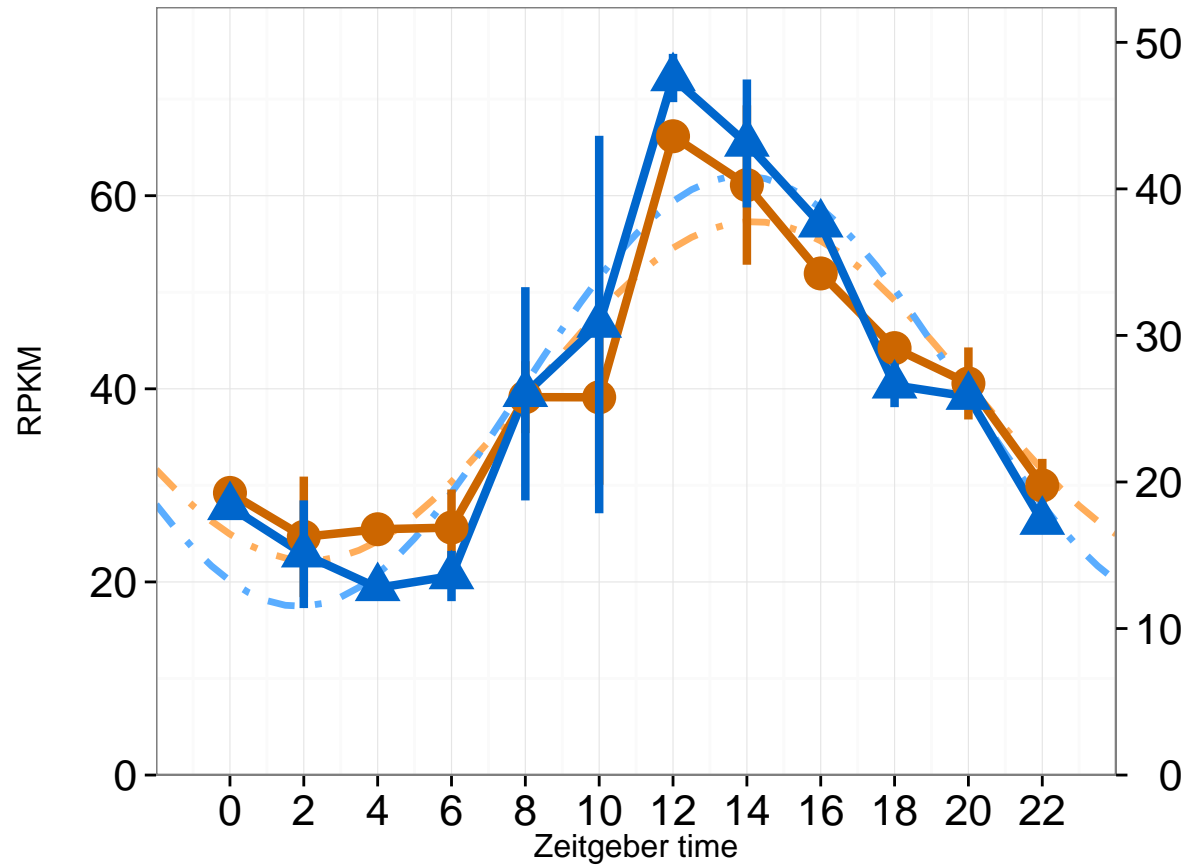

## Slc16a12

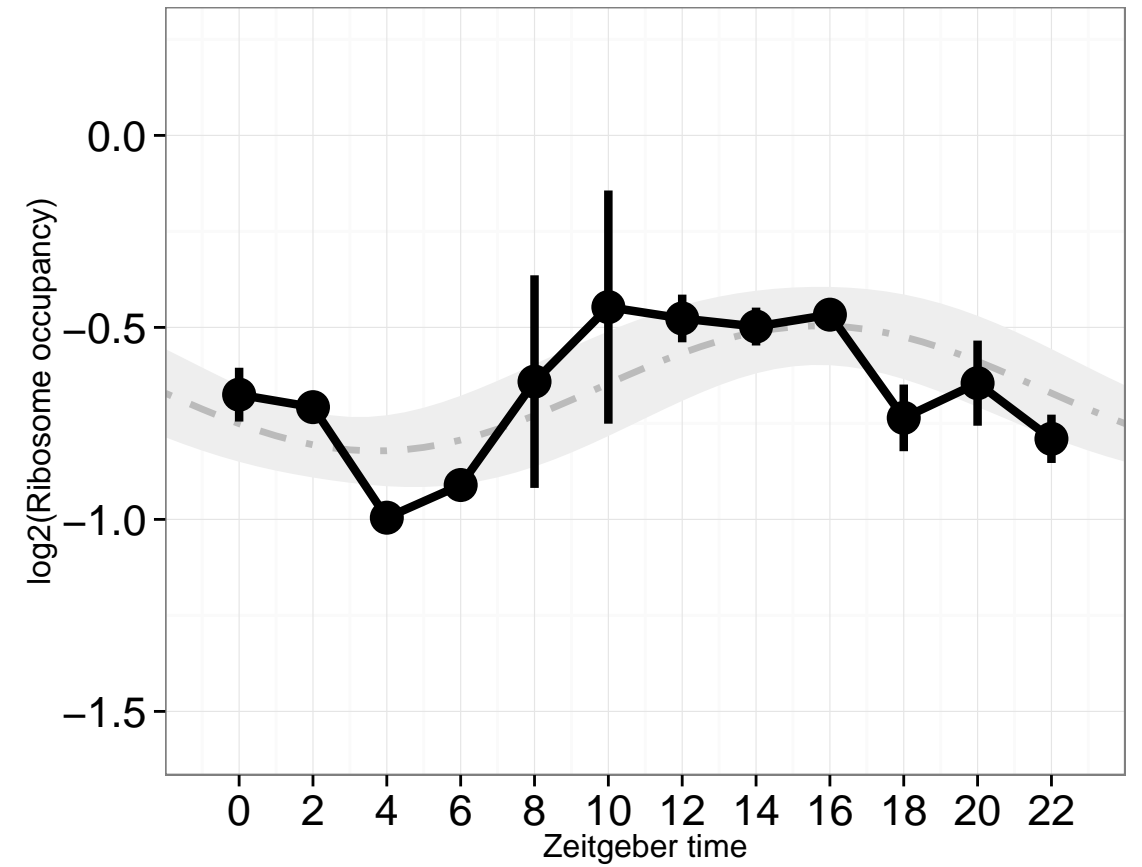

Supplement: SuppDataset_1.zip [file Slc16a12_set_D.pdf › Supplemental Dataset 1/D-mRNA_rhythm_translation_rhyth/Slc16a12_set_D.pdf]

## Slc16a1

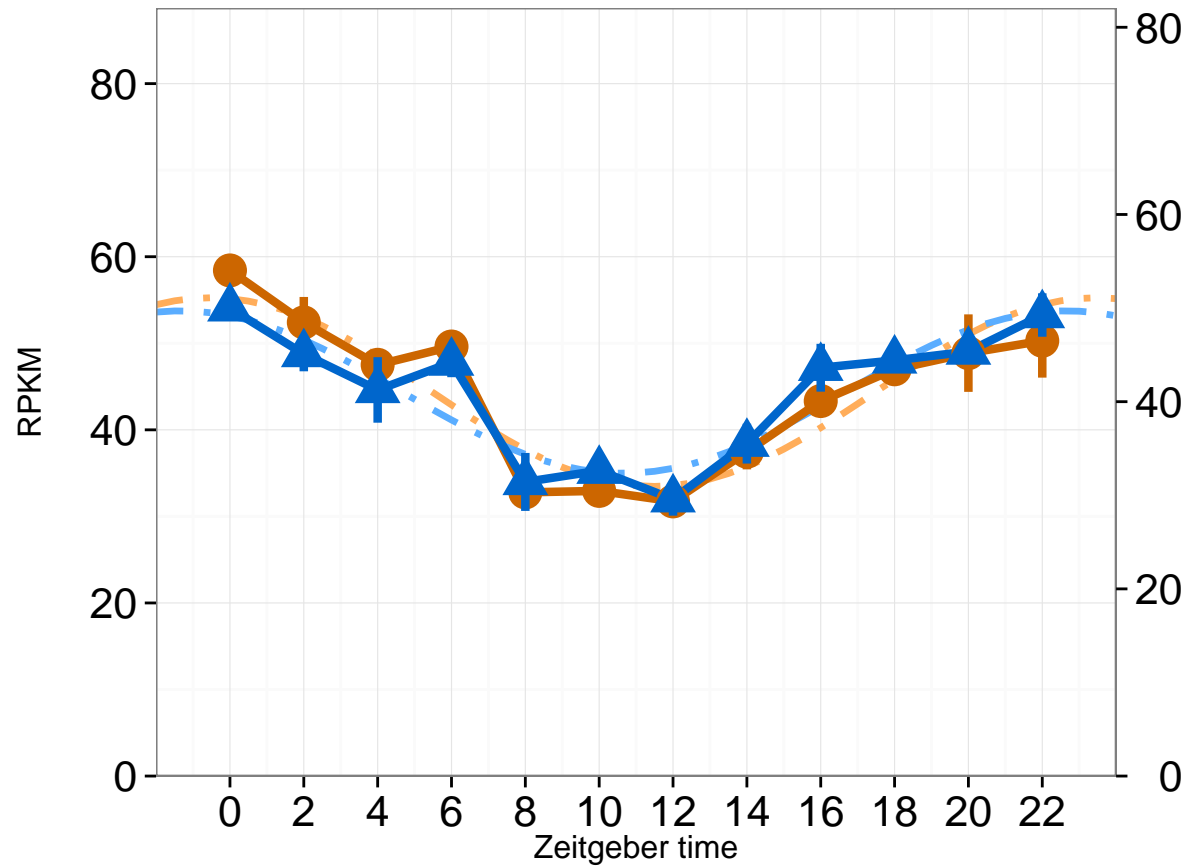

## Slc16a1

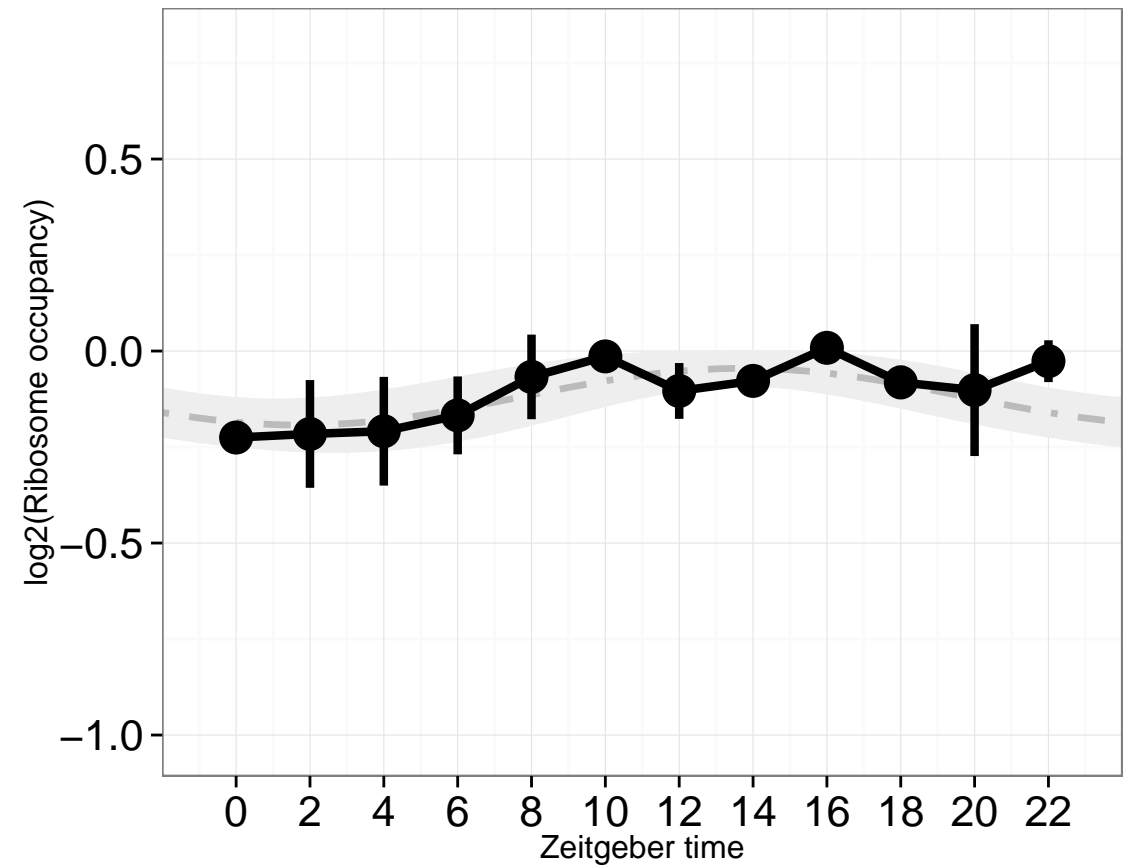

Supplement: SuppDataset_1.zip [file Slc16a1_set_D.pdf › Supplemental Dataset 1/D-mRNA_rhythm_translation_rhyth/Slc16a1_set_D.pdf]

# Slc16a5

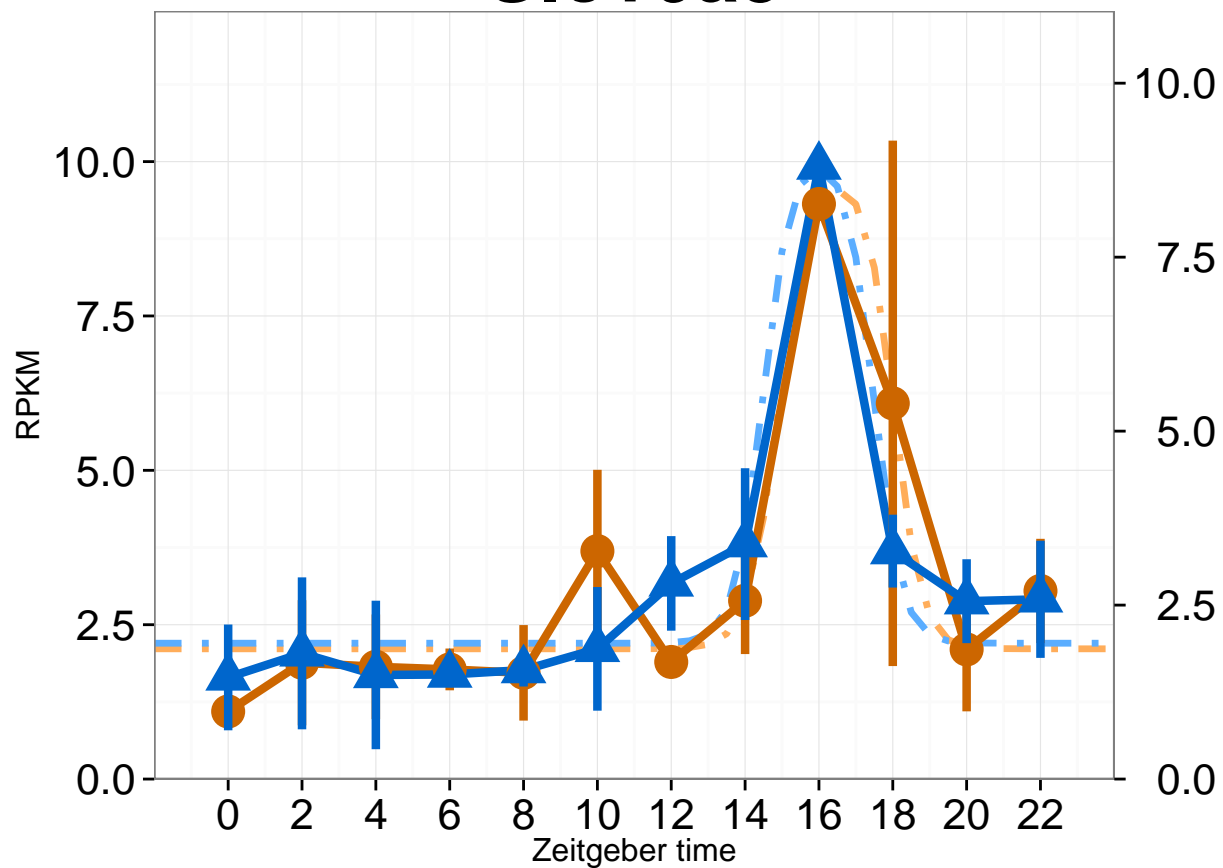

# Slc16a5

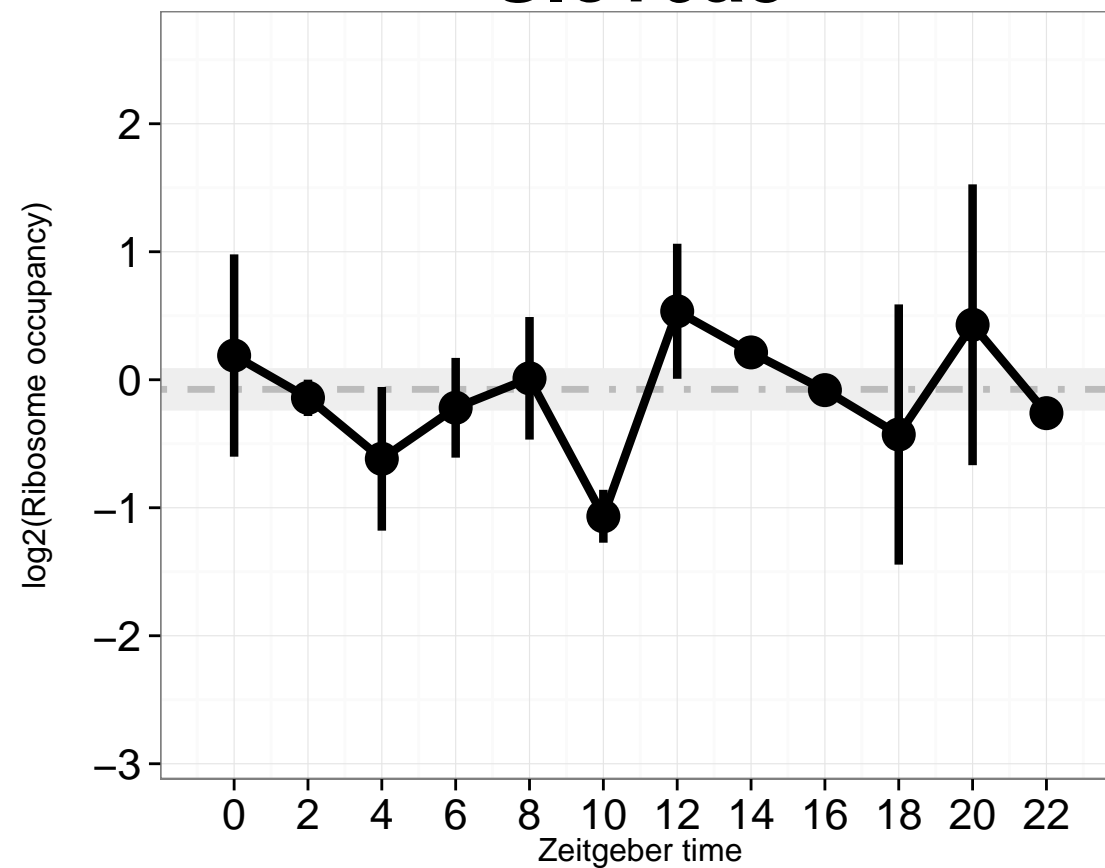

Supplement: SuppDataset_1.zip [file Slc16a5_set_D.pdf › Supplemental Dataset 1/D-mRNA_rhythm_translation_rhyth/Slc16a5_set_D.pdf]

## Slc16a7

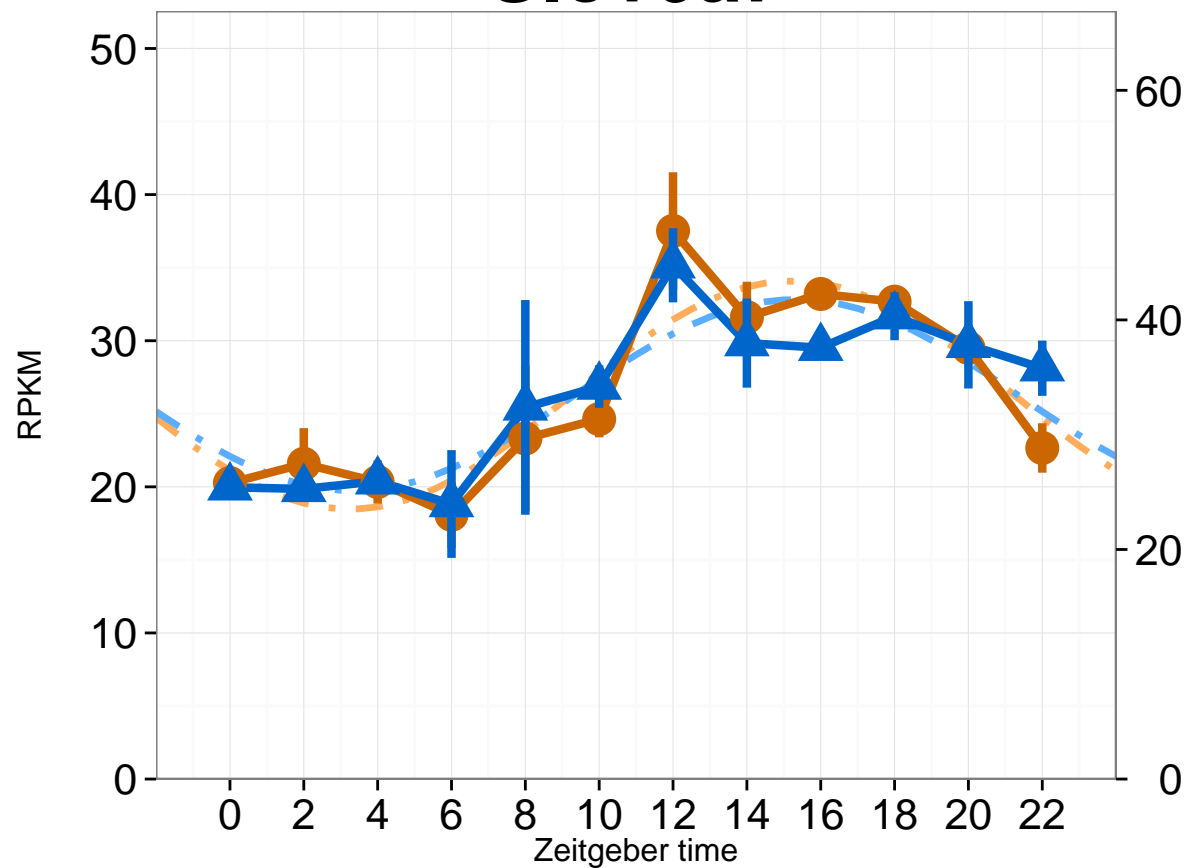

## Slc16a7

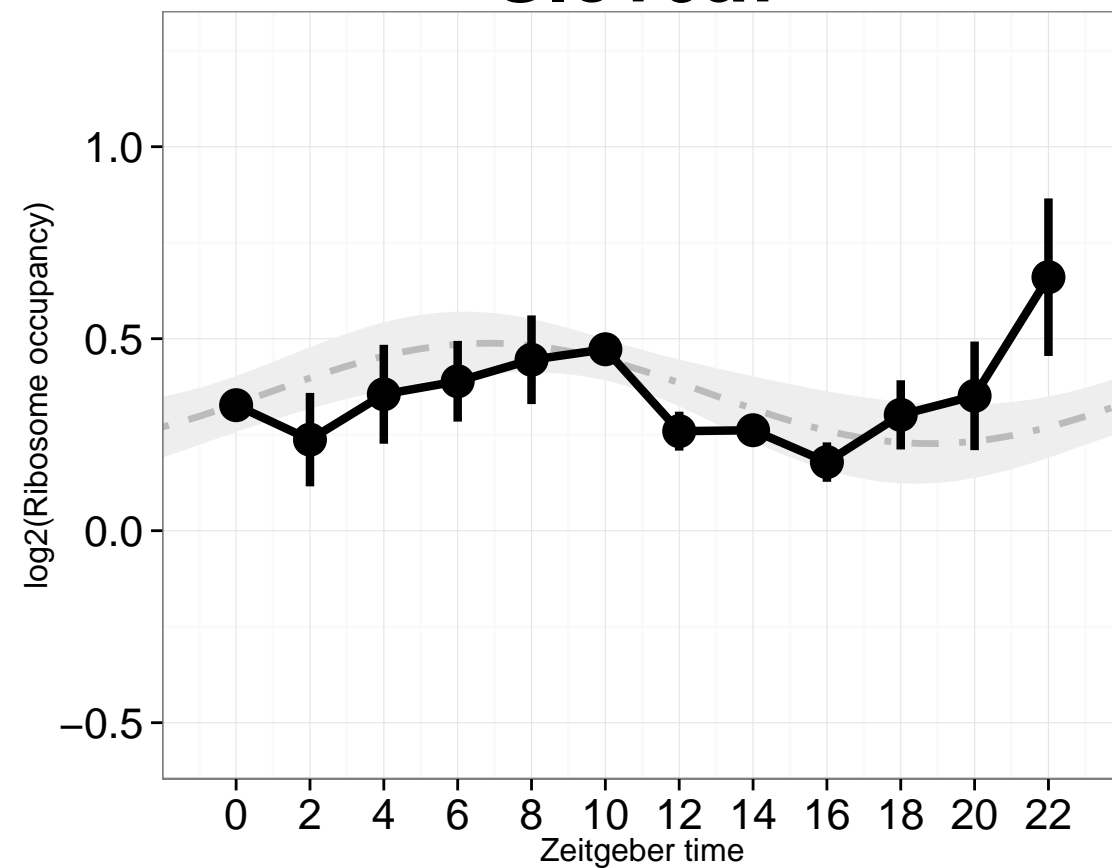

Supplement: SuppDataset_1.zip [file Slc16a7_set_D.pdf › Supplemental Dataset 1/D-mRNA_rhythm_translation_rhyth/Slc16a7_set_D.pdf]

## Slc17a3

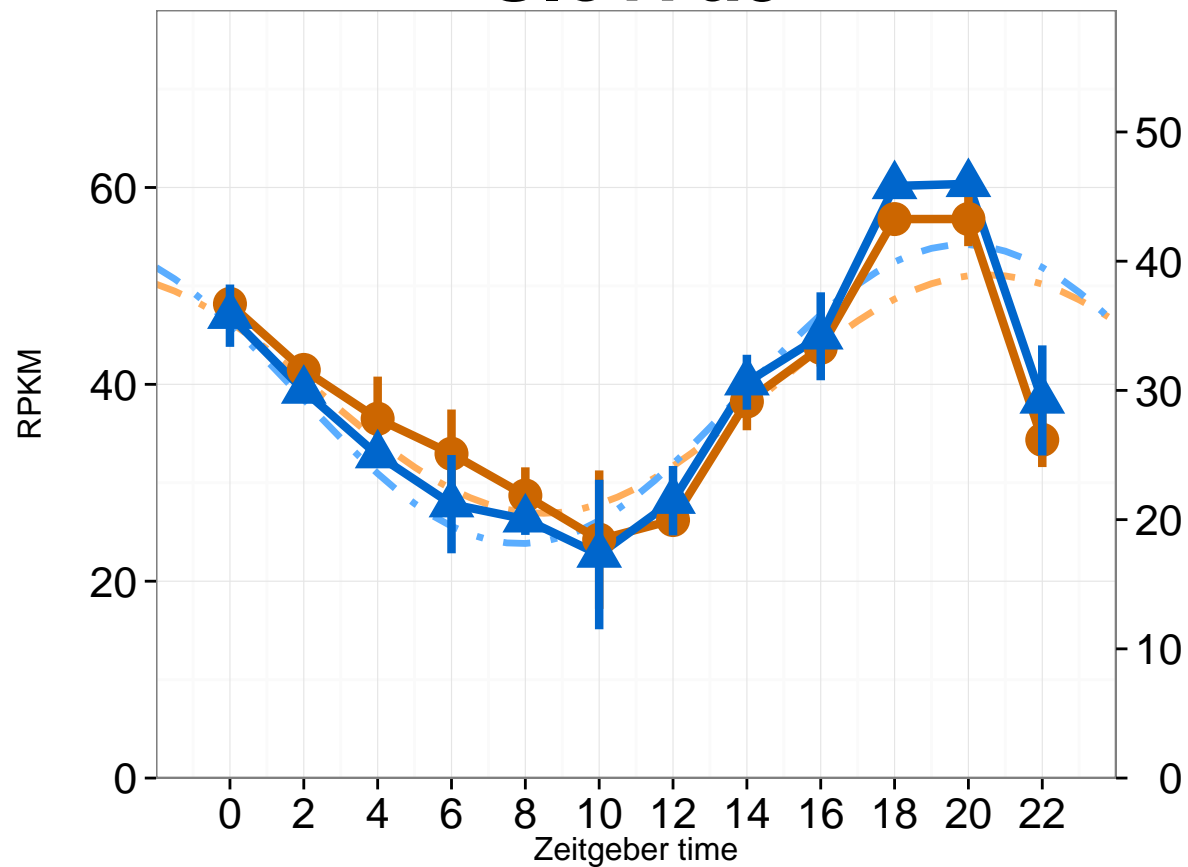

## Slc17a3

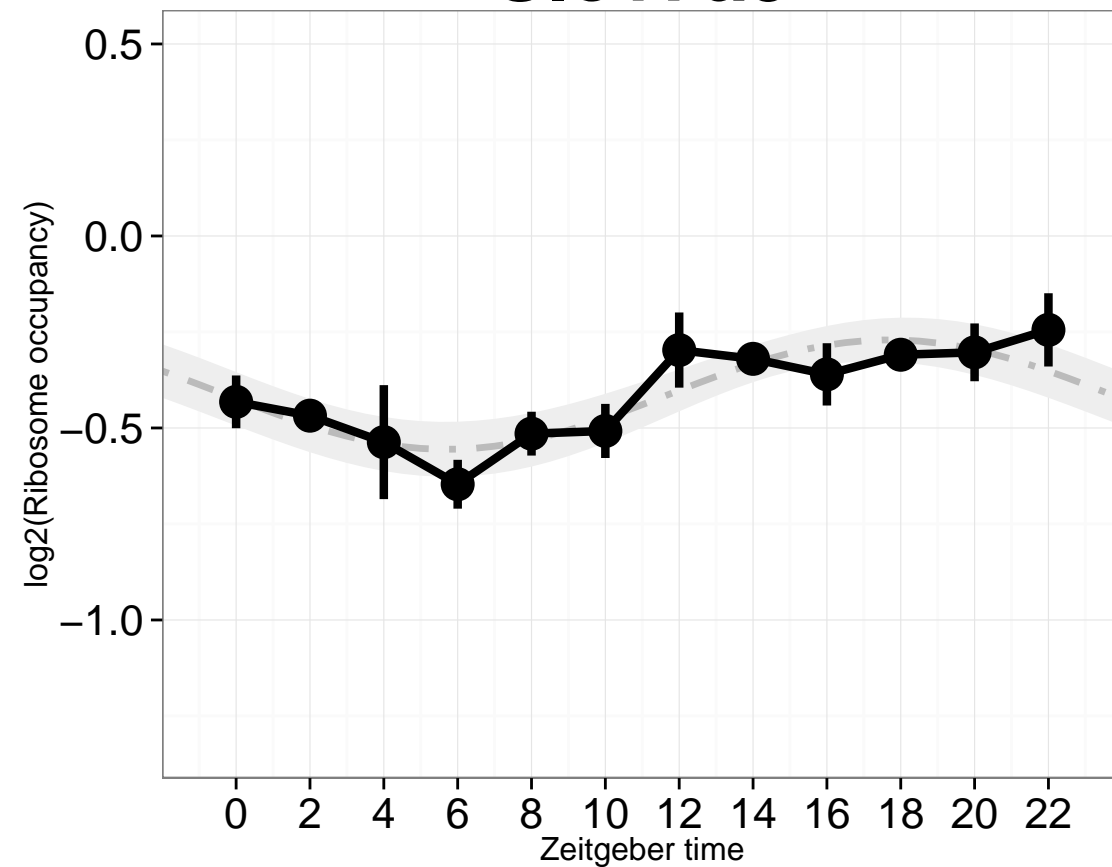

Supplement: SuppDataset_1.zip [file Slc17a3_set_D.pdf › Supplemental Dataset 1/D-mRNA_rhythm_translation_rhyth/Slc17a3_set_D.pdf]

## Slc17a4

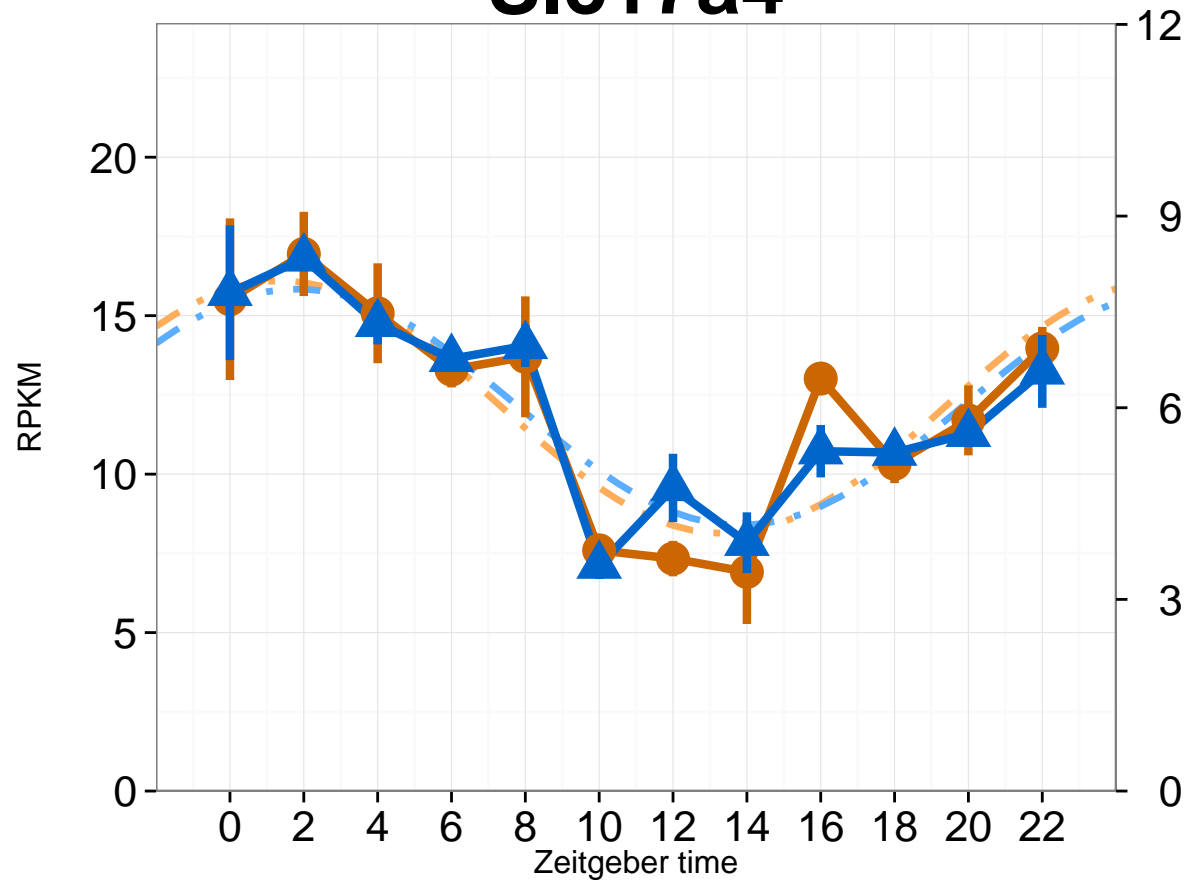

## Slc17a4

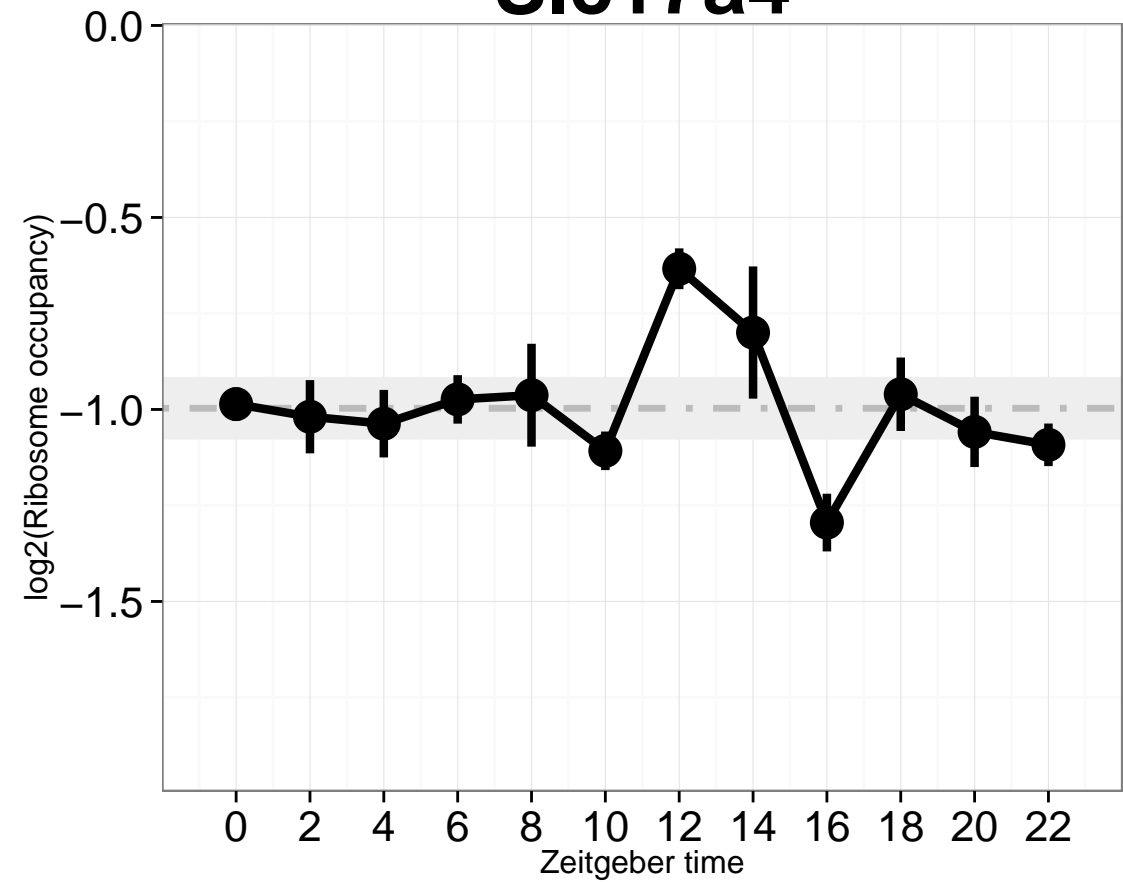

Supplement: SuppDataset_1.zip [file Slc17a4_set_D.pdf › Supplemental Dataset 1/D-mRNA_rhythm_translation_rhyth/Slc17a4_set_D.pdf]

# Slc17a8

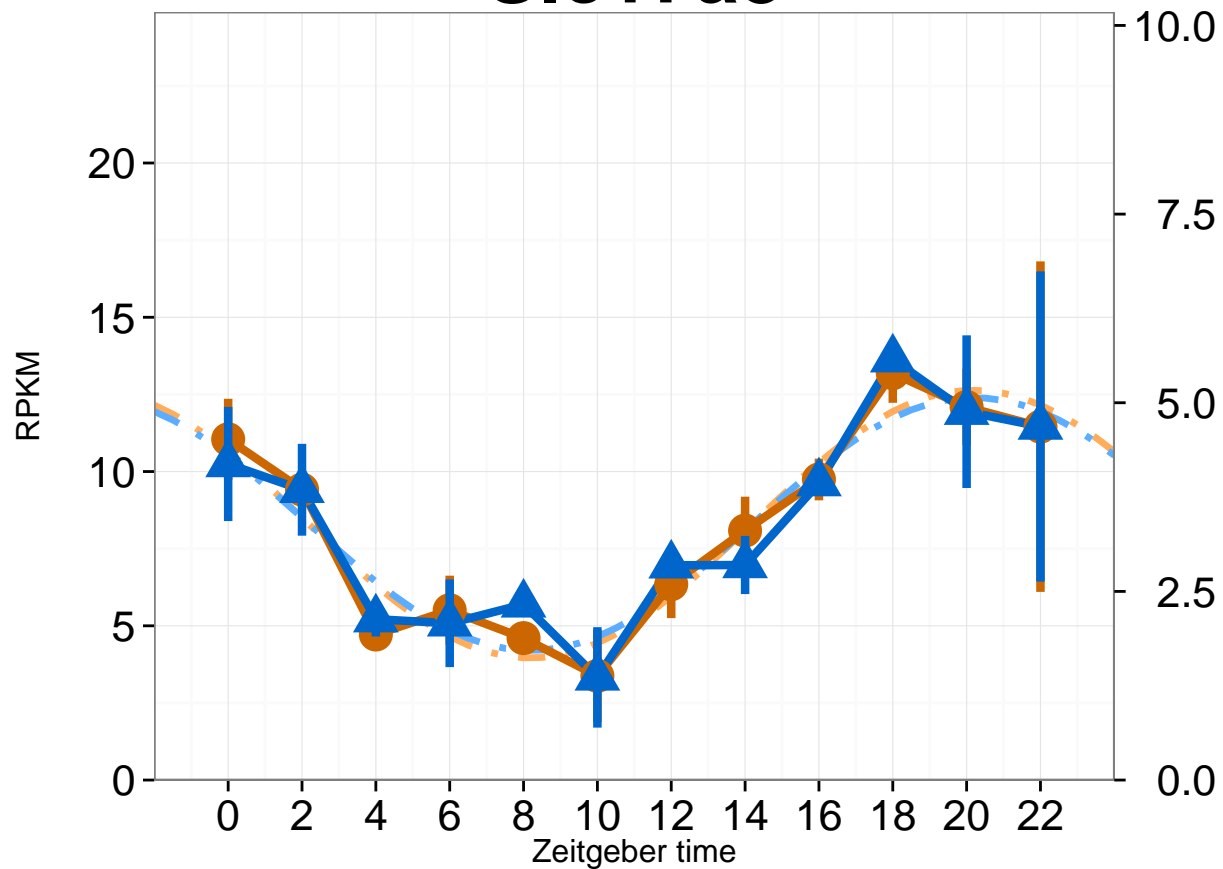

# Slc17a8

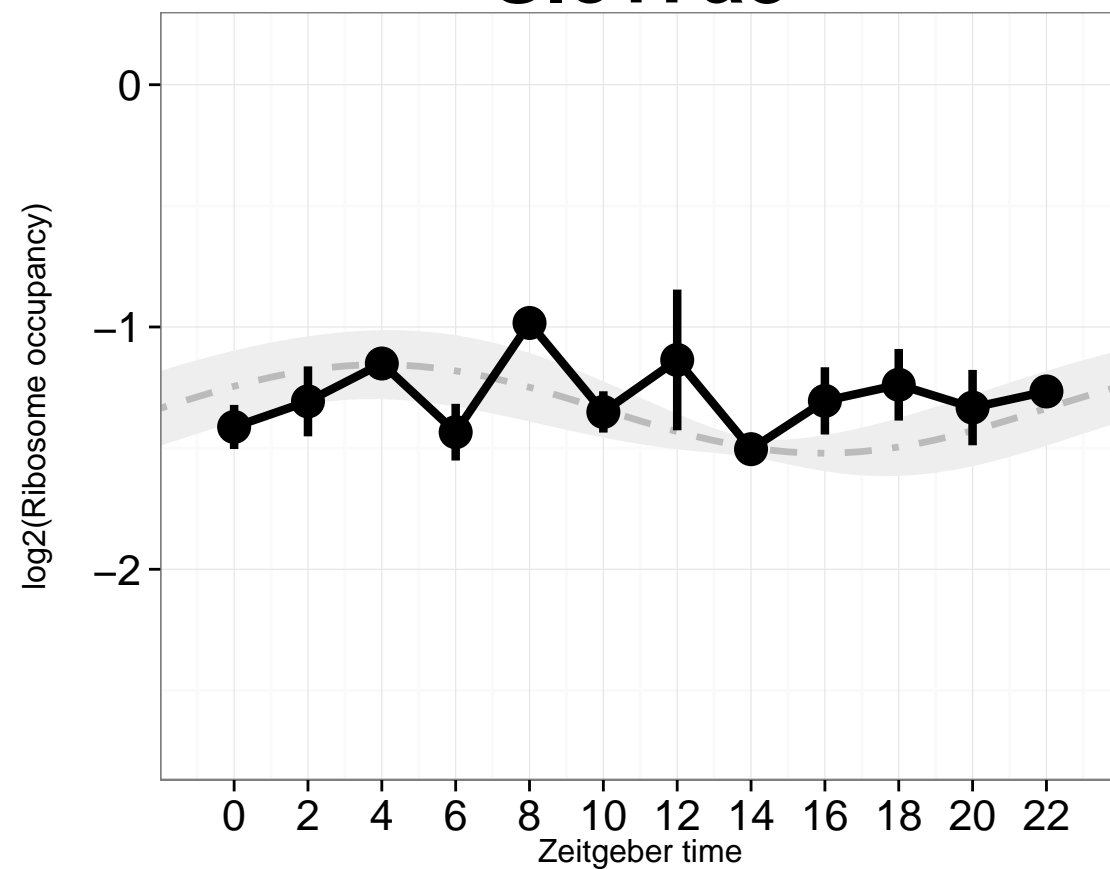

Supplement: SuppDataset_1.zip [file Slc17a8_set_D.pdf › Supplemental Dataset 1/D-mRNA_rhythm_translation_rhyth/Slc17a8_set_D.pdf]

# Slc19a1

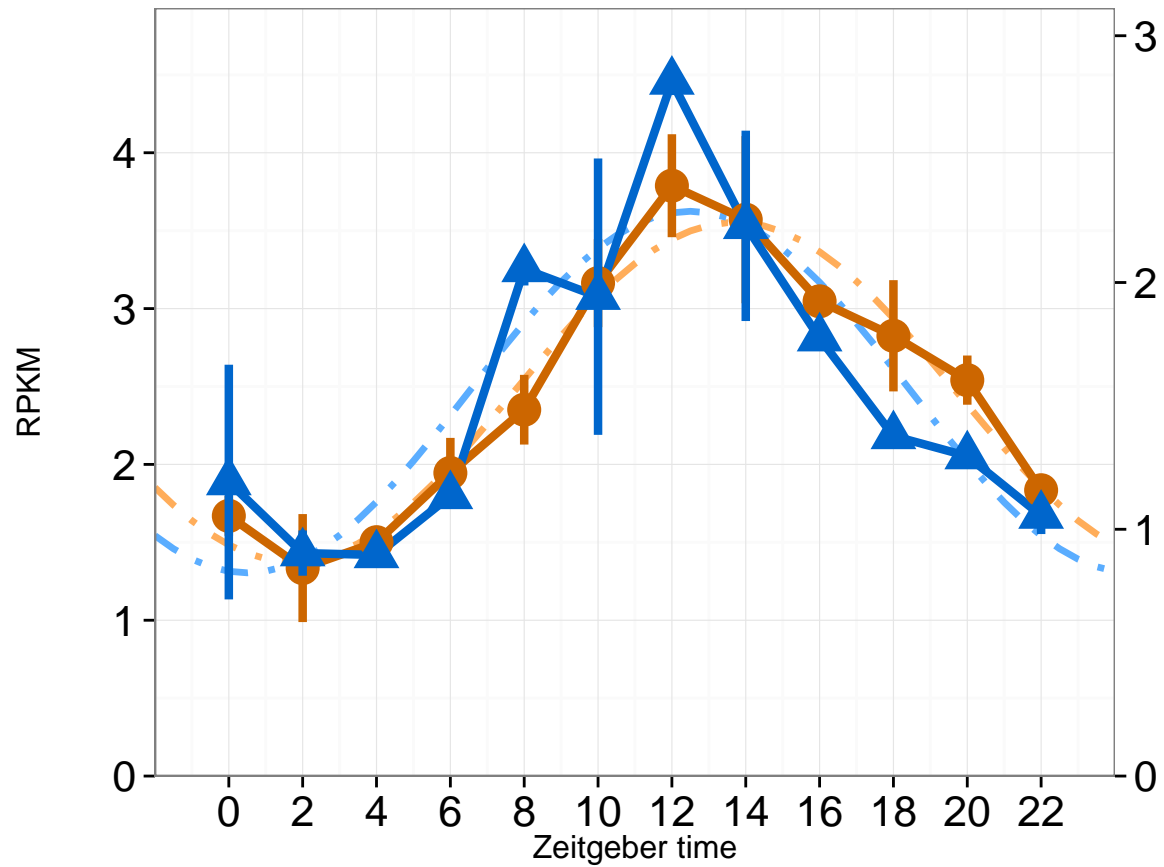

# Slc19a1

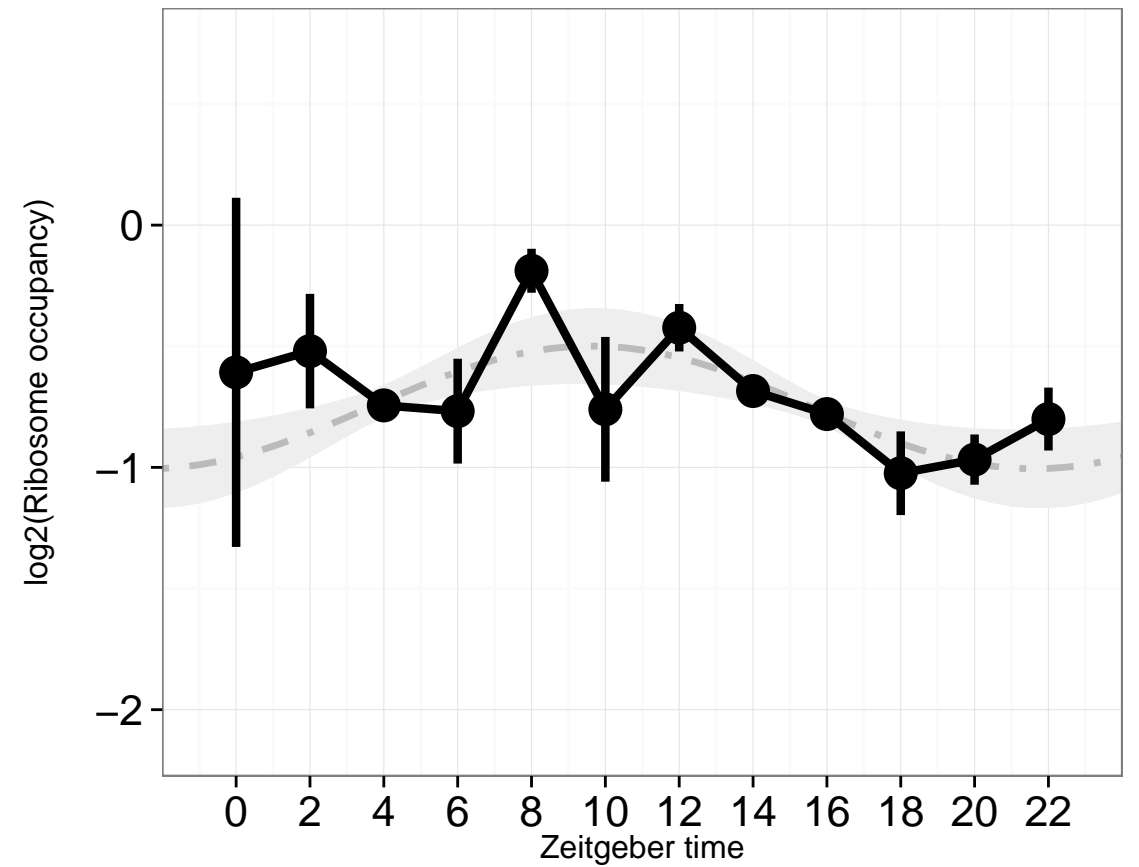

Supplement: SuppDataset_1.zip [file Slc19a1_set_D.pdf › Supplemental Dataset 1/D-mRNA_rhythm_translation_rhyth/Slc19a1_set_D.pdf]

# Slc1a2

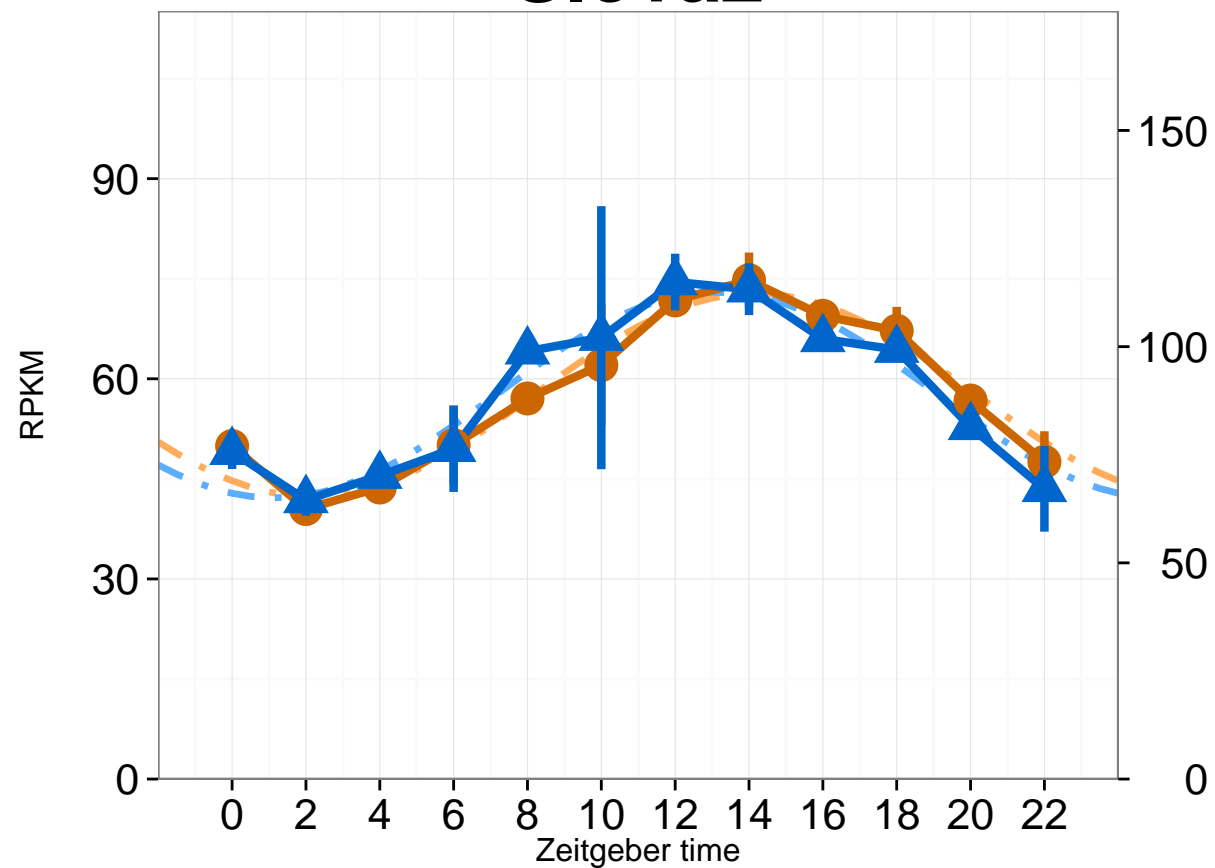

# Slc1a2

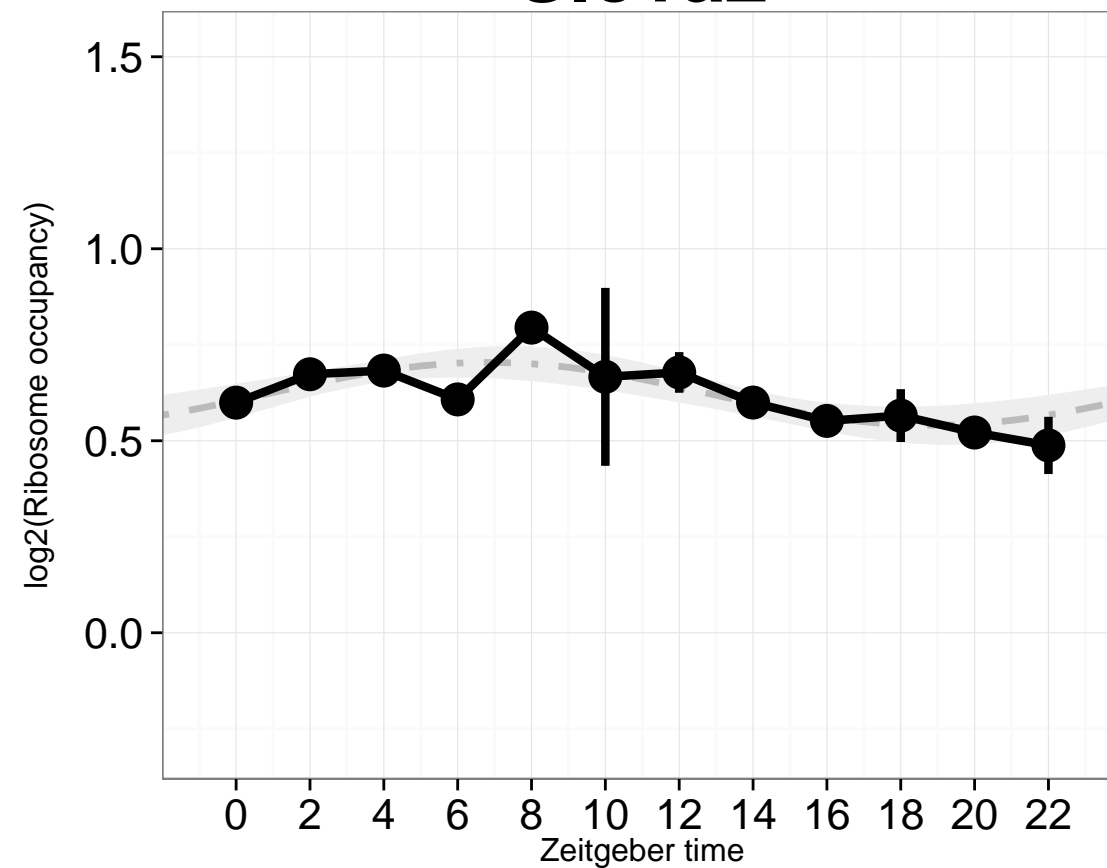

Supplement: SuppDataset_1.zip [file Slc1a2_set_D.pdf › Supplemental Dataset 1/D-mRNA_rhythm_translation_rhyth/Slc1a2_set_D.pdf]

# Slc20a1

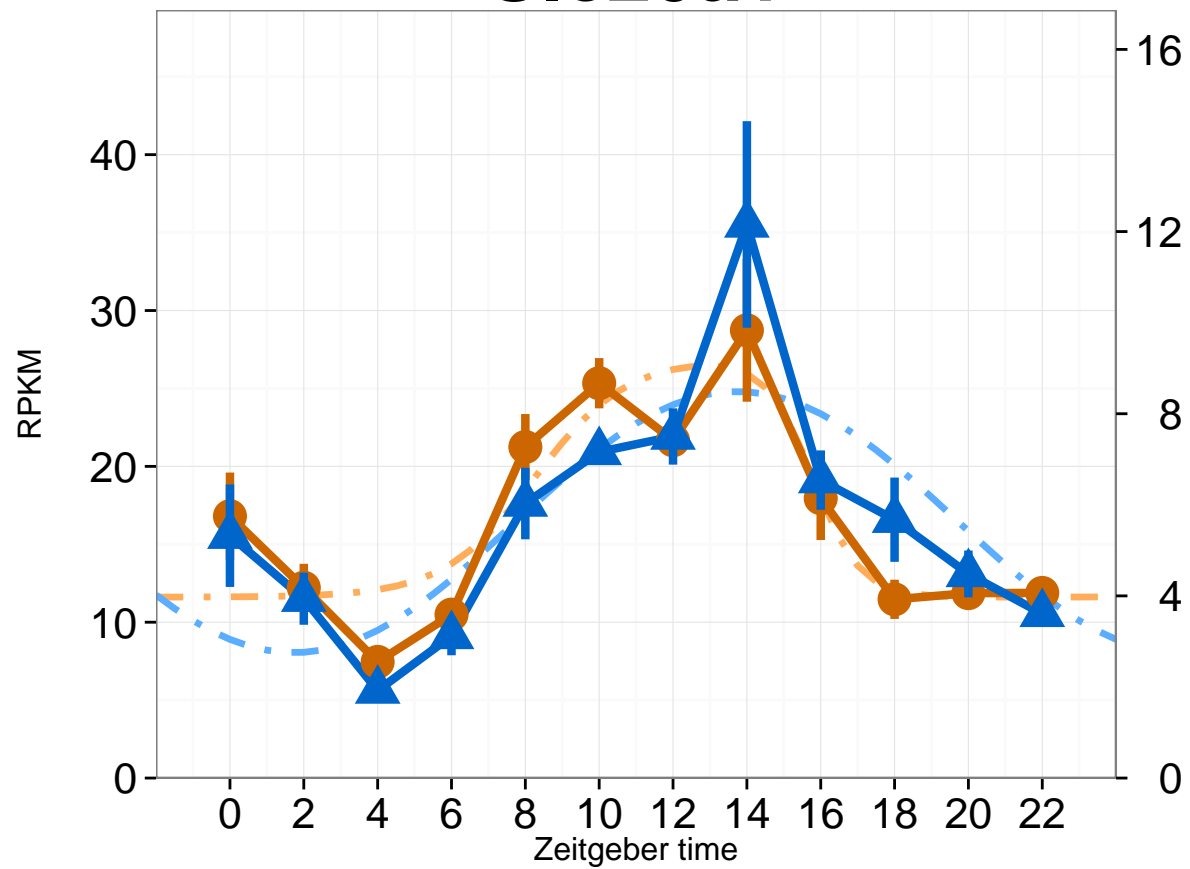

# Slc20a1

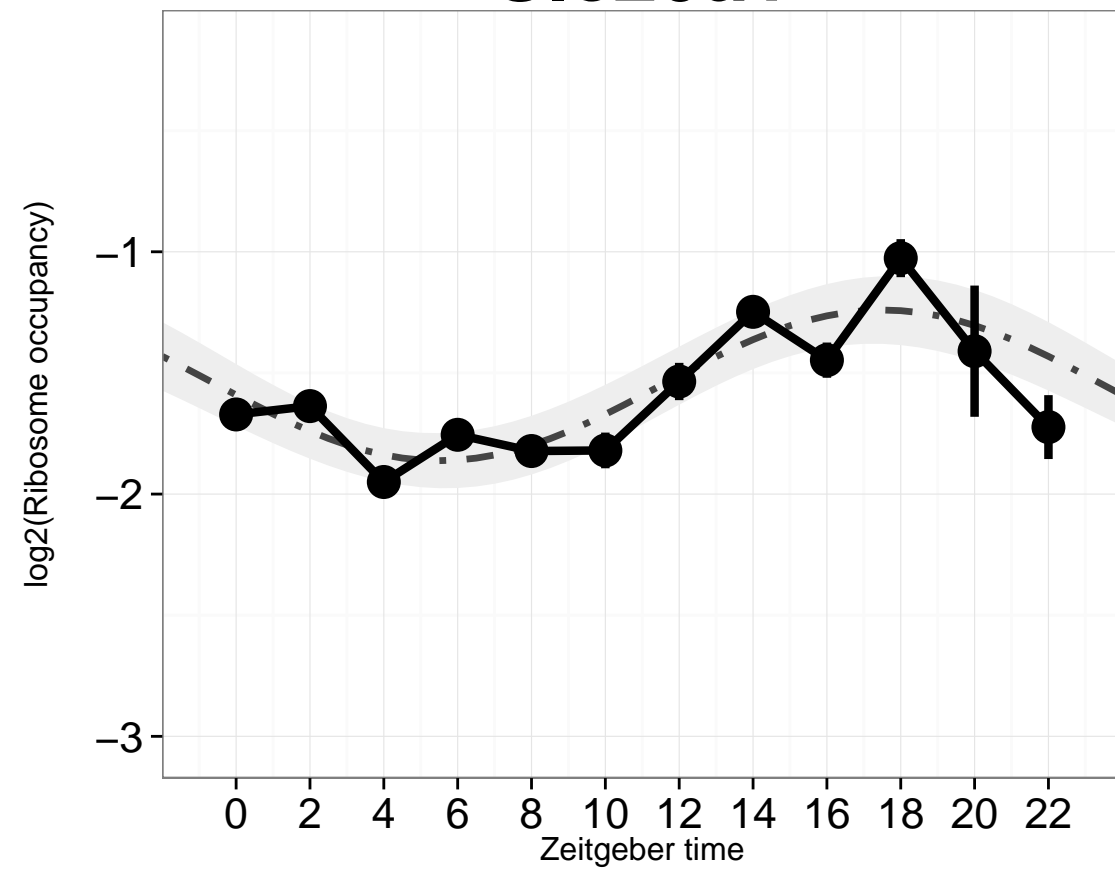

Supplement: SuppDataset_1.zip [file Slc20a1_set_D.pdf › Supplemental Dataset 1/D-mRNA_rhythm_translation_rhyth/Slc20a1_set_D.pdf]

## Slc22a15

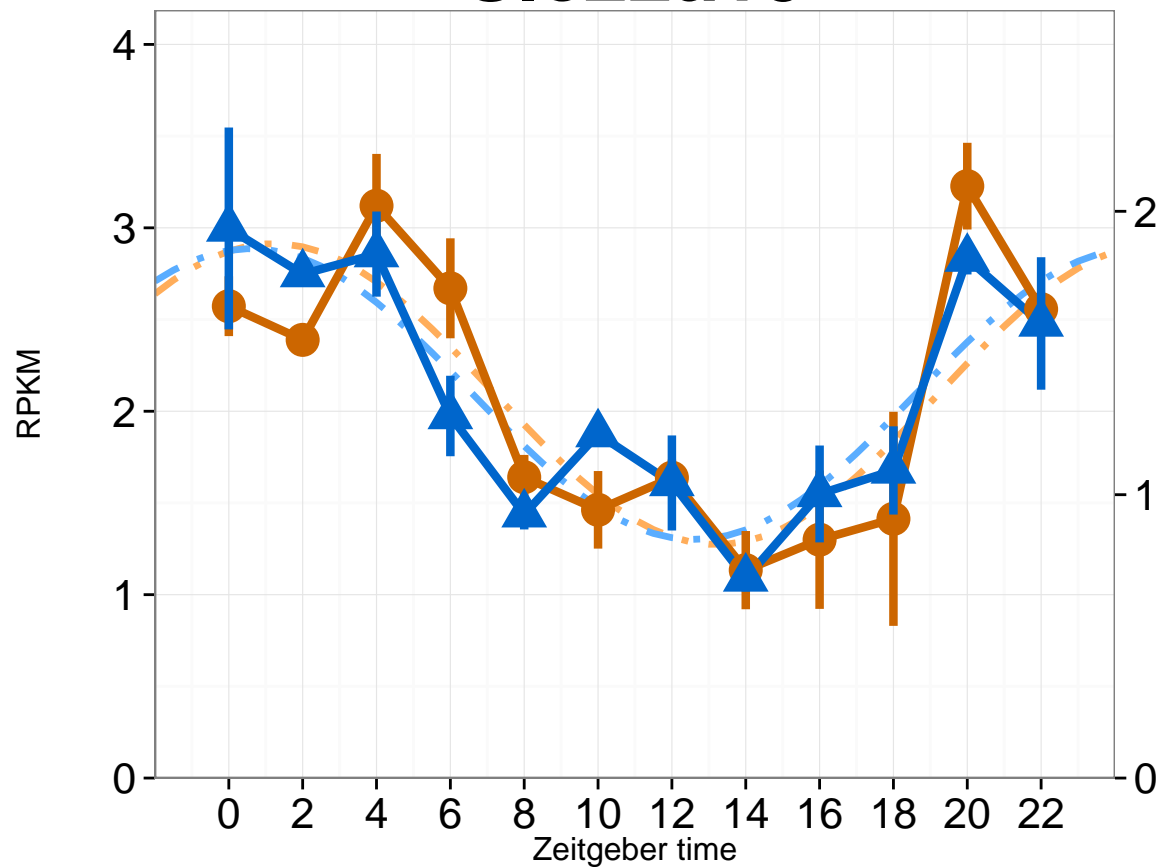

## Slc22a15

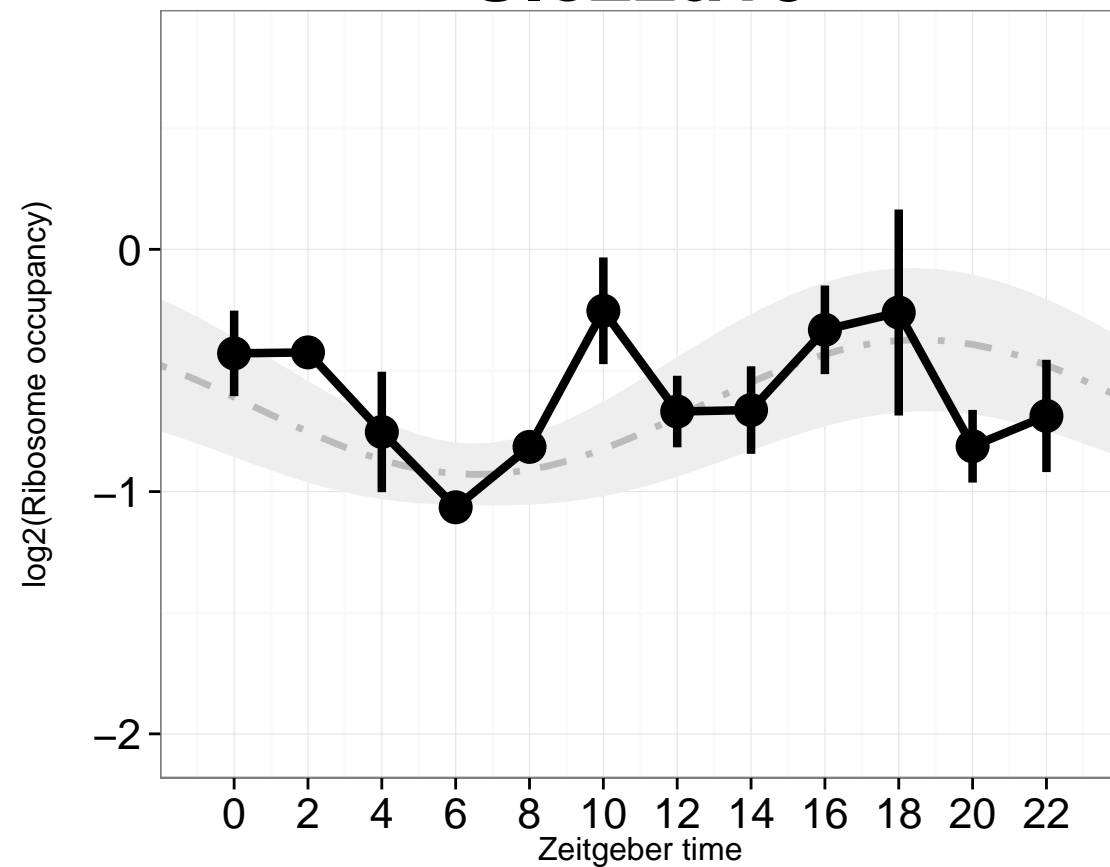

Supplement: SuppDataset_1.zip [file Slc22a15_set_D.pdf › Supplemental Dataset 1/D-mRNA_rhythm_translation_rhyth/Slc22a15_set_D.pdf]

## Slc23a2

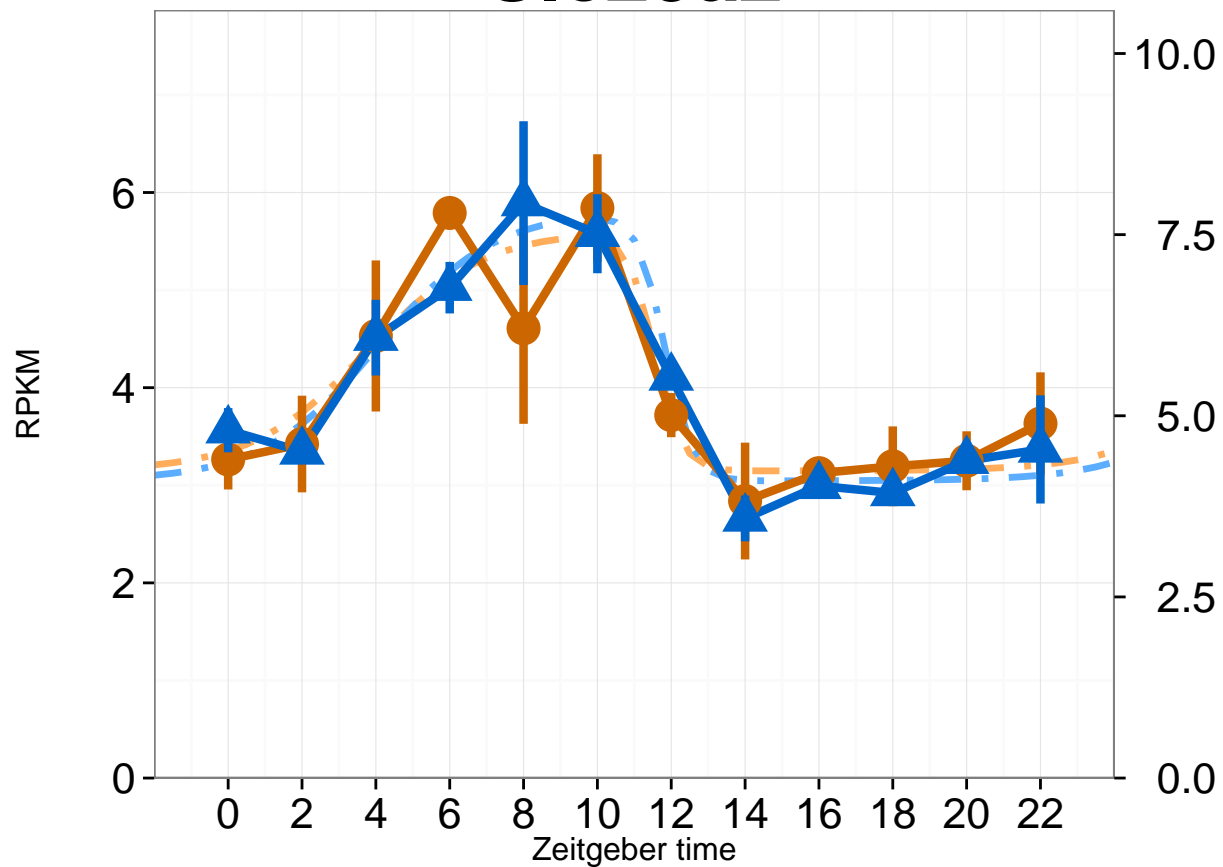

## Slc23a2

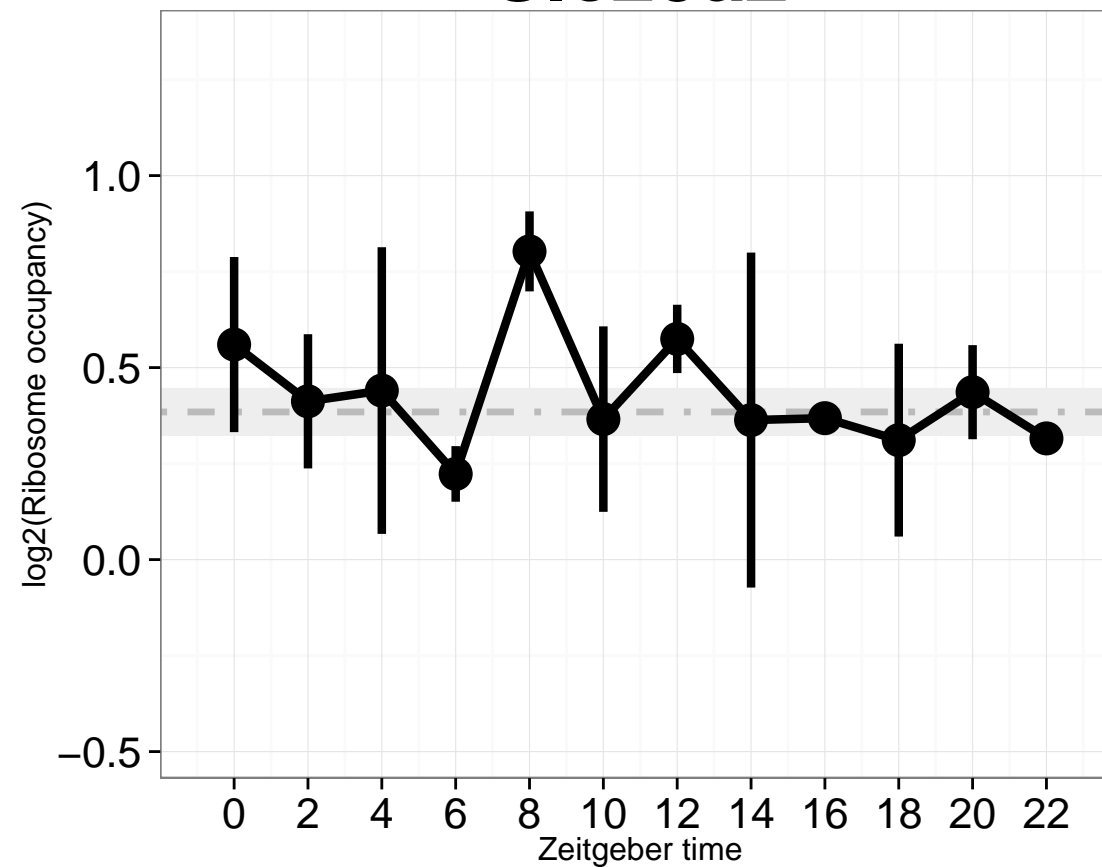

Supplement: SuppDataset_1.zip [file Slc23a2_set_D.pdf › Supplemental Dataset 1/D-mRNA_rhythm_translation_rhyth/Slc23a2_set_D.pdf]

# Slc25a19

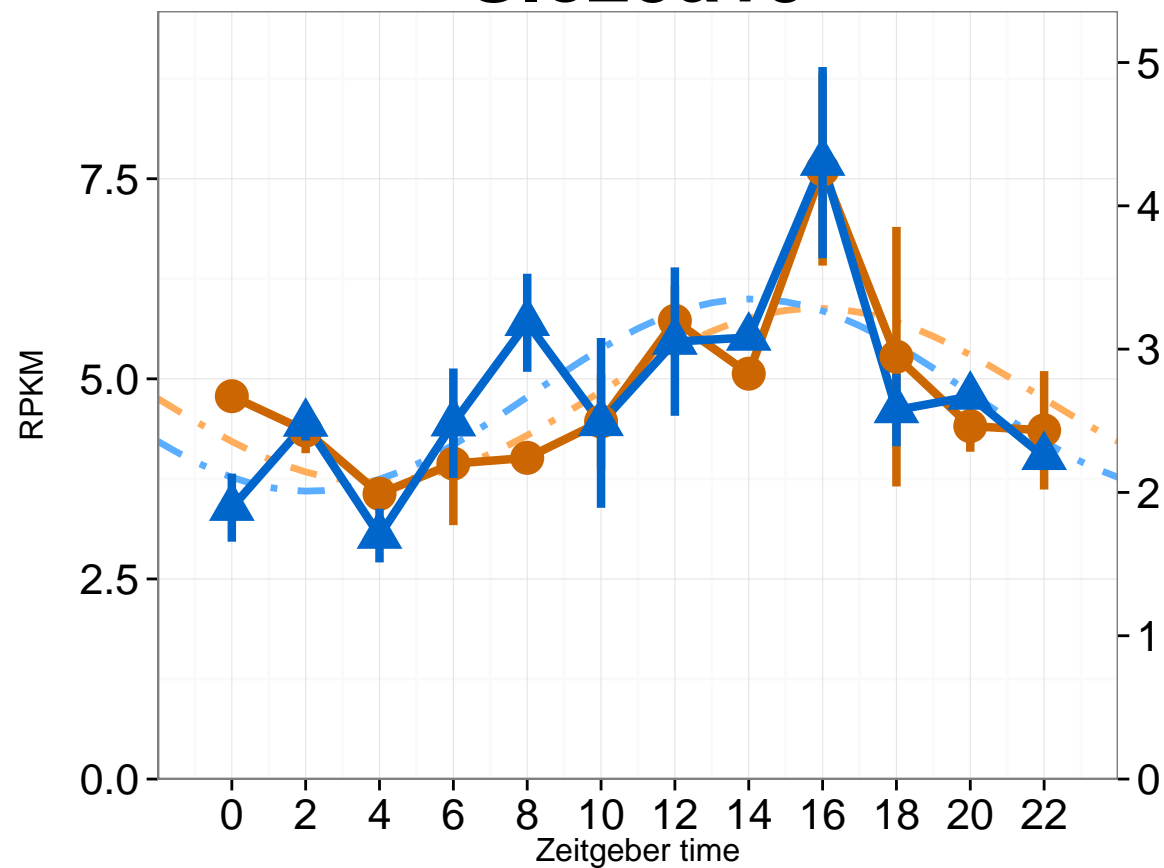

# Slc25a19

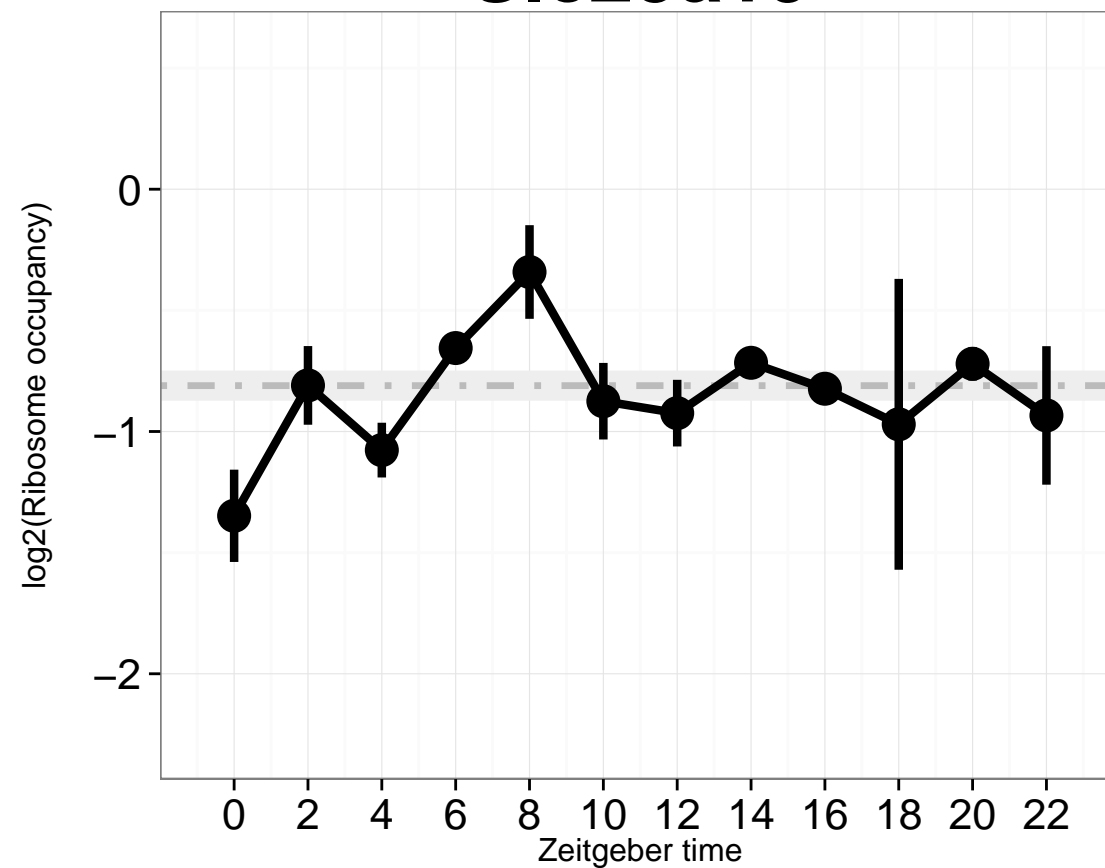

Supplement: SuppDataset_1.zip [file Slc25a19_set_D.pdf › Supplemental Dataset 1/D-mRNA_rhythm_translation_rhyth/Slc25a19_set_D.pdf]

# Slc25a22

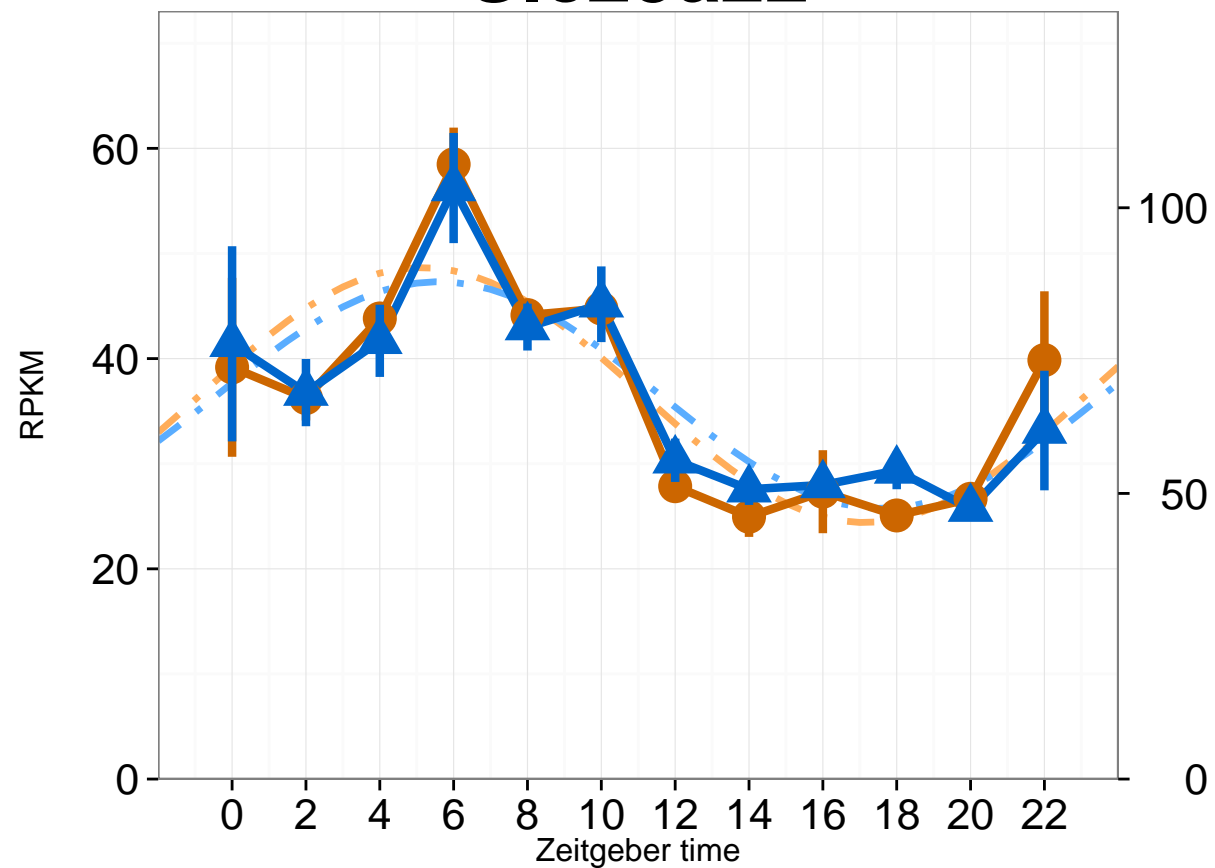

# Slc25a22

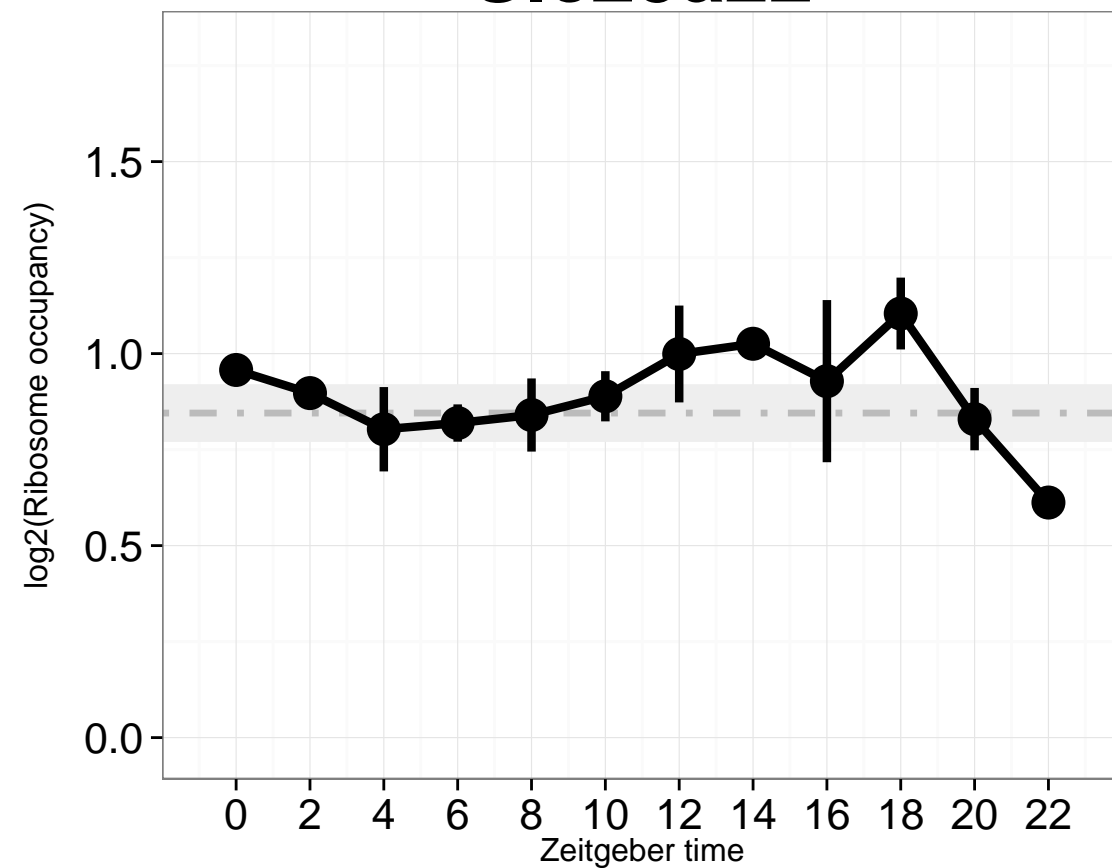

Supplement: SuppDataset_1.zip [file Slc25a22_set_D.pdf › Supplemental Dataset 1/D-mRNA_rhythm_translation_rhyth/Slc25a22_set_D.pdf]

## Slc25a32

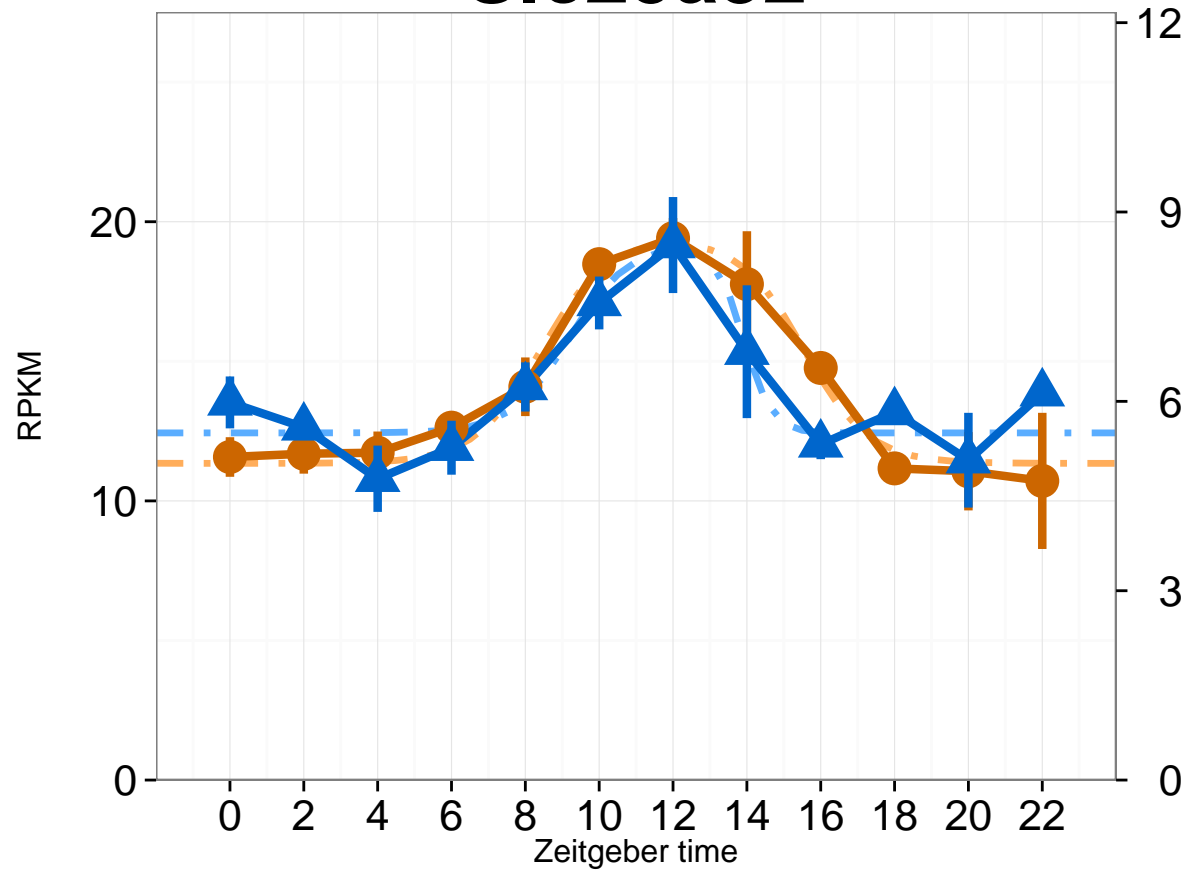

## Slc25a32

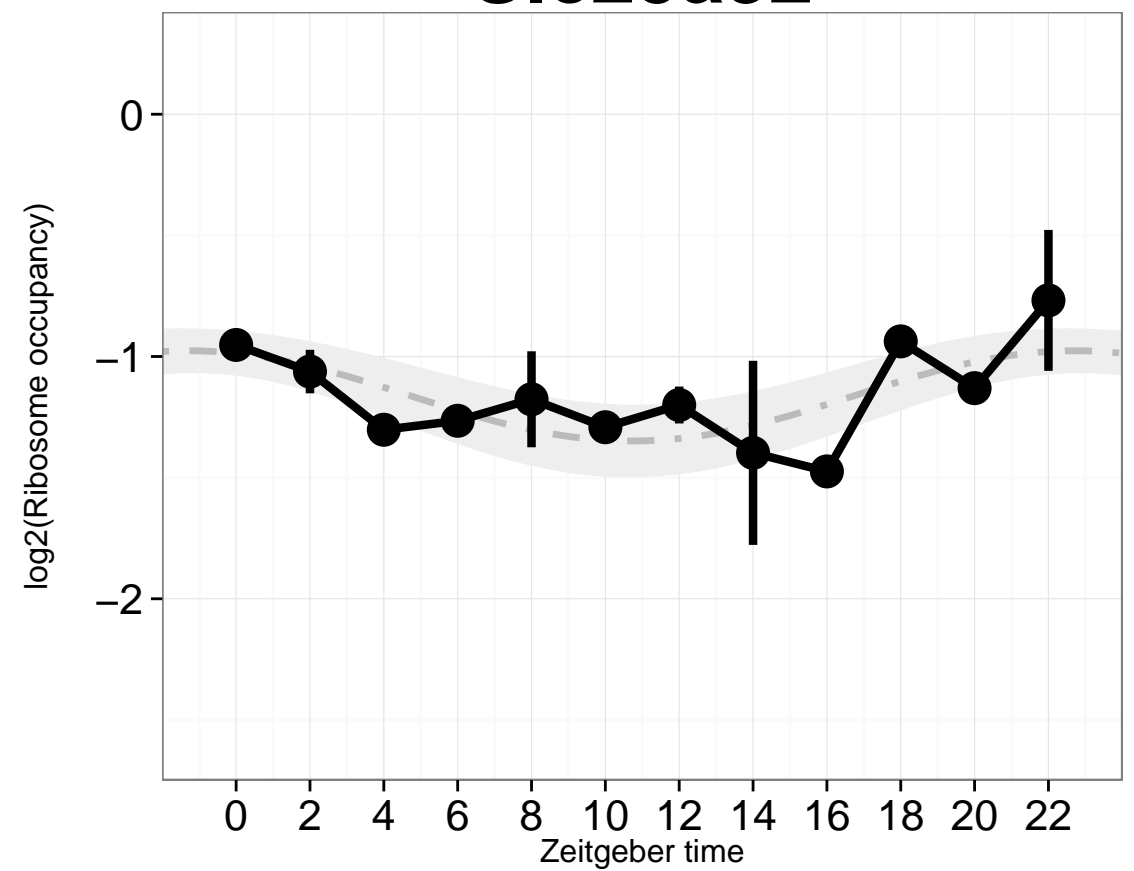

Supplement: SuppDataset_1.zip [file Slc25a32_set_D.pdf › Supplemental Dataset 1/D-mRNA_rhythm_translation_rhyth/Slc25a32_set_D.pdf]

# Slc25a37

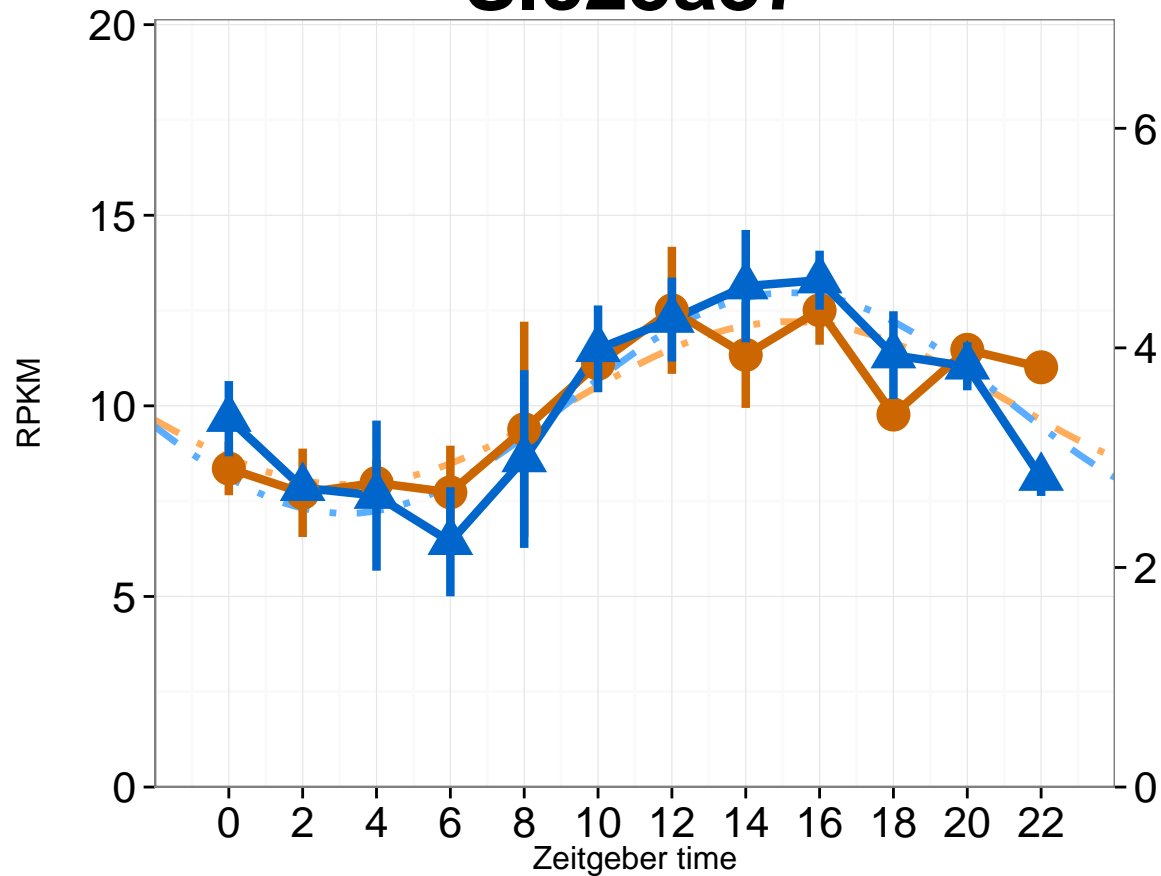

# Slc25a37

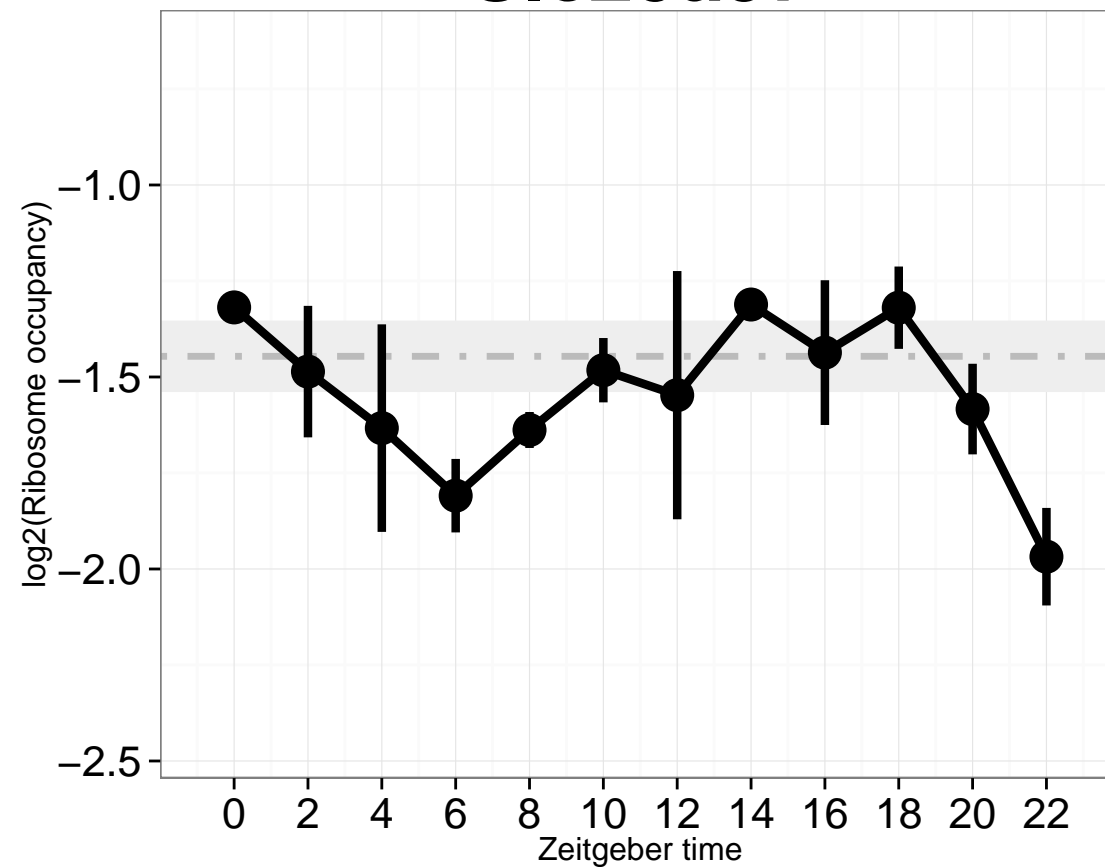

Supplement: SuppDataset_1.zip [file Slc25a37_set_D.pdf › Supplemental Dataset 1/D-mRNA_rhythm_translation_rhyth/Slc25a37_set_D.pdf]

## Slc25a42

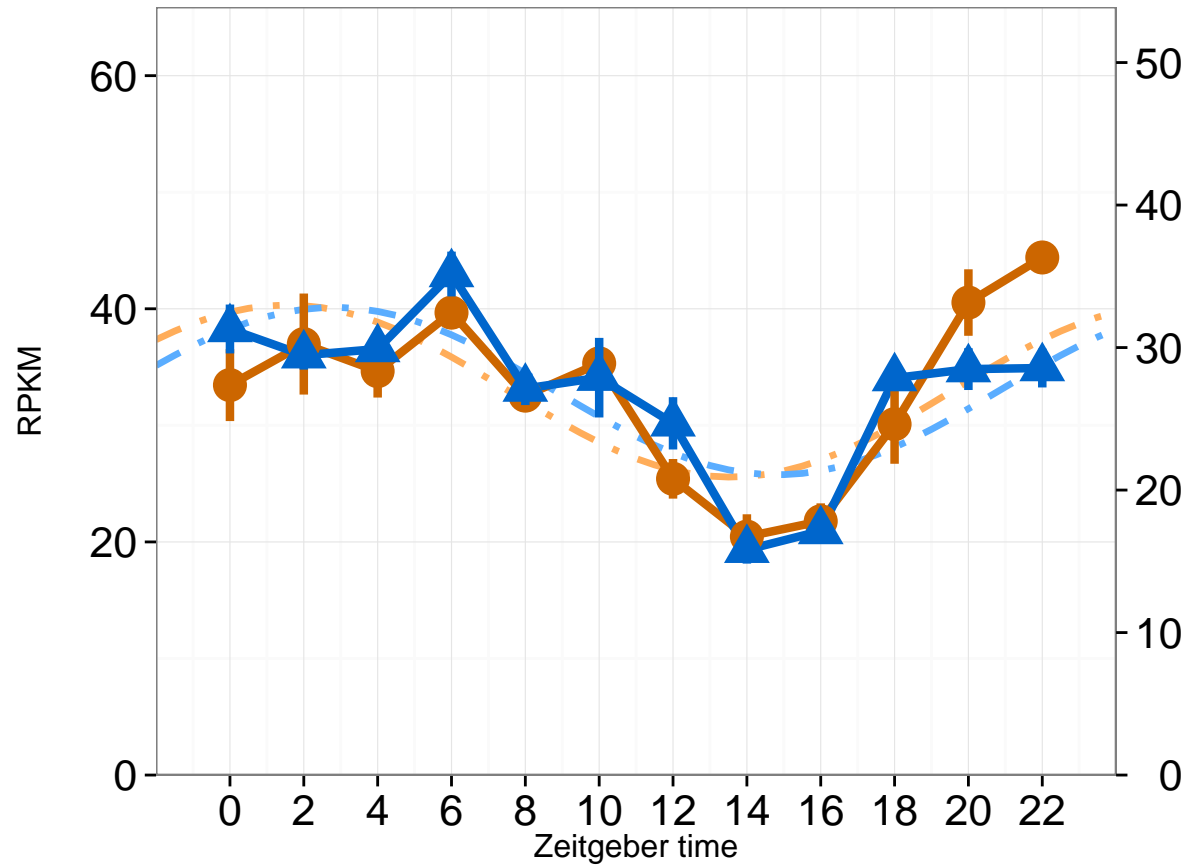

## Slc25a42

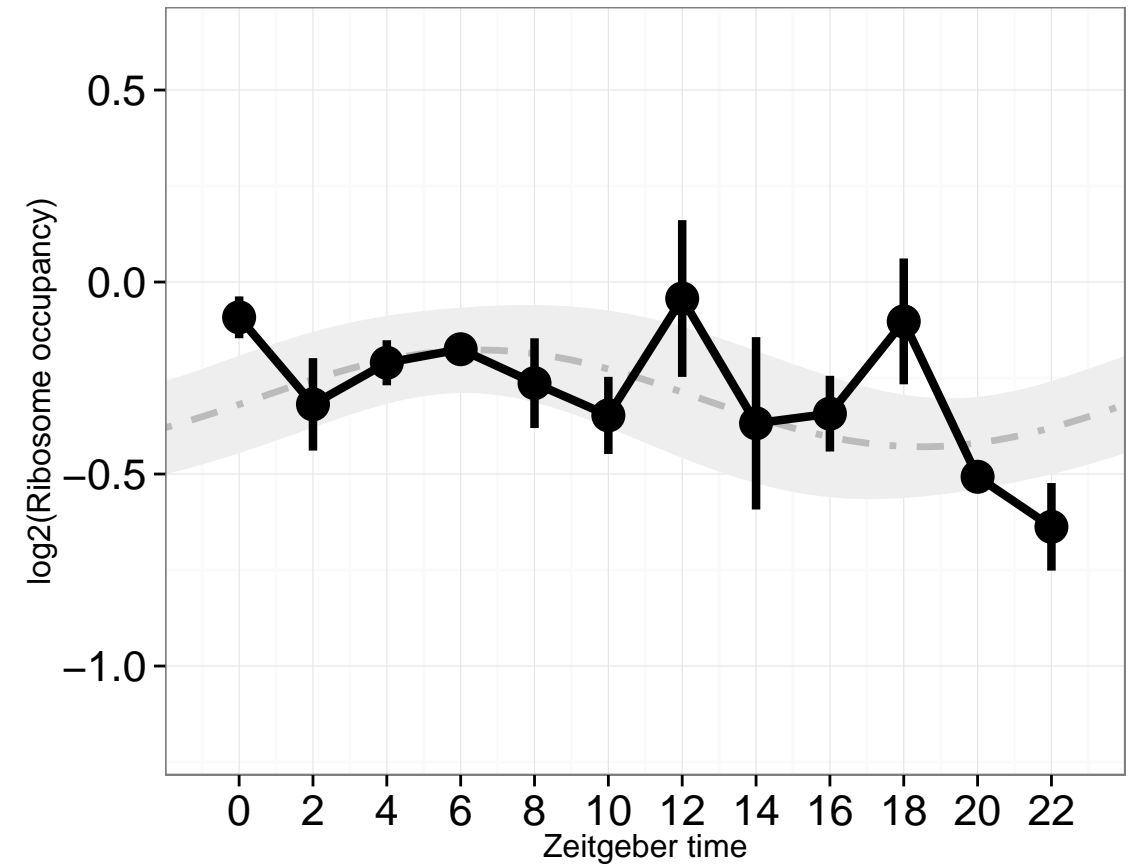

Supplement: SuppDataset_1.zip [file Slc25a42_set_D.pdf › Supplemental Dataset 1/D-mRNA_rhythm_translation_rhyth/Slc25a42_set_D.pdf]

# Slc29a1

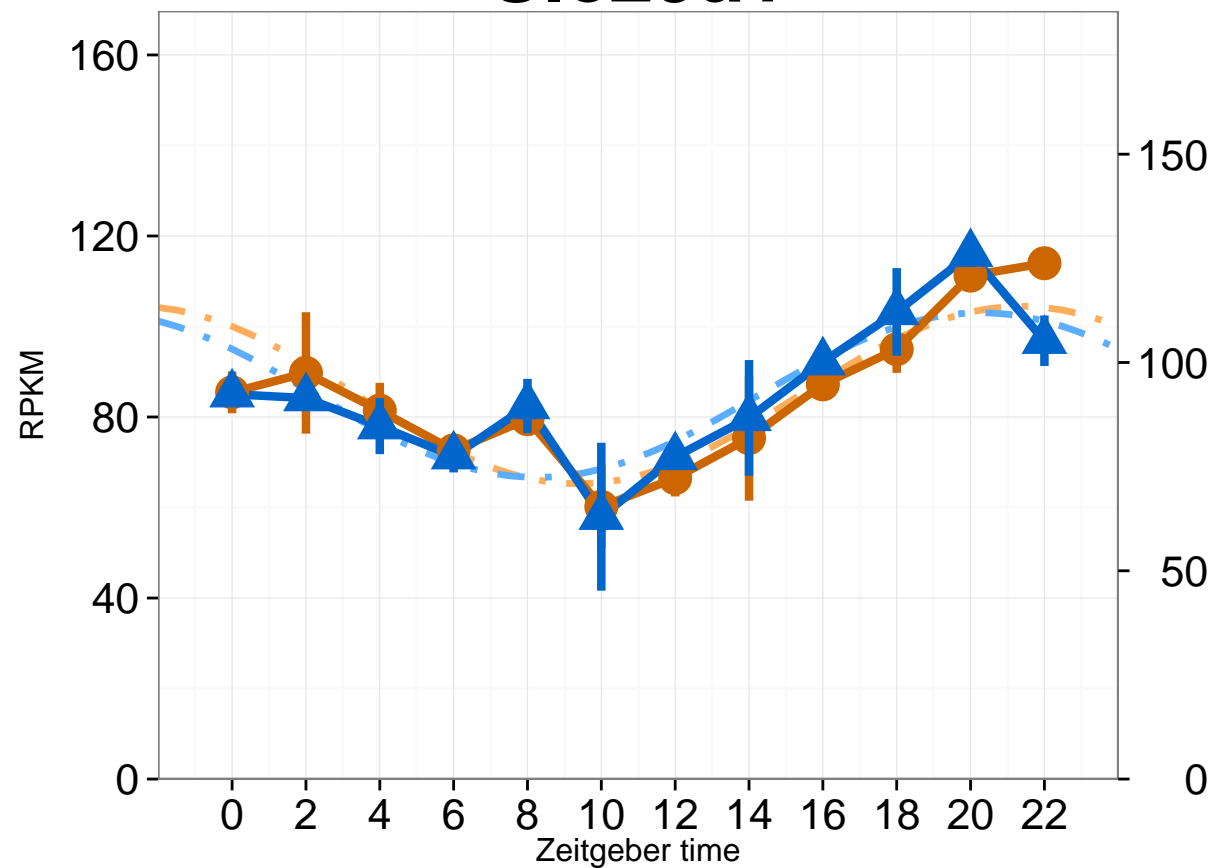

# Slc29a1

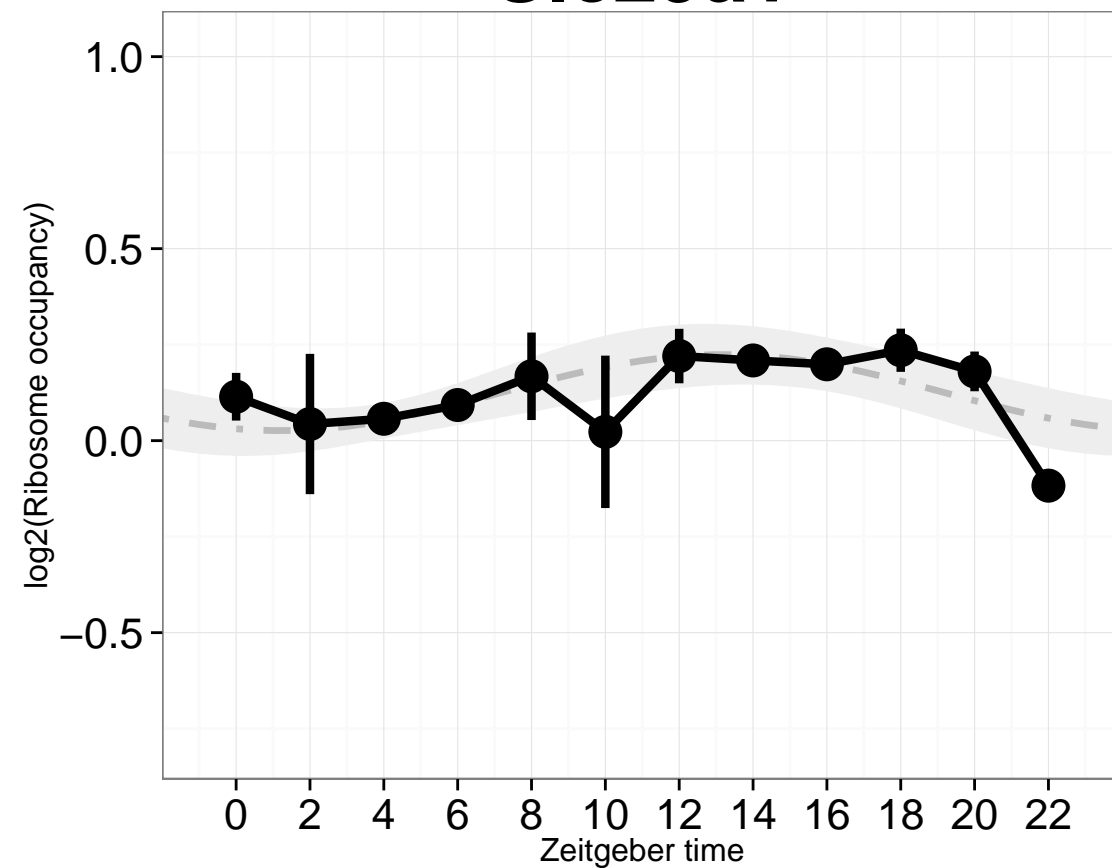

Supplement: SuppDataset_1.zip [file Slc29a1_set_D.pdf › Supplemental Dataset 1/D-mRNA_rhythm_translation_rhyth/Slc29a1_set_D.pdf]

## Slc2a2

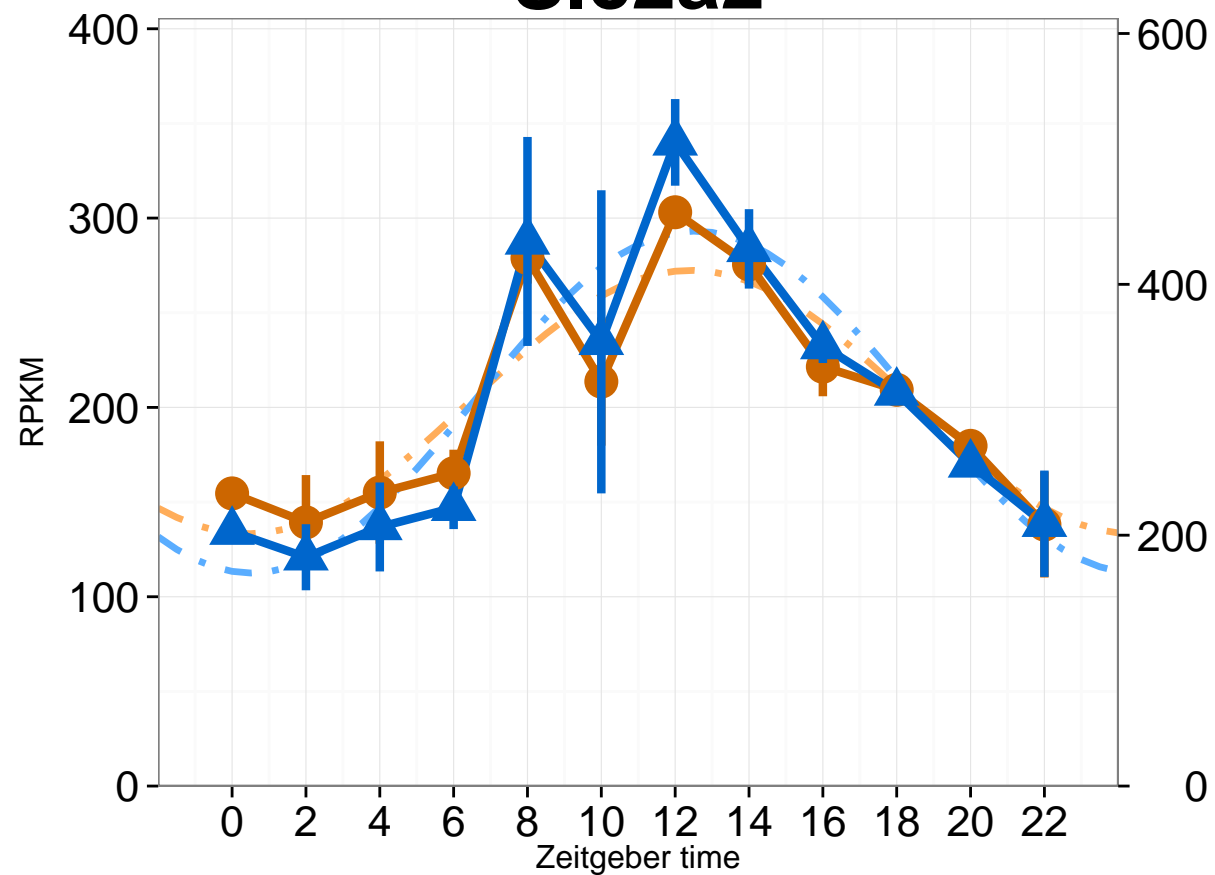

## Slc2a2

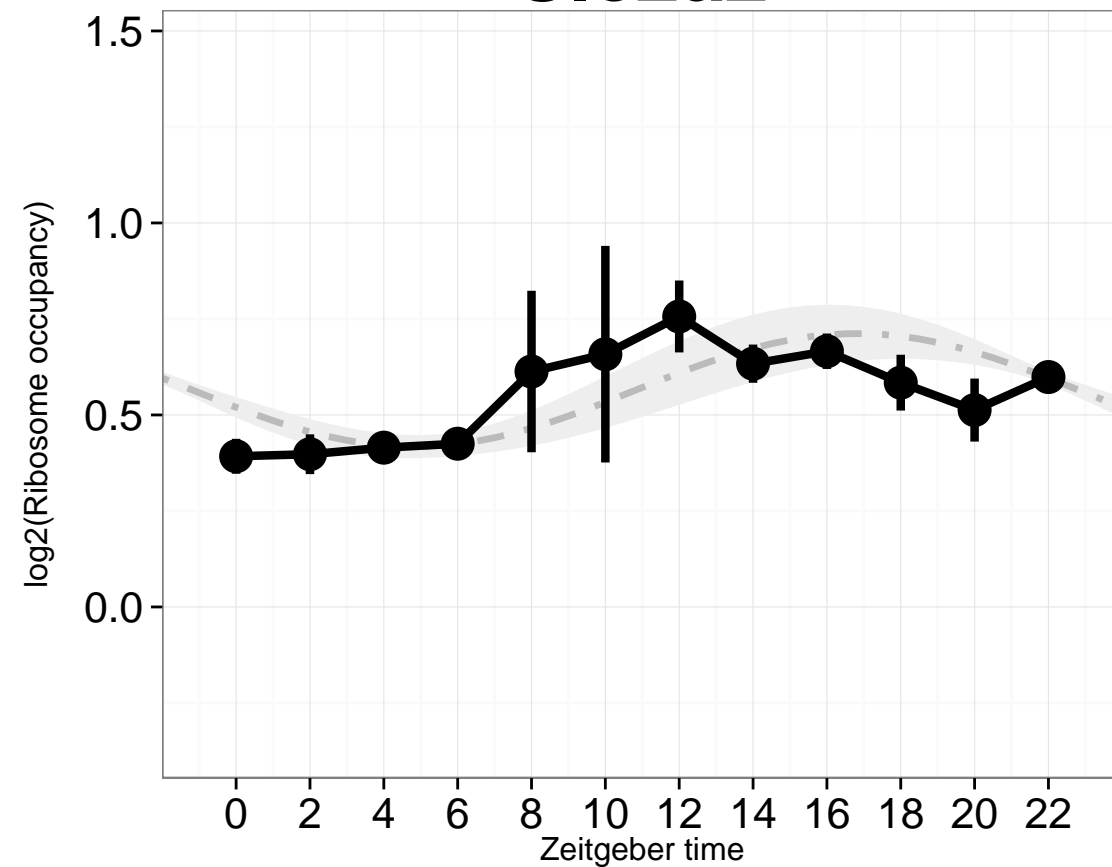

Supplement: SuppDataset_1.zip [file Slc2a2_set_D.pdf › Supplemental Dataset 1/D-mRNA_rhythm_translation_rhyth/Slc2a2_set_D.pdf]

# Slc2a5

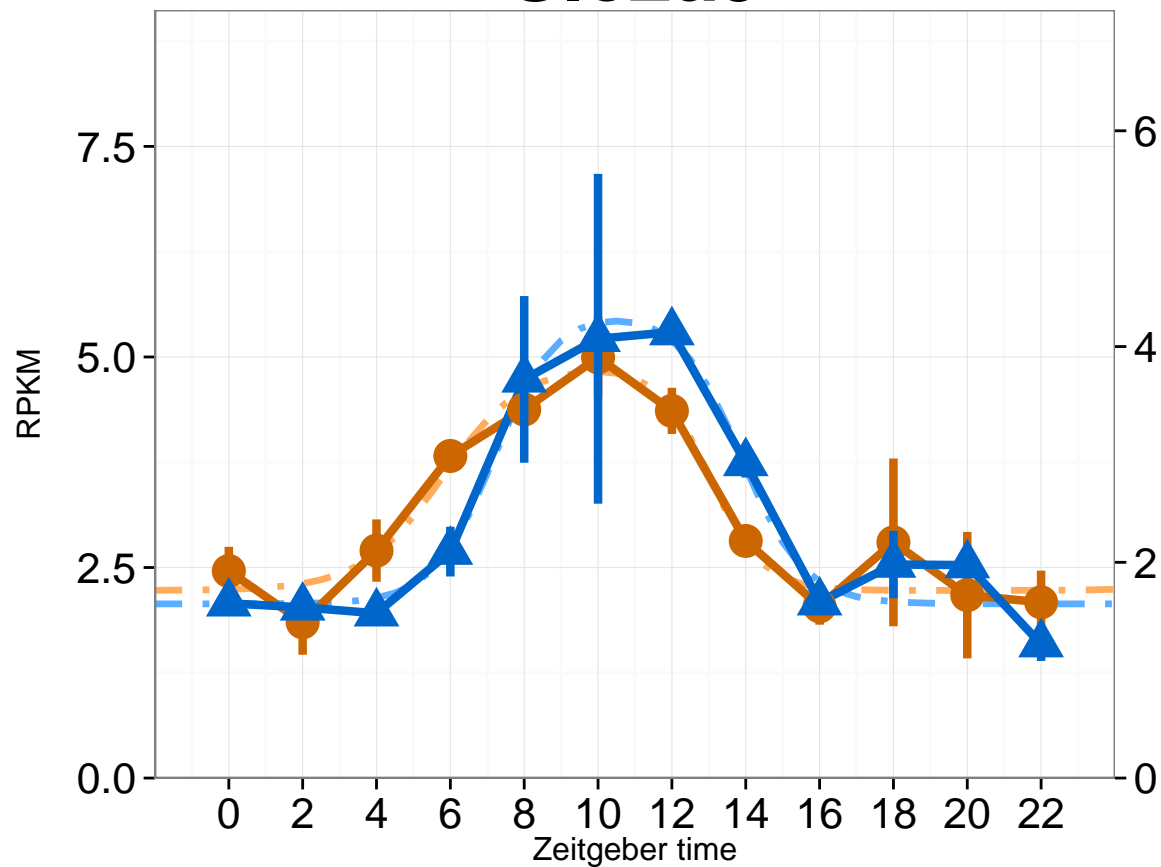

# Slc2a5

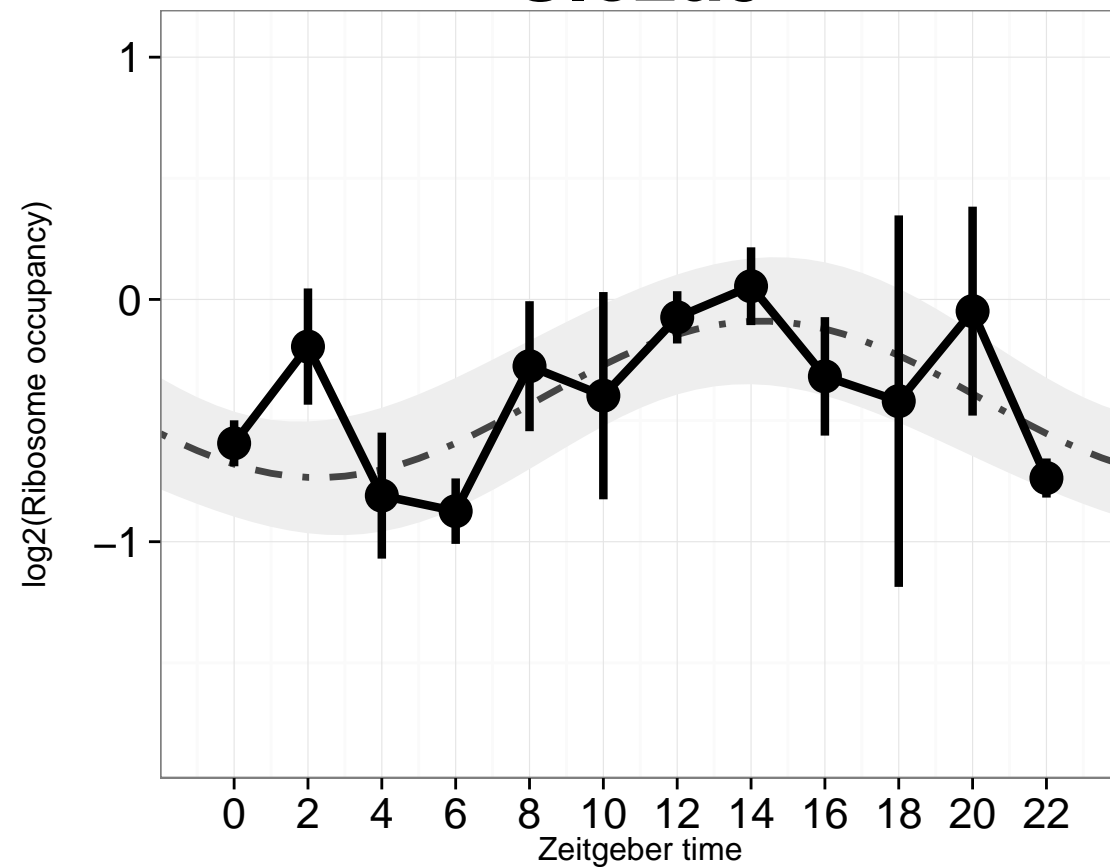

Supplement: SuppDataset_1.zip [file Slc2a5_set_D.pdf › Supplemental Dataset 1/D-mRNA_rhythm_translation_rhyth/Slc2a5_set_D.pdf]

## Slc30a10

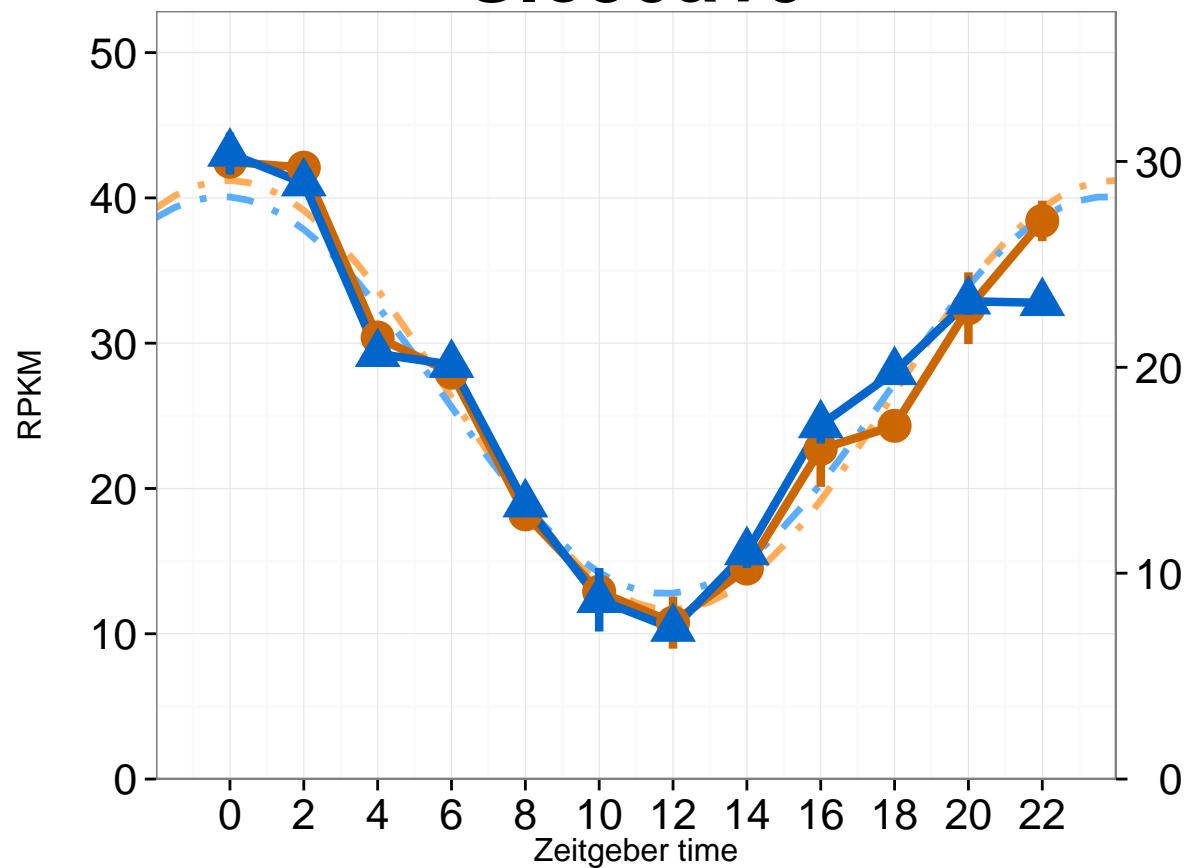

## Slc30a10

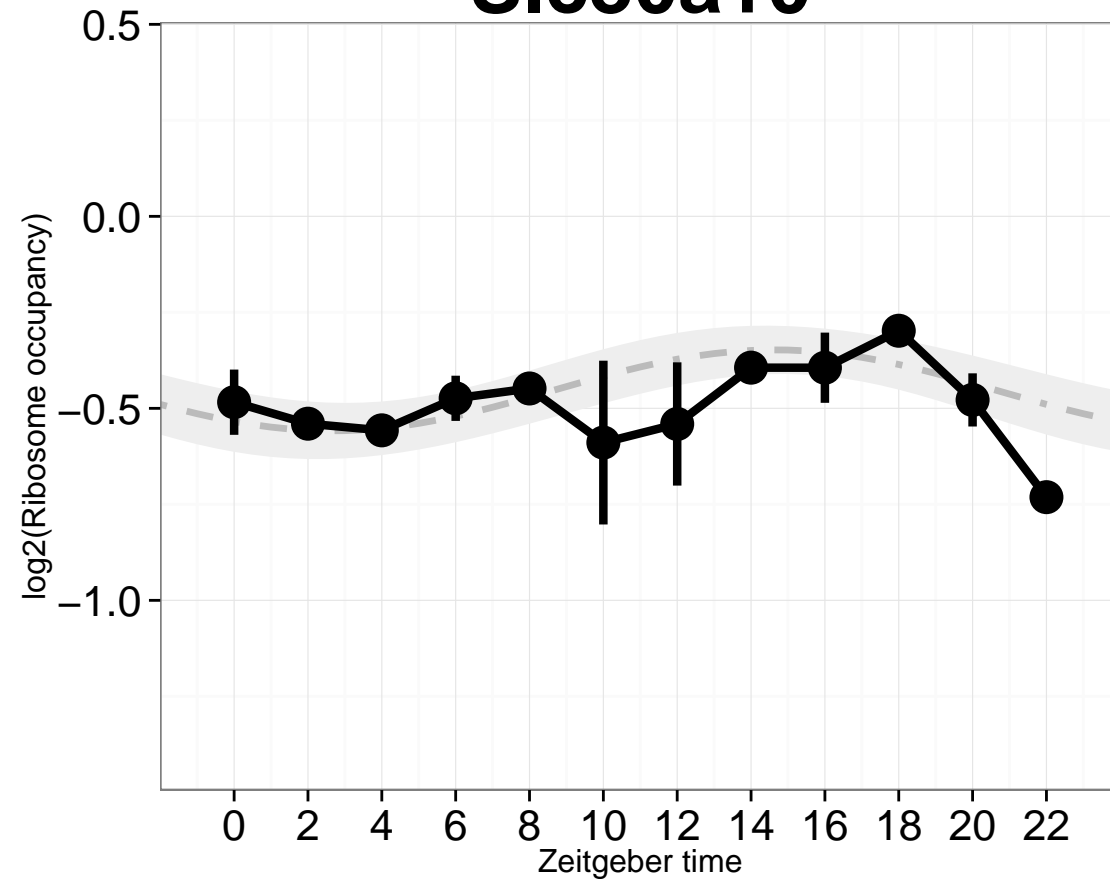

Supplement: SuppDataset_1.zip [file Slc30a10_set_D.pdf › Supplemental Dataset 1/D-mRNA_rhythm_translation_rhyth/Slc30a10_set_D.pdf]

## Slc34a2

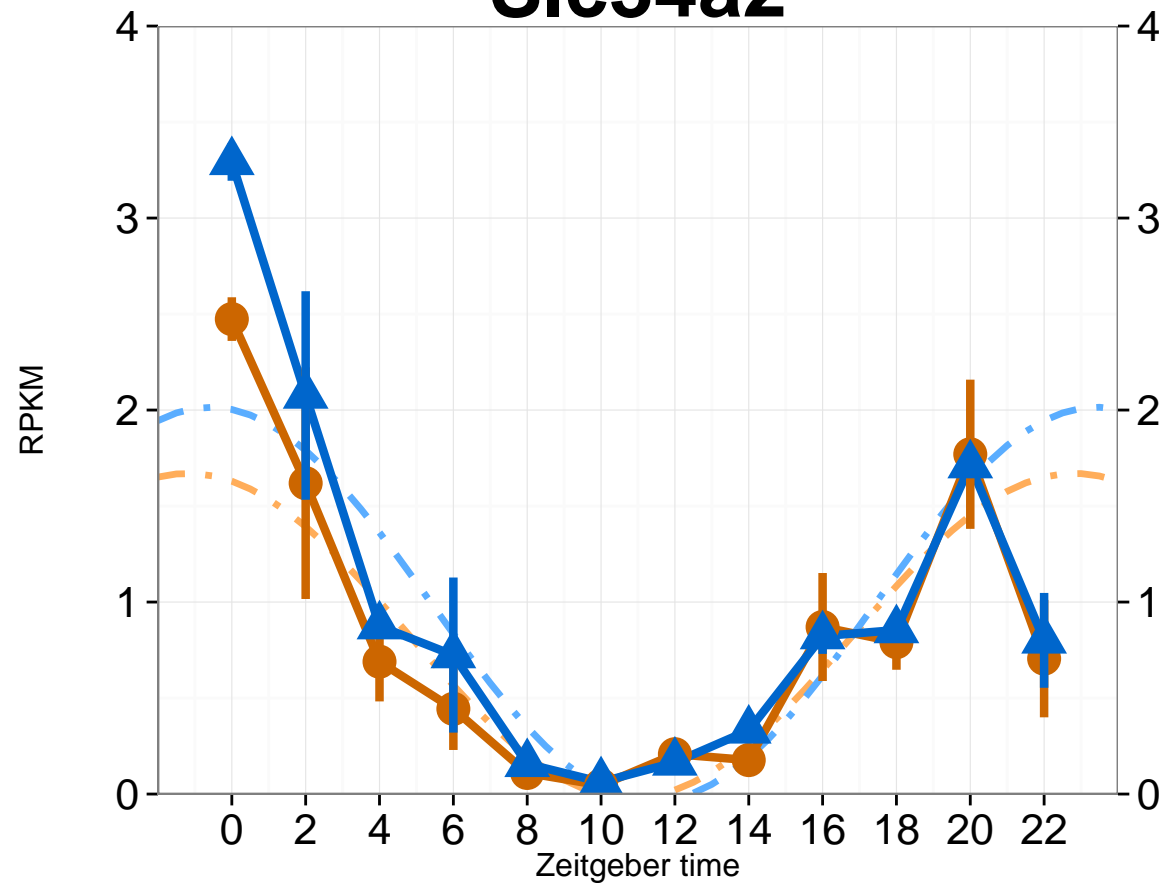

## Slc34a2

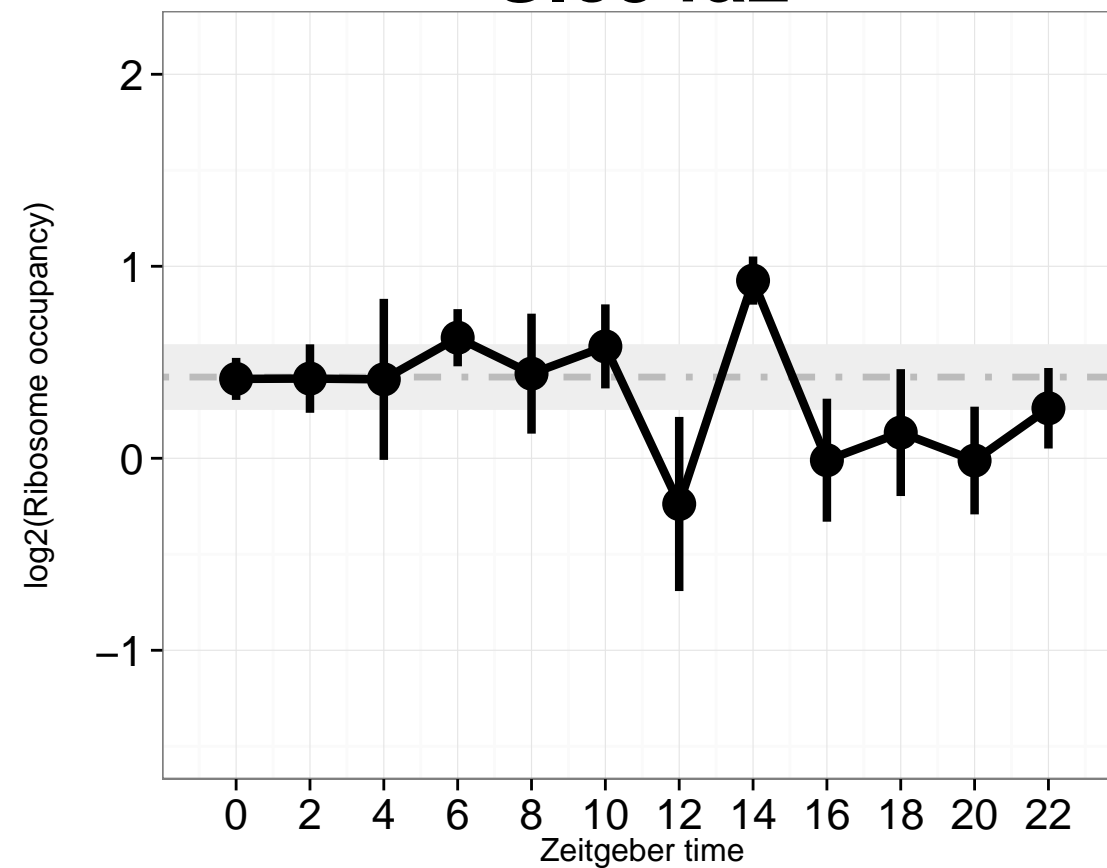

Supplement: SuppDataset_1.zip [file Slc34a2_set_D.pdf › Supplemental Dataset 1/D-mRNA_rhythm_translation_rhyth/Slc34a2_set_D.pdf]

## Slc35g1

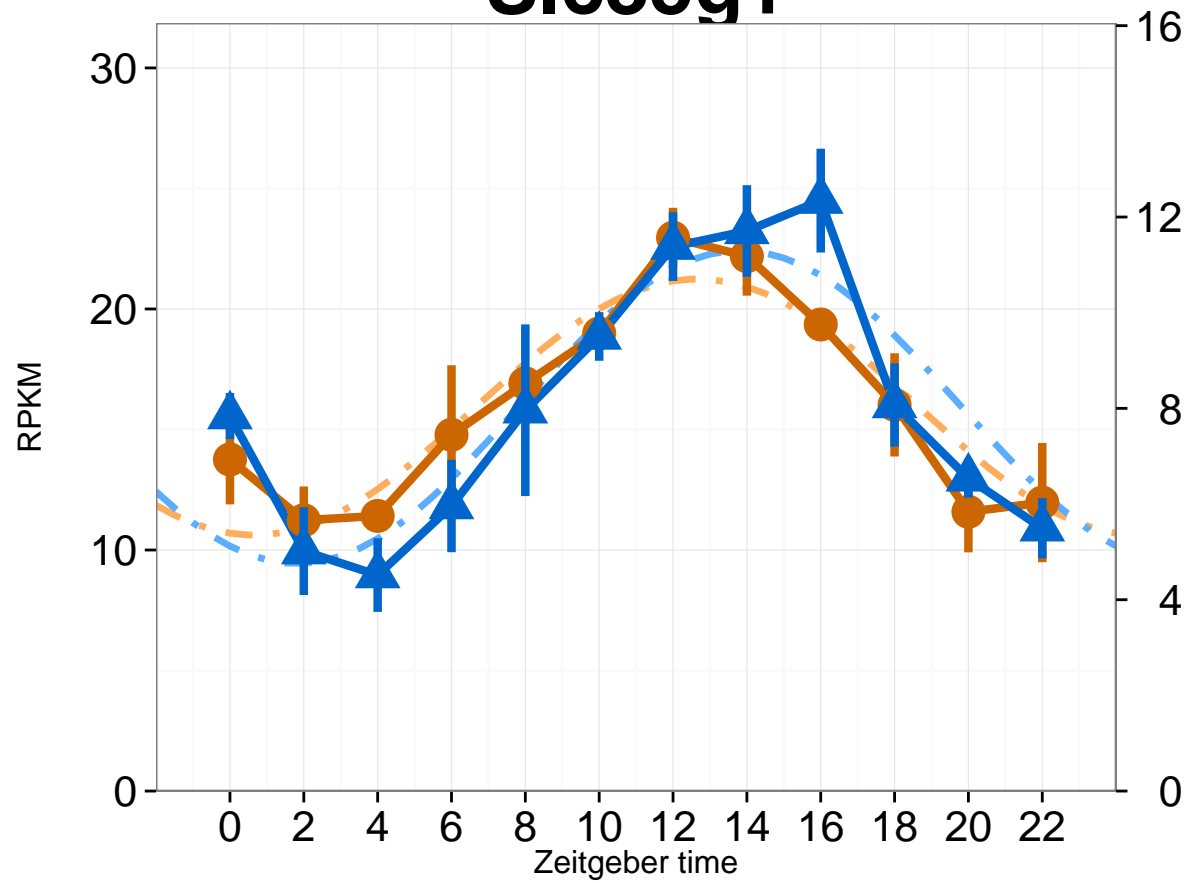

## Slc35g1

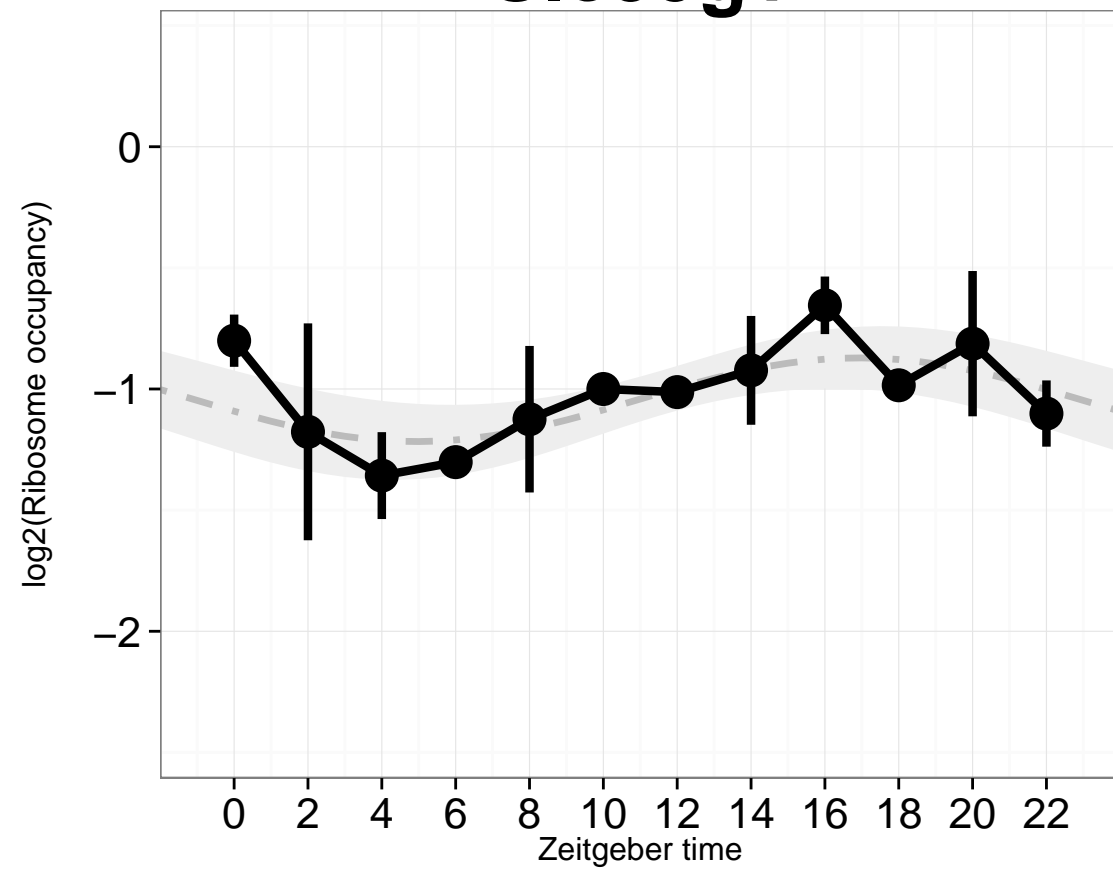

Supplement: SuppDataset_1.zip [file Slc35g1_set_D.pdf › Supplemental Dataset 1/D-mRNA_rhythm_translation_rhyth/Slc35g1_set_D.pdf]

## Slc37a4

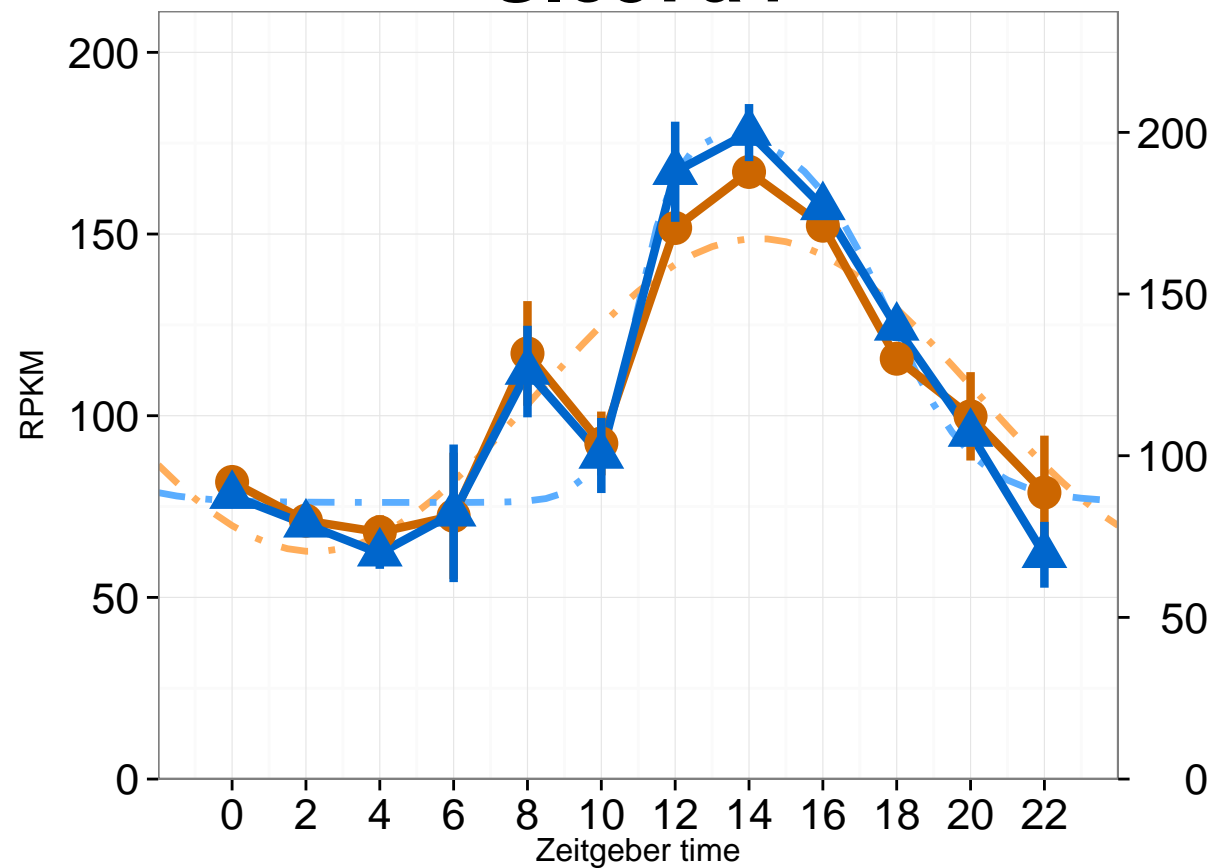

## Slc37a4

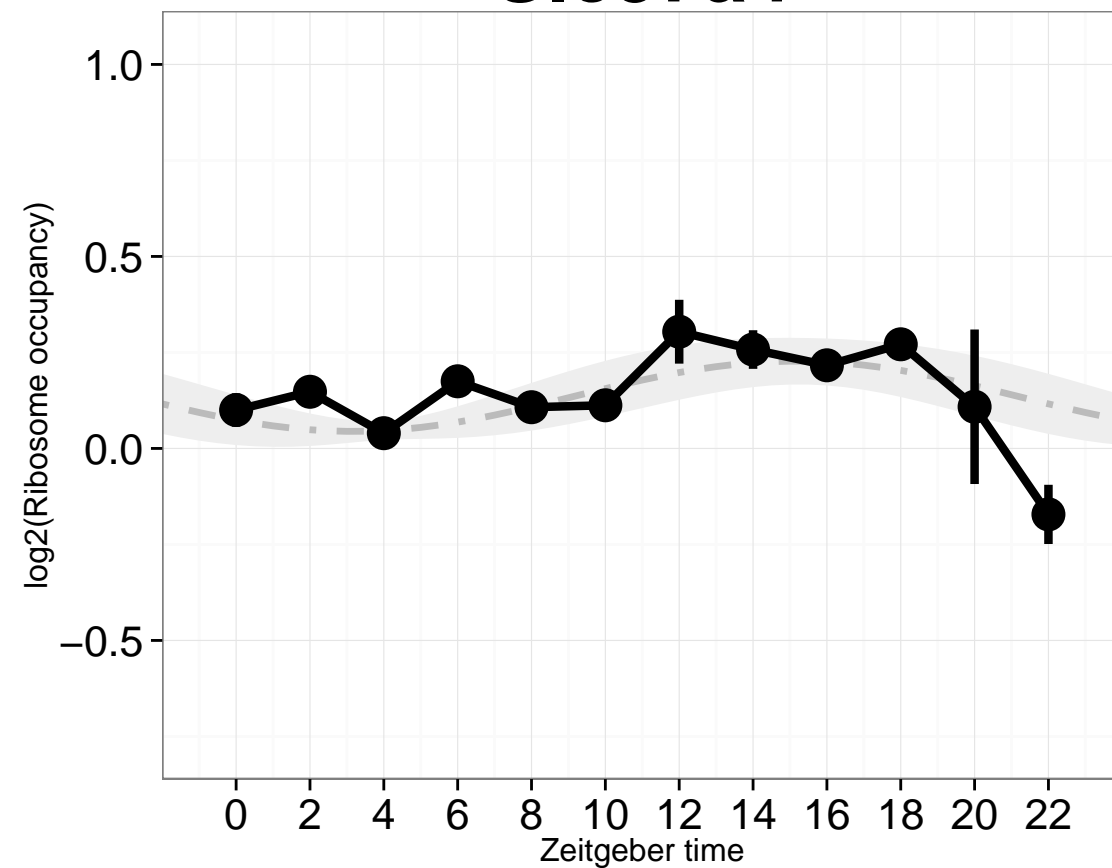

Supplement: SuppDataset_1.zip [file Slc37a4_set_D.pdf › Supplemental Dataset 1/D-mRNA_rhythm_translation_rhyth/Slc37a4_set_D.pdf]

# Slc38a2

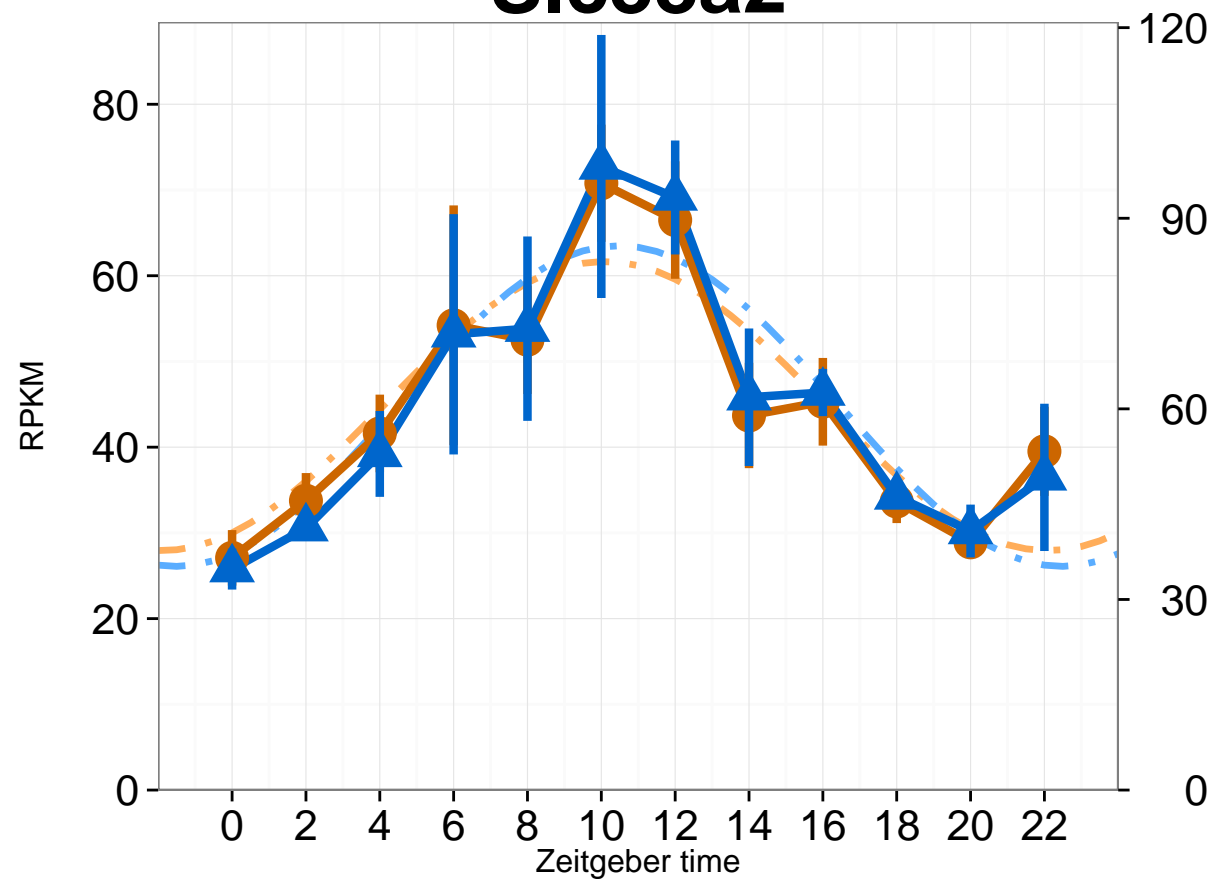

# Slc38a2

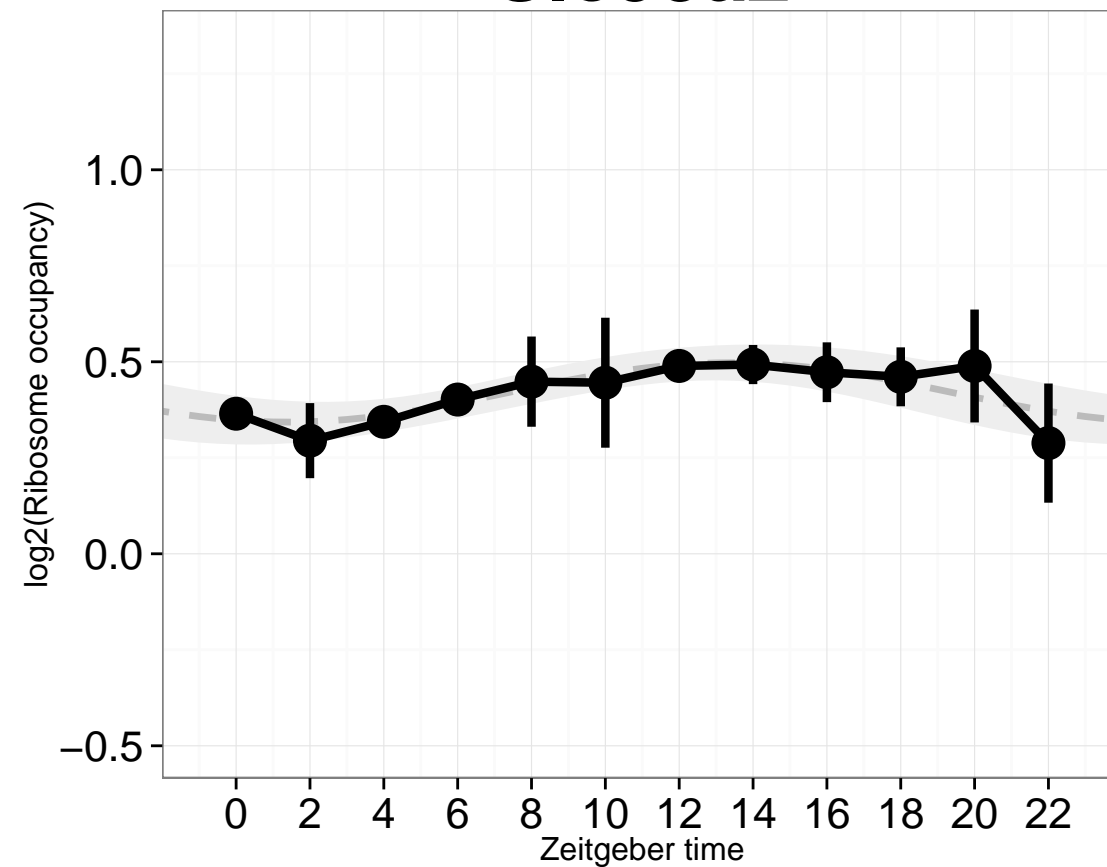

Supplement: SuppDataset_1.zip [file Slc38a2_set_D.pdf › Supplemental Dataset 1/D-mRNA_rhythm_translation_rhyth/Slc38a2_set_D.pdf]

# Slc38a3

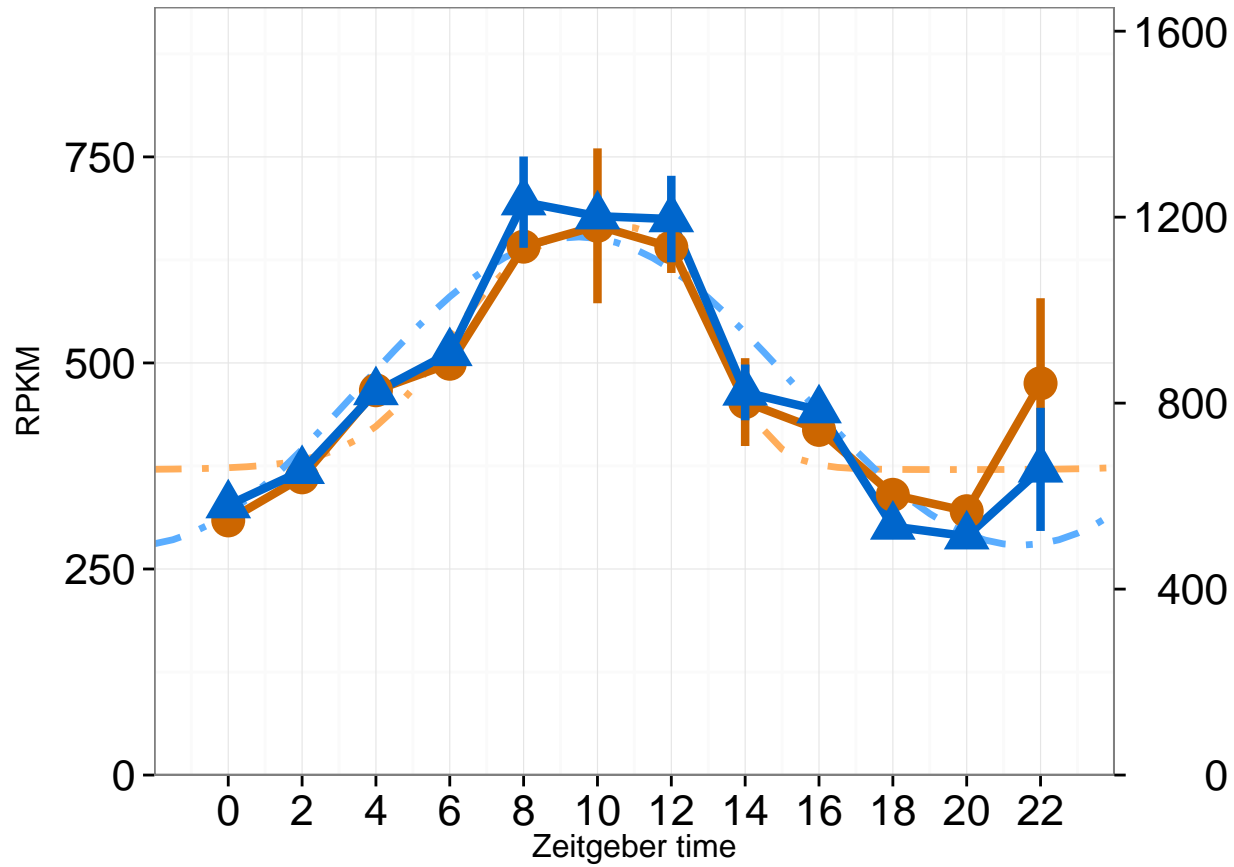

# Slc38a3

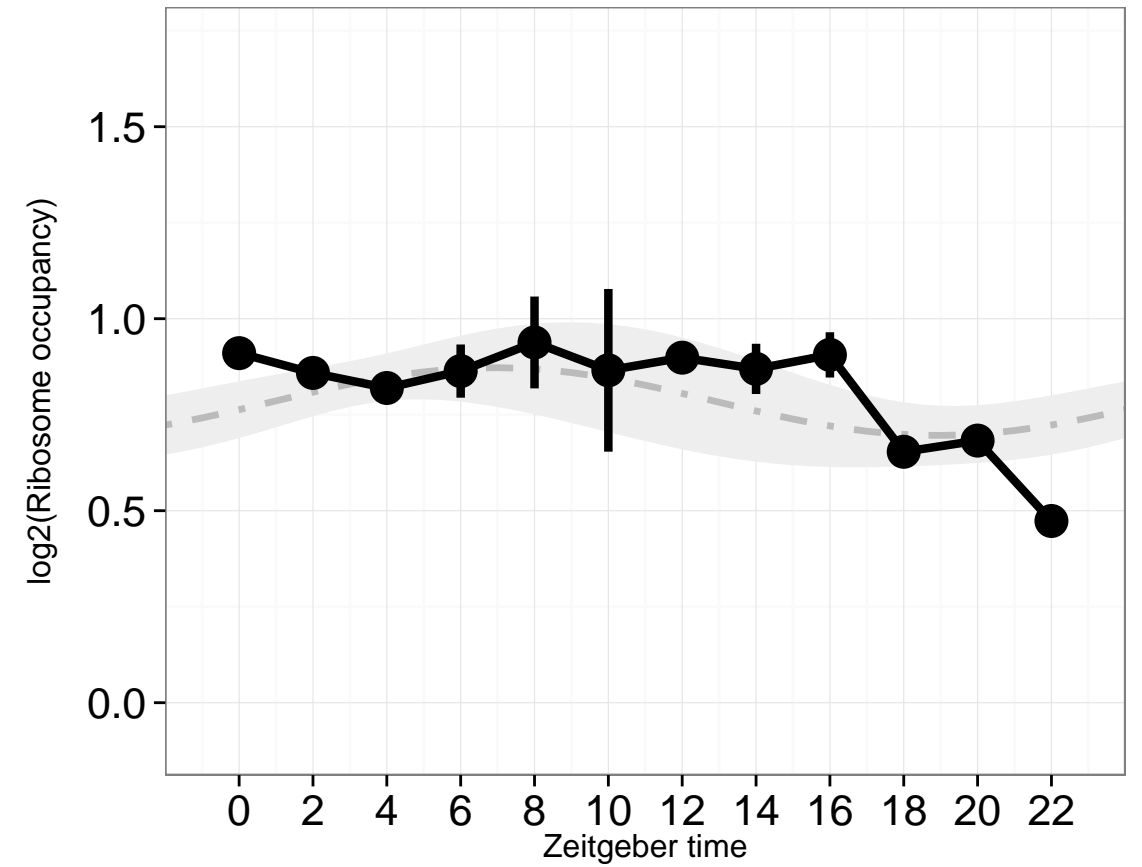

Supplement: SuppDataset_1.zip [file Slc38a3_set_D.pdf › Supplemental Dataset 1/D-mRNA_rhythm_translation_rhyth/Slc38a3_set_D.pdf]

## Slc39a10

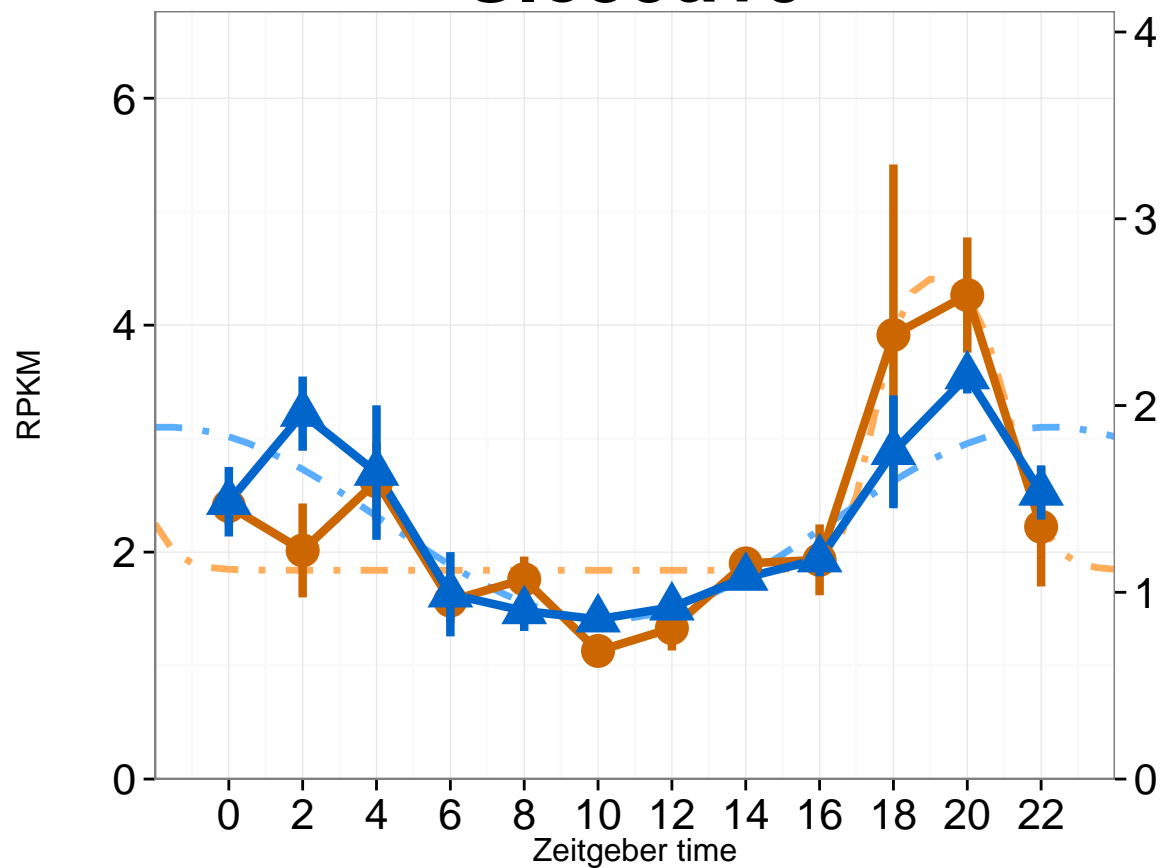

## Slc39a10

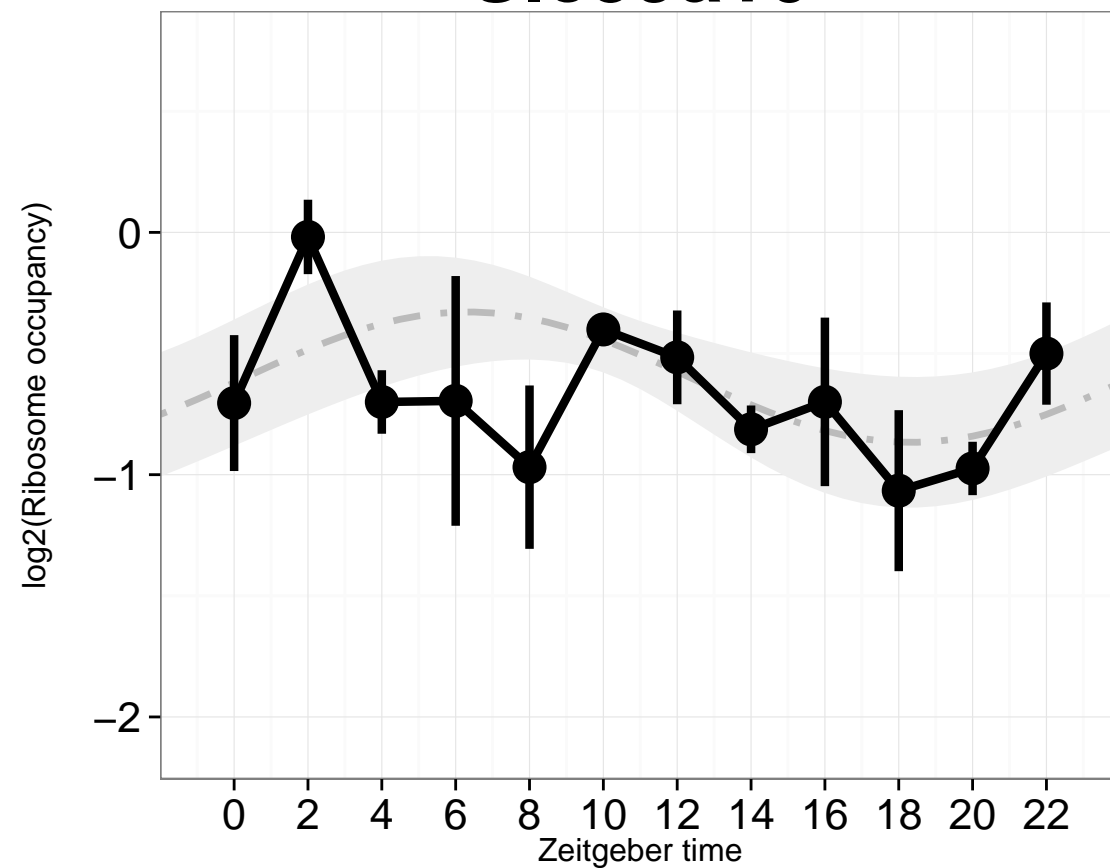

Supplement: SuppDataset_1.zip [file Slc39a10_set_D.pdf › Supplemental Dataset 1/D-mRNA_rhythm_translation_rhyth/Slc39a10_set_D.pdf]

## Slc39a14

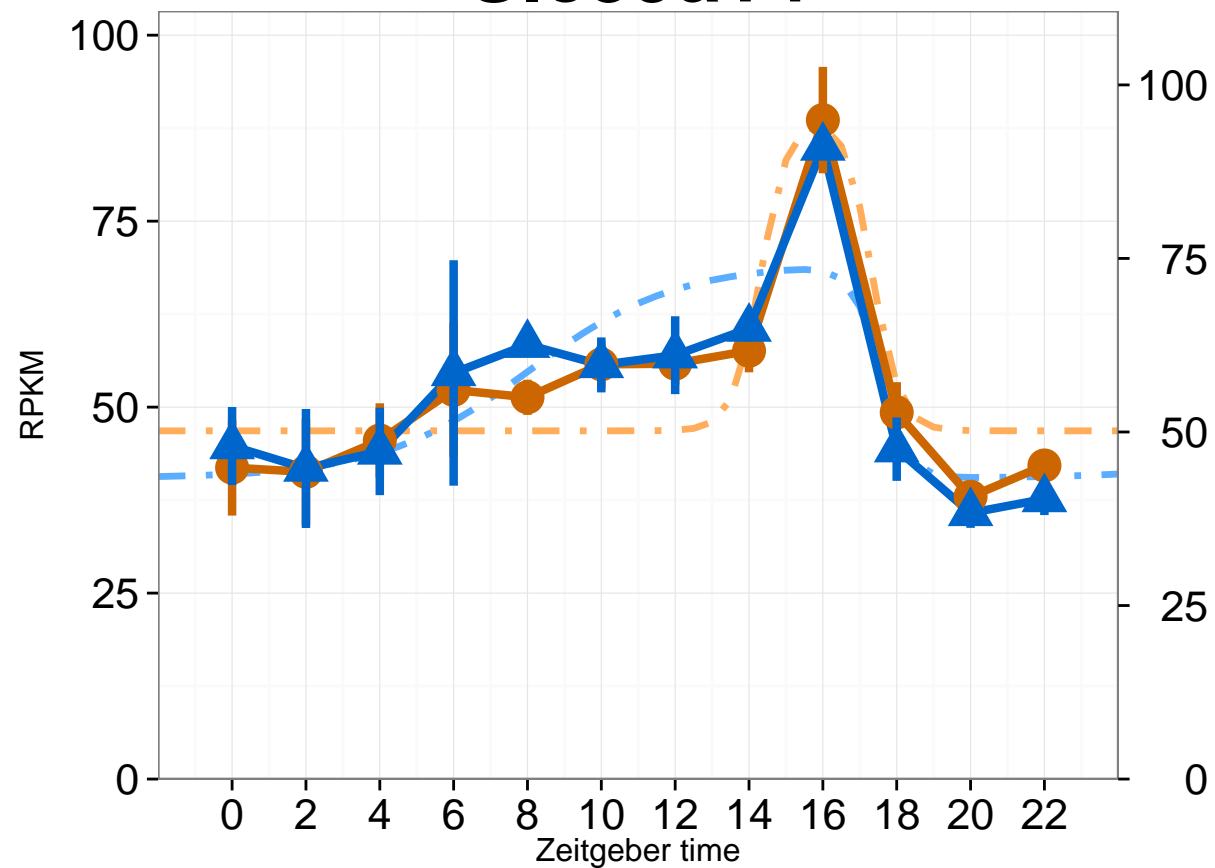

## Slc39a14

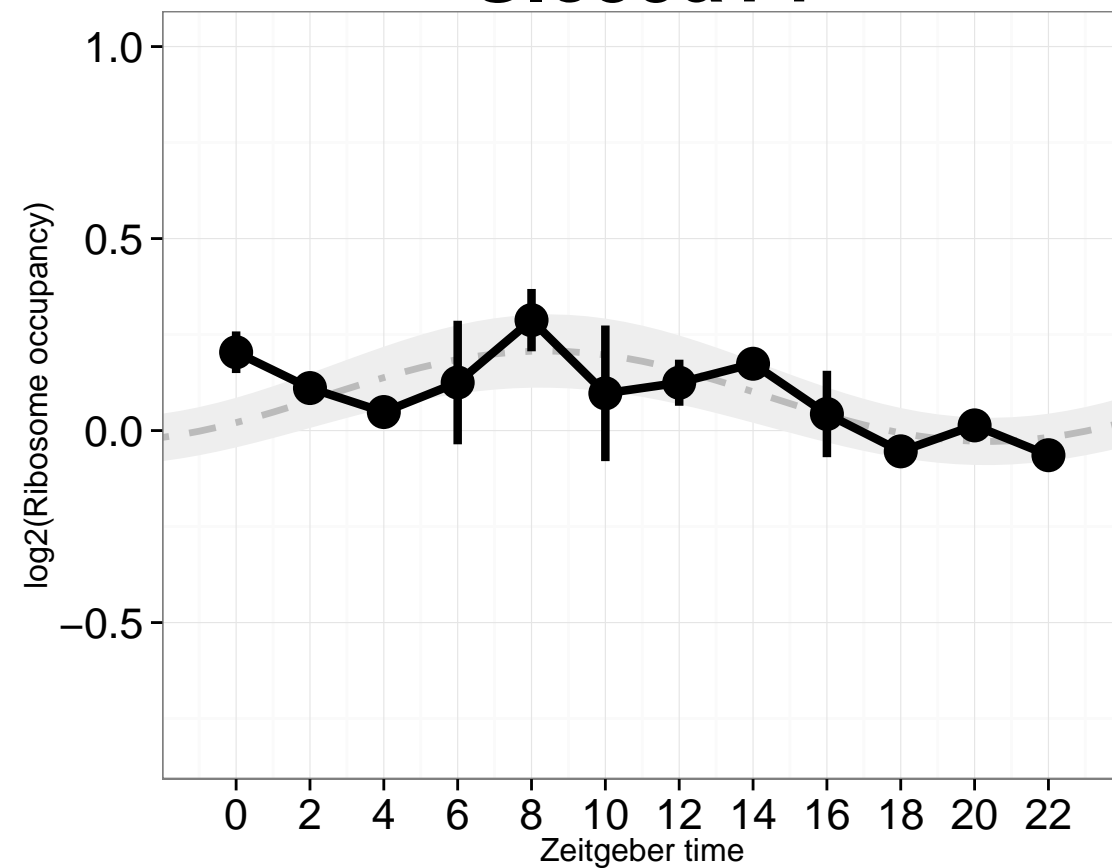

Supplement: SuppDataset_1.zip [file Slc39a14_set_D.pdf › Supplemental Dataset 1/D-mRNA_rhythm_translation_rhyth/Slc39a14_set_D.pdf]

## Slc39a8

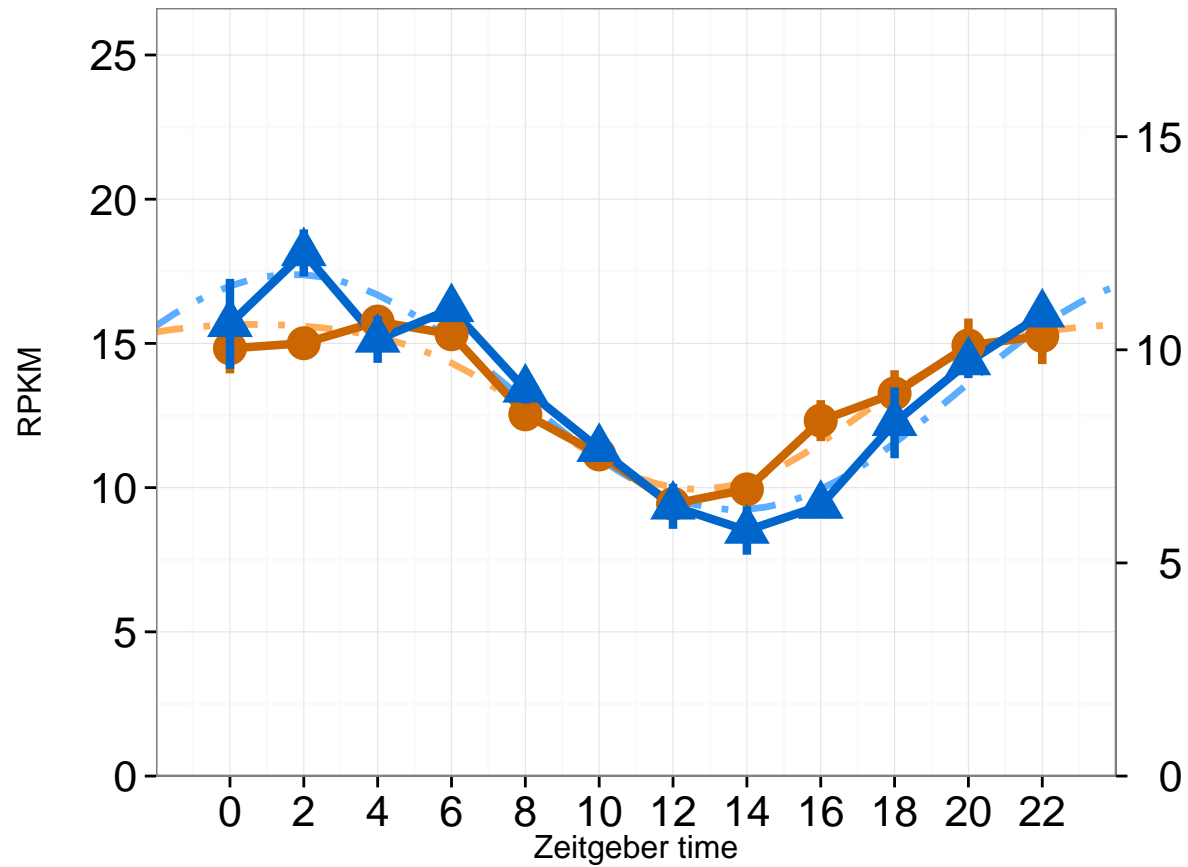

## Slc39a8

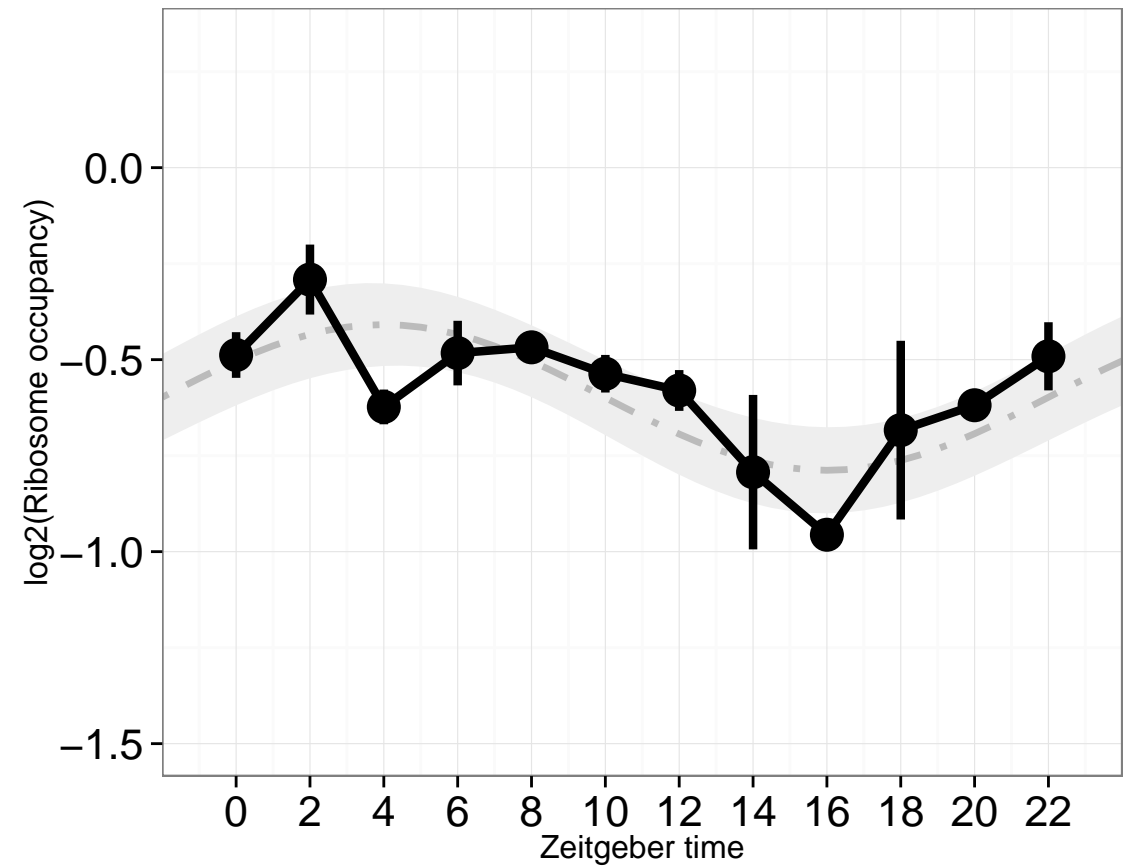

Supplement: SuppDataset_1.zip [file Slc39a8_set_D.pdf › Supplemental Dataset 1/D-mRNA_rhythm_translation_rhyth/Slc39a8_set_D.pdf]

# Slc3a1

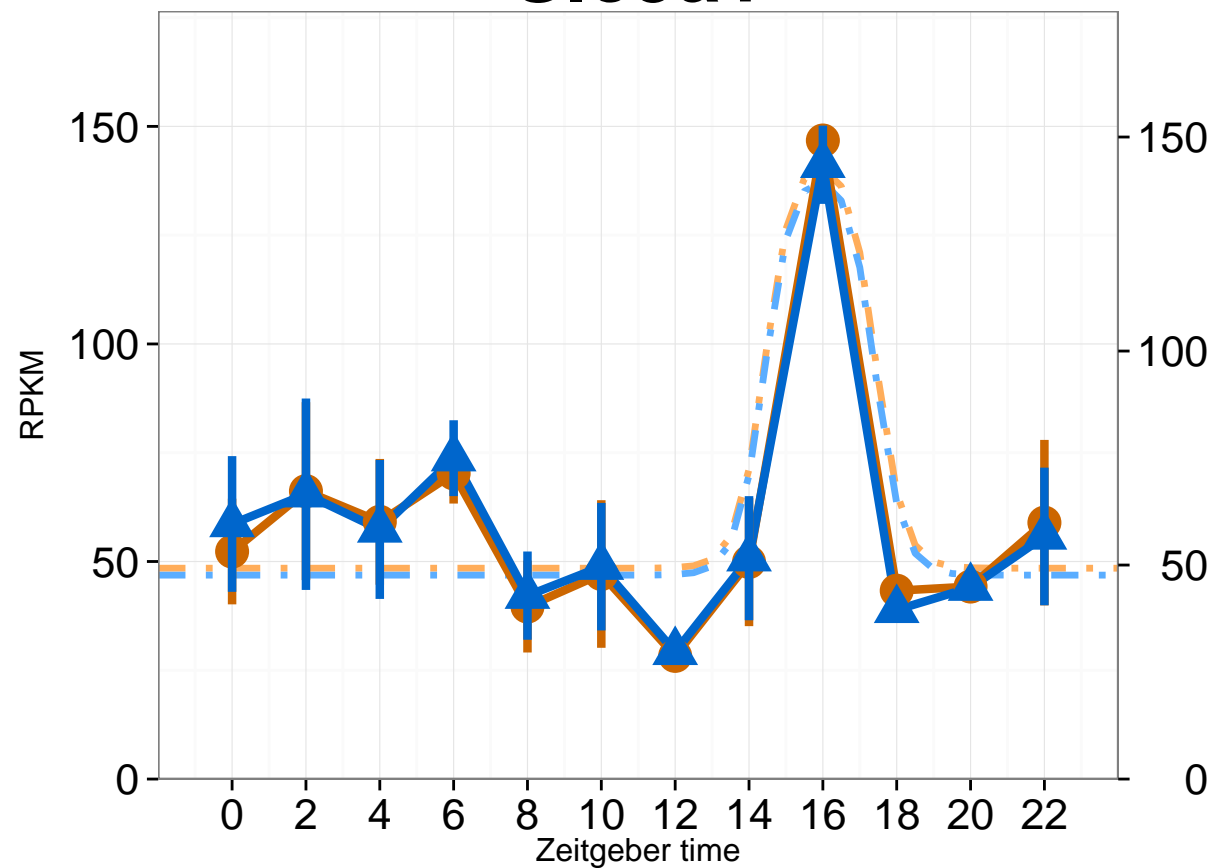

# Slc3a1

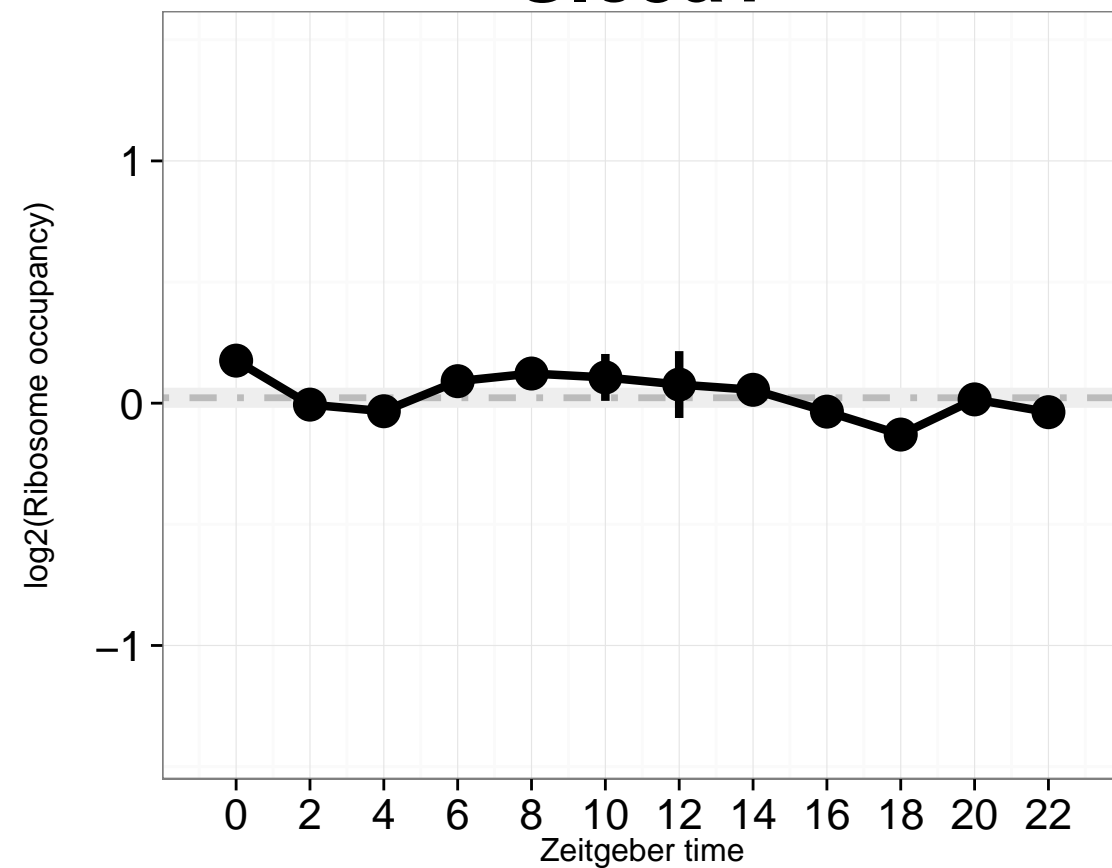

Supplement: SuppDataset_1.zip [file Slc3a1_set_D.pdf › Supplemental Dataset 1/D-mRNA_rhythm_translation_rhyth/Slc3a1_set_D.pdf]

**Slc41a3**

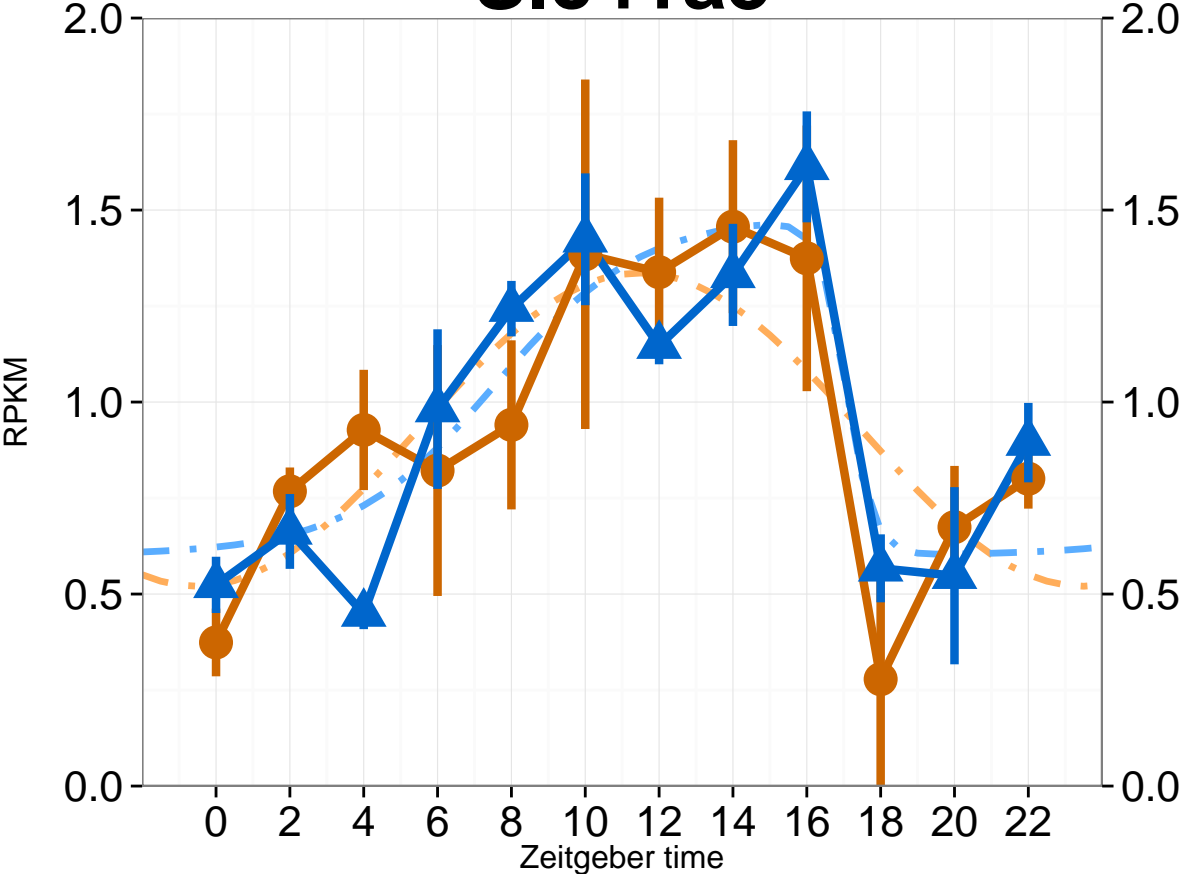

**Slc41a3**

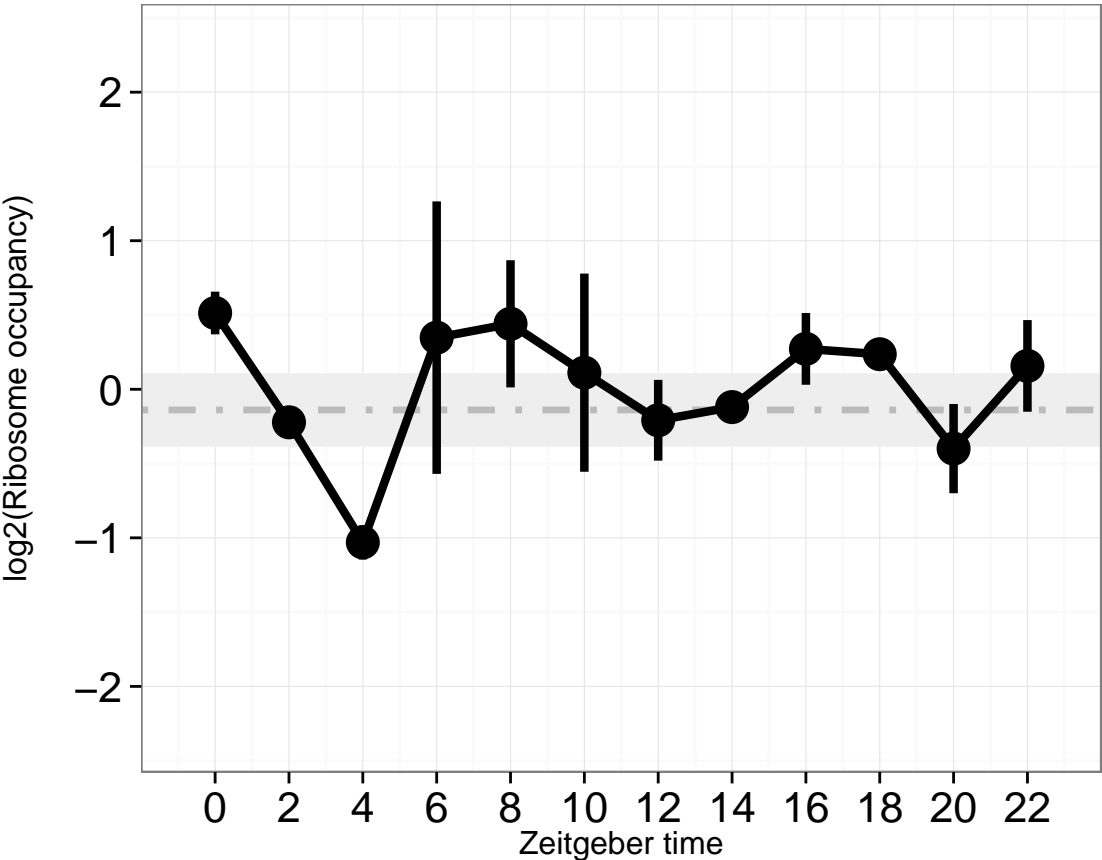

Supplement: SuppDataset_1.zip [file Slc41a3_set_D.pdf › Supplemental Dataset 1/D-mRNA_rhythm_translation_rhyth/Slc41a3_set_D.pdf]

## Slc44a1

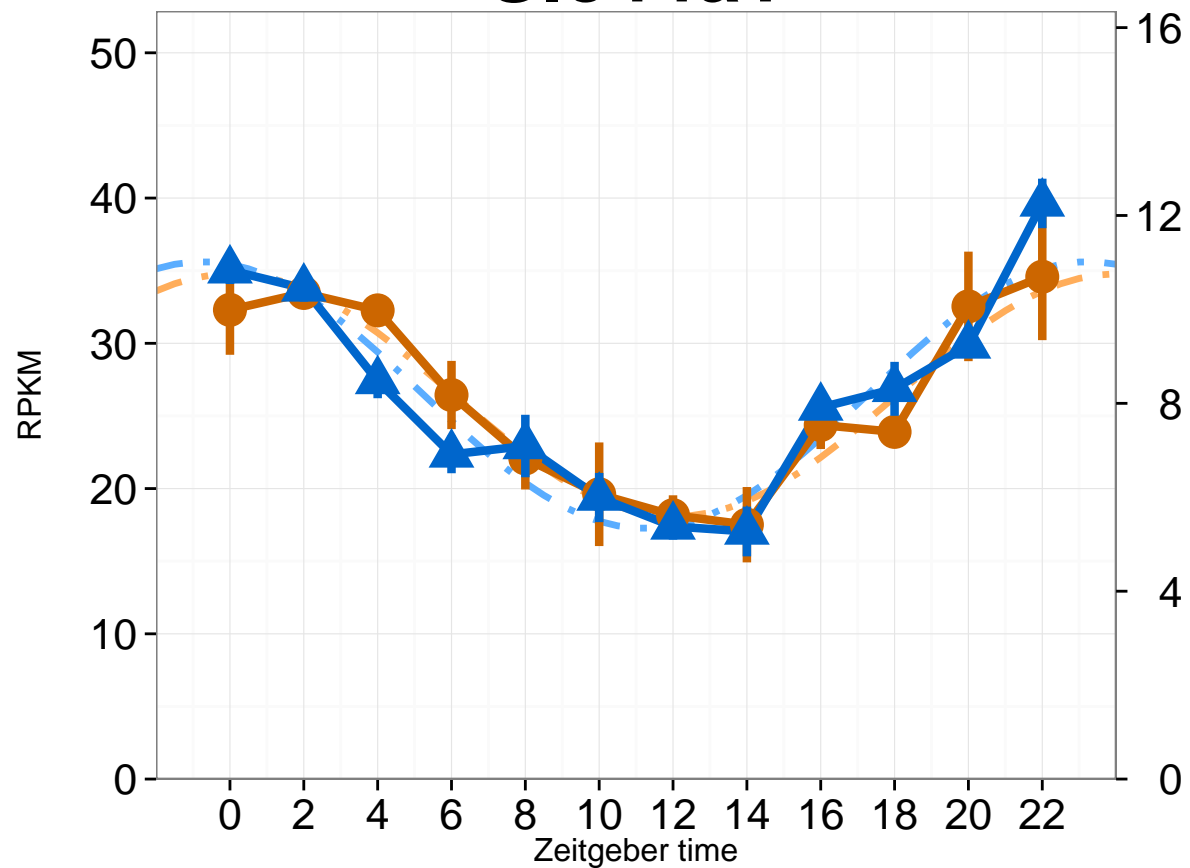

## Slc44a1

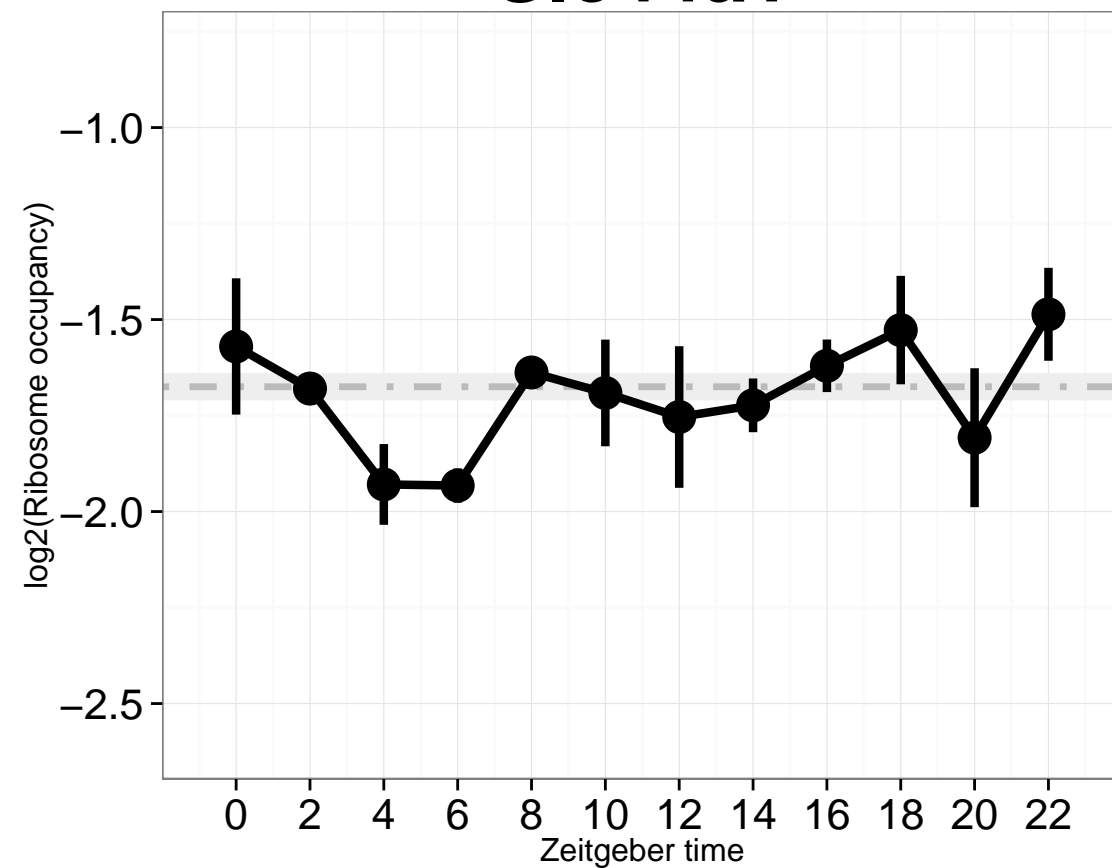

Supplement: SuppDataset_1.zip [file Slc44a1_set_D.pdf › Supplemental Dataset 1/D-mRNA_rhythm_translation_rhyth/Slc44a1_set_D.pdf]

## Slc45a3

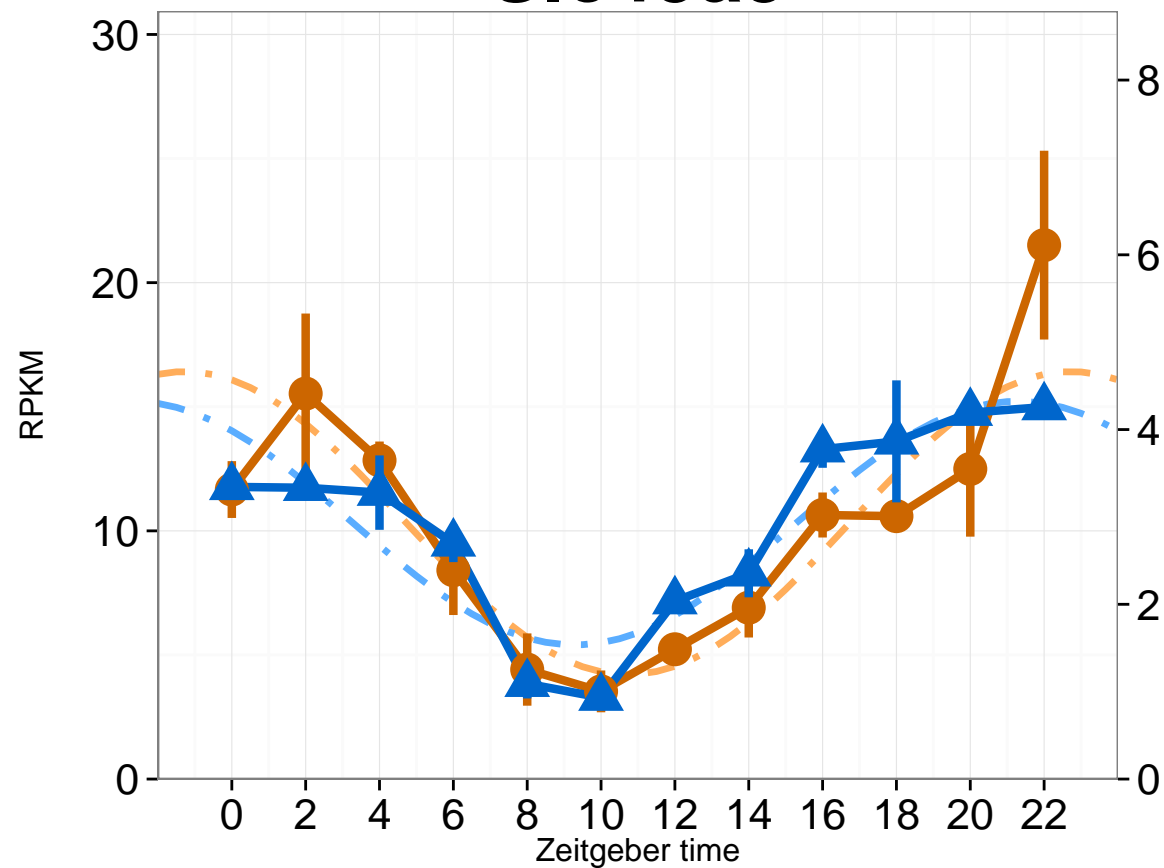

## Slc45a3

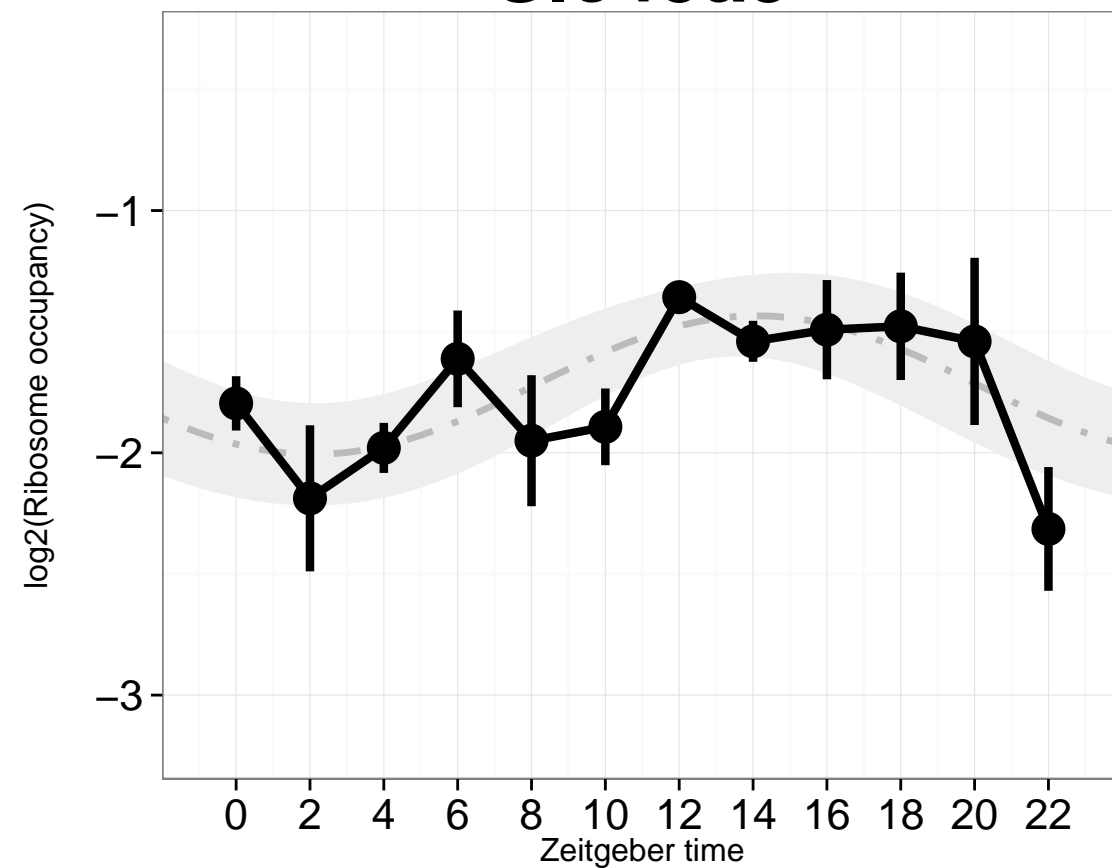

Supplement: SuppDataset_1.zip [file Slc45a3_set_D.pdf › Supplemental Dataset 1/D-mRNA_rhythm_translation_rhyth/Slc45a3_set_D.pdf]

# Slc46a3

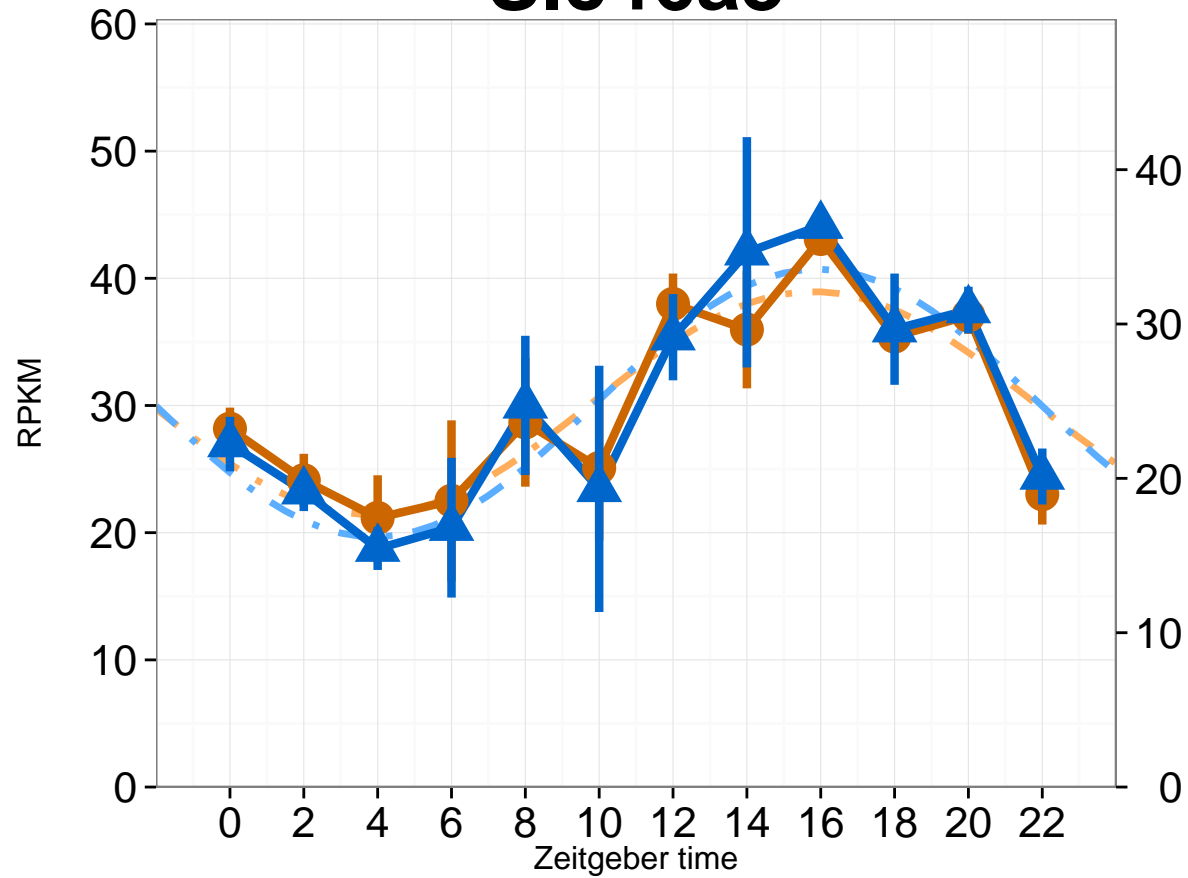

# Slc46a3

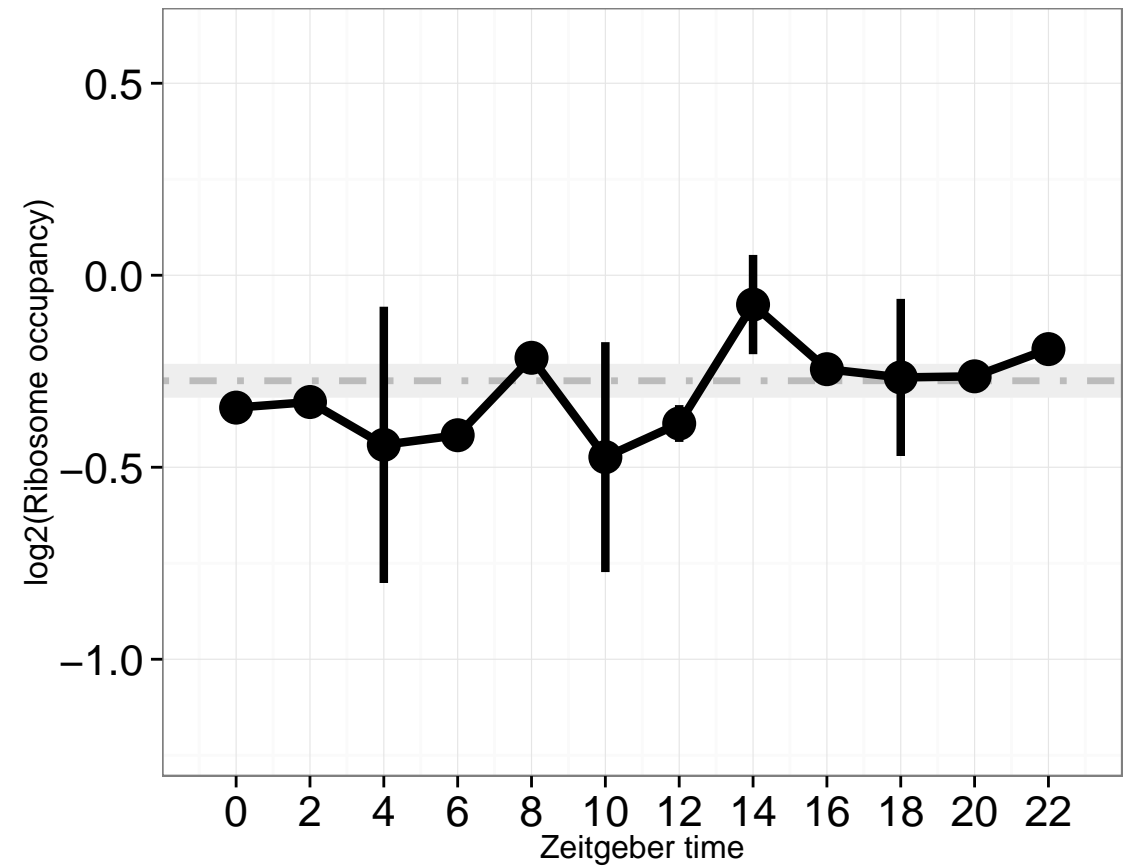

Supplement: SuppDataset_1.zip [file Slc46a3_set_D.pdf › Supplemental Dataset 1/D-mRNA_rhythm_translation_rhyth/Slc46a3_set_D.pdf]

## Slc4a4

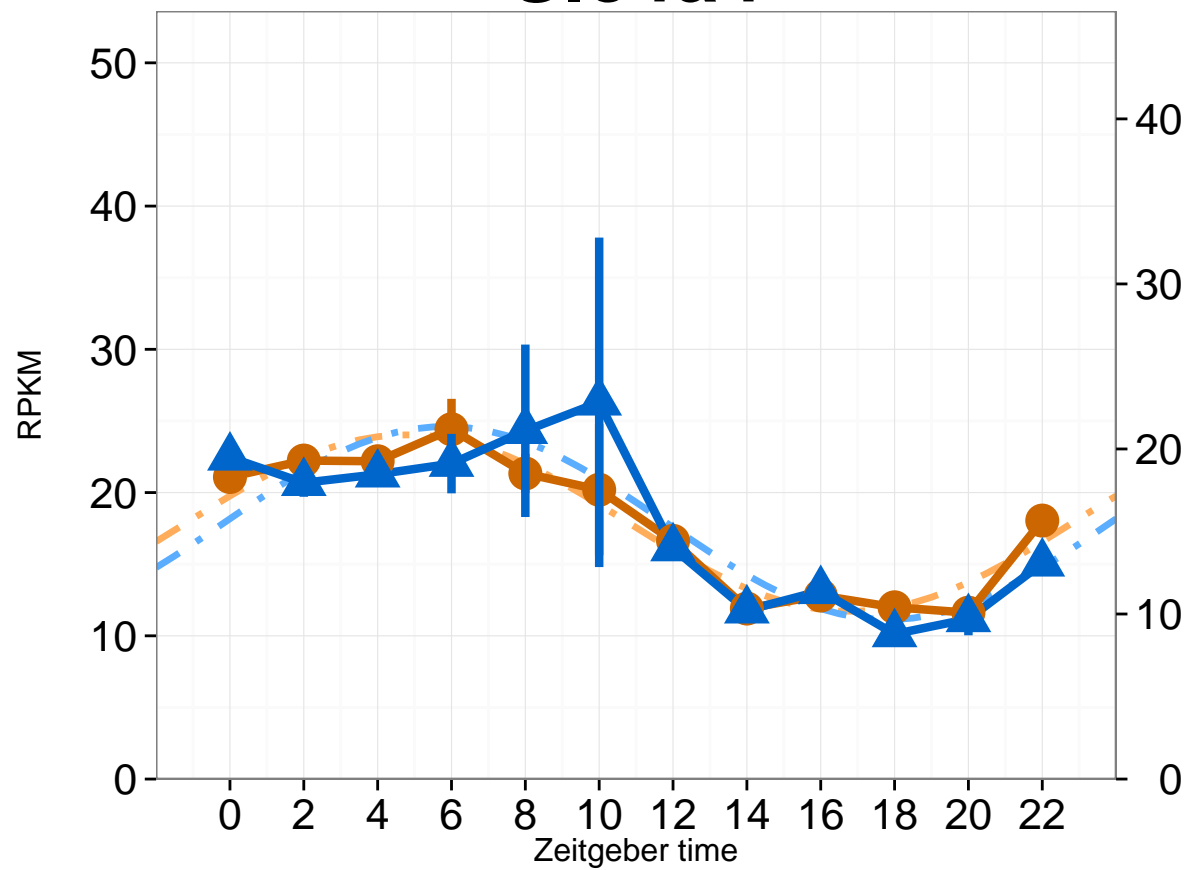

## Slc4a4

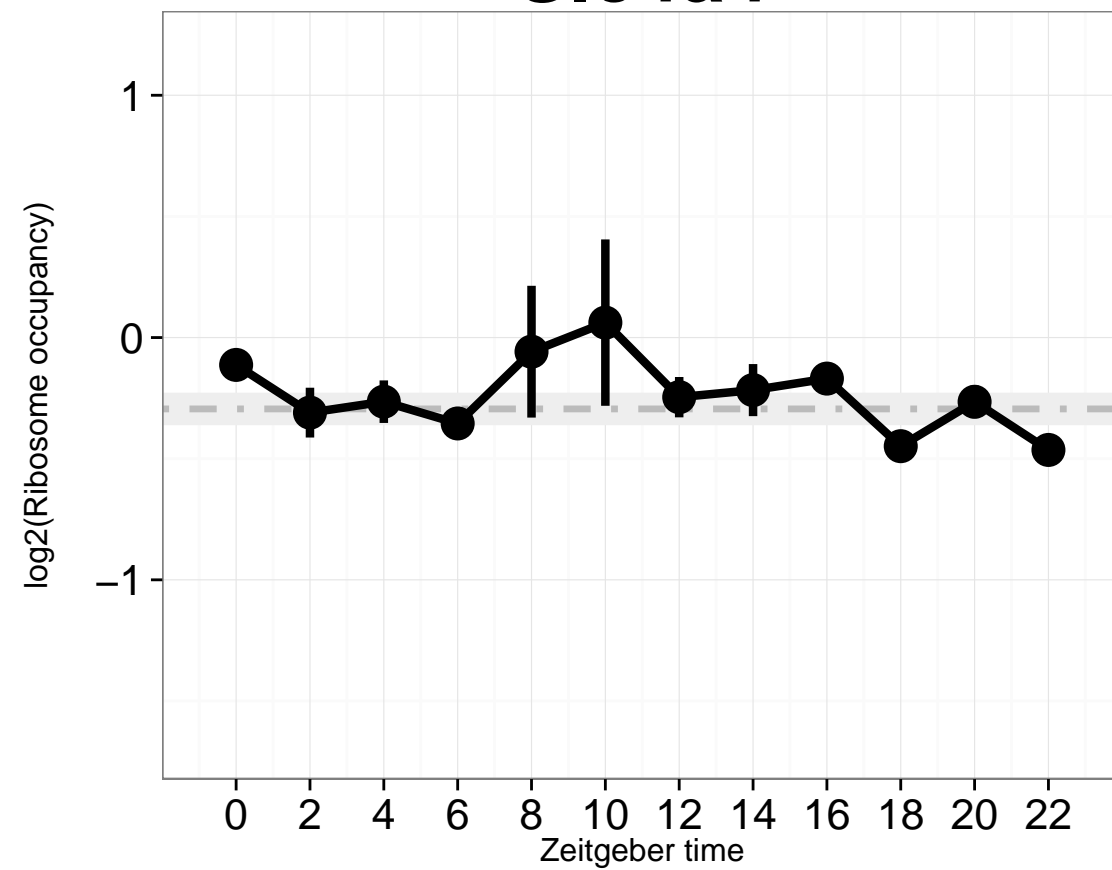

Supplement: SuppDataset_1.zip [file Slc4a4_set_D.pdf › Supplemental Dataset 1/D-mRNA_rhythm_translation_rhyth/Slc4a4_set_D.pdf]

## Slc5a3

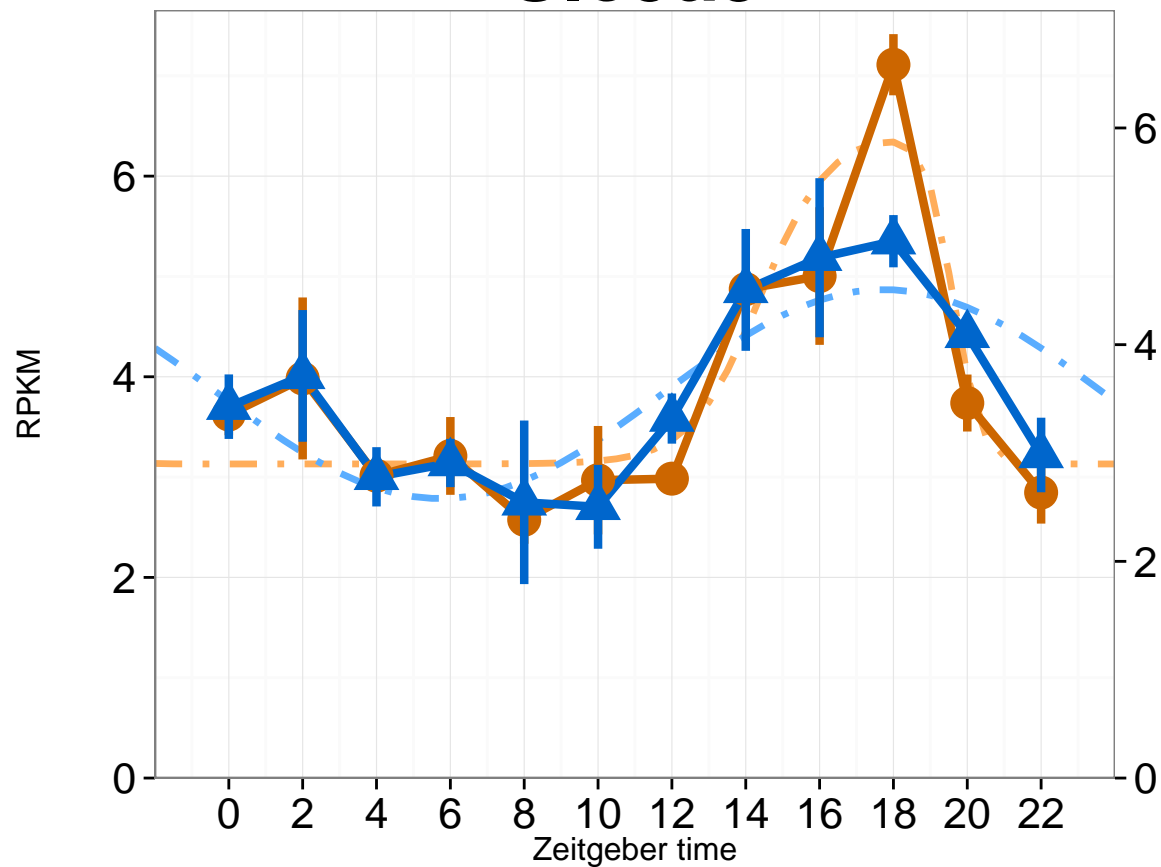

## Slc5a3

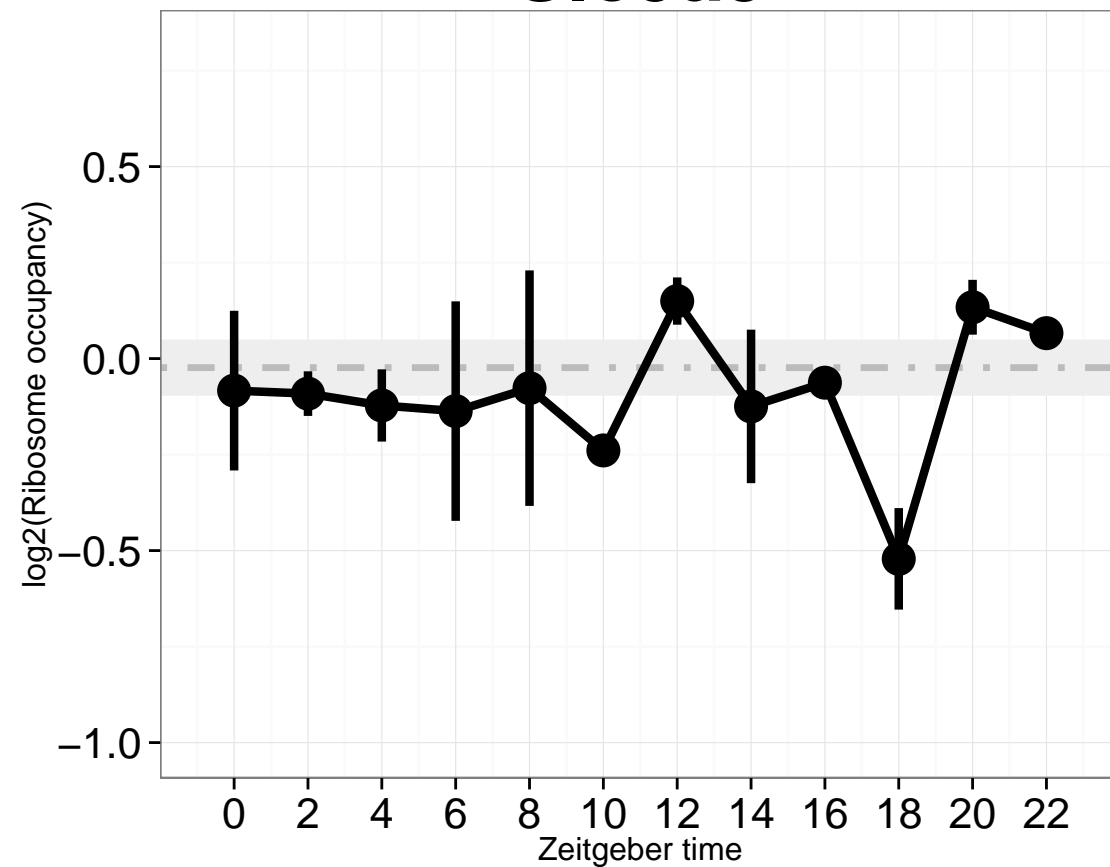

Supplement: SuppDataset_1.zip [file Slc5a3_set_D.pdf › Supplemental Dataset 1/D-mRNA_rhythm_translation_rhyth/Slc5a3_set_D.pdf]

# Slc5a6

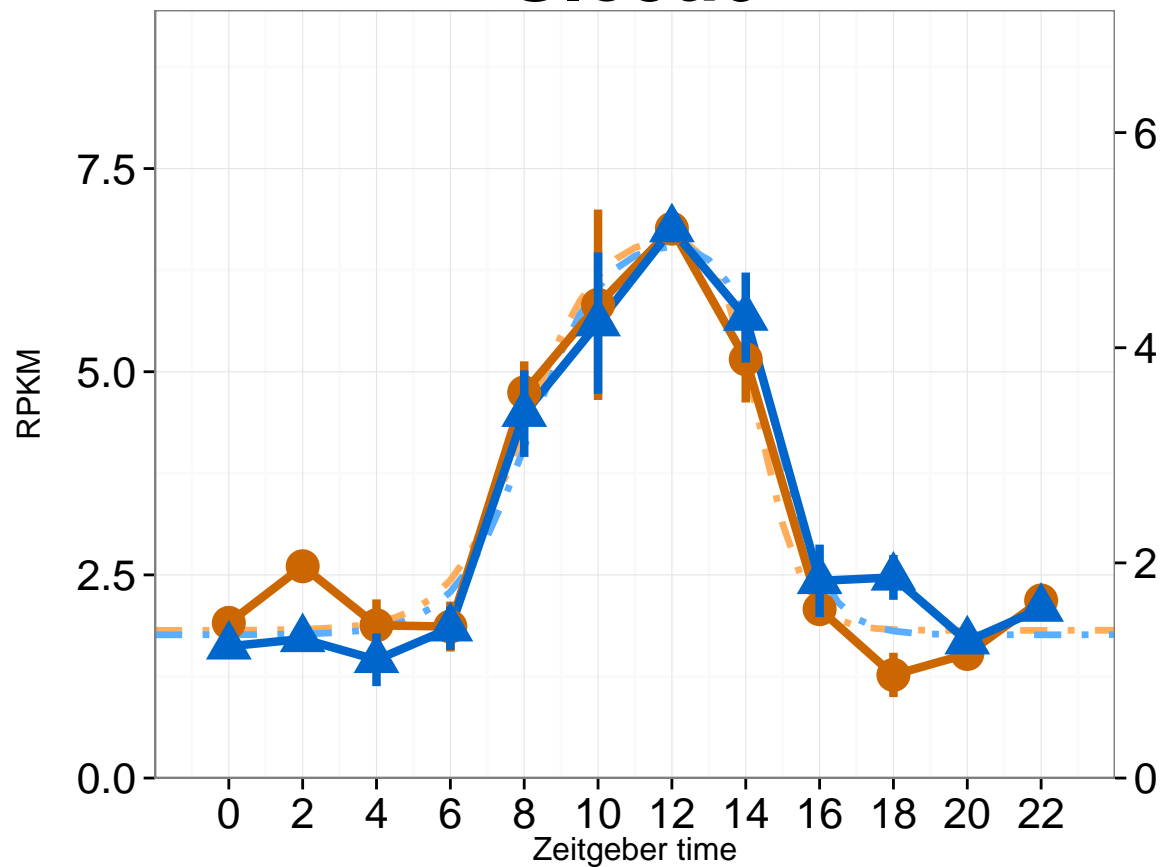

# Slc5a6

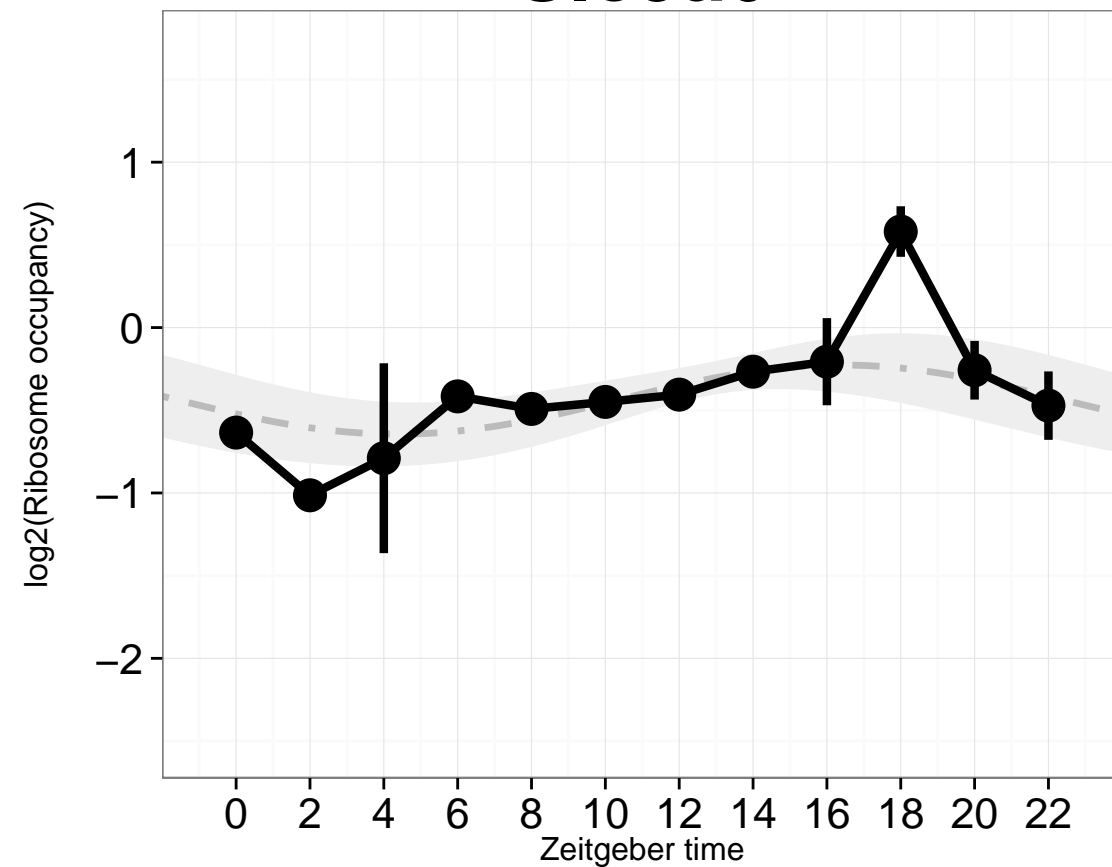

Supplement: SuppDataset_1.zip [file Slc5a6_set_D.pdf › Supplemental Dataset 1/D-mRNA_rhythm_translation_rhyth/Slc5a6_set_D.pdf]

# Slc6a9

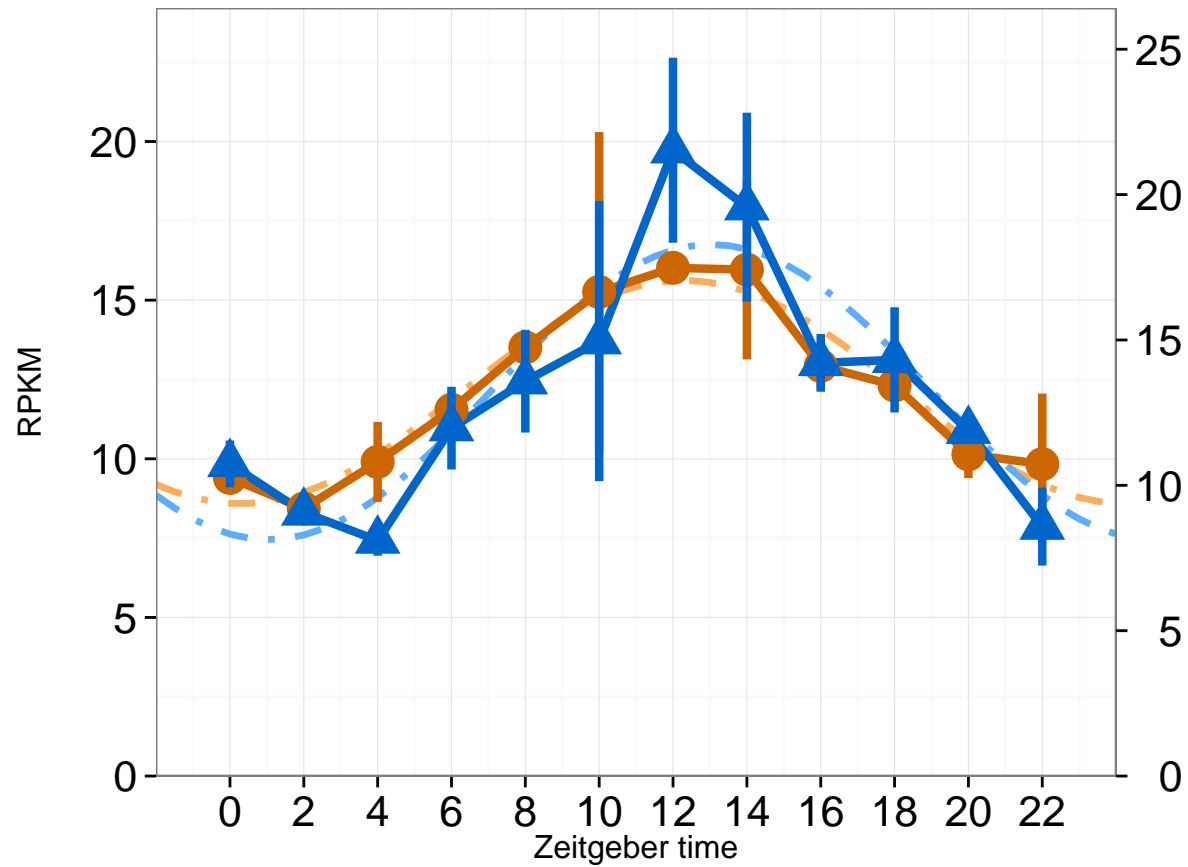

# Slc6a9

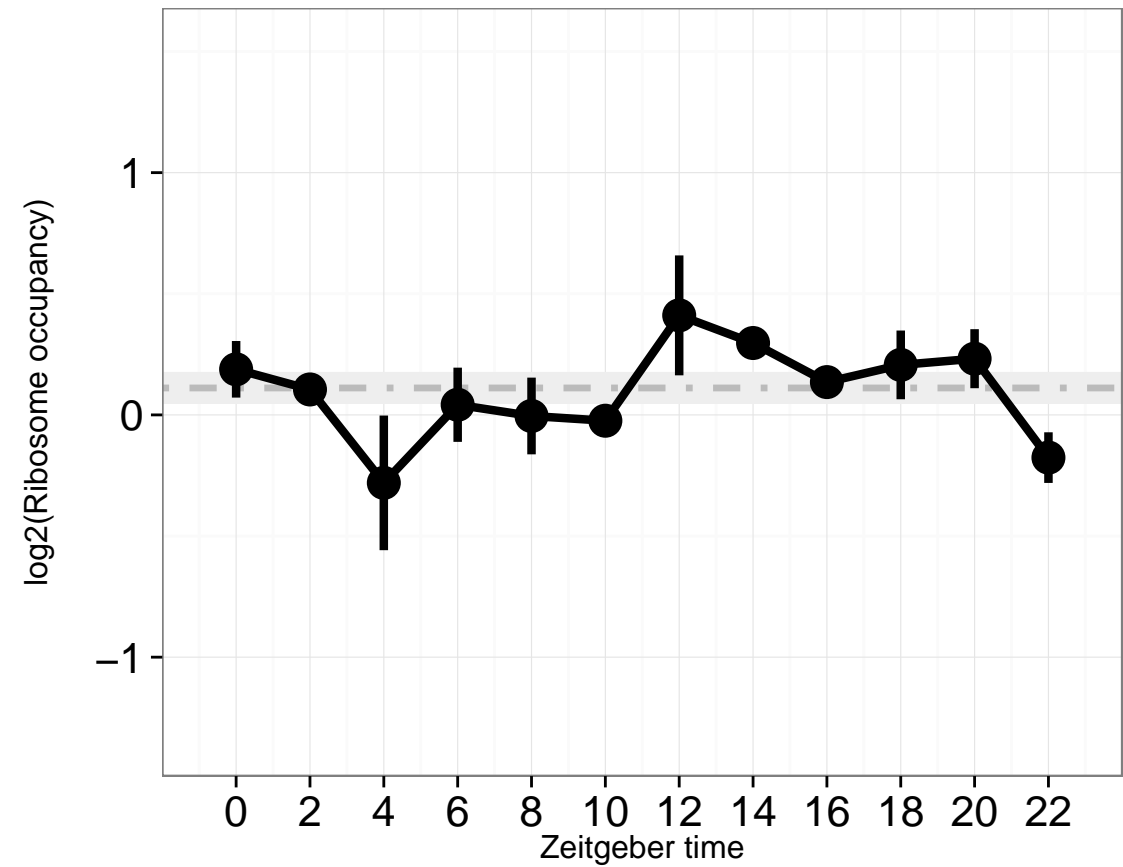

Supplement: SuppDataset_1.zip [file Slc6a9_set_D.pdf › Supplemental Dataset 1/D-mRNA_rhythm_translation_rhyth/Slc6a9_set_D.pdf]

# Slc7a2

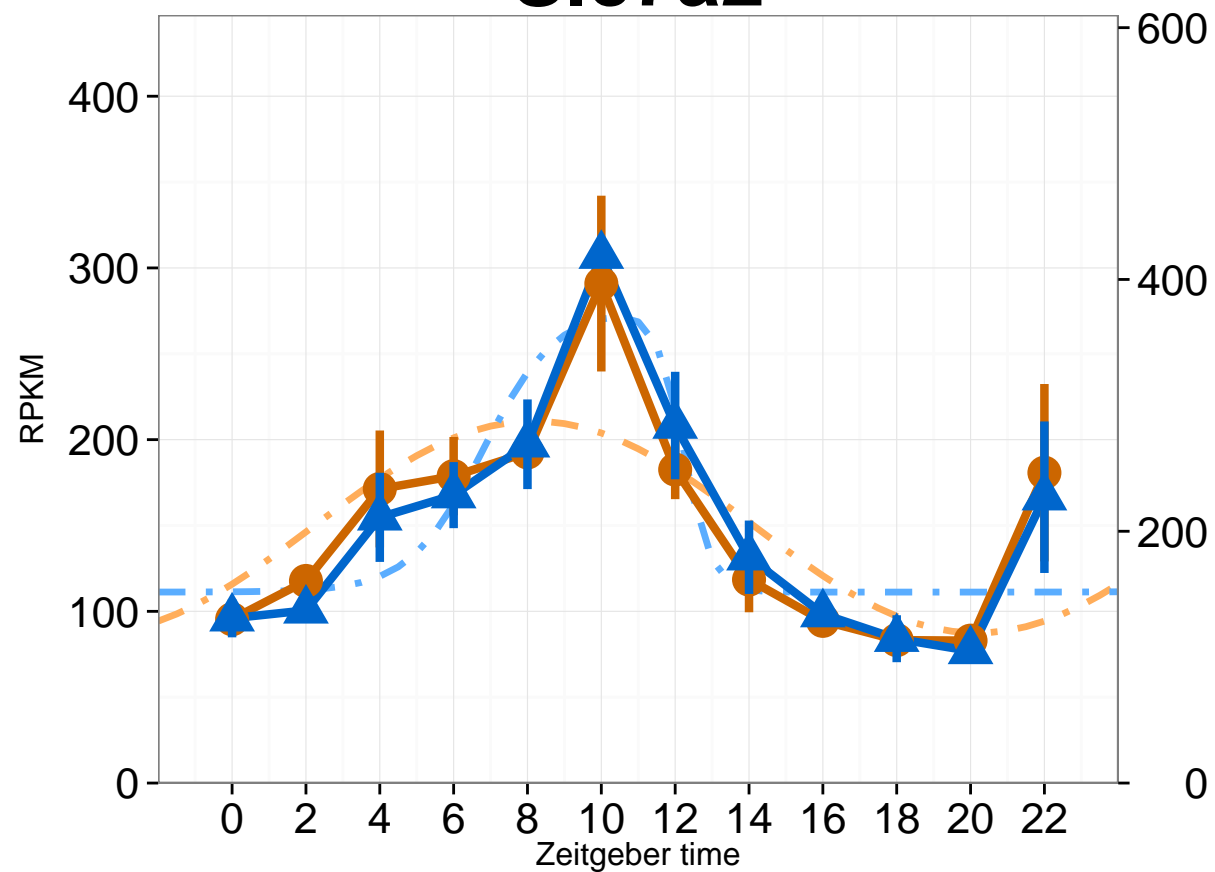

# Slc7a2

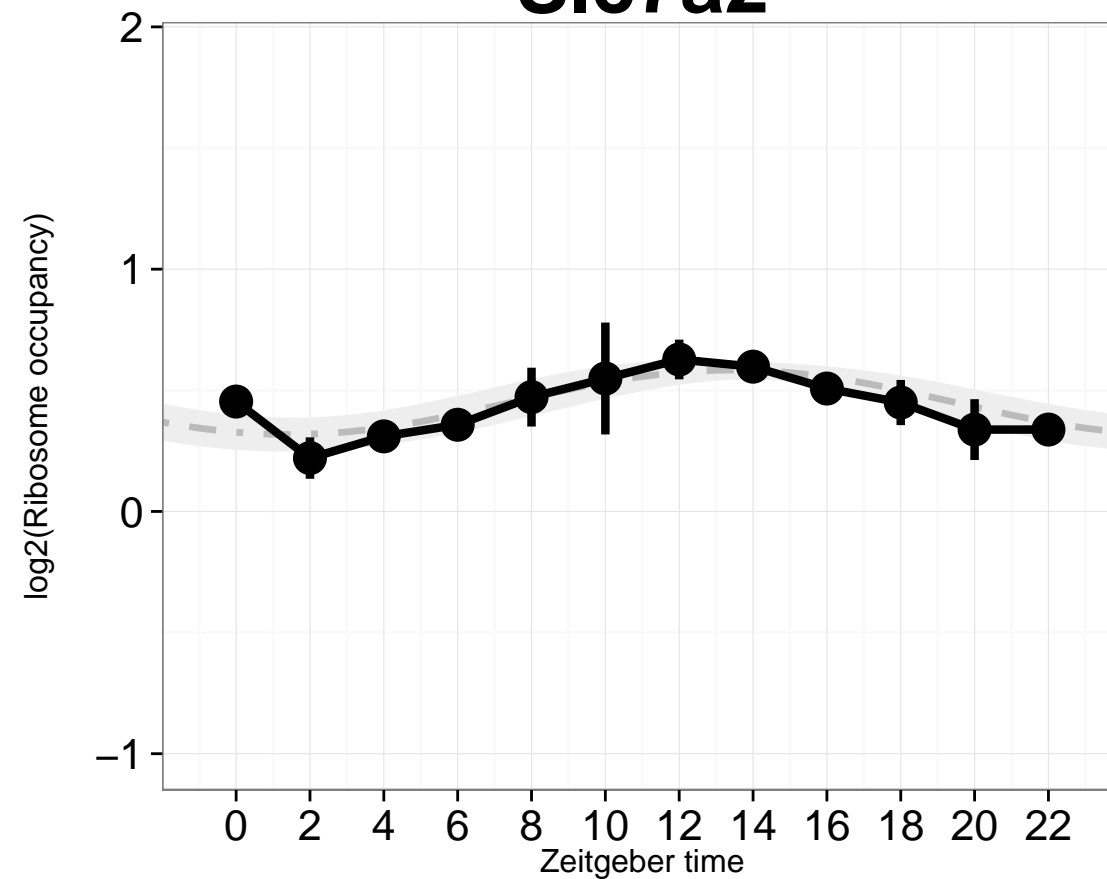

Supplement: SuppDataset_1.zip [file Slc7a2_set_D.pdf › Supplemental Dataset 1/D-mRNA_rhythm_translation_rhyth/Slc7a2_set_D.pdf]

# Slc7a8

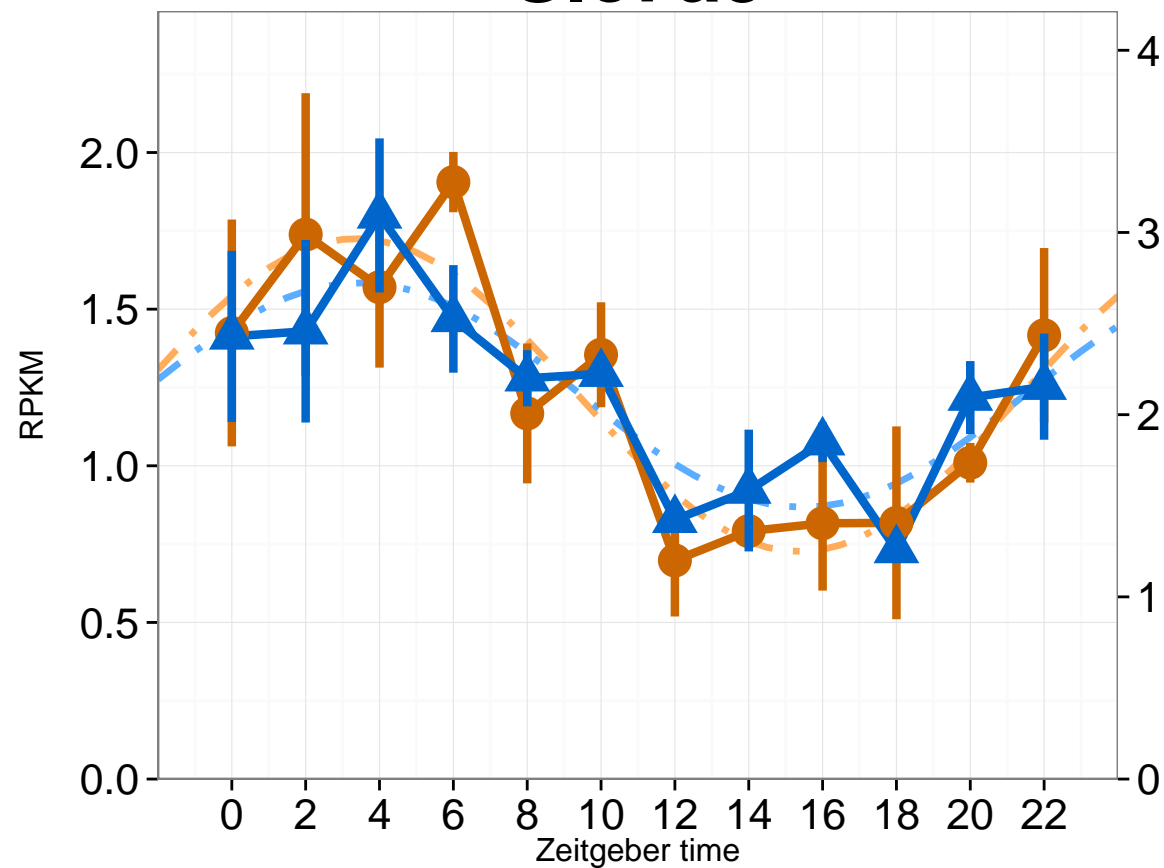

# Slc7a8

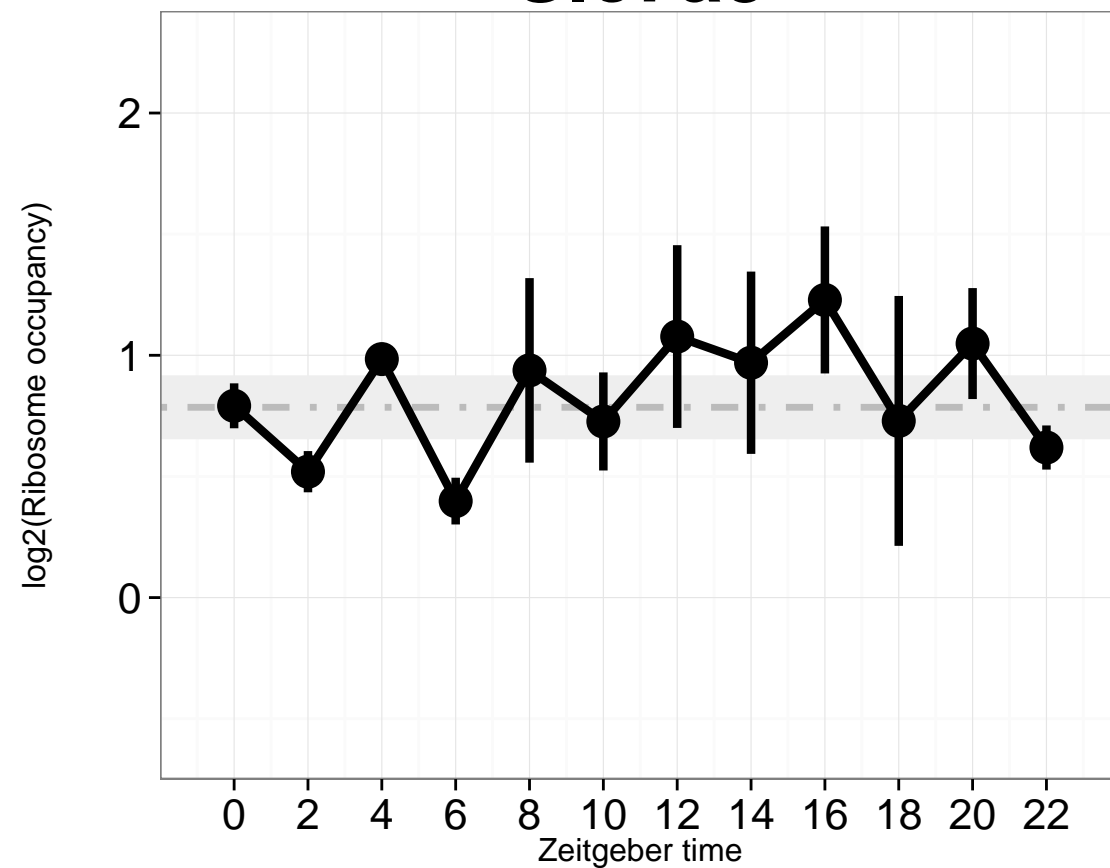

Supplement: SuppDataset_1.zip [file Slc7a8_set_D.pdf › Supplemental Dataset 1/D-mRNA_rhythm_translation_rhyth/Slc7a8_set_D.pdf]

# Slc8b1

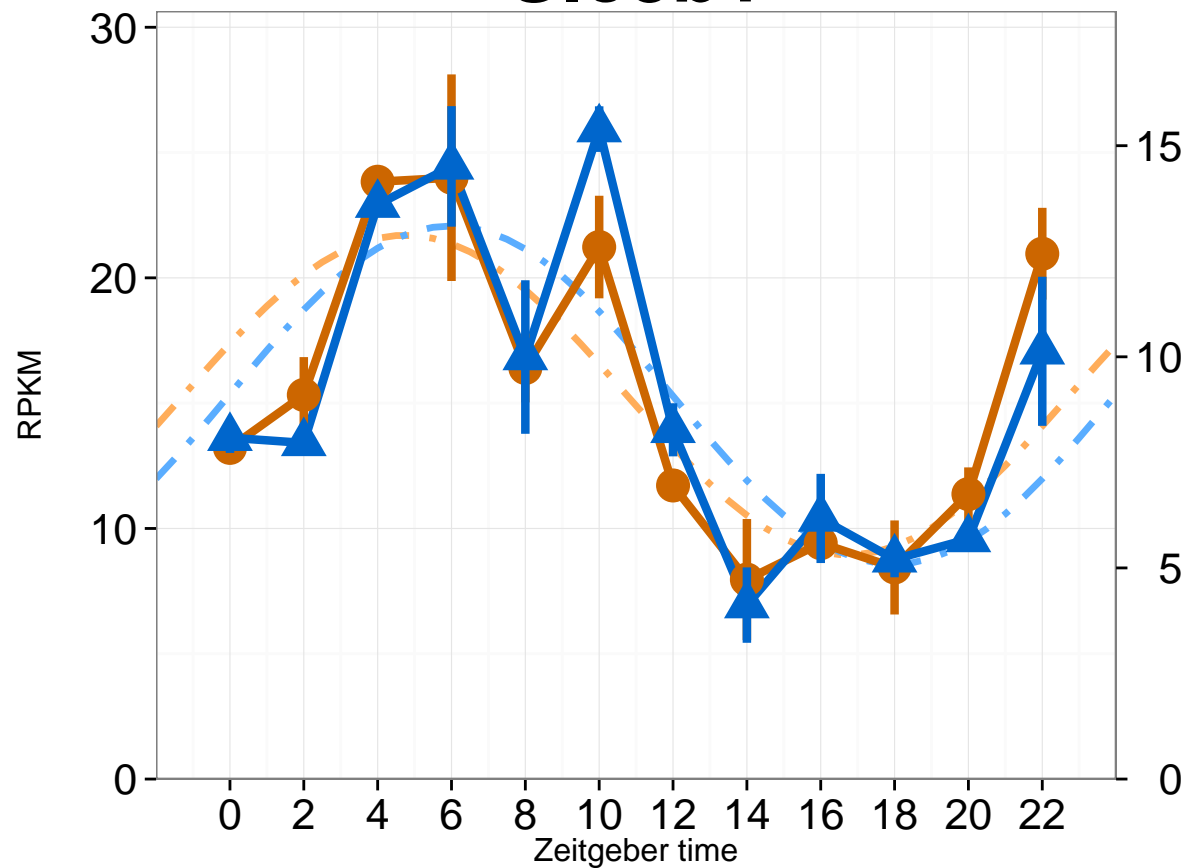

# Slc8b1

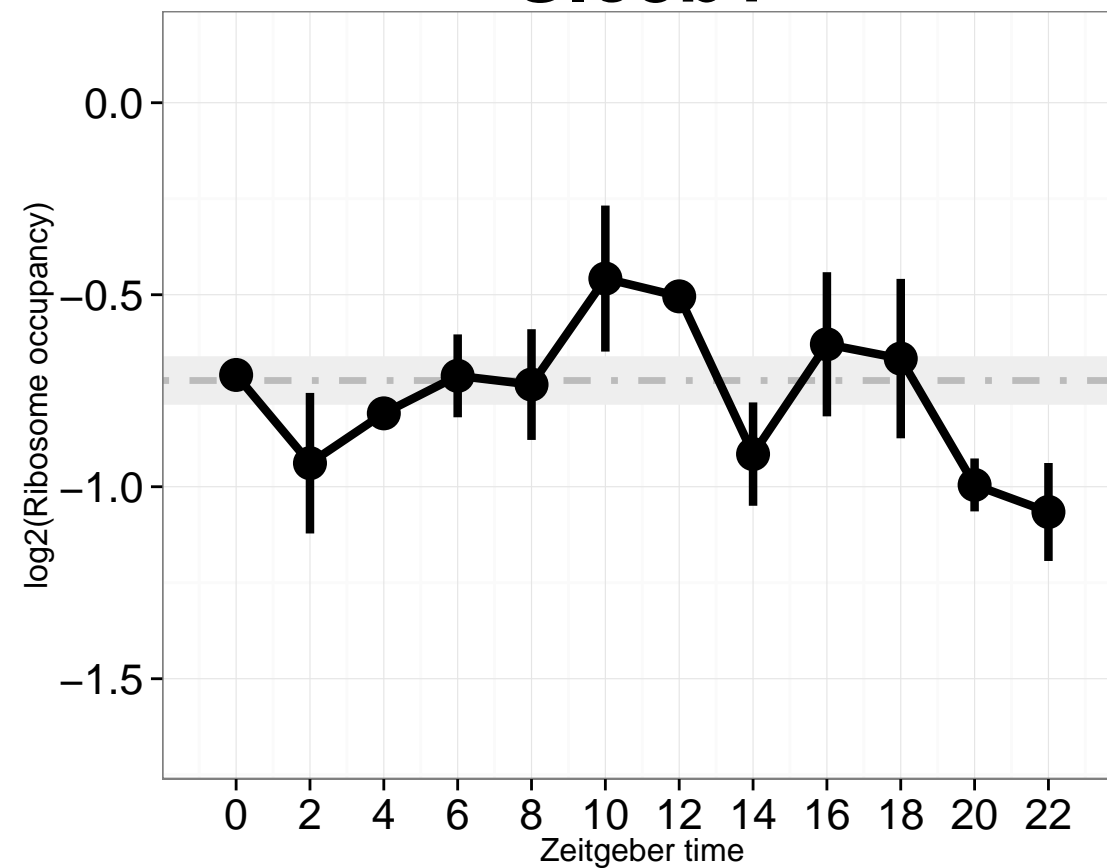

Supplement: SuppDataset_1.zip [file Slc8b1_set_D.pdf › Supplemental Dataset 1/D-mRNA_rhythm_translation_rhyth/Slc8b1_set_D.pdf]

# Slco1b2

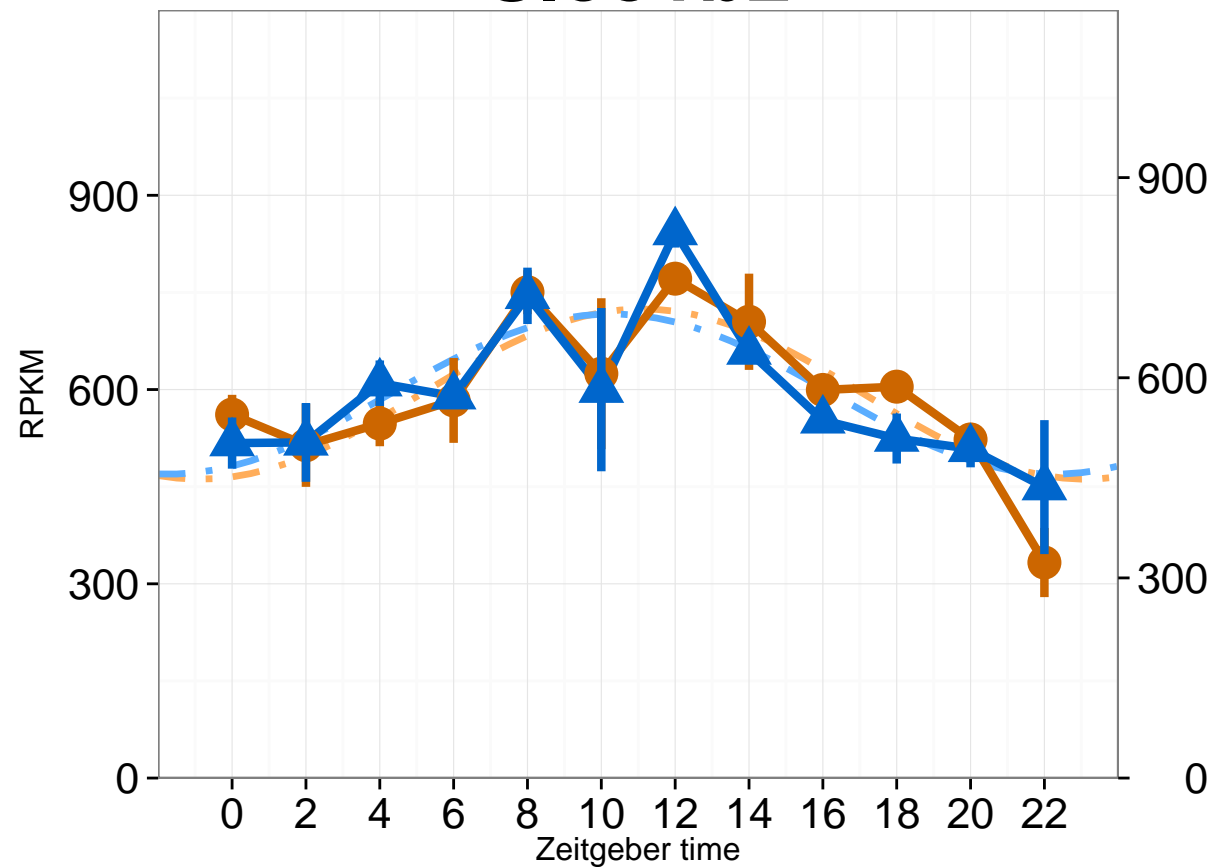

# Slco1b2

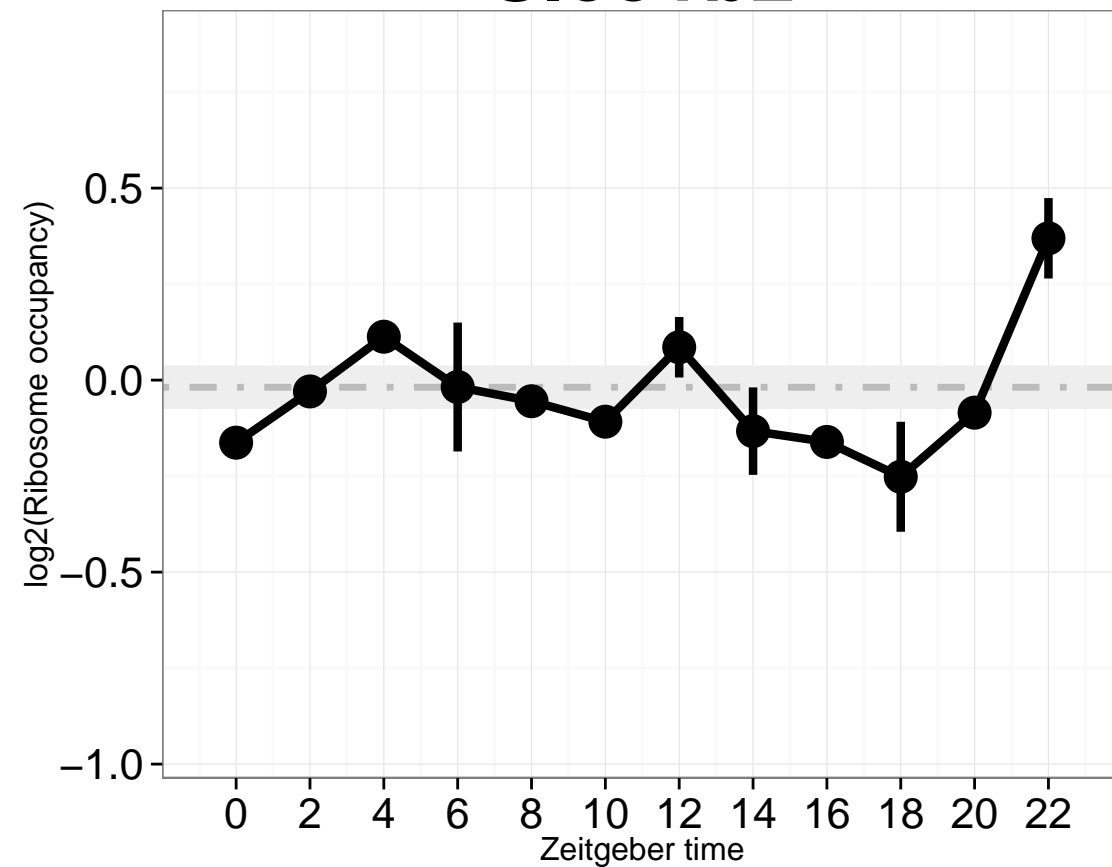

Supplement: SuppDataset_1.zip [file Slco1b2_set_D.pdf › Supplemental Dataset 1/D-mRNA_rhythm_translation_rhyth/Slco1b2_set_D.pdf]

## Smagp

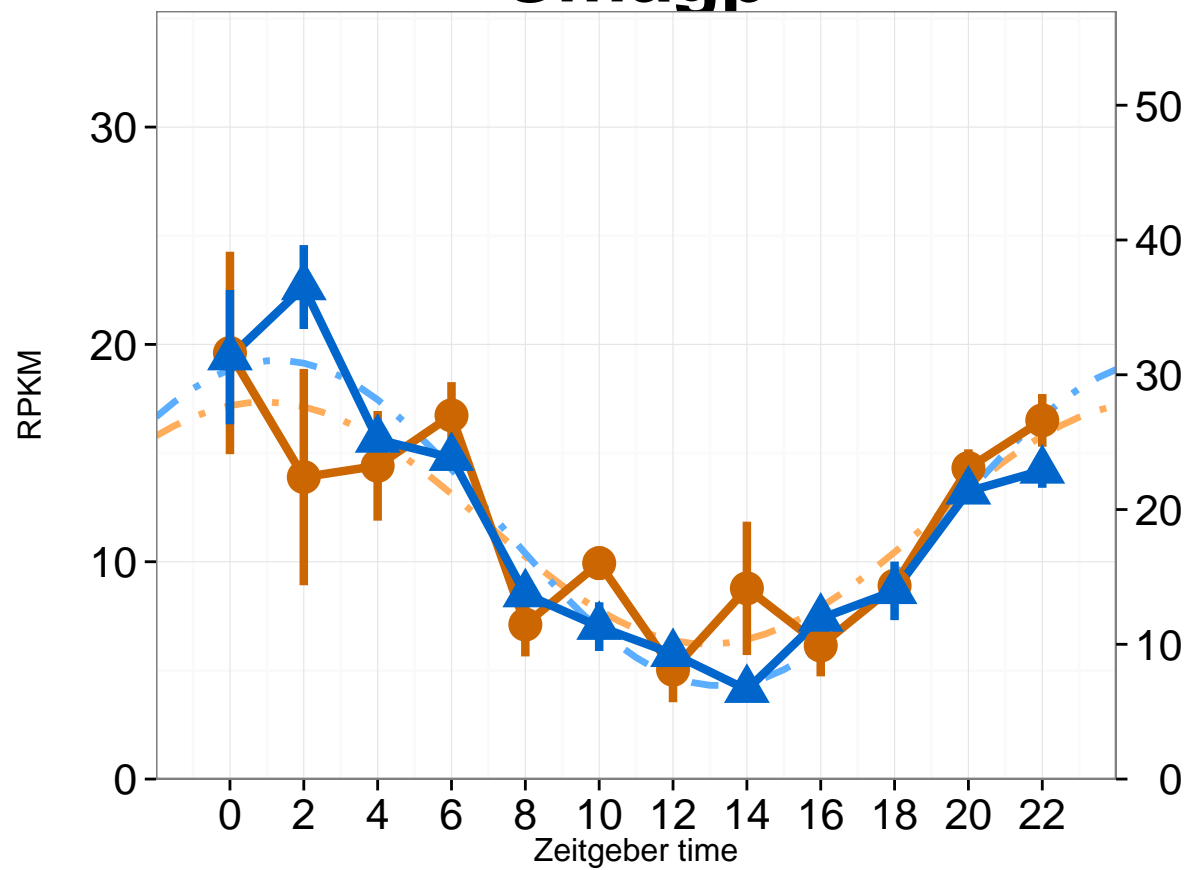

## Smagp

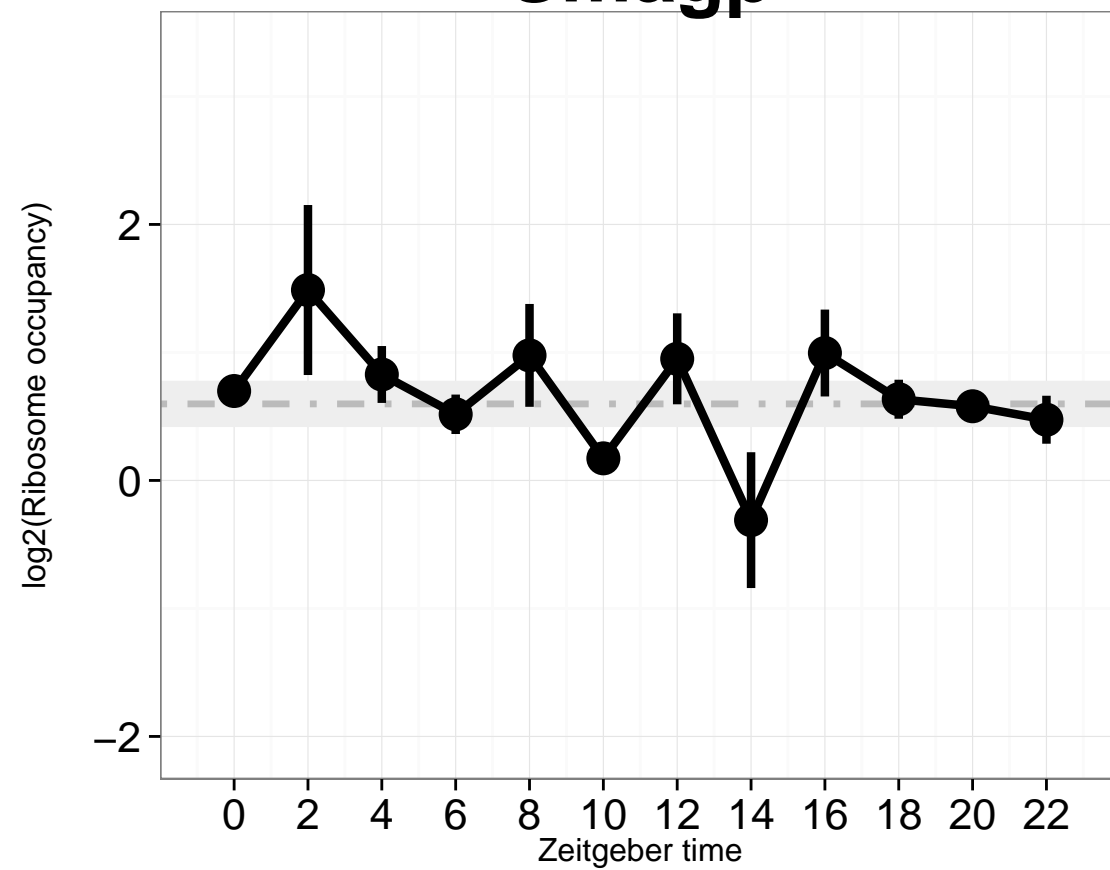

Supplement: SuppDataset_1.zip [file Smagp_set_D.pdf › Supplemental Dataset 1/D-mRNA_rhythm_translation_rhyth/Smagp_set_D.pdf]

## Smarcd1

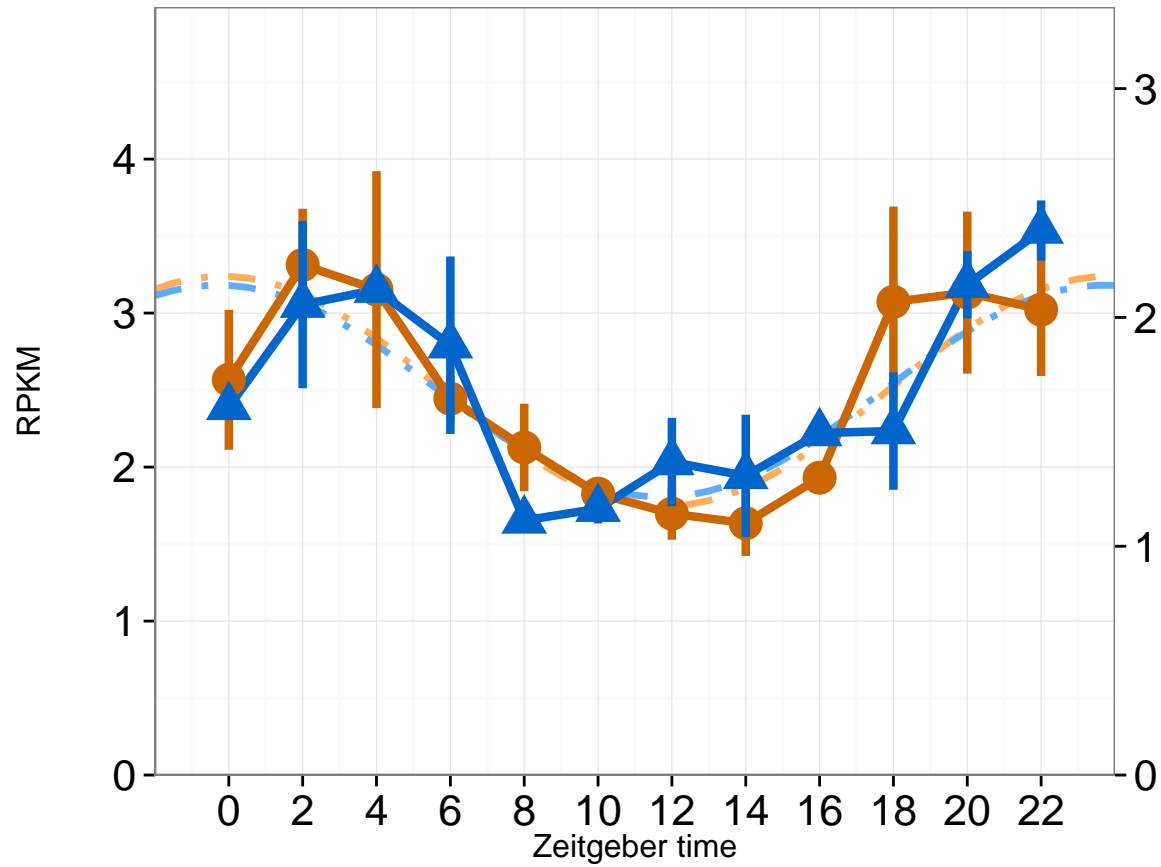

## Smarcd1

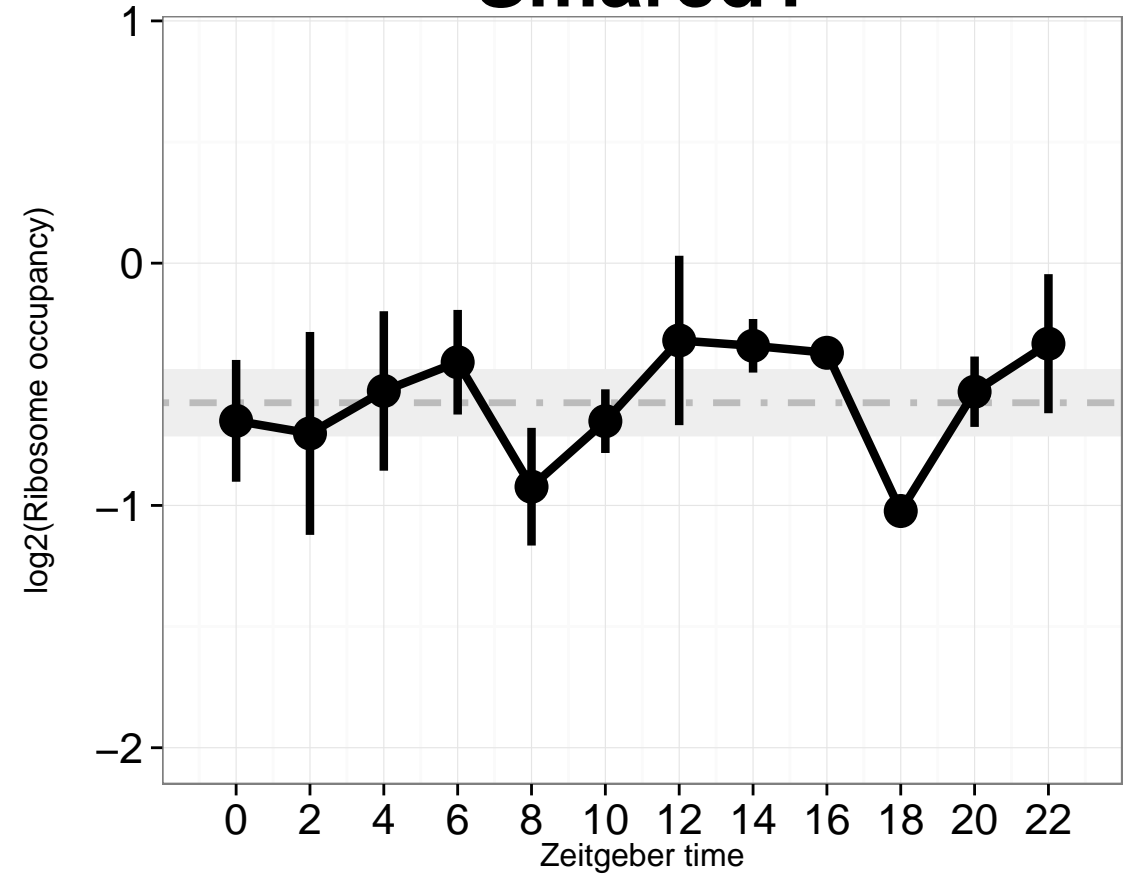

Supplement: SuppDataset_1.zip [file Smarcd1_set_D.pdf › Supplemental Dataset 1/D-mRNA_rhythm_translation_rhyth/Smarcd1_set_D.pdf]

## Smim4

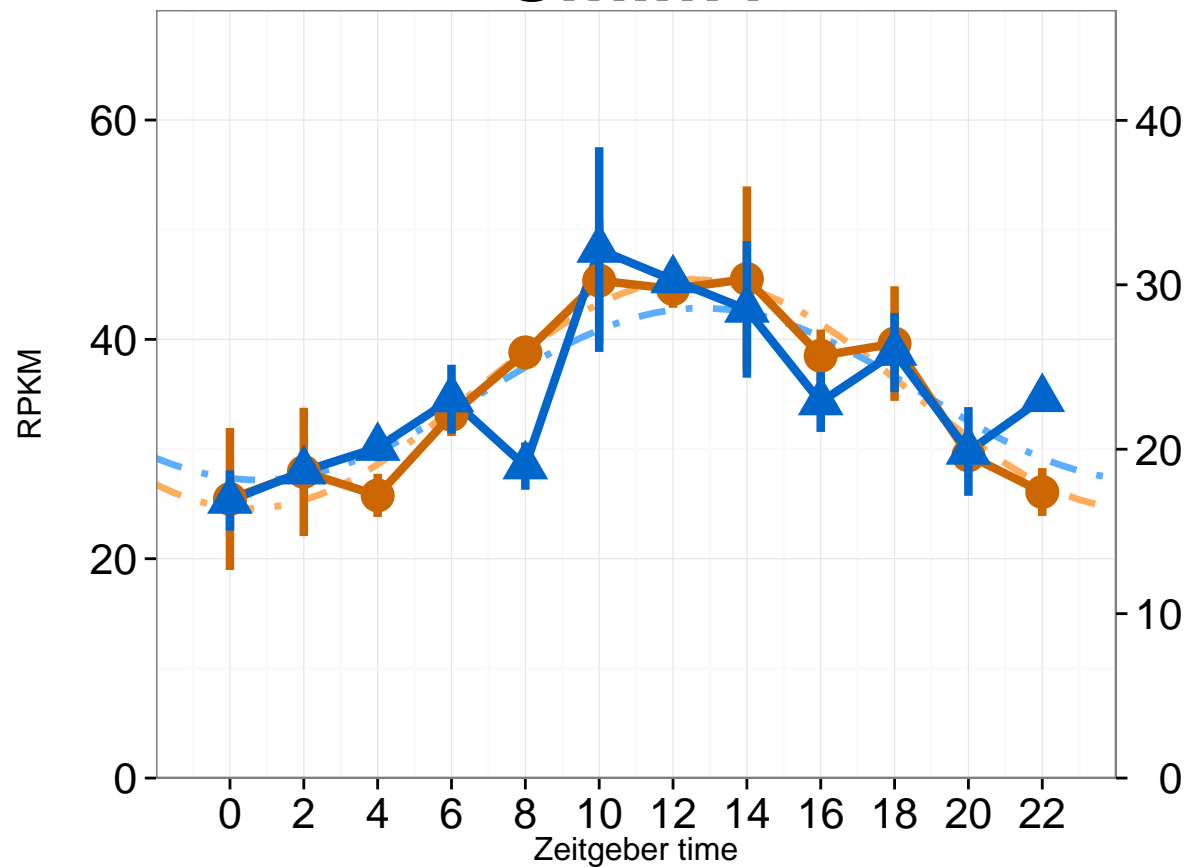

## Smim4

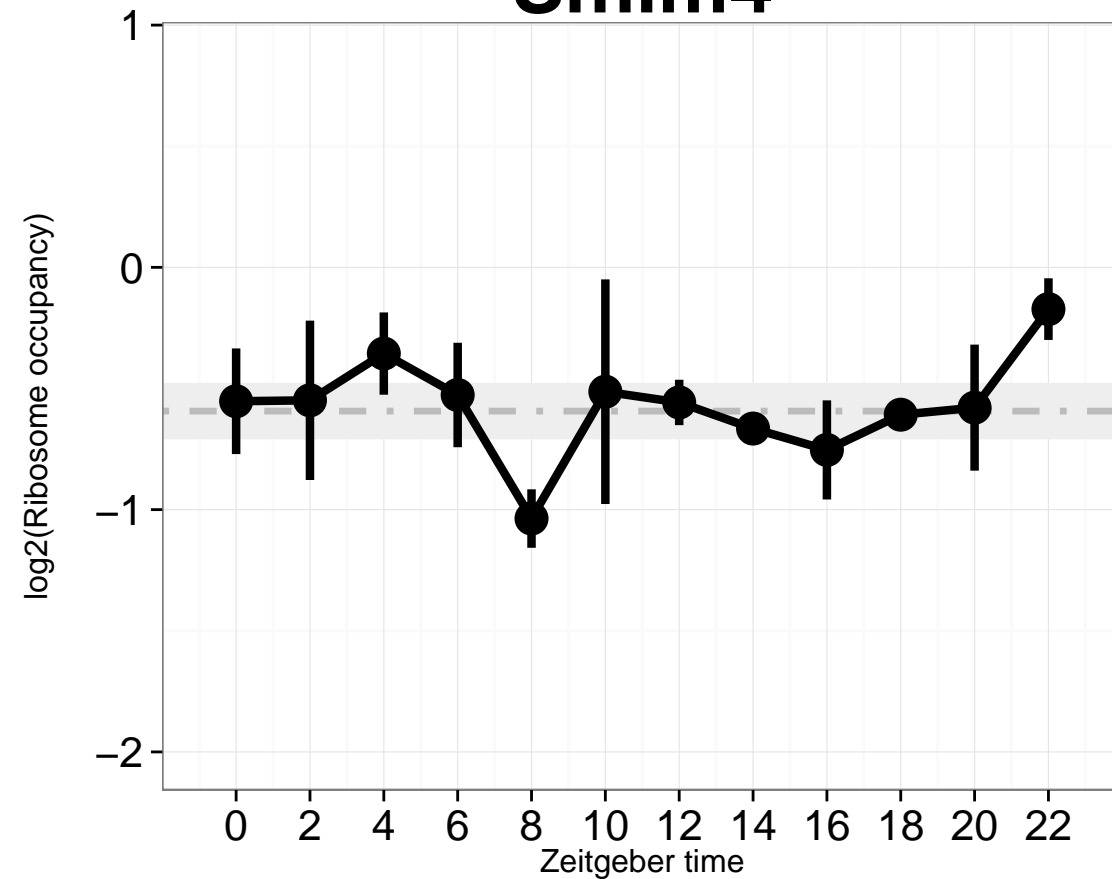

Supplement: SuppDataset_1.zip [file Smim4_set_D.pdf › Supplemental Dataset 1/D-mRNA_rhythm_translation_rhyth/Smim4_set_D.pdf]

## Smo

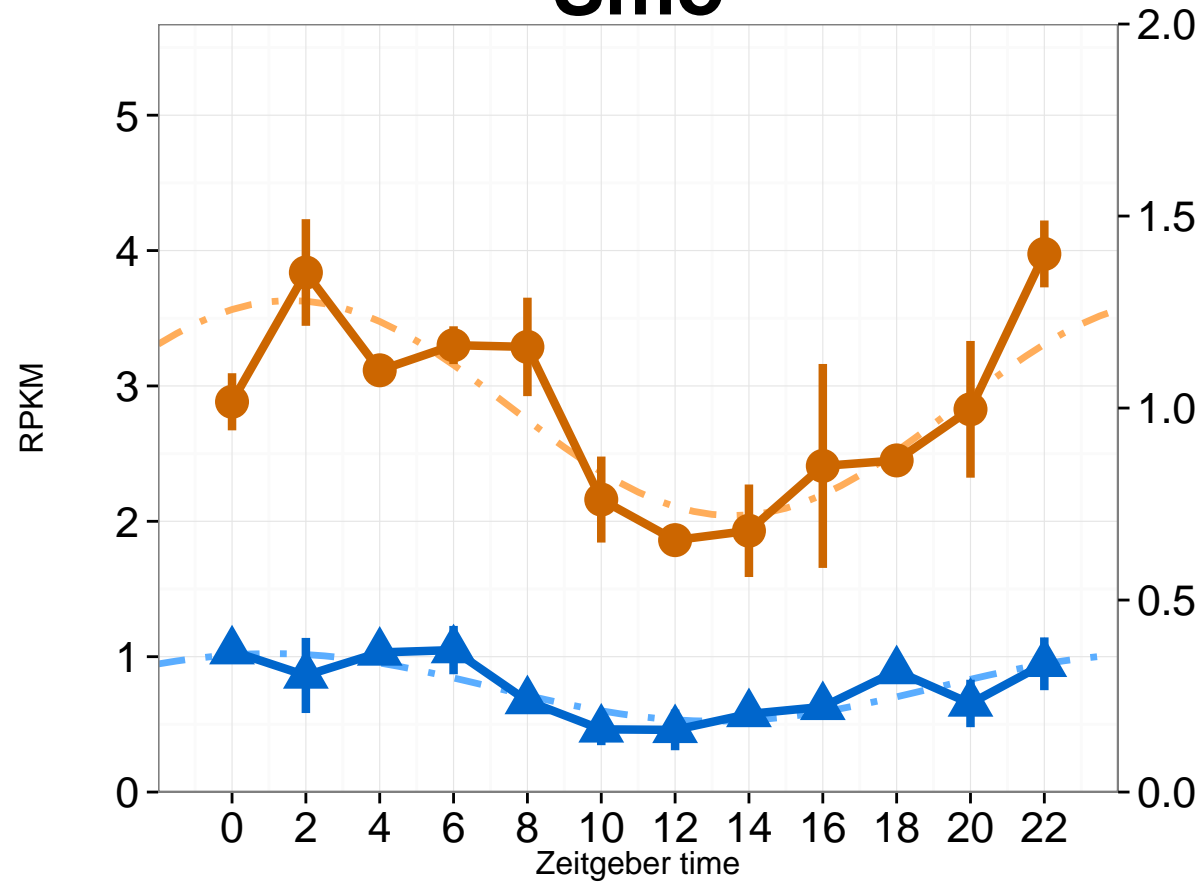

## Smo

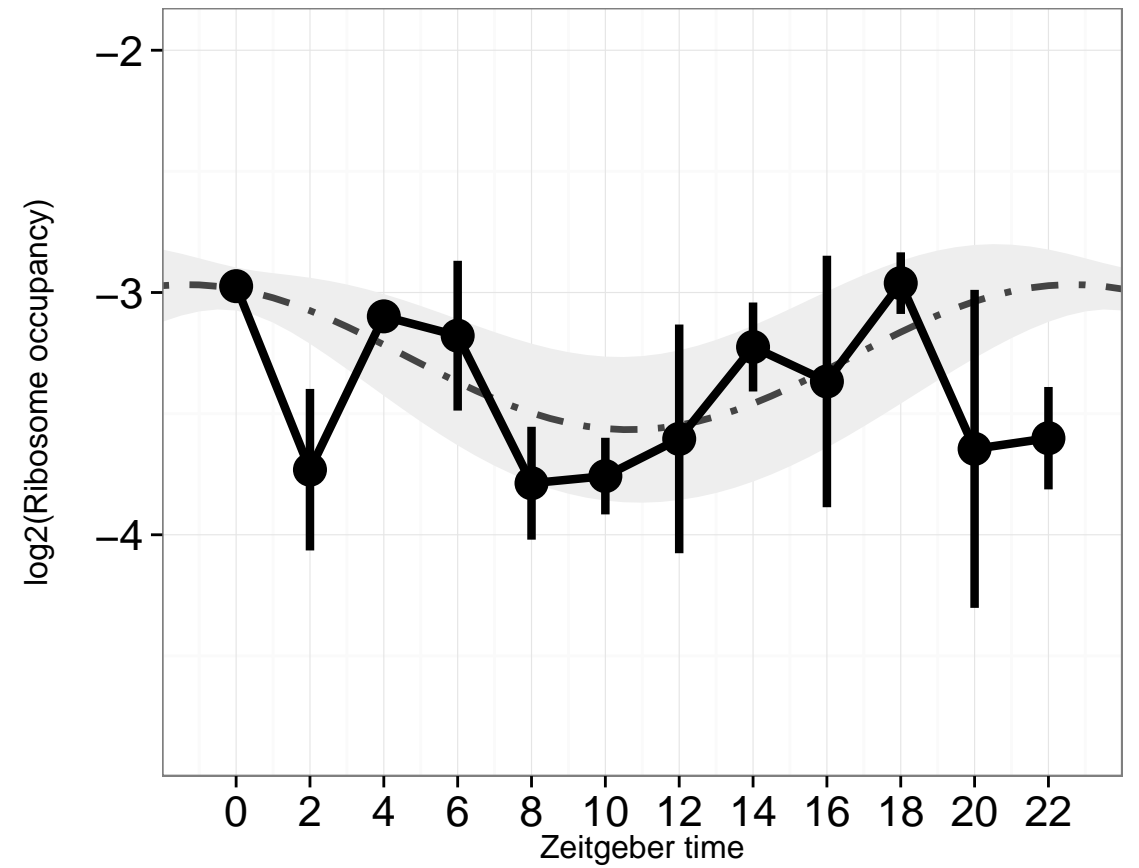

Supplement: SuppDataset_1.zip [file Smo_set_D.pdf › Supplemental Dataset 1/D-mRNA_rhythm_translation_rhyth/Smo_set_D.pdf]

# Snca

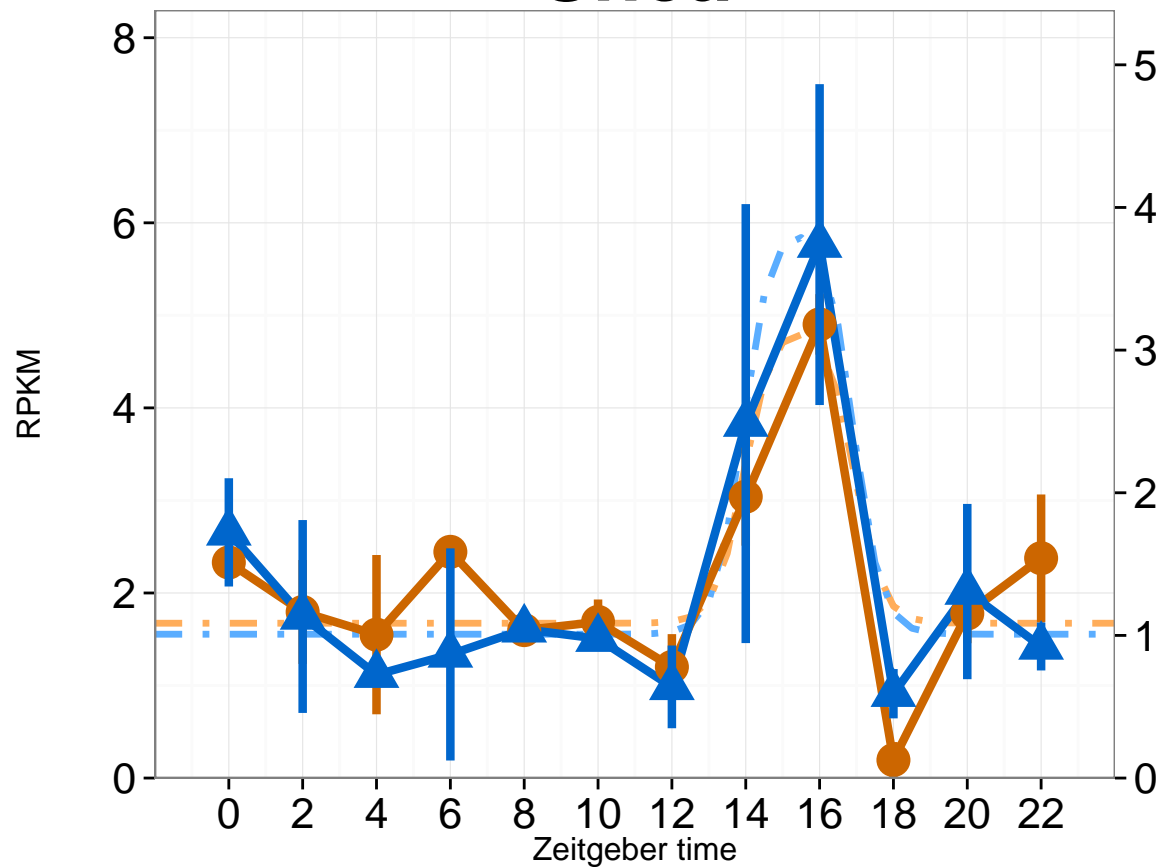

# Snca

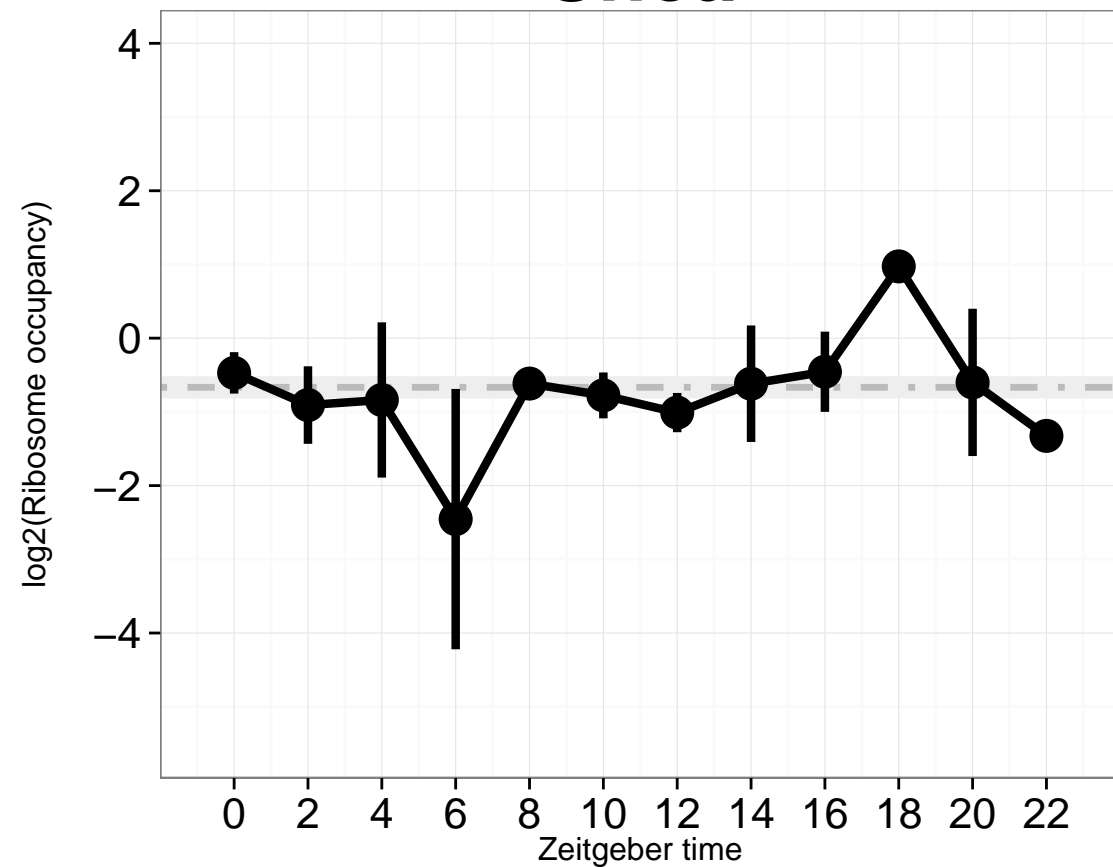

Supplement: SuppDataset_1.zip [file Snca_set_D.pdf › Supplemental Dataset 1/D-mRNA_rhythm_translation_rhyth/Snca_set_D.pdf]

# Snta1

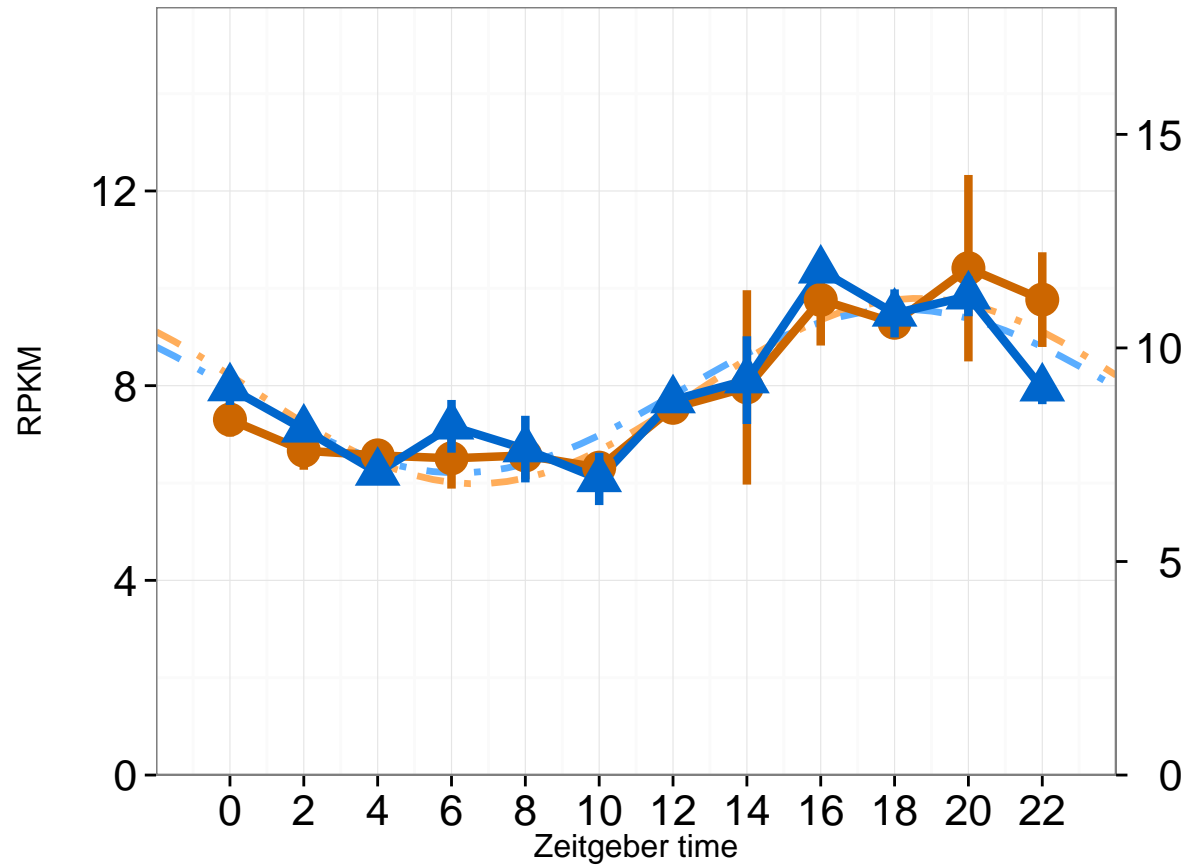

# Snta1

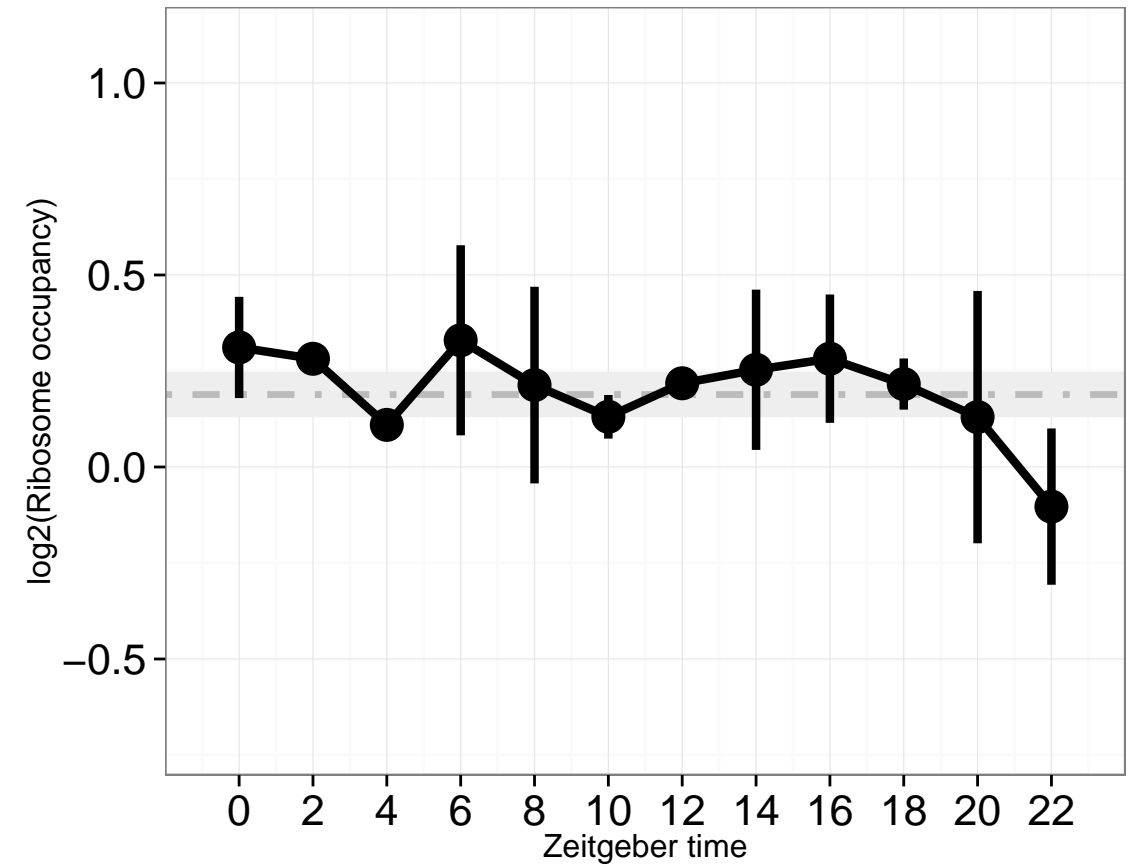

Supplement: SuppDataset_1.zip [file Snta1_set_D.pdf › Supplemental Dataset 1/D-mRNA_rhythm_translation_rhyth/Snta1_set_D.pdf]

## Snx10

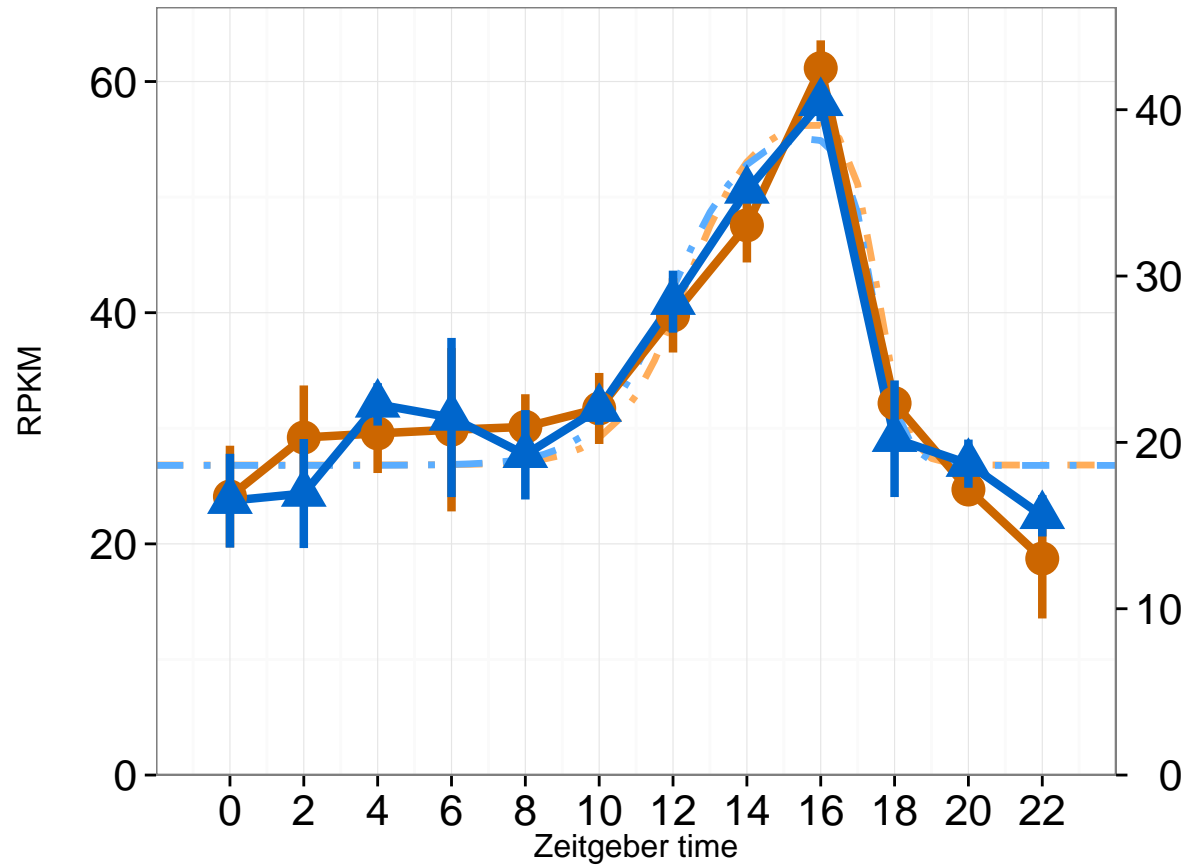

## Snx10

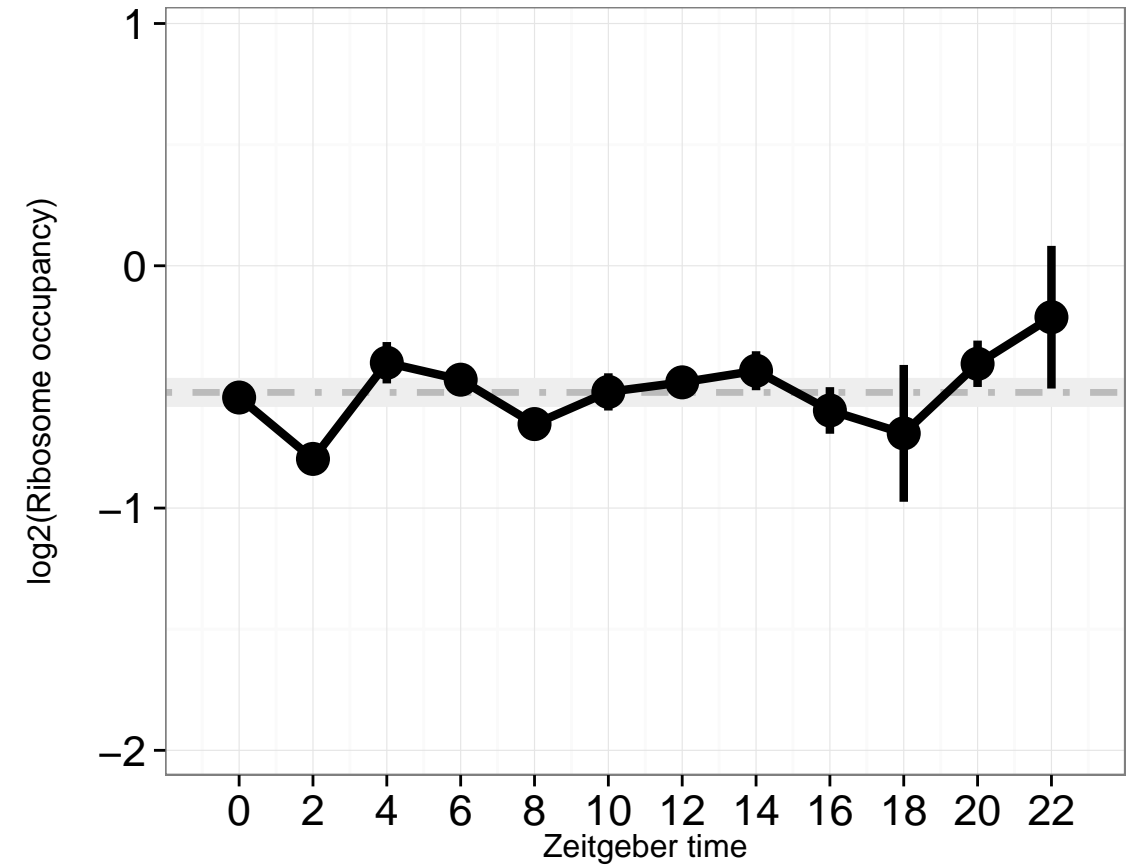

Supplement: SuppDataset_1.zip [file Snx10_set_D.pdf › Supplemental Dataset 1/D-mRNA_rhythm_translation_rhyth/Snx10_set_D.pdf]

## Soat2

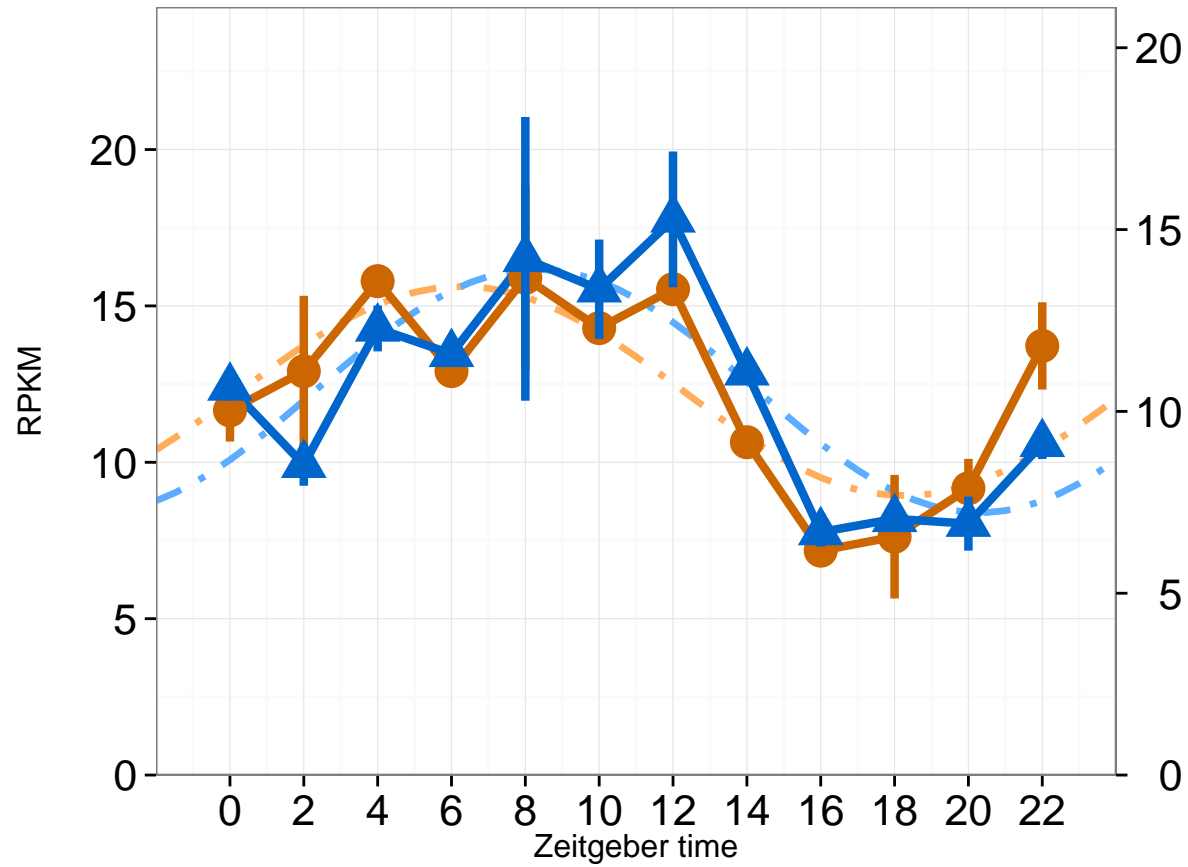

## Soat2

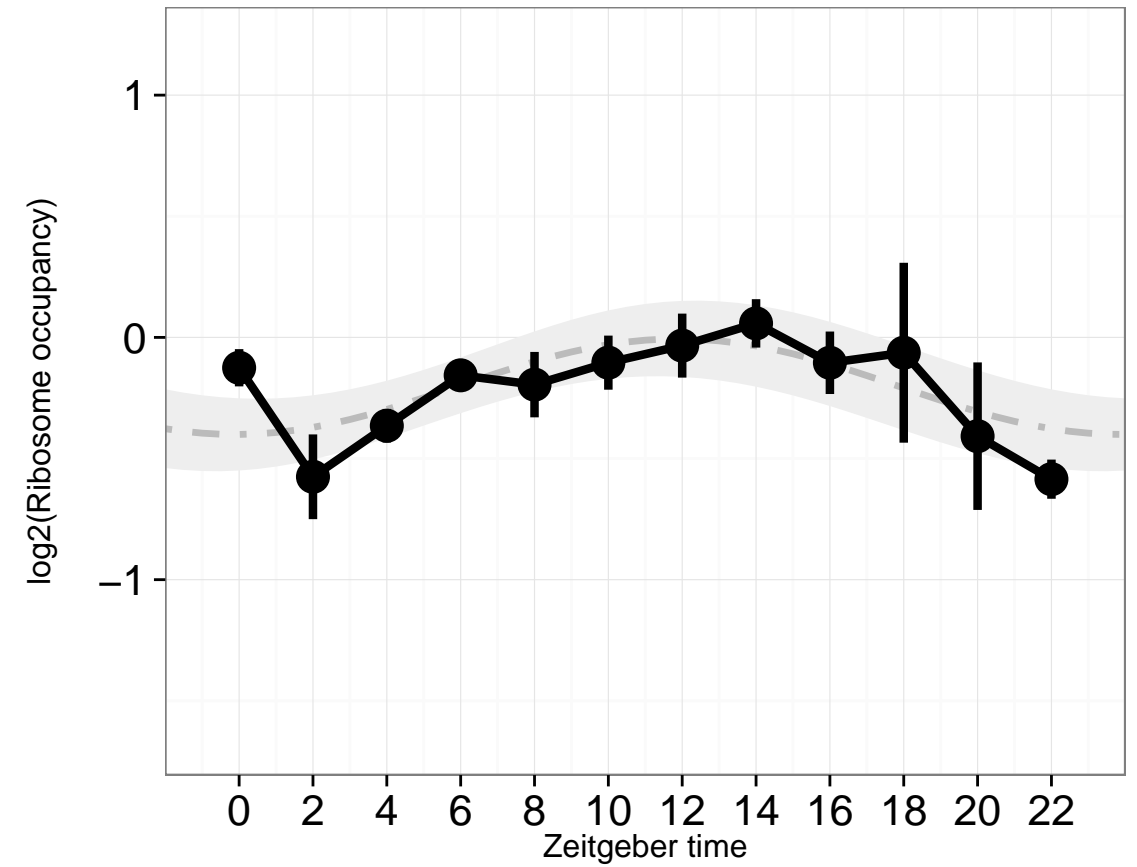

Supplement: SuppDataset_1.zip [file Soat2_set_D.pdf › Supplemental Dataset 1/D-mRNA_rhythm_translation_rhyth/Soat2_set_D.pdf]

## Sorbs1

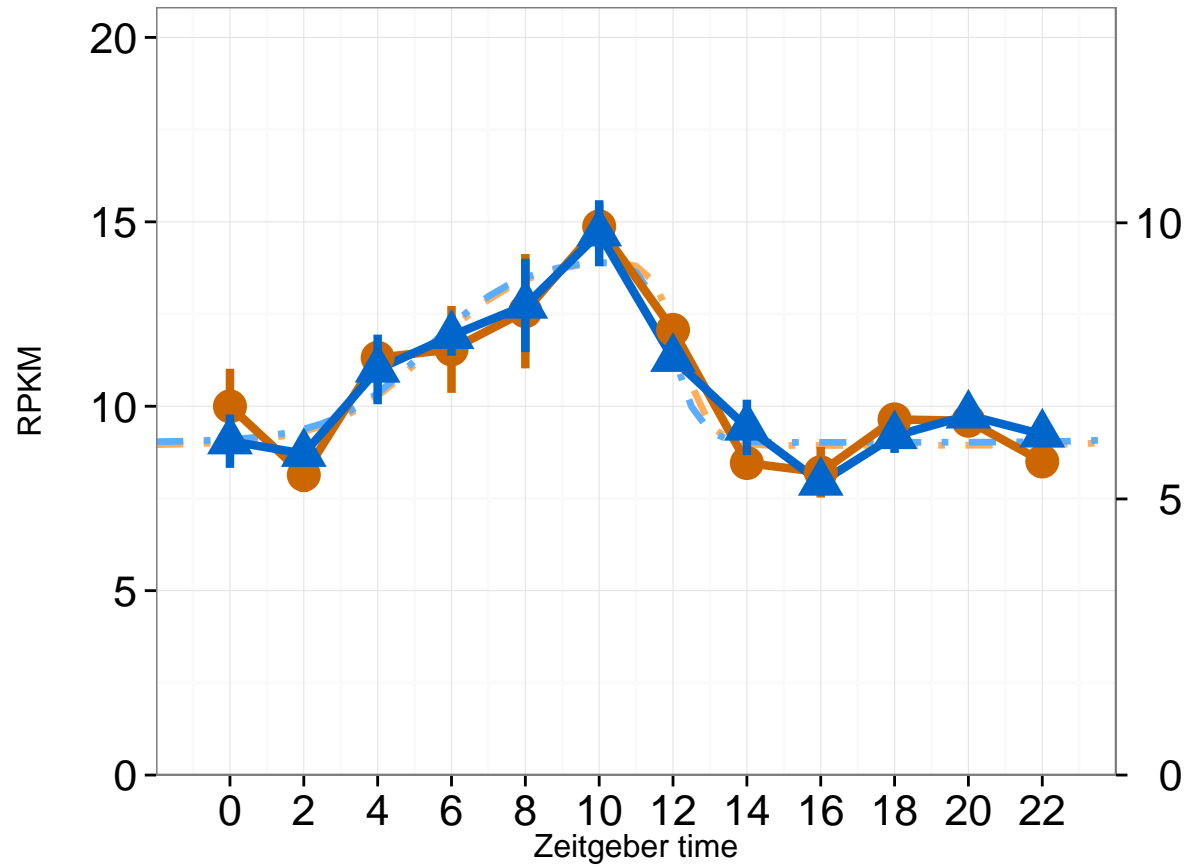

## Sorbs1

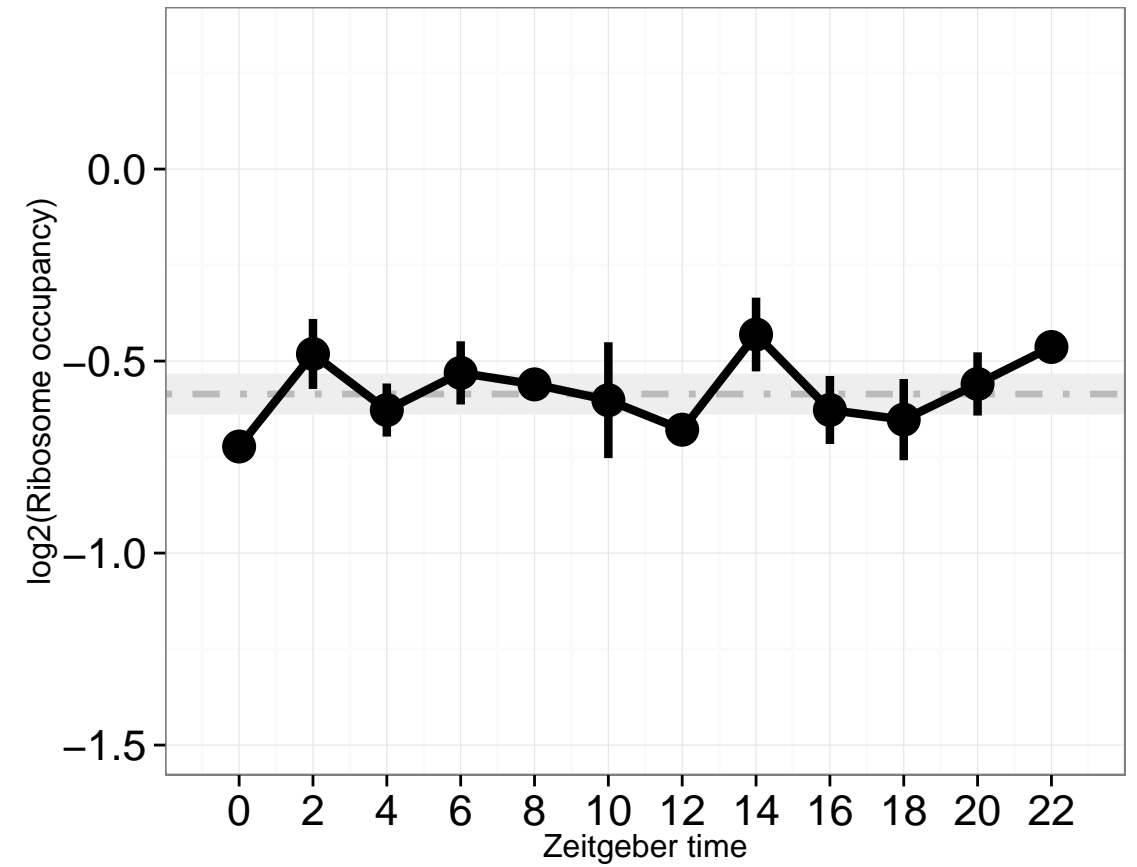

Supplement: SuppDataset_1.zip [file Sorbs1_set_D.pdf › Supplemental Dataset 1/D-mRNA_rhythm_translation_rhyth/Sorbs1_set_D.pdf]

## Sorbs2

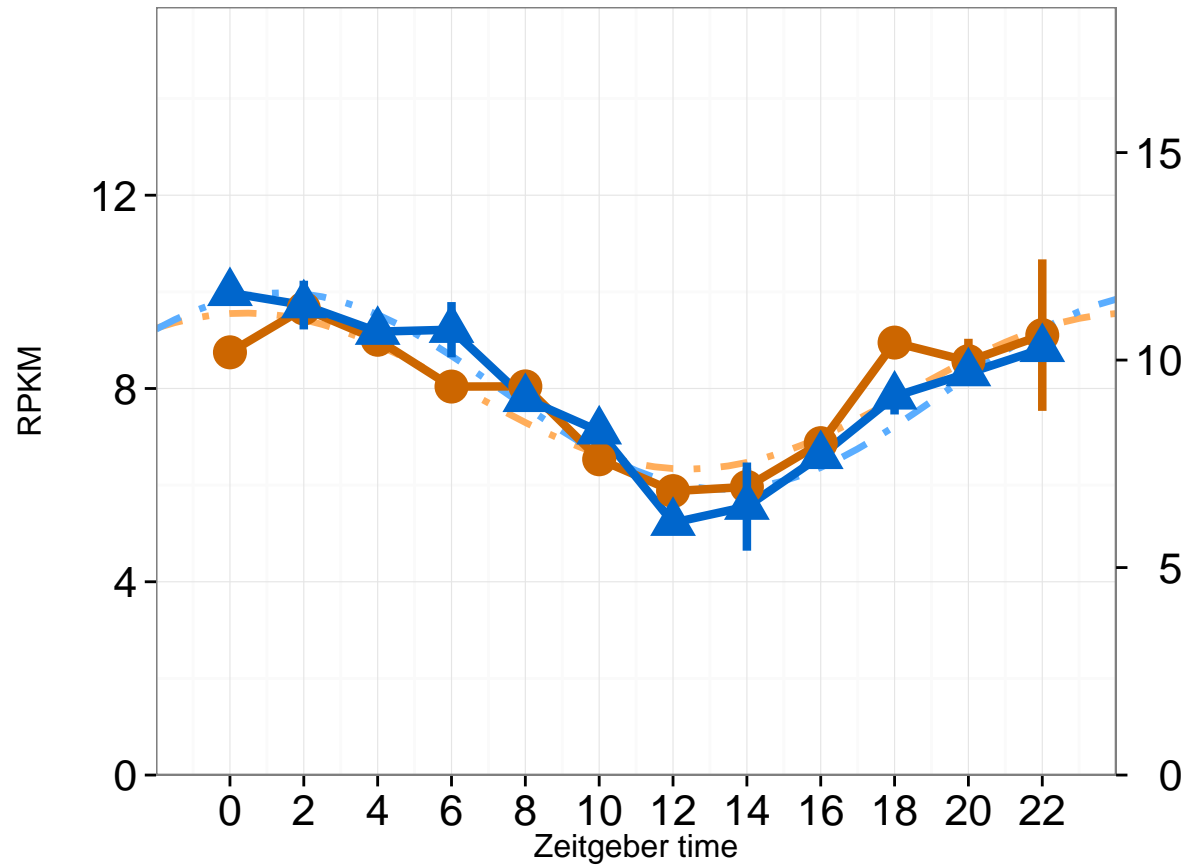

## Sorbs2

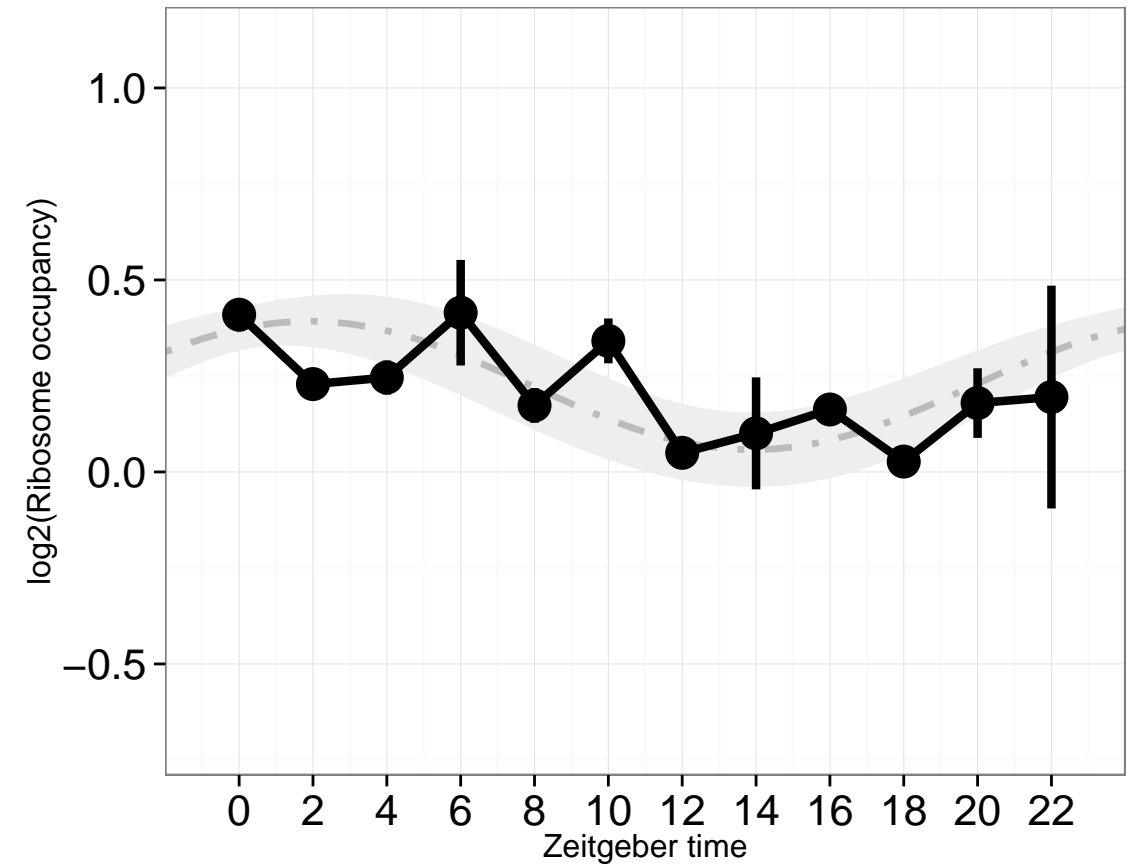

Supplement: SuppDataset_1.zip [file Sorbs2_set_D.pdf › Supplemental Dataset 1/D-mRNA_rhythm_translation_rhyth/Sorbs2_set_D.pdf]

# Sort1

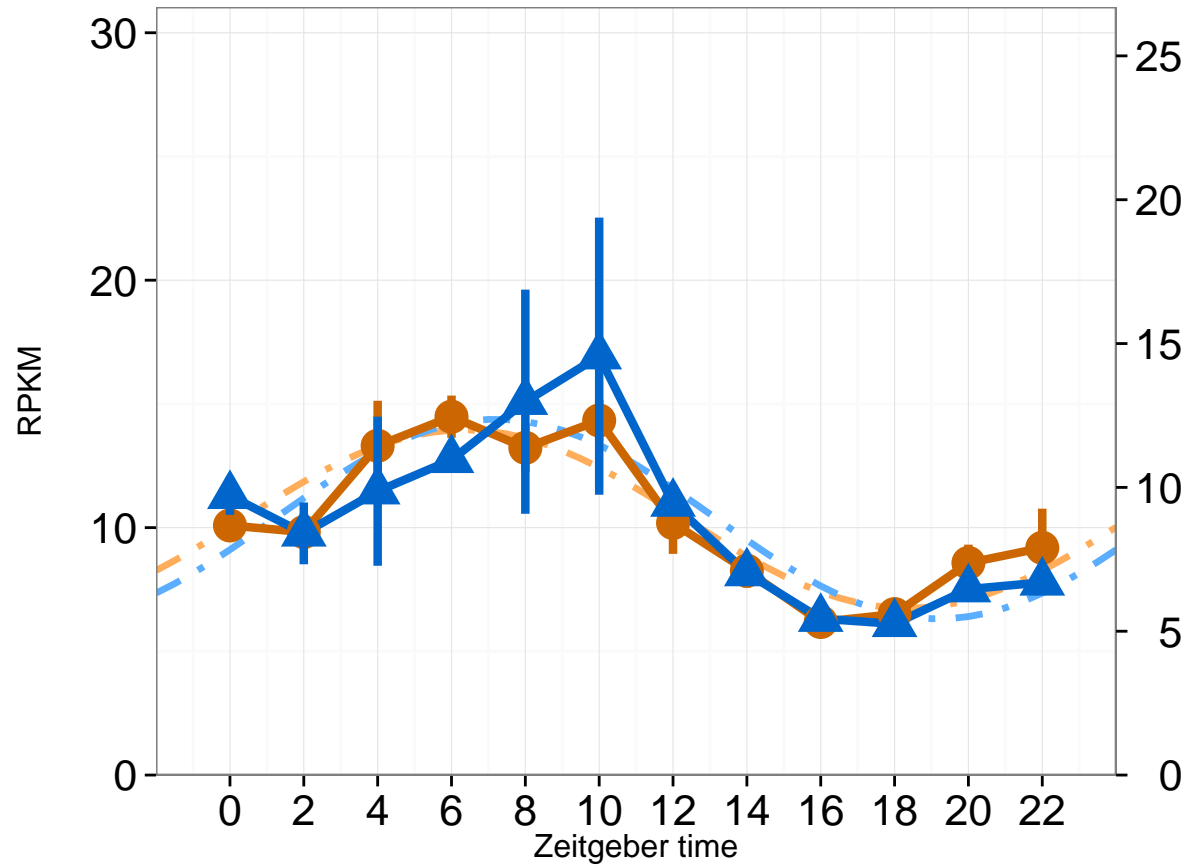

# Sort1

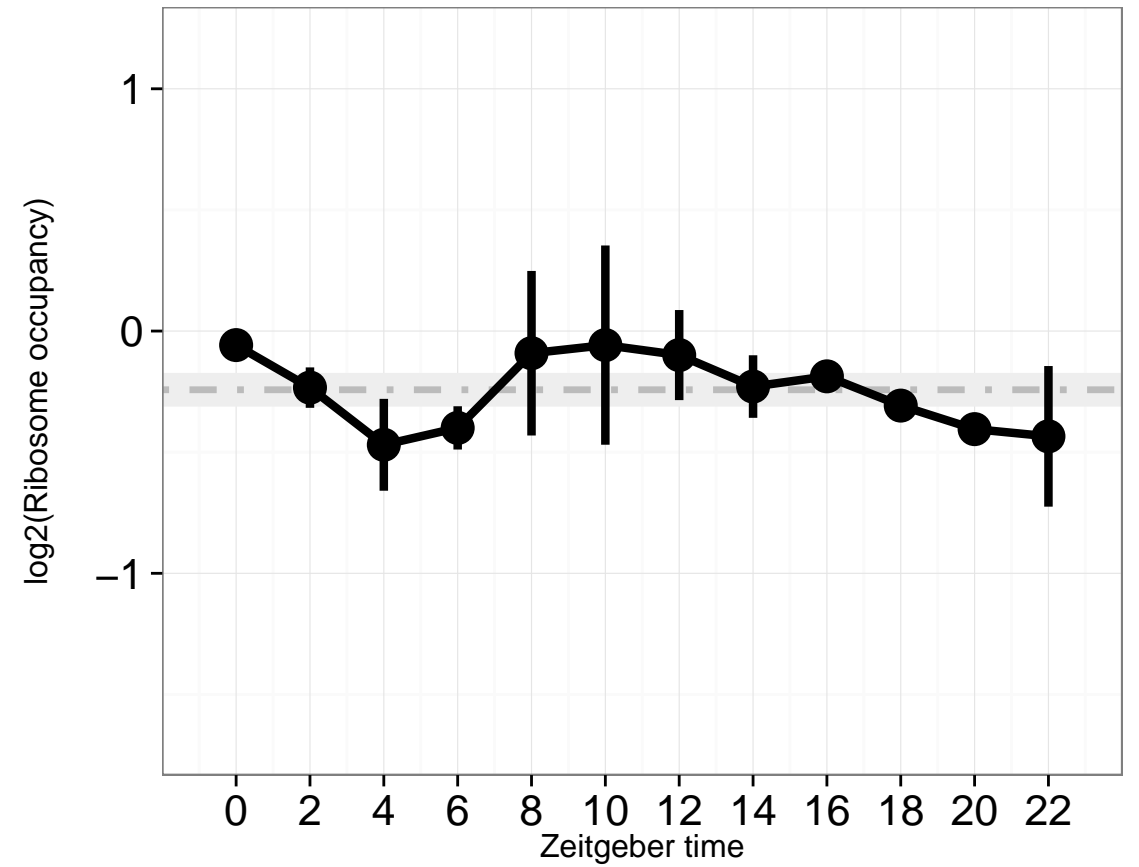

Supplement: SuppDataset_1.zip [file Sort1_set_D.pdf › Supplemental Dataset 1/D-mRNA_rhythm_translation_rhyth/Sort1_set_D.pdf]

## Sox9

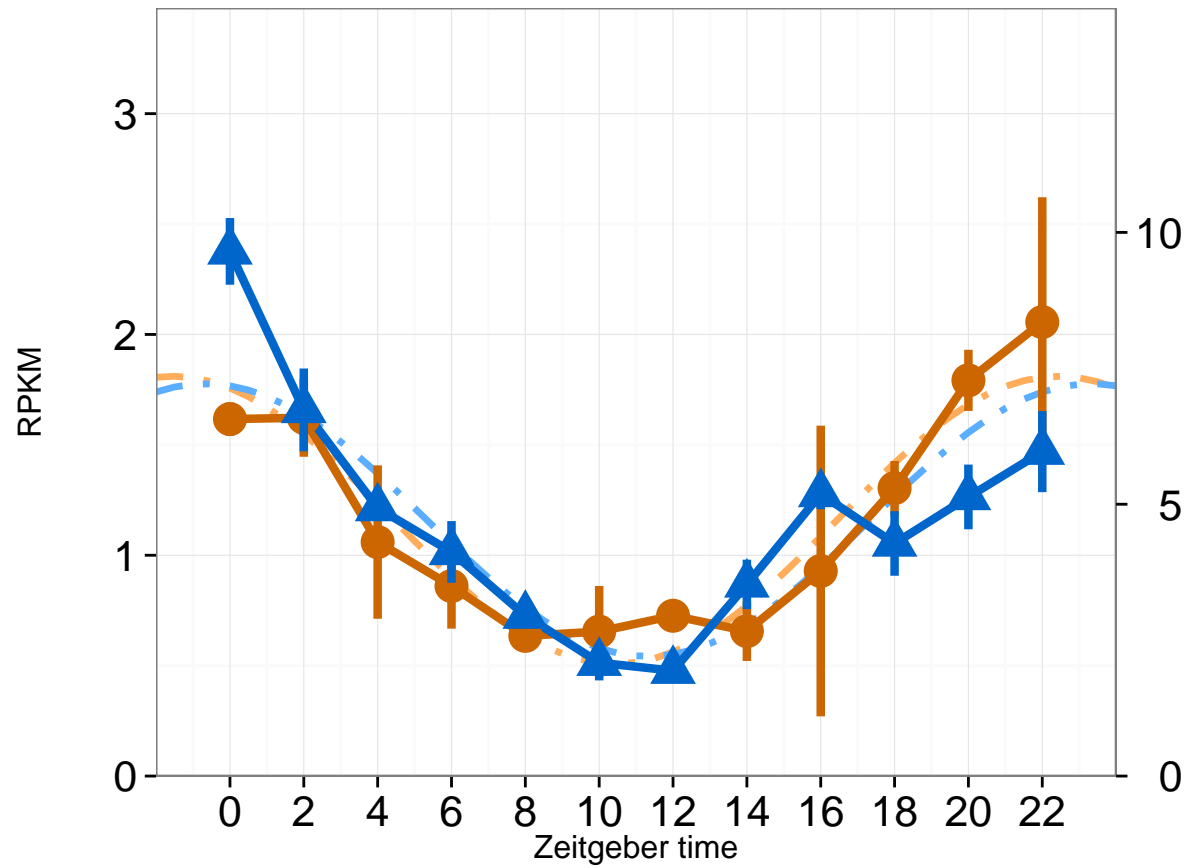

## Sox9

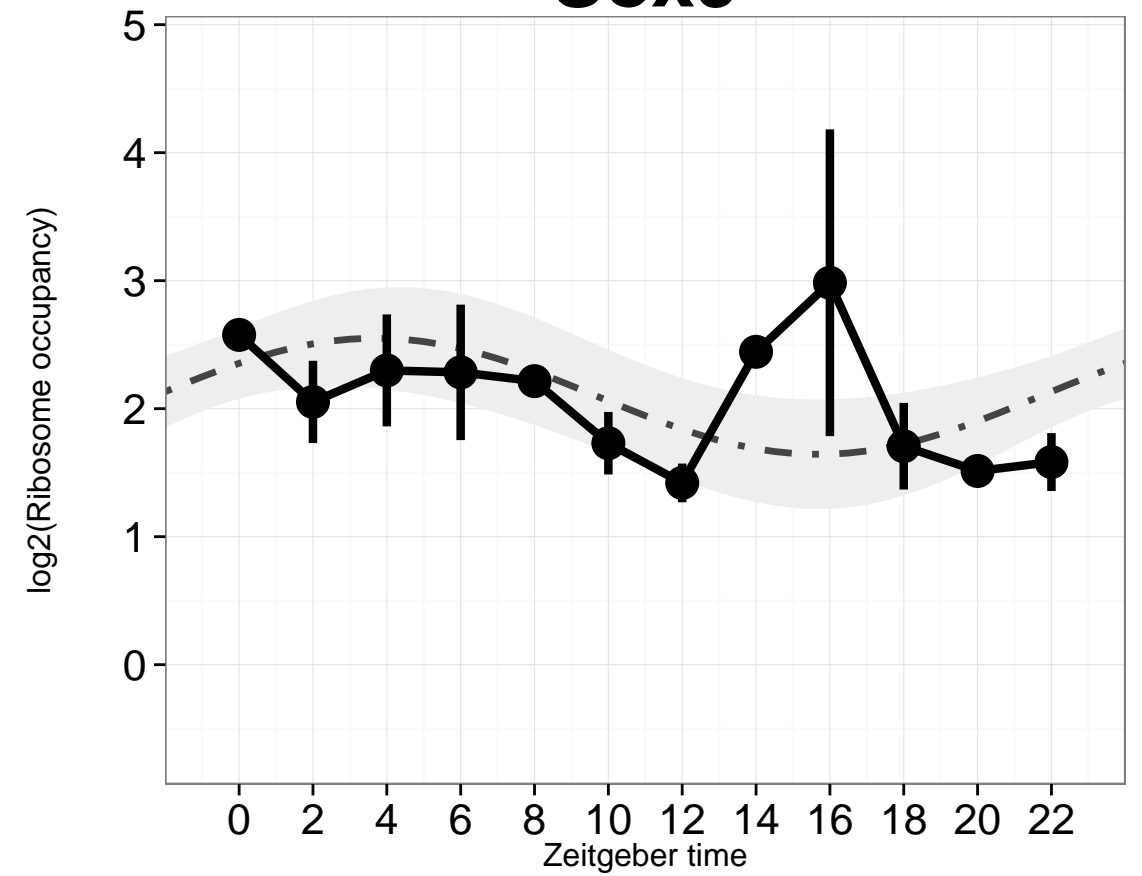

Supplement: SuppDataset_1.zip [file Sox9_set_D.pdf › Supplemental Dataset 1/D-mRNA_rhythm_translation_rhyth/Sox9_set_D.pdf]

# Spata13

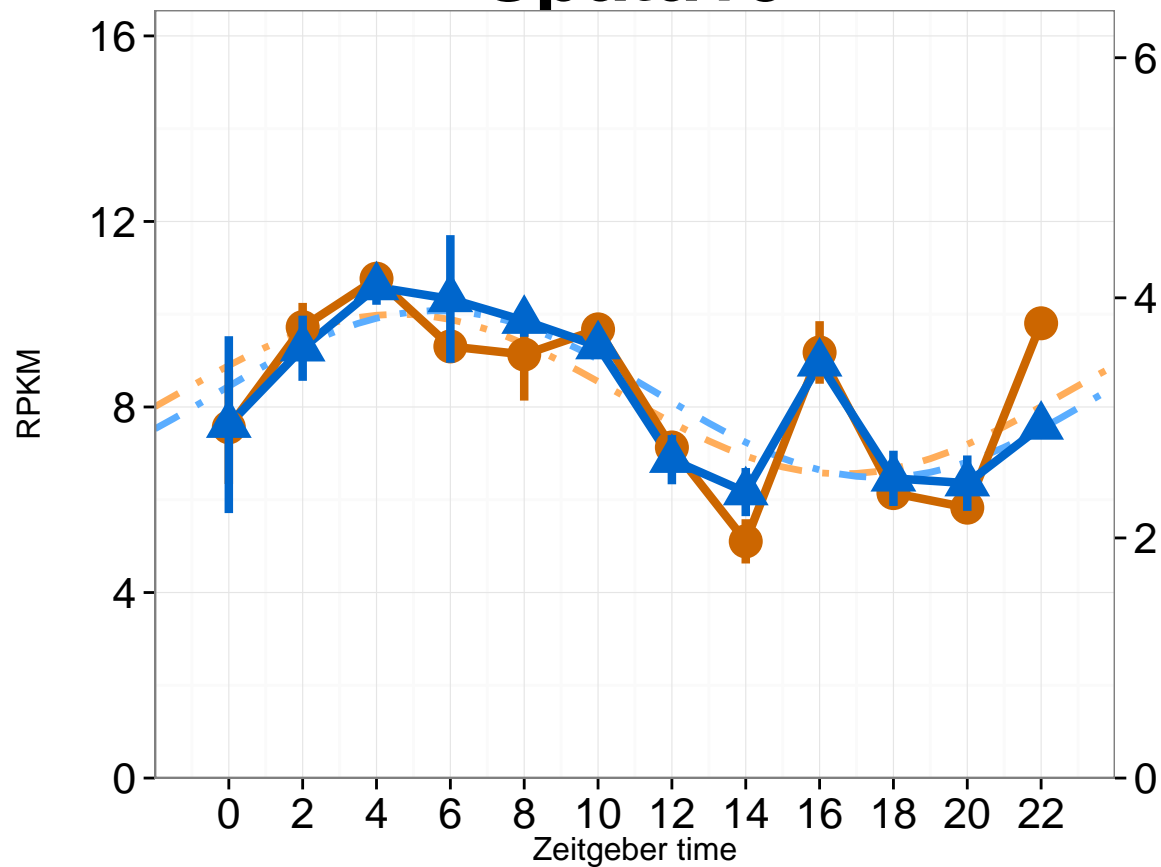

# Spata13

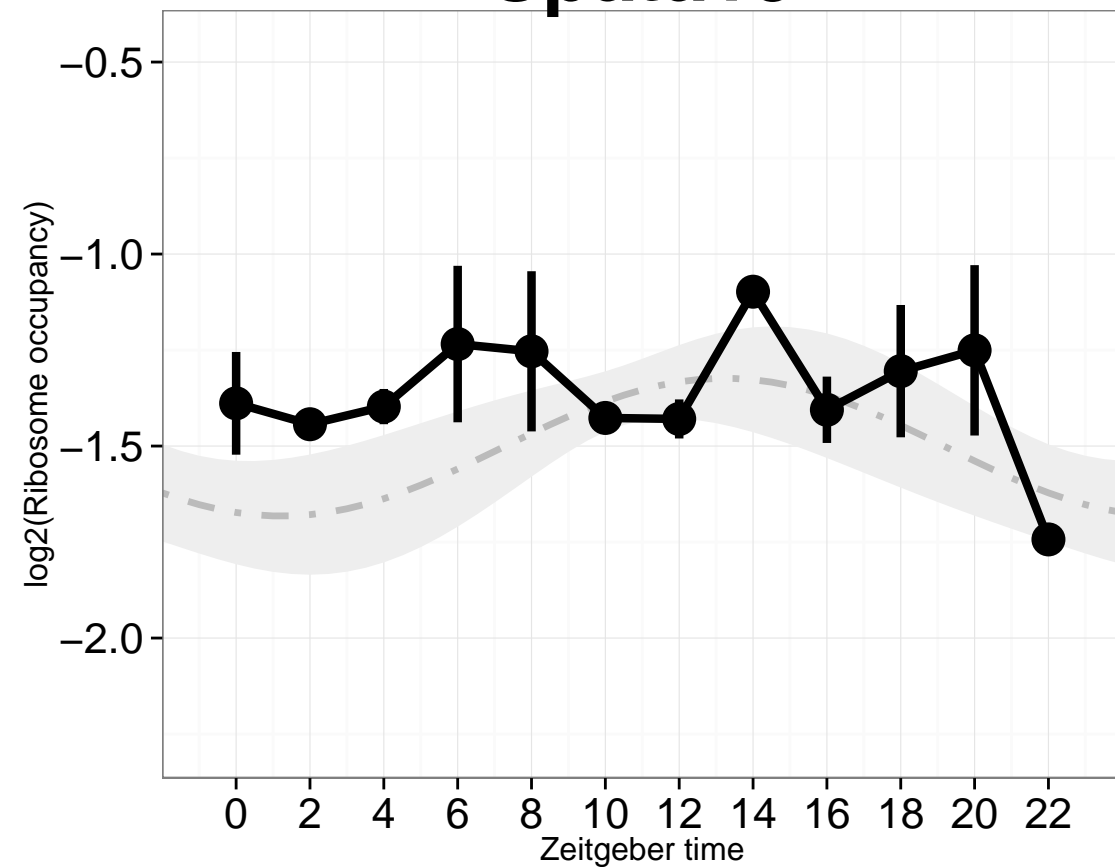

Supplement: SuppDataset_1.zip [file Spata13_set_D.pdf › Supplemental Dataset 1/D-mRNA_rhythm_translation_rhyth/Spata13_set_D.pdf]

# Spata22

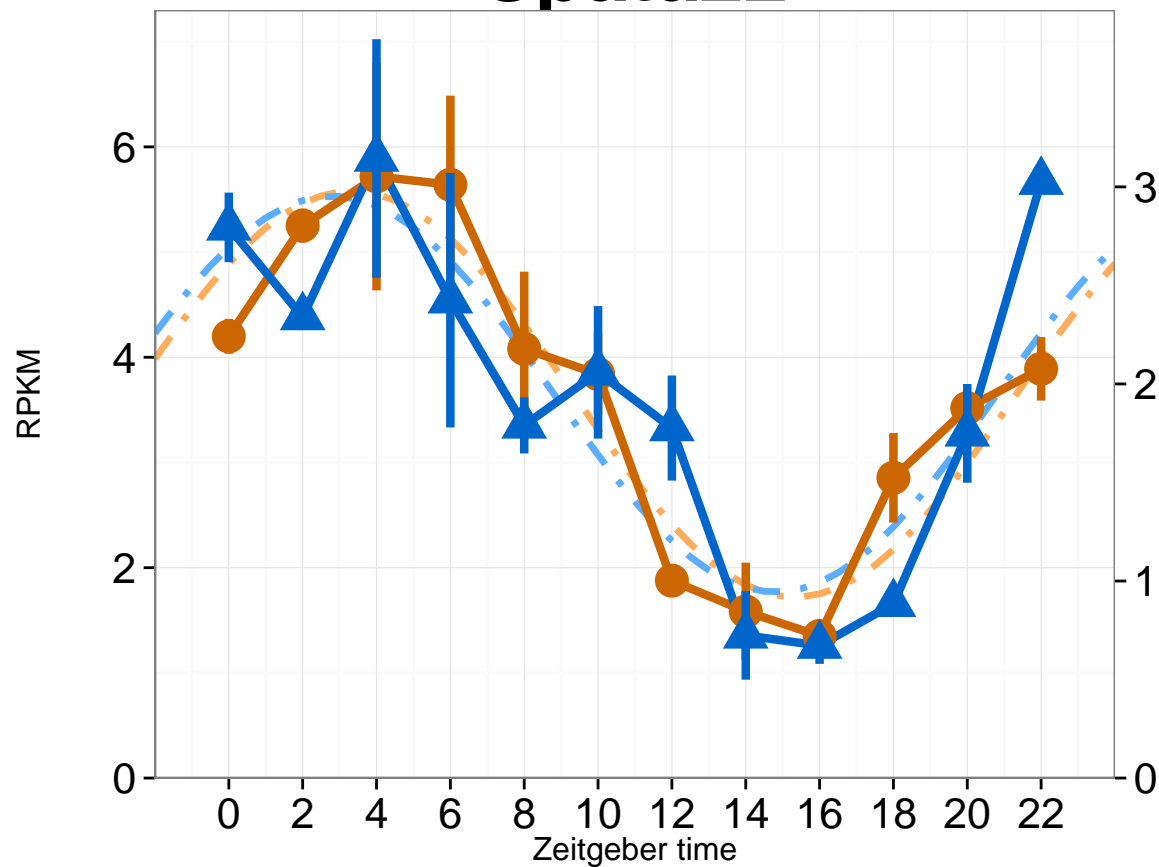

# Spata22

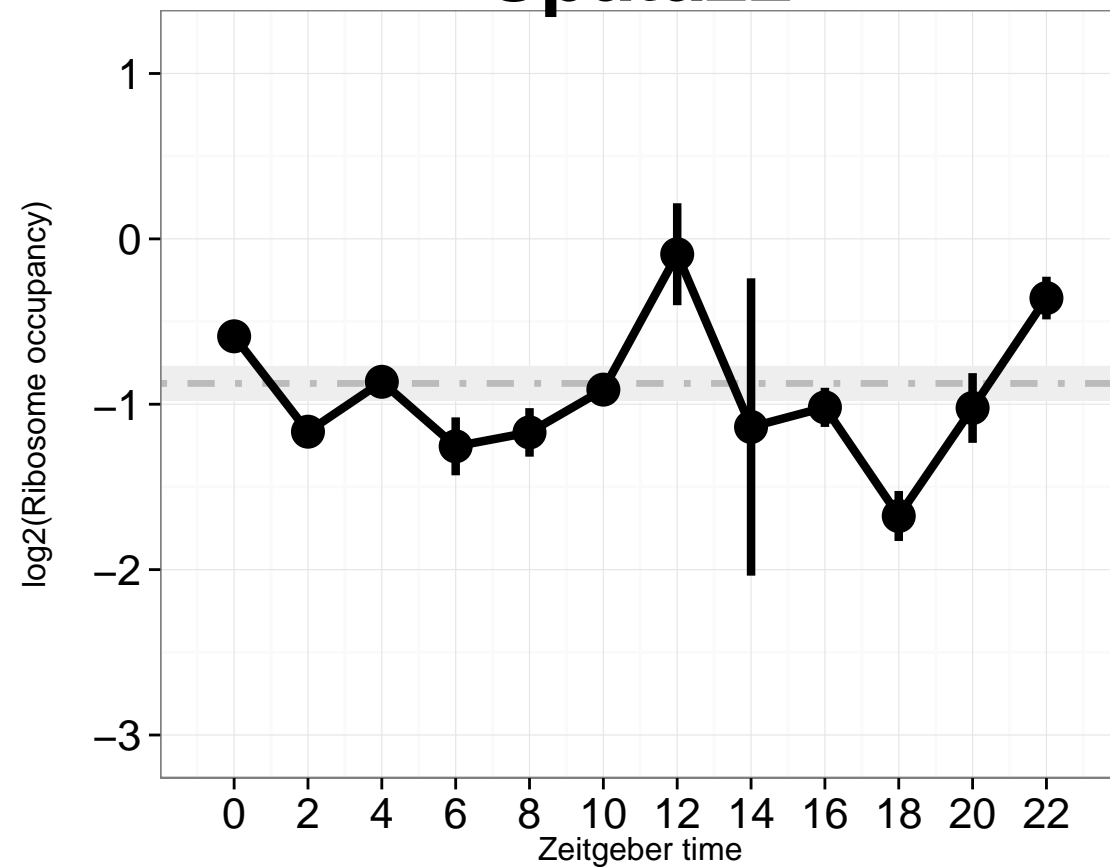

Supplement: SuppDataset_1.zip [file Spata22_set_D.pdf › Supplemental Dataset 1/D-mRNA_rhythm_translation_rhyth/Spata22_set_D.pdf]

# Spc25

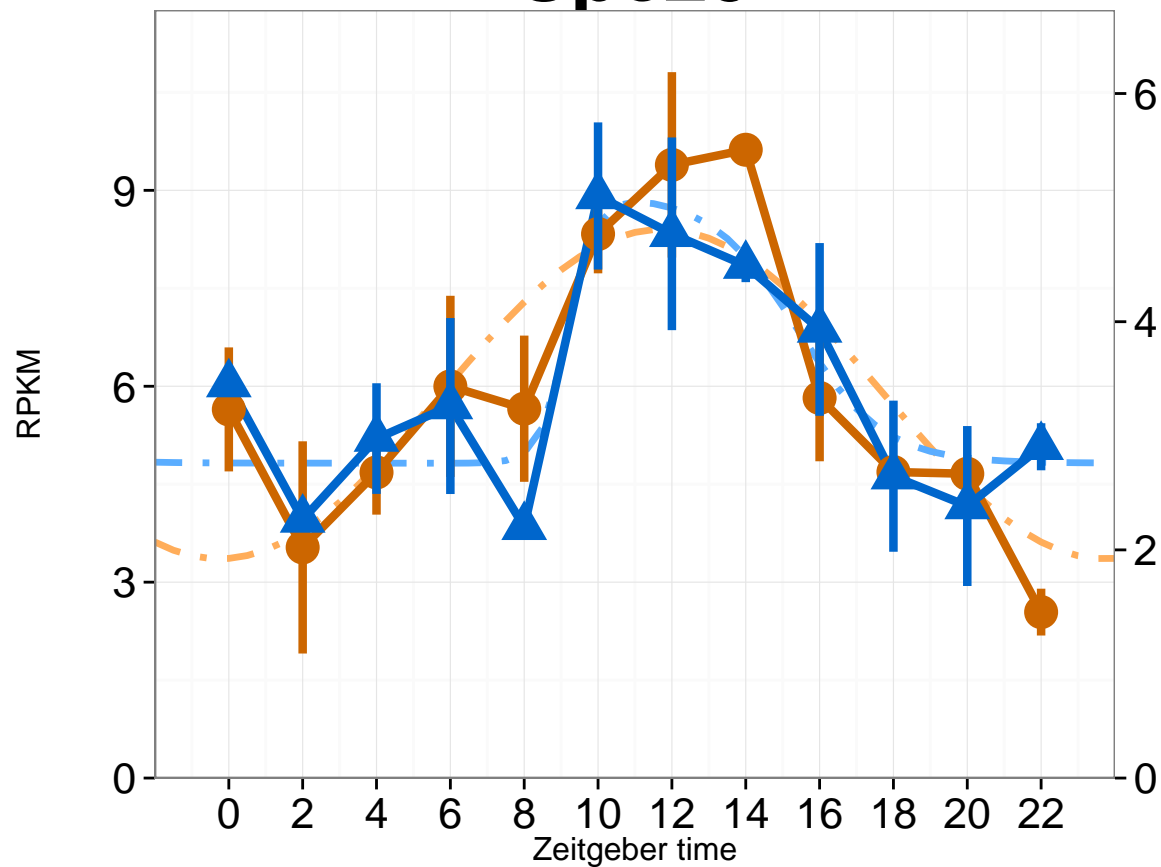

# Spc25

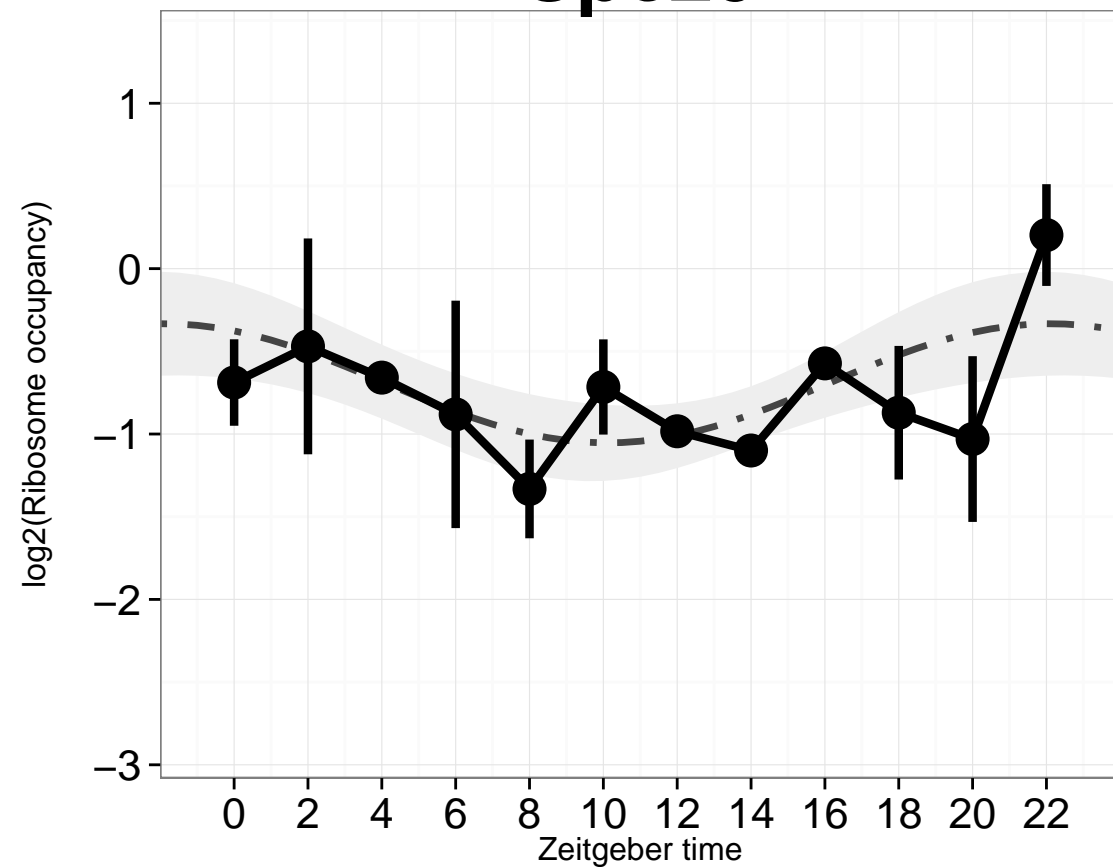

Supplement: SuppDataset_1.zip [file Spc25_set_D.pdf › Supplemental Dataset 1/D-mRNA_rhythm_translation_rhyth/Spc25_set_D.pdf]

## Sphk2

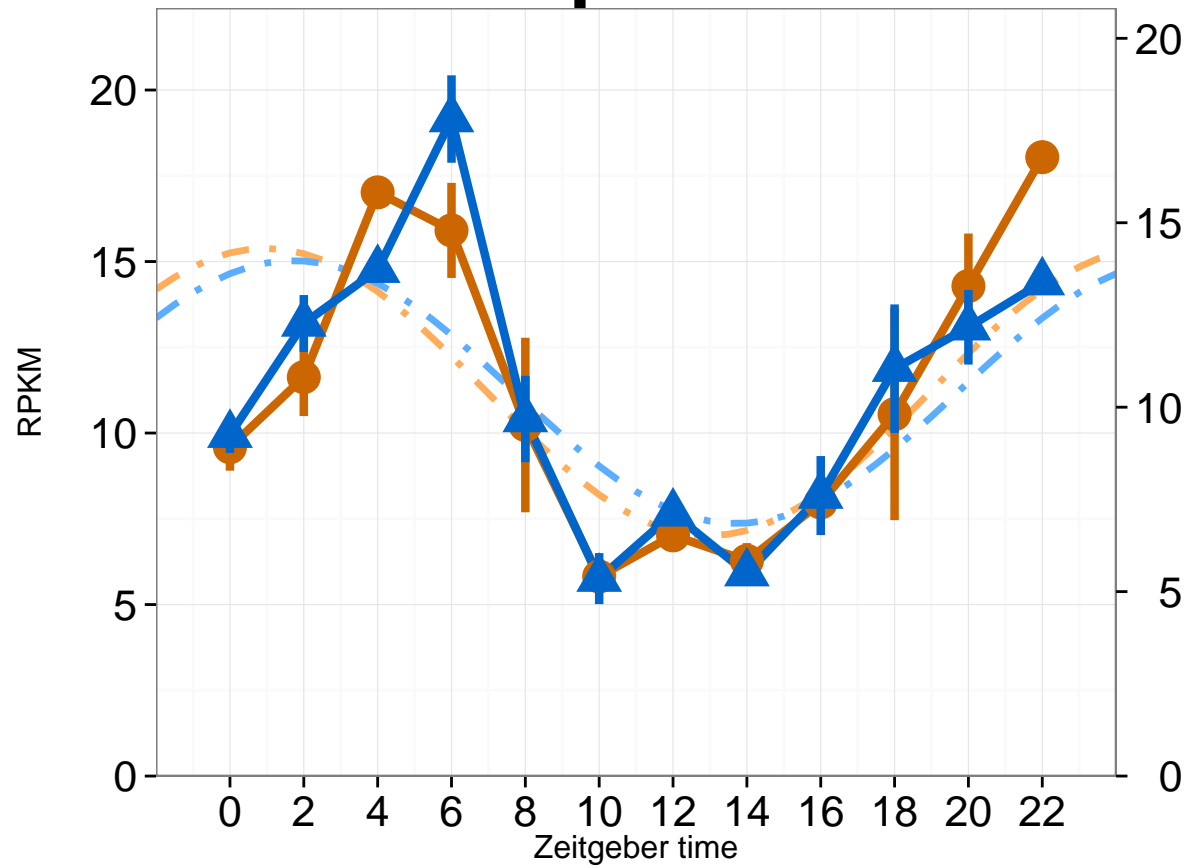

## Sphk2

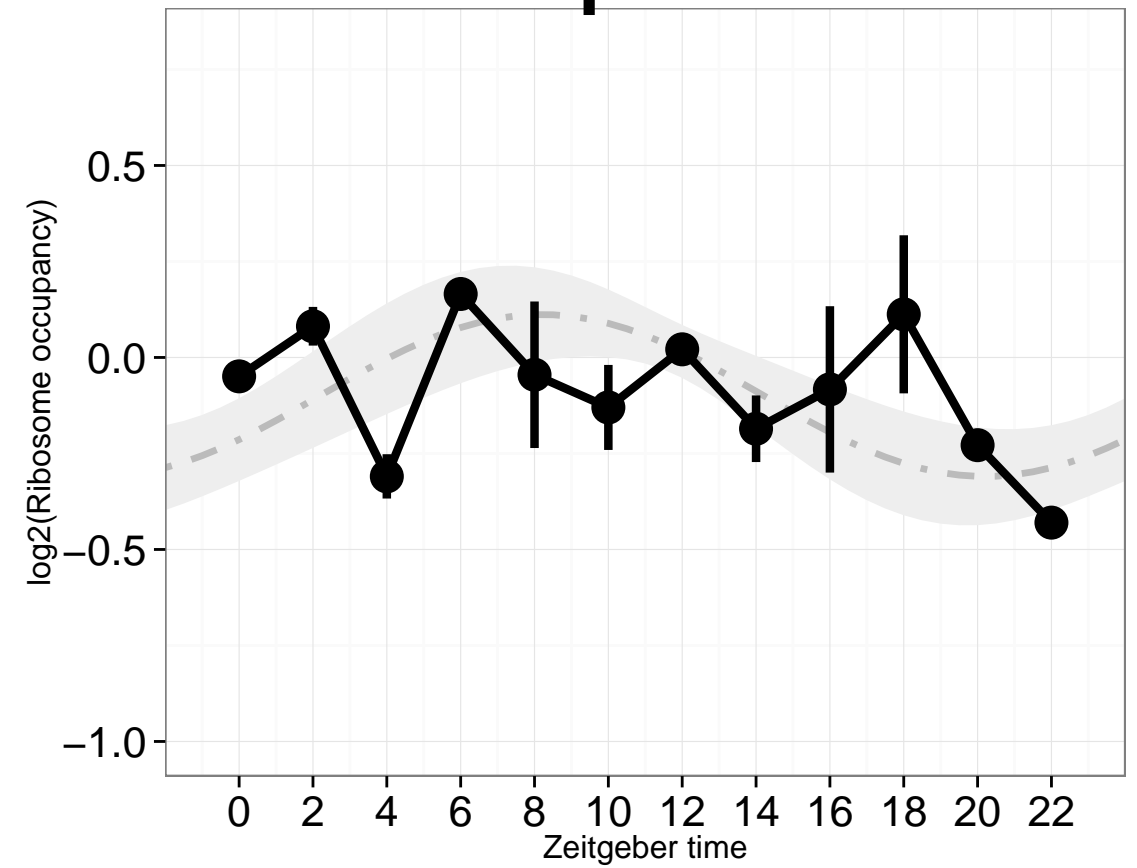

Supplement: SuppDataset_1.zip [file Sphk2_set_D.pdf › Supplemental Dataset 1/D-mRNA_rhythm_translation_rhyth/Sphk2_set_D.pdf]

## Spon2

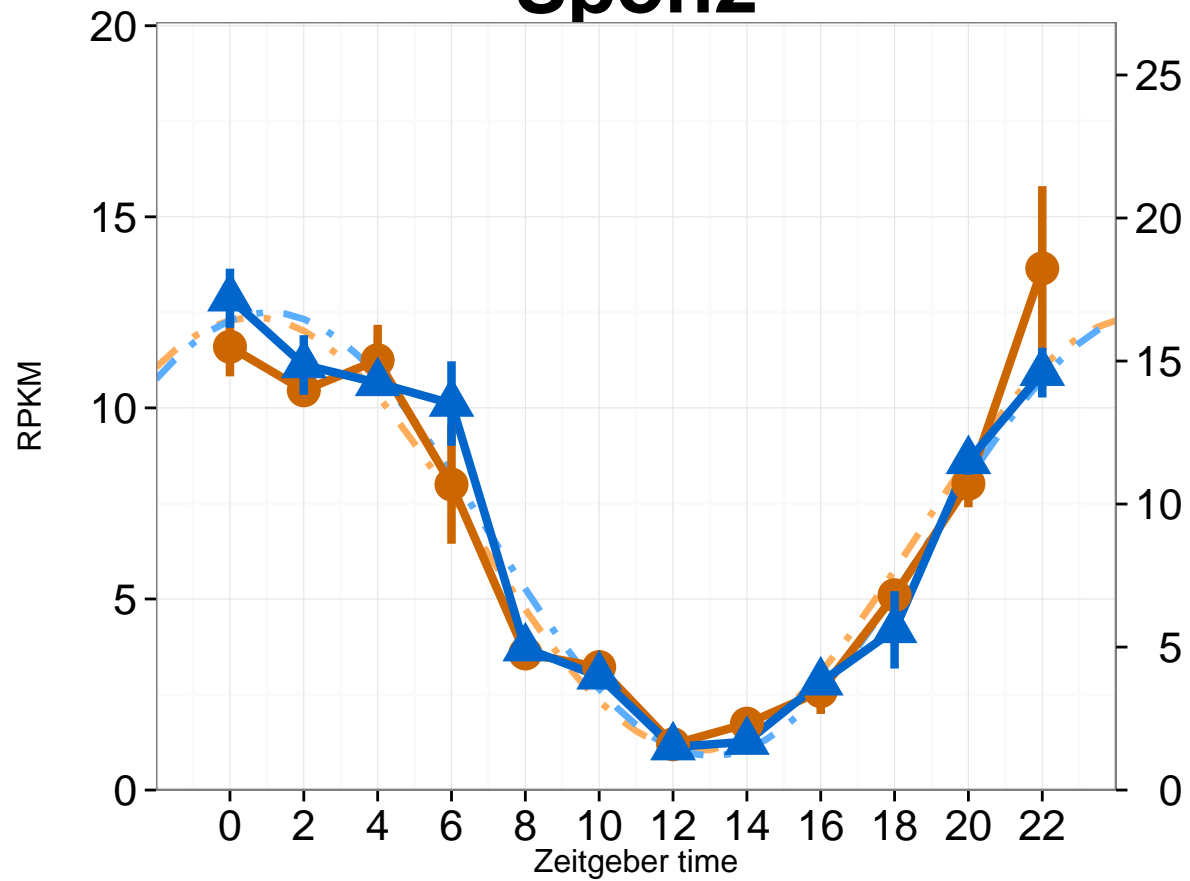

## Spon2

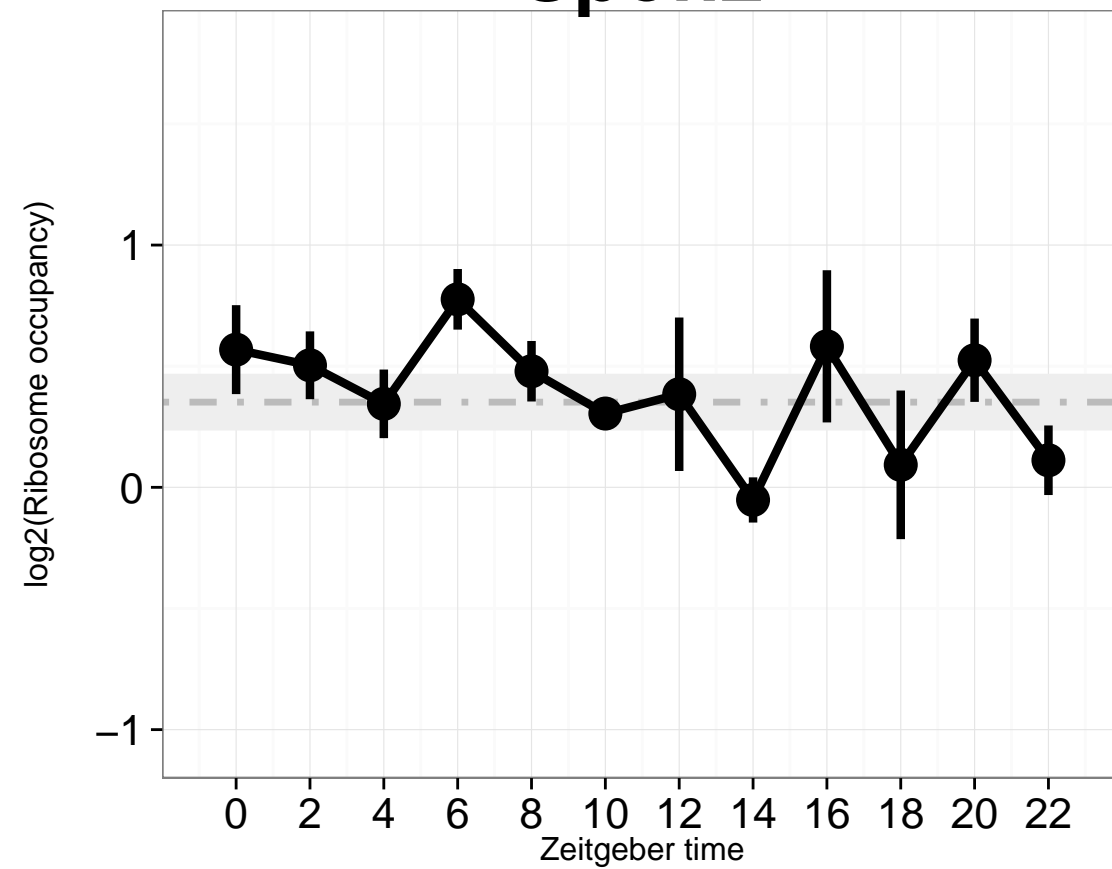

Supplement: SuppDataset_1.zip [file Spon2_set_D.pdf › Supplemental Dataset 1/D-mRNA_rhythm_translation_rhyth/Spon2_set_D.pdf]

## Spsb3

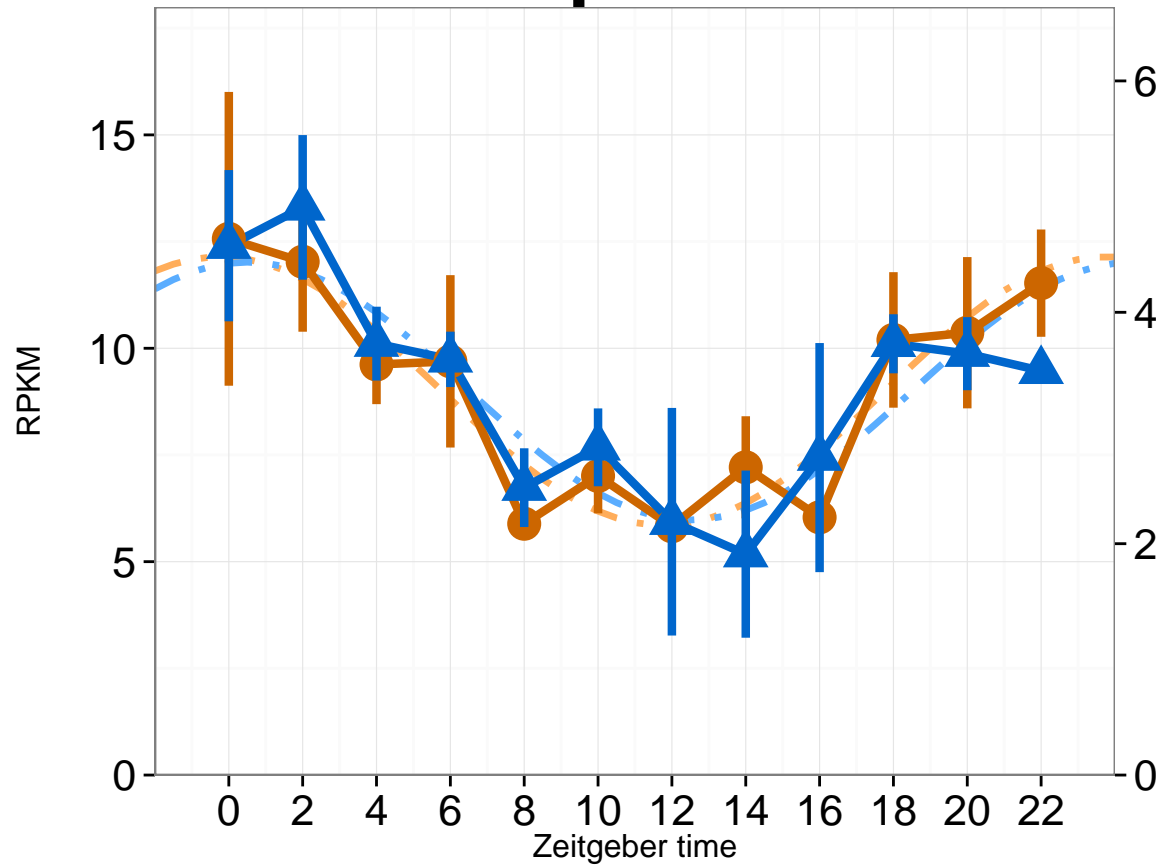

## Spsb3

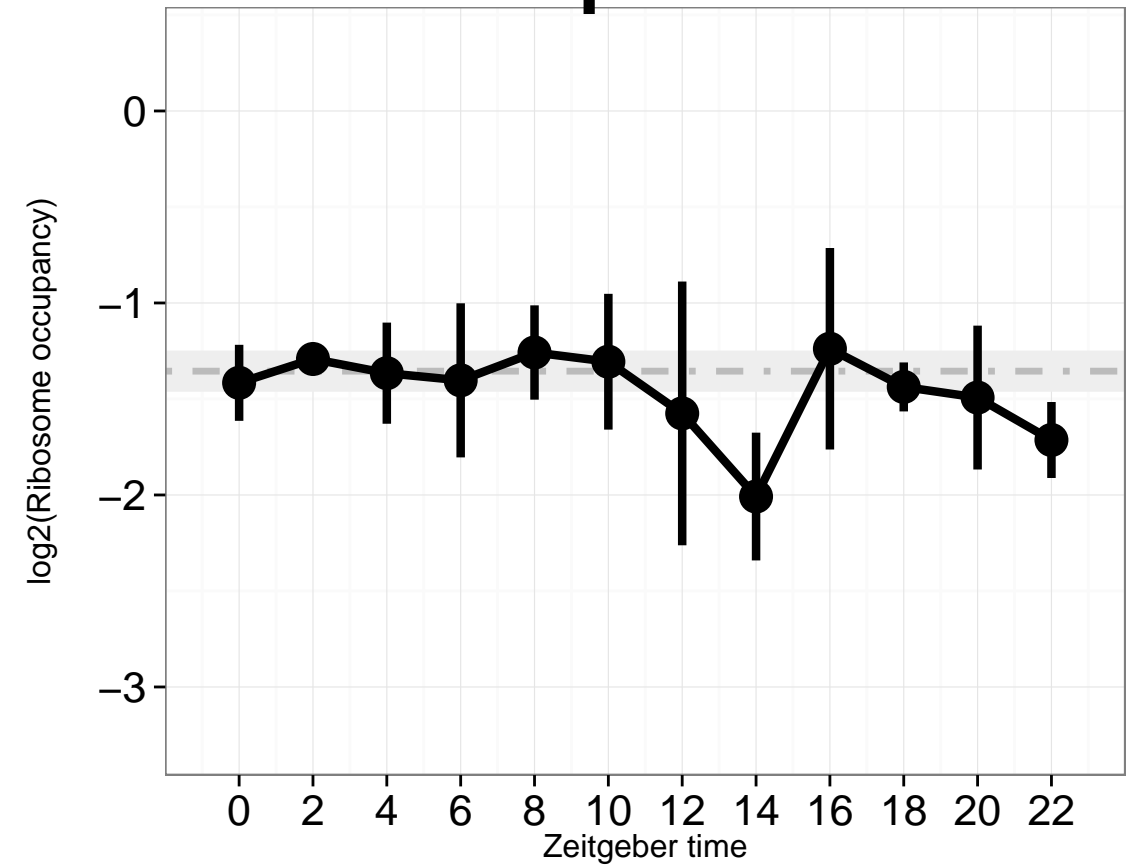

Supplement: SuppDataset_1.zip [file Spsb3_set_D.pdf › Supplemental Dataset 1/D-mRNA_rhythm_translation_rhyth/Spsb3_set_D.pdf]

# Sptlc2

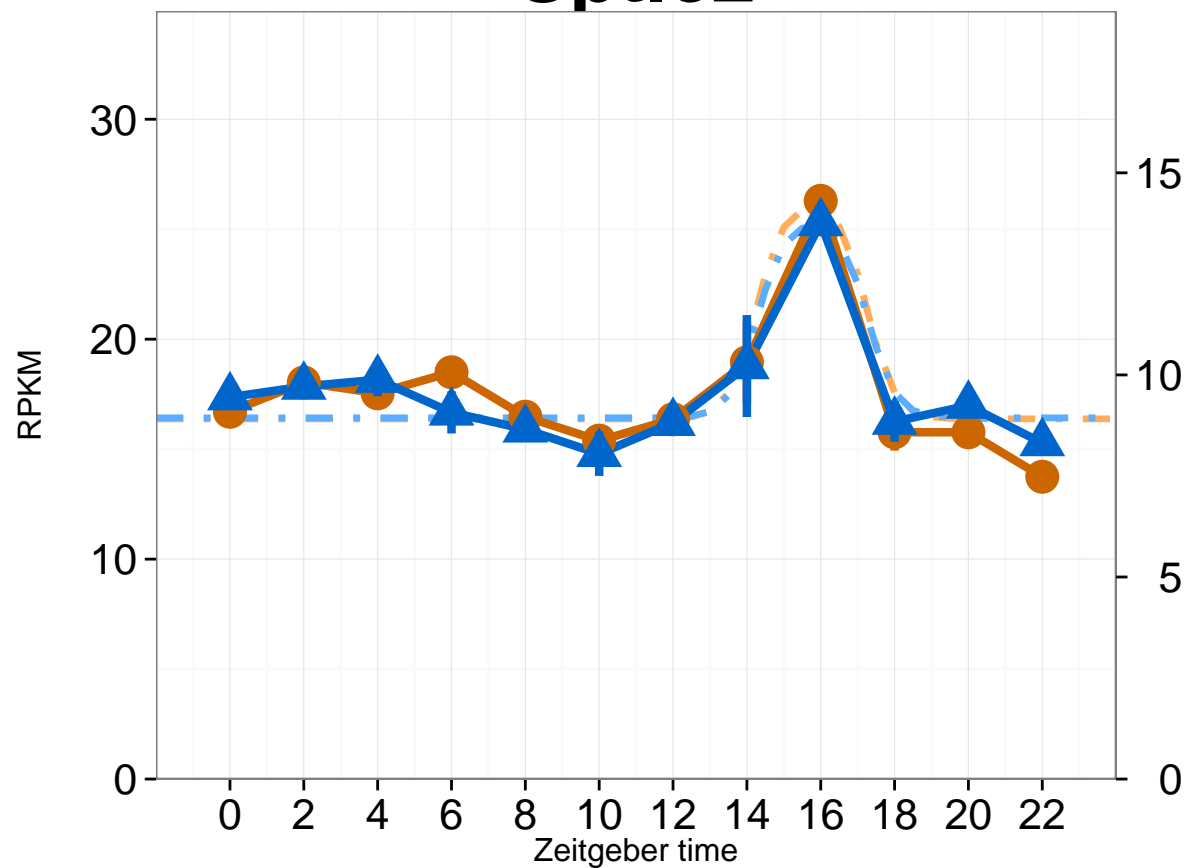

# Sptlc2

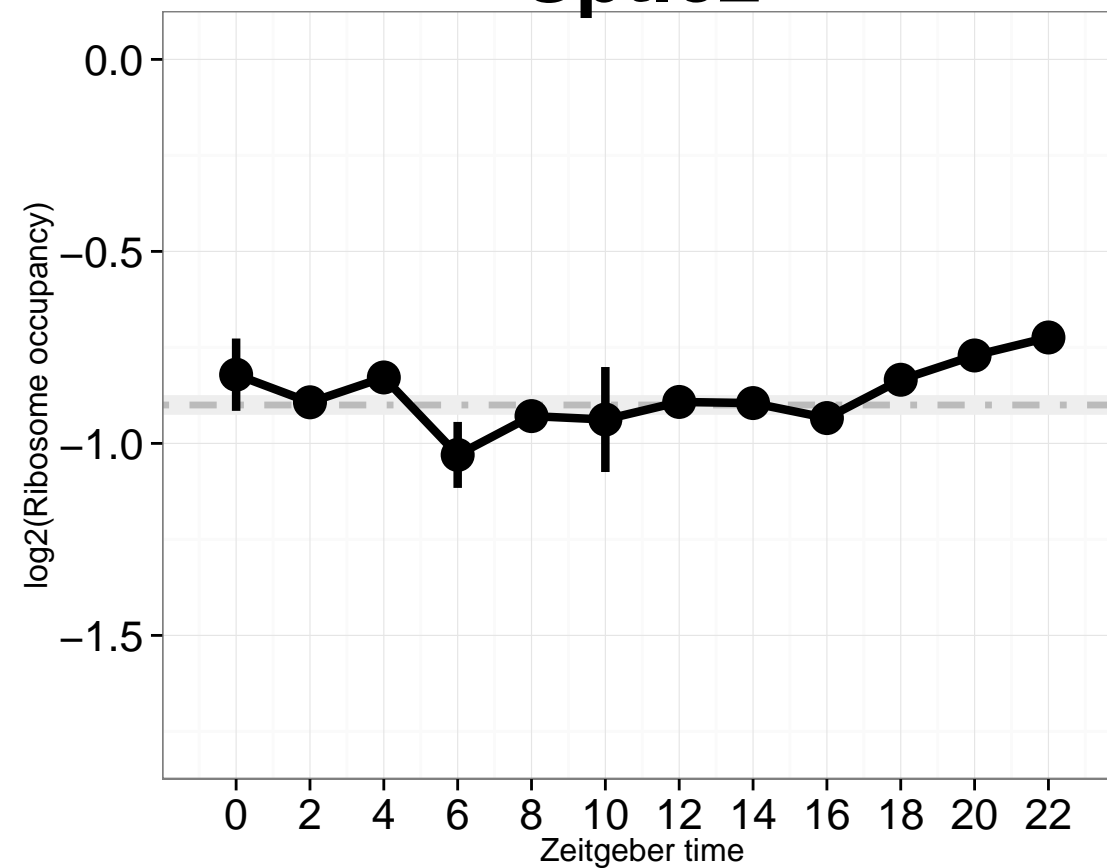

Supplement: SuppDataset_1.zip [file Sptlc2_set_D.pdf › Supplemental Dataset 1/D-mRNA_rhythm_translation_rhyth/Sptlc2_set_D.pdf]

## Srebf1

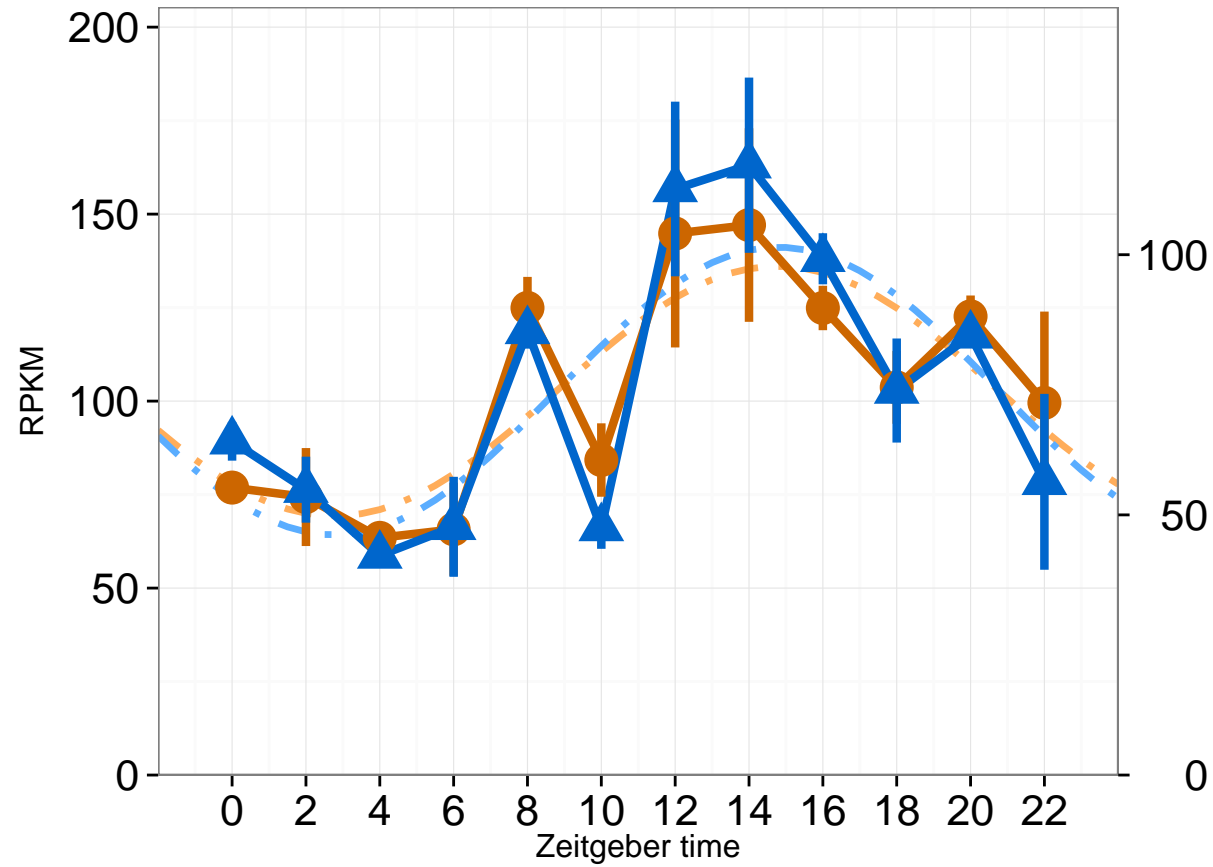

## Srebf1

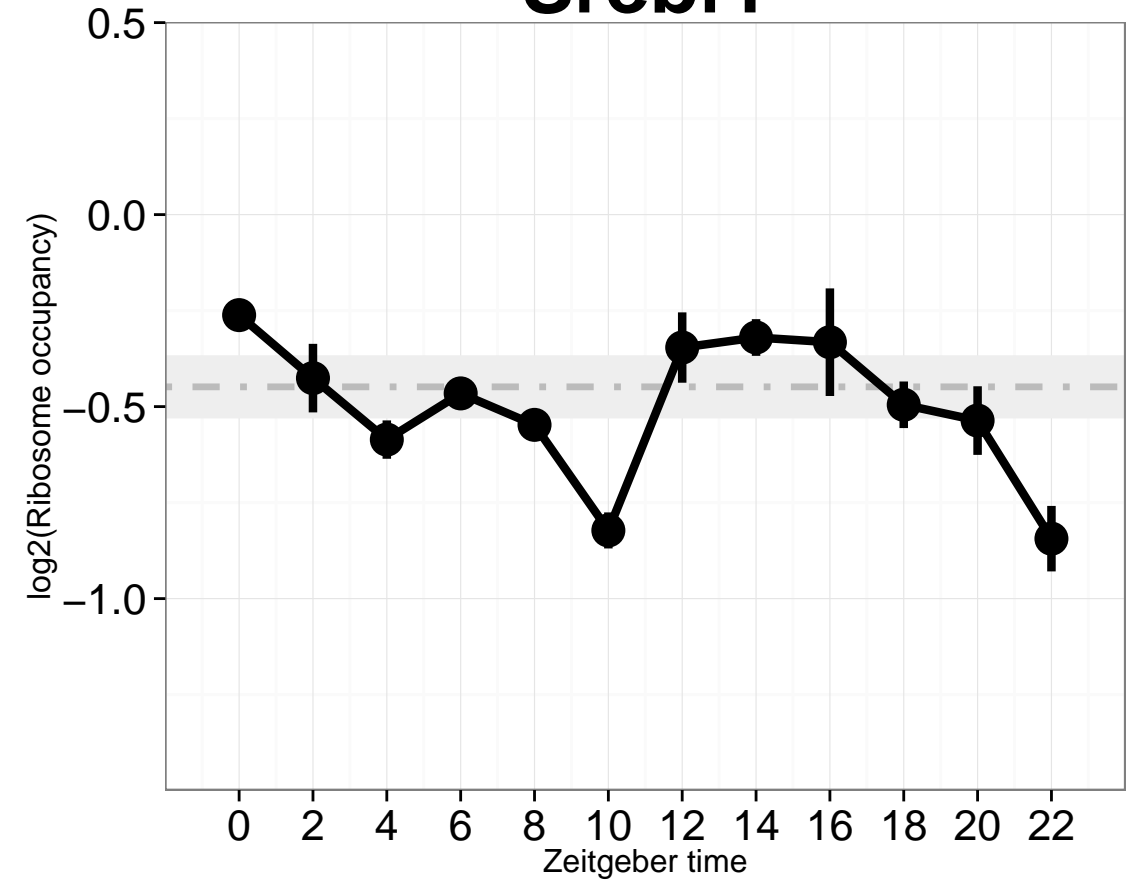

Supplement: SuppDataset_1.zip [file Srebf1_set_D.pdf › Supplemental Dataset 1/D-mRNA_rhythm_translation_rhyth/Srebf1_set_D.pdf]

# Srgap3

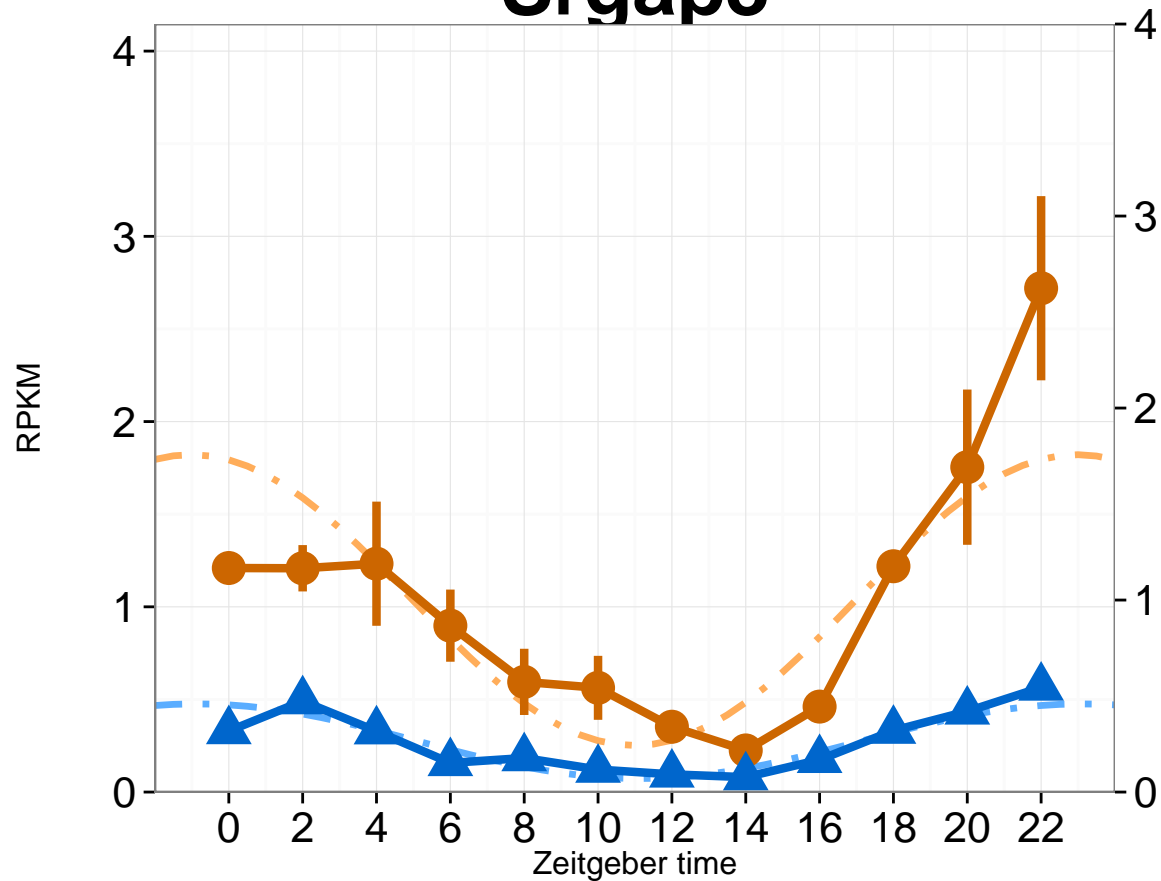

# Srgap3

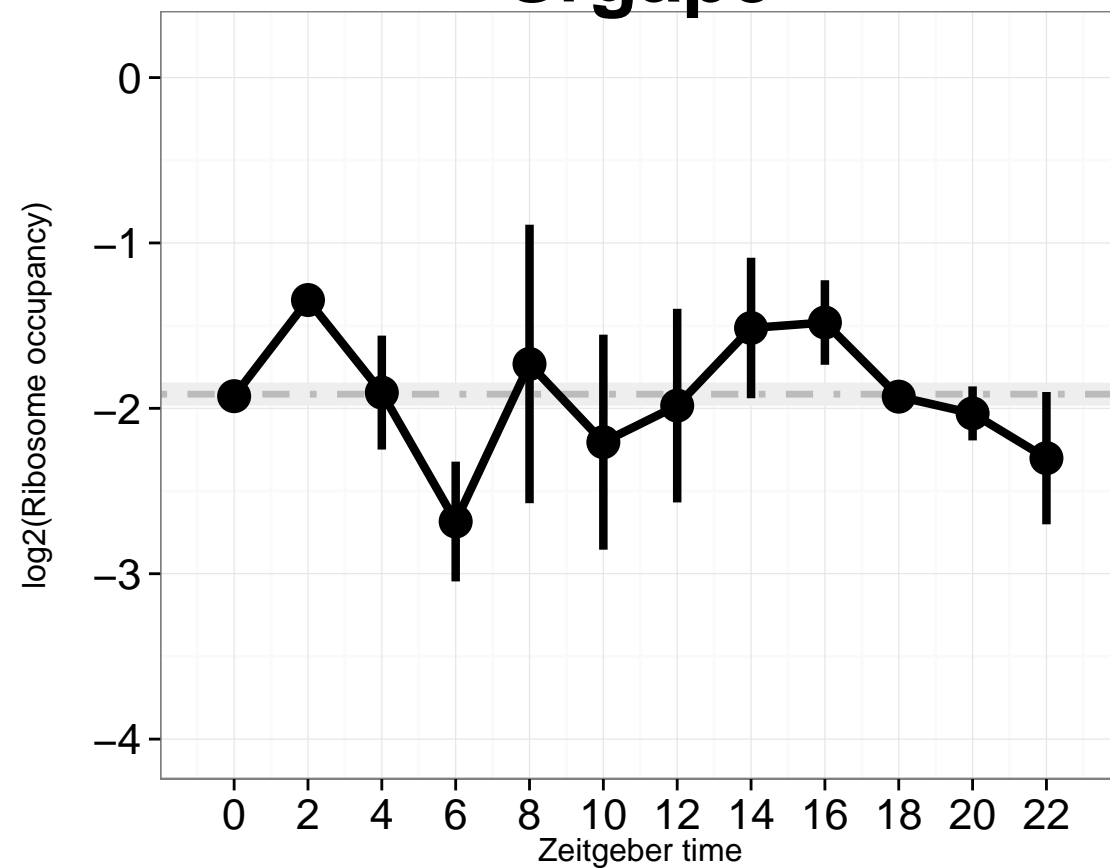

Supplement: SuppDataset_1.zip [file Srgap3_set_D.pdf › Supplemental Dataset 1/D-mRNA_rhythm_translation_rhyth/Srgap3_set_D.pdf]

## Srm

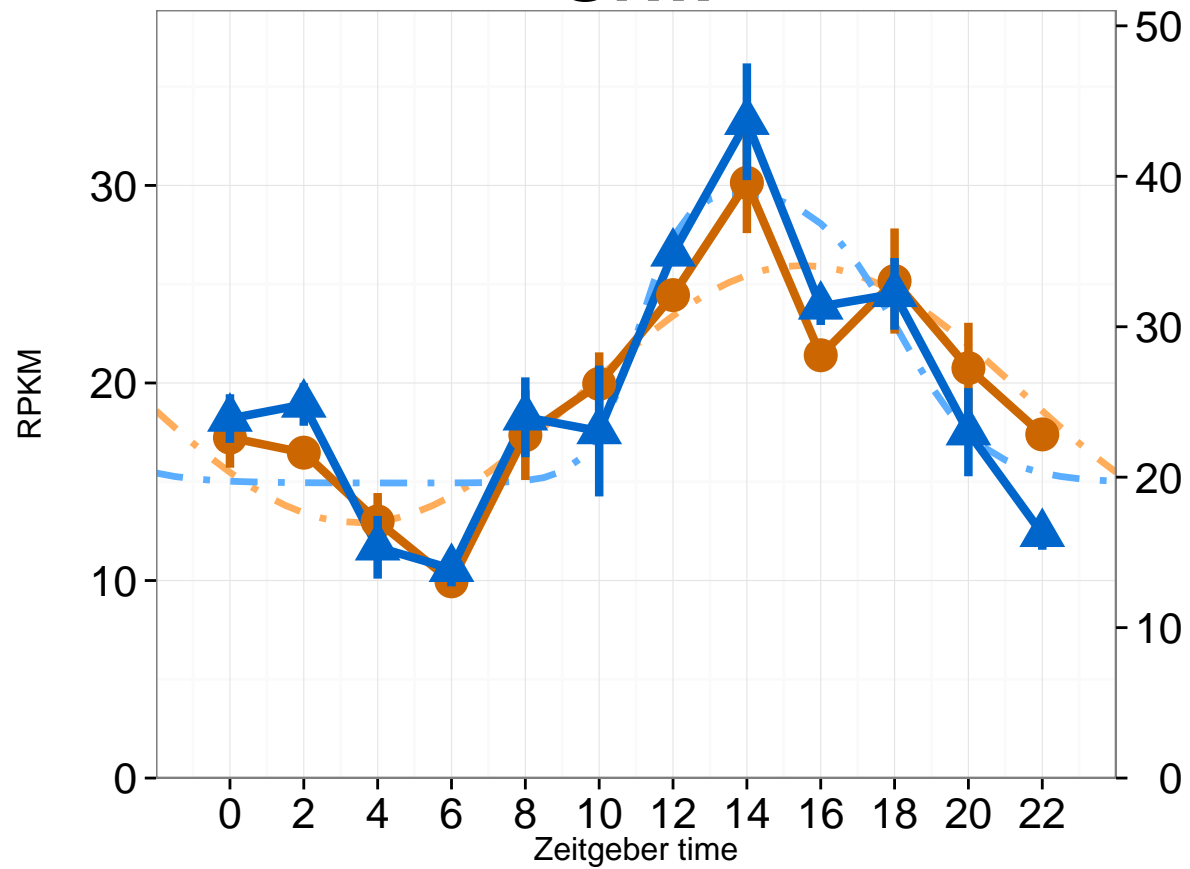

## Srm

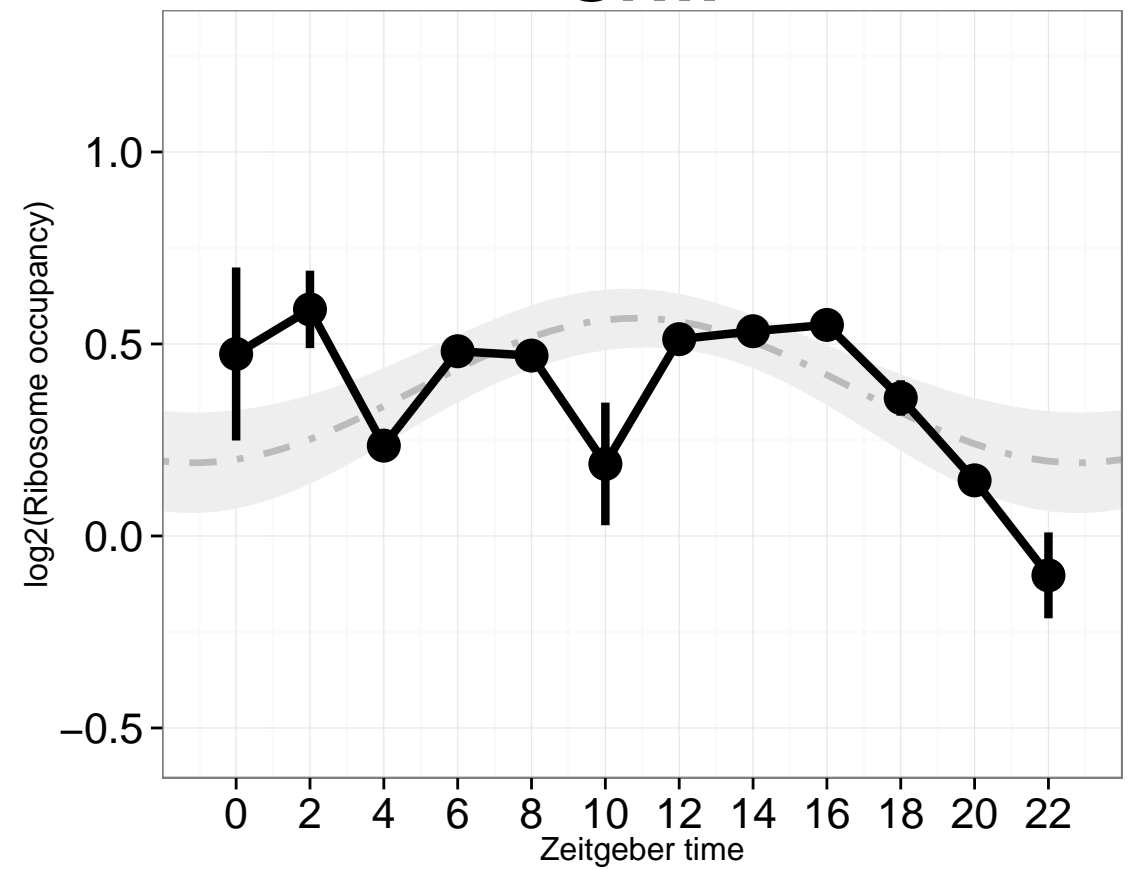

Supplement: SuppDataset_1.zip [file Srm_set_D.pdf › Supplemental Dataset 1/D-mRNA_rhythm_translation_rhyth/Srm_set_D.pdf]

# Srms

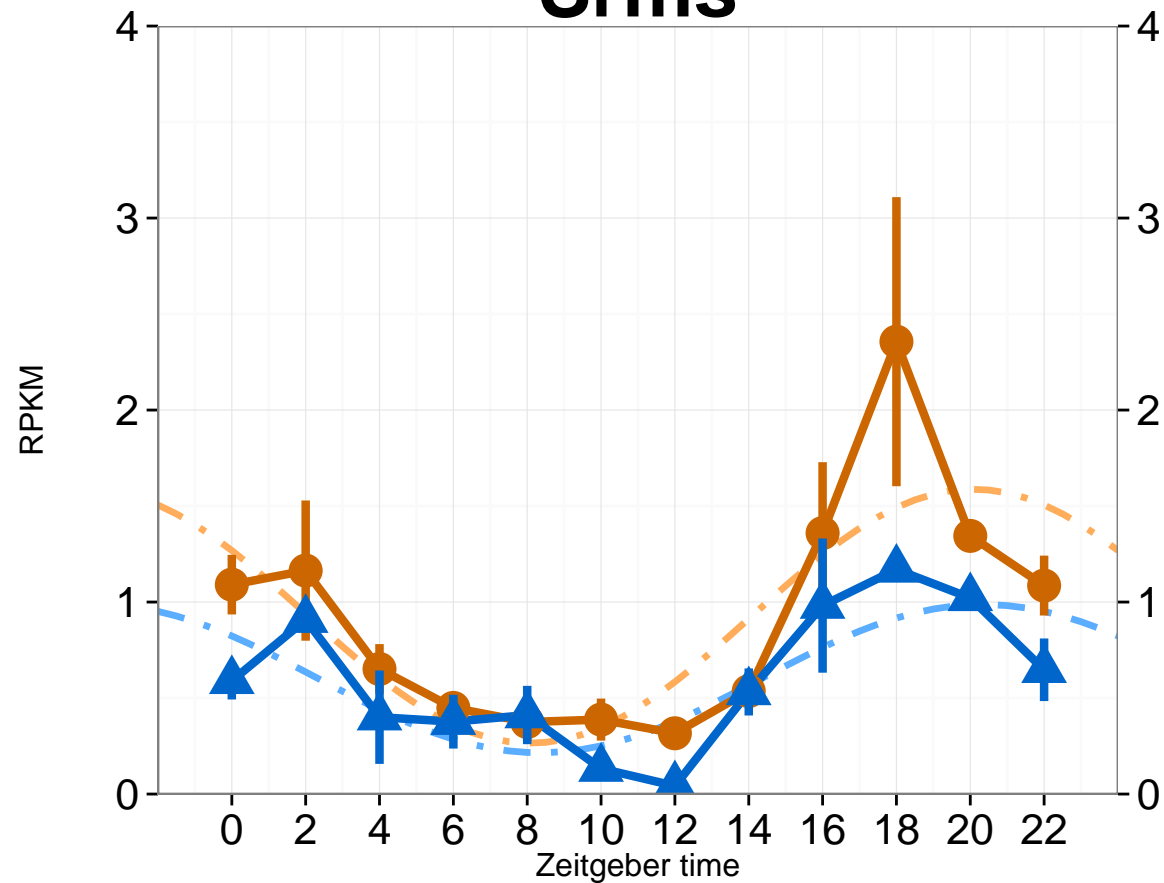

# Srms

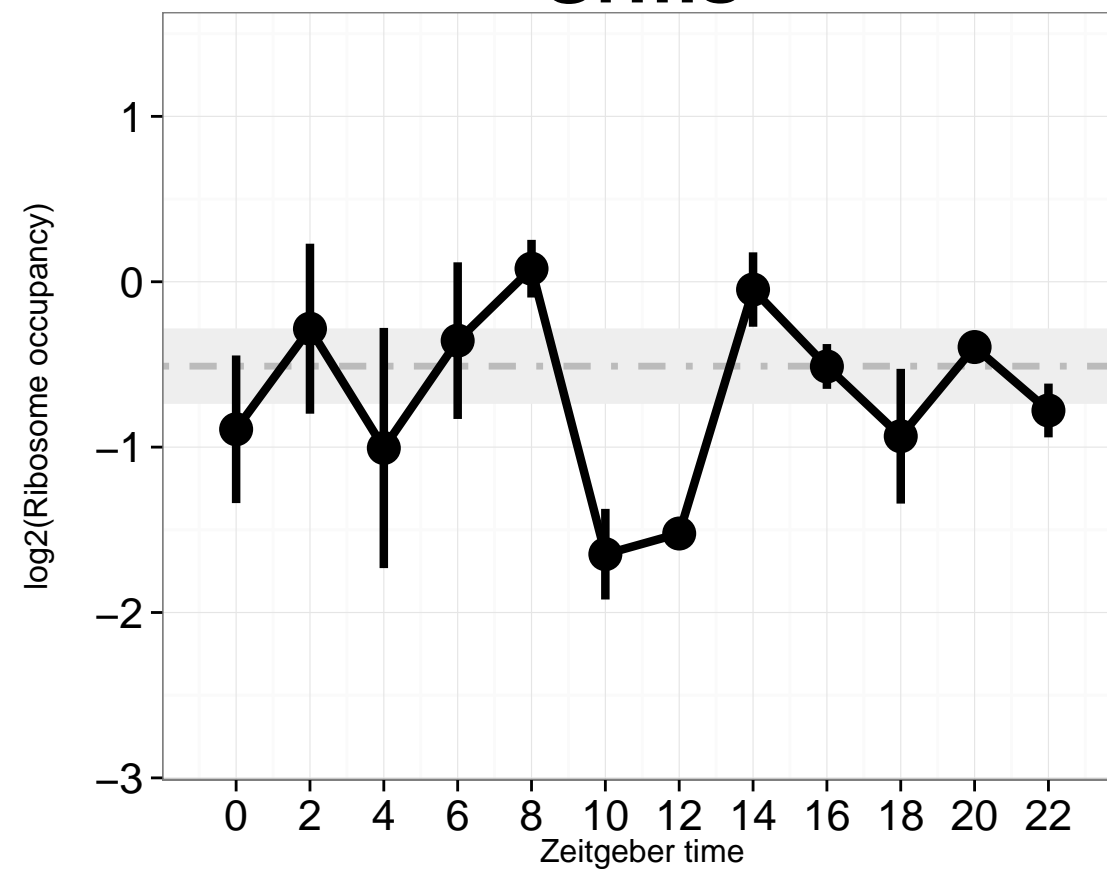

Supplement: SuppDataset_1.zip [file Srms_set_D.pdf › Supplemental Dataset 1/D-mRNA_rhythm_translation_rhyth/Srms_set_D.pdf]

## Srsf5

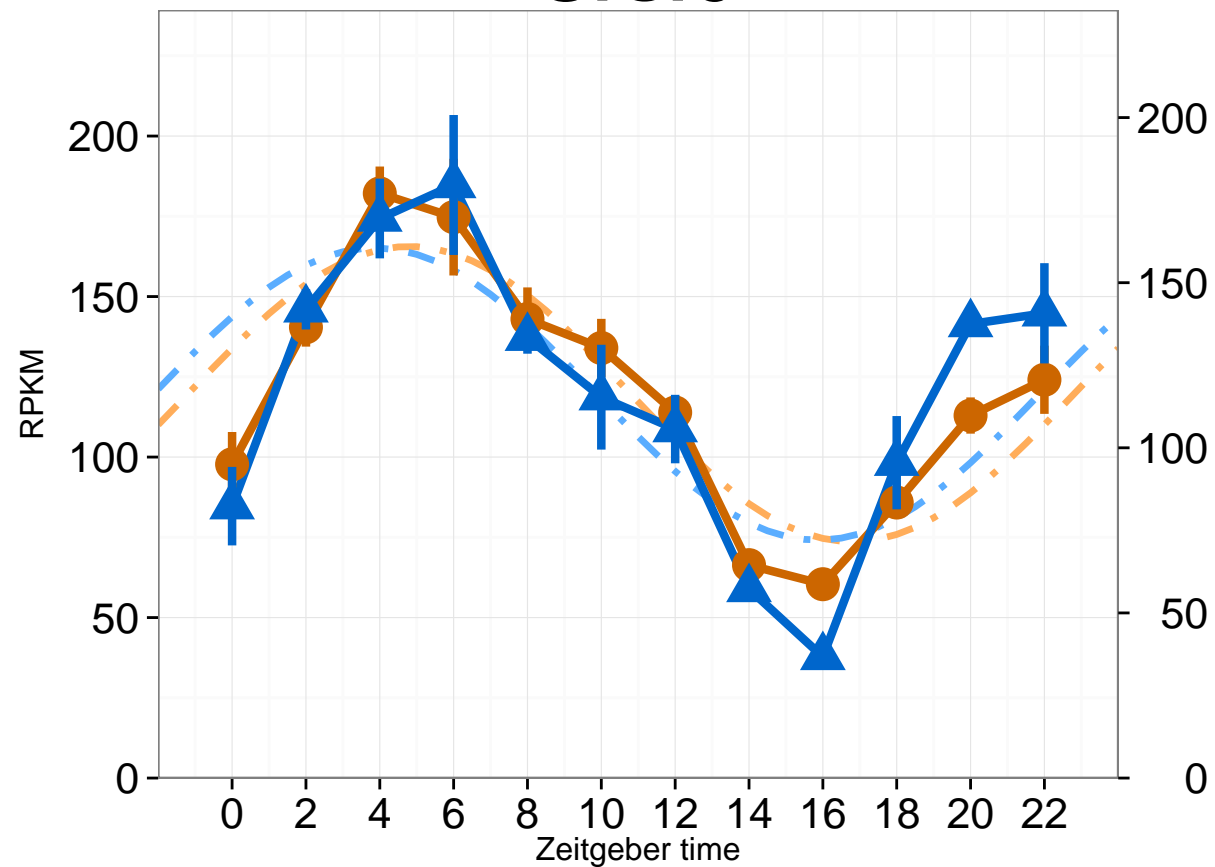

## Srsf5

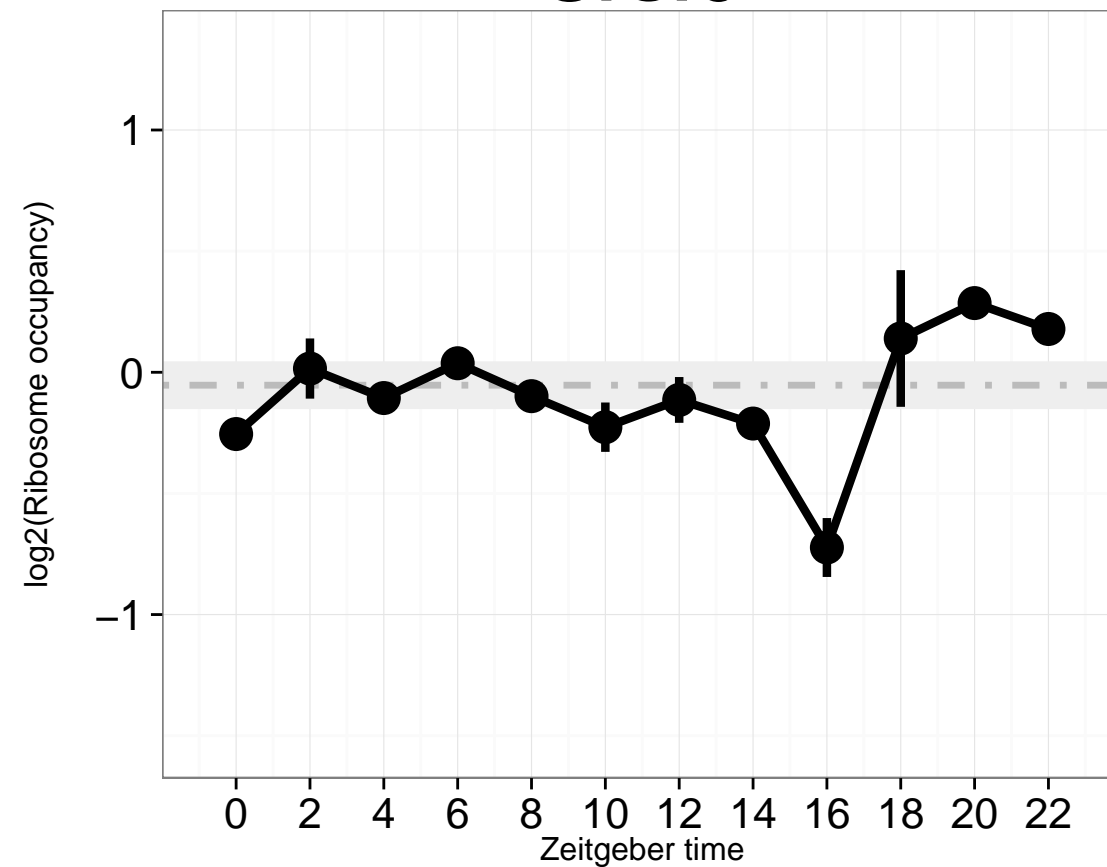

Supplement: SuppDataset_1.zip [file Srsf5_set_D.pdf › Supplemental Dataset 1/D-mRNA_rhythm_translation_rhyth/Srsf5_set_D.pdf]

# St3gal1

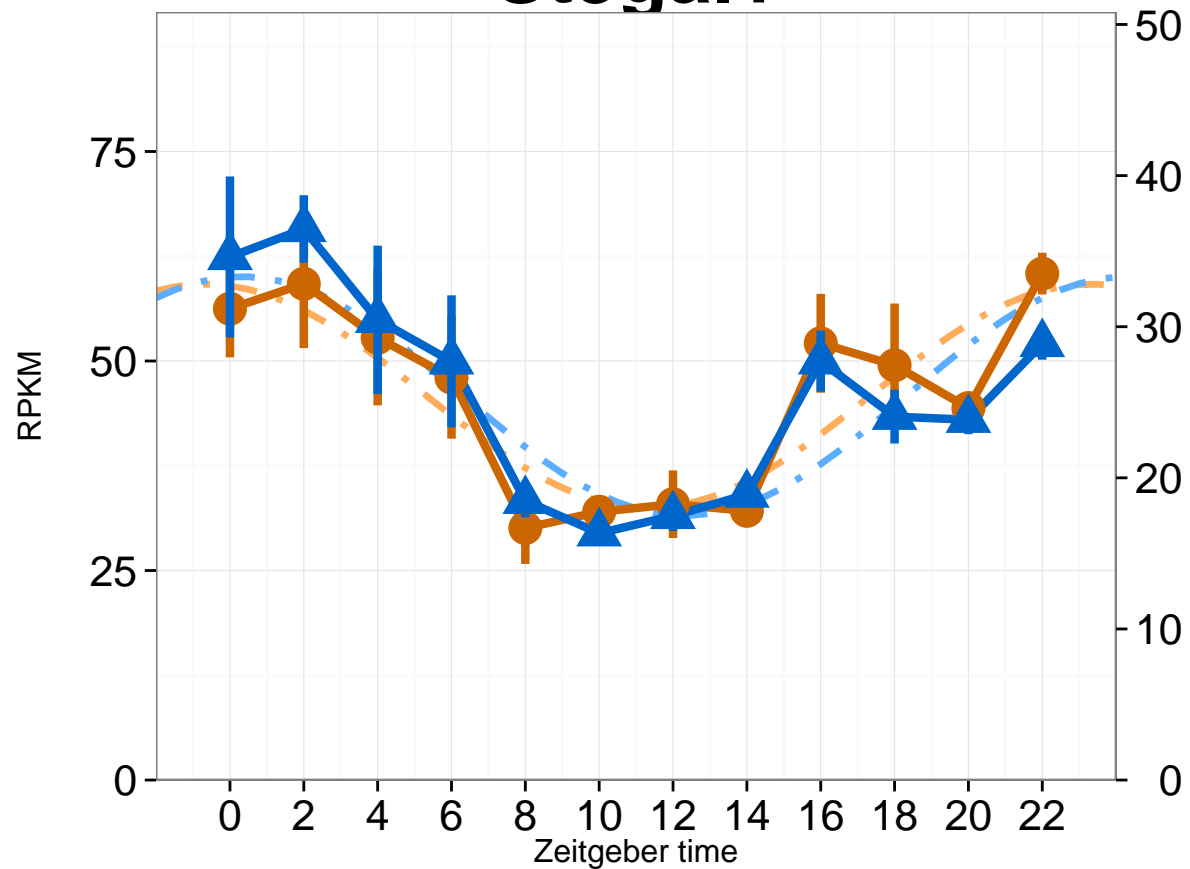

# St3gal1

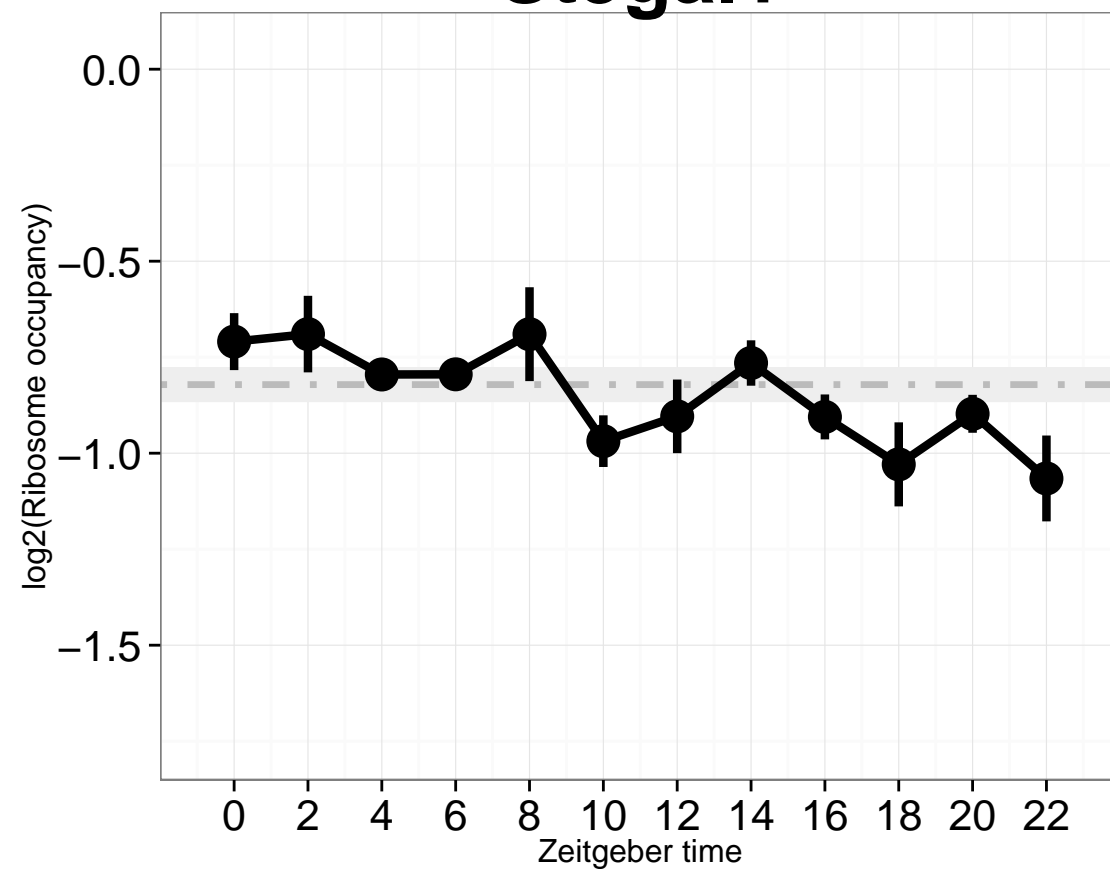

Supplement: SuppDataset_1.zip [file St3gal1_set_D.pdf › Supplemental Dataset 1/D-mRNA_rhythm_translation_rhyth/St3gal1_set_D.pdf]

# St3gal5

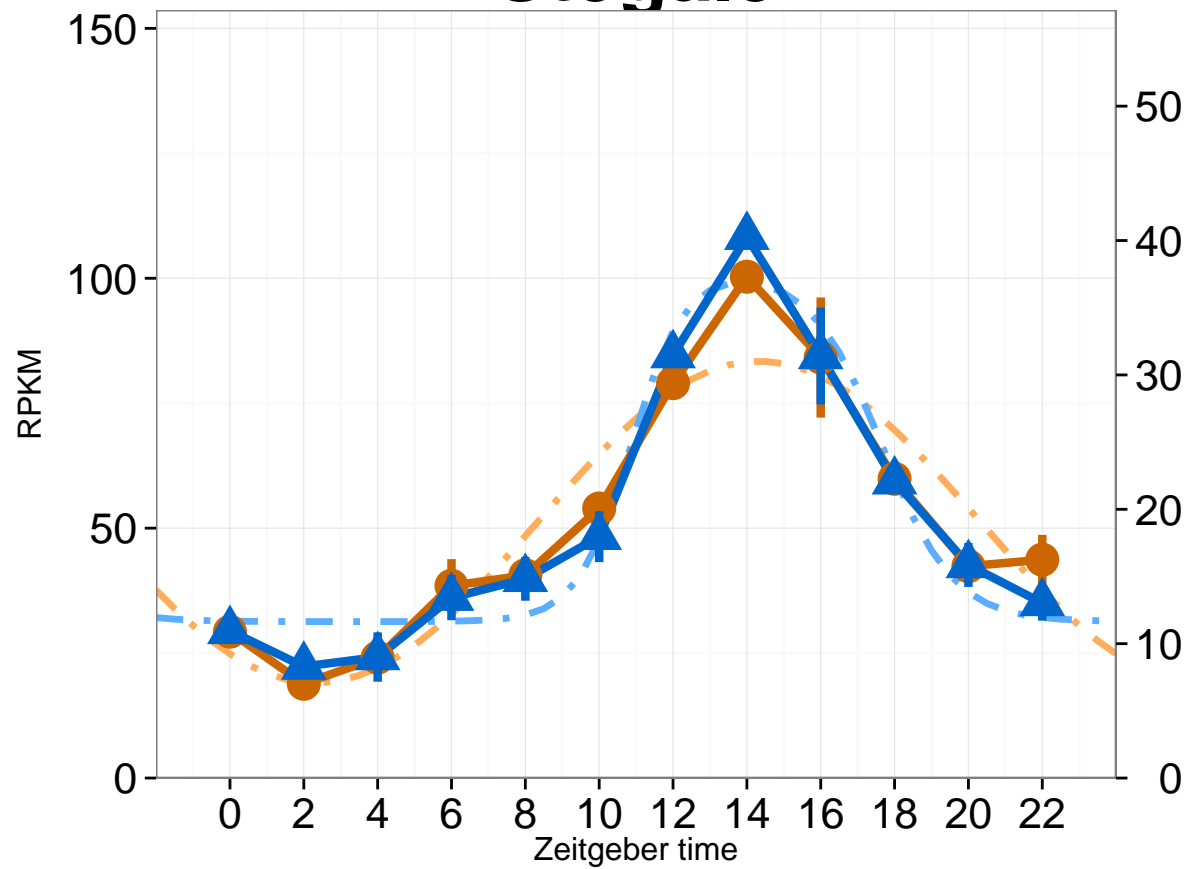

# St3gal5

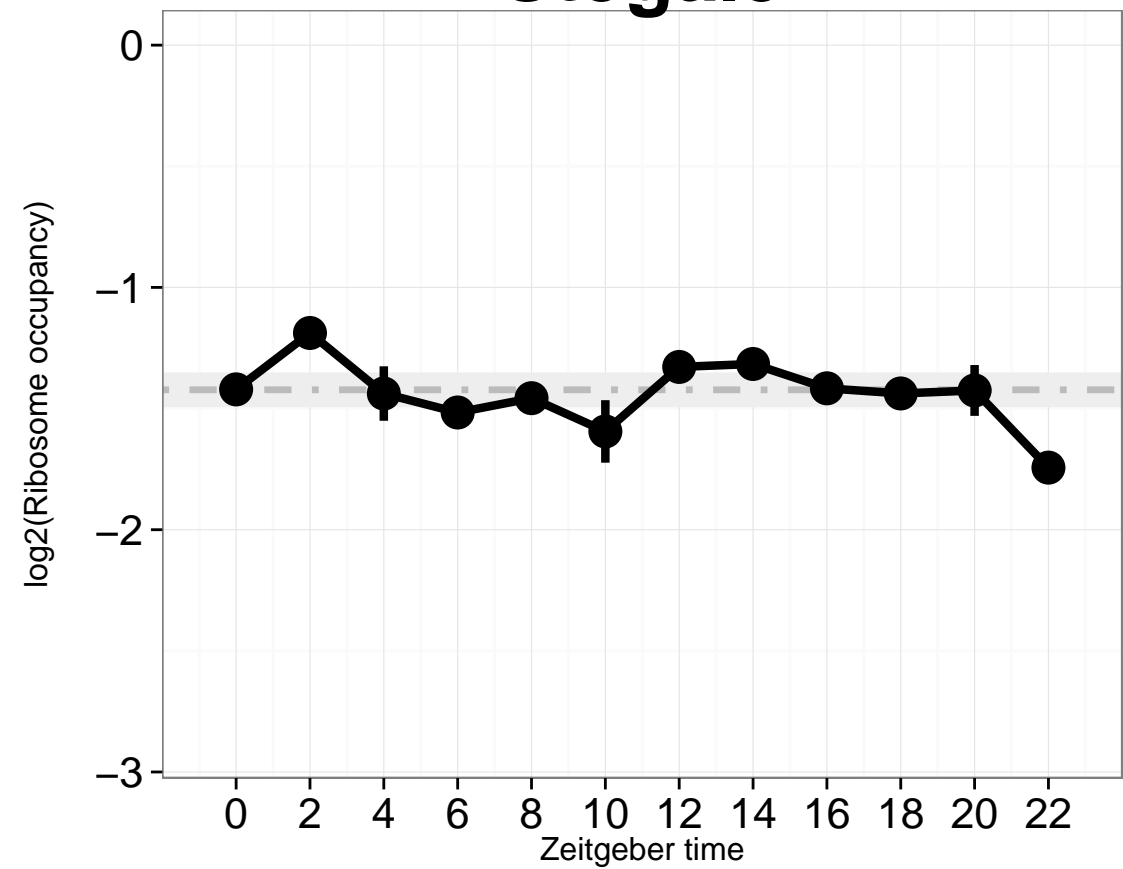

Supplement: SuppDataset_1.zip [file St3gal5_set_D.pdf › Supplemental Dataset 1/D-mRNA_rhythm_translation_rhyth/St3gal5_set_D.pdf]

# St5

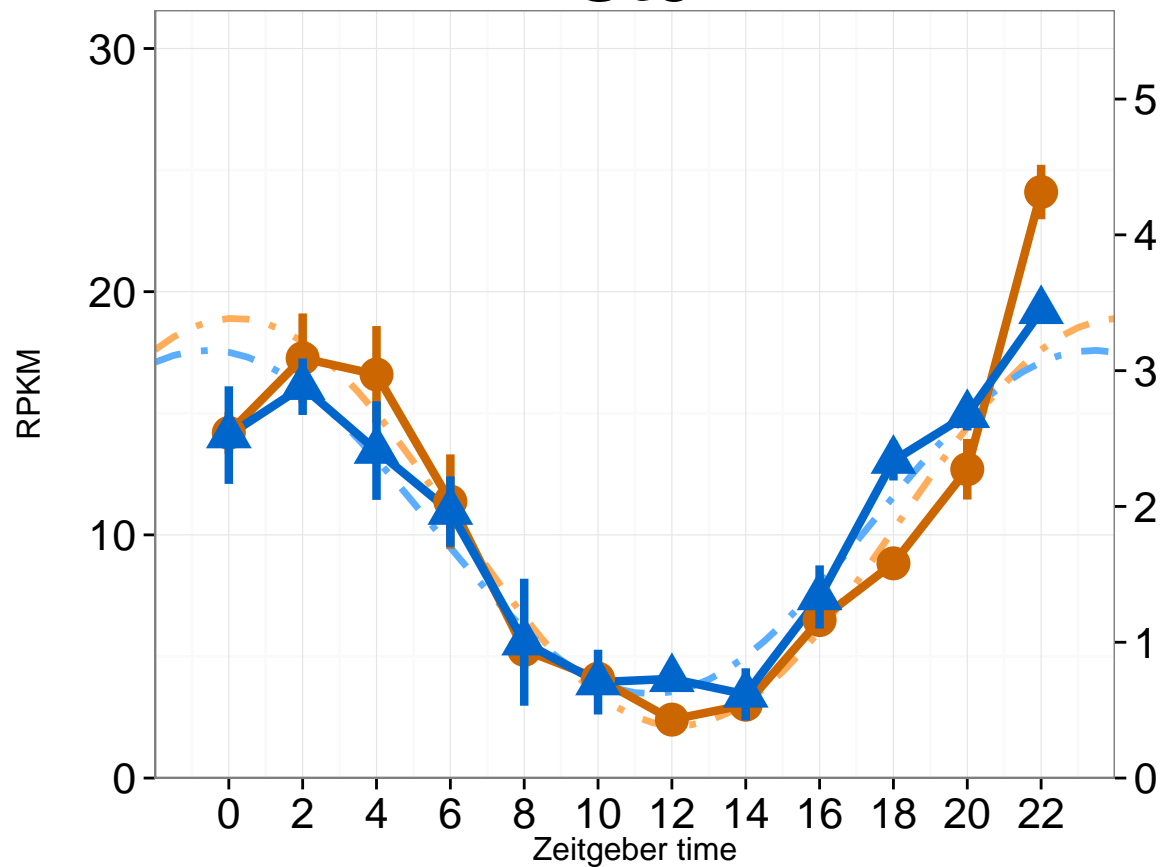

# St5

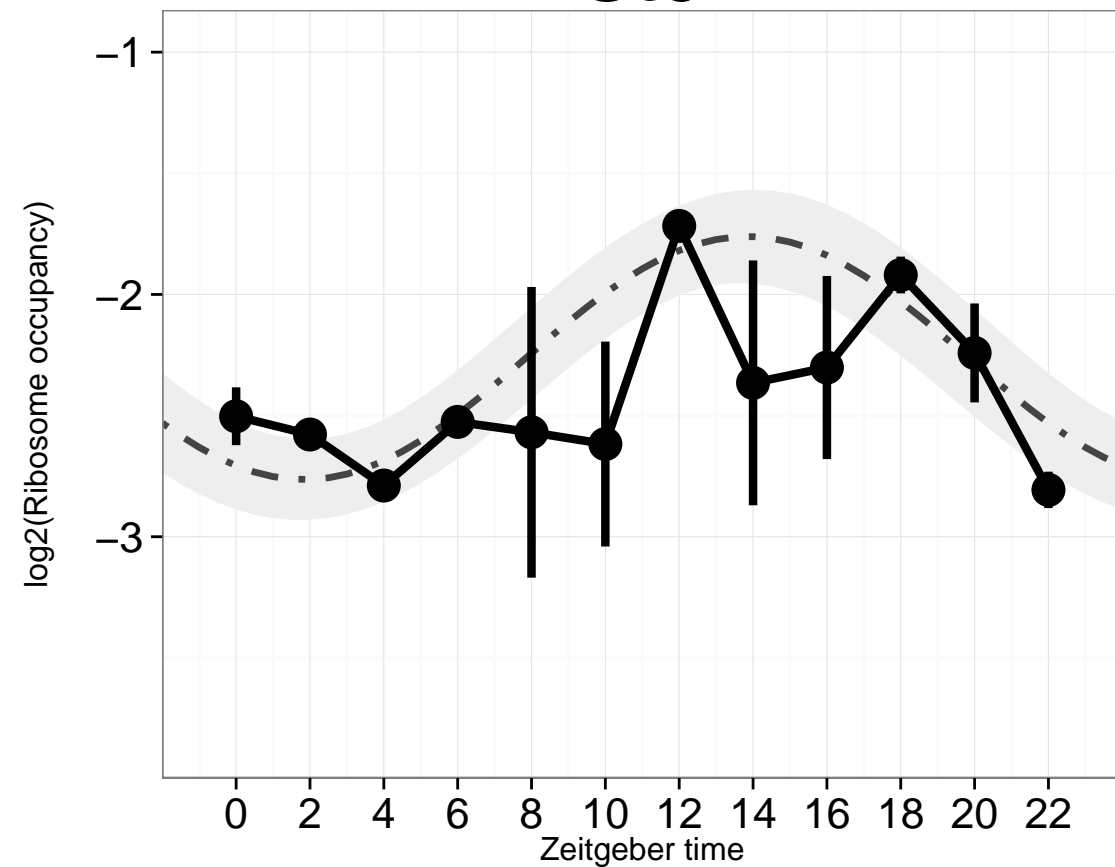

Supplement: SuppDataset_1.zip [file St5_set_D.pdf › Supplemental Dataset 1/D-mRNA_rhythm_translation_rhyth/St5_set_D.pdf]

# St6gal1

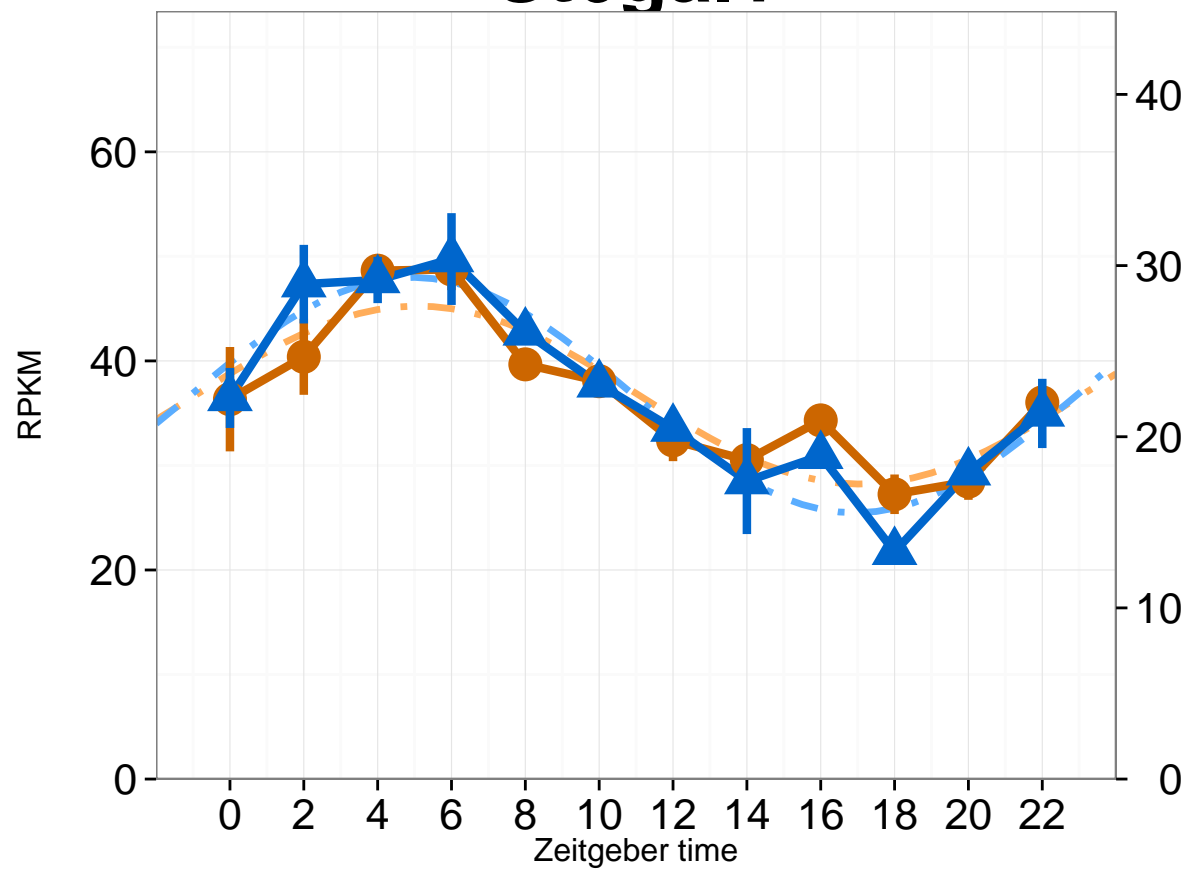

# St6gal1

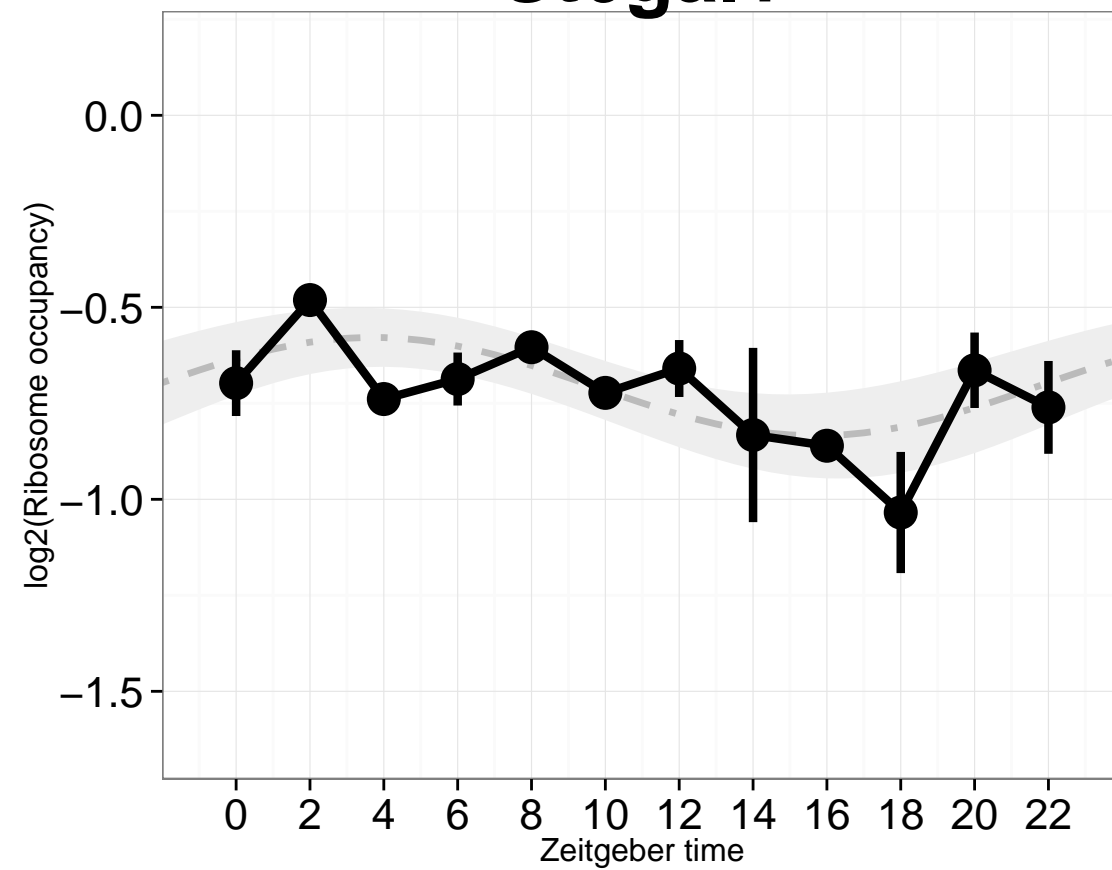

Supplement: SuppDataset_1.zip [file St6gal1_set_D.pdf › Supplemental Dataset 1/D-mRNA_rhythm_translation_rhyth/St6gal1_set_D.pdf]

# St6galnac6

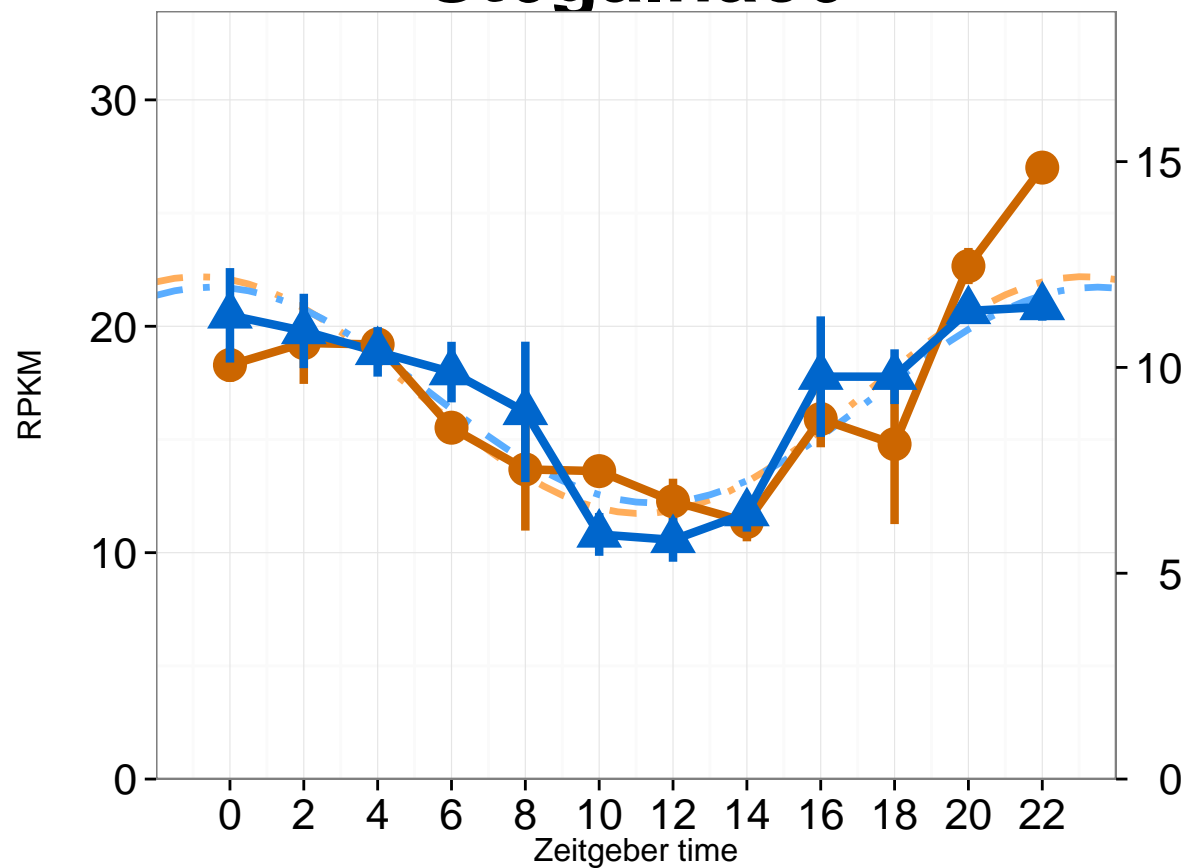

# St6galnac6

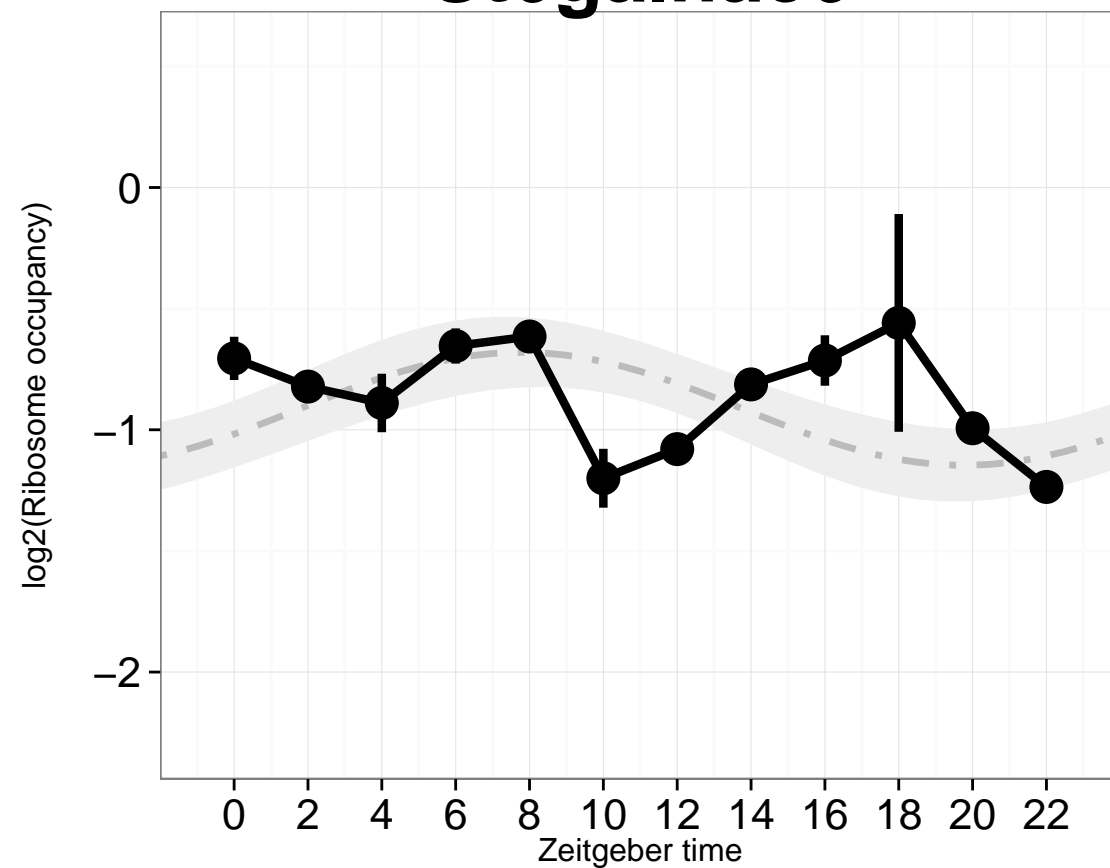

Supplement: SuppDataset_1.zip [file St6galnac6_set_D.pdf › Supplemental Dataset 1/D-mRNA_rhythm_translation_rhyth/St6galnac6_set_D.pdf]

# Stard13

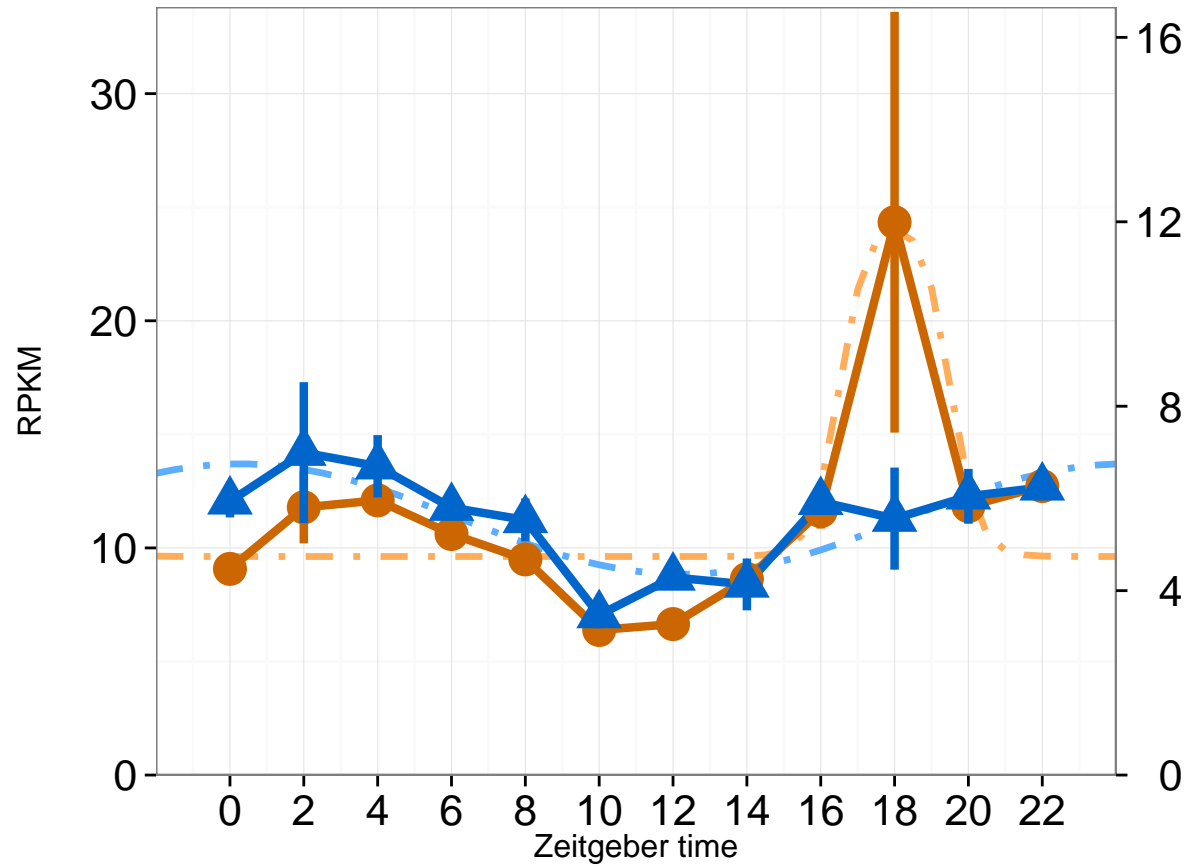

# Stard13

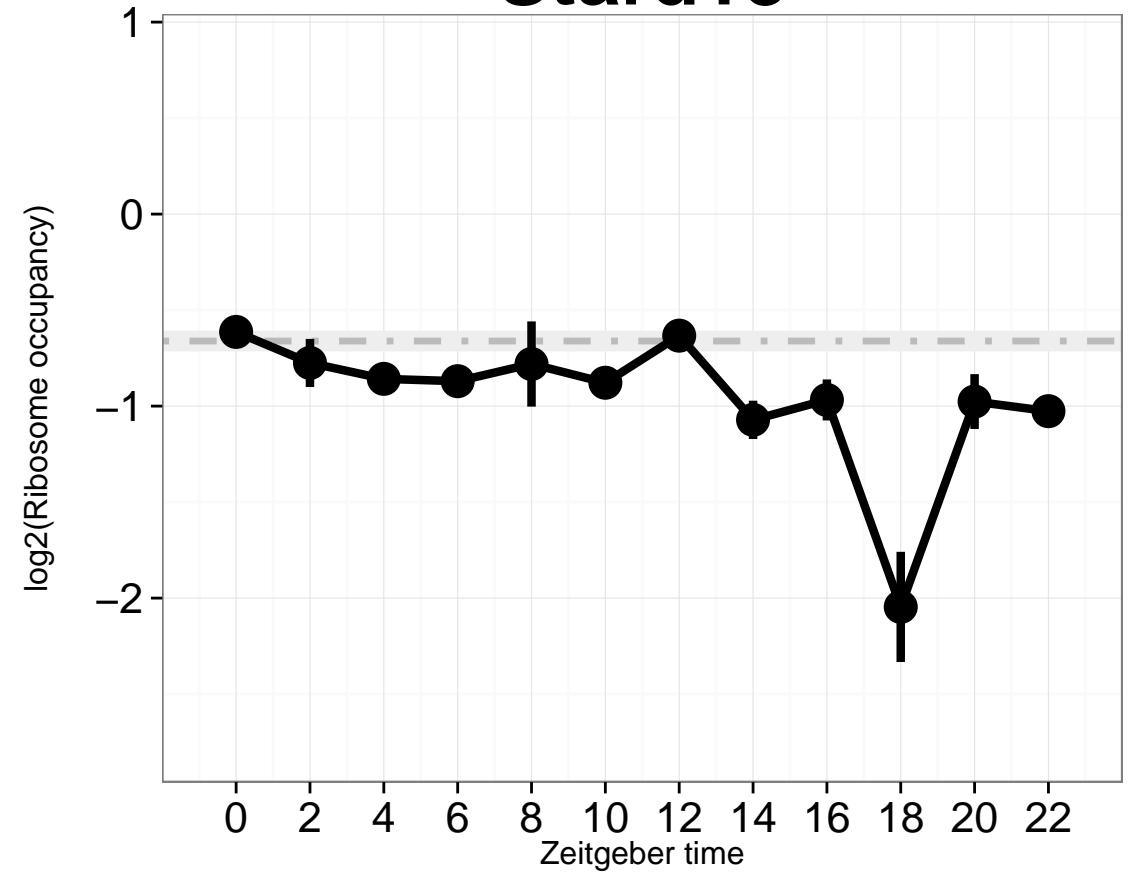

Supplement: SuppDataset_1.zip [file Stard13_set_D.pdf › Supplemental Dataset 1/D-mRNA_rhythm_translation_rhyth/Stard13_set_D.pdf]

## Stard4

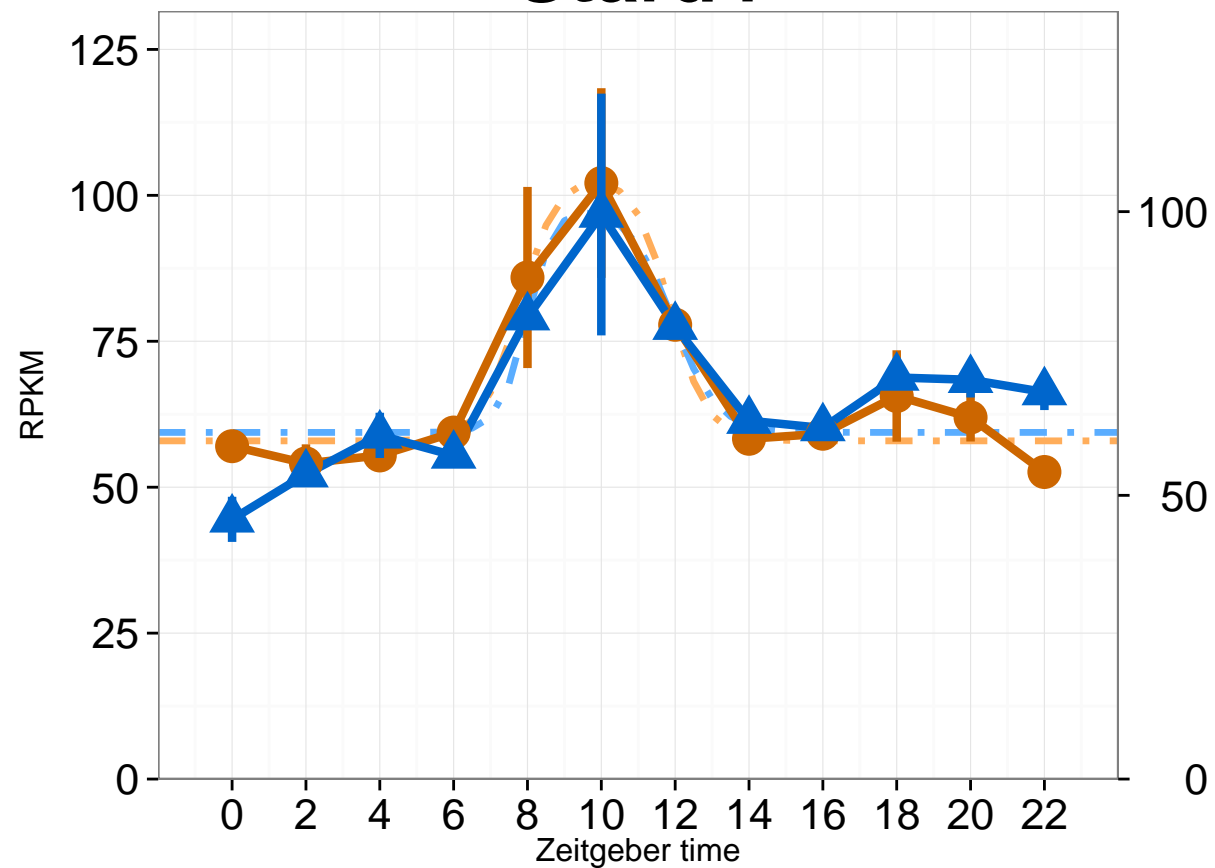

## Stard4

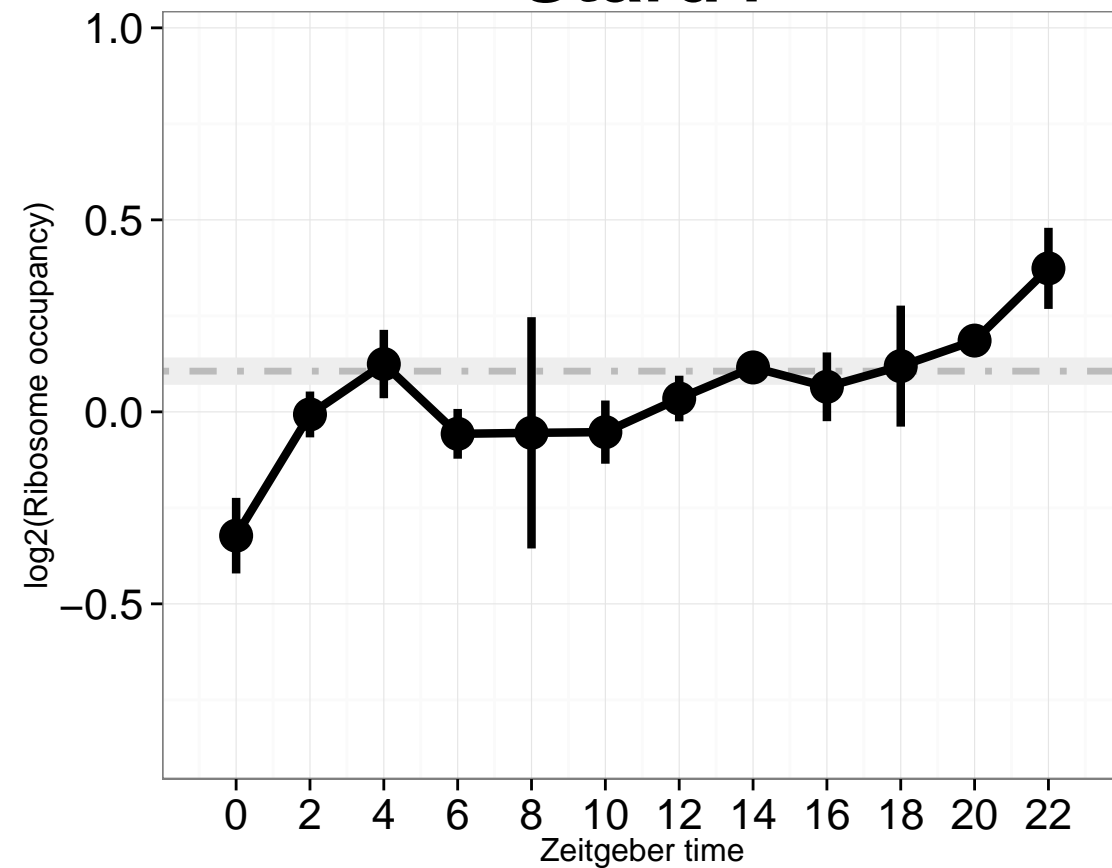

Supplement: SuppDataset_1.zip [file Stard4_set_D.pdf › Supplemental Dataset 1/D-mRNA_rhythm_translation_rhyth/Stard4_set_D.pdf]

## Stat1

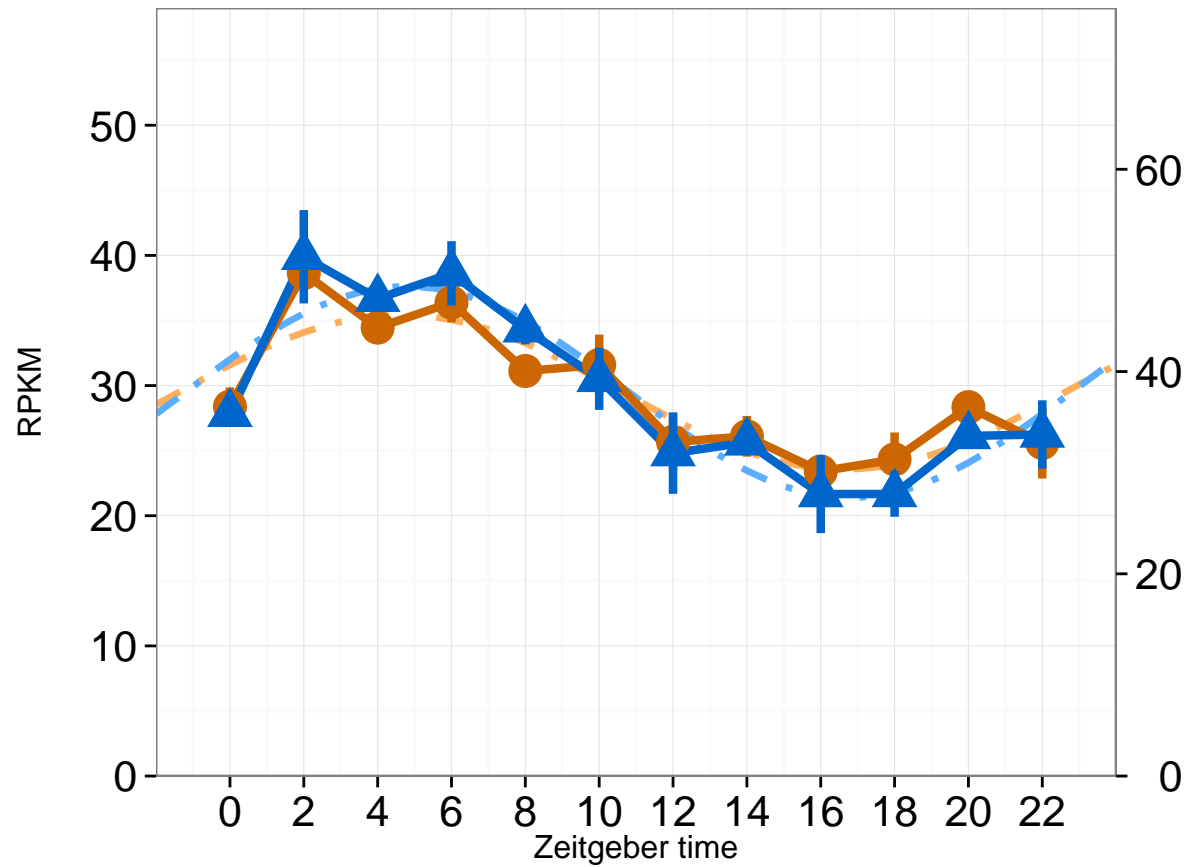

## Stat1

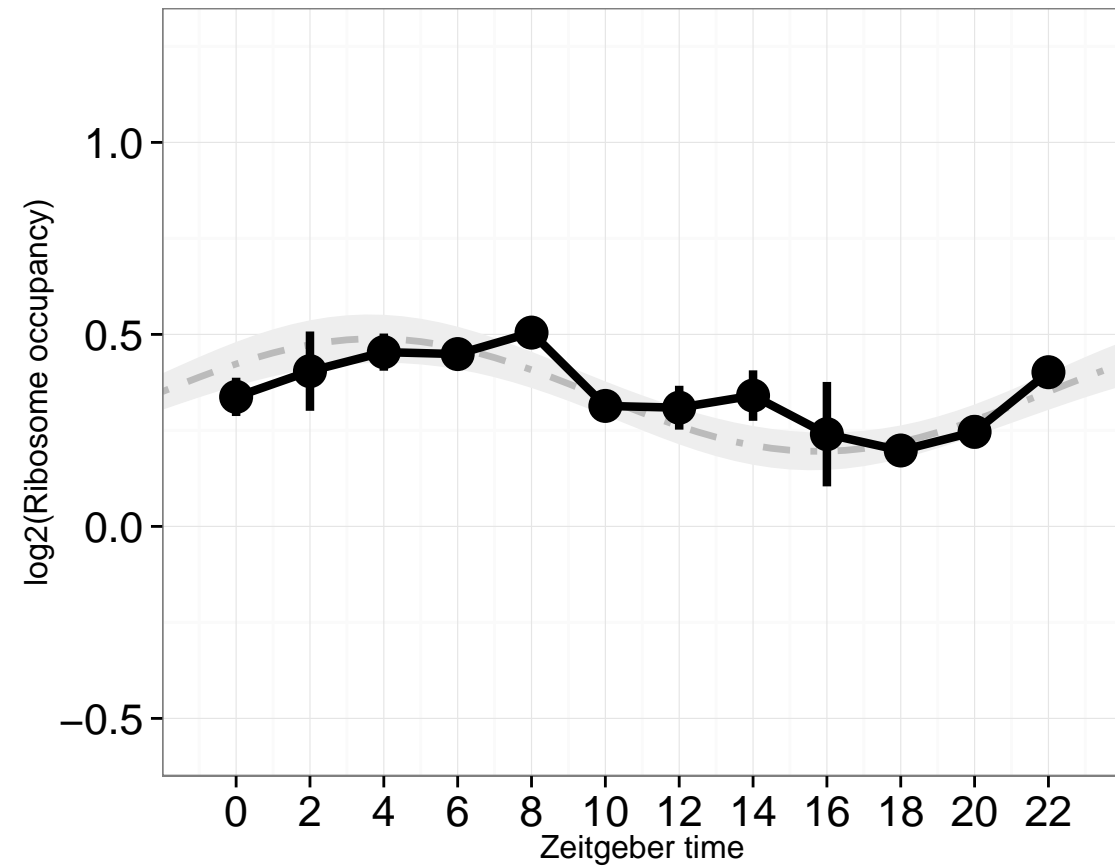

Supplement: SuppDataset_1.zip [file Stat1_set_D.pdf › Supplemental Dataset 1/D-mRNA_rhythm_translation_rhyth/Stat1_set_D.pdf]

# Stat5a

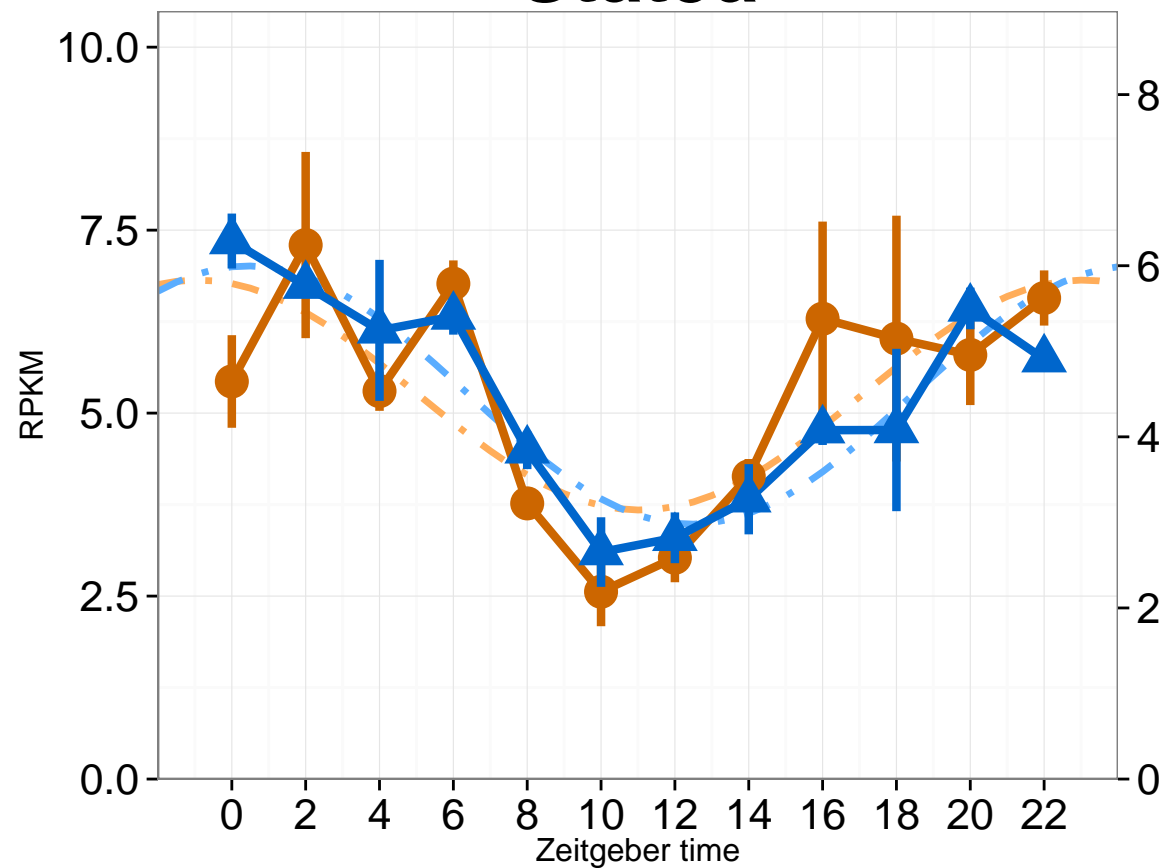

# Stat5a

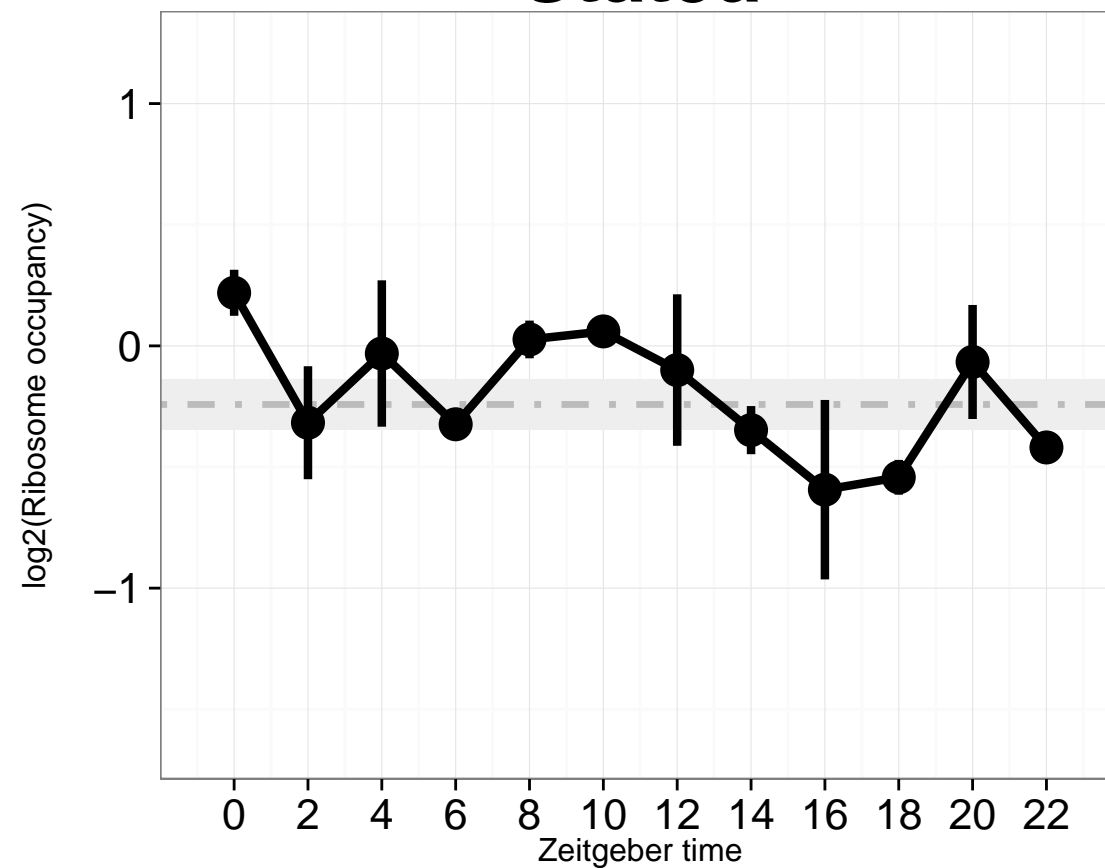

Supplement: SuppDataset_1.zip [file Stat5a_set_D.pdf › Supplemental Dataset 1/D-mRNA_rhythm_translation_rhyth/Stat5a_set_D.pdf]

# Stat5b

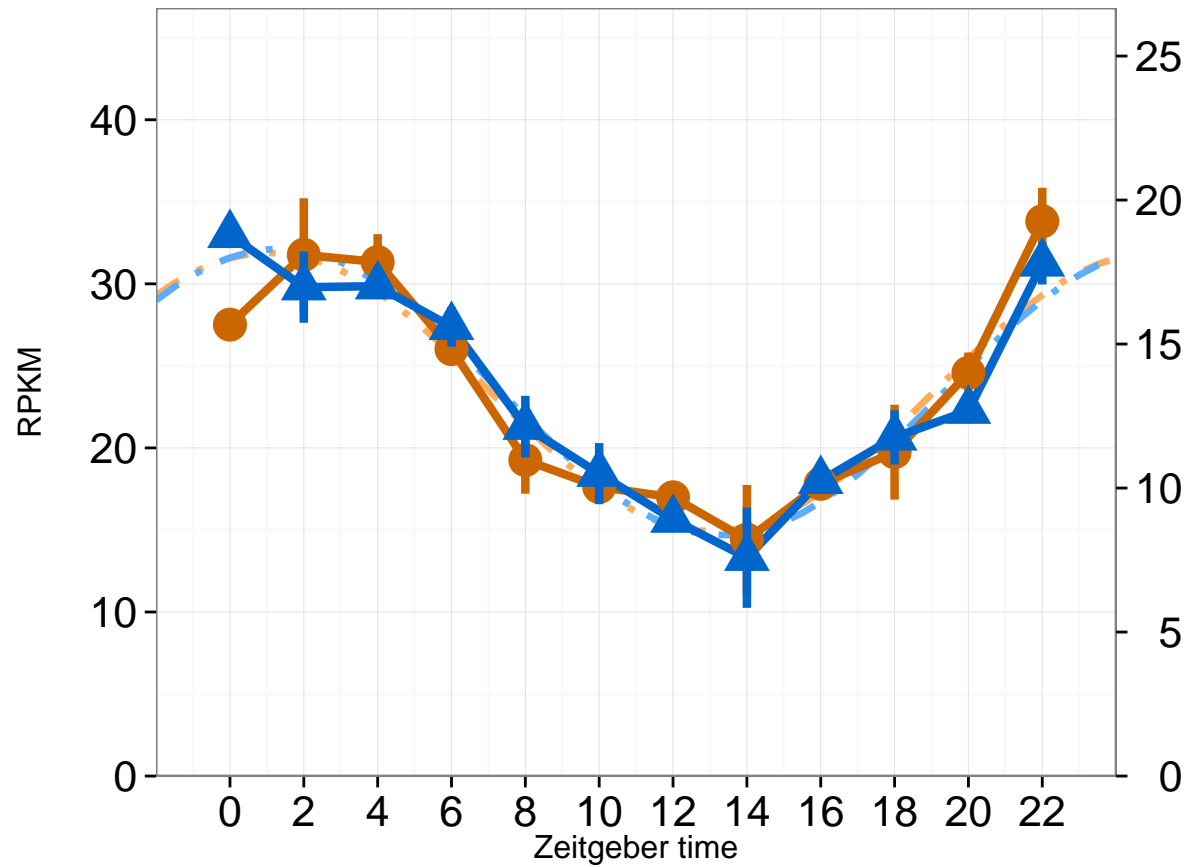

# Stat5b

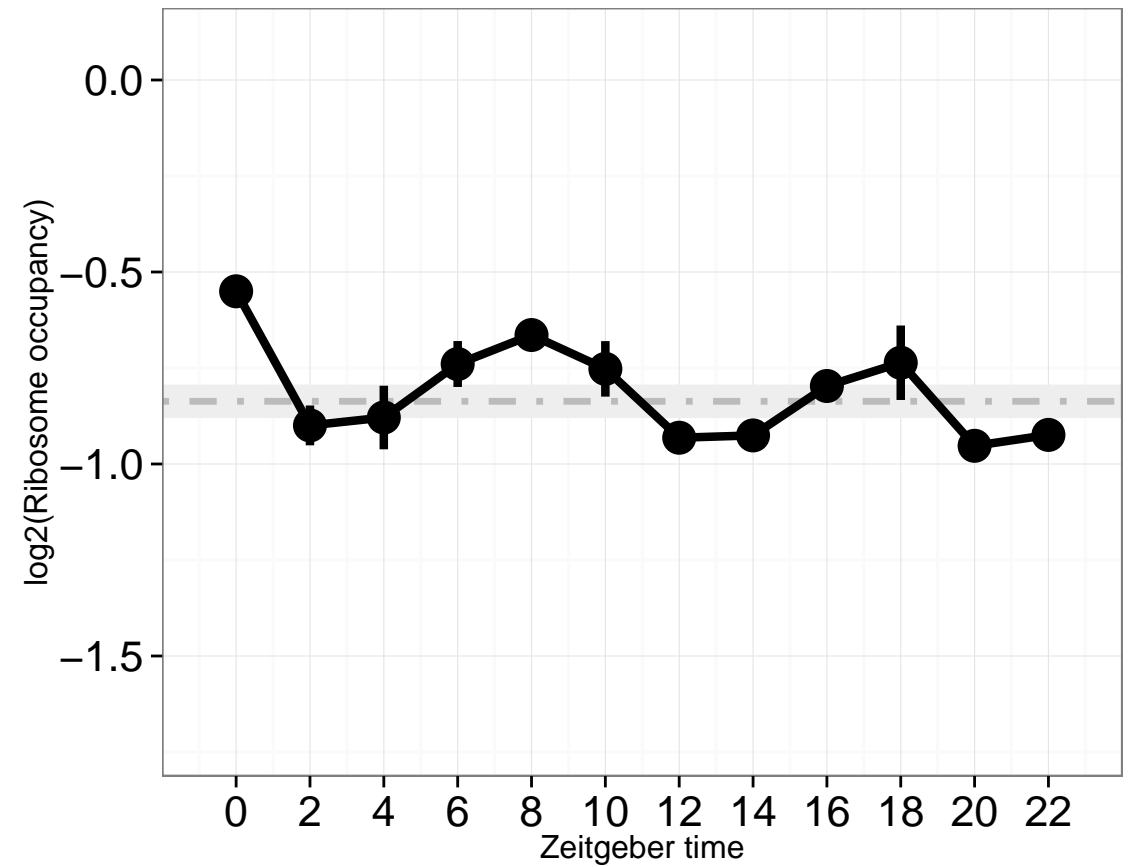

Supplement: SuppDataset_1.zip [file Stat5b_set_D.pdf › Supplemental Dataset 1/D-mRNA_rhythm_translation_rhyth/Stat5b_set_D.pdf]

# Stbd1

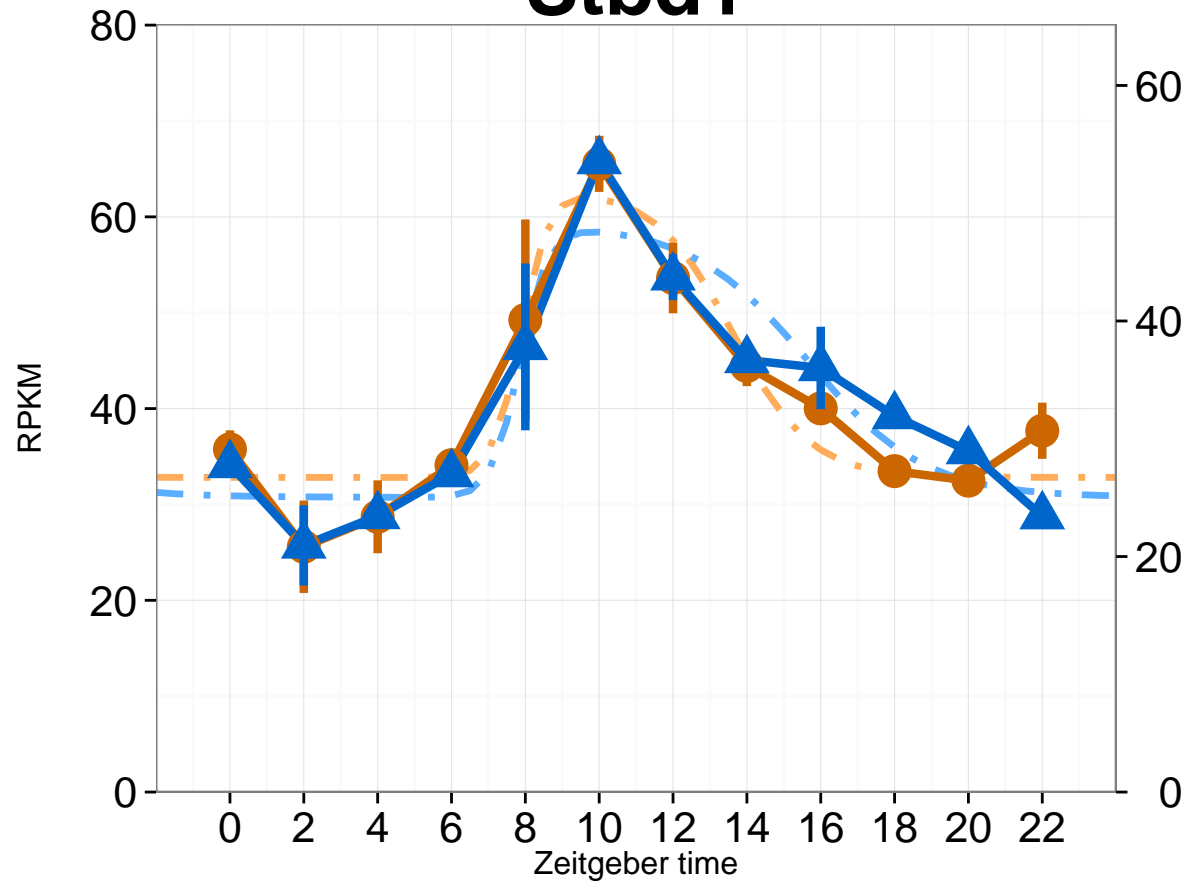

# Stbd1

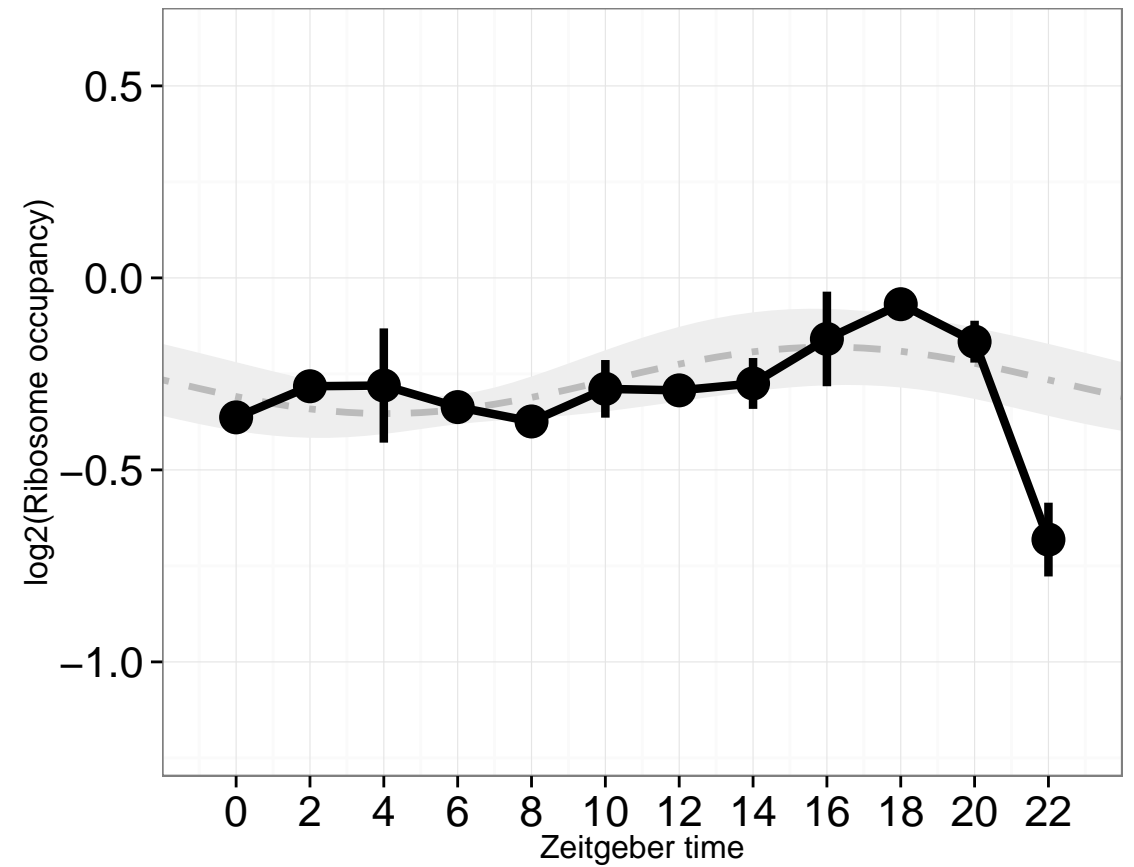

Supplement: SuppDataset_1.zip [file Stbd1_set_D.pdf › Supplemental Dataset 1/D-mRNA_rhythm_translation_rhyth/Stbd1_set_D.pdf]

## Steap3

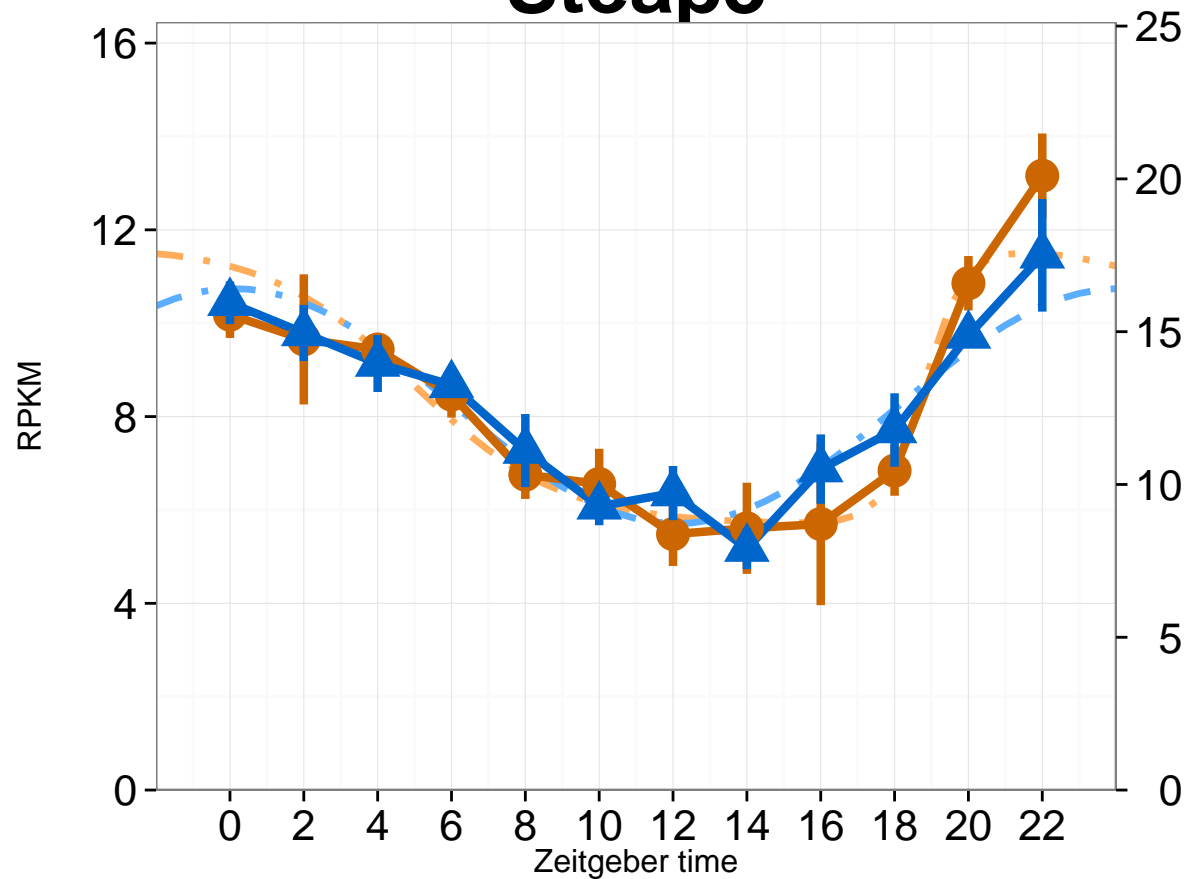

## Steap3

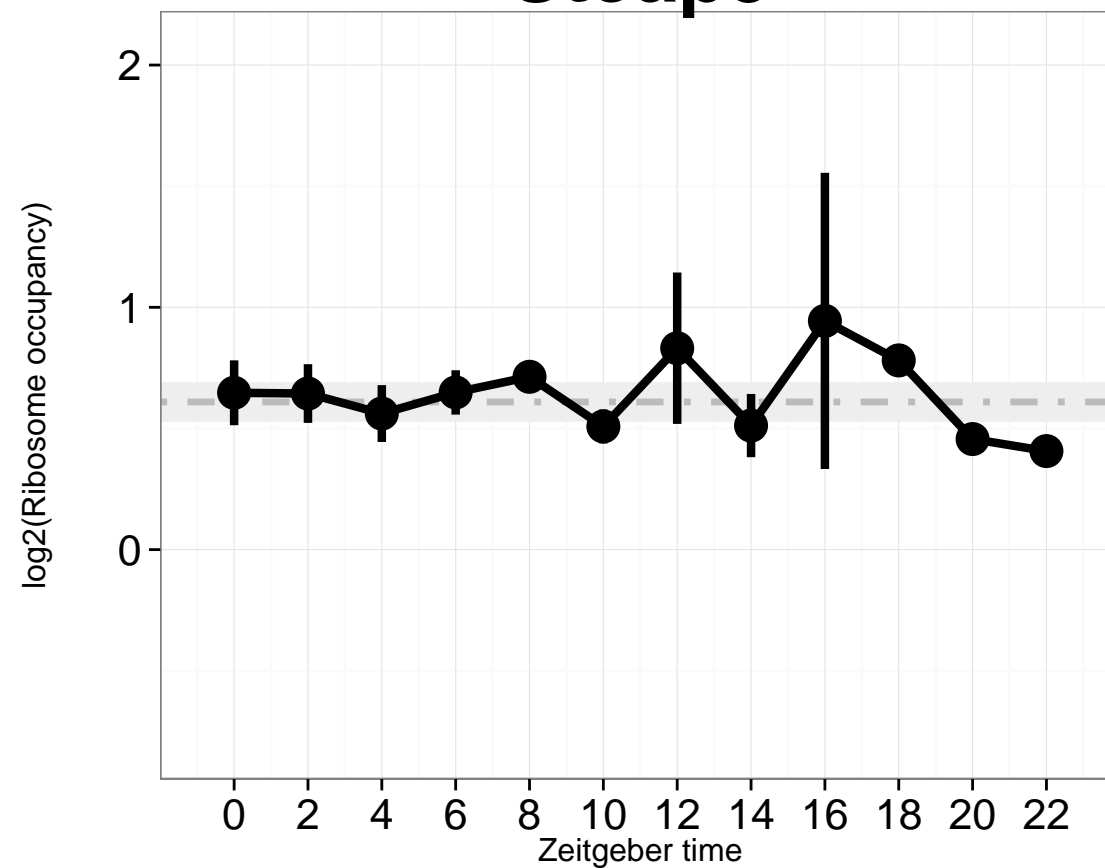

Supplement: SuppDataset_1.zip [file Steap3_set_D.pdf › Supplemental Dataset 1/D-mRNA_rhythm_translation_rhyth/Steap3_set_D.pdf]

# Steap4

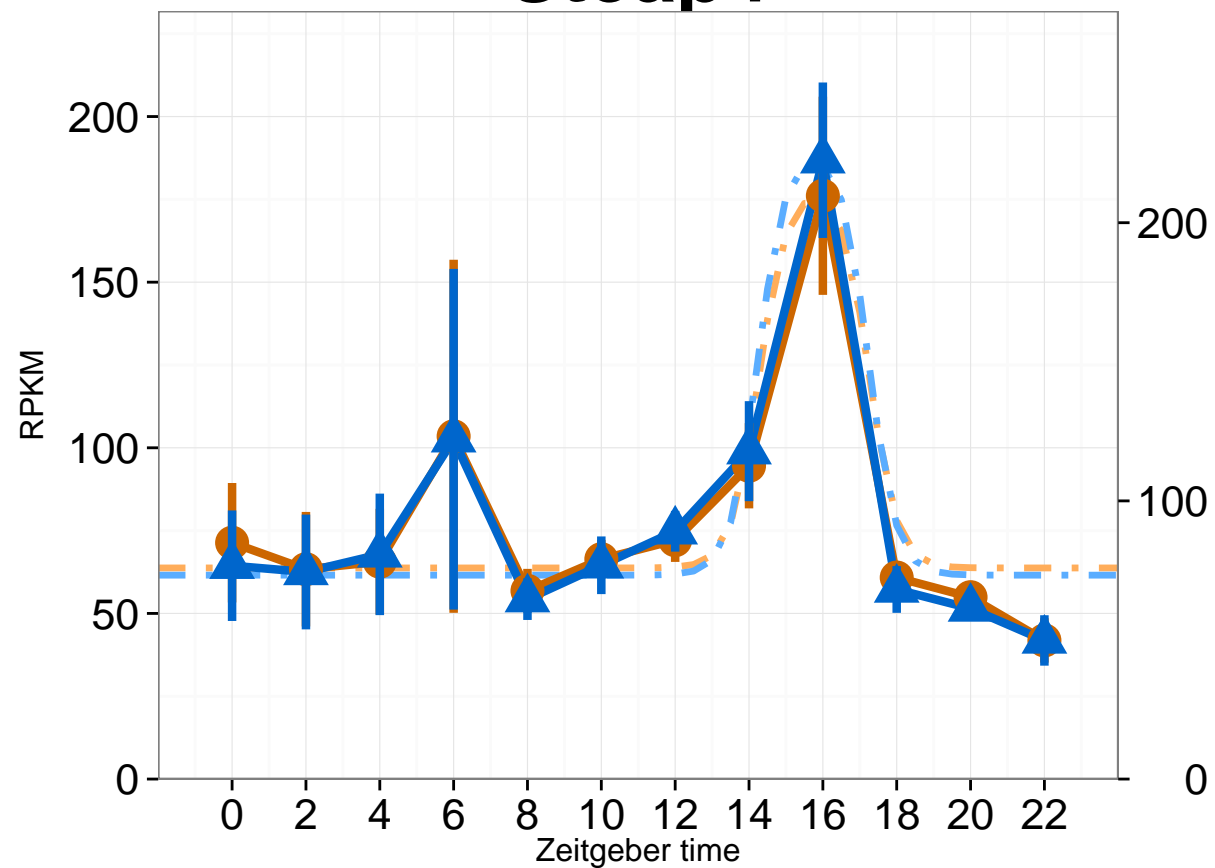

# Steap4

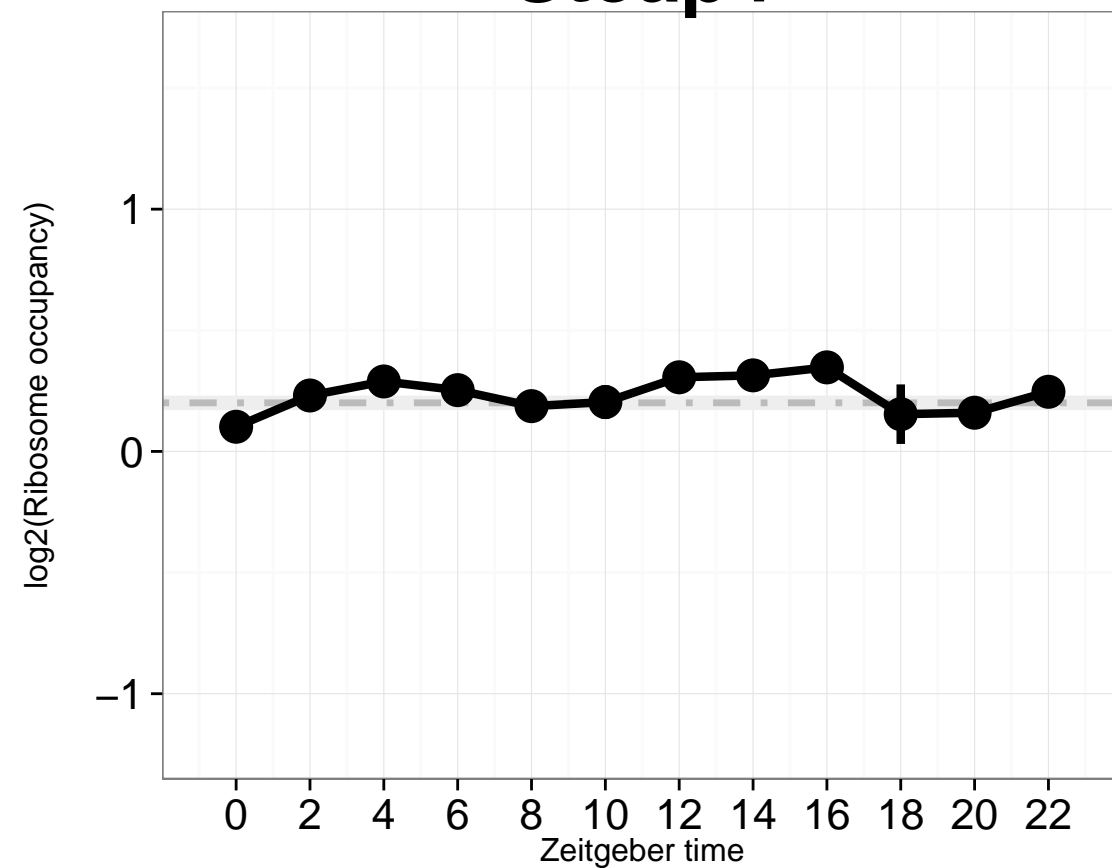

Supplement: SuppDataset_1.zip [file Steap4_set_D.pdf › Supplemental Dataset 1/D-mRNA_rhythm_translation_rhyth/Steap4_set_D.pdf]

## Stim2

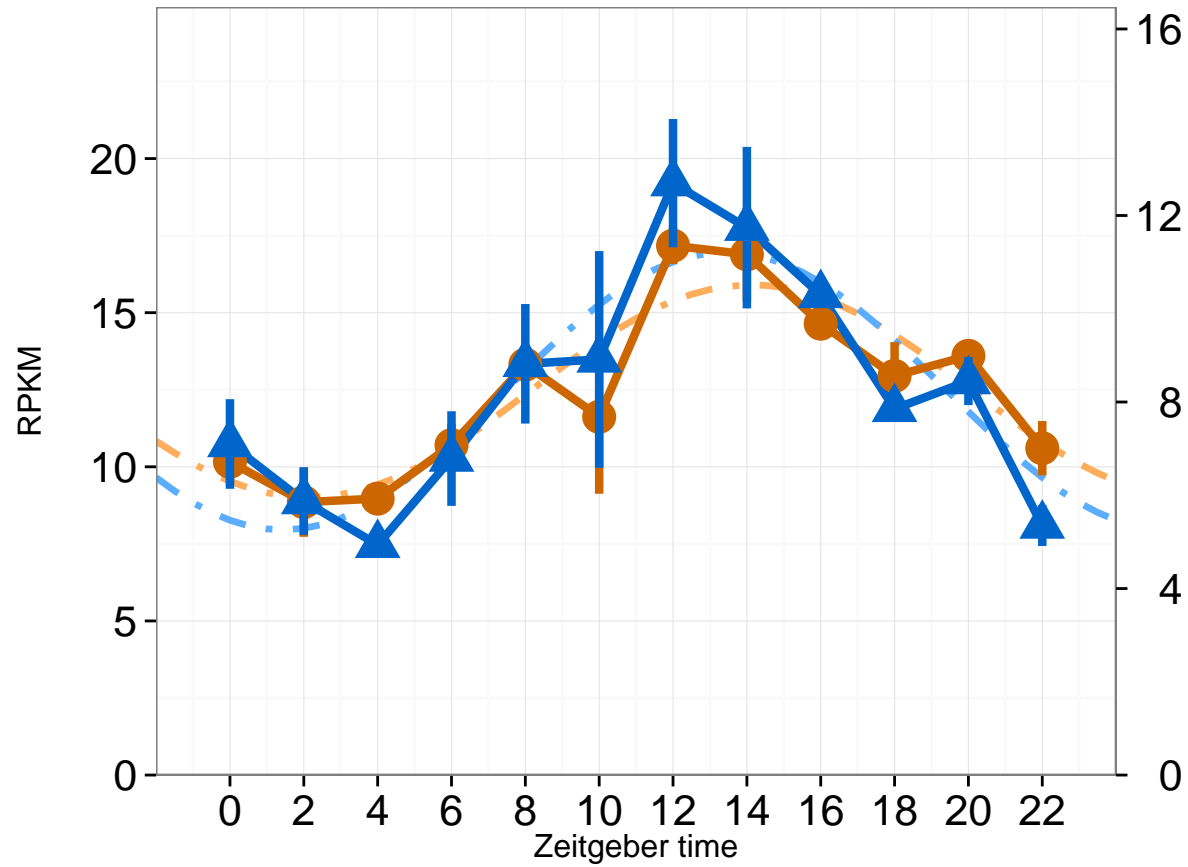

## Stim2

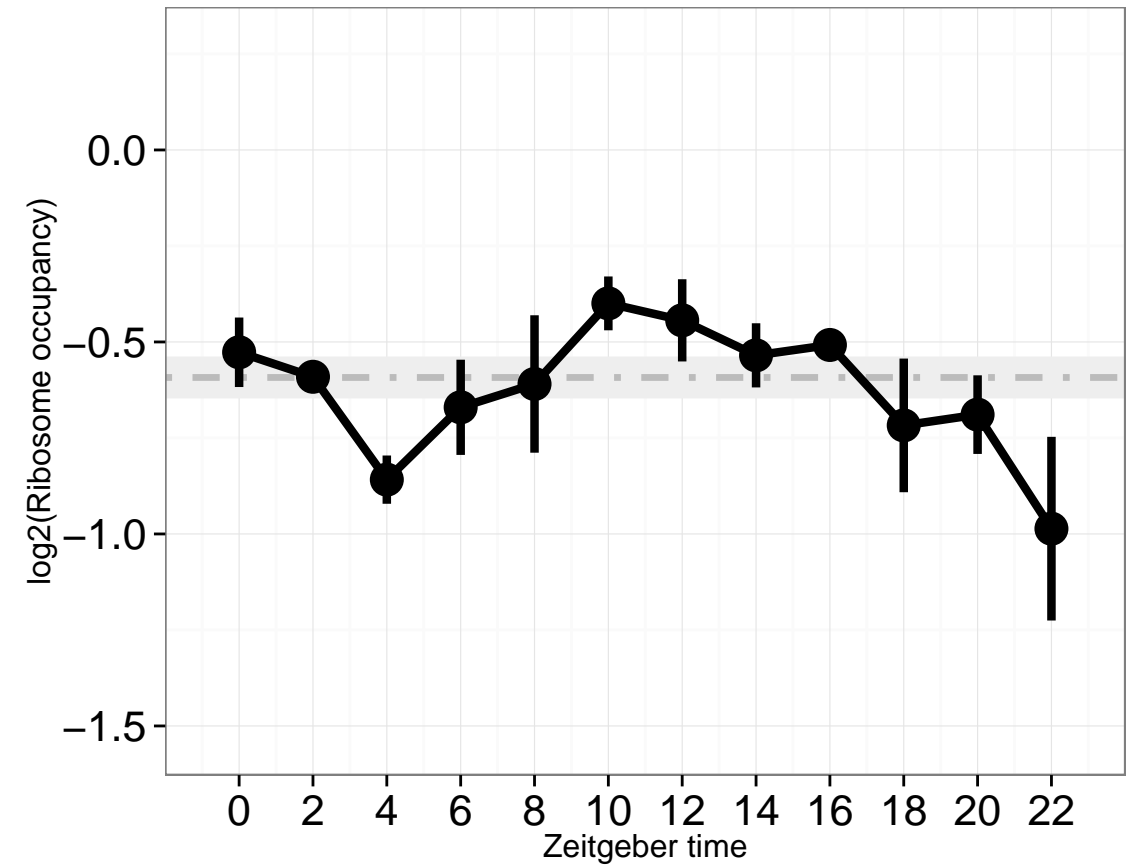

Supplement: SuppDataset_1.zip [file Stim2_set_D.pdf › Supplemental Dataset 1/D-mRNA_rhythm_translation_rhyth/Stim2_set_D.pdf]

# Stip1

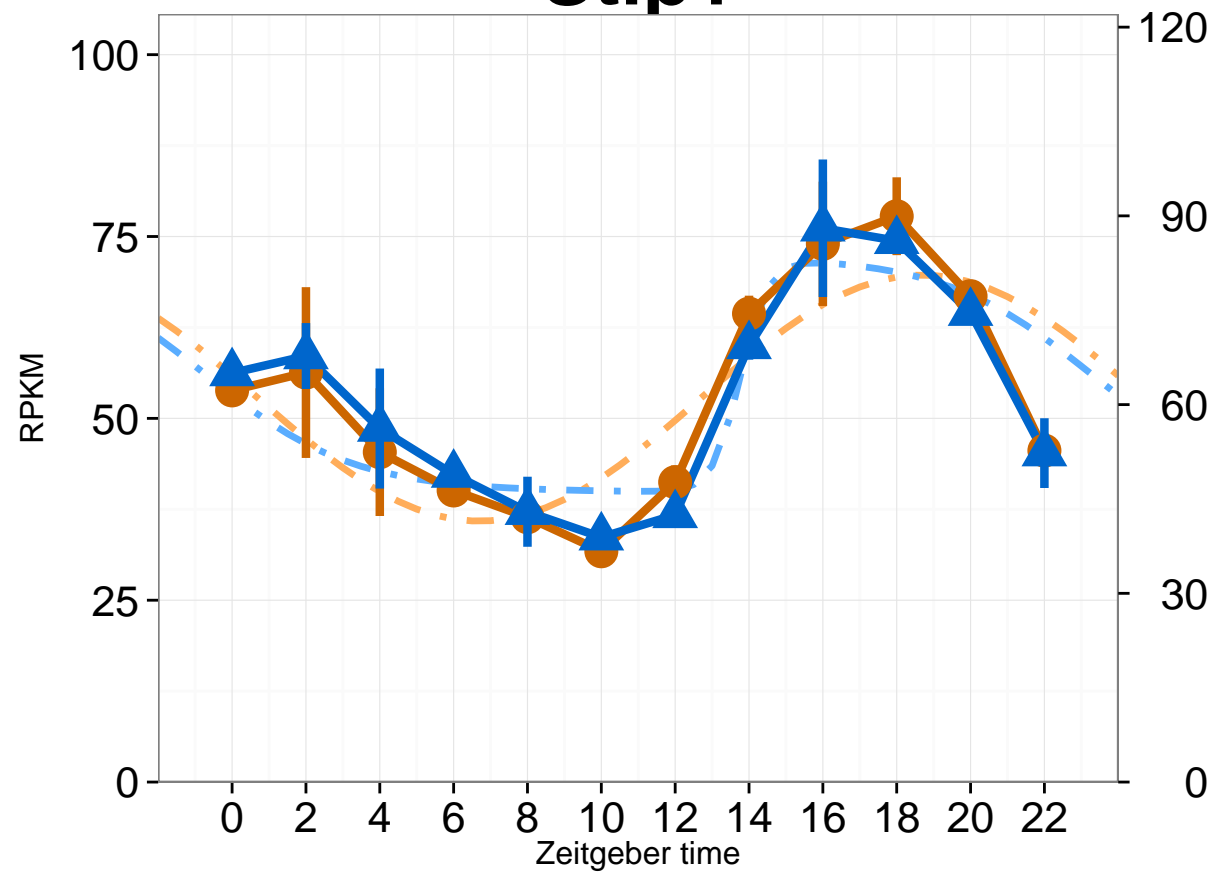

# Stip1

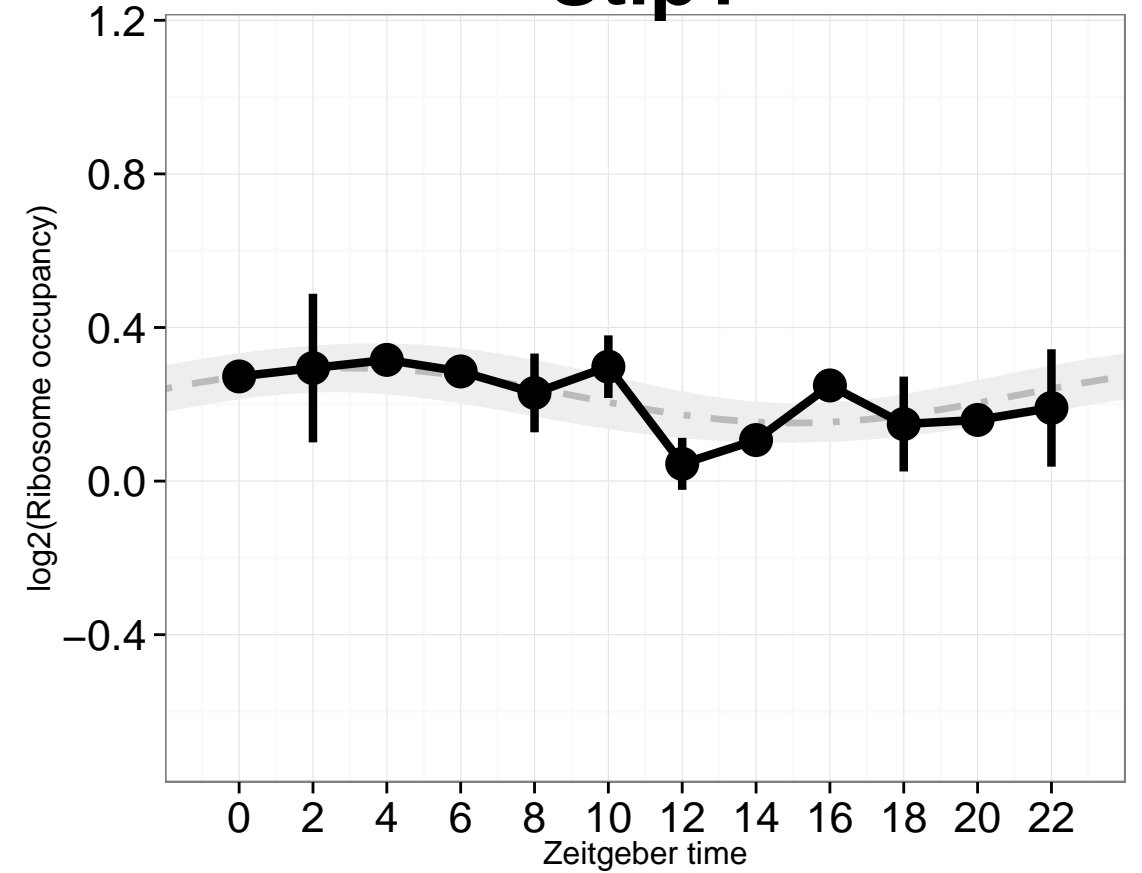

Supplement: SuppDataset_1.zip [file Stip1_set_D.pdf › Supplemental Dataset 1/D-mRNA_rhythm_translation_rhyth/Stip1_set_D.pdf]

## Stk38l

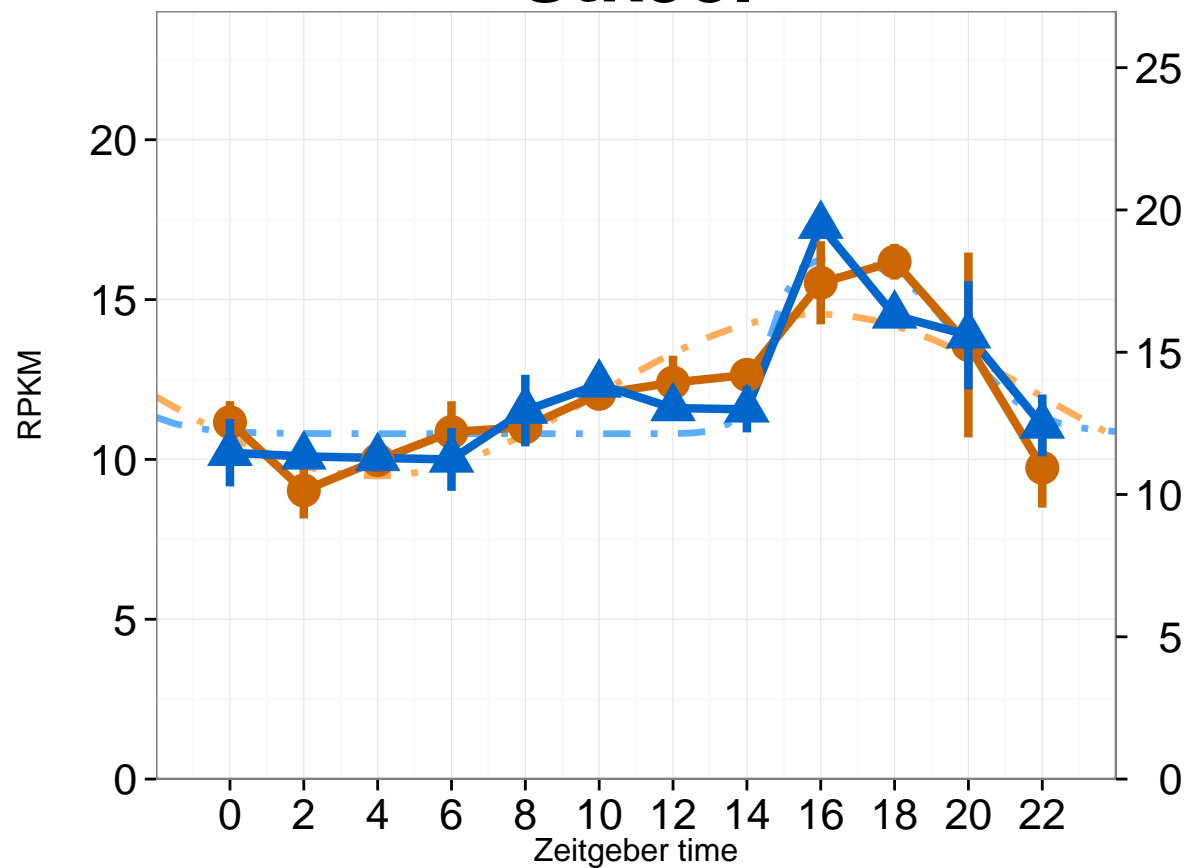

## Stk38l

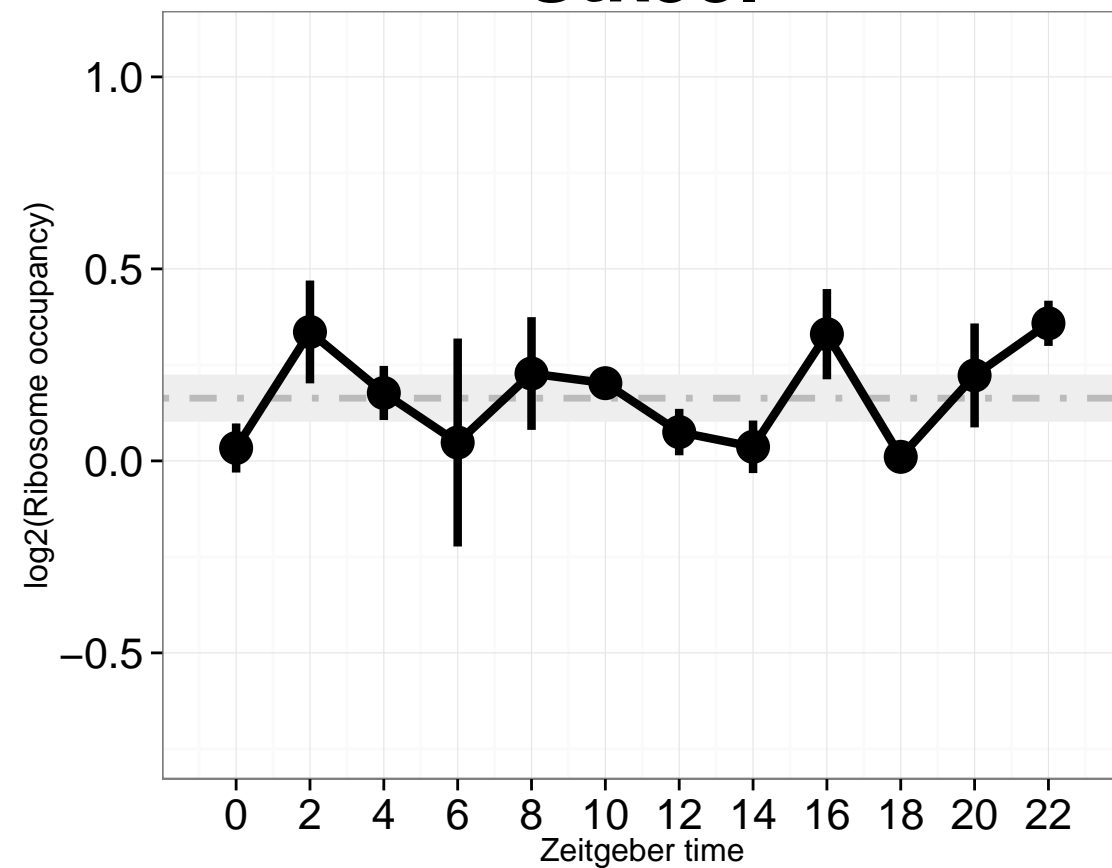

Supplement: SuppDataset_1.zip [file Stk38l_set_D.pdf › Supplemental Dataset 1/D-mRNA_rhythm_translation_rhyth/Stk38l_set_D.pdf]

## Stx2

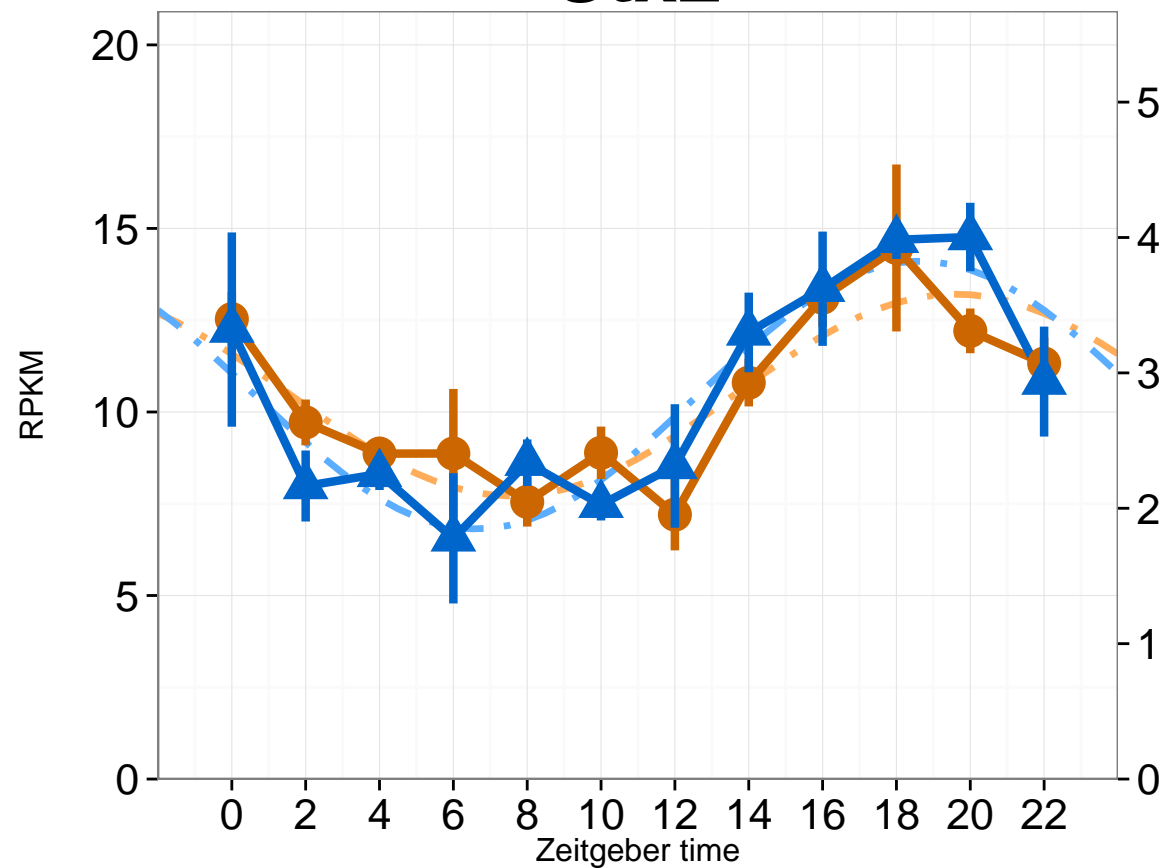

## Stx2

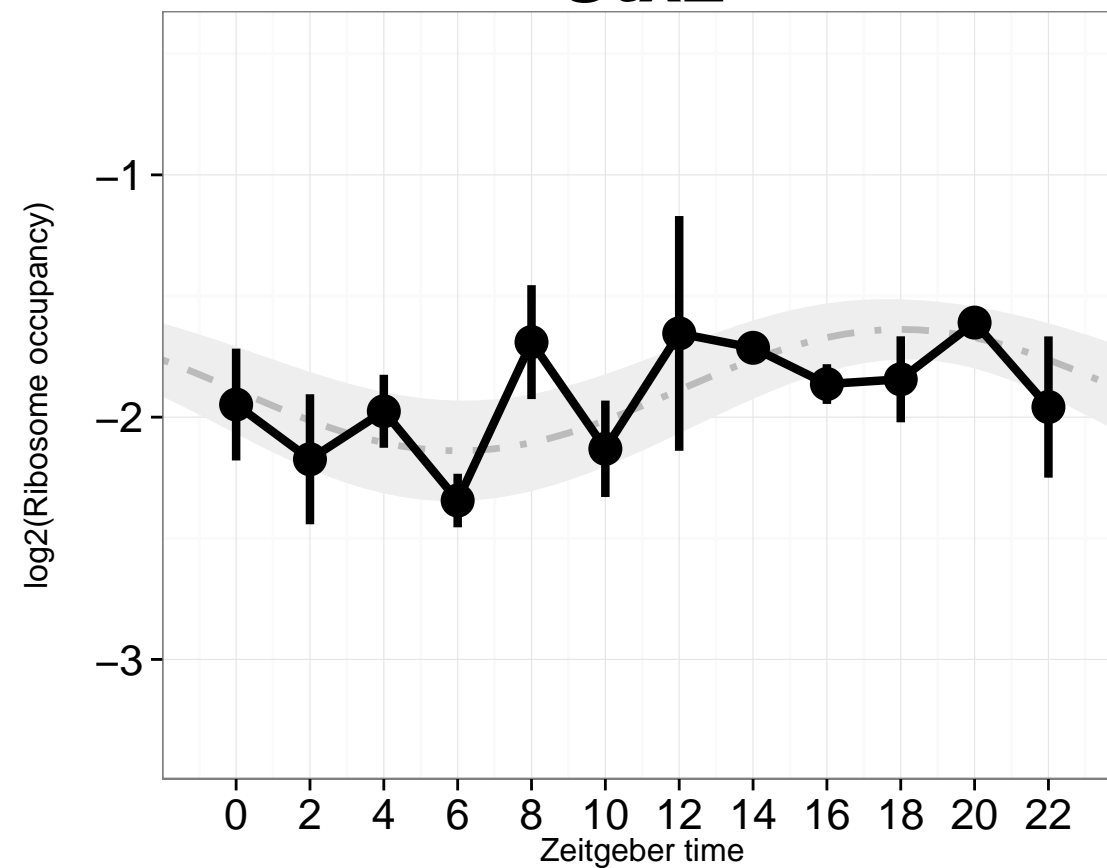

Supplement: SuppDataset_1.zip [file Stx2_set_D.pdf › Supplemental Dataset 1/D-mRNA_rhythm_translation_rhyth/Stx2_set_D.pdf]

# Stx4a

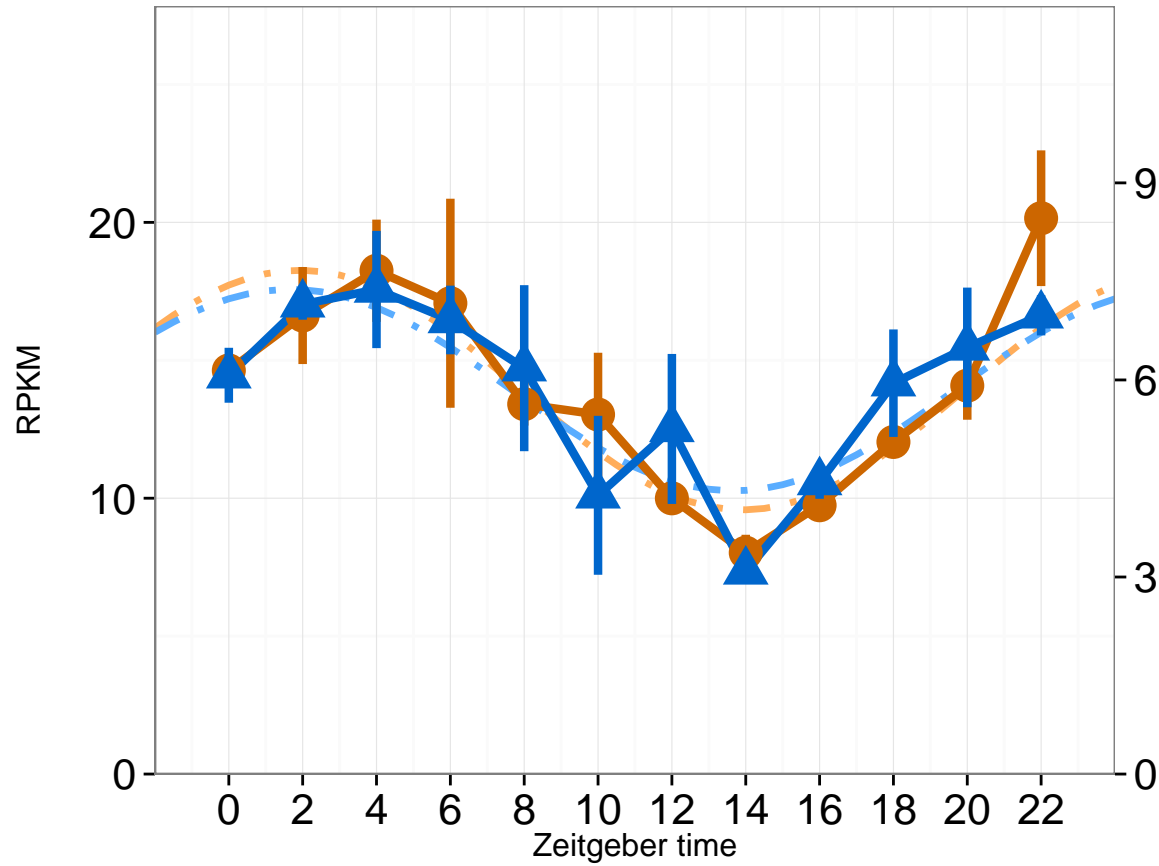

# Stx4a

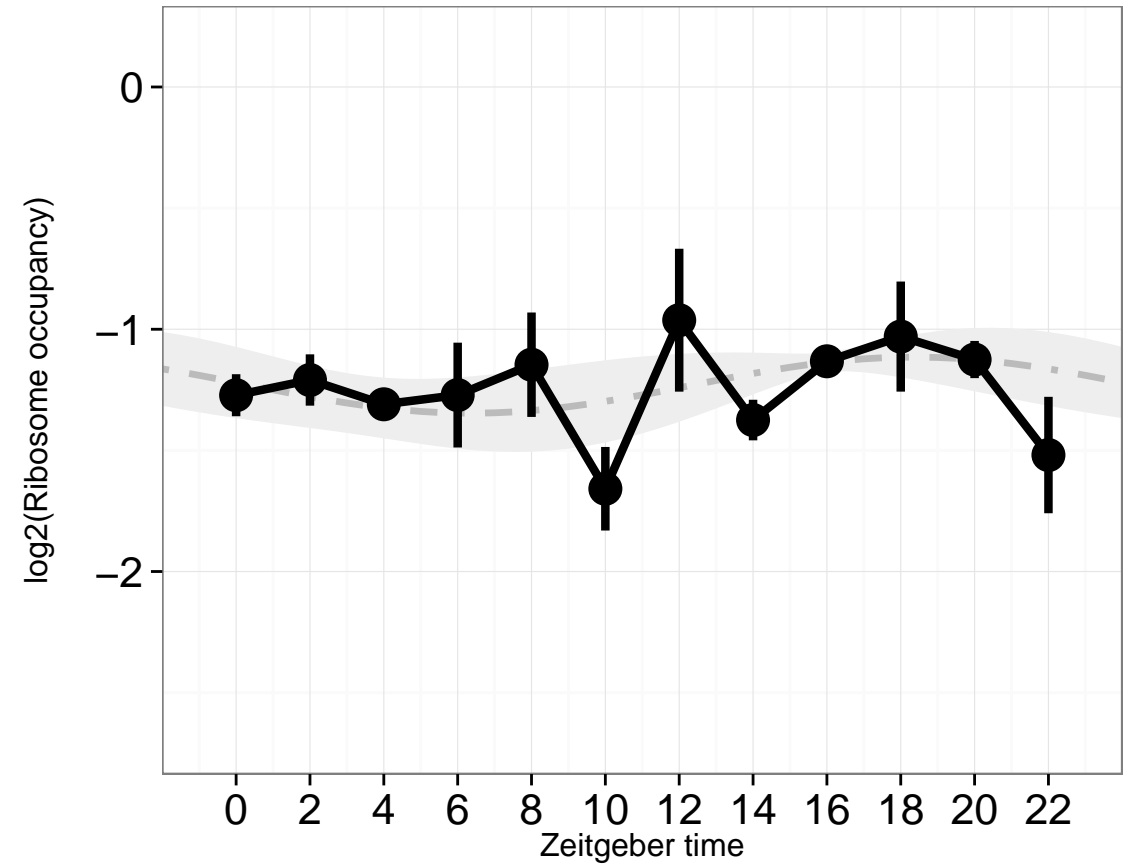

Supplement: SuppDataset_1.zip [file Stx4a_set_D.pdf › Supplemental Dataset 1/D-mRNA_rhythm_translation_rhyth/Stx4a_set_D.pdf]

# Sult1a1

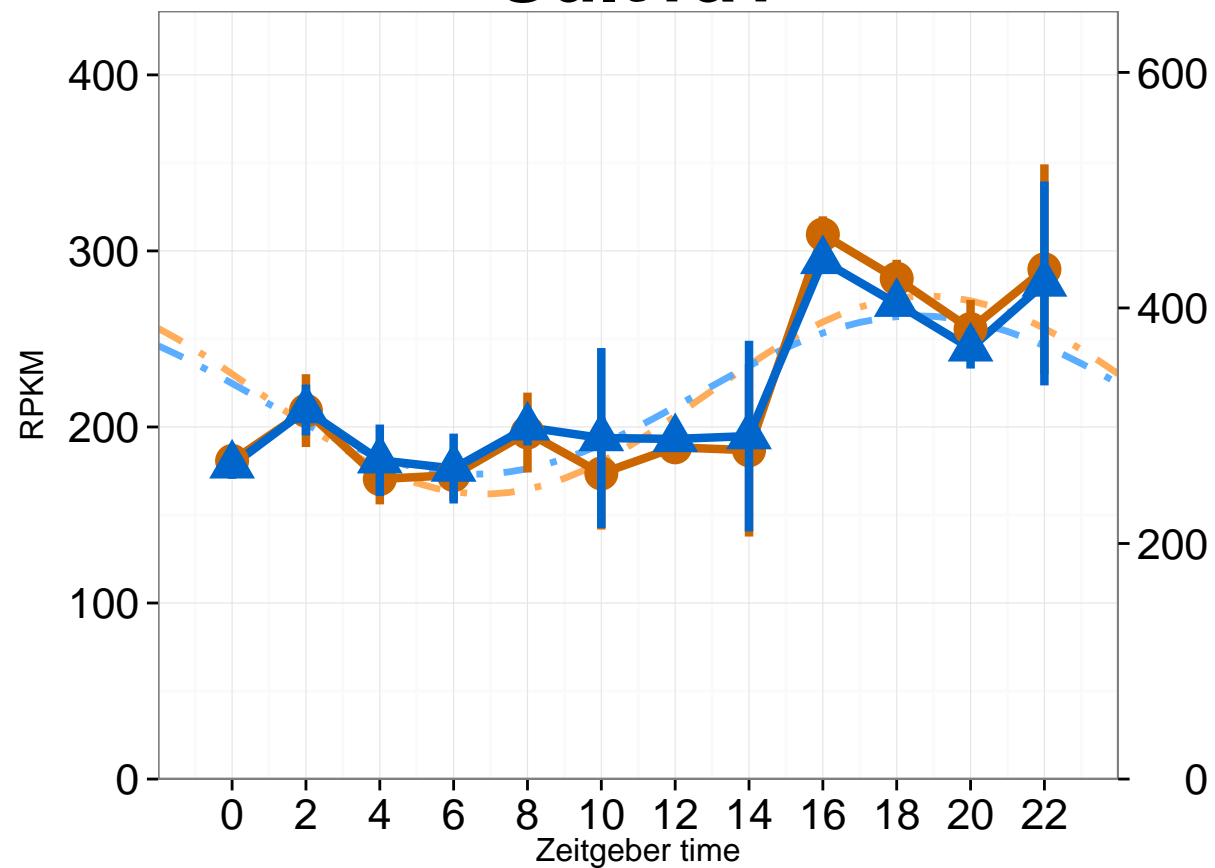

# Sult1a1

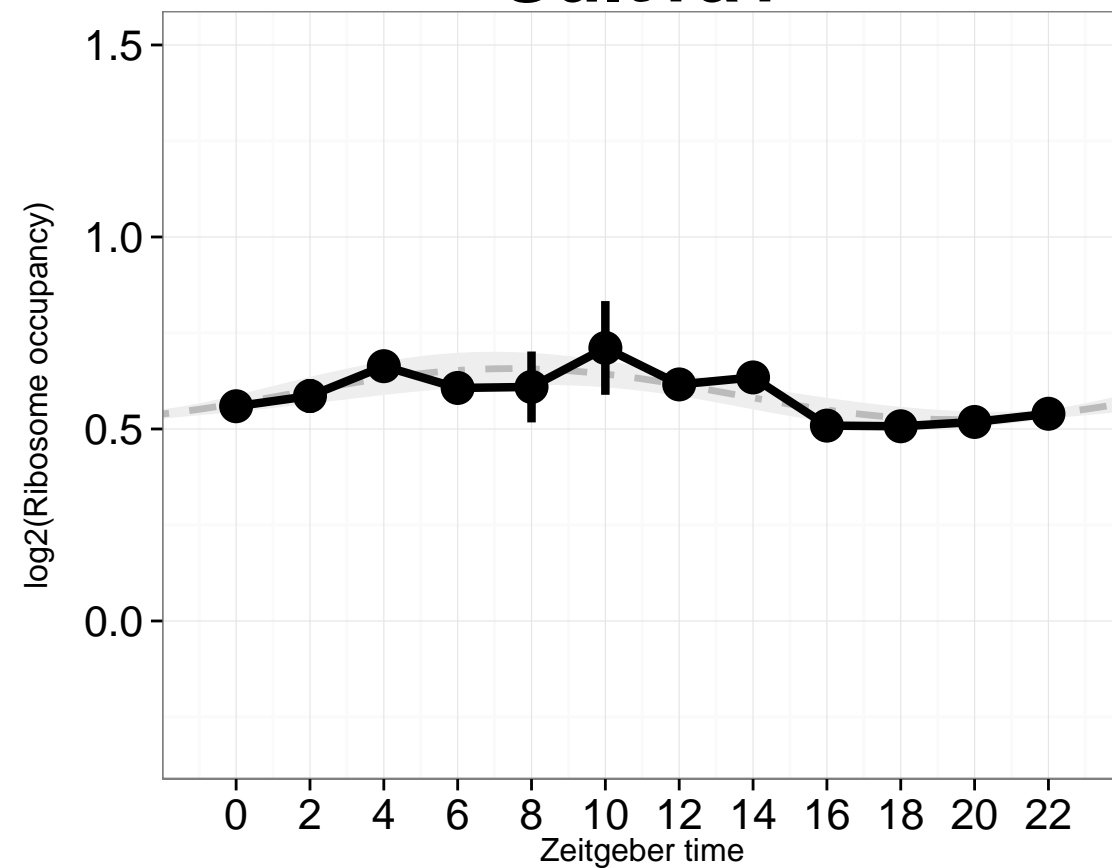

Supplement: SuppDataset_1.zip [file Sult1a1_set_D.pdf › Supplemental Dataset 1/D-mRNA_rhythm_translation_rhyth/Sult1a1_set_D.pdf]

# Sult1d1

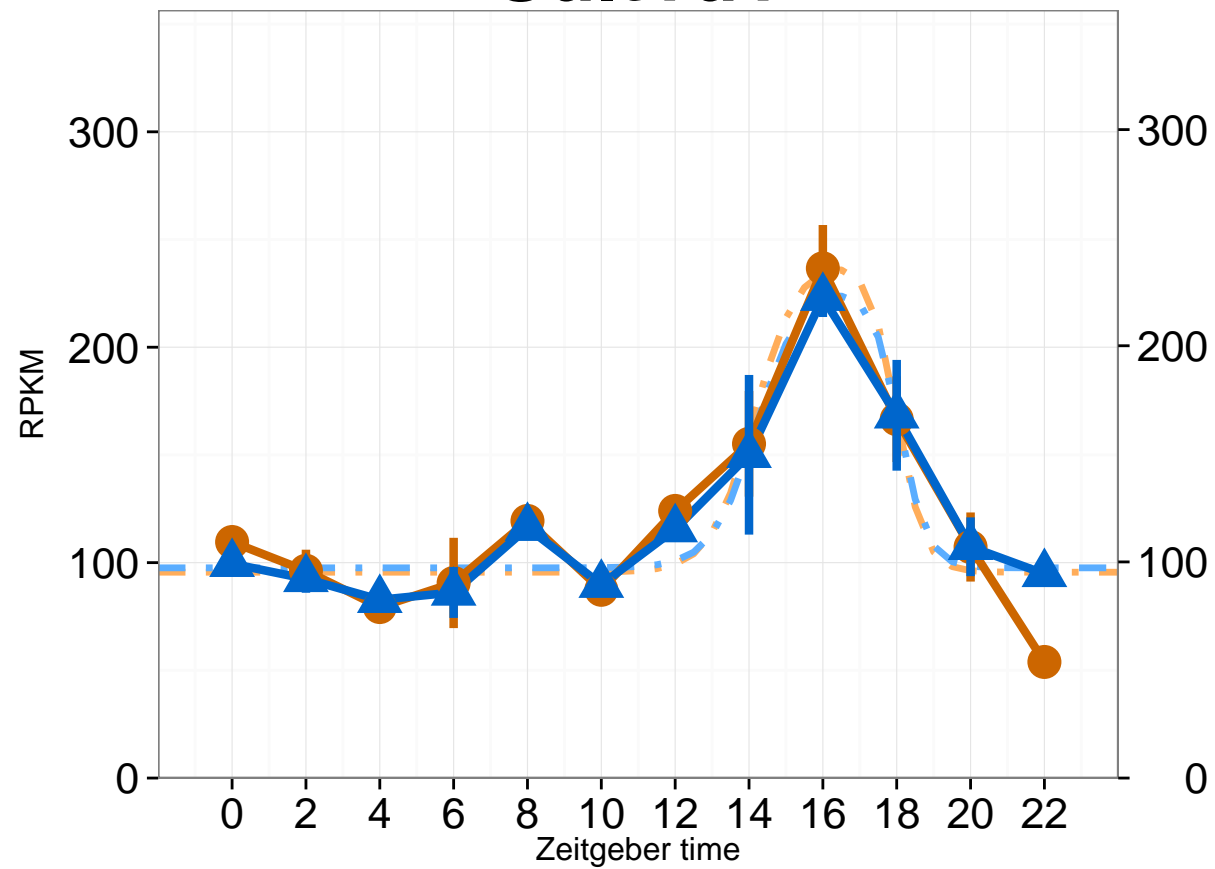

# Sult1d1

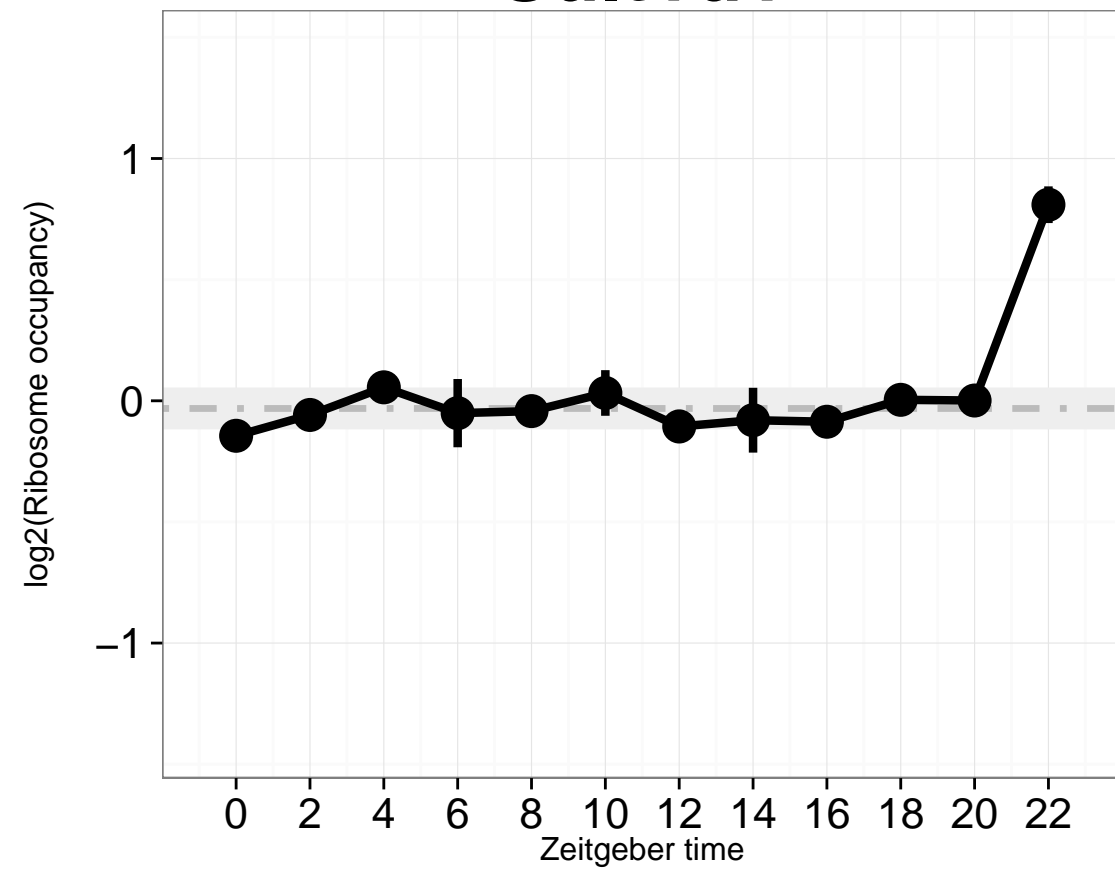

Supplement: SuppDataset_1.zip [file Sult1d1_set_D.pdf › Supplemental Dataset 1/D-mRNA_rhythm_translation_rhyth/Sult1d1_set_D.pdf]

## Sun2

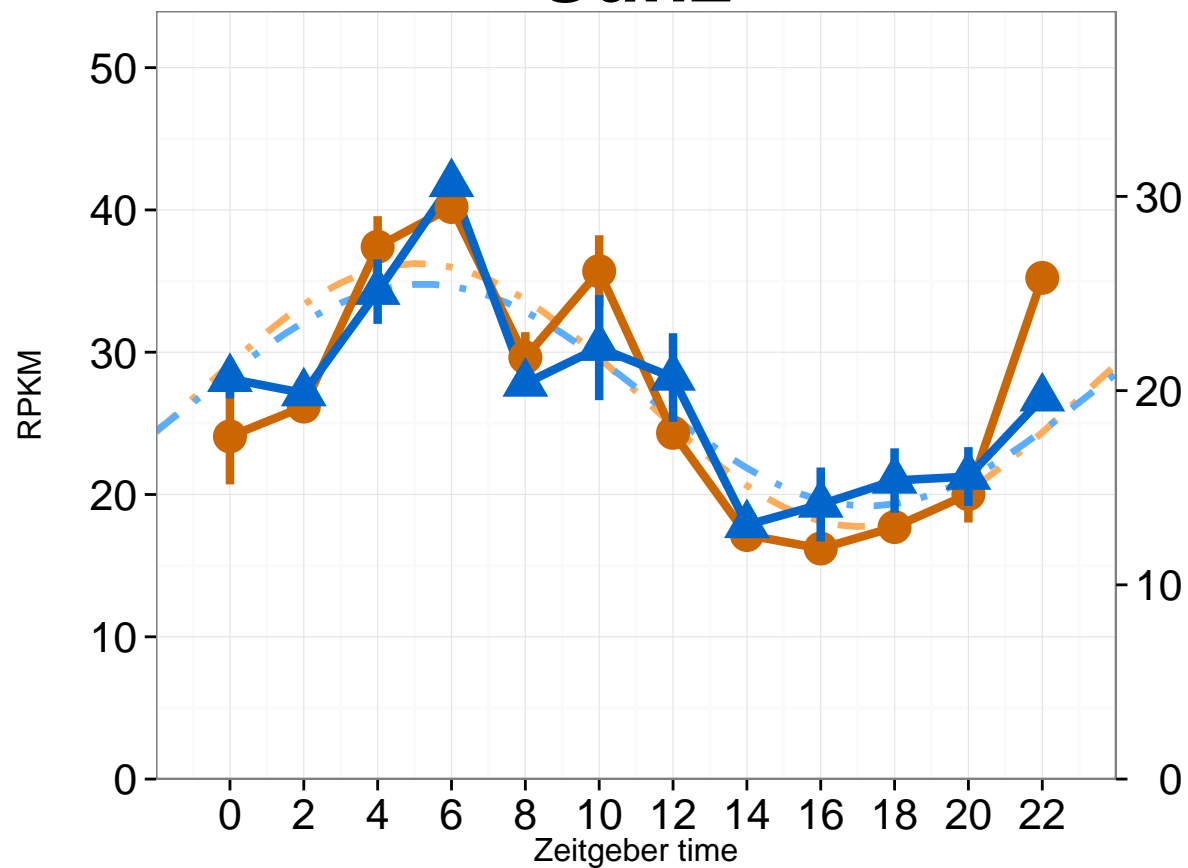

## Sun2

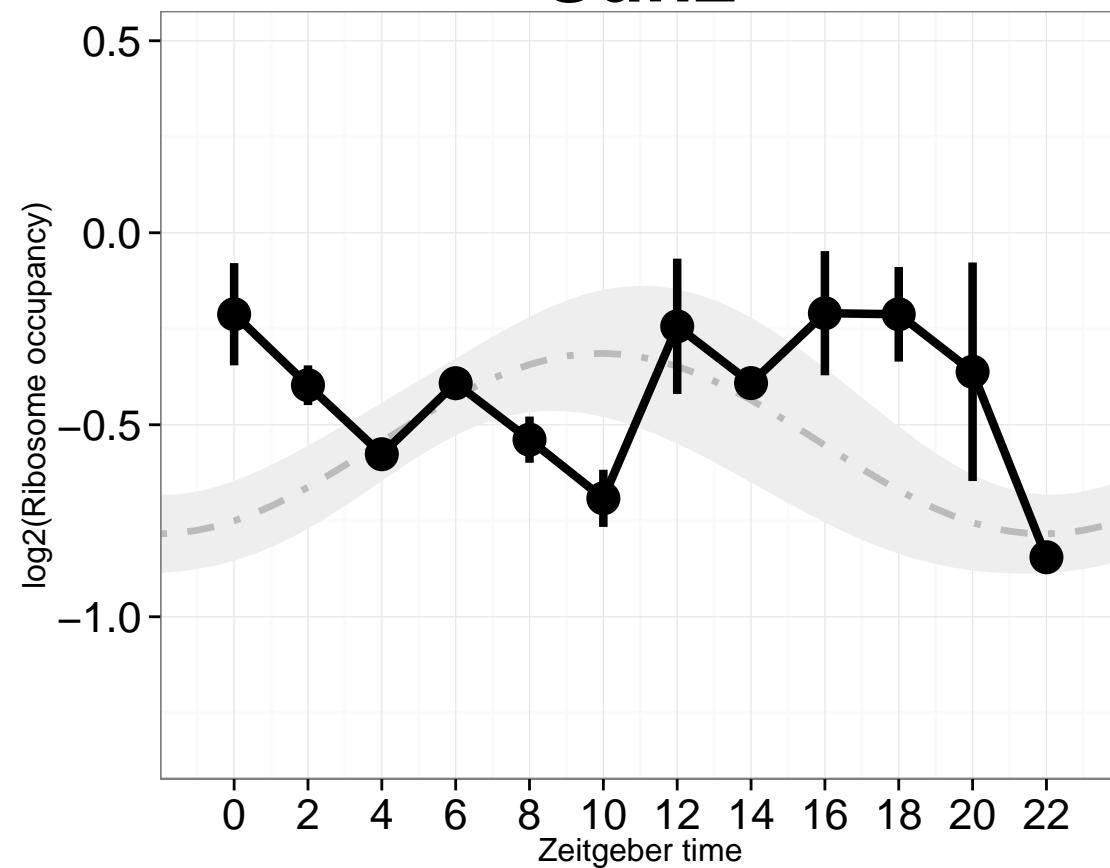

Supplement: SuppDataset_1.zip [file Sun2_set_D.pdf › Supplemental Dataset 1/D-mRNA_rhythm_translation_rhyth/Sun2_set_D.pdf]
