# Supplementary figures and images for: Ribosome profiling reveals the rhythmic liver translatome and circadian clock regulation by upstream open reading frames (part 67 of 113)
Source: HighWire-hosted journal article supplement (doi:10.1101/gr.195404.115), 2015-10-20

## Shisa5

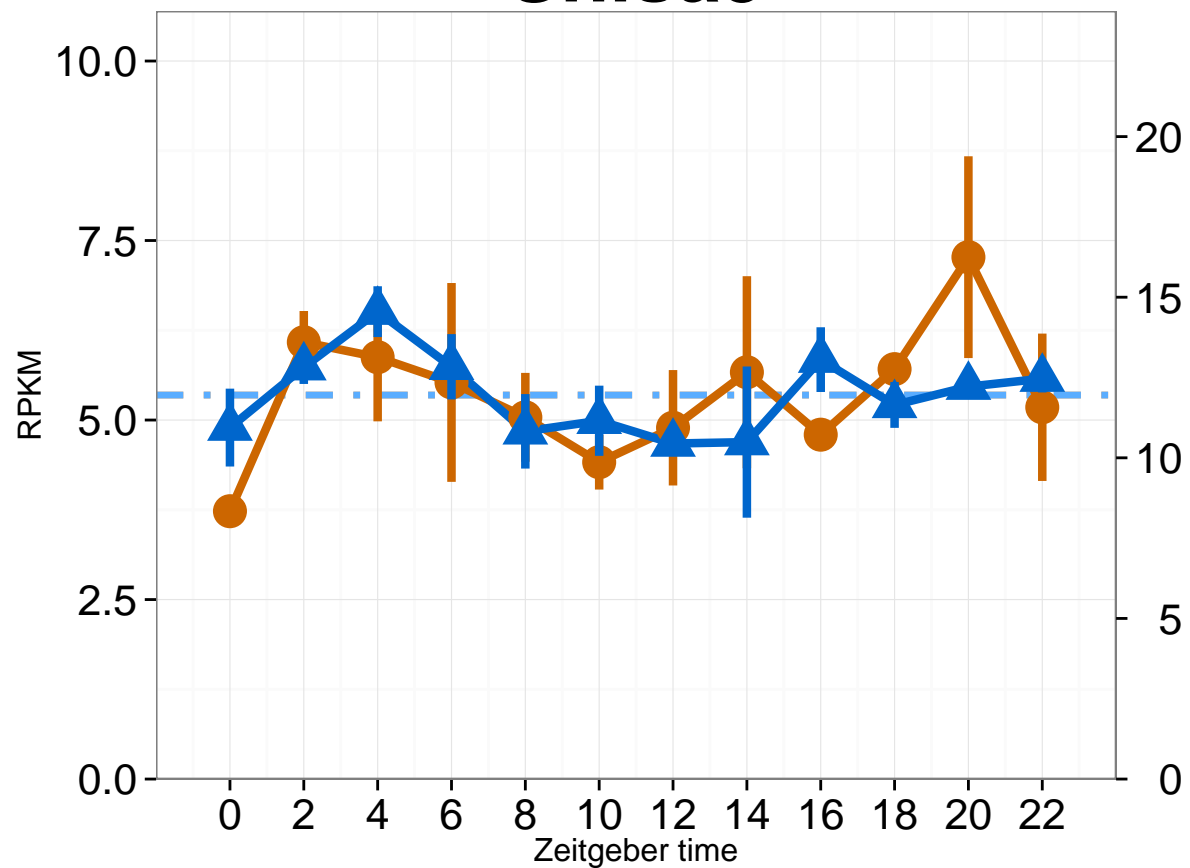

## Shisa5

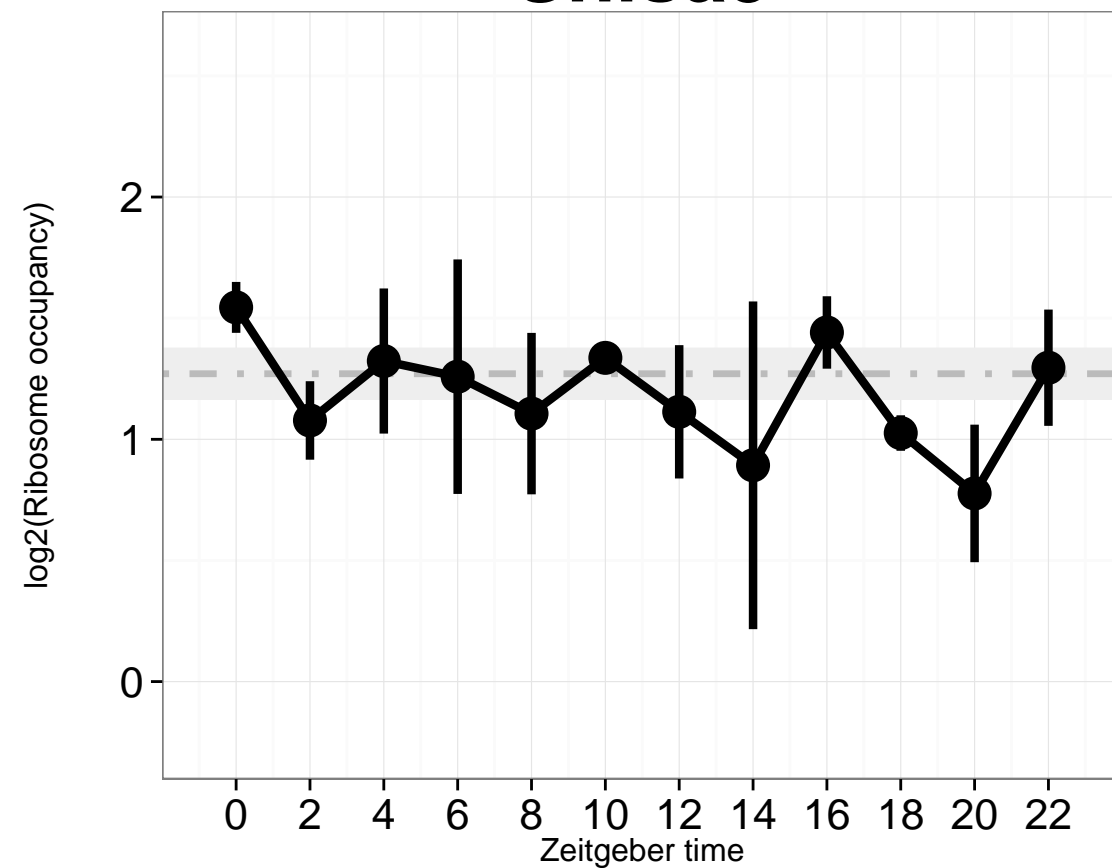

Supplement: SuppDataset_1.zip [file Shisa5_set_A.pdf › Supplemental Dataset 1/A-mRNA_nonrhyth_translation_nonrhyth/Shisa5_set_A.pdf]

## Shmt1

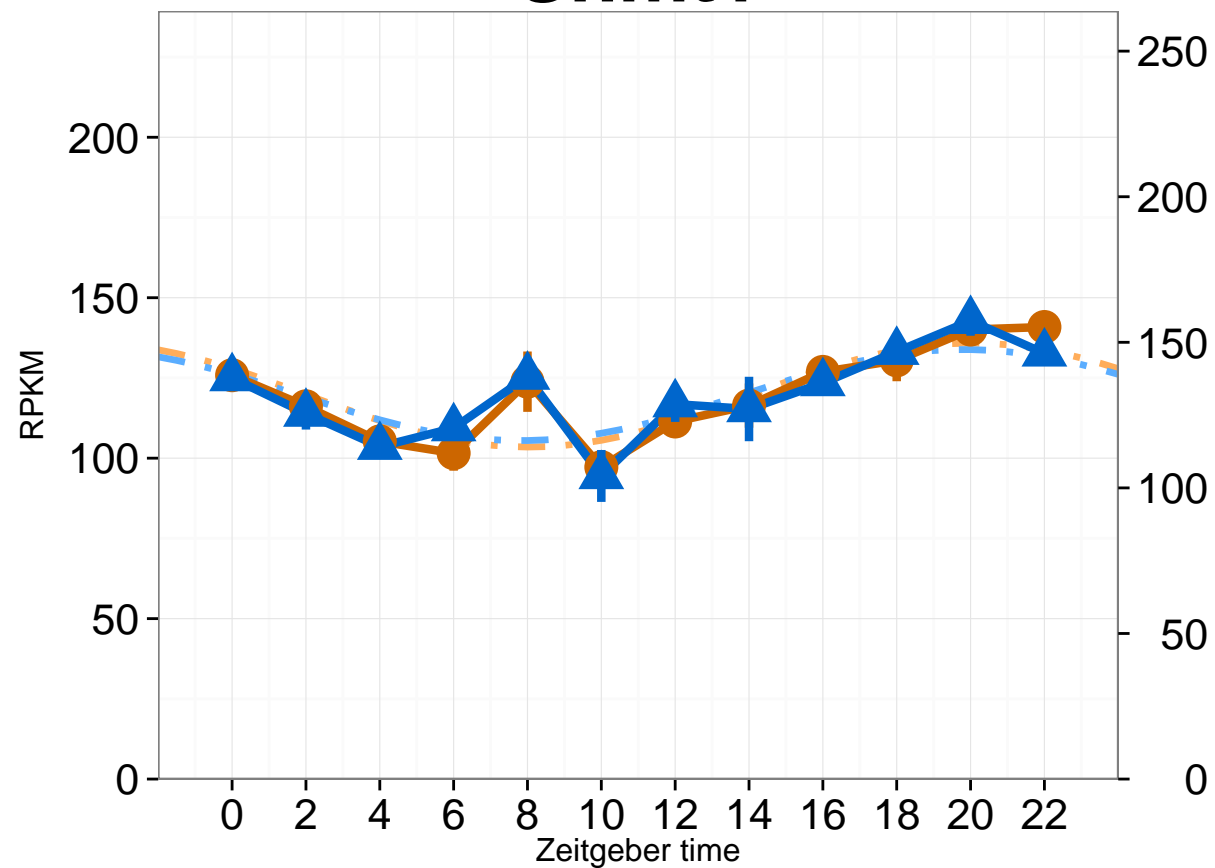

## Shmt1

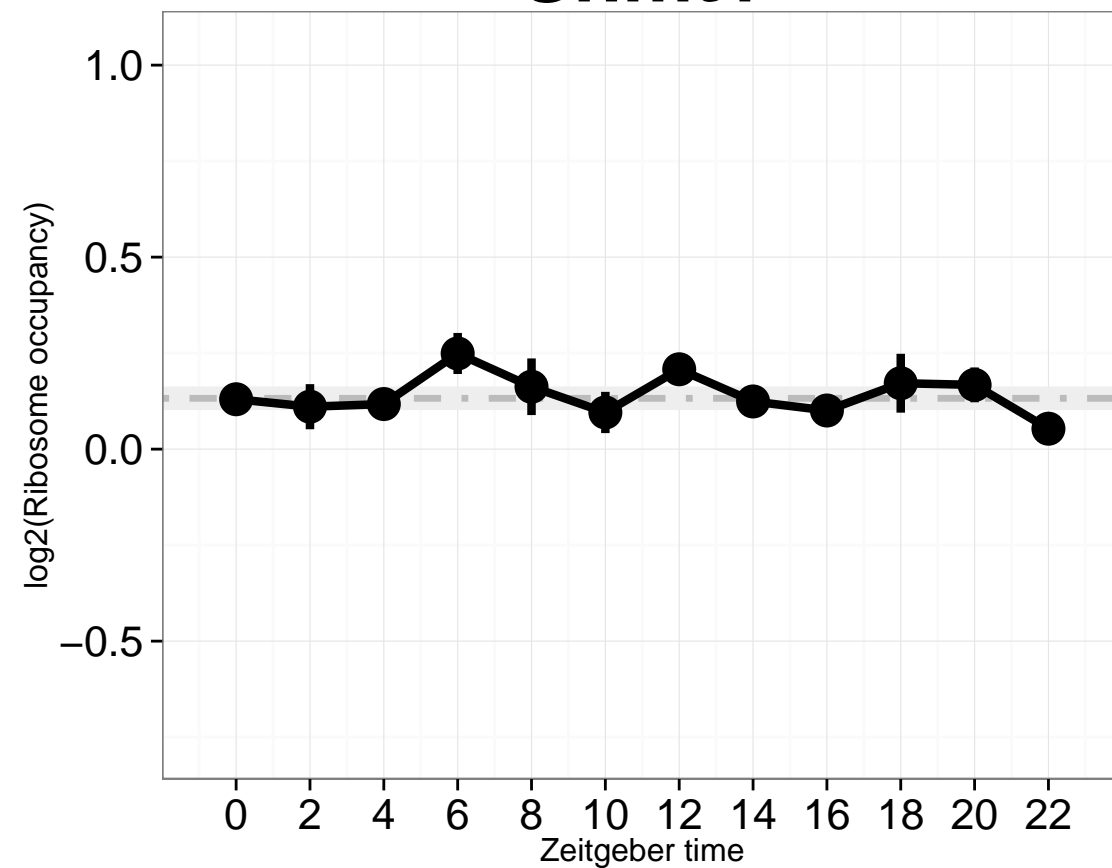

Supplement: SuppDataset_1.zip [file Shmt1_set_A.pdf › Supplemental Dataset 1/A-mRNA_nonrhyth_translation_nonrhyth/Shmt1_set_A.pdf]

## Shmt2

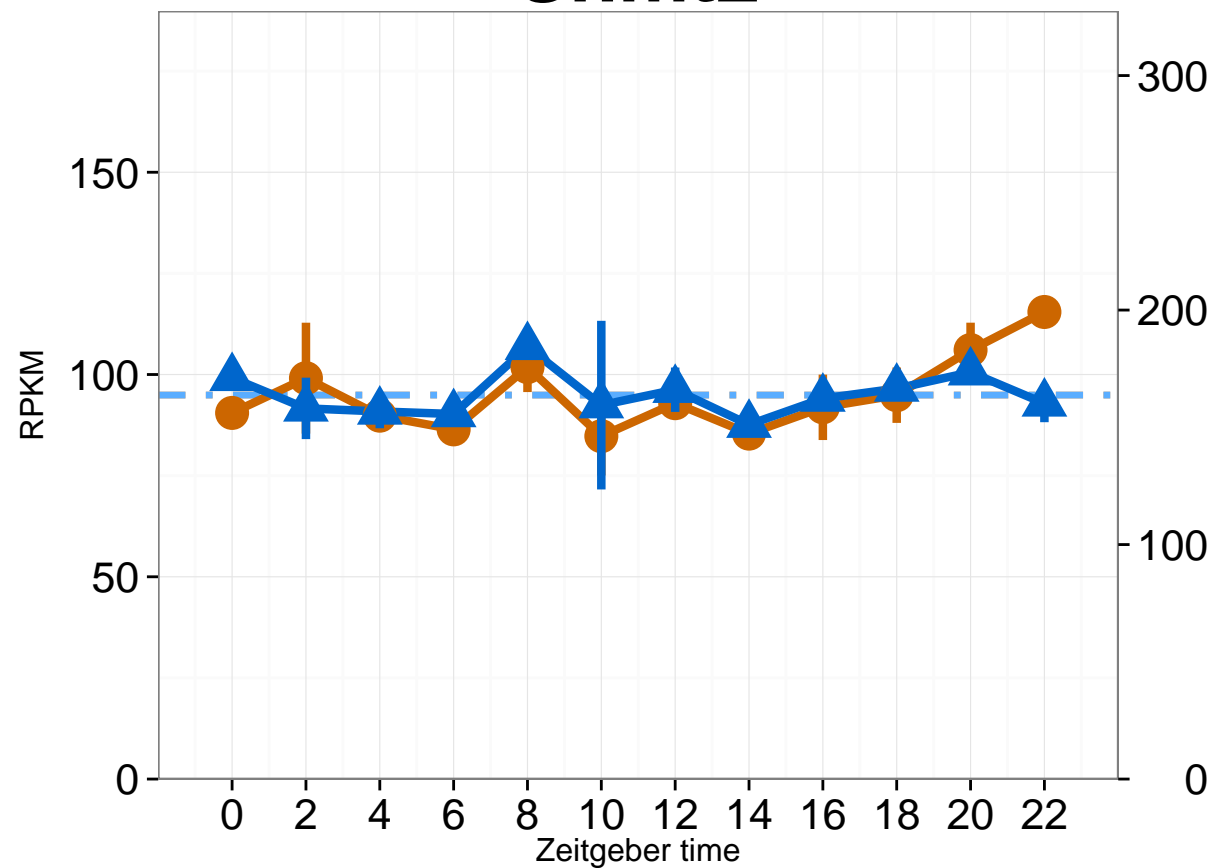

## Shmt2

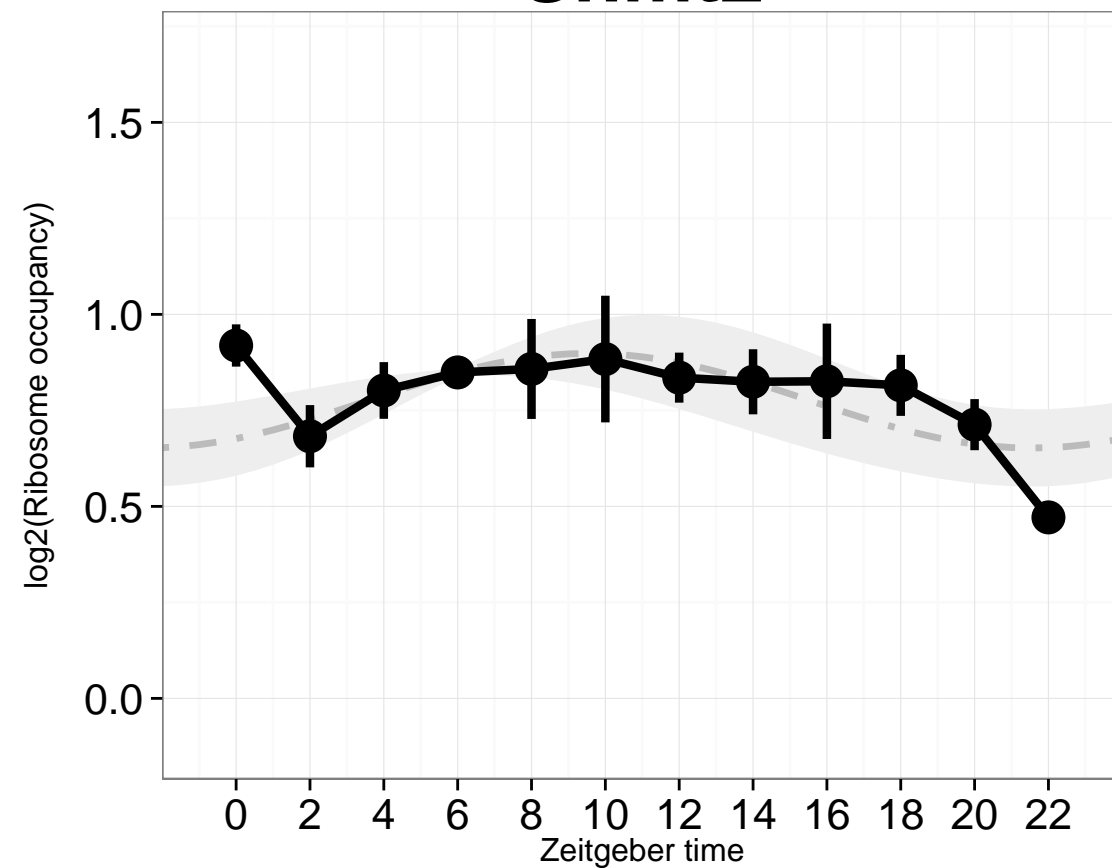

Supplement: SuppDataset_1.zip [file Shmt2_set_A.pdf › Supplemental Dataset 1/A-mRNA_nonrhyth_translation_nonrhyth/Shmt2_set_A.pdf]

## Shoc2

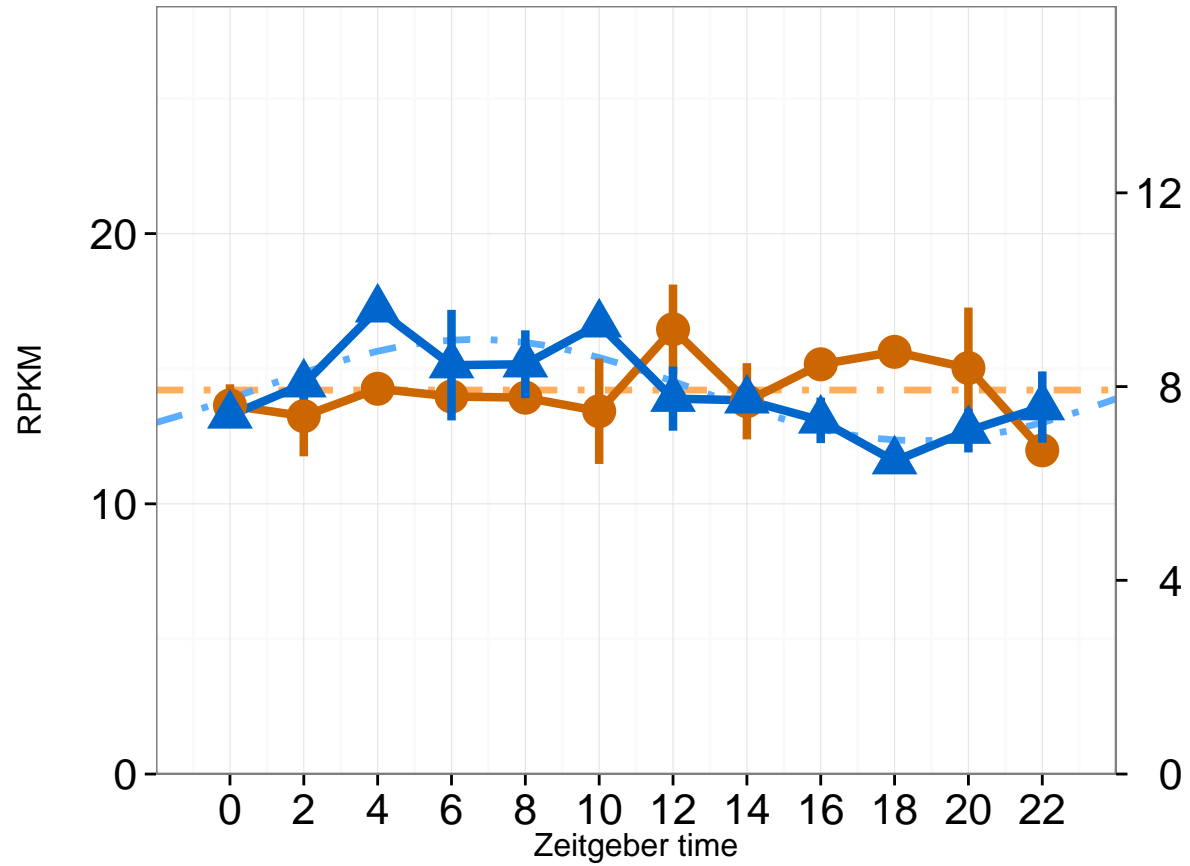

## Shoc2

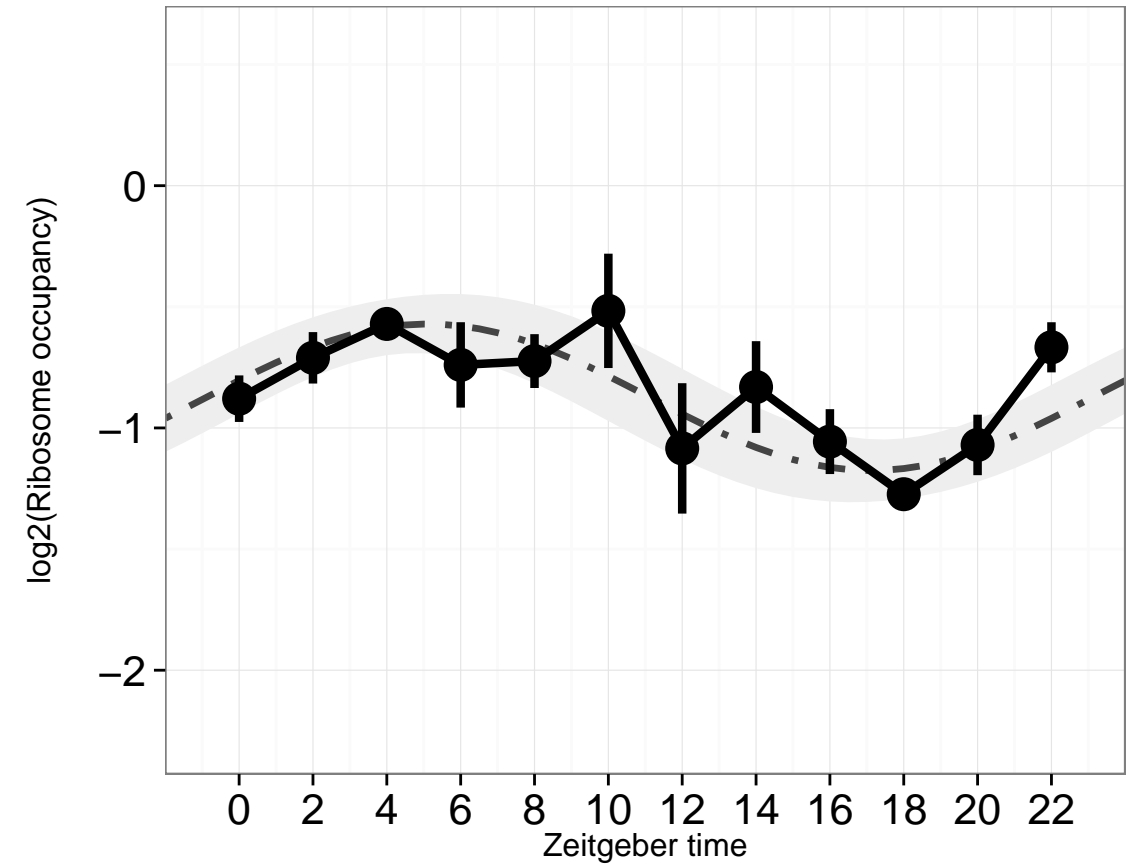

Supplement: SuppDataset_1.zip [file Shoc2_set_A.pdf › Supplemental Dataset 1/A-mRNA_nonrhyth_translation_nonrhyth/Shoc2_set_A.pdf]

## Shpk

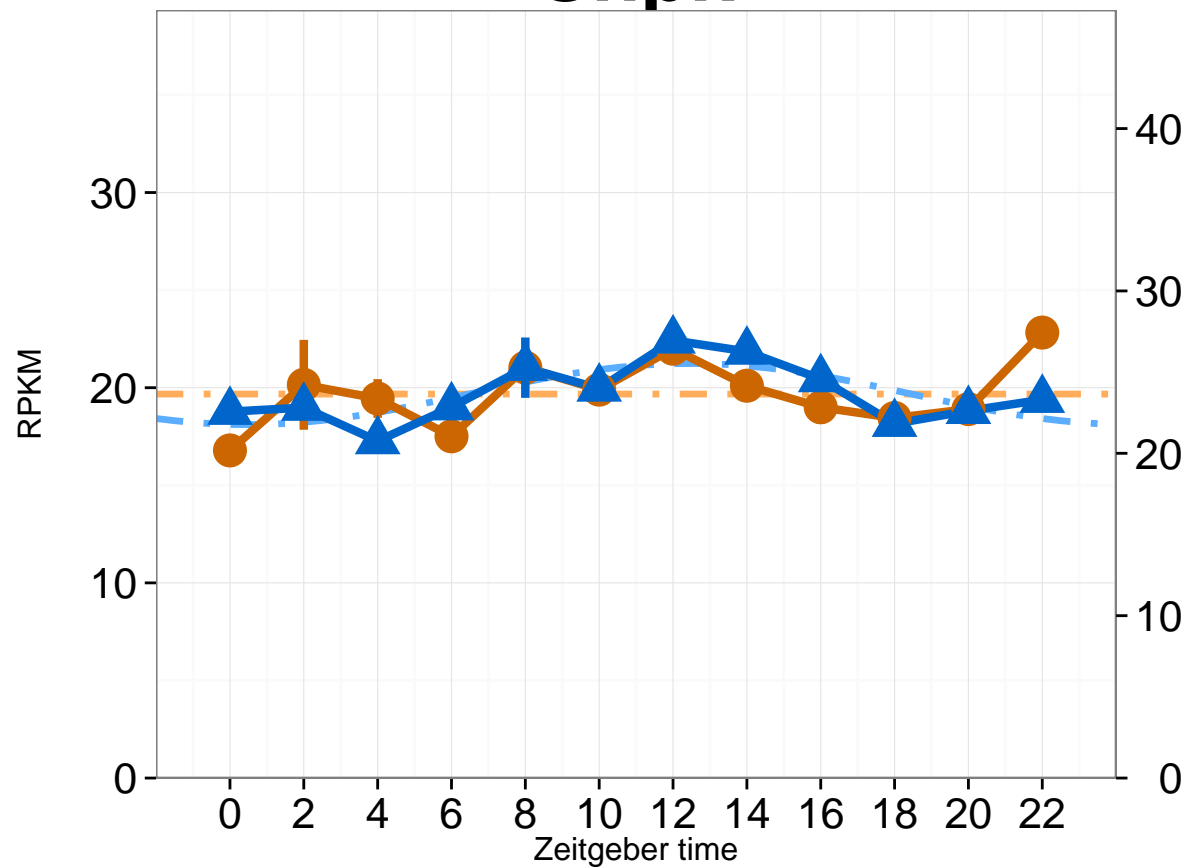

## Shpk

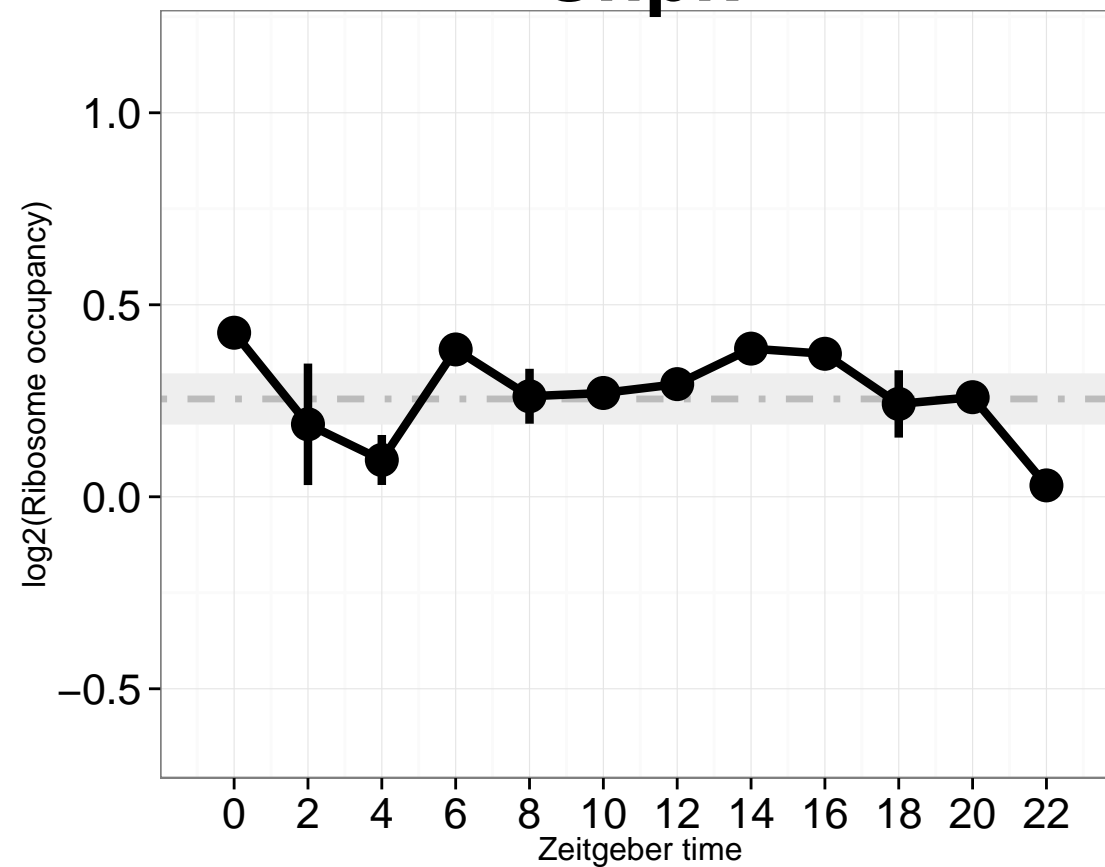

Supplement: SuppDataset_1.zip [file Shpk_set_A.pdf › Supplemental Dataset 1/A-mRNA_nonrhyth_translation_nonrhyth/Shpk_set_A.pdf]

## Shprh

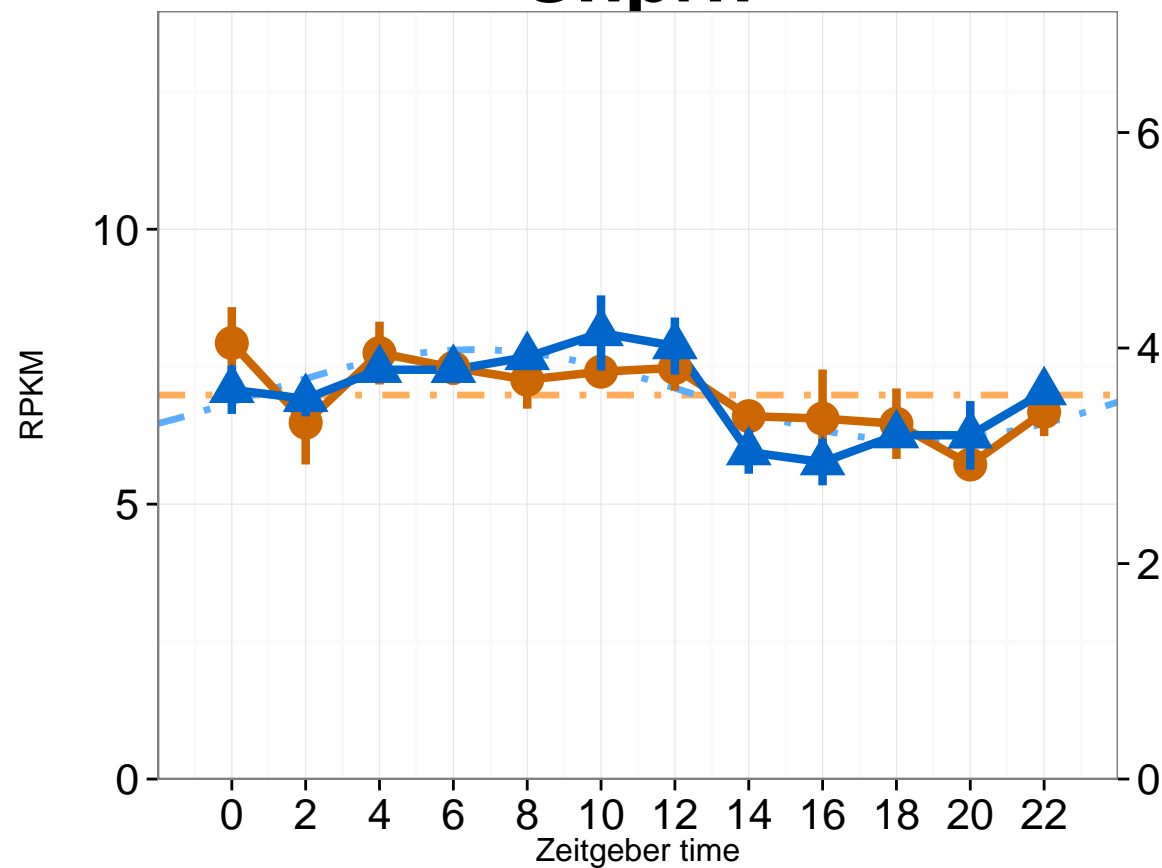

## Shprh

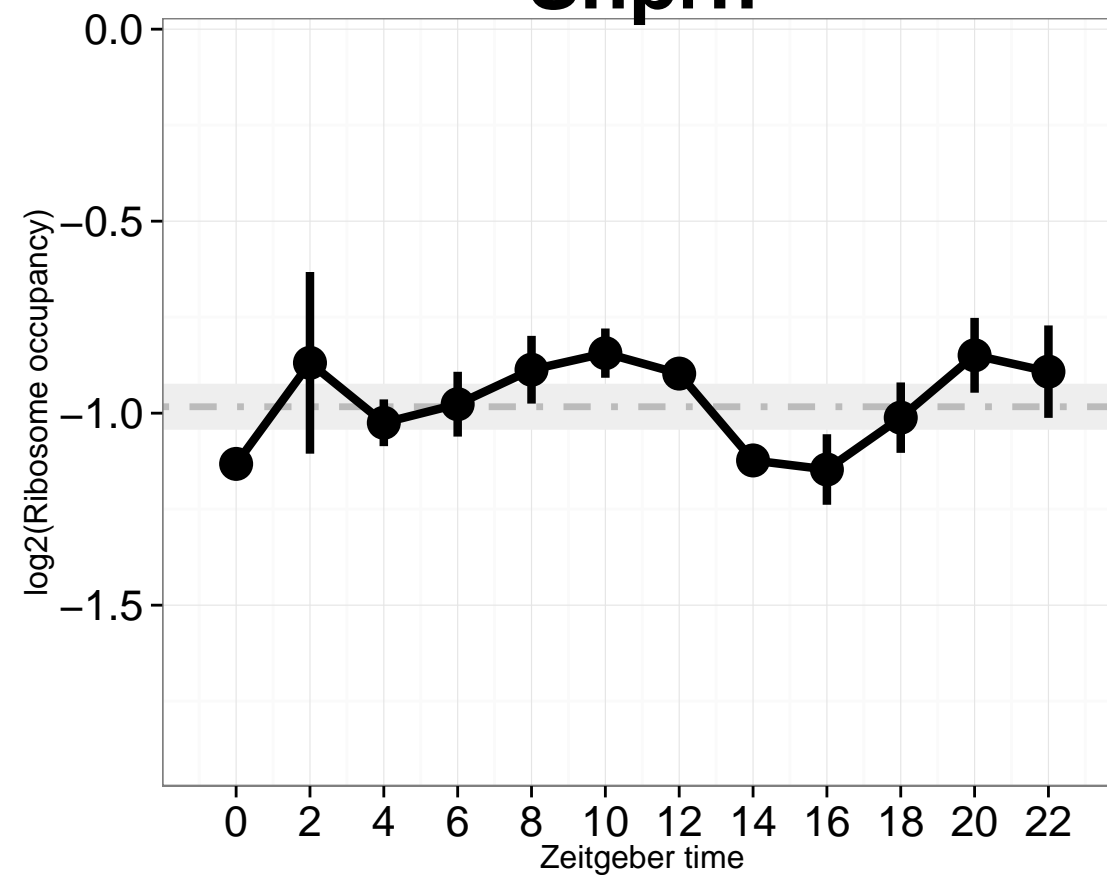

Supplement: SuppDataset_1.zip [file Shprh_set_A.pdf › Supplemental Dataset 1/A-mRNA_nonrhyth_translation_nonrhyth/Shprh_set_A.pdf]

## Shq1

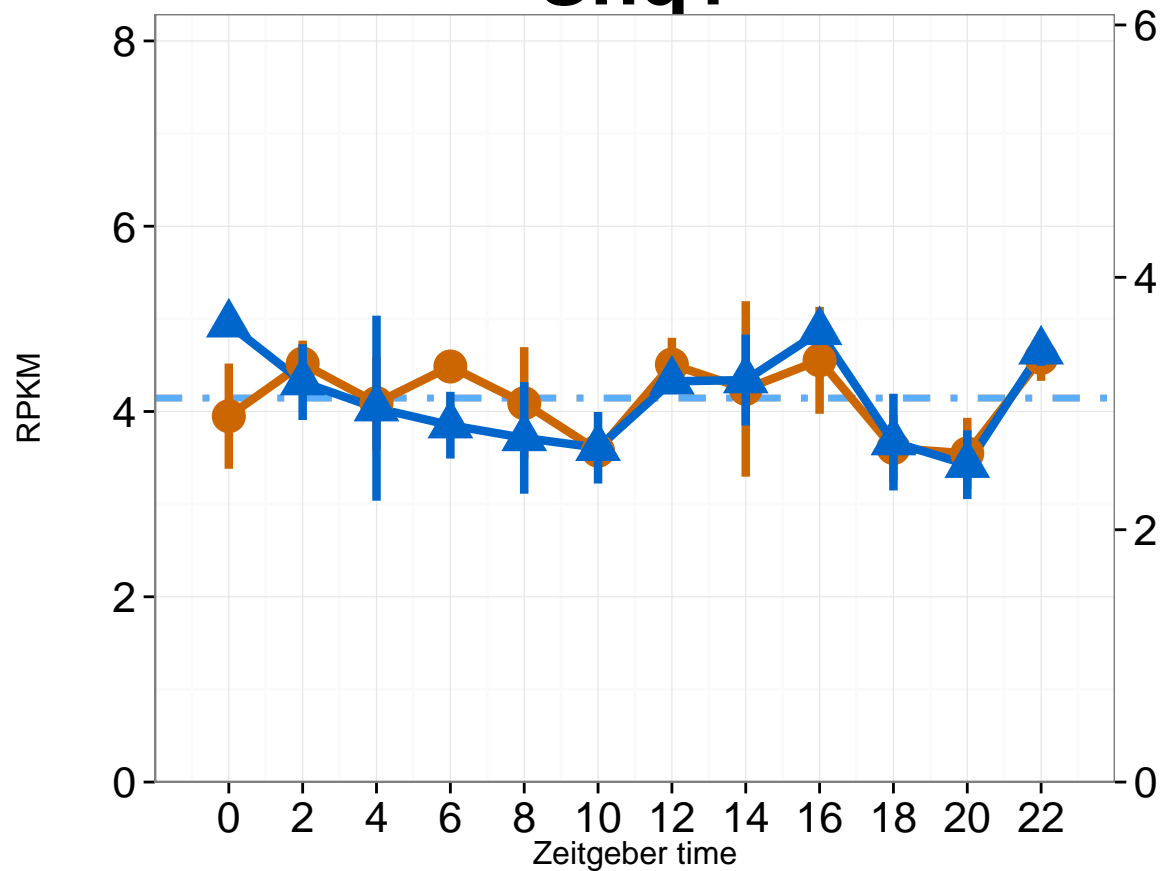

## Shq1

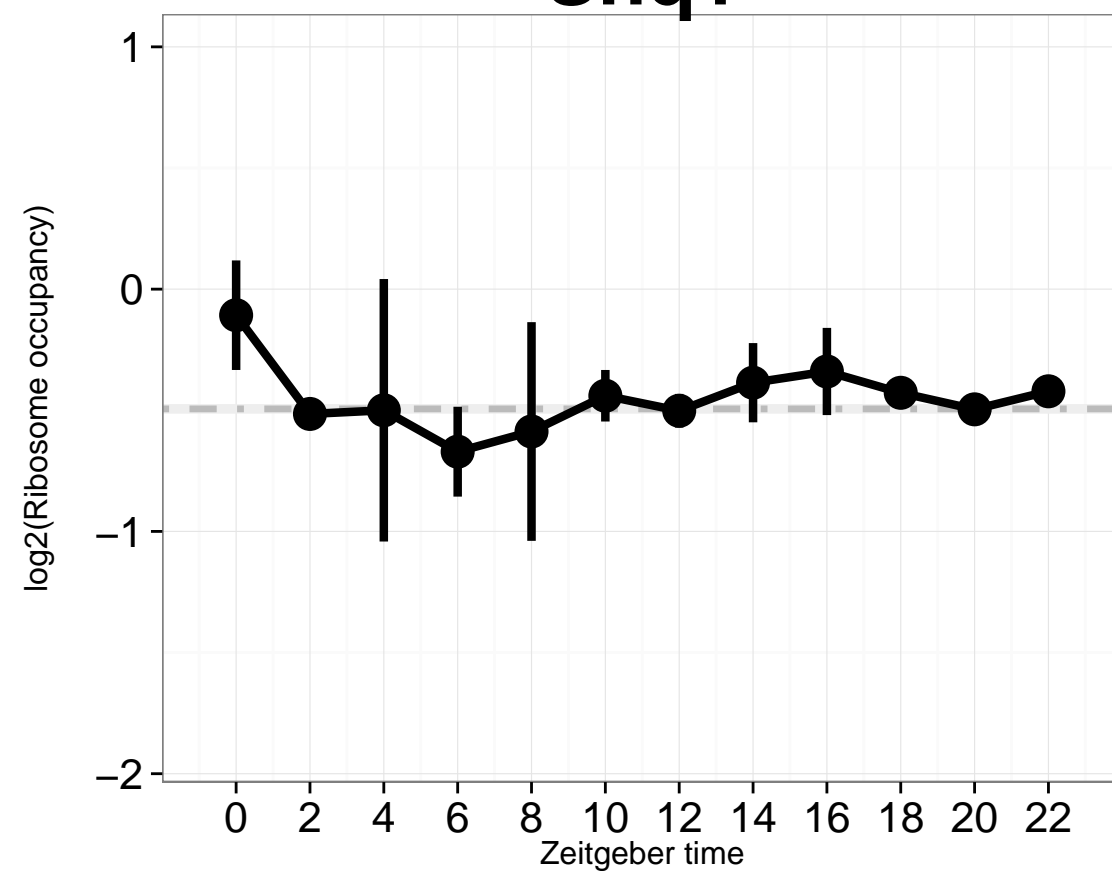

Supplement: SuppDataset_1.zip [file Shq1_set_A.pdf › Supplemental Dataset 1/A-mRNA_nonrhyth_translation_nonrhyth/Shq1_set_A.pdf]

# Shroom1

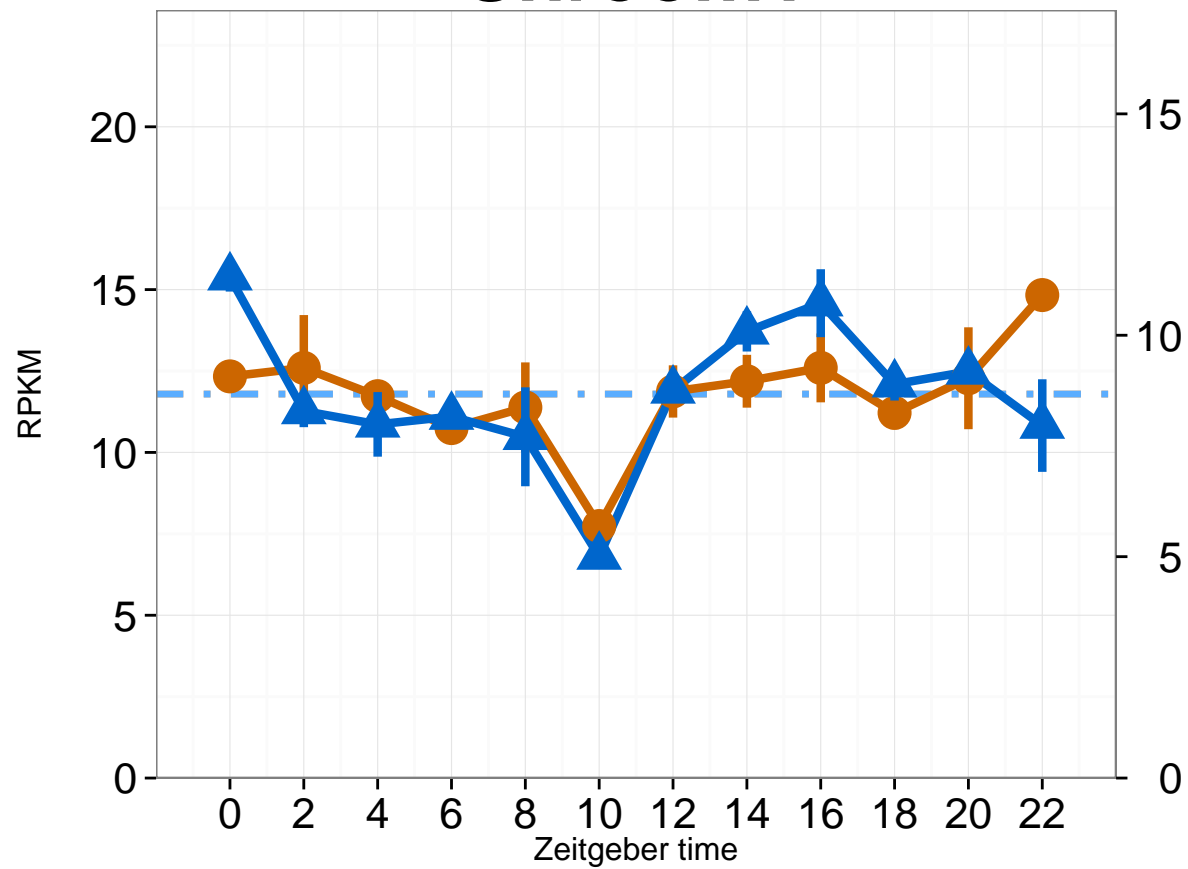

# Shroom1

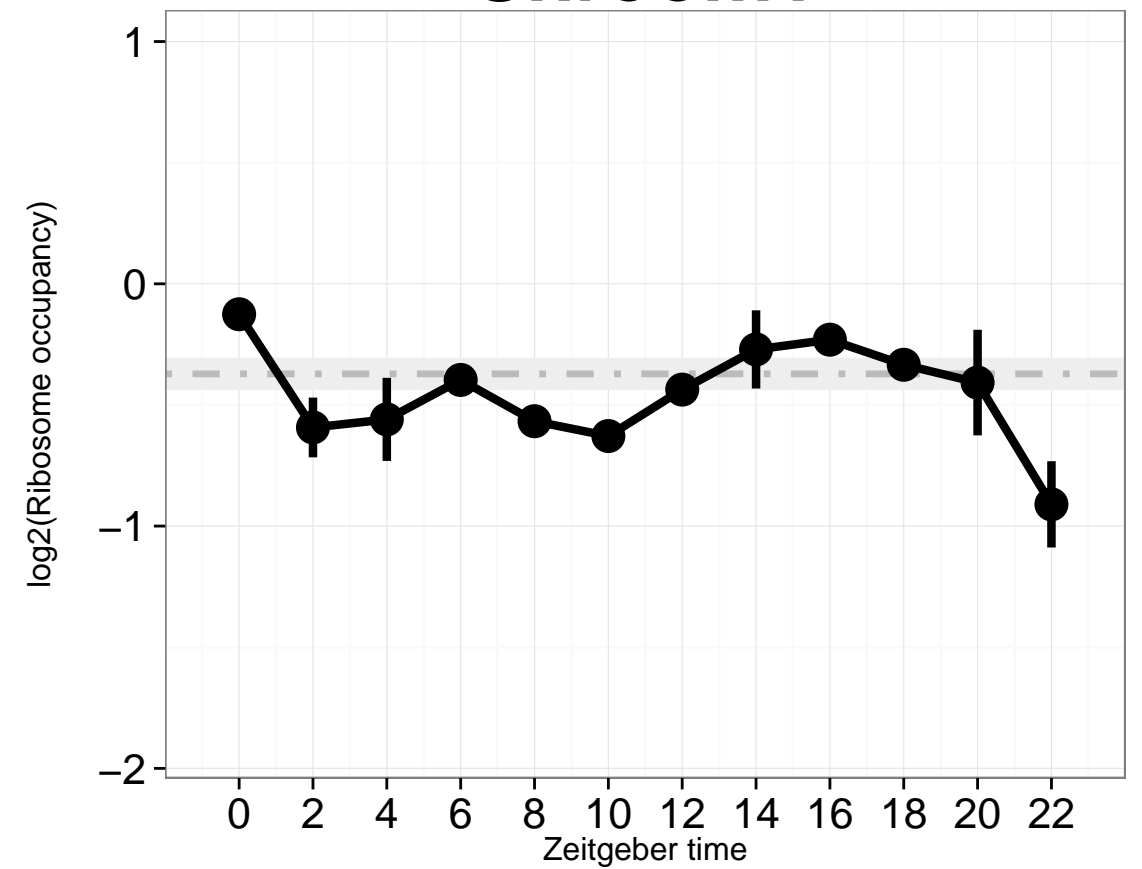

Supplement: SuppDataset_1.zip [file Shroom1_set_A.pdf › Supplemental Dataset 1/A-mRNA_nonrhyth_translation_nonrhyth/Shroom1_set_A.pdf]

## Shroom2

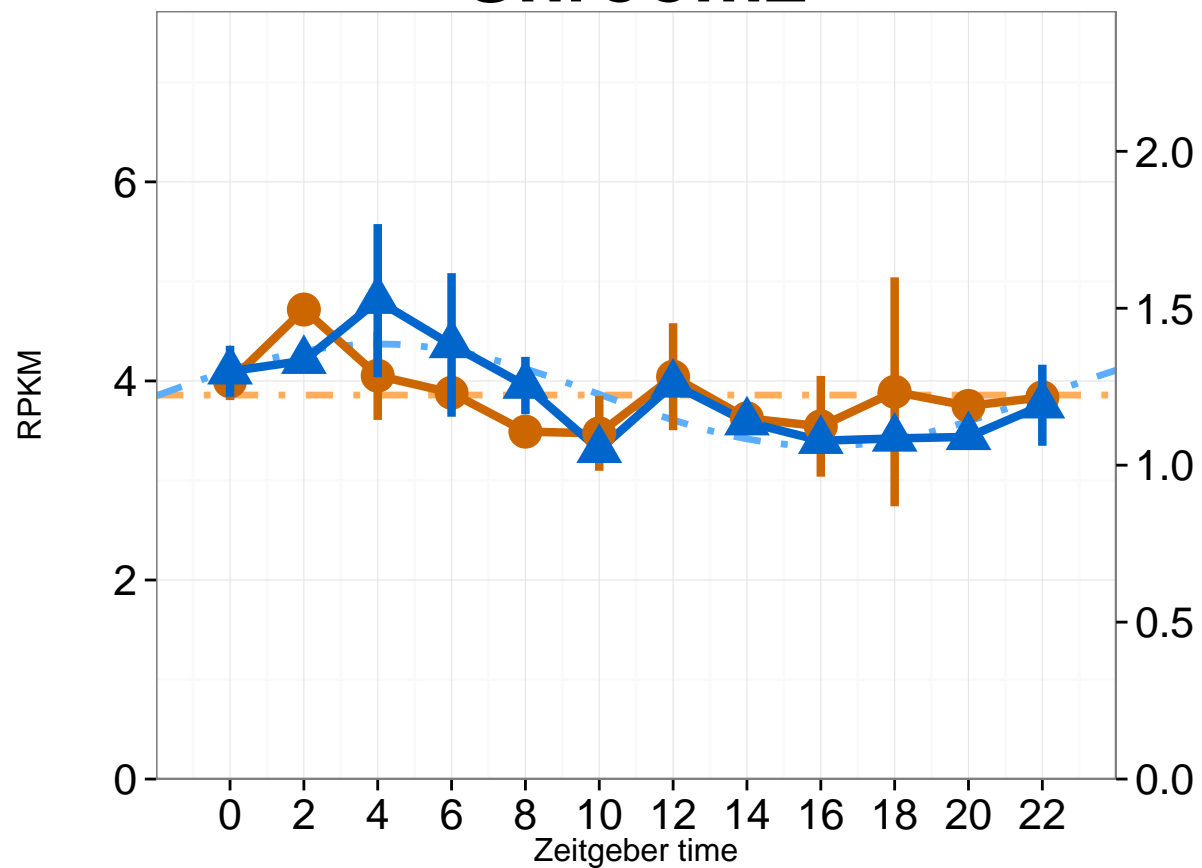

## Shroom2

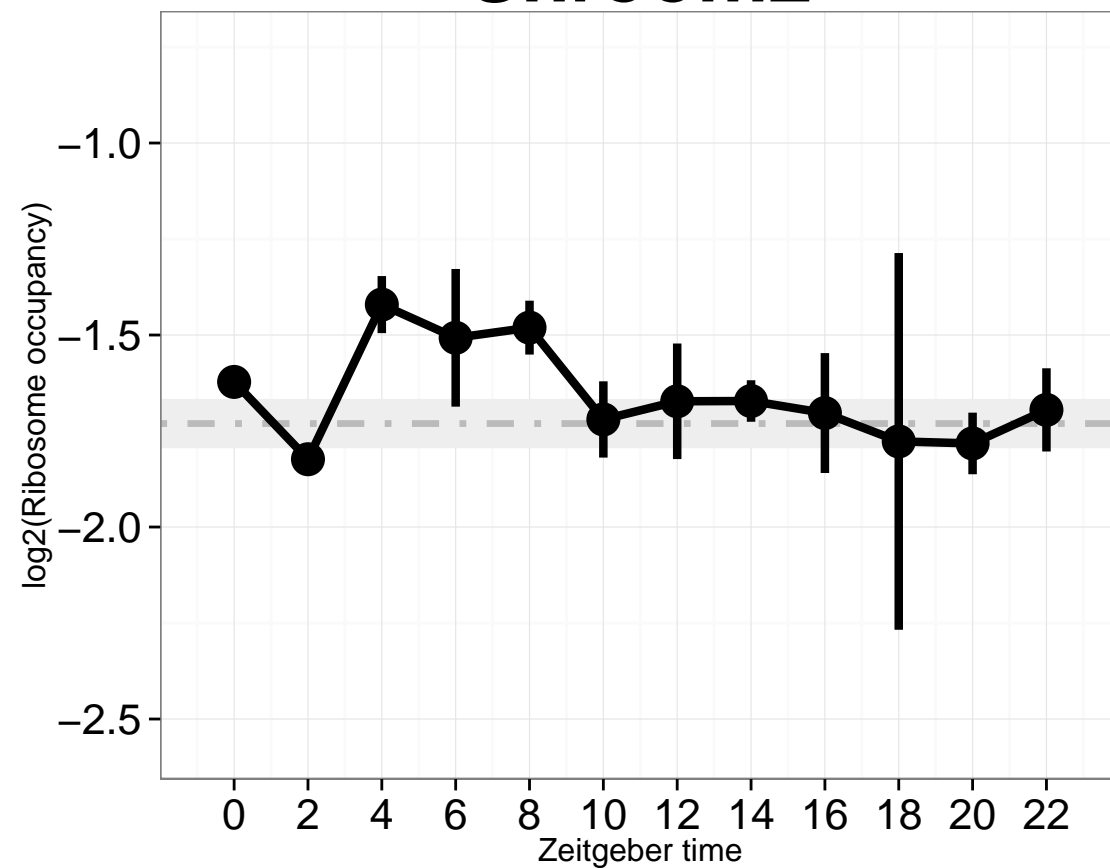

Supplement: SuppDataset_1.zip [file Shroom2_set_A.pdf › Supplemental Dataset 1/A-mRNA_nonrhyth_translation_nonrhyth/Shroom2_set_A.pdf]

## Shroom3

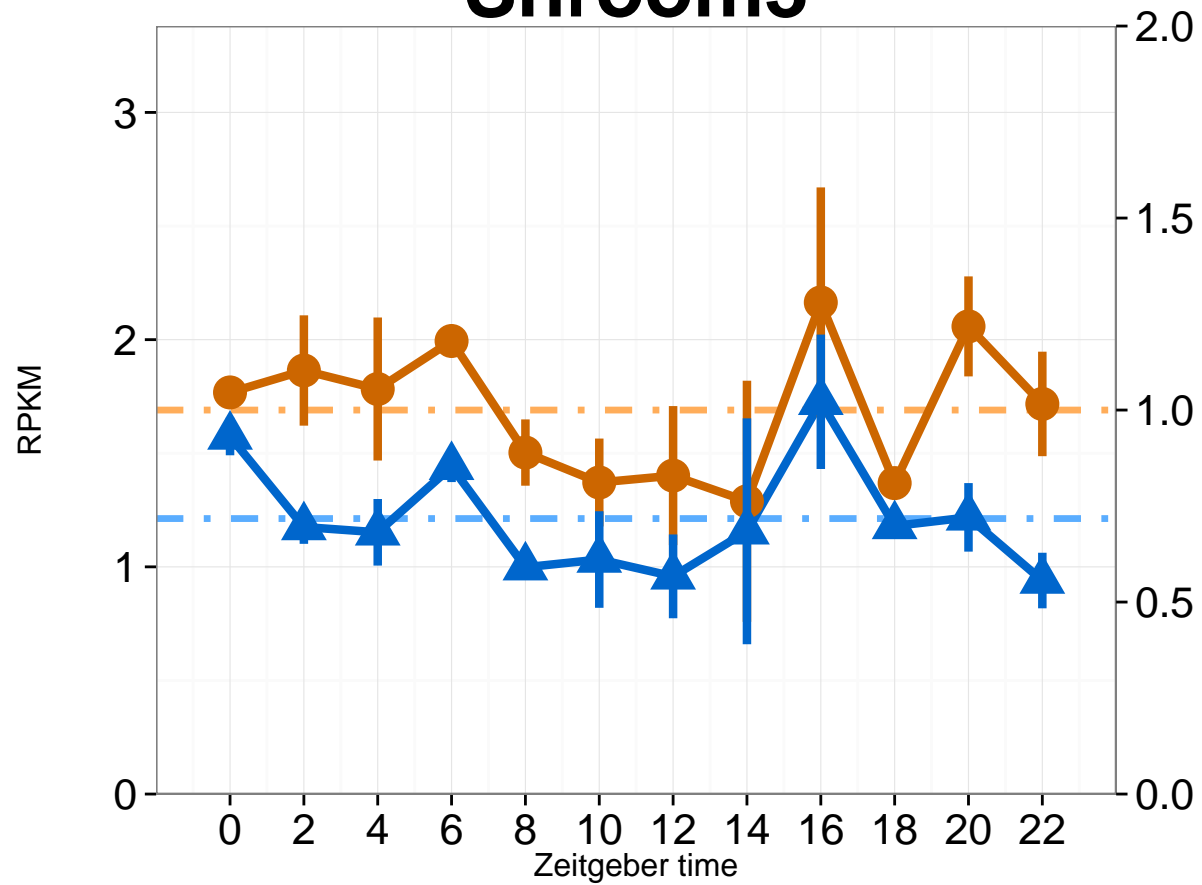

## Shroom3

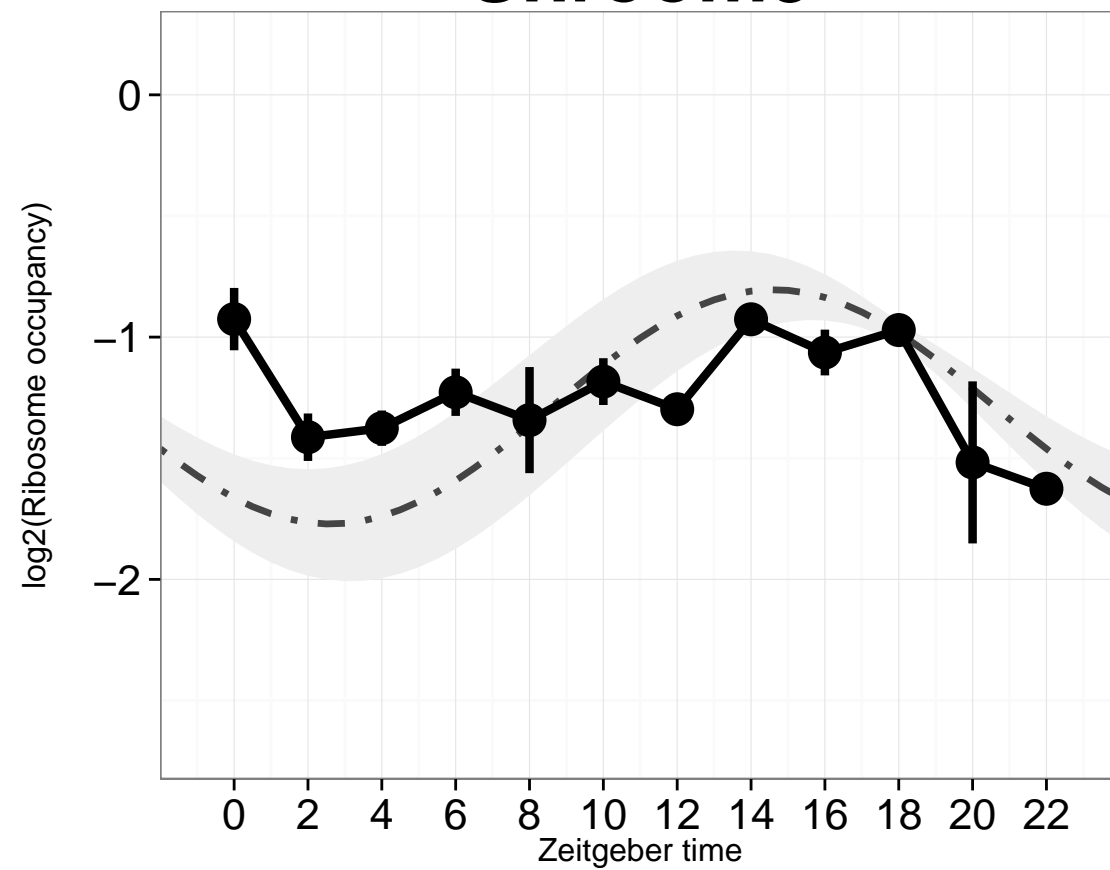

Supplement: SuppDataset_1.zip [file Shroom3_set_A.pdf › Supplemental Dataset 1/A-mRNA_nonrhyth_translation_nonrhyth/Shroom3_set_A.pdf]

## Siae

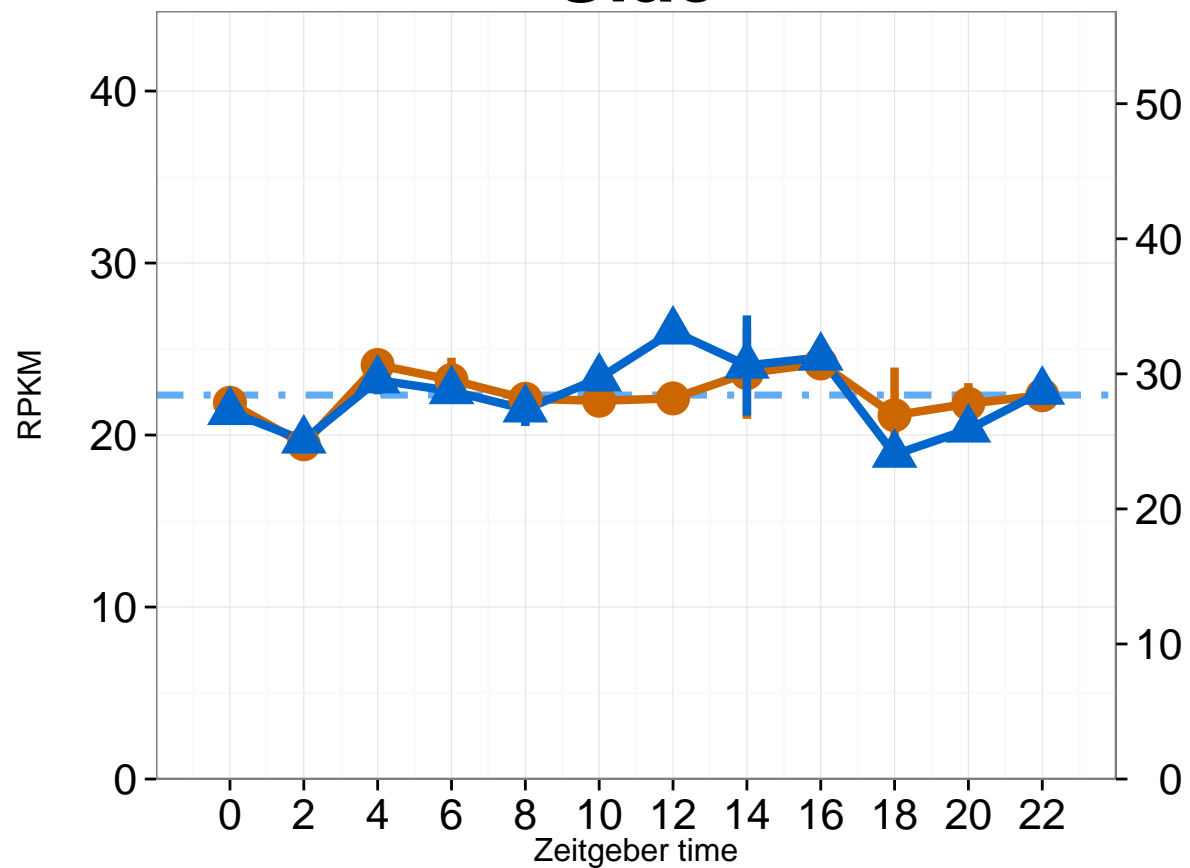

## Siae

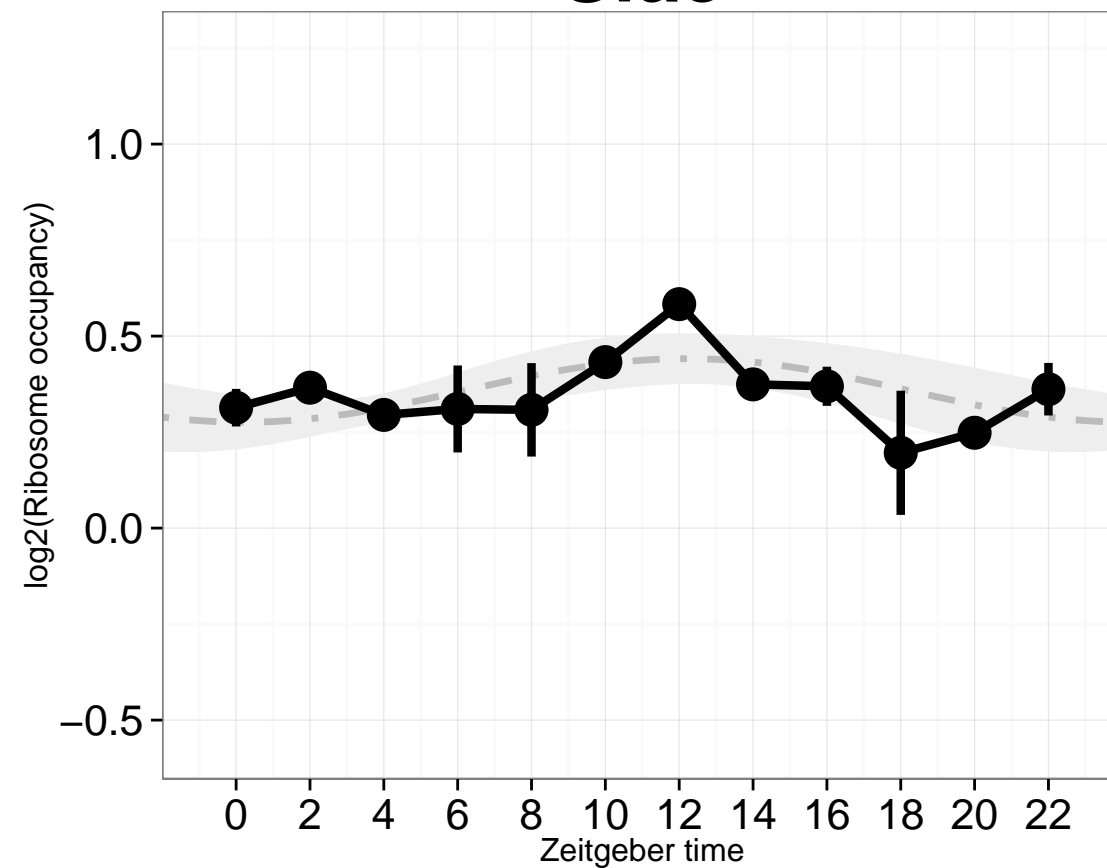

Supplement: SuppDataset_1.zip [file Siae_set_A.pdf › Supplemental Dataset 1/A-mRNA_nonrhyth_translation_nonrhyth/Siae_set_A.pdf]

# Siah1a

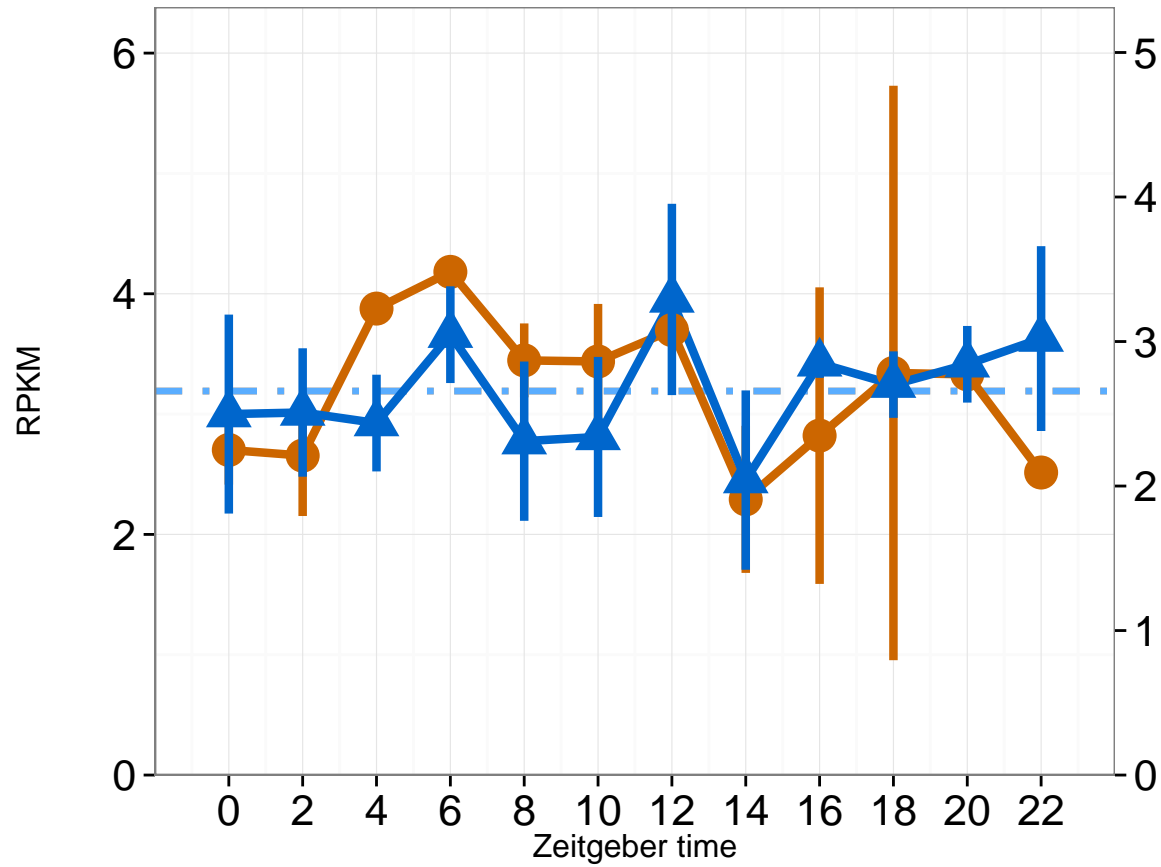

# Siah1a

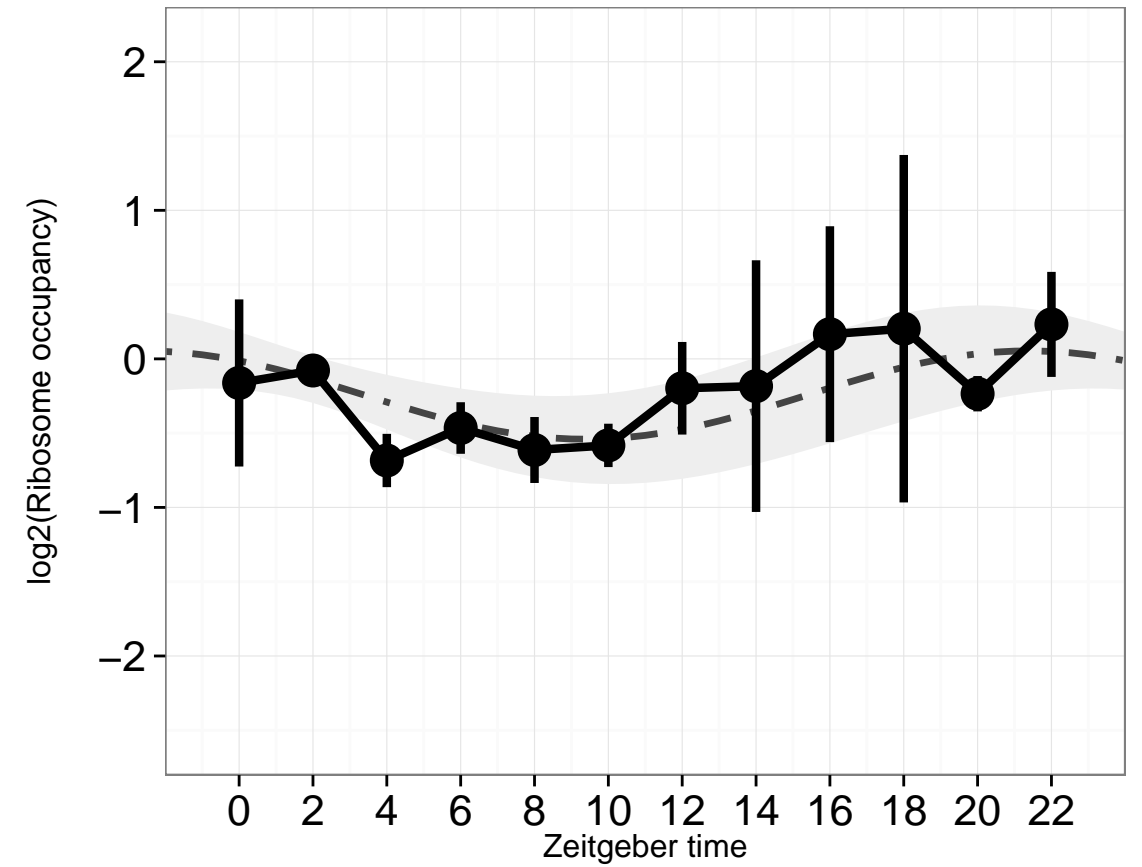

Supplement: SuppDataset_1.zip [file Siah1a_set_A.pdf › Supplemental Dataset 1/A-mRNA_nonrhyth_translation_nonrhyth/Siah1a_set_A.pdf]

## Siah2

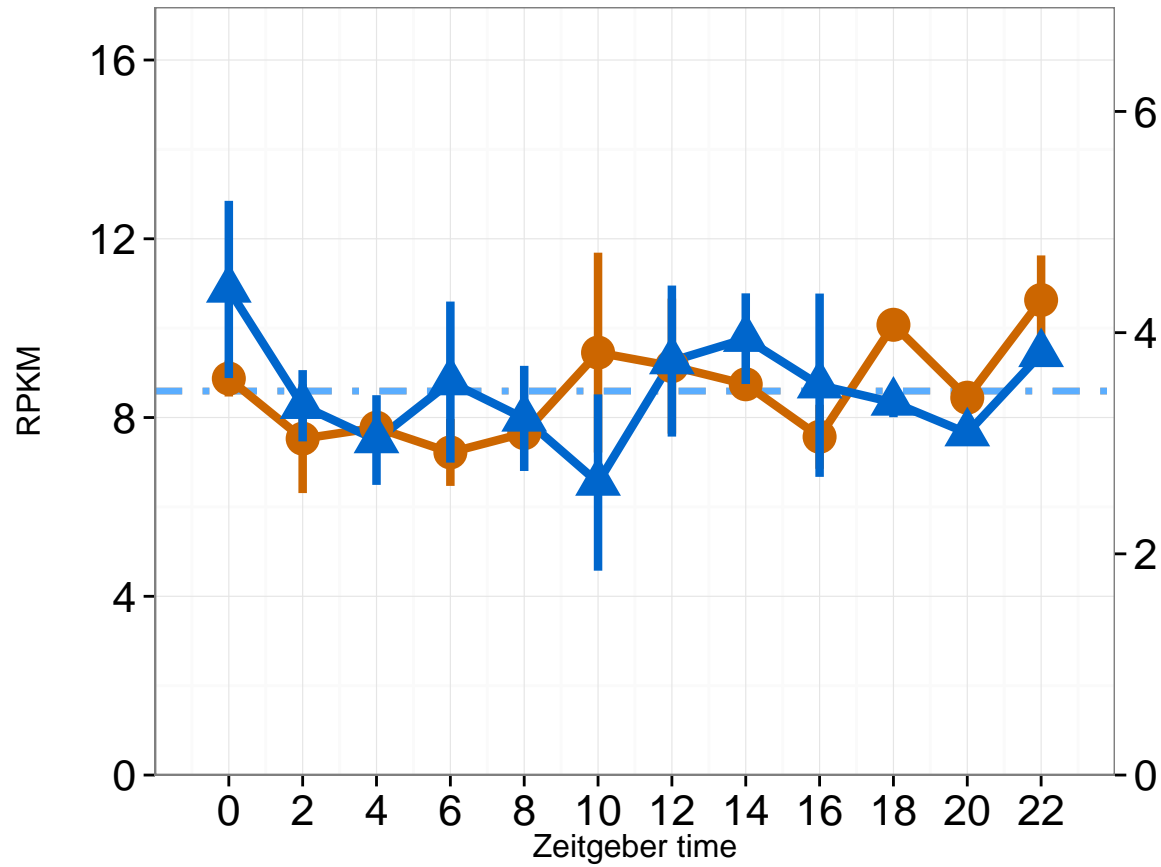

## Siah2

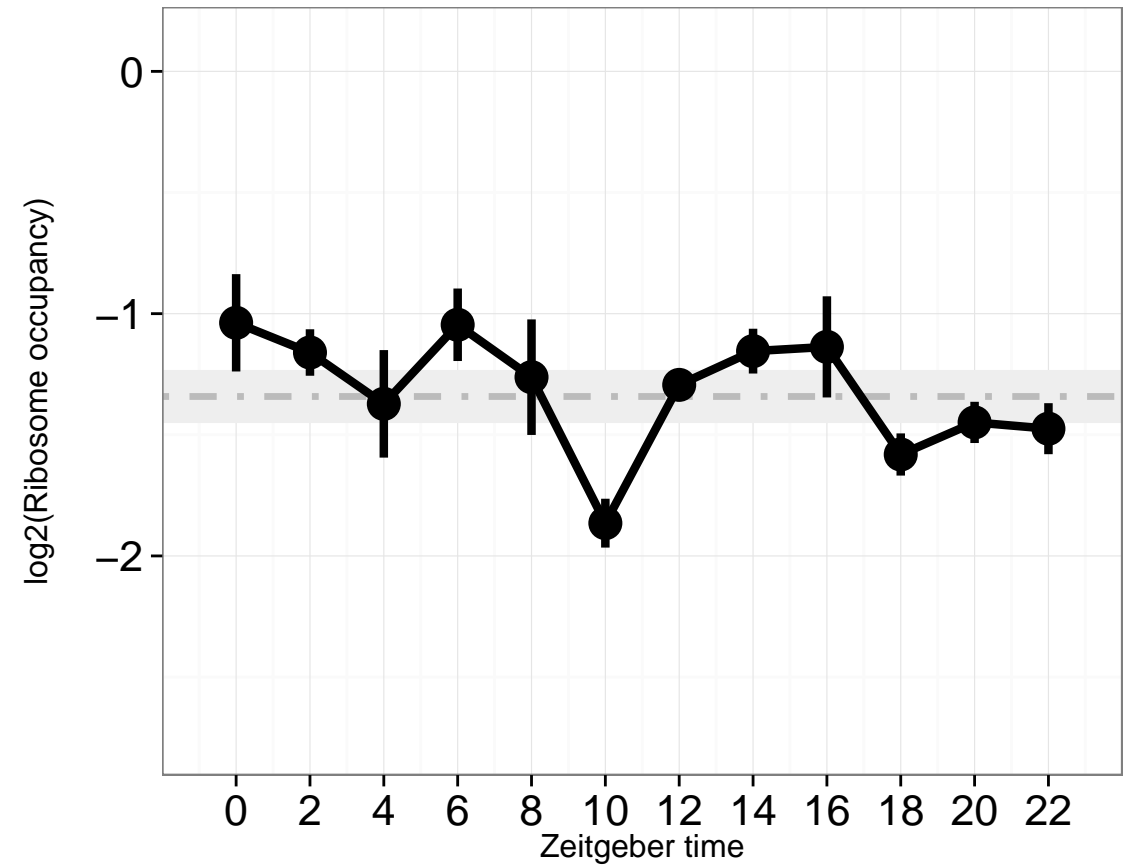

Supplement: SuppDataset_1.zip [file Siah2_set_A.pdf › Supplemental Dataset 1/A-mRNA_nonrhyth_translation_nonrhyth/Siah2_set_A.pdf]

## Sidt2

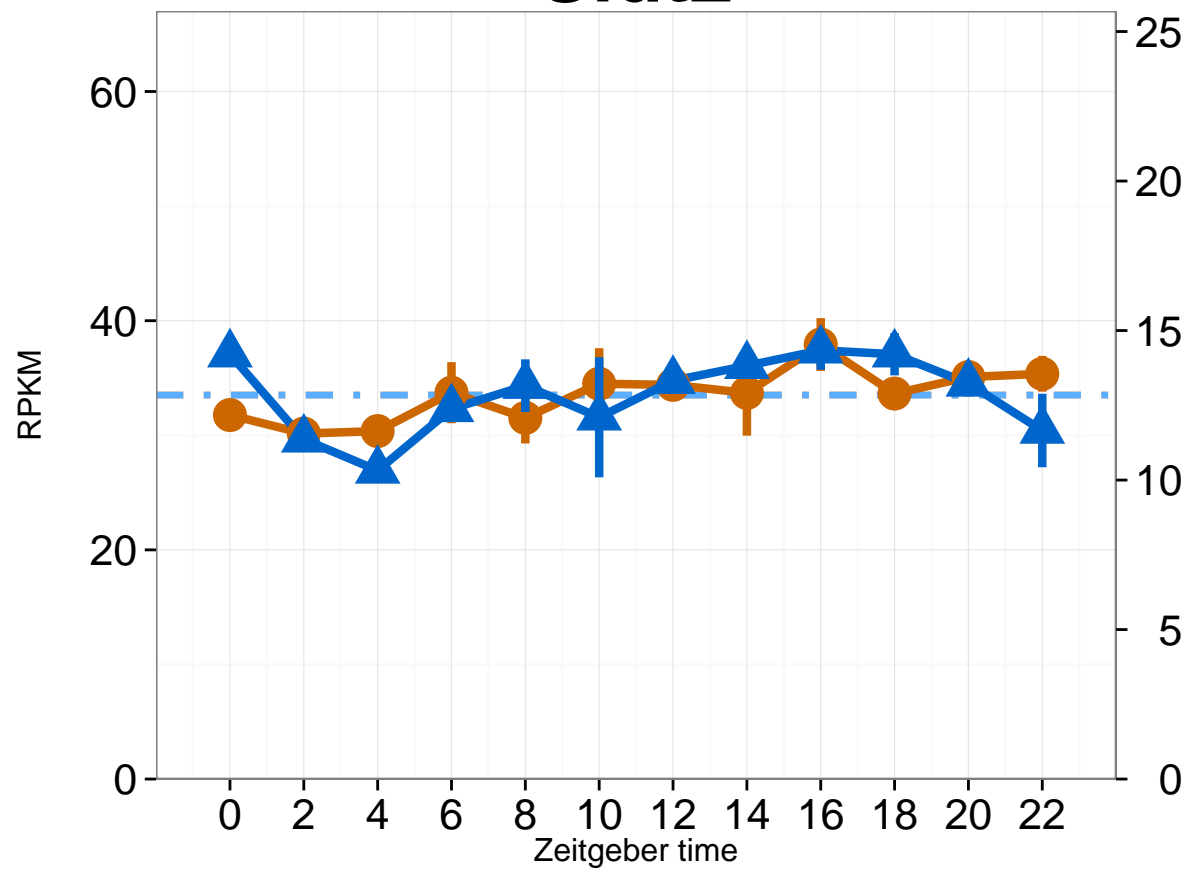

## Sidt2

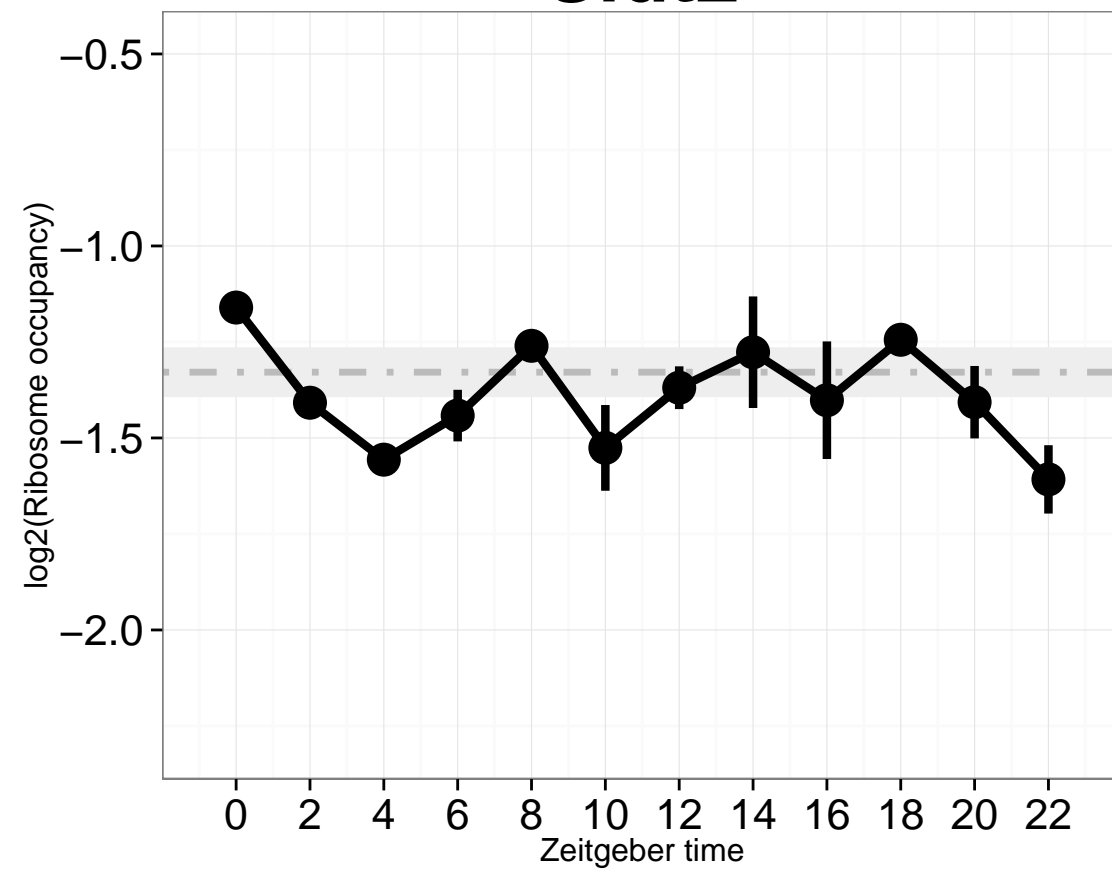

Supplement: SuppDataset_1.zip [file Sidt2_set_A.pdf › Supplemental Dataset 1/A-mRNA_nonrhyth_translation_nonrhyth/Sidt2_set_A.pdf]

## Siglec1

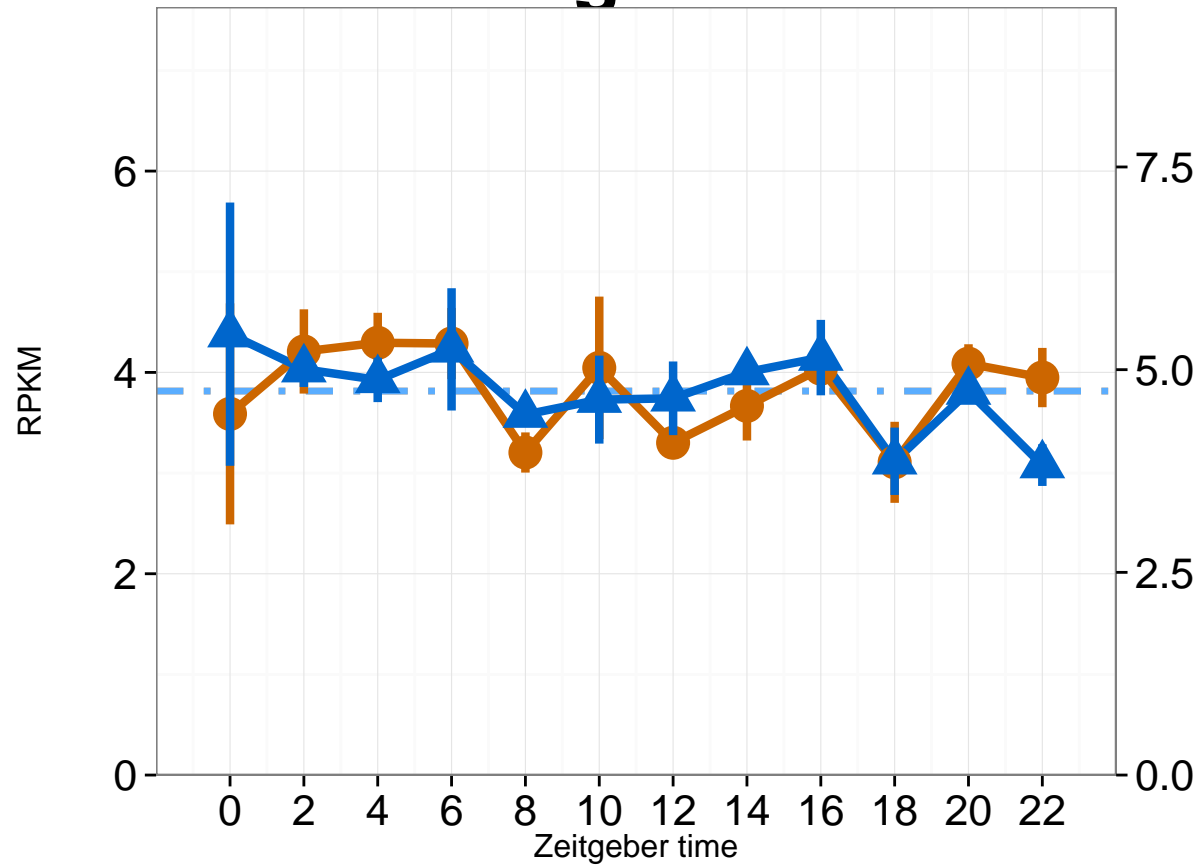

## Siglec1

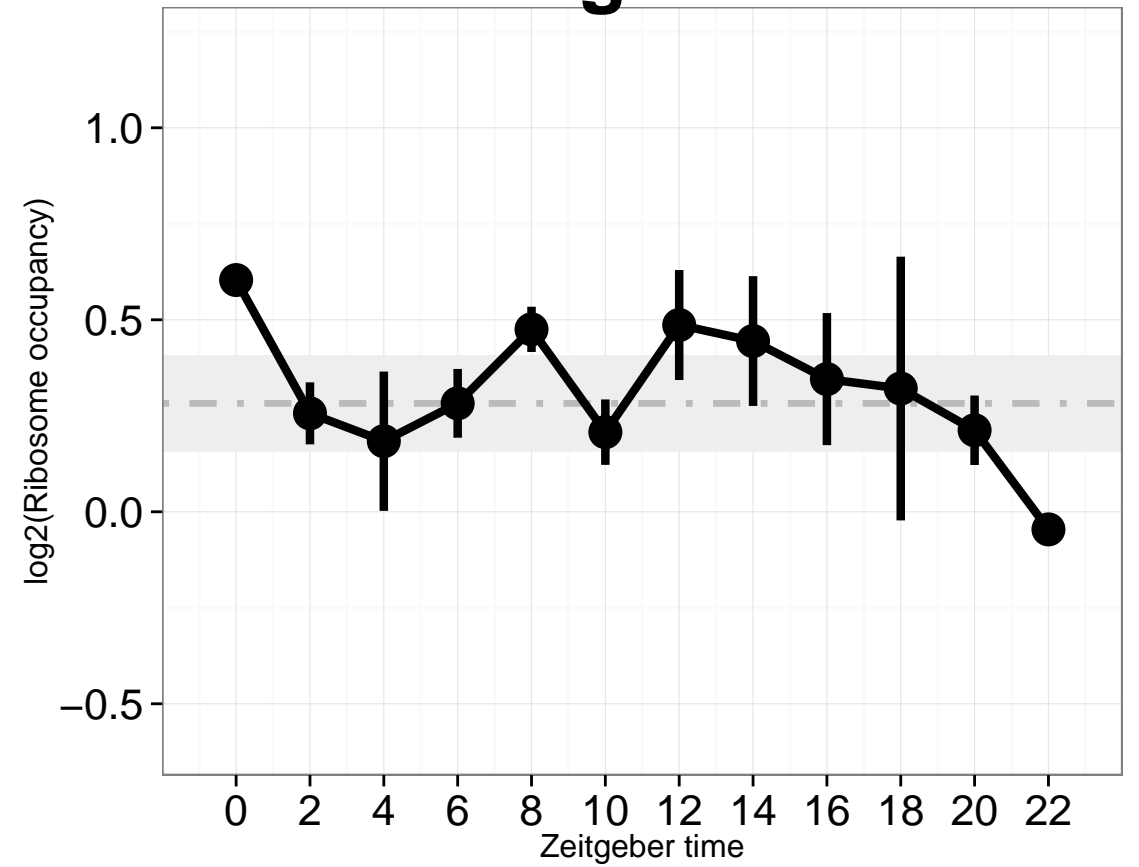

Supplement: SuppDataset_1.zip [file Siglec1_set_A.pdf › Supplemental Dataset 1/A-mRNA_nonrhyth_translation_nonrhyth/Siglec1_set_A.pdf]

## Siglece

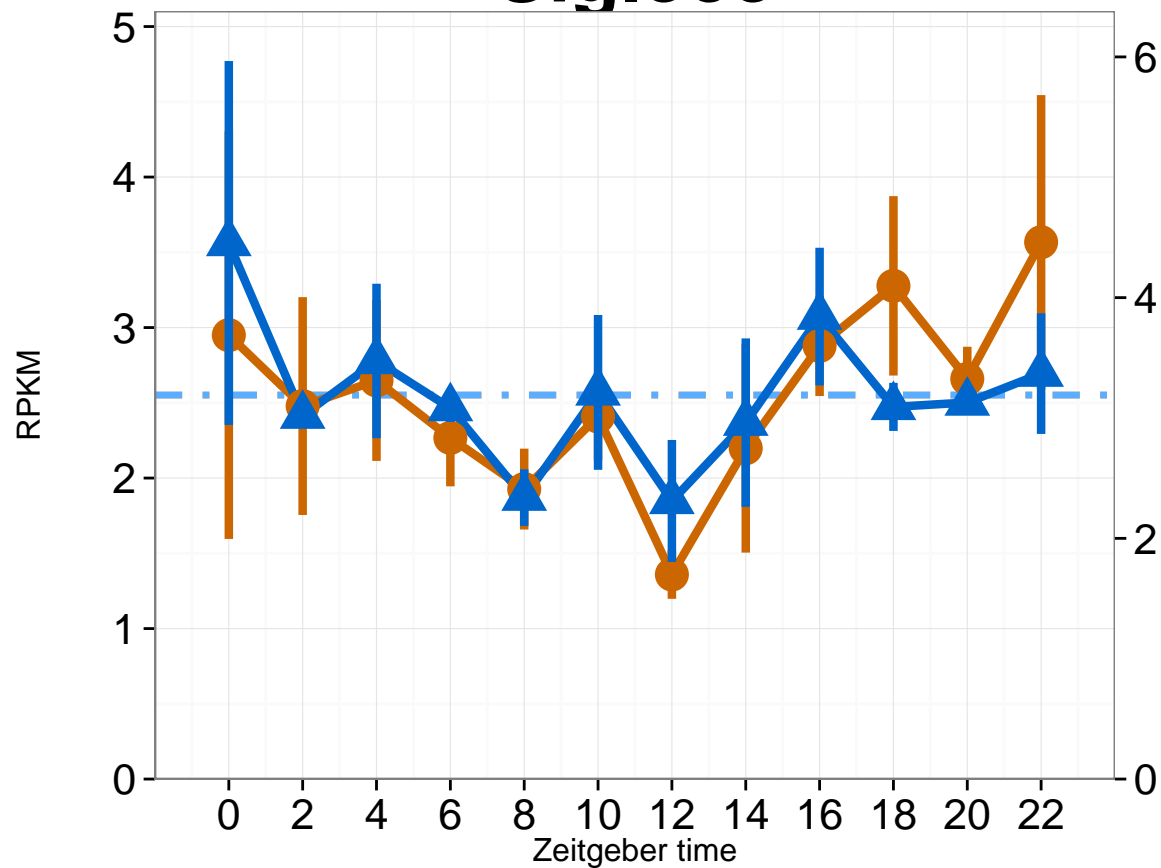

## Siglece

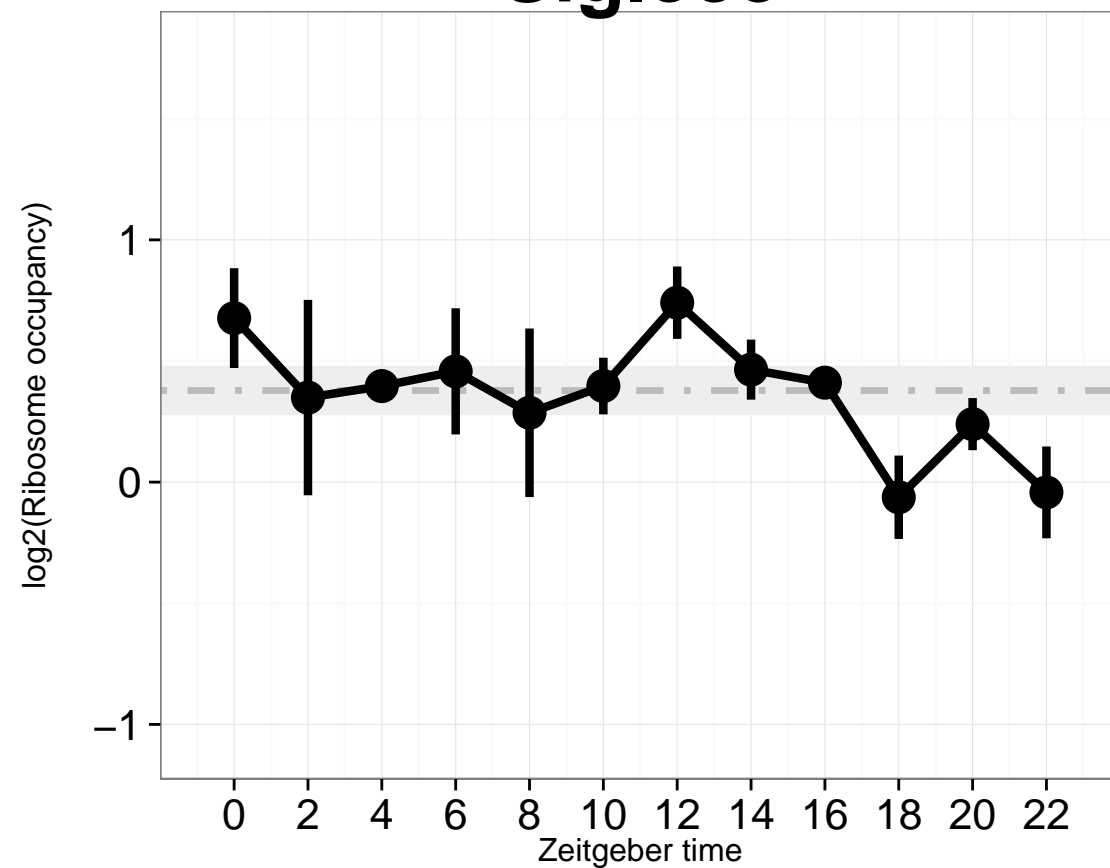

Supplement: SuppDataset_1.zip [file Siglece_set_A.pdf › Supplemental Dataset 1/A-mRNA_nonrhyth_translation_nonrhyth/Siglece_set_A.pdf]

## Sik1

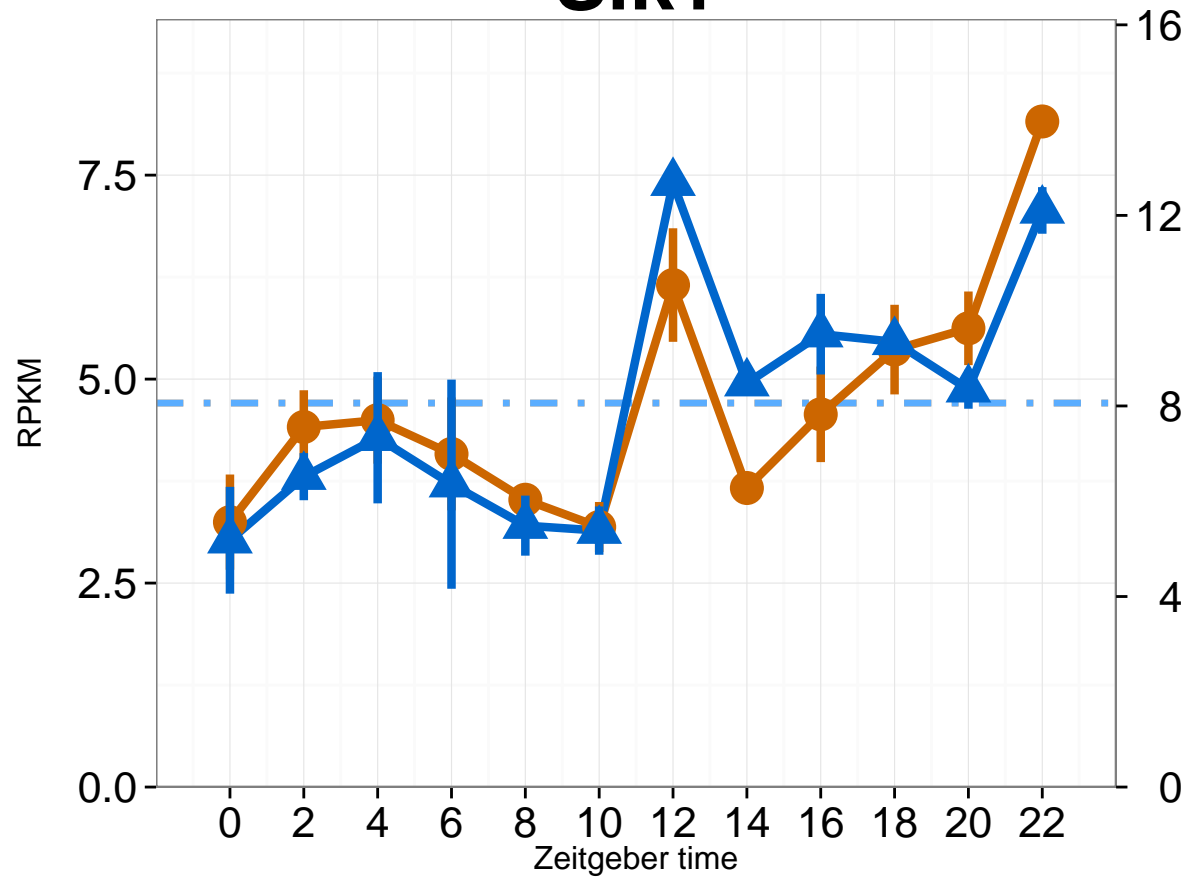

## Sik1

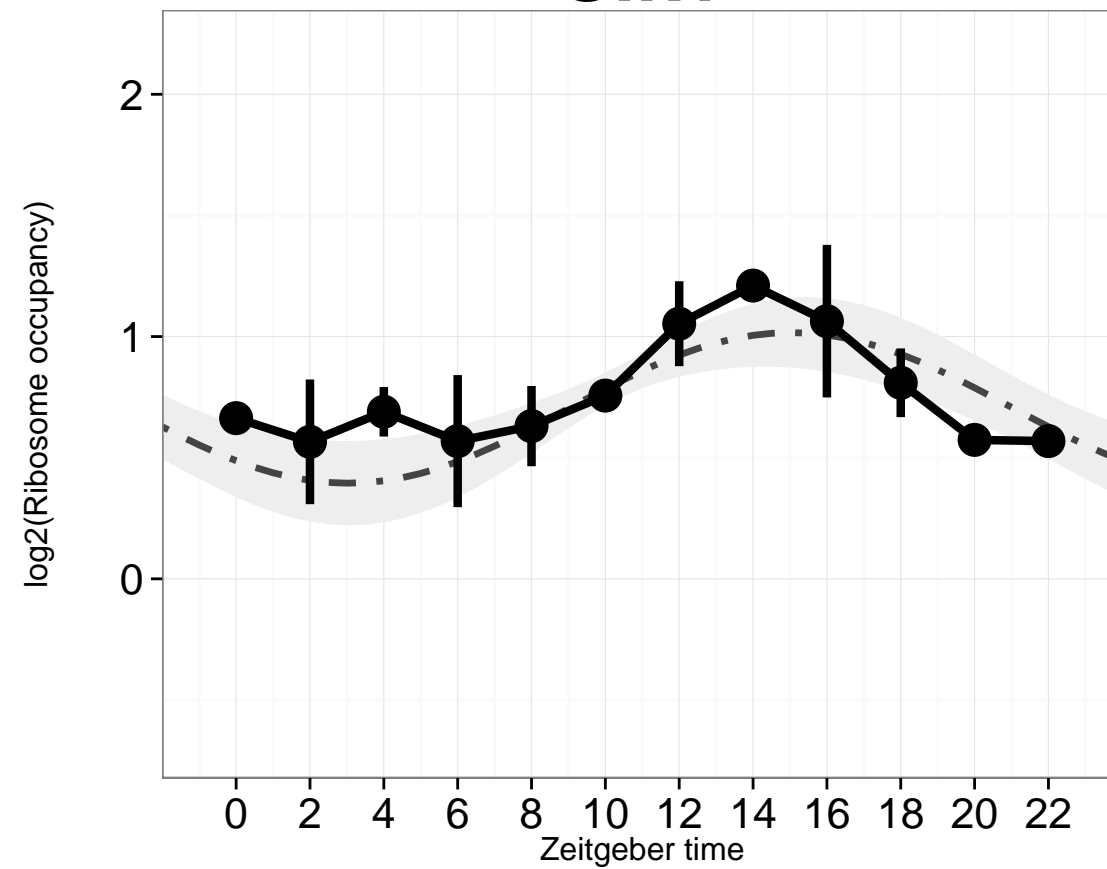

Supplement: SuppDataset_1.zip [file Sik1_set_A.pdf › Supplemental Dataset 1/A-mRNA_nonrhyth_translation_nonrhyth/Sik1_set_A.pdf]

## Sik2

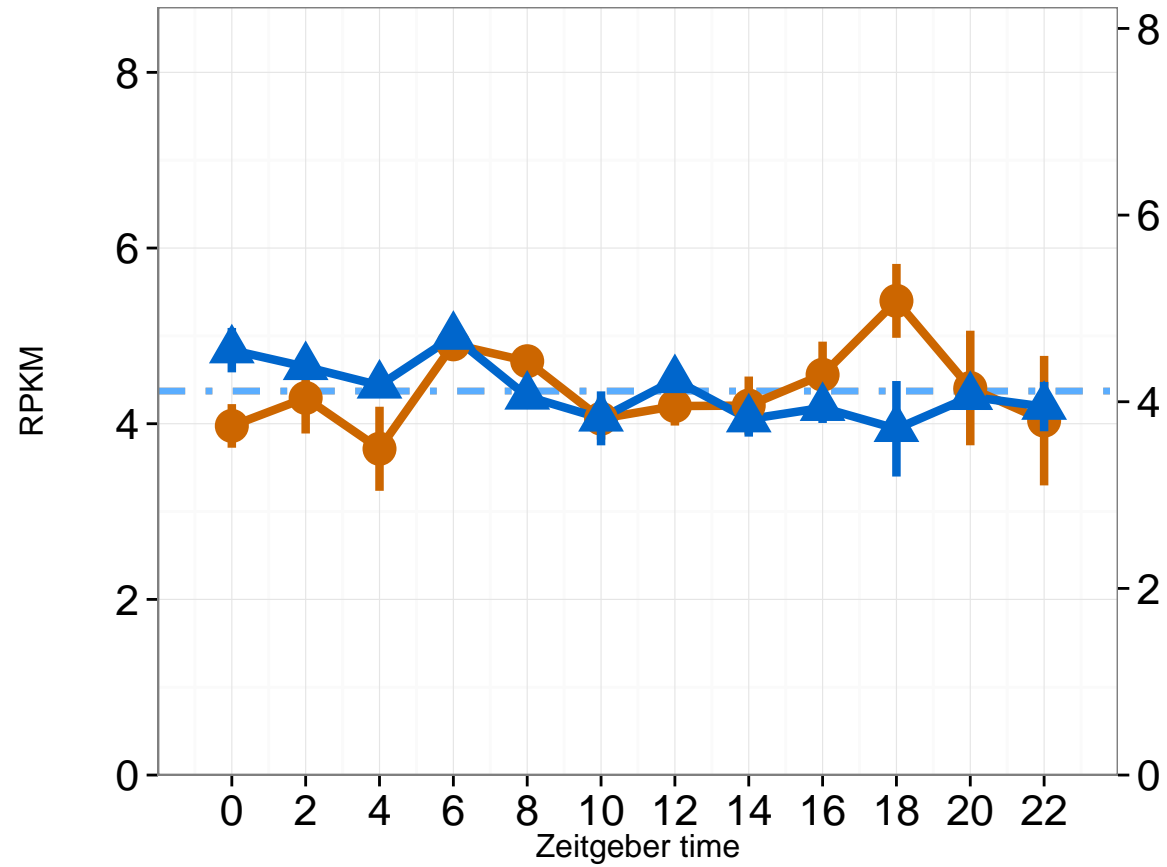

## Sik2

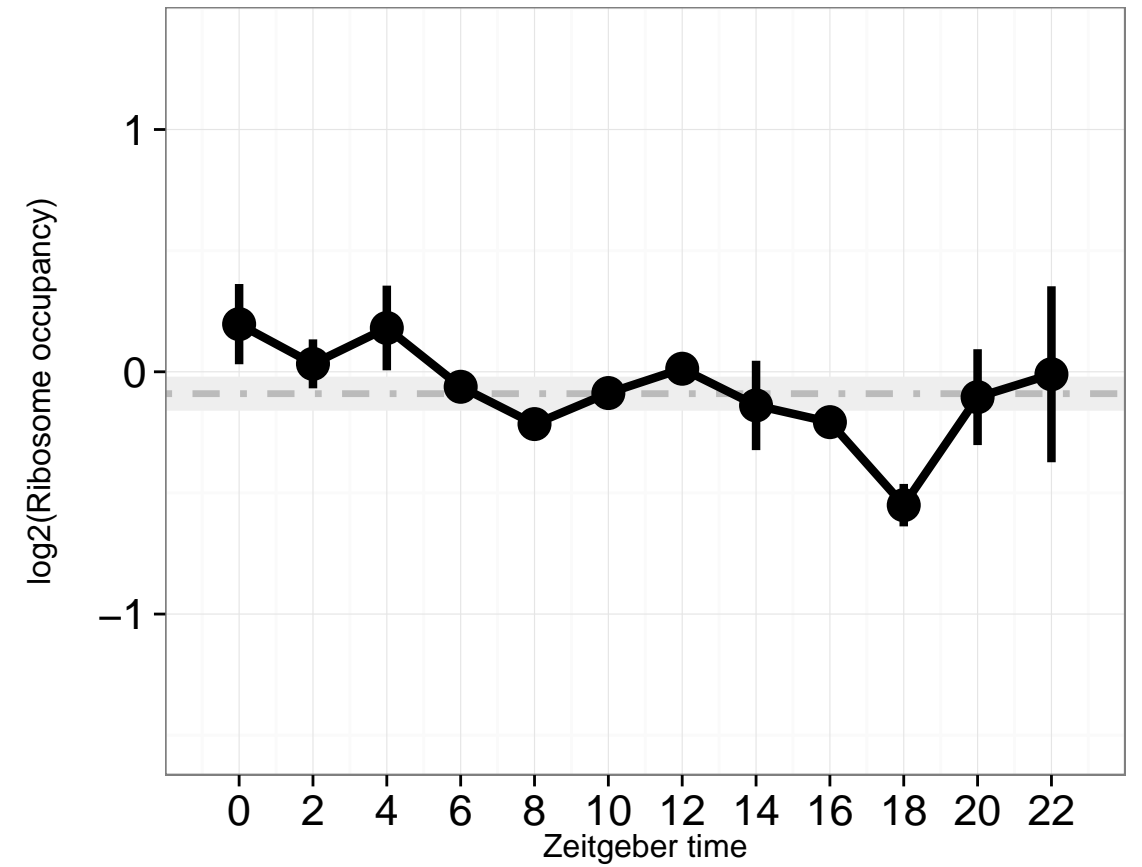

Supplement: SuppDataset_1.zip [file Sik2_set_A.pdf › Supplemental Dataset 1/A-mRNA_nonrhyth_translation_nonrhyth/Sik2_set_A.pdf]

## Sik3

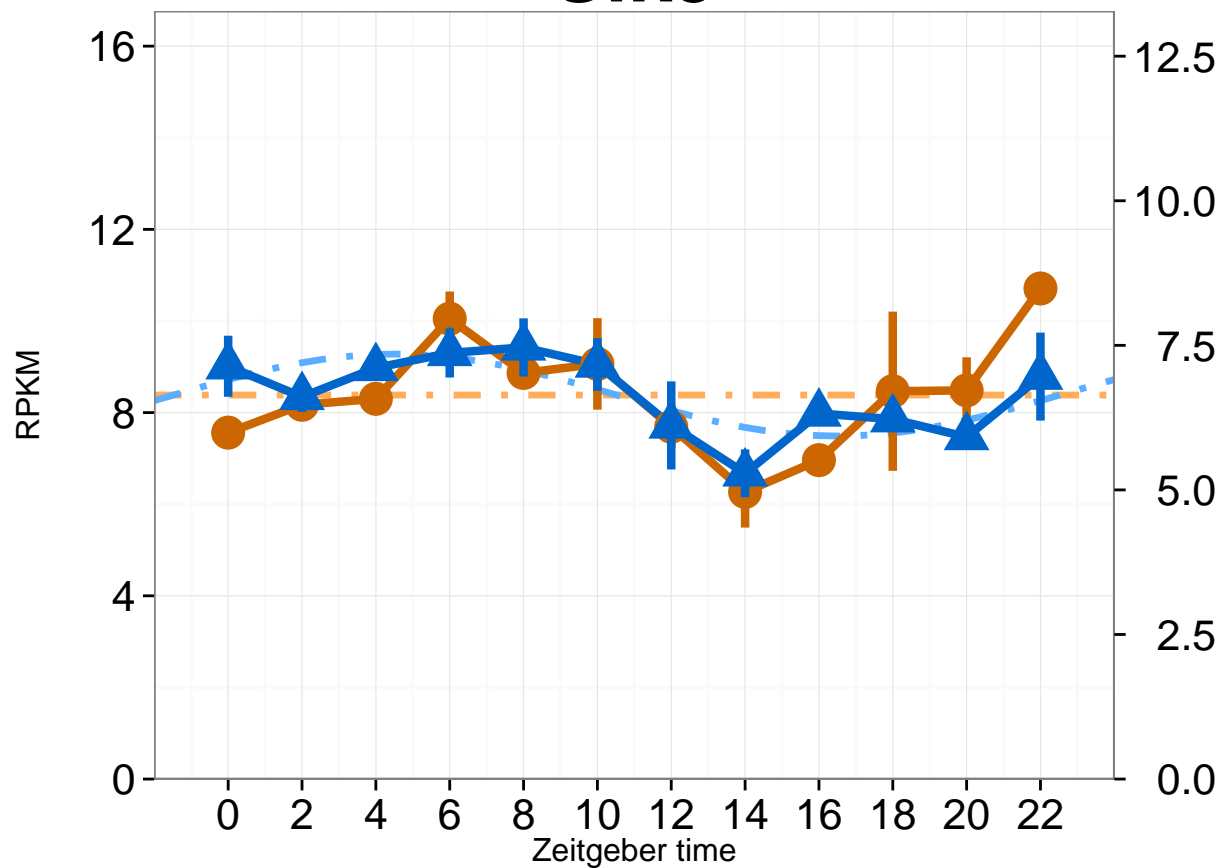

## Sik3

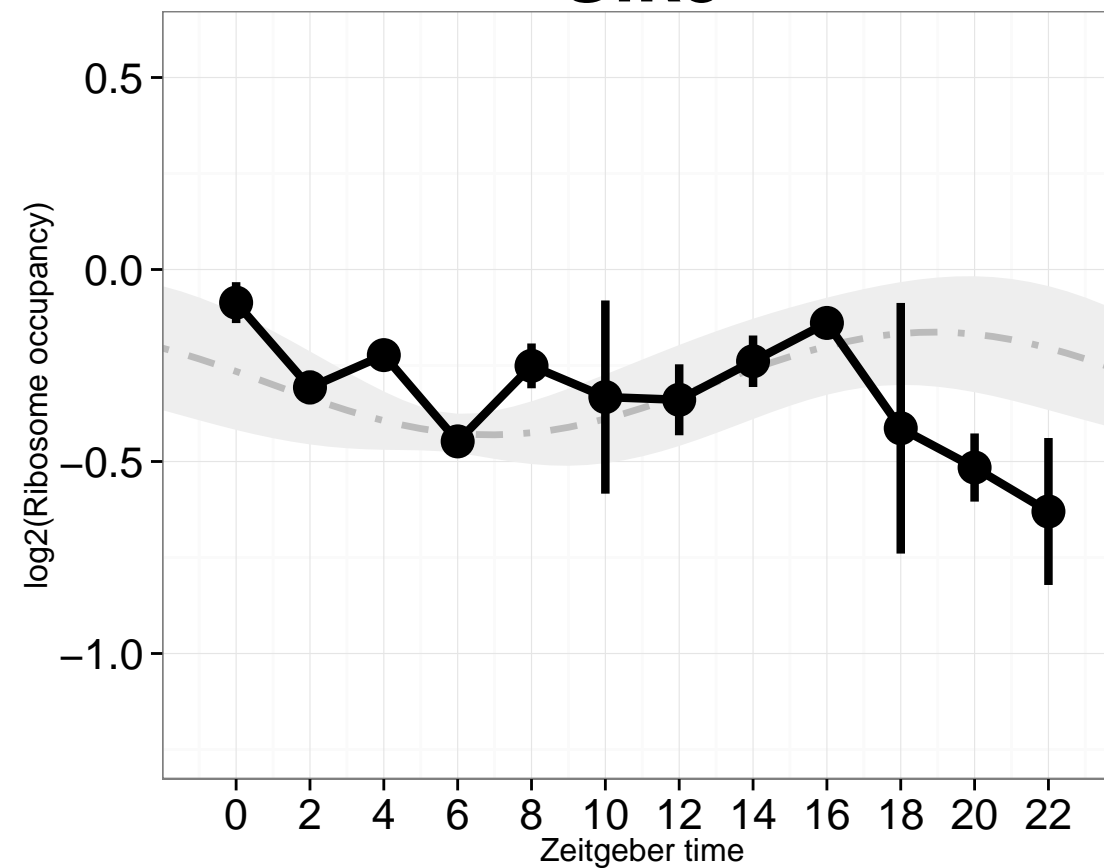

Supplement: SuppDataset_1.zip [file Sik3_set_A.pdf › Supplemental Dataset 1/A-mRNA_nonrhyth_translation_nonrhyth/Sik3_set_A.pdf]

# Sike1

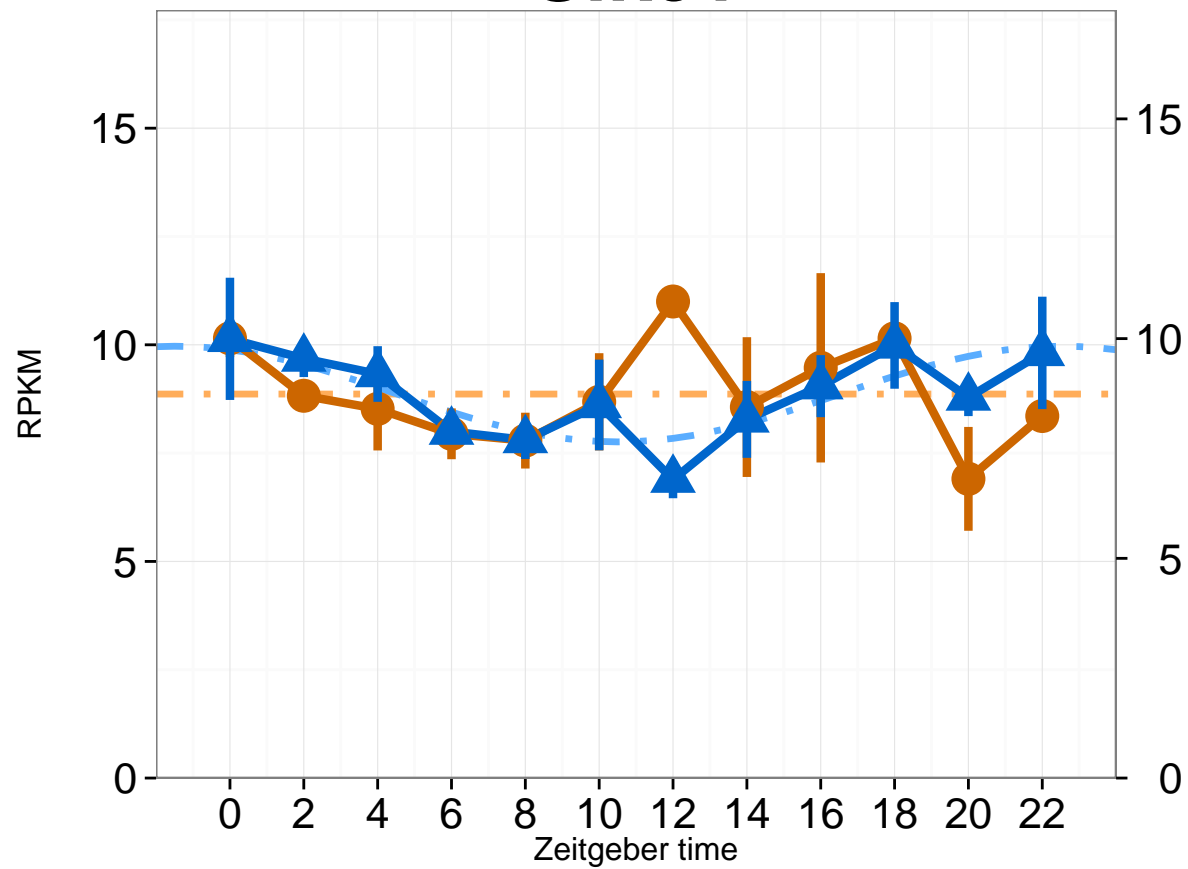

# Sike1

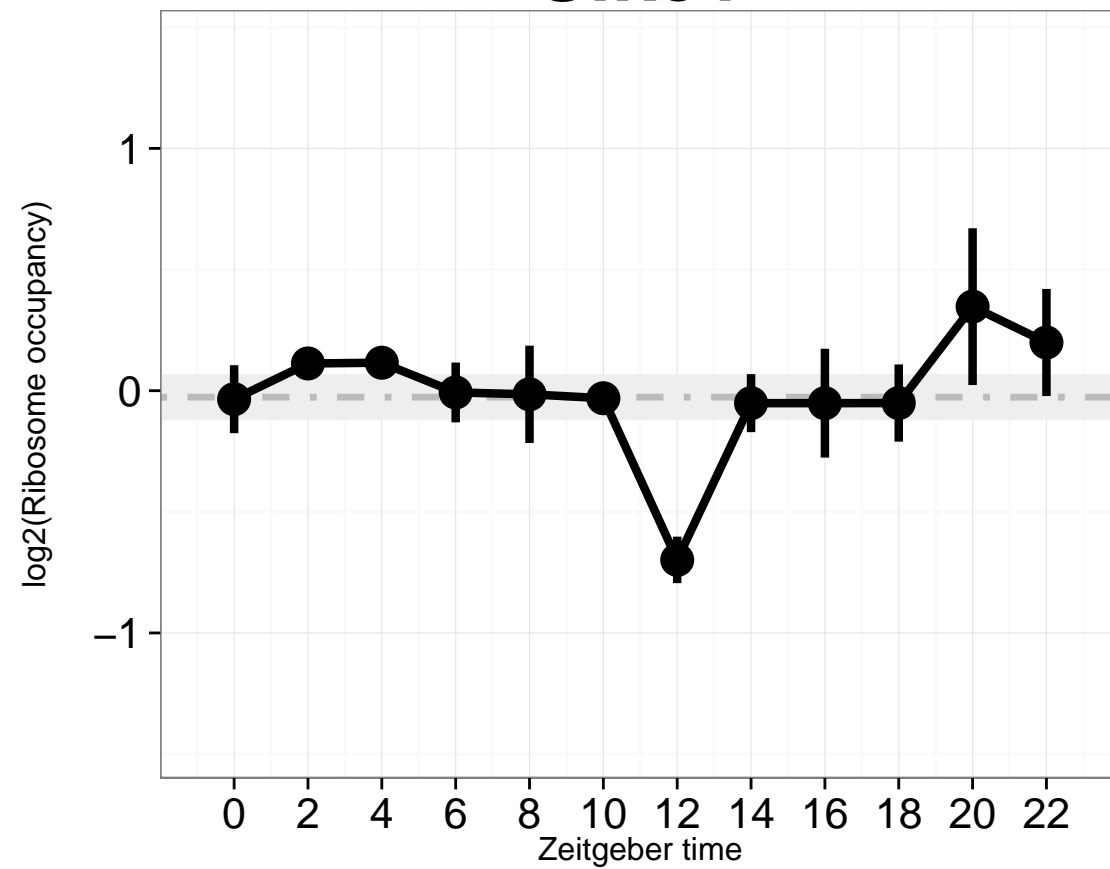

Supplement: SuppDataset_1.zip [file Sike1_set_A.pdf › Supplemental Dataset 1/A-mRNA_nonrhyth_translation_nonrhyth/Sike1_set_A.pdf]

## Si1

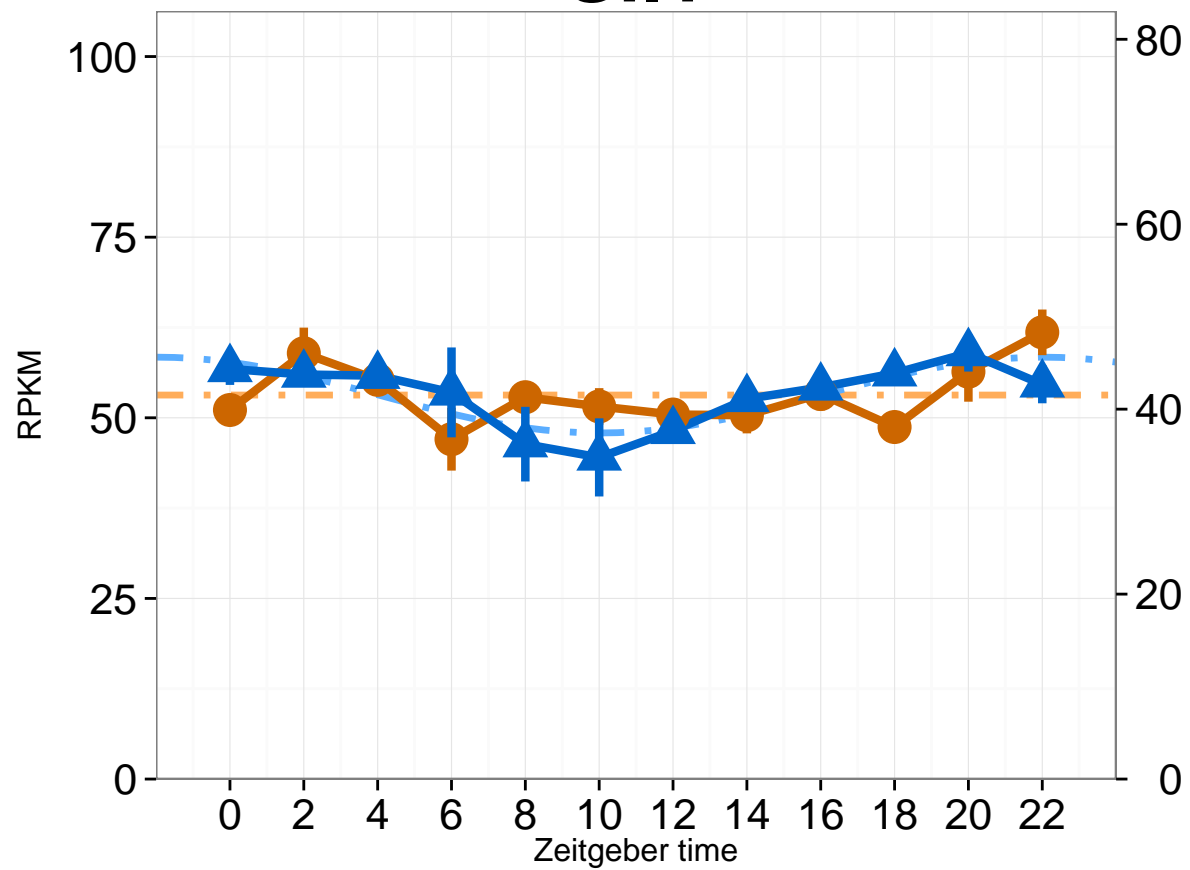

## Si1

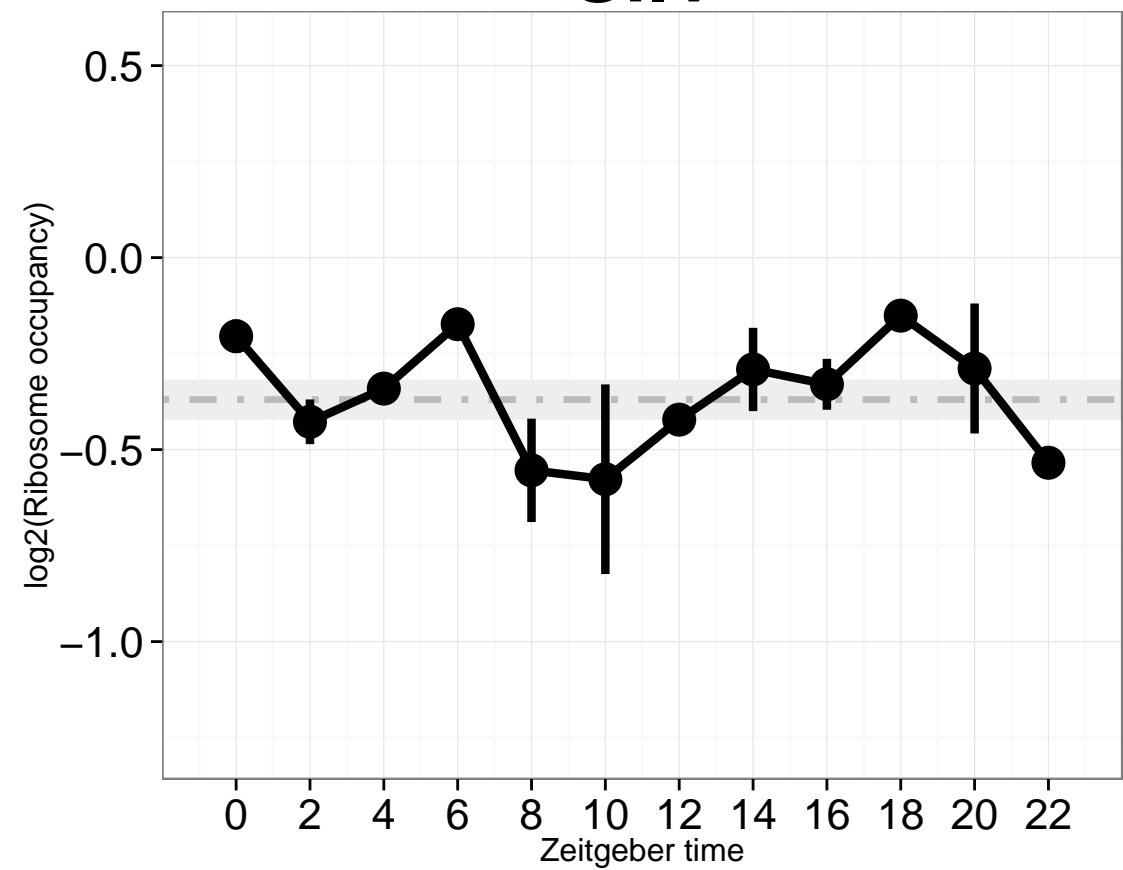

Supplement: SuppDataset_1.zip [file Sil1_set_A.pdf › Supplemental Dataset 1/A-mRNA_nonrhyth_translation_nonrhyth/Sil1_set_A.pdf]

## Simc1

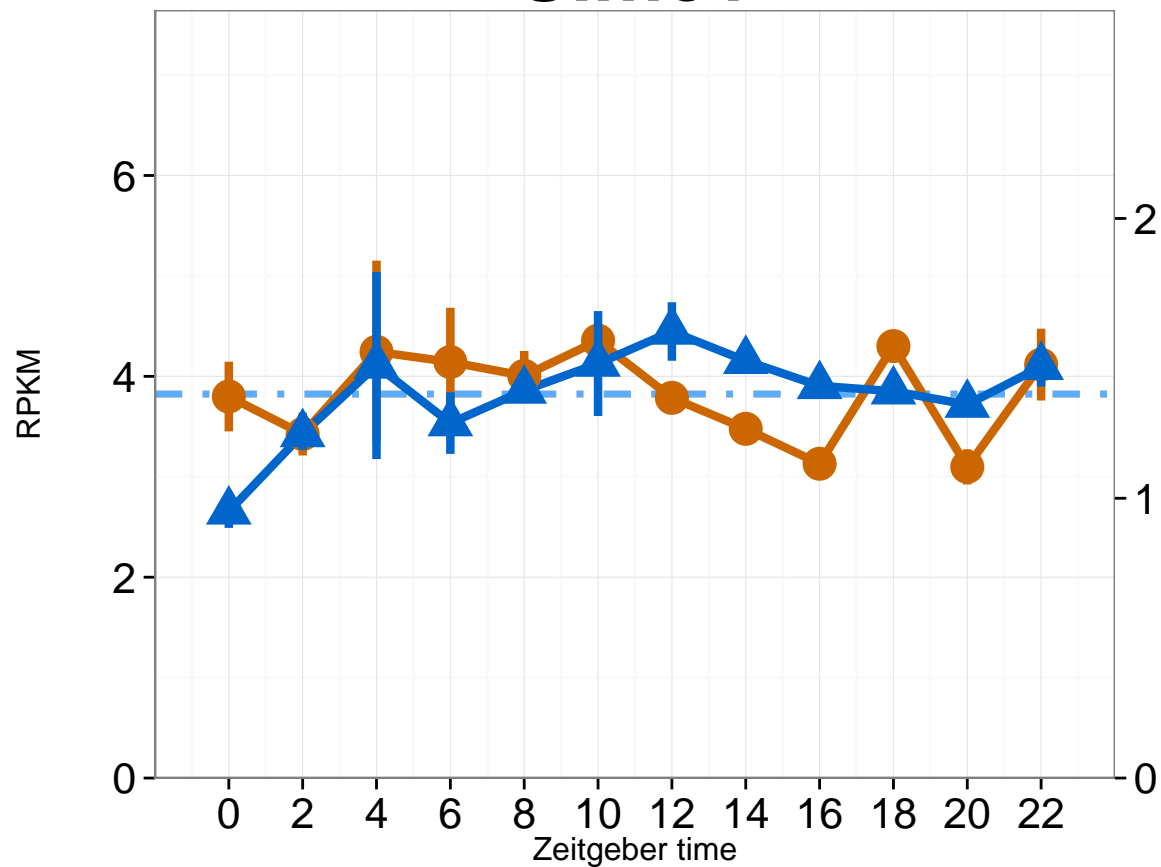

## Simc1

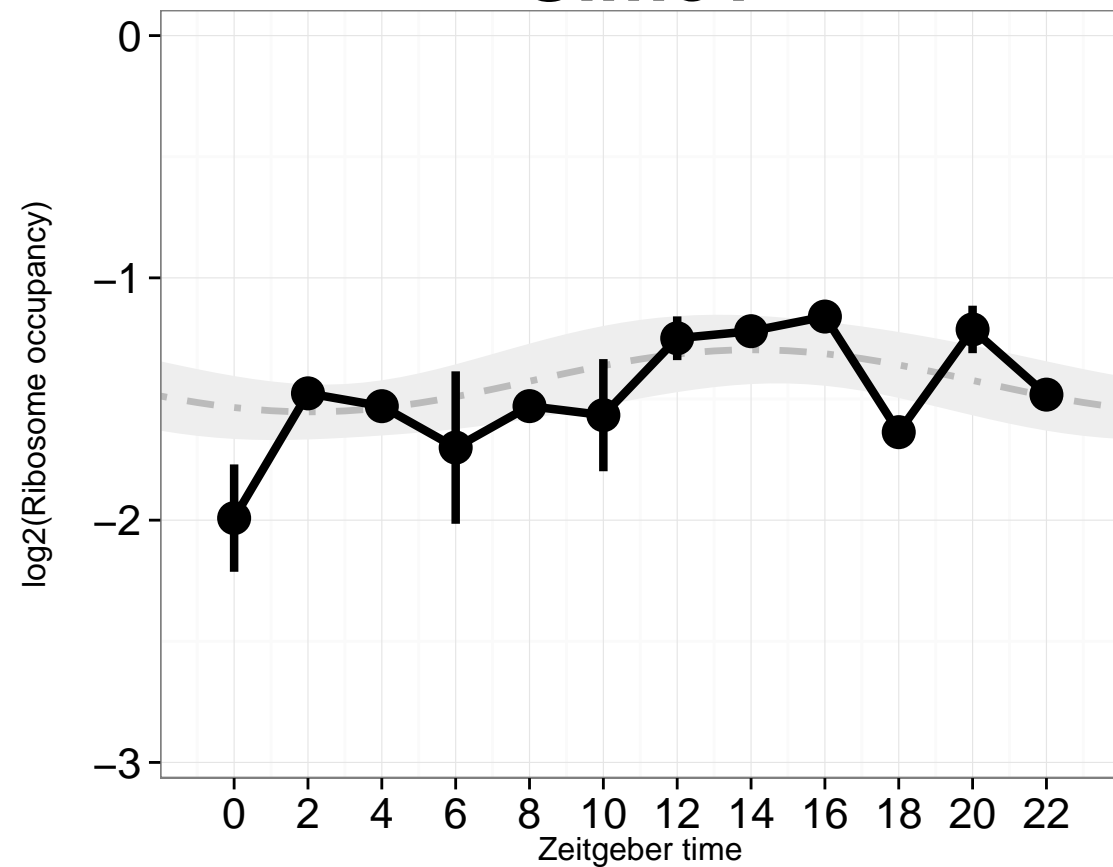

Supplement: SuppDataset_1.zip [file Simc1_set_A.pdf › Supplemental Dataset 1/A-mRNA_nonrhyth_translation_nonrhyth/Simc1_set_A.pdf]

## Sin3a

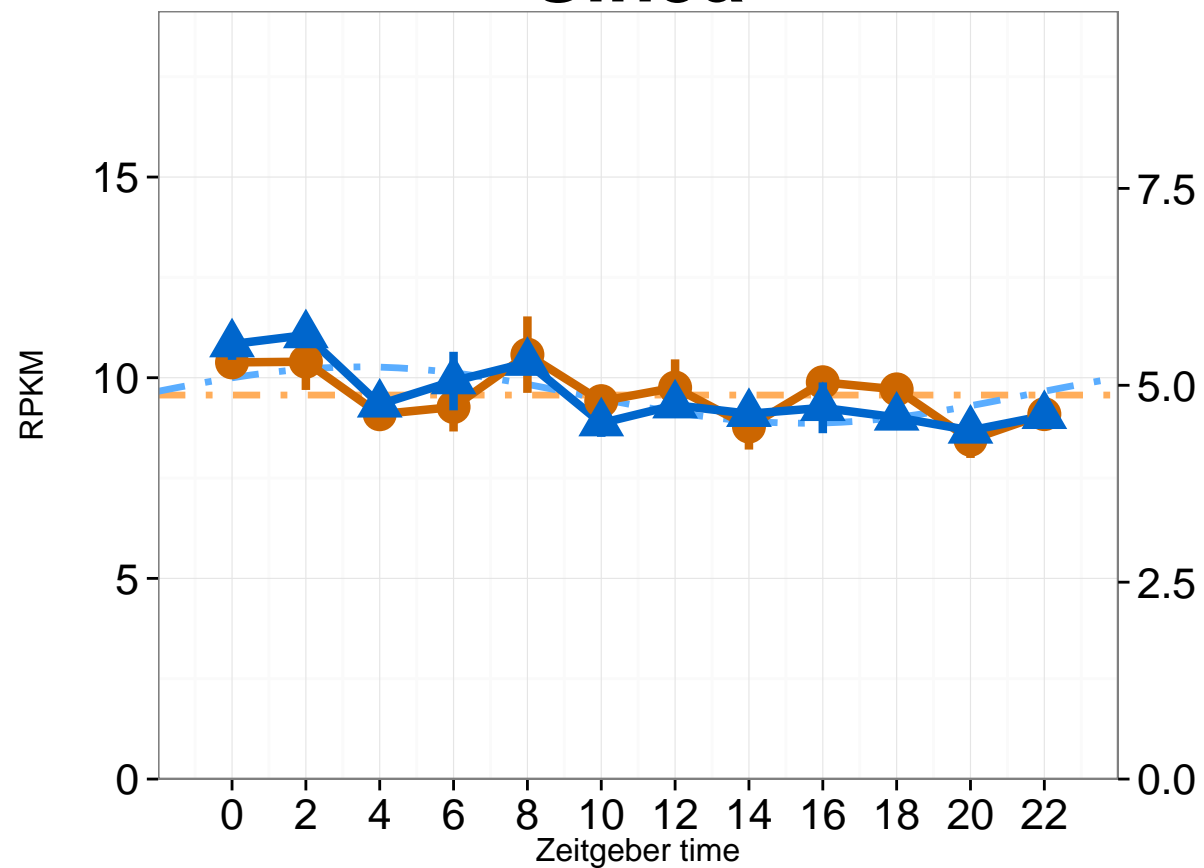

## Sin3a

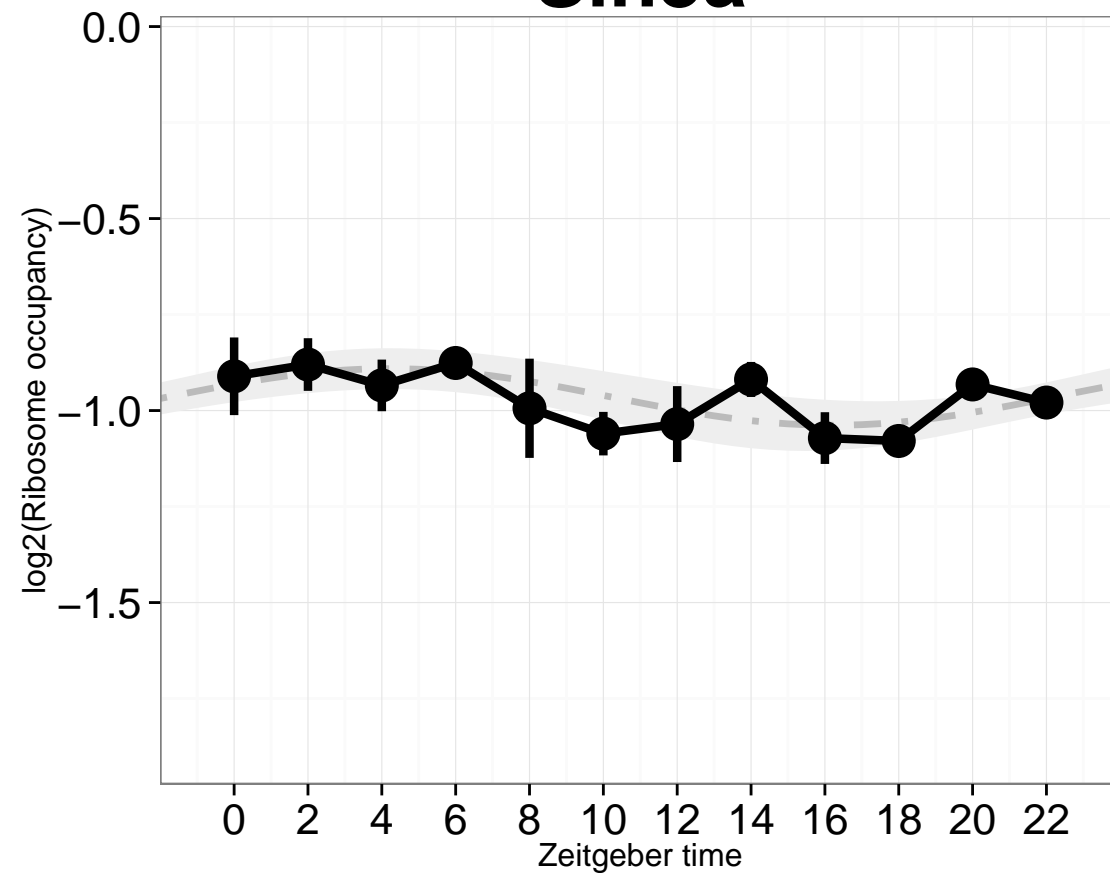

Supplement: SuppDataset_1.zip [file Sin3a_set_A.pdf › Supplemental Dataset 1/A-mRNA_nonrhyth_translation_nonrhyth/Sin3a_set_A.pdf]

## Sin3b

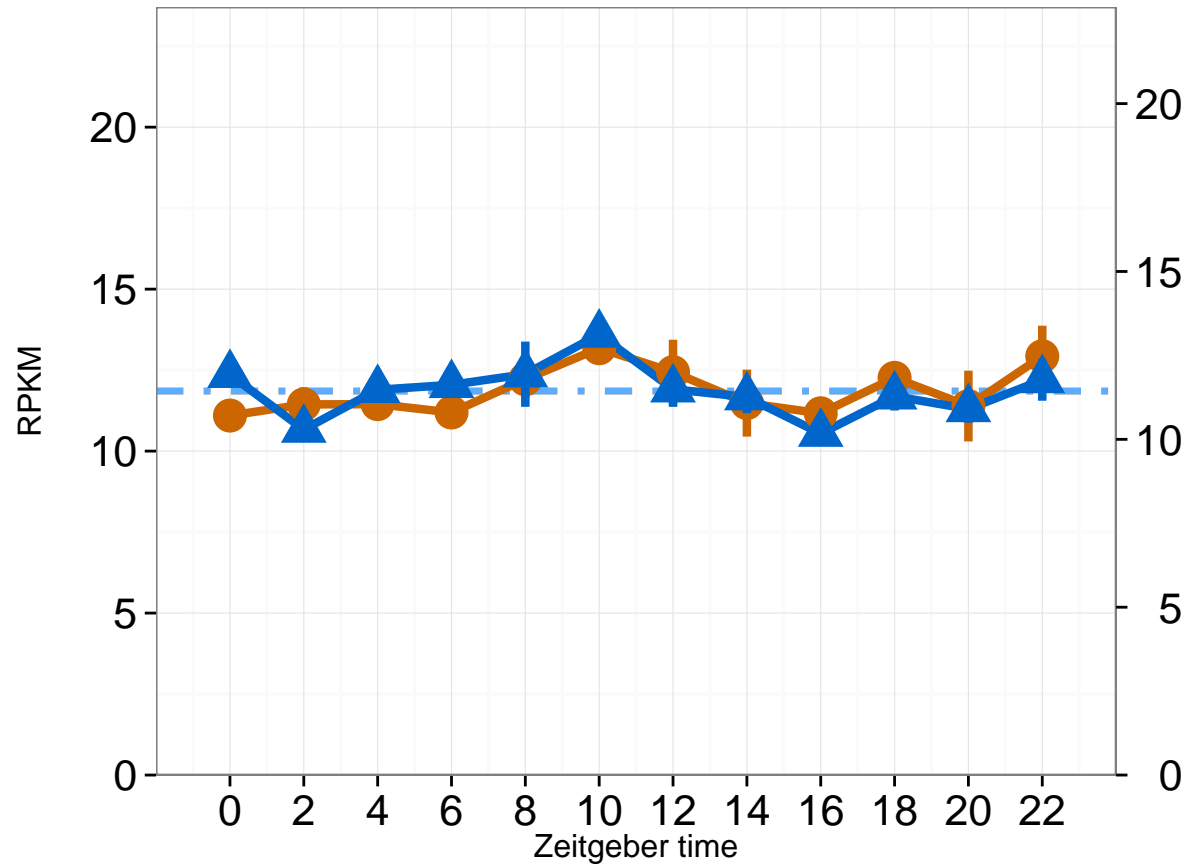

## Sin3b

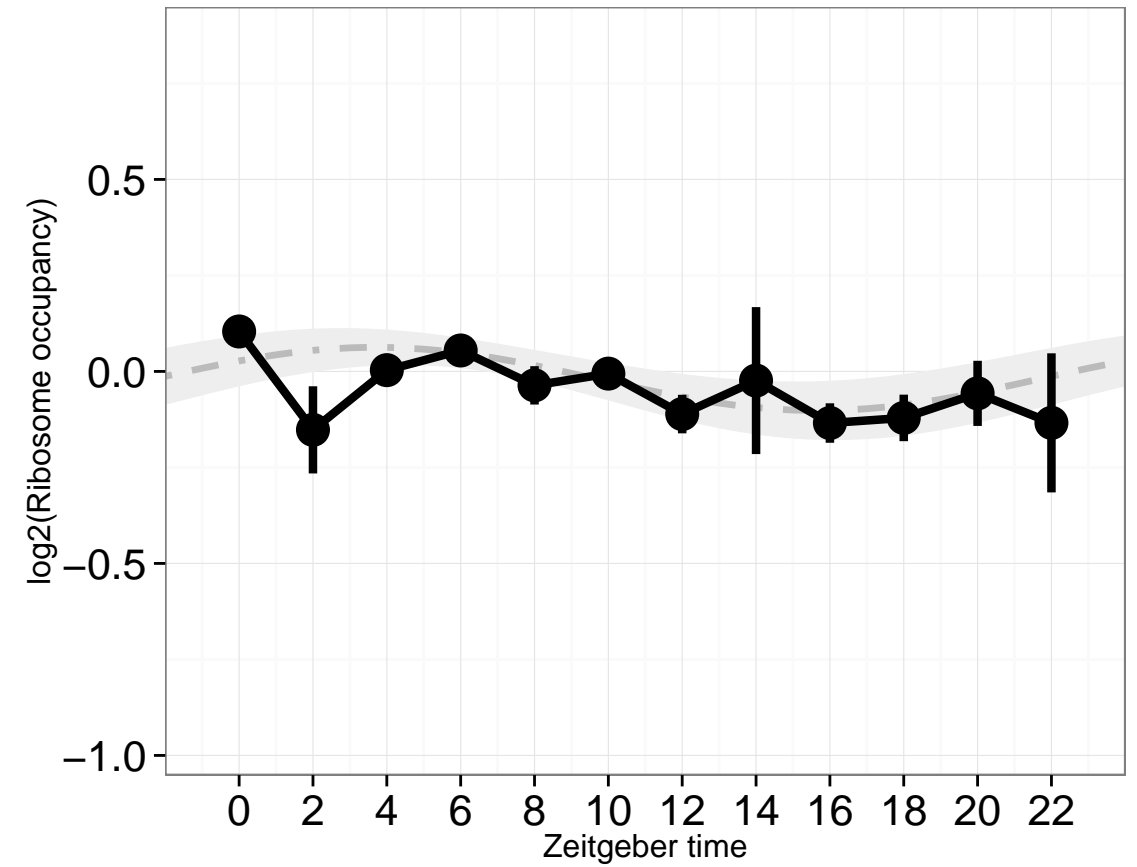

Supplement: SuppDataset_1.zip [file Sin3b_set_A.pdf › Supplemental Dataset 1/A-mRNA_nonrhyth_translation_nonrhyth/Sin3b_set_A.pdf]

# Sipa1l2

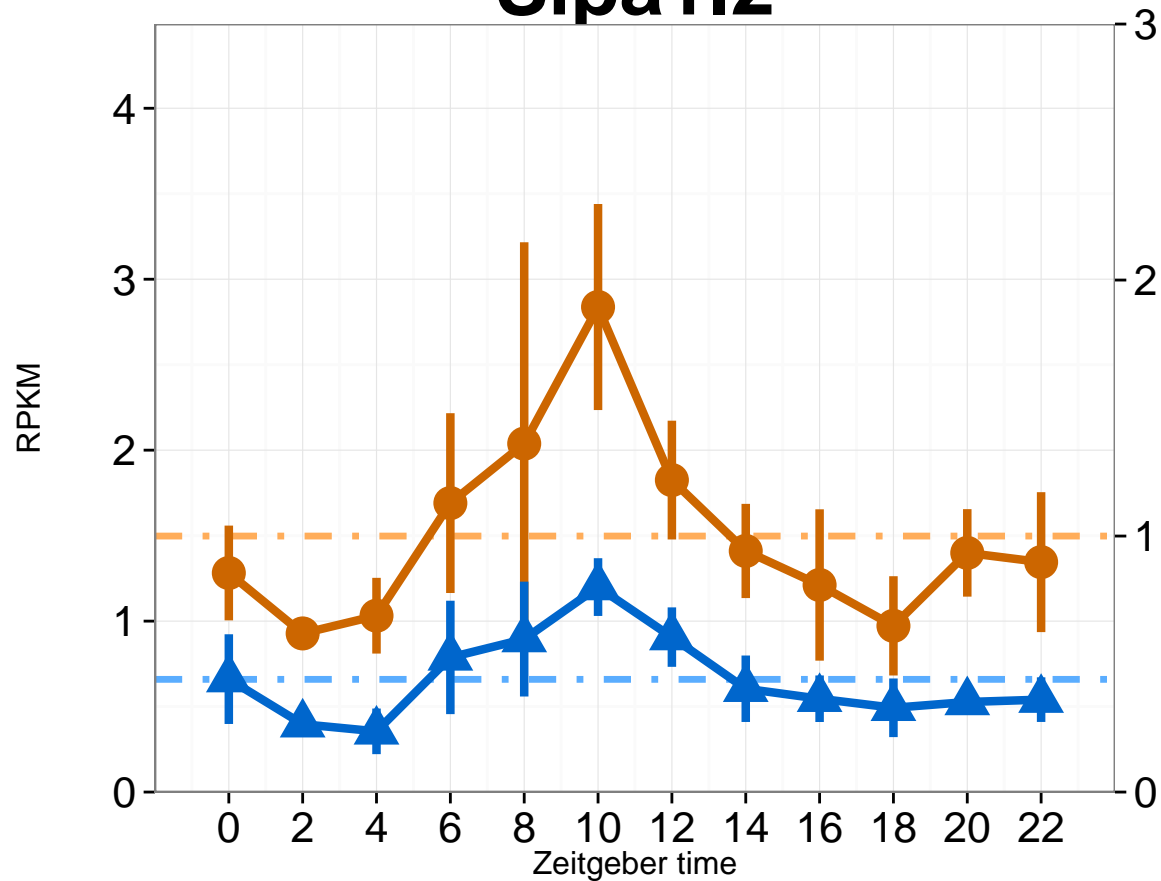

# Sipa1l2

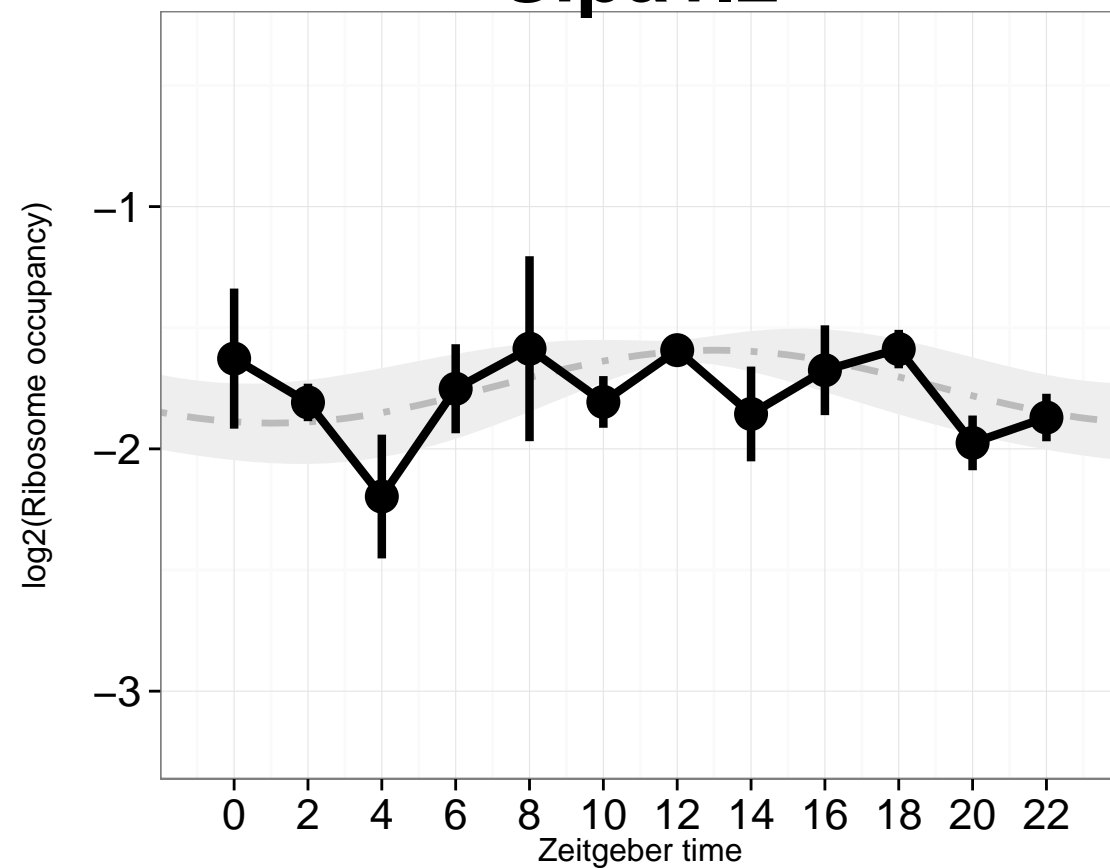

Supplement: SuppDataset_1.zip [file Sipa1l2_set_A.pdf › Supplemental Dataset 1/A-mRNA_nonrhyth_translation_nonrhyth/Sipa1l2_set_A.pdf]

## Sirpa

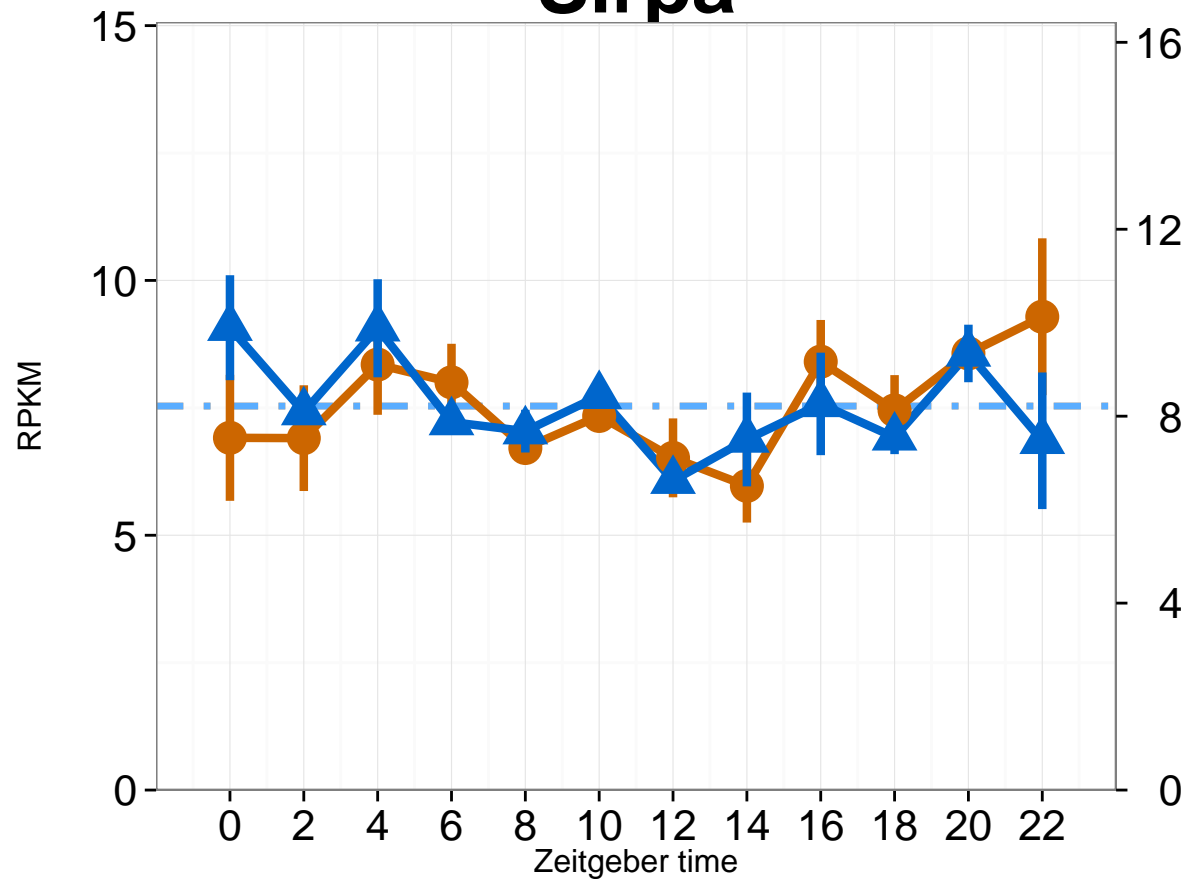

## Sirpa

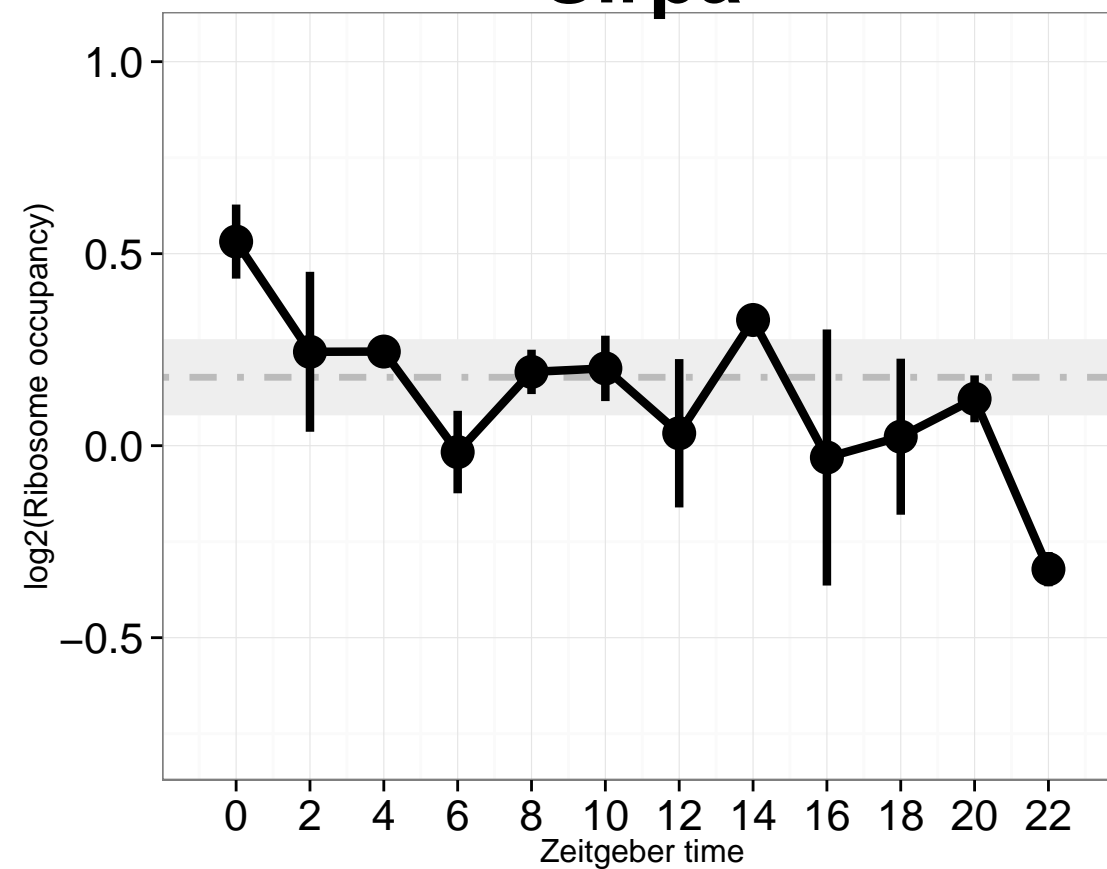

Supplement: SuppDataset_1.zip [file Sirpa_set_A.pdf › Supplemental Dataset 1/A-mRNA_nonrhyth_translation_nonrhyth/Sirpa_set_A.pdf]

## Sirt1

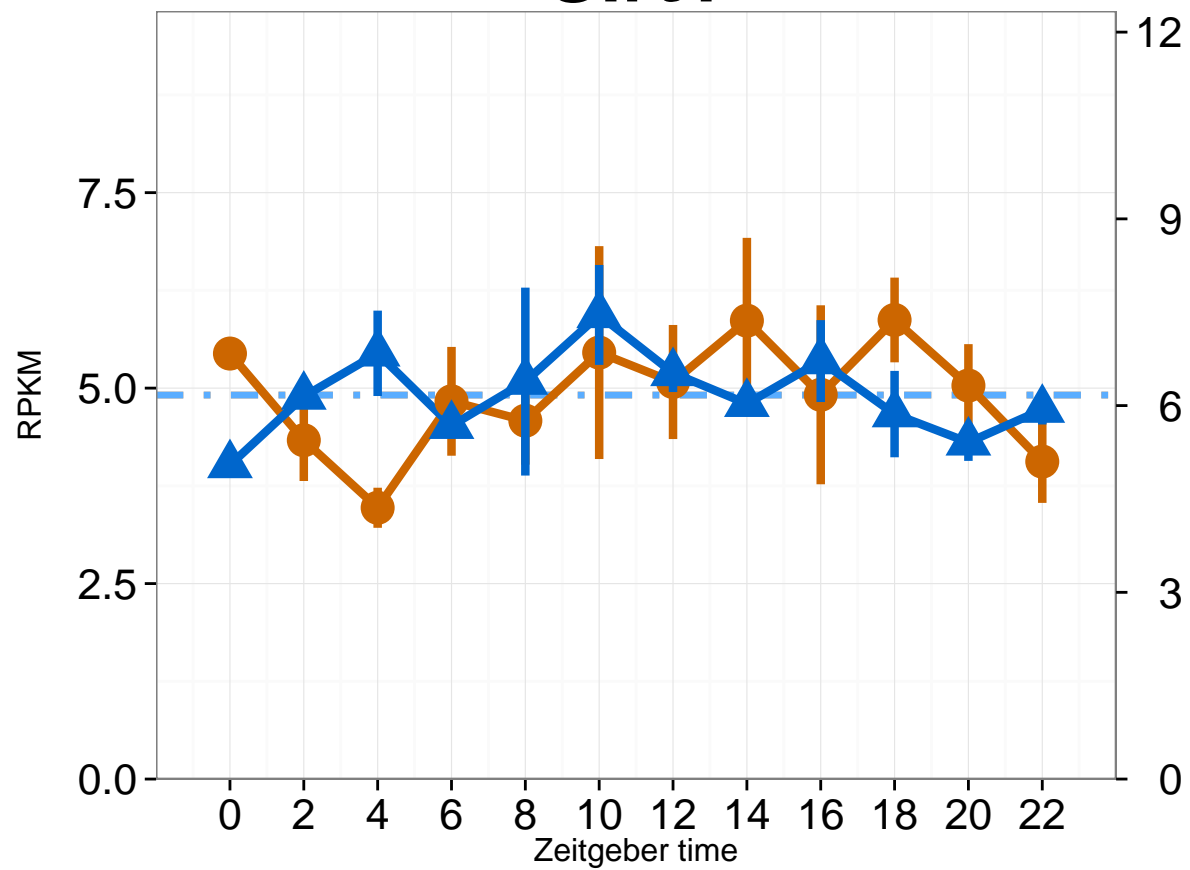

## Sirt1

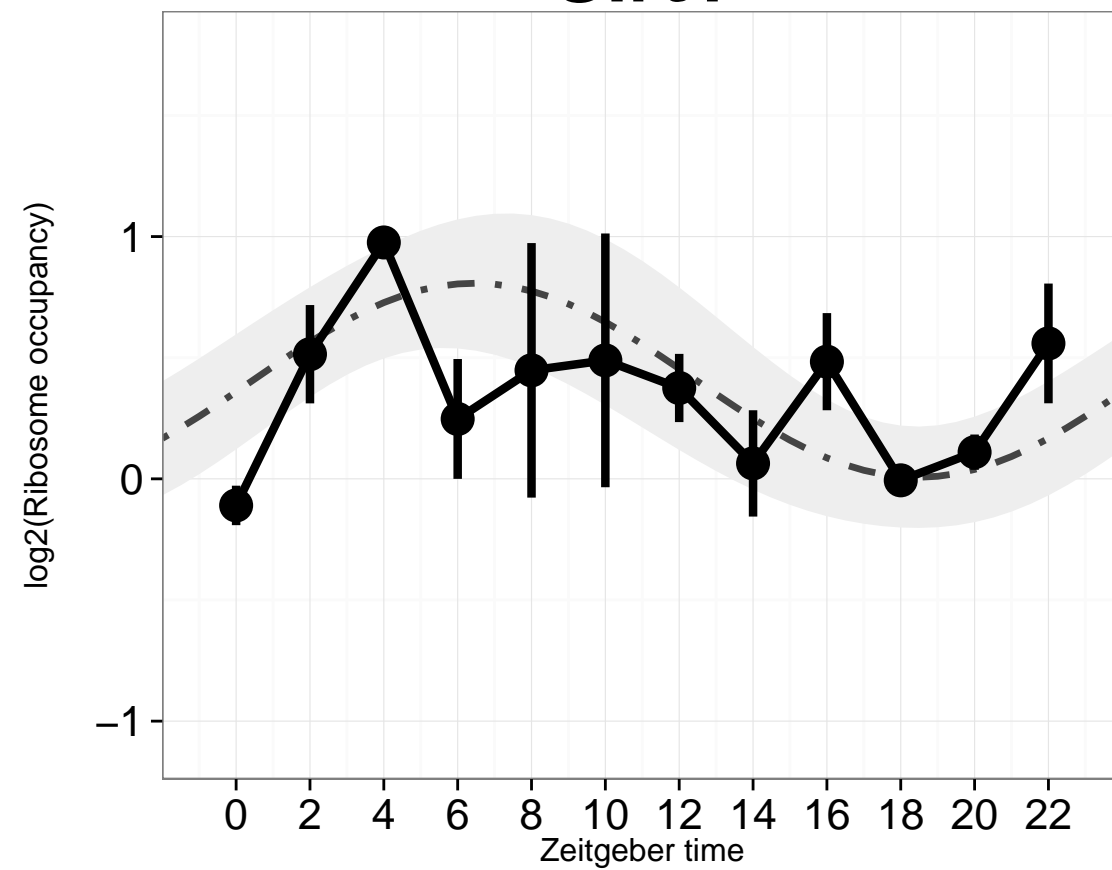

Supplement: SuppDataset_1.zip [file Sirt1_set_A.pdf › Supplemental Dataset 1/A-mRNA_nonrhyth_translation_nonrhyth/Sirt1_set_A.pdf]

## Sirt2

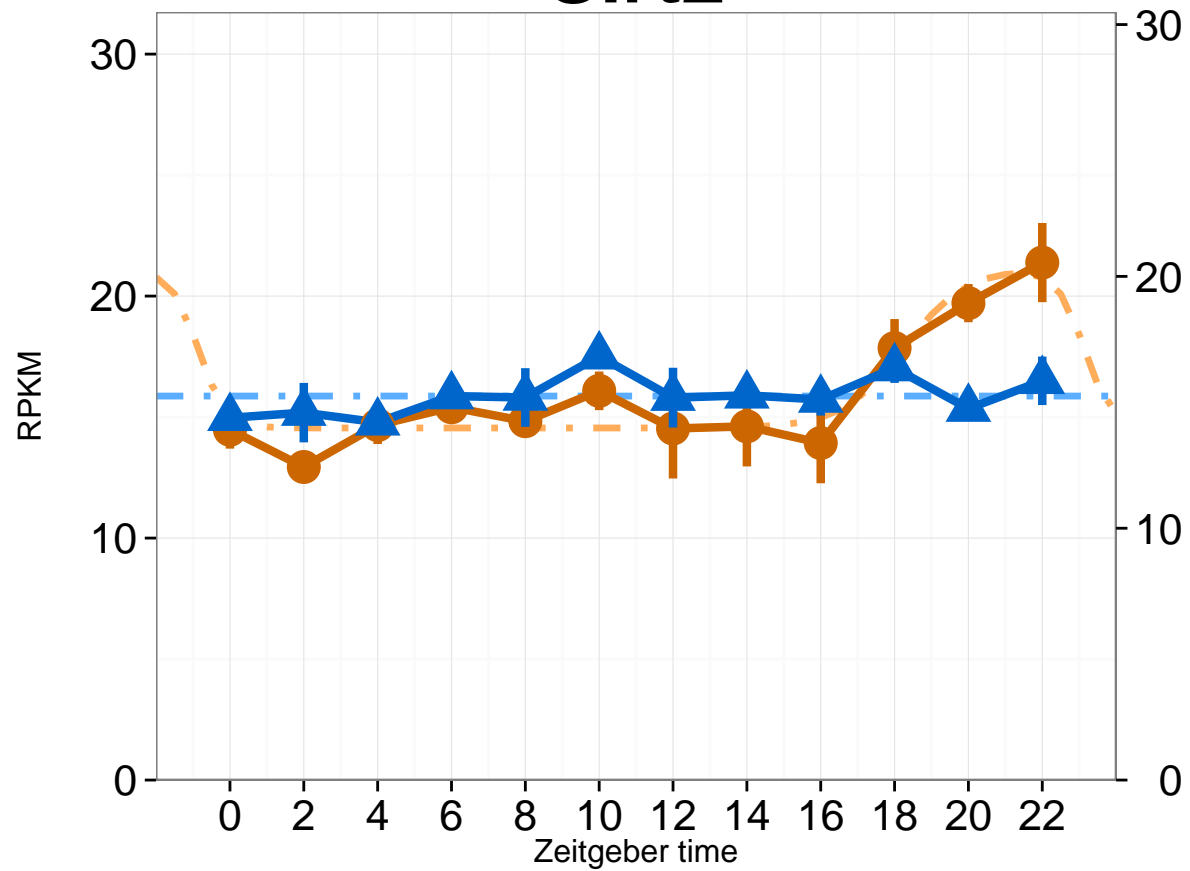

## Sirt2

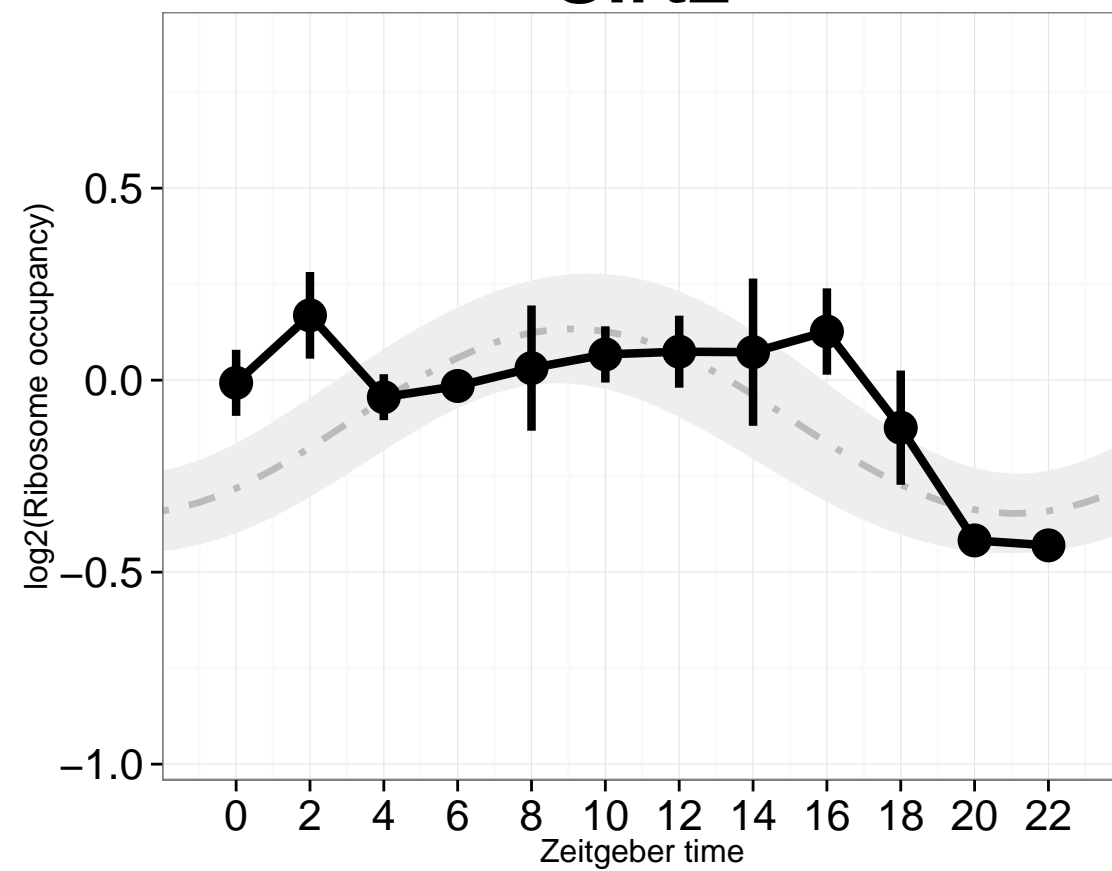

Supplement: SuppDataset_1.zip [file Sirt2_set_A.pdf › Supplemental Dataset 1/A-mRNA_nonrhyth_translation_nonrhyth/Sirt2_set_A.pdf]

## Sirt3

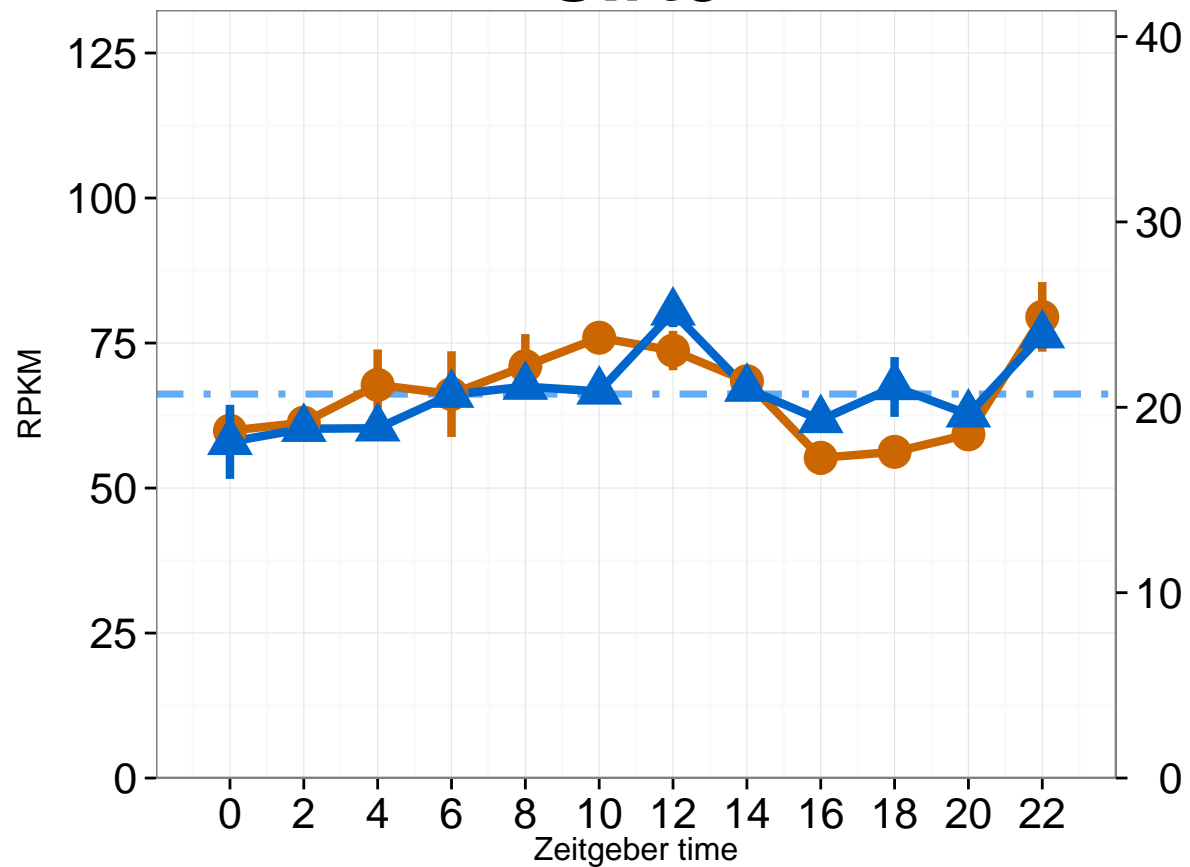

## Sirt3

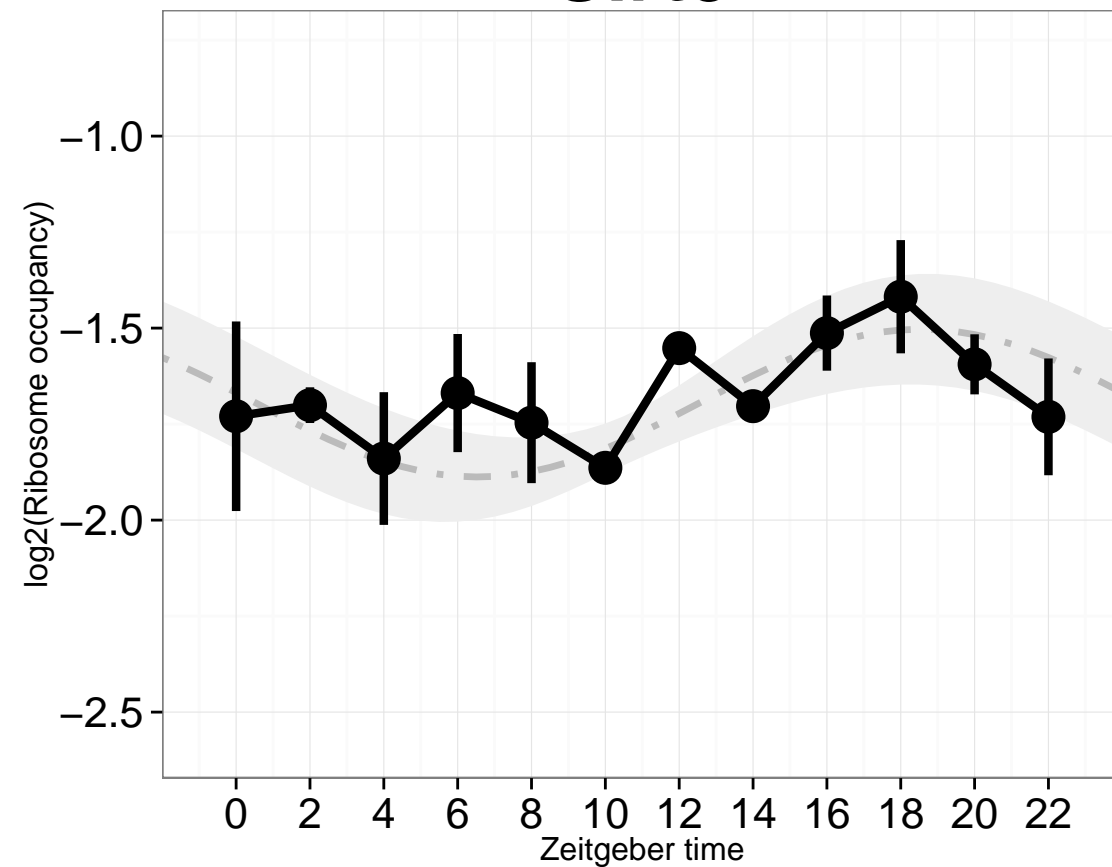

Supplement: SuppDataset_1.zip [file Sirt3_set_A.pdf › Supplemental Dataset 1/A-mRNA_nonrhyth_translation_nonrhyth/Sirt3_set_A.pdf]

## Sirt4

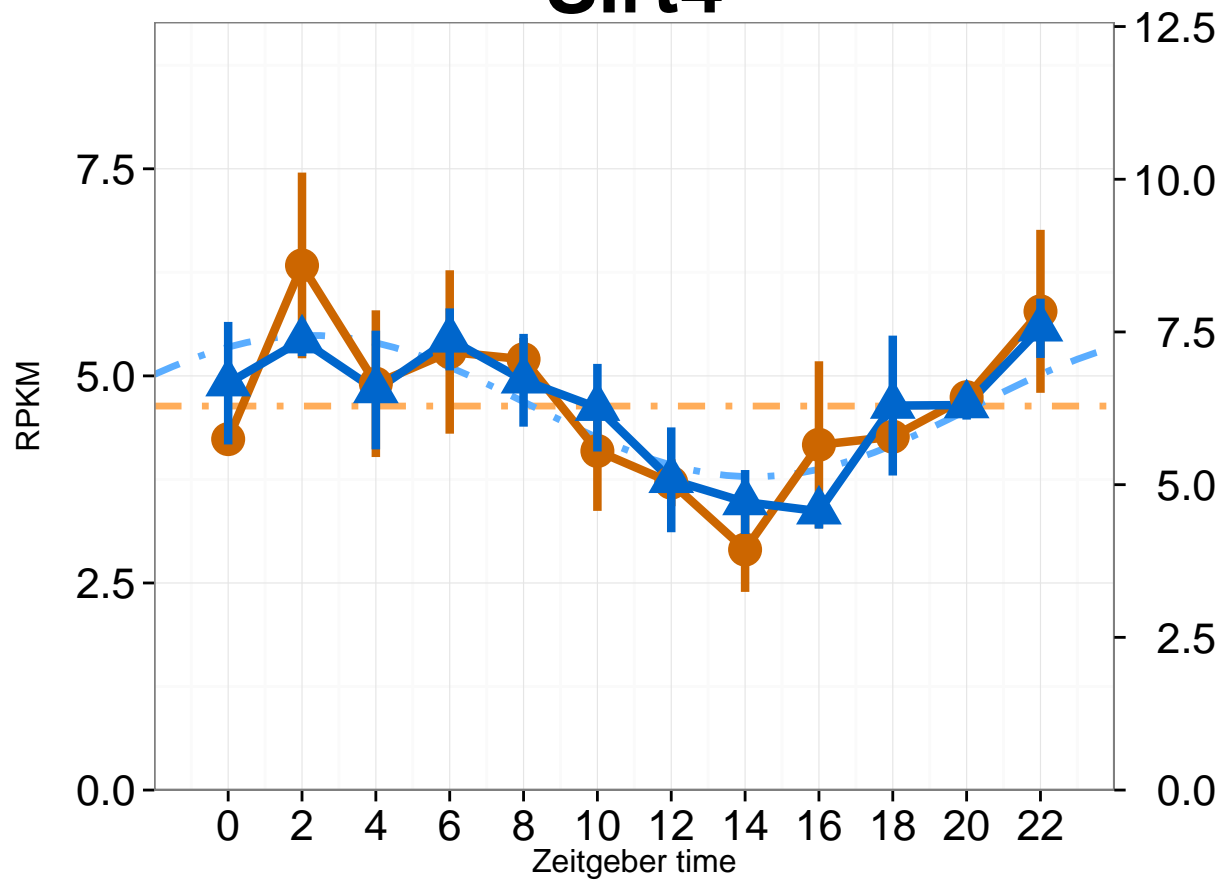

## Sirt4

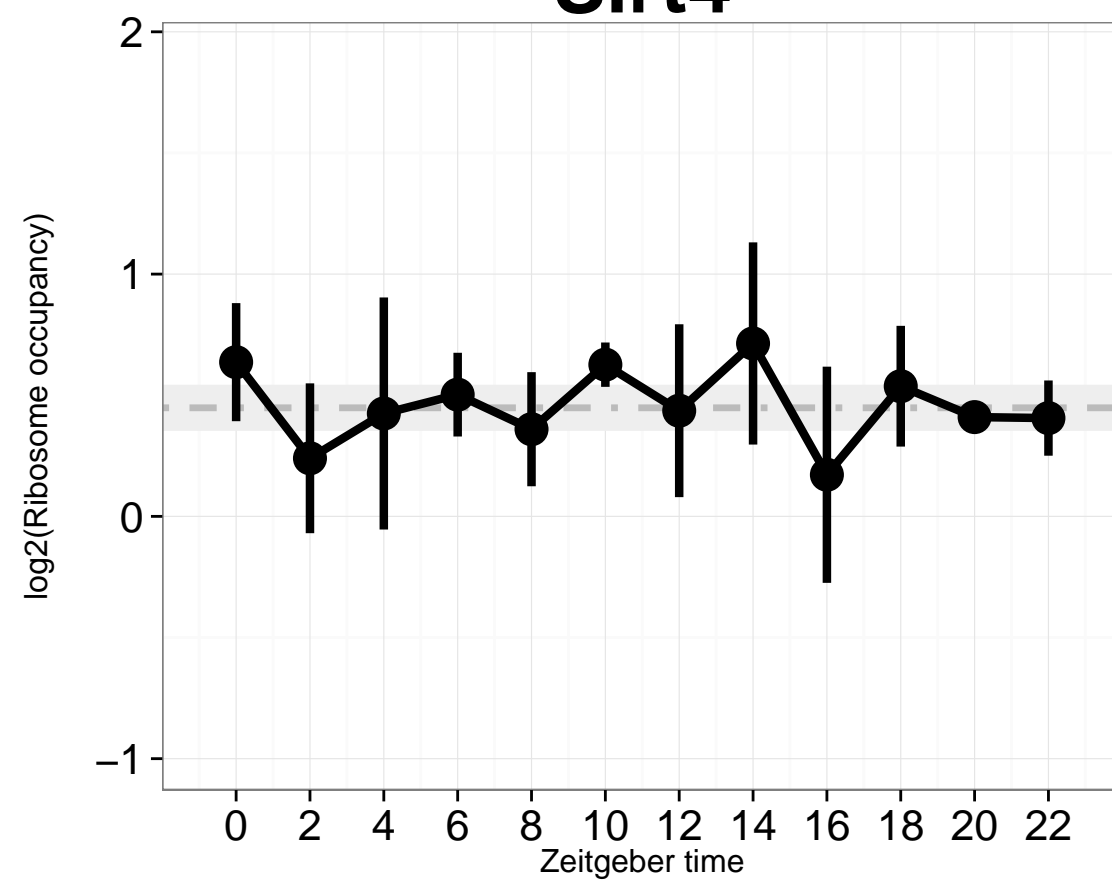

Supplement: SuppDataset_1.zip [file Sirt4_set_A.pdf › Supplemental Dataset 1/A-mRNA_nonrhyth_translation_nonrhyth/Sirt4_set_A.pdf]

# Sirt6

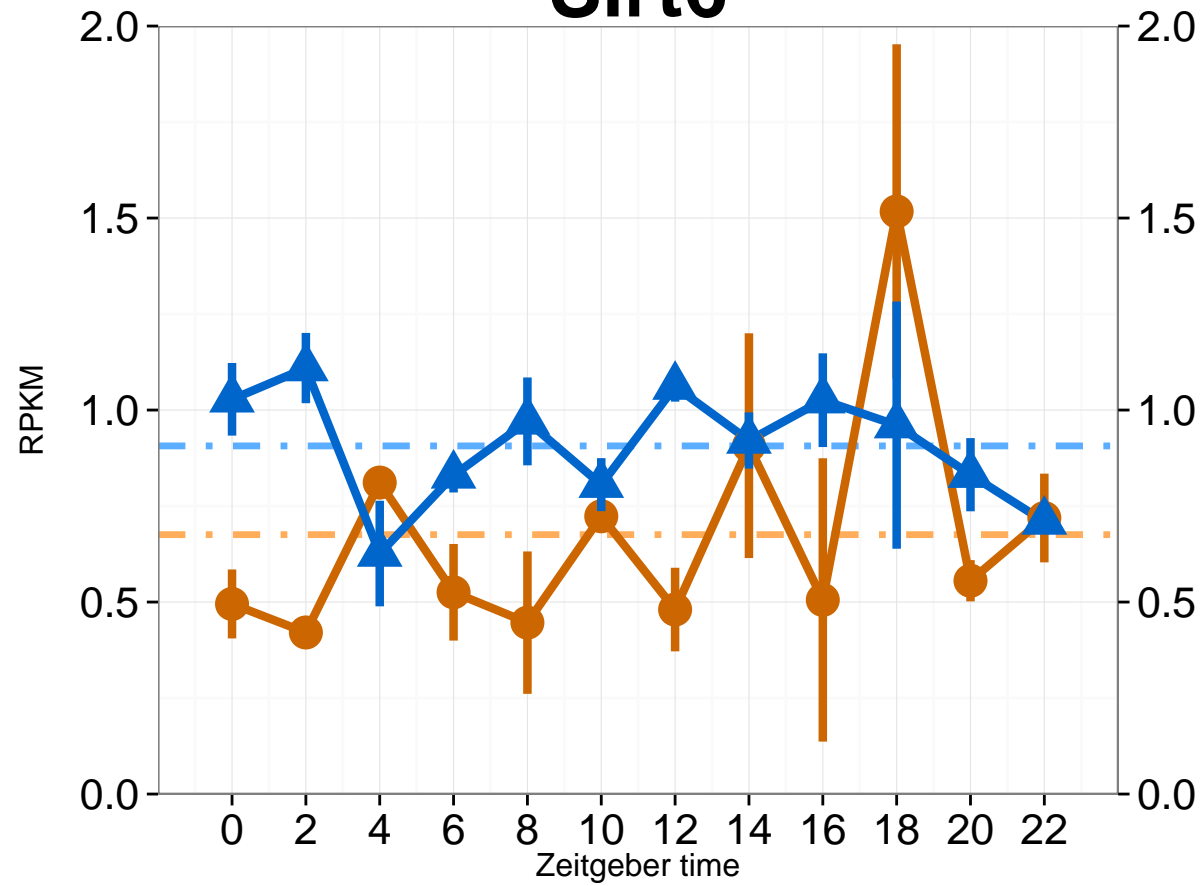

# Sirt6

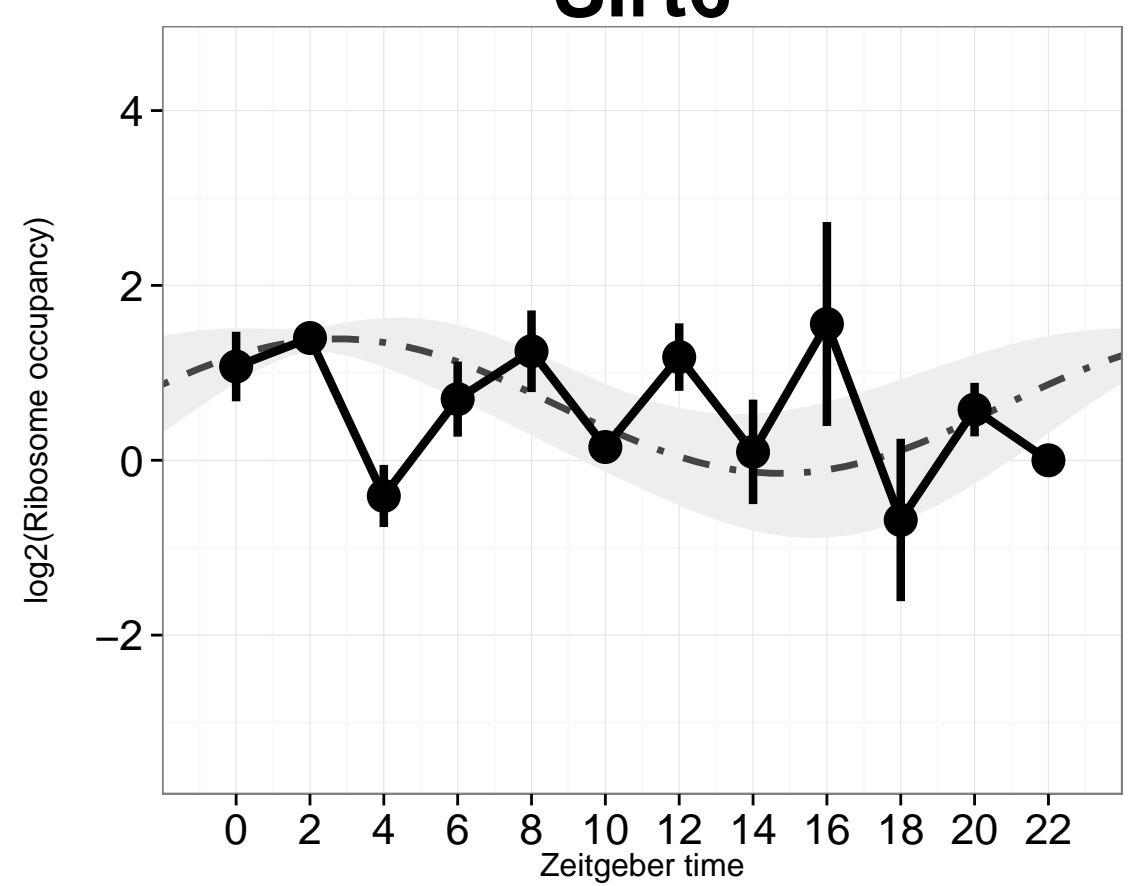

Supplement: SuppDataset_1.zip [file Sirt6_set_A.pdf › Supplemental Dataset 1/A-mRNA_nonrhyth_translation_nonrhyth/Sirt6_set_A.pdf]

## Sirt7

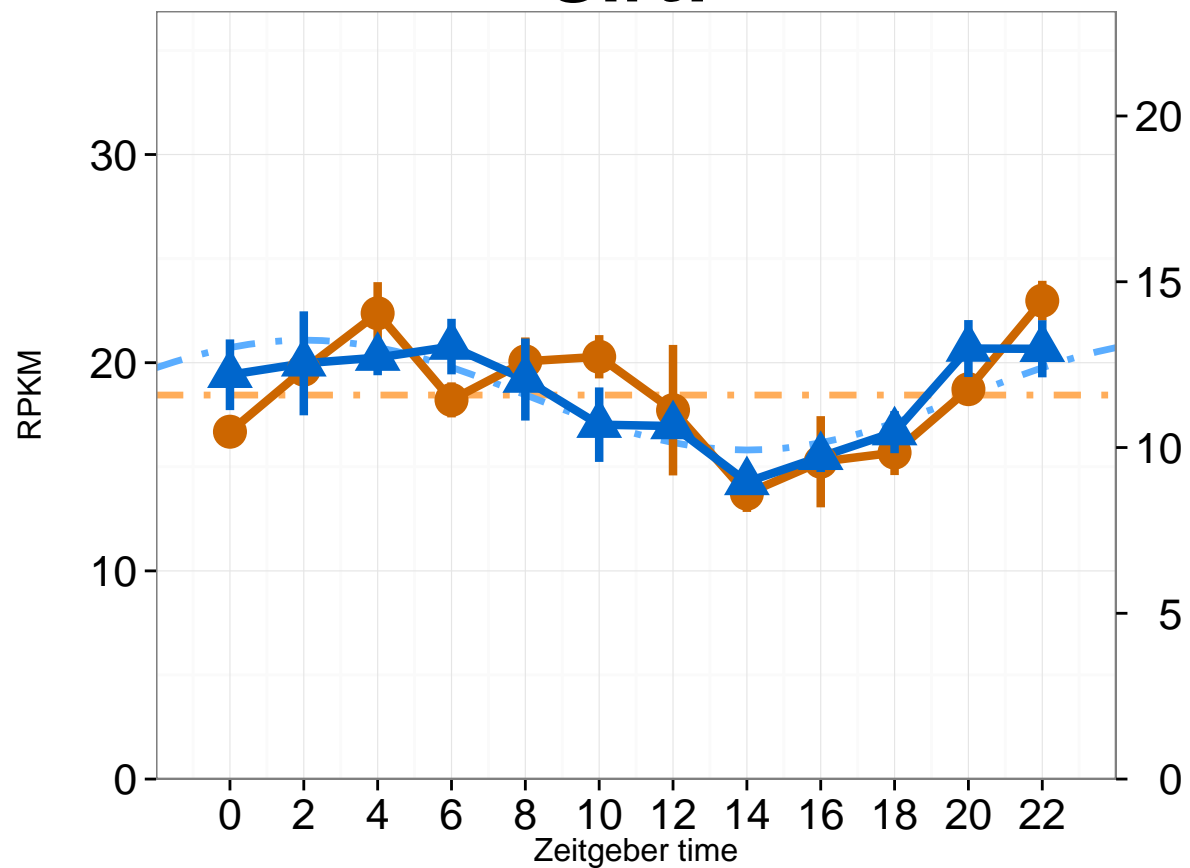

## Sirt7

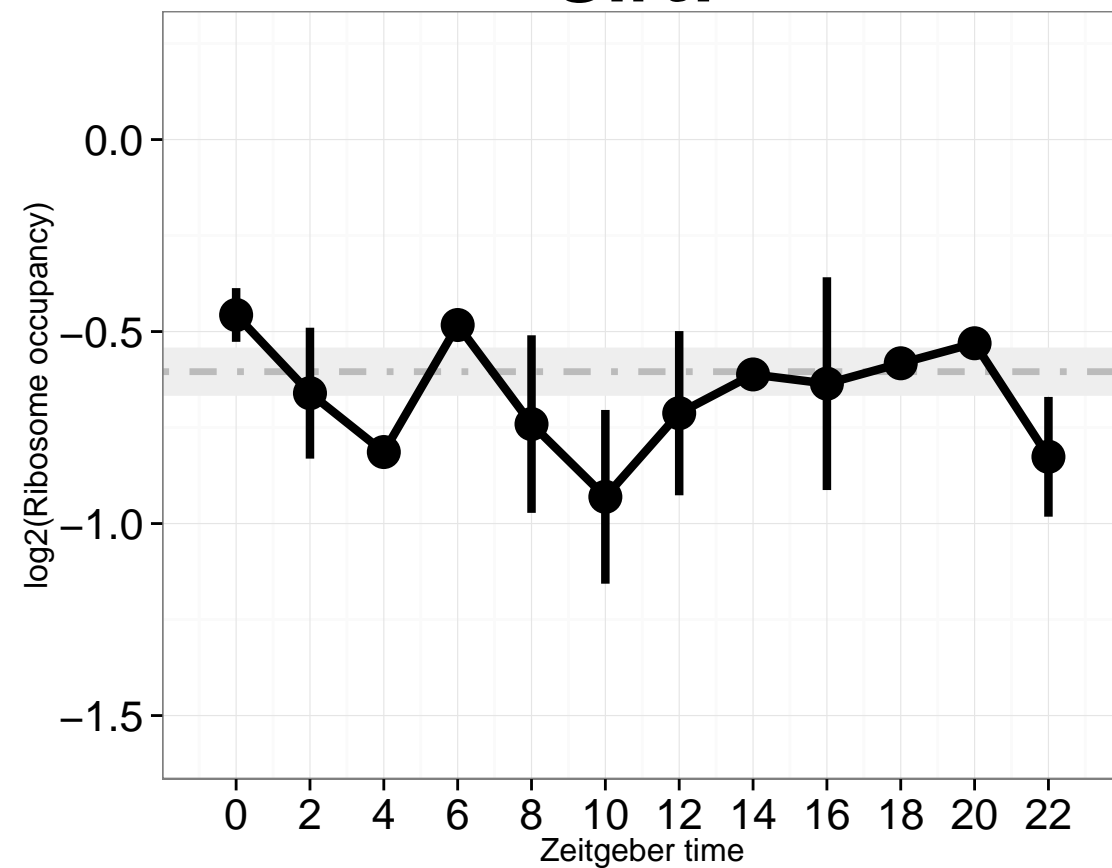

Supplement: SuppDataset_1.zip [file Sirt7_set_A.pdf › Supplemental Dataset 1/A-mRNA_nonrhyth_translation_nonrhyth/Sirt7_set_A.pdf]

## Six5

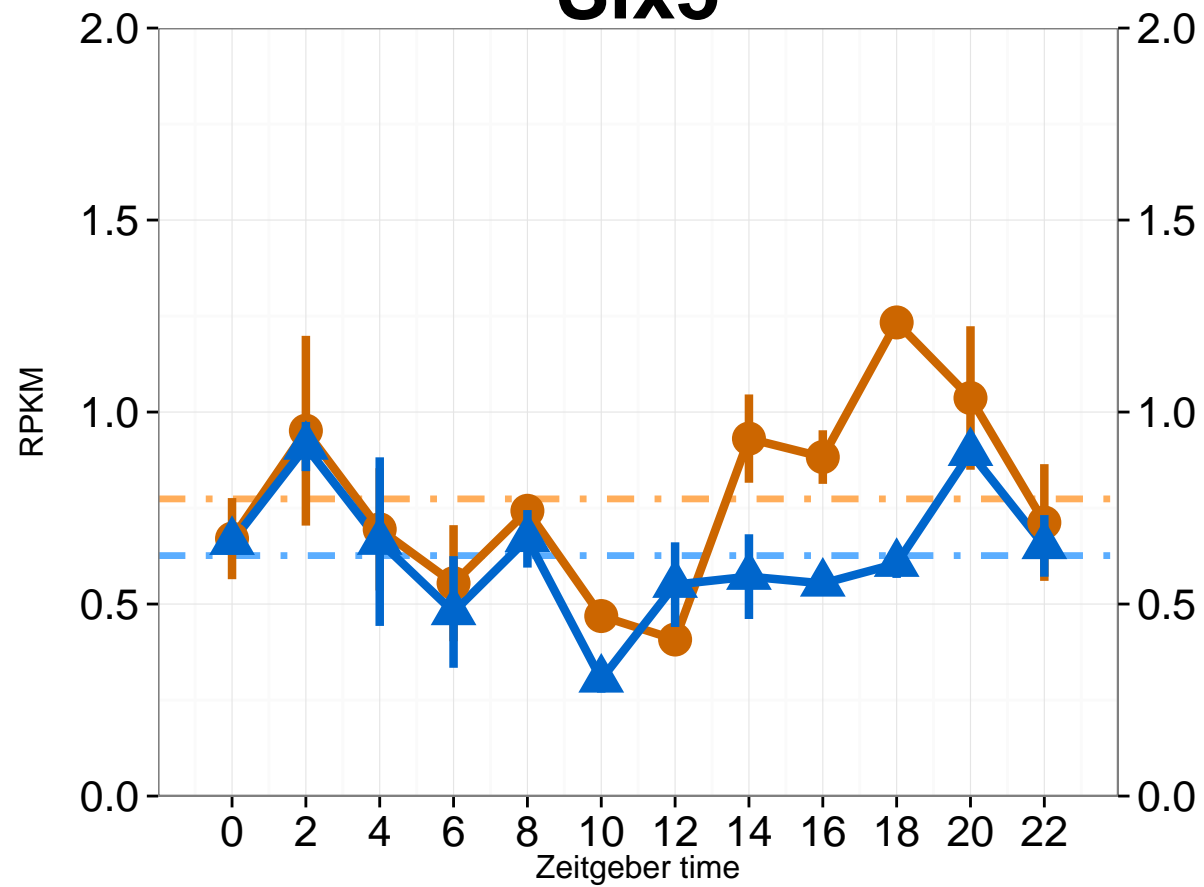

## Six5

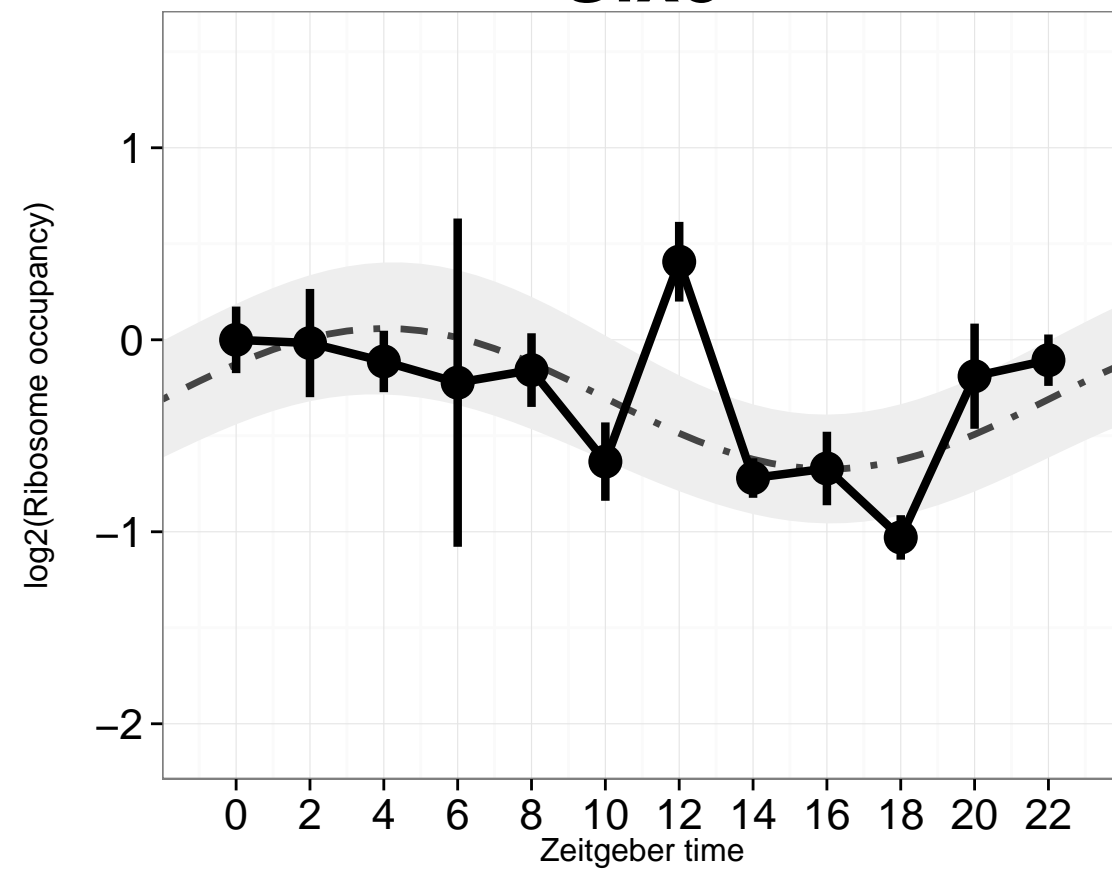

Supplement: SuppDataset_1.zip [file Six5_set_A.pdf › Supplemental Dataset 1/A-mRNA_nonrhyth_translation_nonrhyth/Six5_set_A.pdf]

## Skap2

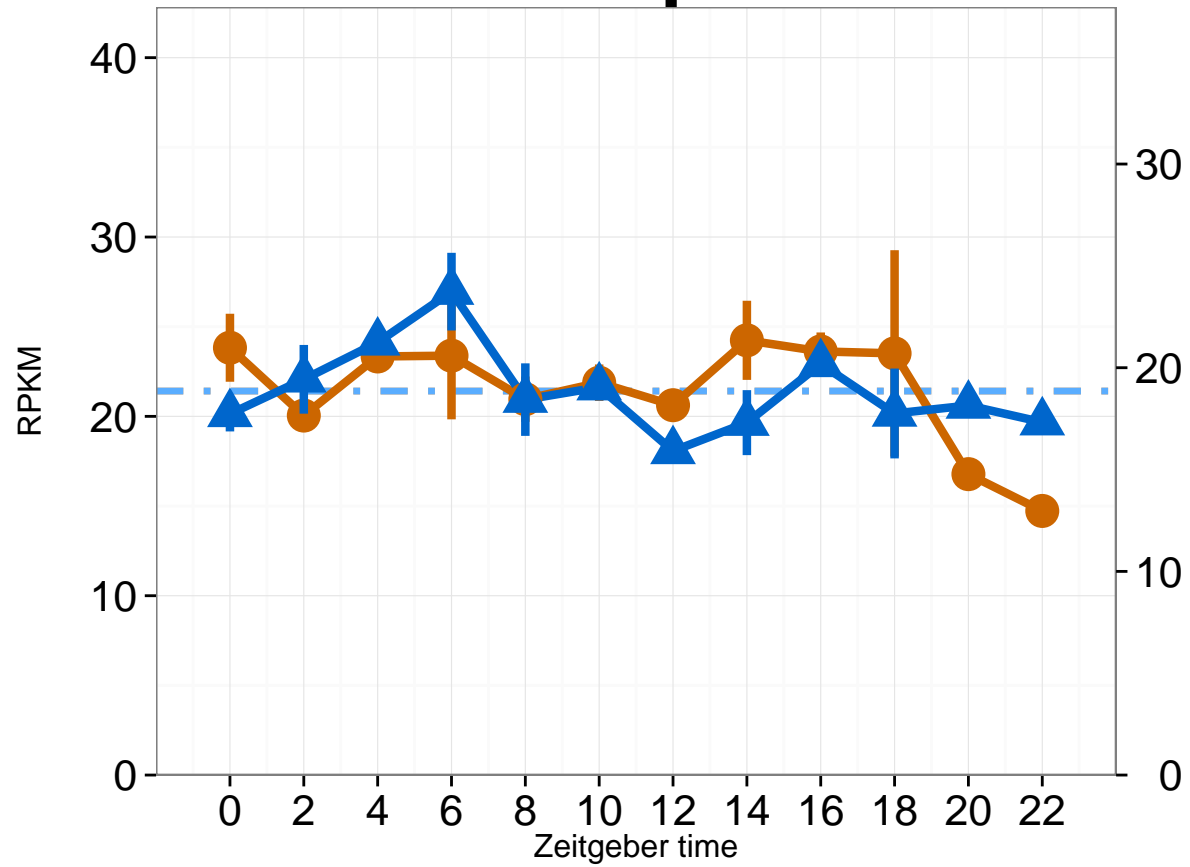

## Skap2

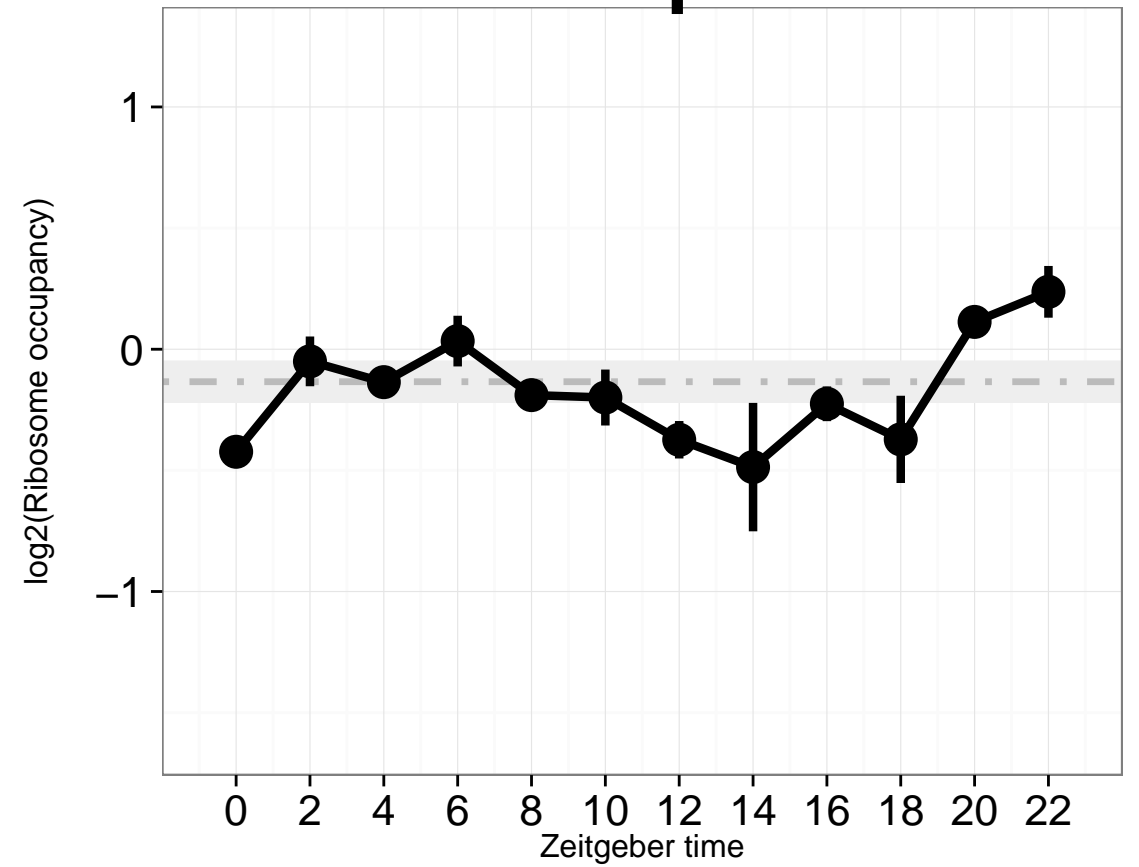

Supplement: SuppDataset_1.zip [file Skap2_set_A.pdf › Supplemental Dataset 1/A-mRNA_nonrhyth_translation_nonrhyth/Skap2_set_A.pdf]

## Skiv2l2

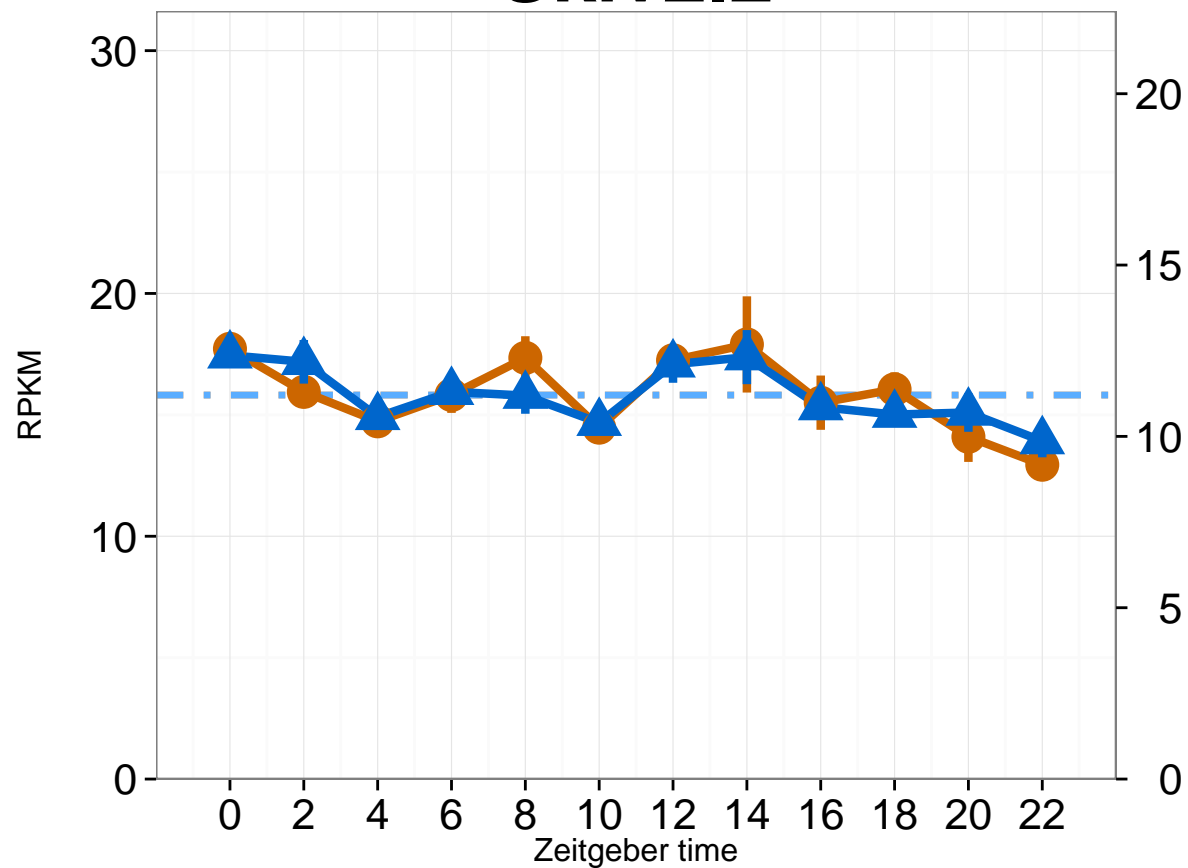

## Skiv2l2

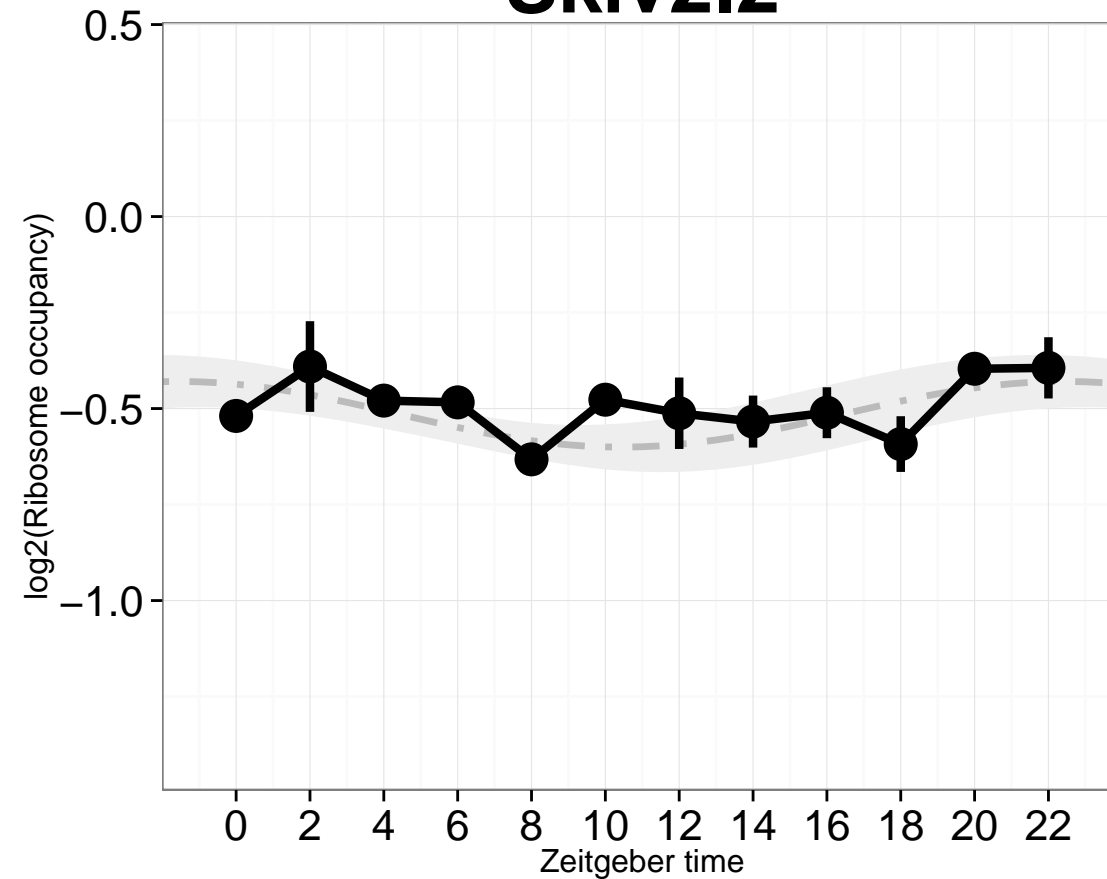

Supplement: SuppDataset_1.zip [file Skiv2l2_set_A.pdf › Supplemental Dataset 1/A-mRNA_nonrhyth_translation_nonrhyth/Skiv2l2_set_A.pdf]

## Skiv2l

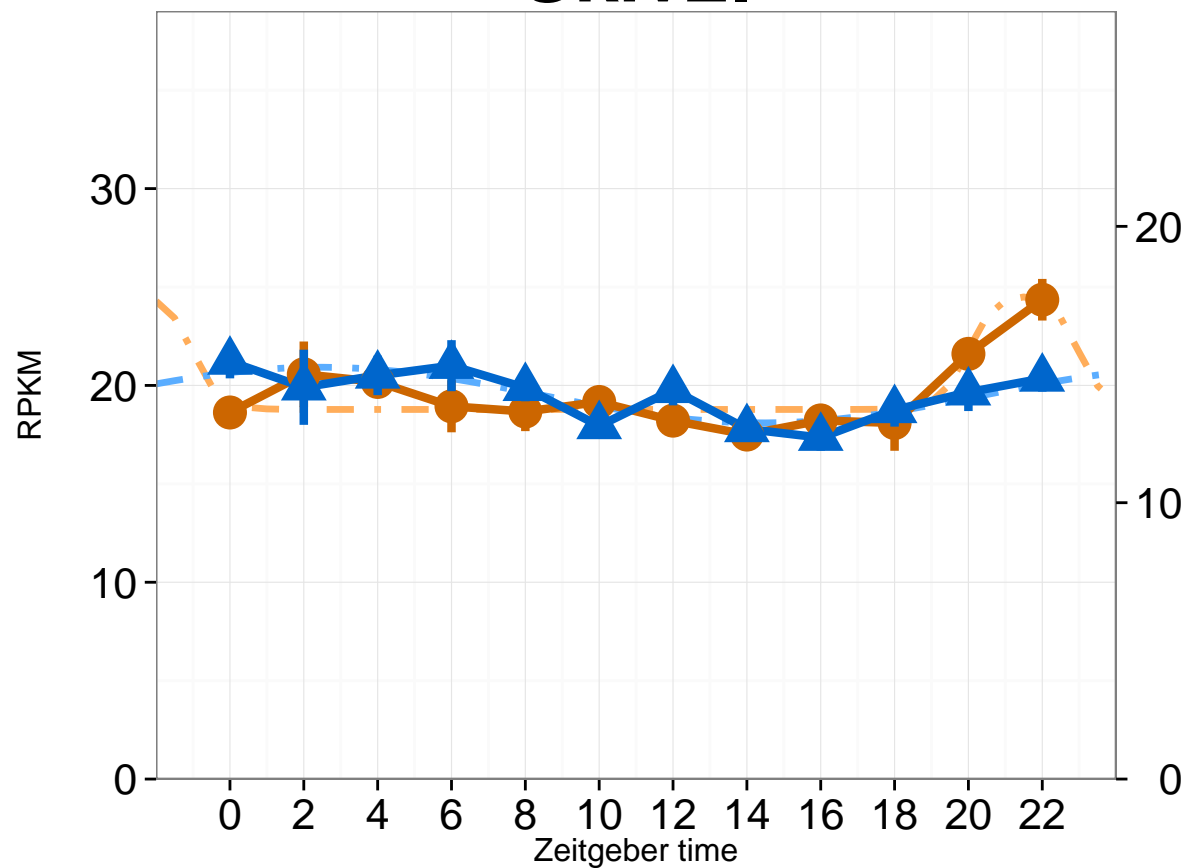

## Skiv2l

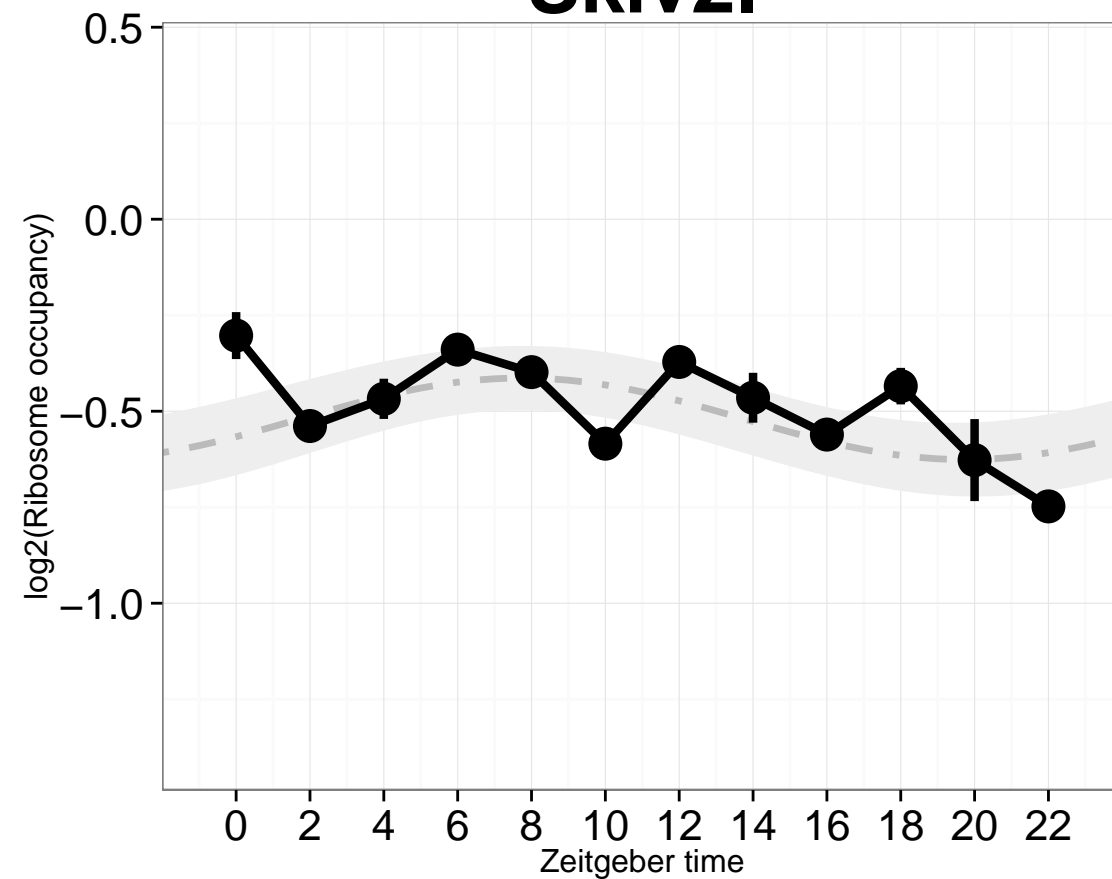

Supplement: SuppDataset_1.zip [file Skiv2l_set_A.pdf › Supplemental Dataset 1/A-mRNA_nonrhyth_translation_nonrhyth/Skiv2l_set_A.pdf]

# Skp1a

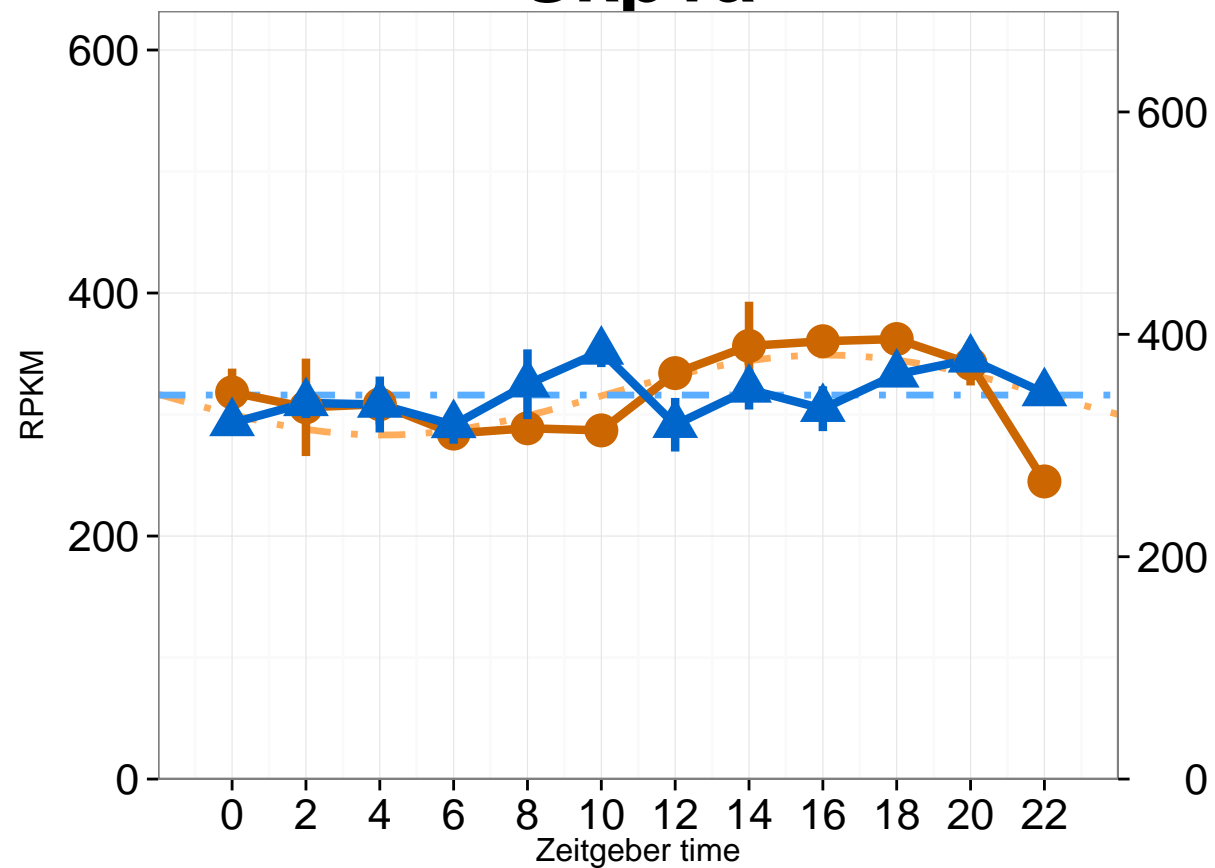

# Skp1a

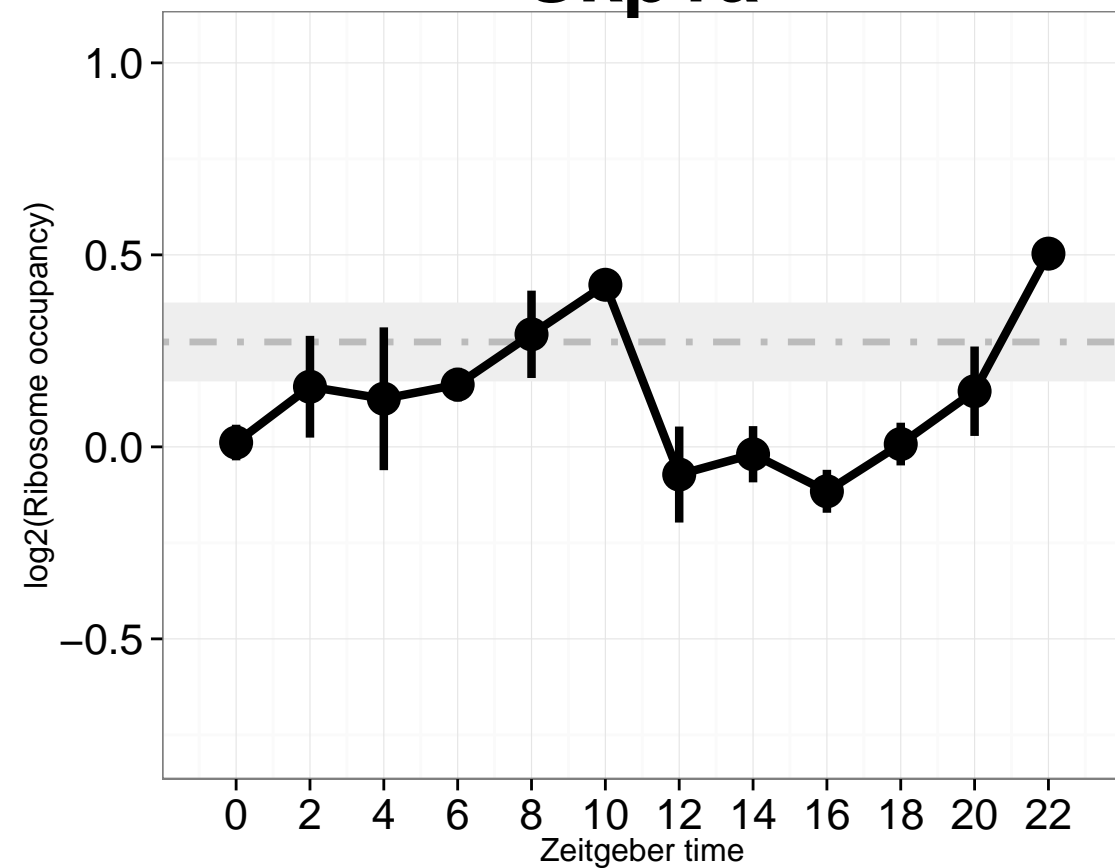

Supplement: SuppDataset_1.zip [file Skp1a_set_A.pdf › Supplemental Dataset 1/A-mRNA_nonrhyth_translation_nonrhyth/Skp1a_set_A.pdf]

## Sla

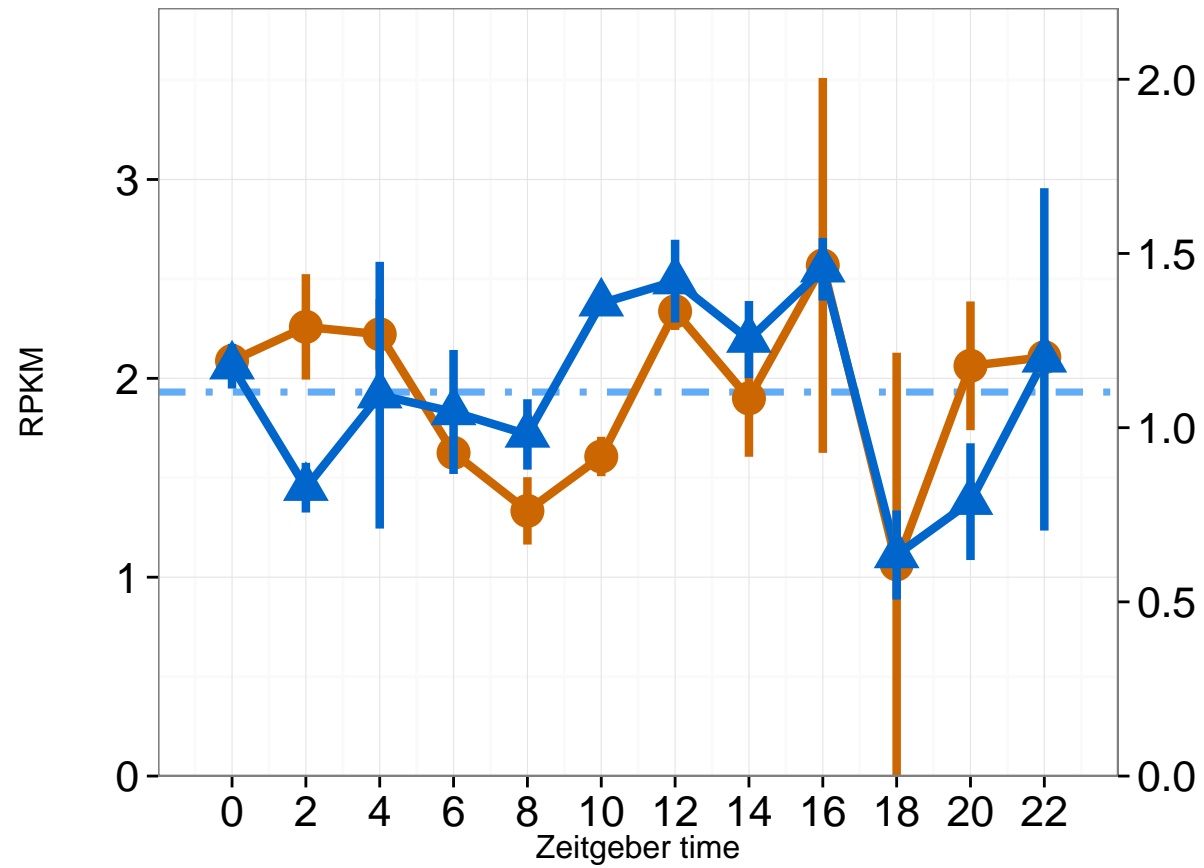

## Sla

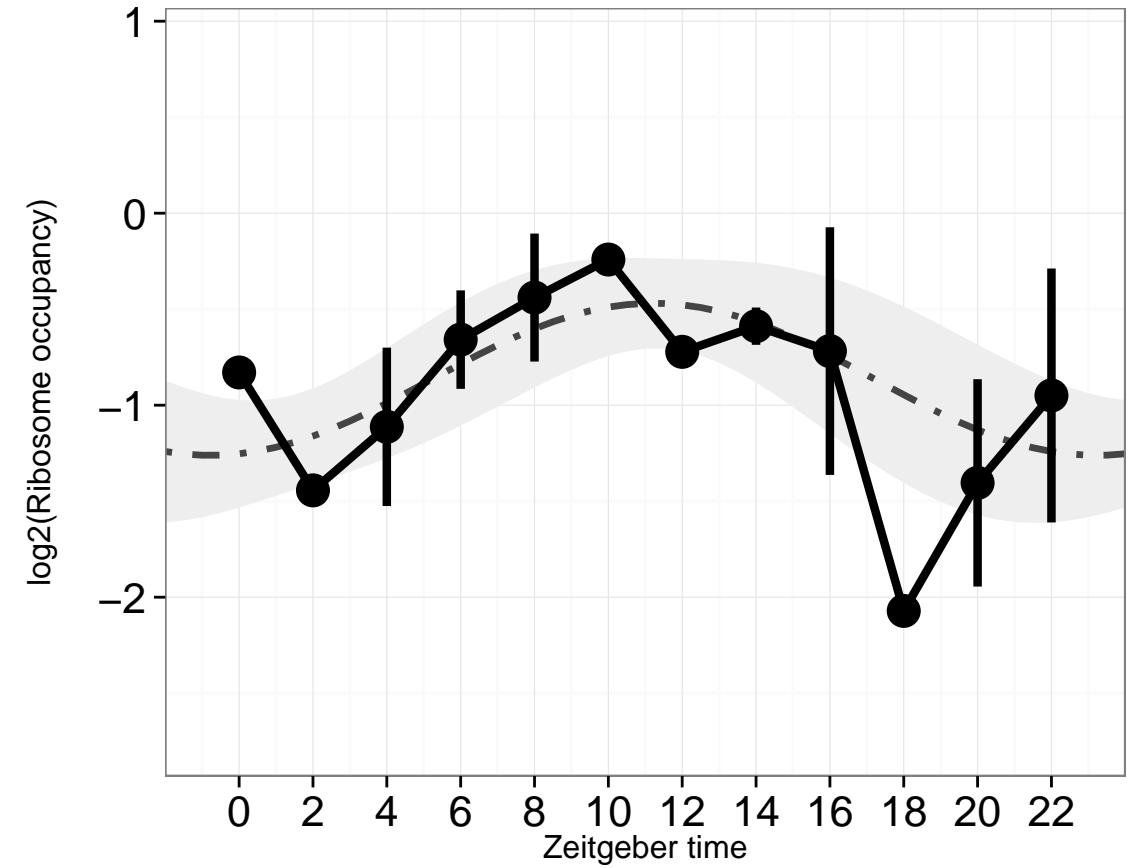

Supplement: SuppDataset_1.zip [file Sla_set_A.pdf › Supplemental Dataset 1/A-mRNA_nonrhyth_translation_nonrhyth/Sla_set_A.pdf]

## Slain2

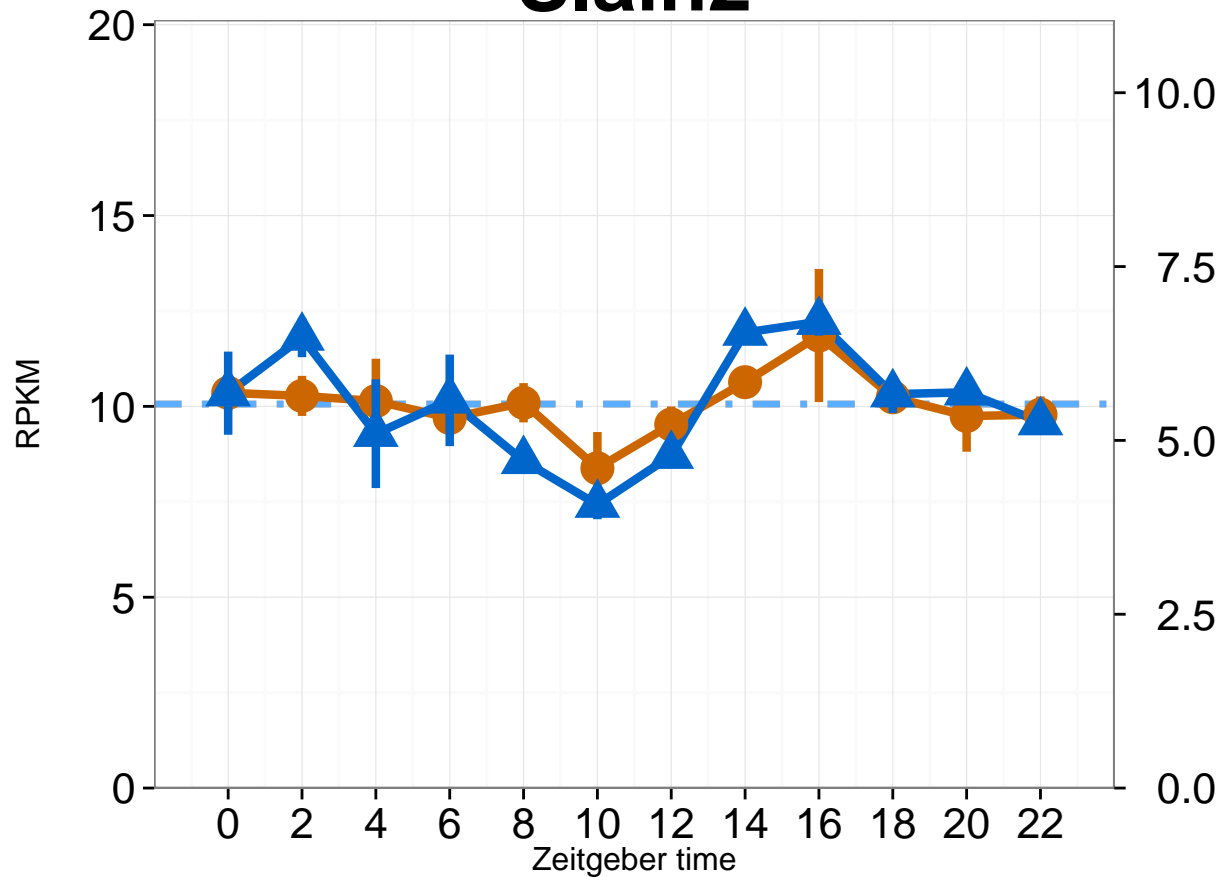

## Slain2

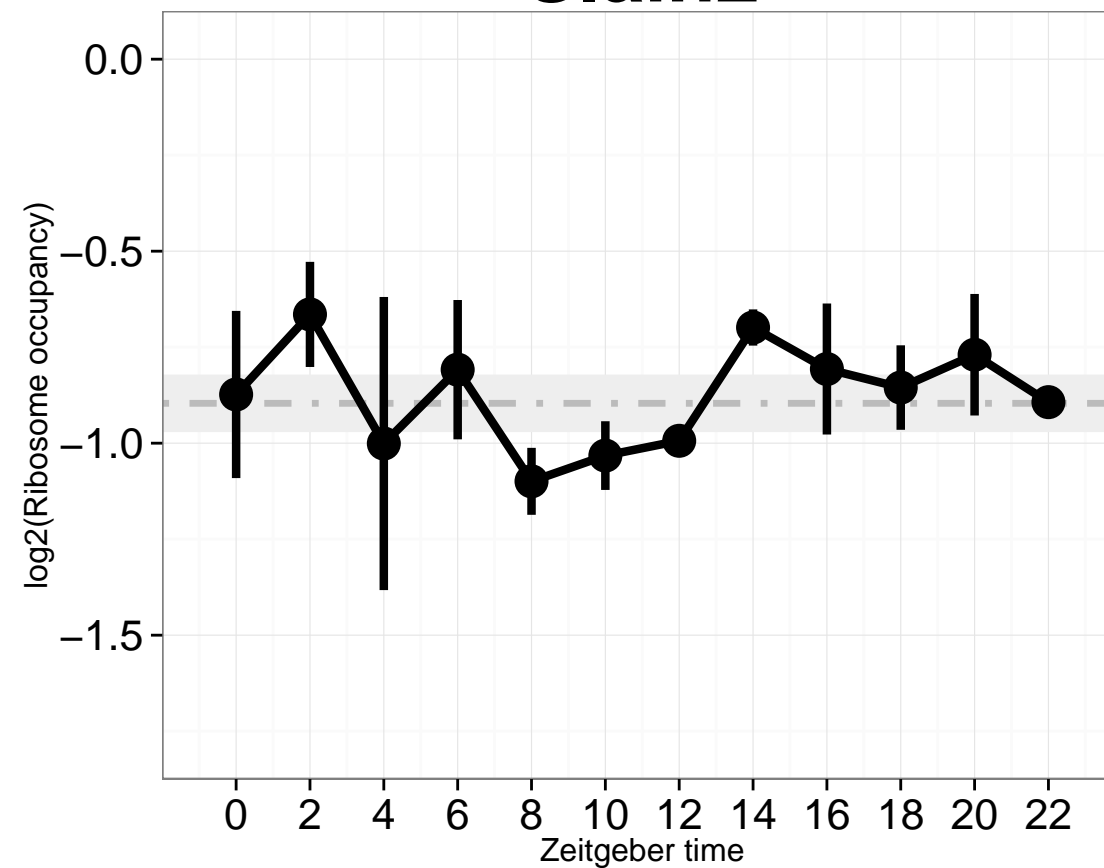

Supplement: SuppDataset_1.zip [file Slain2_set_A.pdf › Supplemental Dataset 1/A-mRNA_nonrhyth_translation_nonrhyth/Slain2_set_A.pdf]

# Slamf9

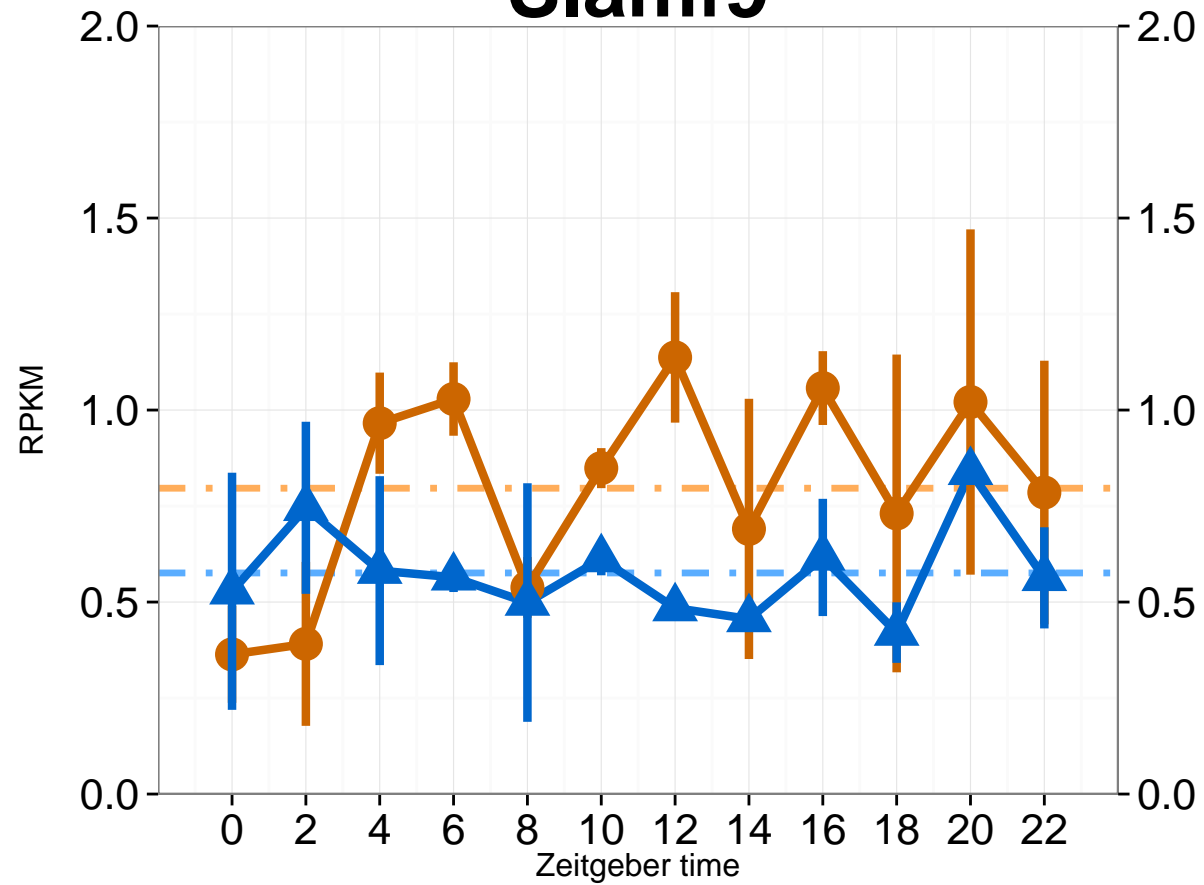

# Slamf9

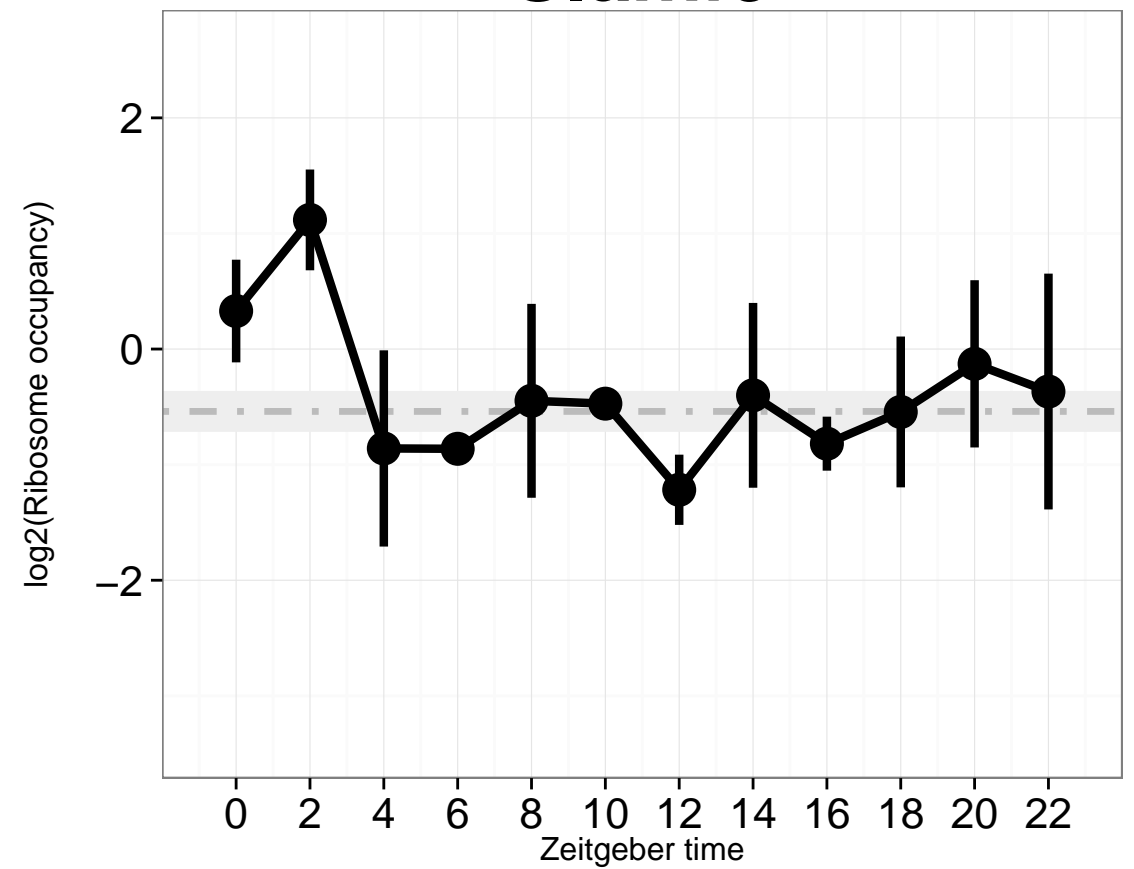

Supplement: SuppDataset_1.zip [file Slamf9_set_A.pdf › Supplemental Dataset 1/A-mRNA_nonrhyth_translation_nonrhyth/Slamf9_set_A.pdf]

## Slbp

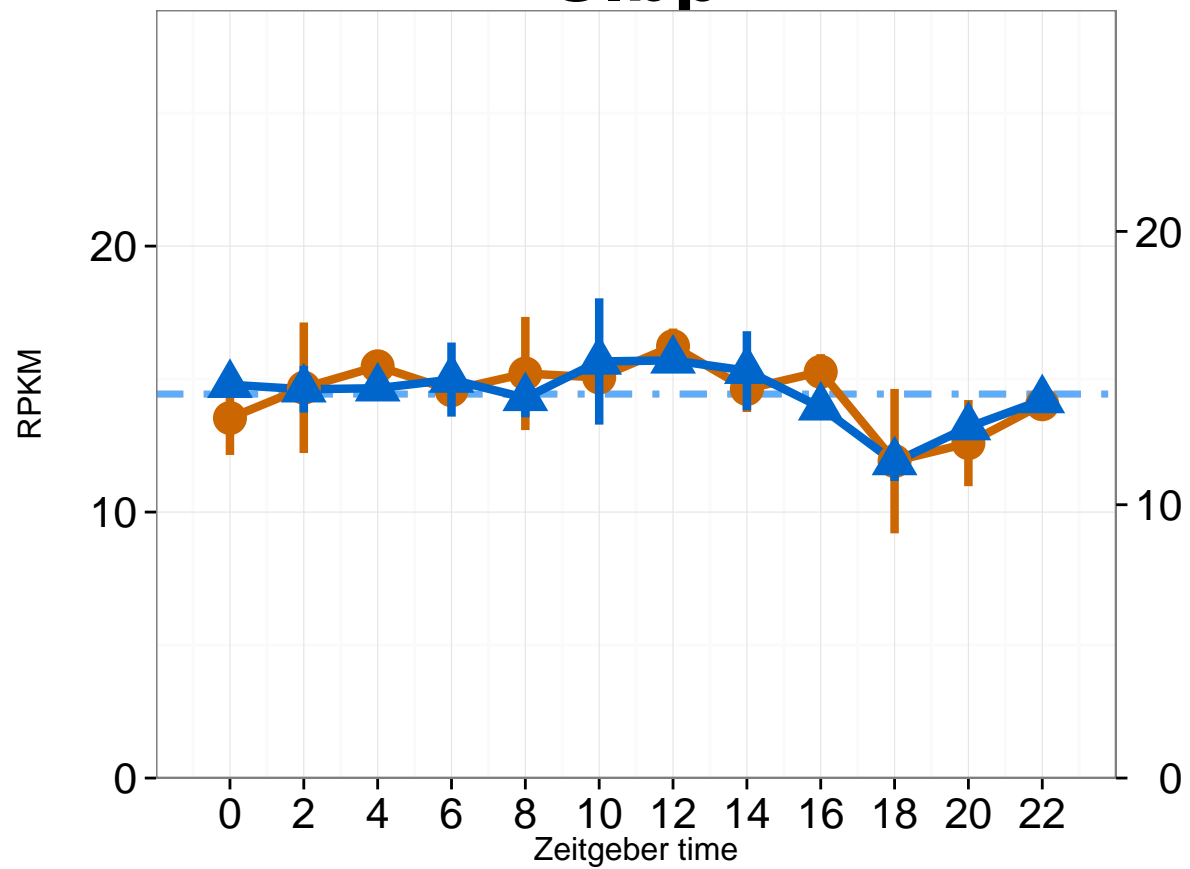

## Slbp

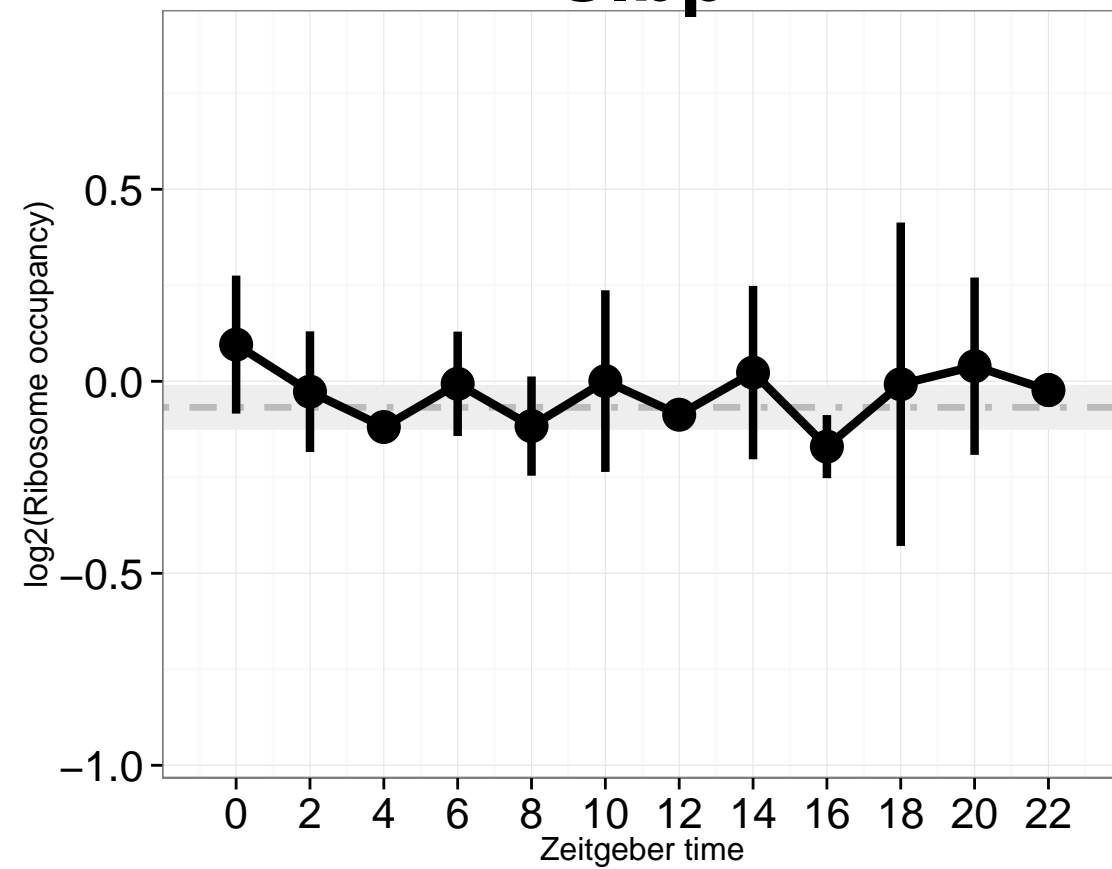

Supplement: SuppDataset_1.zip [file Slbp_set_A.pdf › Supplemental Dataset 1/A-mRNA_nonrhyth_translation_nonrhyth/Slbp_set_A.pdf]

# Slc10a1

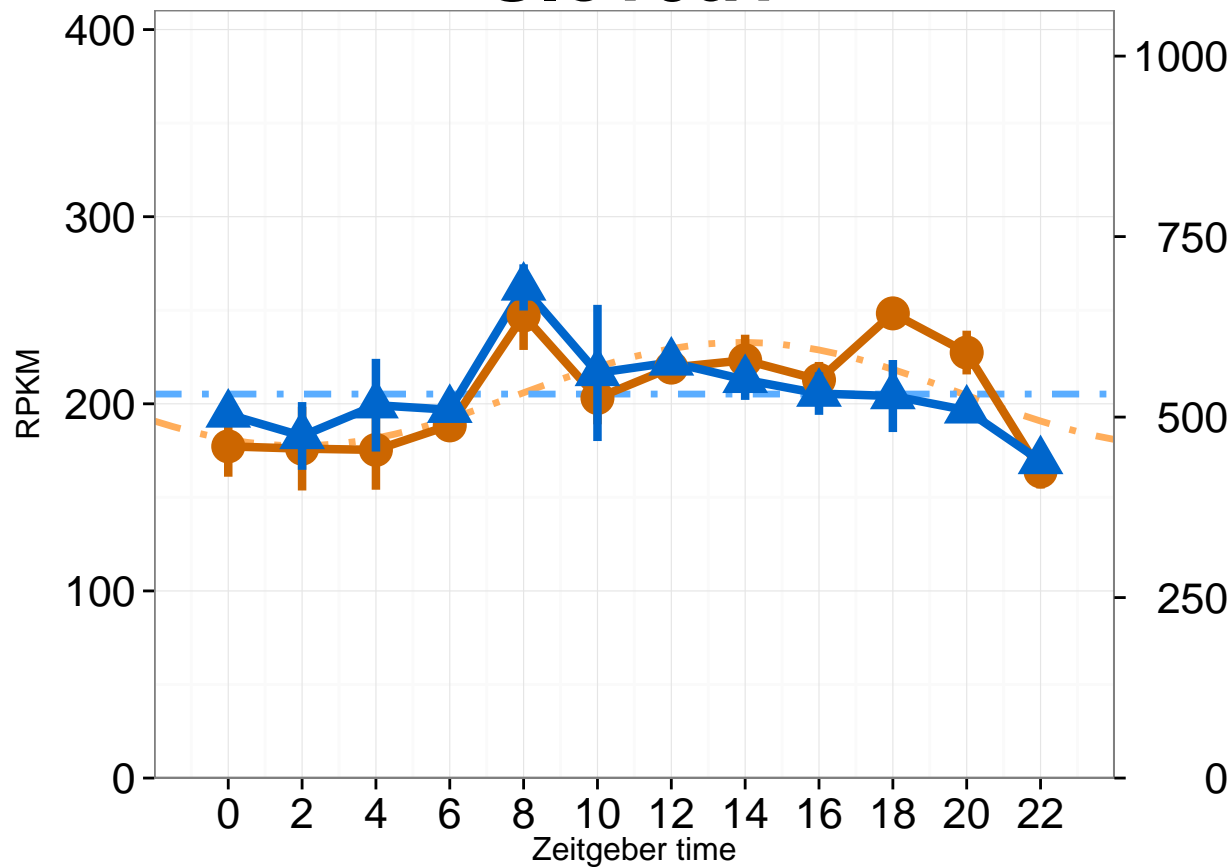

# Slc10a1

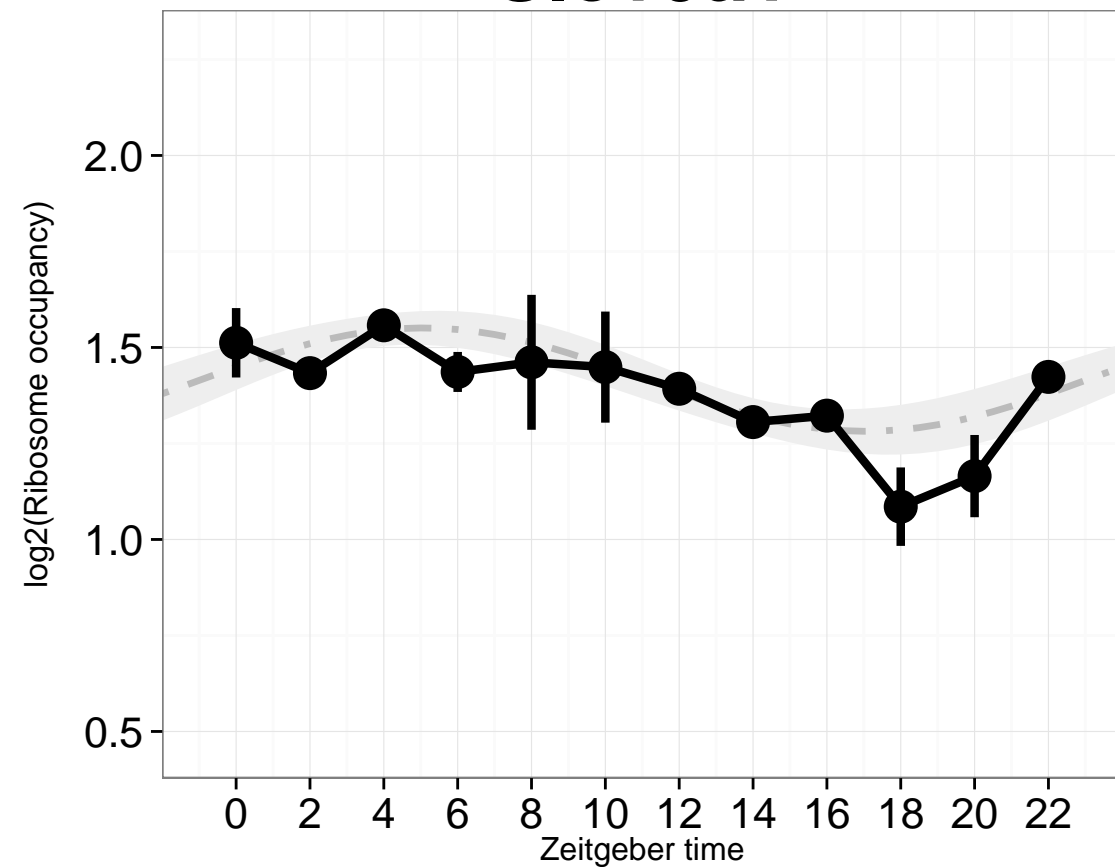

Supplement: SuppDataset_1.zip [file Slc10a1_set_A.pdf › Supplemental Dataset 1/A-mRNA_nonrhyth_translation_nonrhyth/Slc10a1_set_A.pdf]

# Slc10a3

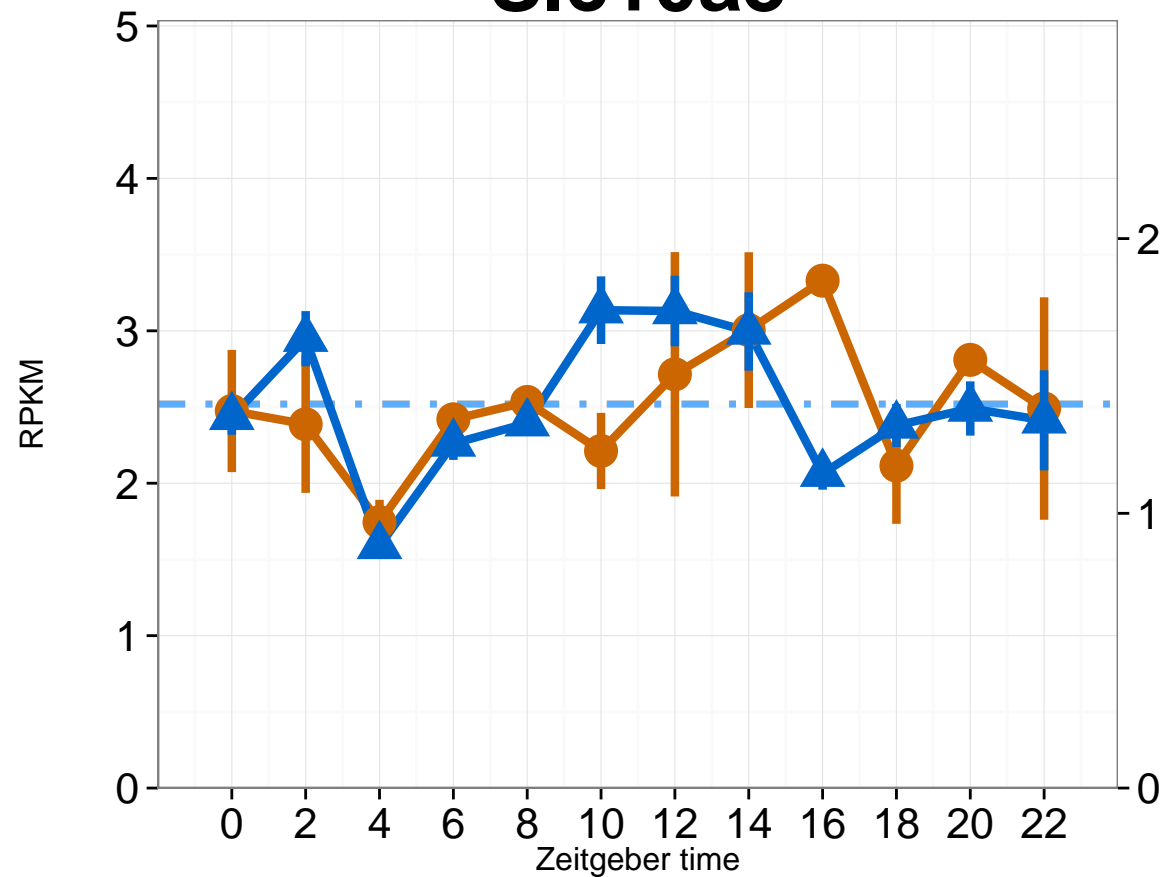

# Slc10a3

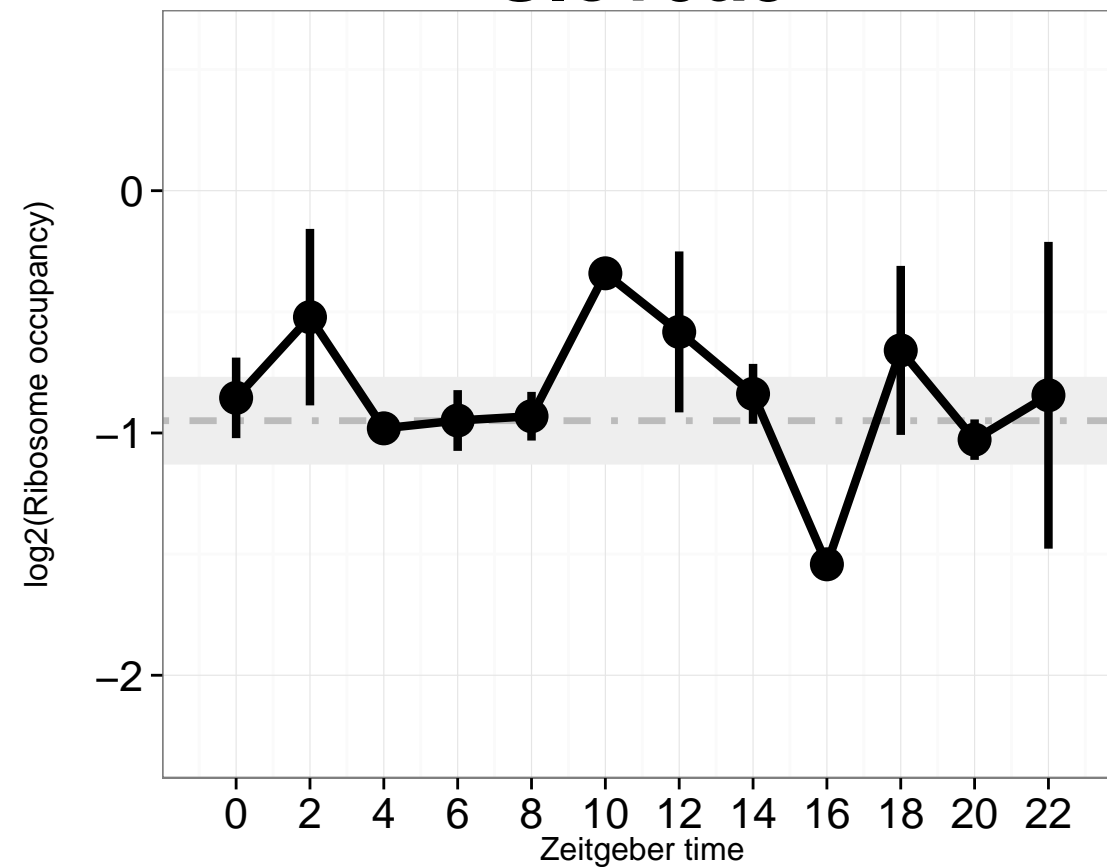

Supplement: SuppDataset_1.zip [file Slc10a3_set_A.pdf › Supplemental Dataset 1/A-mRNA_nonrhyth_translation_nonrhyth/Slc10a3_set_A.pdf]

## Slc10a5

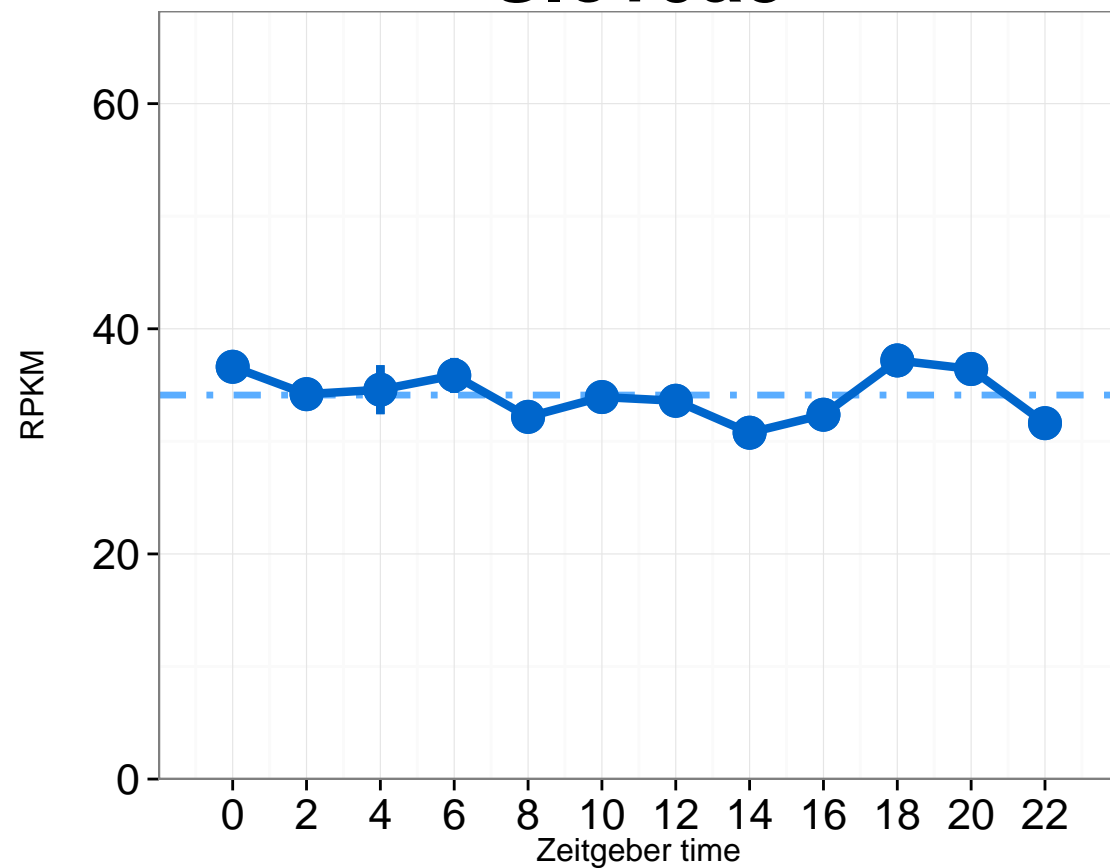

## Slc10a5 log2(Ribosome occupancy)

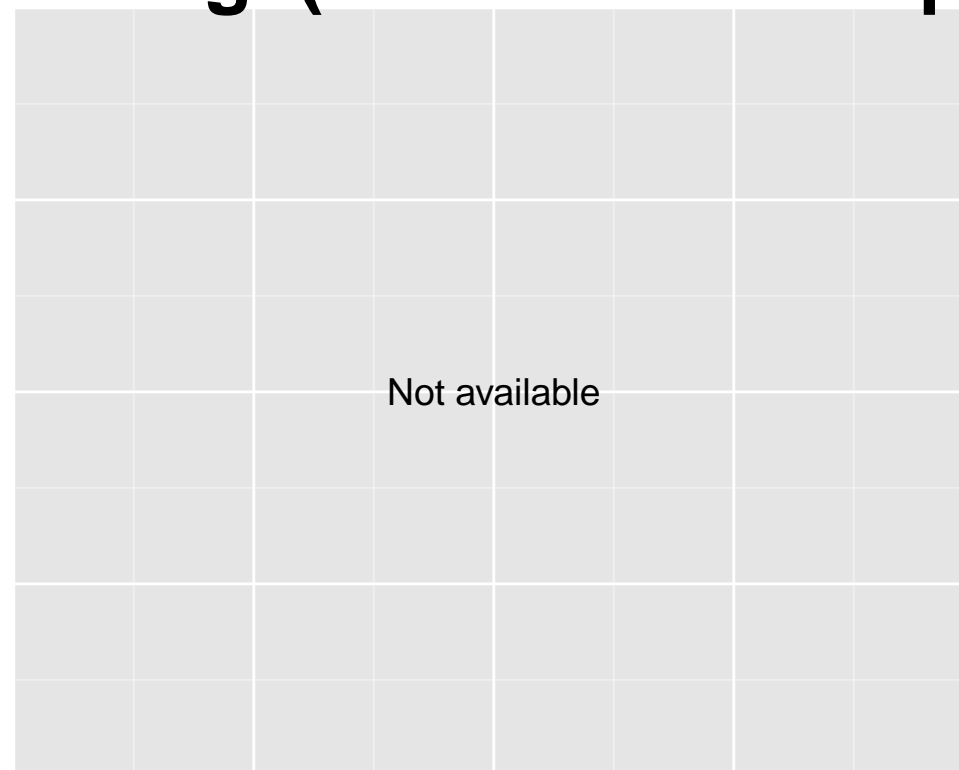

Supplement: SuppDataset_1.zip [file Slc10a5_set_A.pdf › Supplemental Dataset 1/A-mRNA_nonrhyth_translation_nonrhyth/Slc10a5_set_A.pdf]

## Slc10a7

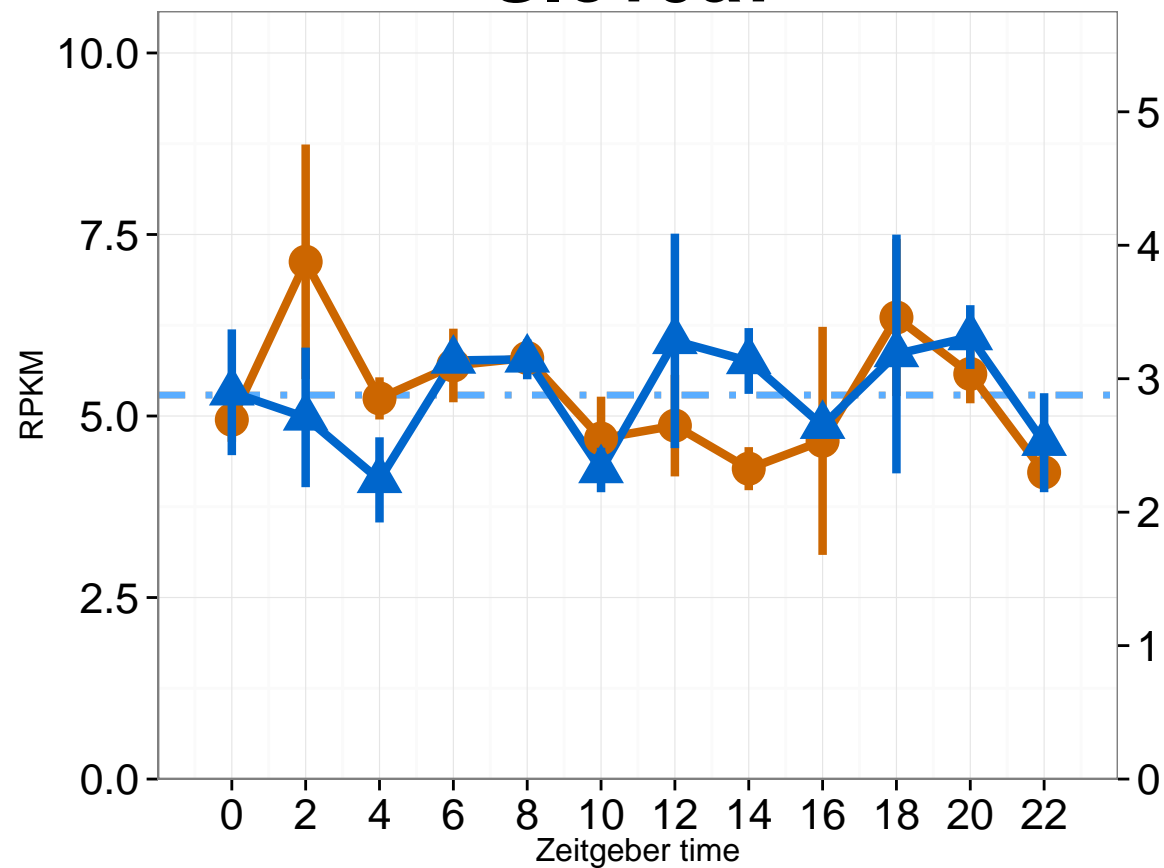

## Slc10a7

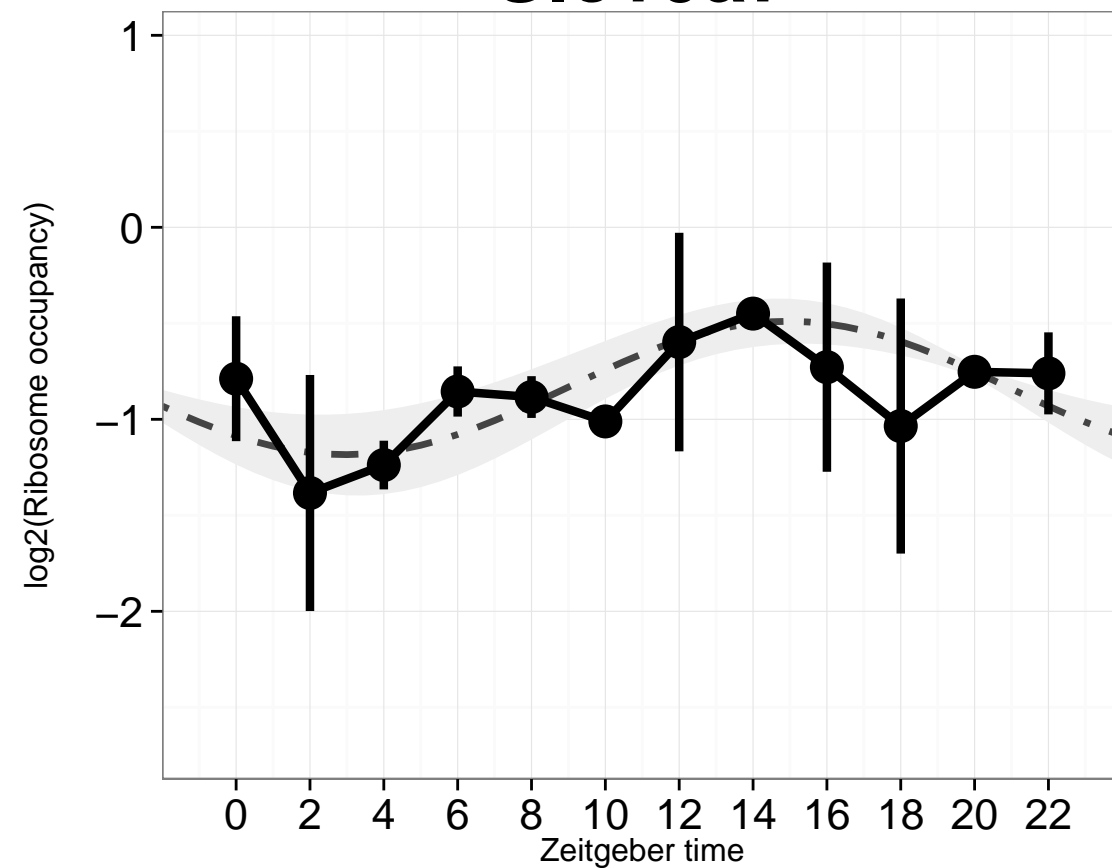

Supplement: SuppDataset_1.zip [file Slc10a7_set_A.pdf › Supplemental Dataset 1/A-mRNA_nonrhyth_translation_nonrhyth/Slc10a7_set_A.pdf]

## Slc11a1

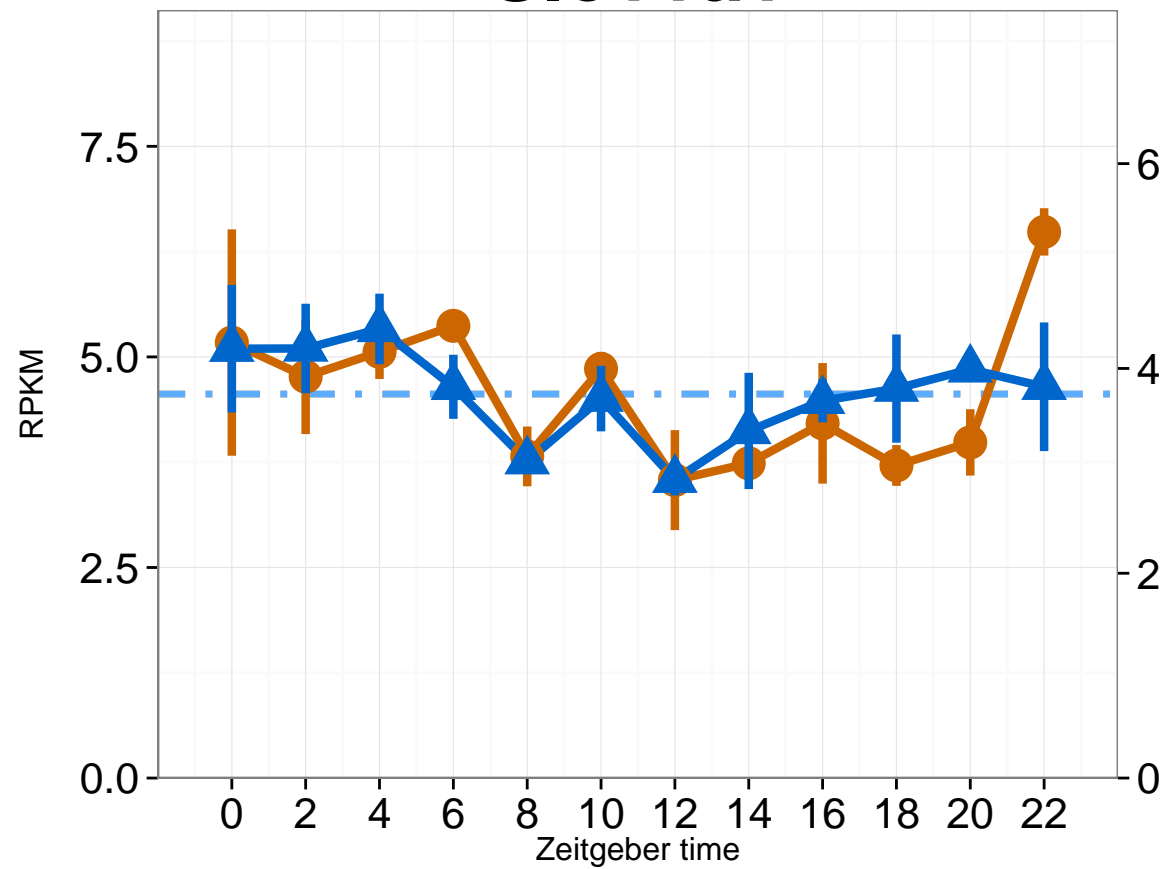

## Slc11a1

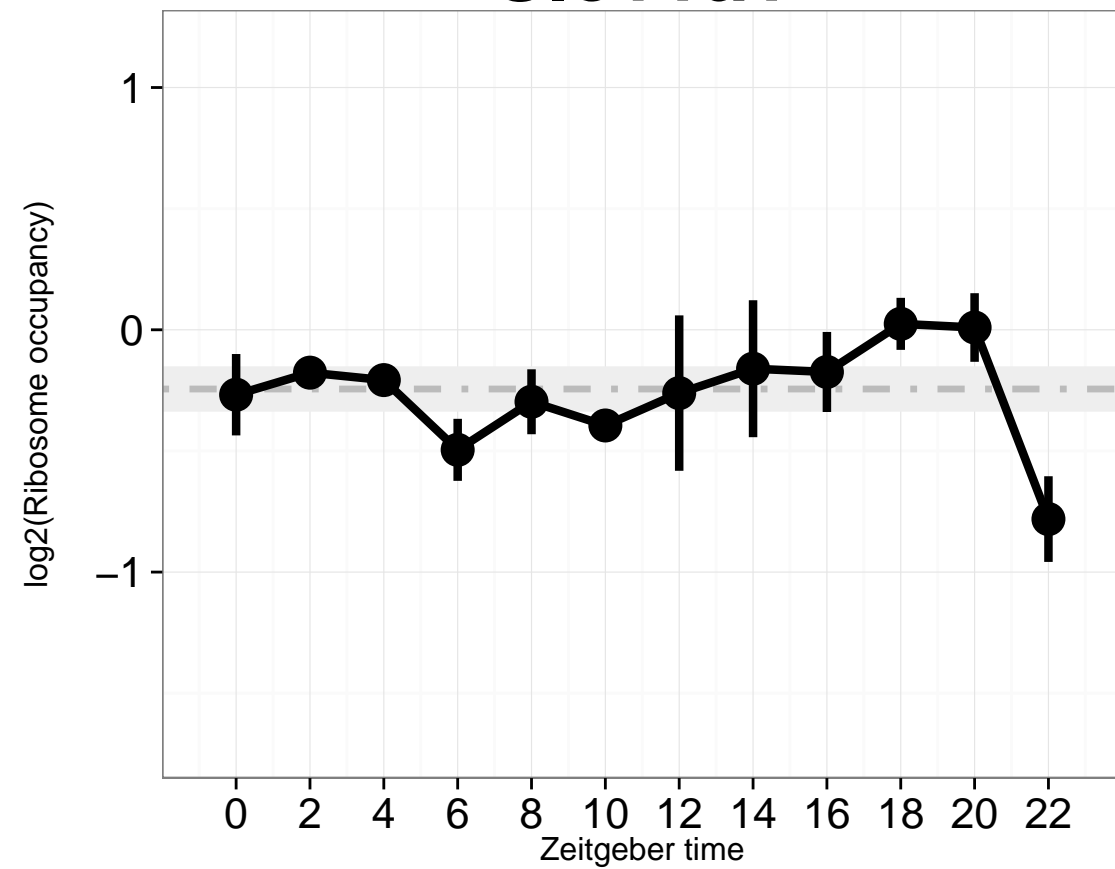

Supplement: SuppDataset_1.zip [file Slc11a1_set_A.pdf › Supplemental Dataset 1/A-mRNA_nonrhyth_translation_nonrhyth/Slc11a1_set_A.pdf]

## Slc11a2

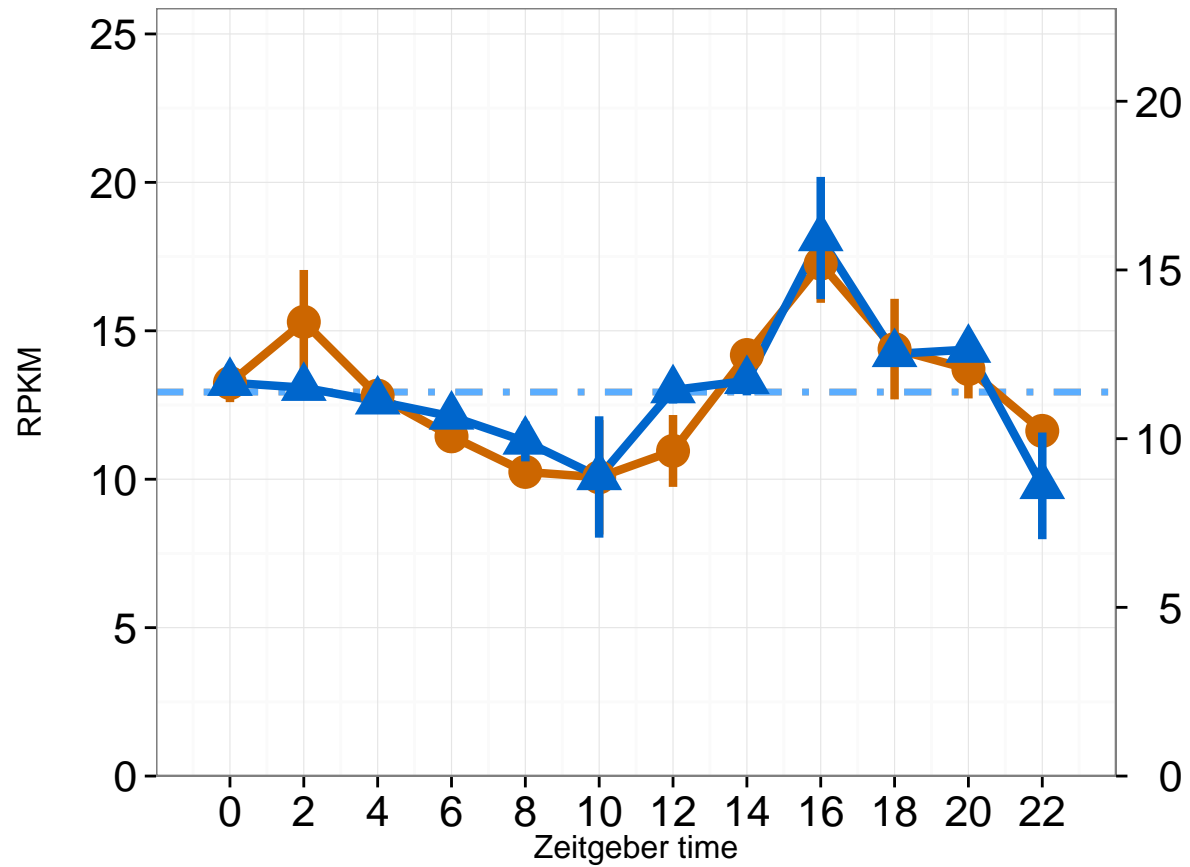

## Slc11a2

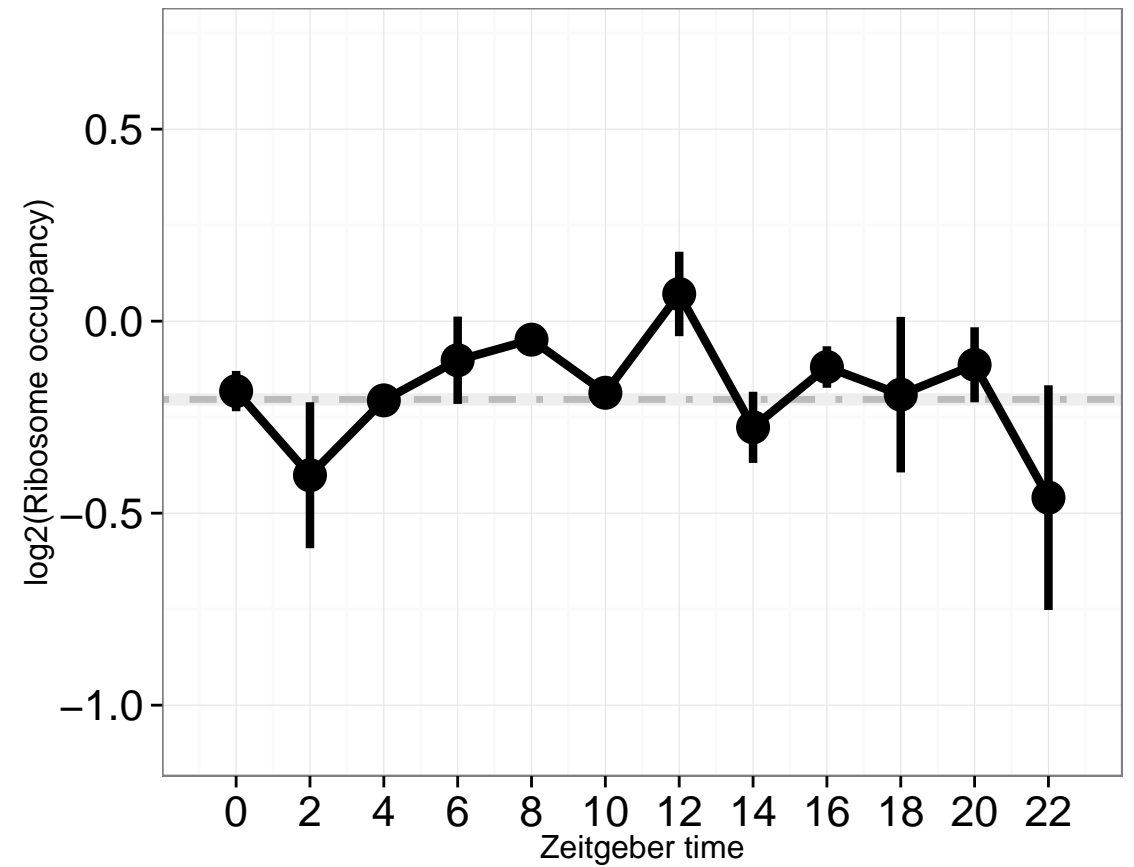

Supplement: SuppDataset_1.zip [file Slc11a2_set_A.pdf › Supplemental Dataset 1/A-mRNA_nonrhyth_translation_nonrhyth/Slc11a2_set_A.pdf]

# Slc12a4

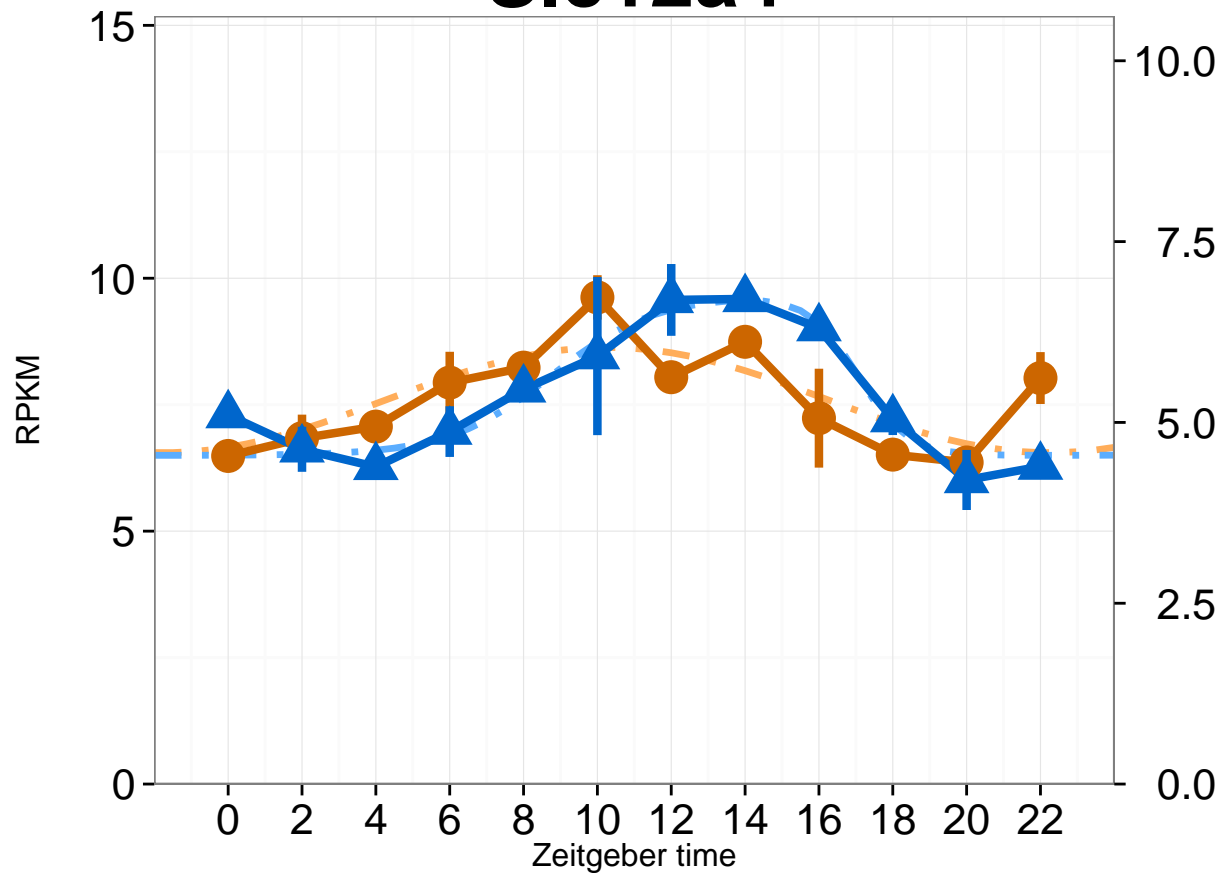

# Slc12a4

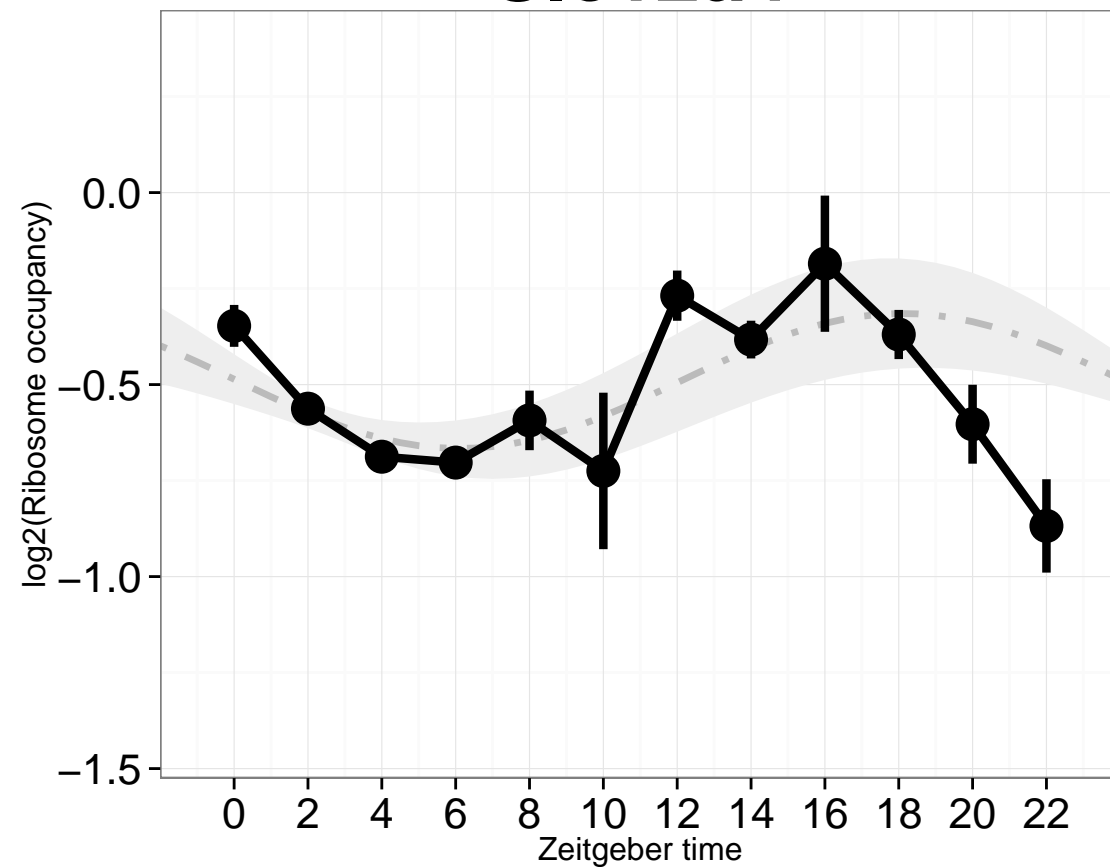

Supplement: SuppDataset_1.zip [file Slc12a4_set_A.pdf › Supplemental Dataset 1/A-mRNA_nonrhyth_translation_nonrhyth/Slc12a4_set_A.pdf]

**Slc12a5**

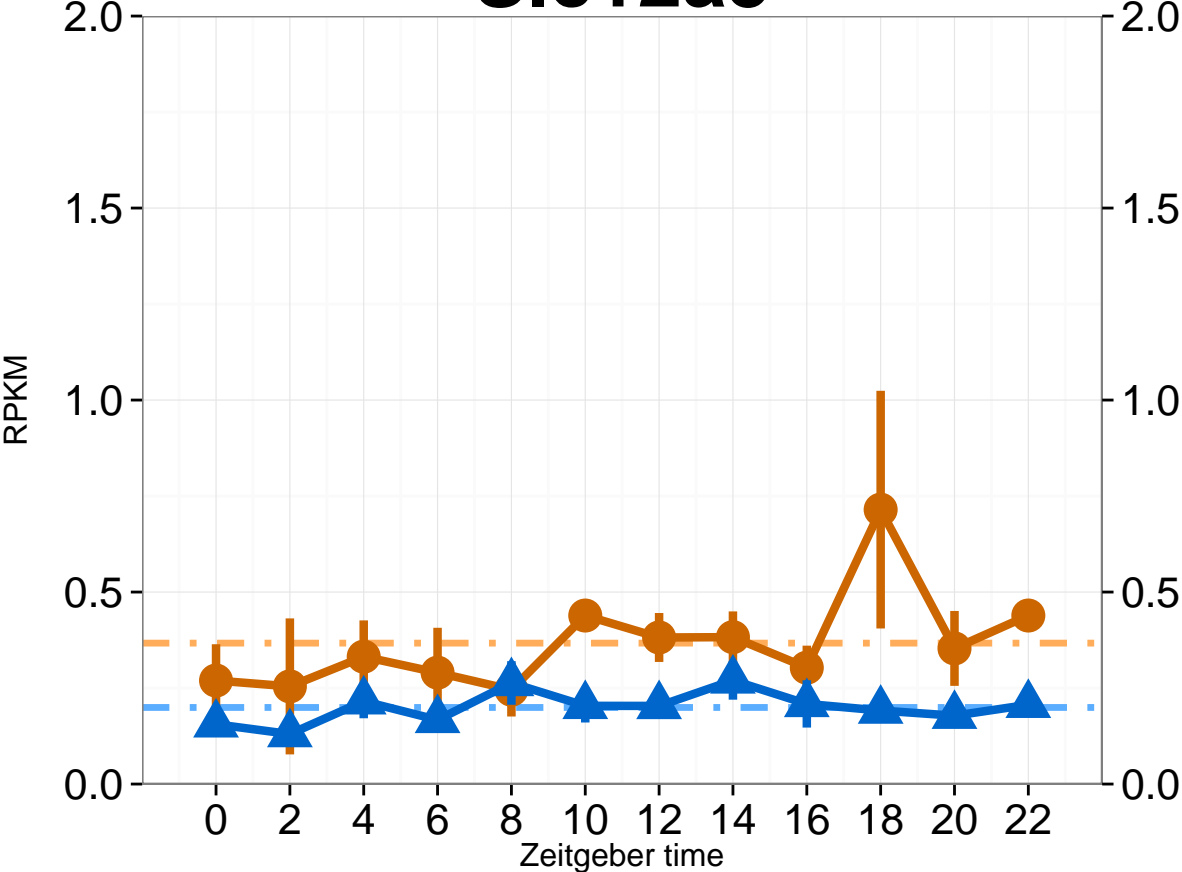

**Slc12a5**

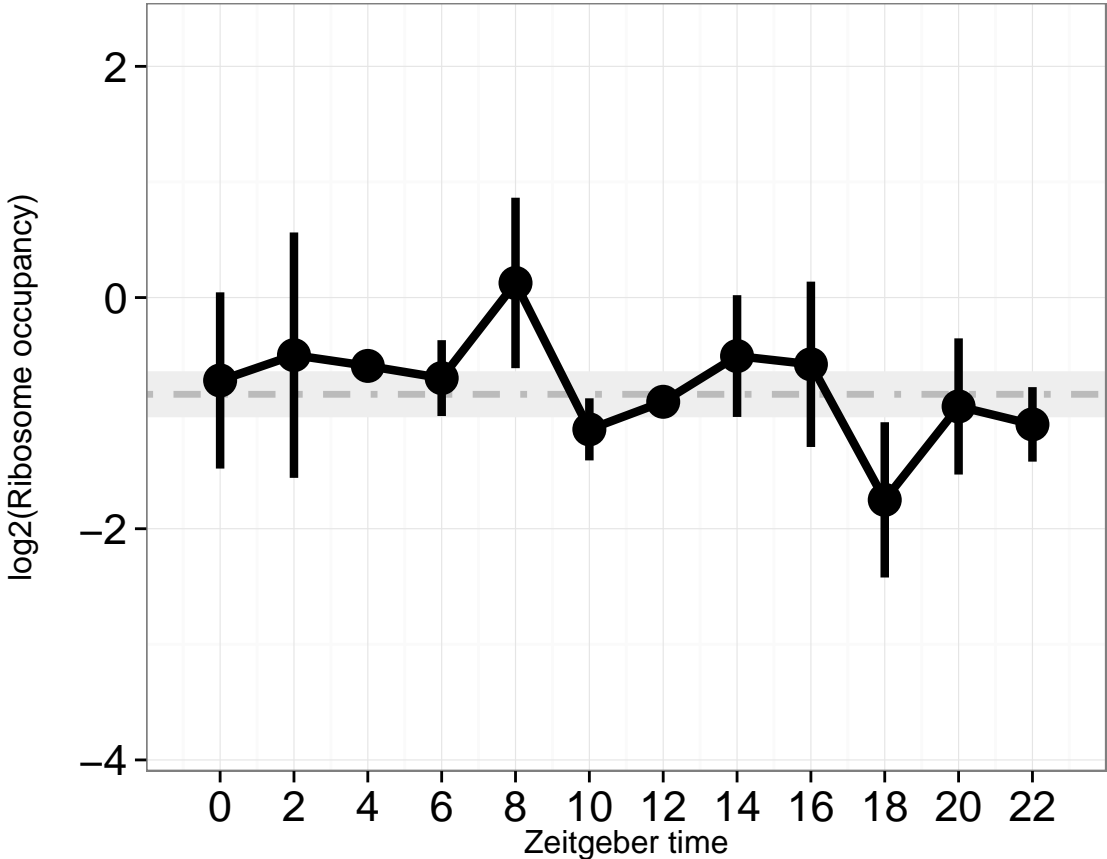

Supplement: SuppDataset_1.zip [file Slc12a5_set_A.pdf › Supplemental Dataset 1/A-mRNA_nonrhyth_translation_nonrhyth/Slc12a5_set_A.pdf]

# Slc12a6

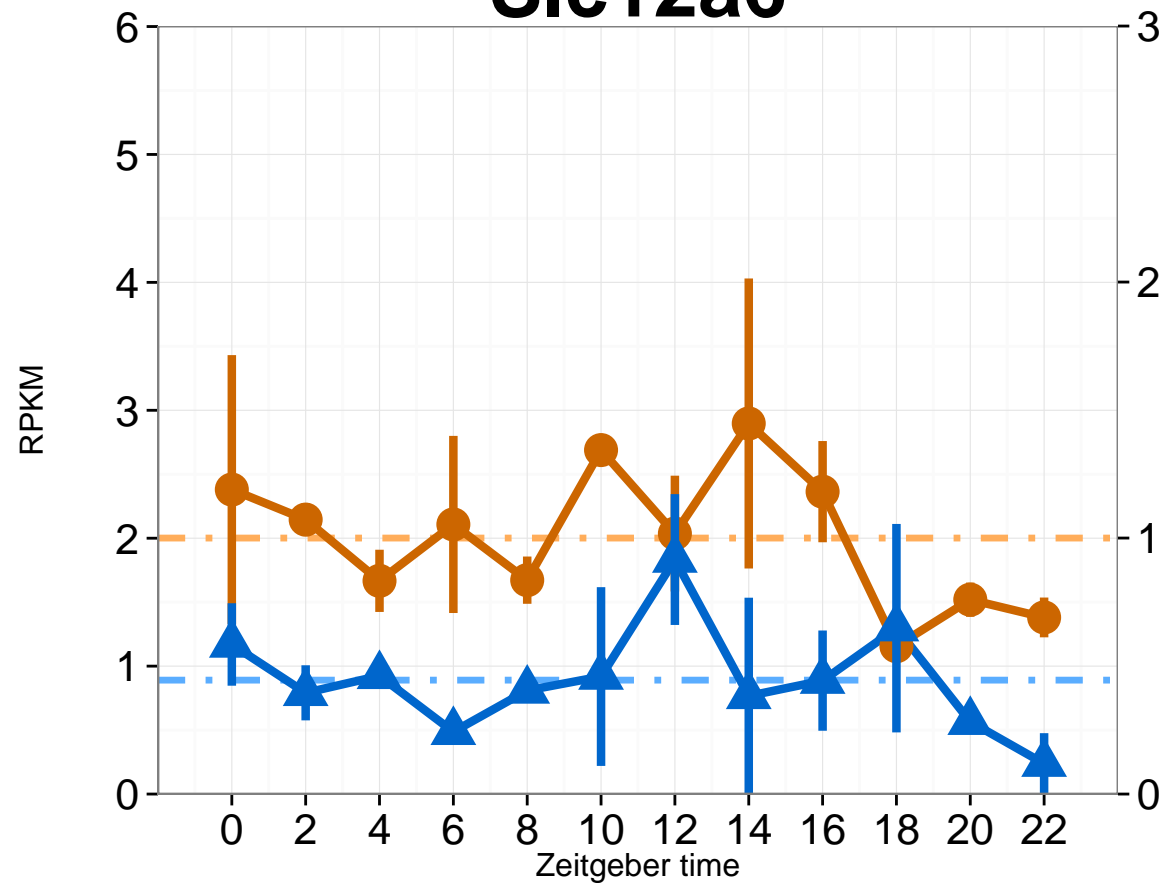

# Slc12a6

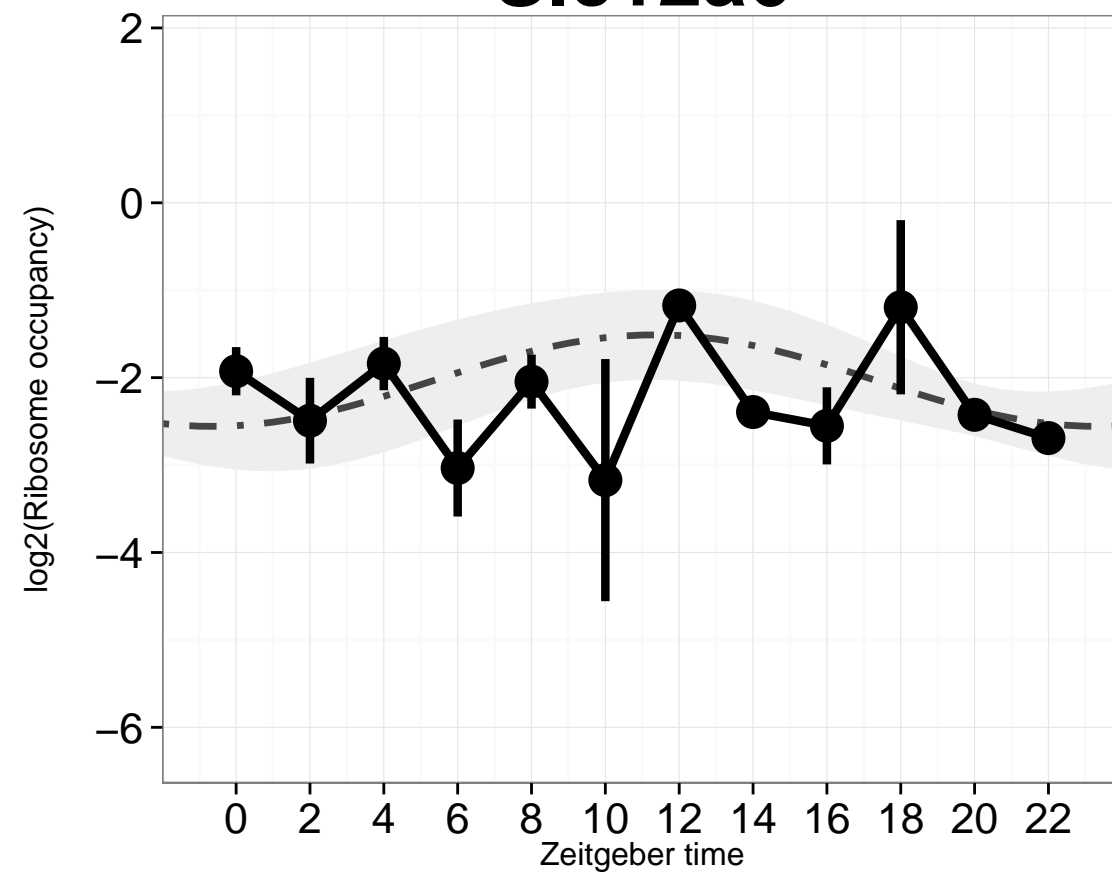

Supplement: SuppDataset_1.zip [file Slc12a6_set_A.pdf › Supplemental Dataset 1/A-mRNA_nonrhyth_translation_nonrhyth/Slc12a6_set_A.pdf]

# Slc12a7

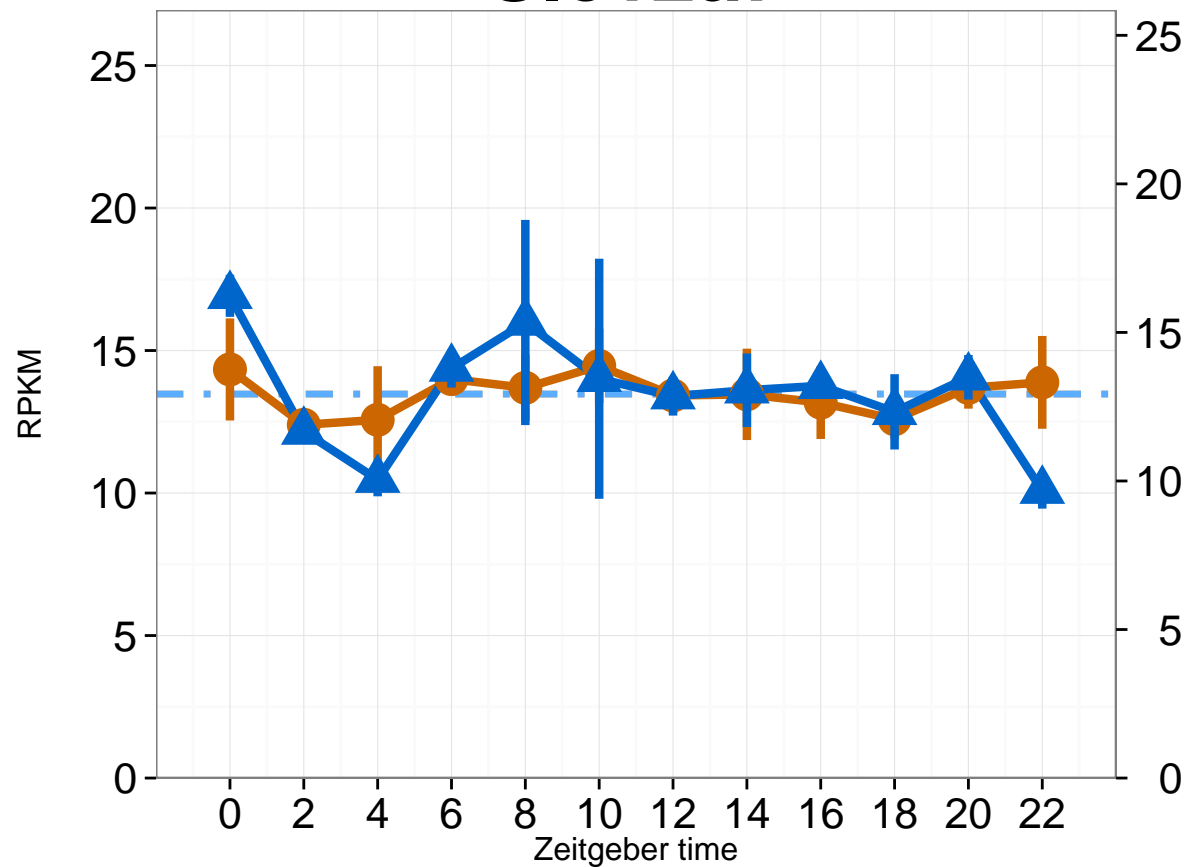

# Slc12a7

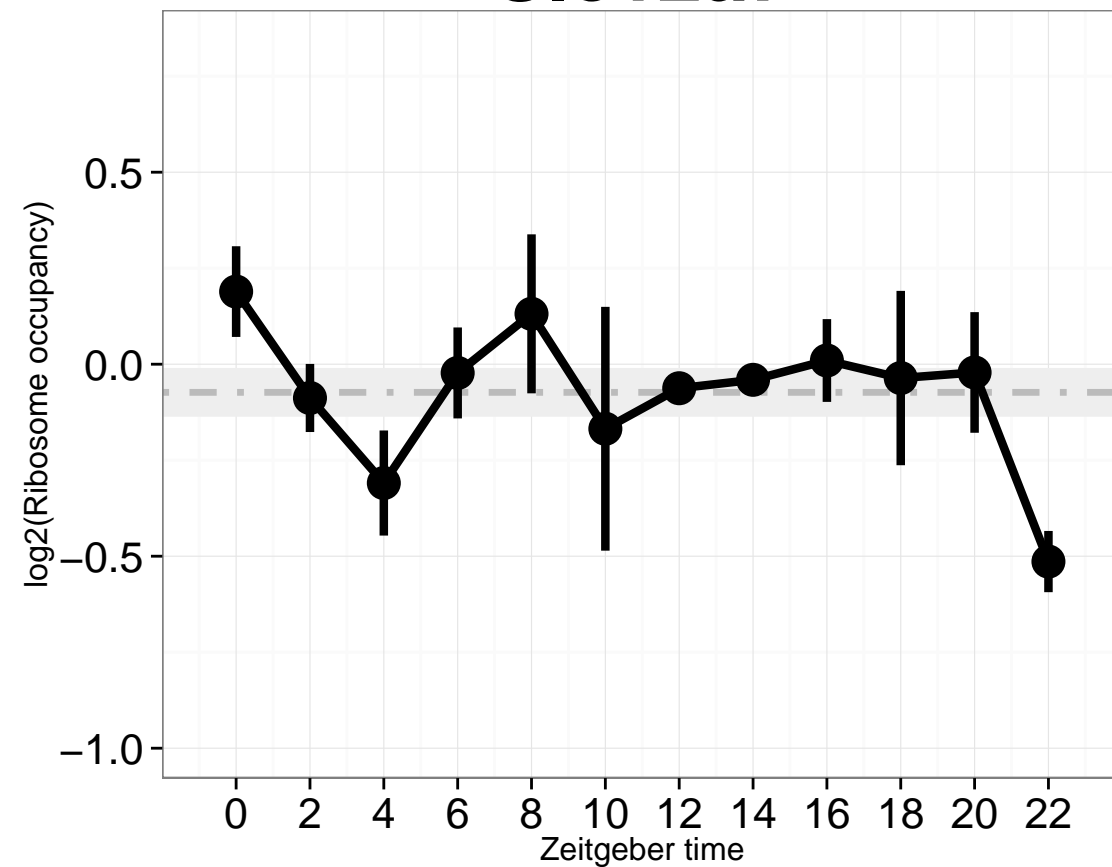

Supplement: SuppDataset_1.zip [file Slc12a7_set_A.pdf › Supplemental Dataset 1/A-mRNA_nonrhyth_translation_nonrhyth/Slc12a7_set_A.pdf]

**Slc15a2**

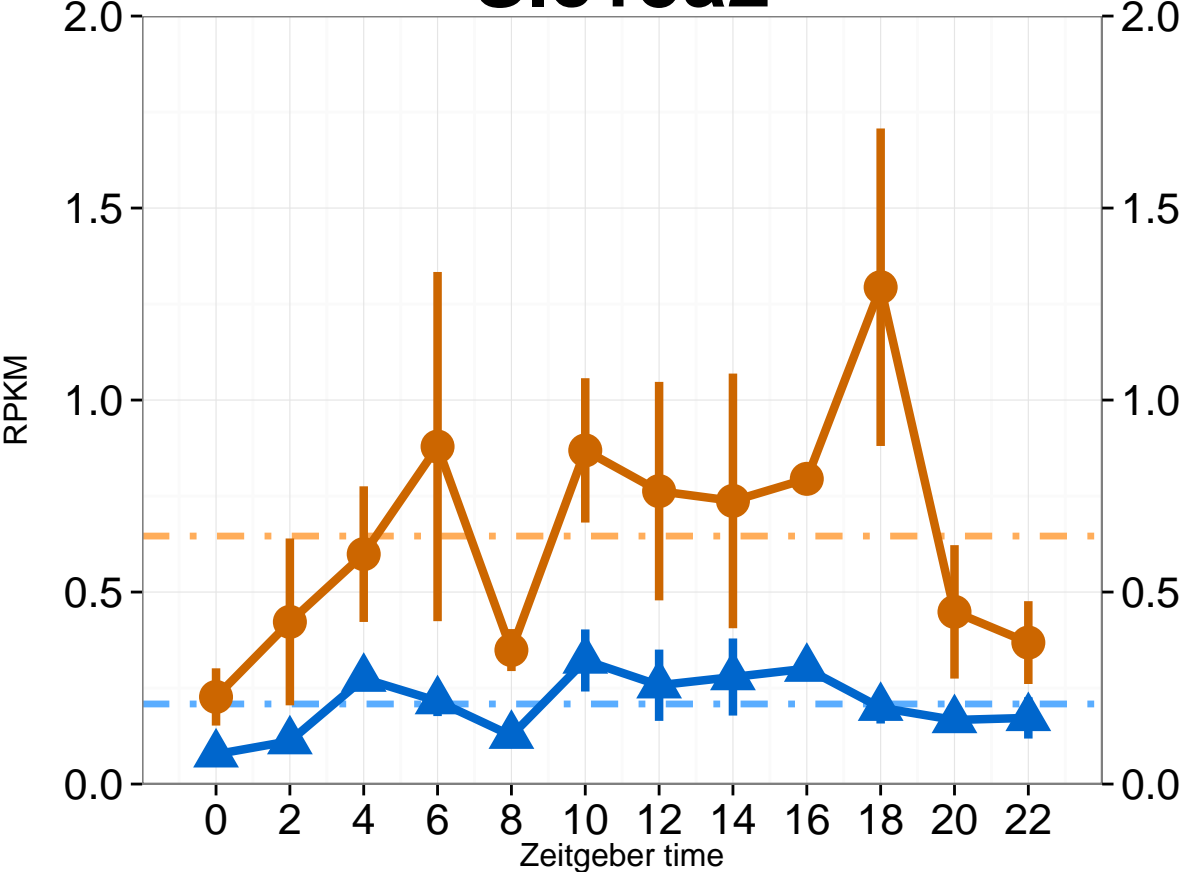

**Slc15a2**

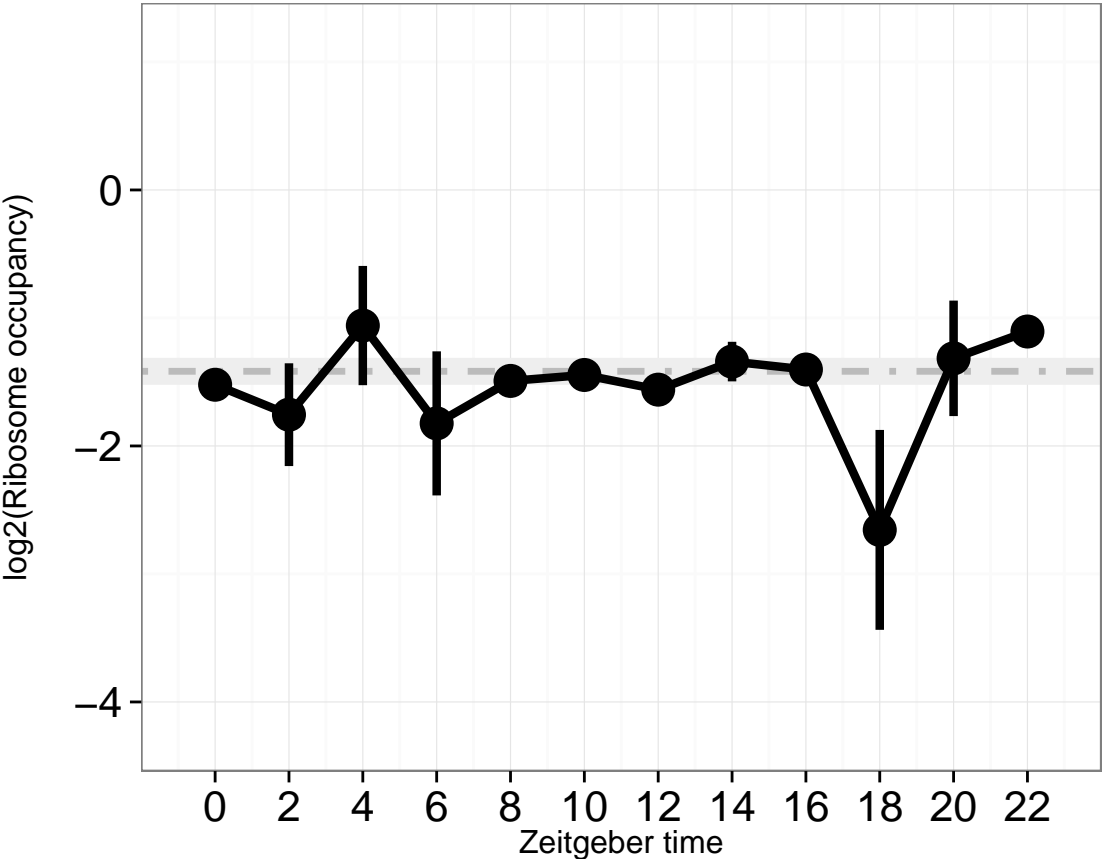

Supplement: SuppDataset_1.zip [file Slc15a2_set_A.pdf › Supplemental Dataset 1/A-mRNA_nonrhyth_translation_nonrhyth/Slc15a2_set_A.pdf]

# Slc15a4

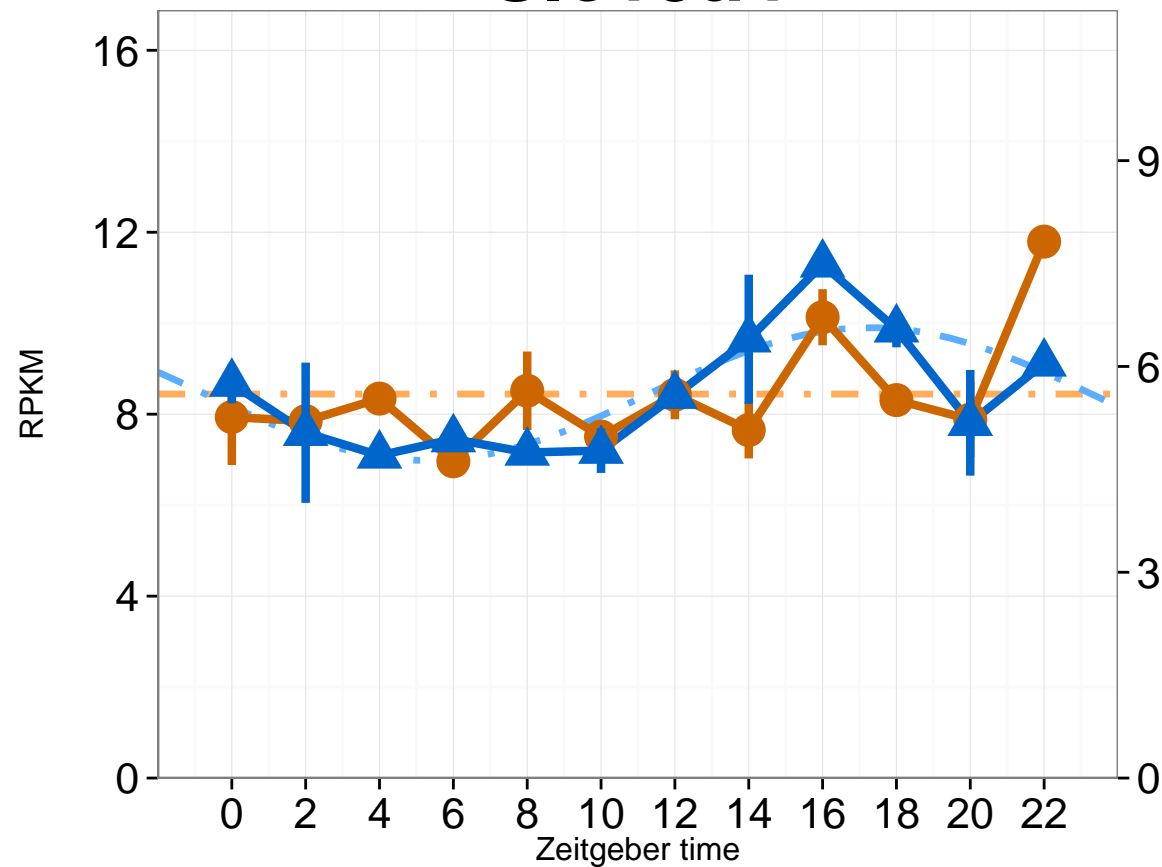

# Slc15a4

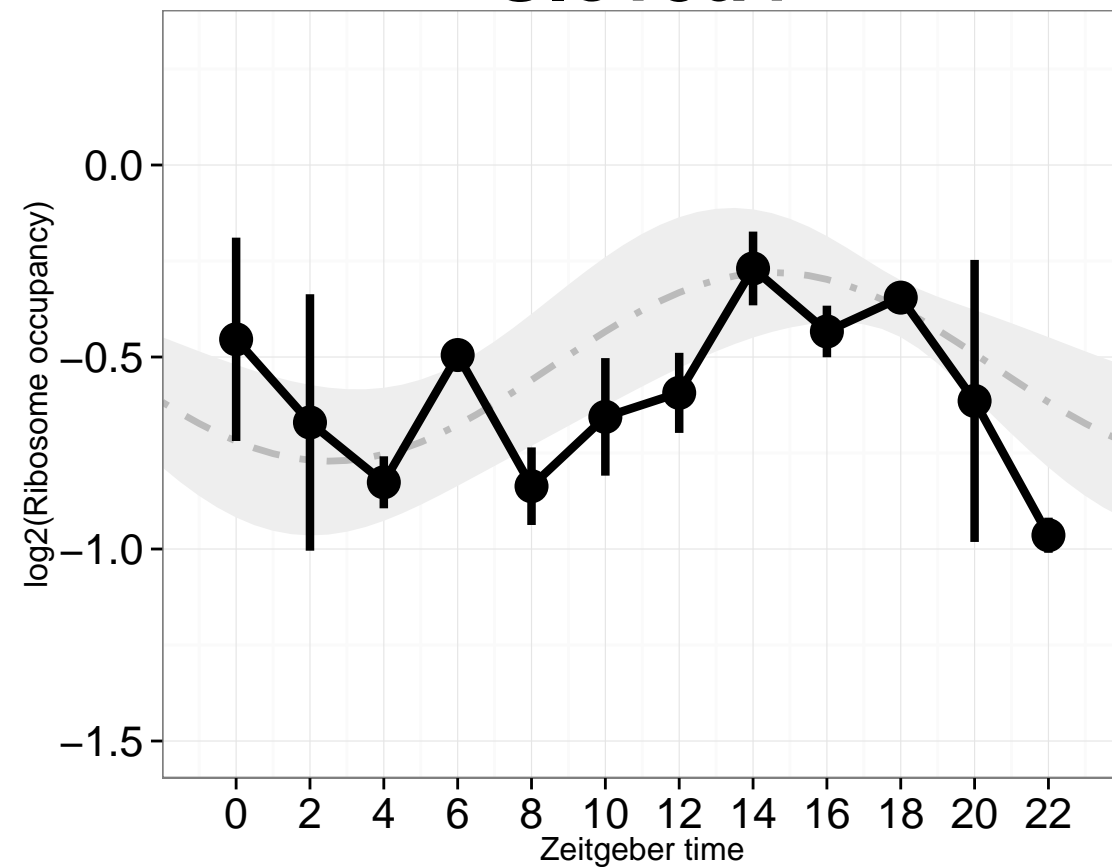

Supplement: SuppDataset_1.zip [file Slc15a4_set_A.pdf › Supplemental Dataset 1/A-mRNA_nonrhyth_translation_nonrhyth/Slc15a4_set_A.pdf]

## Slc15a5

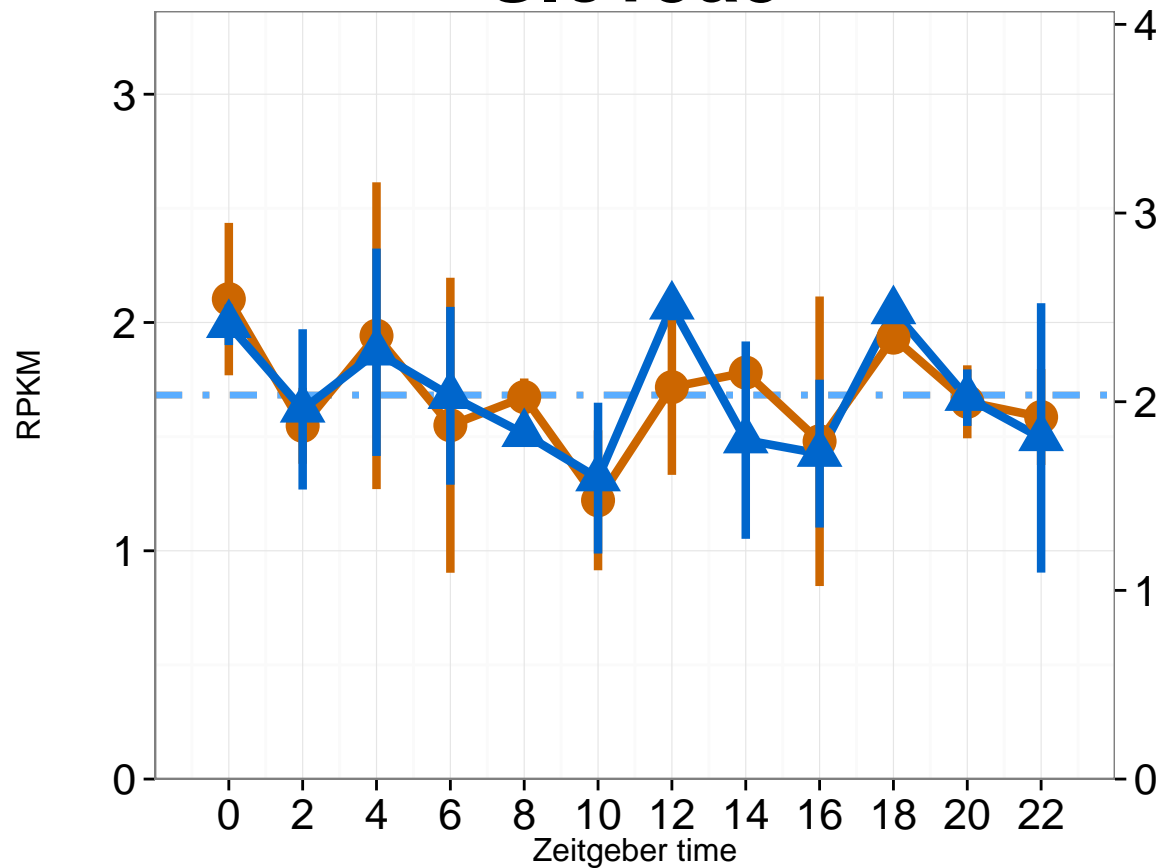

## Slc15a5

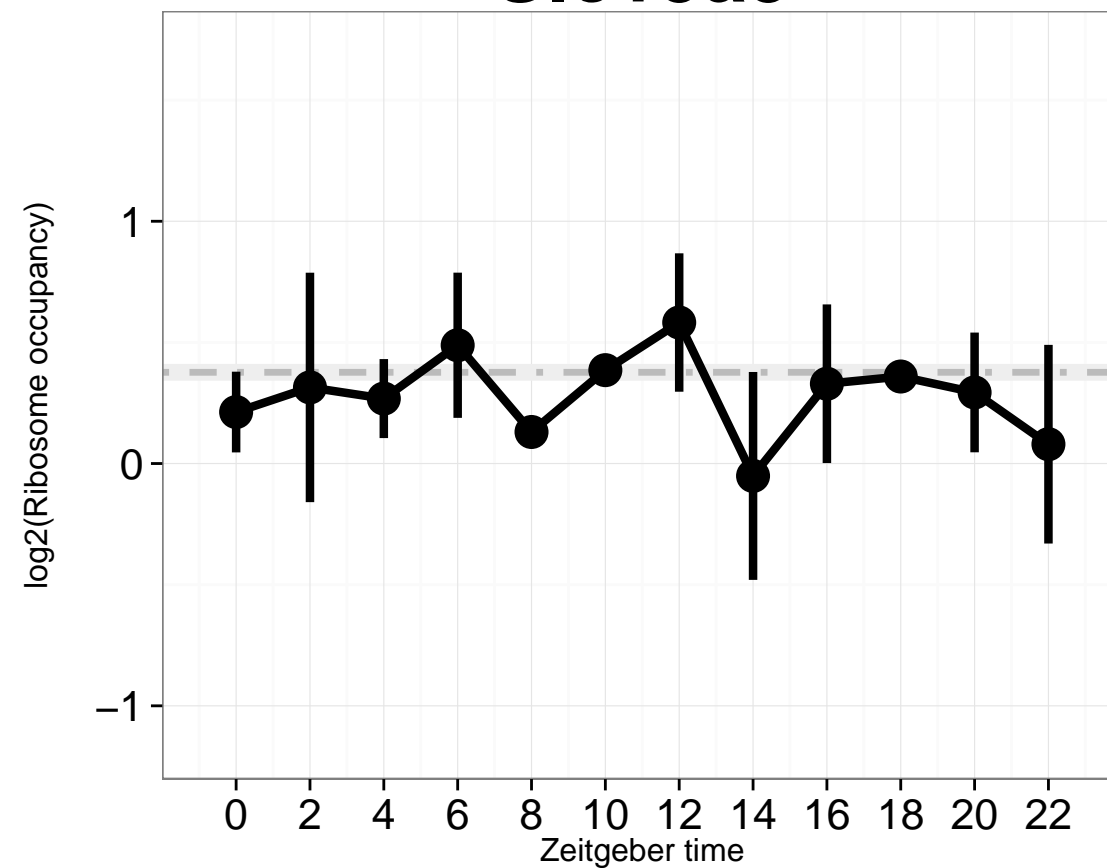

Supplement: SuppDataset_1.zip [file Slc15a5_set_A.pdf › Supplemental Dataset 1/A-mRNA_nonrhyth_translation_nonrhyth/Slc15a5_set_A.pdf]

## Slc16a10

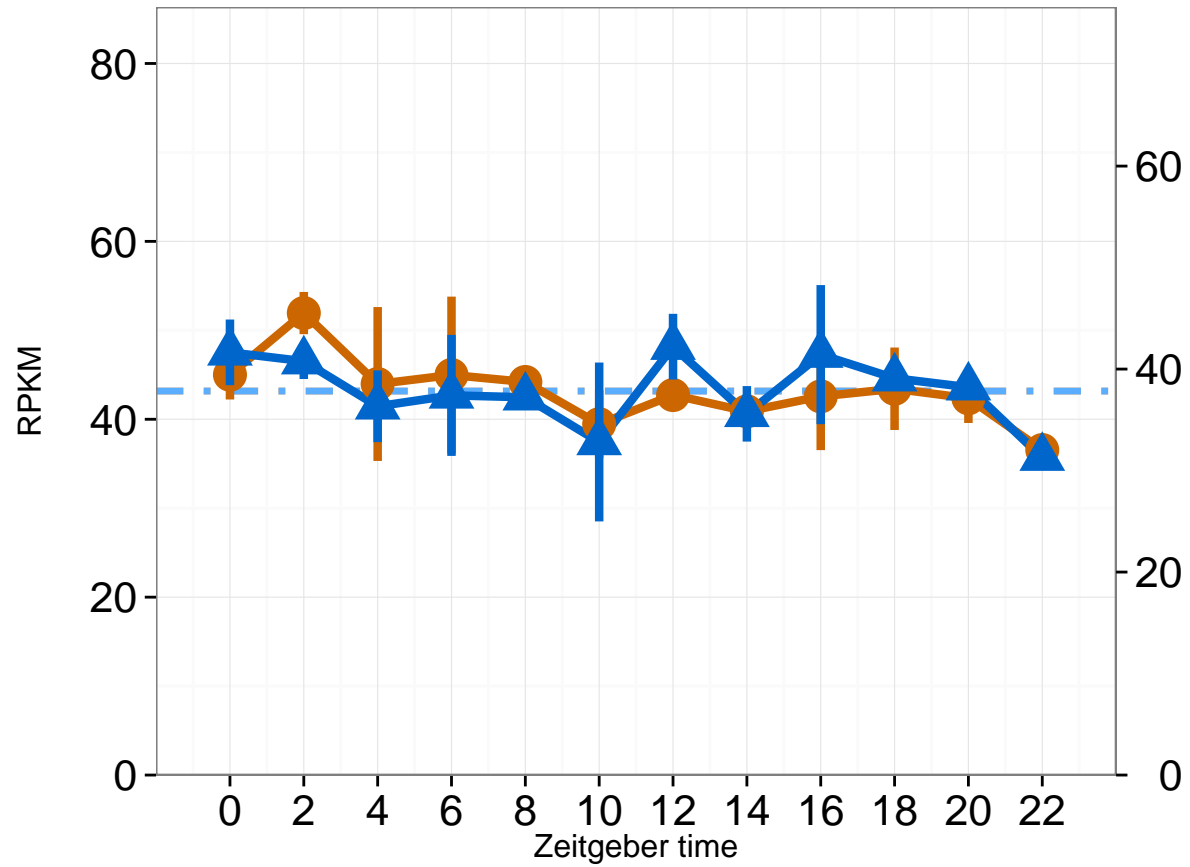

## Slc16a10

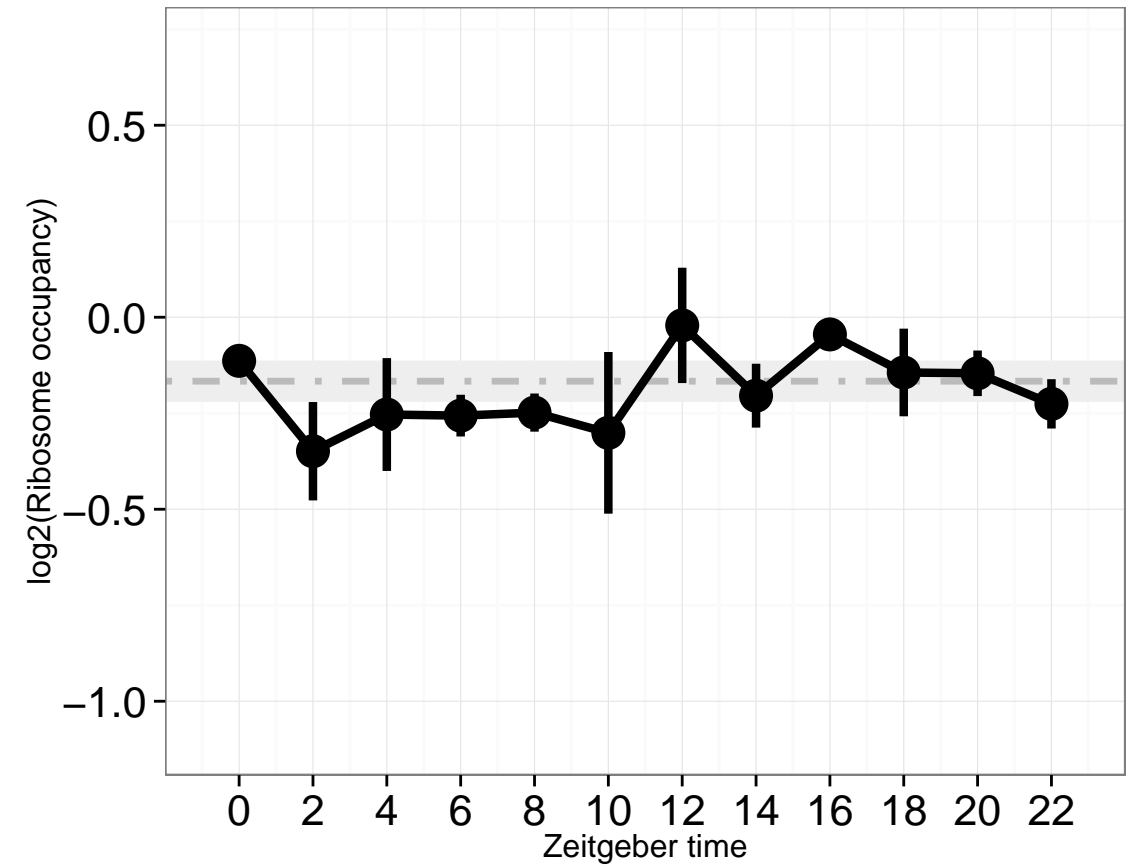

Supplement: SuppDataset_1.zip [file Slc16a10_set_A.pdf › Supplemental Dataset 1/A-mRNA_nonrhyth_translation_nonrhyth/Slc16a10_set_A.pdf]

# Slc16a11

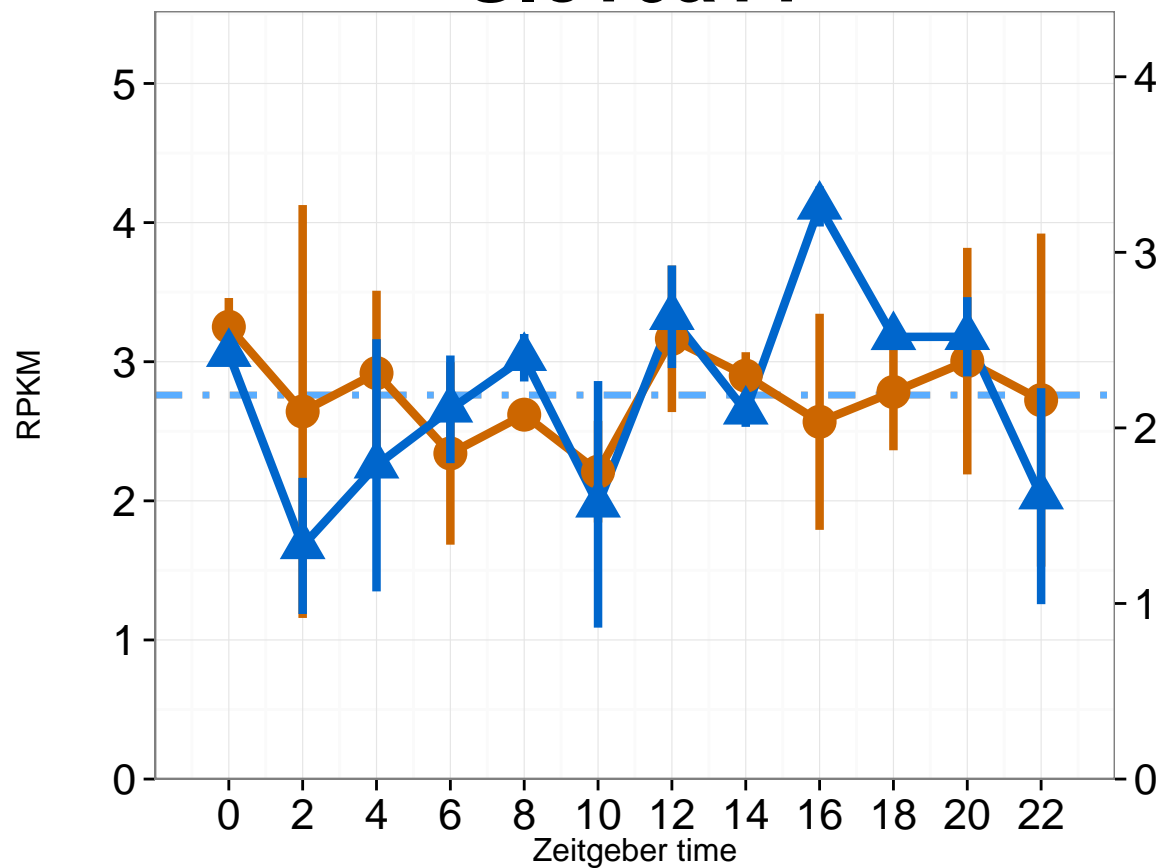

# Slc16a11

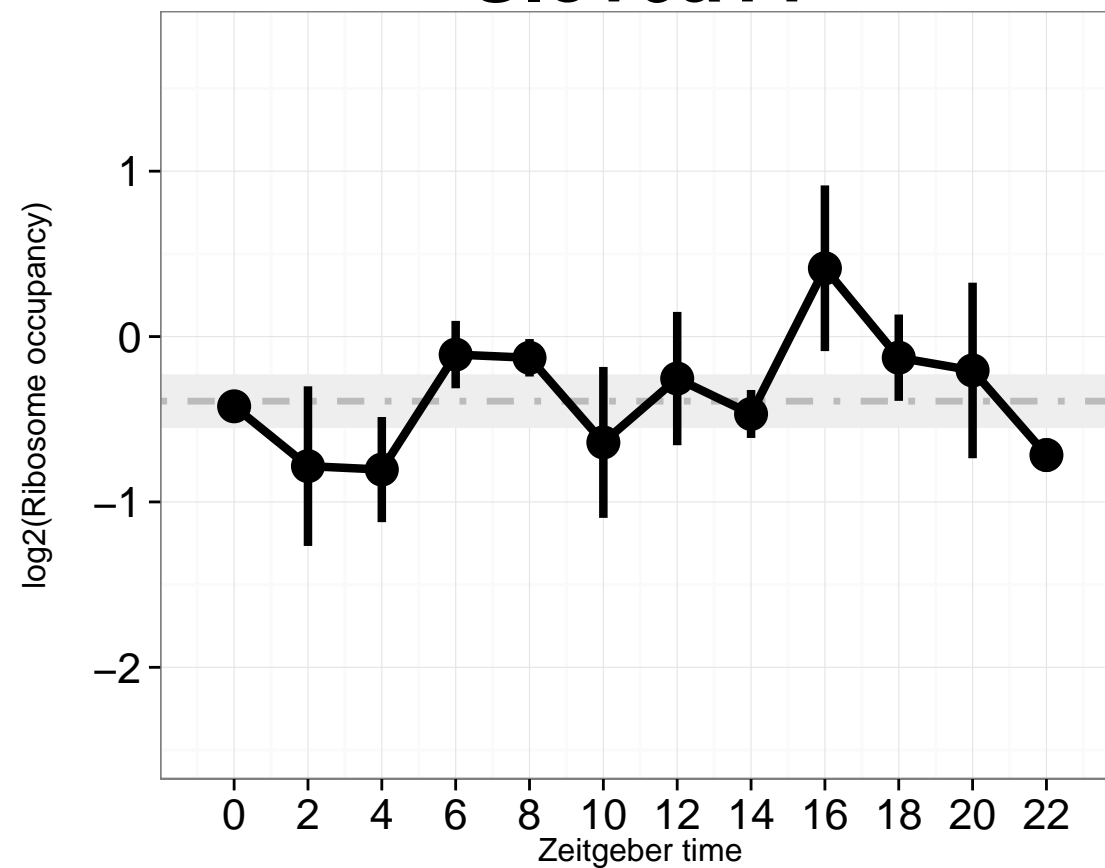

Supplement: SuppDataset_1.zip [file Slc16a11_set_A.pdf › Supplemental Dataset 1/A-mRNA_nonrhyth_translation_nonrhyth/Slc16a11_set_A.pdf]

## Slc16a2

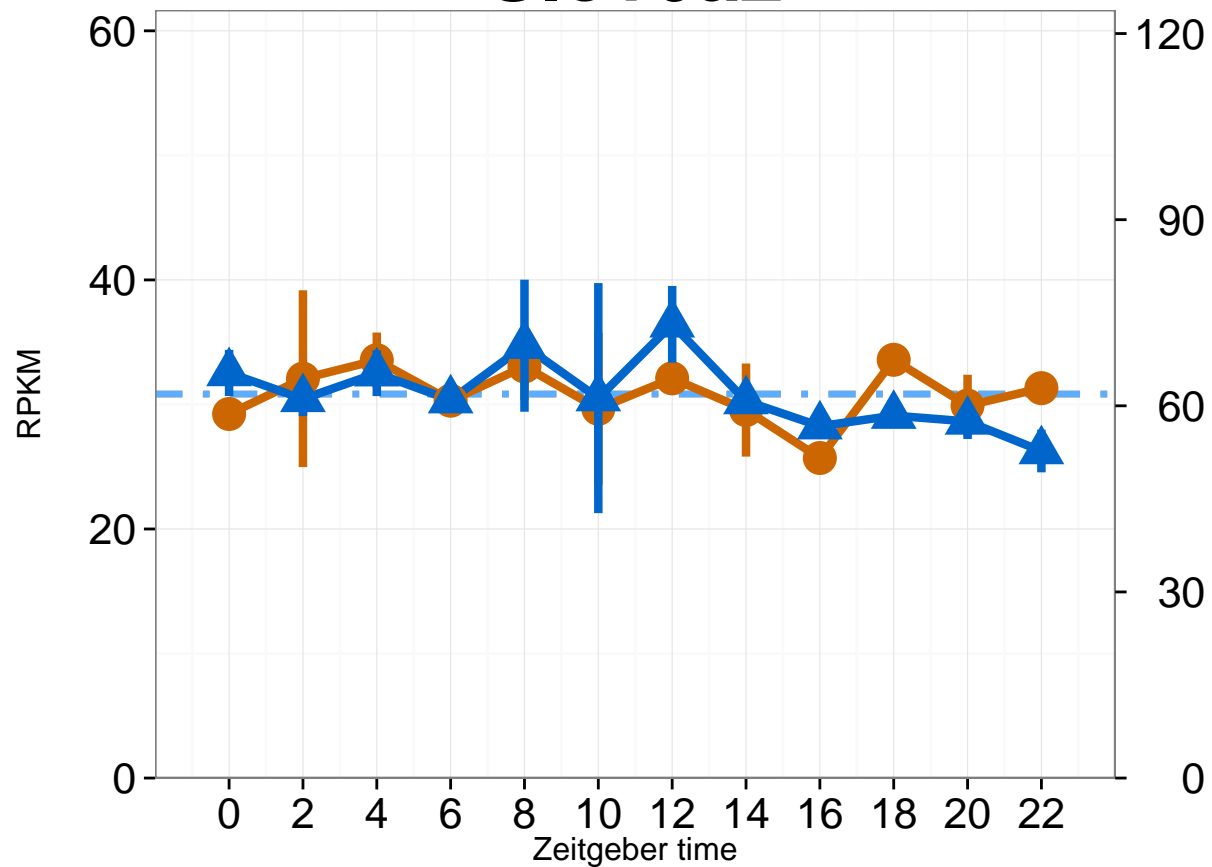

## Slc16a2

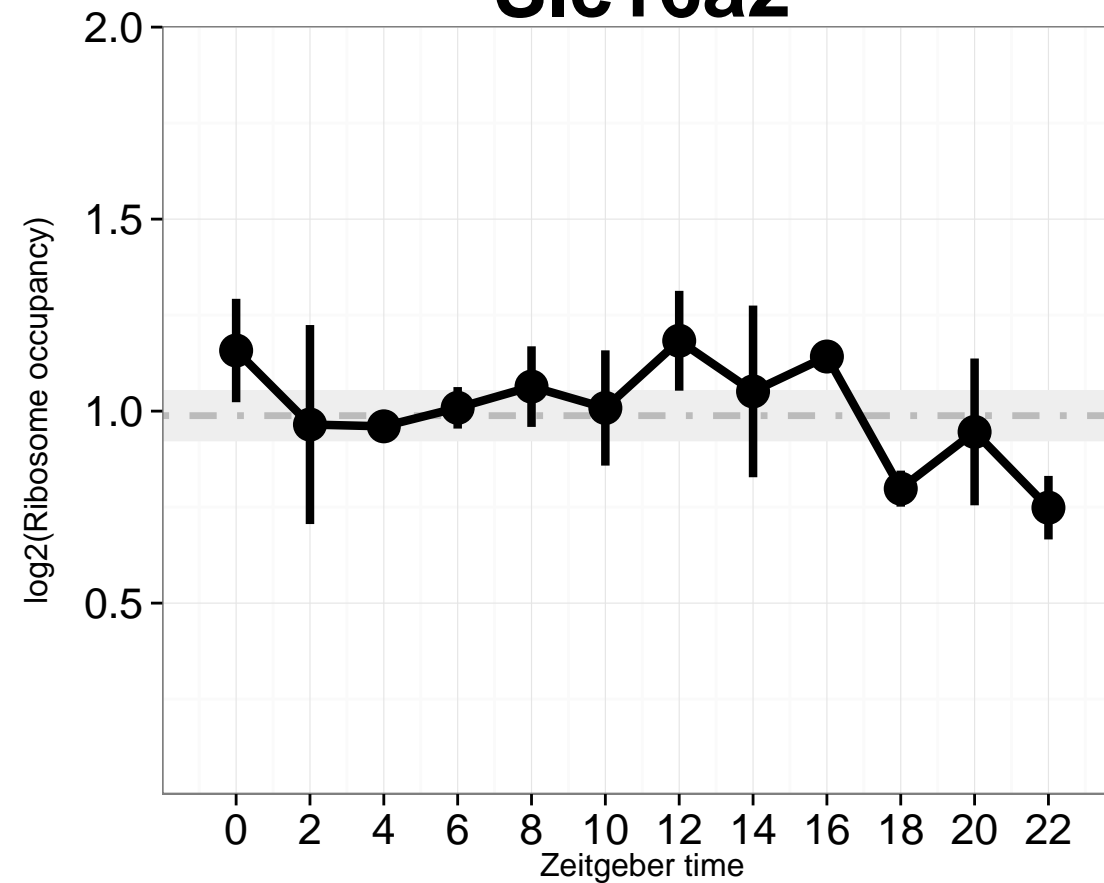

Supplement: SuppDataset_1.zip [file Slc16a2_set_A.pdf › Supplemental Dataset 1/A-mRNA_nonrhyth_translation_nonrhyth/Slc16a2_set_A.pdf]

# Slc16a6

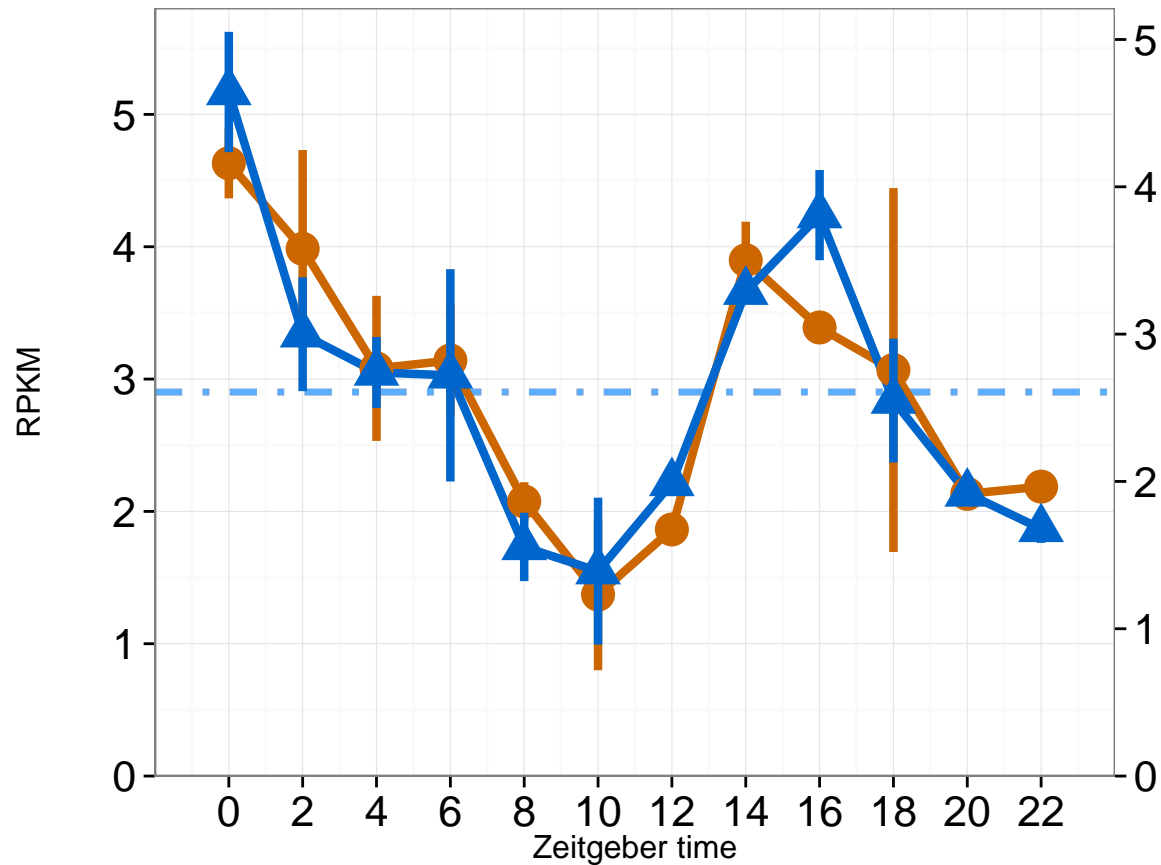

# Slc16a6

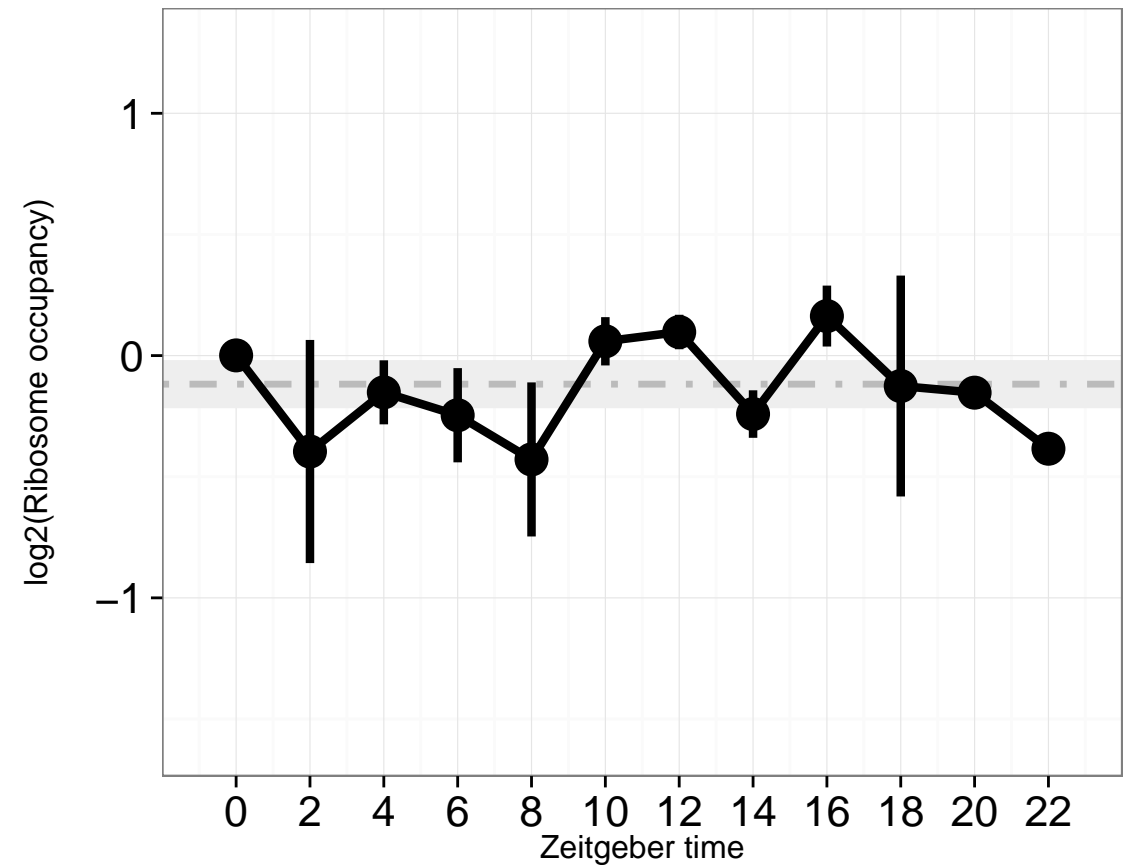

Supplement: SuppDataset_1.zip [file Slc16a6_set_A.pdf › Supplemental Dataset 1/A-mRNA_nonrhyth_translation_nonrhyth/Slc16a6_set_A.pdf]

## Slc16a9

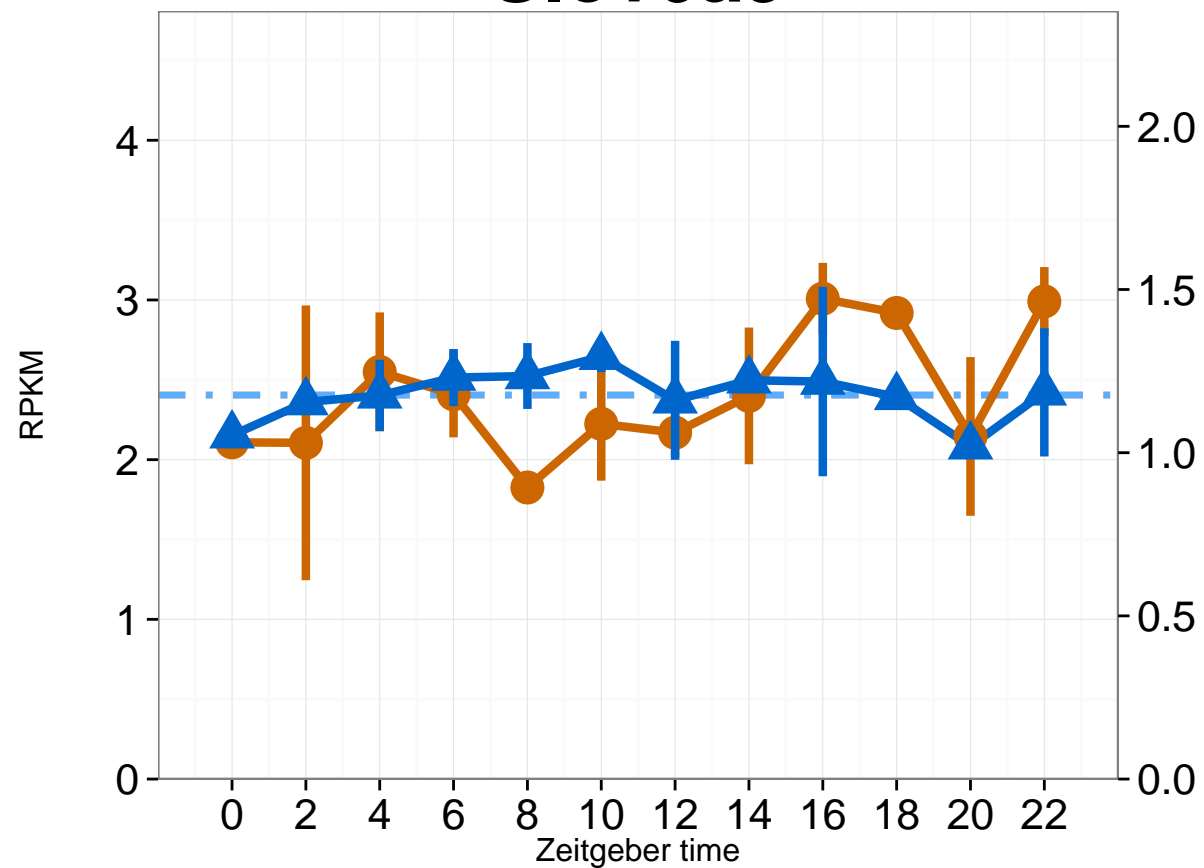

## Slc16a9

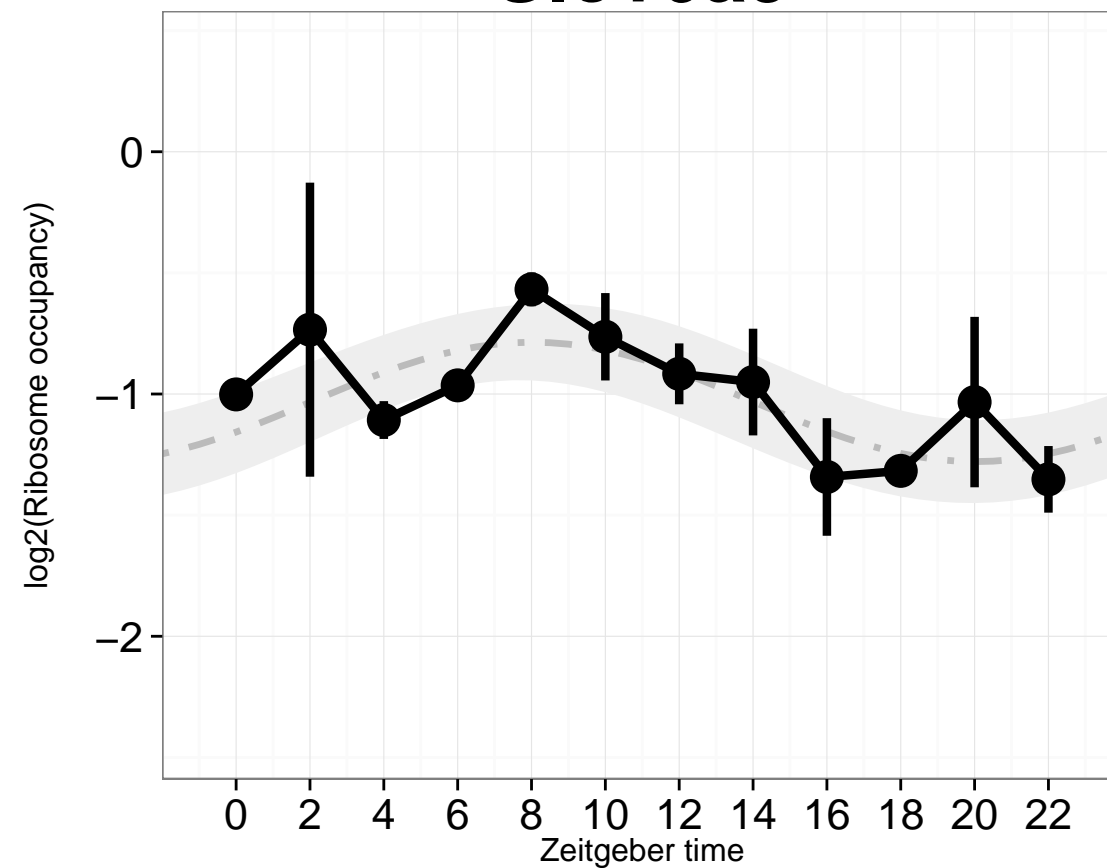

Supplement: SuppDataset_1.zip [file Slc16a9_set_A.pdf › Supplemental Dataset 1/A-mRNA_nonrhyth_translation_nonrhyth/Slc16a9_set_A.pdf]

# Slc17a1

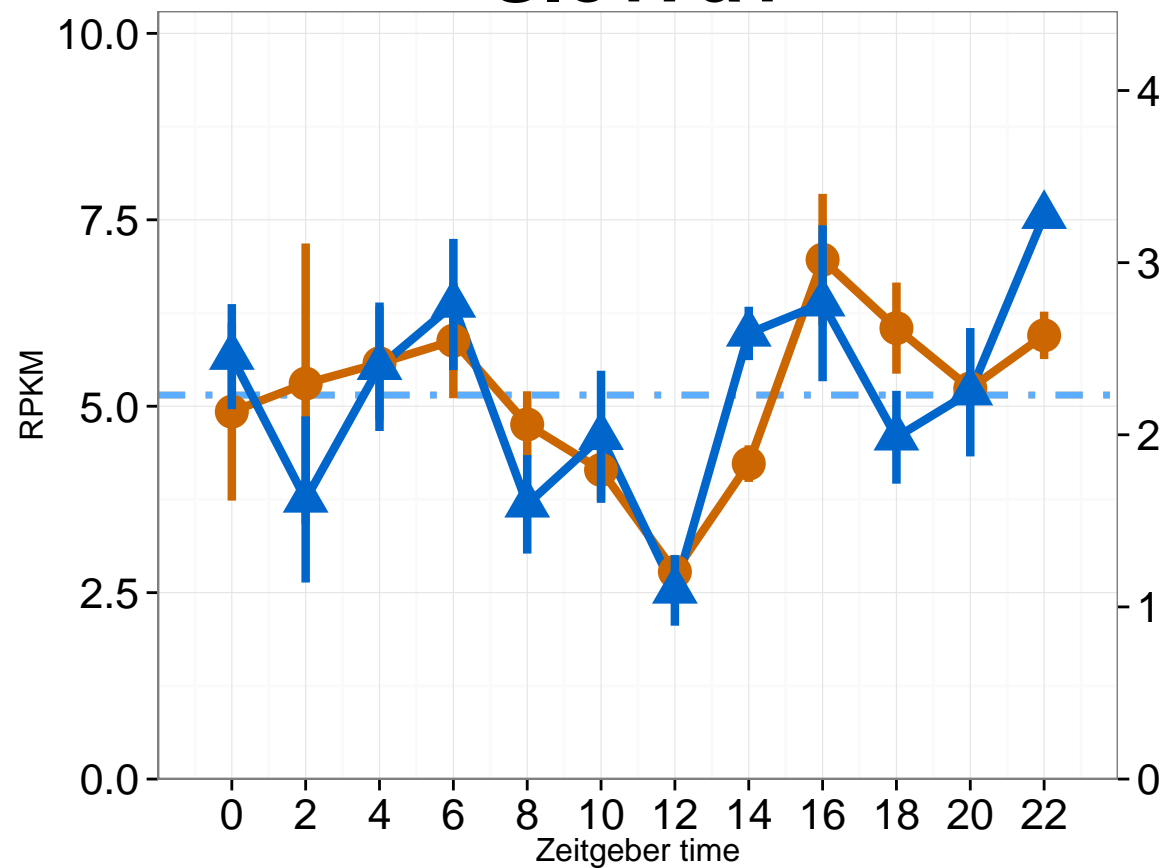

# Slc17a1

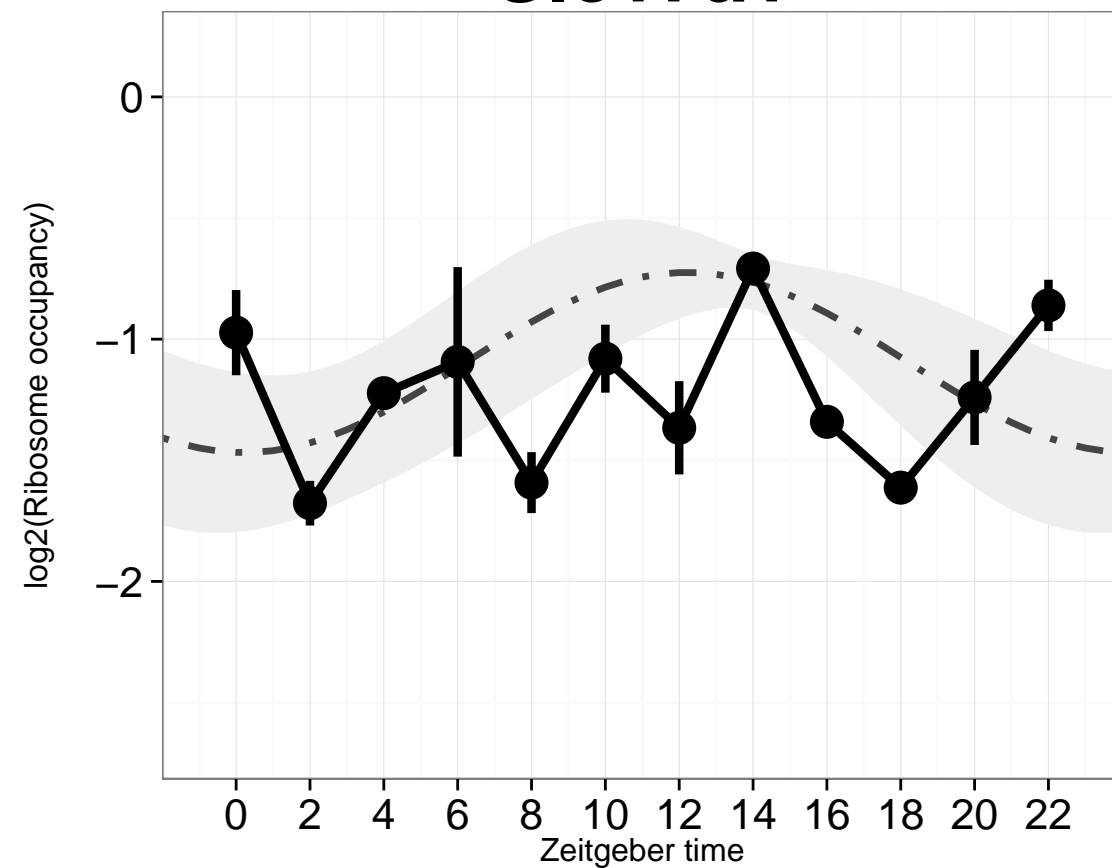

Supplement: SuppDataset_1.zip [file Slc17a1_set_A.pdf › Supplemental Dataset 1/A-mRNA_nonrhyth_translation_nonrhyth/Slc17a1_set_A.pdf]

# Slc17a2

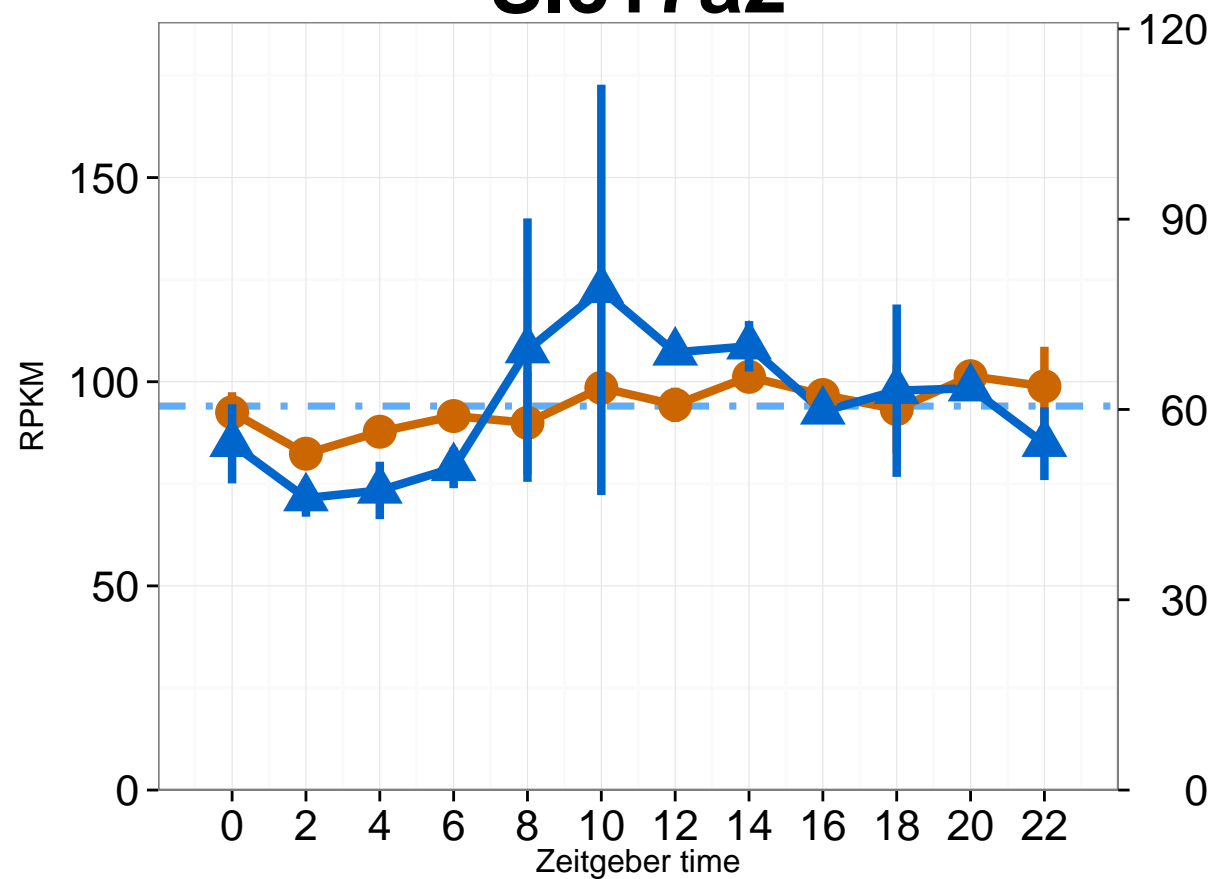

# Slc17a2

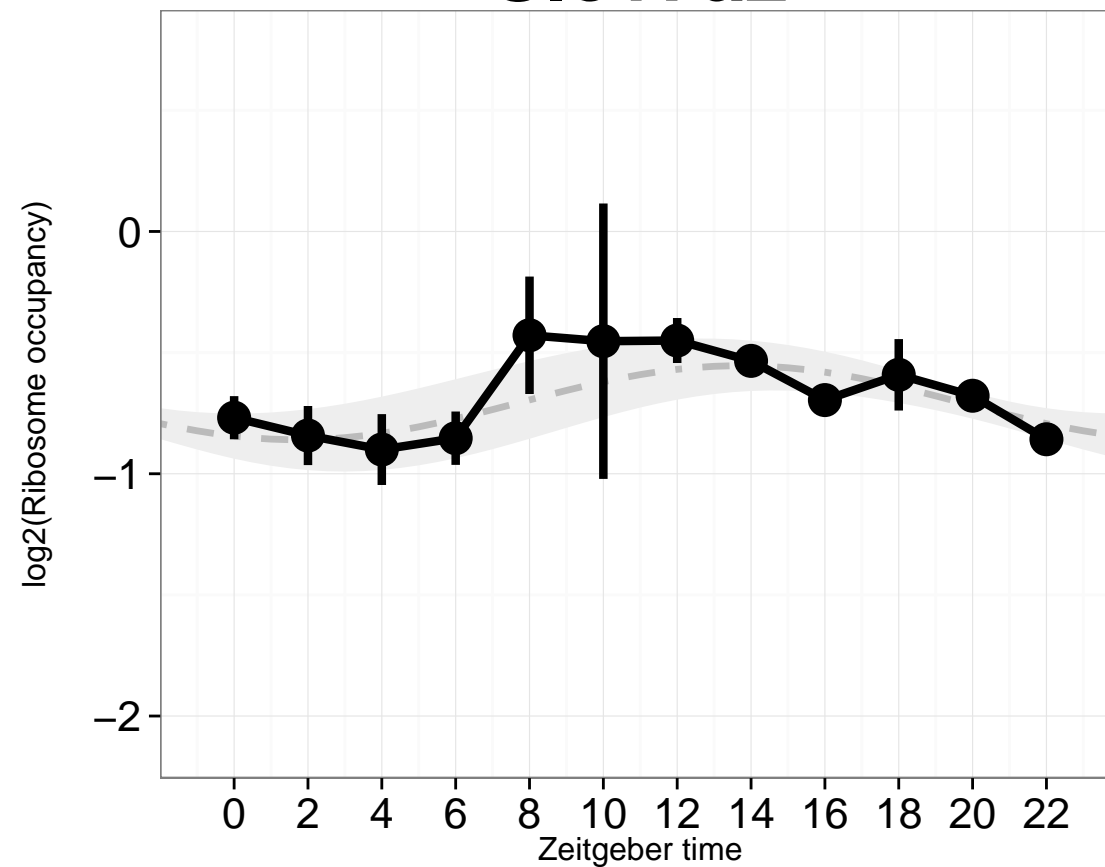

Supplement: SuppDataset_1.zip [file Slc17a2_set_A.pdf › Supplemental Dataset 1/A-mRNA_nonrhyth_translation_nonrhyth/Slc17a2_set_A.pdf]

# Slc17a5

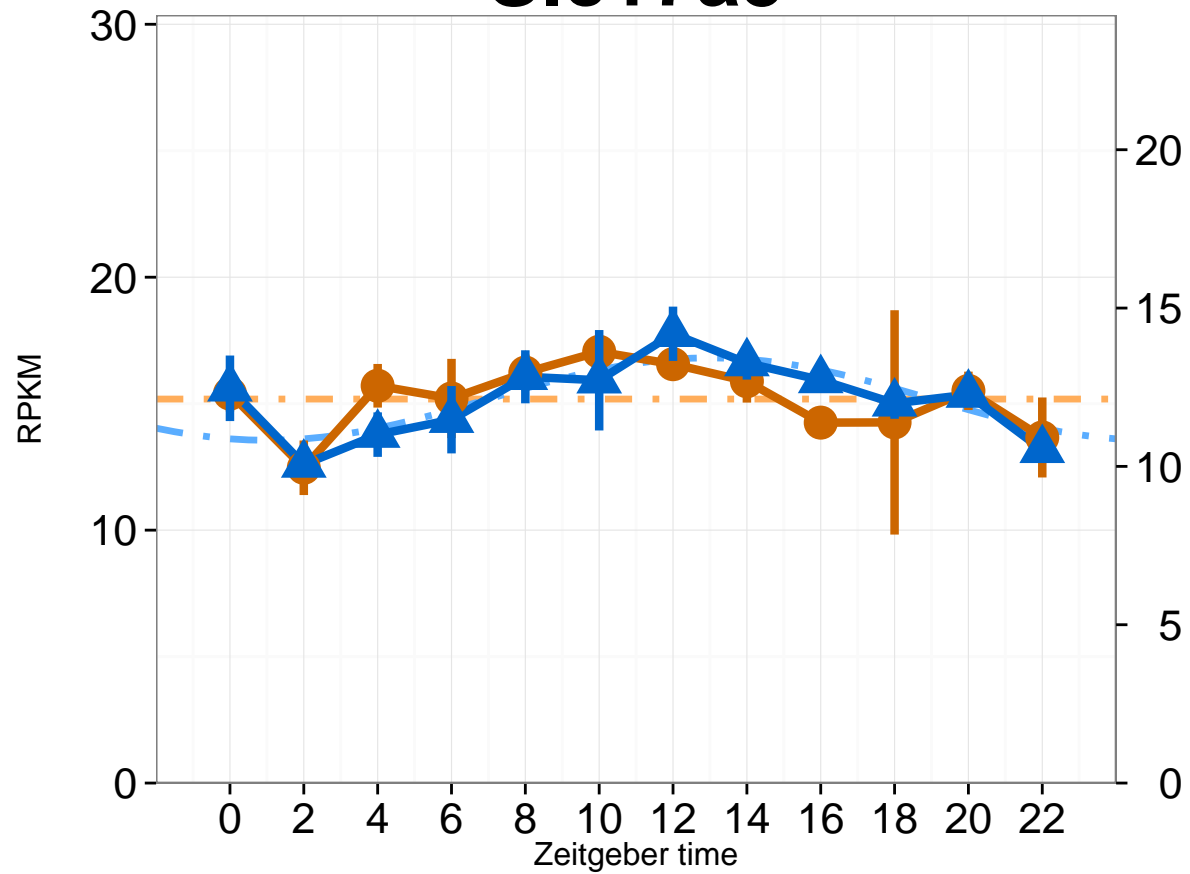

# Slc17a5

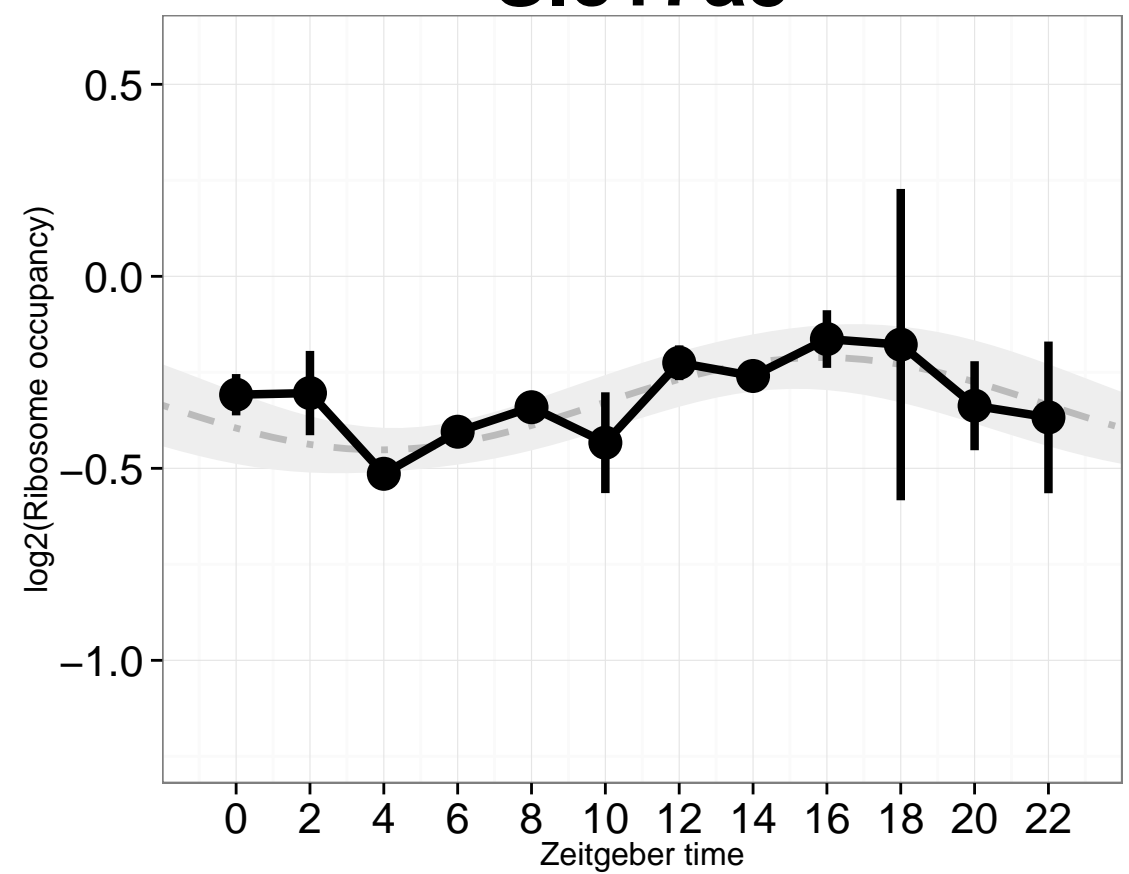

Supplement: SuppDataset_1.zip [file Slc17a5_set_A.pdf › Supplemental Dataset 1/A-mRNA_nonrhyth_translation_nonrhyth/Slc17a5_set_A.pdf]

# Slc18a1

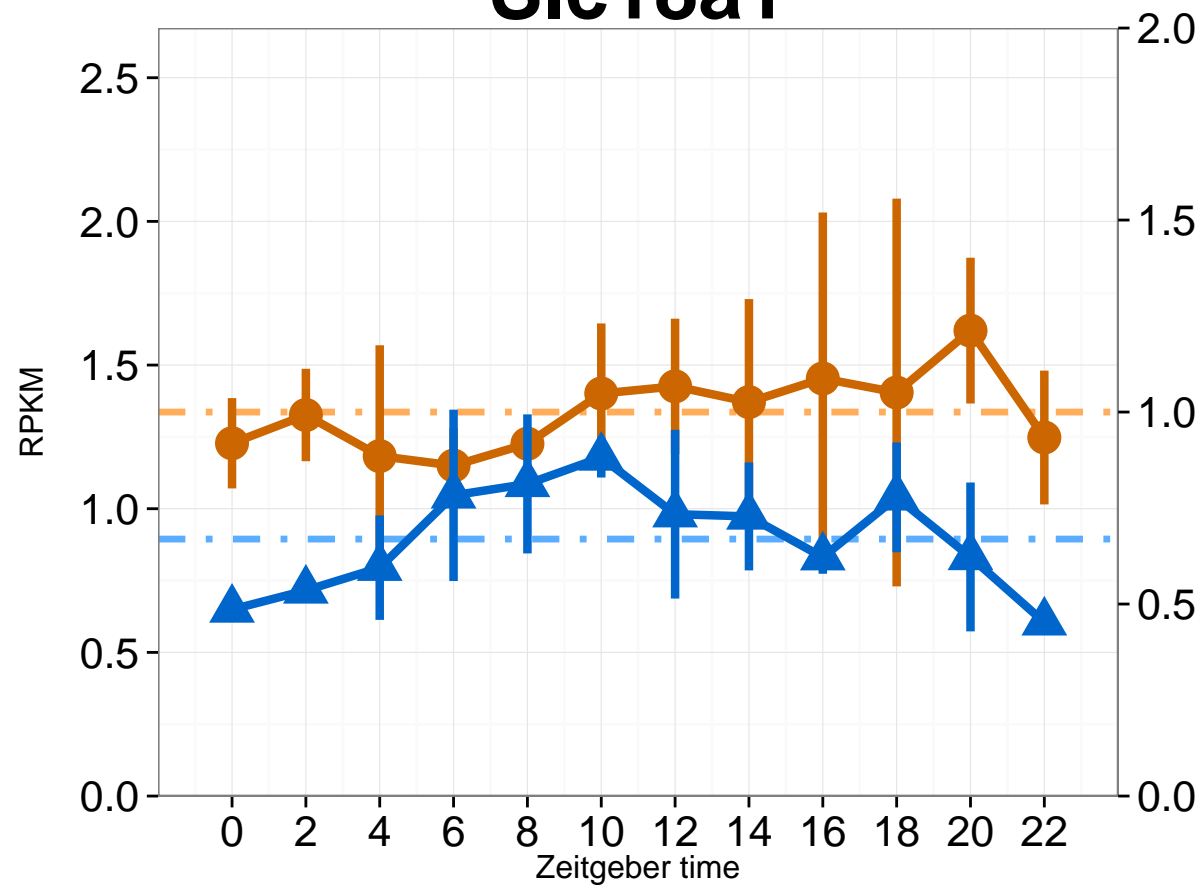

# Slc18a1

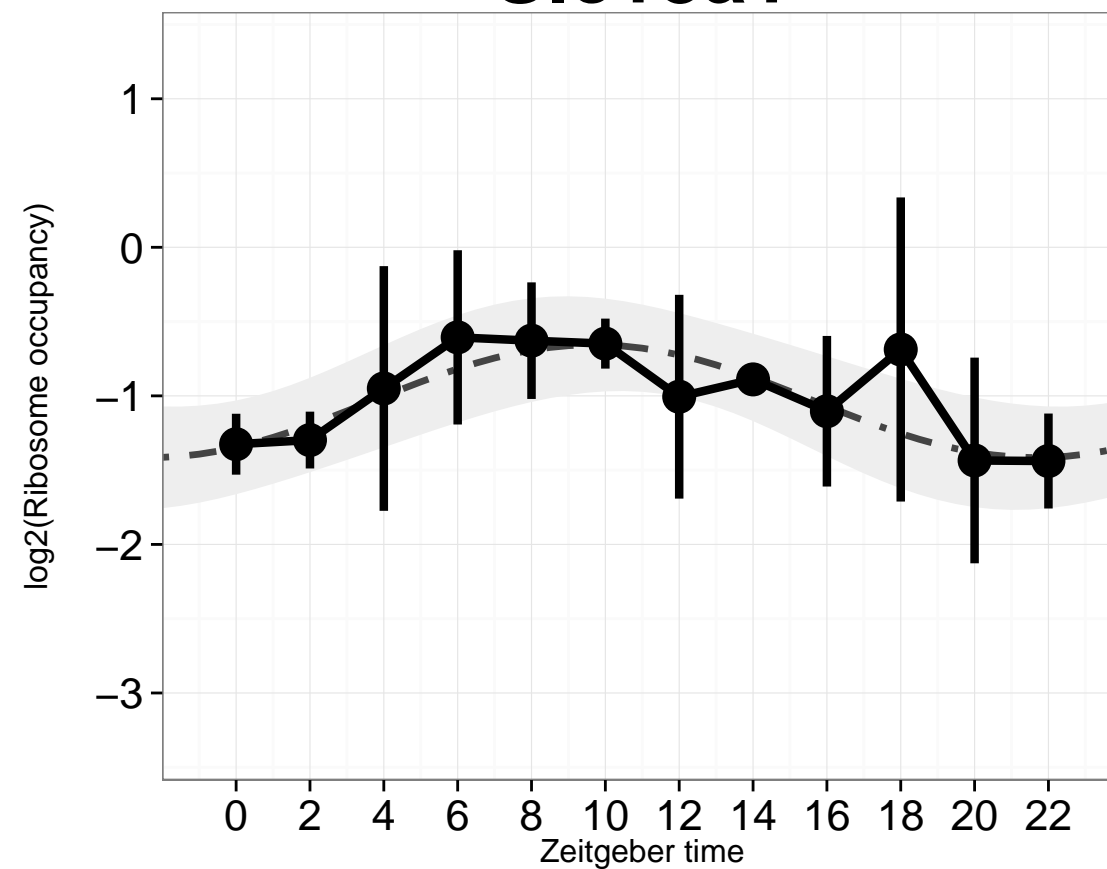

Supplement: SuppDataset_1.zip [file Slc18a1_set_A.pdf › Supplemental Dataset 1/A-mRNA_nonrhyth_translation_nonrhyth/Slc18a1_set_A.pdf]

# Slc18b1

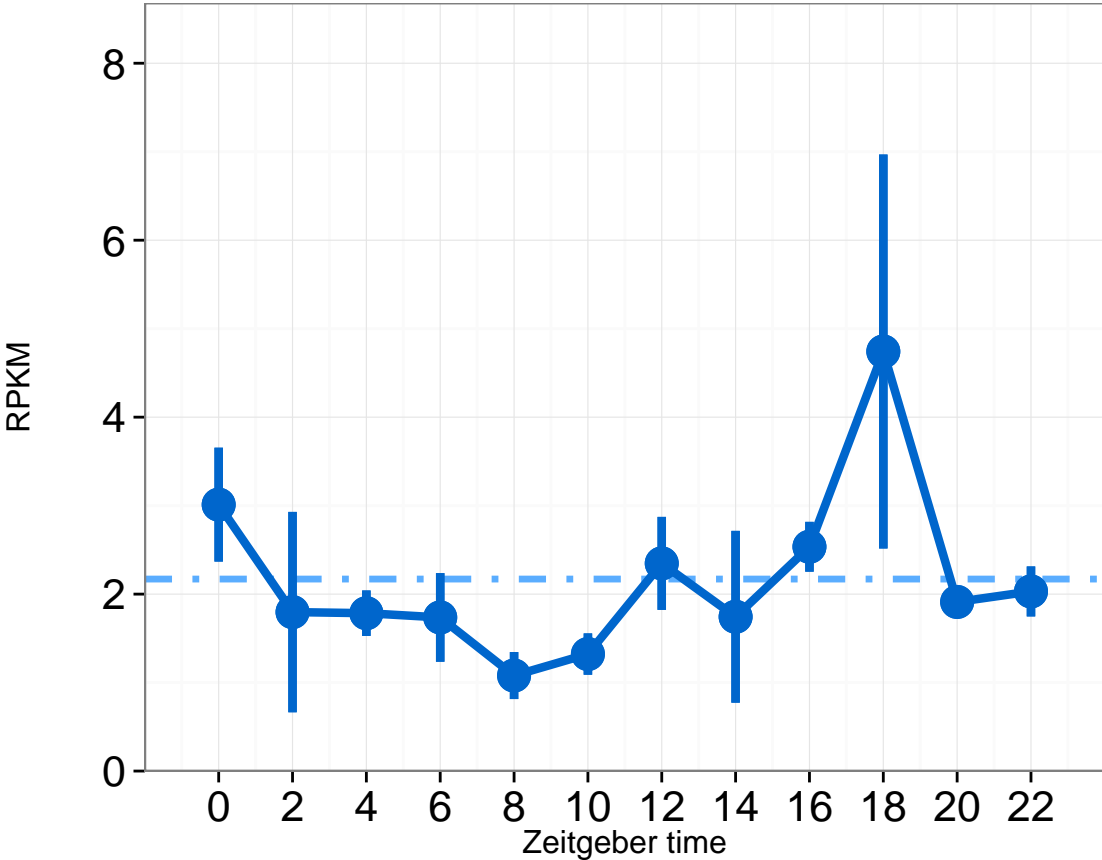

# Slc18b1 log2(Ribosome occupancy)

Supplement: SuppDataset_1.zip [file Slc18b1_set_A.pdf › Supplemental Dataset 1/A-mRNA_nonrhyth_translation_nonrhyth/Slc18b1_set_A.pdf]

# Slc1a4

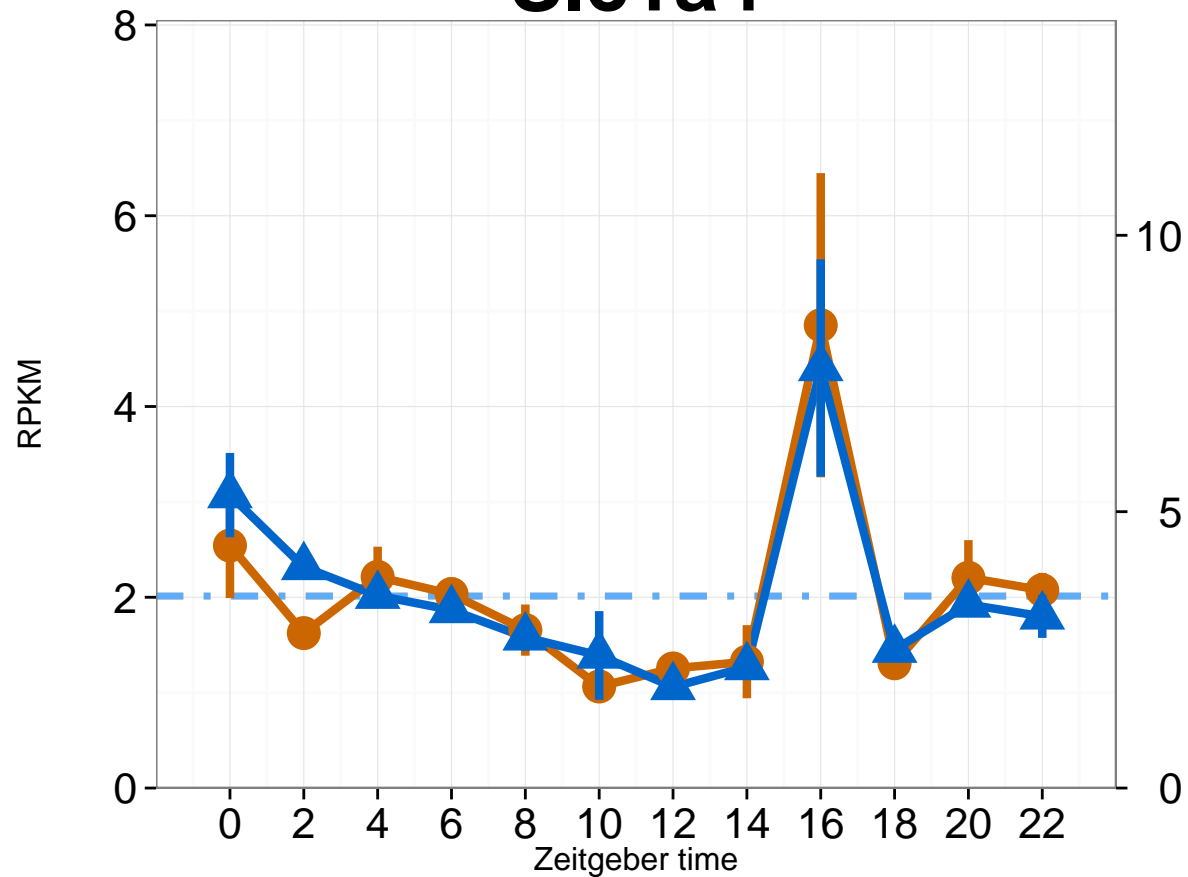

# Slc1a4

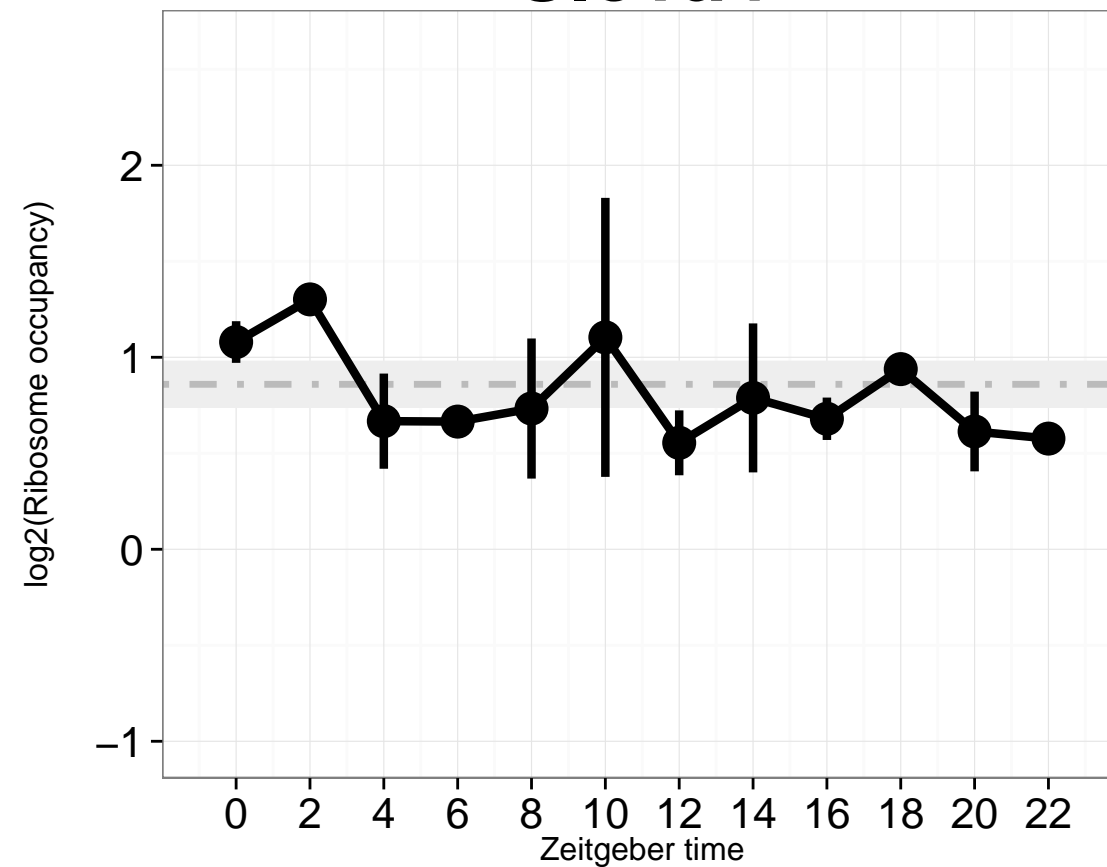

Supplement: SuppDataset_1.zip [file Slc1a4_set_A.pdf › Supplemental Dataset 1/A-mRNA_nonrhyth_translation_nonrhyth/Slc1a4_set_A.pdf]

# Slc1a5

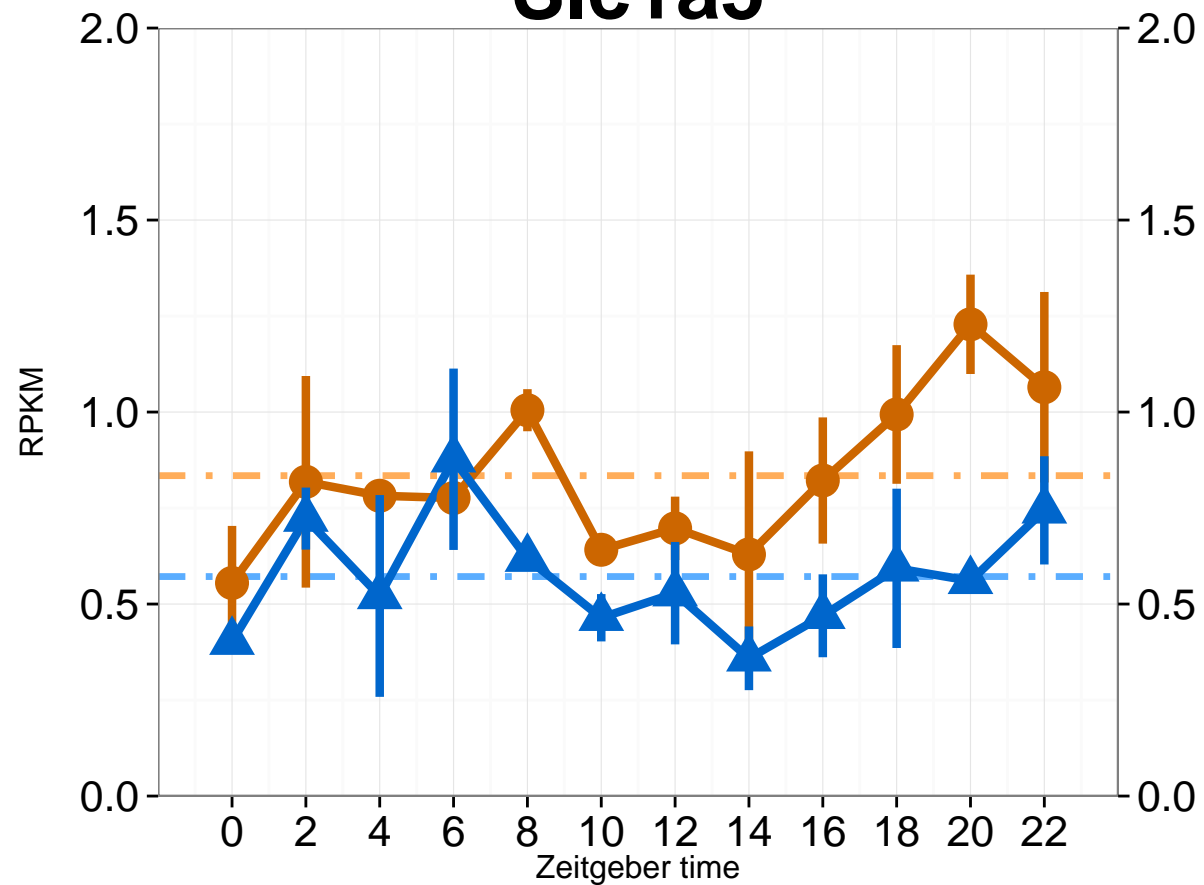

# Slc1a5

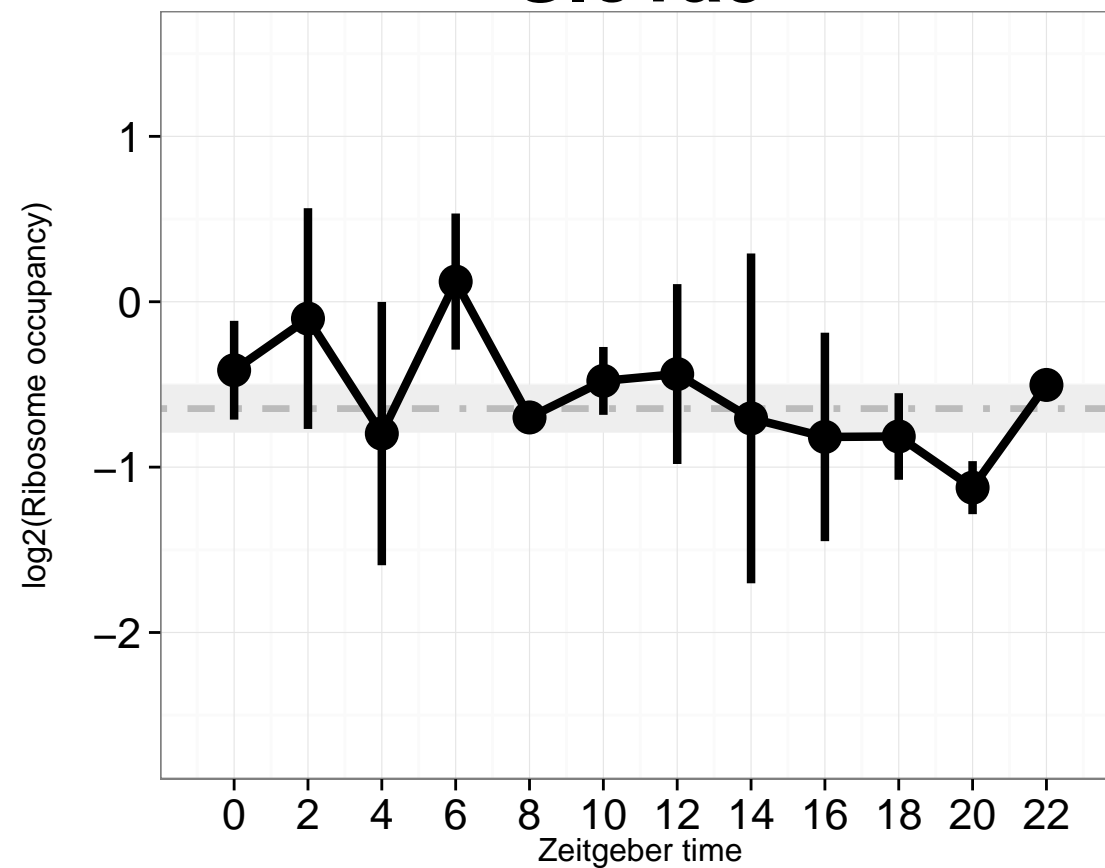

Supplement: SuppDataset_1.zip [file Slc1a5_set_A.pdf › Supplemental Dataset 1/A-mRNA_nonrhyth_translation_nonrhyth/Slc1a5_set_A.pdf]

## Slc20a2

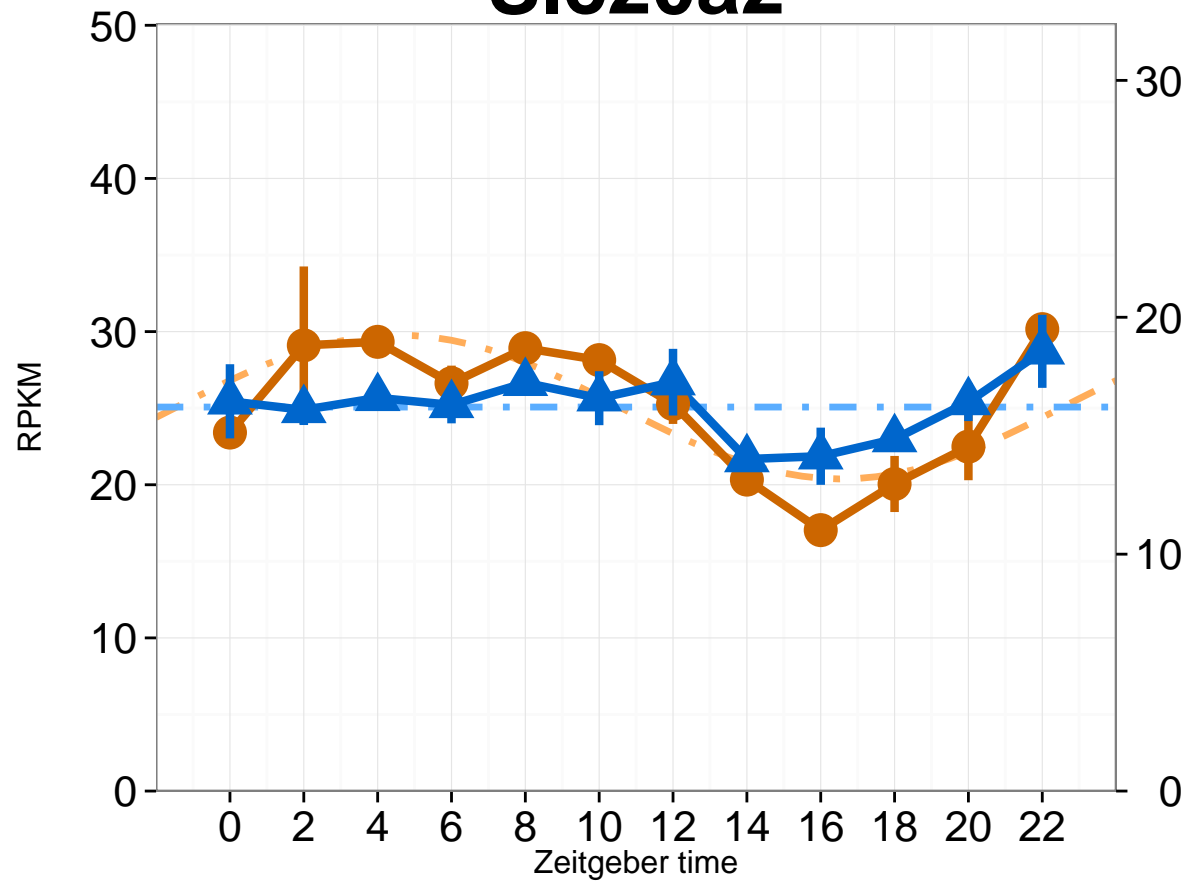

## Slc20a2

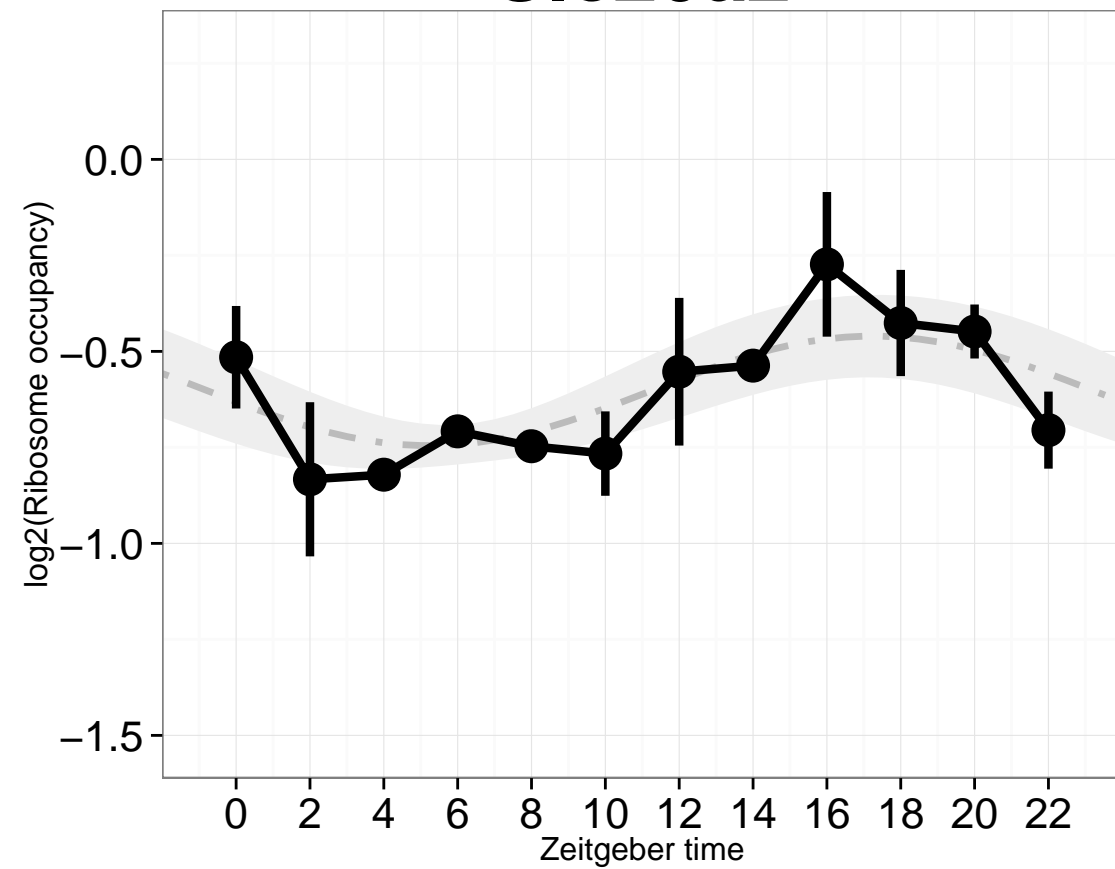

Supplement: SuppDataset_1.zip [file Slc20a2_set_A.pdf › Supplemental Dataset 1/A-mRNA_nonrhyth_translation_nonrhyth/Slc20a2_set_A.pdf]

# Slc22a18

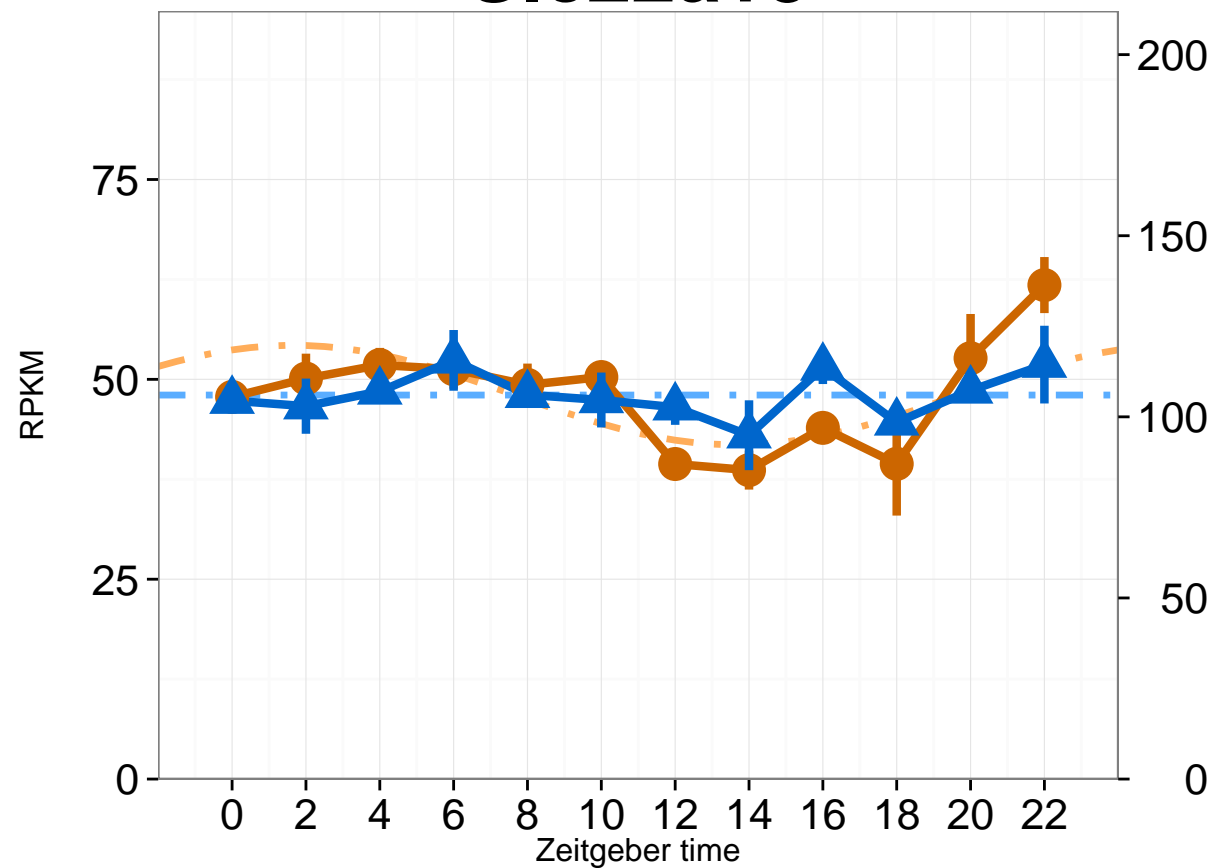

# Slc22a18

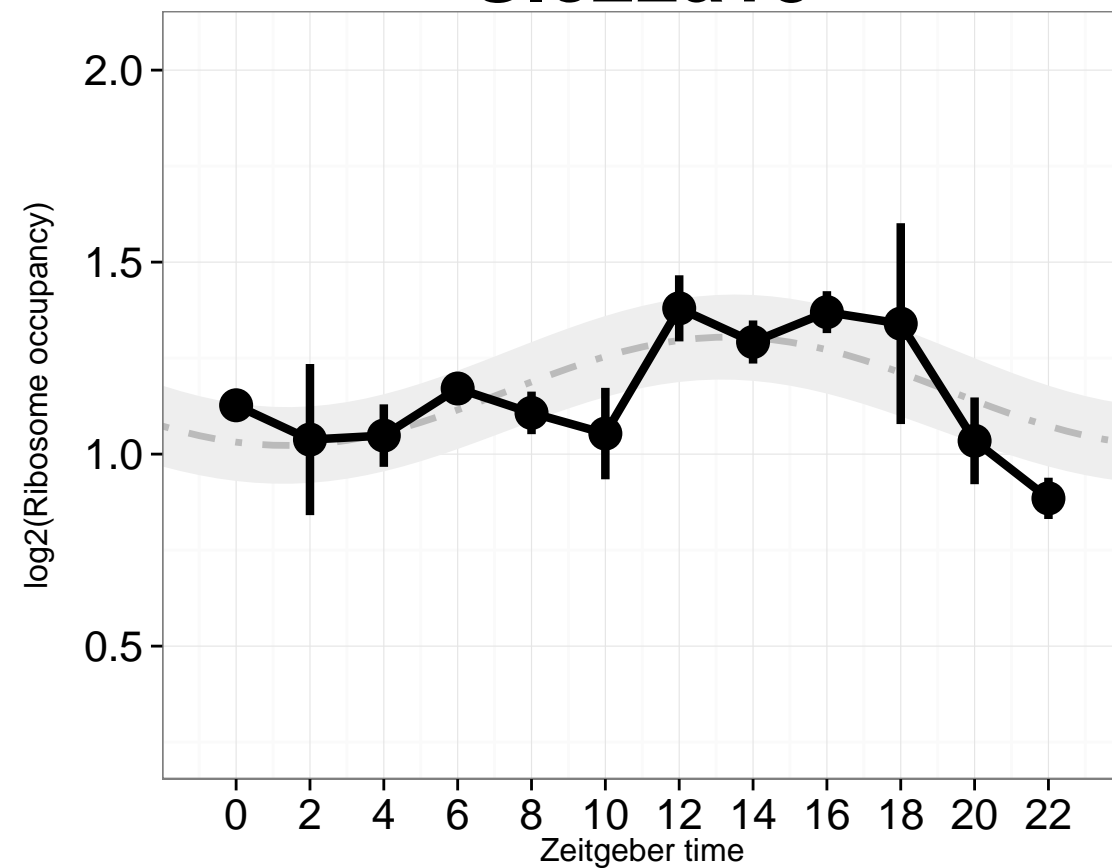

Supplement: SuppDataset_1.zip [file Slc22a18_set_A.pdf › Supplemental Dataset 1/A-mRNA_nonrhyth_translation_nonrhyth/Slc22a18_set_A.pdf]

# Slc22a1

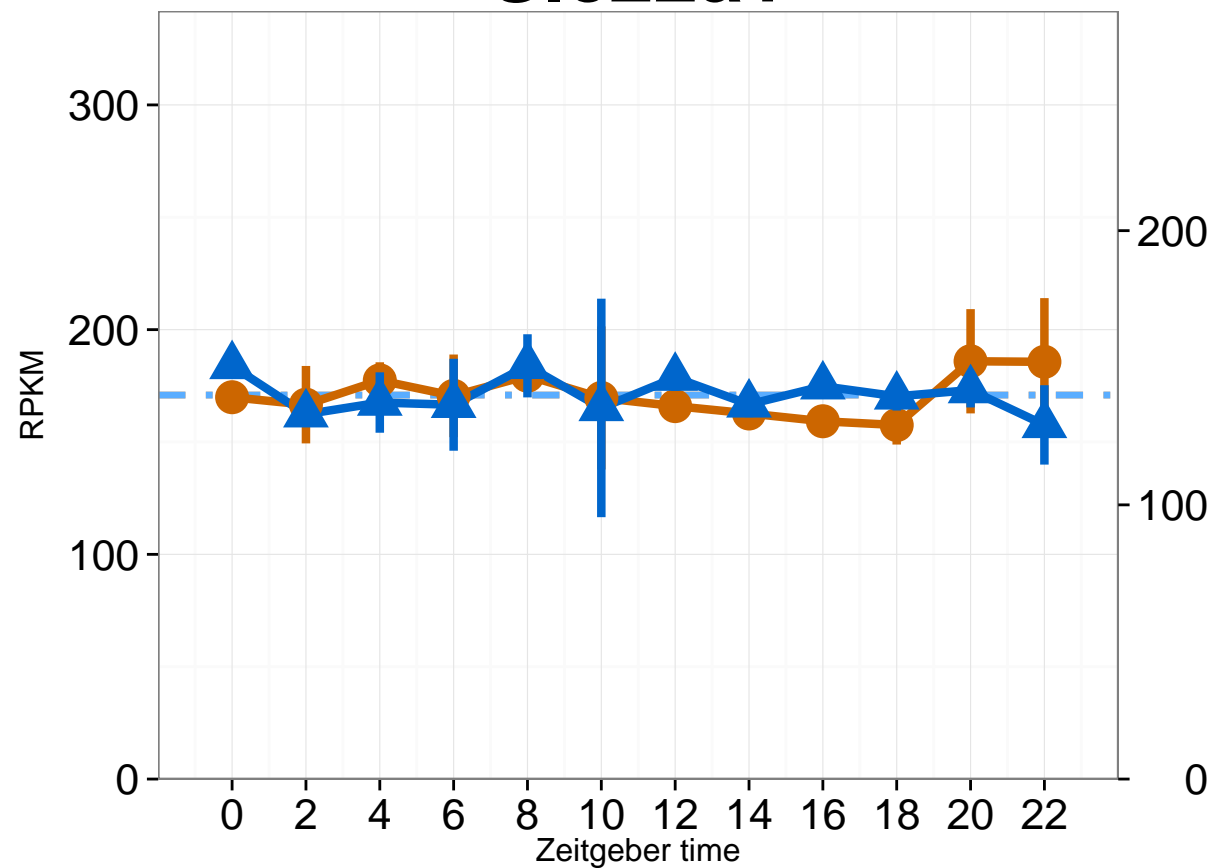

# Slc22a1

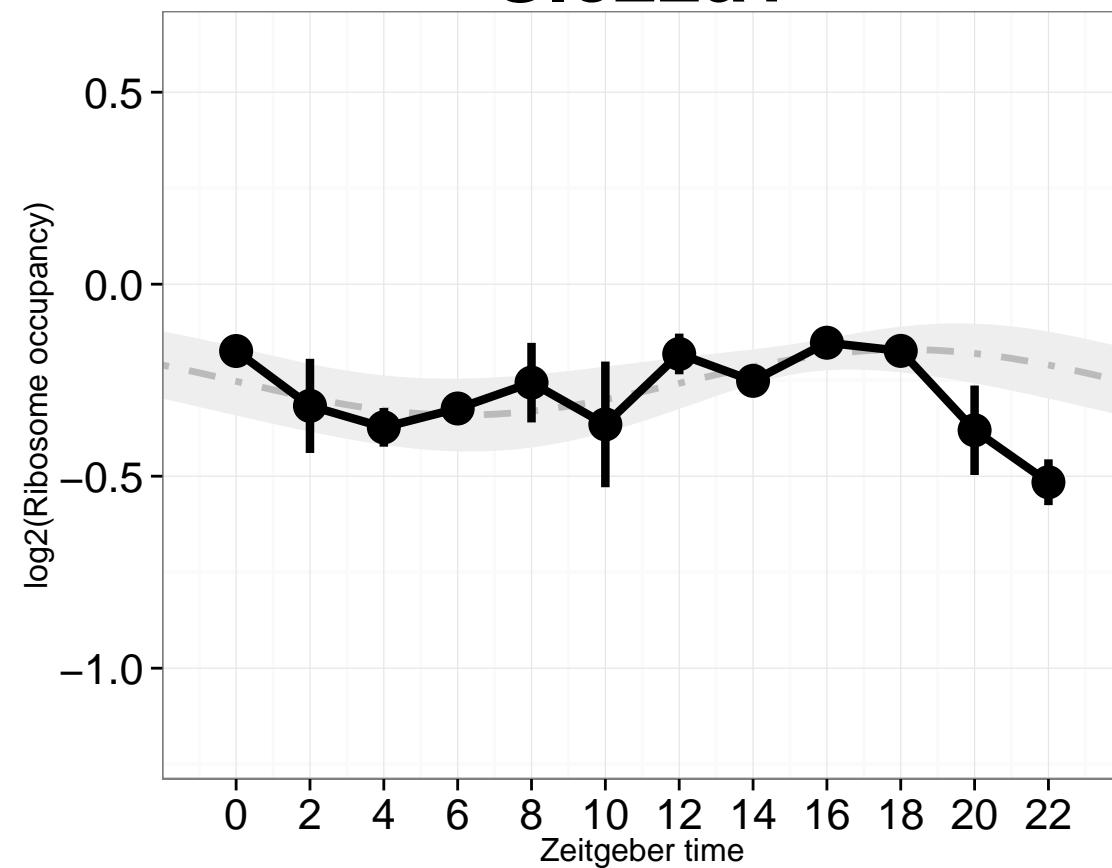

Supplement: SuppDataset_1.zip [file Slc22a1_set_A.pdf › Supplemental Dataset 1/A-mRNA_nonrhyth_translation_nonrhyth/Slc22a1_set_A.pdf]

## Slc22a23

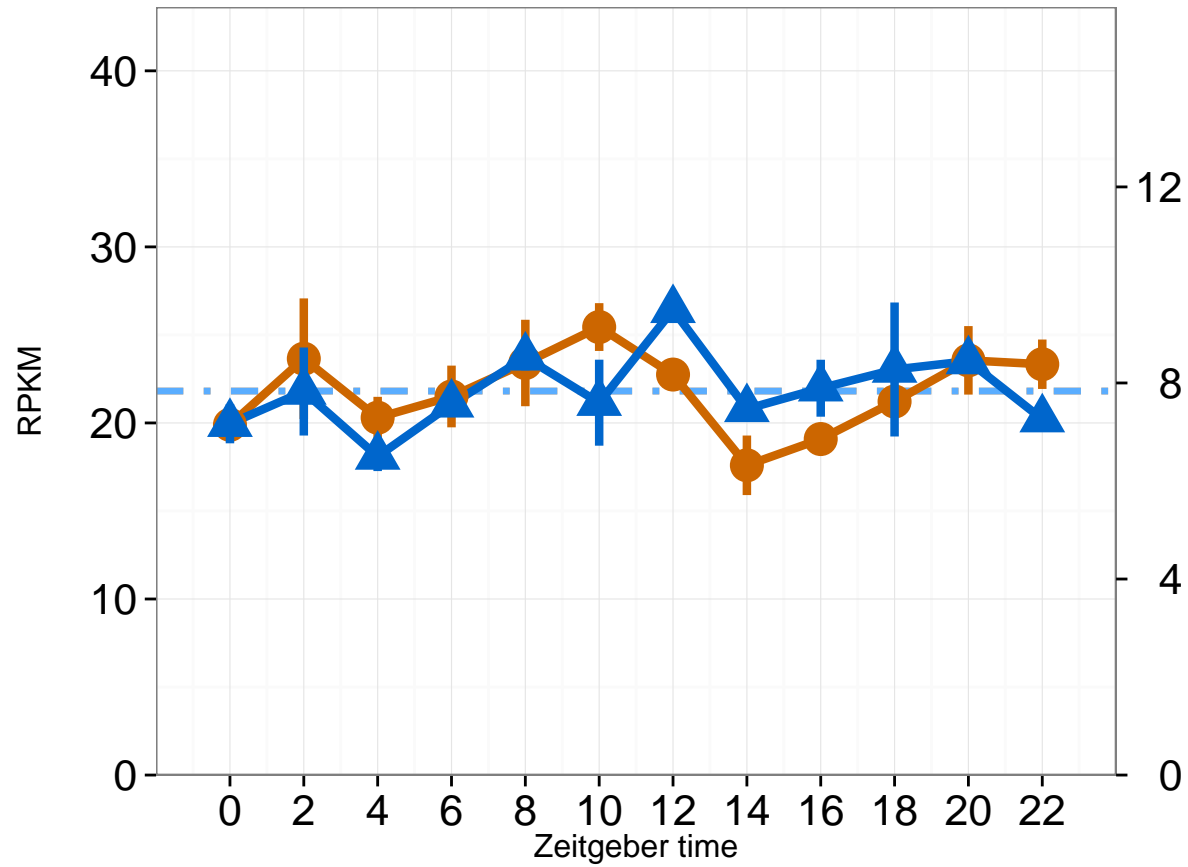

## Slc22a23

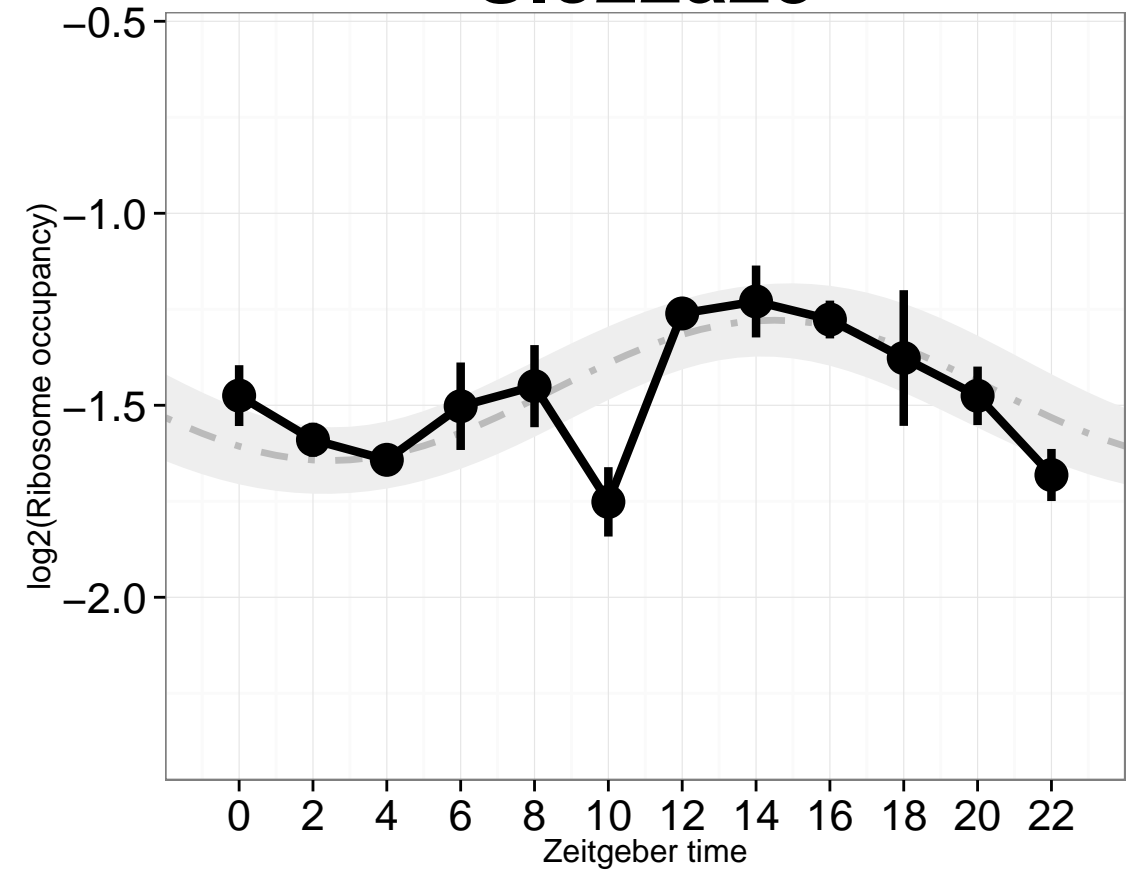

Supplement: SuppDataset_1.zip [file Slc22a23_set_A.pdf › Supplemental Dataset 1/A-mRNA_nonrhyth_translation_nonrhyth/Slc22a23_set_A.pdf]

## Slc22a28

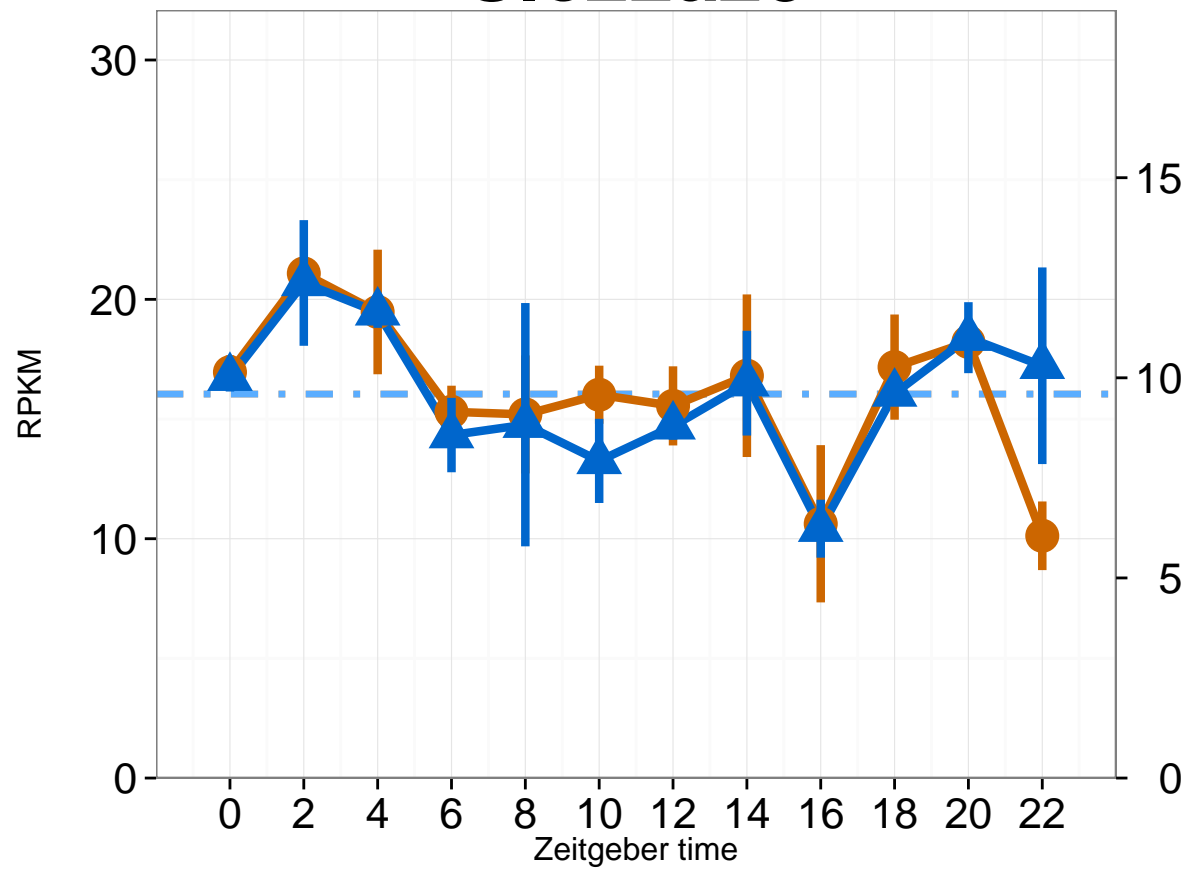

## Slc22a28

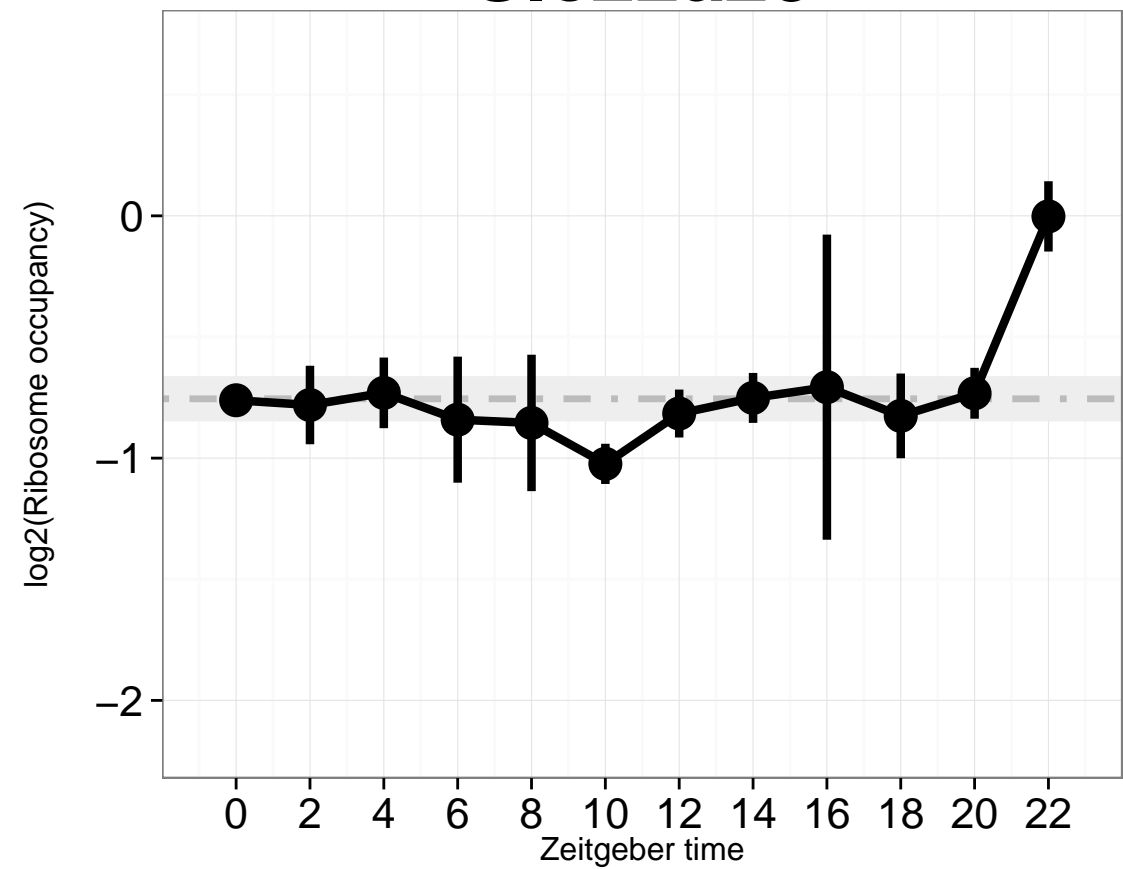

Supplement: SuppDataset_1.zip [file Slc22a28_set_A.pdf › Supplemental Dataset 1/A-mRNA_nonrhyth_translation_nonrhyth/Slc22a28_set_A.pdf]

## Slc22a30

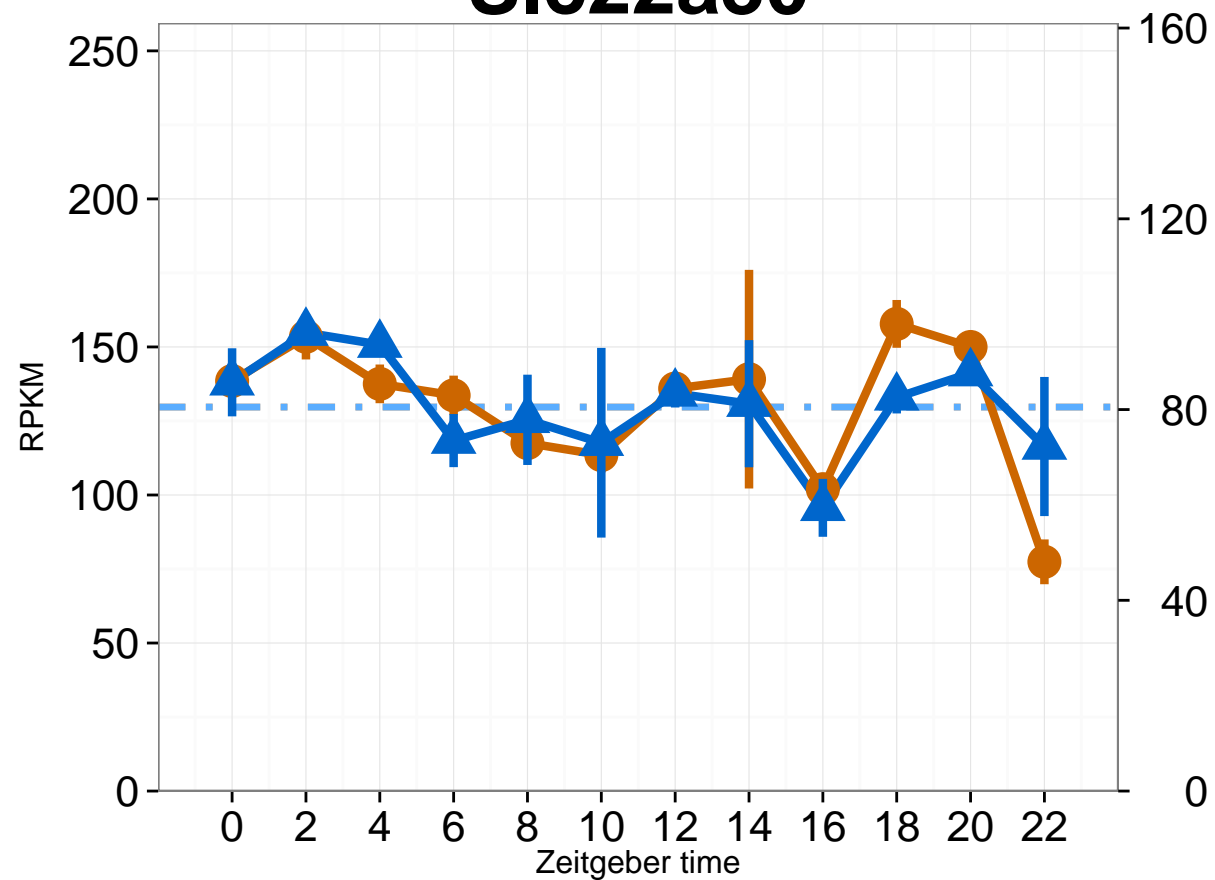

## Slc22a30

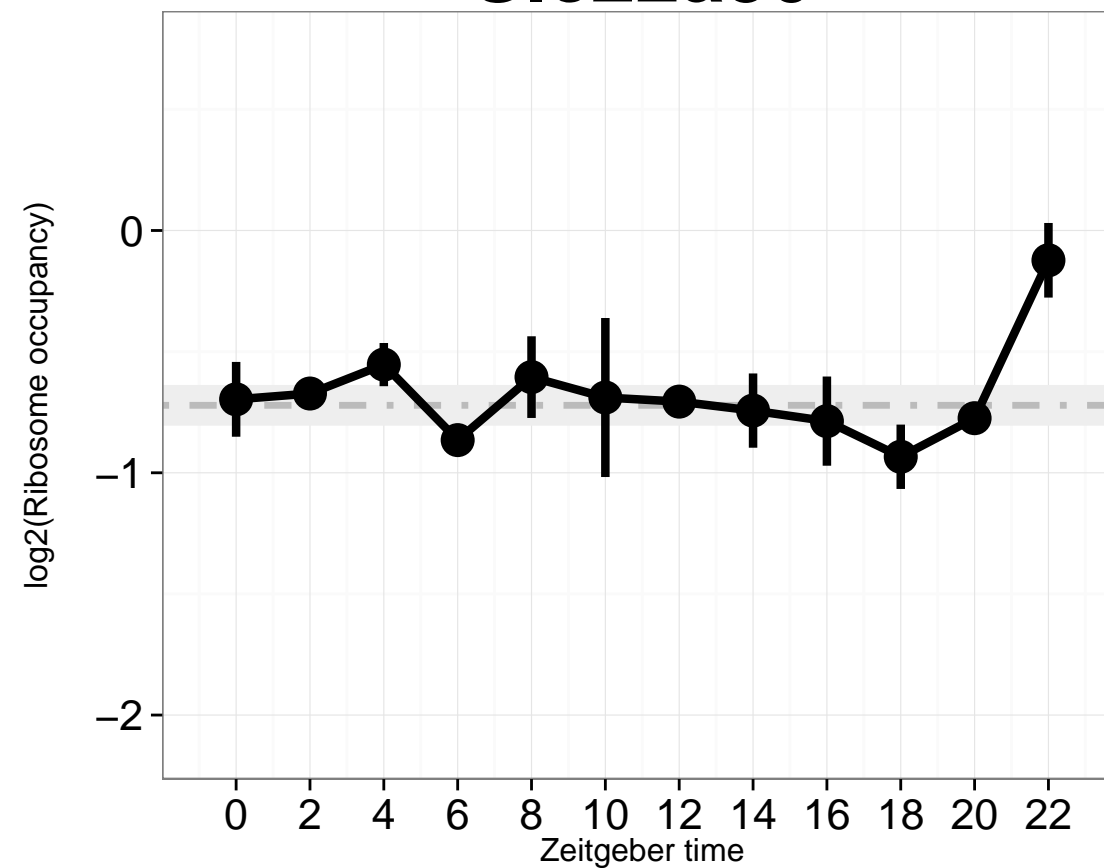

Supplement: SuppDataset_1.zip [file Slc22a30_set_A.pdf › Supplemental Dataset 1/A-mRNA_nonrhyth_translation_nonrhyth/Slc22a30_set_A.pdf]

# Slc22a3

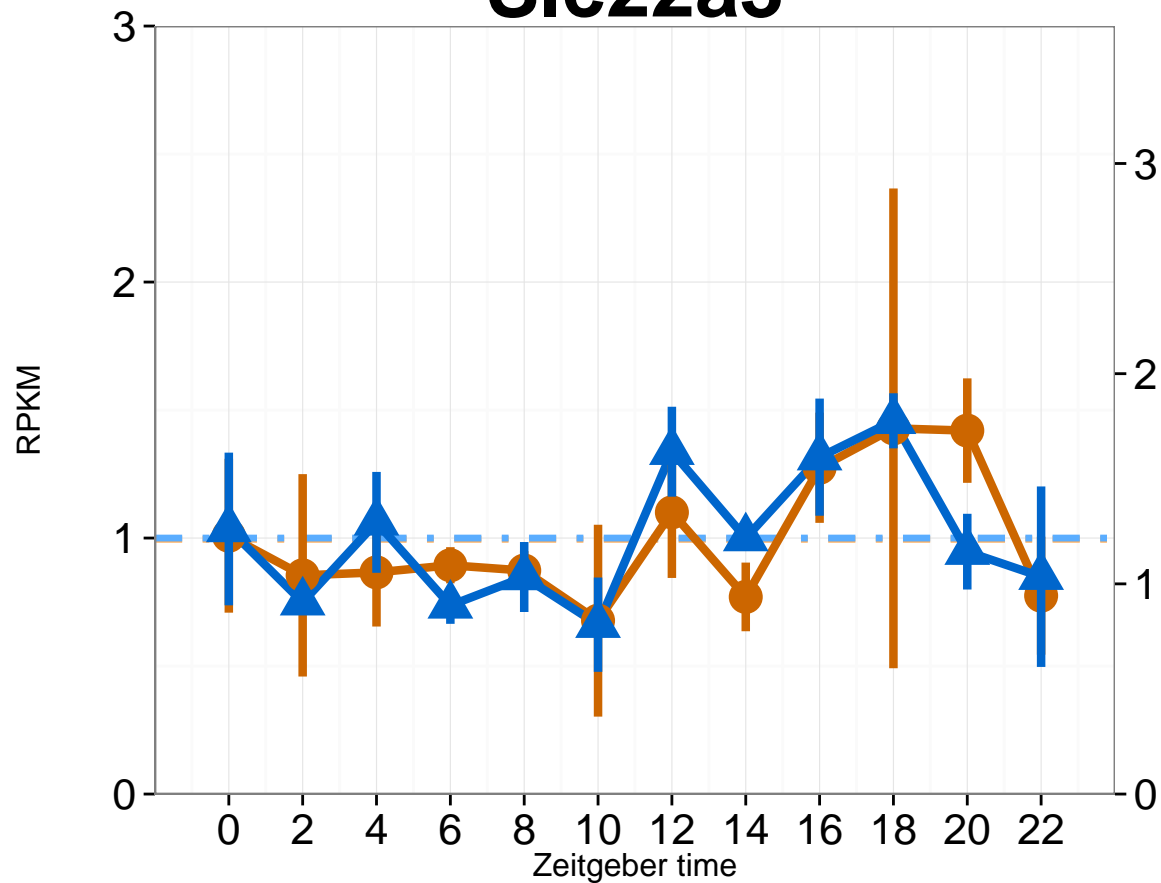

# Slc22a3

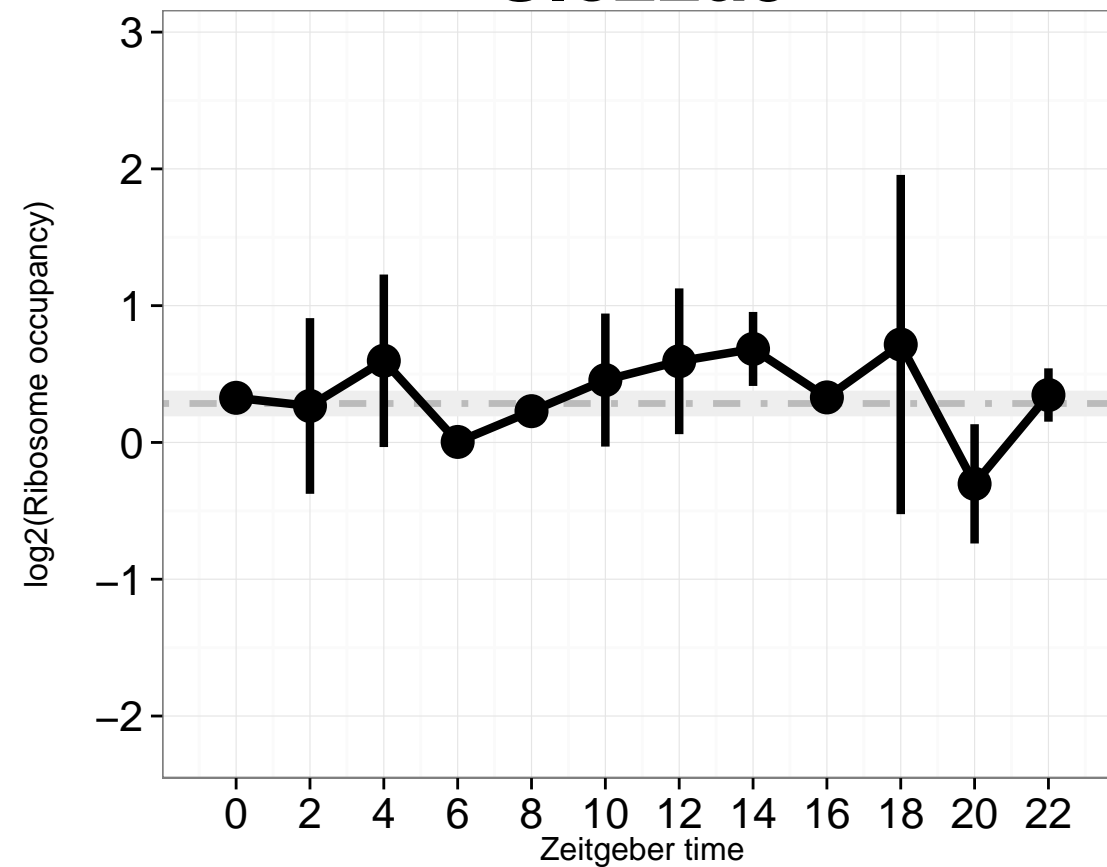

Supplement: SuppDataset_1.zip [file Slc22a3_set_A.pdf › Supplemental Dataset 1/A-mRNA_nonrhyth_translation_nonrhyth/Slc22a3_set_A.pdf]

**Slc22a4**

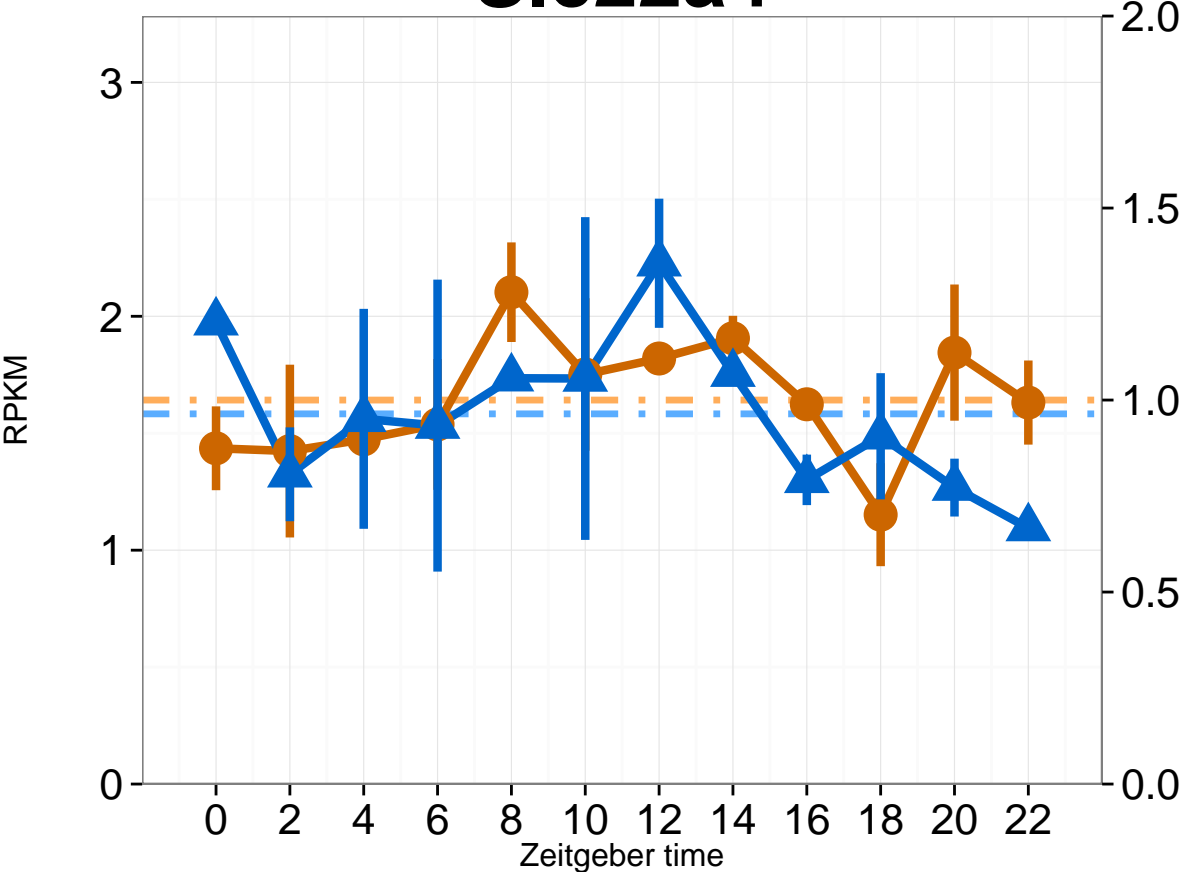

**Slc22a4**

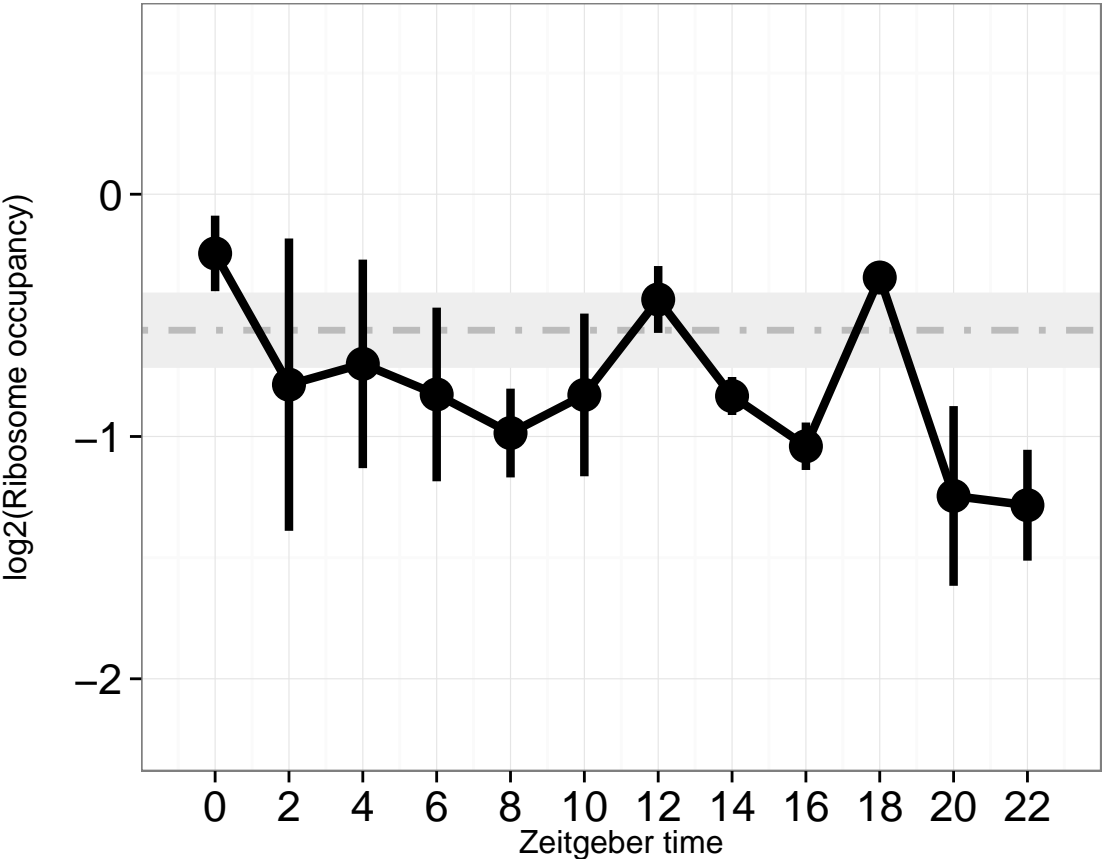

Supplement: SuppDataset_1.zip [file Slc22a4_set_A.pdf › Supplemental Dataset 1/A-mRNA_nonrhyth_translation_nonrhyth/Slc22a4_set_A.pdf]

# Slc22a7

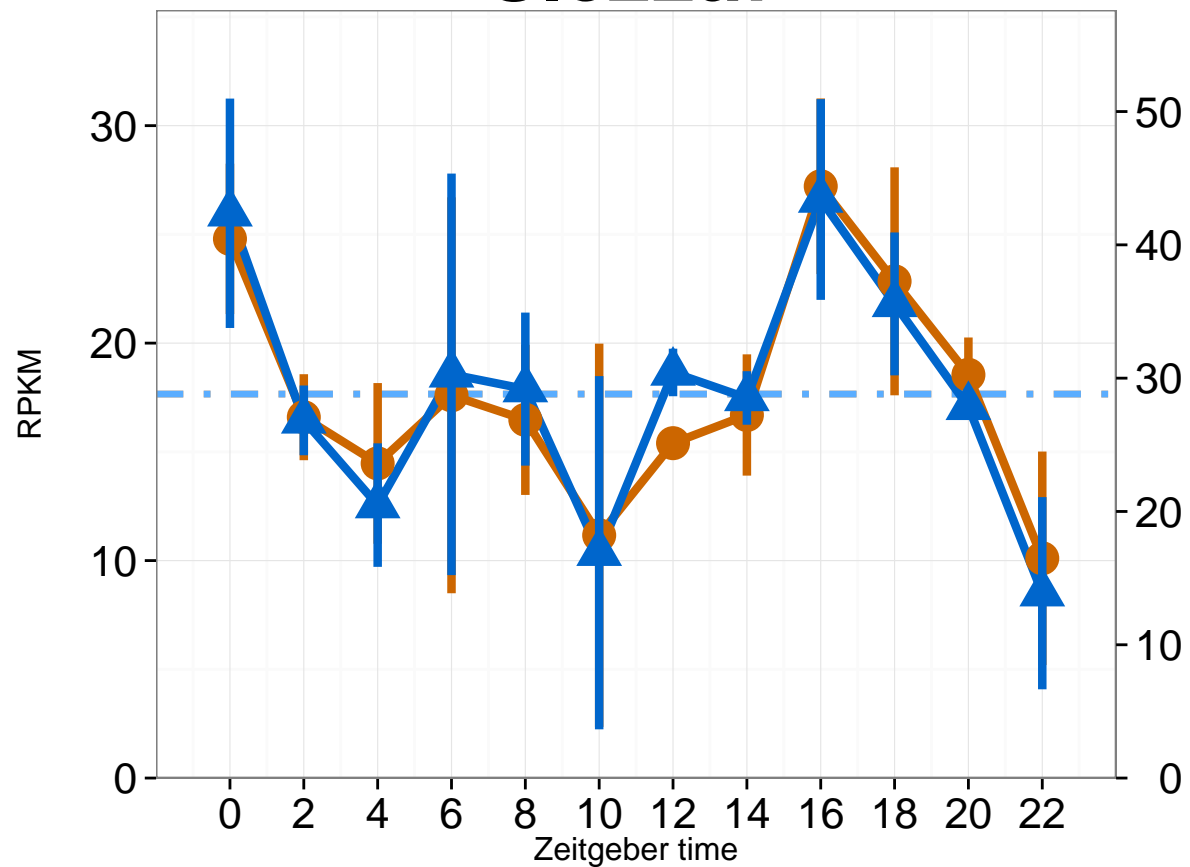

# Slc22a7

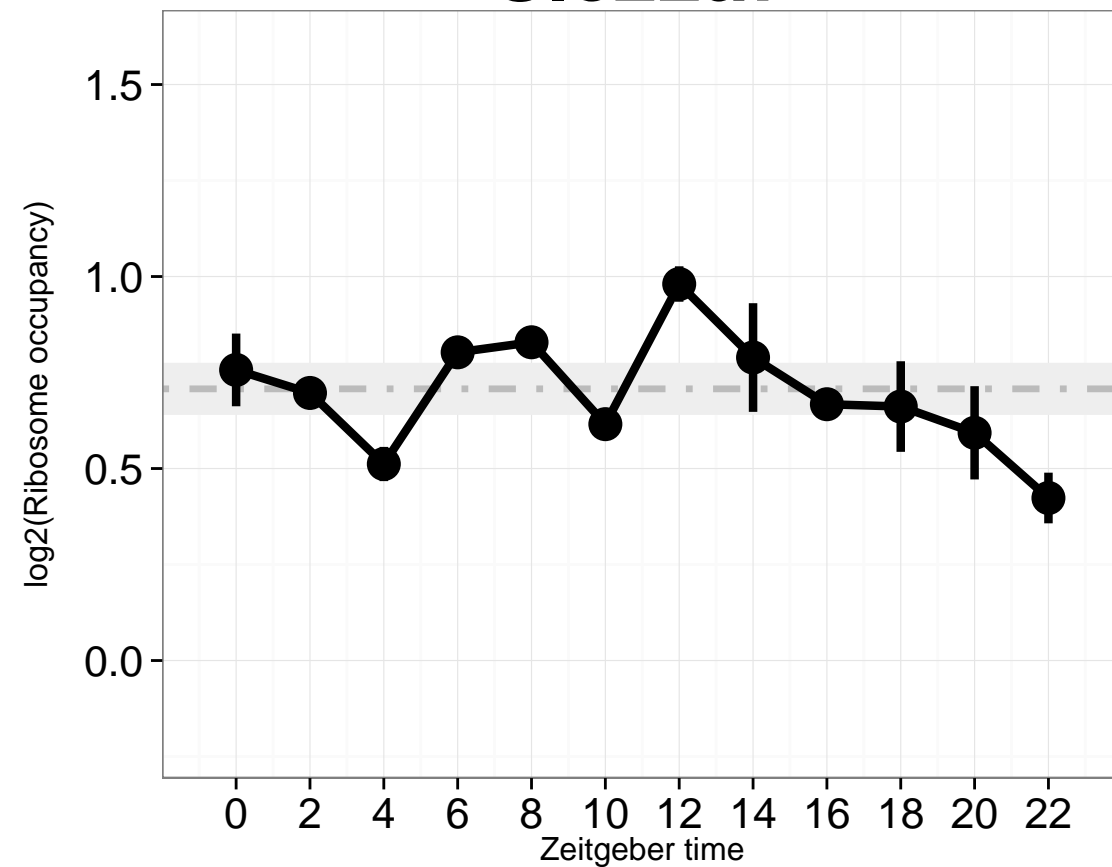

Supplement: SuppDataset_1.zip [file Slc22a7_set_A.pdf › Supplemental Dataset 1/A-mRNA_nonrhyth_translation_nonrhyth/Slc22a7_set_A.pdf]

## Slc23a1

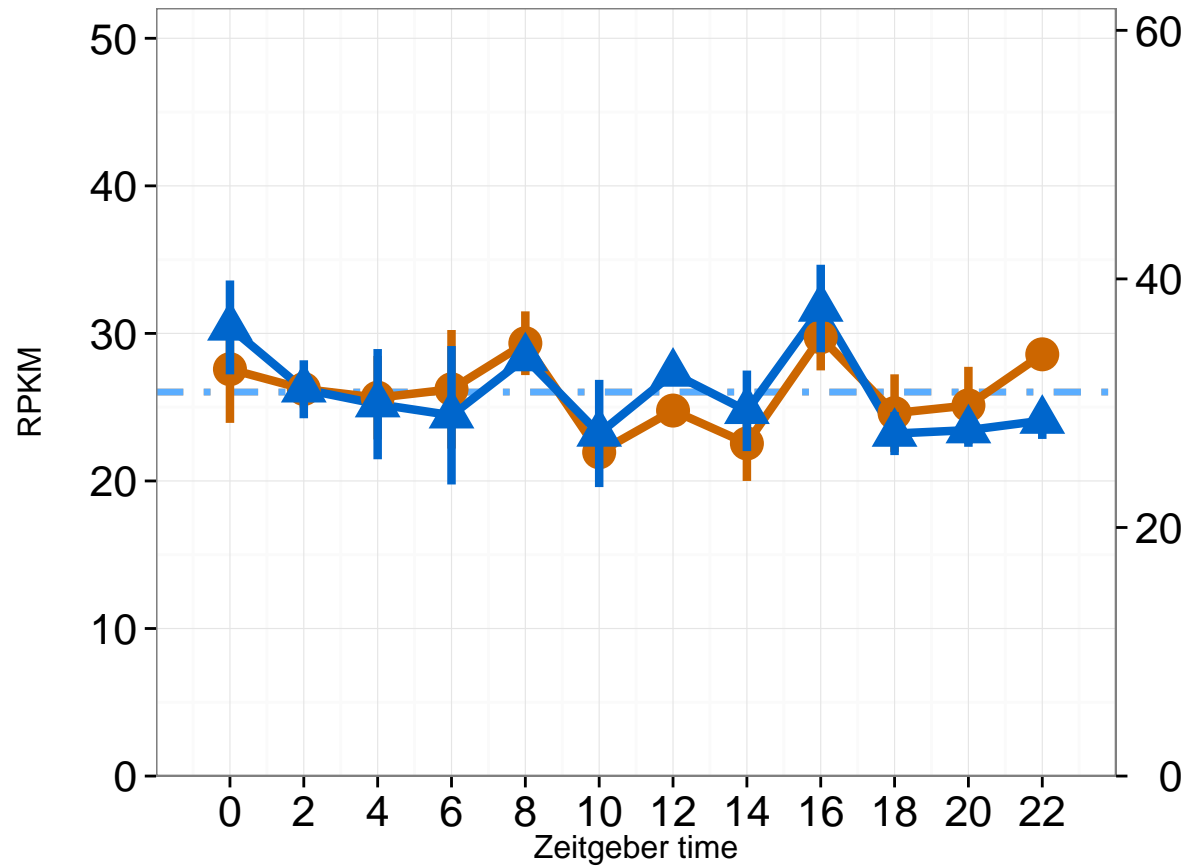

## Slc23a1

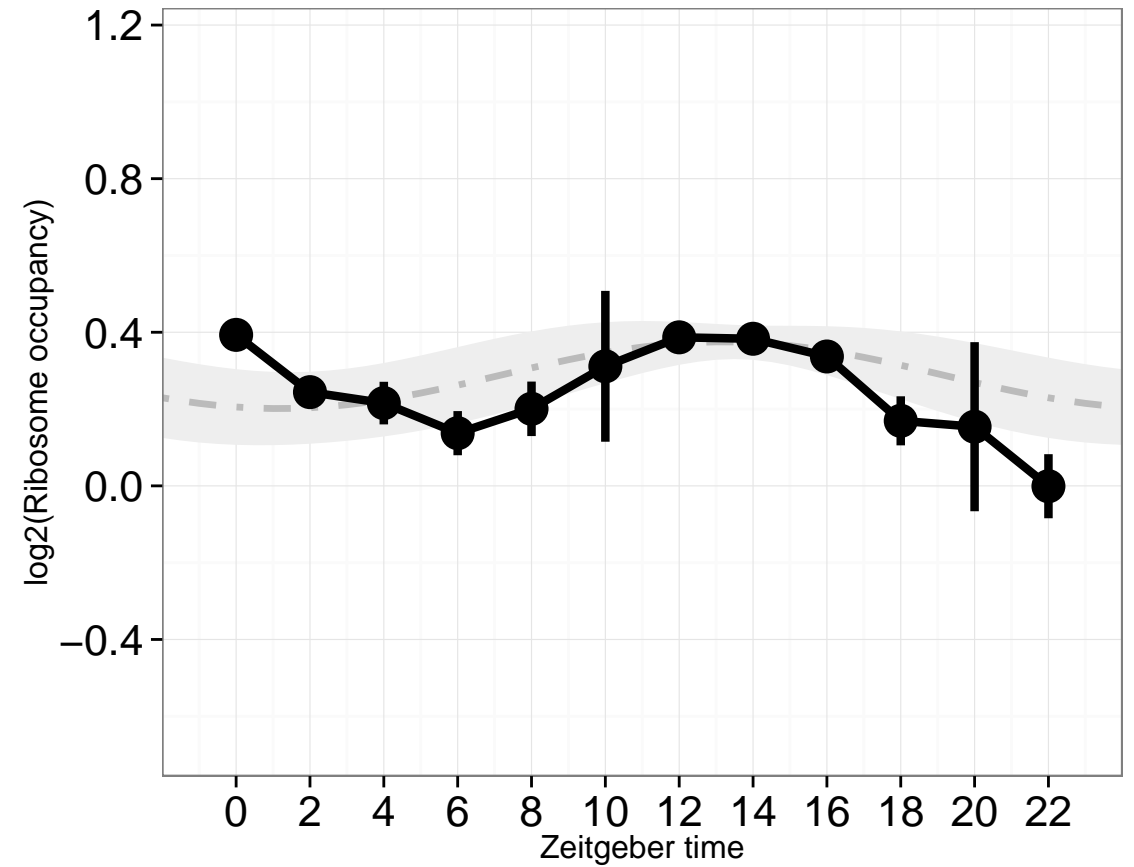

Supplement: SuppDataset_1.zip [file Slc23a1_set_A.pdf › Supplemental Dataset 1/A-mRNA_nonrhyth_translation_nonrhyth/Slc23a1_set_A.pdf]

# Slc24a5

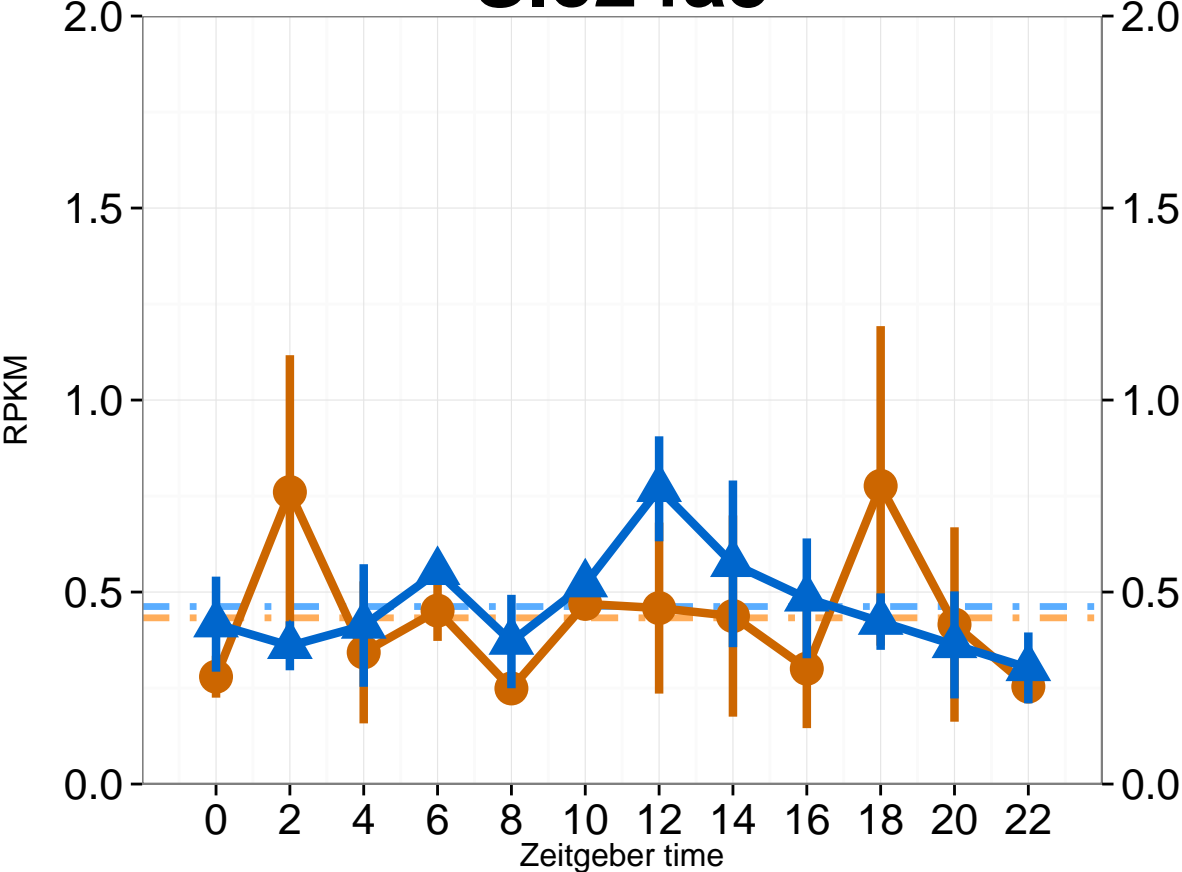

# Slc24a5

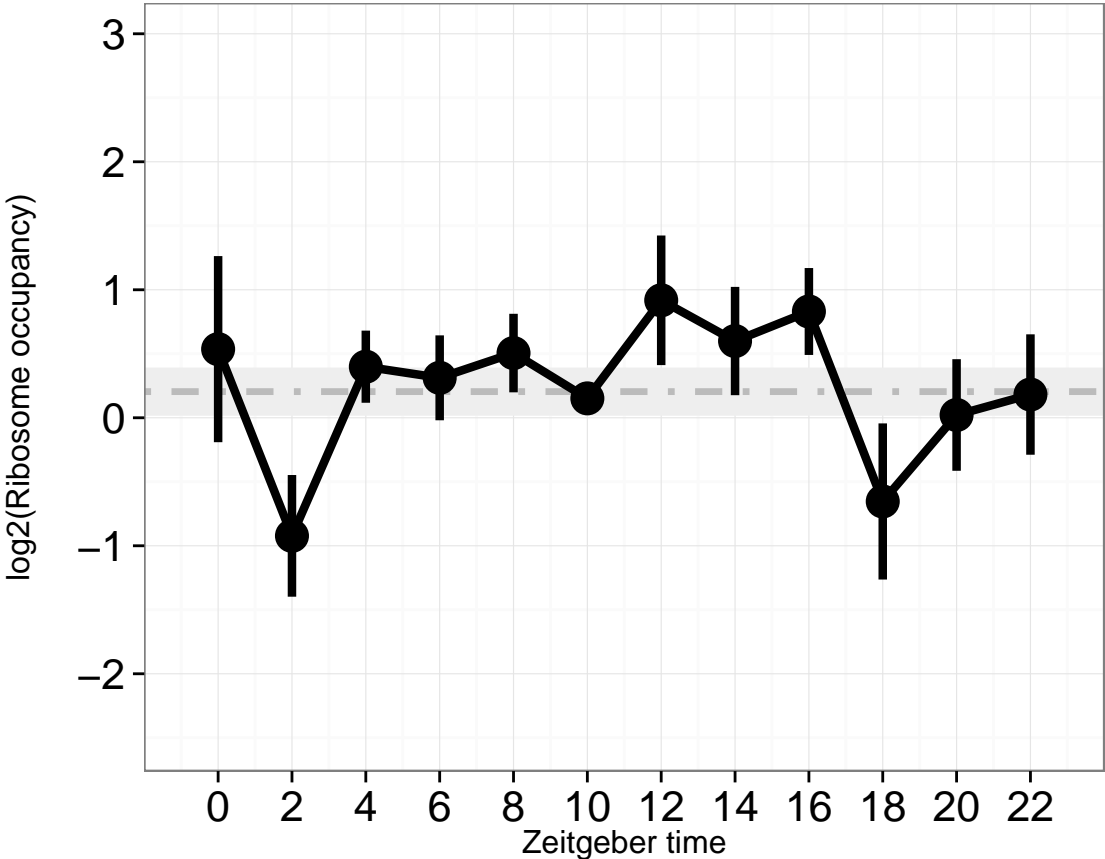

Supplement: SuppDataset_1.zip [file Slc24a5_set_A.pdf › Supplemental Dataset 1/A-mRNA_nonrhyth_translation_nonrhyth/Slc24a5_set_A.pdf]

## Slc25a10

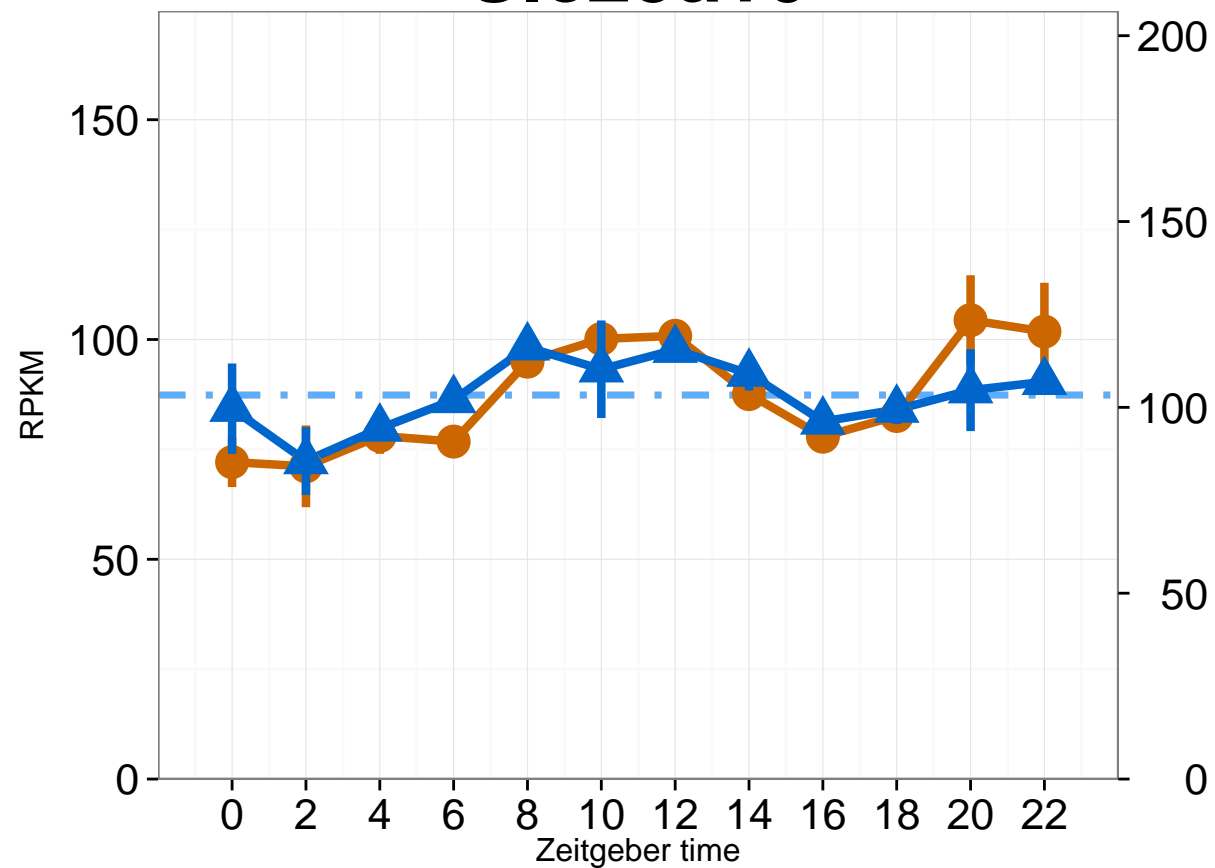

## Slc25a10

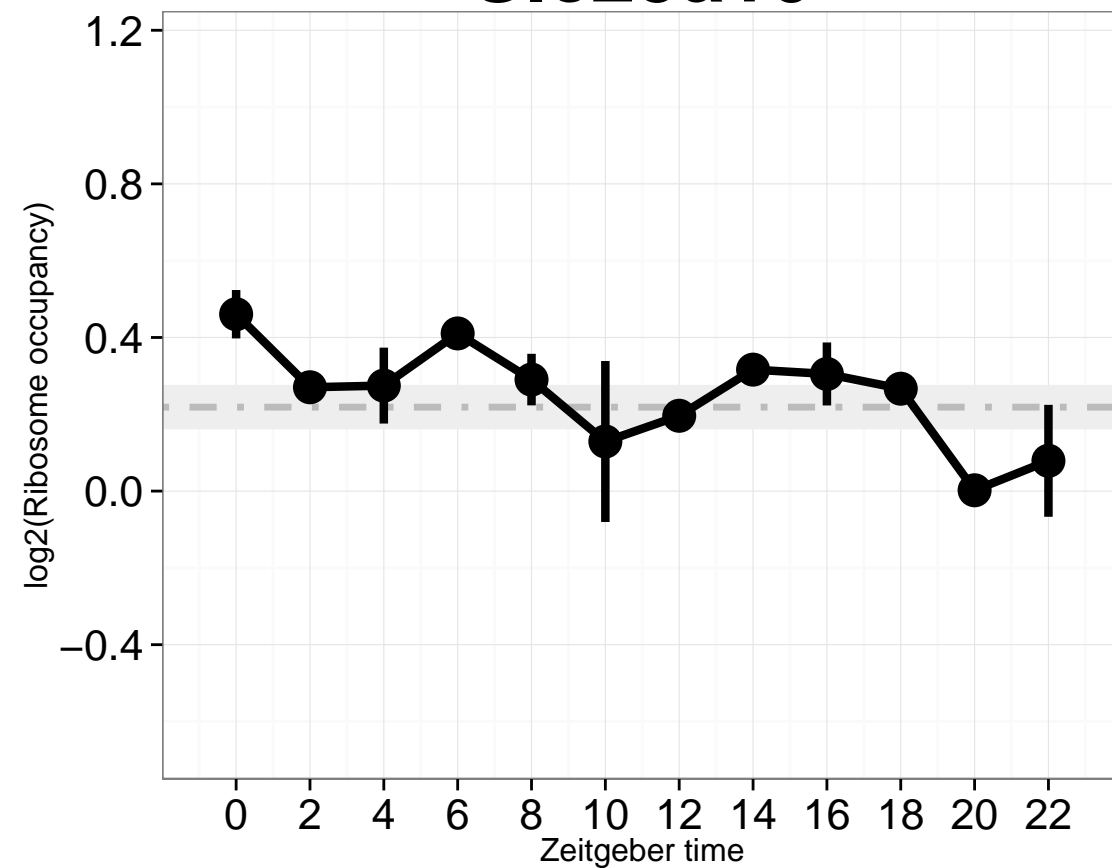

Supplement: SuppDataset_1.zip [file Slc25a10_set_A.pdf › Supplemental Dataset 1/A-mRNA_nonrhyth_translation_nonrhyth/Slc25a10_set_A.pdf]

## Slc25a11

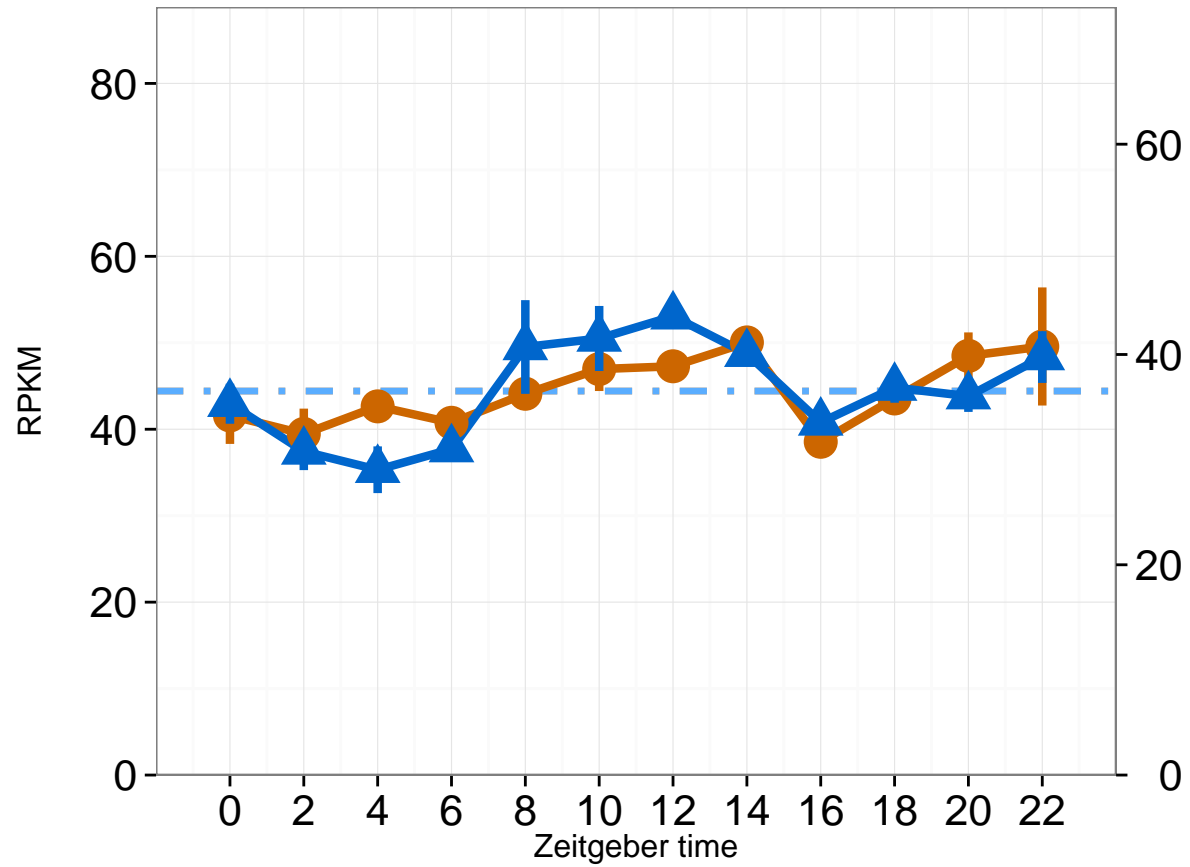

## Slc25a11

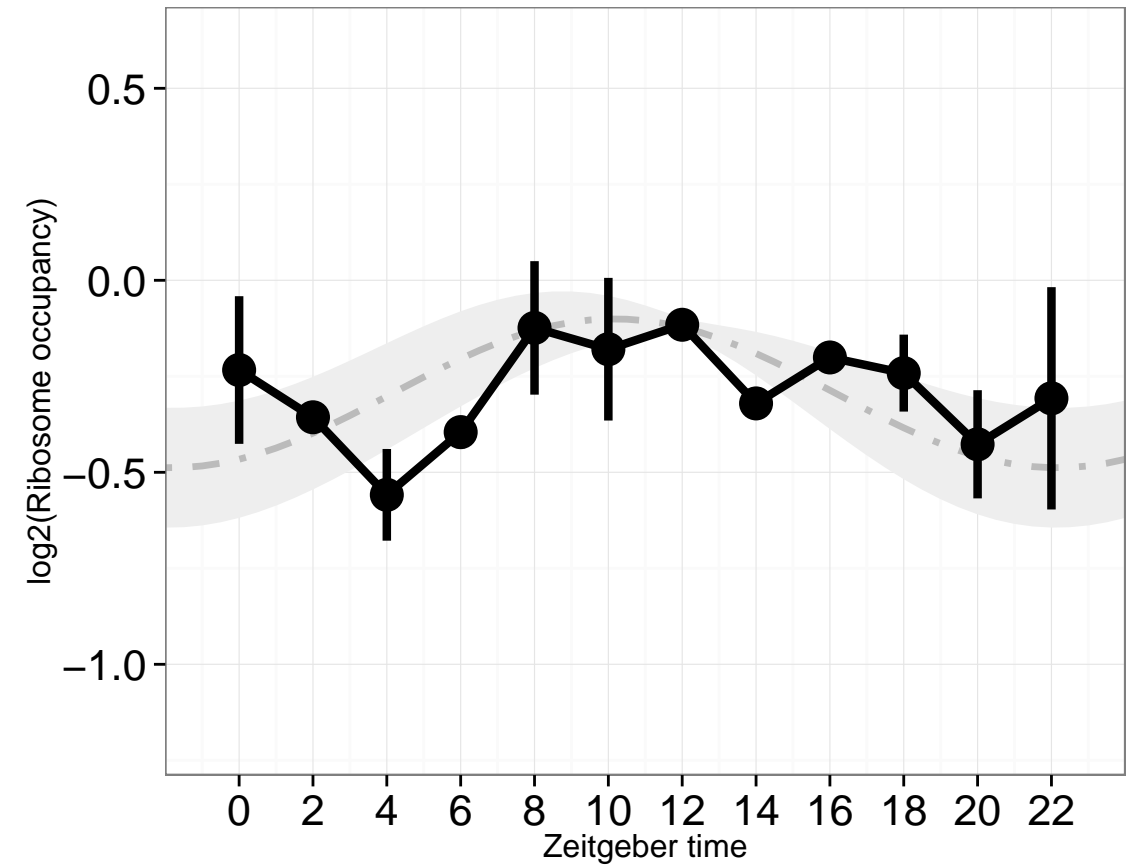

Supplement: SuppDataset_1.zip [file Slc25a11_set_A.pdf › Supplemental Dataset 1/A-mRNA_nonrhyth_translation_nonrhyth/Slc25a11_set_A.pdf]

## Slc25a12

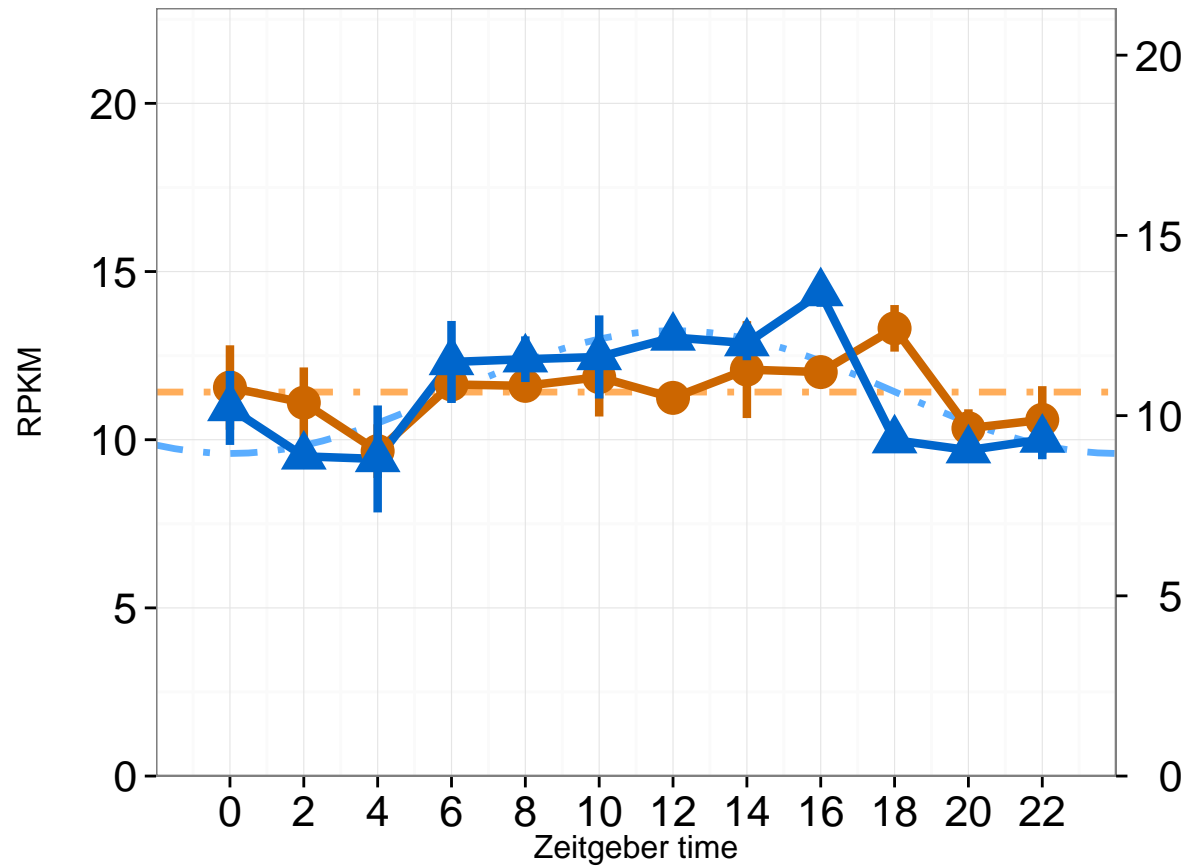

## Slc25a12

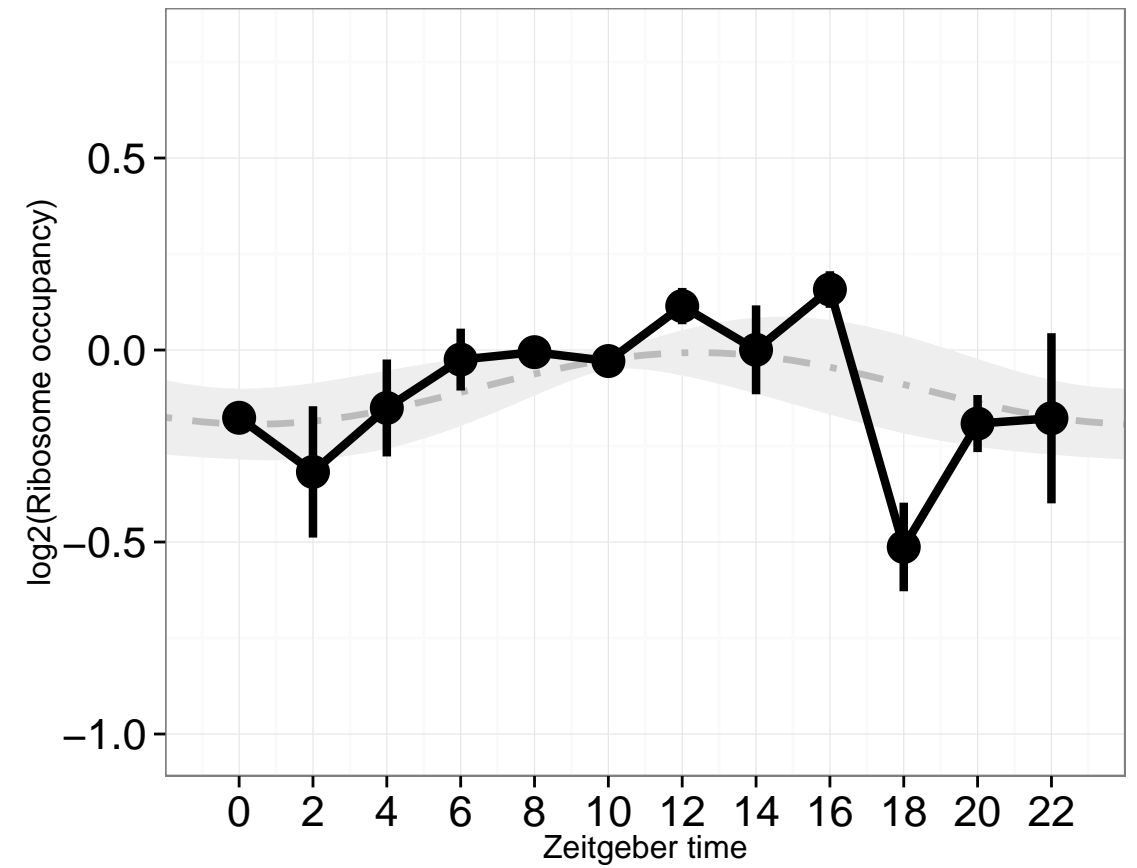

Supplement: SuppDataset_1.zip [file Slc25a12_set_A.pdf › Supplemental Dataset 1/A-mRNA_nonrhyth_translation_nonrhyth/Slc25a12_set_A.pdf]

## Slc25a13

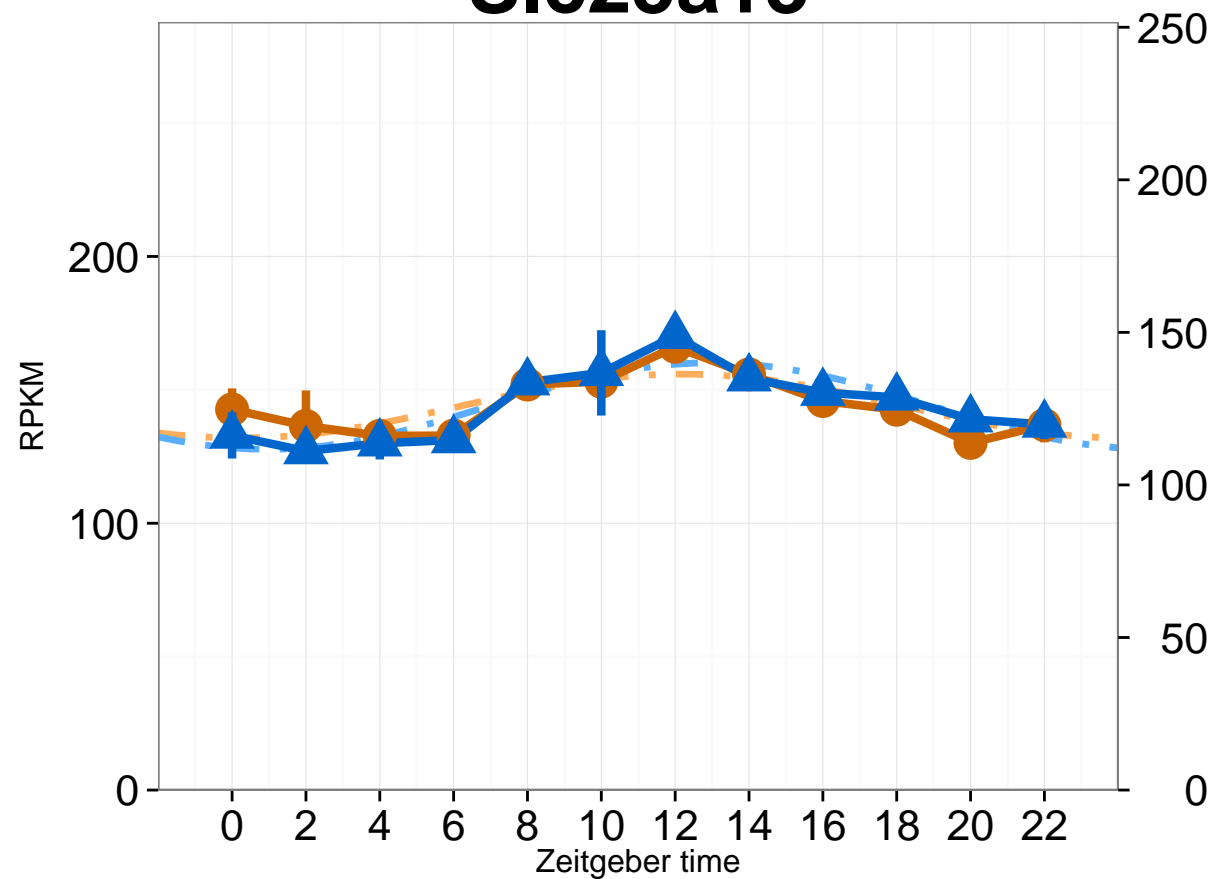

## Slc25a13

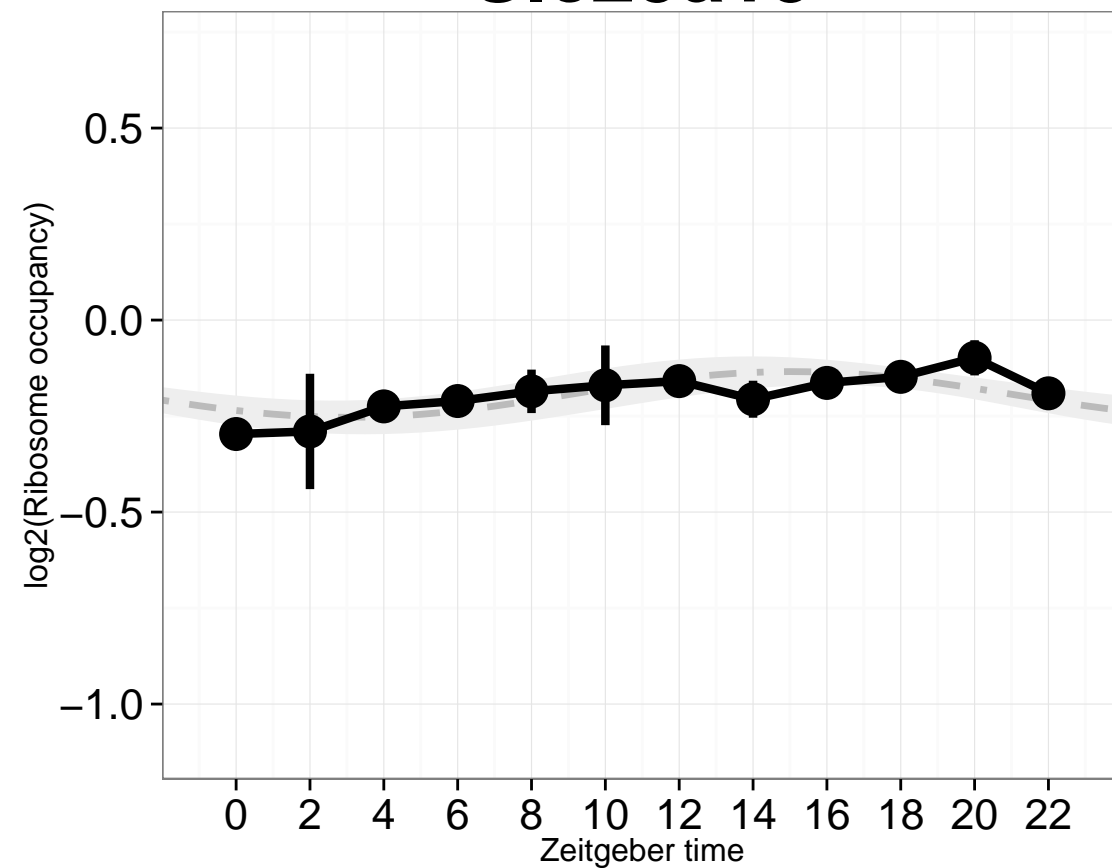

Supplement: SuppDataset_1.zip [file Slc25a13_set_A.pdf › Supplemental Dataset 1/A-mRNA_nonrhyth_translation_nonrhyth/Slc25a13_set_A.pdf]

# Slc25a14

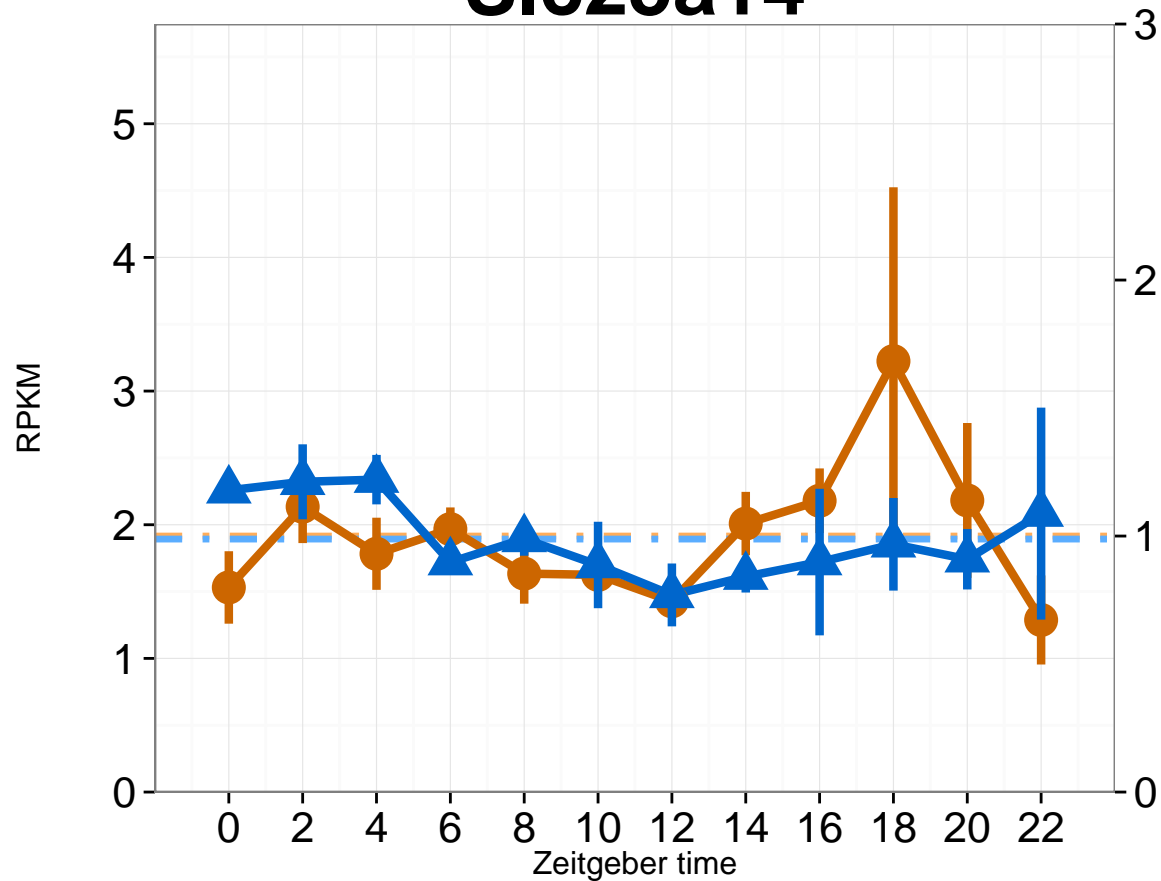

# Slc25a14

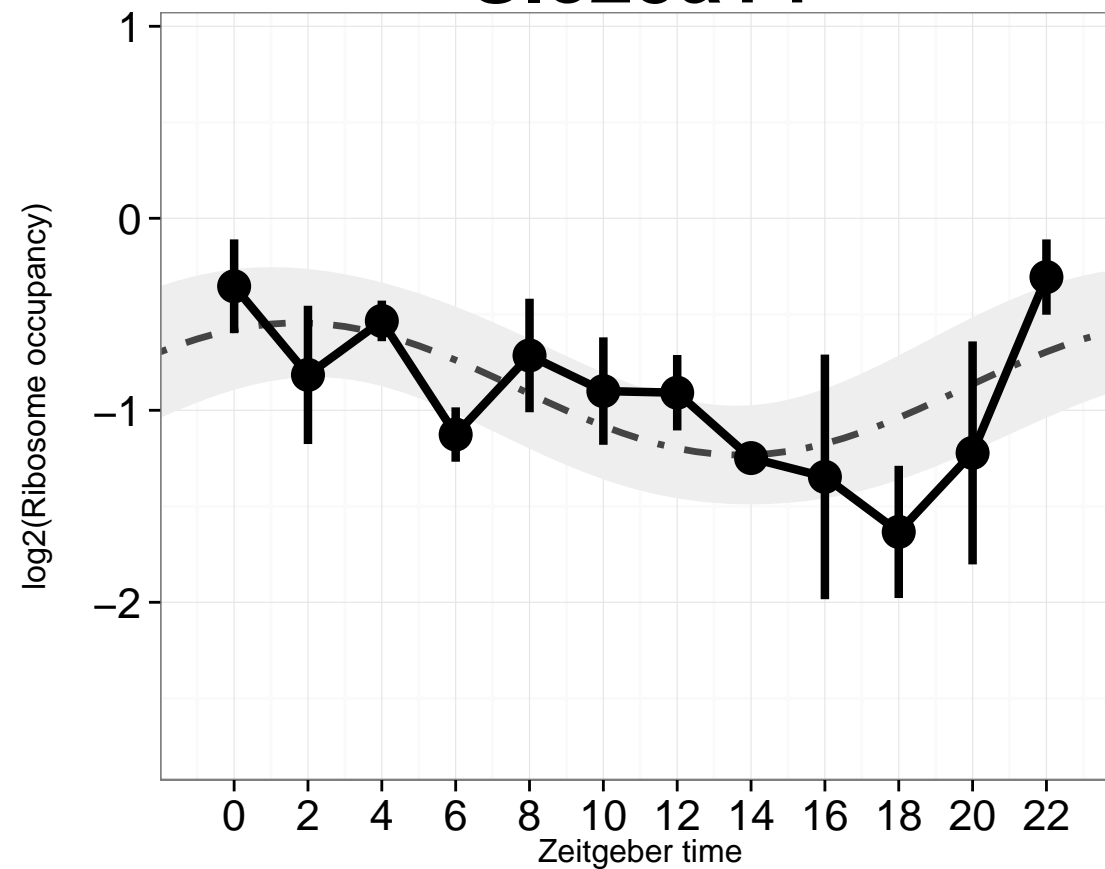

Supplement: SuppDataset_1.zip [file Slc25a14_set_A.pdf › Supplemental Dataset 1/A-mRNA_nonrhyth_translation_nonrhyth/Slc25a14_set_A.pdf]

## Slc25a15

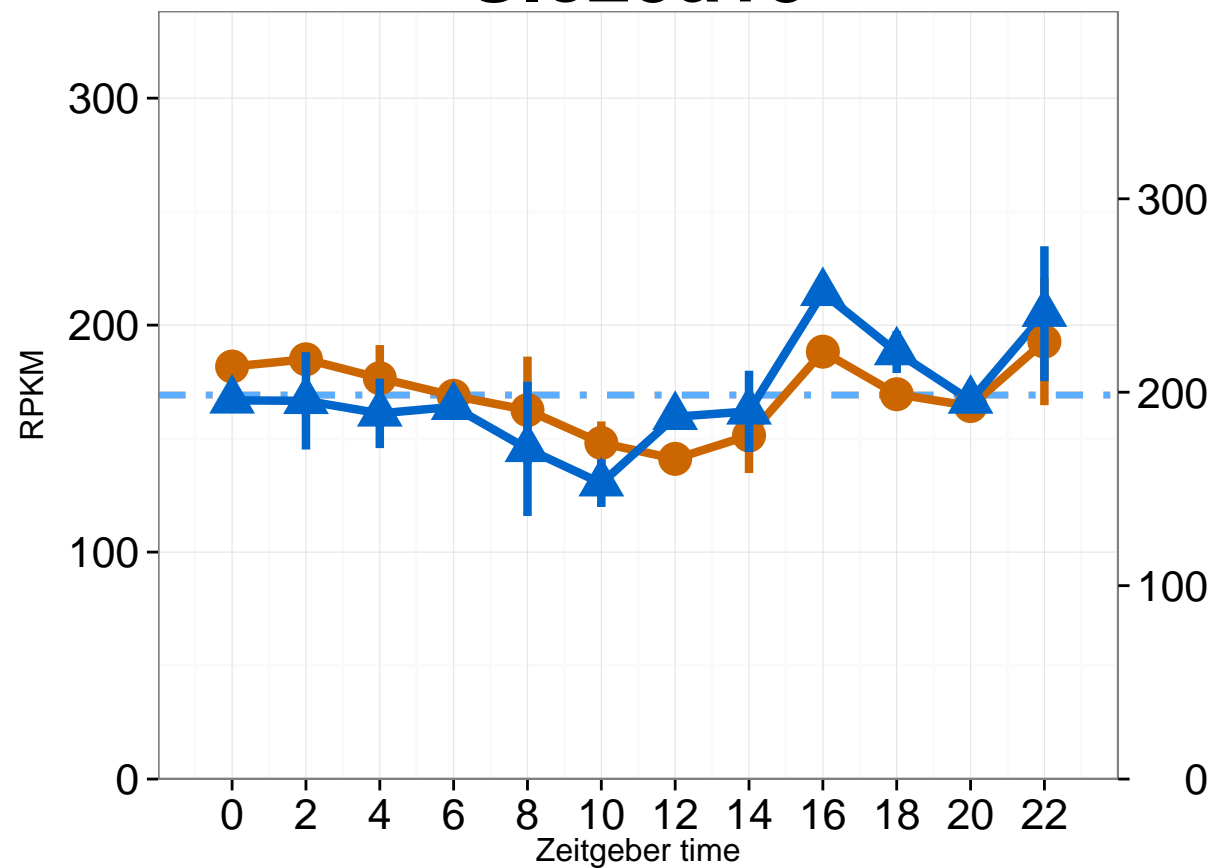

## Slc25a15

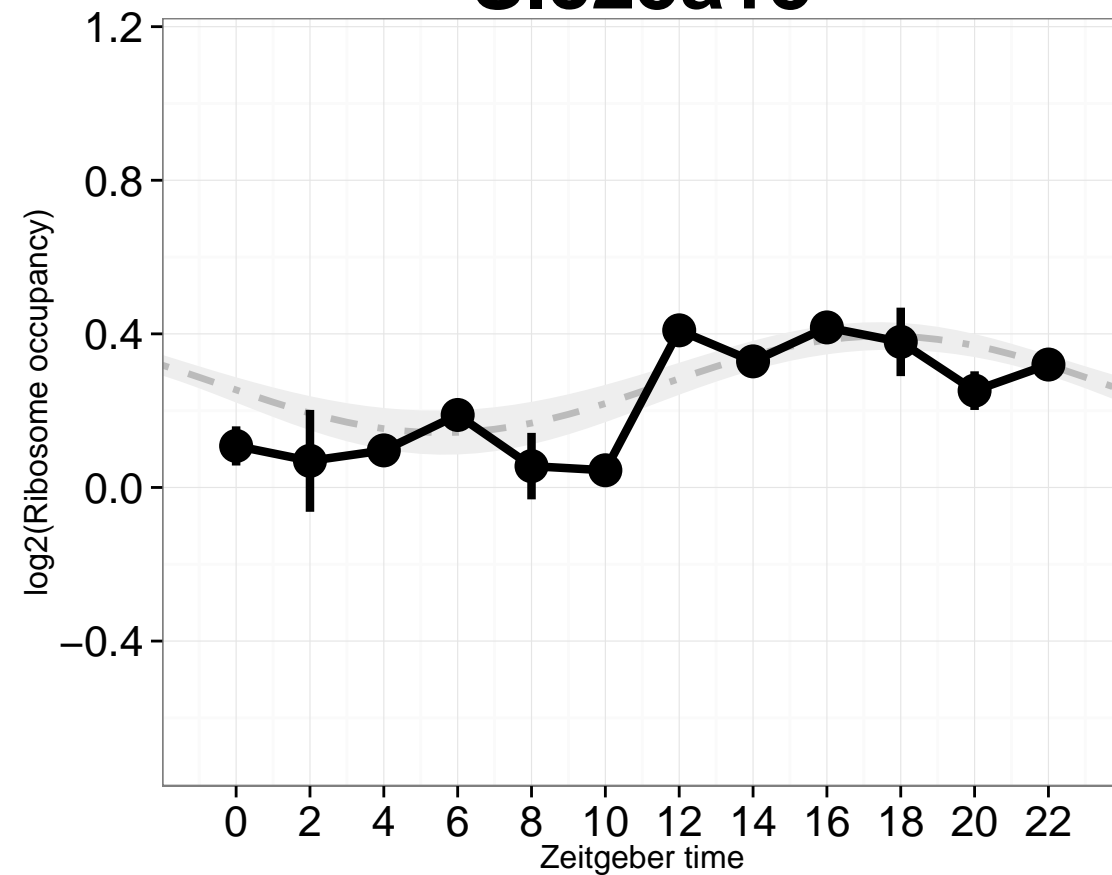

Supplement: SuppDataset_1.zip [file Slc25a15_set_A.pdf › Supplemental Dataset 1/A-mRNA_nonrhyth_translation_nonrhyth/Slc25a15_set_A.pdf]

## Slc25a16

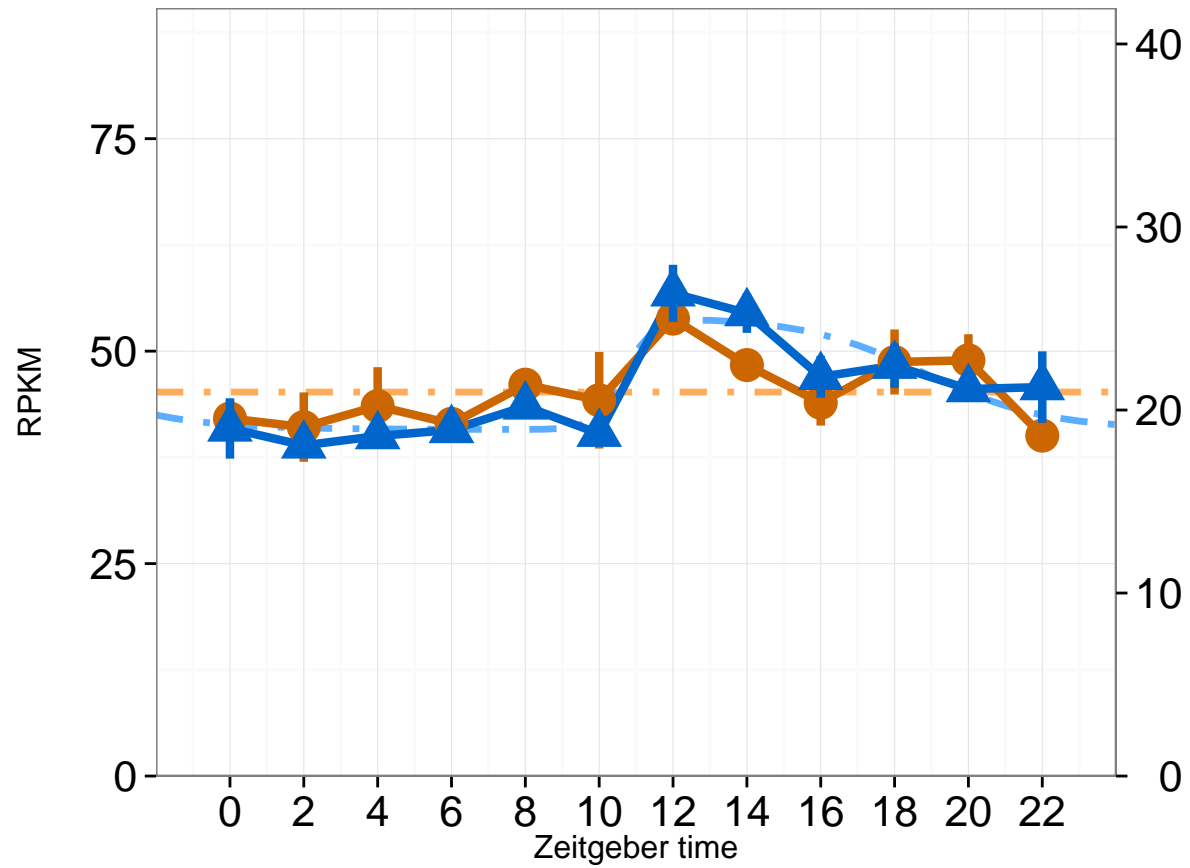

## Slc25a16

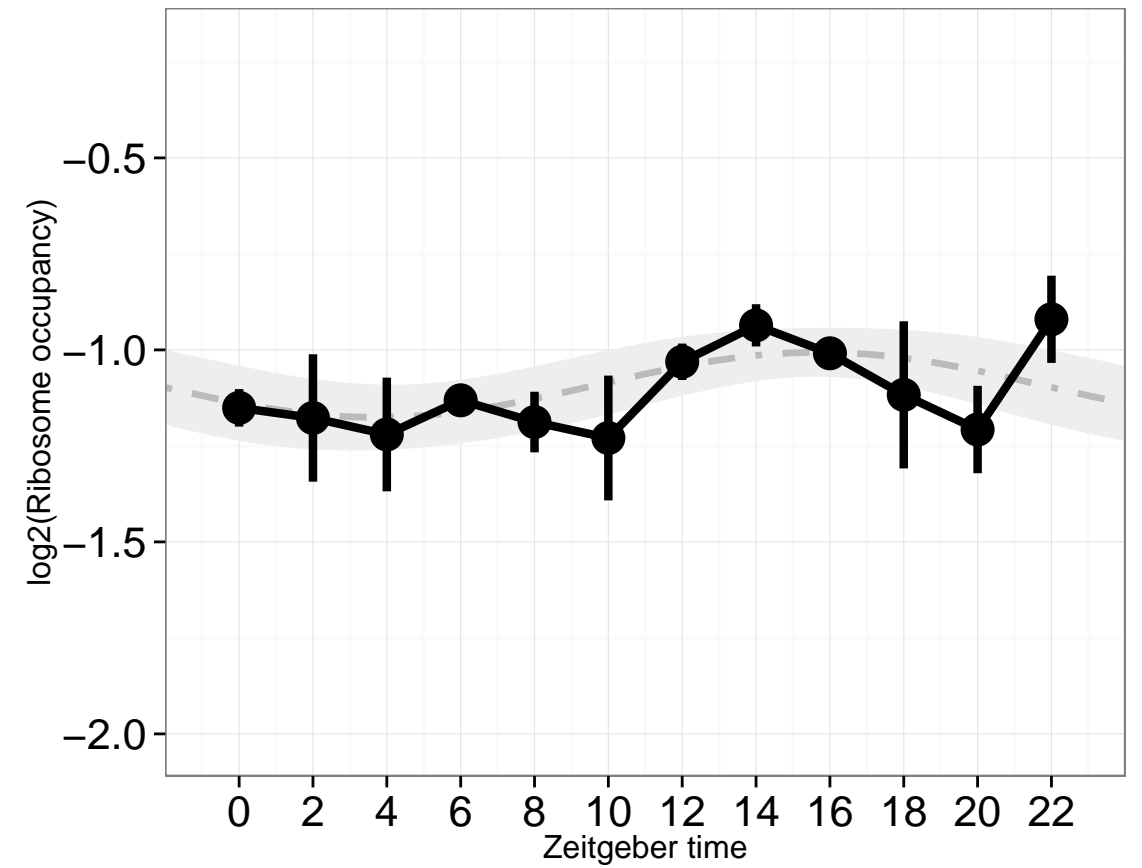

Supplement: SuppDataset_1.zip [file Slc25a16_set_A.pdf › Supplemental Dataset 1/A-mRNA_nonrhyth_translation_nonrhyth/Slc25a16_set_A.pdf]

## Slc25a17

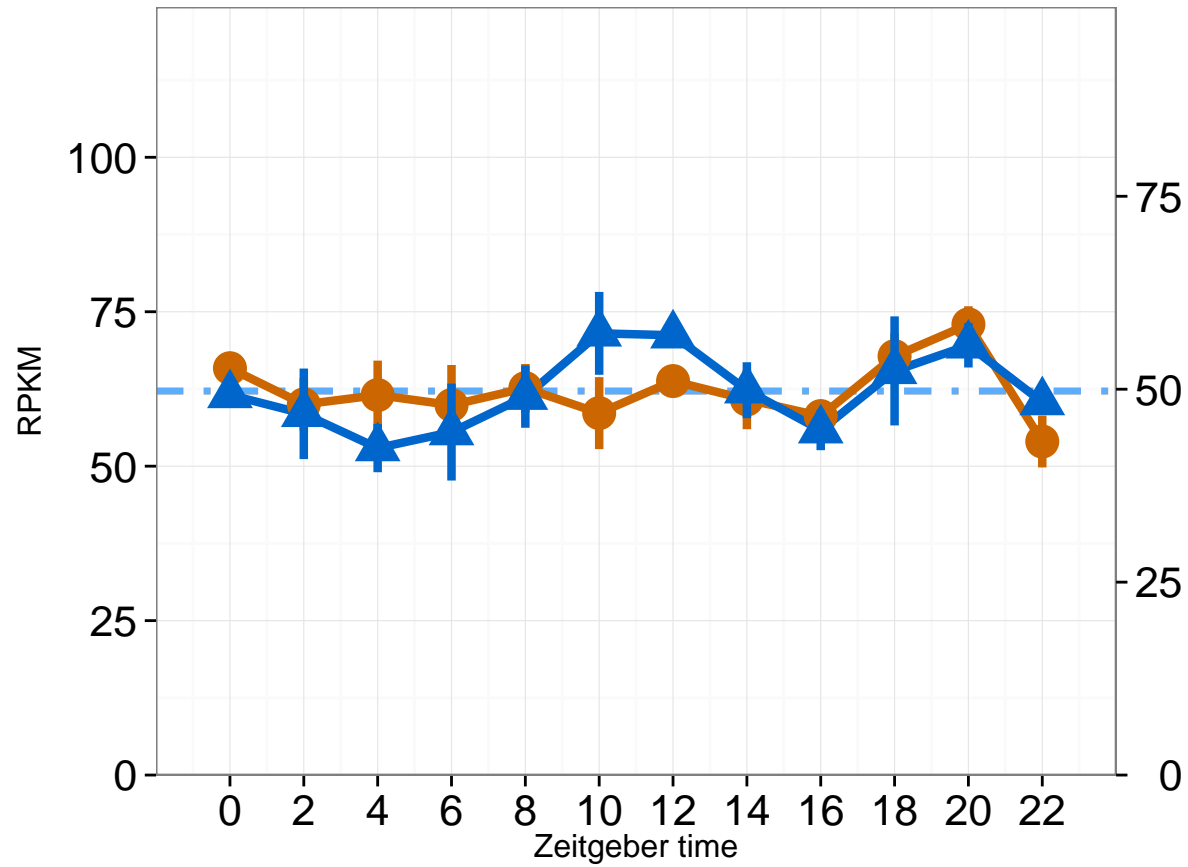

## Slc25a17

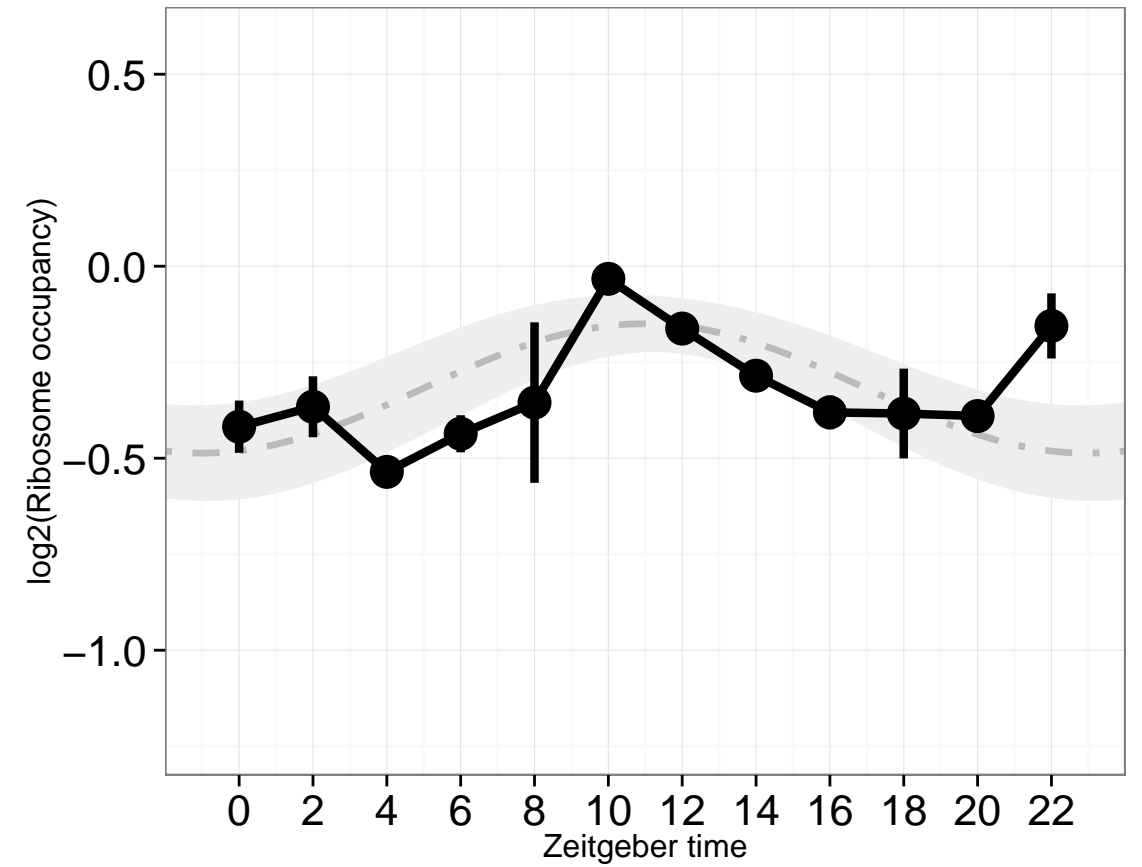

Supplement: SuppDataset_1.zip [file Slc25a17_set_A.pdf › Supplemental Dataset 1/A-mRNA_nonrhyth_translation_nonrhyth/Slc25a17_set_A.pdf]

## Slc25a1

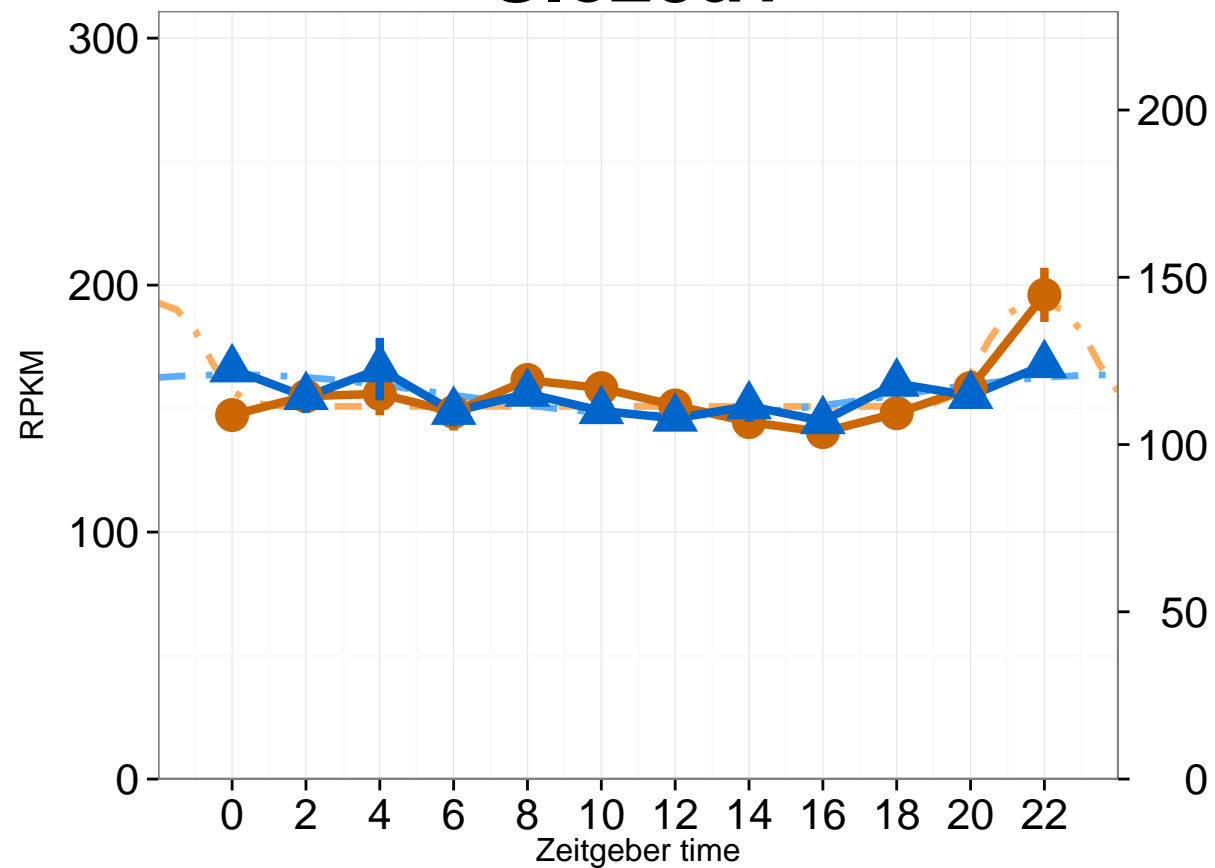

## Slc25a1

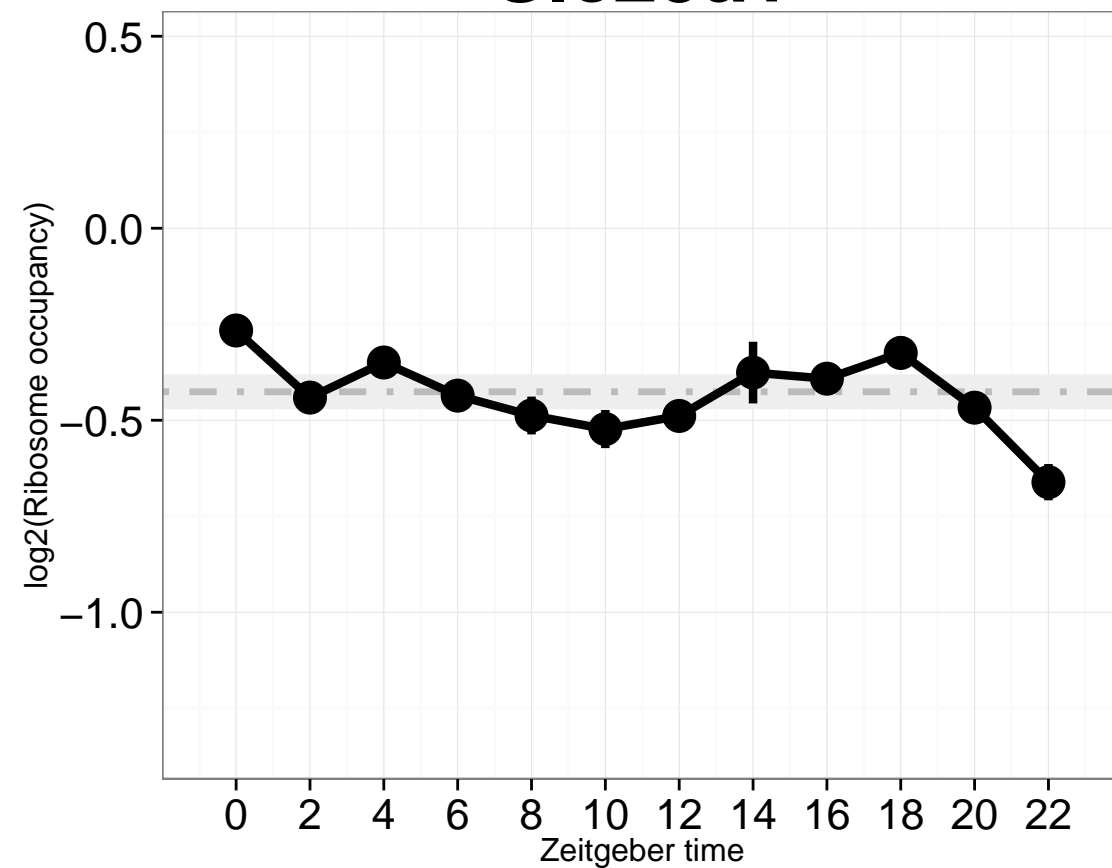

Supplement: SuppDataset_1.zip [file Slc25a1_set_A.pdf › Supplemental Dataset 1/A-mRNA_nonrhyth_translation_nonrhyth/Slc25a1_set_A.pdf]

## Slc25a20

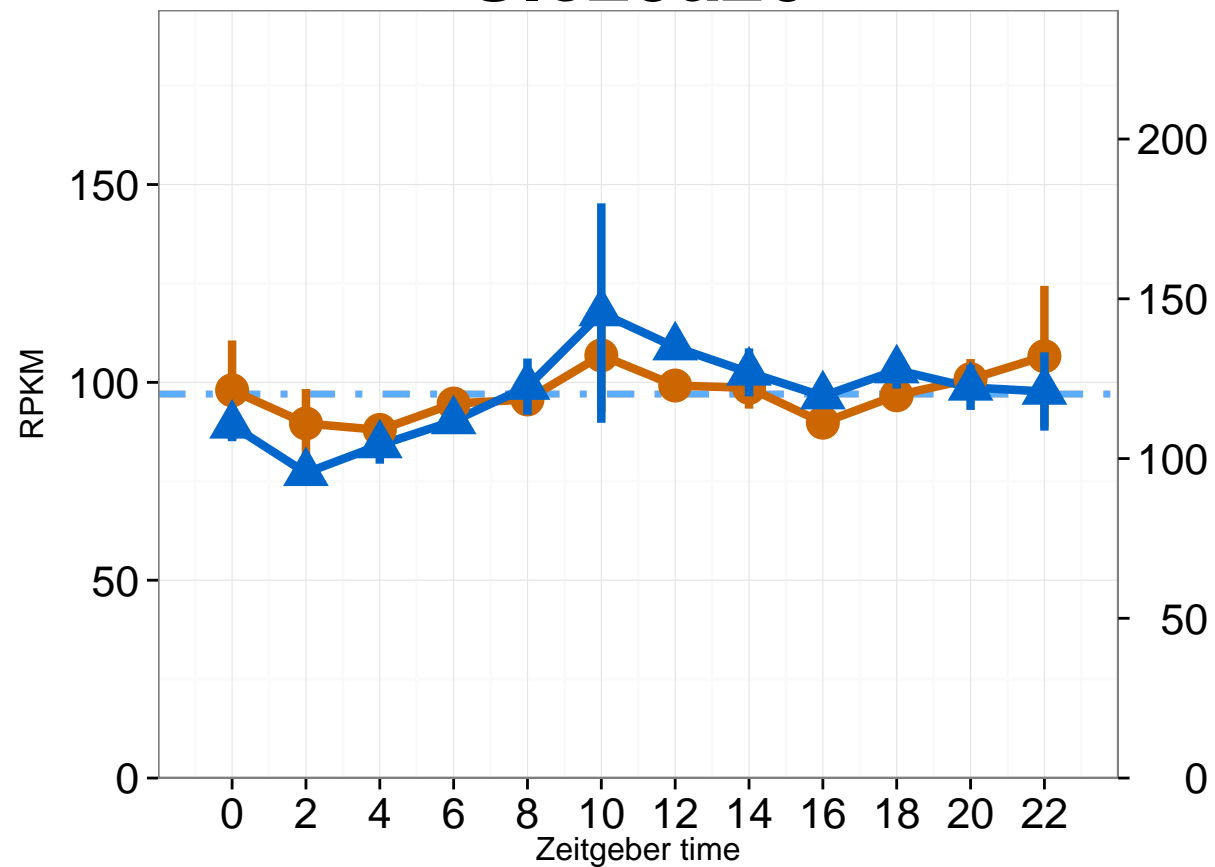

## Slc25a20

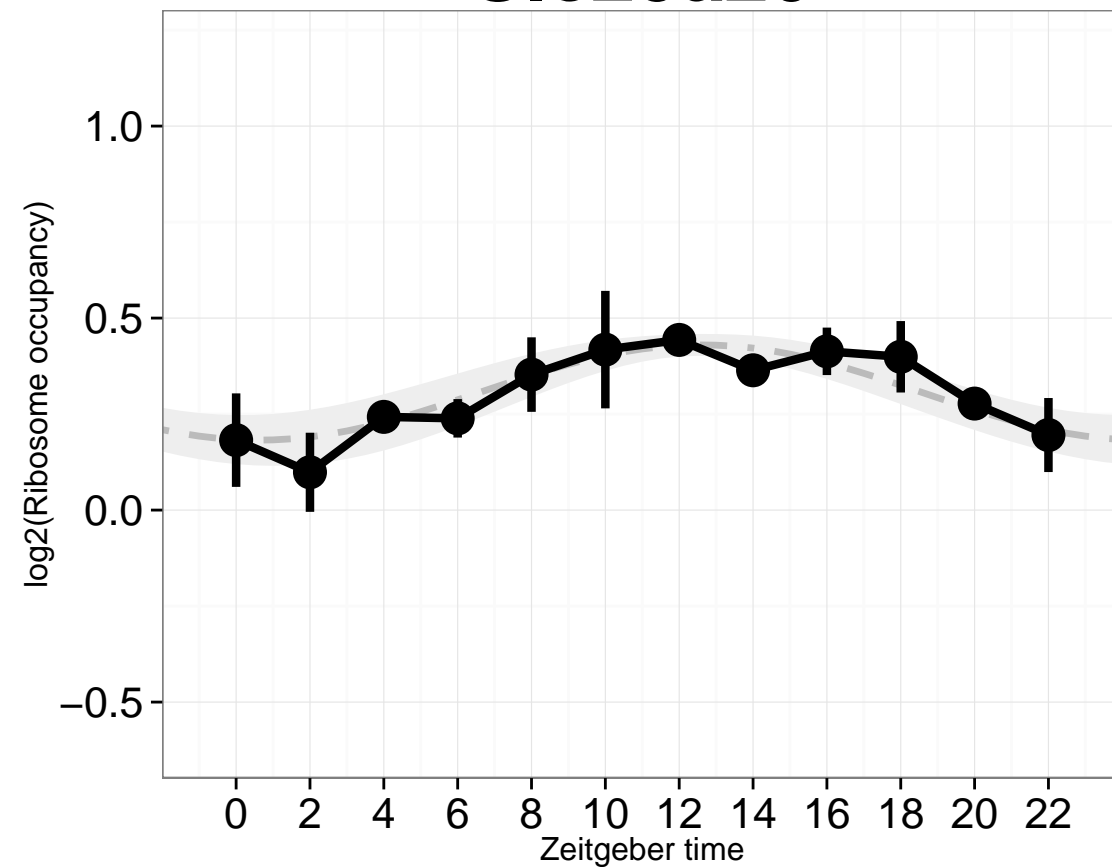

Supplement: SuppDataset_1.zip [file Slc25a20_set_A.pdf › Supplemental Dataset 1/A-mRNA_nonrhyth_translation_nonrhyth/Slc25a20_set_A.pdf]

## Slc25a21

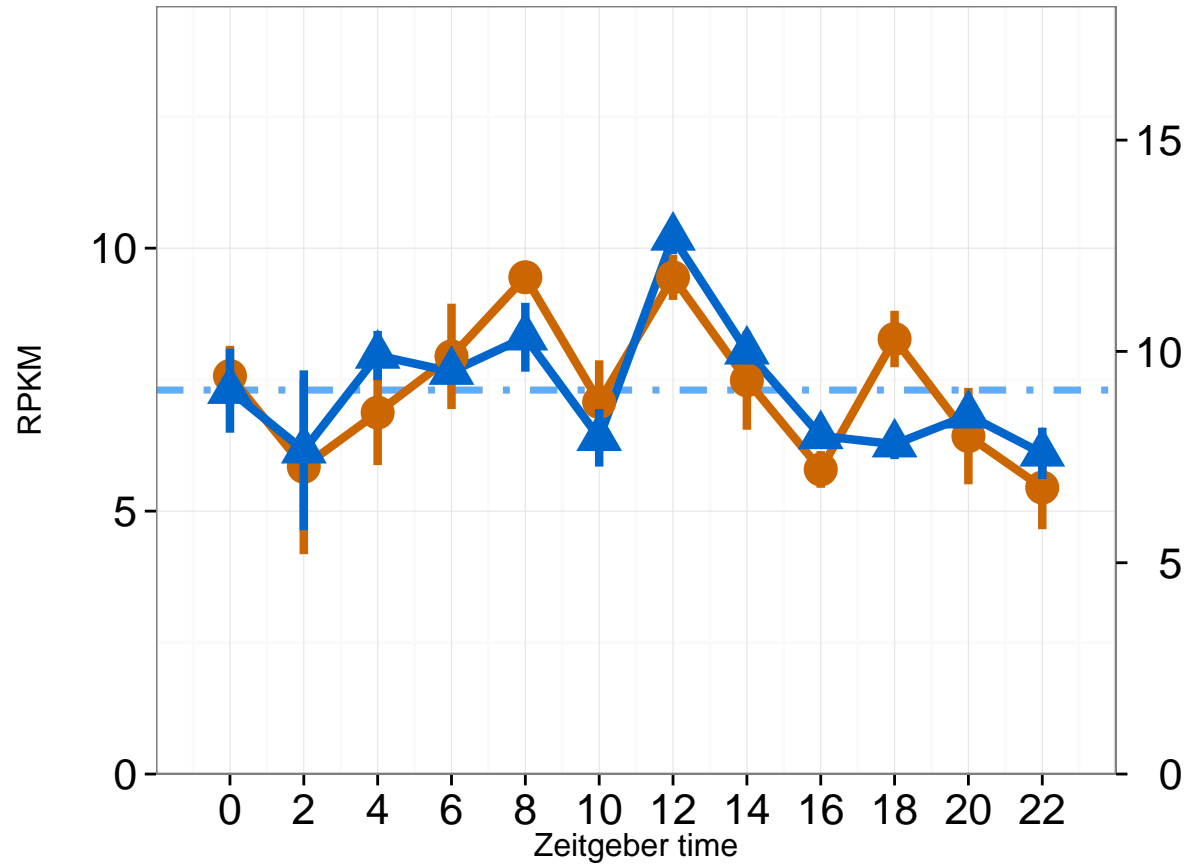

## Slc25a21

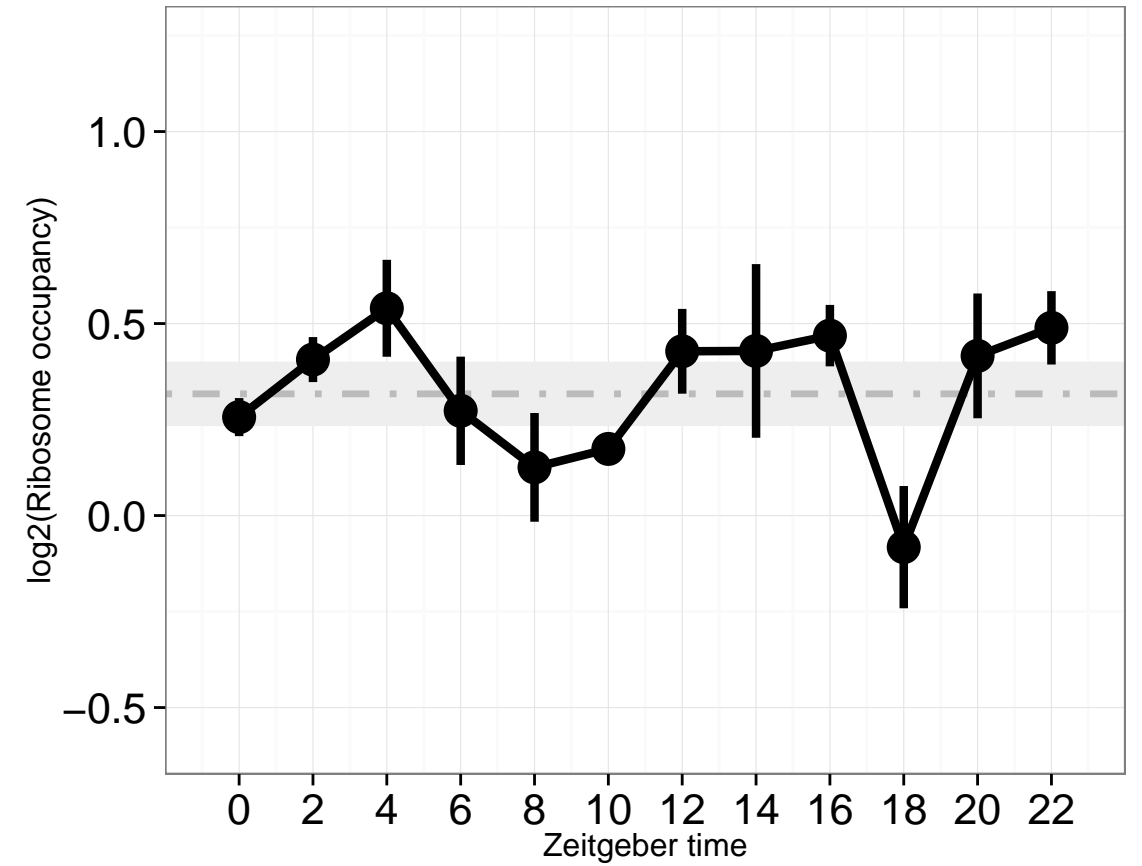

Supplement: SuppDataset_1.zip [file Slc25a21_set_A.pdf › Supplemental Dataset 1/A-mRNA_nonrhyth_translation_nonrhyth/Slc25a21_set_A.pdf]

# Slc25a23

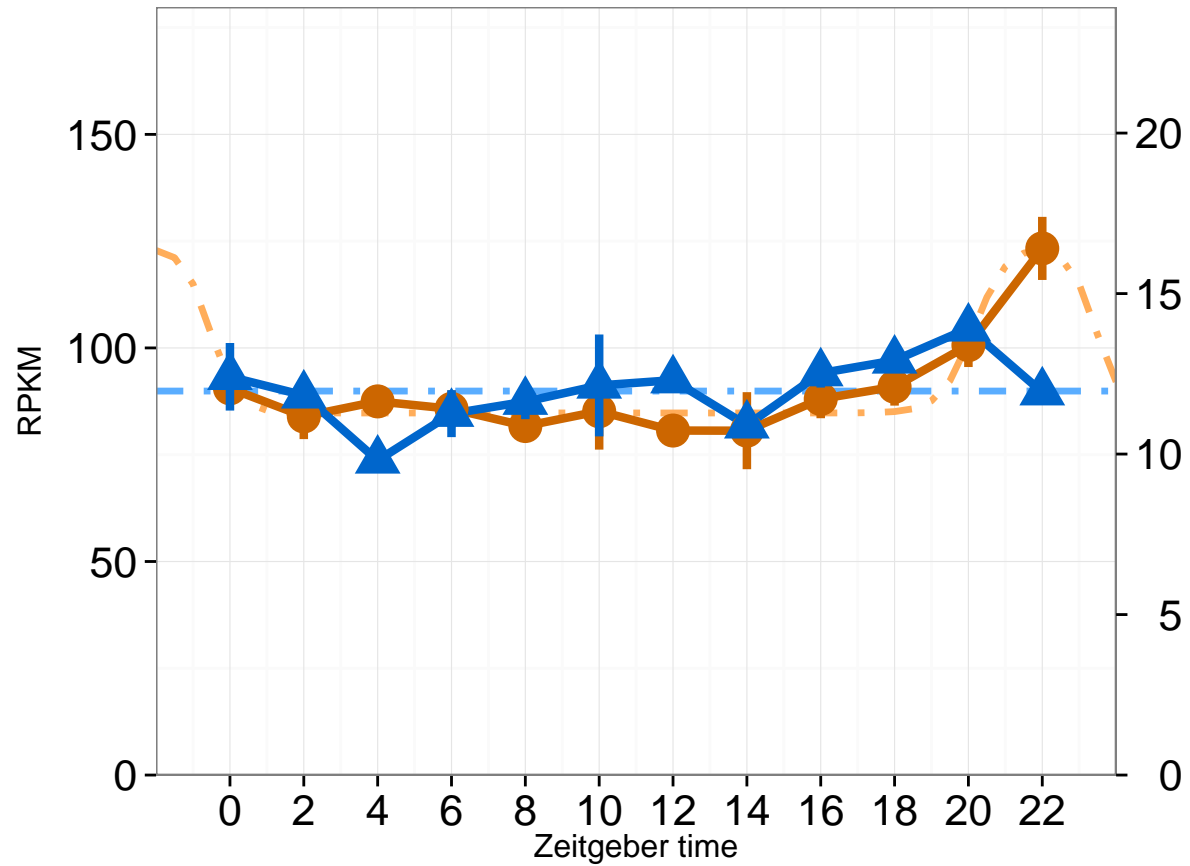

# Slc25a23

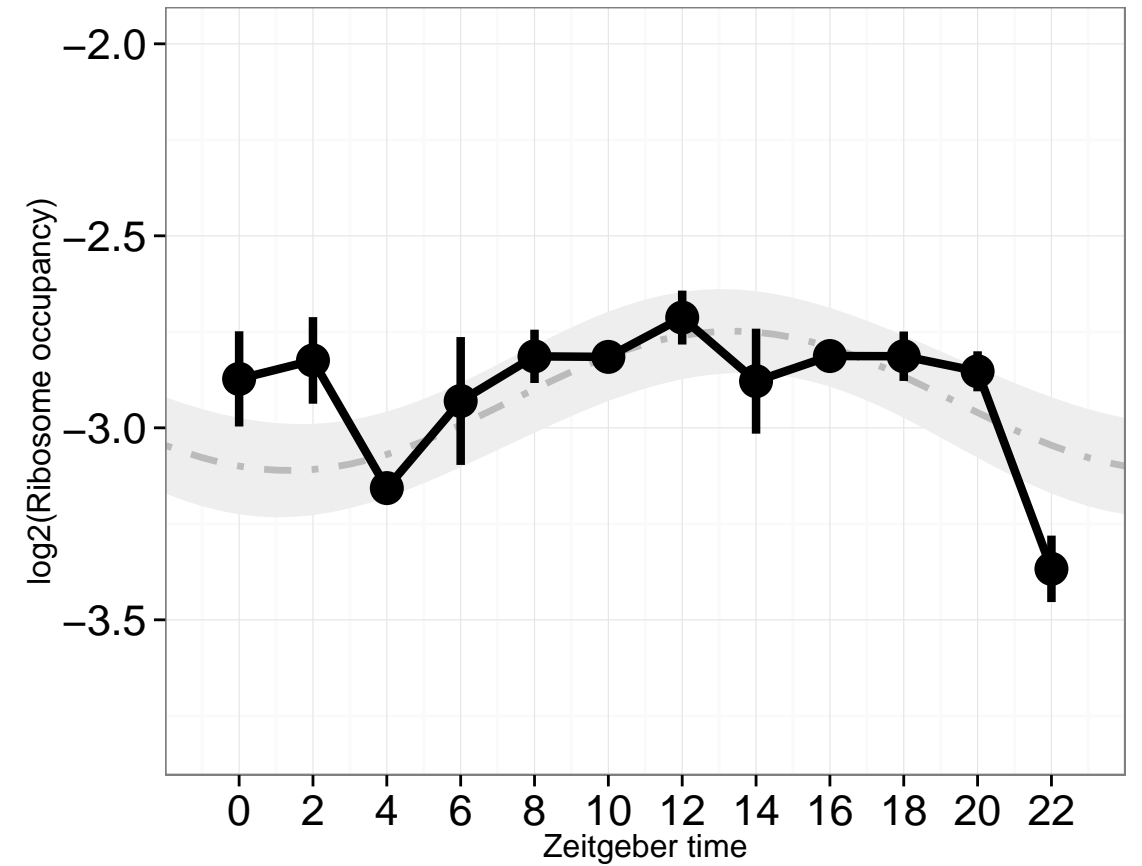

Supplement: SuppDataset_1.zip [file Slc25a23_set_A.pdf › Supplemental Dataset 1/A-mRNA_nonrhyth_translation_nonrhyth/Slc25a23_set_A.pdf]

## Slc25a25

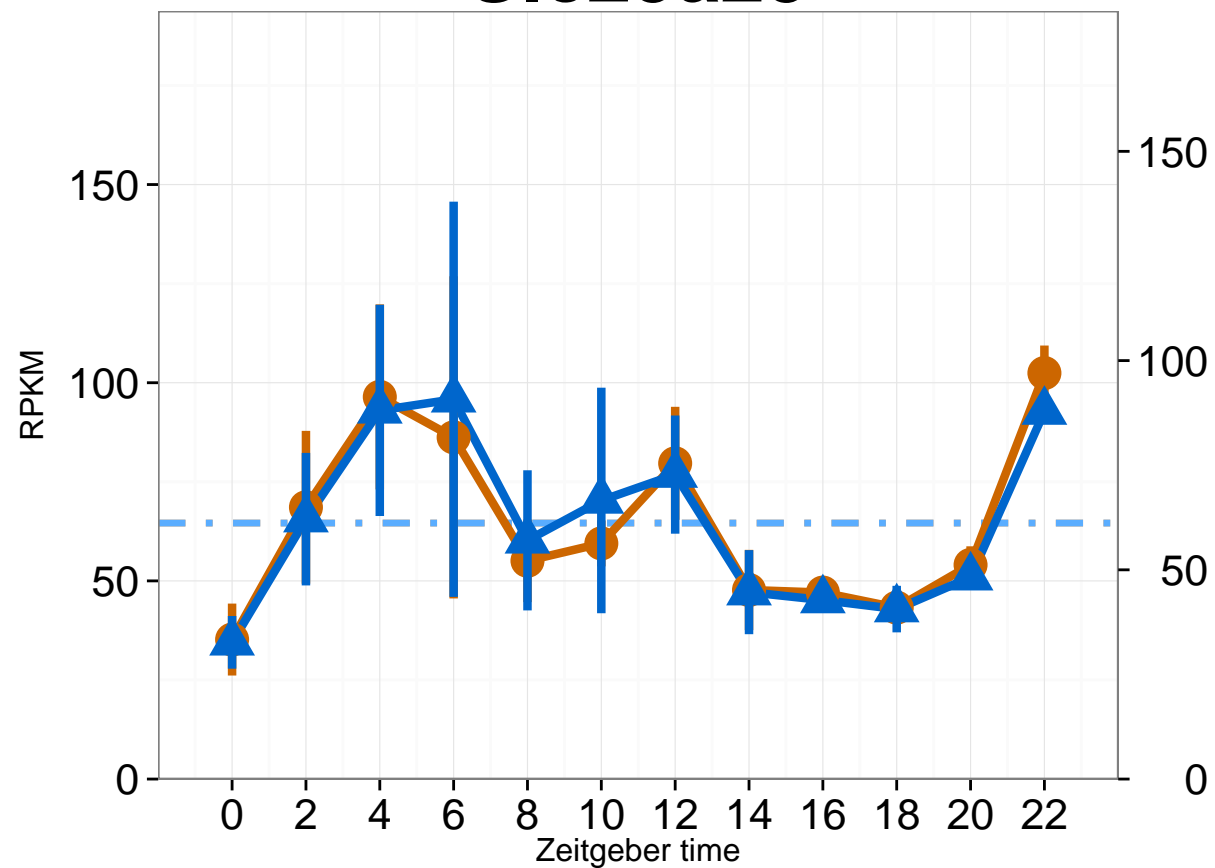

## Slc25a25

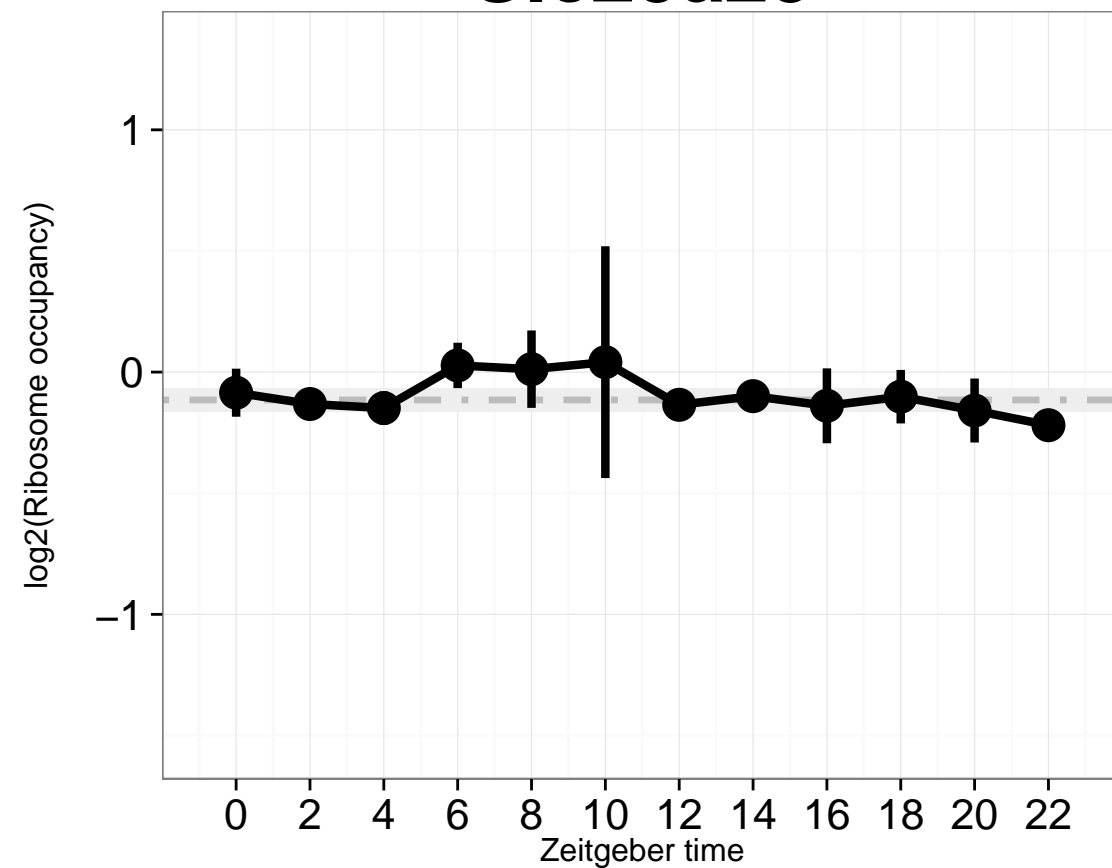

Supplement: SuppDataset_1.zip [file Slc25a25_set_A.pdf › Supplemental Dataset 1/A-mRNA_nonrhyth_translation_nonrhyth/Slc25a25_set_A.pdf]

# Slc25a26

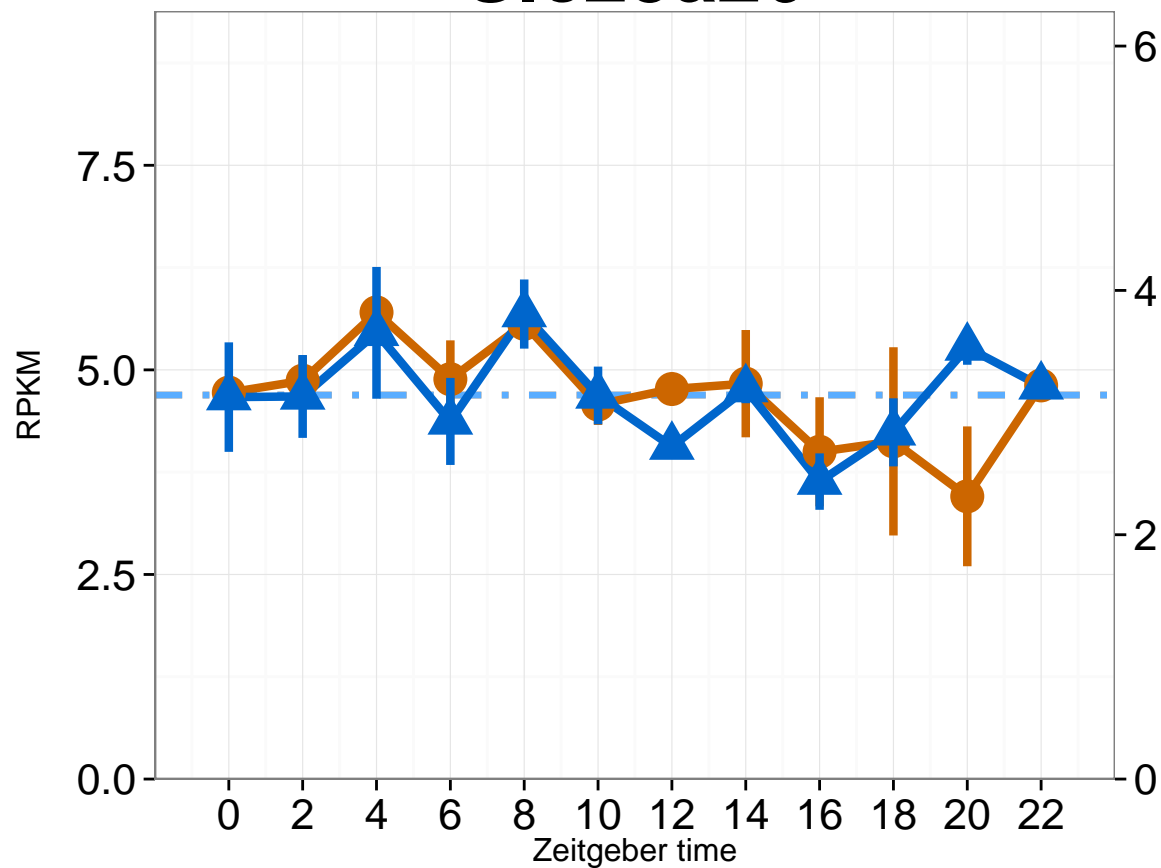

# Slc25a26

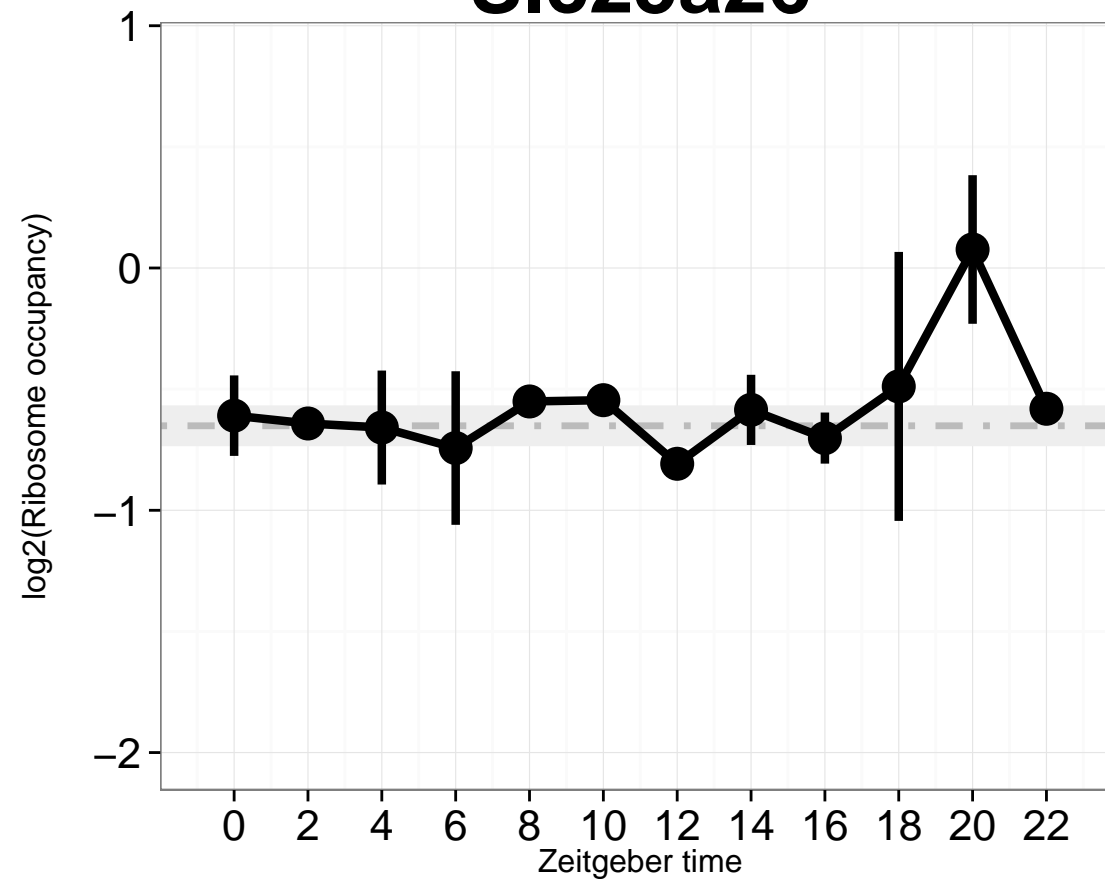

Supplement: SuppDataset_1.zip [file Slc25a26_set_A.pdf › Supplemental Dataset 1/A-mRNA_nonrhyth_translation_nonrhyth/Slc25a26_set_A.pdf]

## Slc25a28

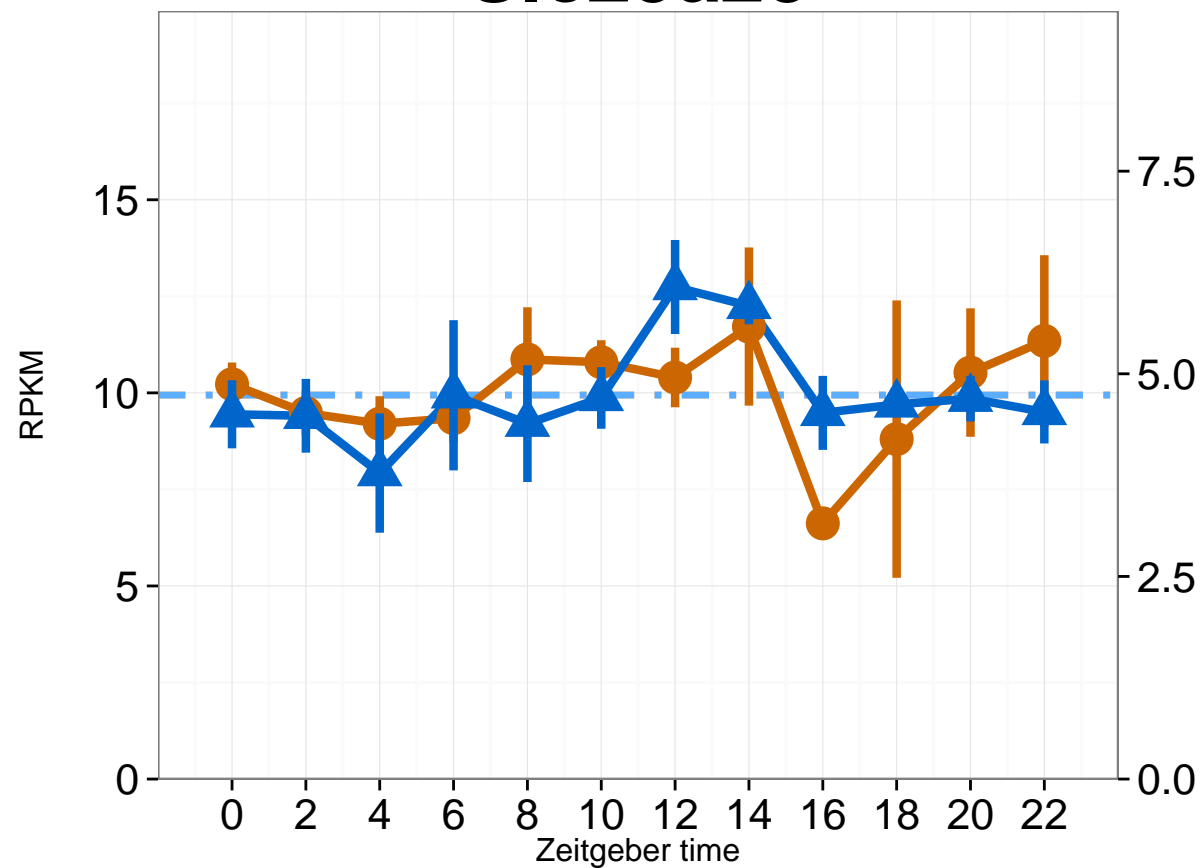

## Slc25a28

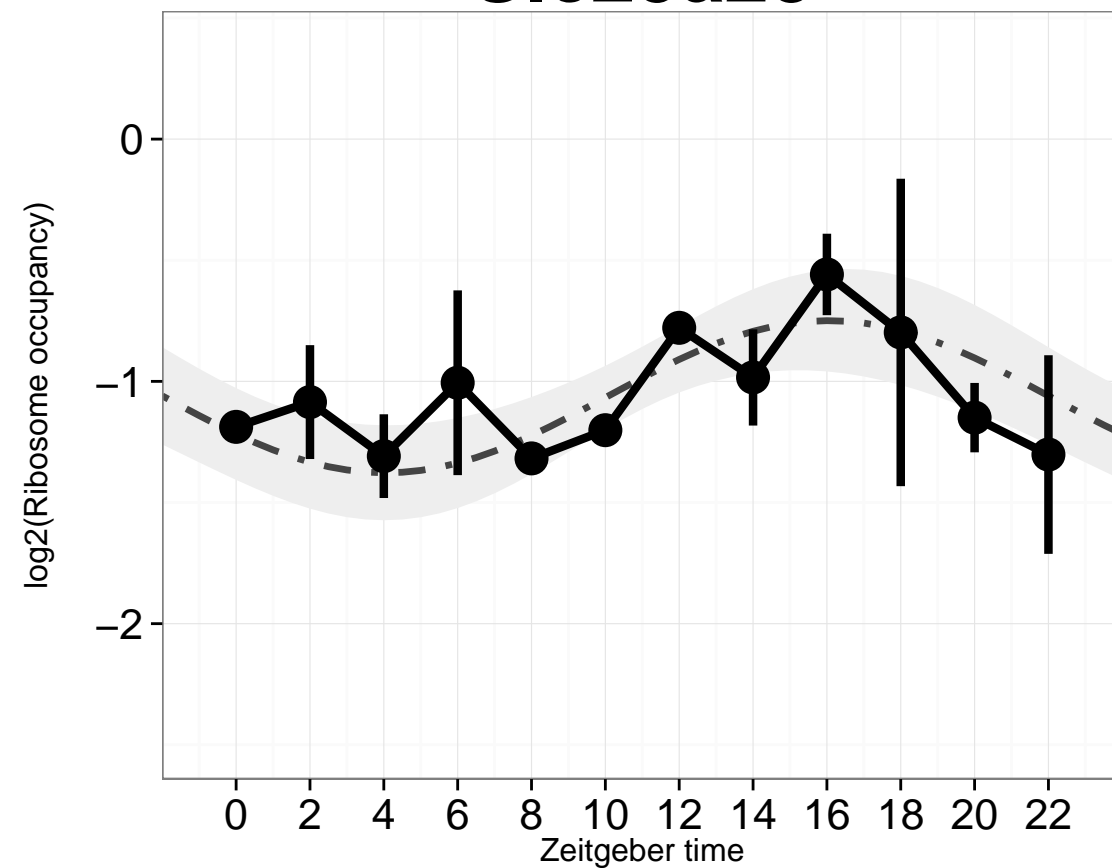

Supplement: SuppDataset_1.zip [file Slc25a28_set_A.pdf › Supplemental Dataset 1/A-mRNA_nonrhyth_translation_nonrhyth/Slc25a28_set_A.pdf]

## Slc25a33

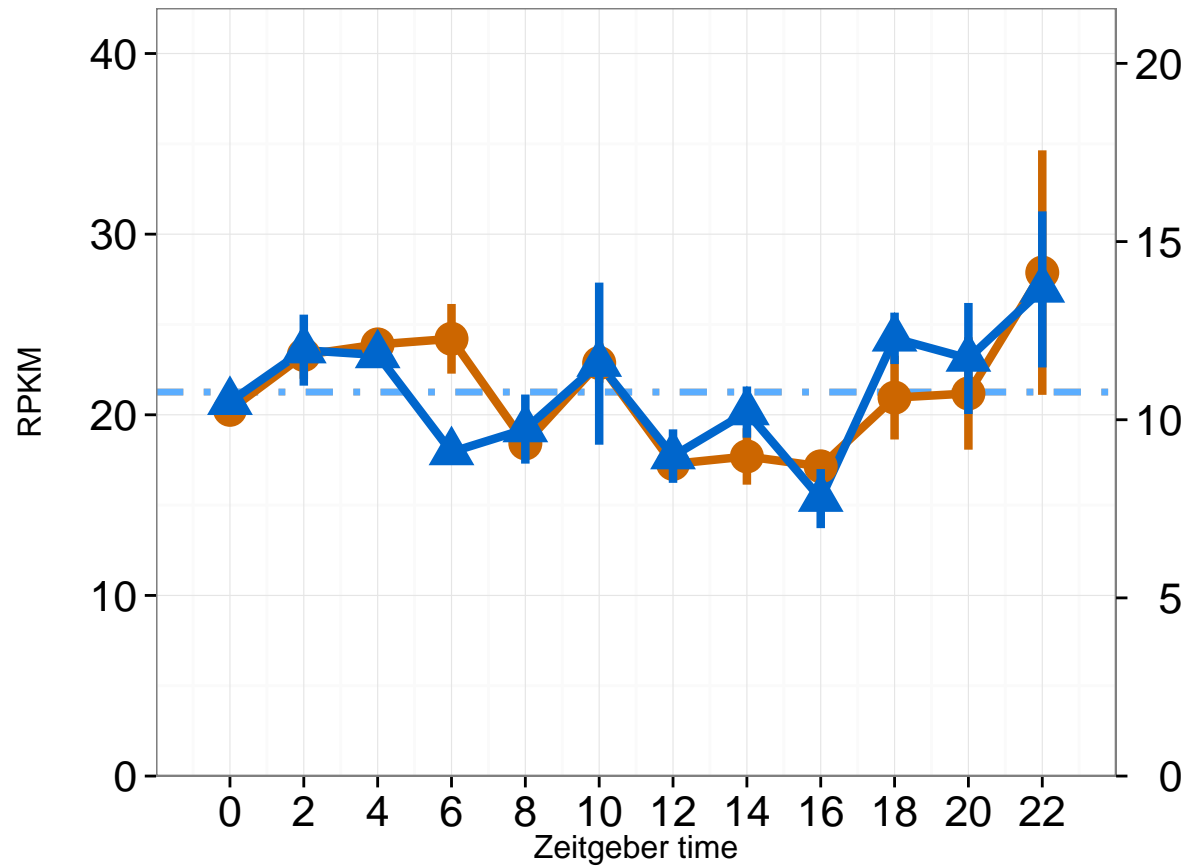

## Slc25a33

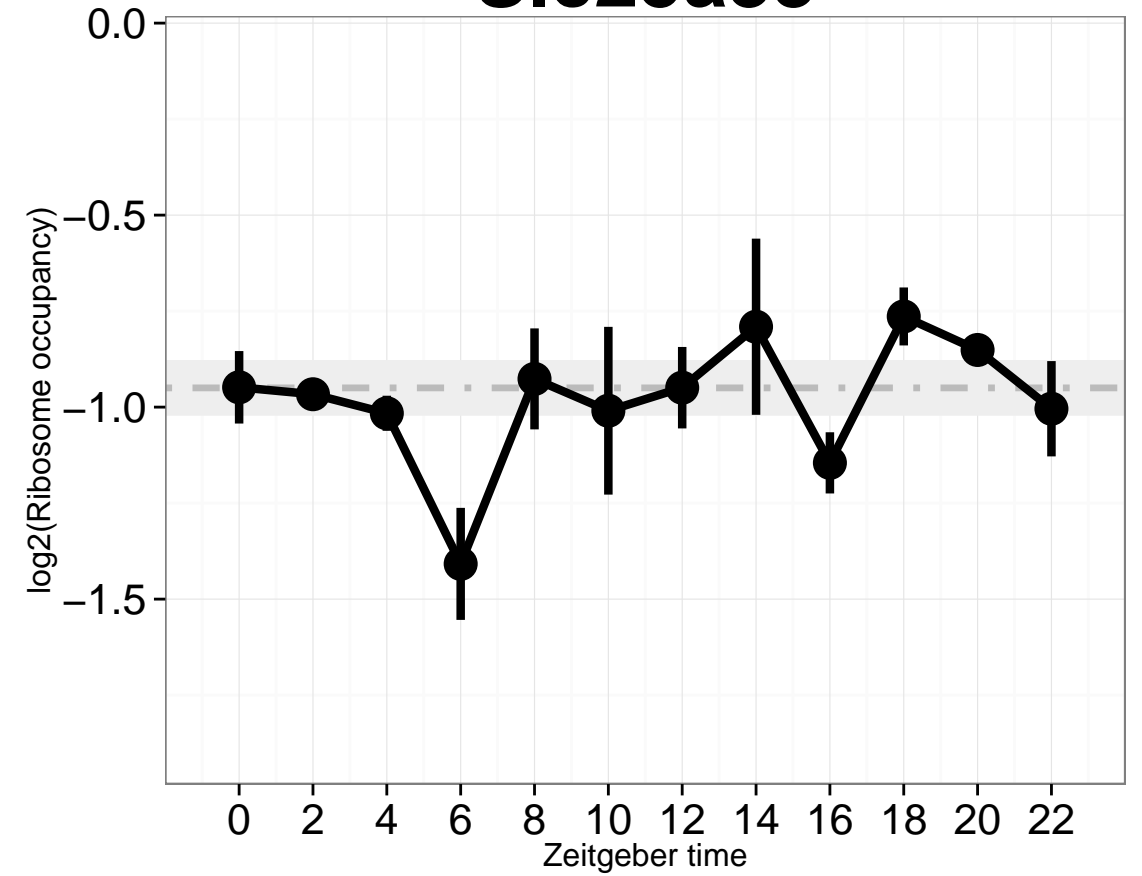

Supplement: SuppDataset_1.zip [file Slc25a33_set_A.pdf › Supplemental Dataset 1/A-mRNA_nonrhyth_translation_nonrhyth/Slc25a33_set_A.pdf]

# Slc25a34

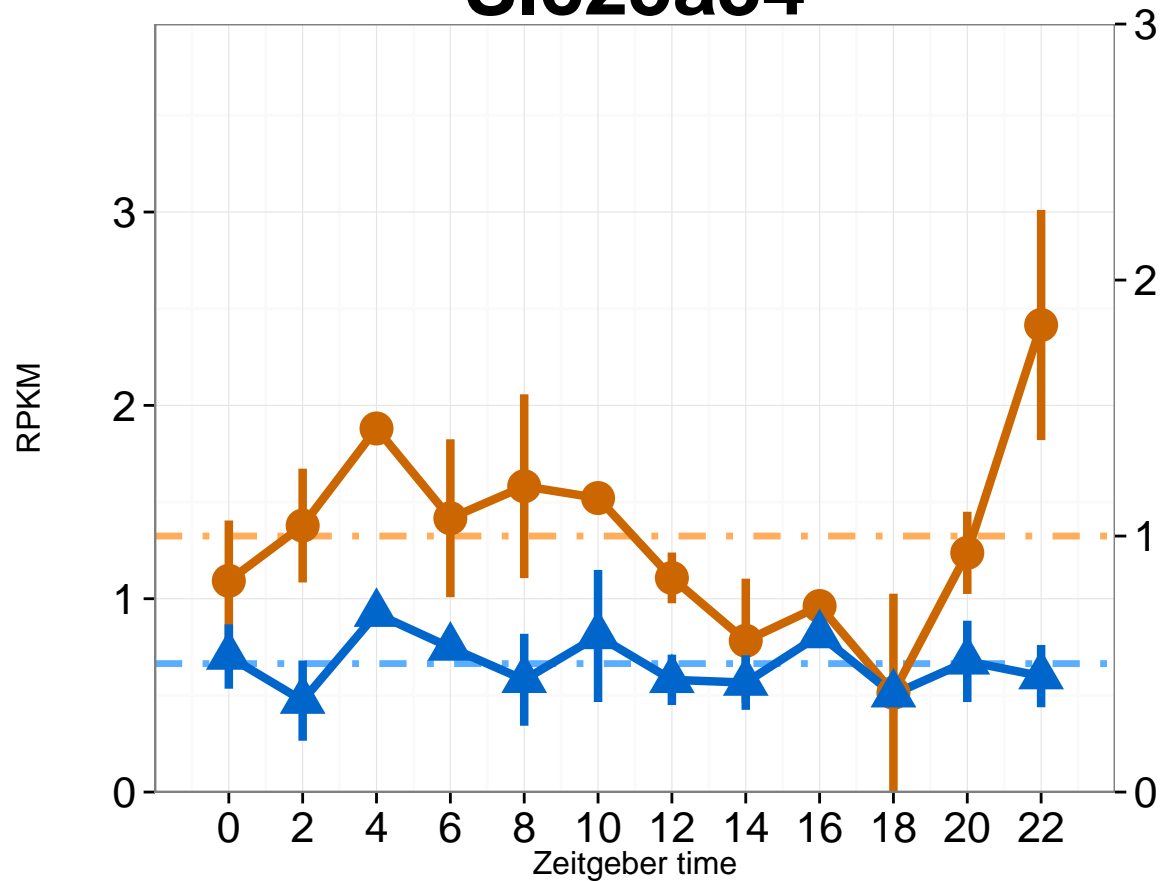

# Slc25a34

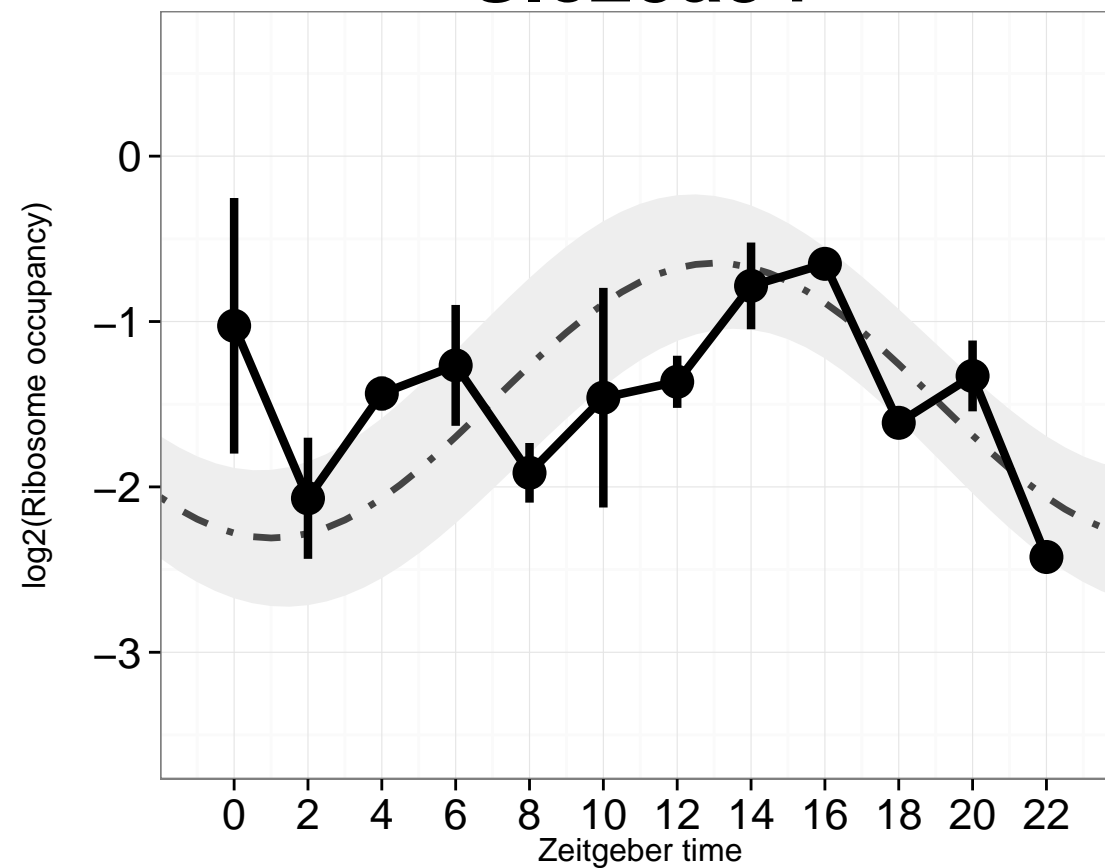

Supplement: SuppDataset_1.zip [file Slc25a34_set_A.pdf › Supplemental Dataset 1/A-mRNA_nonrhyth_translation_nonrhyth/Slc25a34_set_A.pdf]

# Slc25a36

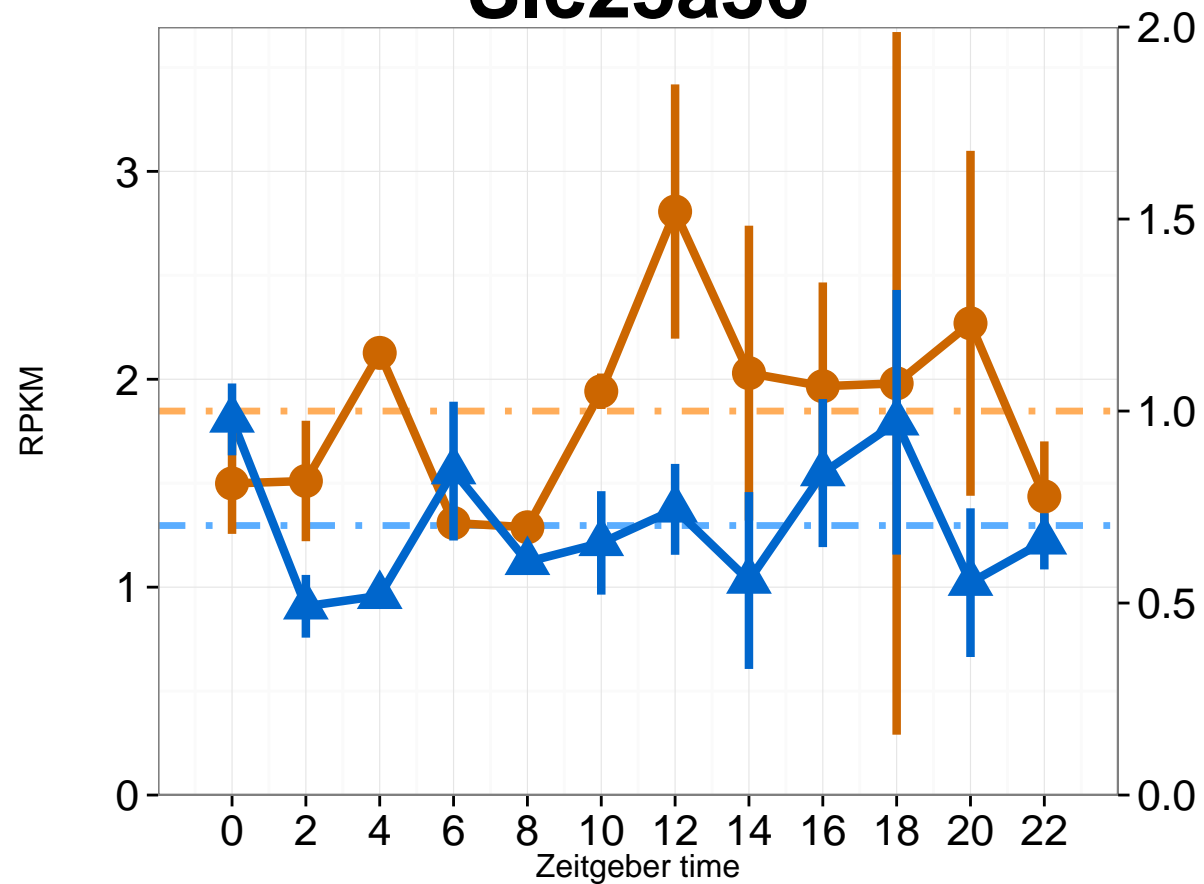

# Slc25a36

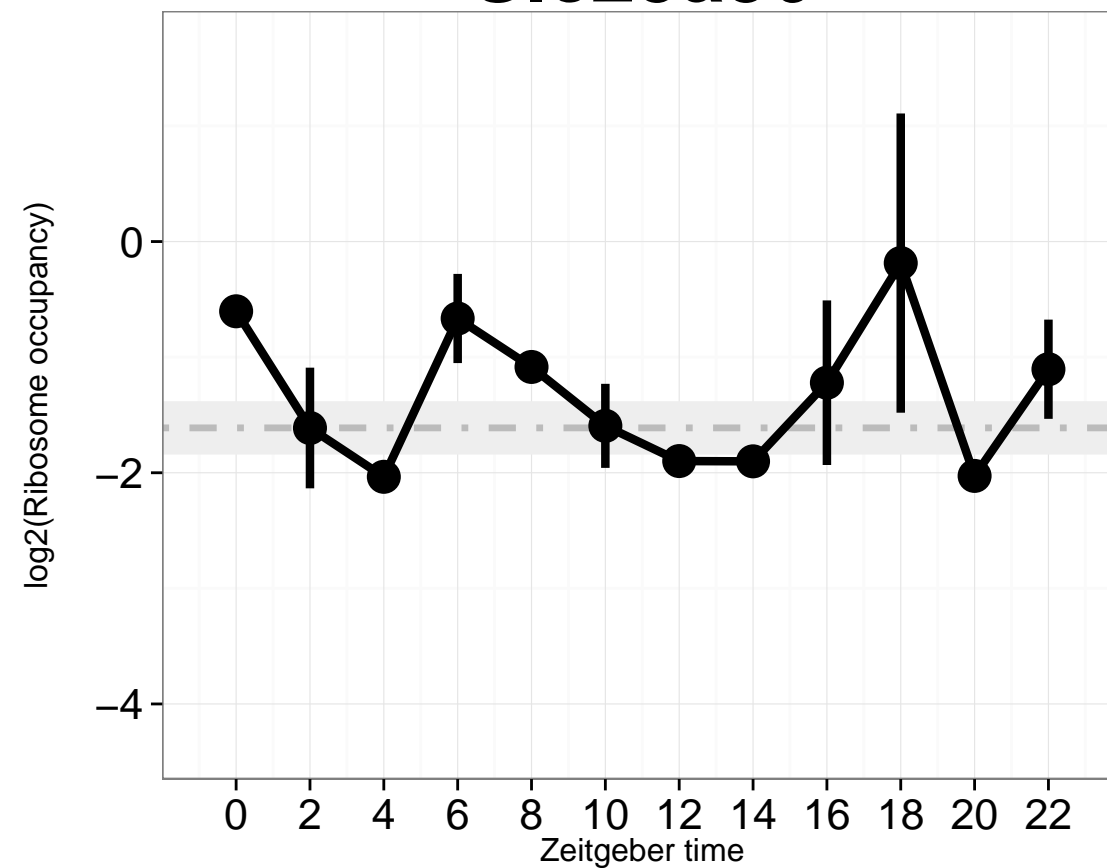

Supplement: SuppDataset_1.zip [file Slc25a36_set_A.pdf › Supplemental Dataset 1/A-mRNA_nonrhyth_translation_nonrhyth/Slc25a36_set_A.pdf]

## Slc25a39

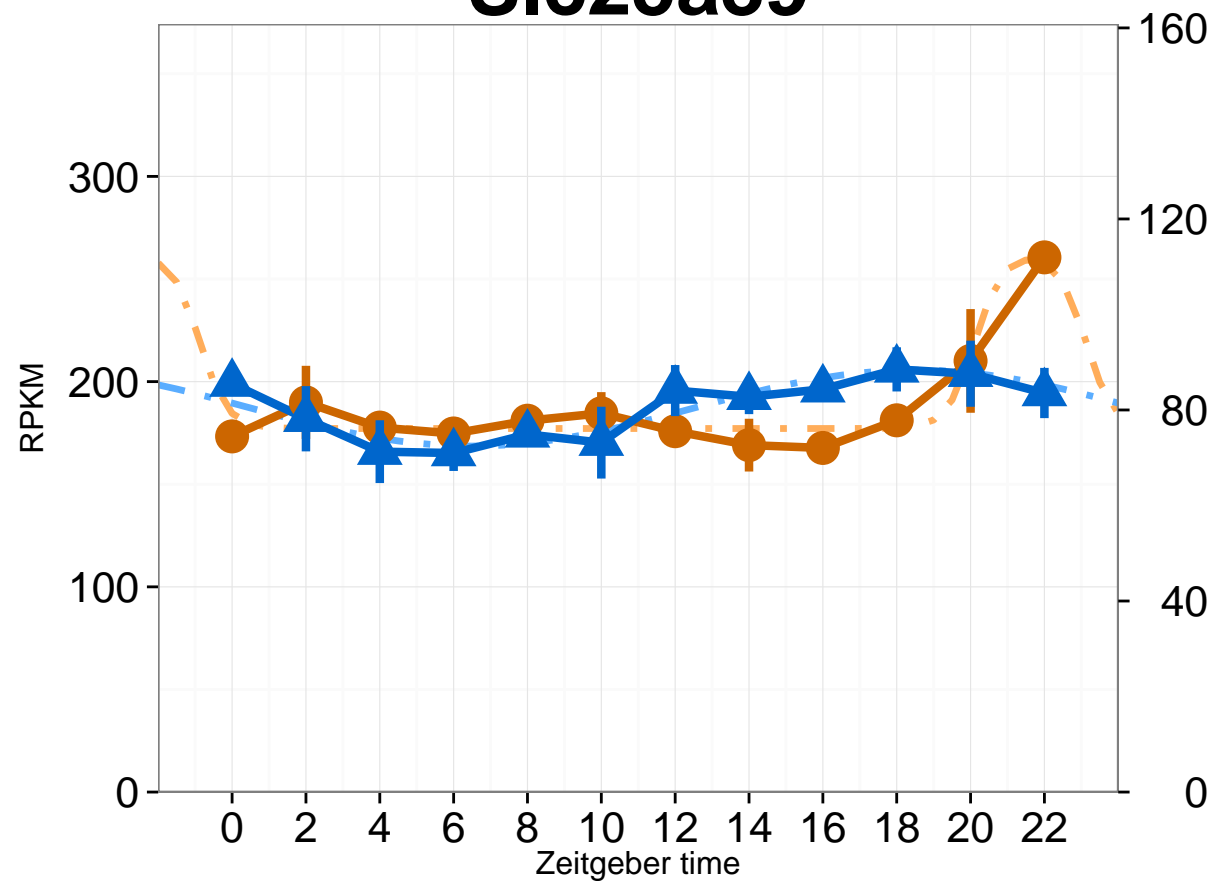

## Slc25a39

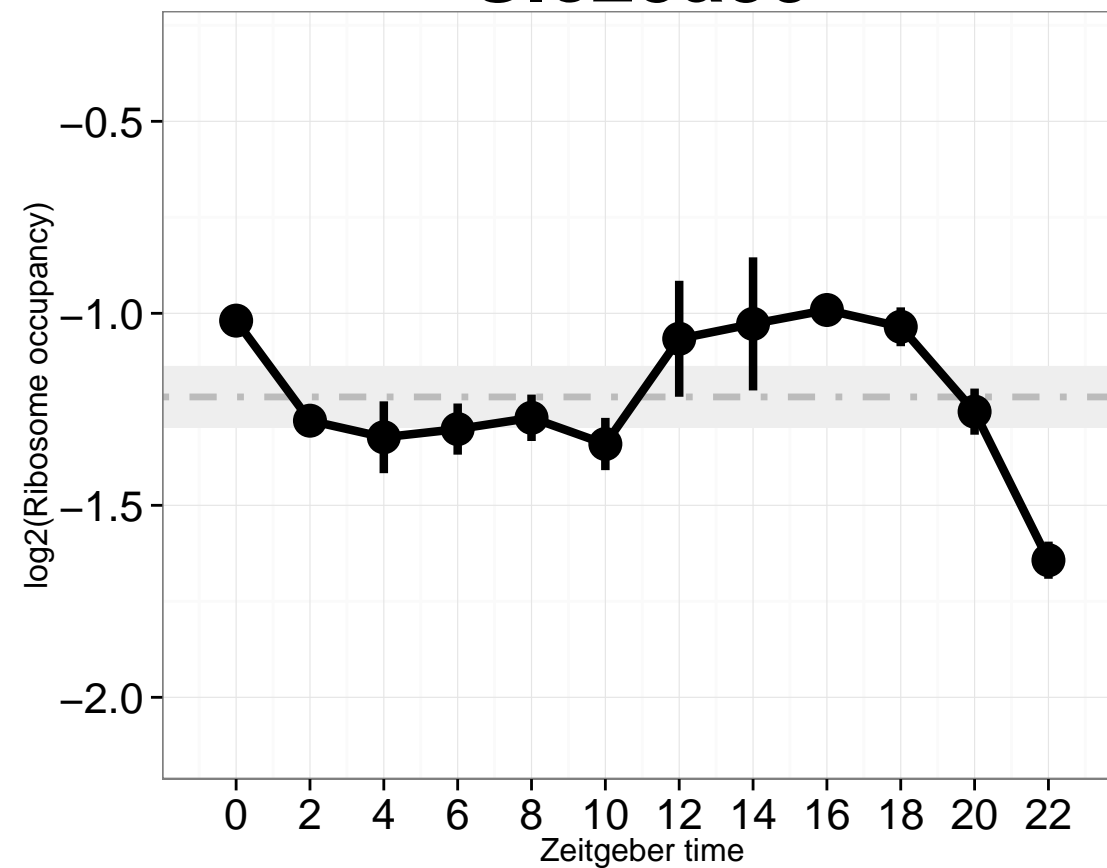

Supplement: SuppDataset_1.zip [file Slc25a39_set_A.pdf › Supplemental Dataset 1/A-mRNA_nonrhyth_translation_nonrhyth/Slc25a39_set_A.pdf]

## Slc25a3

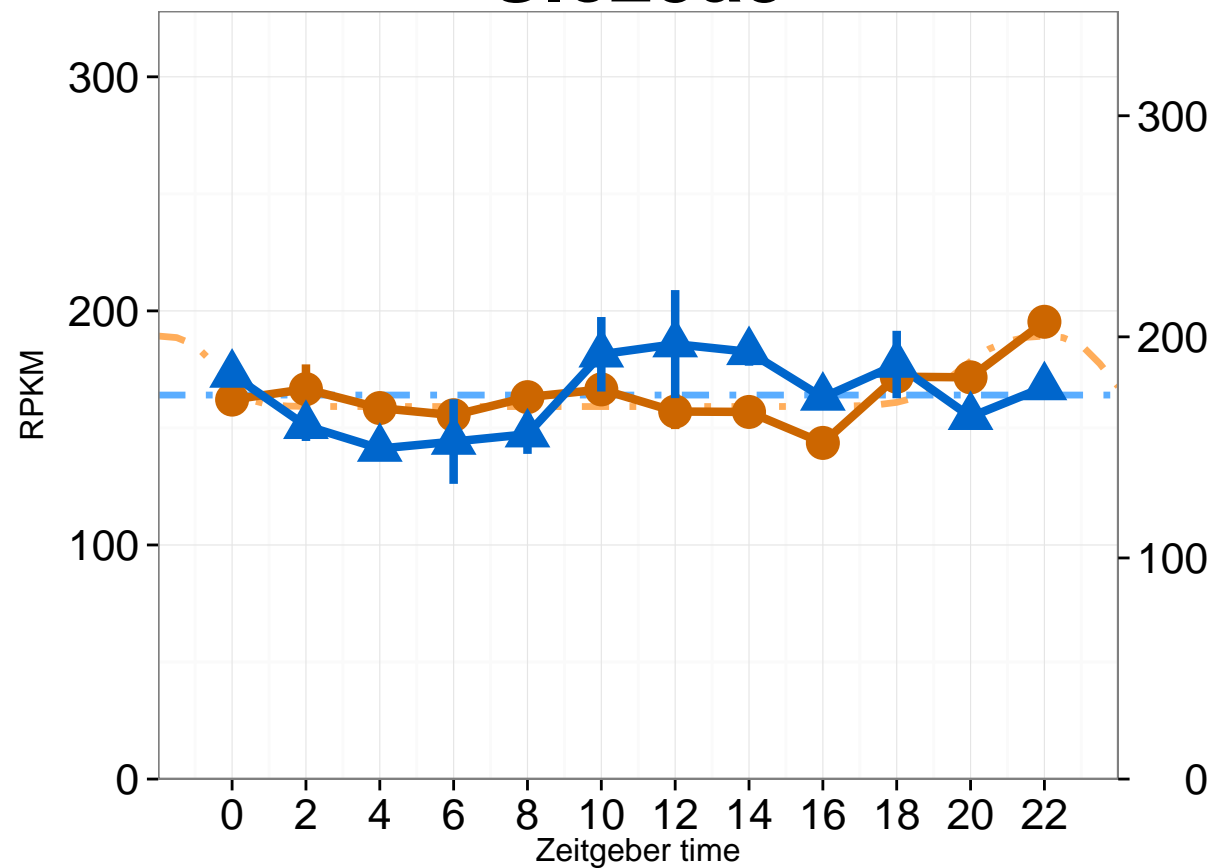

## Slc25a3

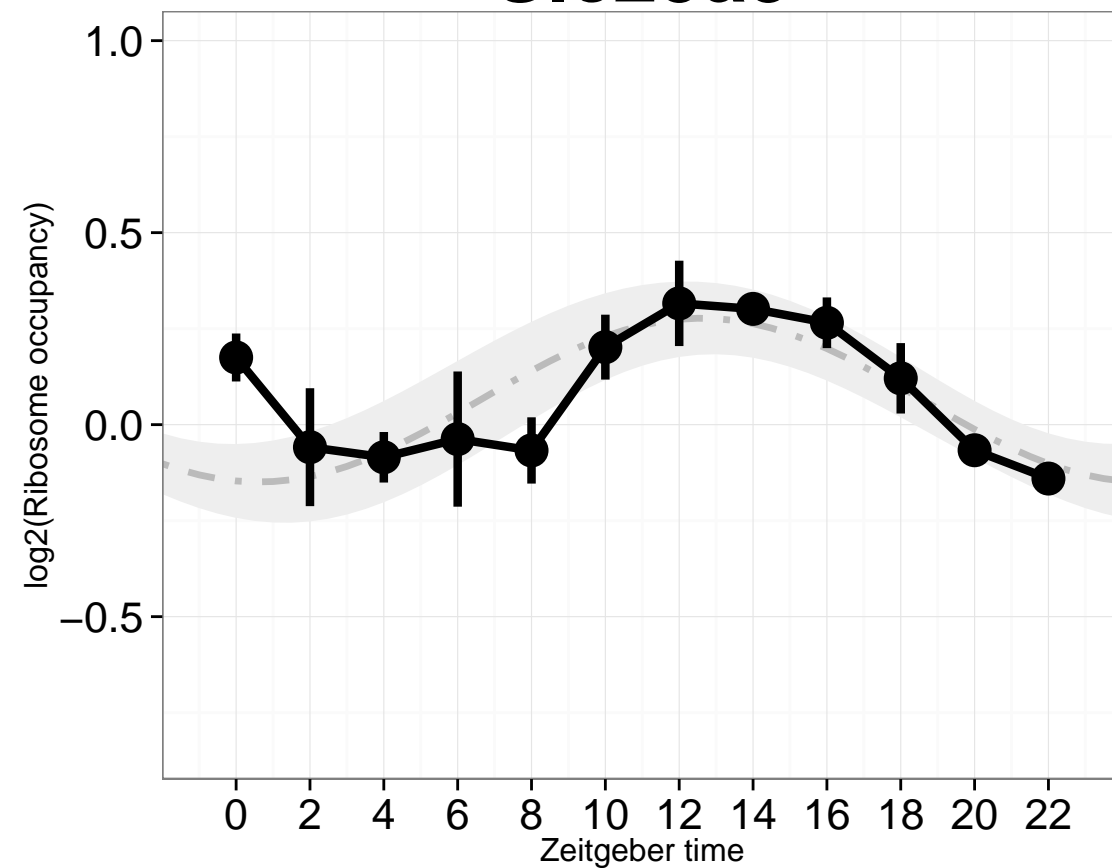

Supplement: SuppDataset_1.zip [file Slc25a3_set_A.pdf › Supplemental Dataset 1/A-mRNA_nonrhyth_translation_nonrhyth/Slc25a3_set_A.pdf]

## Slc25a40

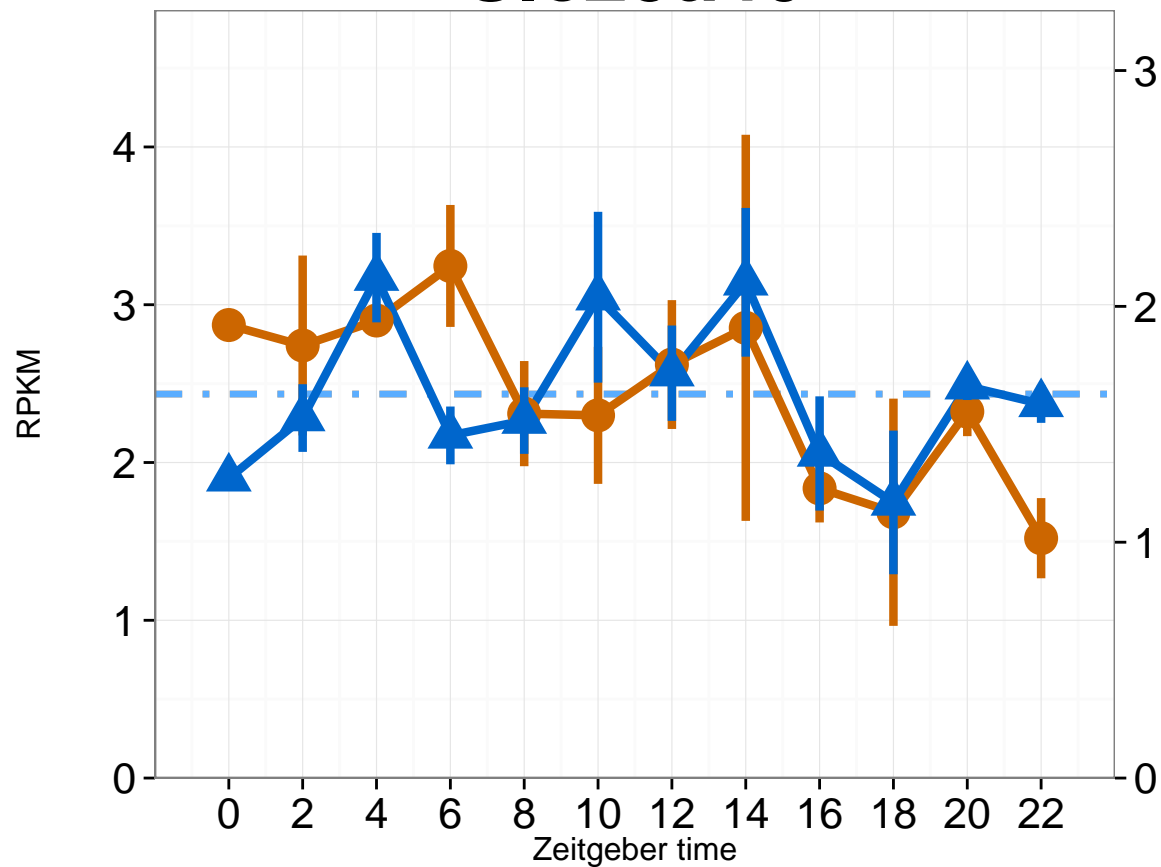

## Slc25a40

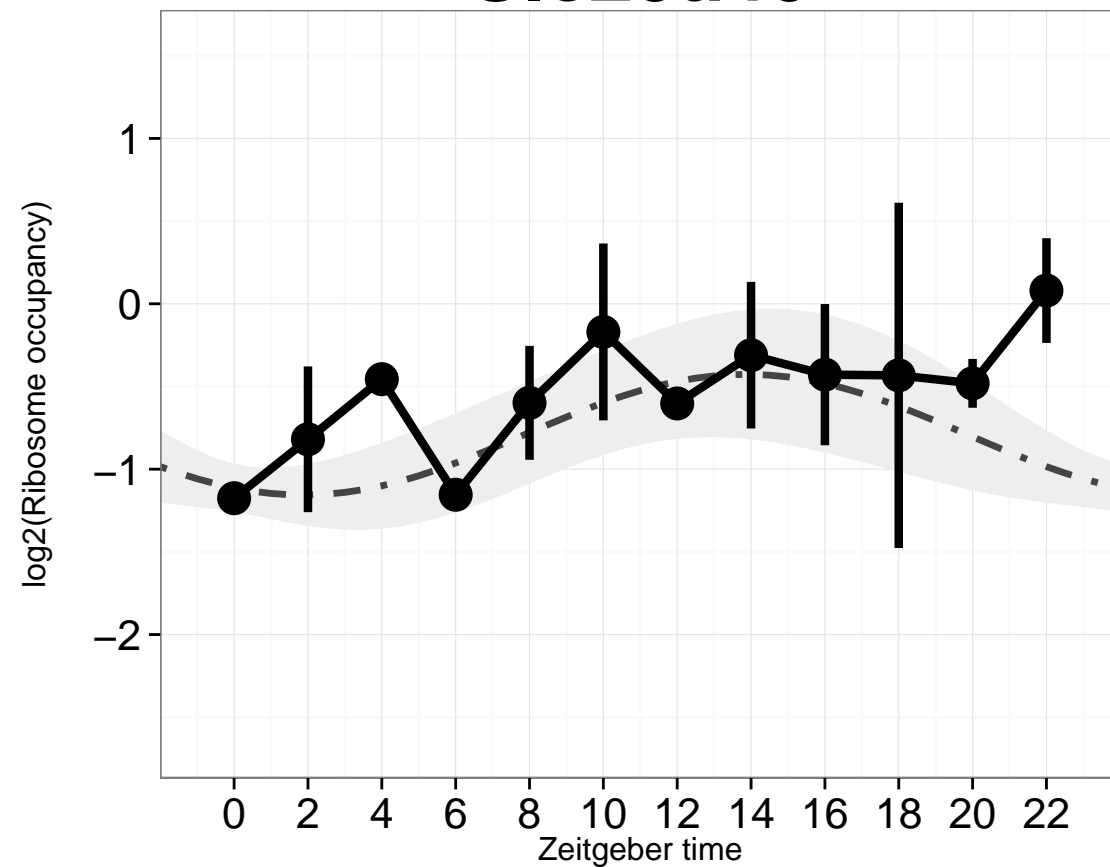

Supplement: SuppDataset_1.zip [file Slc25a40_set_A.pdf › Supplemental Dataset 1/A-mRNA_nonrhyth_translation_nonrhyth/Slc25a40_set_A.pdf]

## Slc25a45

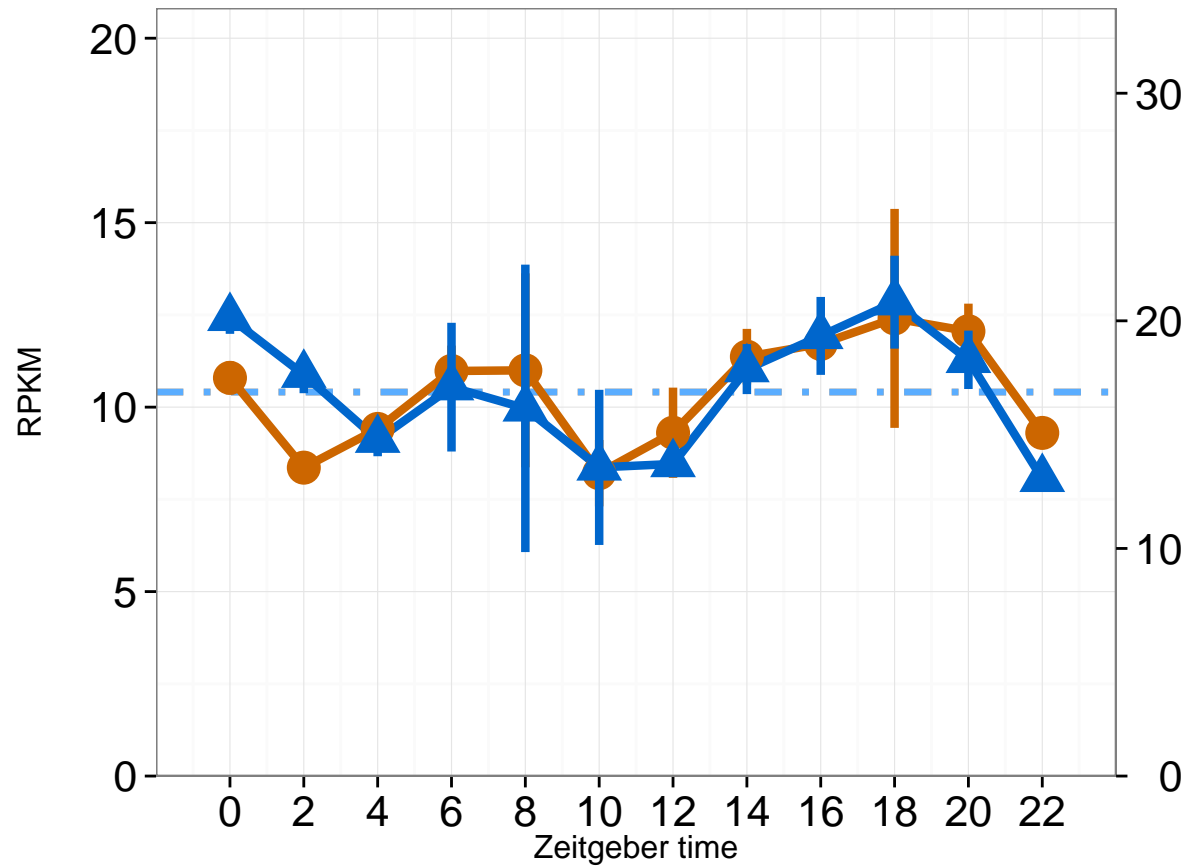

## Slc25a45

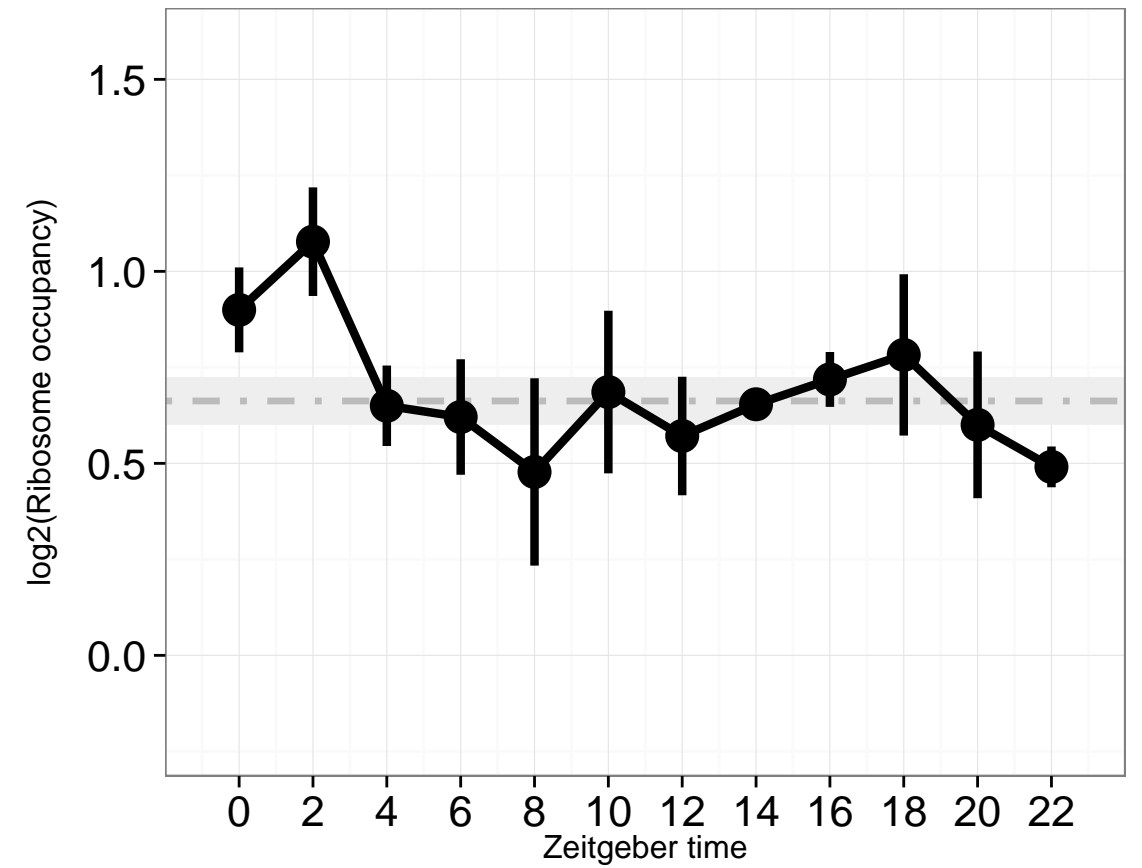

Supplement: SuppDataset_1.zip [file Slc25a45_set_A.pdf › Supplemental Dataset 1/A-mRNA_nonrhyth_translation_nonrhyth/Slc25a45_set_A.pdf]

## Slc25a46

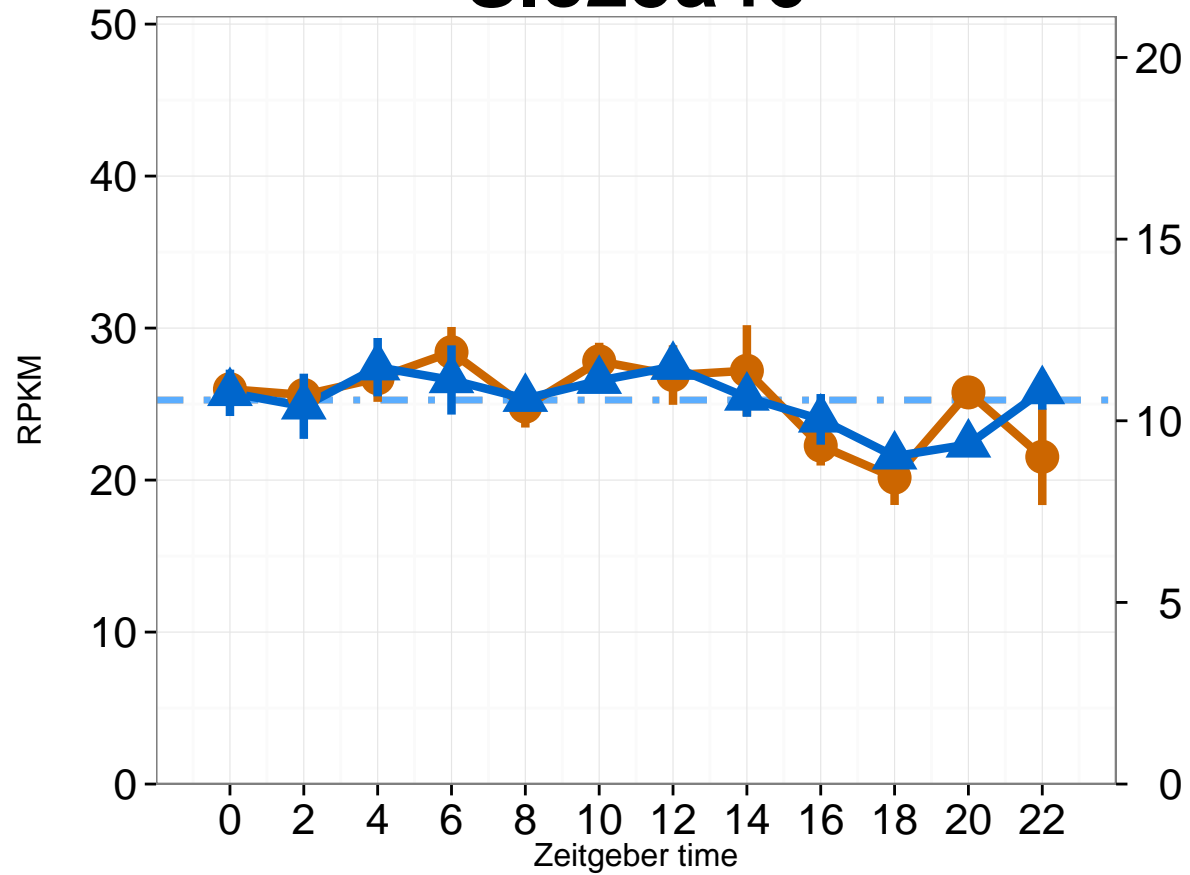

## Slc25a46

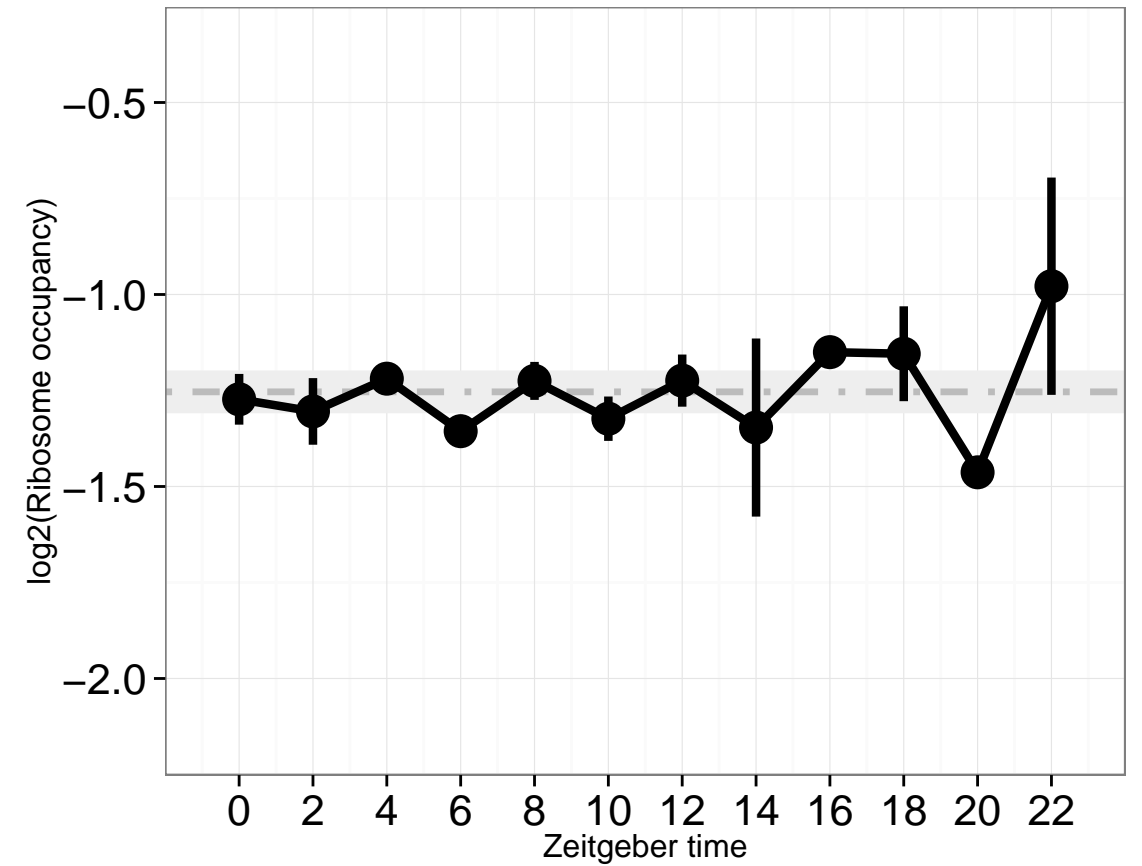

Supplement: SuppDataset_1.zip [file Slc25a46_set_A.pdf › Supplemental Dataset 1/A-mRNA_nonrhyth_translation_nonrhyth/Slc25a46_set_A.pdf]
