# Supplementary figures and images for: Ribosome profiling reveals the rhythmic liver translatome and circadian clock regulation by upstream open reading frames (part 68 of 113)
Source: HighWire-hosted journal article supplement (doi:10.1101/gr.195404.115), 2015-10-20

# Slc25a48

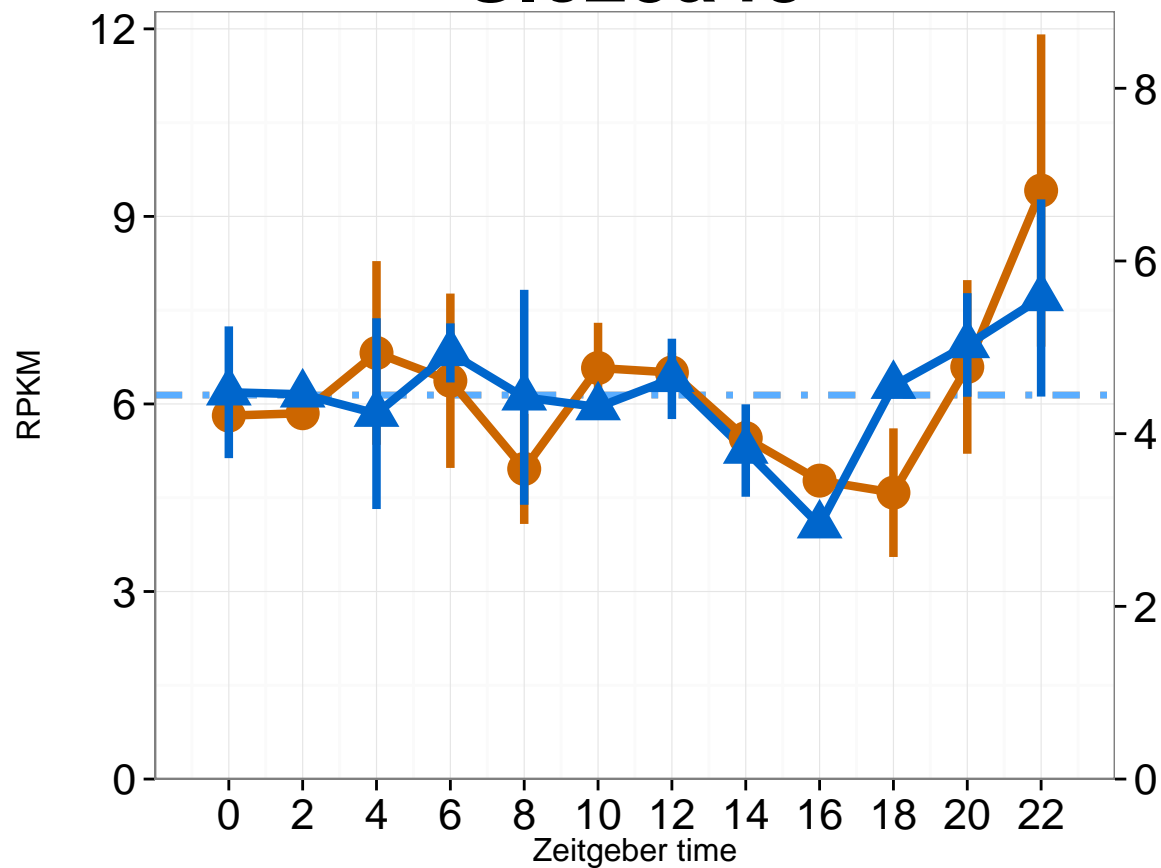

# Slc25a48

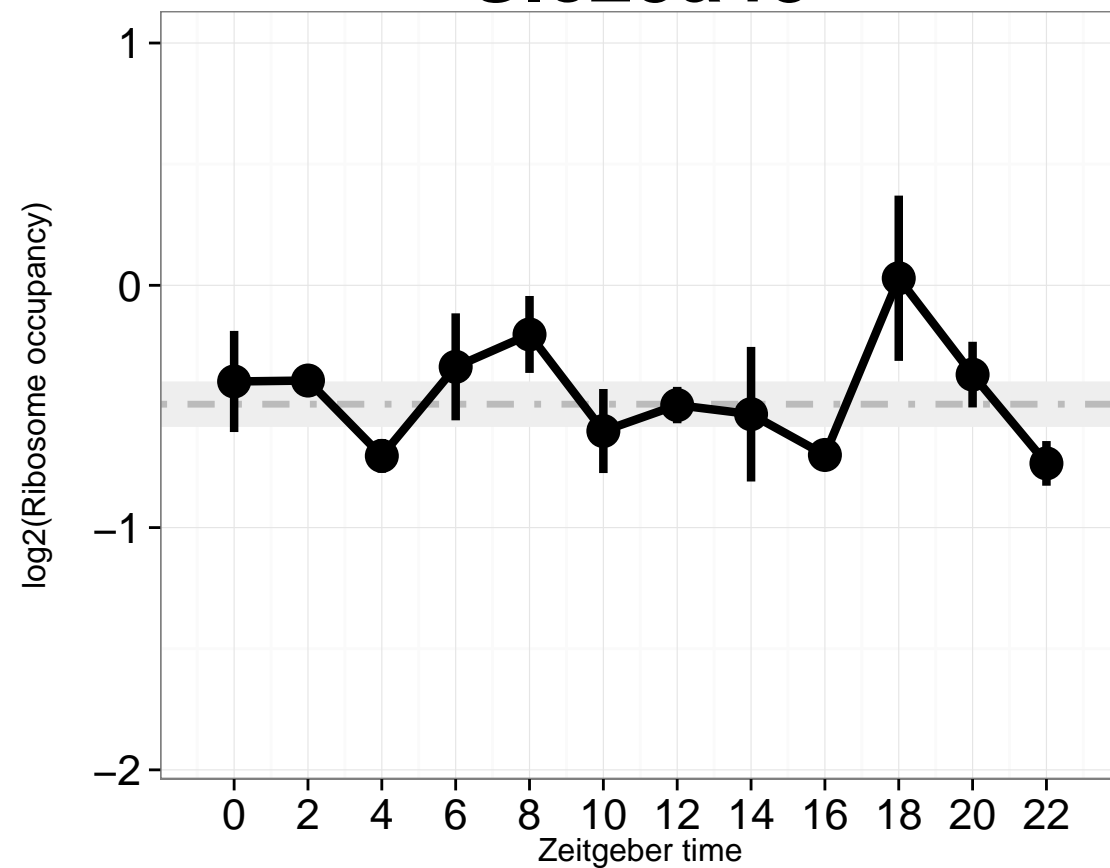

Supplement: SuppDataset_1.zip [file Slc25a48_set_A.pdf › Supplemental Dataset 1/A-mRNA_nonrhyth_translation_nonrhyth/Slc25a48_set_A.pdf]

# Slc25a4

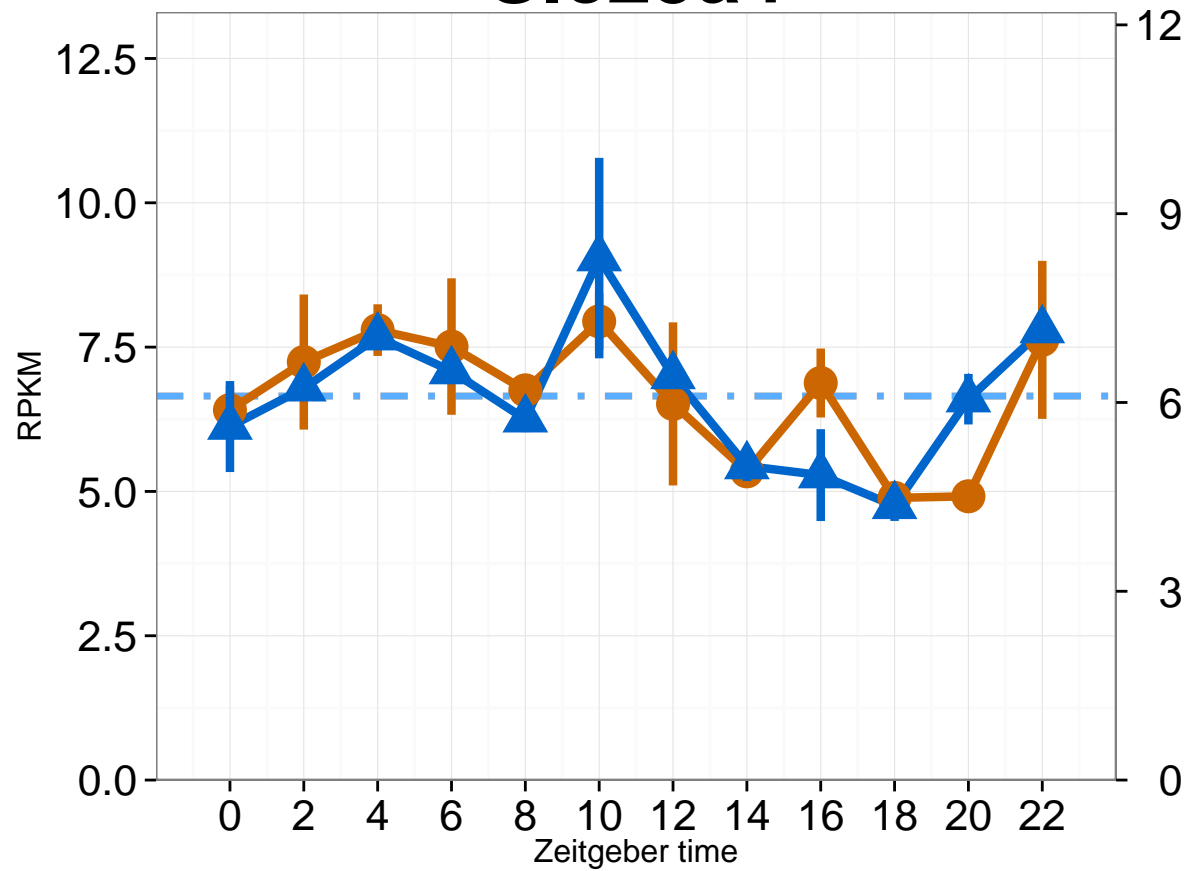

# Slc25a4

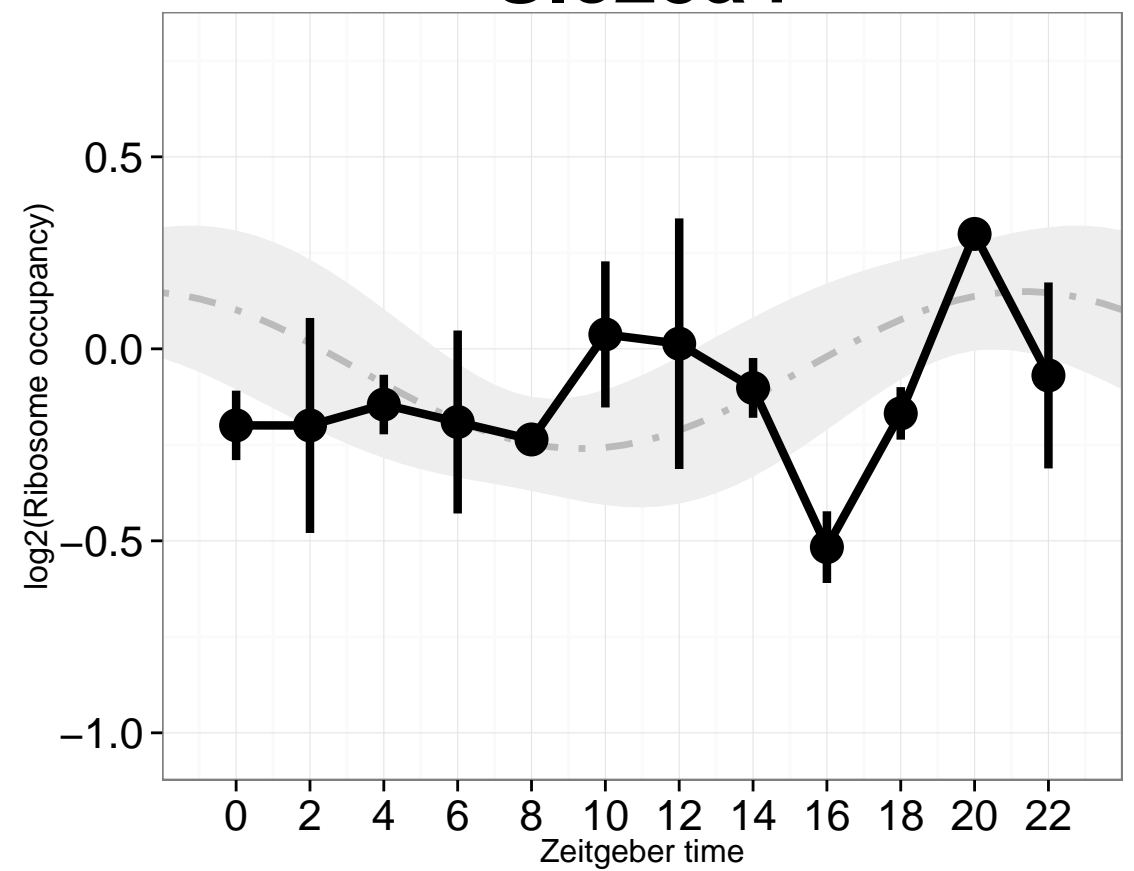

Supplement: SuppDataset_1.zip [file Slc25a4_set_A.pdf › Supplemental Dataset 1/A-mRNA_nonrhyth_translation_nonrhyth/Slc25a4_set_A.pdf]

# Slc25a5

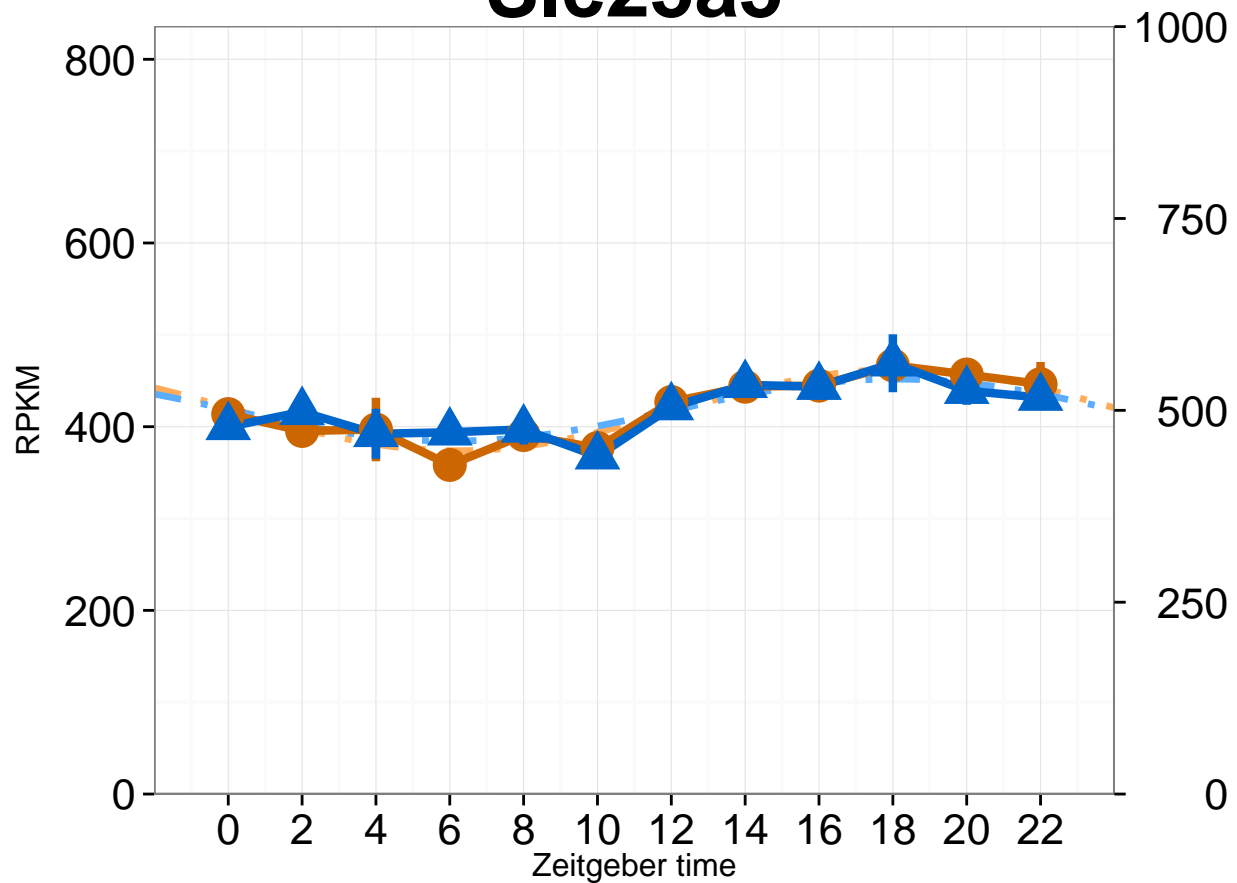

# Slc25a5

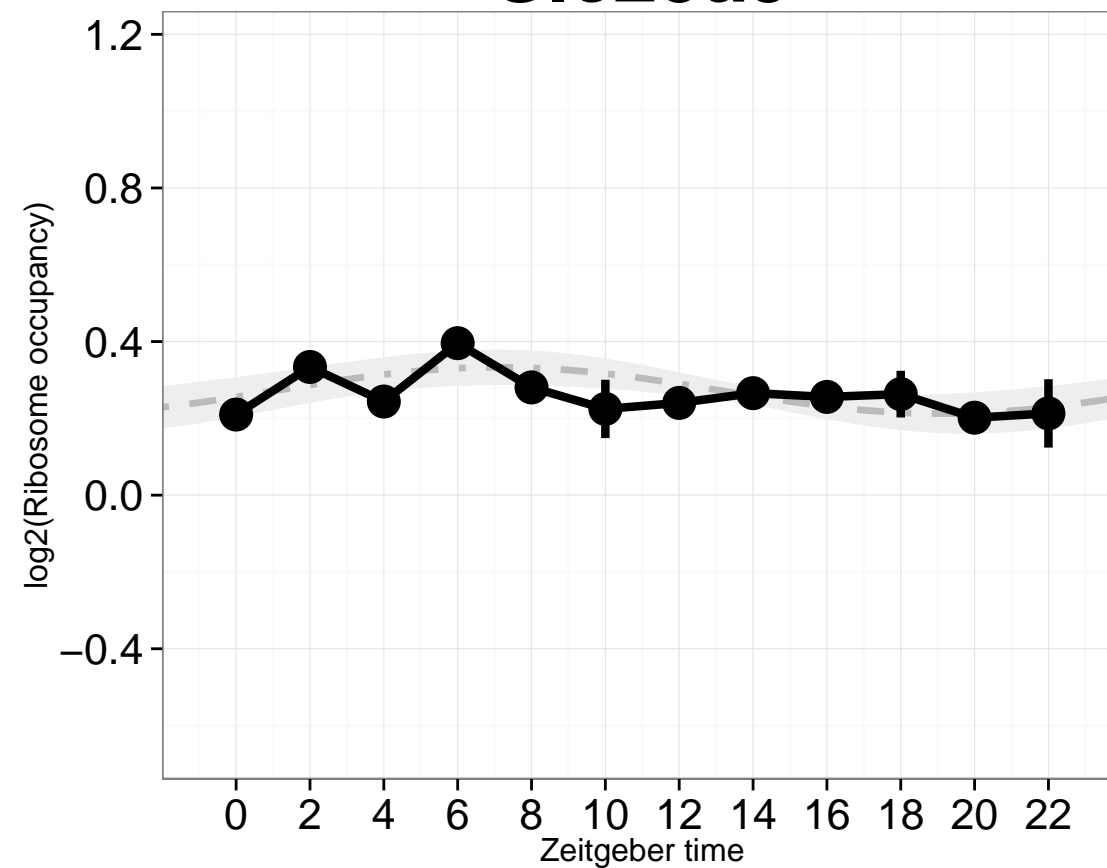

Supplement: SuppDataset_1.zip [file Slc25a5_set_A.pdf › Supplemental Dataset 1/A-mRNA_nonrhyth_translation_nonrhyth/Slc25a5_set_A.pdf]

# Slc26a11

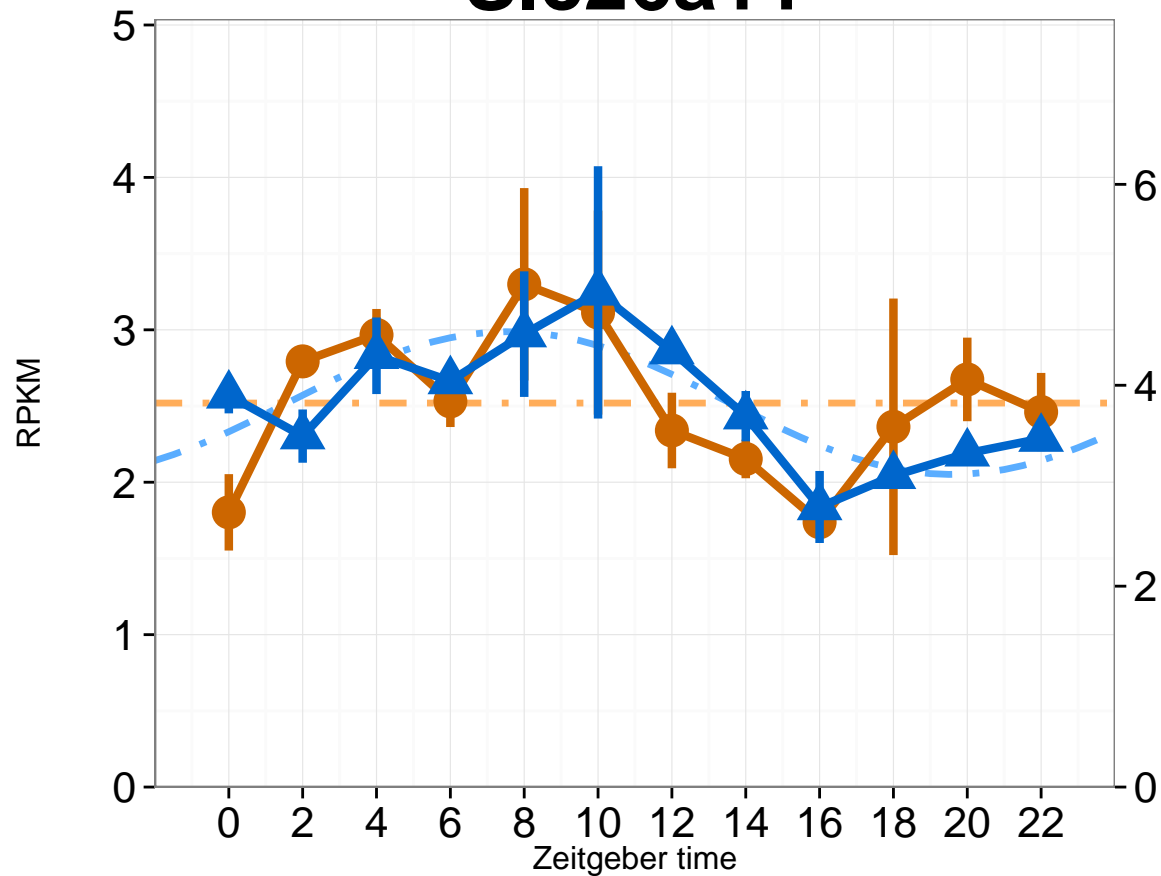

# Slc26a11

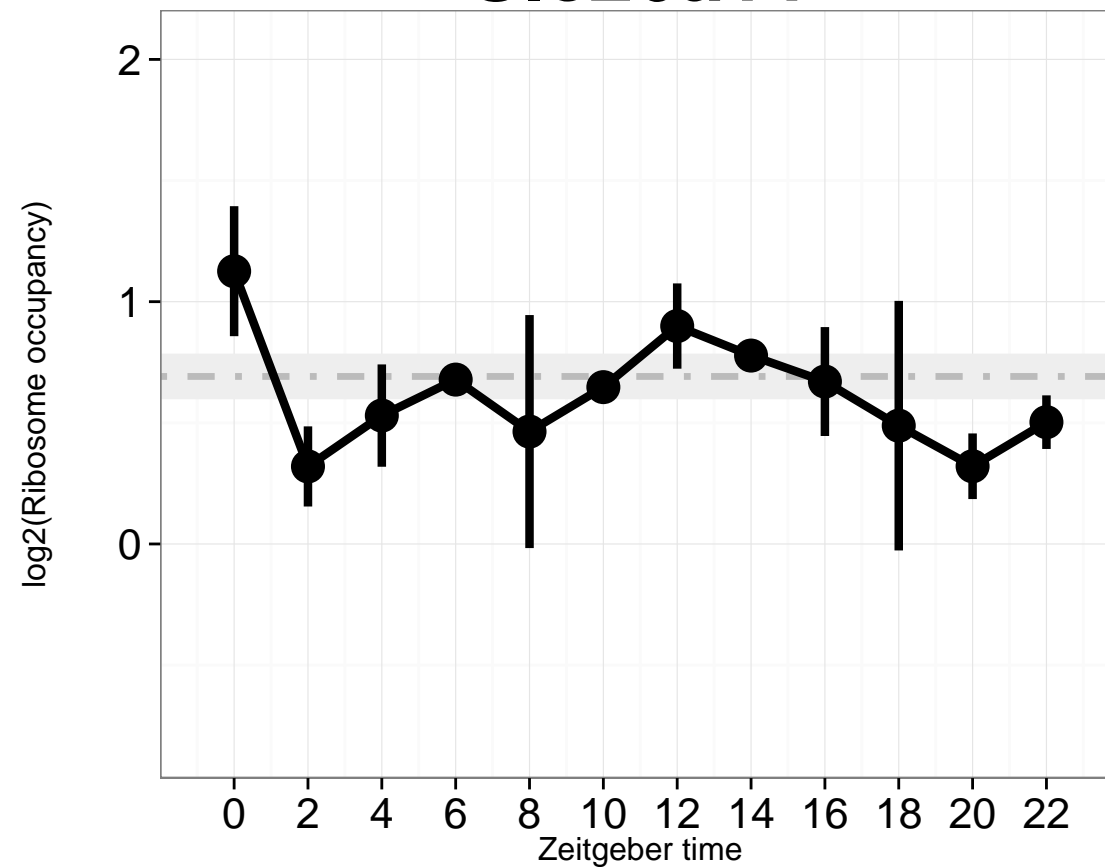

Supplement: SuppDataset_1.zip [file Slc26a11_set_A.pdf › Supplemental Dataset 1/A-mRNA_nonrhyth_translation_nonrhyth/Slc26a11_set_A.pdf]

# Slc26a1

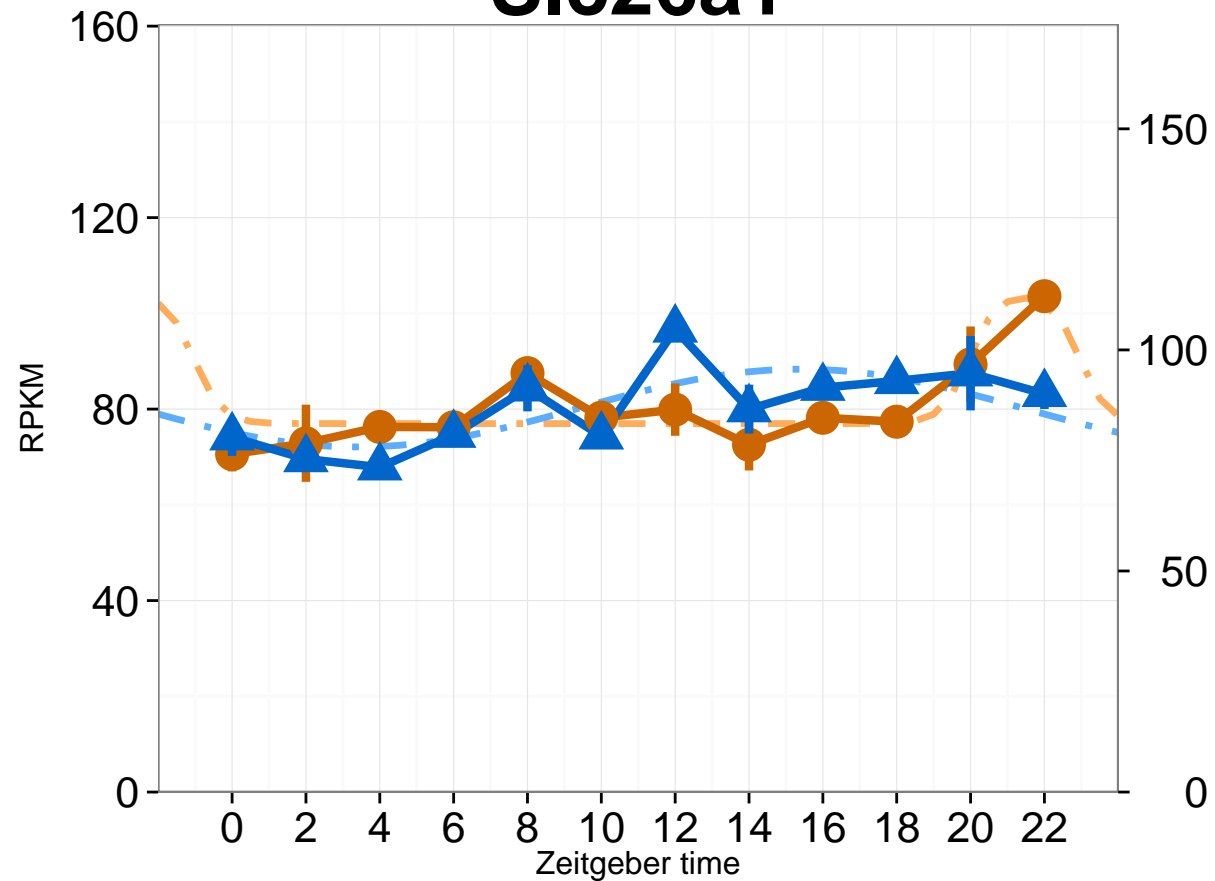

# Slc26a1

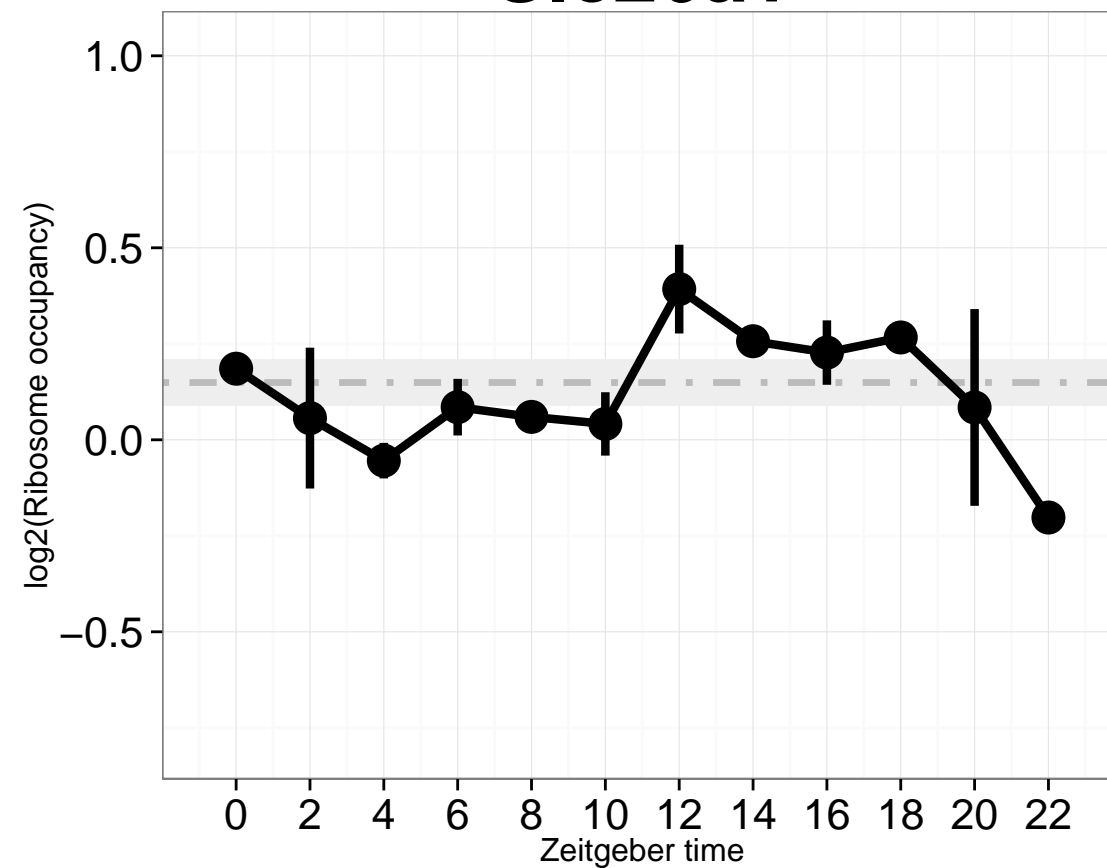

Supplement: SuppDataset_1.zip [file Slc26a1_set_A.pdf › Supplemental Dataset 1/A-mRNA_nonrhyth_translation_nonrhyth/Slc26a1_set_A.pdf]

## Slc26a2

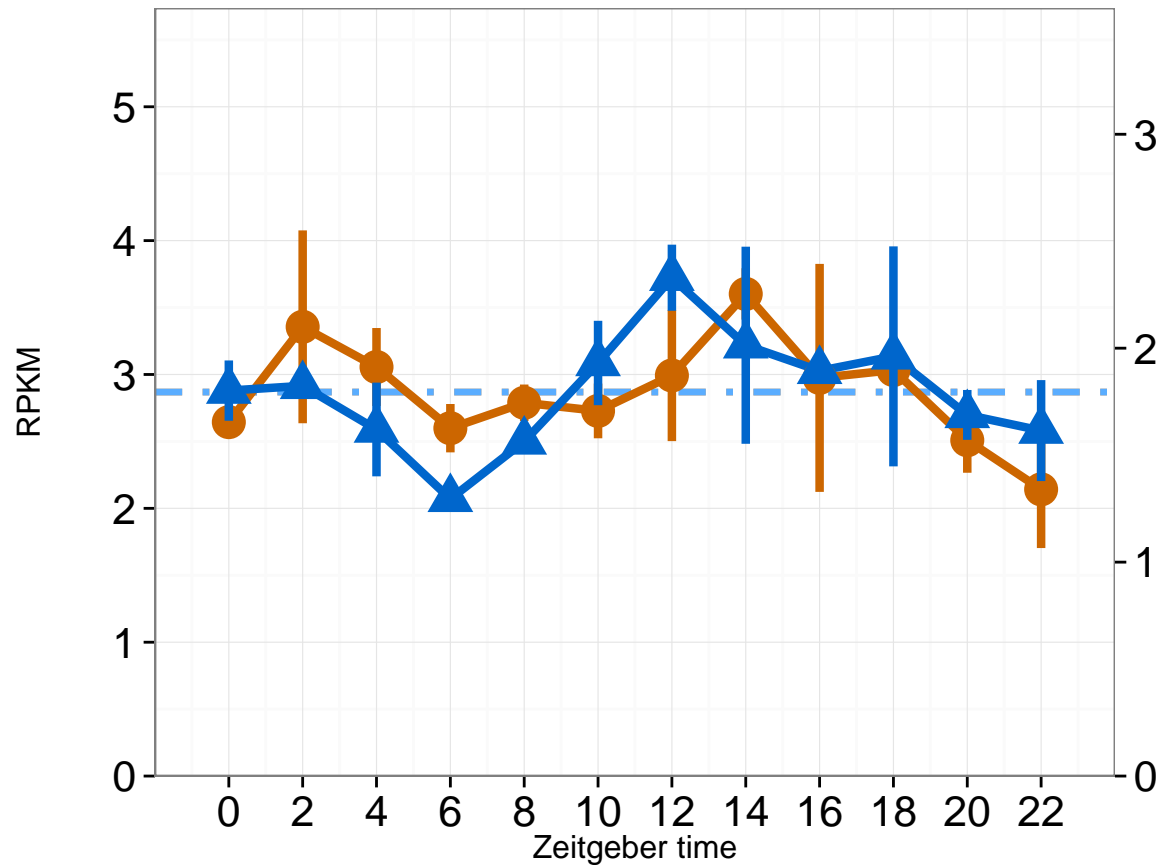

## Slc26a2

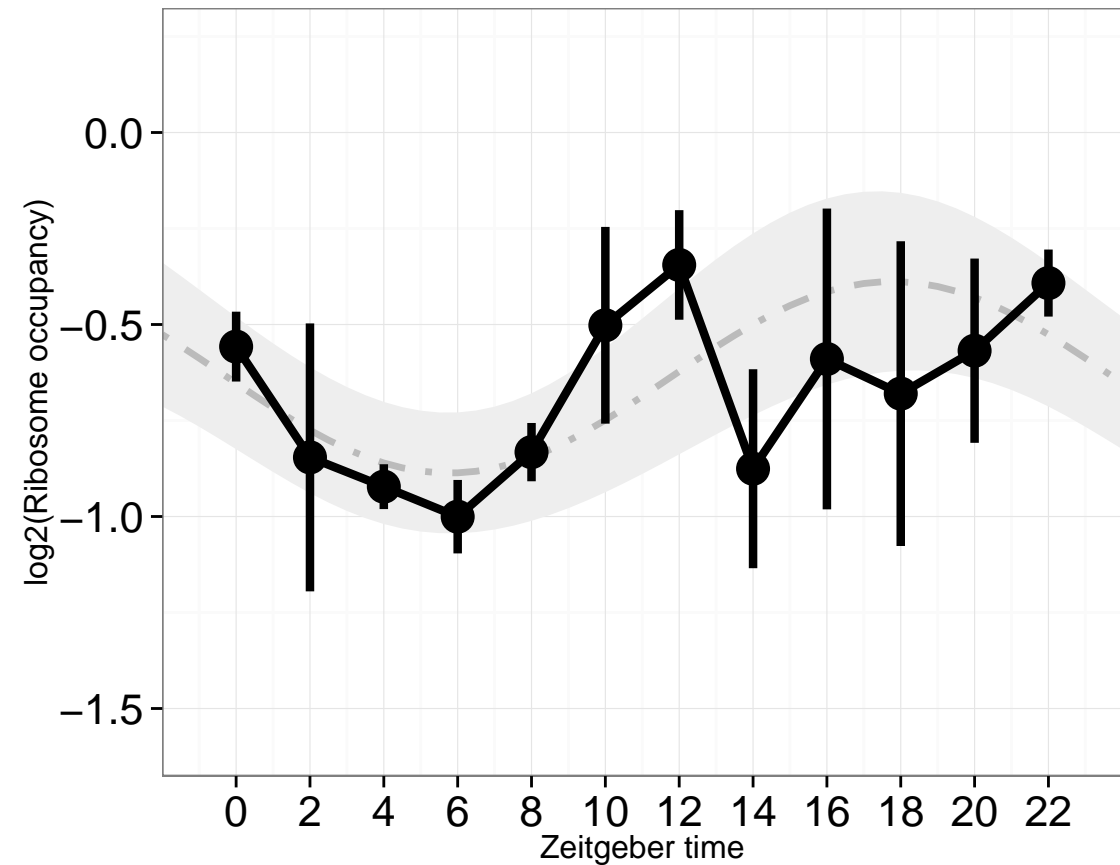

Supplement: SuppDataset_1.zip [file Slc26a2_set_A.pdf › Supplemental Dataset 1/A-mRNA_nonrhyth_translation_nonrhyth/Slc26a2_set_A.pdf]

## Slc27a1

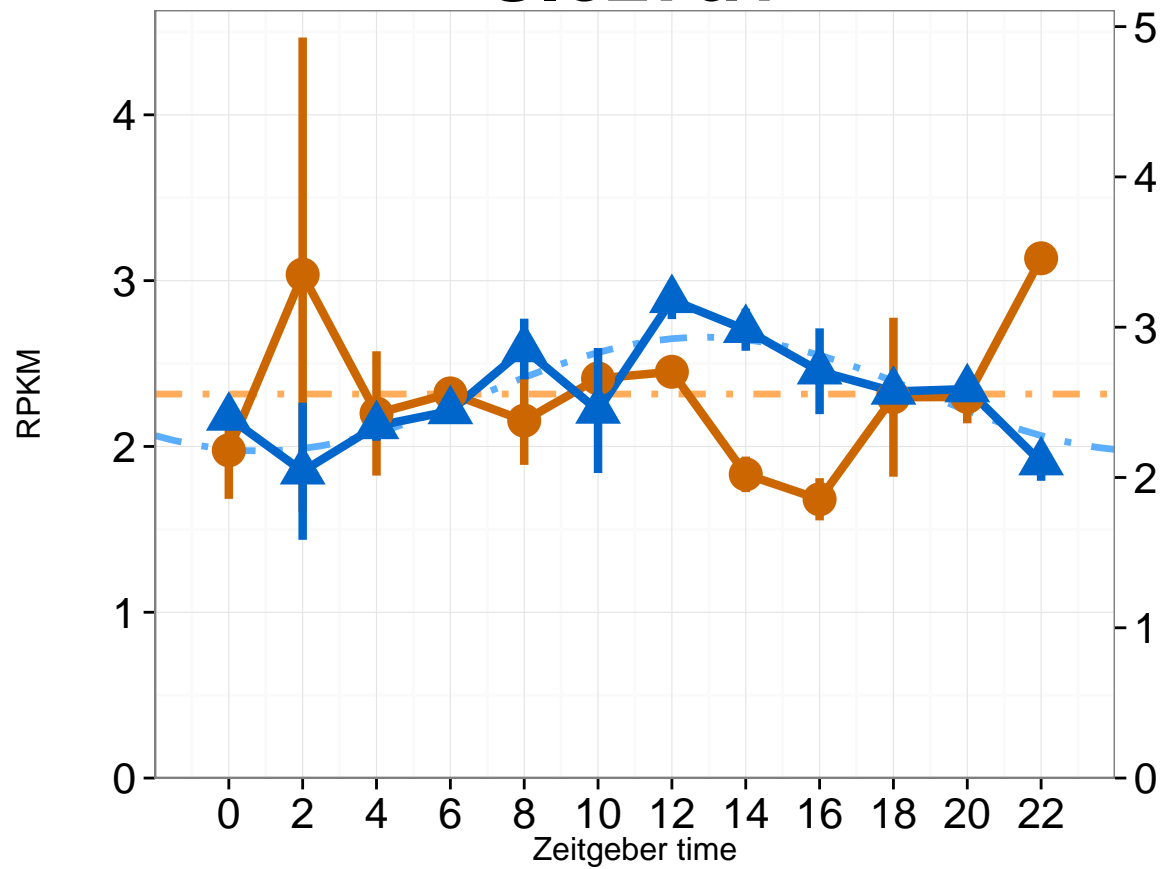

## Slc27a1

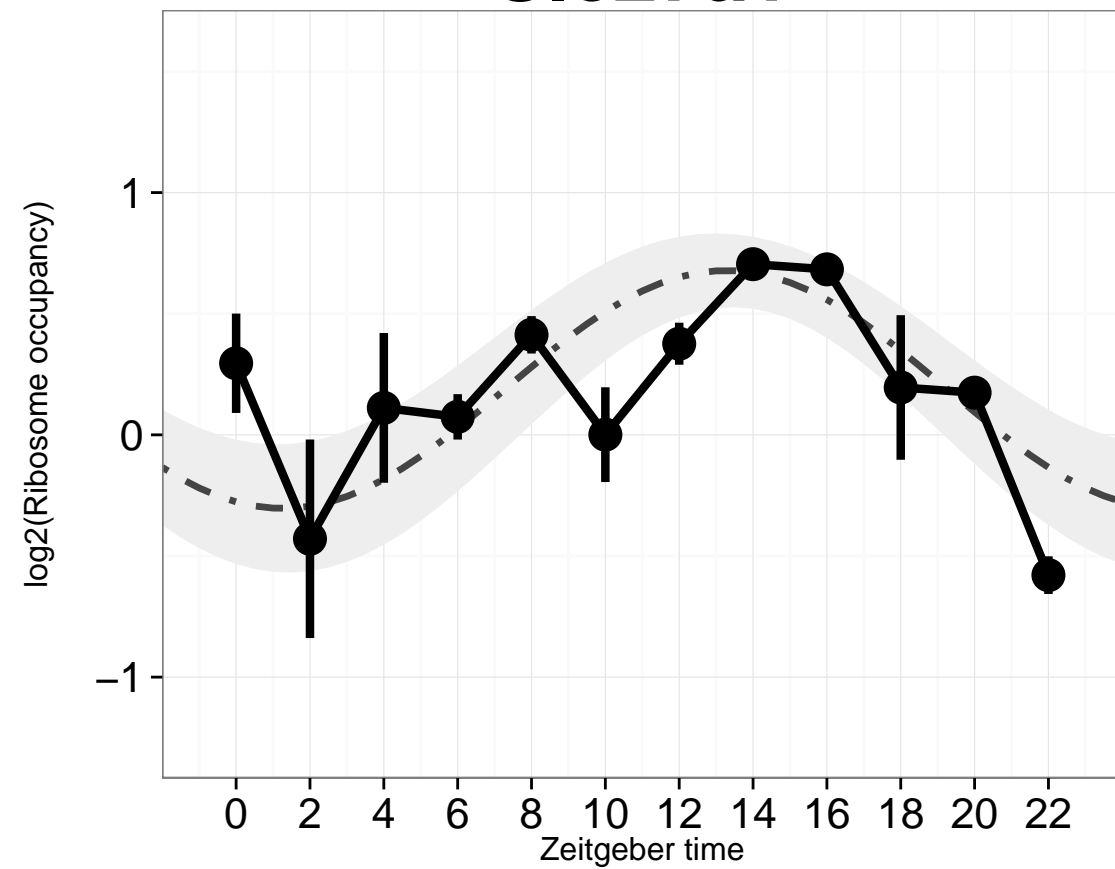

Supplement: SuppDataset_1.zip [file Slc27a1_set_A.pdf › Supplemental Dataset 1/A-mRNA_nonrhyth_translation_nonrhyth/Slc27a1_set_A.pdf]

# Slc27a2

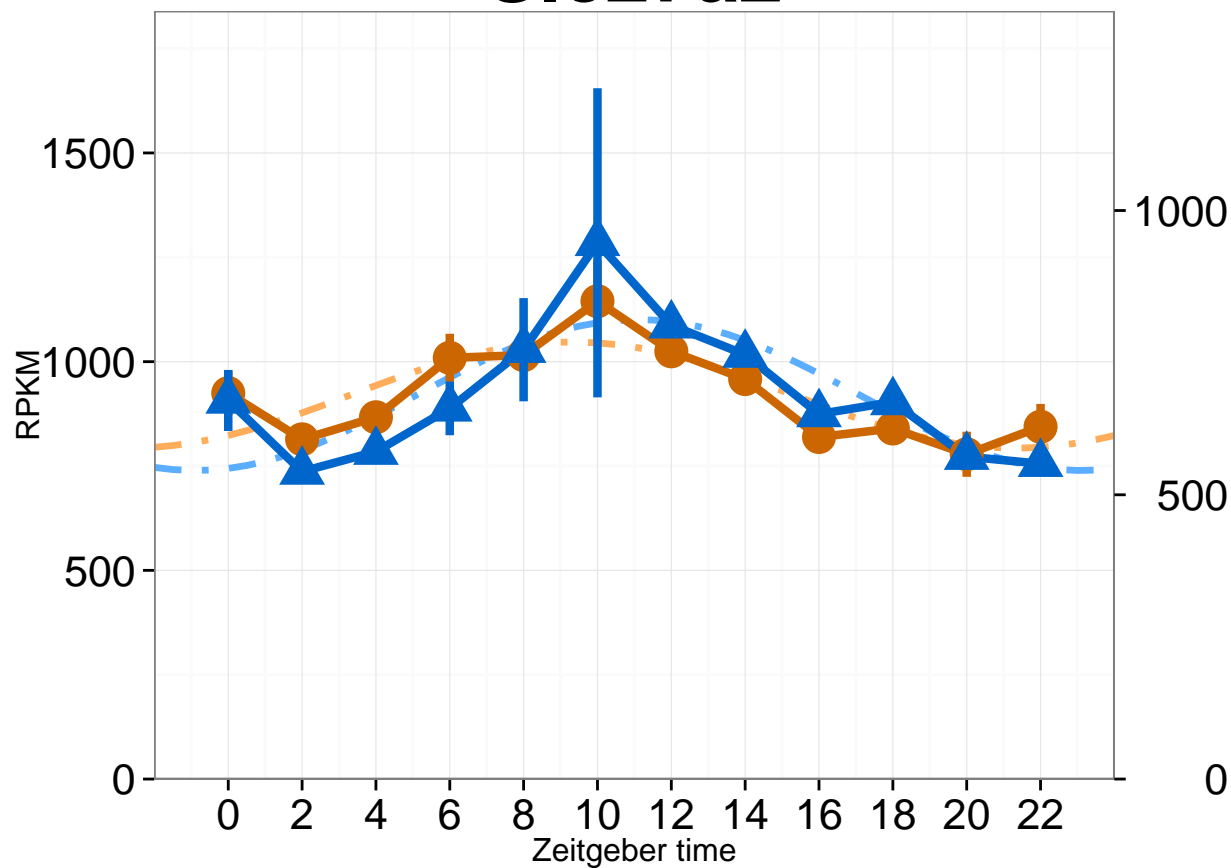

# Slc27a2

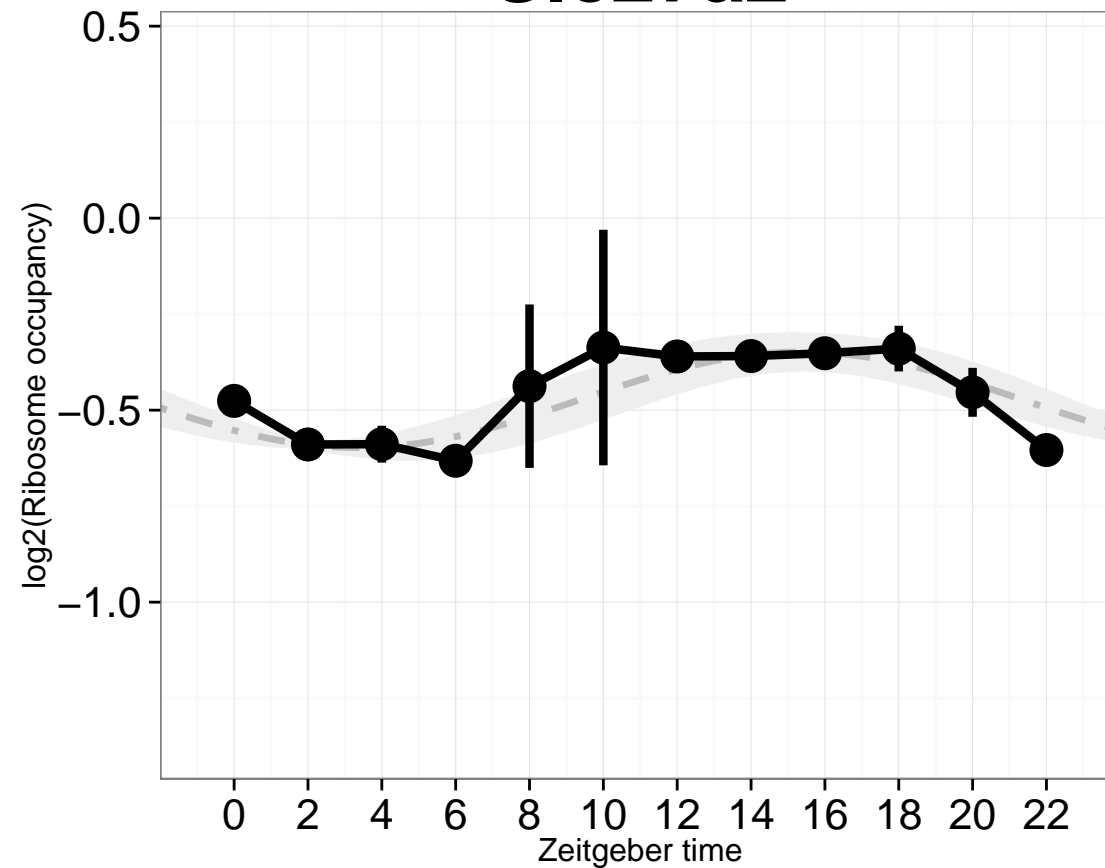

Supplement: SuppDataset_1.zip [file Slc27a2_set_A.pdf › Supplemental Dataset 1/A-mRNA_nonrhyth_translation_nonrhyth/Slc27a2_set_A.pdf]

## Slc27a4

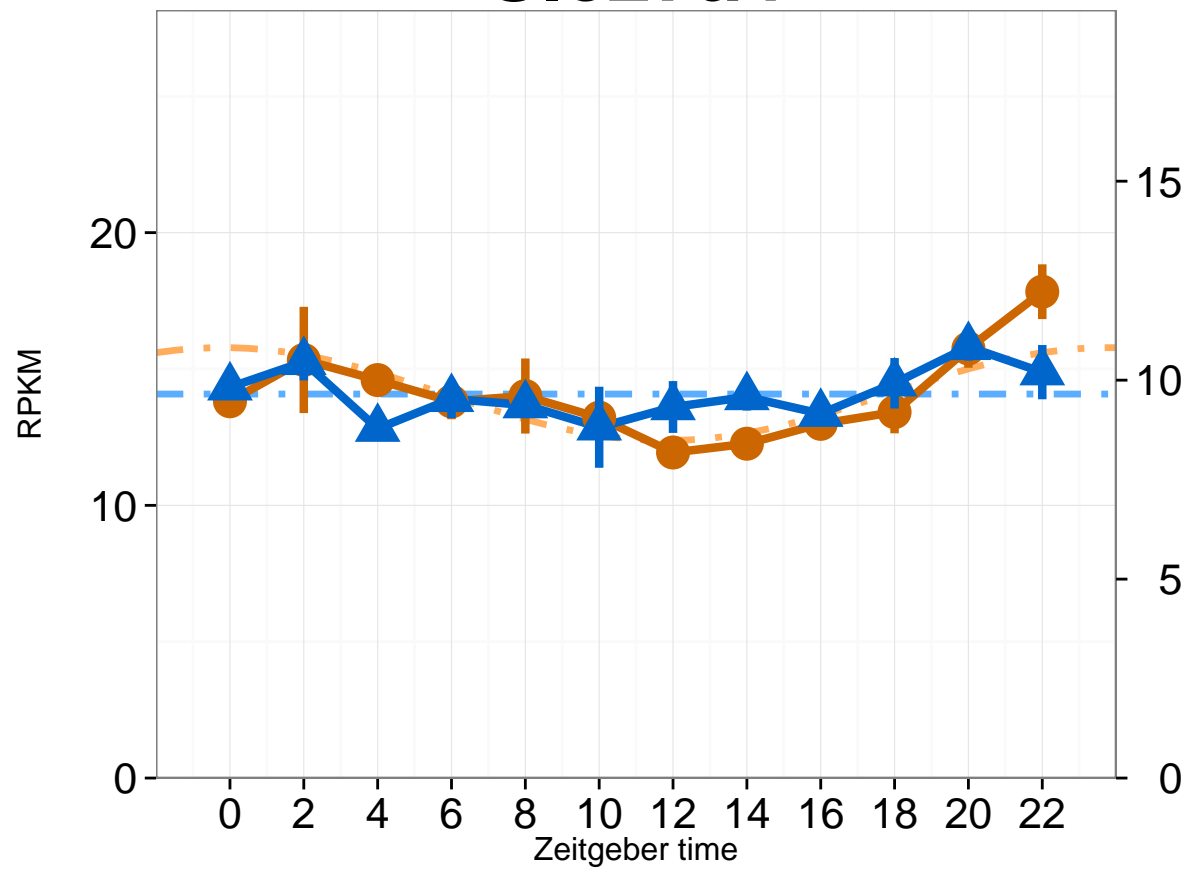

## Slc27a4

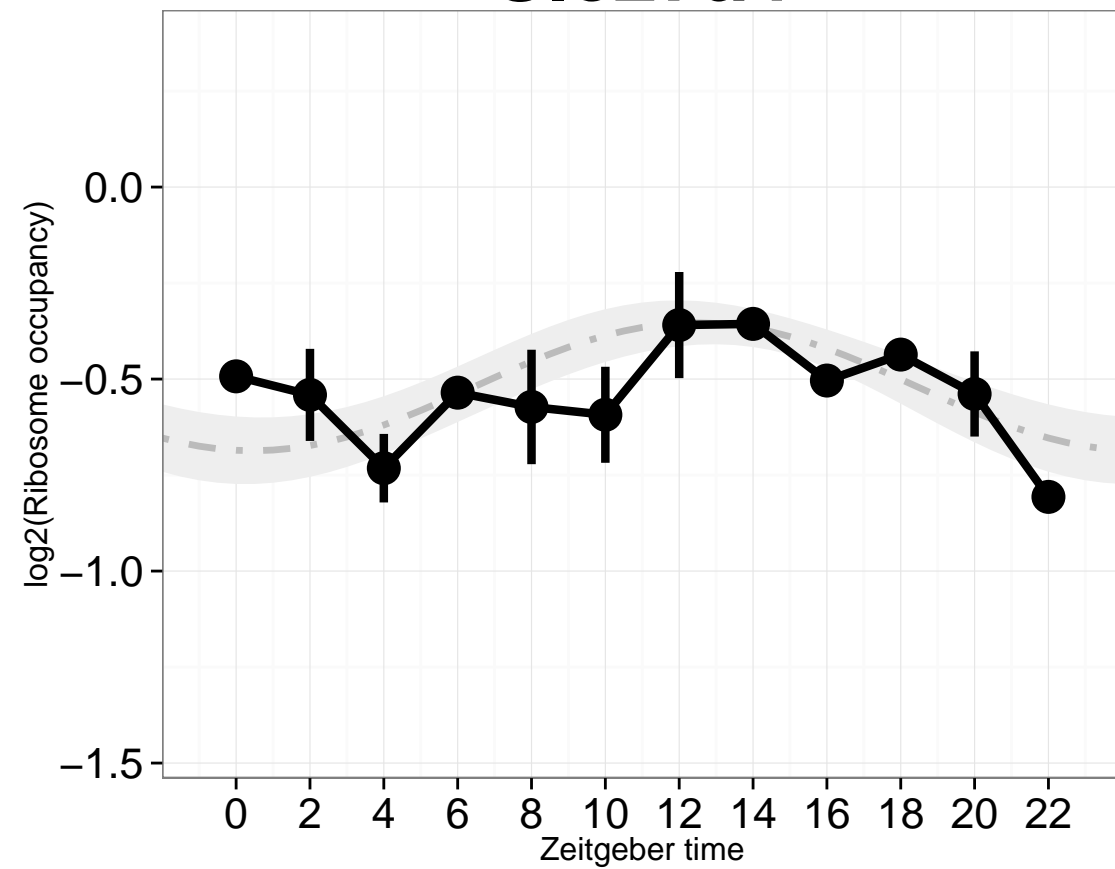

Supplement: SuppDataset_1.zip [file Slc27a4_set_A.pdf › Supplemental Dataset 1/A-mRNA_nonrhyth_translation_nonrhyth/Slc27a4_set_A.pdf]

## Slc27a5

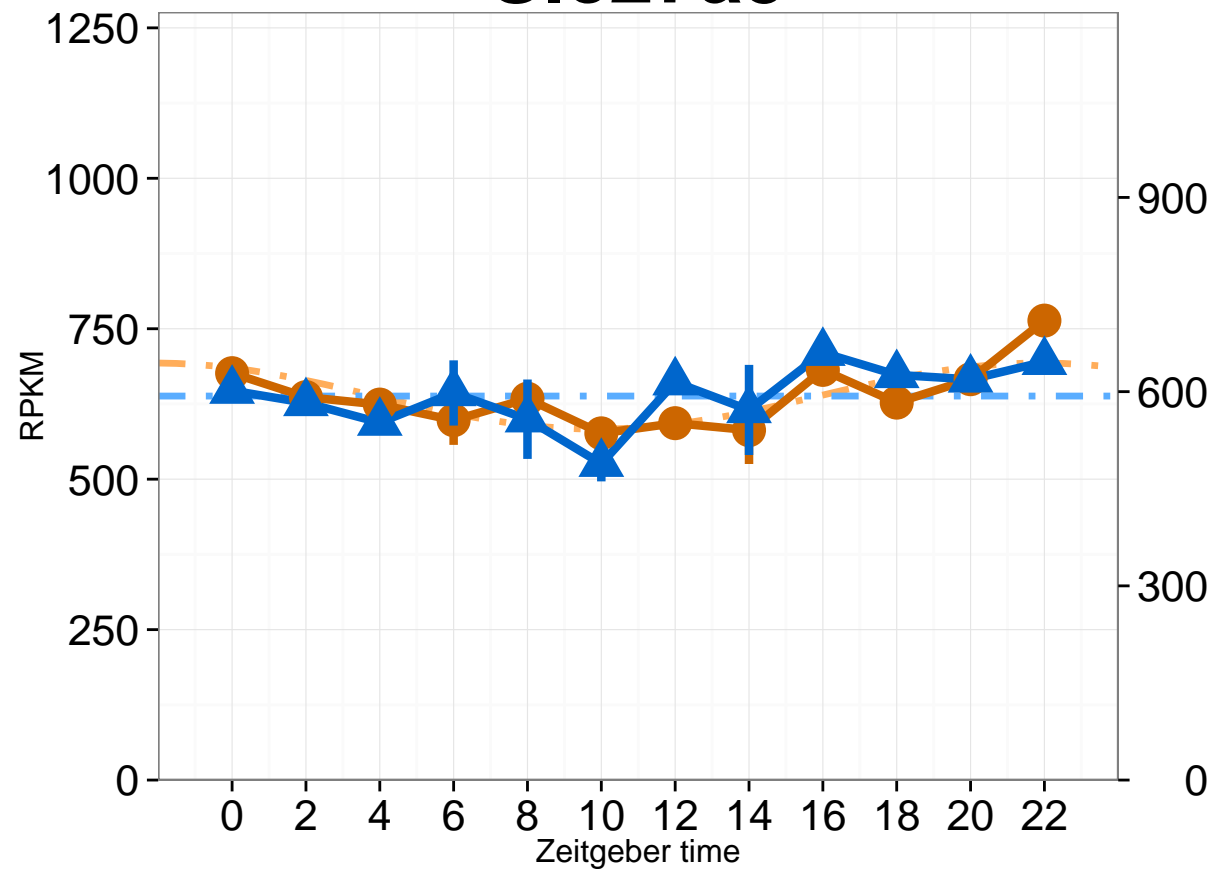

## Slc27a5

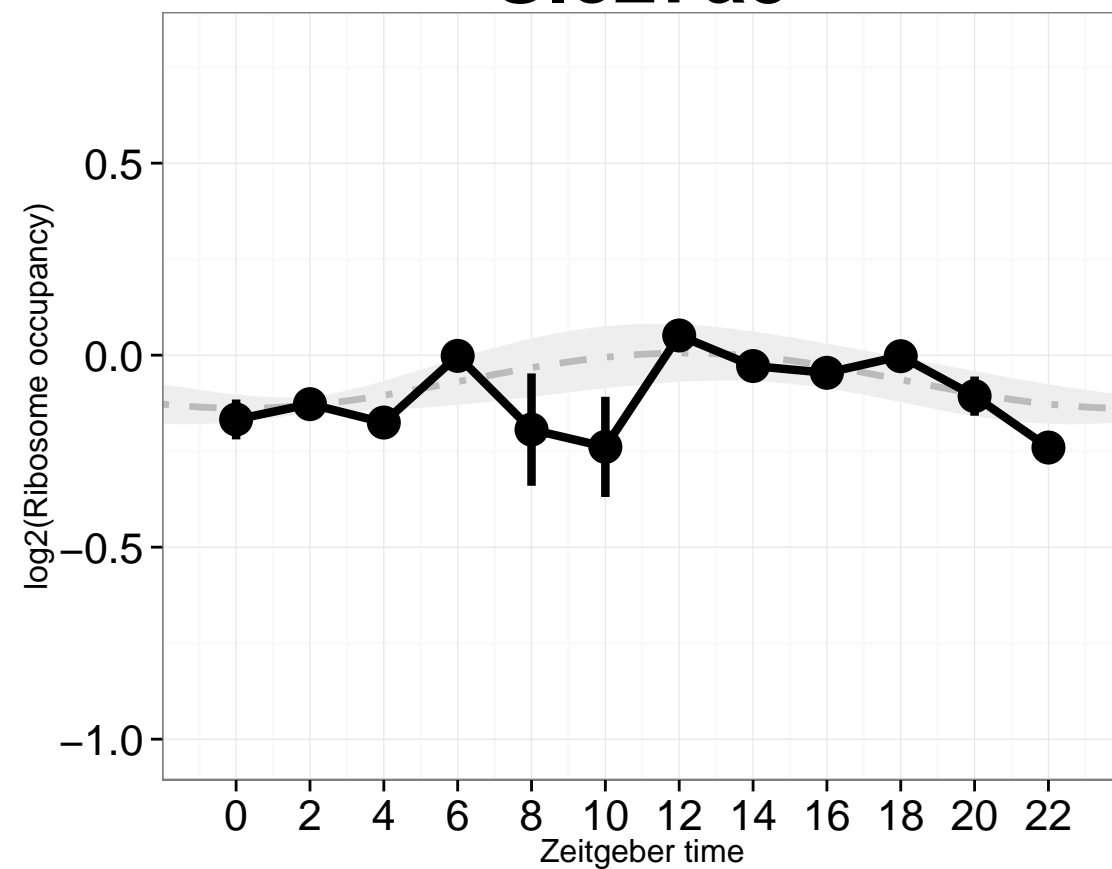

Supplement: SuppDataset_1.zip [file Slc27a5_set_A.pdf › Supplemental Dataset 1/A-mRNA_nonrhyth_translation_nonrhyth/Slc27a5_set_A.pdf]

**Slc28a2**

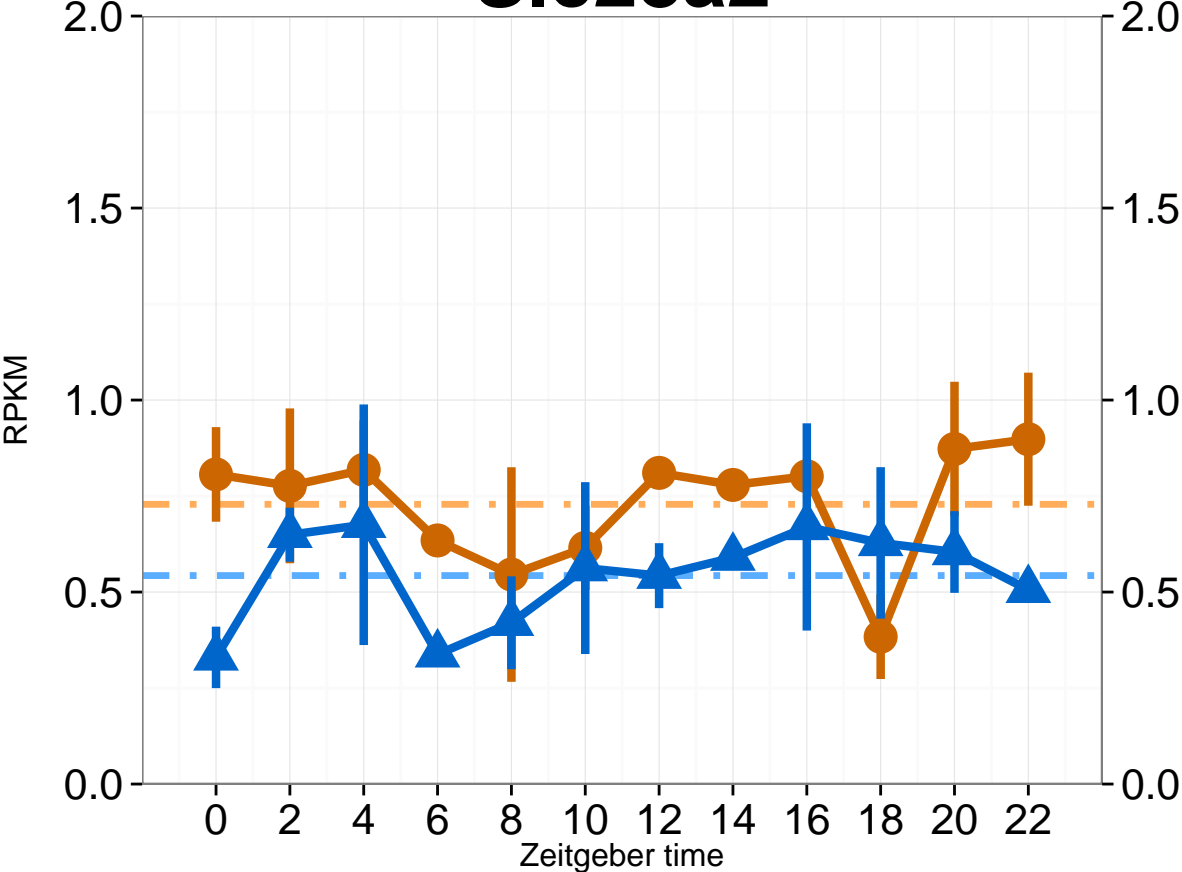

**Slc28a2**

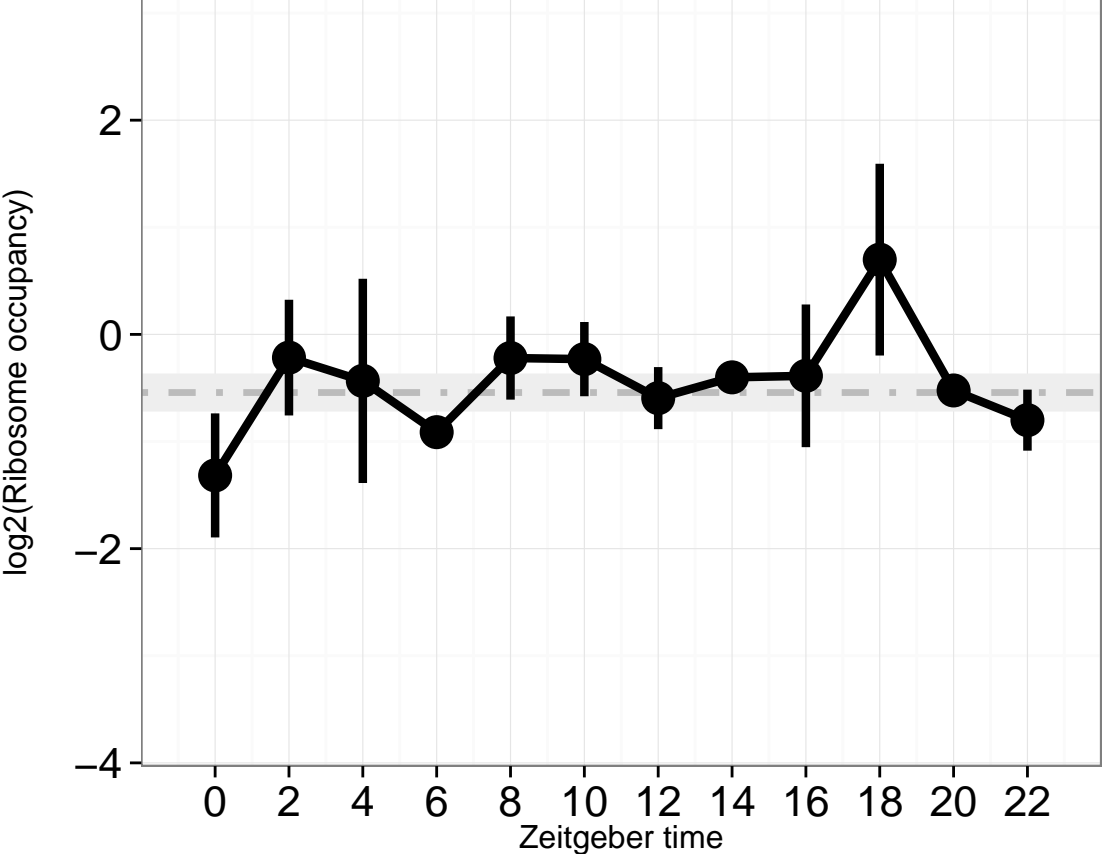

Supplement: SuppDataset_1.zip [file Slc28a2_set_A.pdf › Supplemental Dataset 1/A-mRNA_nonrhyth_translation_nonrhyth/Slc28a2_set_A.pdf]

# Slc29a2 TR

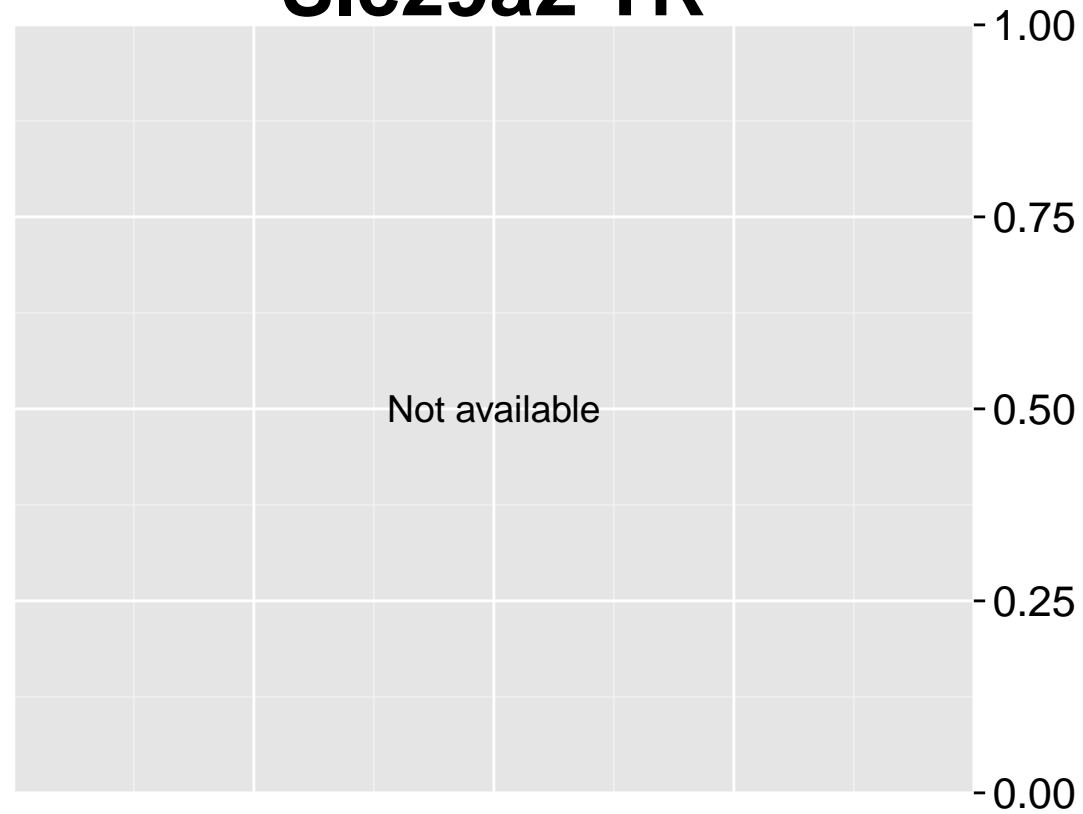

# Slc29a2 log2(Ribosome occupancy)

Supplement: SuppDataset_1.zip [file Slc29a2_set_A.pdf › Supplemental Dataset 1/A-mRNA_nonrhyth_translation_nonrhyth/Slc29a2_set_A.pdf]

## Slc2a8

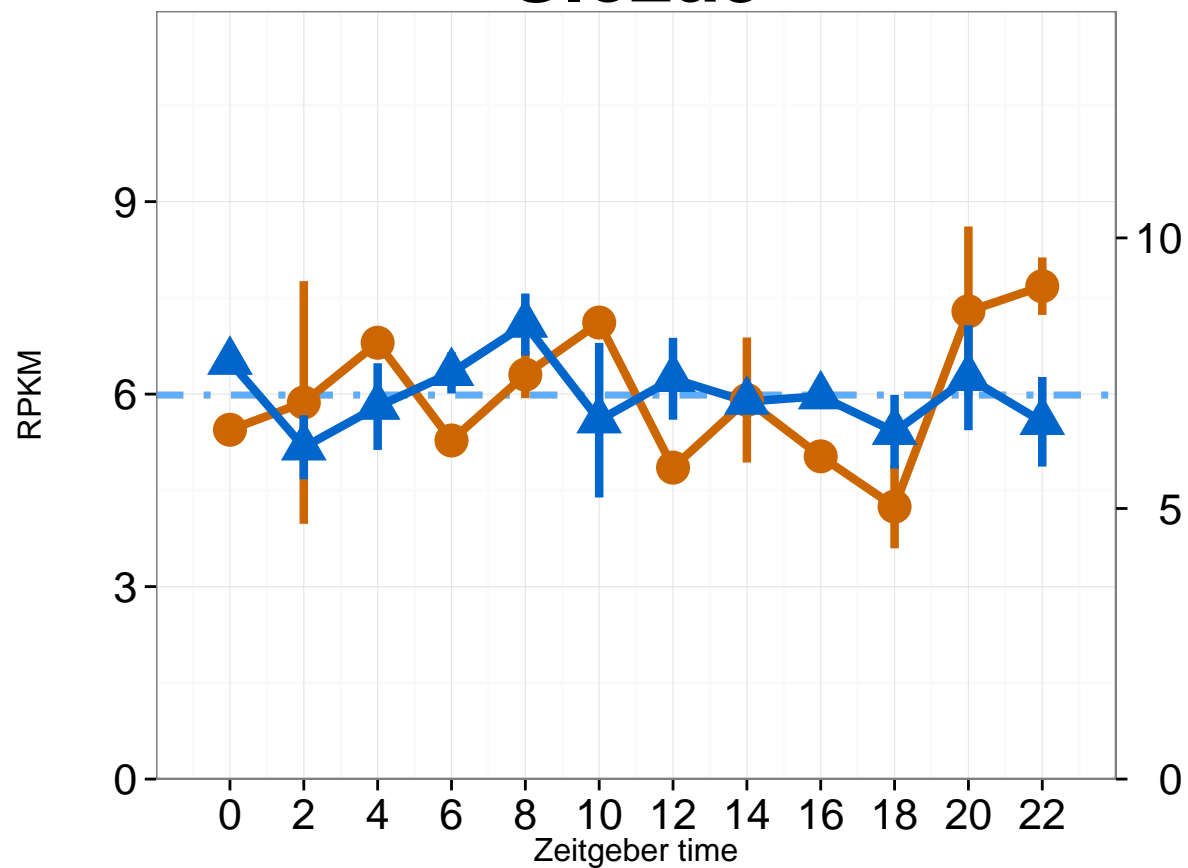

## Slc2a8

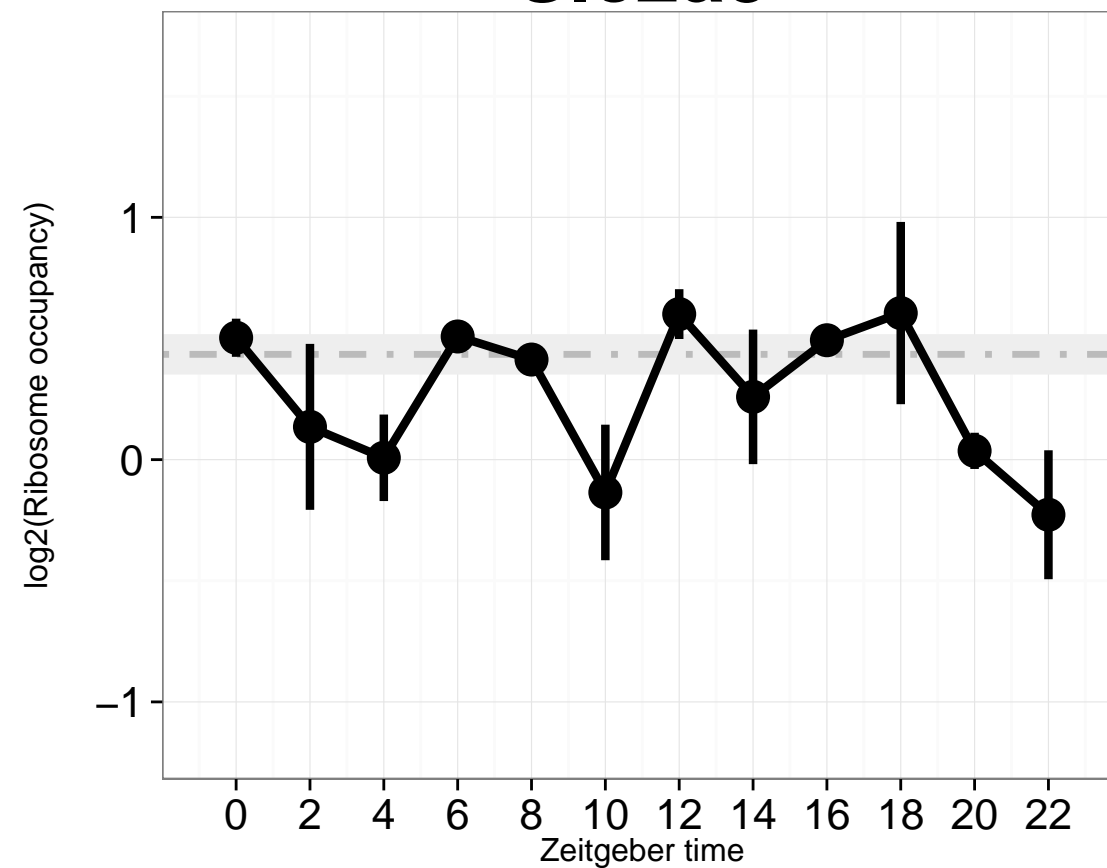

Supplement: SuppDataset_1.zip [file Slc2a8_set_A.pdf › Supplemental Dataset 1/A-mRNA_nonrhyth_translation_nonrhyth/Slc2a8_set_A.pdf]

# Slc30a6

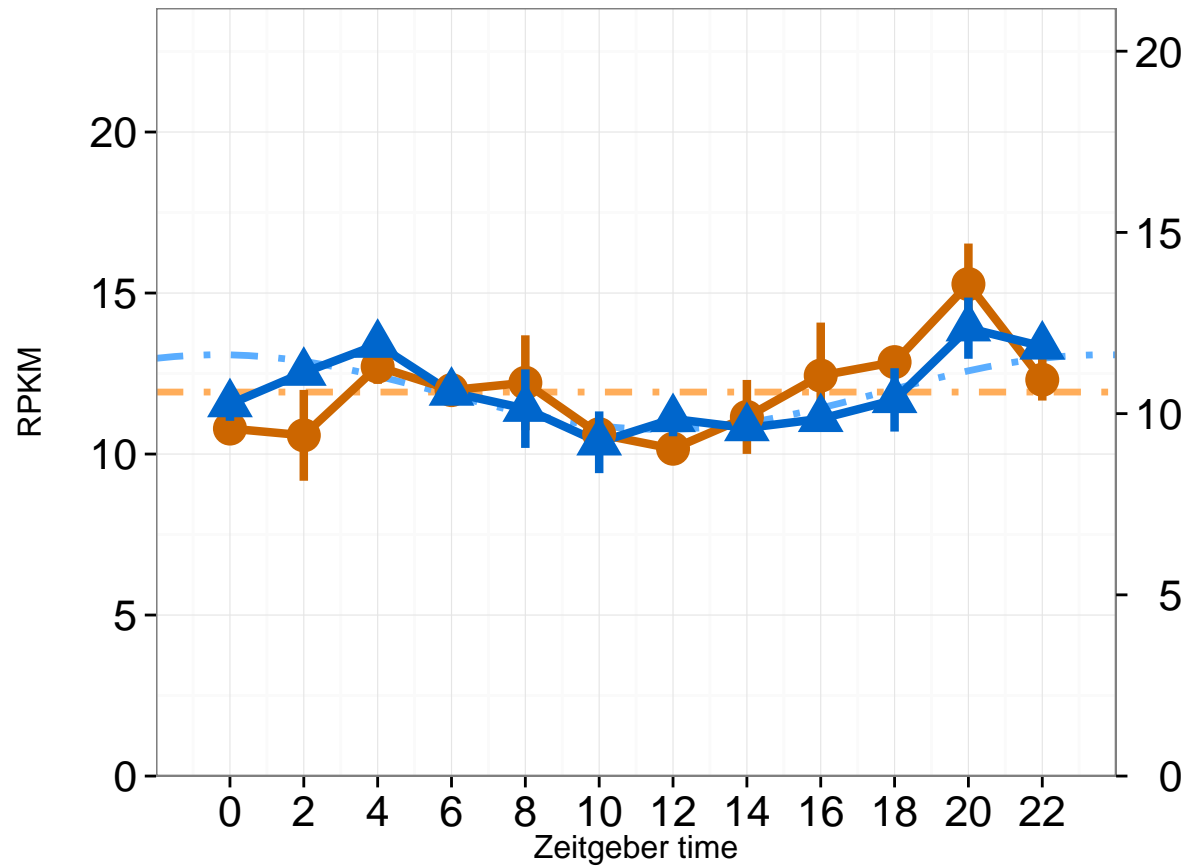

# Slc30a6

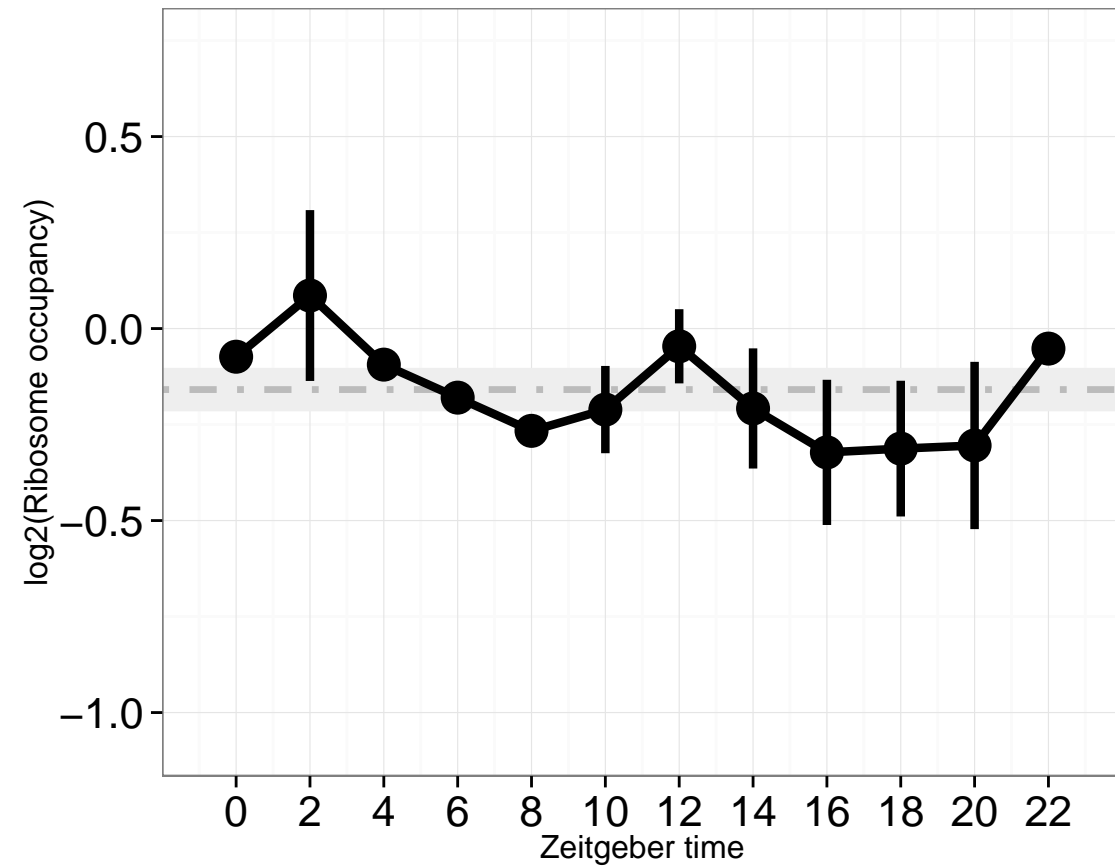

Supplement: SuppDataset_1.zip [file Slc30a6_set_A.pdf › Supplemental Dataset 1/A-mRNA_nonrhyth_translation_nonrhyth/Slc30a6_set_A.pdf]

# Slc30a7

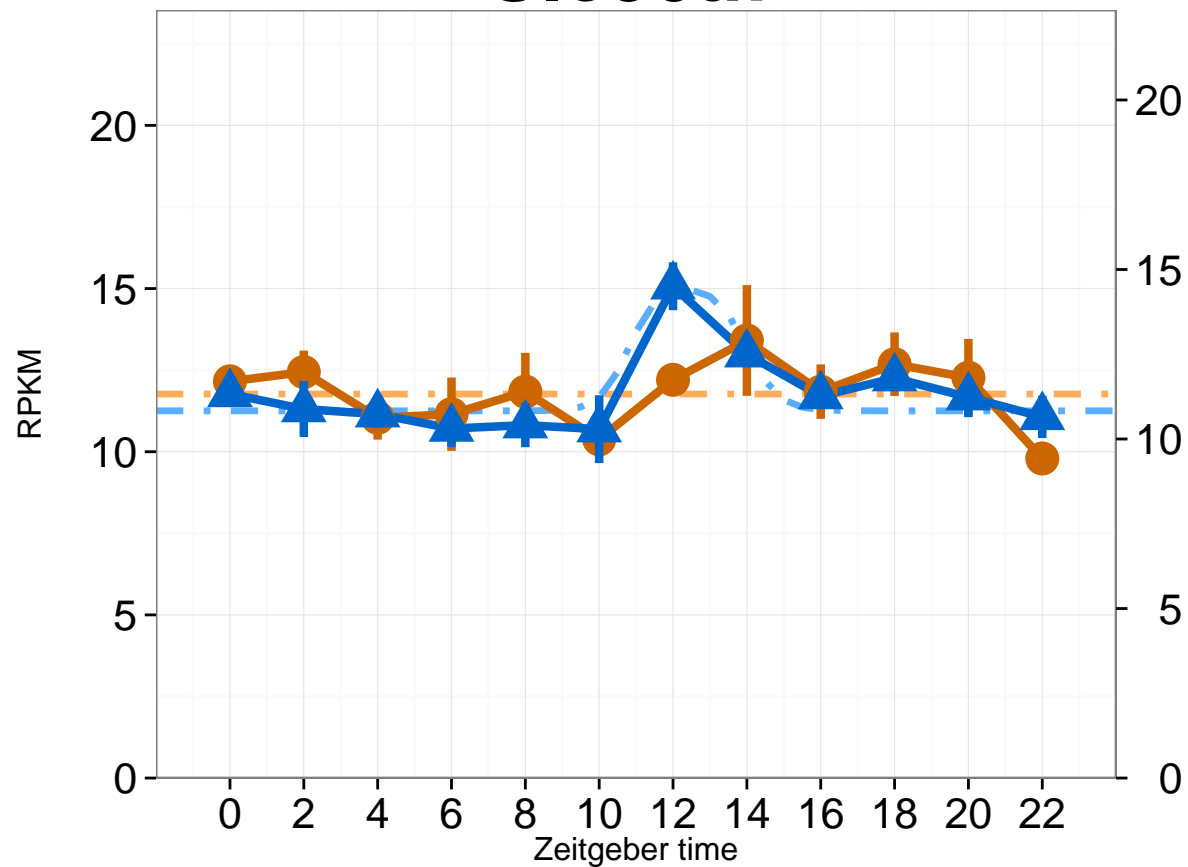

# Slc30a7

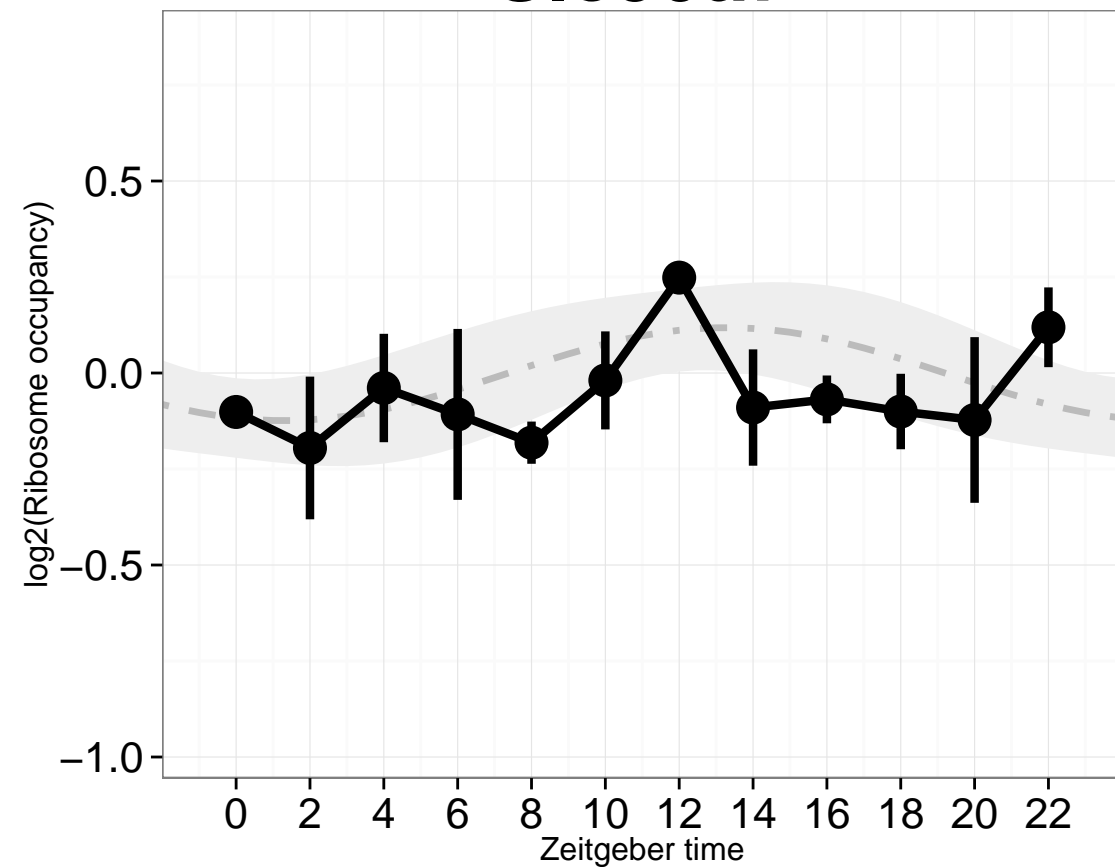

Supplement: SuppDataset_1.zip [file Slc30a7_set_A.pdf › Supplemental Dataset 1/A-mRNA_nonrhyth_translation_nonrhyth/Slc30a7_set_A.pdf]

# Slc30a9

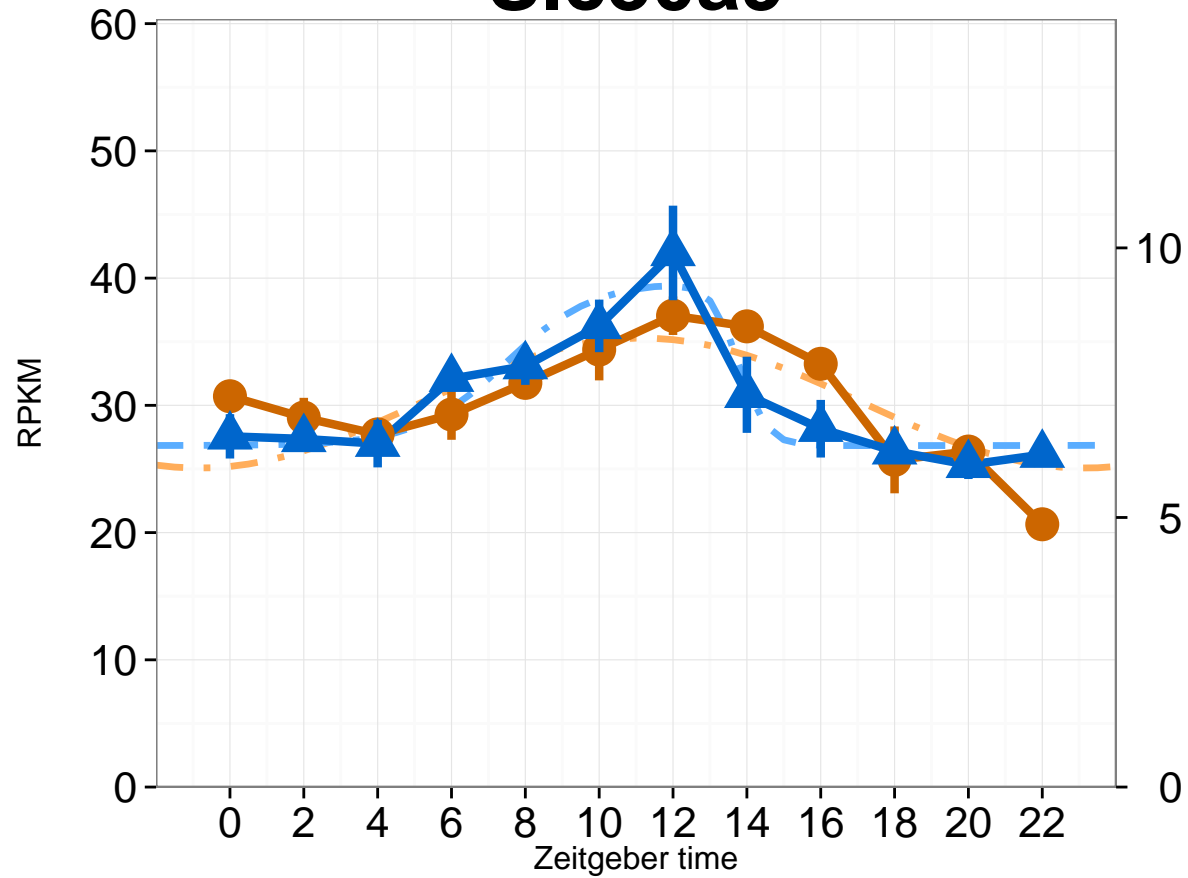

# Slc30a9

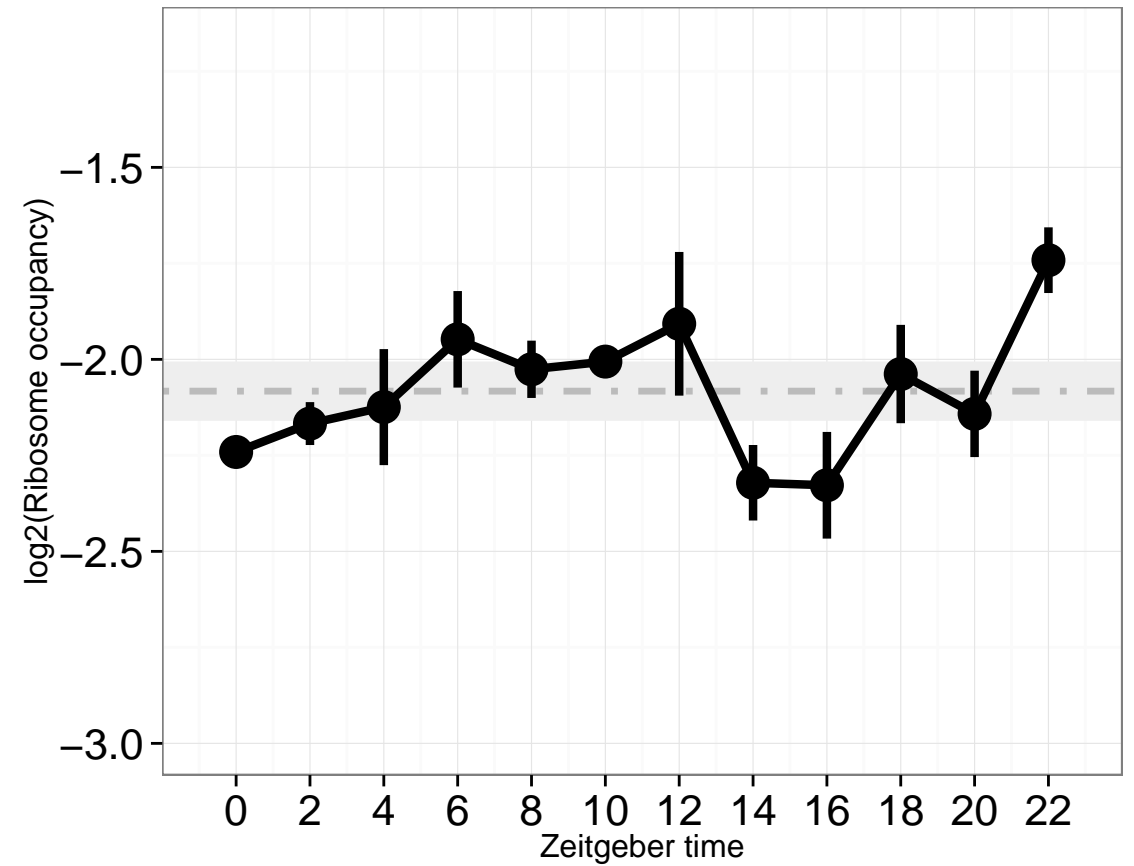

Supplement: SuppDataset_1.zip [file Slc30a9_set_A.pdf › Supplemental Dataset 1/A-mRNA_nonrhyth_translation_nonrhyth/Slc30a9_set_A.pdf]

## Slc31a1

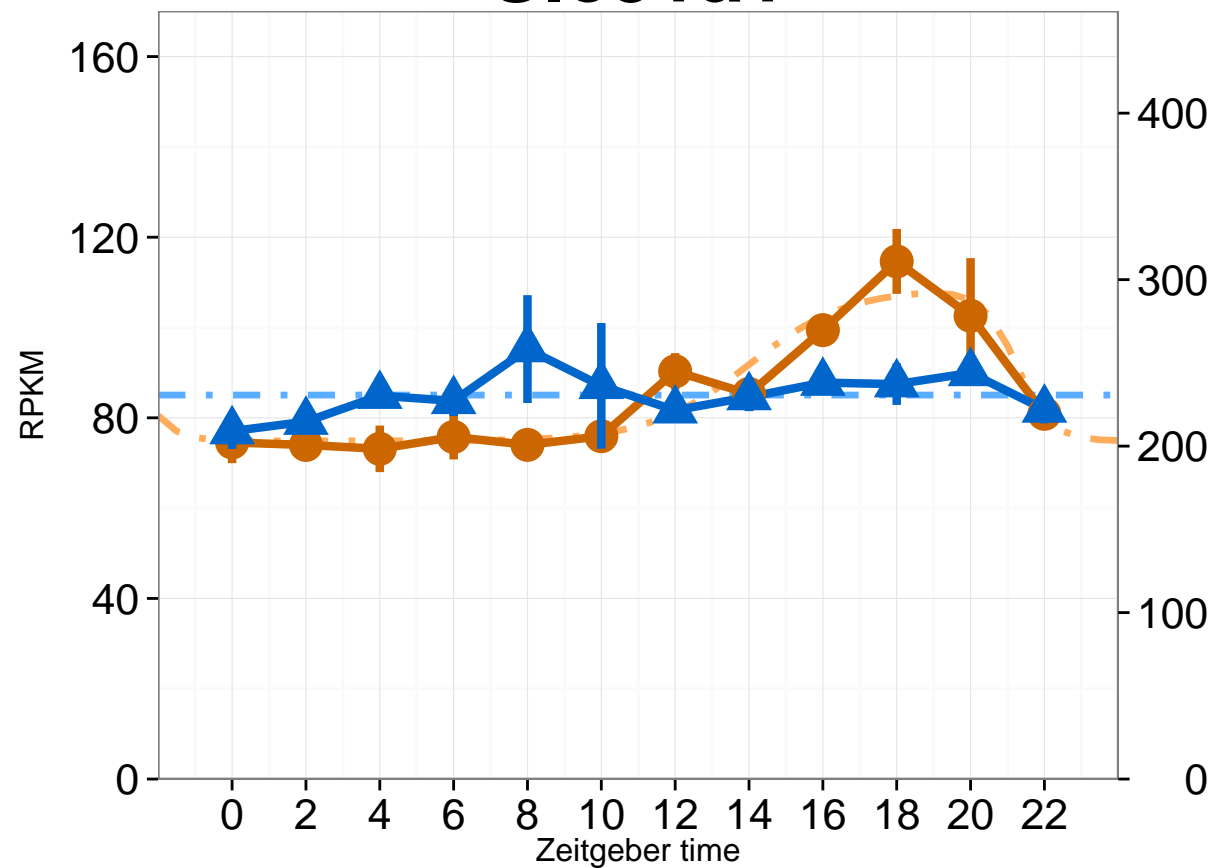

## Slc31a1

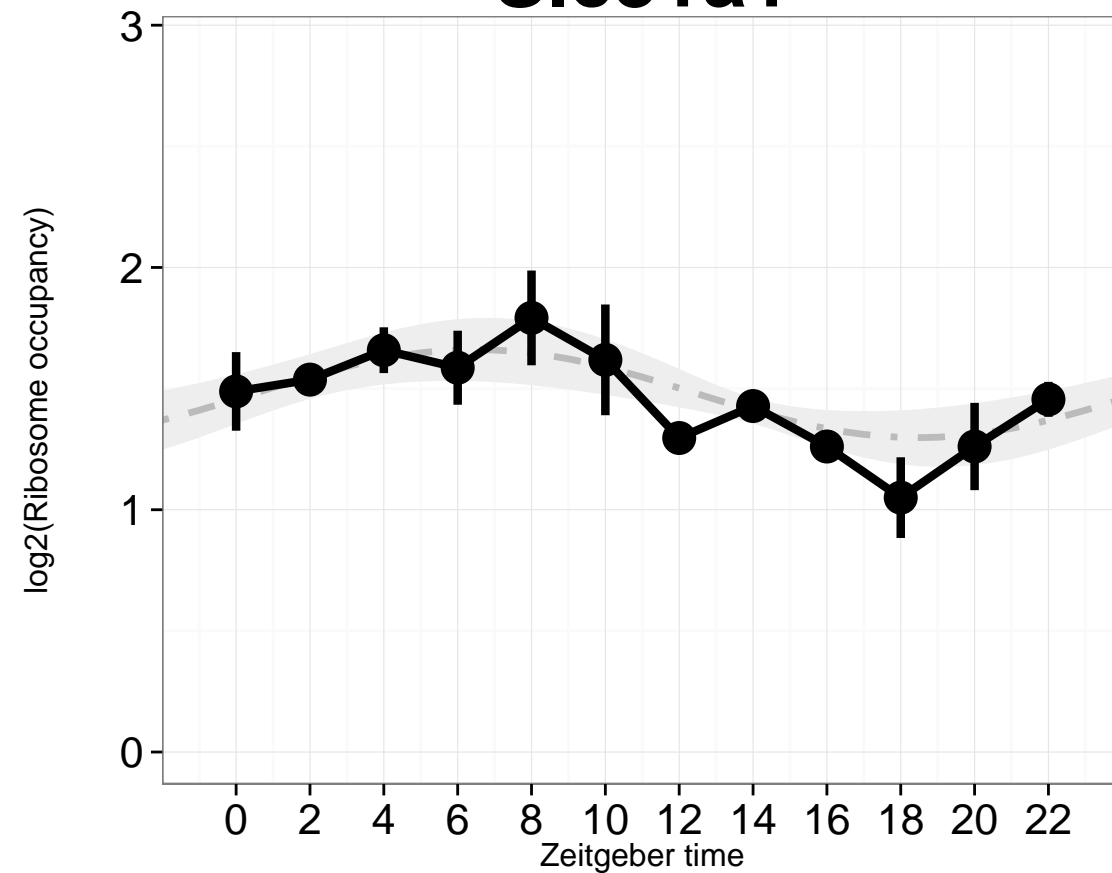

Supplement: SuppDataset_1.zip [file Slc31a1_set_A.pdf › Supplemental Dataset 1/A-mRNA_nonrhyth_translation_nonrhyth/Slc31a1_set_A.pdf]

## Slc31a2

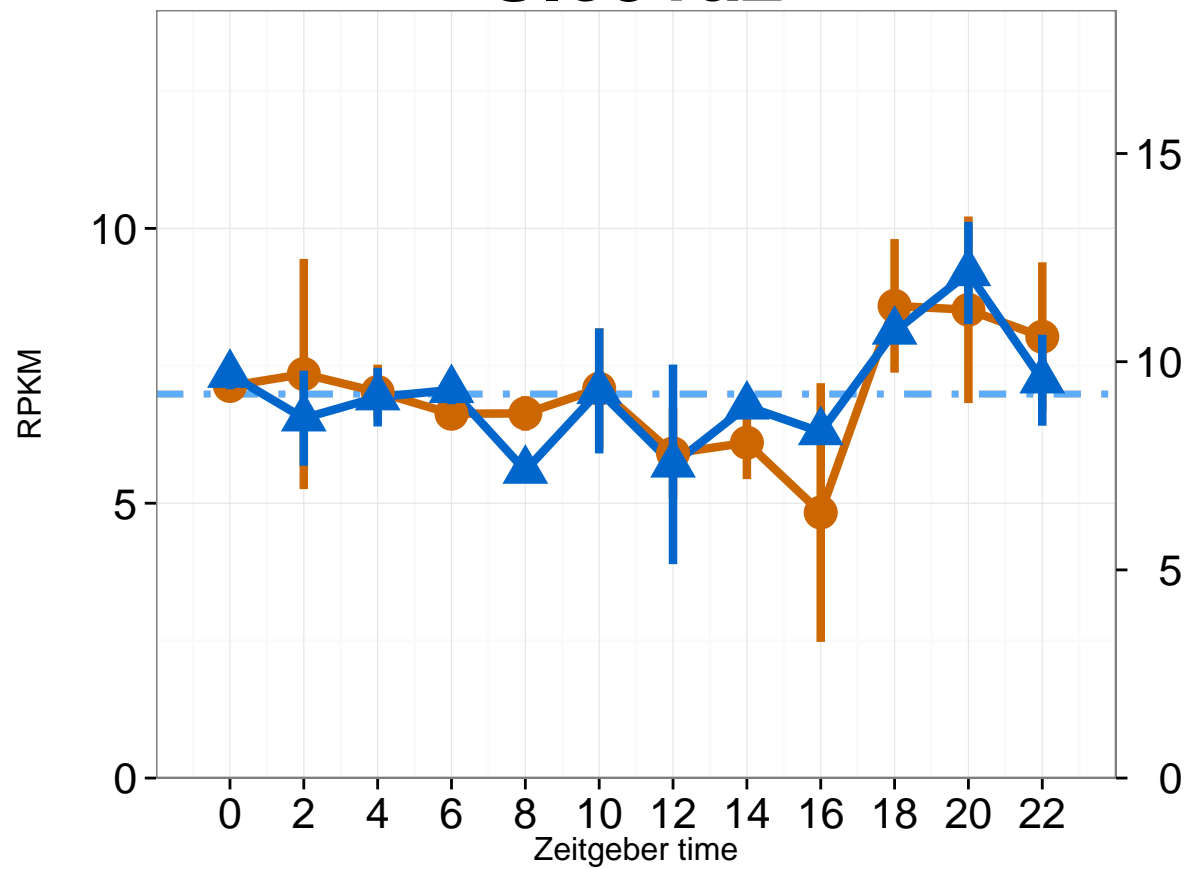

## Slc31a2

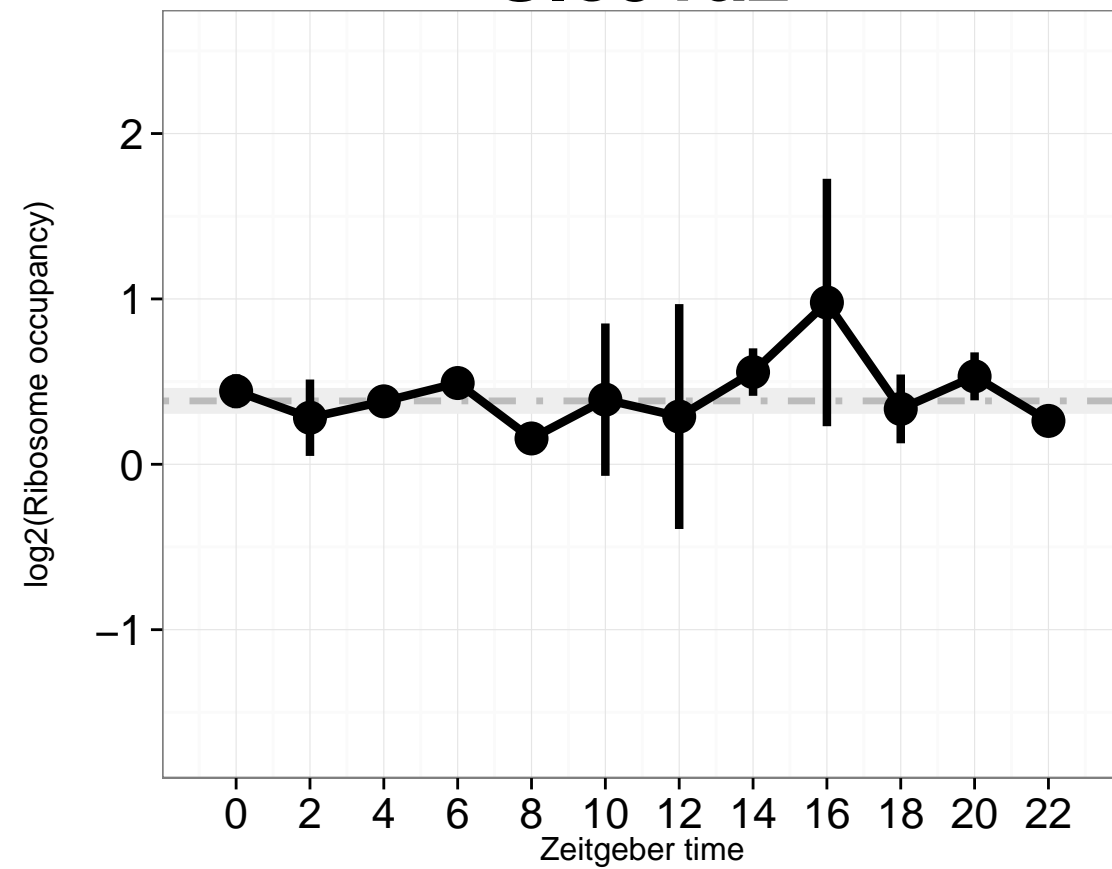

Supplement: SuppDataset_1.zip [file Slc31a2_set_A.pdf › Supplemental Dataset 1/A-mRNA_nonrhyth_translation_nonrhyth/Slc31a2_set_A.pdf]

# Slc33a1

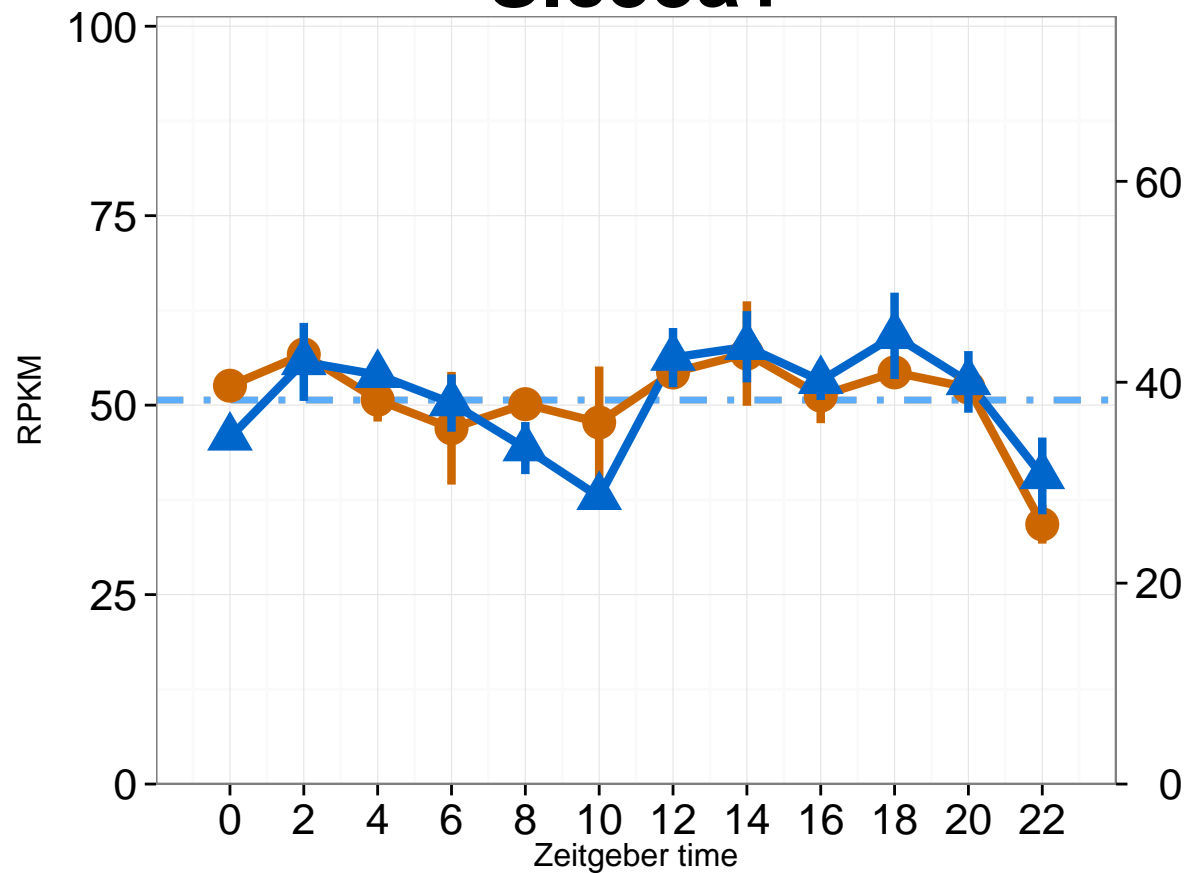

# Slc33a1

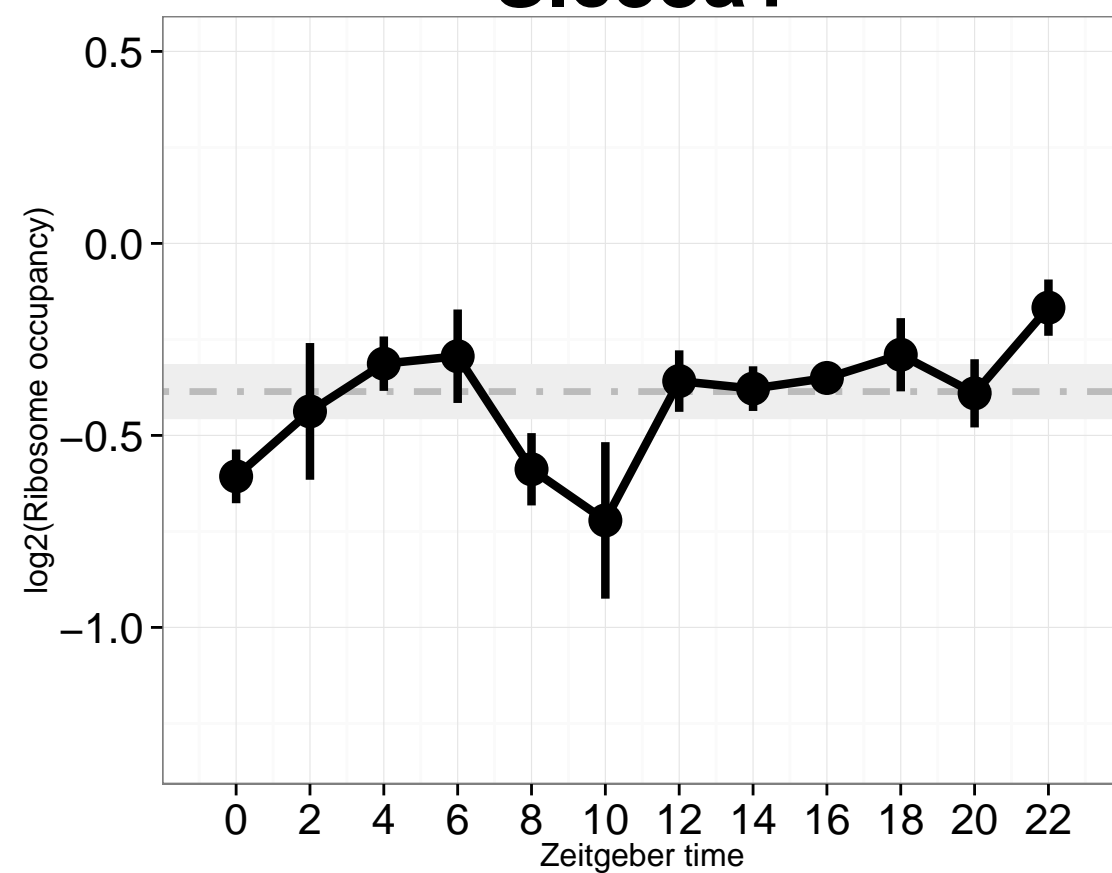

Supplement: SuppDataset_1.zip [file Slc33a1_set_A.pdf › Supplemental Dataset 1/A-mRNA_nonrhyth_translation_nonrhyth/Slc33a1_set_A.pdf]

# Slc35a1

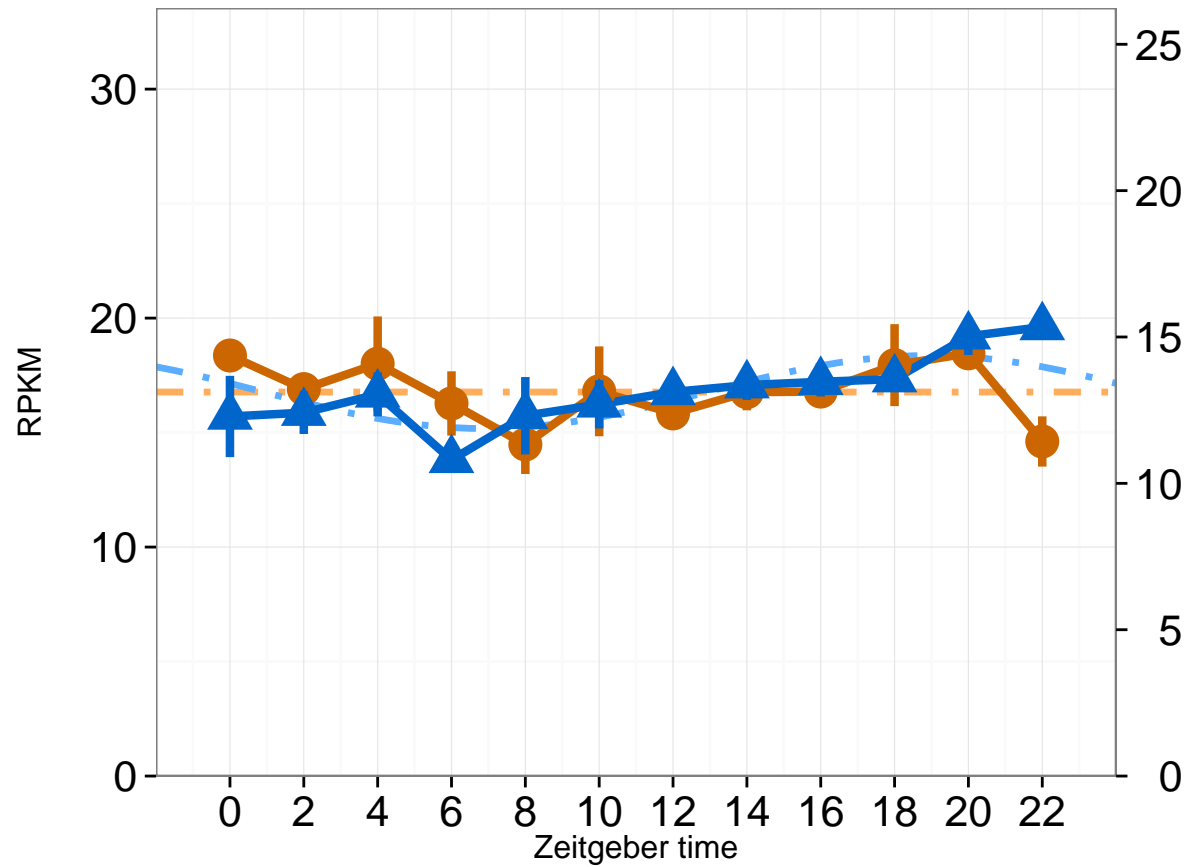

# Slc35a1

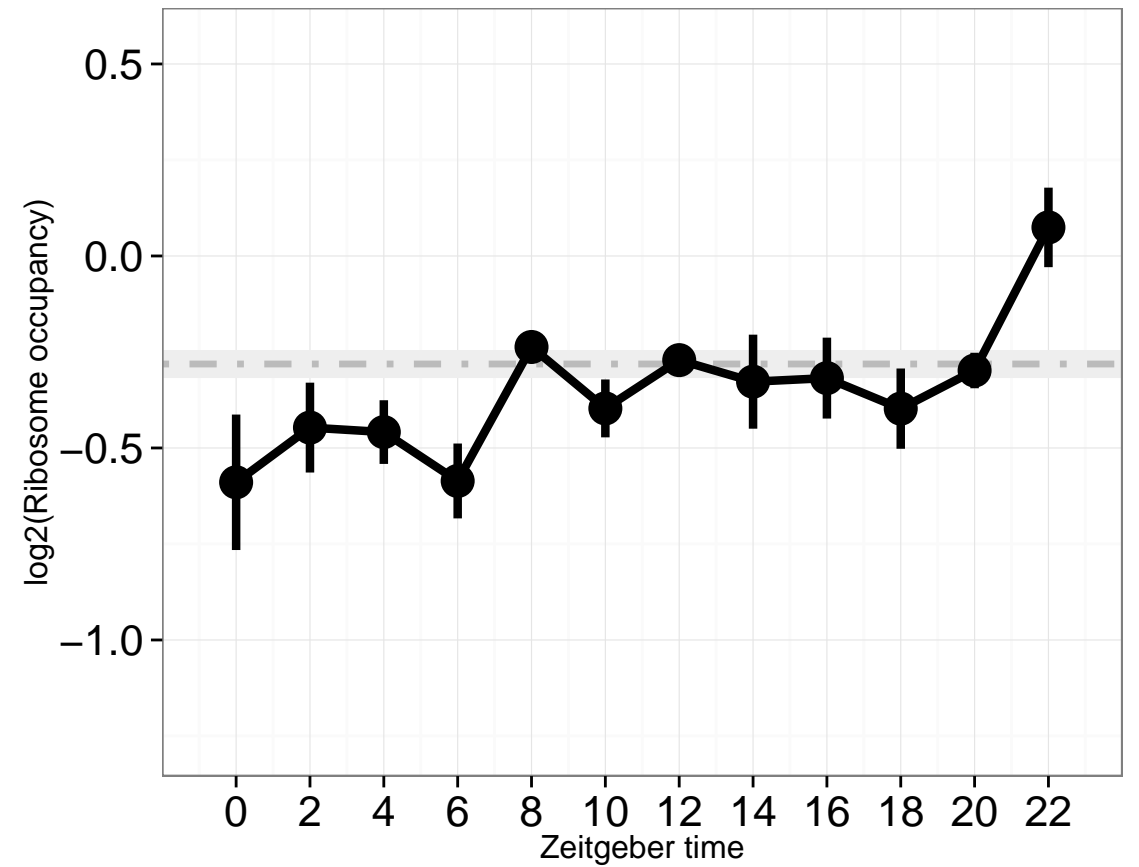

Supplement: SuppDataset_1.zip [file Slc35a1_set_A.pdf › Supplemental Dataset 1/A-mRNA_nonrhyth_translation_nonrhyth/Slc35a1_set_A.pdf]

## Slc35a2

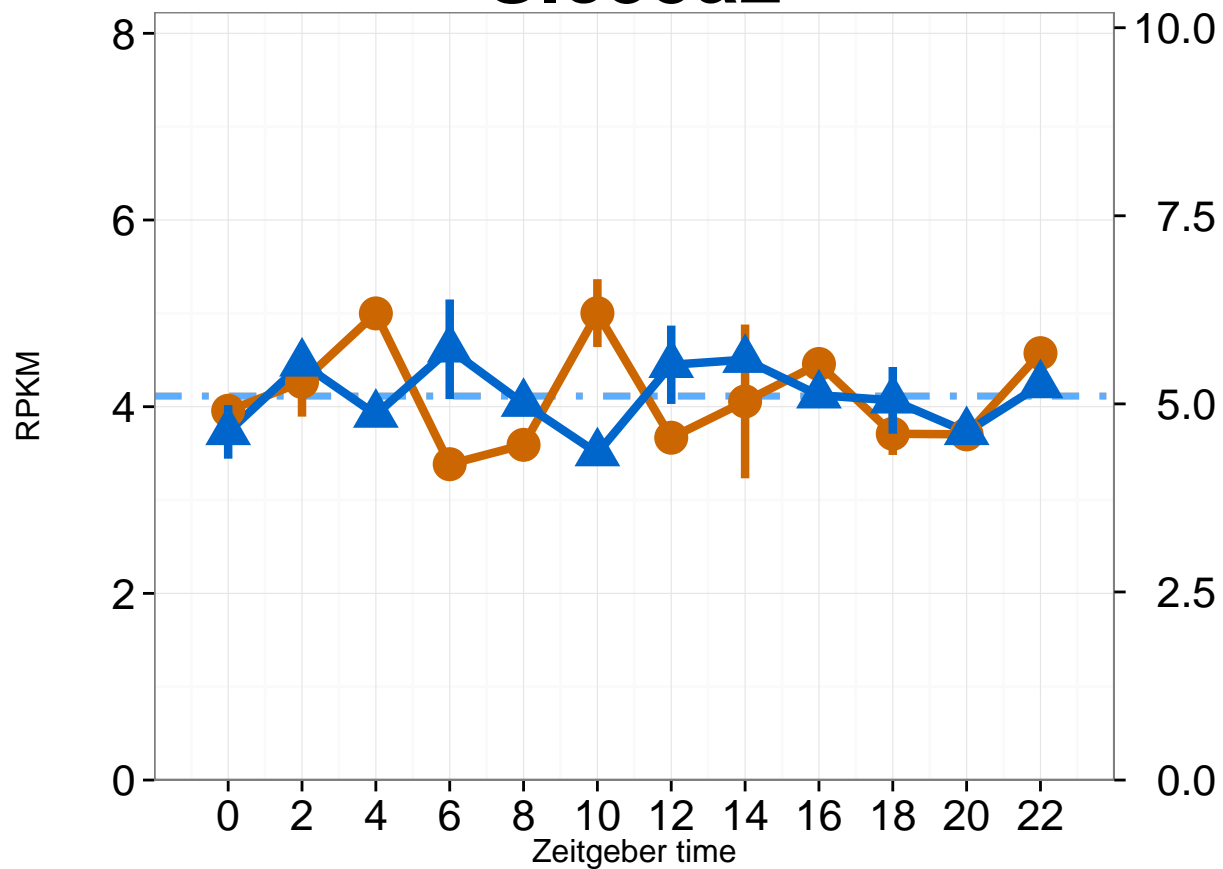

## Slc35a2

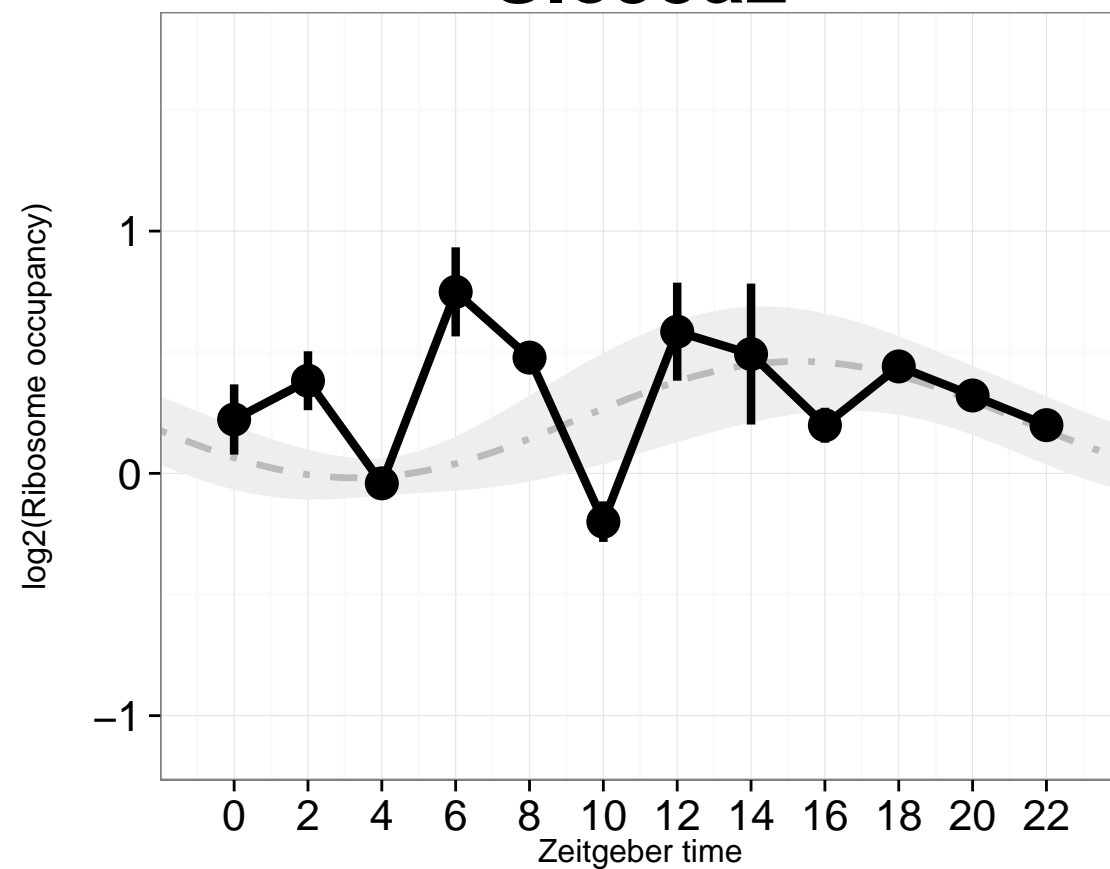

Supplement: SuppDataset_1.zip [file Slc35a2_set_A.pdf › Supplemental Dataset 1/A-mRNA_nonrhyth_translation_nonrhyth/Slc35a2_set_A.pdf]

## Slc35a3

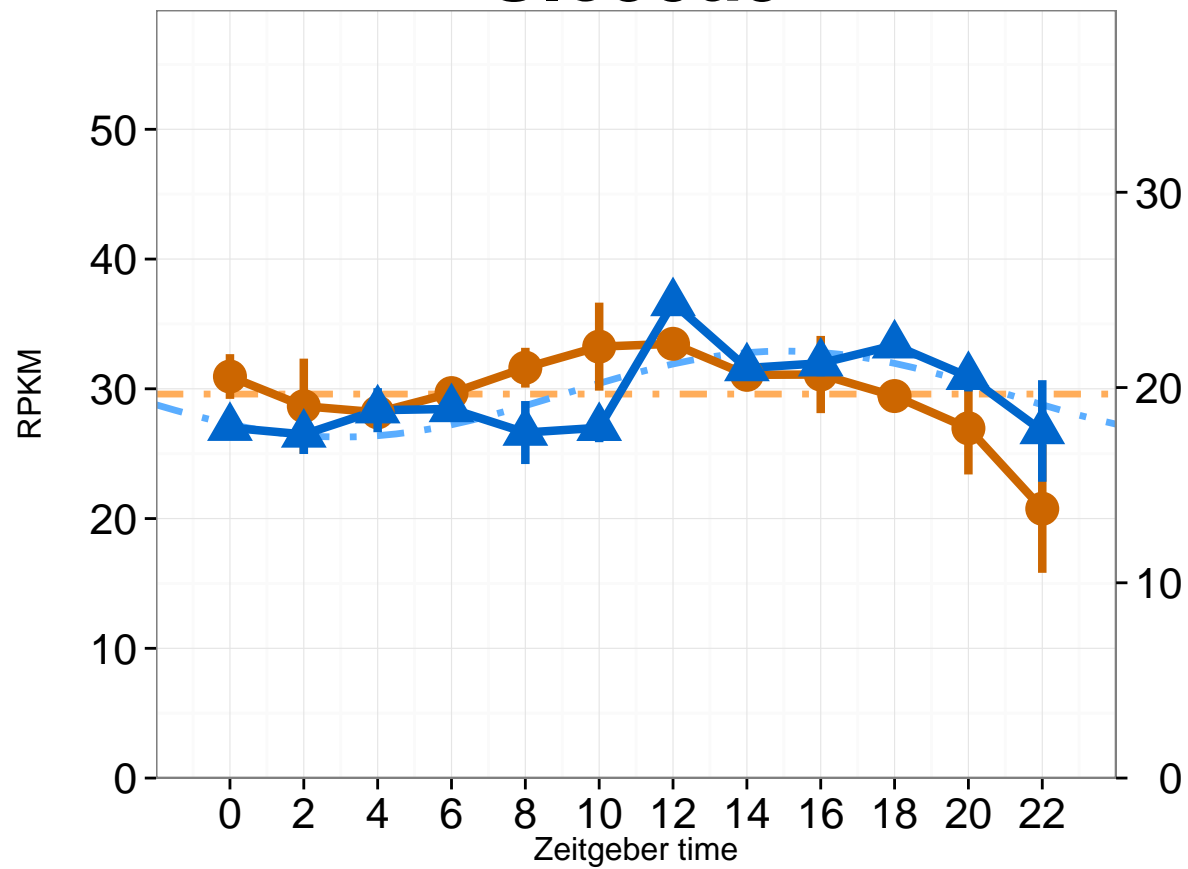

## Slc35a3

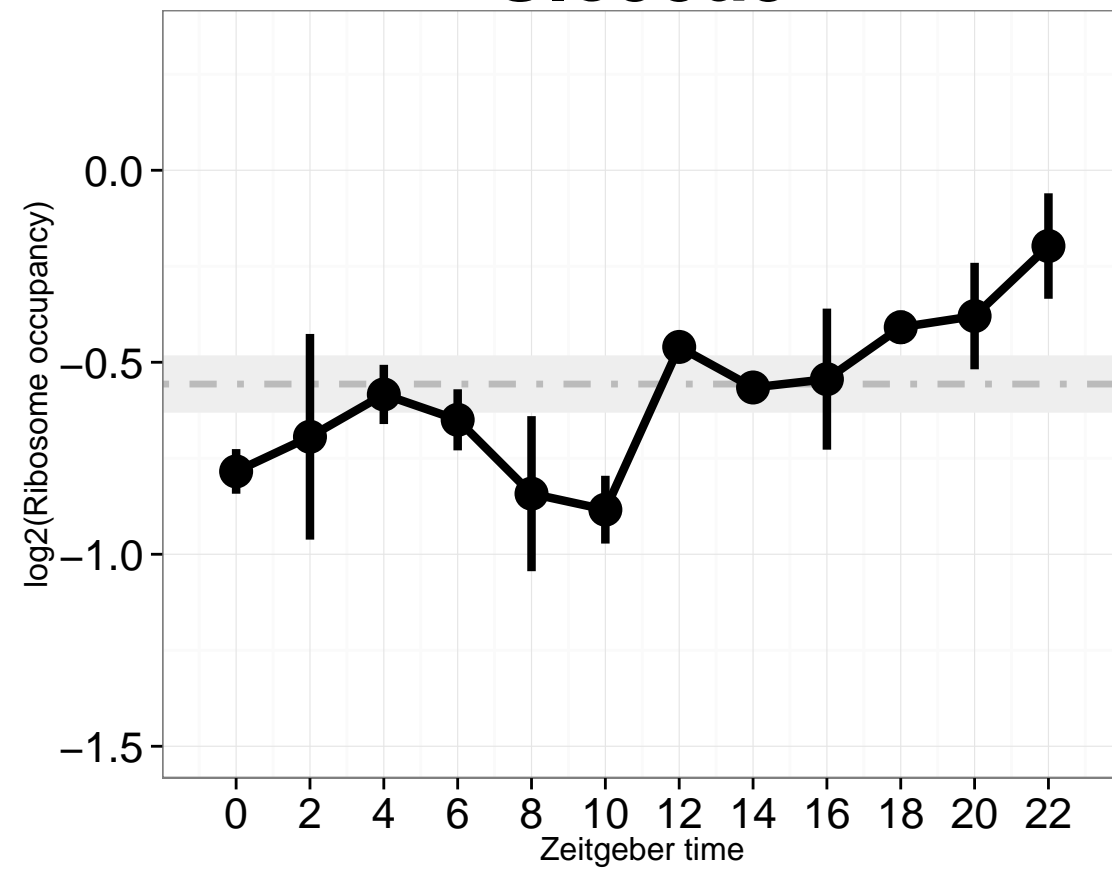

Supplement: SuppDataset_1.zip [file Slc35a3_set_A.pdf › Supplemental Dataset 1/A-mRNA_nonrhyth_translation_nonrhyth/Slc35a3_set_A.pdf]

## Slc35a4

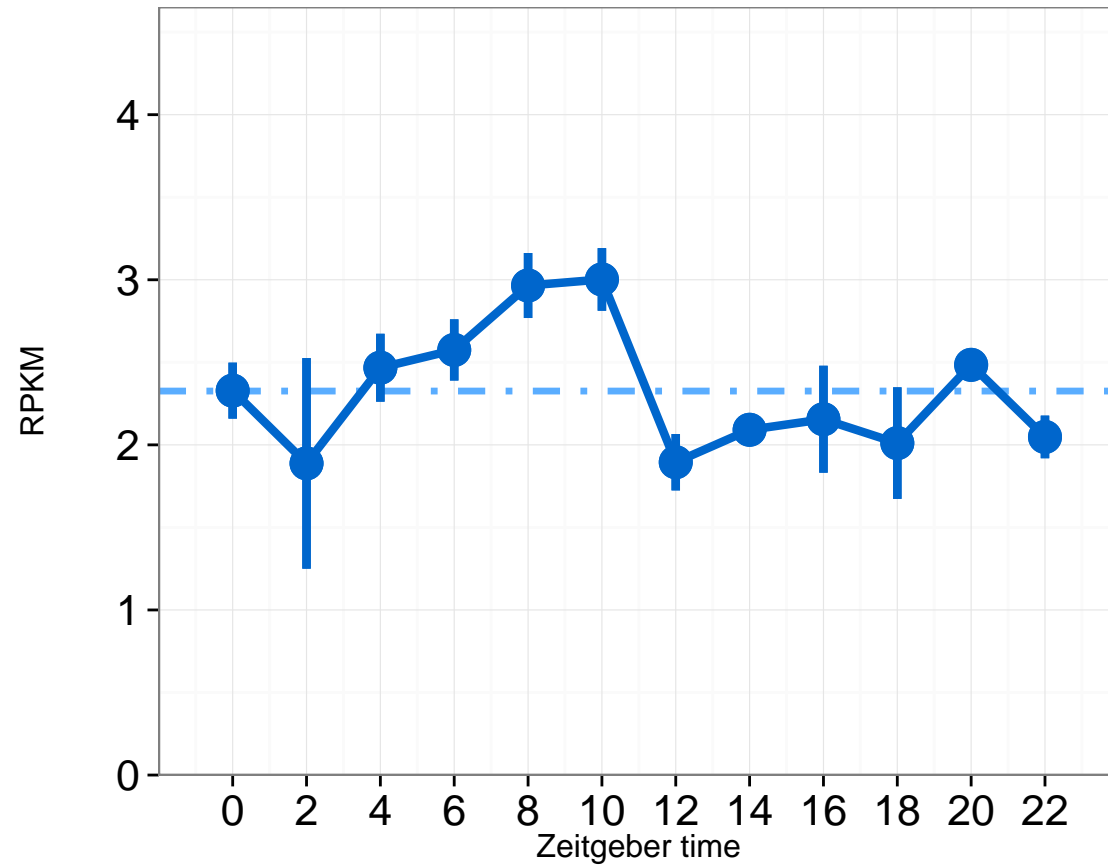

## Slc35a4 log2(Ribosome occupancy)

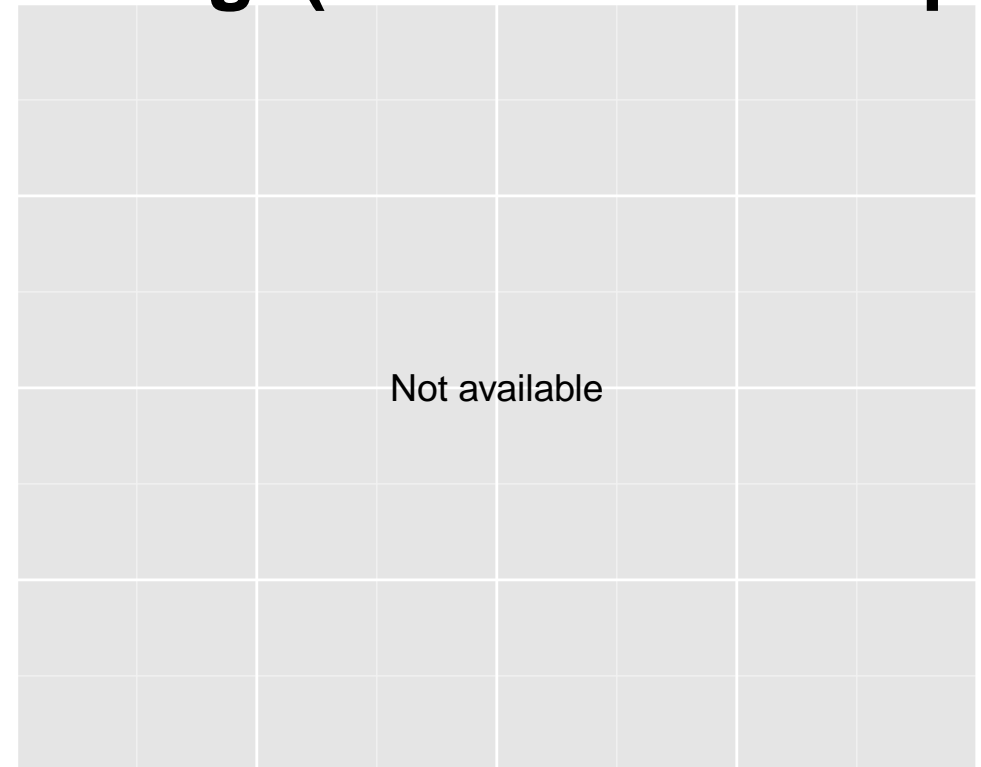

Supplement: SuppDataset_1.zip [file Slc35a4_set_A.pdf › Supplemental Dataset 1/A-mRNA_nonrhyth_translation_nonrhyth/Slc35a4_set_A.pdf]

# Slc35a5

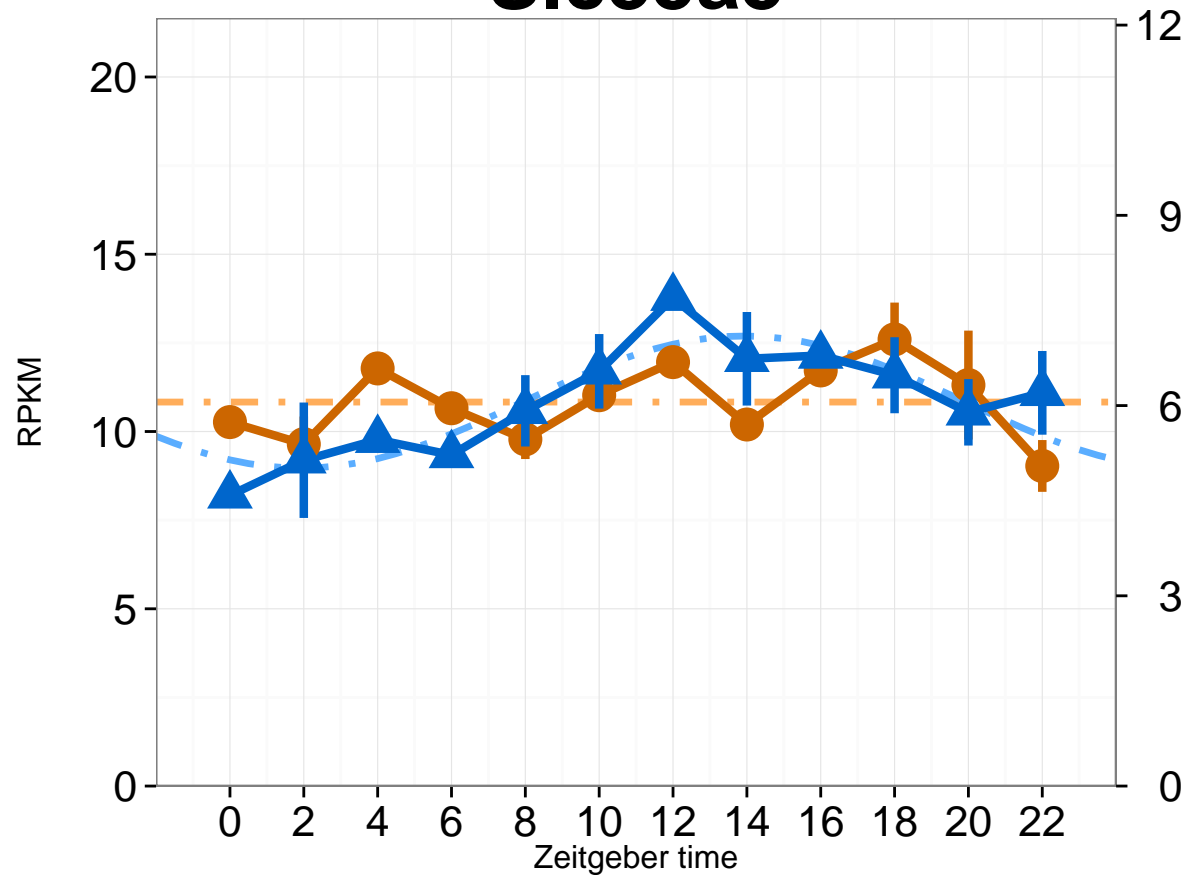

# Slc35a5

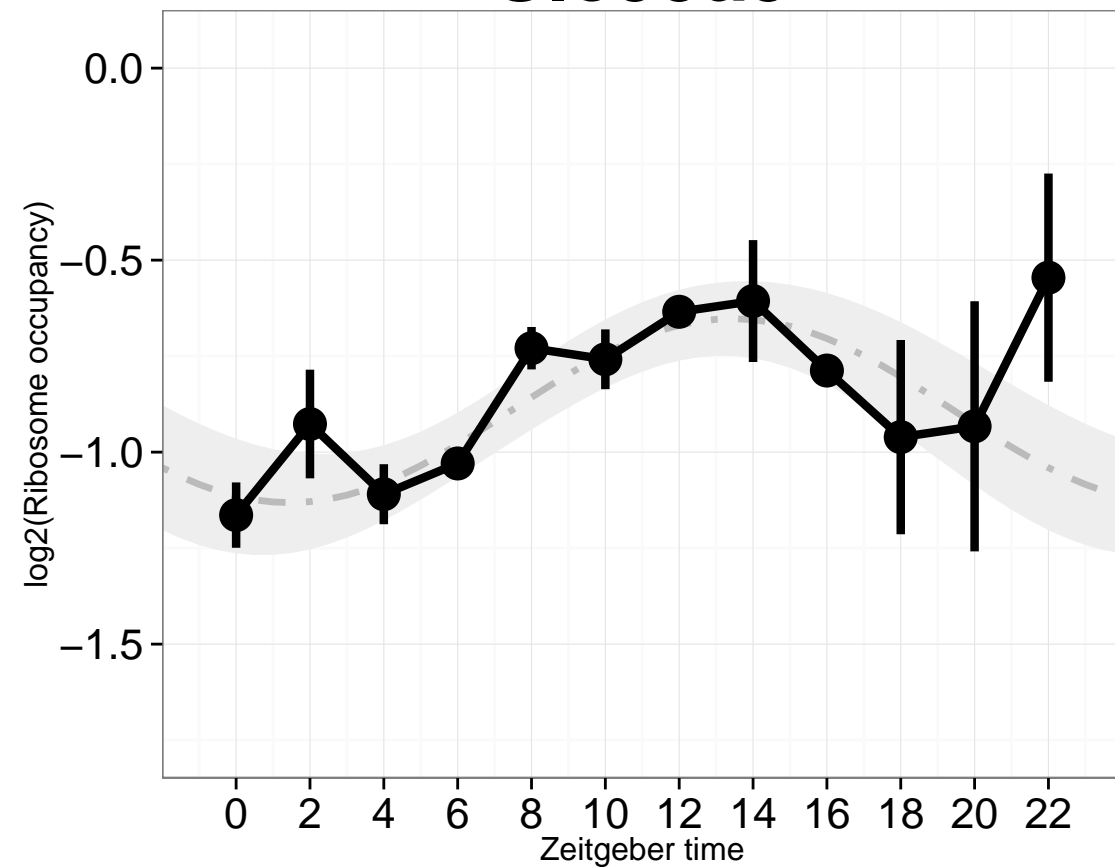

Supplement: SuppDataset_1.zip [file Slc35a5_set_A.pdf › Supplemental Dataset 1/A-mRNA_nonrhyth_translation_nonrhyth/Slc35a5_set_A.pdf]

# Slc35b1

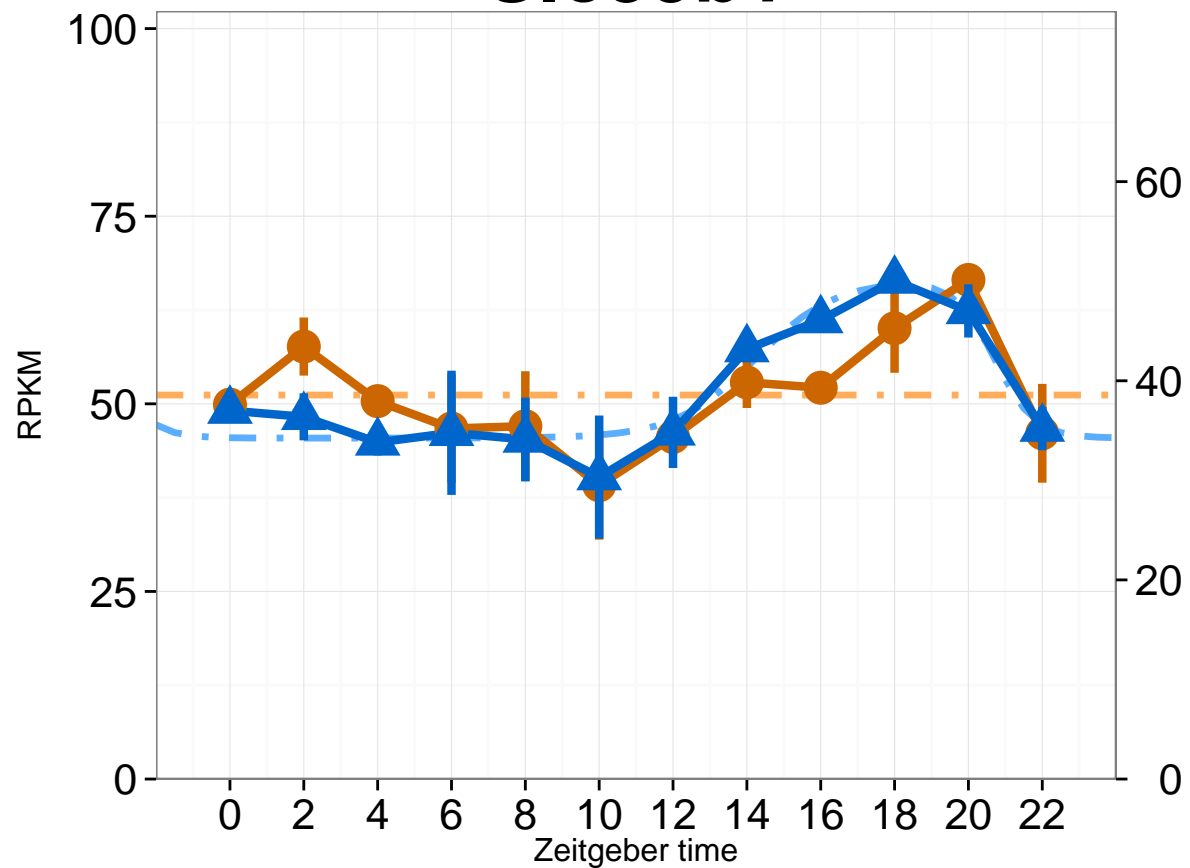

# Slc35b1

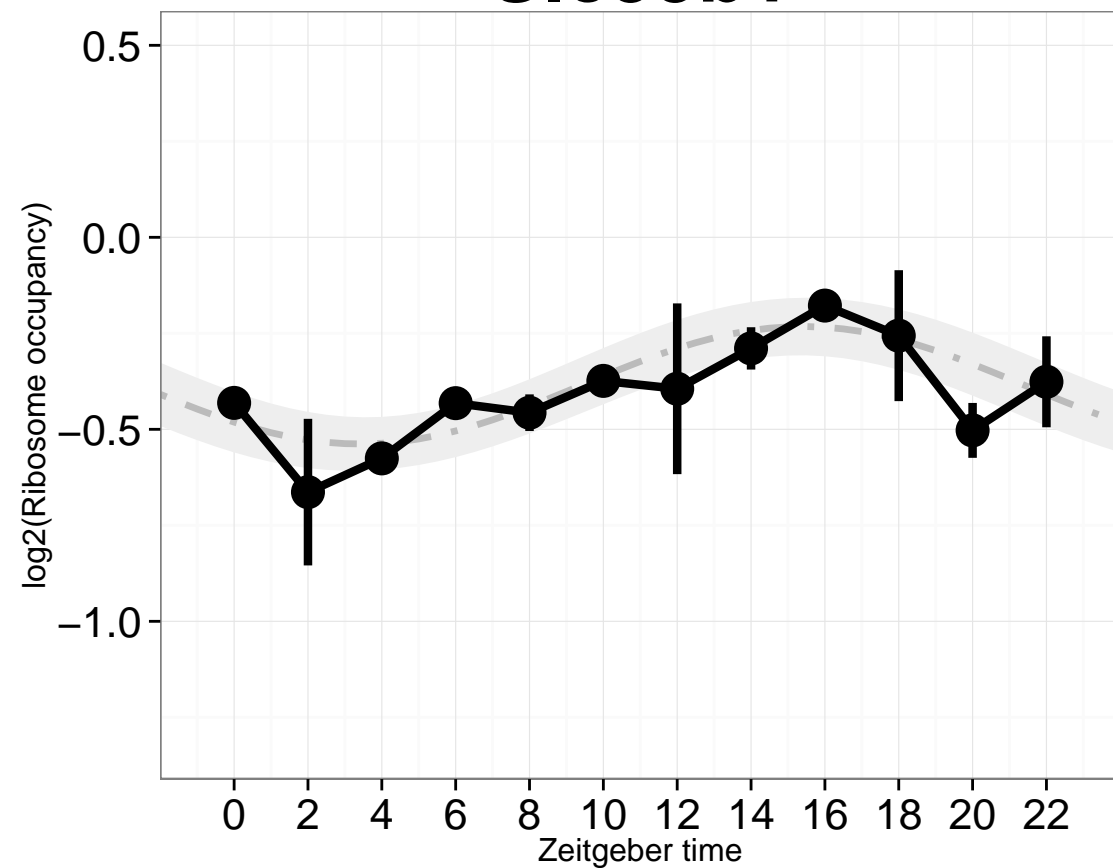

Supplement: SuppDataset_1.zip [file Slc35b1_set_A.pdf › Supplemental Dataset 1/A-mRNA_nonrhyth_translation_nonrhyth/Slc35b1_set_A.pdf]

# Slc35b2

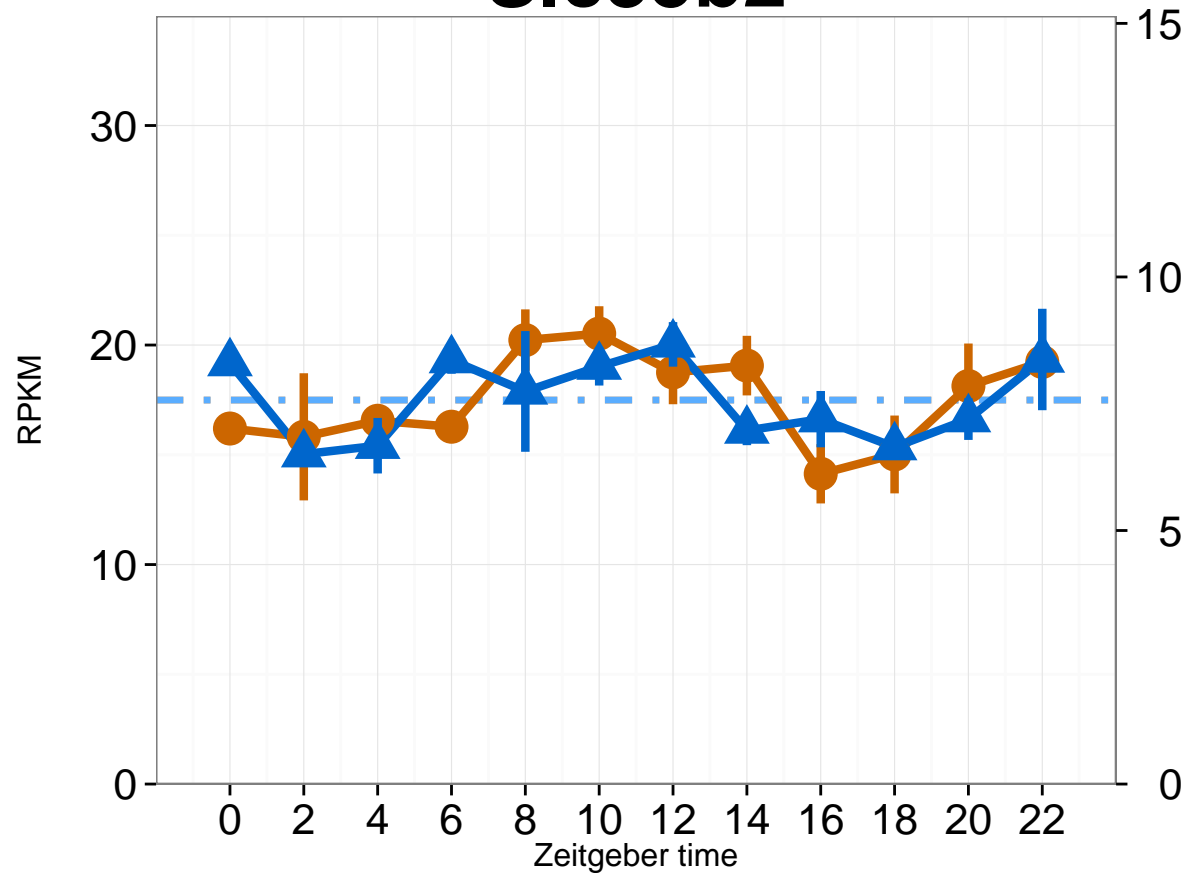

# Slc35b2

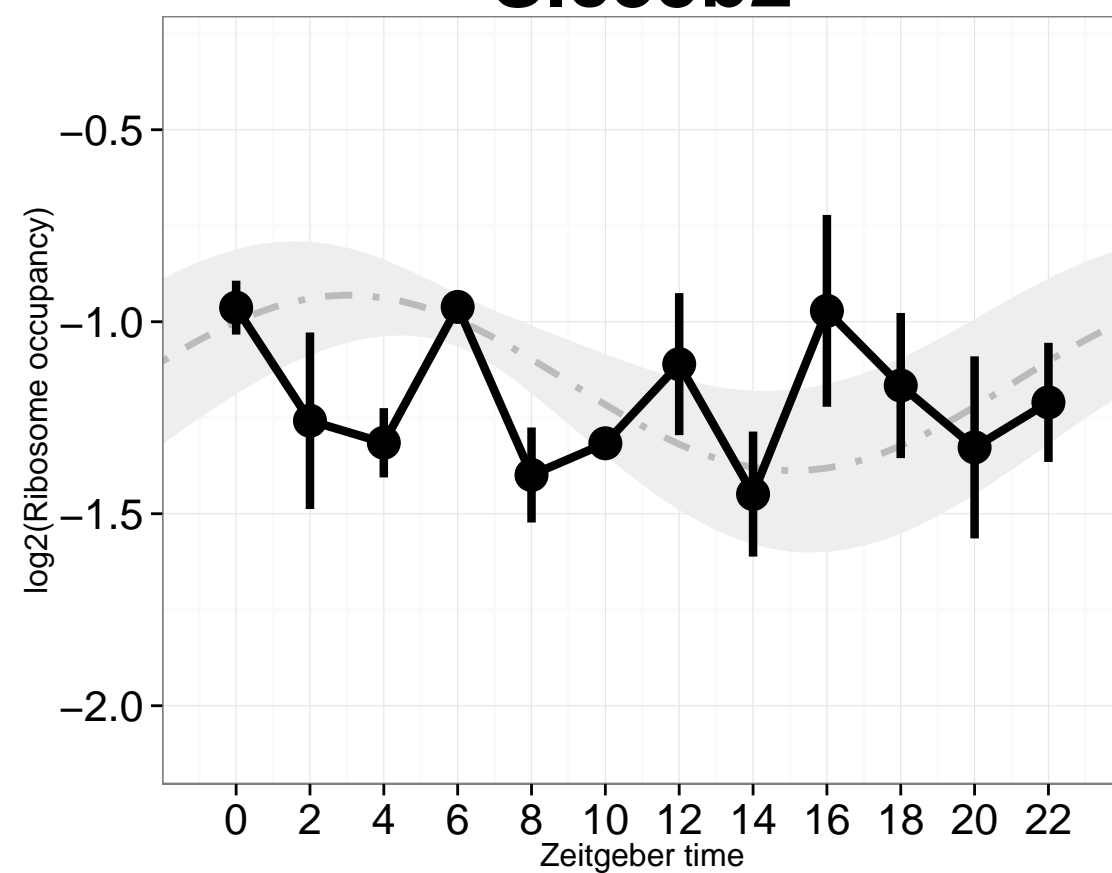

Supplement: SuppDataset_1.zip [file Slc35b2_set_A.pdf › Supplemental Dataset 1/A-mRNA_nonrhyth_translation_nonrhyth/Slc35b2_set_A.pdf]

# Slc35b3

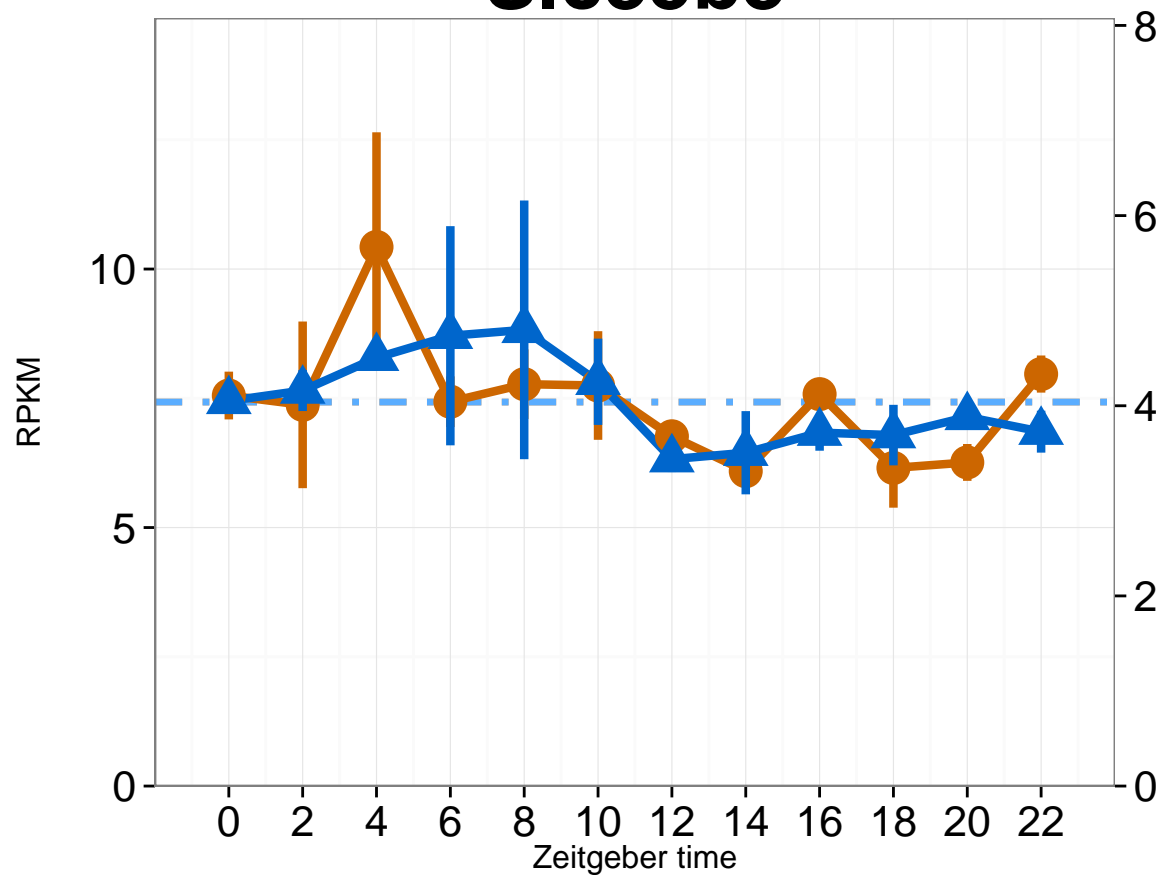

# Slc35b3

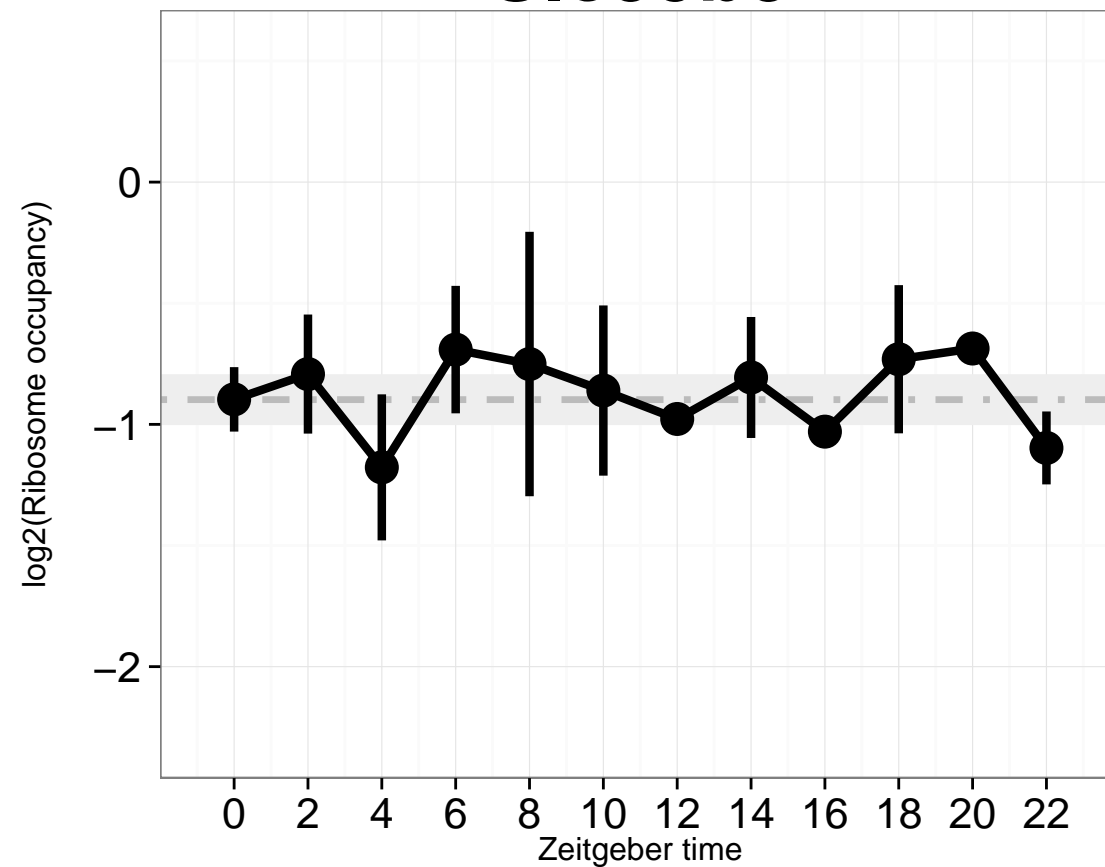

Supplement: SuppDataset_1.zip [file Slc35b3_set_A.pdf › Supplemental Dataset 1/A-mRNA_nonrhyth_translation_nonrhyth/Slc35b3_set_A.pdf]

## Slc35c2

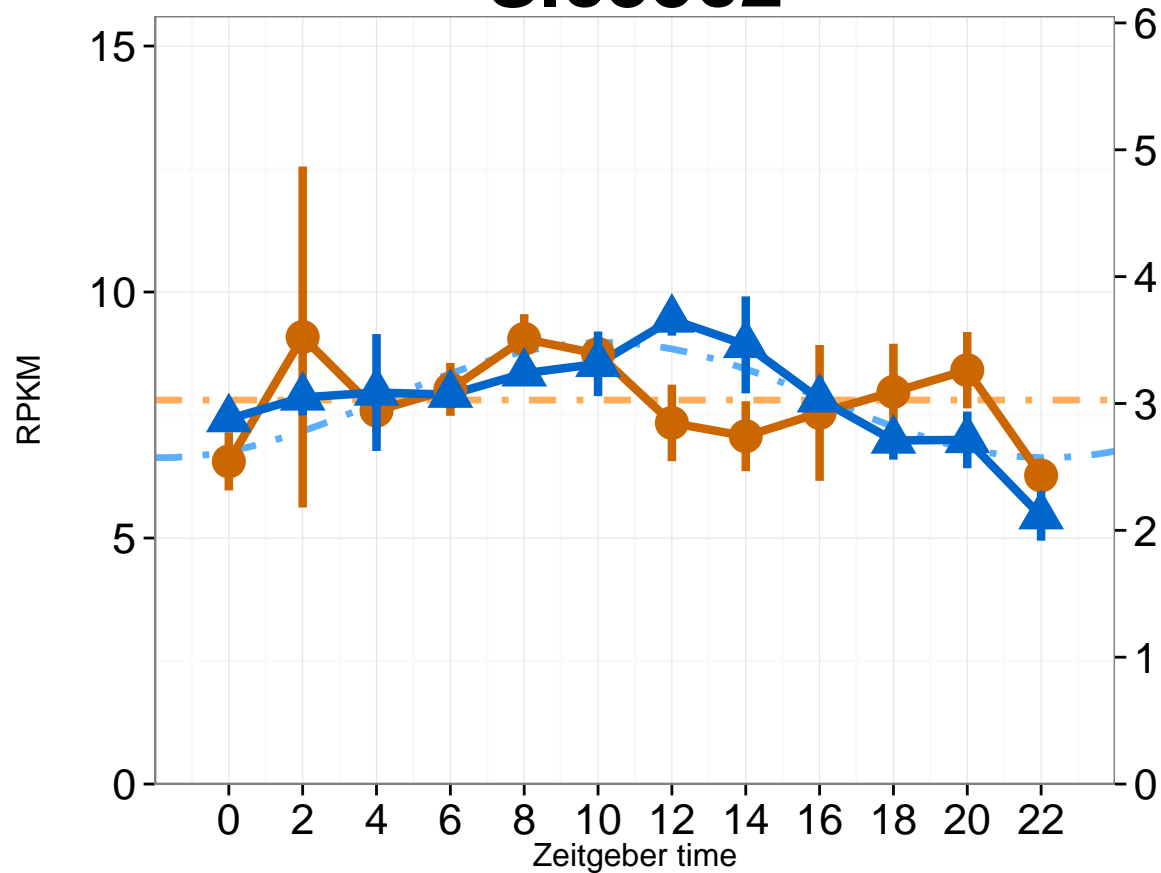

## Slc35c2

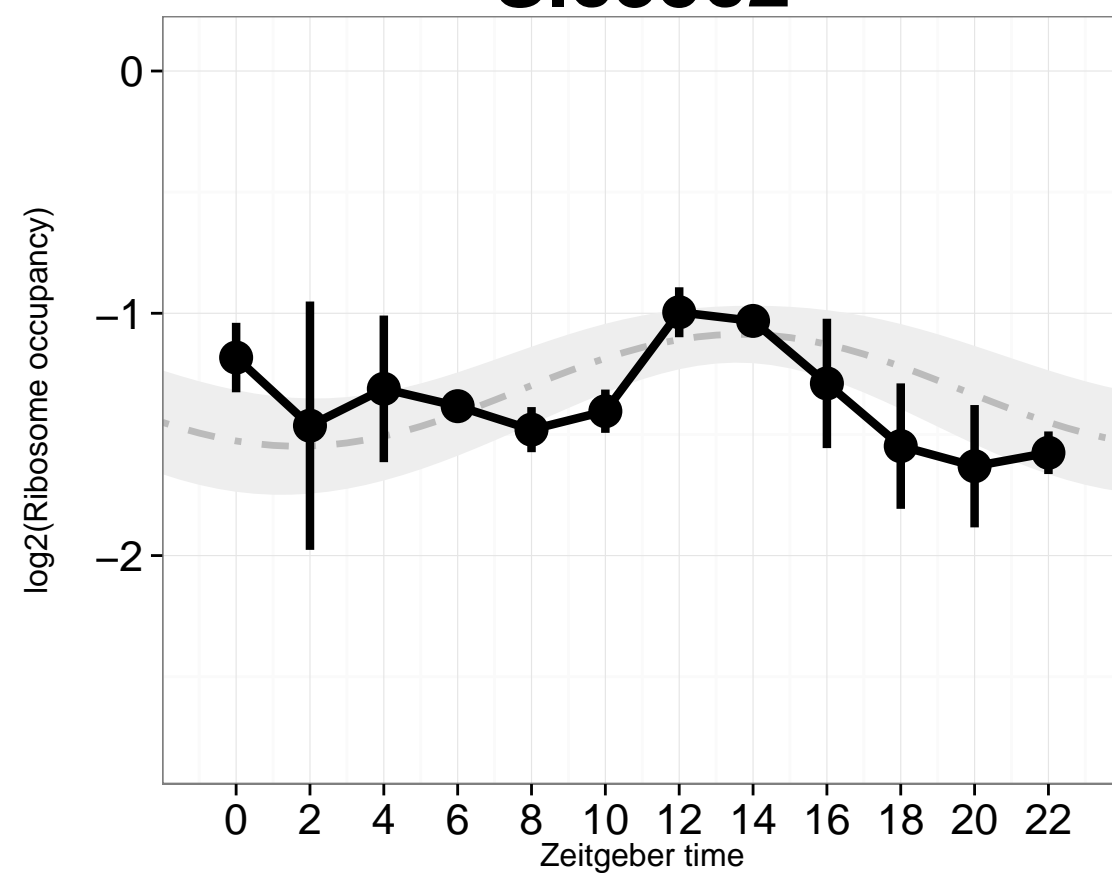

Supplement: SuppDataset_1.zip [file Slc35c2_set_A.pdf › Supplemental Dataset 1/A-mRNA_nonrhyth_translation_nonrhyth/Slc35c2_set_A.pdf]

## Slc35d2

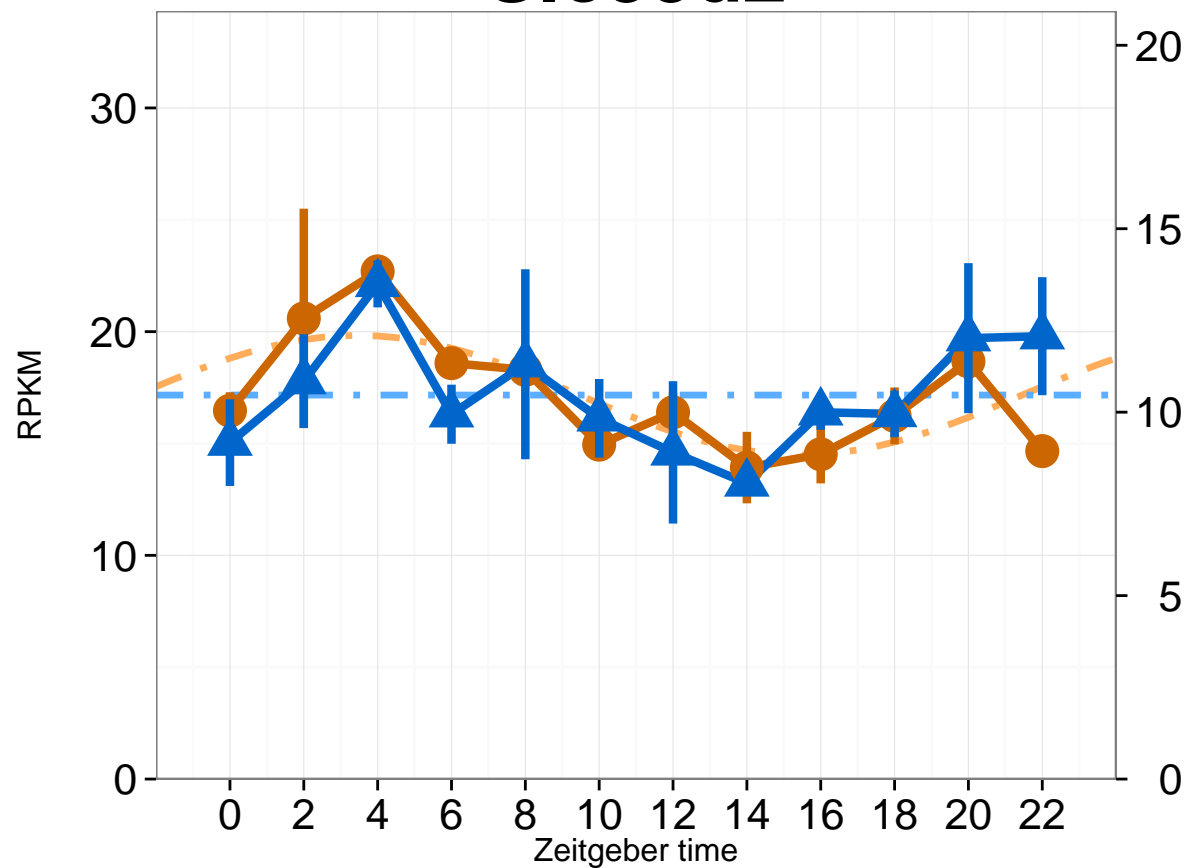

## Slc35d2

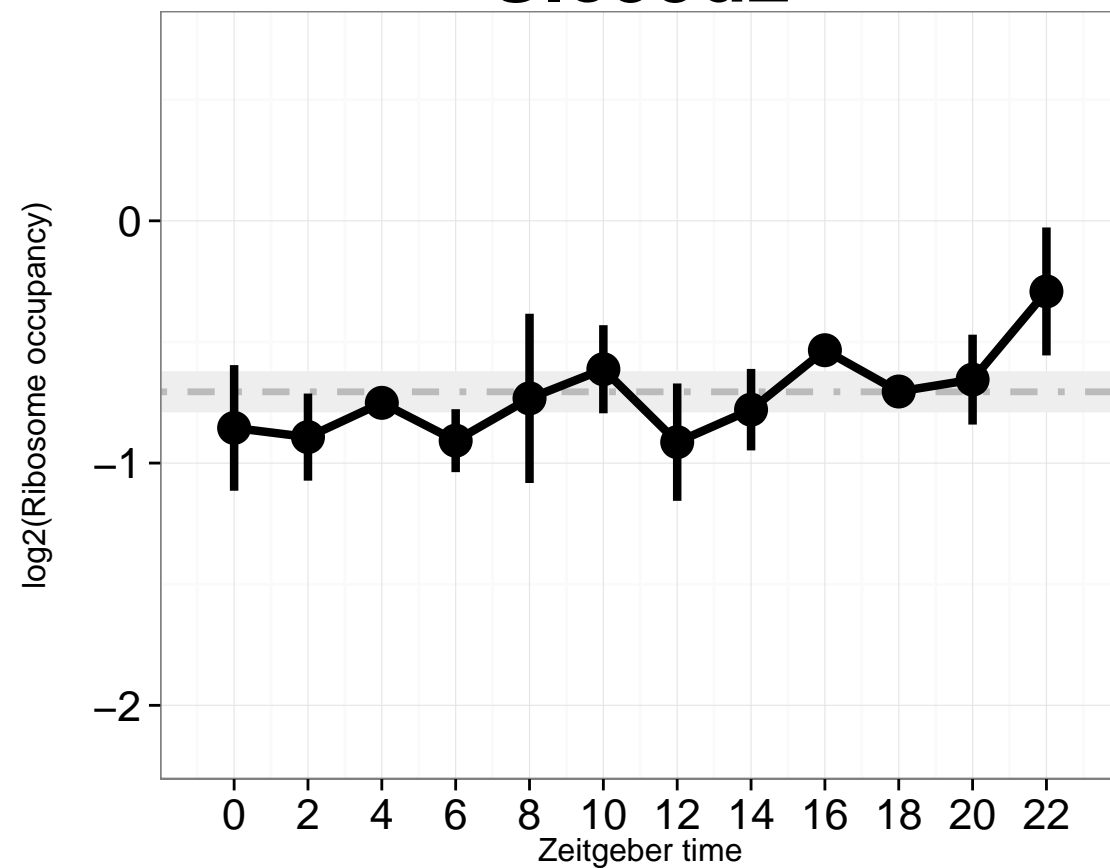

Supplement: SuppDataset_1.zip [file Slc35d2_set_A.pdf › Supplemental Dataset 1/A-mRNA_nonrhyth_translation_nonrhyth/Slc35d2_set_A.pdf]

# Slc35e1

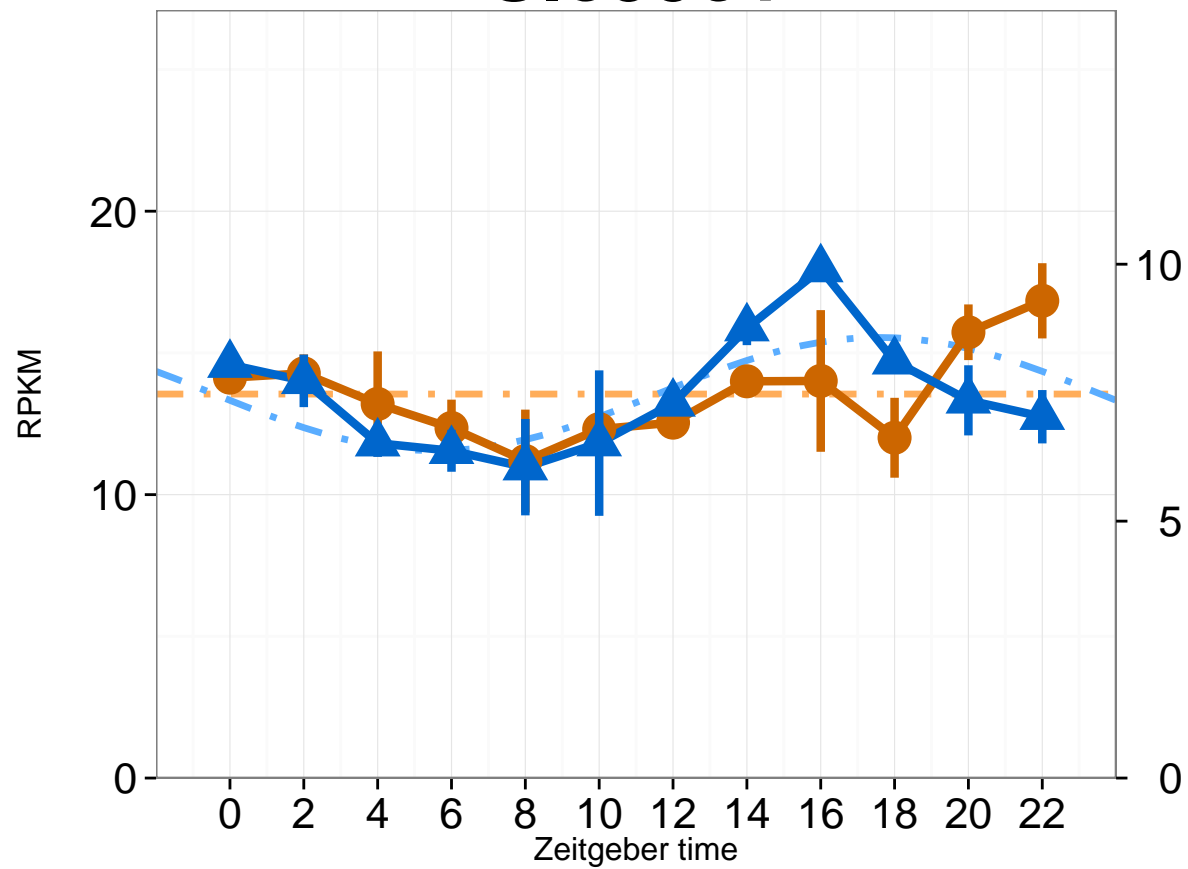

# Slc35e1

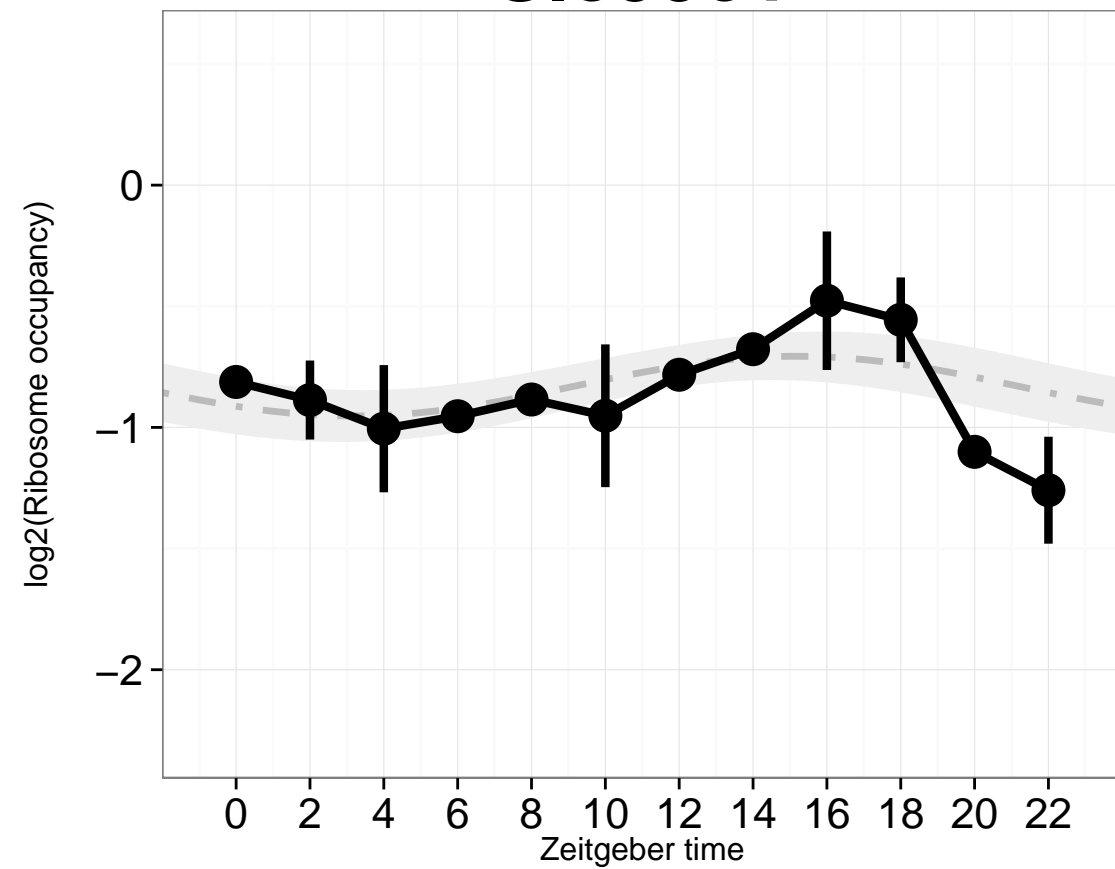

Supplement: SuppDataset_1.zip [file Slc35e1_set_A.pdf › Supplemental Dataset 1/A-mRNA_nonrhyth_translation_nonrhyth/Slc35e1_set_A.pdf]

## Slc35e2

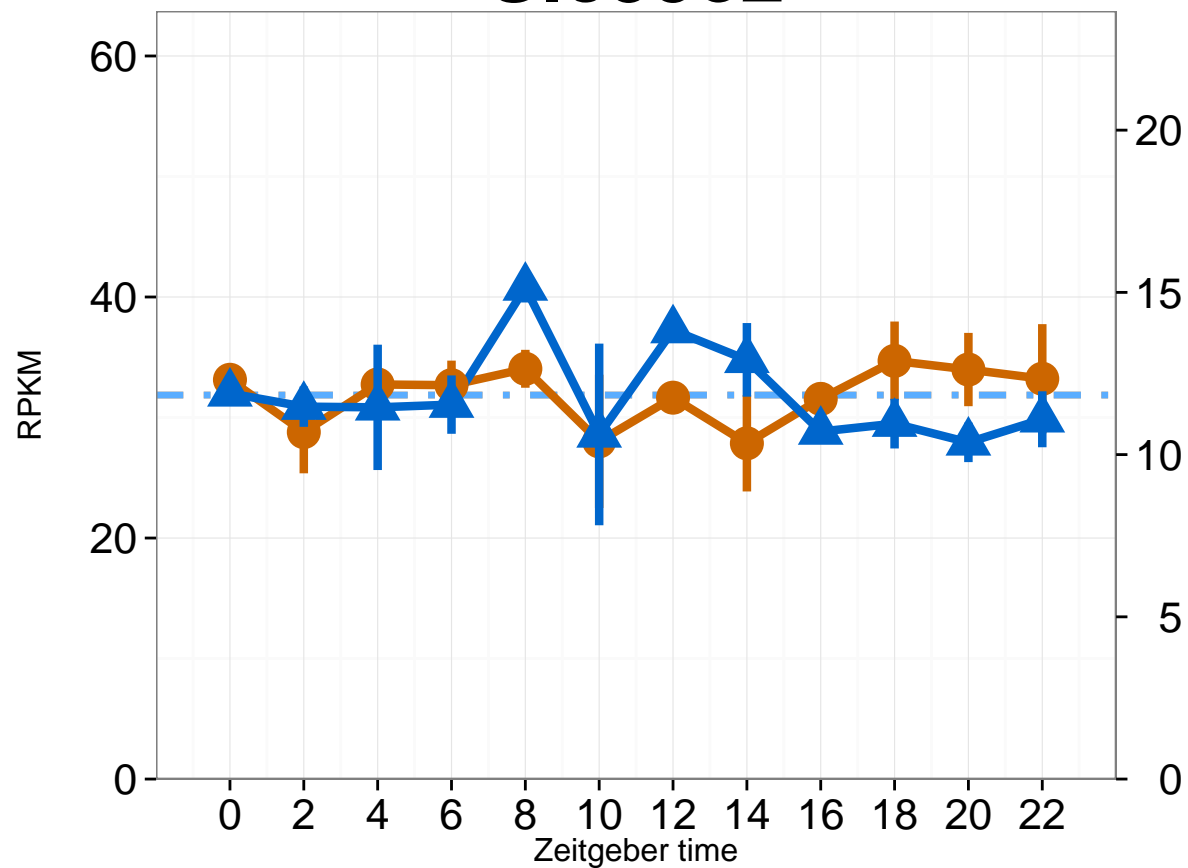

## Slc35e2

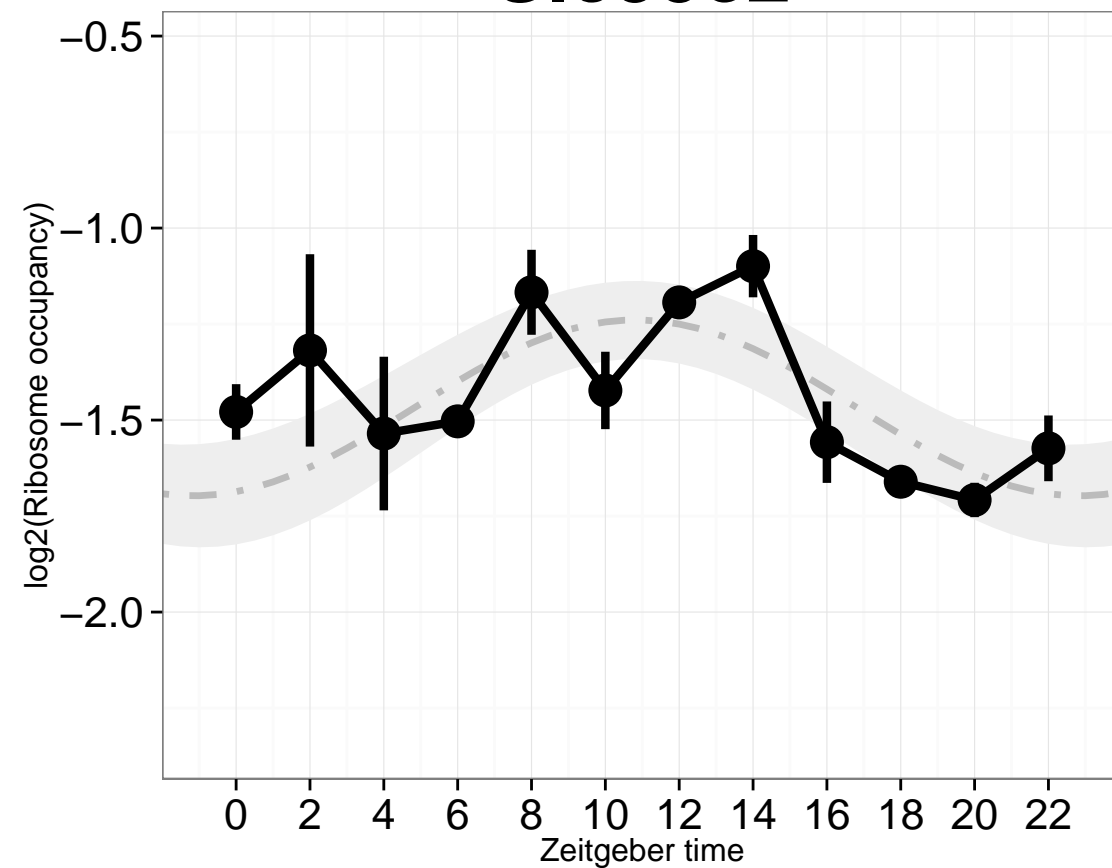

Supplement: SuppDataset_1.zip [file Slc35e2_set_A.pdf › Supplemental Dataset 1/A-mRNA_nonrhyth_translation_nonrhyth/Slc35e2_set_A.pdf]

## Slc35e3

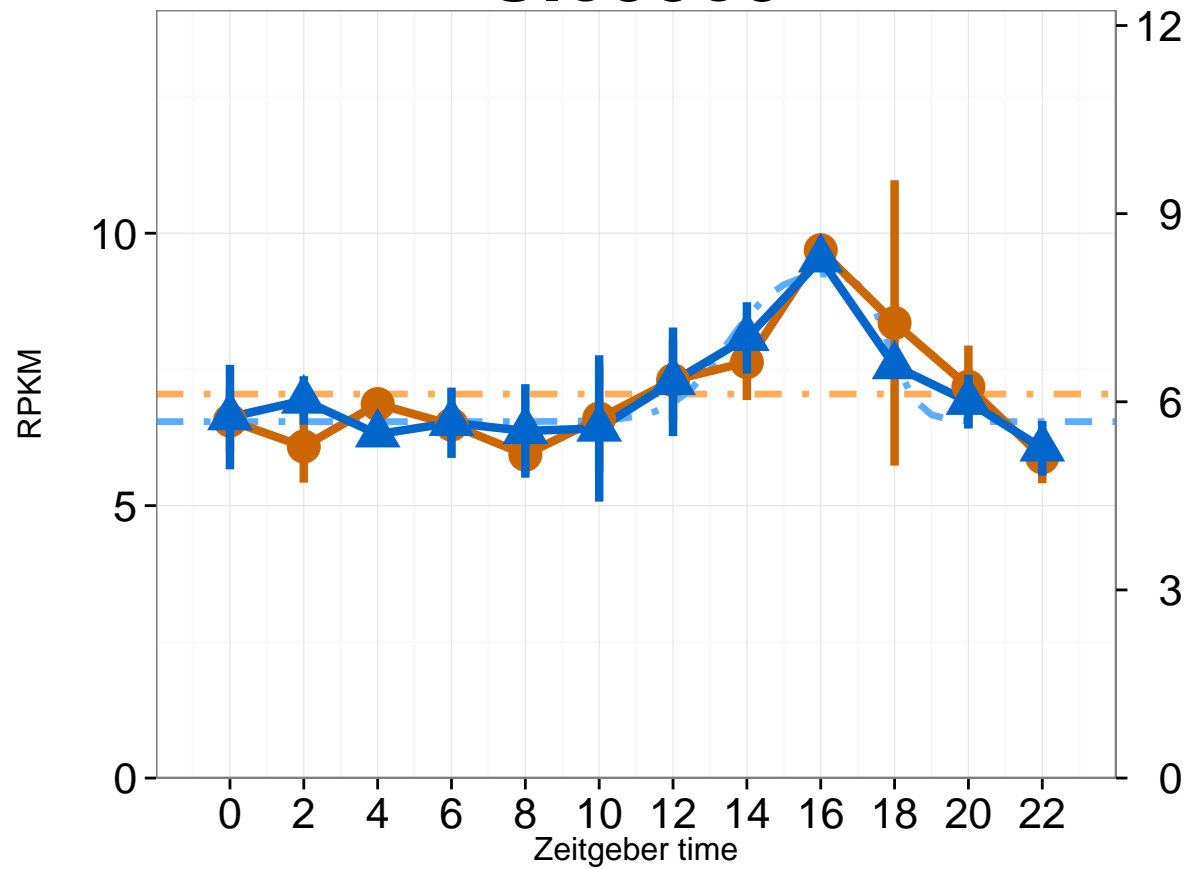

## Slc35e3

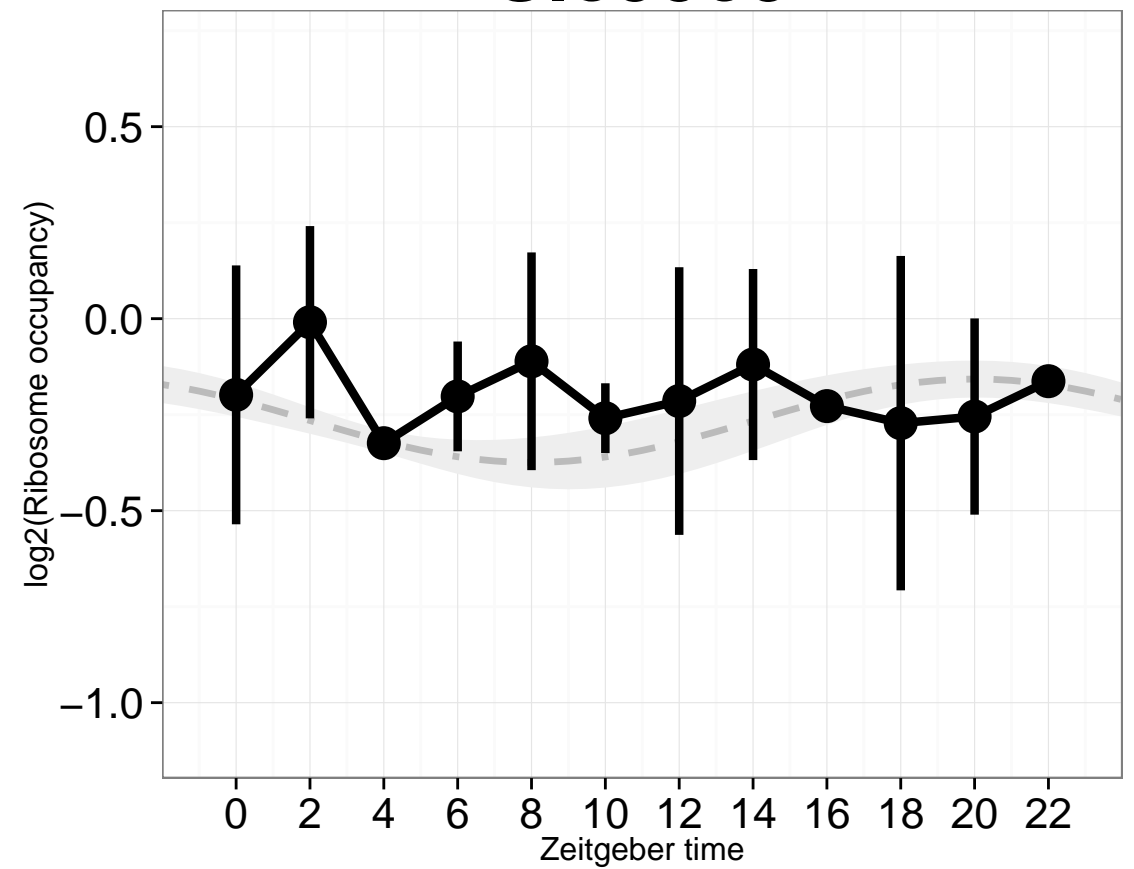

Supplement: SuppDataset_1.zip [file Slc35e3_set_A.pdf › Supplemental Dataset 1/A-mRNA_nonrhyth_translation_nonrhyth/Slc35e3_set_A.pdf]

## Slc35f5

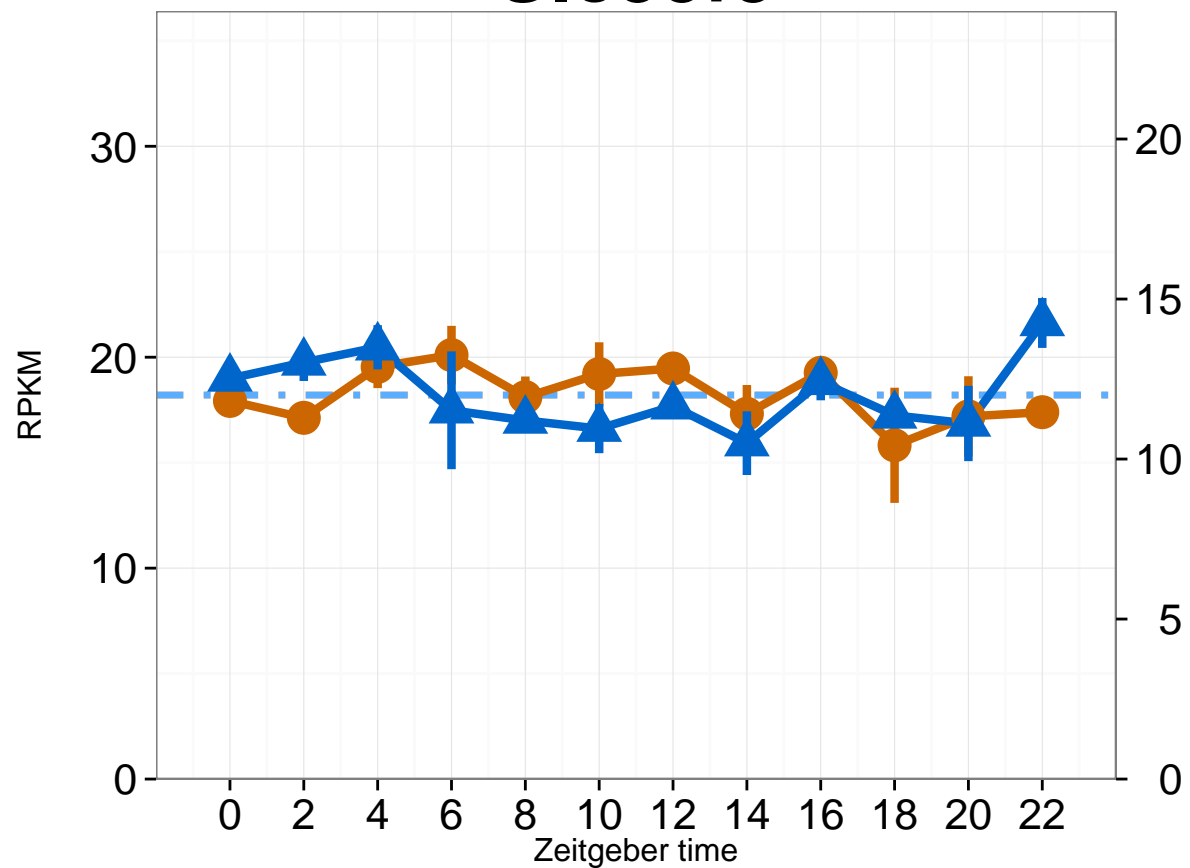

## Slc35f5

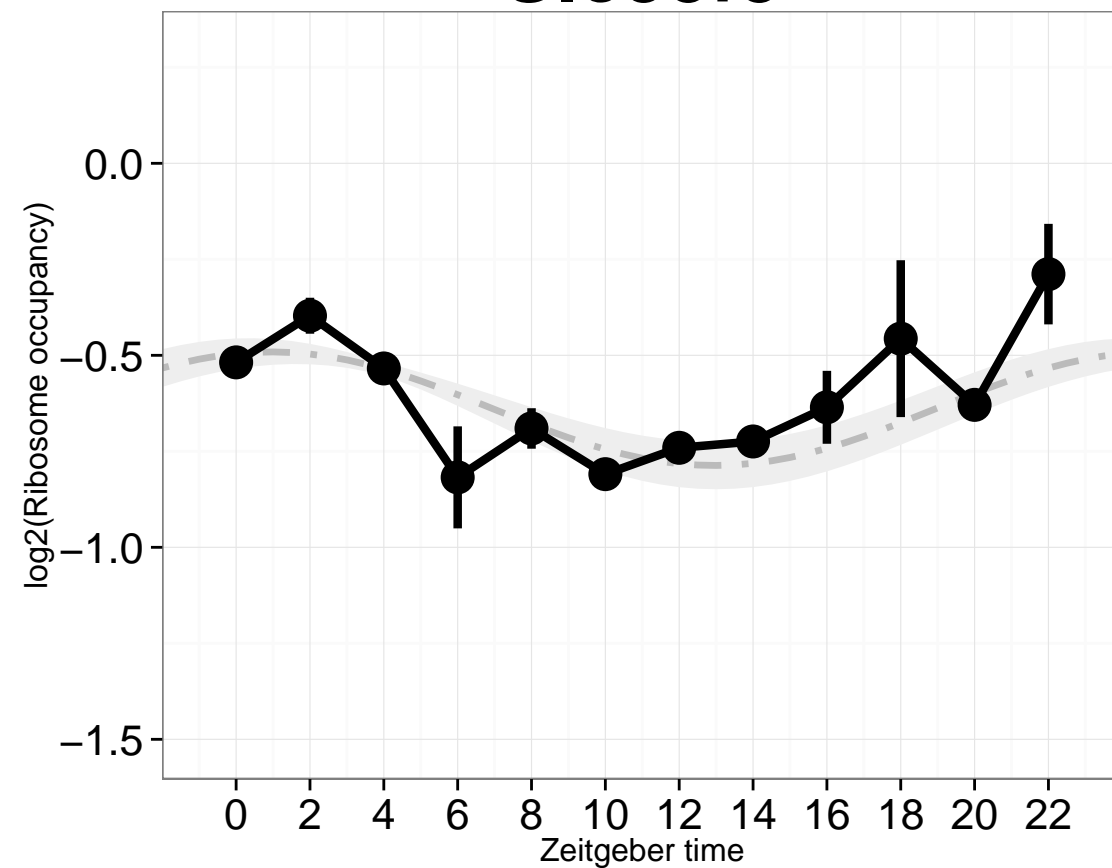

Supplement: SuppDataset_1.zip [file Slc35f5_set_A.pdf › Supplemental Dataset 1/A-mRNA_nonrhyth_translation_nonrhyth/Slc35f5_set_A.pdf]

# Slc35f6

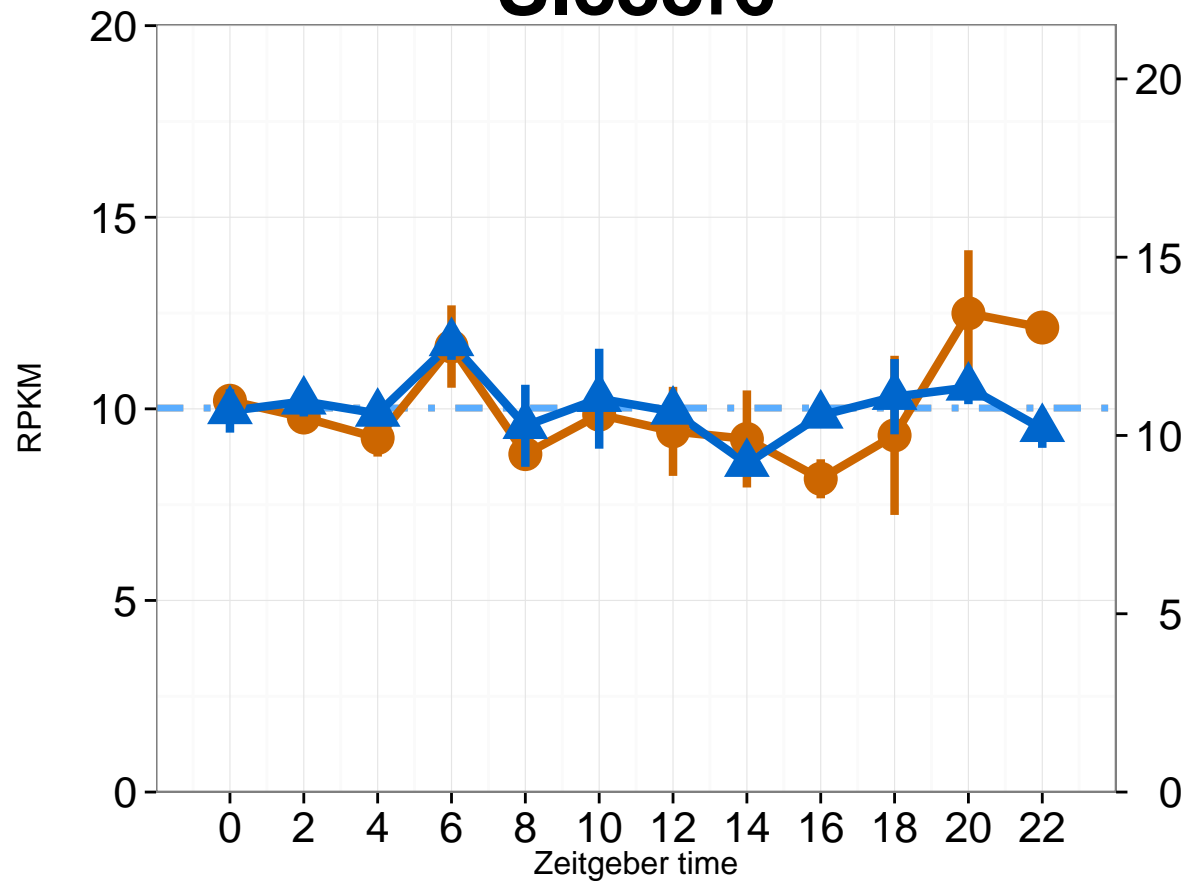

# Slc35f6

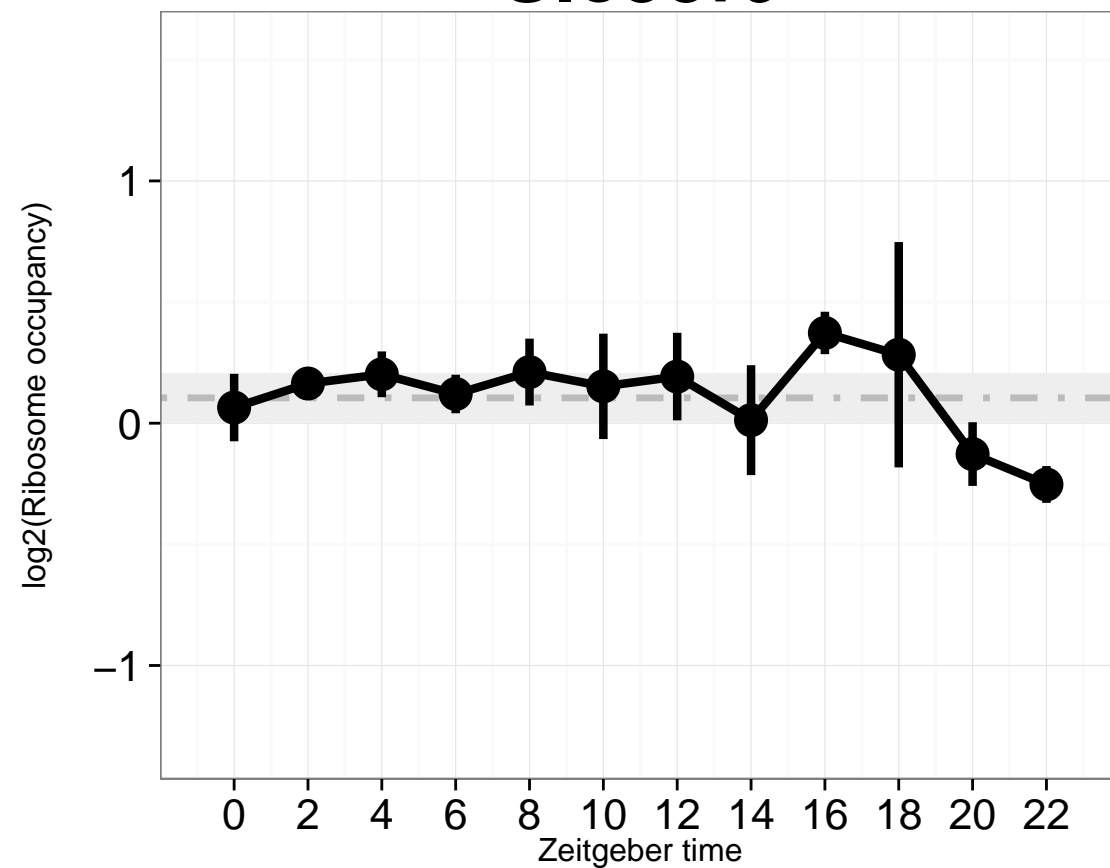

Supplement: SuppDataset_1.zip [file Slc35f6_set_A.pdf › Supplemental Dataset 1/A-mRNA_nonrhyth_translation_nonrhyth/Slc35f6_set_A.pdf]

# Slc36a1

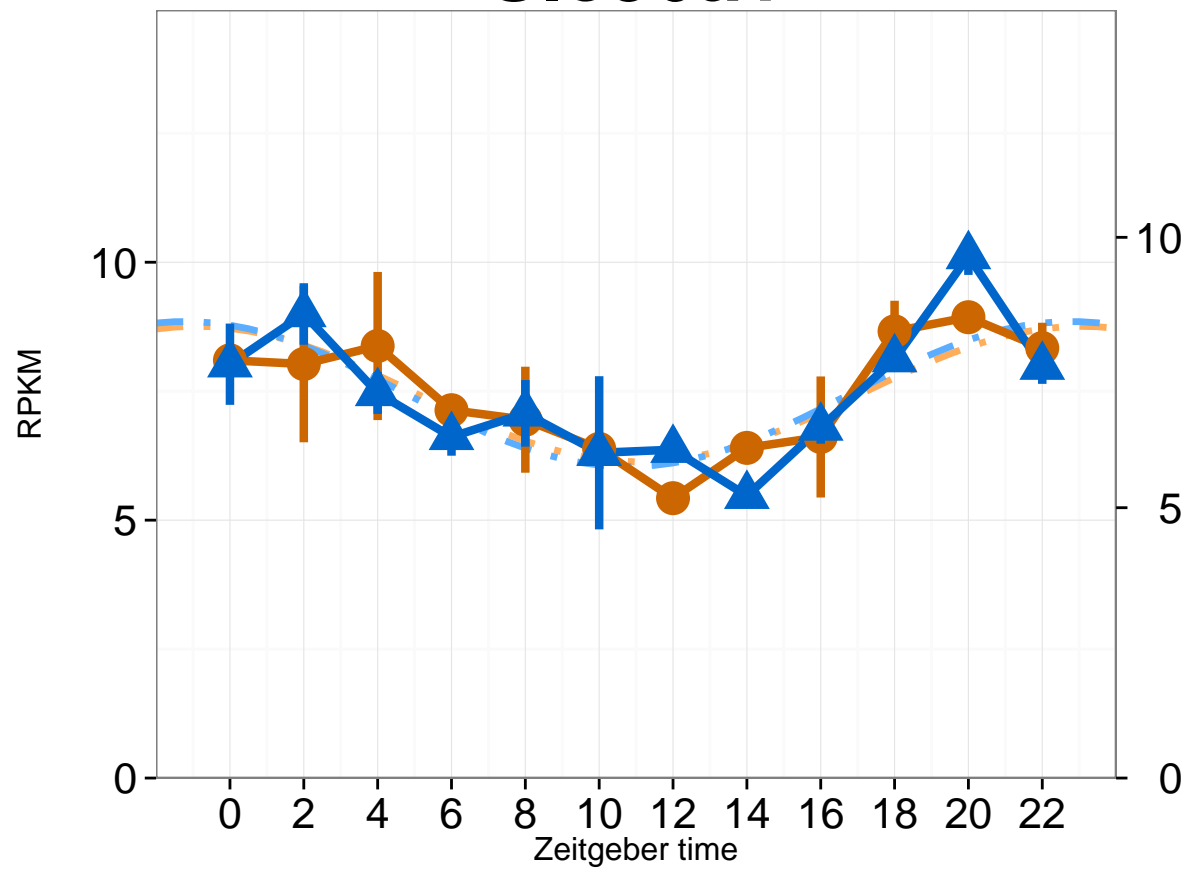

# Slc36a1

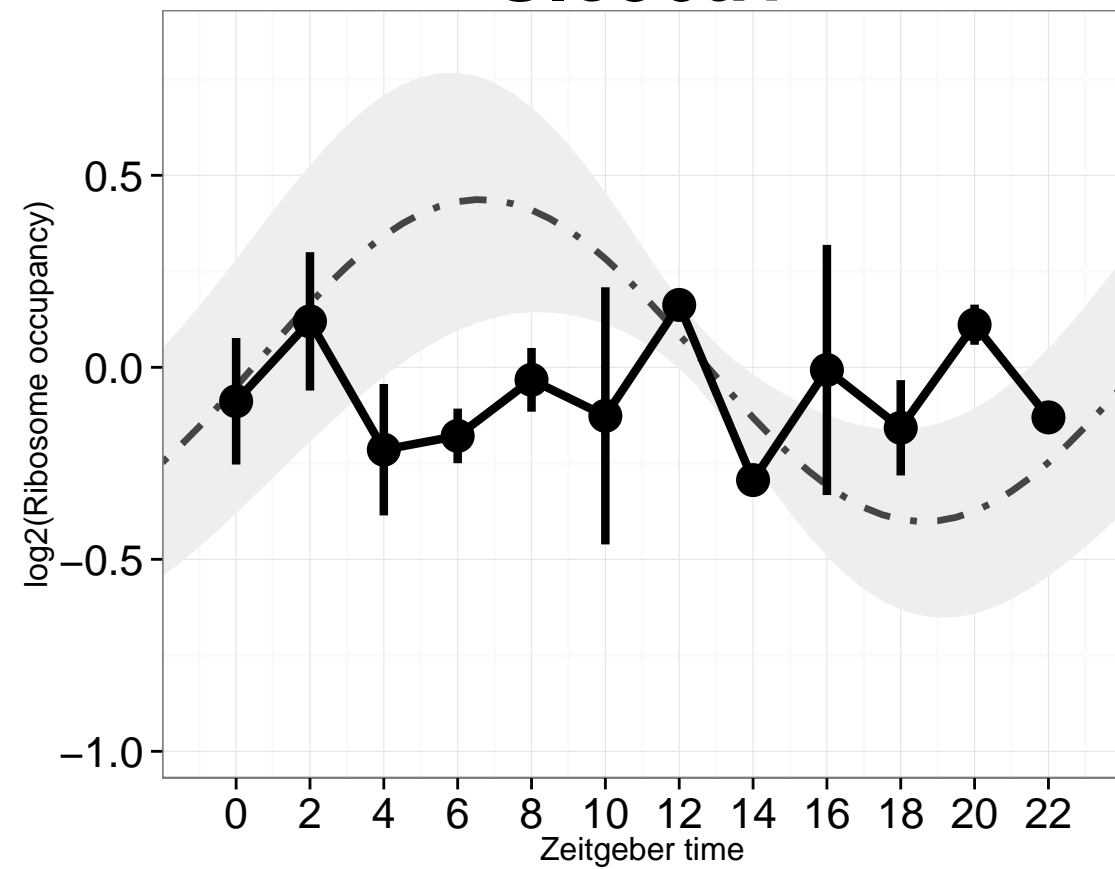

Supplement: SuppDataset_1.zip [file Slc36a1_set_A.pdf › Supplemental Dataset 1/A-mRNA_nonrhyth_translation_nonrhyth/Slc36a1_set_A.pdf]

# Slc36a4

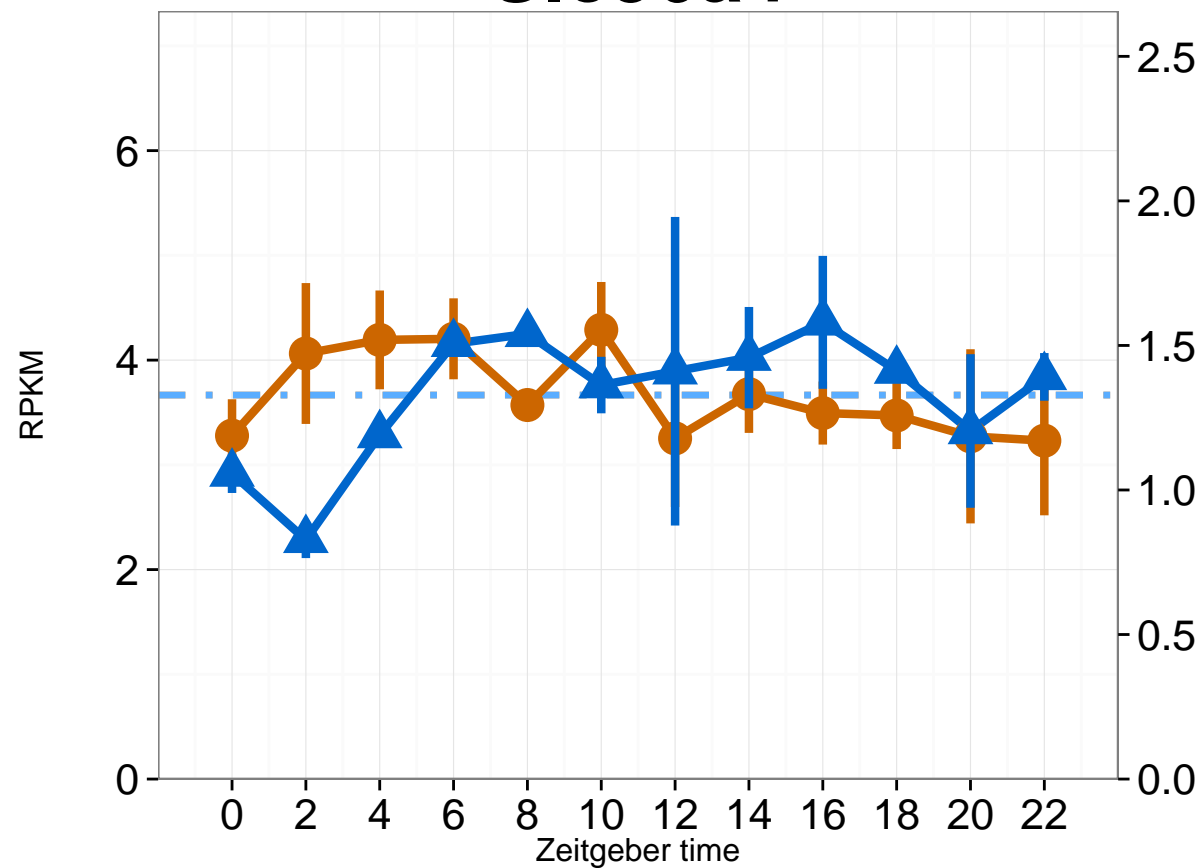

# Slc36a4

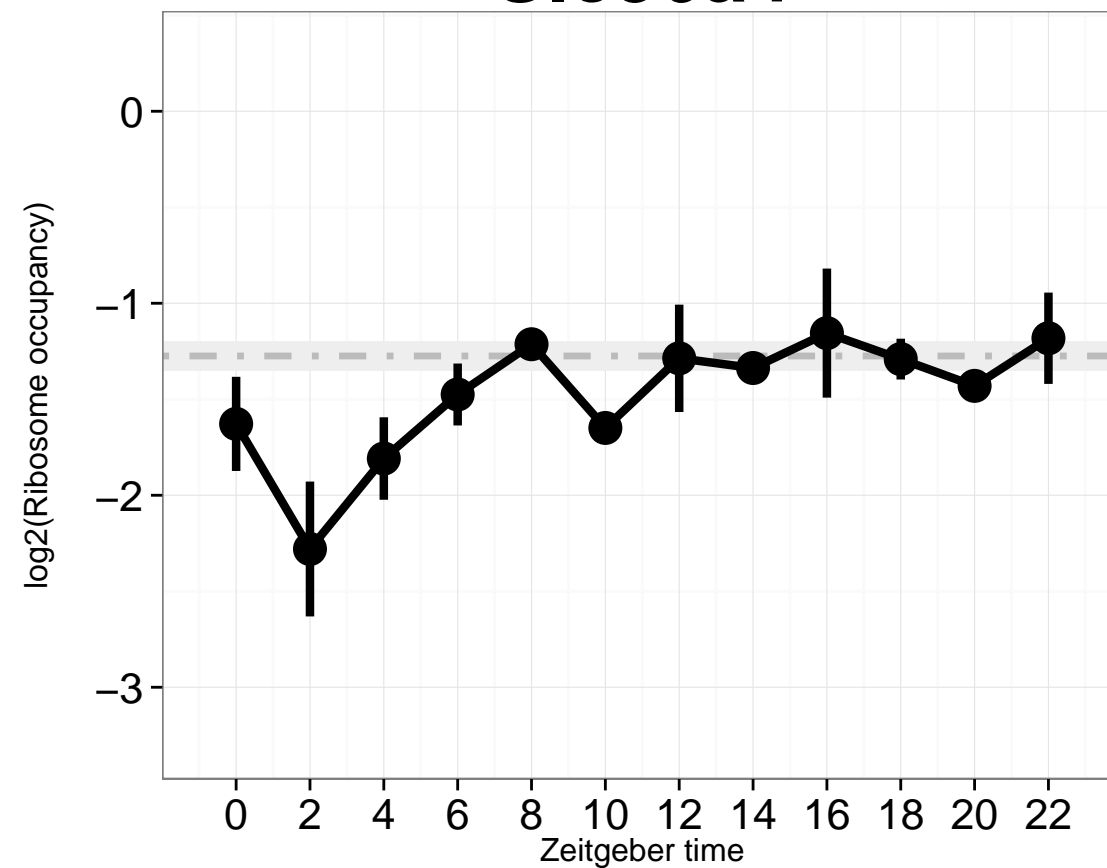

Supplement: SuppDataset_1.zip [file Slc36a4_set_A.pdf › Supplemental Dataset 1/A-mRNA_nonrhyth_translation_nonrhyth/Slc36a4_set_A.pdf]

## Slc37a1

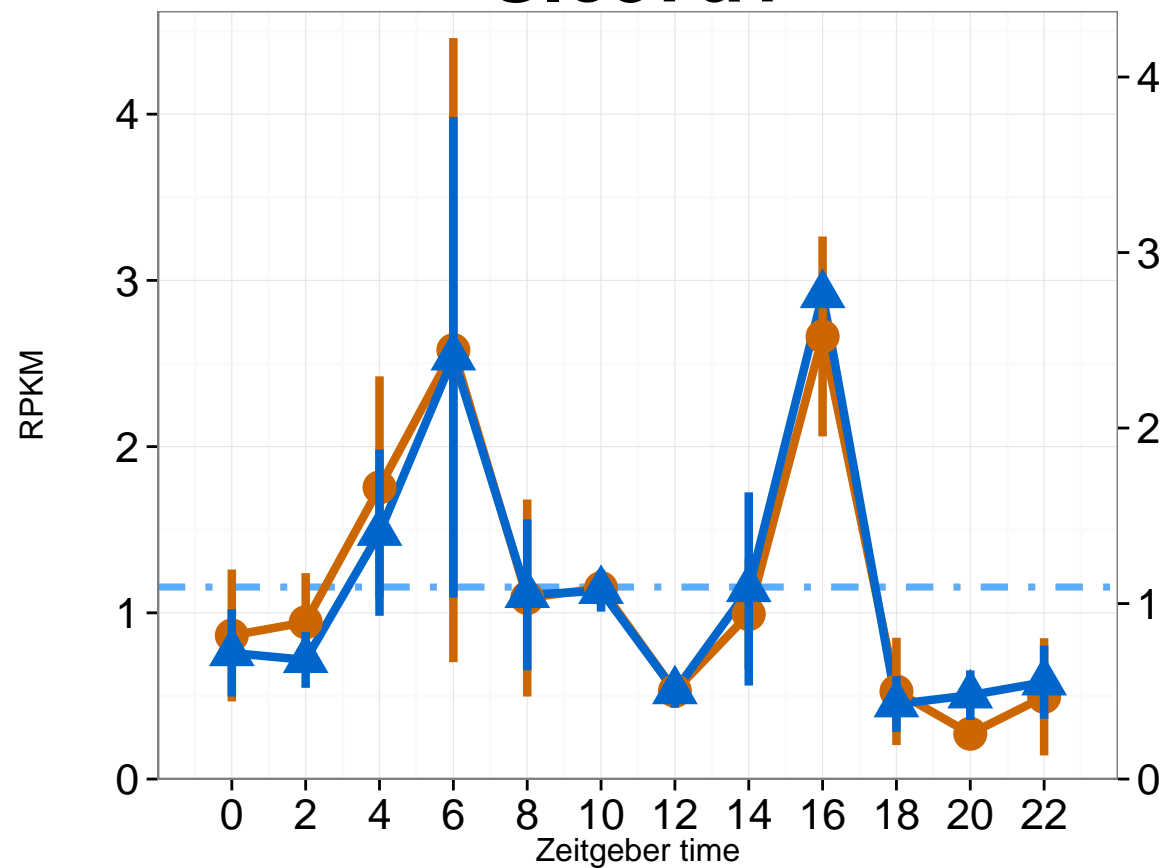

## Slc37a1

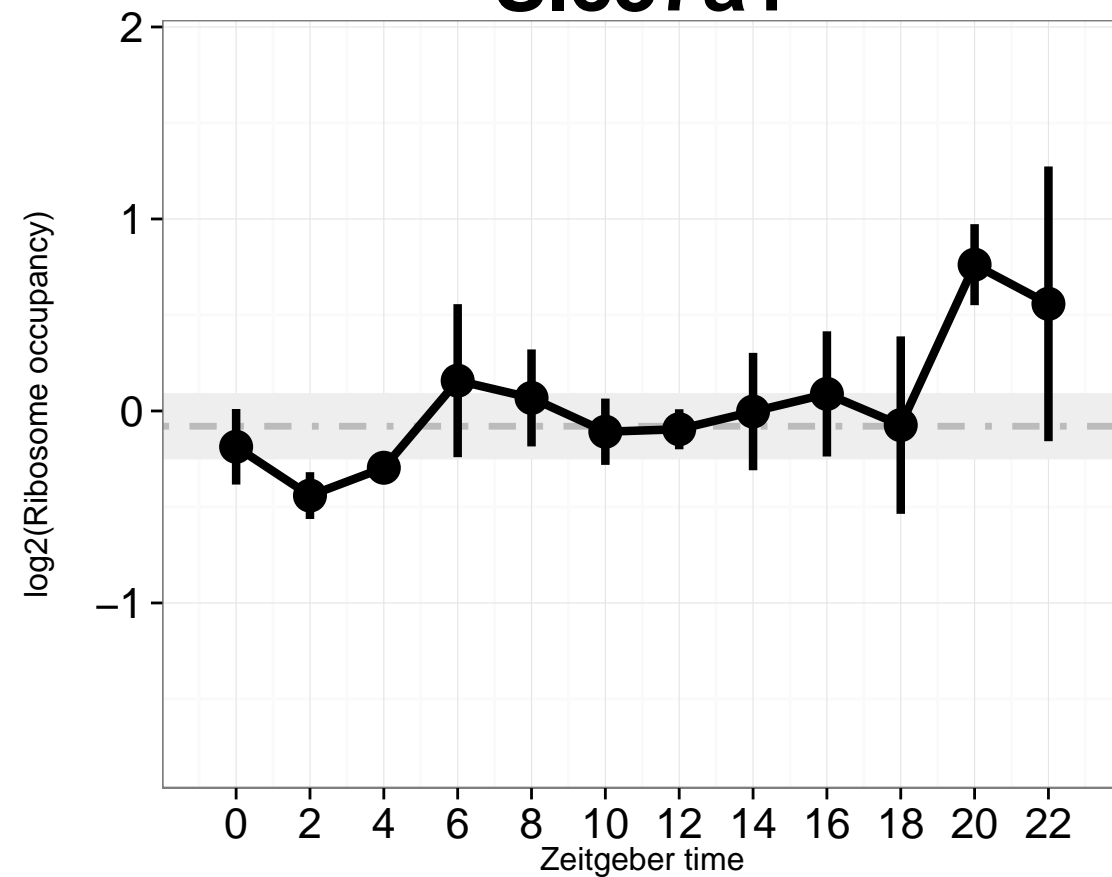

Supplement: SuppDataset_1.zip [file Slc37a1_set_A.pdf › Supplemental Dataset 1/A-mRNA_nonrhyth_translation_nonrhyth/Slc37a1_set_A.pdf]

# Slc37a3

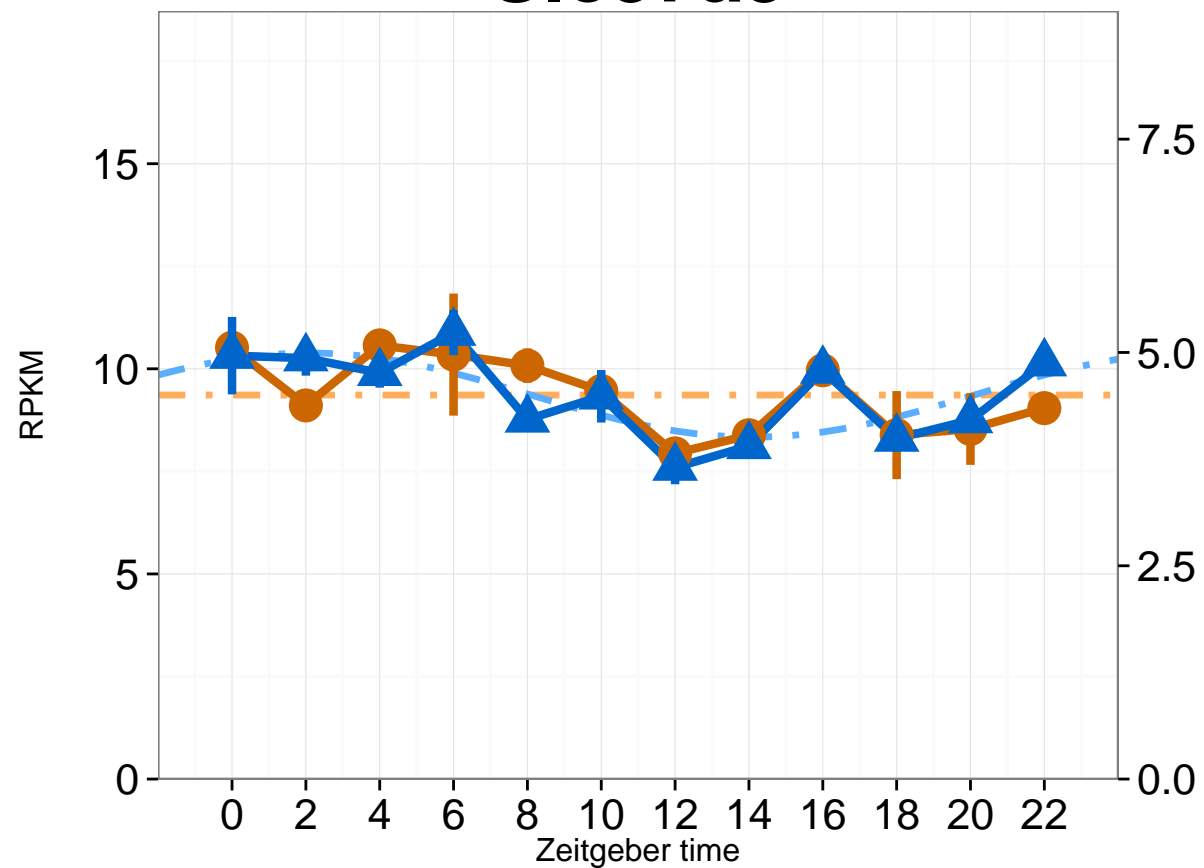

# Slc37a3

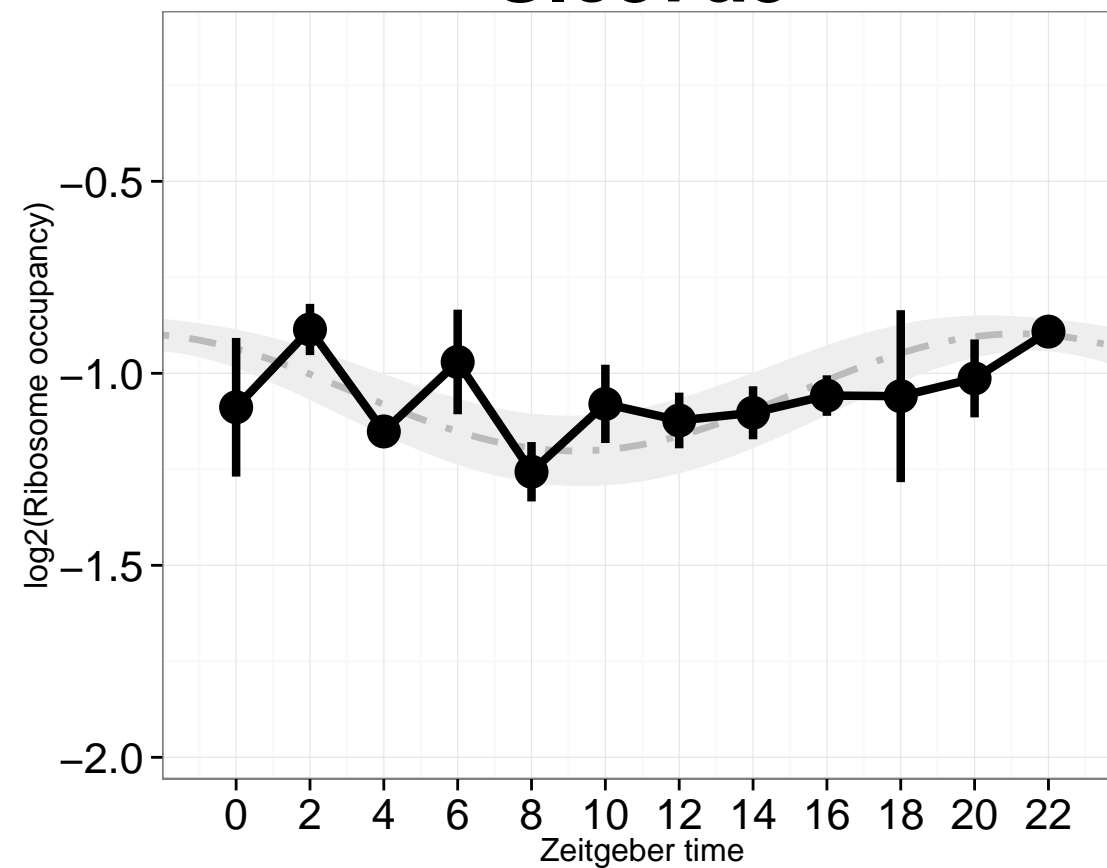

Supplement: SuppDataset_1.zip [file Slc37a3_set_A.pdf › Supplemental Dataset 1/A-mRNA_nonrhyth_translation_nonrhyth/Slc37a3_set_A.pdf]

# Slc38a10

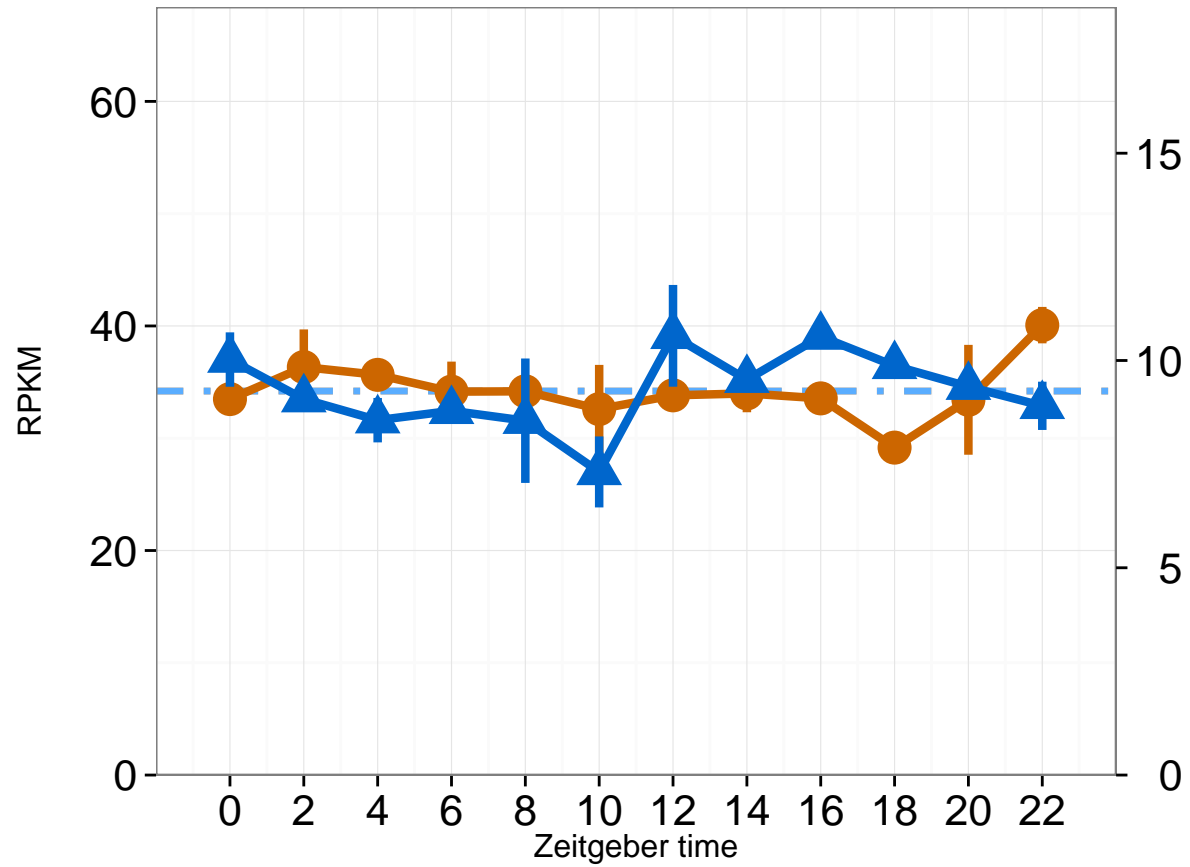

# Slc38a10

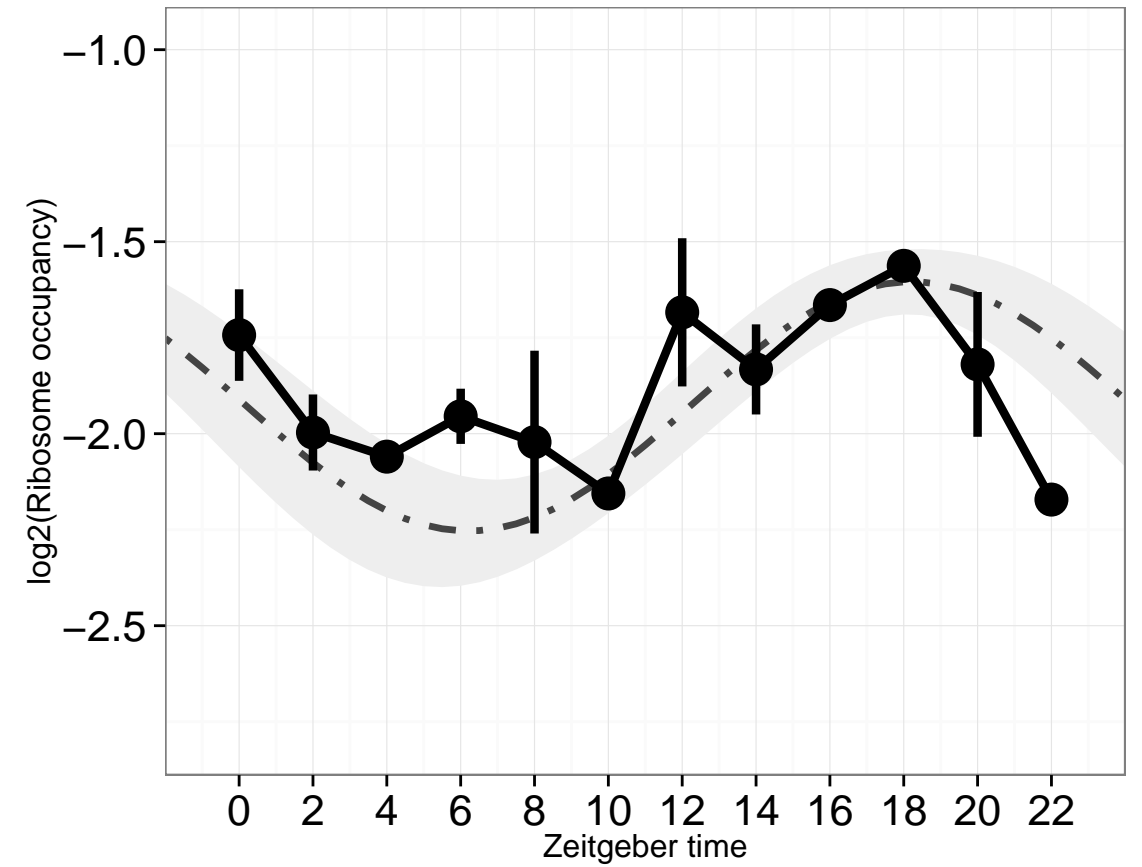

Supplement: SuppDataset_1.zip [file Slc38a10_set_A.pdf › Supplemental Dataset 1/A-mRNA_nonrhyth_translation_nonrhyth/Slc38a10_set_A.pdf]

**Slc38a1**

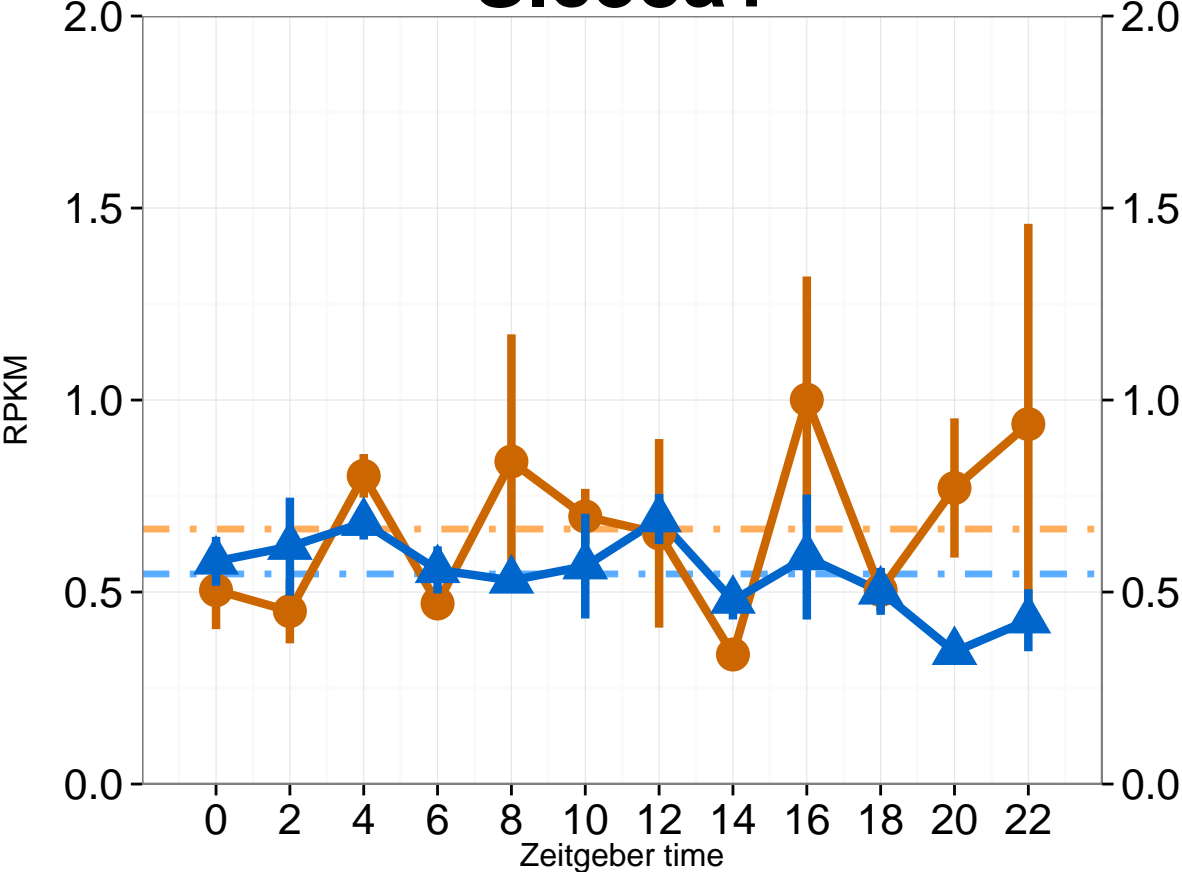

**Slc38a1**

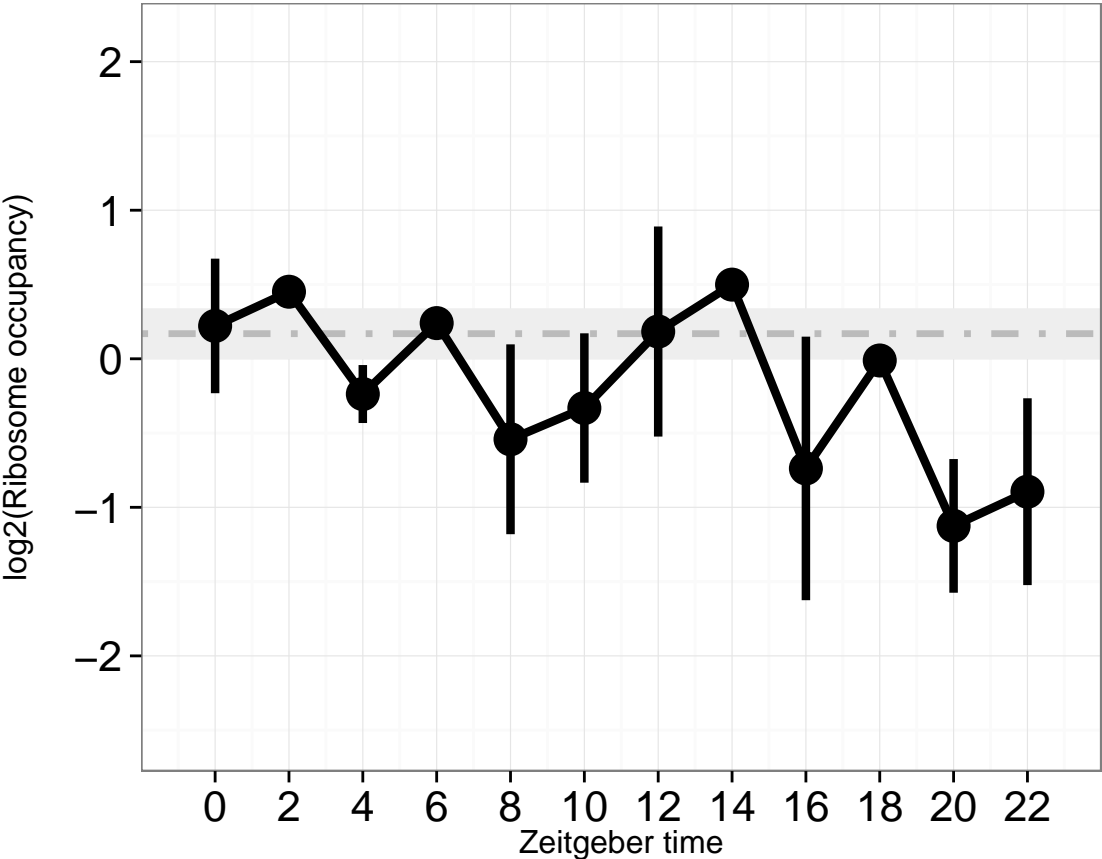

Supplement: SuppDataset_1.zip [file Slc38a1_set_A.pdf › Supplemental Dataset 1/A-mRNA_nonrhyth_translation_nonrhyth/Slc38a1_set_A.pdf]

# Slc38a6

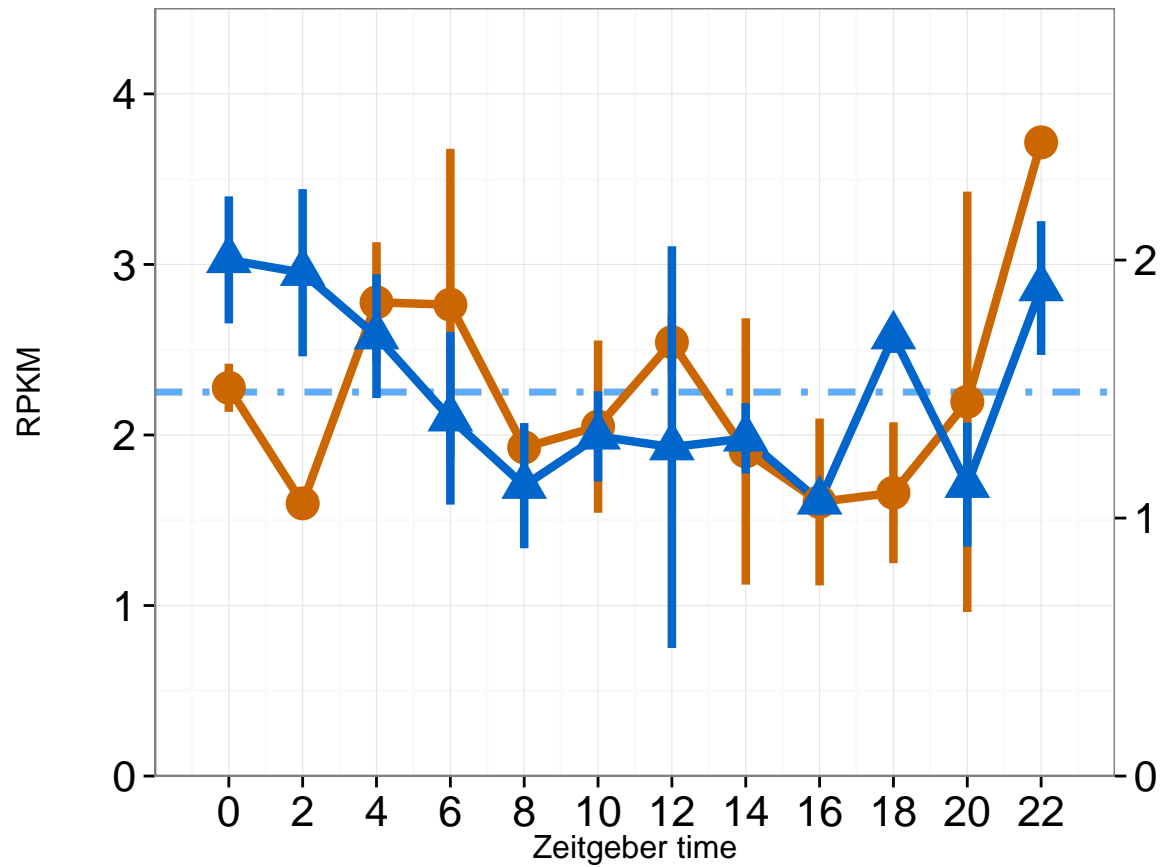

# Slc38a6

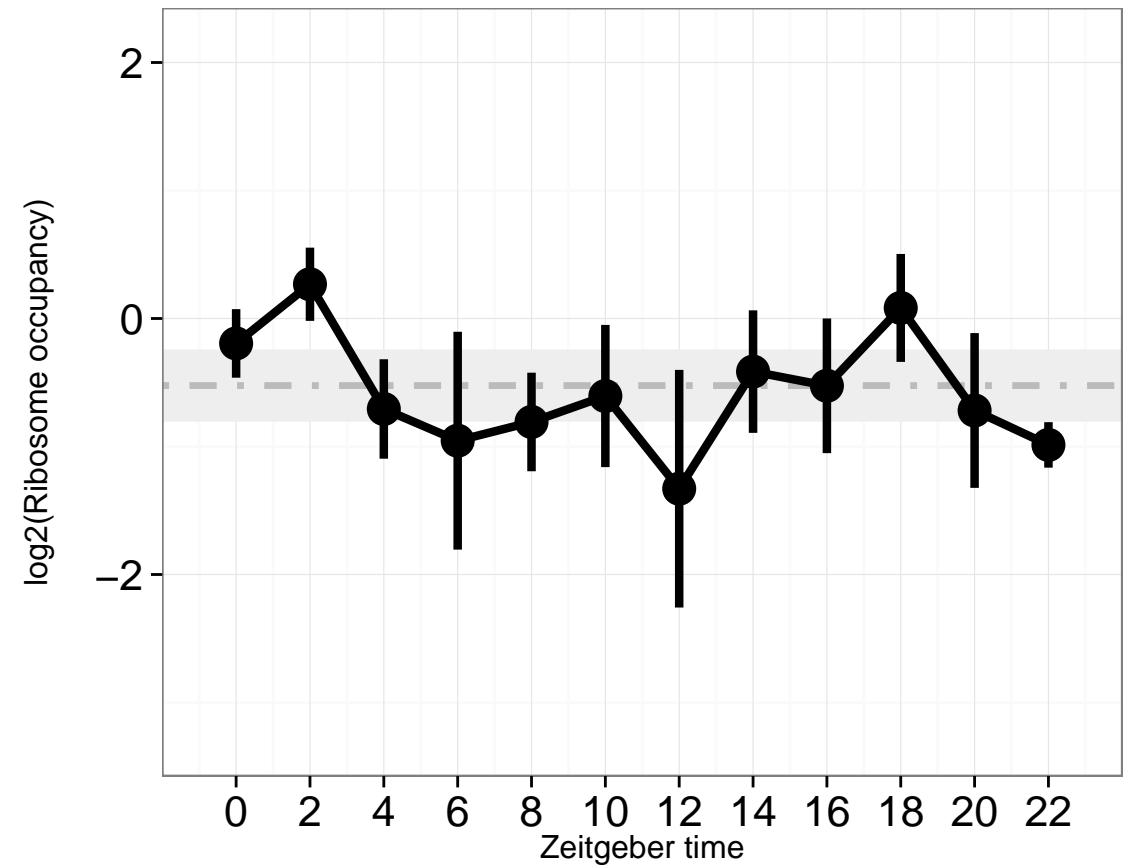

Supplement: SuppDataset_1.zip [file Slc38a6_set_A.pdf › Supplemental Dataset 1/A-mRNA_nonrhyth_translation_nonrhyth/Slc38a6_set_A.pdf]

## Slc38a7

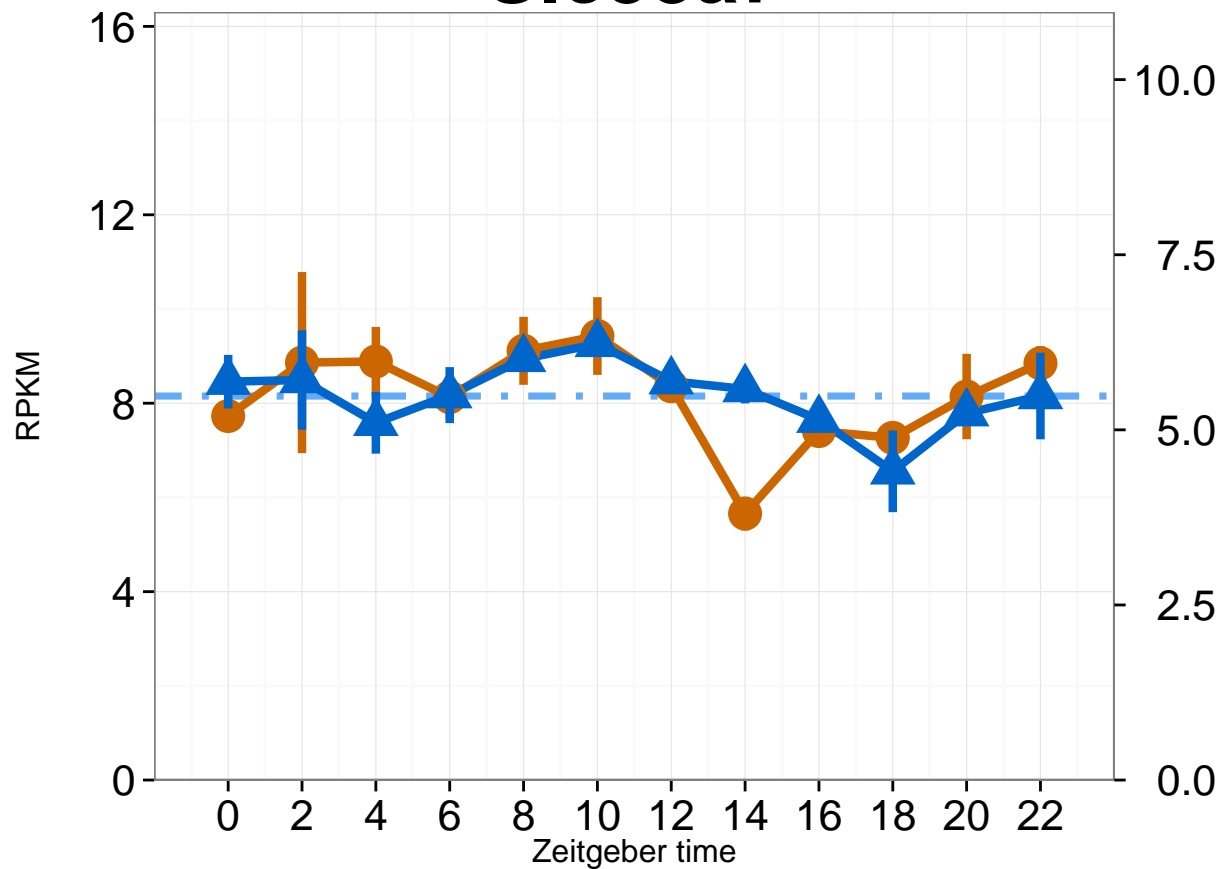

## Slc38a7

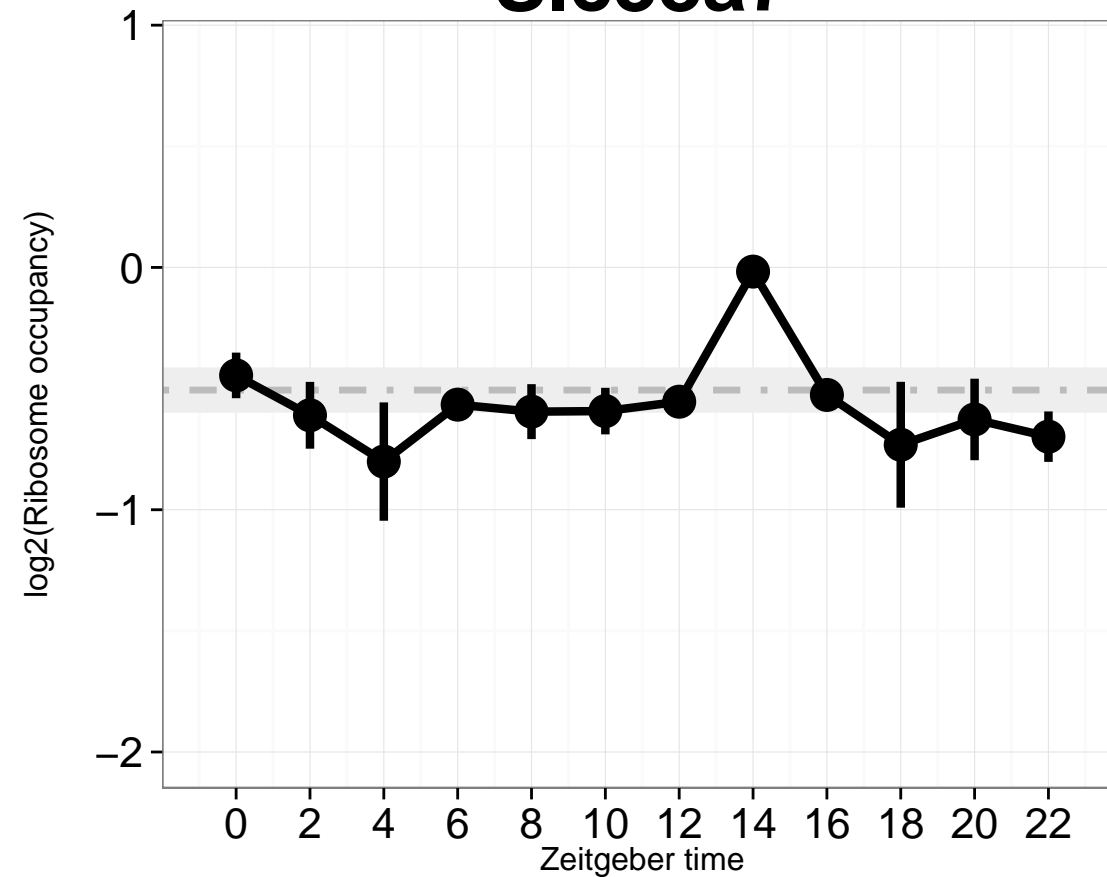

Supplement: SuppDataset_1.zip [file Slc38a7_set_A.pdf › Supplemental Dataset 1/A-mRNA_nonrhyth_translation_nonrhyth/Slc38a7_set_A.pdf]

## Slc38a9

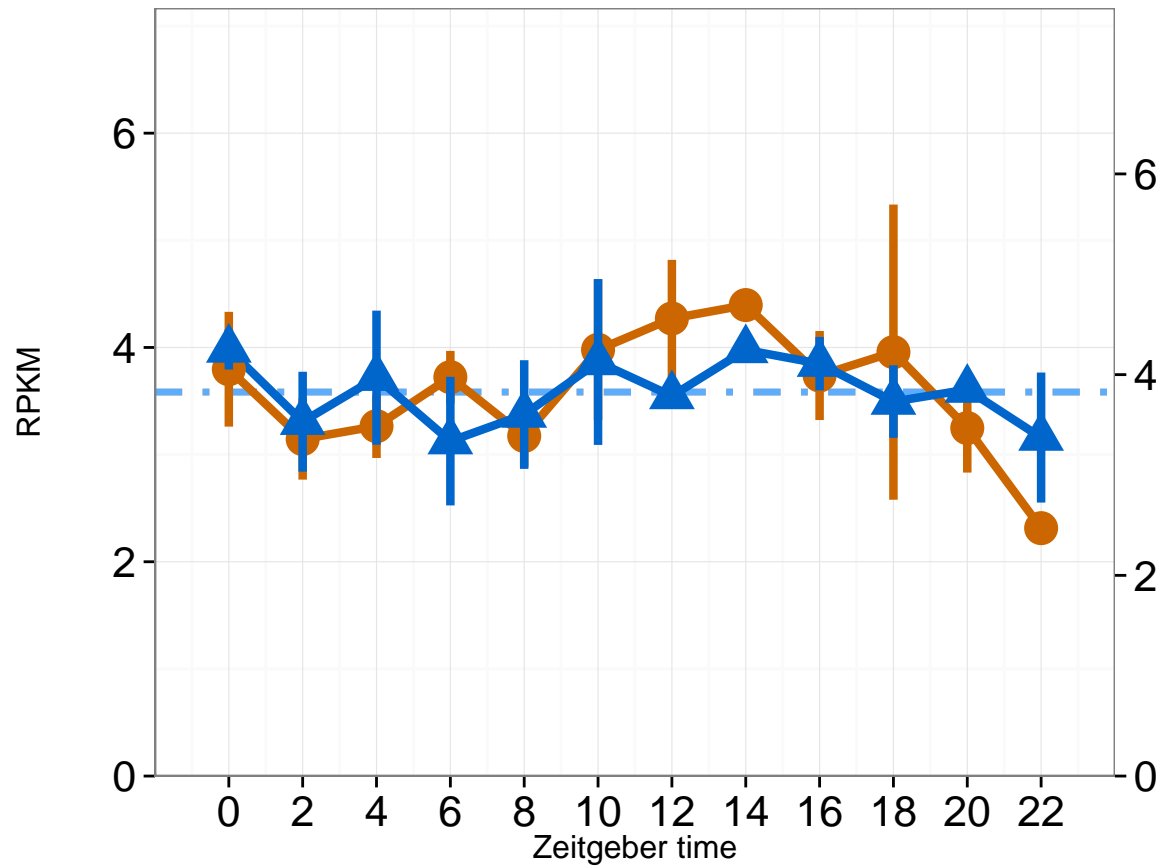

## Slc38a9

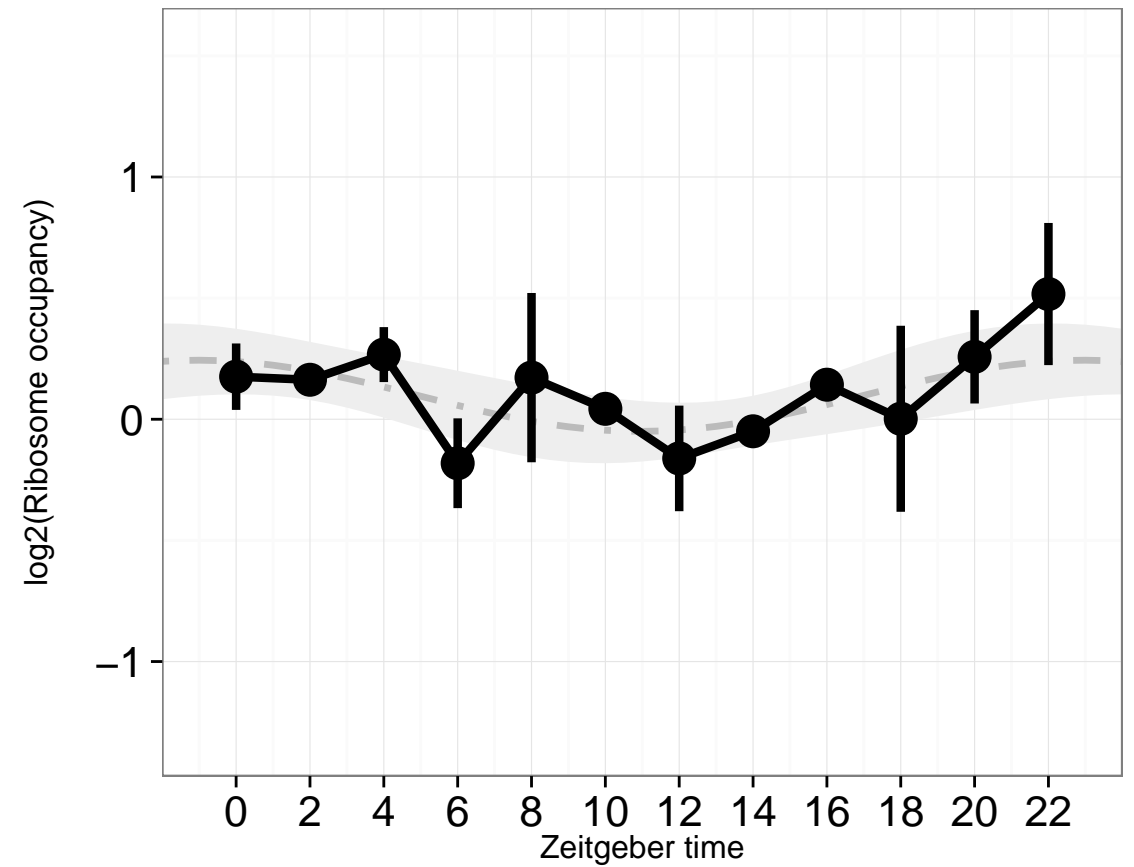

Supplement: SuppDataset_1.zip [file Slc38a9_set_A.pdf › Supplemental Dataset 1/A-mRNA_nonrhyth_translation_nonrhyth/Slc38a9_set_A.pdf]

# Slc39a11

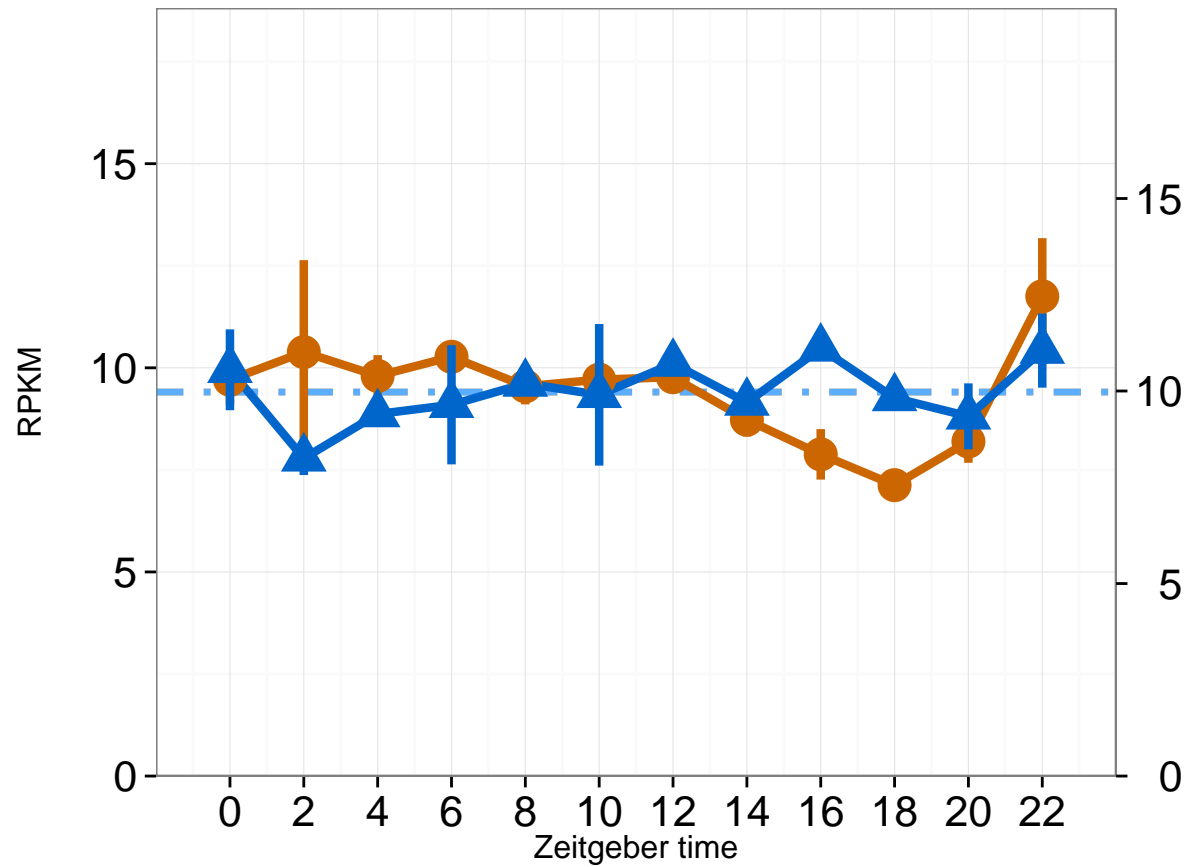

# Slc39a11

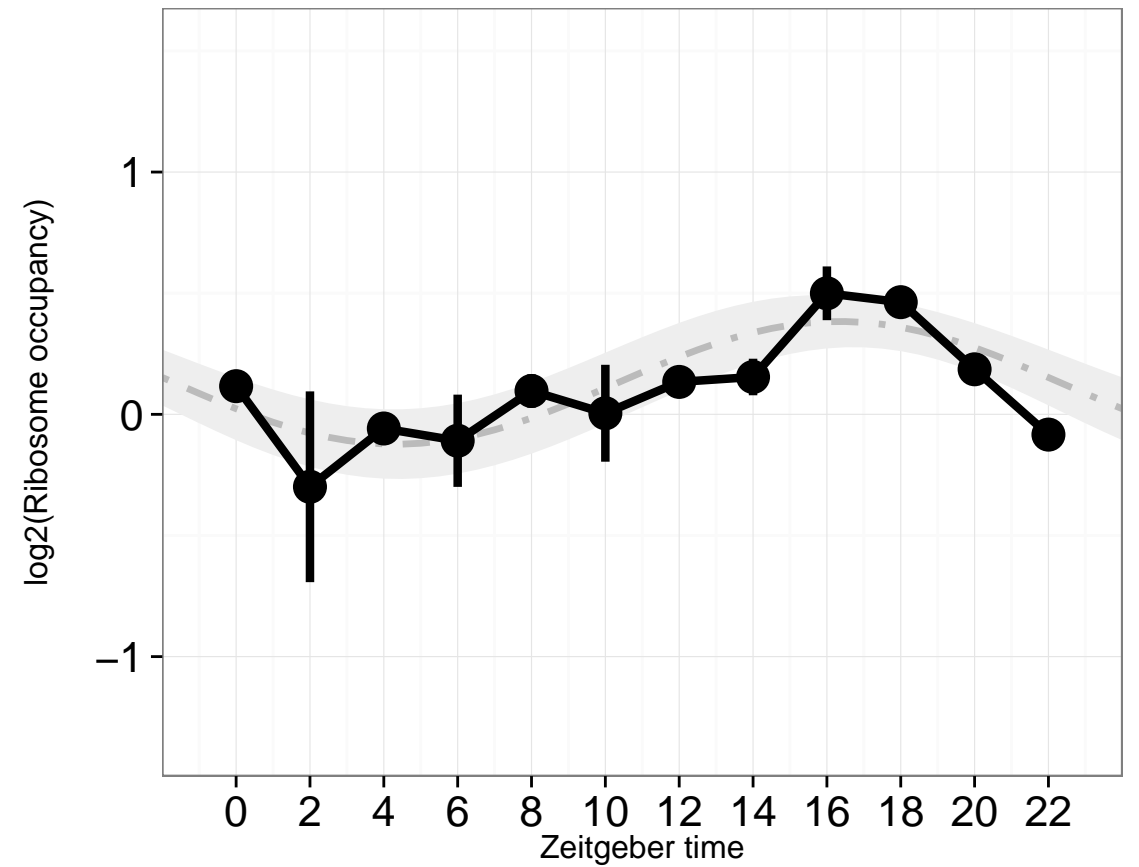

Supplement: SuppDataset_1.zip [file Slc39a11_set_A.pdf › Supplemental Dataset 1/A-mRNA_nonrhyth_translation_nonrhyth/Slc39a11_set_A.pdf]

## Slc39a13

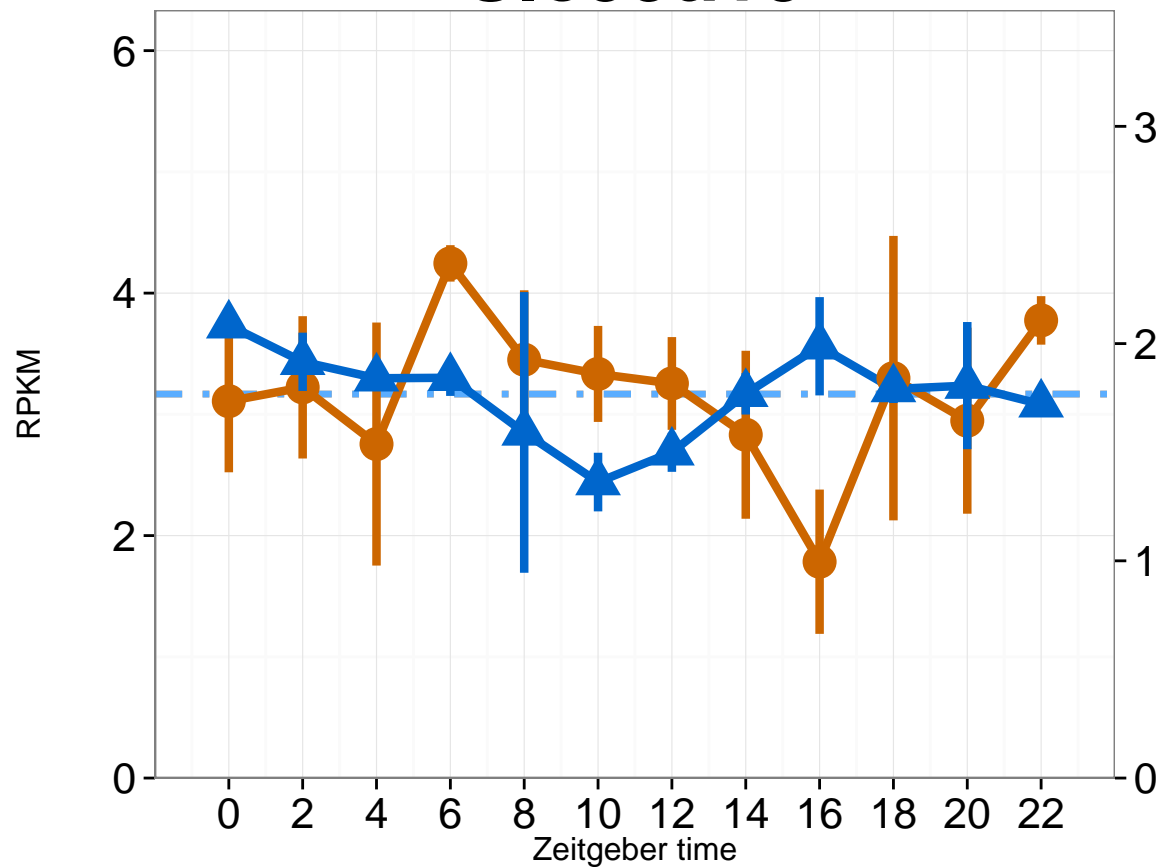

## Slc39a13

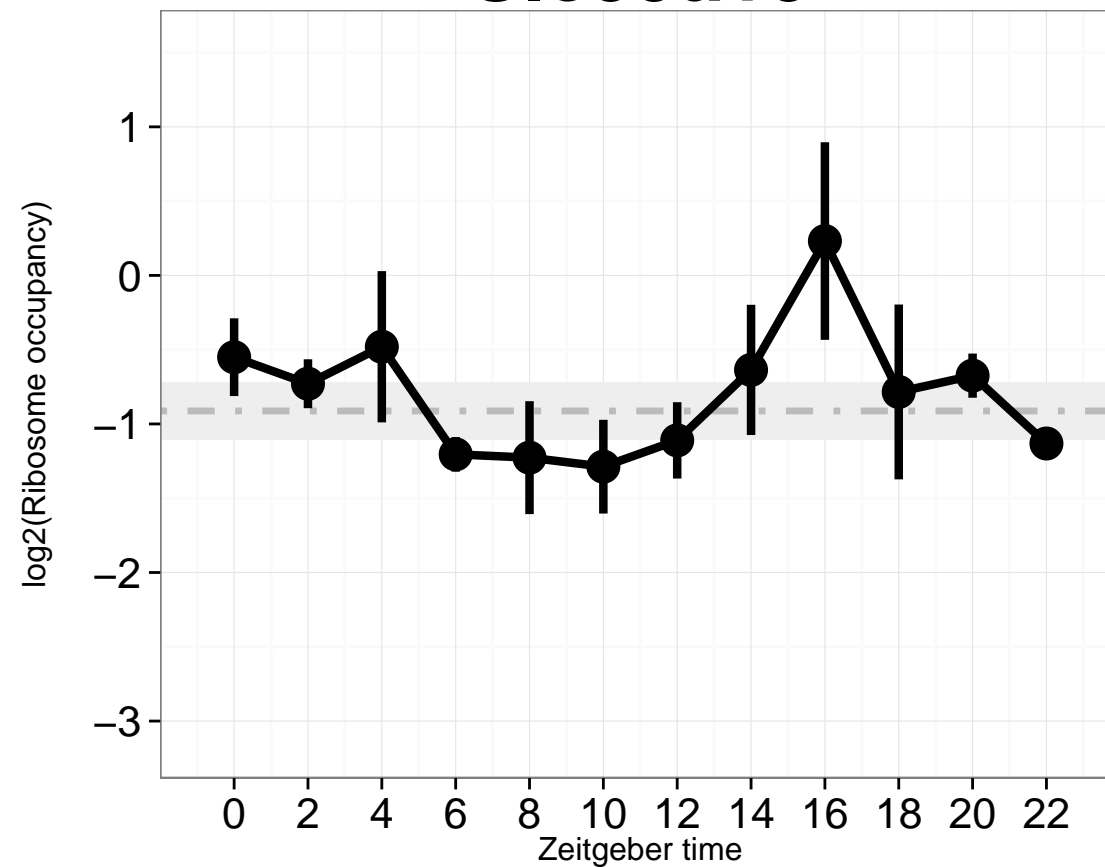

Supplement: SuppDataset_1.zip [file Slc39a13_set_A.pdf › Supplemental Dataset 1/A-mRNA_nonrhyth_translation_nonrhyth/Slc39a13_set_A.pdf]

# Slc39a1

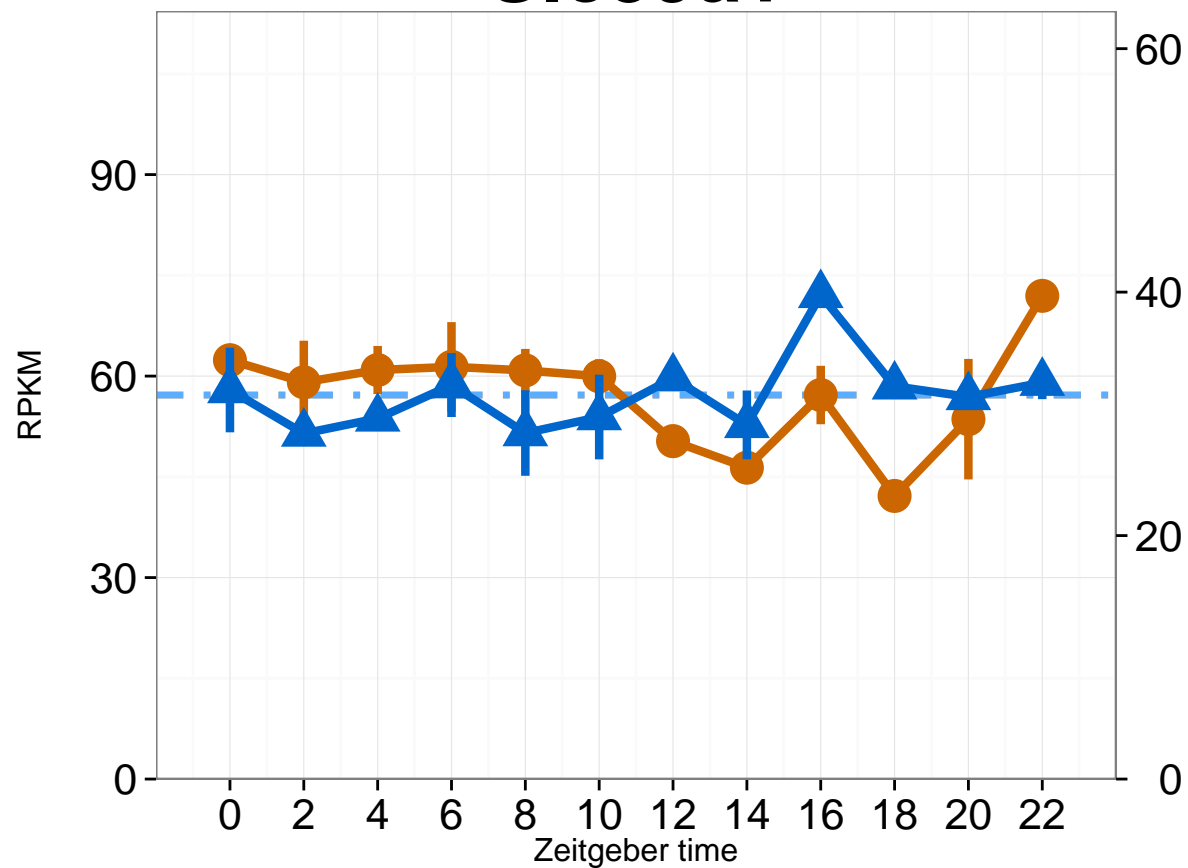

# Slc39a1

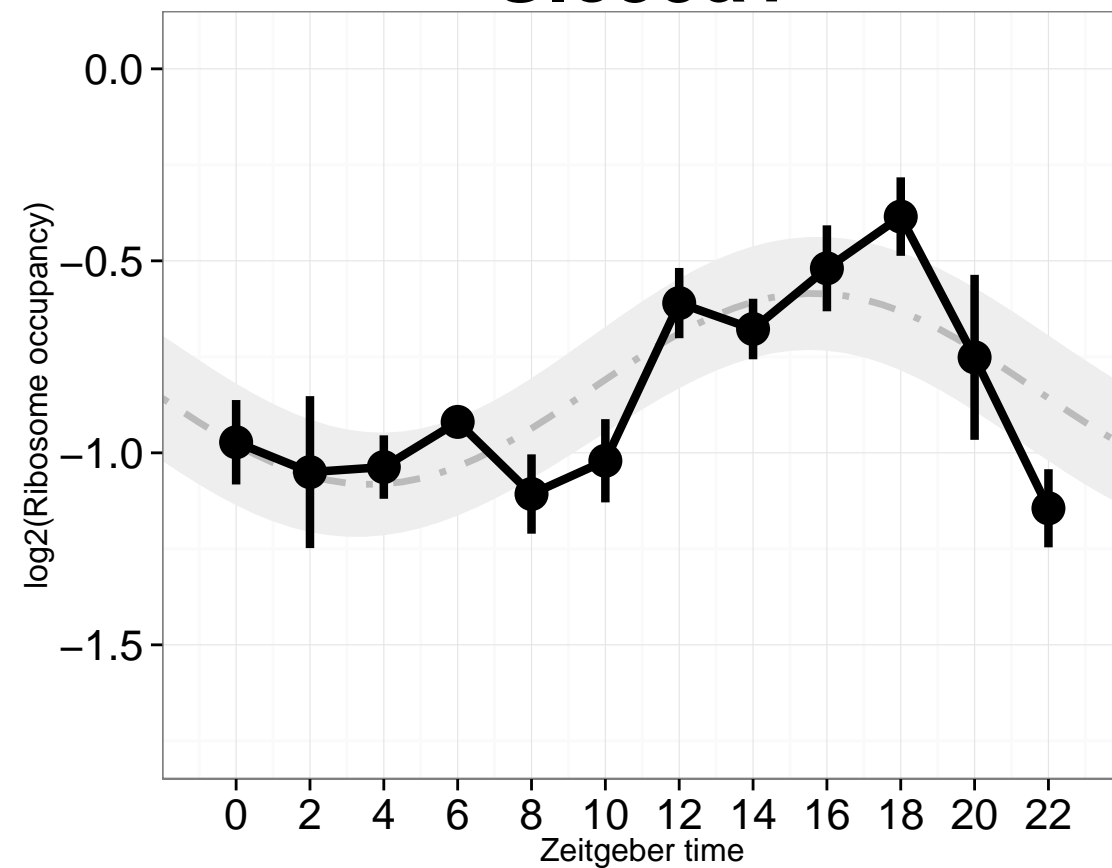

Supplement: SuppDataset_1.zip [file Slc39a1_set_A.pdf › Supplemental Dataset 1/A-mRNA_nonrhyth_translation_nonrhyth/Slc39a1_set_A.pdf]

# Slc39a3

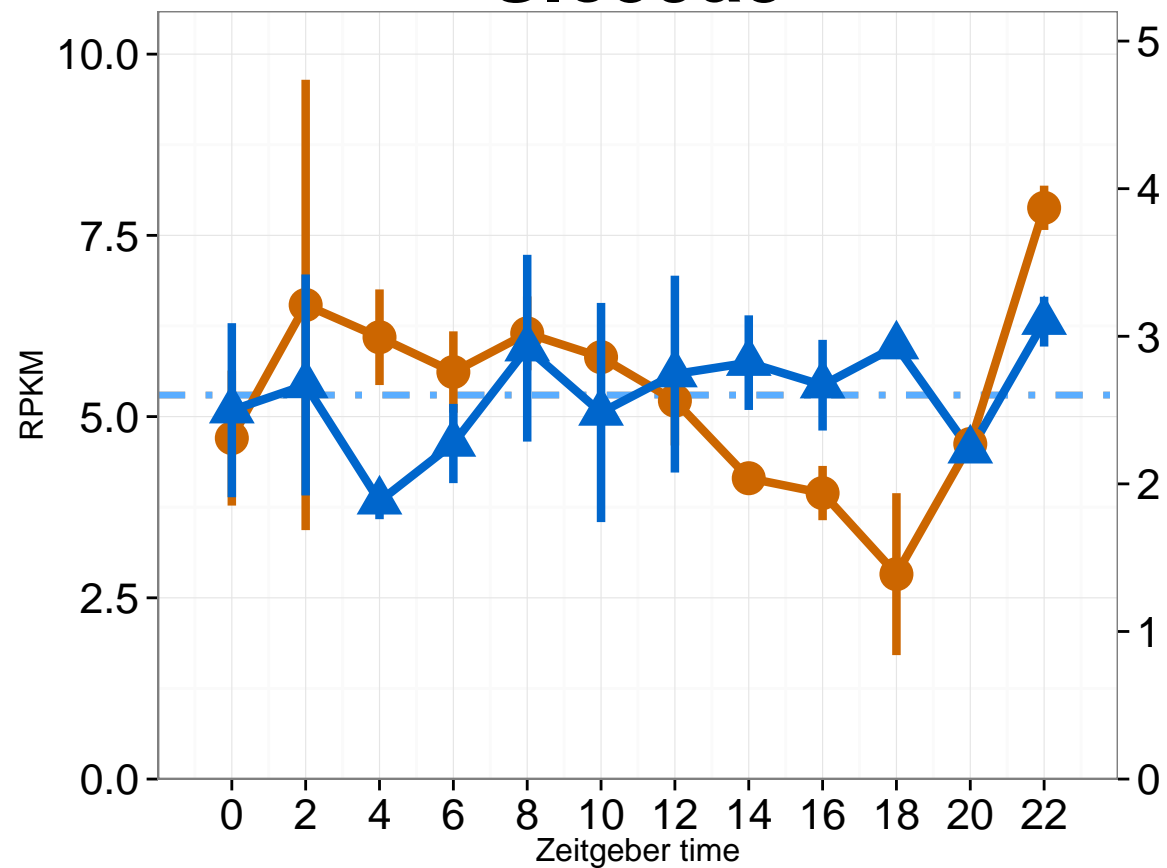

# Slc39a3

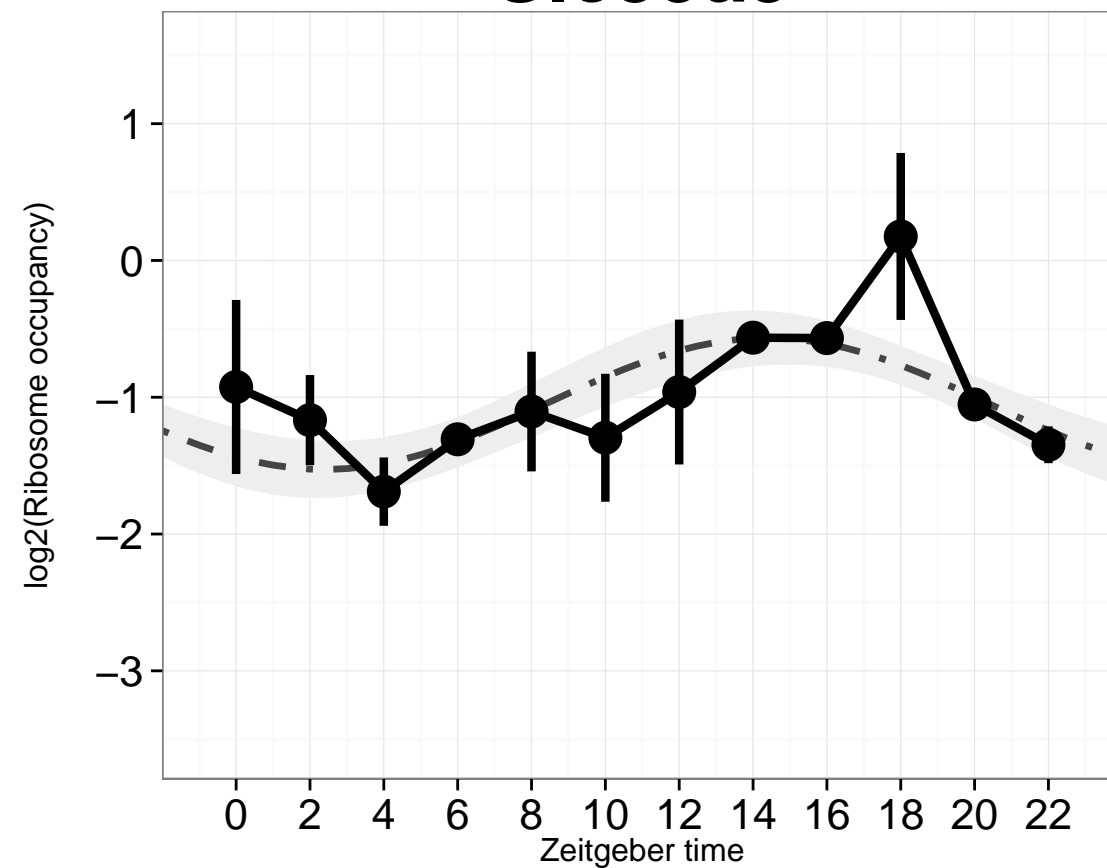

Supplement: SuppDataset_1.zip [file Slc39a3_set_A.pdf › Supplemental Dataset 1/A-mRNA_nonrhyth_translation_nonrhyth/Slc39a3_set_A.pdf]

## Slc39a4

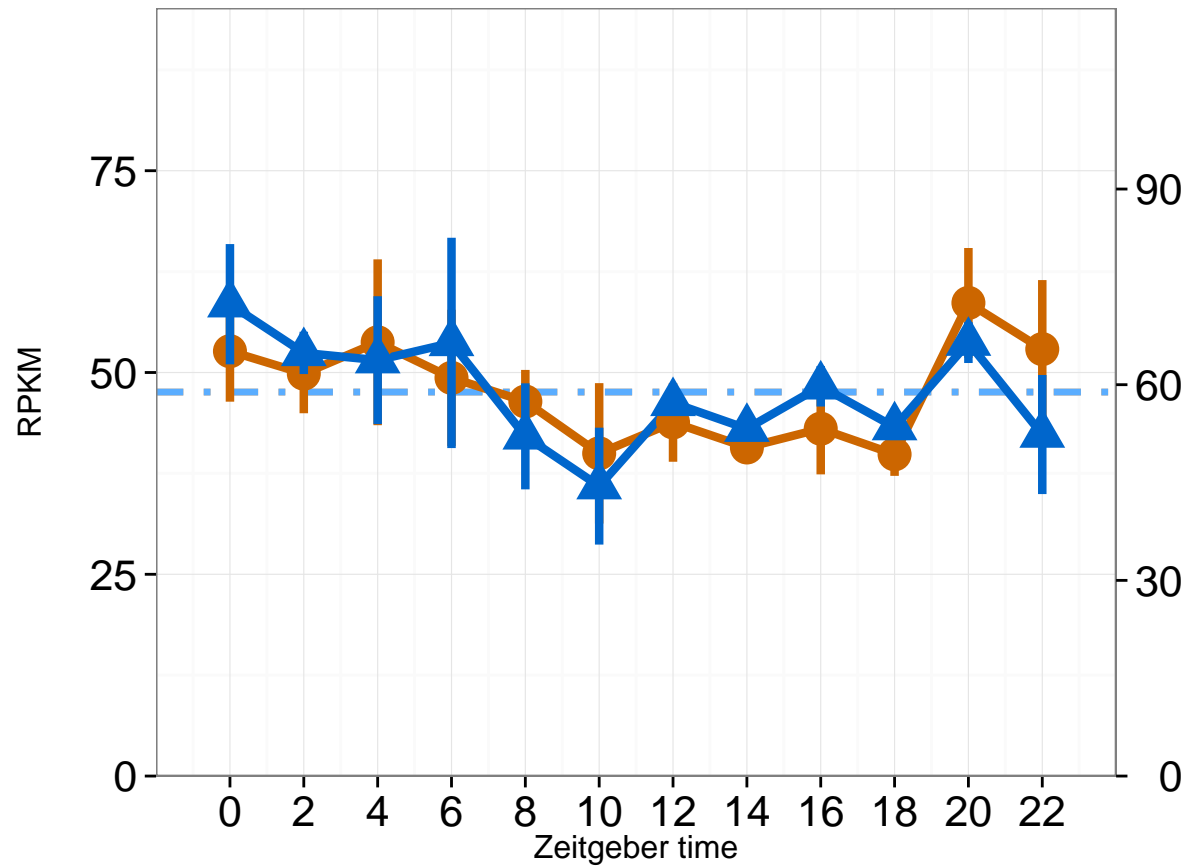

## Slc39a4

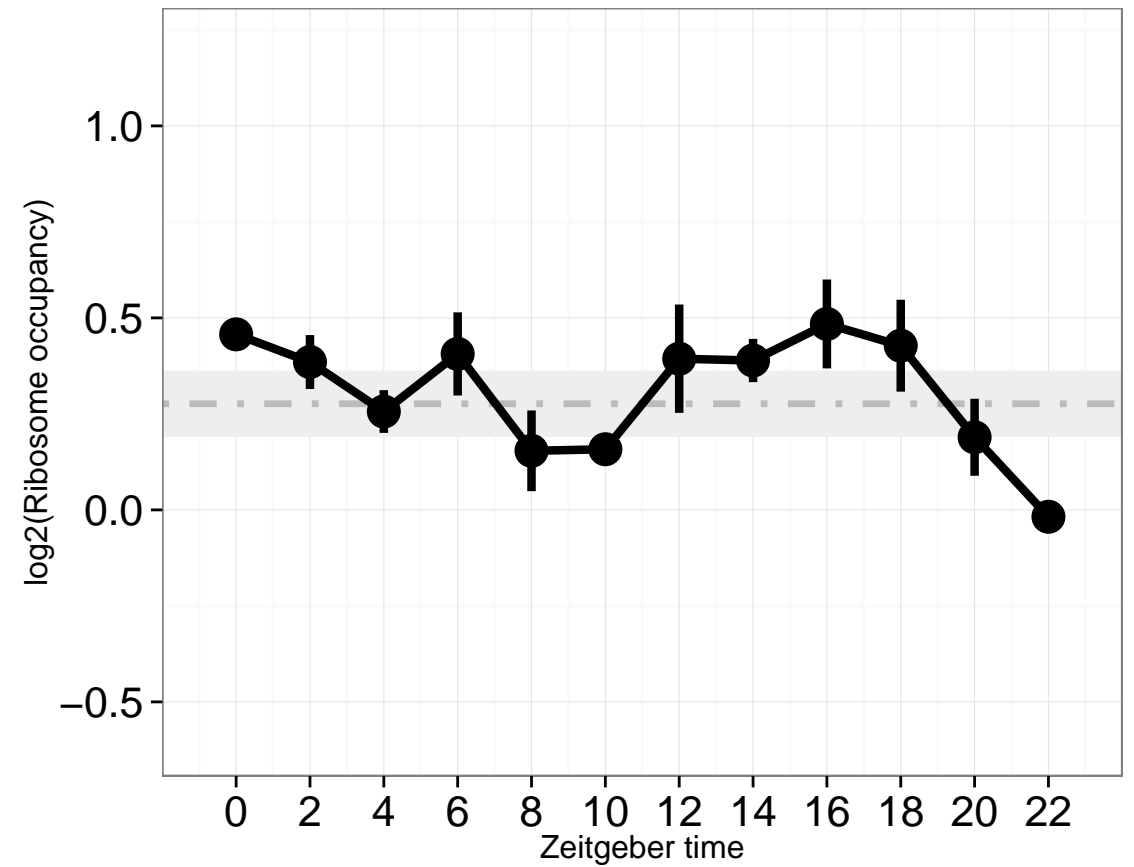

Supplement: SuppDataset_1.zip [file Slc39a4_set_A.pdf › Supplemental Dataset 1/A-mRNA_nonrhyth_translation_nonrhyth/Slc39a4_set_A.pdf]

## Slc39a7

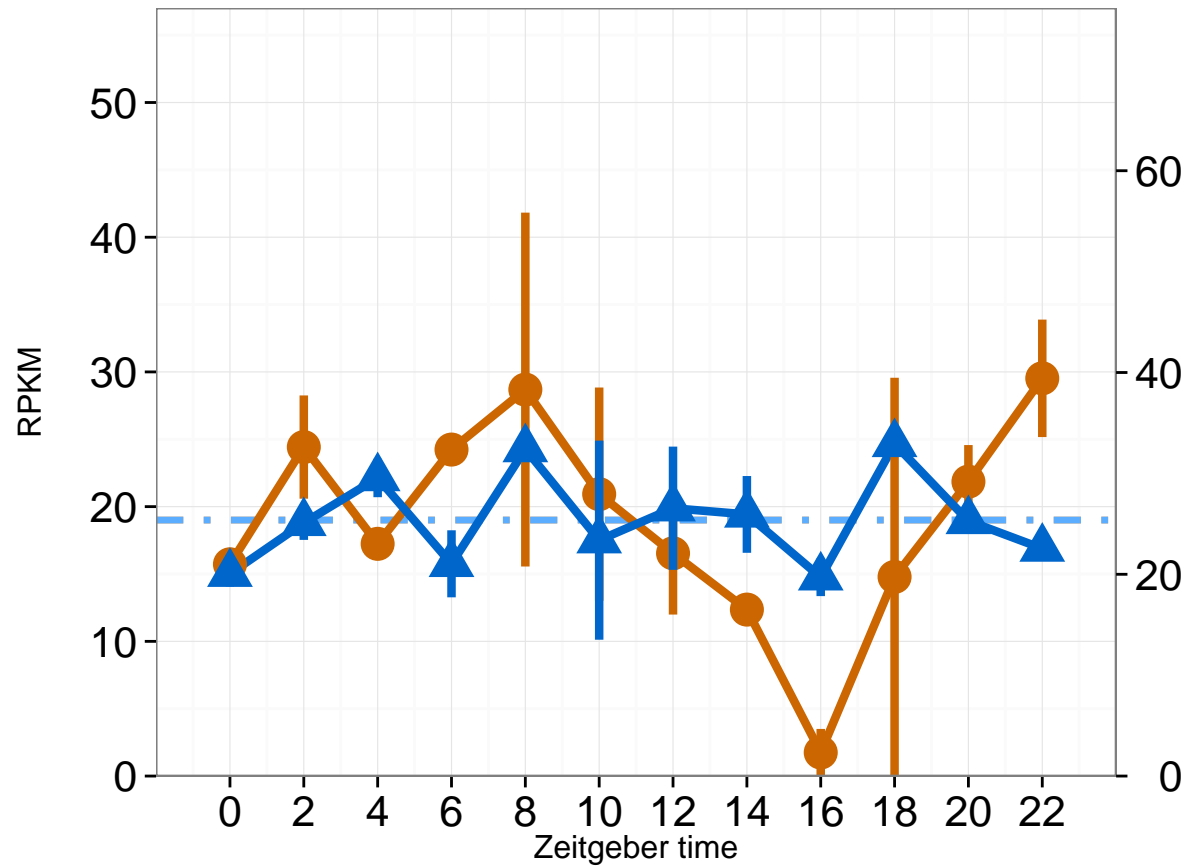

## Slc39a7

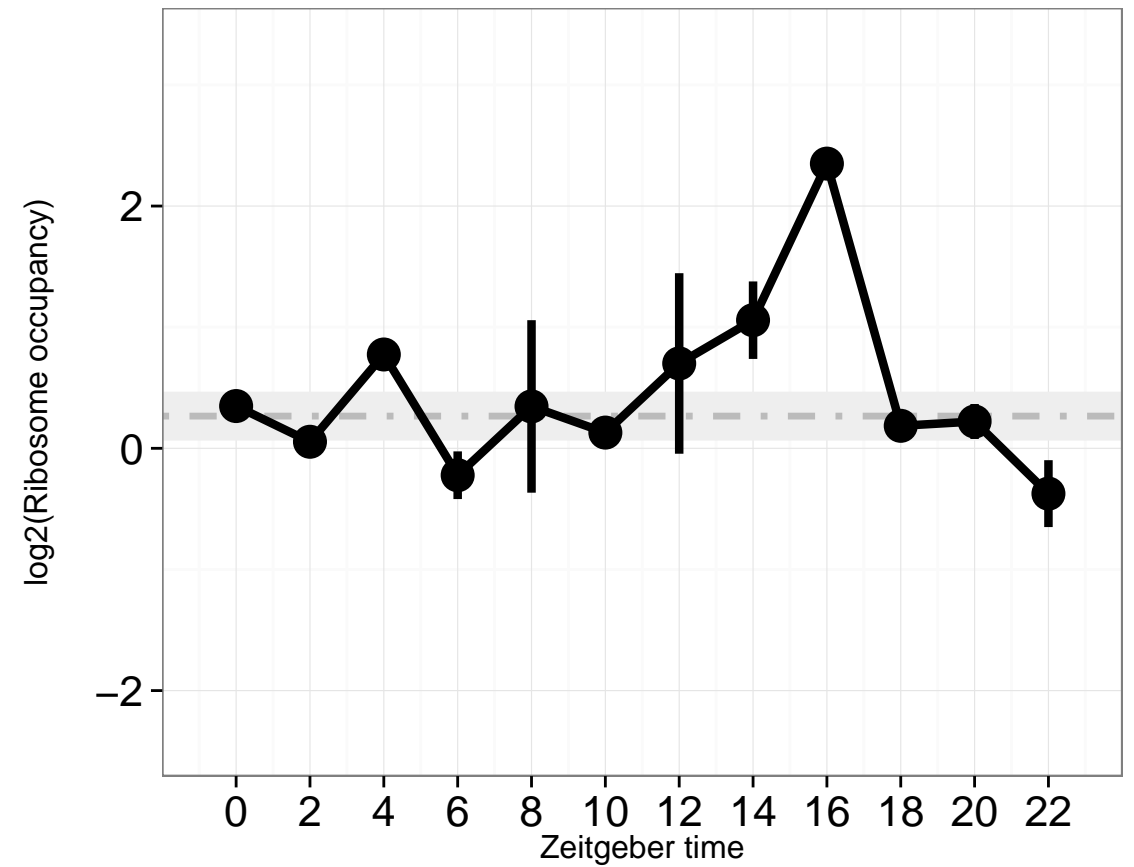

Supplement: SuppDataset_1.zip [file Slc39a7_set_A.pdf › Supplemental Dataset 1/A-mRNA_nonrhyth_translation_nonrhyth/Slc39a7_set_A.pdf]

## Slc39a9

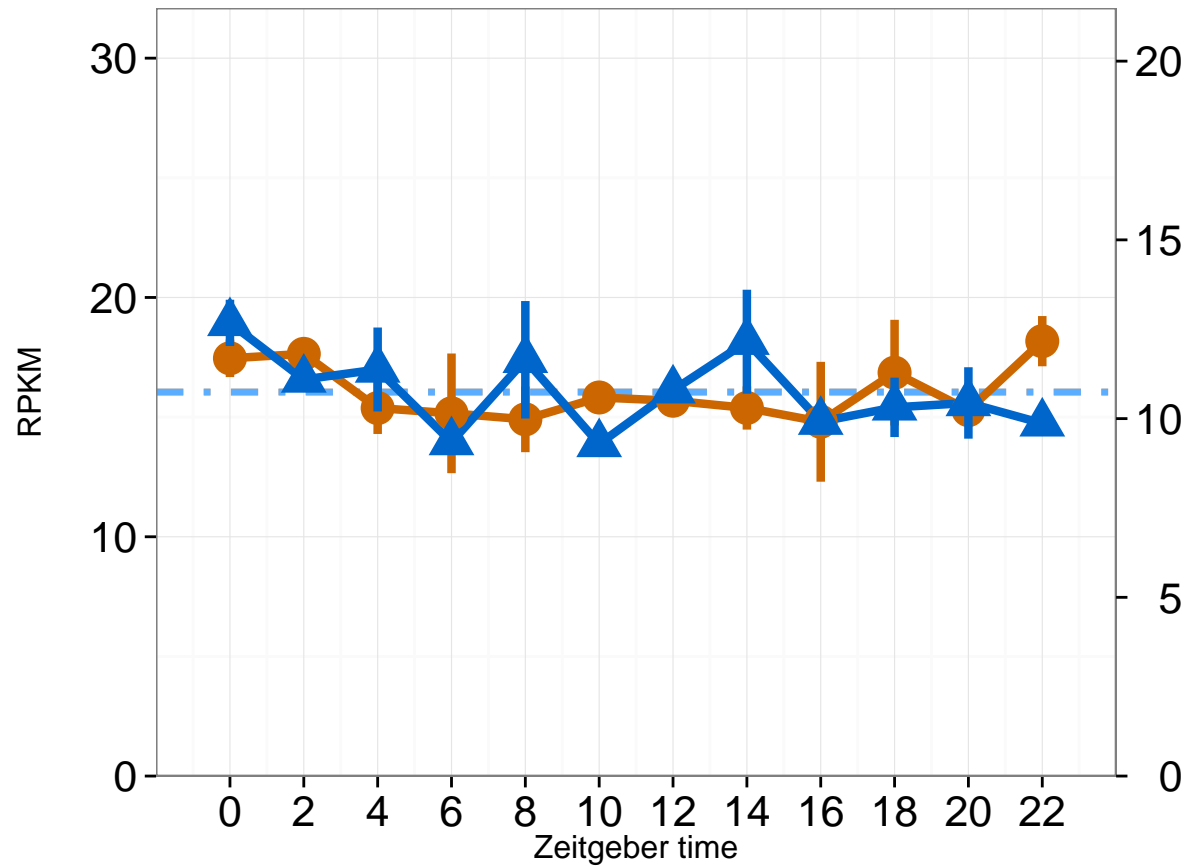

## Slc39a9

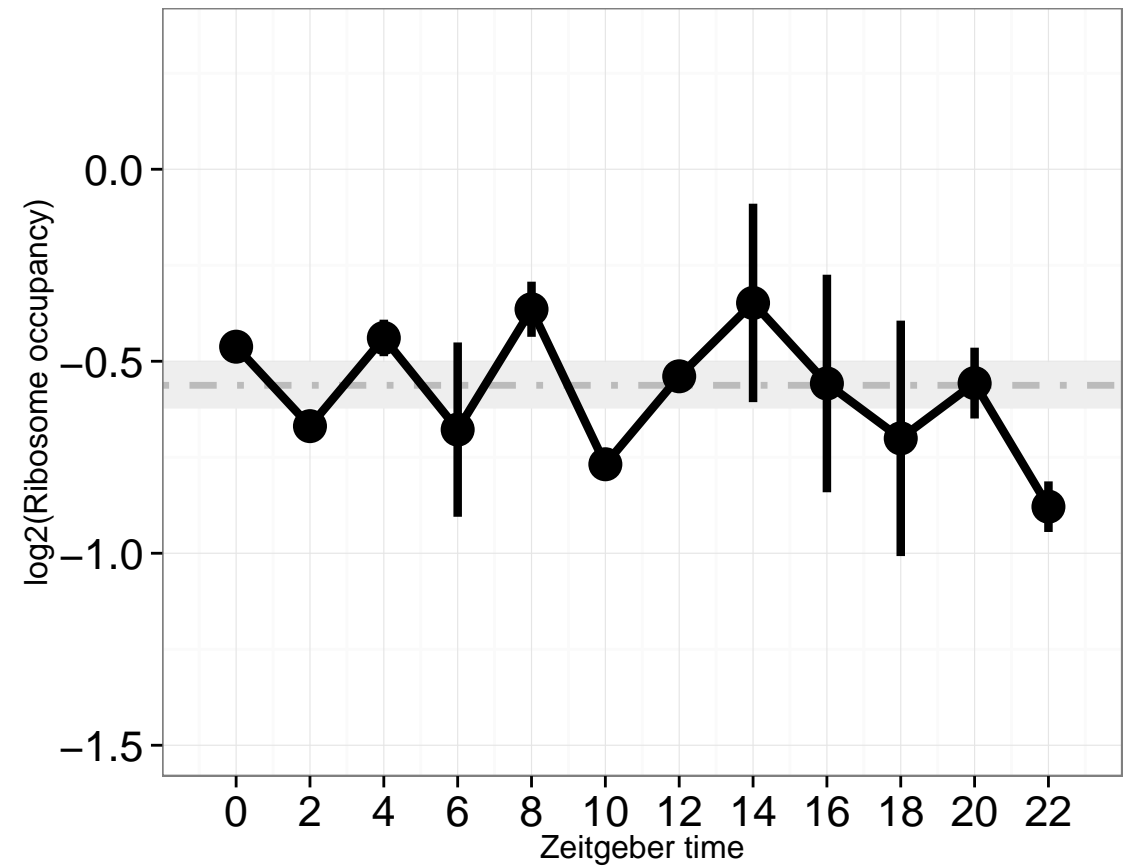

Supplement: SuppDataset_1.zip [file Slc39a9_set_A.pdf › Supplemental Dataset 1/A-mRNA_nonrhyth_translation_nonrhyth/Slc39a9_set_A.pdf]

# Slc3a2

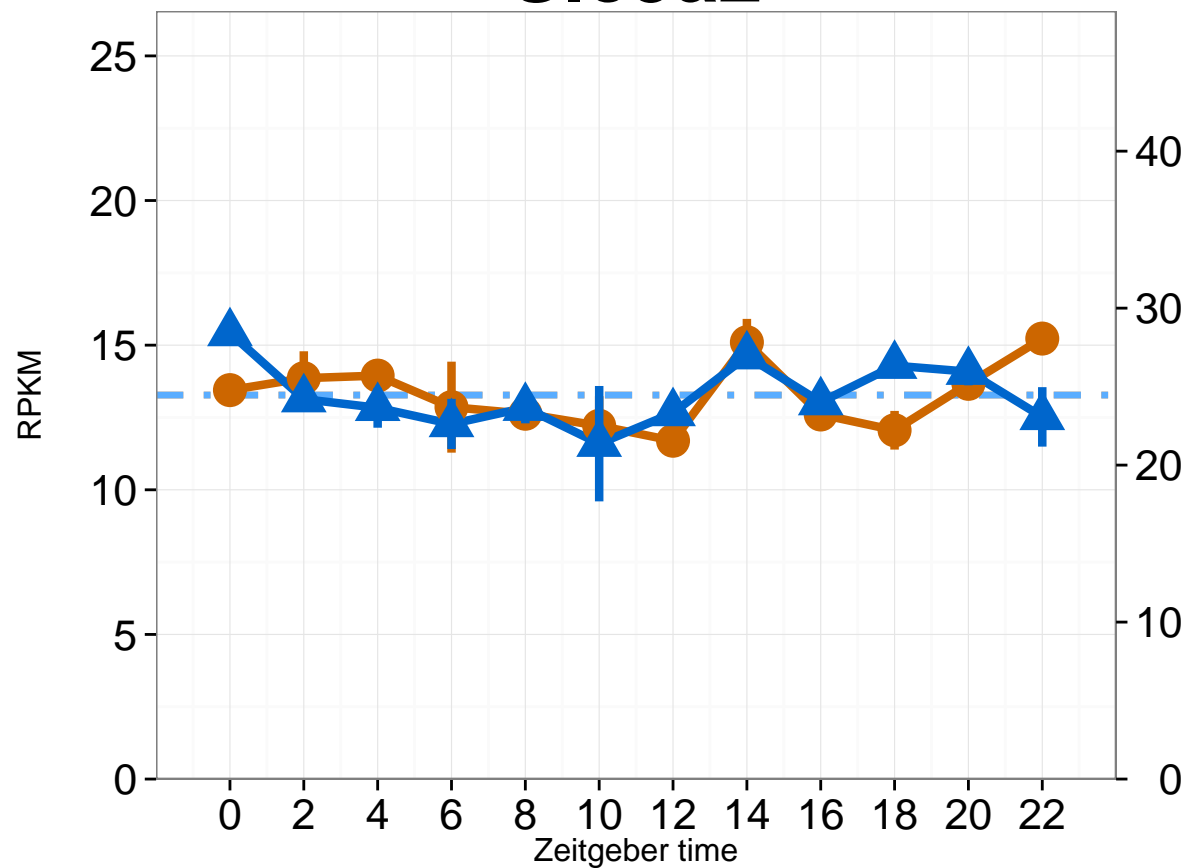

# Slc3a2

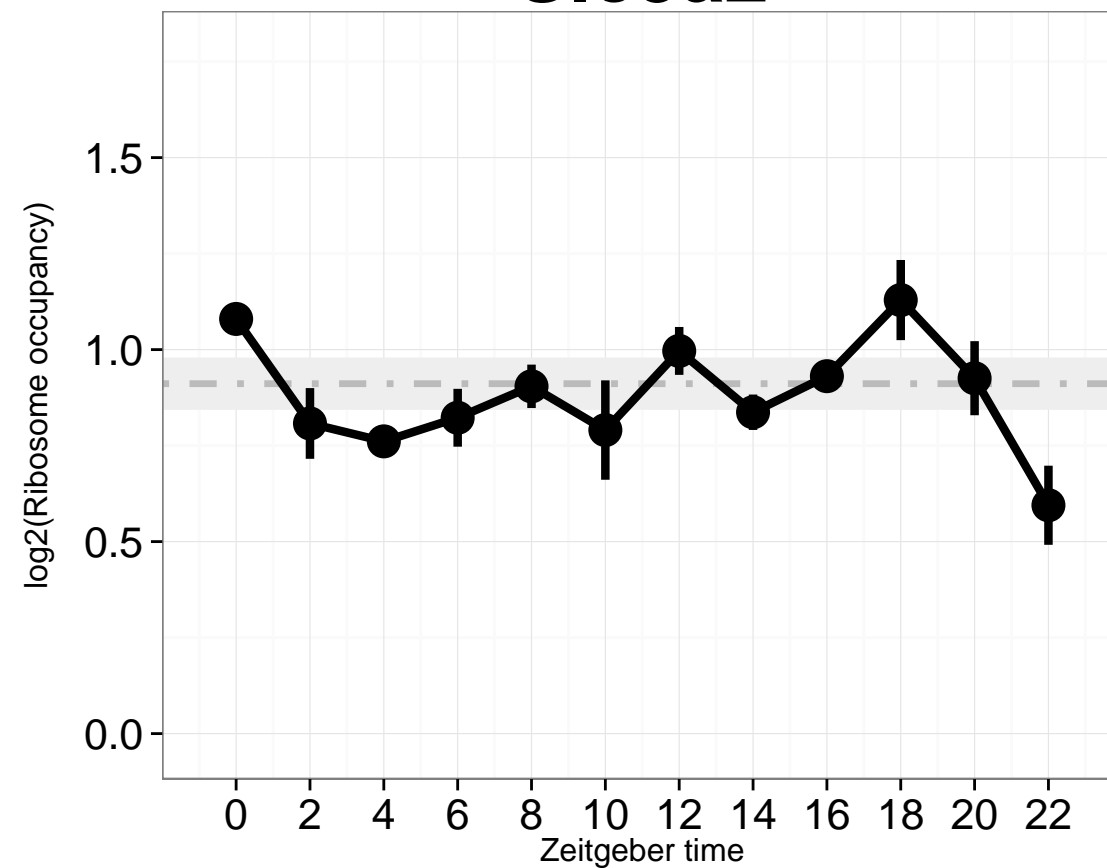

Supplement: SuppDataset_1.zip [file Slc3a2_set_A.pdf › Supplemental Dataset 1/A-mRNA_nonrhyth_translation_nonrhyth/Slc3a2_set_A.pdf]

# Slc40a1

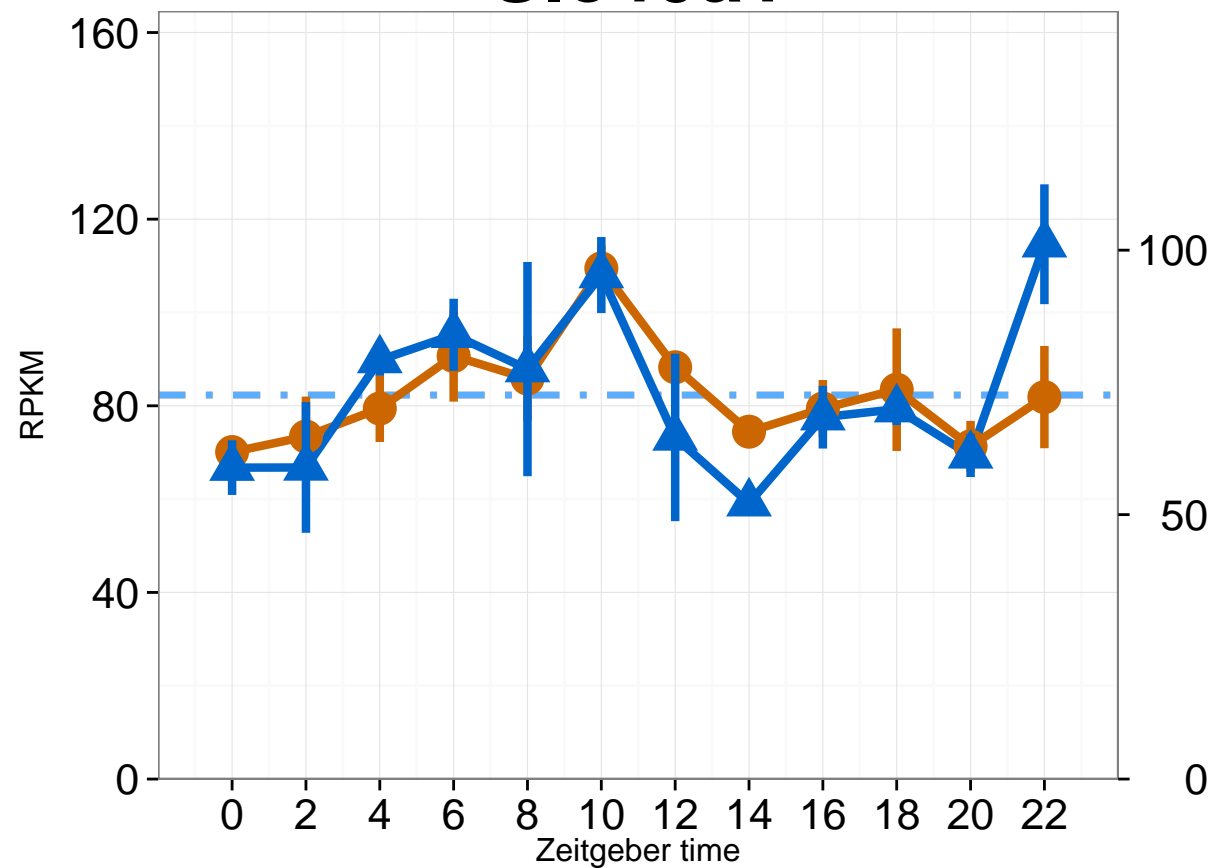

# Slc40a1

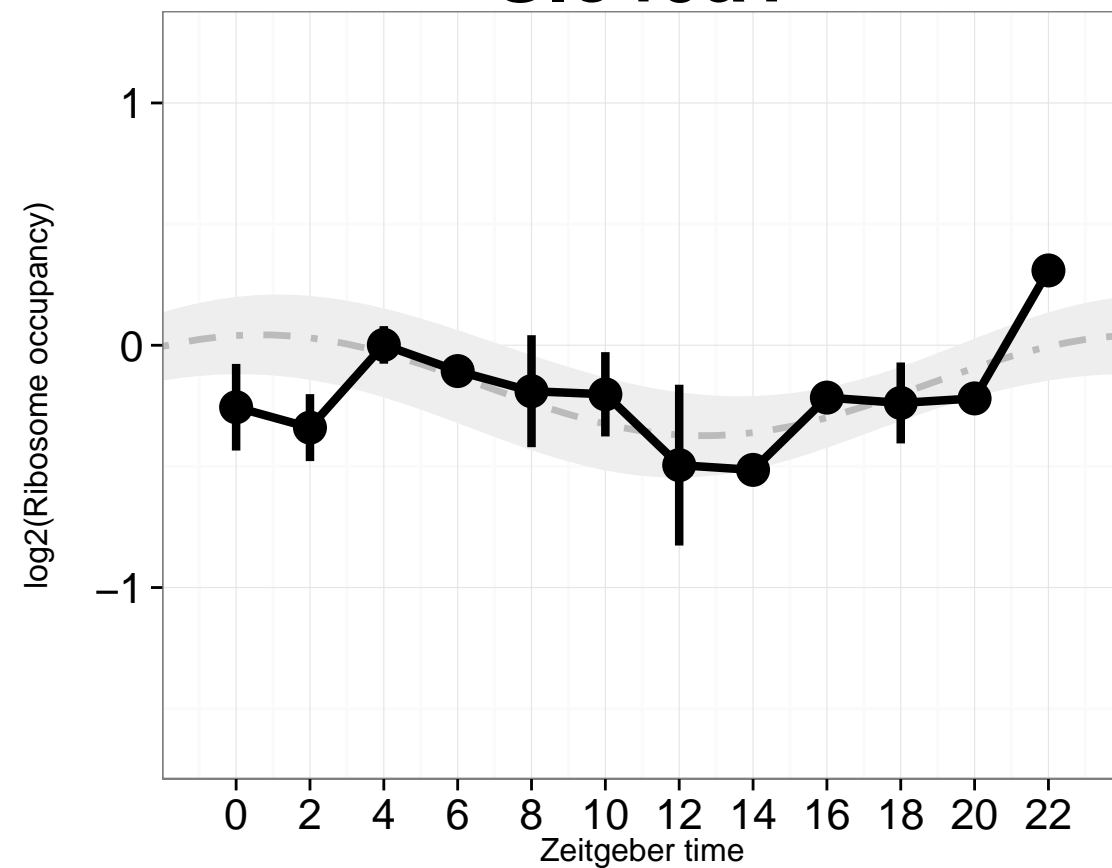

Supplement: SuppDataset_1.zip [file Slc40a1_set_A.pdf › Supplemental Dataset 1/A-mRNA_nonrhyth_translation_nonrhyth/Slc40a1_set_A.pdf]

# Slc41a2

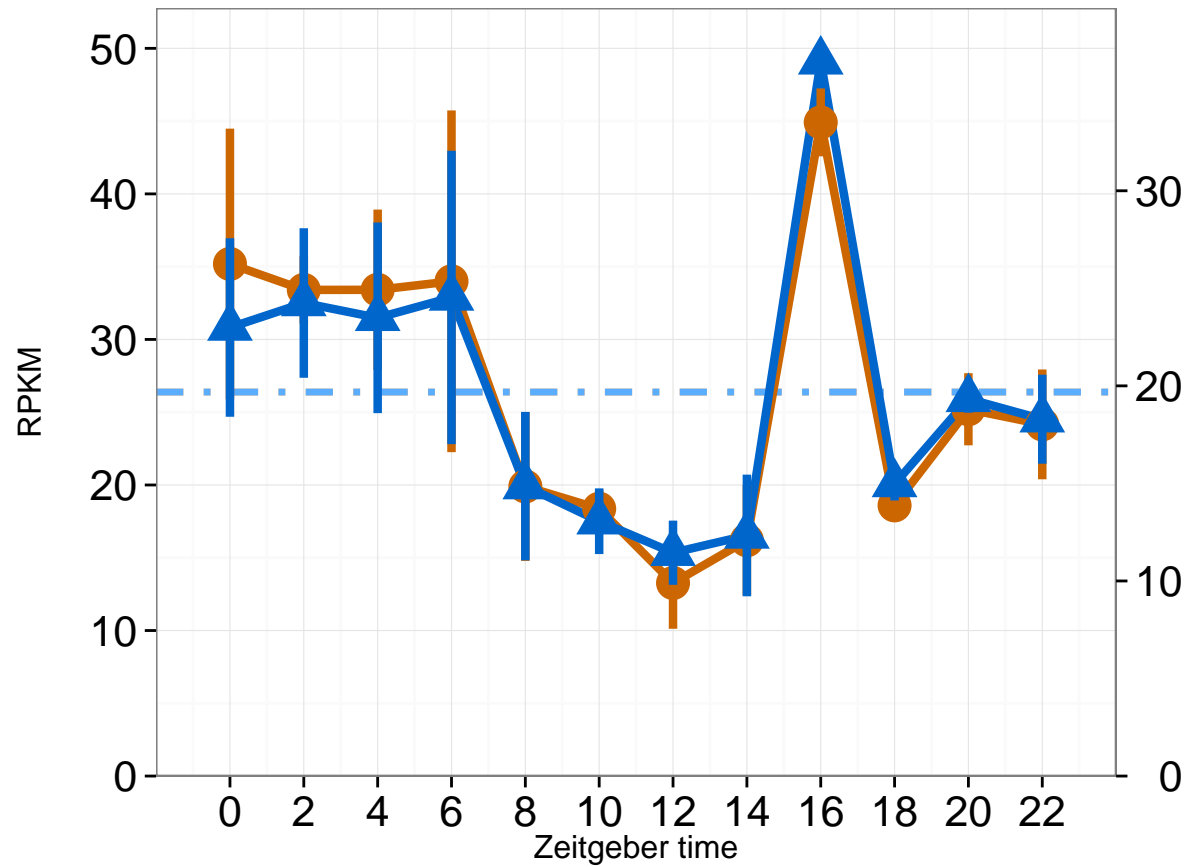

# Slc41a2

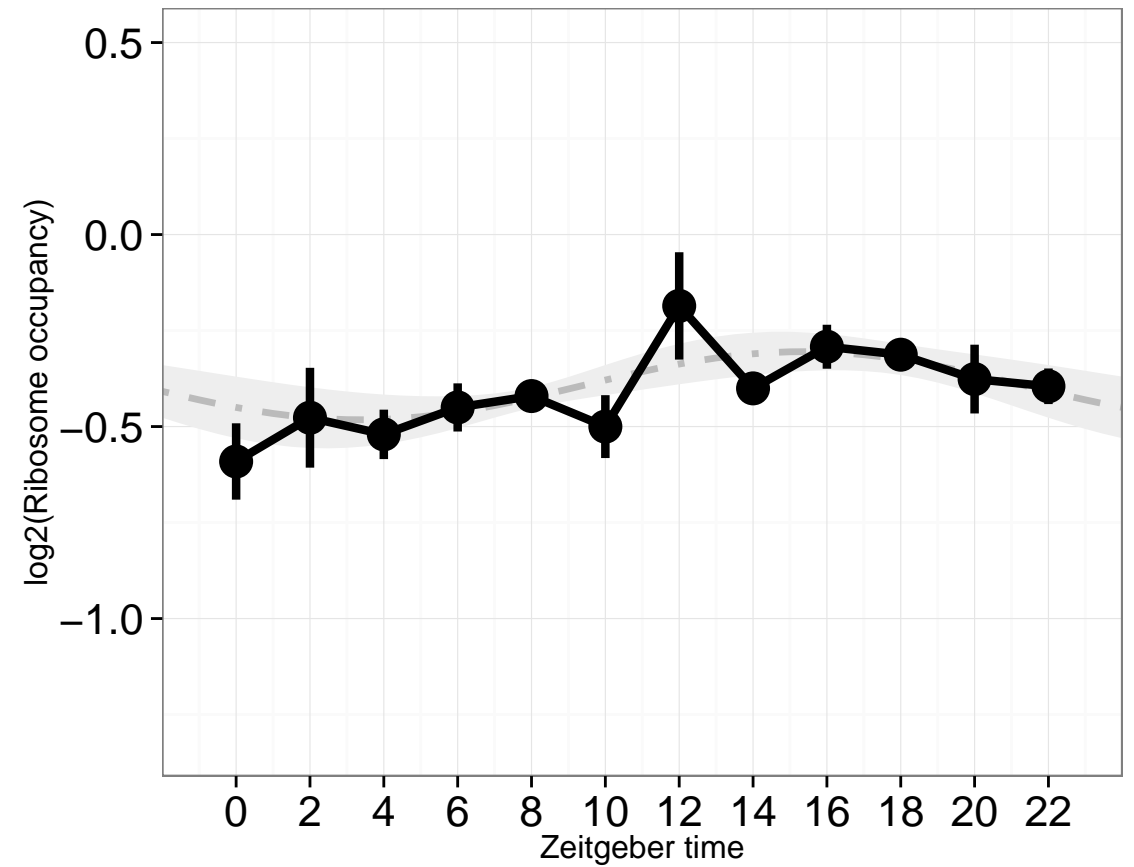

Supplement: SuppDataset_1.zip [file Slc41a2_set_A.pdf › Supplemental Dataset 1/A-mRNA_nonrhyth_translation_nonrhyth/Slc41a2_set_A.pdf]

## Slc43a3

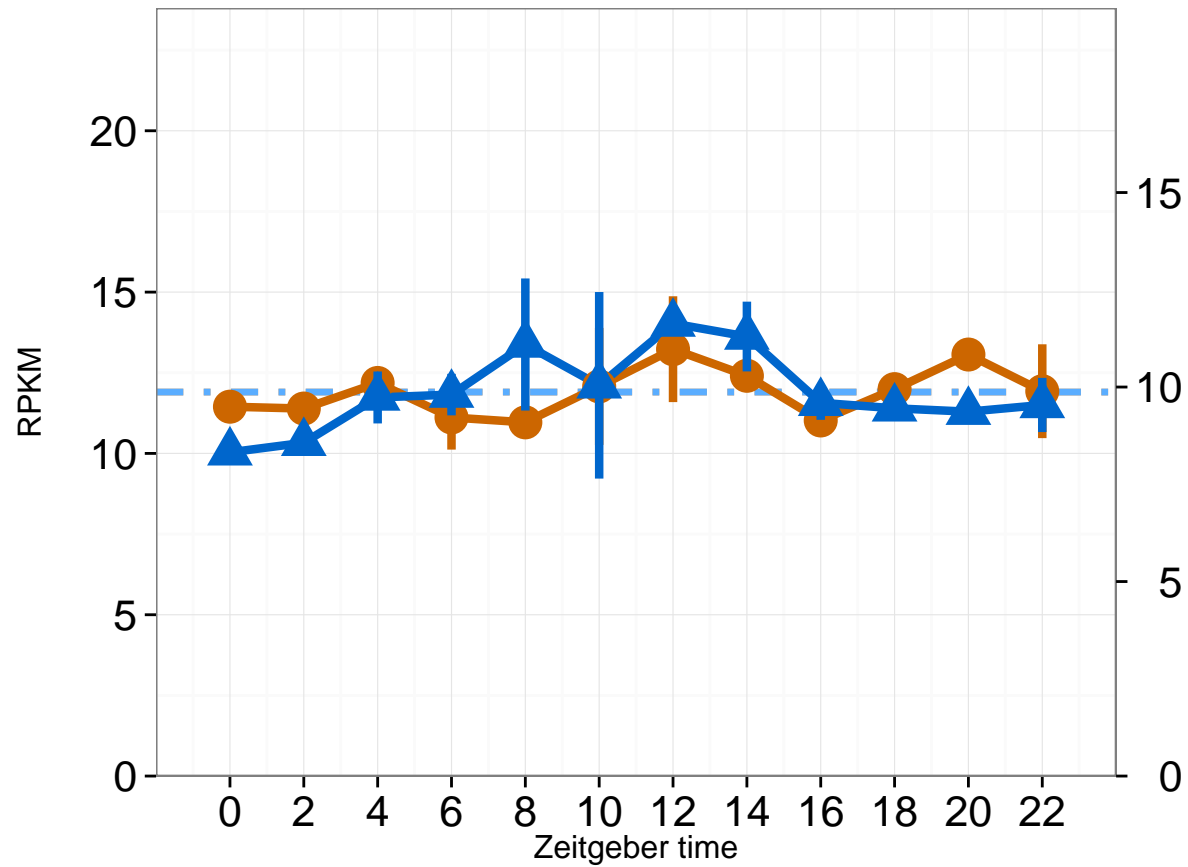

## Slc43a3

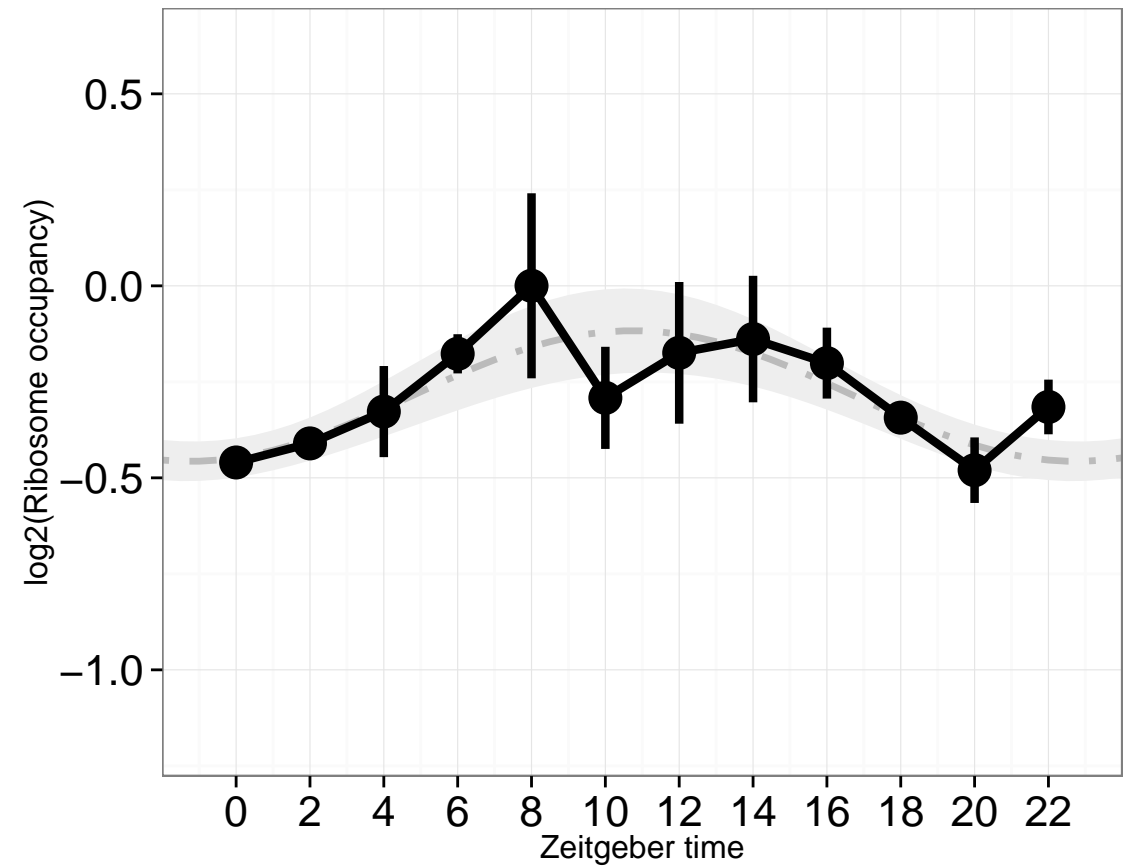

Supplement: SuppDataset_1.zip [file Slc43a3_set_A.pdf › Supplemental Dataset 1/A-mRNA_nonrhyth_translation_nonrhyth/Slc43a3_set_A.pdf]

# Slc44a2

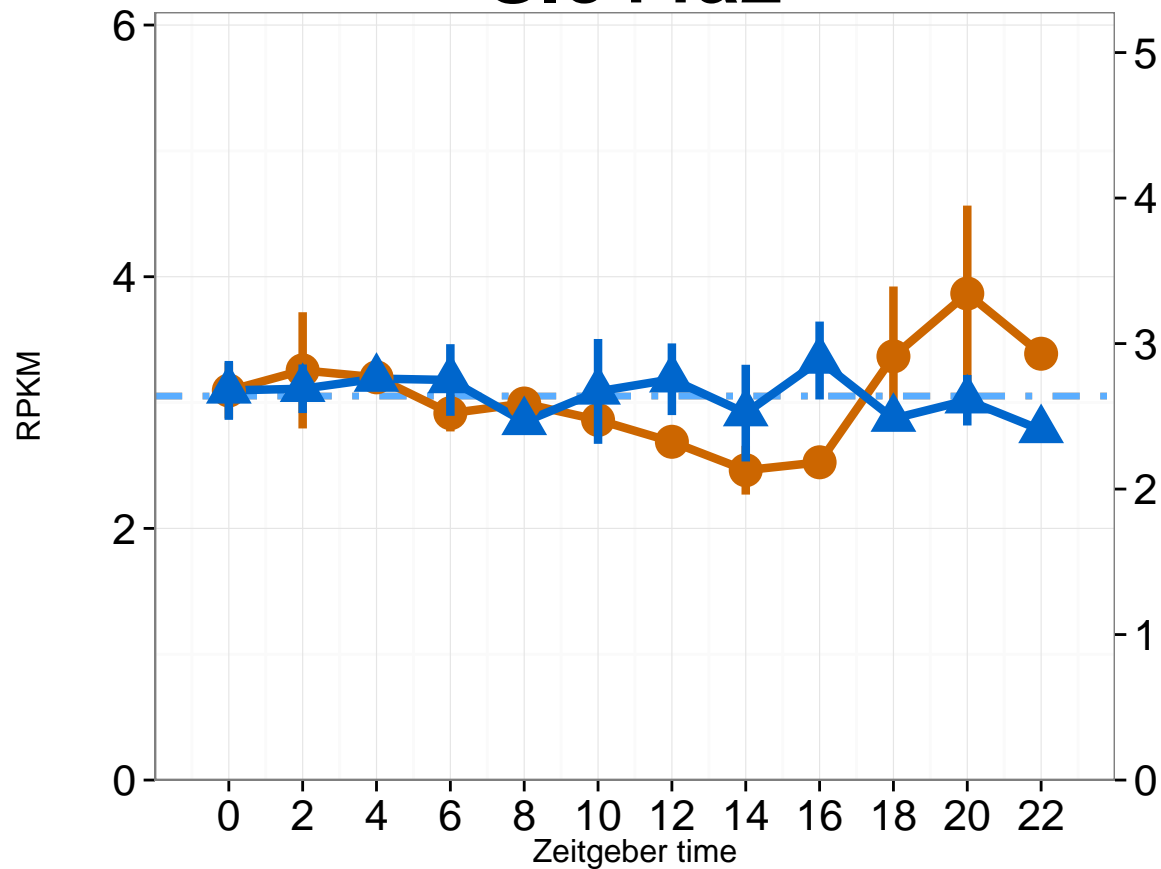

# Slc44a2

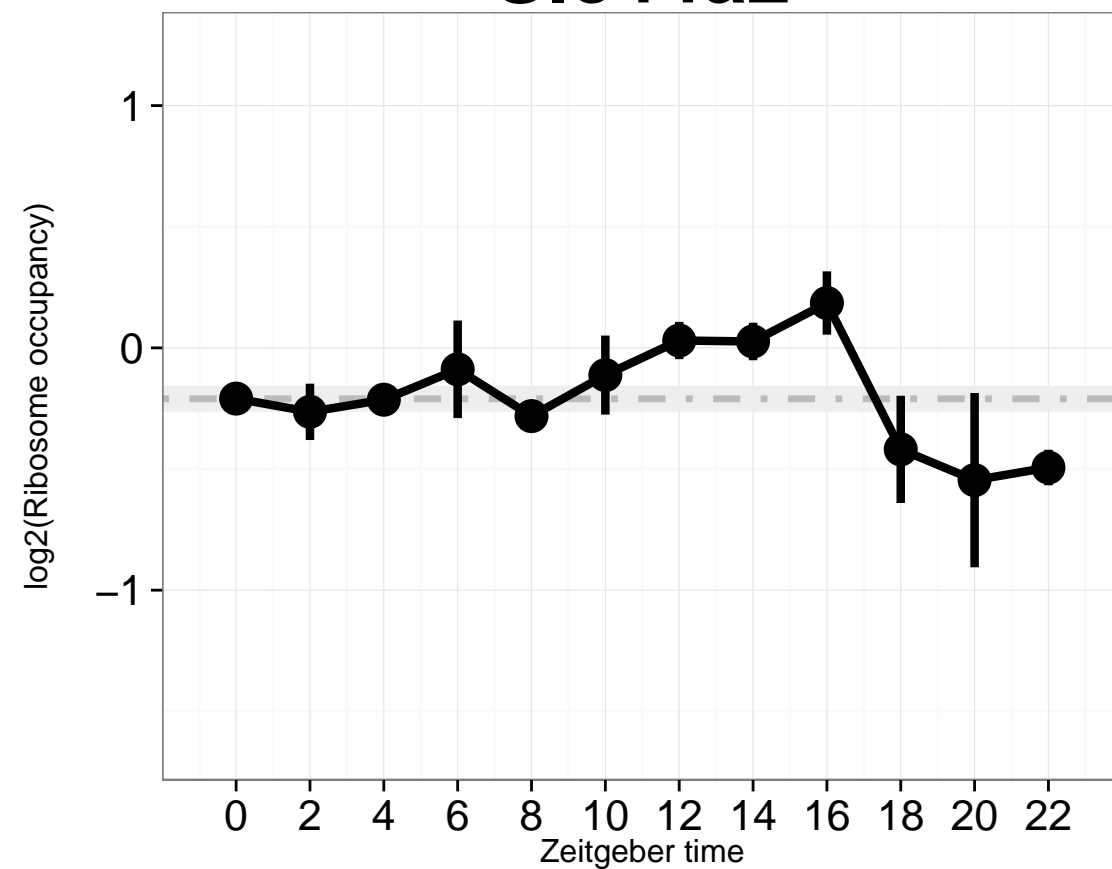

Supplement: SuppDataset_1.zip [file Slc44a2_set_A.pdf › Supplemental Dataset 1/A-mRNA_nonrhyth_translation_nonrhyth/Slc44a2_set_A.pdf]

# Slc45a4

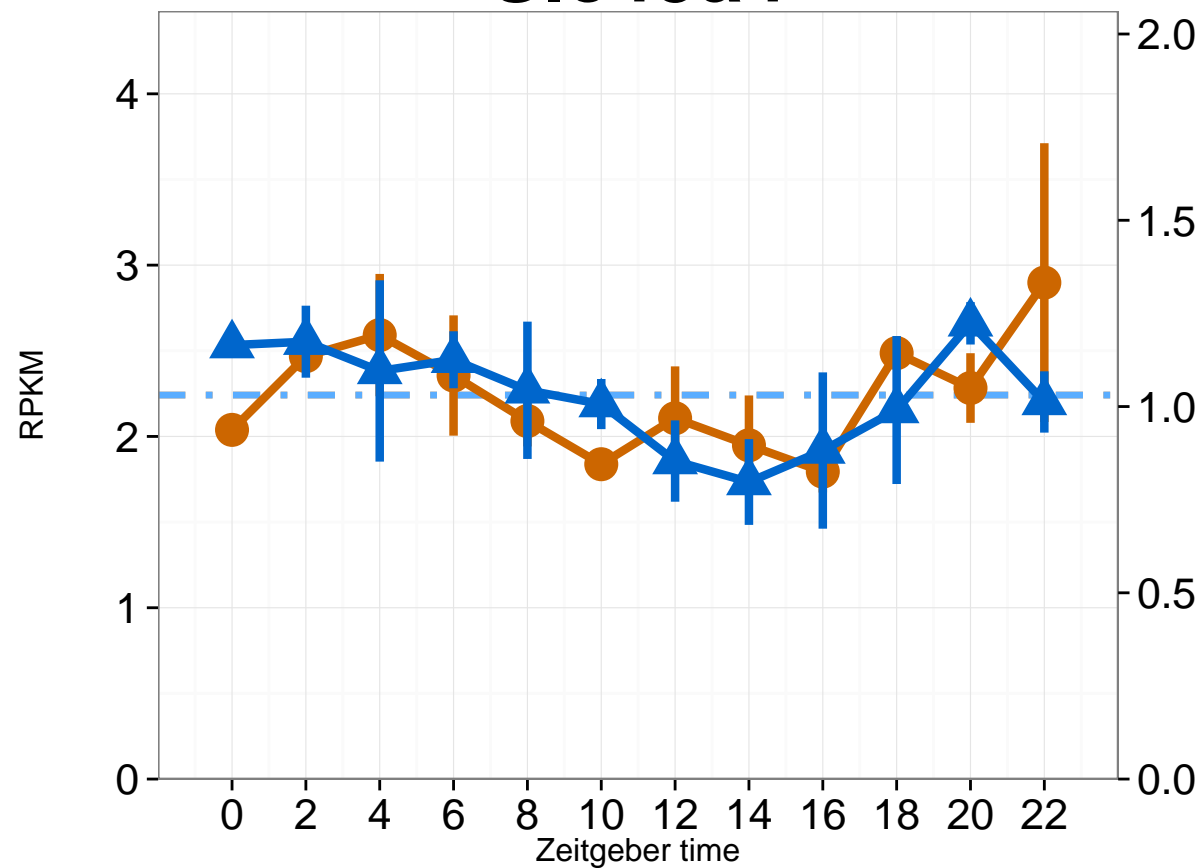

# Slc45a4

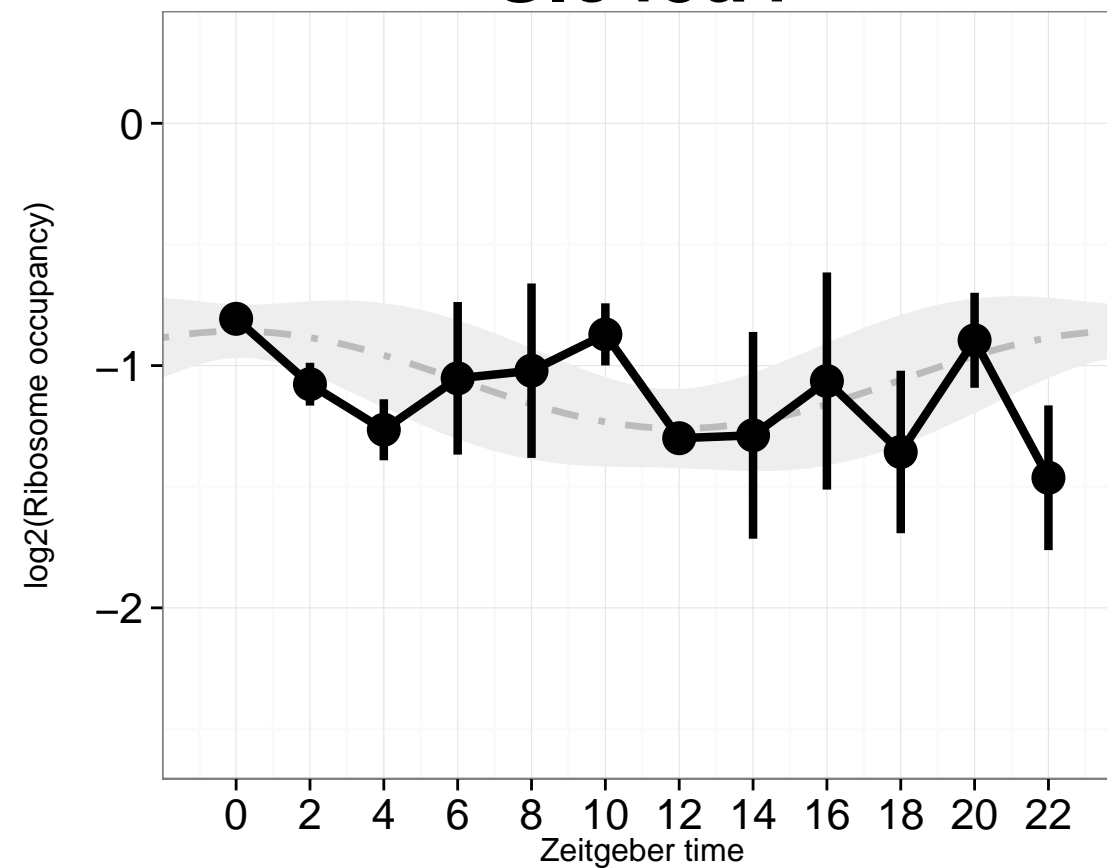

Supplement: SuppDataset_1.zip [file Slc45a4_set_A.pdf › Supplemental Dataset 1/A-mRNA_nonrhyth_translation_nonrhyth/Slc45a4_set_A.pdf]

# Slc46a1

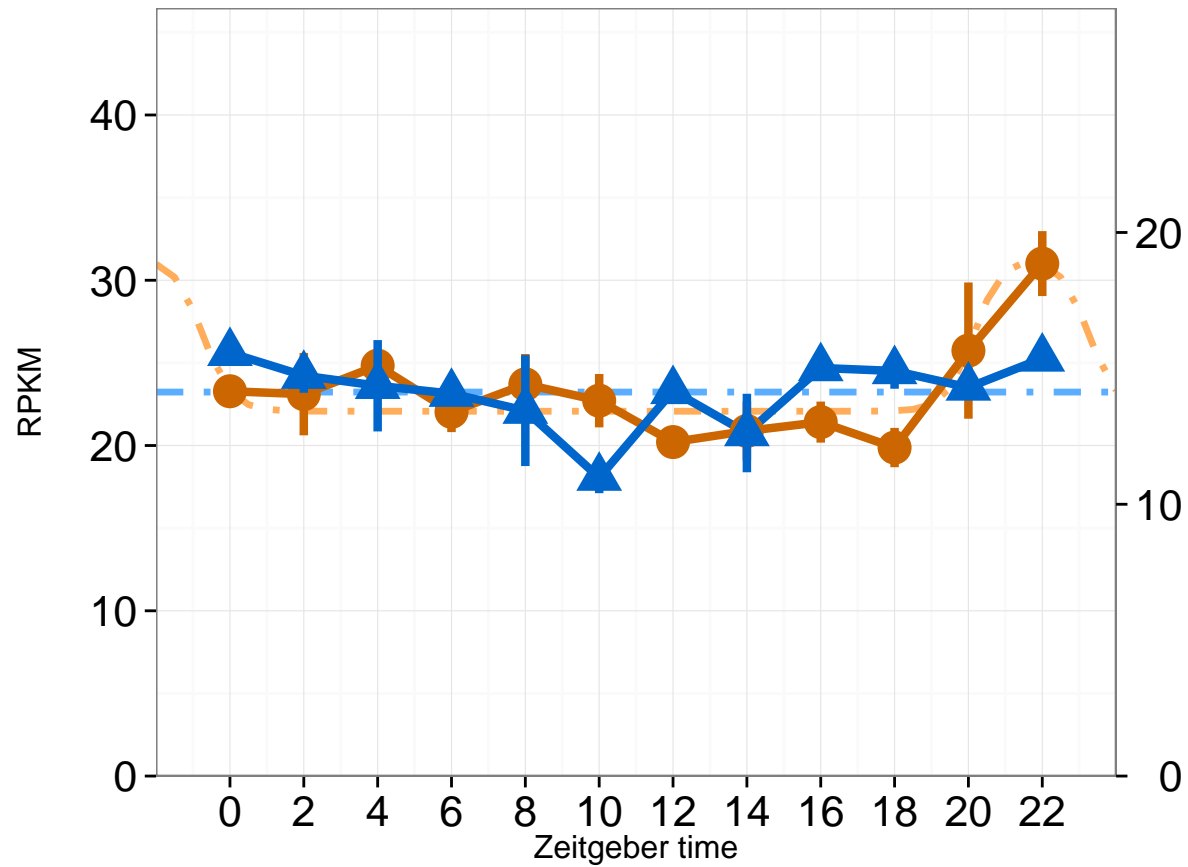

# Slc46a1

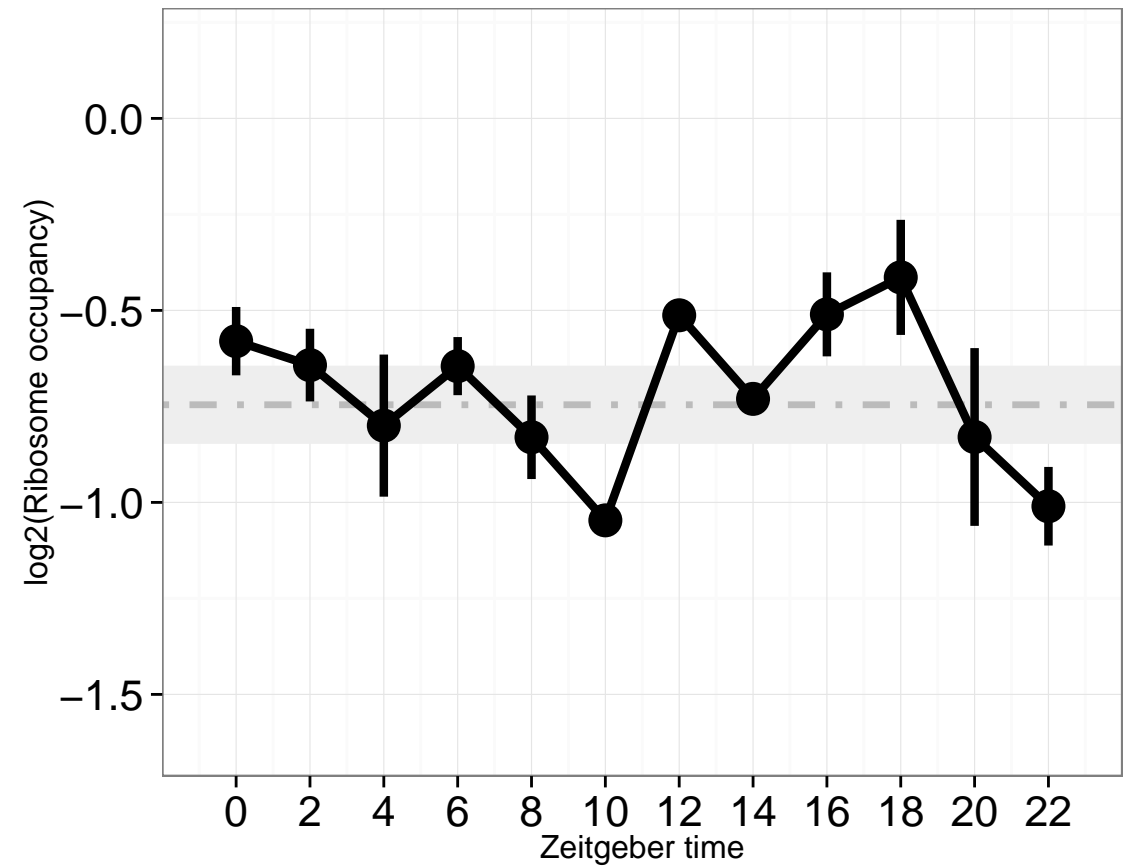

Supplement: SuppDataset_1.zip [file Slc46a1_set_A.pdf › Supplemental Dataset 1/A-mRNA_nonrhyth_translation_nonrhyth/Slc46a1_set_A.pdf]

## Slc47a1

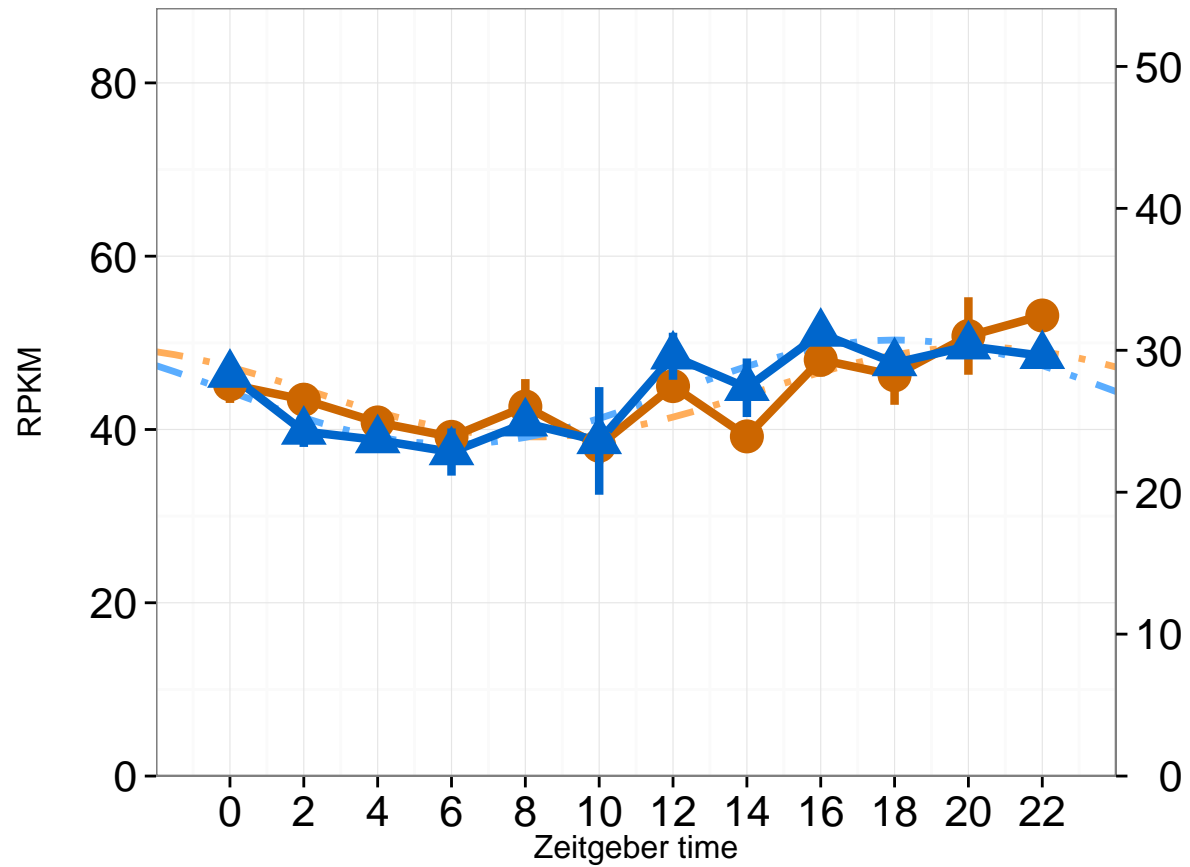

## Slc47a1

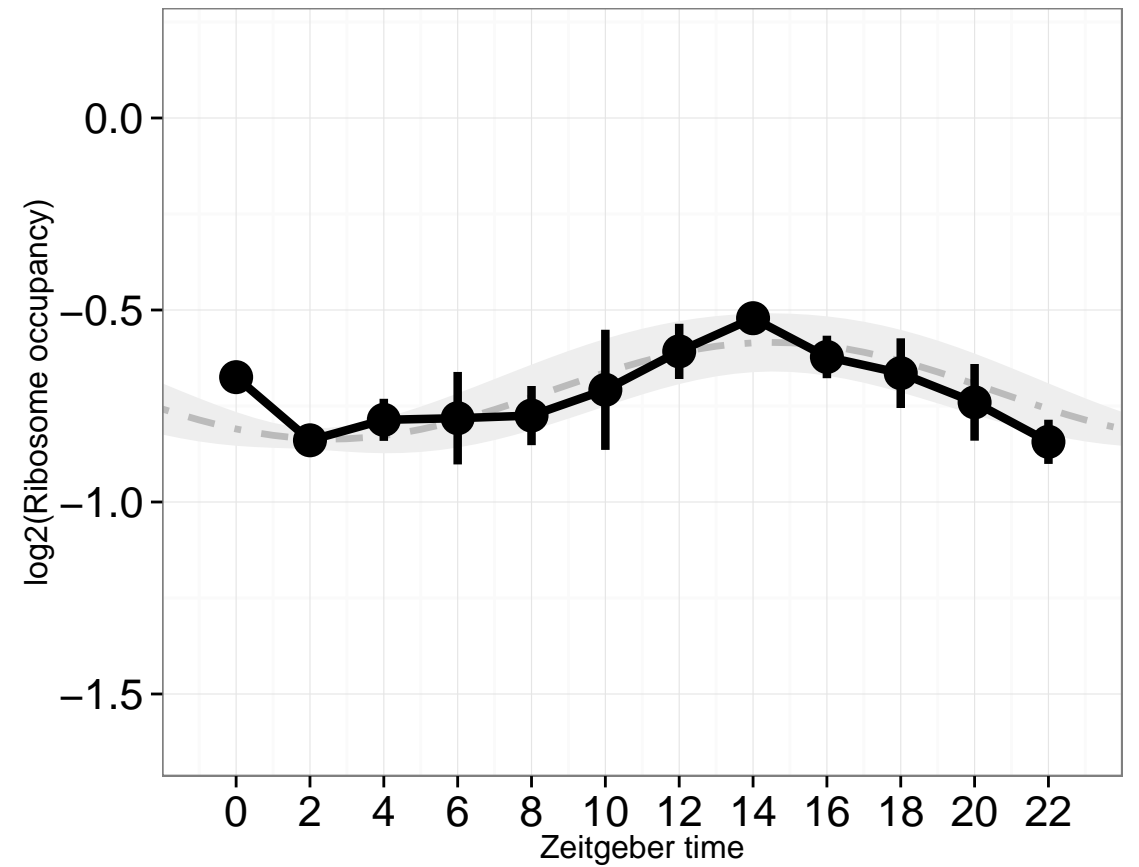

Supplement: SuppDataset_1.zip [file Slc47a1_set_A.pdf › Supplemental Dataset 1/A-mRNA_nonrhyth_translation_nonrhyth/Slc47a1_set_A.pdf]

# Slc4a2

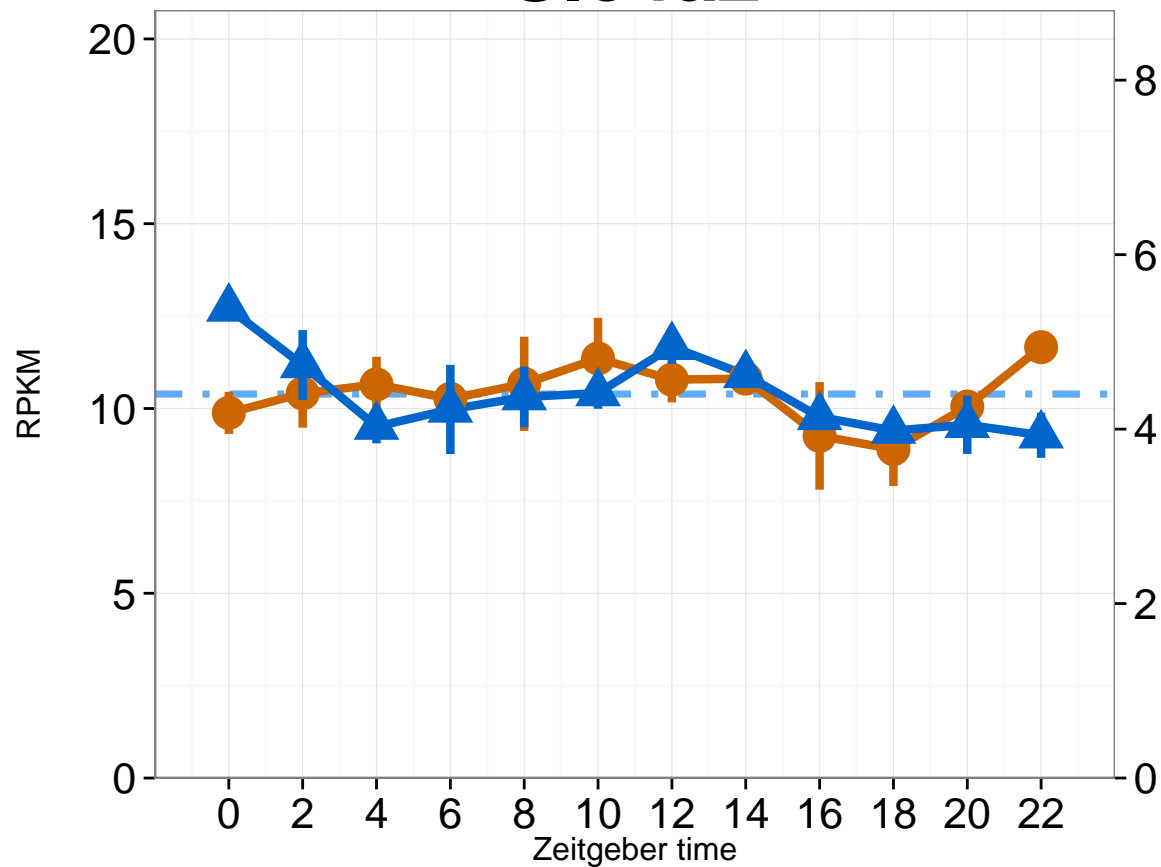

# Slc4a2

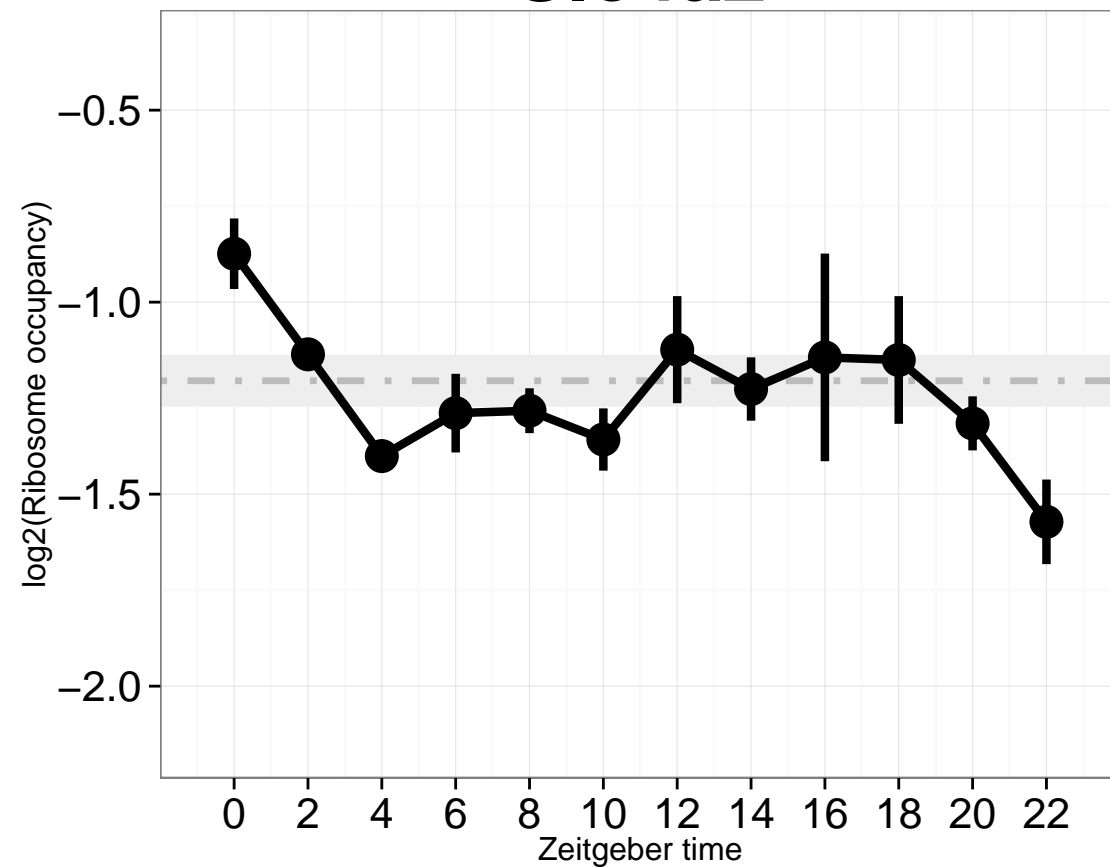

Supplement: SuppDataset_1.zip [file Slc4a2_set_A.pdf › Supplemental Dataset 1/A-mRNA_nonrhyth_translation_nonrhyth/Slc4a2_set_A.pdf]

# Slc4a7

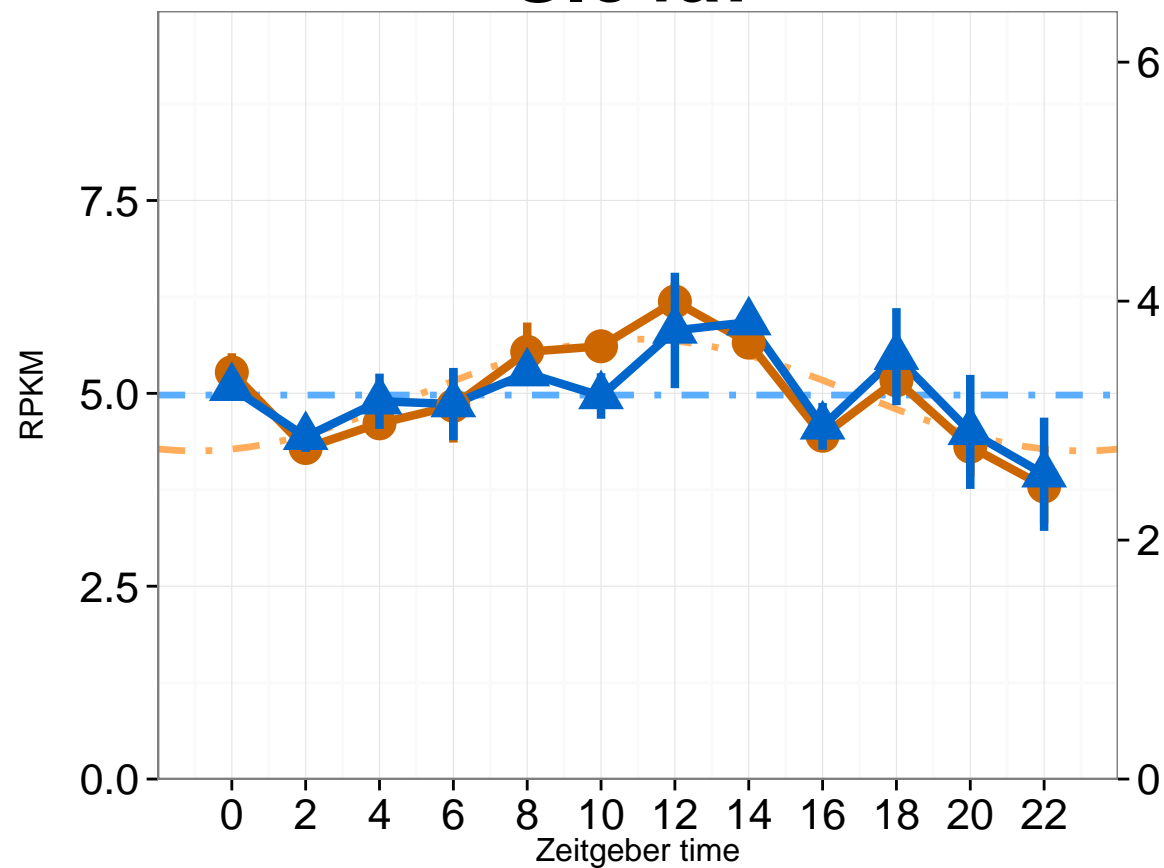

# Slc4a7

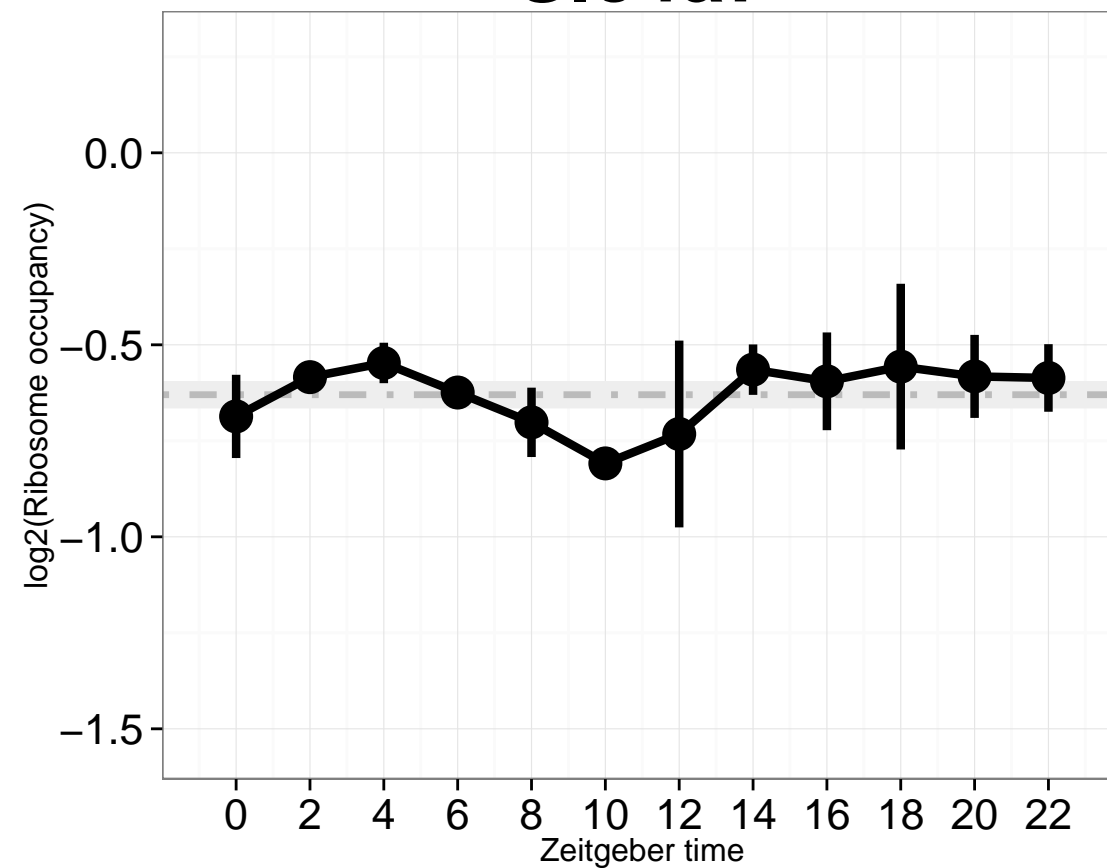

Supplement: SuppDataset_1.zip [file Slc4a7_set_A.pdf › Supplemental Dataset 1/A-mRNA_nonrhyth_translation_nonrhyth/Slc4a7_set_A.pdf]

**Slc51b TR**

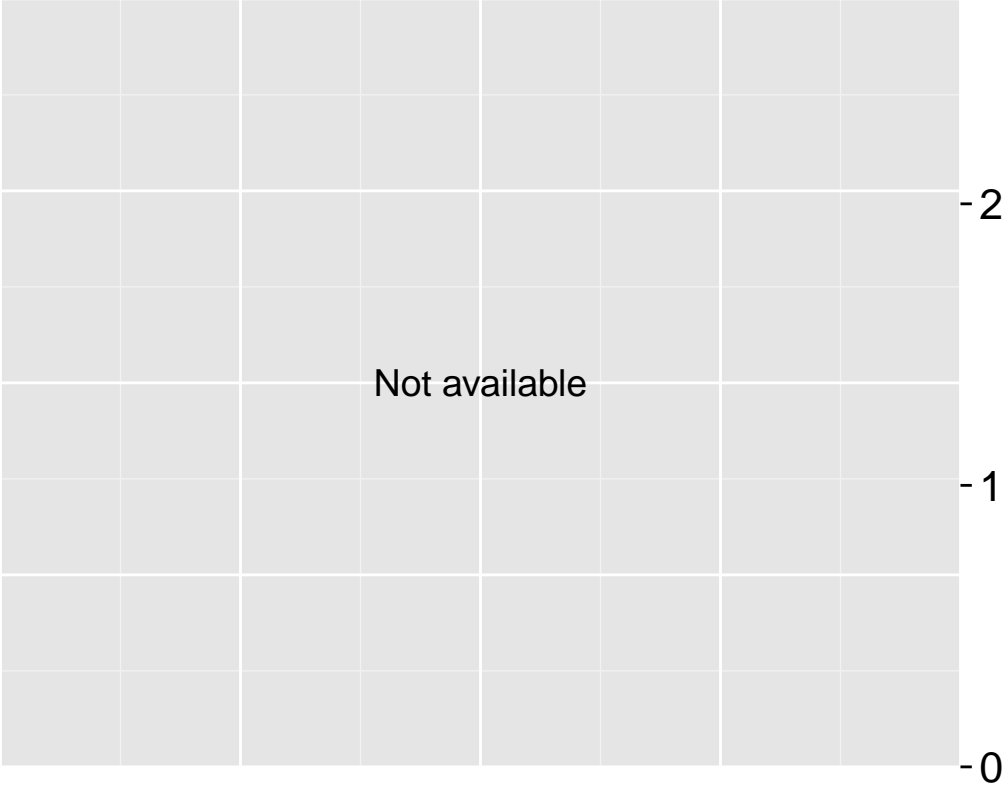

**Slc51b log2(Ribosome occupancy**

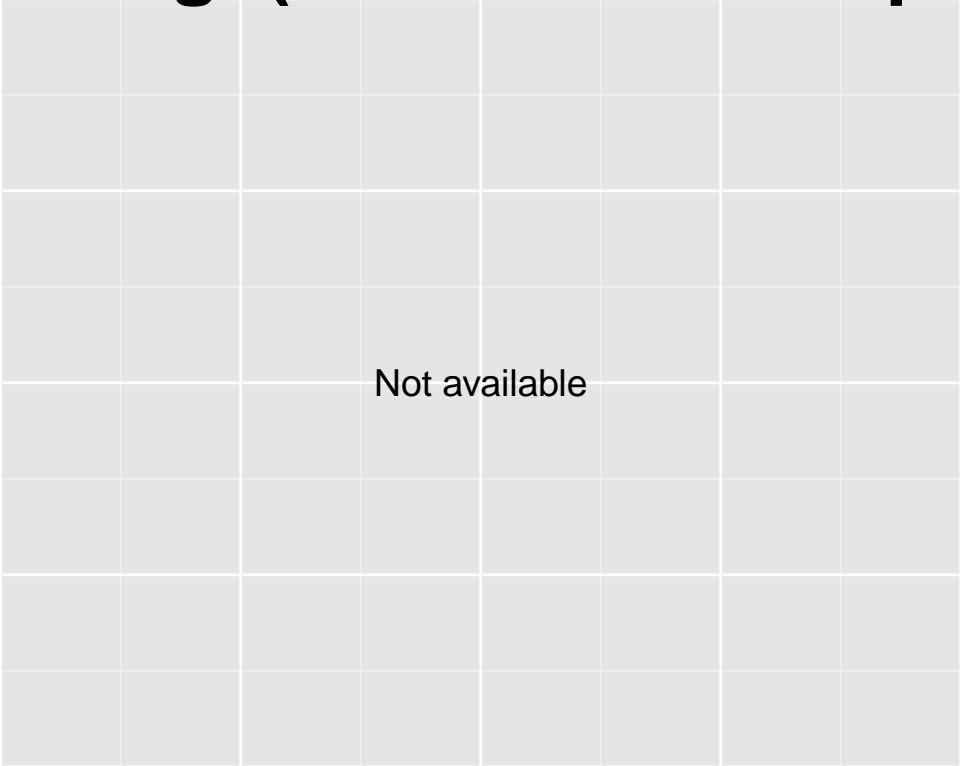

Supplement: SuppDataset_1.zip [file Slc51b_set_A.pdf › Supplemental Dataset 1/A-mRNA_nonrhyth_translation_nonrhyth/Slc51b_set_A.pdf]

## Slc52a2

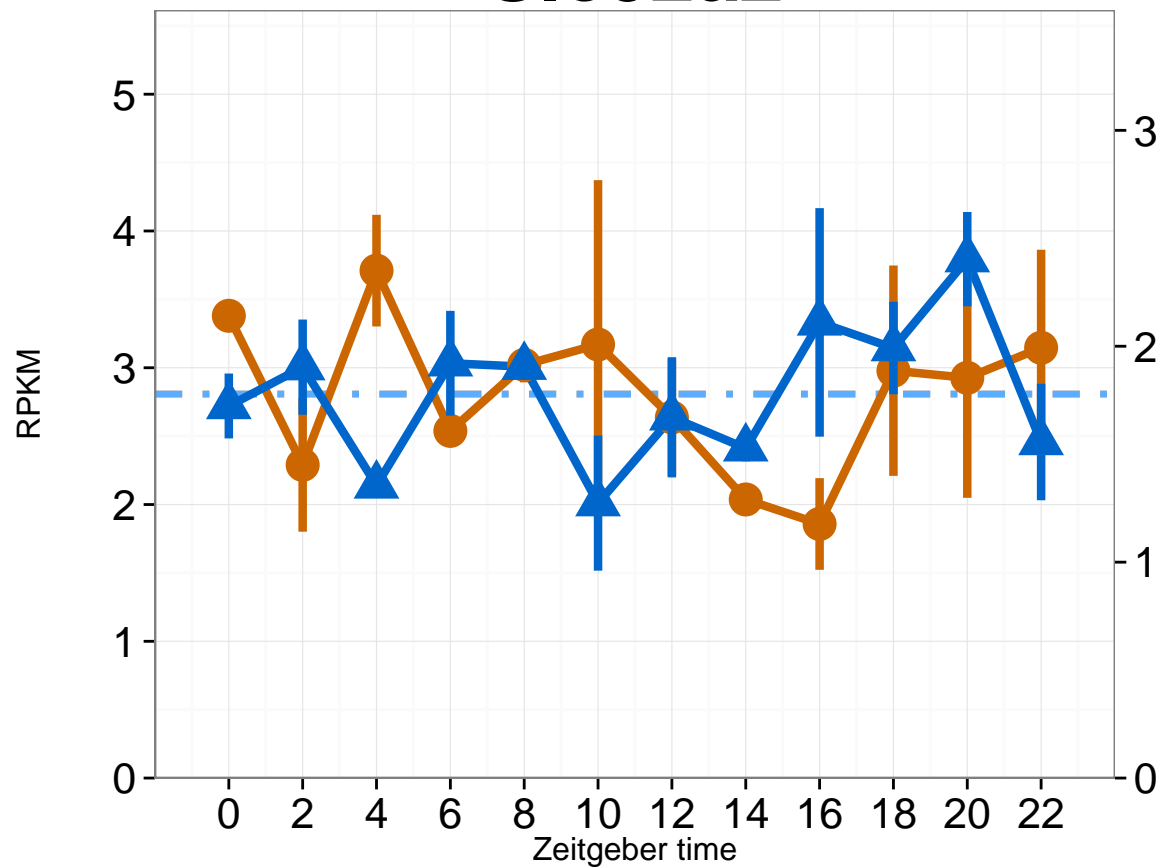

## Slc52a2

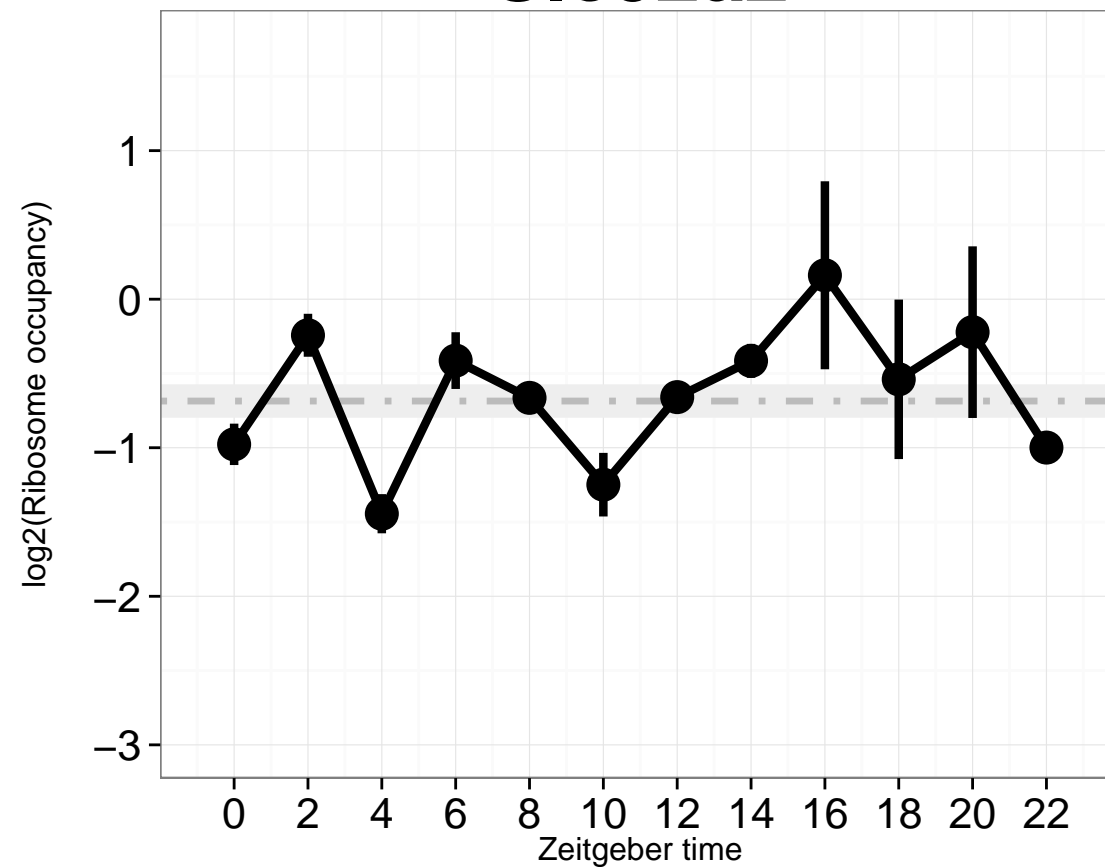

Supplement: SuppDataset_1.zip [file Slc52a2_set_A.pdf › Supplemental Dataset 1/A-mRNA_nonrhyth_translation_nonrhyth/Slc52a2_set_A.pdf]

**Slc5a1 TR**

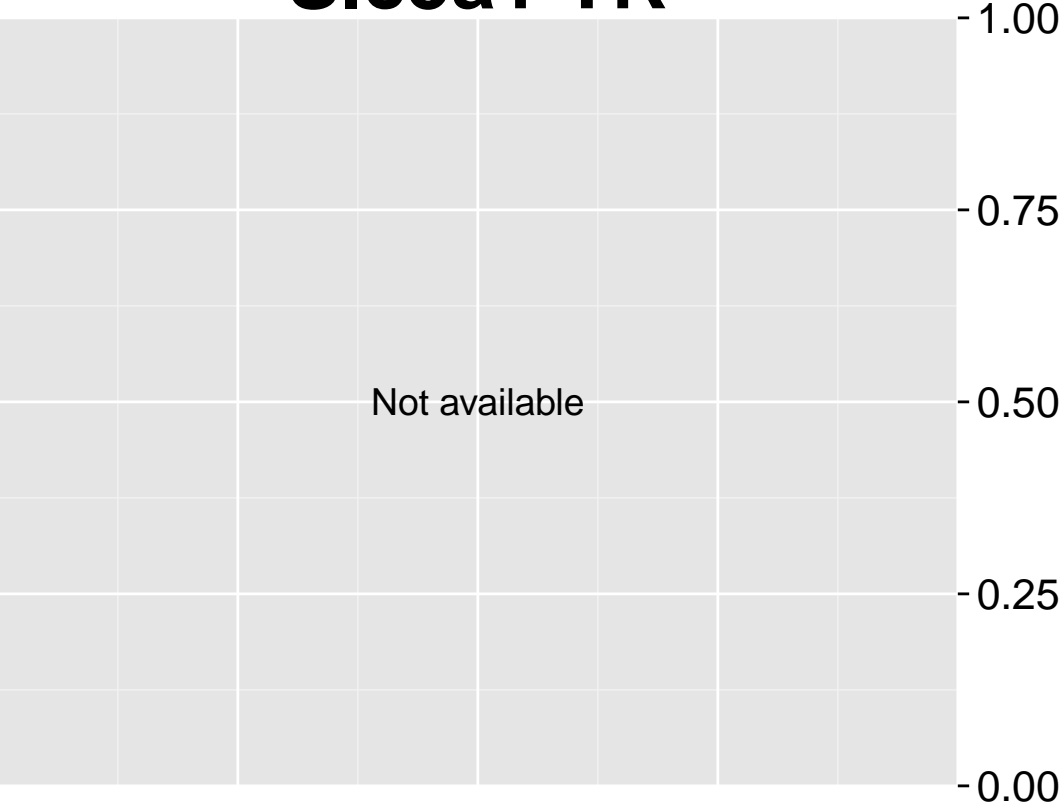

**Slc5a1 log2(Ribosome occupancy**

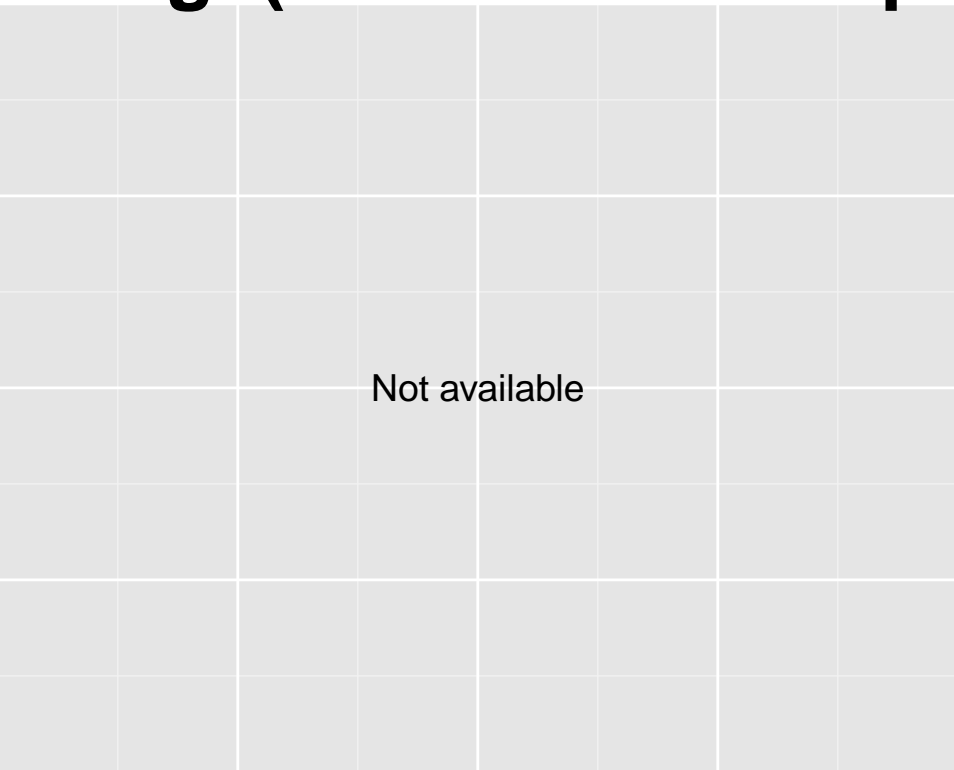

Supplement: SuppDataset_1.zip [file Slc5a1_set_A.pdf › Supplemental Dataset 1/A-mRNA_nonrhyth_translation_nonrhyth/Slc5a1_set_A.pdf]

## Slc6a12

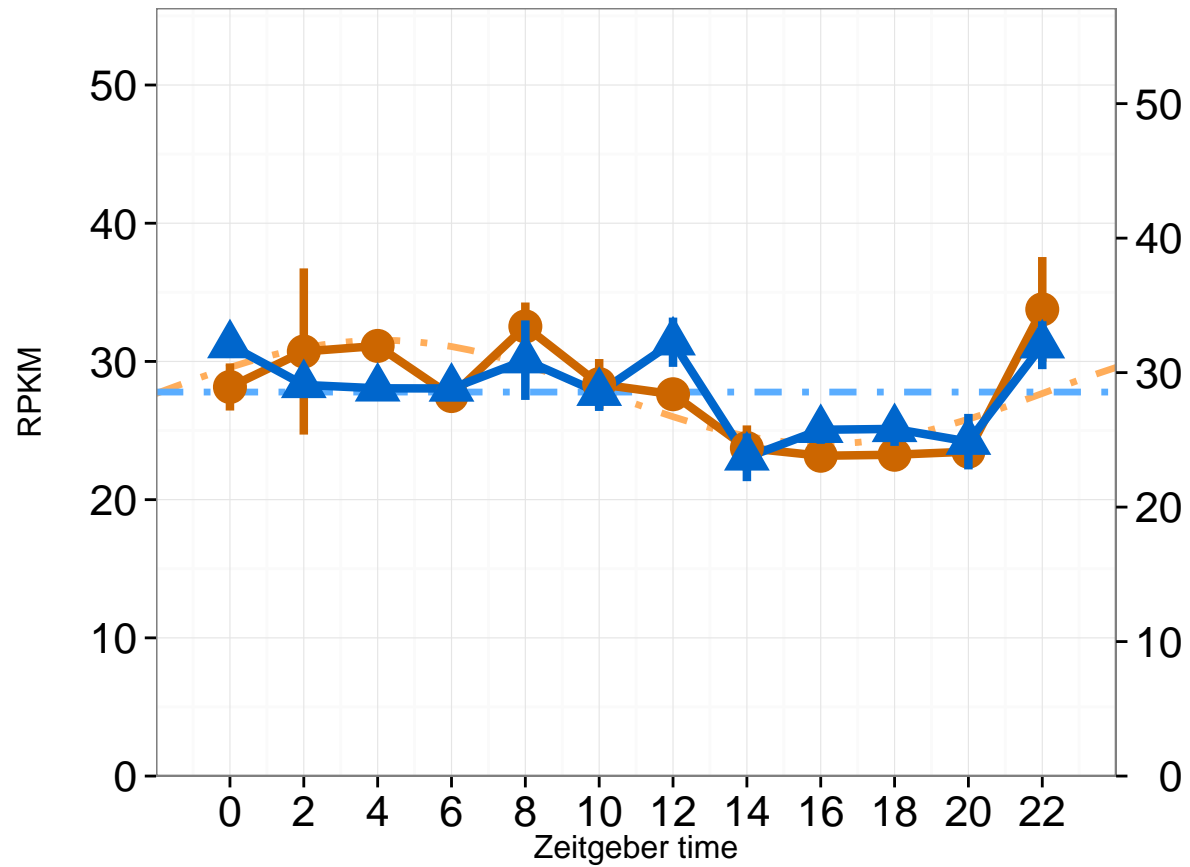

## Slc6a12

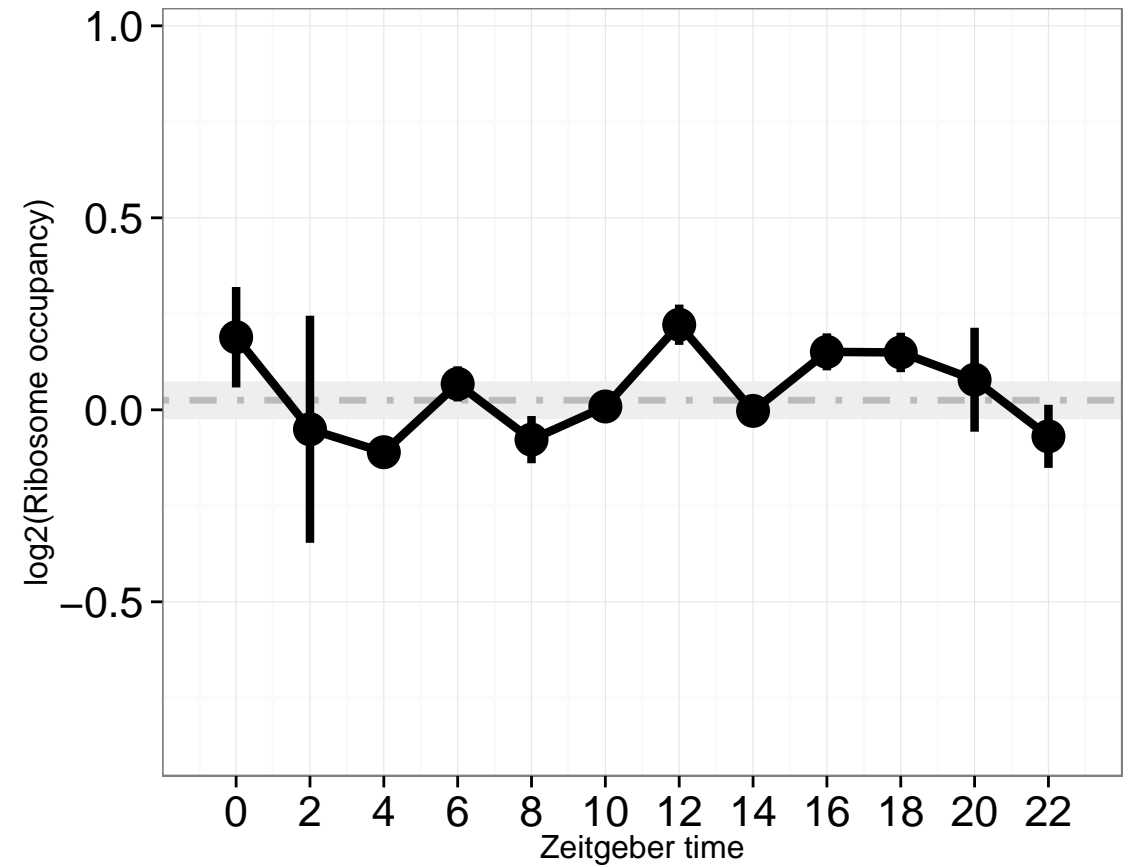

Supplement: SuppDataset_1.zip [file Slc6a12_set_A.pdf › Supplemental Dataset 1/A-mRNA_nonrhyth_translation_nonrhyth/Slc6a12_set_A.pdf]

## Slc6a13

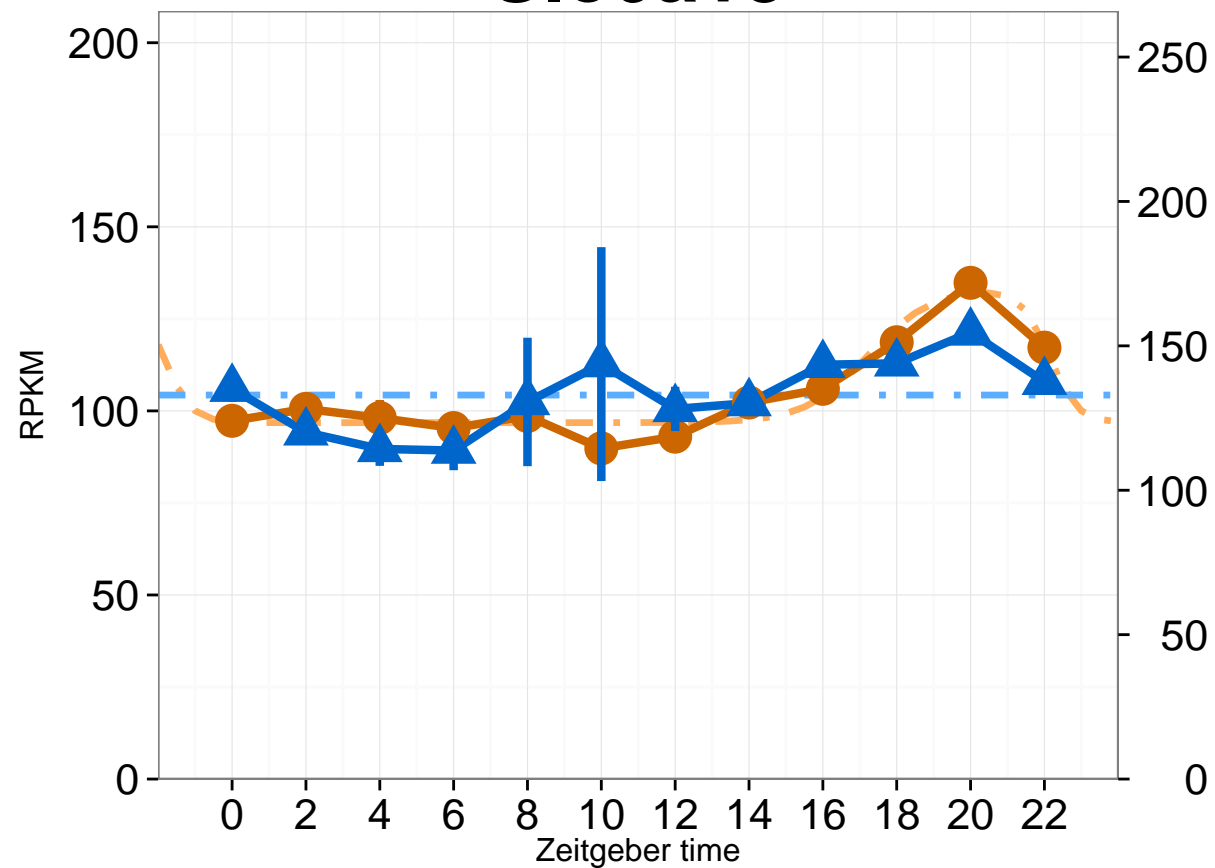

## Slc6a13

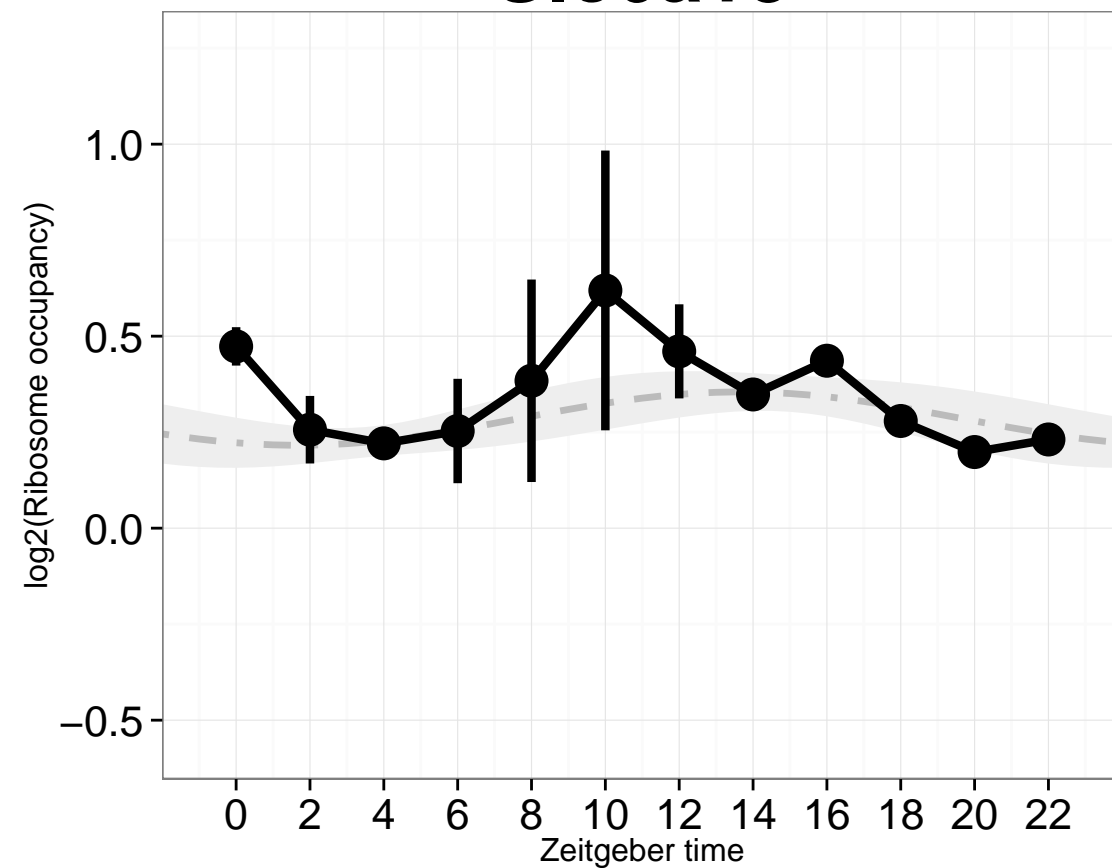

Supplement: SuppDataset_1.zip [file Slc6a13_set_A.pdf › Supplemental Dataset 1/A-mRNA_nonrhyth_translation_nonrhyth/Slc6a13_set_A.pdf]

# Slc6a6

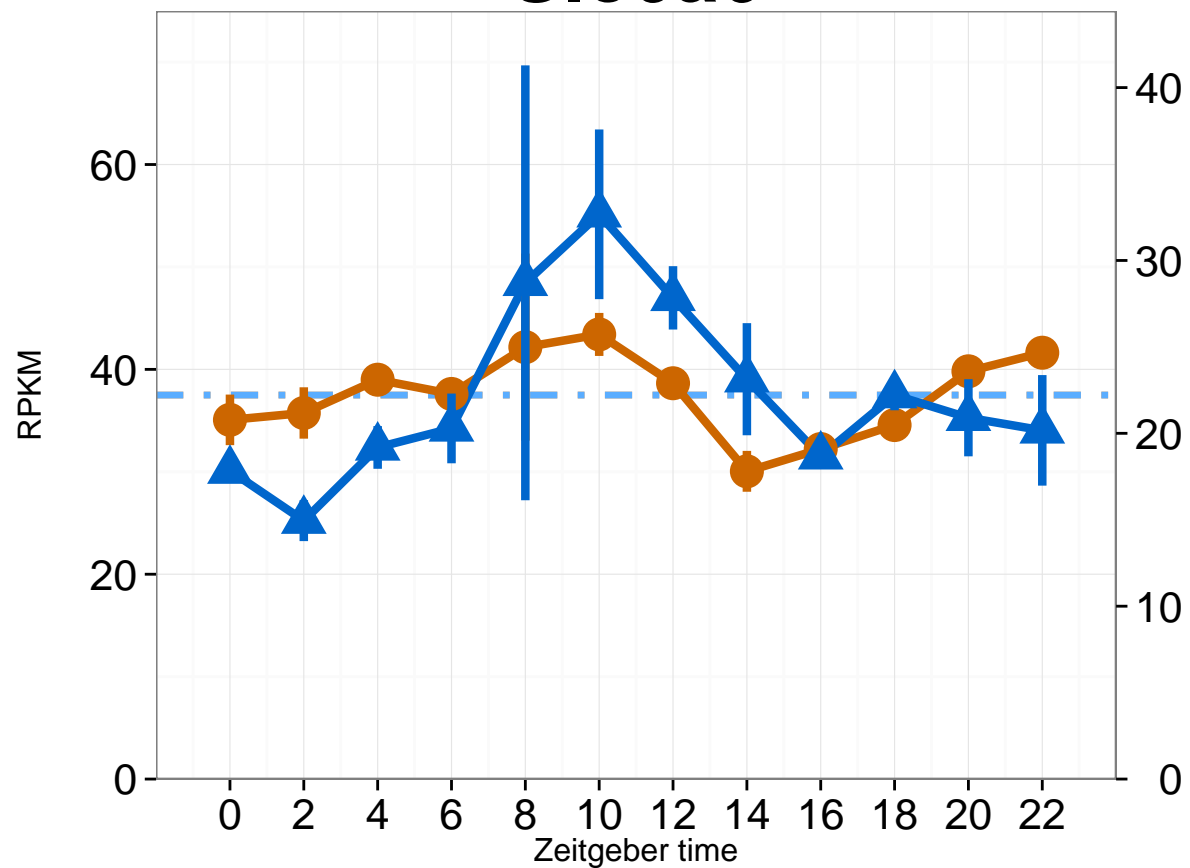

# Slc6a6

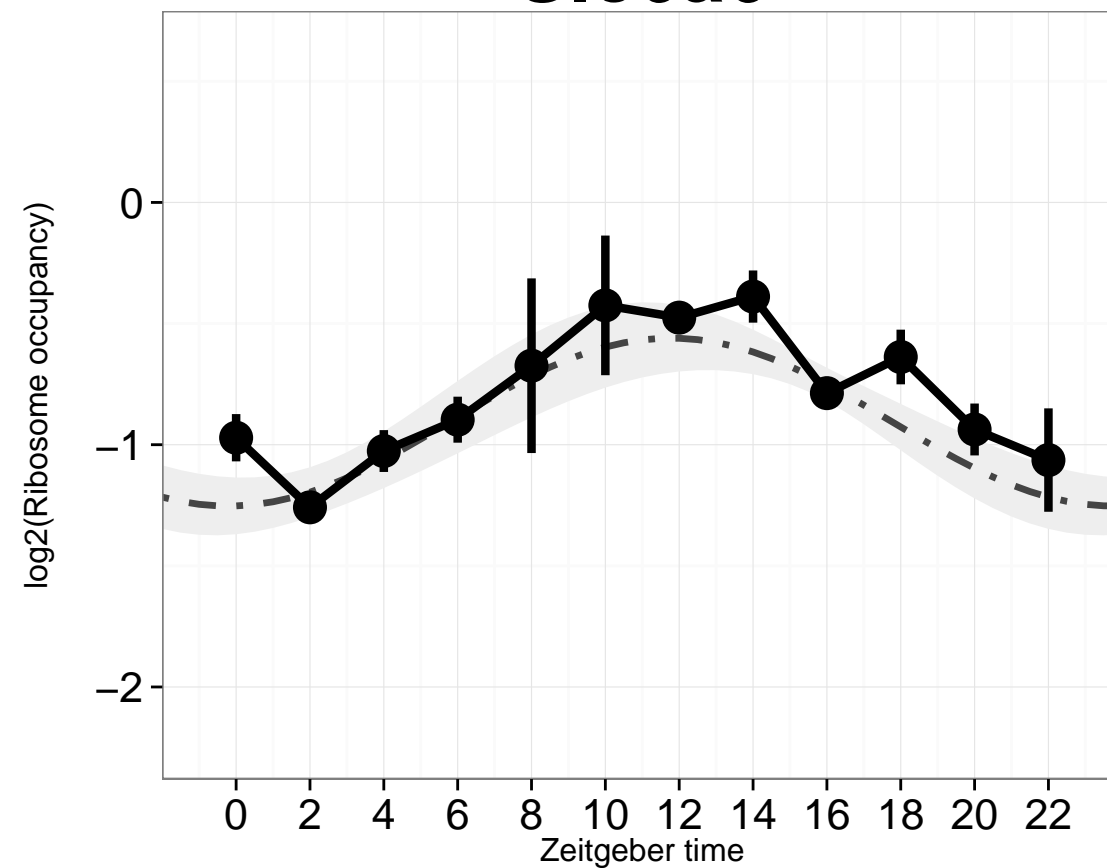

Supplement: SuppDataset_1.zip [file Slc6a6_set_A.pdf › Supplemental Dataset 1/A-mRNA_nonrhyth_translation_nonrhyth/Slc6a6_set_A.pdf]

# Slc6a8

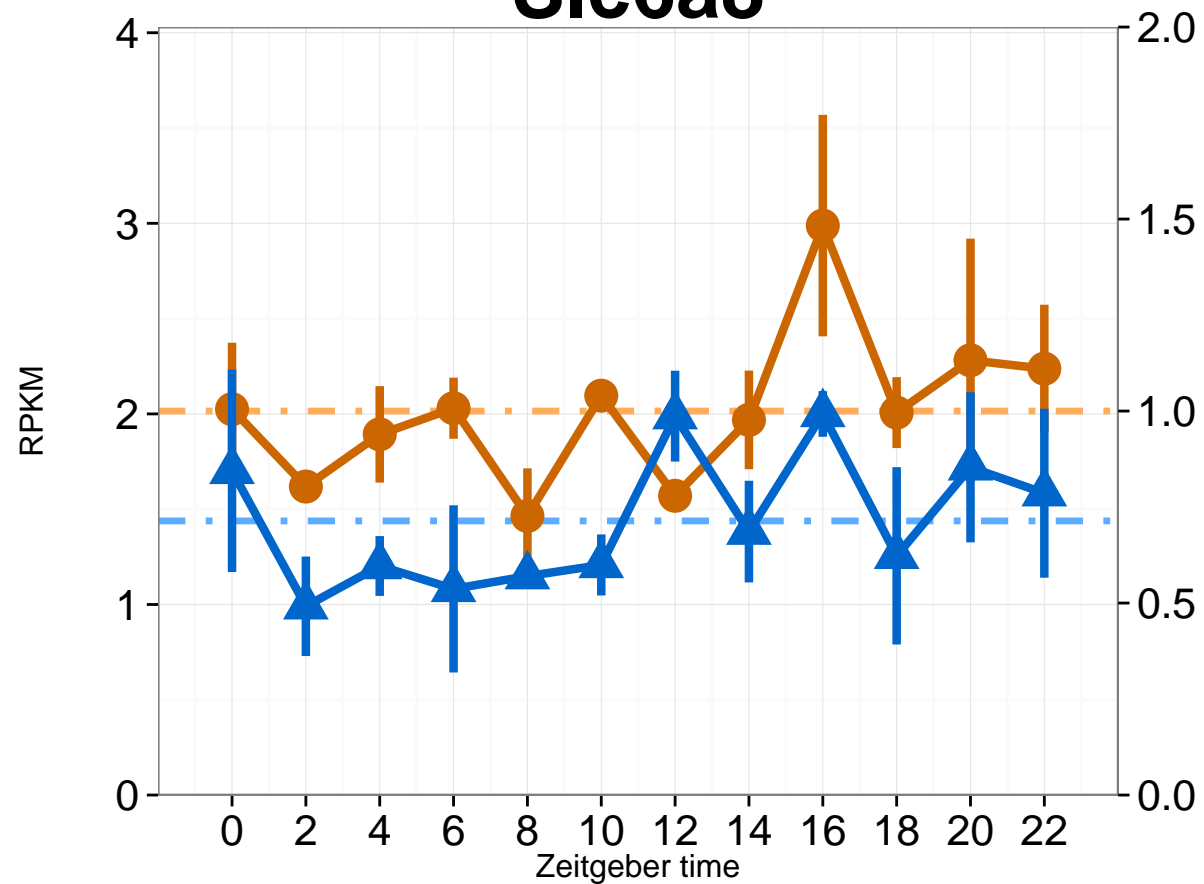

# Slc6a8

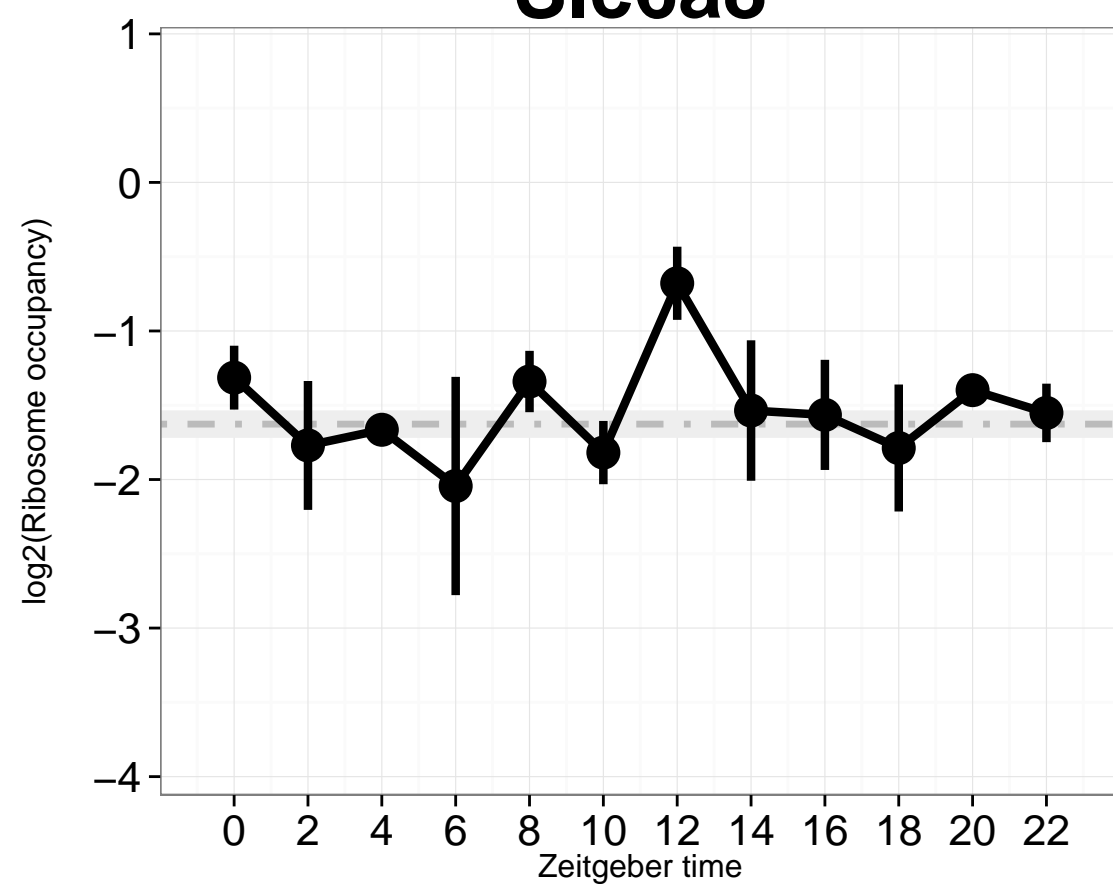

Supplement: SuppDataset_1.zip [file Slc6a8_set_A.pdf › Supplemental Dataset 1/A-mRNA_nonrhyth_translation_nonrhyth/Slc6a8_set_A.pdf]

# Slc7a1 TR

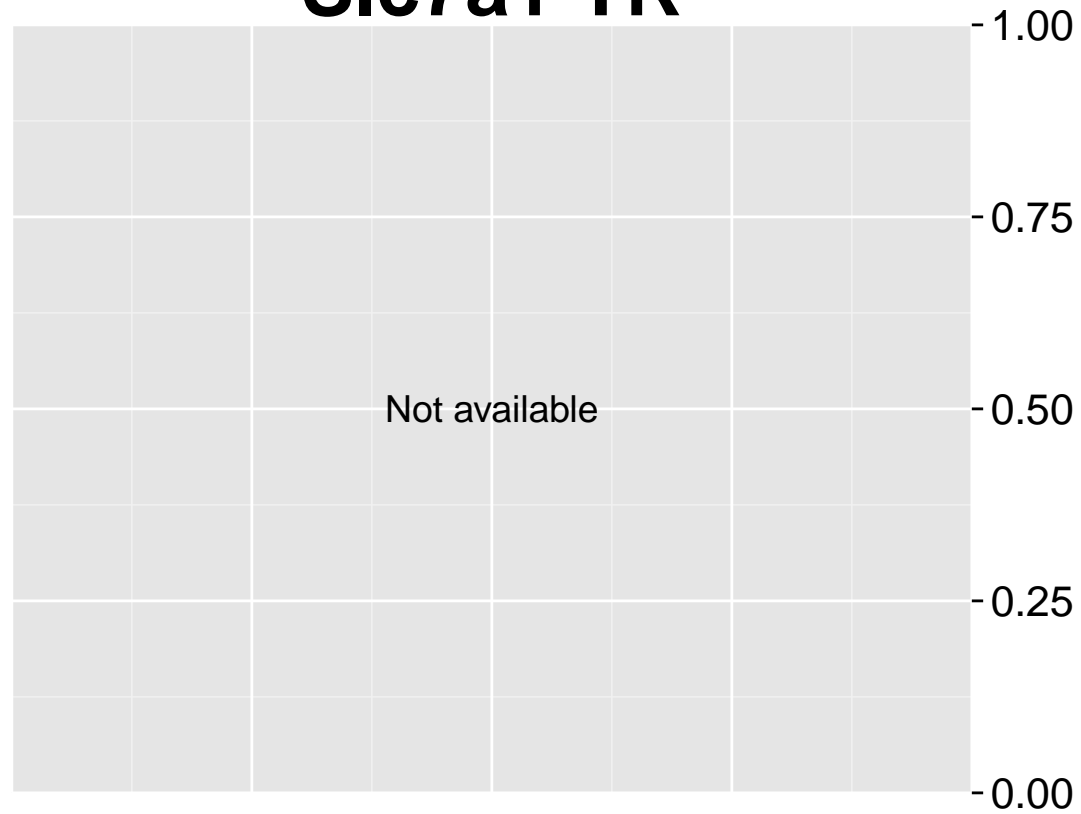

# Slc7a1 log2(Ribosome occupancy

Supplement: SuppDataset_1.zip [file Slc7a1_set_A.pdf › Supplemental Dataset 1/A-mRNA_nonrhyth_translation_nonrhyth/Slc7a1_set_A.pdf]

## Slc7a6os

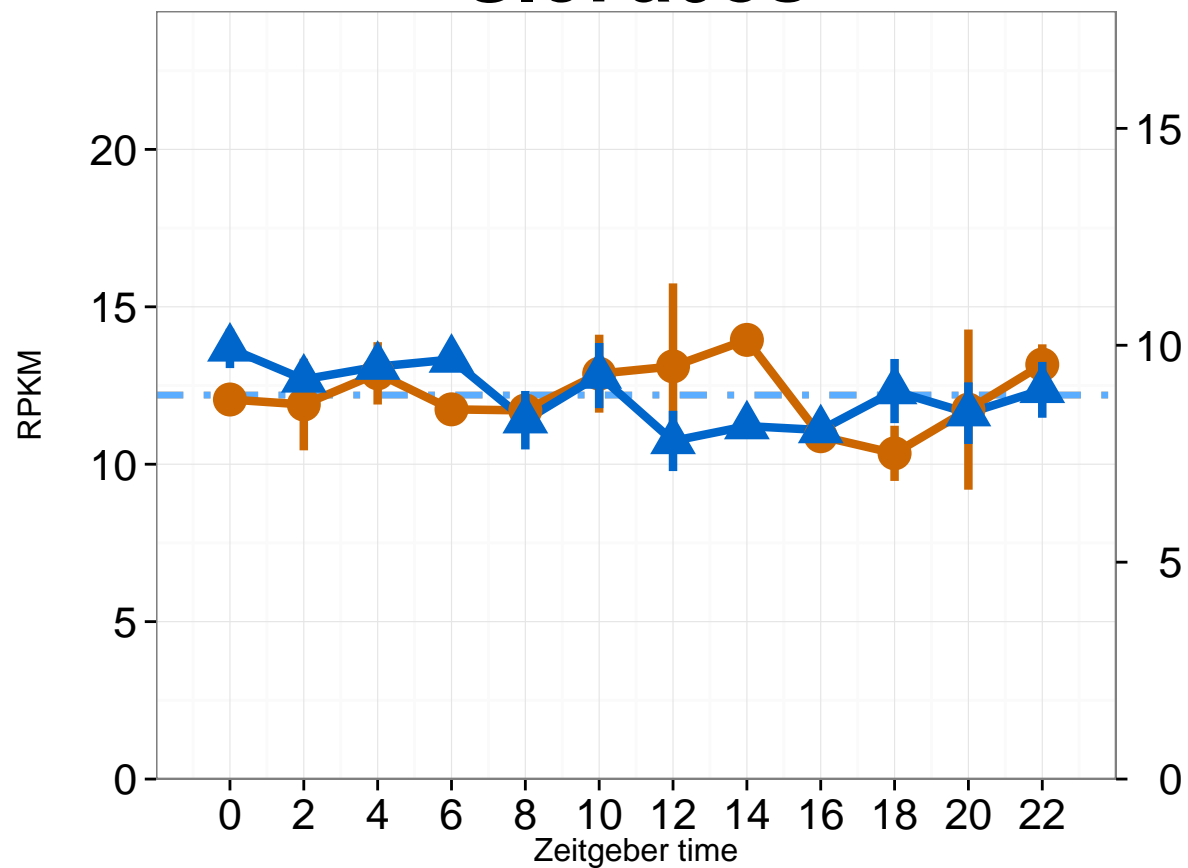

## Slc7a6os

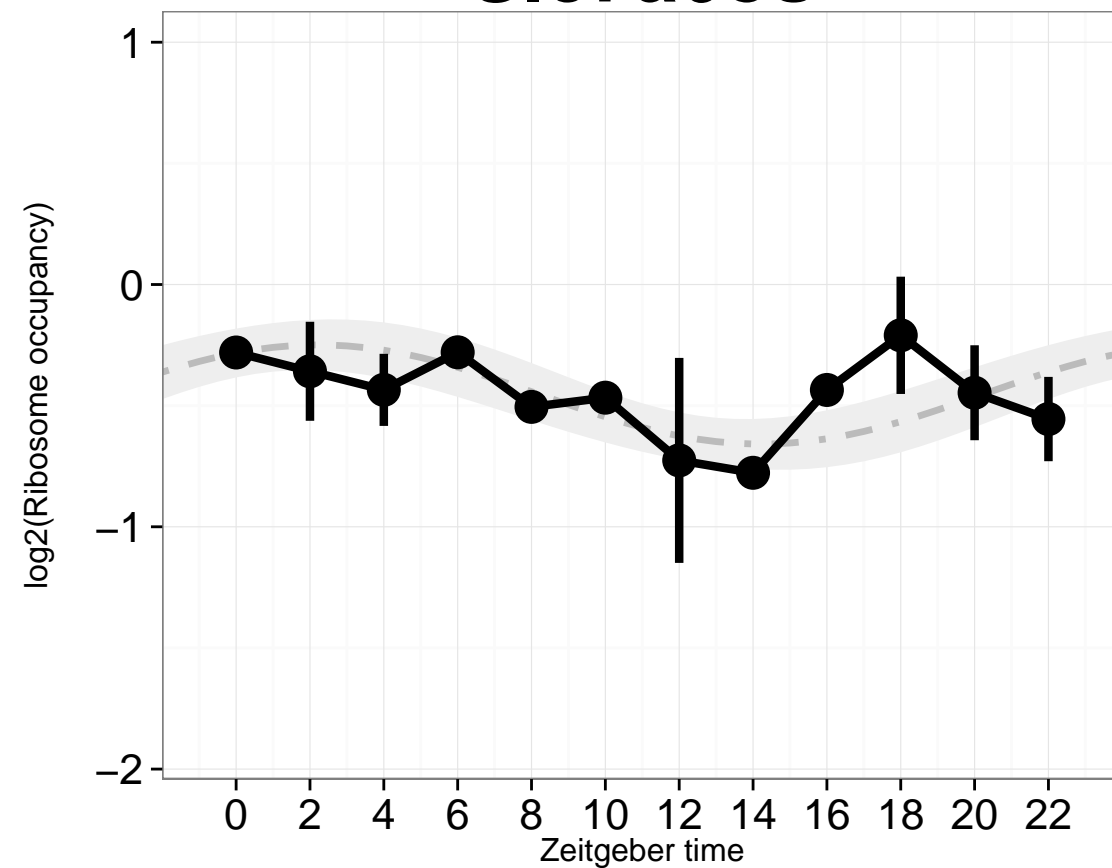

Supplement: SuppDataset_1.zip [file Slc7a6os_set_A.pdf › Supplemental Dataset 1/A-mRNA_nonrhyth_translation_nonrhyth/Slc7a6os_set_A.pdf]

# Slc7a7

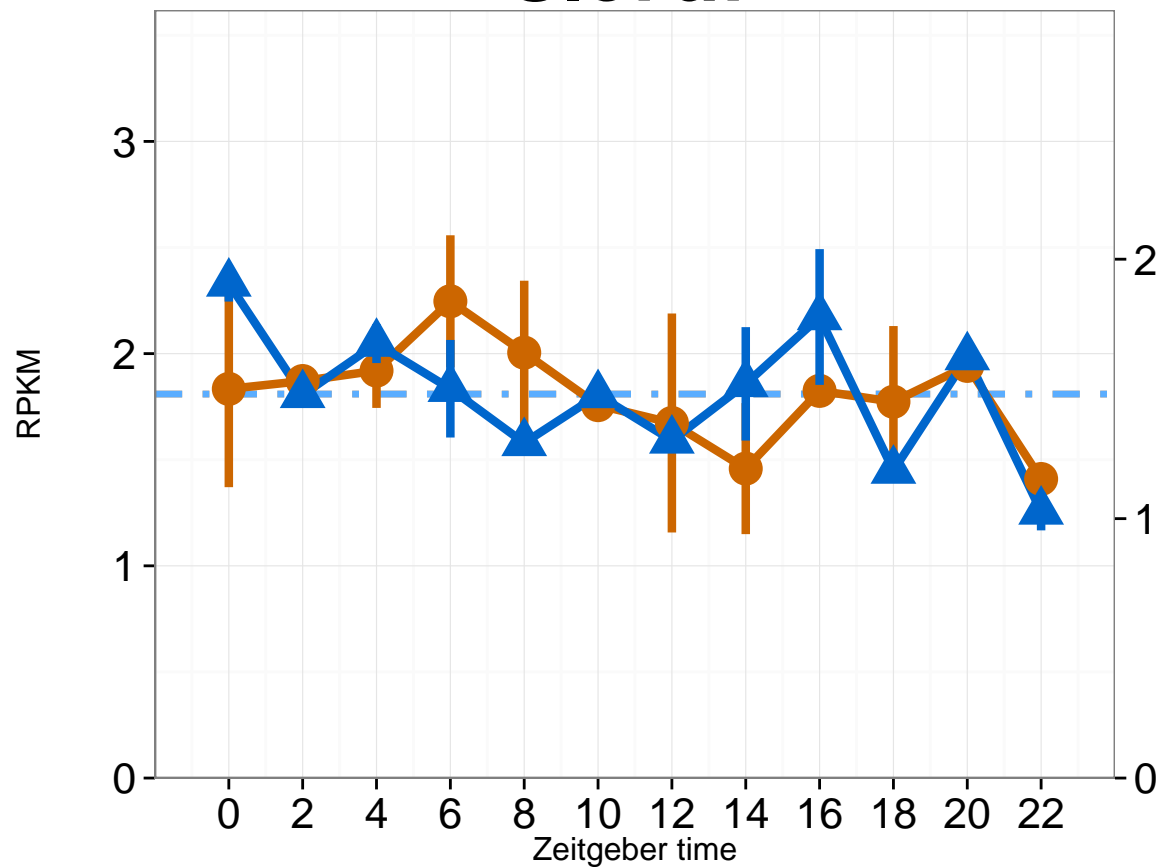

# Slc7a7

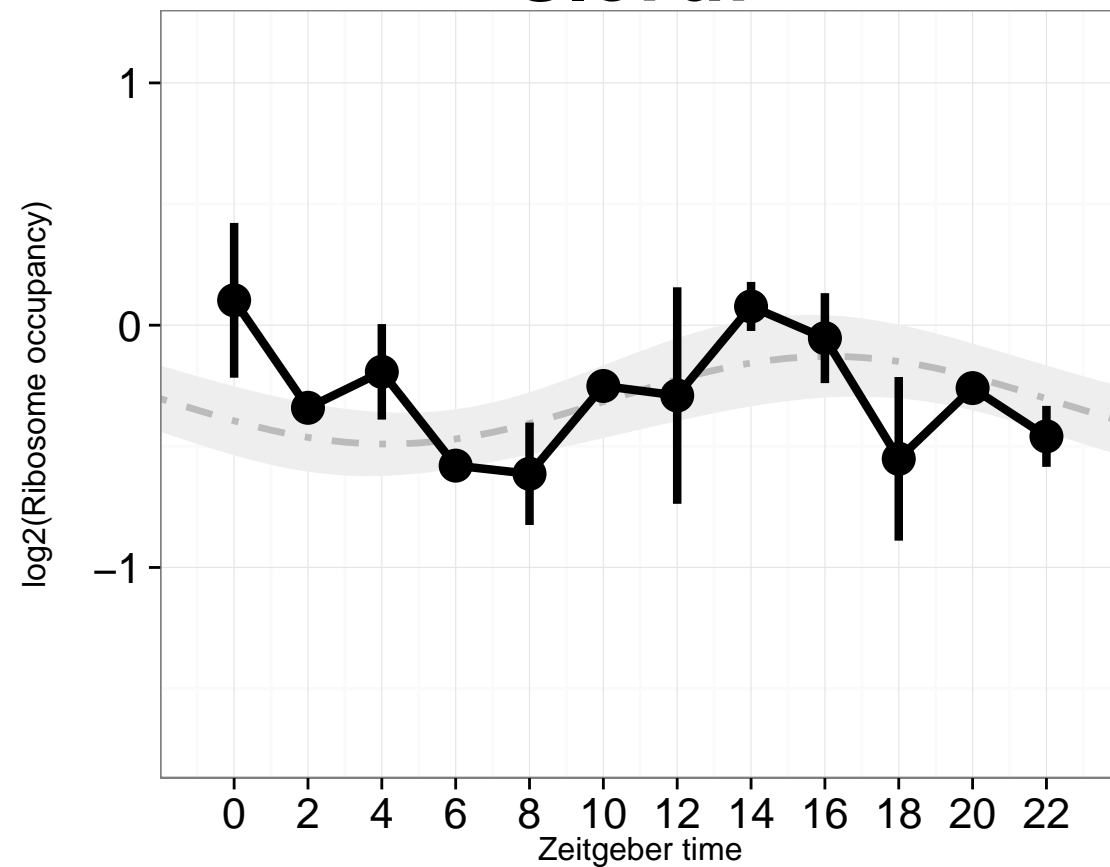

Supplement: SuppDataset_1.zip [file Slc7a7_set_A.pdf › Supplemental Dataset 1/A-mRNA_nonrhyth_translation_nonrhyth/Slc7a7_set_A.pdf]

# Slc8a1

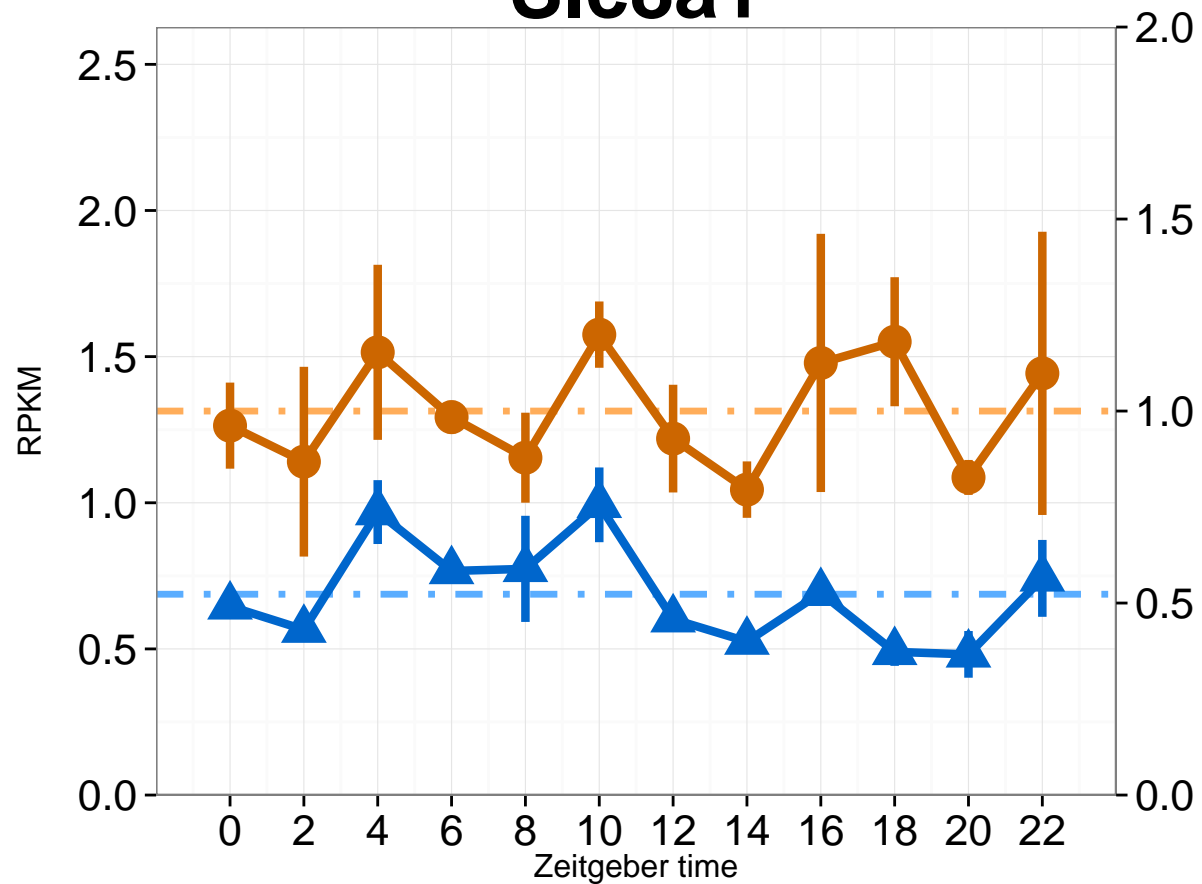

# Slc8a1

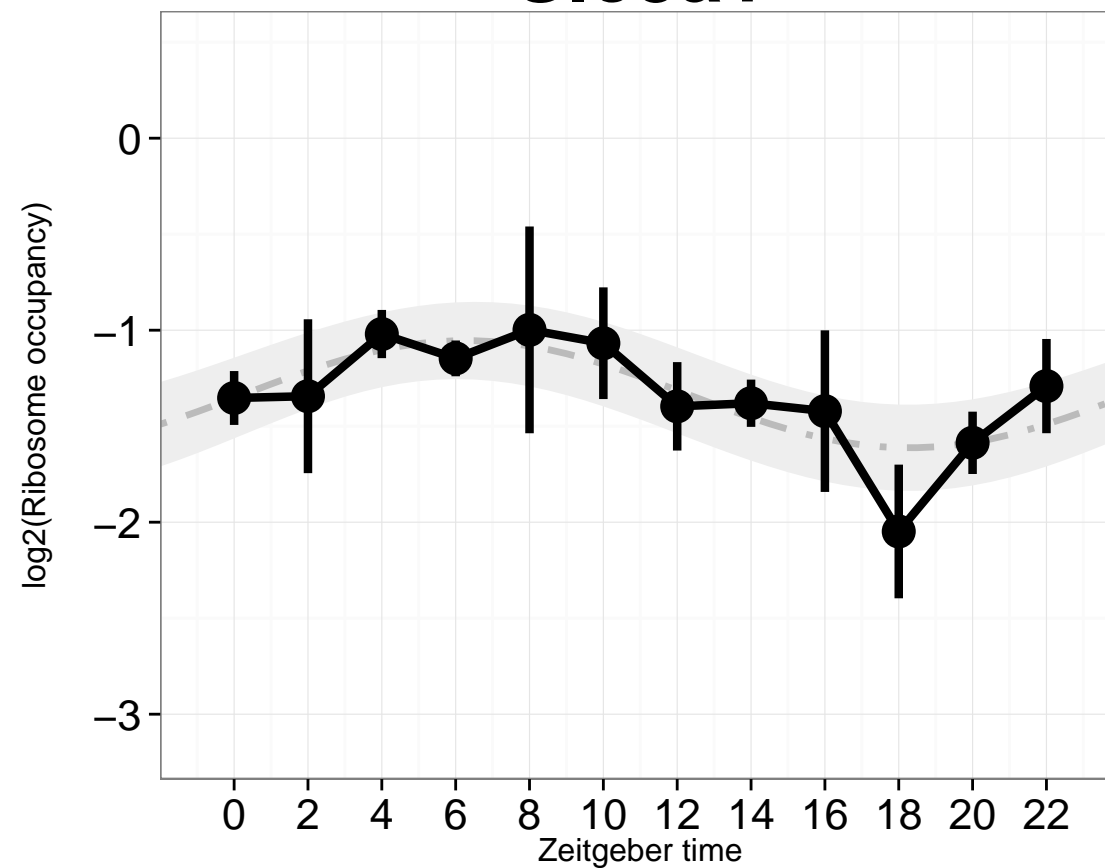

Supplement: SuppDataset_1.zip [file Slc8a1_set_A.pdf › Supplemental Dataset 1/A-mRNA_nonrhyth_translation_nonrhyth/Slc8a1_set_A.pdf]

## Slc9a1

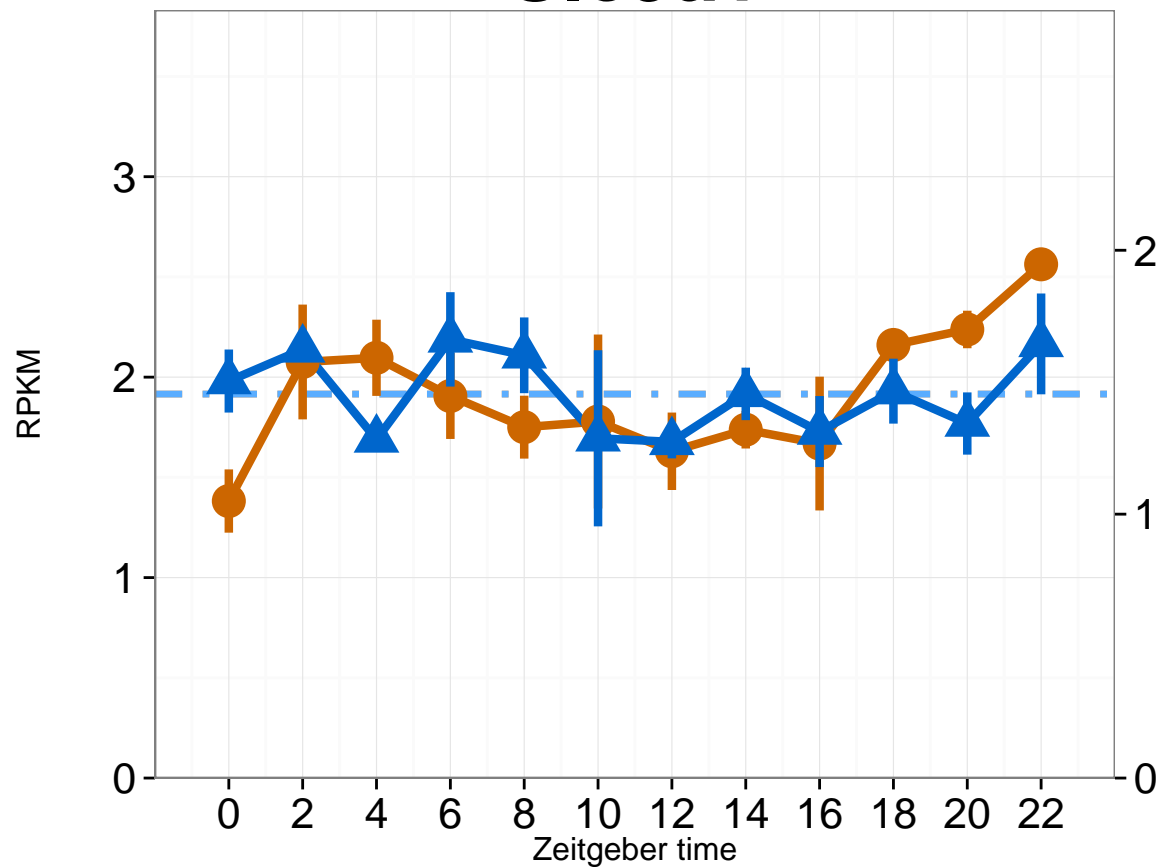

## Slc9a1

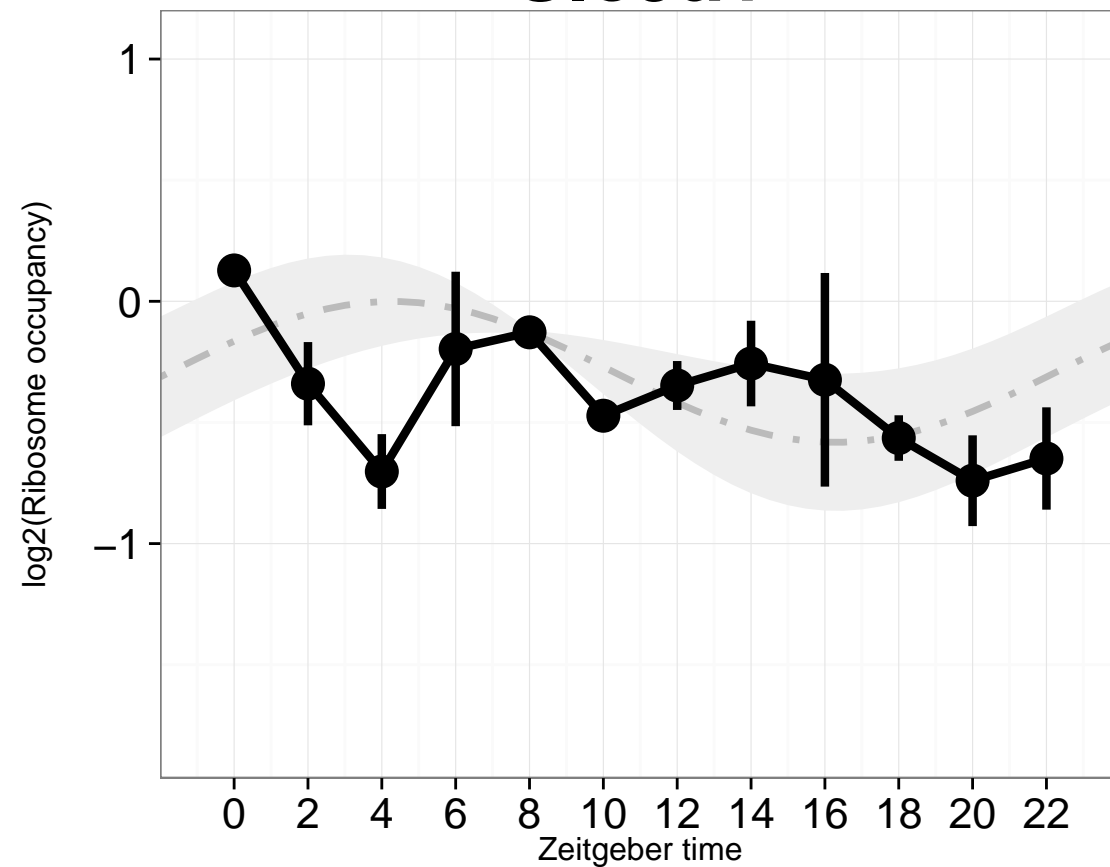

Supplement: SuppDataset_1.zip [file Slc9a1_set_A.pdf › Supplemental Dataset 1/A-mRNA_nonrhyth_translation_nonrhyth/Slc9a1_set_A.pdf]

# Slc9a3r1

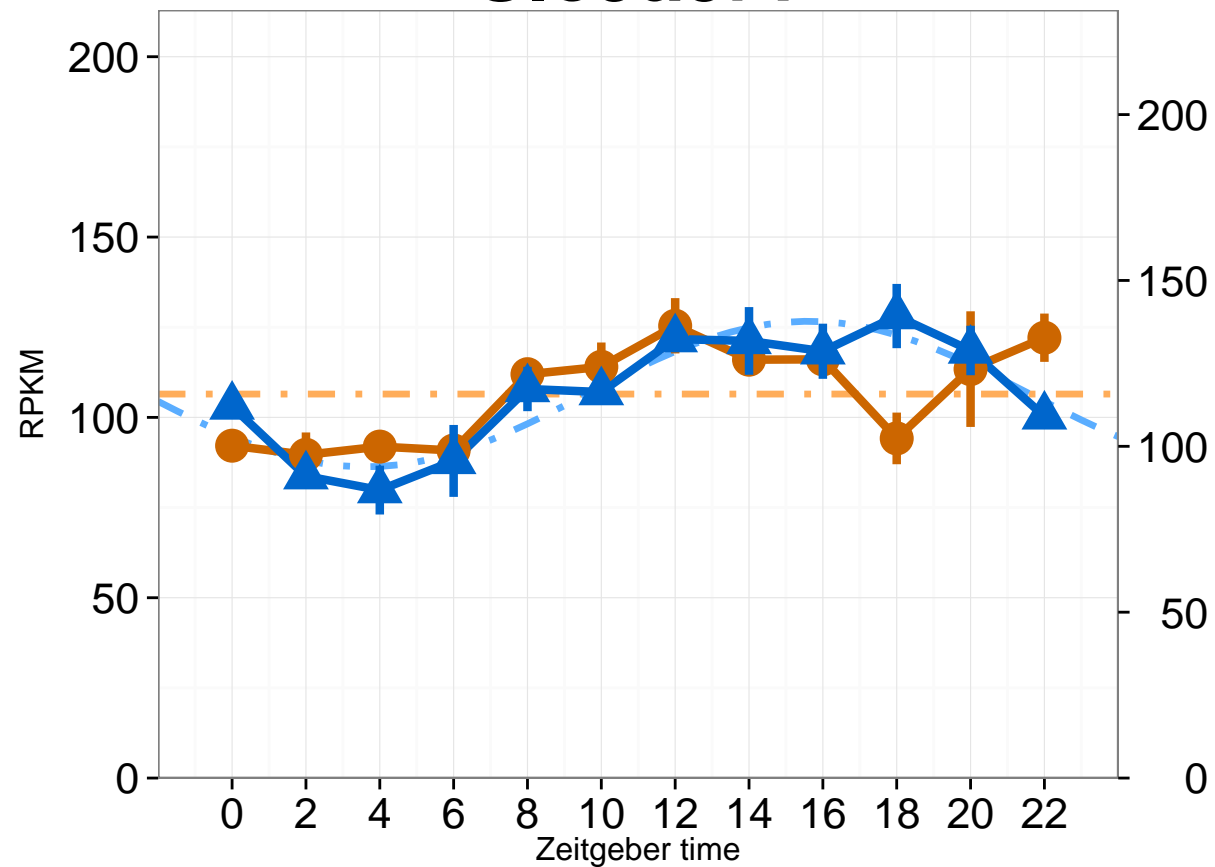

# Slc9a3r1

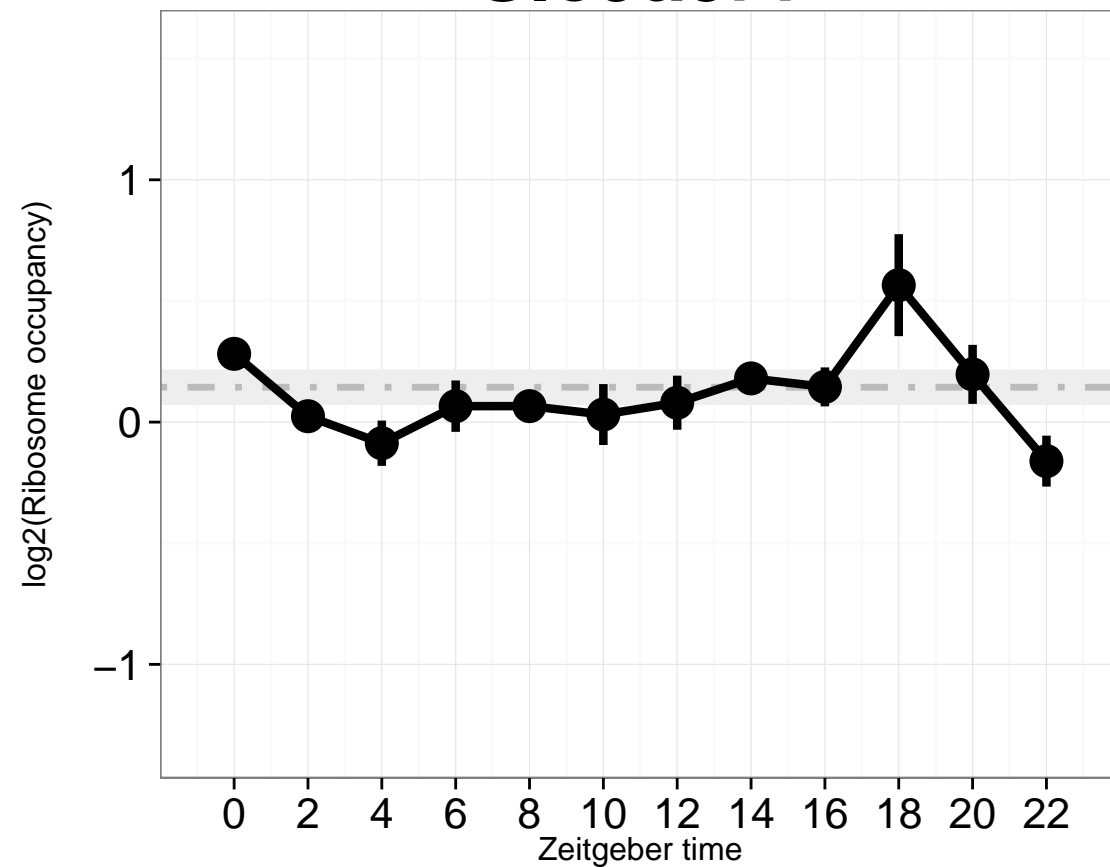

Supplement: SuppDataset_1.zip [file Slc9a3r1_set_A.pdf › Supplemental Dataset 1/A-mRNA_nonrhyth_translation_nonrhyth/Slc9a3r1_set_A.pdf]

# Slc9a3r2

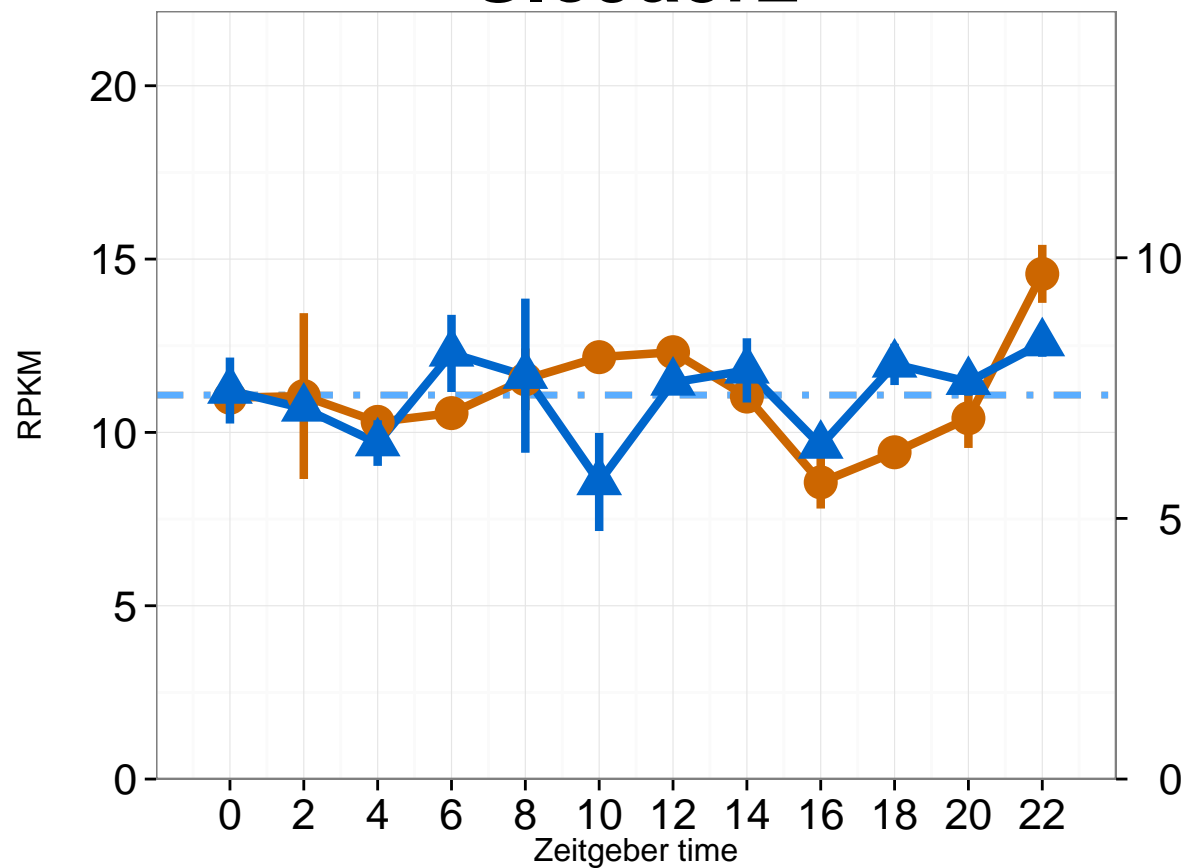

# Slc9a3r2

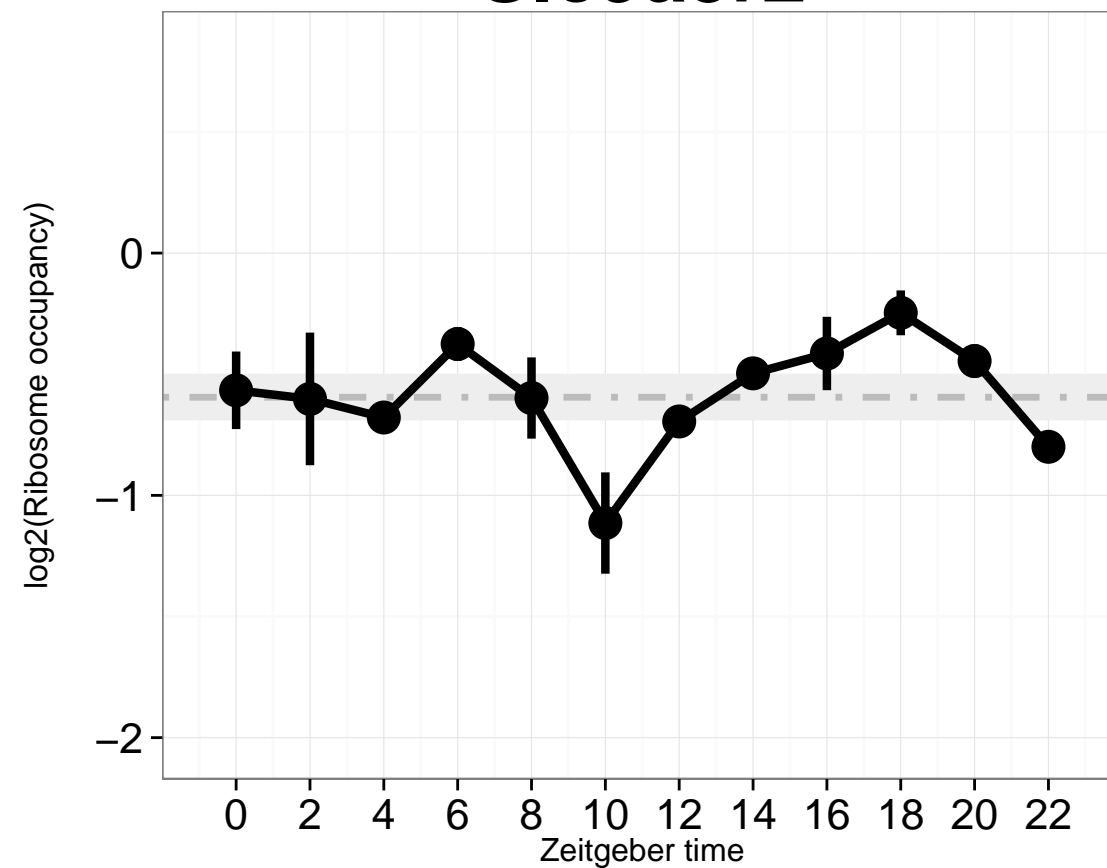

Supplement: SuppDataset_1.zip [file Slc9a3r2_set_A.pdf › Supplemental Dataset 1/A-mRNA_nonrhyth_translation_nonrhyth/Slc9a3r2_set_A.pdf]

# Slc9a6

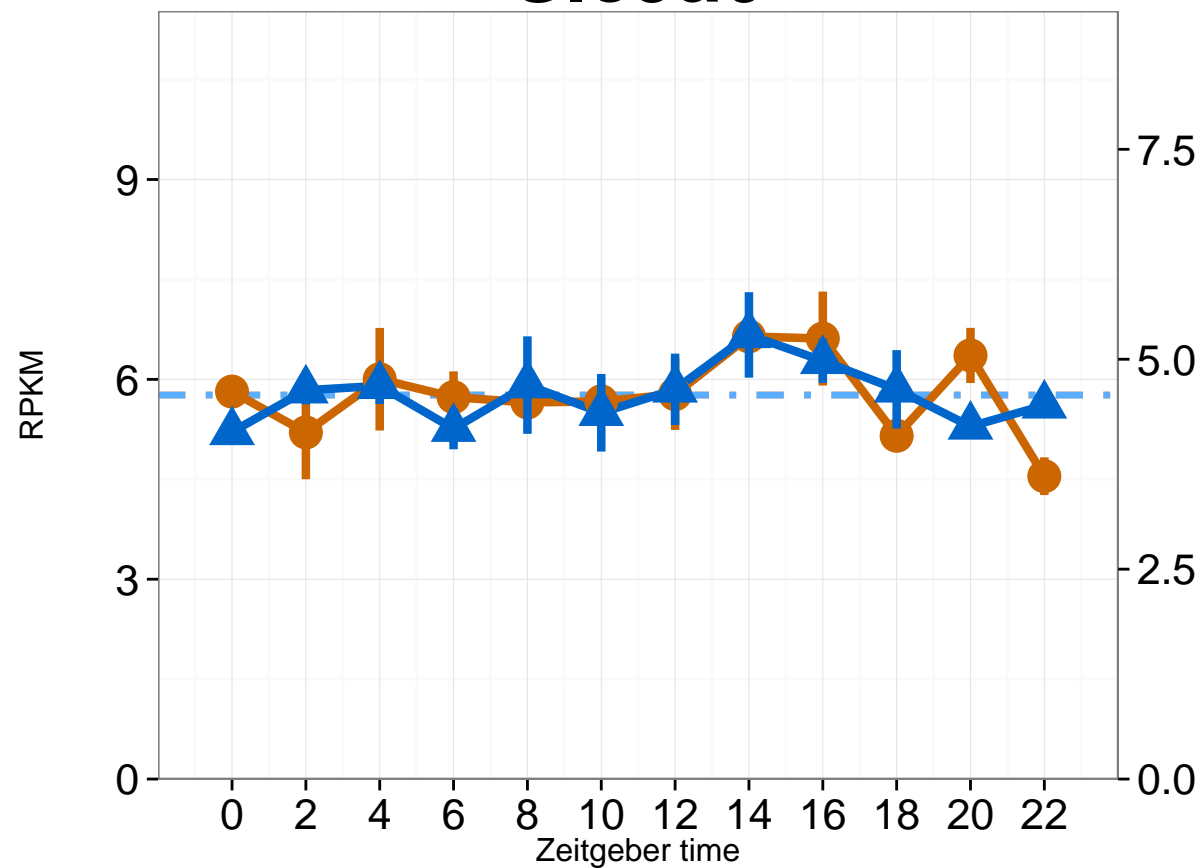

# Slc9a6

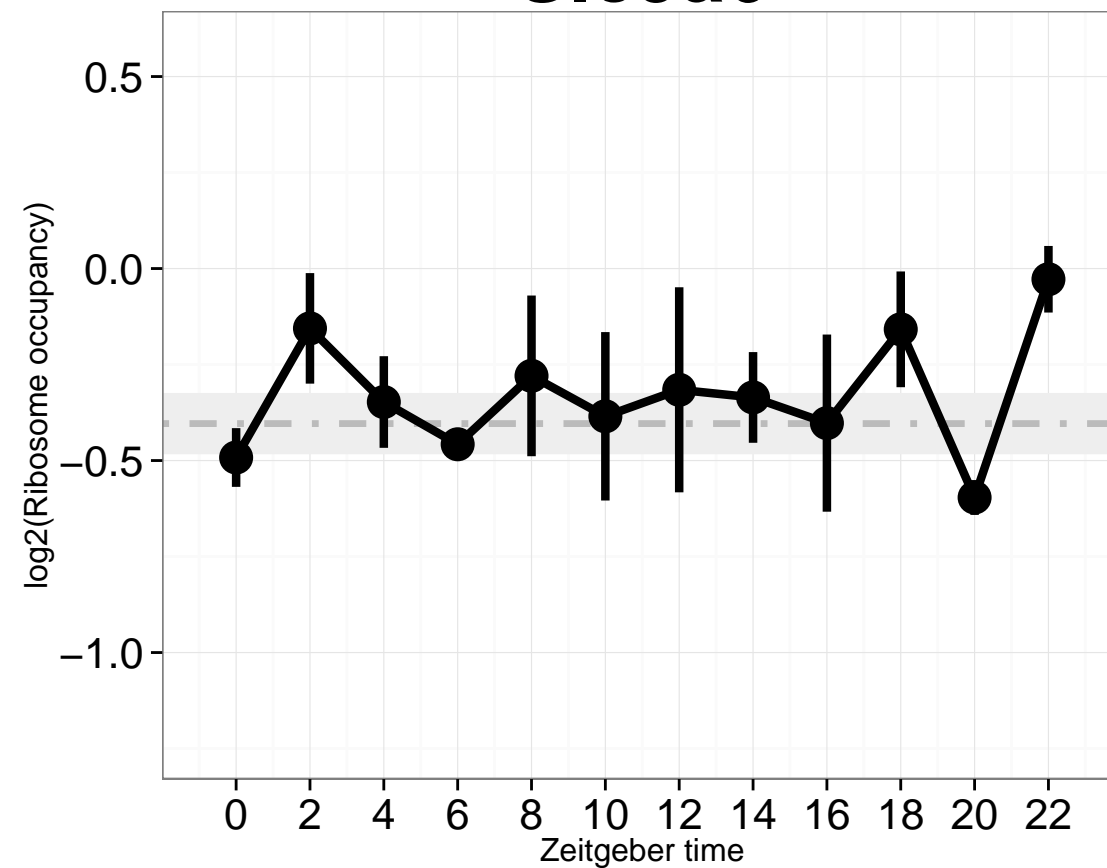

Supplement: SuppDataset_1.zip [file Slc9a6_set_A.pdf › Supplemental Dataset 1/A-mRNA_nonrhyth_translation_nonrhyth/Slc9a6_set_A.pdf]

## Slc9a7

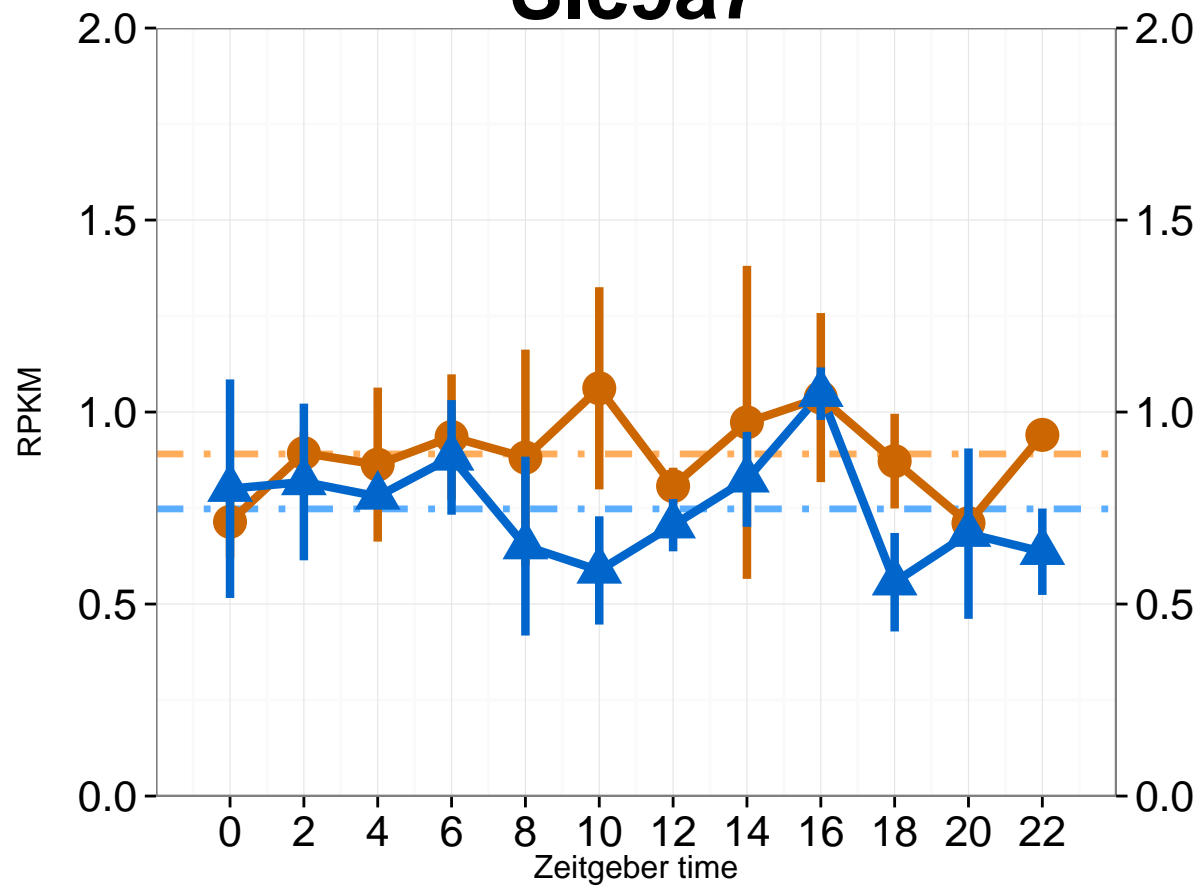

## Slc9a7

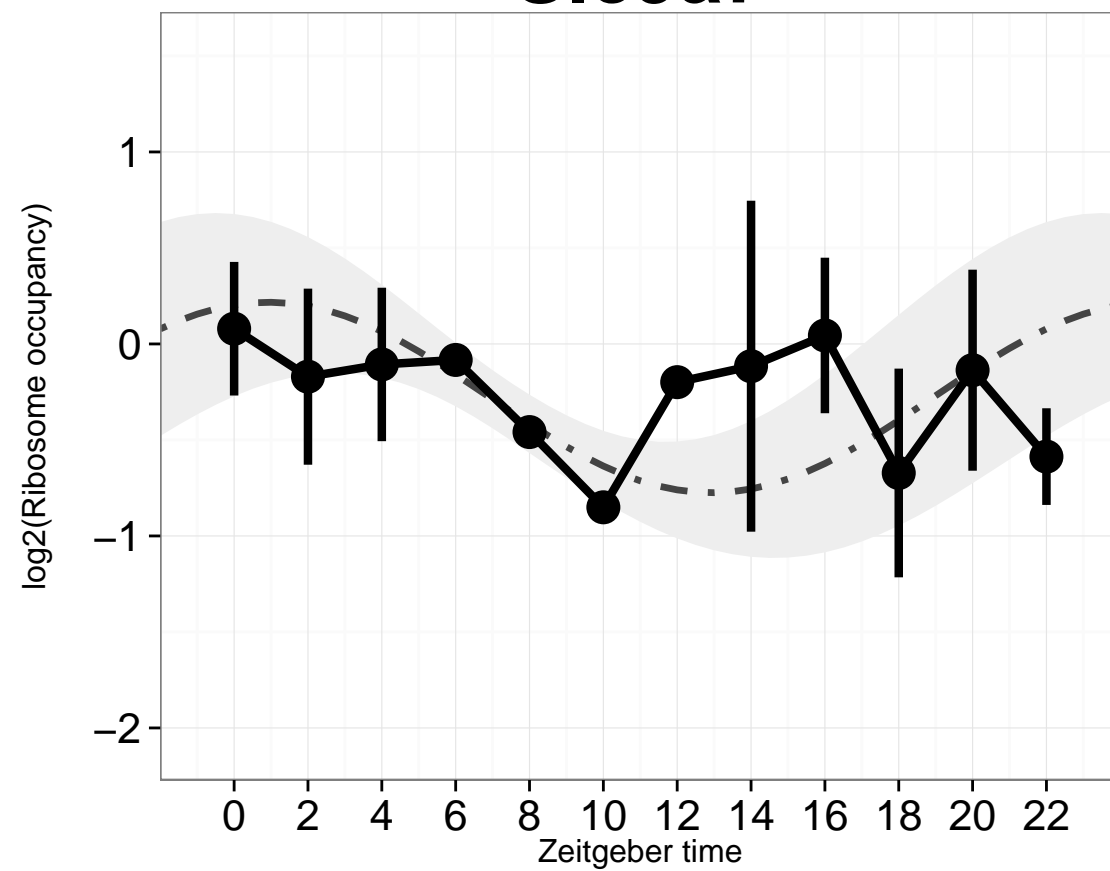

Supplement: SuppDataset_1.zip [file Slc9a7_set_A.pdf › Supplemental Dataset 1/A-mRNA_nonrhyth_translation_nonrhyth/Slc9a7_set_A.pdf]

## Slc9a8

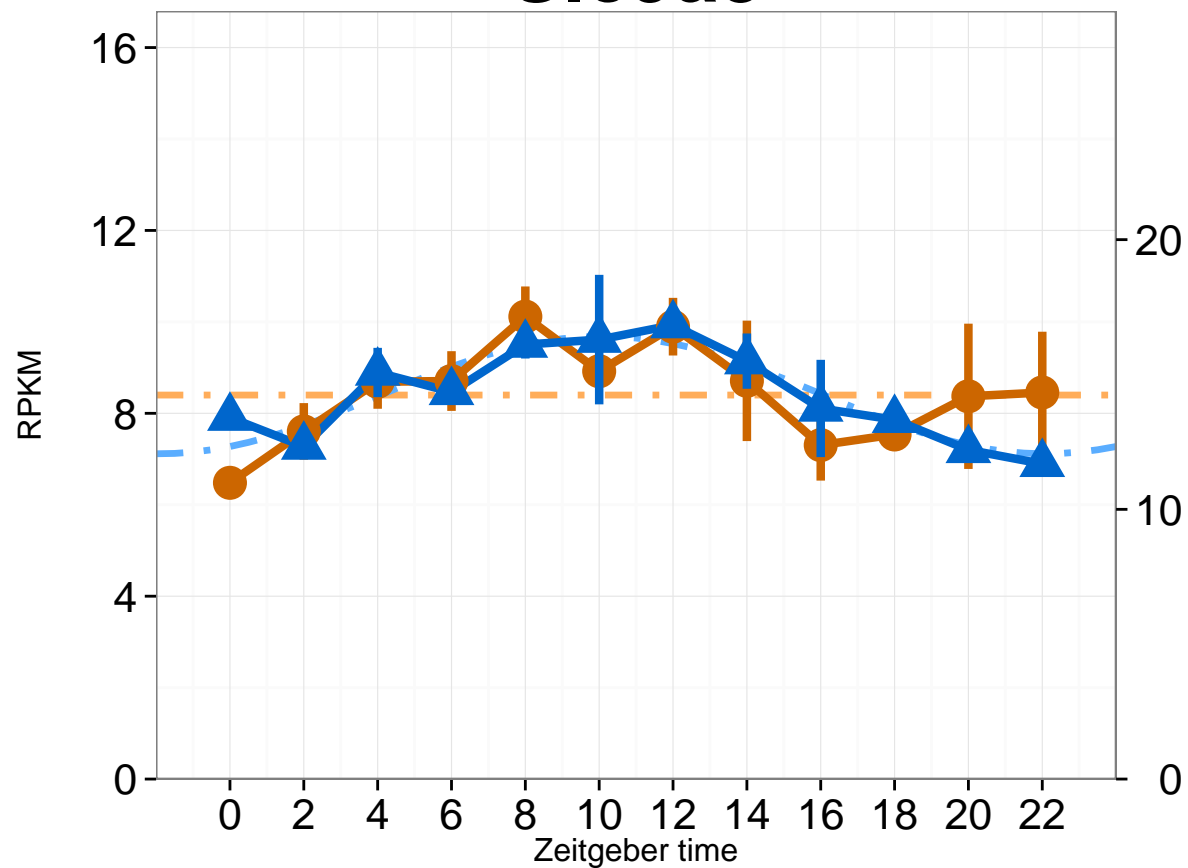

## Slc9a8

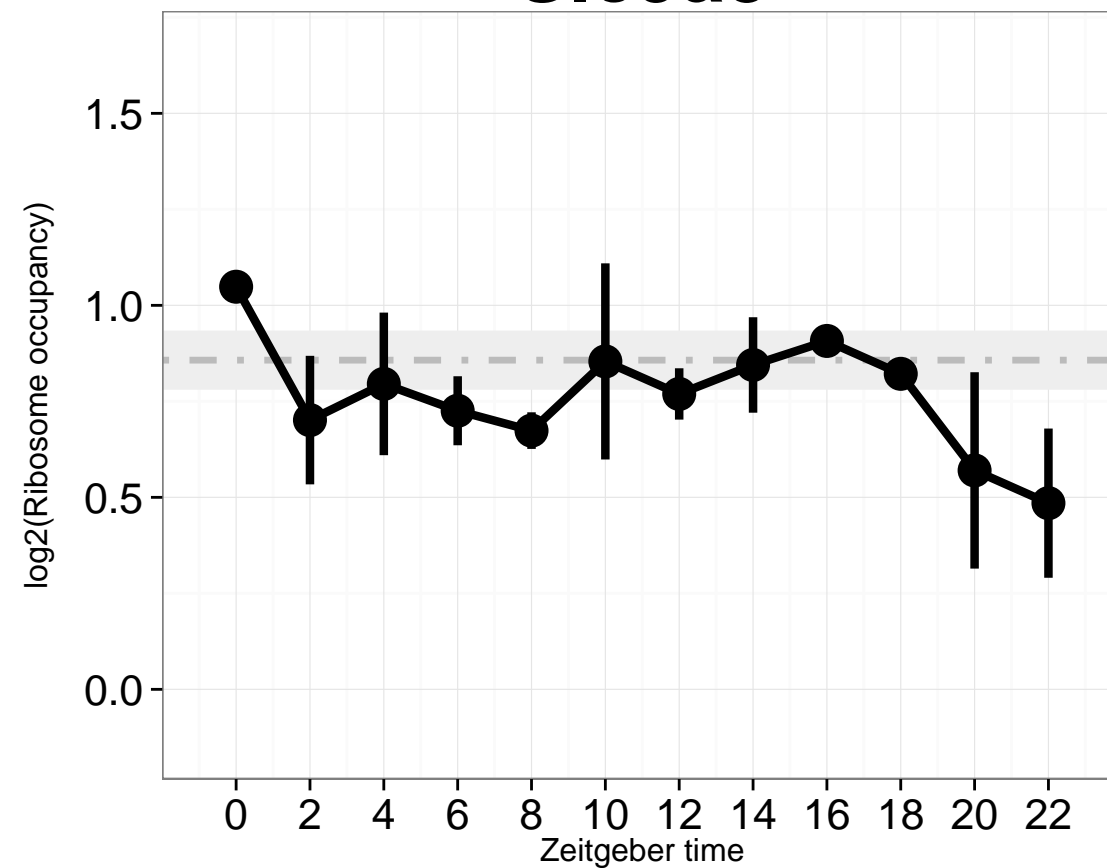

Supplement: SuppDataset_1.zip [file Slc9a8_set_A.pdf › Supplemental Dataset 1/A-mRNA_nonrhyth_translation_nonrhyth/Slc9a8_set_A.pdf]

## Slc9a9

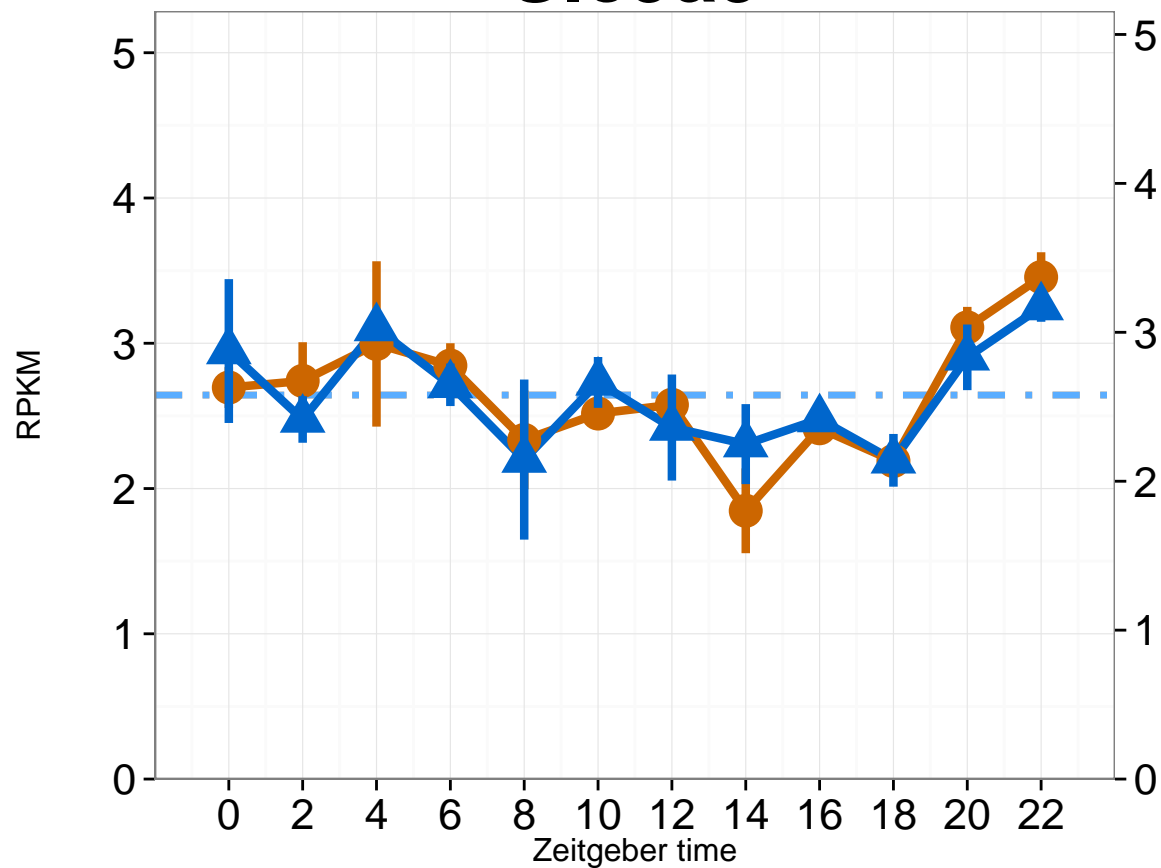

## Slc9a9

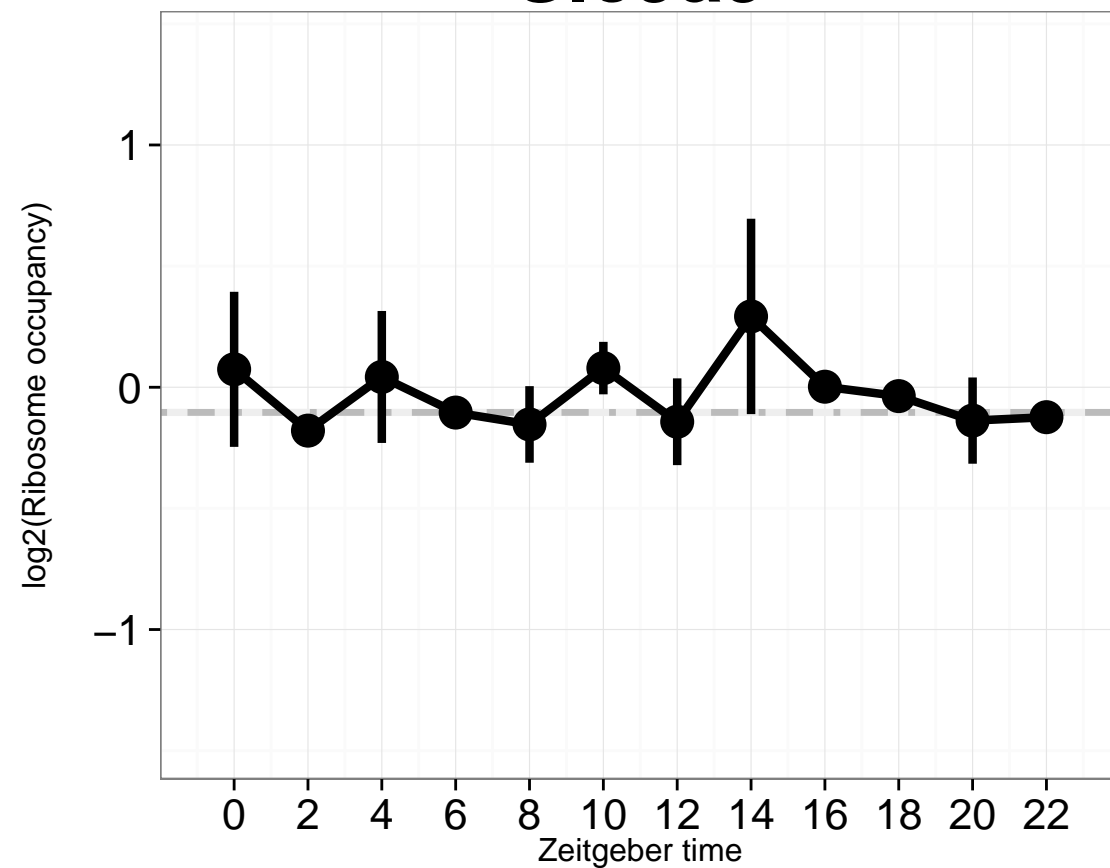

Supplement: SuppDataset_1.zip [file Slc9a9_set_A.pdf › Supplemental Dataset 1/A-mRNA_nonrhyth_translation_nonrhyth/Slc9a9_set_A.pdf]

# Slco1a1

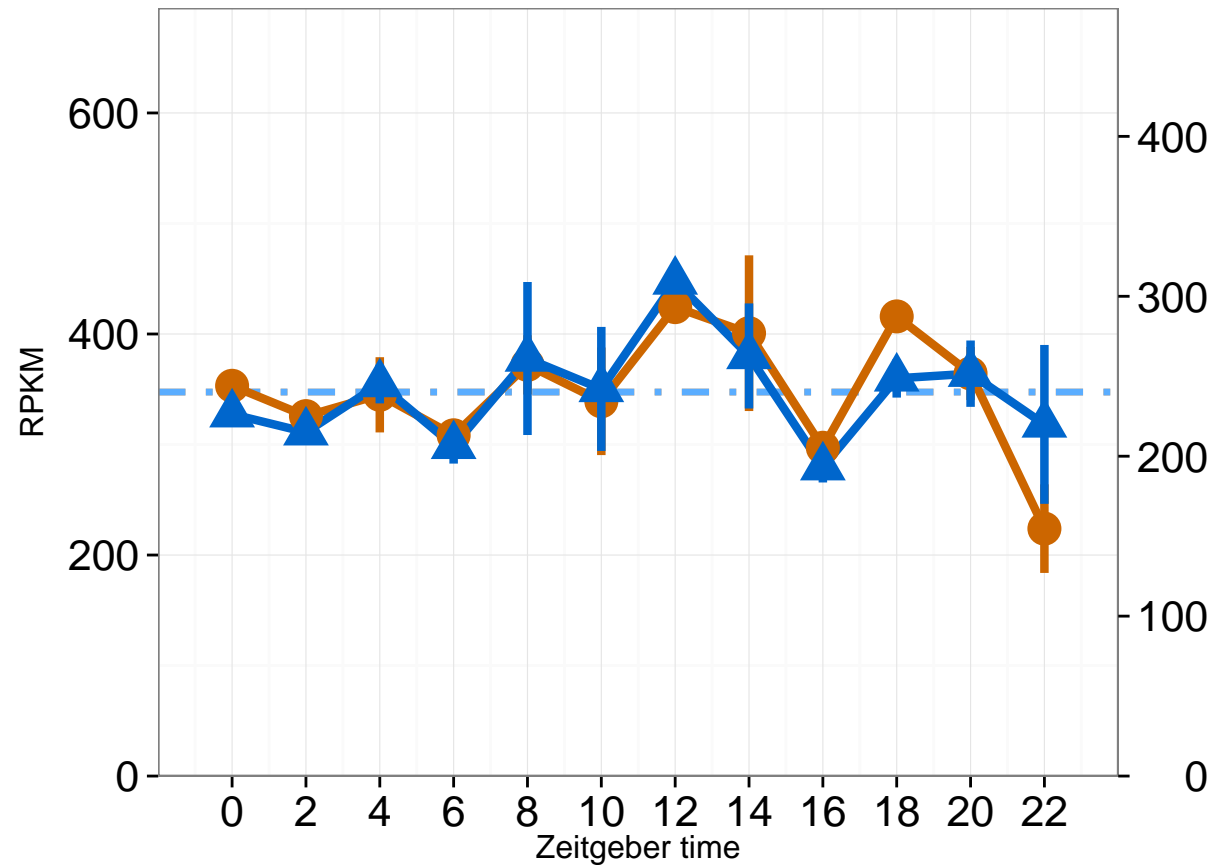

# Slco1a1

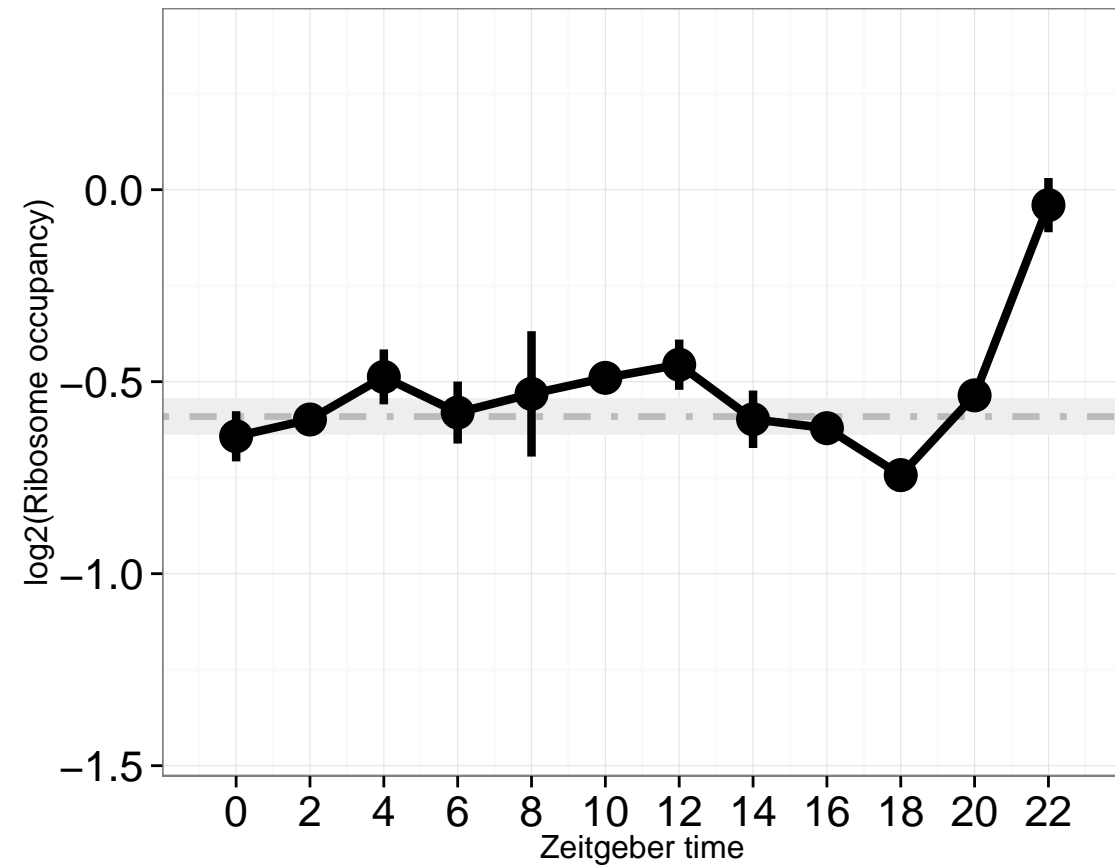

Supplement: SuppDataset_1.zip [file Slco1a1_set_A.pdf › Supplemental Dataset 1/A-mRNA_nonrhyth_translation_nonrhyth/Slco1a1_set_A.pdf]

# Slco1a4

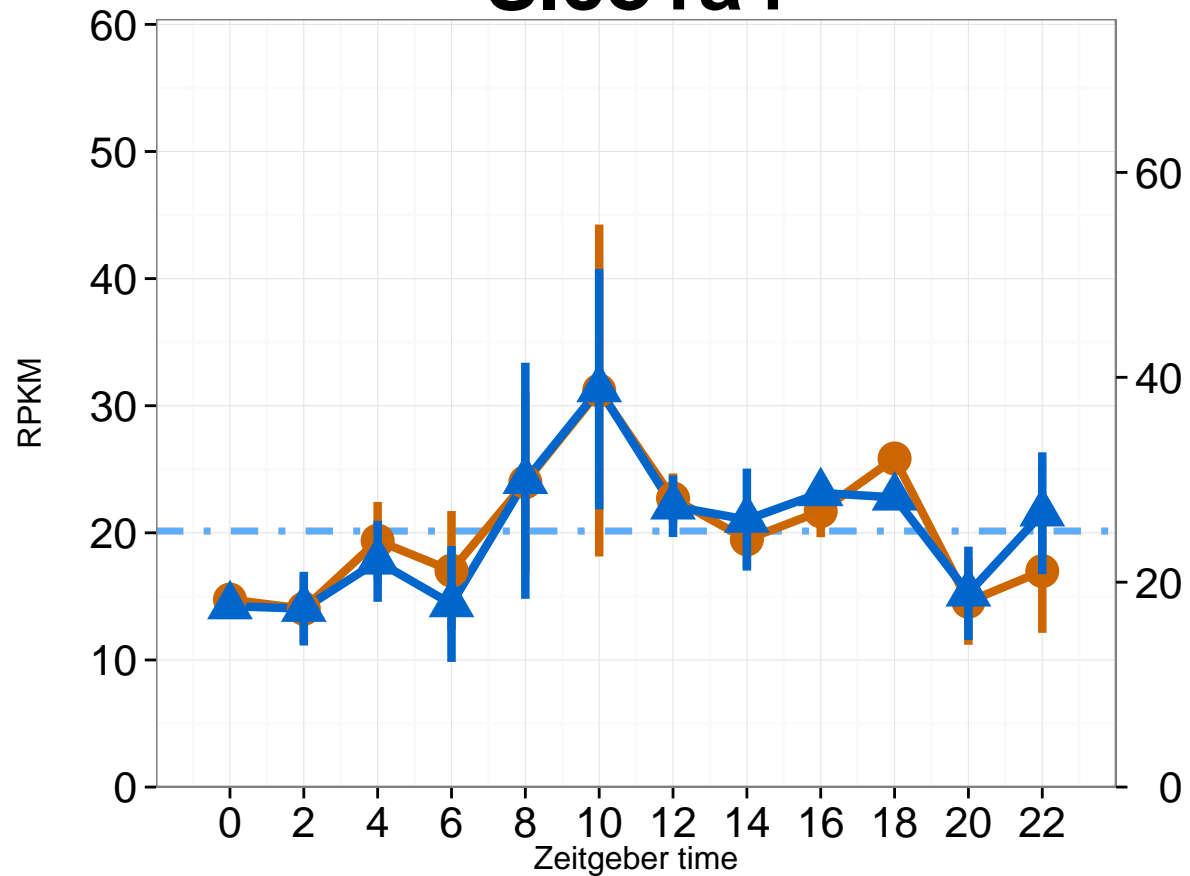

# Slco1a4

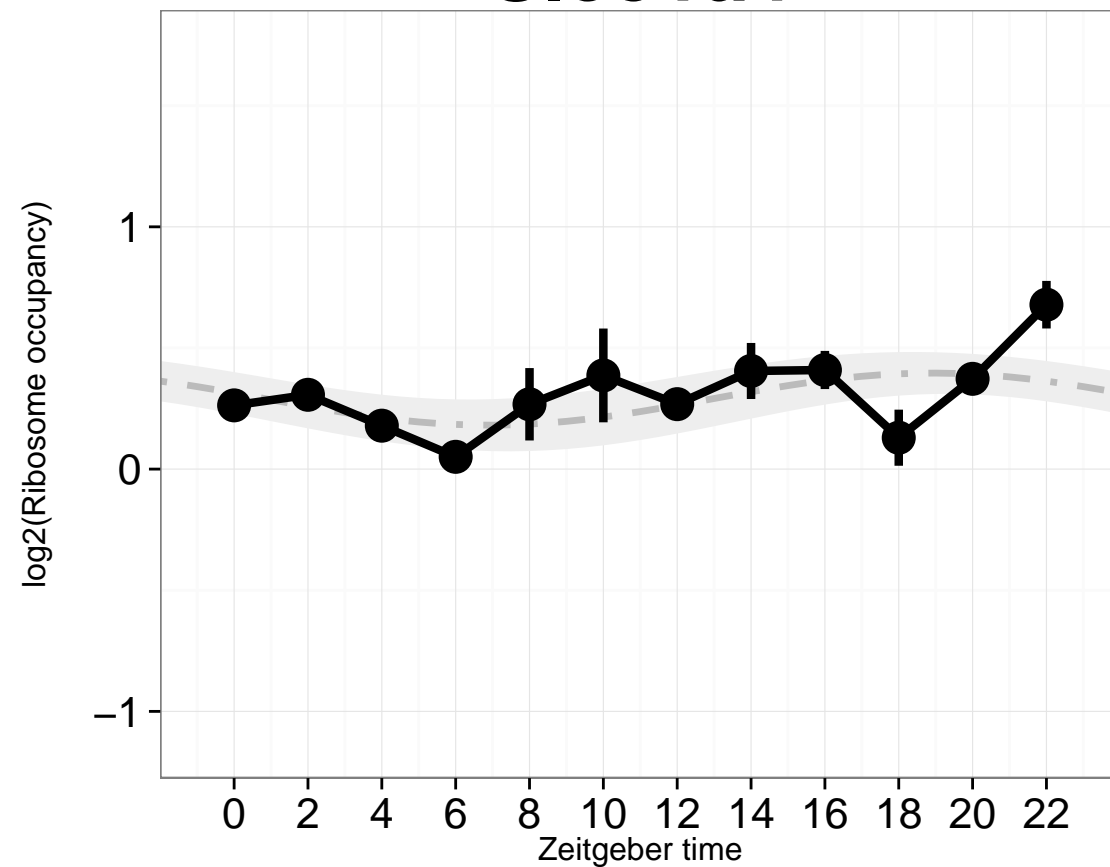

Supplement: SuppDataset_1.zip [file Slco1a4_set_A.pdf › Supplemental Dataset 1/A-mRNA_nonrhyth_translation_nonrhyth/Slco1a4_set_A.pdf]

## Slco2a1

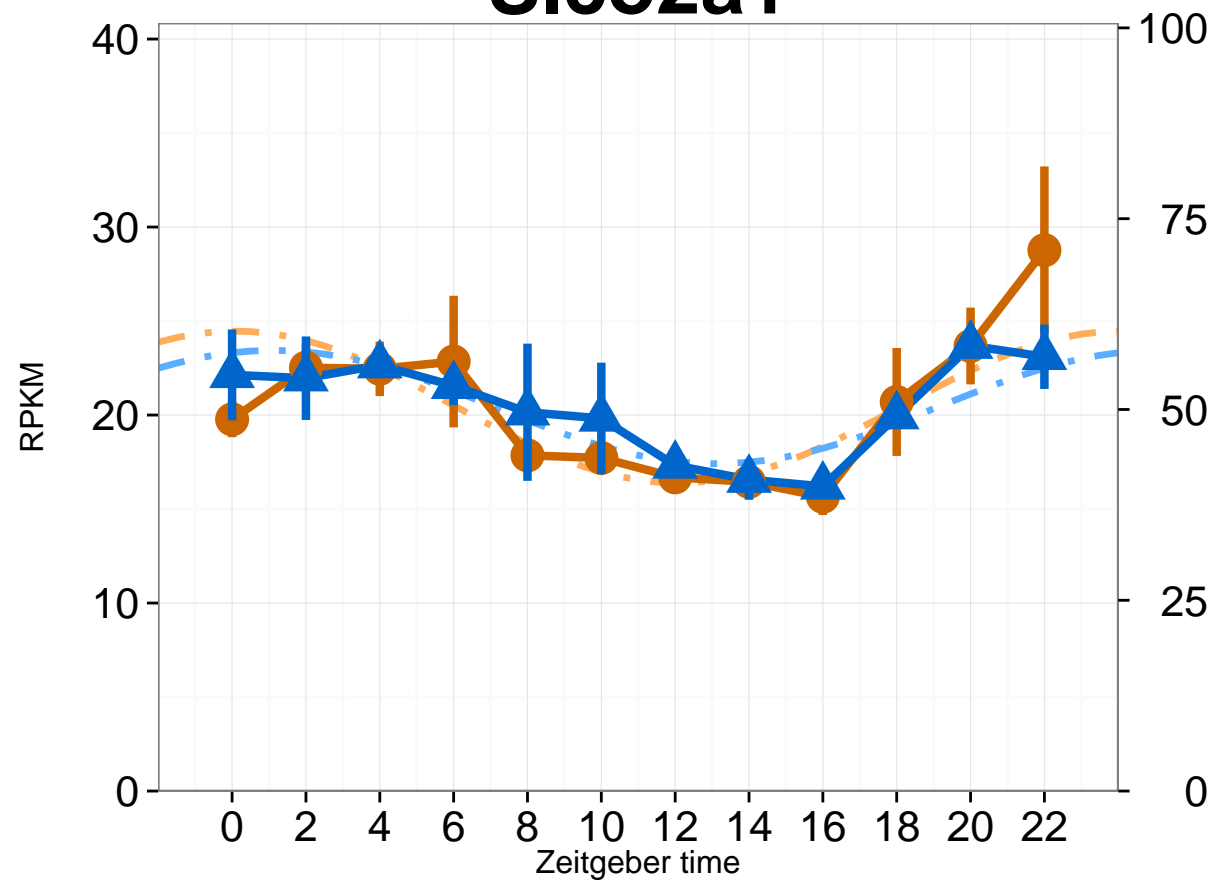

## Slco2a1

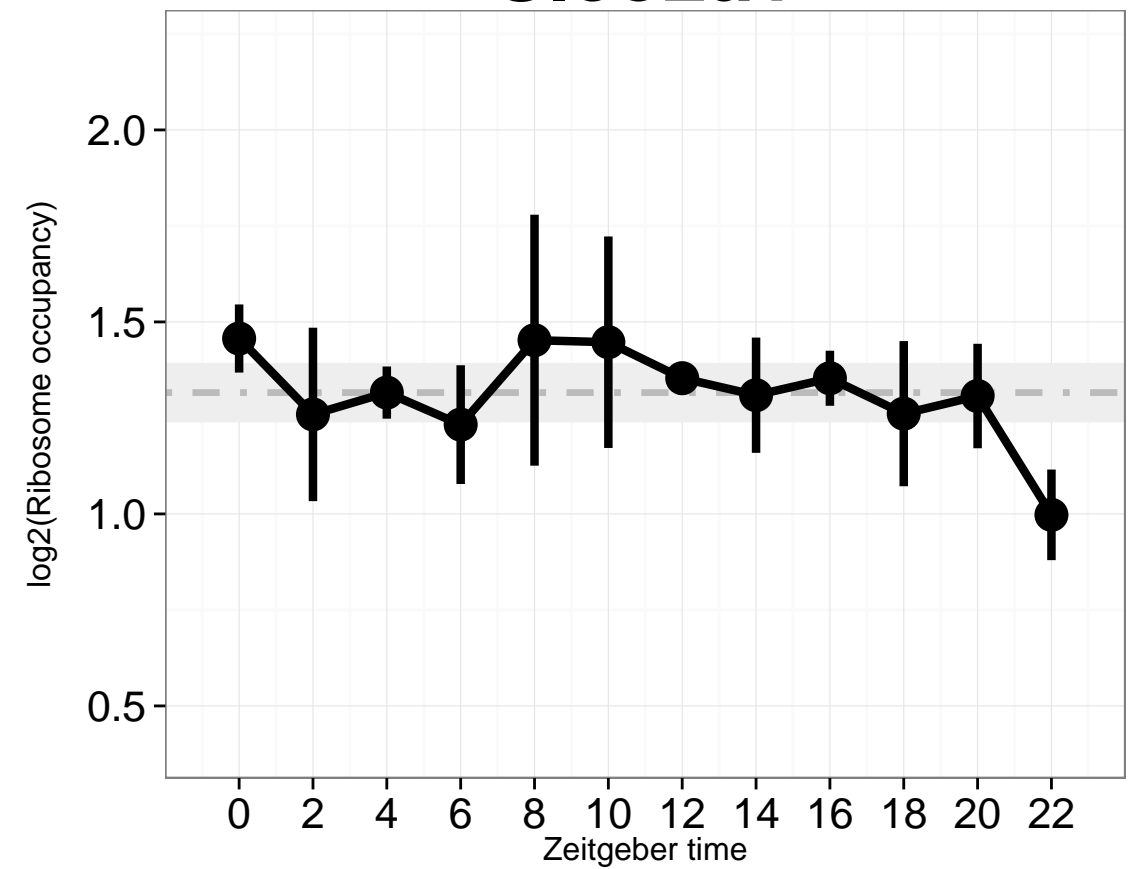

Supplement: SuppDataset_1.zip [file Slco2a1_set_A.pdf › Supplemental Dataset 1/A-mRNA_nonrhyth_translation_nonrhyth/Slco2a1_set_A.pdf]

# Slco3a1

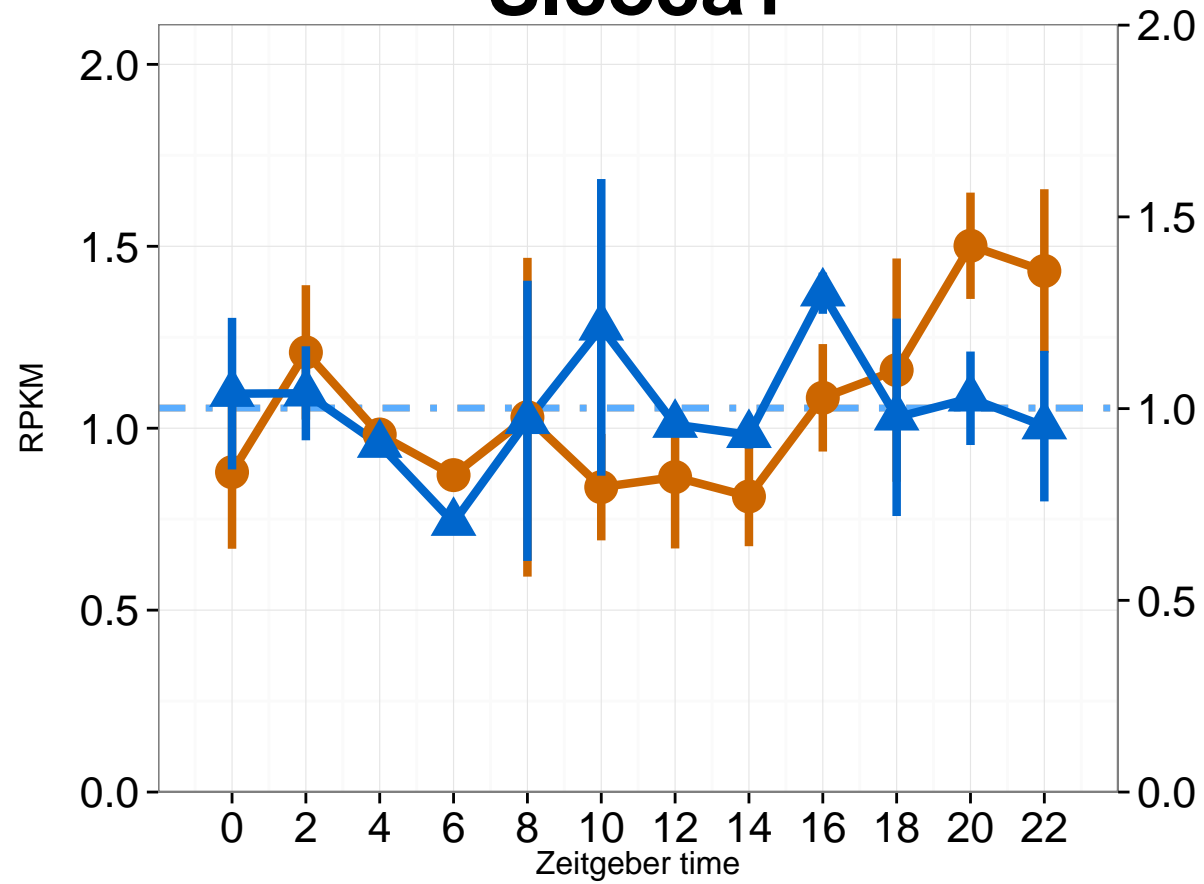

# Slco3a1

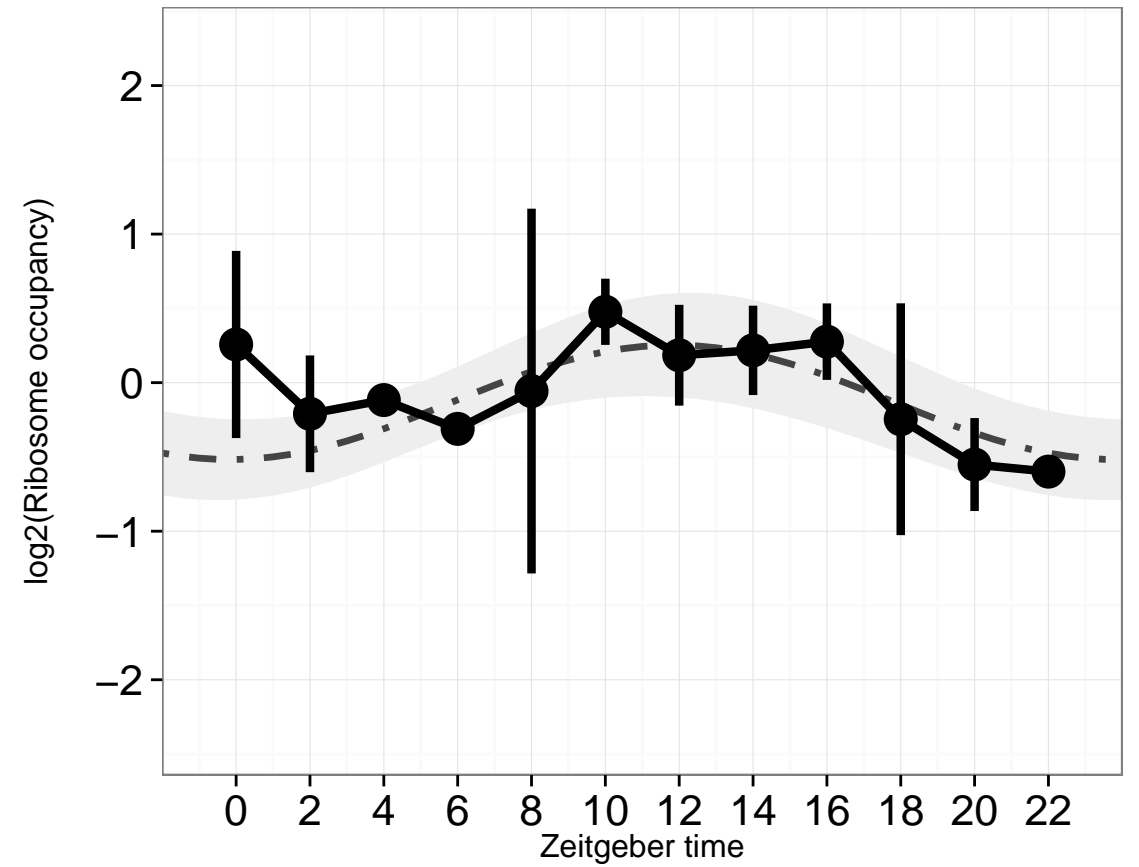

Supplement: SuppDataset_1.zip [file Slco3a1_set_A.pdf › Supplemental Dataset 1/A-mRNA_nonrhyth_translation_nonrhyth/Slco3a1_set_A.pdf]

## Slfn2

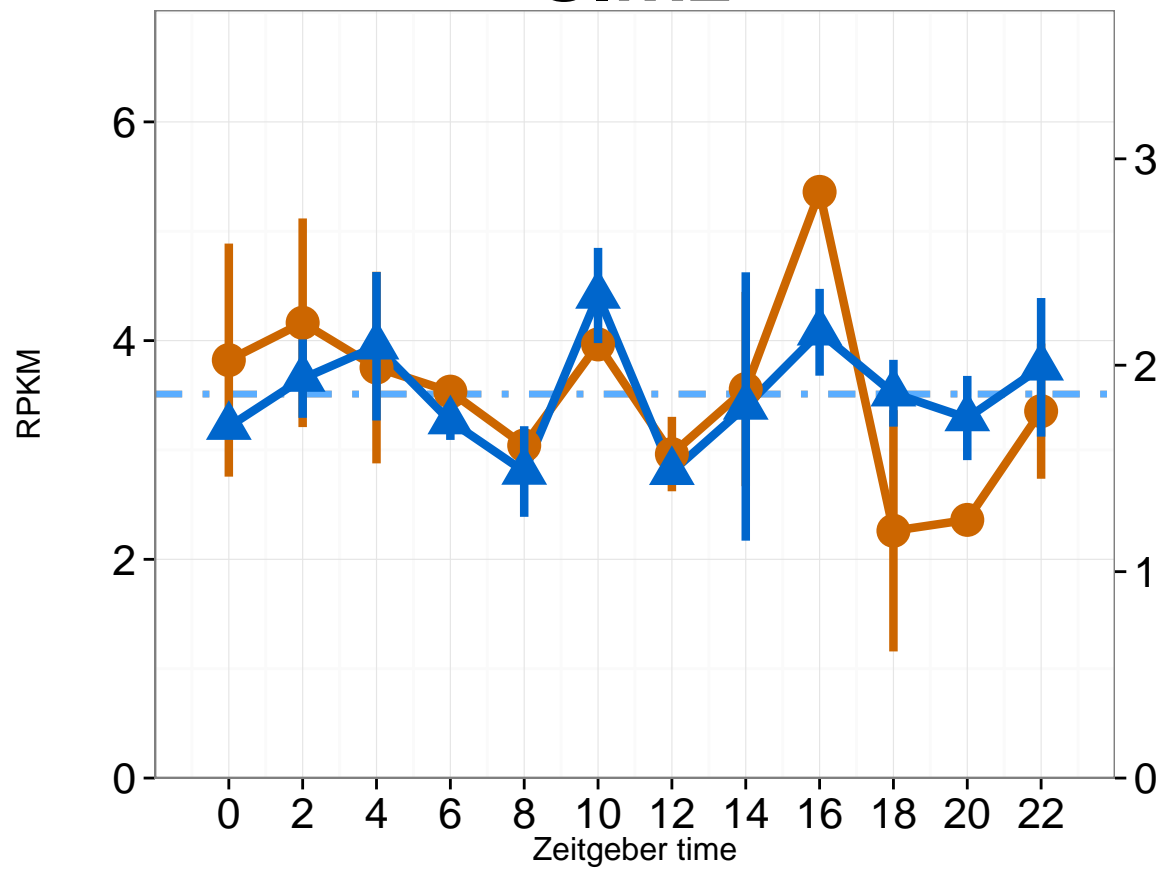

## Slfn2

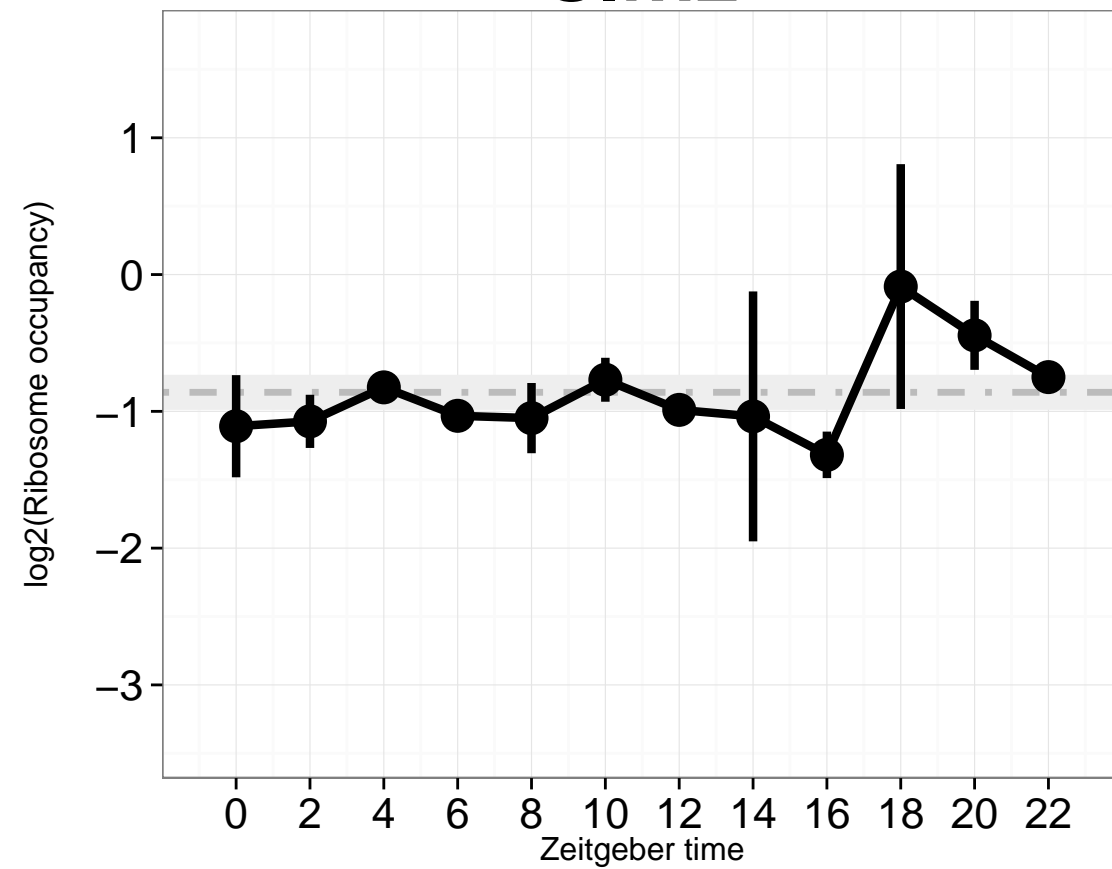

Supplement: SuppDataset_1.zip [file Slfn2_set_A.pdf › Supplemental Dataset 1/A-mRNA_nonrhyth_translation_nonrhyth/Slfn2_set_A.pdf]

## Slfn5

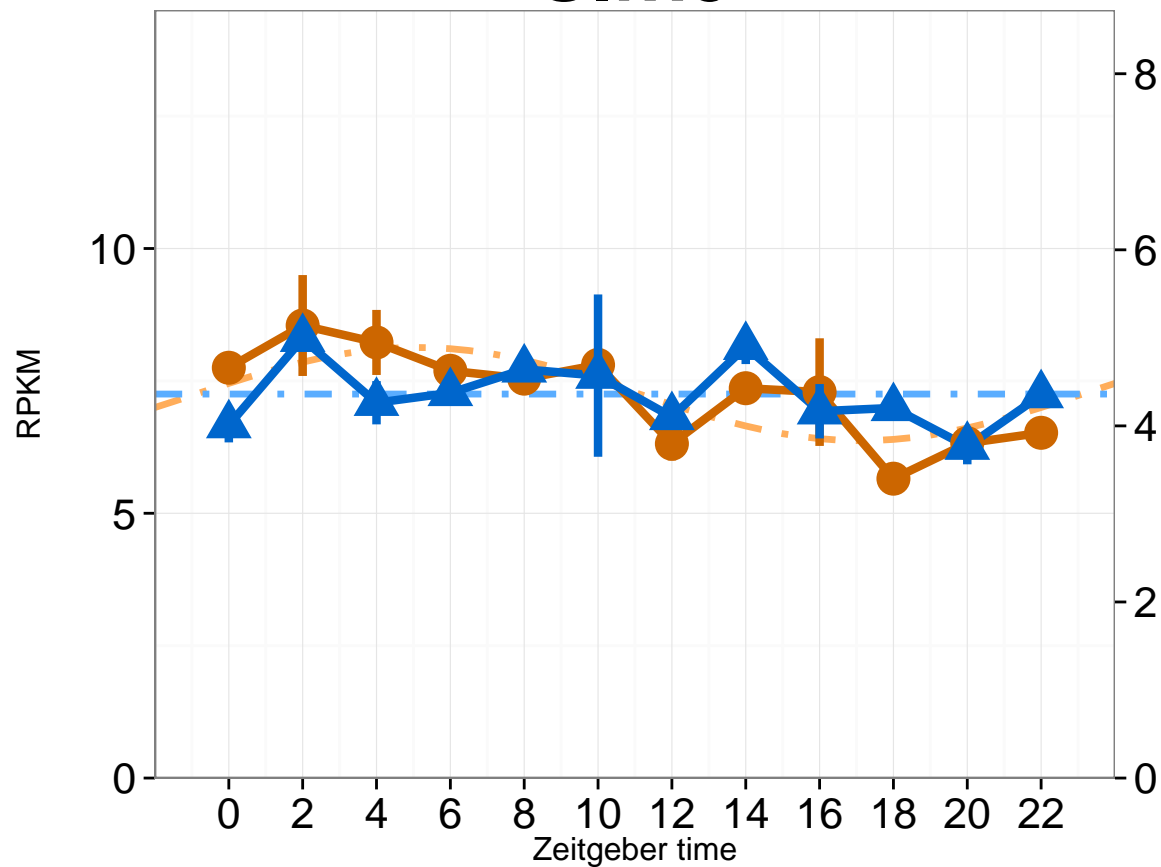

## Slfn5

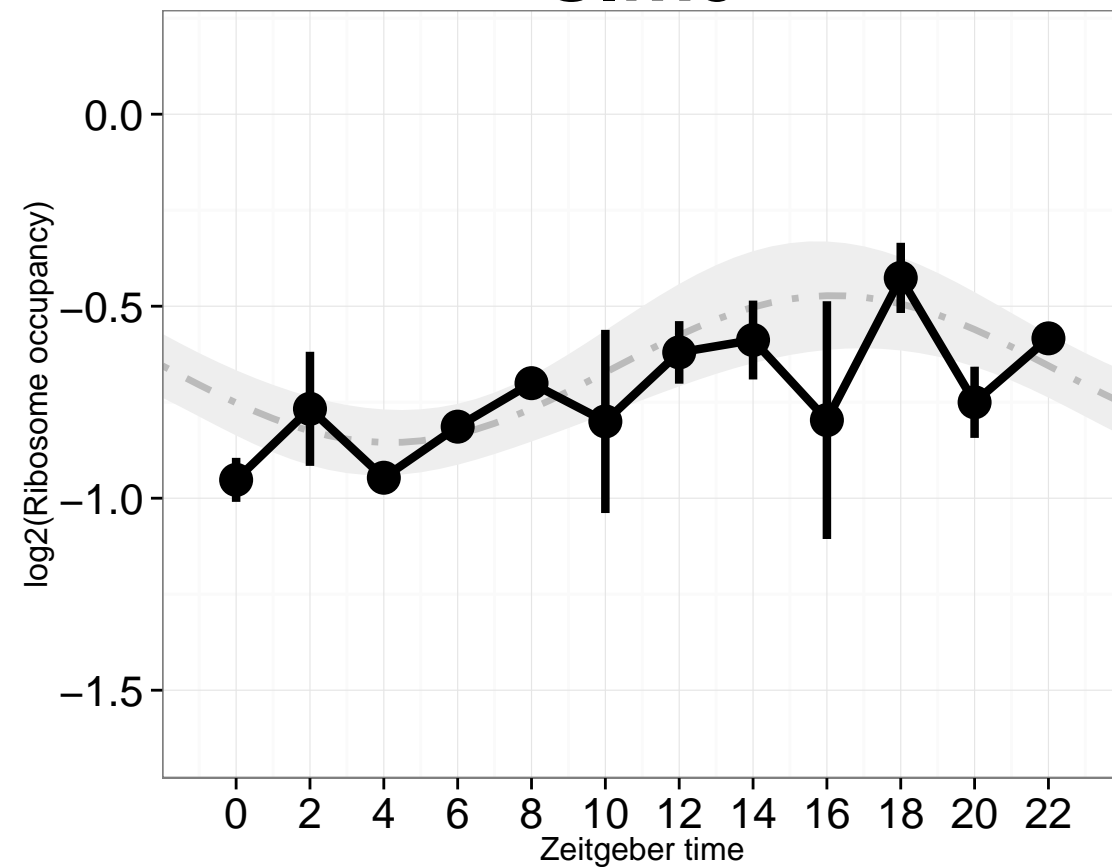

Supplement: SuppDataset_1.zip [file Slfn5_set_A.pdf › Supplemental Dataset 1/A-mRNA_nonrhyth_translation_nonrhyth/Slfn5_set_A.pdf]

# Slfn9

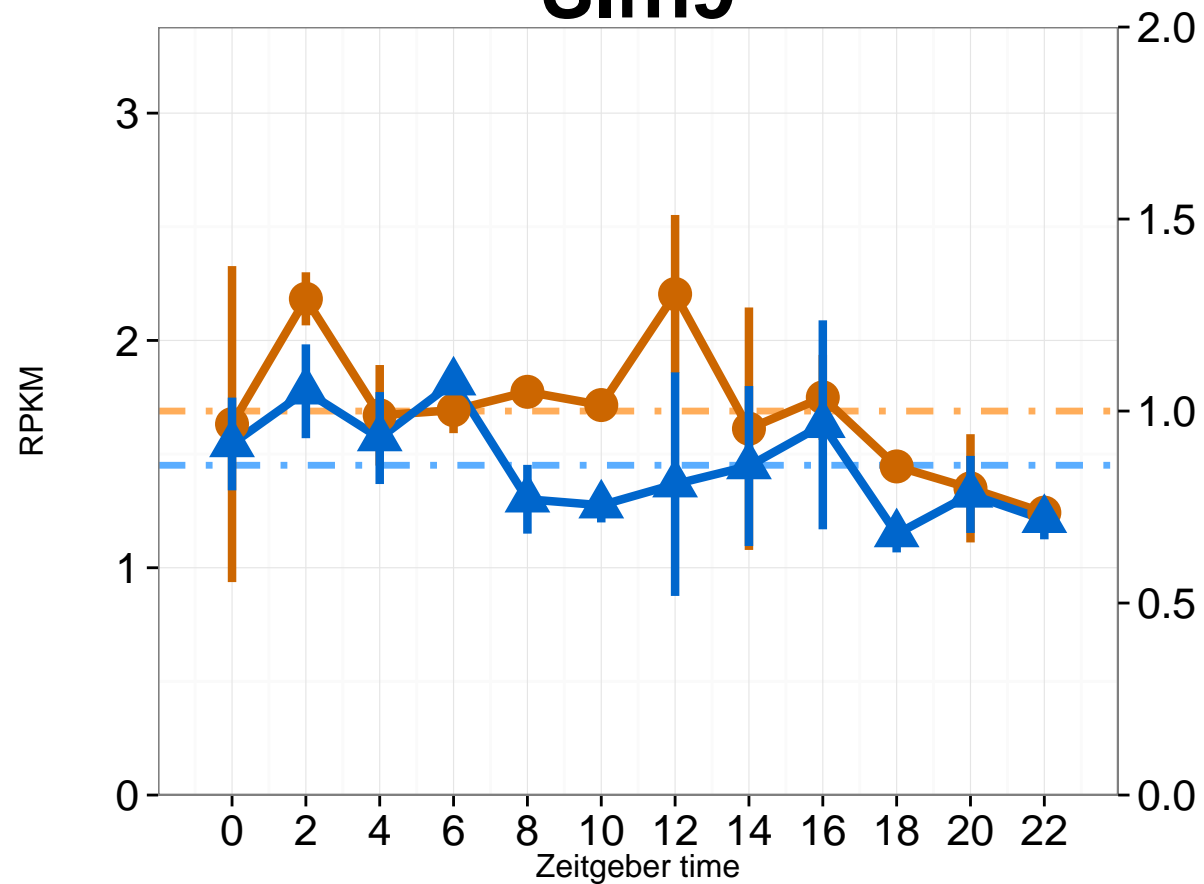

# Slfn9

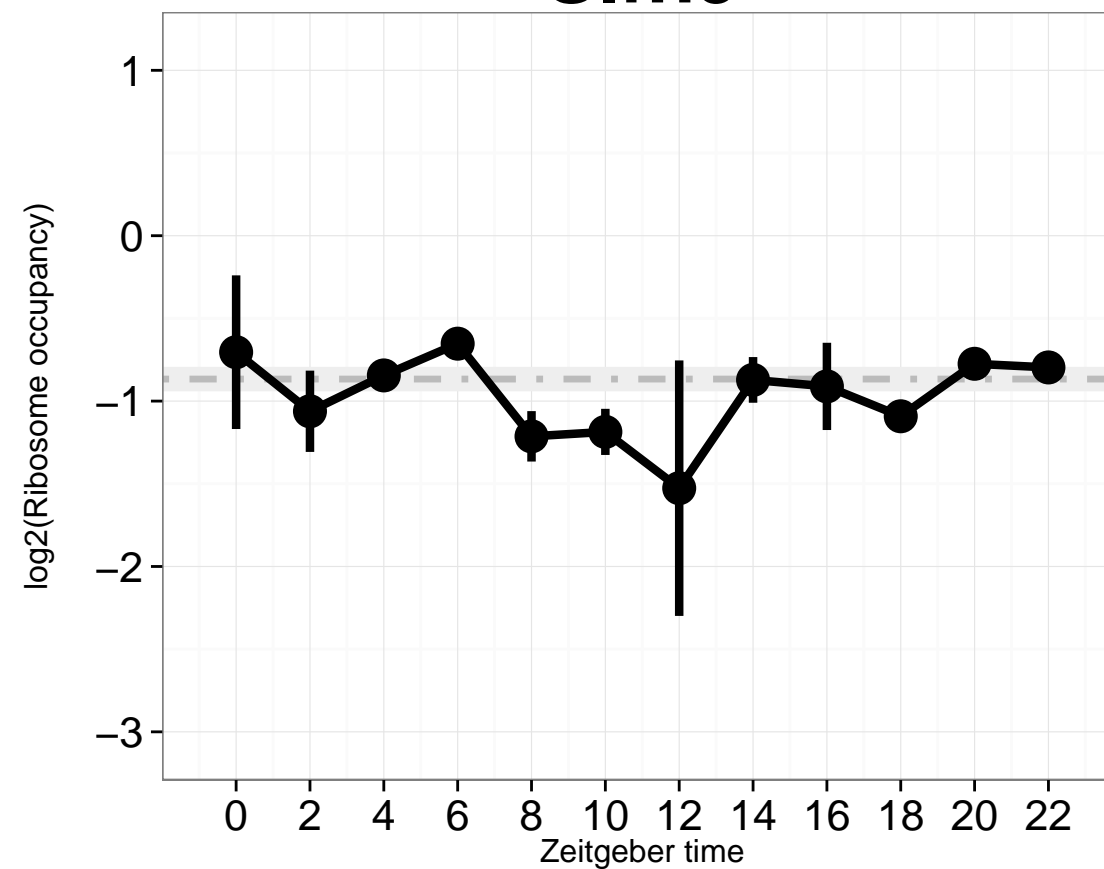

Supplement: SuppDataset_1.zip [file Slfn9_set_A.pdf › Supplemental Dataset 1/A-mRNA_nonrhyth_translation_nonrhyth/Slfn9_set_A.pdf]

## Slk

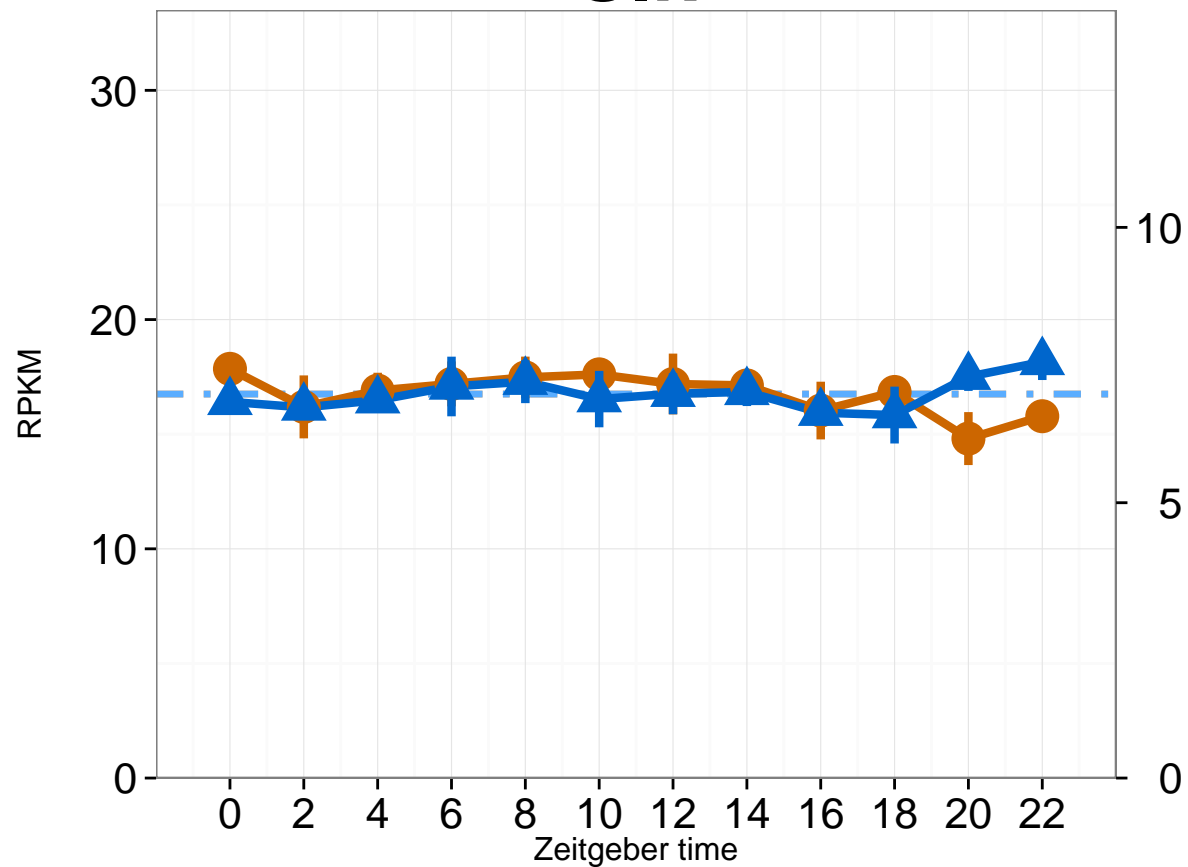

## Slk

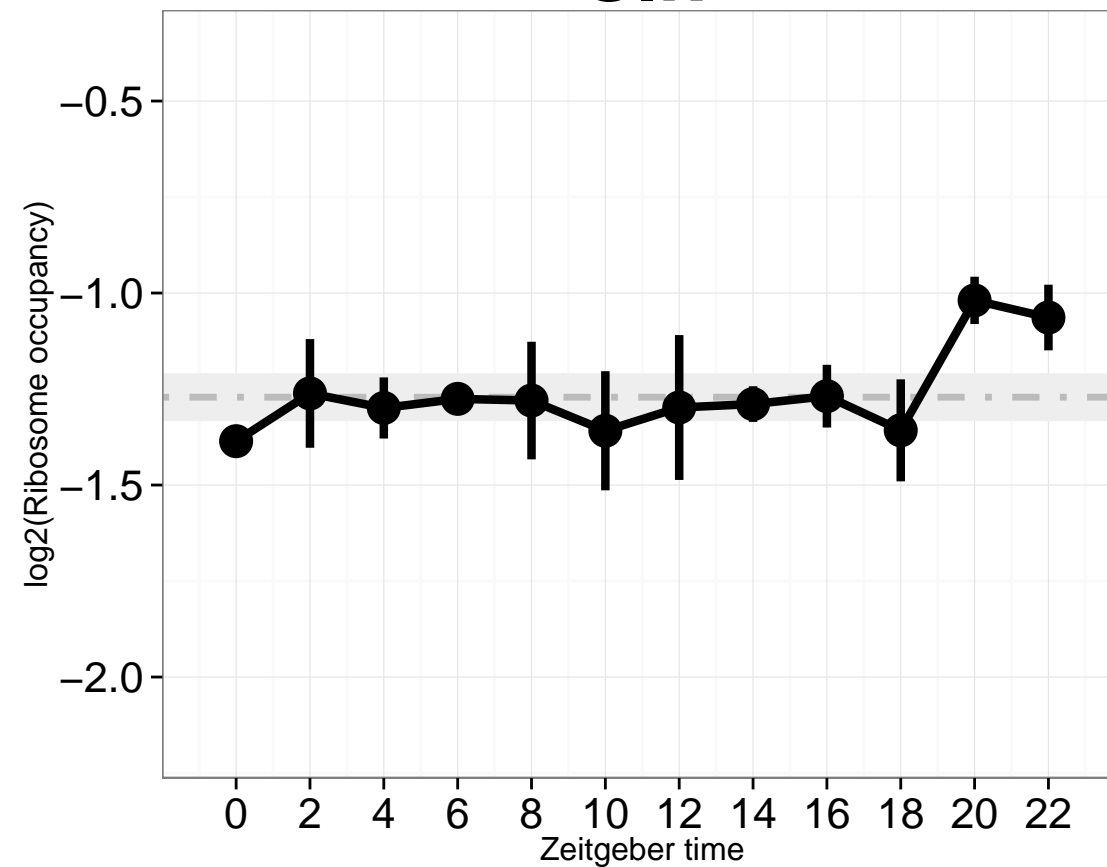

Supplement: SuppDataset_1.zip [file Slk_set_A.pdf › Supplemental Dataset 1/A-mRNA_nonrhyth_translation_nonrhyth/Slk_set_A.pdf]

# Simap

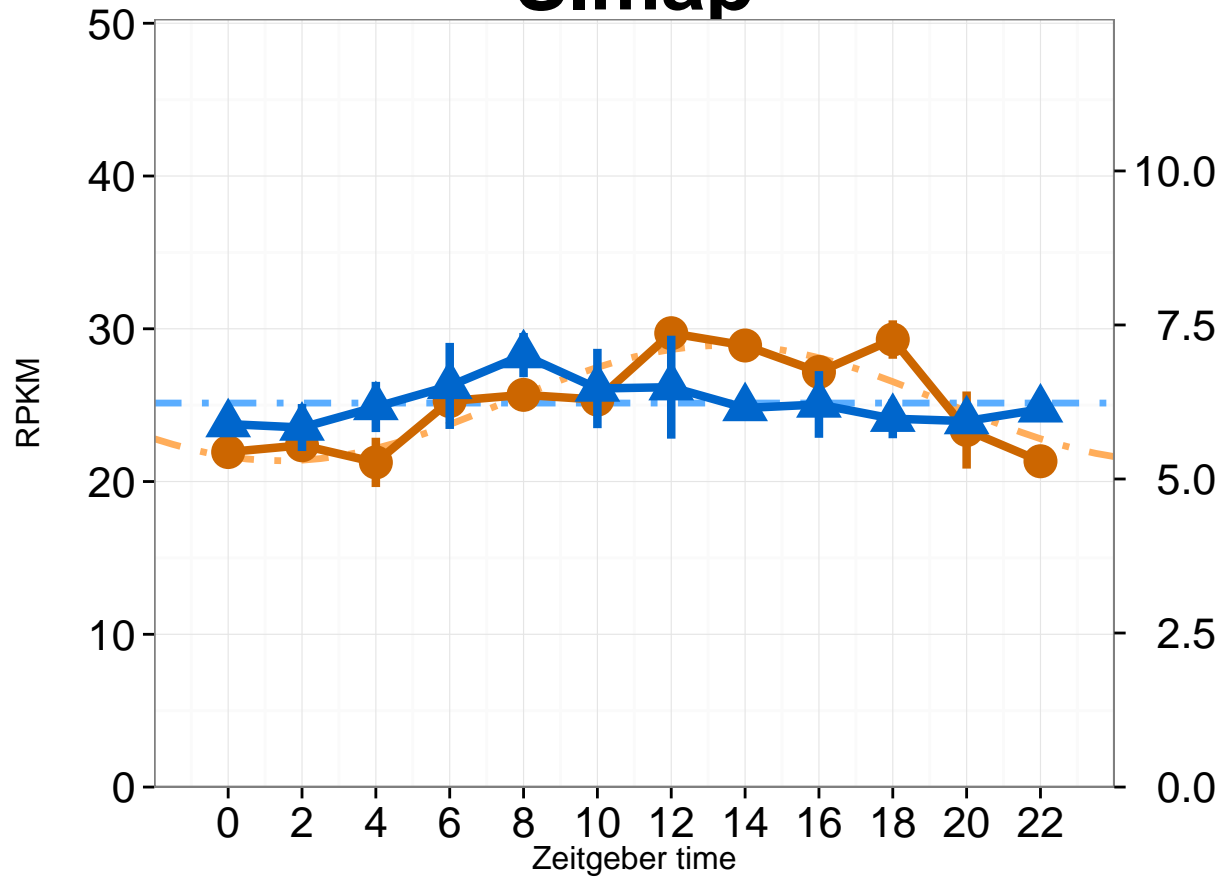

# Simap

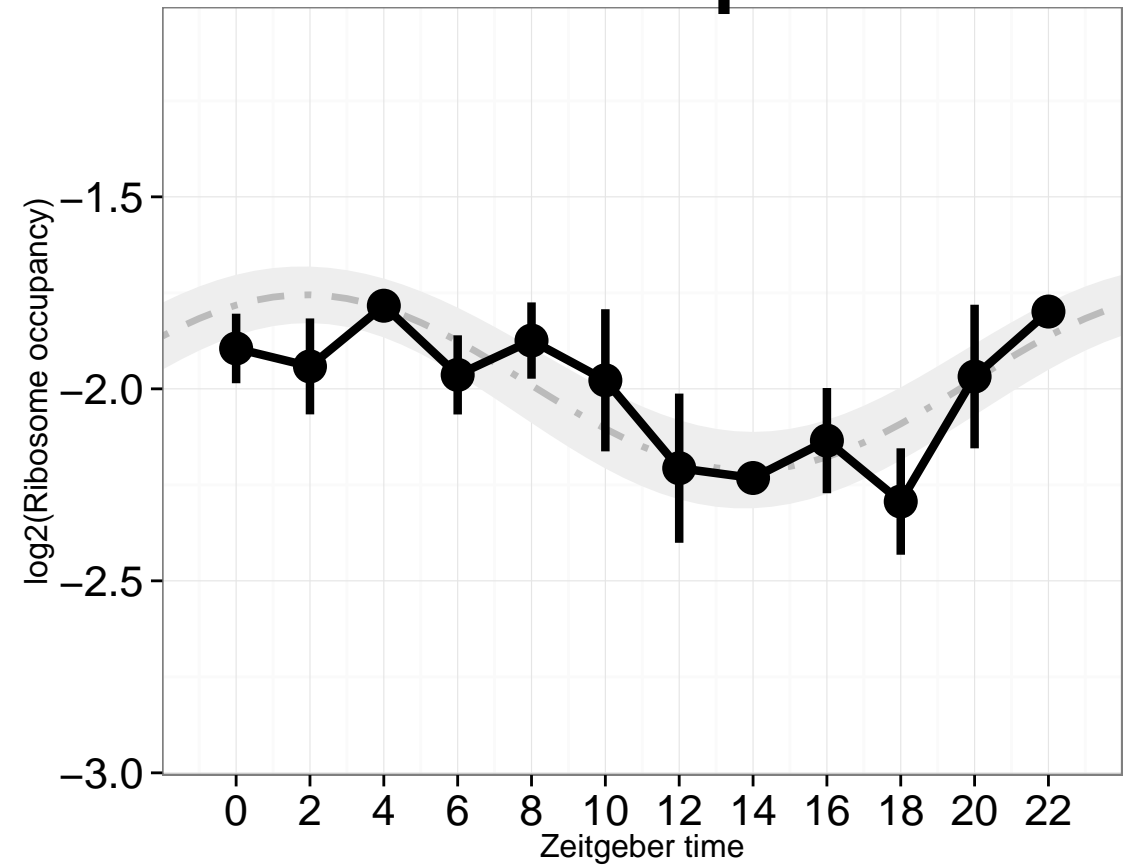

Supplement: SuppDataset_1.zip [file Slmap_set_A.pdf › Supplemental Dataset 1/A-mRNA_nonrhyth_translation_nonrhyth/Slmap_set_A.pdf]

## Slm

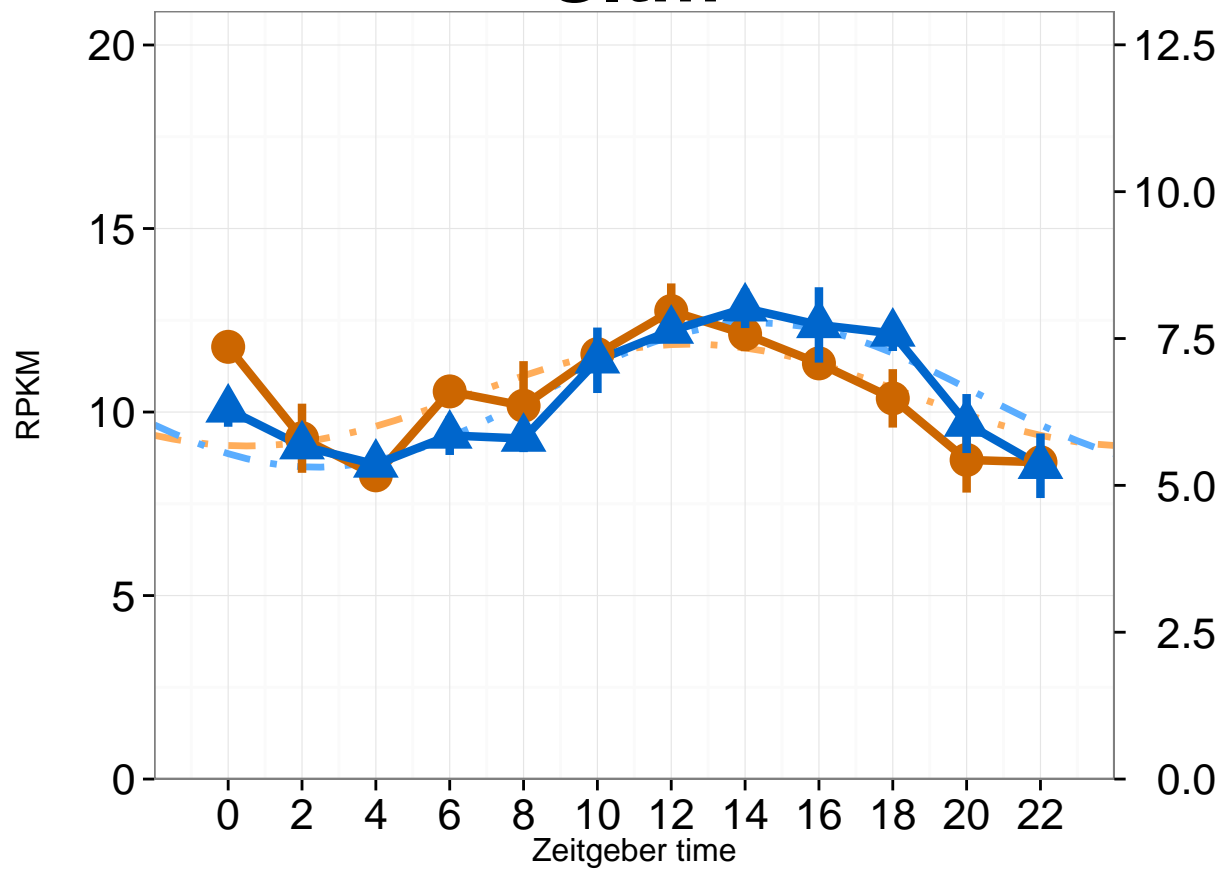

## Slm

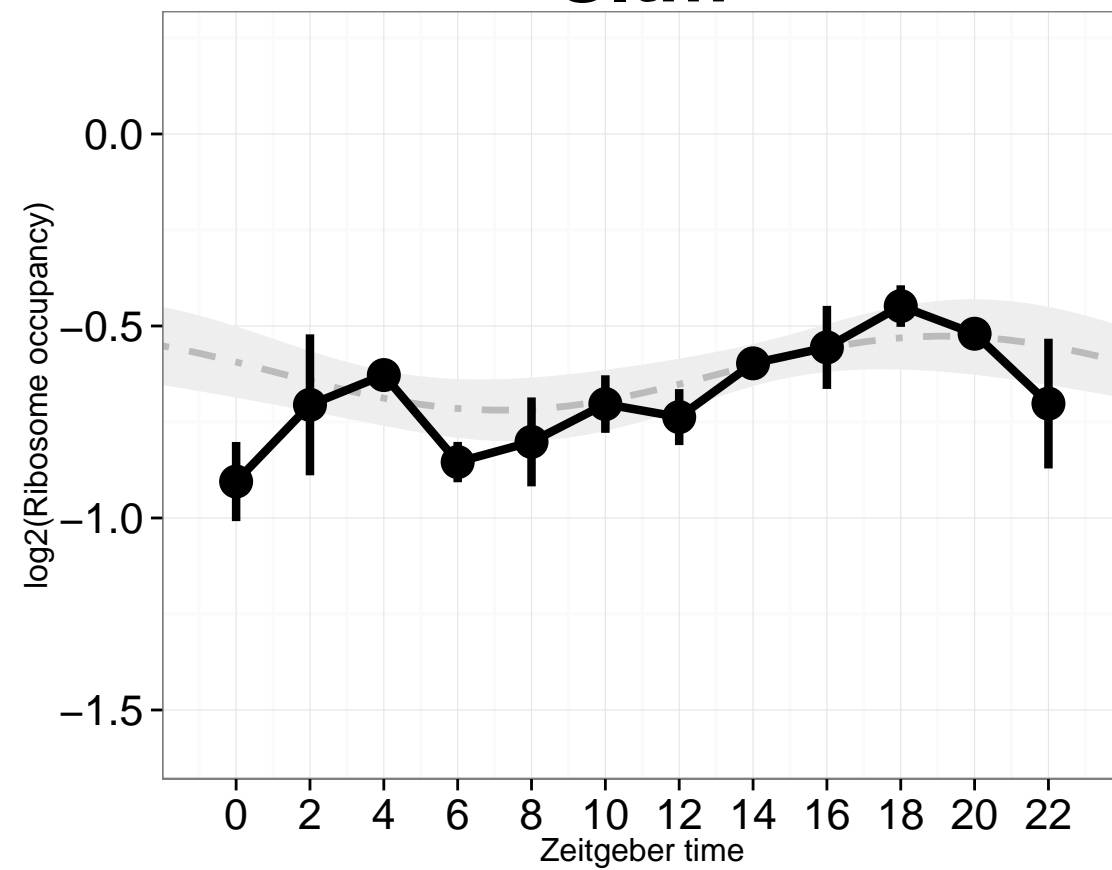

Supplement: SuppDataset_1.zip [file Sltm_set_A.pdf › Supplemental Dataset 1/A-mRNA_nonrhyth_translation_nonrhyth/Sltm_set_A.pdf]

## Slu7

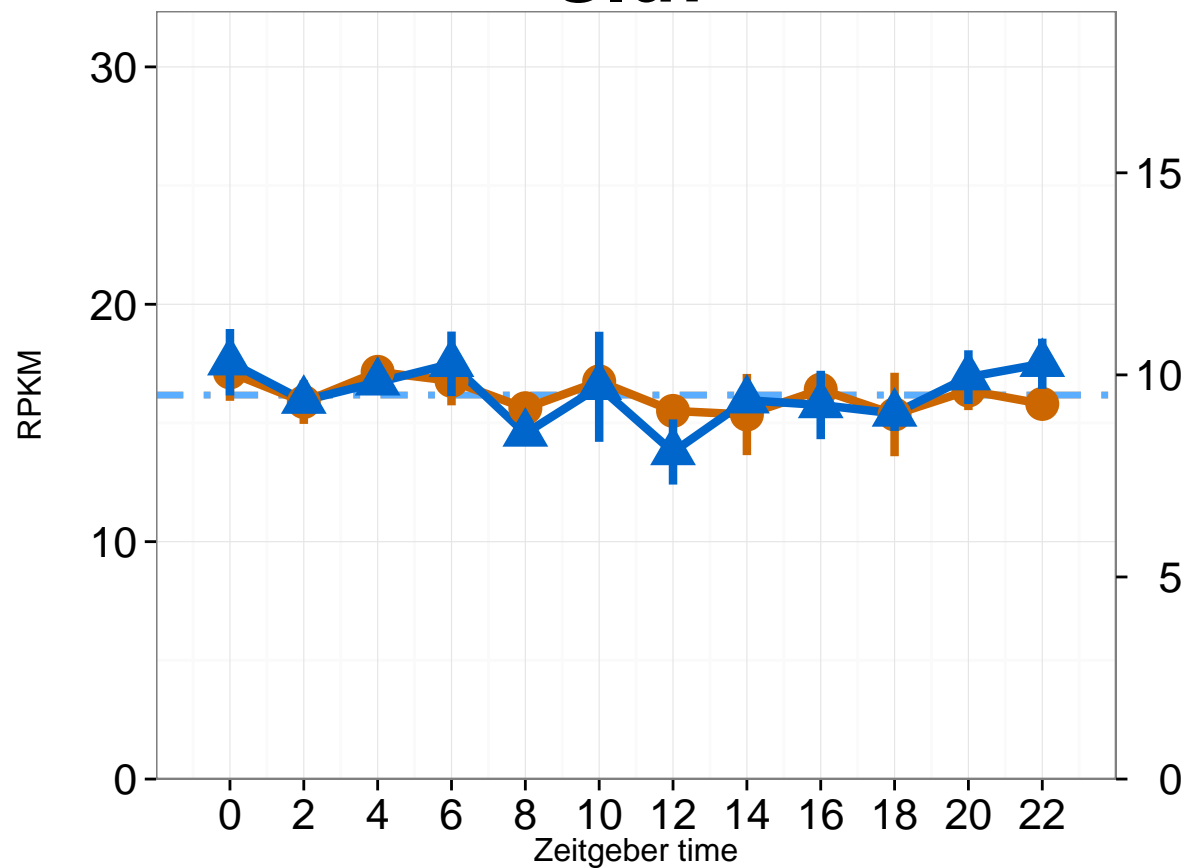

## Slu7

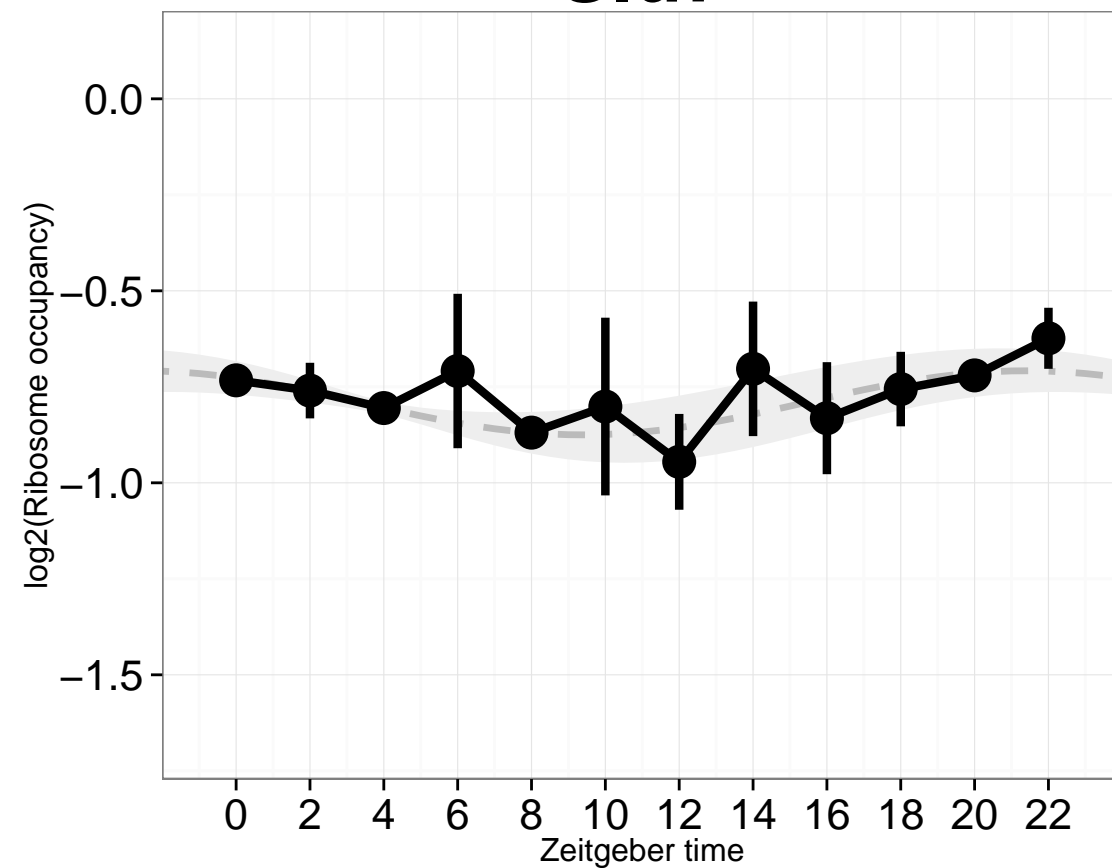

Supplement: SuppDataset_1.zip [file Slu7_set_A.pdf › Supplemental Dataset 1/A-mRNA_nonrhyth_translation_nonrhyth/Slu7_set_A.pdf]

# Slx1b

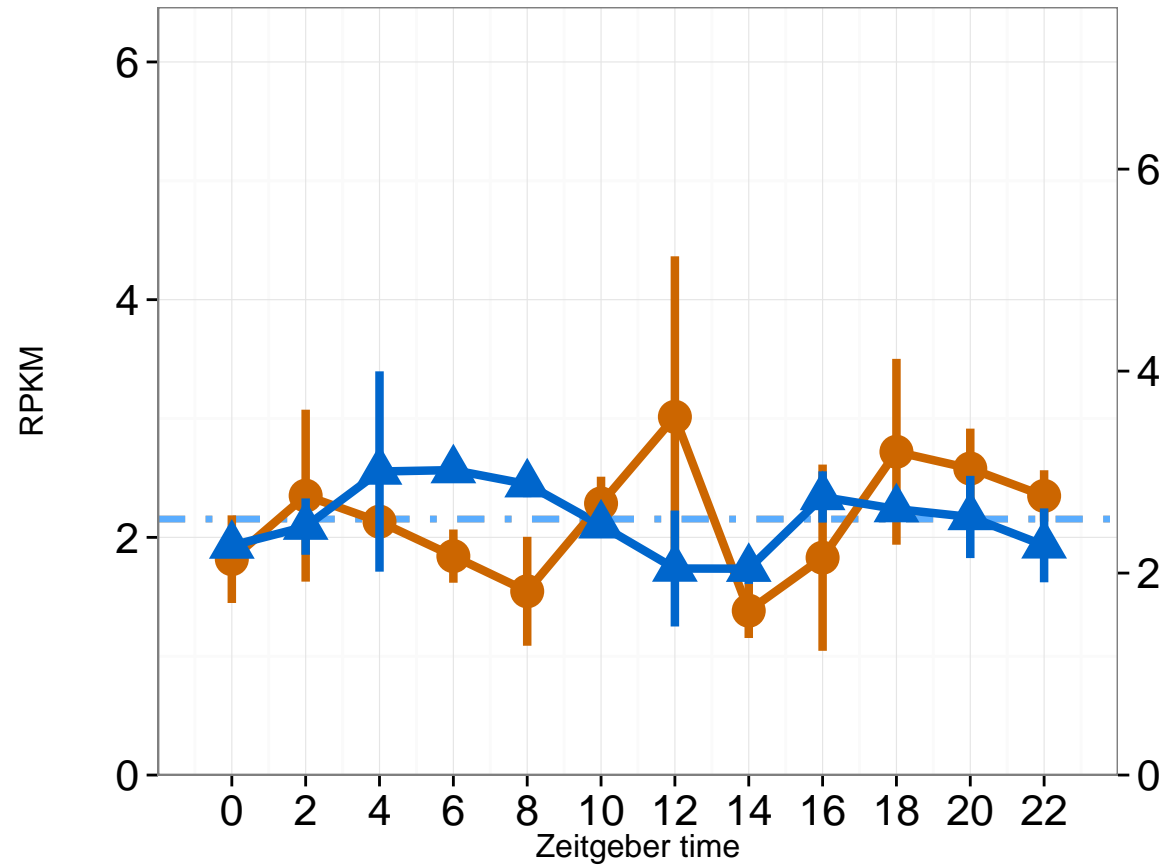

# Slx1b

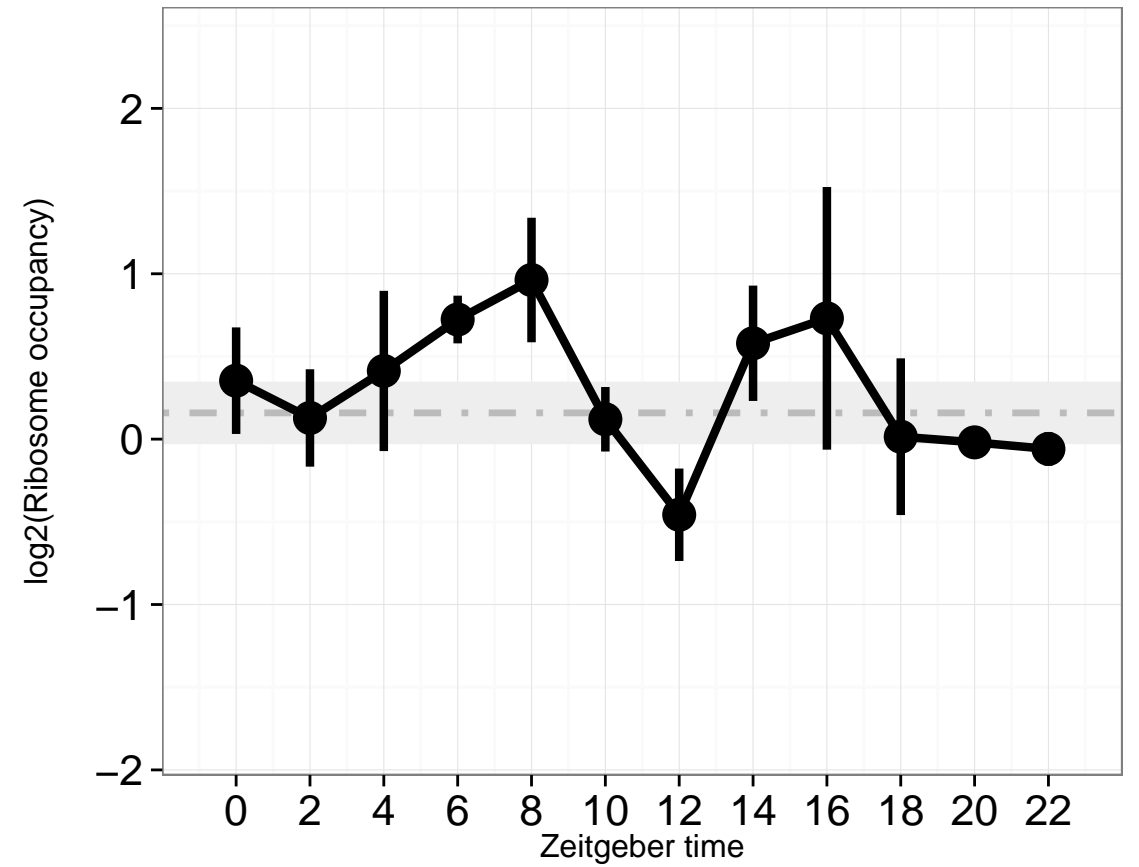

Supplement: SuppDataset_1.zip [file Slx1b_set_A.pdf › Supplemental Dataset 1/A-mRNA_nonrhyth_translation_nonrhyth/Slx1b_set_A.pdf]

## Slx4

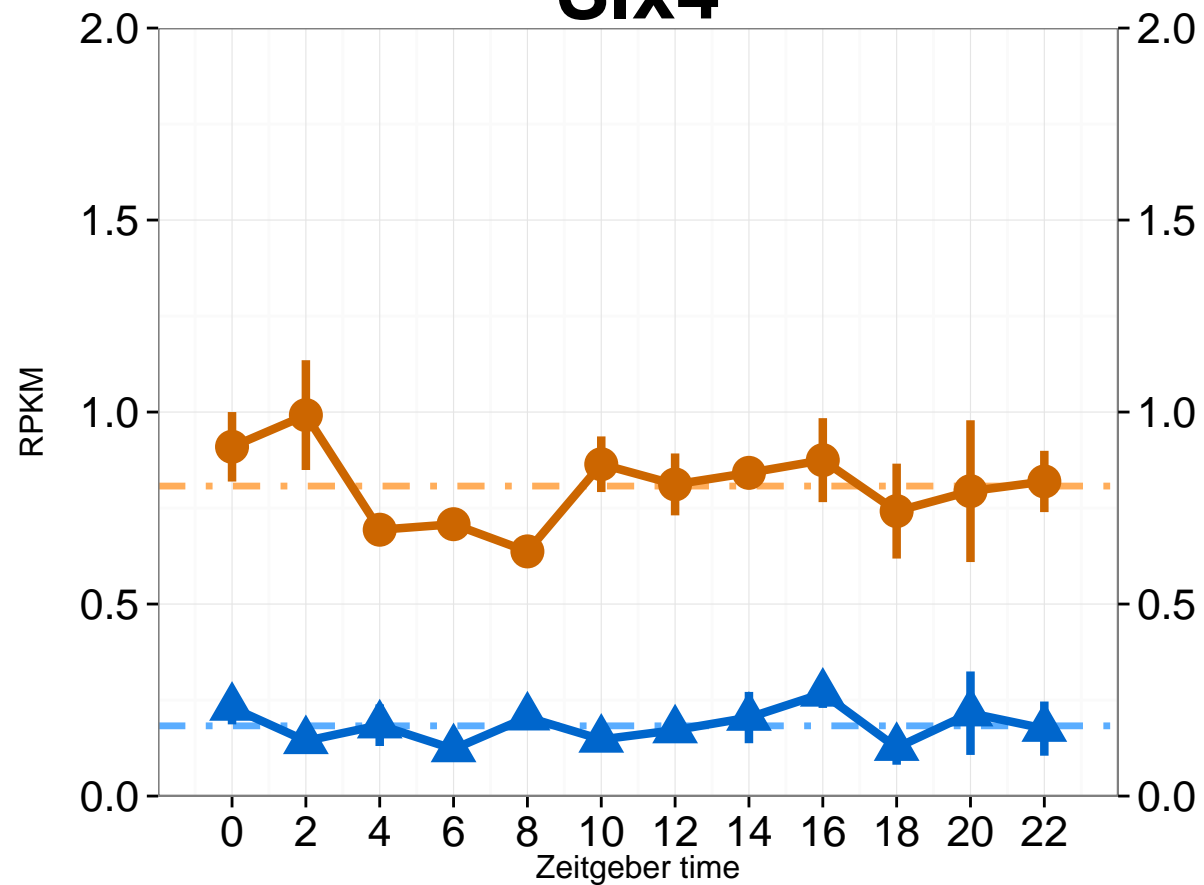

## Slx4

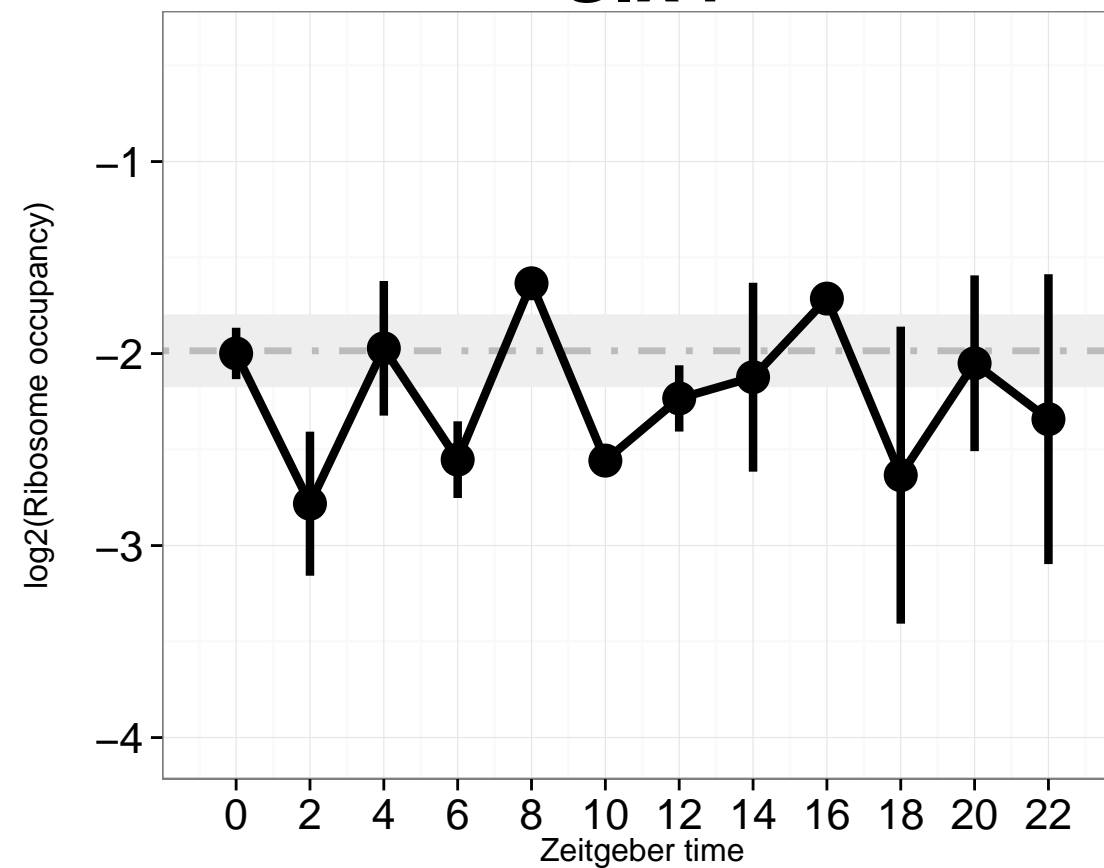

Supplement: SuppDataset_1.zip [file Slx4_set_A.pdf › Supplemental Dataset 1/A-mRNA_nonrhyth_translation_nonrhyth/Slx4_set_A.pdf]

## Smad1

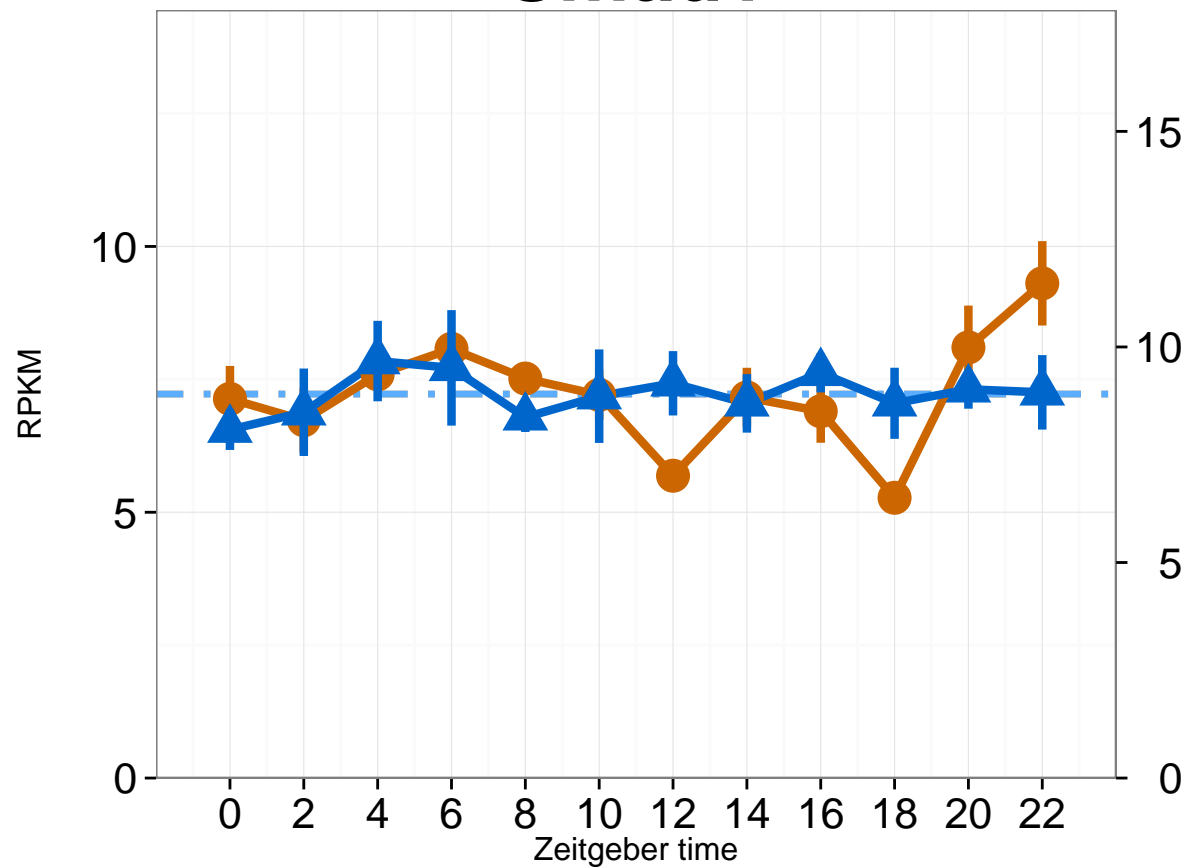

## Smad1

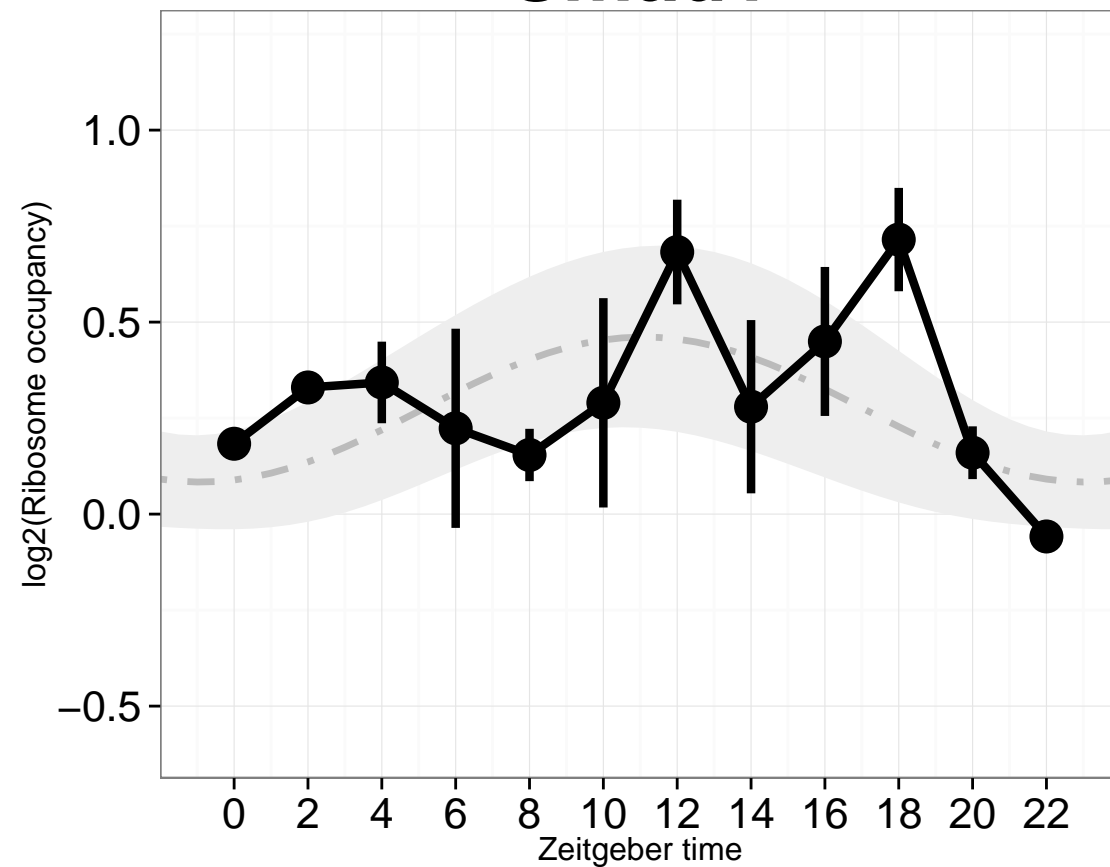

Supplement: SuppDataset_1.zip [file Smad1_set_A.pdf › Supplemental Dataset 1/A-mRNA_nonrhyth_translation_nonrhyth/Smad1_set_A.pdf]

## Smad2

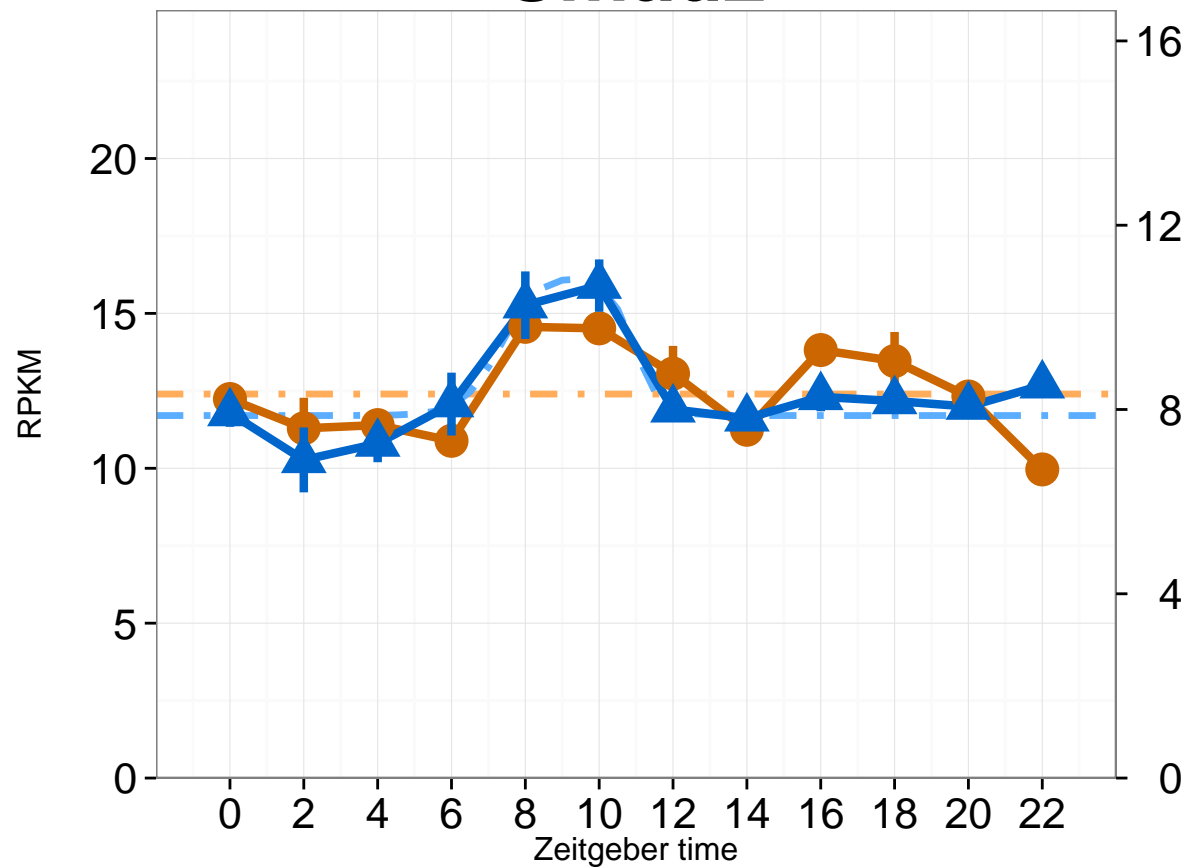

## Smad2

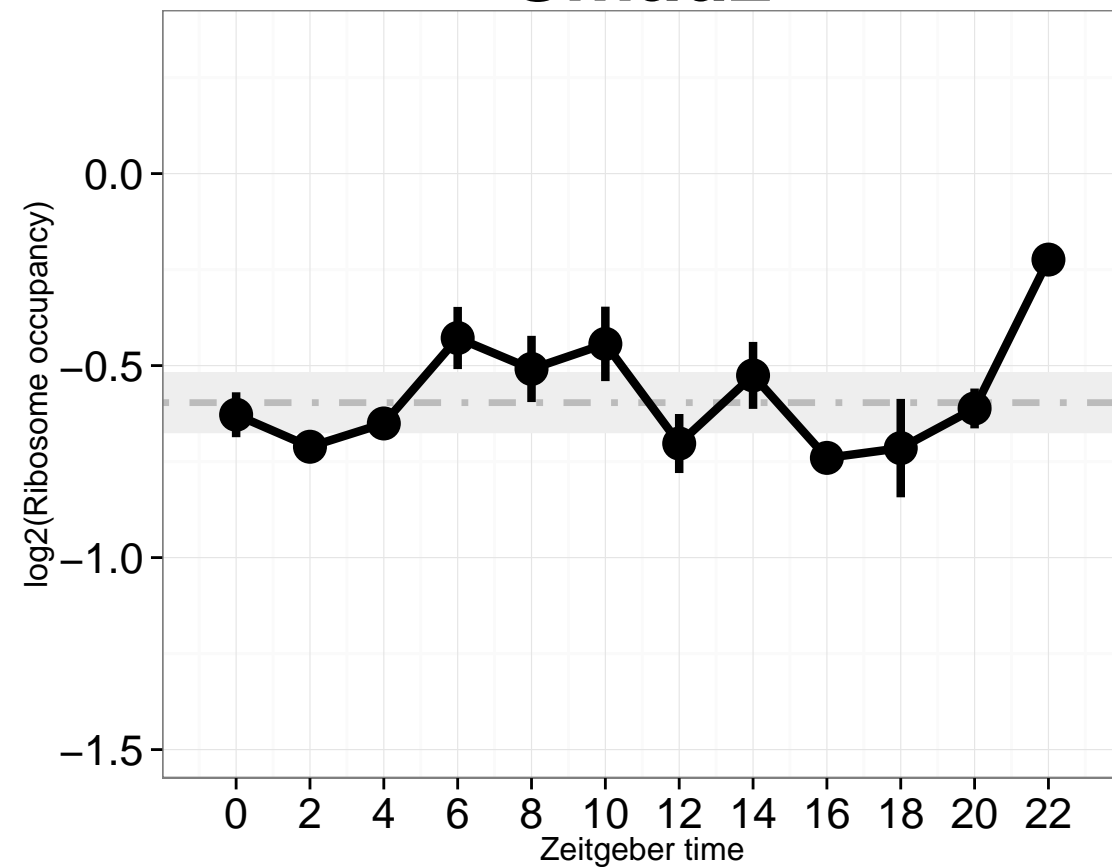

Supplement: SuppDataset_1.zip [file Smad2_set_A.pdf › Supplemental Dataset 1/A-mRNA_nonrhyth_translation_nonrhyth/Smad2_set_A.pdf]

## Smad3

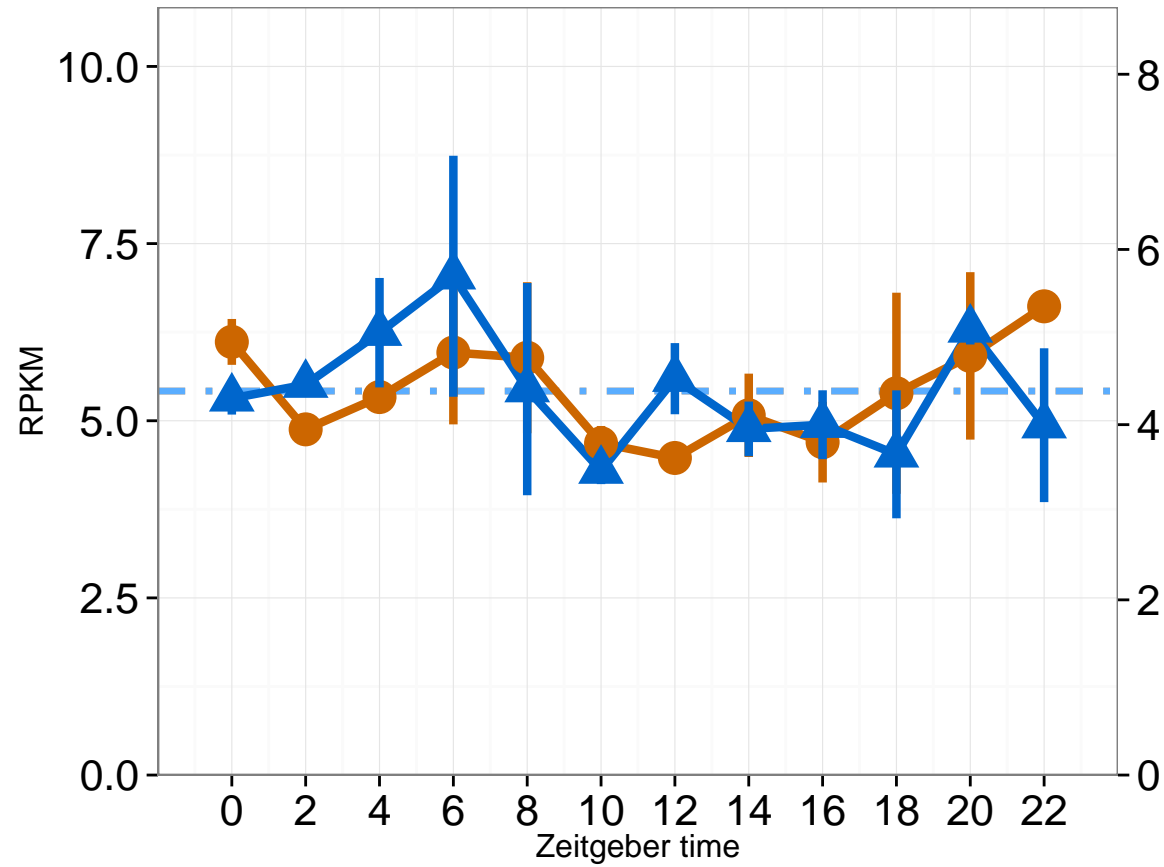

## Smad3

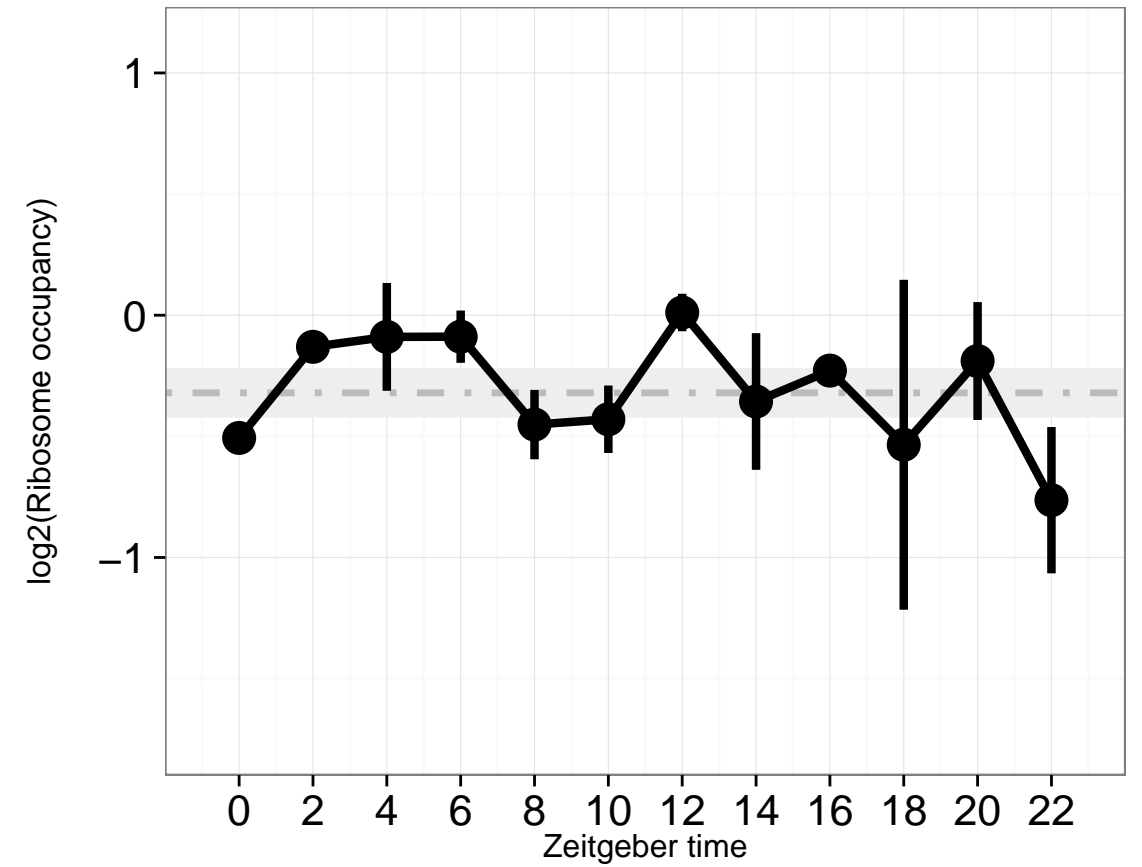

Supplement: SuppDataset_1.zip [file Smad3_set_A.pdf › Supplemental Dataset 1/A-mRNA_nonrhyth_translation_nonrhyth/Smad3_set_A.pdf]

## Smad4

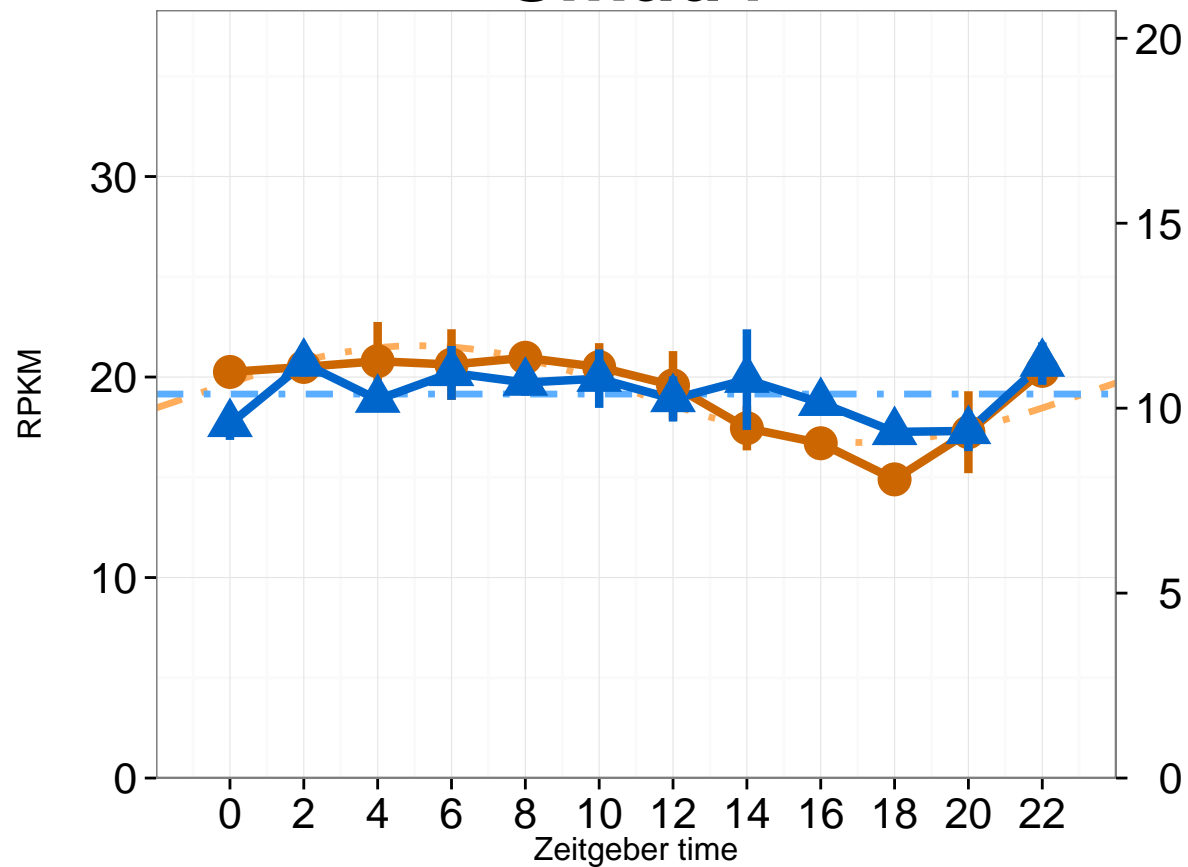

## Smad4

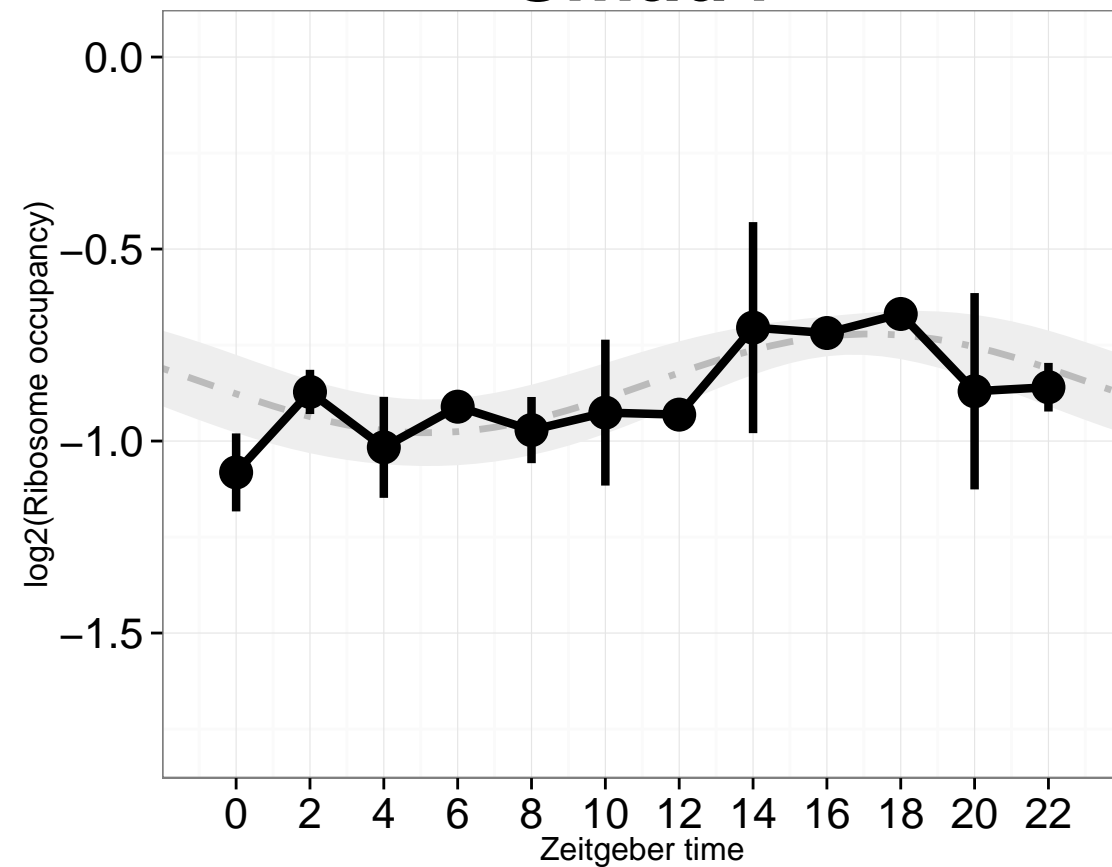

Supplement: SuppDataset_1.zip [file Smad4_set_A.pdf › Supplemental Dataset 1/A-mRNA_nonrhyth_translation_nonrhyth/Smad4_set_A.pdf]

## Smad5

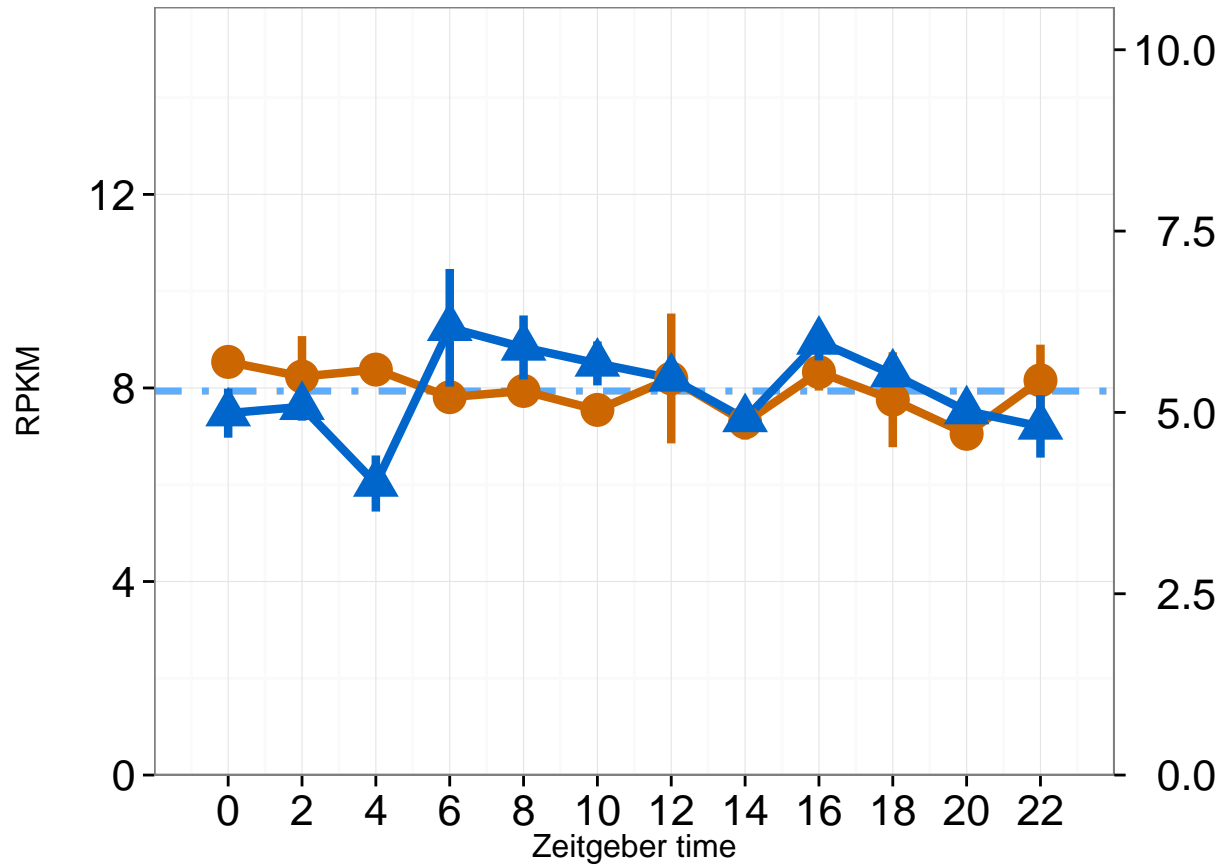

## Smad5

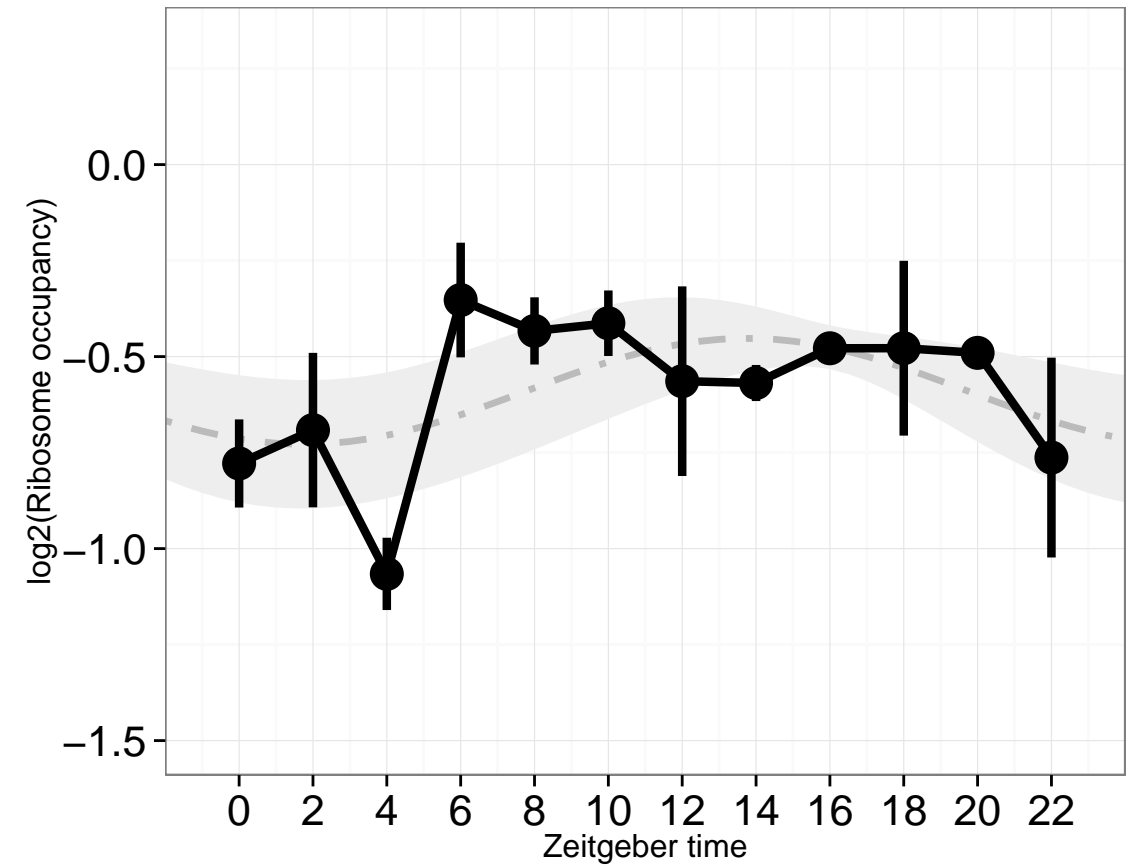

Supplement: SuppDataset_1.zip [file Smad5_set_A.pdf › Supplemental Dataset 1/A-mRNA_nonrhyth_translation_nonrhyth/Smad5_set_A.pdf]

# Smad6

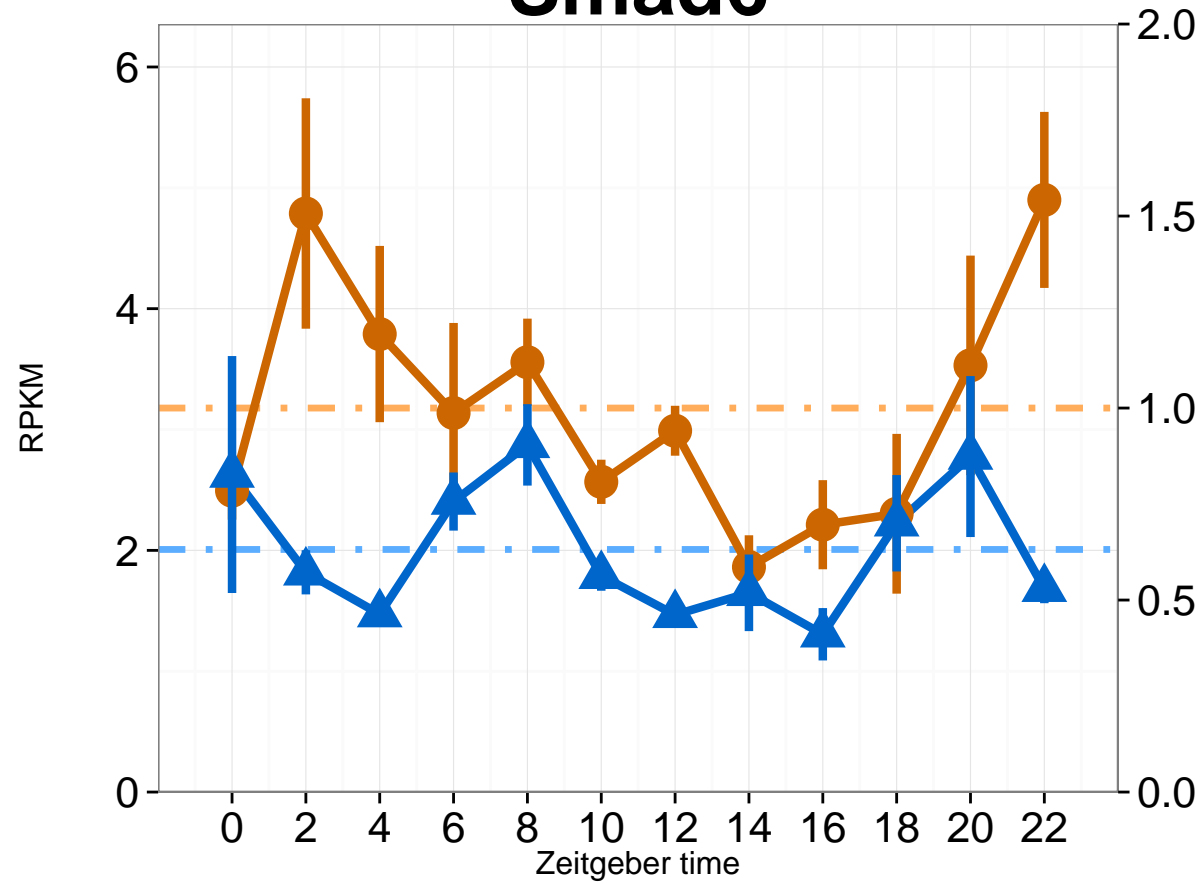

# Smad6

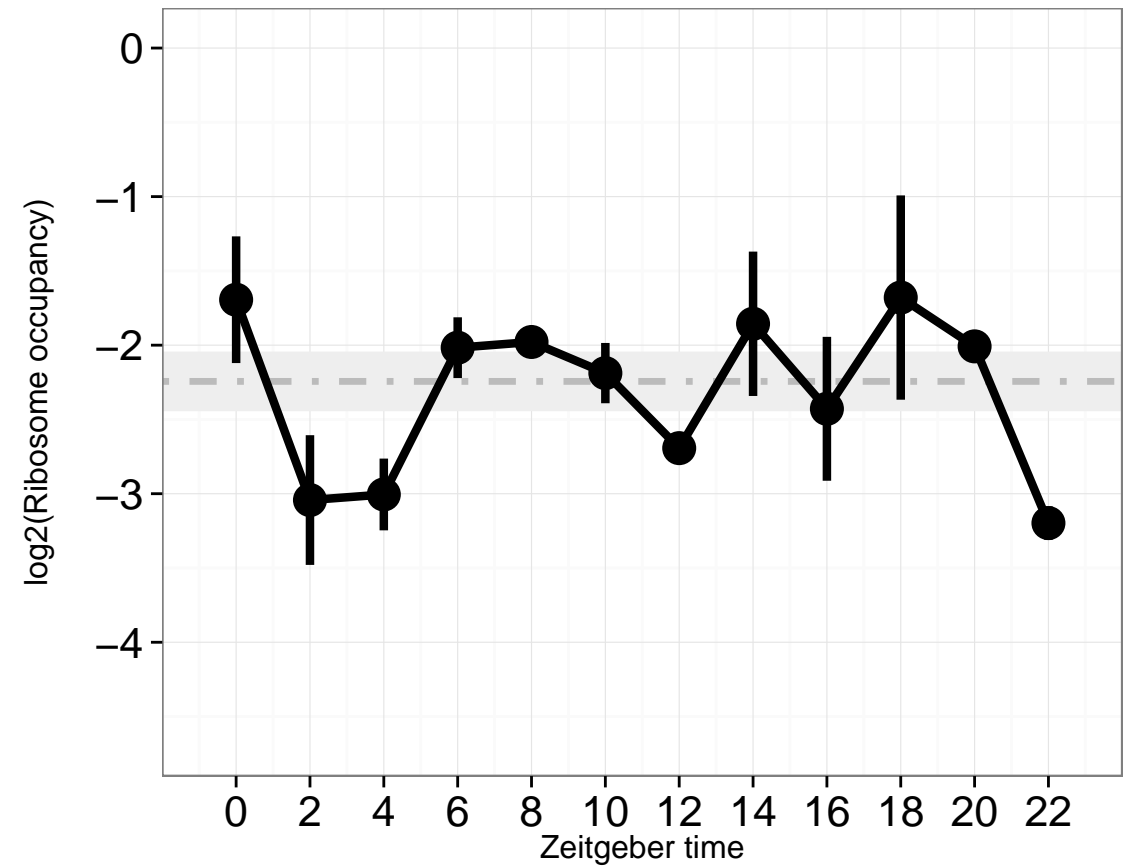

Supplement: SuppDataset_1.zip [file Smad6_set_A.pdf › Supplemental Dataset 1/A-mRNA_nonrhyth_translation_nonrhyth/Smad6_set_A.pdf]

## Smad7

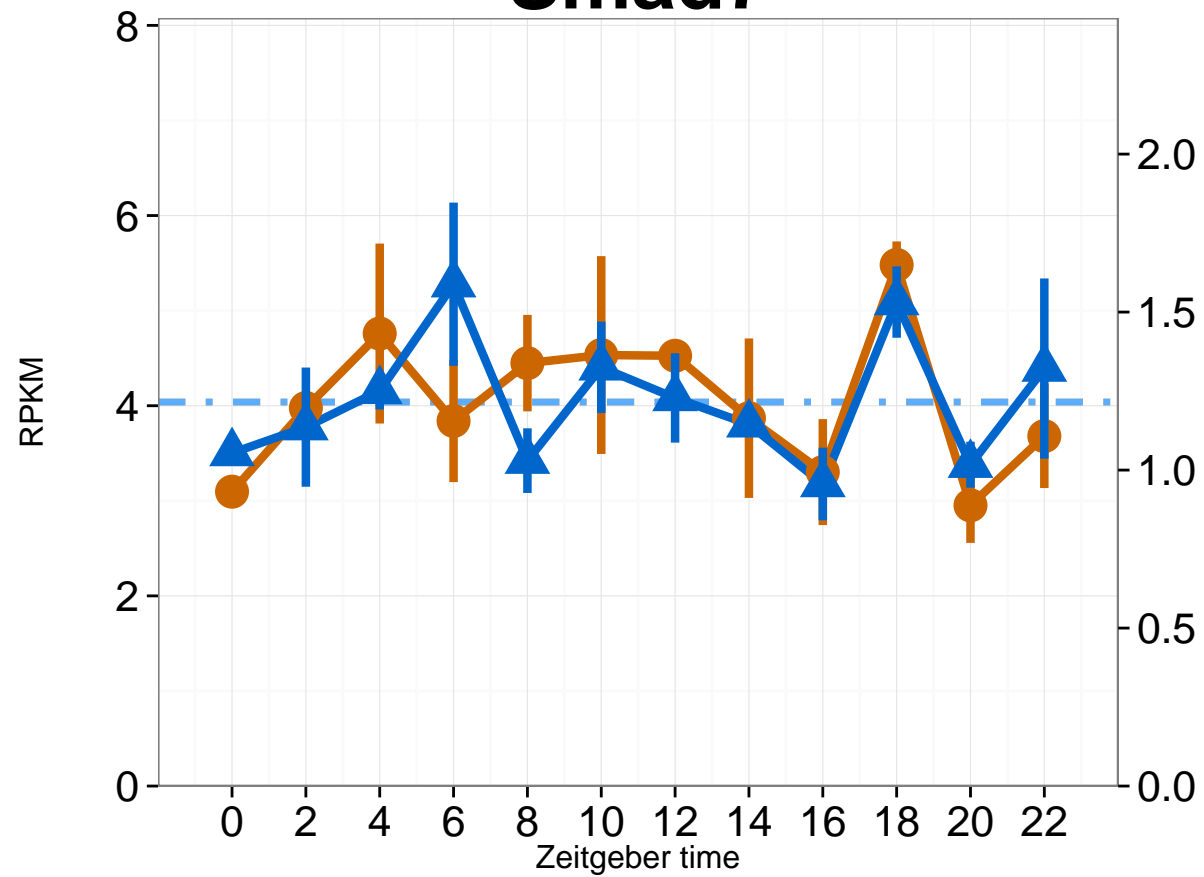

## Smad7

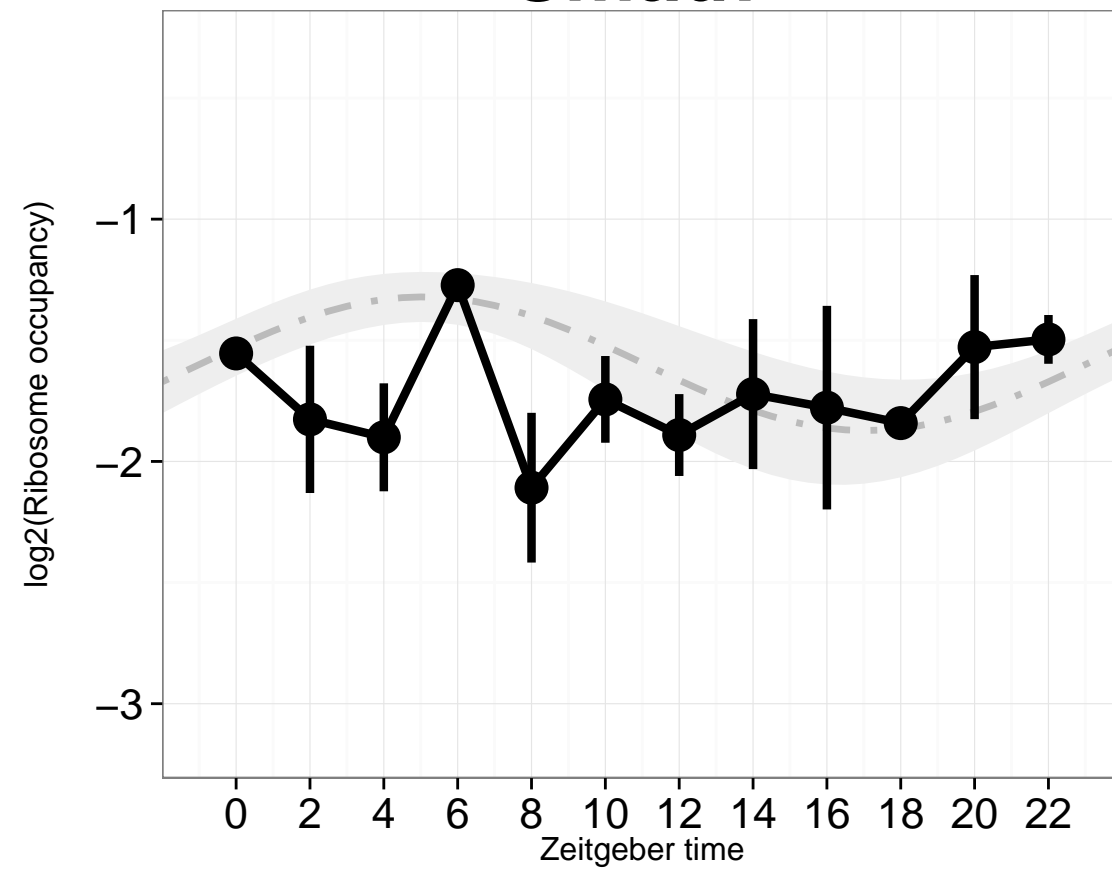

Supplement: SuppDataset_1.zip [file Smad7_set_A.pdf › Supplemental Dataset 1/A-mRNA_nonrhyth_translation_nonrhyth/Smad7_set_A.pdf]

# Smap1

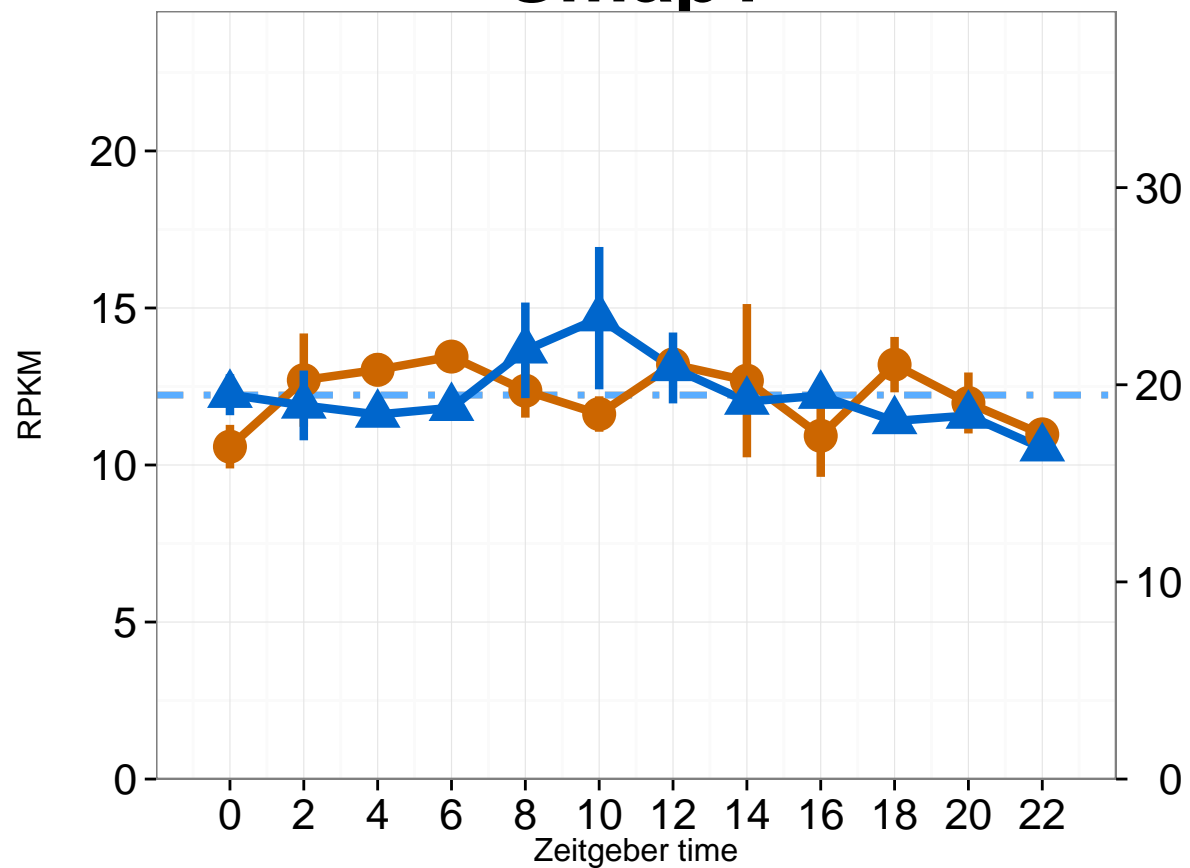

# Smap1

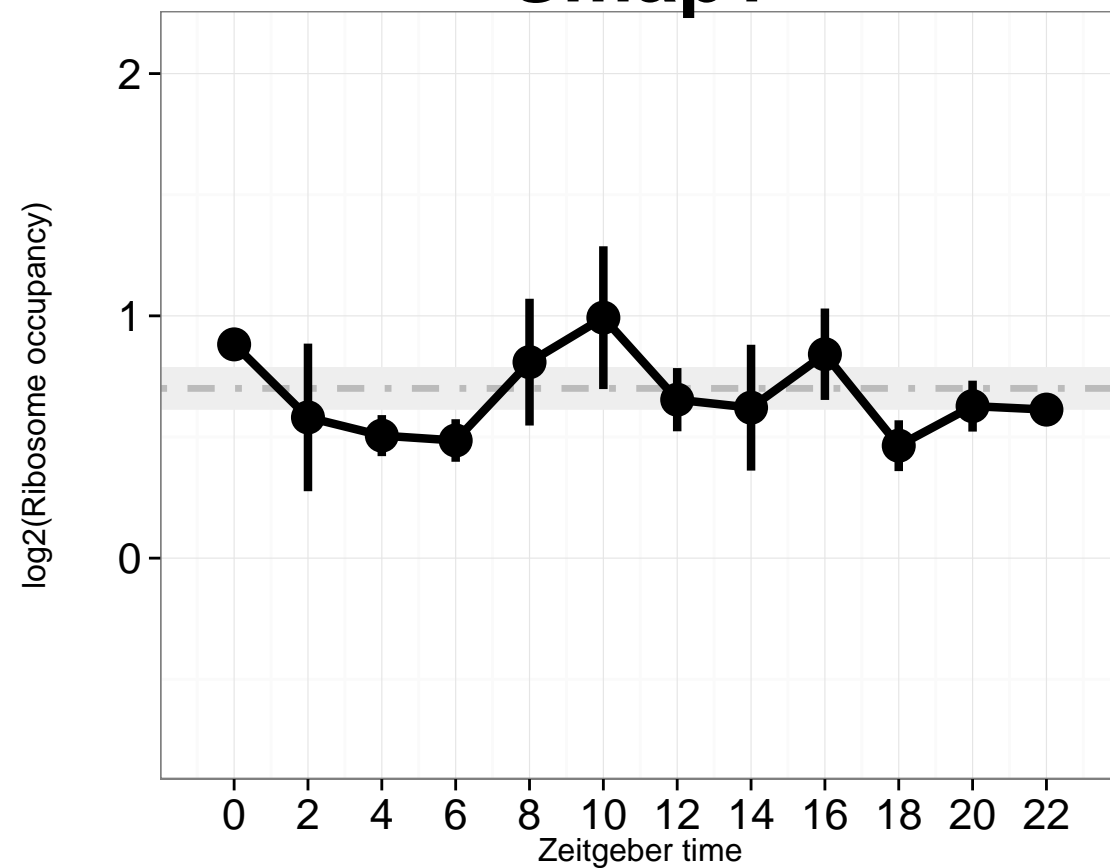

Supplement: SuppDataset_1.zip [file Smap1_set_A.pdf › Supplemental Dataset 1/A-mRNA_nonrhyth_translation_nonrhyth/Smap1_set_A.pdf]

## Smap2

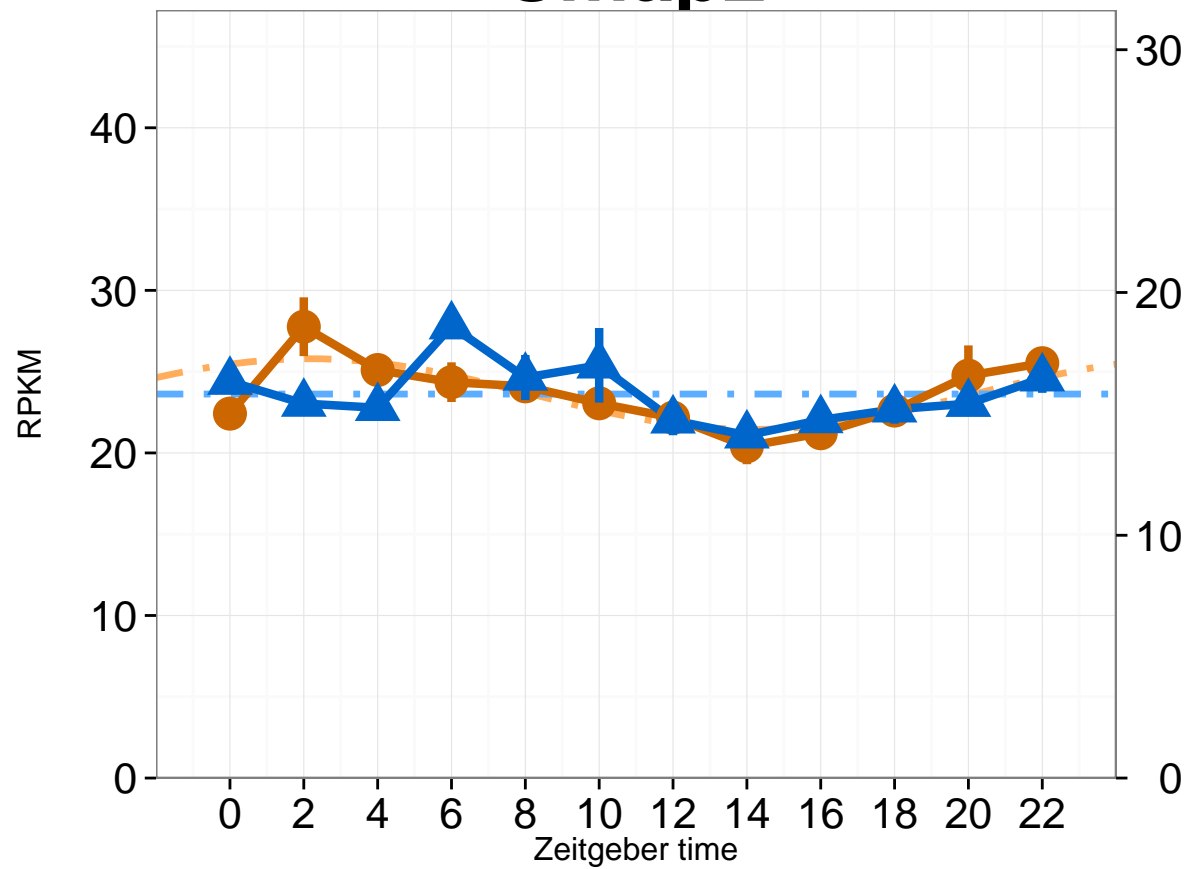

## Smap2

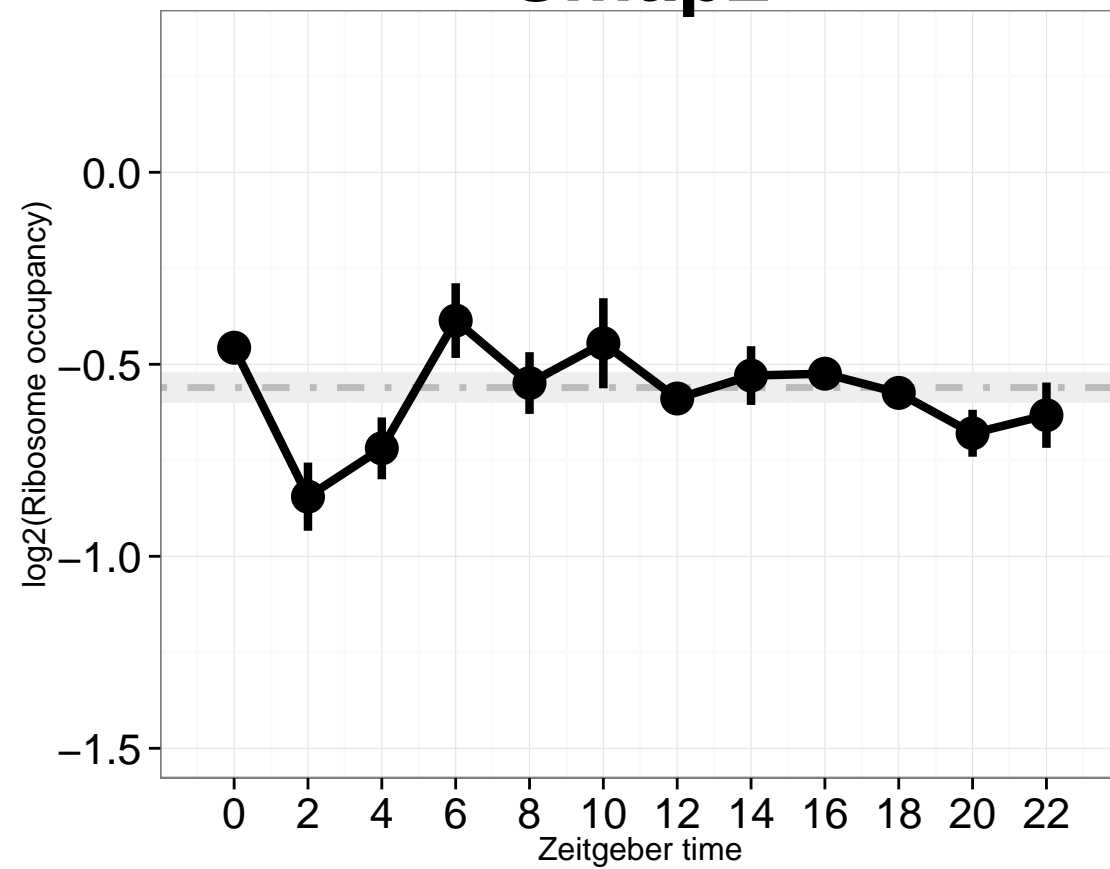

Supplement: SuppDataset_1.zip [file Smap2_set_A.pdf › Supplemental Dataset 1/A-mRNA_nonrhyth_translation_nonrhyth/Smap2_set_A.pdf]
