# Supplementary figures and images for: Ribosome profiling reveals the rhythmic liver translatome and circadian clock regulation by upstream open reading frames (part 69 of 113)
Source: HighWire-hosted journal article supplement (doi:10.1101/gr.195404.115), 2015-10-20

## Smarca4

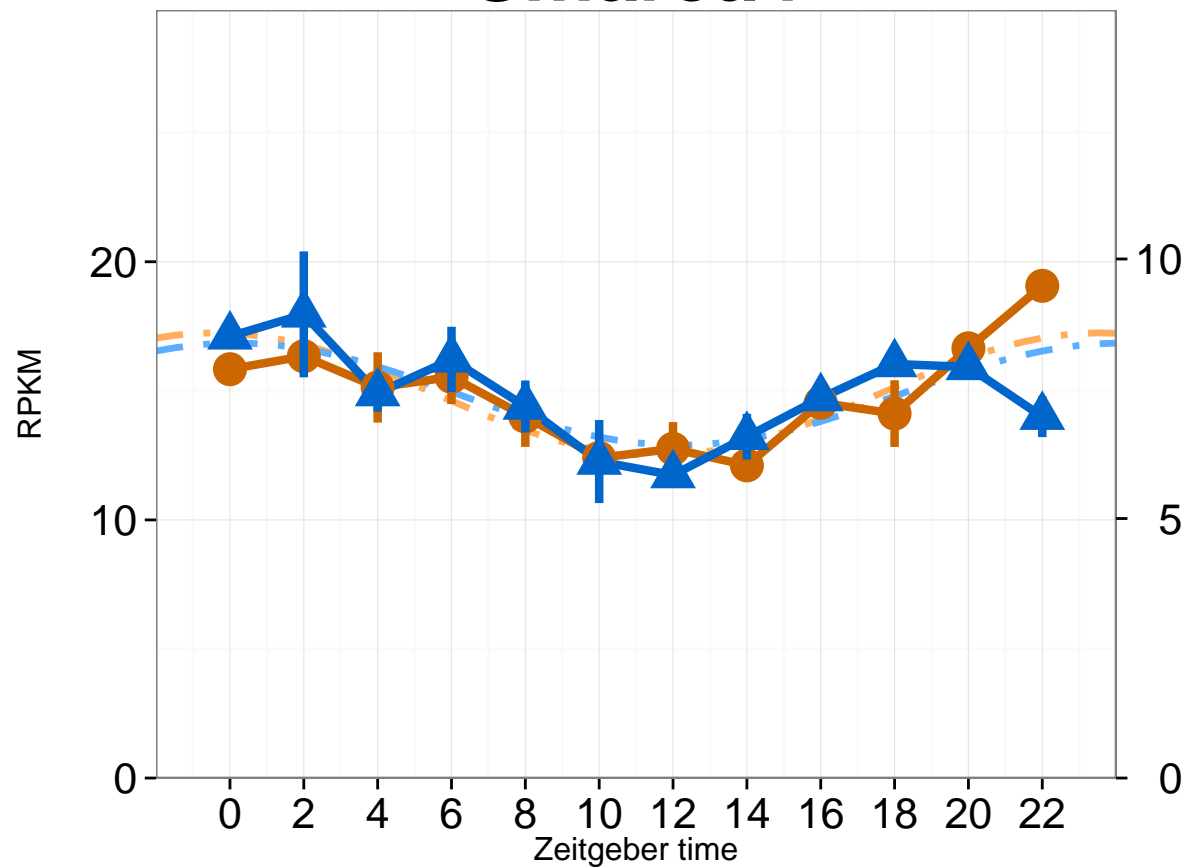

## Smarca4

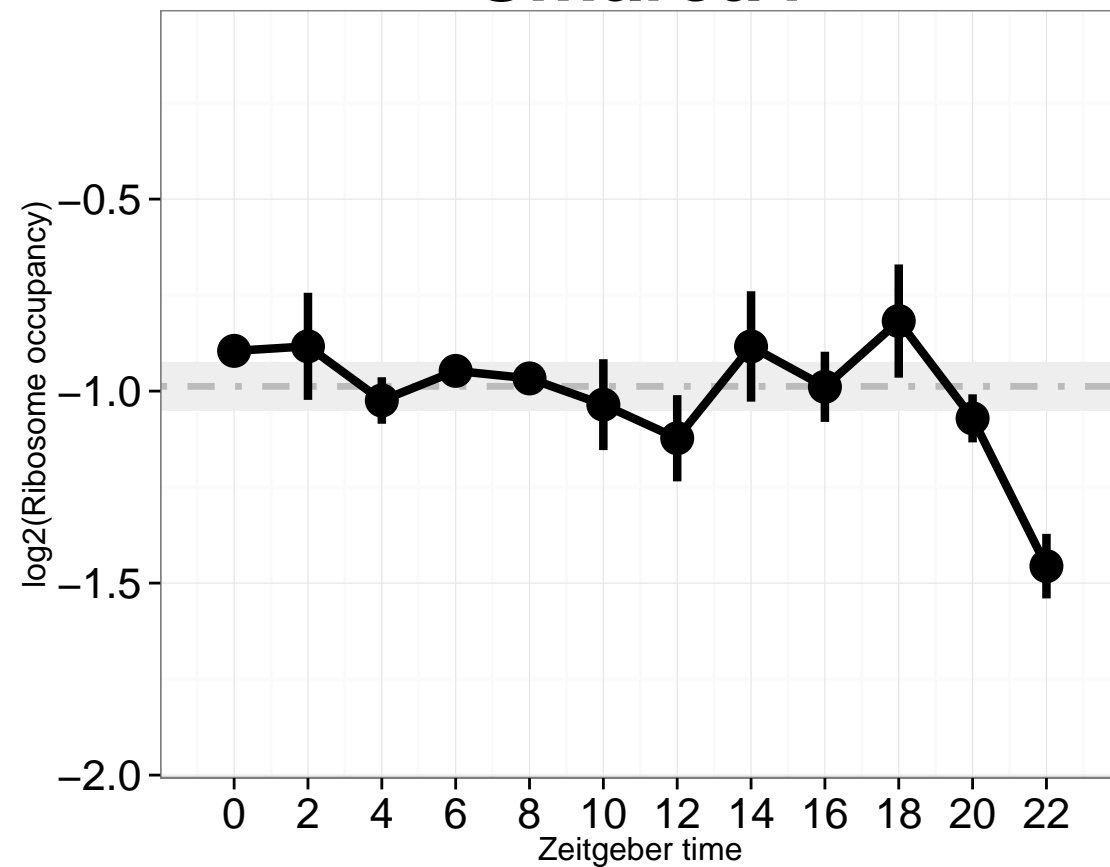

Supplement: SuppDataset_1.zip [file Smarca4_set_A.pdf › Supplemental Dataset 1/A-mRNA_nonrhyth_translation_nonrhyth/Smarca4_set_A.pdf]

## Smarca5

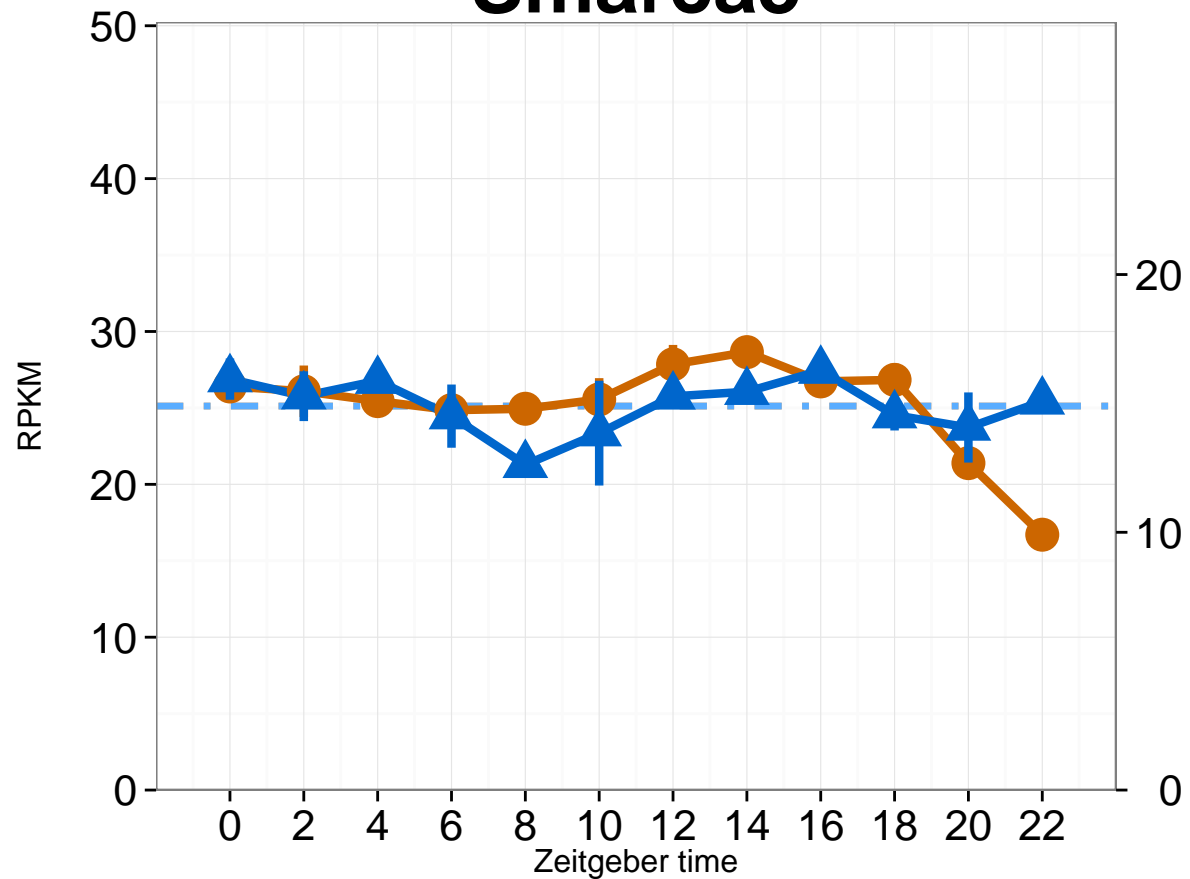

## Smarca5

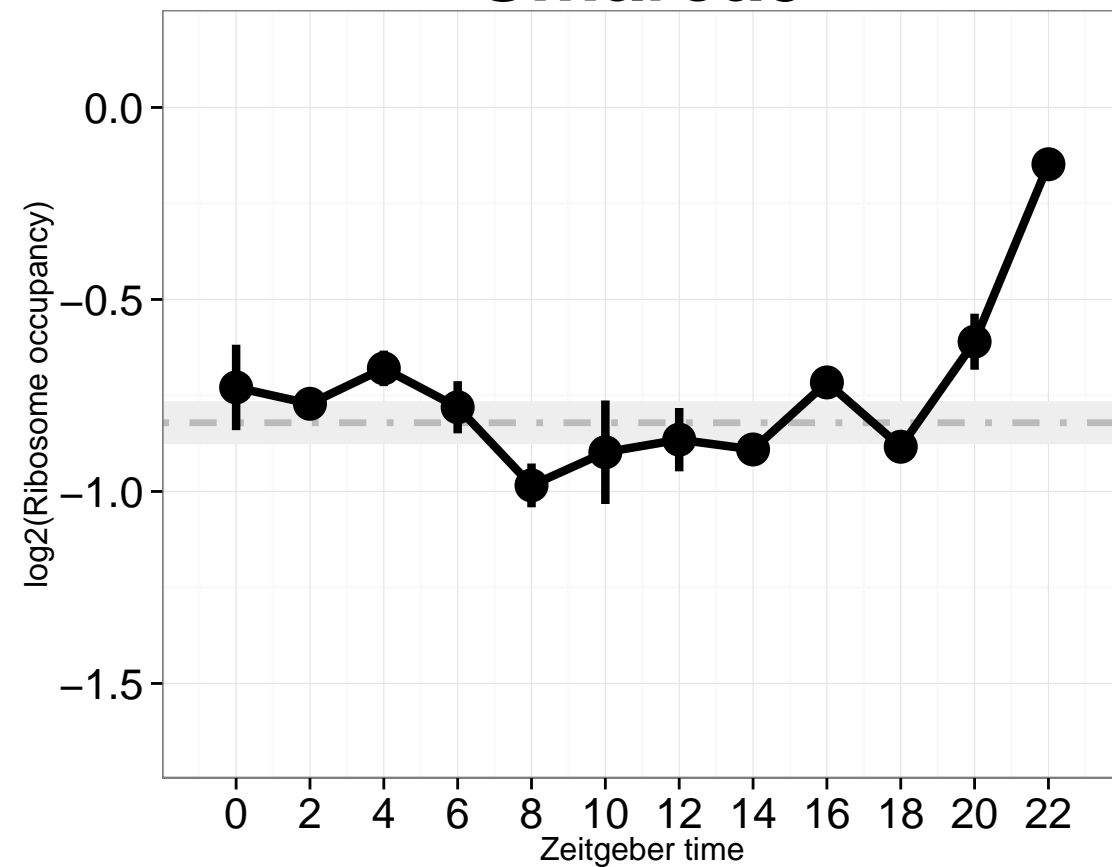

Supplement: SuppDataset_1.zip [file Smarca5_set_A.pdf › Supplemental Dataset 1/A-mRNA_nonrhyth_translation_nonrhyth/Smarca5_set_A.pdf]

## Smarcad1

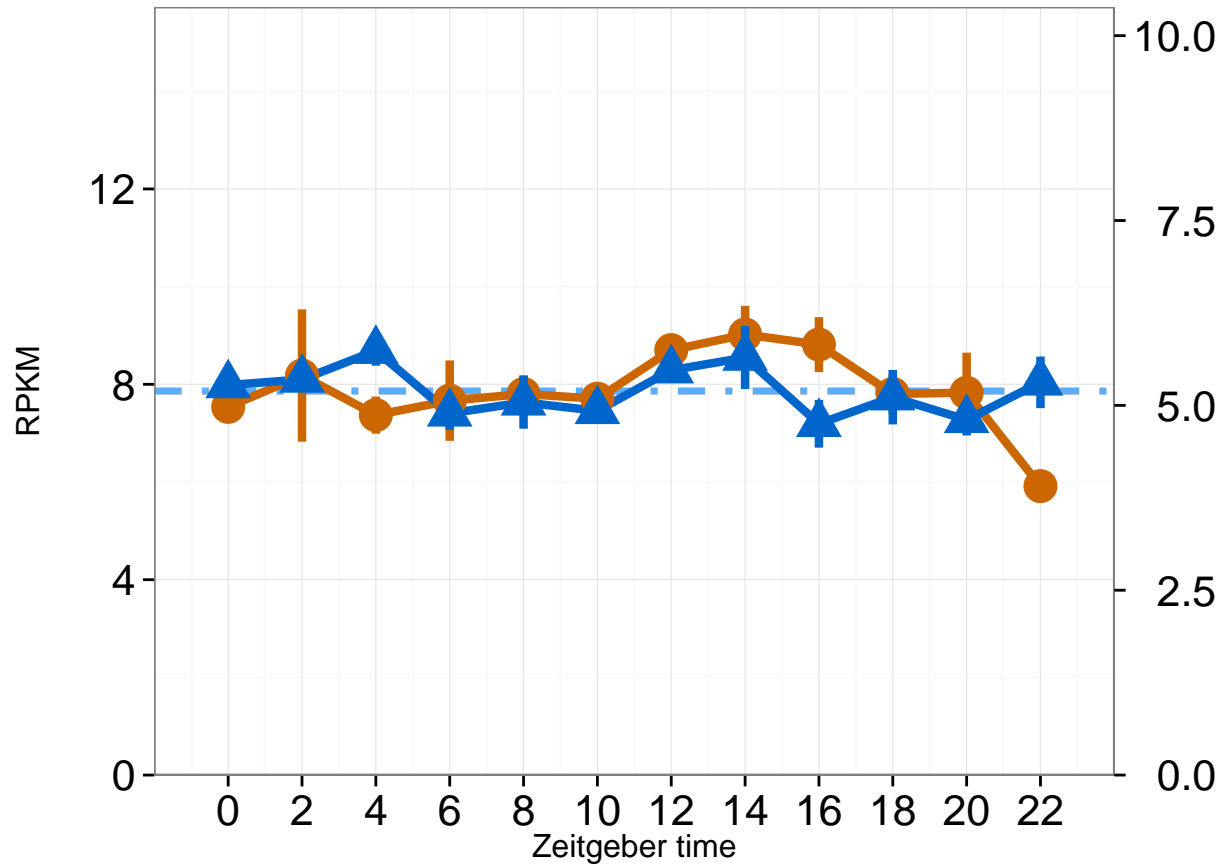

## Smarcad1

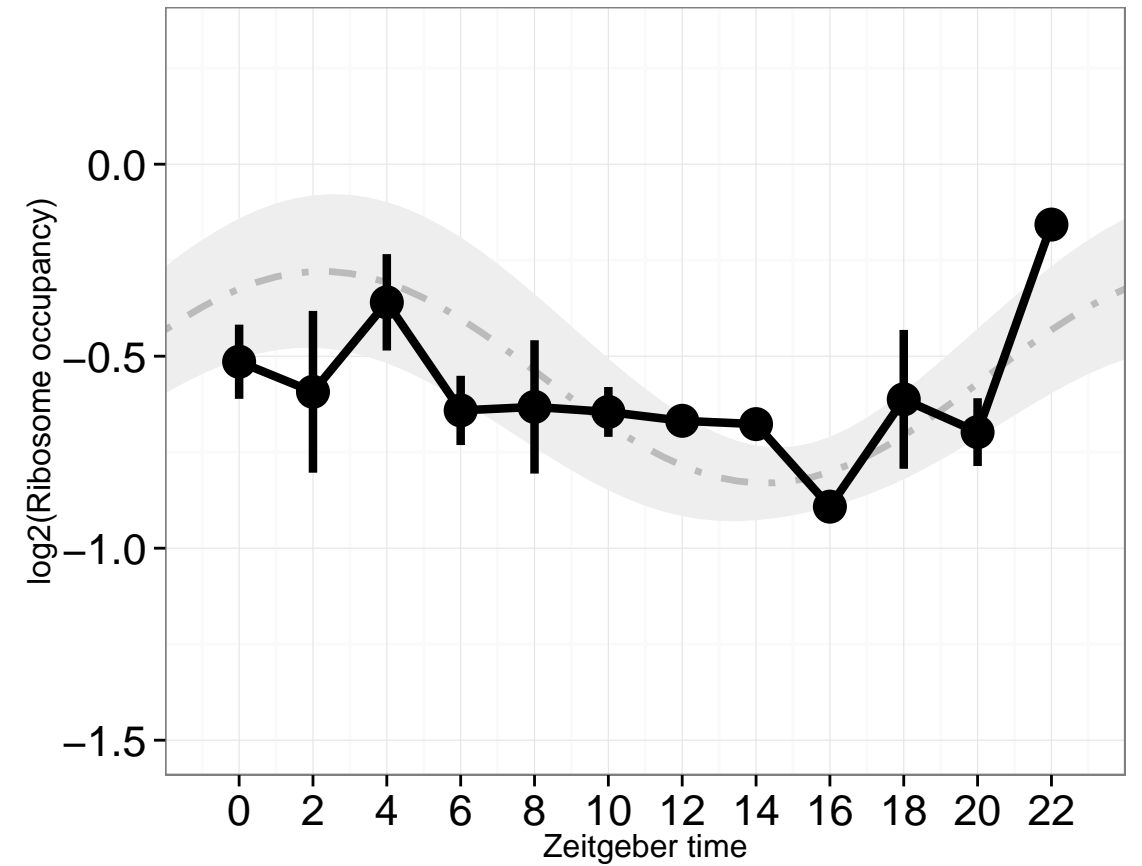

Supplement: SuppDataset_1.zip [file Smarcad1_set_A.pdf › Supplemental Dataset 1/A-mRNA_nonrhyth_translation_nonrhyth/Smarcad1_set_A.pdf]

# Smarcal1

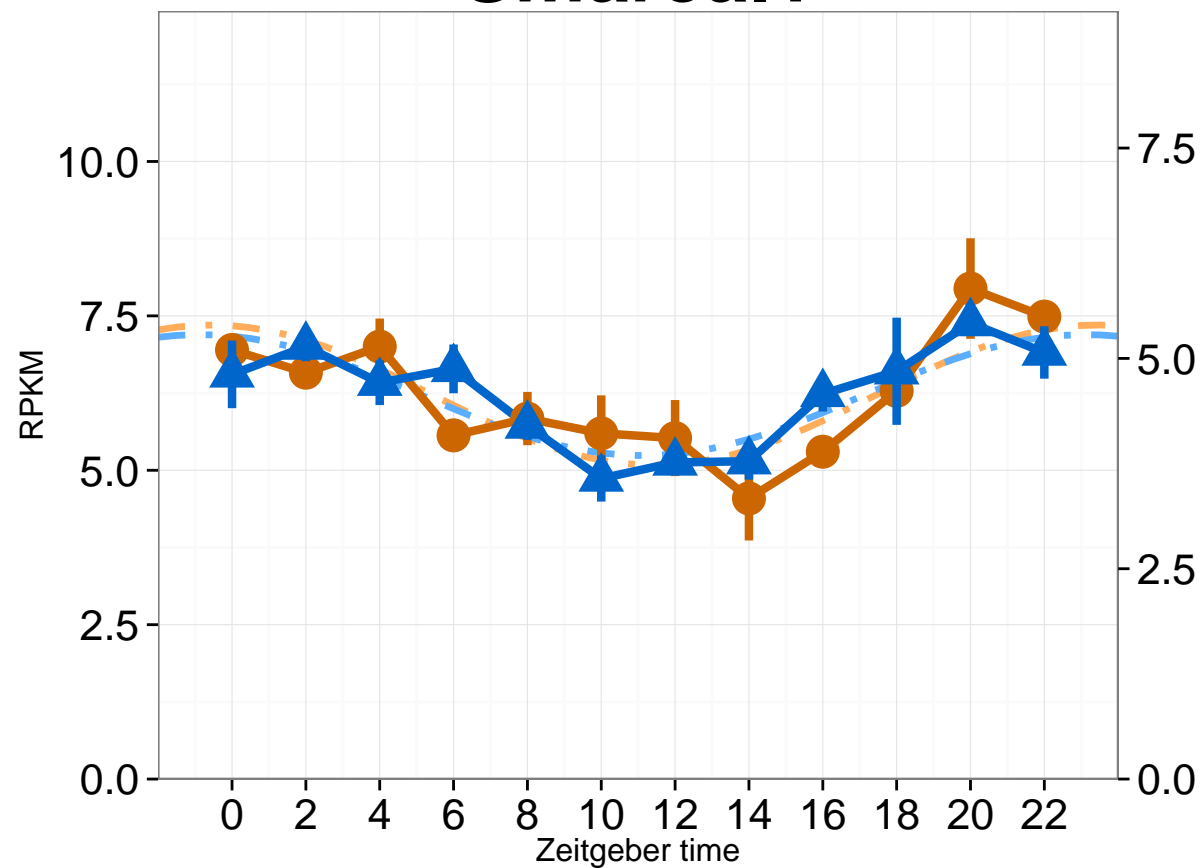

# Smarcal1

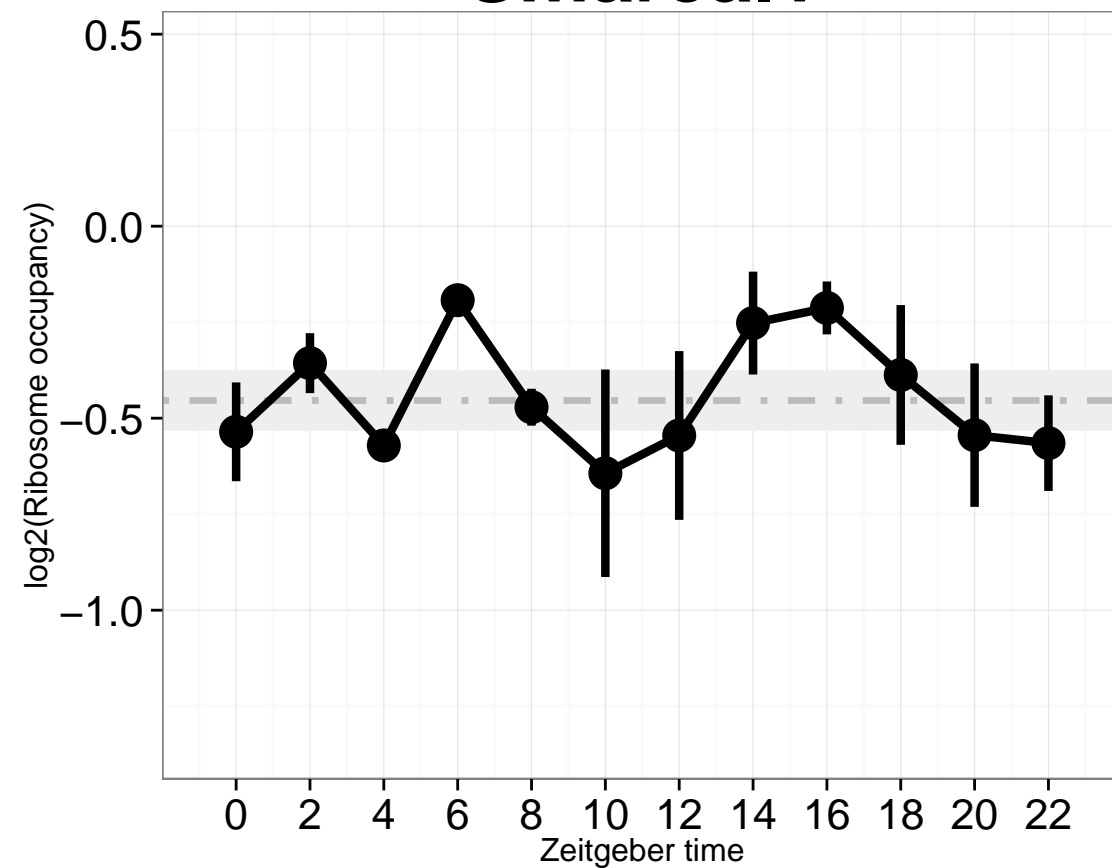

Supplement: SuppDataset_1.zip [file Smarcal1_set_A.pdf › Supplemental Dataset 1/A-mRNA_nonrhyth_translation_nonrhyth/Smarcal1_set_A.pdf]

## Smarb1

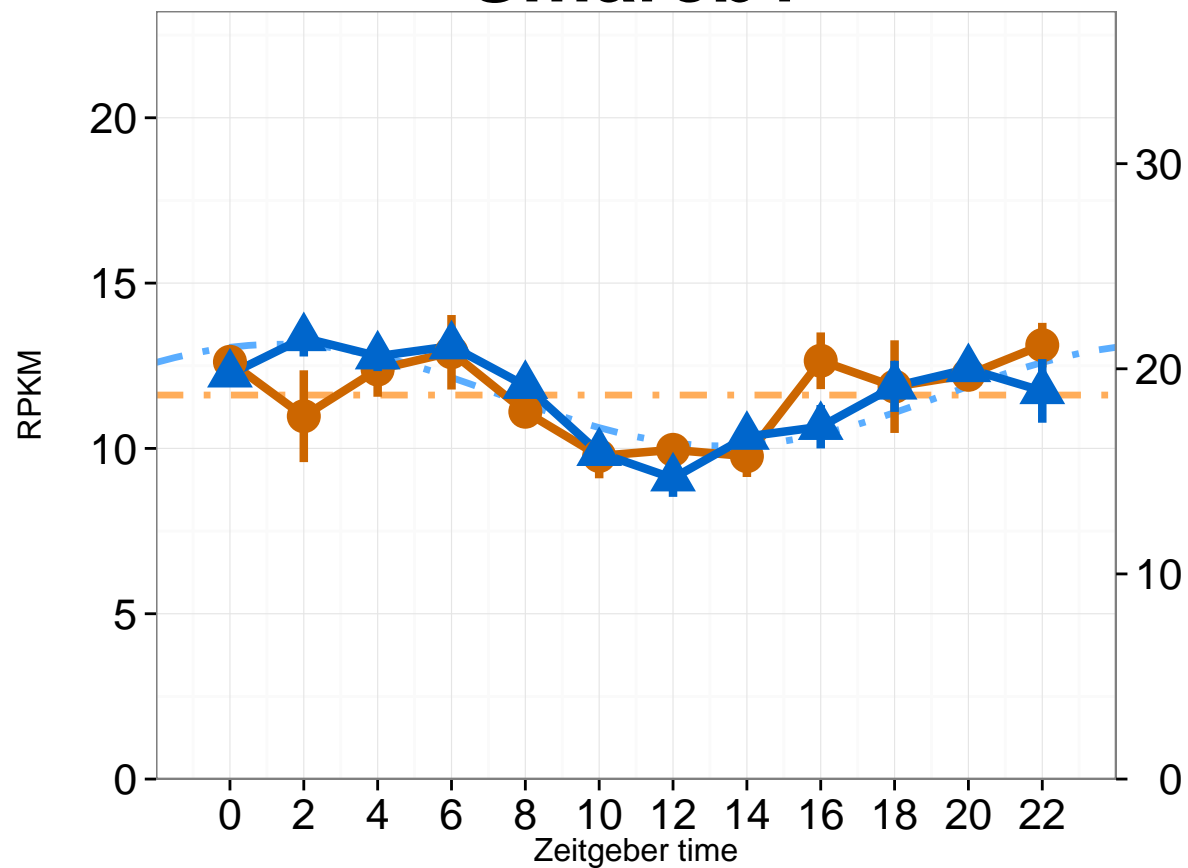

## Smarb1

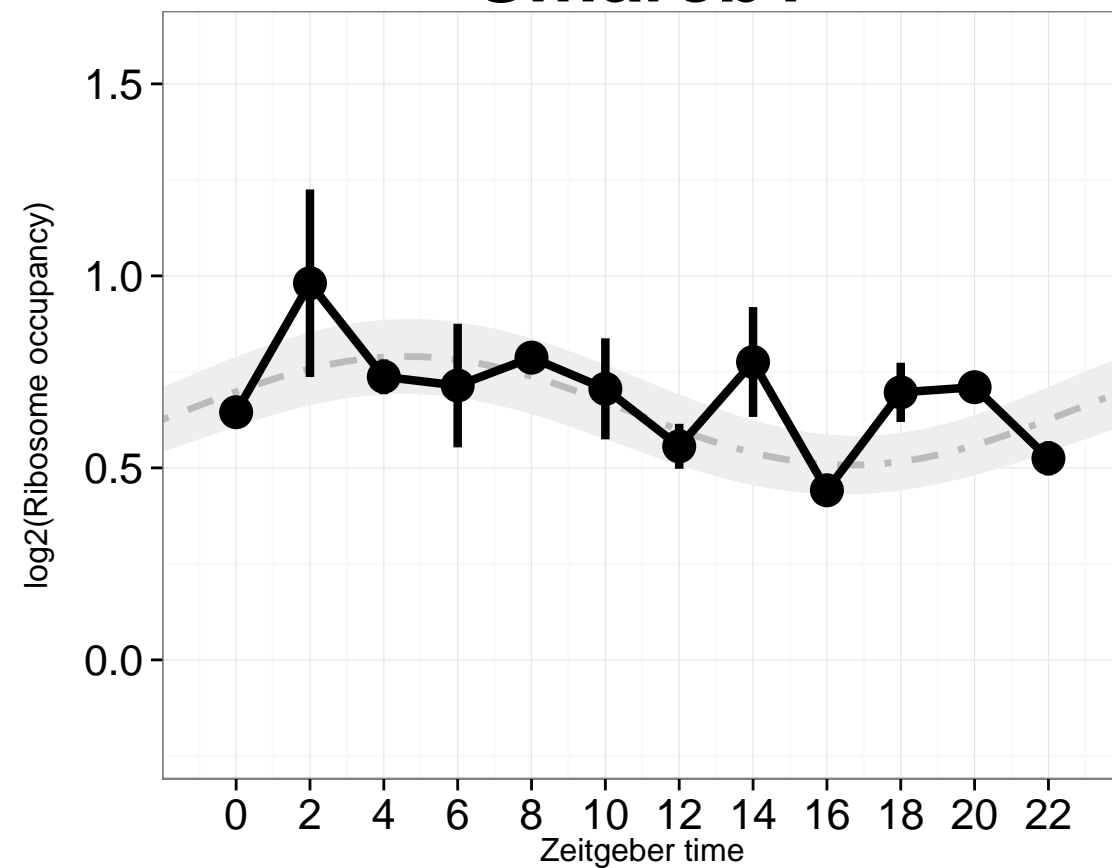

Supplement: SuppDataset_1.zip [file Smarcb1_set_A.pdf › Supplemental Dataset 1/A-mRNA_nonrhyth_translation_nonrhyth/Smarcb1_set_A.pdf]

## Smarcc1

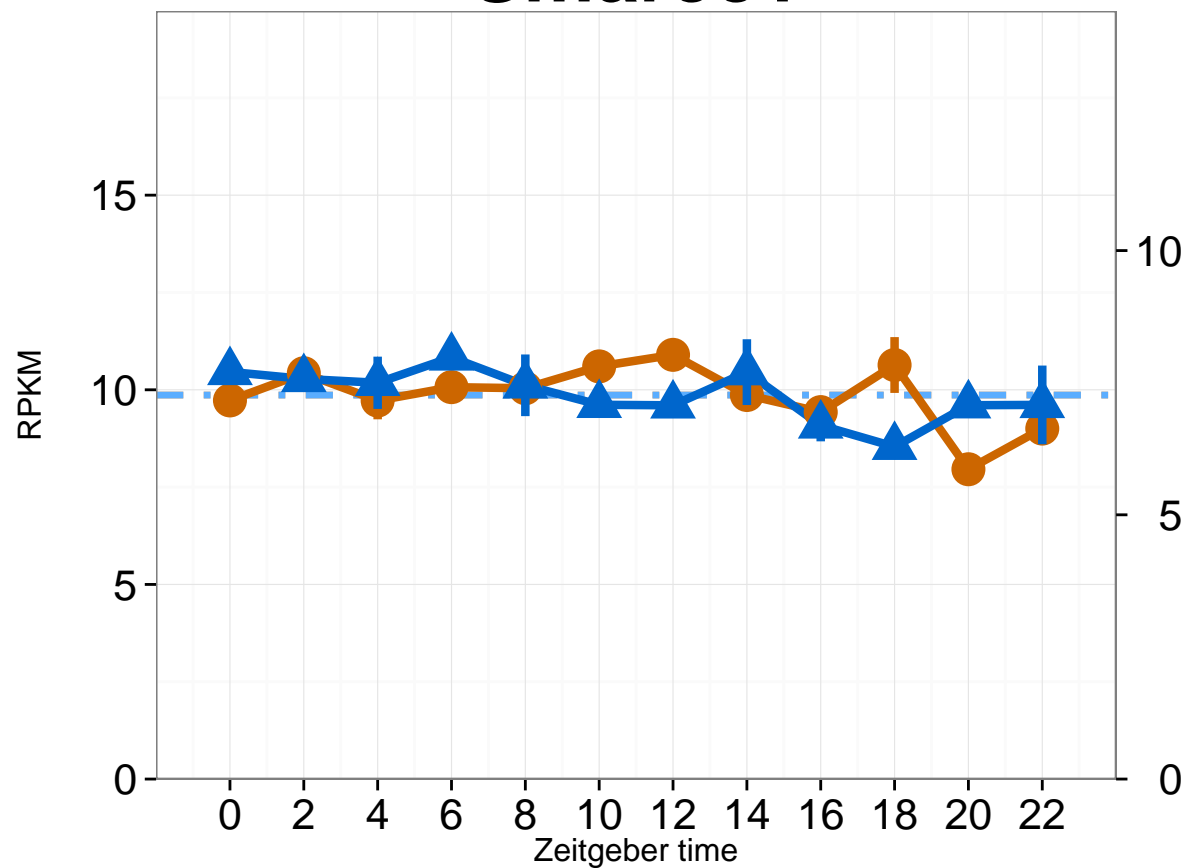

## Smarcc1

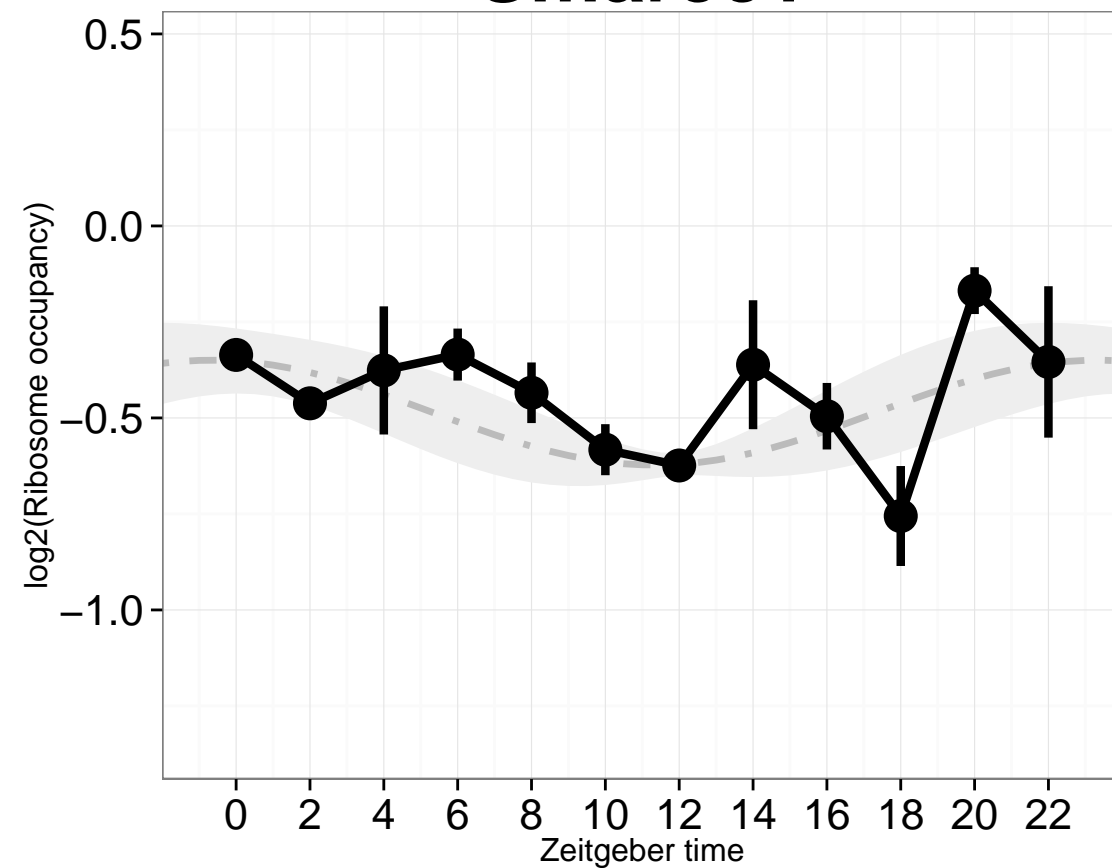

Supplement: SuppDataset_1.zip [file Smarcc1_set_A.pdf › Supplemental Dataset 1/A-mRNA_nonrhyth_translation_nonrhyth/Smarcc1_set_A.pdf]

## Smarcc2

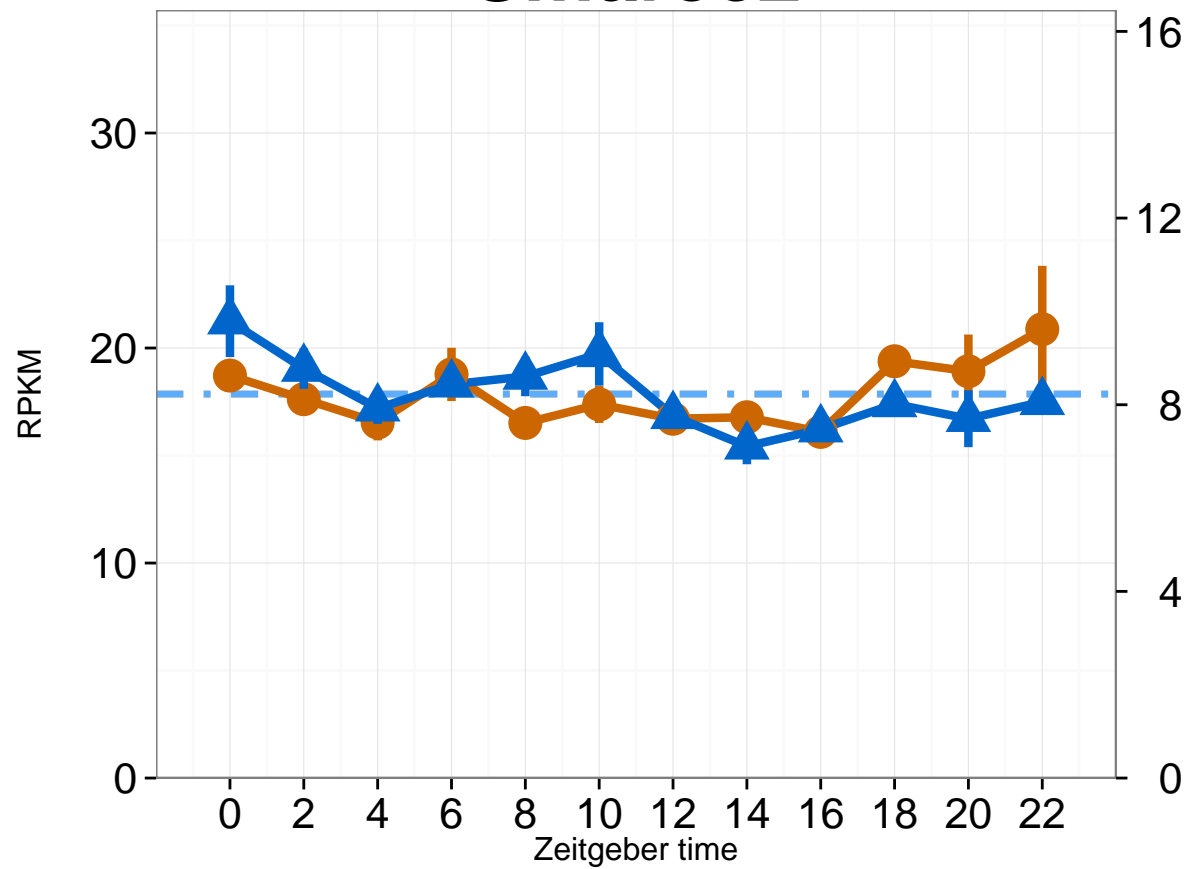

## Smarcc2

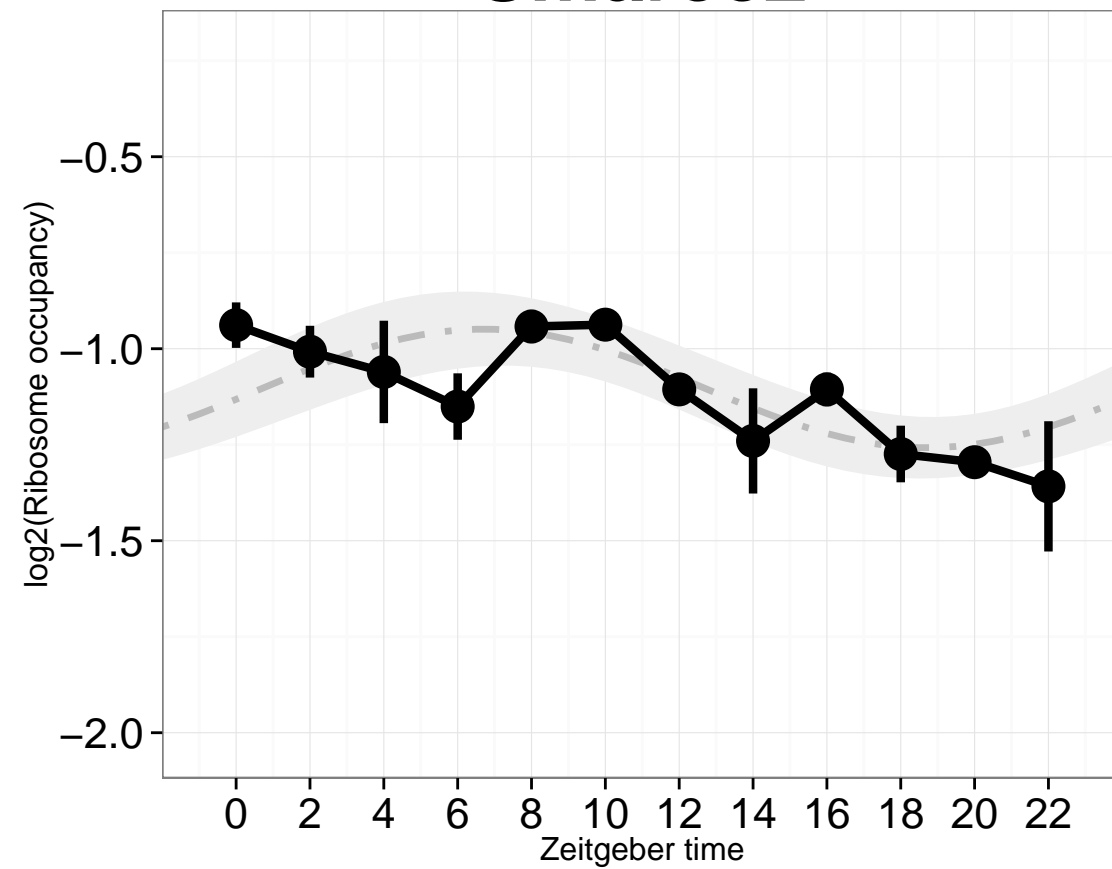

Supplement: SuppDataset_1.zip [file Smarcc2_set_A.pdf › Supplemental Dataset 1/A-mRNA_nonrhyth_translation_nonrhyth/Smarcc2_set_A.pdf]

## Smarcd2

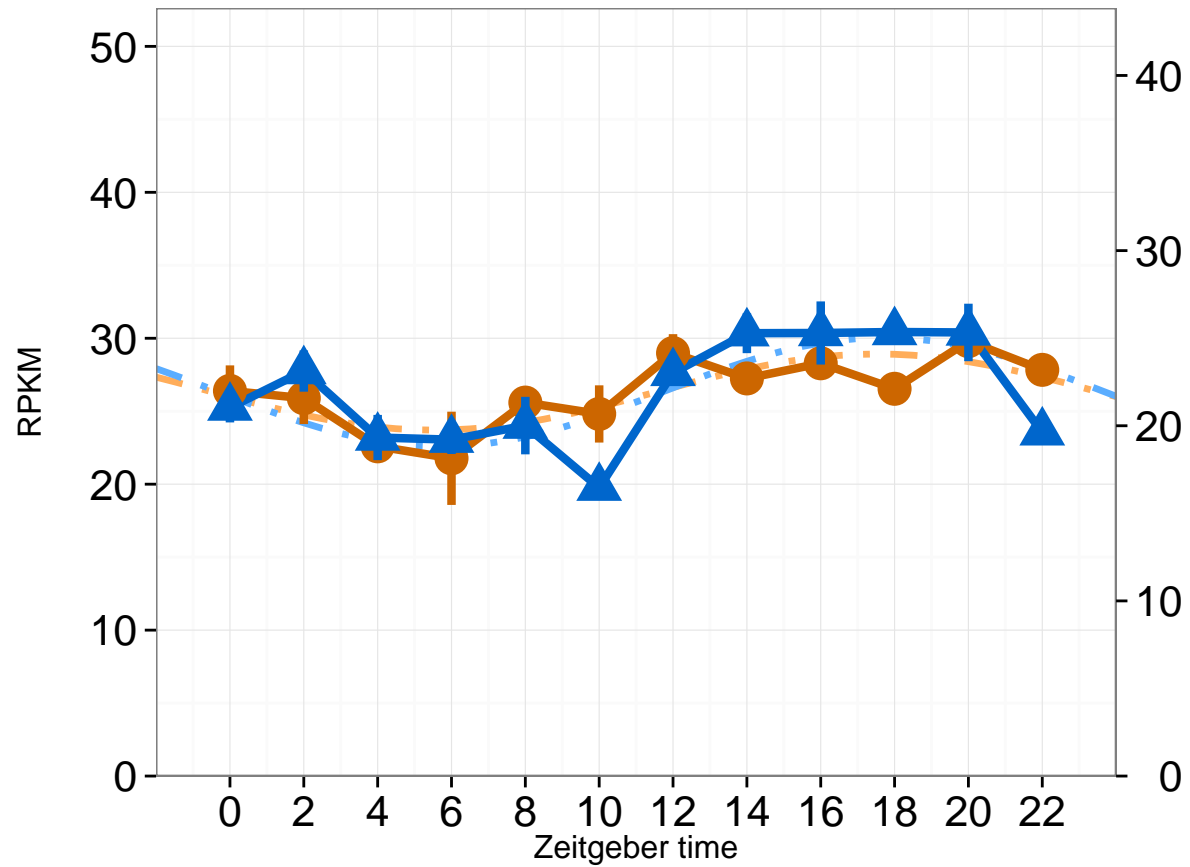

## Smarcd2

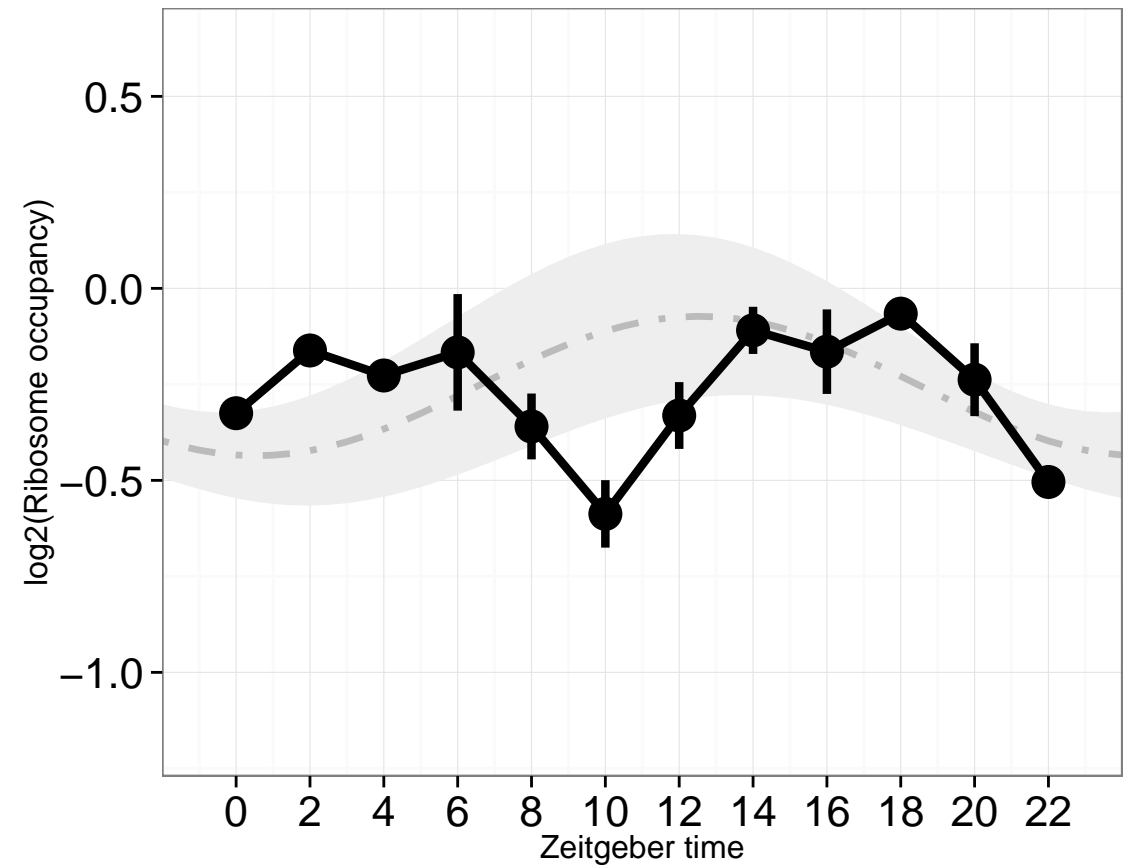

Supplement: SuppDataset_1.zip [file Smarcd2_set_A.pdf › Supplemental Dataset 1/A-mRNA_nonrhyth_translation_nonrhyth/Smarcd2_set_A.pdf]

# Smarce1

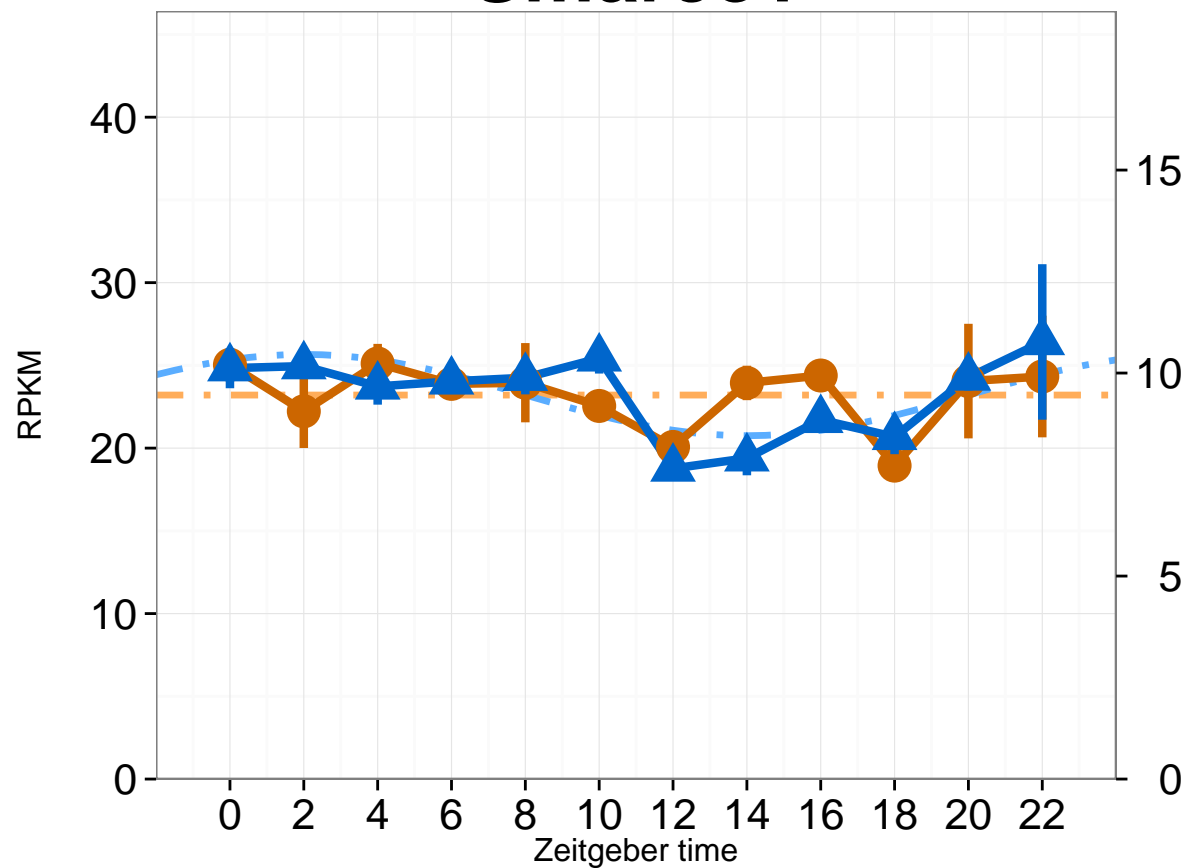

# Smarce1

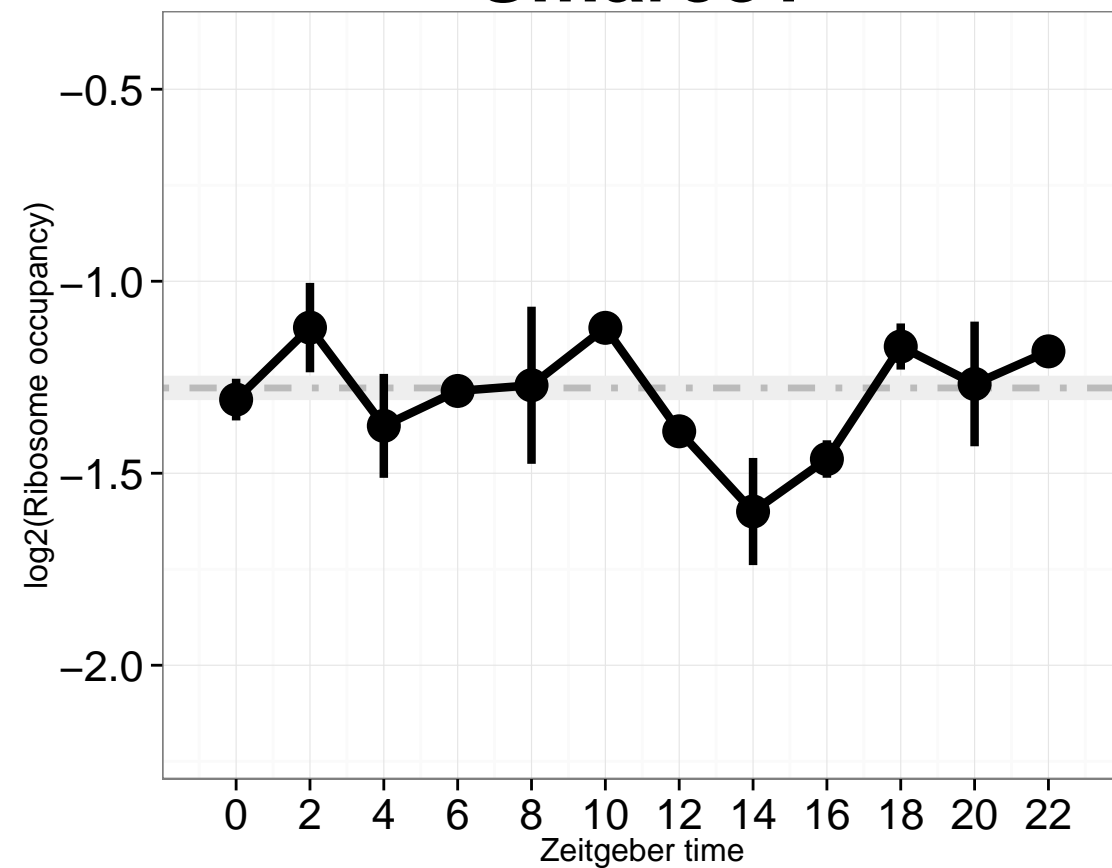

Supplement: SuppDataset_1.zip [file Smarce1_set_A.pdf › Supplemental Dataset 1/A-mRNA_nonrhyth_translation_nonrhyth/Smarce1_set_A.pdf]

# Smc1a

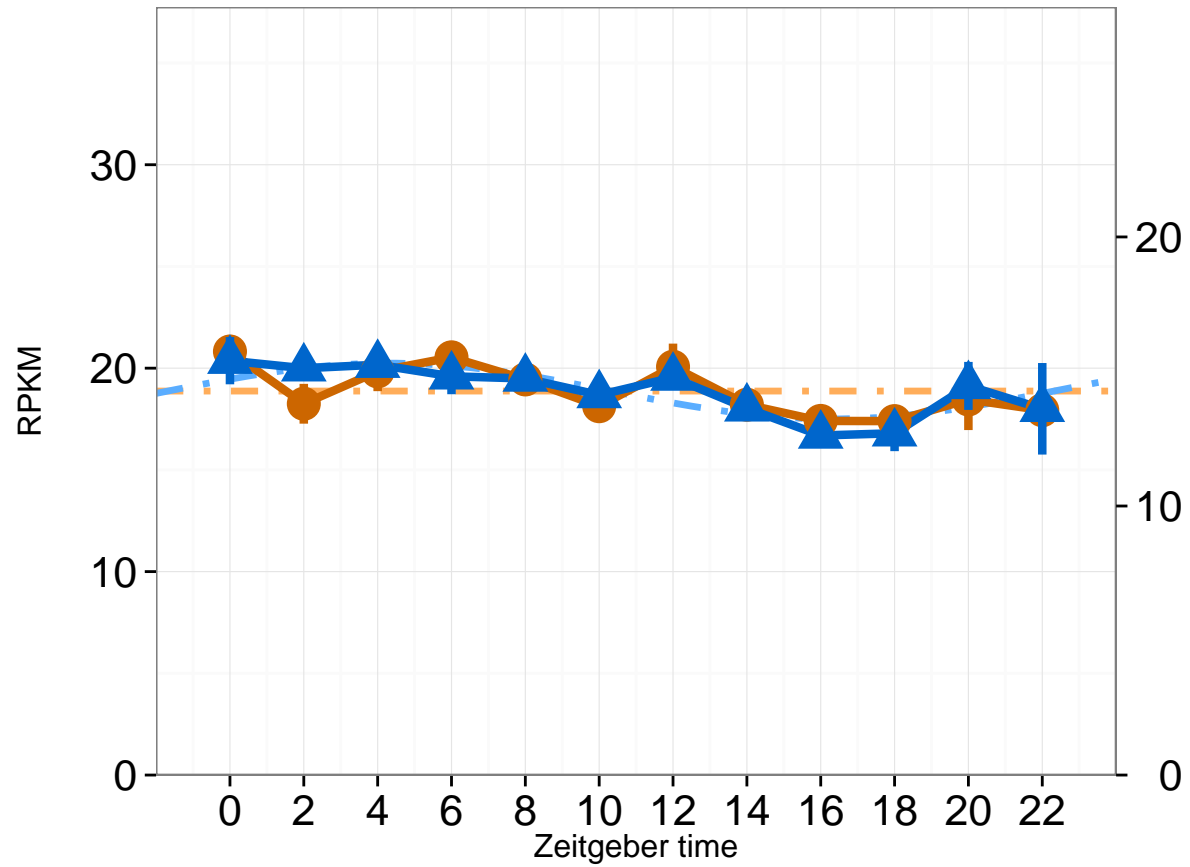

# Smc1a

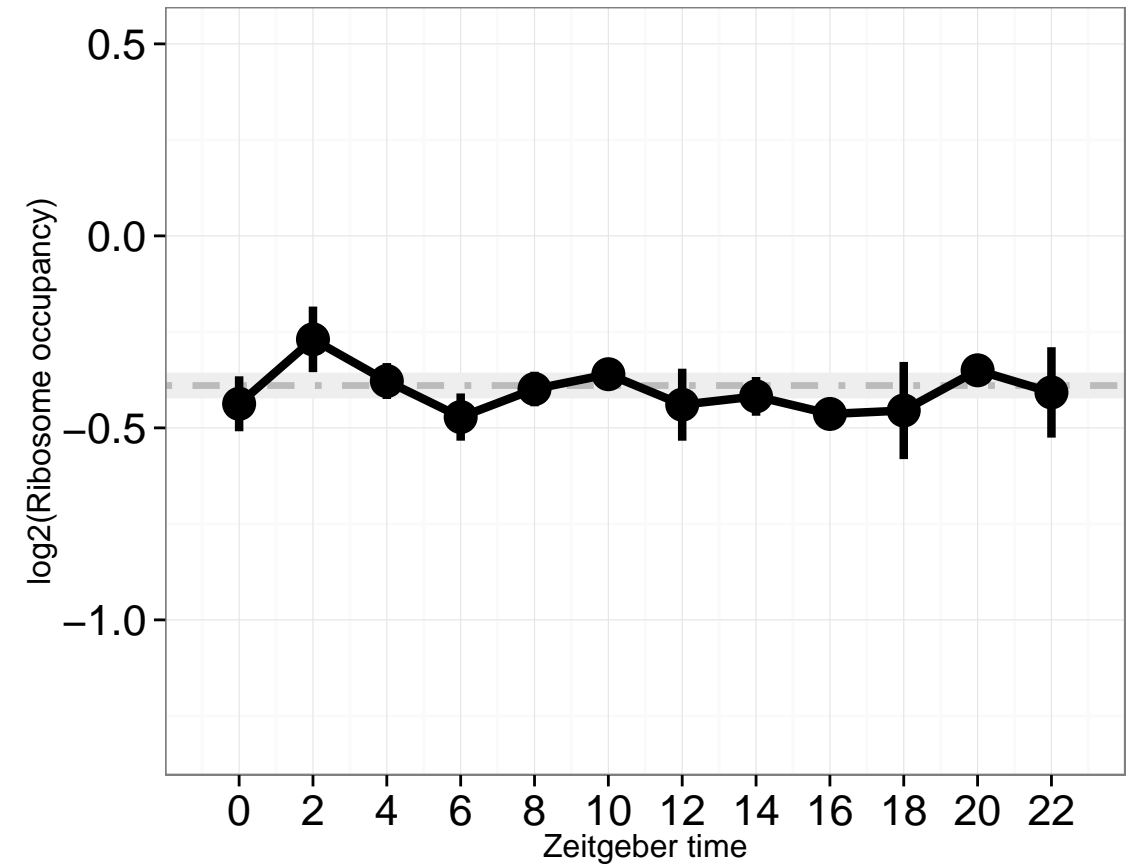

Supplement: SuppDataset_1.zip [file Smc1a_set_A.pdf › Supplemental Dataset 1/A-mRNA_nonrhyth_translation_nonrhyth/Smc1a_set_A.pdf]

## Smc3

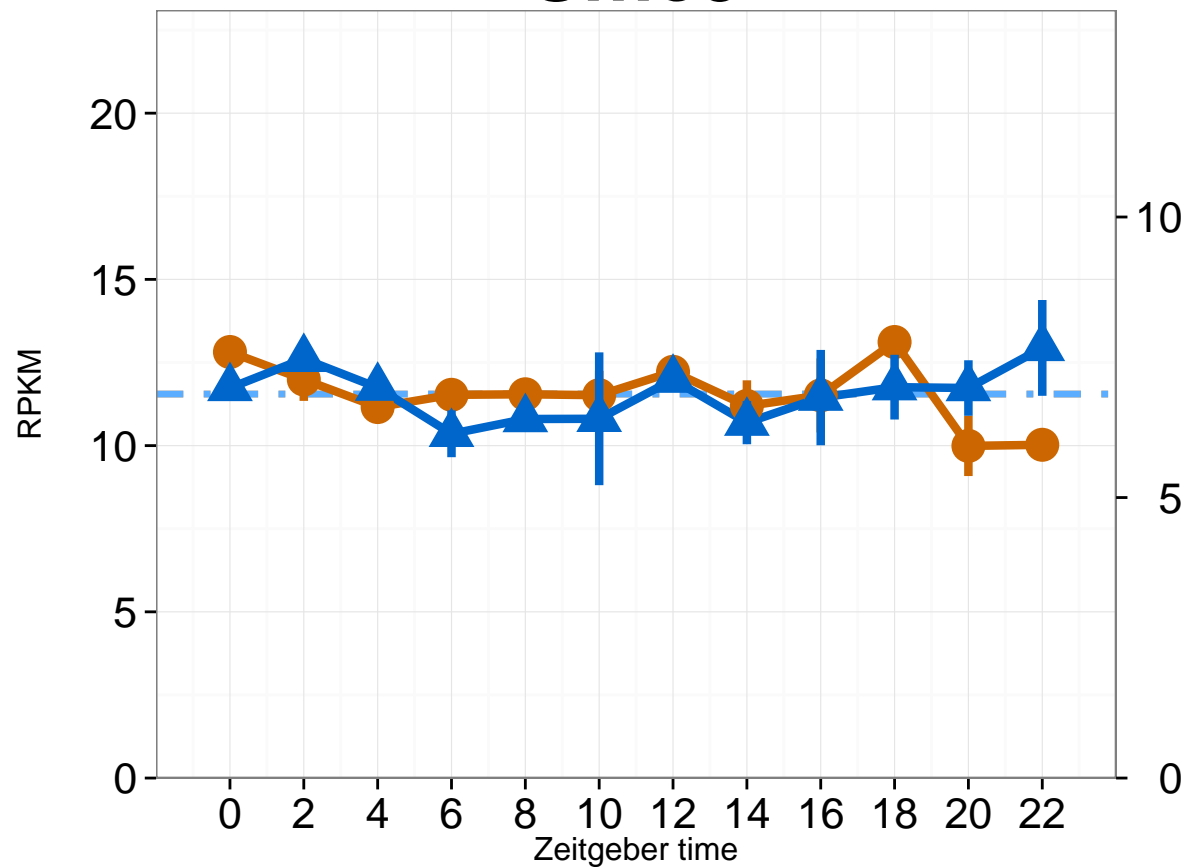

## Smc3

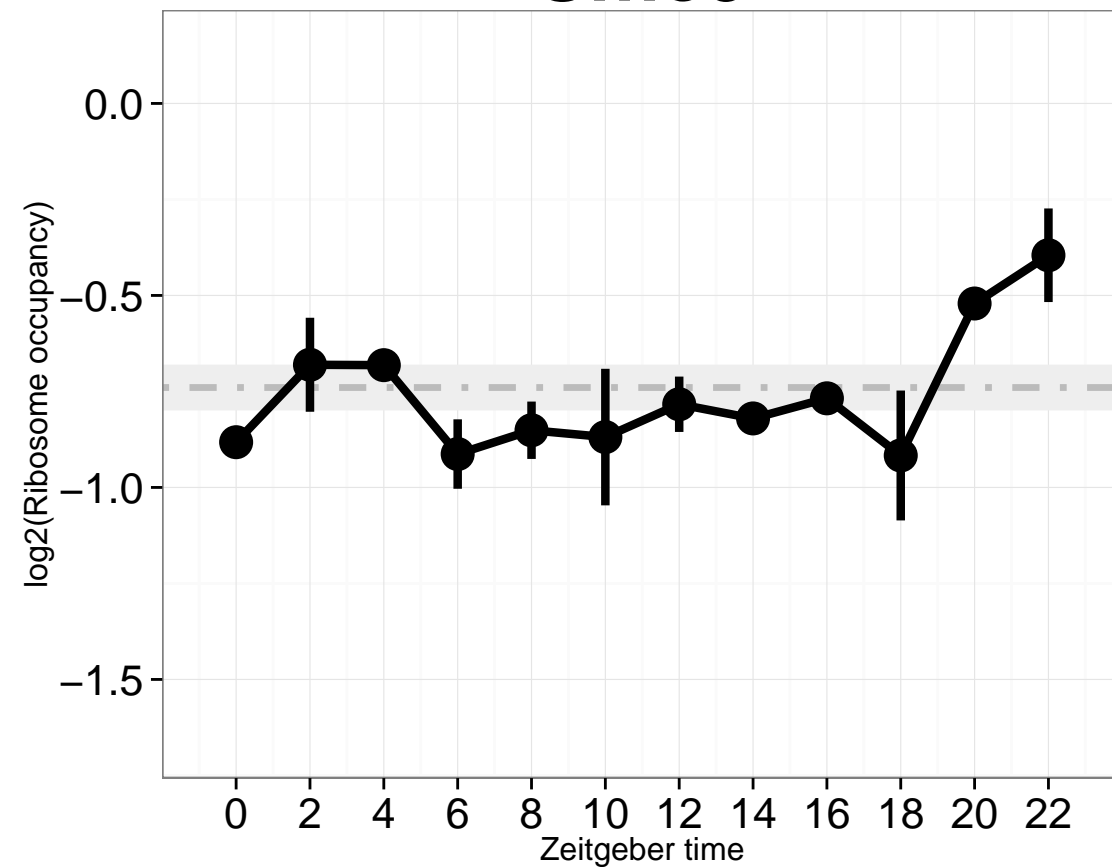

Supplement: SuppDataset_1.zip [file Smc3_set_A.pdf › Supplemental Dataset 1/A-mRNA_nonrhyth_translation_nonrhyth/Smc3_set_A.pdf]

# Smc4

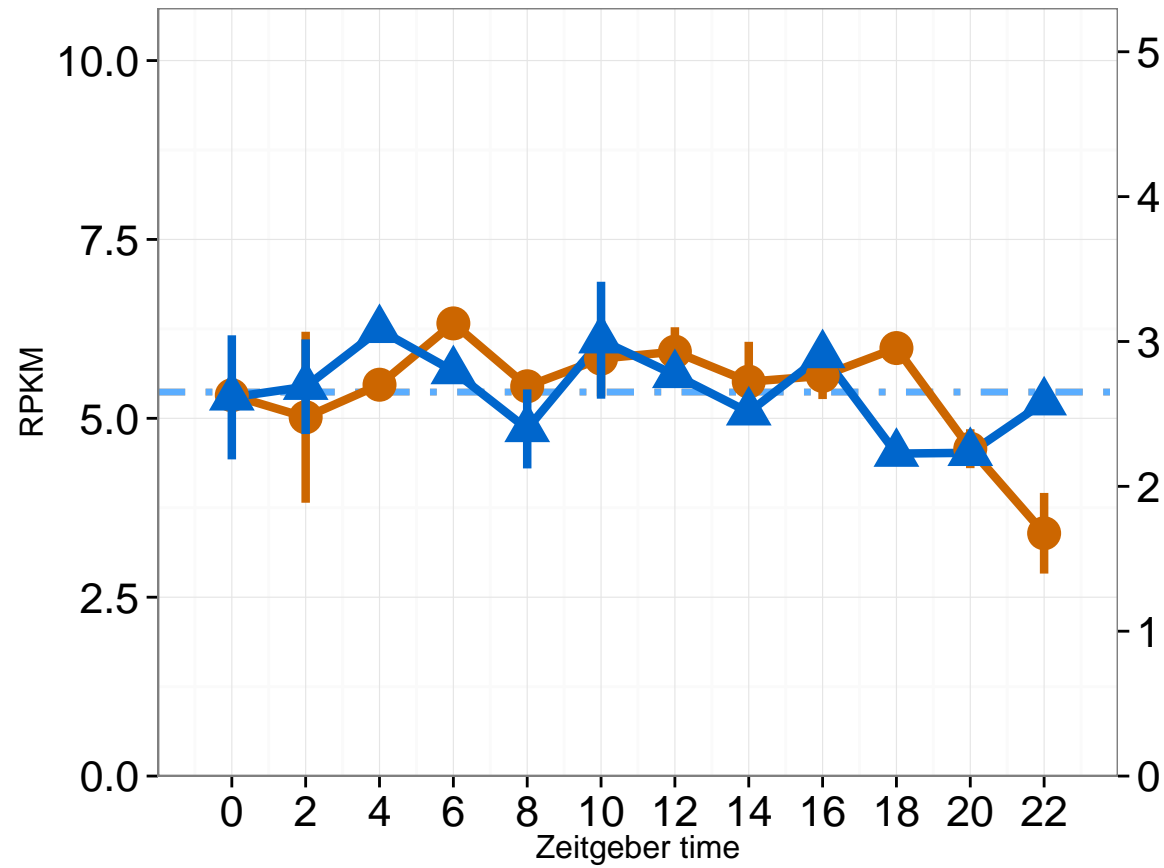

# Smc4

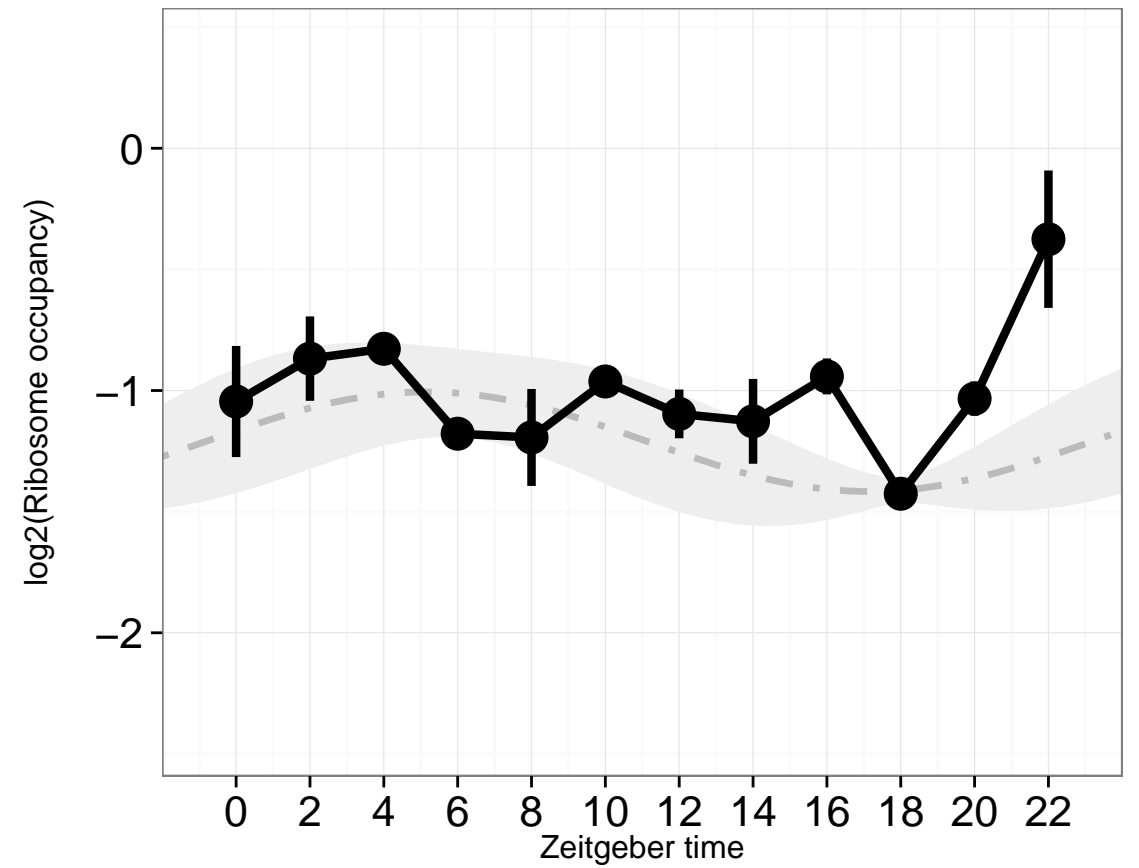

Supplement: SuppDataset_1.zip [file Smc4_set_A.pdf › Supplemental Dataset 1/A-mRNA_nonrhyth_translation_nonrhyth/Smc4_set_A.pdf]

## Smc5

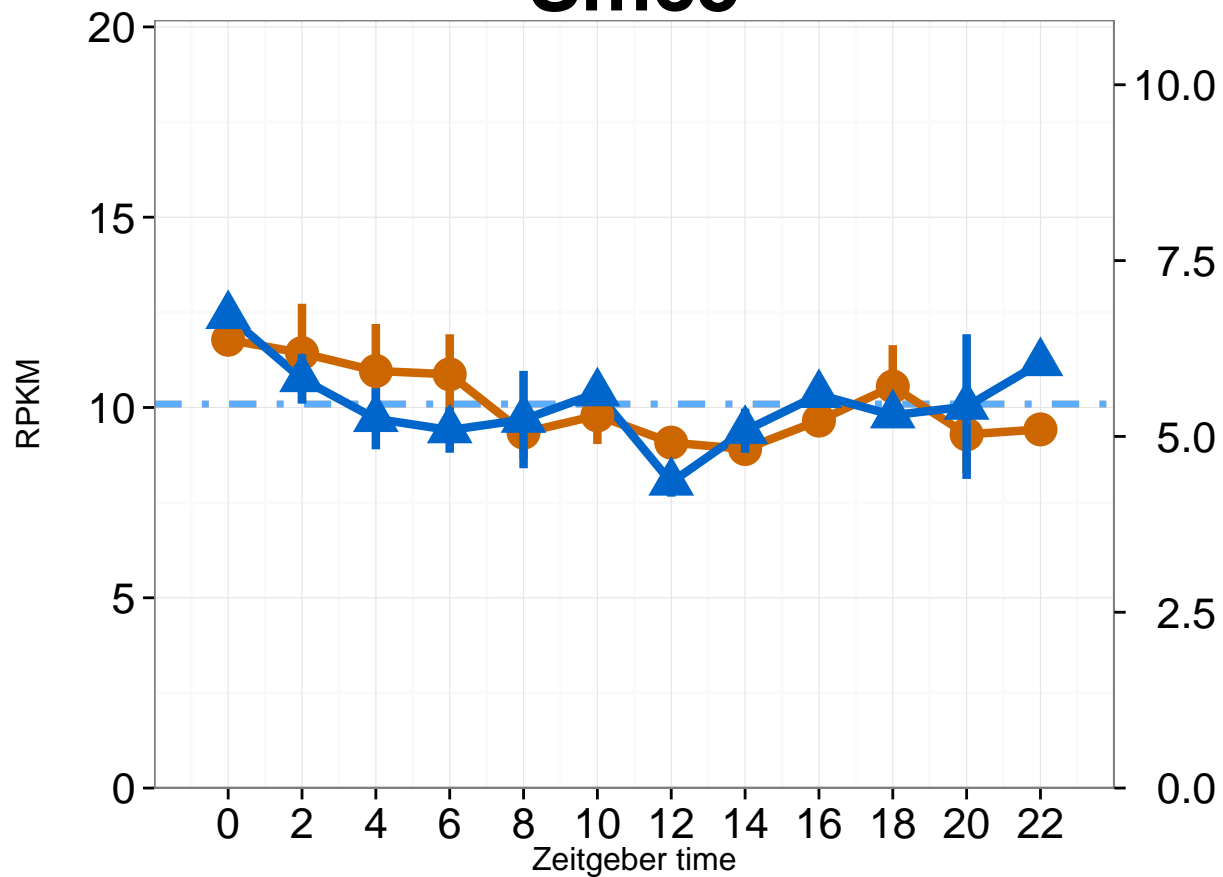

## Smc5

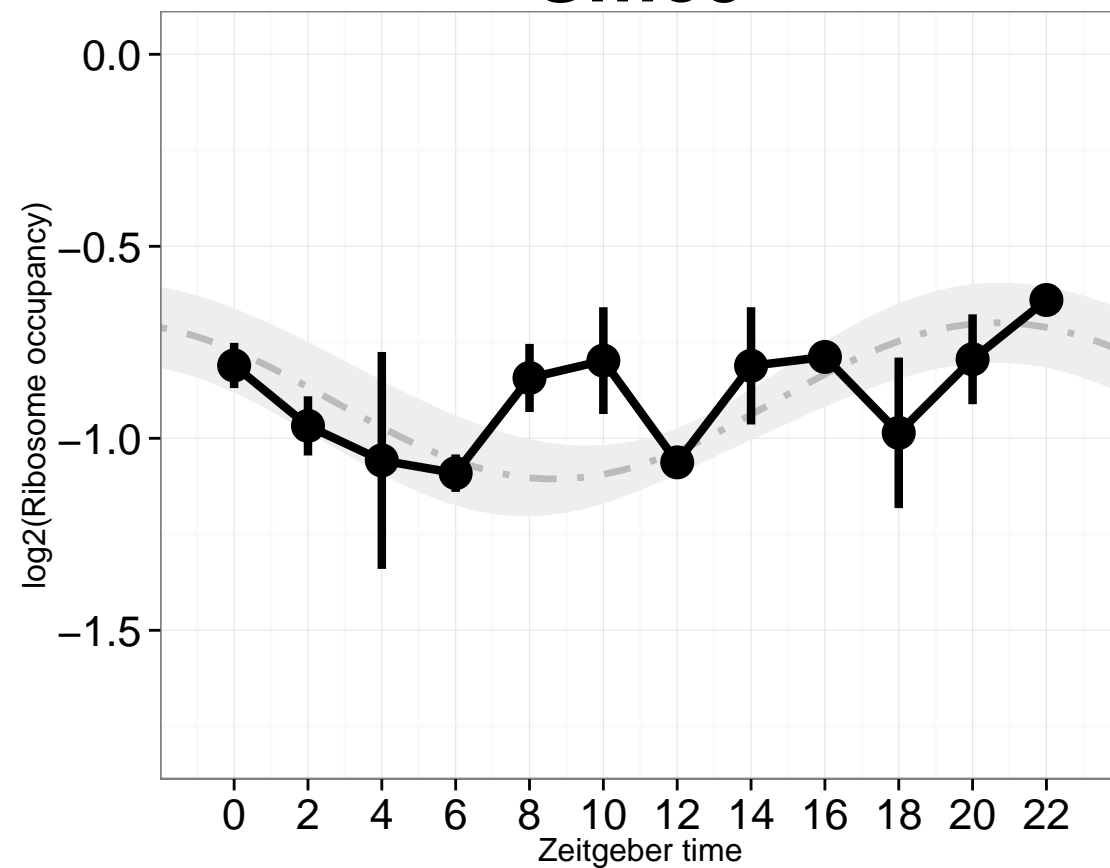

Supplement: SuppDataset_1.zip [file Smc5_set_A.pdf › Supplemental Dataset 1/A-mRNA_nonrhyth_translation_nonrhyth/Smc5_set_A.pdf]

# Smchd1

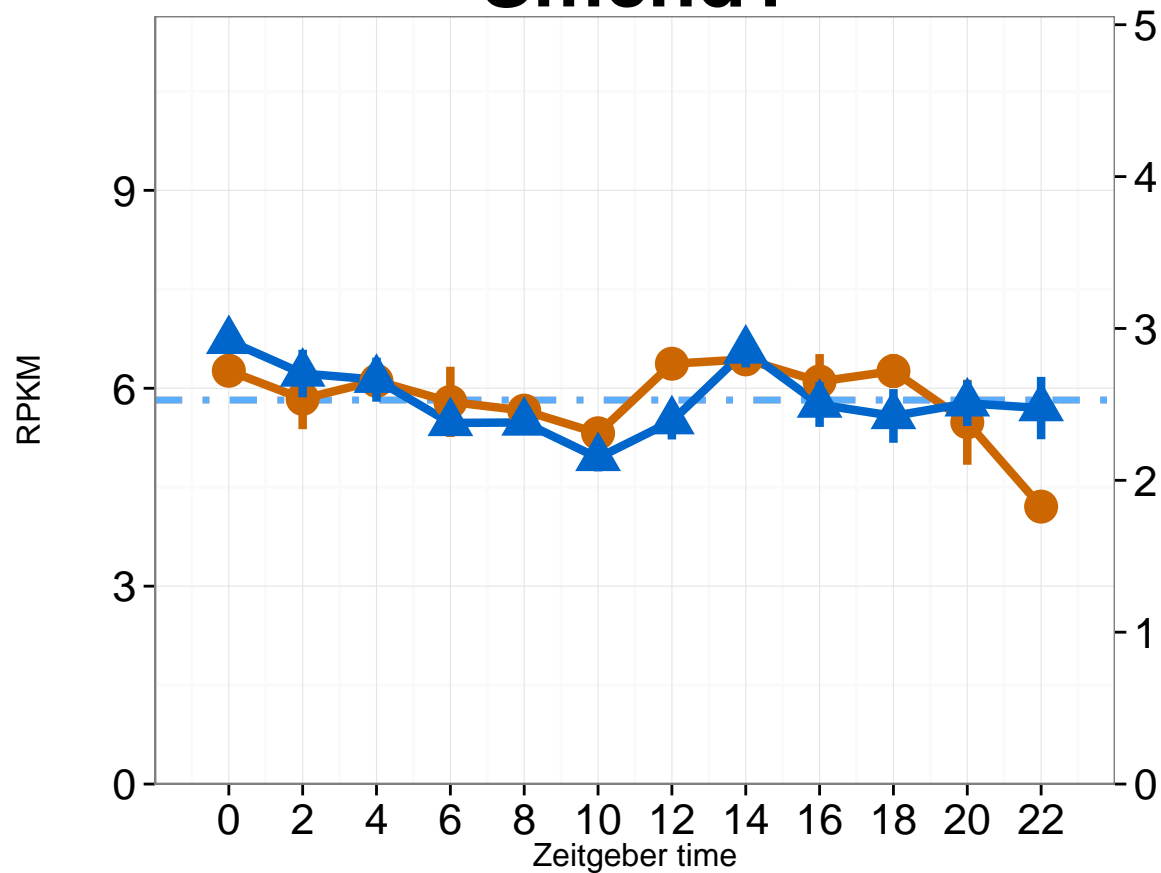

# Smchd1

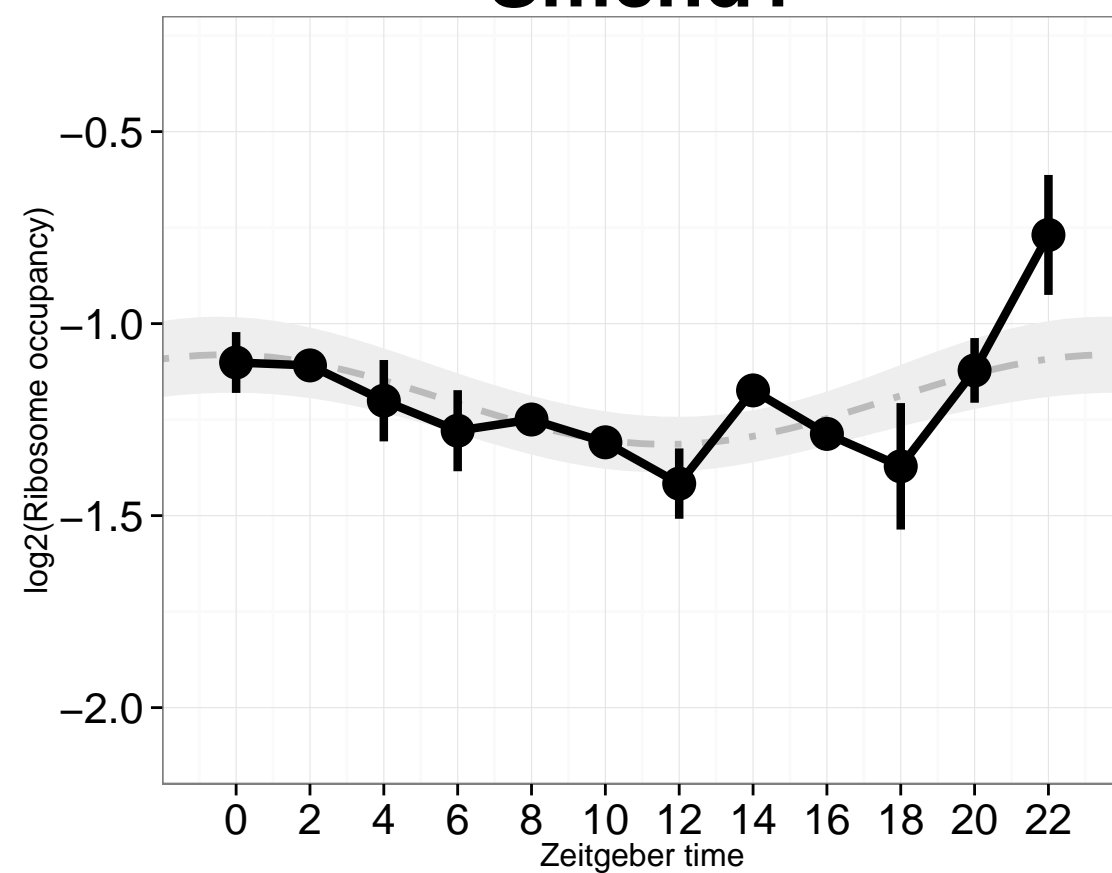

Supplement: SuppDataset_1.zip [file Smchd1_set_A.pdf › Supplemental Dataset 1/A-mRNA_nonrhyth_translation_nonrhyth/Smchd1_set_A.pdf]

# Smcr8

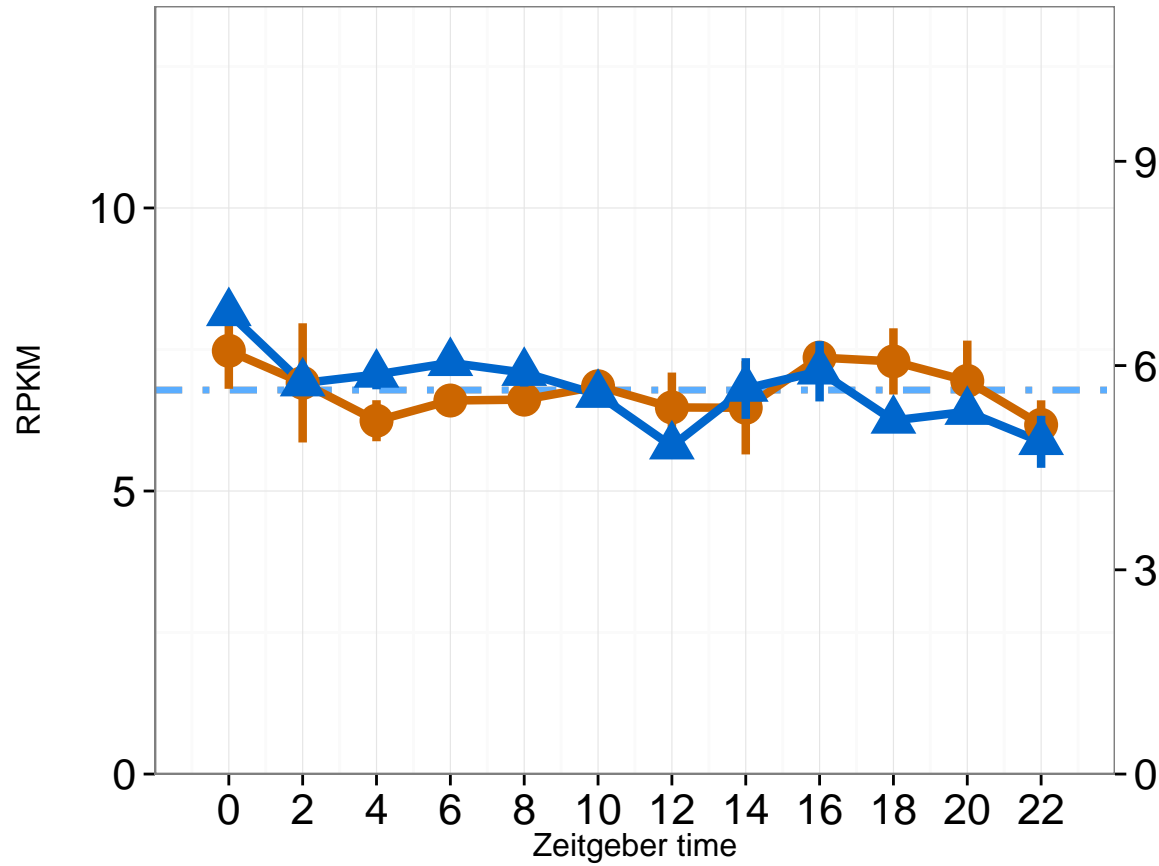

# Smcr8

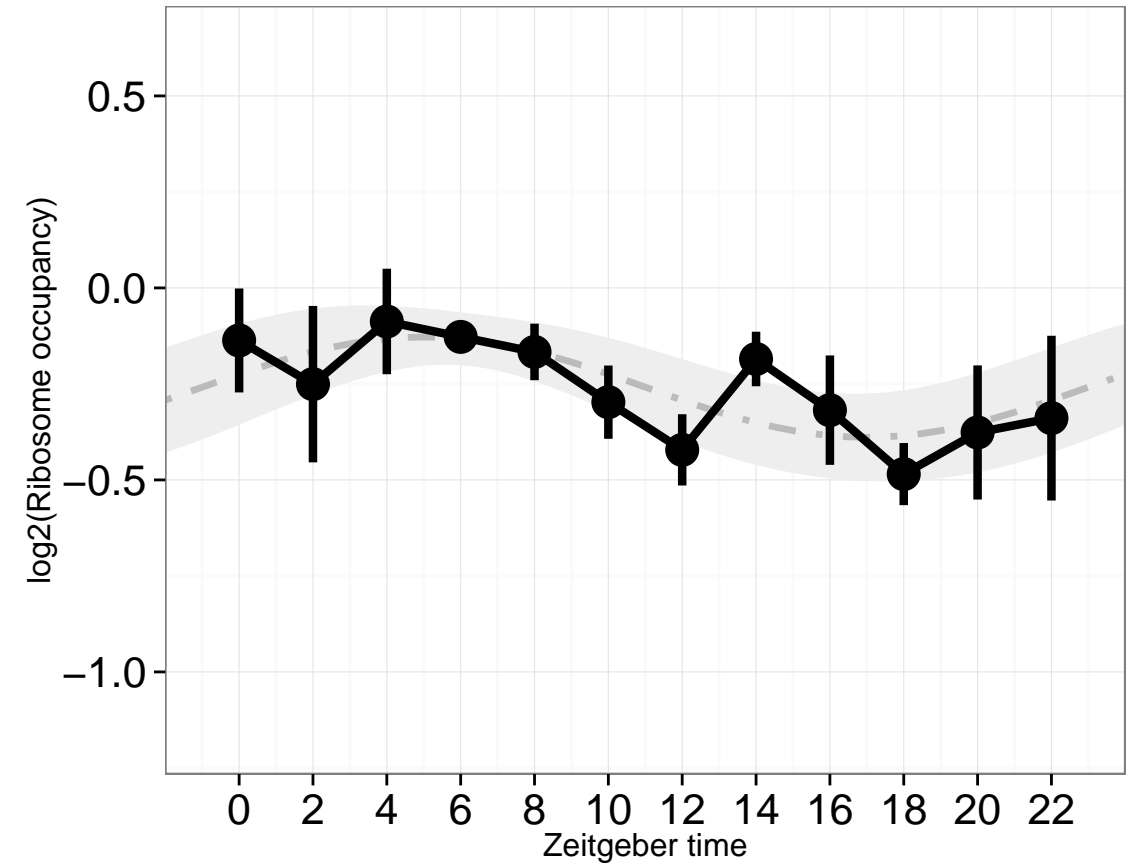

Supplement: SuppDataset_1.zip [file Smcr8_set_A.pdf › Supplemental Dataset 1/A-mRNA_nonrhyth_translation_nonrhyth/Smcr8_set_A.pdf]

# Smdt1

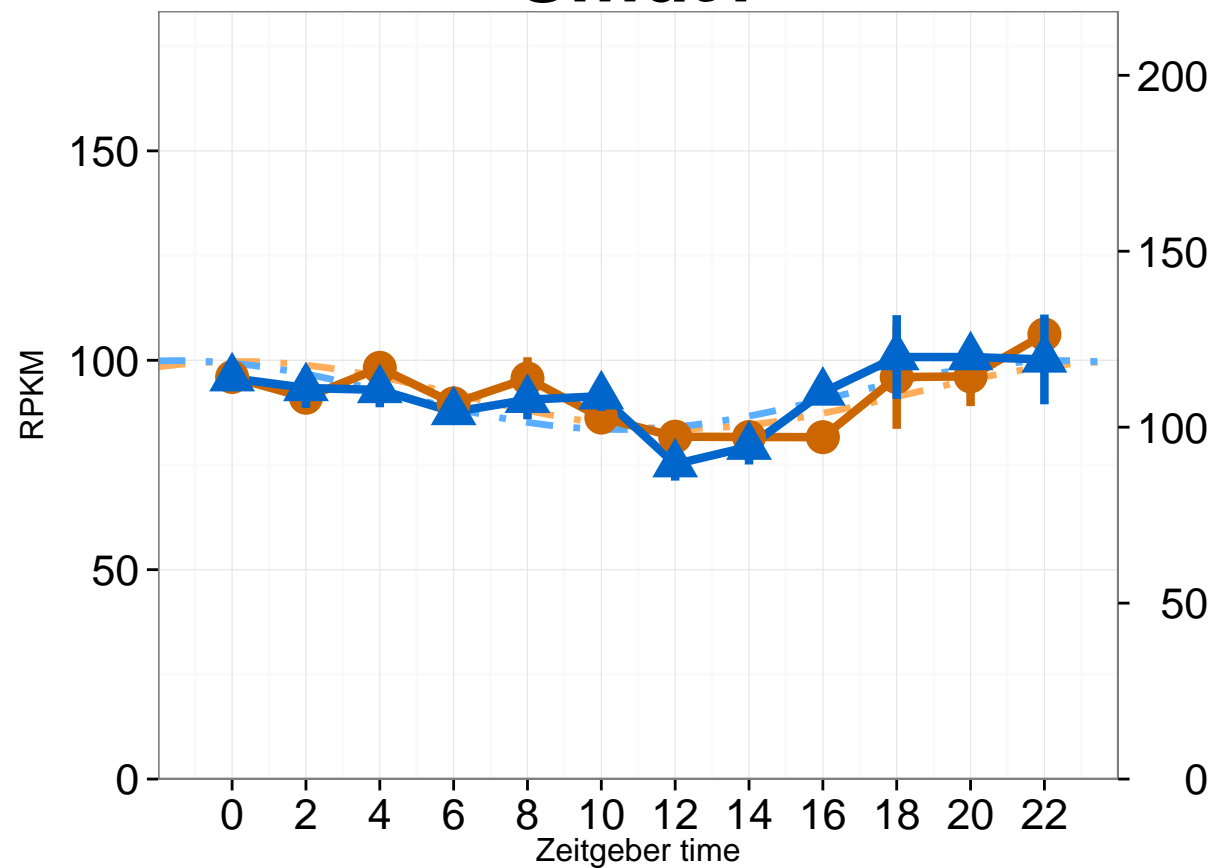

# Smdt1

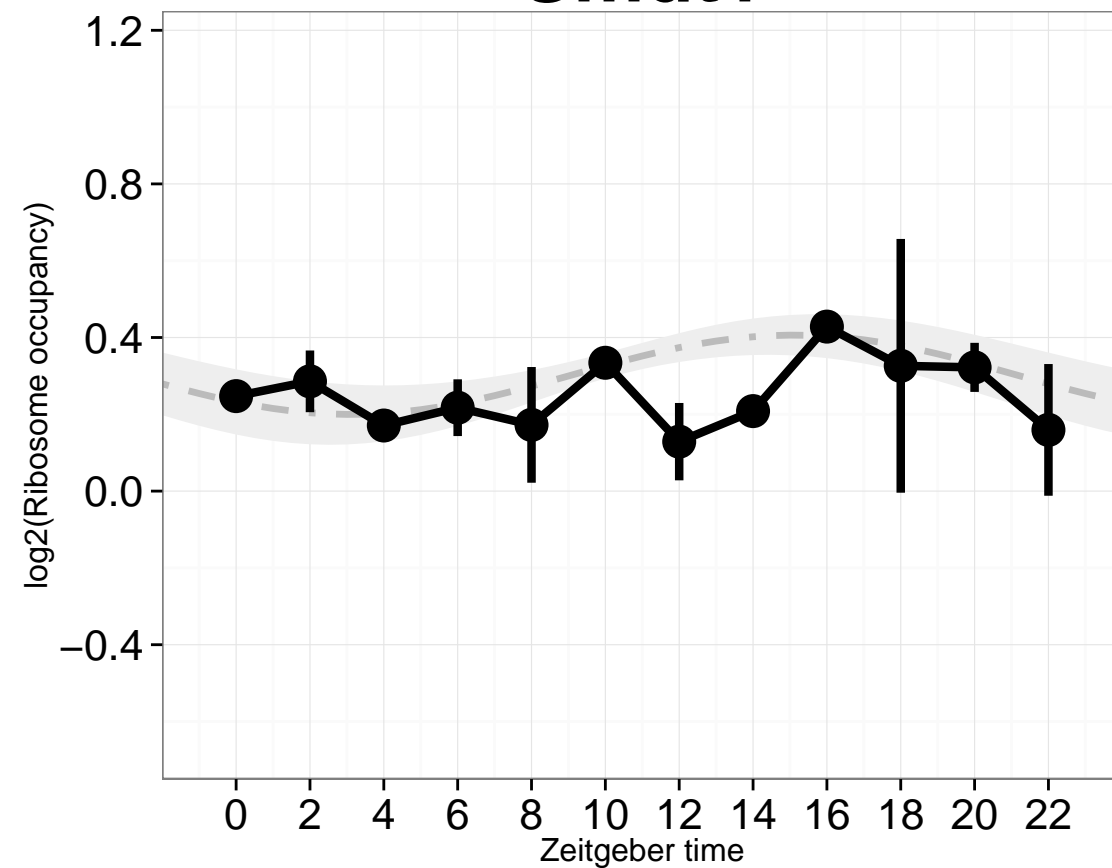

Supplement: SuppDataset_1.zip [file Smdt1_set_A.pdf › Supplemental Dataset 1/A-mRNA_nonrhyth_translation_nonrhyth/Smdt1_set_A.pdf]

## Smek1

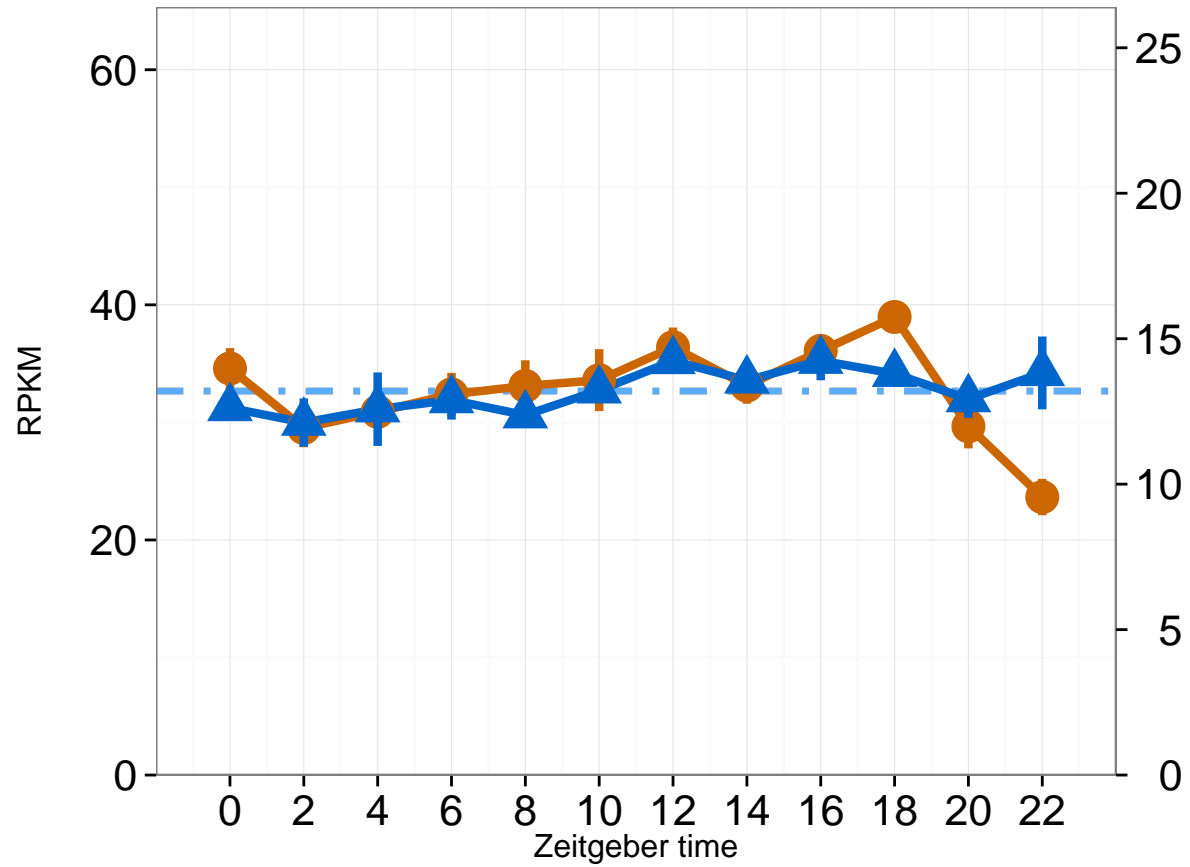

## Smek1

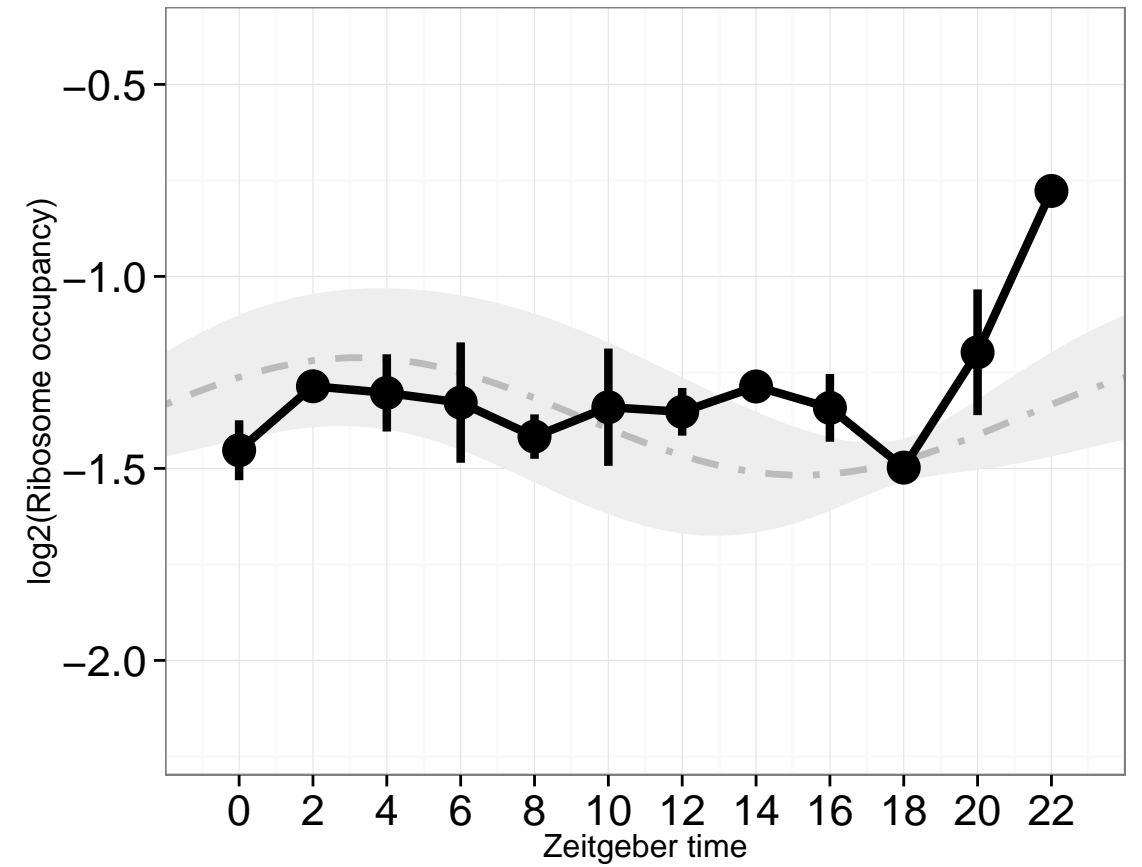

Supplement: SuppDataset_1.zip [file Smek1_set_A.pdf › Supplemental Dataset 1/A-mRNA_nonrhyth_translation_nonrhyth/Smek1_set_A.pdf]

## Smek2

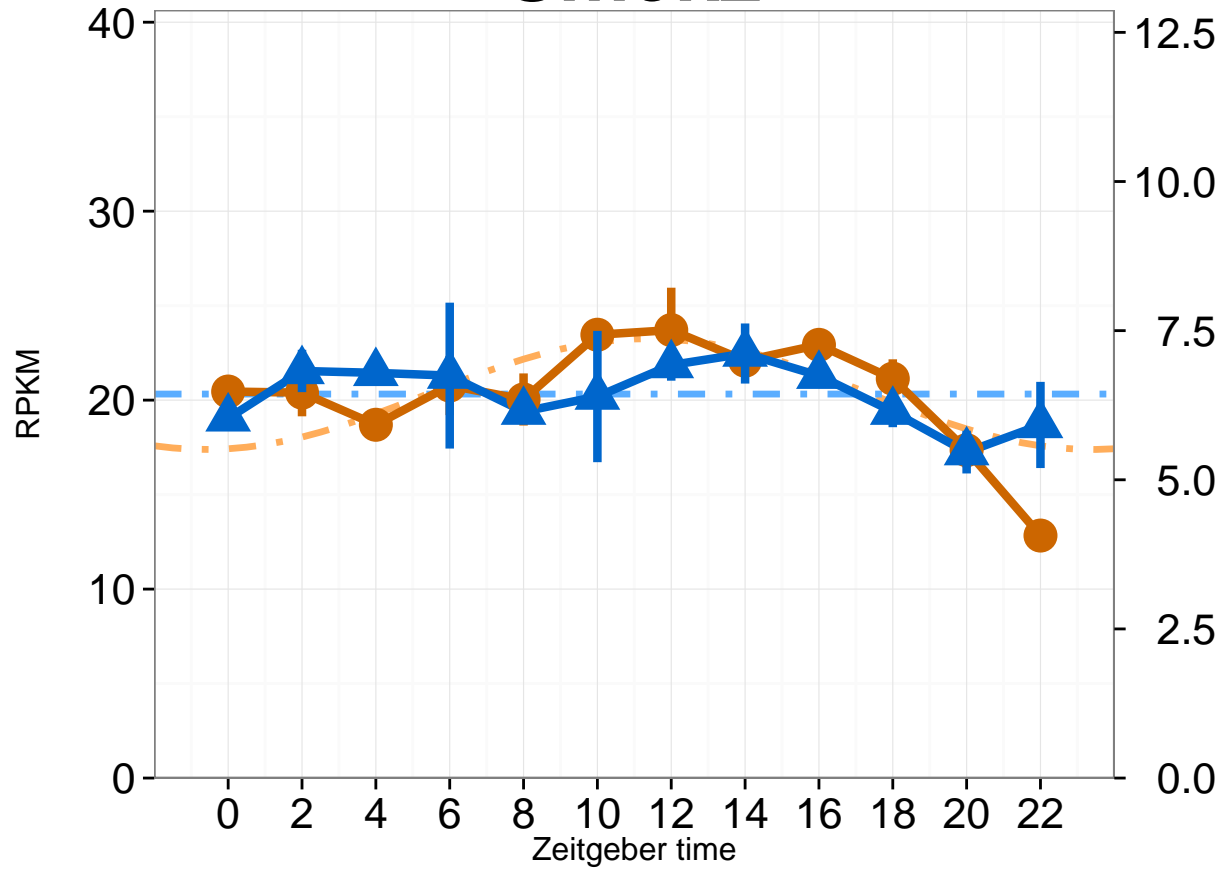

## Smek2

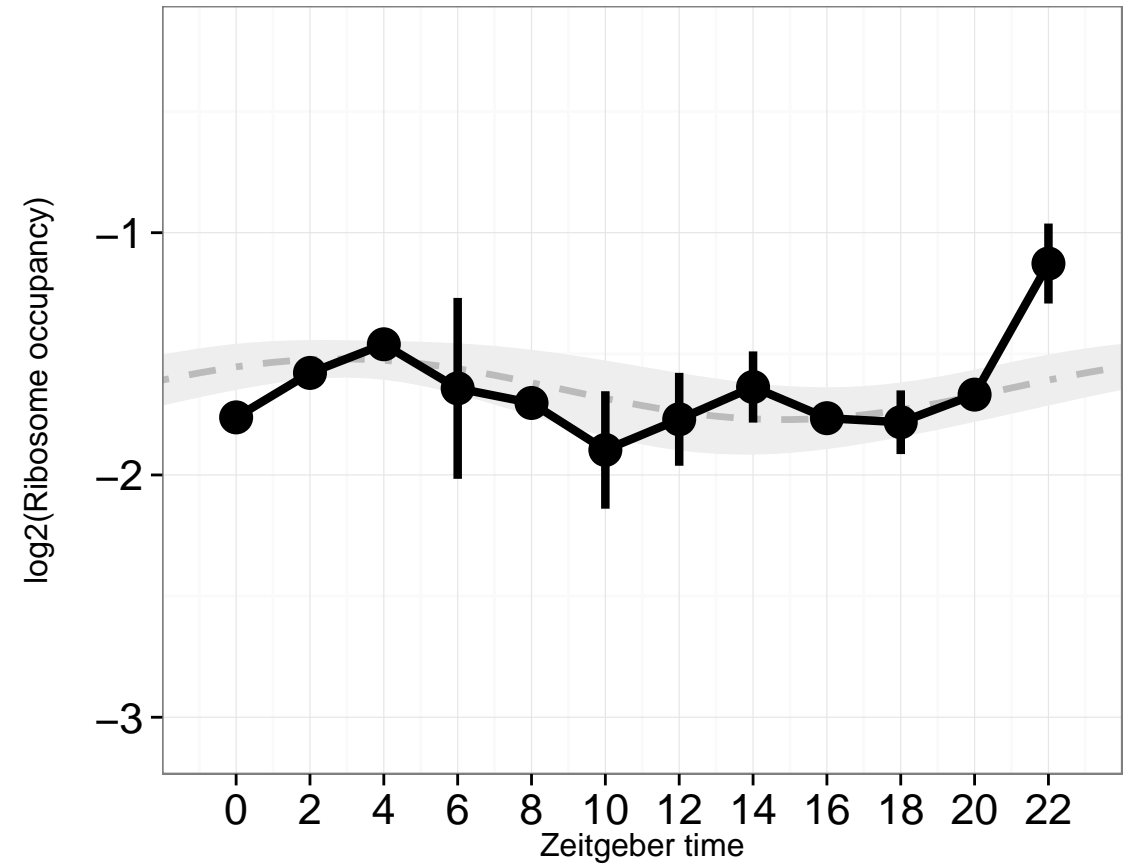

Supplement: SuppDataset_1.zip [file Smek2_set_A.pdf › Supplemental Dataset 1/A-mRNA_nonrhyth_translation_nonrhyth/Smek2_set_A.pdf]

## Smg1

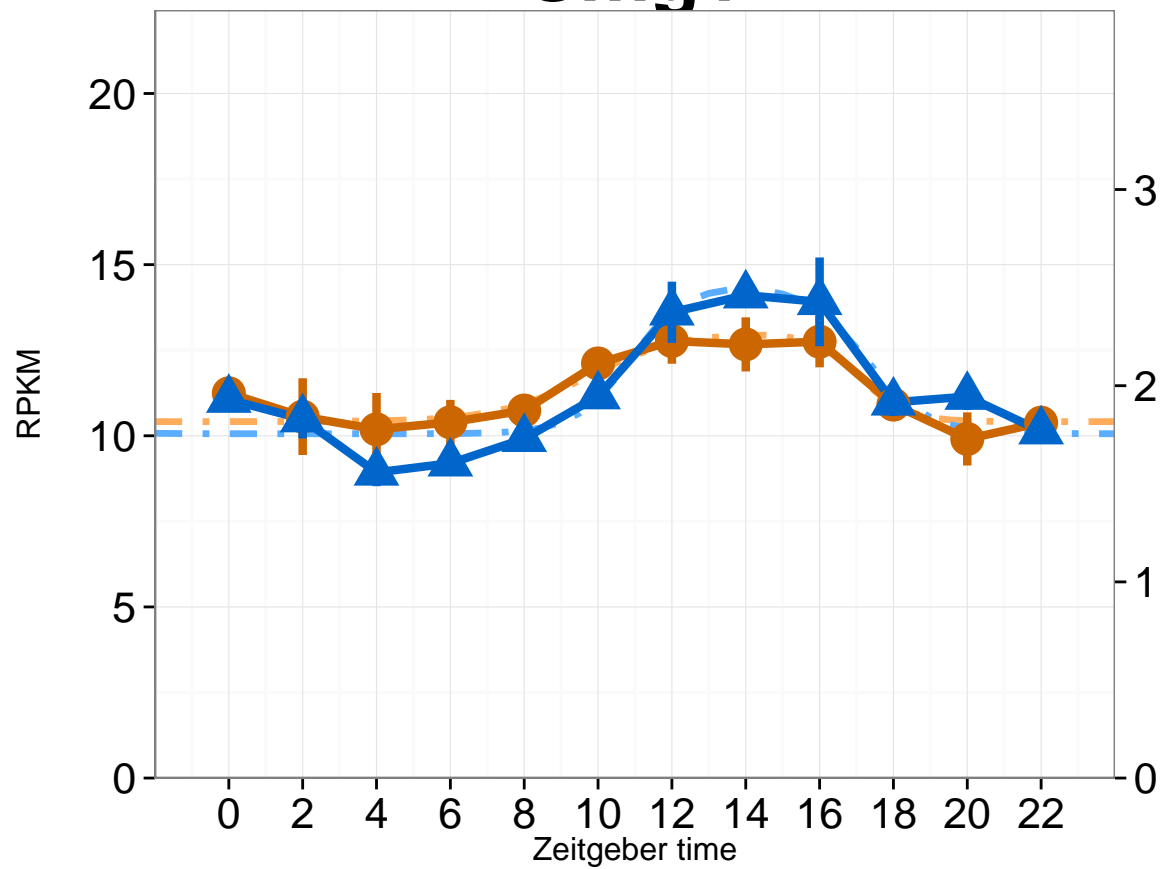

## Smg1

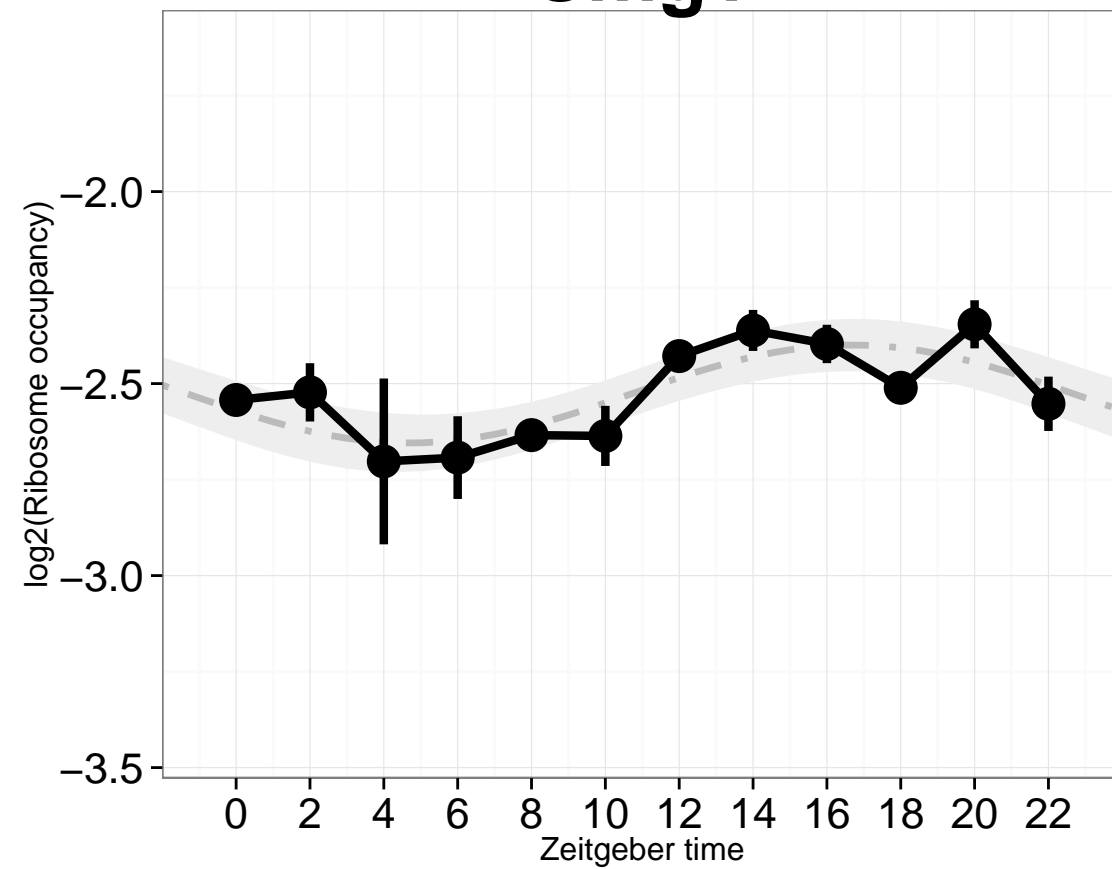

Supplement: SuppDataset_1.zip [file Smg1_set_A.pdf › Supplemental Dataset 1/A-mRNA_nonrhyth_translation_nonrhyth/Smg1_set_A.pdf]

# Smg5

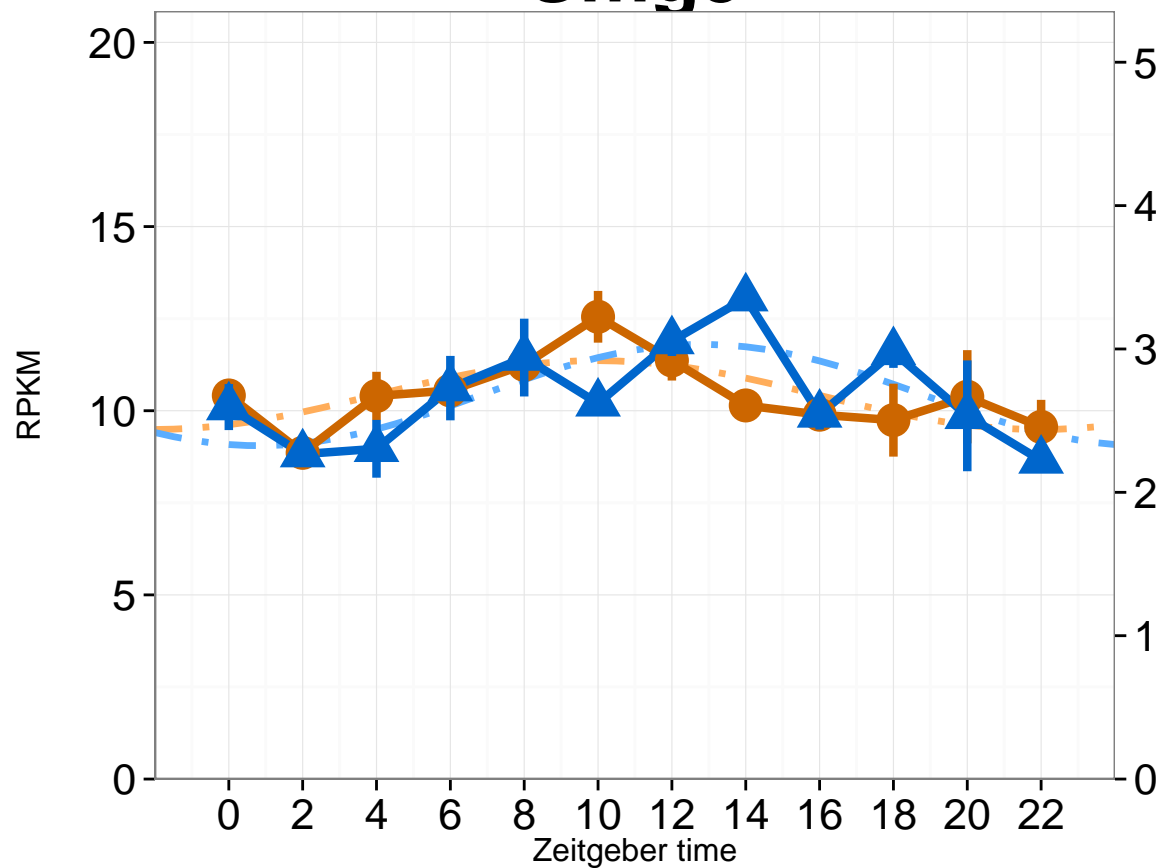

# Smg5

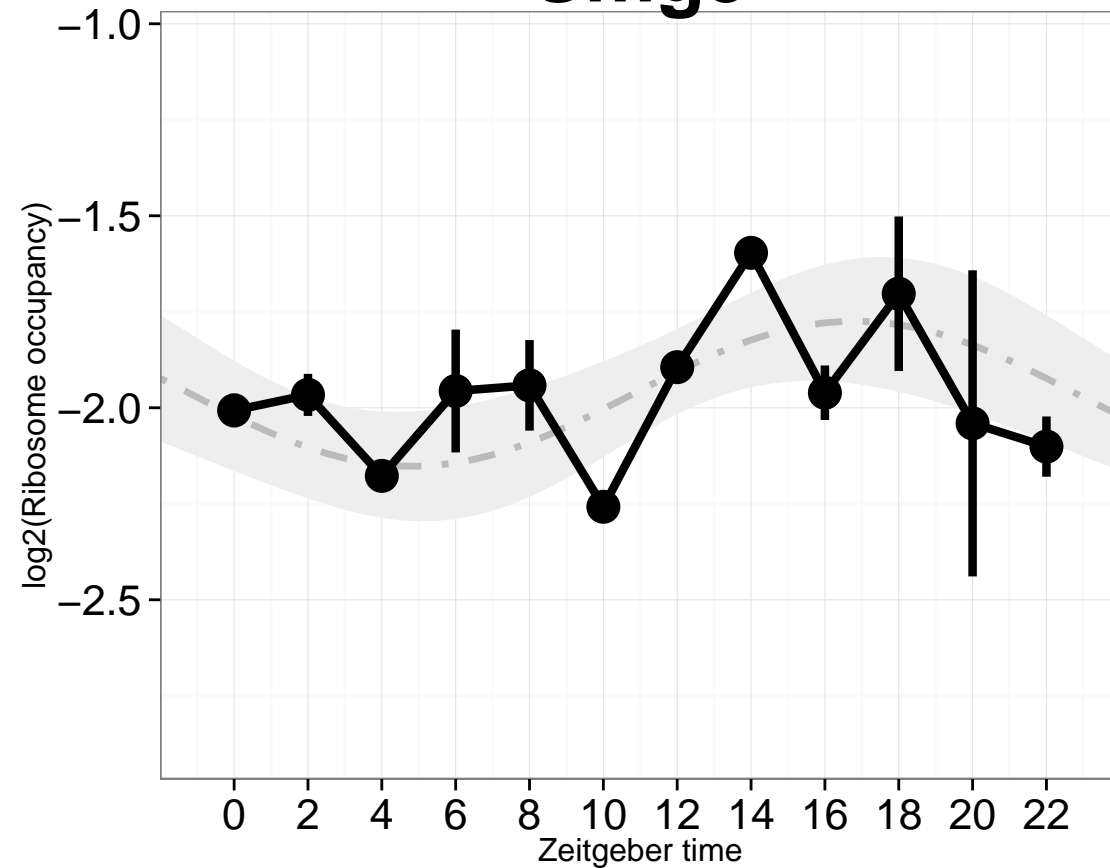

Supplement: SuppDataset_1.zip [file Smg5_set_A.pdf › Supplemental Dataset 1/A-mRNA_nonrhyth_translation_nonrhyth/Smg5_set_A.pdf]

# Smg6

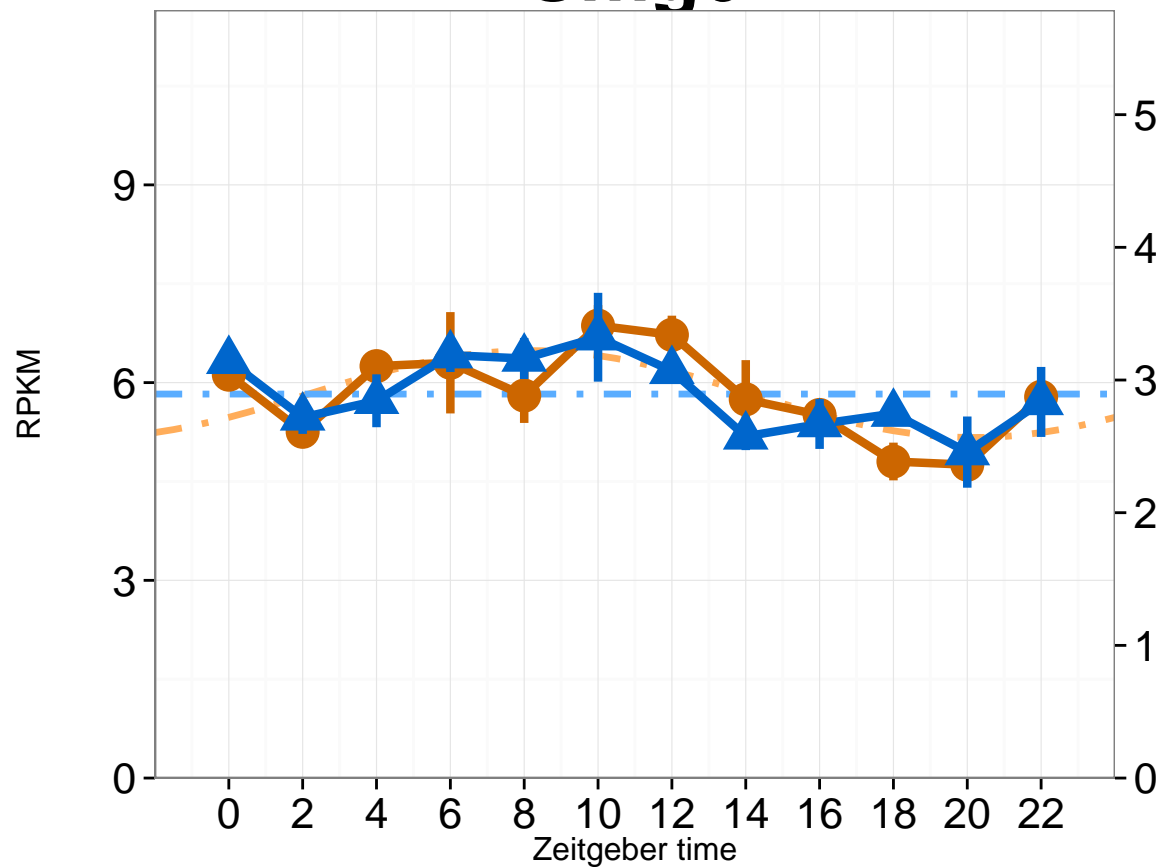

# Smg6

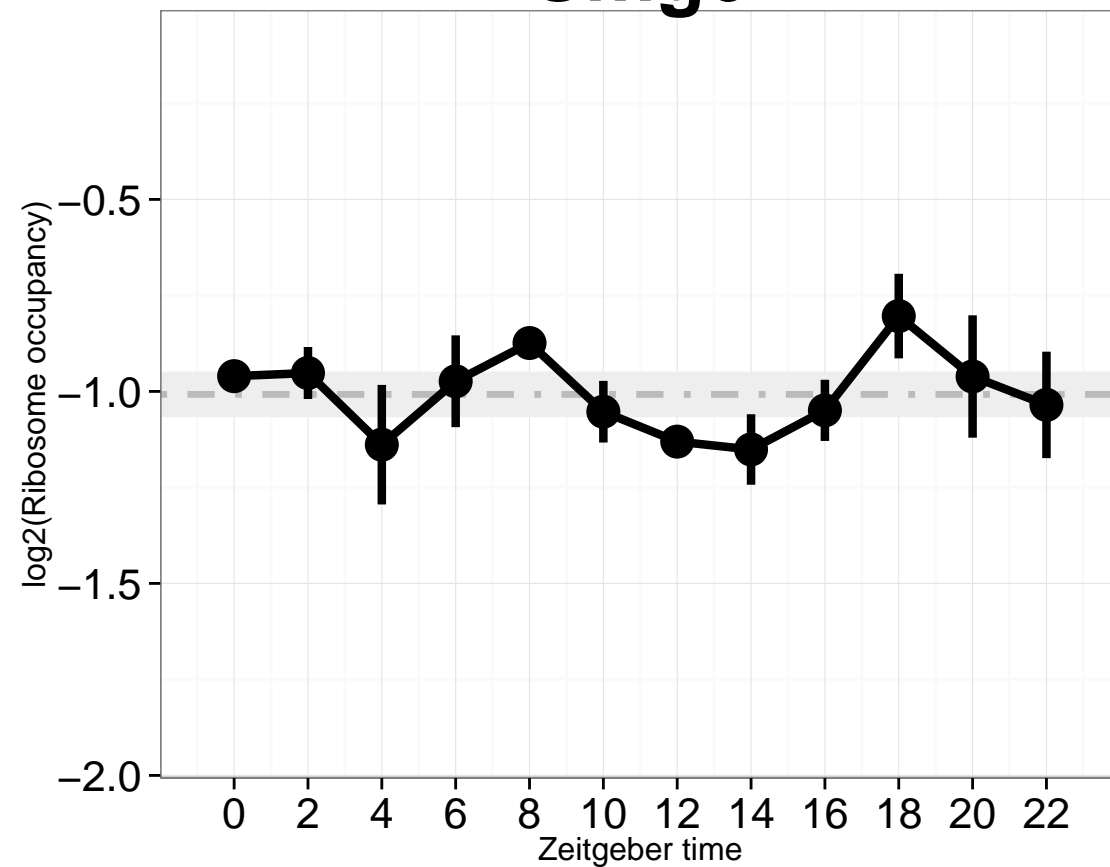

Supplement: SuppDataset_1.zip [file Smg6_set_A.pdf › Supplemental Dataset 1/A-mRNA_nonrhyth_translation_nonrhyth/Smg6_set_A.pdf]

## Smg7

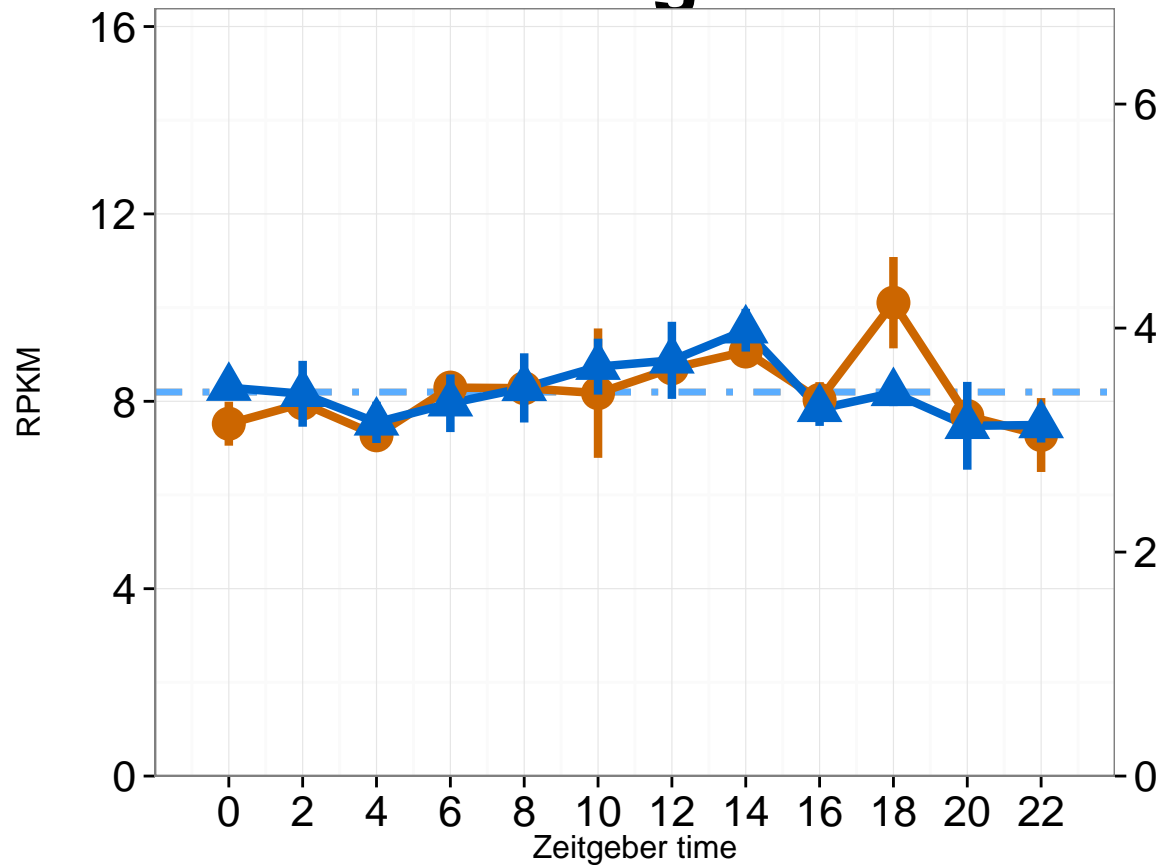

## Smg7

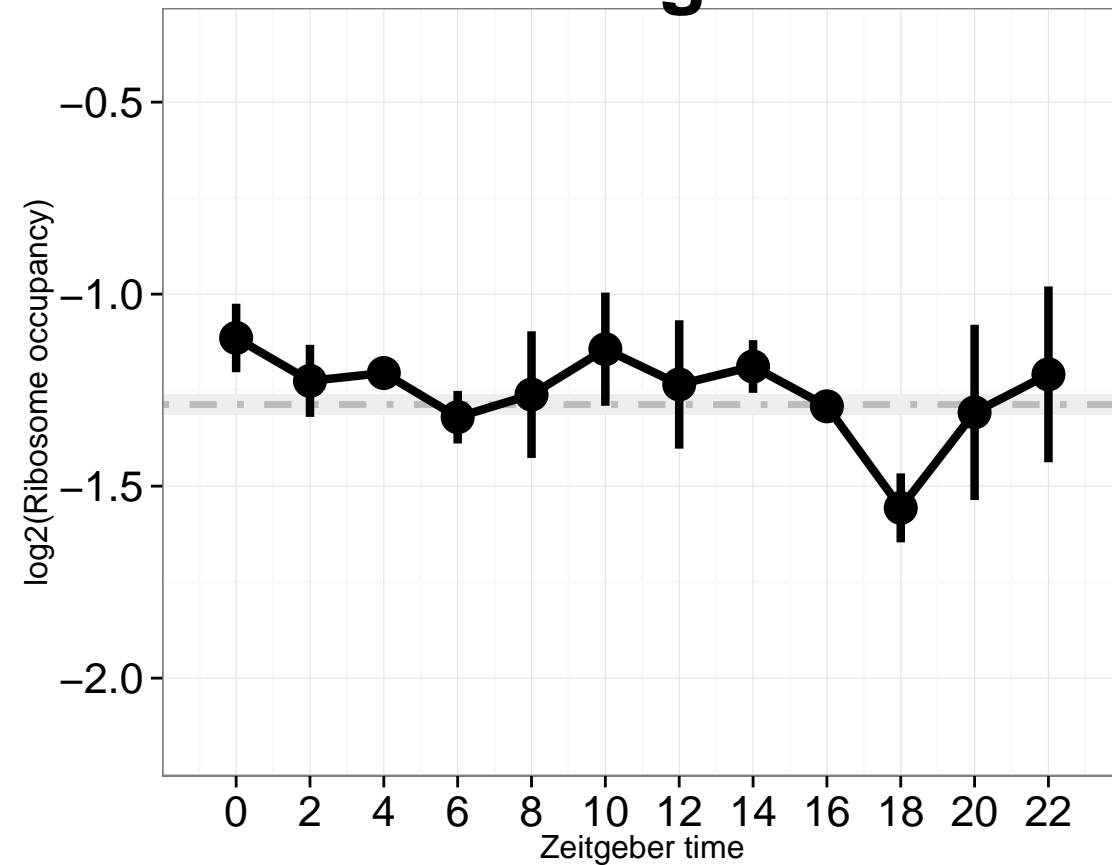

Supplement: SuppDataset_1.zip [file Smg7_set_A.pdf › Supplemental Dataset 1/A-mRNA_nonrhyth_translation_nonrhyth/Smg7_set_A.pdf]

## Smg8

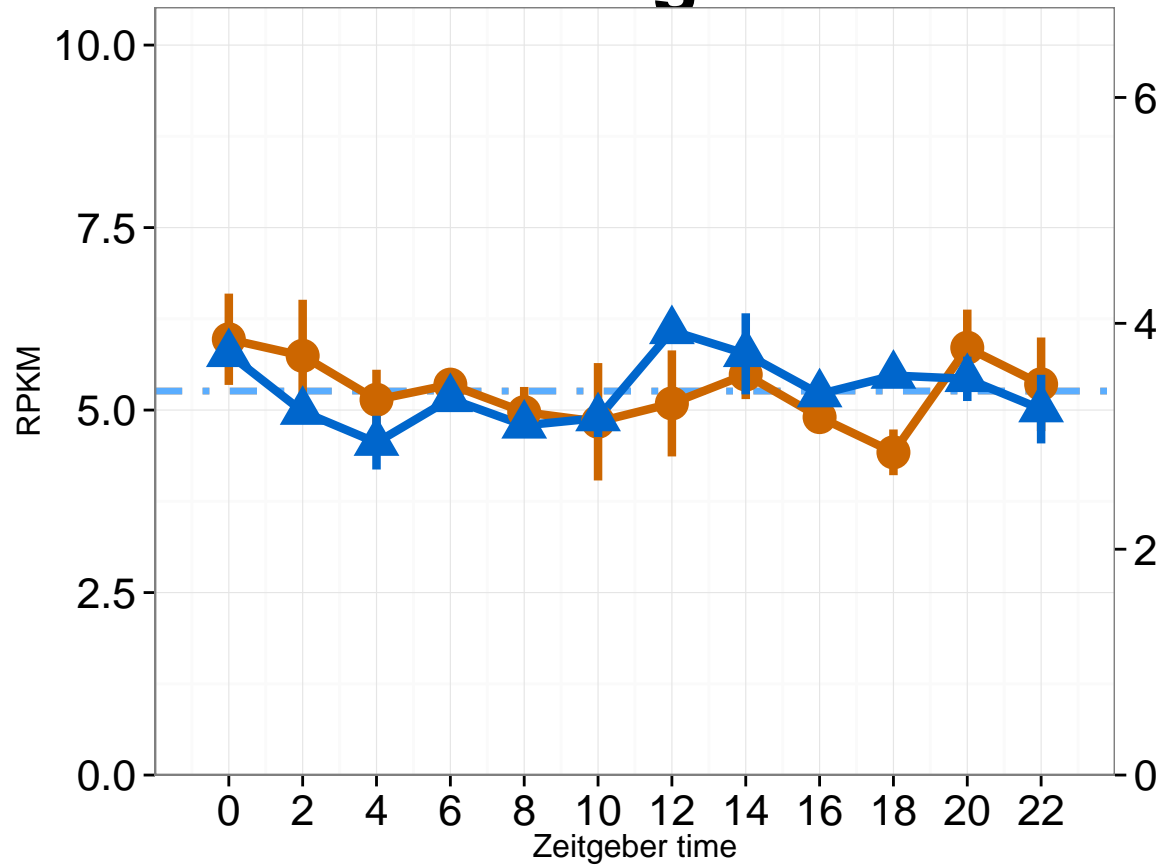

## Smg8

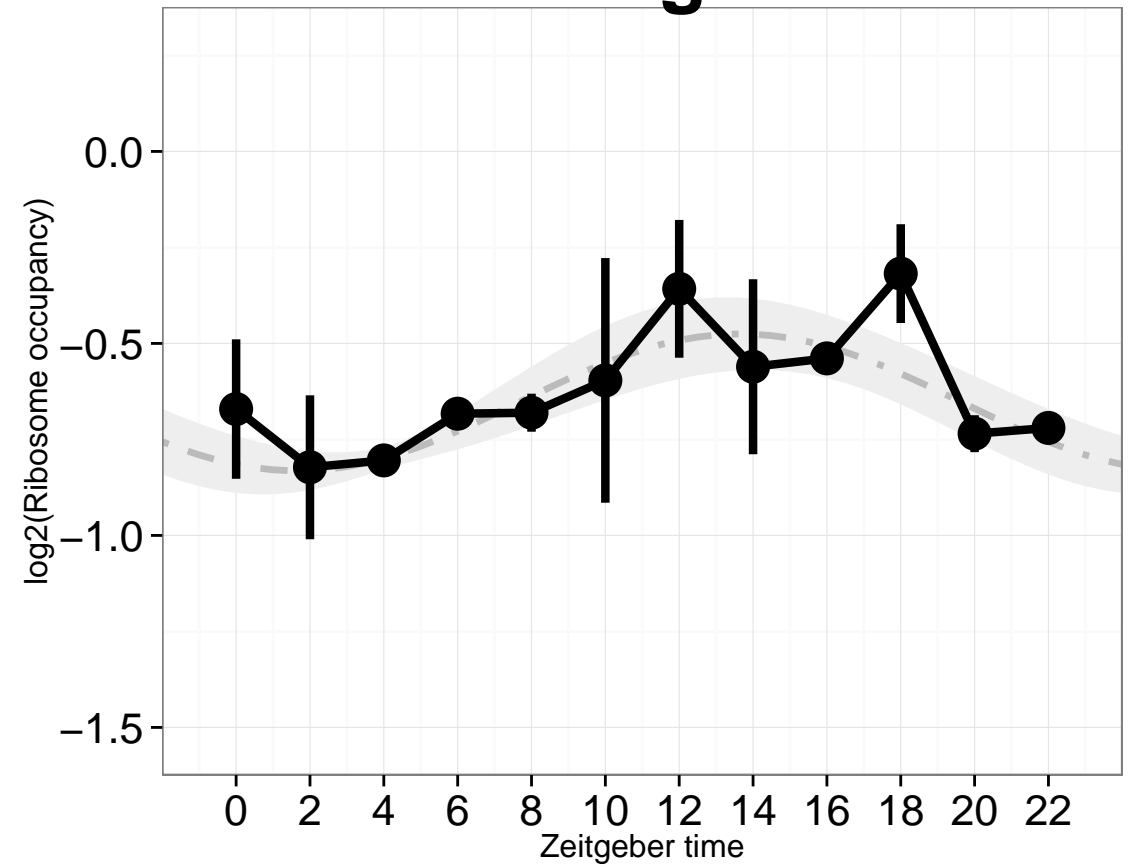

Supplement: SuppDataset_1.zip [file Smg8_set_A.pdf › Supplemental Dataset 1/A-mRNA_nonrhyth_translation_nonrhyth/Smg8_set_A.pdf]

# Smg9

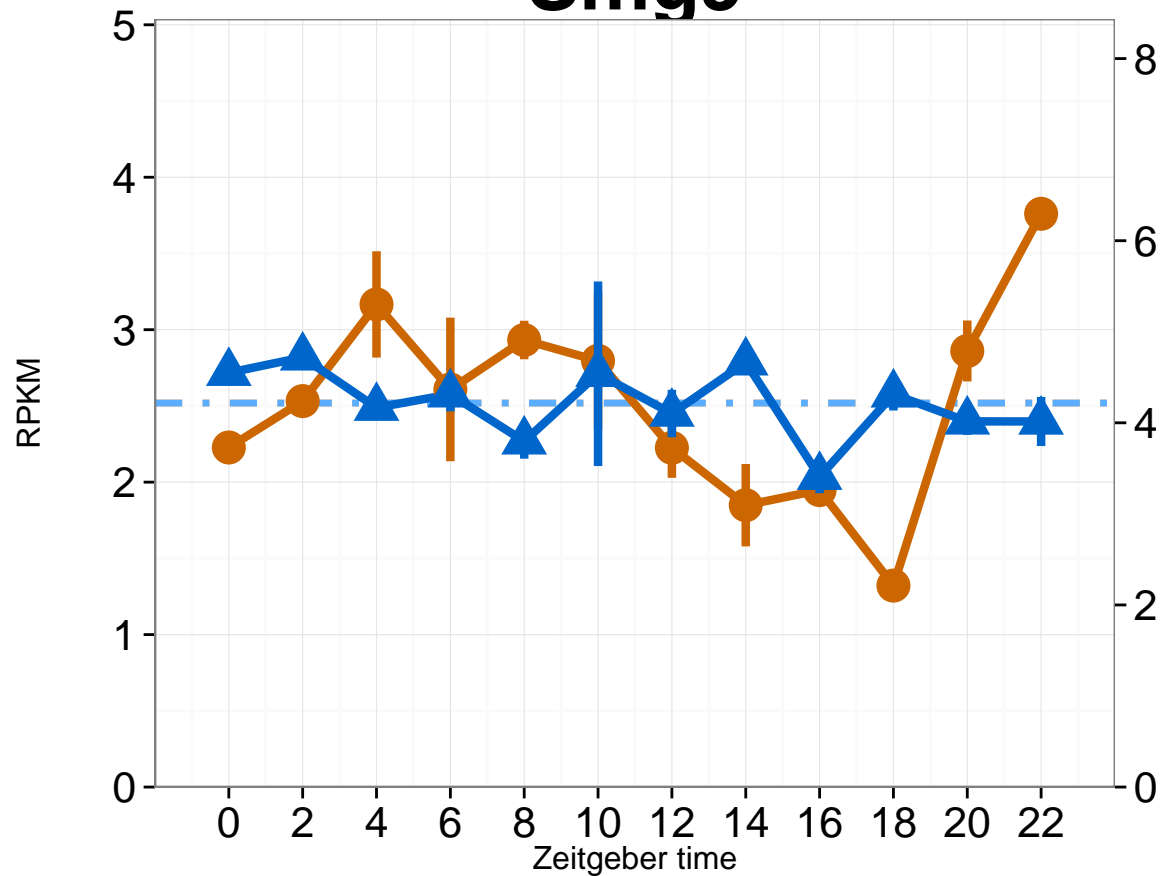

# Smg9

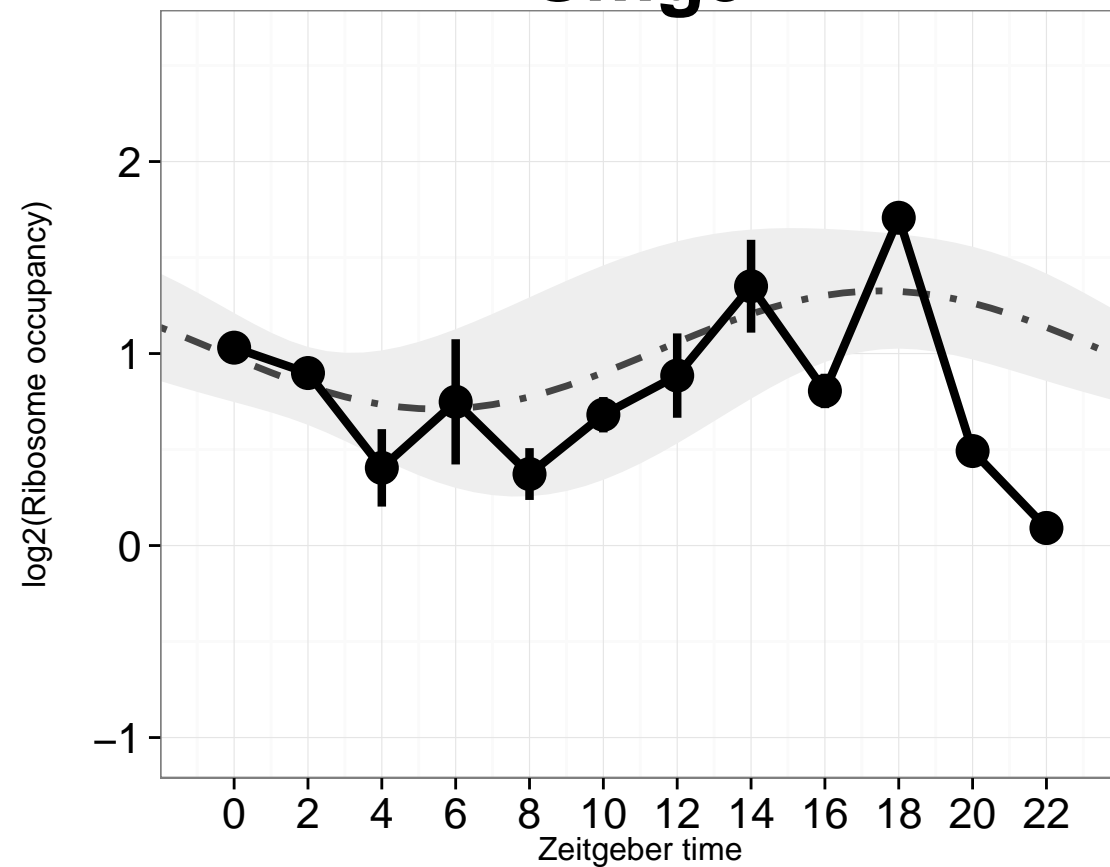

Supplement: SuppDataset_1.zip [file Smg9_set_A.pdf › Supplemental Dataset 1/A-mRNA_nonrhyth_translation_nonrhyth/Smg9_set_A.pdf]

# Smim11

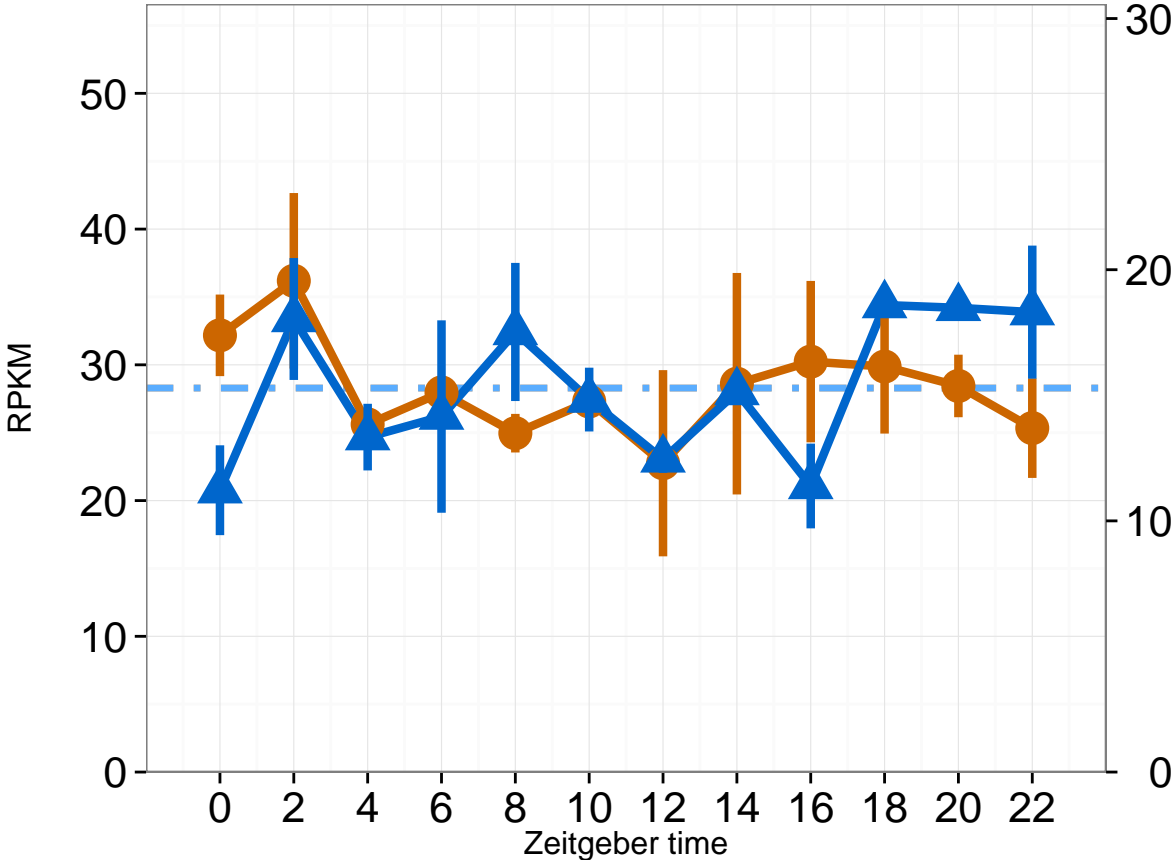

# Smim11

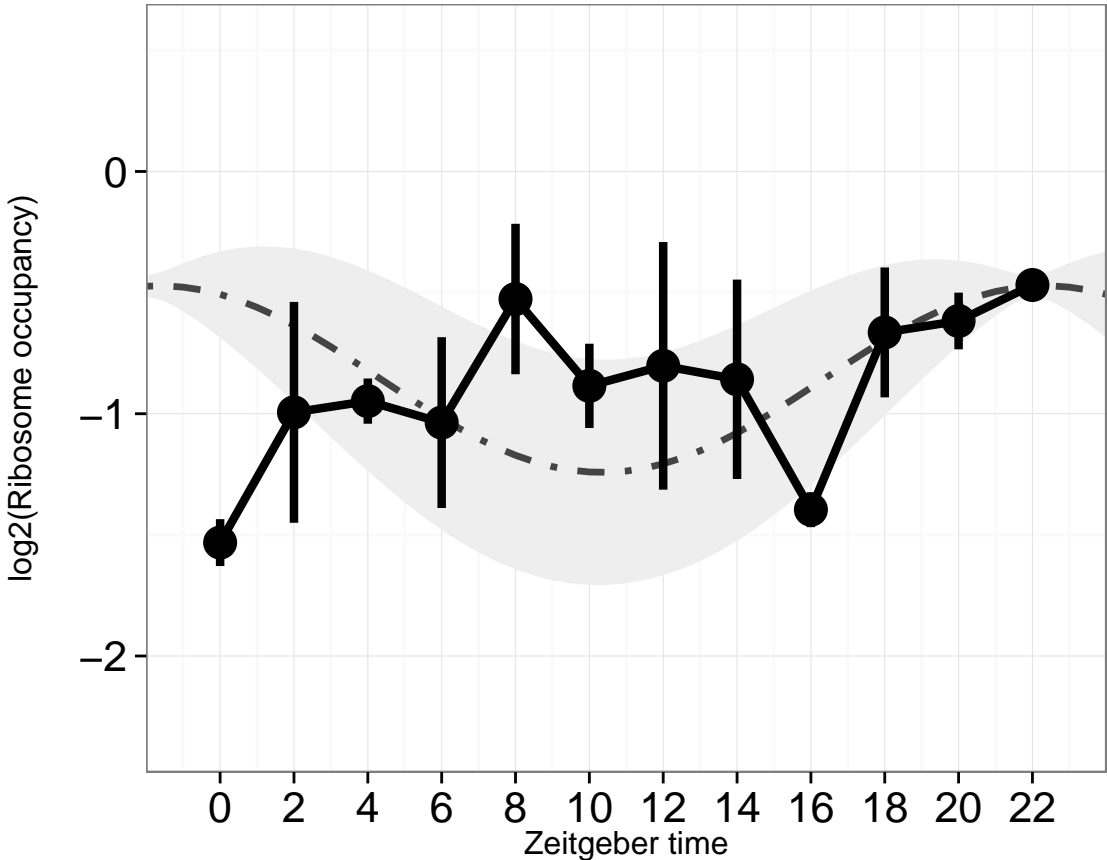

Supplement: SuppDataset_1.zip [file Smim11_set_A.pdf › Supplemental Dataset 1/A-mRNA_nonrhyth_translation_nonrhyth/Smim11_set_A.pdf]

# Smim12

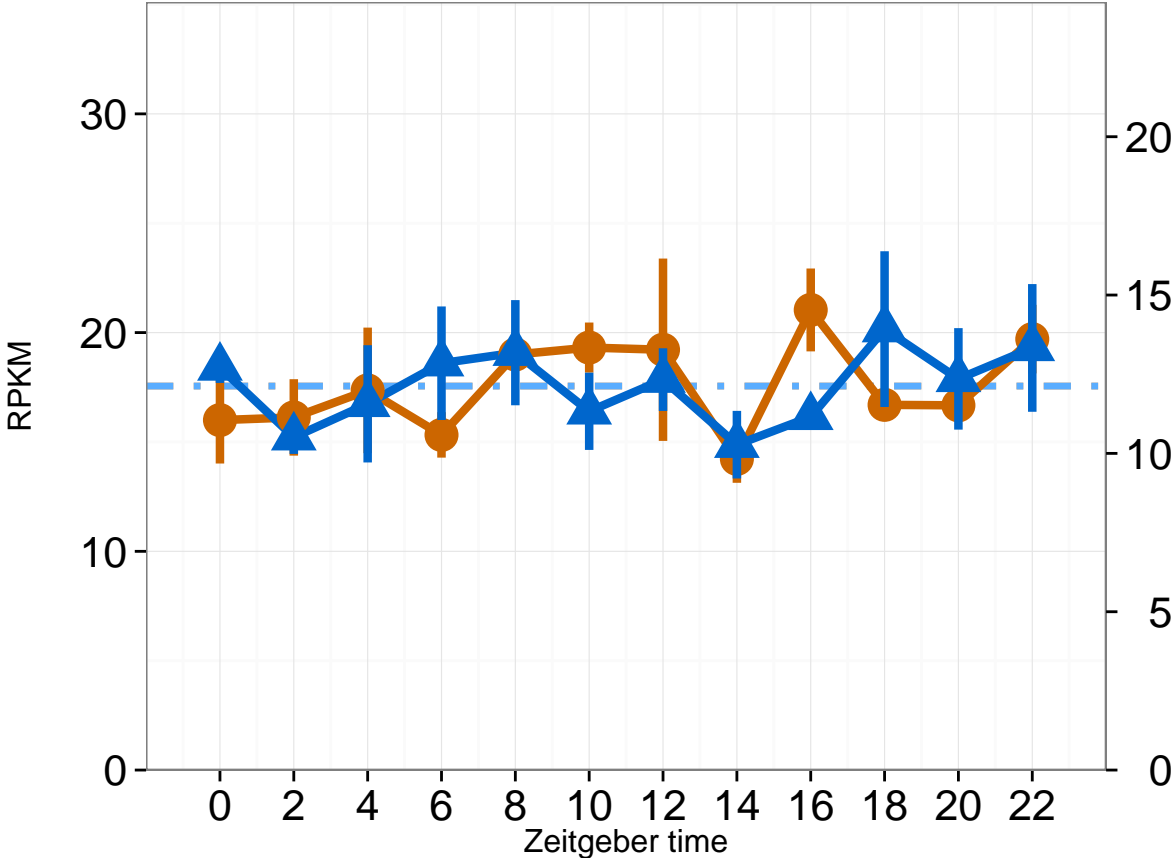

# Smim12

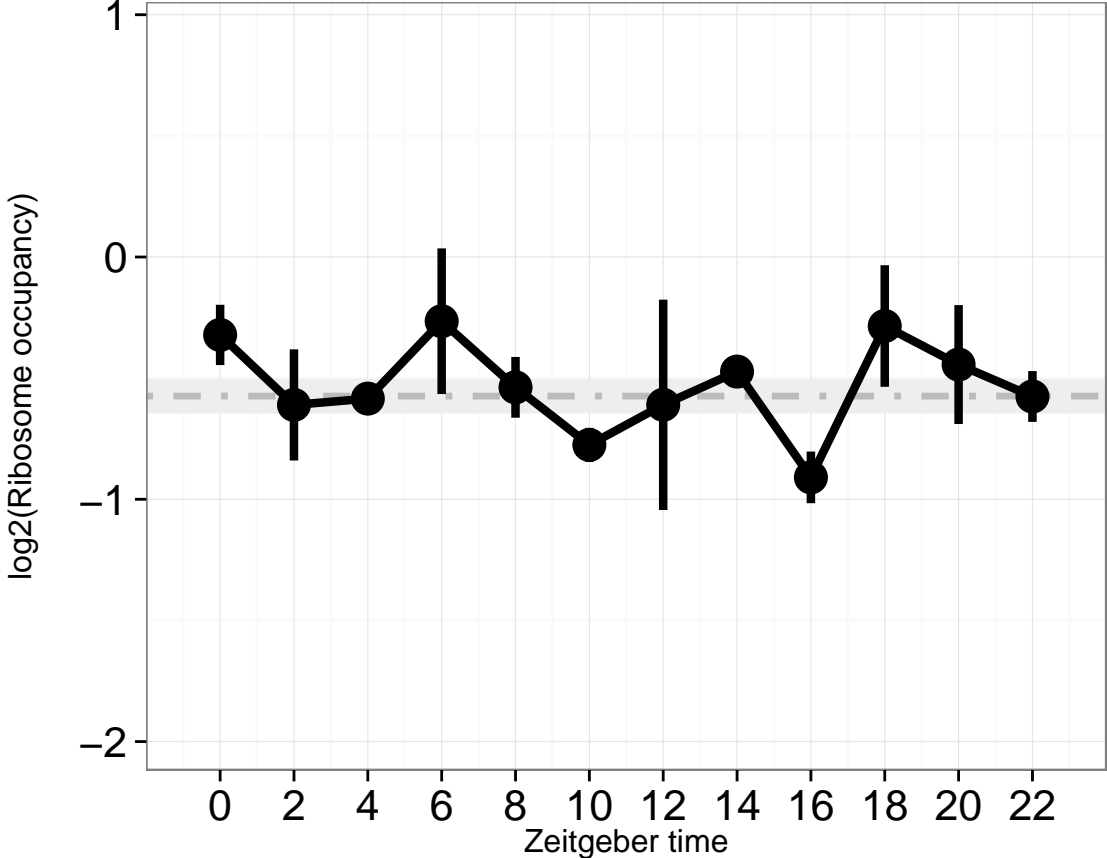

Supplement: SuppDataset_1.zip [file Smim12_set_A.pdf › Supplemental Dataset 1/A-mRNA_nonrhyth_translation_nonrhyth/Smim12_set_A.pdf]

**Smim13**

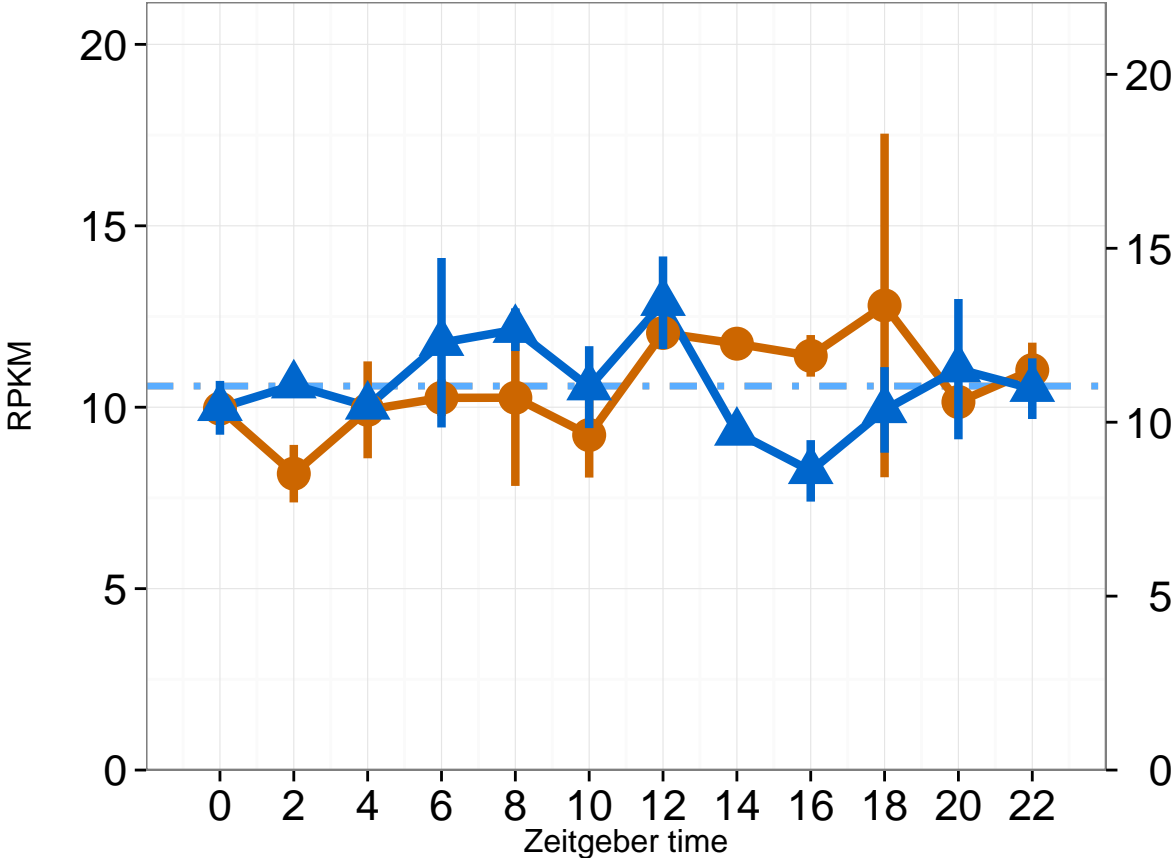

**Smim13**

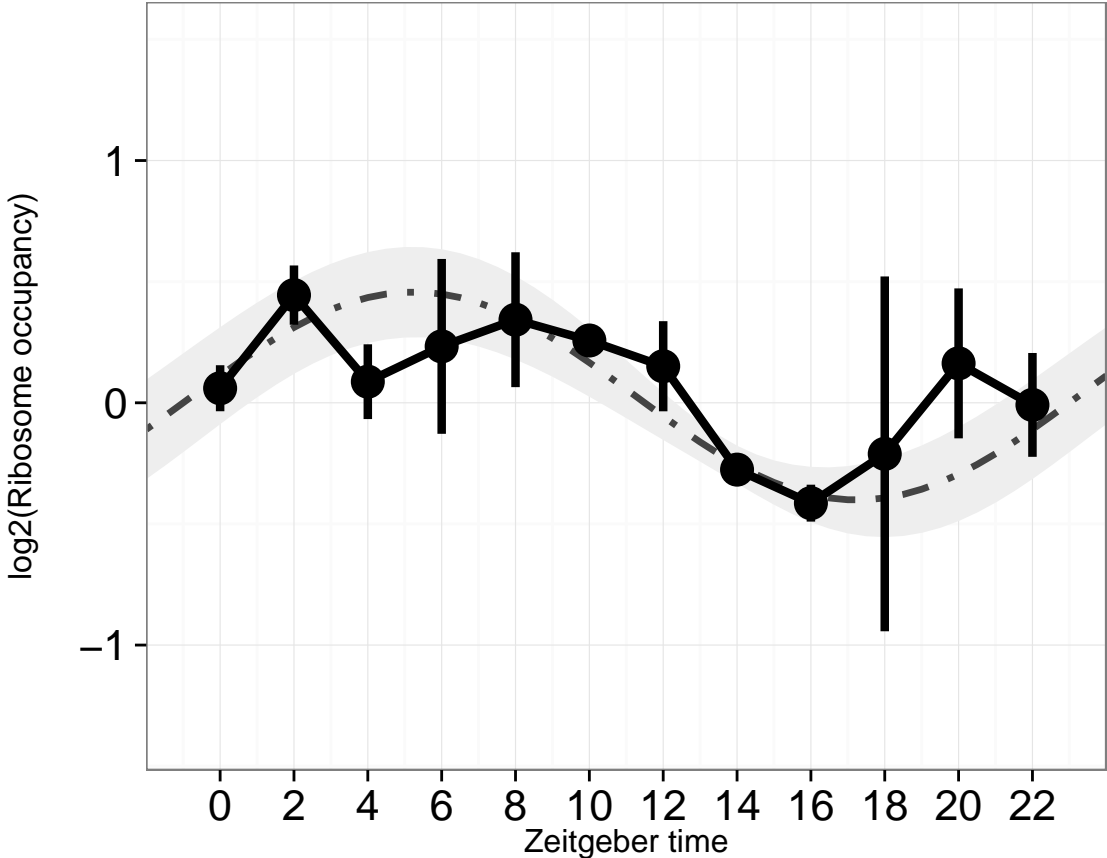

Supplement: SuppDataset_1.zip [file Smim13_set_A.pdf › Supplemental Dataset 1/A-mRNA_nonrhyth_translation_nonrhyth/Smim13_set_A.pdf]

## Smim14

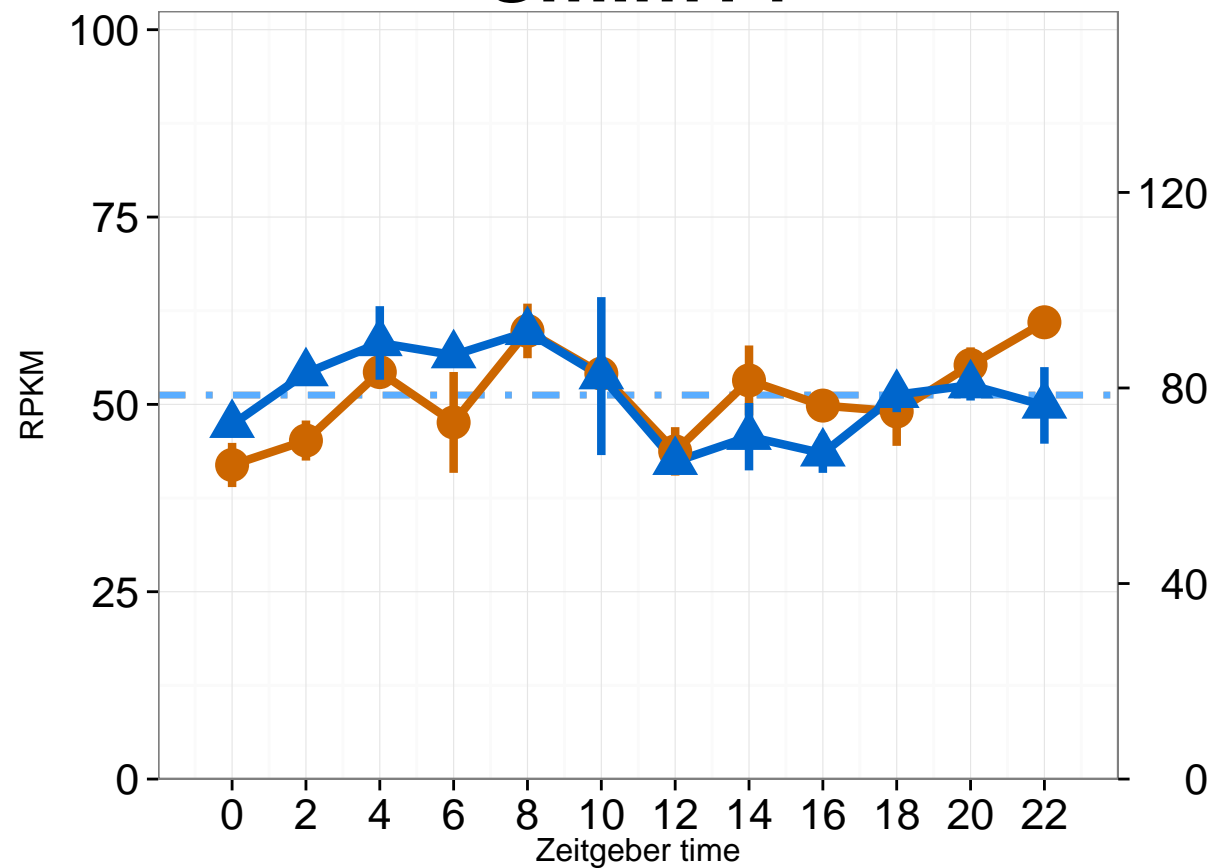

## Smim14

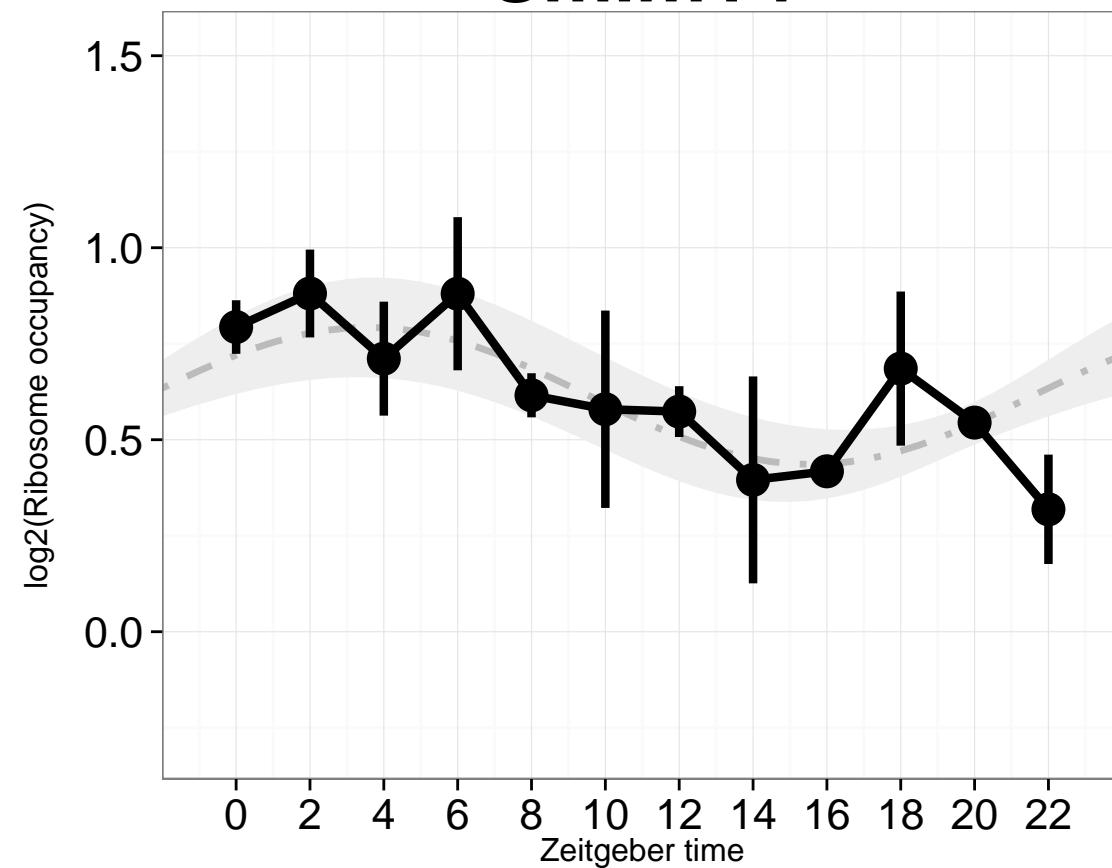

Supplement: SuppDataset_1.zip [file Smim14_set_A.pdf › Supplemental Dataset 1/A-mRNA_nonrhyth_translation_nonrhyth/Smim14_set_A.pdf]

Smim15

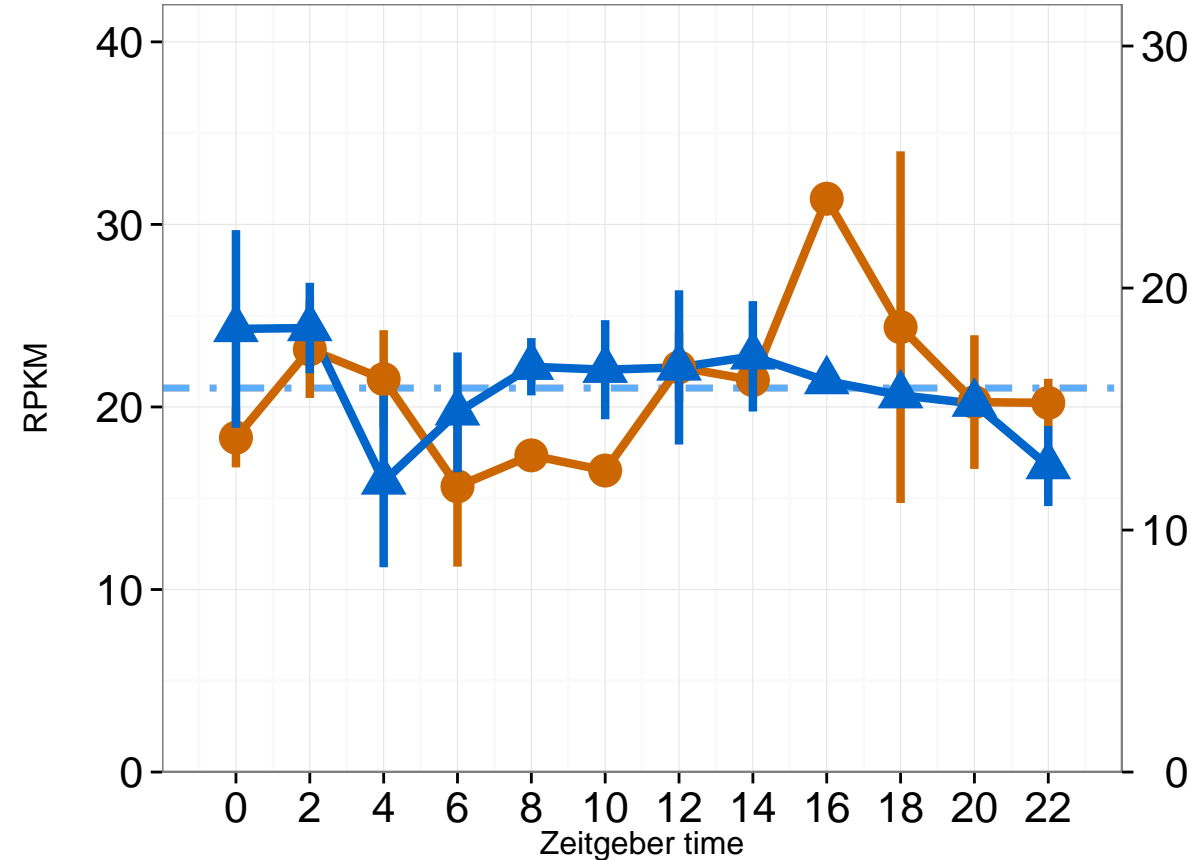

Smim15

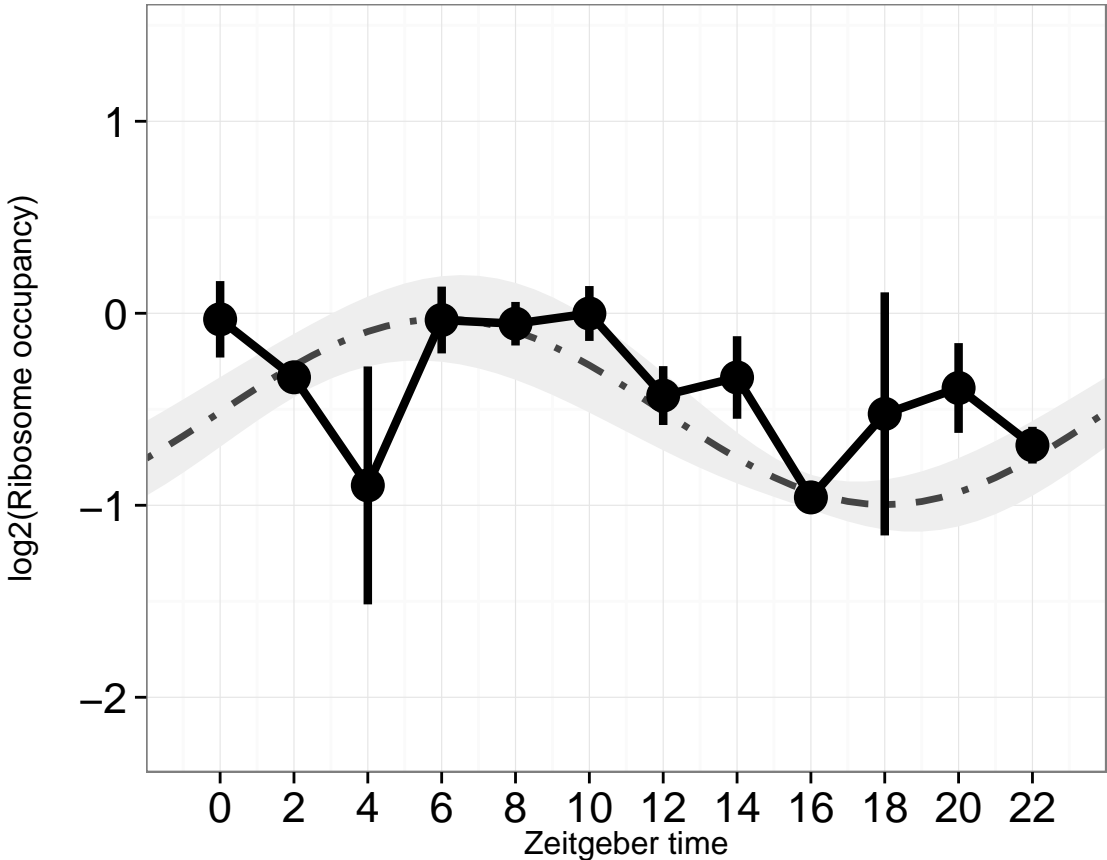

Supplement: SuppDataset_1.zip [file Smim15_set_A.pdf › Supplemental Dataset 1/A-mRNA_nonrhyth_translation_nonrhyth/Smim15_set_A.pdf]

**Smim19**

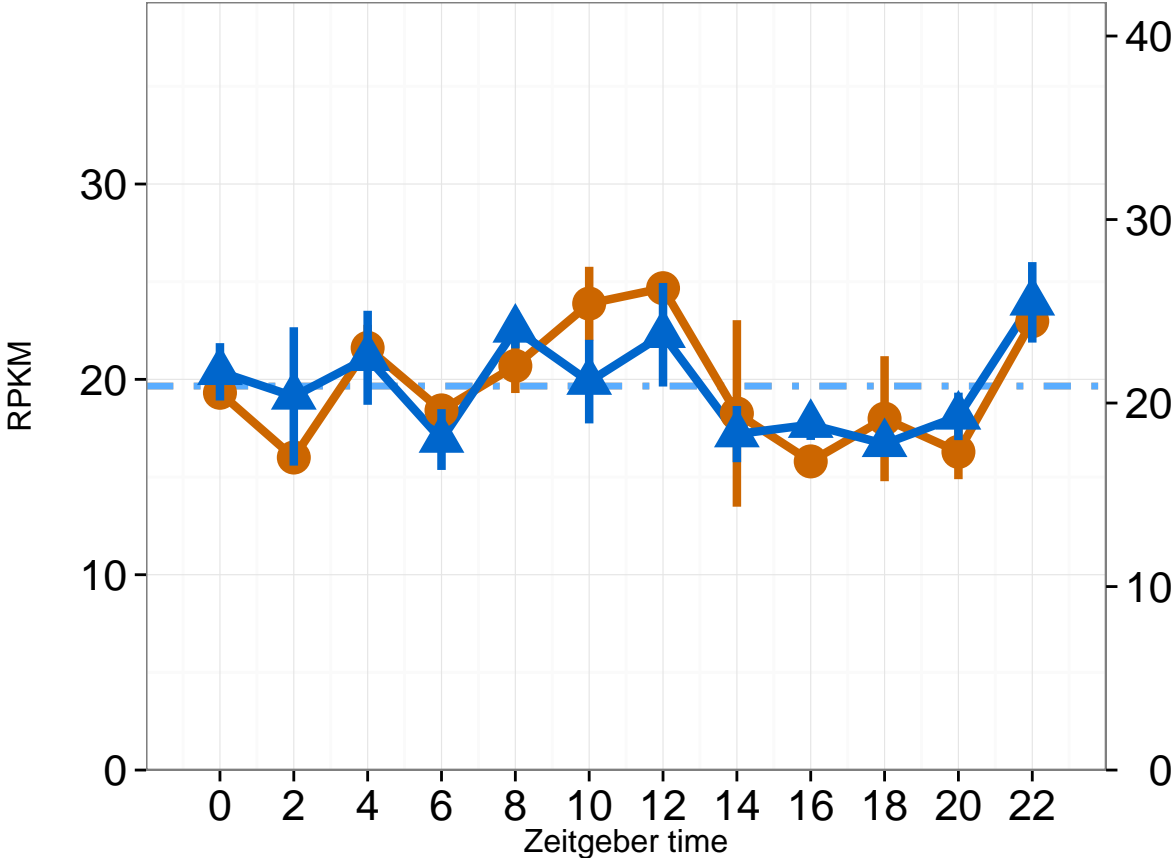

**Smim19**

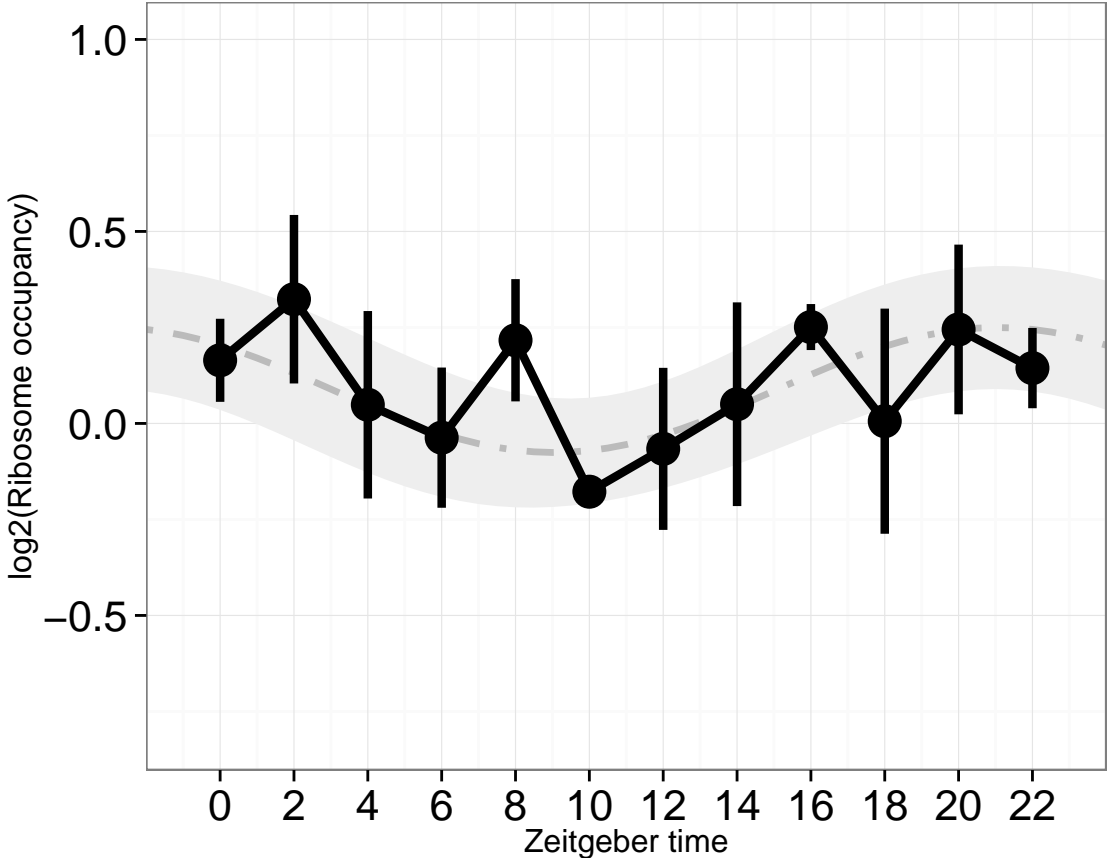

Supplement: SuppDataset_1.zip [file Smim19_set_A.pdf › Supplemental Dataset 1/A-mRNA_nonrhyth_translation_nonrhyth/Smim19_set_A.pdf]

# Smim20

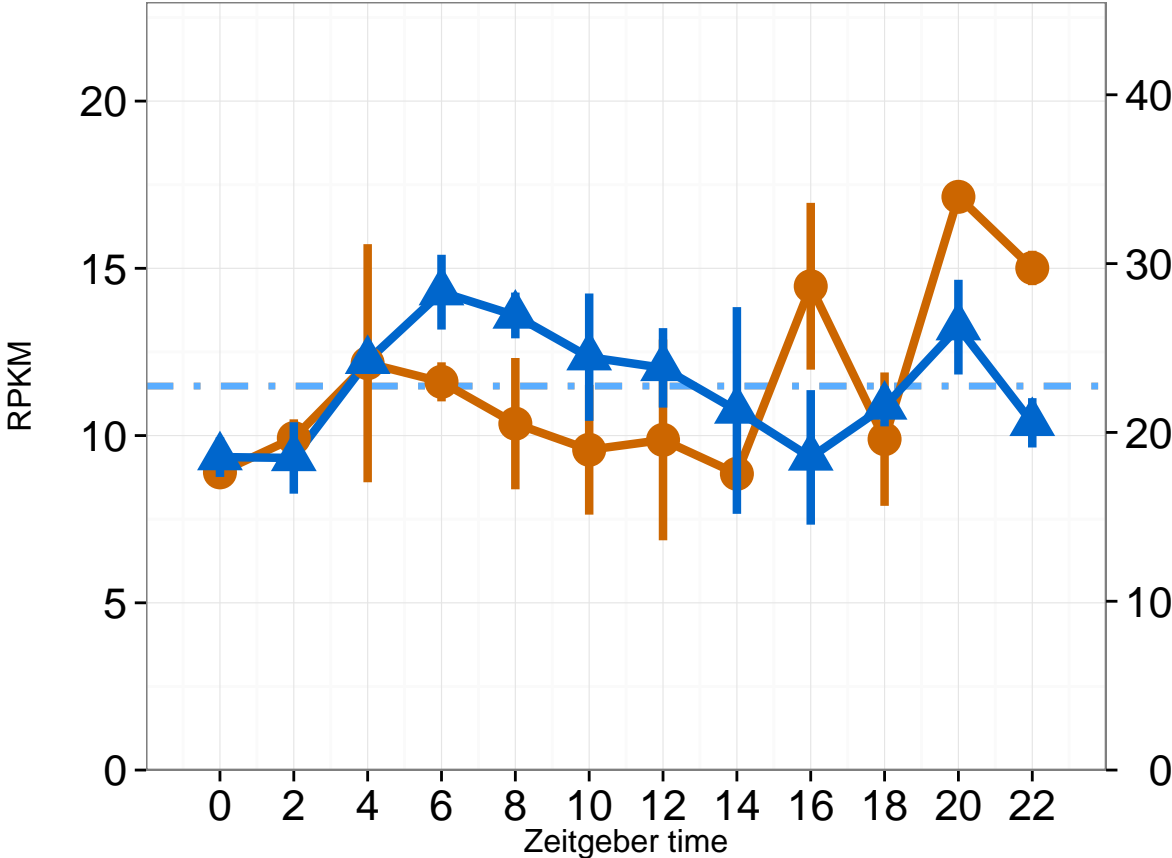

# Smim20

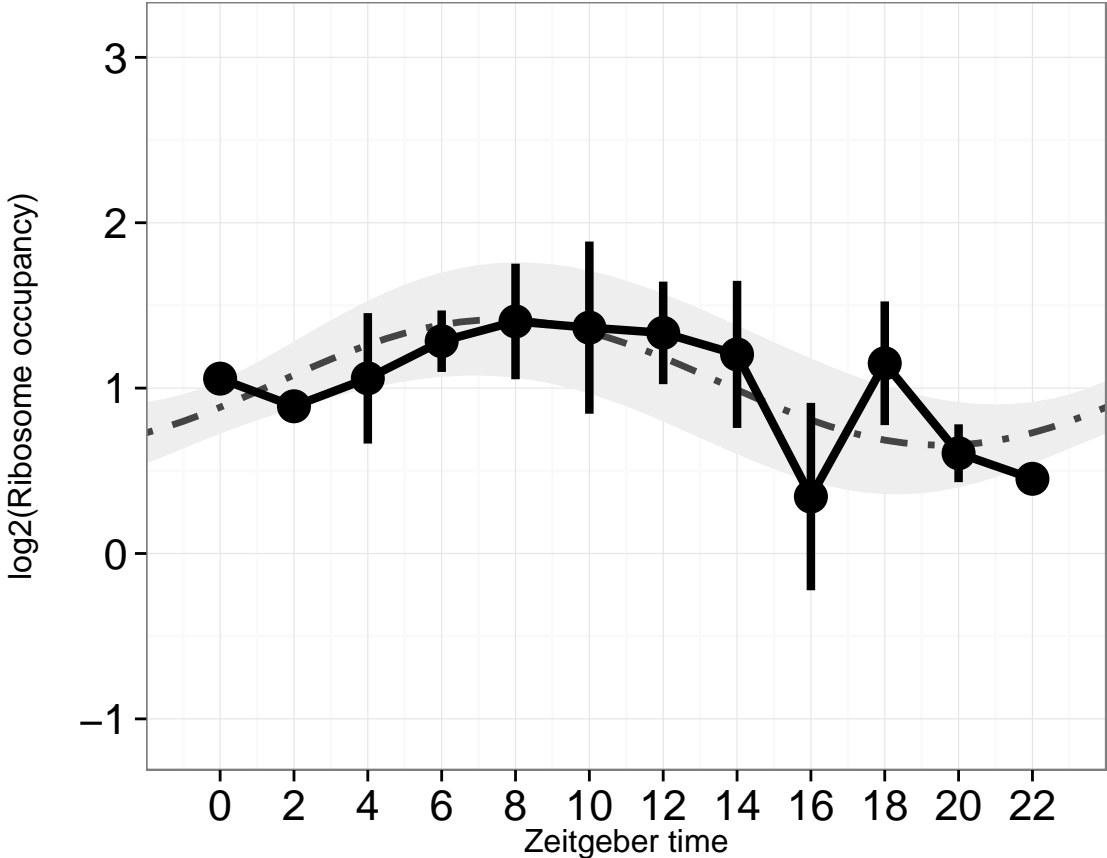

Supplement: SuppDataset_1.zip [file Smim20_set_A.pdf › Supplemental Dataset 1/A-mRNA_nonrhyth_translation_nonrhyth/Smim20_set_A.pdf]

## Smim7

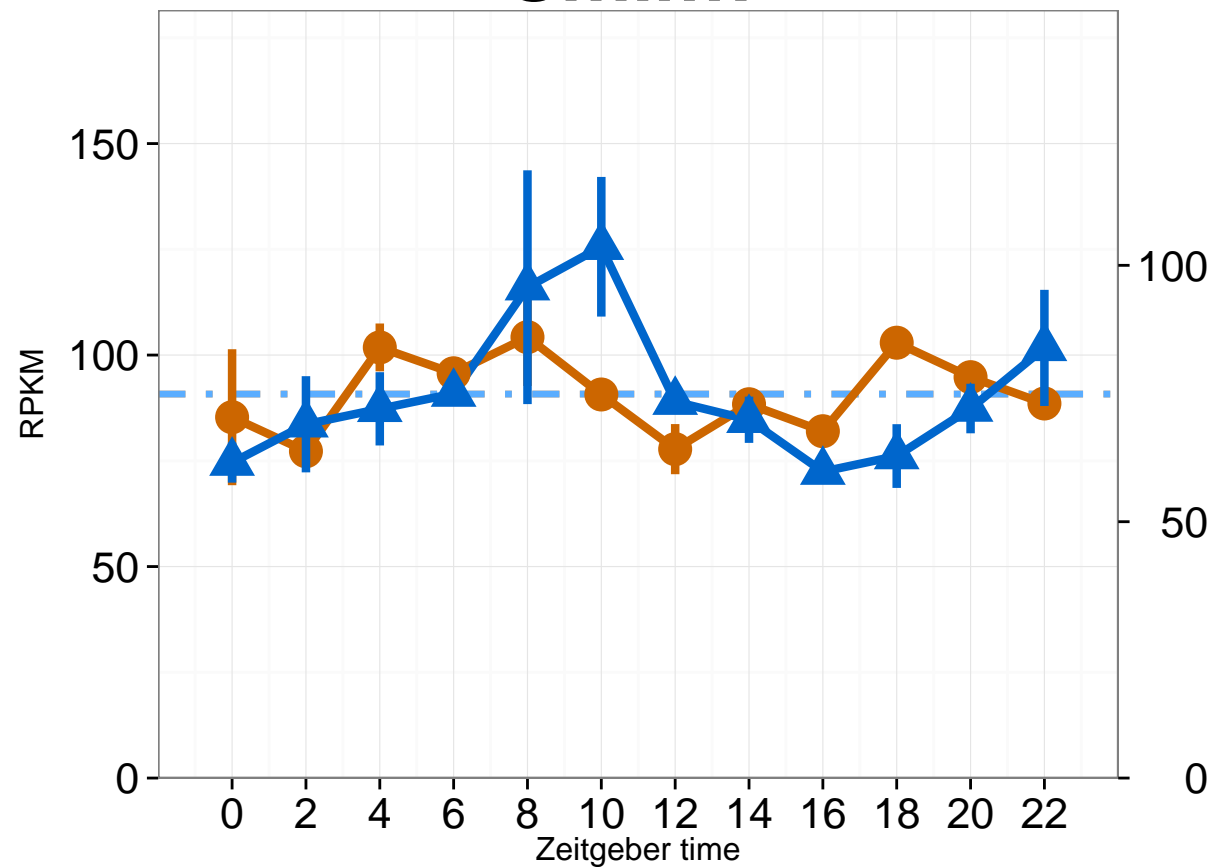

## Smim7

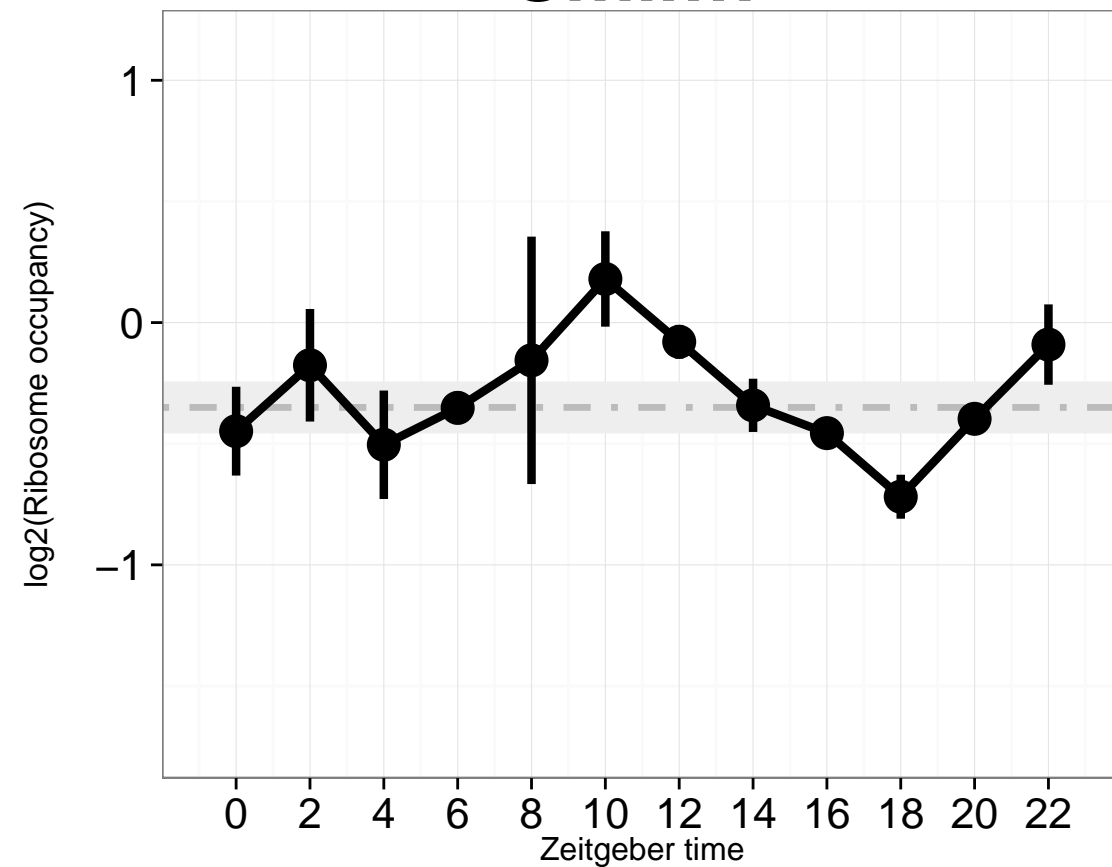

Supplement: SuppDataset_1.zip [file Smim7_set_A.pdf › Supplemental Dataset 1/A-mRNA_nonrhyth_translation_nonrhyth/Smim7_set_A.pdf]

## Smim8

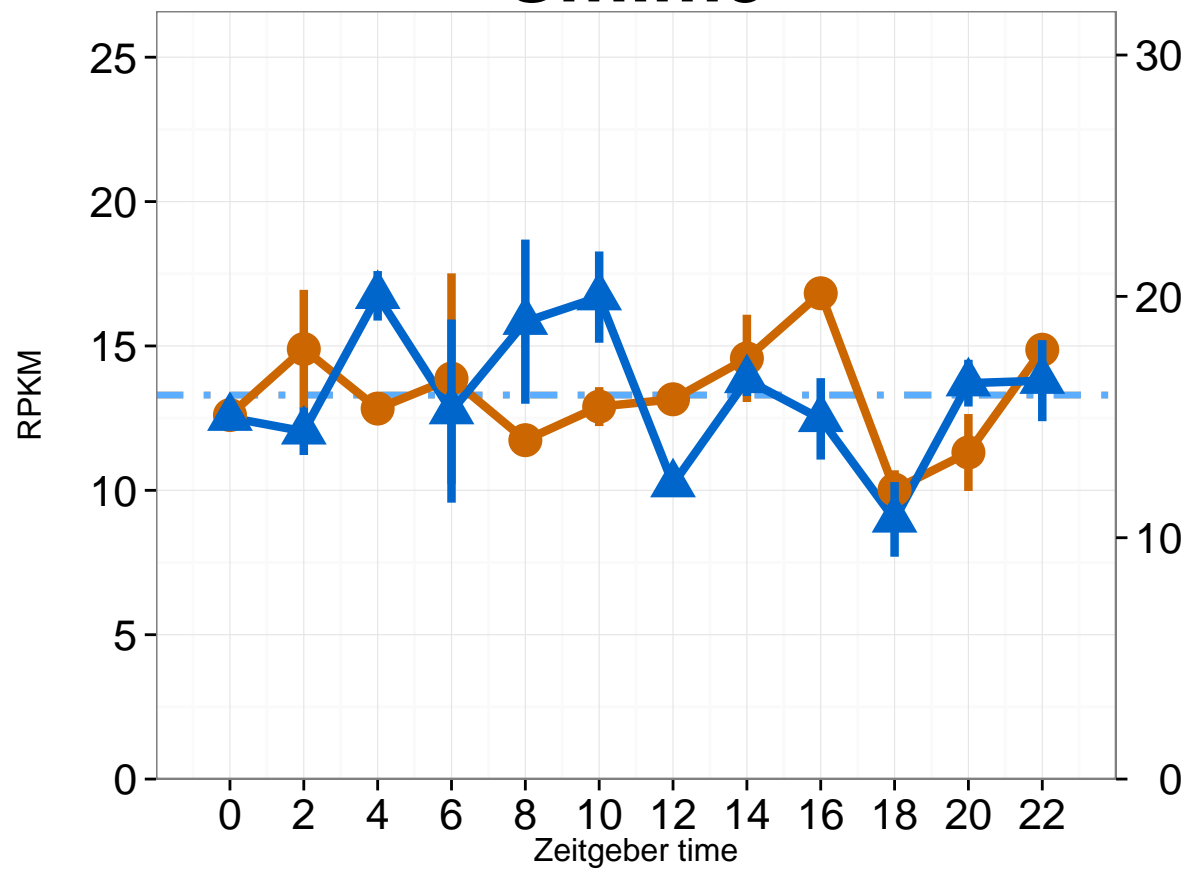

## Smim8

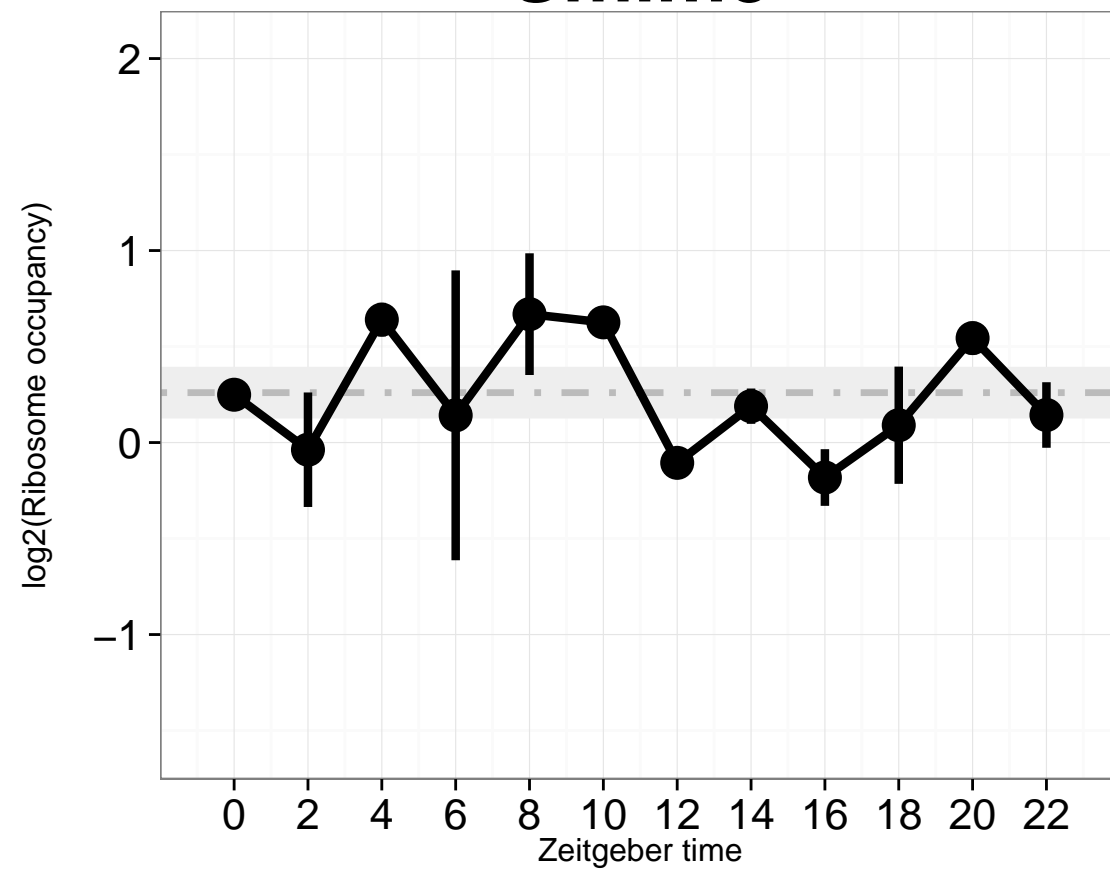

Supplement: SuppDataset_1.zip [file Smim8_set_A.pdf › Supplemental Dataset 1/A-mRNA_nonrhyth_translation_nonrhyth/Smim8_set_A.pdf]

# Smlr1

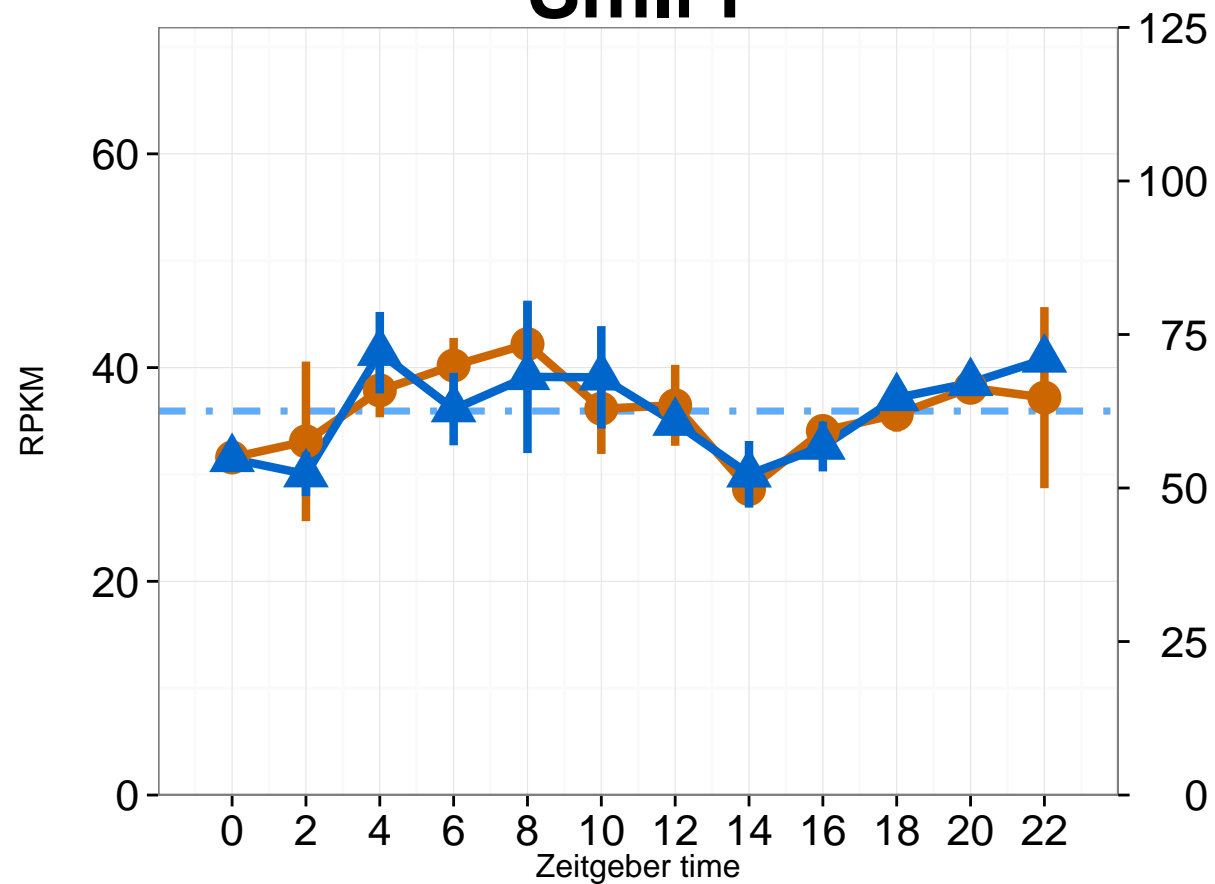

# Smlr1

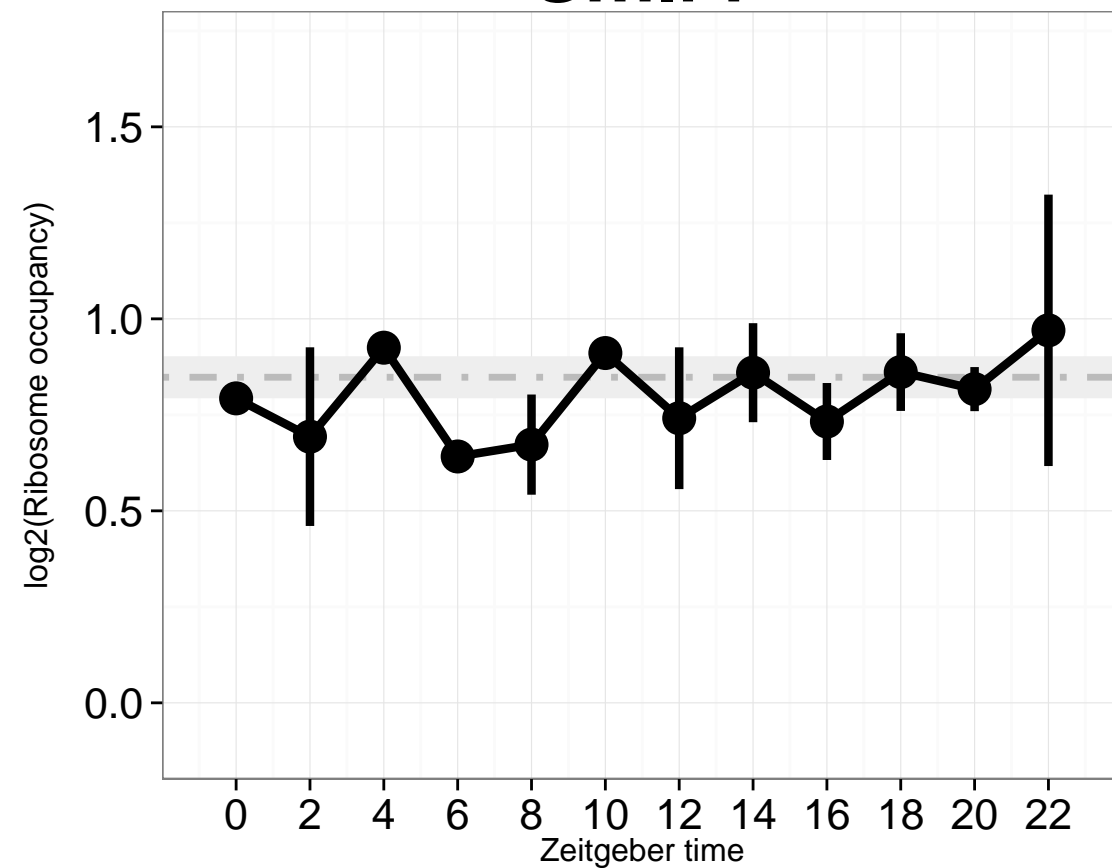

Supplement: SuppDataset_1.zip [file Smlr1_set_A.pdf › Supplemental Dataset 1/A-mRNA_nonrhyth_translation_nonrhyth/Smlr1_set_A.pdf]

## Smn1

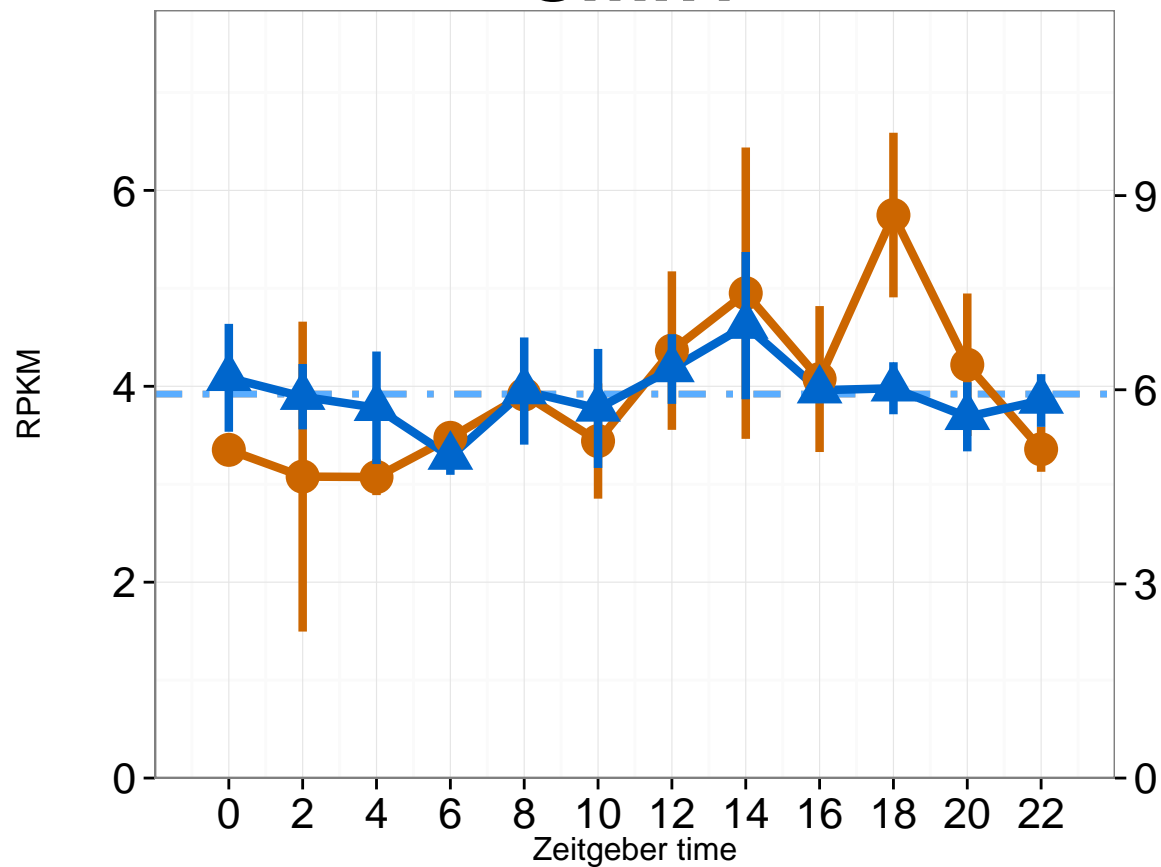

## Smn1

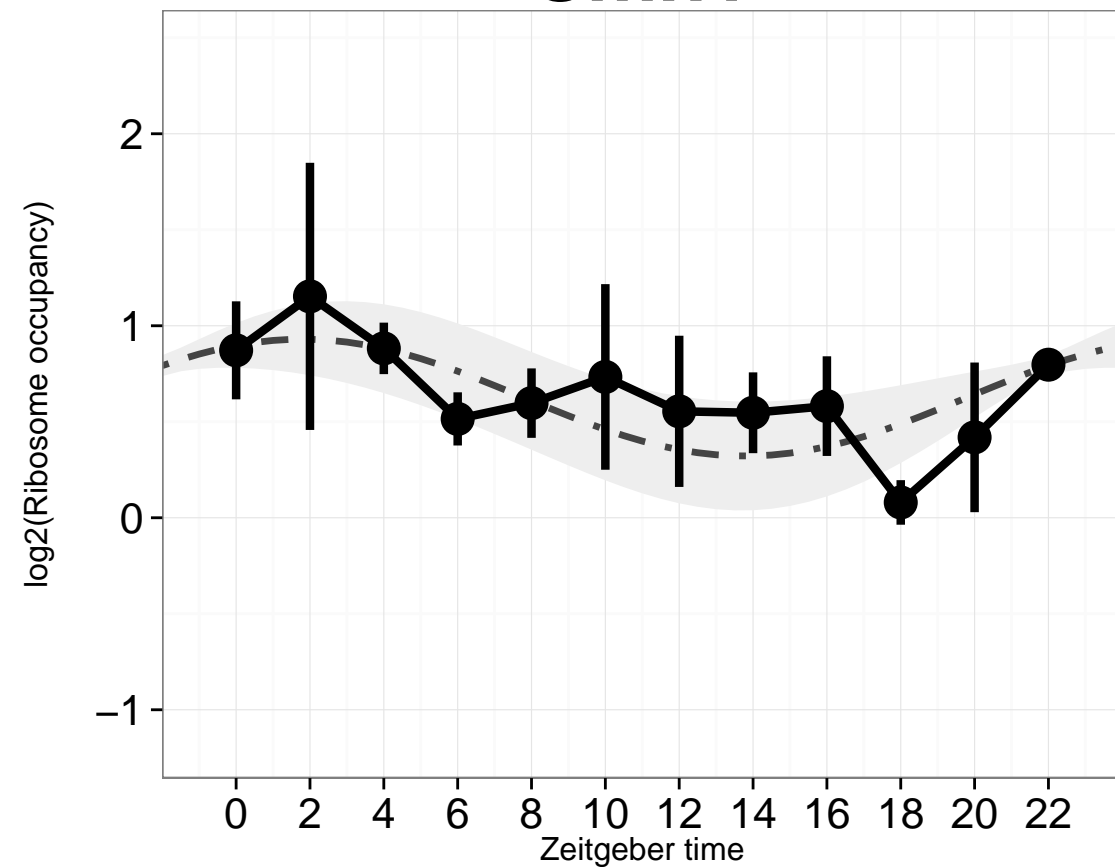

Supplement: SuppDataset_1.zip [file Smn1_set_A.pdf › Supplemental Dataset 1/A-mRNA_nonrhyth_translation_nonrhyth/Smn1_set_A.pdf]

# Smndc1

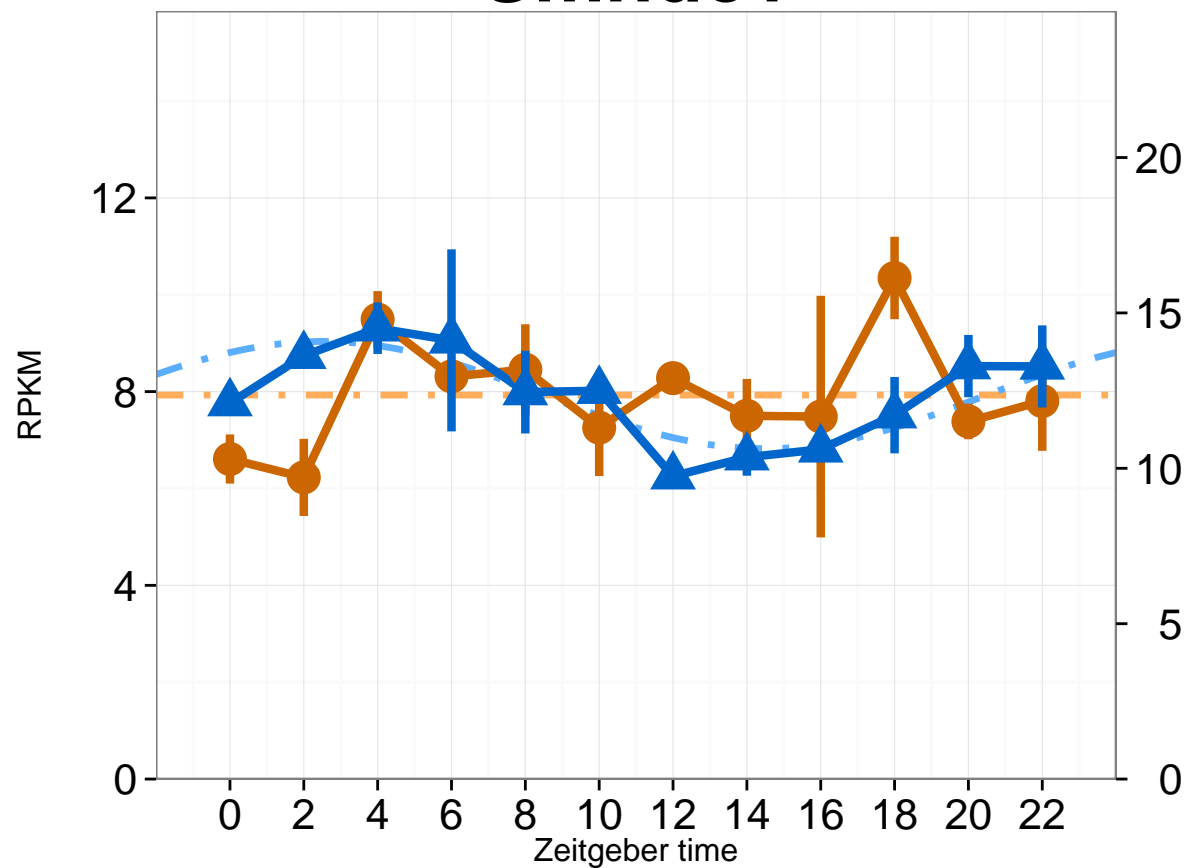

# Smndc1

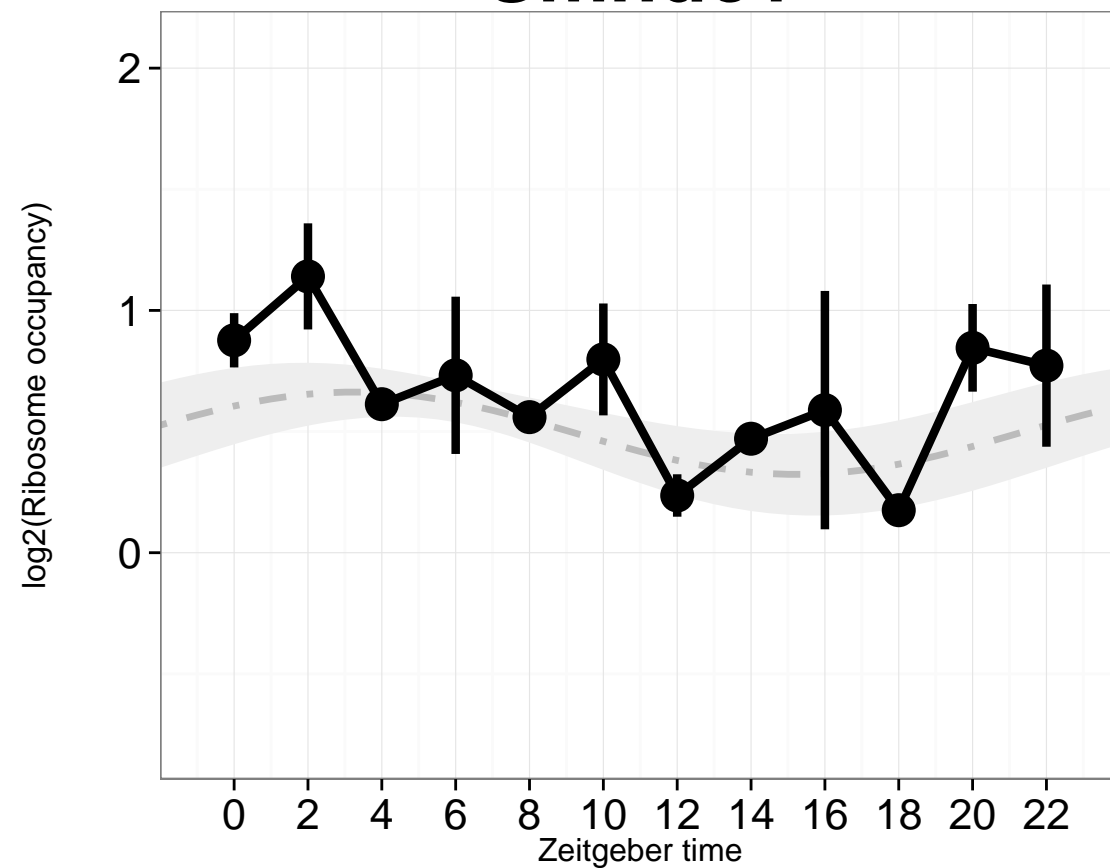

Supplement: SuppDataset_1.zip [file Smndc1_set_A.pdf › Supplemental Dataset 1/A-mRNA_nonrhyth_translation_nonrhyth/Smndc1_set_A.pdf]

## Smoc1

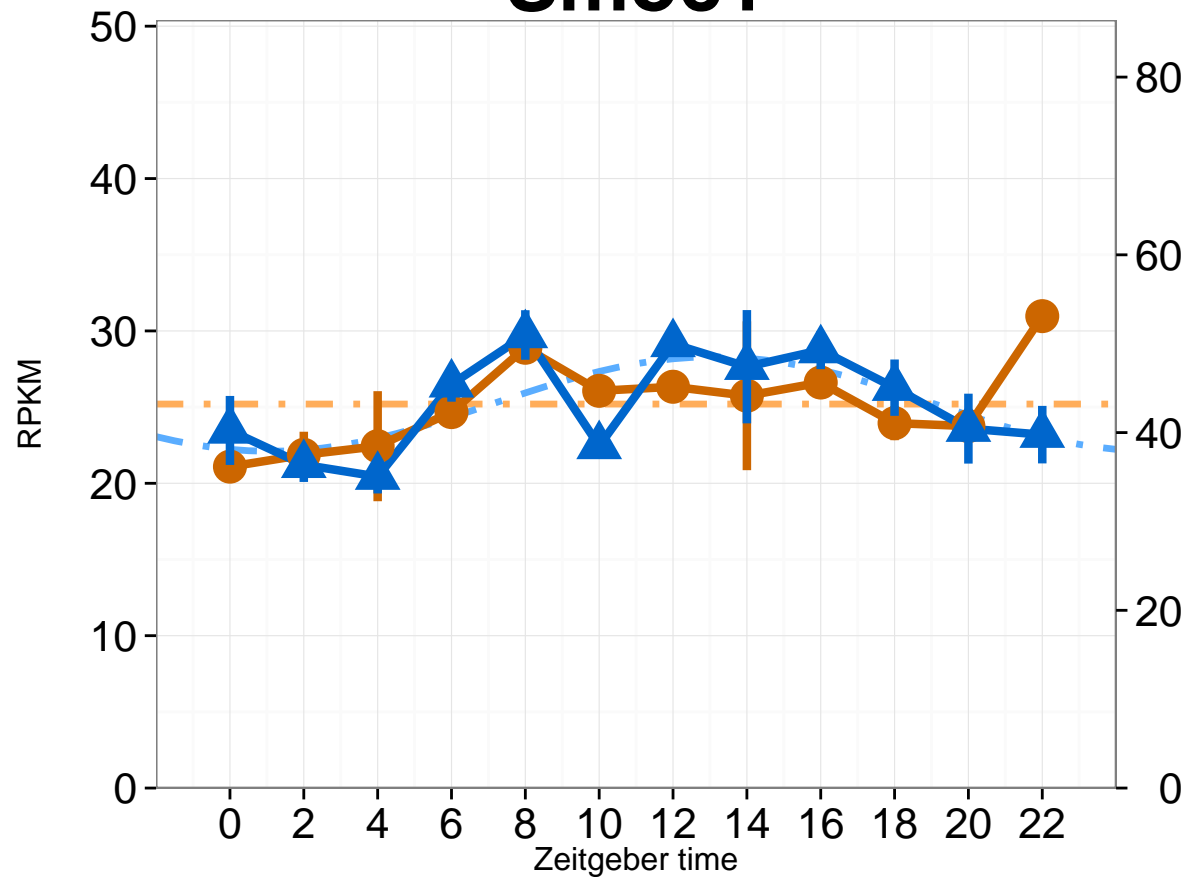

## Smoc1

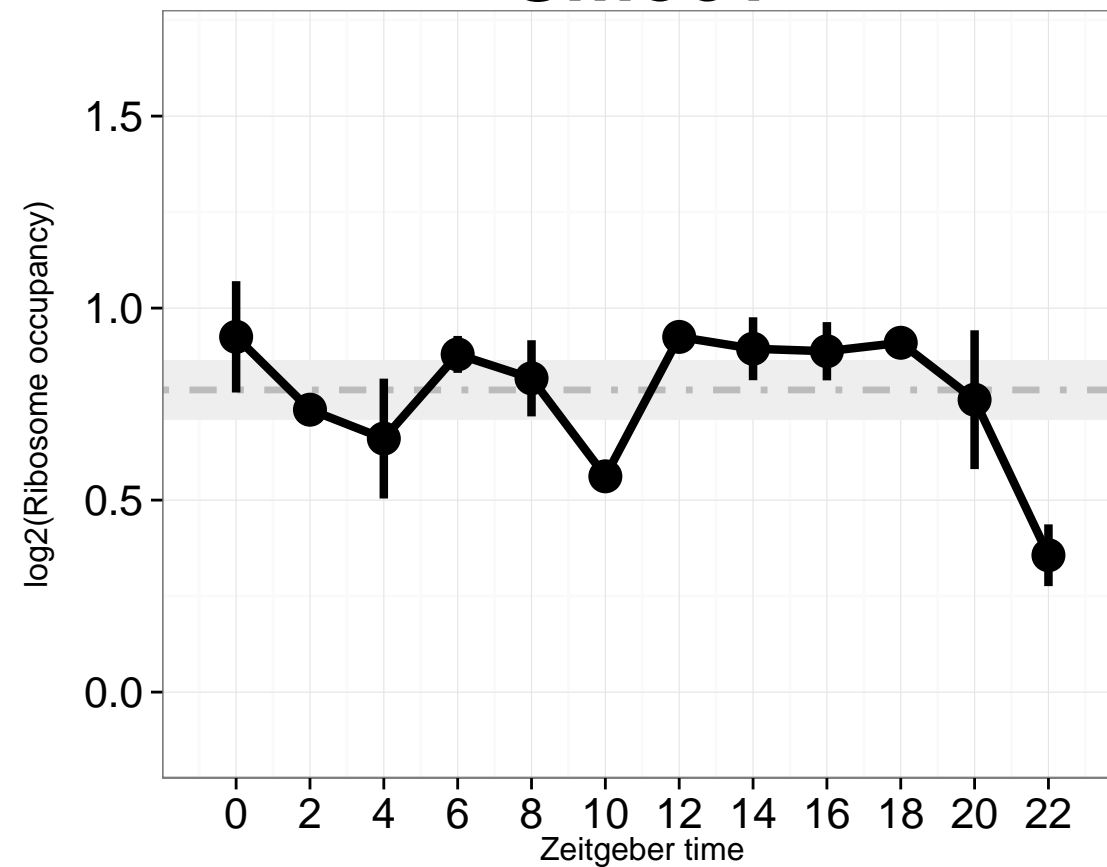

Supplement: SuppDataset_1.zip [file Smoc1_set_A.pdf › Supplemental Dataset 1/A-mRNA_nonrhyth_translation_nonrhyth/Smoc1_set_A.pdf]

## Smoc2

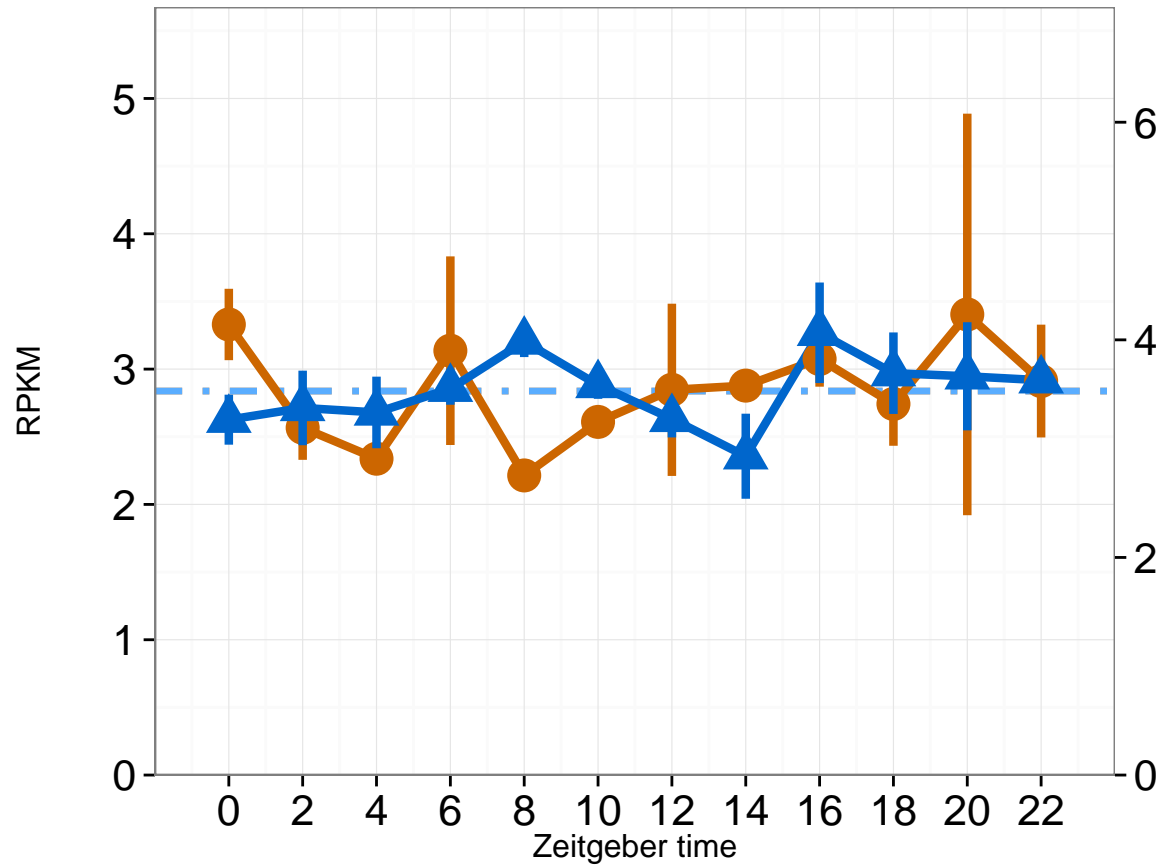

## Smoc2

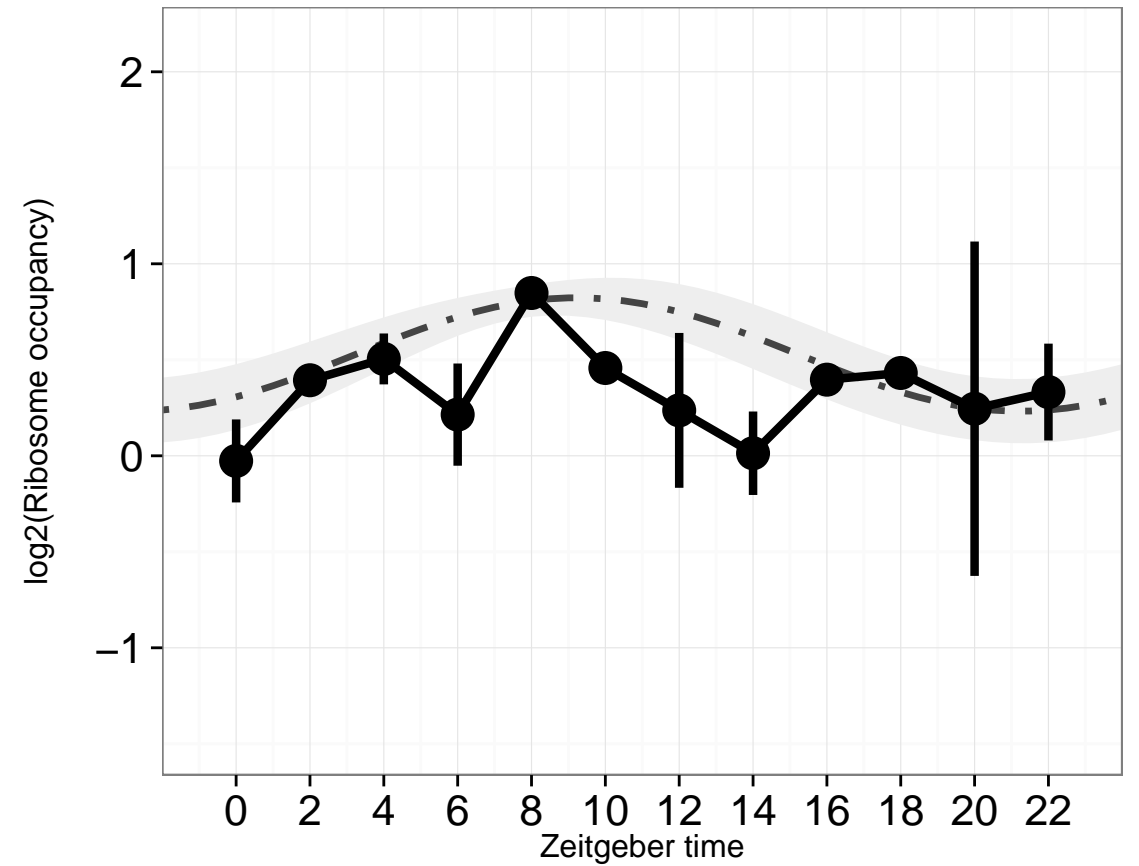

Supplement: SuppDataset_1.zip [file Smoc2_set_A.pdf › Supplemental Dataset 1/A-mRNA_nonrhyth_translation_nonrhyth/Smoc2_set_A.pdf]

# Smpd1

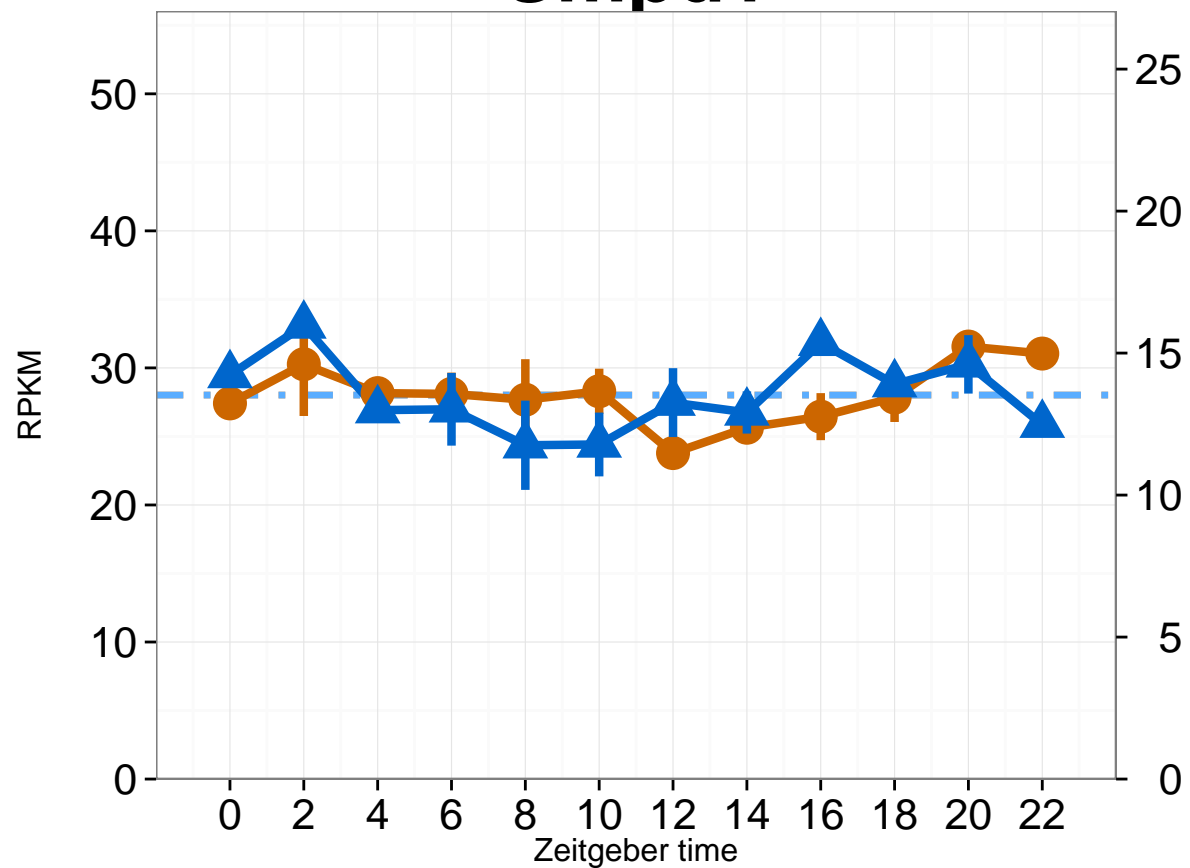

# Smpd1

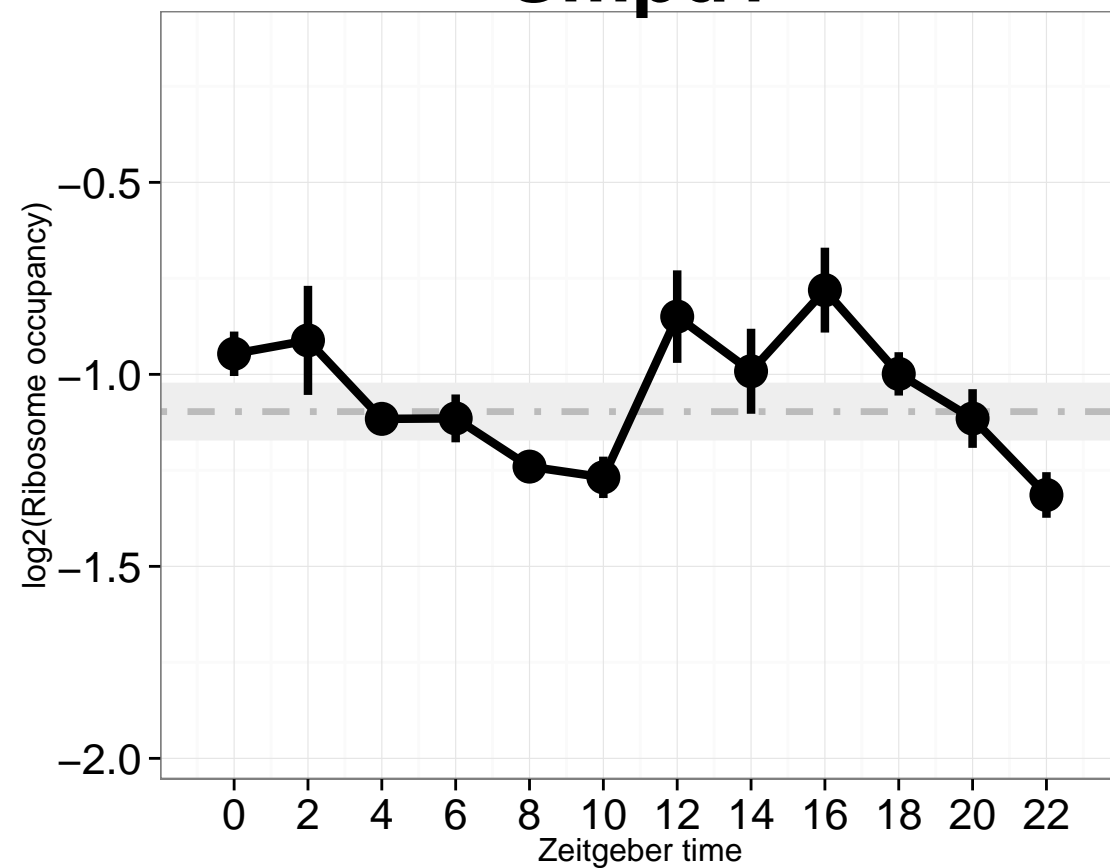

Supplement: SuppDataset_1.zip [file Smpd1_set_A.pdf › Supplemental Dataset 1/A-mRNA_nonrhyth_translation_nonrhyth/Smpd1_set_A.pdf]

# Smpd2

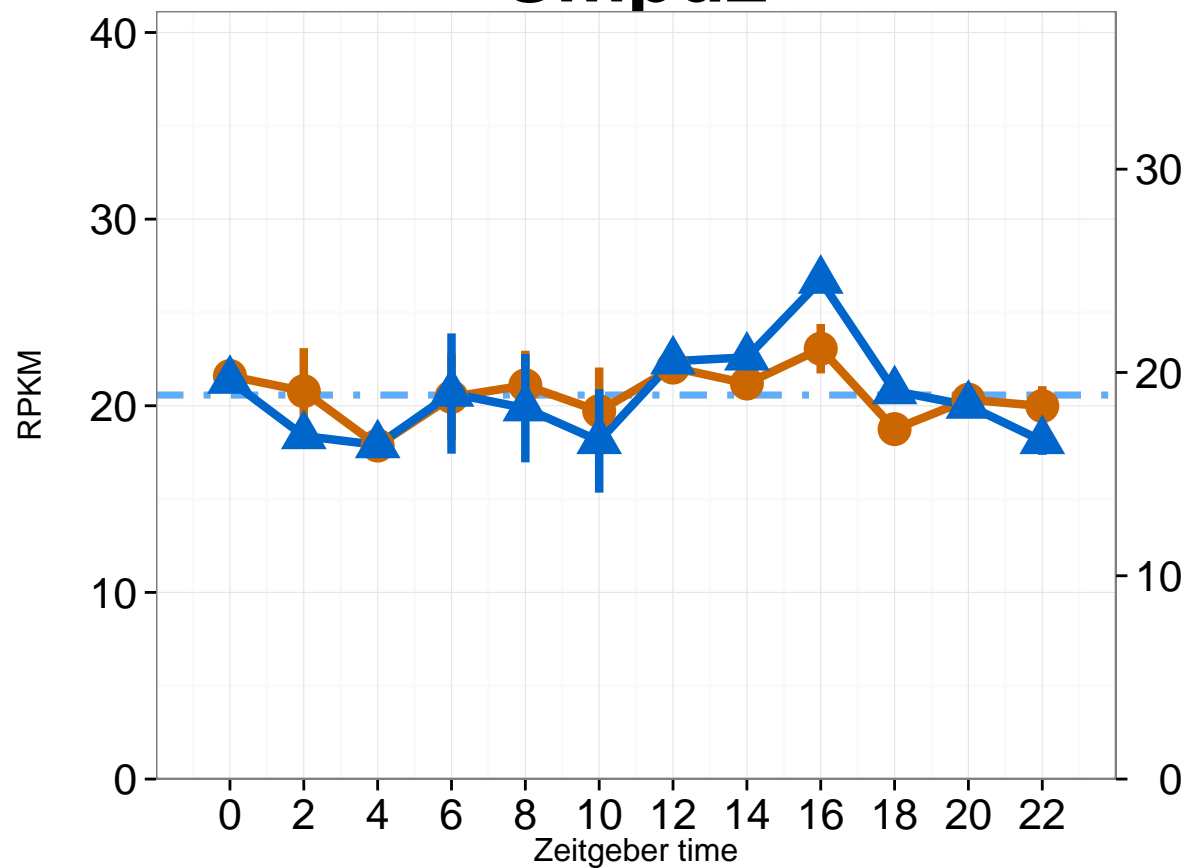

# Smpd2

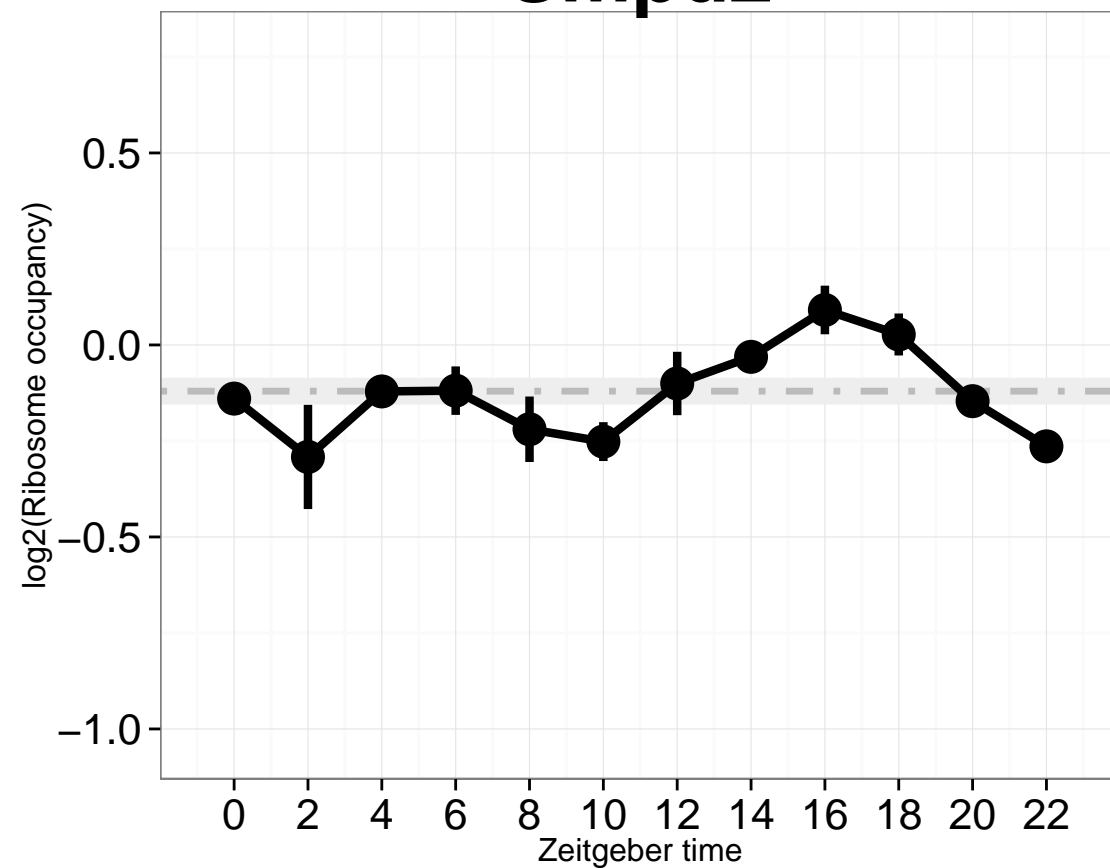

Supplement: SuppDataset_1.zip [file Smpd2_set_A.pdf › Supplemental Dataset 1/A-mRNA_nonrhyth_translation_nonrhyth/Smpd2_set_A.pdf]

# Smpd3

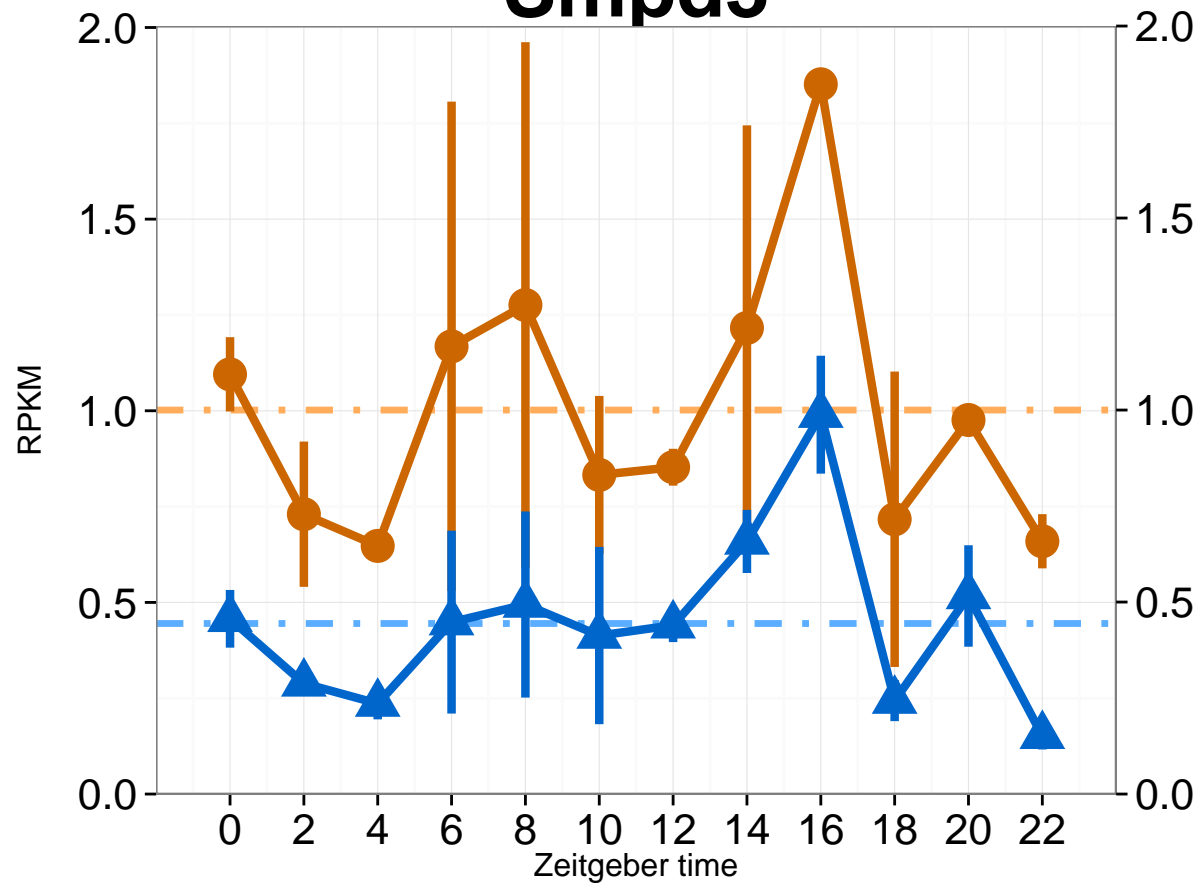

# Smpd3

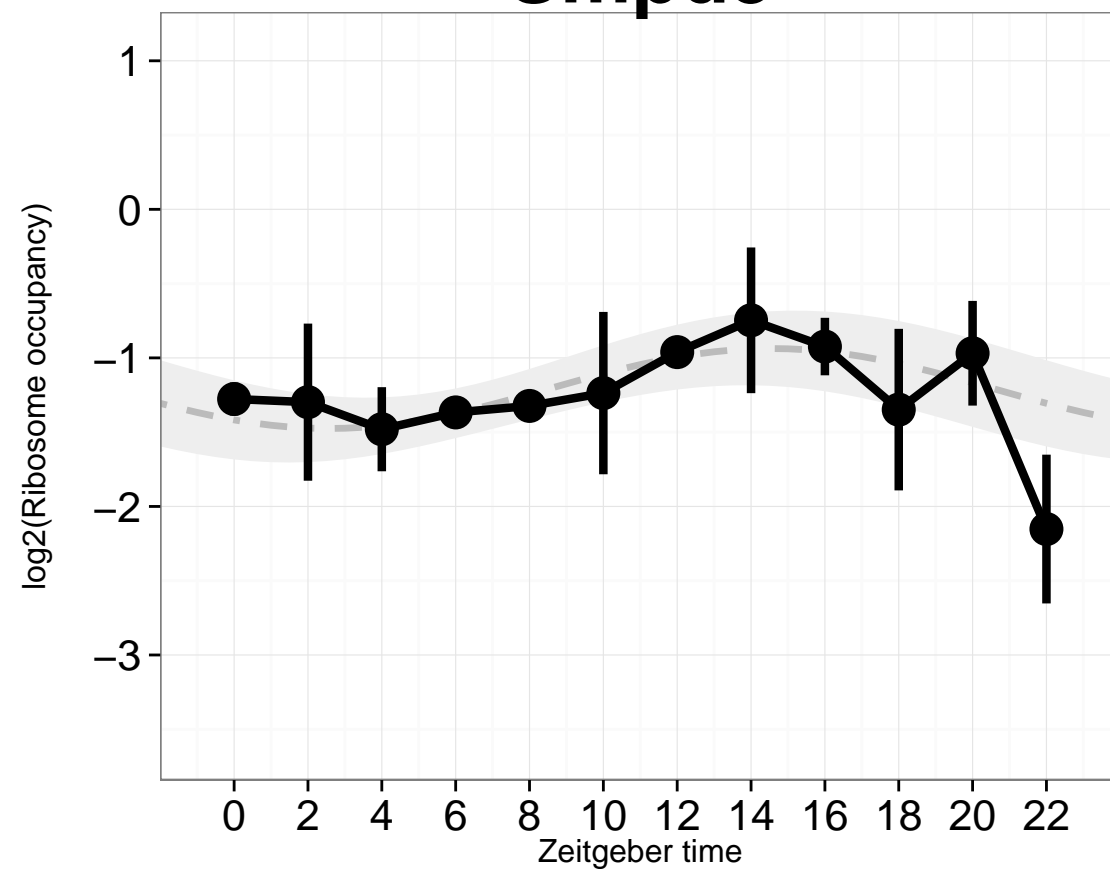

Supplement: SuppDataset_1.zip [file Smpd3_set_A.pdf › Supplemental Dataset 1/A-mRNA_nonrhyth_translation_nonrhyth/Smpd3_set_A.pdf]

## Smpd4

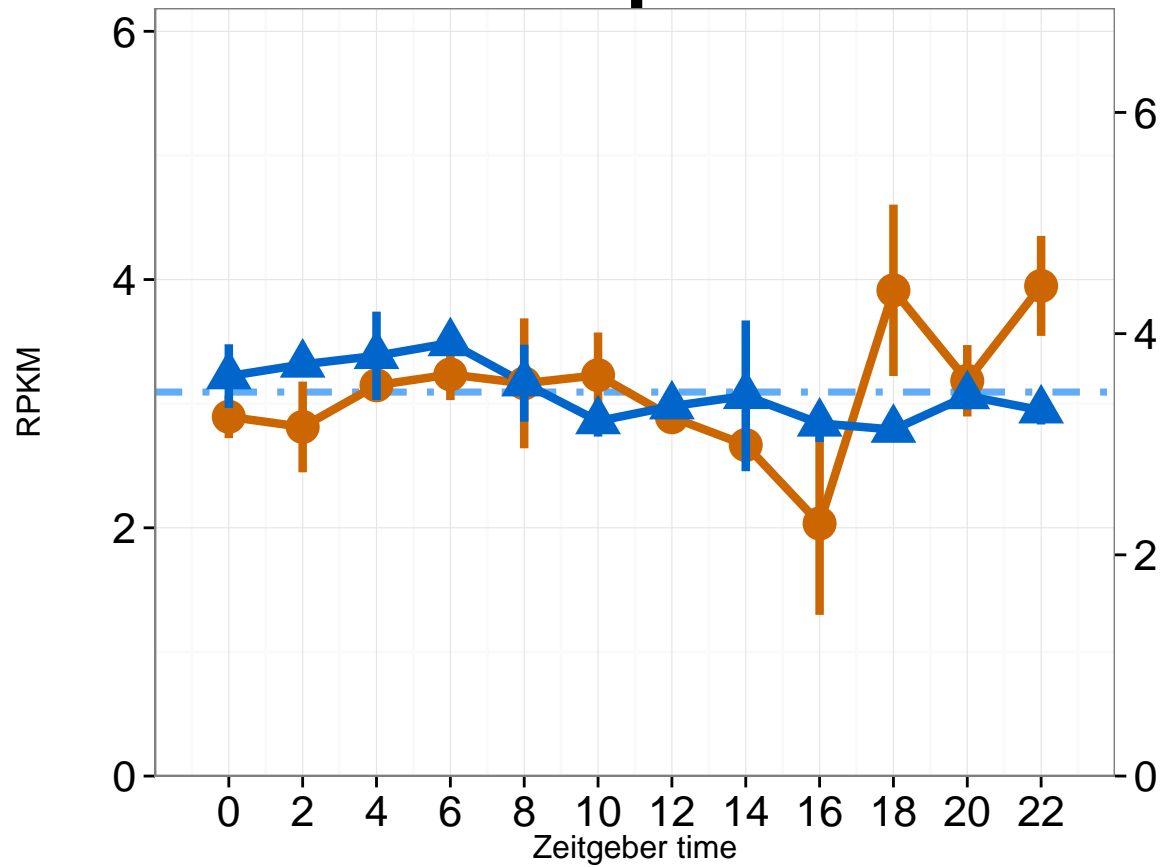

## Smpd4

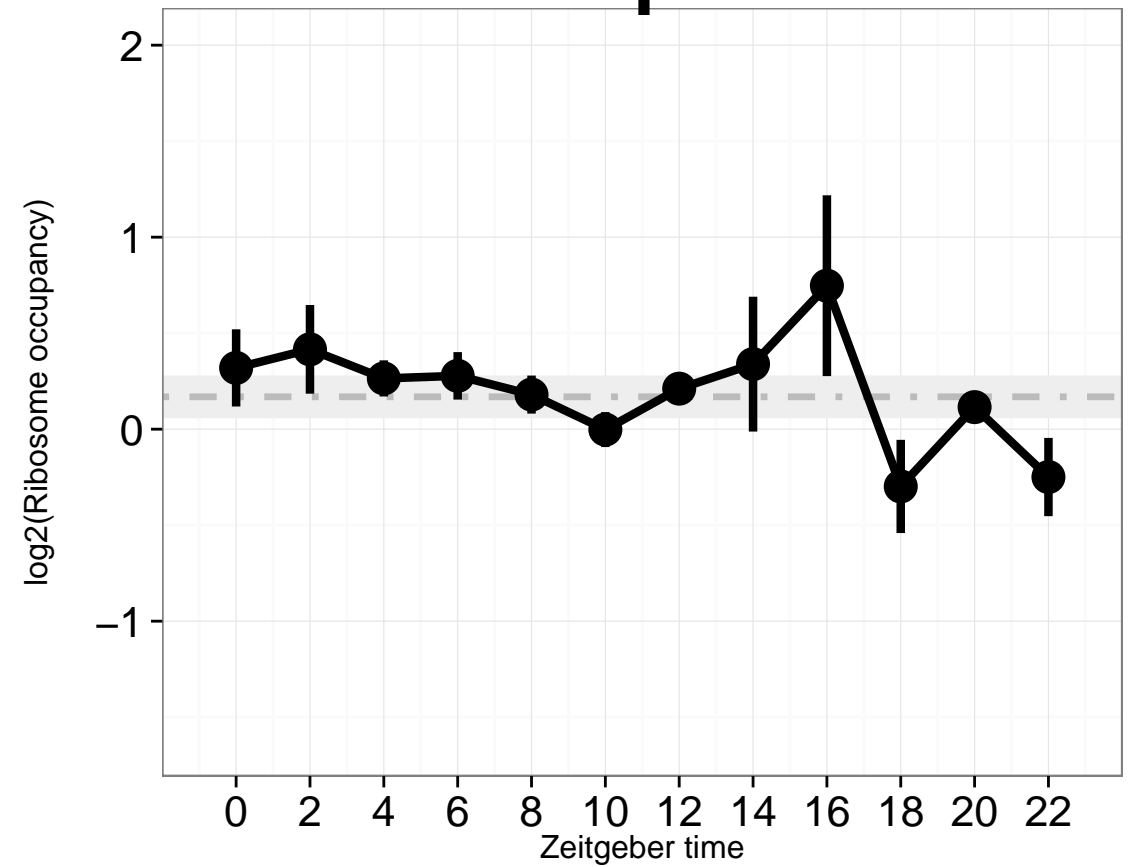

Supplement: SuppDataset_1.zip [file Smpd4_set_A.pdf › Supplemental Dataset 1/A-mRNA_nonrhyth_translation_nonrhyth/Smpd4_set_A.pdf]

# Smpd13a

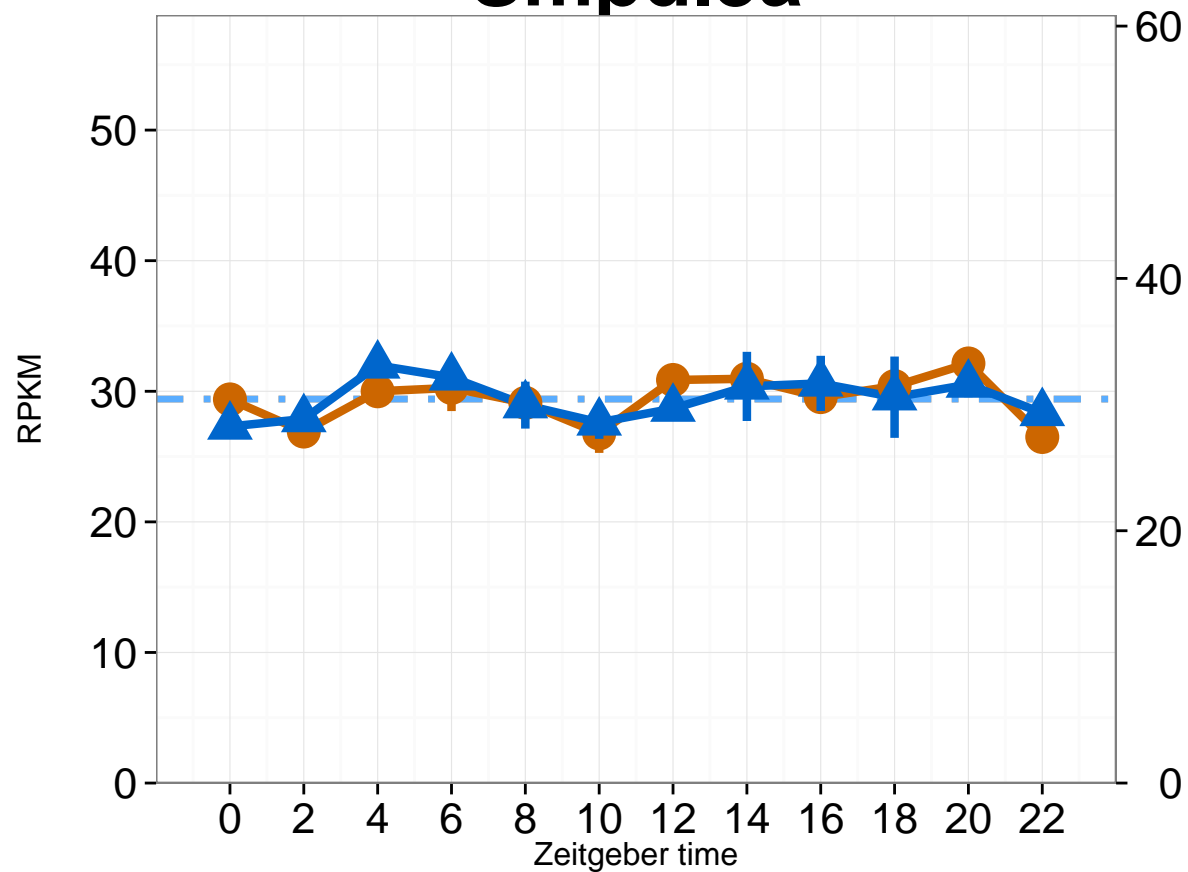

# Smpd13a

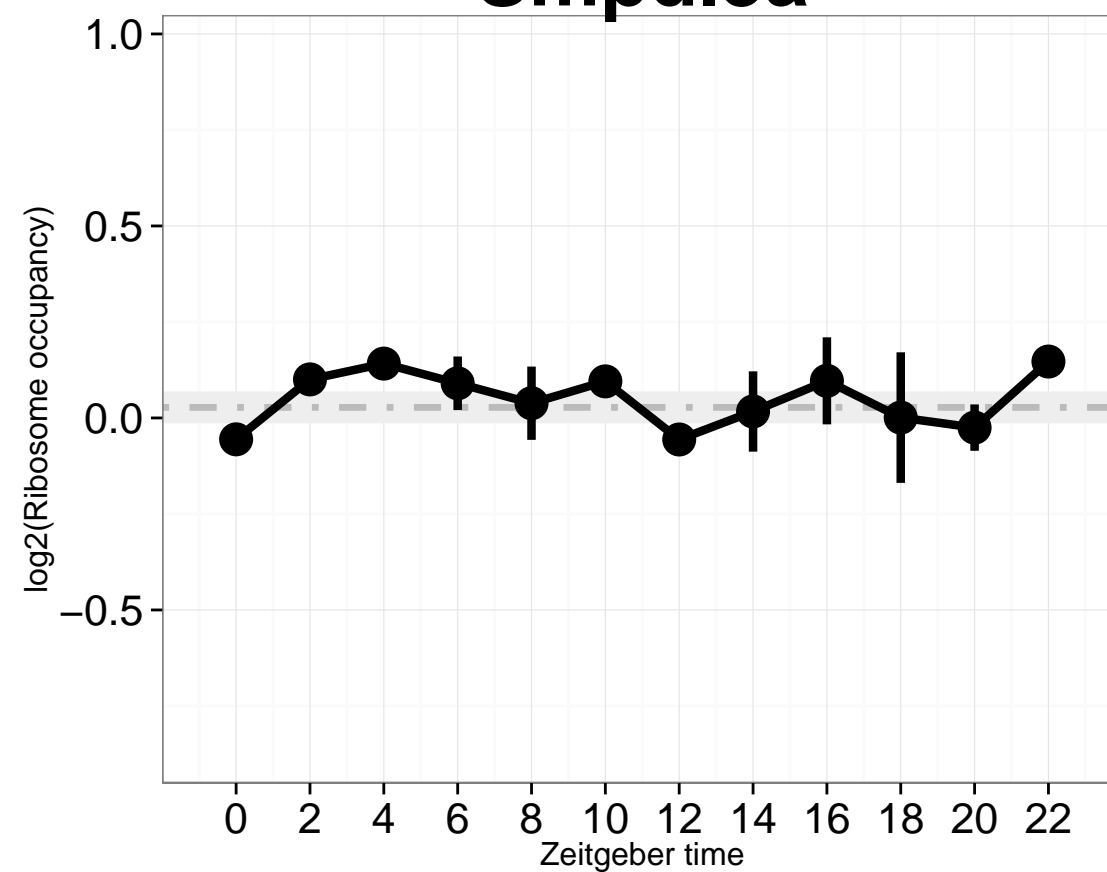

Supplement: SuppDataset_1.zip [file Smpdl3a_set_A.pdf › Supplemental Dataset 1/A-mRNA_nonrhyth_translation_nonrhyth/Smpdl3a_set_A.pdf]

## Sms

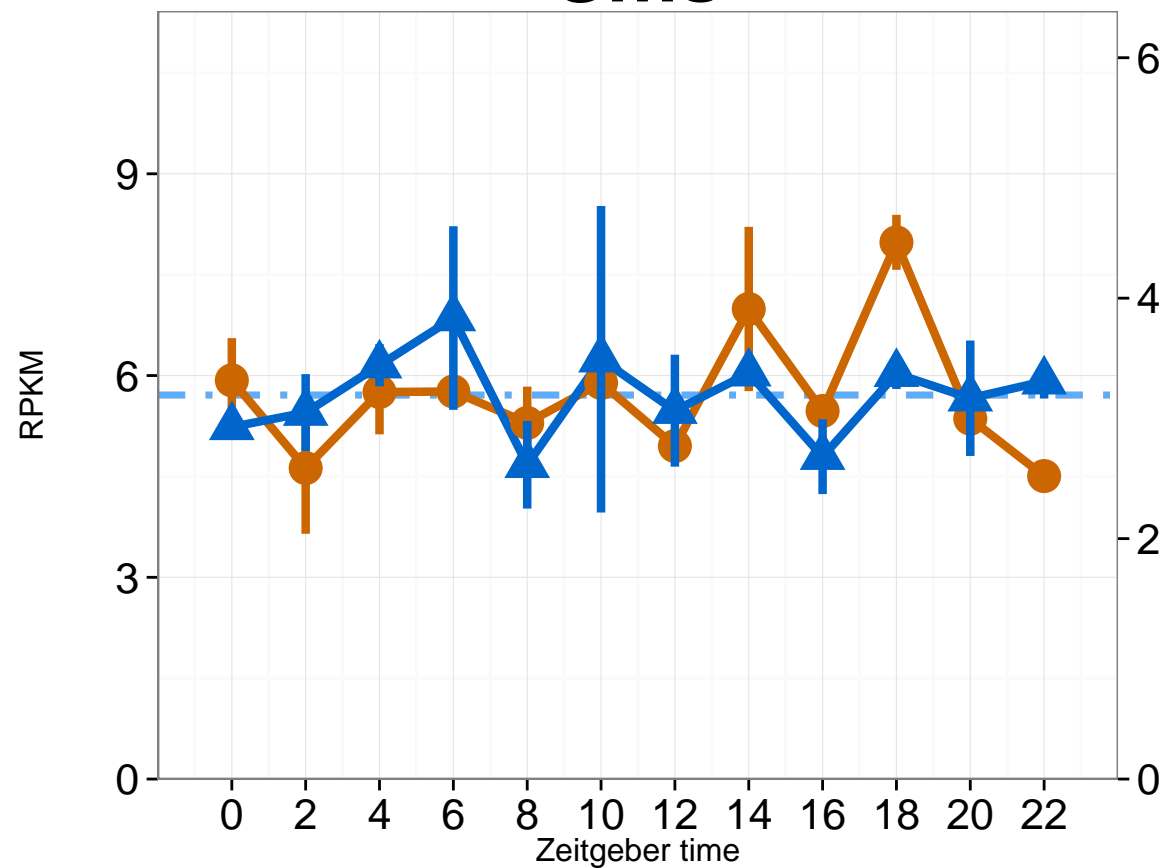

## Sms

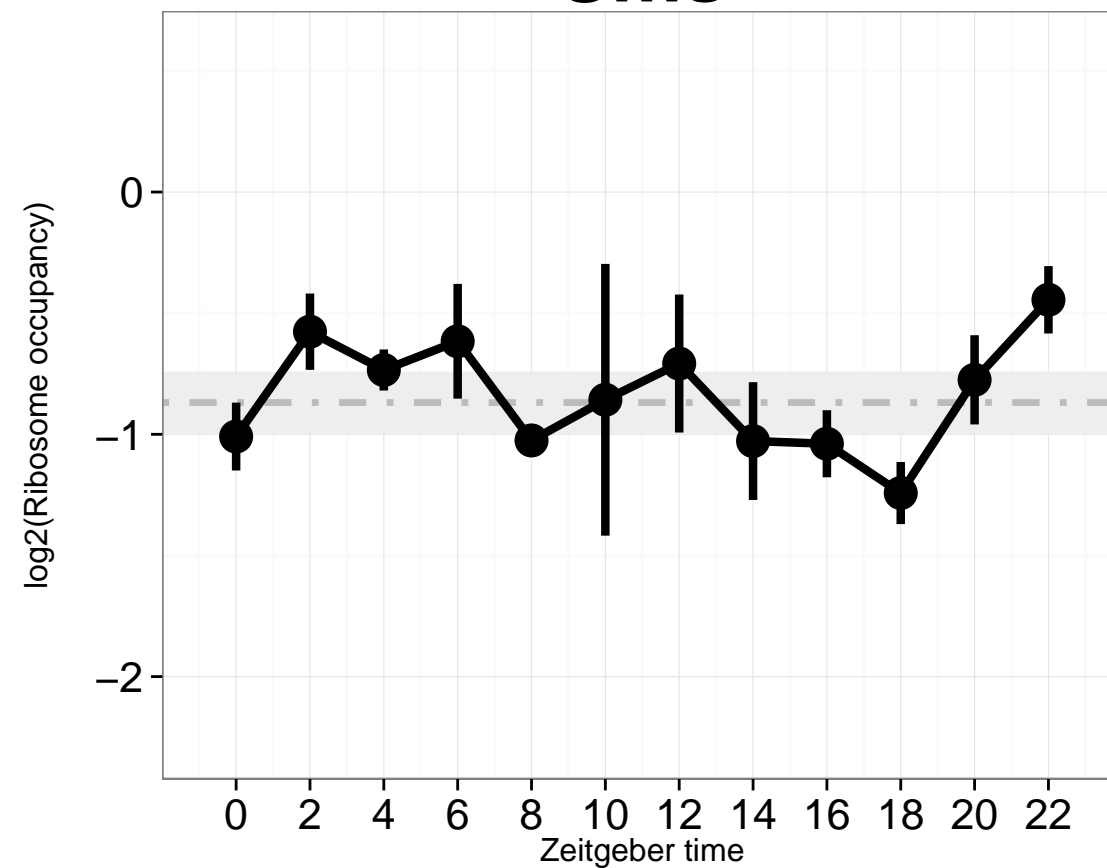

Supplement: SuppDataset_1.zip [file Sms_set_A.pdf › Supplemental Dataset 1/A-mRNA_nonrhyth_translation_nonrhyth/Sms_set_A.pdf]

# Smtn

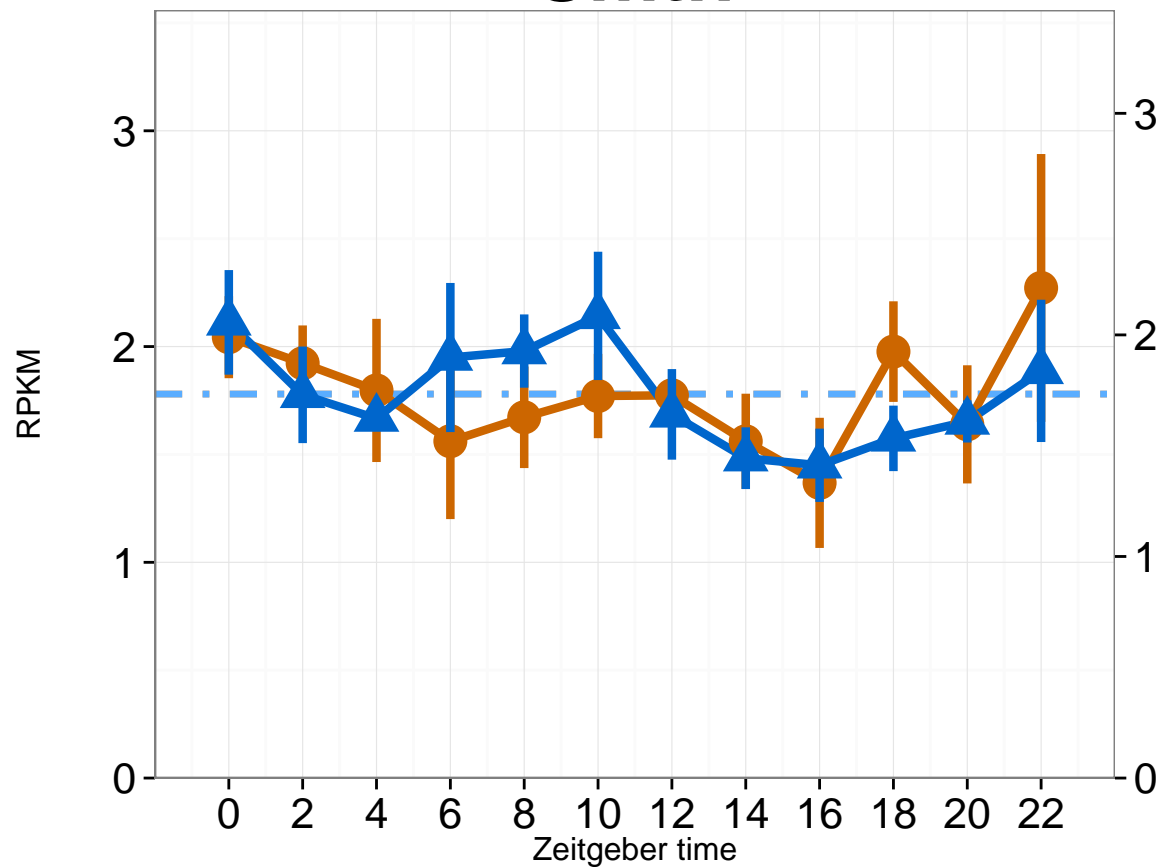

# Smtn

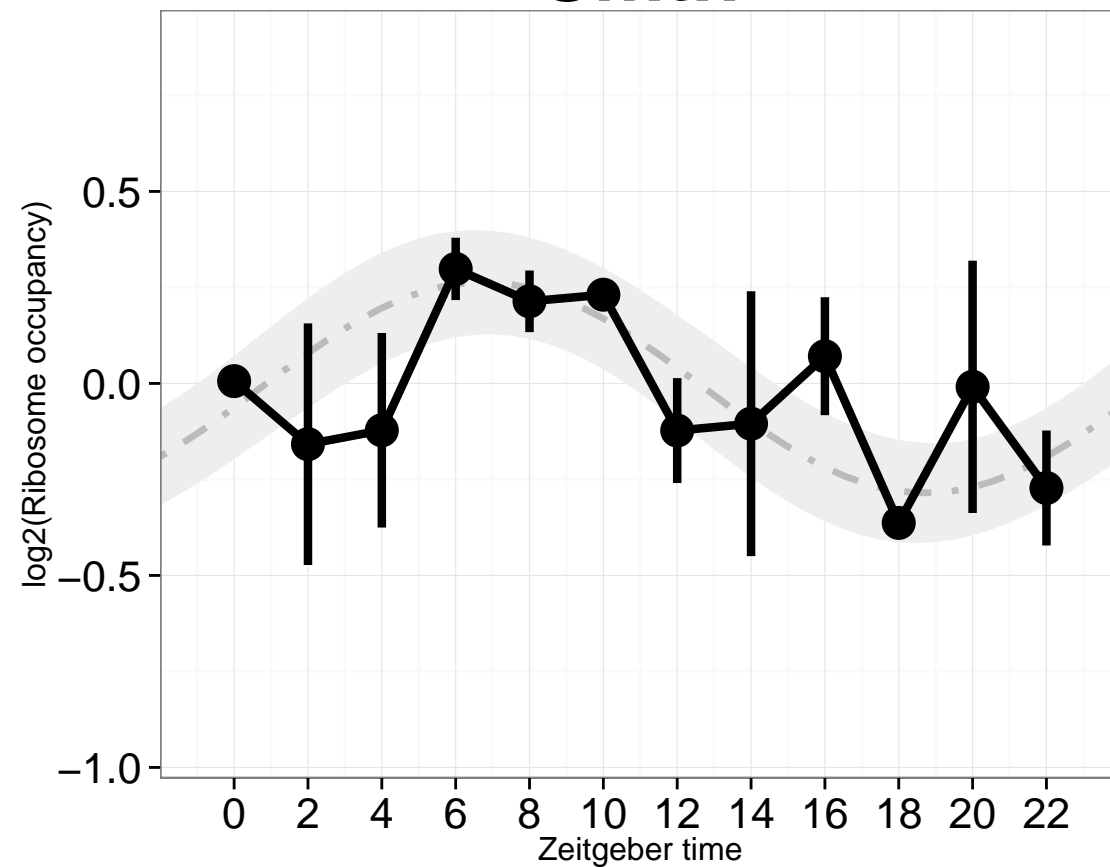

Supplement: SuppDataset_1.zip [file Smtn_set_A.pdf › Supplemental Dataset 1/A-mRNA_nonrhyth_translation_nonrhyth/Smtn_set_A.pdf]

## Smu1

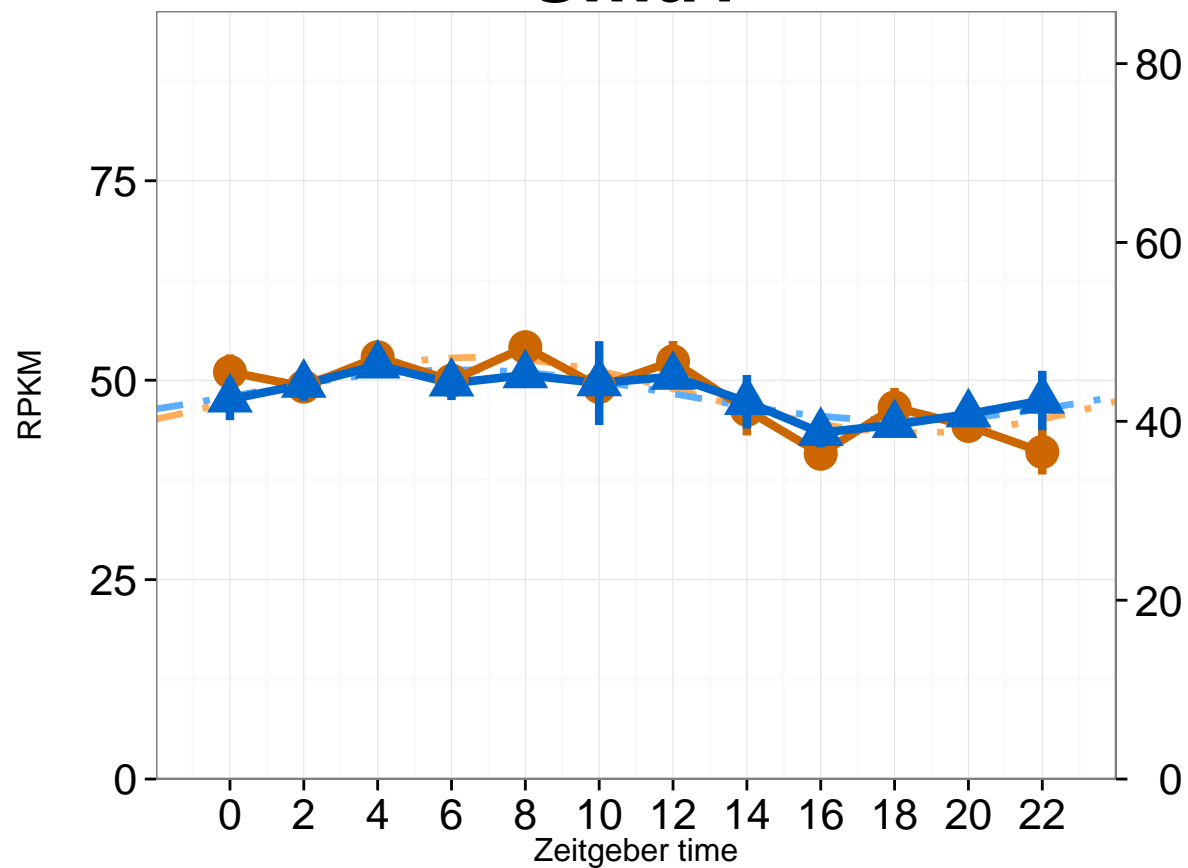

## Smu1

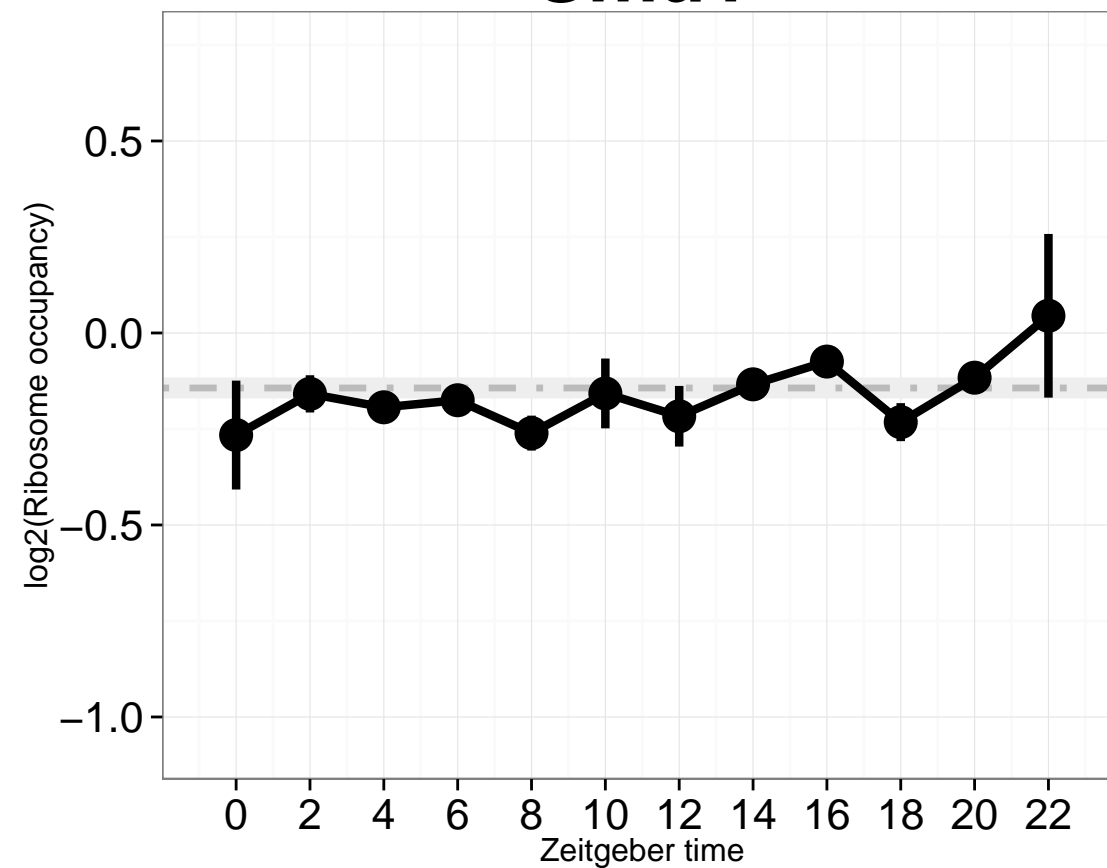

Supplement: SuppDataset_1.zip [file Smu1_set_A.pdf › Supplemental Dataset 1/A-mRNA_nonrhyth_translation_nonrhyth/Smu1_set_A.pdf]

# Smug1

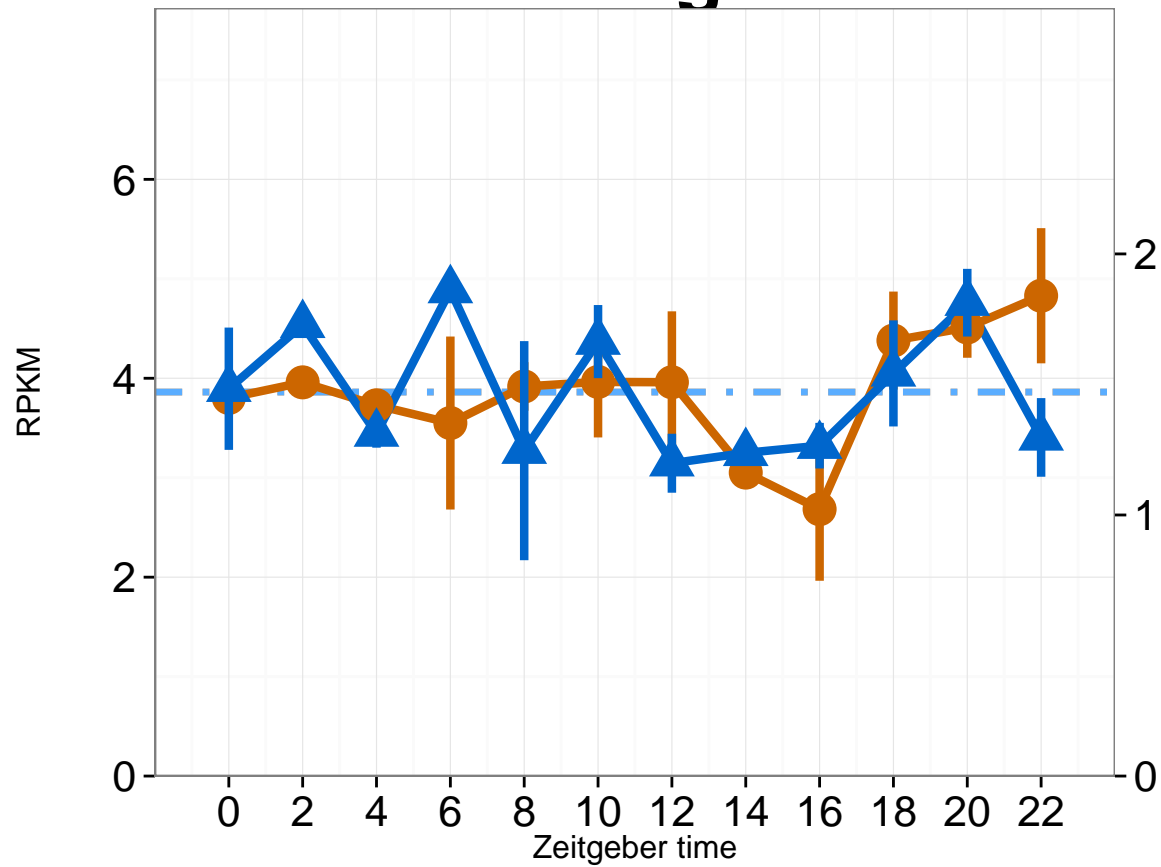

# Smug1

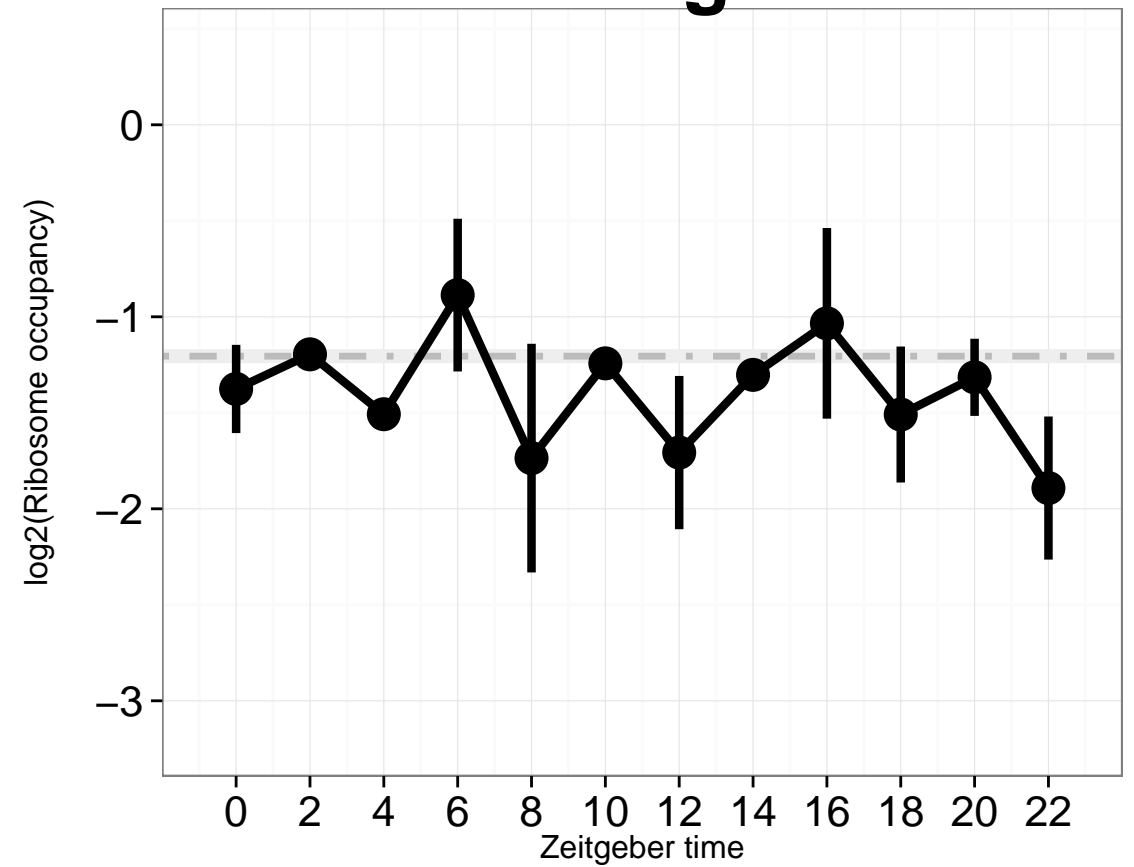

Supplement: SuppDataset_1.zip [file Smug1_set_A.pdf › Supplemental Dataset 1/A-mRNA_nonrhyth_translation_nonrhyth/Smug1_set_A.pdf]

## Smurf1

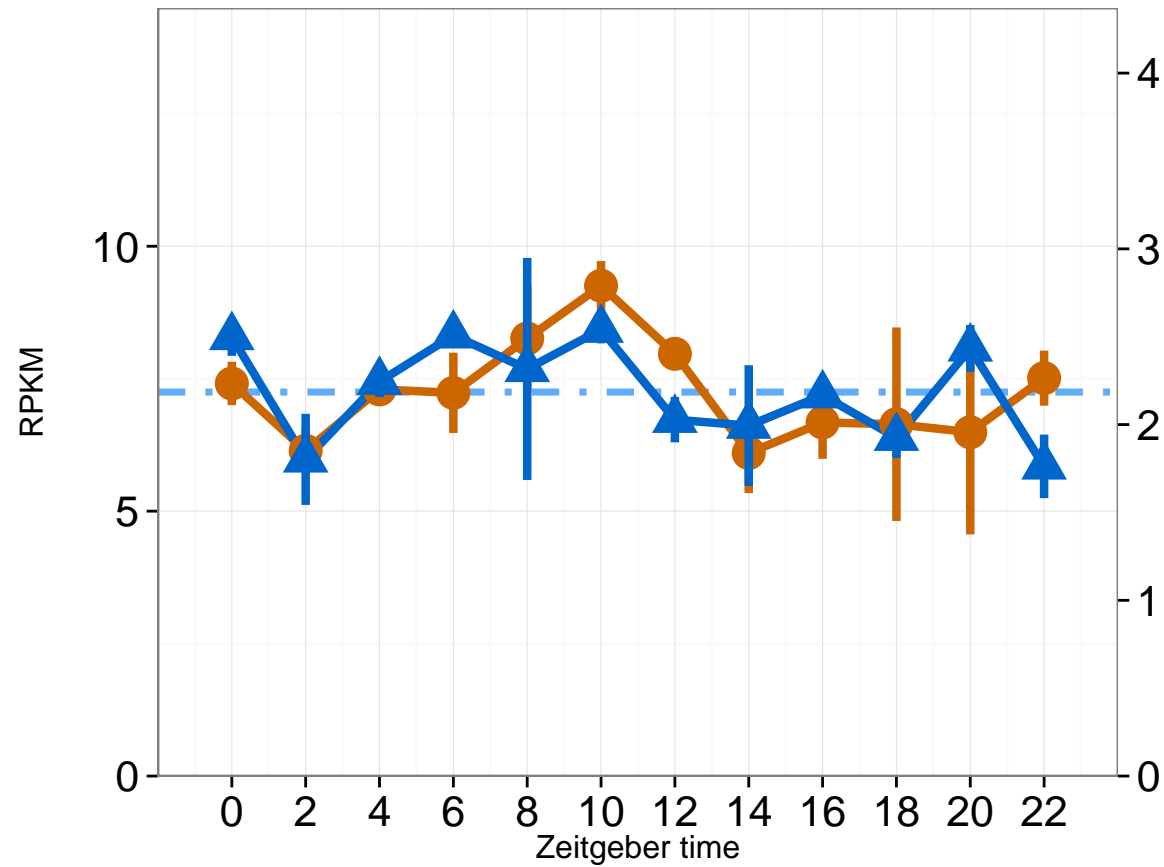

## Smurf1

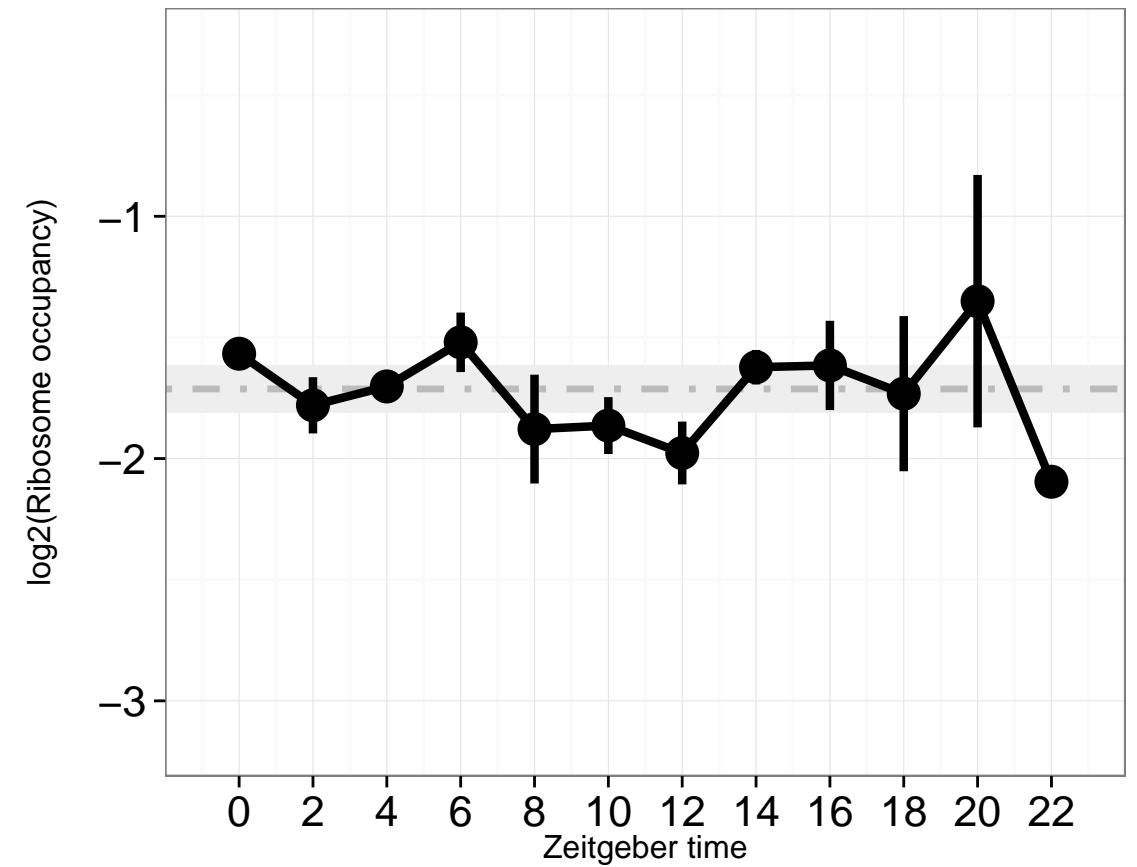

Supplement: SuppDataset_1.zip [file Smurf1_set_A.pdf › Supplemental Dataset 1/A-mRNA_nonrhyth_translation_nonrhyth/Smurf1_set_A.pdf]

## Smurf2

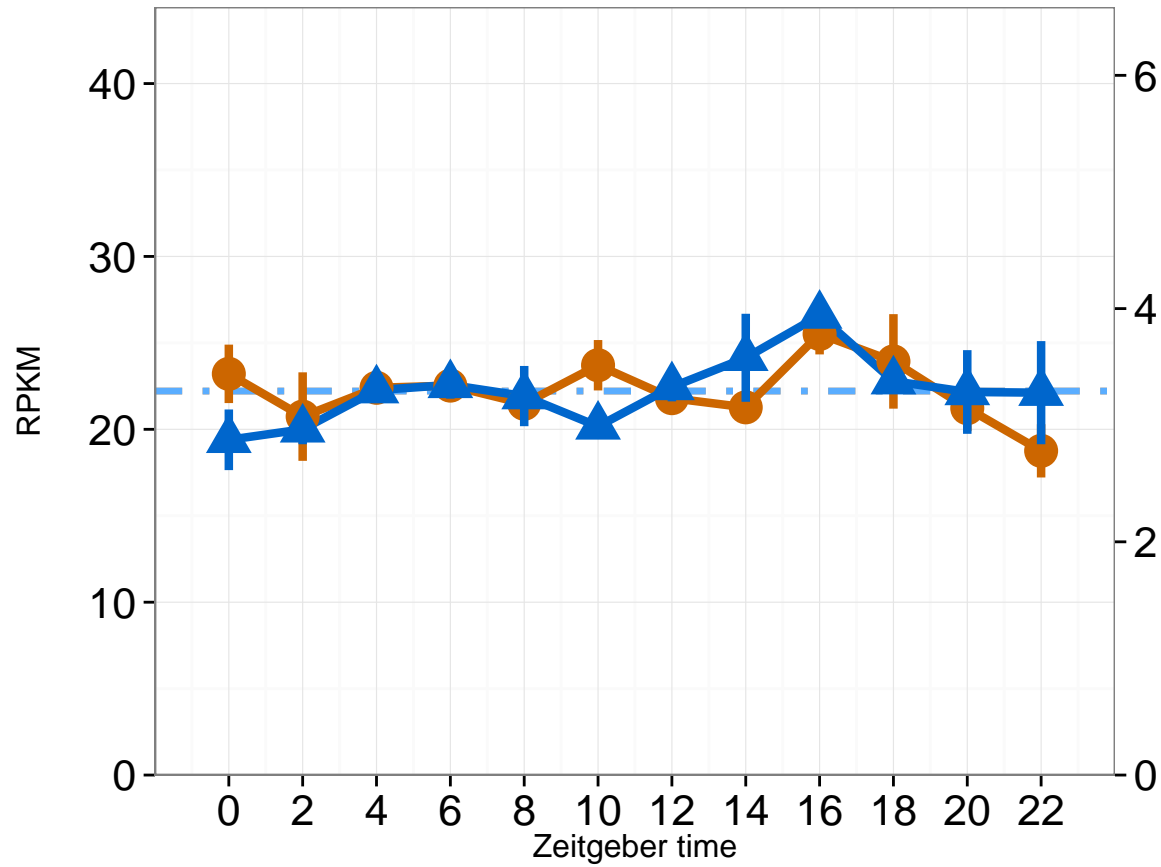

## Smurf2

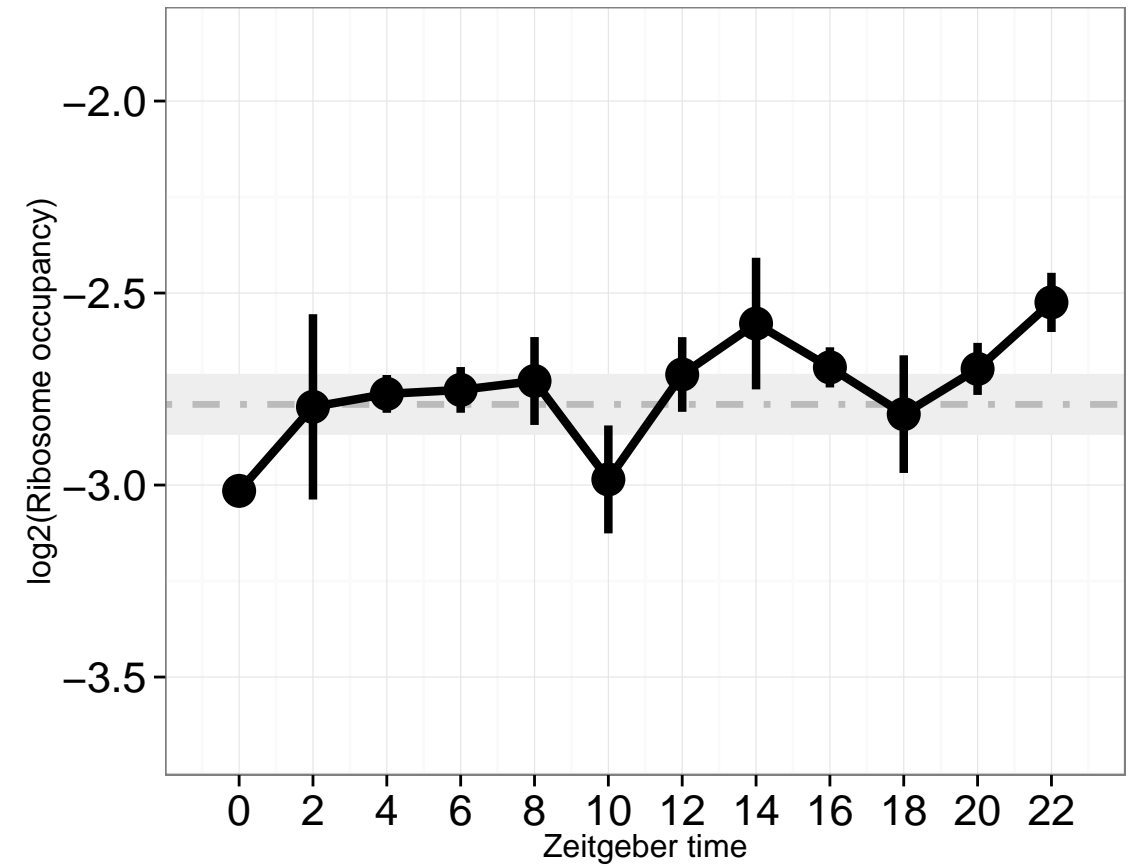

Supplement: SuppDataset_1.zip [file Smurf2_set_A.pdf › Supplemental Dataset 1/A-mRNA_nonrhyth_translation_nonrhyth/Smurf2_set_A.pdf]

## Smyd1

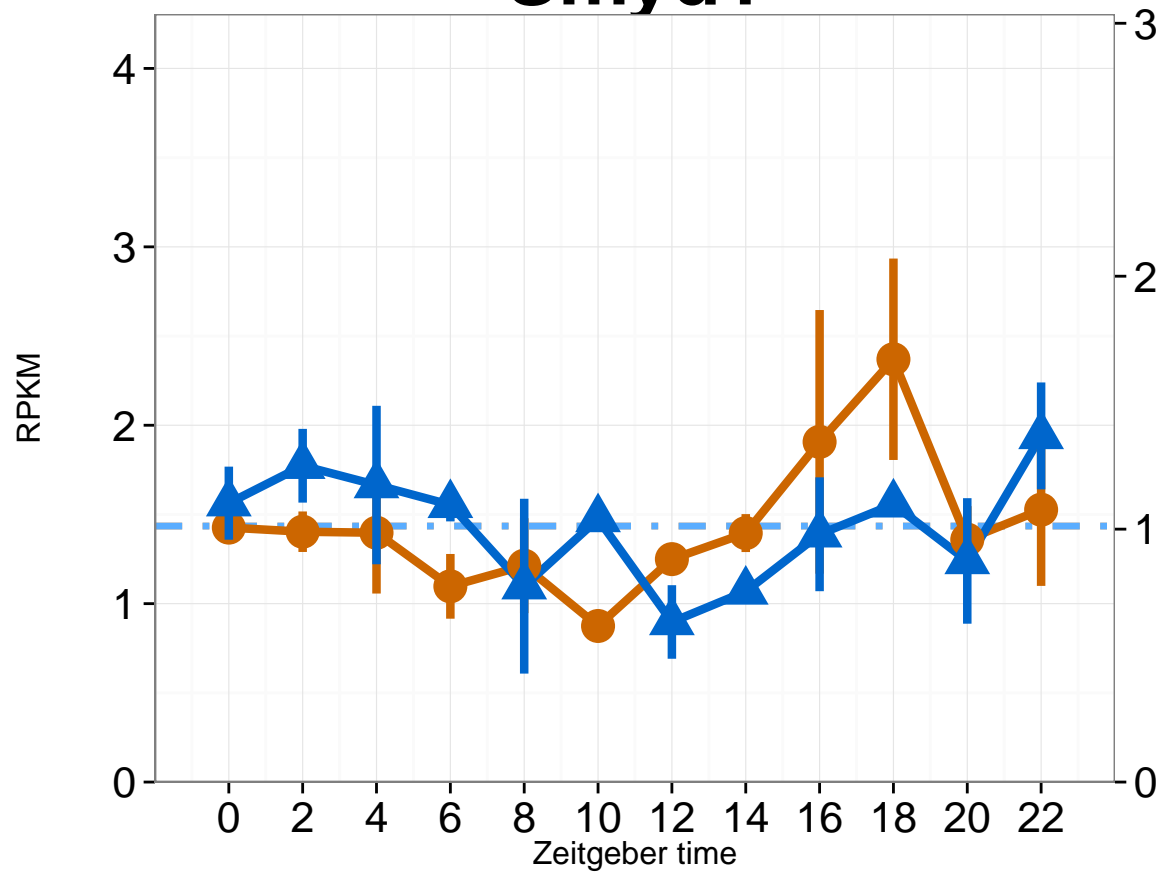

## Smyd1

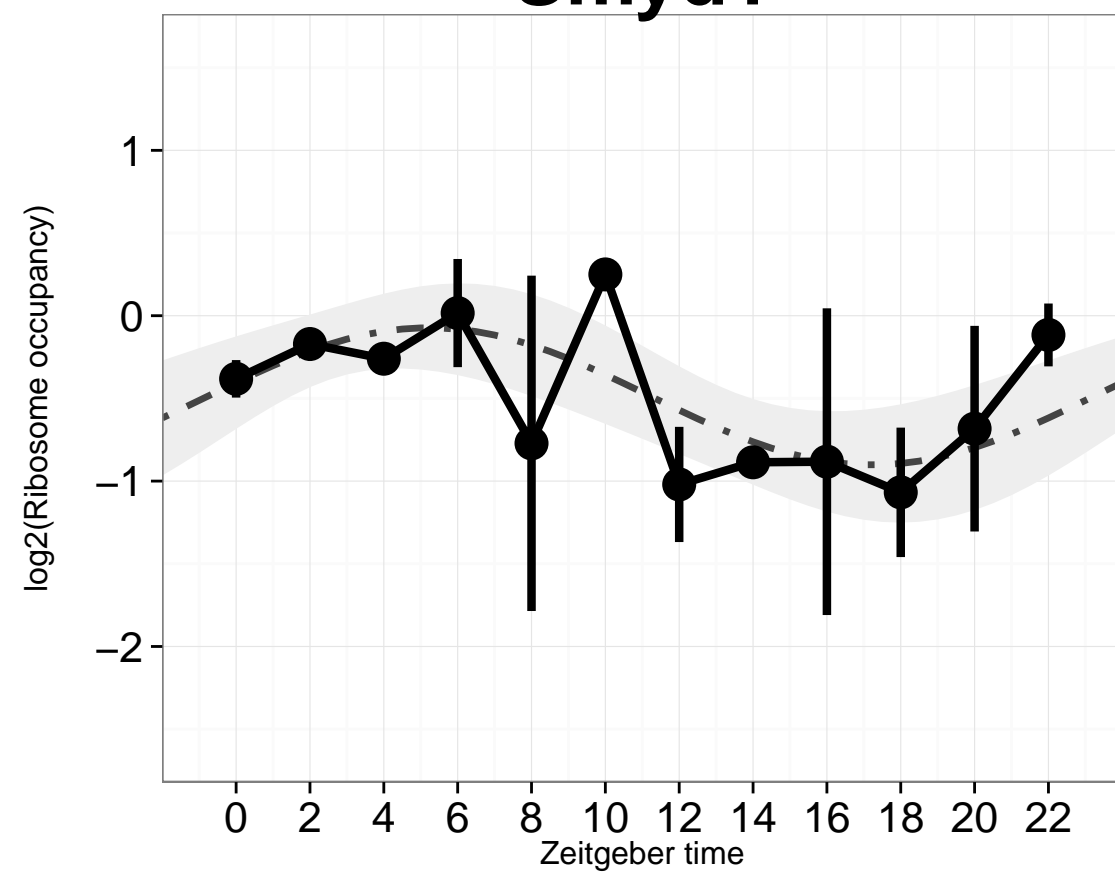

Supplement: SuppDataset_1.zip [file Smyd1_set_A.pdf › Supplemental Dataset 1/A-mRNA_nonrhyth_translation_nonrhyth/Smyd1_set_A.pdf]

## Smyd3

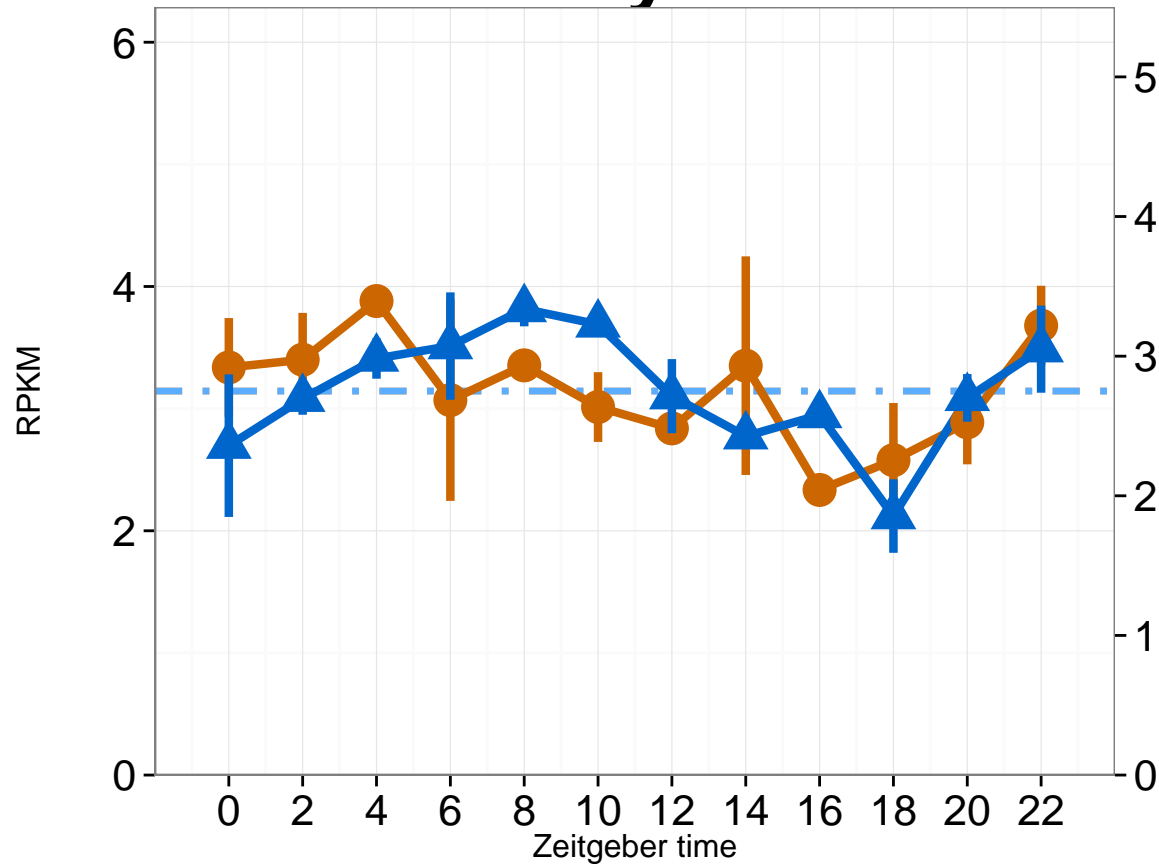

## Smyd3

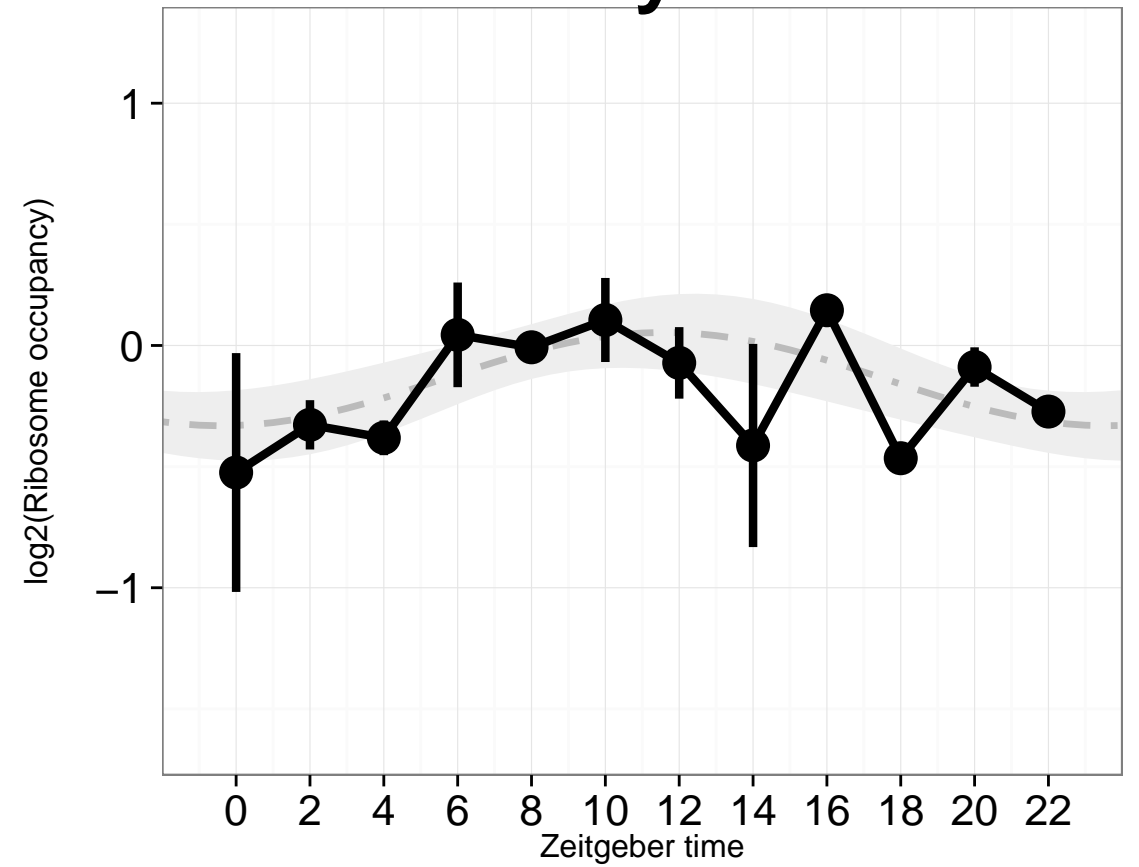

Supplement: SuppDataset_1.zip [file Smyd3_set_A.pdf › Supplemental Dataset 1/A-mRNA_nonrhyth_translation_nonrhyth/Smyd3_set_A.pdf]

# Smyd5

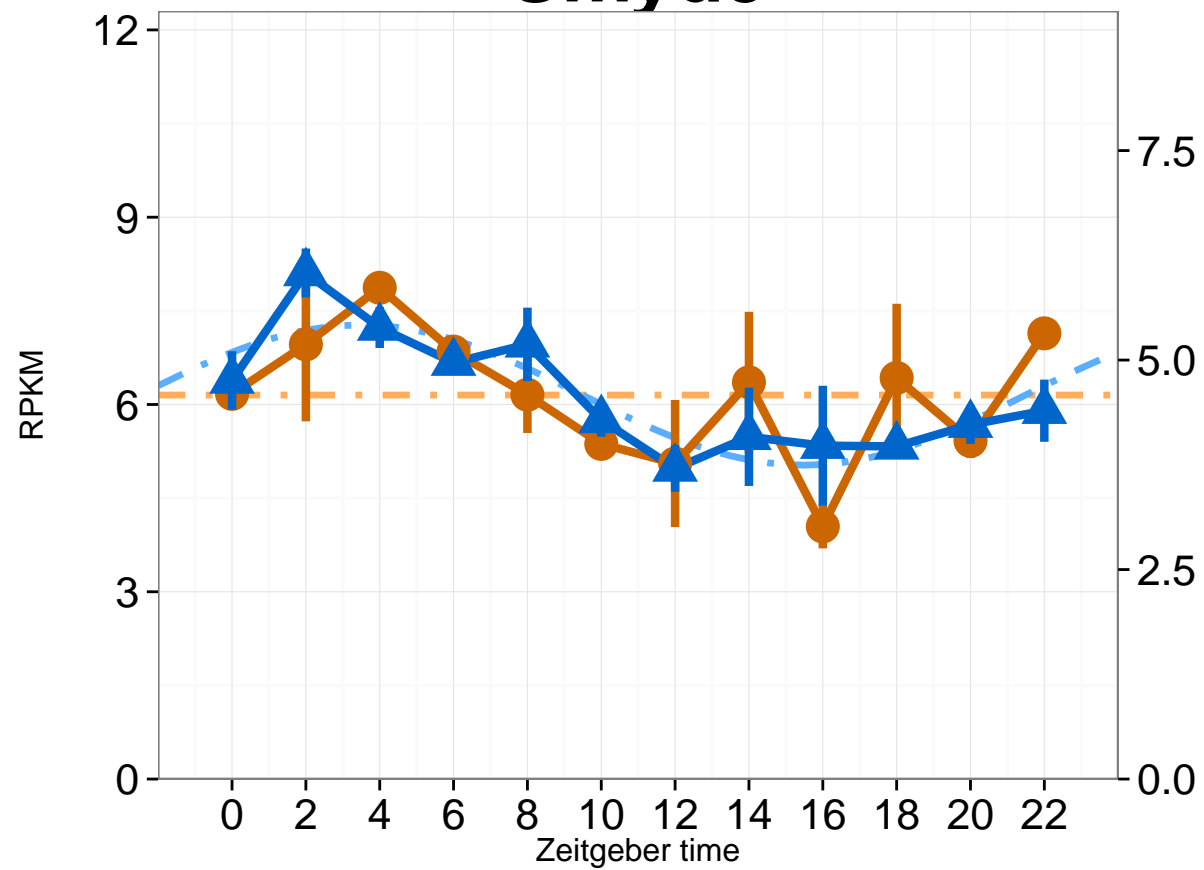

# Smyd5

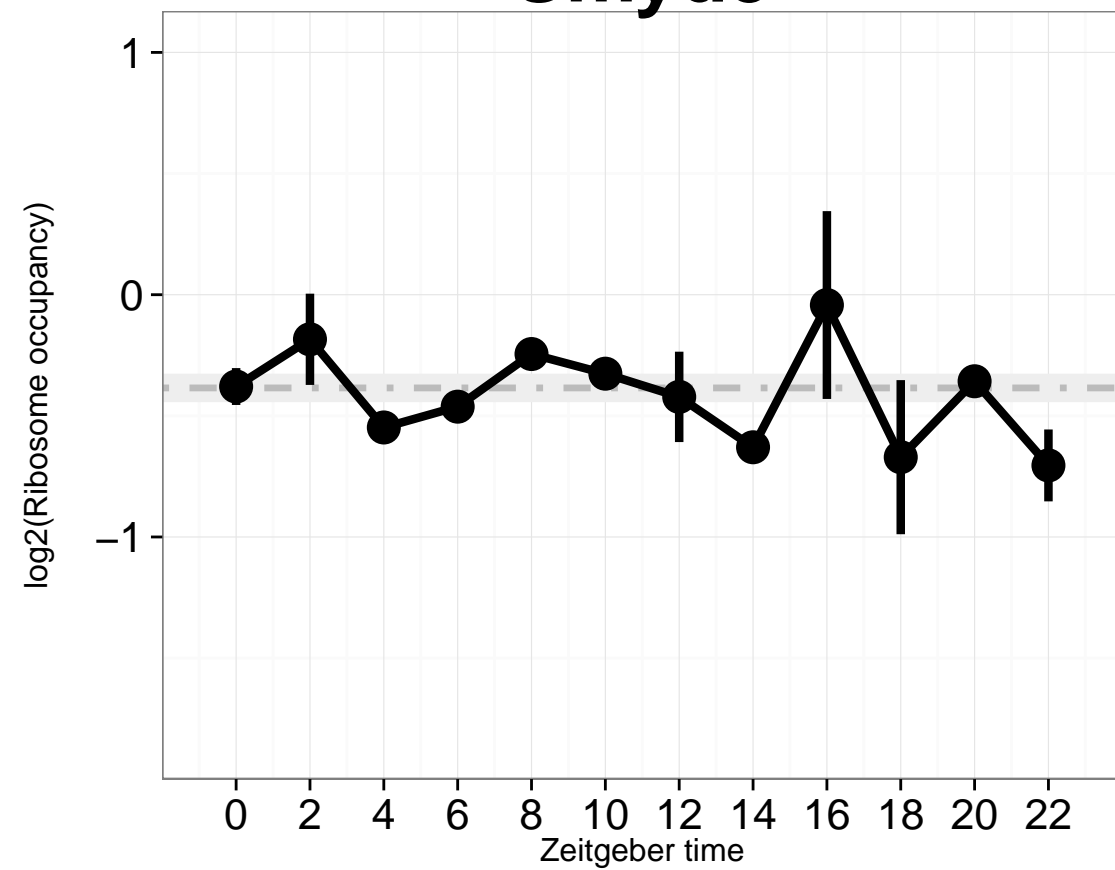

Supplement: SuppDataset_1.zip [file Smyd5_set_A.pdf › Supplemental Dataset 1/A-mRNA_nonrhyth_translation_nonrhyth/Smyd5_set_A.pdf]

## Snai2

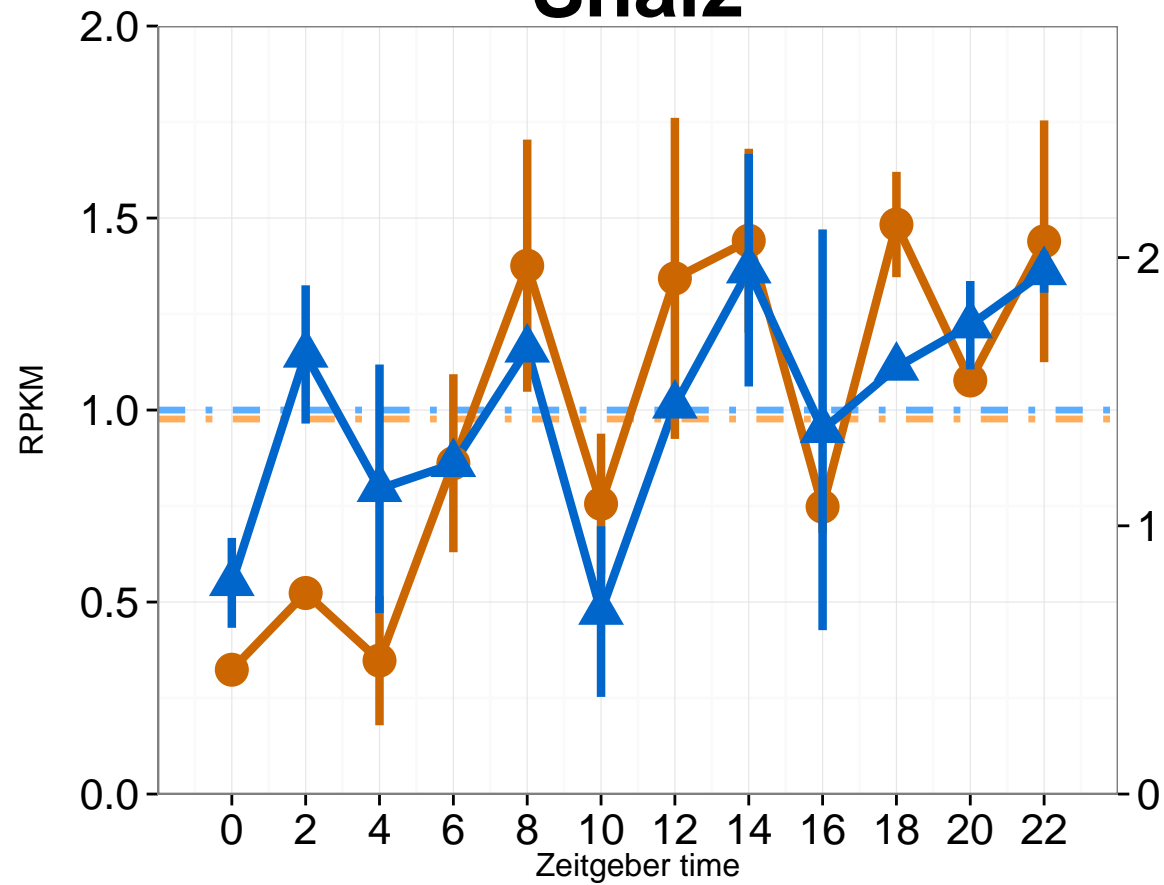

## Snai2

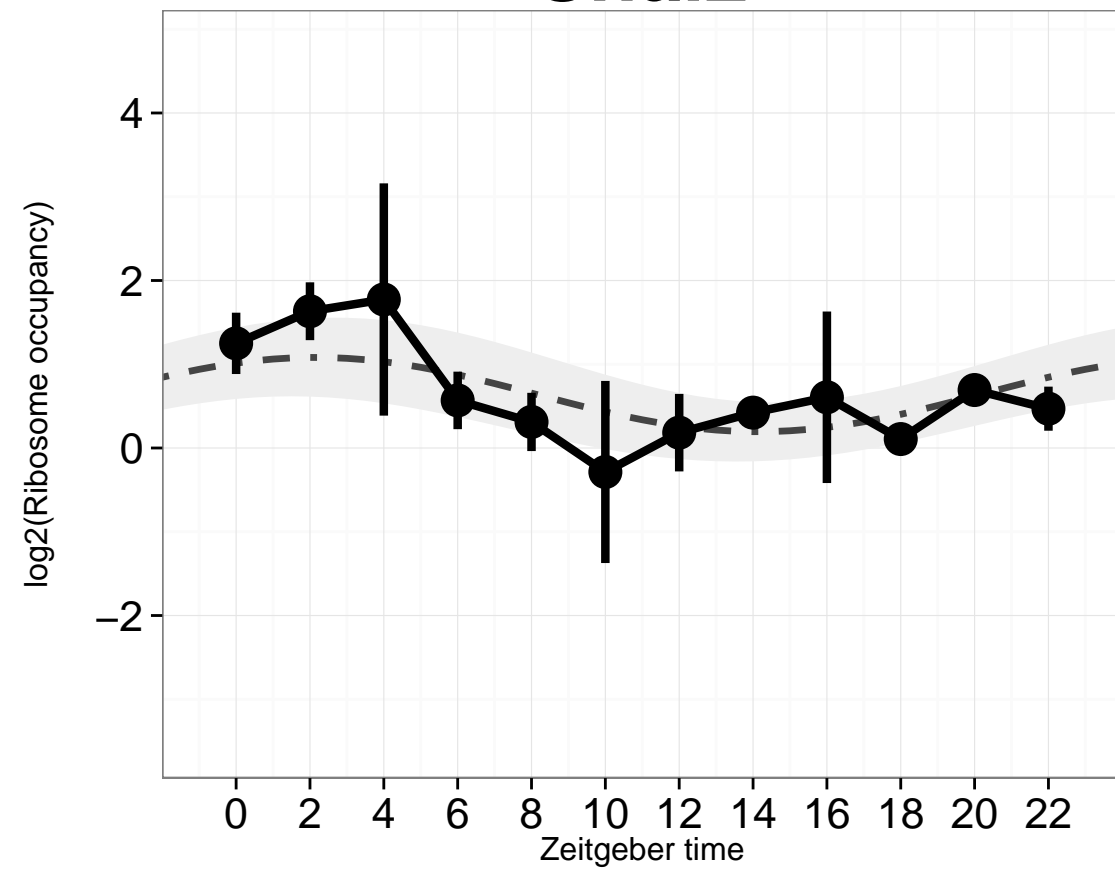

Supplement: SuppDataset_1.zip [file Snai2_set_A.pdf › Supplemental Dataset 1/A-mRNA_nonrhyth_translation_nonrhyth/Snai2_set_A.pdf]

## Snap23

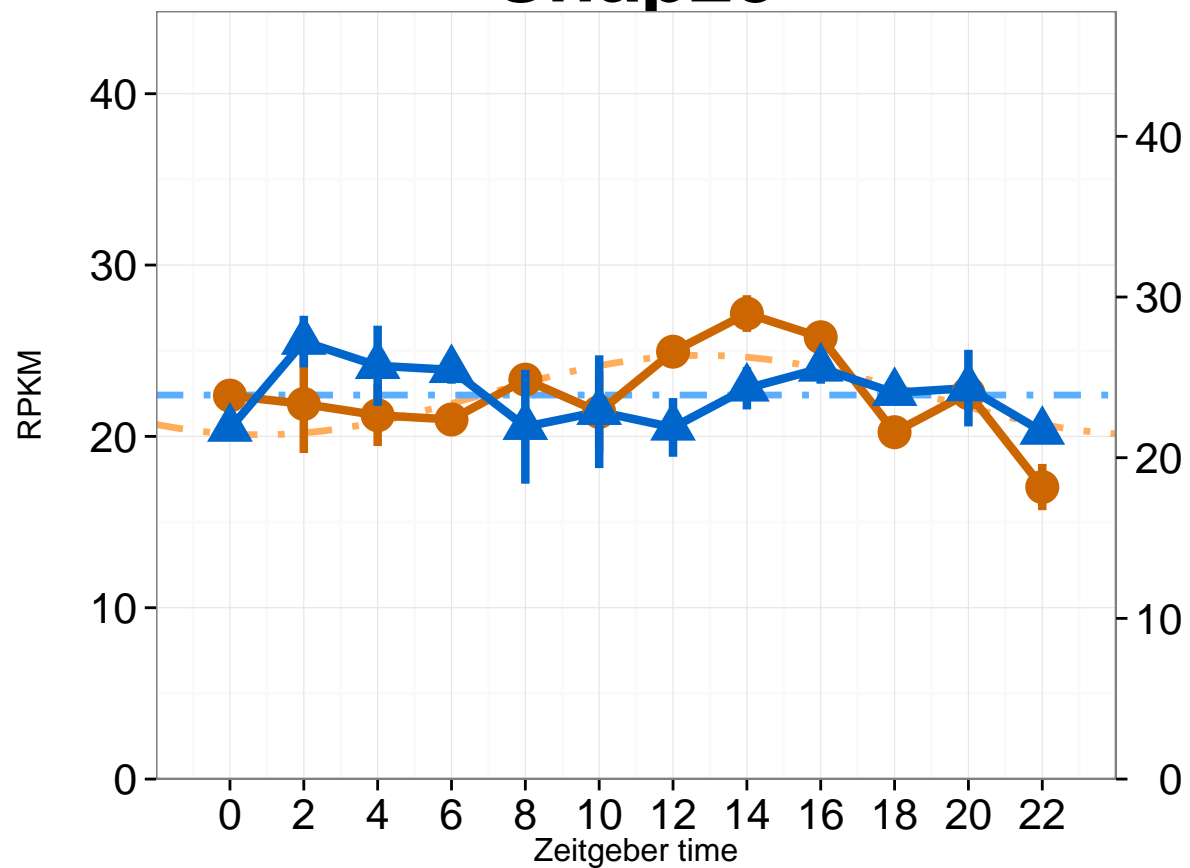

## Snap23

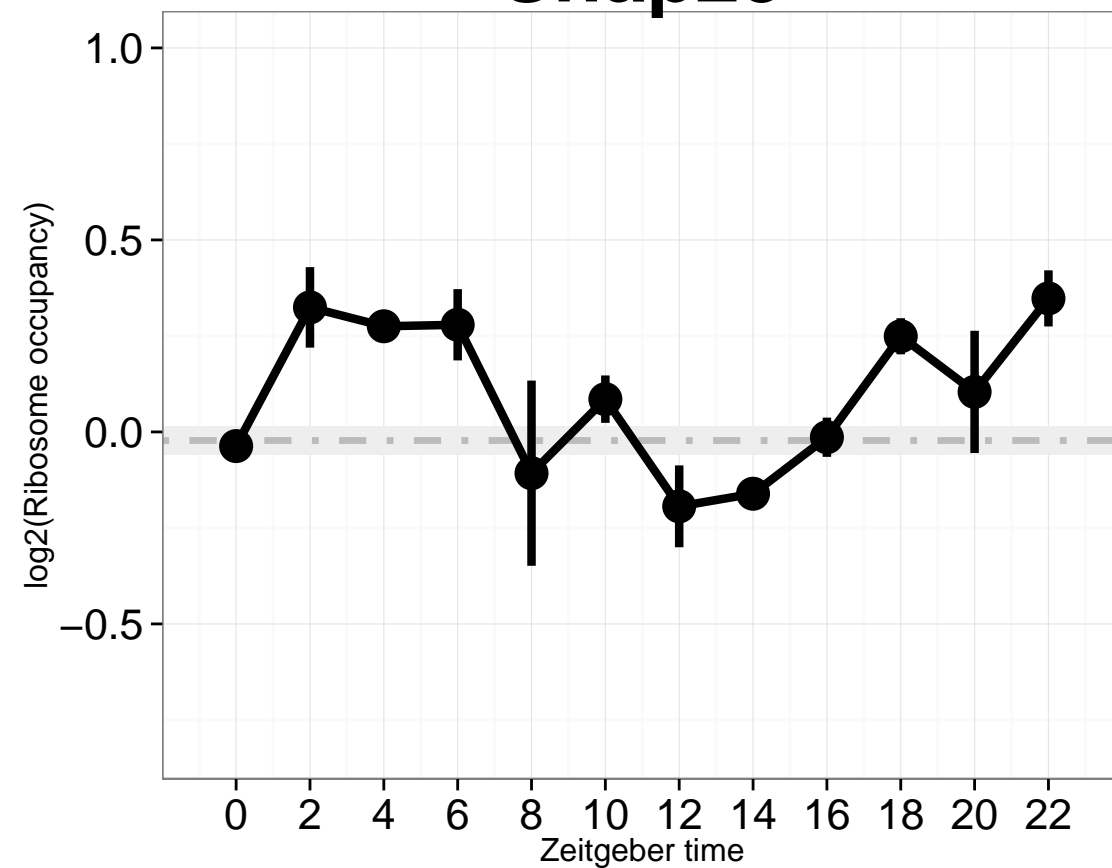

Supplement: SuppDataset_1.zip [file Snap23_set_A.pdf › Supplemental Dataset 1/A-mRNA_nonrhyth_translation_nonrhyth/Snap23_set_A.pdf]

## Snap29

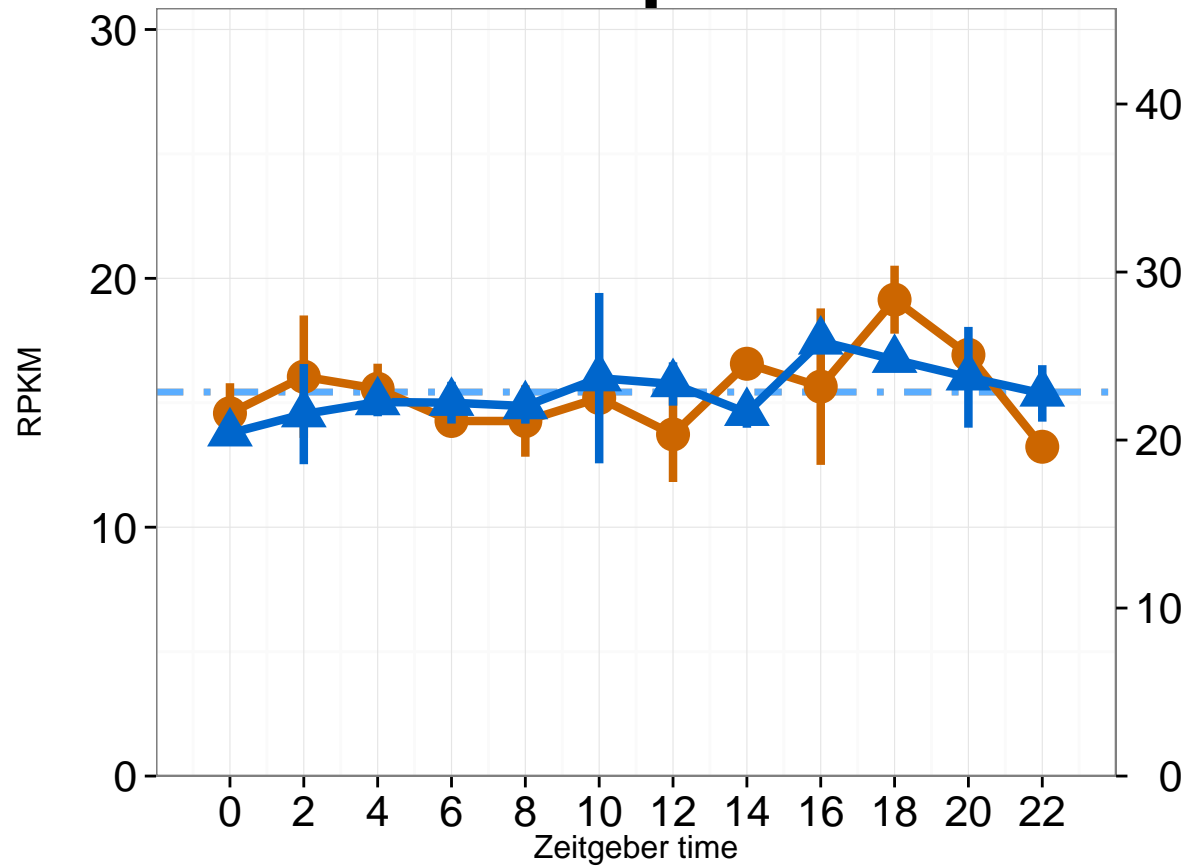

## Snap29

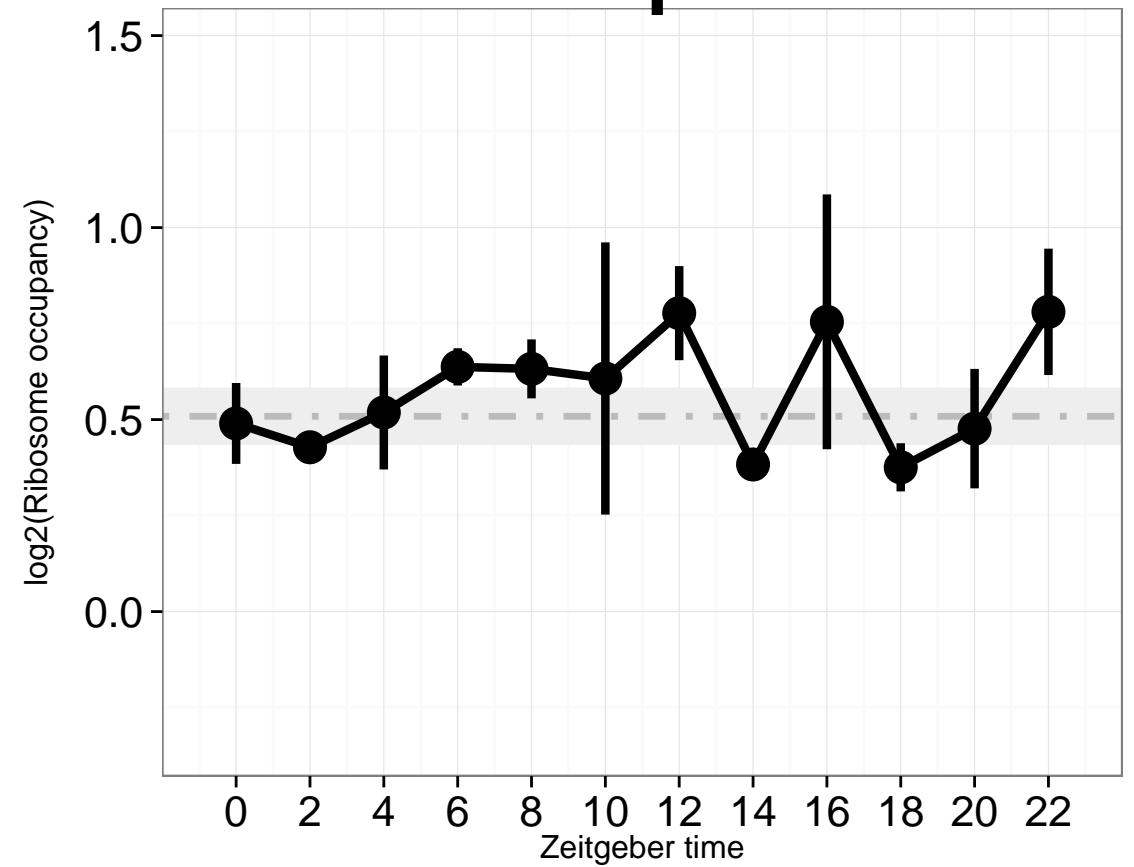

Supplement: SuppDataset_1.zip [file Snap29_set_A.pdf › Supplemental Dataset 1/A-mRNA_nonrhyth_translation_nonrhyth/Snap29_set_A.pdf]

## Snap47

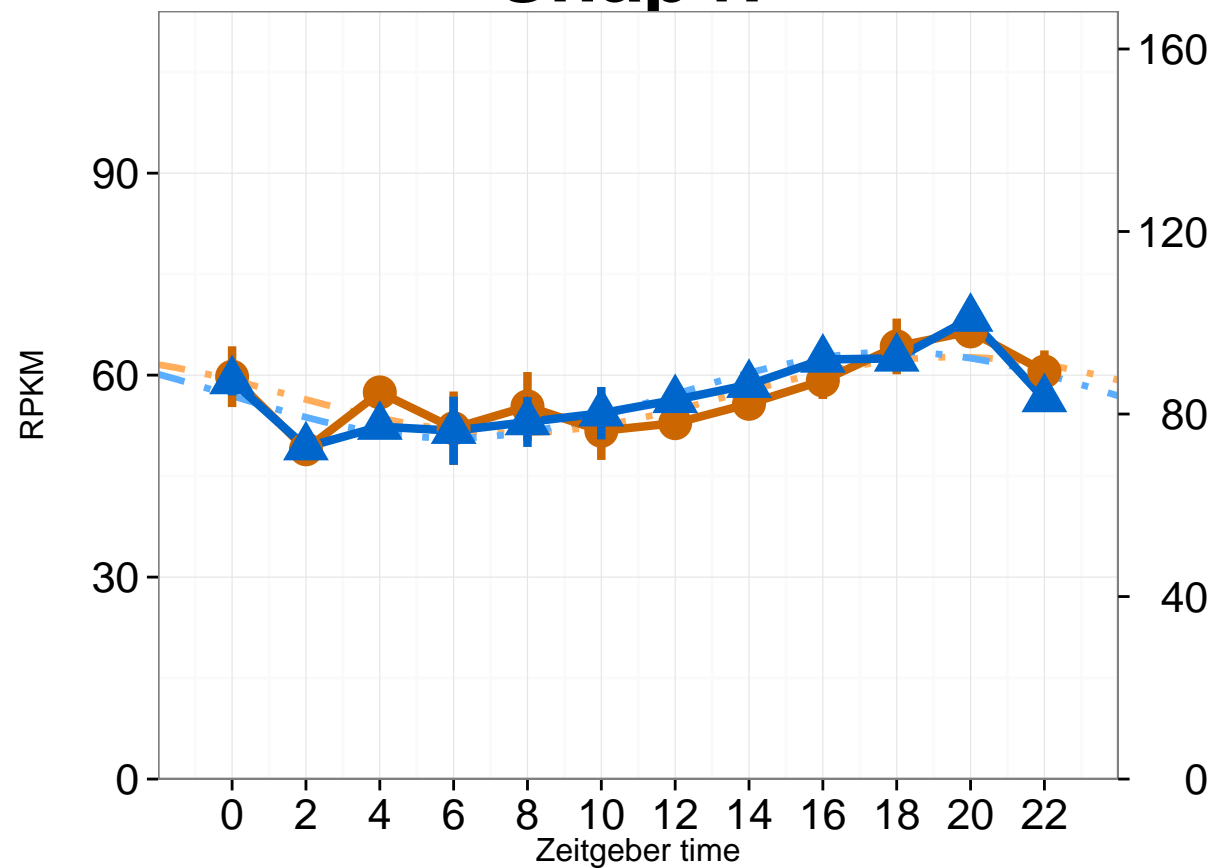

## Snap47

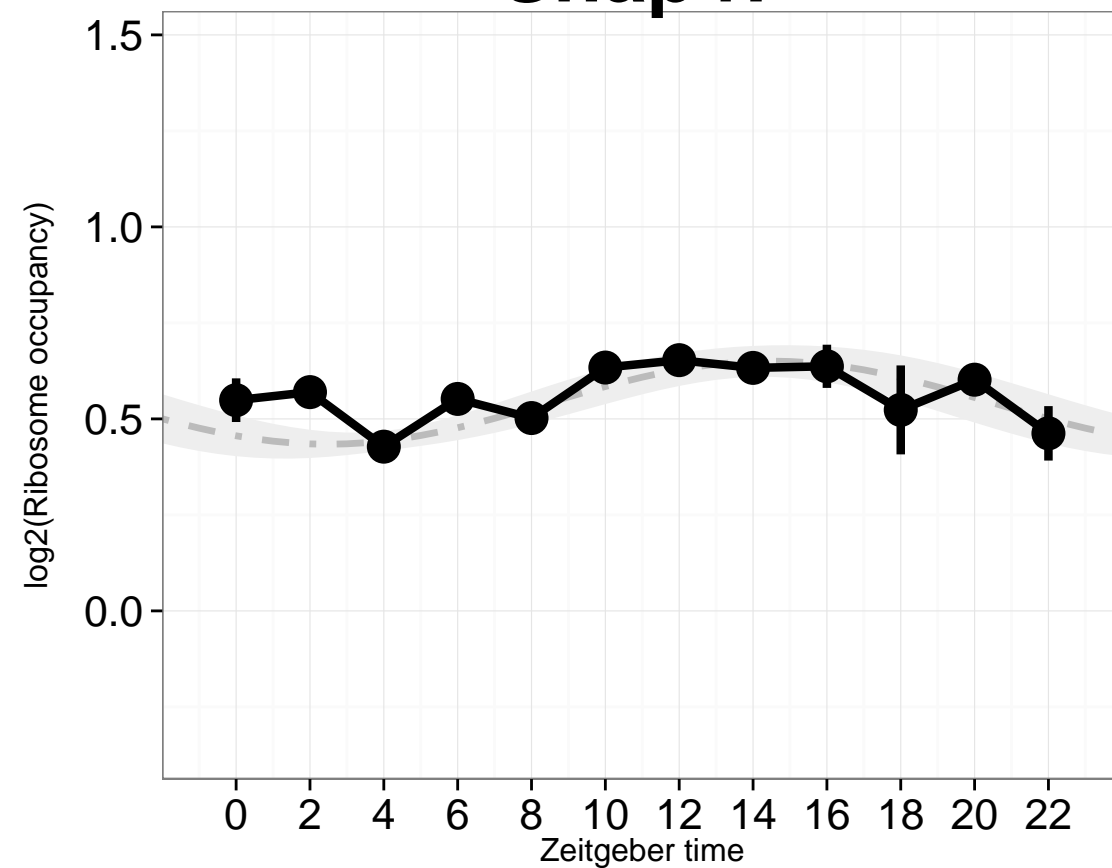

Supplement: SuppDataset_1.zip [file Snap47_set_A.pdf › Supplemental Dataset 1/A-mRNA_nonrhyth_translation_nonrhyth/Snap47_set_A.pdf]

# Snapc1

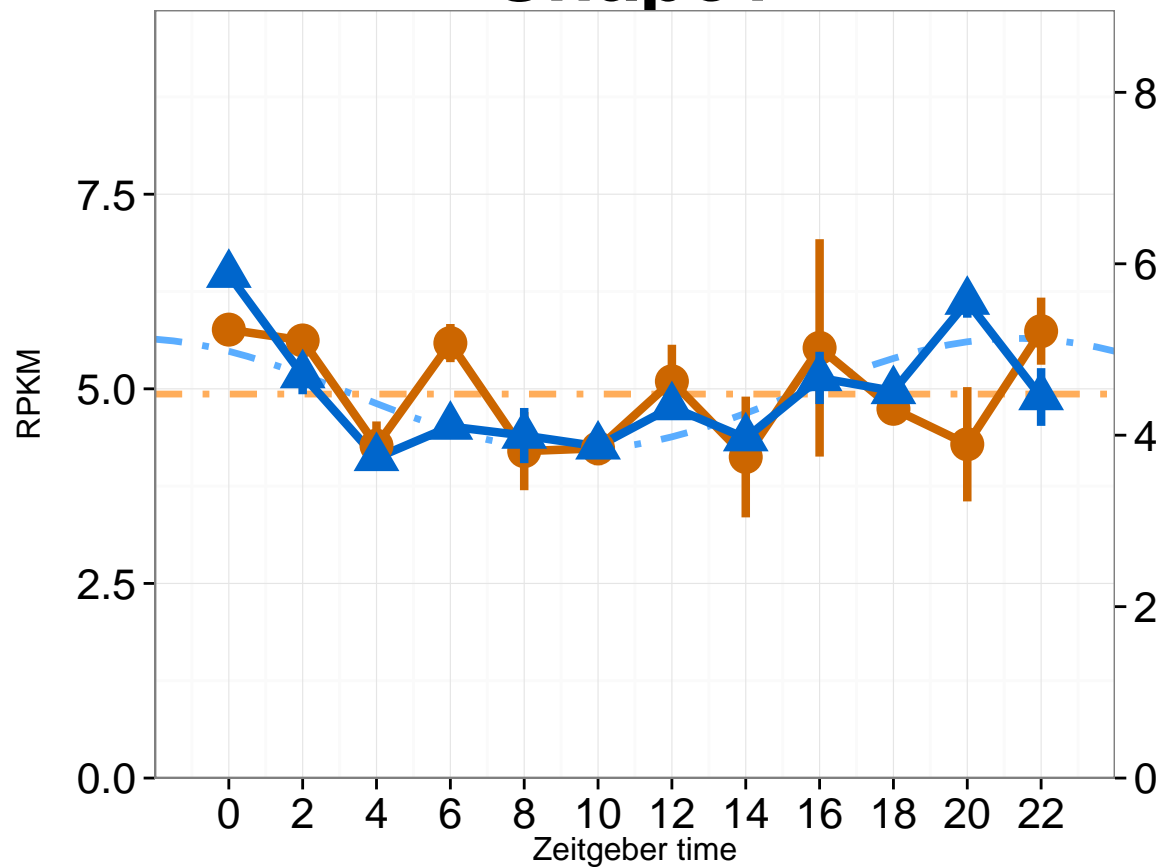

# Snapc1

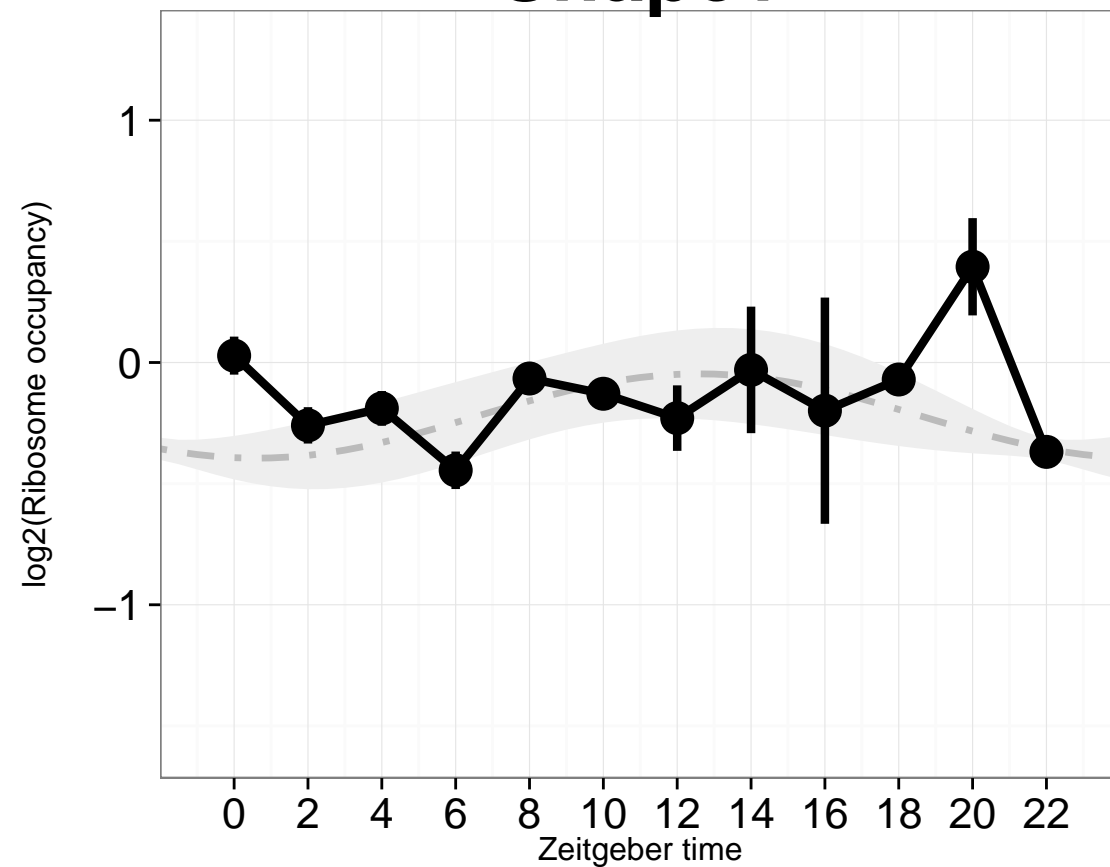

Supplement: SuppDataset_1.zip [file Snapc1_set_A.pdf › Supplemental Dataset 1/A-mRNA_nonrhyth_translation_nonrhyth/Snapc1_set_A.pdf]

## Snapc2

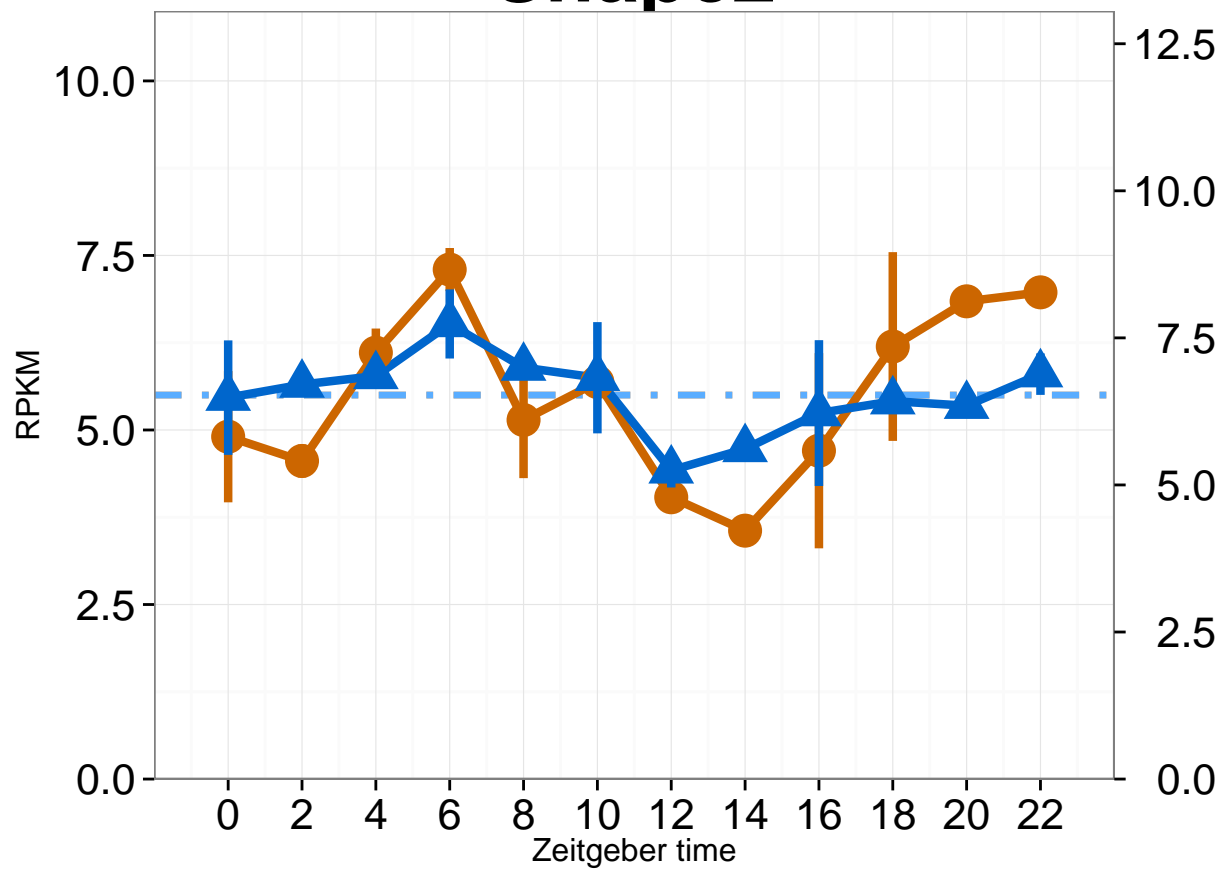

## Snapc2

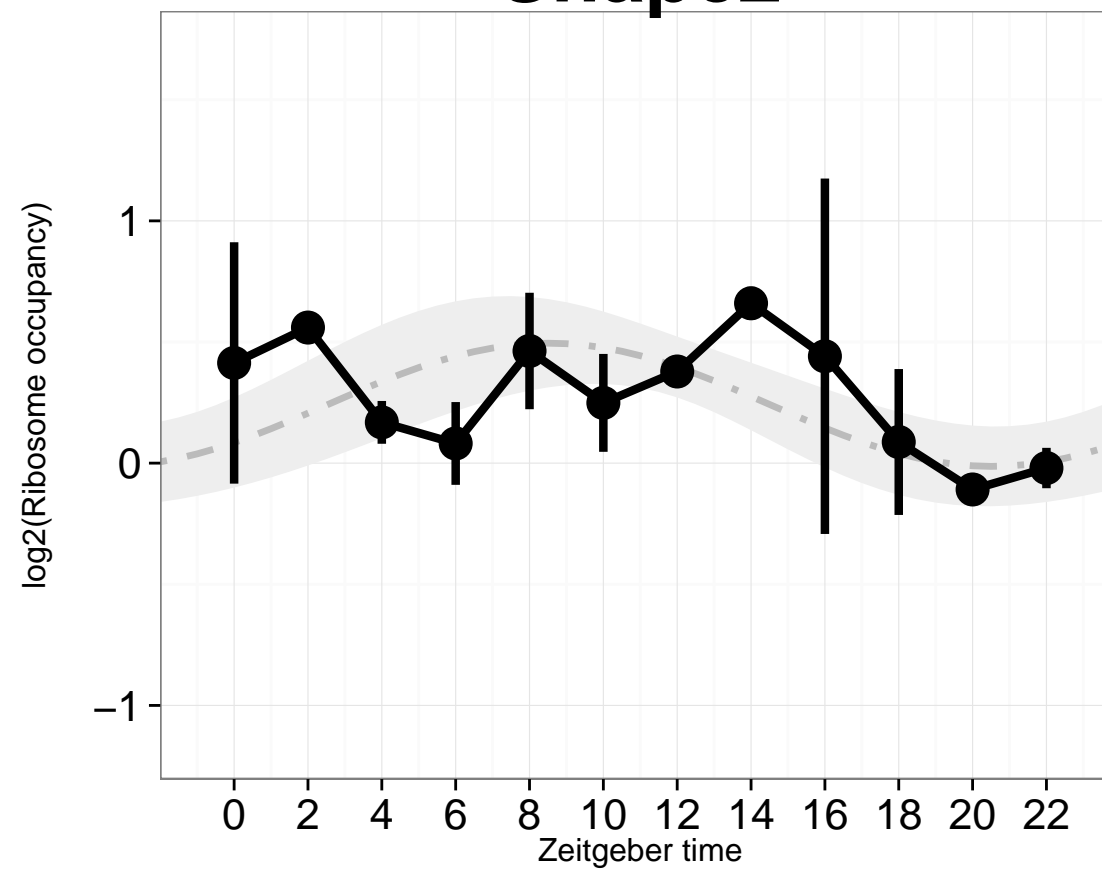

Supplement: SuppDataset_1.zip [file Snapc2_set_A.pdf › Supplemental Dataset 1/A-mRNA_nonrhyth_translation_nonrhyth/Snapc2_set_A.pdf]

## Snapc3

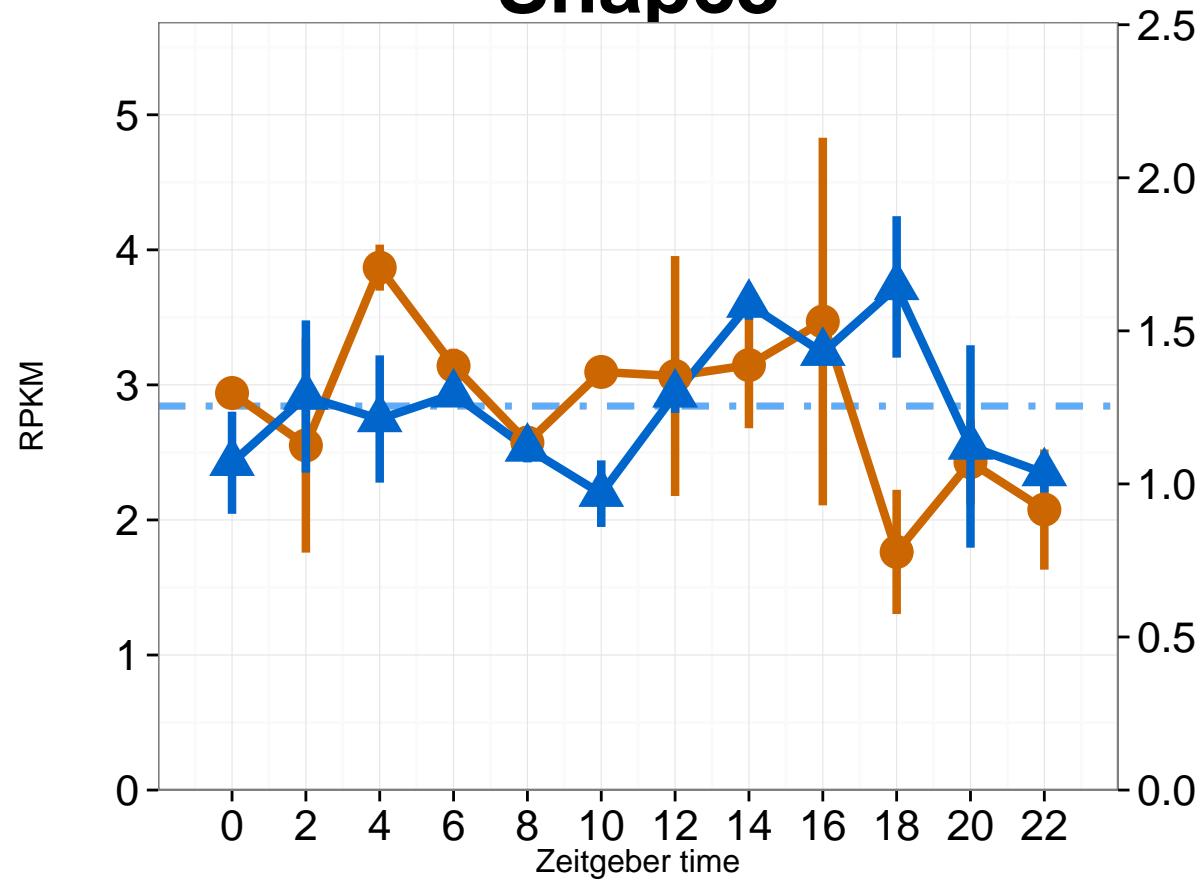

## Snapc3

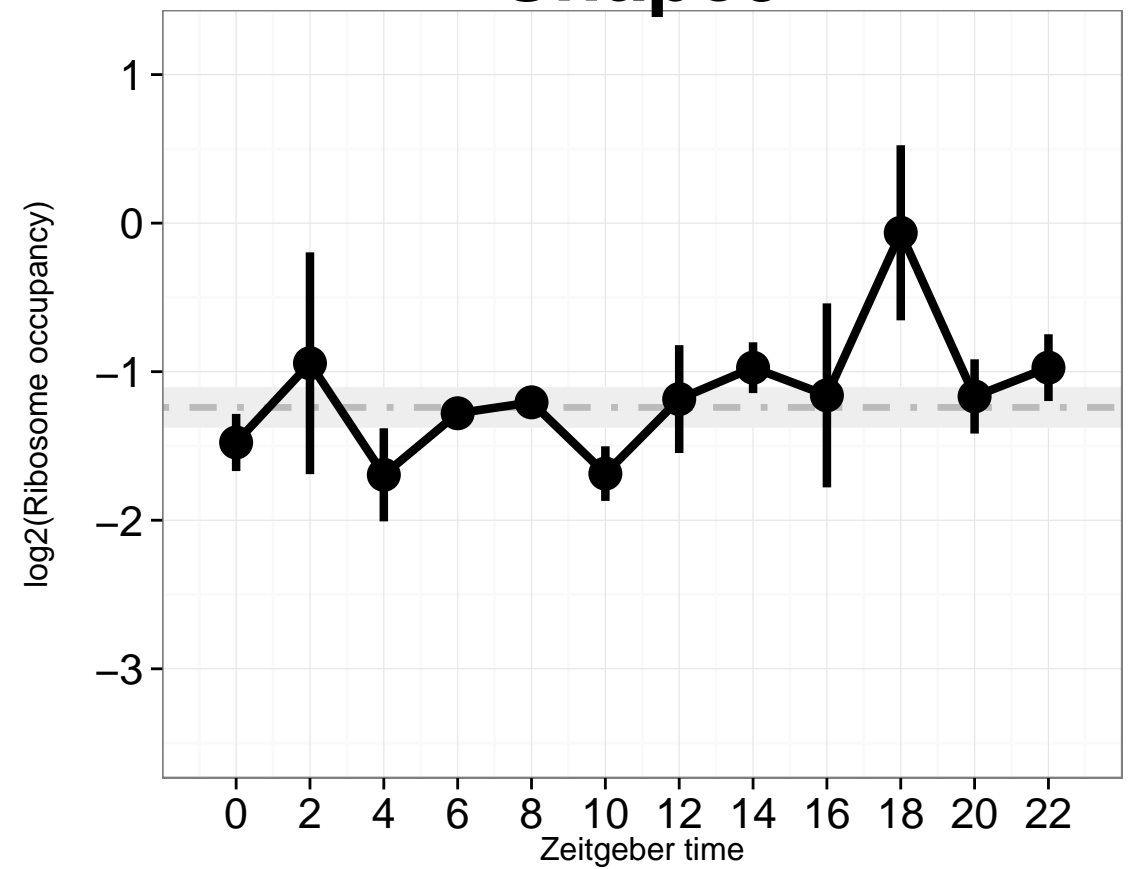

Supplement: SuppDataset_1.zip [file Snapc3_set_A.pdf › Supplemental Dataset 1/A-mRNA_nonrhyth_translation_nonrhyth/Snapc3_set_A.pdf]

## Snapc4

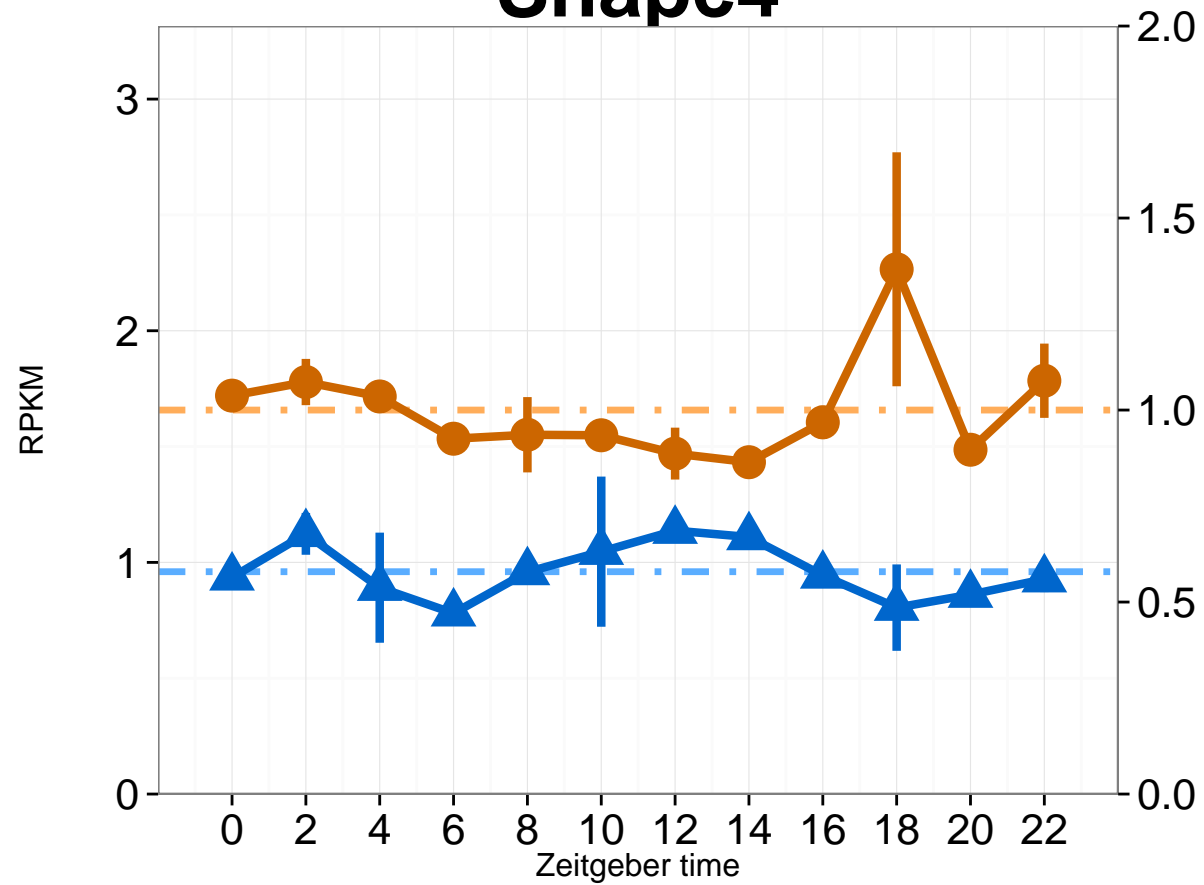

## Snapc4

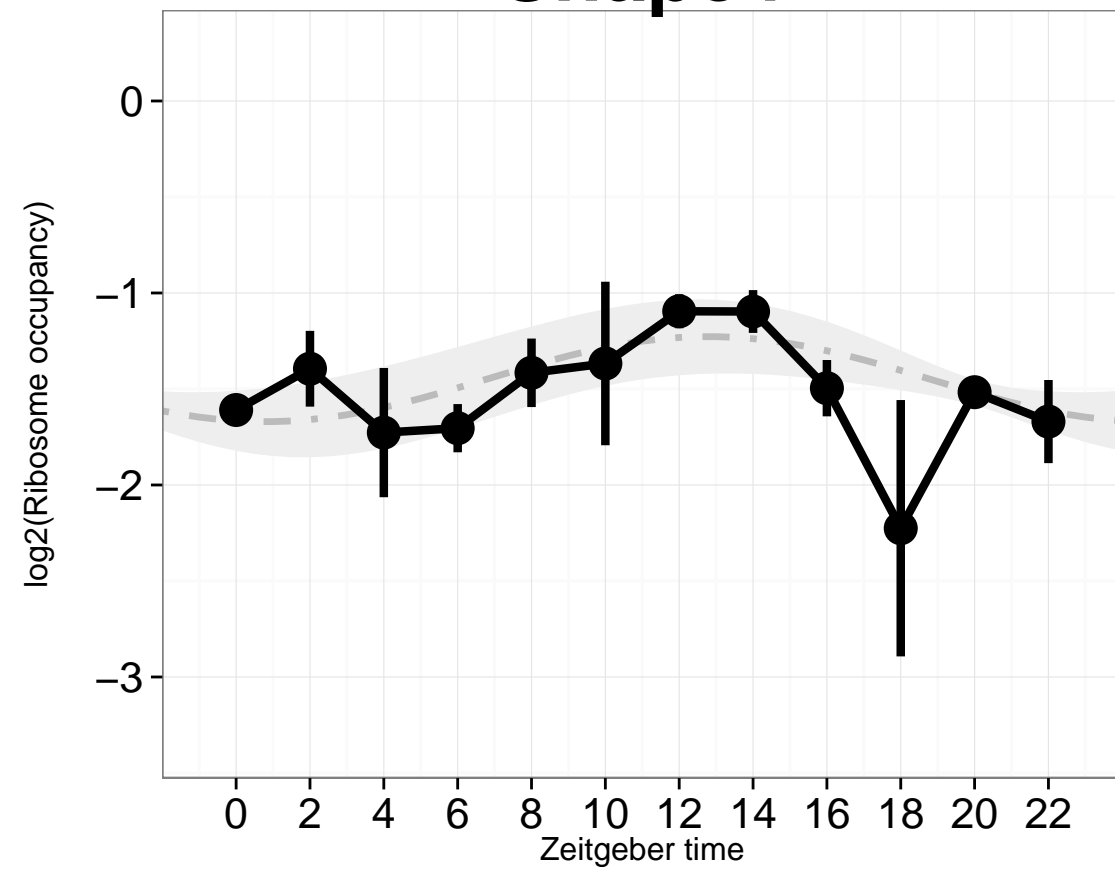

Supplement: SuppDataset_1.zip [file Snapc4_set_A.pdf › Supplemental Dataset 1/A-mRNA_nonrhyth_translation_nonrhyth/Snapc4_set_A.pdf]

# Snapc5

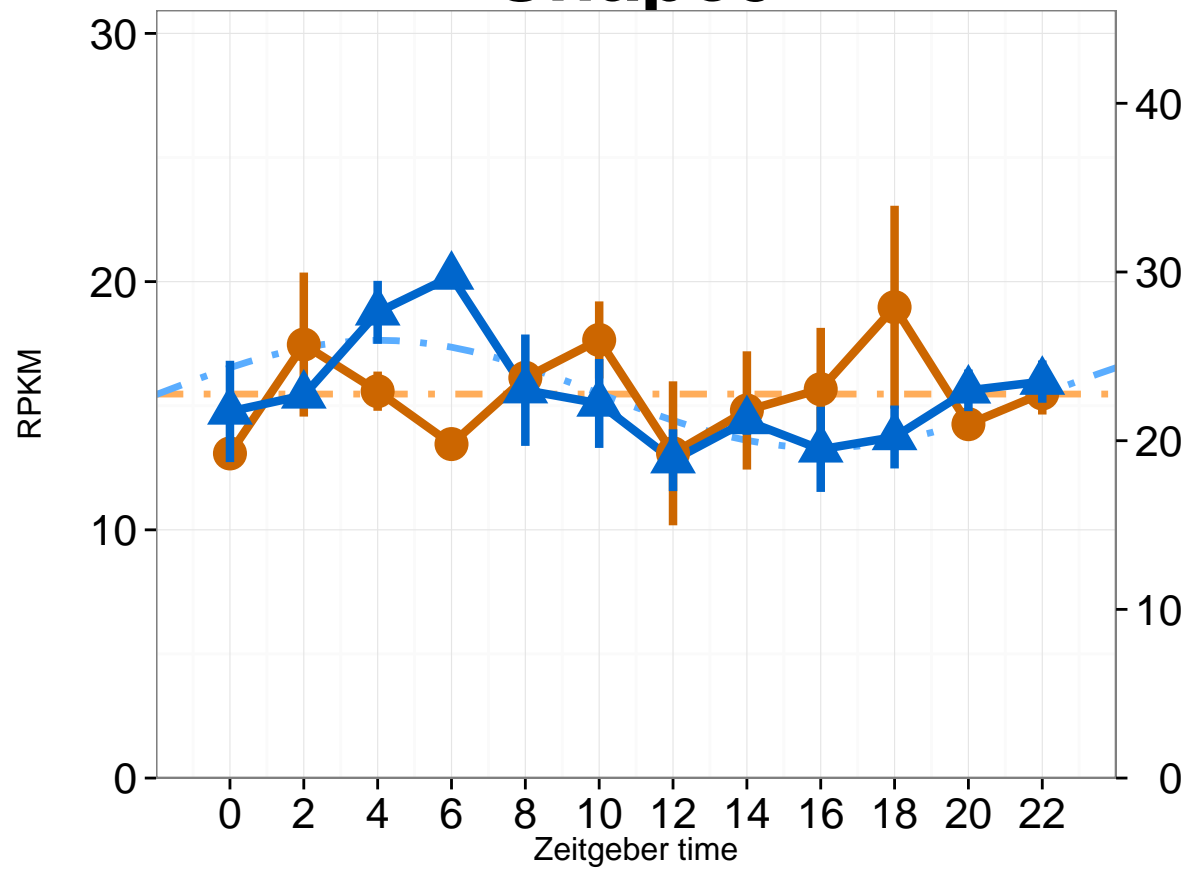

# Snapc5

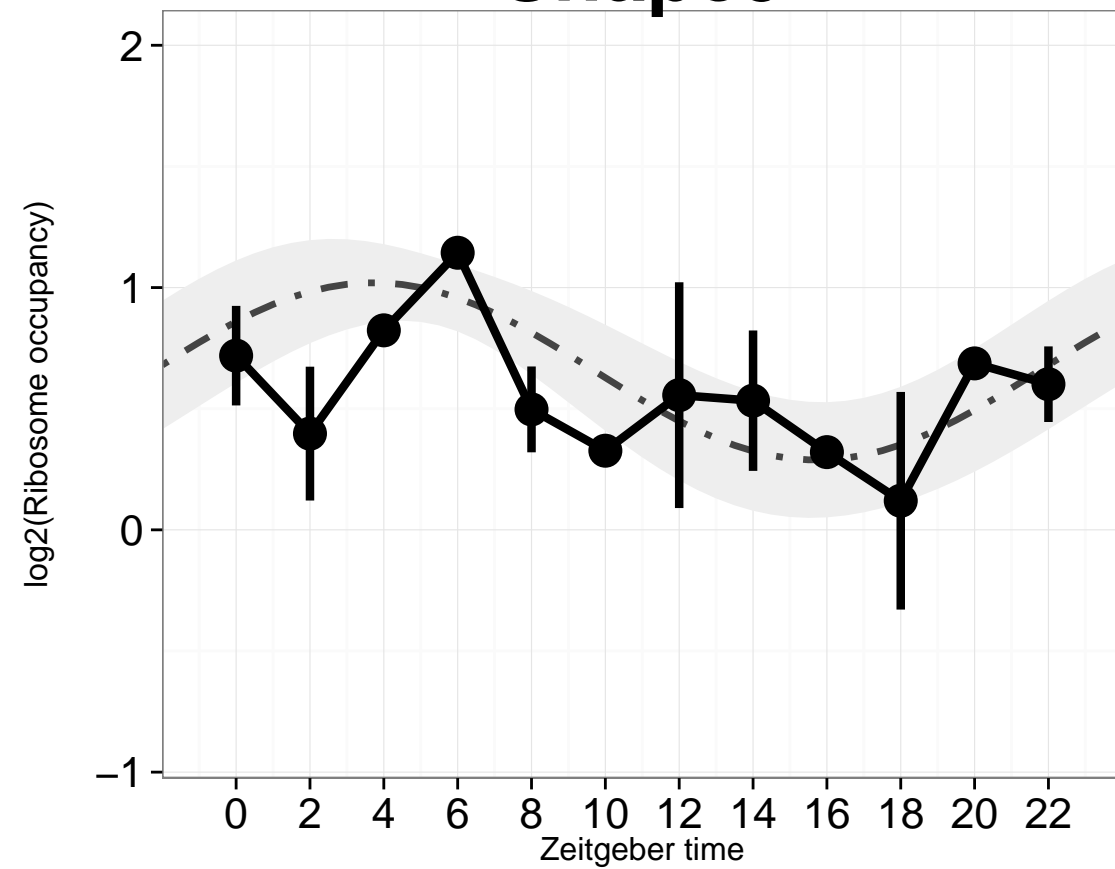

Supplement: SuppDataset_1.zip [file Snapc5_set_A.pdf › Supplemental Dataset 1/A-mRNA_nonrhyth_translation_nonrhyth/Snapc5_set_A.pdf]

## Snapin

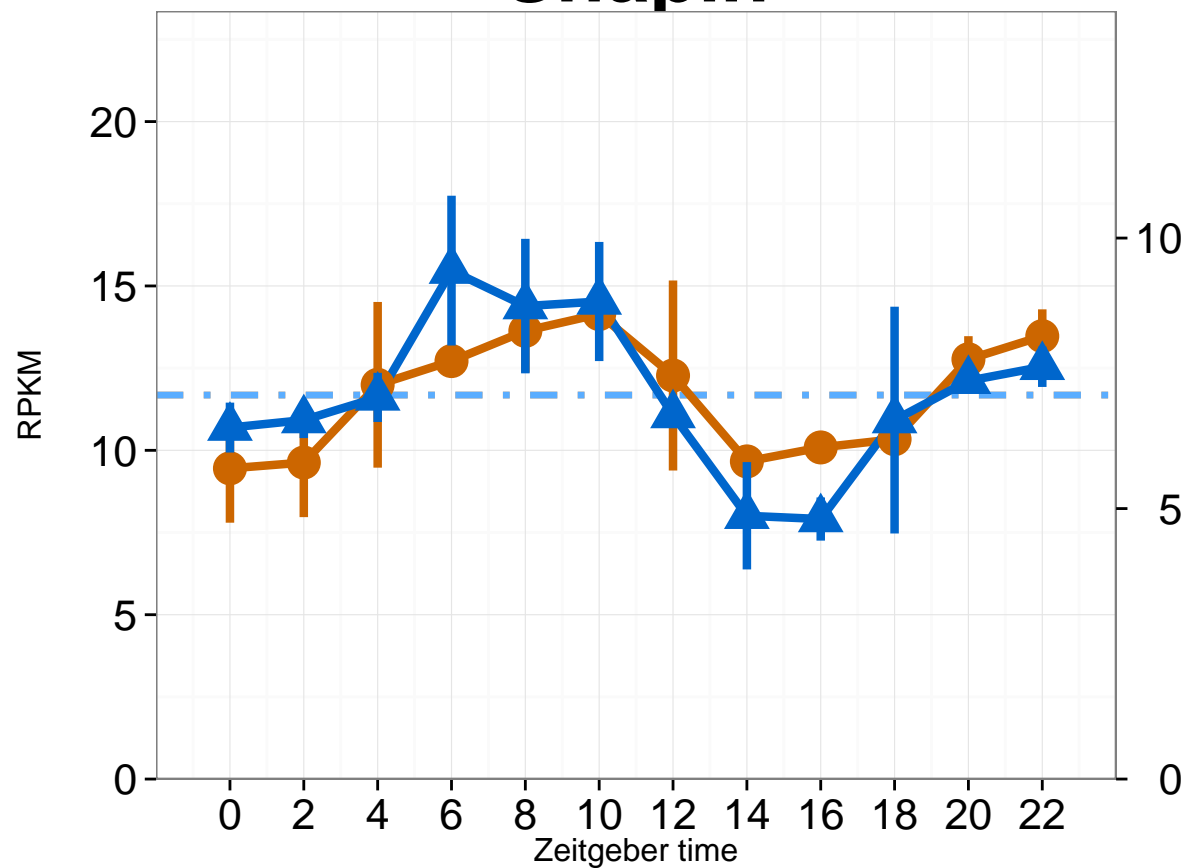

## Snapin

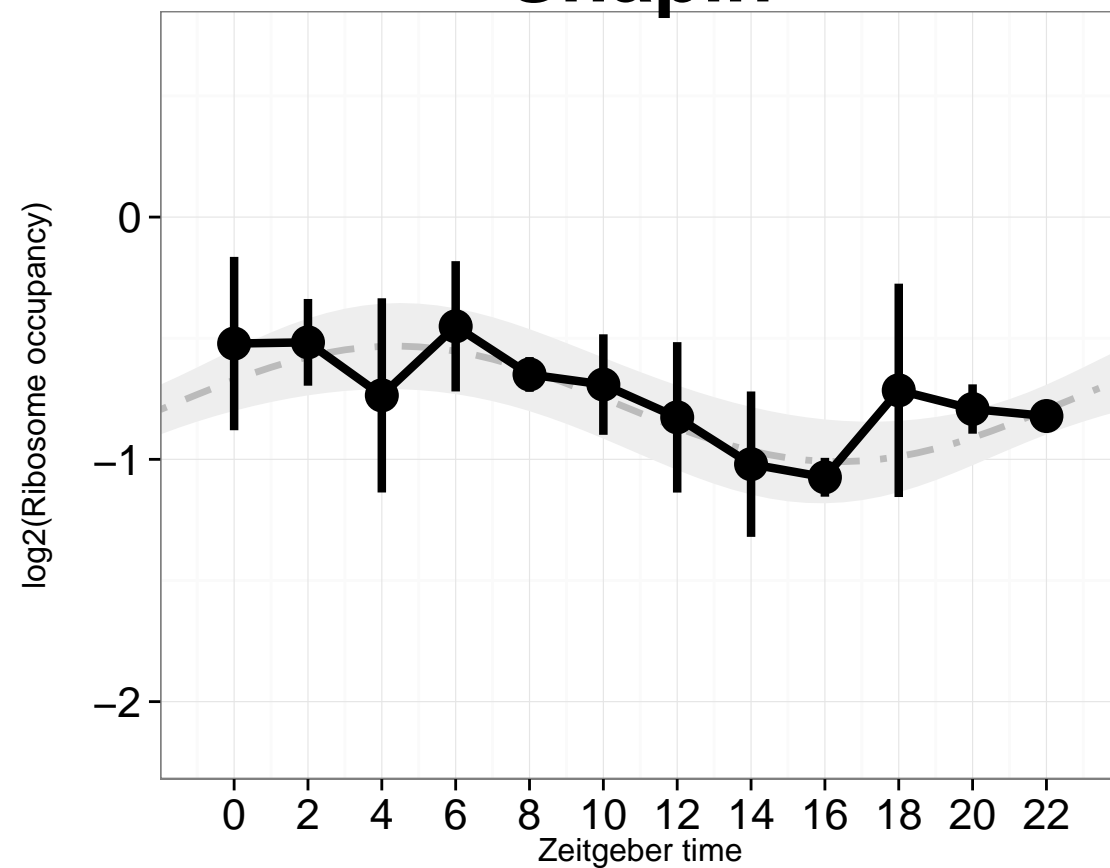

Supplement: SuppDataset_1.zip [file Snapin_set_A.pdf › Supplemental Dataset 1/A-mRNA_nonrhyth_translation_nonrhyth/Snapin_set_A.pdf]

## Snd1

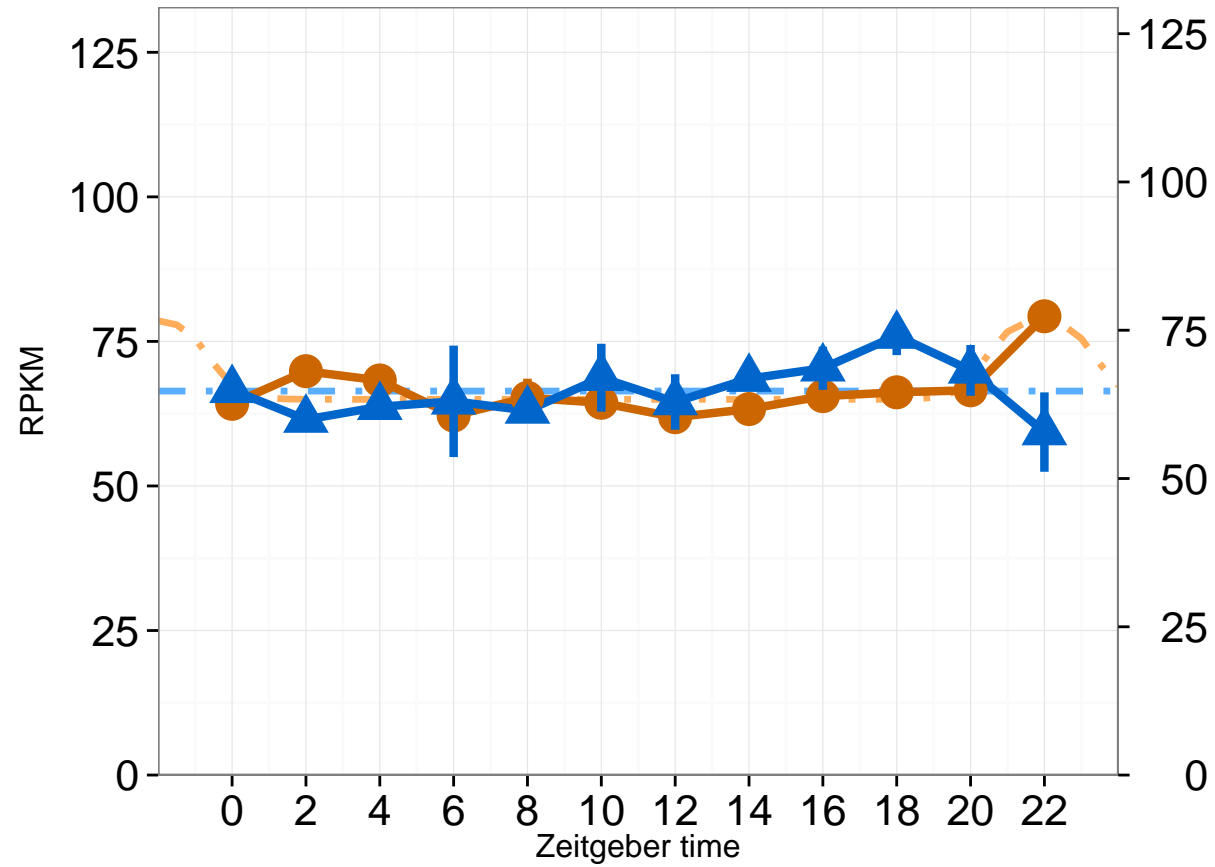

## Snd1

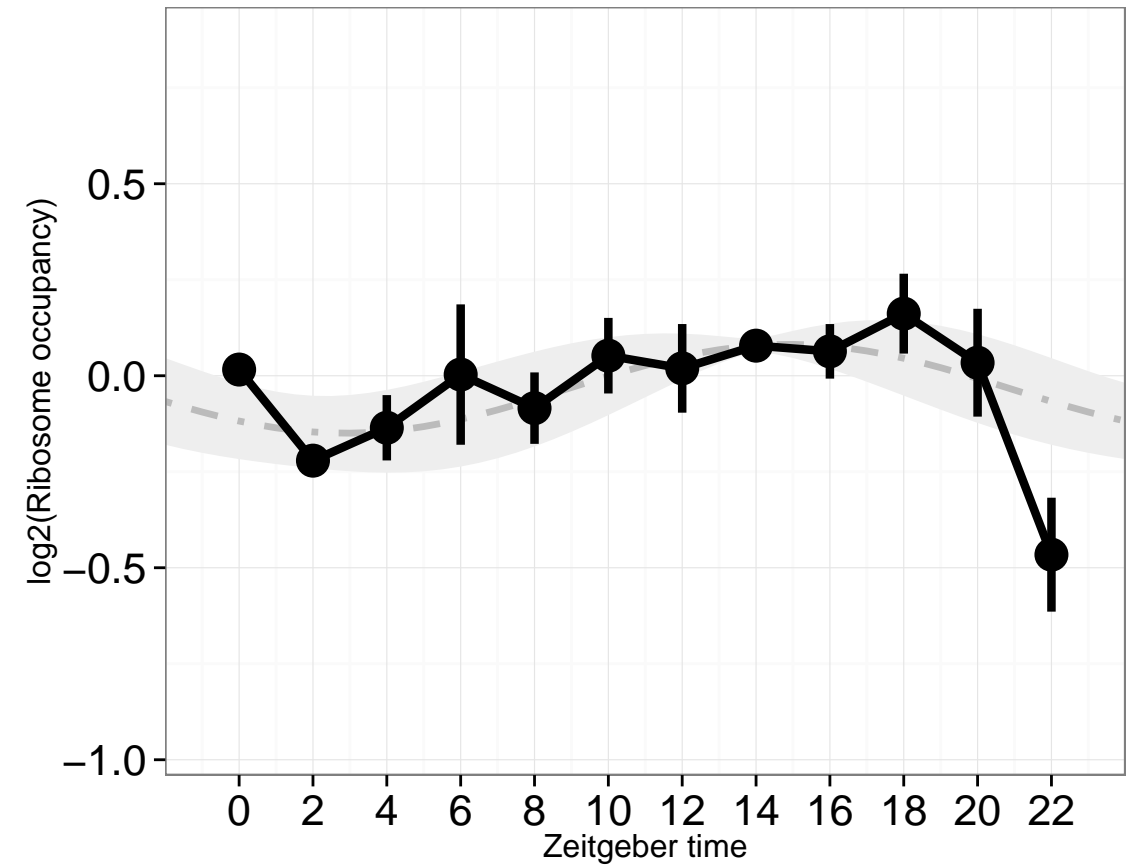

Supplement: SuppDataset_1.zip [file Snd1_set_A.pdf › Supplemental Dataset 1/A-mRNA_nonrhyth_translation_nonrhyth/Snd1_set_A.pdf]

# Sned1

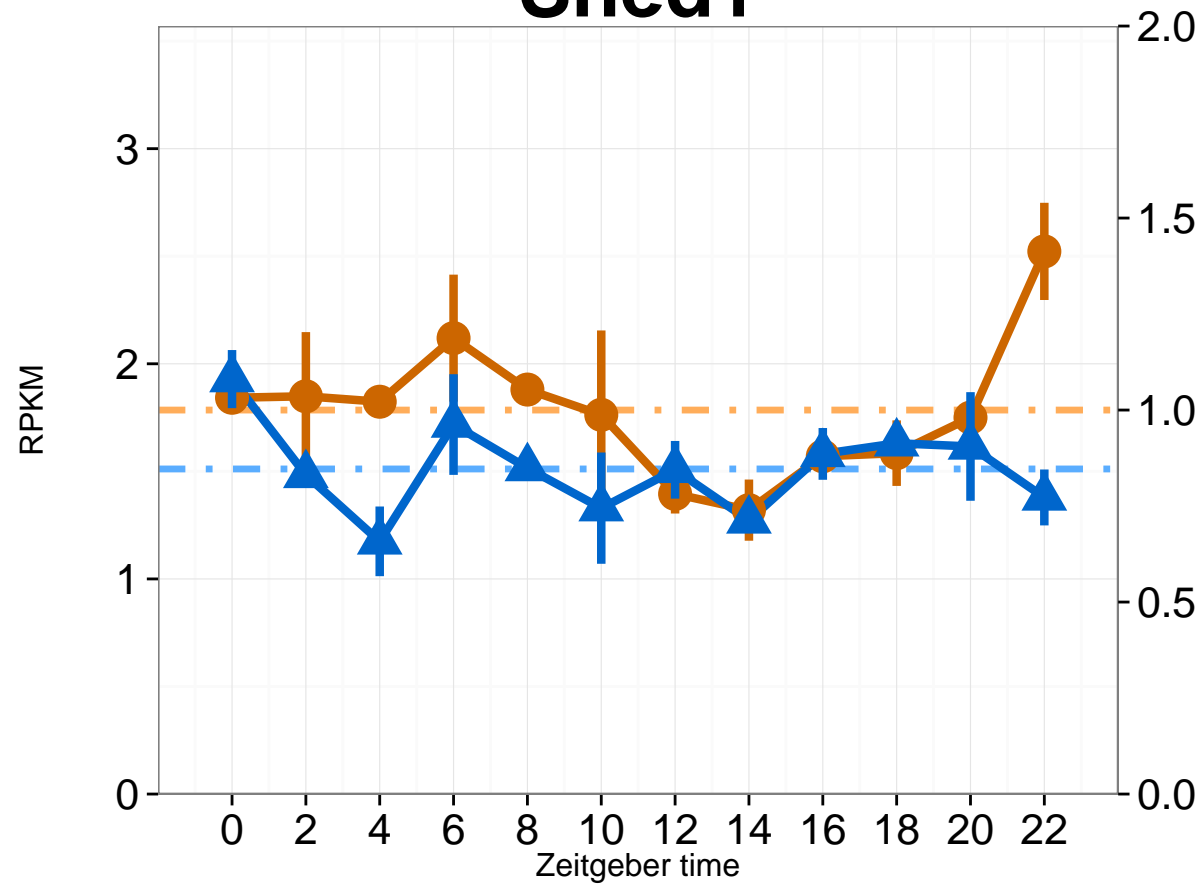

# Sned1

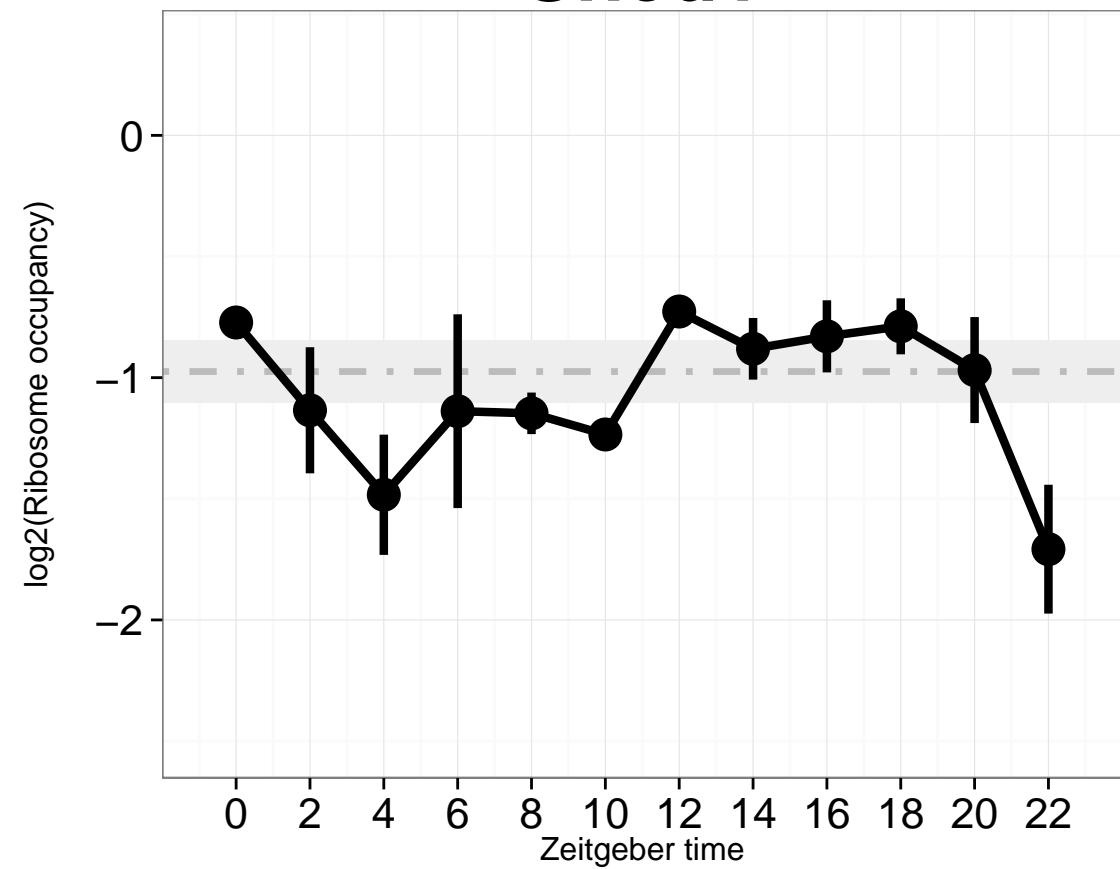

Supplement: SuppDataset_1.zip [file Sned1_set_A.pdf › Supplemental Dataset 1/A-mRNA_nonrhyth_translation_nonrhyth/Sned1_set_A.pdf]

## Snf8

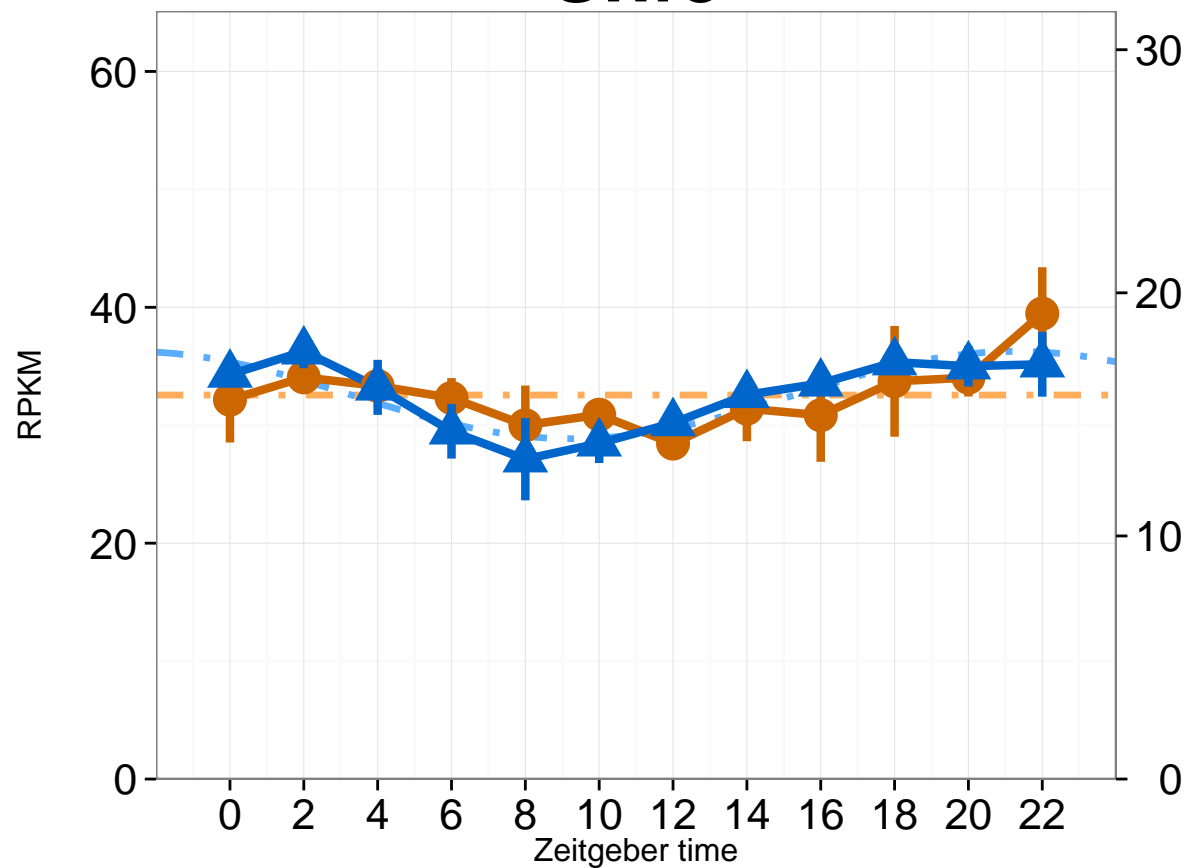

## Snf8

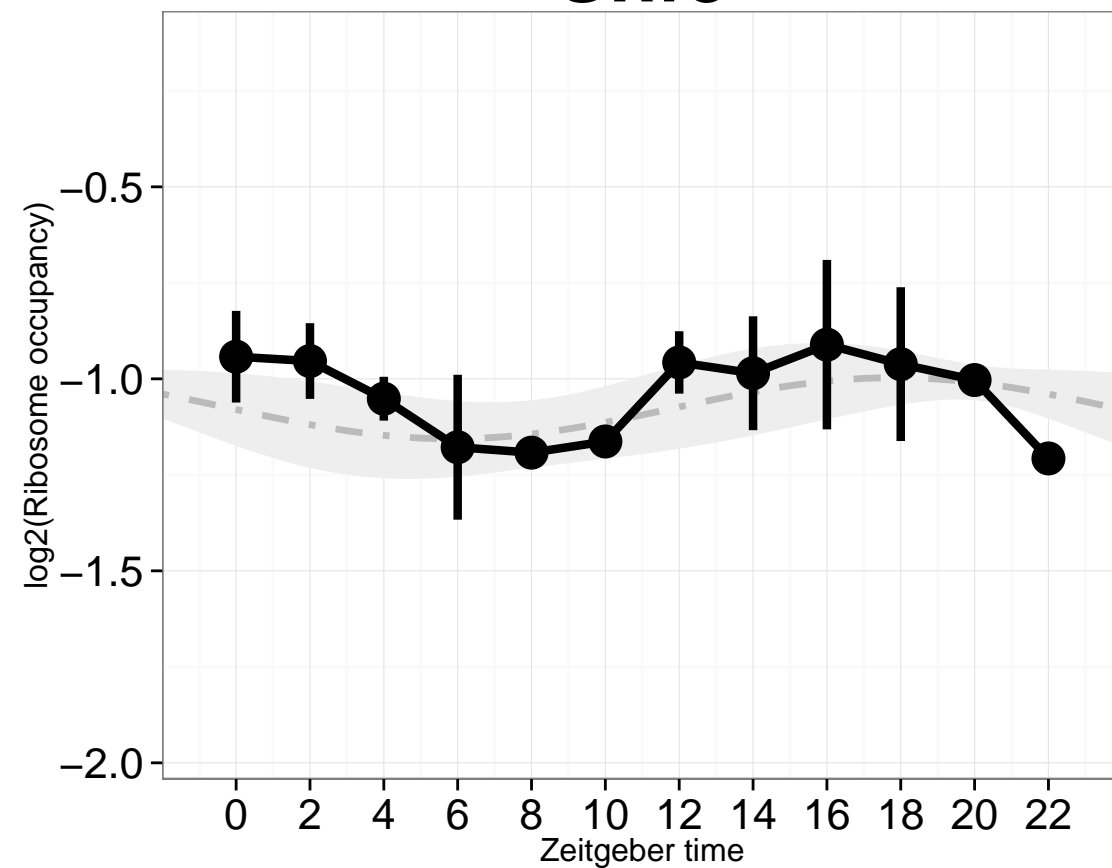

Supplement: SuppDataset_1.zip [file Snf8_set_A.pdf › Supplemental Dataset 1/A-mRNA_nonrhyth_translation_nonrhyth/Snf8_set_A.pdf]

## Snip1

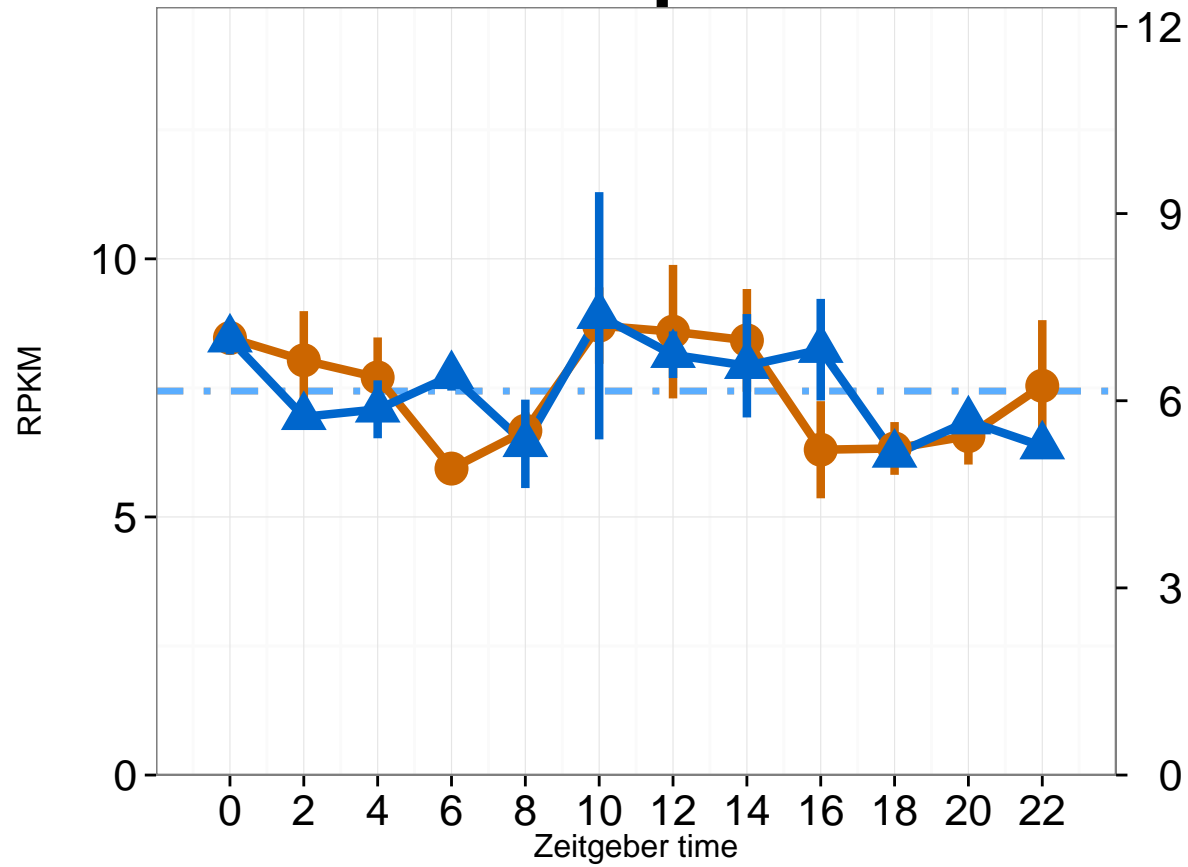

## Snip1

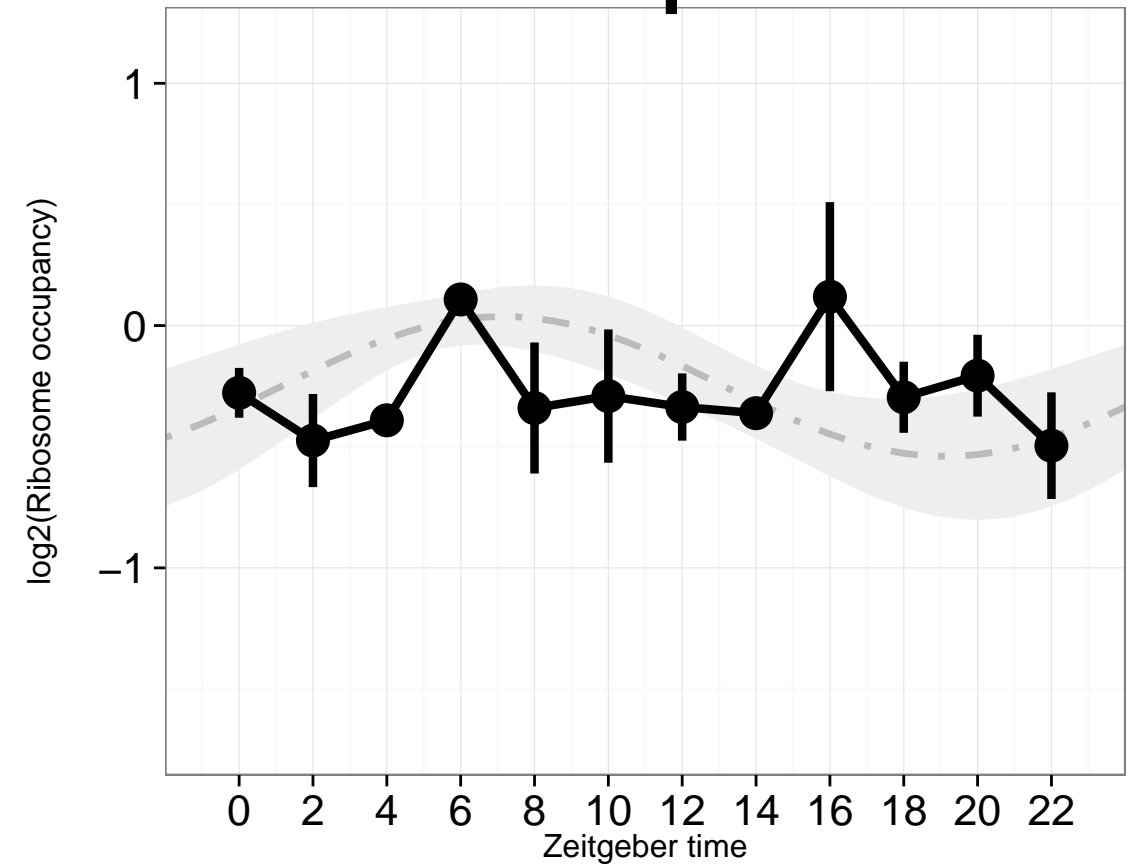

Supplement: SuppDataset_1.zip [file Snip1_set_A.pdf › Supplemental Dataset 1/A-mRNA_nonrhyth_translation_nonrhyth/Snip1_set_A.pdf]

## Snrnp200

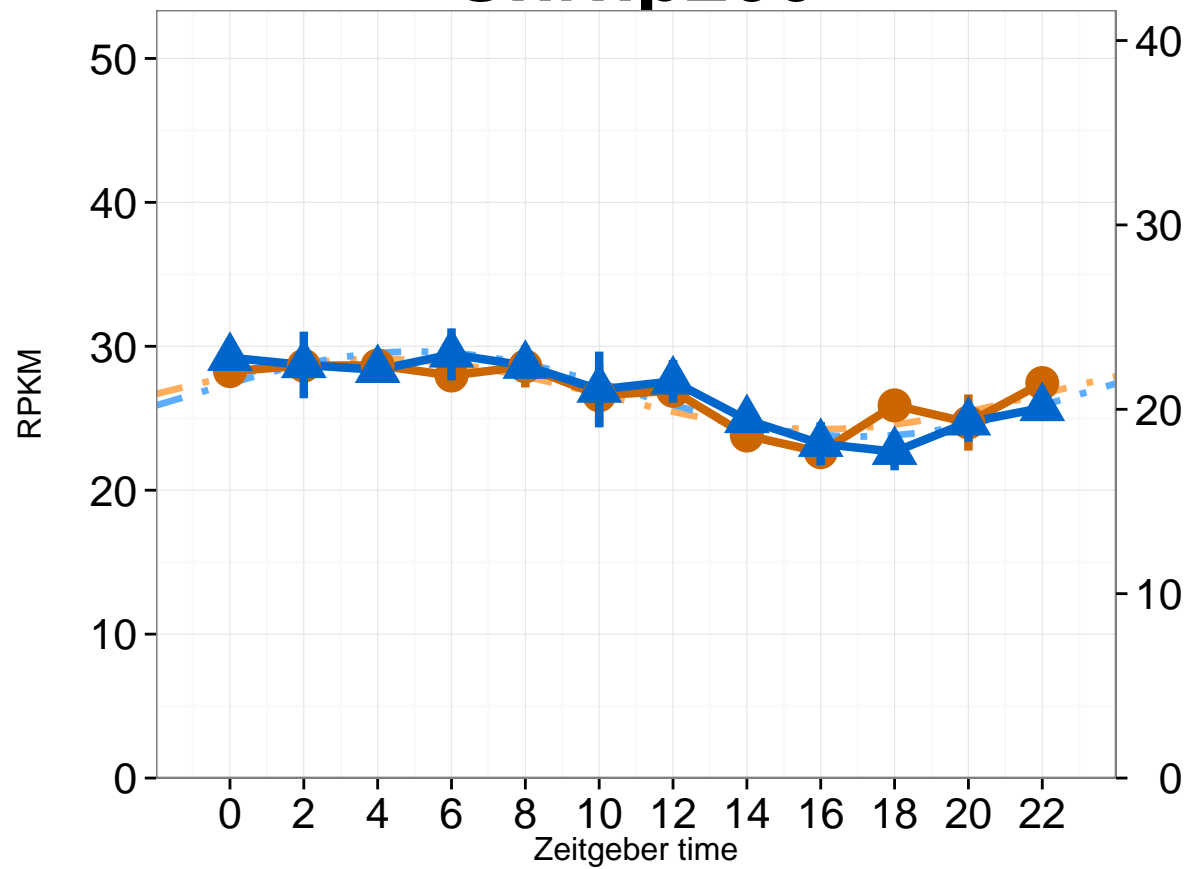

## Snrnp200

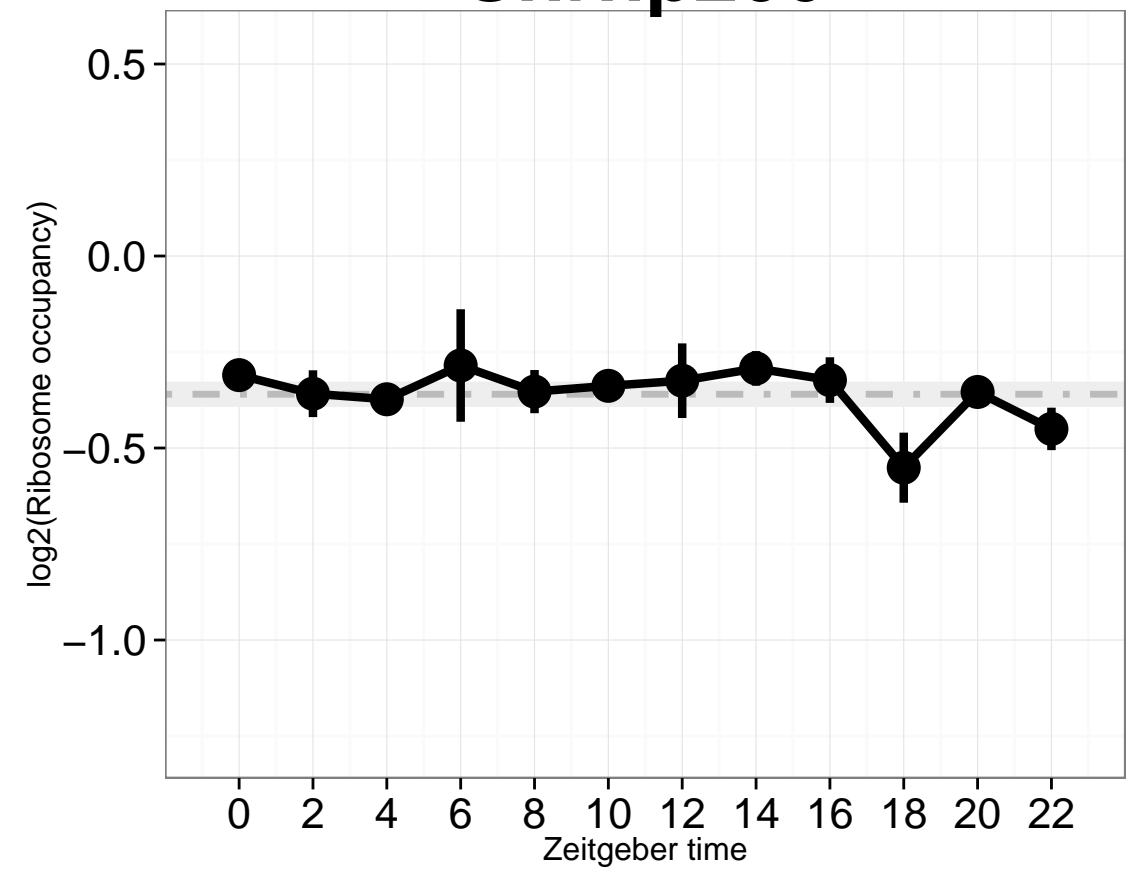

Supplement: SuppDataset_1.zip [file Snrnp200_set_A.pdf › Supplemental Dataset 1/A-mRNA_nonrhyth_translation_nonrhyth/Snrnp200_set_A.pdf]

# Snrnp25

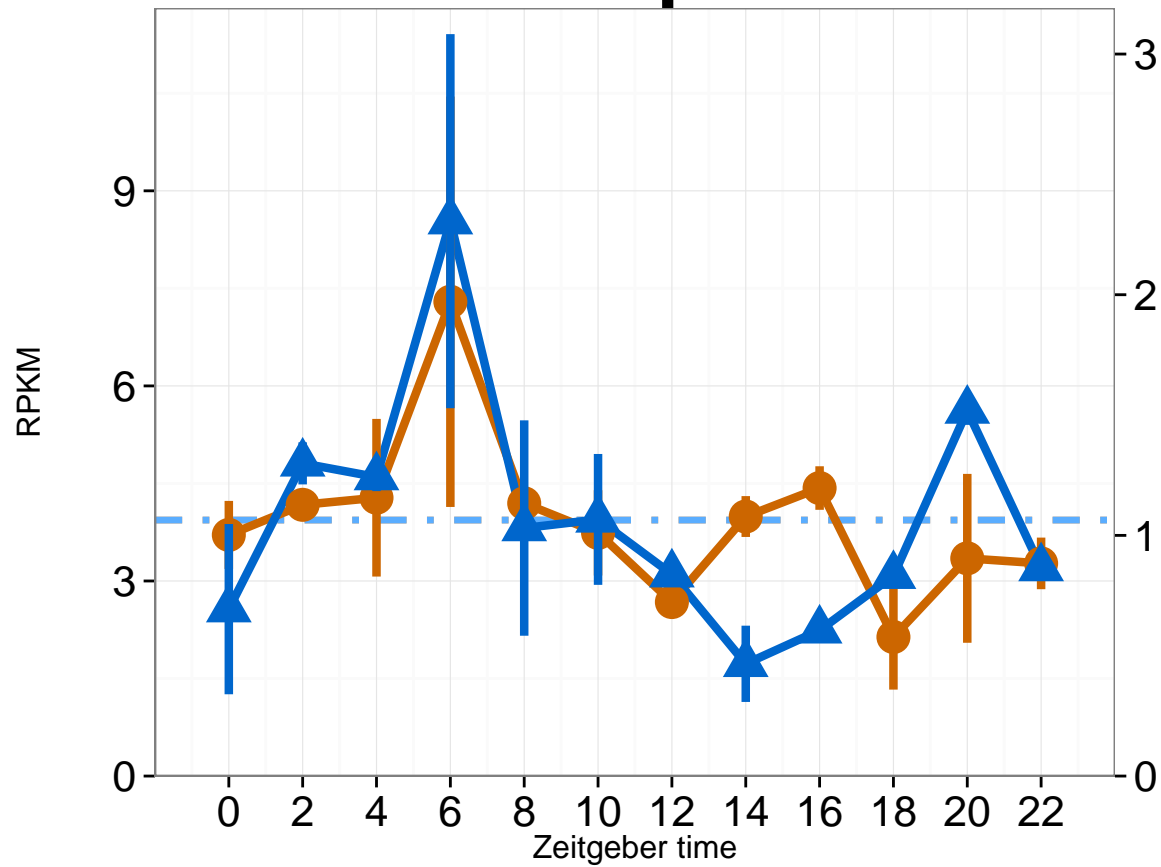

# Snrnp25

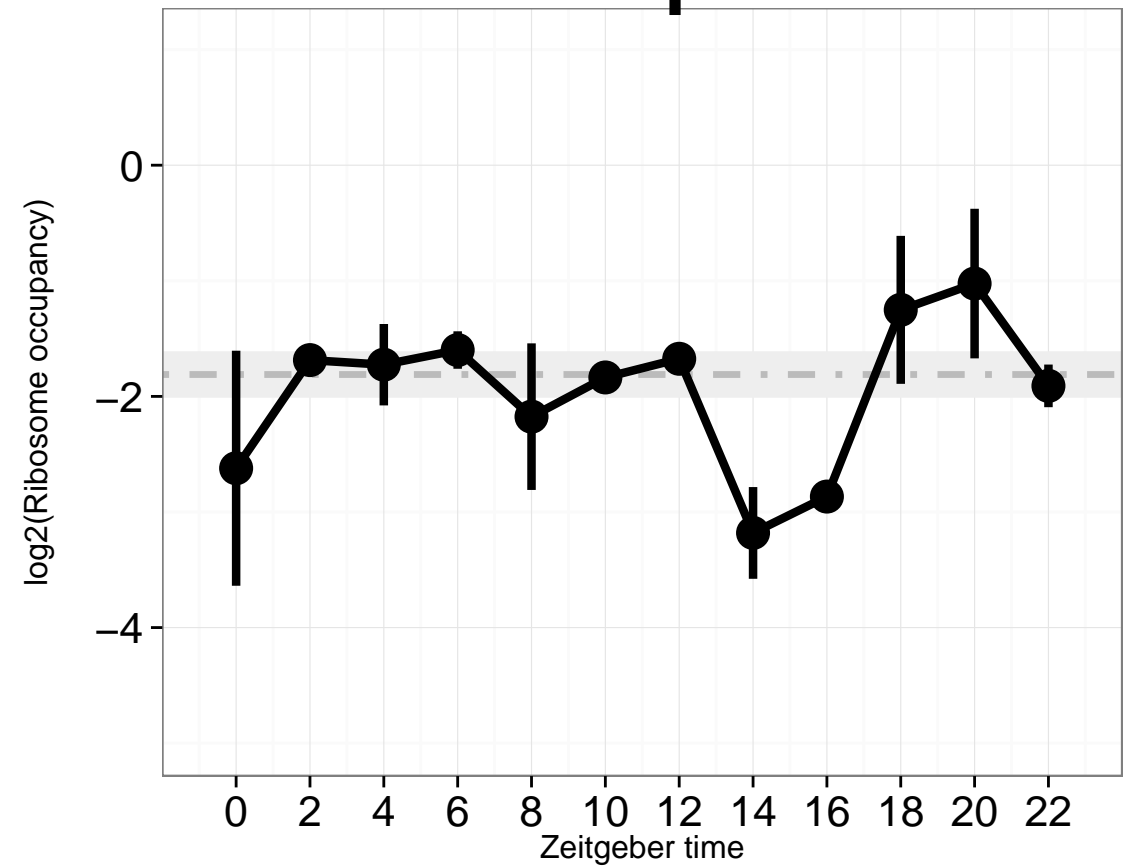

Supplement: SuppDataset_1.zip [file Snrnp25_set_A.pdf › Supplemental Dataset 1/A-mRNA_nonrhyth_translation_nonrhyth/Snrnp25_set_A.pdf]

# Snrnp27

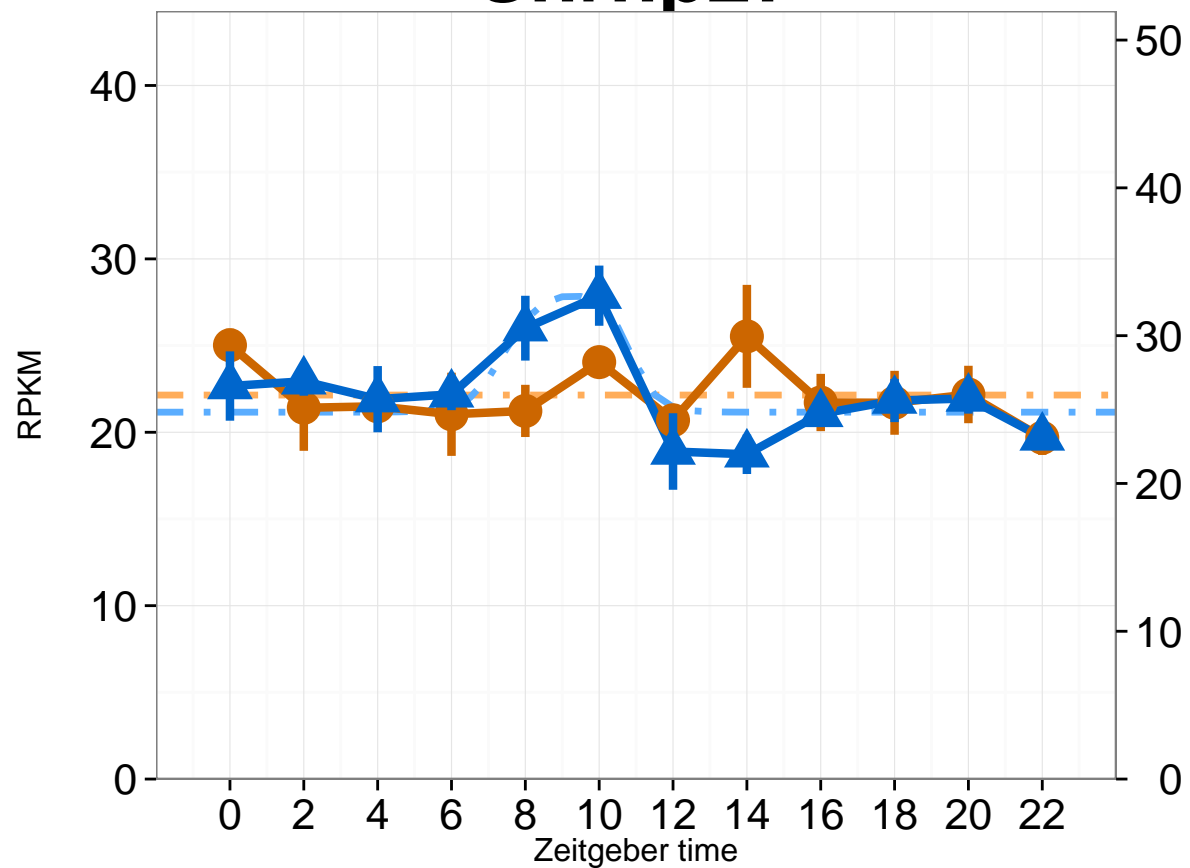

# Snrnp27

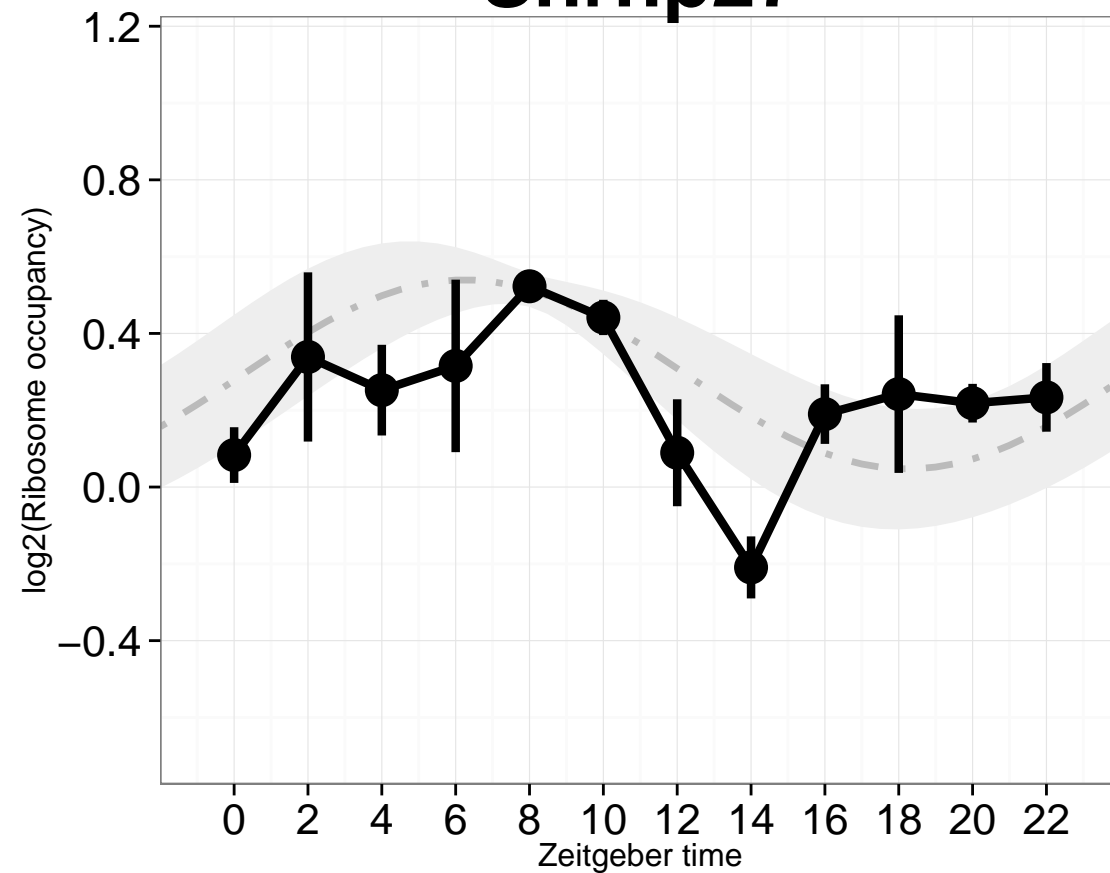

Supplement: SuppDataset_1.zip [file Snrnp27_set_A.pdf › Supplemental Dataset 1/A-mRNA_nonrhyth_translation_nonrhyth/Snrnp27_set_A.pdf]

# Snrrnp35

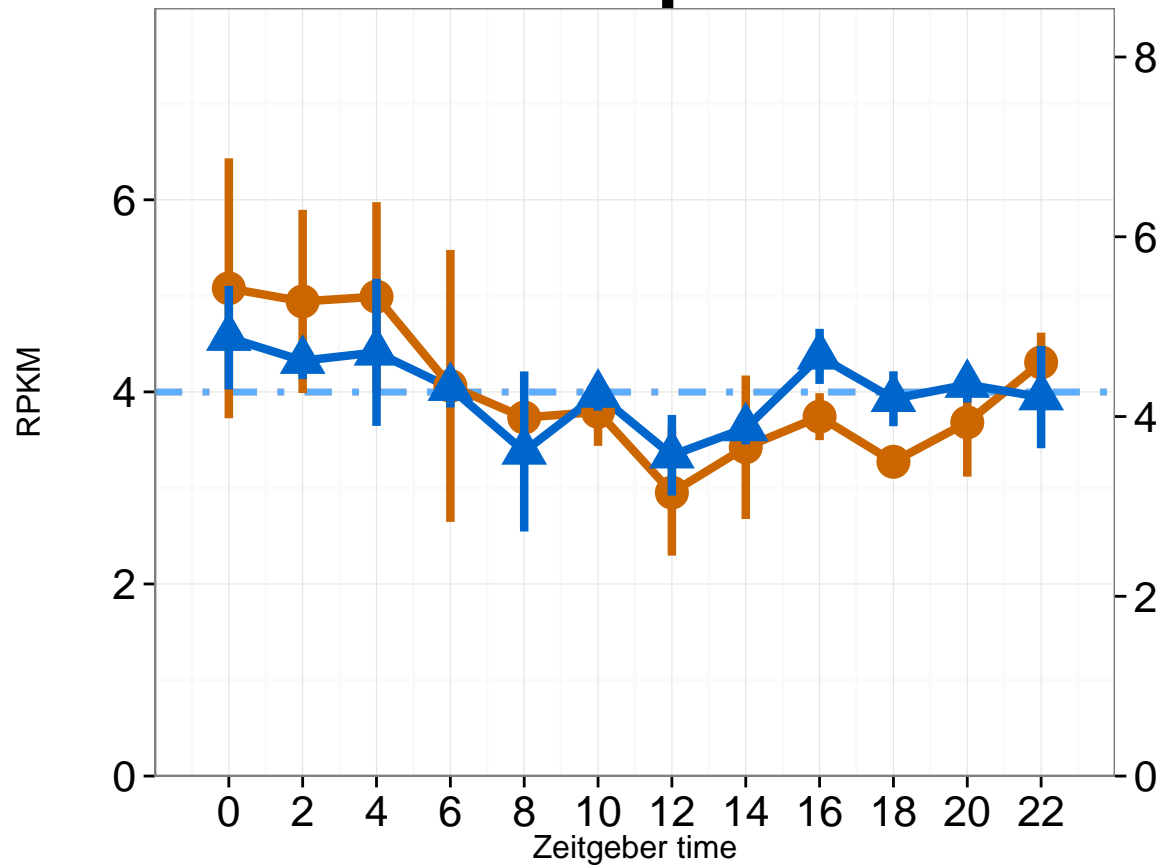

# Snrrnp35

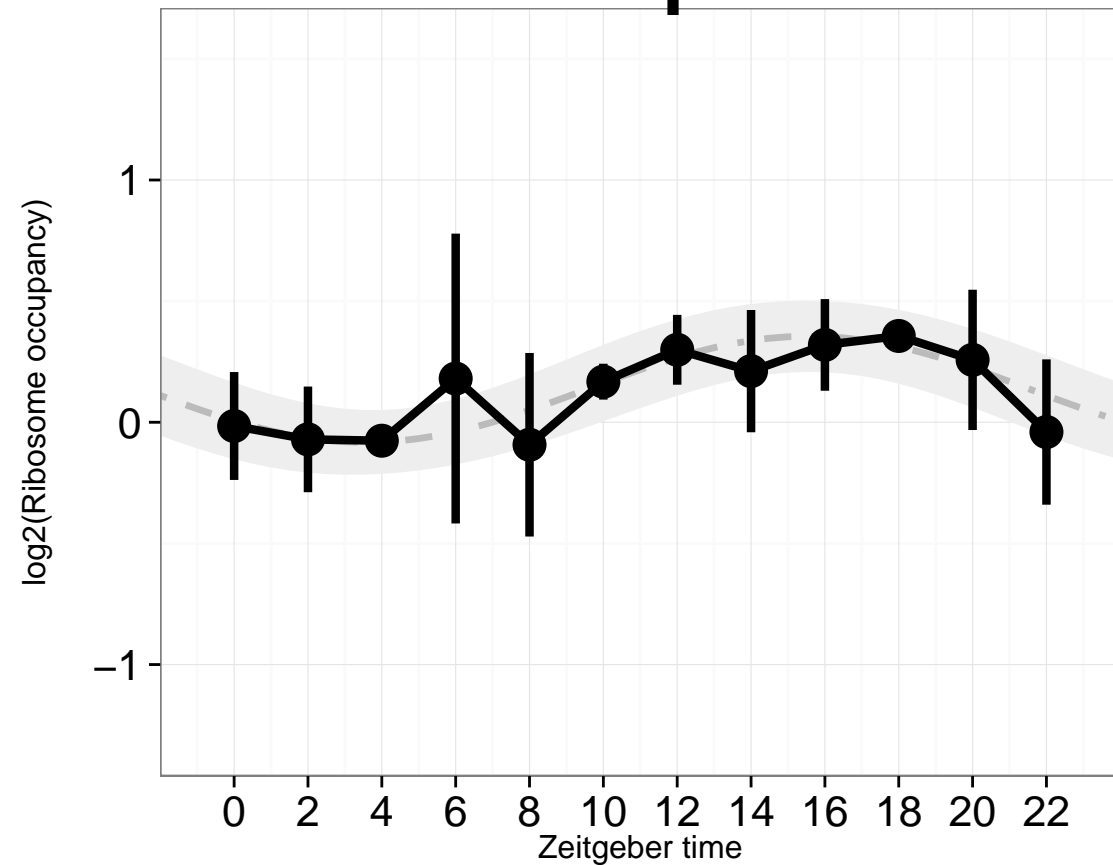

Supplement: SuppDataset_1.zip [file Snrnp35_set_A.pdf › Supplemental Dataset 1/A-mRNA_nonrhyth_translation_nonrhyth/Snrnp35_set_A.pdf]

## Snrrnp40

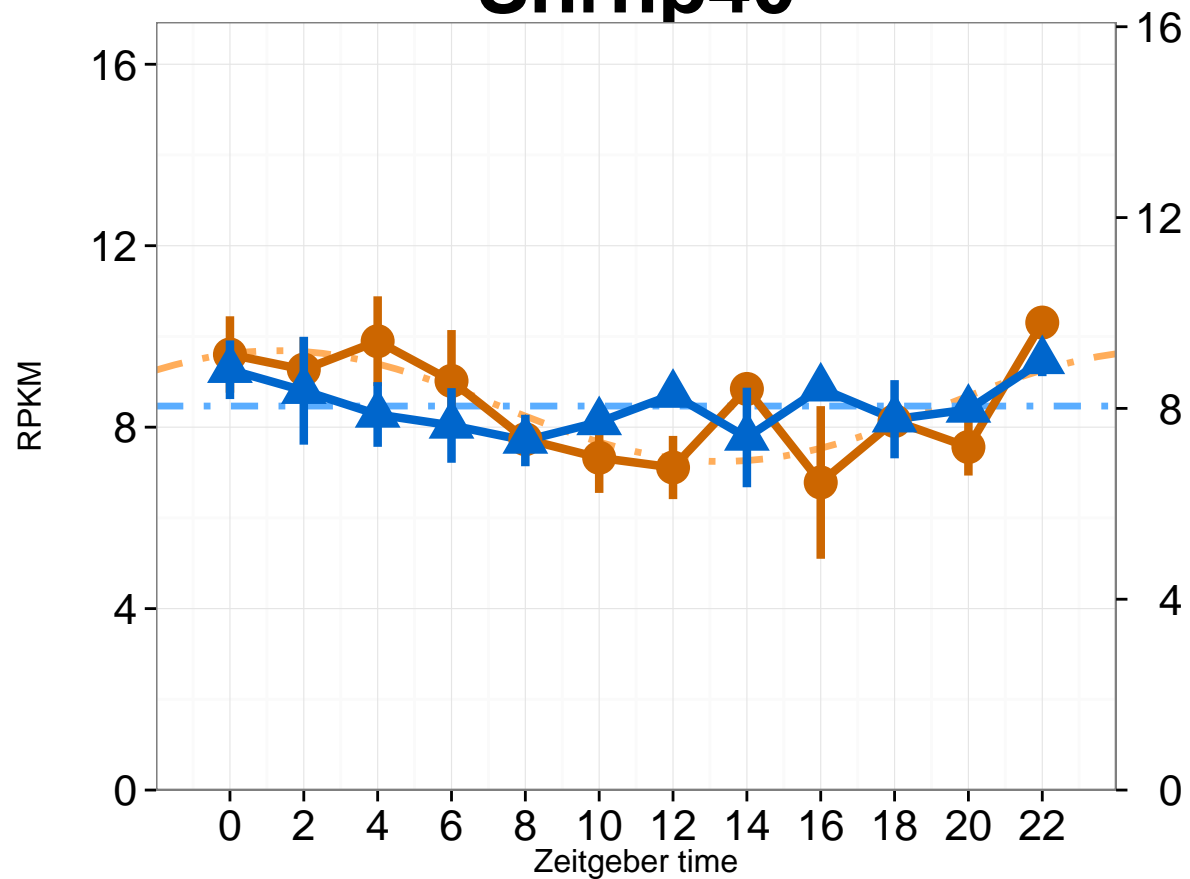

## Snrrnp40

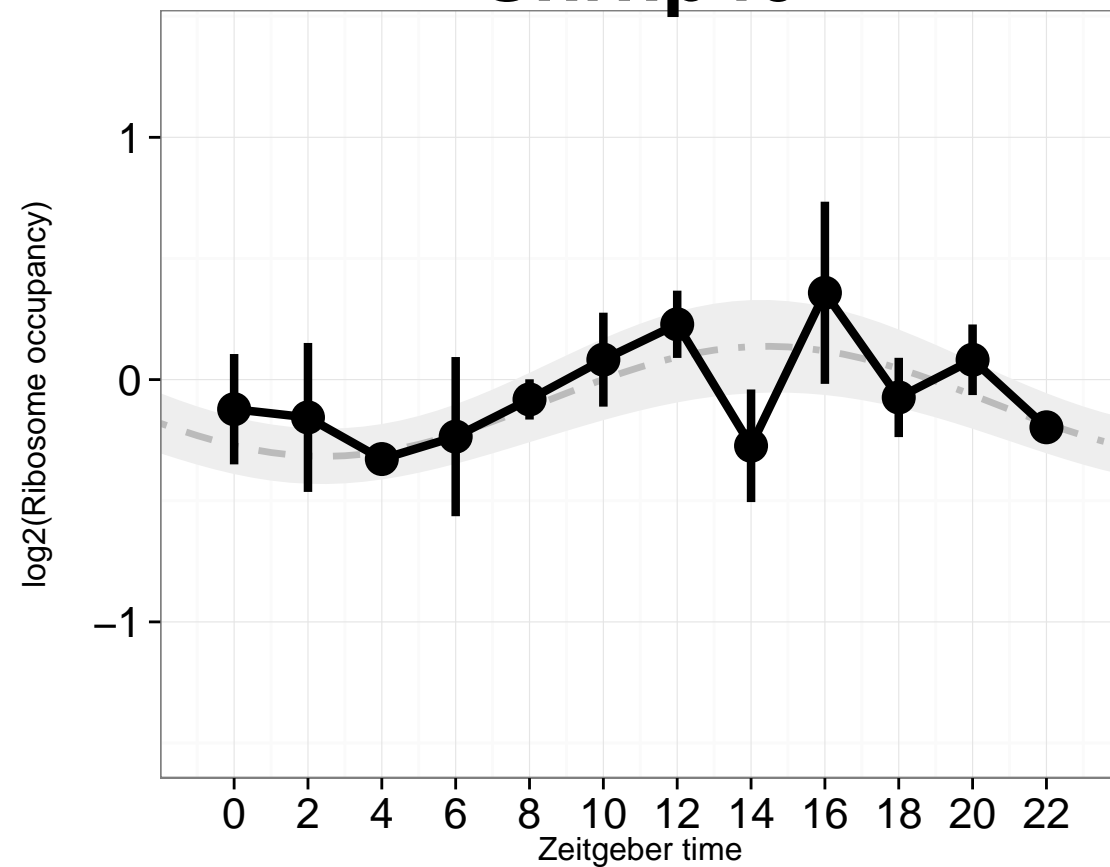

Supplement: SuppDataset_1.zip [file Snrnp40_set_A.pdf › Supplemental Dataset 1/A-mRNA_nonrhyth_translation_nonrhyth/Snrnp40_set_A.pdf]

# Snrnnp48

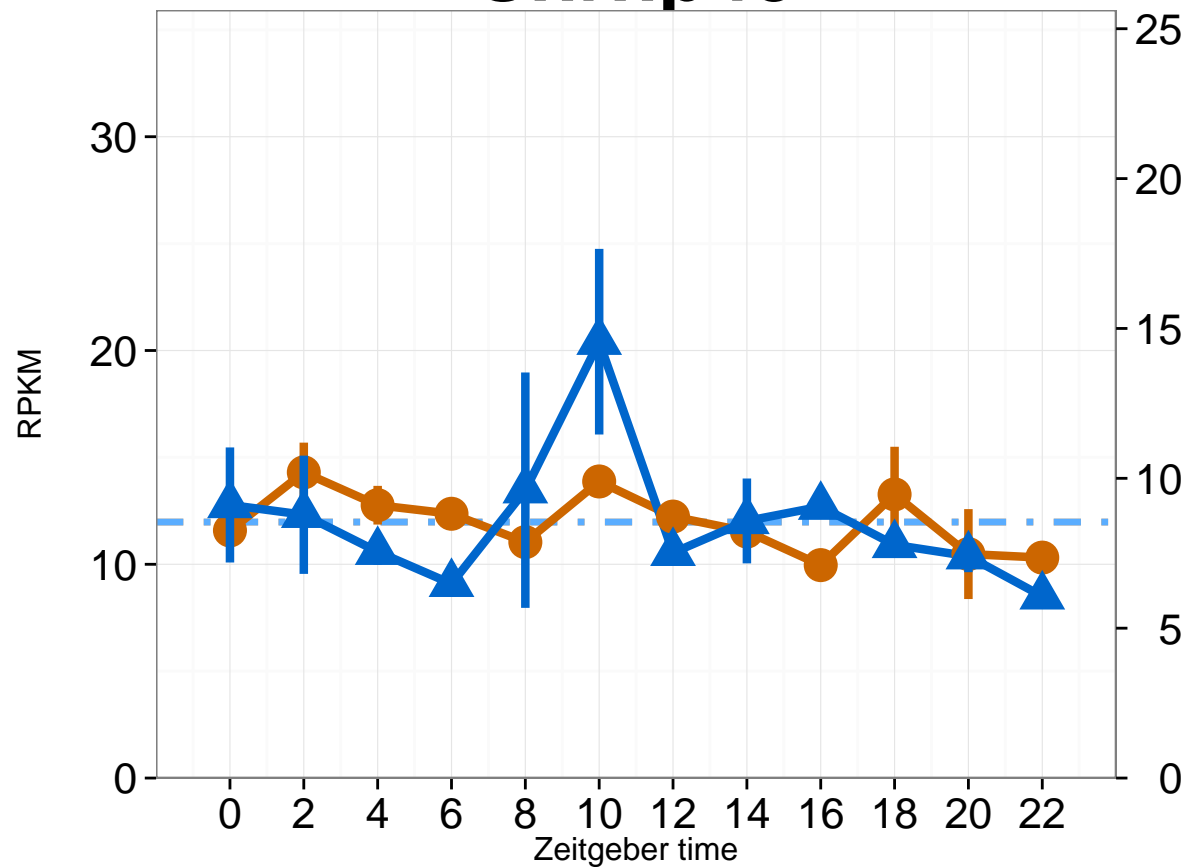

# Snrnnp48

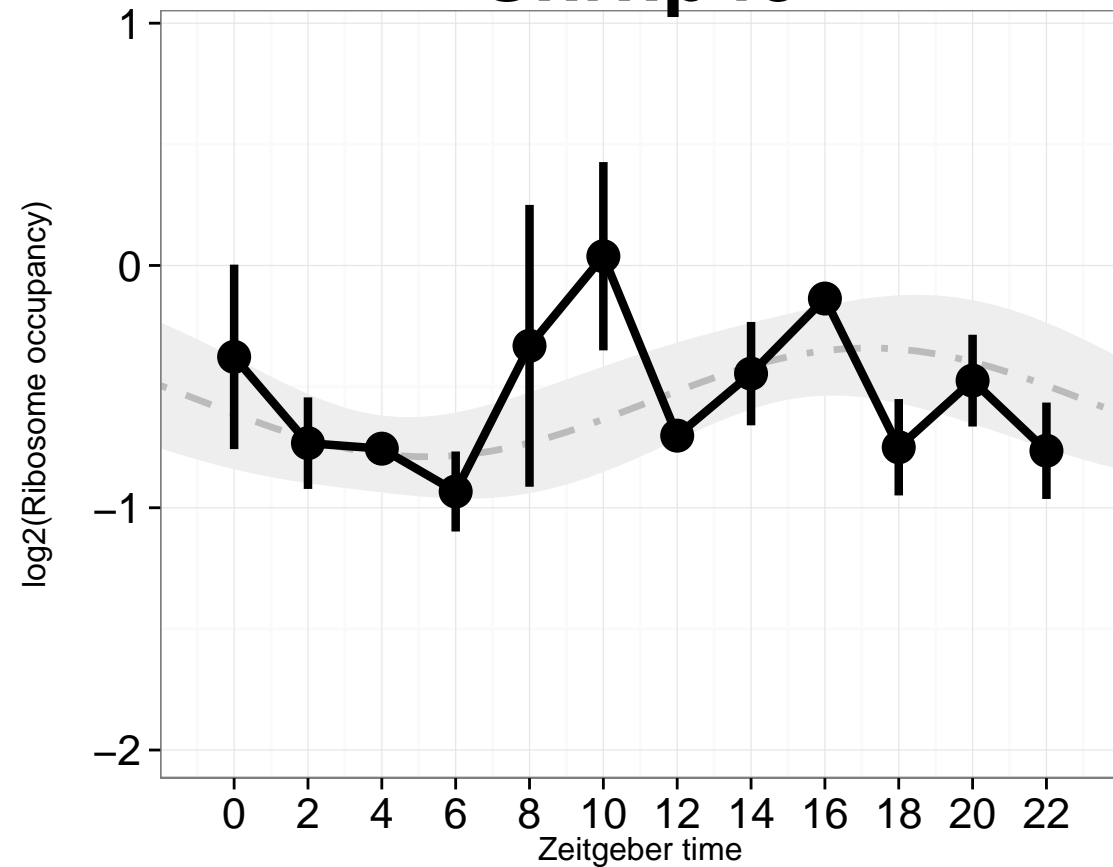

Supplement: SuppDataset_1.zip [file Snrnp48_set_A.pdf › Supplemental Dataset 1/A-mRNA_nonrhyth_translation_nonrhyth/Snrnp48_set_A.pdf]

# Snrnp70

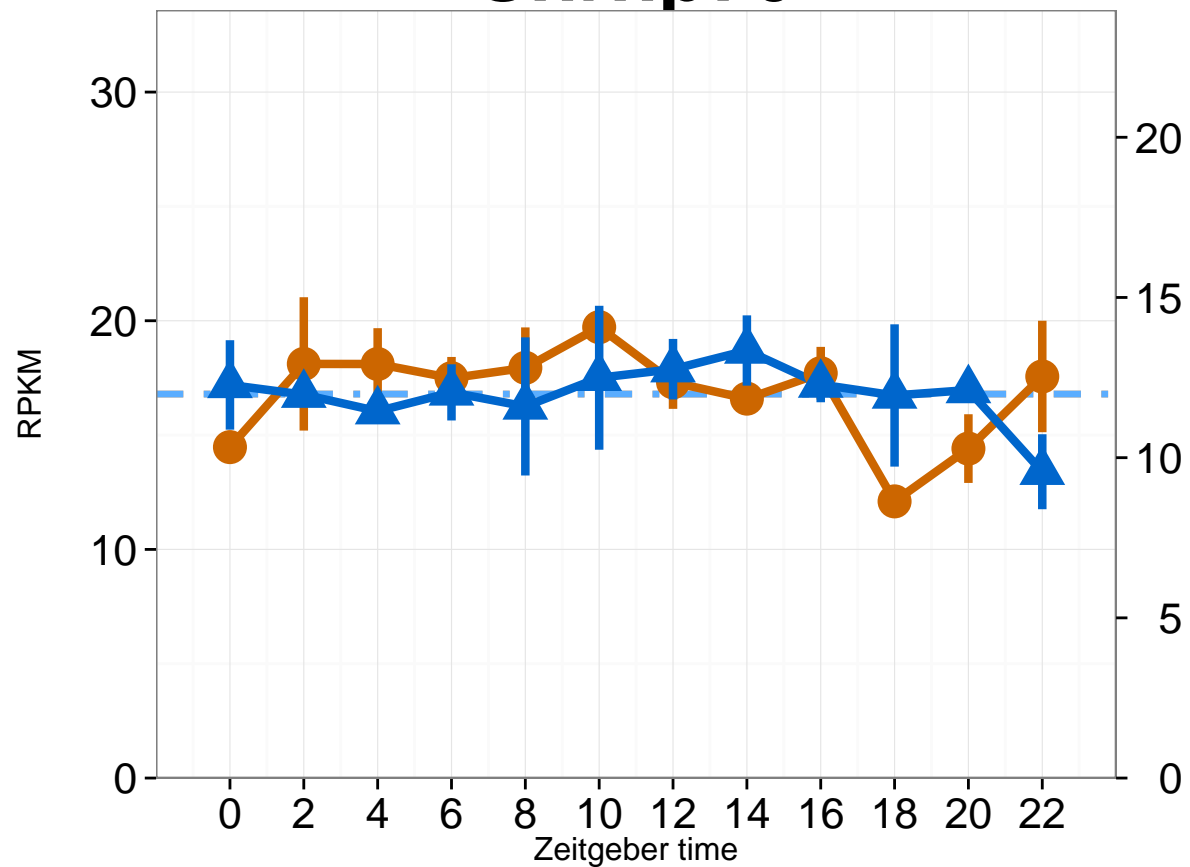

# Snrnp70

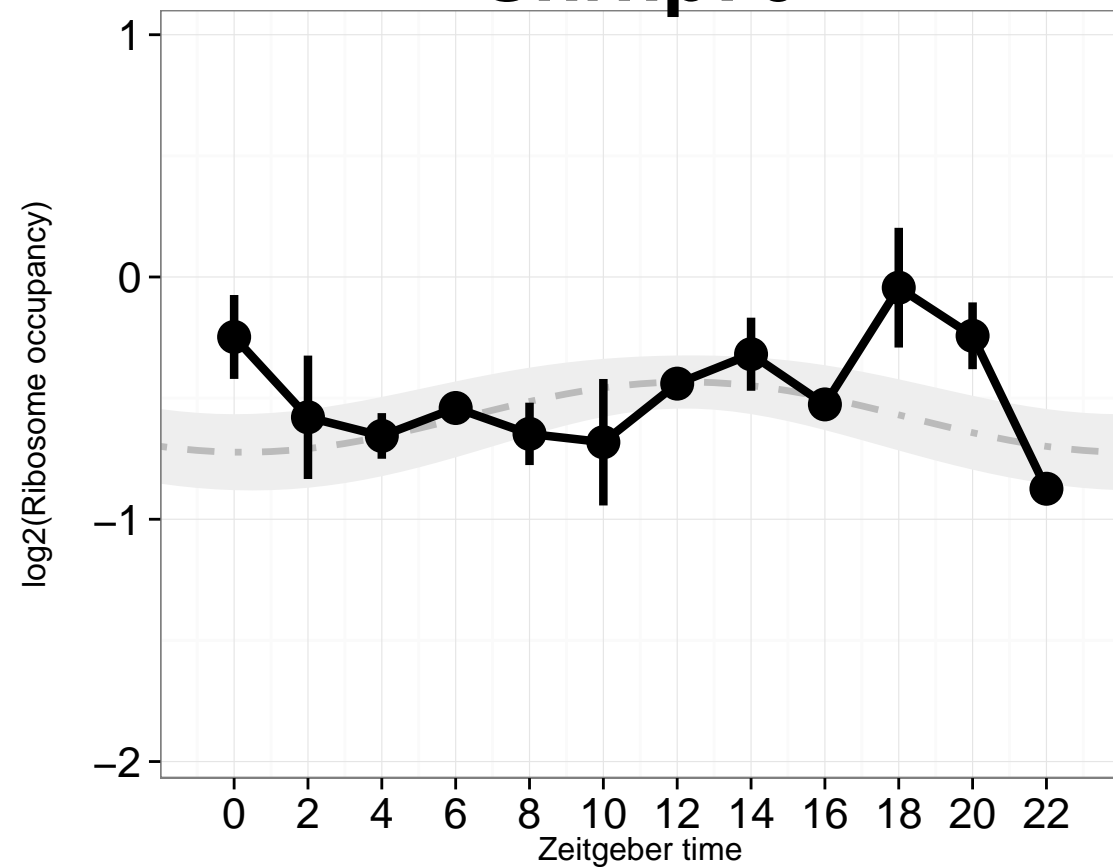

Supplement: SuppDataset_1.zip [file Snrnp70_set_A.pdf › Supplemental Dataset 1/A-mRNA_nonrhyth_translation_nonrhyth/Snrnp70_set_A.pdf]

# Snrpa1

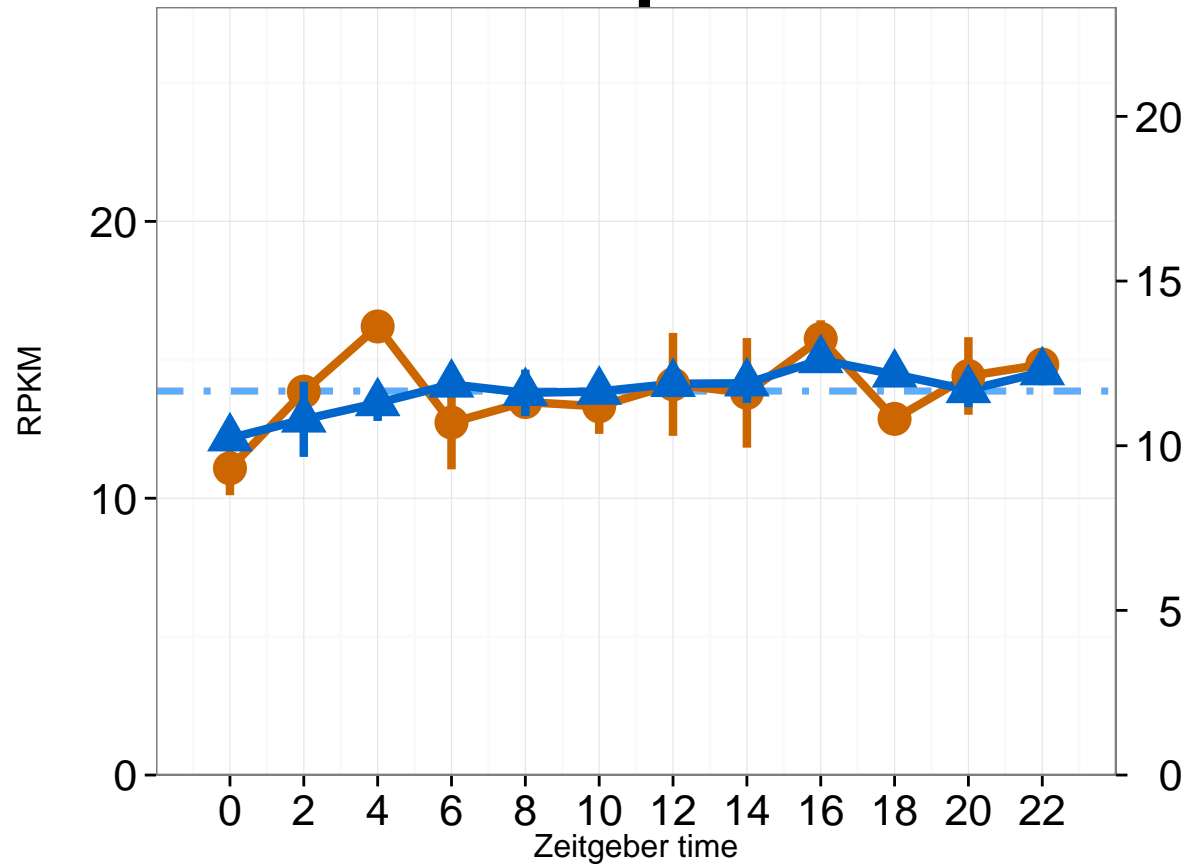

# Snrpa1

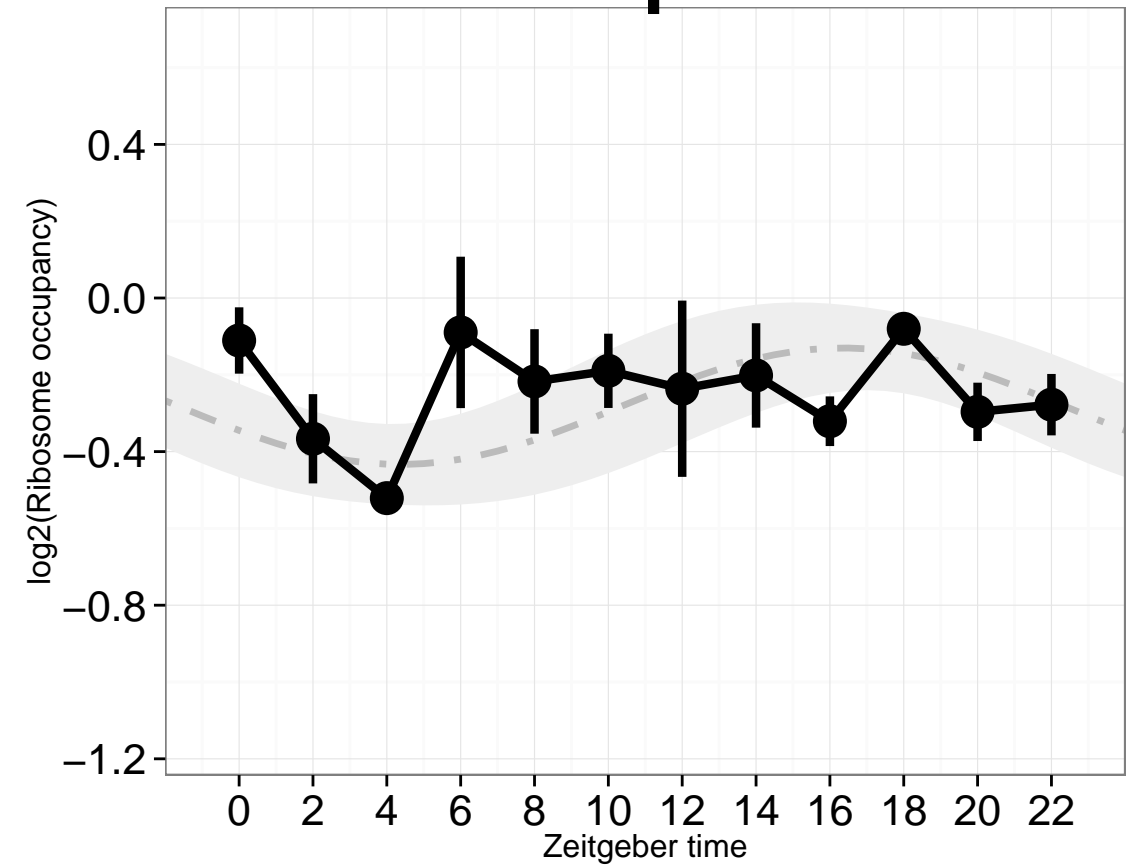

Supplement: SuppDataset_1.zip [file Snrpa1_set_A.pdf › Supplemental Dataset 1/A-mRNA_nonrhyth_translation_nonrhyth/Snrpa1_set_A.pdf]

# Snrpb2

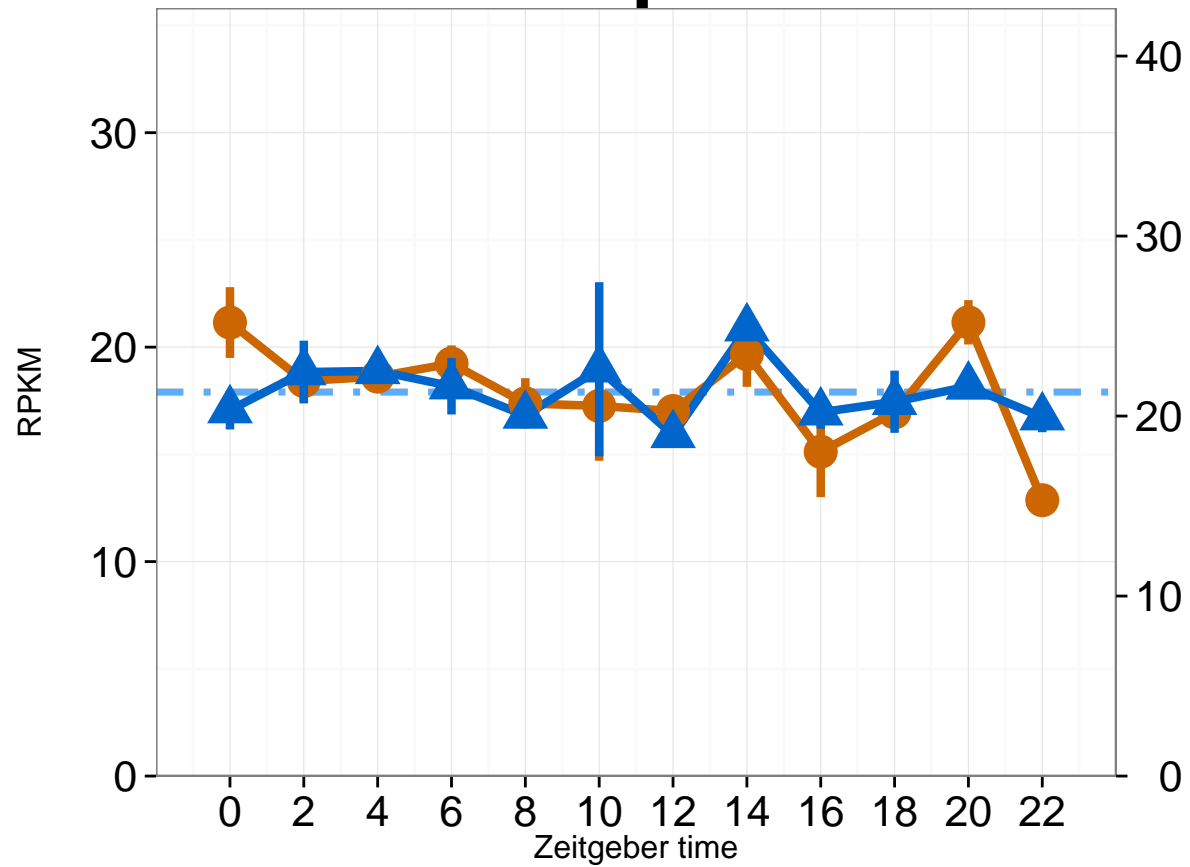

# Snrpb2

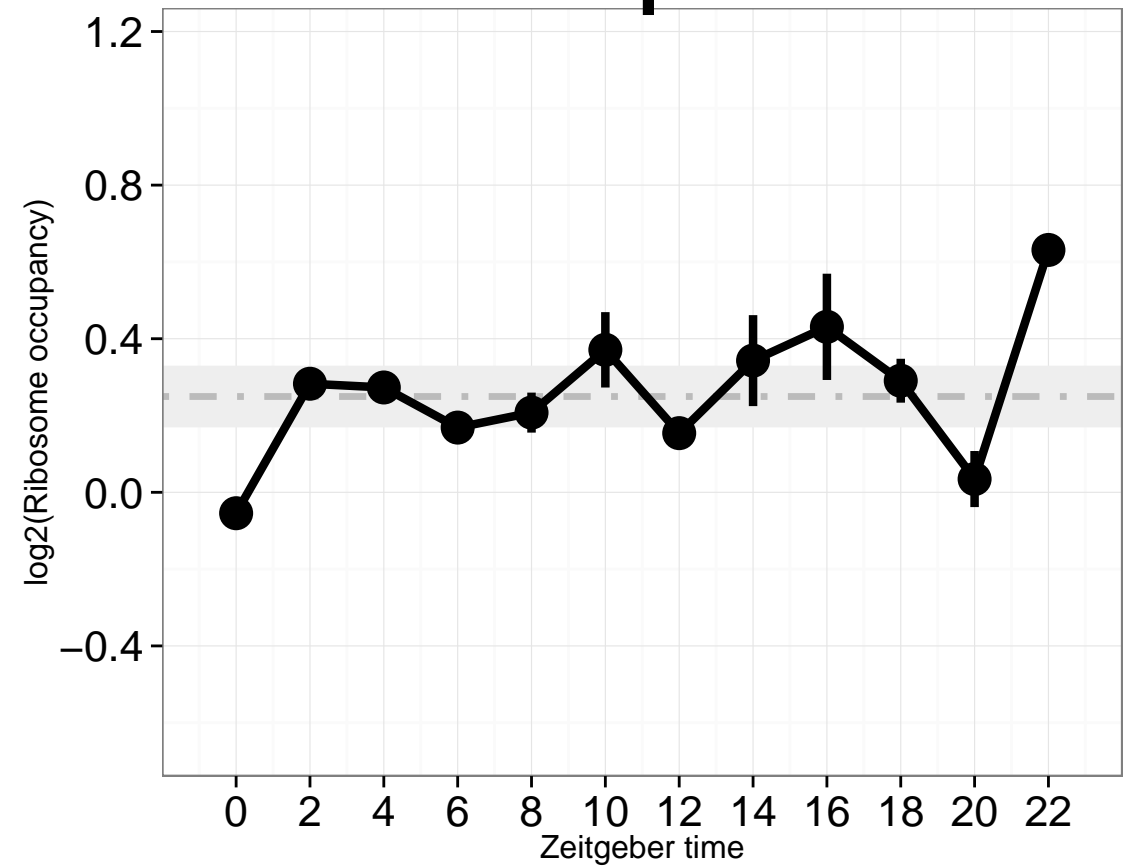

Supplement: SuppDataset_1.zip [file Snrpb2_set_A.pdf › Supplemental Dataset 1/A-mRNA_nonrhyth_translation_nonrhyth/Snrpb2_set_A.pdf]

## Snrpb

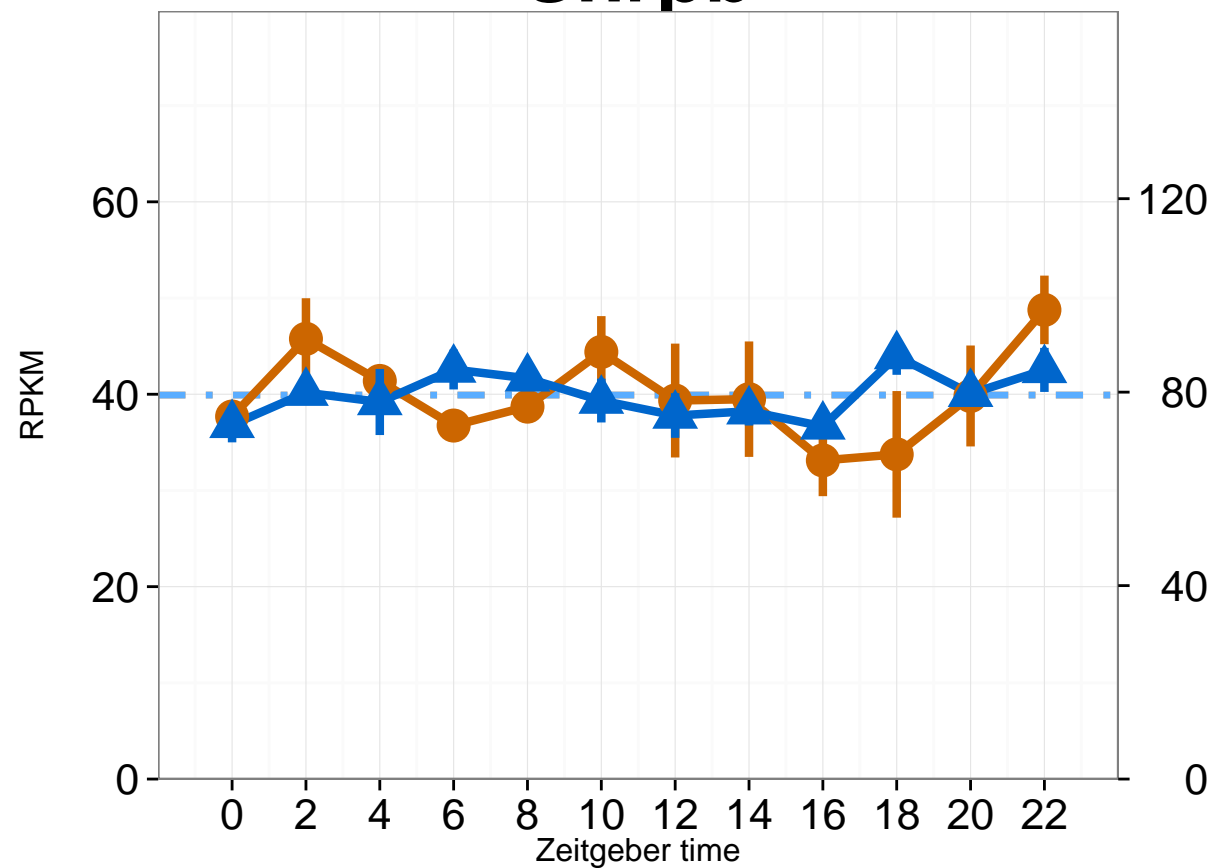

## Snrpb

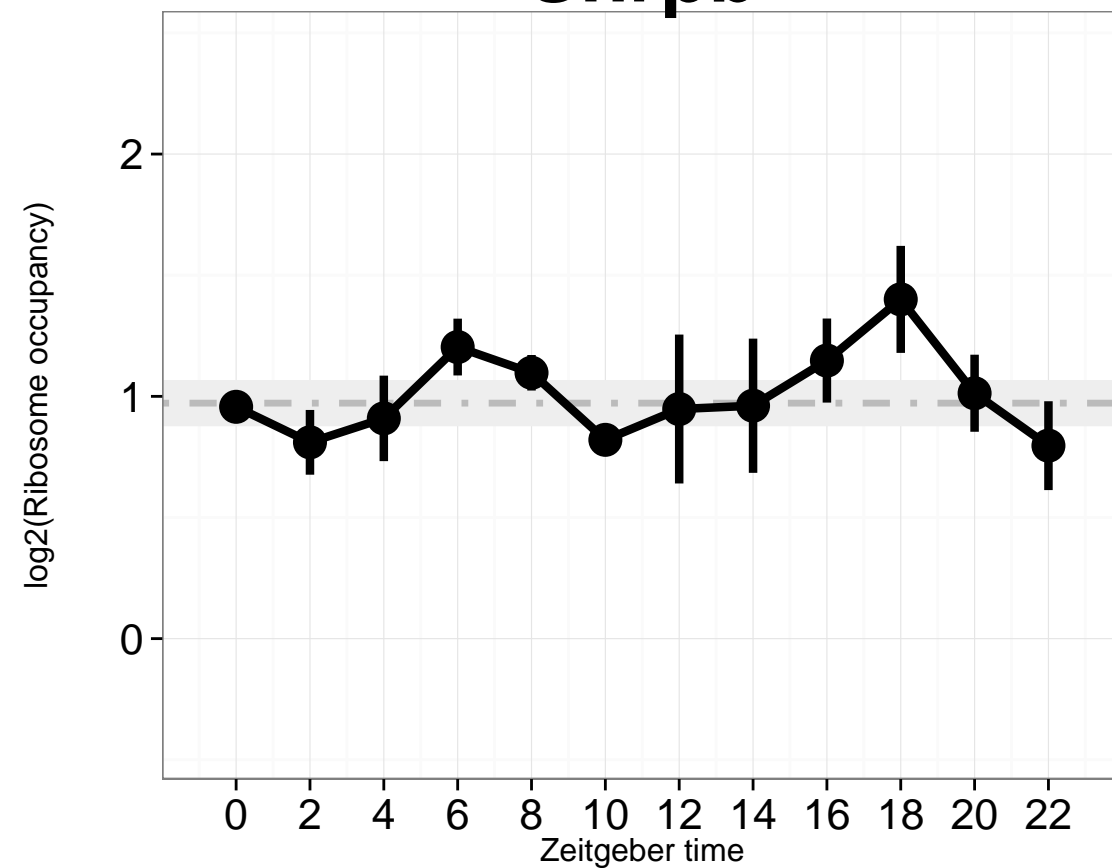

Supplement: SuppDataset_1.zip [file Snrpb_set_A.pdf › Supplemental Dataset 1/A-mRNA_nonrhyth_translation_nonrhyth/Snrpb_set_A.pdf]

## Snrpc

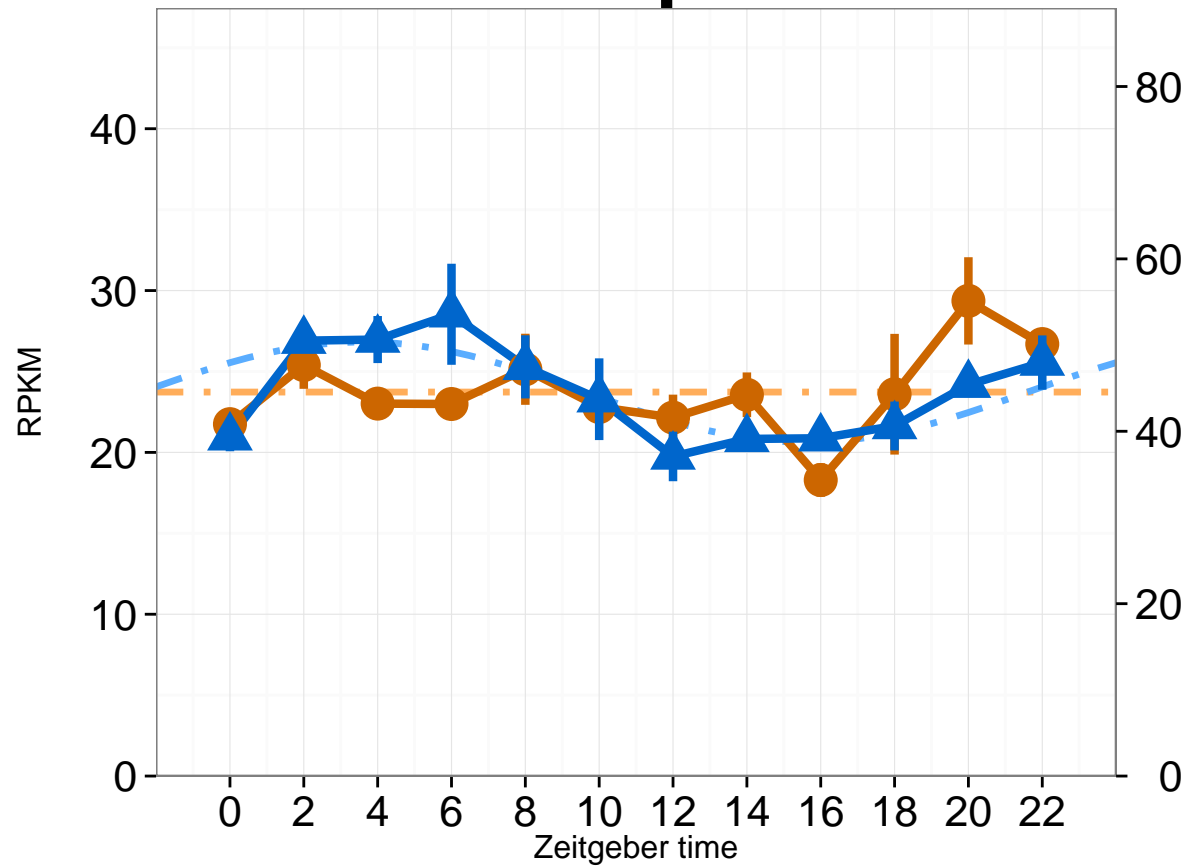

## Snrpc

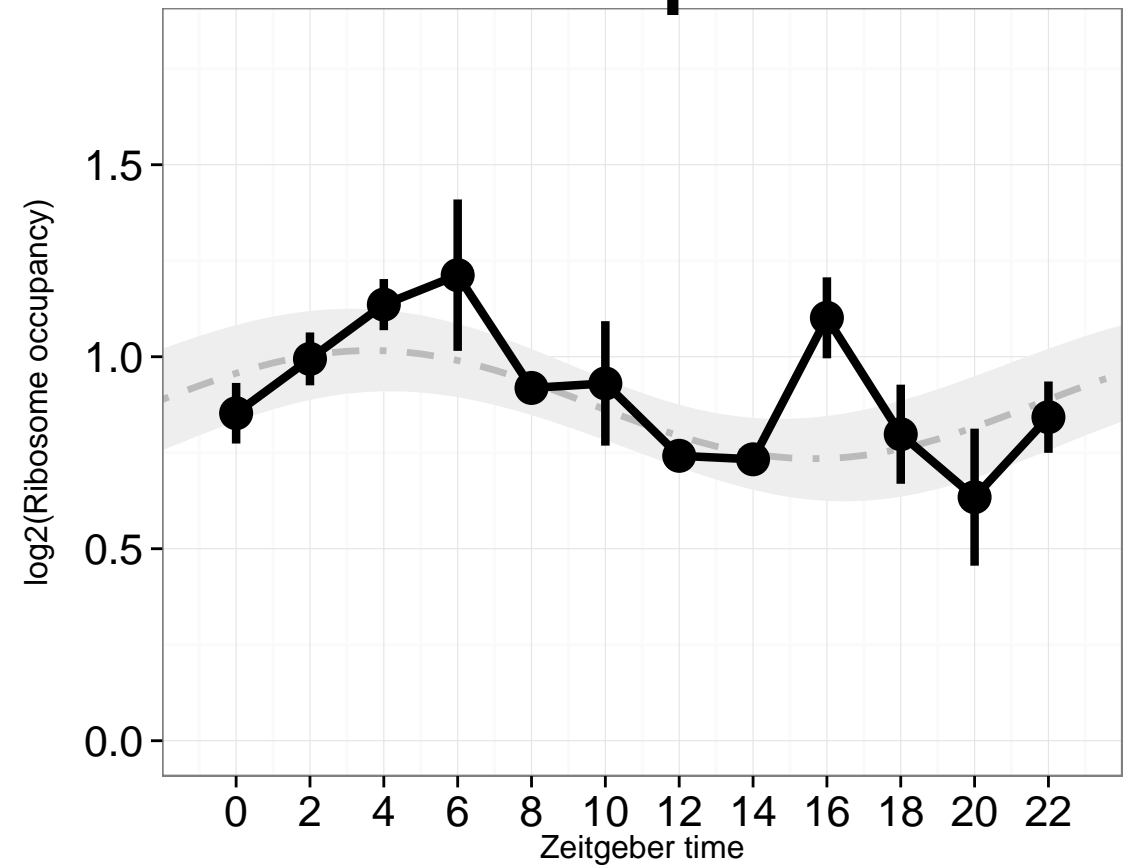

Supplement: SuppDataset_1.zip [file Snrpc_set_A.pdf › Supplemental Dataset 1/A-mRNA_nonrhyth_translation_nonrhyth/Snrpc_set_A.pdf]

## Snrpd1

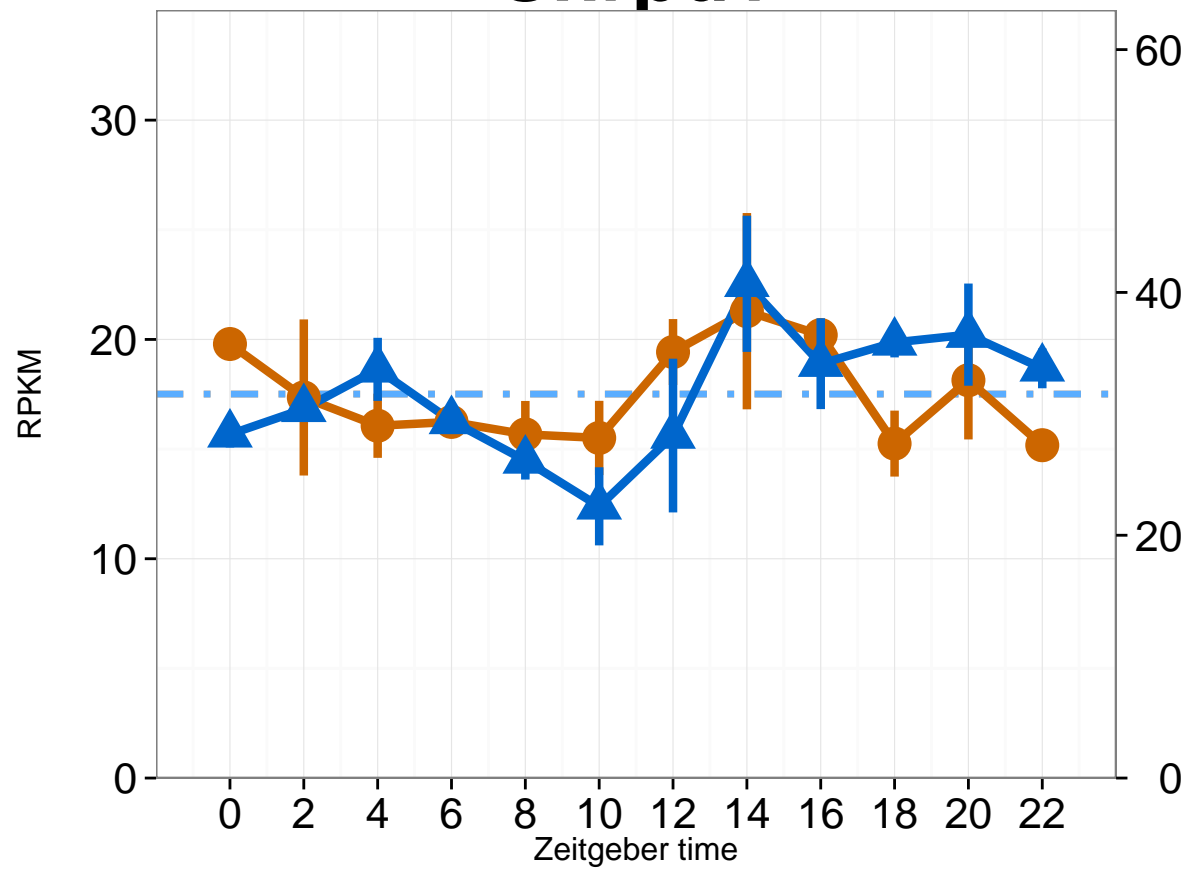

## Snrpd1

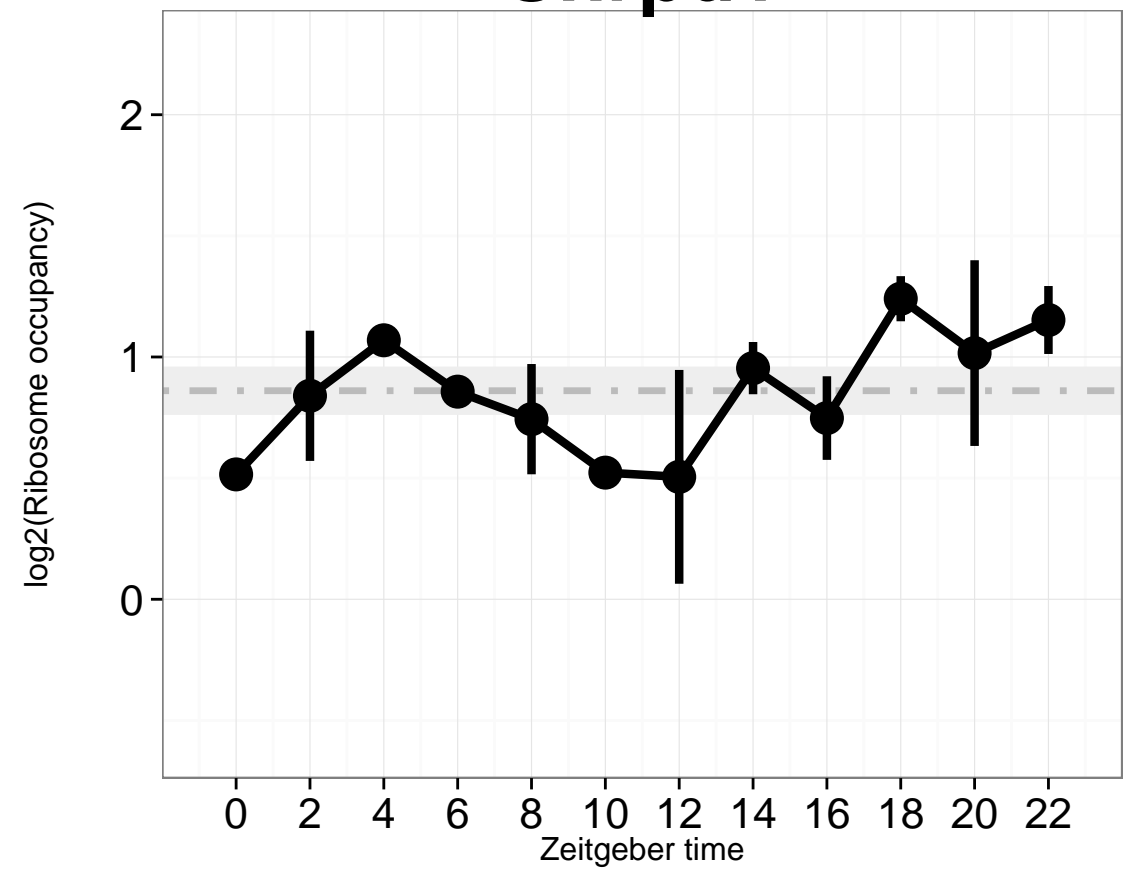

Supplement: SuppDataset_1.zip [file Snrpd1_set_A.pdf › Supplemental Dataset 1/A-mRNA_nonrhyth_translation_nonrhyth/Snrpd1_set_A.pdf]

## Snrpd2

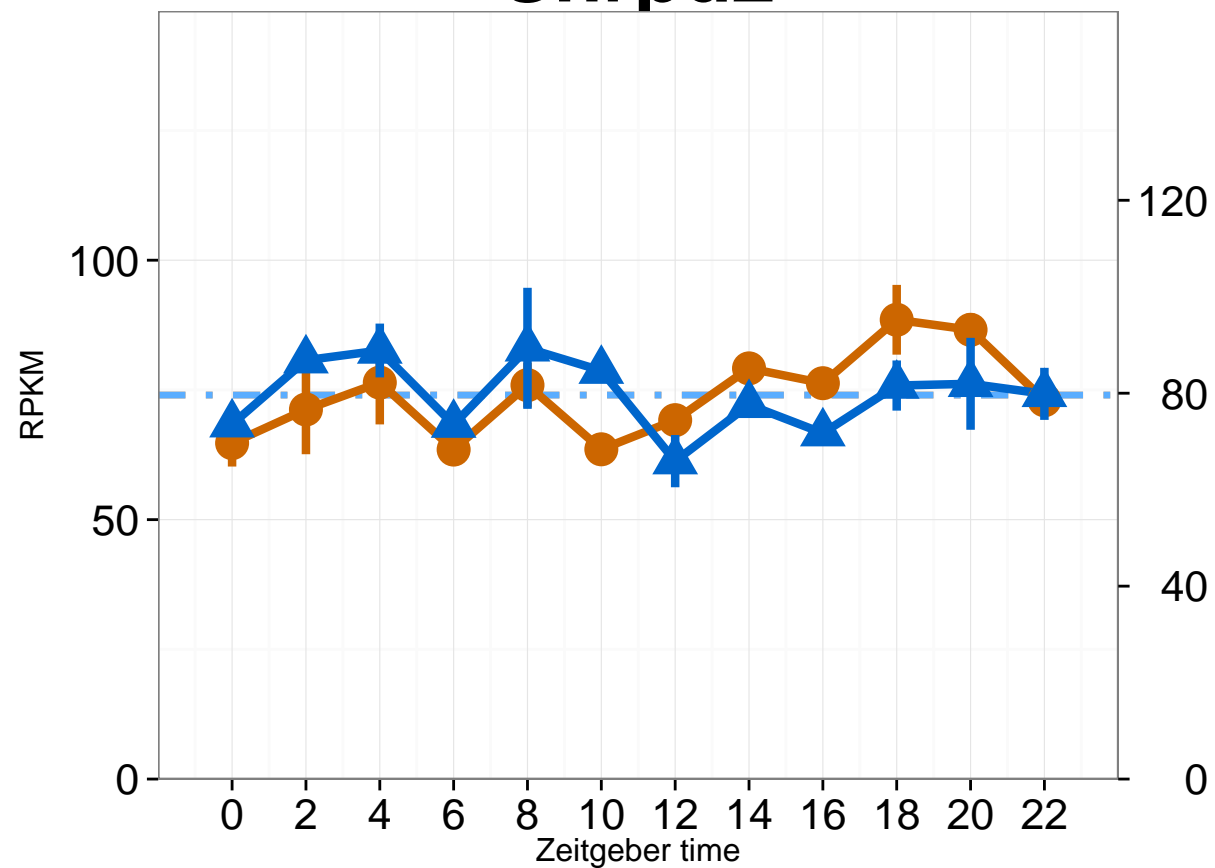

## Snrpd2

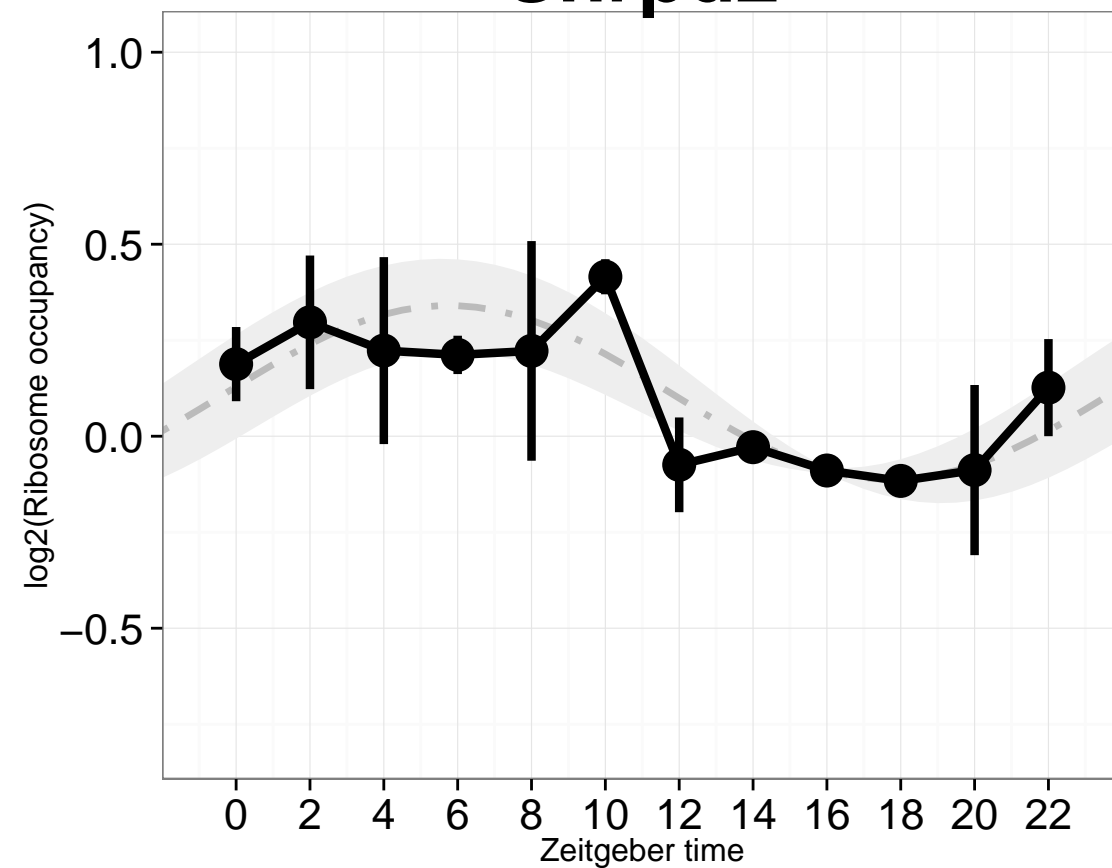

Supplement: SuppDataset_1.zip [file Snrpd2_set_A.pdf › Supplemental Dataset 1/A-mRNA_nonrhyth_translation_nonrhyth/Snrpd2_set_A.pdf]

## Snrpd3

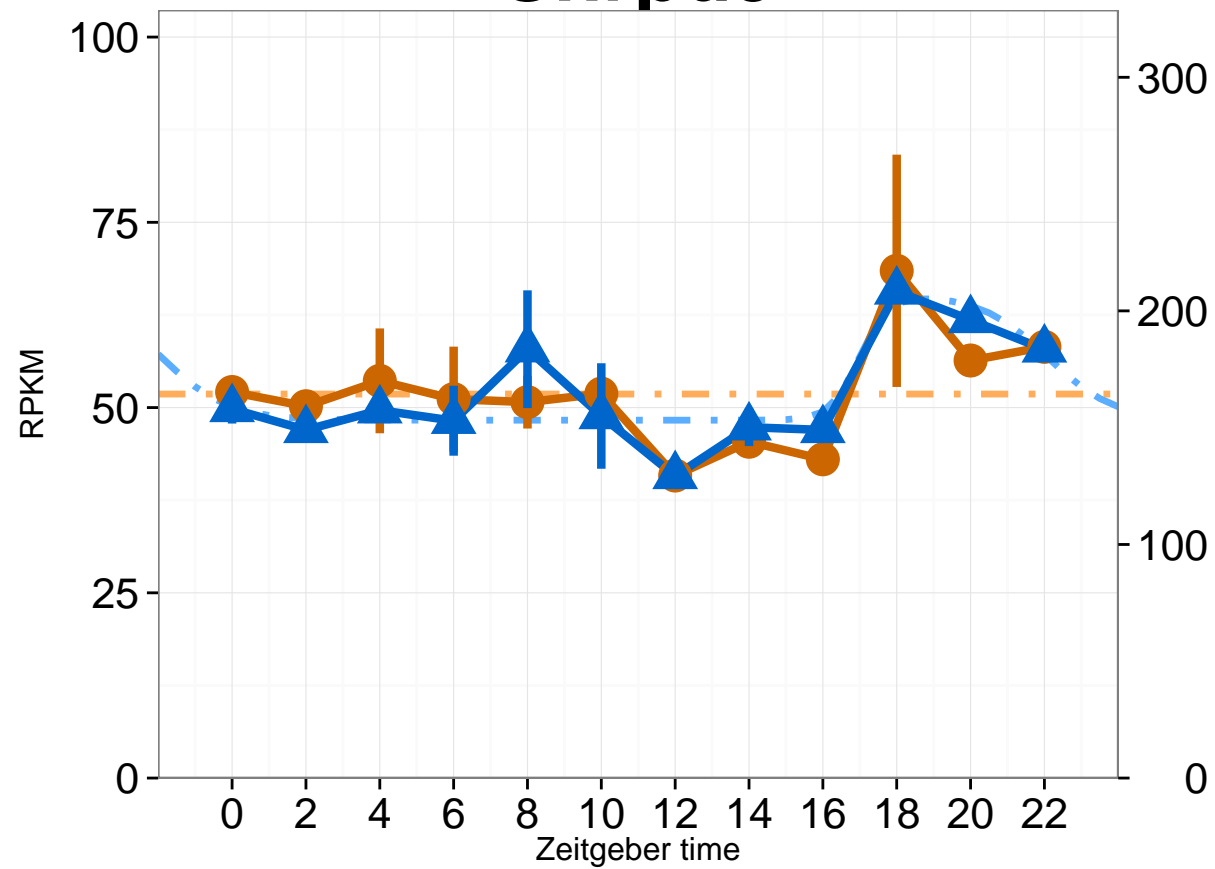

## Snrpd3

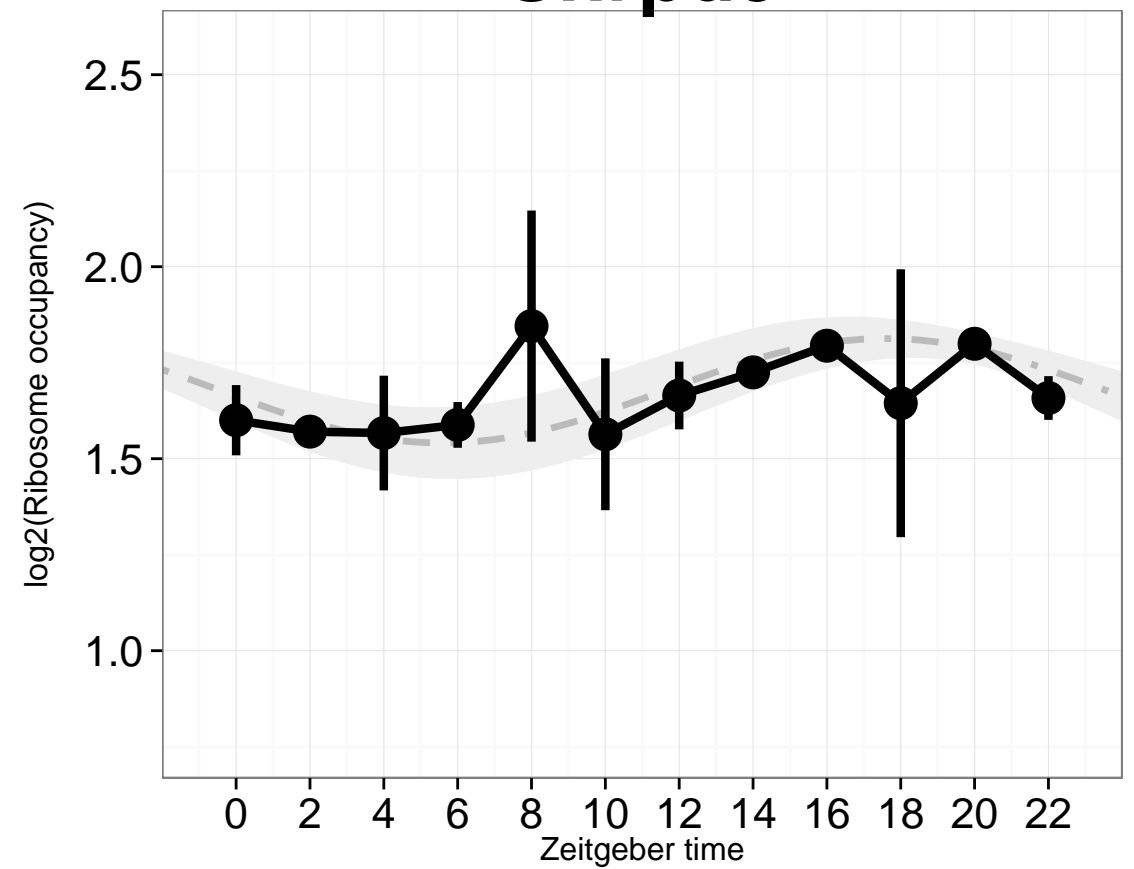

Supplement: SuppDataset_1.zip [file Snrpd3_set_A.pdf › Supplemental Dataset 1/A-mRNA_nonrhyth_translation_nonrhyth/Snrpd3_set_A.pdf]

## Snrpe

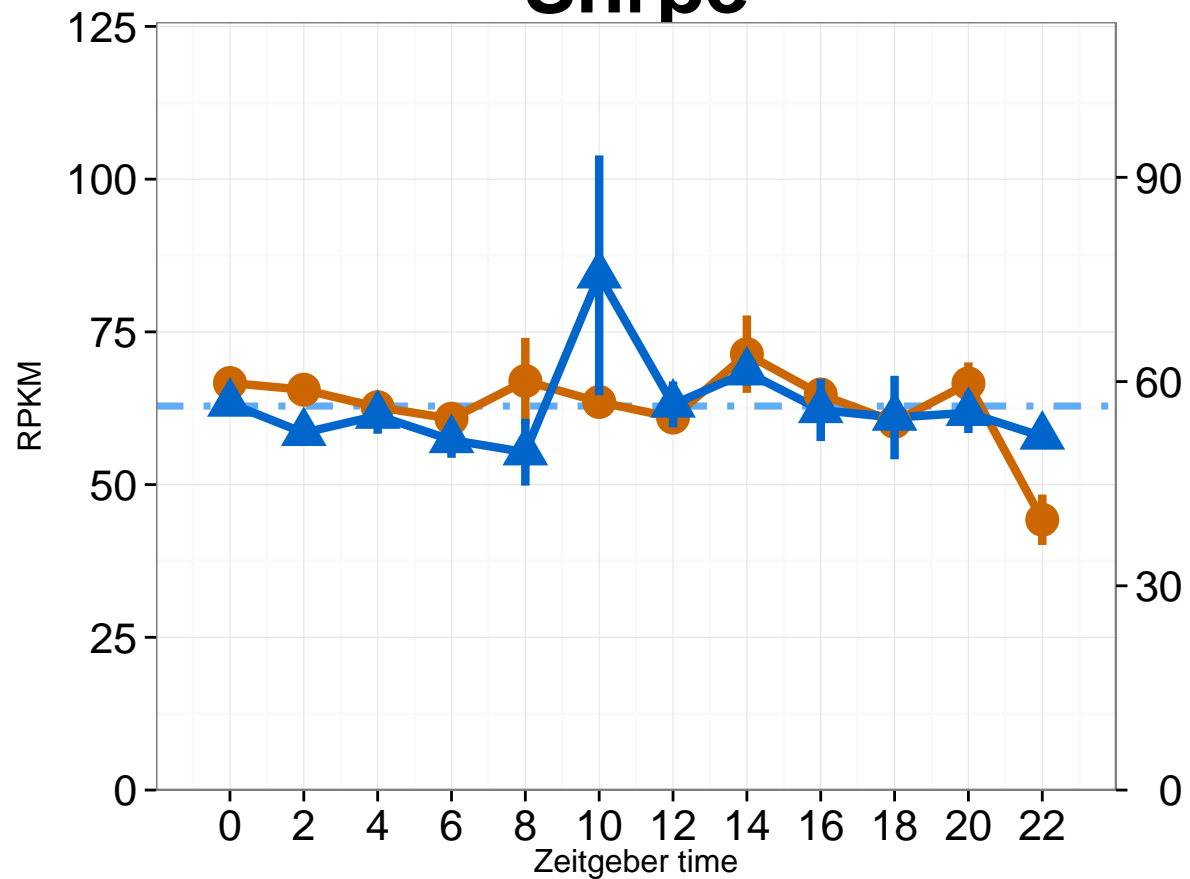

## Snrpe

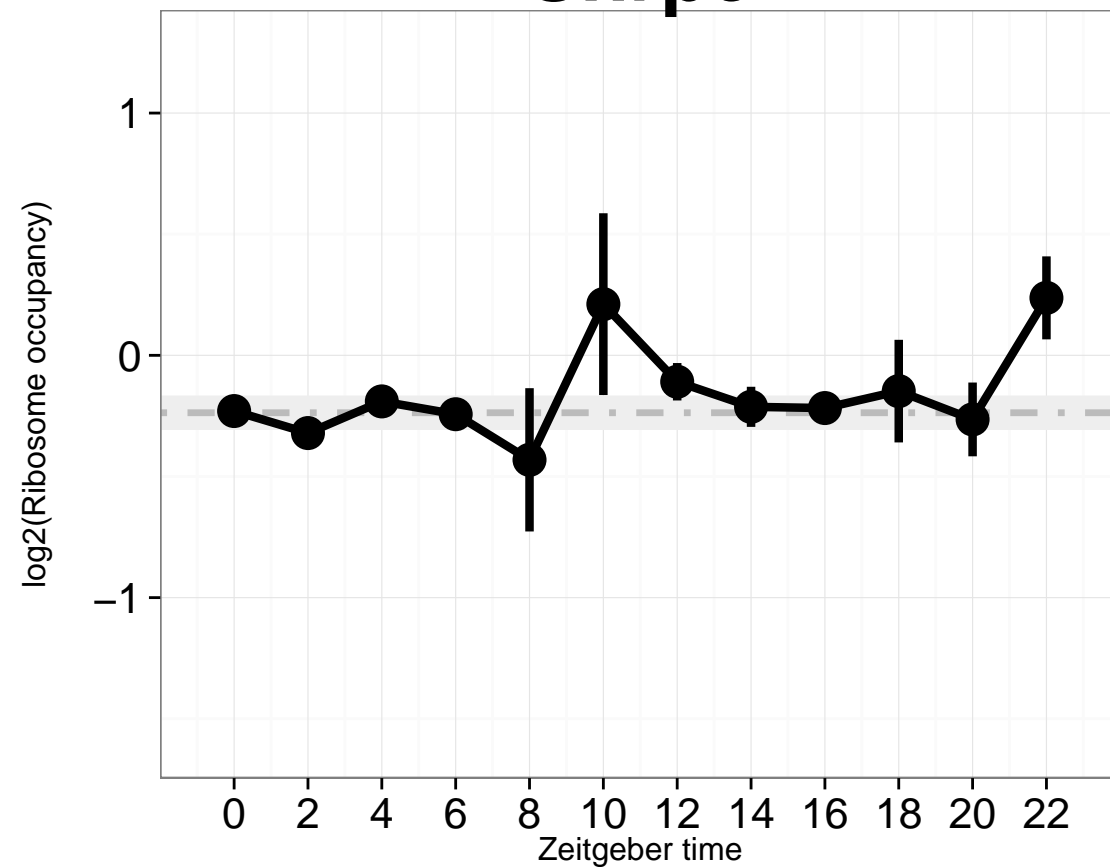

Supplement: SuppDataset_1.zip [file Snrpe_set_A.pdf › Supplemental Dataset 1/A-mRNA_nonrhyth_translation_nonrhyth/Snrpe_set_A.pdf]

## Snrpf

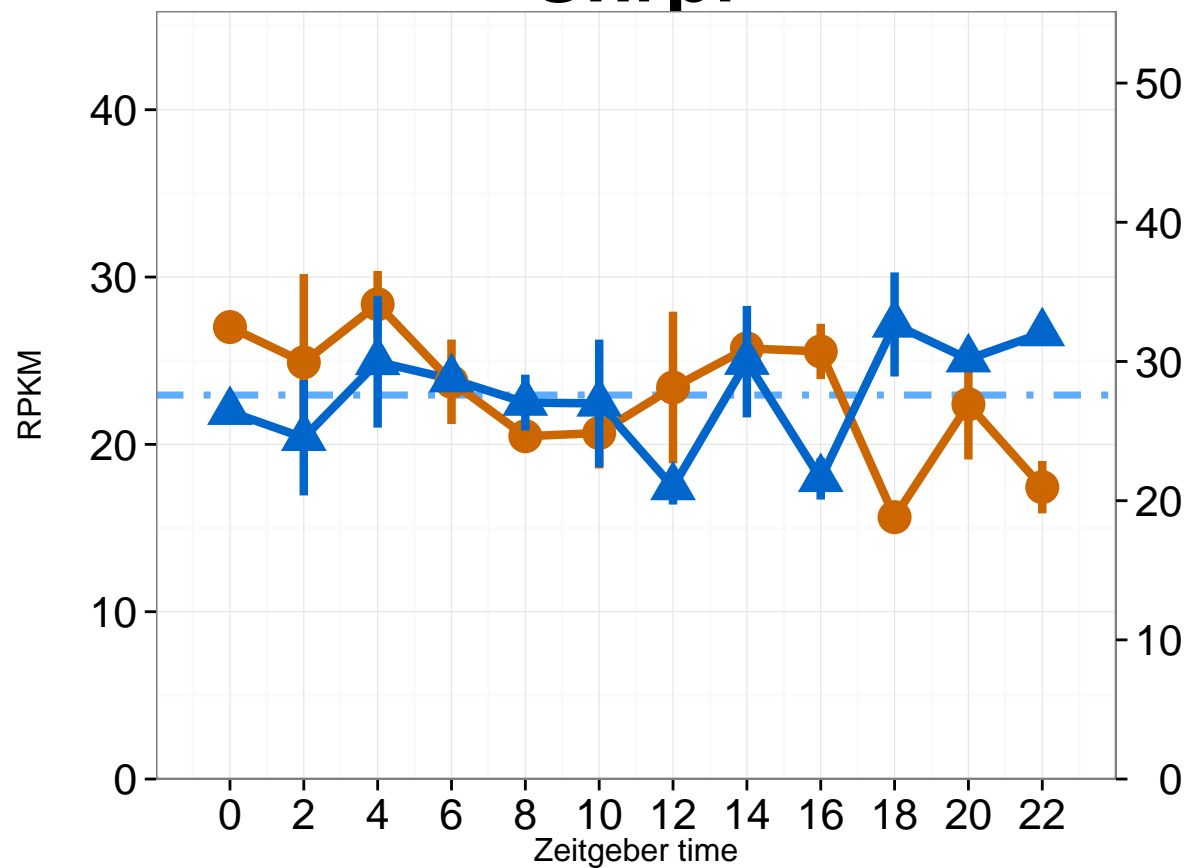

## Snrpf

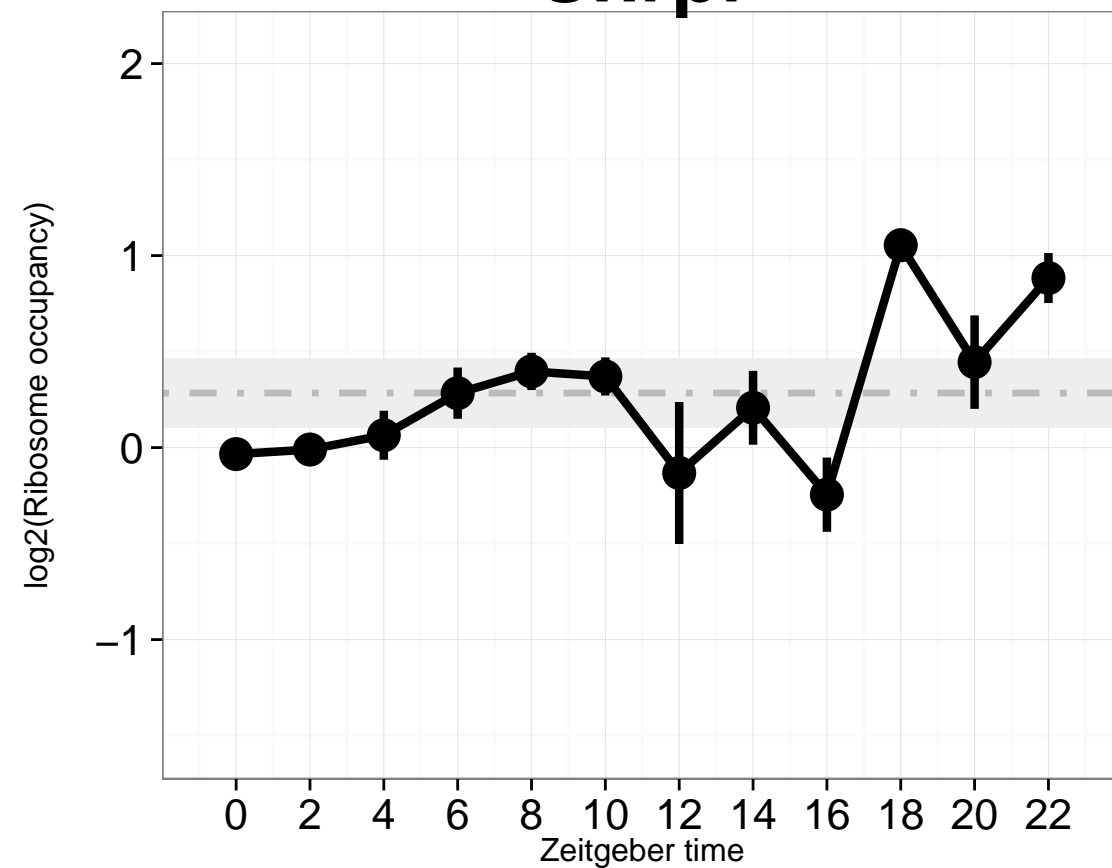

Supplement: SuppDataset_1.zip [file Snrpf_set_A.pdf › Supplemental Dataset 1/A-mRNA_nonrhyth_translation_nonrhyth/Snrpf_set_A.pdf]

## Snrpn

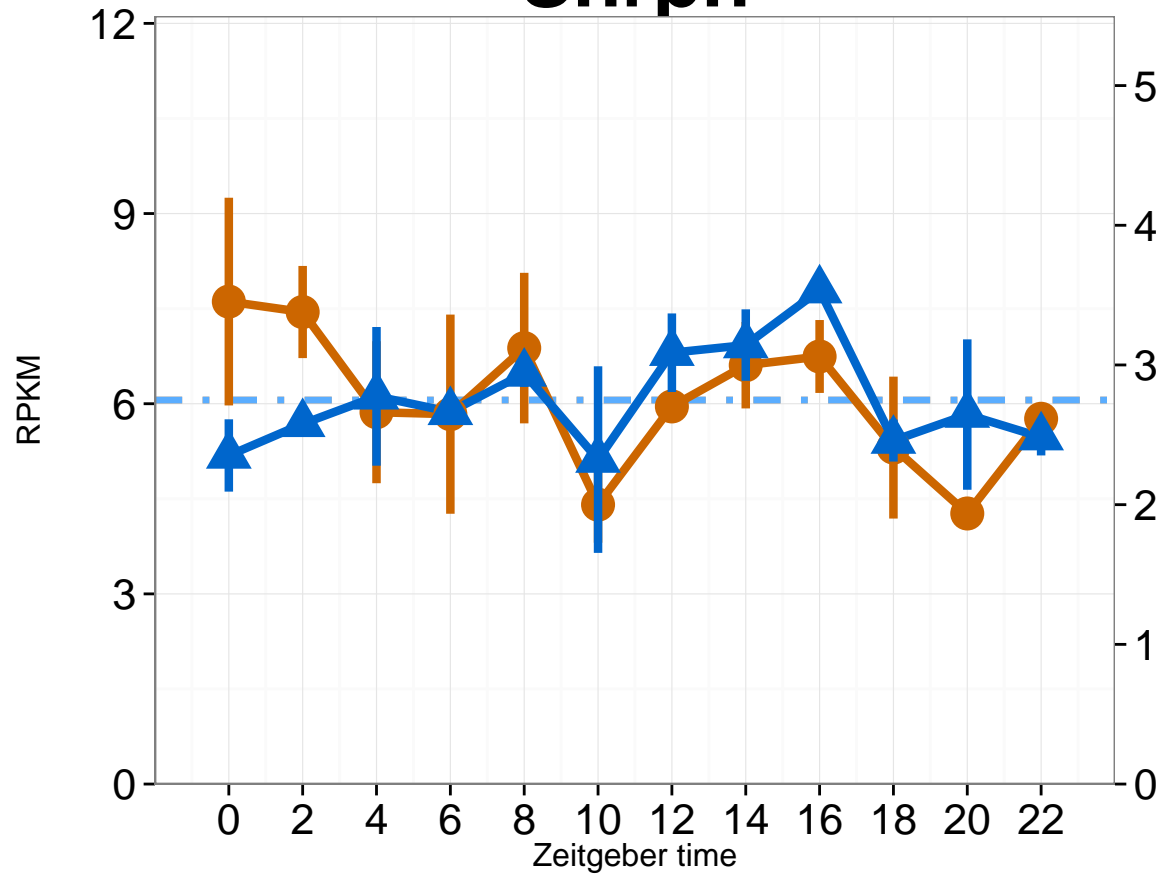

## Snrpn

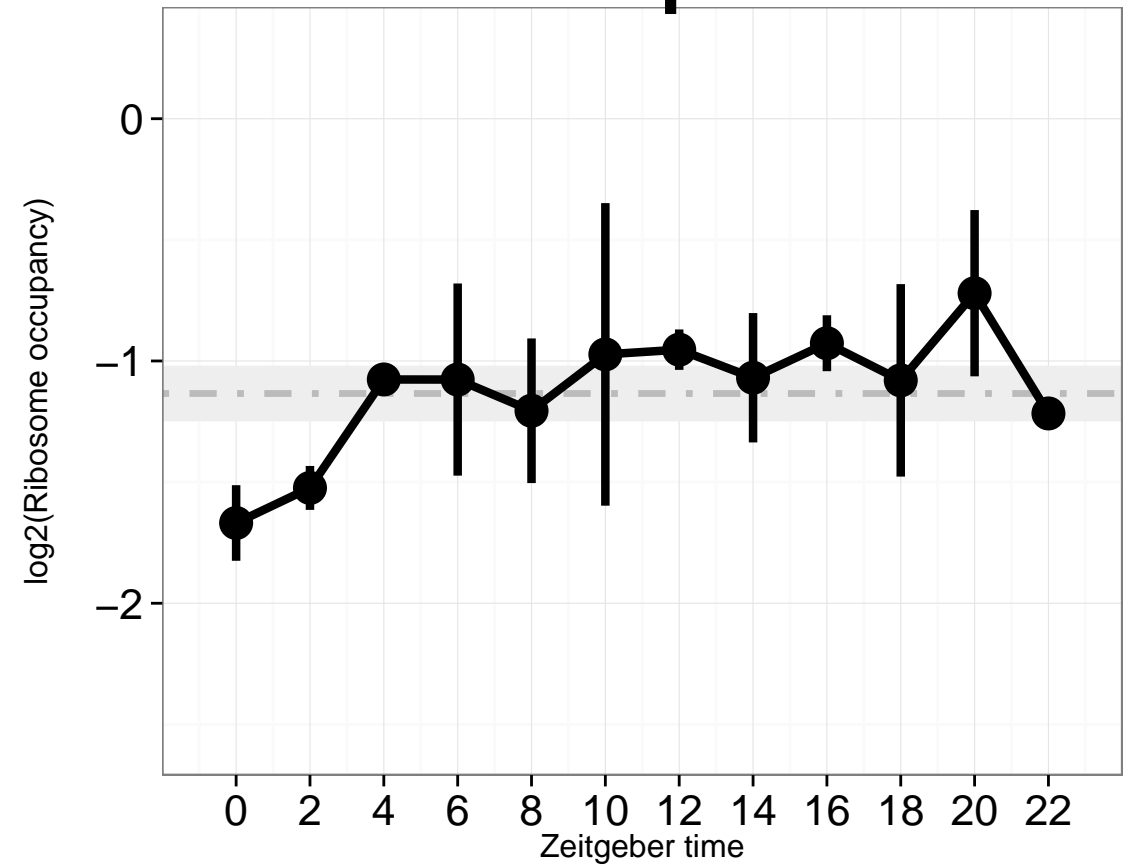

Supplement: SuppDataset_1.zip [file Snrpn_set_A.pdf › Supplemental Dataset 1/A-mRNA_nonrhyth_translation_nonrhyth/Snrpn_set_A.pdf]

# Sntb1

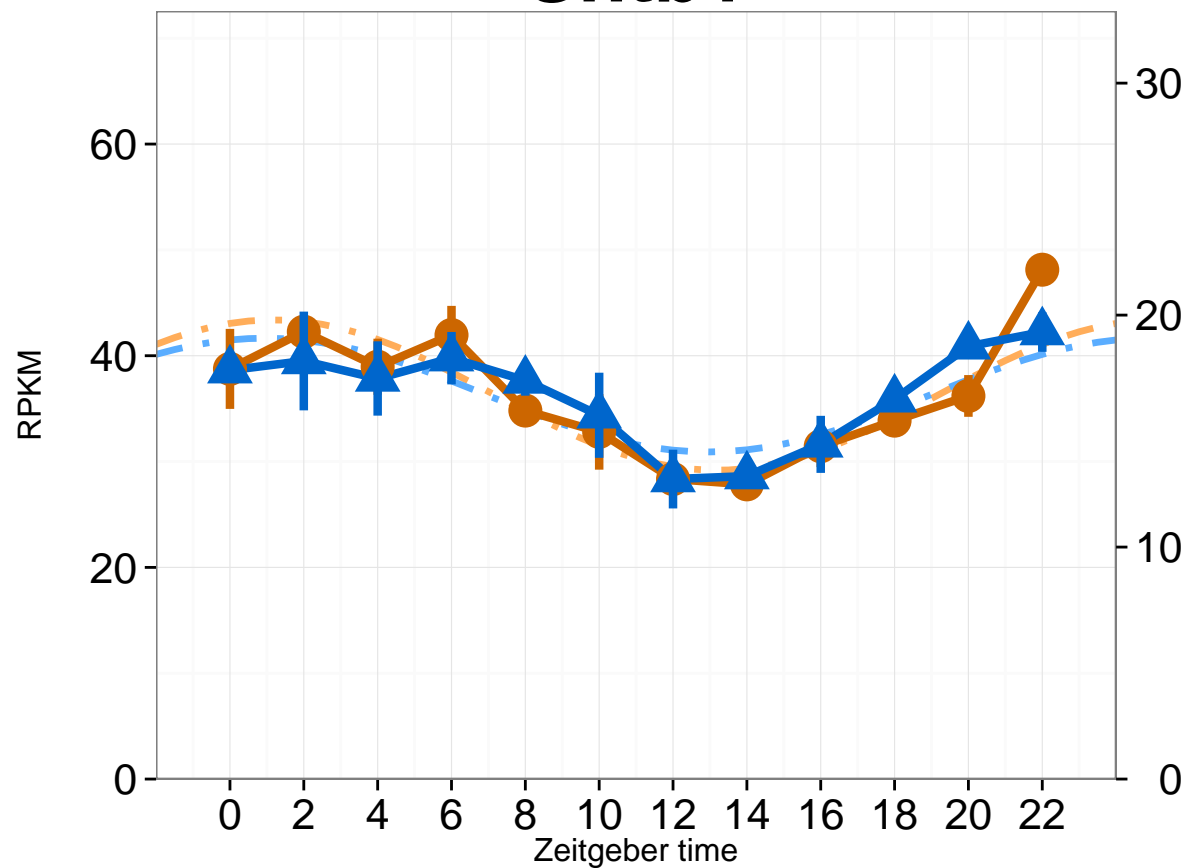

# Sntb1

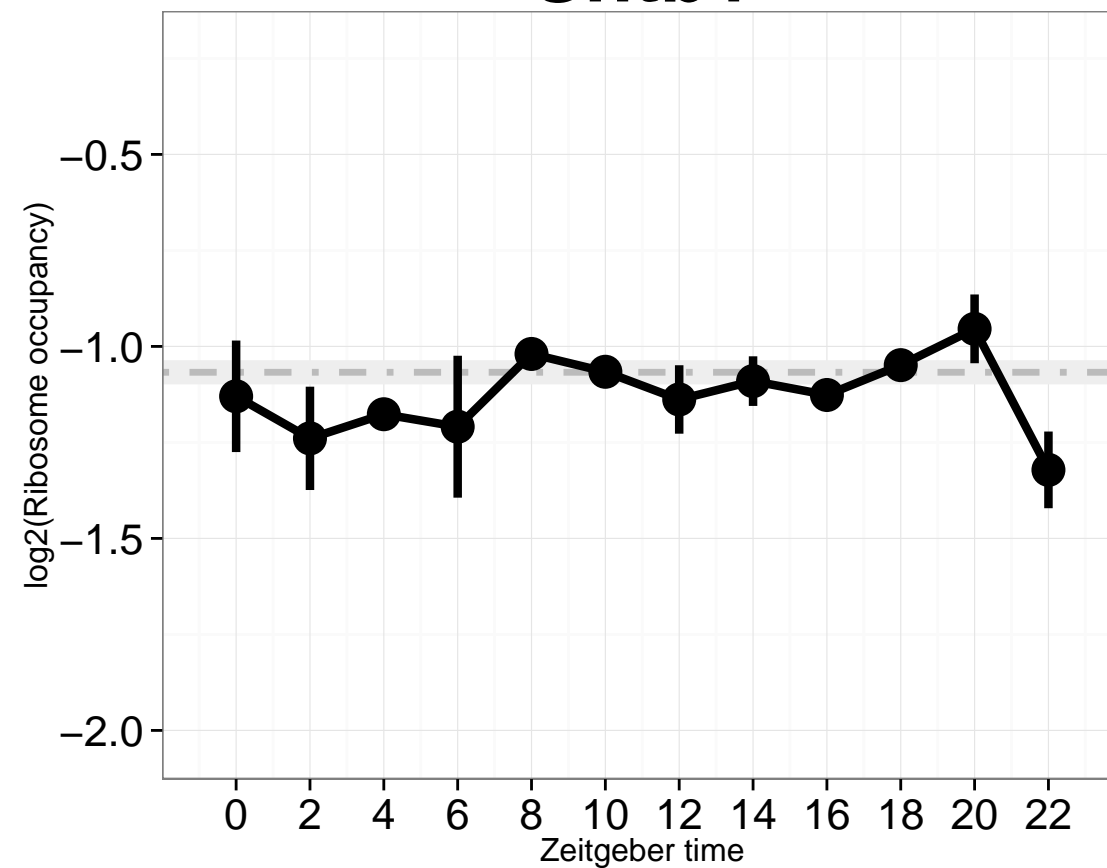

Supplement: SuppDataset_1.zip [file Sntb1_set_A.pdf › Supplemental Dataset 1/A-mRNA_nonrhyth_translation_nonrhyth/Sntb1_set_A.pdf]

## Sntb2

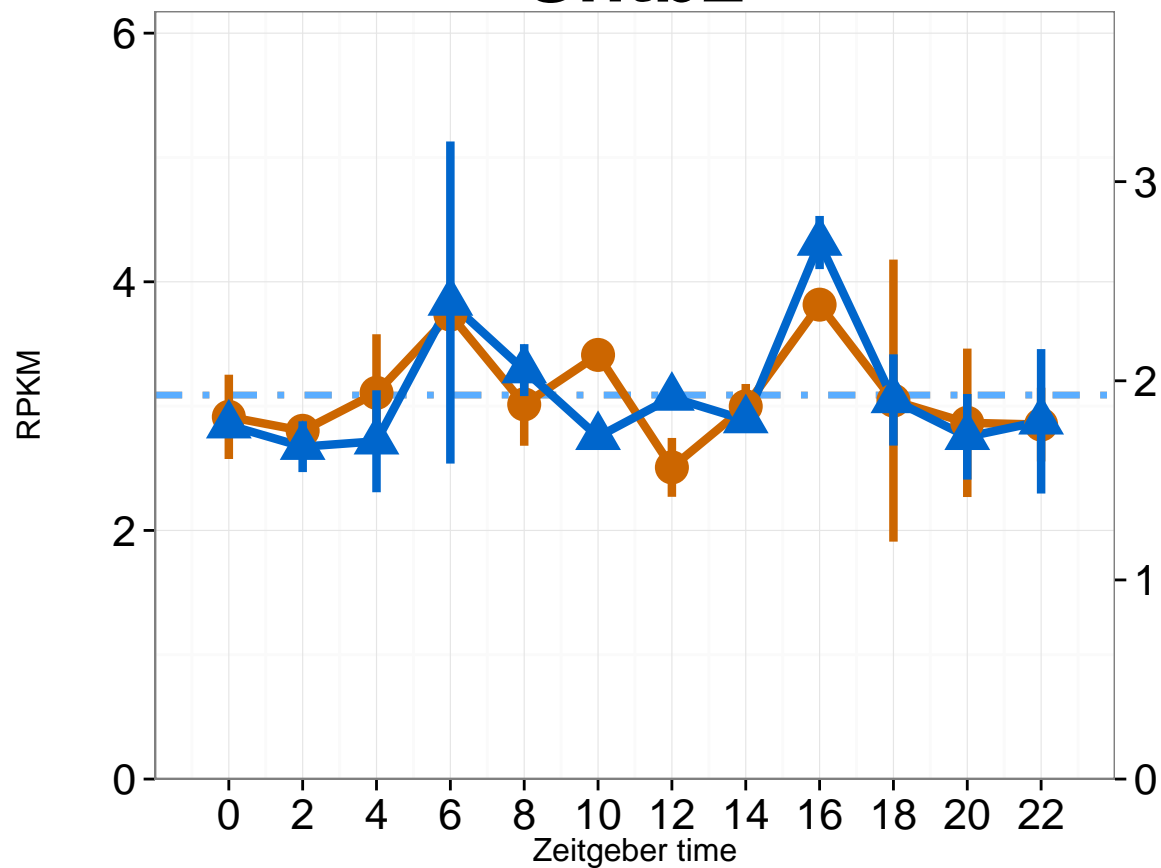

## Sntb2

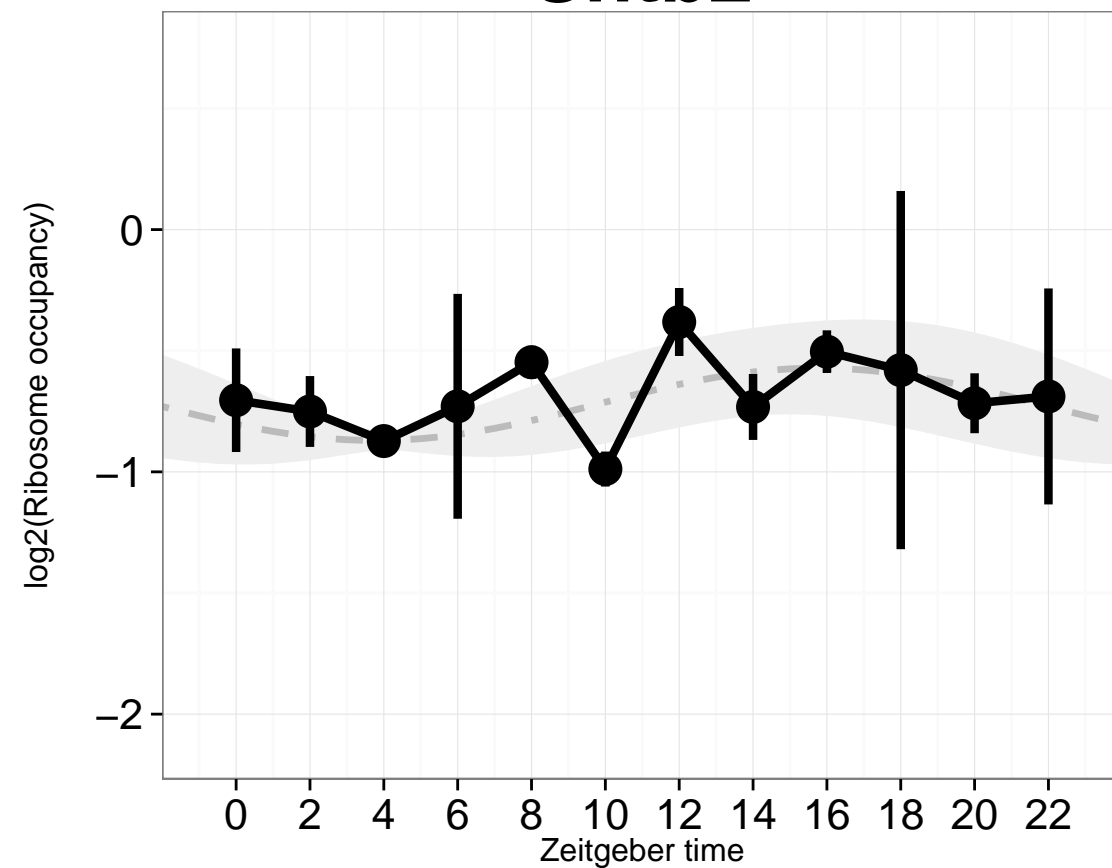

Supplement: SuppDataset_1.zip [file Sntb2_set_A.pdf › Supplemental Dataset 1/A-mRNA_nonrhyth_translation_nonrhyth/Sntb2_set_A.pdf]

## Sntg2

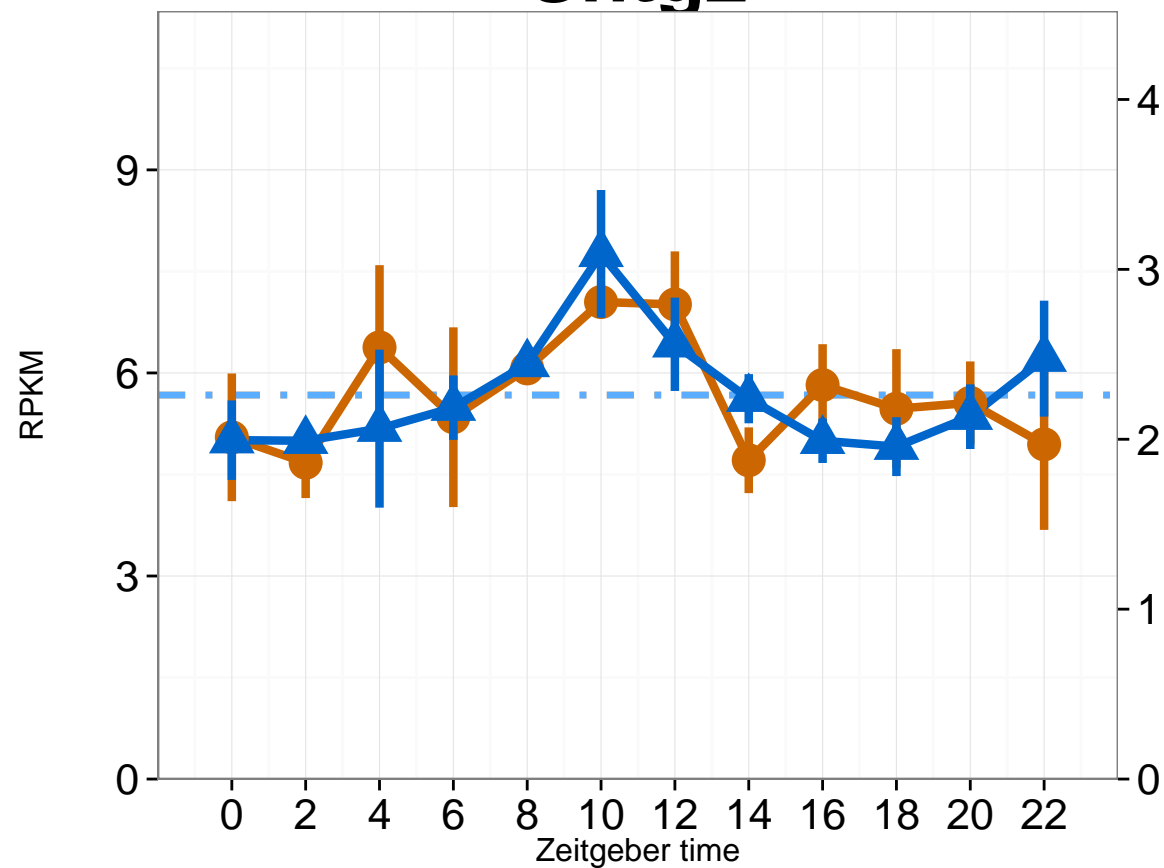

## Sntg2

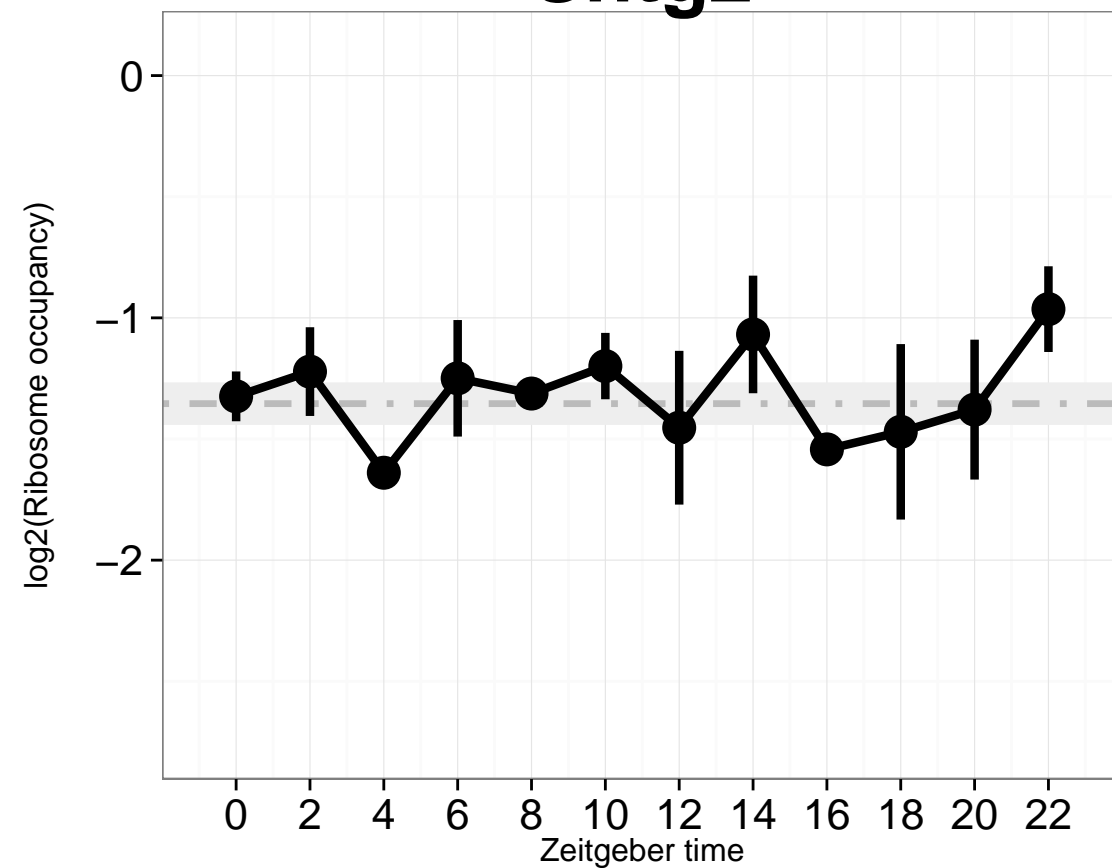

Supplement: SuppDataset_1.zip [file Sntg2_set_A.pdf › Supplemental Dataset 1/A-mRNA_nonrhyth_translation_nonrhyth/Sntg2_set_A.pdf]

## Snupn

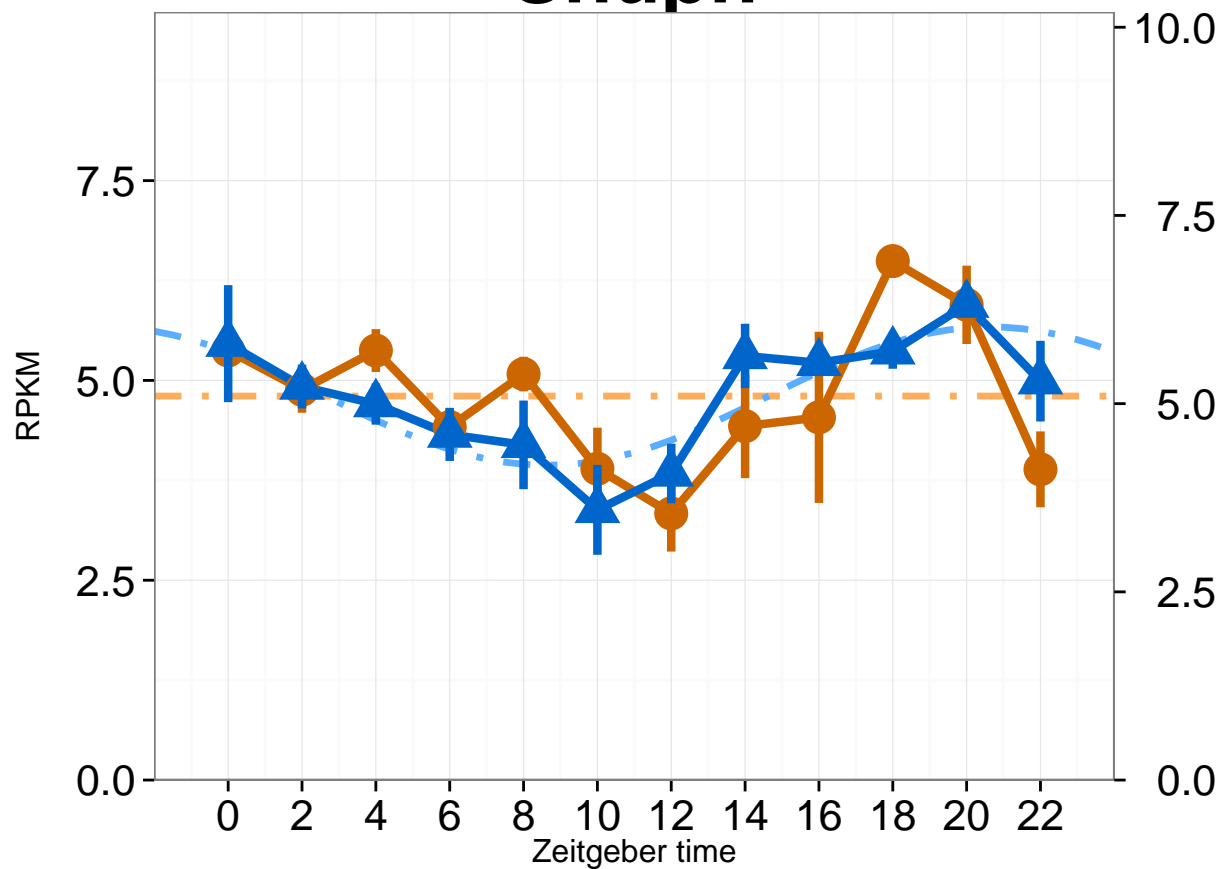

## Snupn

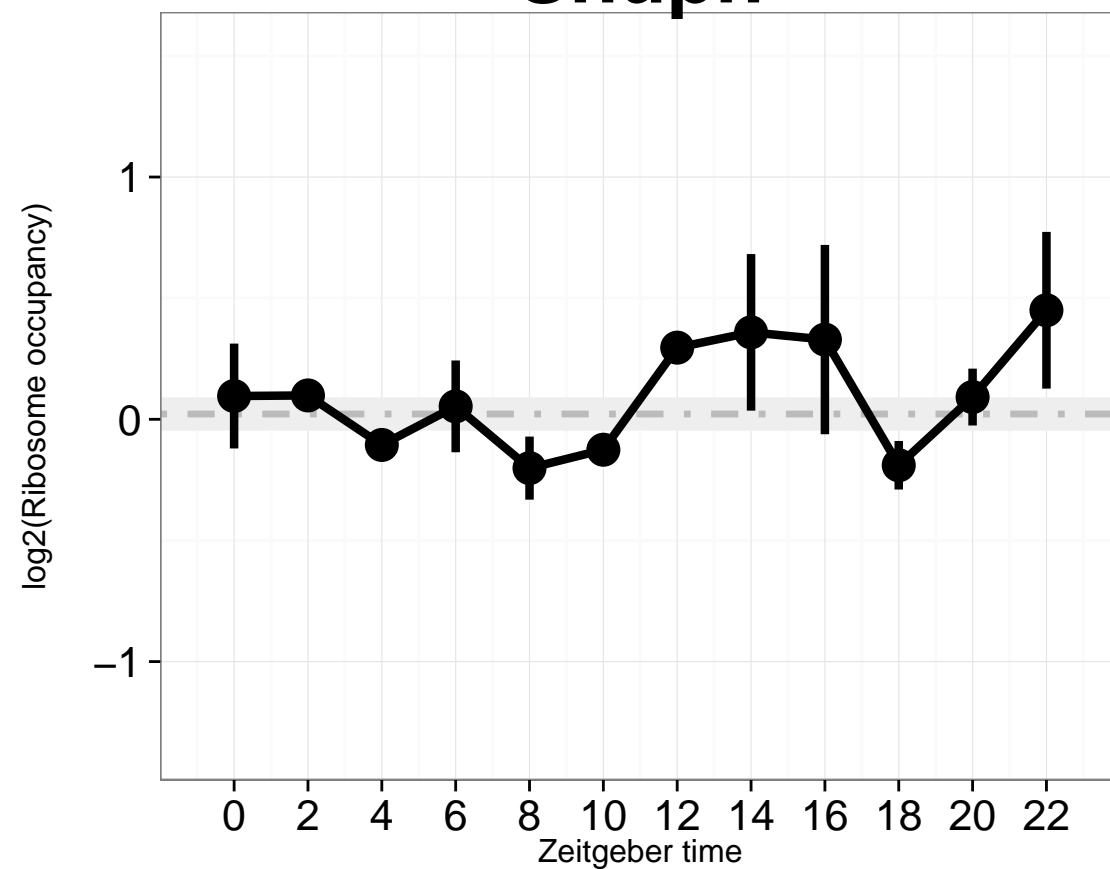

Supplement: SuppDataset_1.zip [file Snupn_set_A.pdf › Supplemental Dataset 1/A-mRNA_nonrhyth_translation_nonrhyth/Snupn_set_A.pdf]

## Snw1

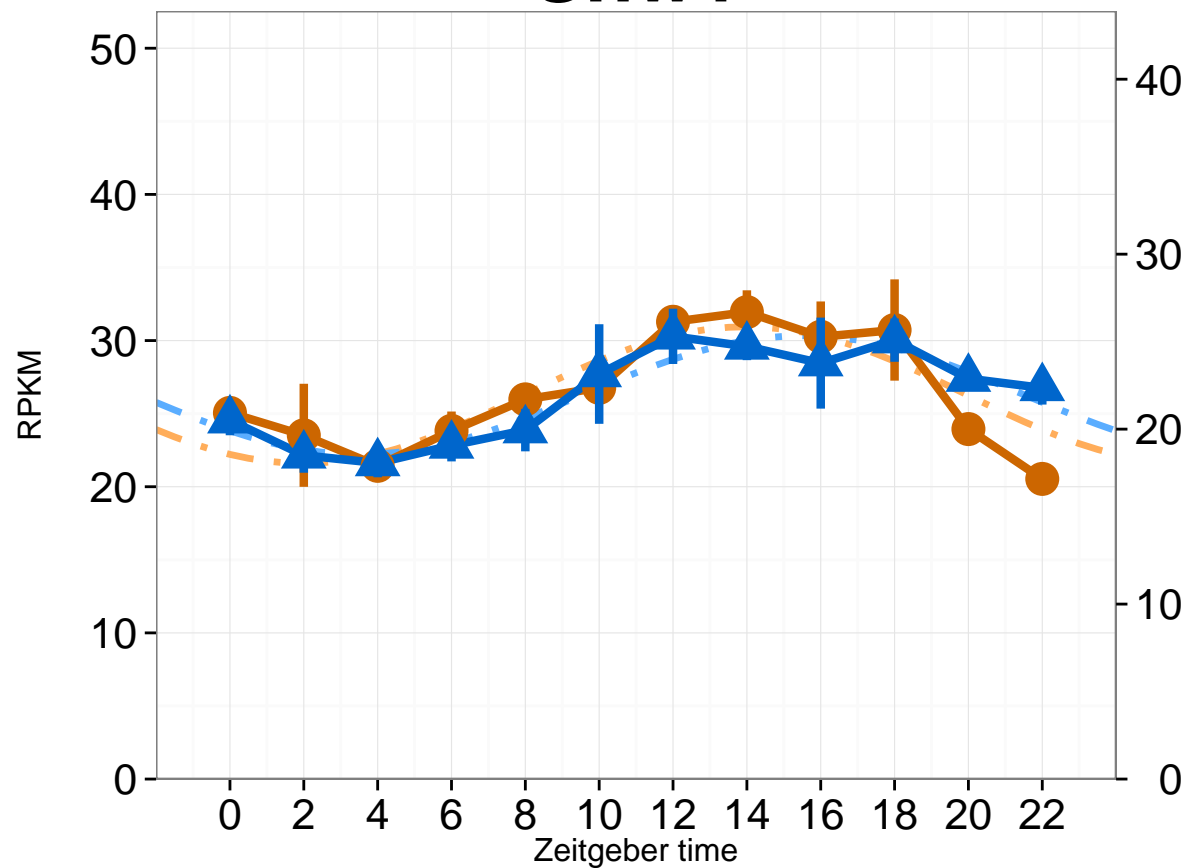

## Snw1

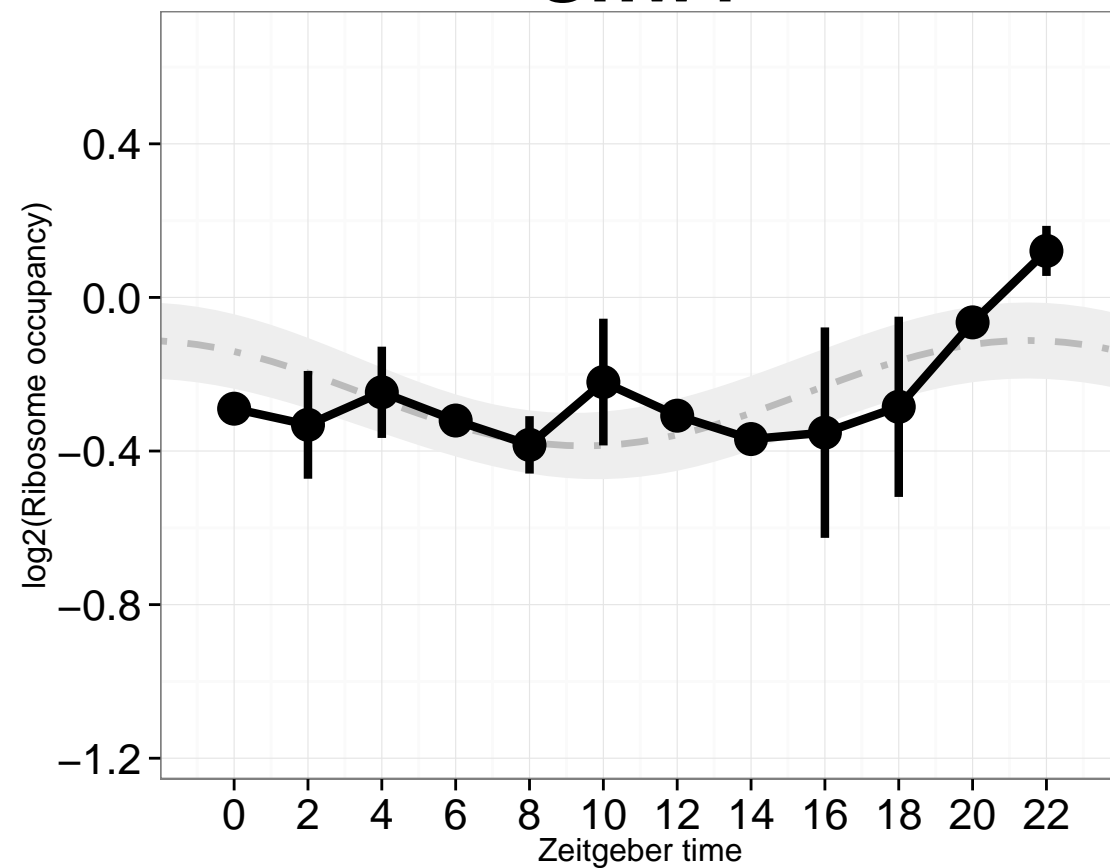

Supplement: SuppDataset_1.zip [file Snw1_set_A.pdf › Supplemental Dataset 1/A-mRNA_nonrhyth_translation_nonrhyth/Snw1_set_A.pdf]

## Snx11

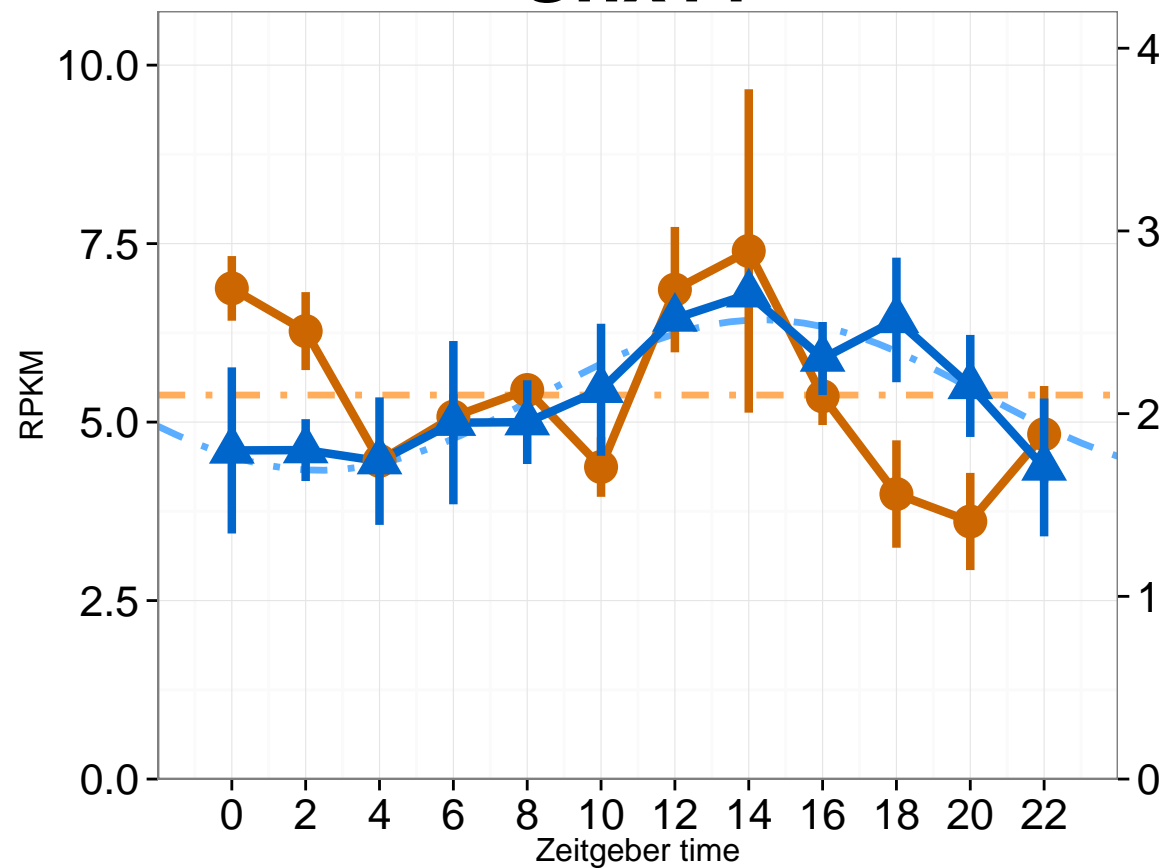

## Snx11

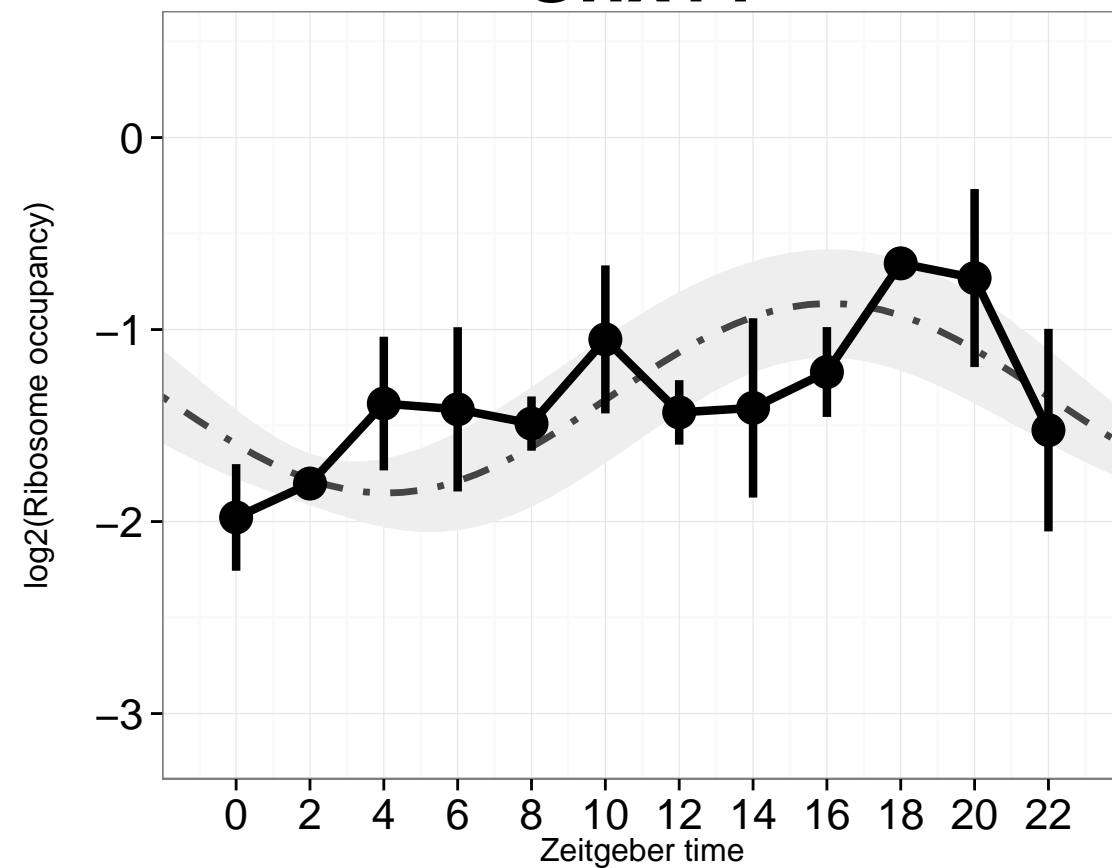

Supplement: SuppDataset_1.zip [file Snx11_set_A.pdf › Supplemental Dataset 1/A-mRNA_nonrhyth_translation_nonrhyth/Snx11_set_A.pdf]

## Snx12

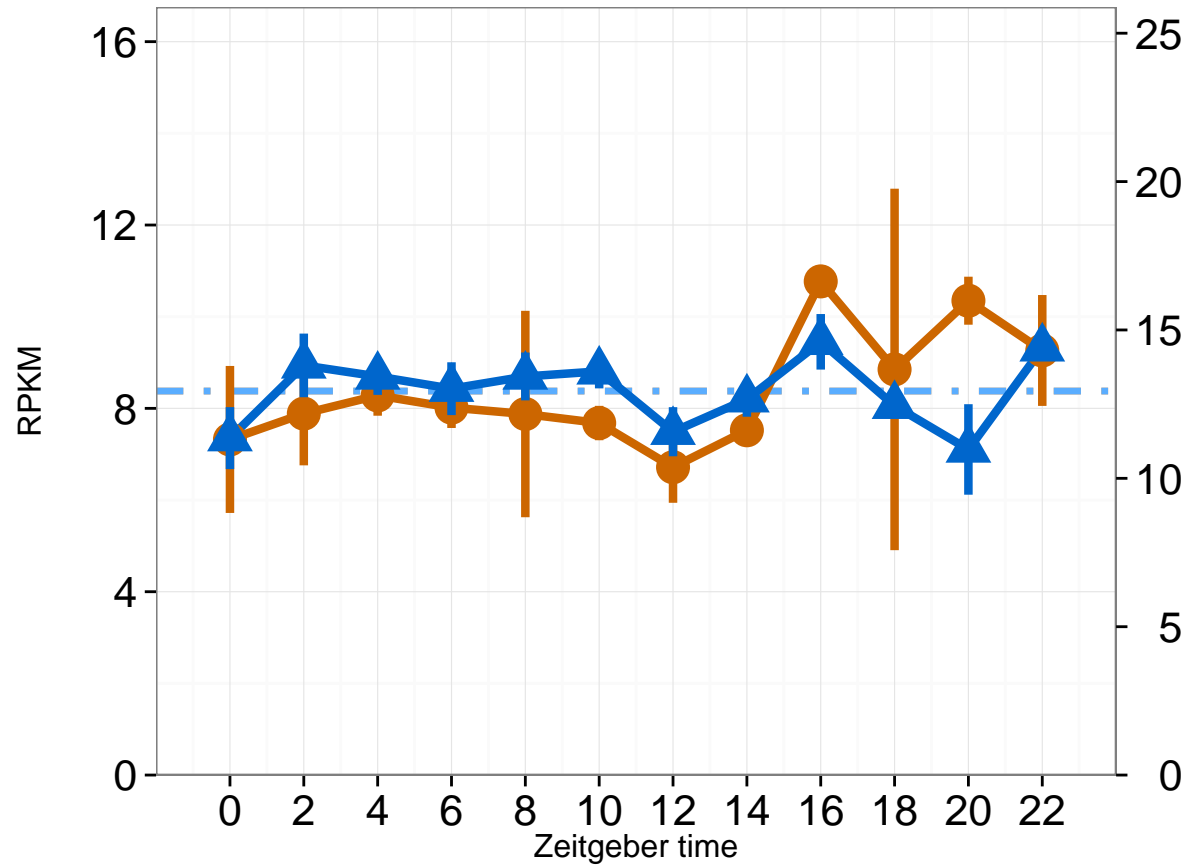

## Snx12

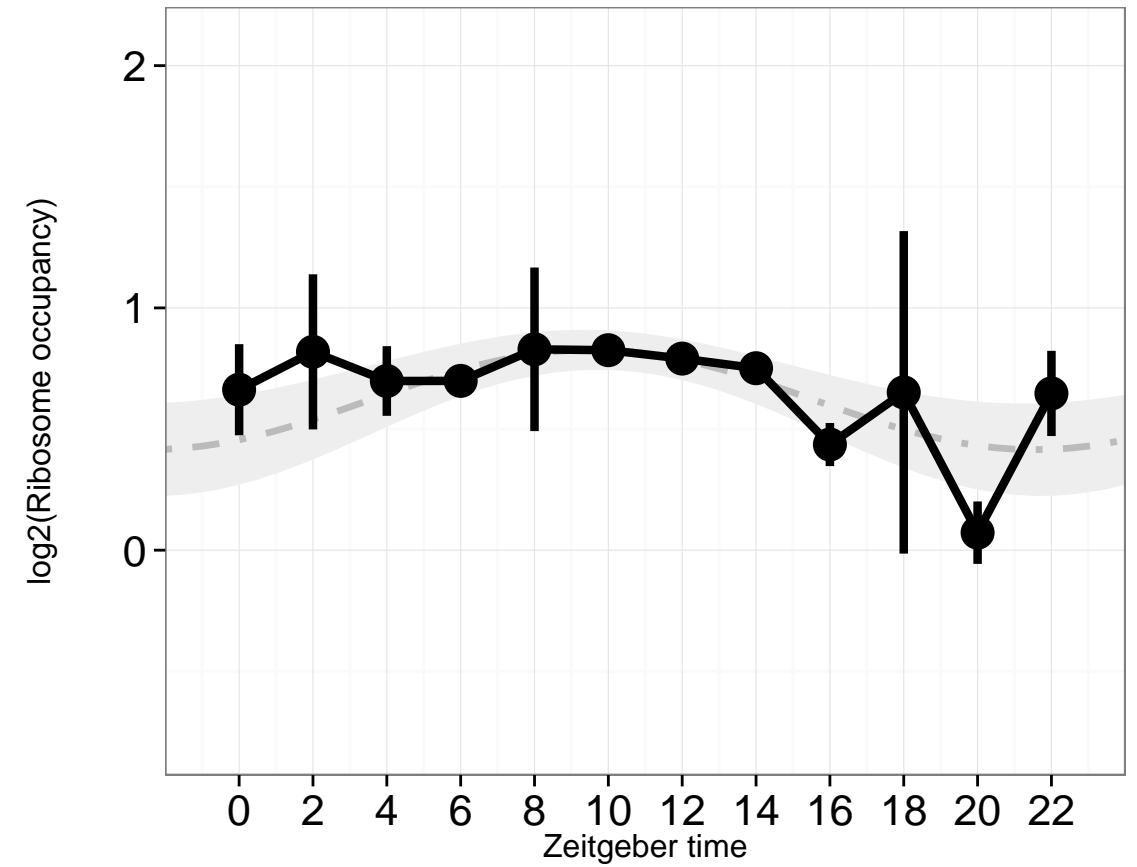

Supplement: SuppDataset_1.zip [file Snx12_set_A.pdf › Supplemental Dataset 1/A-mRNA_nonrhyth_translation_nonrhyth/Snx12_set_A.pdf]

# Snx13

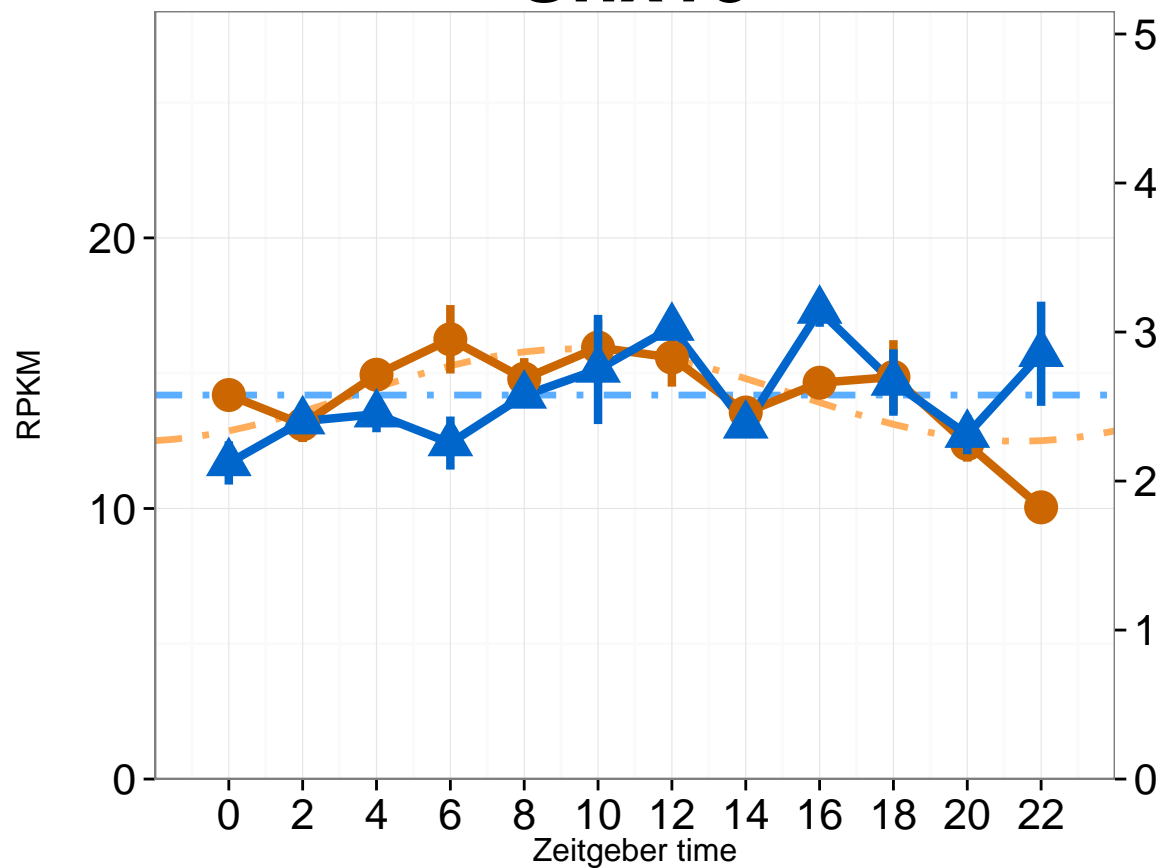

# Snx13

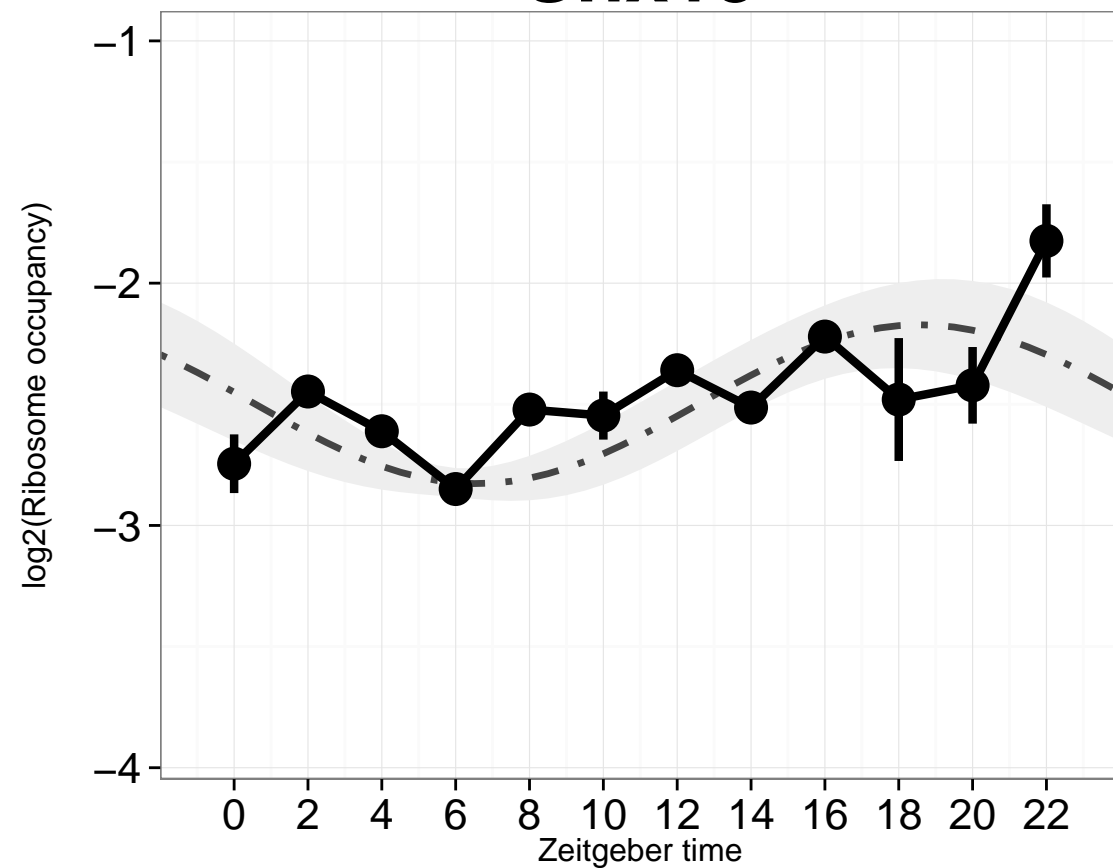

Supplement: SuppDataset_1.zip [file Snx13_set_A.pdf › Supplemental Dataset 1/A-mRNA_nonrhyth_translation_nonrhyth/Snx13_set_A.pdf]

## Snx14

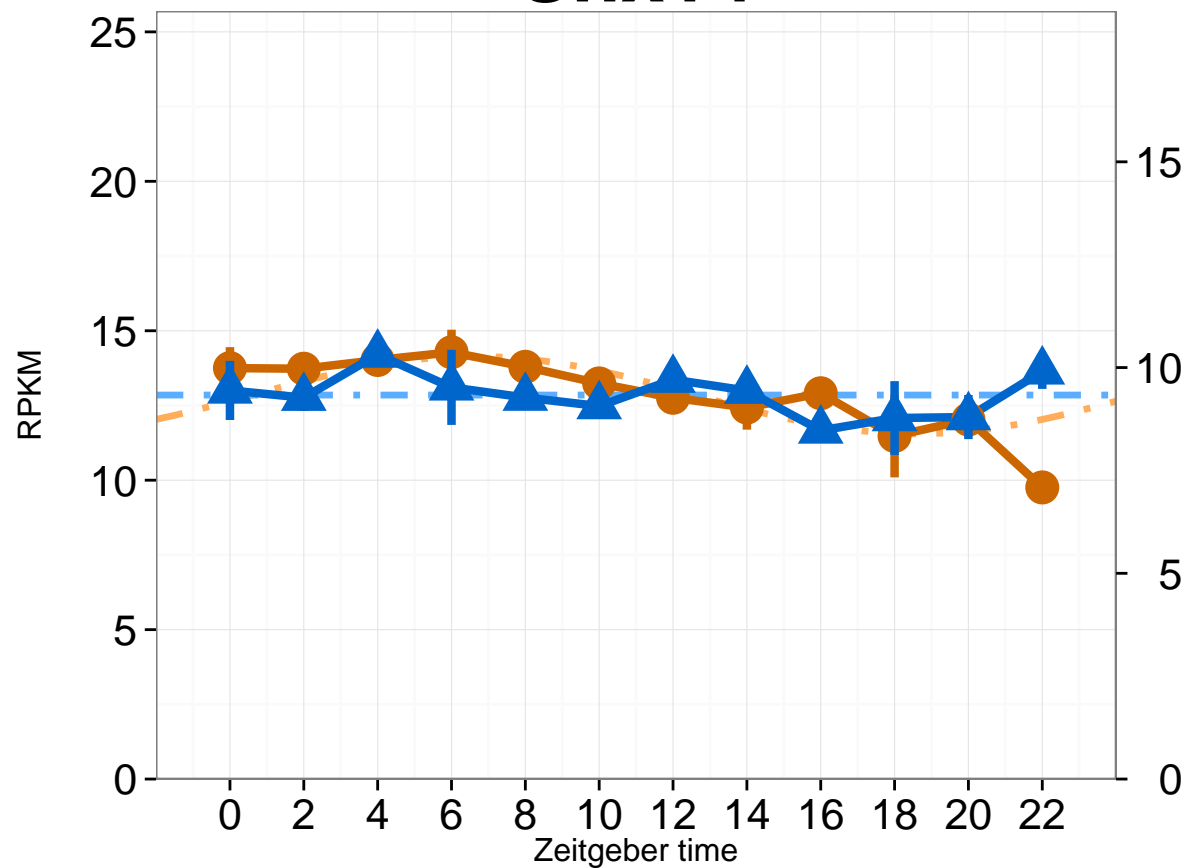

## Snx14

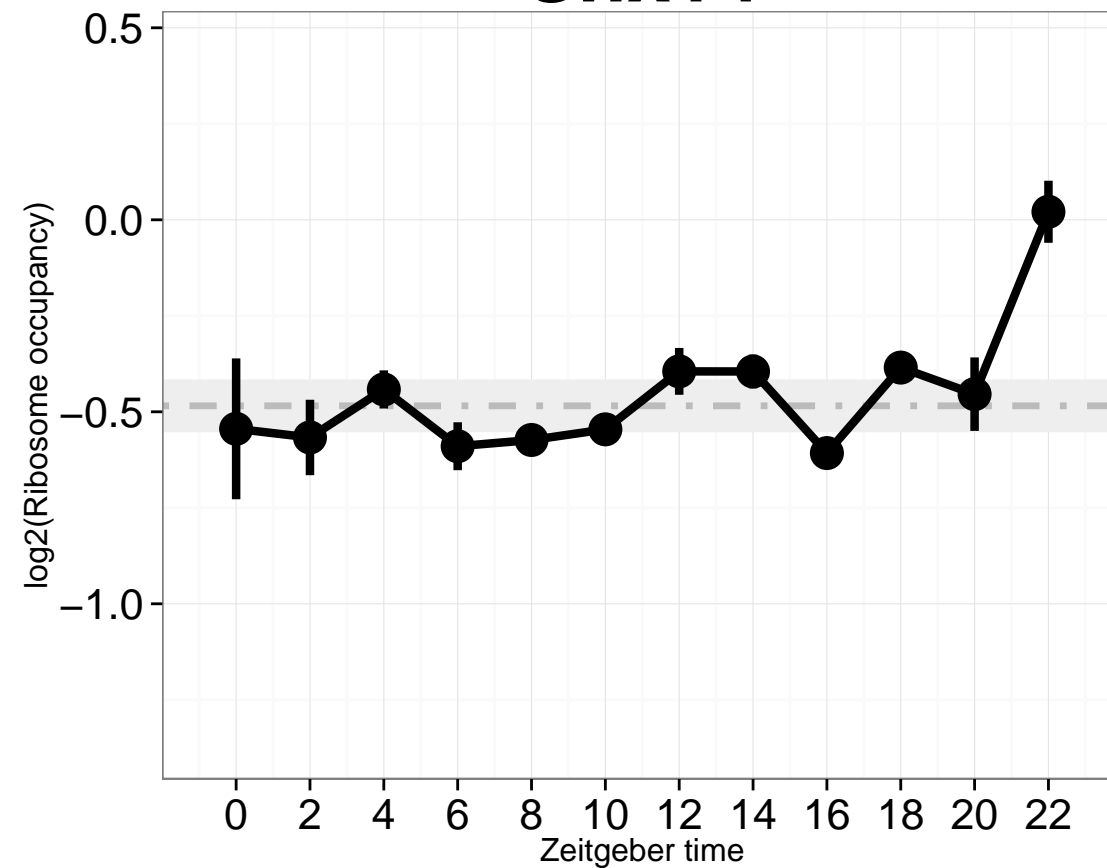

Supplement: SuppDataset_1.zip [file Snx14_set_A.pdf › Supplemental Dataset 1/A-mRNA_nonrhyth_translation_nonrhyth/Snx14_set_A.pdf]

## Snx15

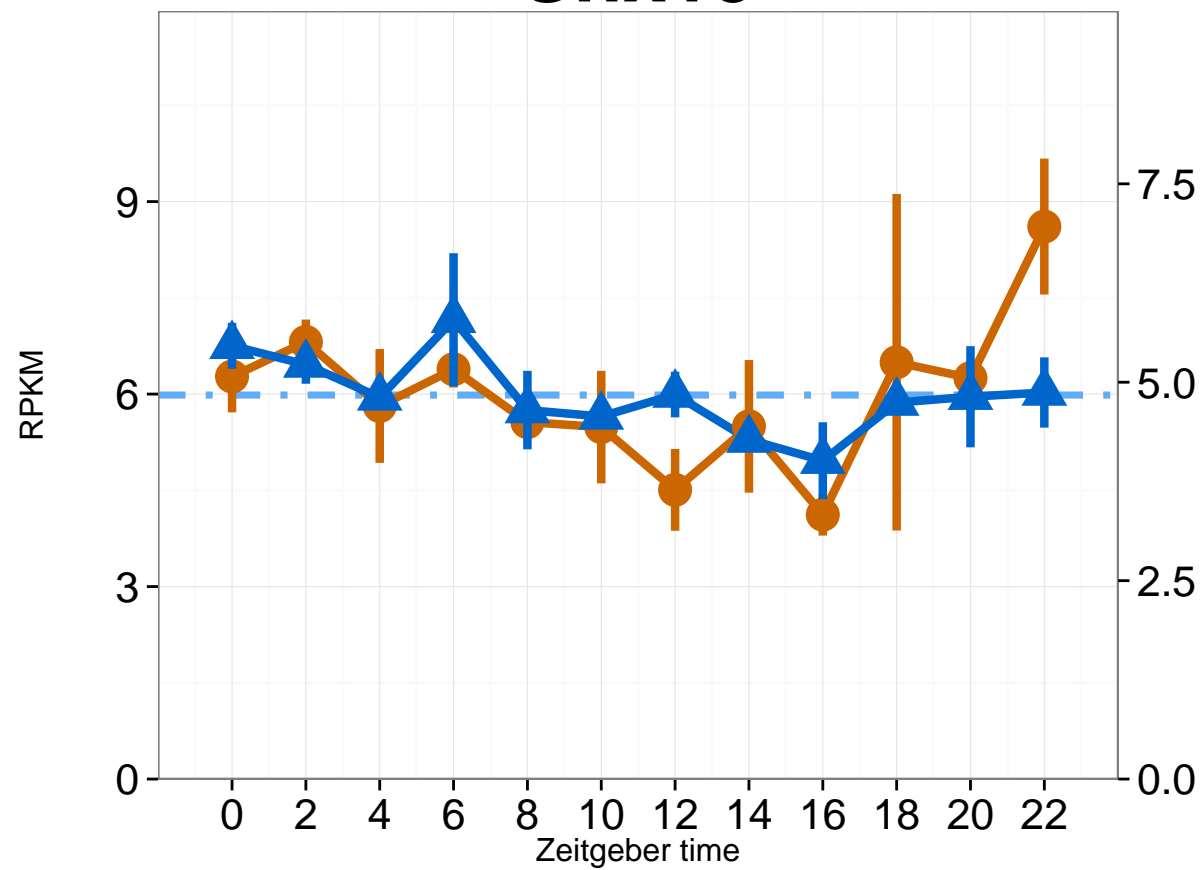

## Snx15

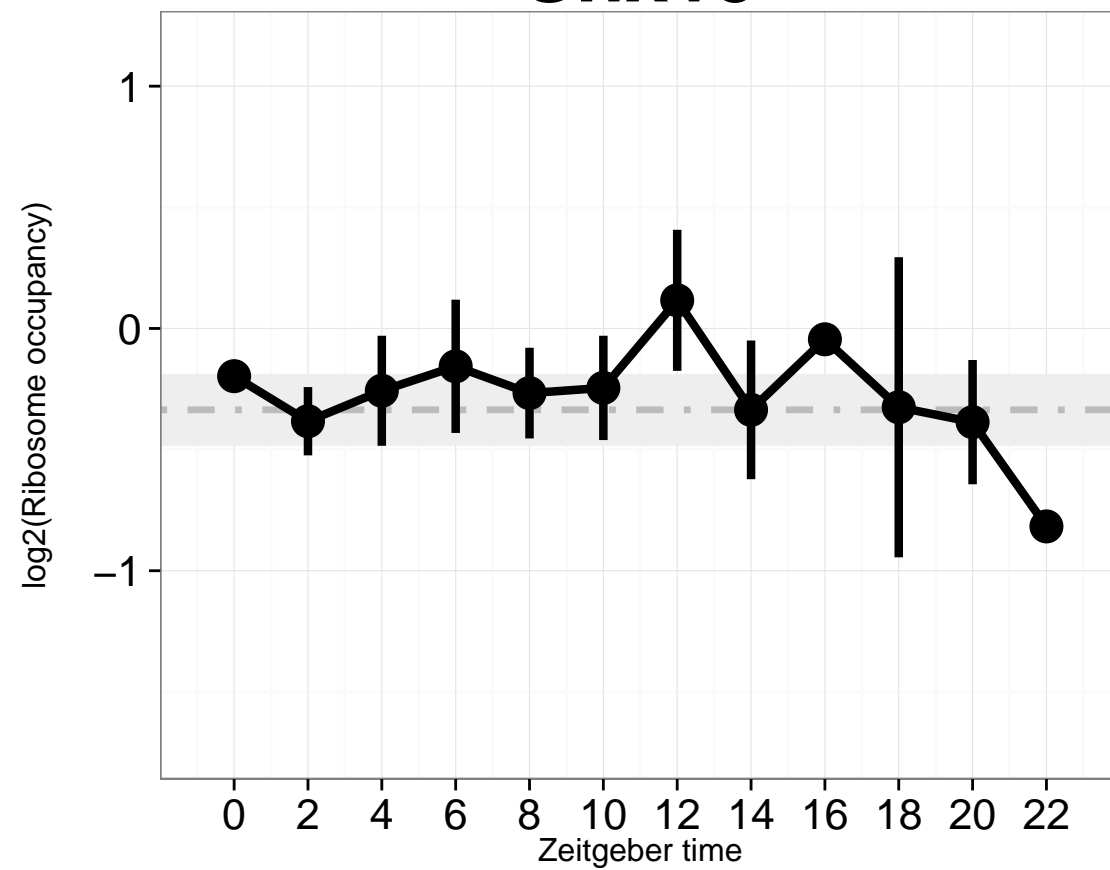

Supplement: SuppDataset_1.zip [file Snx15_set_A.pdf › Supplemental Dataset 1/A-mRNA_nonrhyth_translation_nonrhyth/Snx15_set_A.pdf]

# Snx16

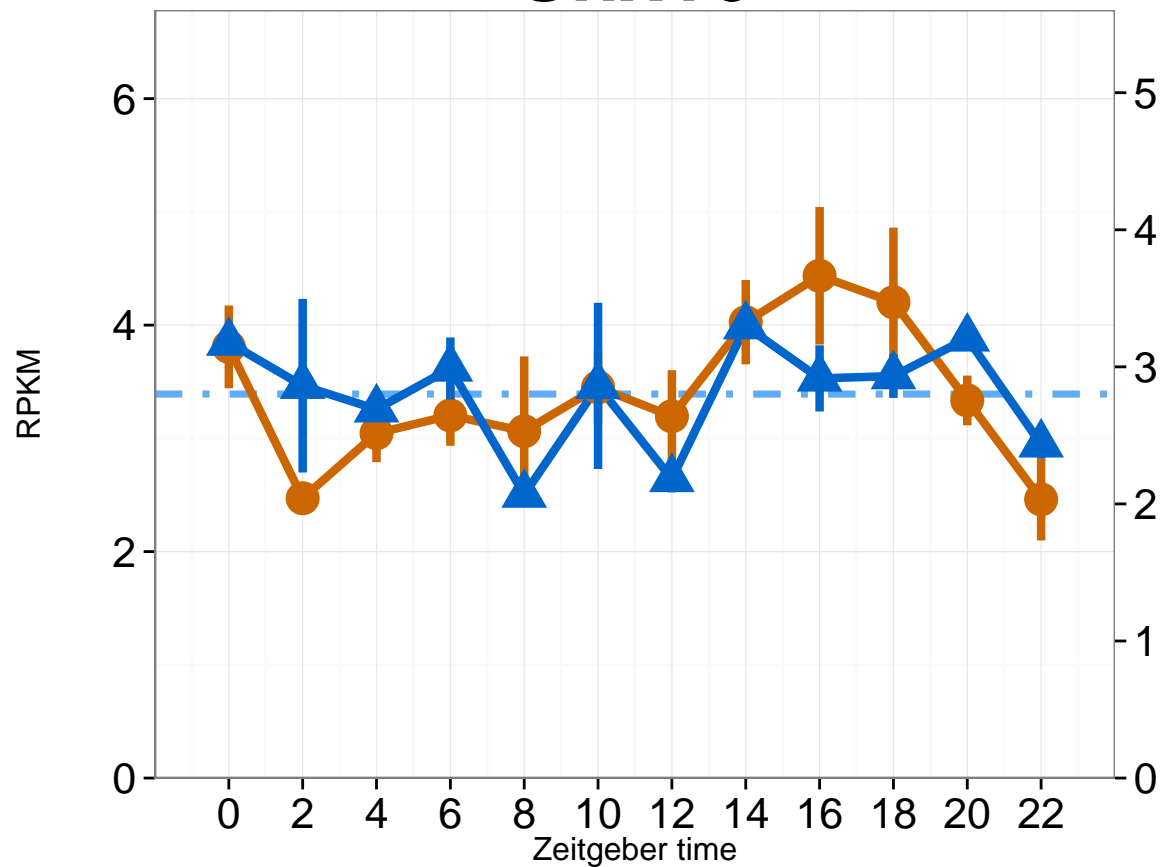

# Snx16

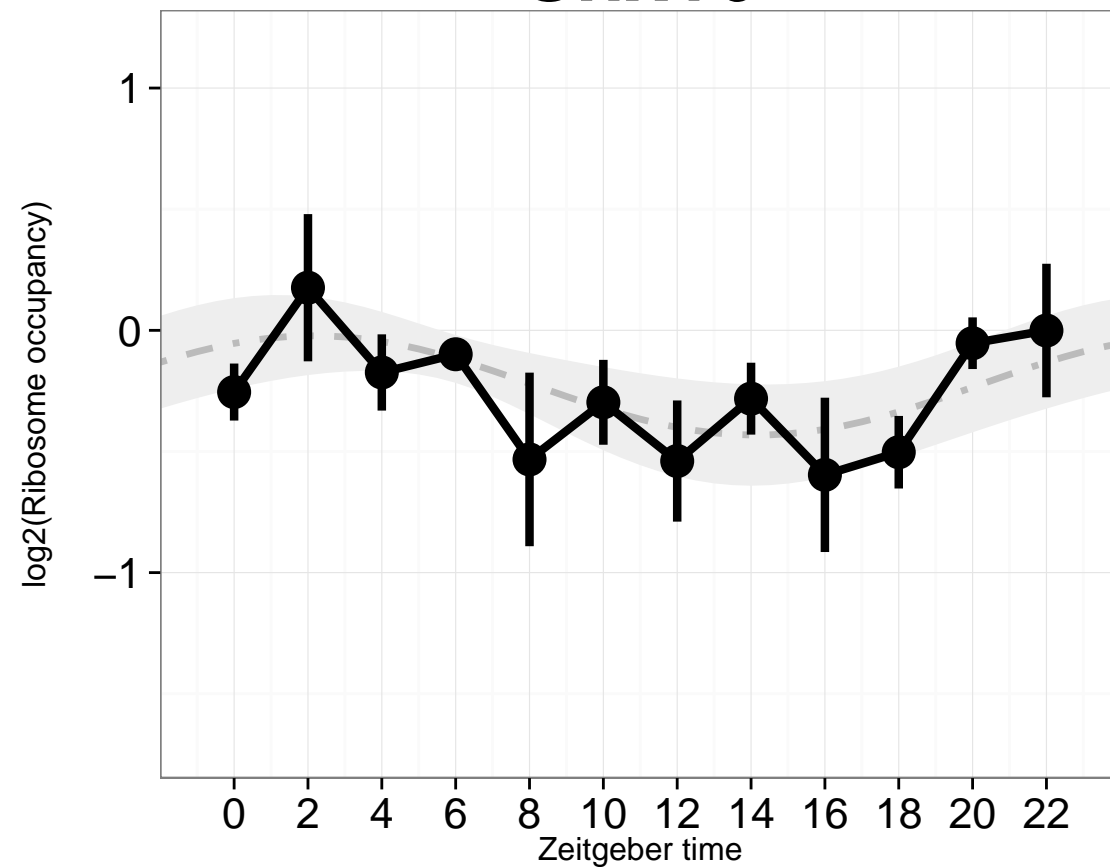

Supplement: SuppDataset_1.zip [file Snx16_set_A.pdf › Supplemental Dataset 1/A-mRNA_nonrhyth_translation_nonrhyth/Snx16_set_A.pdf]

## Snx17

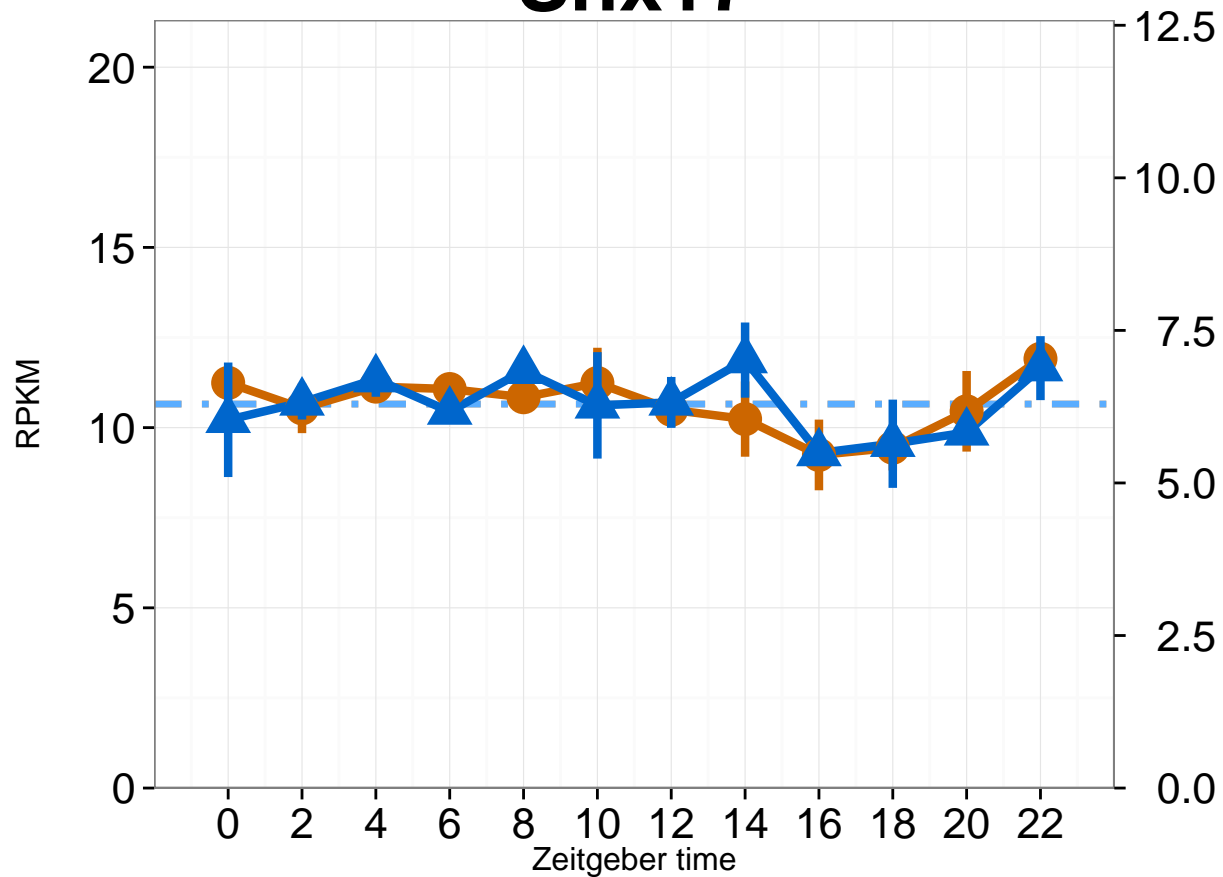

## Snx17

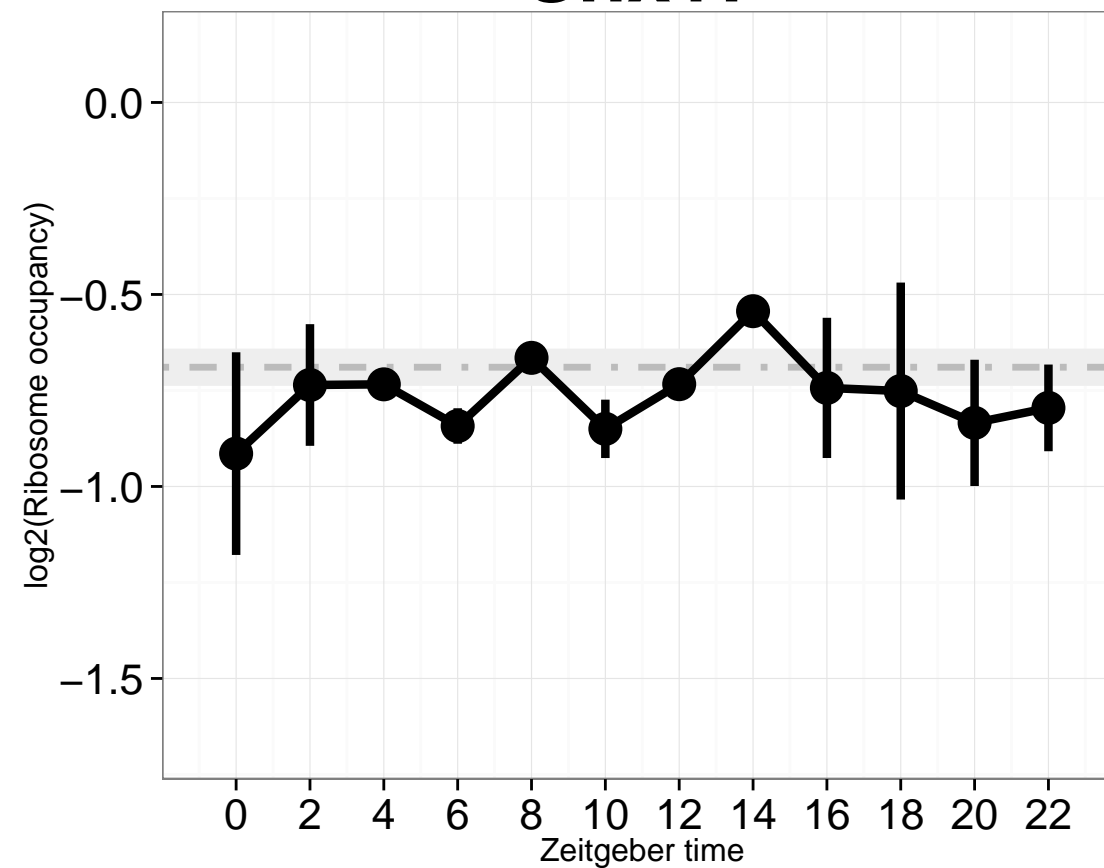

Supplement: SuppDataset_1.zip [file Snx17_set_A.pdf › Supplemental Dataset 1/A-mRNA_nonrhyth_translation_nonrhyth/Snx17_set_A.pdf]

## Snx18

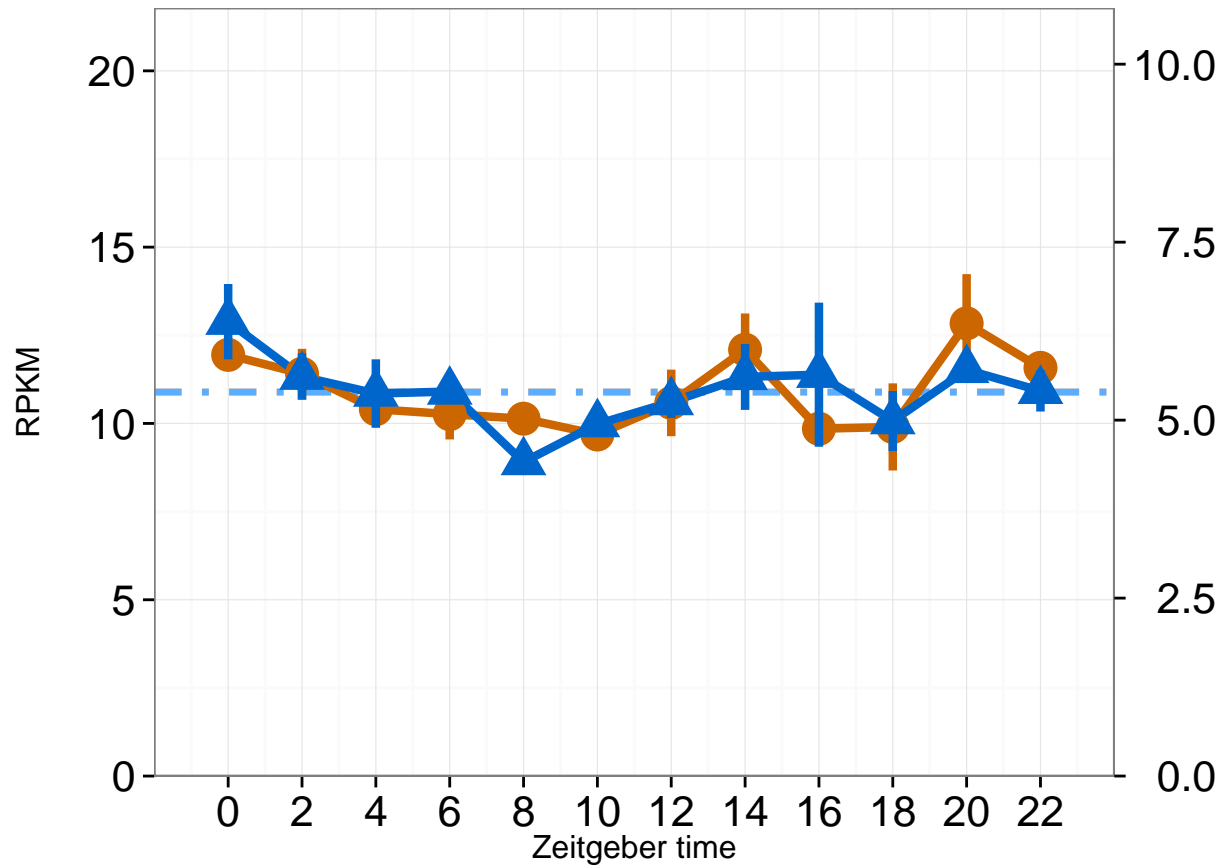

## Snx18

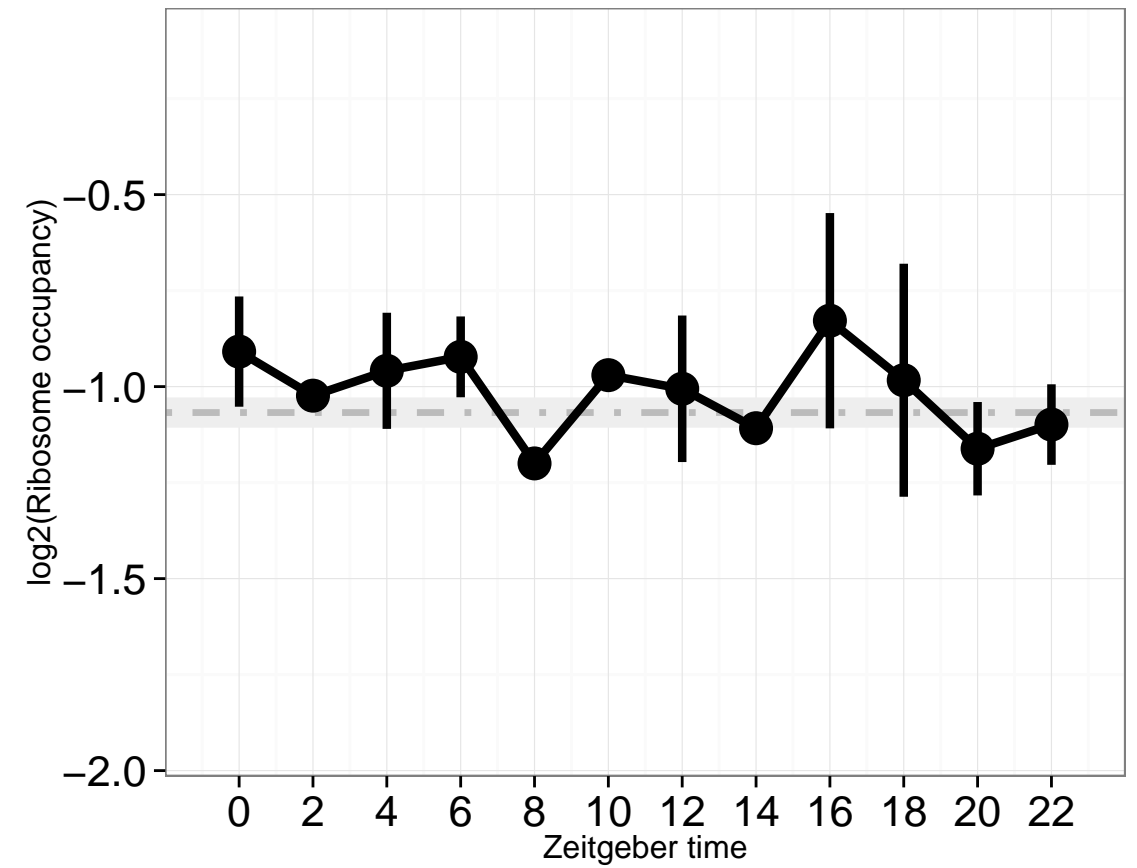

Supplement: SuppDataset_1.zip [file Snx18_set_A.pdf › Supplemental Dataset 1/A-mRNA_nonrhyth_translation_nonrhyth/Snx18_set_A.pdf]

## Snx19

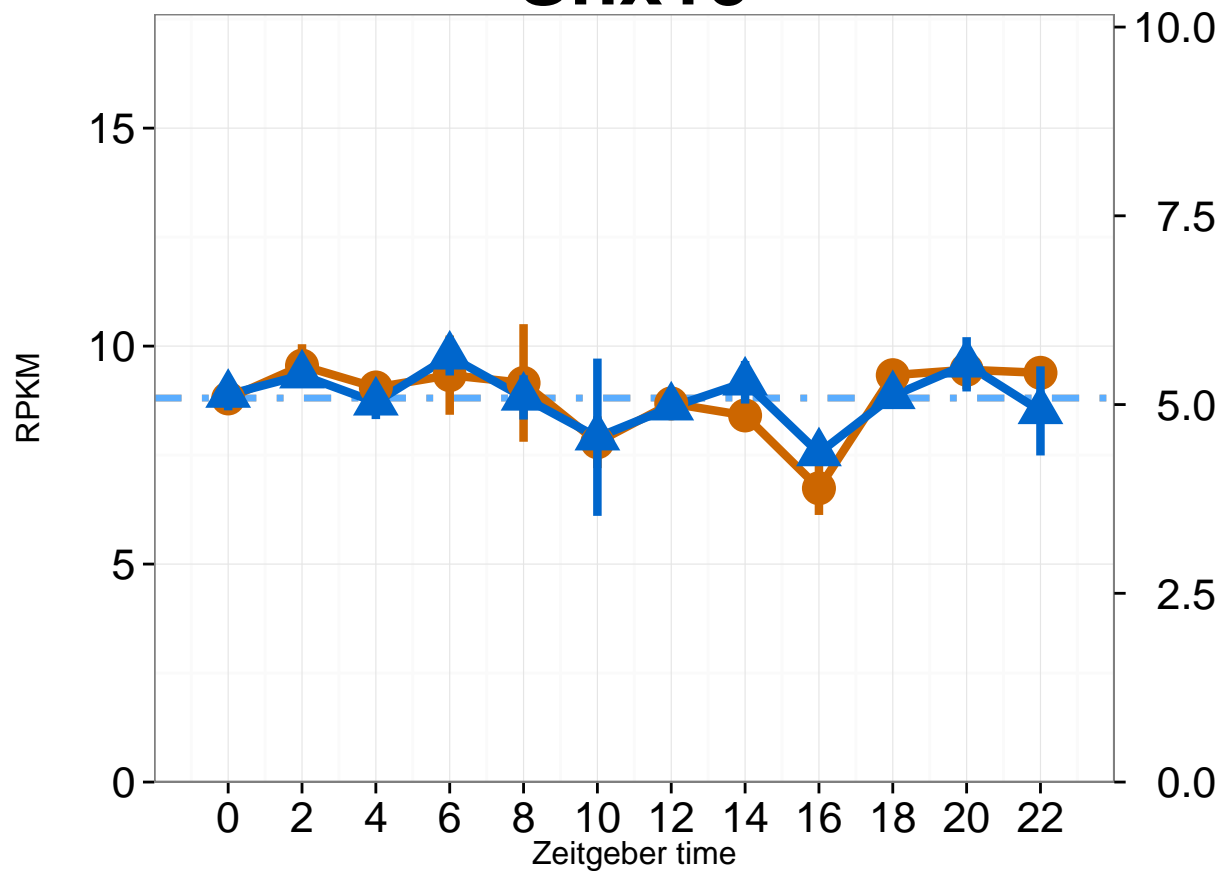

## Snx19

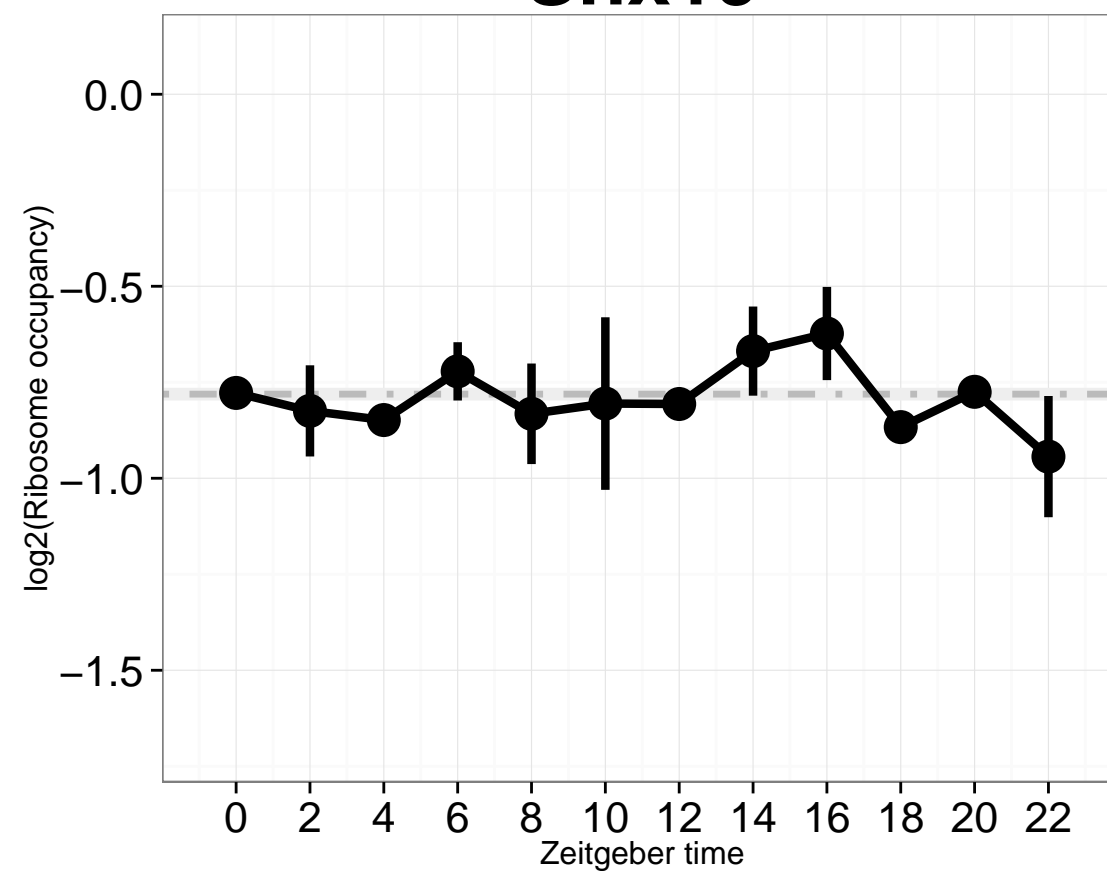

Supplement: SuppDataset_1.zip [file Snx19_set_A.pdf › Supplemental Dataset 1/A-mRNA_nonrhyth_translation_nonrhyth/Snx19_set_A.pdf]

## Snx1

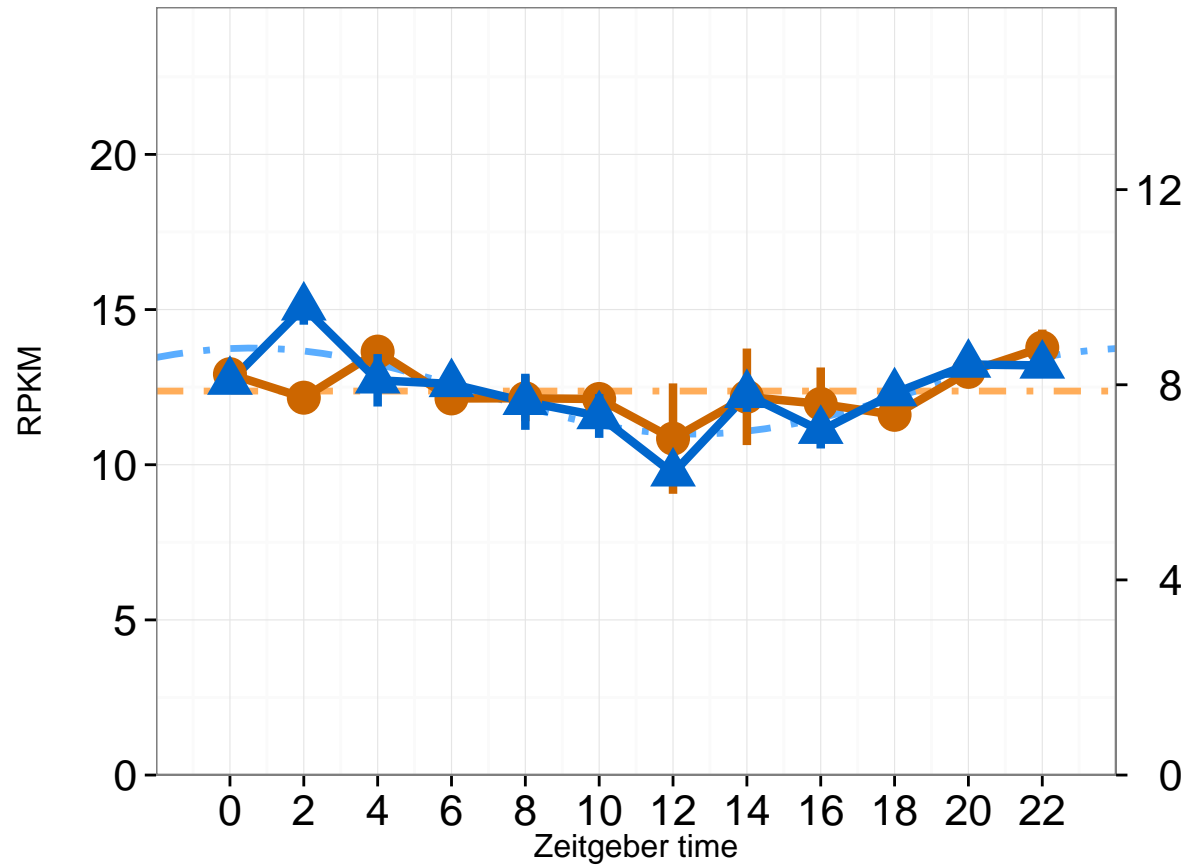

## Snx1

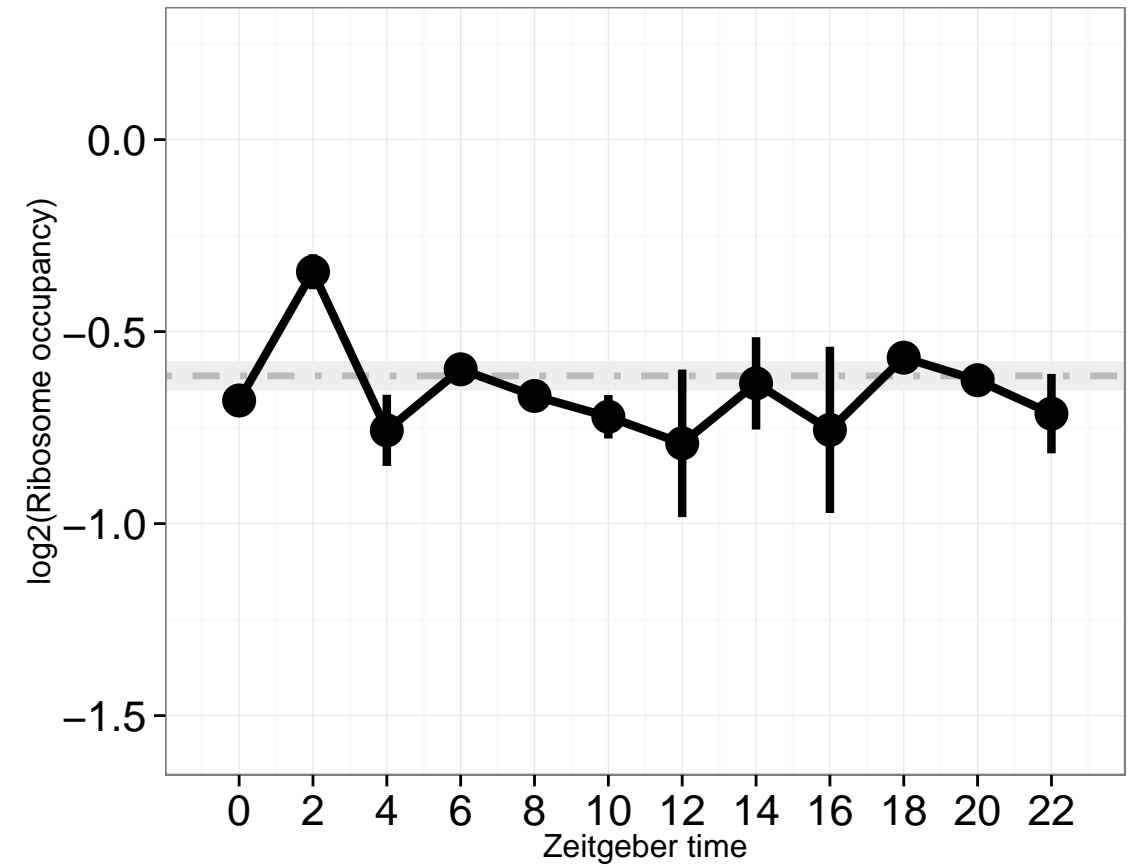

Supplement: SuppDataset_1.zip [file Snx1_set_A.pdf › Supplemental Dataset 1/A-mRNA_nonrhyth_translation_nonrhyth/Snx1_set_A.pdf]

## Snx20

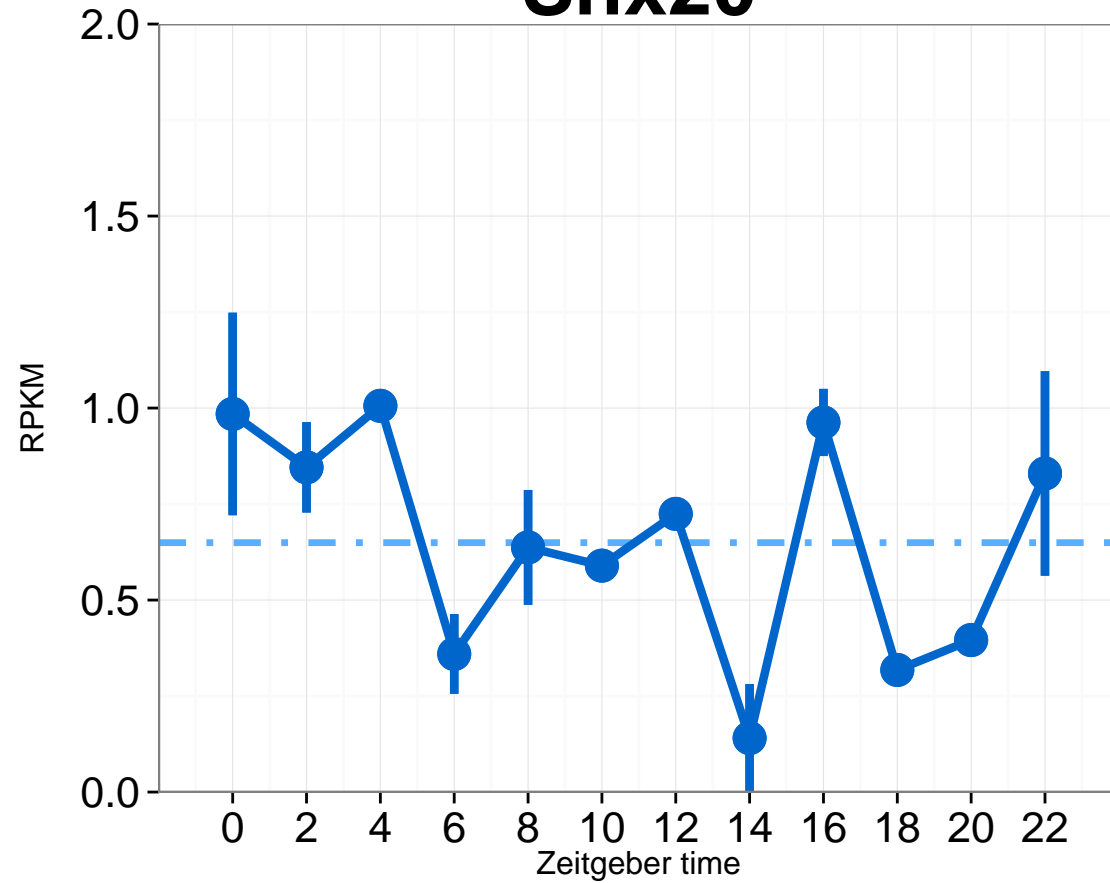

## Snx20 log2(Ribosome occupancy

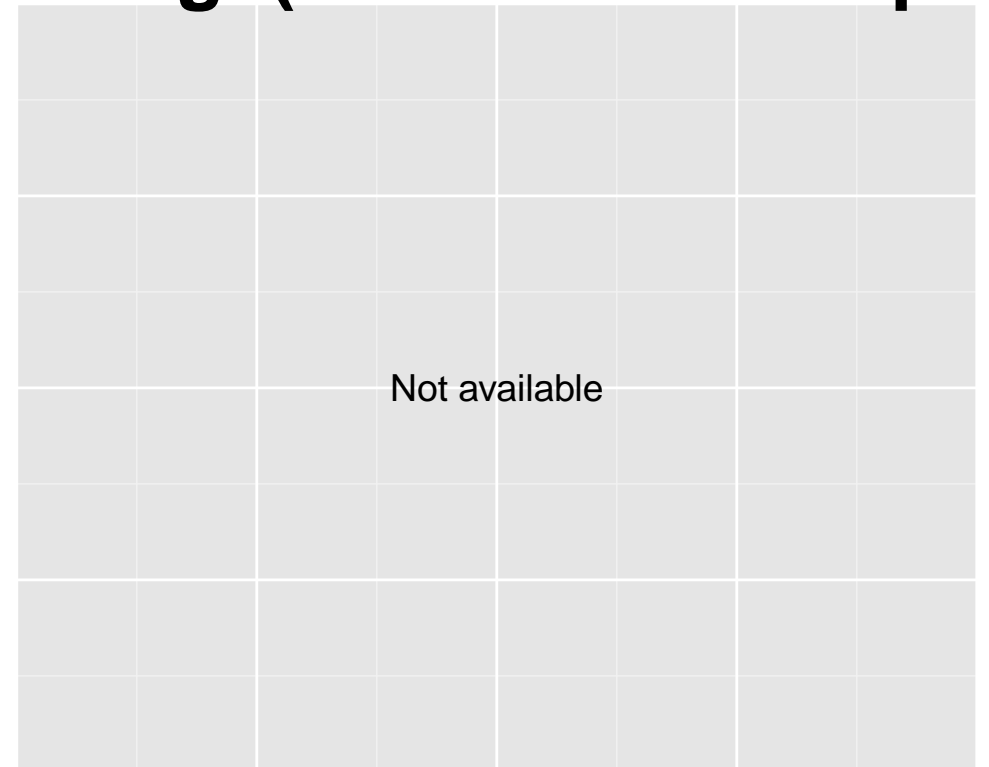

Supplement: SuppDataset_1.zip [file Snx20_set_A.pdf › Supplemental Dataset 1/A-mRNA_nonrhyth_translation_nonrhyth/Snx20_set_A.pdf]

## Snx25

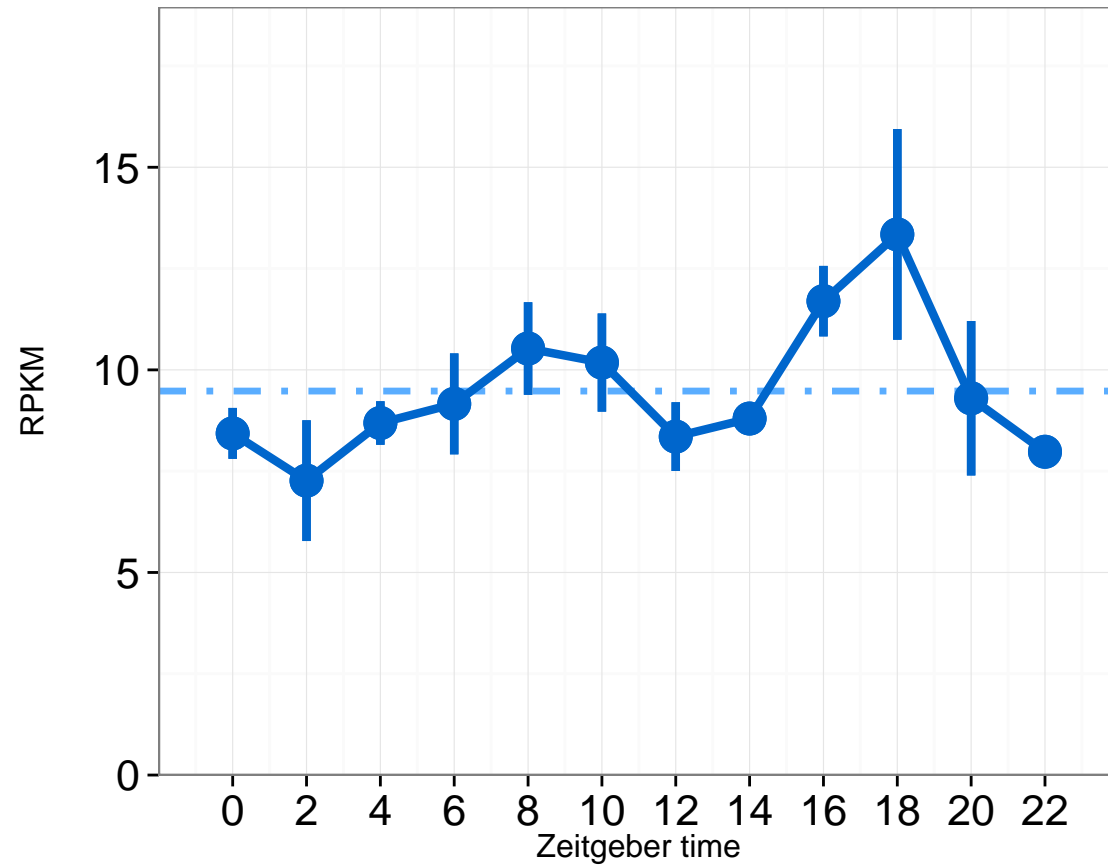

## Snx25 log2(Ribosome occupancy

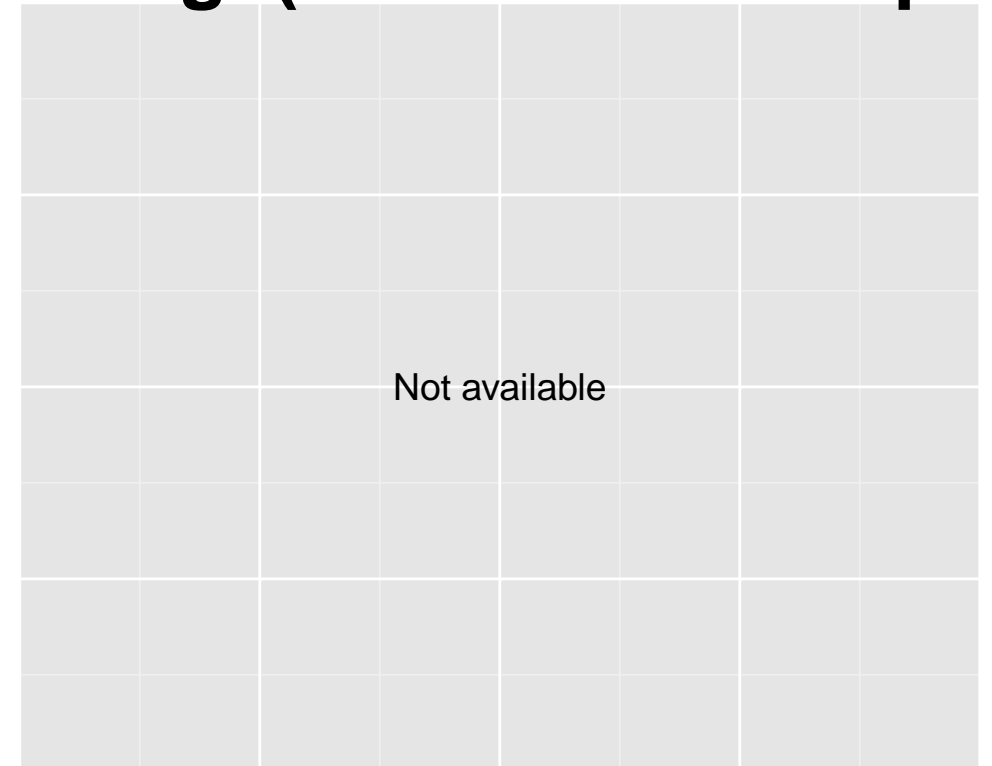

Supplement: SuppDataset_1.zip [file Snx25_set_A.pdf › Supplemental Dataset 1/A-mRNA_nonrhyth_translation_nonrhyth/Snx25_set_A.pdf]
