# Supplementary figures and images for: Ribosome profiling reveals the rhythmic liver translatome and circadian clock regulation by upstream open reading frames (part 70 of 113)
Source: HighWire-hosted journal article supplement (doi:10.1101/gr.195404.115), 2015-10-20

## Snx27

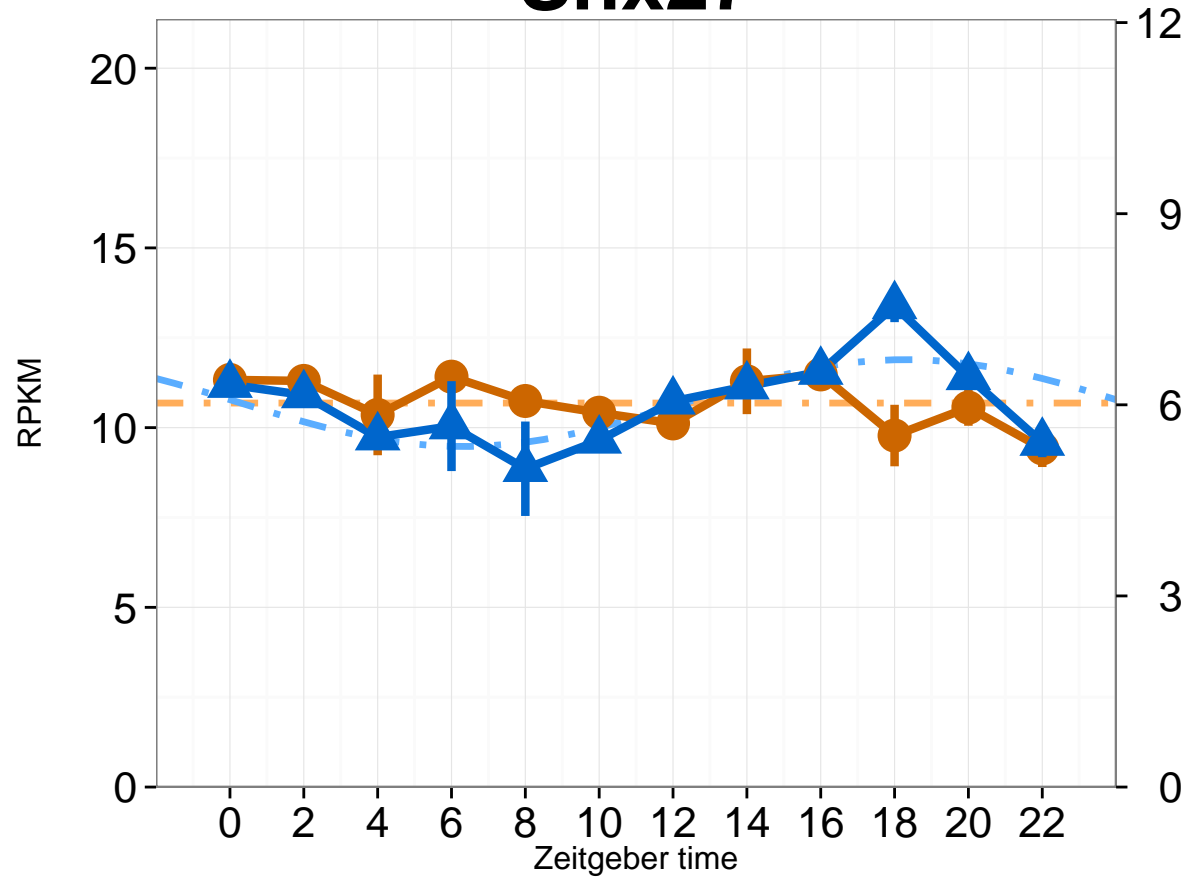

## Snx27

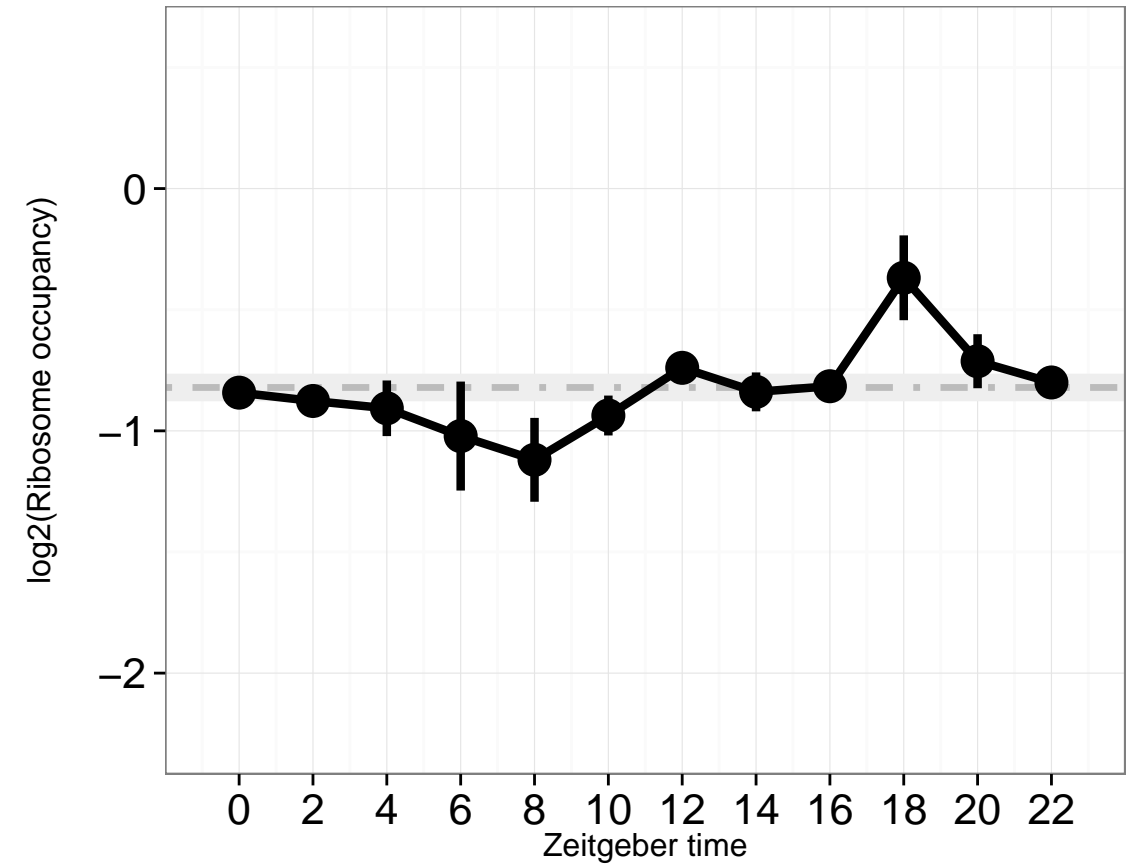

Supplement: SuppDataset_1.zip [file Snx27_set_A.pdf › Supplemental Dataset 1/A-mRNA_nonrhyth_translation_nonrhyth/Snx27_set_A.pdf]

# Snx29

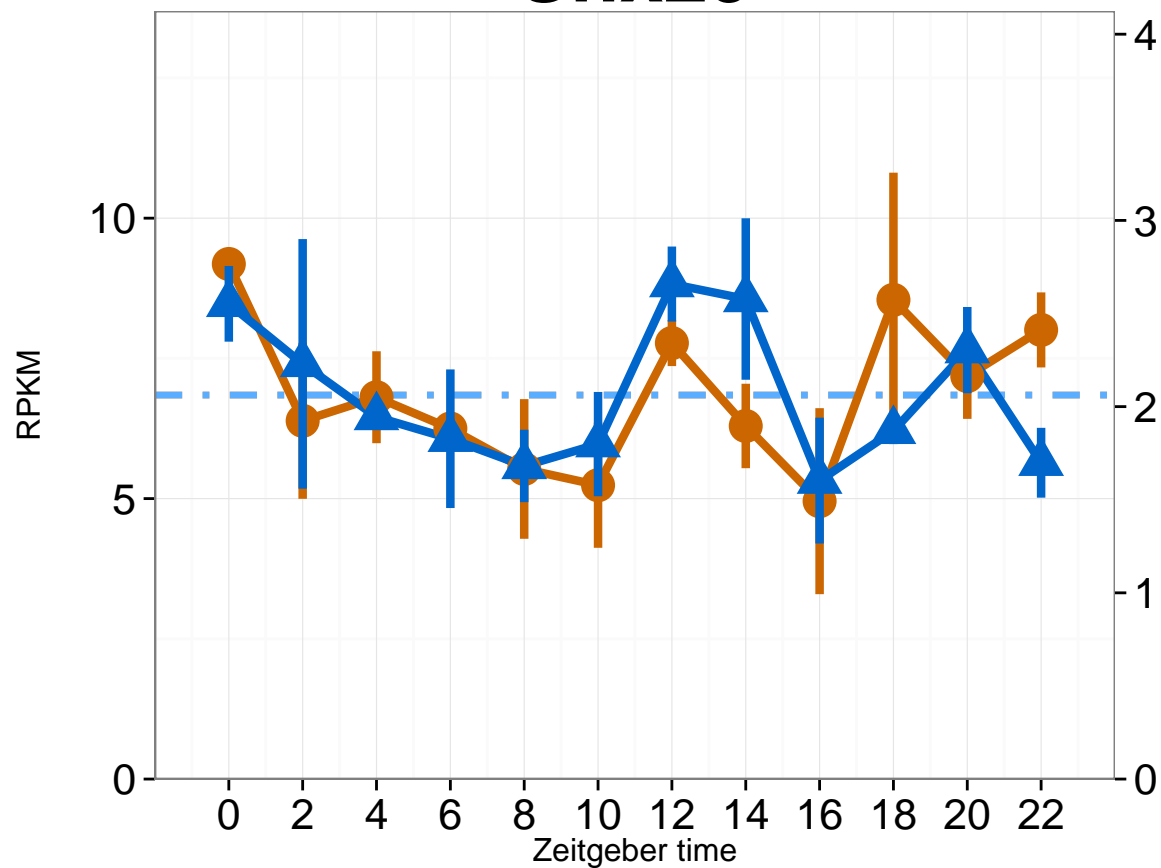

# Snx29

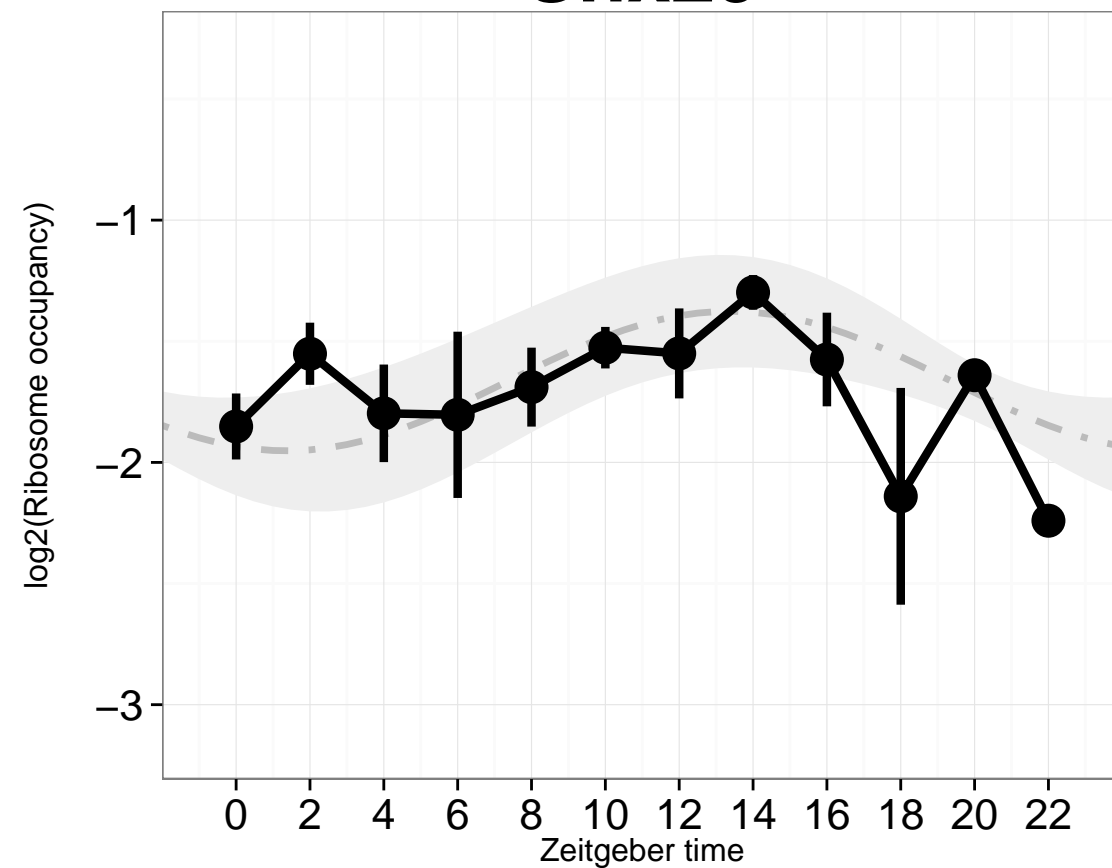

Supplement: SuppDataset_1.zip [file Snx29_set_A.pdf › Supplemental Dataset 1/A-mRNA_nonrhyth_translation_nonrhyth/Snx29_set_A.pdf]

## Snx2

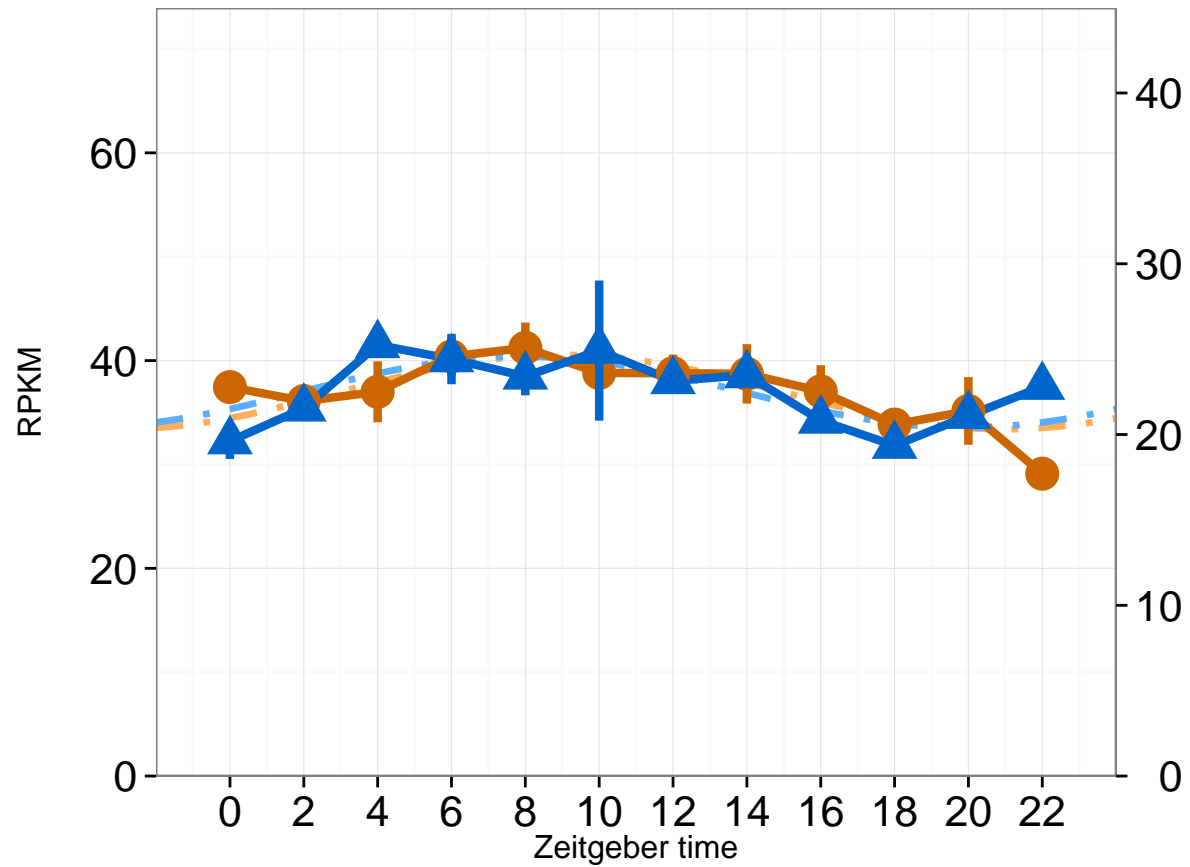

## Snx2

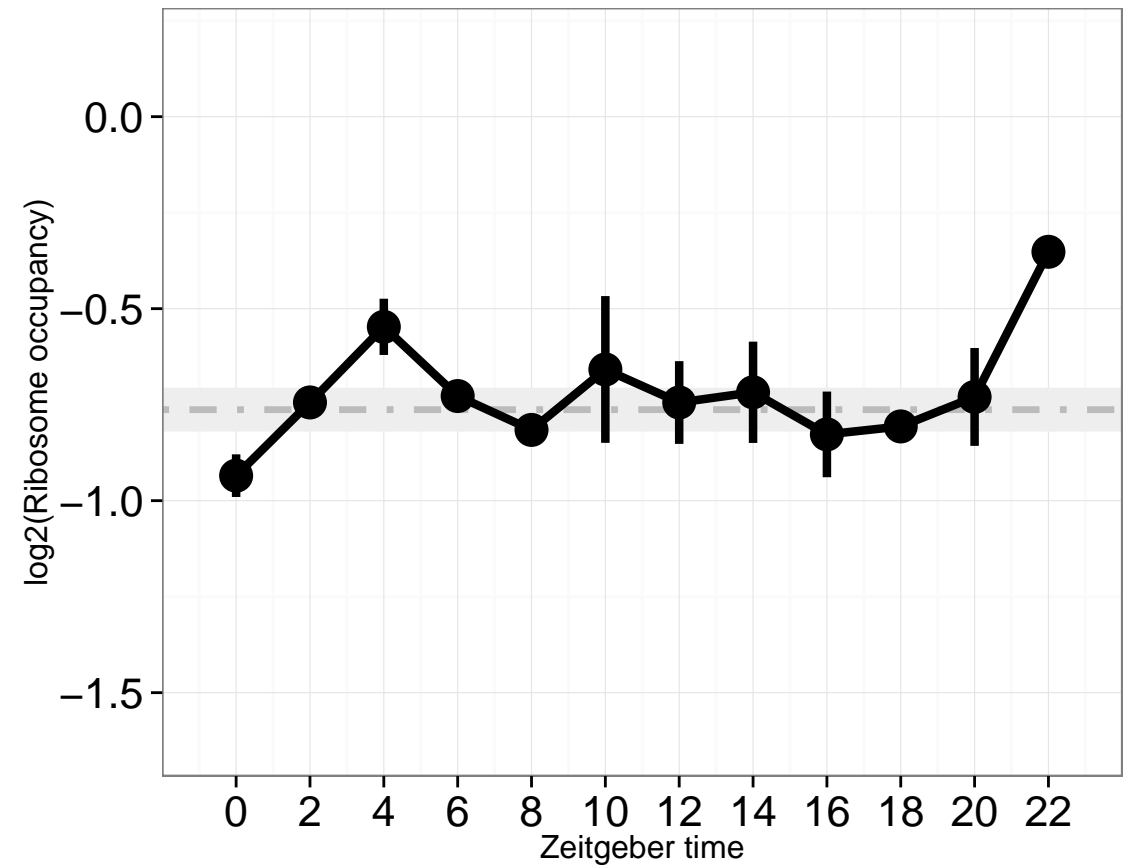

Supplement: SuppDataset_1.zip [file Snx2_set_A.pdf › Supplemental Dataset 1/A-mRNA_nonrhyth_translation_nonrhyth/Snx2_set_A.pdf]

## Snx3

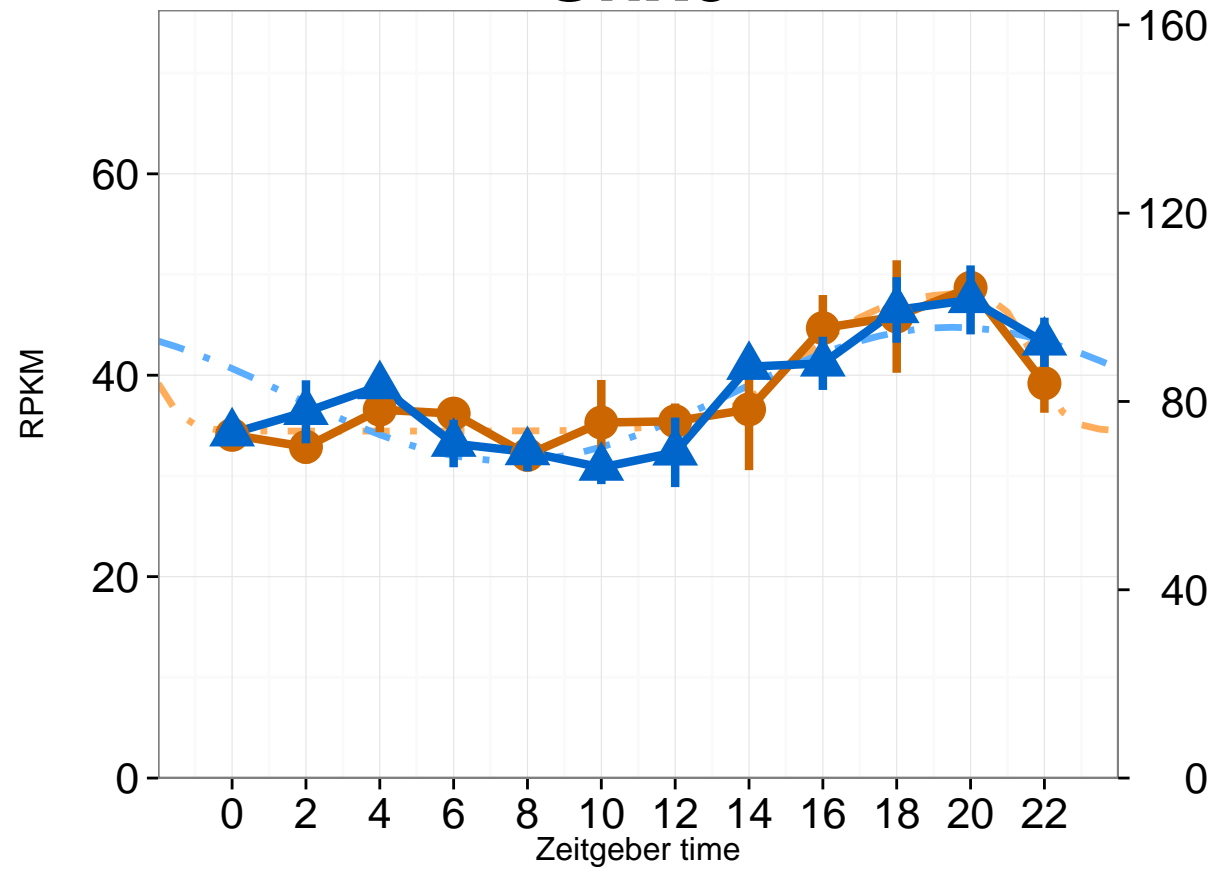

## Snx3

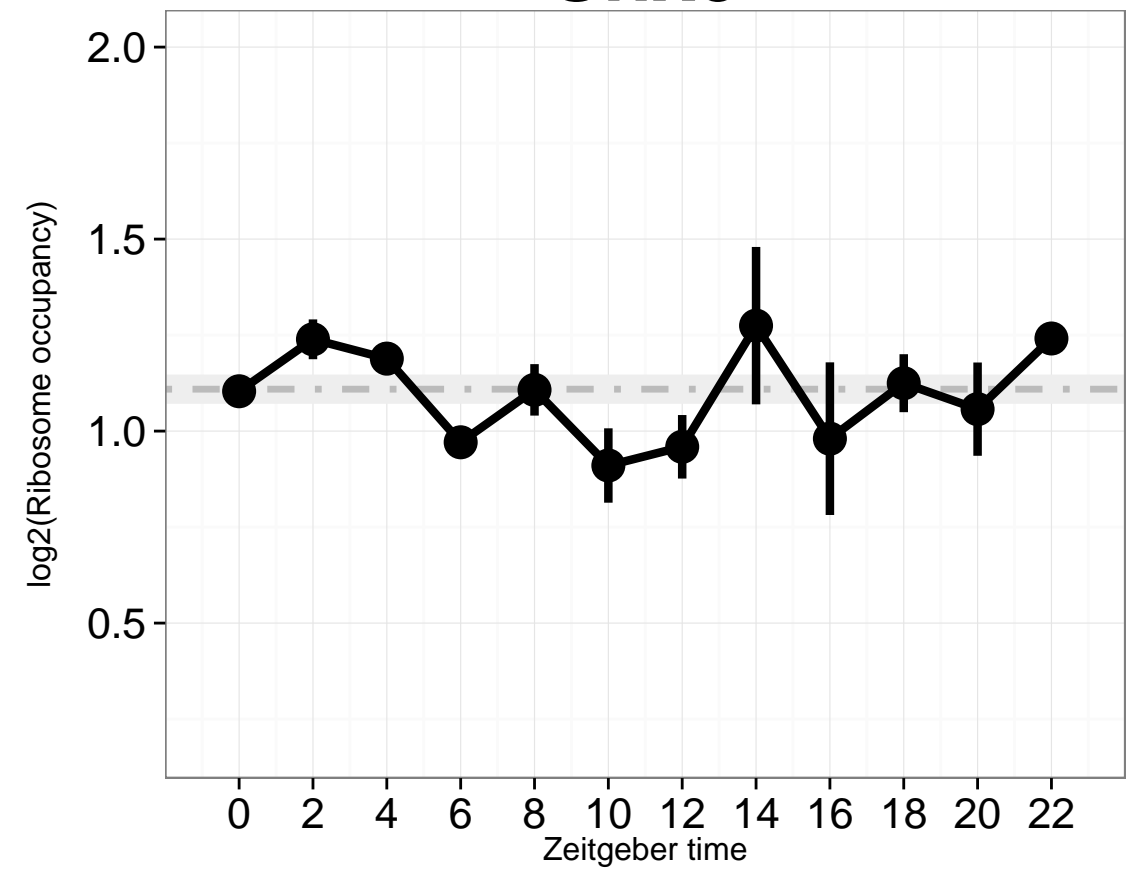

Supplement: SuppDataset_1.zip [file Snx3_set_A.pdf › Supplemental Dataset 1/A-mRNA_nonrhyth_translation_nonrhyth/Snx3_set_A.pdf]

## Snx4

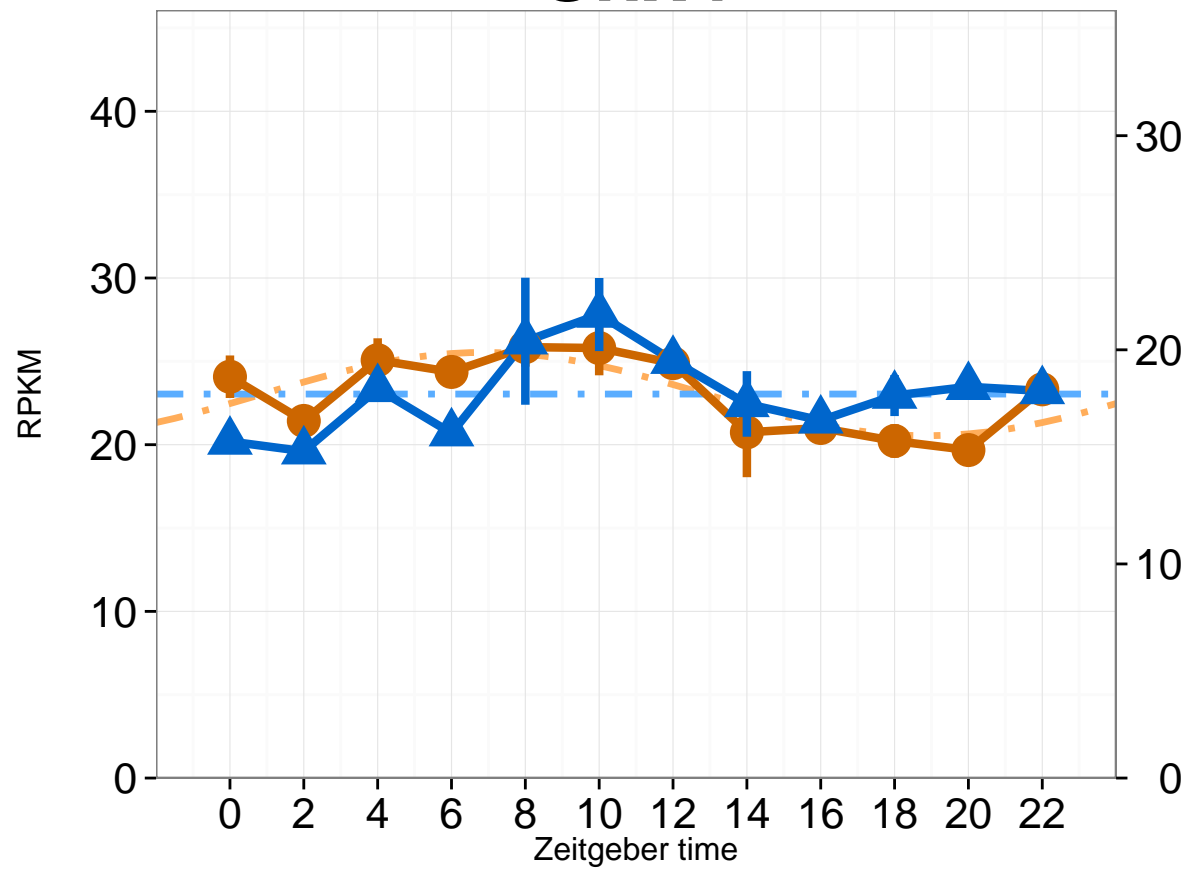

## Snx4

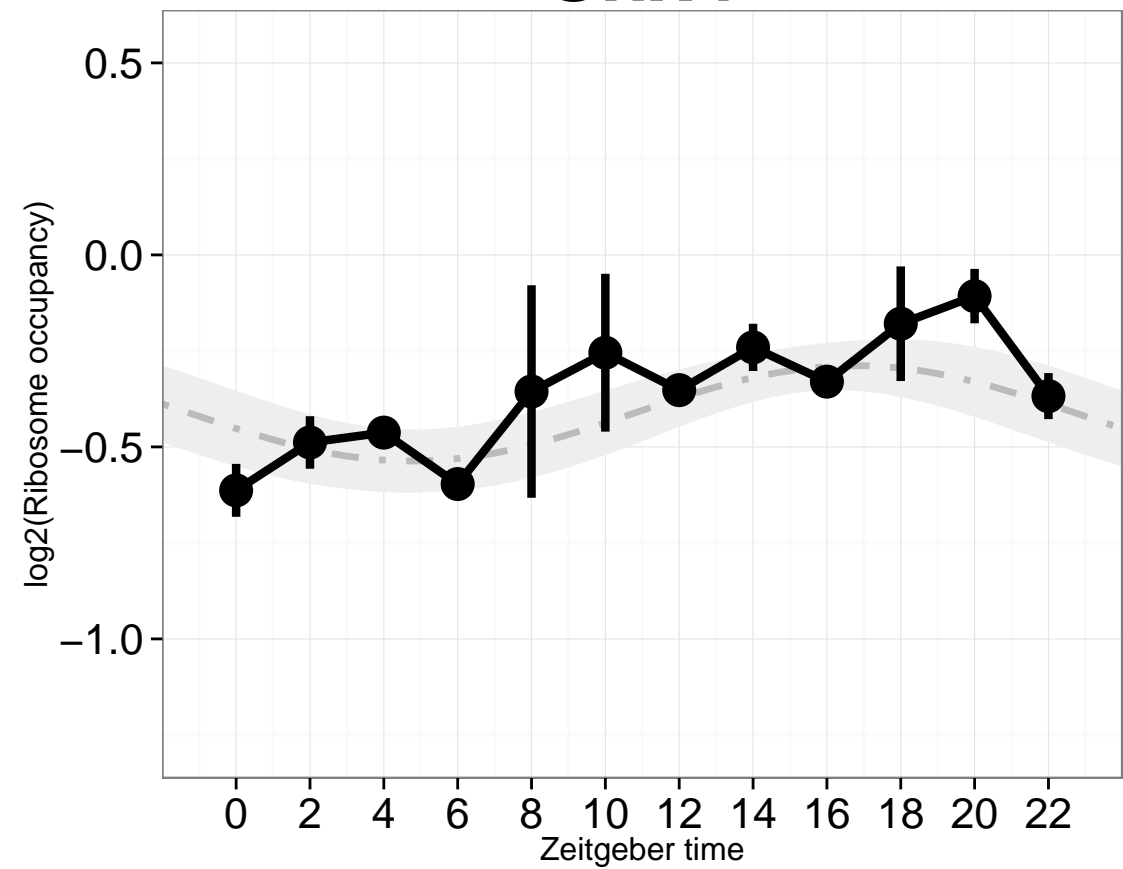

Supplement: SuppDataset_1.zip [file Snx4_set_A.pdf › Supplemental Dataset 1/A-mRNA_nonrhyth_translation_nonrhyth/Snx4_set_A.pdf]

## Snx5

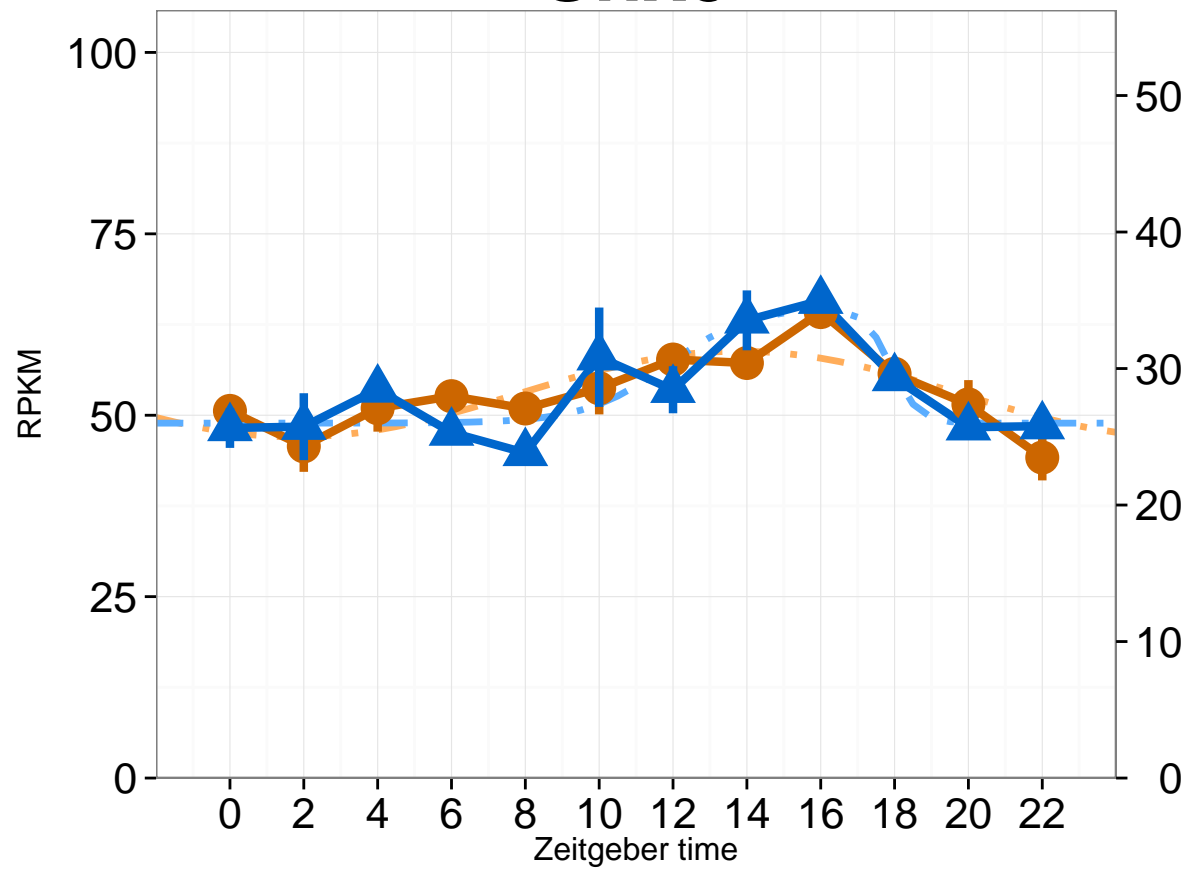

## Snx5

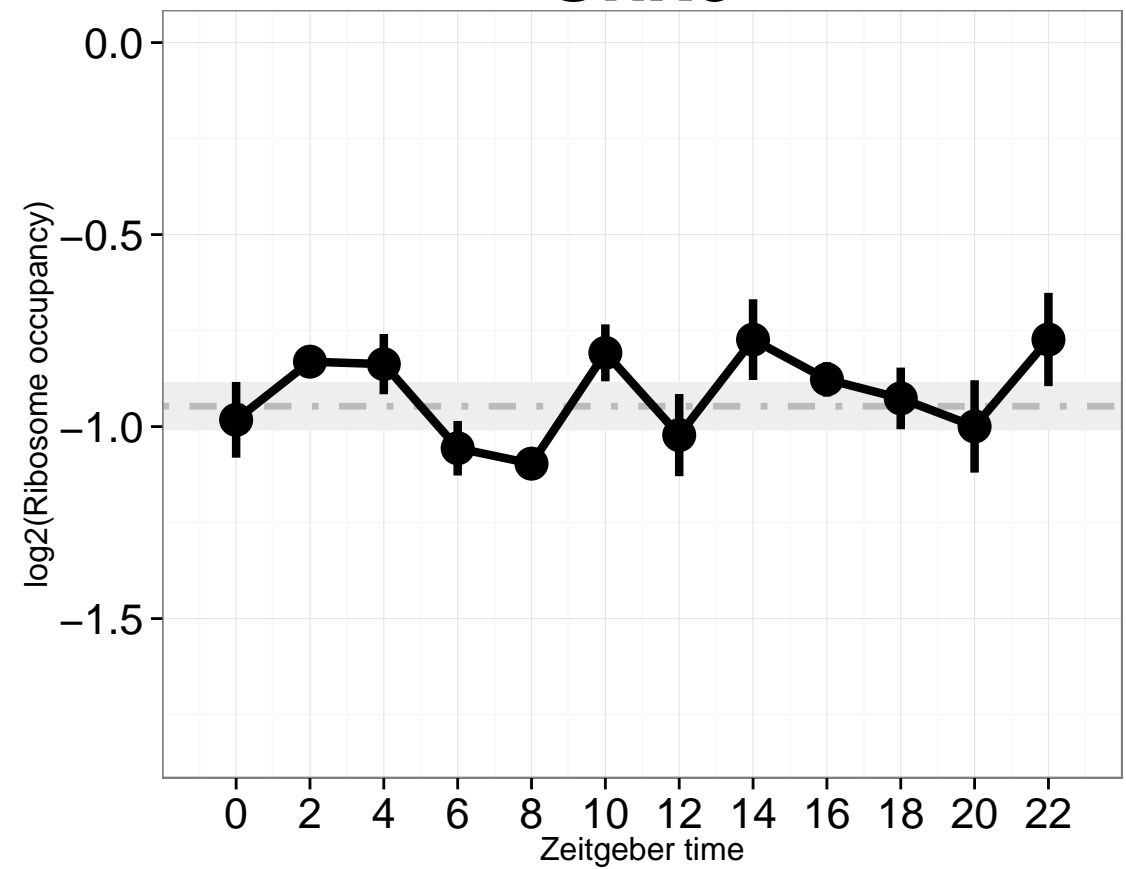

Supplement: SuppDataset_1.zip [file Snx5_set_A.pdf › Supplemental Dataset 1/A-mRNA_nonrhyth_translation_nonrhyth/Snx5_set_A.pdf]

## Snx6

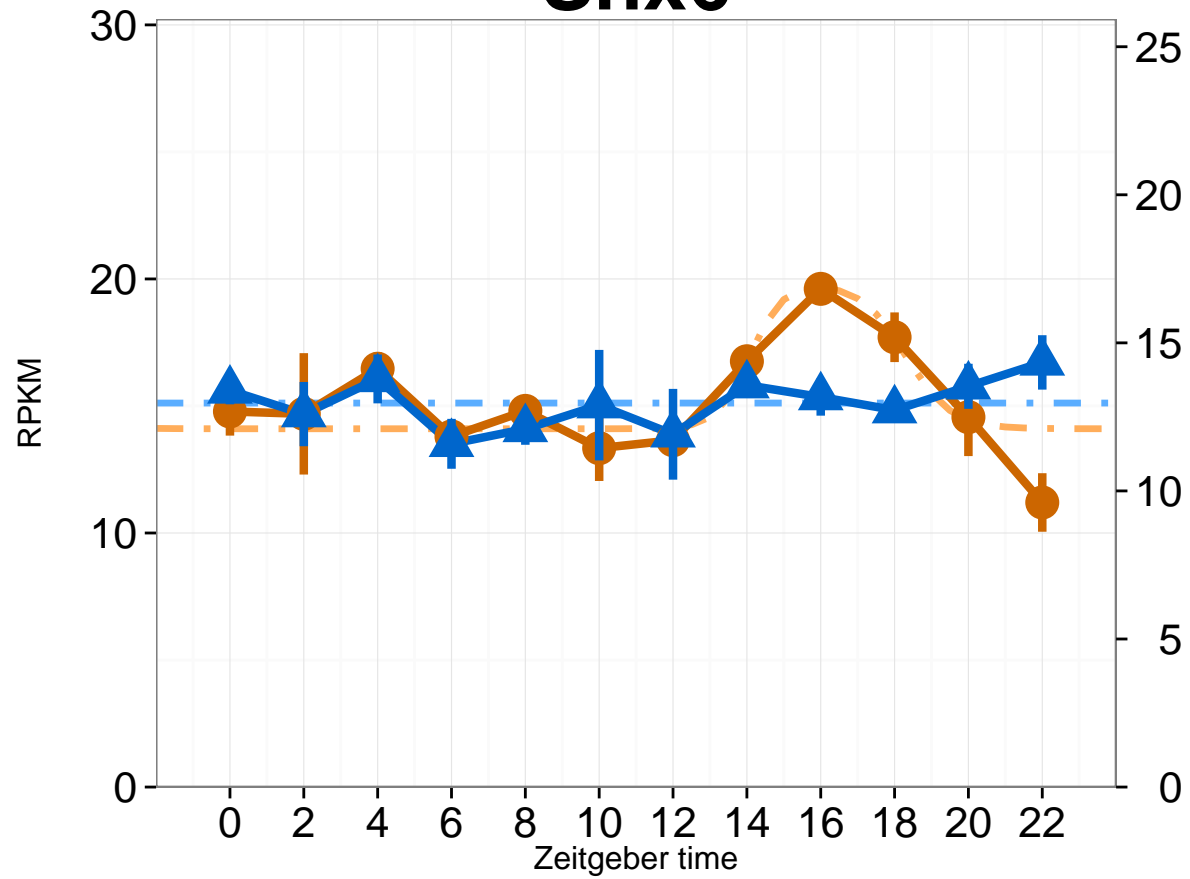

## Snx6

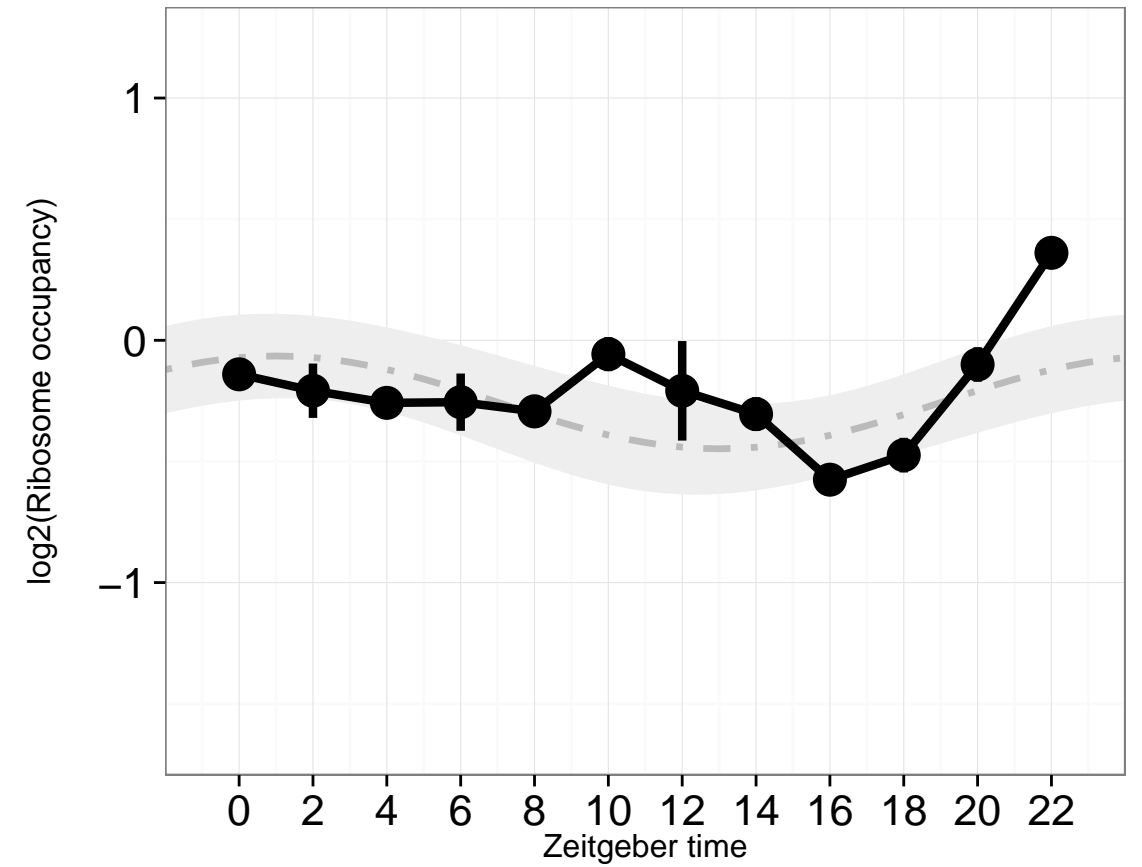

Supplement: SuppDataset_1.zip [file Snx6_set_A.pdf › Supplemental Dataset 1/A-mRNA_nonrhyth_translation_nonrhyth/Snx6_set_A.pdf]

## Snx7

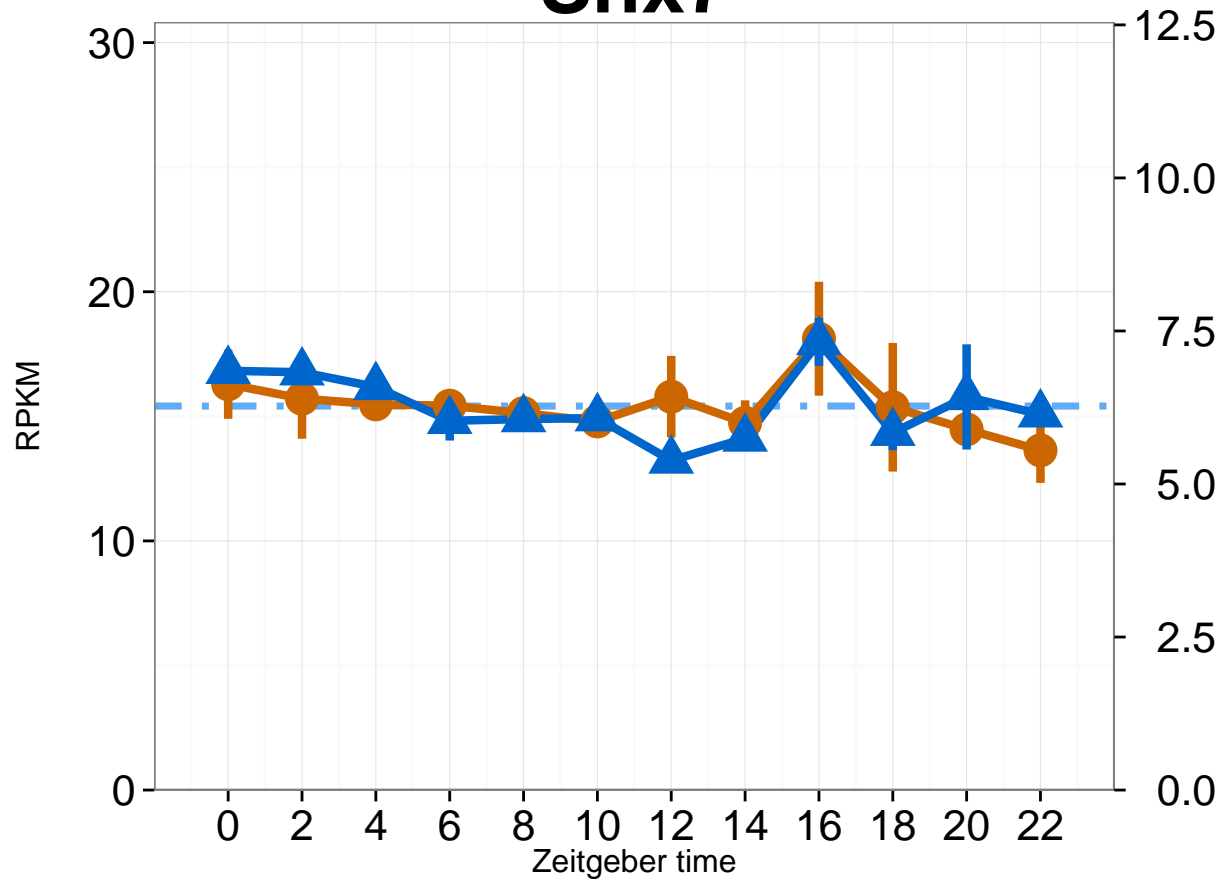

## Snx7

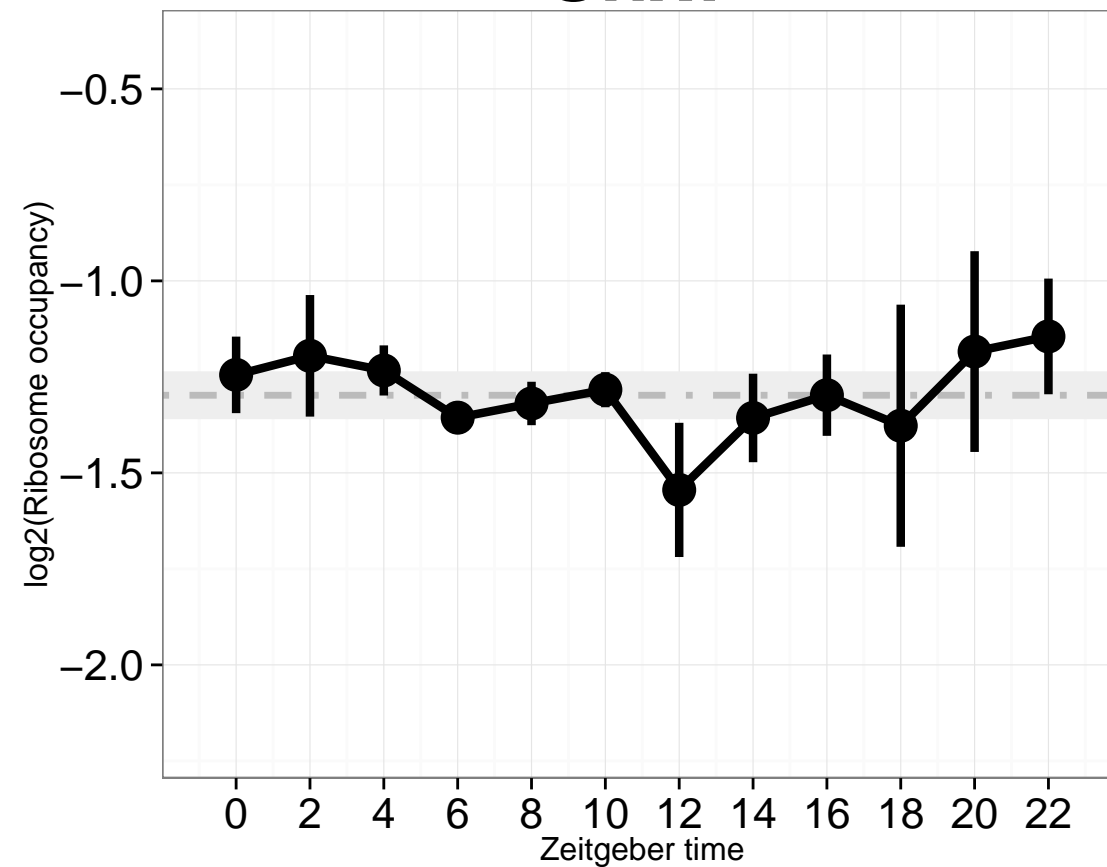

Supplement: SuppDataset_1.zip [file Snx7_set_A.pdf › Supplemental Dataset 1/A-mRNA_nonrhyth_translation_nonrhyth/Snx7_set_A.pdf]

## Snx9

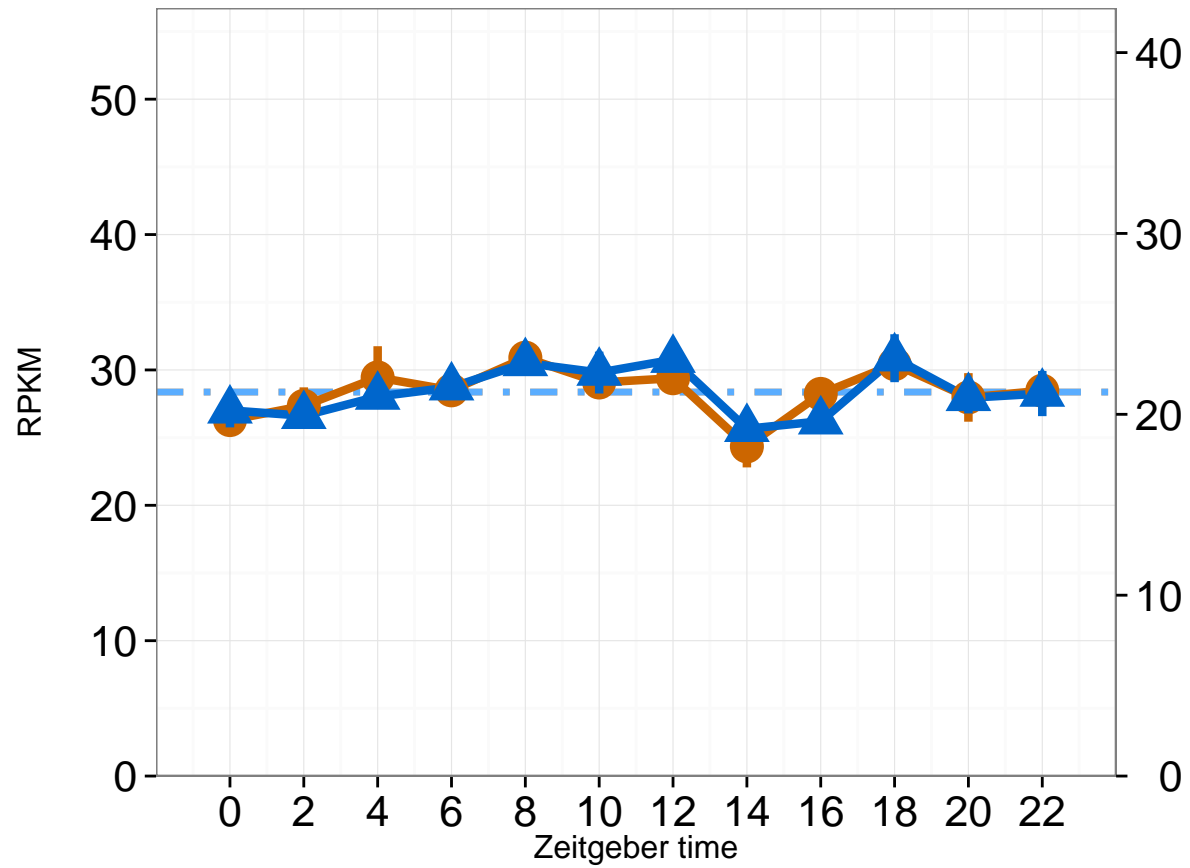

## Snx9

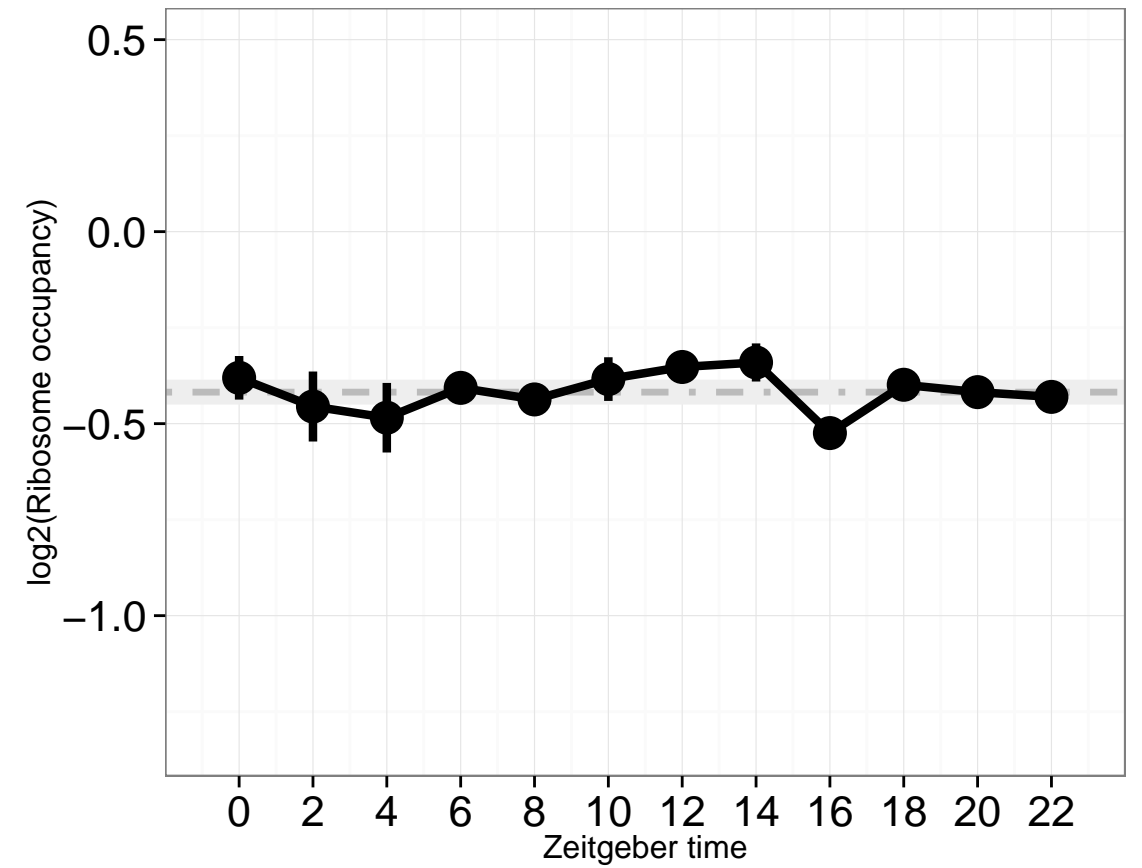

Supplement: SuppDataset_1.zip [file Snx9_set_A.pdf › Supplemental Dataset 1/A-mRNA_nonrhyth_translation_nonrhyth/Snx9_set_A.pdf]

# Soat1

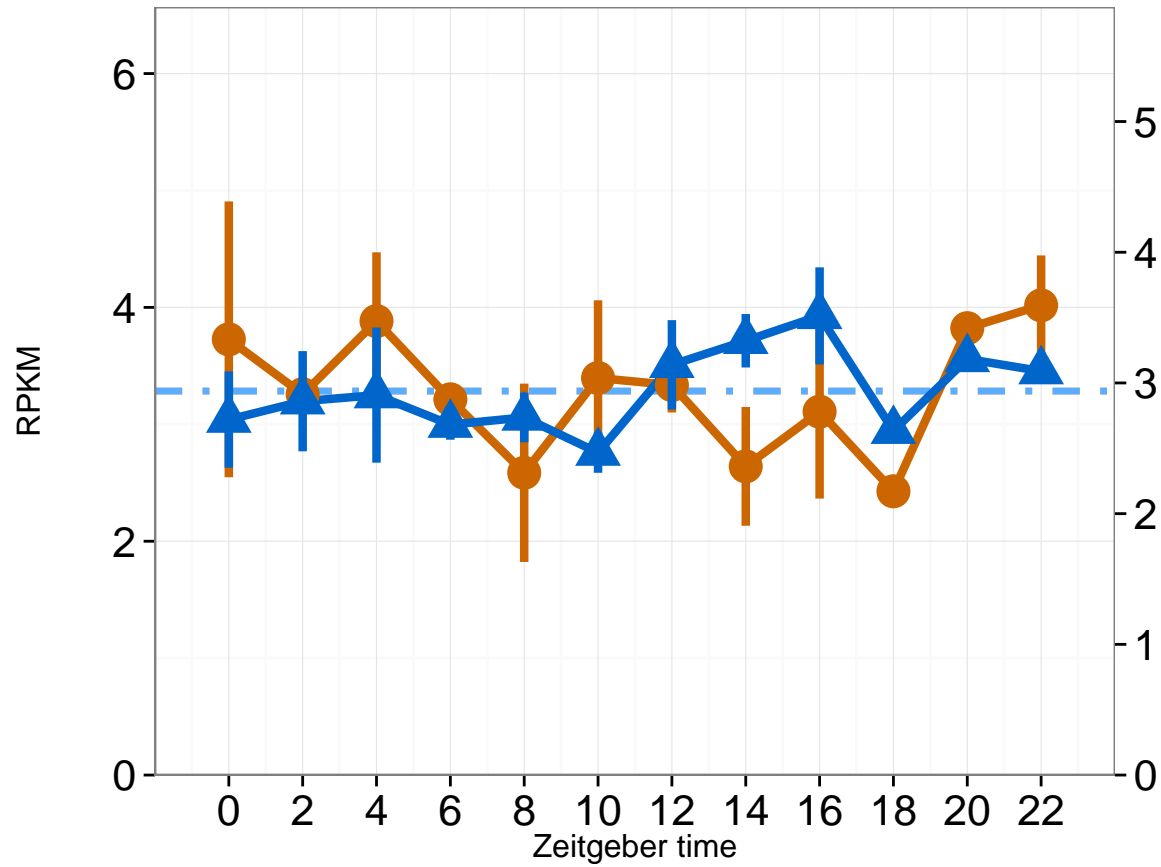

# Soat1

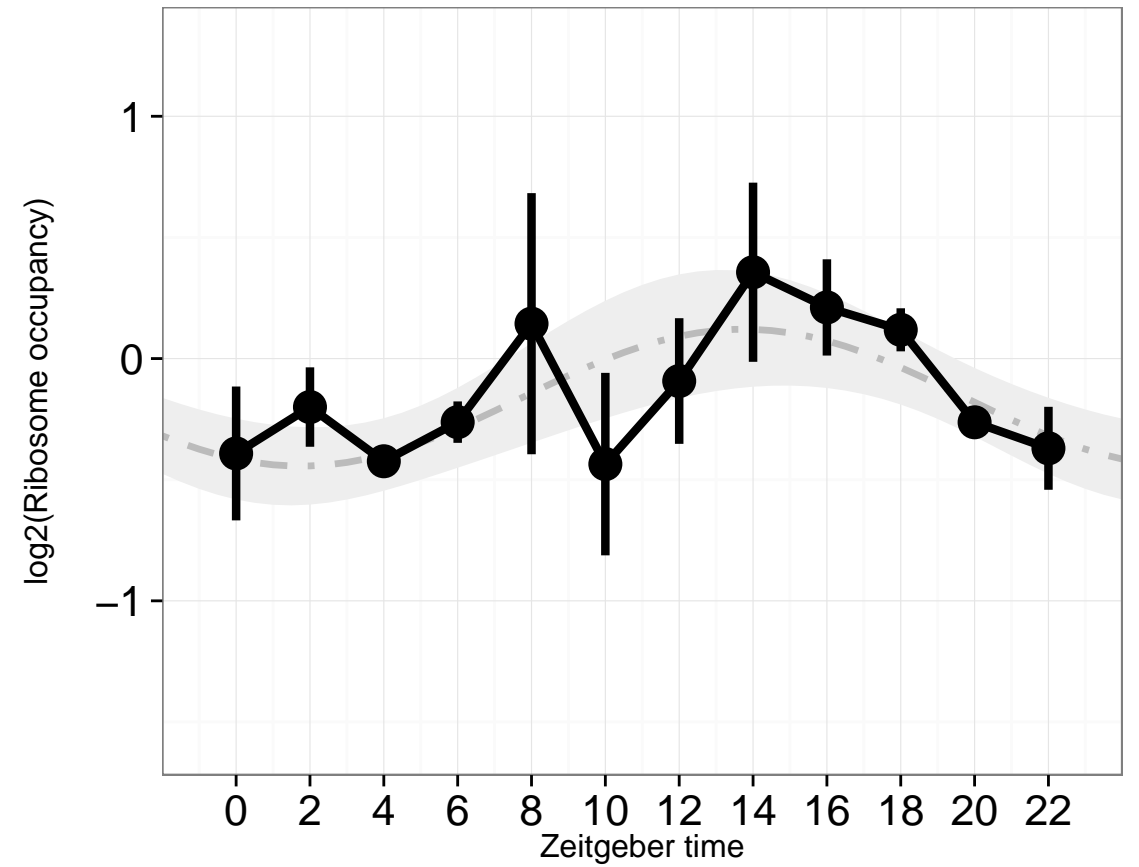

Supplement: SuppDataset_1.zip [file Soat1_set_A.pdf › Supplemental Dataset 1/A-mRNA_nonrhyth_translation_nonrhyth/Soat1_set_A.pdf]

## Socs2

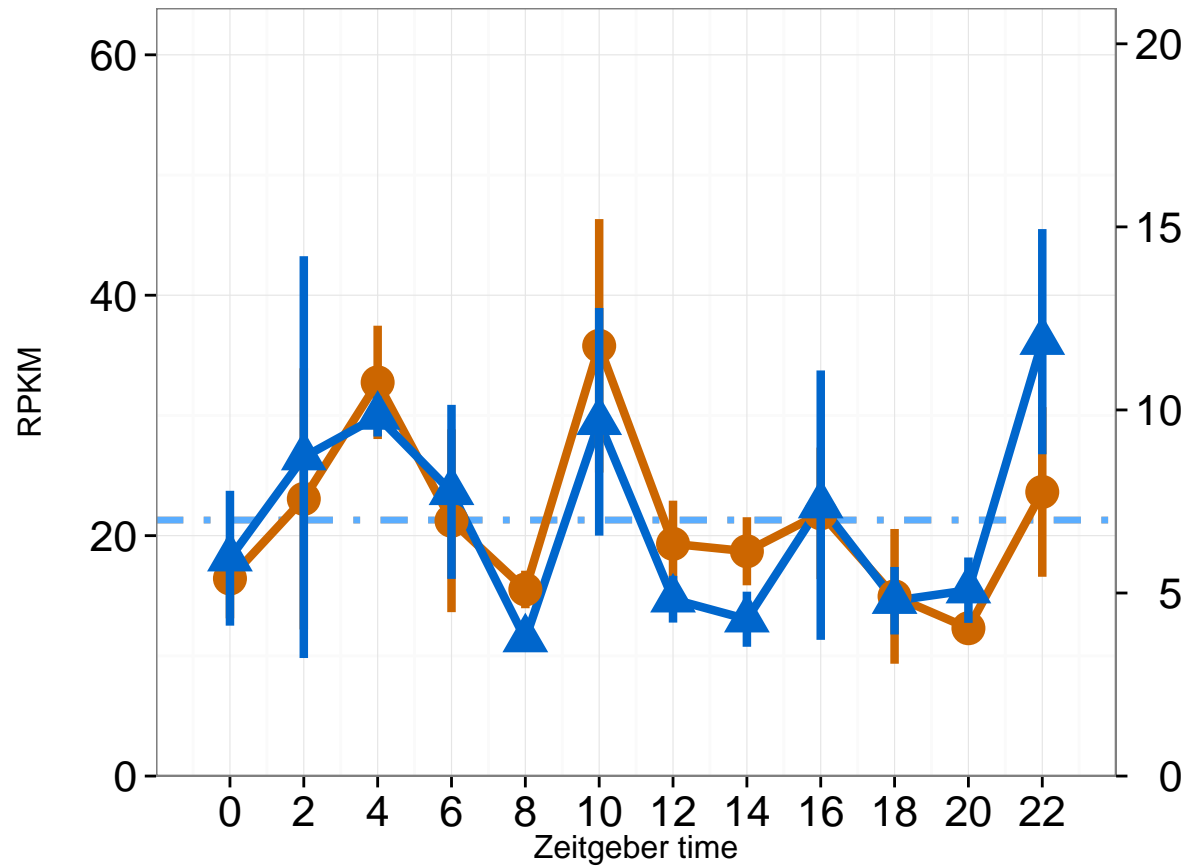

## Socs2

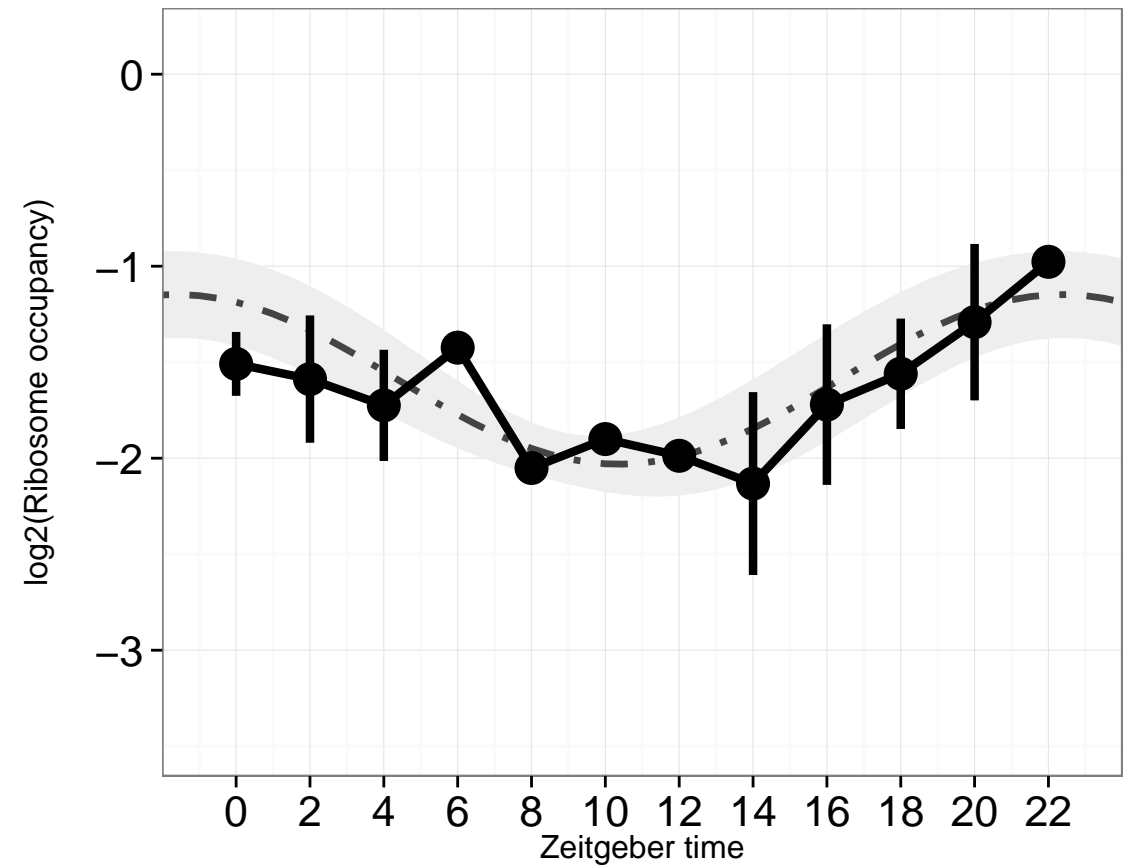

Supplement: SuppDataset_1.zip [file Socs2_set_A.pdf › Supplemental Dataset 1/A-mRNA_nonrhyth_translation_nonrhyth/Socs2_set_A.pdf]

## Socs3

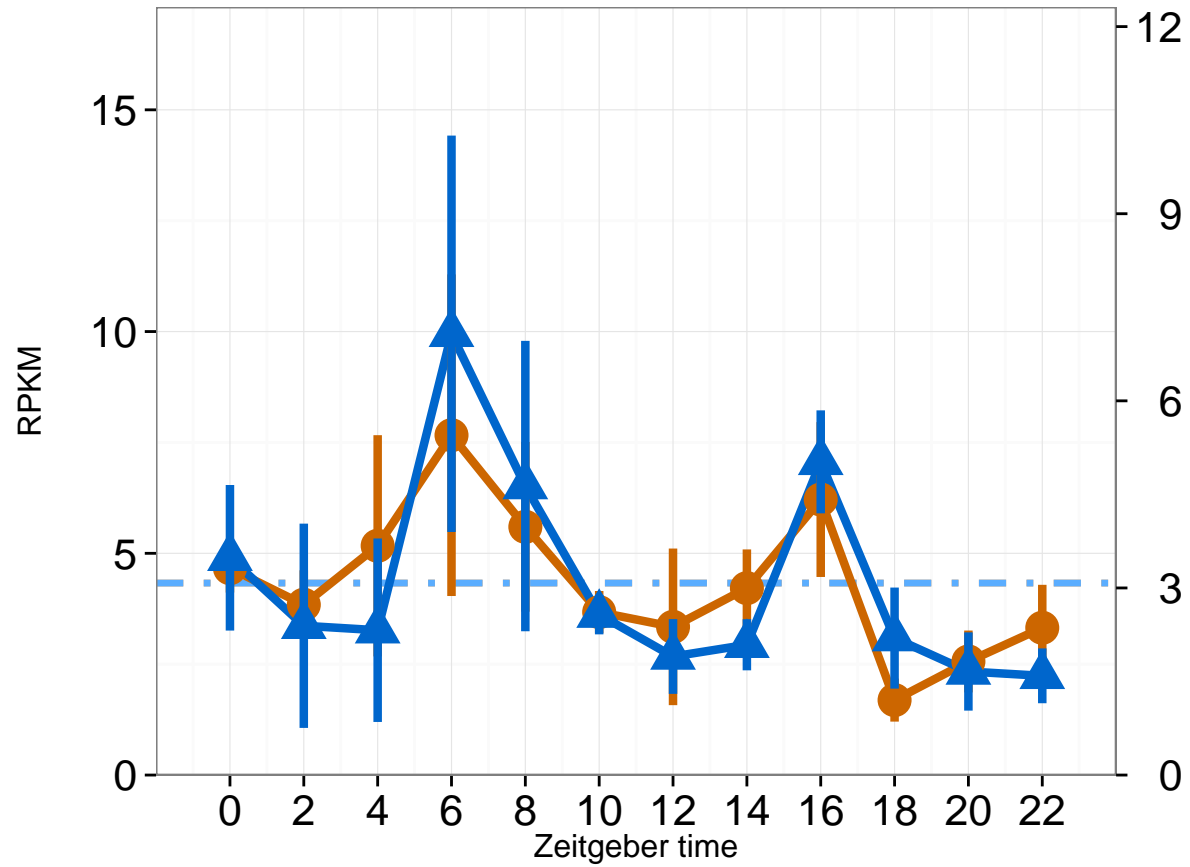

## Socs3

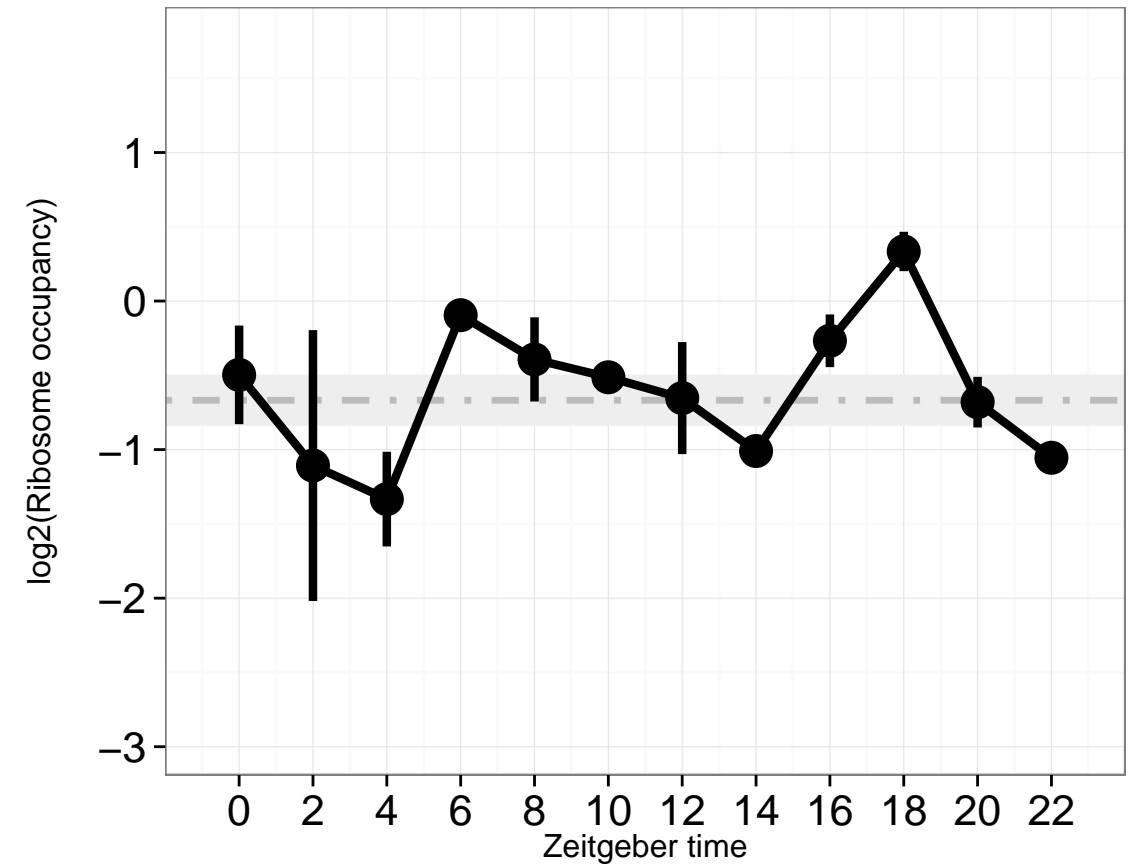

Supplement: SuppDataset_1.zip [file Socs3_set_A.pdf › Supplemental Dataset 1/A-mRNA_nonrhyth_translation_nonrhyth/Socs3_set_A.pdf]

## Socs5

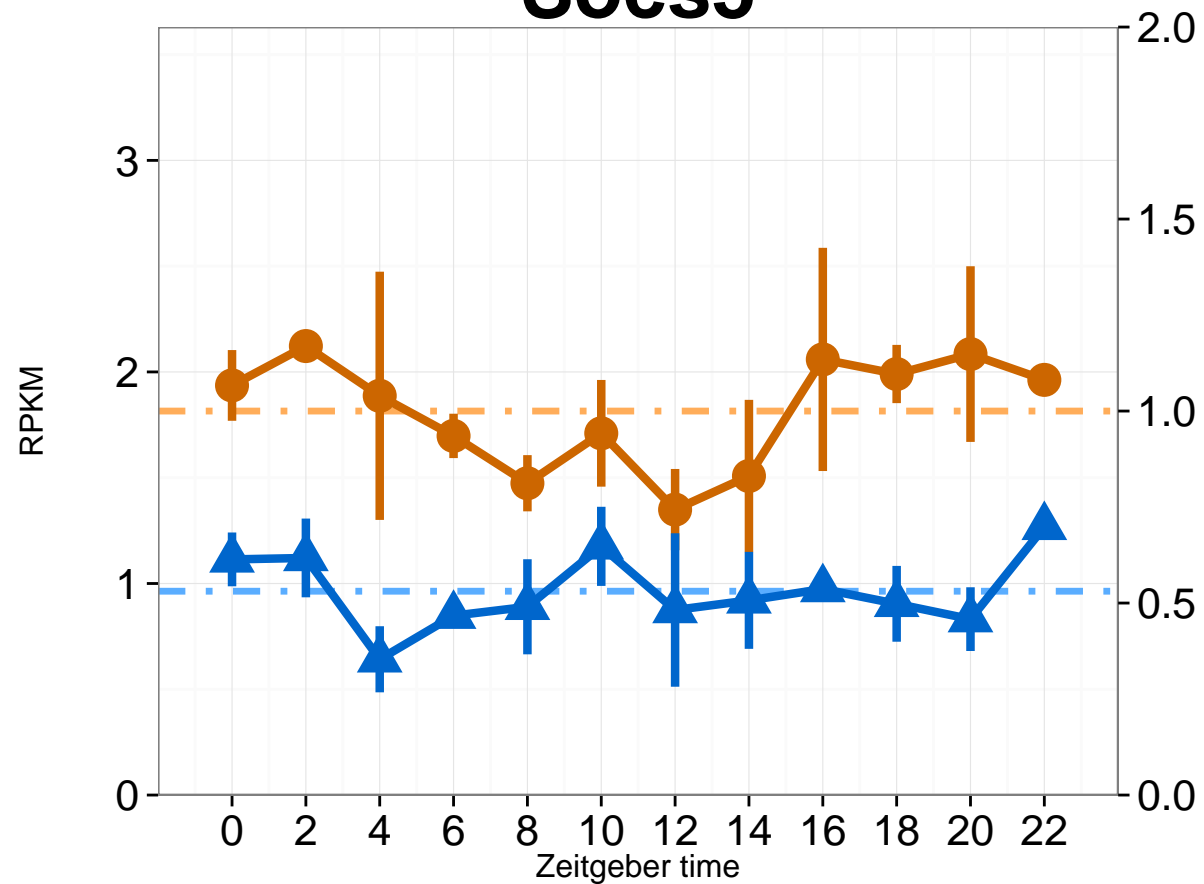

## Socs5

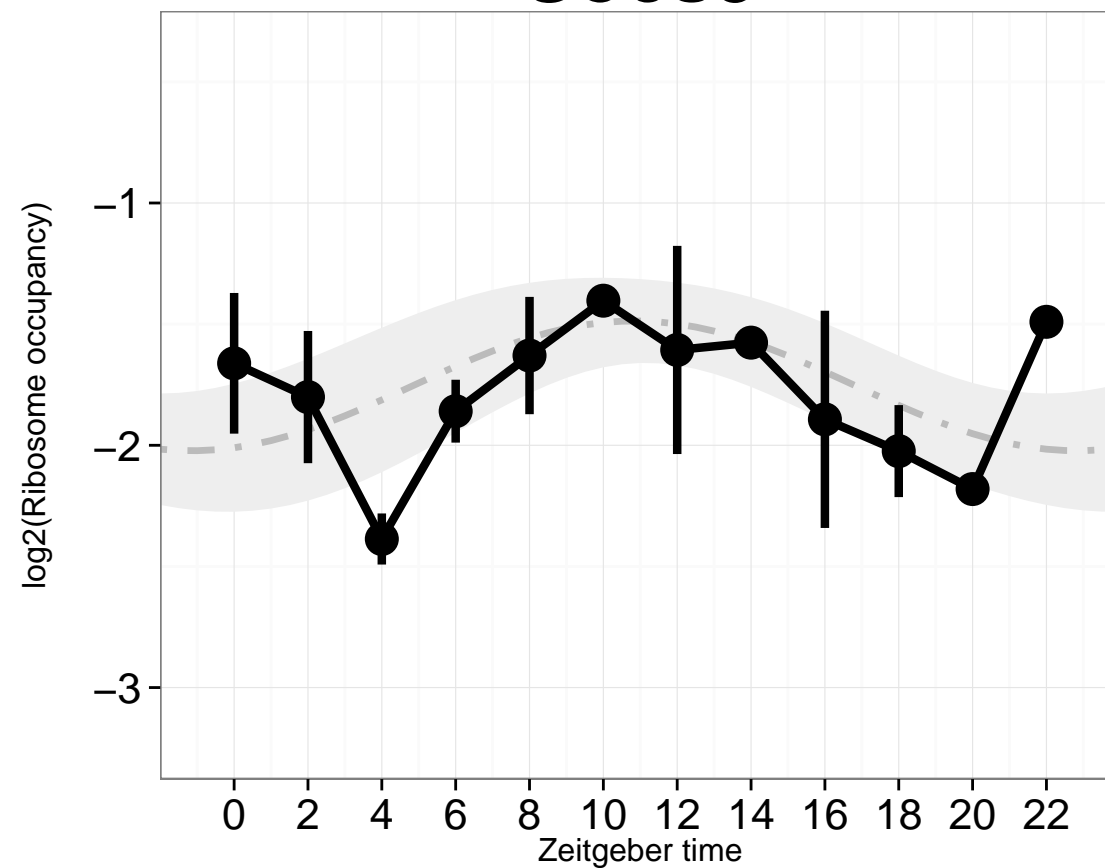

Supplement: SuppDataset_1.zip [file Socs5_set_A.pdf › Supplemental Dataset 1/A-mRNA_nonrhyth_translation_nonrhyth/Socs5_set_A.pdf]

## Socs6

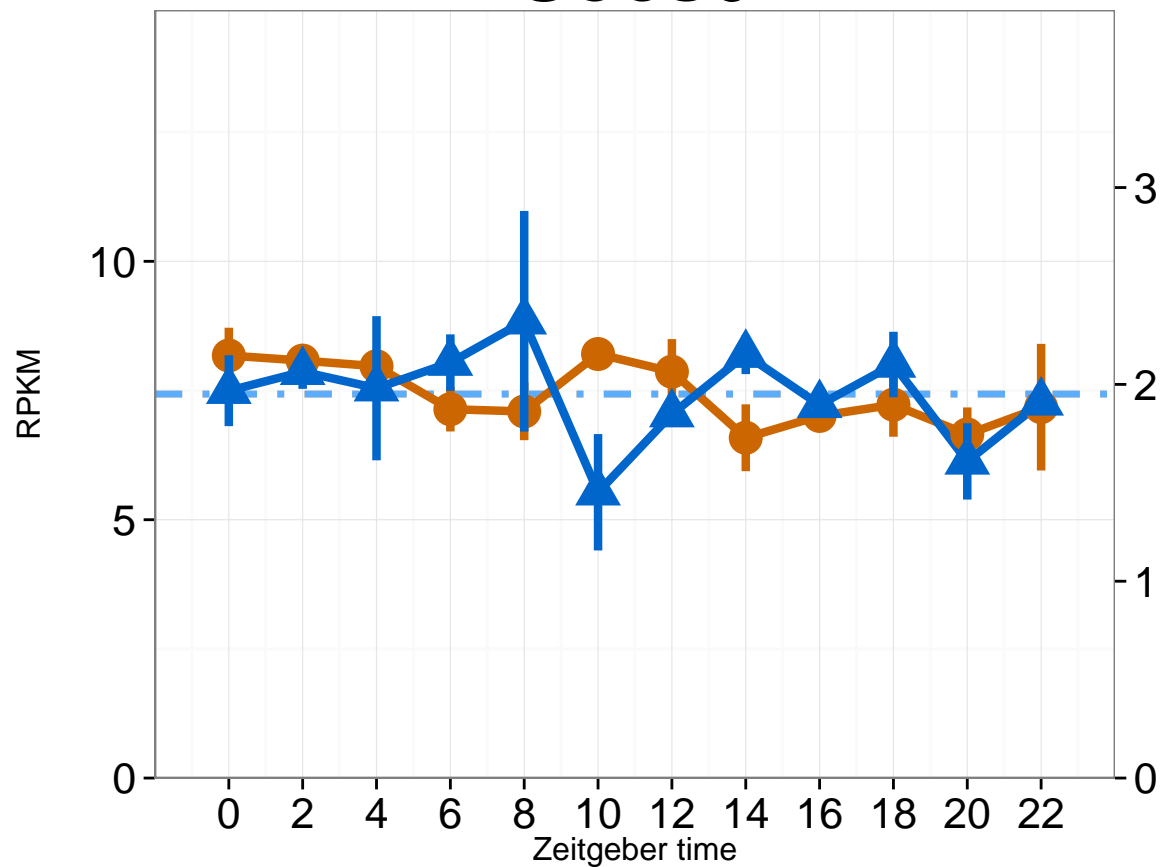

## Socs6

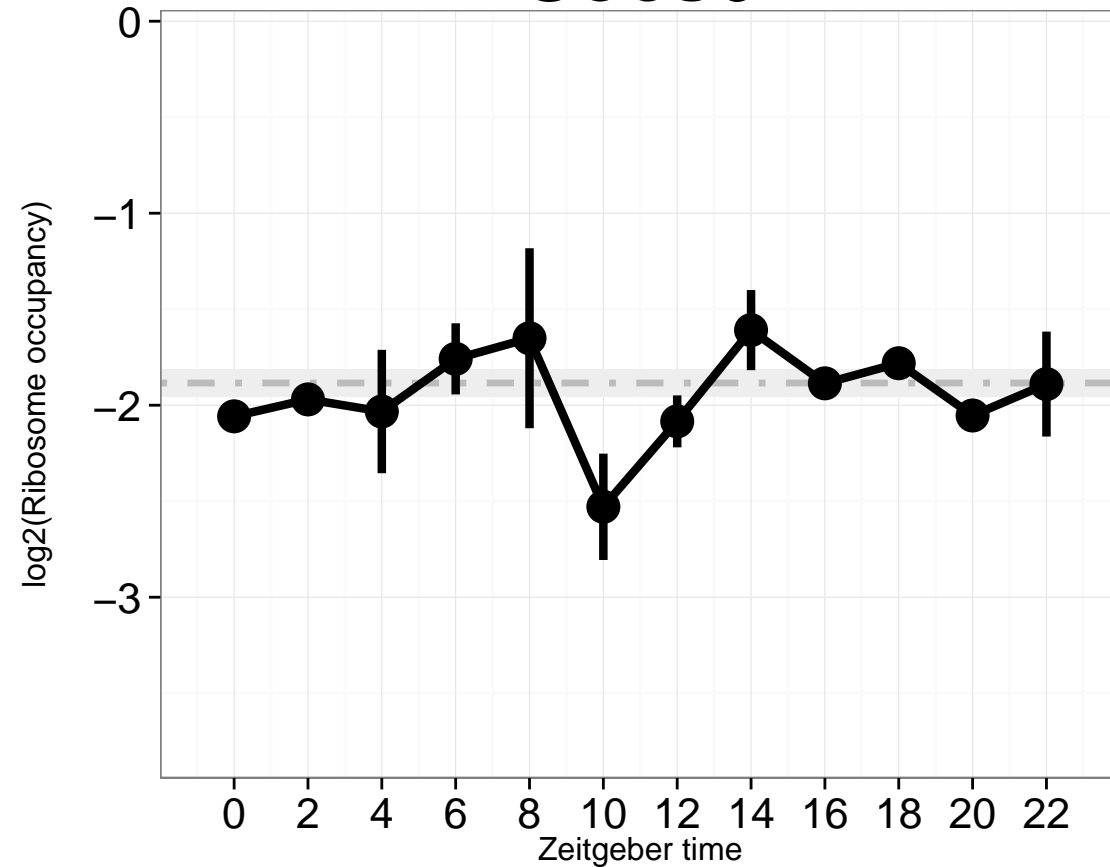

Supplement: SuppDataset_1.zip [file Socs6_set_A.pdf › Supplemental Dataset 1/A-mRNA_nonrhyth_translation_nonrhyth/Socs6_set_A.pdf]

## Socs7

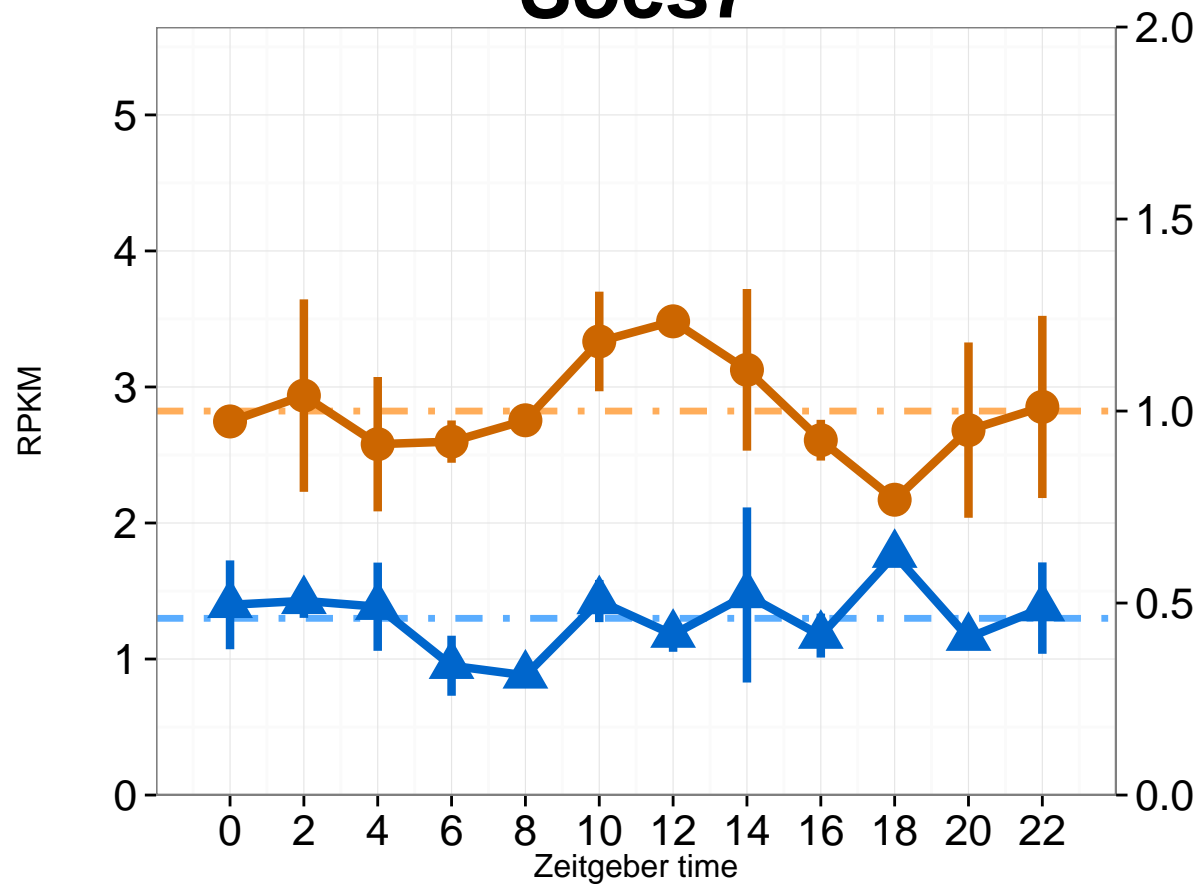

## Socs7

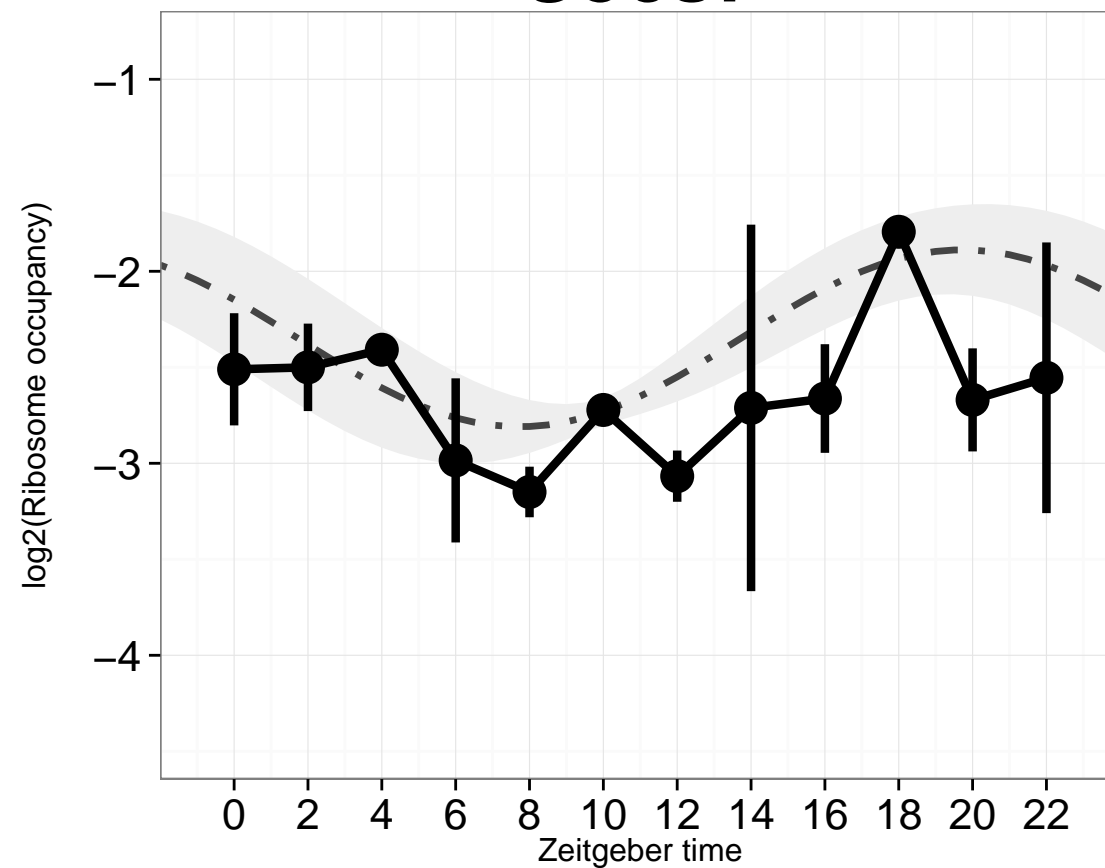

Supplement: SuppDataset_1.zip [file Socs7_set_A.pdf › Supplemental Dataset 1/A-mRNA_nonrhyth_translation_nonrhyth/Socs7_set_A.pdf]

## Sod1

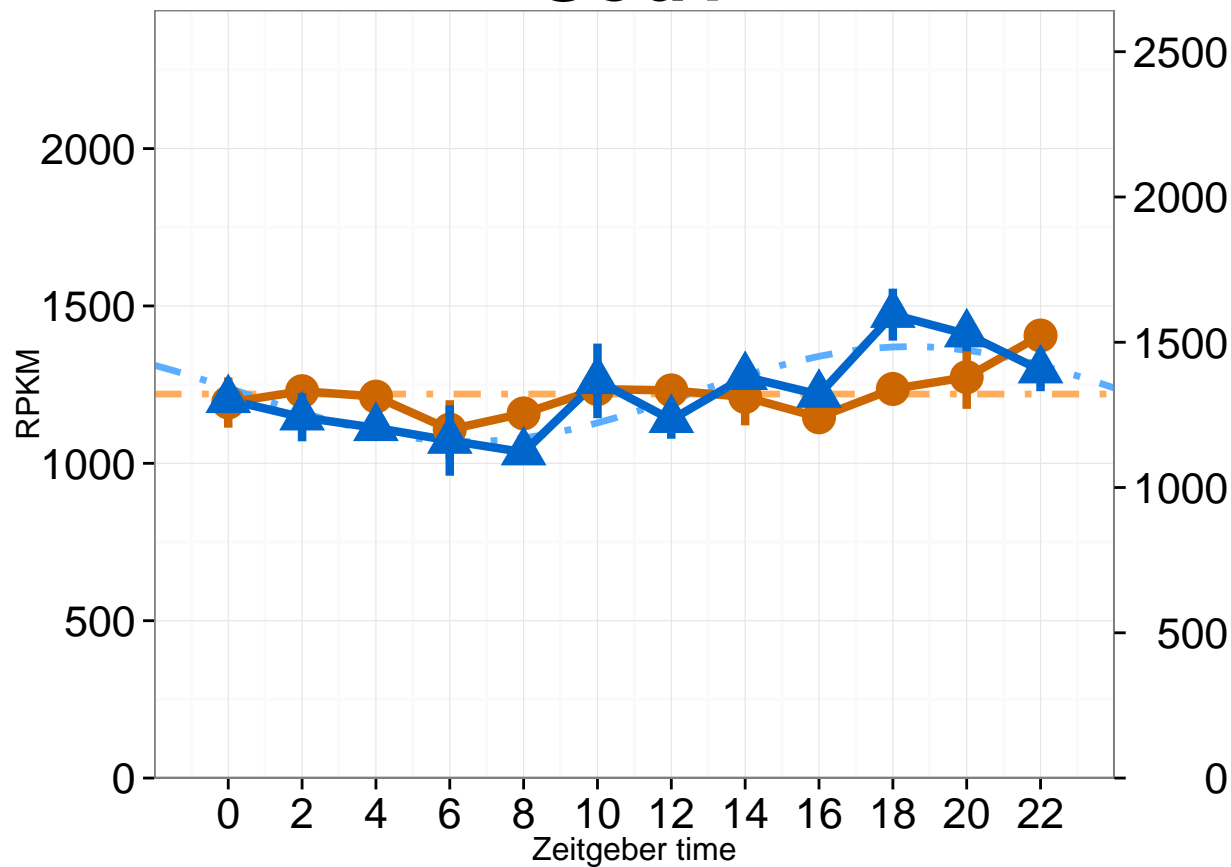

## Sod1

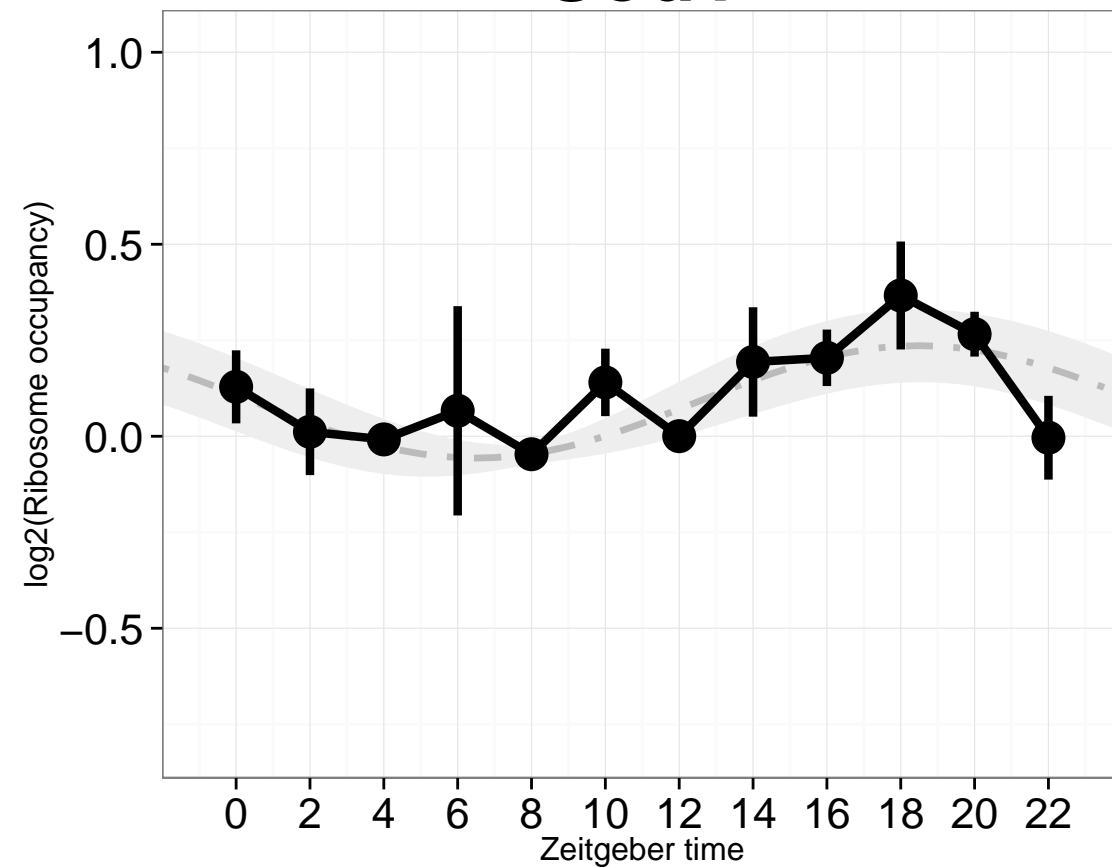

Supplement: SuppDataset_1.zip [file Sod1_set_A.pdf › Supplemental Dataset 1/A-mRNA_nonrhyth_translation_nonrhyth/Sod1_set_A.pdf]

## Sod2

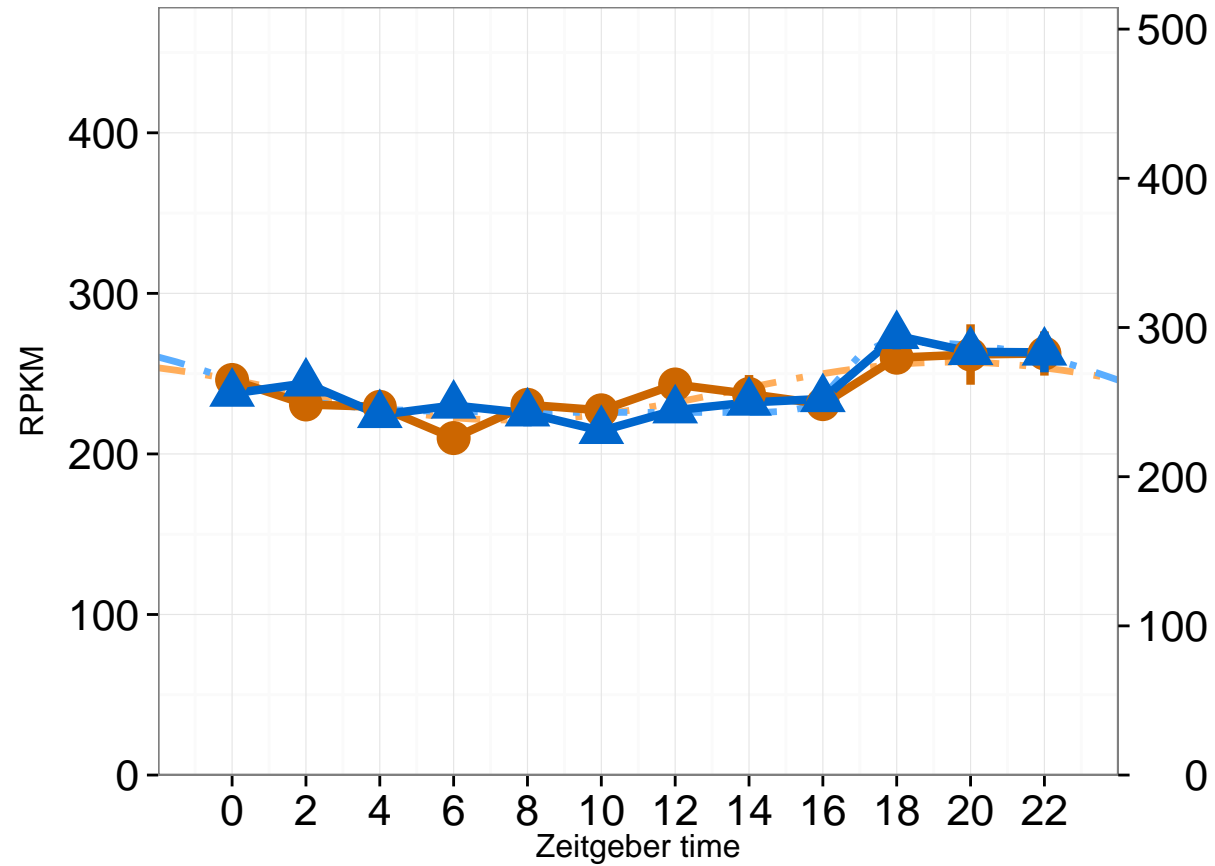

## Sod2

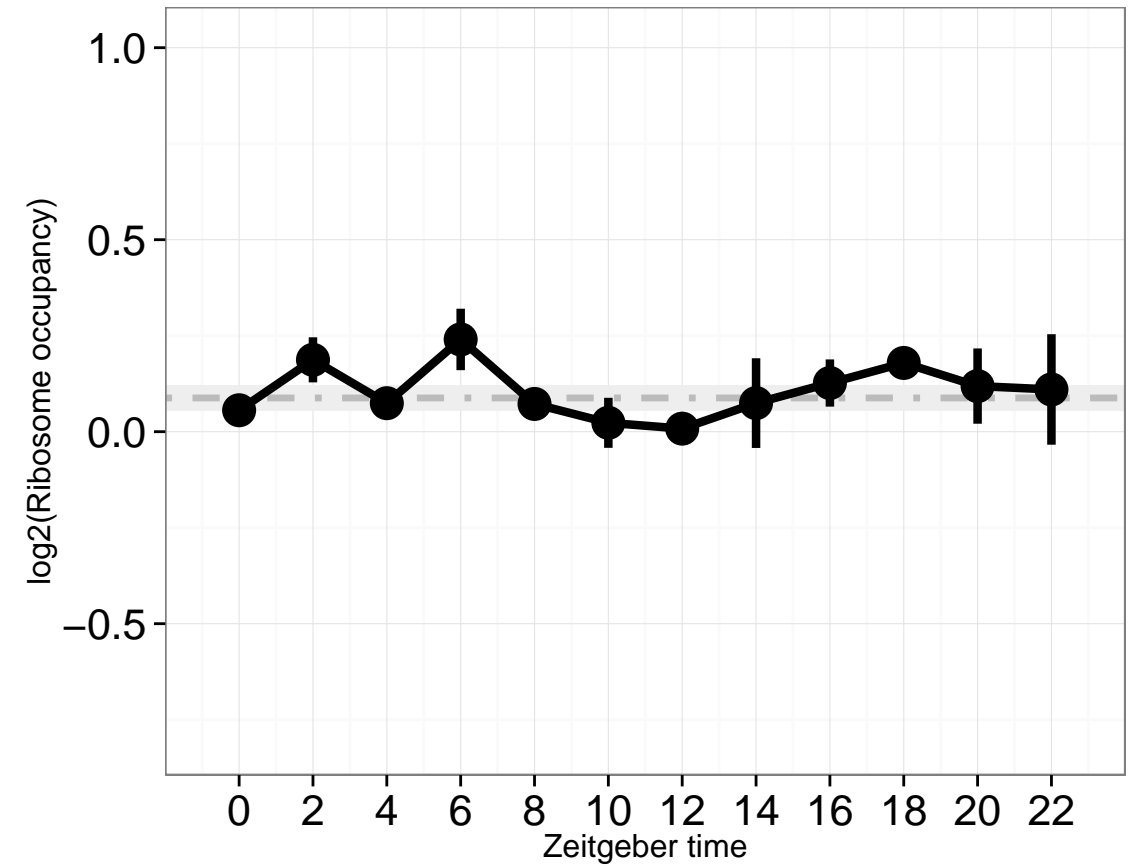

Supplement: SuppDataset_1.zip [file Sod2_set_A.pdf › Supplemental Dataset 1/A-mRNA_nonrhyth_translation_nonrhyth/Sod2_set_A.pdf]

## Sod3

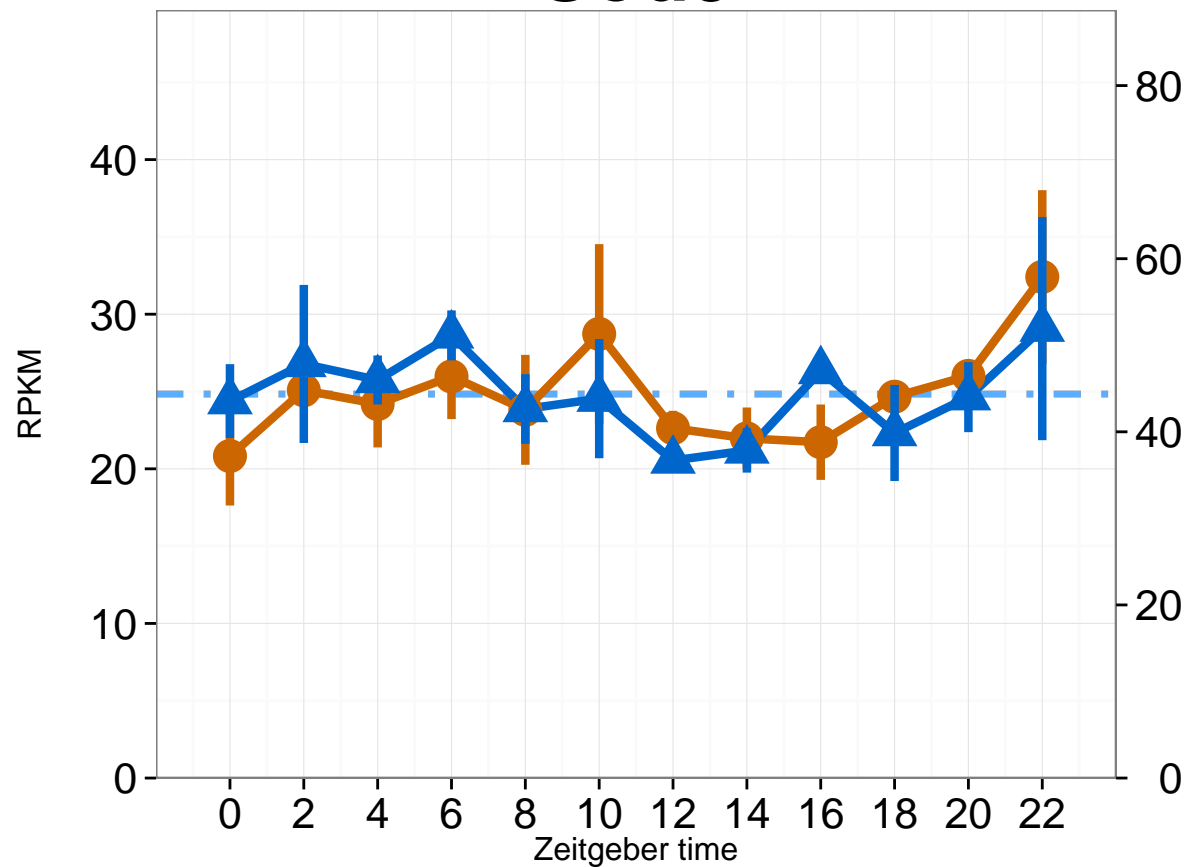

## Sod3

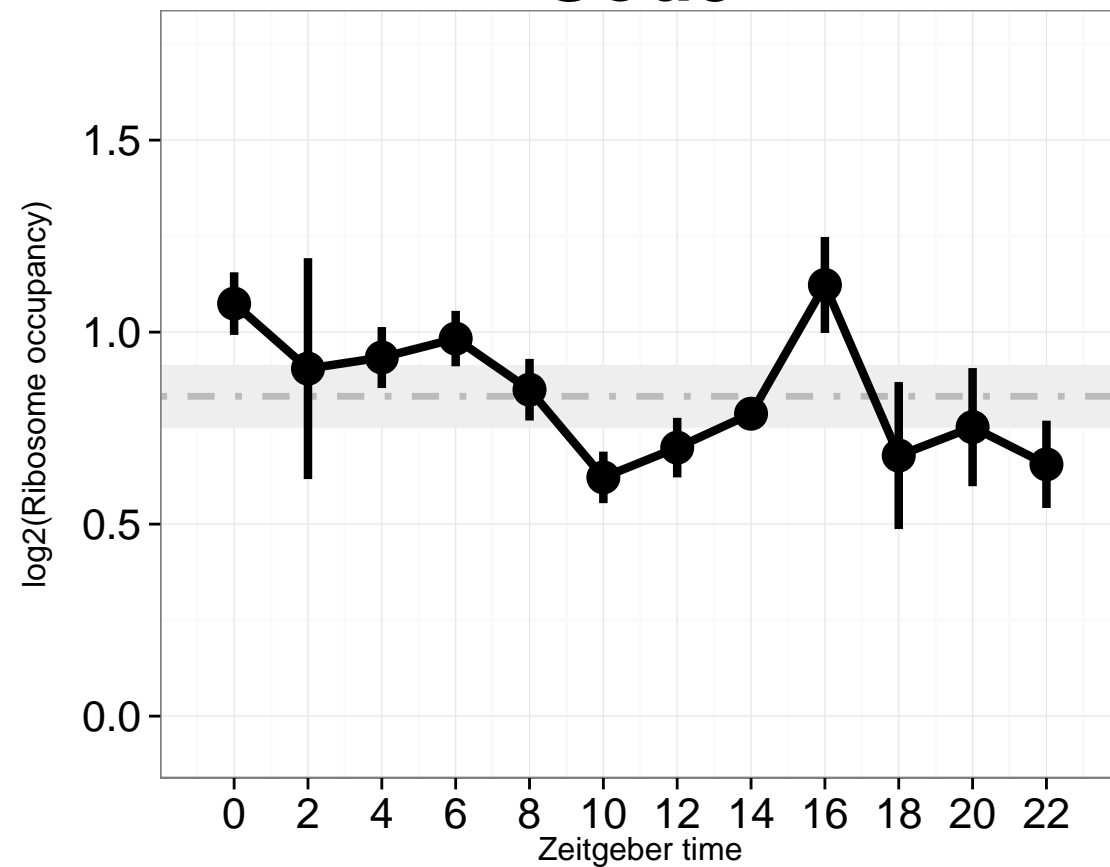

Supplement: SuppDataset_1.zip [file Sod3_set_A.pdf › Supplemental Dataset 1/A-mRNA_nonrhyth_translation_nonrhyth/Sod3_set_A.pdf]

# Soga1

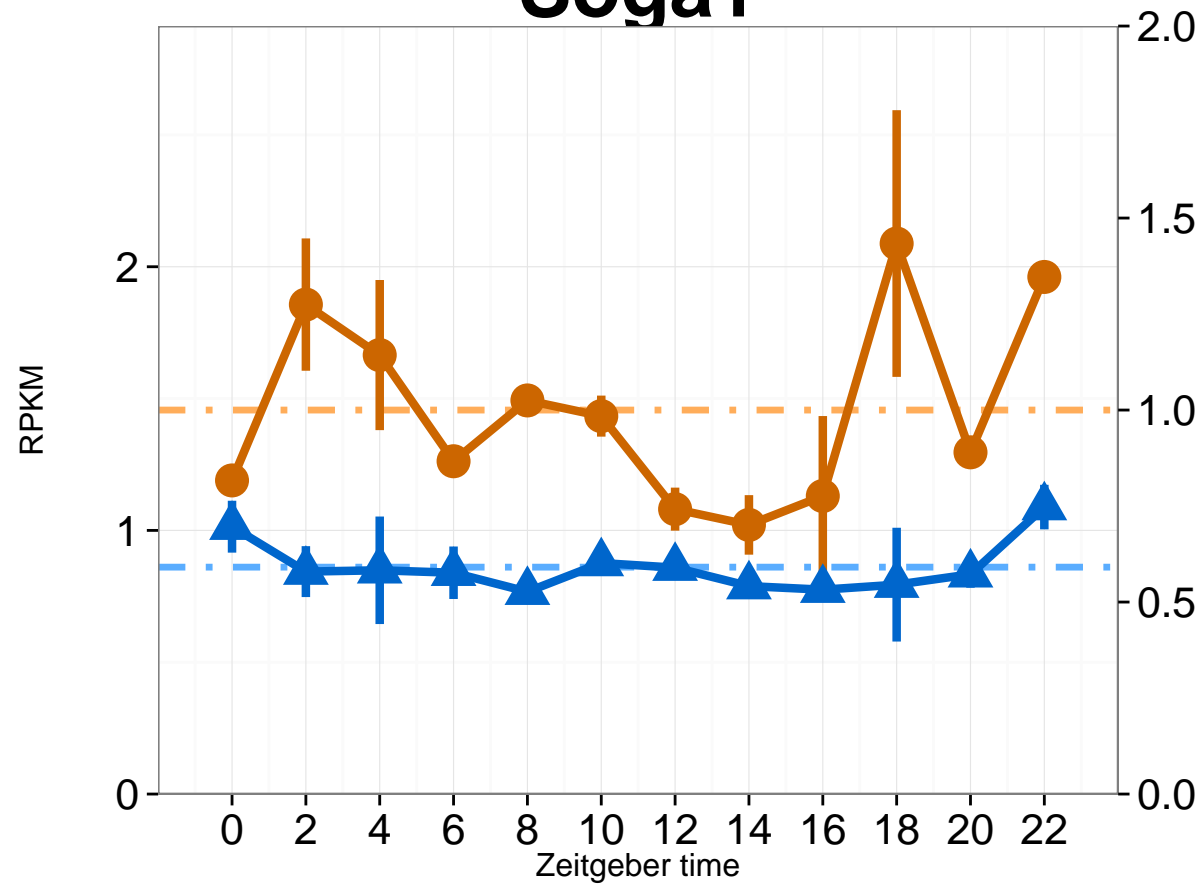

# Soga1

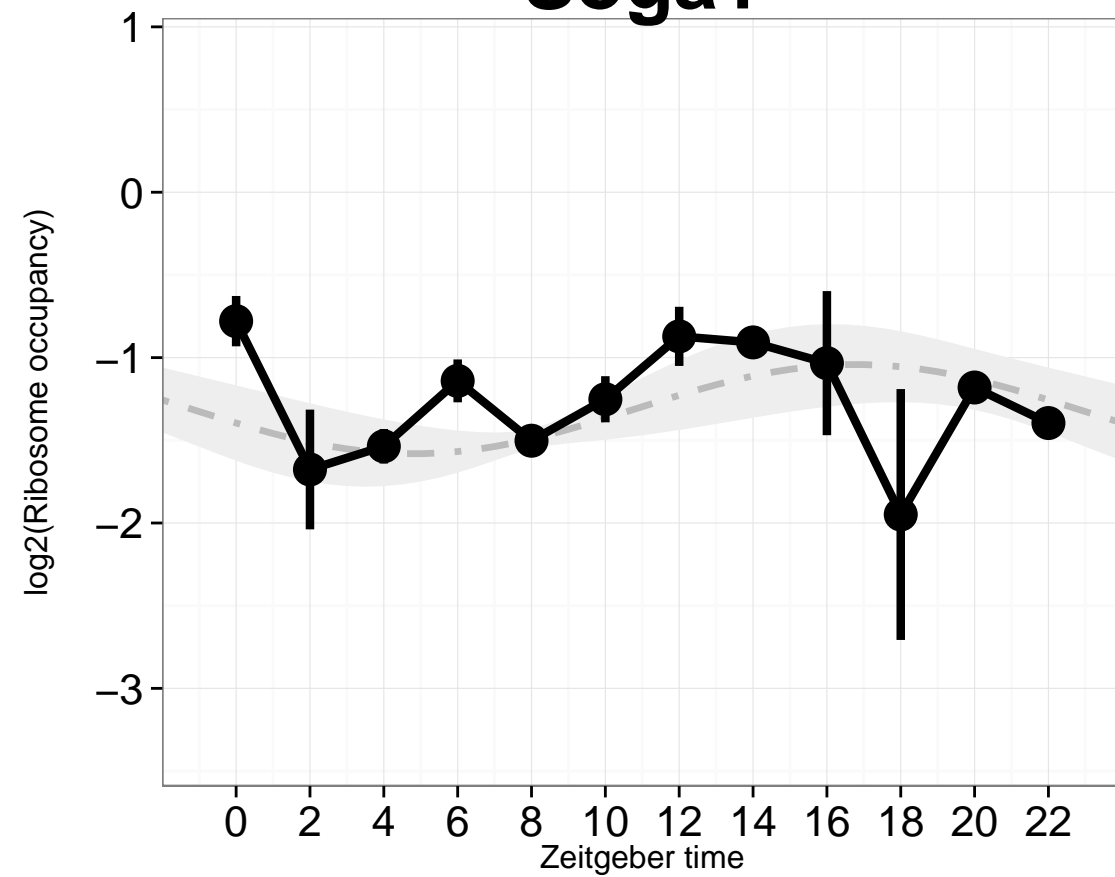

Supplement: SuppDataset_1.zip [file Soga1_set_A.pdf › Supplemental Dataset 1/A-mRNA_nonrhyth_translation_nonrhyth/Soga1_set_A.pdf]

## Son

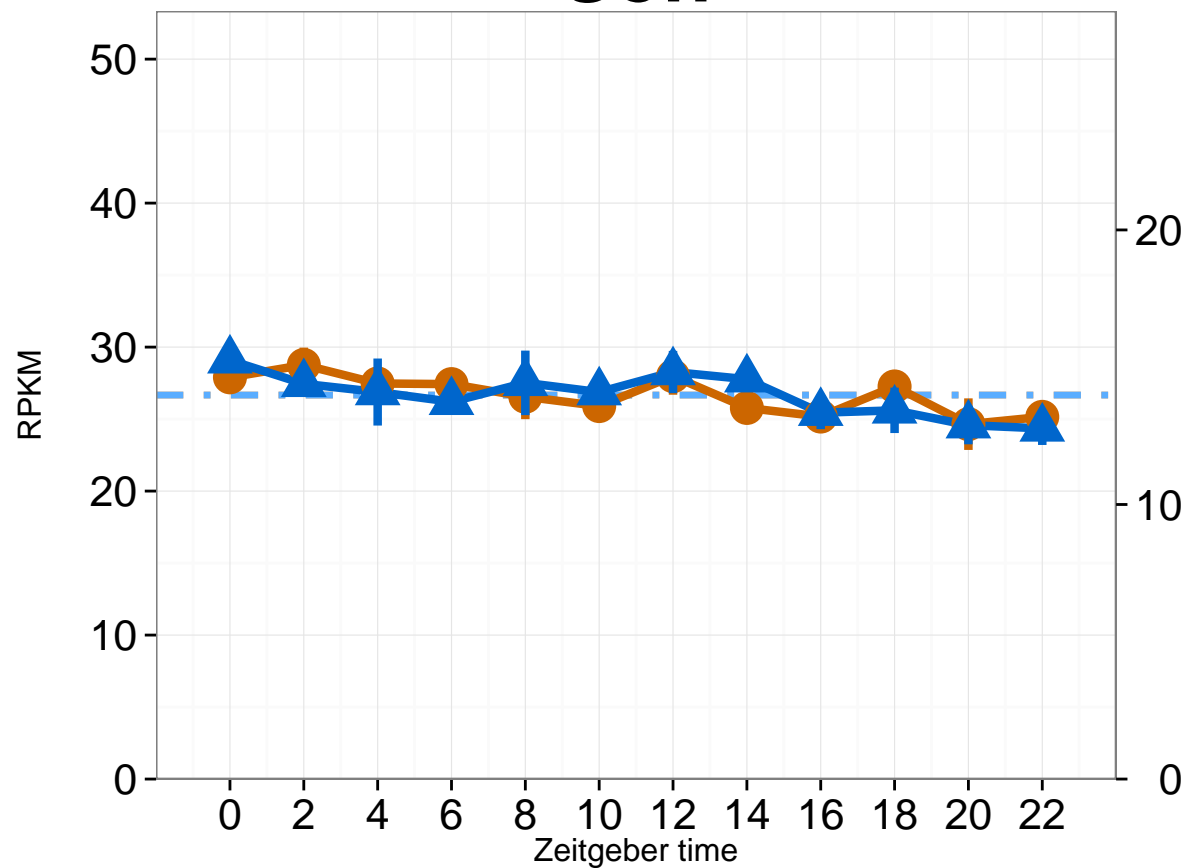

## Son

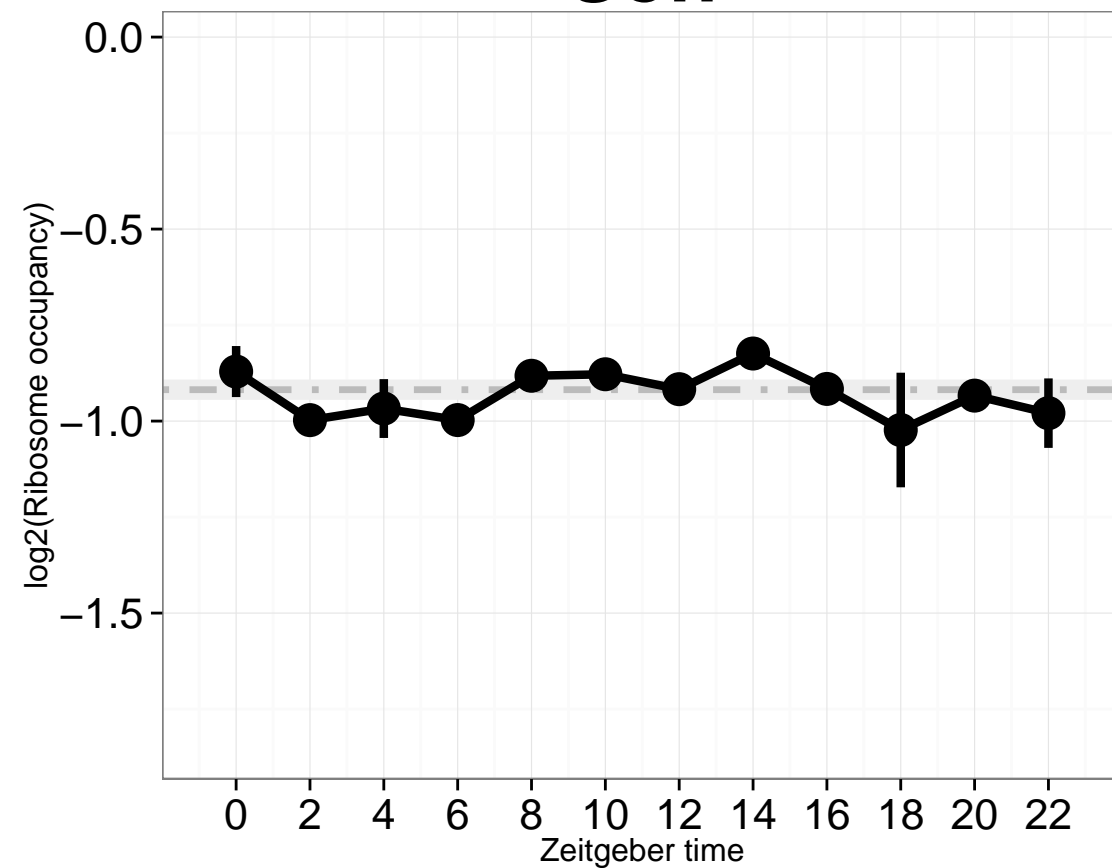

Supplement: SuppDataset_1.zip [file Son_set_A.pdf › Supplemental Dataset 1/A-mRNA_nonrhyth_translation_nonrhyth/Son_set_A.pdf]

## Sorl1

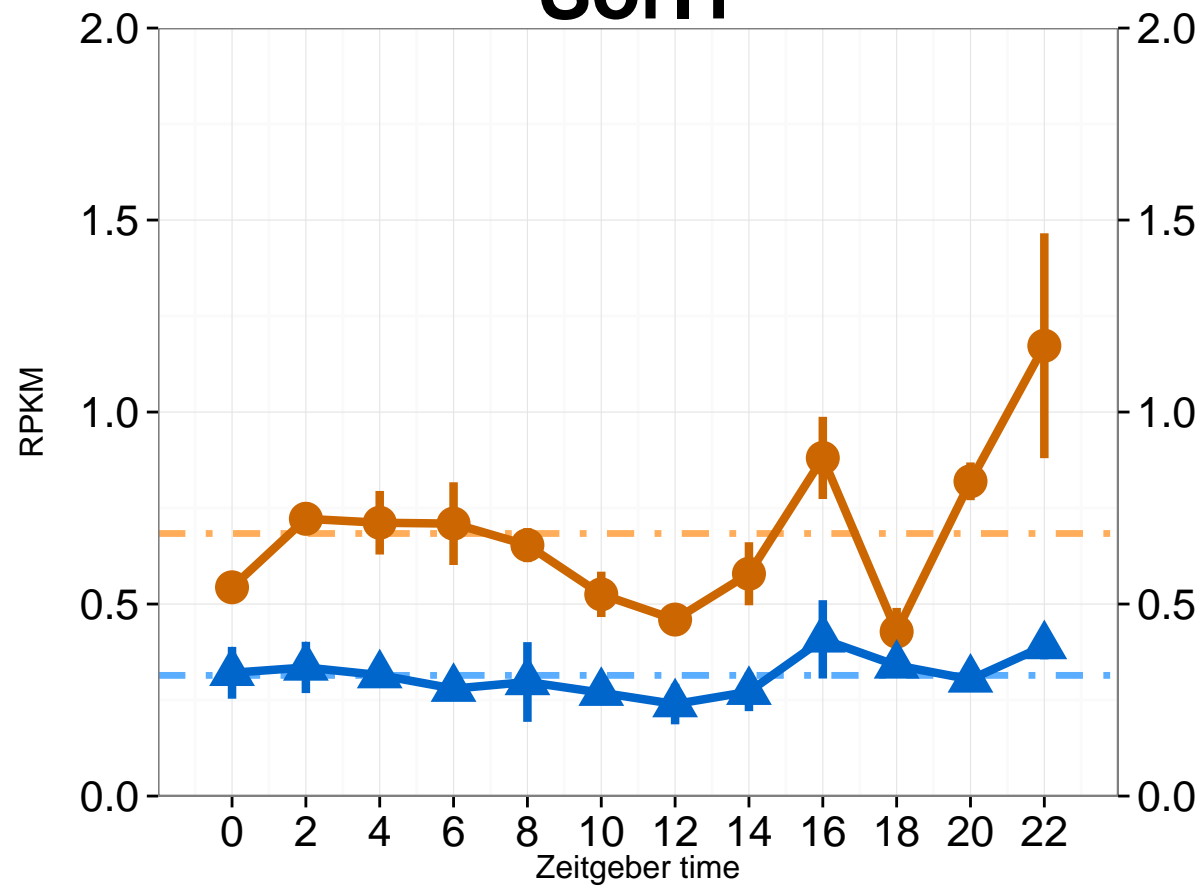

## Sorl1

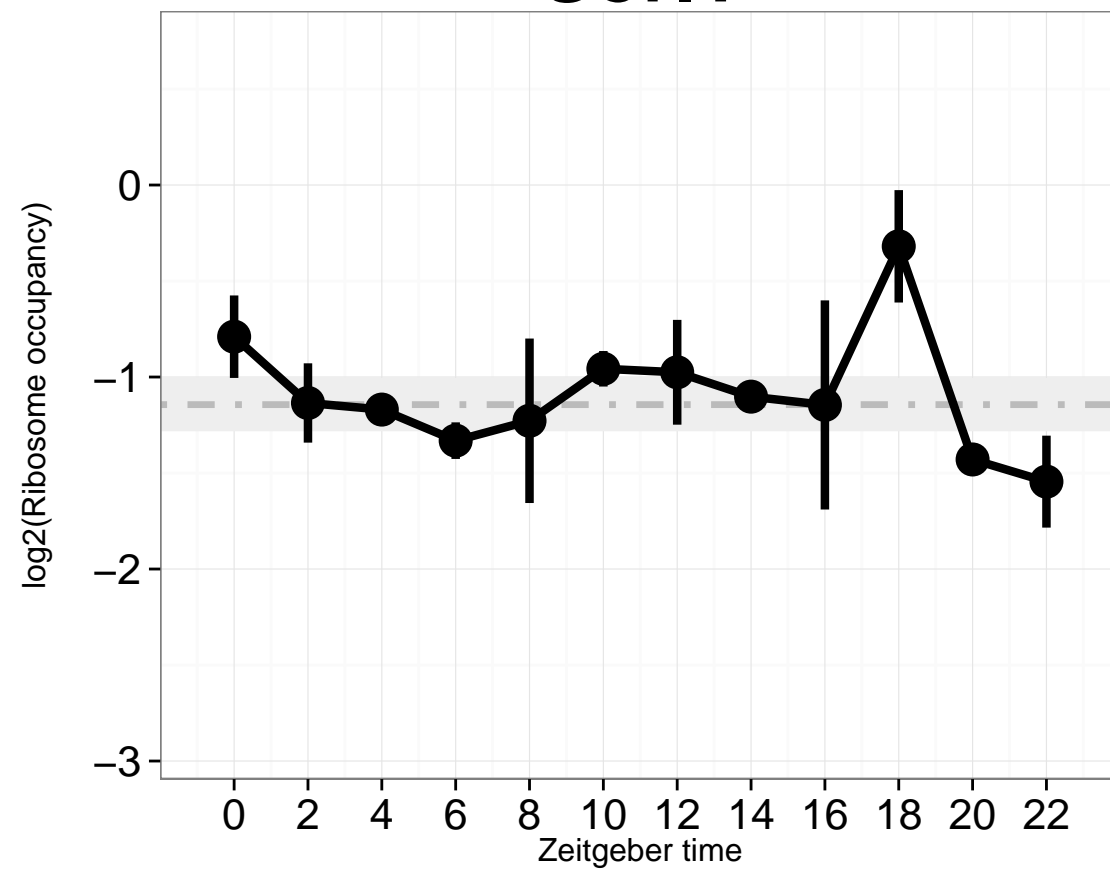

Supplement: SuppDataset_1.zip [file Sorl1_set_A.pdf › Supplemental Dataset 1/A-mRNA_nonrhyth_translation_nonrhyth/Sorl1_set_A.pdf]

## Sos1

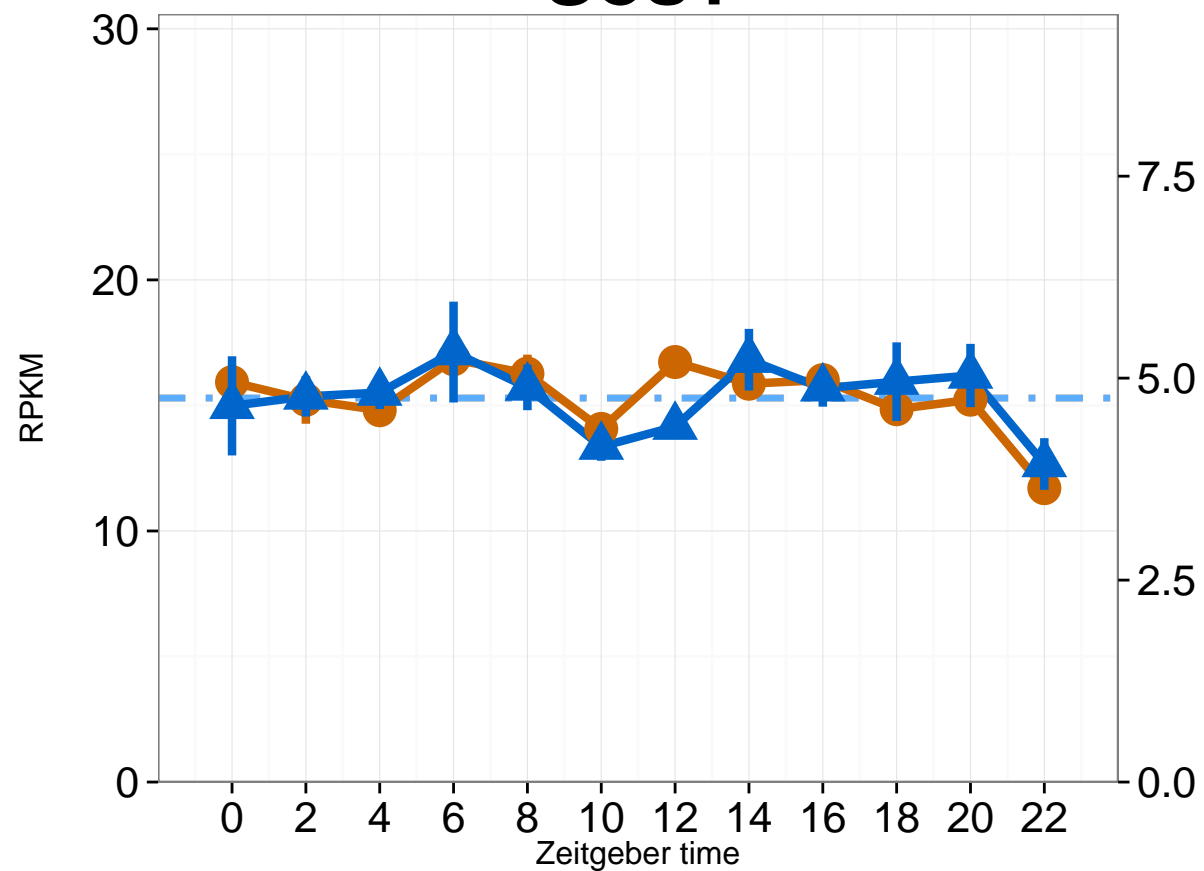

## Sos1

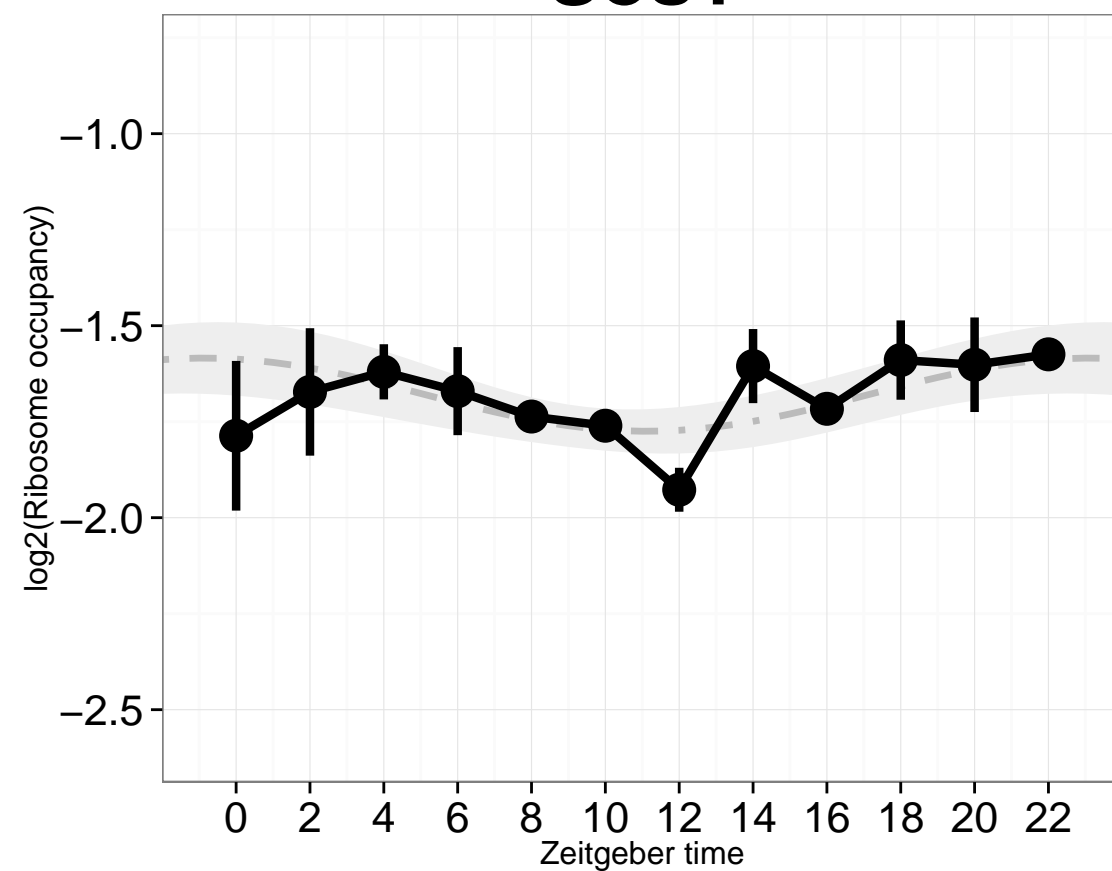

Supplement: SuppDataset_1.zip [file Sos1_set_A.pdf › Supplemental Dataset 1/A-mRNA_nonrhyth_translation_nonrhyth/Sos1_set_A.pdf]

## Sos2

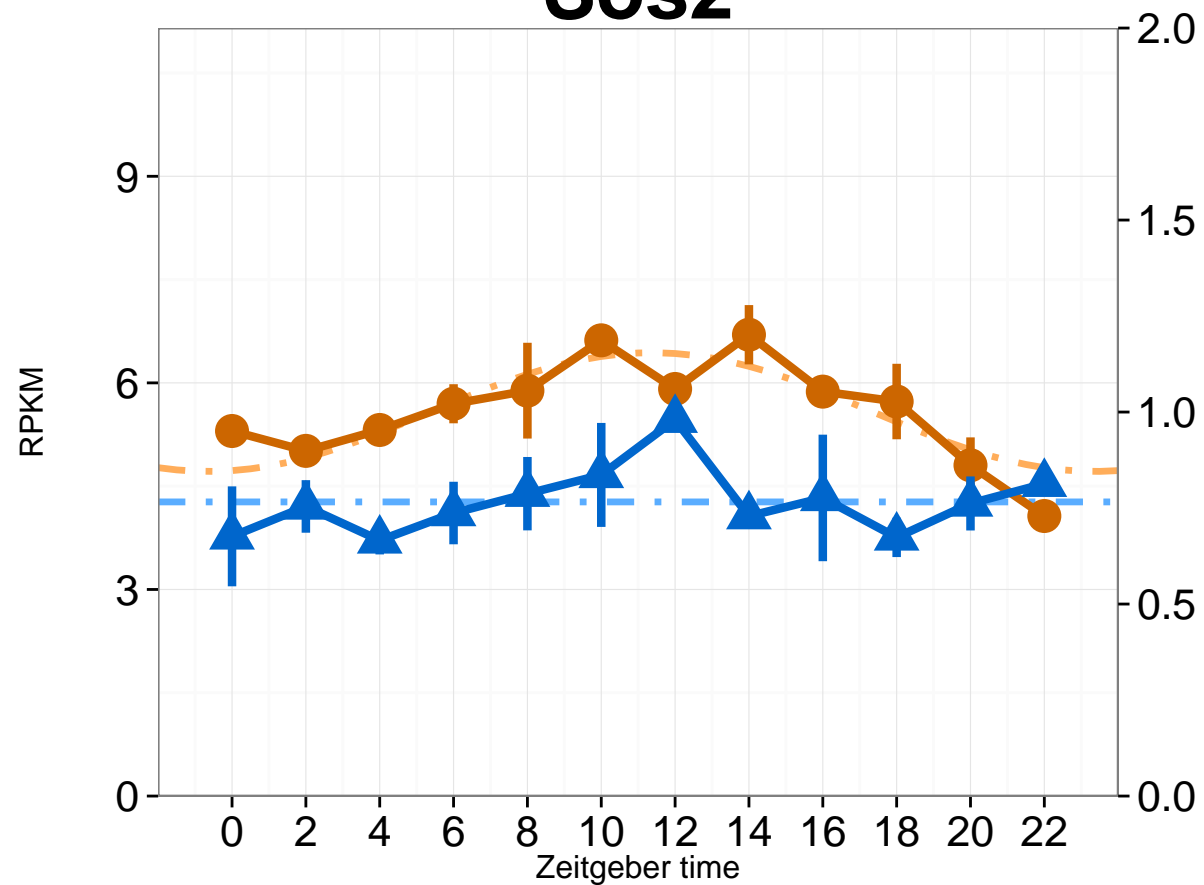

## Sos2

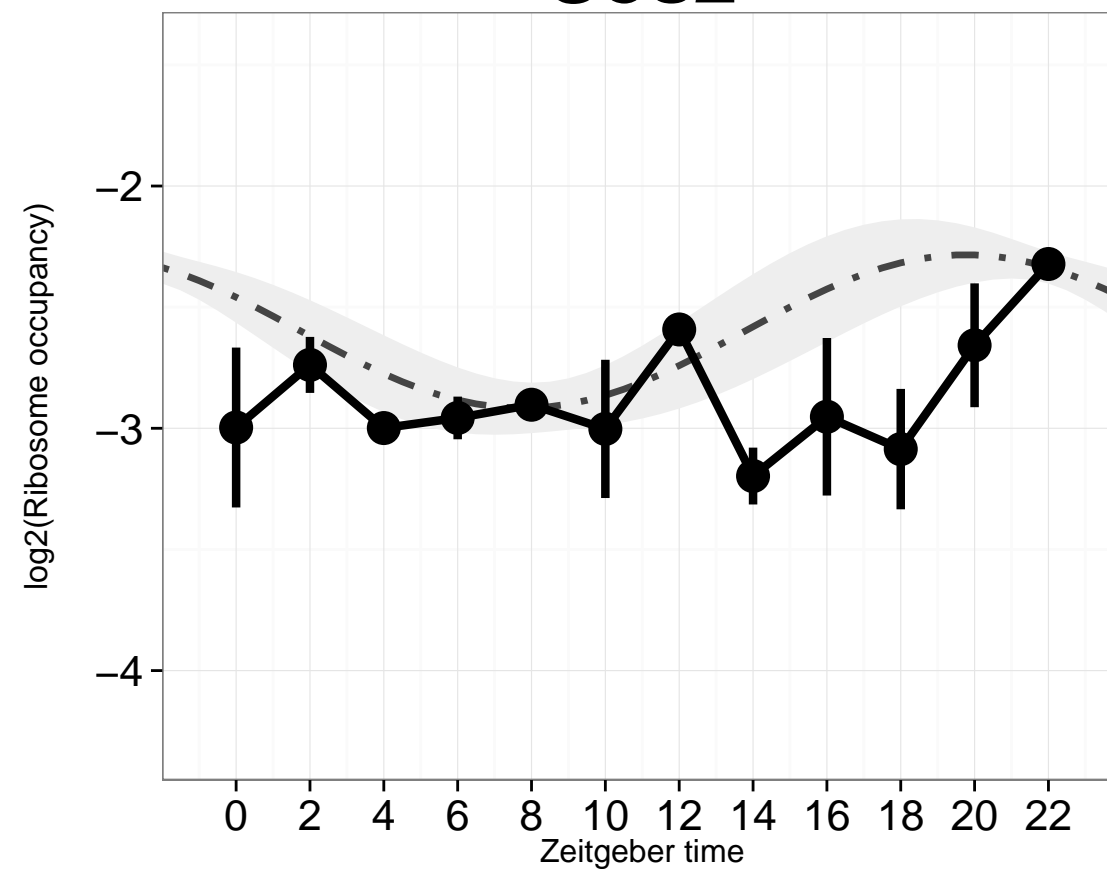

Supplement: SuppDataset_1.zip [file Sos2_set_A.pdf › Supplemental Dataset 1/A-mRNA_nonrhyth_translation_nonrhyth/Sos2_set_A.pdf]

## Sowahb

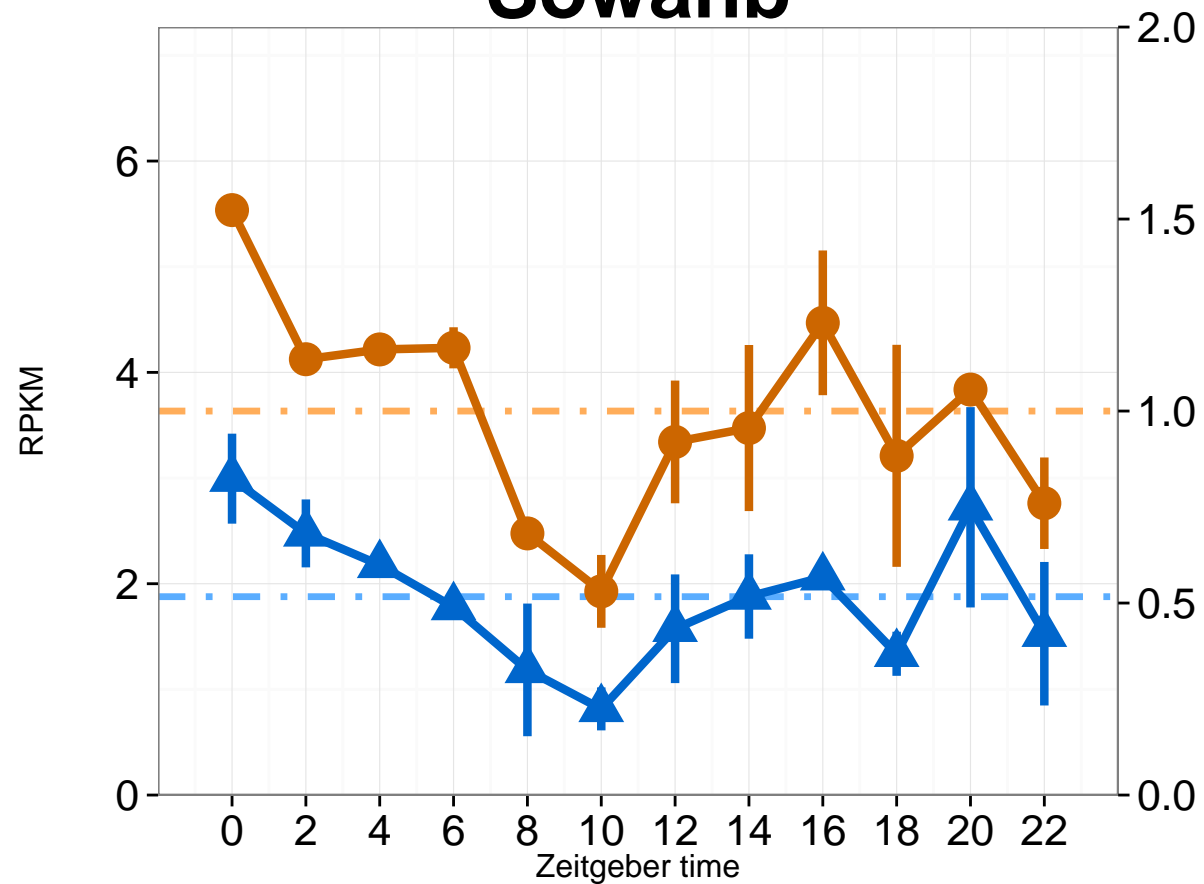

## Sowahb

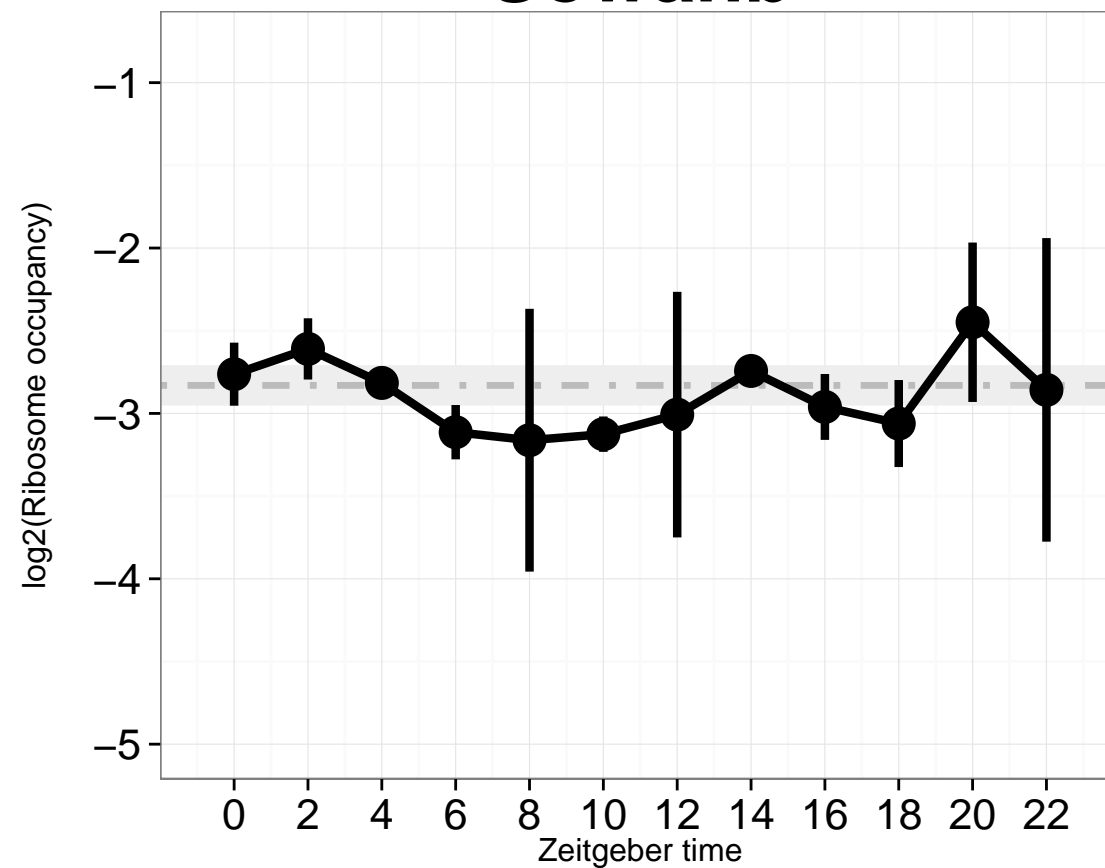

Supplement: SuppDataset_1.zip [file Sowahb_set_A.pdf › Supplemental Dataset 1/A-mRNA_nonrhyth_translation_nonrhyth/Sowahb_set_A.pdf]

## Sowahc

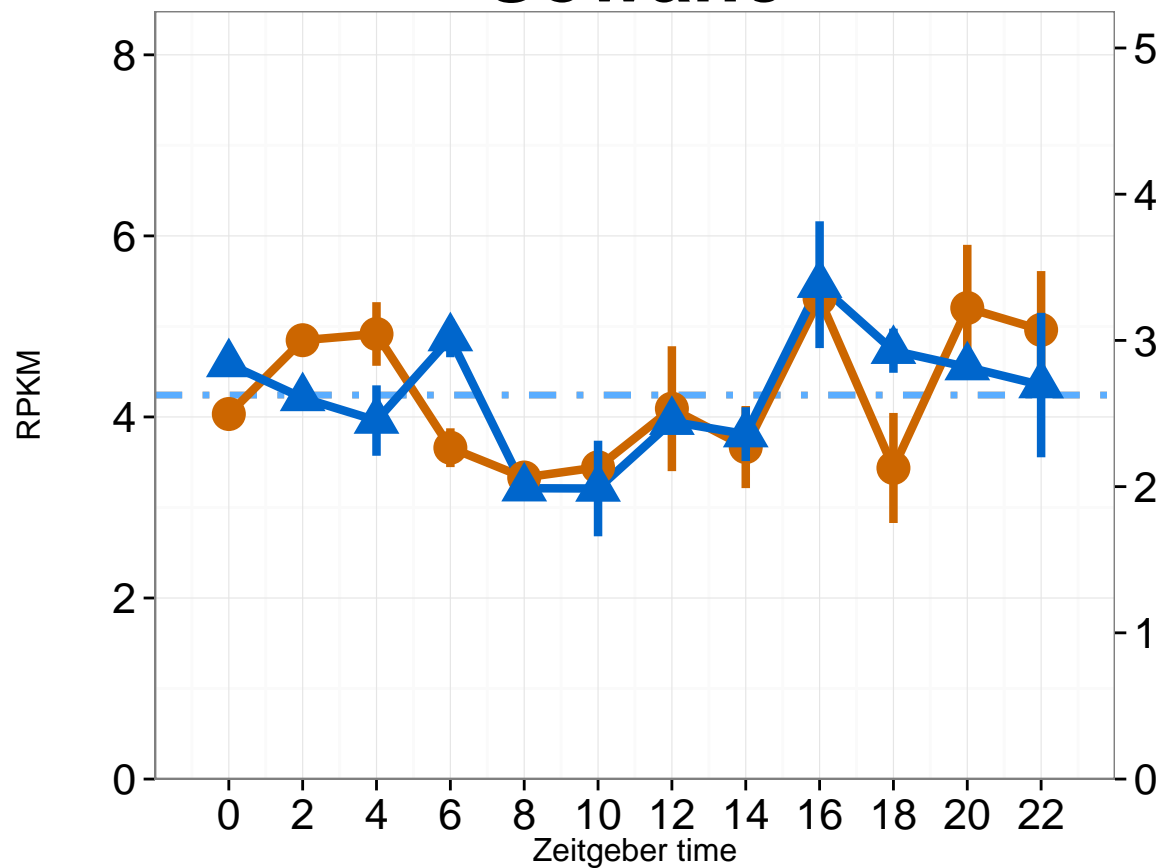

## Sowahc

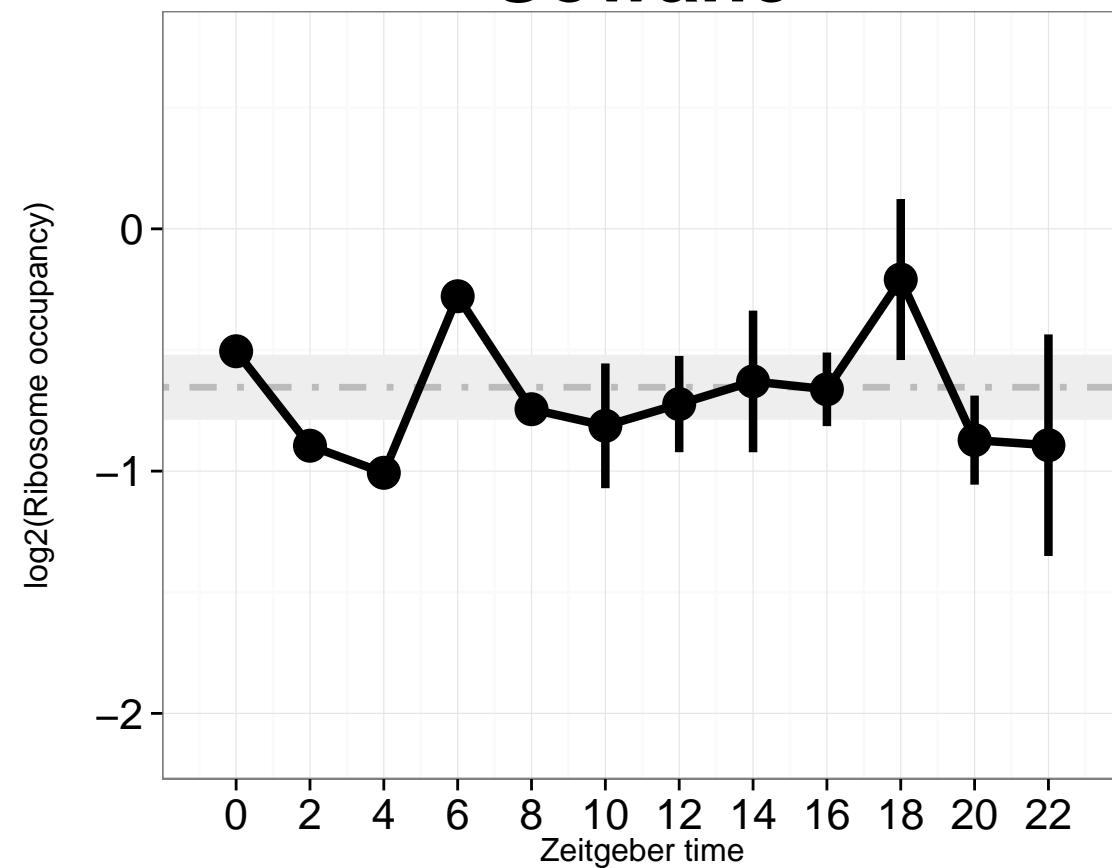

Supplement: SuppDataset_1.zip [file Sowahc_set_A.pdf › Supplemental Dataset 1/A-mRNA_nonrhyth_translation_nonrhyth/Sowahc_set_A.pdf]

## Sox13

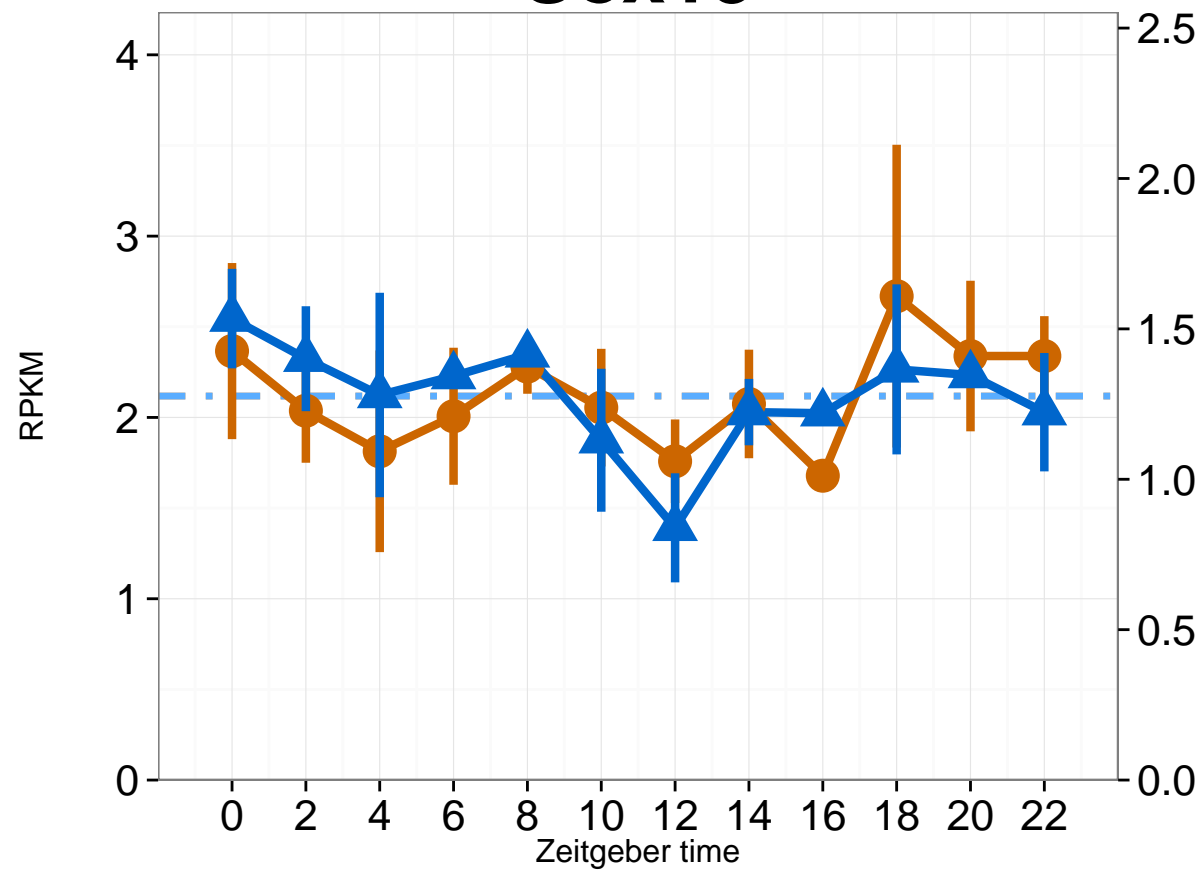

## Sox13

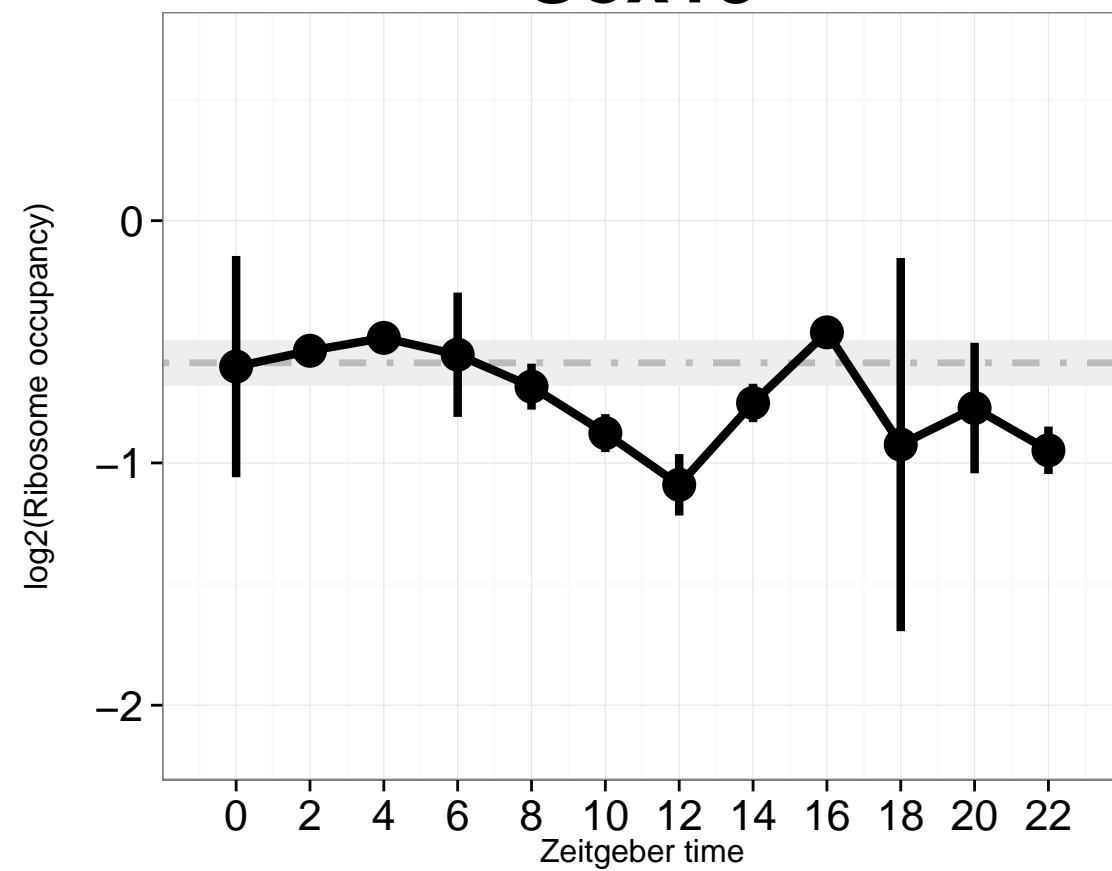

Supplement: SuppDataset_1.zip [file Sox13_set_A.pdf › Supplemental Dataset 1/A-mRNA_nonrhyth_translation_nonrhyth/Sox13_set_A.pdf]

## Sox17

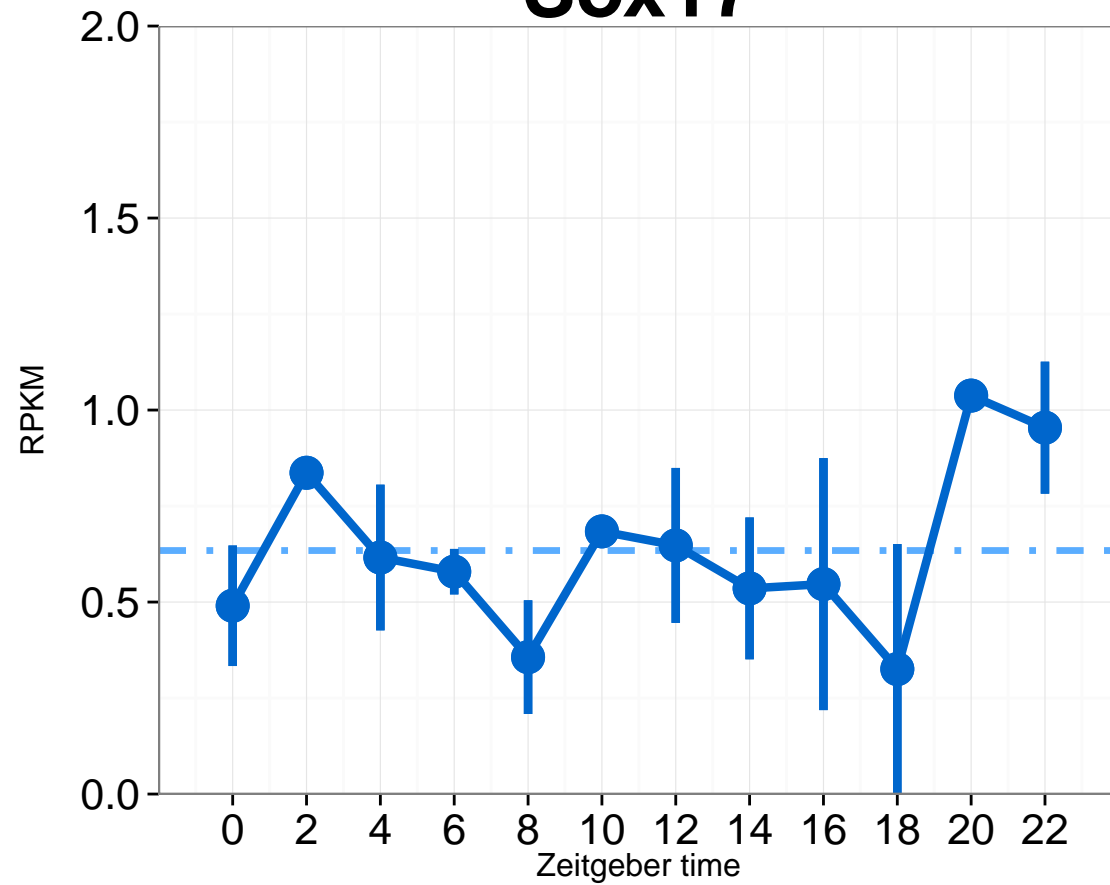

## Sox17 log2(Ribosome occupancy

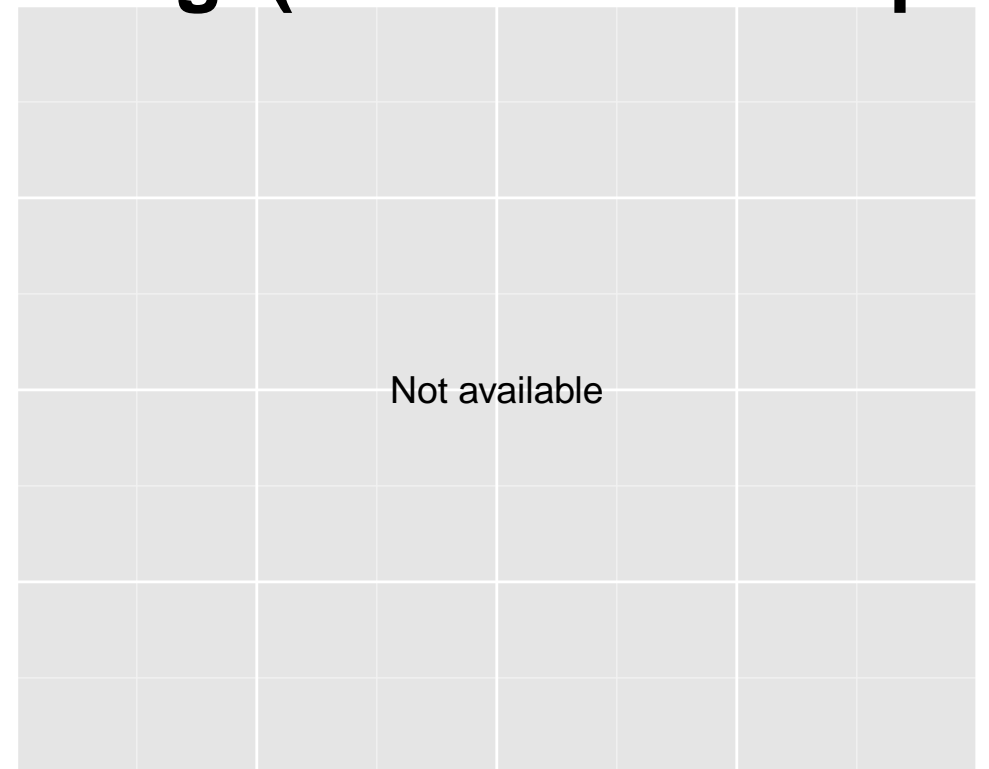

Supplement: SuppDataset_1.zip [file Sox17_set_A.pdf › Supplemental Dataset 1/A-mRNA_nonrhyth_translation_nonrhyth/Sox17_set_A.pdf]

## Sox18

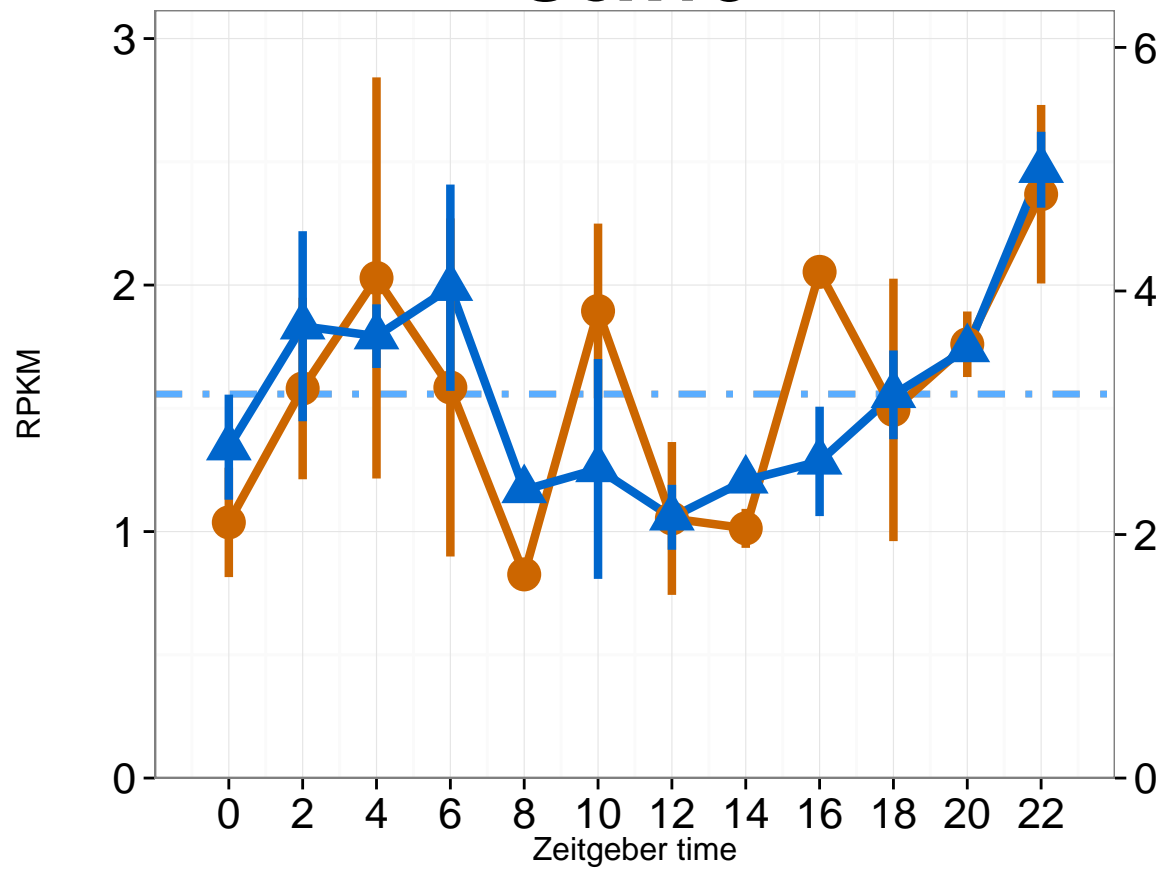

## Sox18

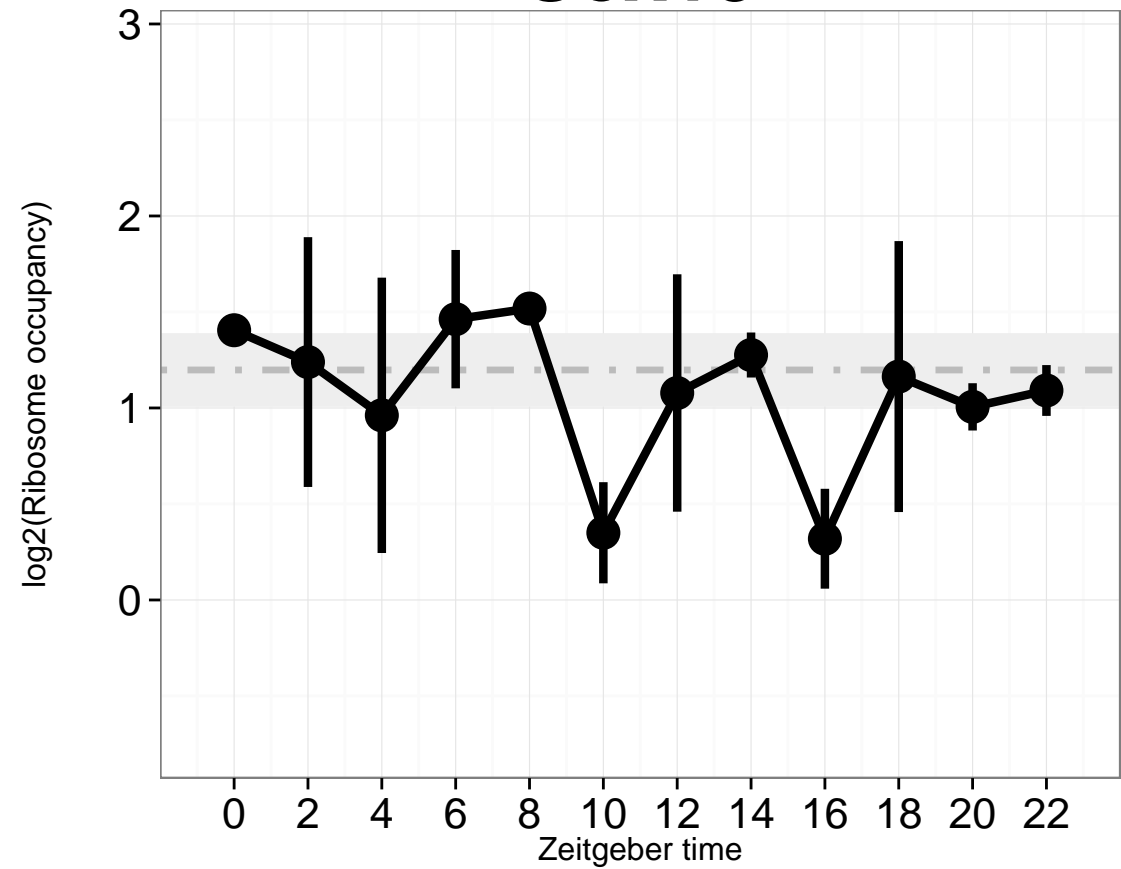

Supplement: SuppDataset_1.zip [file Sox18_set_A.pdf › Supplemental Dataset 1/A-mRNA_nonrhyth_translation_nonrhyth/Sox18_set_A.pdf]

## Sox6

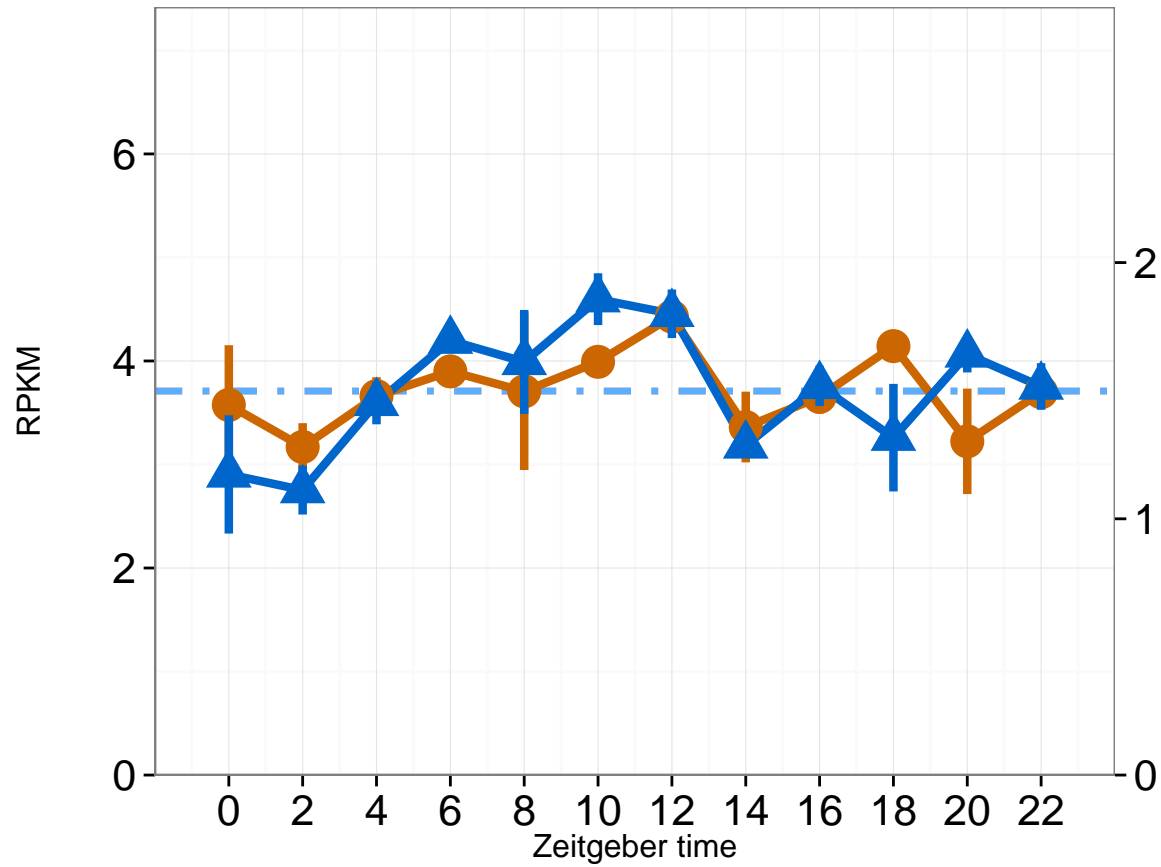

## Sox6

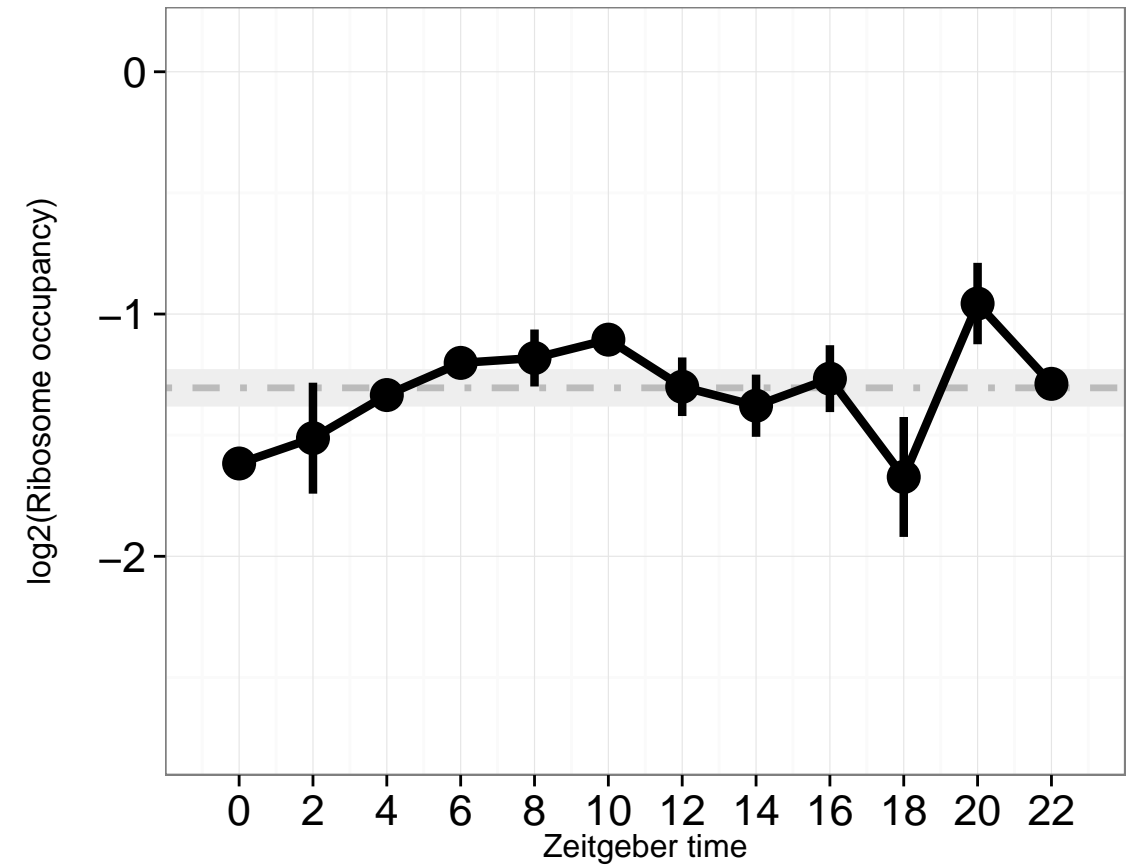

Supplement: SuppDataset_1.zip [file Sox6_set_A.pdf › Supplemental Dataset 1/A-mRNA_nonrhyth_translation_nonrhyth/Sox6_set_A.pdf]

## Sox7

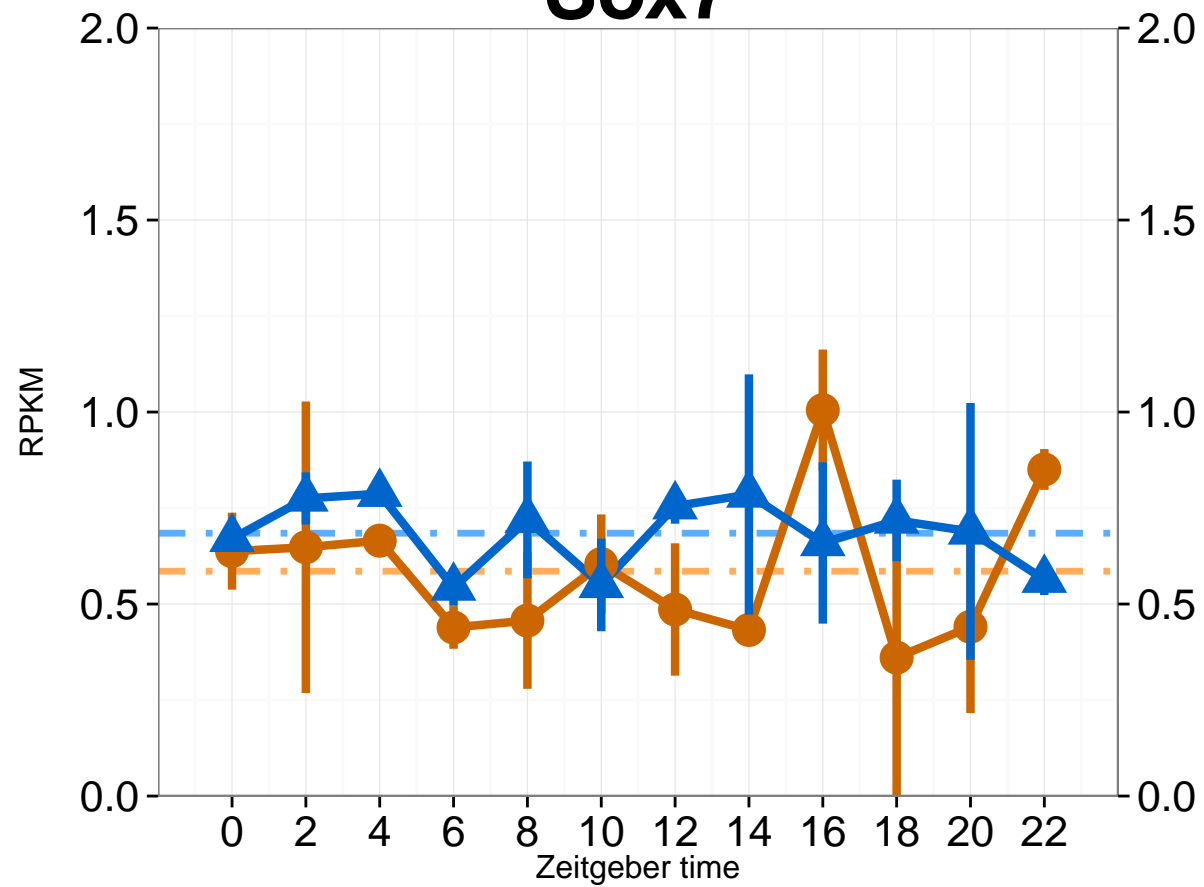

## Sox7

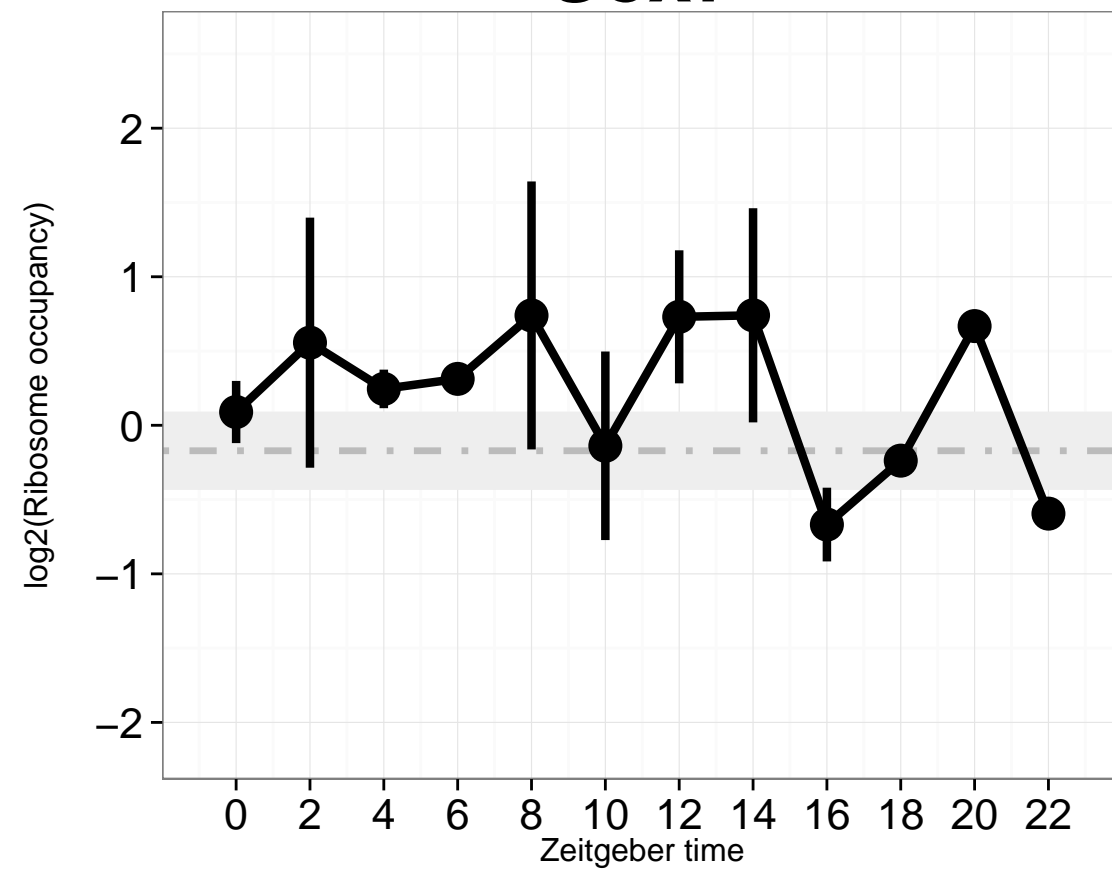

Supplement: SuppDataset_1.zip [file Sox7_set_A.pdf › Supplemental Dataset 1/A-mRNA_nonrhyth_translation_nonrhyth/Sox7_set_A.pdf]

# Sp100

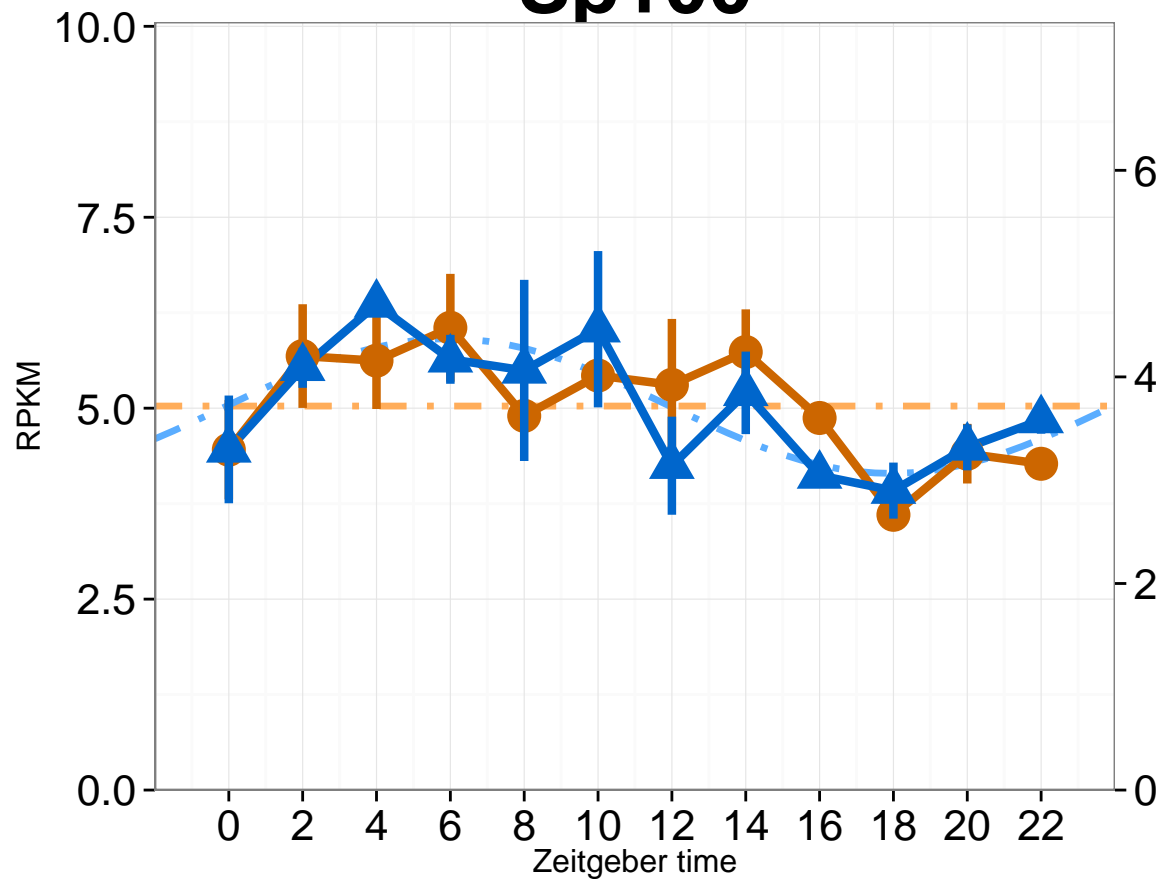

# Sp100

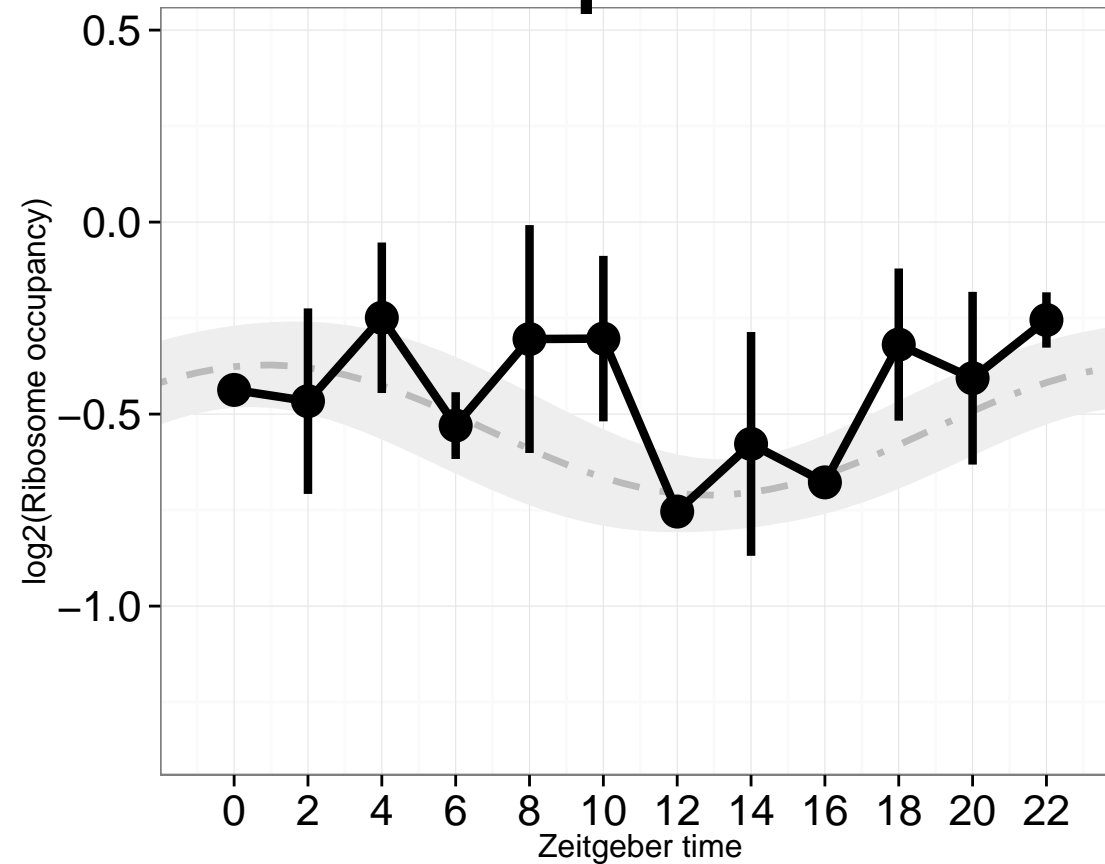

Supplement: SuppDataset_1.zip [file Sp100_set_A.pdf › Supplemental Dataset 1/A-mRNA_nonrhyth_translation_nonrhyth/Sp100_set_A.pdf]

# Sp110

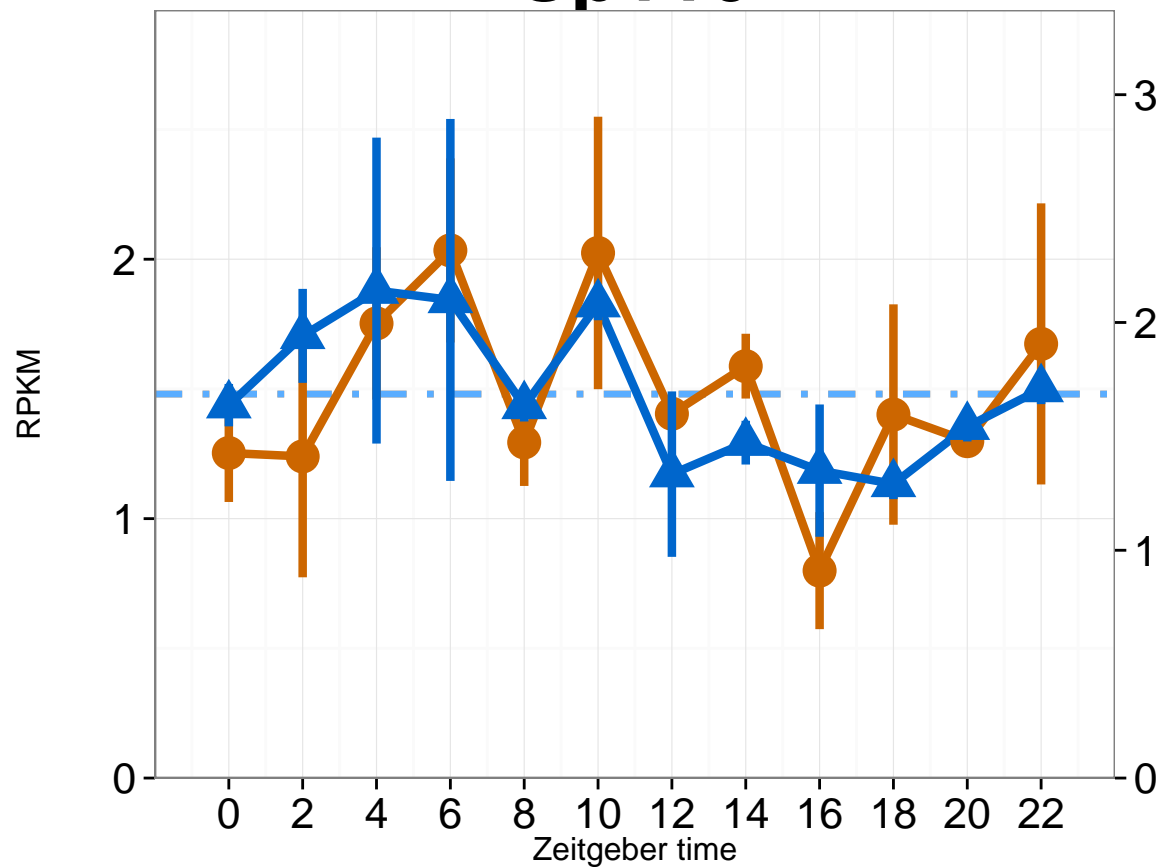

# Sp110

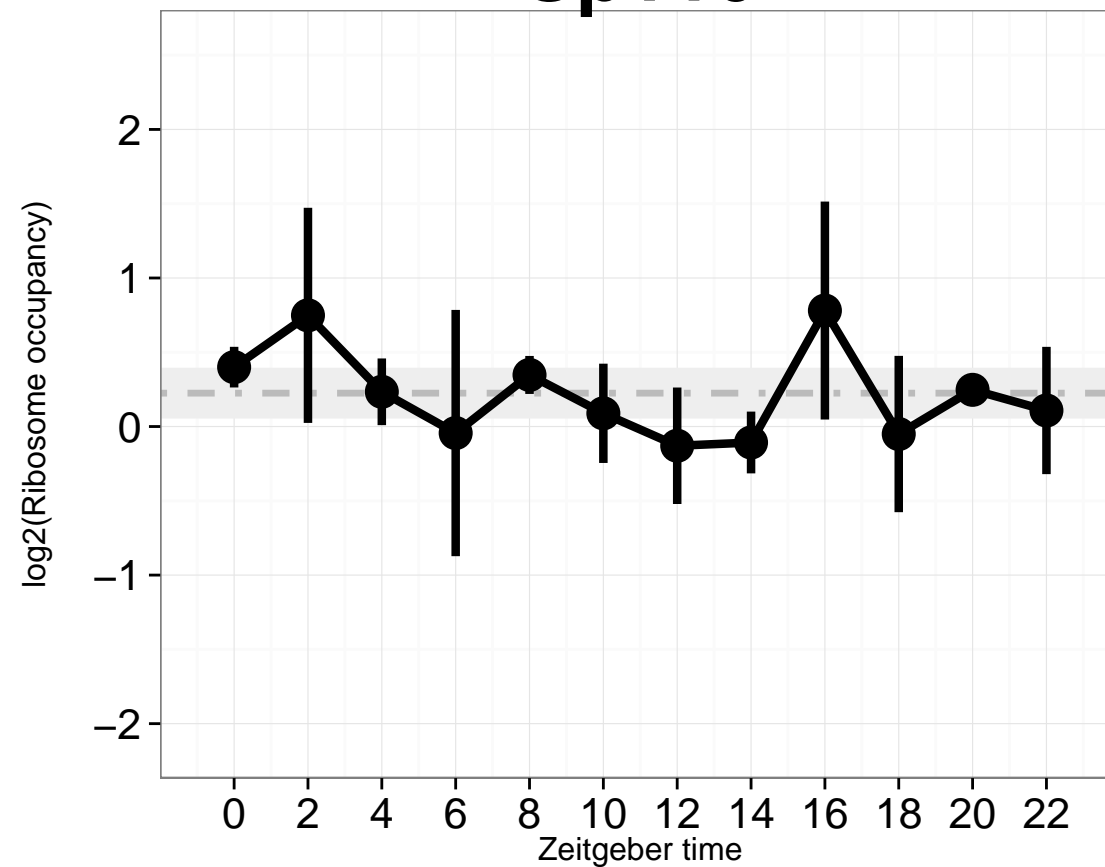

Supplement: SuppDataset_1.zip [file Sp110_set_A.pdf › Supplemental Dataset 1/A-mRNA_nonrhyth_translation_nonrhyth/Sp110_set_A.pdf]

# Sp140

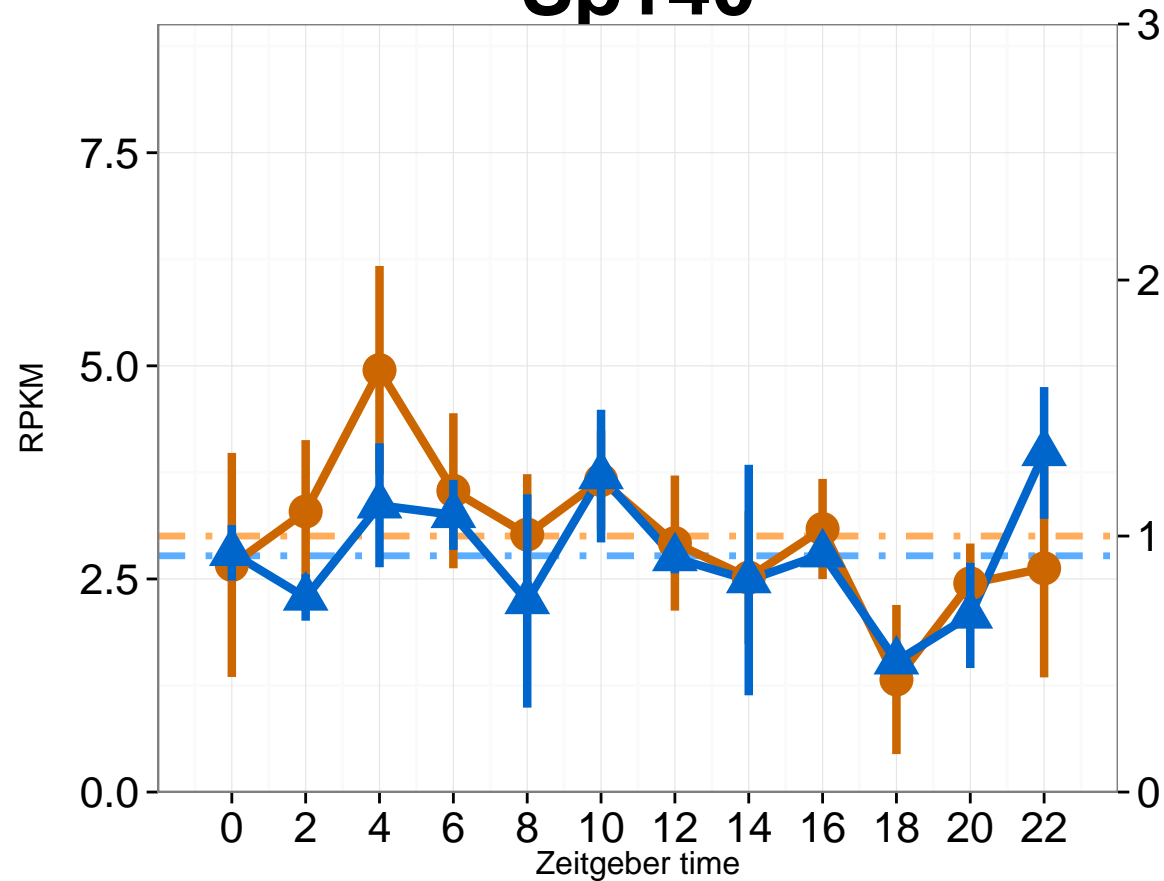

# Sp140

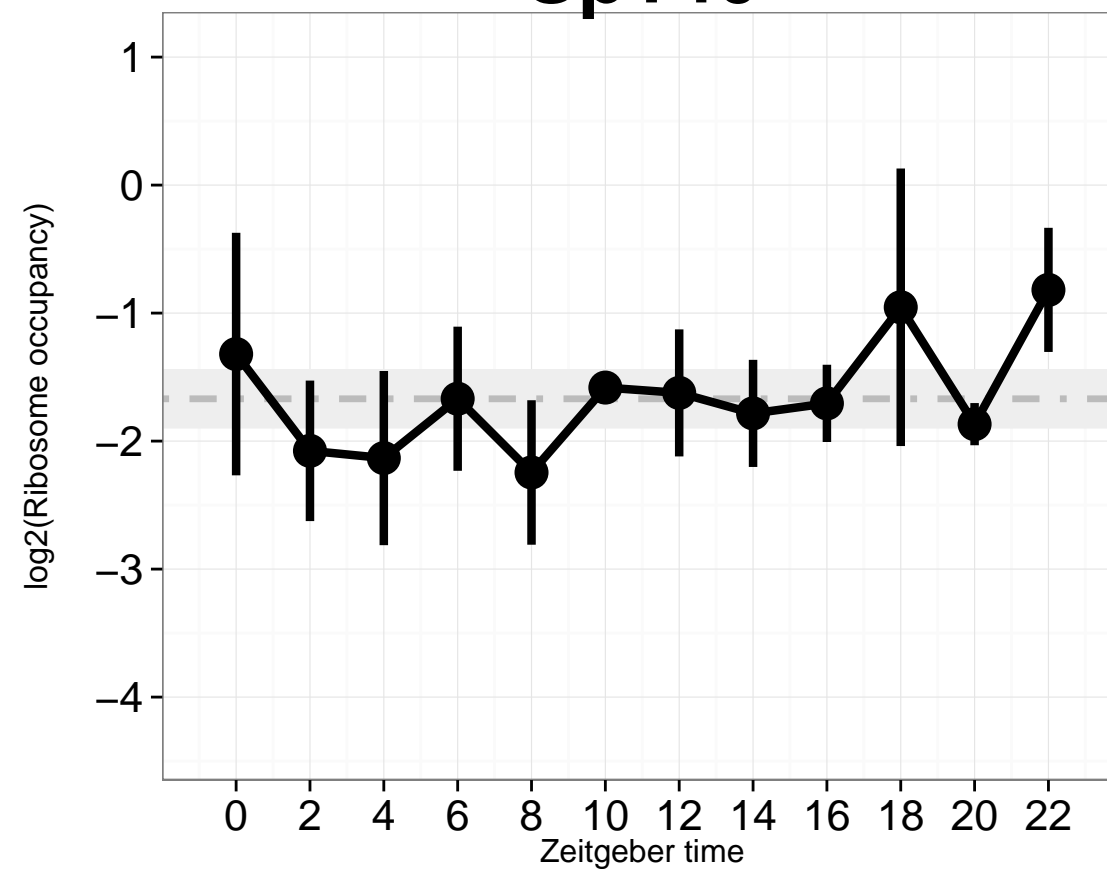

Supplement: SuppDataset_1.zip [file Sp140_set_A.pdf › Supplemental Dataset 1/A-mRNA_nonrhyth_translation_nonrhyth/Sp140_set_A.pdf]

# Sp1

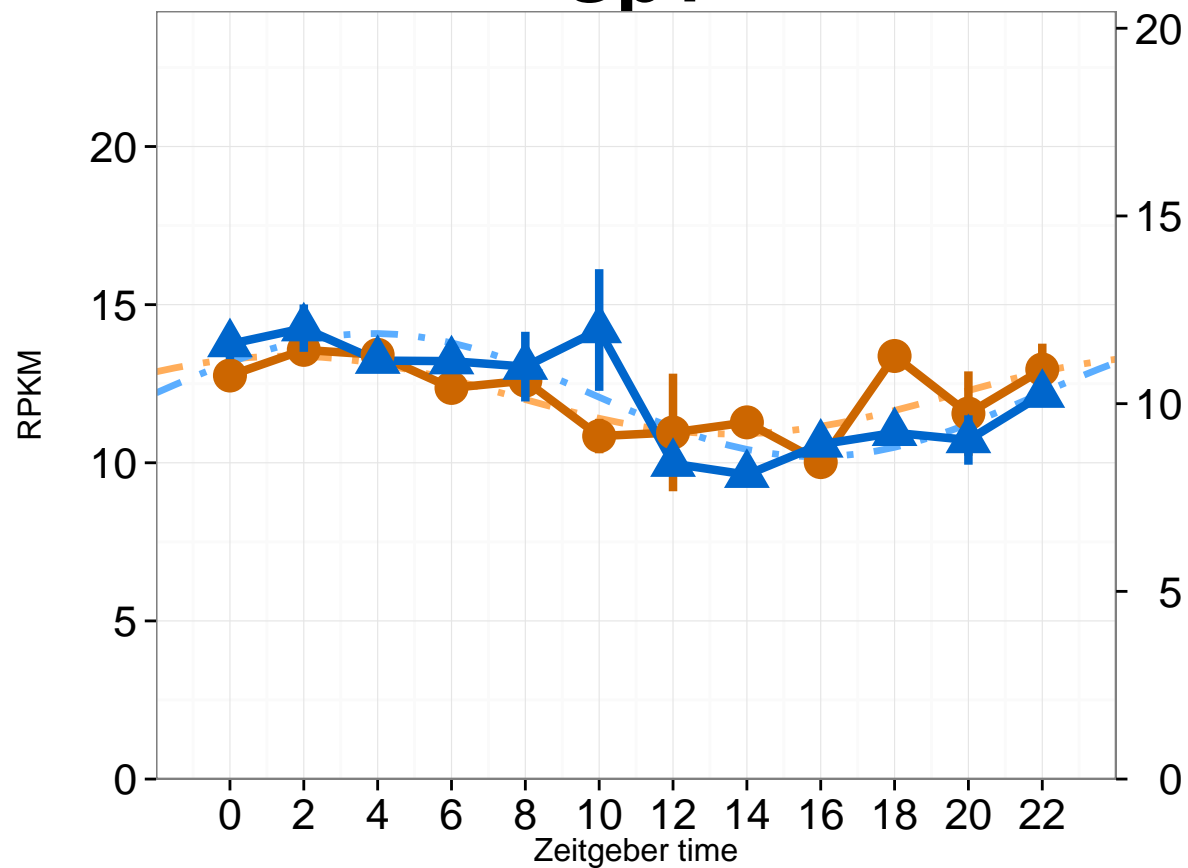

# Sp1

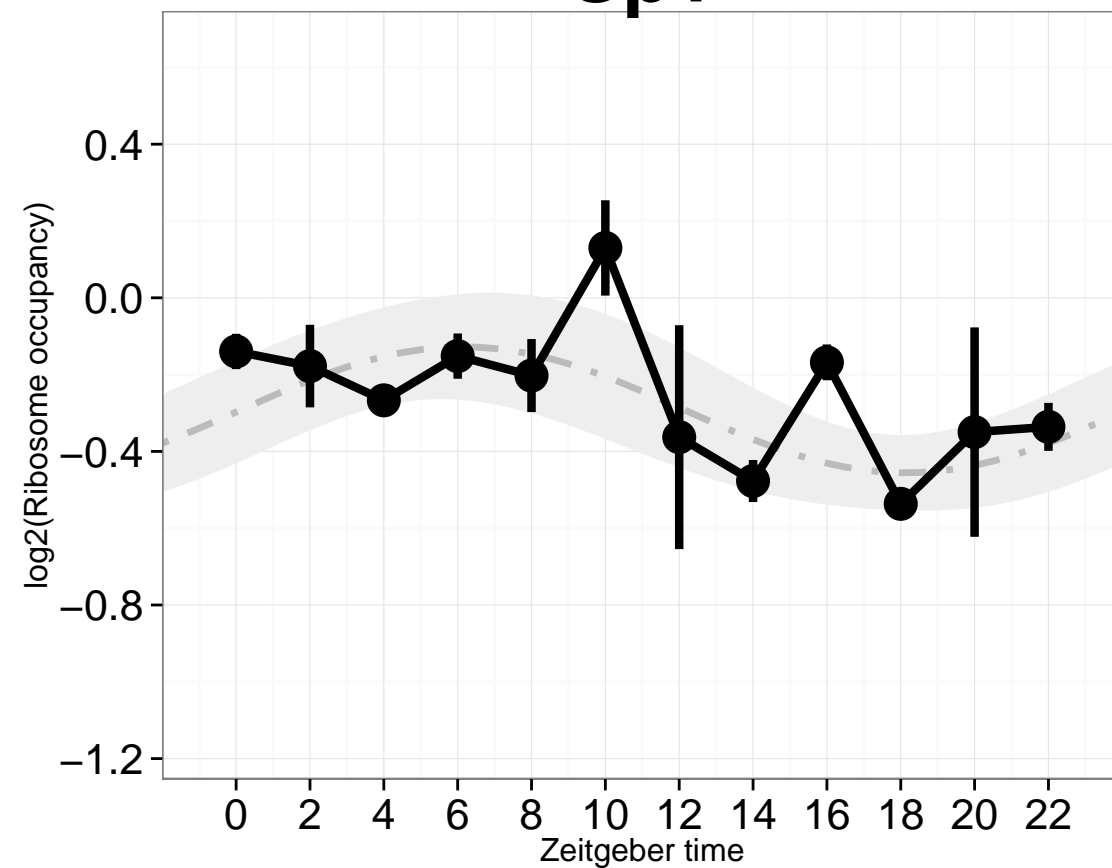

Supplement: SuppDataset_1.zip [file Sp1_set_A.pdf › Supplemental Dataset 1/A-mRNA_nonrhyth_translation_nonrhyth/Sp1_set_A.pdf]

## Sp3

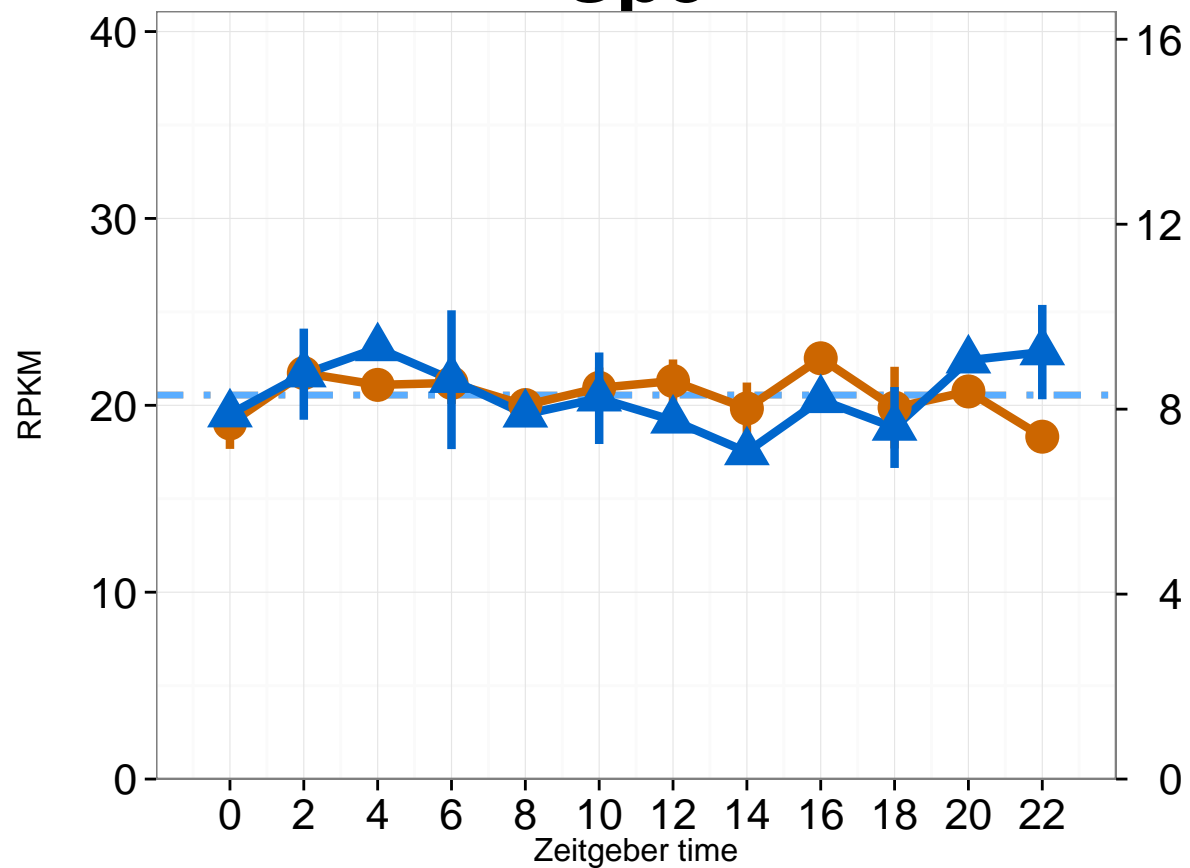

## Sp3

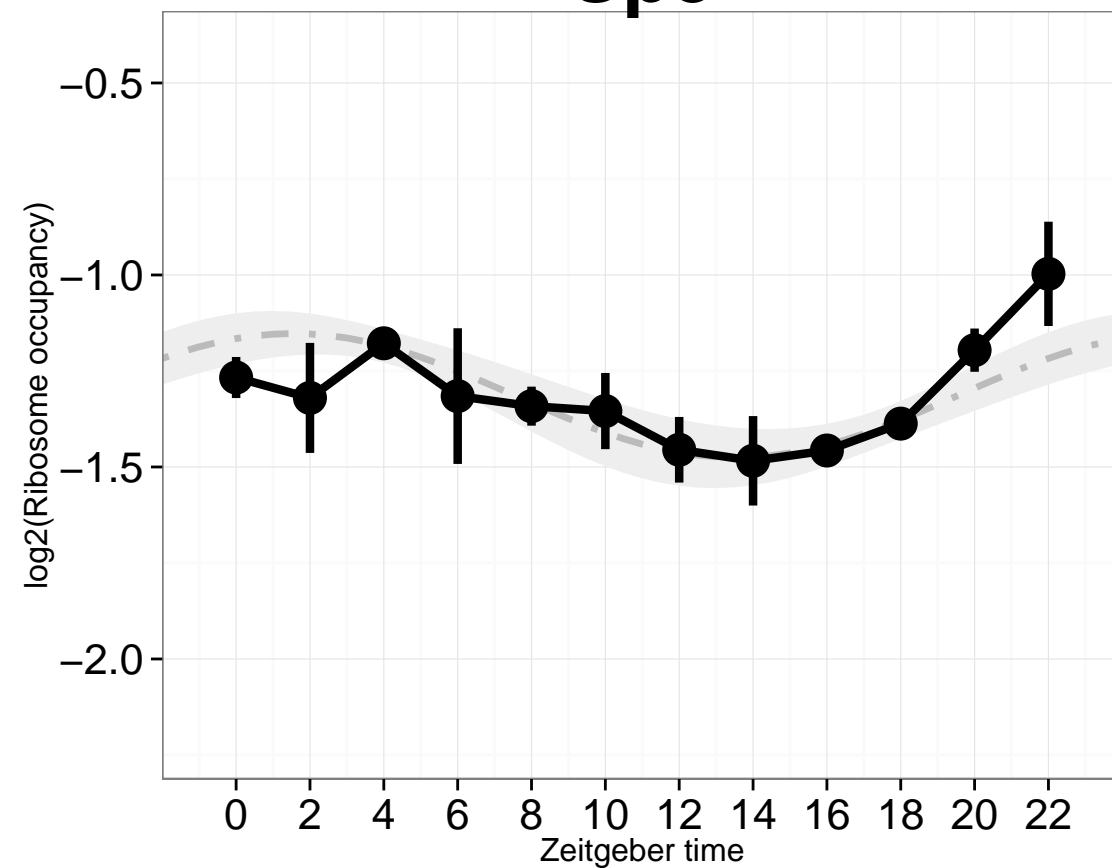

Supplement: SuppDataset_1.zip [file Sp3_set_A.pdf › Supplemental Dataset 1/A-mRNA_nonrhyth_translation_nonrhyth/Sp3_set_A.pdf]

## Sp4

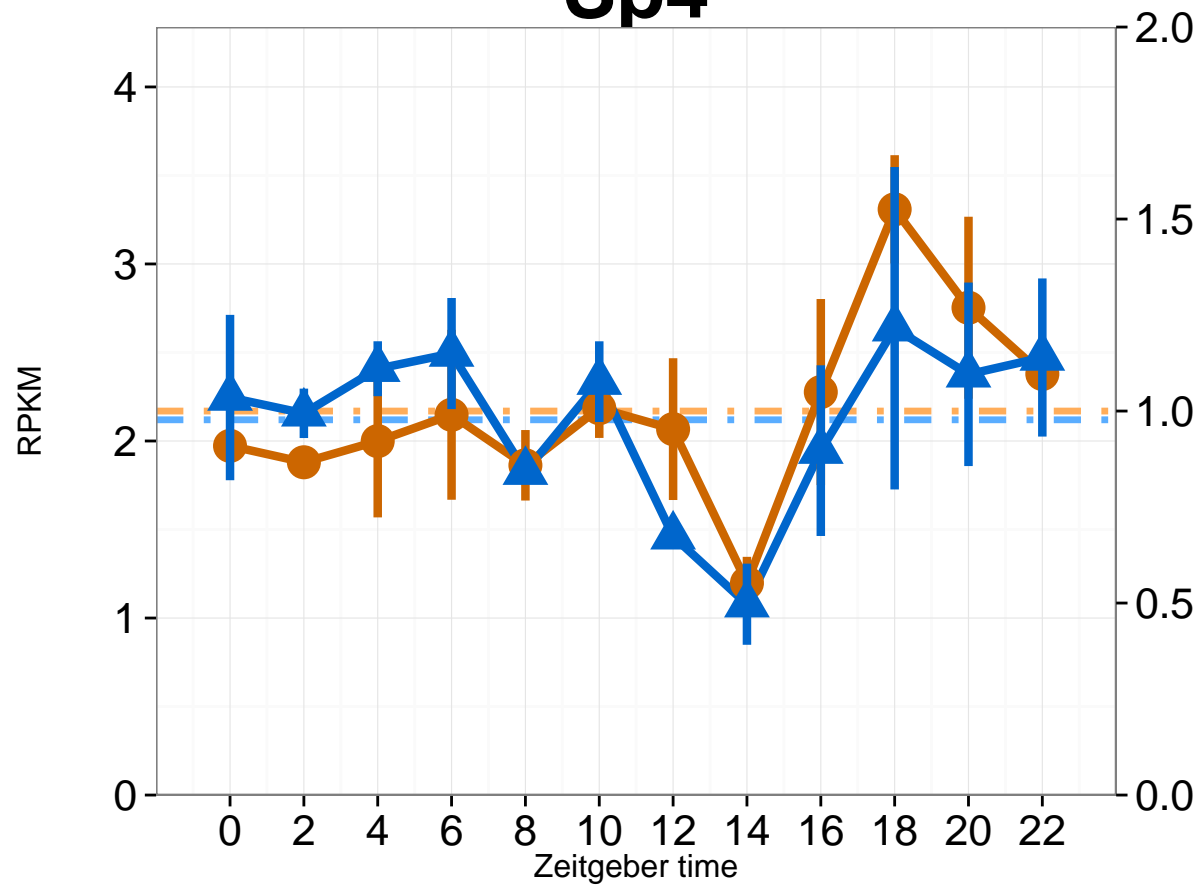

## Sp4

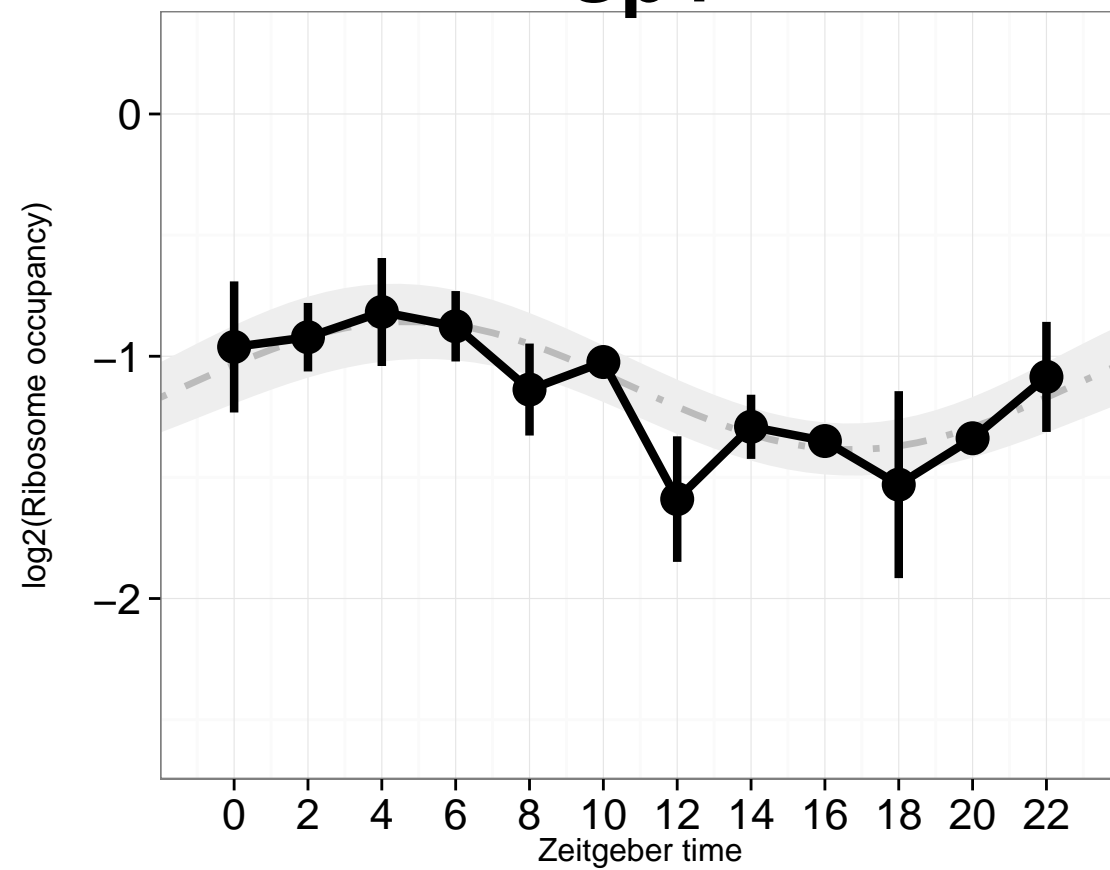

Supplement: SuppDataset_1.zip [file Sp4_set_A.pdf › Supplemental Dataset 1/A-mRNA_nonrhyth_translation_nonrhyth/Sp4_set_A.pdf]

**Sp5 TR**

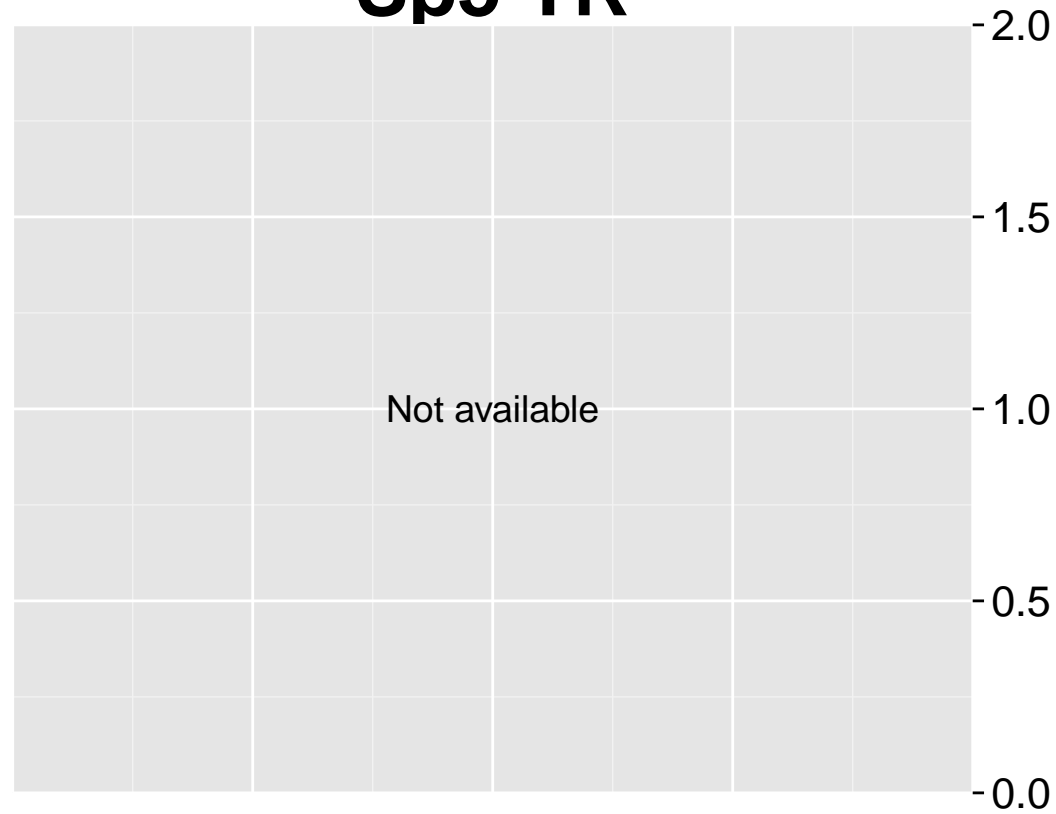

**Sp5 log2(Ribosome occupancy)**

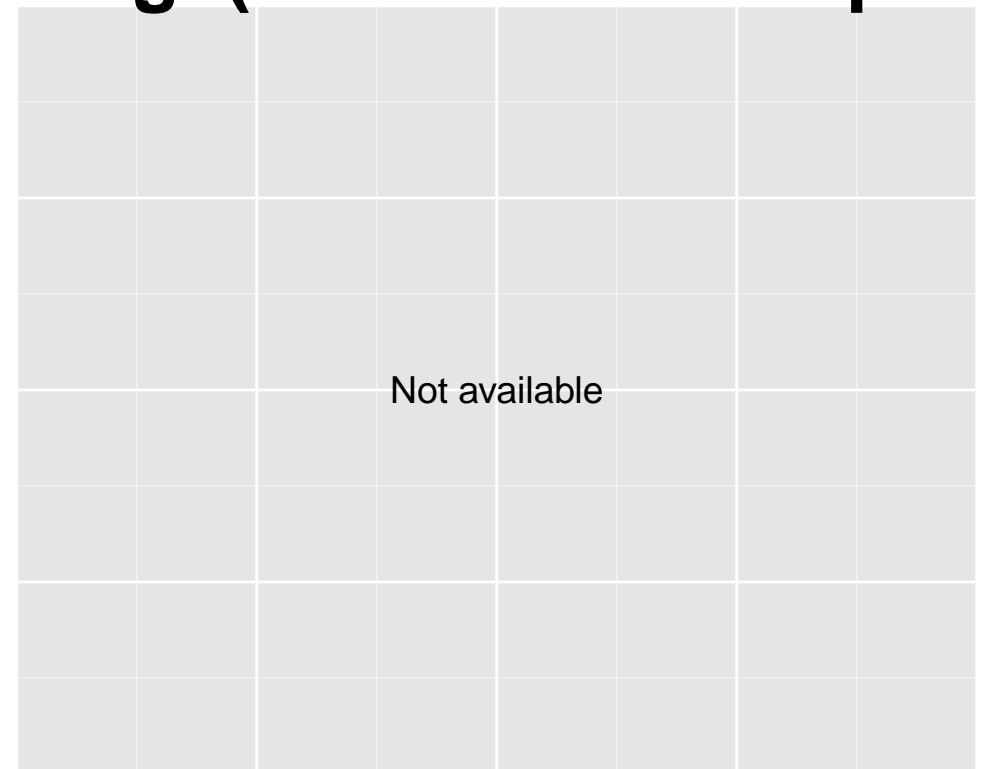

Supplement: SuppDataset_1.zip [file Sp5_set_A.pdf › Supplemental Dataset 1/A-mRNA_nonrhyth_translation_nonrhyth/Sp5_set_A.pdf]

## Spag7

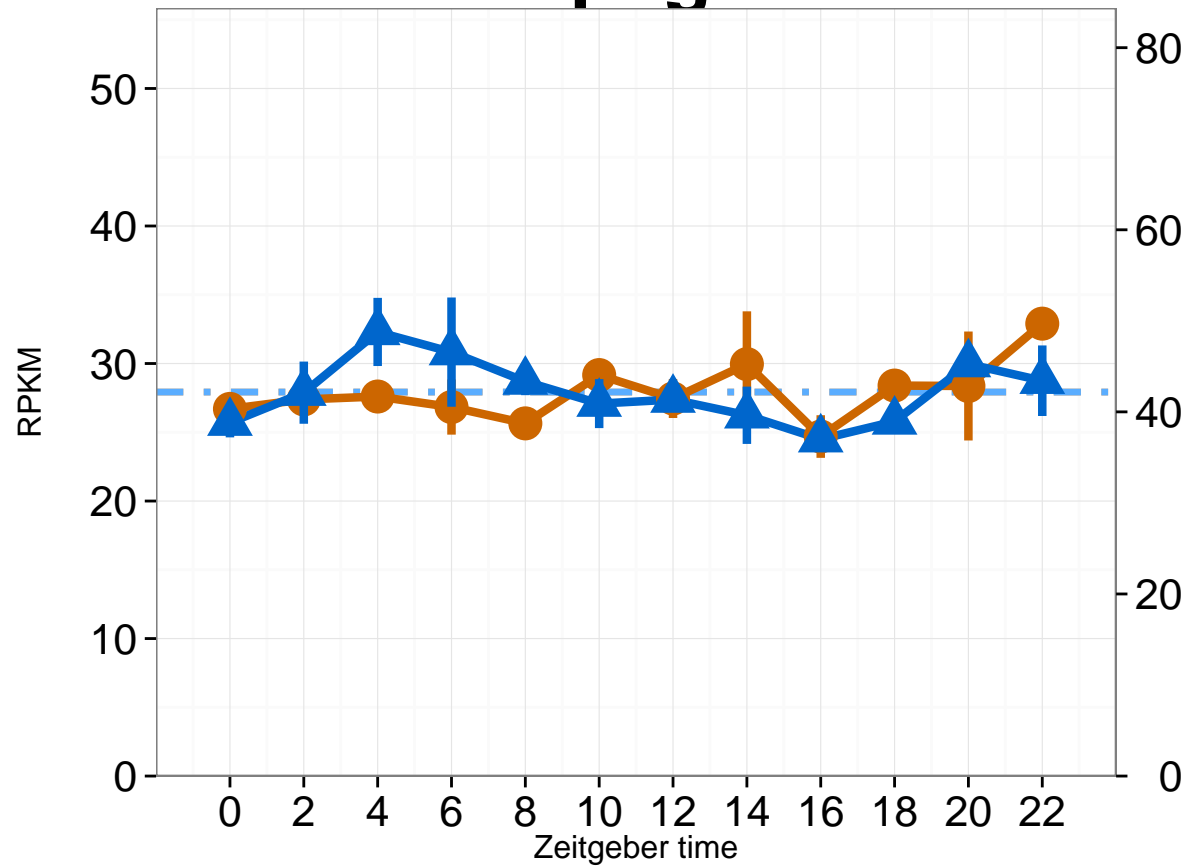

## Spag7

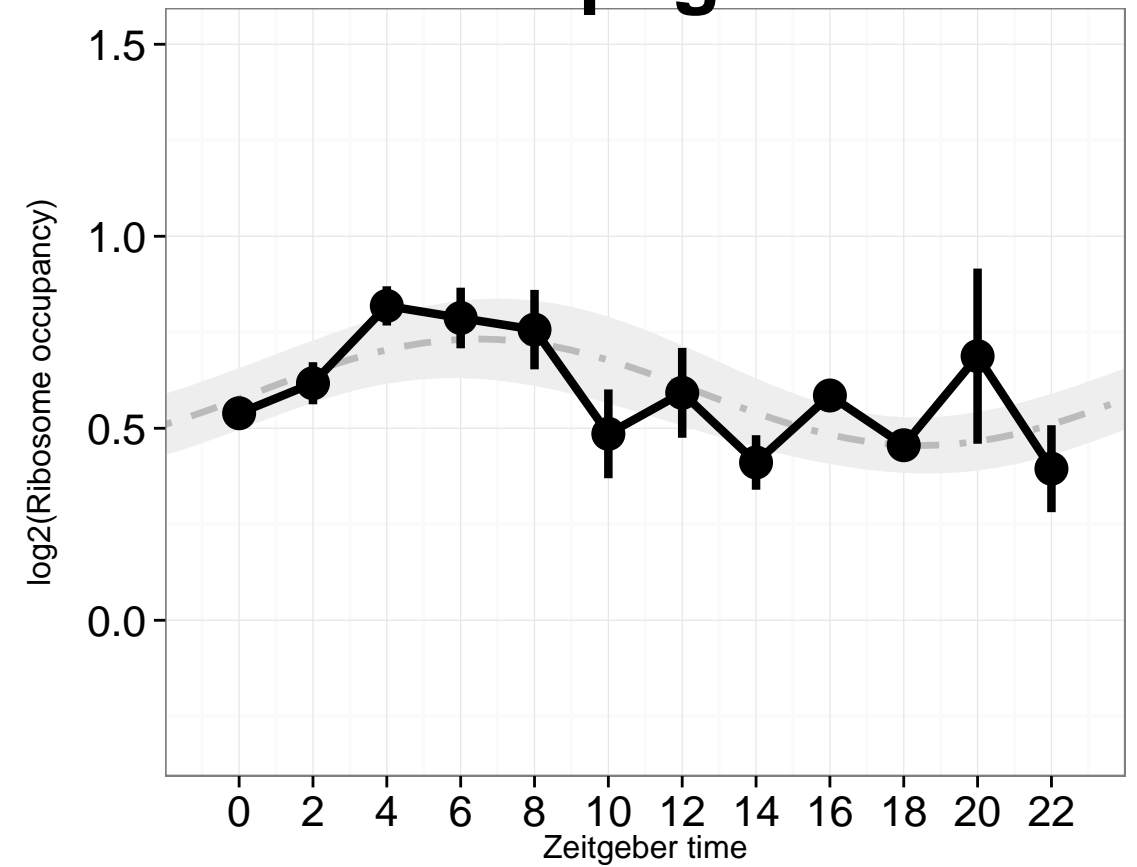

Supplement: SuppDataset_1.zip [file Spag7_set_A.pdf › Supplemental Dataset 1/A-mRNA_nonrhyth_translation_nonrhyth/Spag7_set_A.pdf]

## Spag9

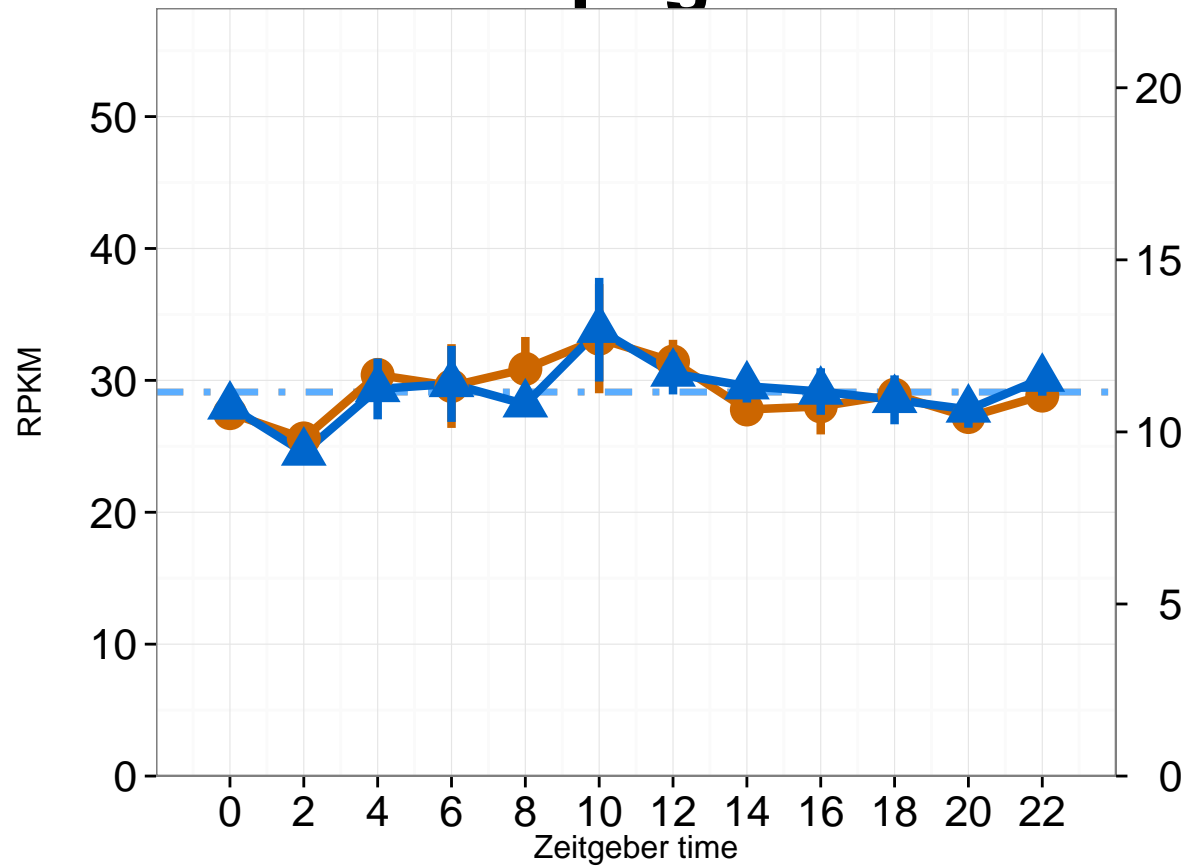

## Spag9

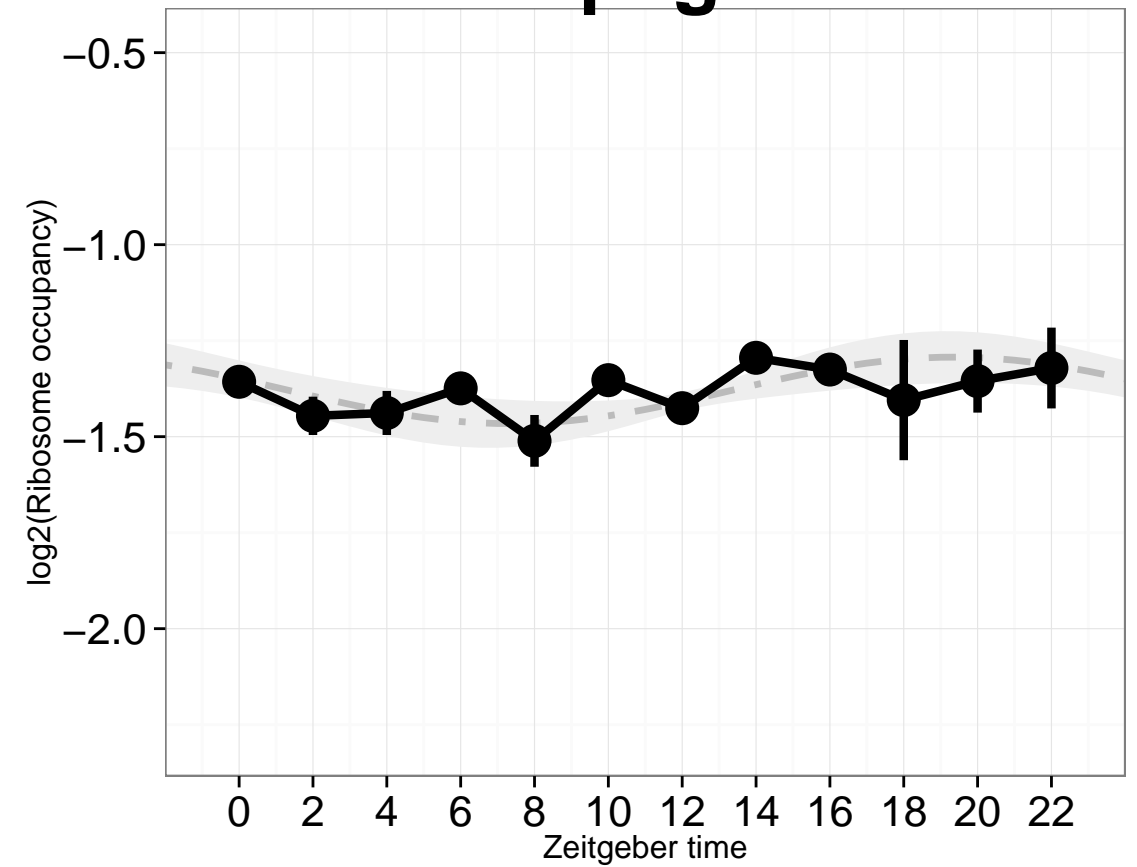

Supplement: SuppDataset_1.zip [file Spag9_set_A.pdf › Supplemental Dataset 1/A-mRNA_nonrhyth_translation_nonrhyth/Spag9_set_A.pdf]

## Sparc

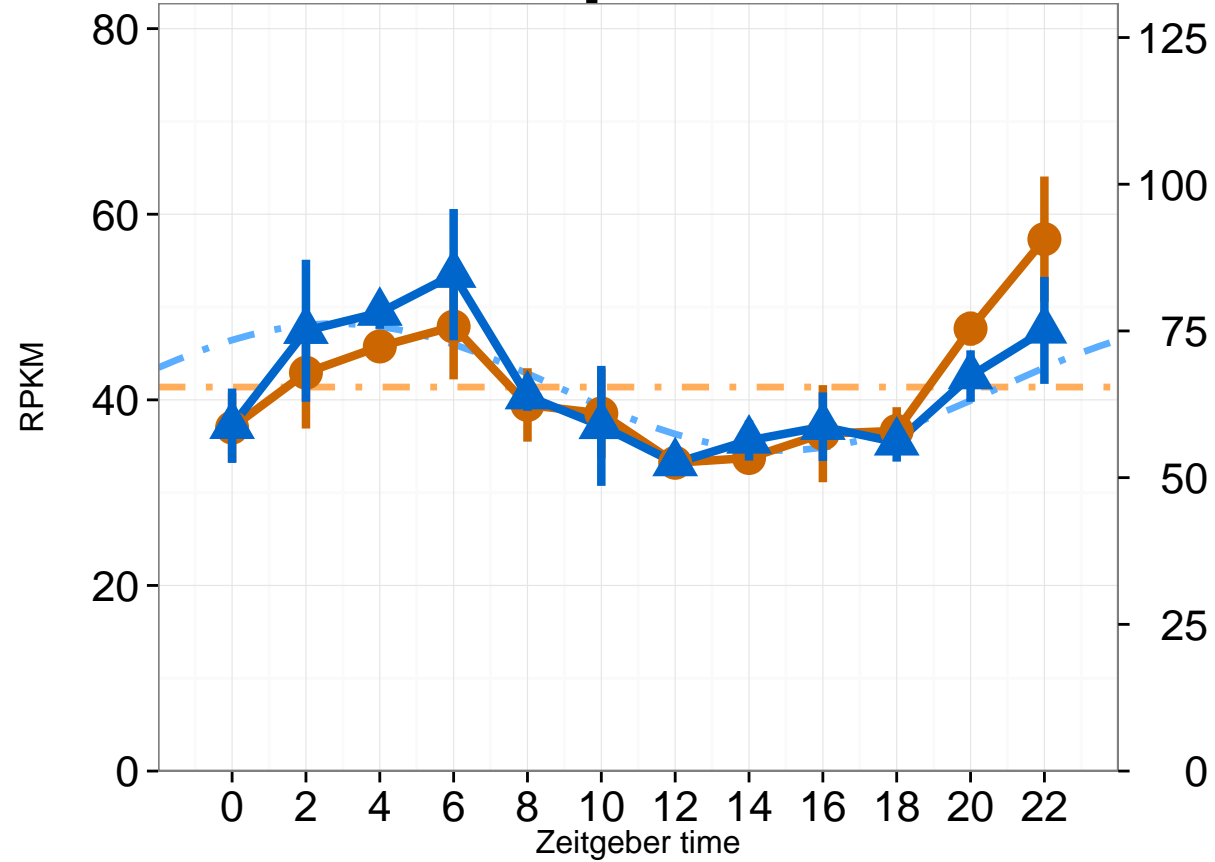

## Sparc

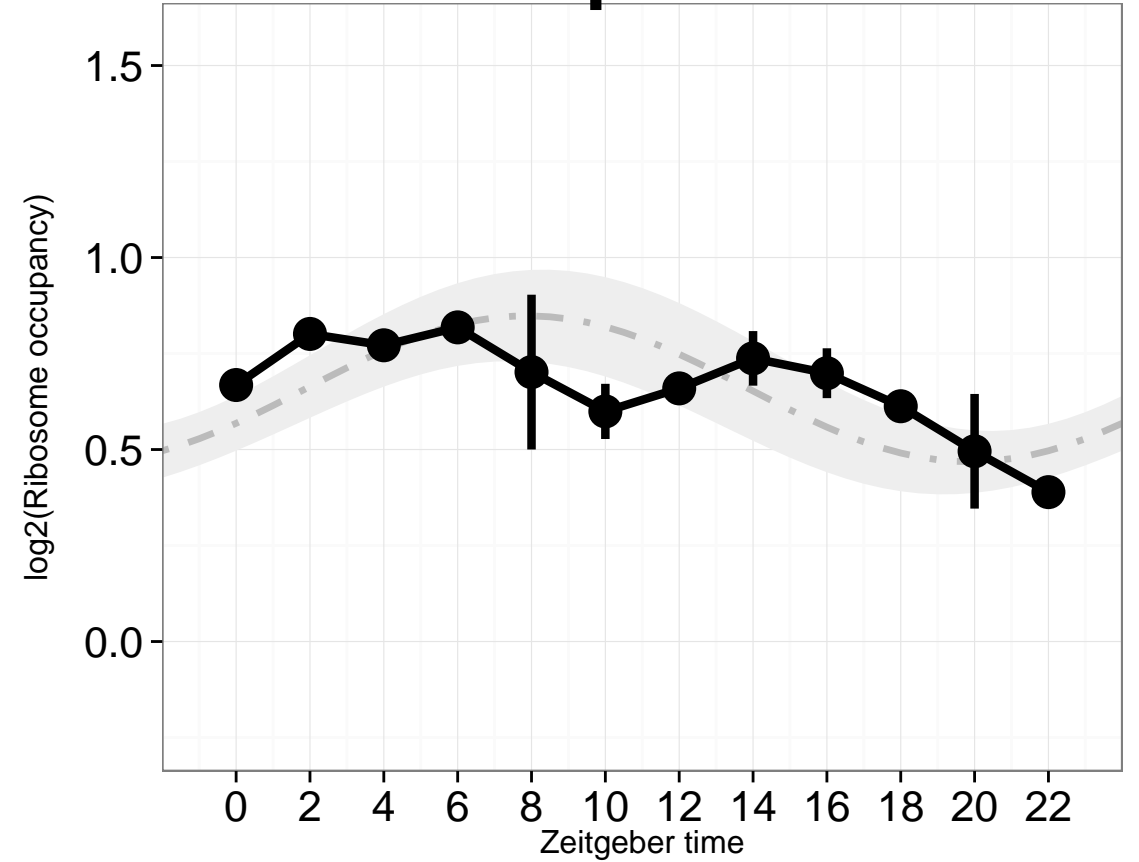

Supplement: SuppDataset_1.zip [file Sparc_set_A.pdf › Supplemental Dataset 1/A-mRNA_nonrhyth_translation_nonrhyth/Sparc_set_A.pdf]

# Sparcl1

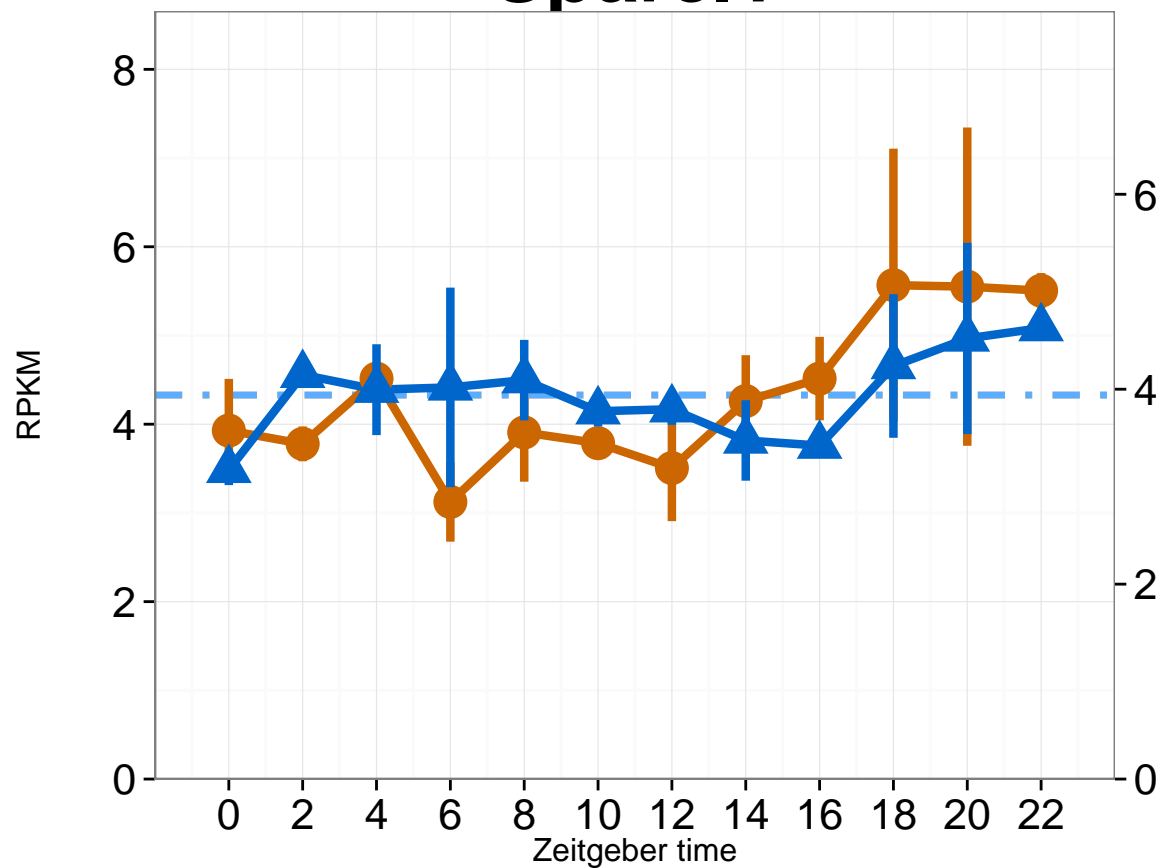

# Sparcl1

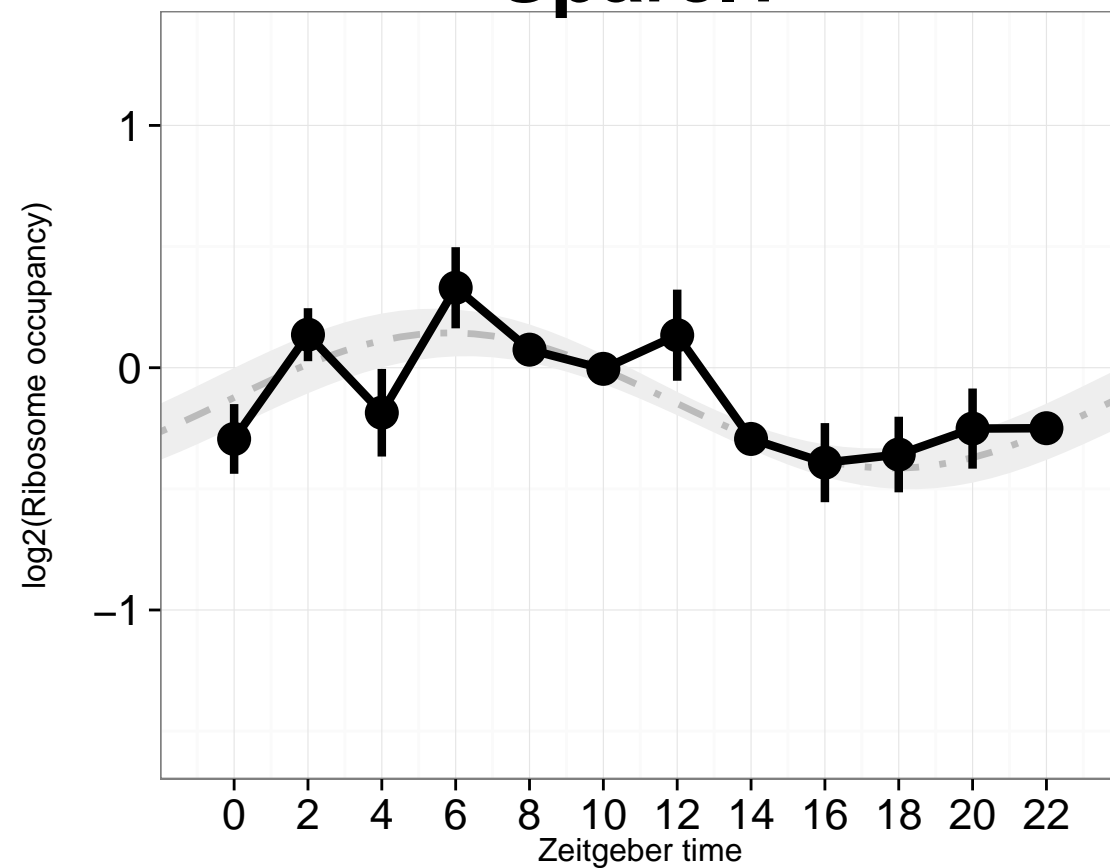

Supplement: SuppDataset_1.zip [file Sparcl1_set_A.pdf › Supplemental Dataset 1/A-mRNA_nonrhyth_translation_nonrhyth/Sparcl1_set_A.pdf]

## Spast

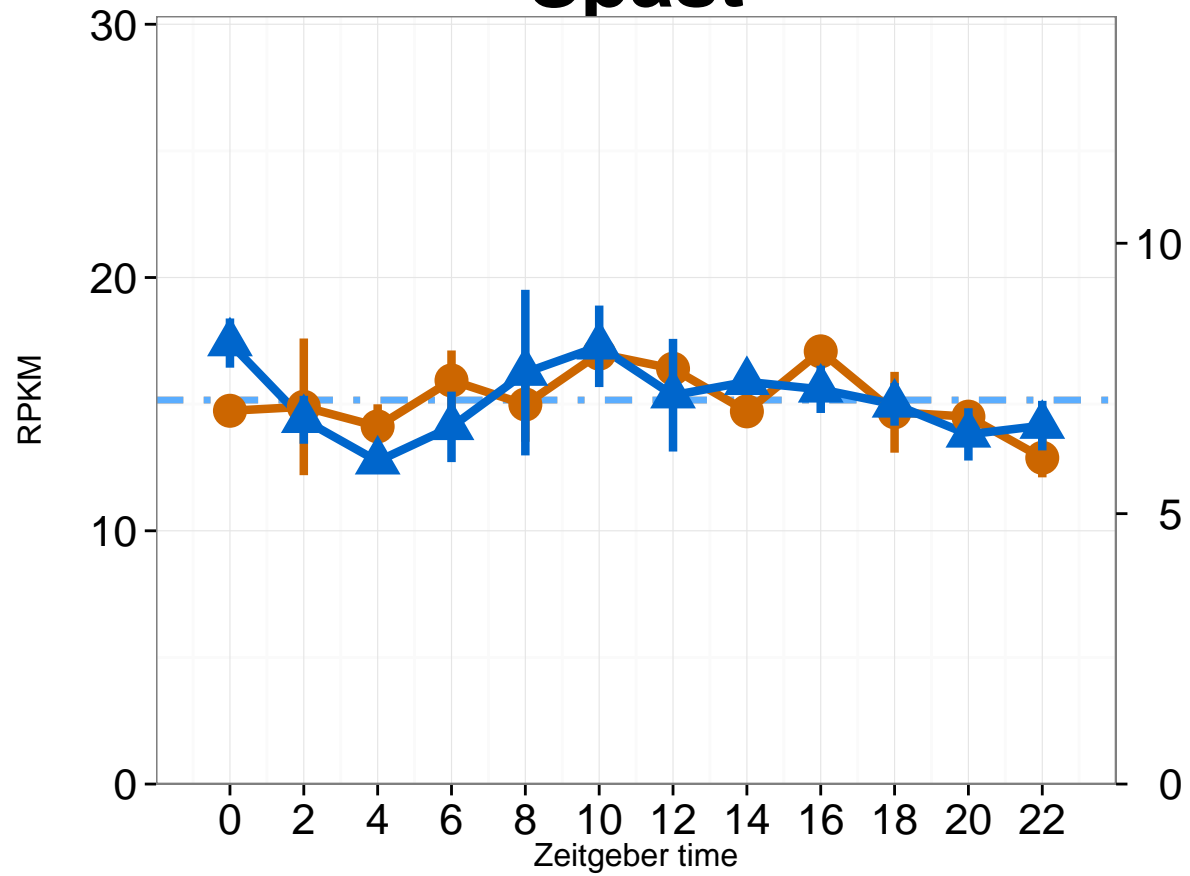

## Spast

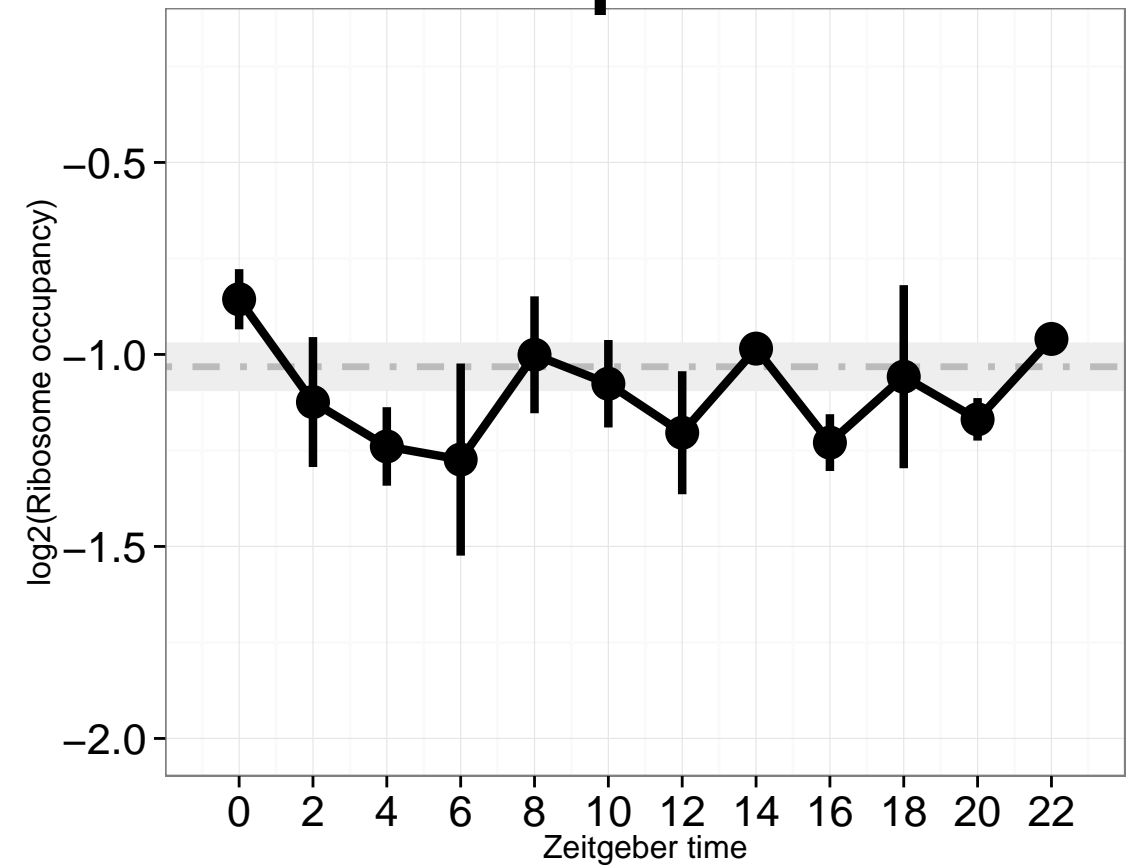

Supplement: SuppDataset_1.zip [file Spast_set_A.pdf › Supplemental Dataset 1/A-mRNA_nonrhyth_translation_nonrhyth/Spast_set_A.pdf]

## Spata1

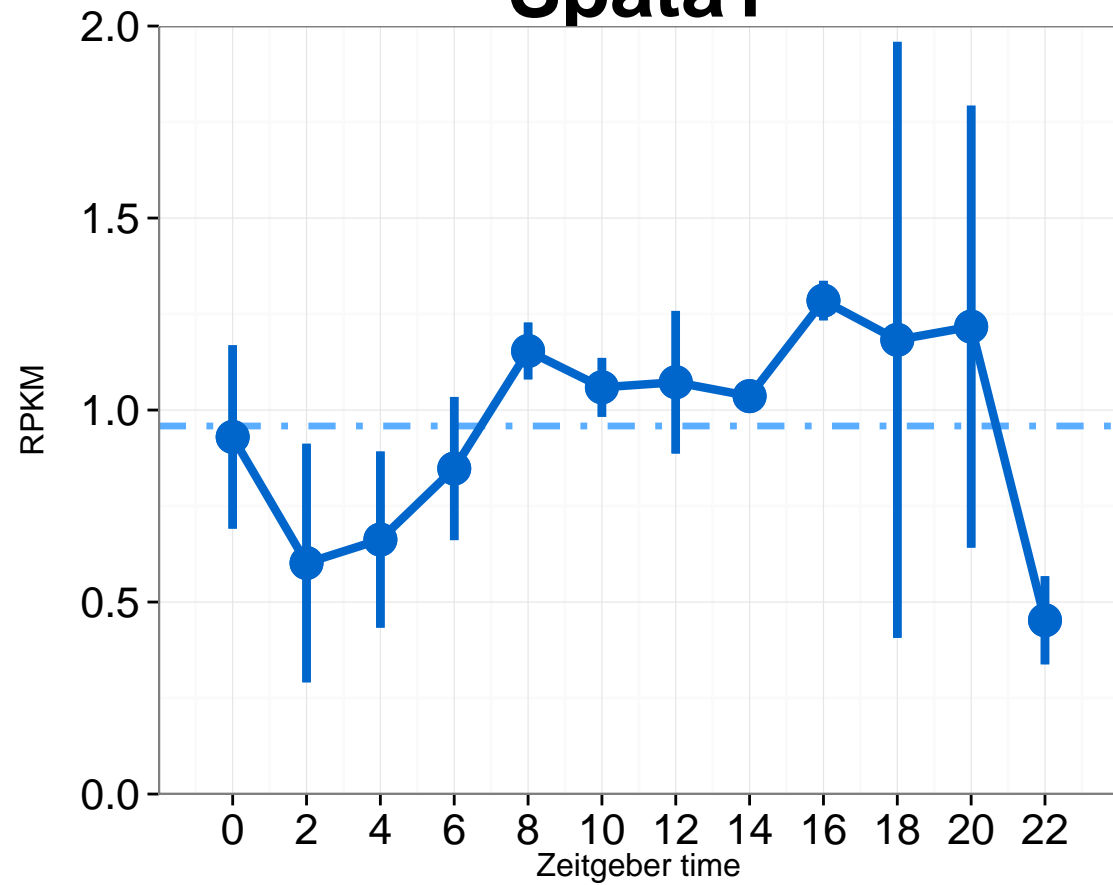

## Spata1 log2(Ribosome occupancy)

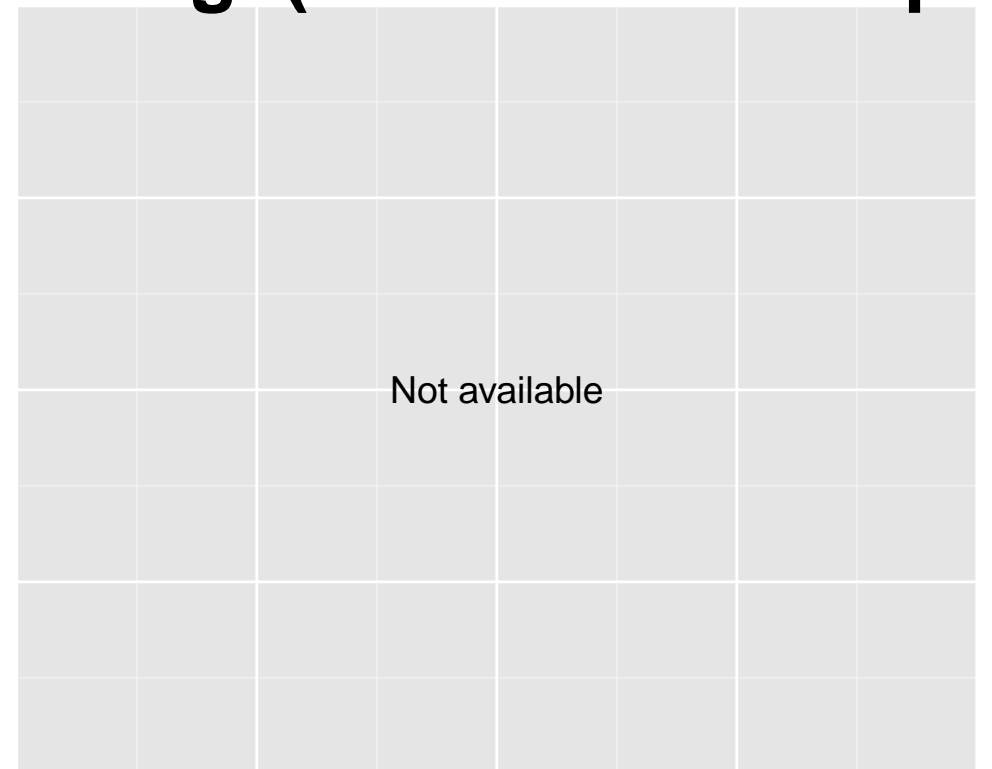

Supplement: SuppDataset_1.zip [file Spata1_set_A.pdf › Supplemental Dataset 1/A-mRNA_nonrhyth_translation_nonrhyth/Spata1_set_A.pdf]

# Spata24

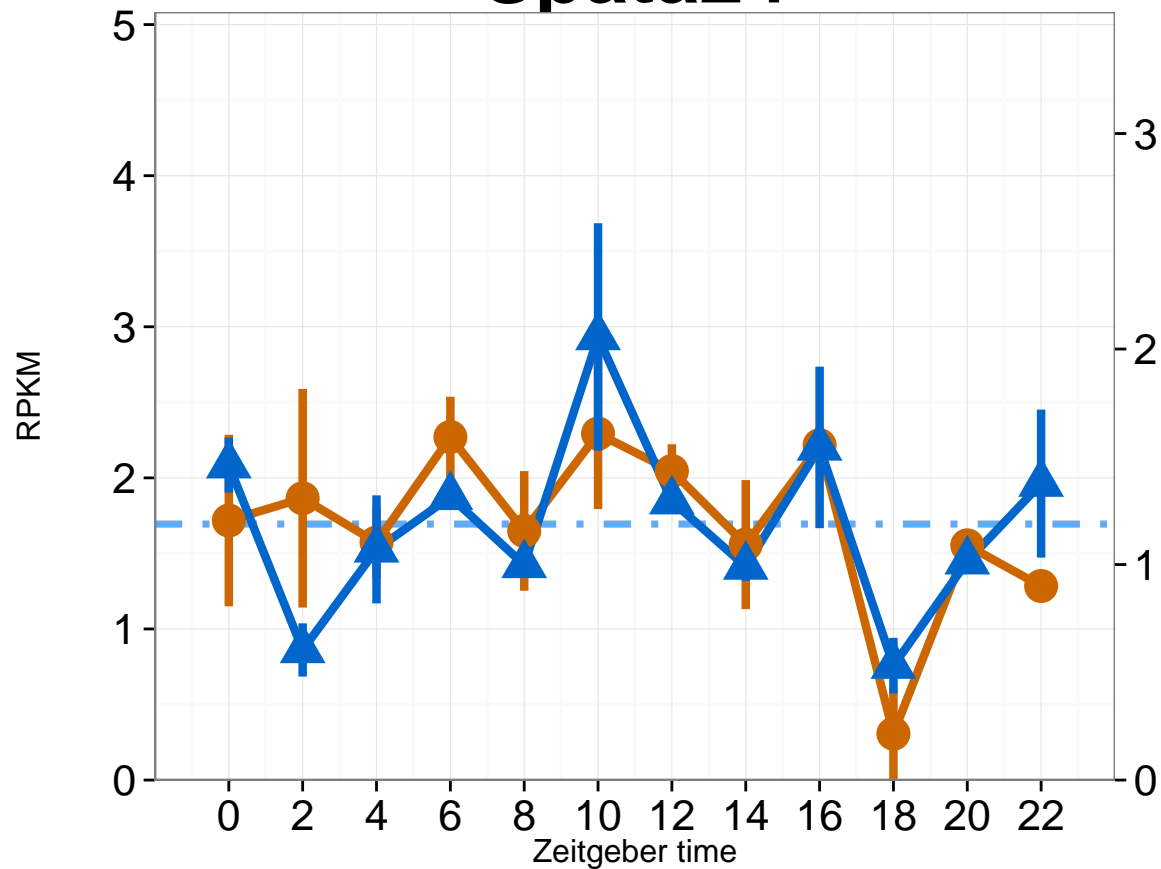

# Spata24

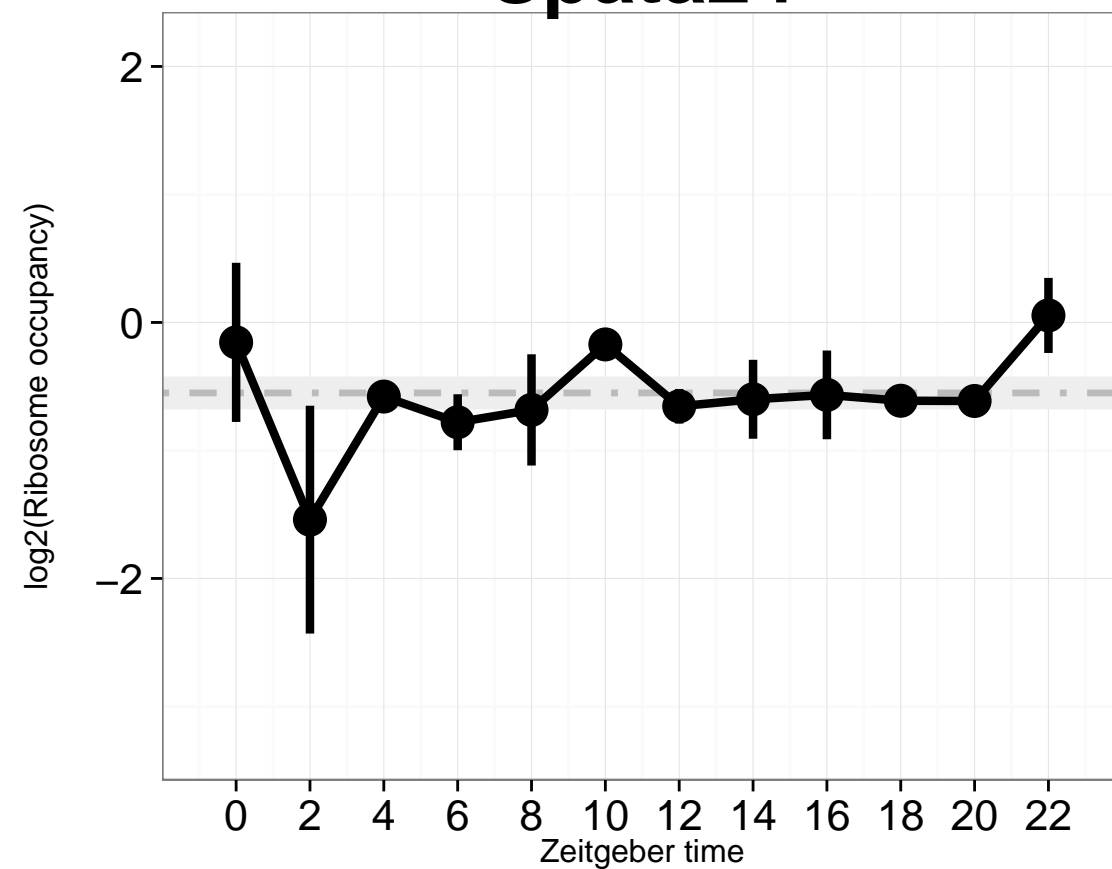

Supplement: SuppDataset_1.zip [file Spata24_set_A.pdf › Supplemental Dataset 1/A-mRNA_nonrhyth_translation_nonrhyth/Spata24_set_A.pdf]

## Spata2

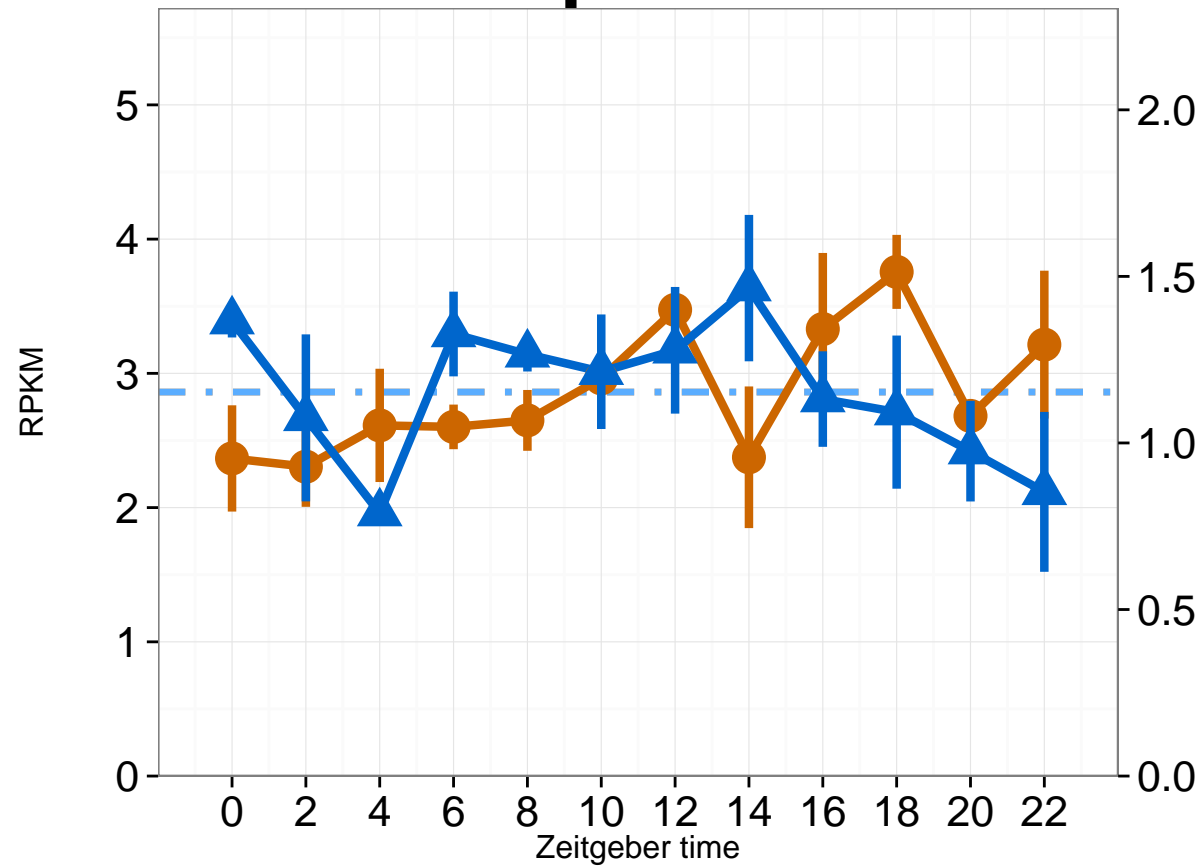

## Spata2

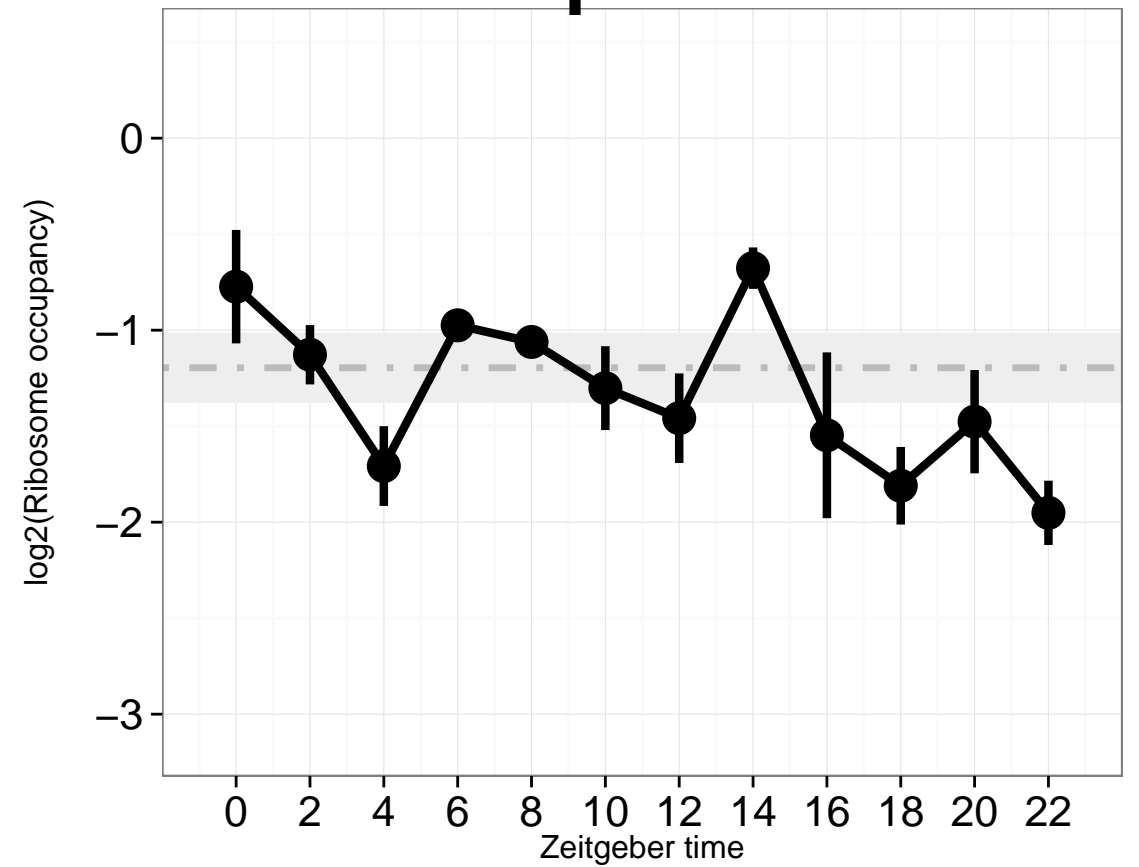

Supplement: SuppDataset_1.zip [file Spata2_set_A.pdf › Supplemental Dataset 1/A-mRNA_nonrhyth_translation_nonrhyth/Spata2_set_A.pdf]

## Spata5

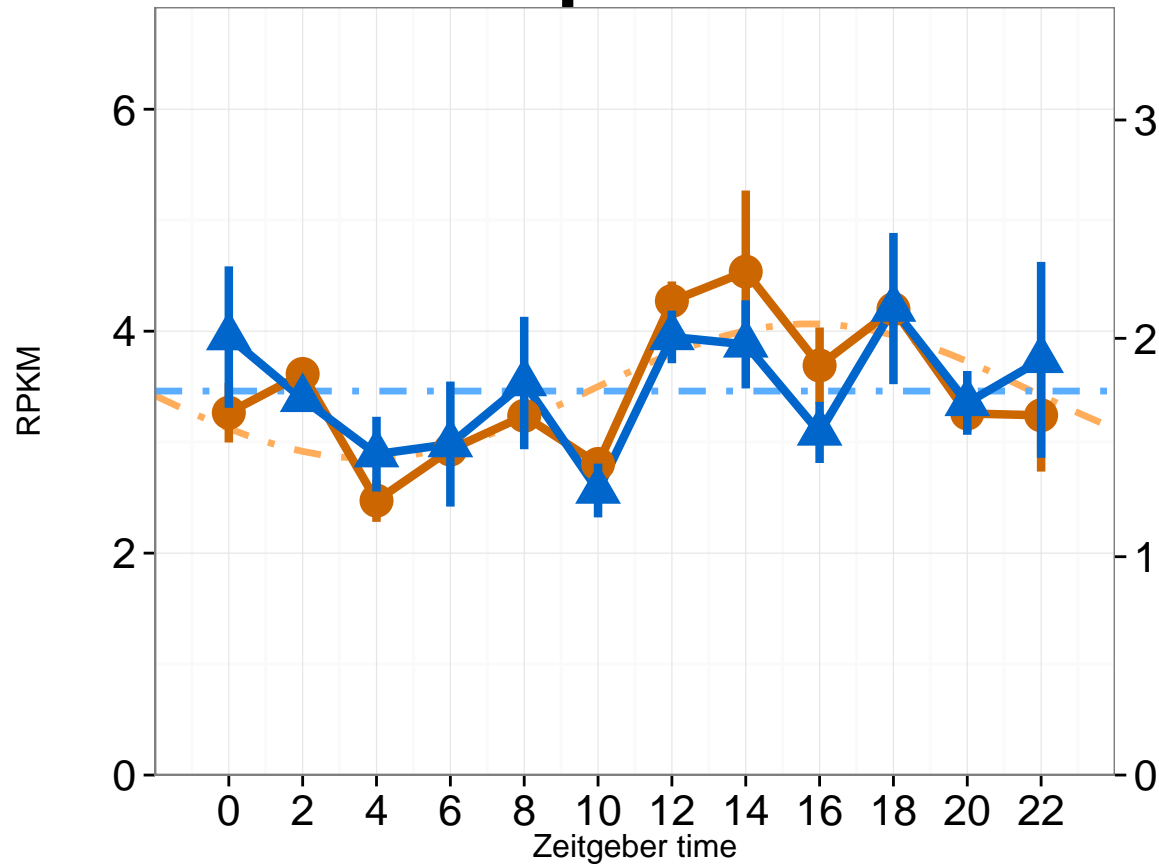

## Spata5

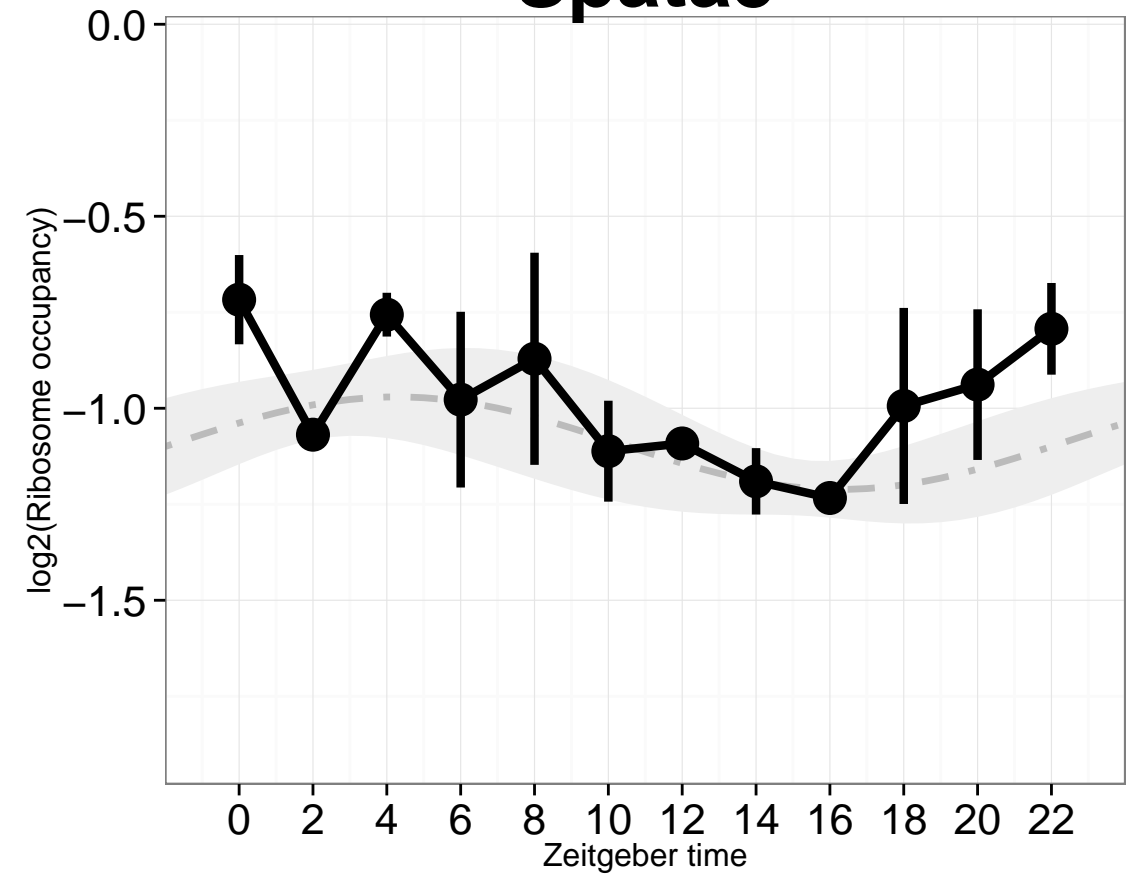

Supplement: SuppDataset_1.zip [file Spata5_set_A.pdf › Supplemental Dataset 1/A-mRNA_nonrhyth_translation_nonrhyth/Spata5_set_A.pdf]

# Spata6

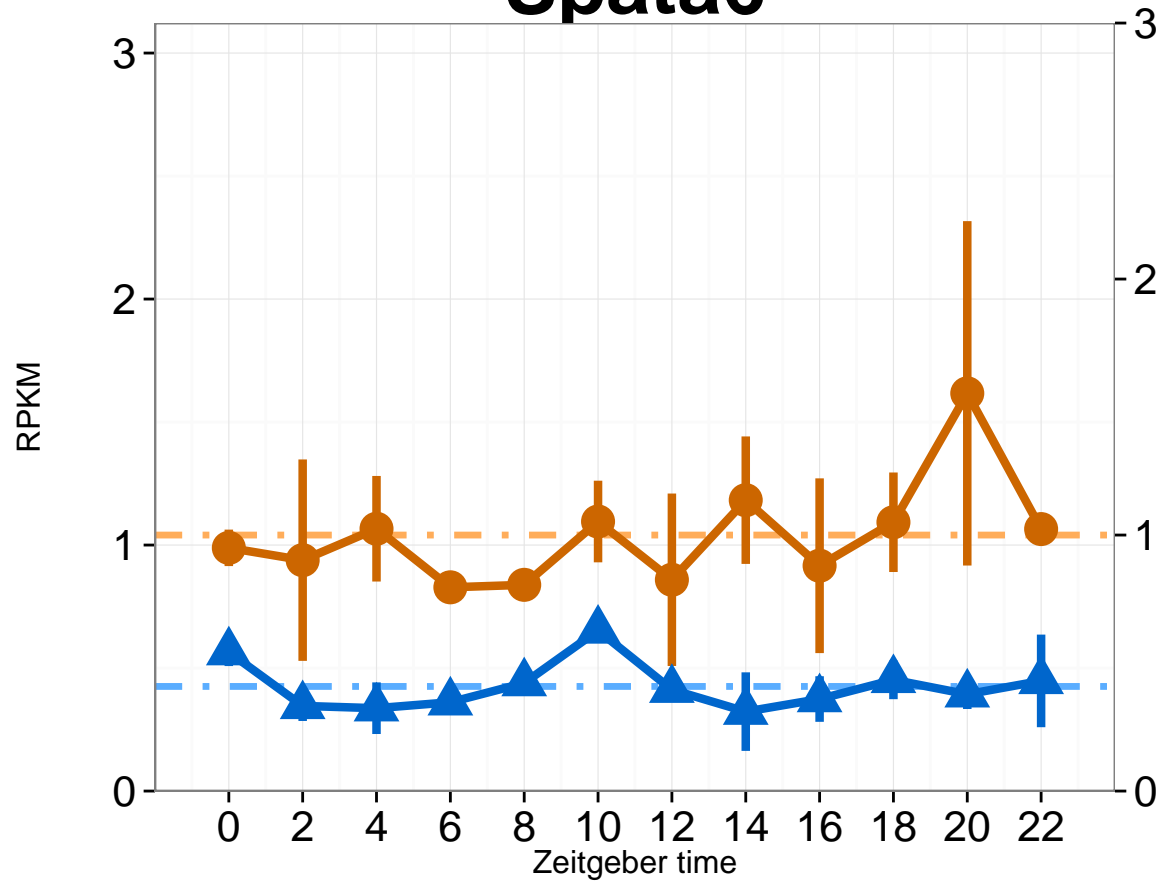

# Spata6

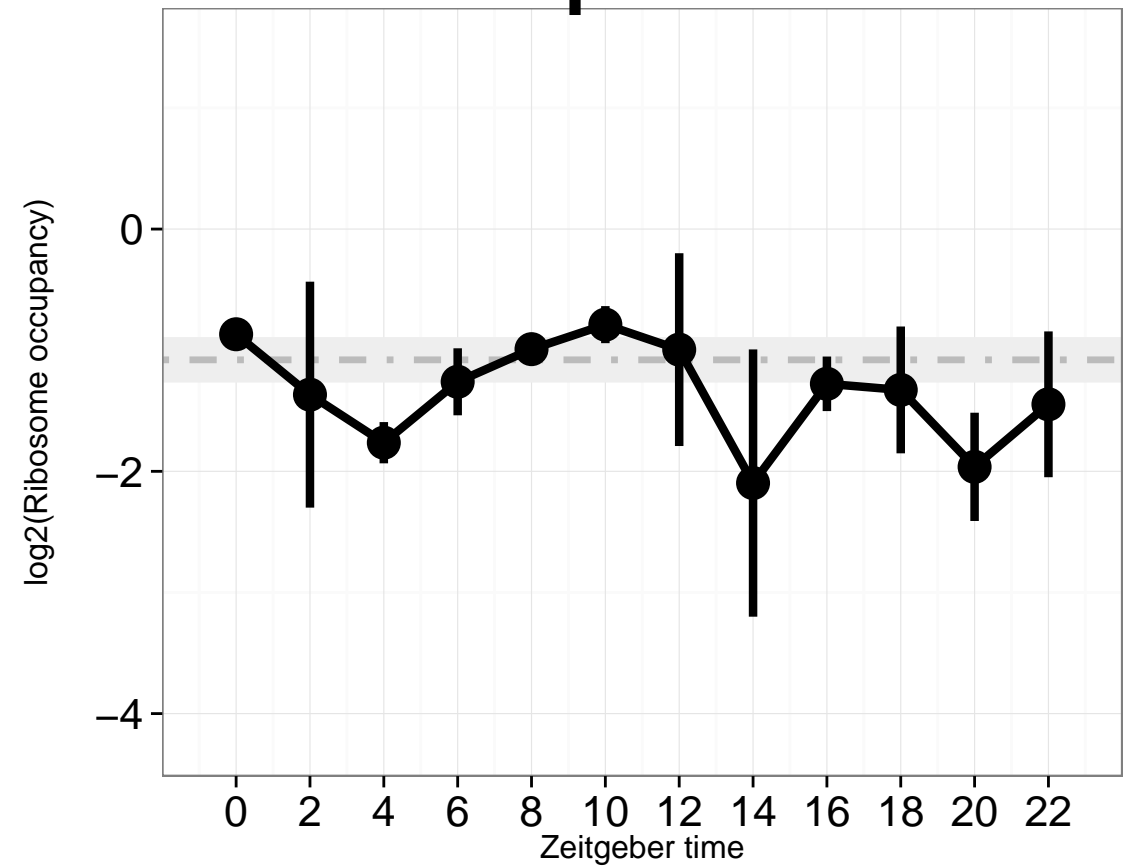

Supplement: SuppDataset_1.zip [file Spata6_set_A.pdf › Supplemental Dataset 1/A-mRNA_nonrhyth_translation_nonrhyth/Spata6_set_A.pdf]

# Spata7

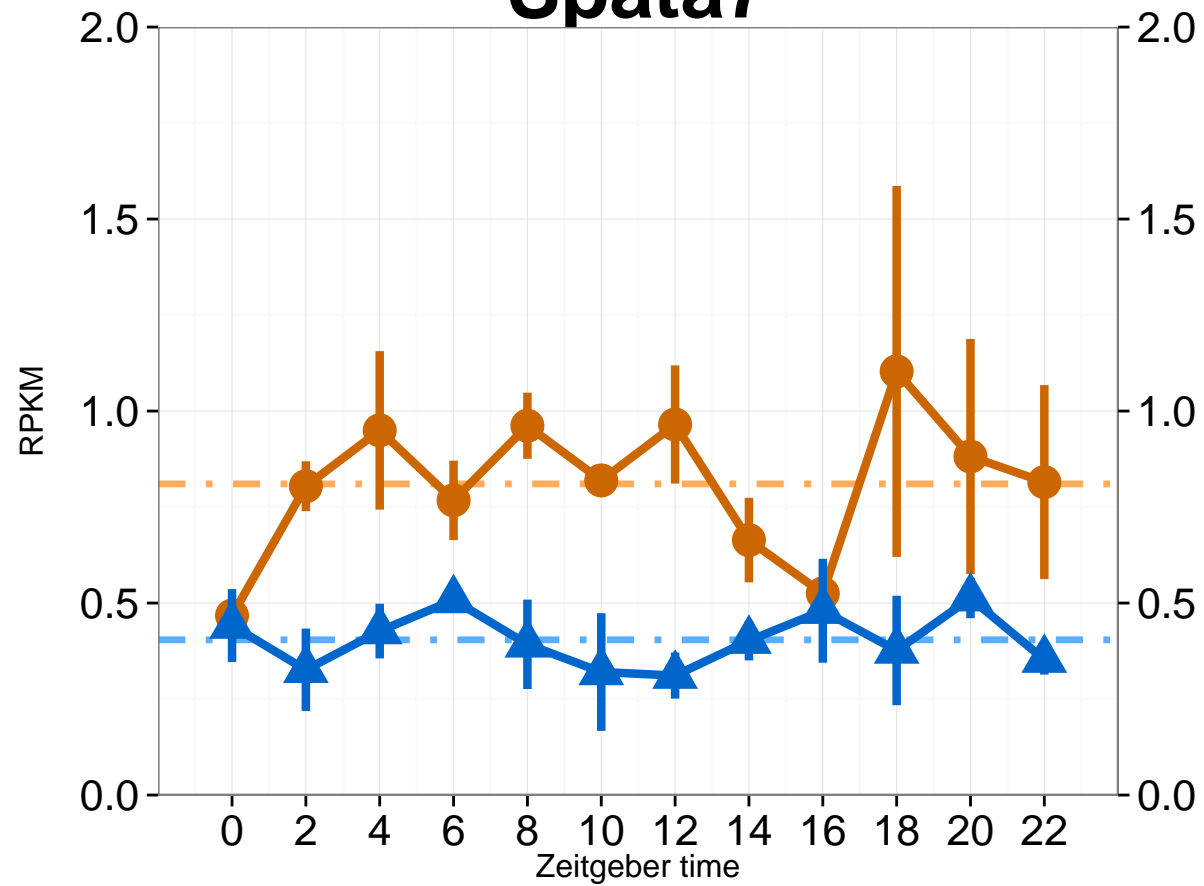

# Spata7

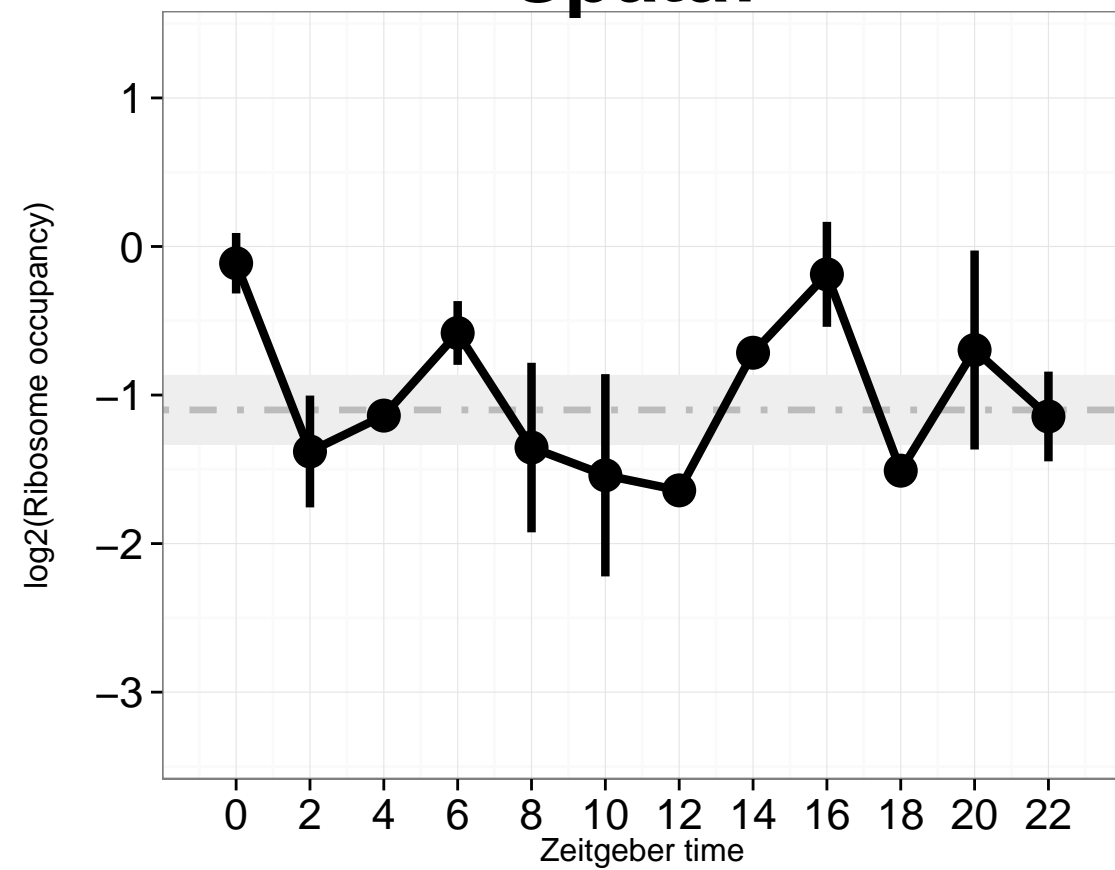

Supplement: SuppDataset_1.zip [file Spata7_set_A.pdf › Supplemental Dataset 1/A-mRNA_nonrhyth_translation_nonrhyth/Spata7_set_A.pdf]

## Spats2

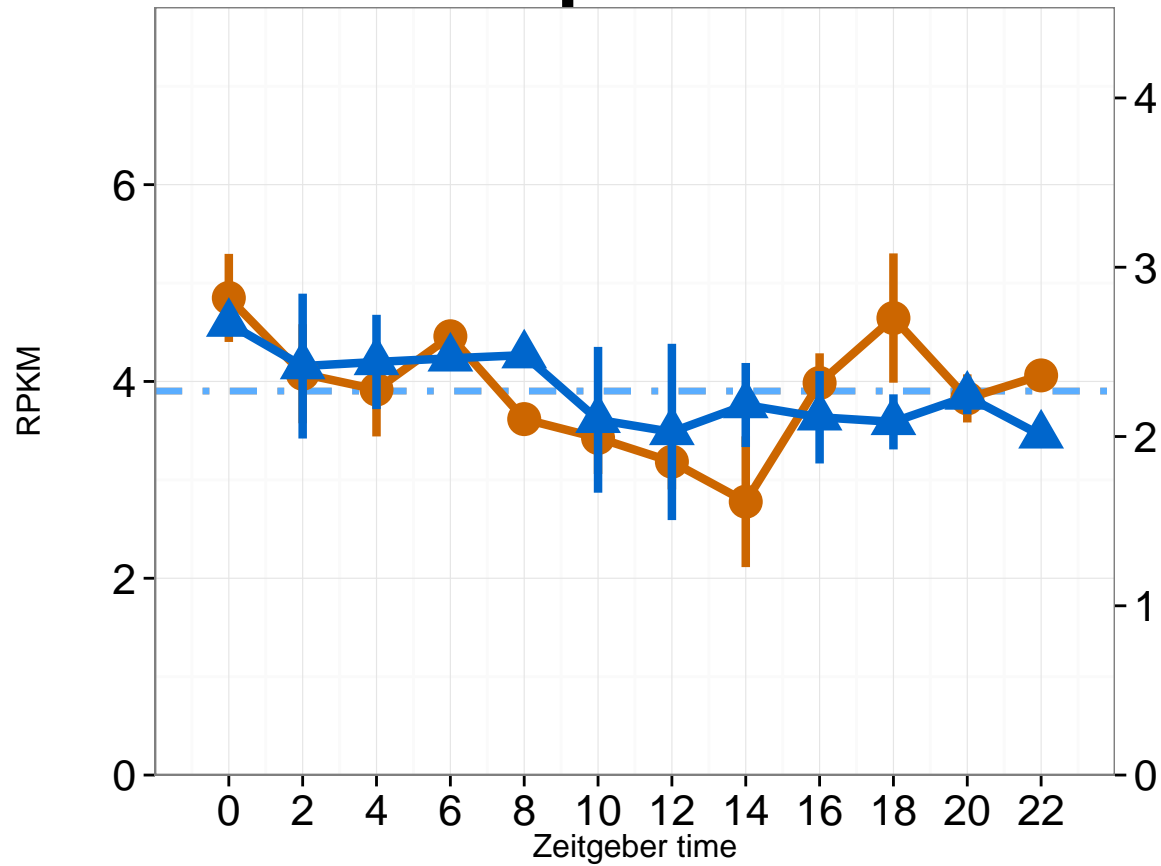

## Spats2

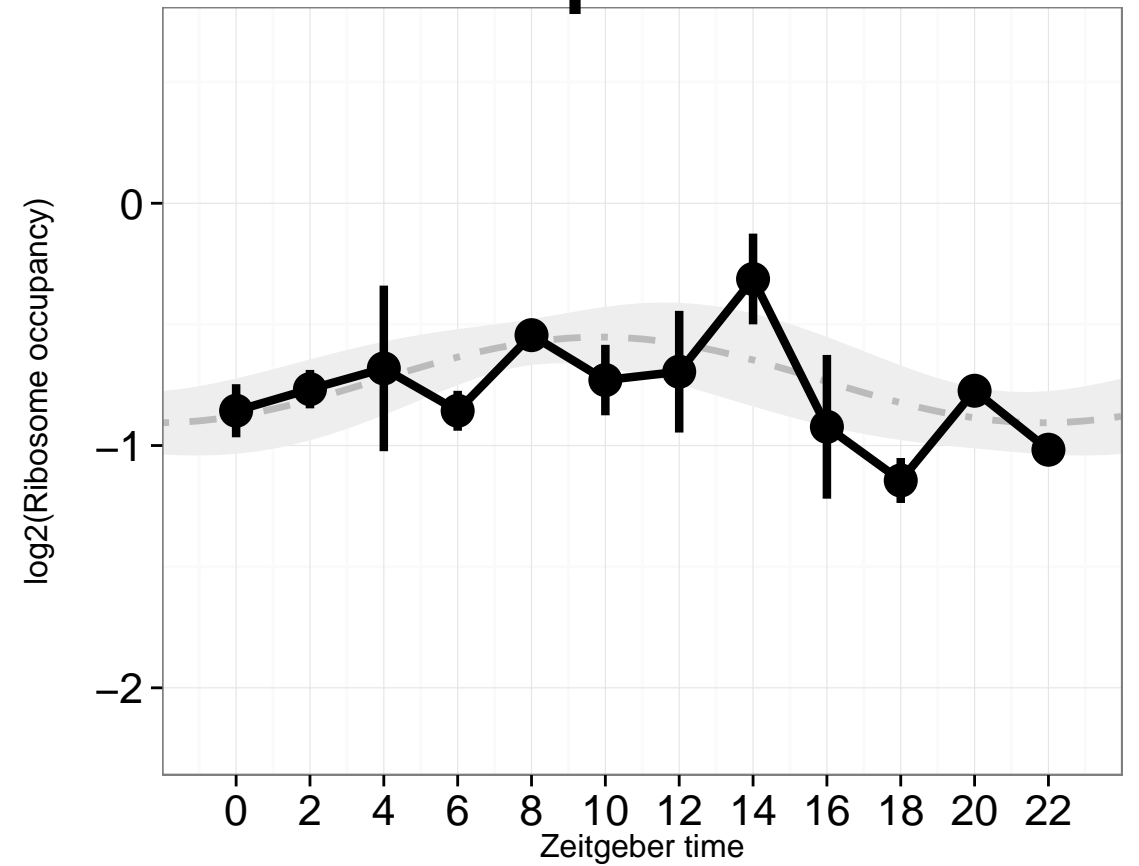

Supplement: SuppDataset_1.zip [file Spats2_set_A.pdf › Supplemental Dataset 1/A-mRNA_nonrhyth_translation_nonrhyth/Spats2_set_A.pdf]

# Spats2l

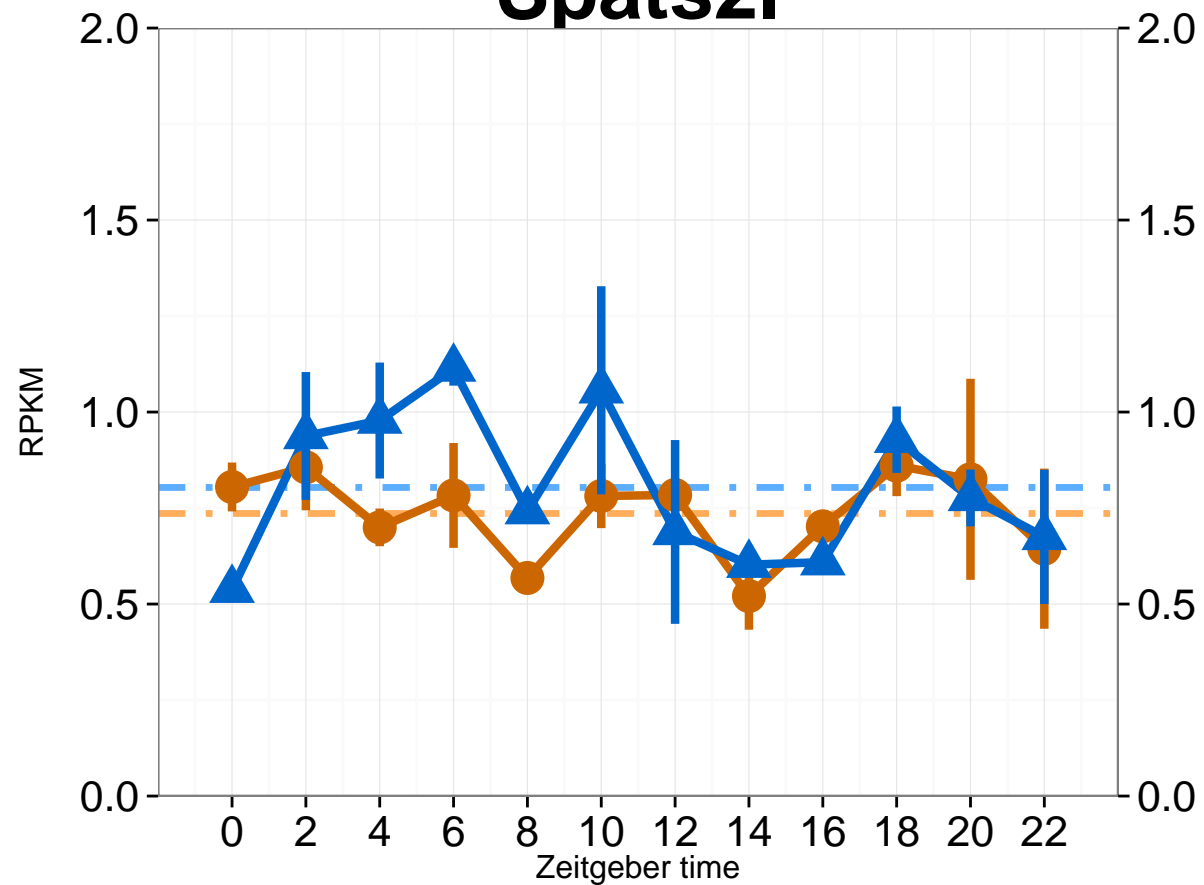

# Spats2l

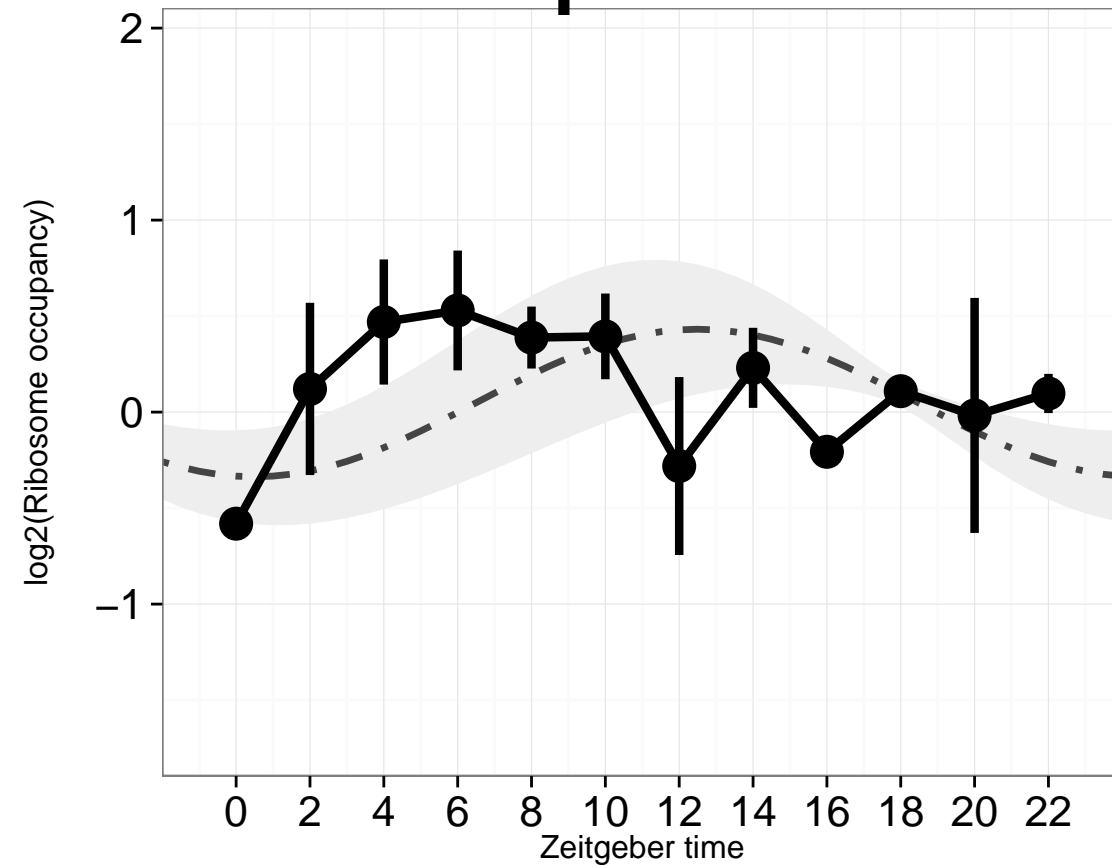

Supplement: SuppDataset_1.zip [file Spats2l_set_A.pdf › Supplemental Dataset 1/A-mRNA_nonrhyth_translation_nonrhyth/Spats2l_set_A.pdf]

## Spc24

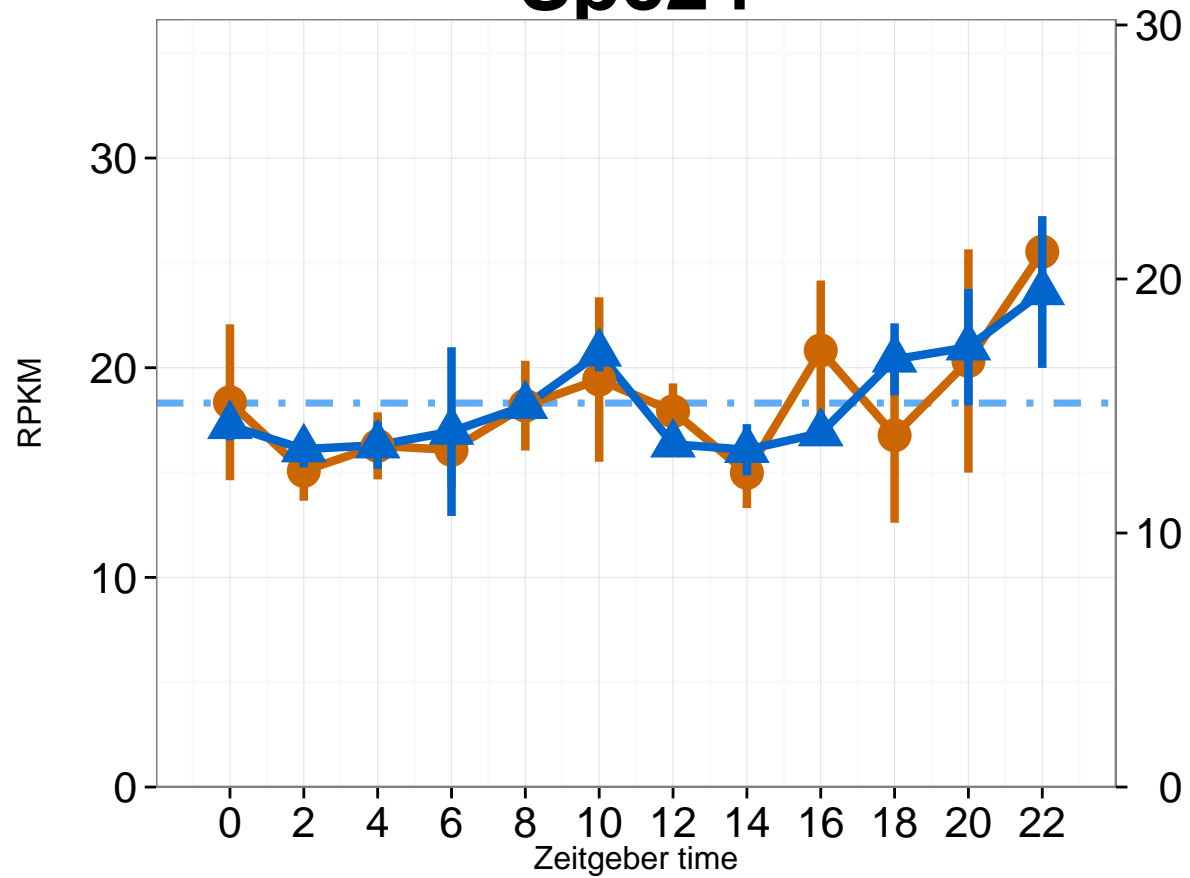

## Spc24

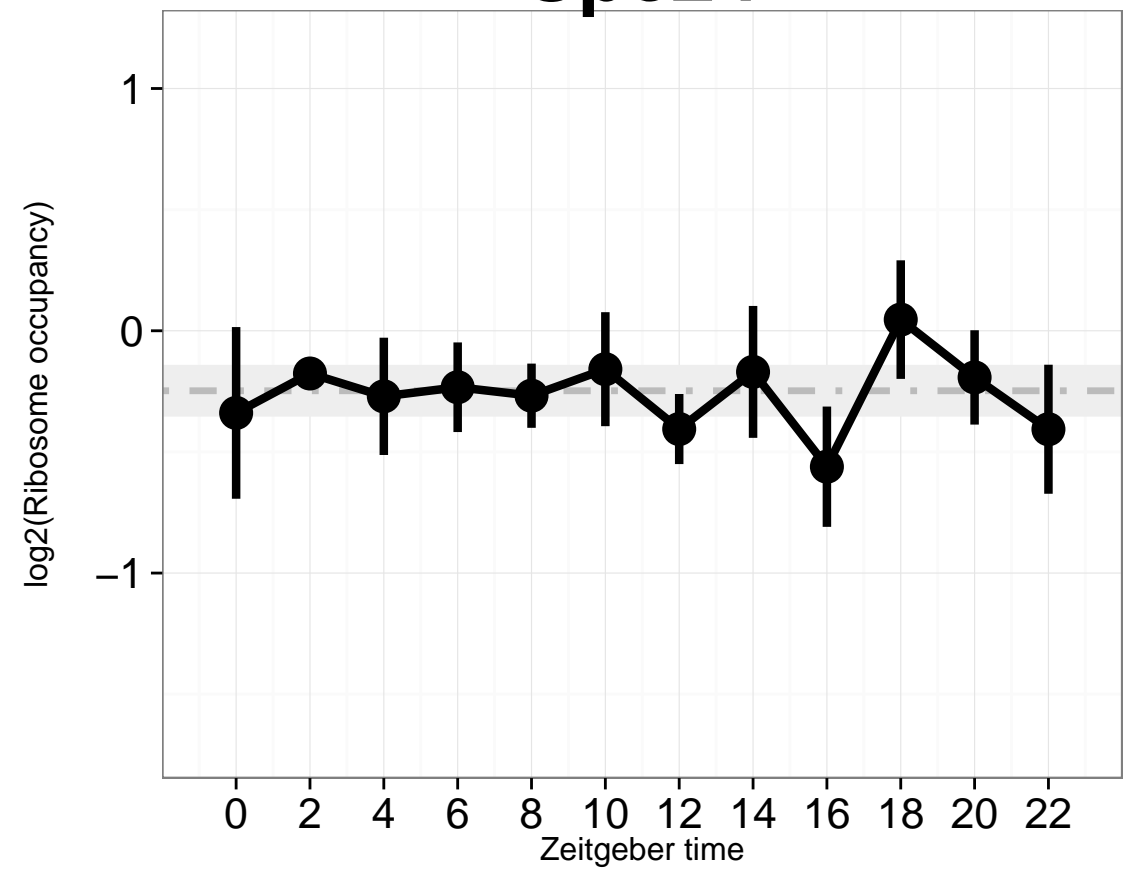

Supplement: SuppDataset_1.zip [file Spc24_set_A.pdf › Supplemental Dataset 1/A-mRNA_nonrhyth_translation_nonrhyth/Spc24_set_A.pdf]

## Spcs2

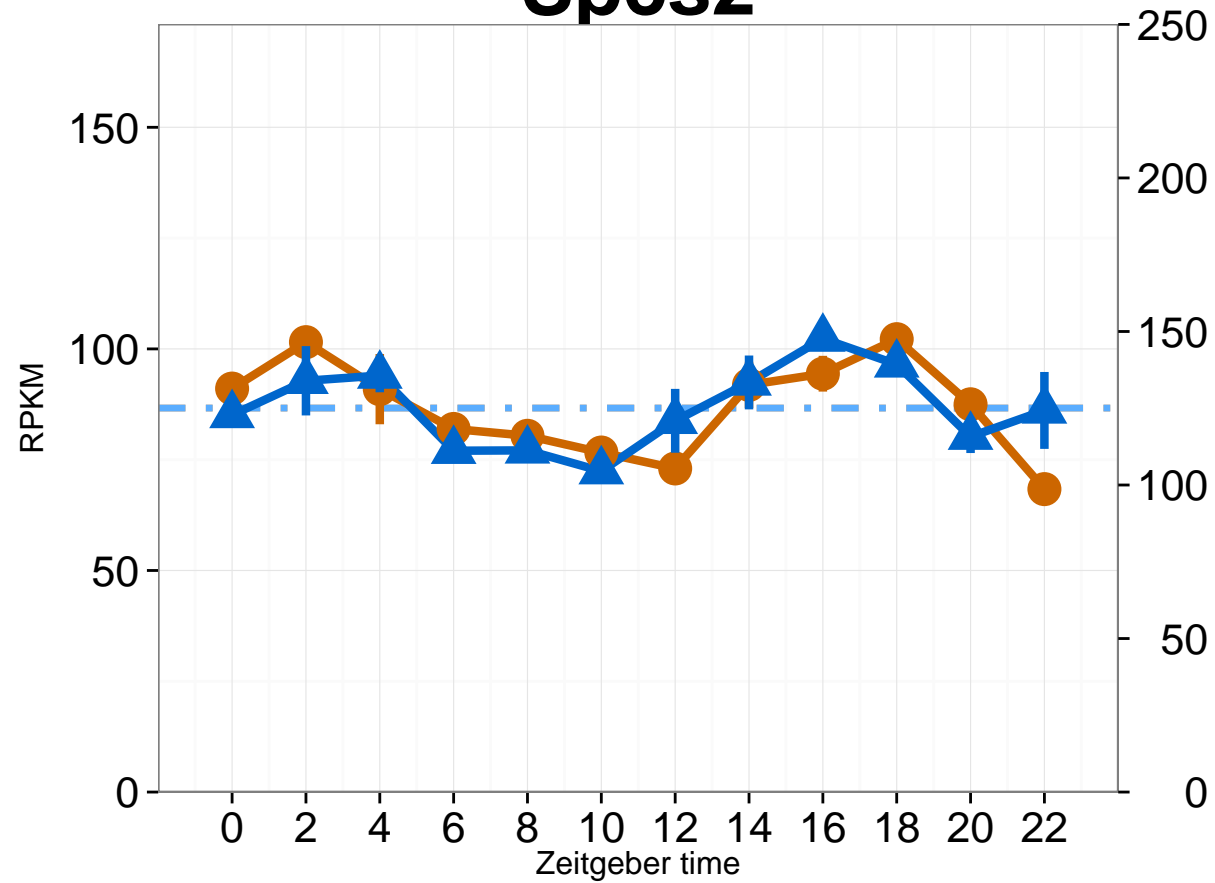

## Spcs2

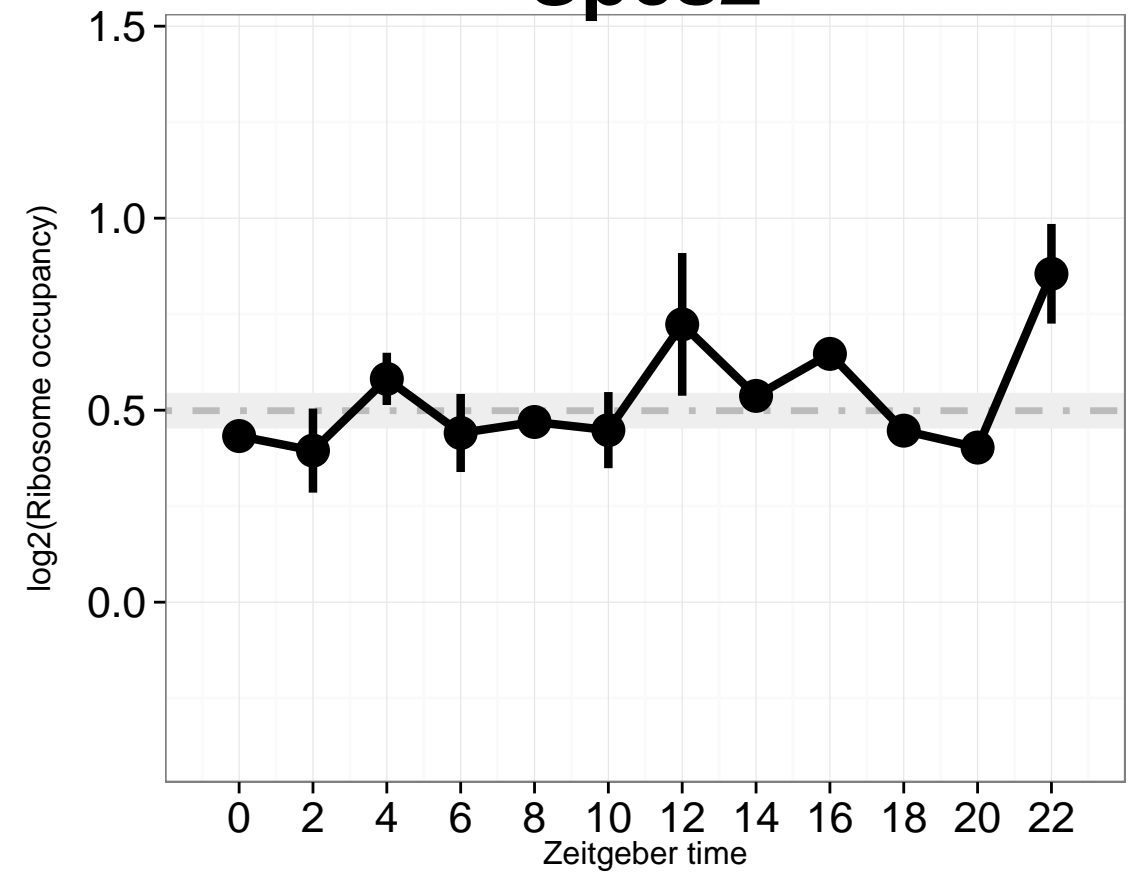

Supplement: SuppDataset_1.zip [file Spcs2_set_A.pdf › Supplemental Dataset 1/A-mRNA_nonrhyth_translation_nonrhyth/Spcs2_set_A.pdf]

## Spcs3

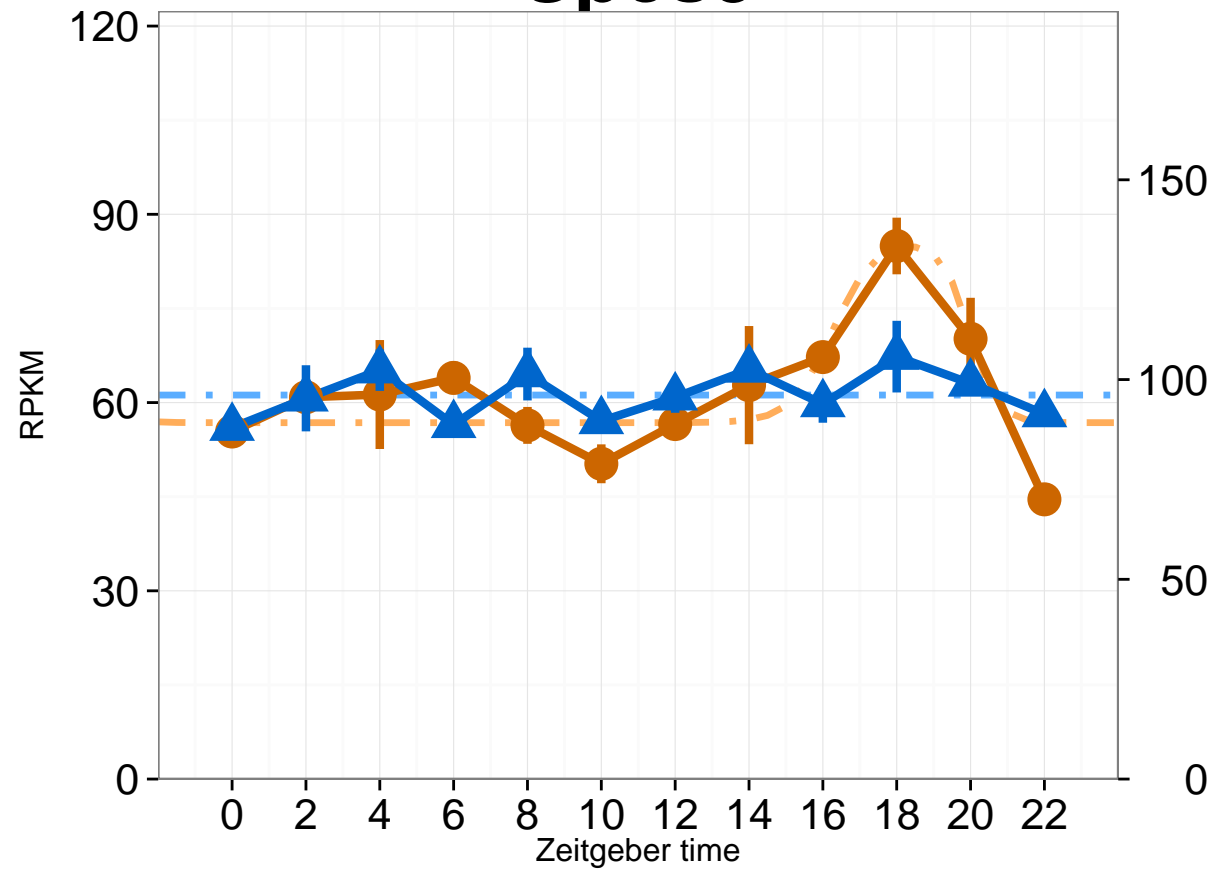

## Spcs3

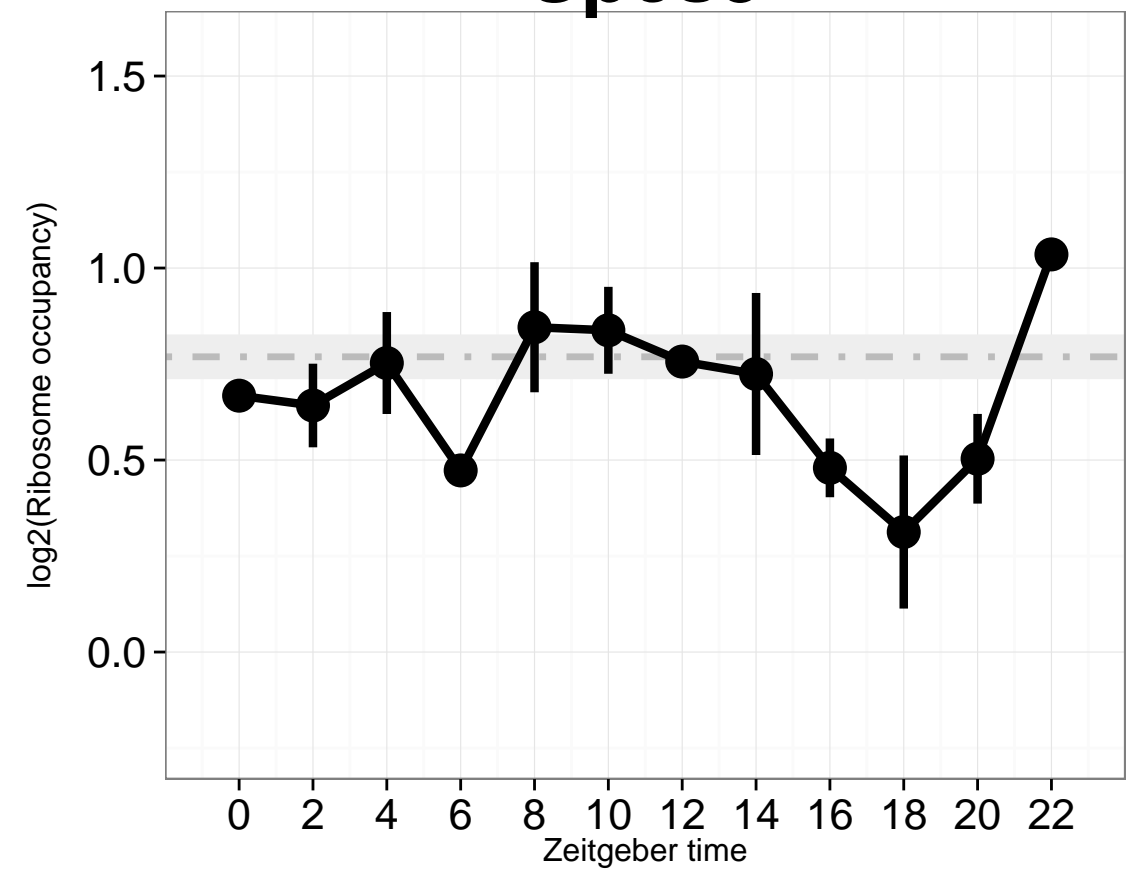

Supplement: SuppDataset_1.zip [file Spcs3_set_A.pdf › Supplemental Dataset 1/A-mRNA_nonrhyth_translation_nonrhyth/Spcs3_set_A.pdf]

# Spdl1 TR

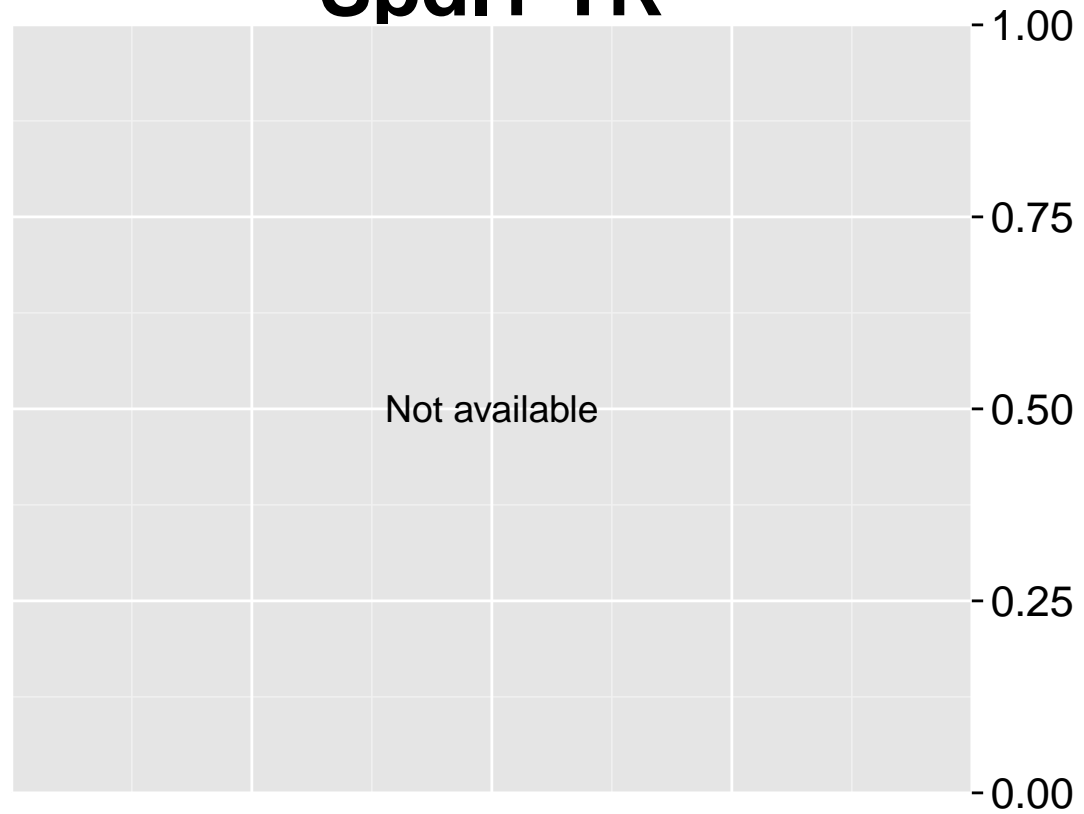

# Spdl1 log2(Ribosome occupancy)

Supplement: SuppDataset_1.zip [file Spdl1_set_A.pdf › Supplemental Dataset 1/A-mRNA_nonrhyth_translation_nonrhyth/Spdl1_set_A.pdf]

# Specc1

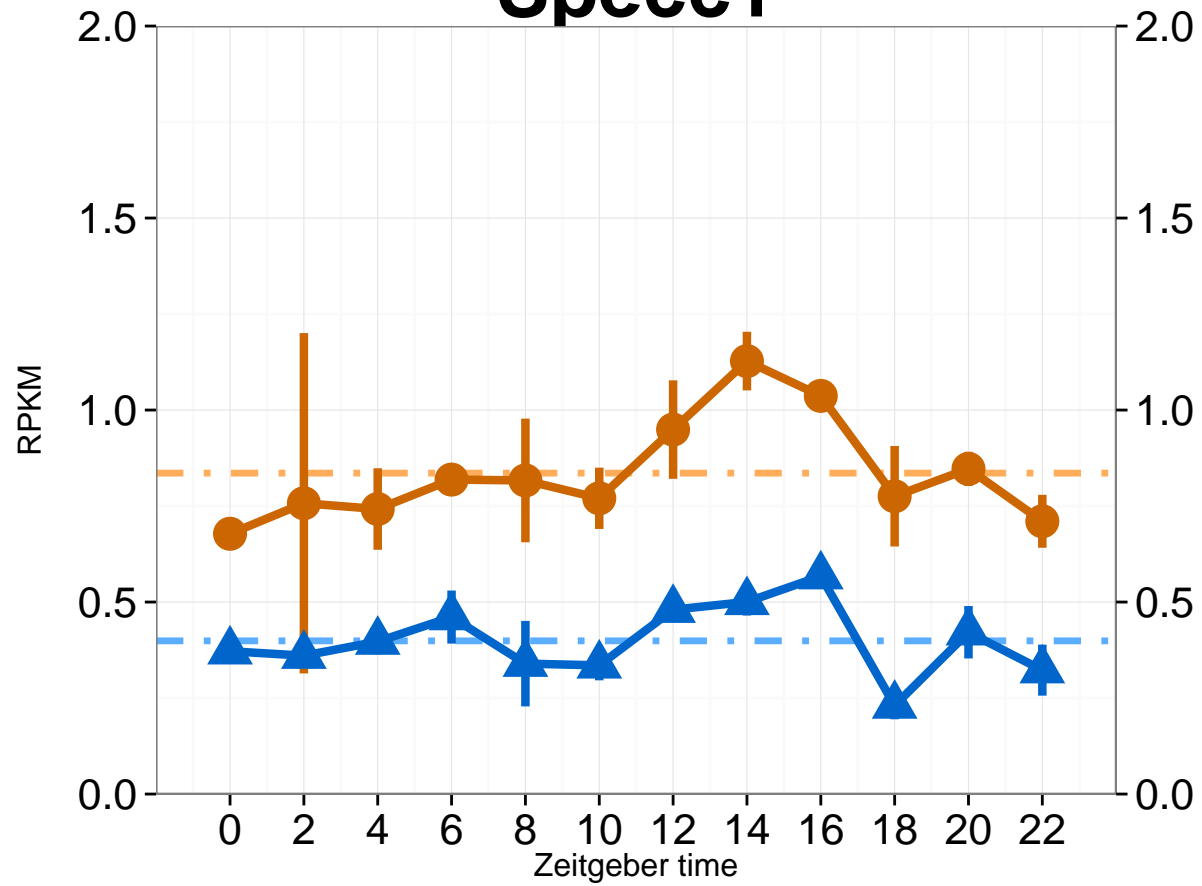

# Specc1

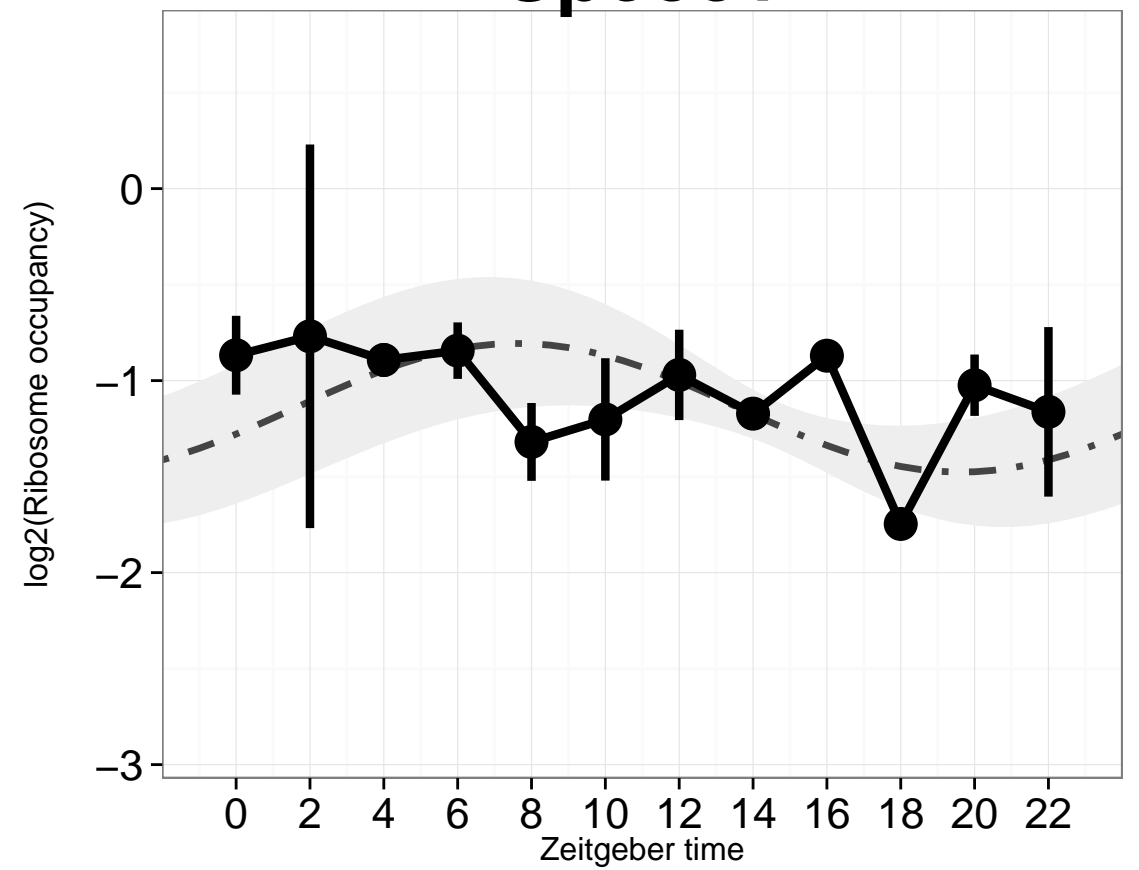

Supplement: SuppDataset_1.zip [file Specc1_set_A.pdf › Supplemental Dataset 1/A-mRNA_nonrhyth_translation_nonrhyth/Specc1_set_A.pdf]

## Specc1l

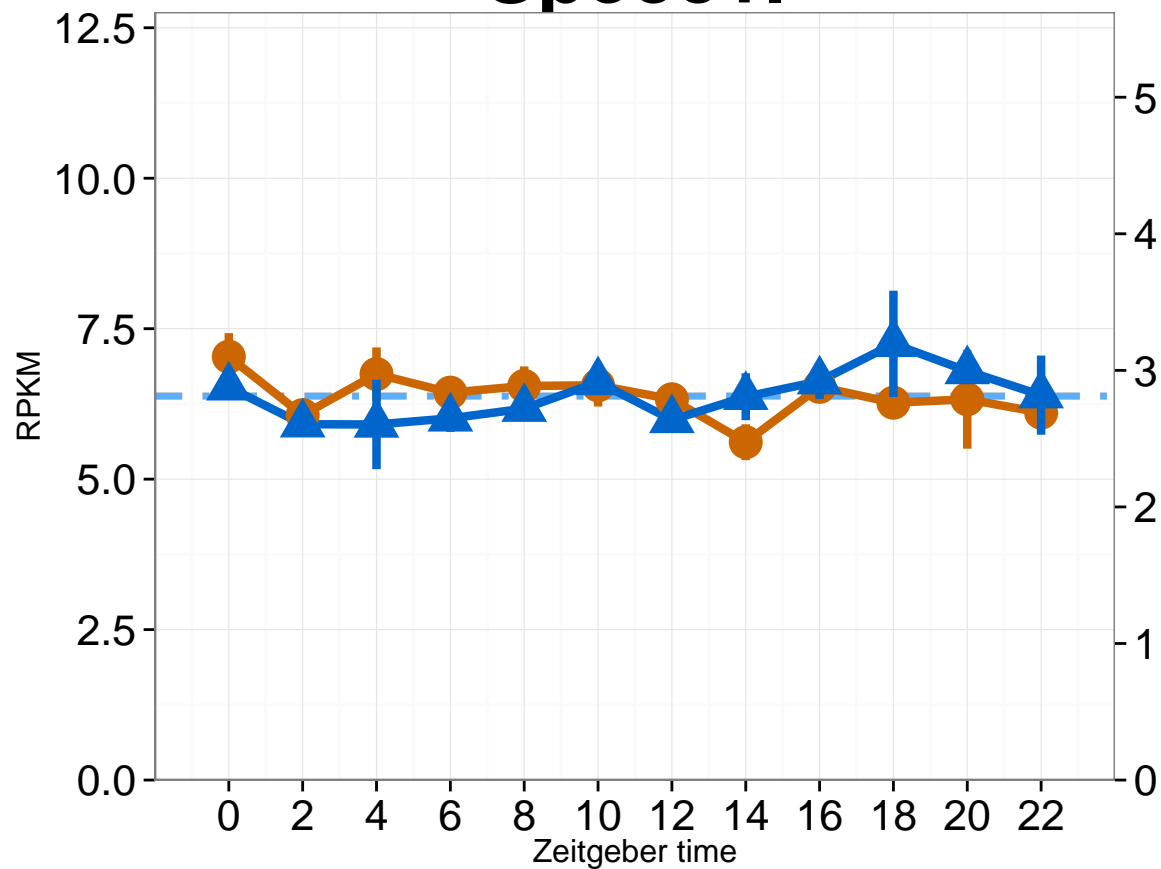

## Specc1l

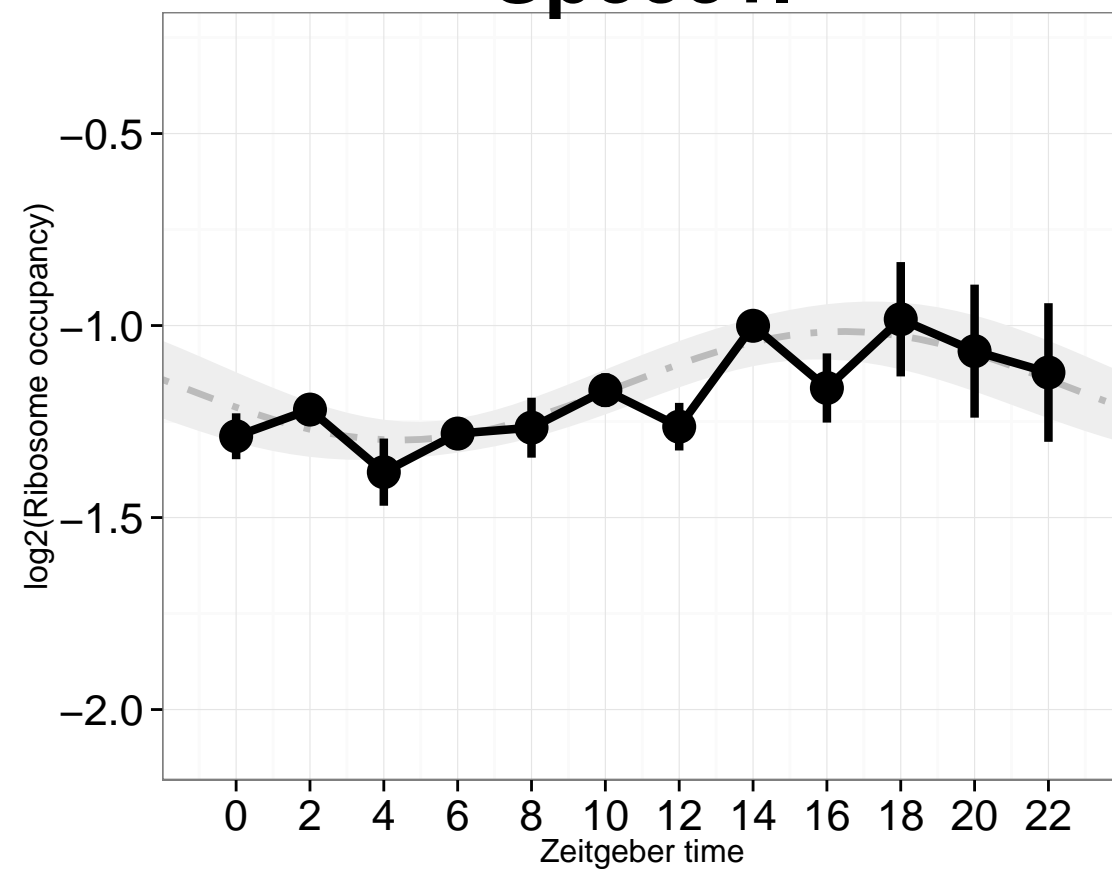

Supplement: SuppDataset_1.zip [file Specc1l_set_A.pdf › Supplemental Dataset 1/A-mRNA_nonrhyth_translation_nonrhyth/Specc1l_set_A.pdf]

## Spen

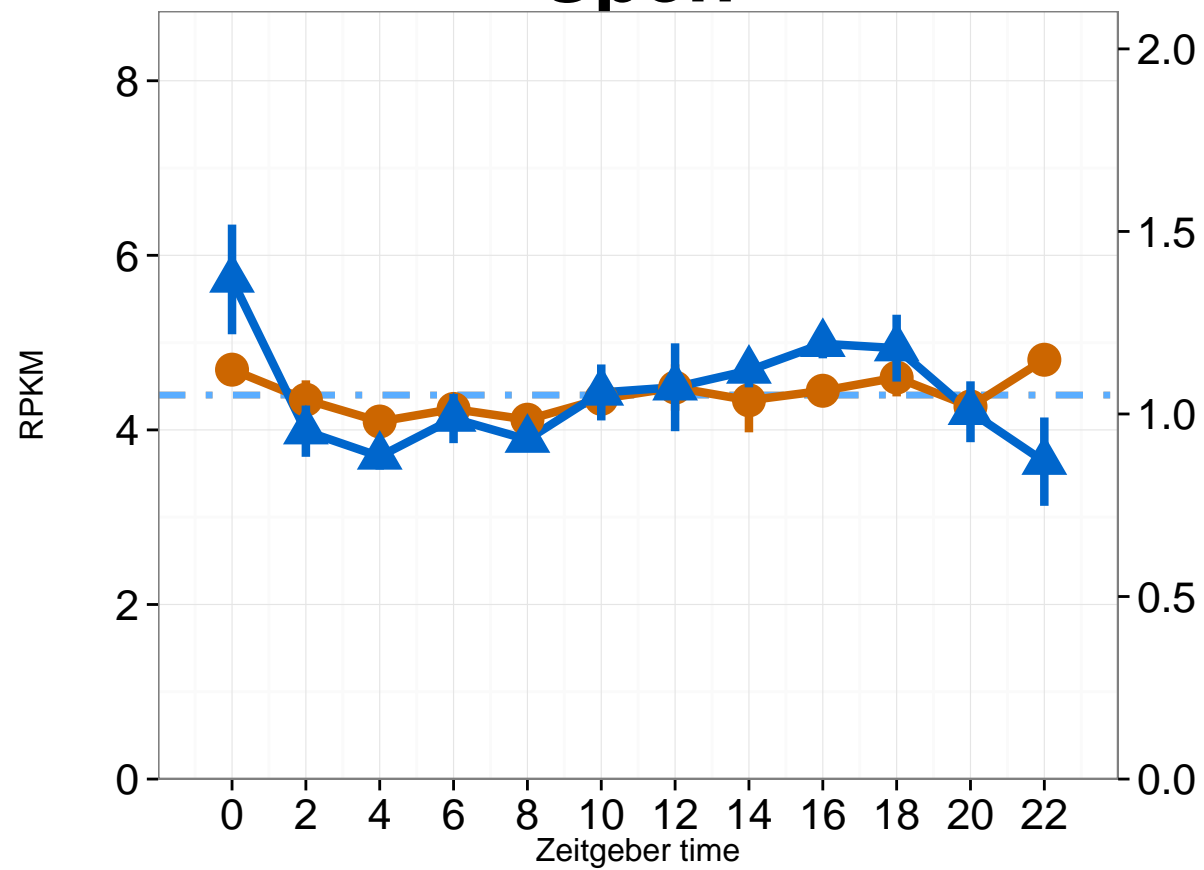

## Spen

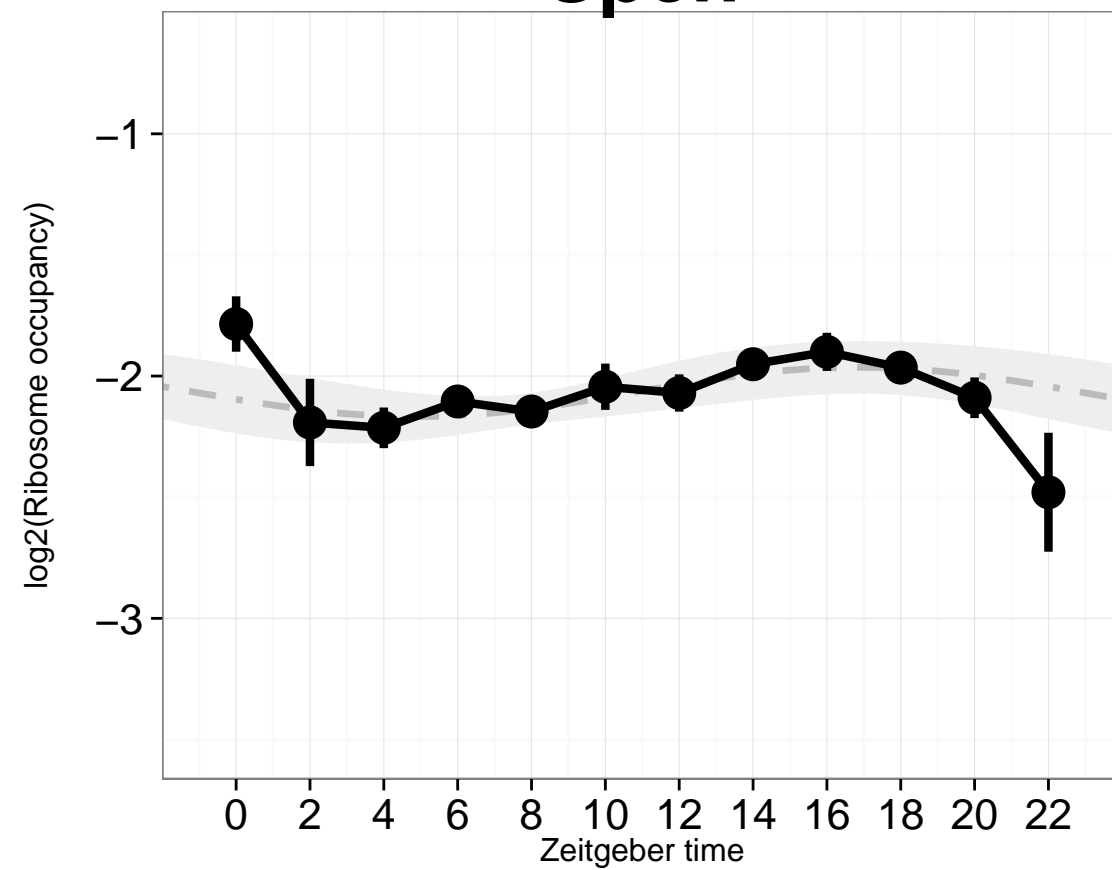

Supplement: SuppDataset_1.zip [file Spen_set_A.pdf › Supplemental Dataset 1/A-mRNA_nonrhyth_translation_nonrhyth/Spen_set_A.pdf]

# Spg11

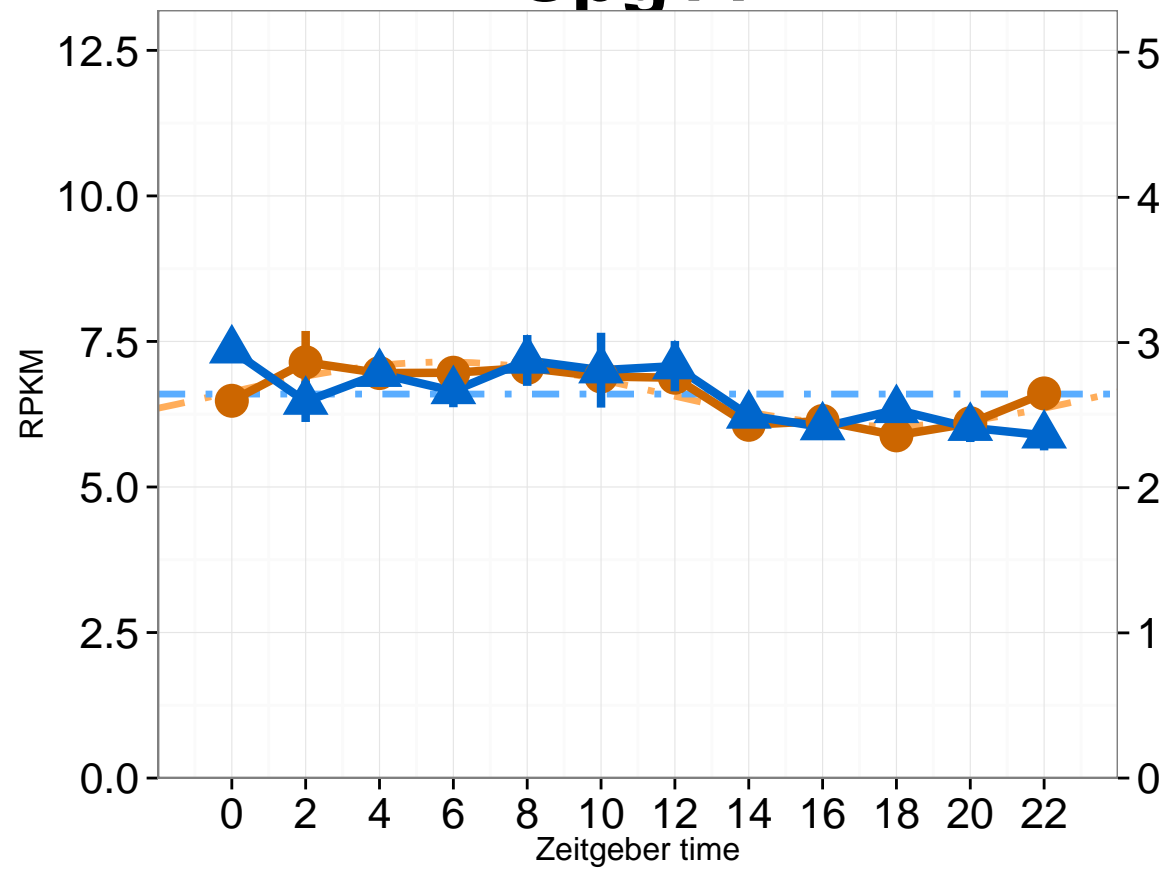

# Spg11

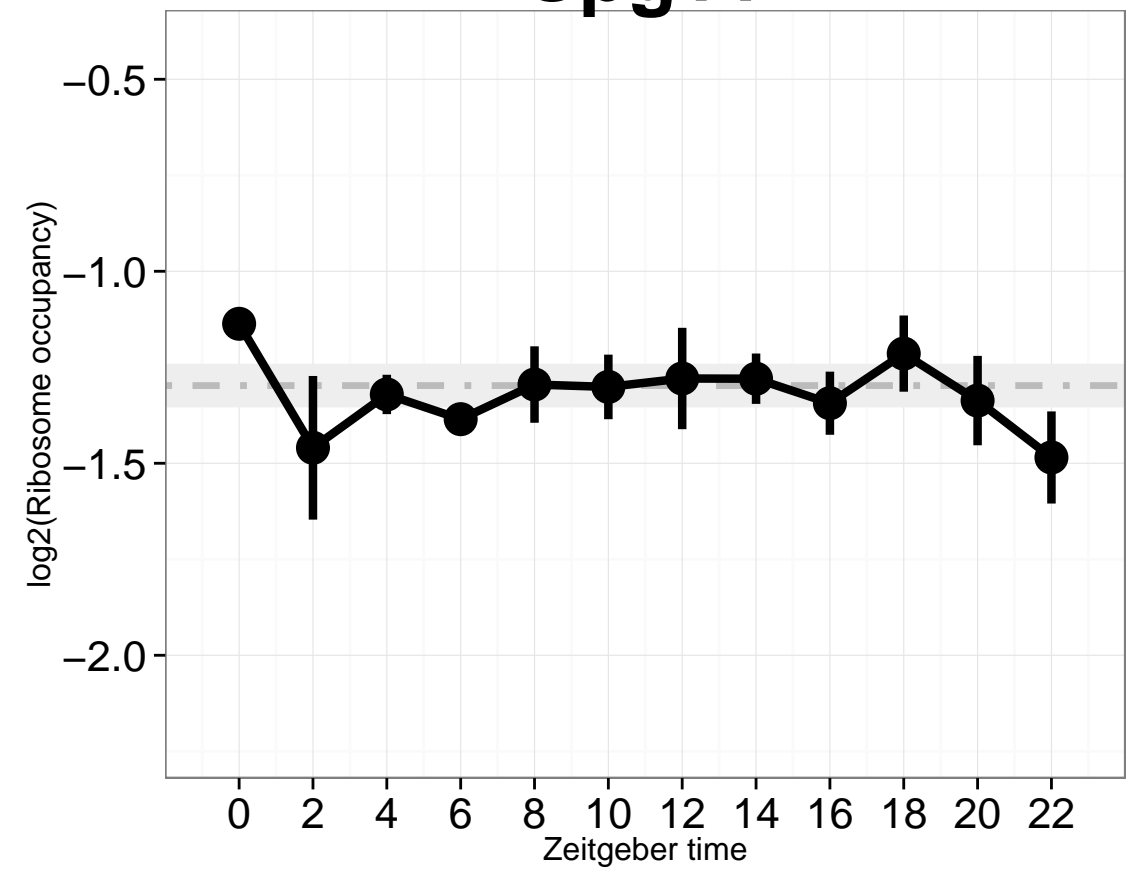

Supplement: SuppDataset_1.zip [file Spg11_set_A.pdf › Supplemental Dataset 1/A-mRNA_nonrhyth_translation_nonrhyth/Spg11_set_A.pdf]

## Spg20

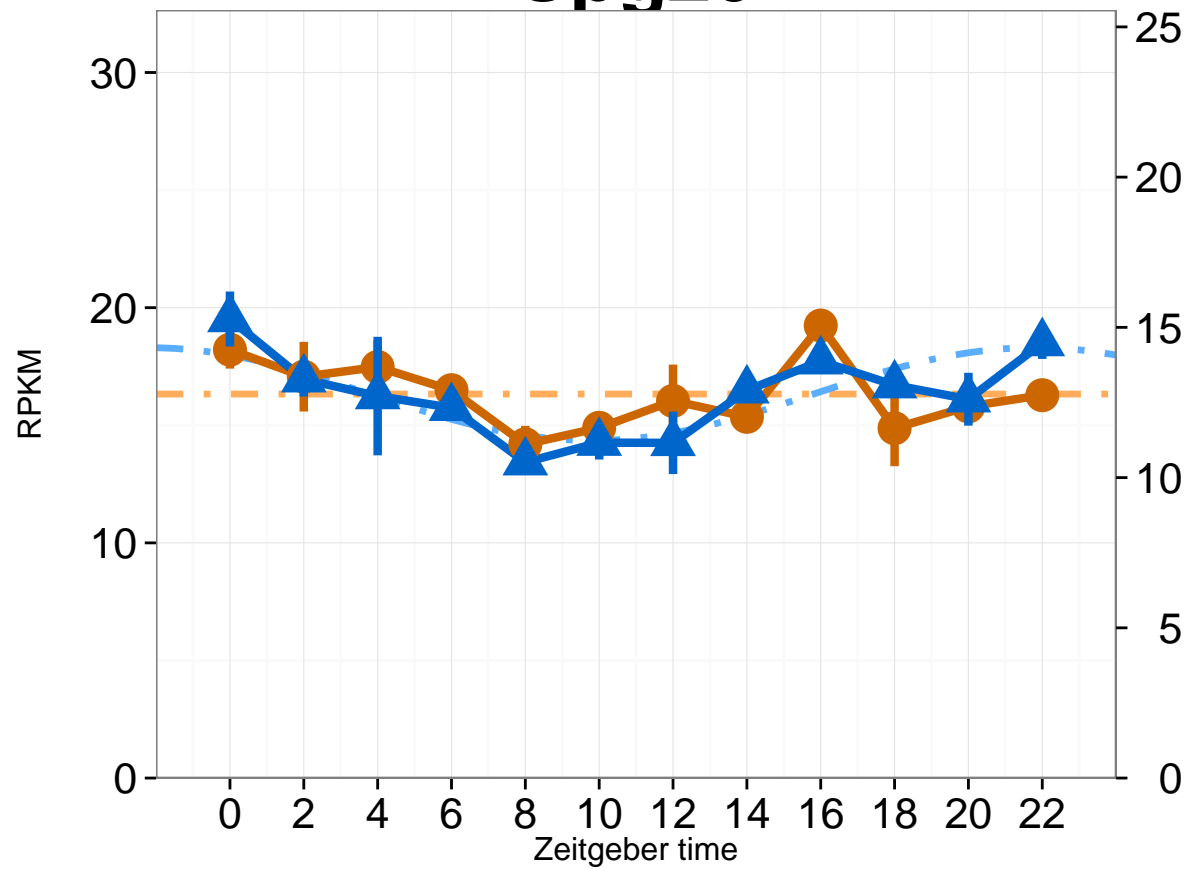

## Spg20

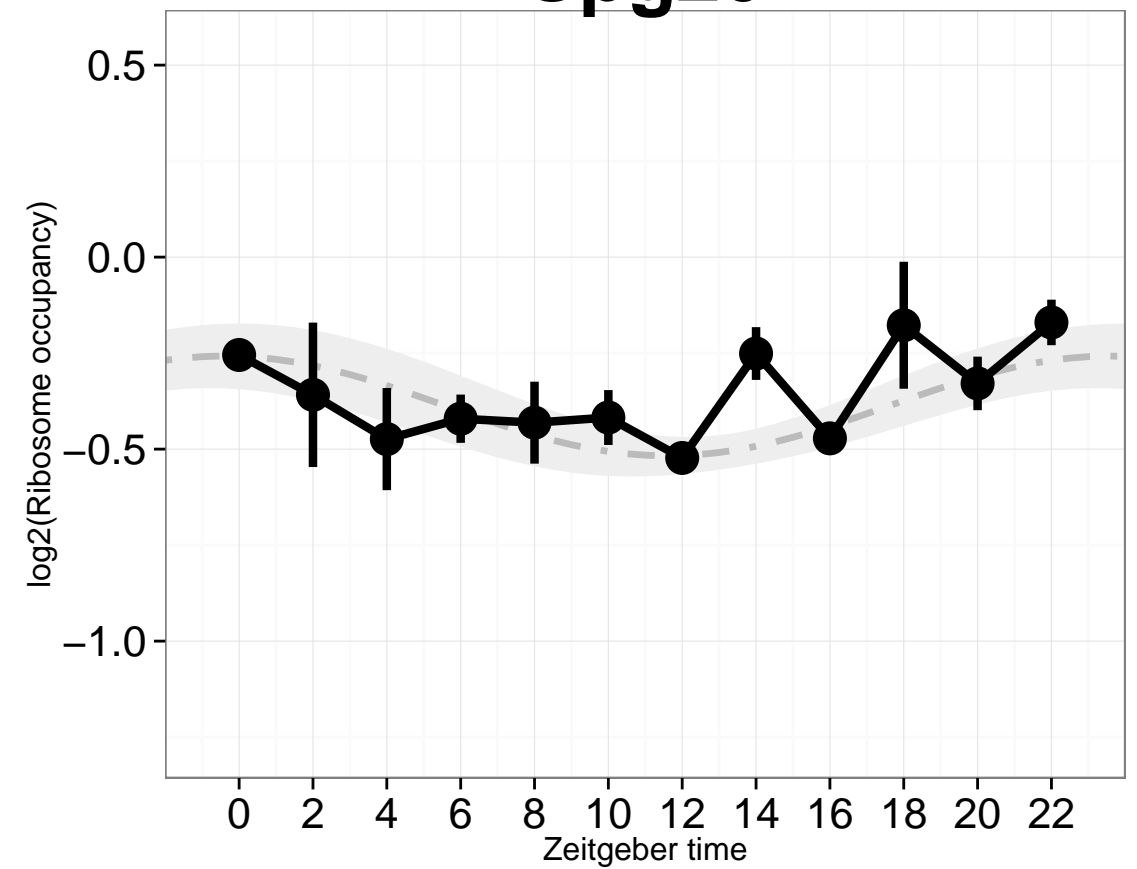

Supplement: SuppDataset_1.zip [file Spg20_set_A.pdf › Supplemental Dataset 1/A-mRNA_nonrhyth_translation_nonrhyth/Spg20_set_A.pdf]

## Spi1

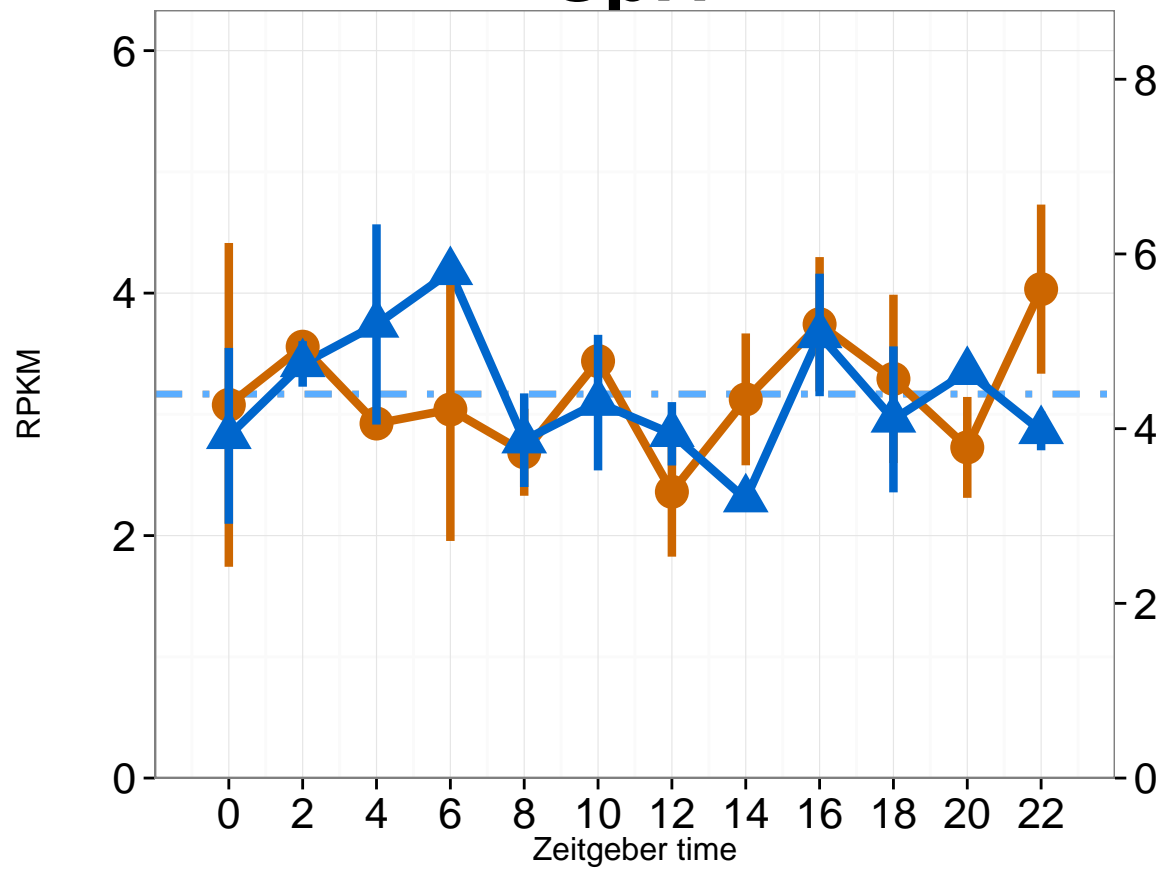

## Spi1

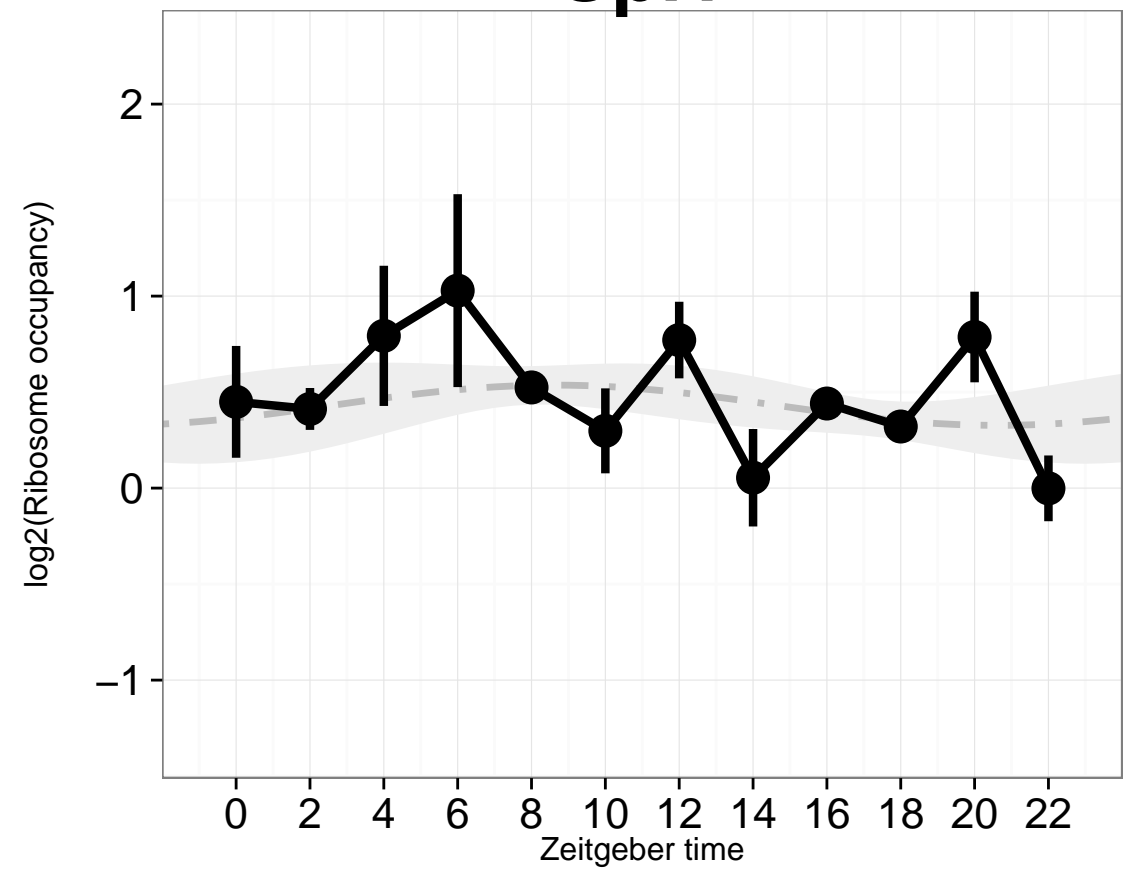

Supplement: SuppDataset_1.zip [file Spi1_set_A.pdf › Supplemental Dataset 1/A-mRNA_nonrhyth_translation_nonrhyth/Spi1_set_A.pdf]

## Spic

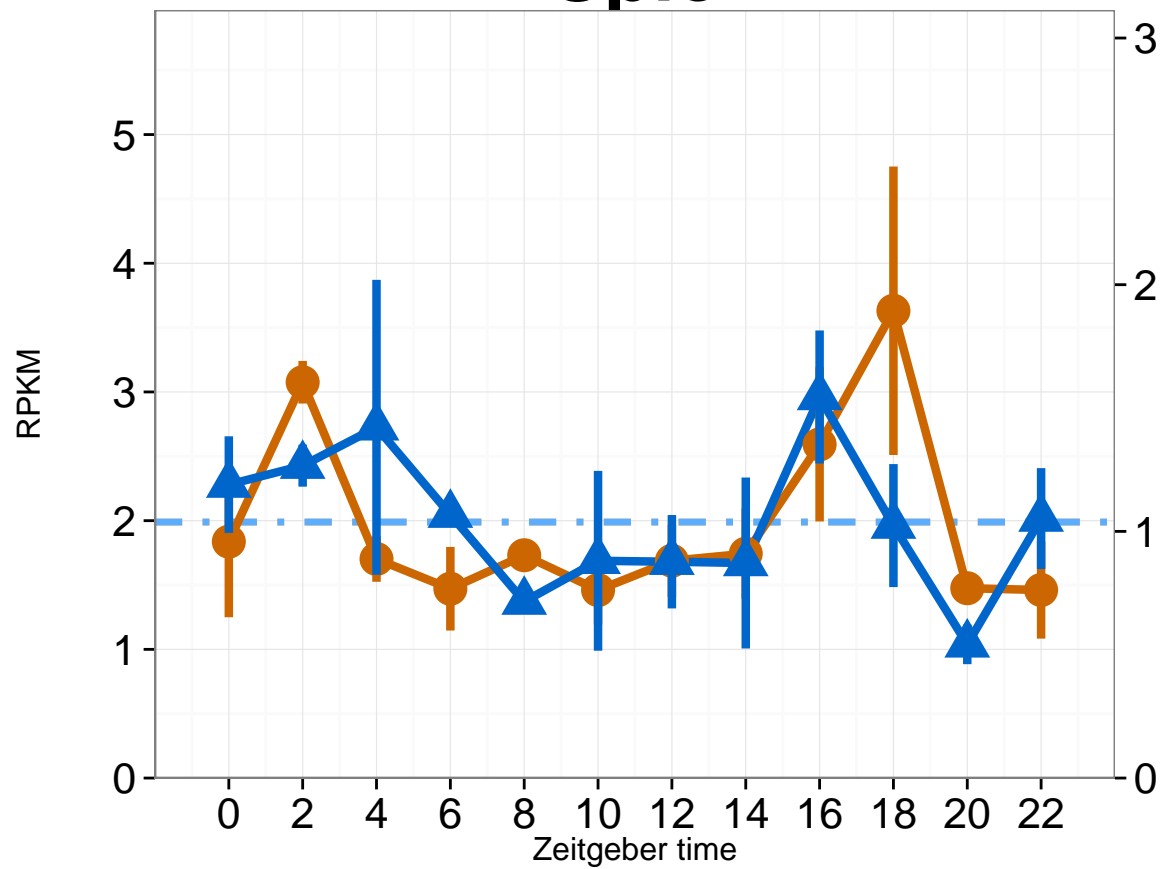

## Spic

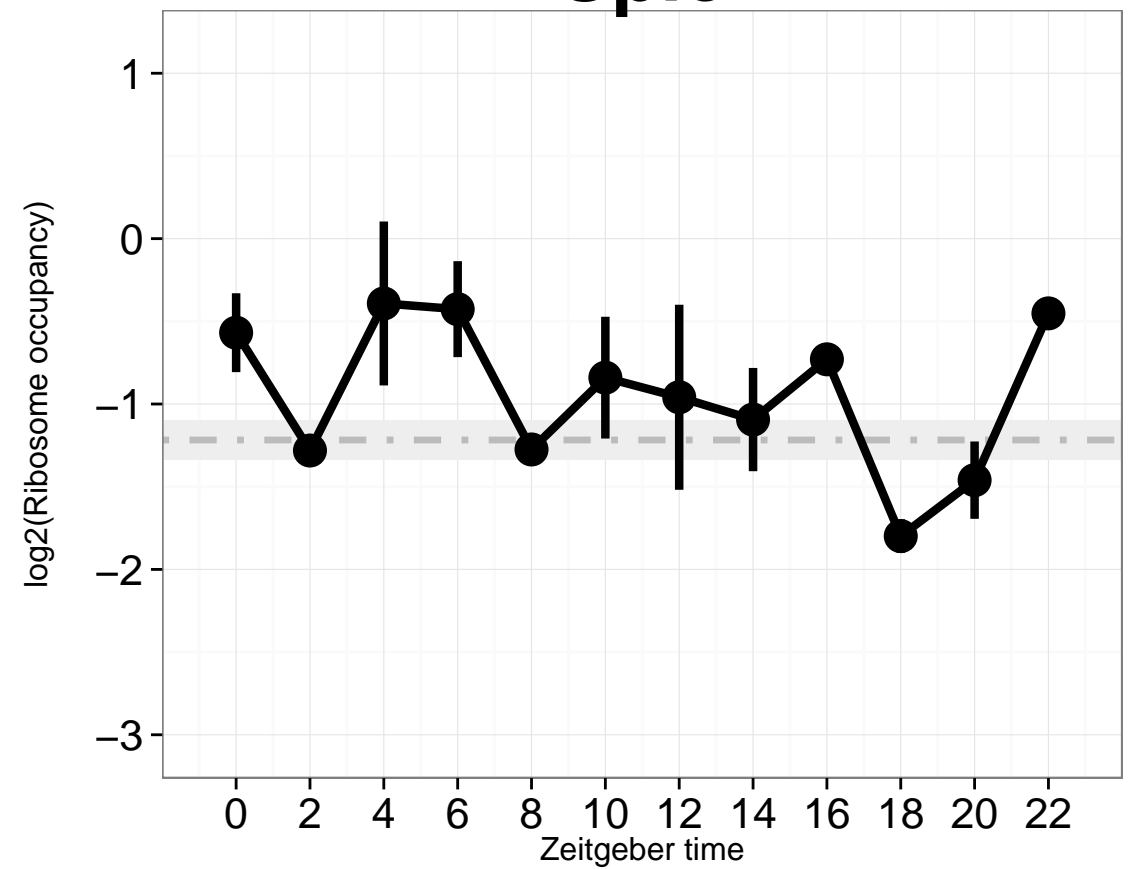

Supplement: SuppDataset_1.zip [file Spic_set_A.pdf › Supplemental Dataset 1/A-mRNA_nonrhyth_translation_nonrhyth/Spic_set_A.pdf]

## Spin1

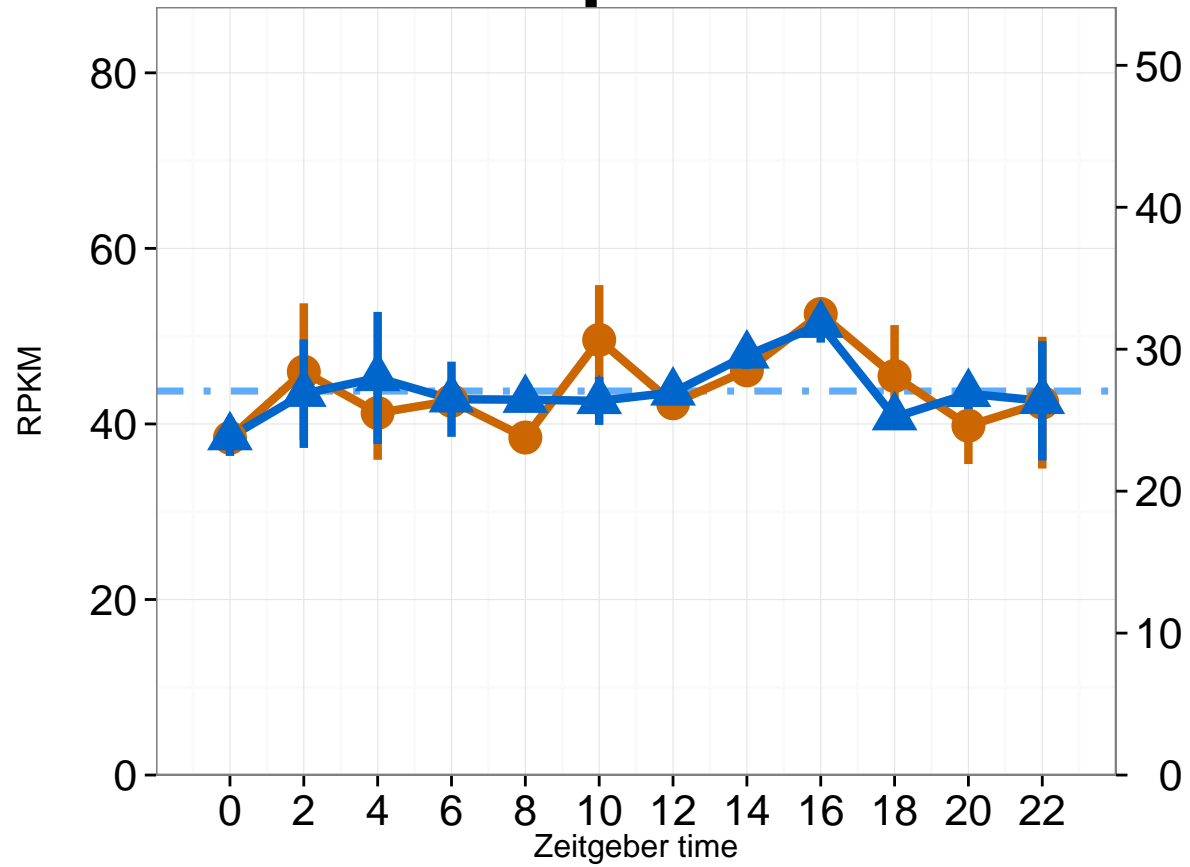

## Spin1

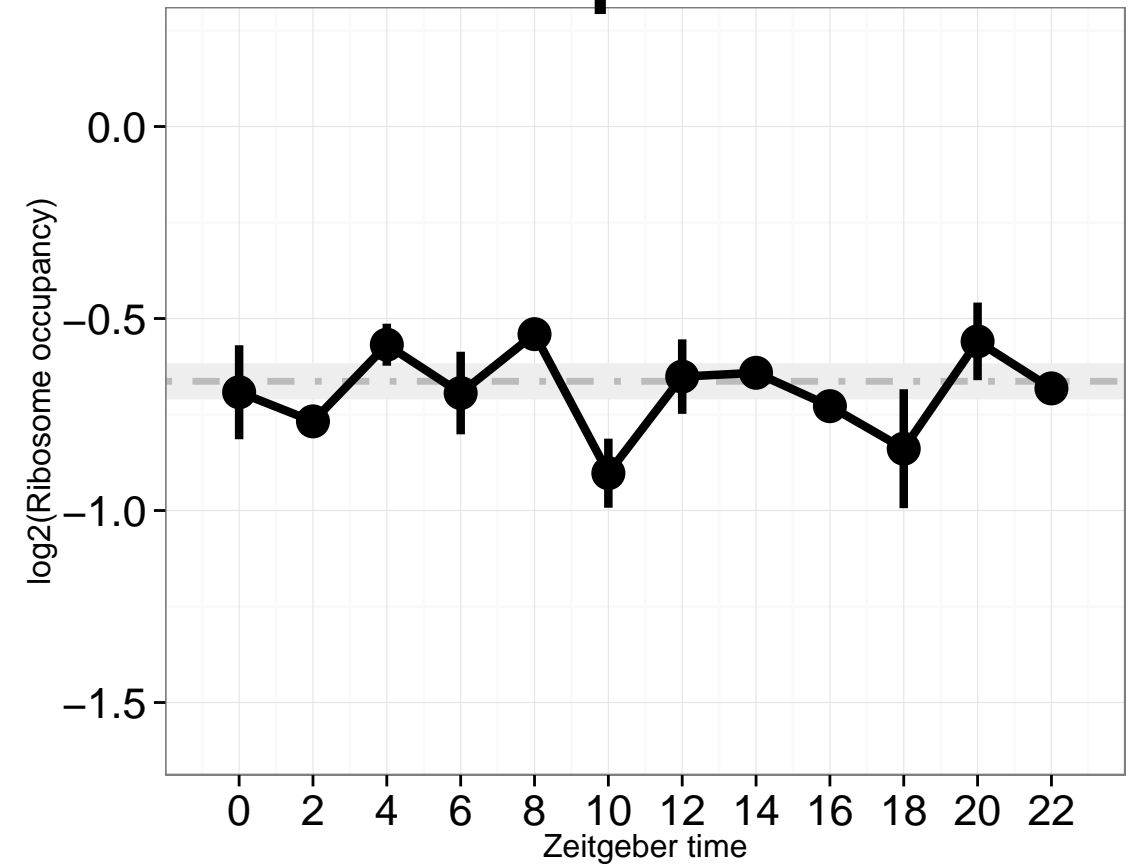

Supplement: SuppDataset_1.zip [file Spin1_set_A.pdf › Supplemental Dataset 1/A-mRNA_nonrhyth_translation_nonrhyth/Spin1_set_A.pdf]

## Spink3

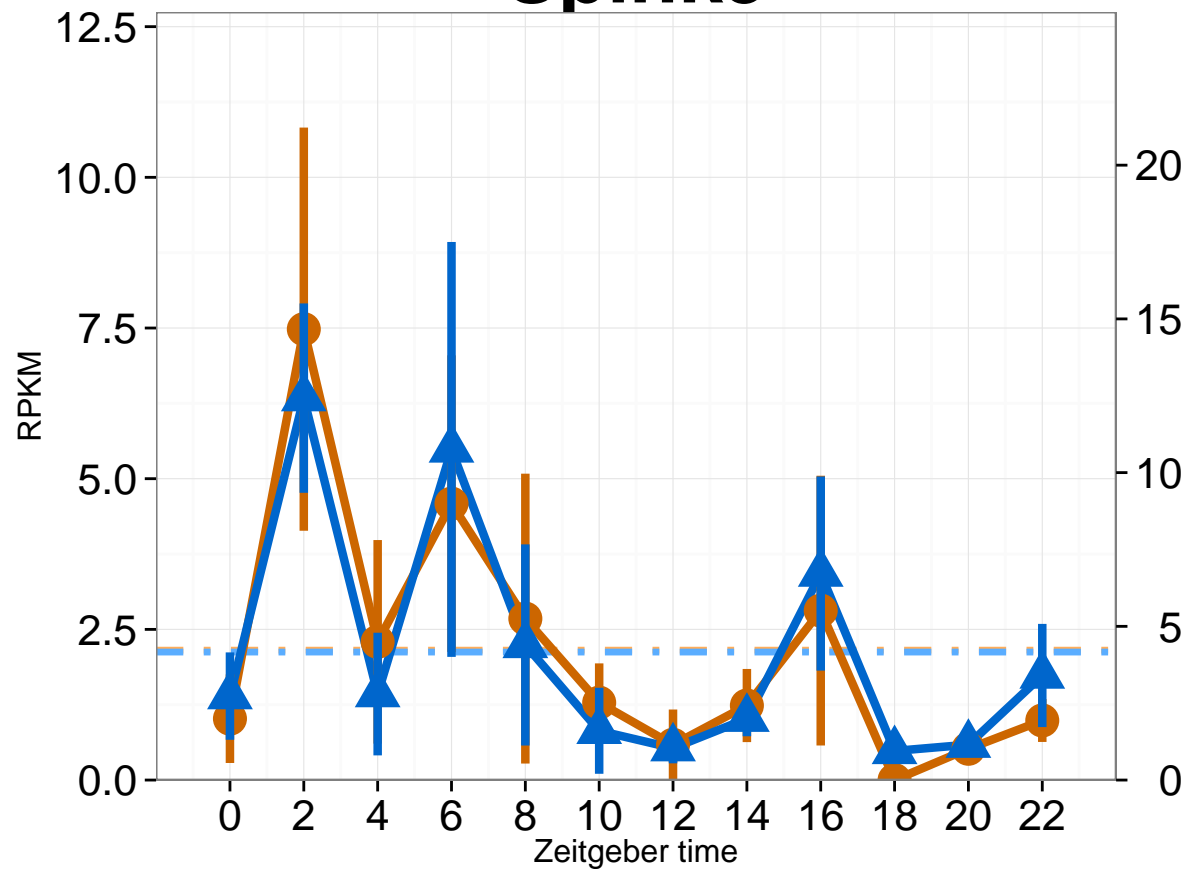

## Spink3

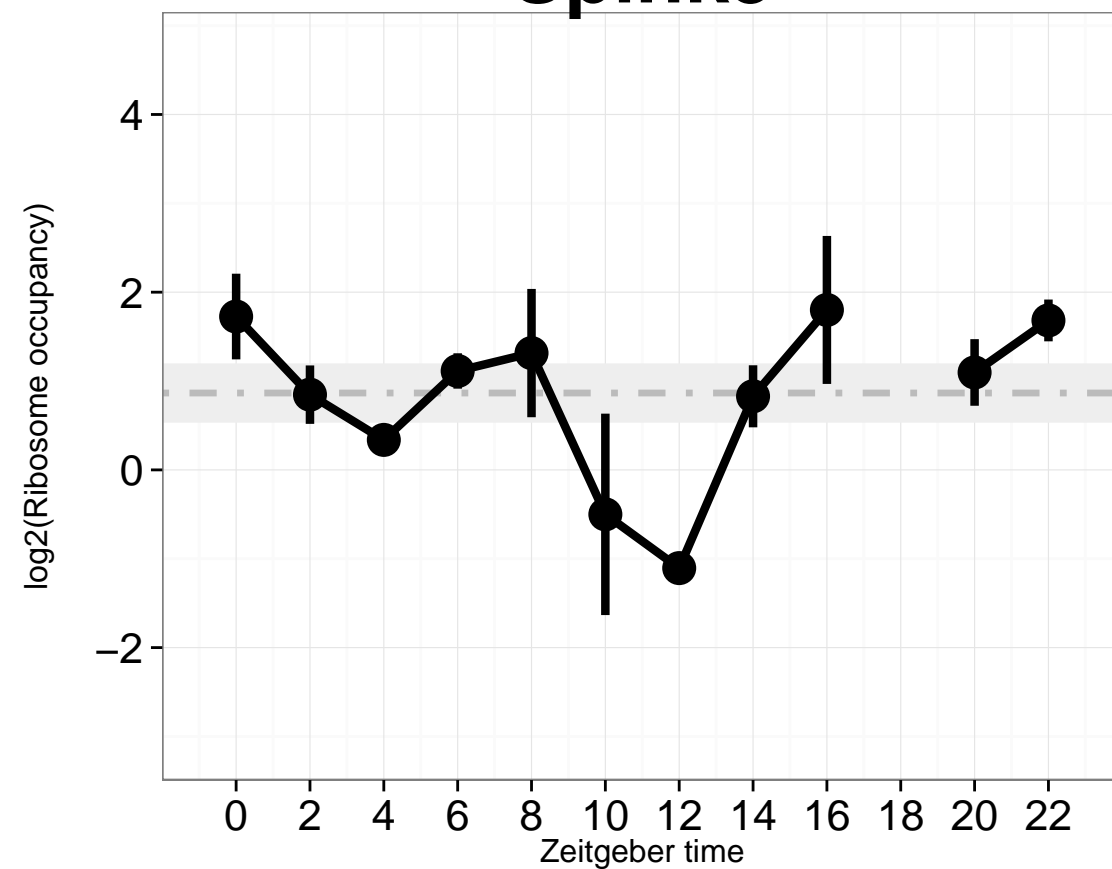

Supplement: SuppDataset_1.zip [file Spink3_set_A.pdf › Supplemental Dataset 1/A-mRNA_nonrhyth_translation_nonrhyth/Spink3_set_A.pdf]

## Spint2

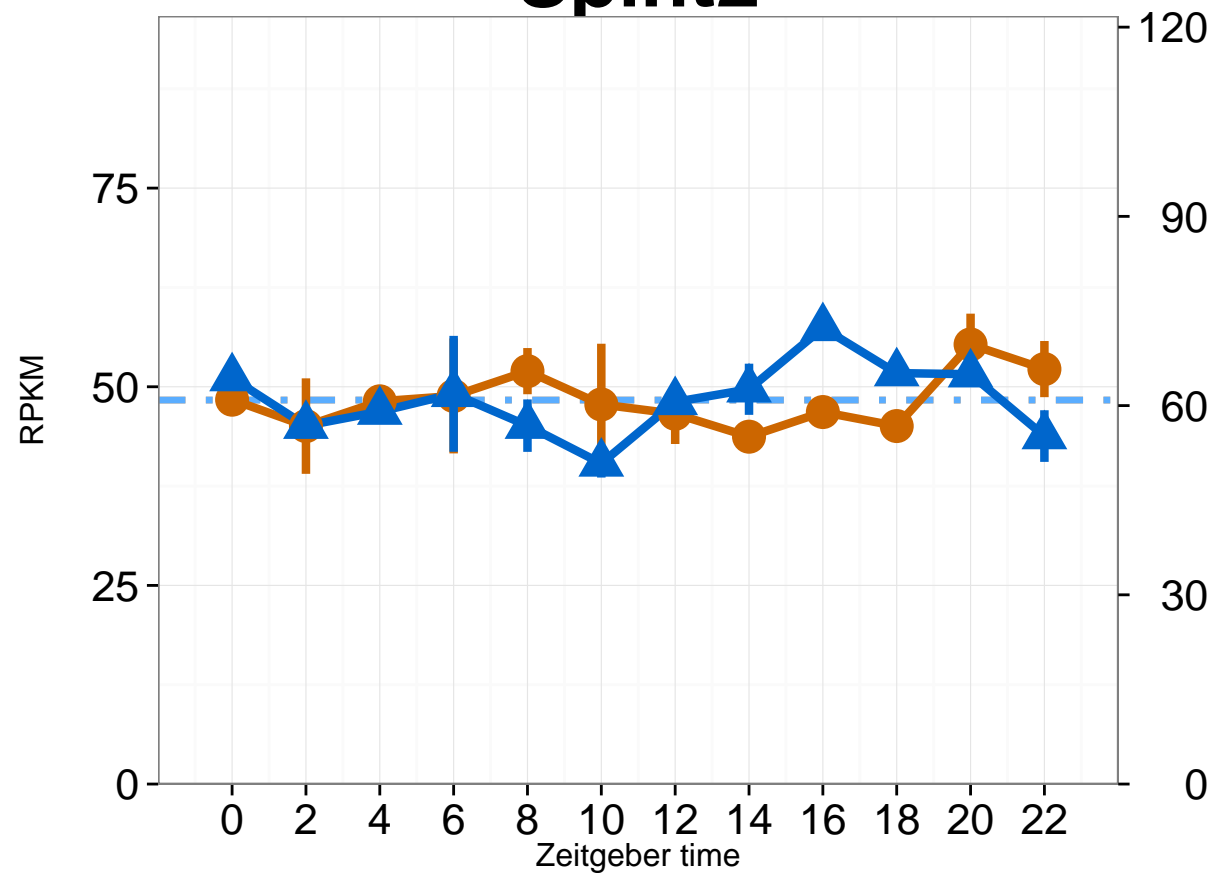

## Spint2

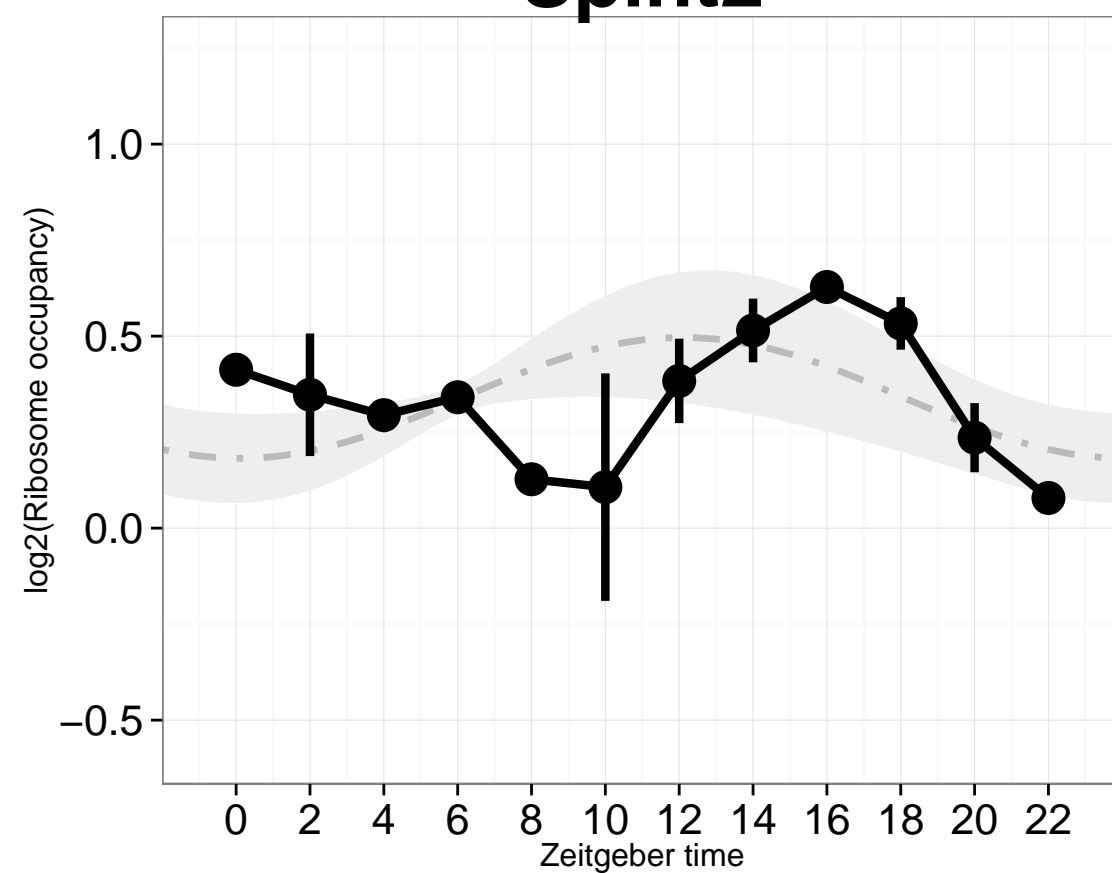

Supplement: SuppDataset_1.zip [file Spint2_set_A.pdf › Supplemental Dataset 1/A-mRNA_nonrhyth_translation_nonrhyth/Spint2_set_A.pdf]

**Spn TR**

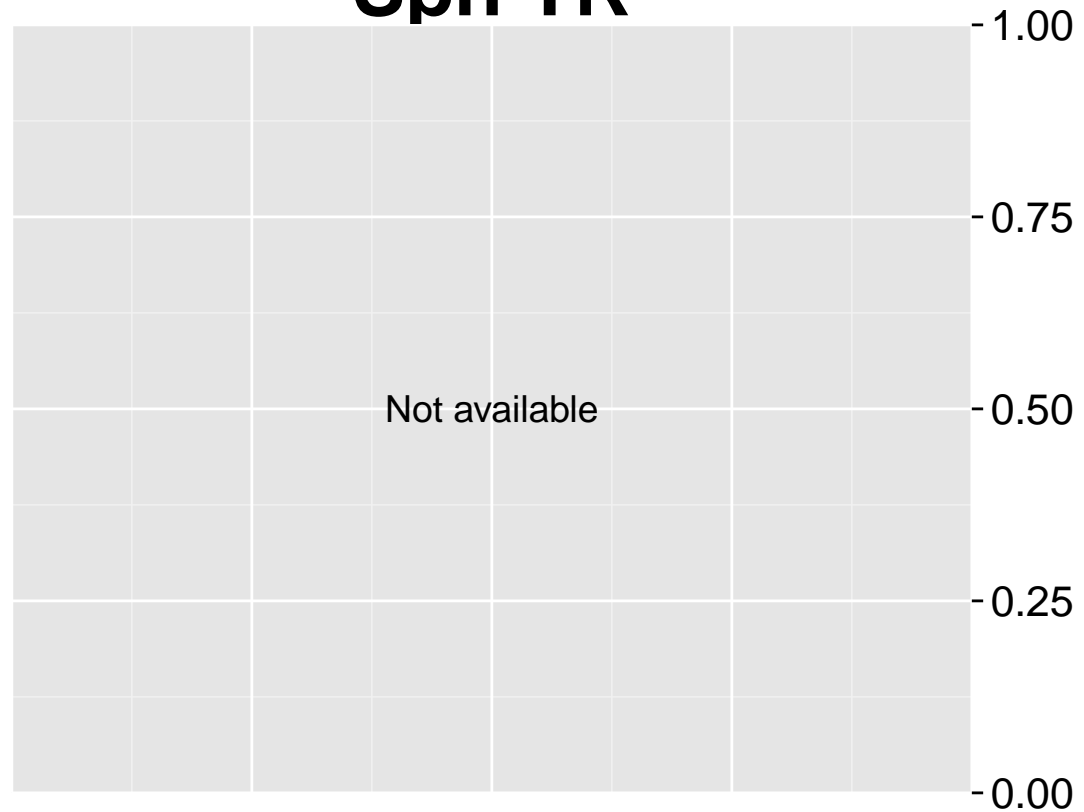

**Spn log2(Ribosome occupancy)**

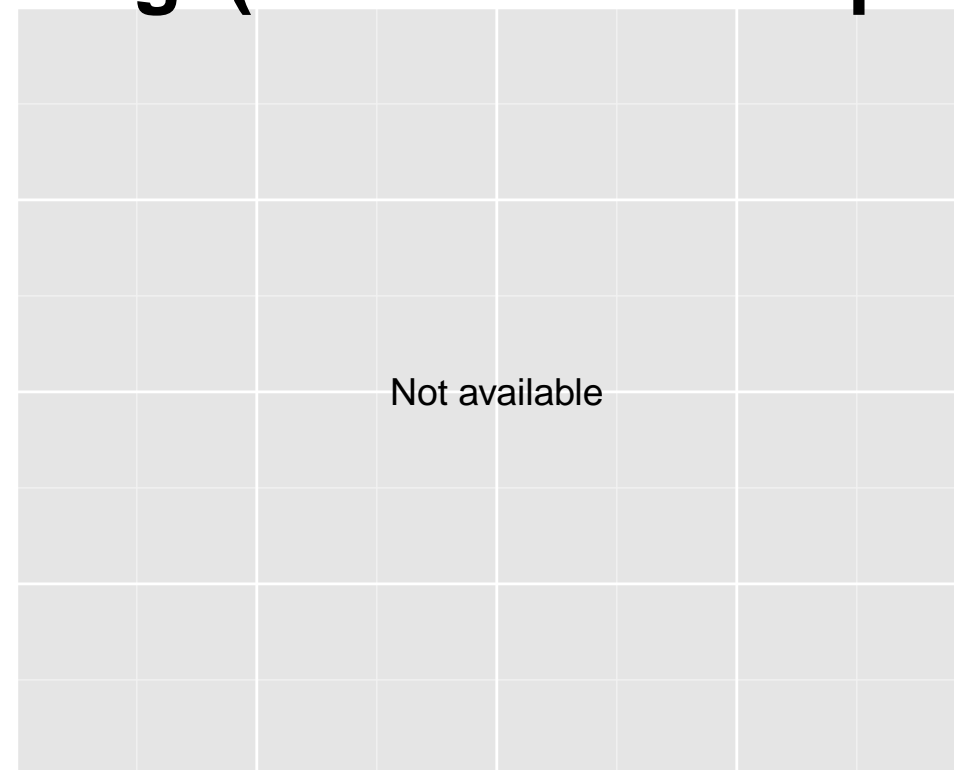

Supplement: SuppDataset_1.zip [file Spn_set_A.pdf › Supplemental Dataset 1/A-mRNA_nonrhyth_translation_nonrhyth/Spn_set_A.pdf]

# Spns1

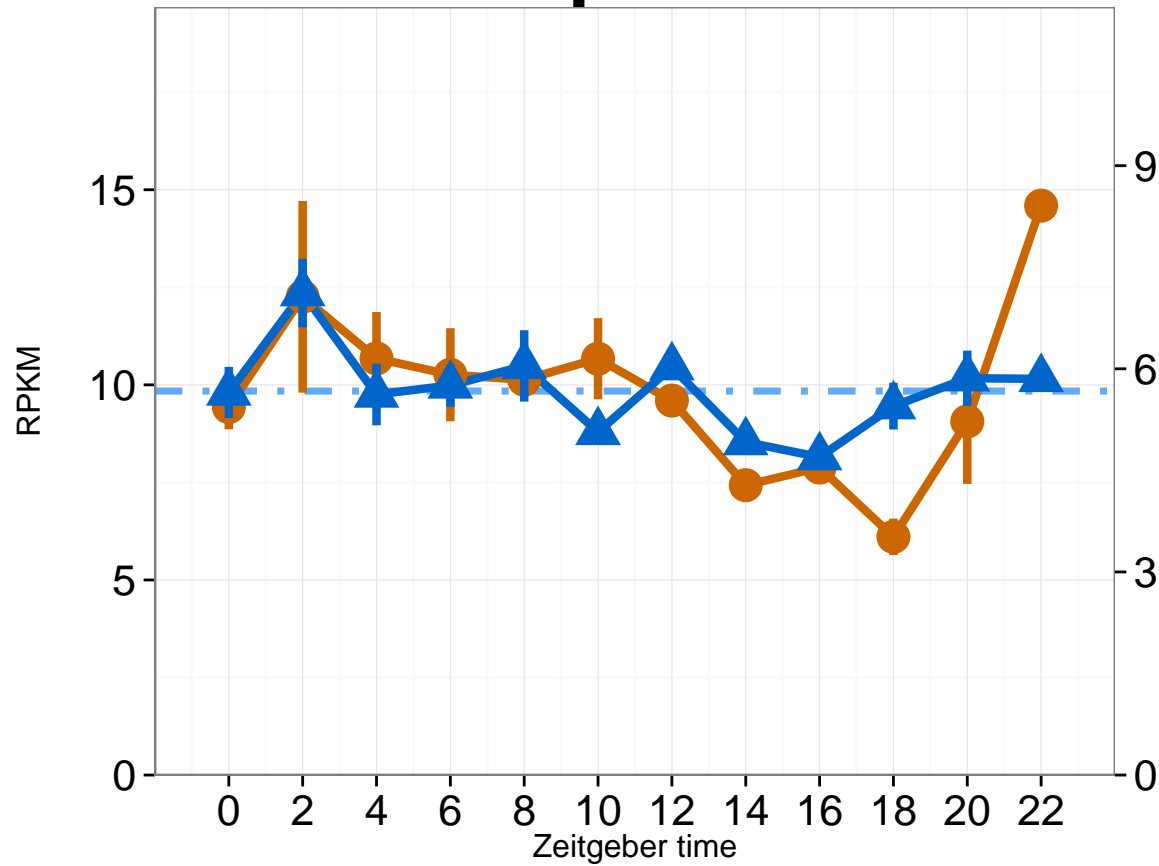

# Spns1

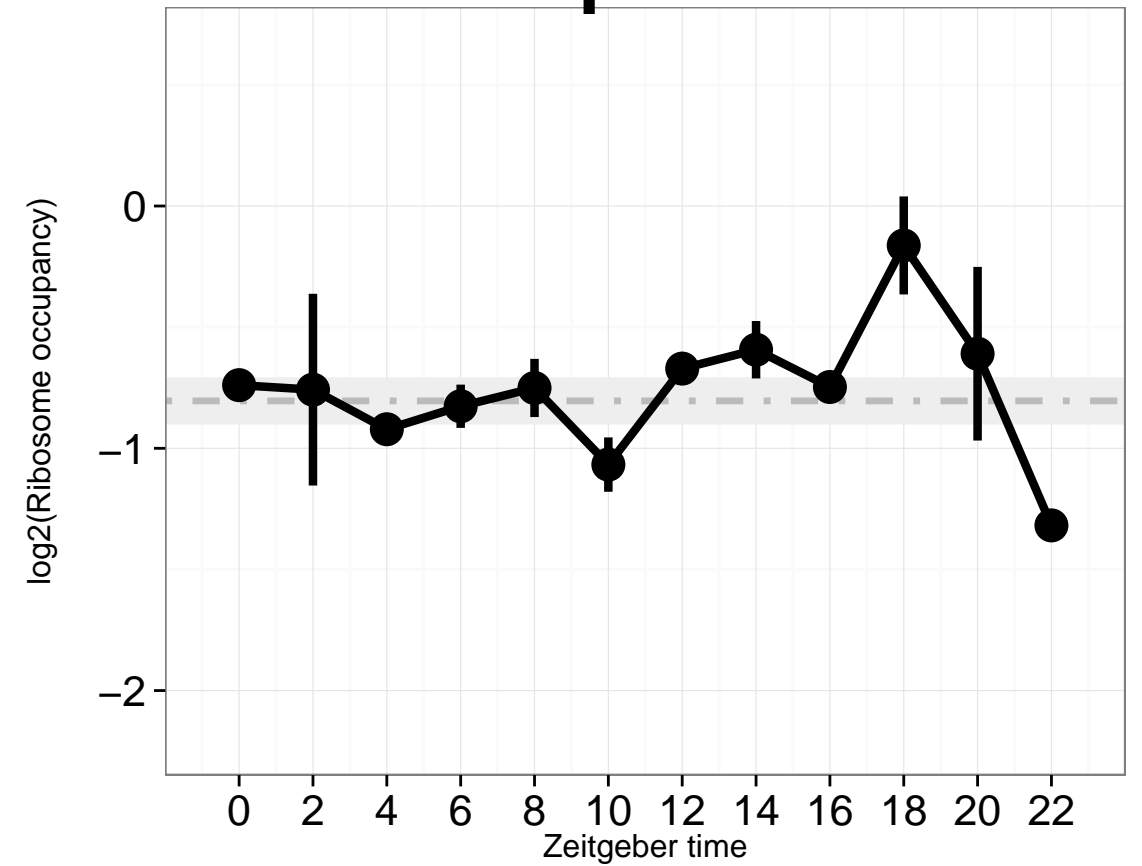

Supplement: SuppDataset_1.zip [file Spns1_set_A.pdf › Supplemental Dataset 1/A-mRNA_nonrhyth_translation_nonrhyth/Spns1_set_A.pdf]

## Spop

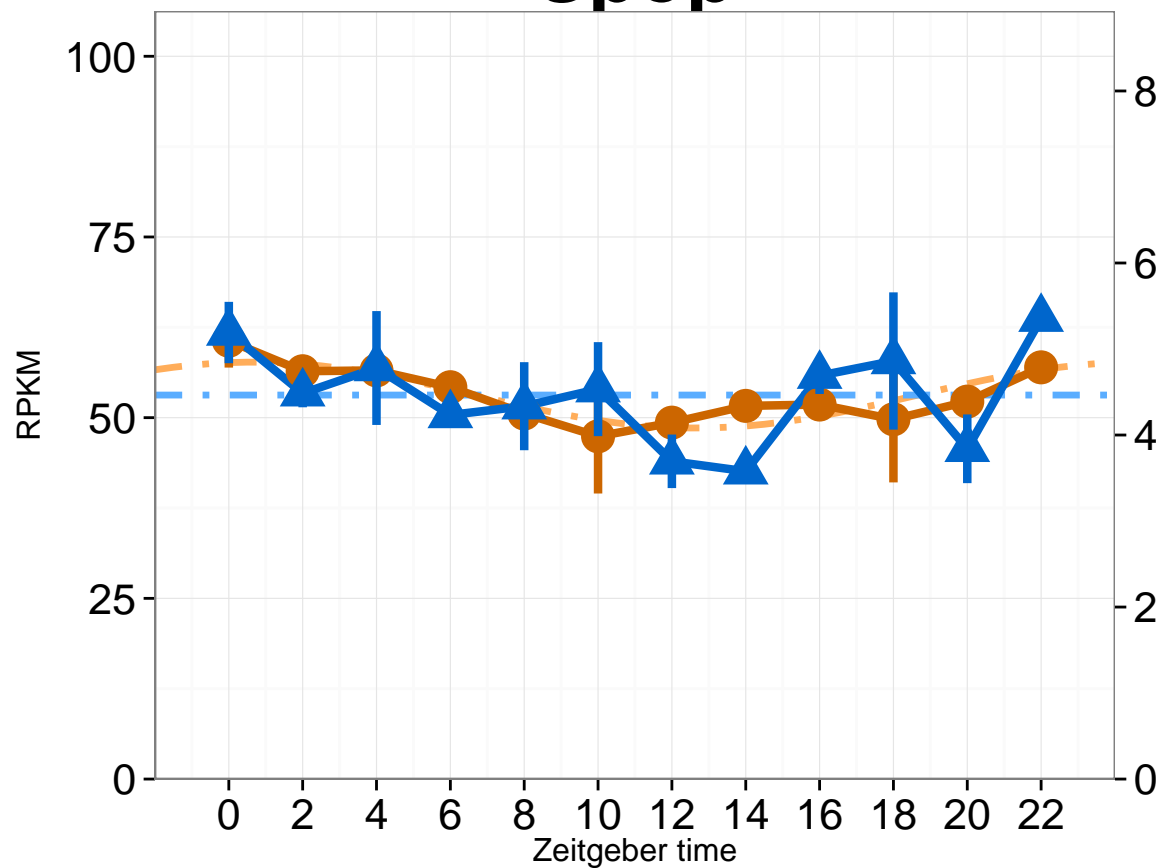

## Spop

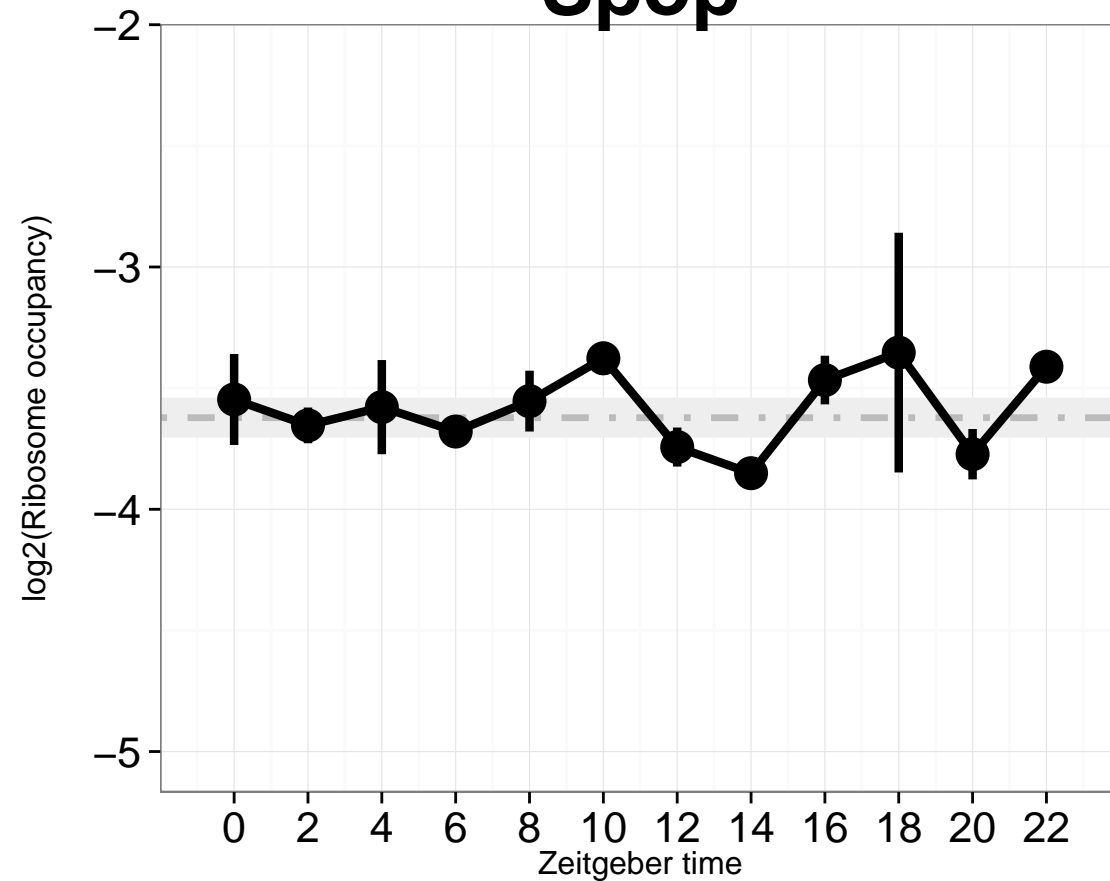

Supplement: SuppDataset_1.zip [file Spop_set_A.pdf › Supplemental Dataset 1/A-mRNA_nonrhyth_translation_nonrhyth/Spop_set_A.pdf]

# Spp1

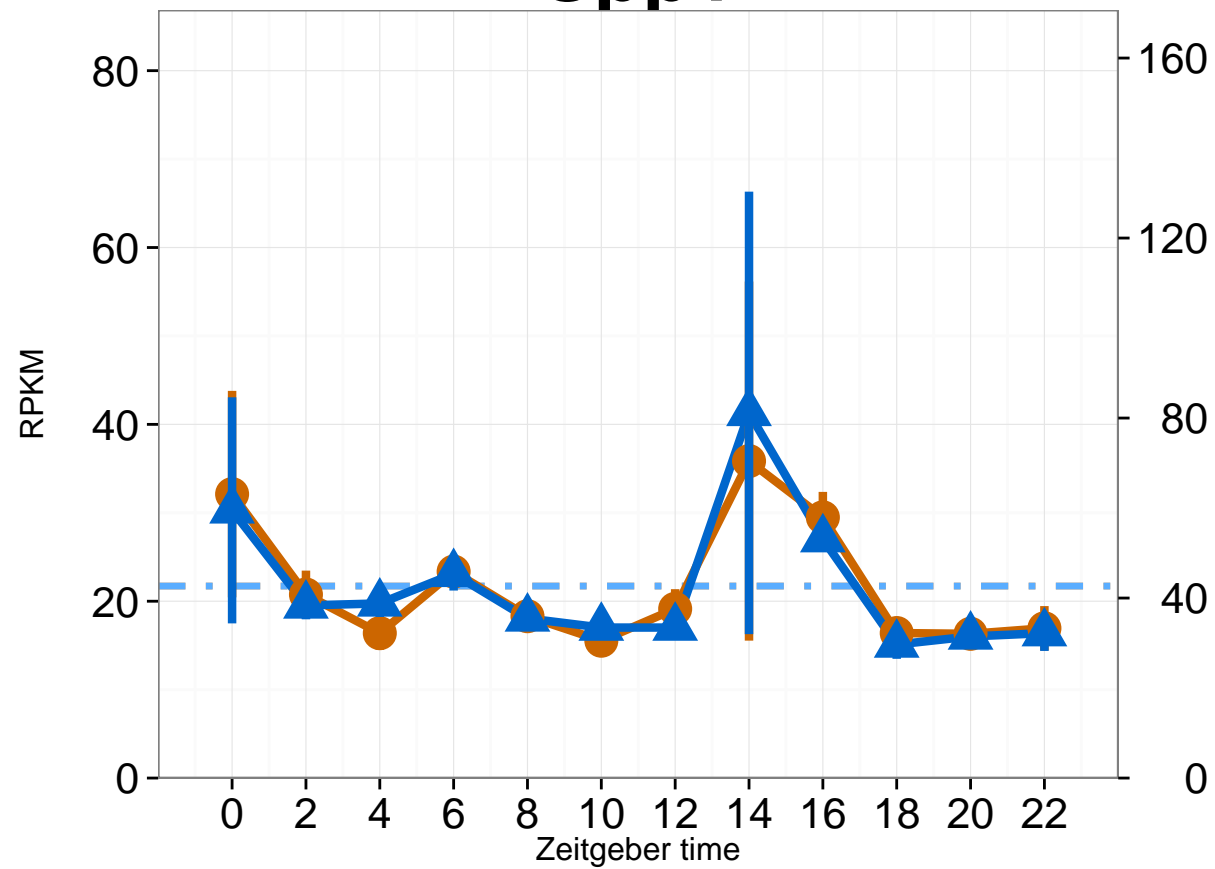

# Spp1

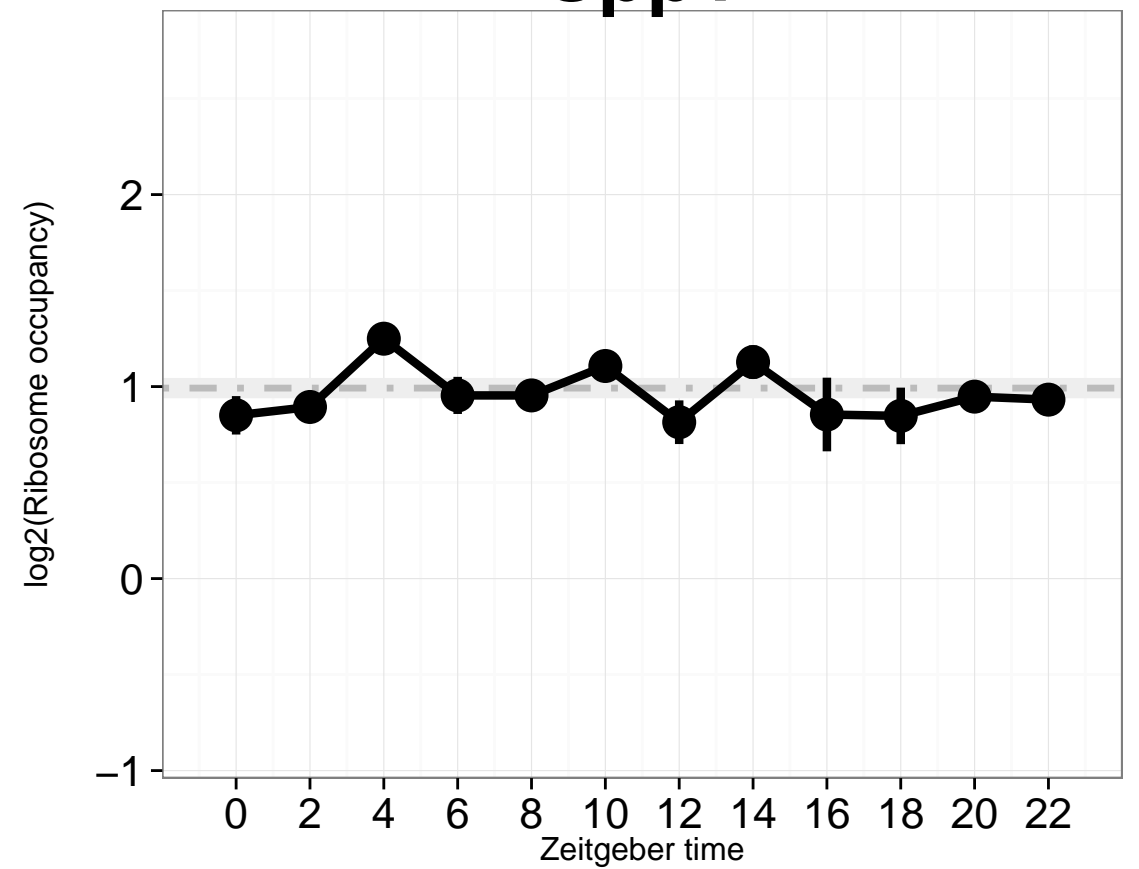

Supplement: SuppDataset_1.zip [file Spp1_set_A.pdf › Supplemental Dataset 1/A-mRNA_nonrhyth_translation_nonrhyth/Spp1_set_A.pdf]

## Spp2

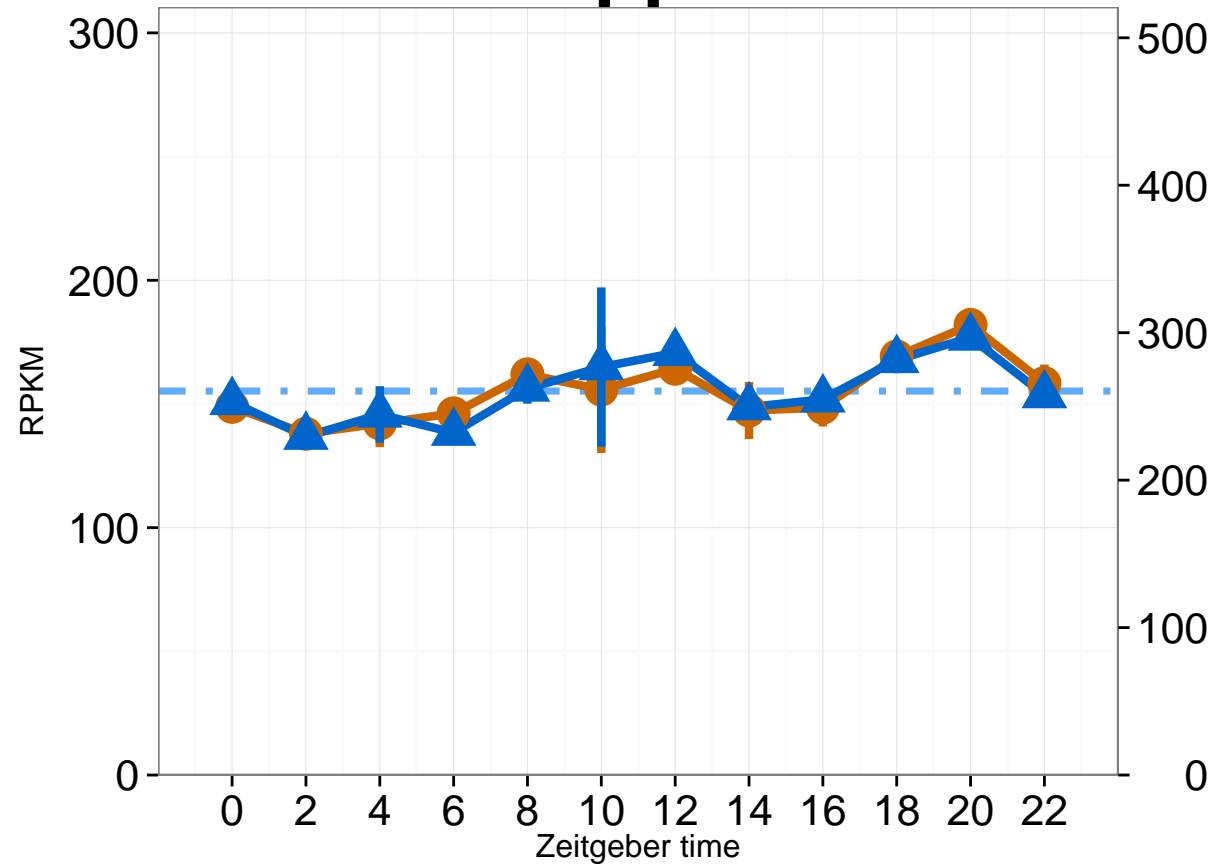

## Spp2

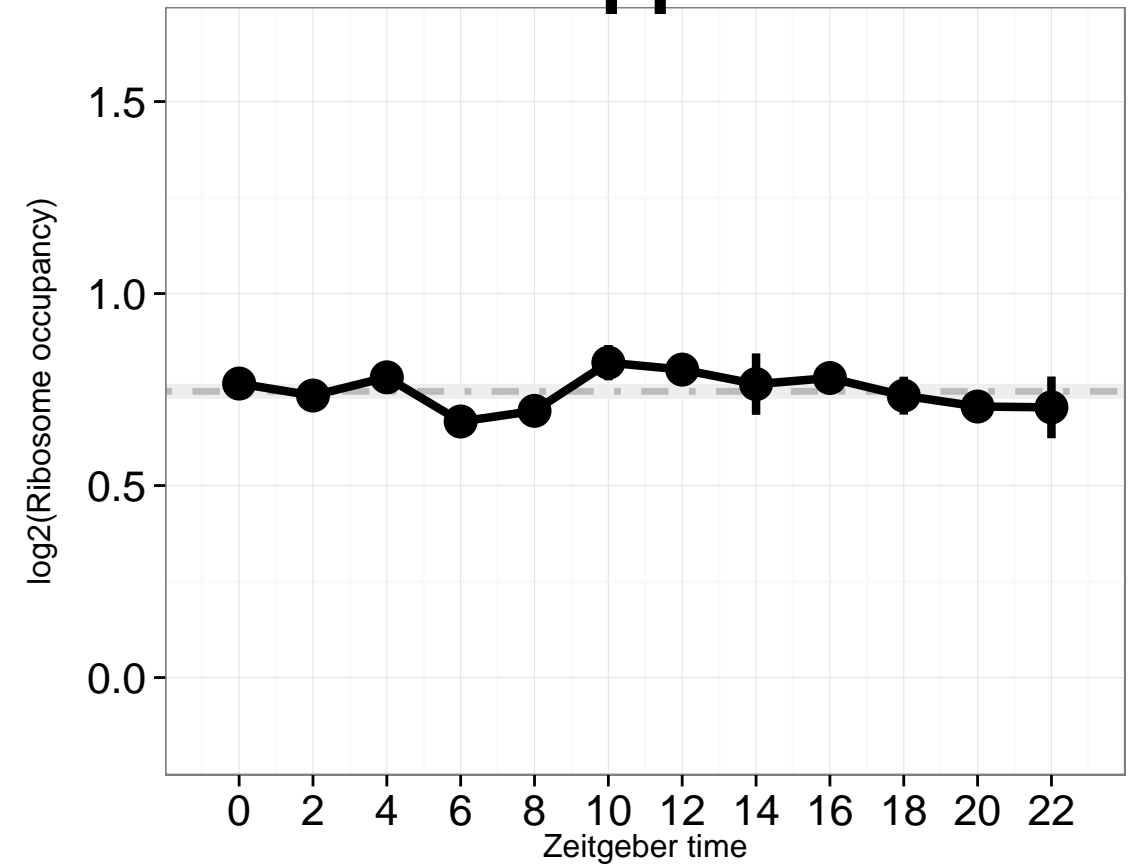

Supplement: SuppDataset_1.zip [file Spp2_set_A.pdf › Supplemental Dataset 1/A-mRNA_nonrhyth_translation_nonrhyth/Spp2_set_A.pdf]

# Sppl2a

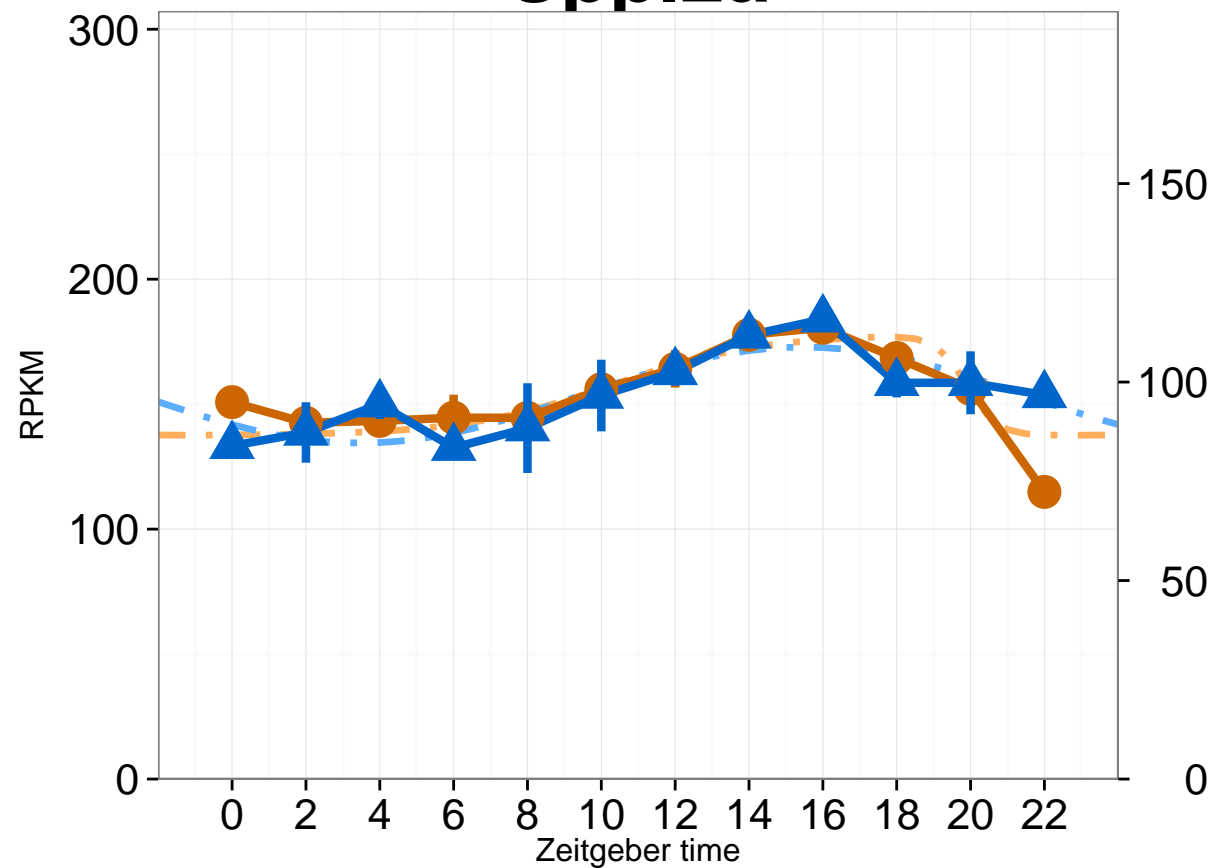

# Sppl2a

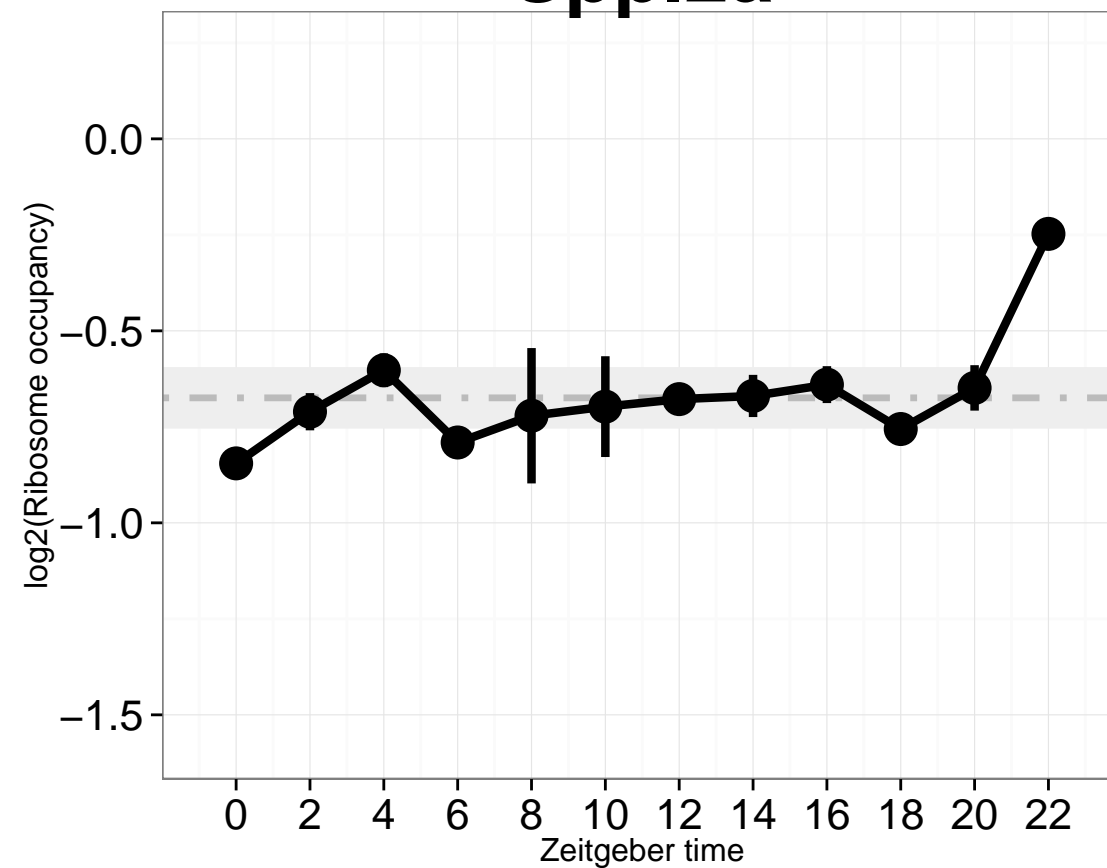

Supplement: SuppDataset_1.zip [file Sppl2a_set_A.pdf › Supplemental Dataset 1/A-mRNA_nonrhyth_translation_nonrhyth/Sppl2a_set_A.pdf]

# Sppl3

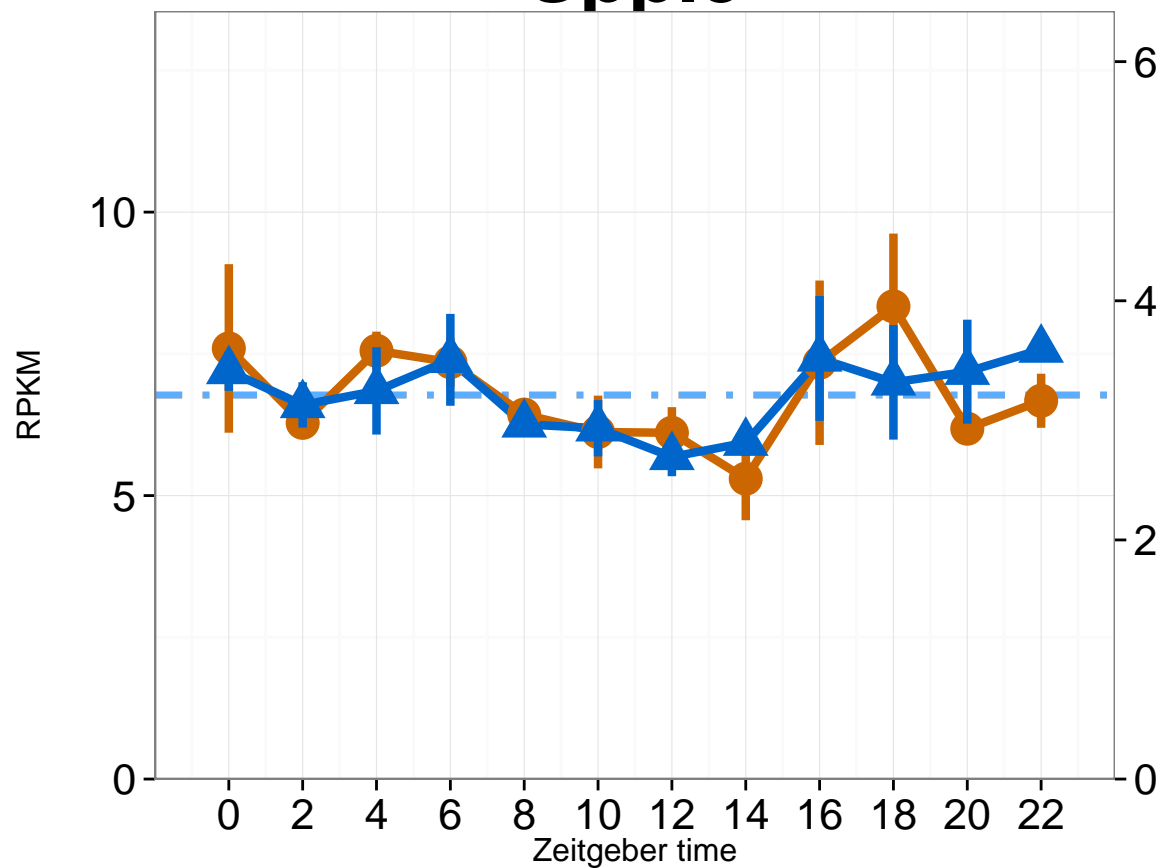

# Sppl3

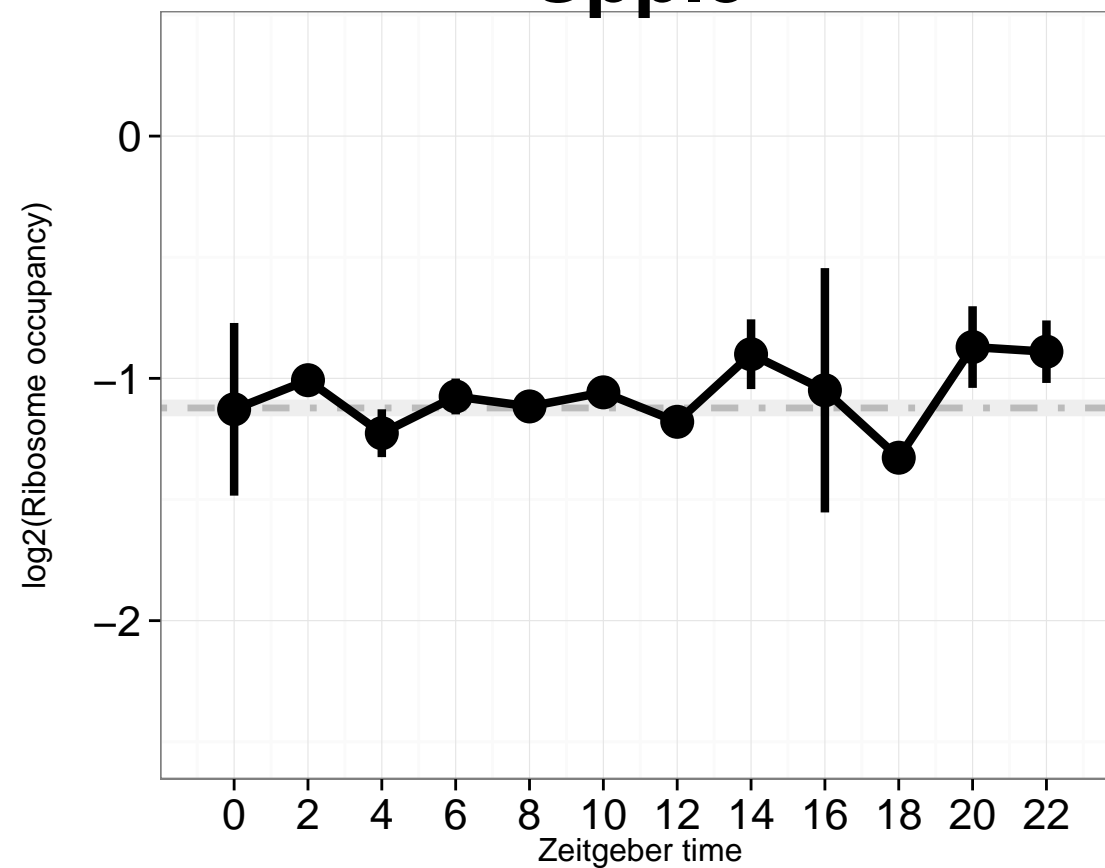

Supplement: SuppDataset_1.zip [file Sppl3_set_A.pdf › Supplemental Dataset 1/A-mRNA_nonrhyth_translation_nonrhyth/Sppl3_set_A.pdf]

**Spr**

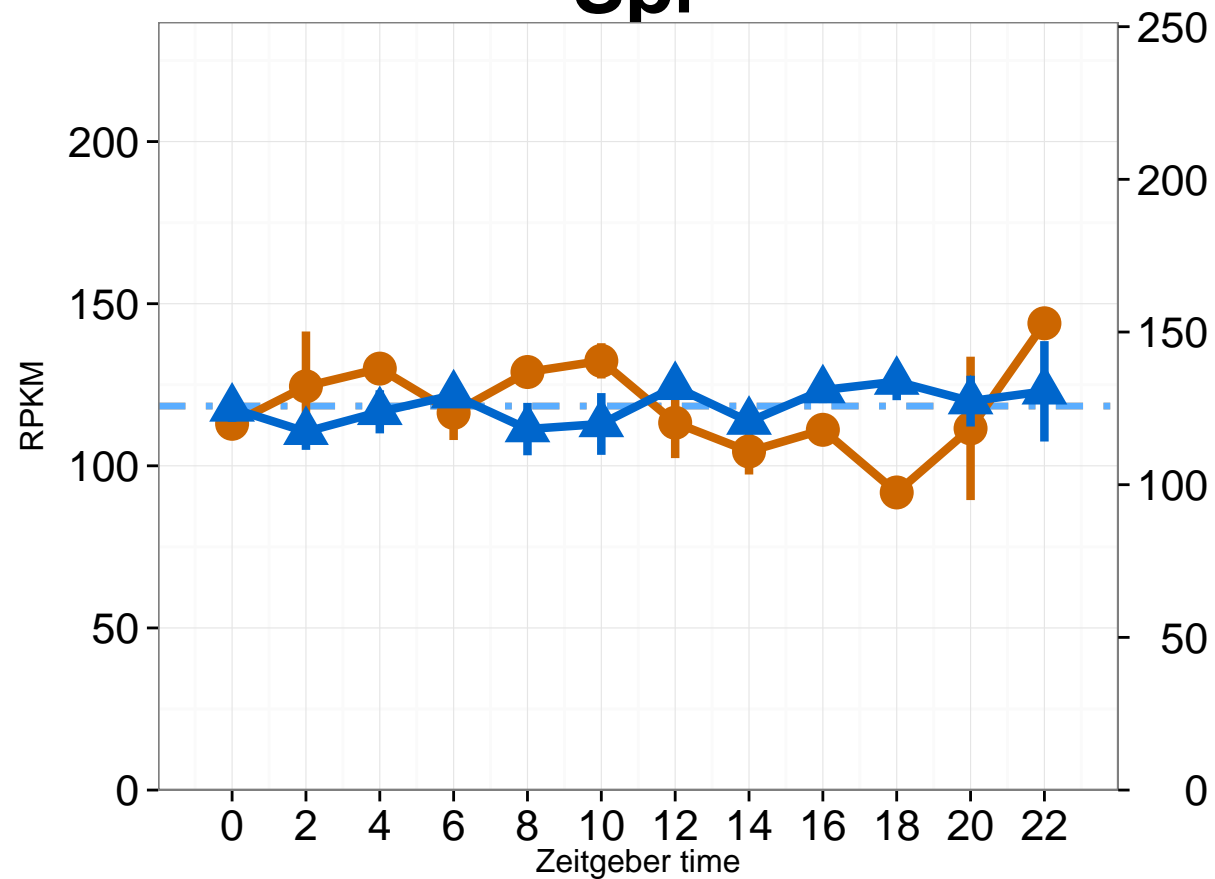

**Spr**

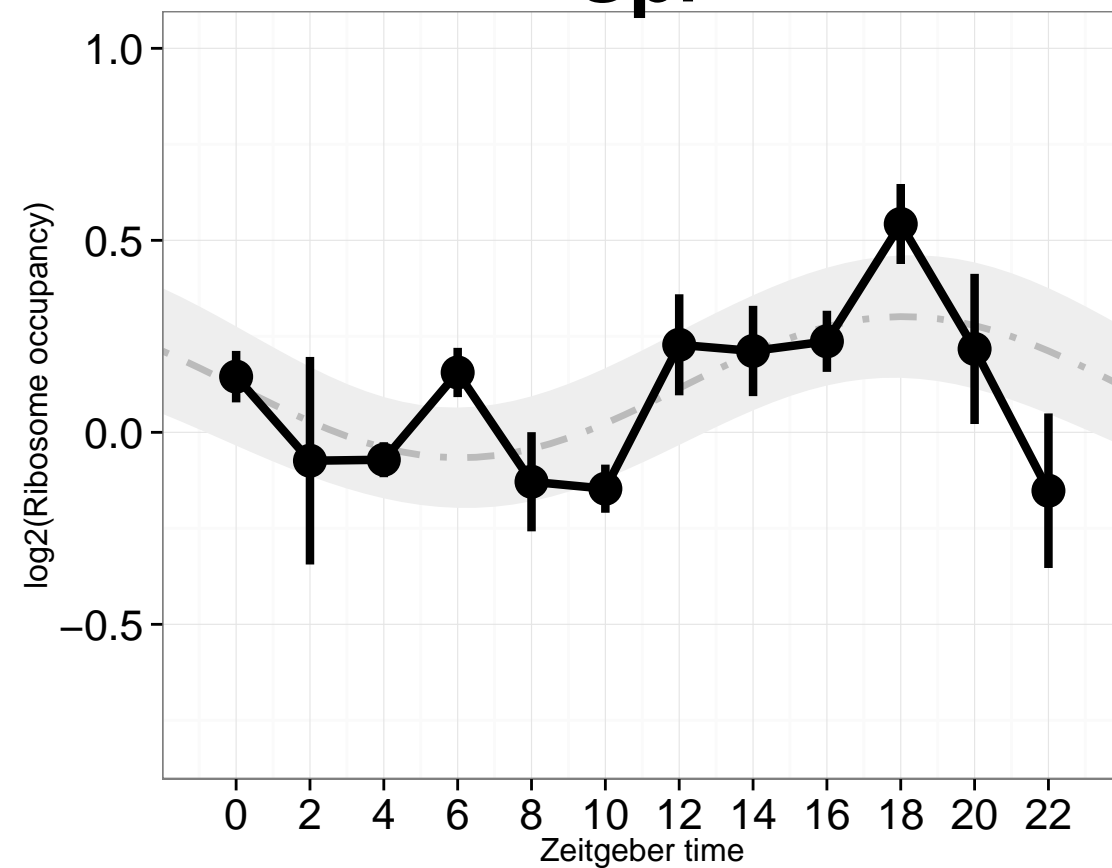

Supplement: SuppDataset_1.zip [file Spr_set_A.pdf › Supplemental Dataset 1/A-mRNA_nonrhyth_translation_nonrhyth/Spr_set_A.pdf]

# Spred2

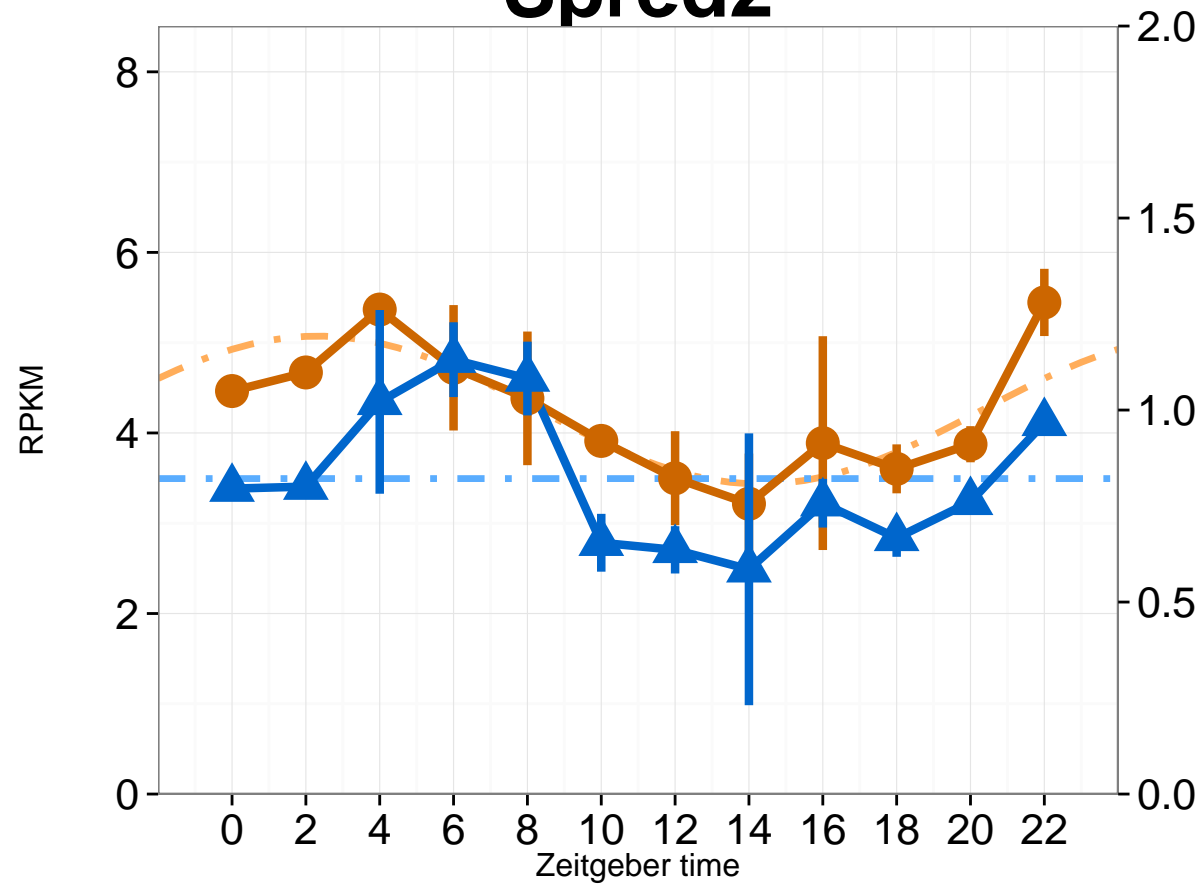

# Spred2

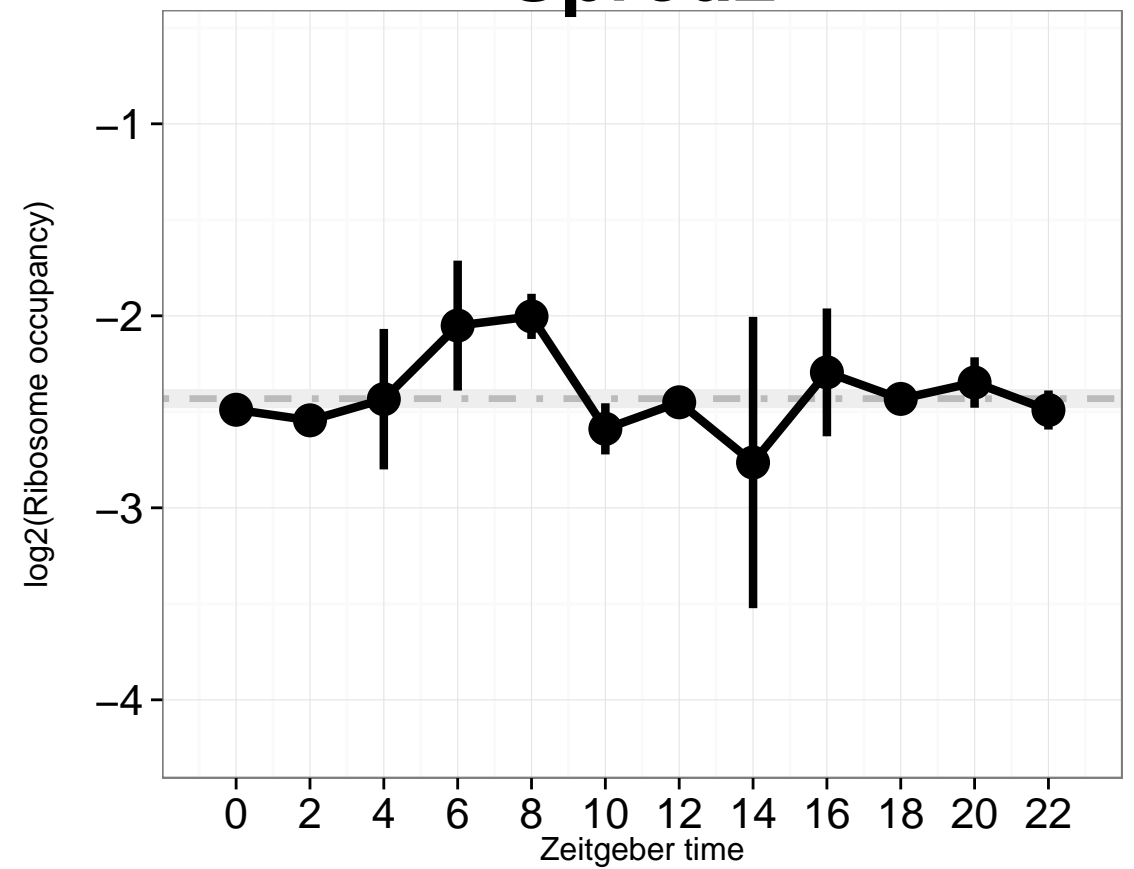

Supplement: SuppDataset_1.zip [file Spred2_set_A.pdf › Supplemental Dataset 1/A-mRNA_nonrhyth_translation_nonrhyth/Spred2_set_A.pdf]

## Sprtn

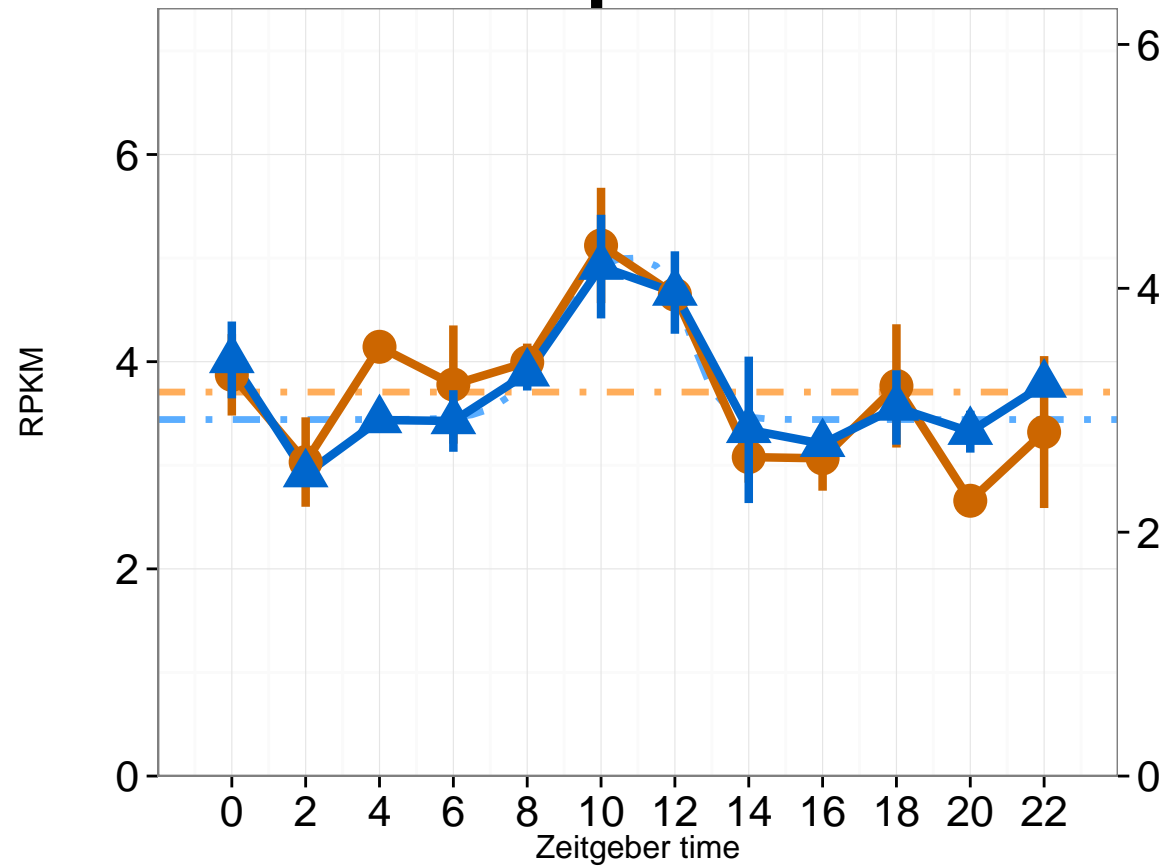

## Sprtn

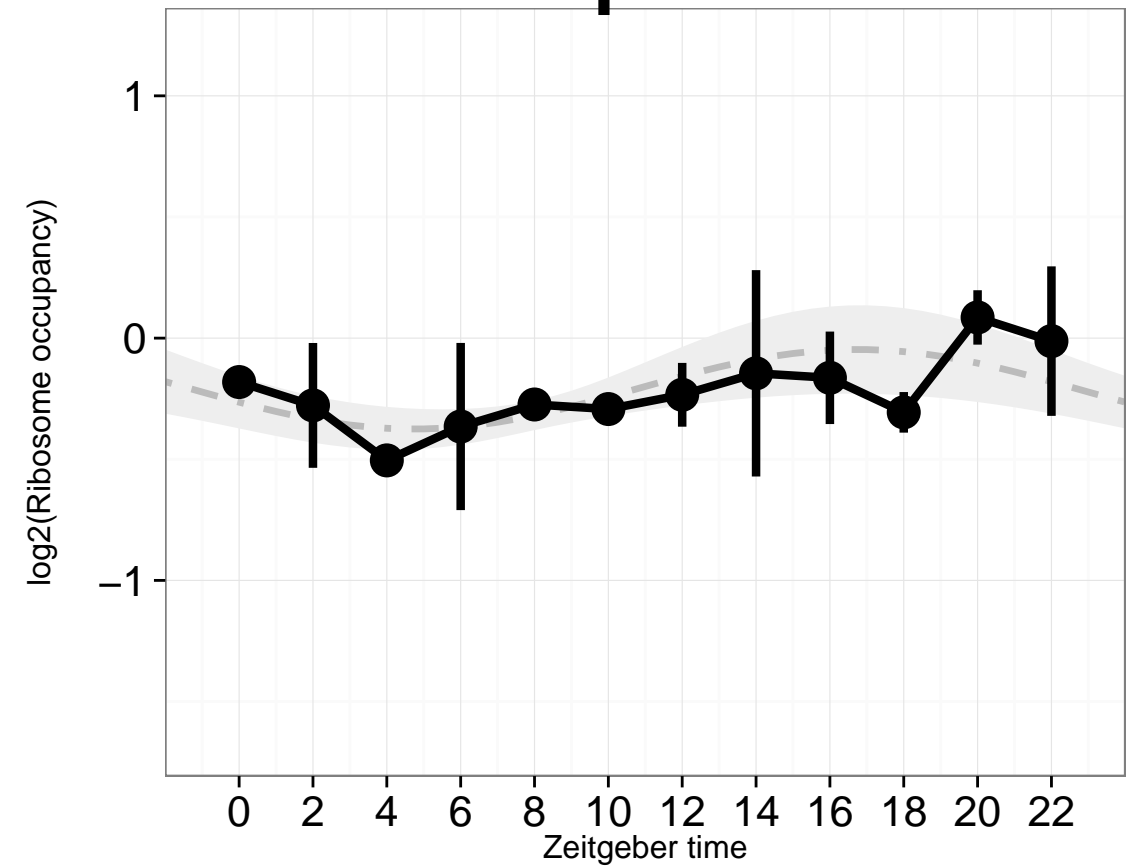

Supplement: SuppDataset_1.zip [file Sprtn_set_A.pdf › Supplemental Dataset 1/A-mRNA_nonrhyth_translation_nonrhyth/Sprtn_set_A.pdf]

# Spry2

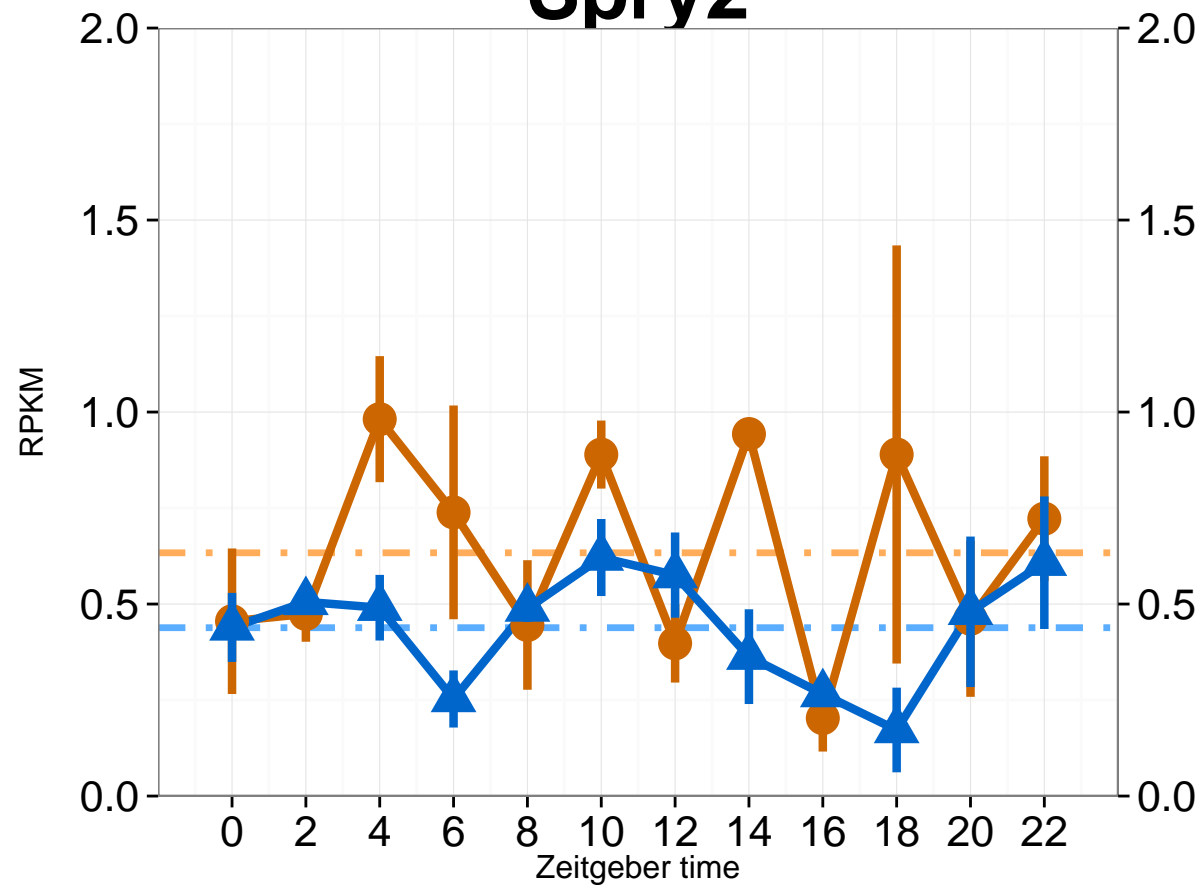

# Spry2

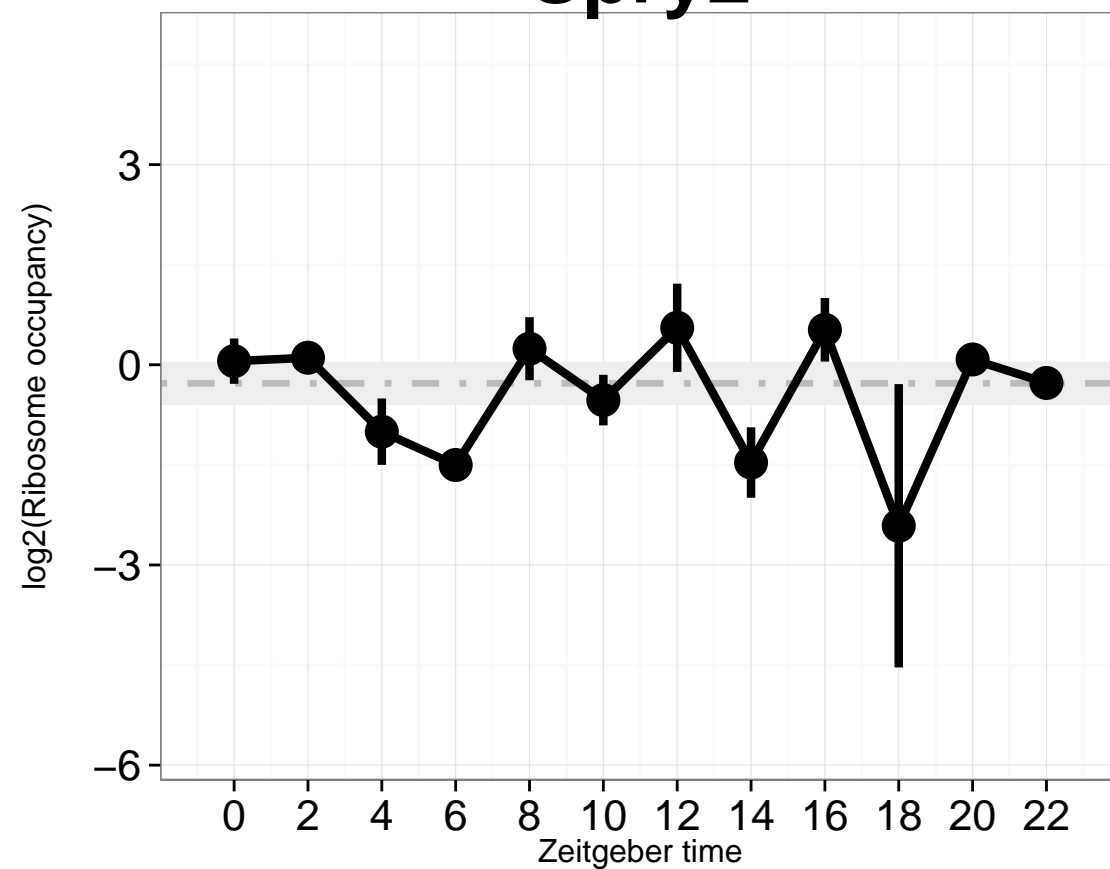

Supplement: SuppDataset_1.zip [file Spry2_set_A.pdf › Supplemental Dataset 1/A-mRNA_nonrhyth_translation_nonrhyth/Spry2_set_A.pdf]

# Spry4

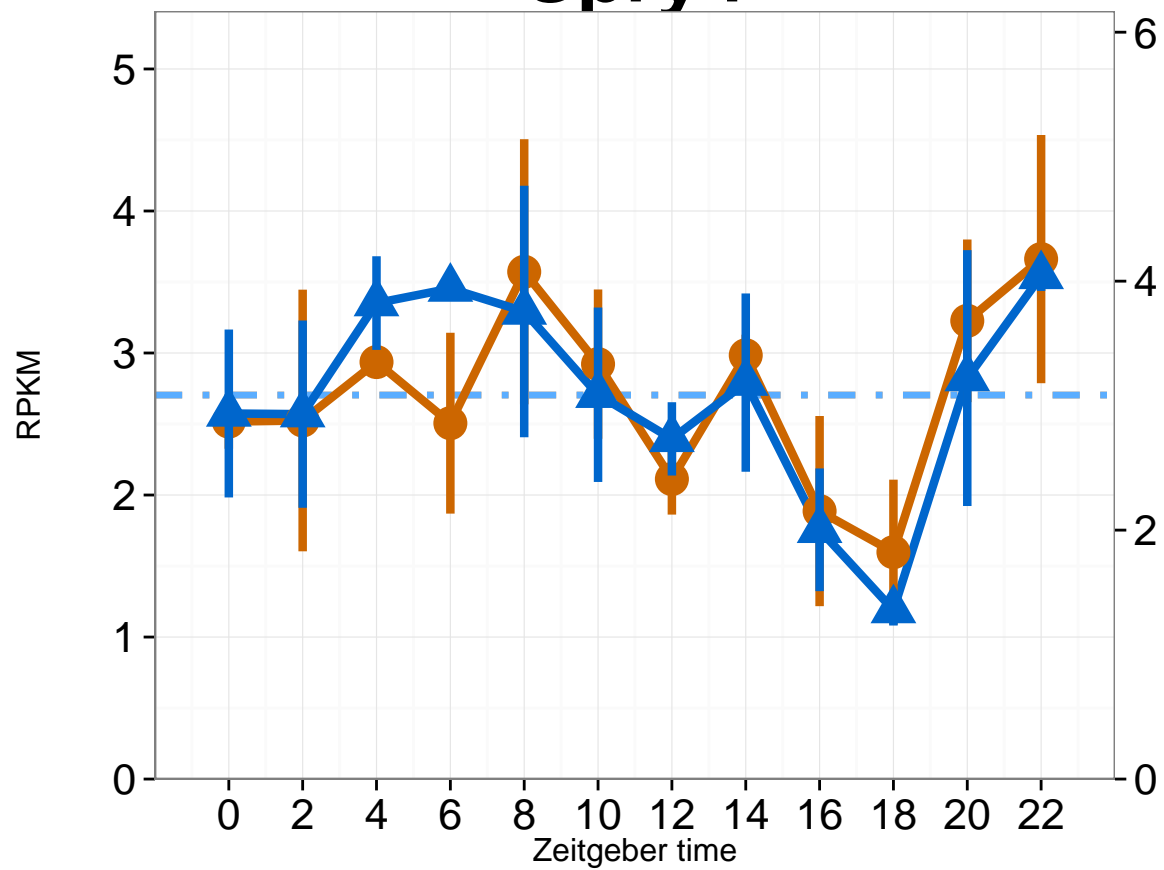

# Spry4

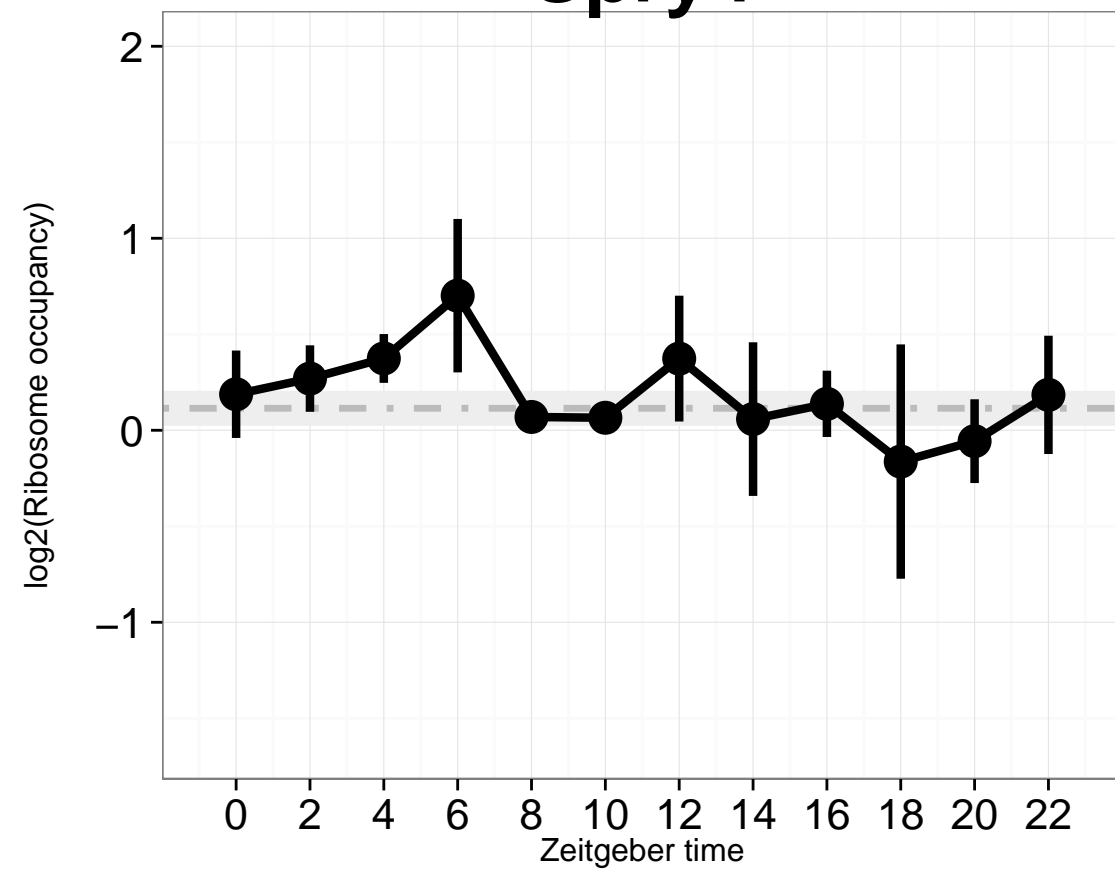

Supplement: SuppDataset_1.zip [file Spry4_set_A.pdf › Supplemental Dataset 1/A-mRNA_nonrhyth_translation_nonrhyth/Spry4_set_A.pdf]

## Spryd4

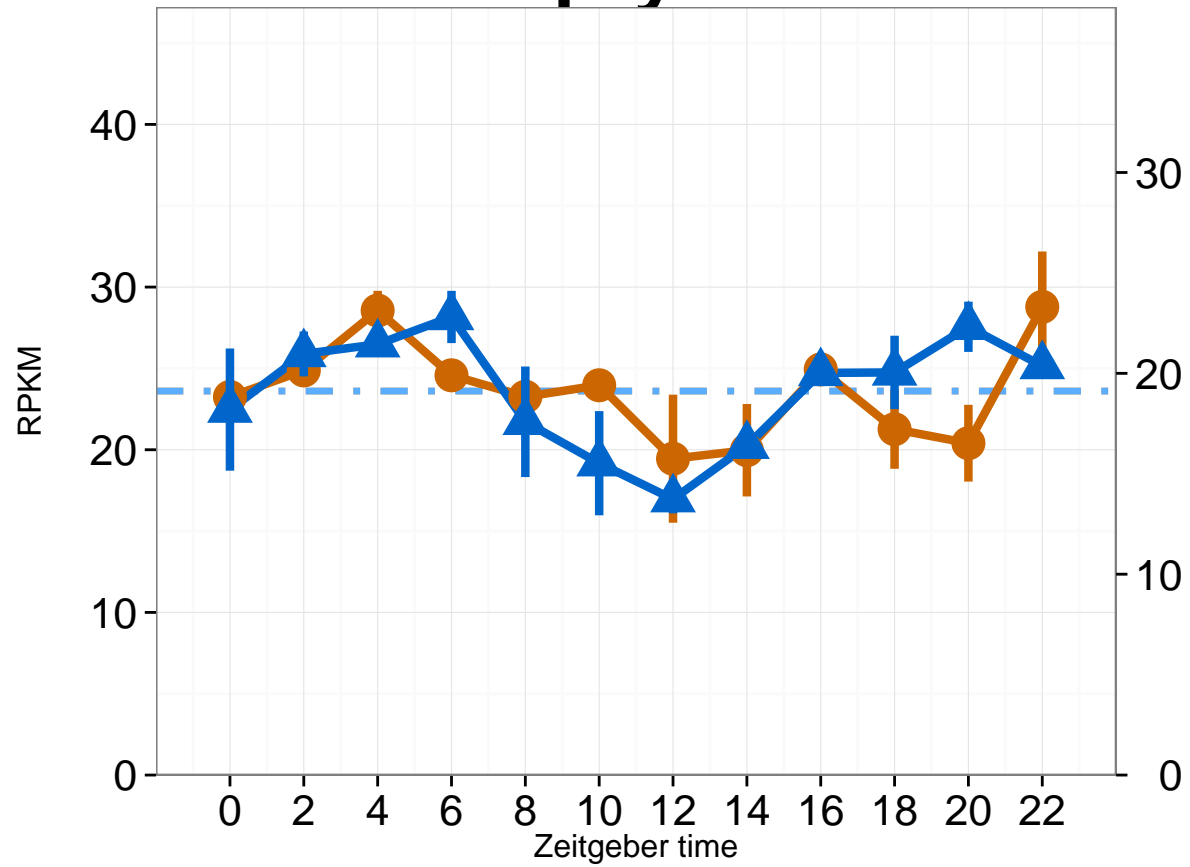

## Spryd4

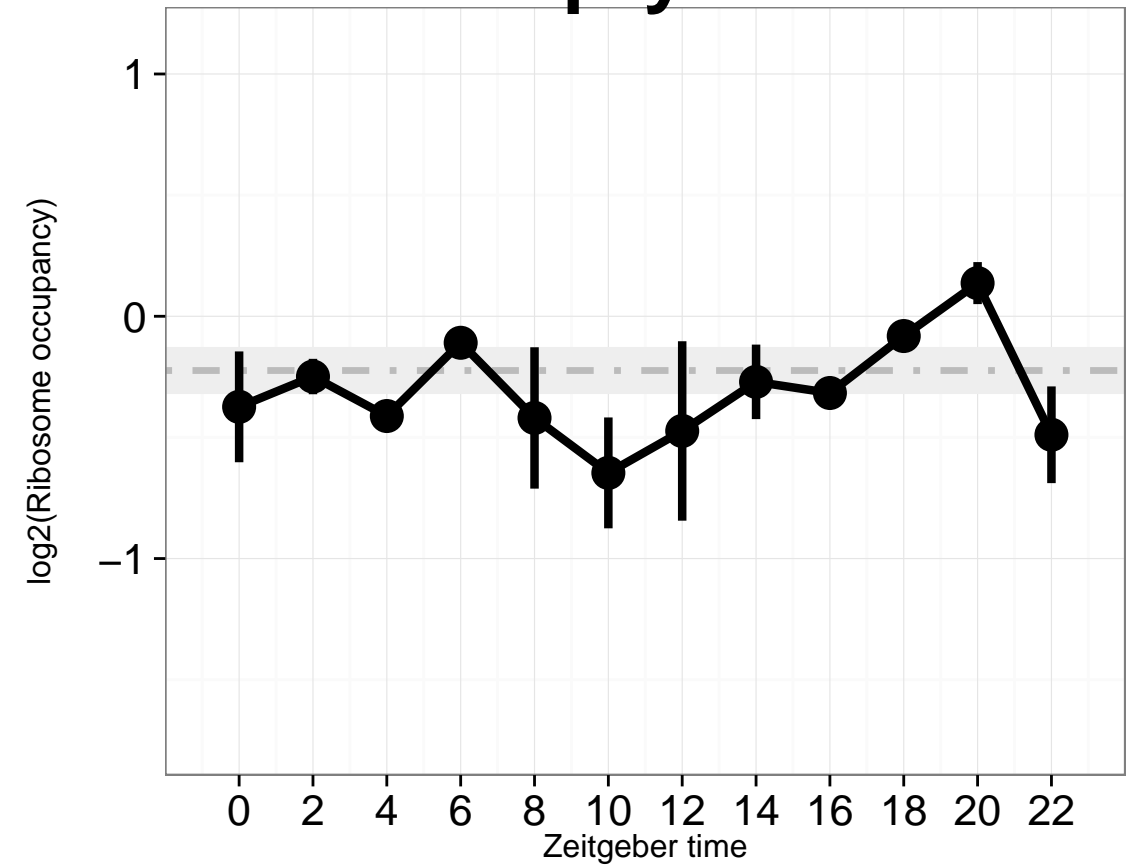

Supplement: SuppDataset_1.zip [file Spryd4_set_A.pdf › Supplemental Dataset 1/A-mRNA_nonrhyth_translation_nonrhyth/Spryd4_set_A.pdf]

## Spryd7

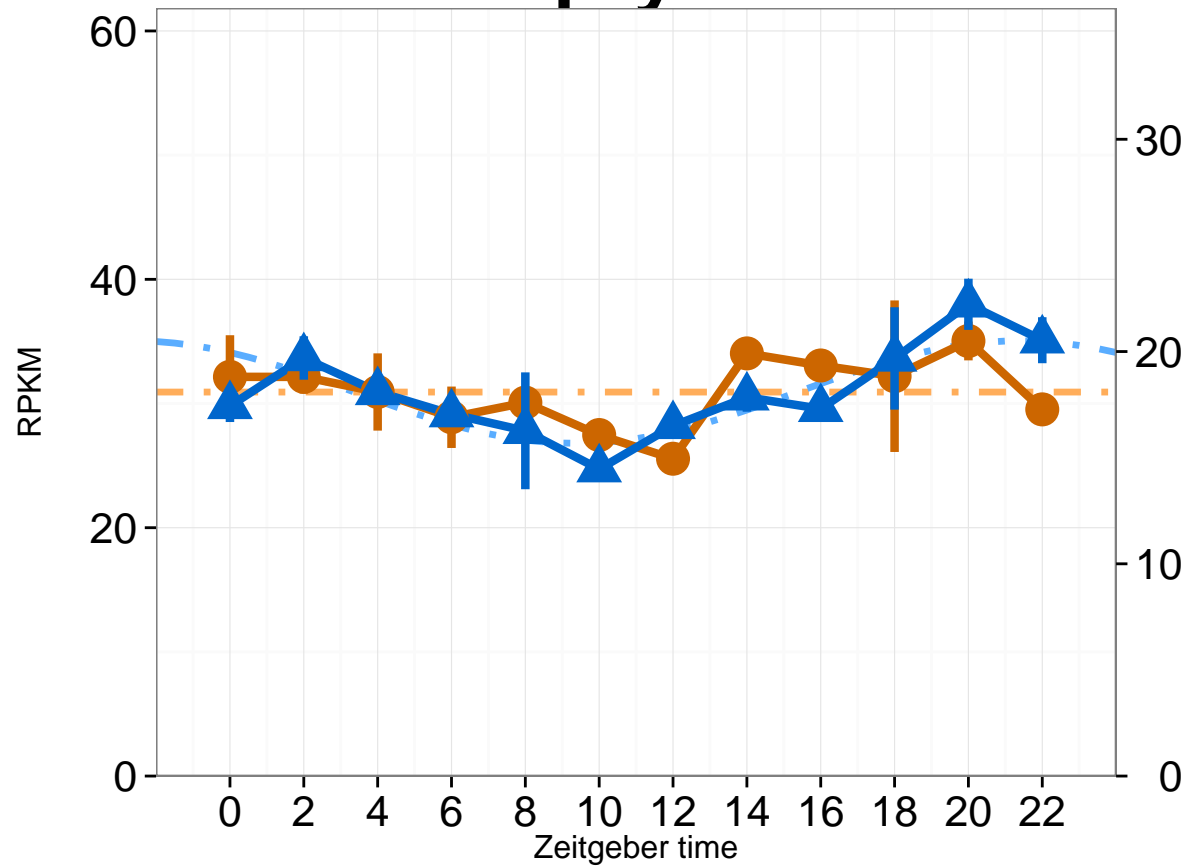

## Spryd7

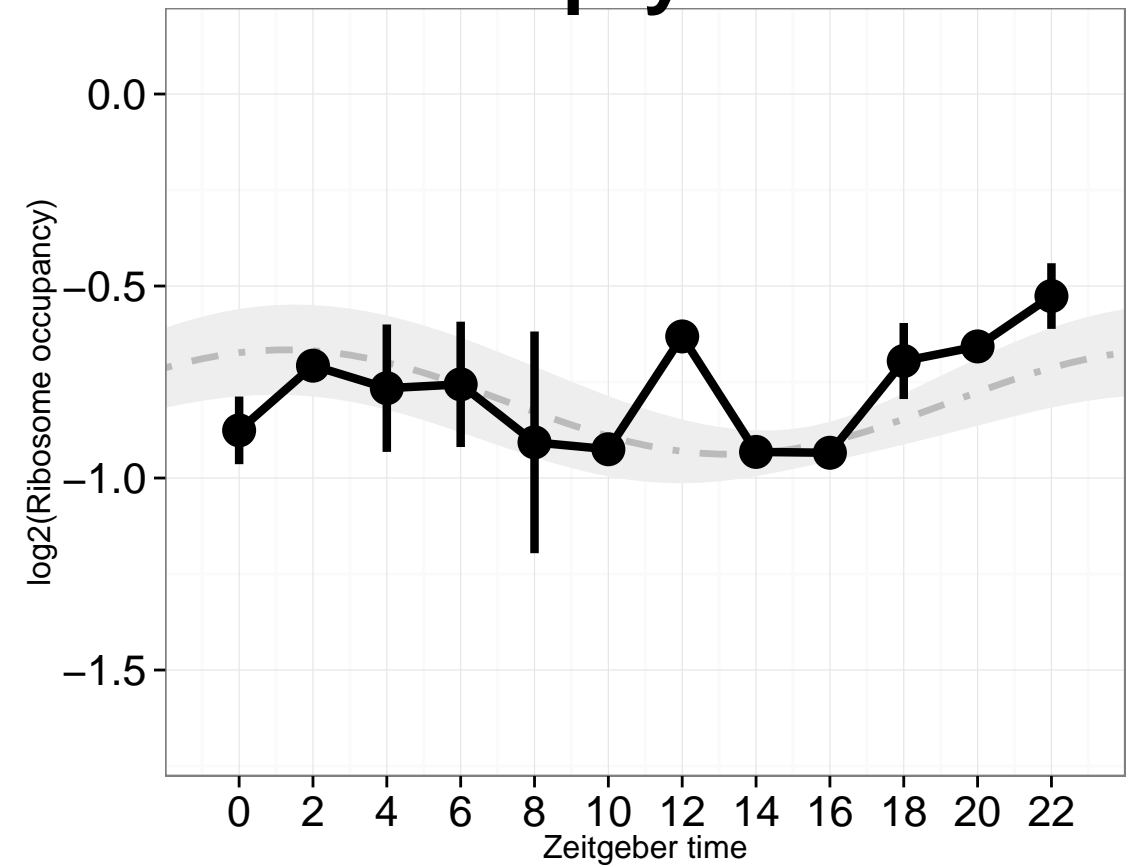

Supplement: SuppDataset_1.zip [file Spryd7_set_A.pdf › Supplemental Dataset 1/A-mRNA_nonrhyth_translation_nonrhyth/Spryd7_set_A.pdf]

# Sptan1

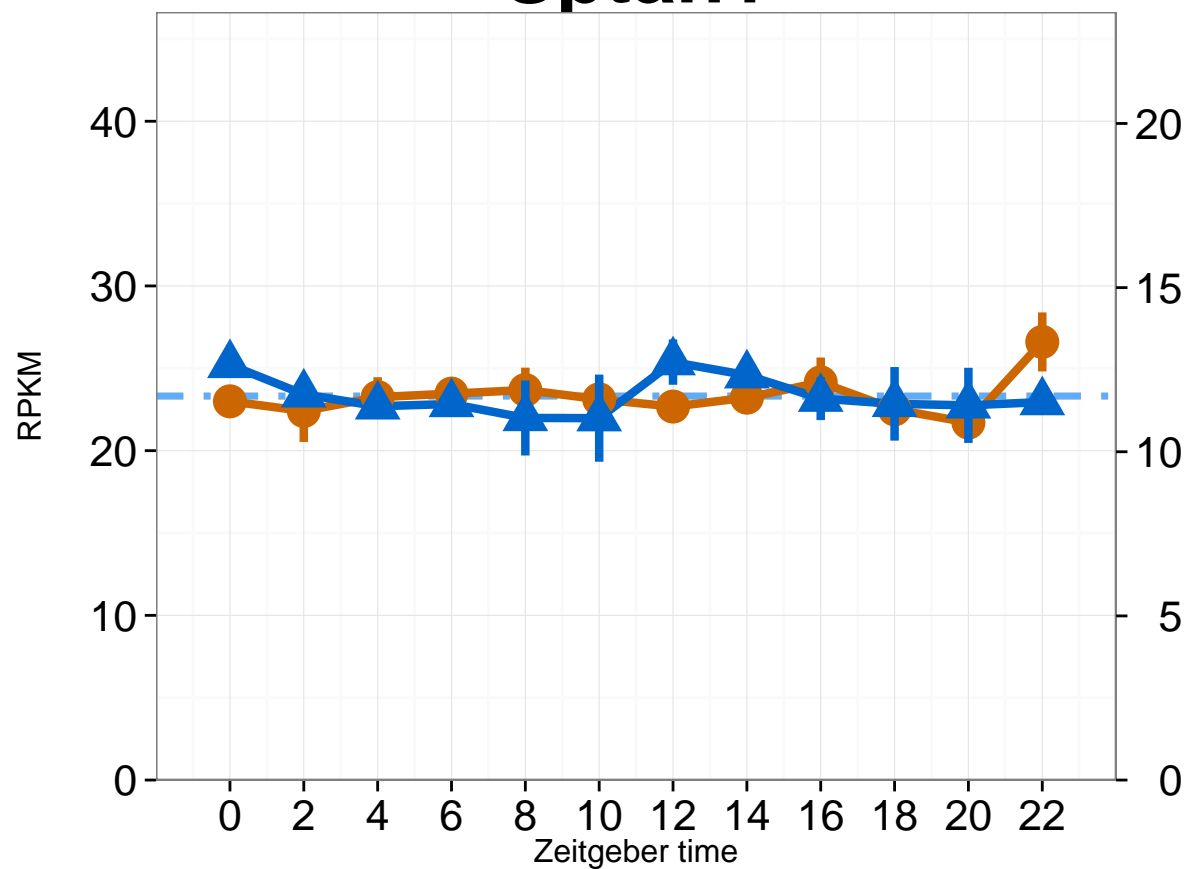

# Sptan1

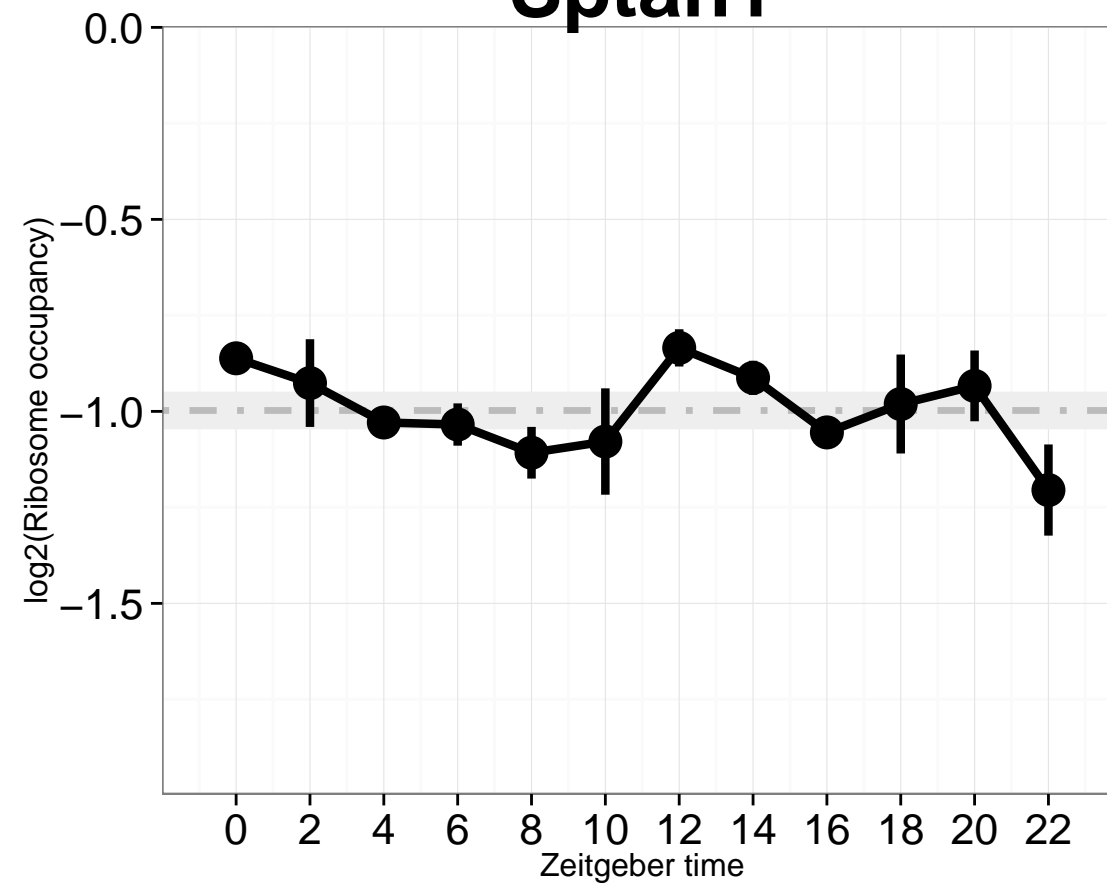

Supplement: SuppDataset_1.zip [file Sptan1_set_A.pdf › Supplemental Dataset 1/A-mRNA_nonrhyth_translation_nonrhyth/Sptan1_set_A.pdf]

## Sptbn1

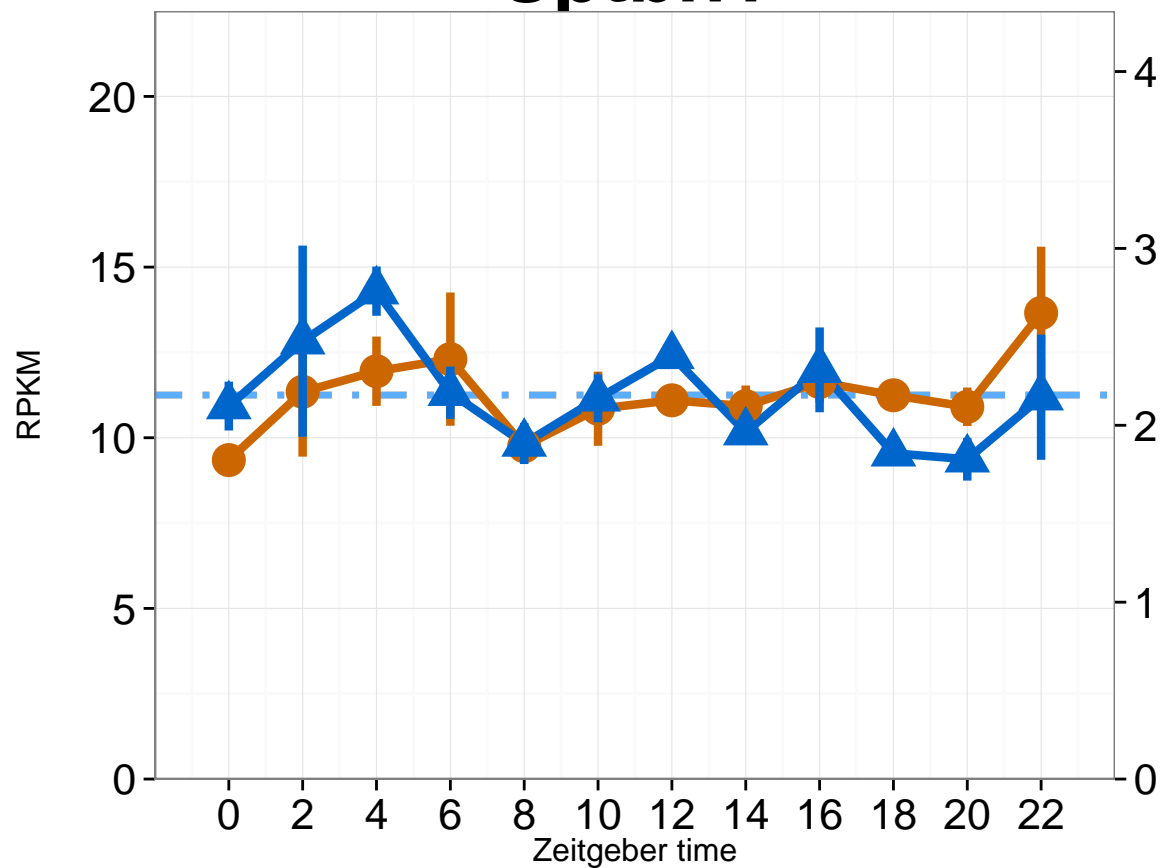

## Sptbn1

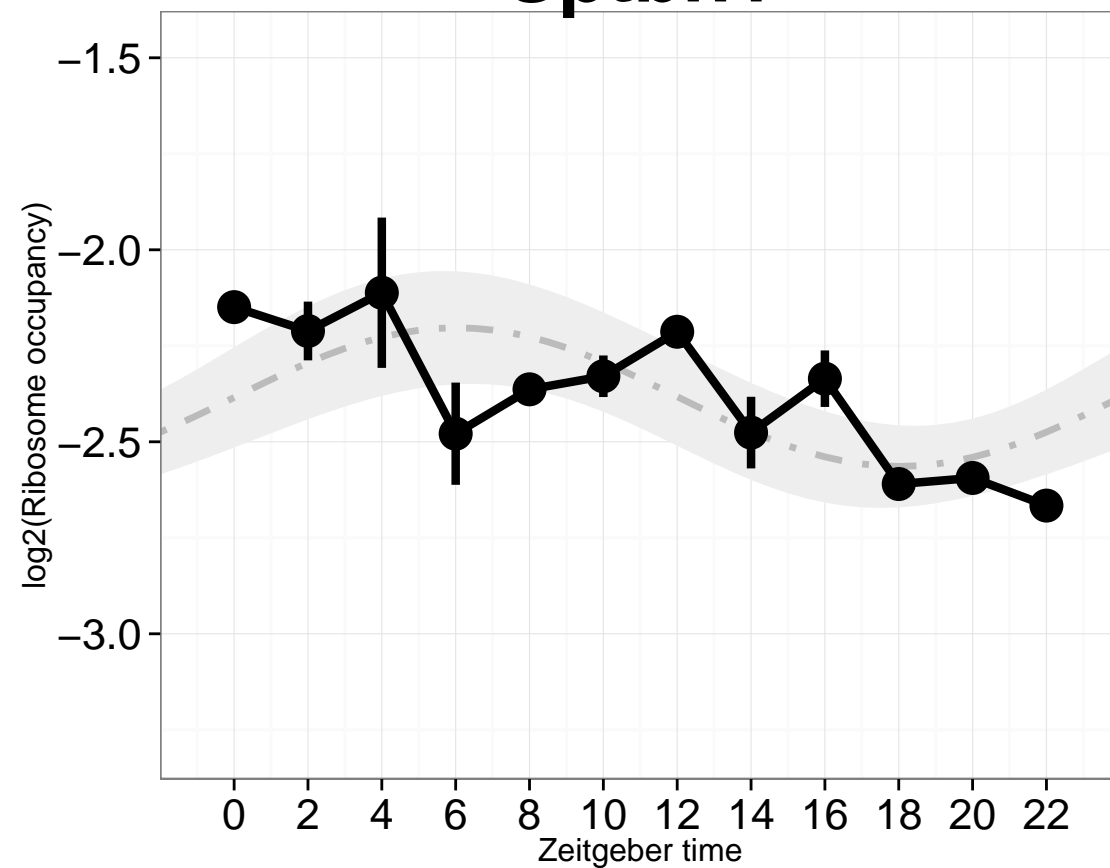

Supplement: SuppDataset_1.zip [file Sptbn1_set_A.pdf › Supplemental Dataset 1/A-mRNA_nonrhyth_translation_nonrhyth/Sptbn1_set_A.pdf]

## Sptlc1

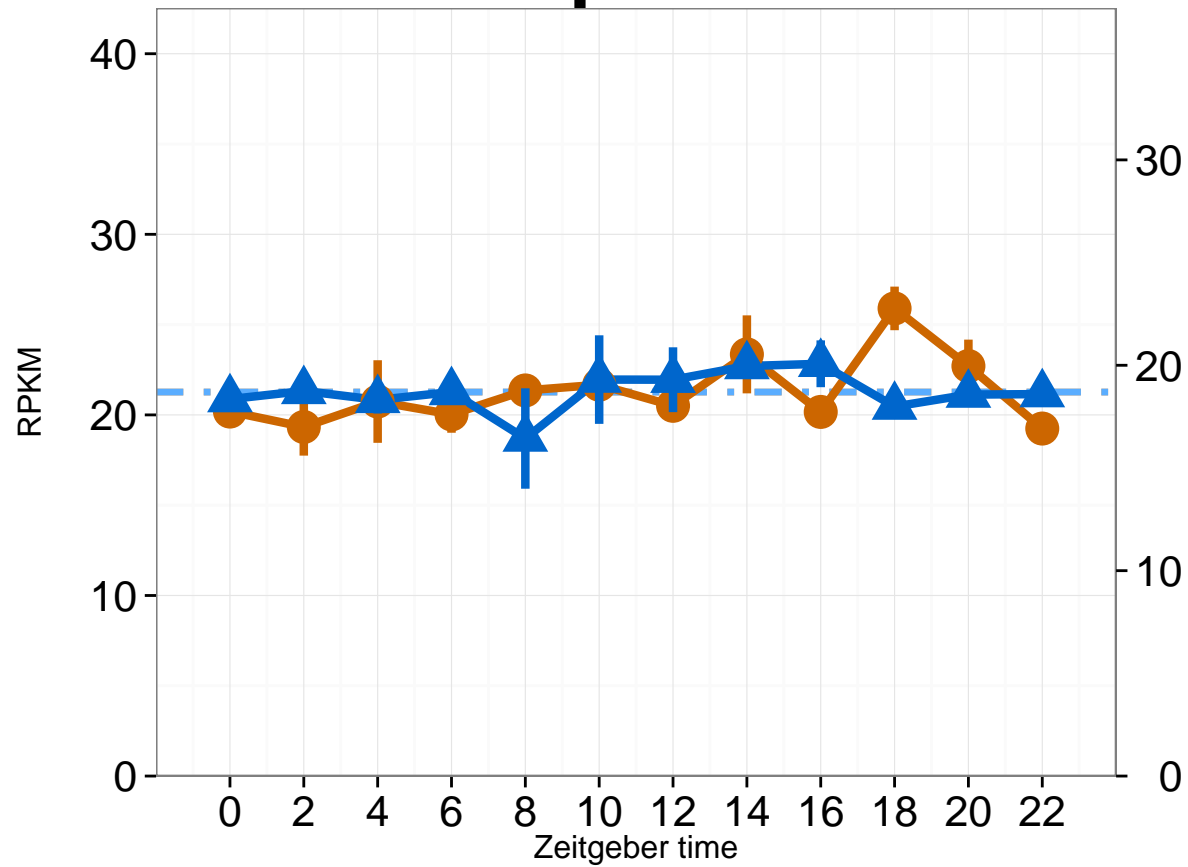

## Sptlc1

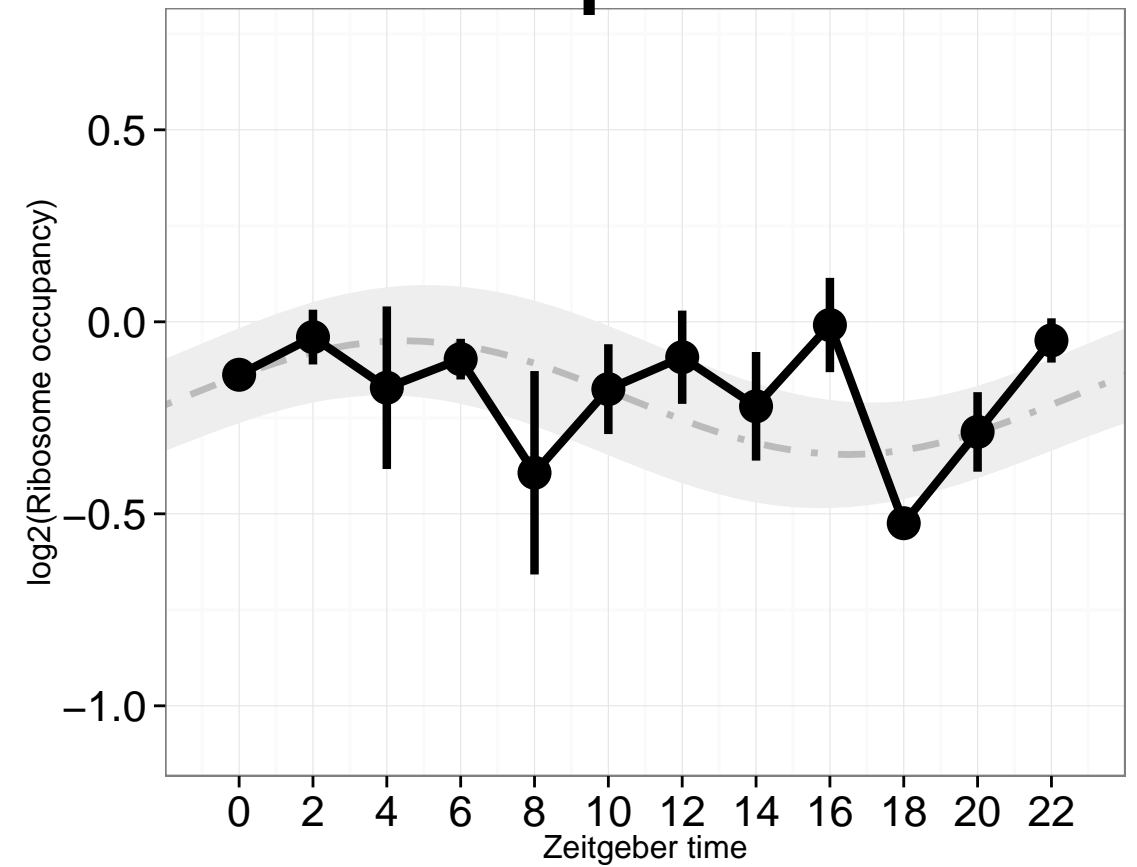

Supplement: SuppDataset_1.zip [file Sptlc1_set_A.pdf › Supplemental Dataset 1/A-mRNA_nonrhyth_translation_nonrhyth/Sptlc1_set_A.pdf]

# Sptssa

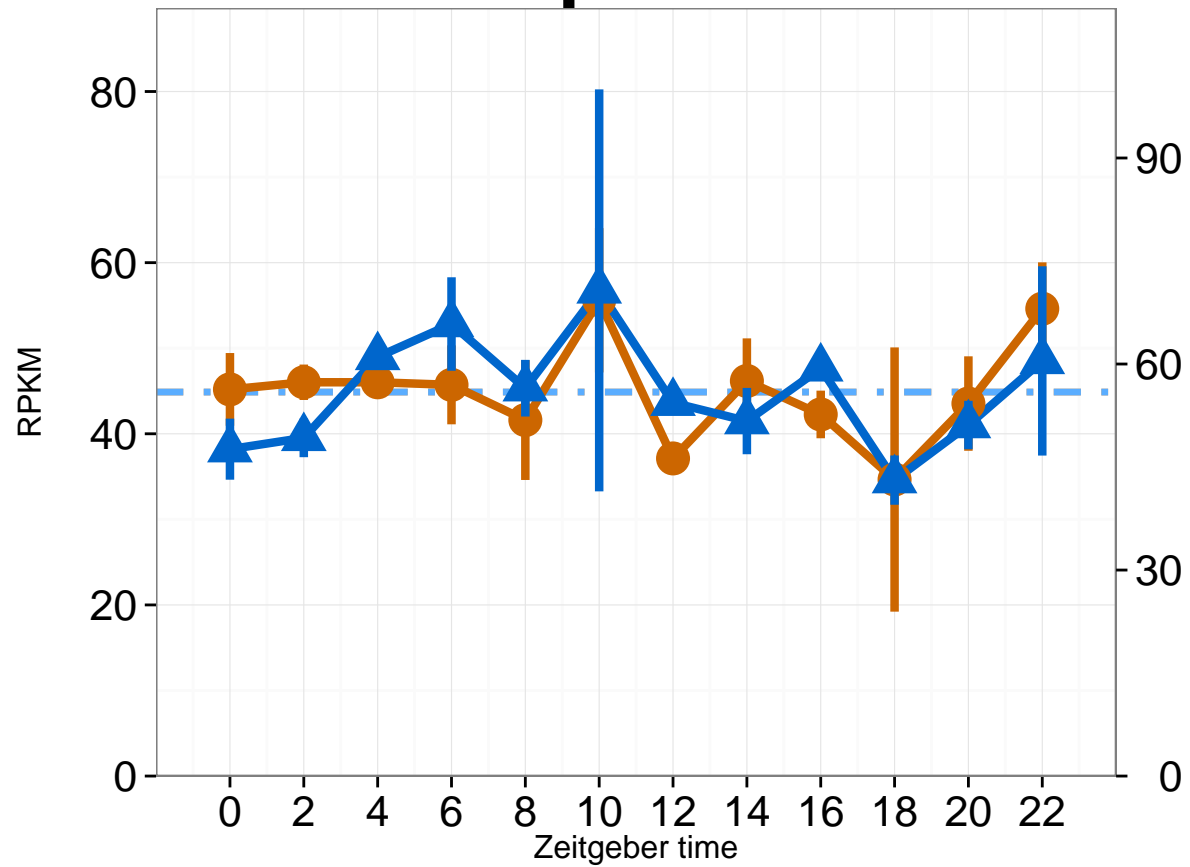

# Sptssa

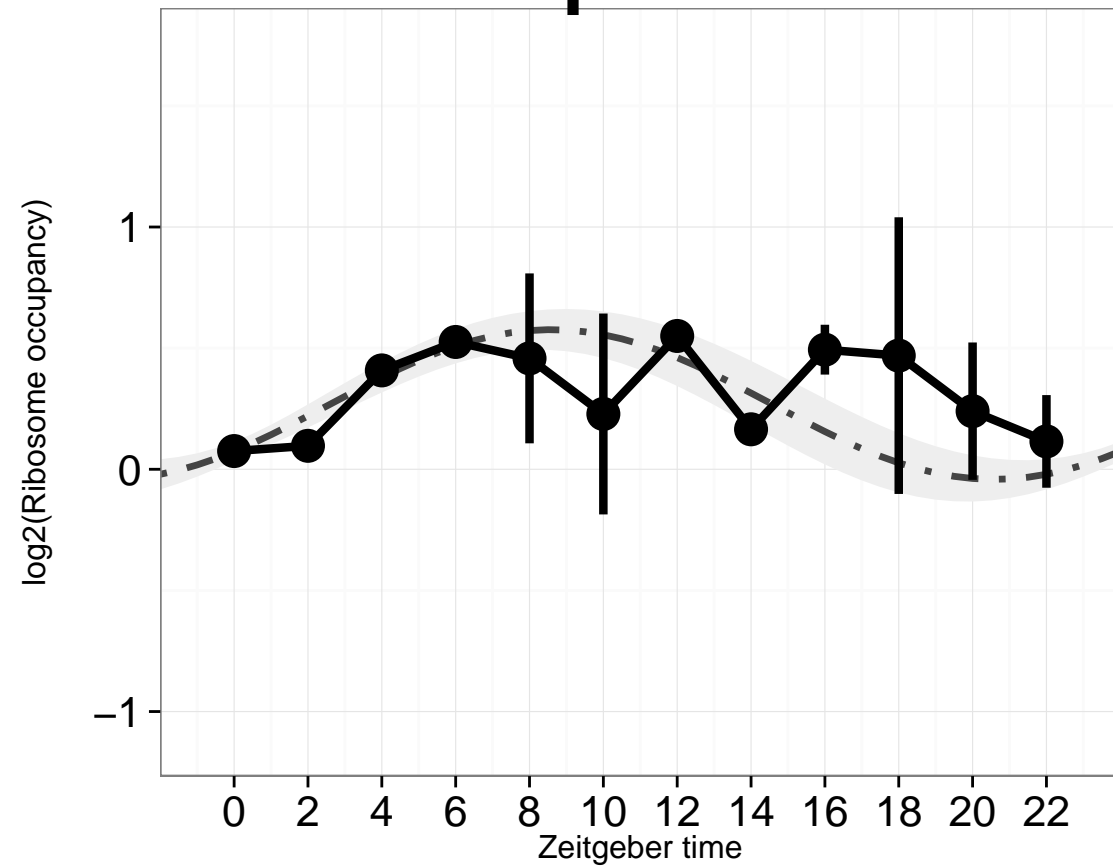

Supplement: SuppDataset_1.zip [file Sptssa_set_A.pdf › Supplemental Dataset 1/A-mRNA_nonrhyth_translation_nonrhyth/Sptssa_set_A.pdf]

# Spty2d1

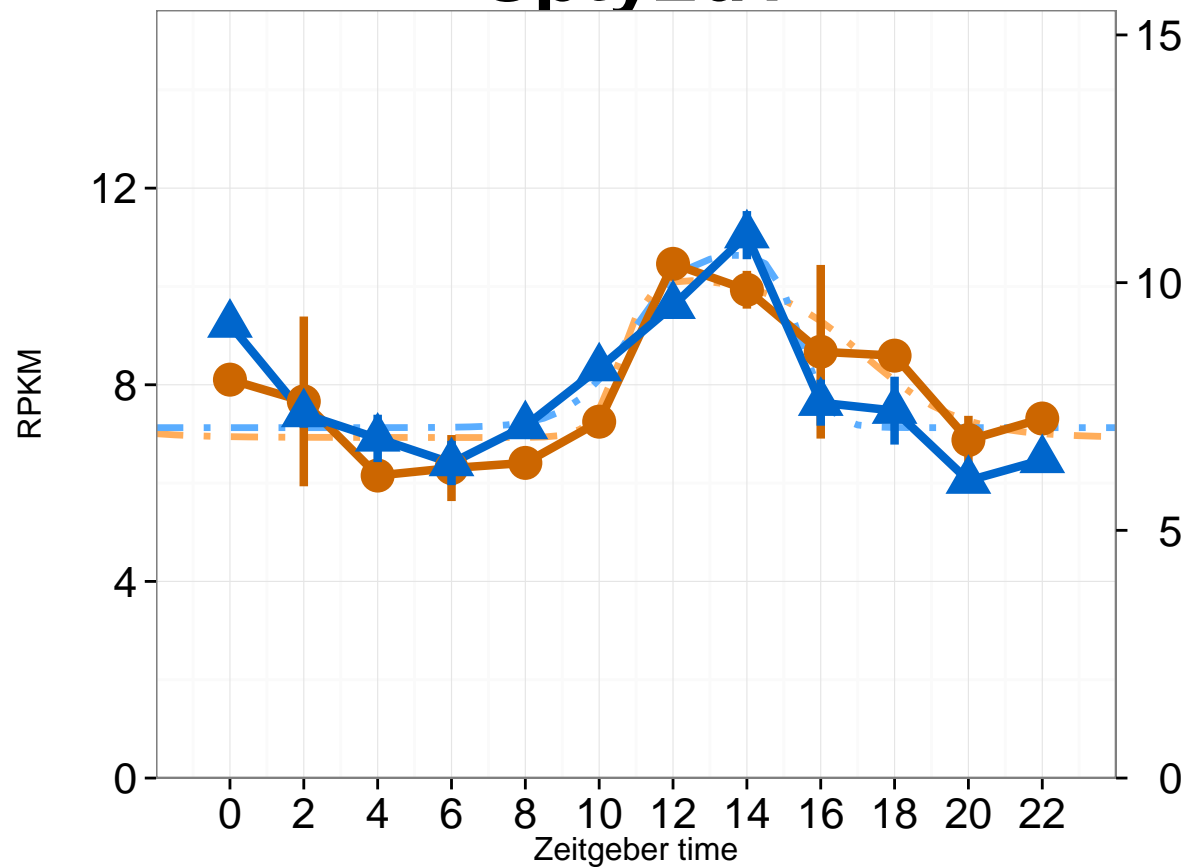

# Spty2d1

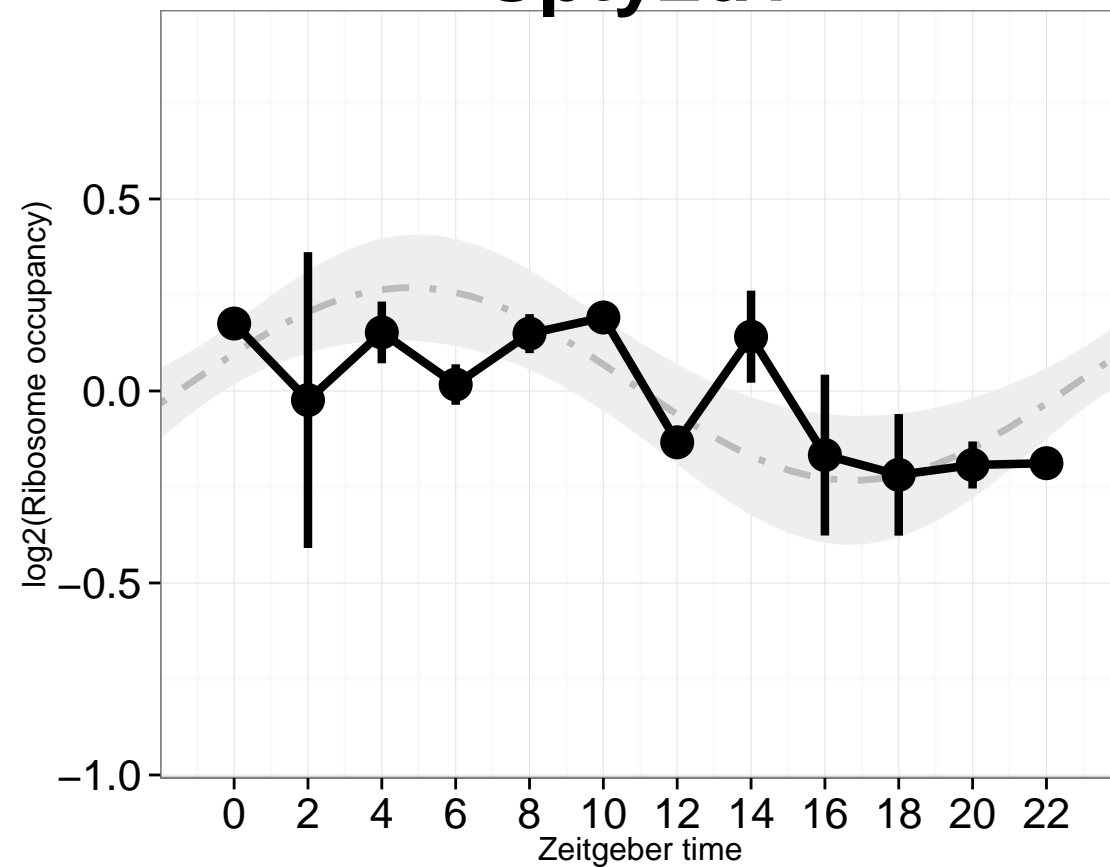

Supplement: SuppDataset_1.zip [file Spty2d1_set_A.pdf › Supplemental Dataset 1/A-mRNA_nonrhyth_translation_nonrhyth/Spty2d1_set_A.pdf]

## Sqrdl

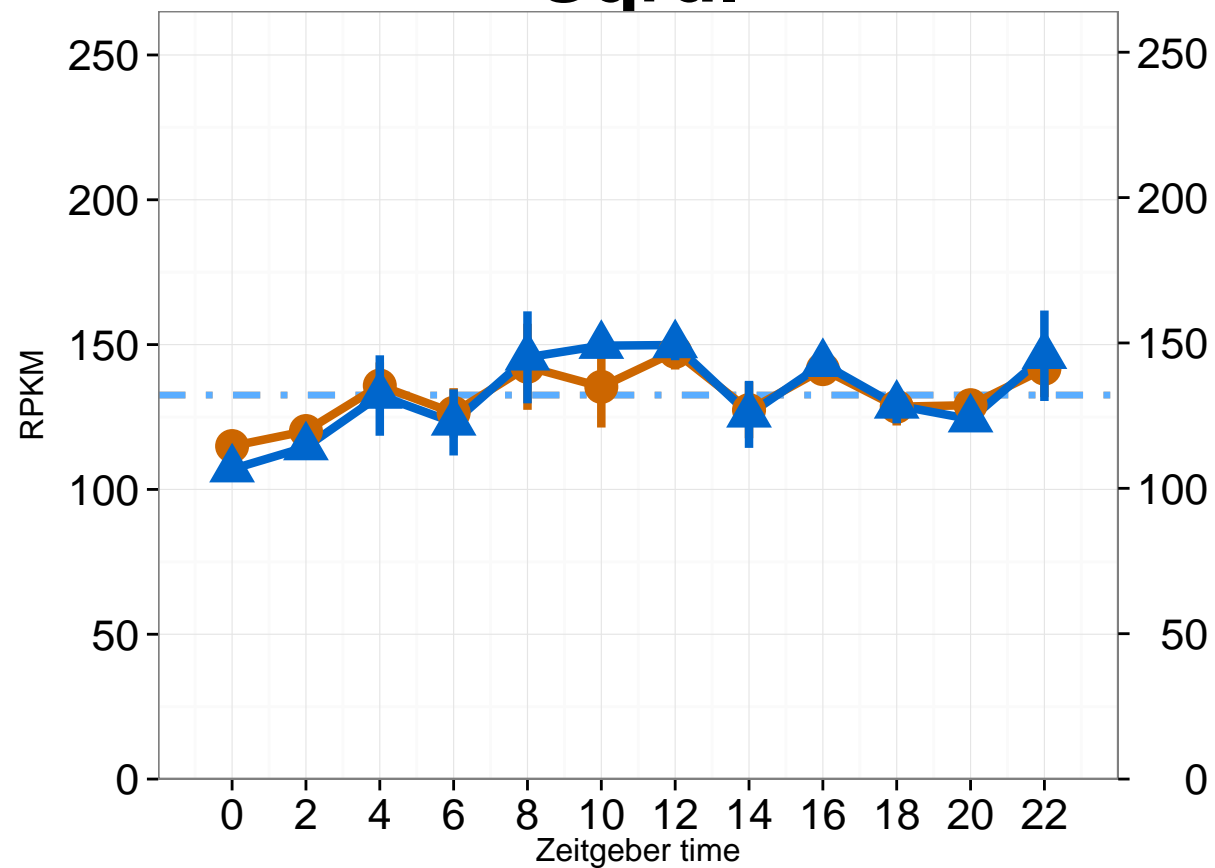

## Sqrdl

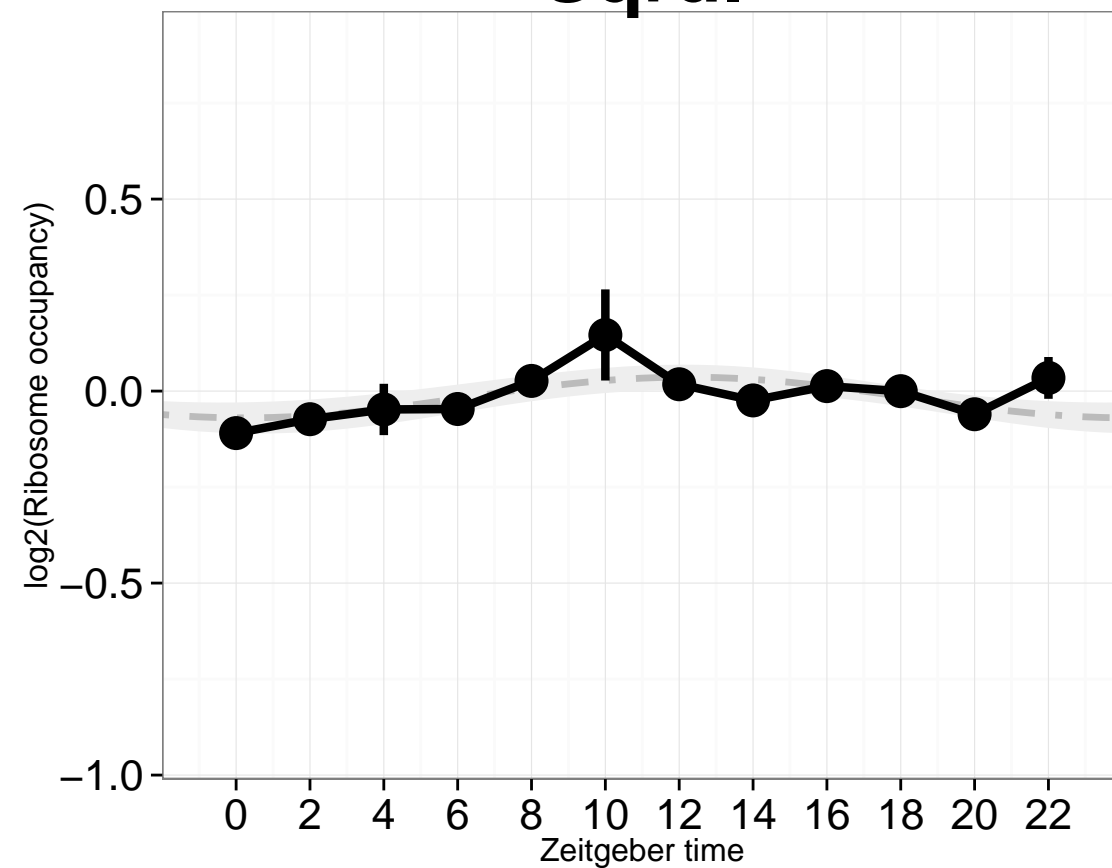

Supplement: SuppDataset_1.zip [file Sqrdl_set_A.pdf › Supplemental Dataset 1/A-mRNA_nonrhyth_translation_nonrhyth/Sqrdl_set_A.pdf]

# Sra1

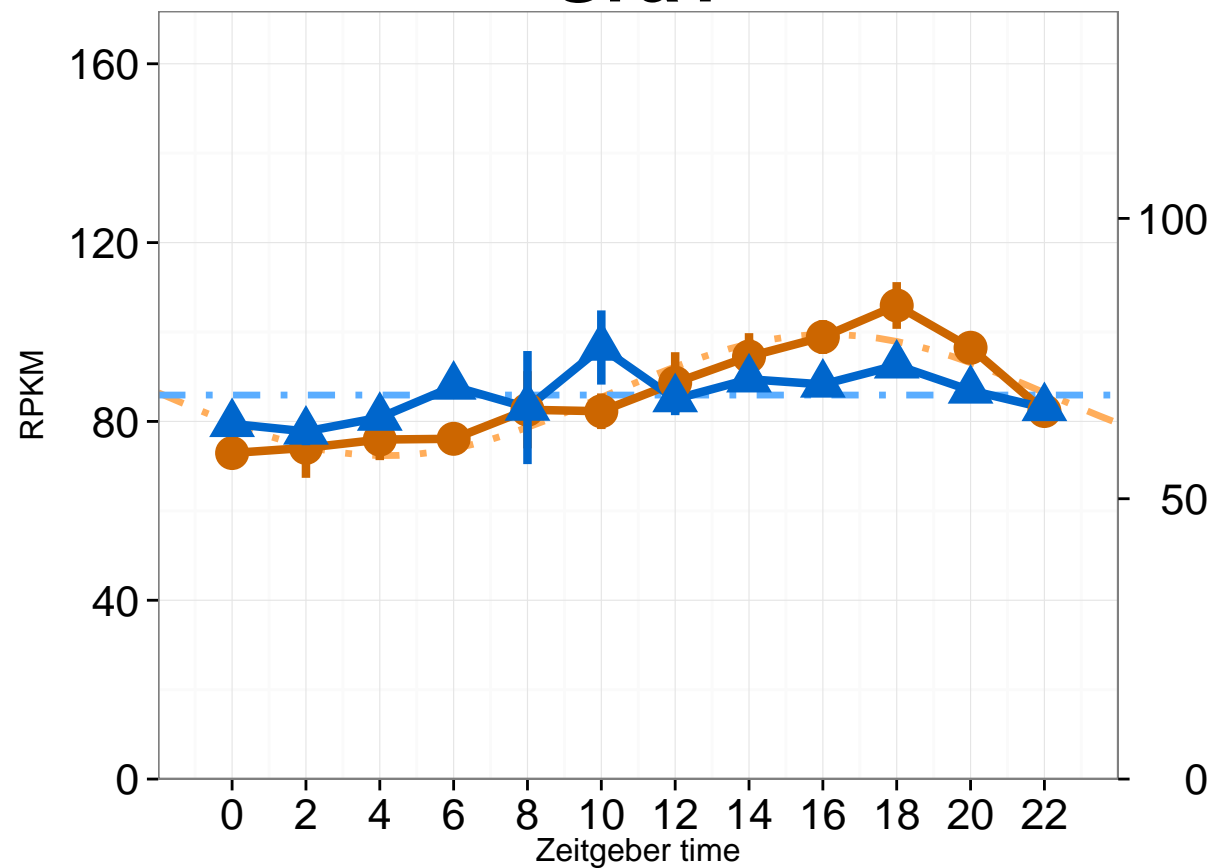

# Sra1

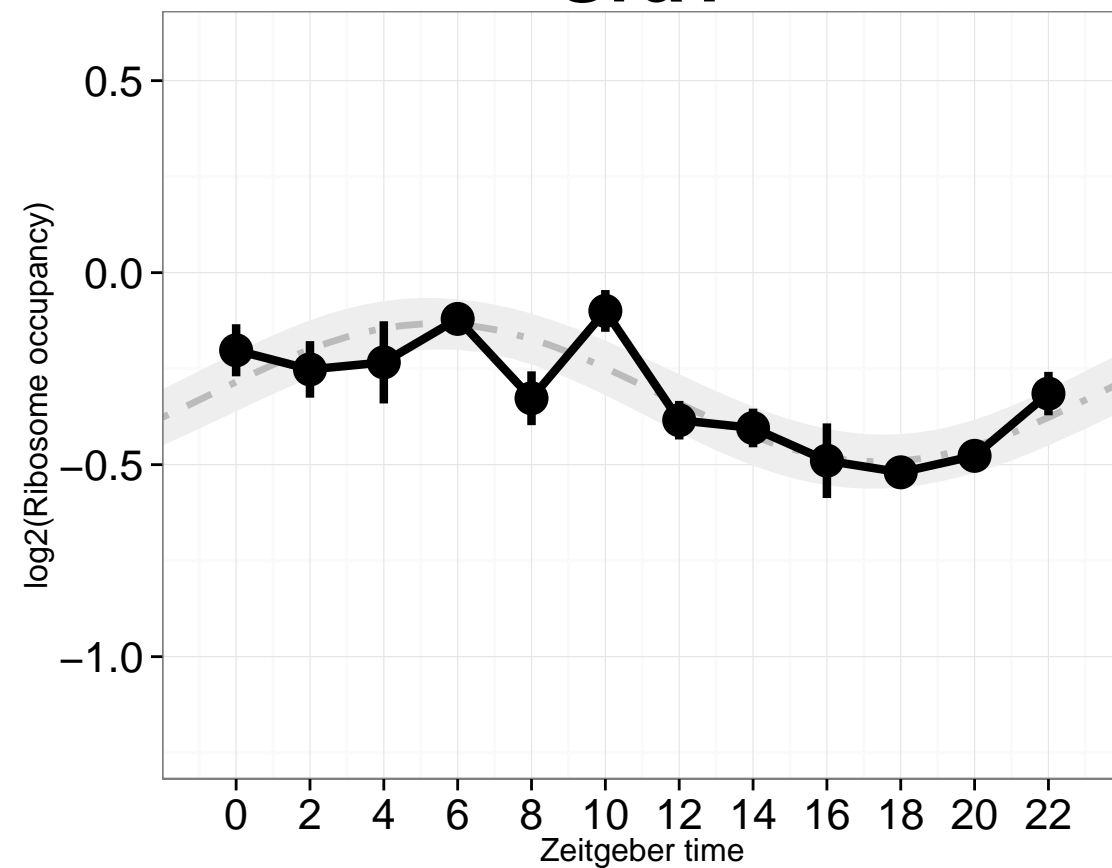

Supplement: SuppDataset_1.zip [file Sra1_set_A.pdf › Supplemental Dataset 1/A-mRNA_nonrhyth_translation_nonrhyth/Sra1_set_A.pdf]

# Srbd1

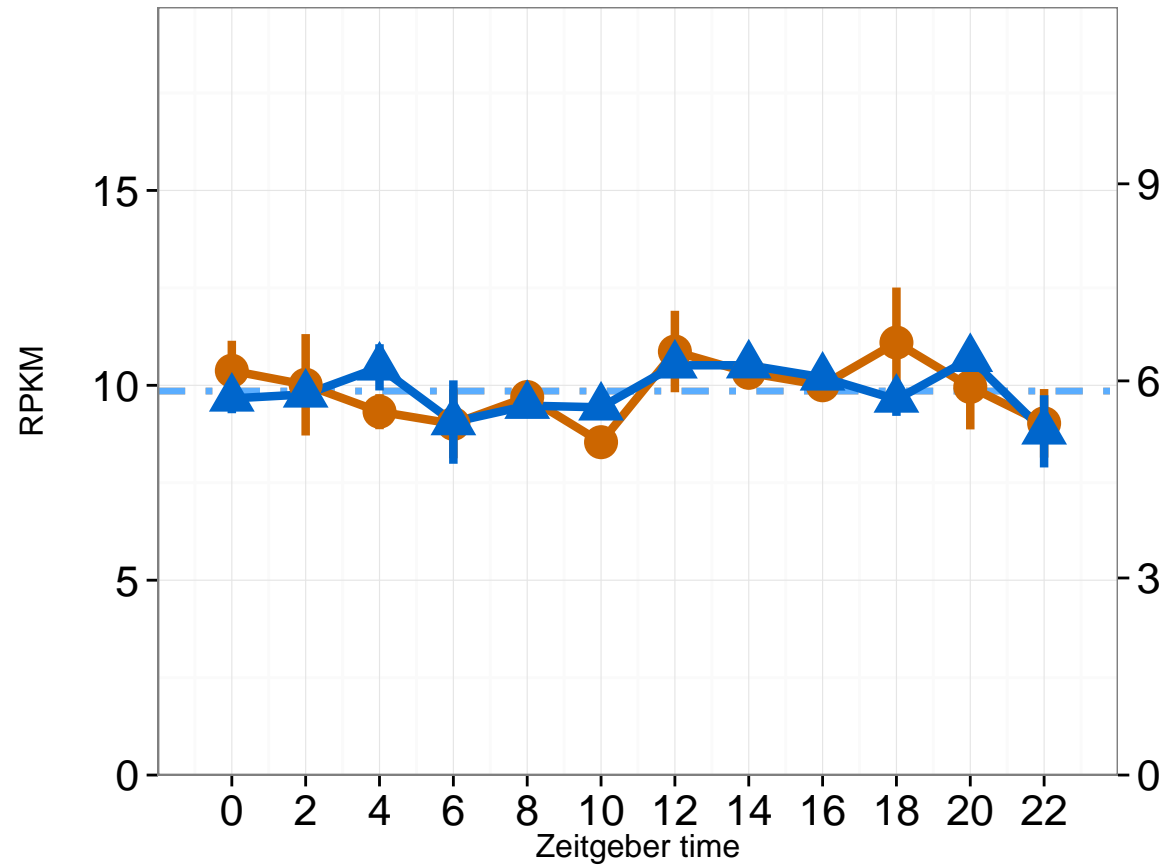

# Srbd1

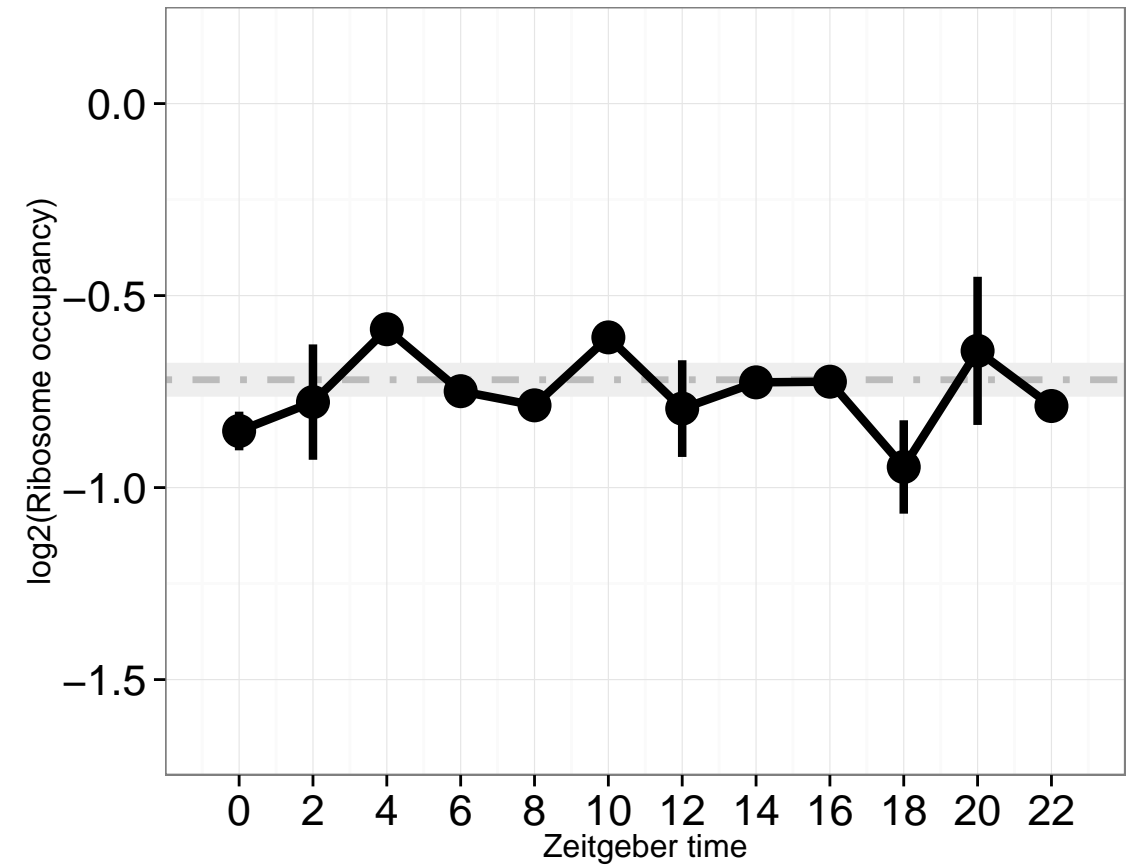

Supplement: SuppDataset_1.zip [file Srbd1_set_A.pdf › Supplemental Dataset 1/A-mRNA_nonrhyth_translation_nonrhyth/Srbd1_set_A.pdf]

## Src

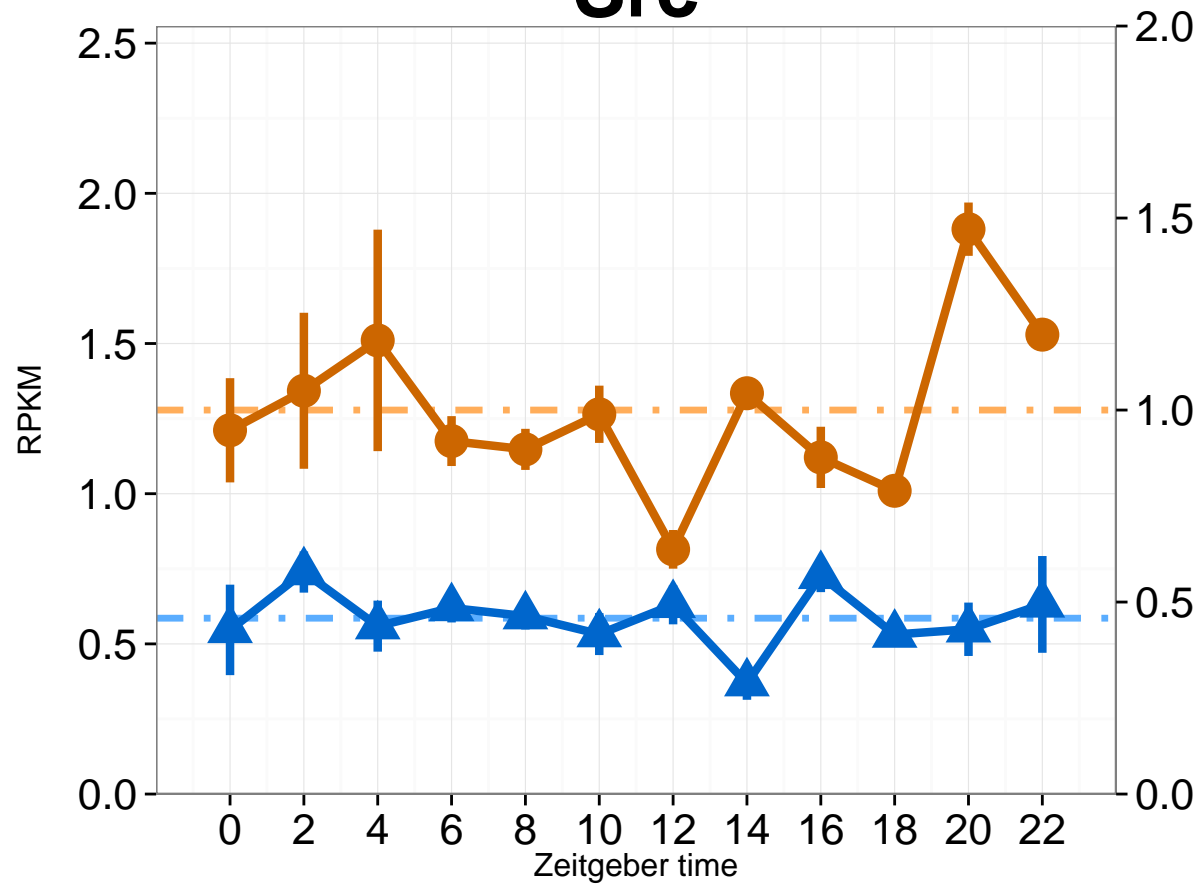

## Src

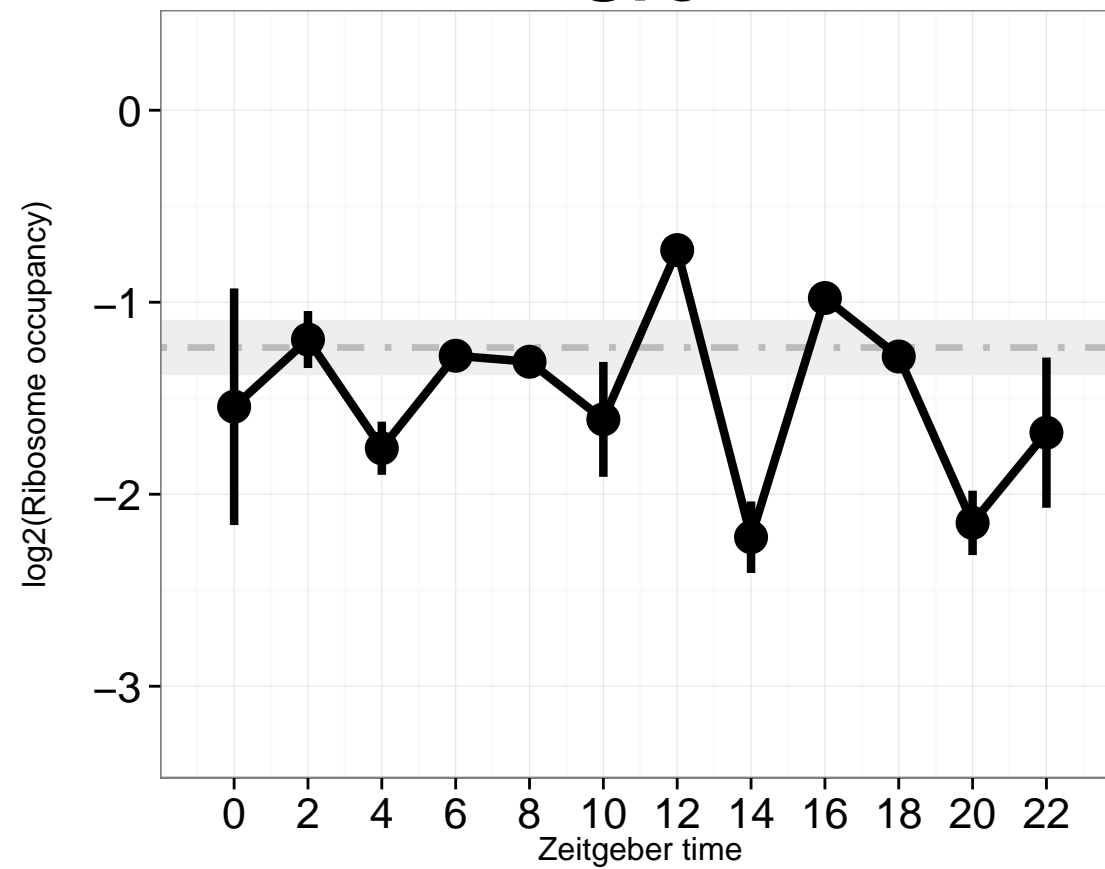

Supplement: SuppDataset_1.zip [file Src_set_A.pdf › Supplemental Dataset 1/A-mRNA_nonrhyth_translation_nonrhyth/Src_set_A.pdf]

# Srcap

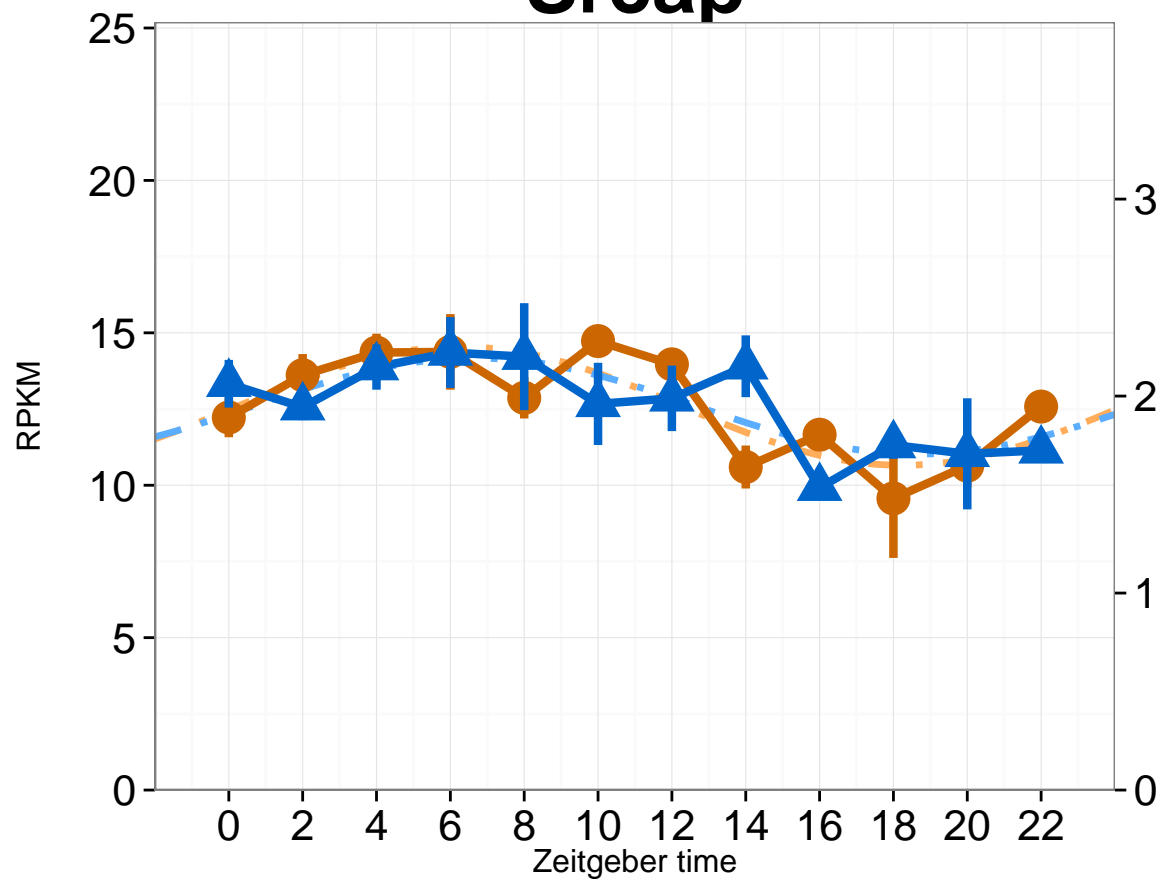

# Srcap

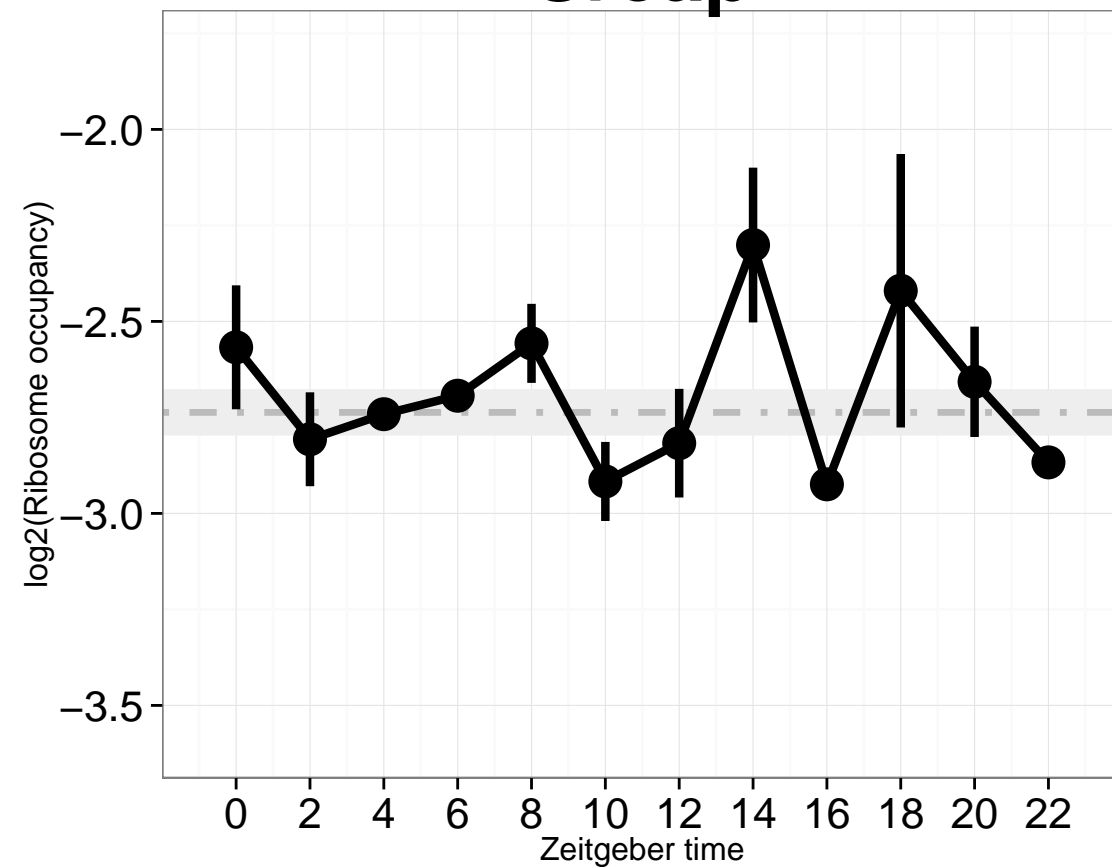

Supplement: SuppDataset_1.zip [file Srcap_set_A.pdf › Supplemental Dataset 1/A-mRNA_nonrhyth_translation_nonrhyth/Srcap_set_A.pdf]

# Srd5a1

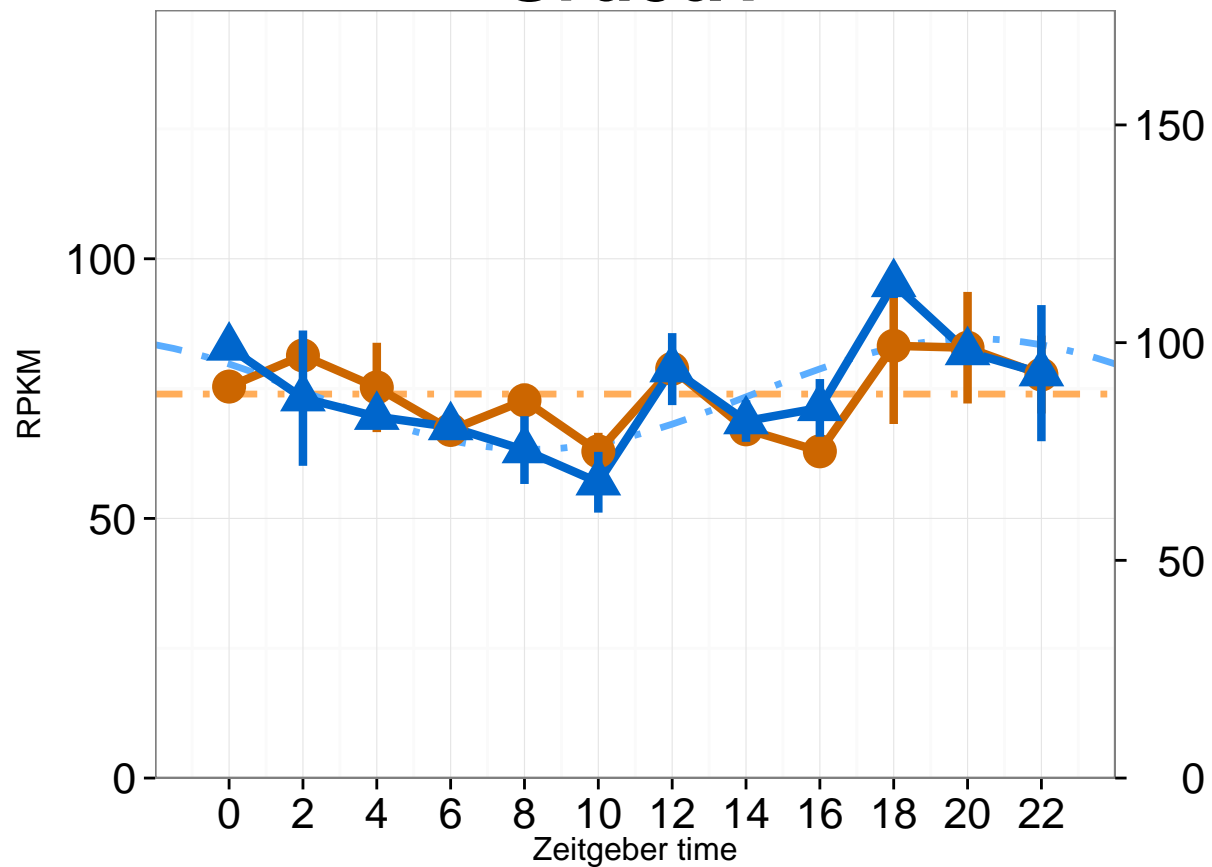

# Srd5a1

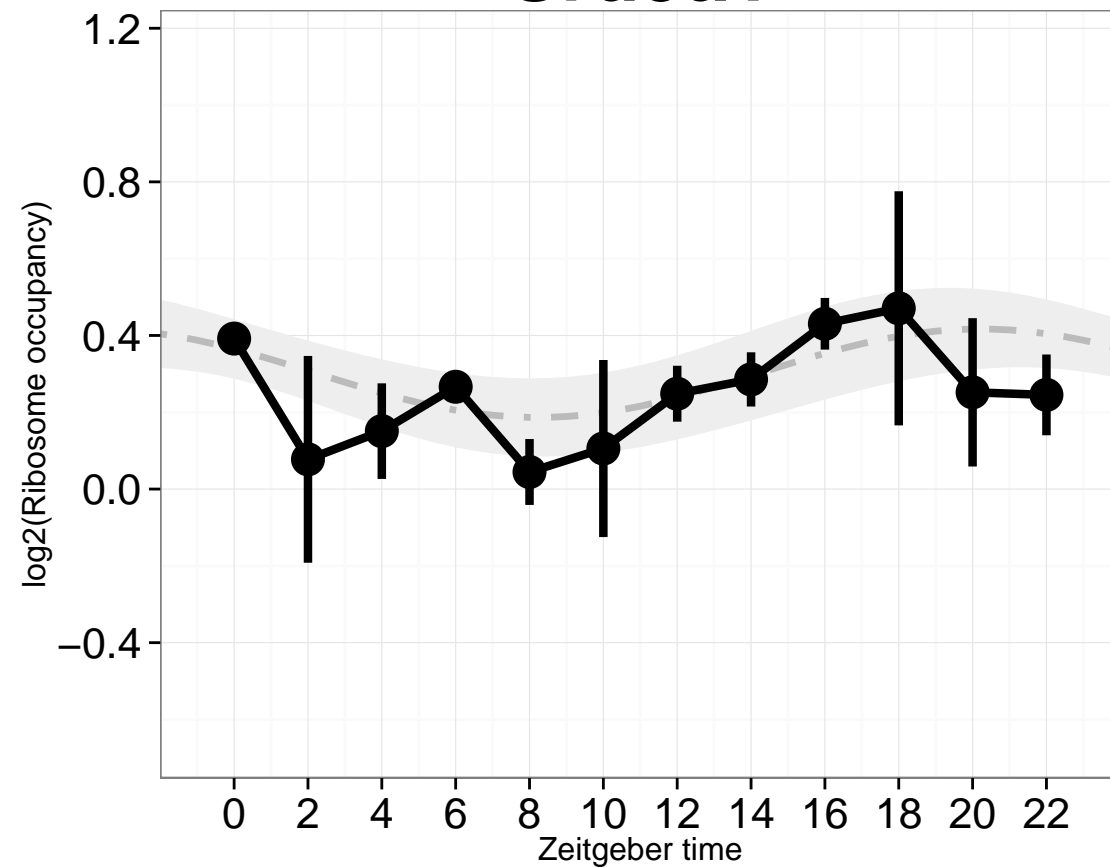

Supplement: SuppDataset_1.zip [file Srd5a1_set_A.pdf › Supplemental Dataset 1/A-mRNA_nonrhyth_translation_nonrhyth/Srd5a1_set_A.pdf]

# Srd5a2

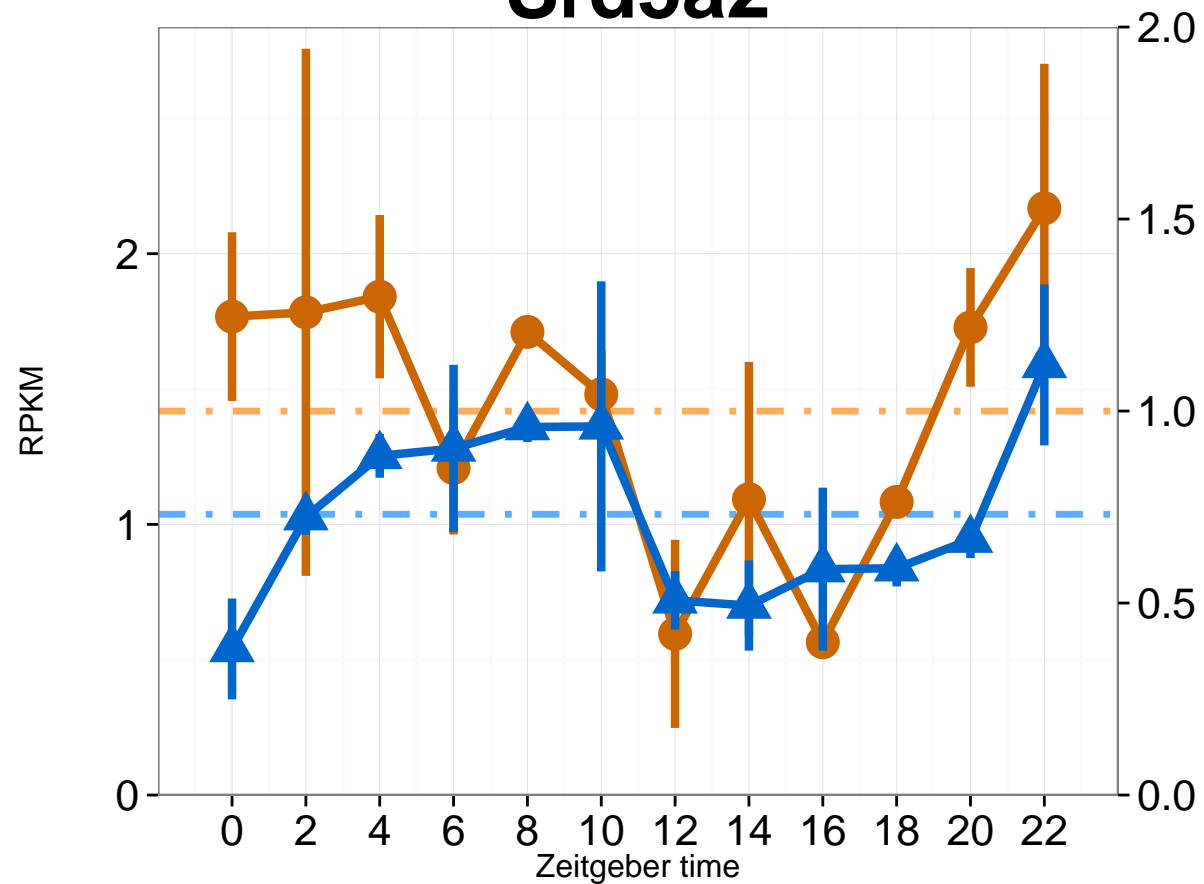

# Srd5a2

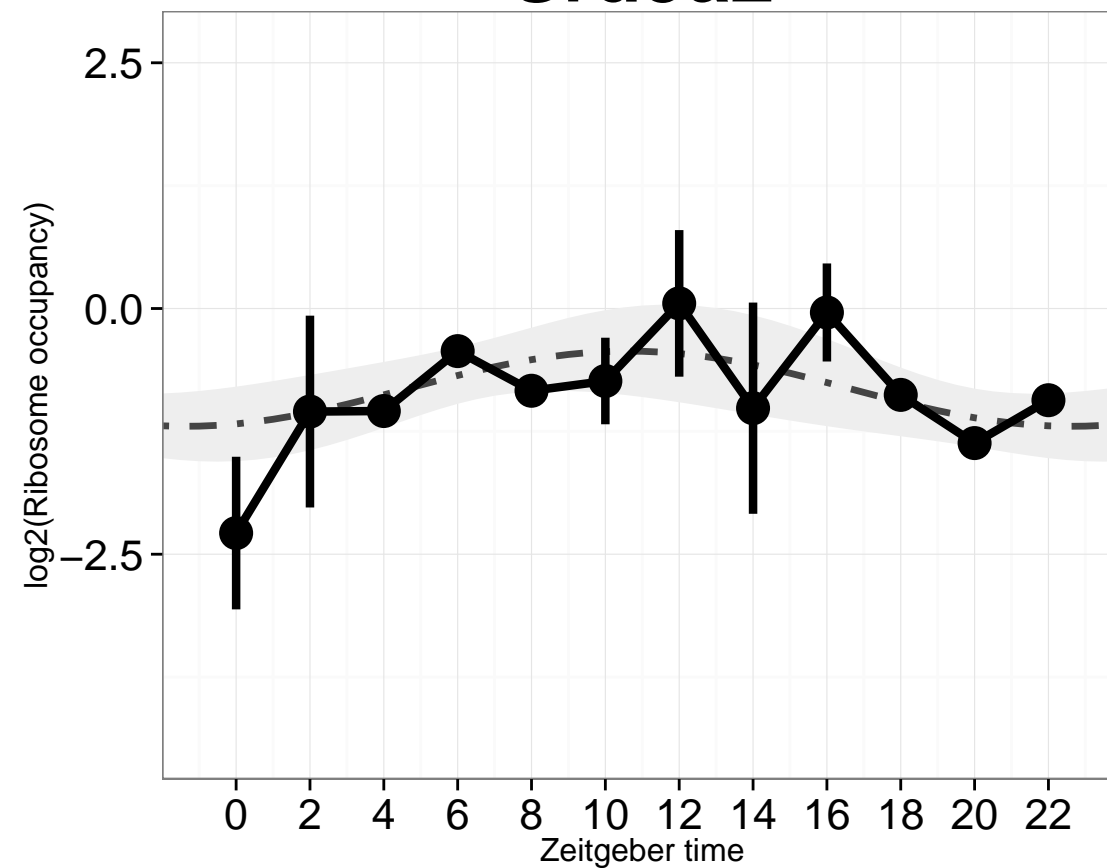

Supplement: SuppDataset_1.zip [file Srd5a2_set_A.pdf › Supplemental Dataset 1/A-mRNA_nonrhyth_translation_nonrhyth/Srd5a2_set_A.pdf]

# Srd5a3

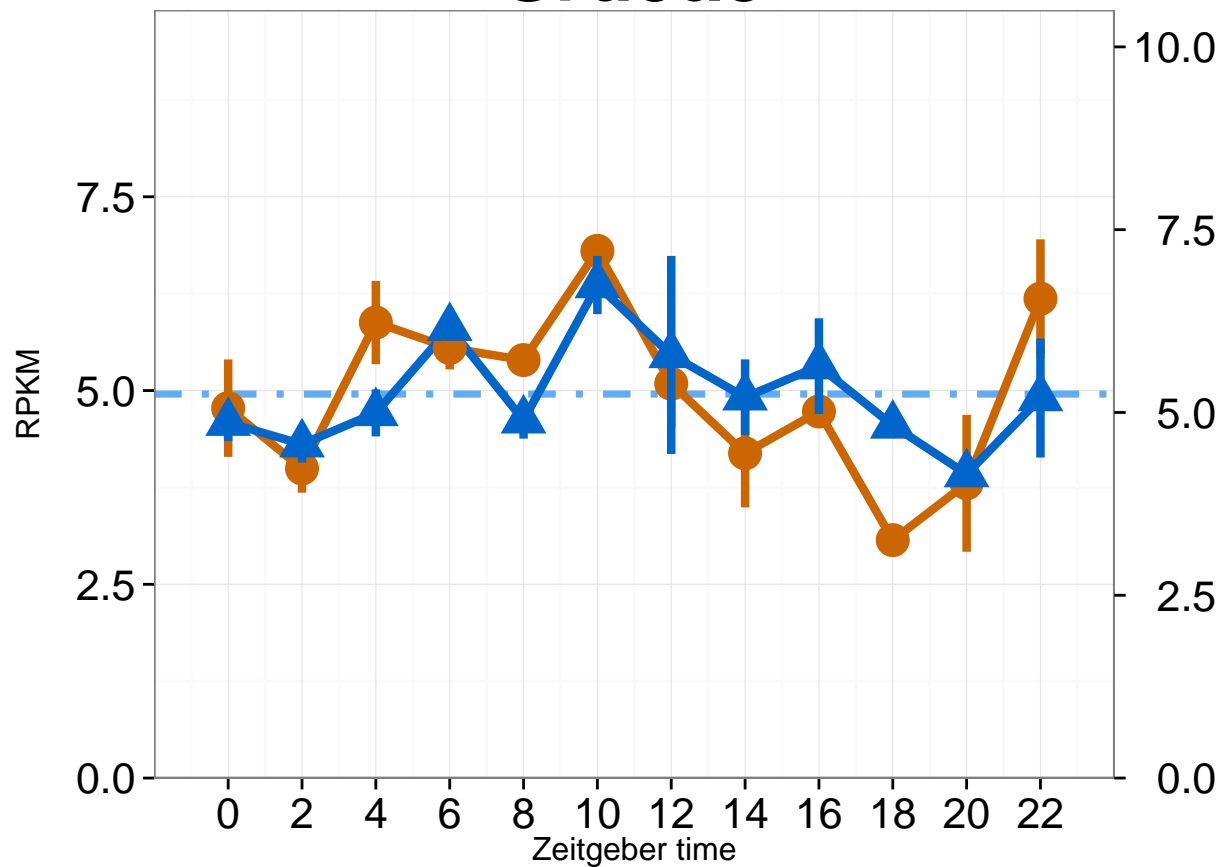

# Srd5a3

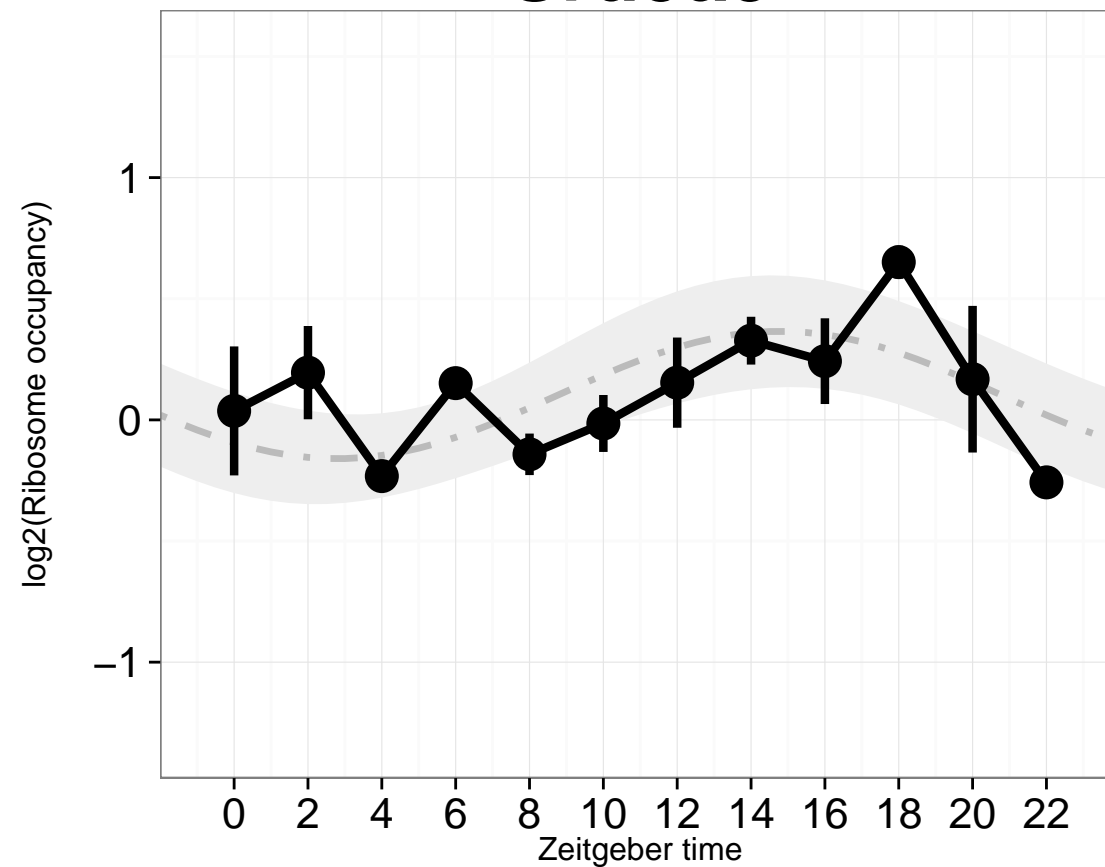

Supplement: SuppDataset_1.zip [file Srd5a3_set_A.pdf › Supplemental Dataset 1/A-mRNA_nonrhyth_translation_nonrhyth/Srd5a3_set_A.pdf]

## Srebf2

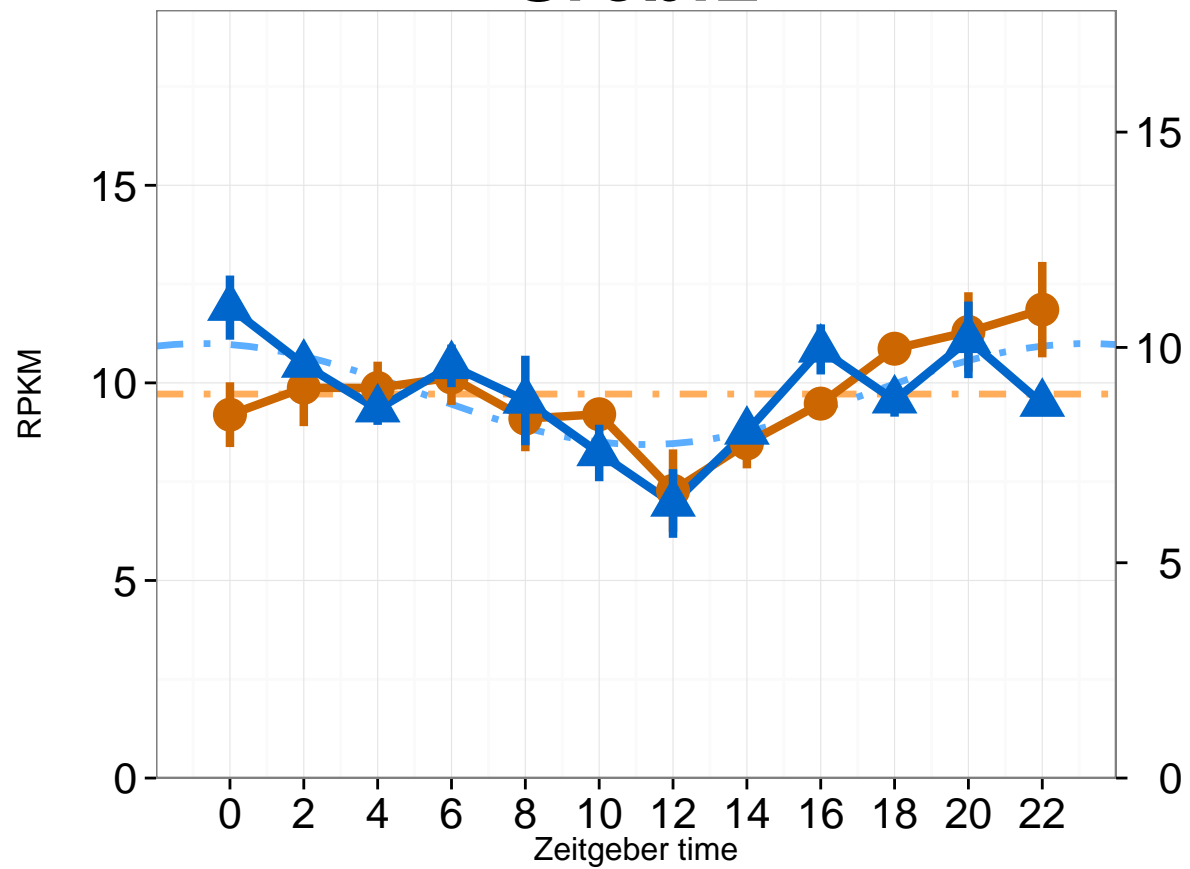

## Srebf2

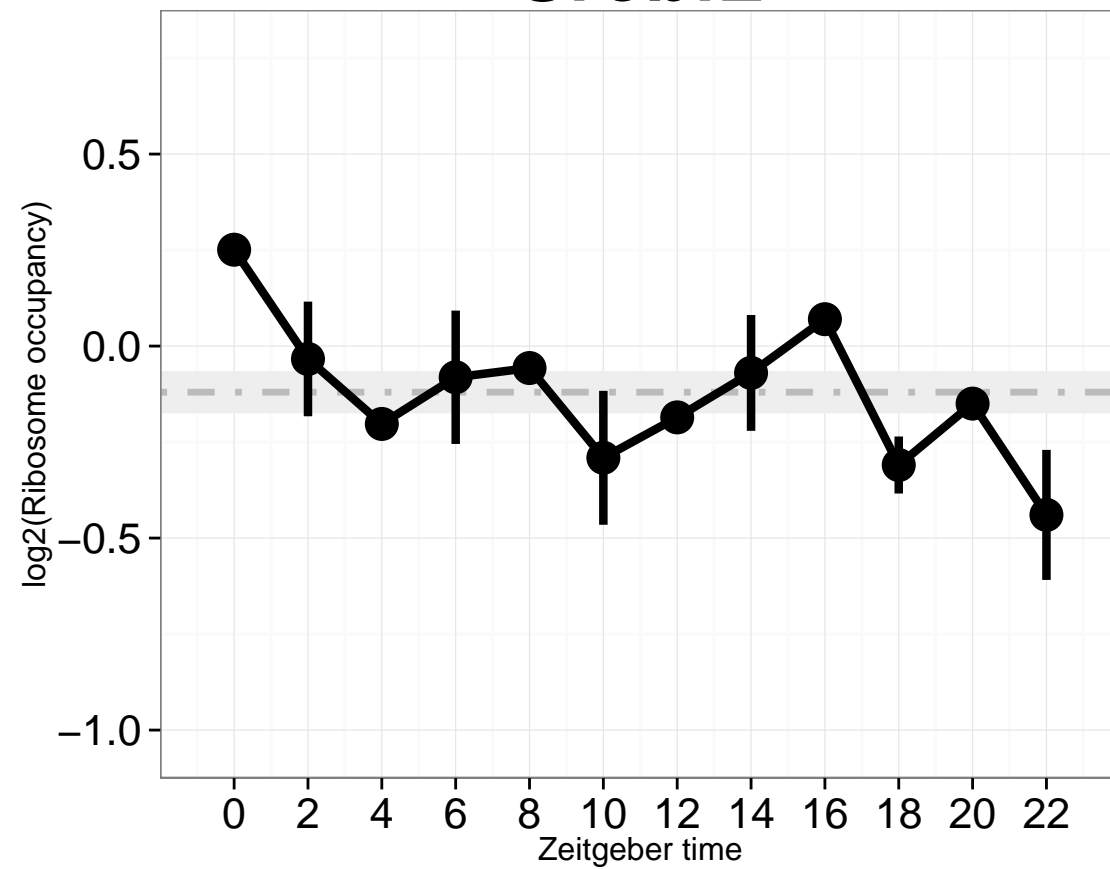

Supplement: SuppDataset_1.zip [file Srebf2_set_A.pdf › Supplemental Dataset 1/A-mRNA_nonrhyth_translation_nonrhyth/Srebf2_set_A.pdf]

# Srf

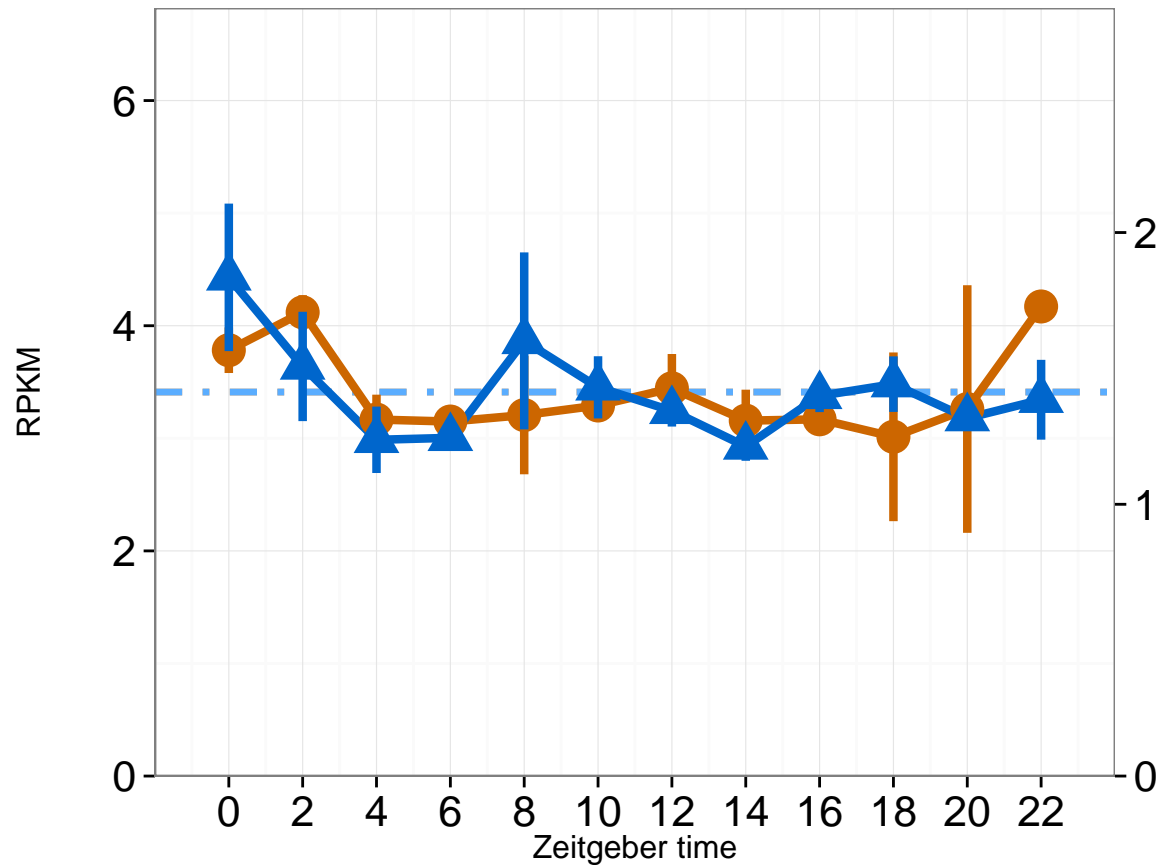

# Srf

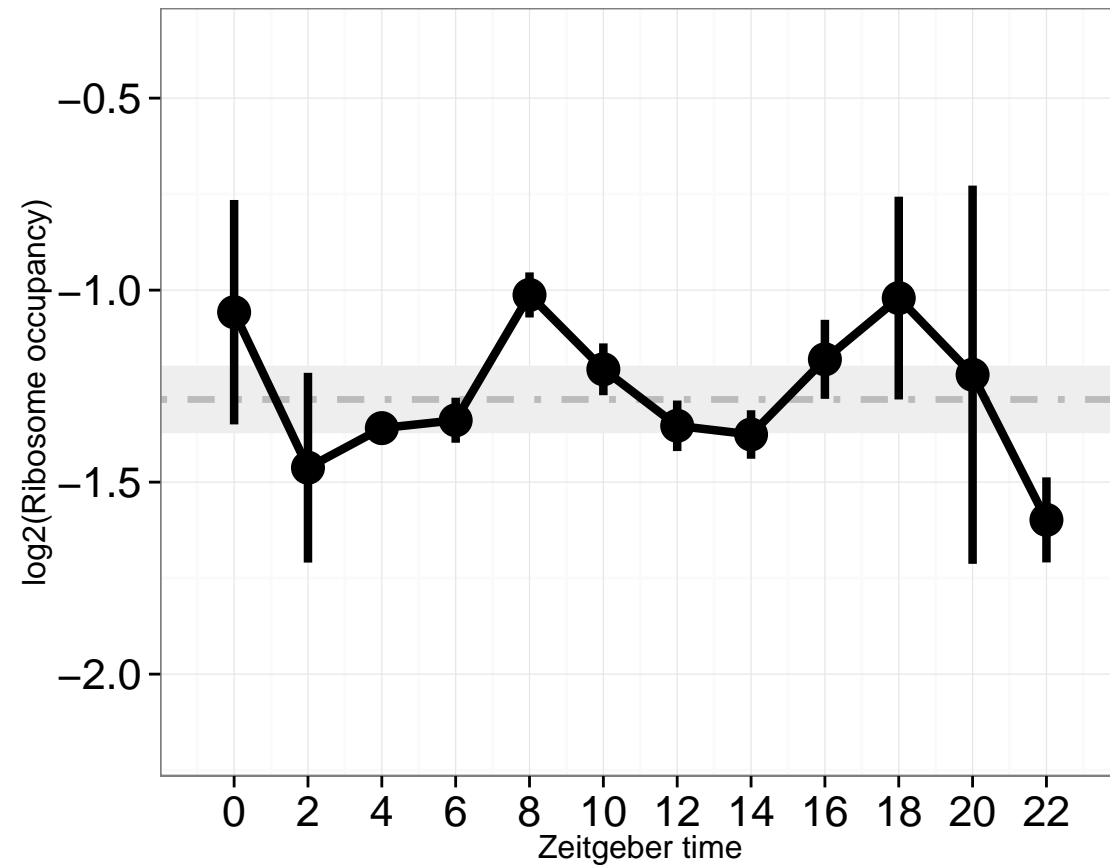

Supplement: SuppDataset_1.zip [file Srf_set_A.pdf › Supplemental Dataset 1/A-mRNA_nonrhyth_translation_nonrhyth/Srf_set_A.pdf]

# Srfbp1

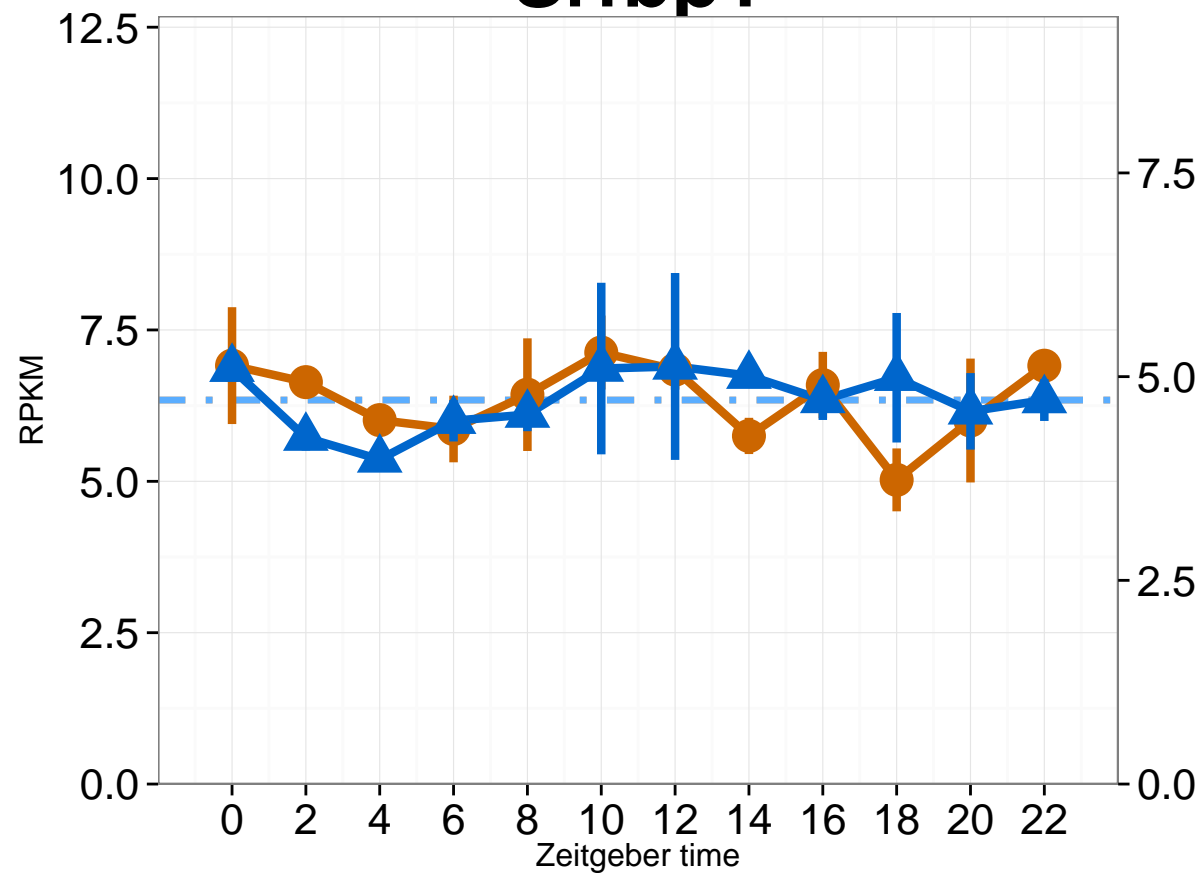

# Srfbp1

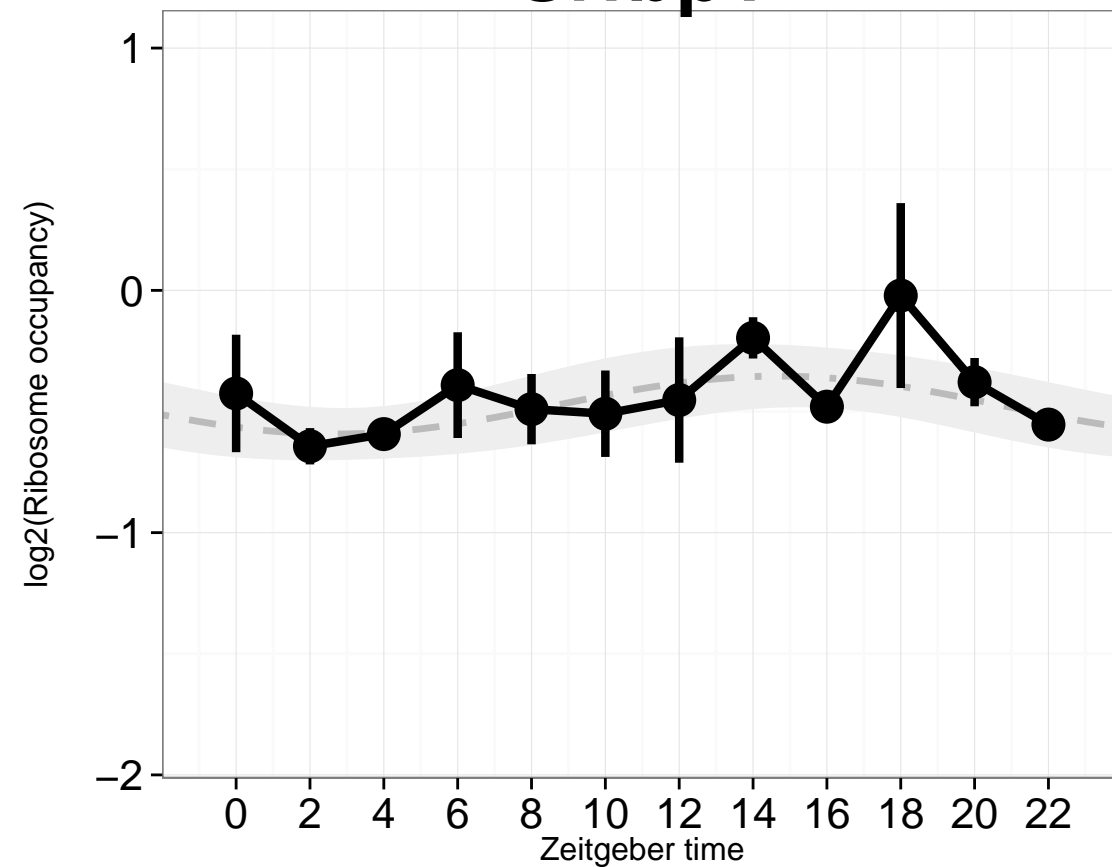

Supplement: SuppDataset_1.zip [file Srfbp1_set_A.pdf › Supplemental Dataset 1/A-mRNA_nonrhyth_translation_nonrhyth/Srfbp1_set_A.pdf]

# Srgap1

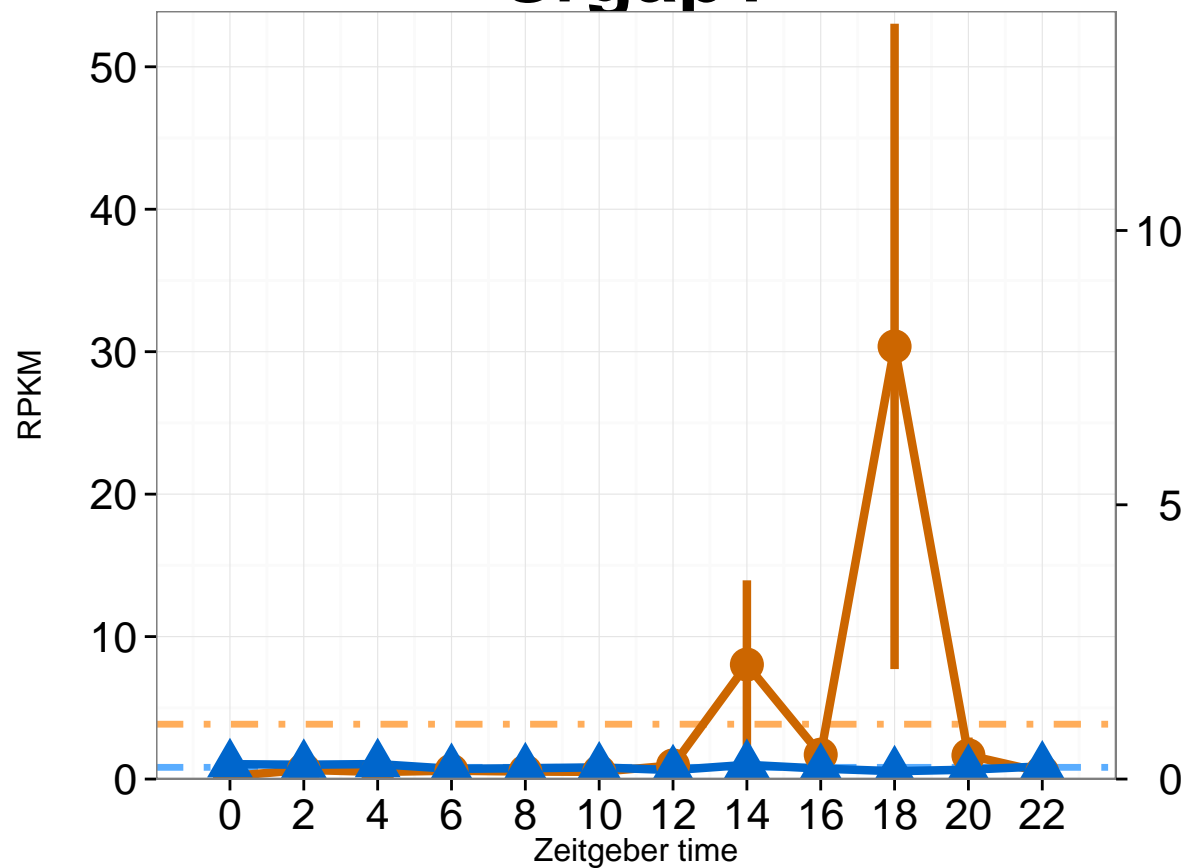

# Srgap1

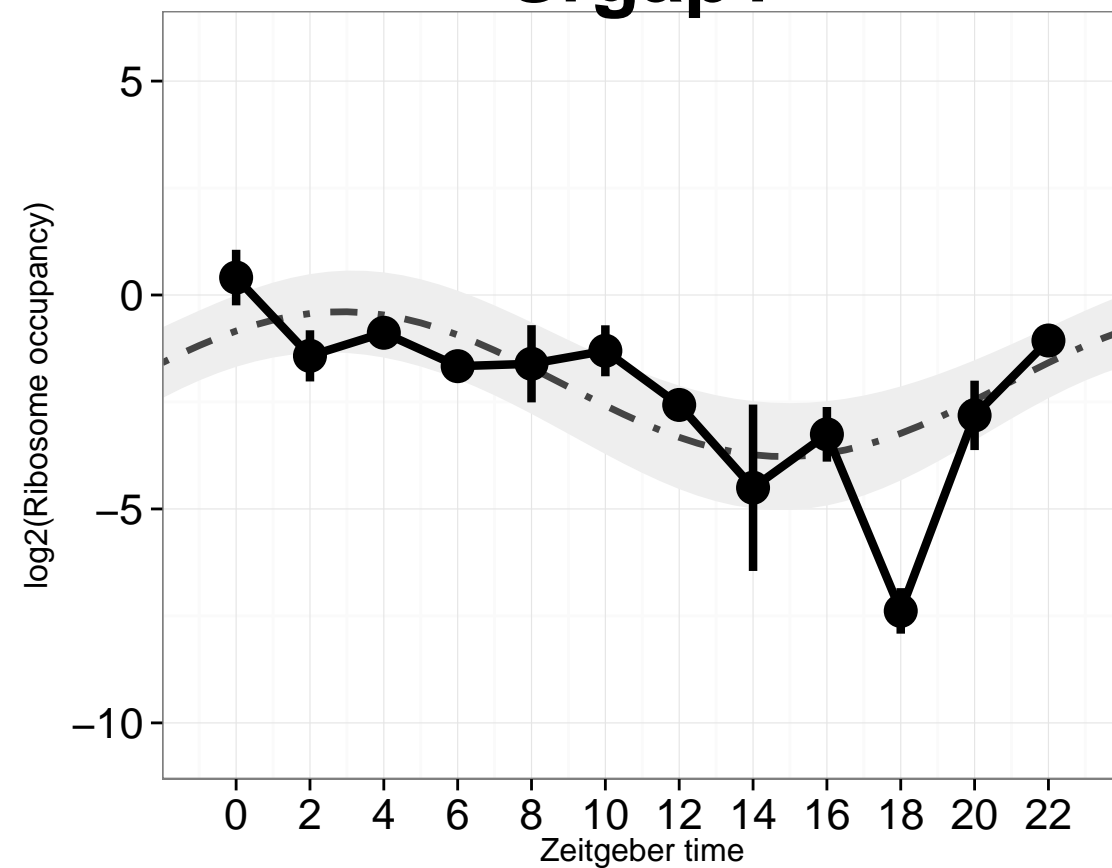

Supplement: SuppDataset_1.zip [file Srgap1_set_A.pdf › Supplemental Dataset 1/A-mRNA_nonrhyth_translation_nonrhyth/Srgap1_set_A.pdf]

# Srgap2

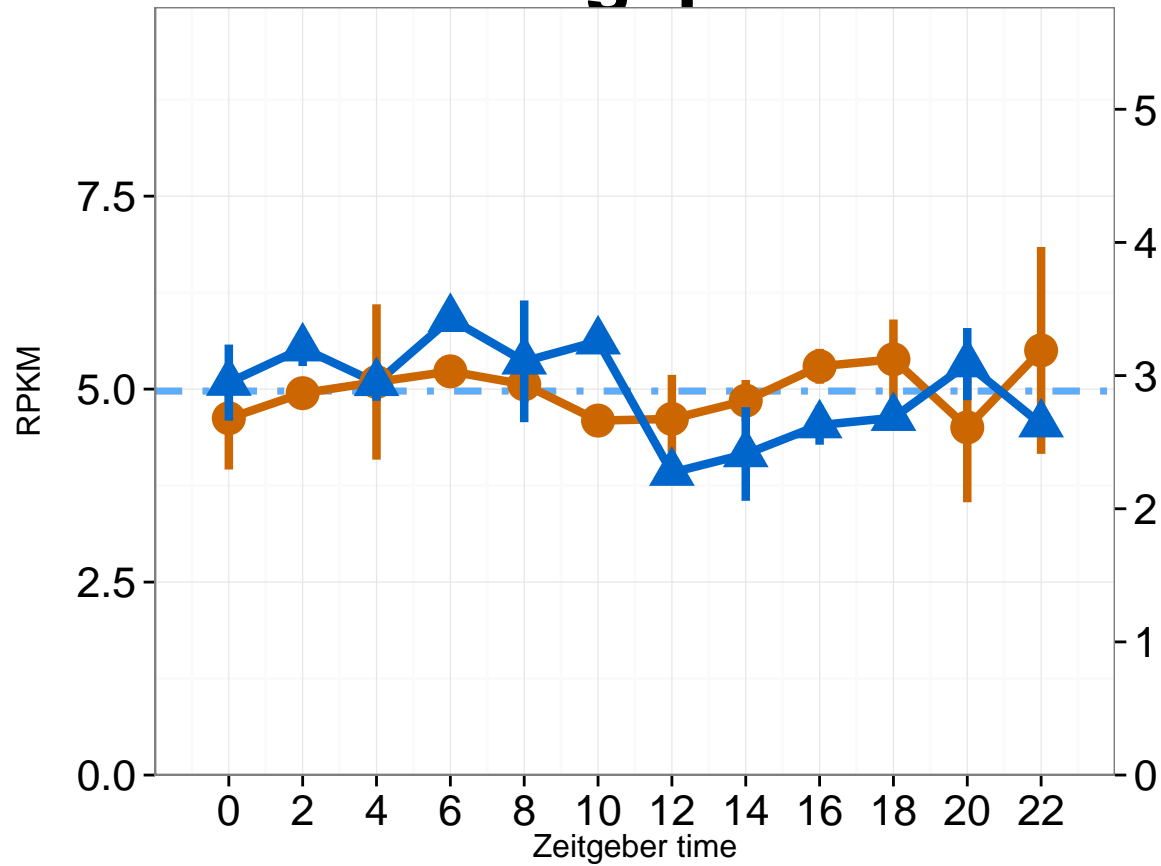

# Srgap2

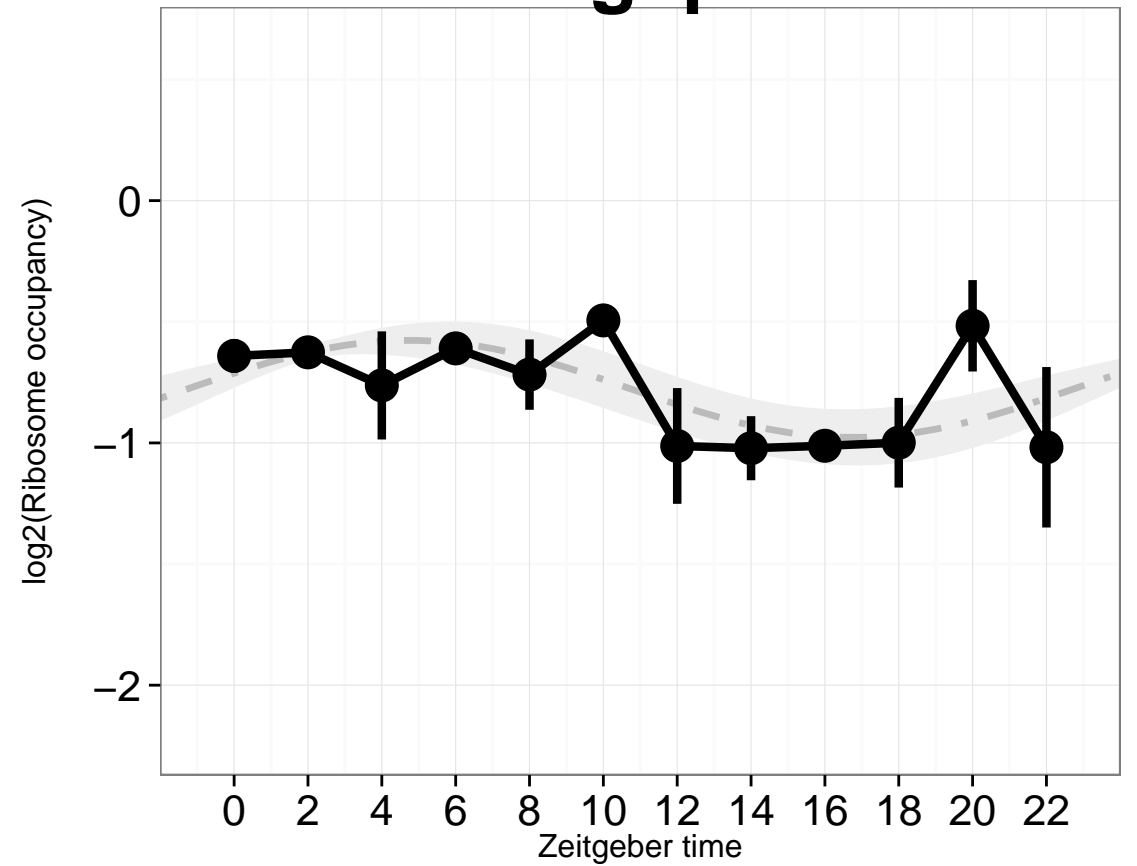

Supplement: SuppDataset_1.zip [file Srgap2_set_A.pdf › Supplemental Dataset 1/A-mRNA_nonrhyth_translation_nonrhyth/Srgap2_set_A.pdf]

## Srgn

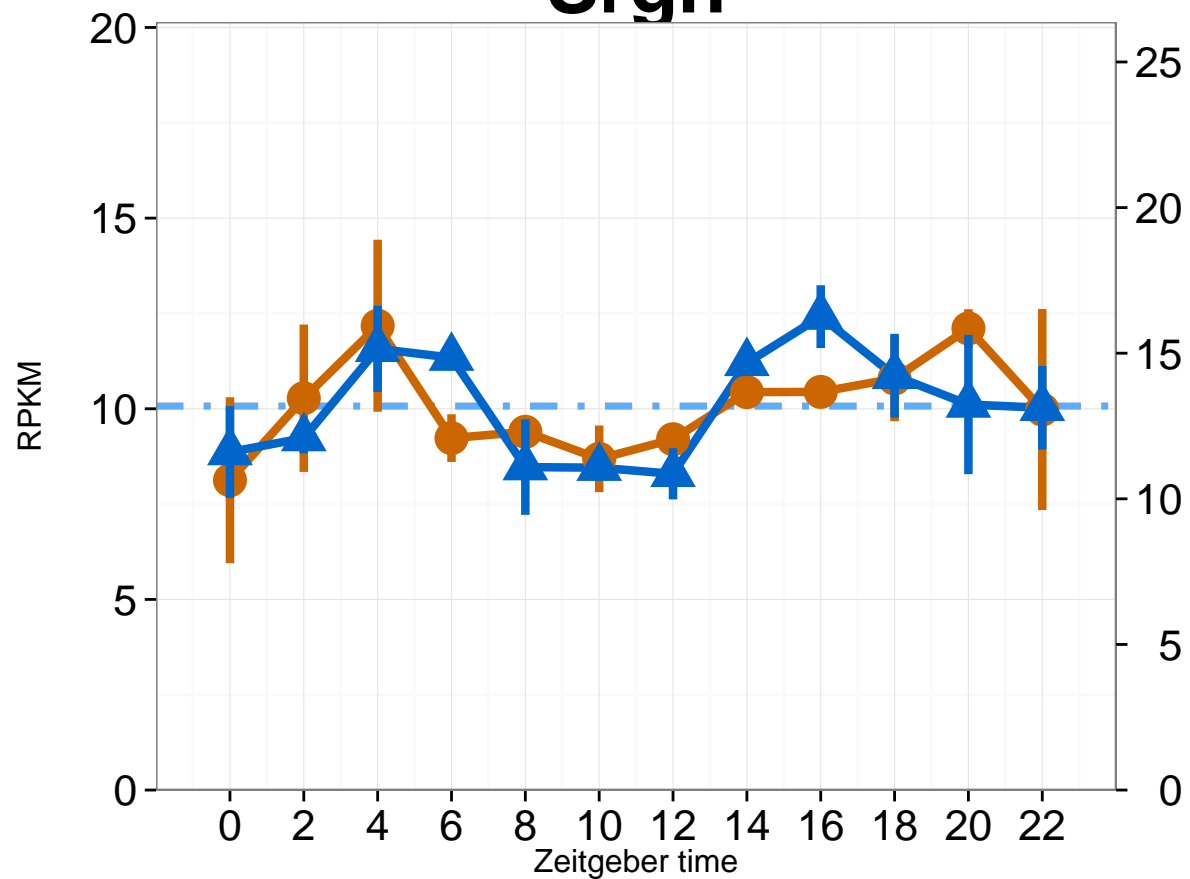

## Srgn

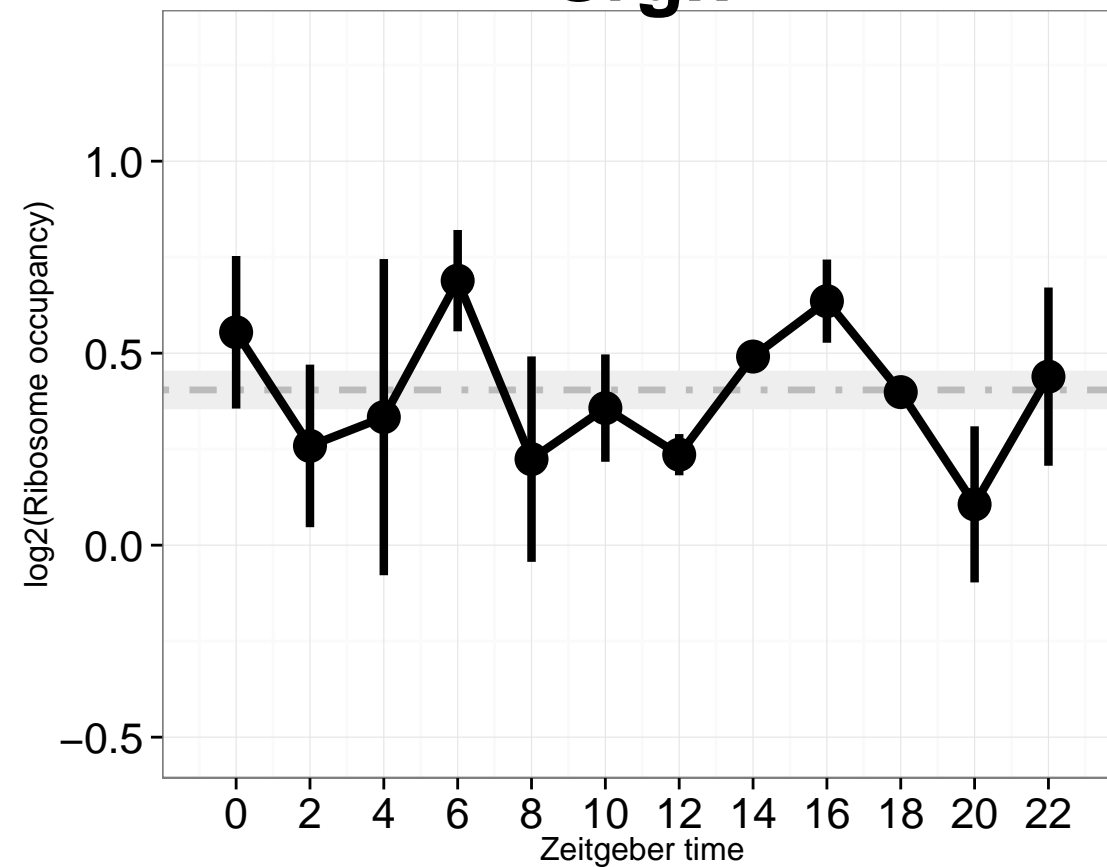

Supplement: SuppDataset_1.zip [file Srgn_set_A.pdf › Supplemental Dataset 1/A-mRNA_nonrhyth_translation_nonrhyth/Srgn_set_A.pdf]

## Sri

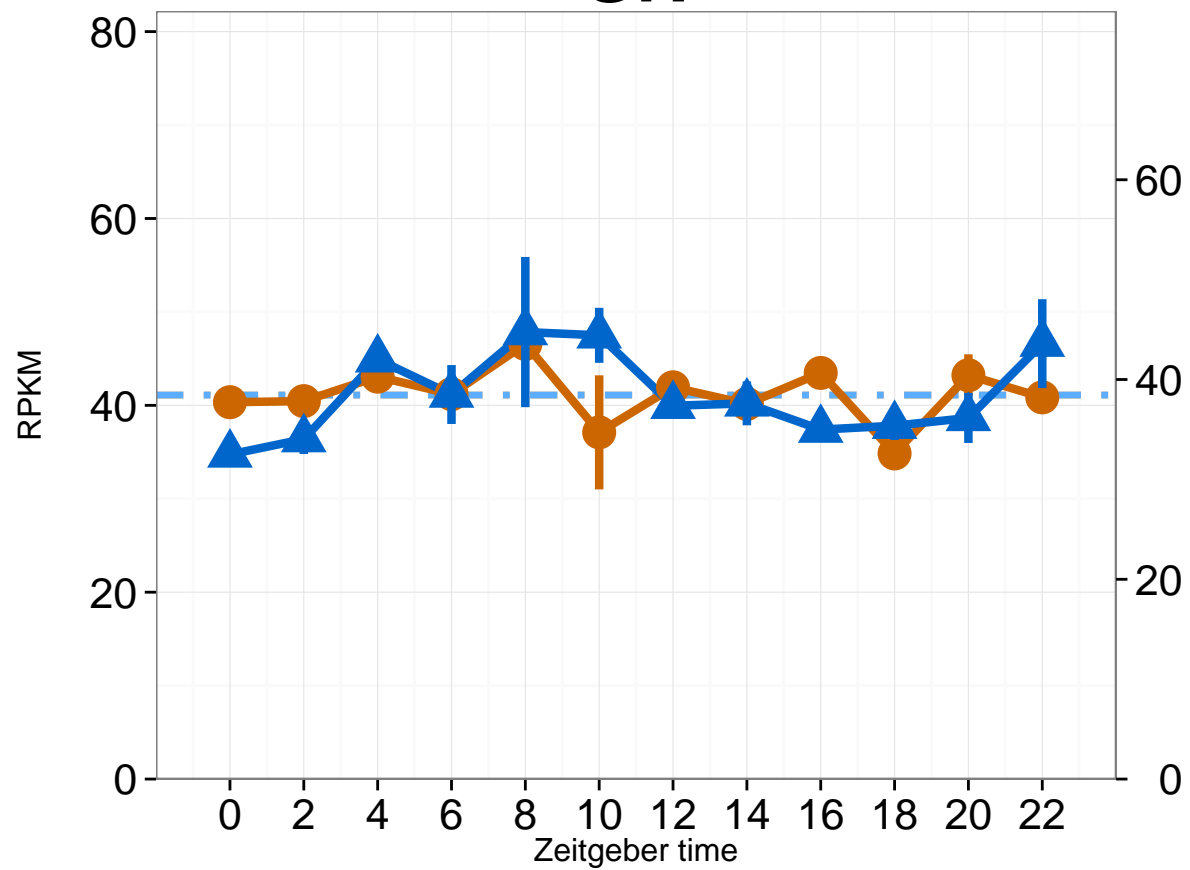

## Sri

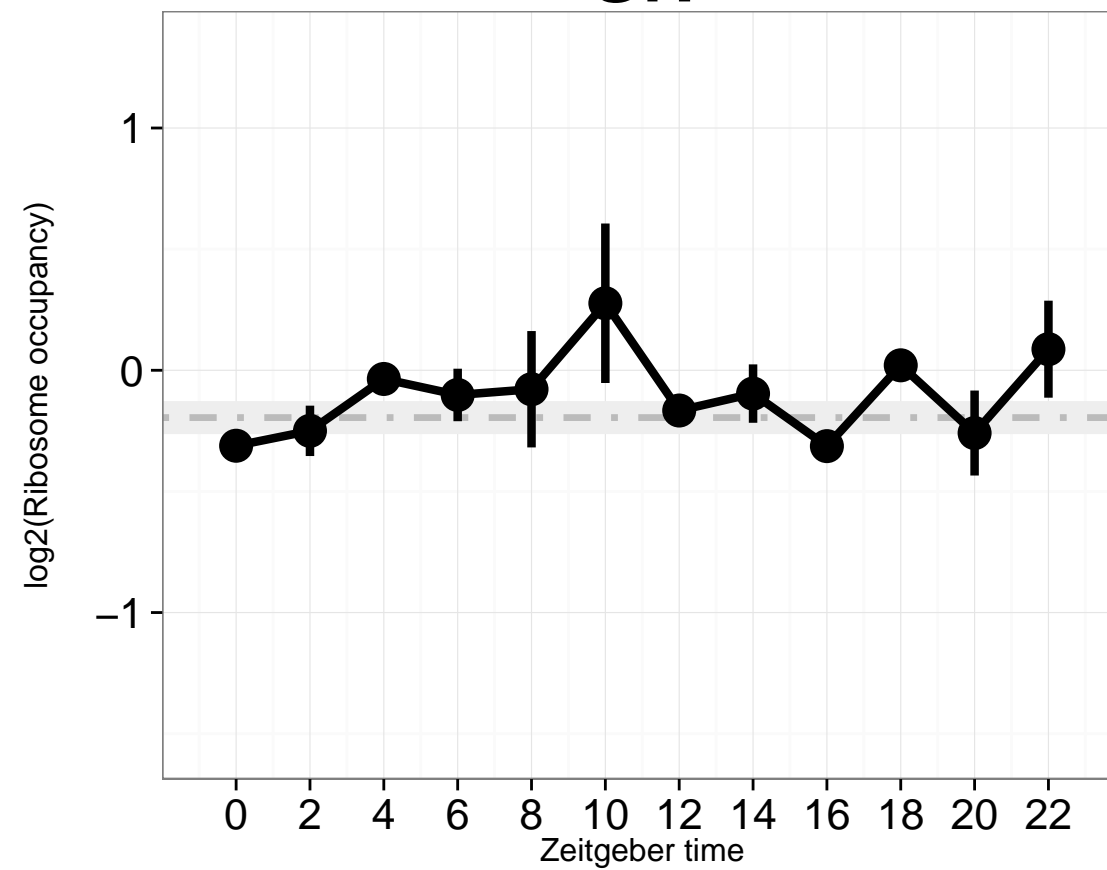

Supplement: SuppDataset_1.zip [file Sri_set_A.pdf › Supplemental Dataset 1/A-mRNA_nonrhyth_translation_nonrhyth/Sri_set_A.pdf]

# Srl

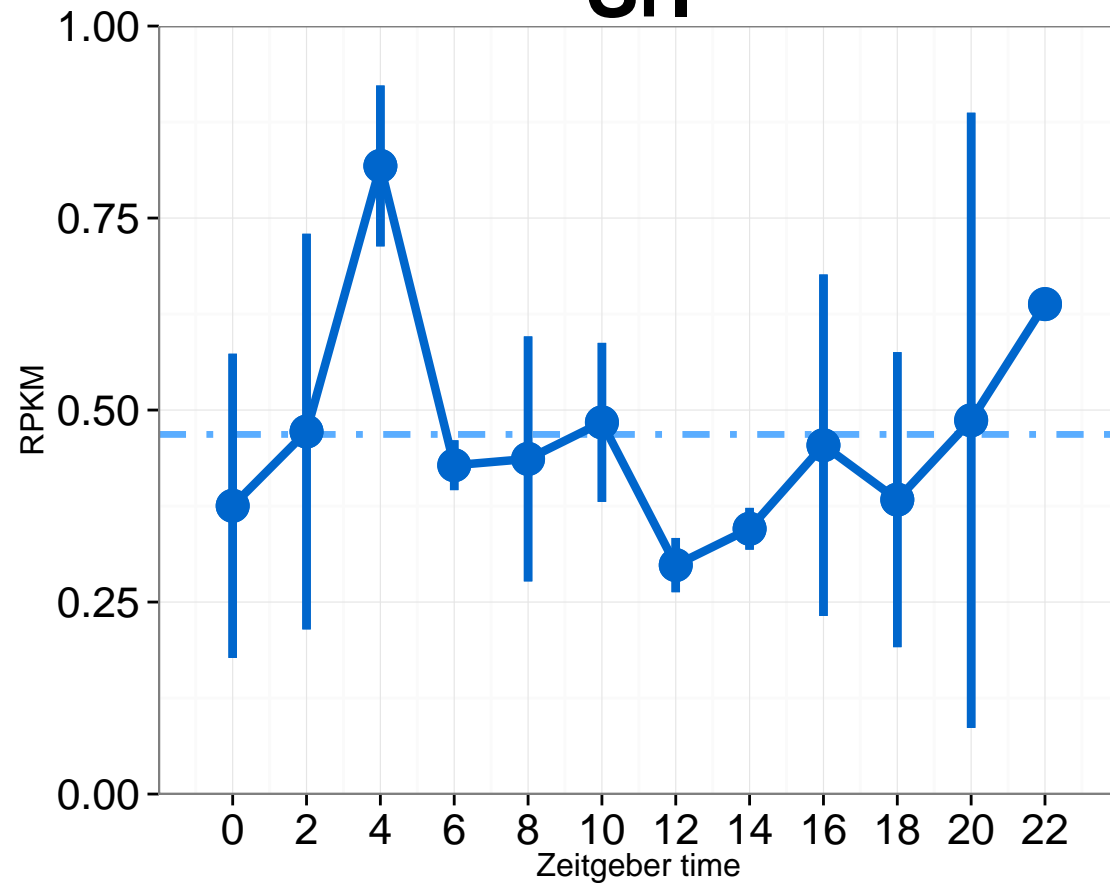

# Srl log2(Ribosome occupancy)

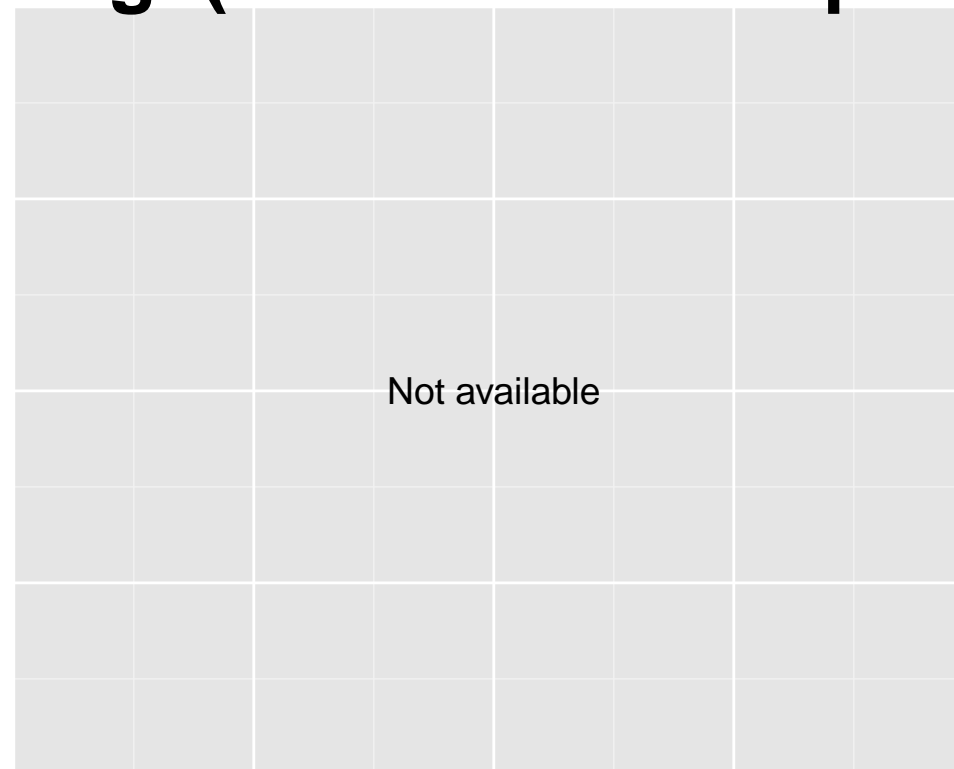

Supplement: SuppDataset_1.zip [file Srl_set_A.pdf › Supplemental Dataset 1/A-mRNA_nonrhyth_translation_nonrhyth/Srl_set_A.pdf]

# Srp14

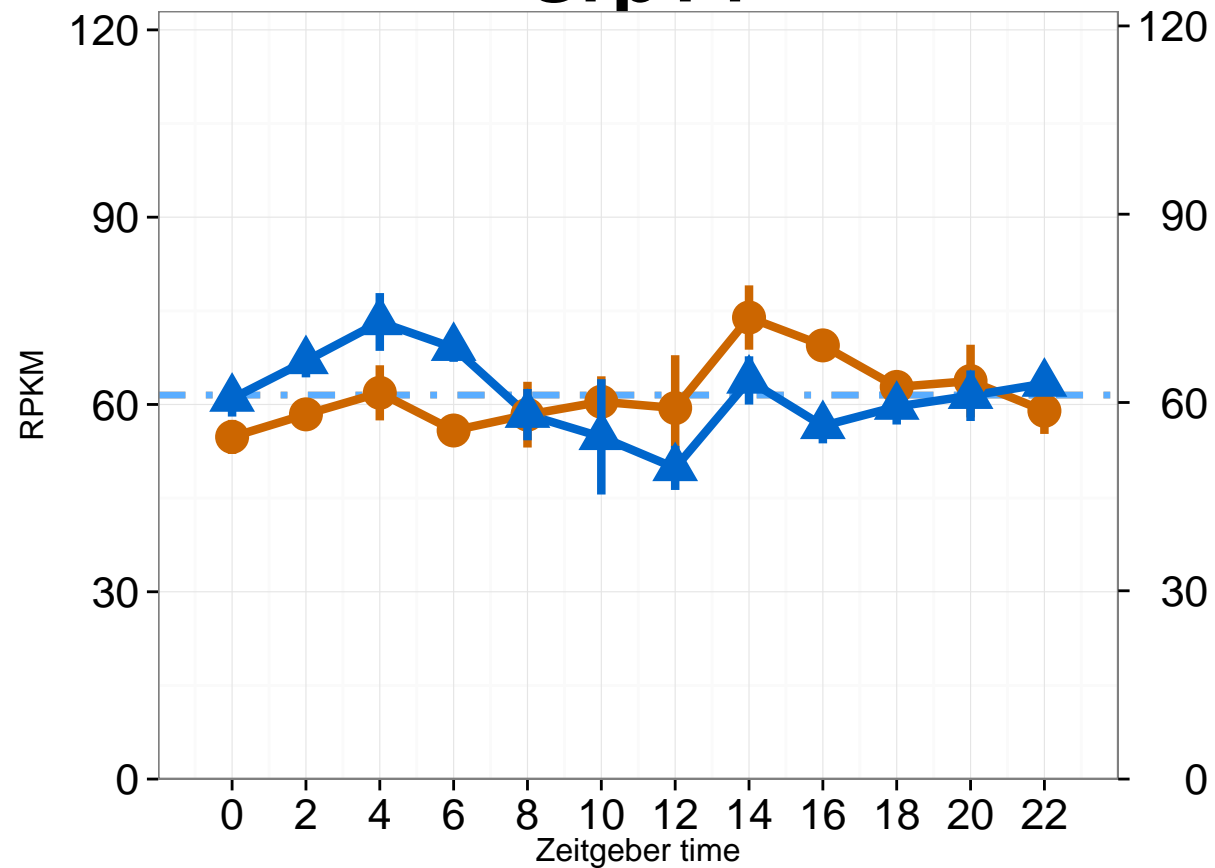

# Srp14

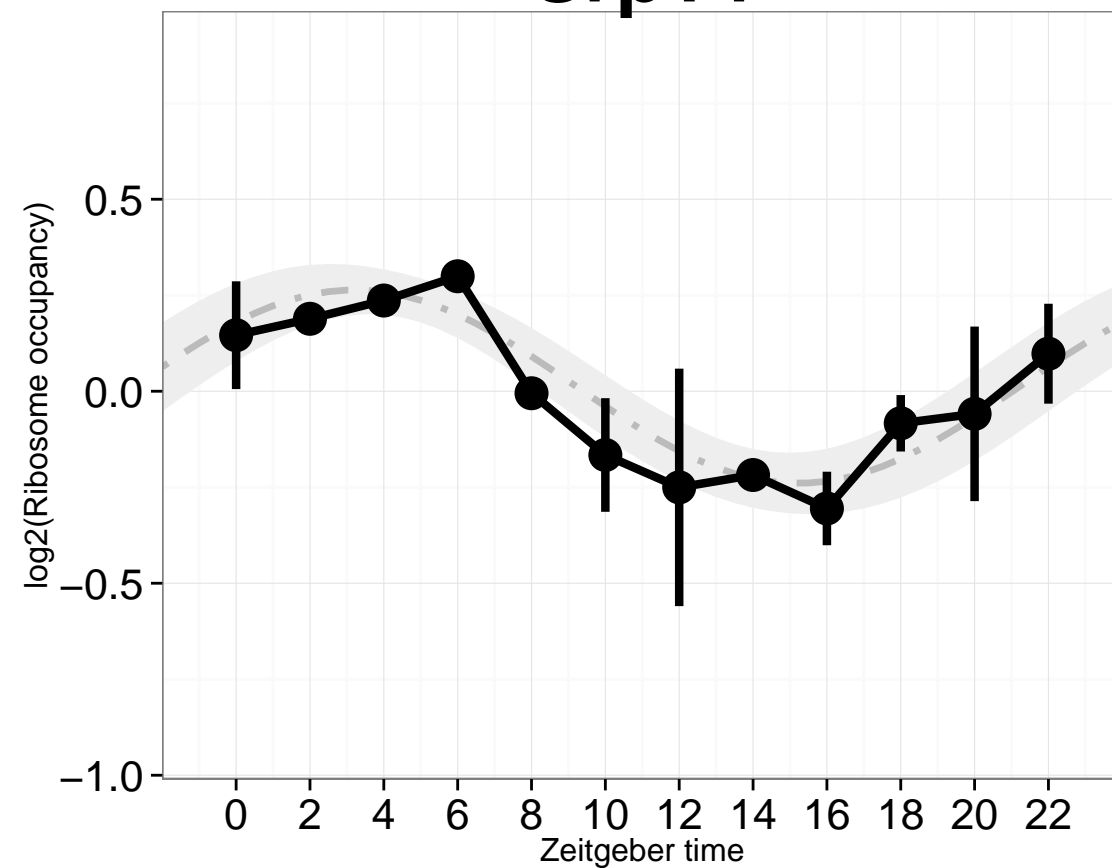

Supplement: SuppDataset_1.zip [file Srp14_set_A.pdf › Supplemental Dataset 1/A-mRNA_nonrhyth_translation_nonrhyth/Srp14_set_A.pdf]
