# Supplementary figures and images for: Ribosome profiling reveals the rhythmic liver translatome and circadian clock regulation by upstream open reading frames (part 71 of 113)
Source: HighWire-hosted journal article supplement (doi:10.1101/gr.195404.115), 2015-10-20

# Srp54b

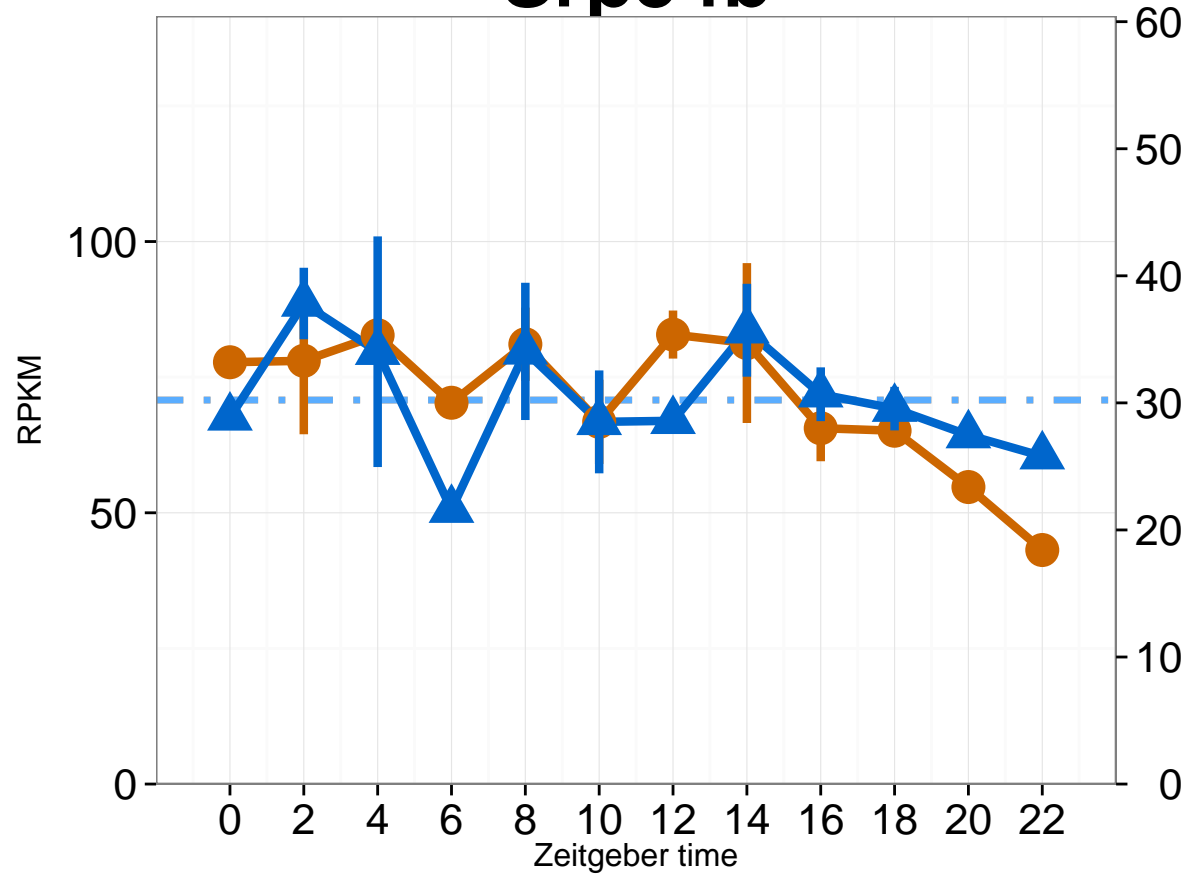

# Srp54b

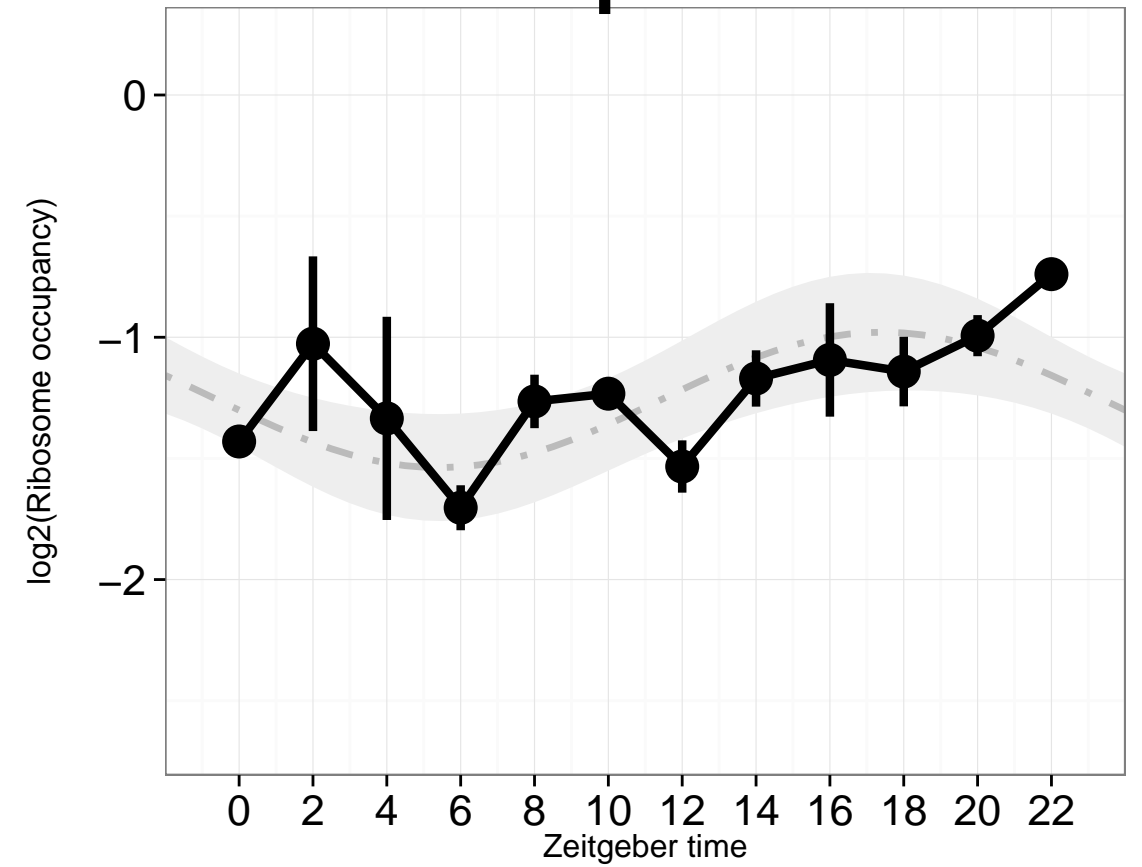

Supplement: SuppDataset_1.zip [file Srp54b_set_A.pdf › Supplemental Dataset 1/A-mRNA_nonrhyth_translation_nonrhyth/Srp54b_set_A.pdf]

# Srp54c

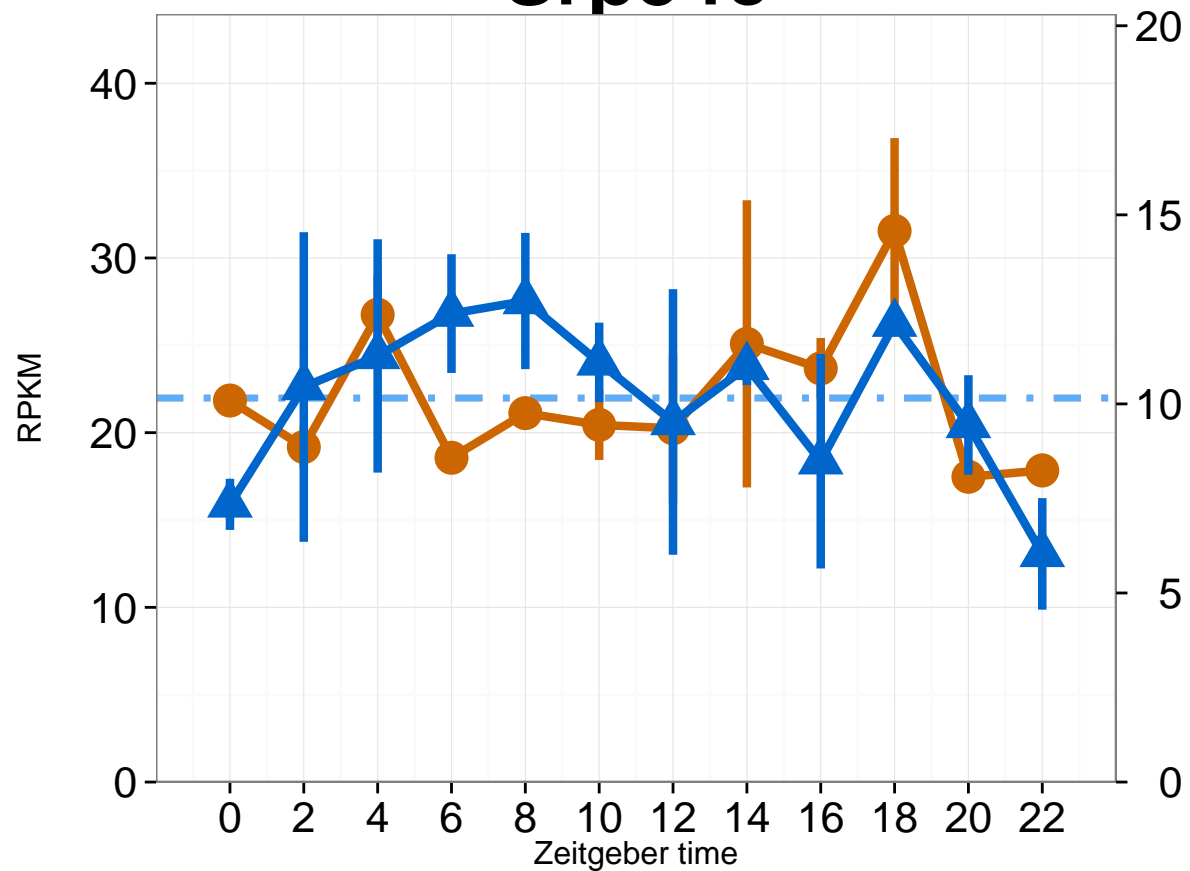

# Srp54c

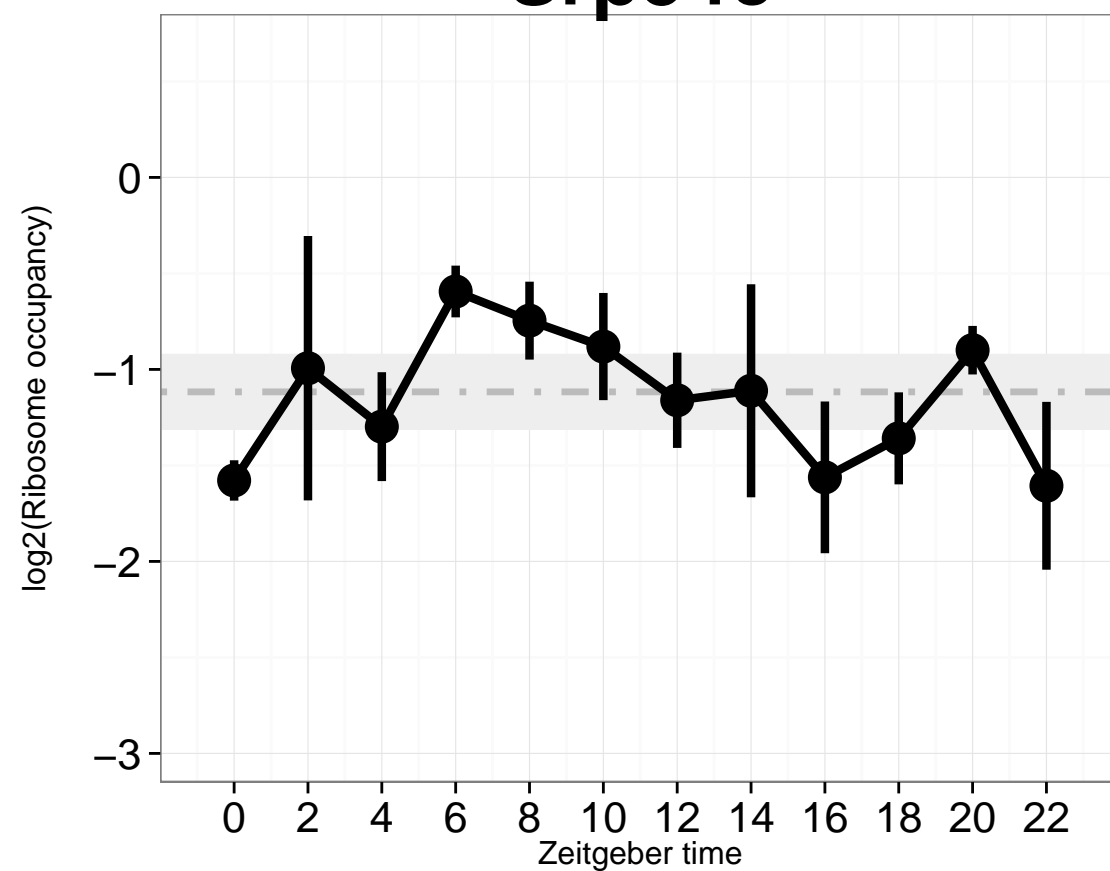

Supplement: SuppDataset_1.zip [file Srp54c_set_A.pdf › Supplemental Dataset 1/A-mRNA_nonrhyth_translation_nonrhyth/Srp54c_set_A.pdf]

# Srp68

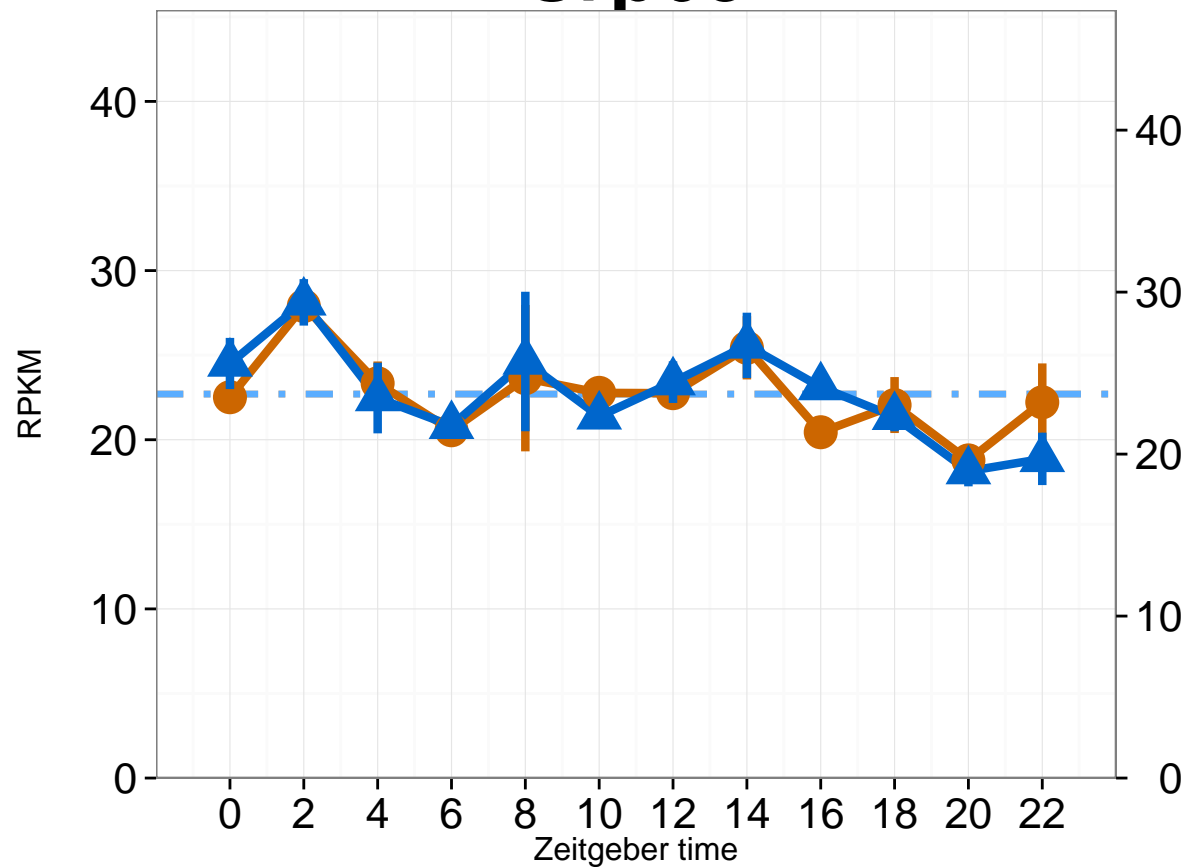

# Srp68

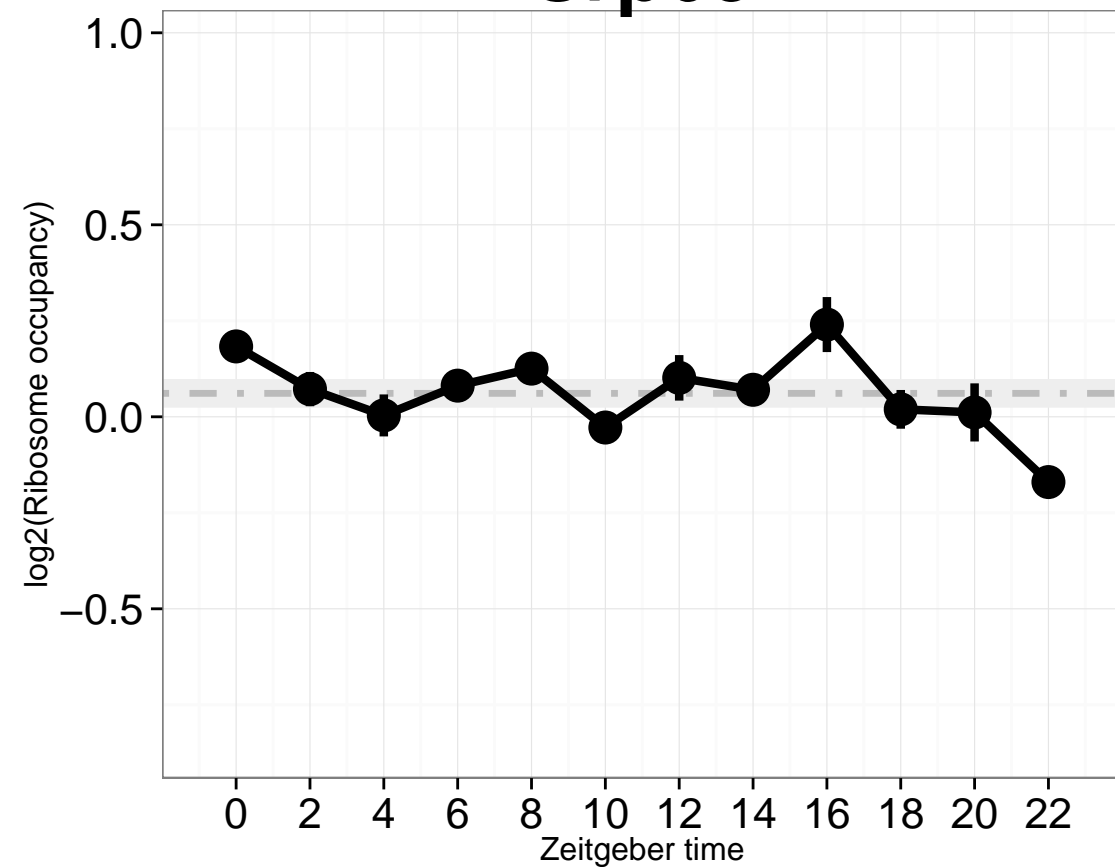

Supplement: SuppDataset_1.zip [file Srp68_set_A.pdf › Supplemental Dataset 1/A-mRNA_nonrhyth_translation_nonrhyth/Srp68_set_A.pdf]

# Srp72

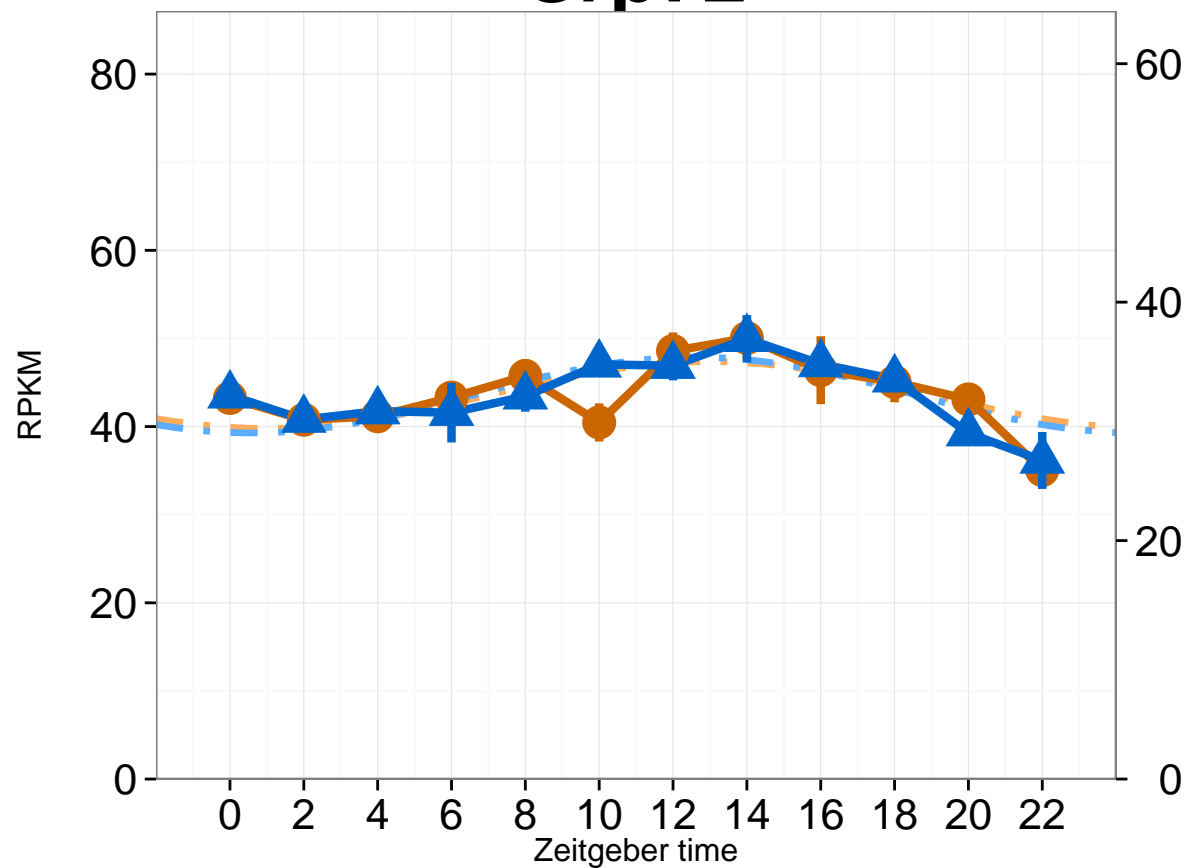

# Srp72

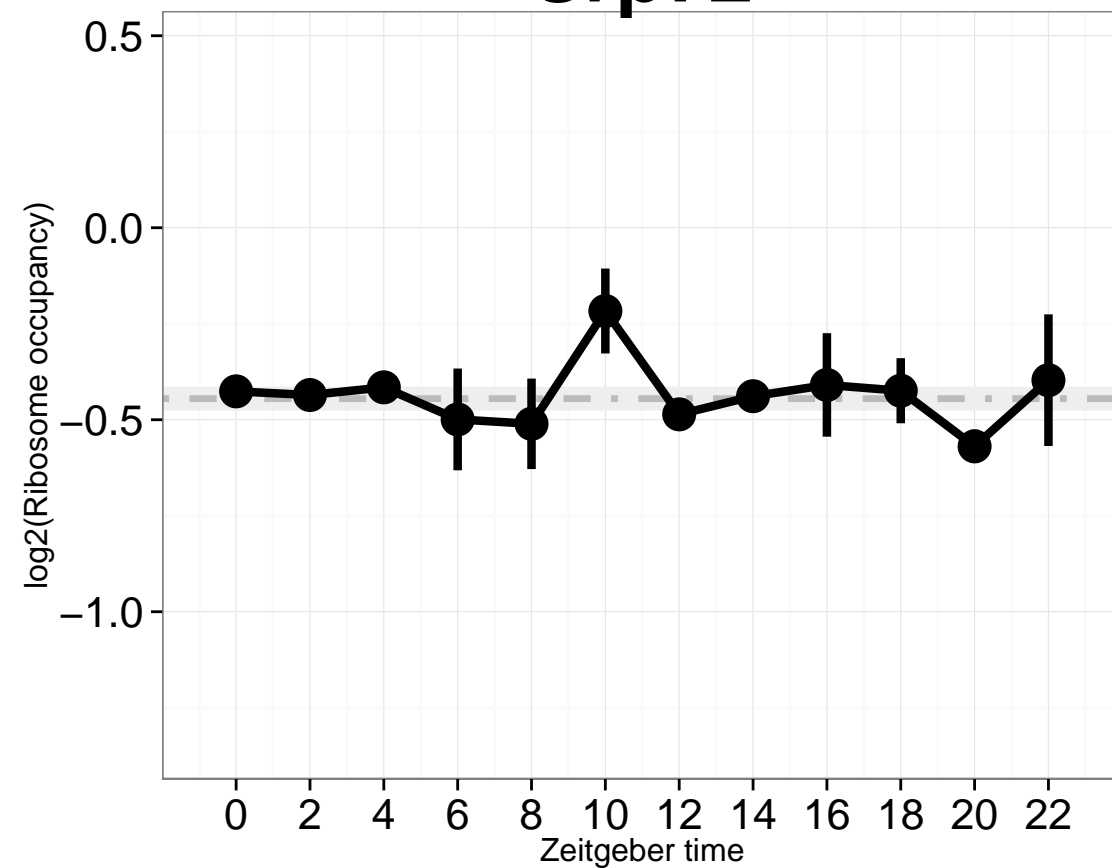

Supplement: SuppDataset_1.zip [file Srp72_set_A.pdf › Supplemental Dataset 1/A-mRNA_nonrhyth_translation_nonrhyth/Srp72_set_A.pdf]

# Srp9

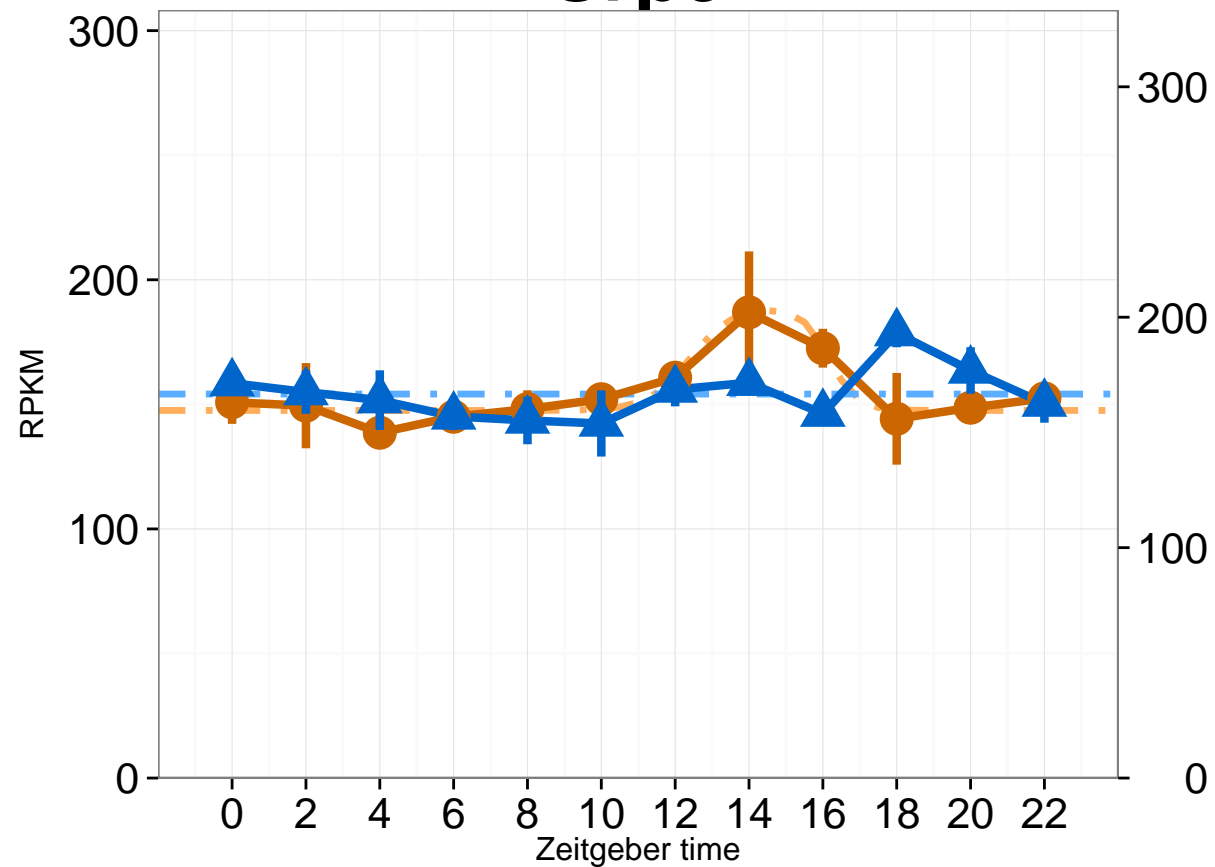

# Srp9

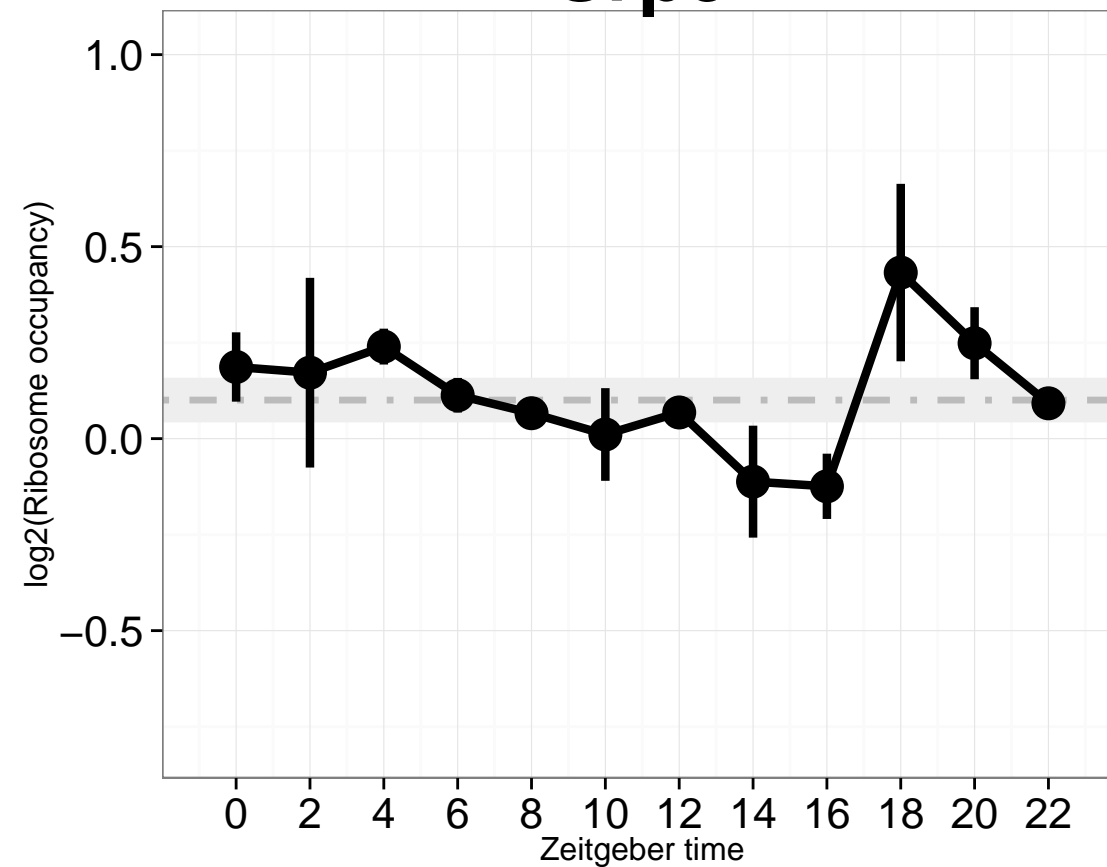

Supplement: SuppDataset_1.zip [file Srp9_set_A.pdf › Supplemental Dataset 1/A-mRNA_nonrhyth_translation_nonrhyth/Srp9_set_A.pdf]

# Srpk1

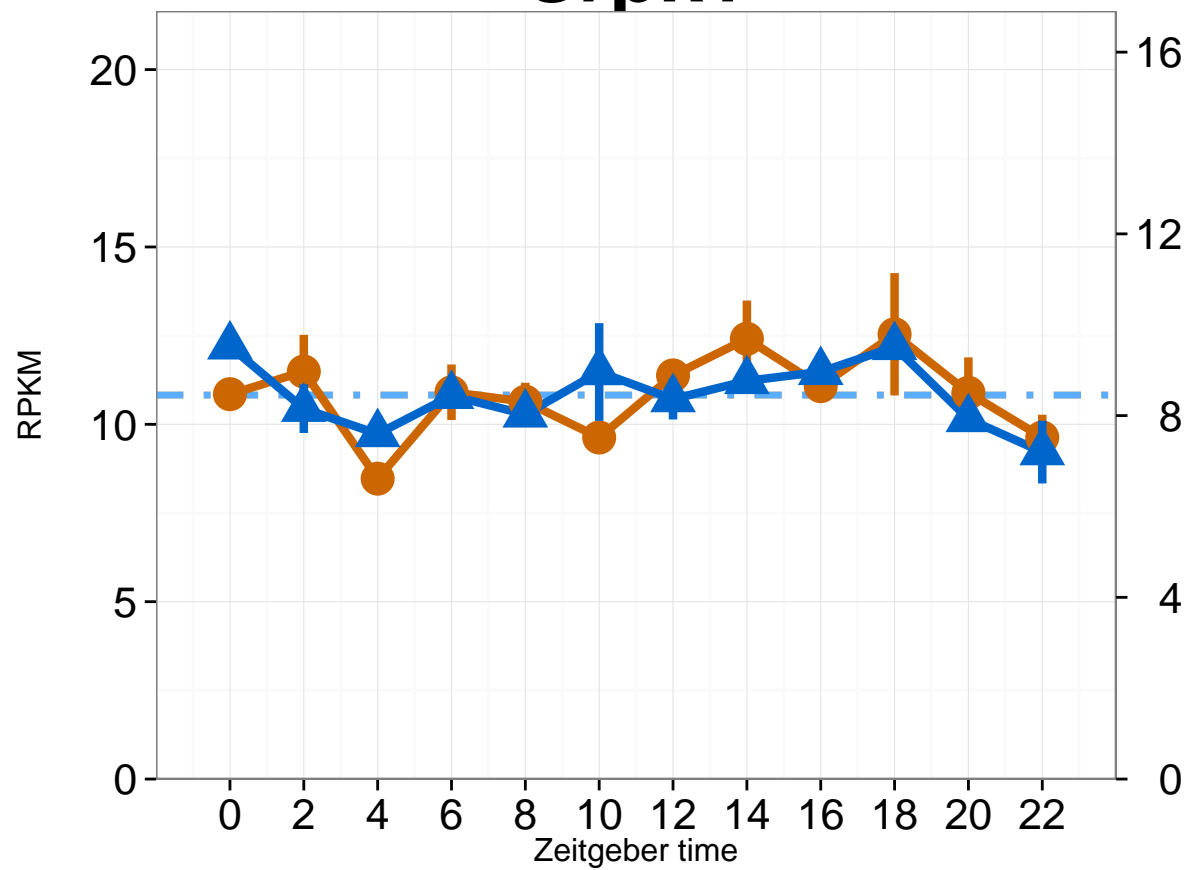

# Srpk1

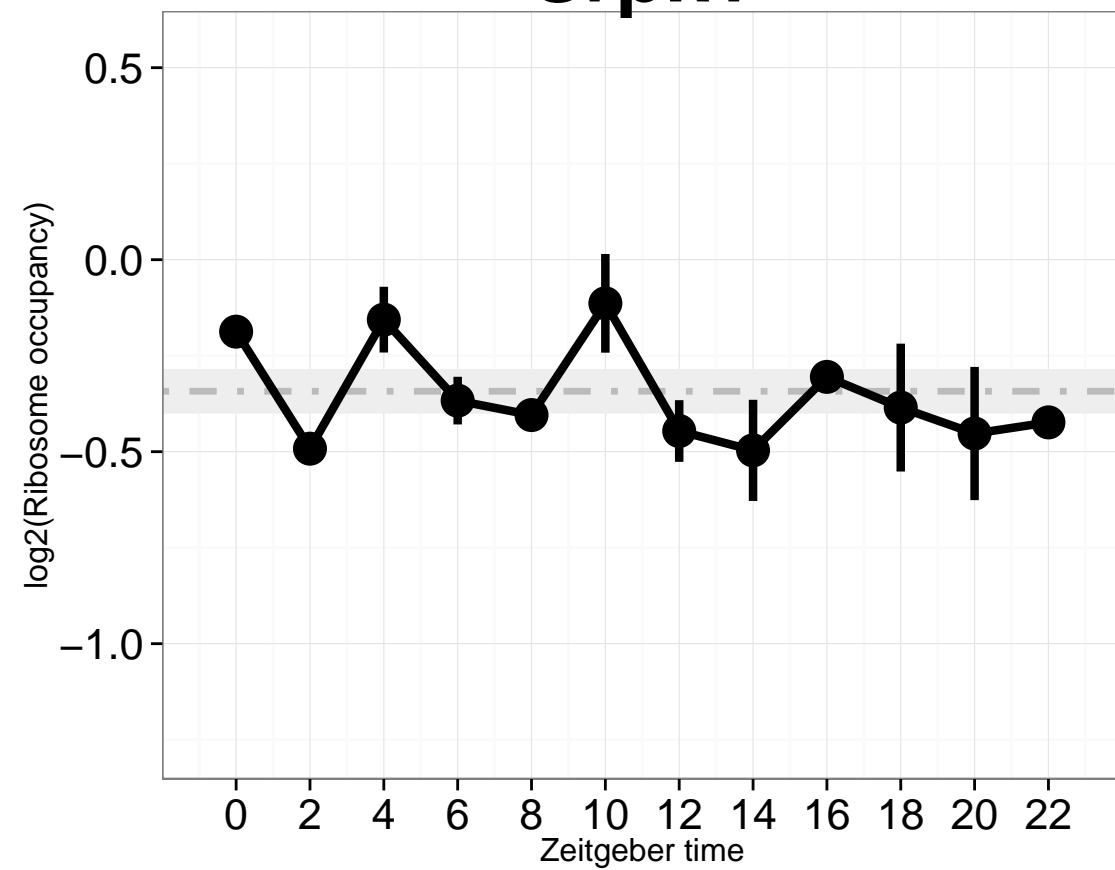

Supplement: SuppDataset_1.zip [file Srpk1_set_A.pdf › Supplemental Dataset 1/A-mRNA_nonrhyth_translation_nonrhyth/Srpk1_set_A.pdf]

## Srpk2

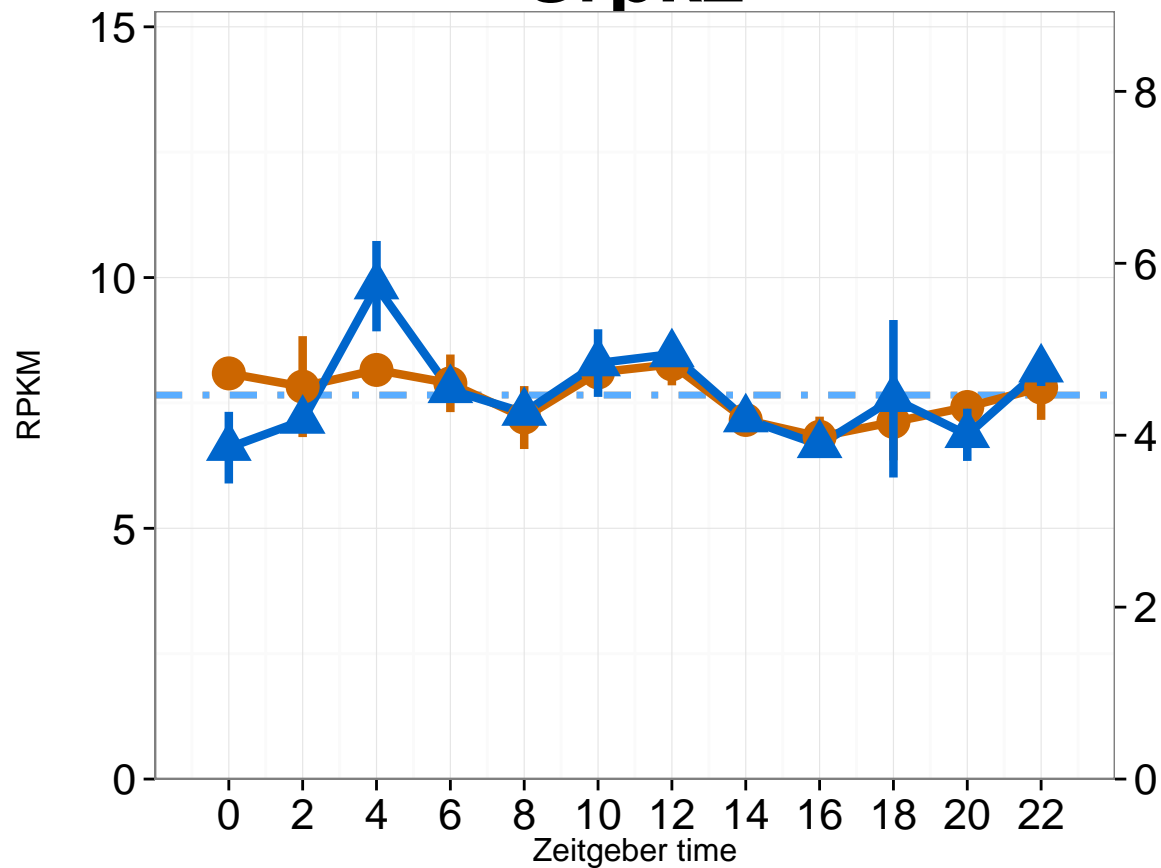

## Srpk2

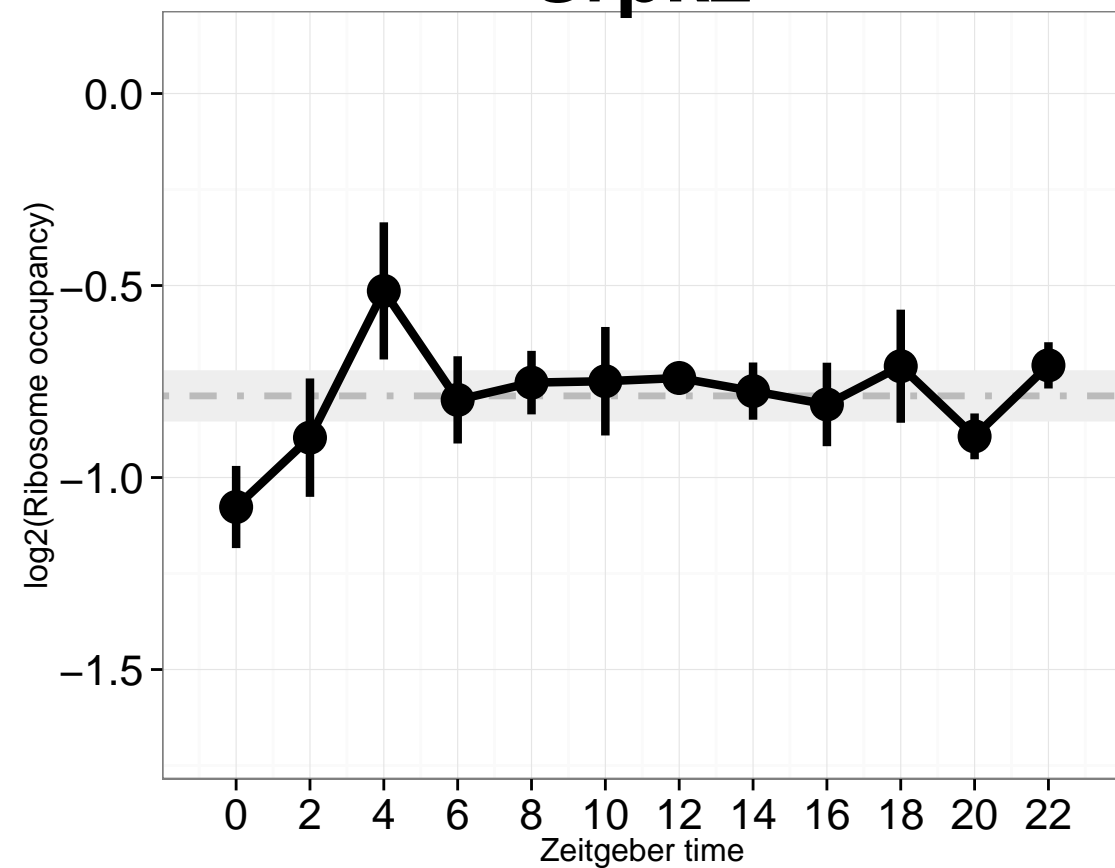

Supplement: SuppDataset_1.zip [file Srpk2_set_A.pdf › Supplemental Dataset 1/A-mRNA_nonrhyth_translation_nonrhyth/Srpk2_set_A.pdf]

## Srpr

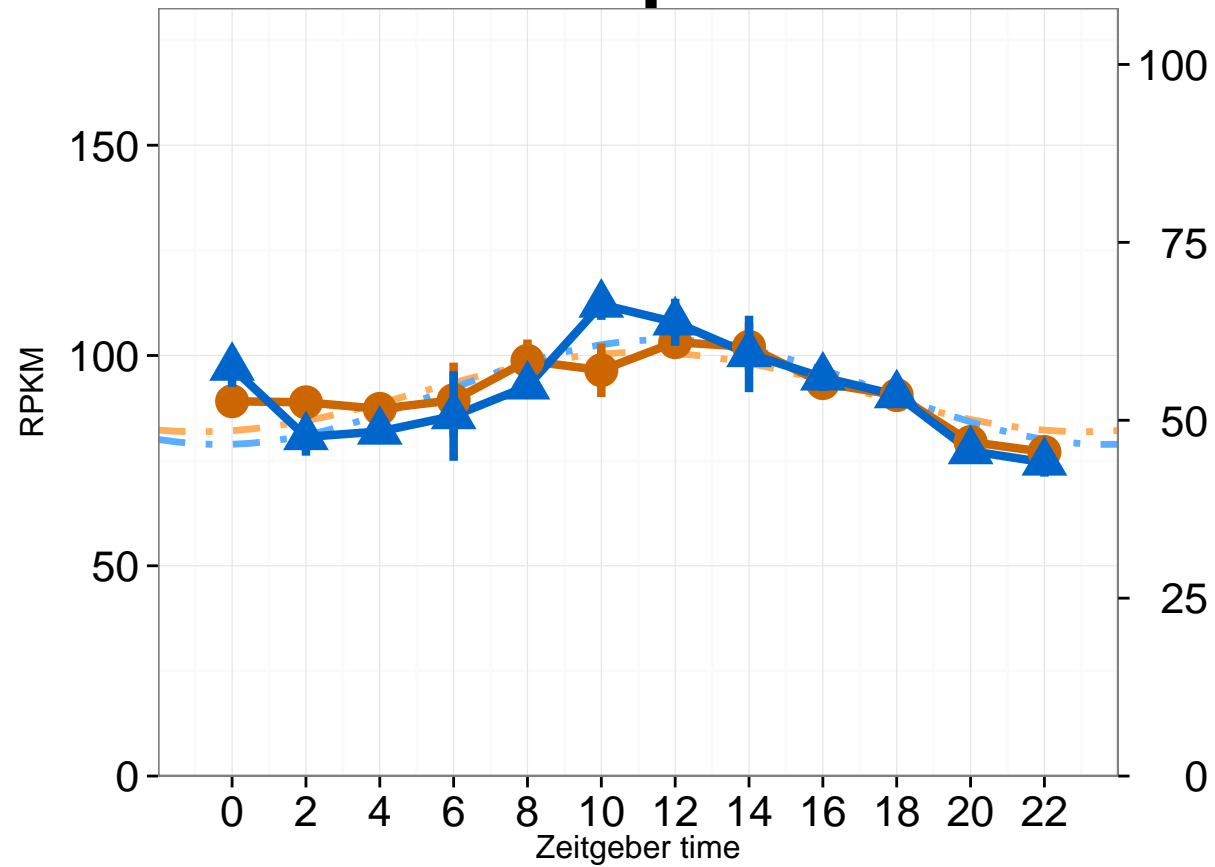

## Srpr

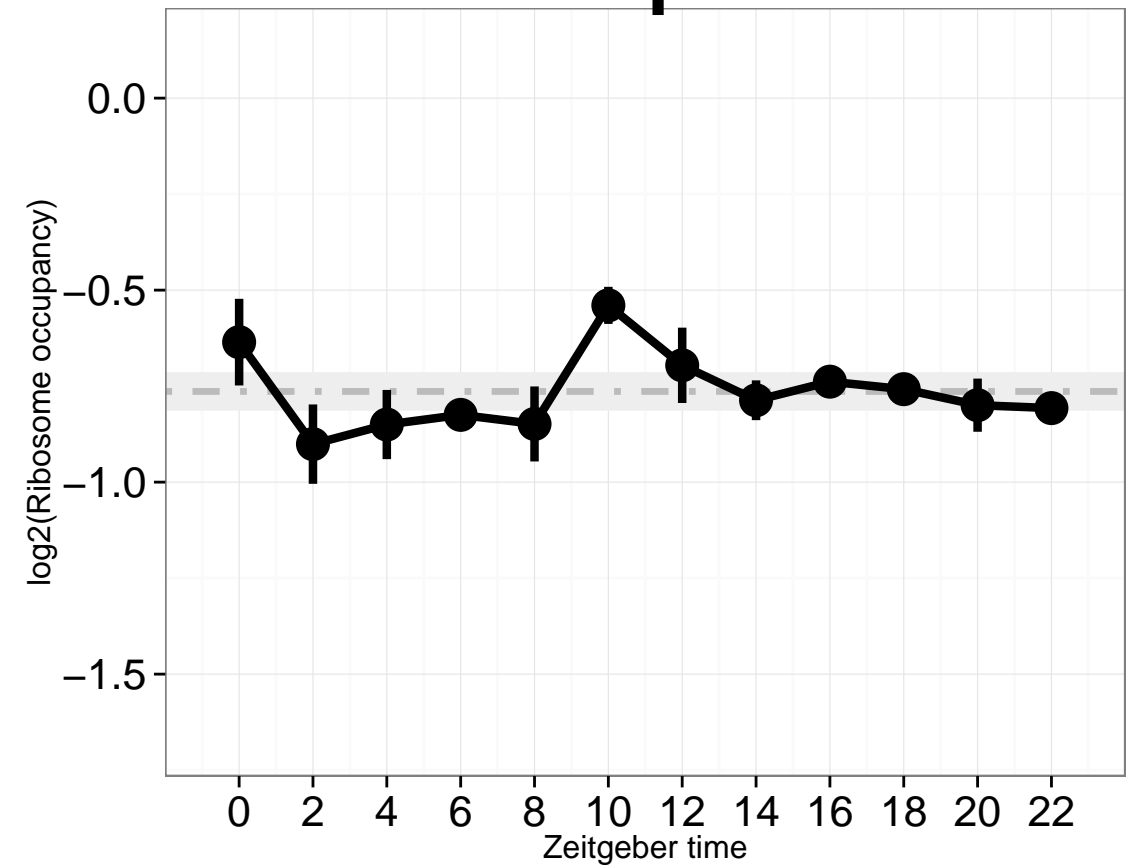

Supplement: SuppDataset_1.zip [file Srpr_set_A.pdf › Supplemental Dataset 1/A-mRNA_nonrhyth_translation_nonrhyth/Srpr_set_A.pdf]

## Srr

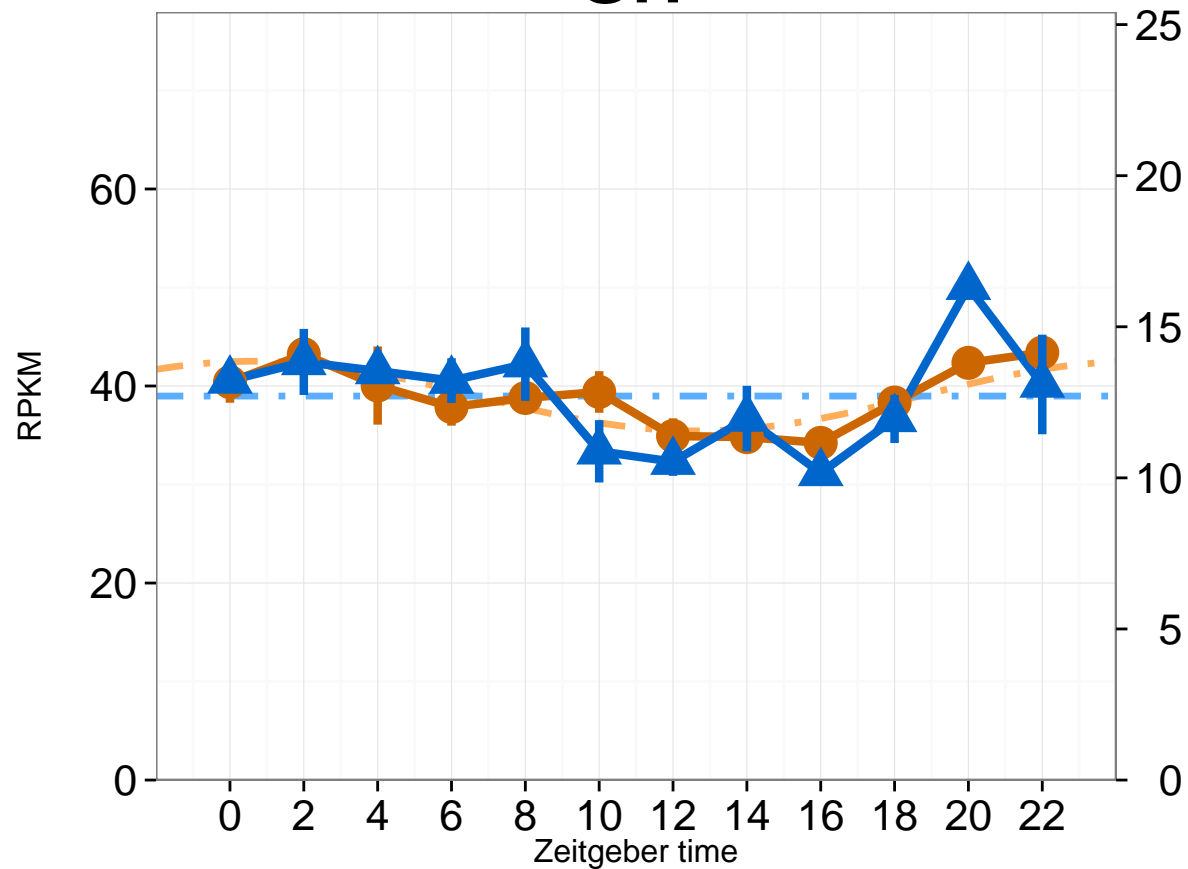

## Srr

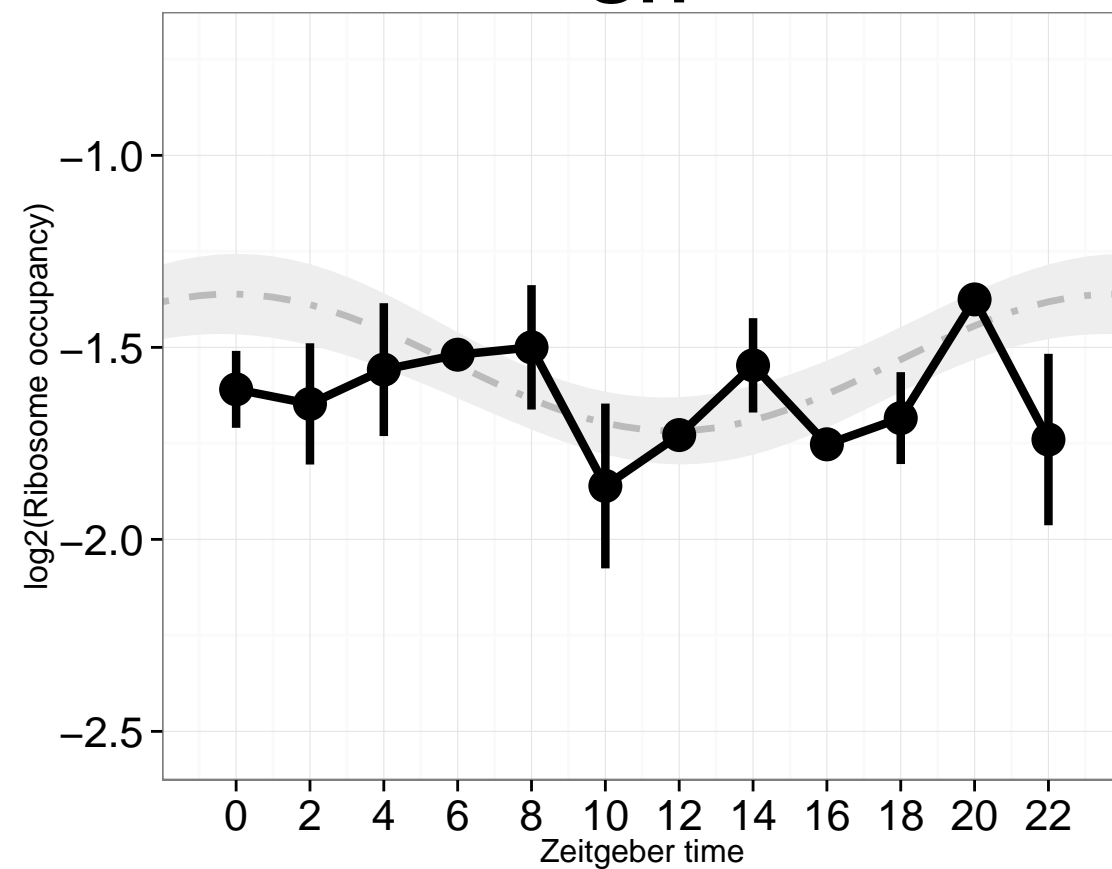

Supplement: SuppDataset_1.zip [file Srr_set_A.pdf › Supplemental Dataset 1/A-mRNA_nonrhyth_translation_nonrhyth/Srr_set_A.pdf]

## Srrd

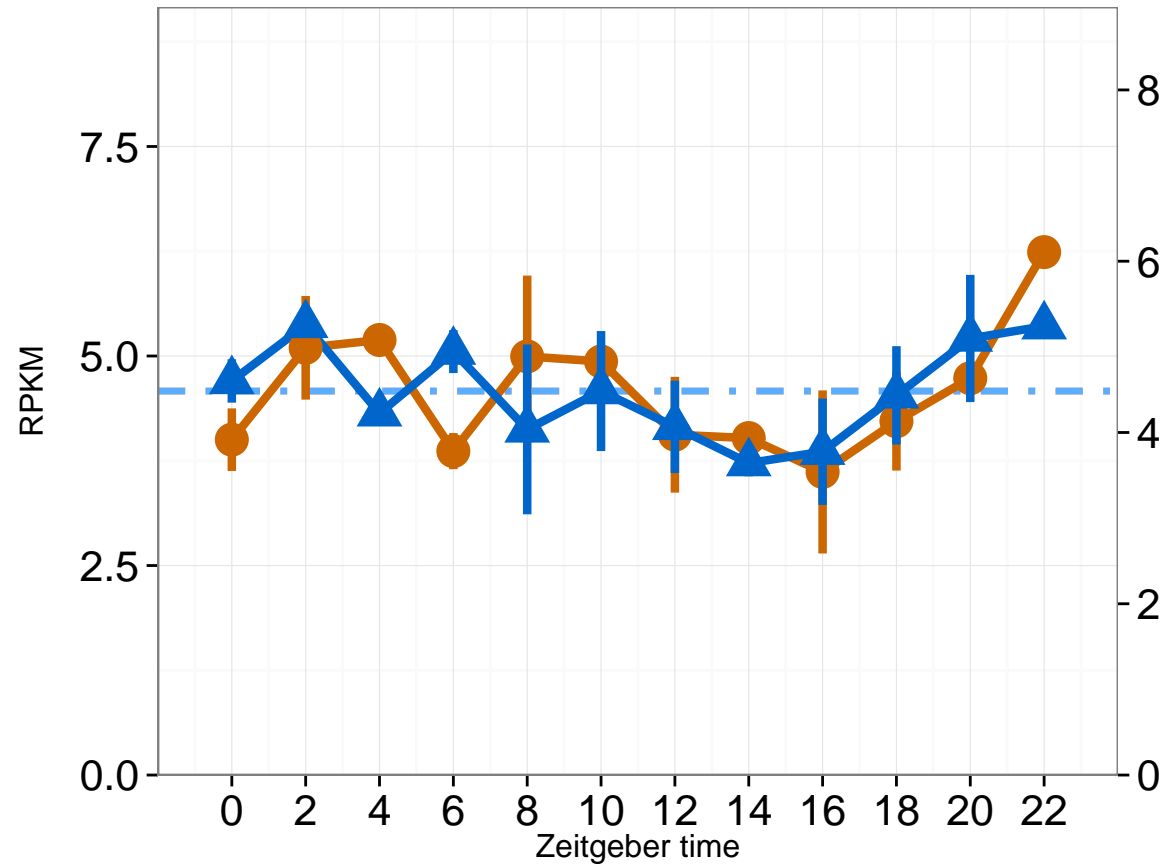

## Srrd

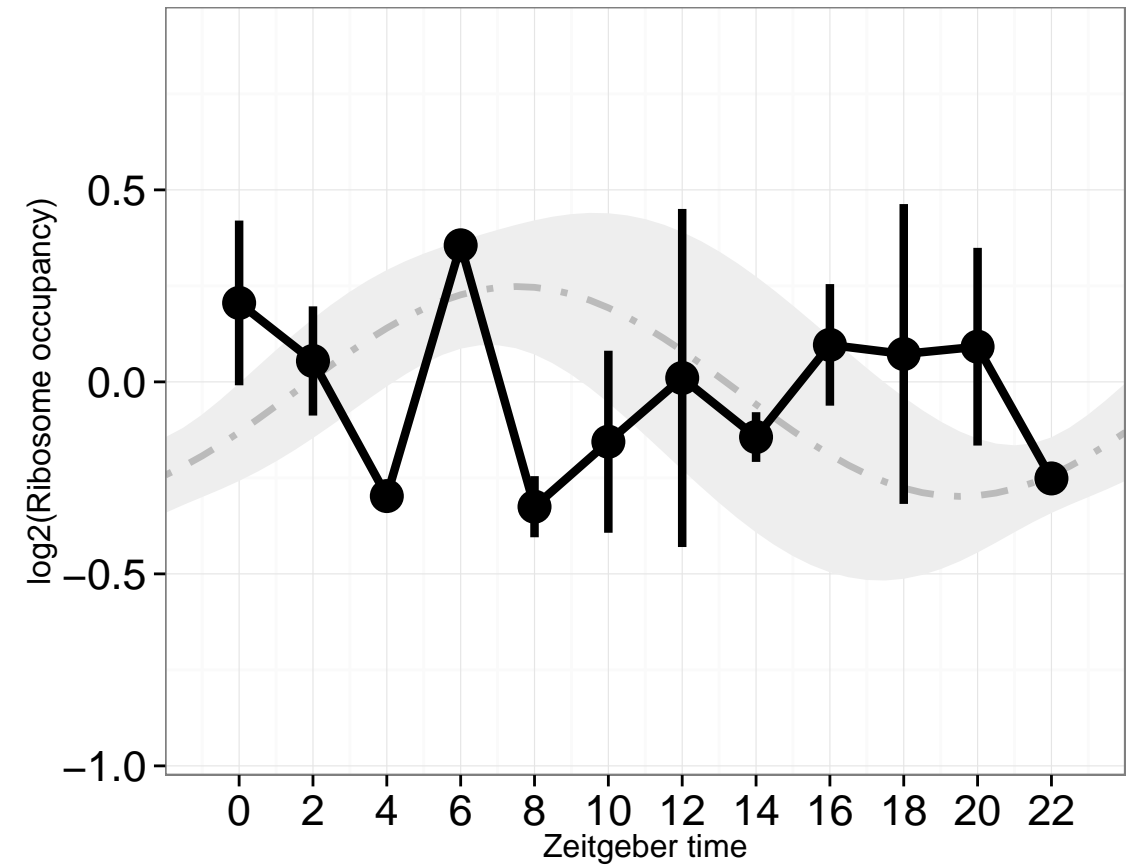

Supplement: SuppDataset_1.zip [file Srrd_set_A.pdf › Supplemental Dataset 1/A-mRNA_nonrhyth_translation_nonrhyth/Srrd_set_A.pdf]

# Srrm1

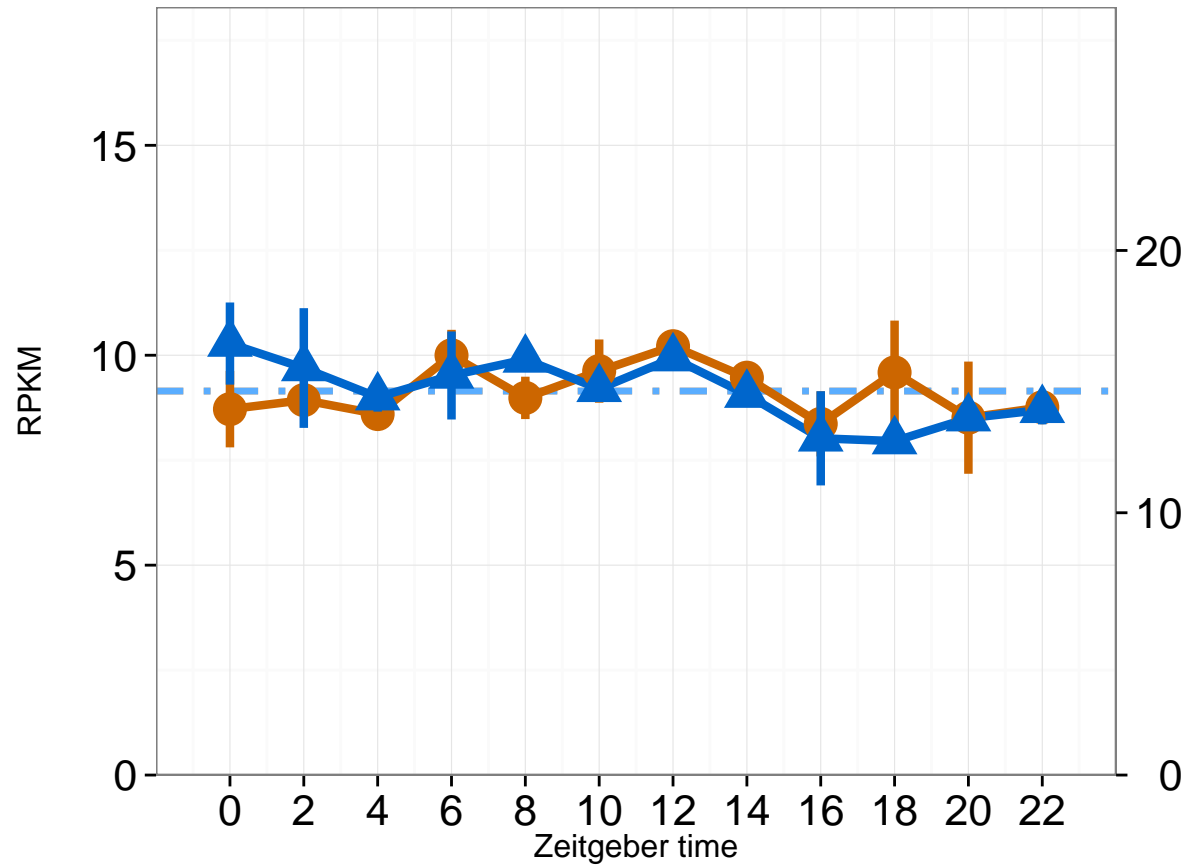

# Srrm1

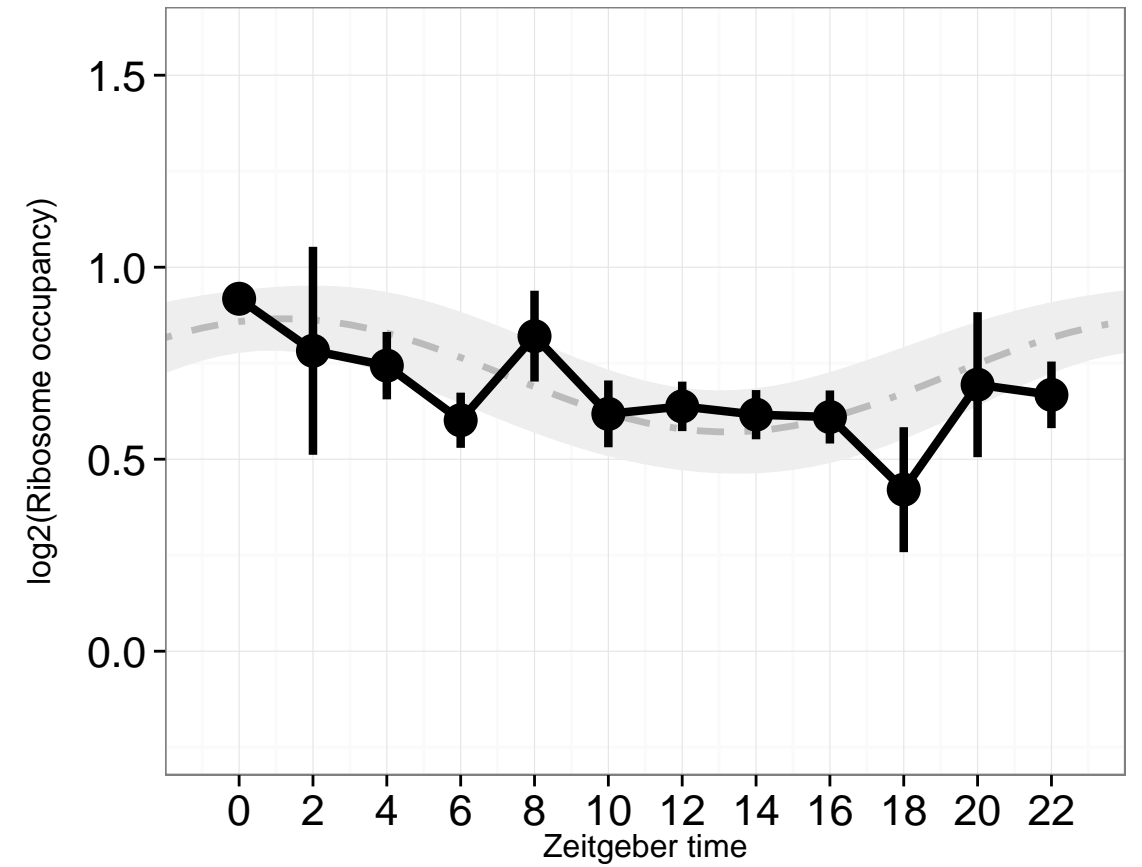

Supplement: SuppDataset_1.zip [file Srrm1_set_A.pdf › Supplemental Dataset 1/A-mRNA_nonrhyth_translation_nonrhyth/Srrm1_set_A.pdf]

## Srrm2

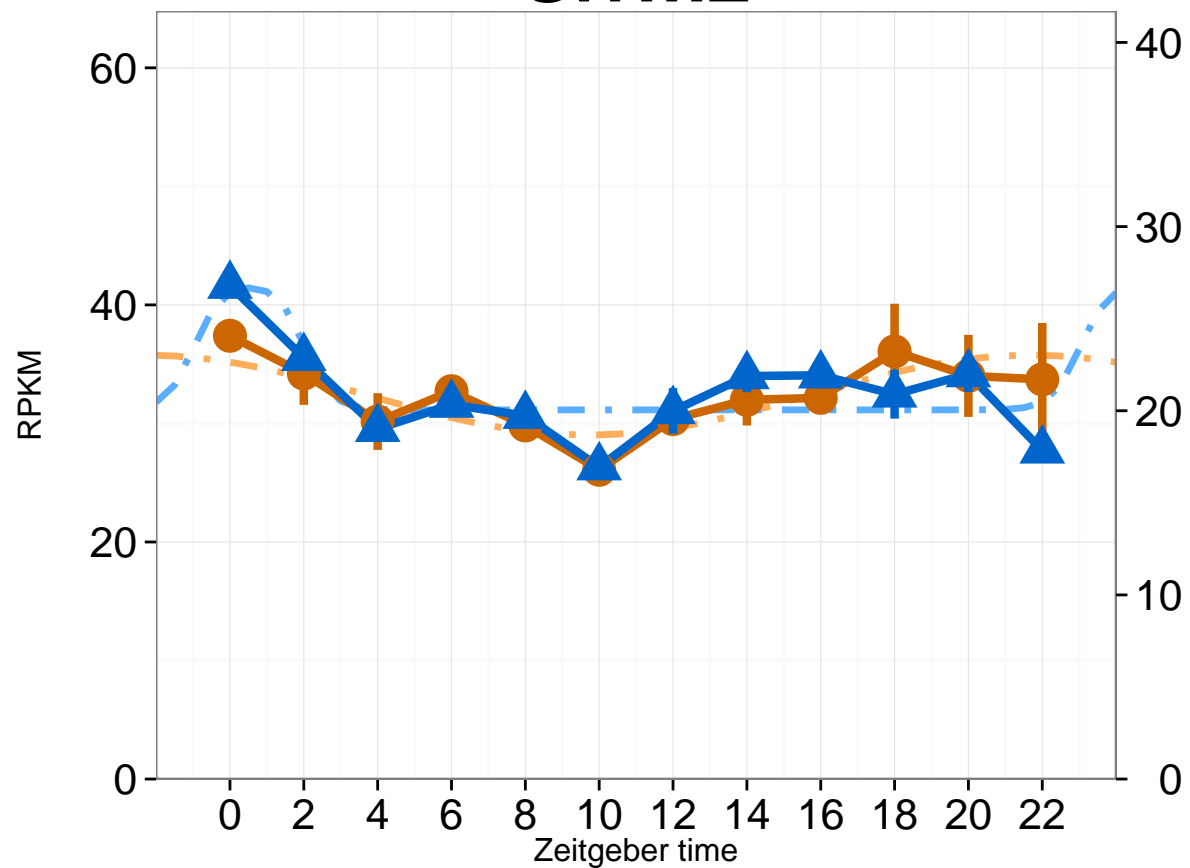

## Srrm2

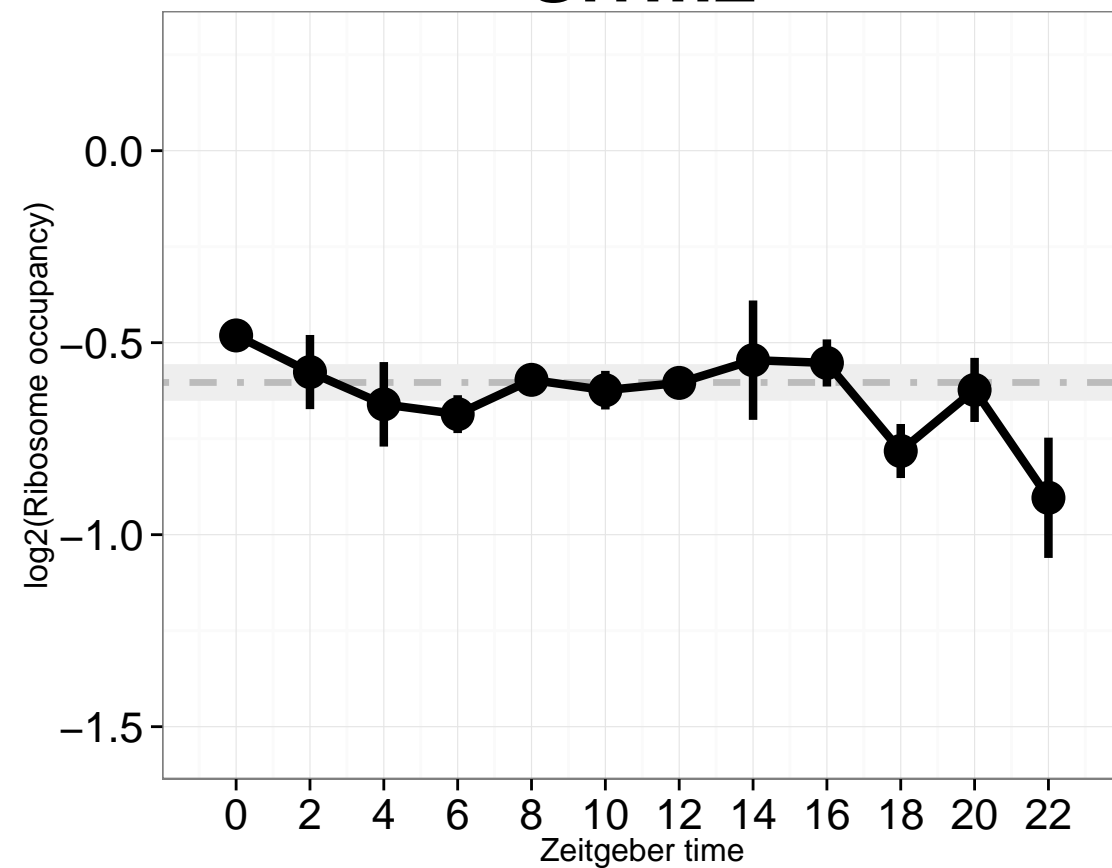

Supplement: SuppDataset_1.zip [file Srrm2_set_A.pdf › Supplemental Dataset 1/A-mRNA_nonrhyth_translation_nonrhyth/Srrm2_set_A.pdf]

## Srrt

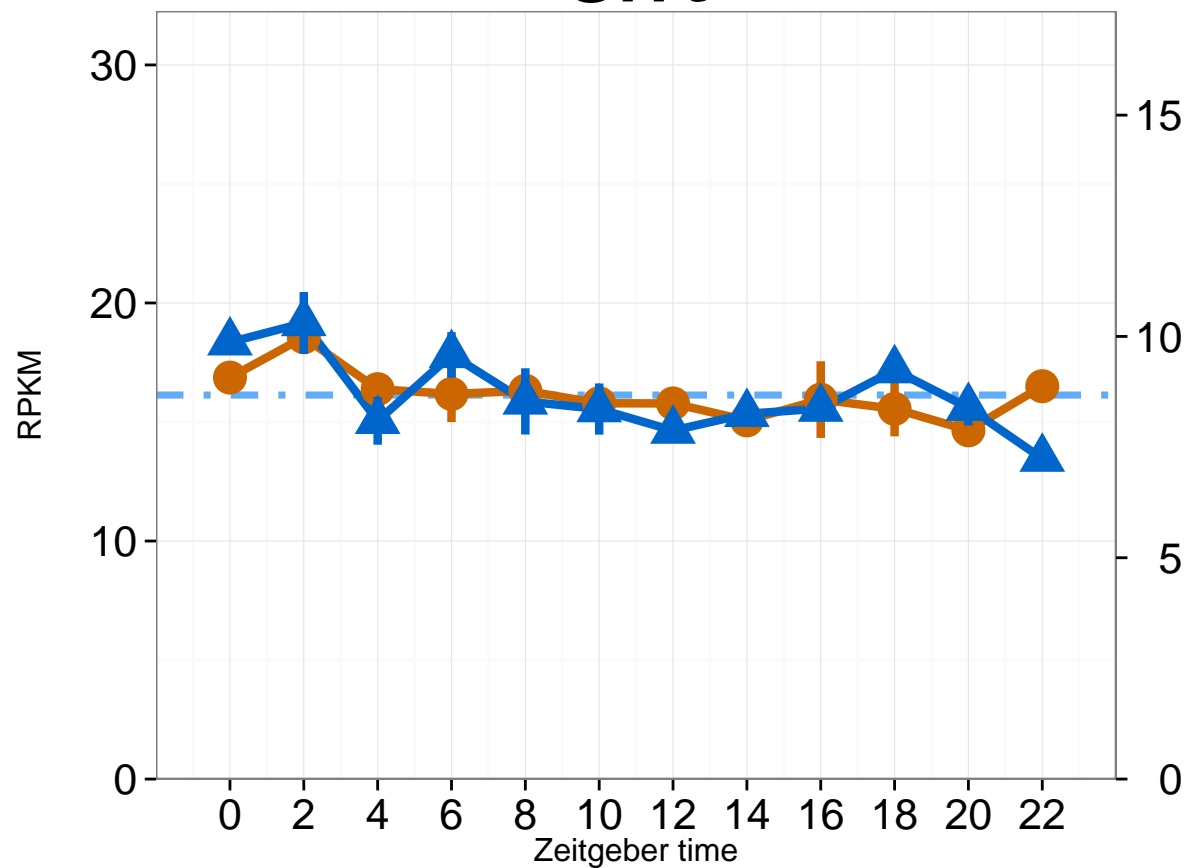

## Srrt

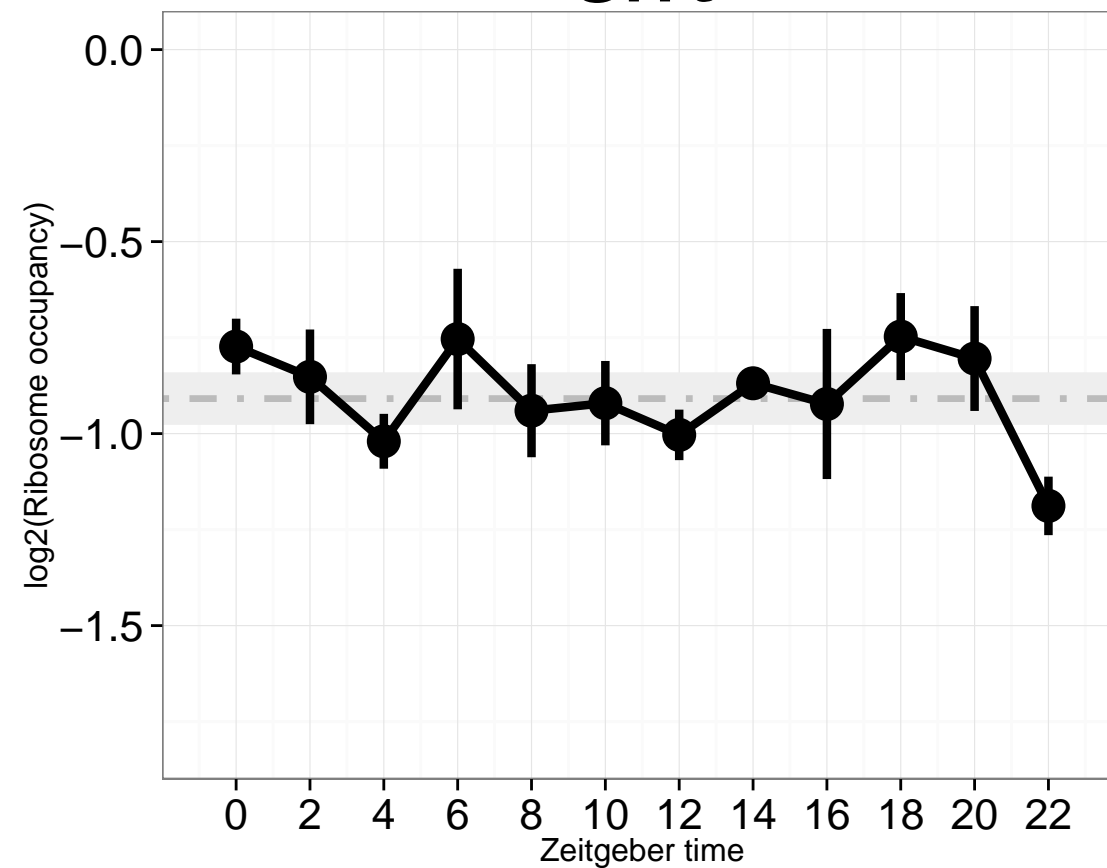

Supplement: SuppDataset_1.zip [file Srrt_set_A.pdf › Supplemental Dataset 1/A-mRNA_nonrhyth_translation_nonrhyth/Srrt_set_A.pdf]

## Srsf10

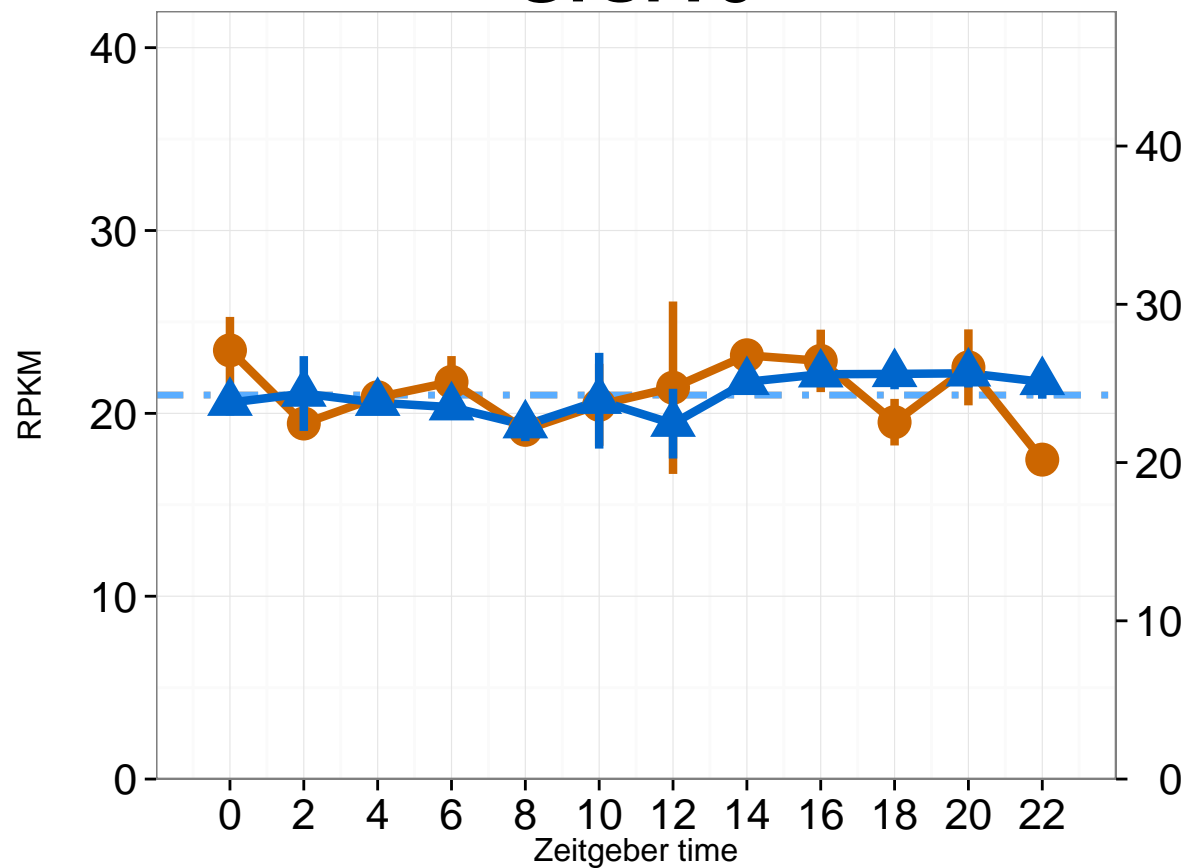

## Srsf10

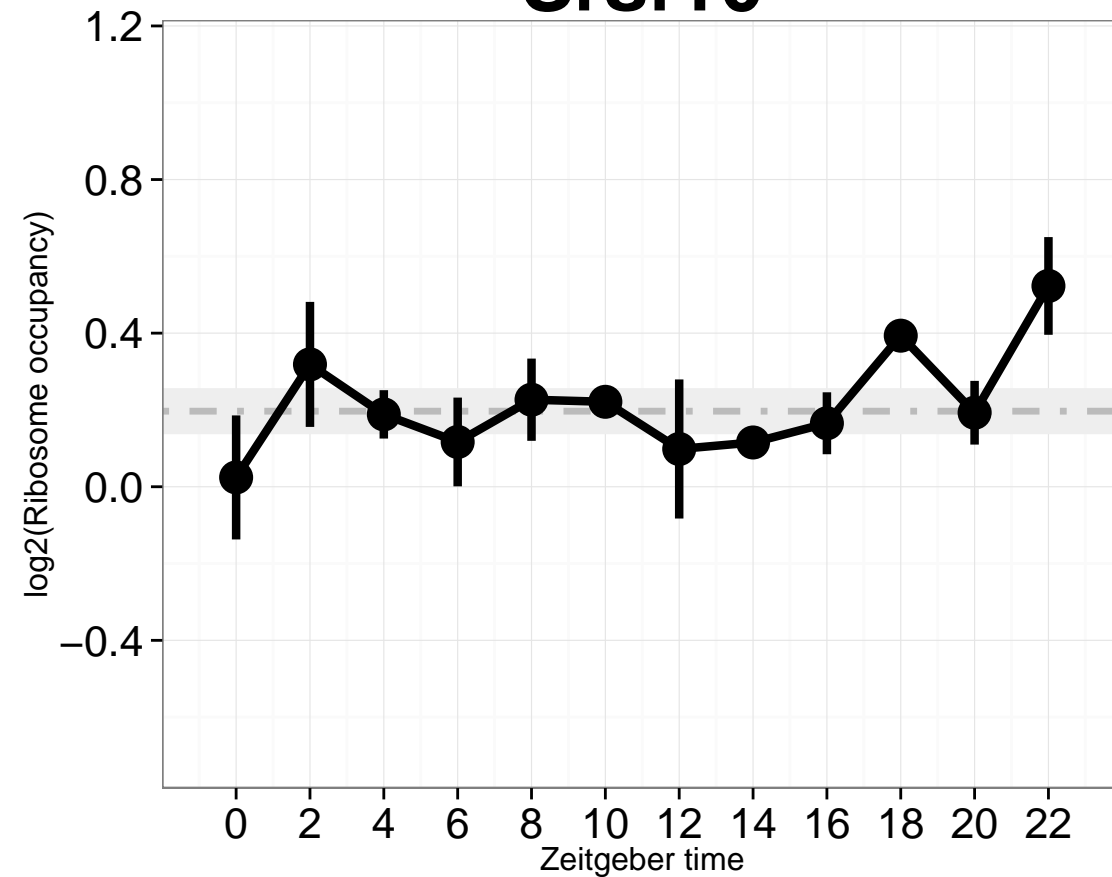

Supplement: SuppDataset_1.zip [file Srsf10_set_A.pdf › Supplemental Dataset 1/A-mRNA_nonrhyth_translation_nonrhyth/Srsf10_set_A.pdf]

## Srsf11

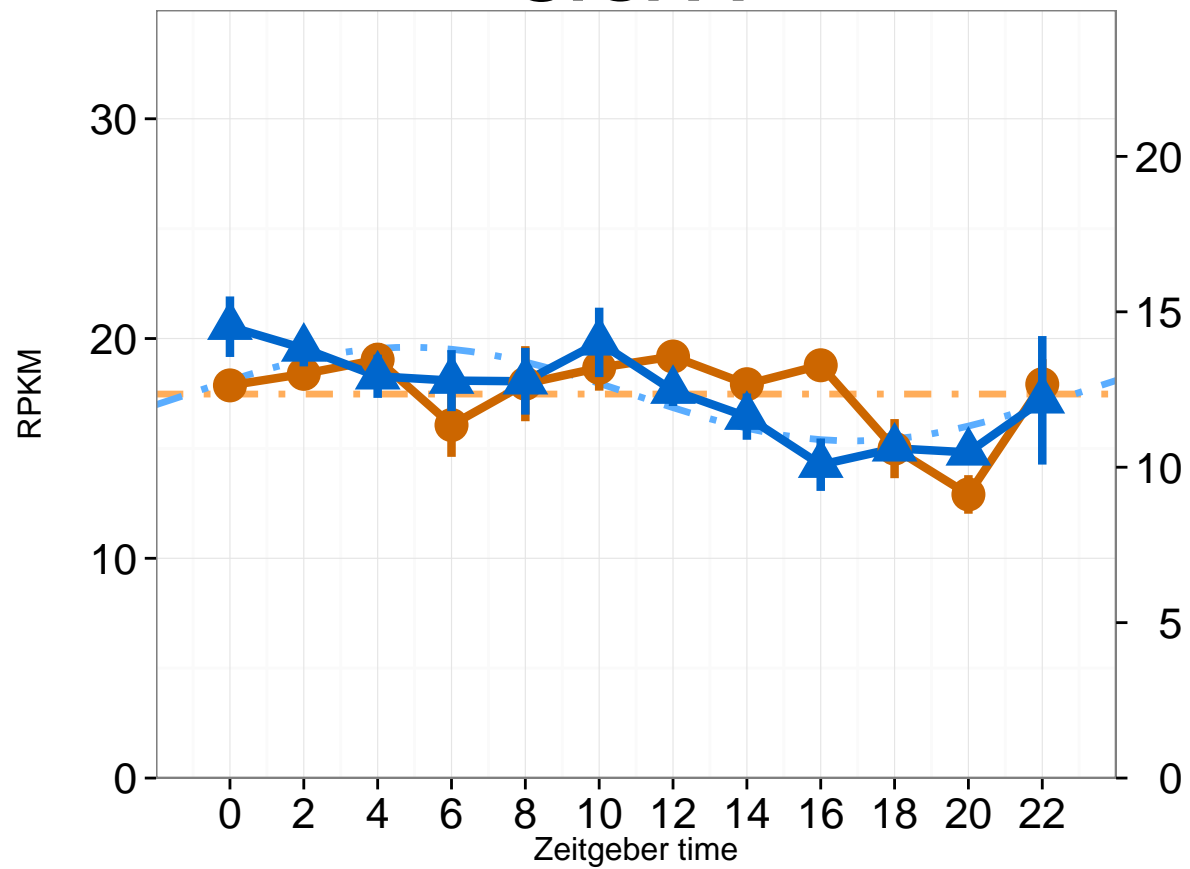

## Srsf11

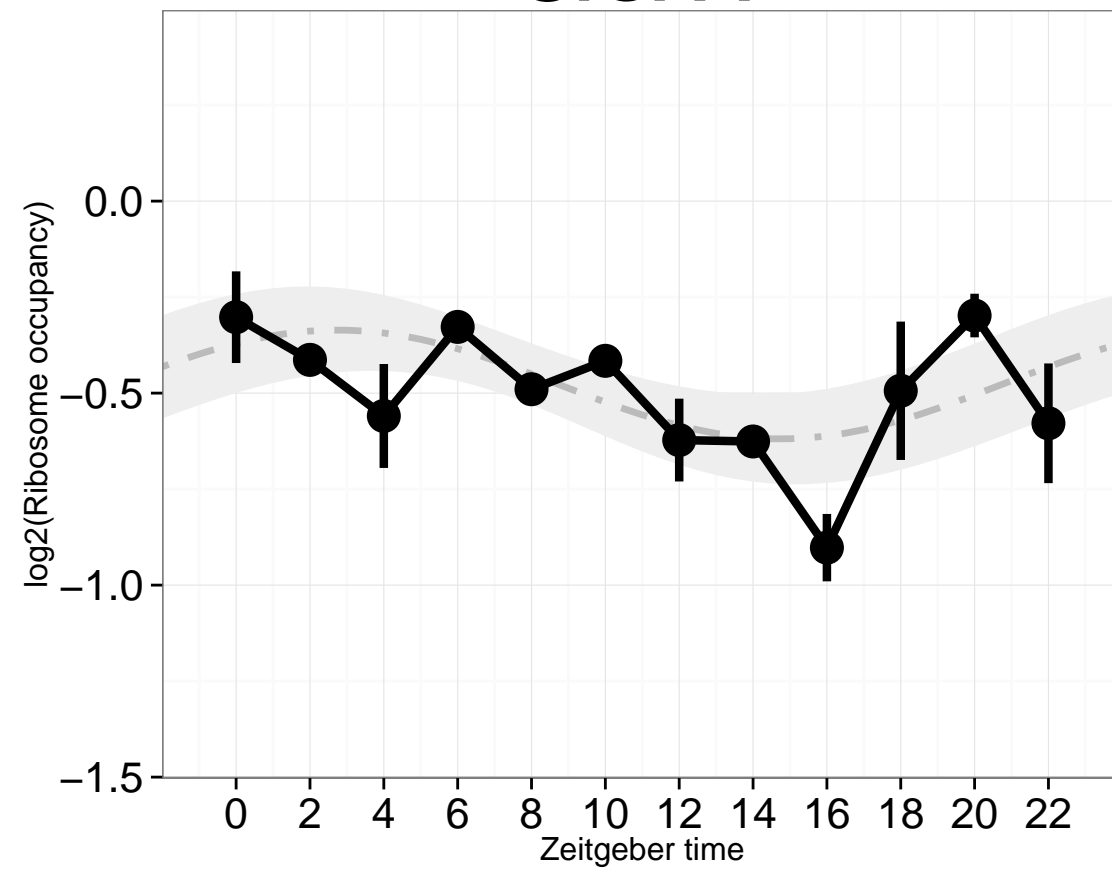

Supplement: SuppDataset_1.zip [file Srsf11_set_A.pdf › Supplemental Dataset 1/A-mRNA_nonrhyth_translation_nonrhyth/Srsf11_set_A.pdf]

## Srsf2

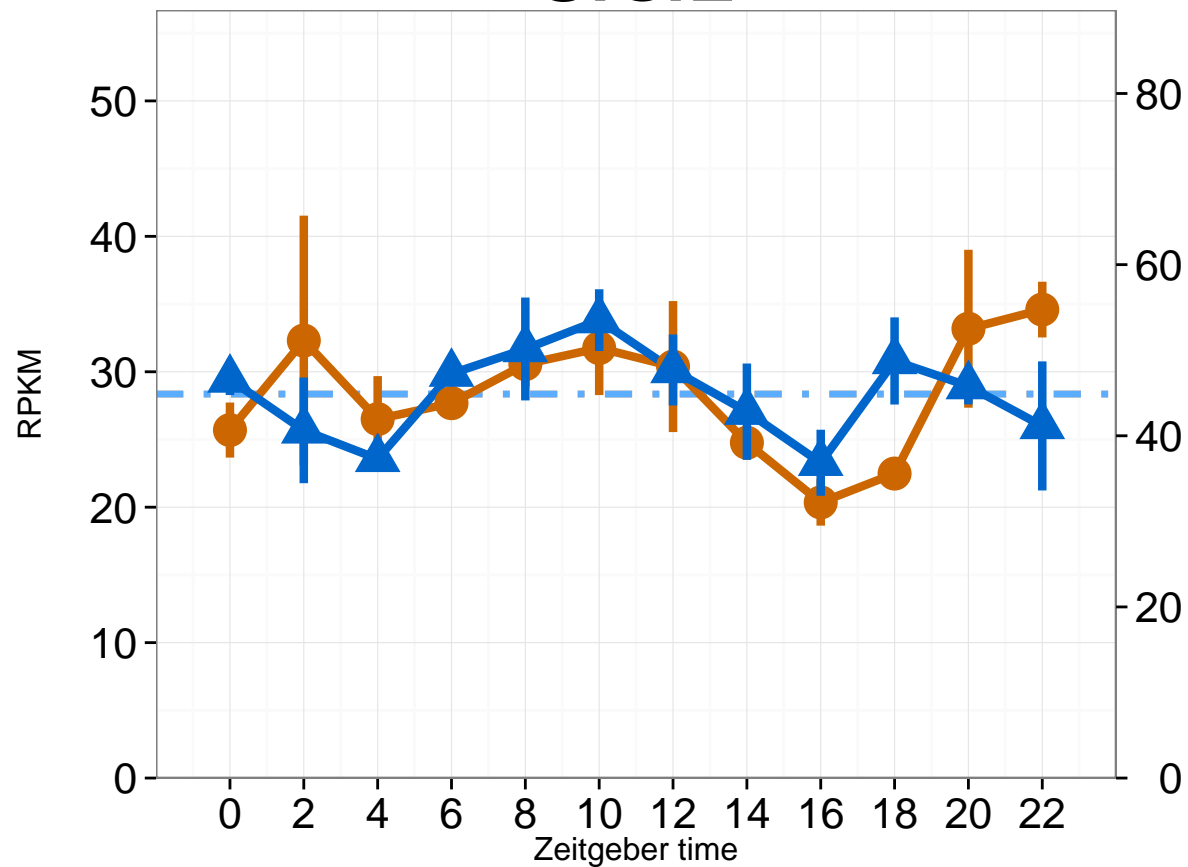

## Srsf2

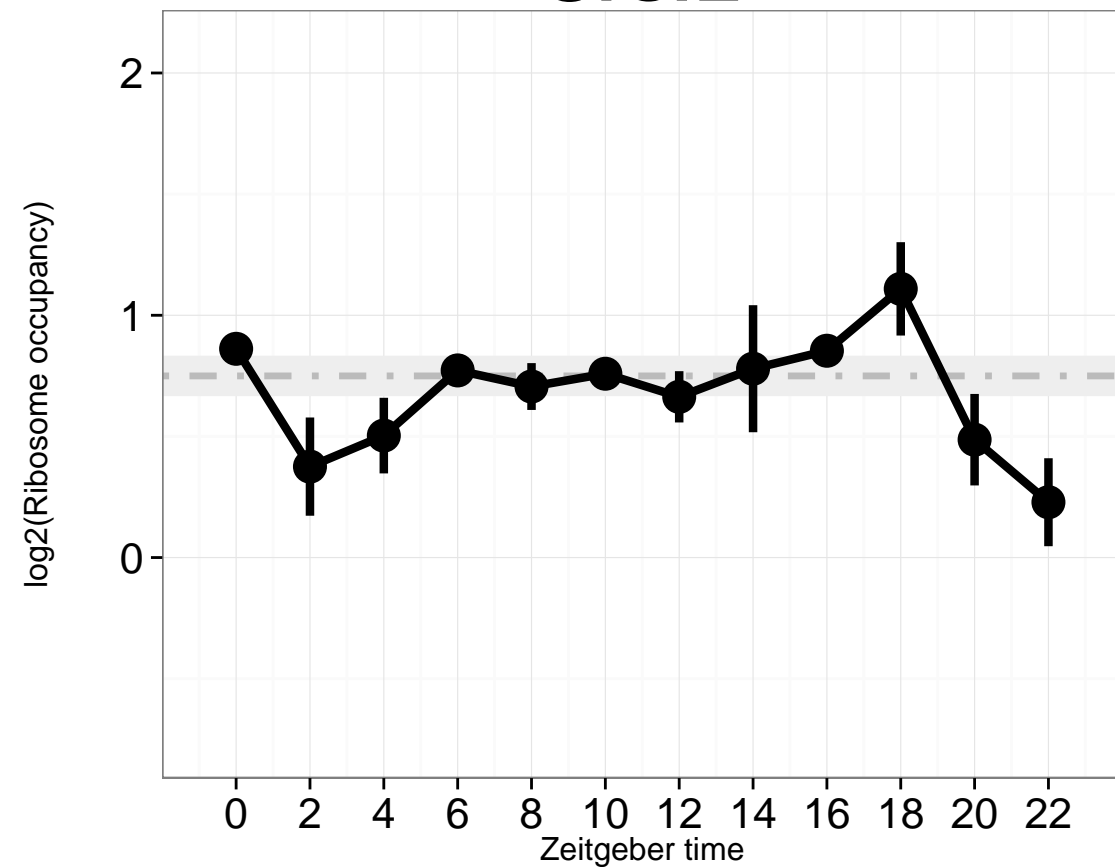

Supplement: SuppDataset_1.zip [file Srsf2_set_A.pdf › Supplemental Dataset 1/A-mRNA_nonrhyth_translation_nonrhyth/Srsf2_set_A.pdf]

## Srsf3

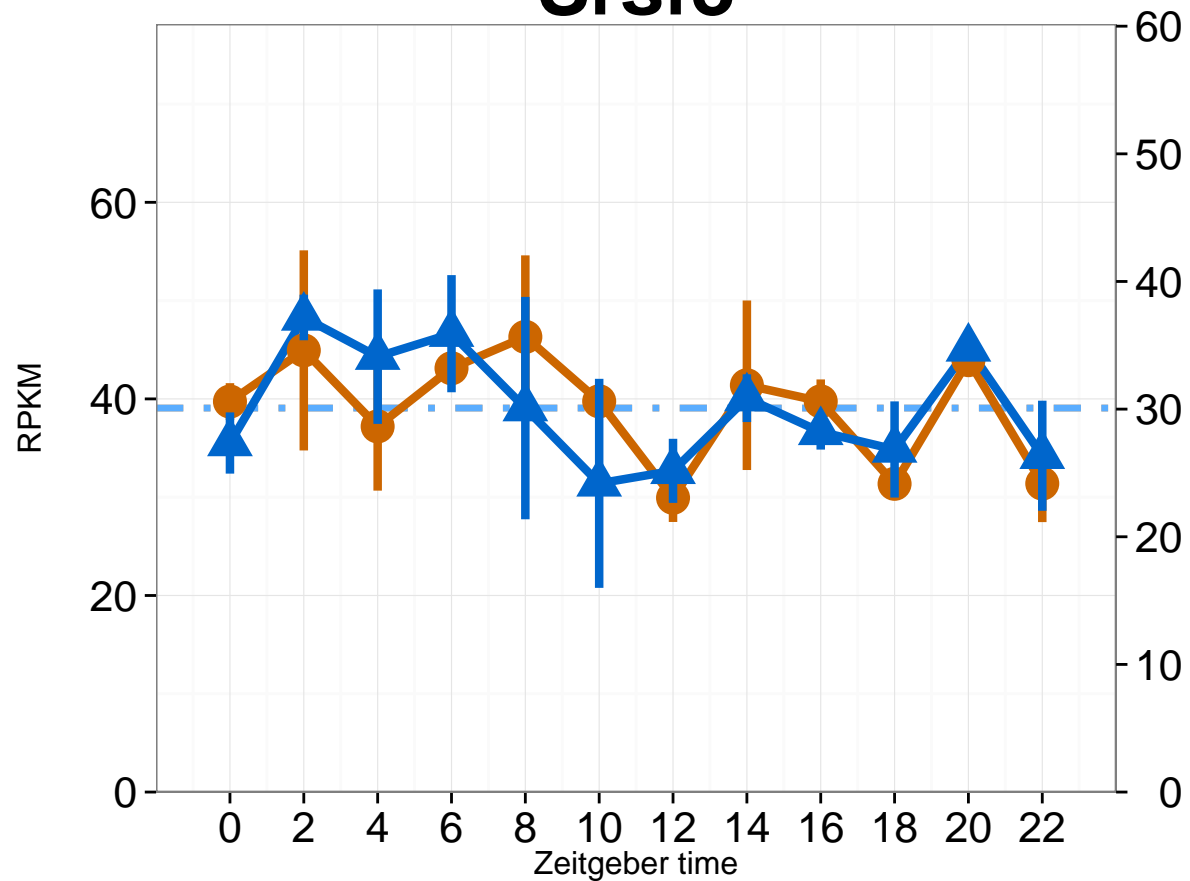

## Srsf3

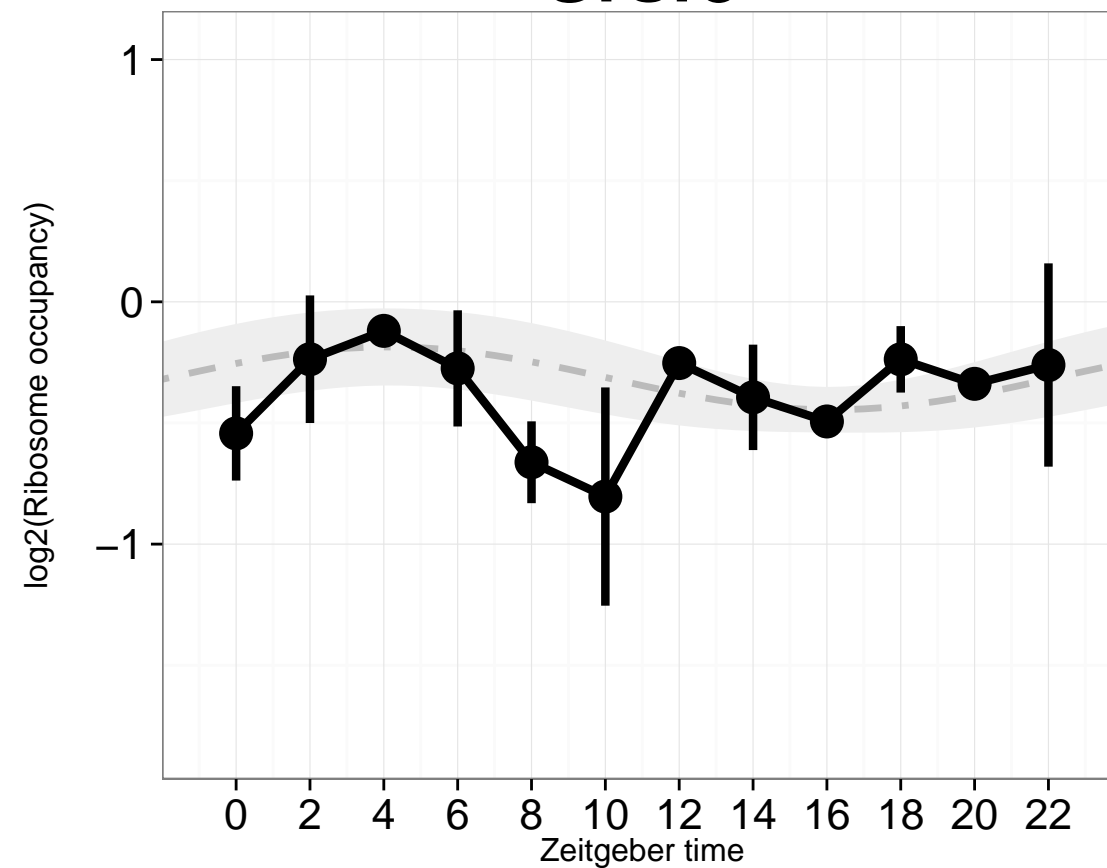

Supplement: SuppDataset_1.zip [file Srsf3_set_A.pdf › Supplemental Dataset 1/A-mRNA_nonrhyth_translation_nonrhyth/Srsf3_set_A.pdf]

## Srsf4

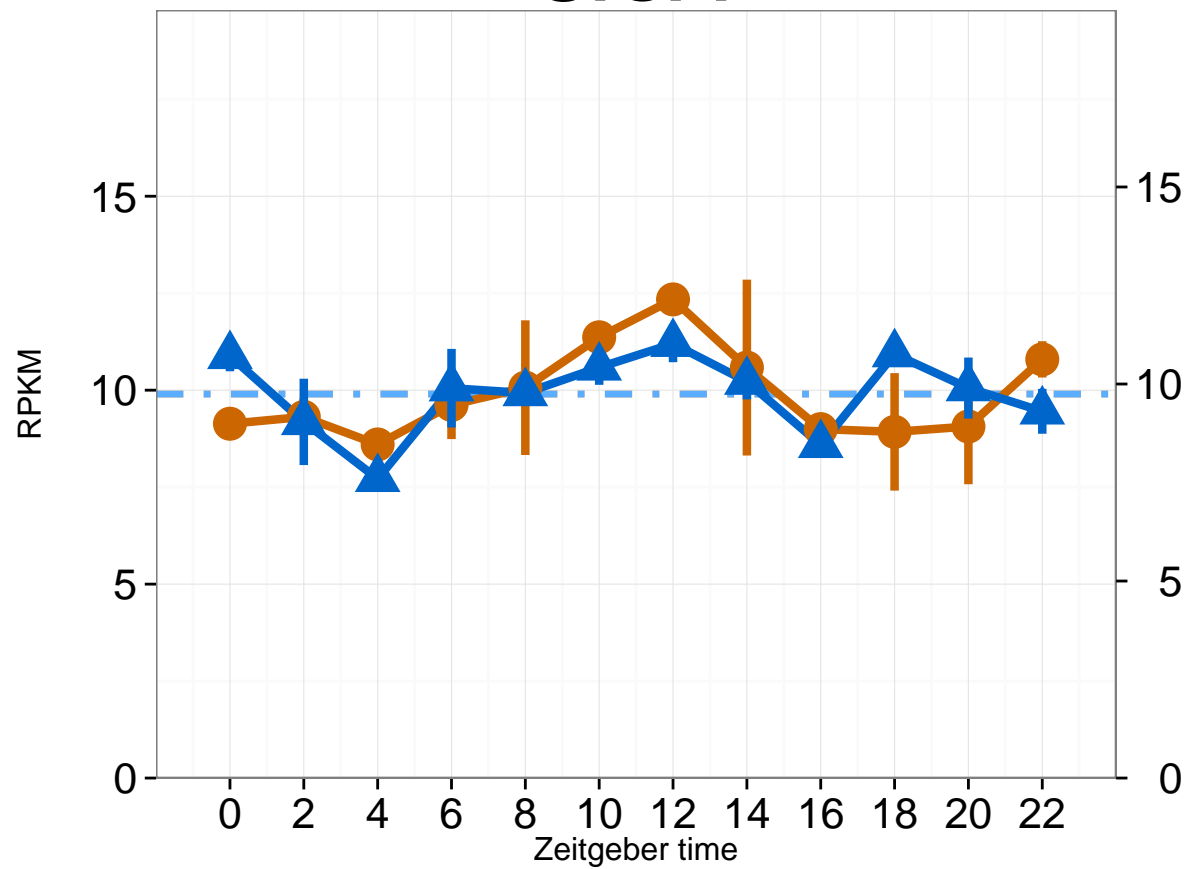

## Srsf4

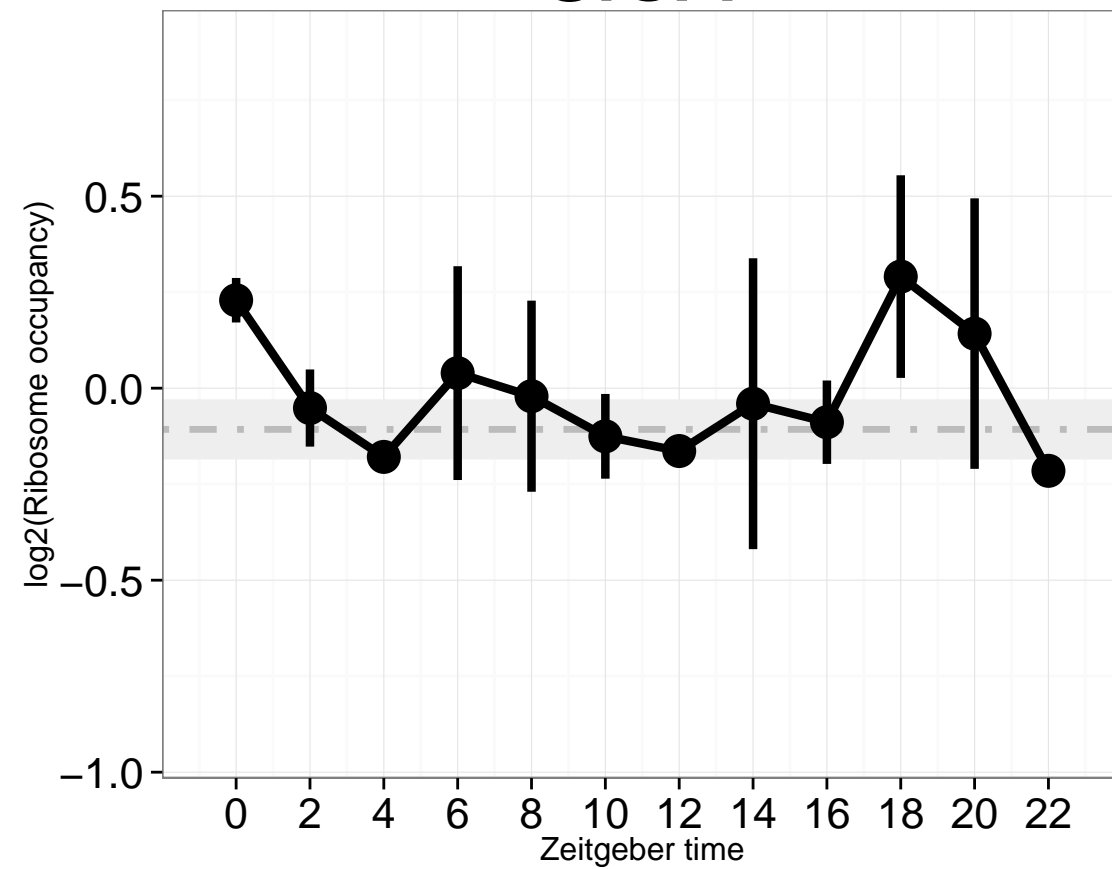

Supplement: SuppDataset_1.zip [file Srsf4_set_A.pdf › Supplemental Dataset 1/A-mRNA_nonrhyth_translation_nonrhyth/Srsf4_set_A.pdf]

## Srsf6

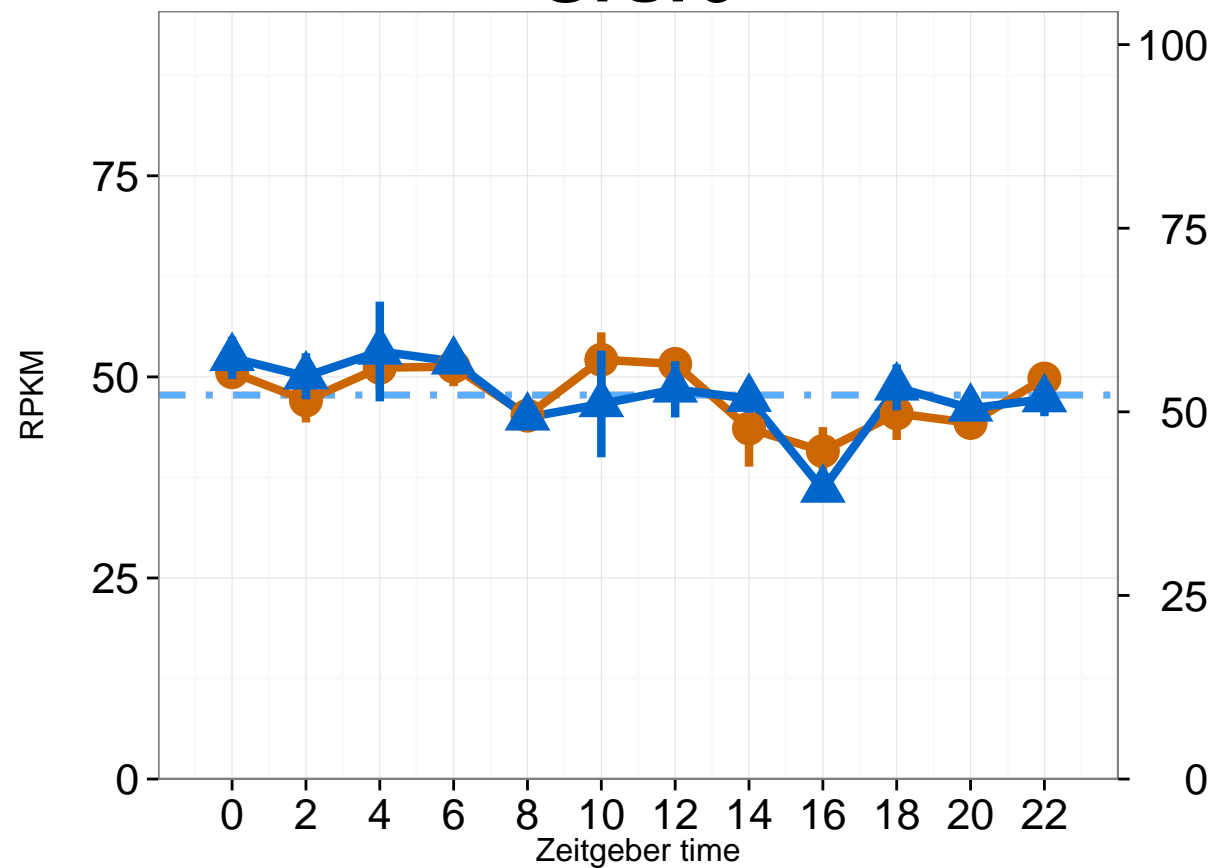

## Srsf6

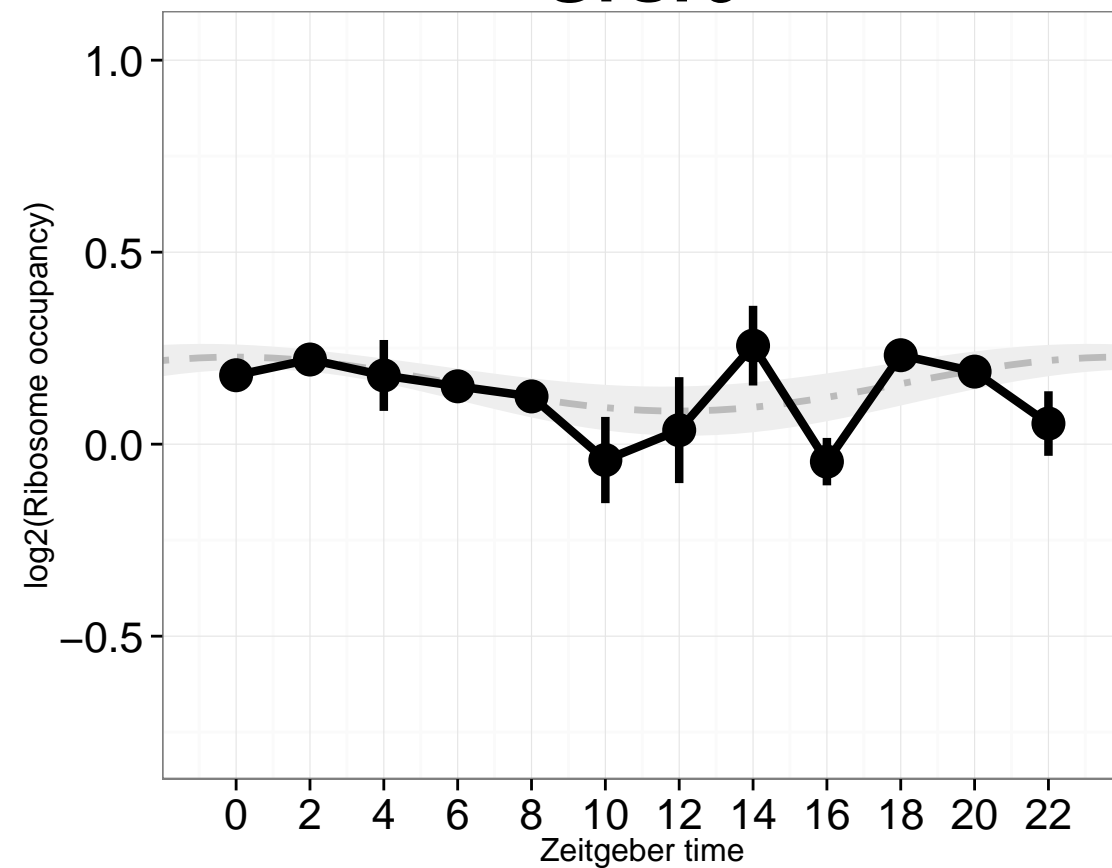

Supplement: SuppDataset_1.zip [file Srsf6_set_A.pdf › Supplemental Dataset 1/A-mRNA_nonrhyth_translation_nonrhyth/Srsf6_set_A.pdf]

## Srsf7

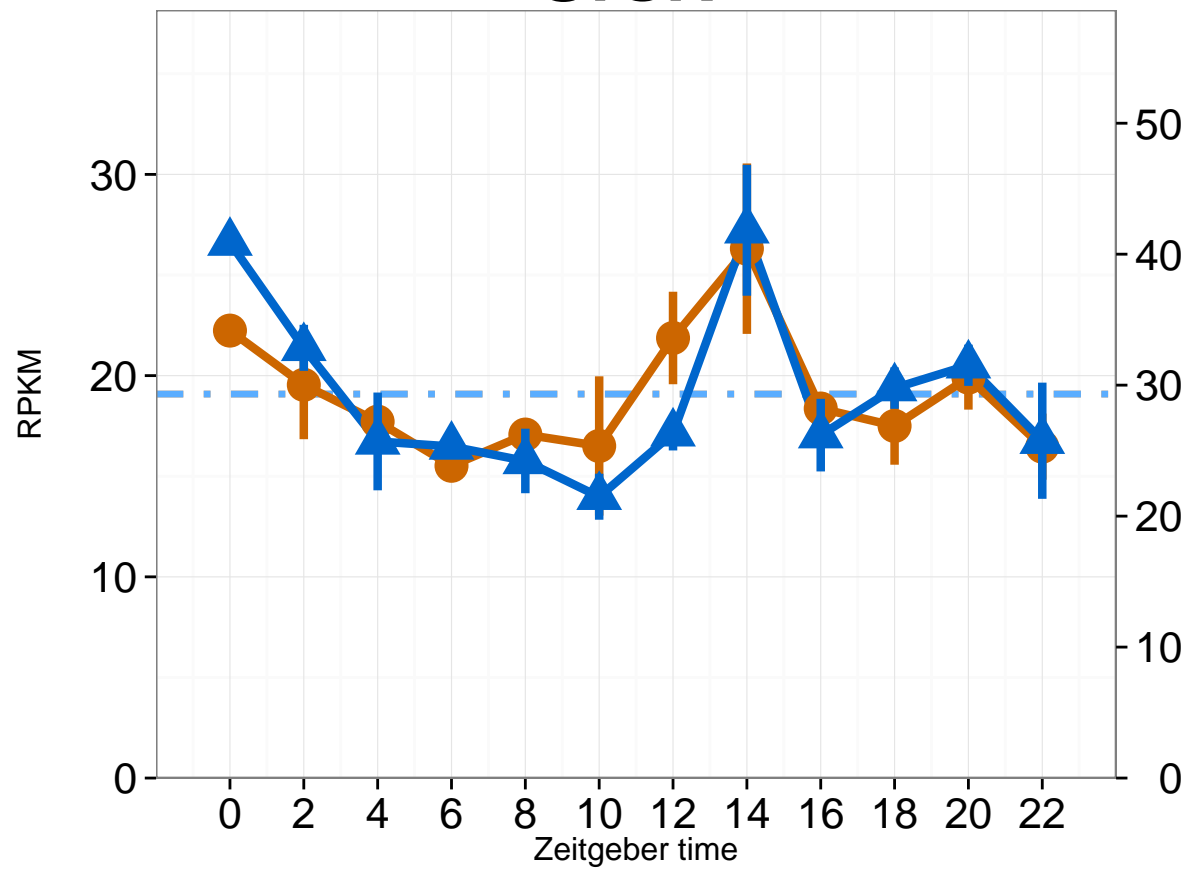

## Srsf7

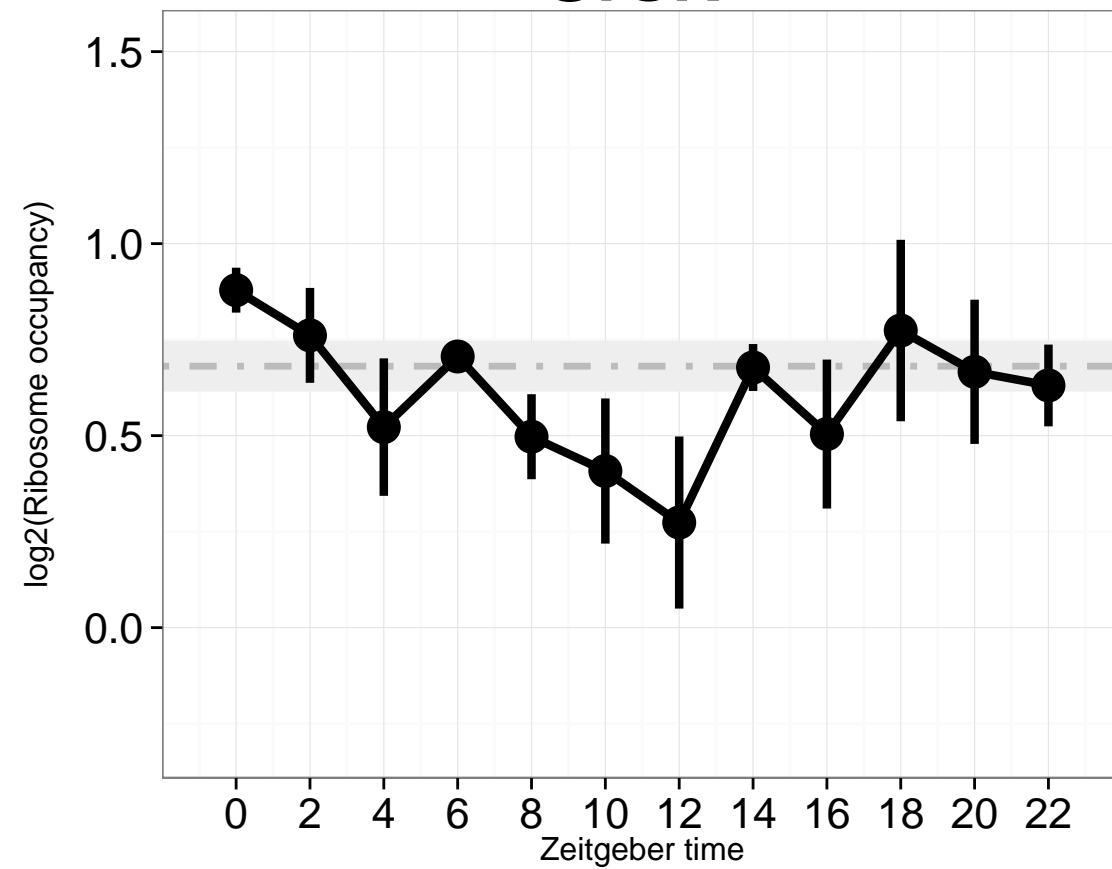

Supplement: SuppDataset_1.zip [file Srsf7_set_A.pdf › Supplemental Dataset 1/A-mRNA_nonrhyth_translation_nonrhyth/Srsf7_set_A.pdf]

## Srsf9

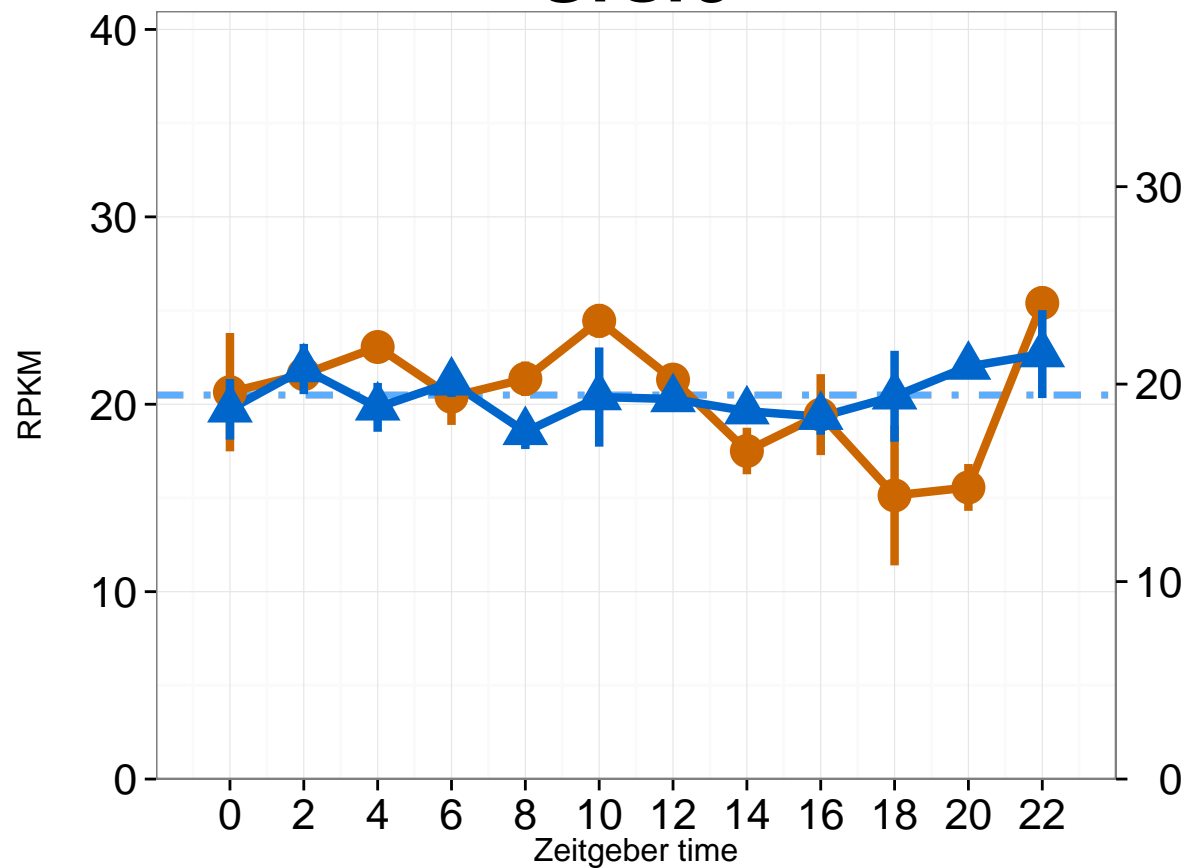

## Srsf9

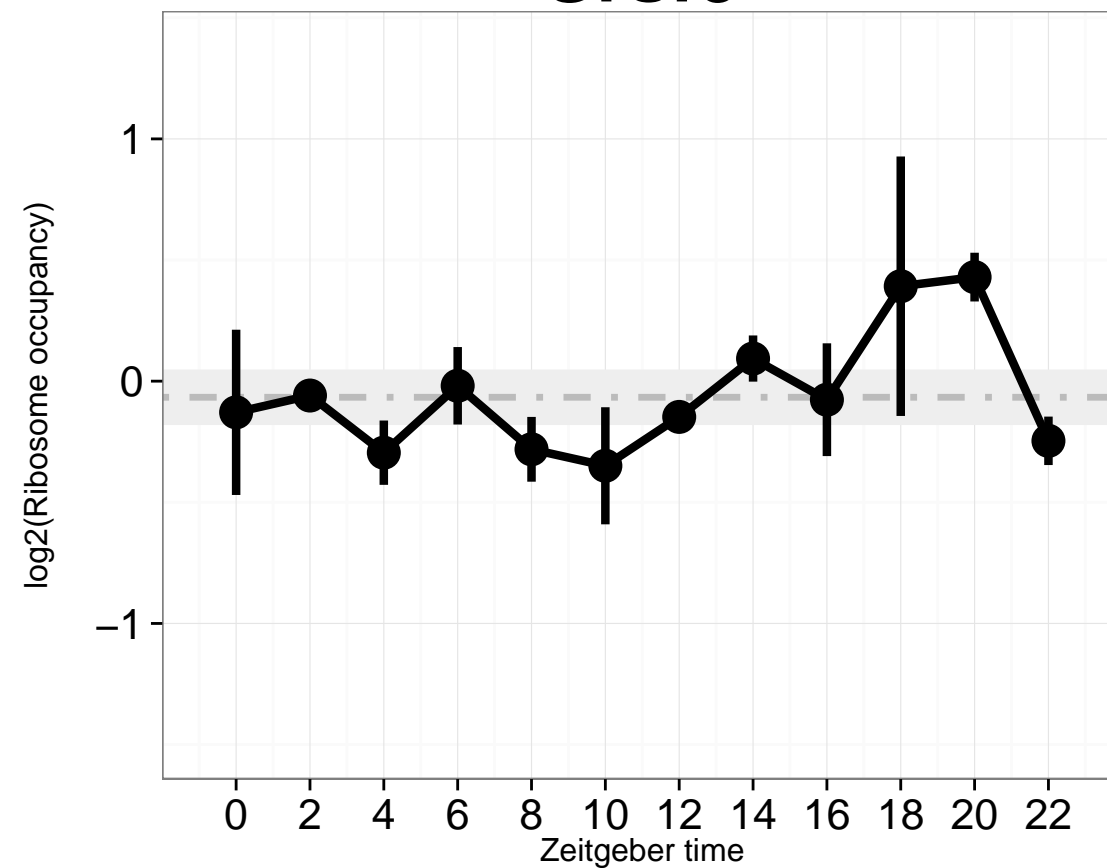

Supplement: SuppDataset_1.zip [file Srsf9_set_A.pdf › Supplemental Dataset 1/A-mRNA_nonrhyth_translation_nonrhyth/Srsf9_set_A.pdf]

## Ss18

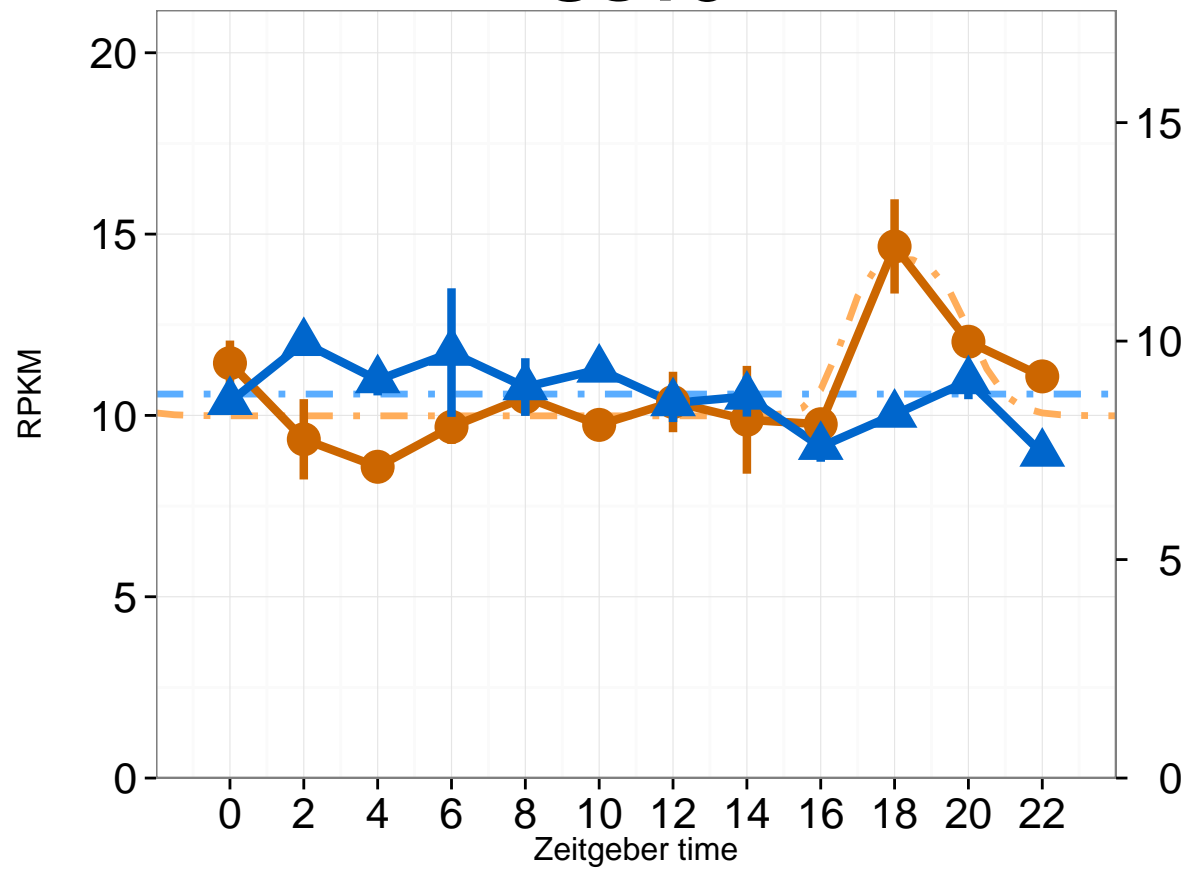

## Ss18

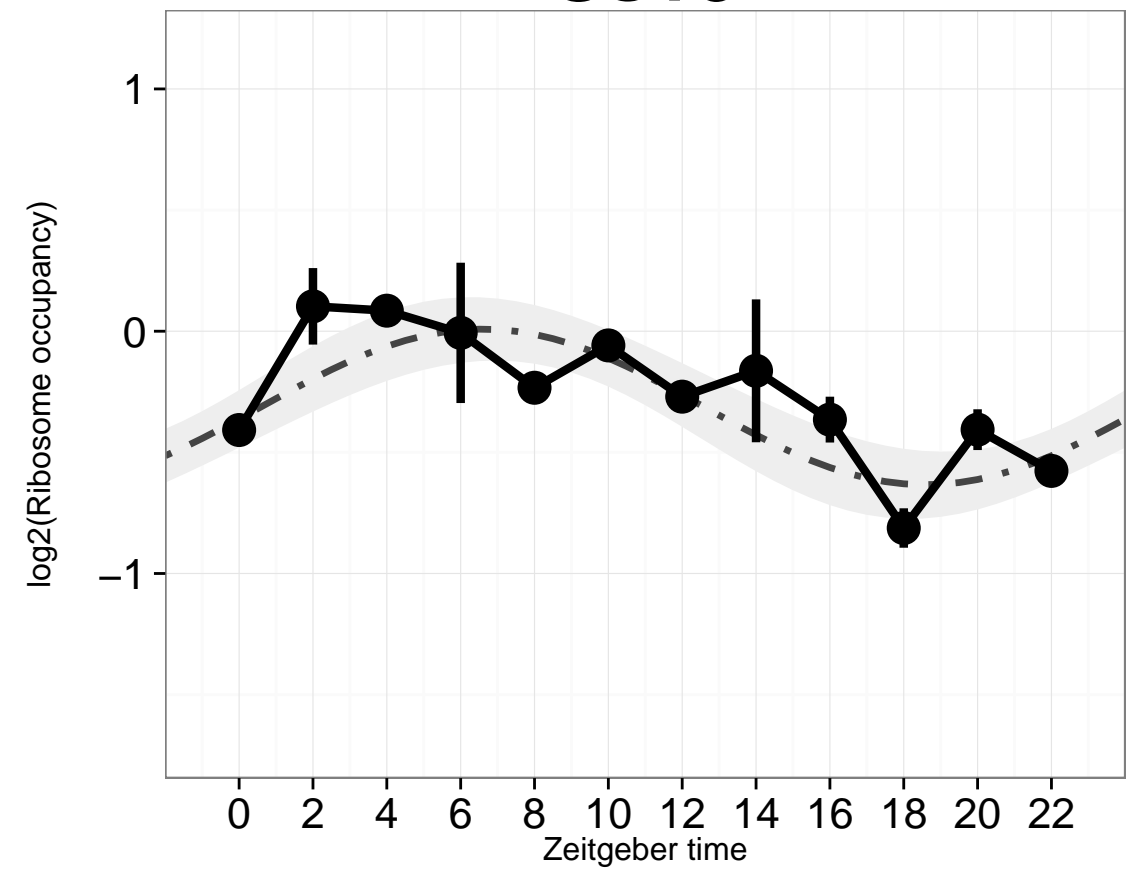

Supplement: SuppDataset_1.zip [file Ss18_set_A.pdf › Supplemental Dataset 1/A-mRNA_nonrhyth_translation_nonrhyth/Ss18_set_A.pdf]

## Ss18l1

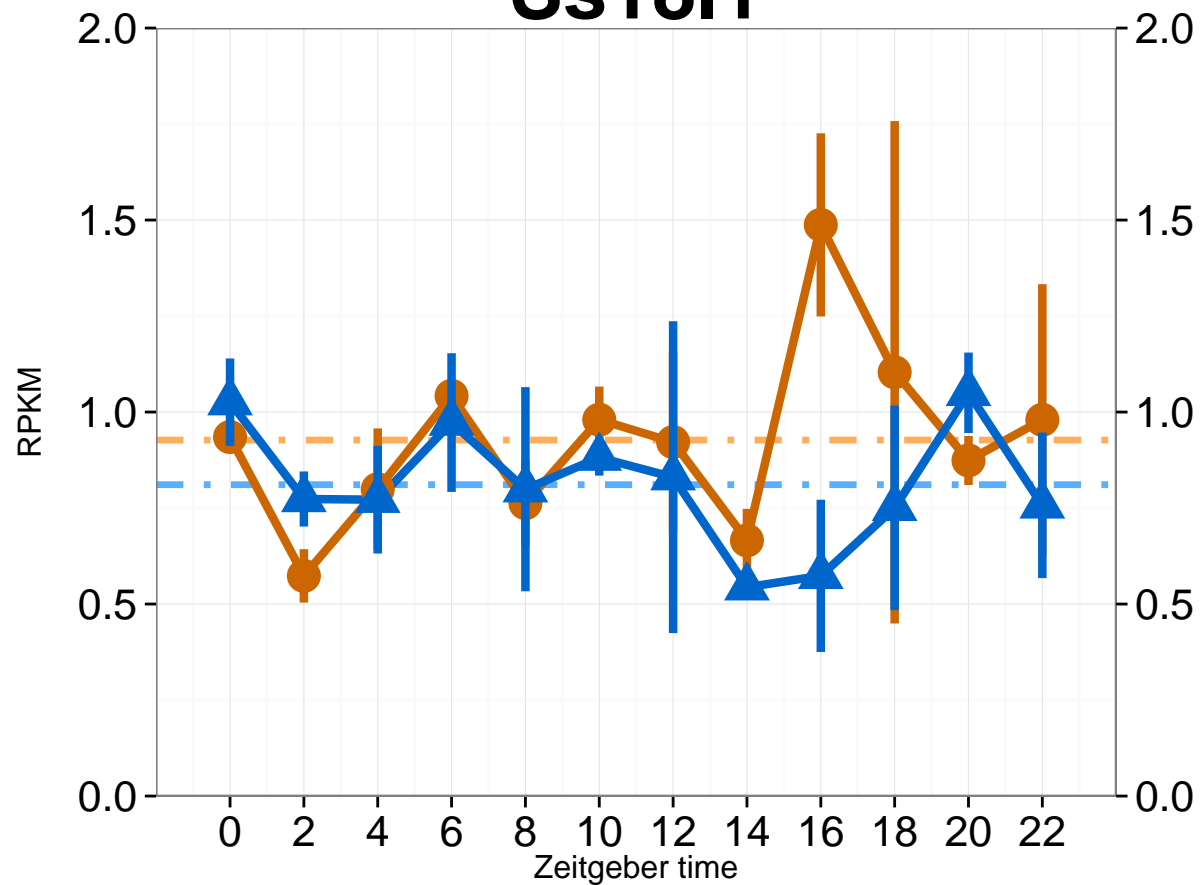

## Ss18l1

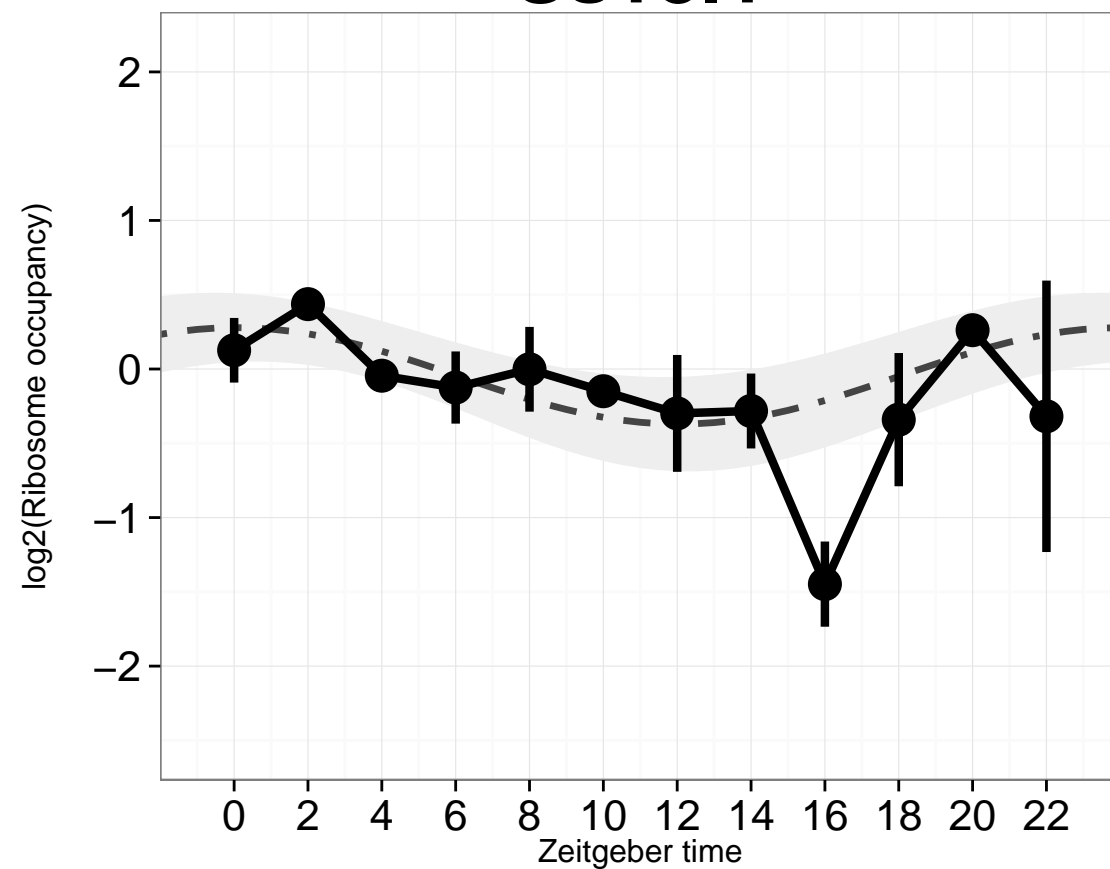

Supplement: SuppDataset_1.zip [file Ss18l1_set_A.pdf › Supplemental Dataset 1/A-mRNA_nonrhyth_translation_nonrhyth/Ss18l1_set_A.pdf]

## Ssb

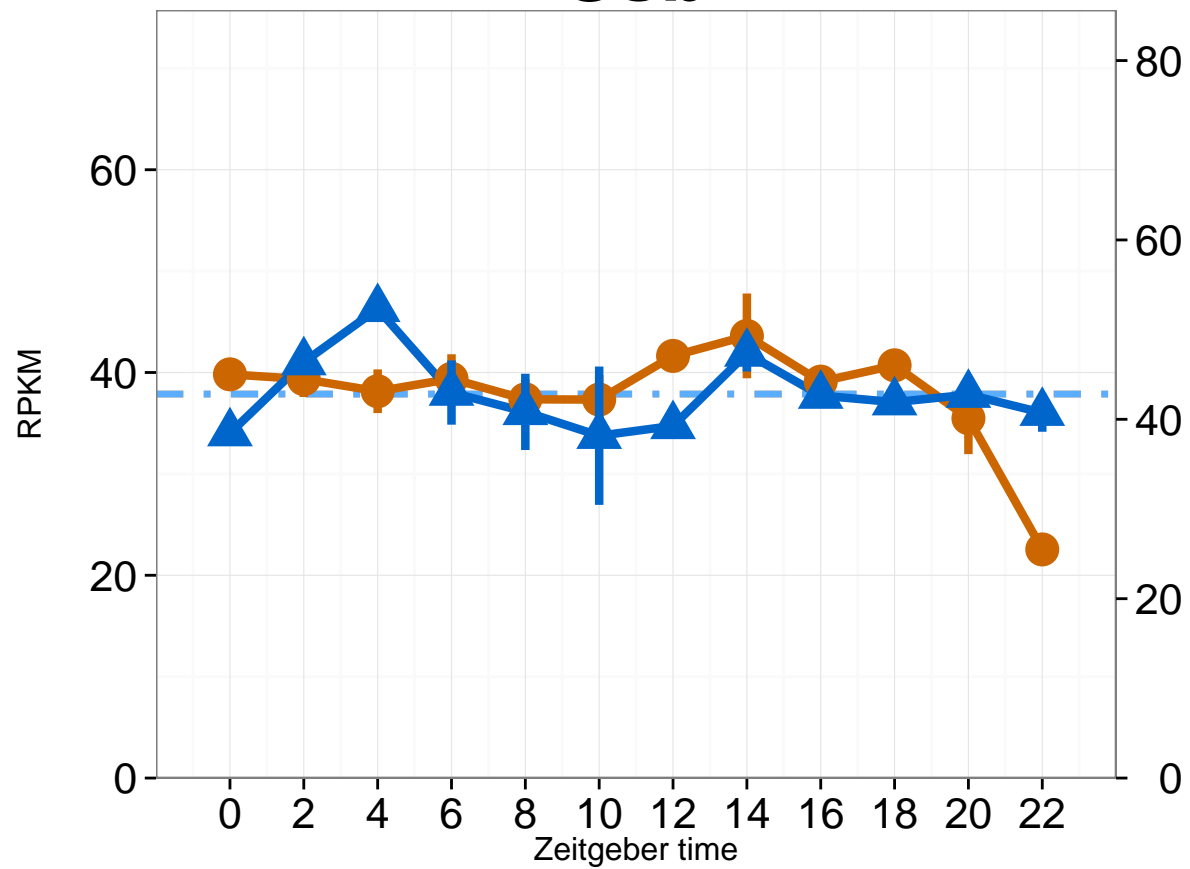

## Ssb

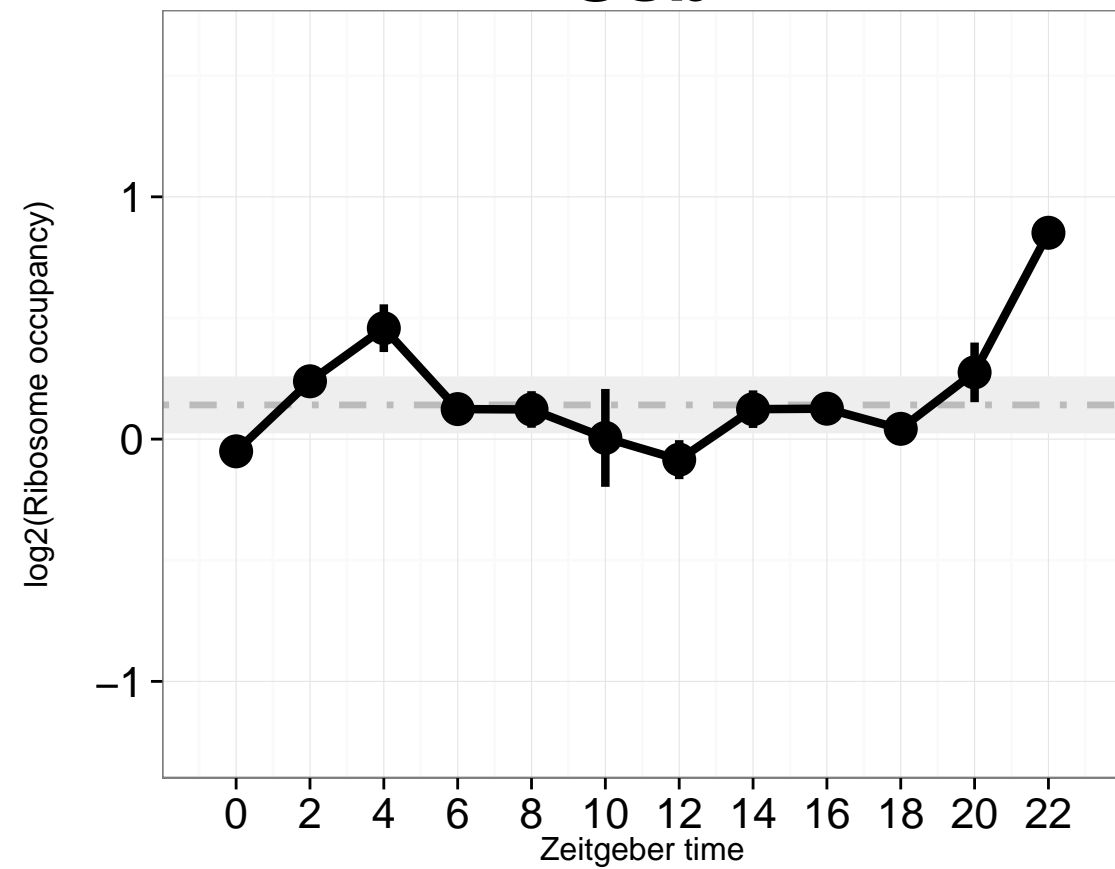

Supplement: SuppDataset_1.zip [file Ssb_set_A.pdf › Supplemental Dataset 1/A-mRNA_nonrhyth_translation_nonrhyth/Ssb_set_A.pdf]

## Ssbp1

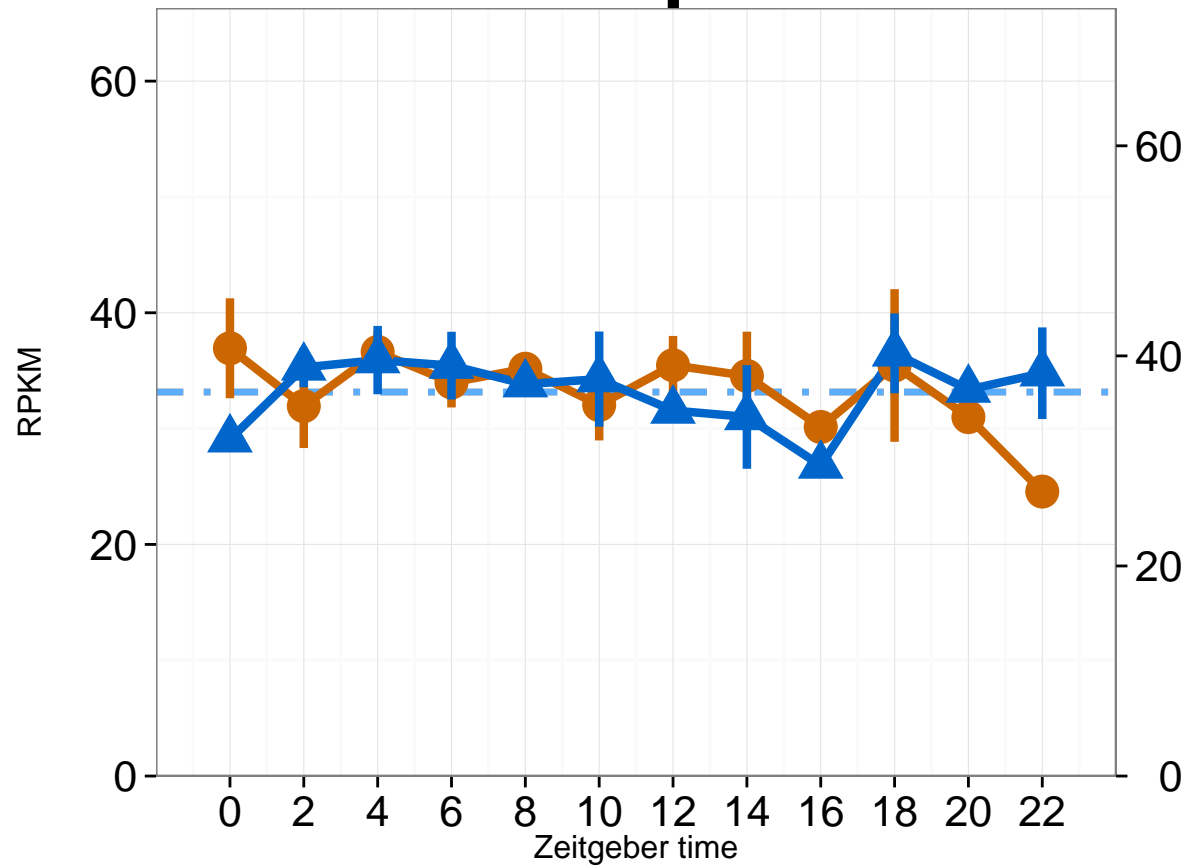

## Ssbp1

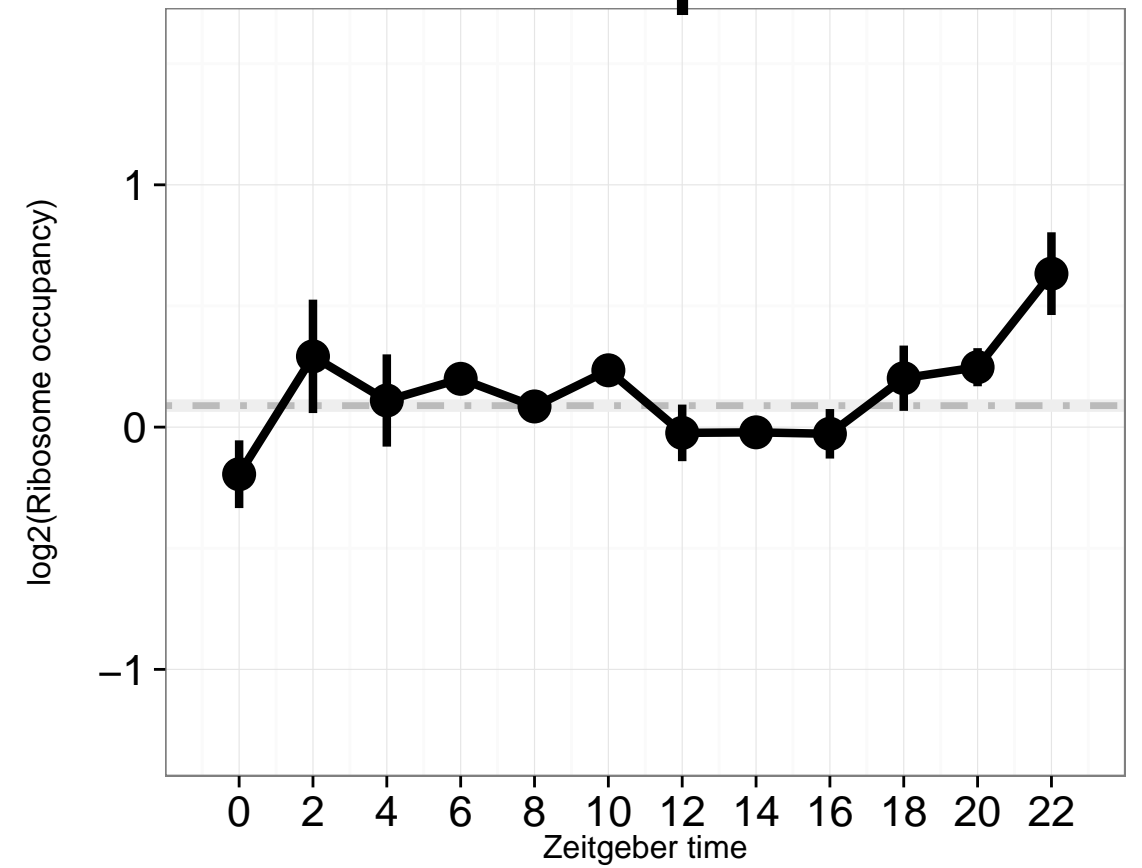

Supplement: SuppDataset_1.zip [file Ssbp1_set_A.pdf › Supplemental Dataset 1/A-mRNA_nonrhyth_translation_nonrhyth/Ssbp1_set_A.pdf]

## Ssbp2

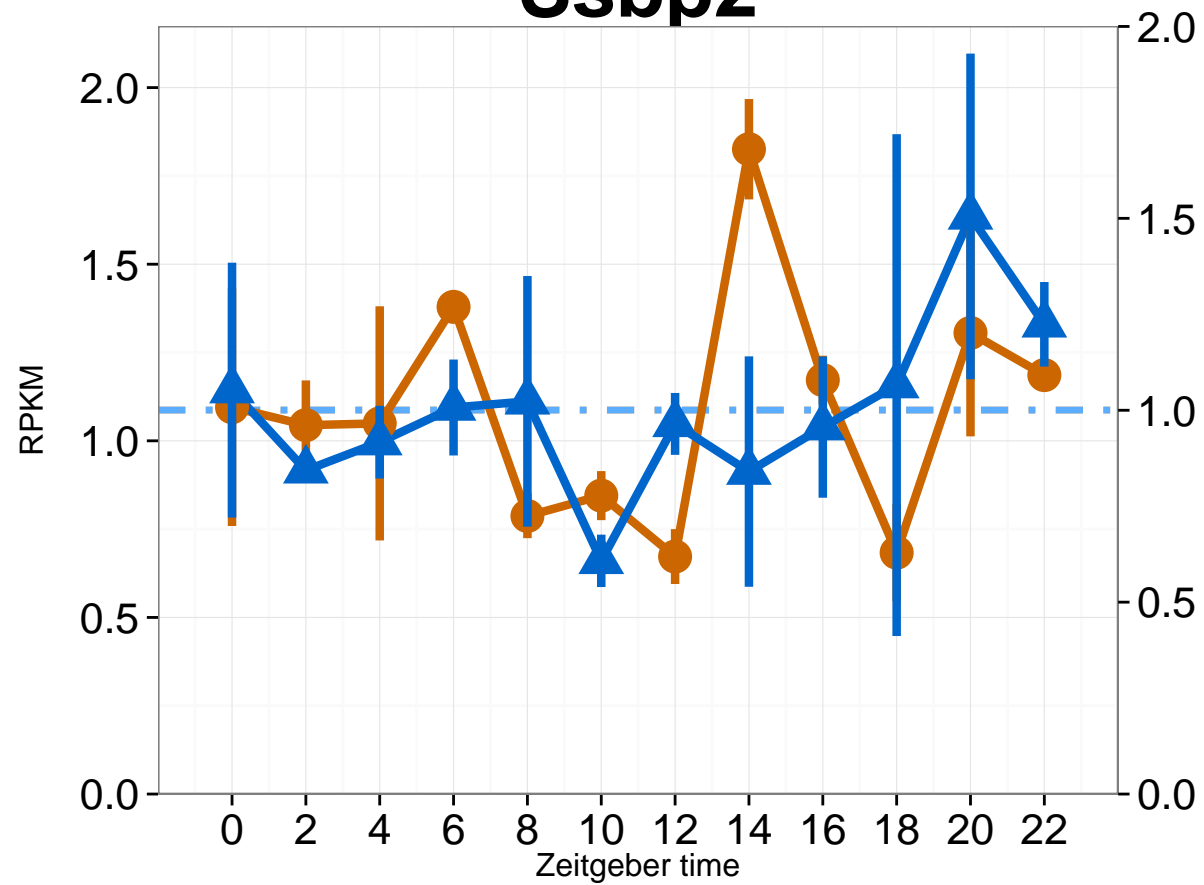

## Ssbp2

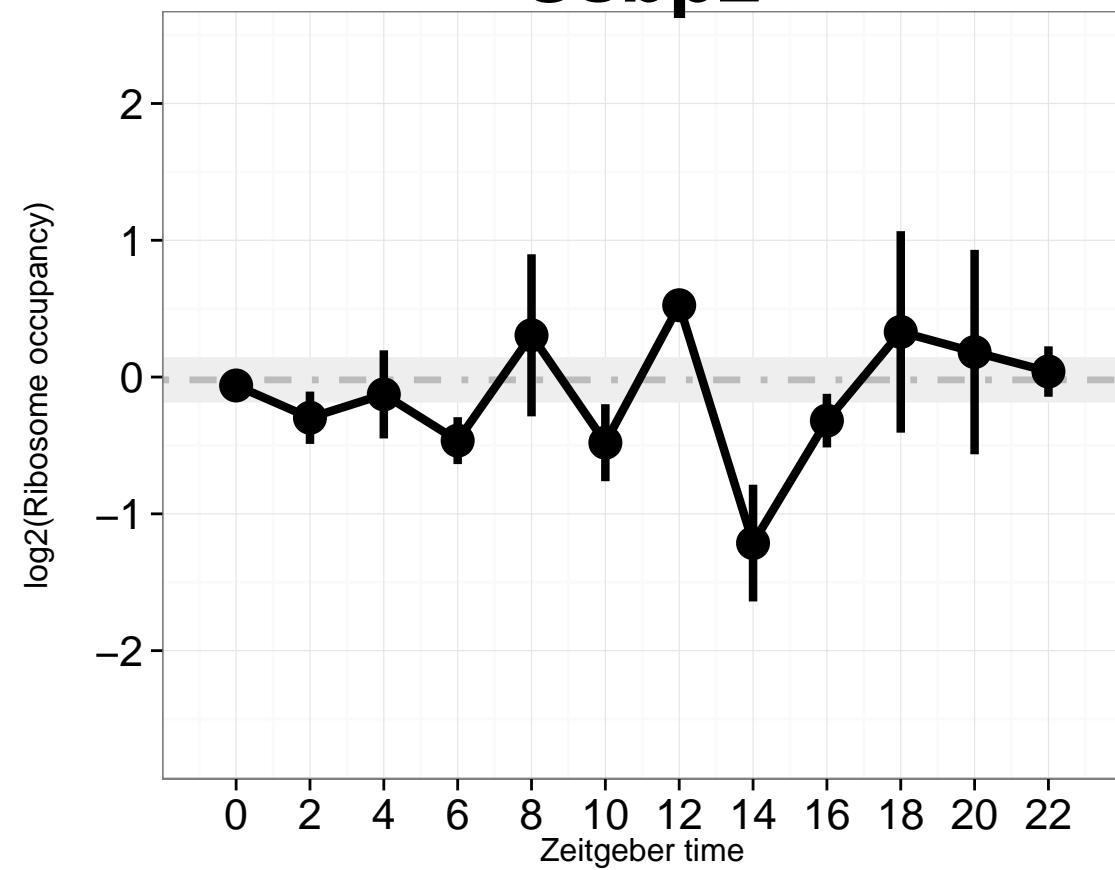

Supplement: SuppDataset_1.zip [file Ssbp2_set_A.pdf › Supplemental Dataset 1/A-mRNA_nonrhyth_translation_nonrhyth/Ssbp2_set_A.pdf]

## Ssbp3

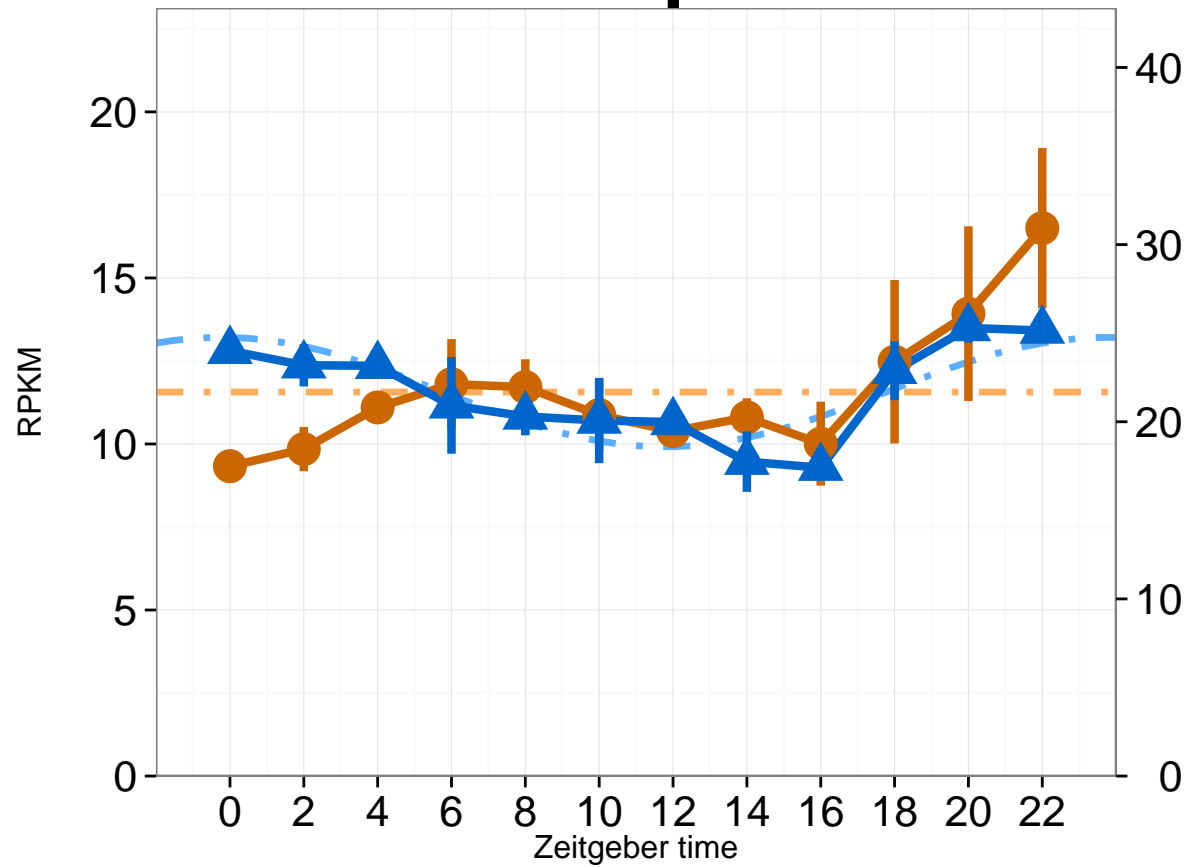

## Ssbp3

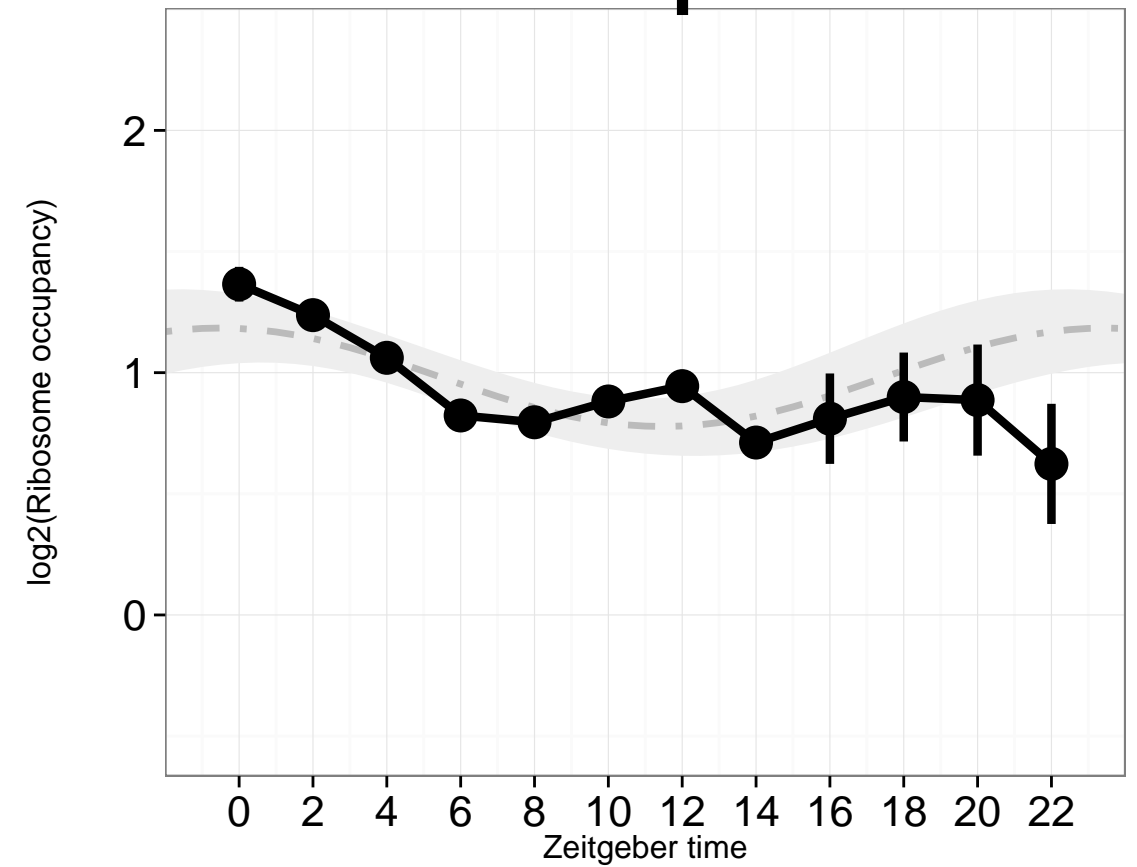

Supplement: SuppDataset_1.zip [file Ssbp3_set_A.pdf › Supplemental Dataset 1/A-mRNA_nonrhyth_translation_nonrhyth/Ssbp3_set_A.pdf]

## Ssbp4

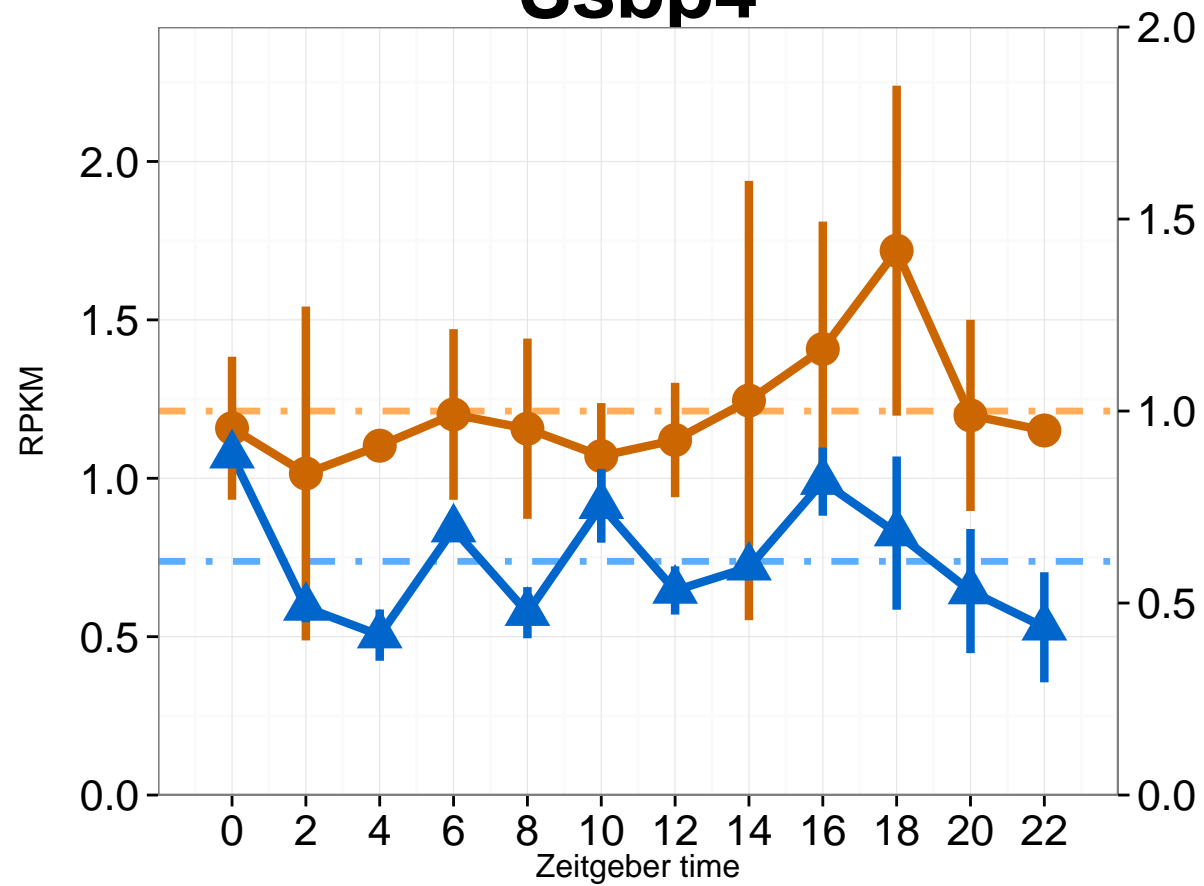

## Ssbp4

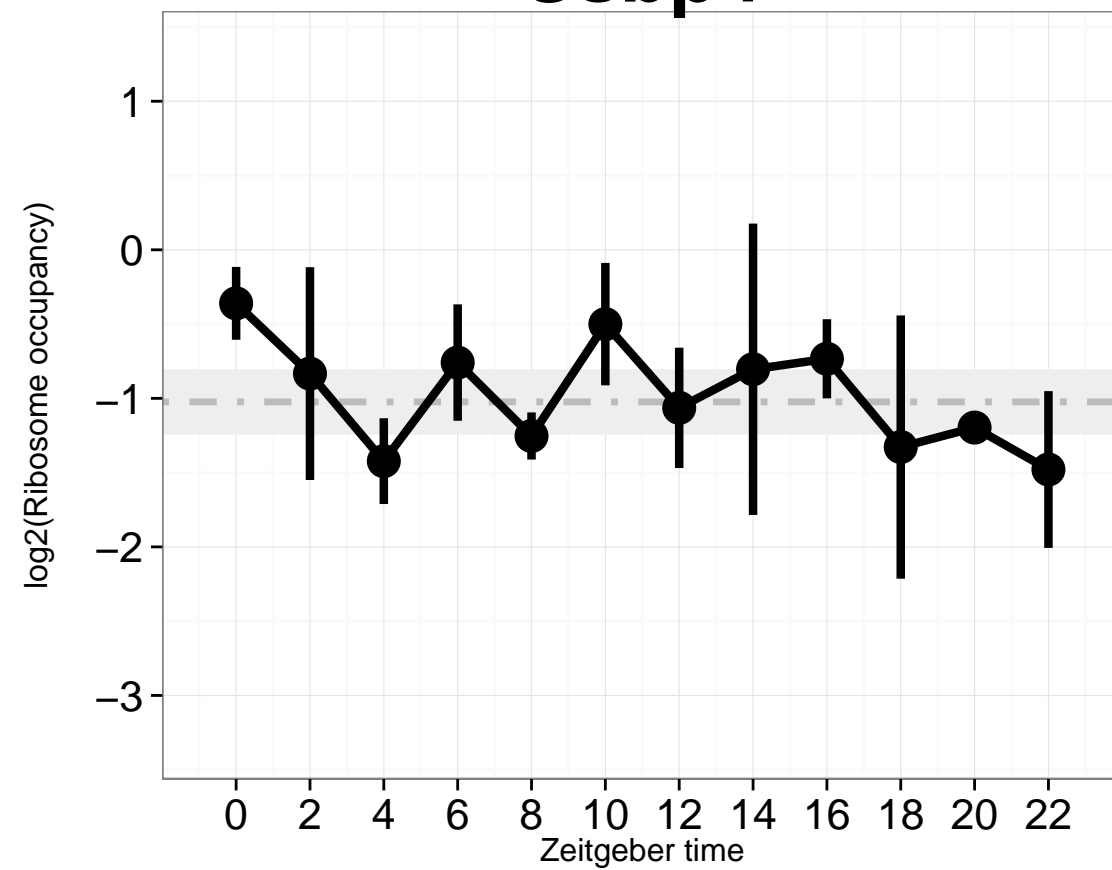

Supplement: SuppDataset_1.zip [file Ssbp4_set_A.pdf › Supplemental Dataset 1/A-mRNA_nonrhyth_translation_nonrhyth/Ssbp4_set_A.pdf]

# Ssfa2

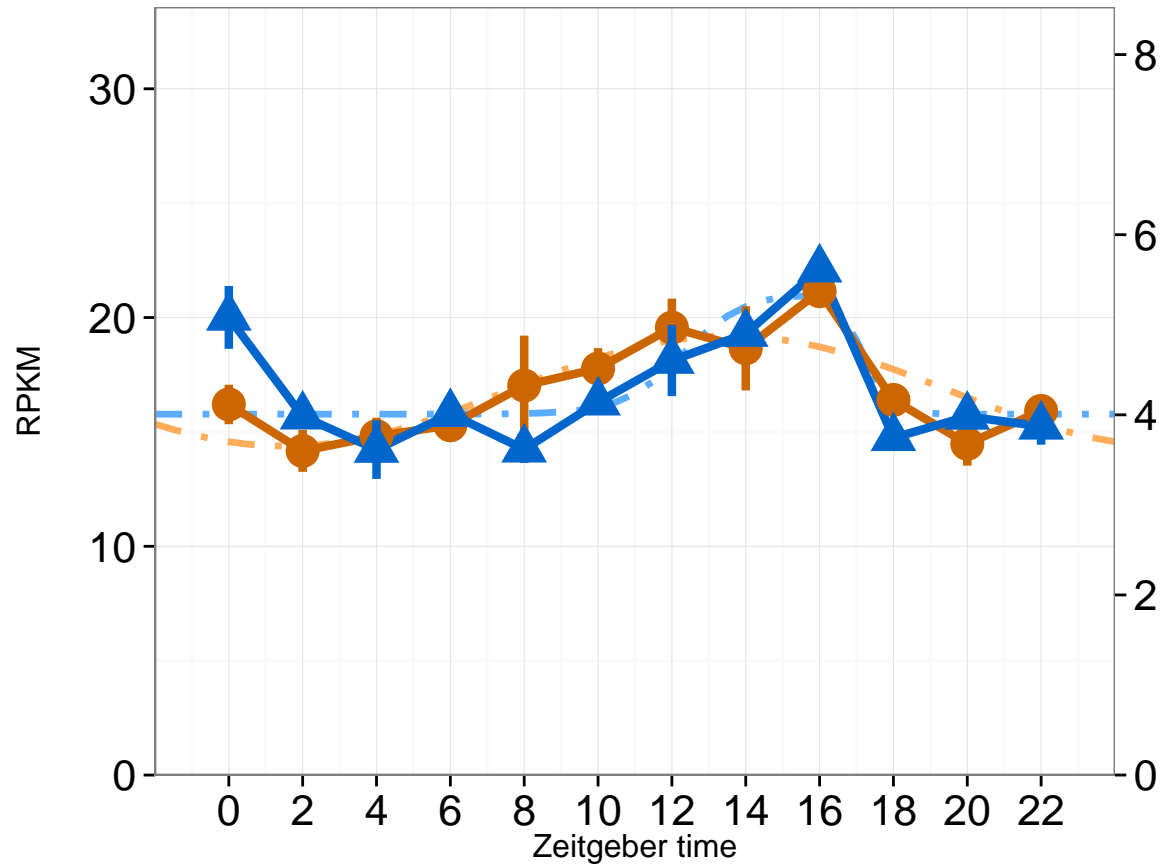

# Ssfa2

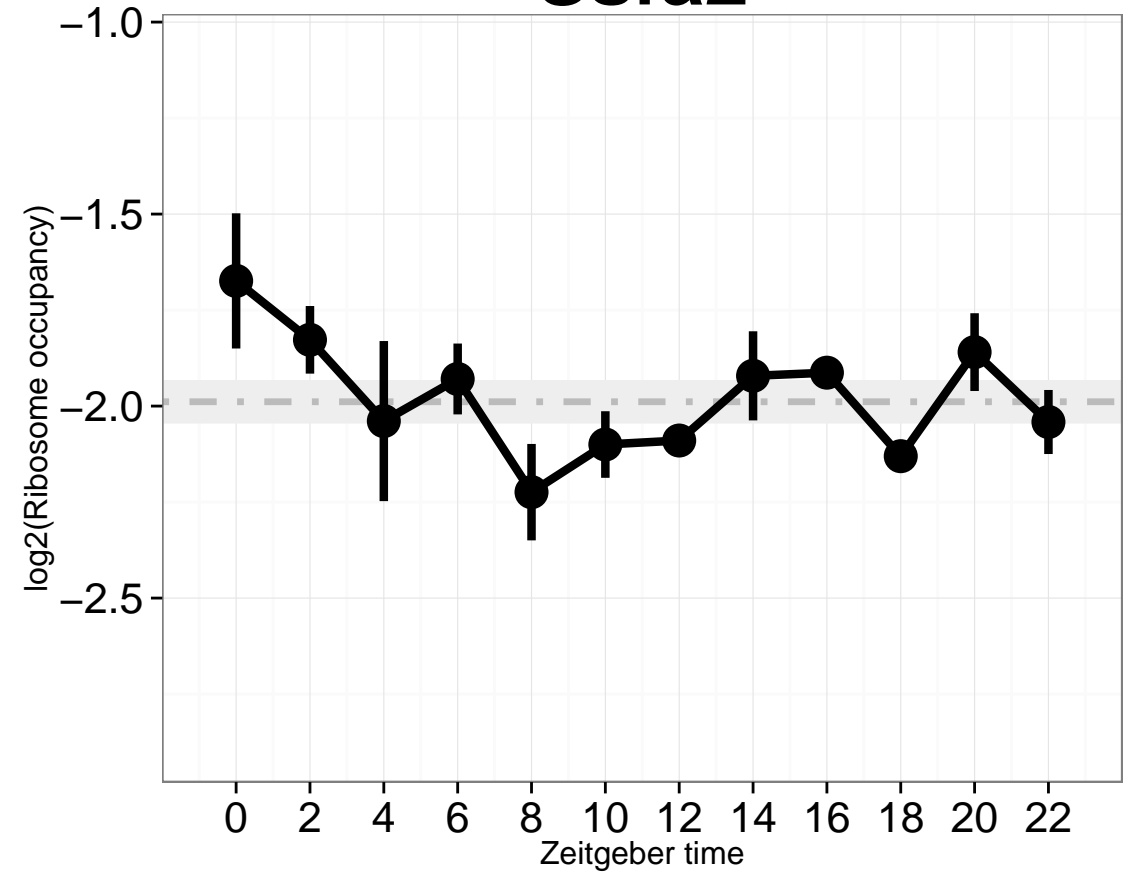

Supplement: SuppDataset_1.zip [file Ssfa2_set_A.pdf › Supplemental Dataset 1/A-mRNA_nonrhyth_translation_nonrhyth/Ssfa2_set_A.pdf]

## Ssh1

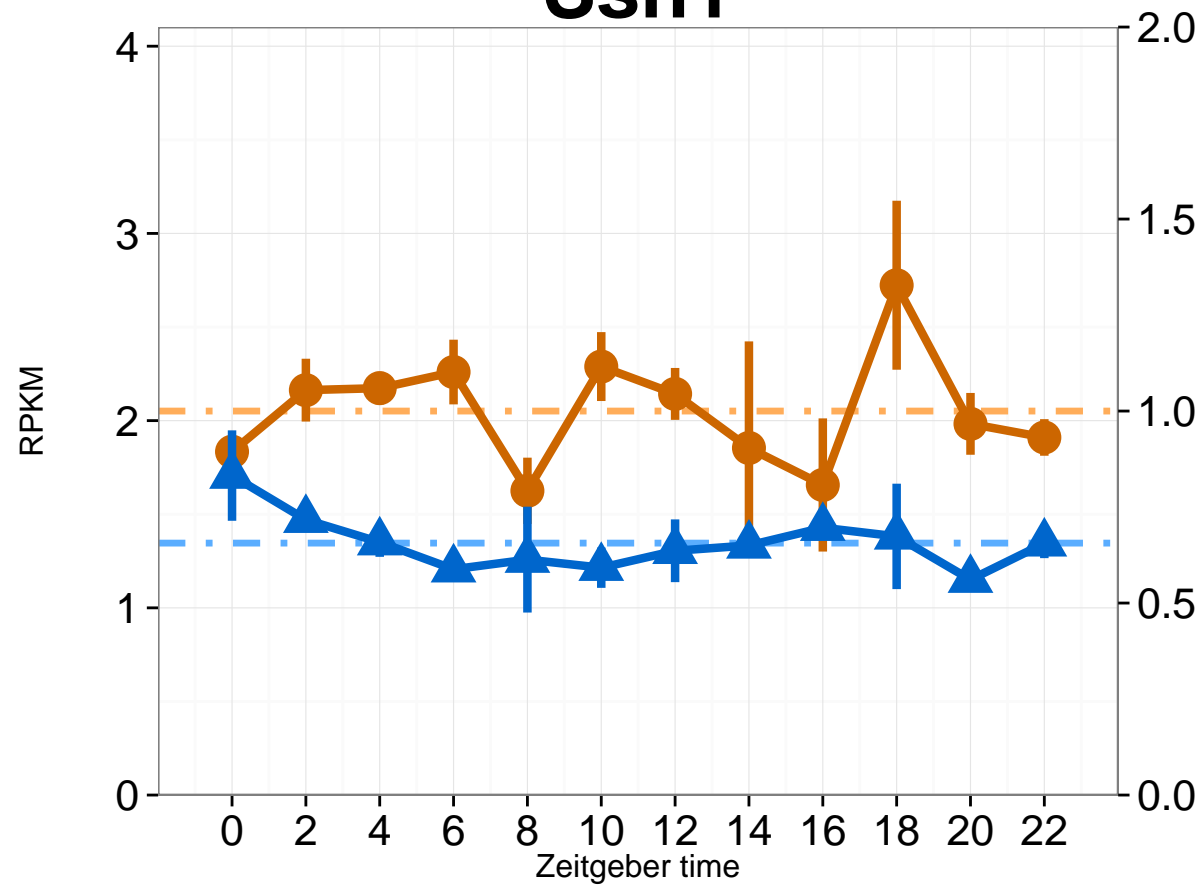

## Ssh1

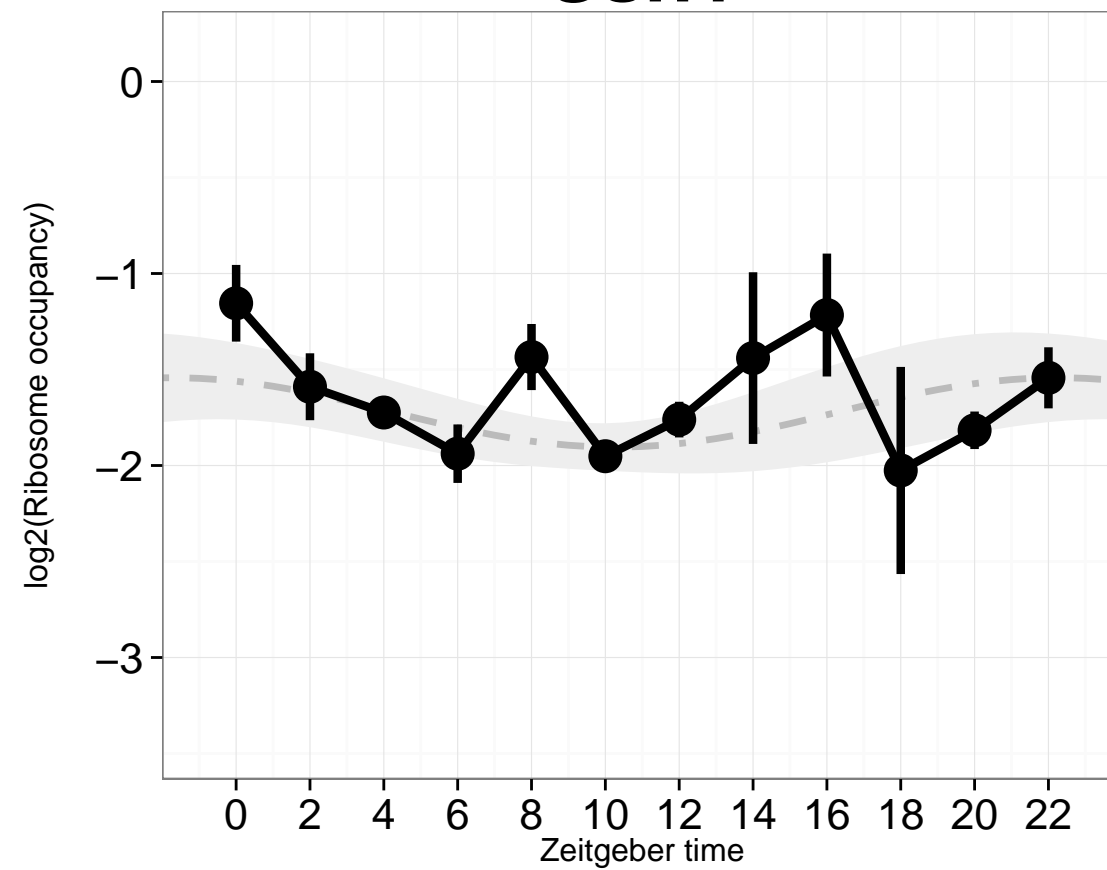

Supplement: SuppDataset_1.zip [file Ssh1_set_A.pdf › Supplemental Dataset 1/A-mRNA_nonrhyth_translation_nonrhyth/Ssh1_set_A.pdf]

## Ssh2

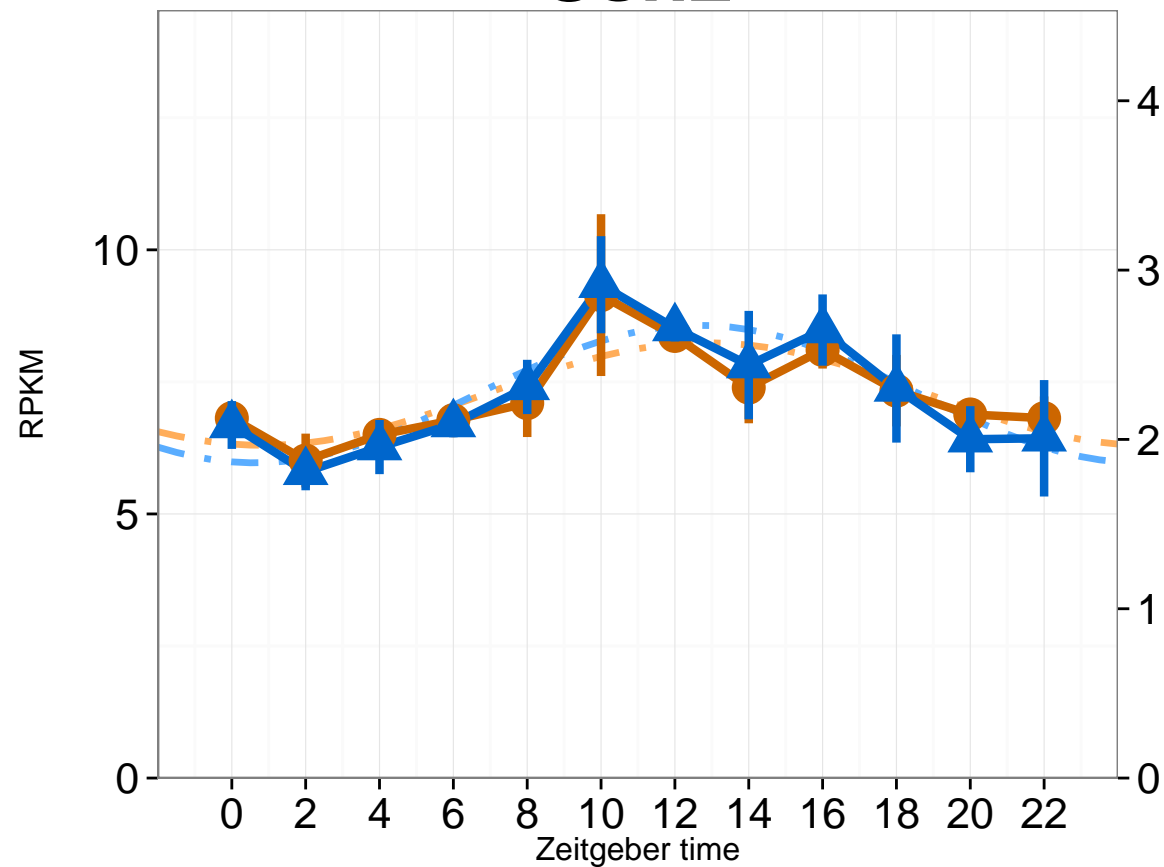

## Ssh2

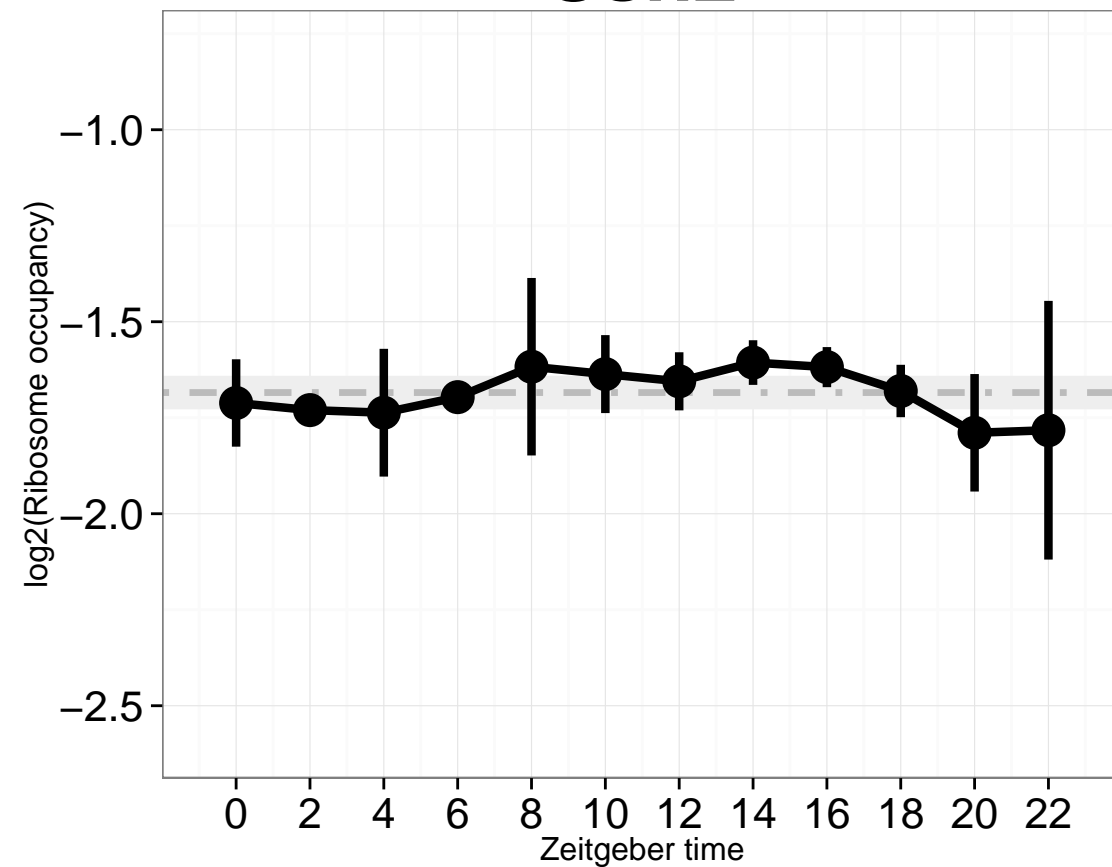

Supplement: SuppDataset_1.zip [file Ssh2_set_A.pdf › Supplemental Dataset 1/A-mRNA_nonrhyth_translation_nonrhyth/Ssh2_set_A.pdf]

## Ssh3

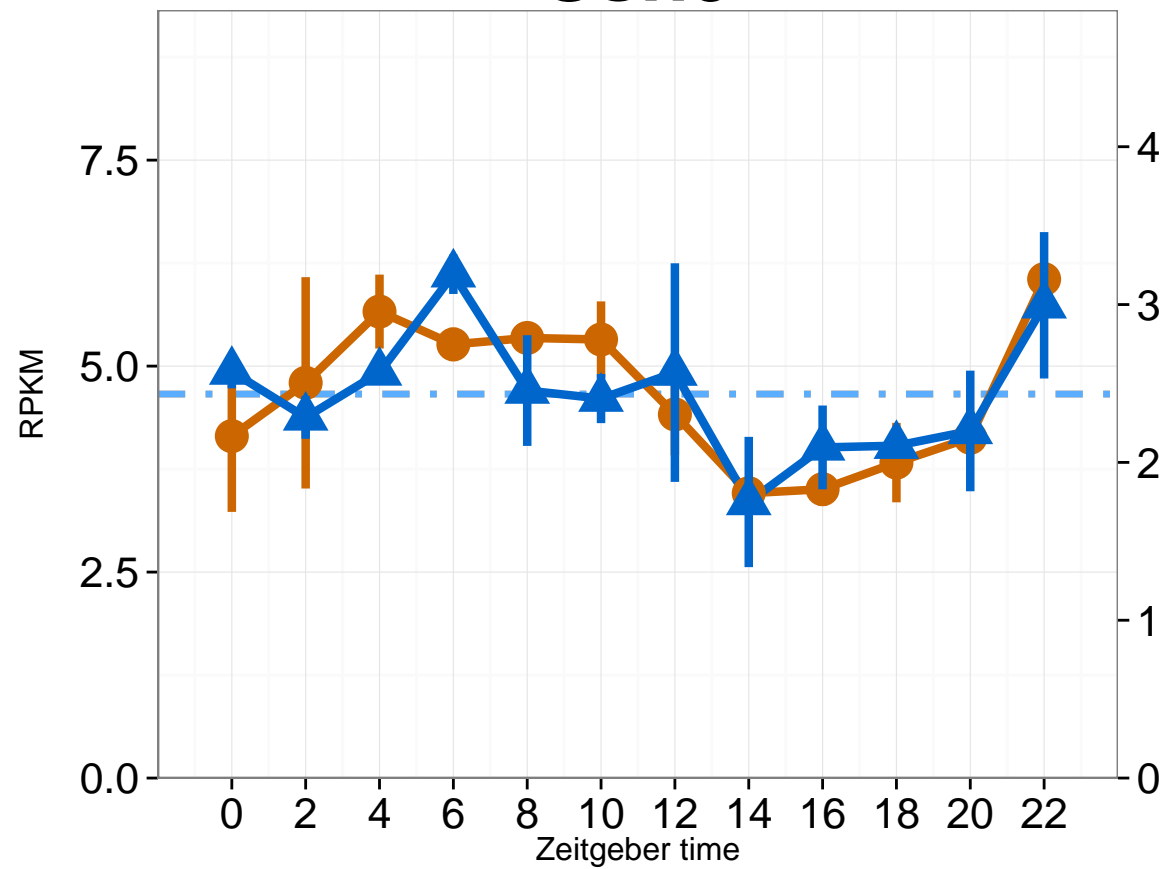

## Ssh3

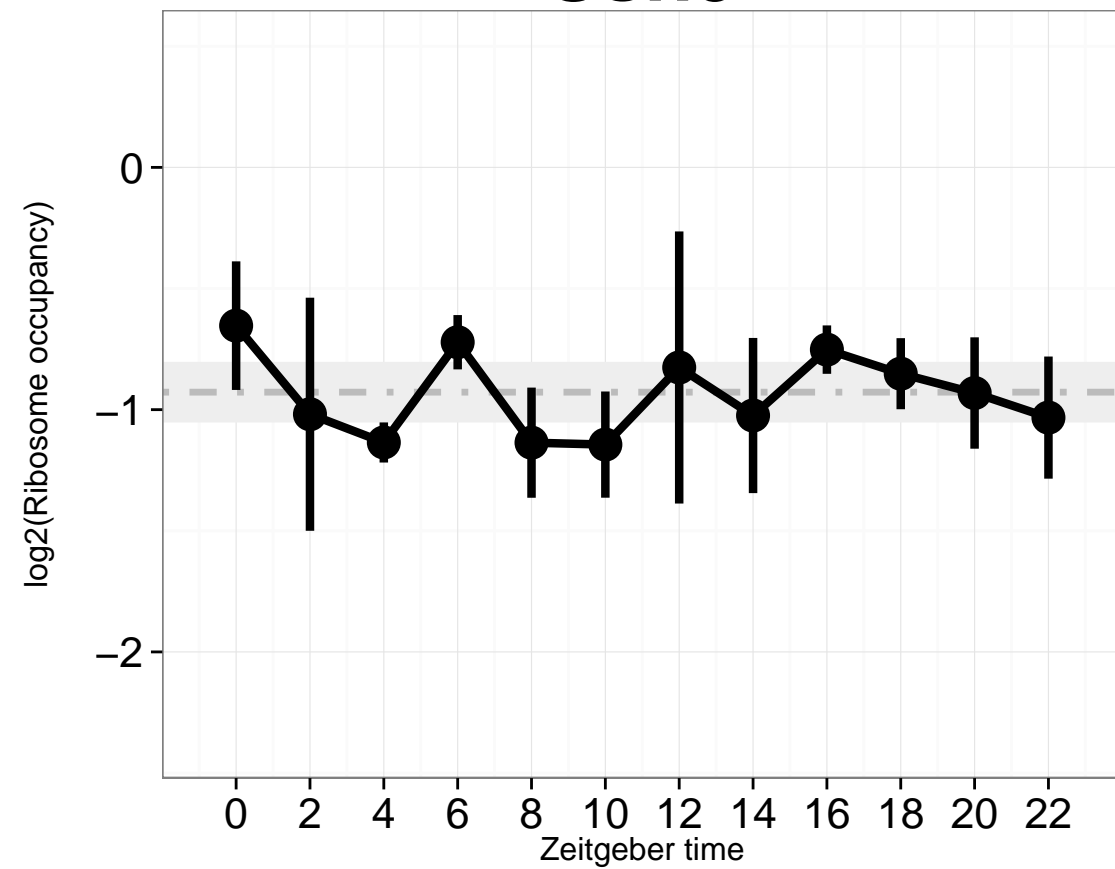

Supplement: SuppDataset_1.zip [file Ssh3_set_A.pdf › Supplemental Dataset 1/A-mRNA_nonrhyth_translation_nonrhyth/Ssh3_set_A.pdf]

# Ssna1

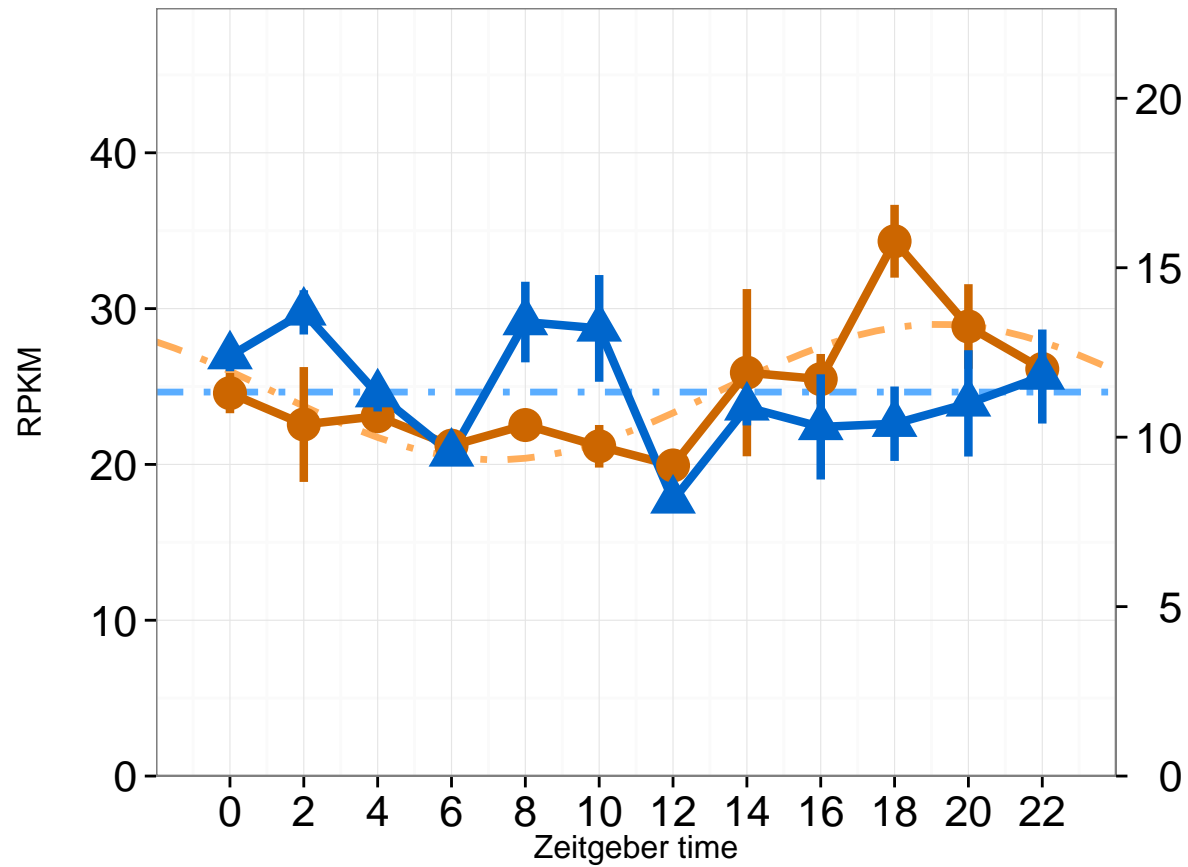

# Ssna1

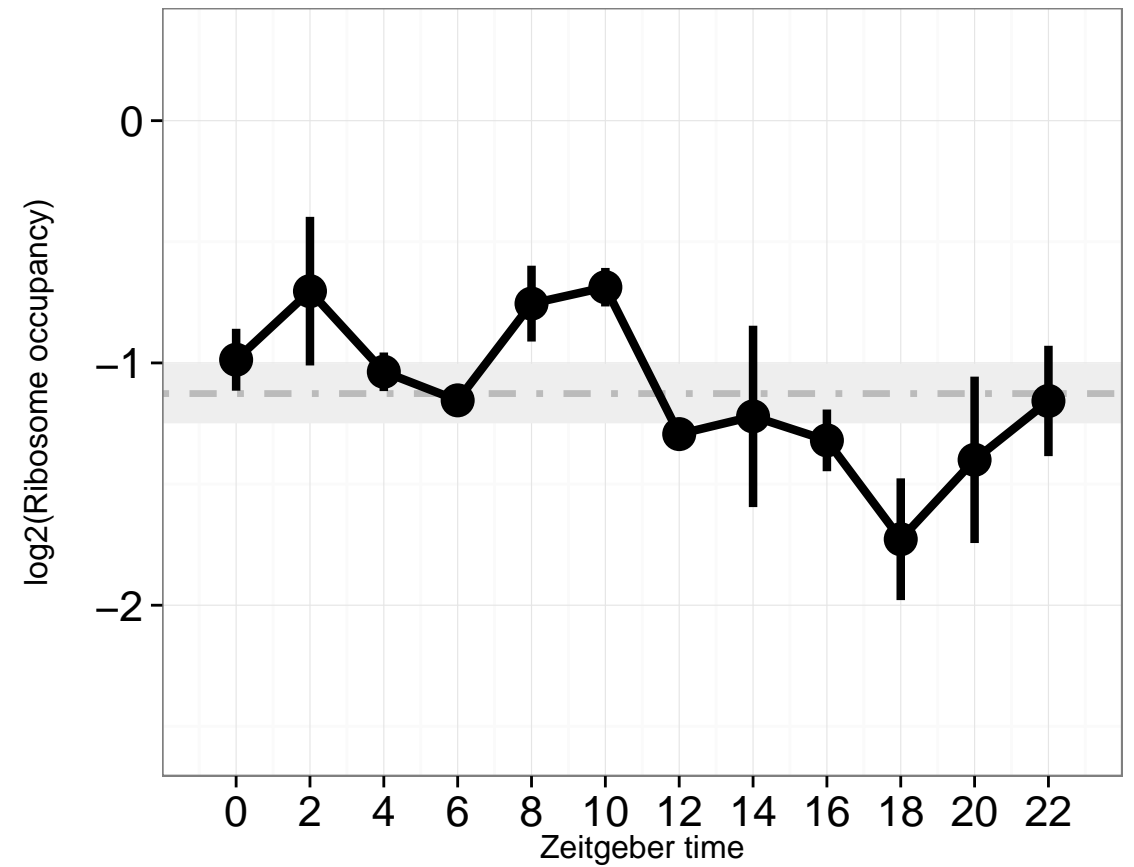

Supplement: SuppDataset_1.zip [file Ssna1_set_A.pdf › Supplemental Dataset 1/A-mRNA_nonrhyth_translation_nonrhyth/Ssna1_set_A.pdf]

## Ssr1

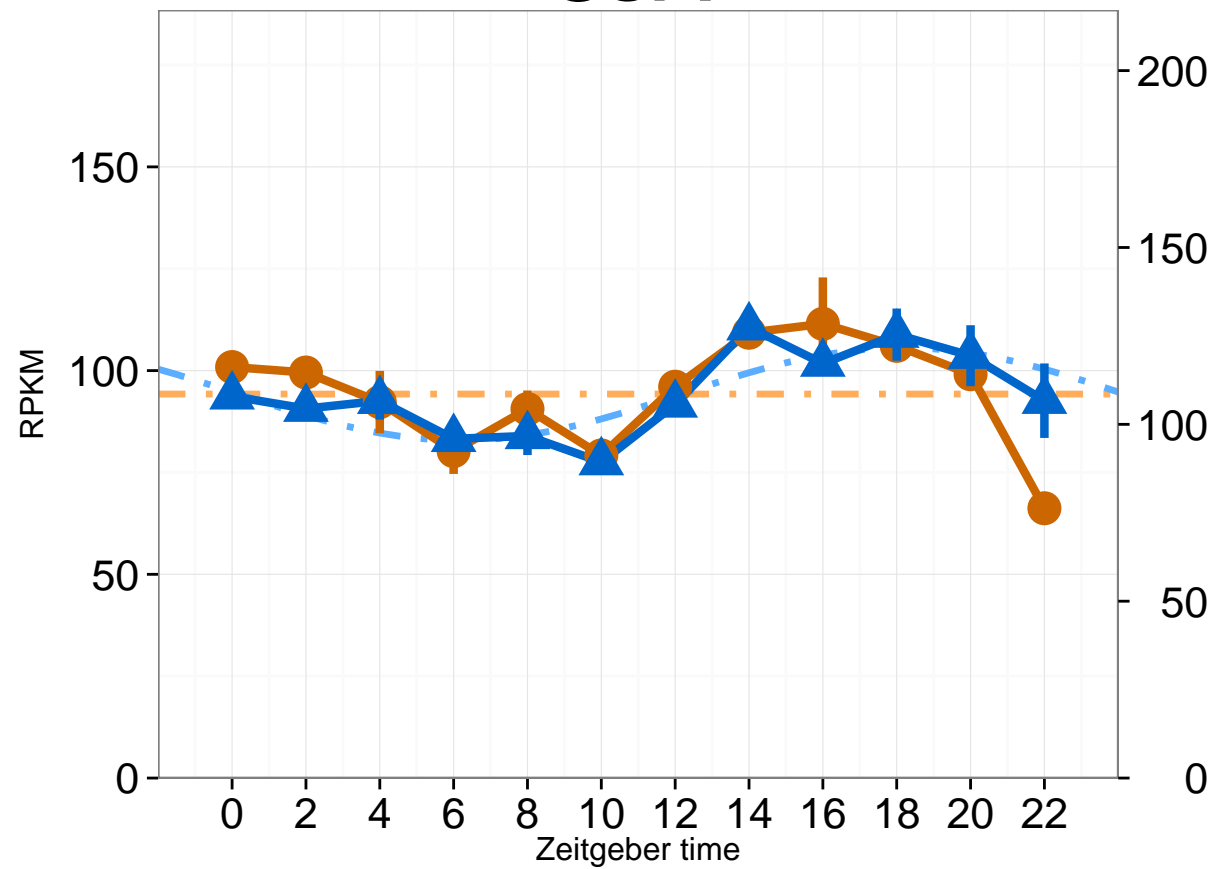

## Ssr1

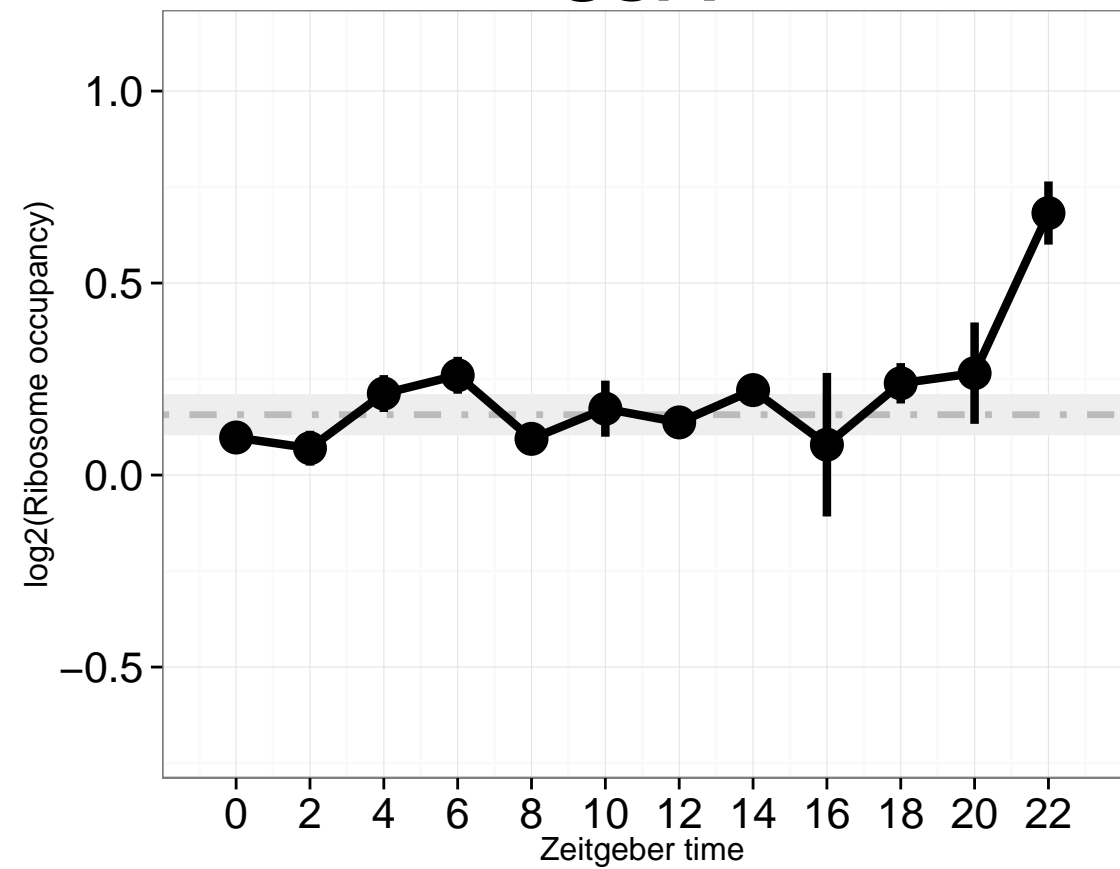

Supplement: SuppDataset_1.zip [file Ssr1_set_A.pdf › Supplemental Dataset 1/A-mRNA_nonrhyth_translation_nonrhyth/Ssr1_set_A.pdf]

## Ssr2

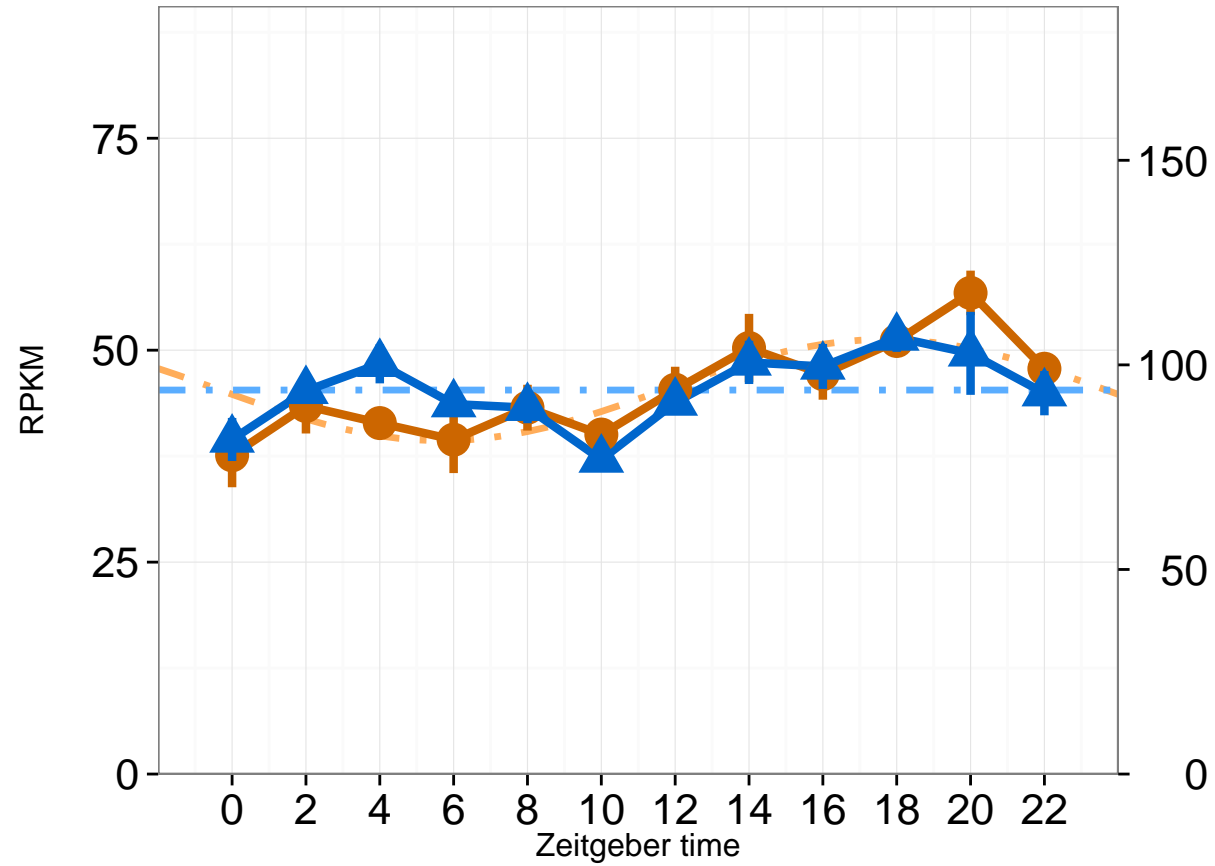

## Ssr2

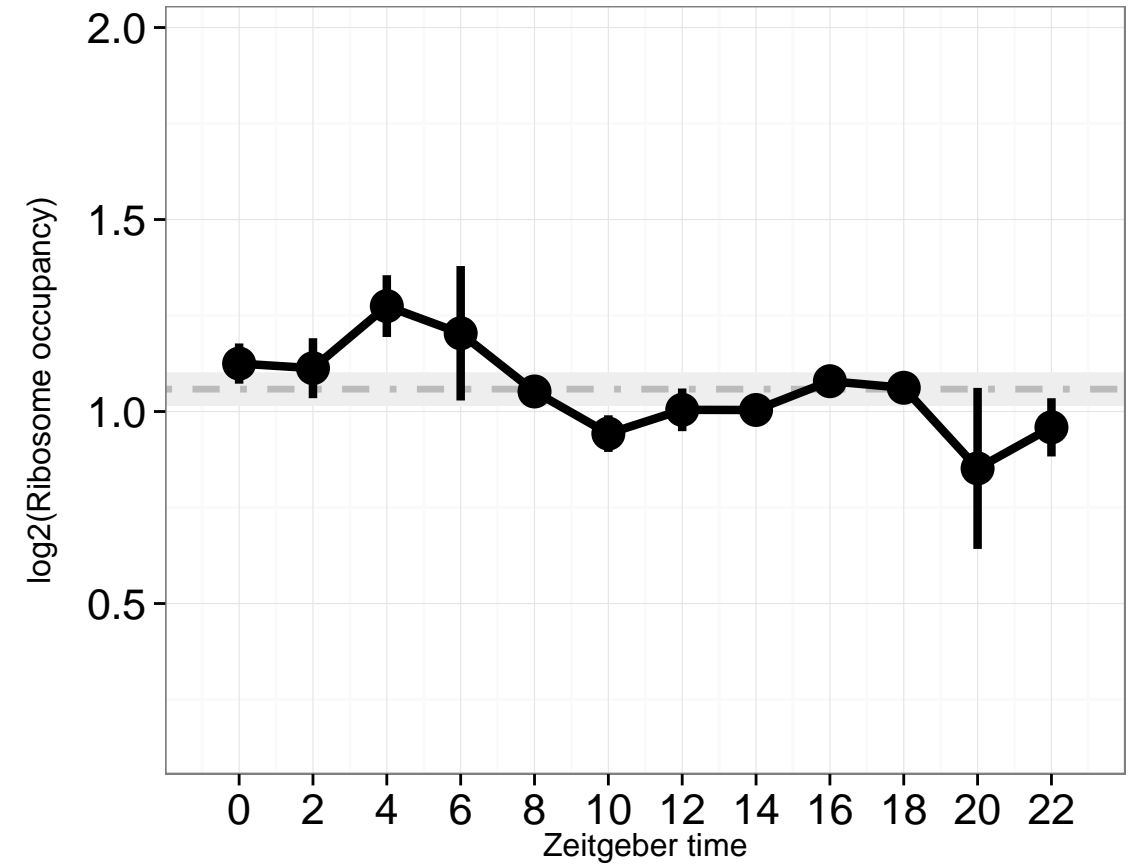

Supplement: SuppDataset_1.zip [file Ssr2_set_A.pdf › Supplemental Dataset 1/A-mRNA_nonrhyth_translation_nonrhyth/Ssr2_set_A.pdf]

## Ssr3

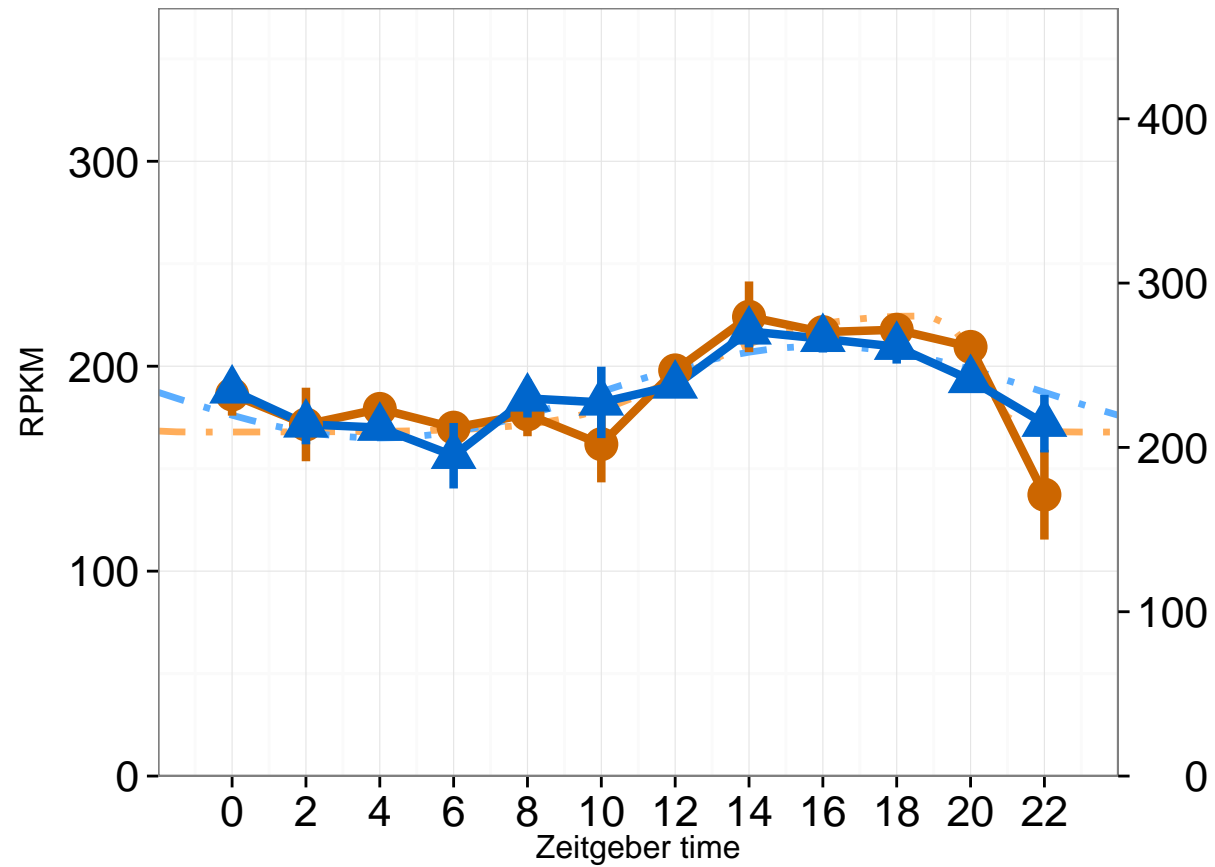

## Ssr3

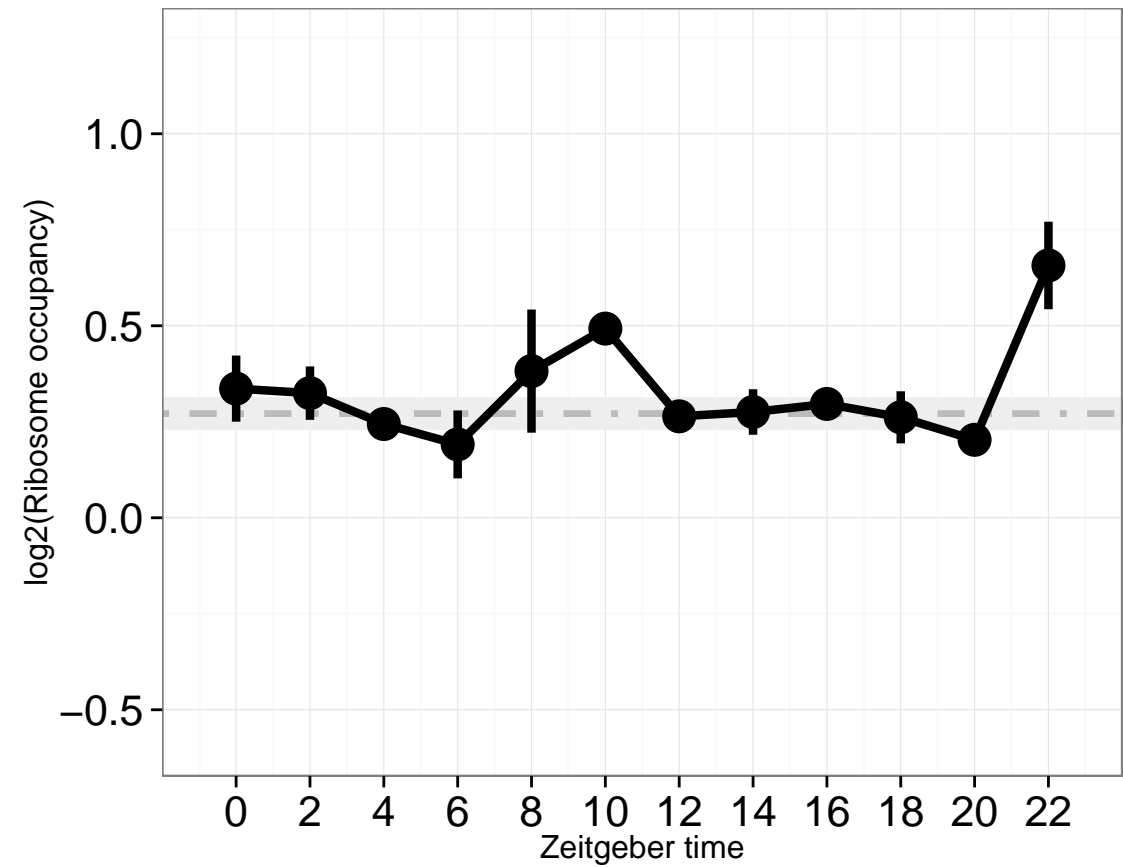

Supplement: SuppDataset_1.zip [file Ssr3_set_A.pdf › Supplemental Dataset 1/A-mRNA_nonrhyth_translation_nonrhyth/Ssr3_set_A.pdf]

## Ssr4

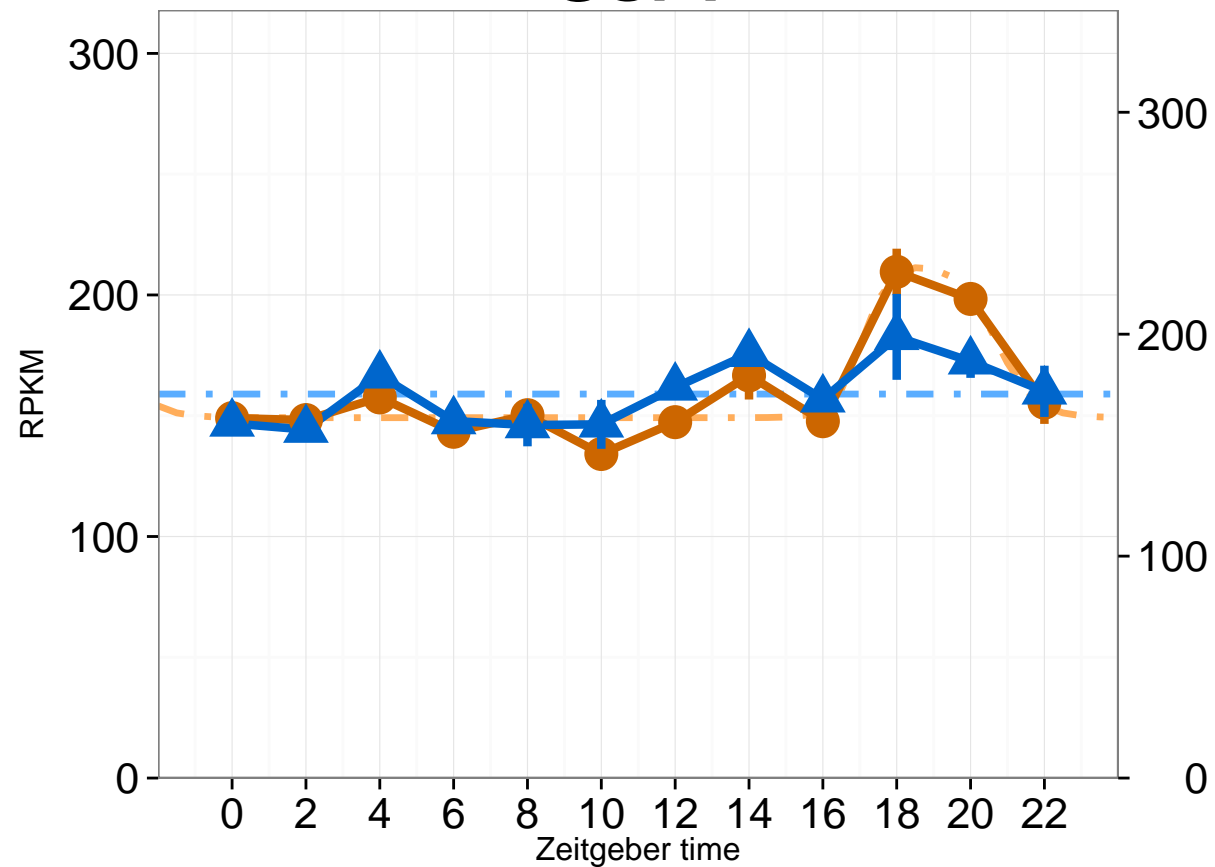

## Ssr4

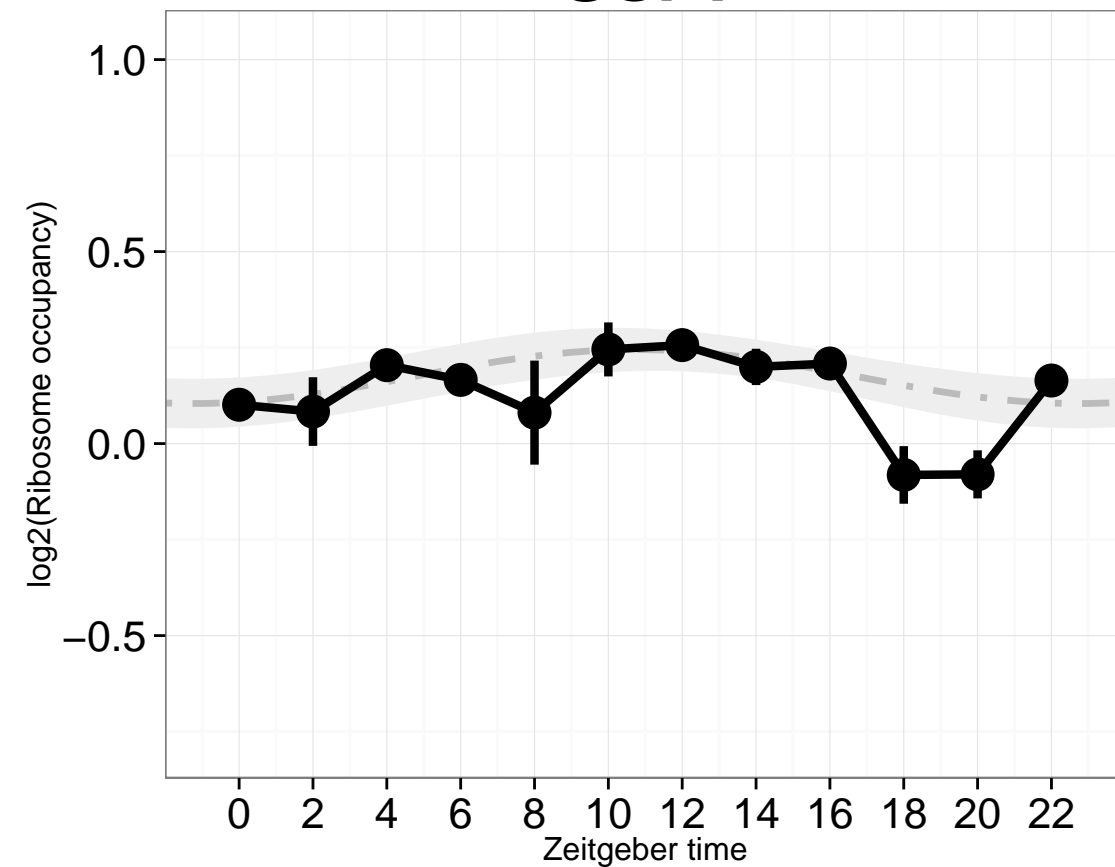

Supplement: SuppDataset_1.zip [file Ssr4_set_A.pdf › Supplemental Dataset 1/A-mRNA_nonrhyth_translation_nonrhyth/Ssr4_set_A.pdf]

# Ssrp1

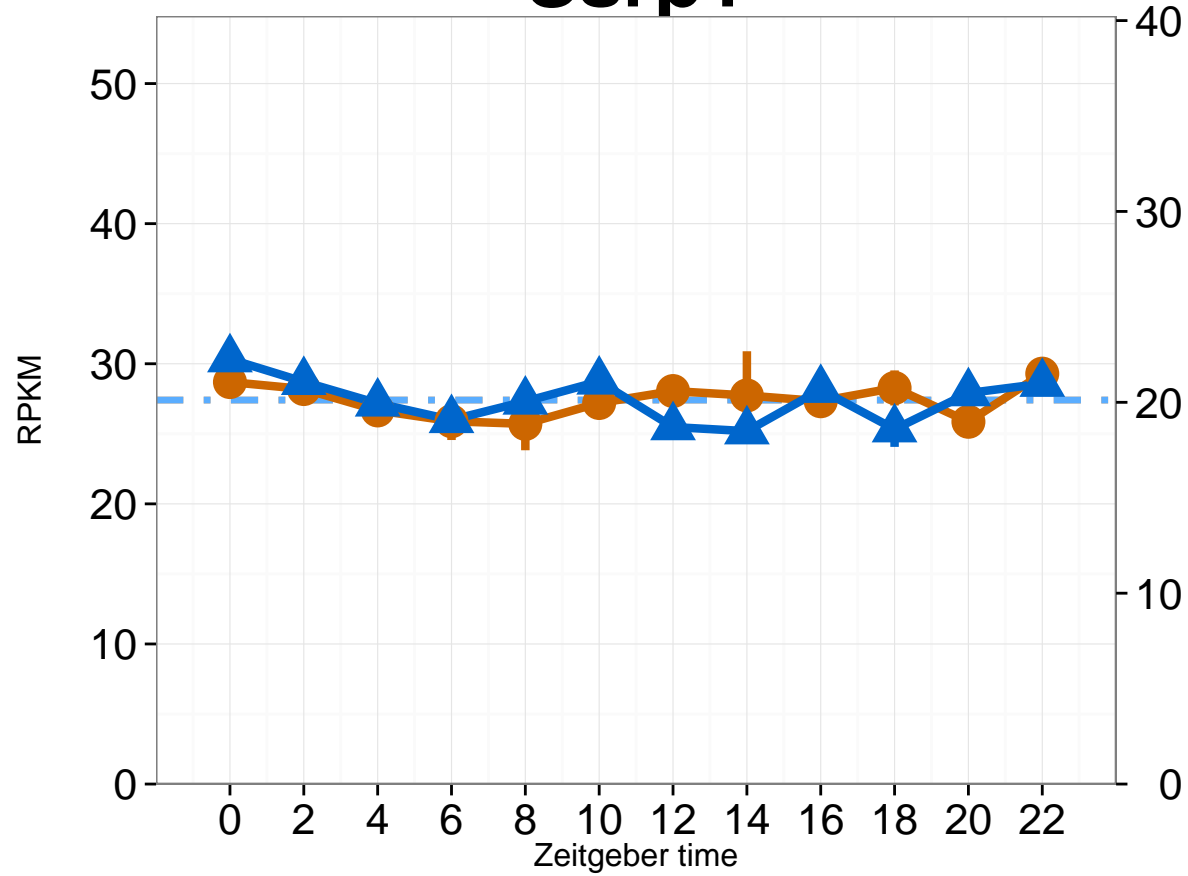

# Ssrp1

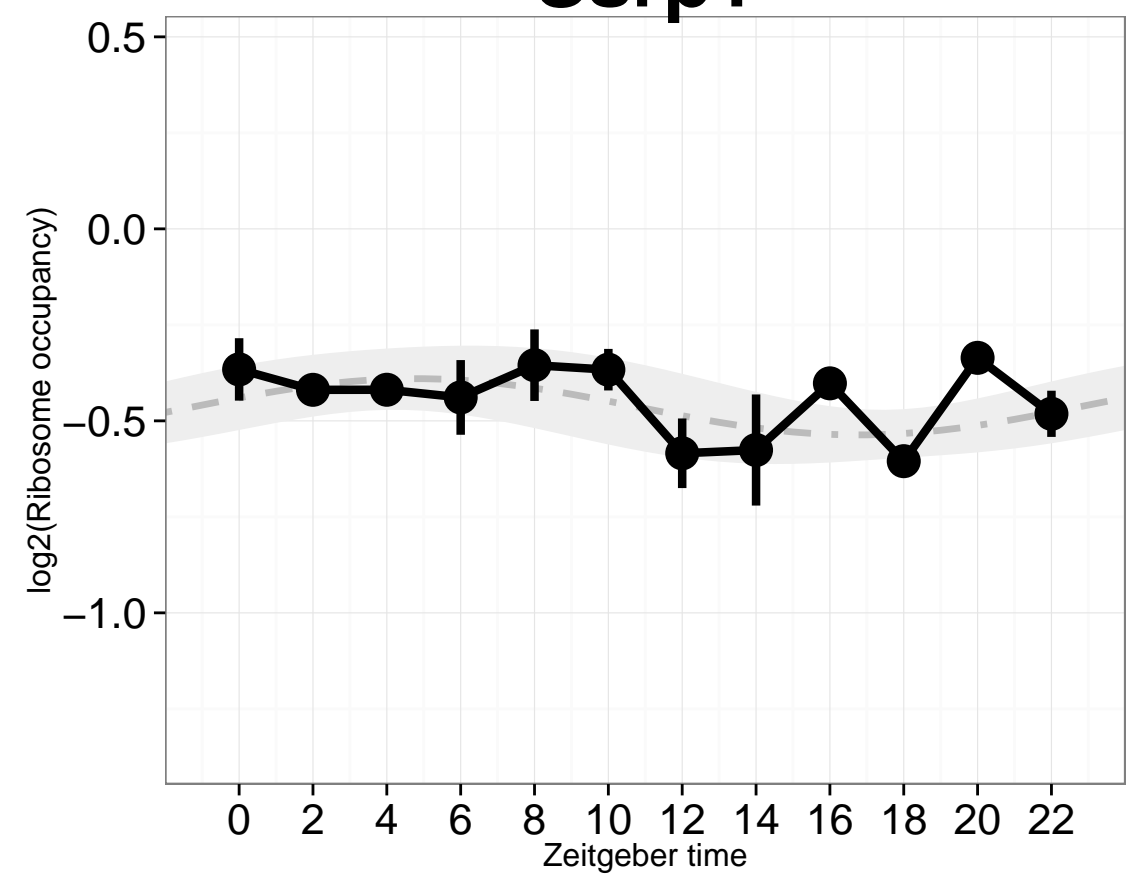

Supplement: SuppDataset_1.zip [file Ssrp1_set_A.pdf › Supplemental Dataset 1/A-mRNA_nonrhyth_translation_nonrhyth/Ssrp1_set_A.pdf]

## Sssca1

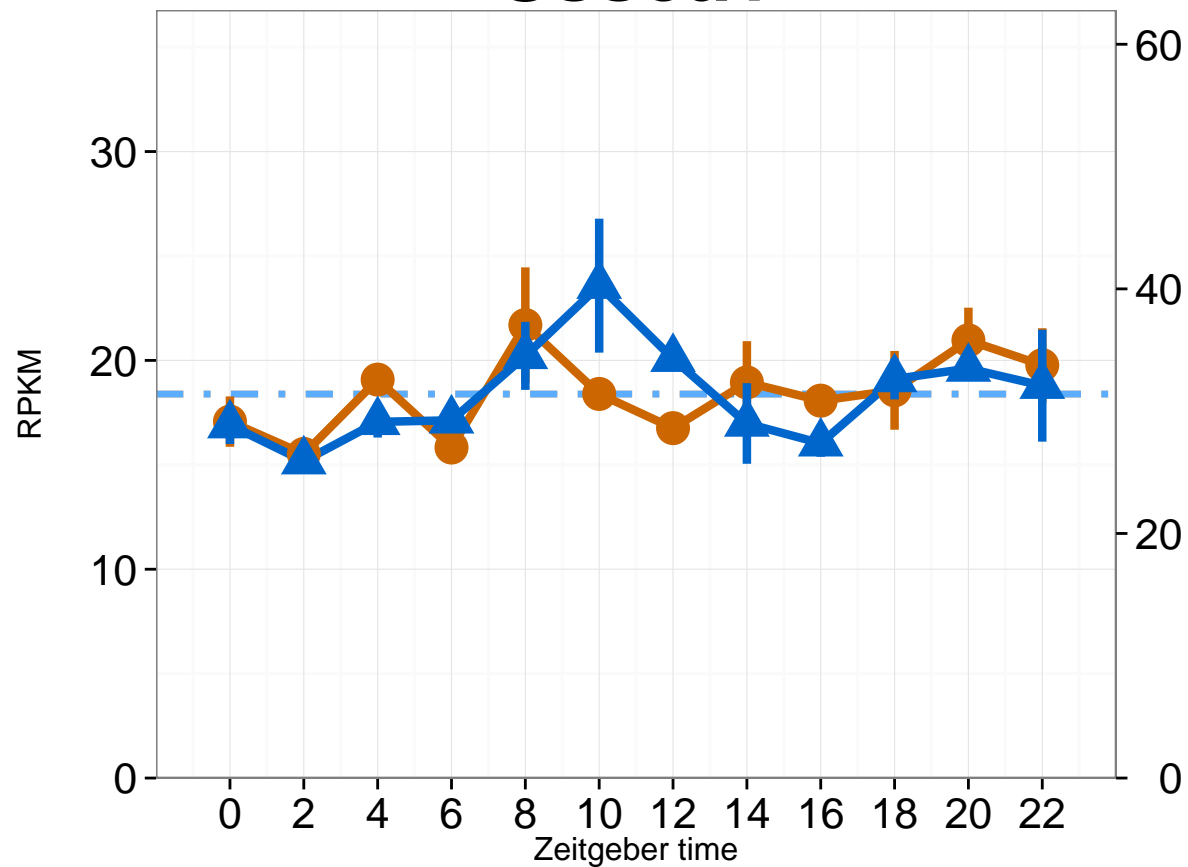

## Sssca1

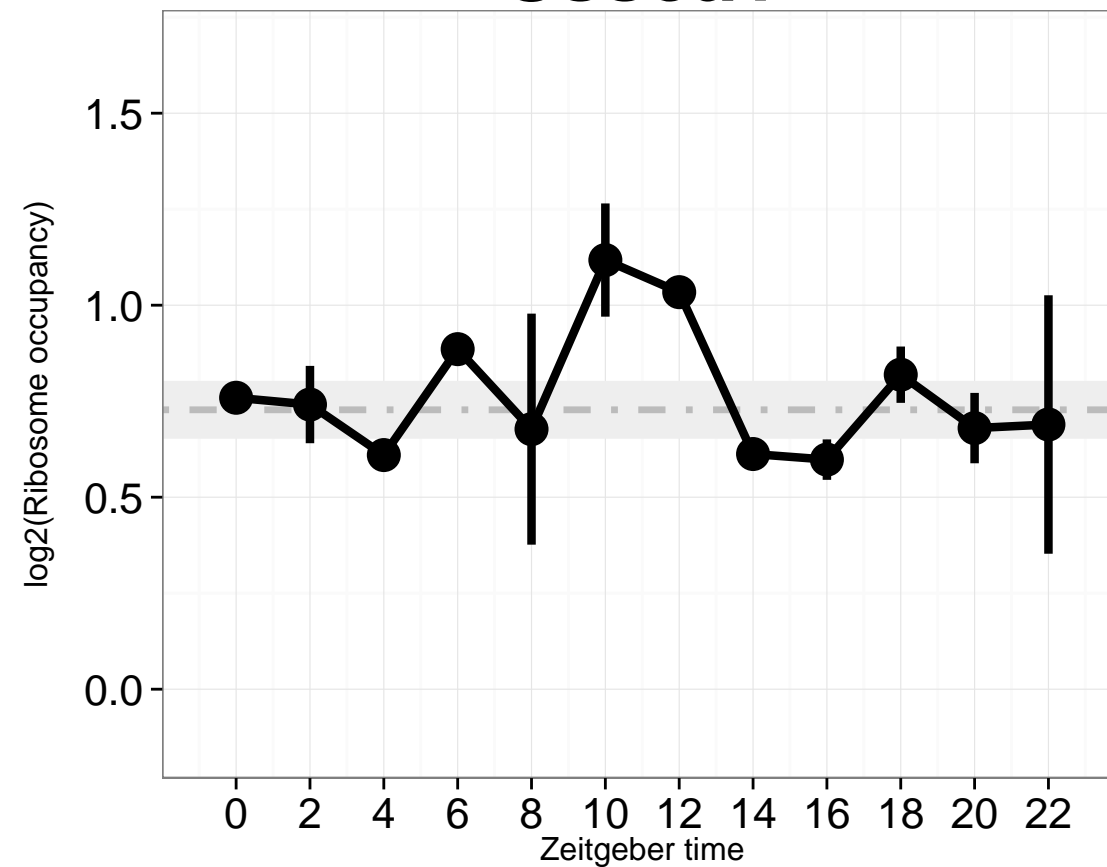

Supplement: SuppDataset_1.zip [file Sssca1_set_A.pdf › Supplemental Dataset 1/A-mRNA_nonrhyth_translation_nonrhyth/Sssca1_set_A.pdf]

# Sstr2

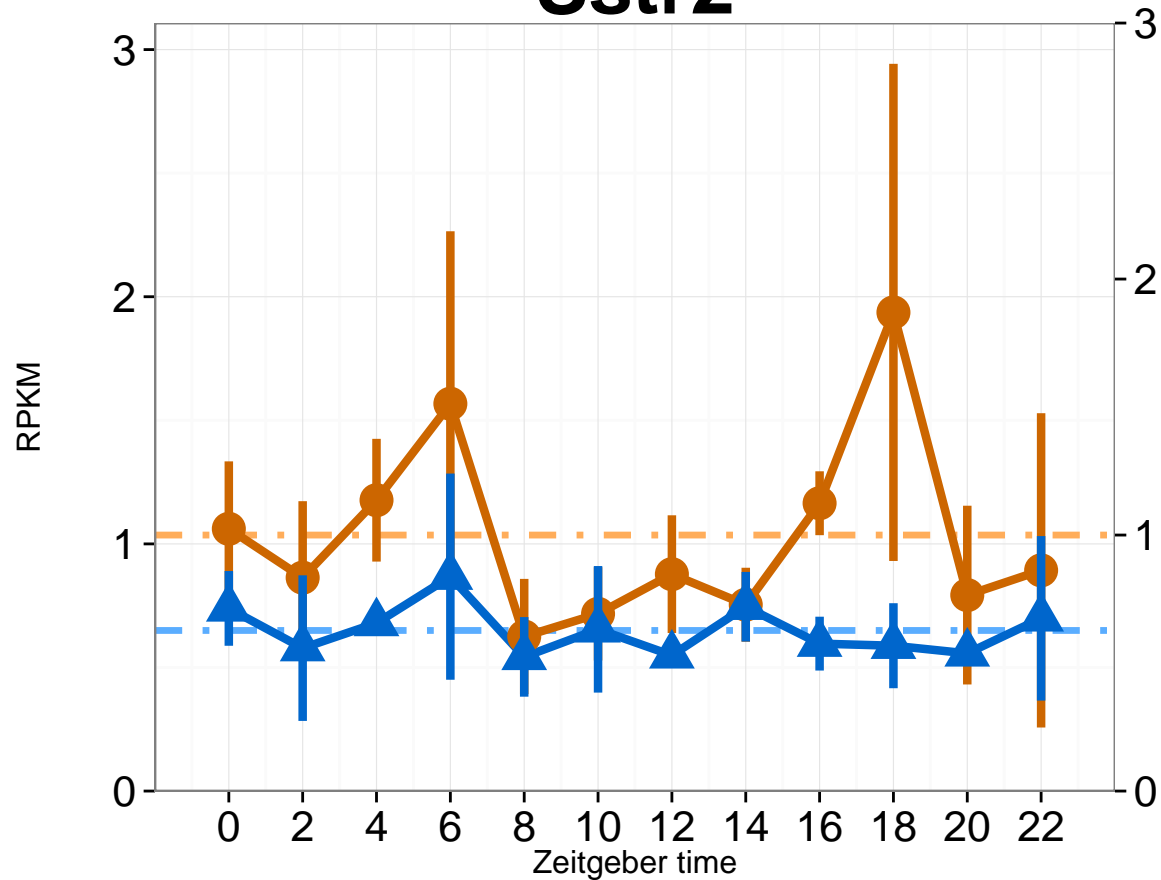

# Sstr2

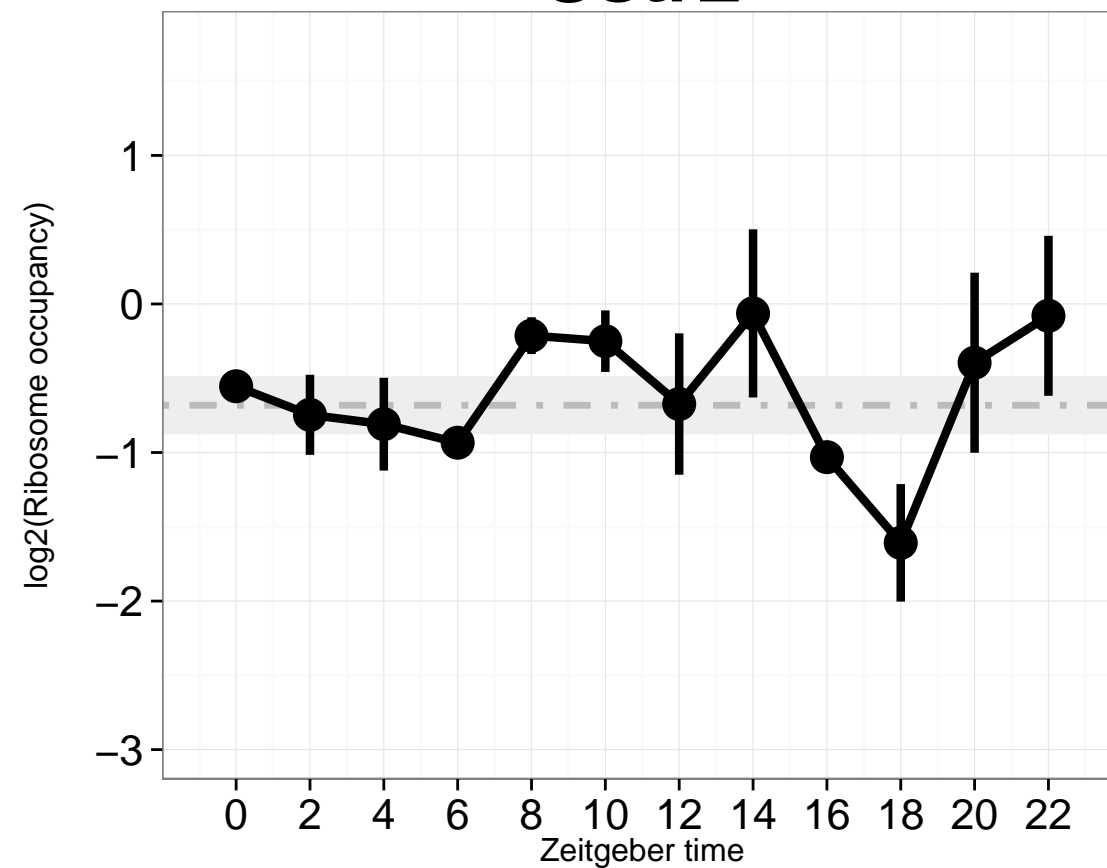

Supplement: SuppDataset_1.zip [file Sstr2_set_A.pdf › Supplemental Dataset 1/A-mRNA_nonrhyth_translation_nonrhyth/Sstr2_set_A.pdf]

## Ssu72

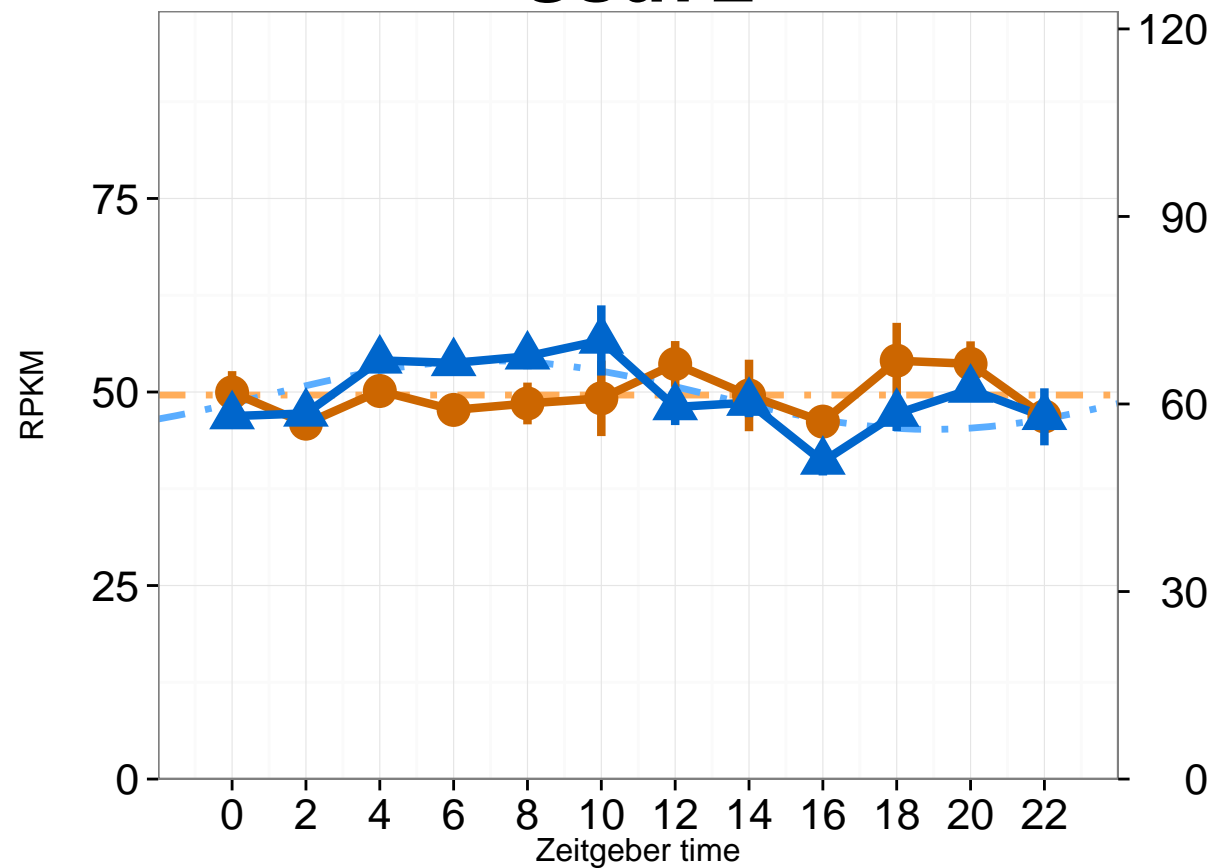

## Ssu72

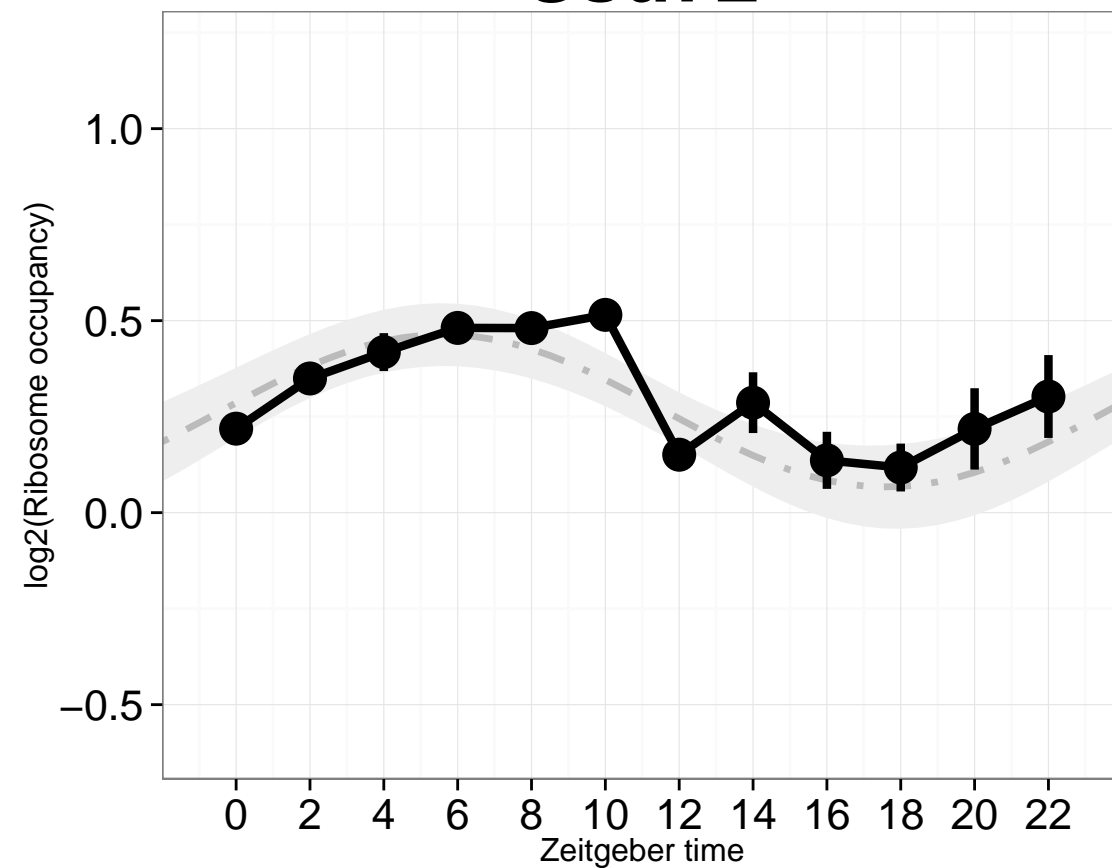

Supplement: SuppDataset_1.zip [file Ssu72_set_A.pdf › Supplemental Dataset 1/A-mRNA_nonrhyth_translation_nonrhyth/Ssu72_set_A.pdf]

## Ssx2ip

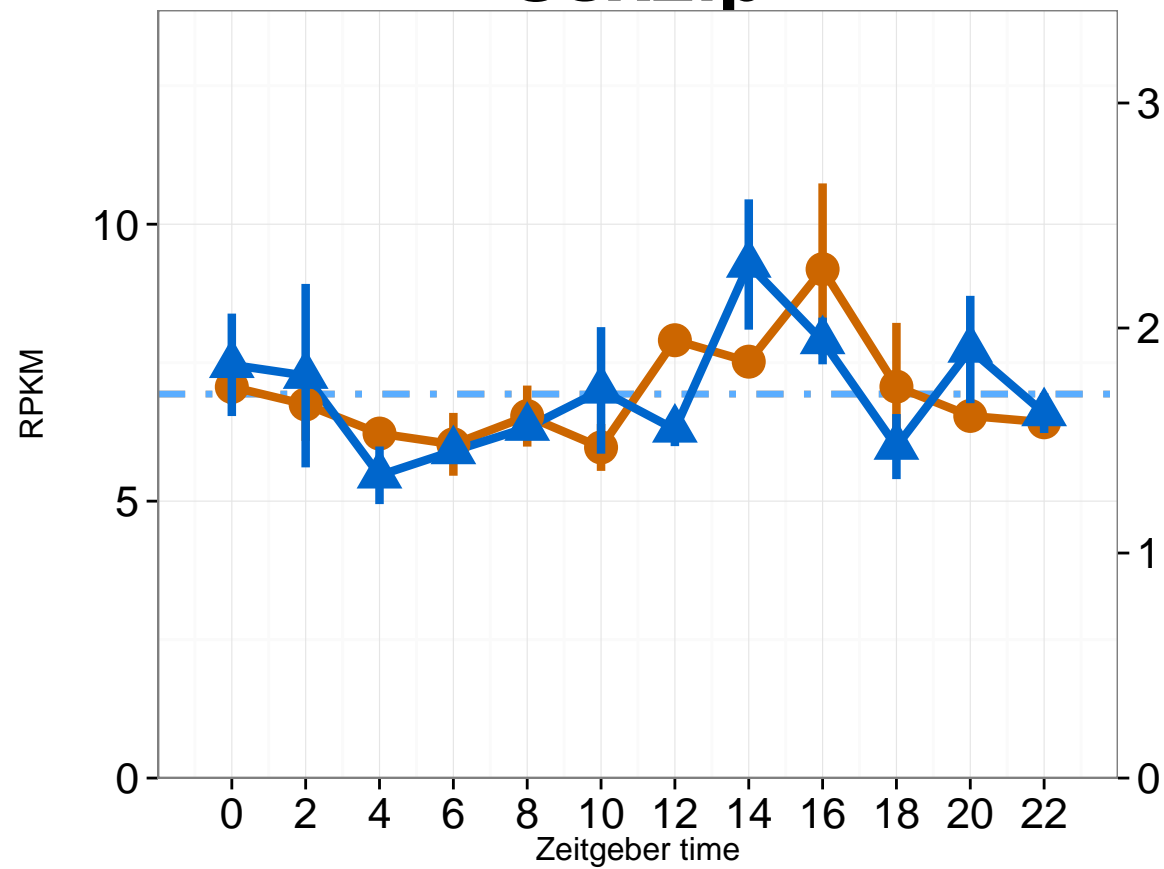

## Ssx2ip

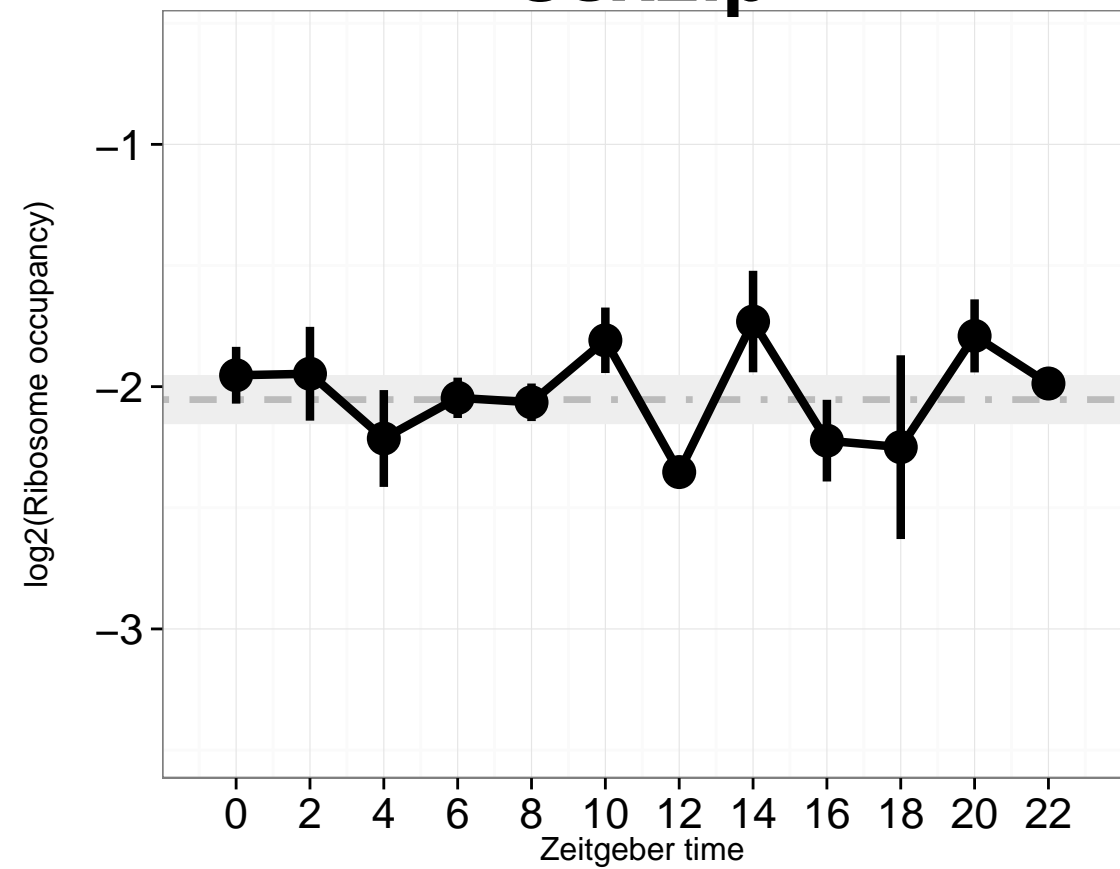

Supplement: SuppDataset_1.zip [file Ssx2ip_set_A.pdf › Supplemental Dataset 1/A-mRNA_nonrhyth_translation_nonrhyth/Ssx2ip_set_A.pdf]

# St13

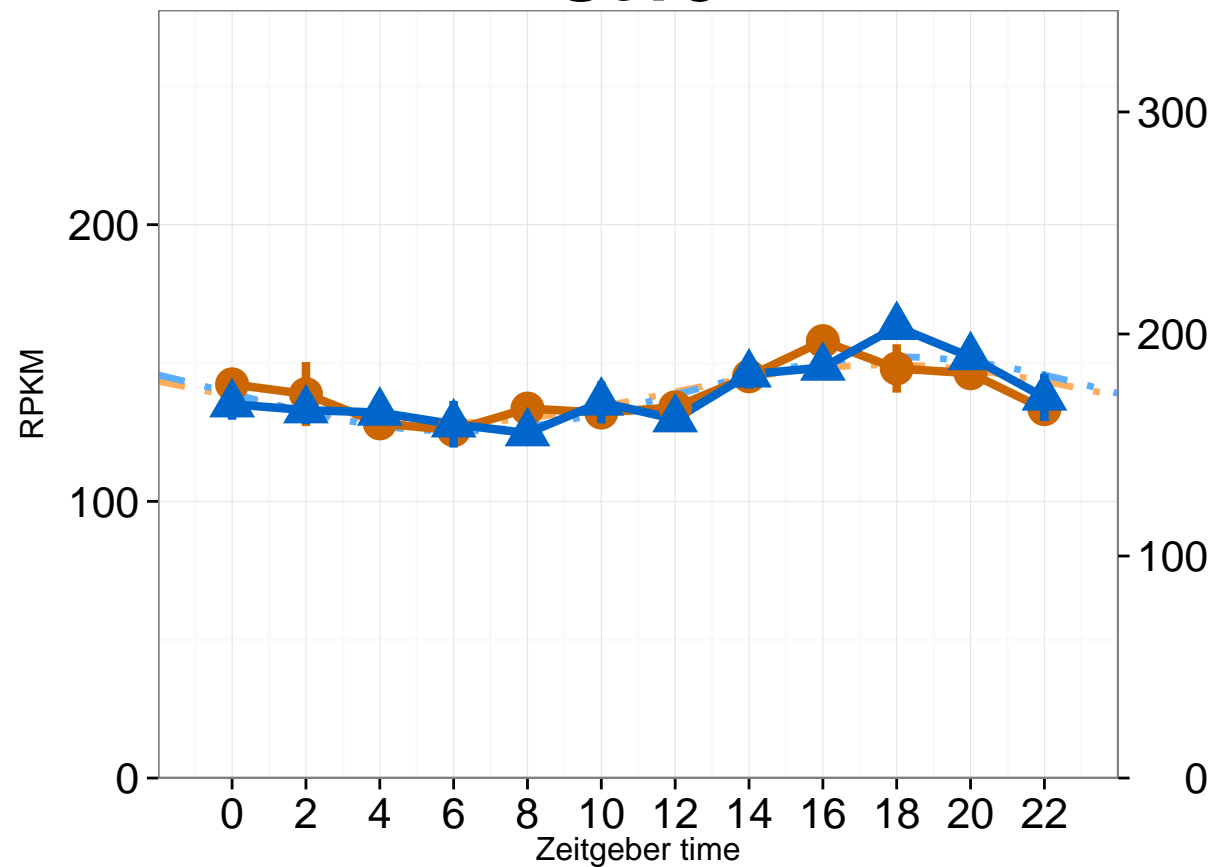

# St13

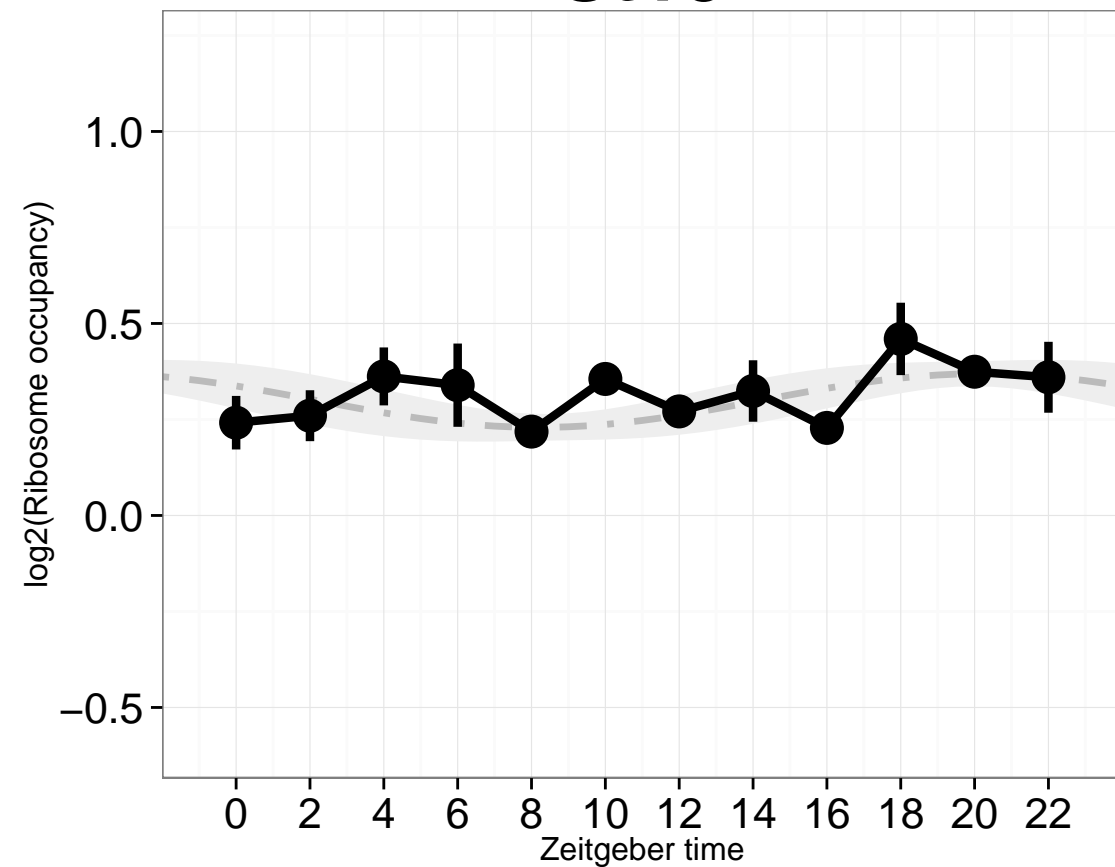

Supplement: SuppDataset_1.zip [file St13_set_A.pdf › Supplemental Dataset 1/A-mRNA_nonrhyth_translation_nonrhyth/St13_set_A.pdf]

## St3gal2

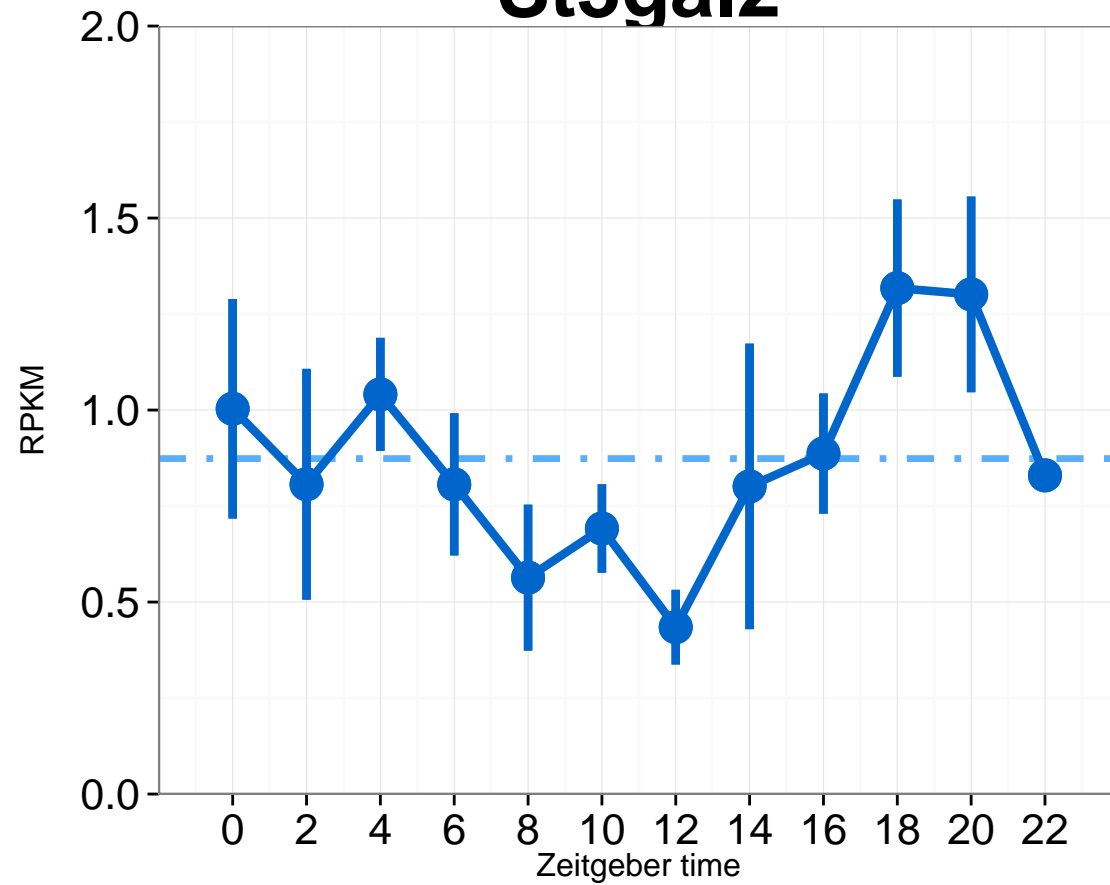

## St3gal2 log2(Ribosome occupancy)

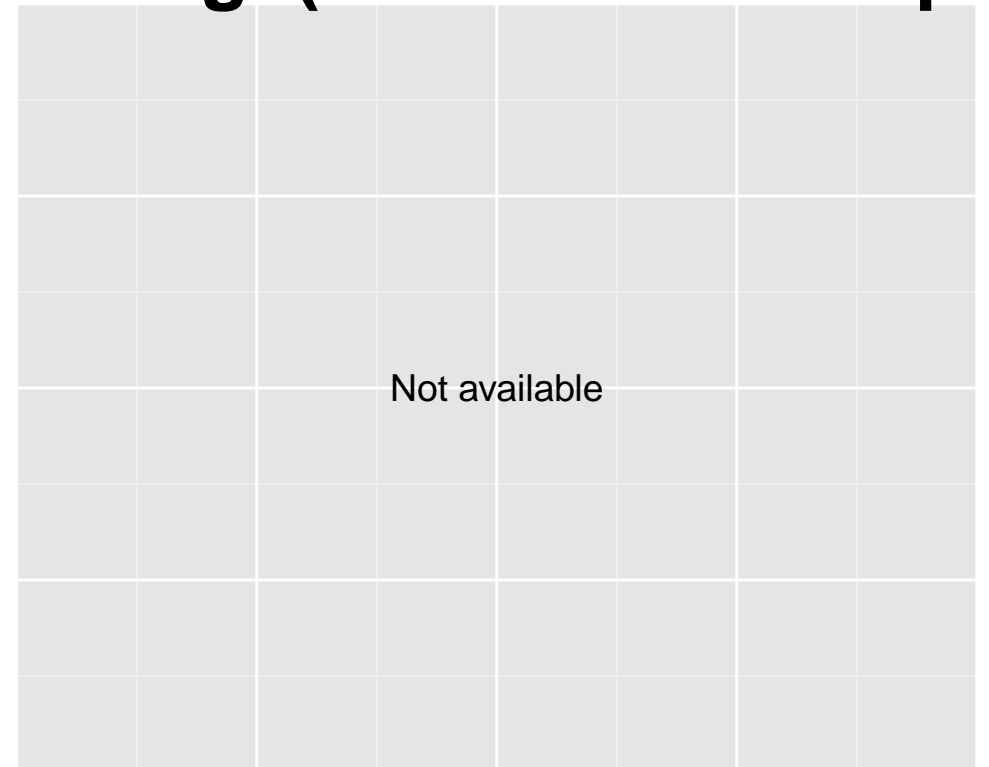

Supplement: SuppDataset_1.zip [file St3gal2_set_A.pdf › Supplemental Dataset 1/A-mRNA_nonrhyth_translation_nonrhyth/St3gal2_set_A.pdf]

# St3gal3

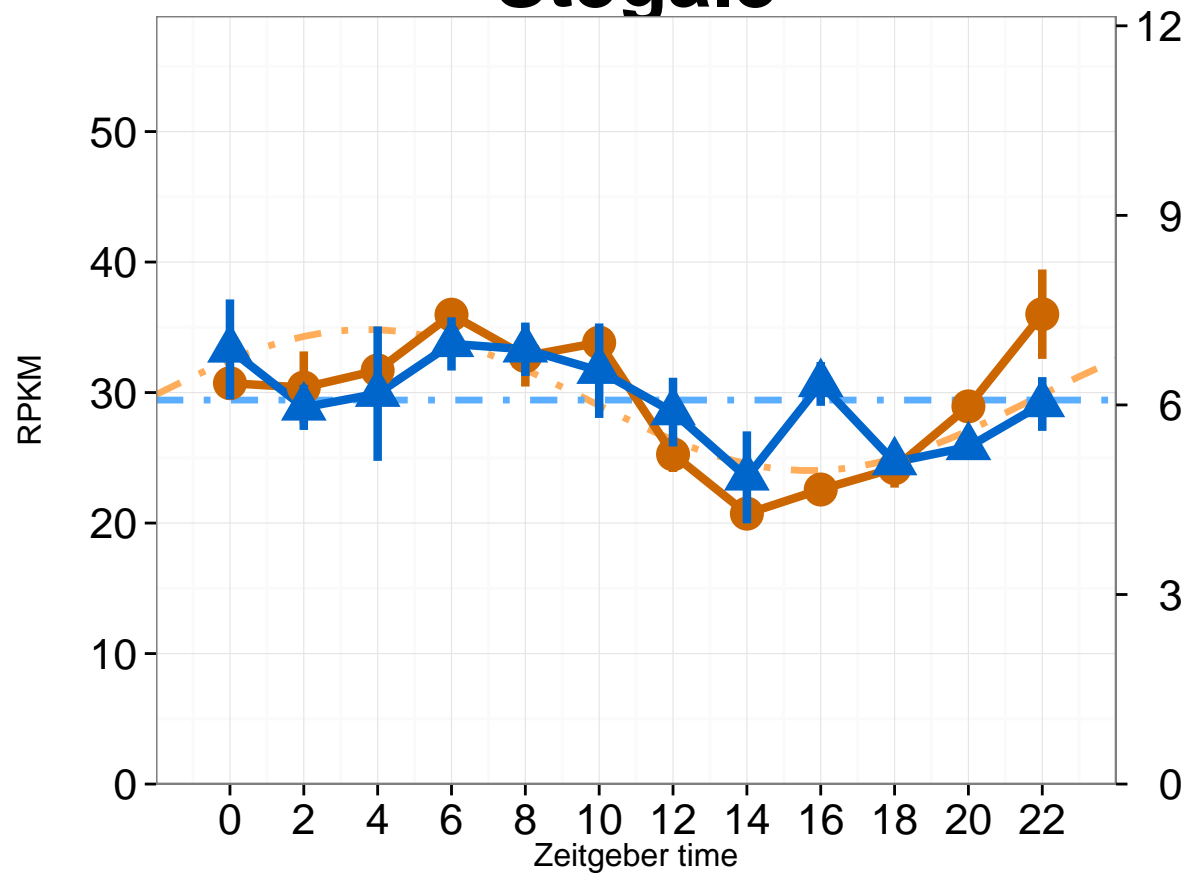

# St3gal3

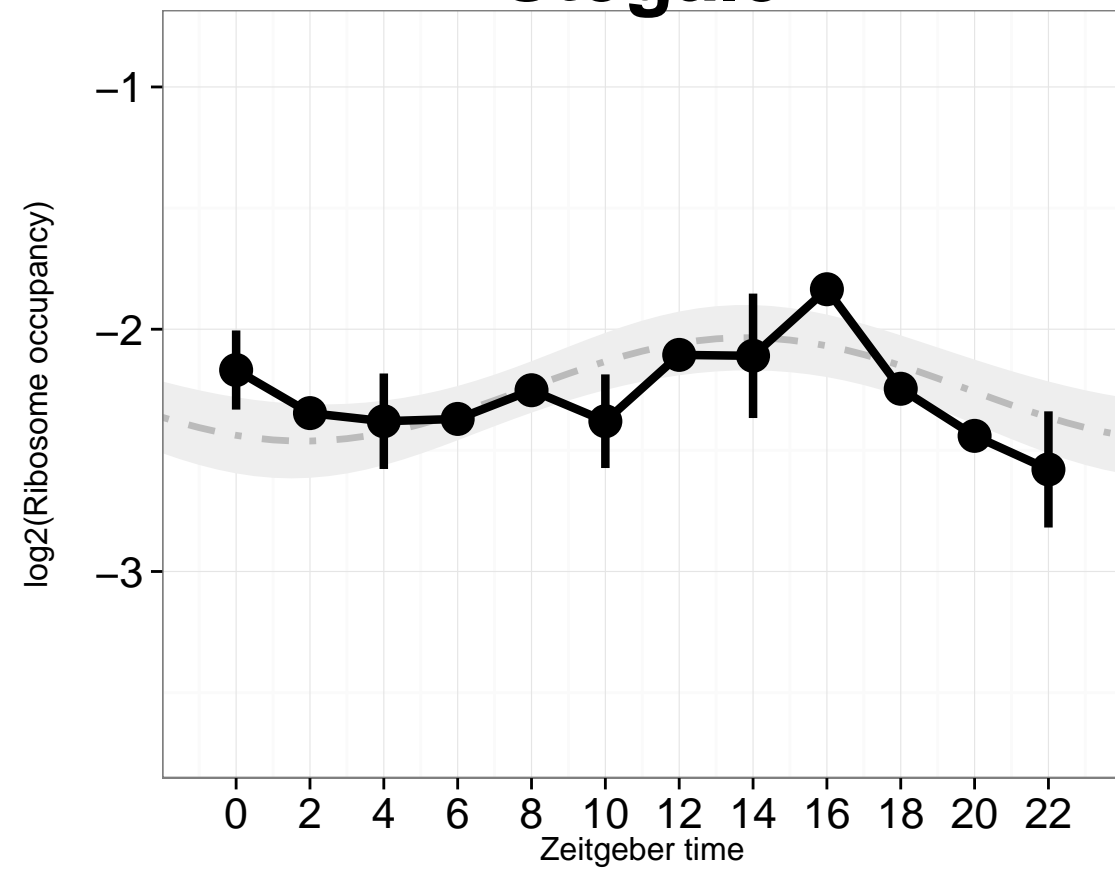

Supplement: SuppDataset_1.zip [file St3gal3_set_A.pdf › Supplemental Dataset 1/A-mRNA_nonrhyth_translation_nonrhyth/St3gal3_set_A.pdf]

## St3gal4

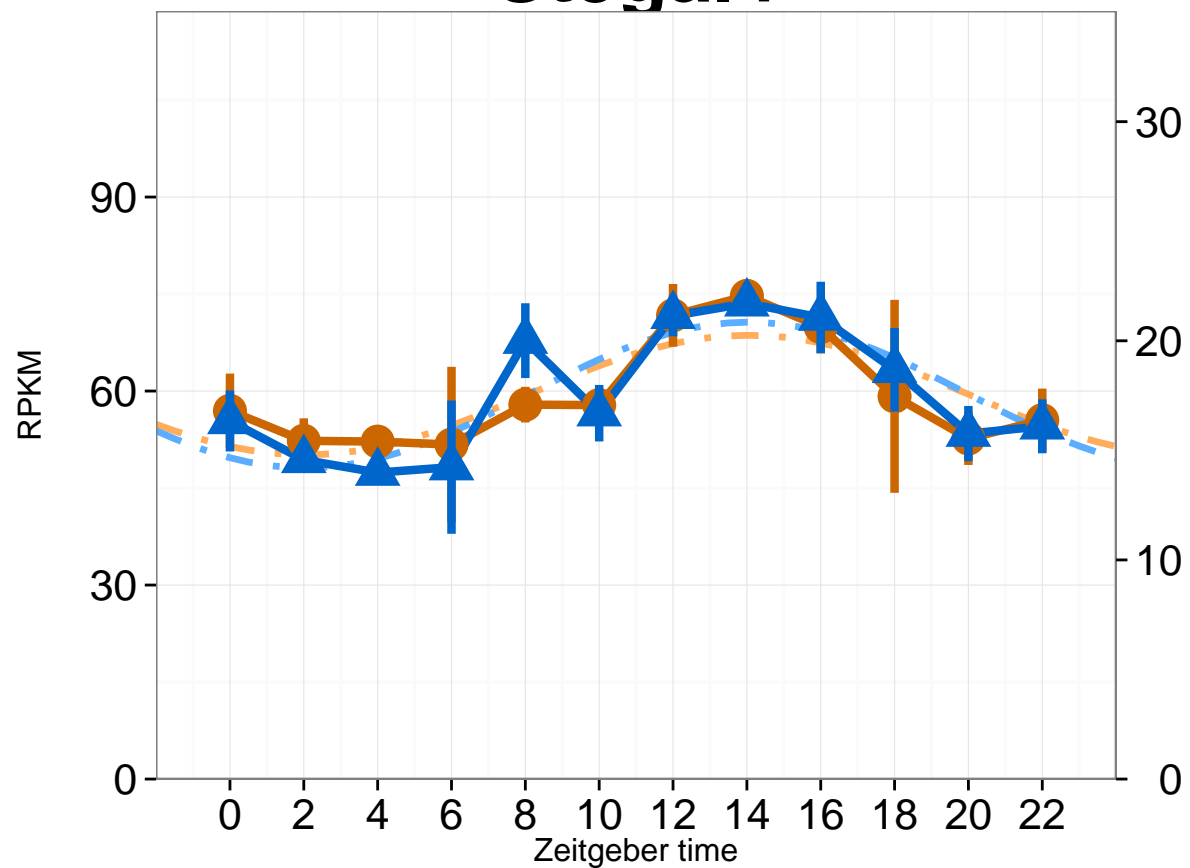

## St3gal4

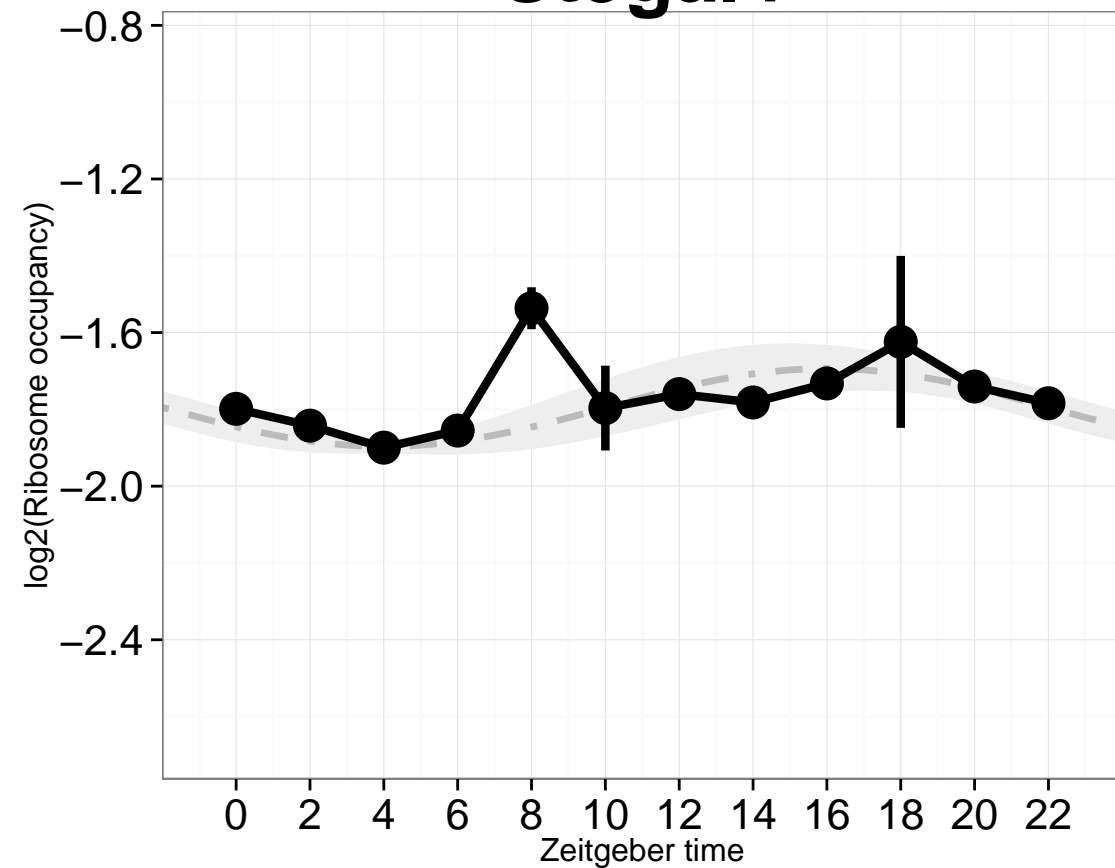

Supplement: SuppDataset_1.zip [file St3gal4_set_A.pdf › Supplemental Dataset 1/A-mRNA_nonrhyth_translation_nonrhyth/St3gal4_set_A.pdf]

## St6galnac4

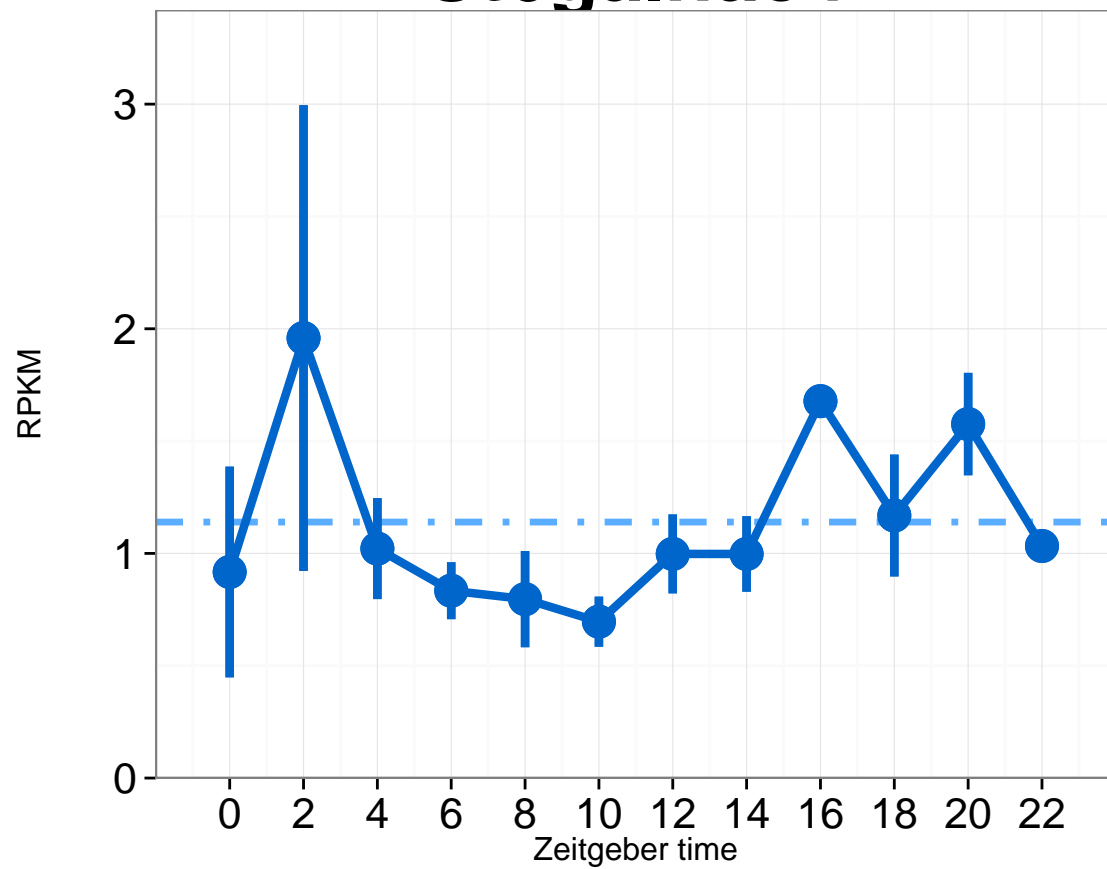

## St6galnac4 log2(Ribosome occupan

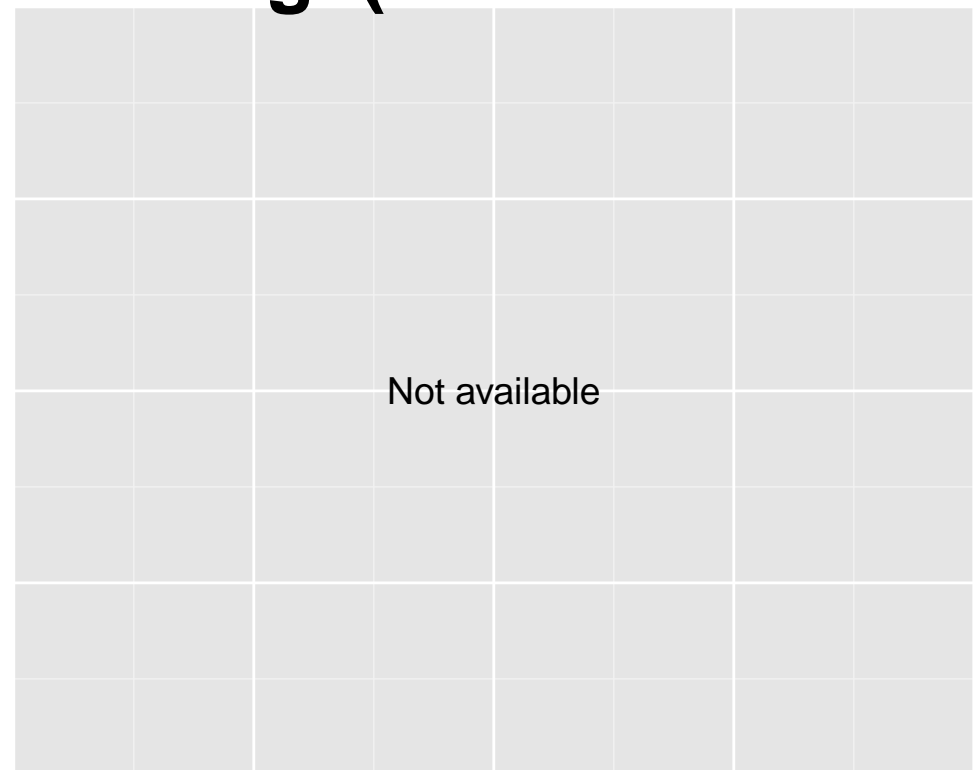

Supplement: SuppDataset_1.zip [file St6galnac4_set_A.pdf › Supplemental Dataset 1/A-mRNA_nonrhyth_translation_nonrhyth/St6galnac4_set_A.pdf]

# St7

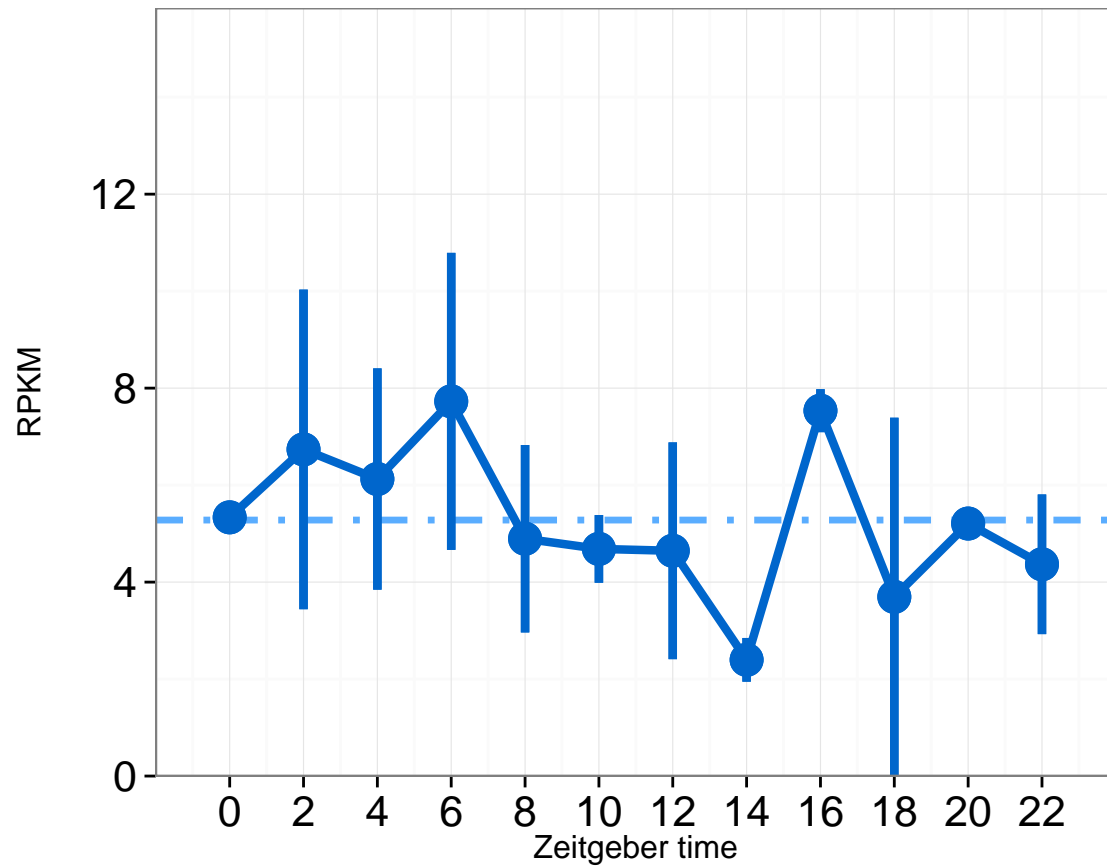

# St7 log2(Ribosome occupancy)

Supplement: SuppDataset_1.zip [file St7_set_A.pdf › Supplemental Dataset 1/A-mRNA_nonrhyth_translation_nonrhyth/St7_set_A.pdf]

## St7I

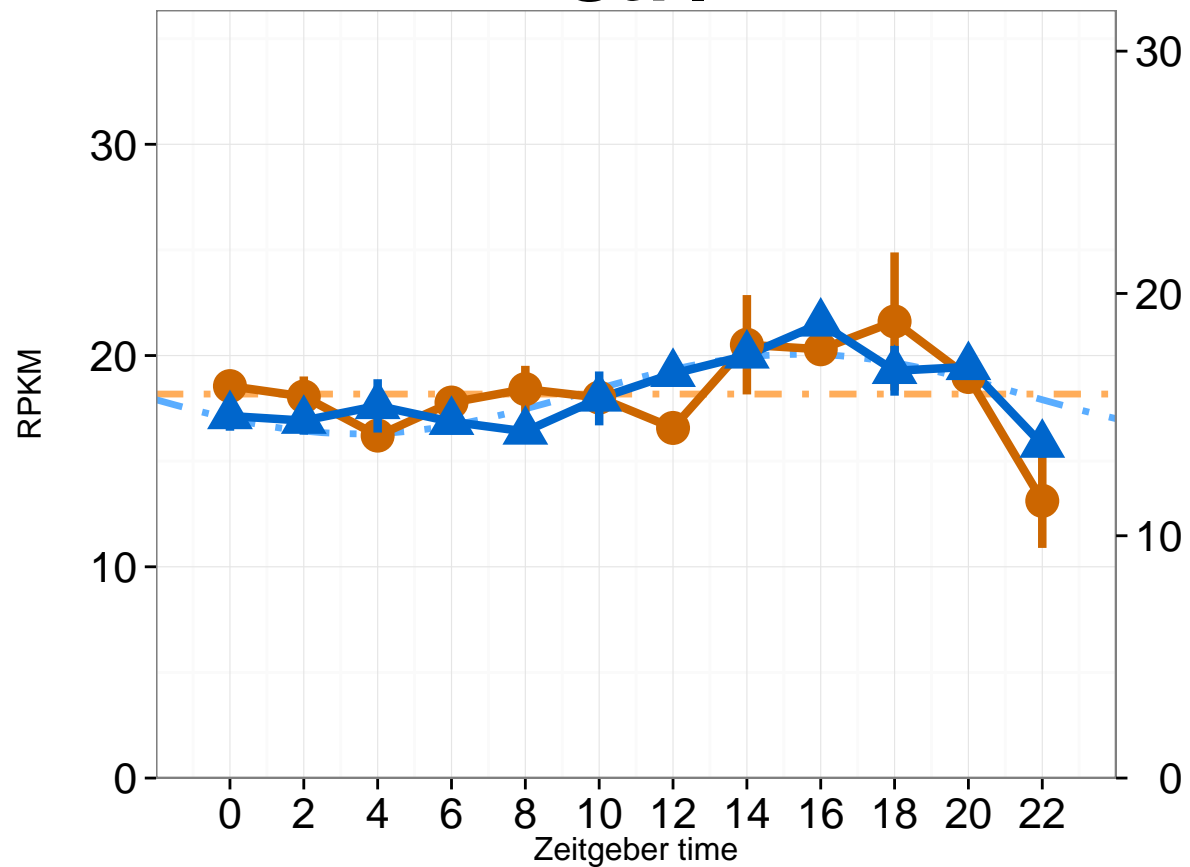

## St7I

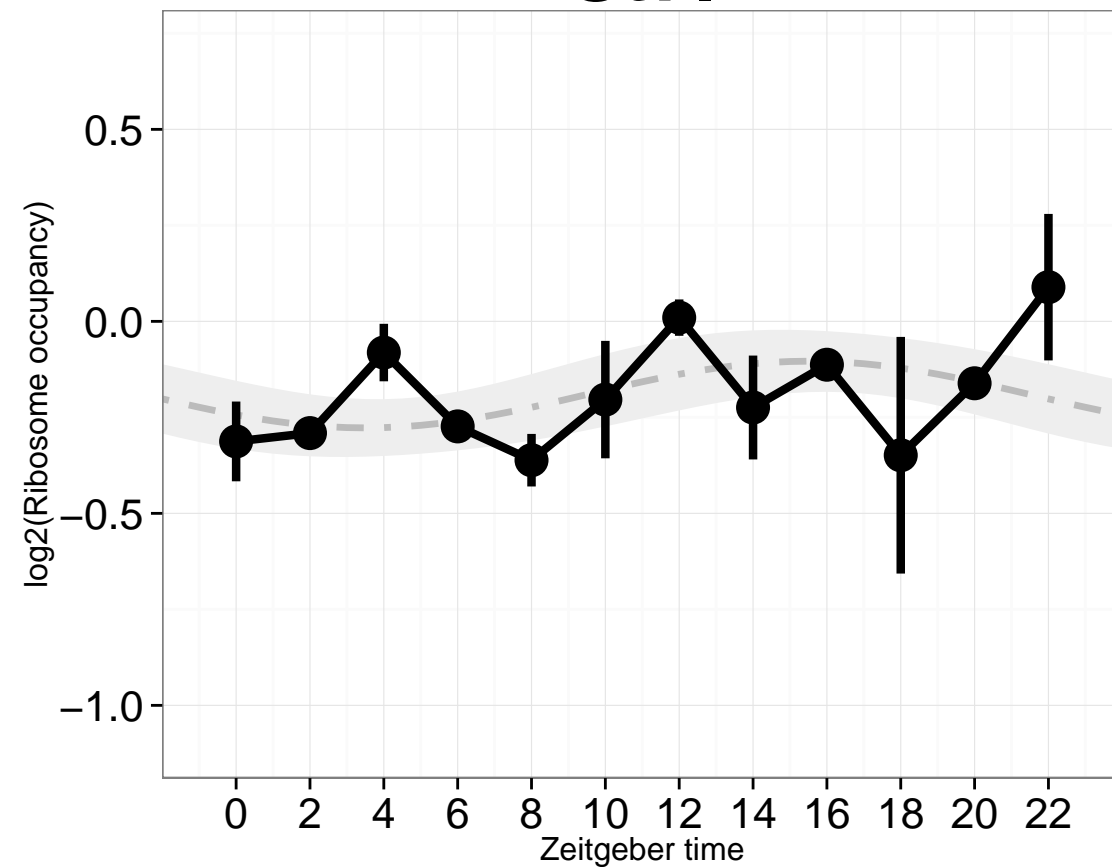

Supplement: SuppDataset_1.zip [file St7l_set_A.pdf › Supplemental Dataset 1/A-mRNA_nonrhyth_translation_nonrhyth/St7l_set_A.pdf]

**St8sia3 TR**

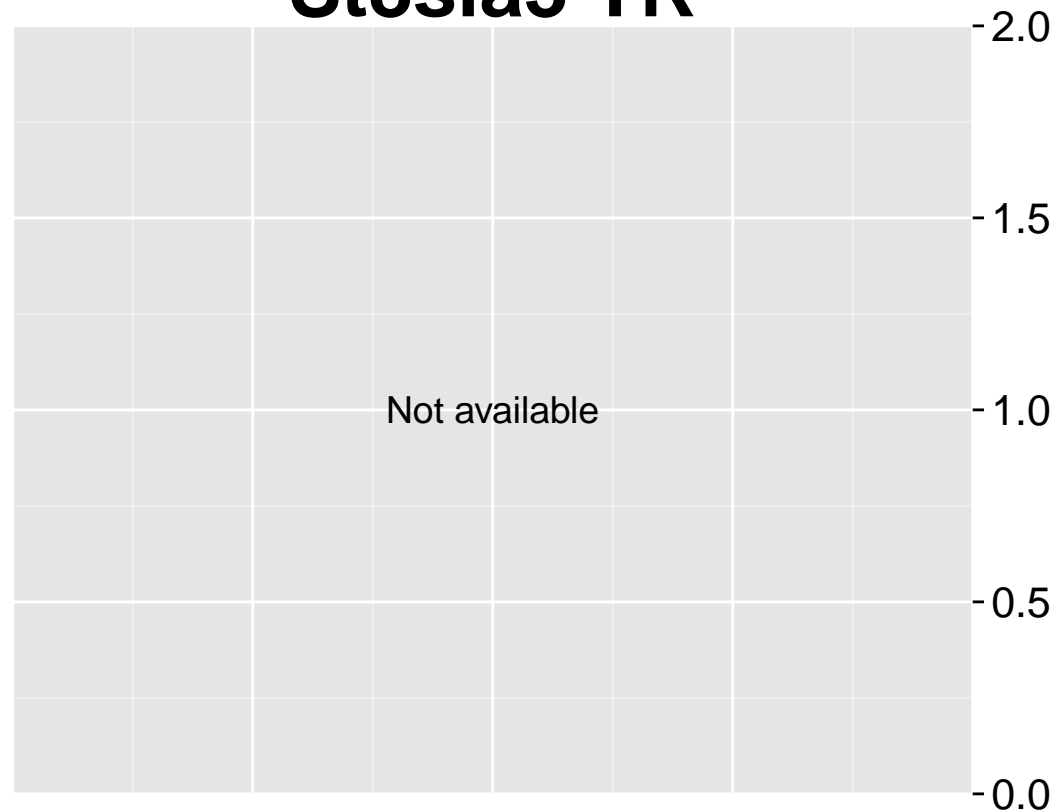

**St8sia3 log2(Ribosome occupancy**

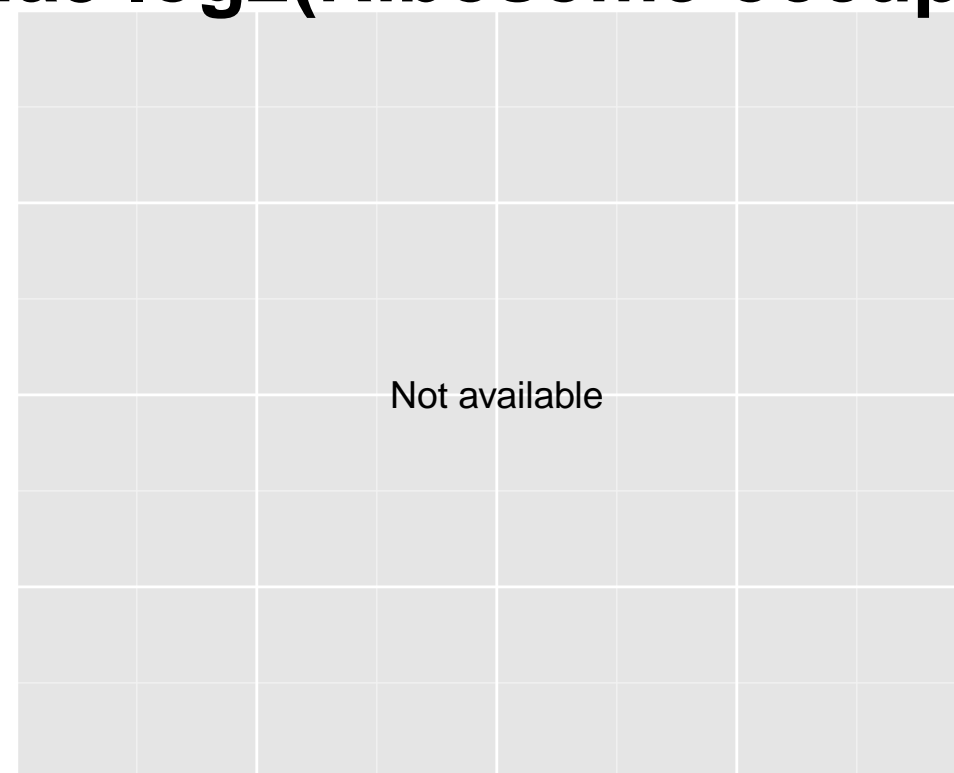

Supplement: SuppDataset_1.zip [file St8sia3_set_A.pdf › Supplemental Dataset 1/A-mRNA_nonrhyth_translation_nonrhyth/St8sia3_set_A.pdf]

# St8sia4

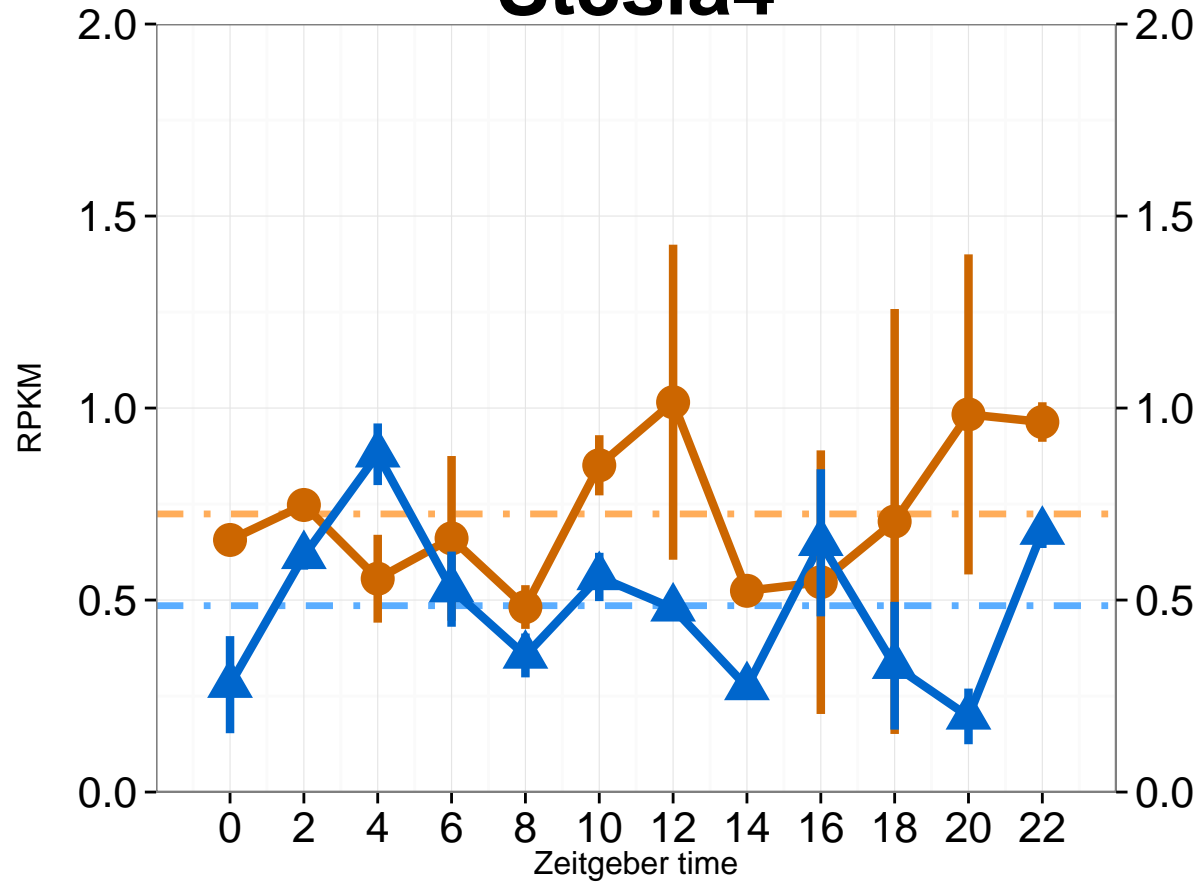

# St8sia4

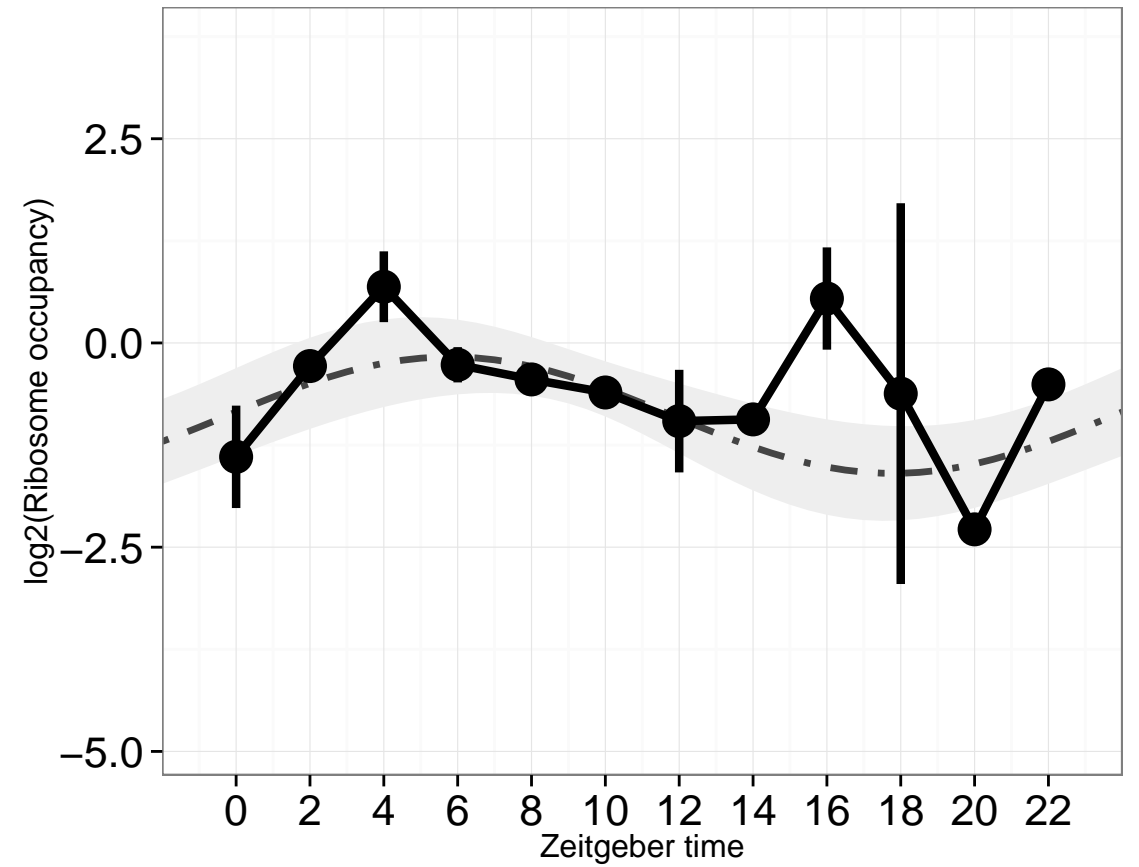

Supplement: SuppDataset_1.zip [file St8sia4_set_A.pdf › Supplemental Dataset 1/A-mRNA_nonrhyth_translation_nonrhyth/St8sia4_set_A.pdf]

# Stab1

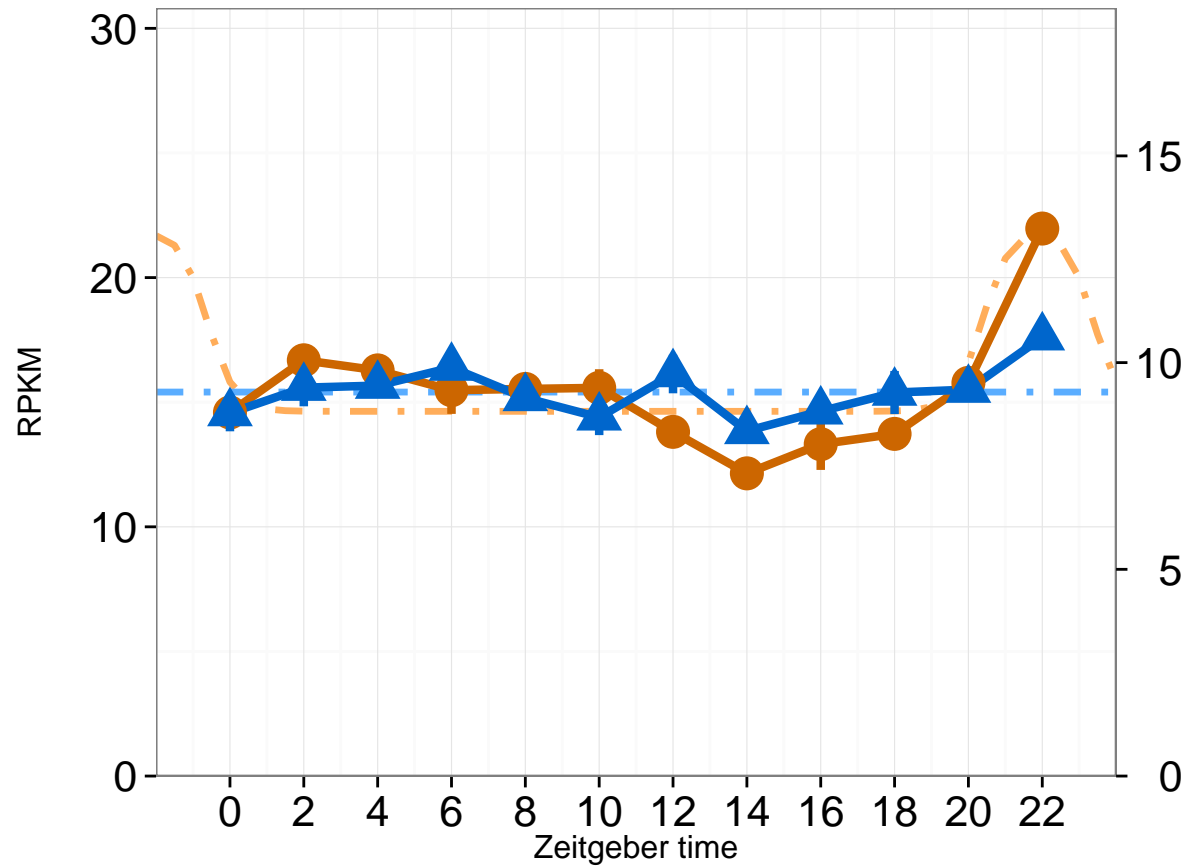

# Stab1

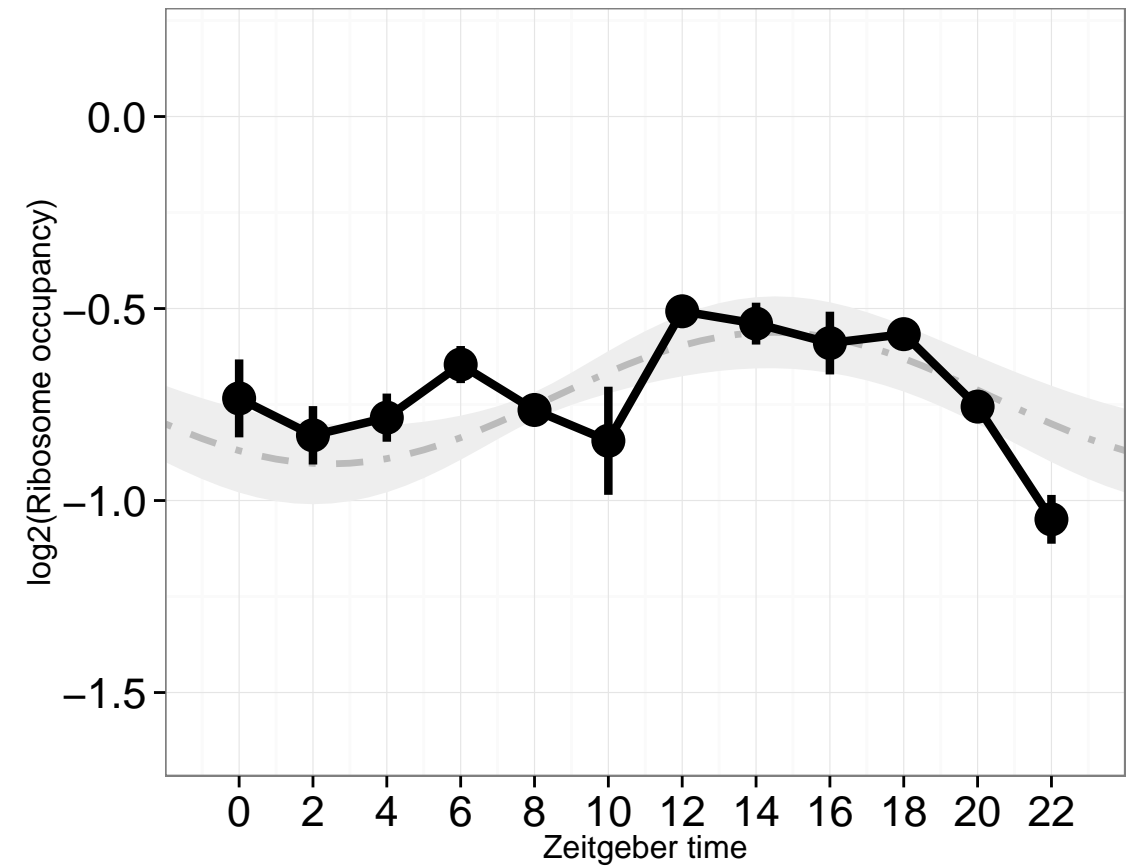

Supplement: SuppDataset_1.zip [file Stab1_set_A.pdf › Supplemental Dataset 1/A-mRNA_nonrhyth_translation_nonrhyth/Stab1_set_A.pdf]

## Stab2

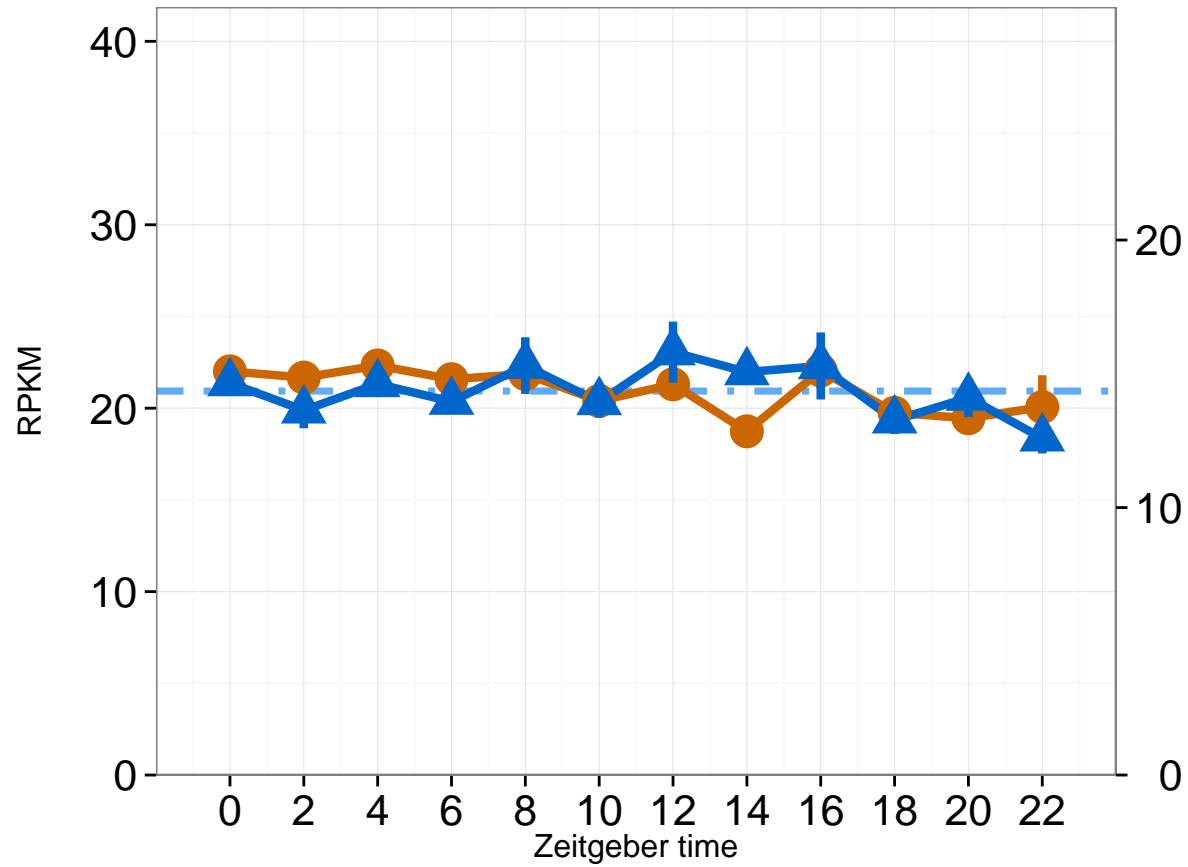

## Stab2

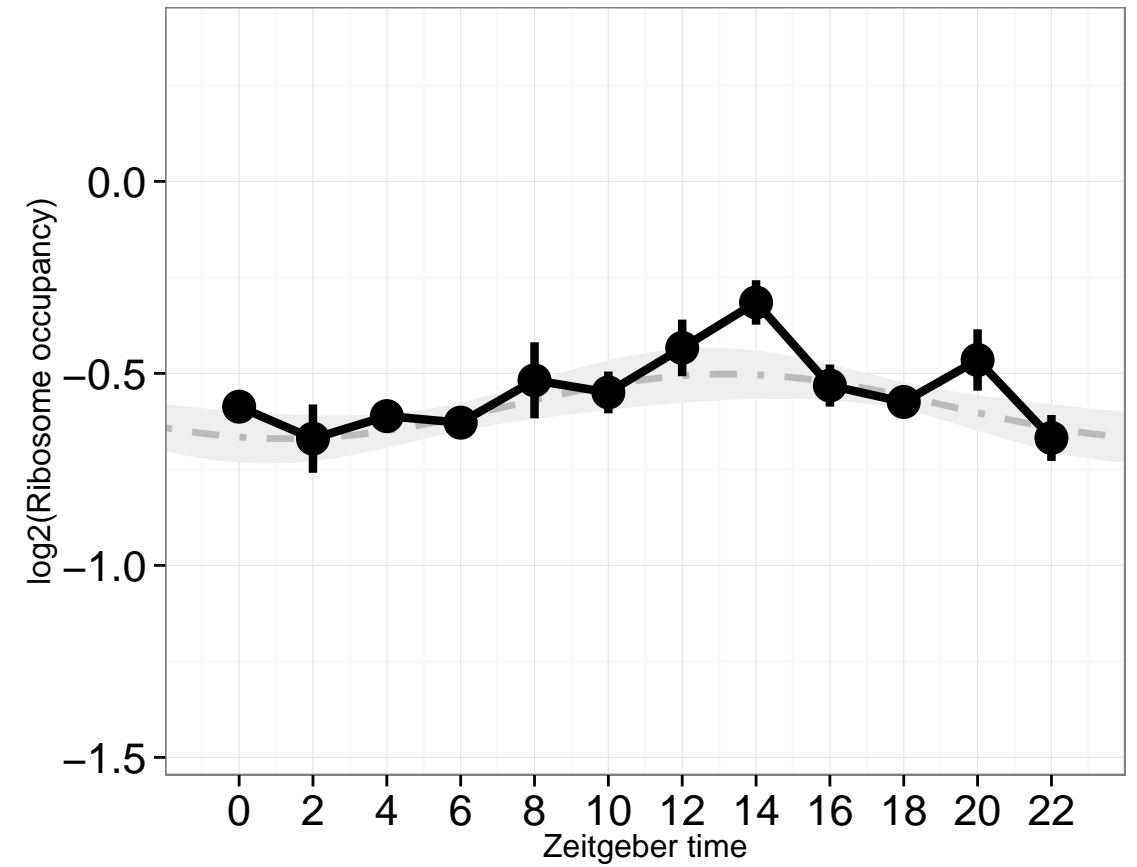

Supplement: SuppDataset_1.zip [file Stab2_set_A.pdf › Supplemental Dataset 1/A-mRNA_nonrhyth_translation_nonrhyth/Stab2_set_A.pdf]

# Stag1

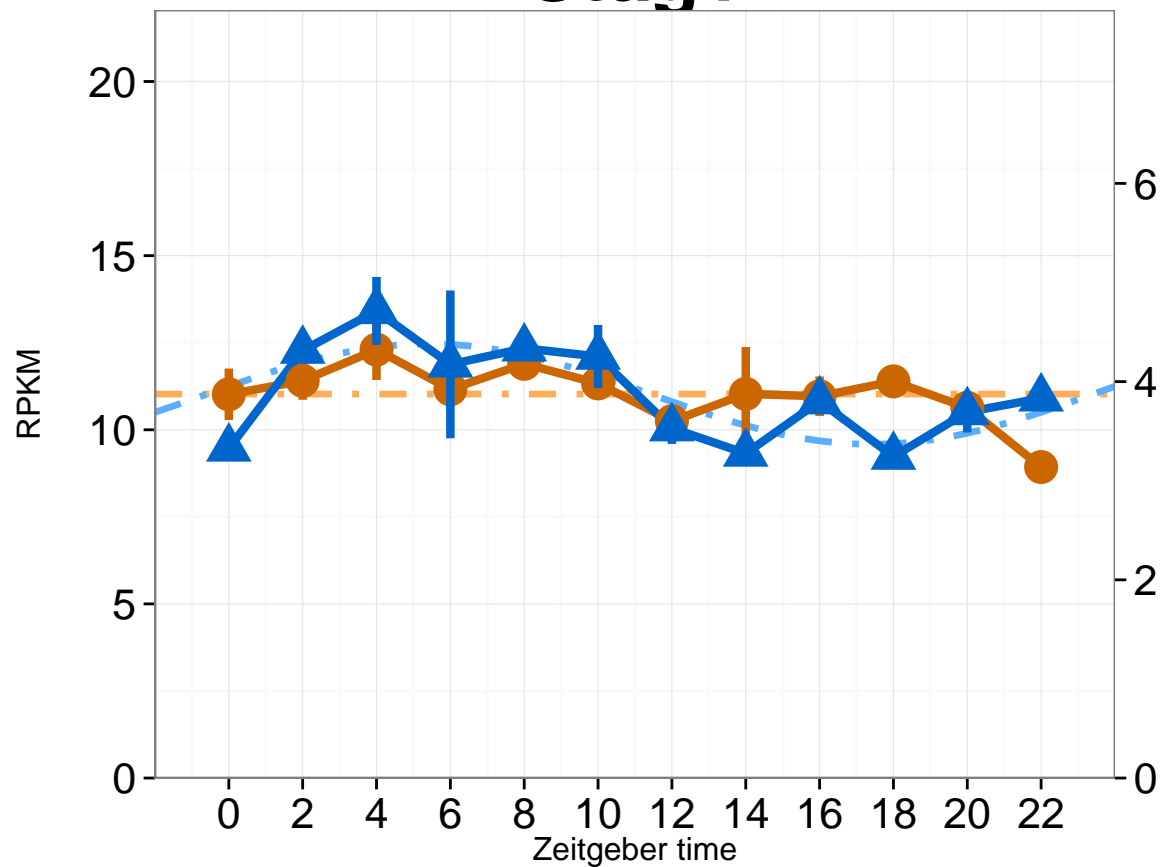

# Stag1

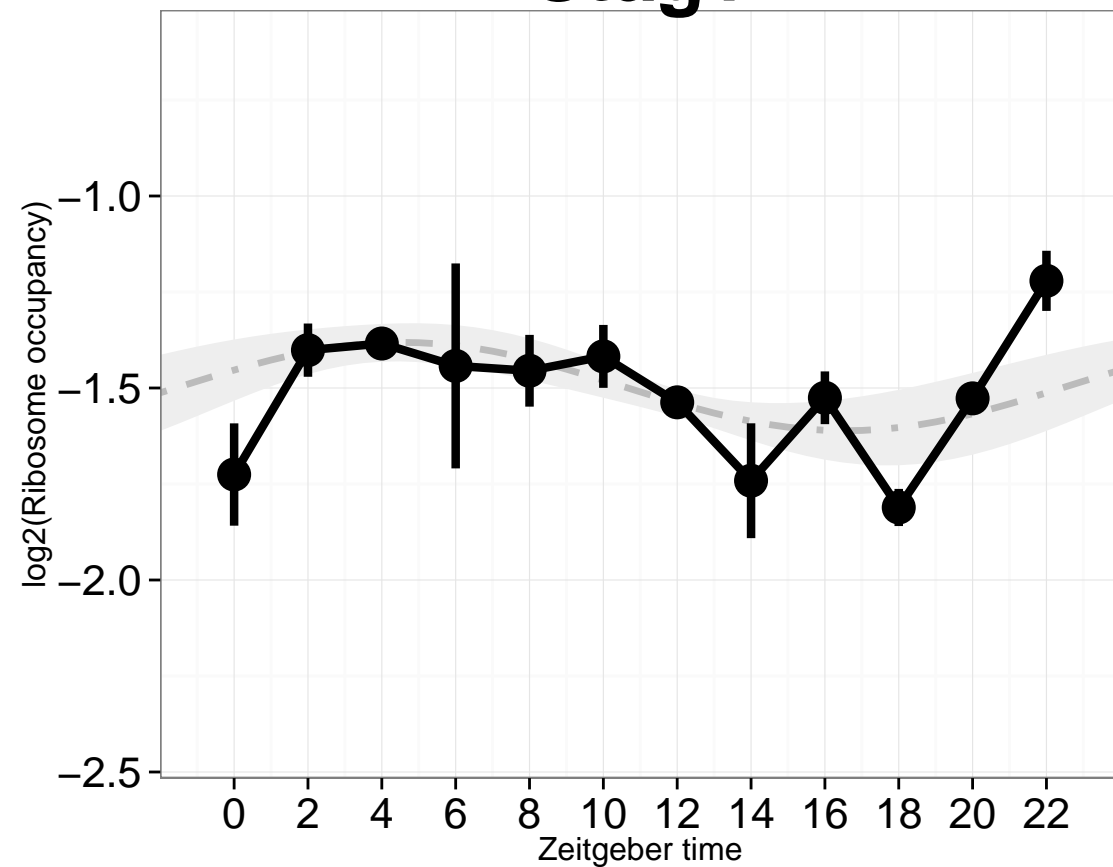

Supplement: SuppDataset_1.zip [file Stag1_set_A.pdf › Supplemental Dataset 1/A-mRNA_nonrhyth_translation_nonrhyth/Stag1_set_A.pdf]

# Stag2

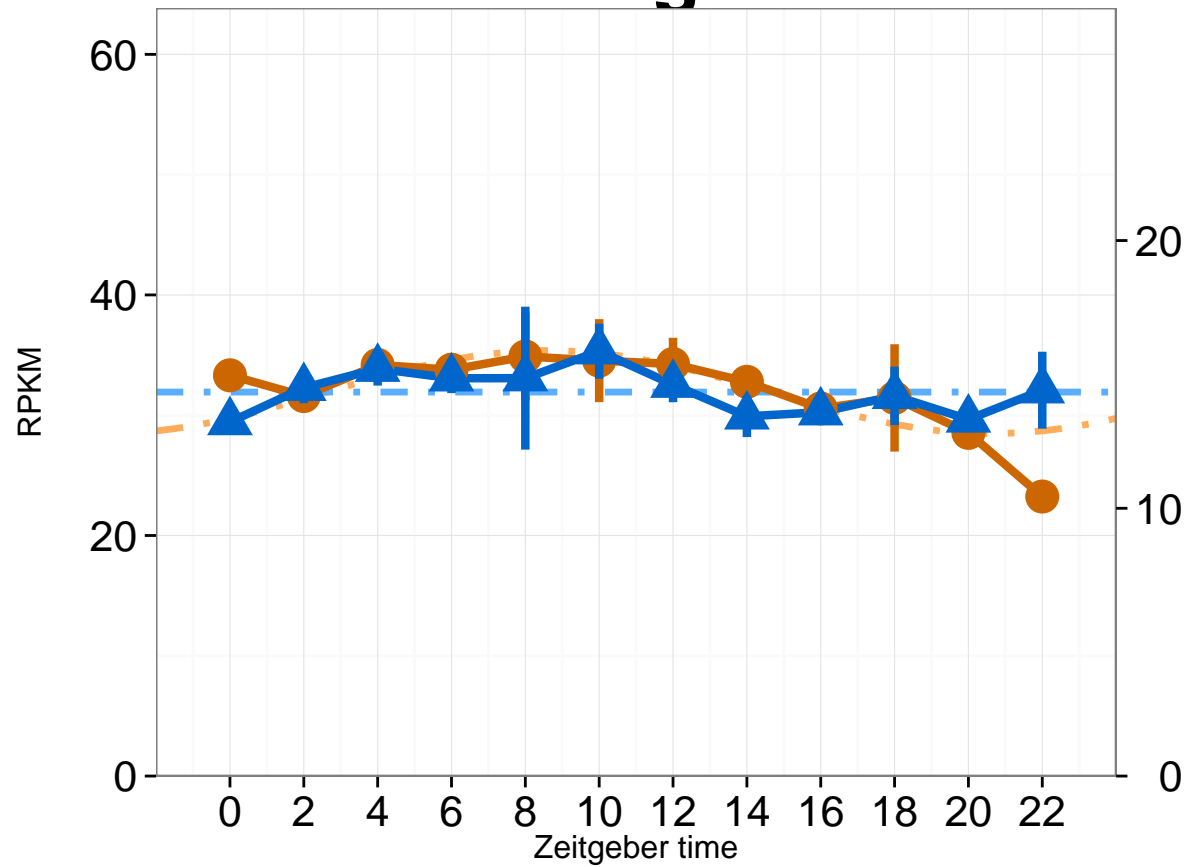

# Stag2

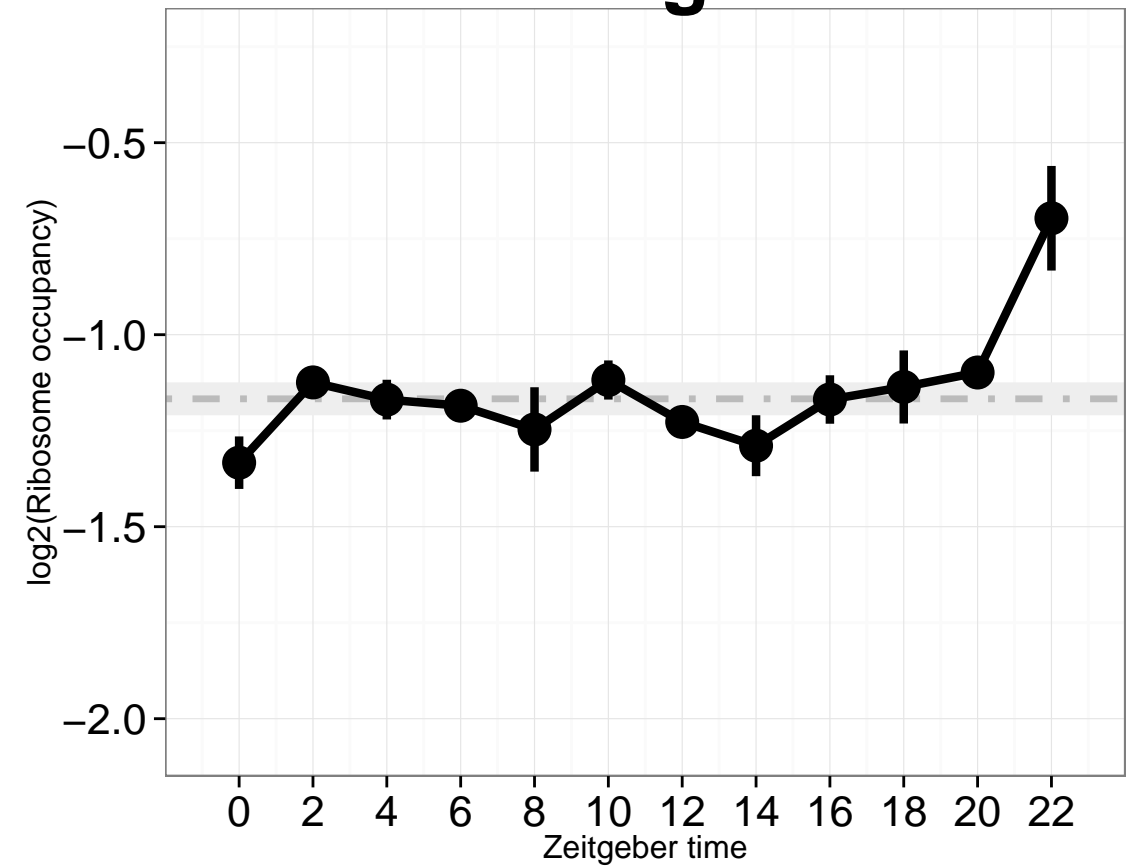

Supplement: SuppDataset_1.zip [file Stag2_set_A.pdf › Supplemental Dataset 1/A-mRNA_nonrhyth_translation_nonrhyth/Stag2_set_A.pdf]

# Stam2

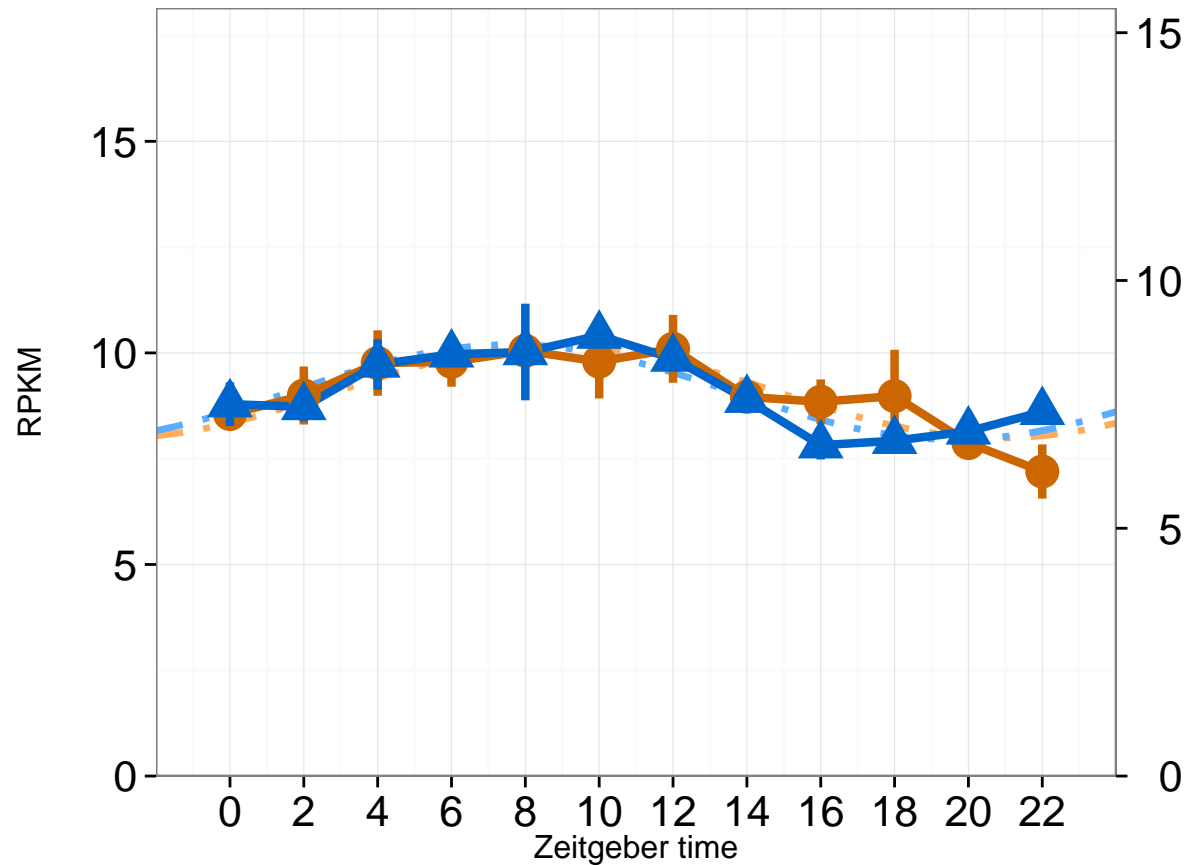

# Stam2

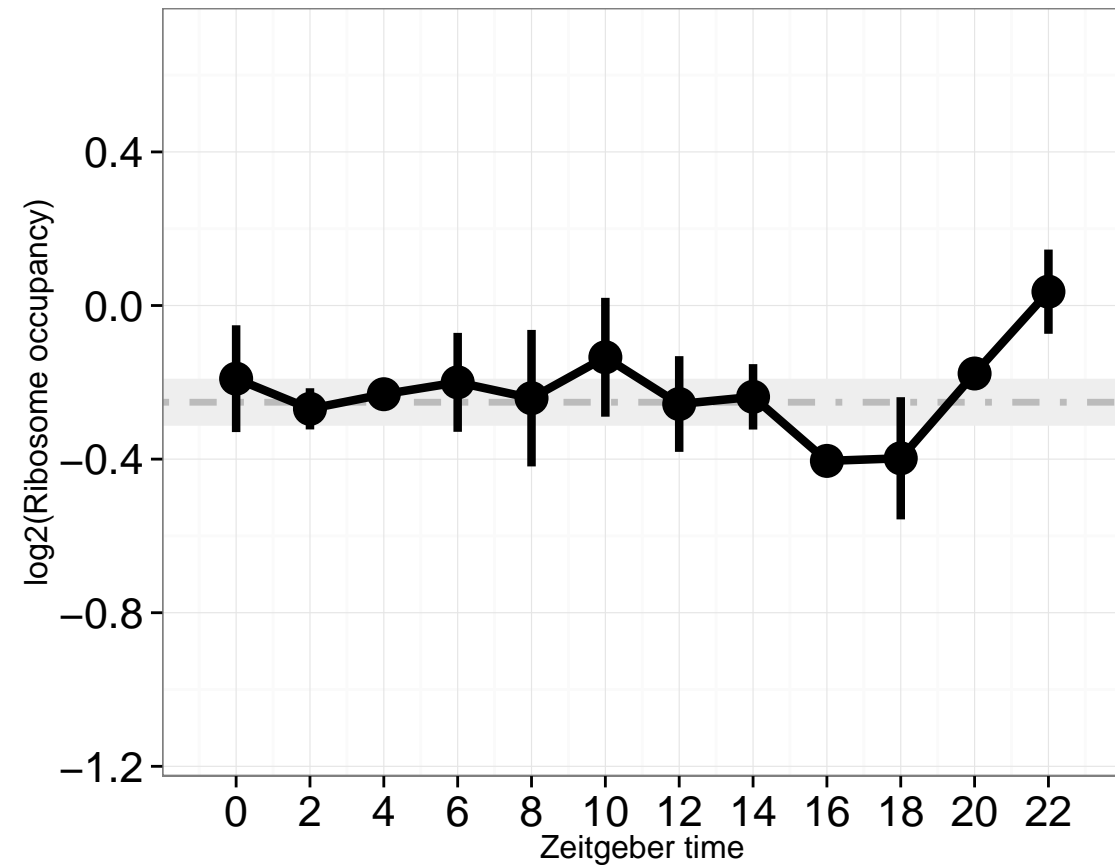

Supplement: SuppDataset_1.zip [file Stam2_set_A.pdf › Supplemental Dataset 1/A-mRNA_nonrhyth_translation_nonrhyth/Stam2_set_A.pdf]

## Stam

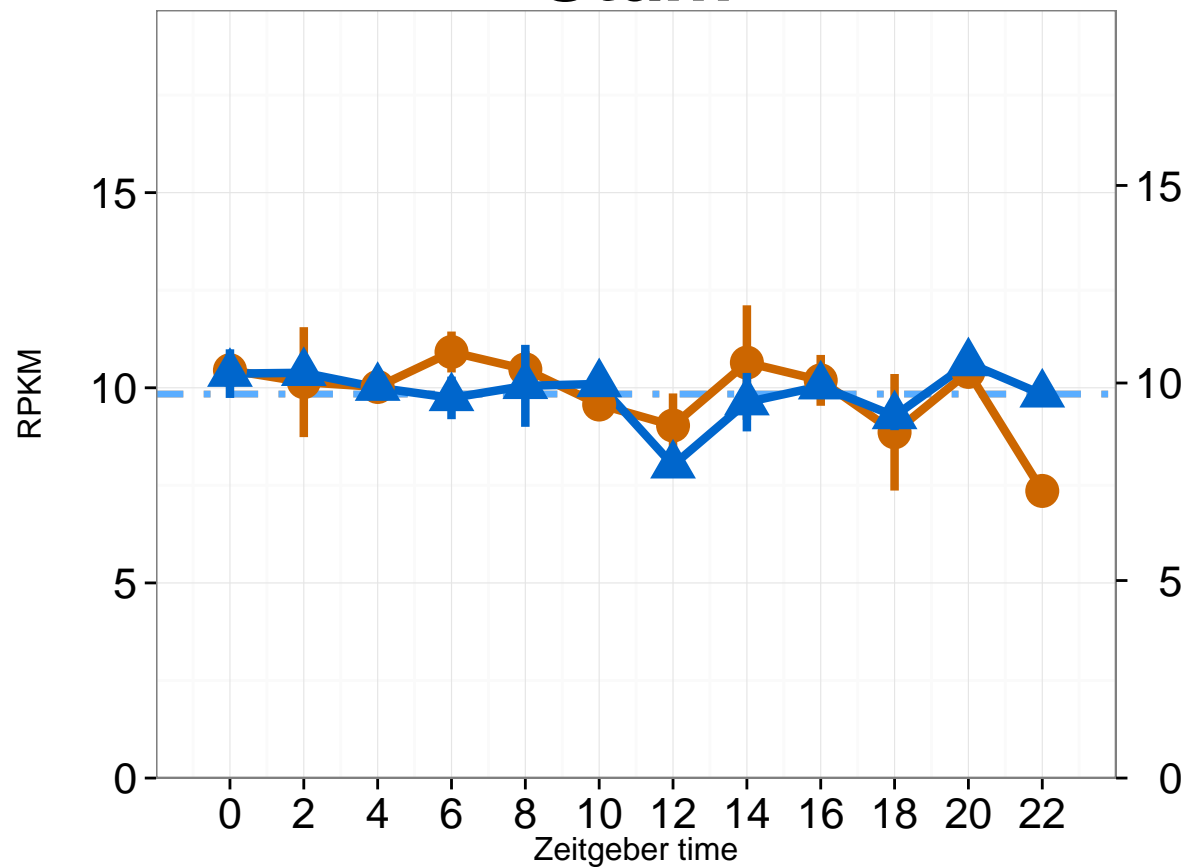

## Stam

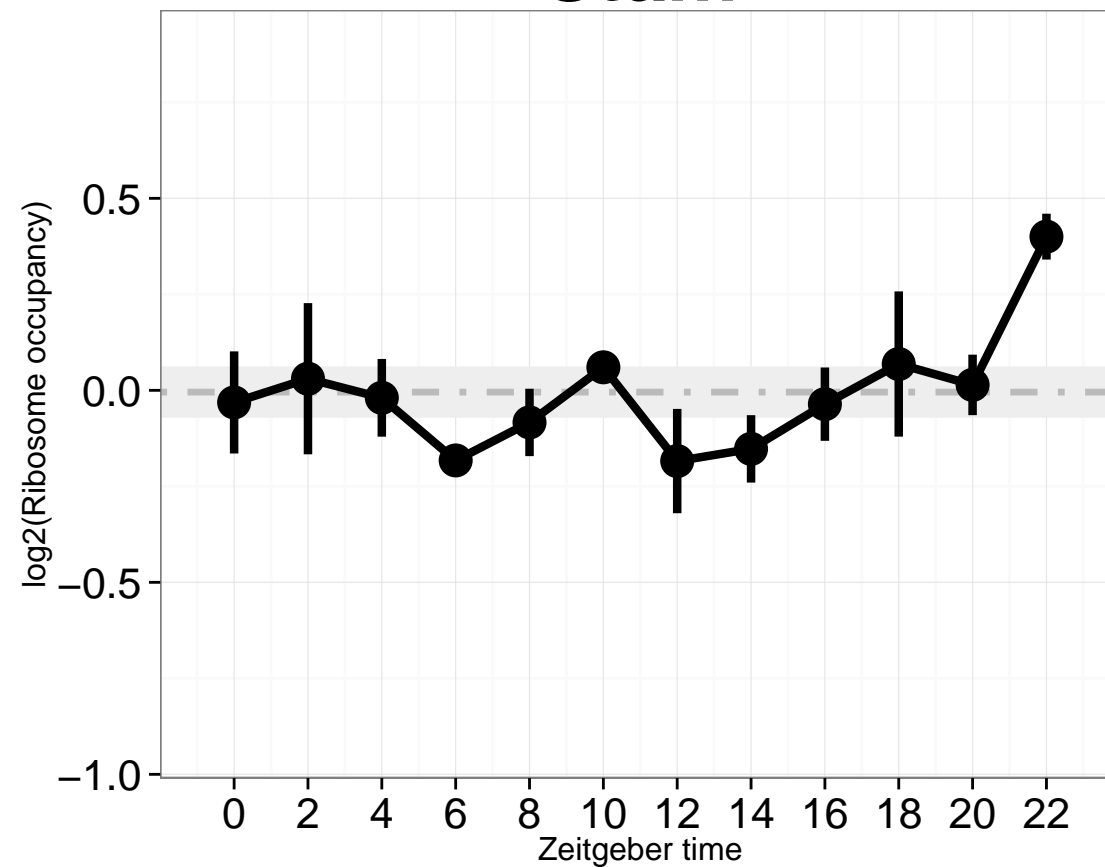

Supplement: SuppDataset_1.zip [file Stam_set_A.pdf › Supplemental Dataset 1/A-mRNA_nonrhyth_translation_nonrhyth/Stam_set_A.pdf]

## Stambp

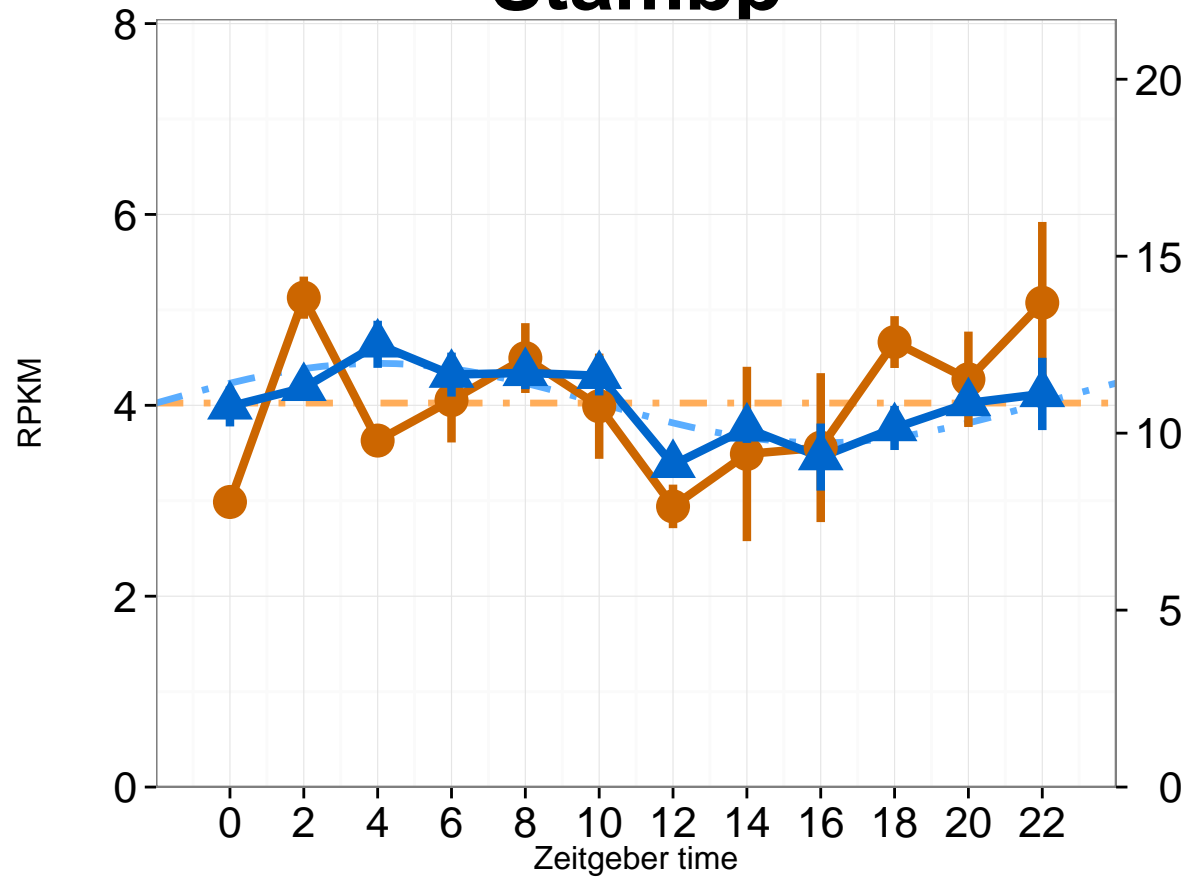

## Stambp

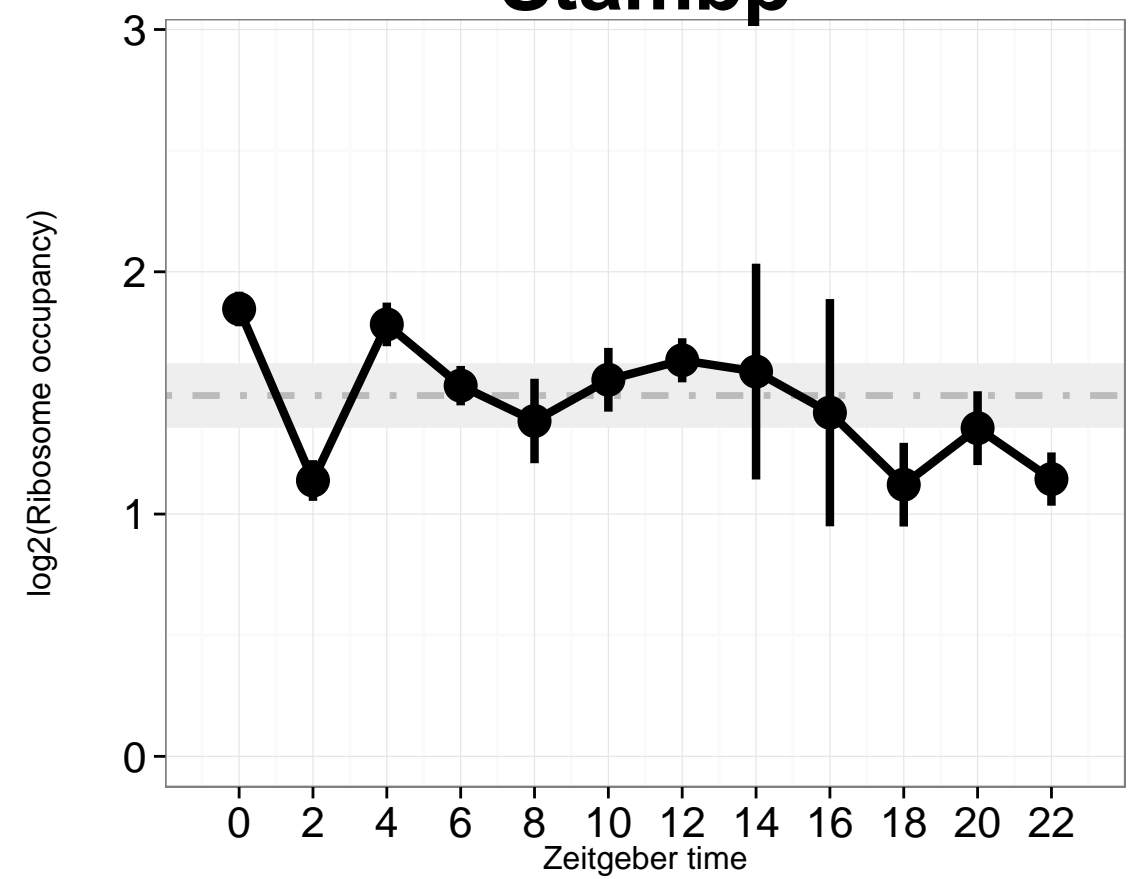

Supplement: SuppDataset_1.zip [file Stambp_set_A.pdf › Supplemental Dataset 1/A-mRNA_nonrhyth_translation_nonrhyth/Stambp_set_A.pdf]

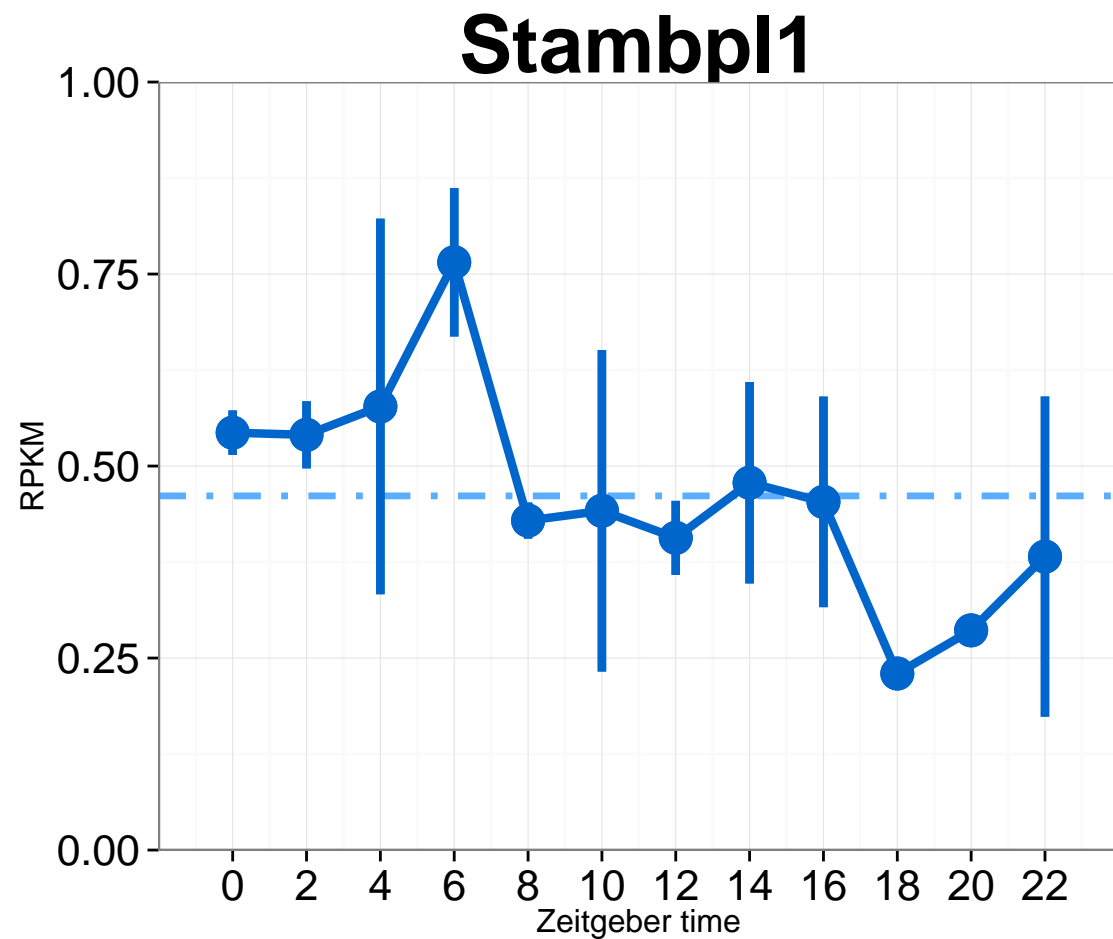

### Stambpl1 log2(Ribosome occupanc

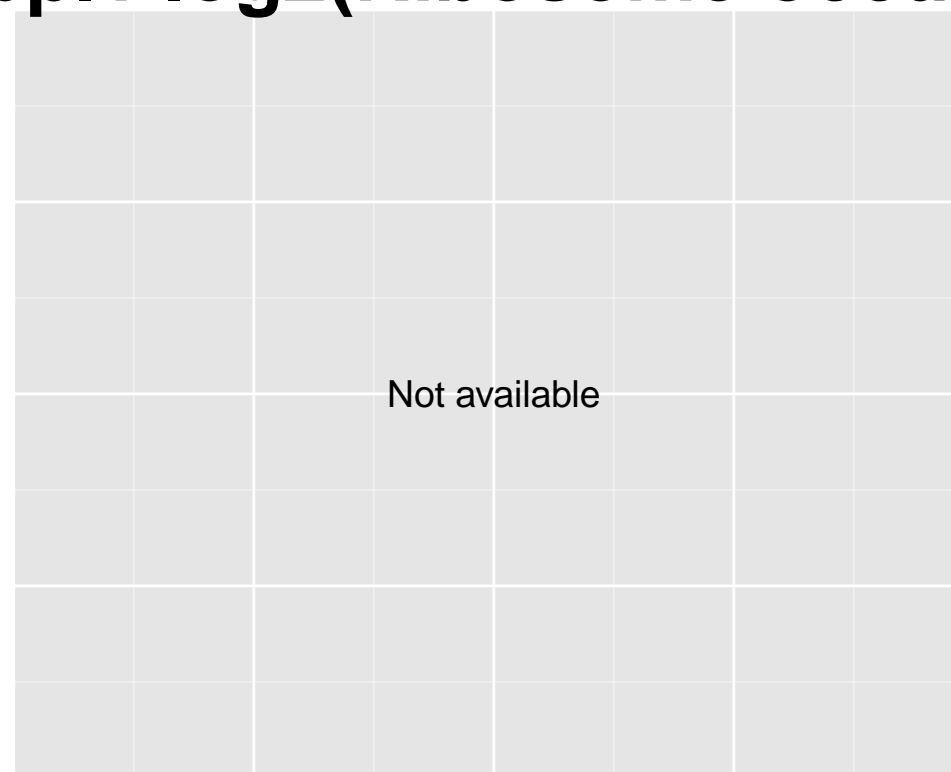

Supplement: SuppDataset_1.zip [file Stambpl1_set_A.pdf › Supplemental Dataset 1/A-mRNA_nonrhyth_translation_nonrhyth/Stambpl1_set_A.pdf]

# Stap2

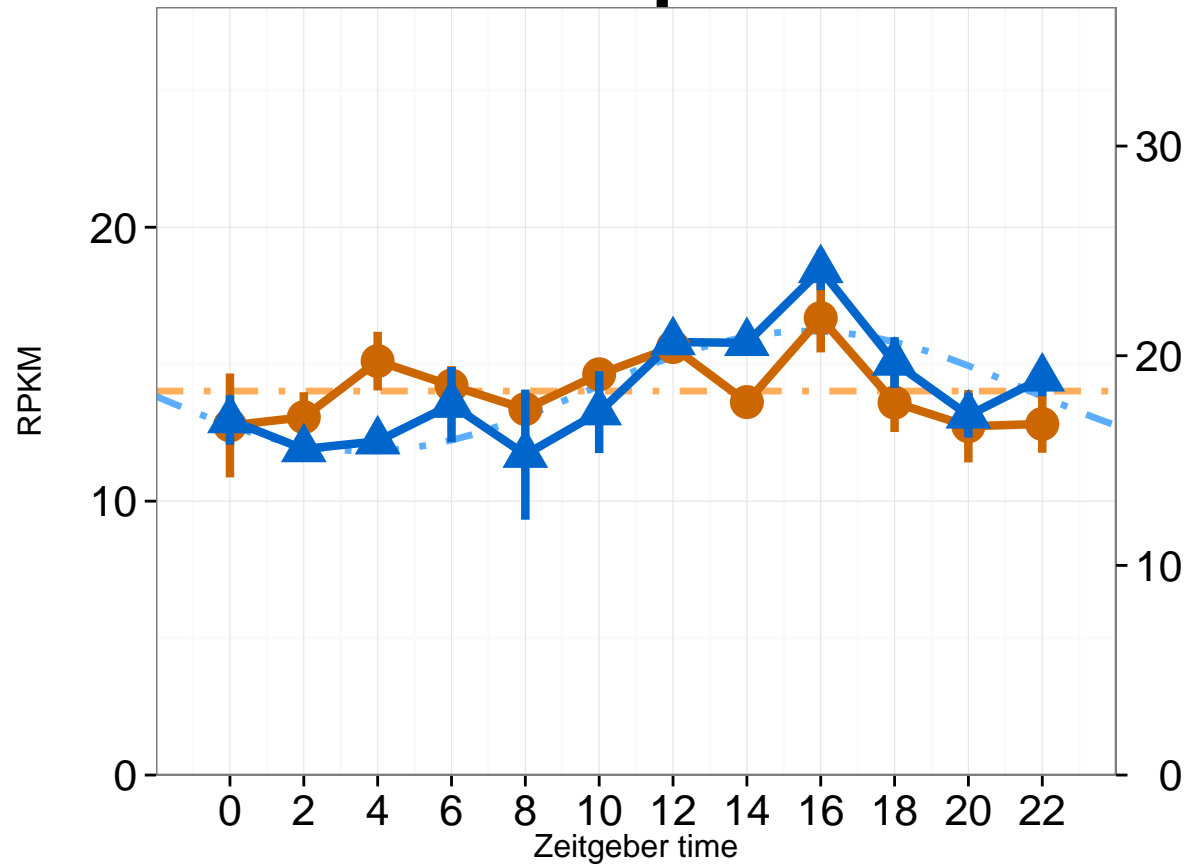

# Stap2

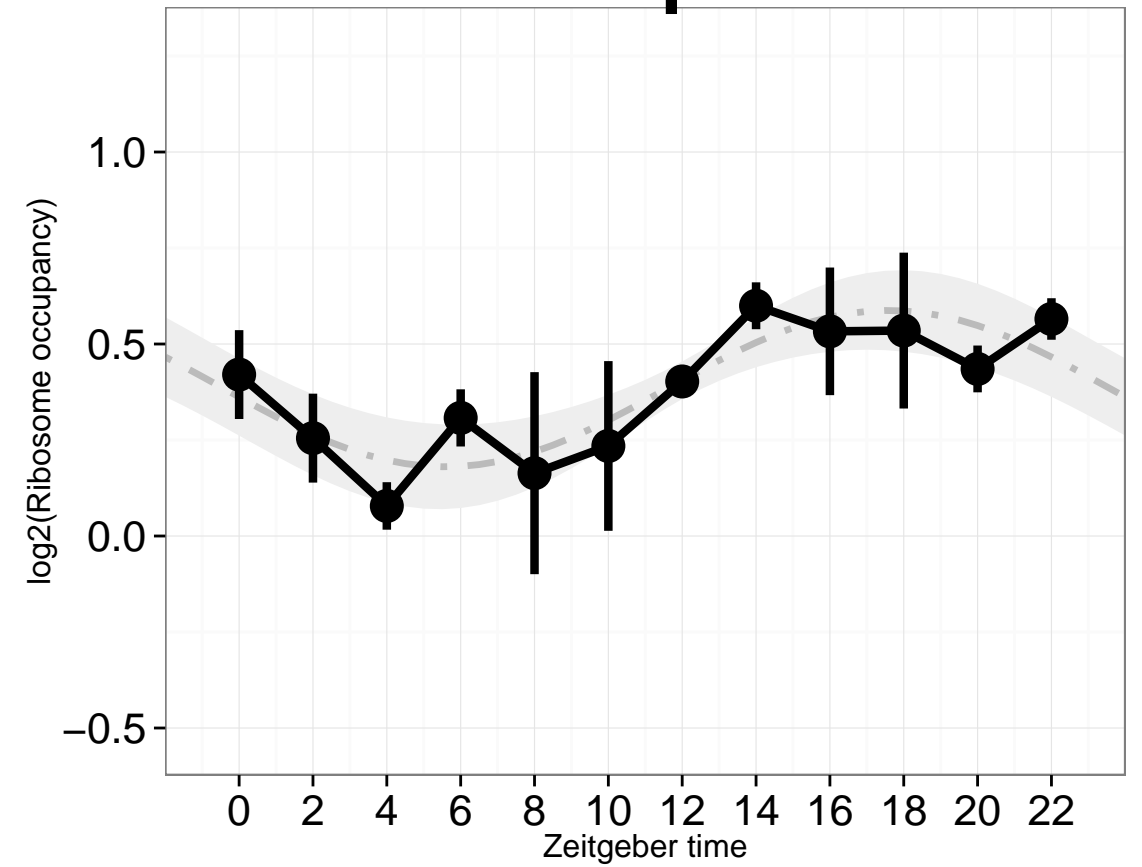

Supplement: SuppDataset_1.zip [file Stap2_set_A.pdf › Supplemental Dataset 1/A-mRNA_nonrhyth_translation_nonrhyth/Stap2_set_A.pdf]

# Stard10

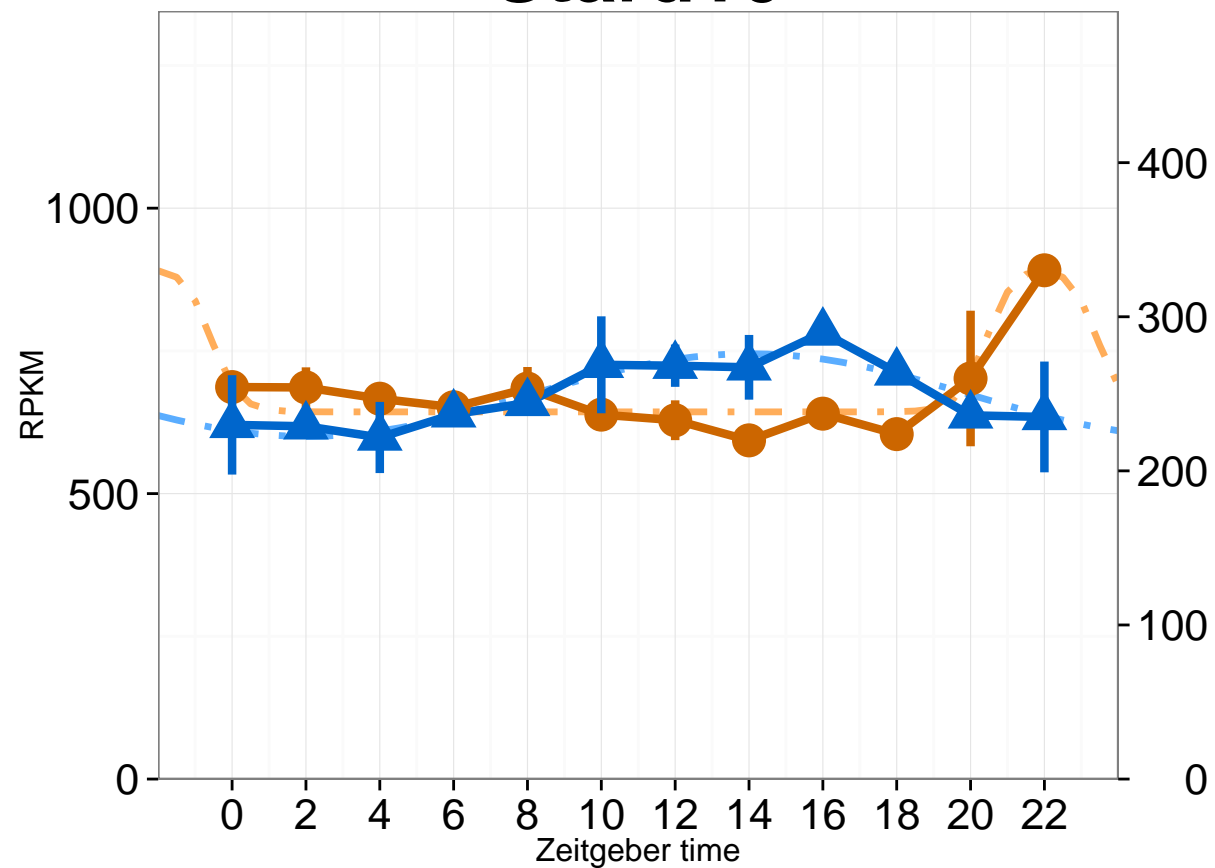

# Stard10

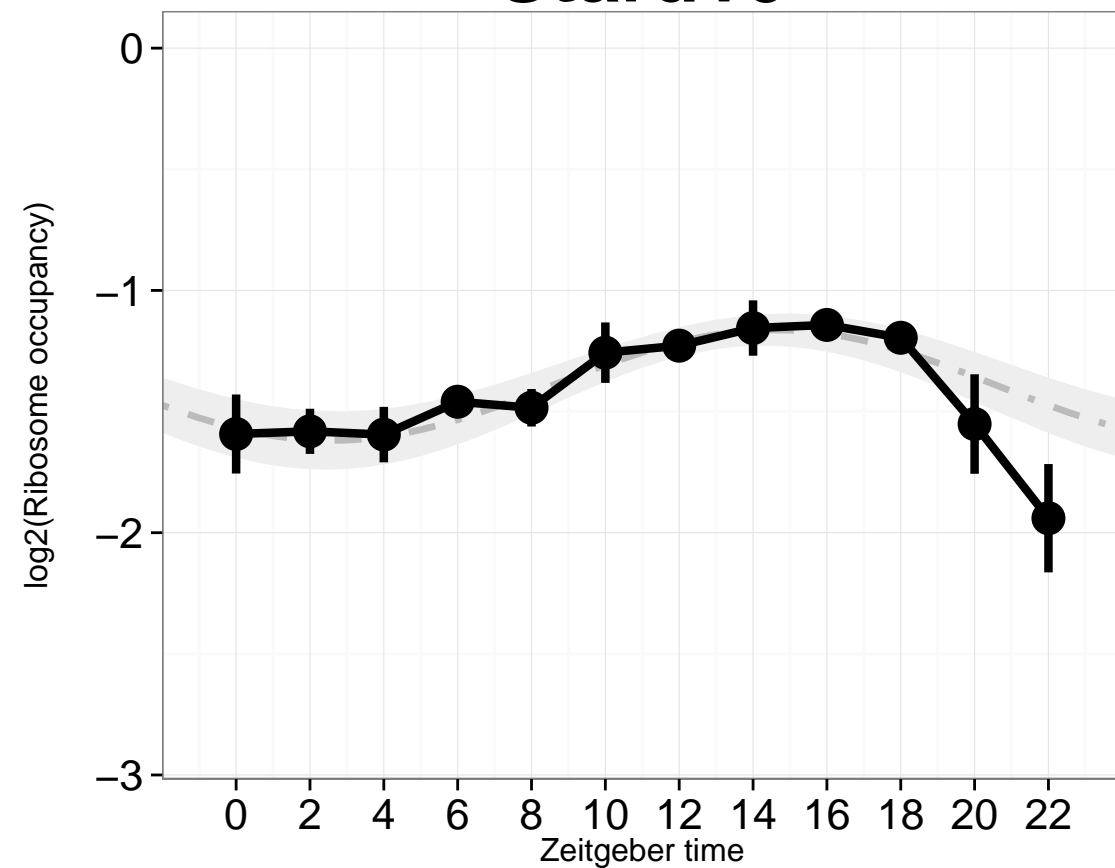

Supplement: SuppDataset_1.zip [file Stard10_set_A.pdf › Supplemental Dataset 1/A-mRNA_nonrhyth_translation_nonrhyth/Stard10_set_A.pdf]

## Stard3

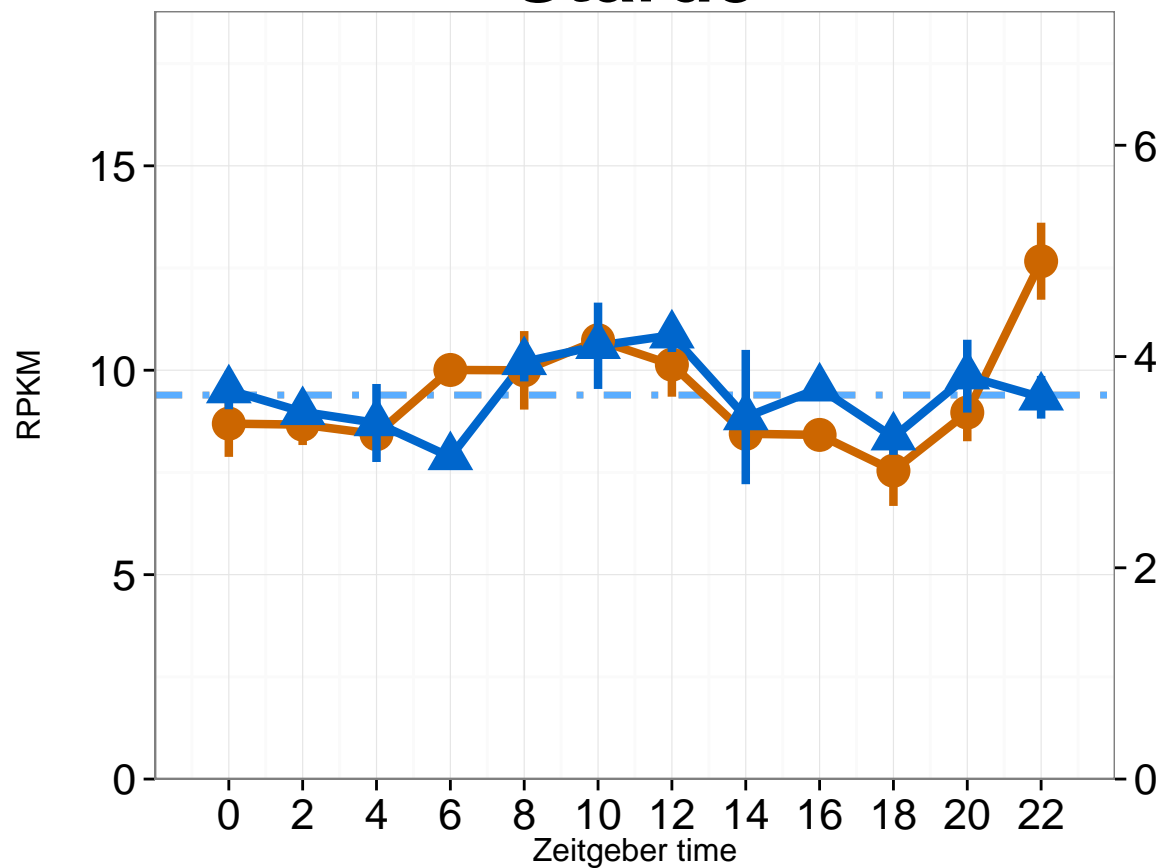

## Stard3

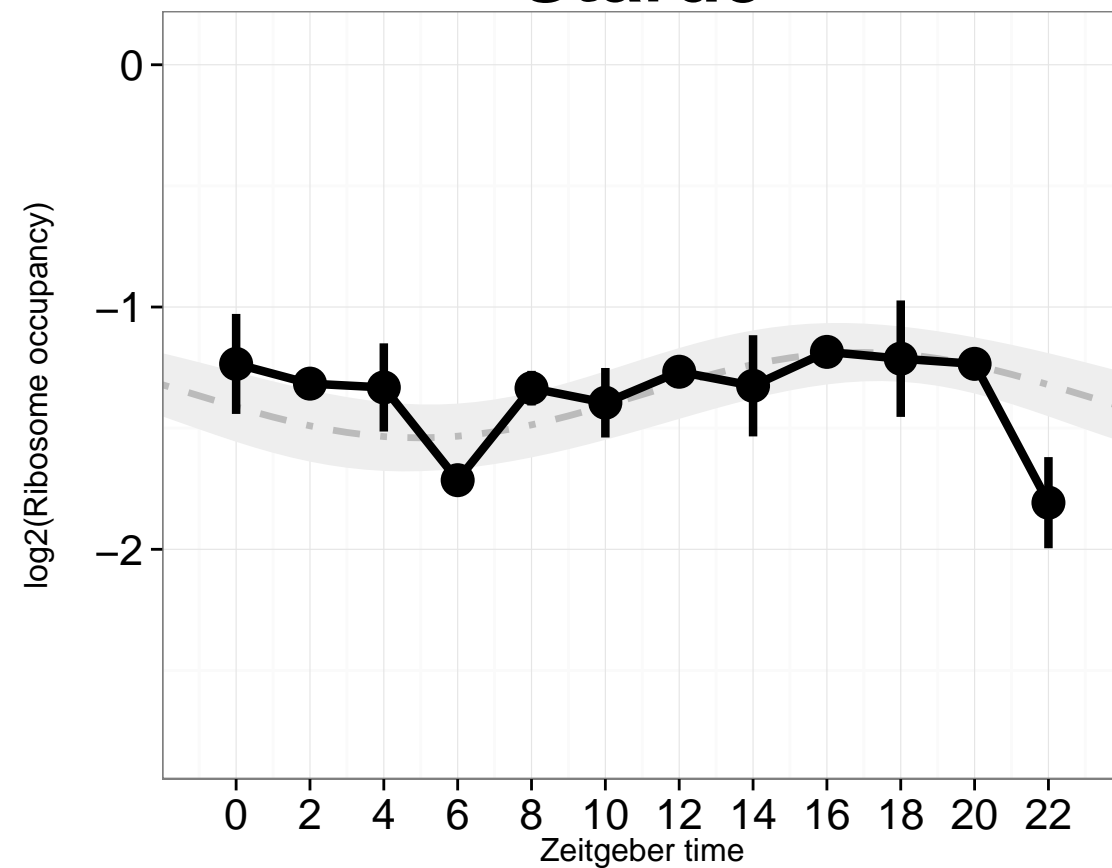

Supplement: SuppDataset_1.zip [file Stard3_set_A.pdf › Supplemental Dataset 1/A-mRNA_nonrhyth_translation_nonrhyth/Stard3_set_A.pdf]

# Stard3nl

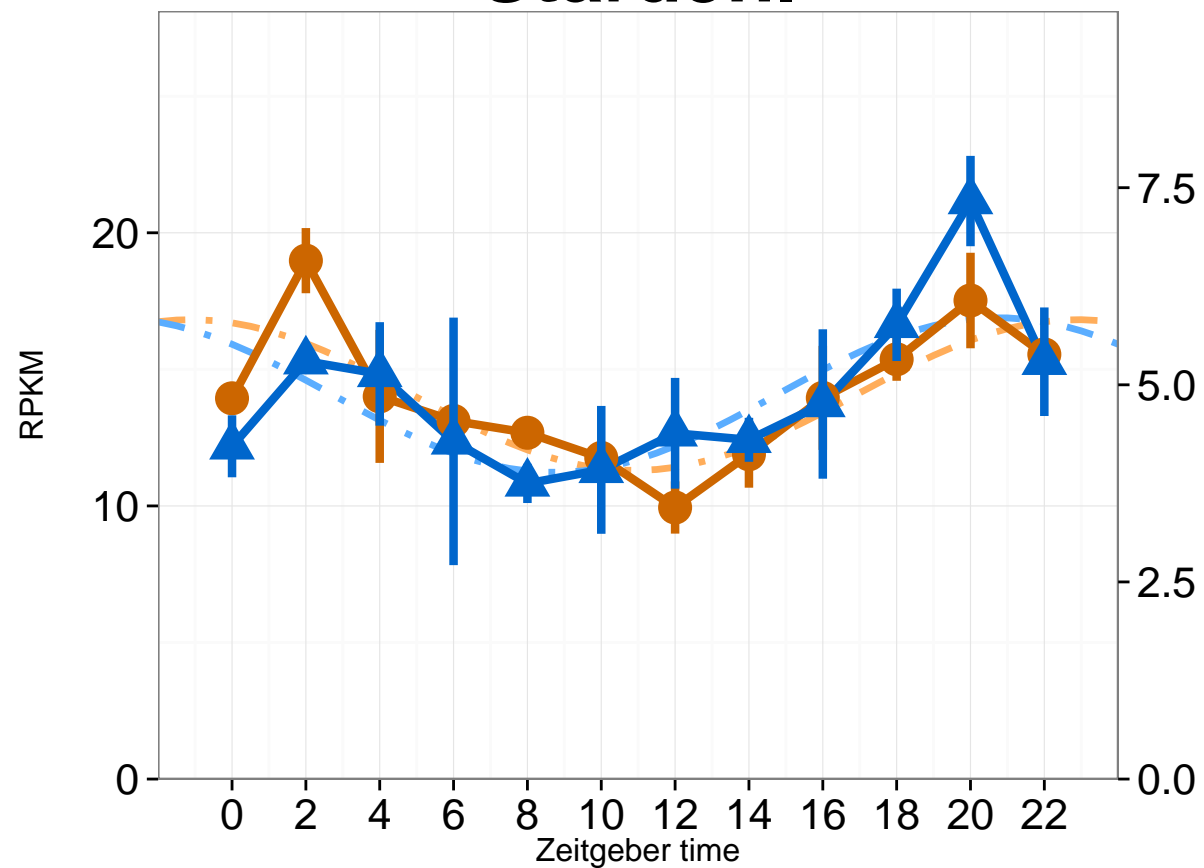

# Stard3nl

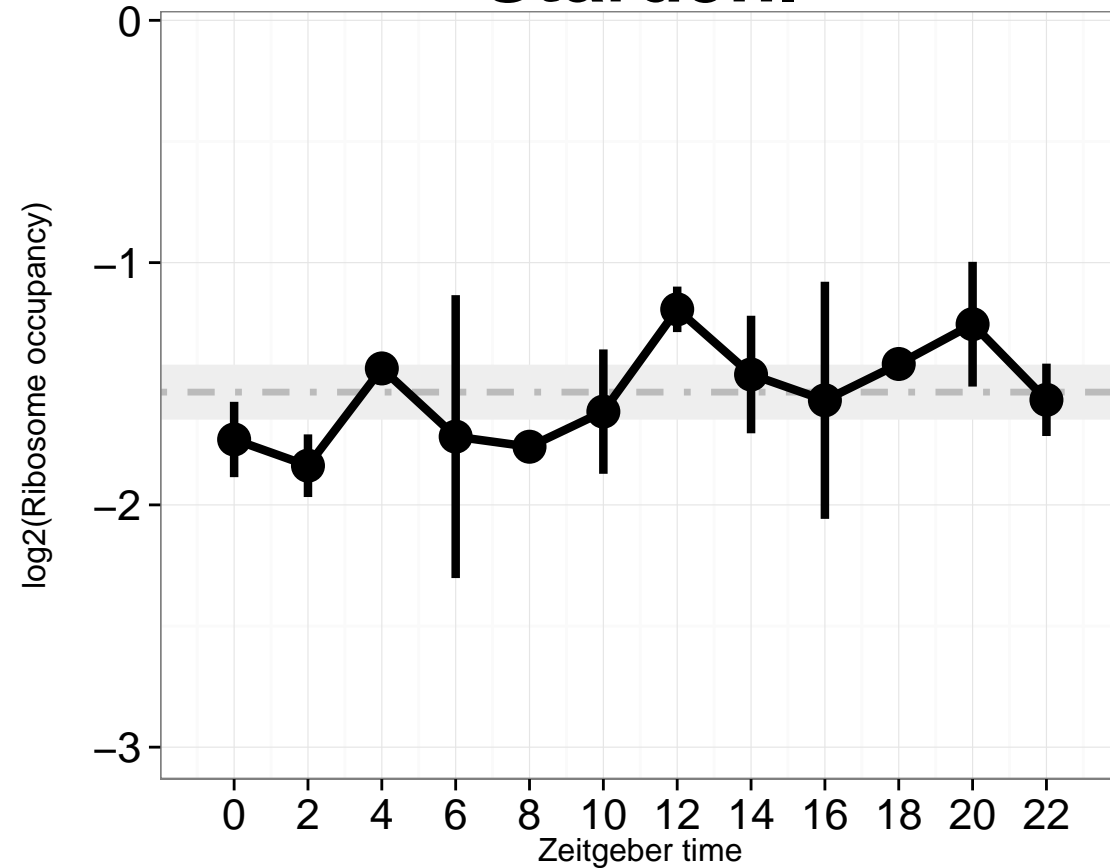

Supplement: SuppDataset_1.zip [file Stard3nl_set_A.pdf › Supplemental Dataset 1/A-mRNA_nonrhyth_translation_nonrhyth/Stard3nl_set_A.pdf]

# Stard7

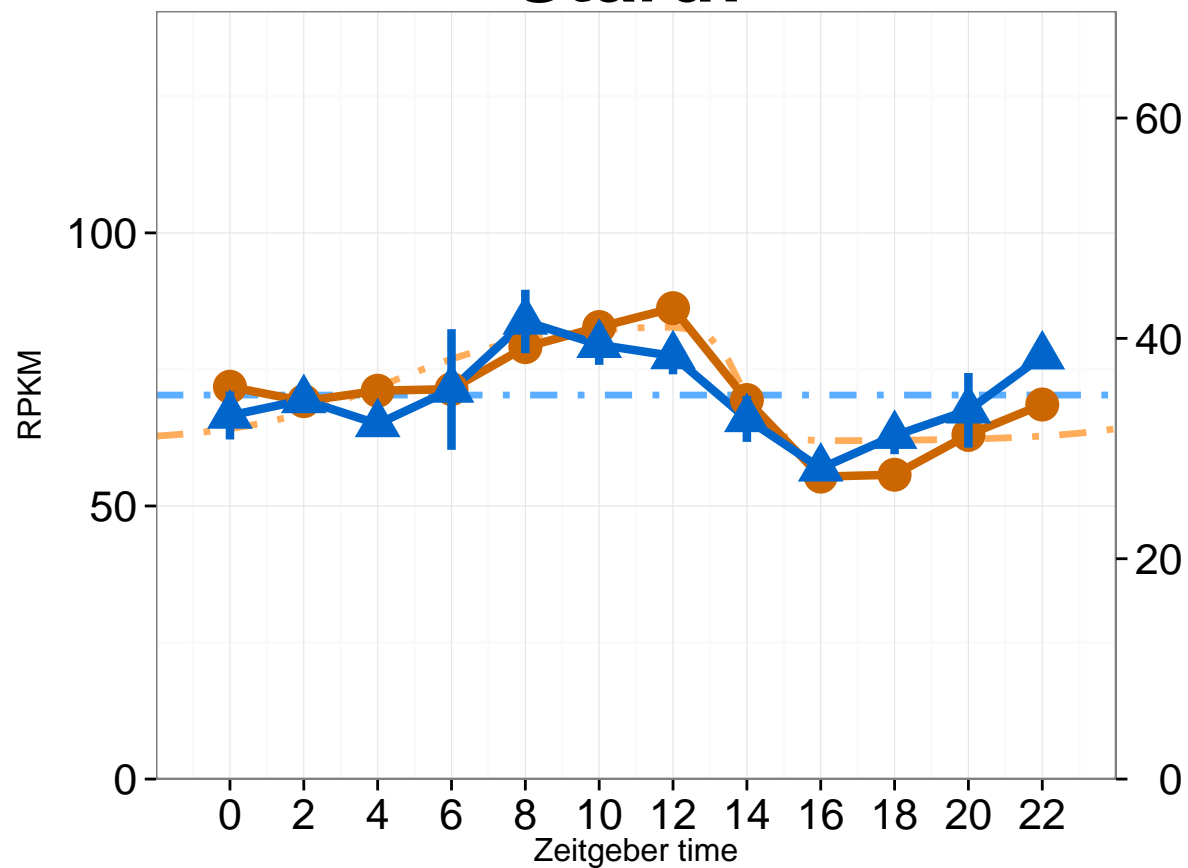

# Stard7

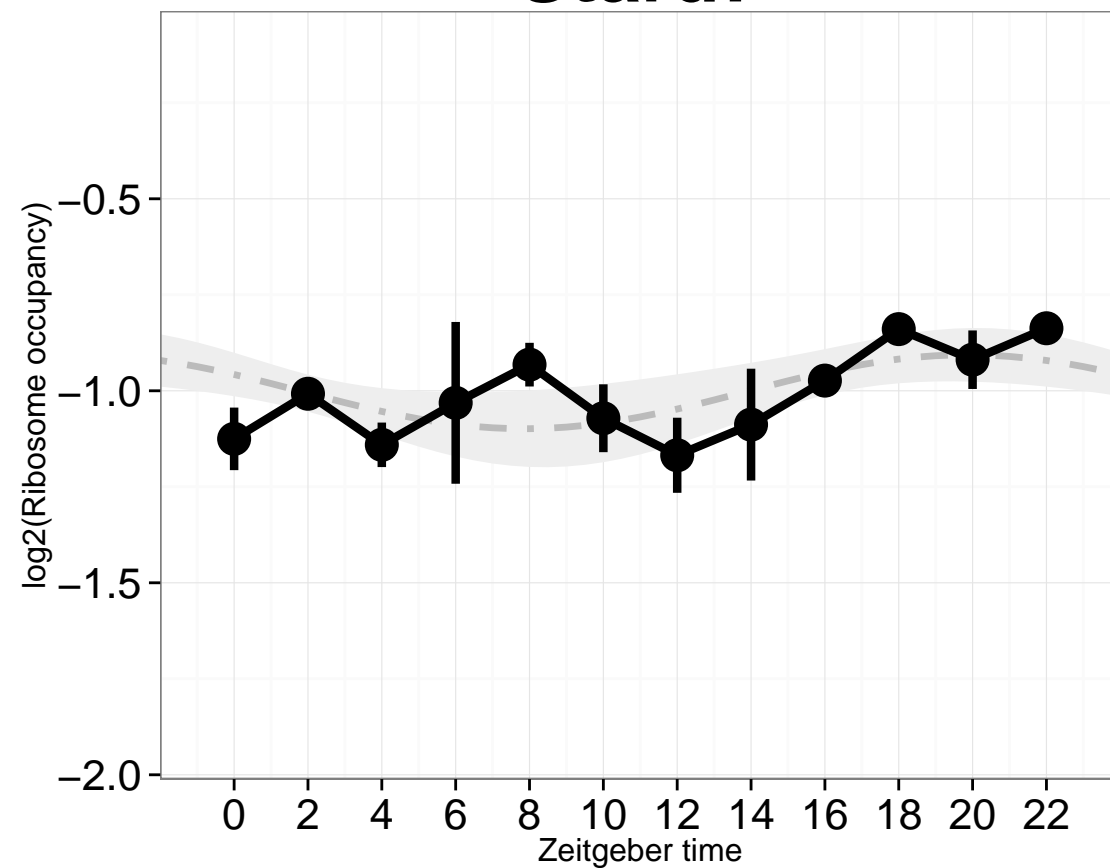

Supplement: SuppDataset_1.zip [file Stard7_set_A.pdf › Supplemental Dataset 1/A-mRNA_nonrhyth_translation_nonrhyth/Stard7_set_A.pdf]

# Stat2

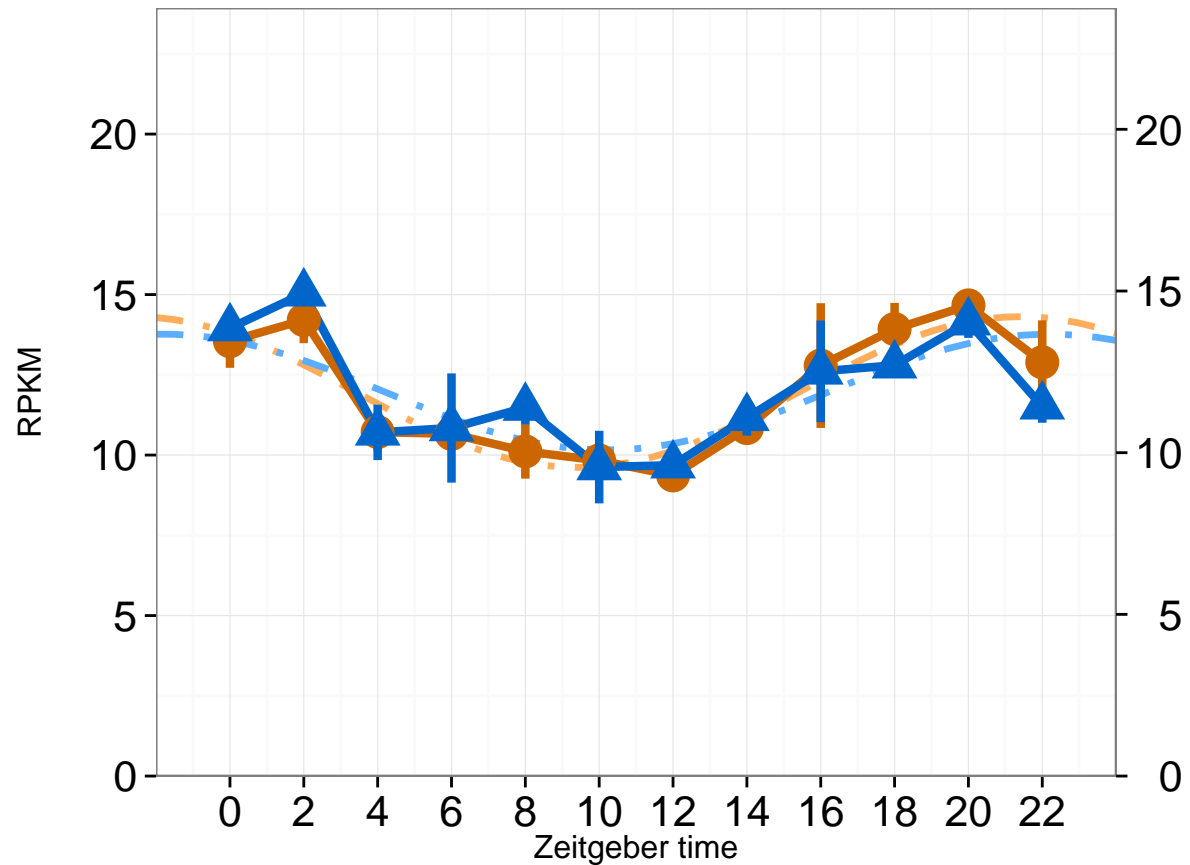

# Stat2

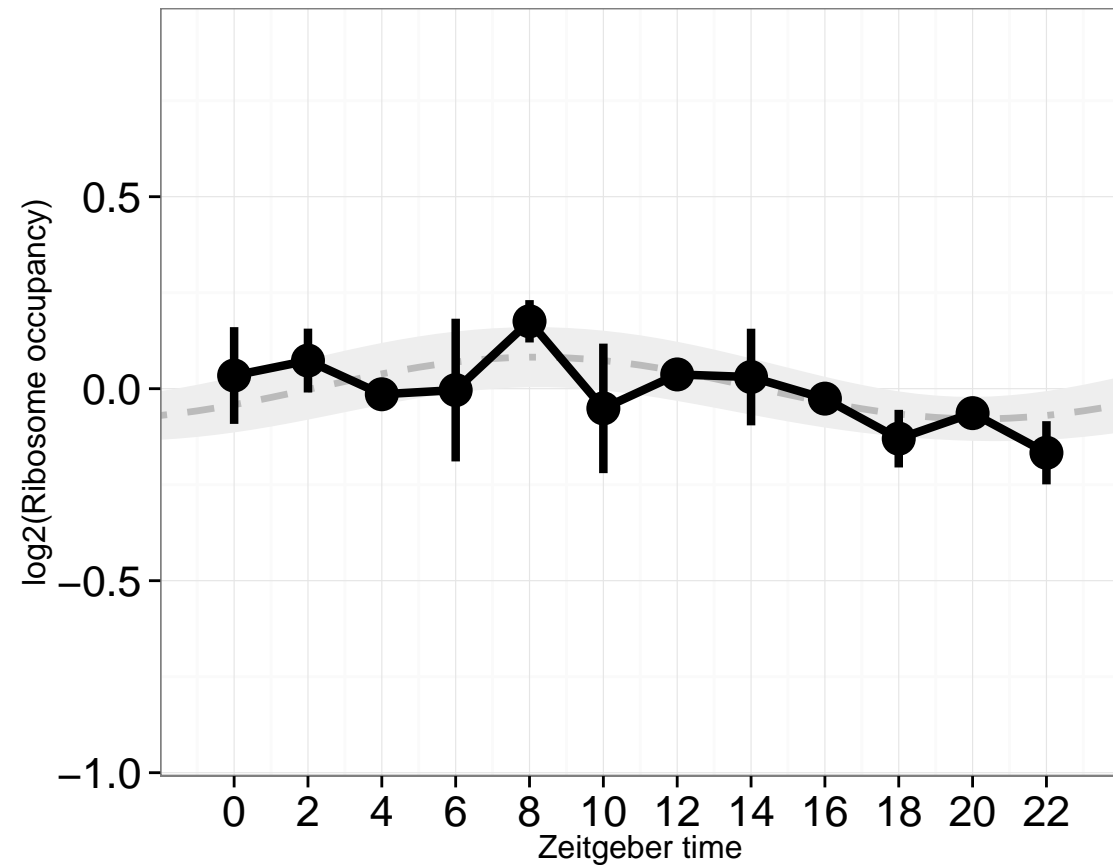

Supplement: SuppDataset_1.zip [file Stat2_set_A.pdf › Supplemental Dataset 1/A-mRNA_nonrhyth_translation_nonrhyth/Stat2_set_A.pdf]

## Stat3

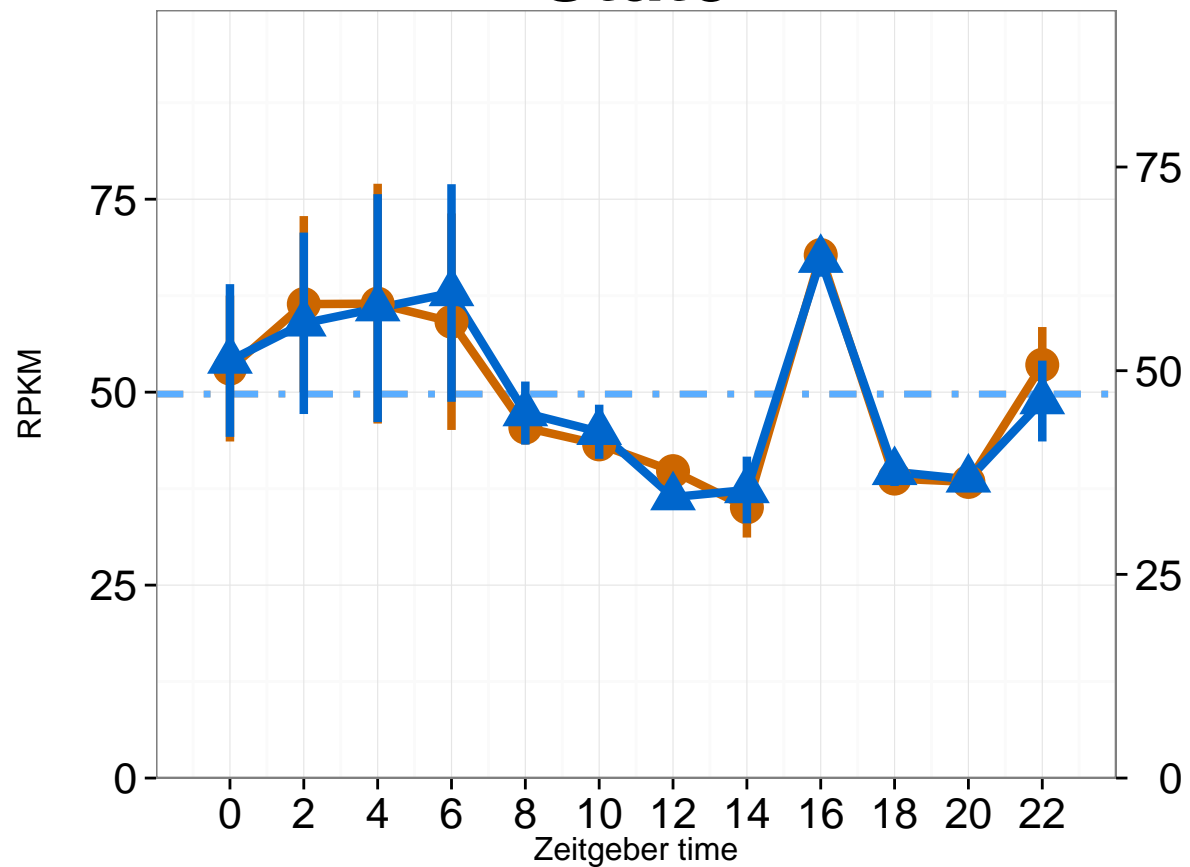

## Stat3

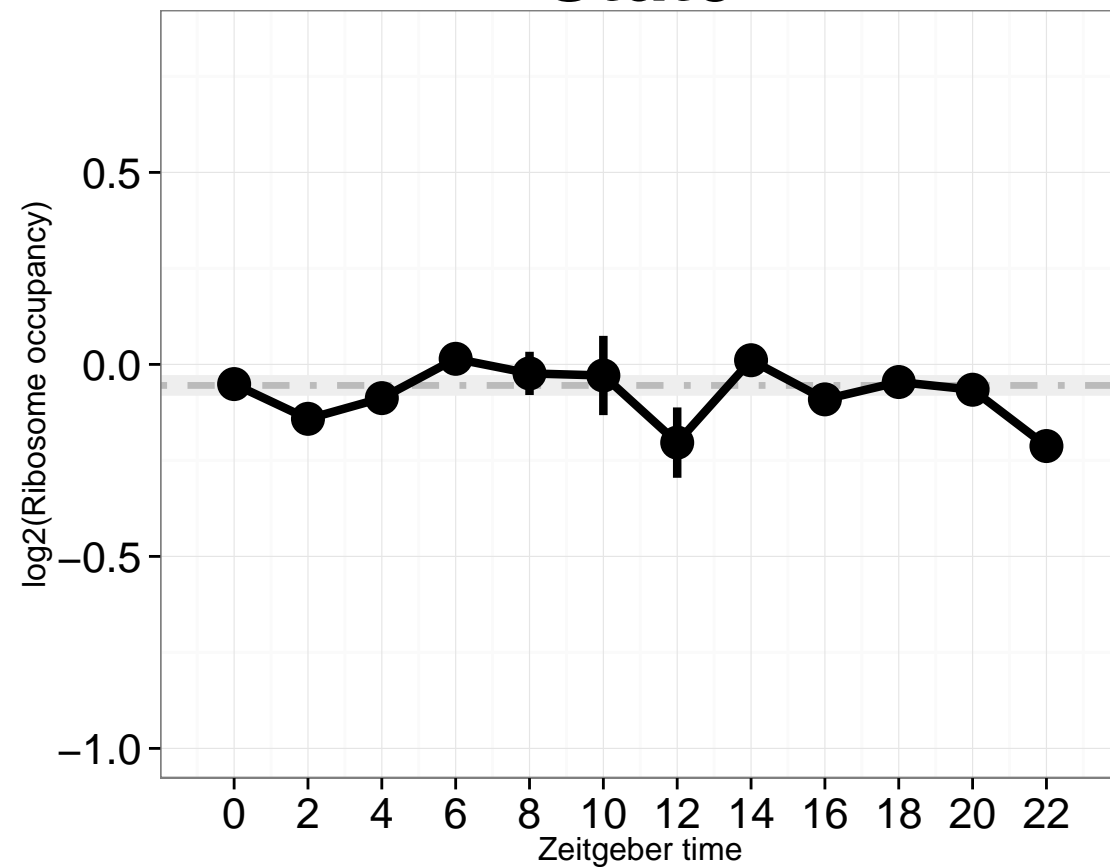

Supplement: SuppDataset_1.zip [file Stat3_set_A.pdf › Supplemental Dataset 1/A-mRNA_nonrhyth_translation_nonrhyth/Stat3_set_A.pdf]

# Stat6

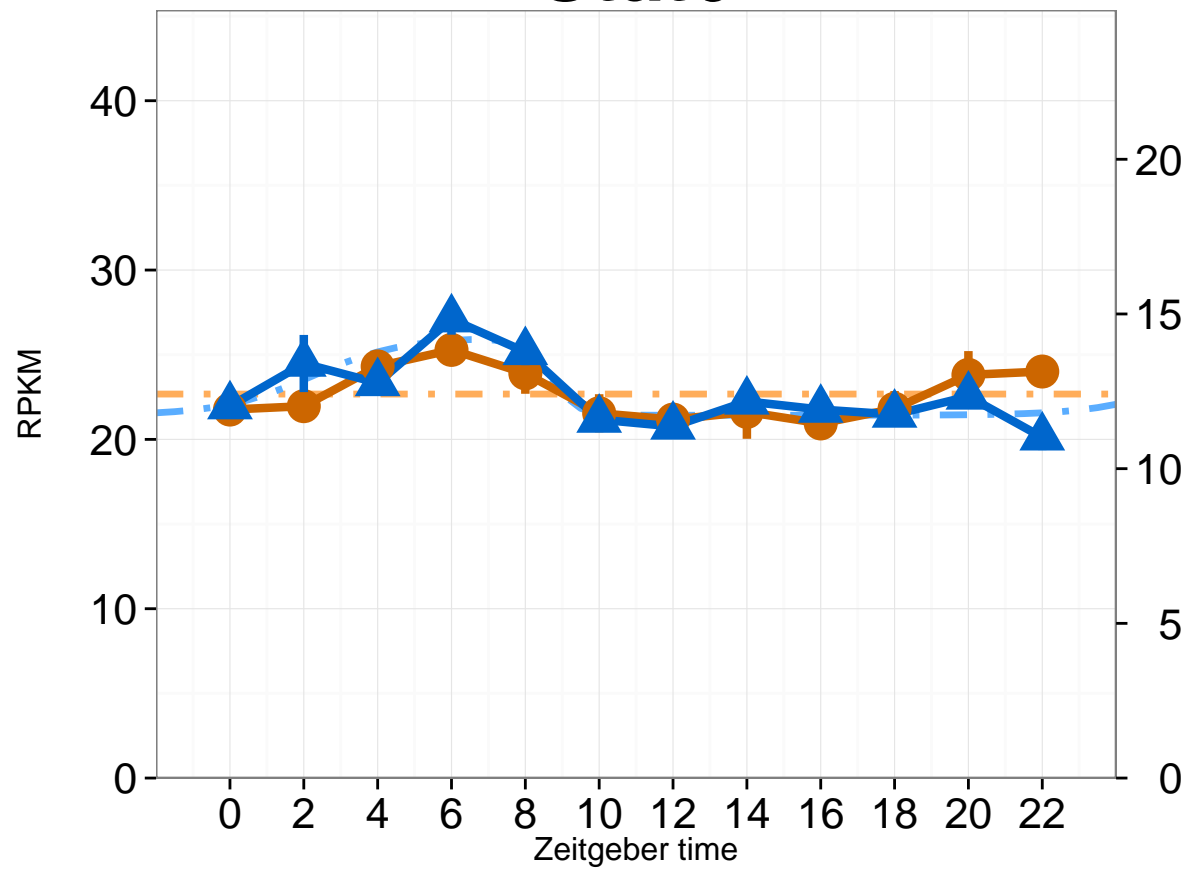

# Stat6

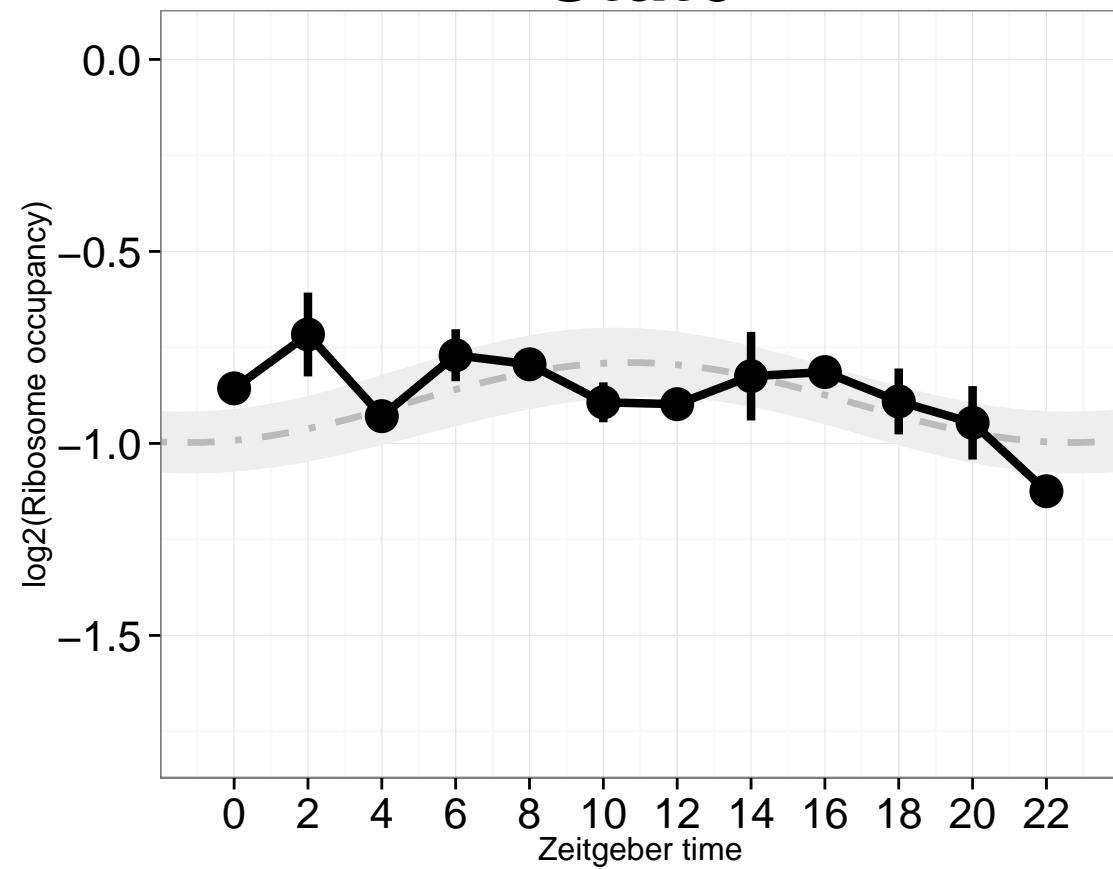

Supplement: SuppDataset_1.zip [file Stat6_set_A.pdf › Supplemental Dataset 1/A-mRNA_nonrhyth_translation_nonrhyth/Stat6_set_A.pdf]

# Stau1

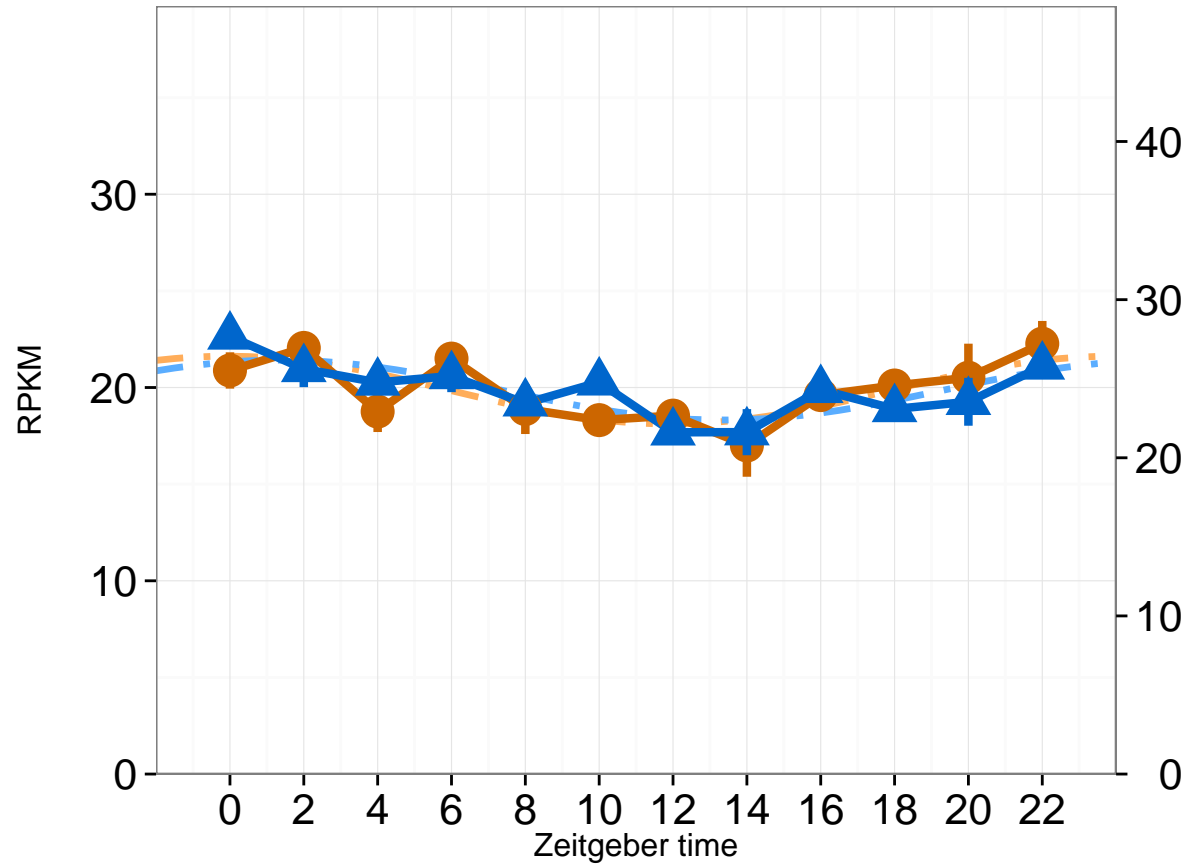

# Stau1

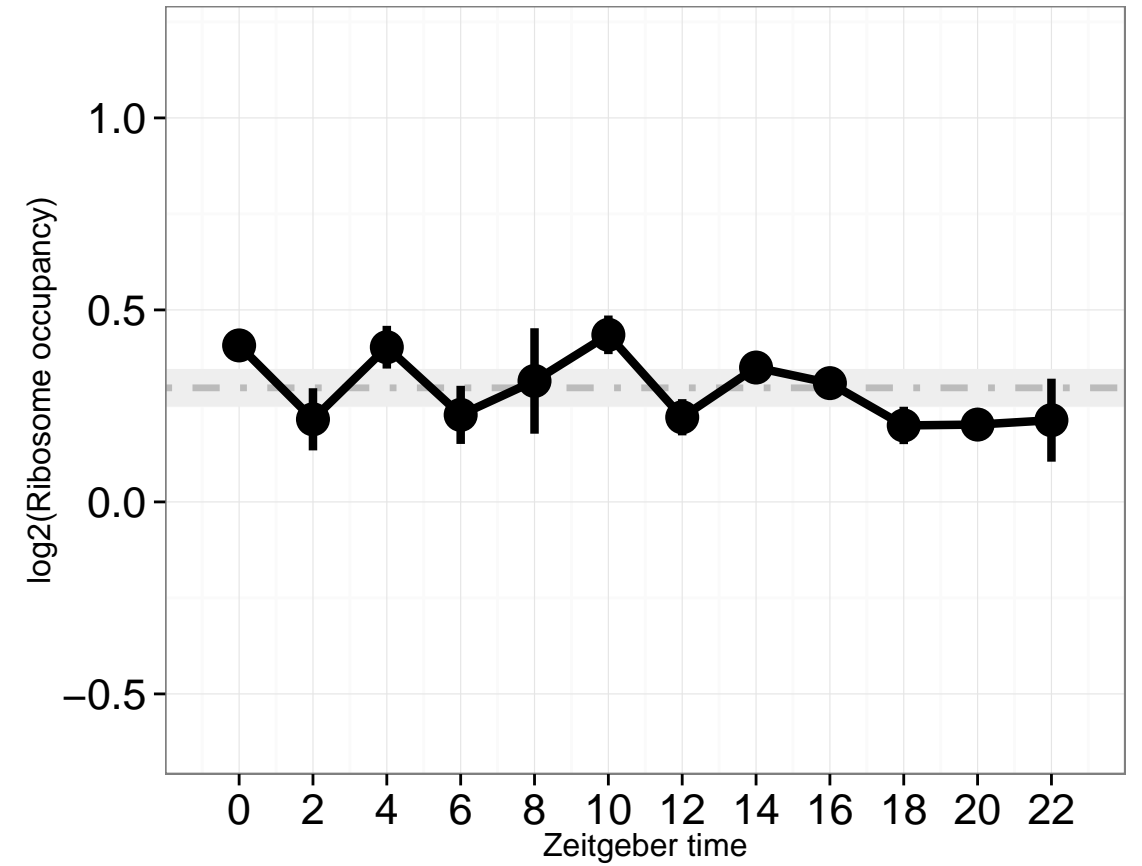

Supplement: SuppDataset_1.zip [file Stau1_set_A.pdf › Supplemental Dataset 1/A-mRNA_nonrhyth_translation_nonrhyth/Stau1_set_A.pdf]

# Stau2

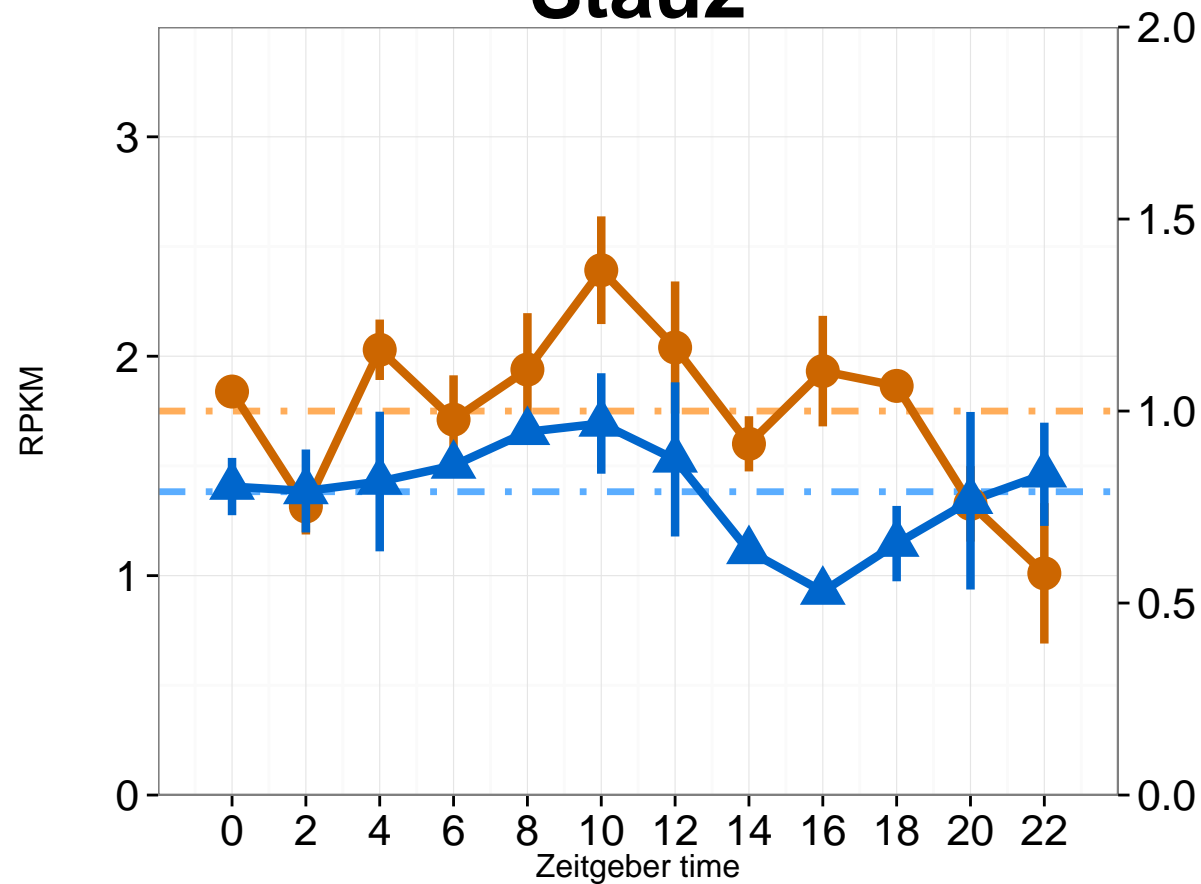

# Stau2

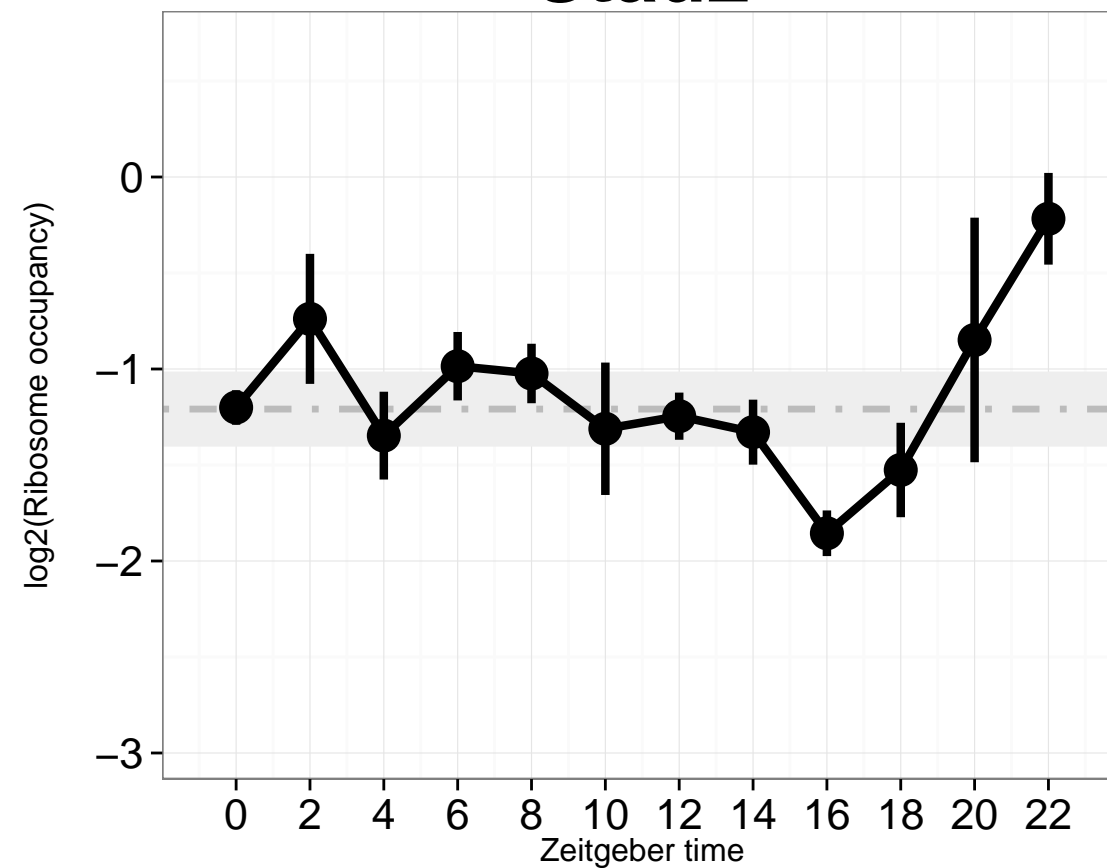

Supplement: SuppDataset_1.zip [file Stau2_set_A.pdf › Supplemental Dataset 1/A-mRNA_nonrhyth_translation_nonrhyth/Stau2_set_A.pdf]

# Steap2

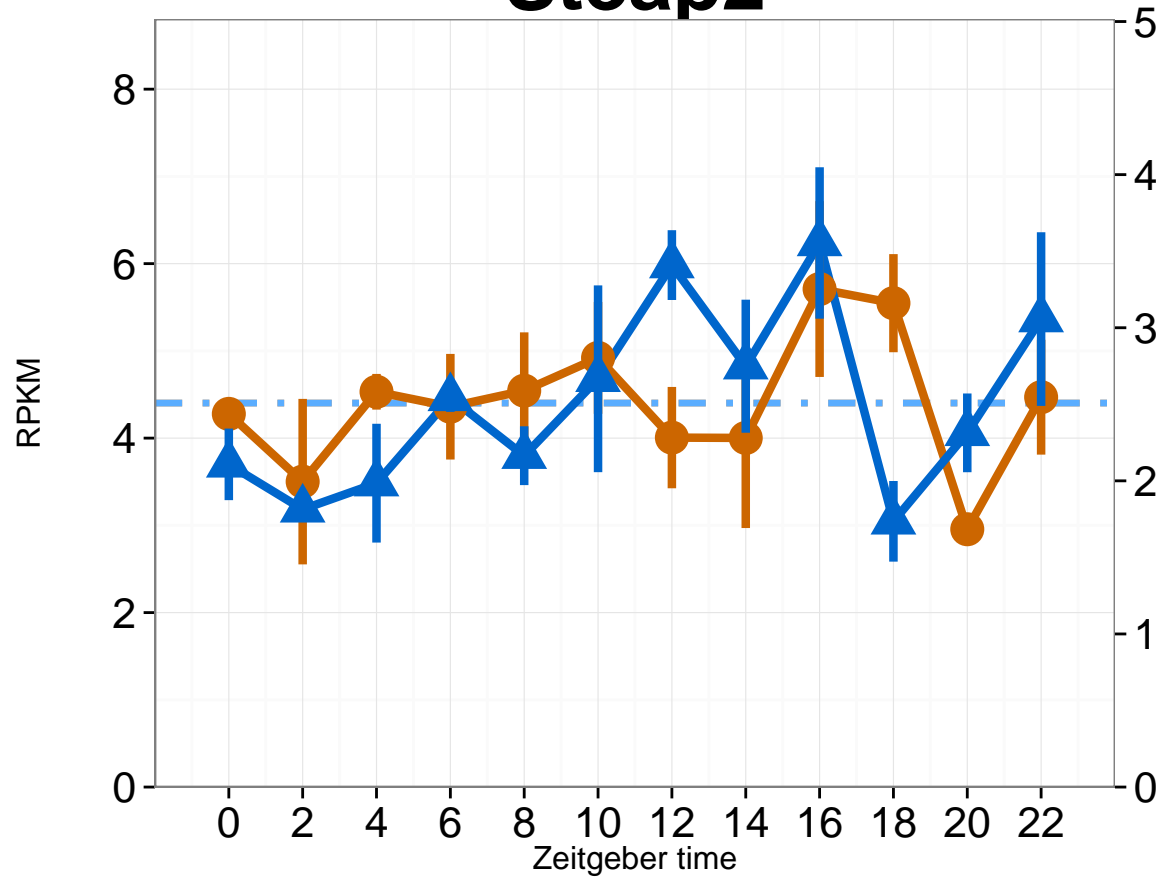

# Steap2

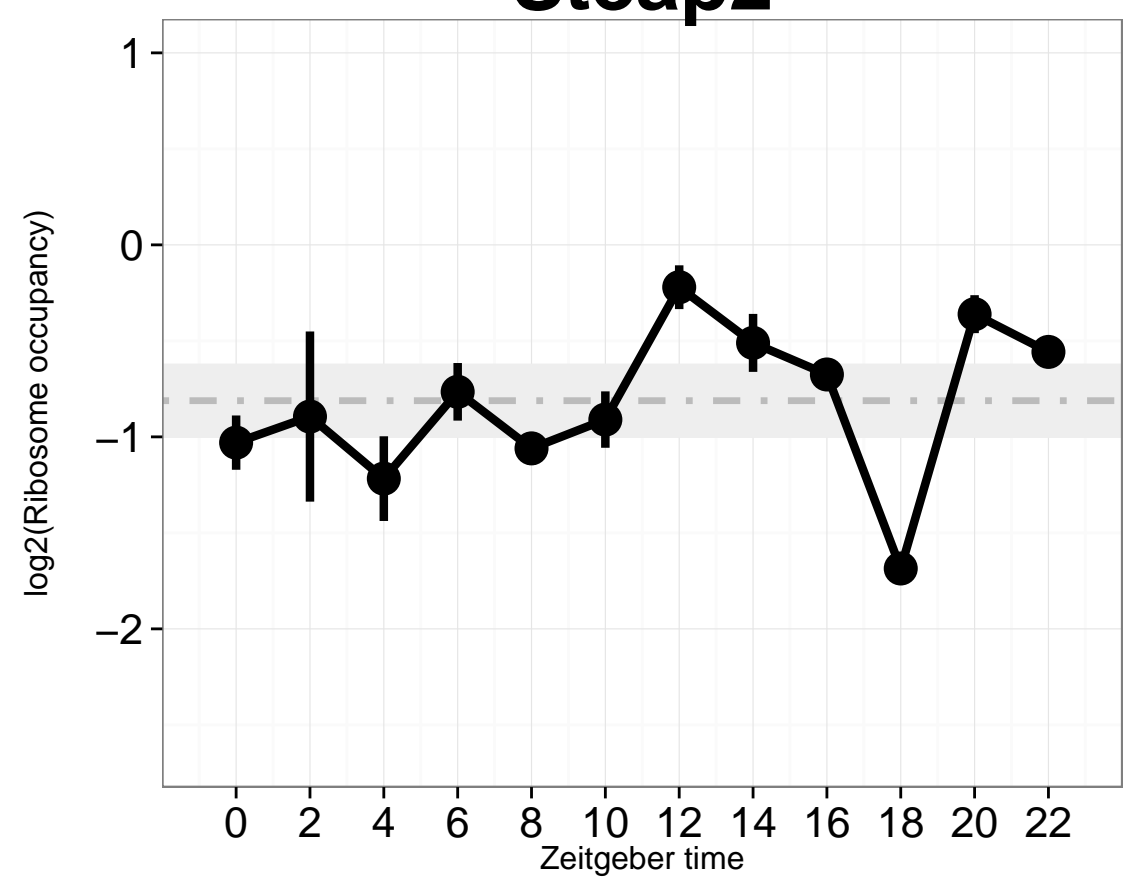

Supplement: SuppDataset_1.zip [file Steap2_set_A.pdf › Supplemental Dataset 1/A-mRNA_nonrhyth_translation_nonrhyth/Steap2_set_A.pdf]

## Stim1

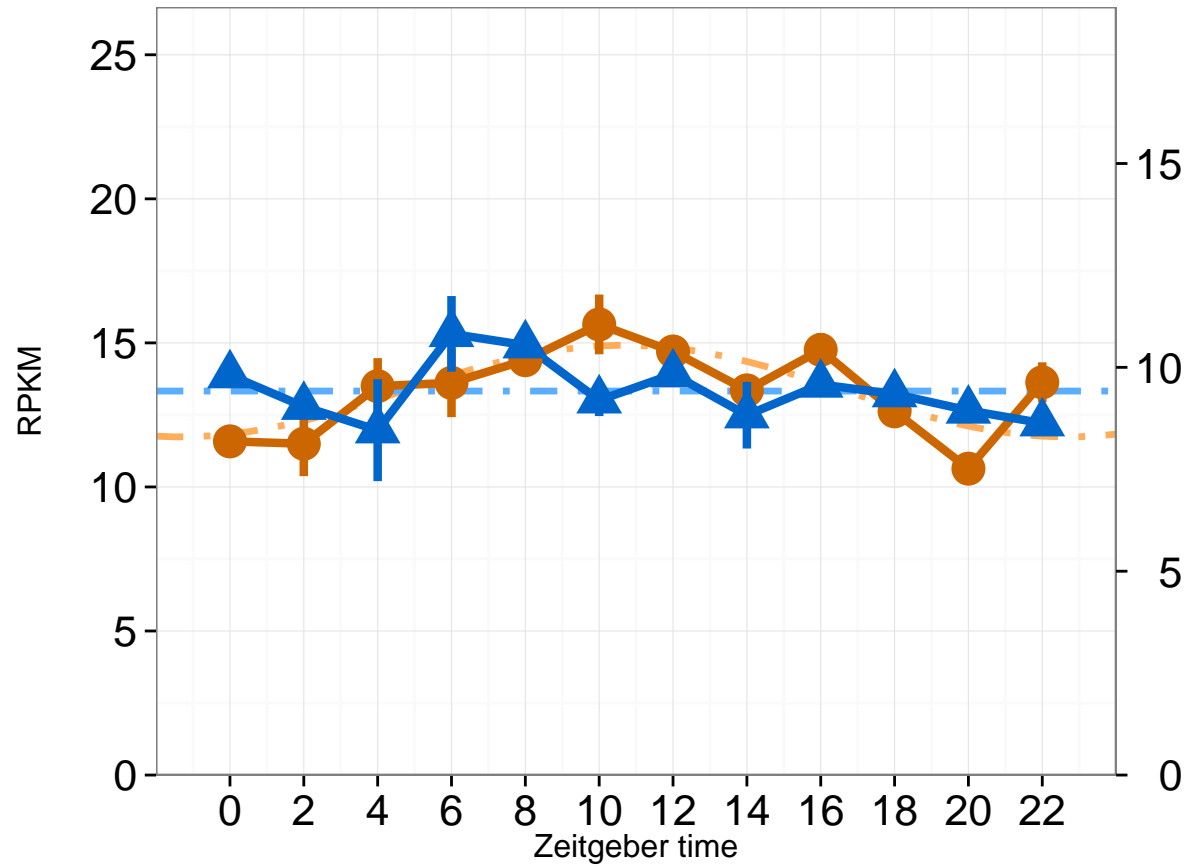

## Stim1

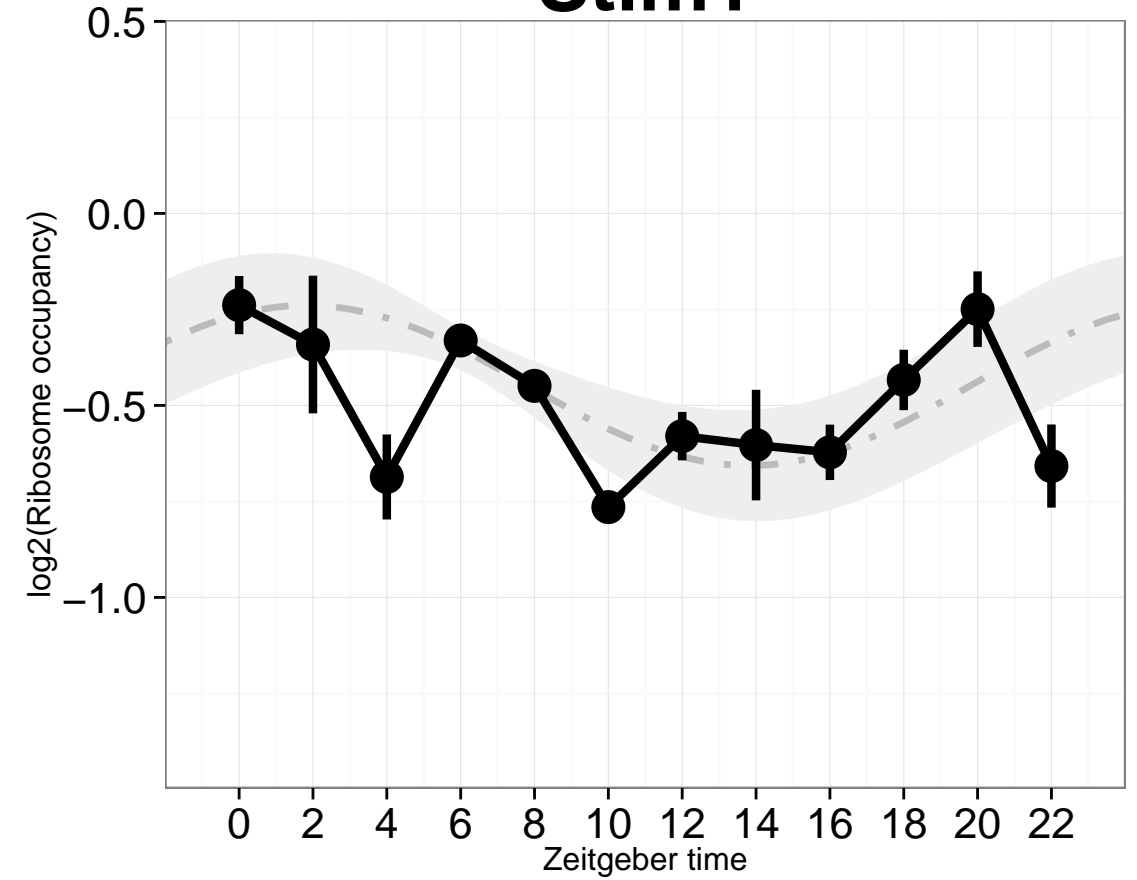

Supplement: SuppDataset_1.zip [file Stim1_set_A.pdf › Supplemental Dataset 1/A-mRNA_nonrhyth_translation_nonrhyth/Stim1_set_A.pdf]

## Stk10

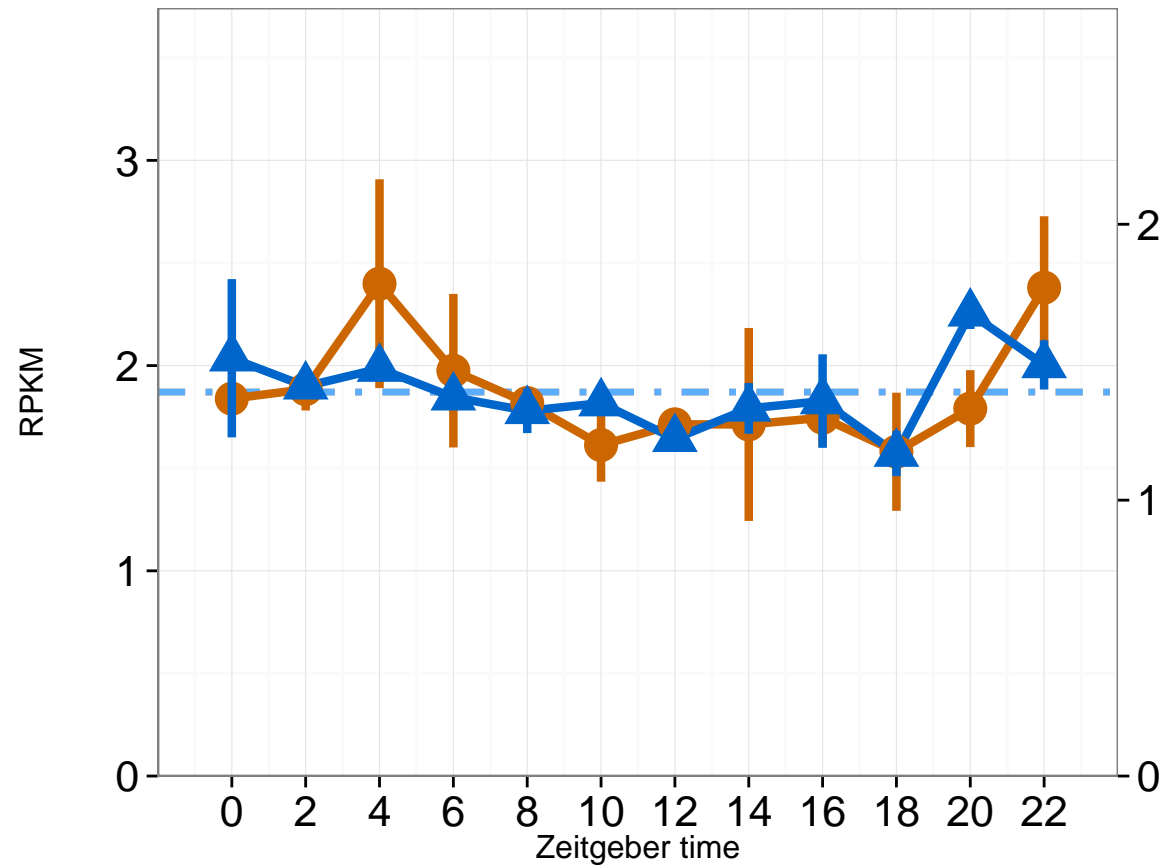

## Stk10

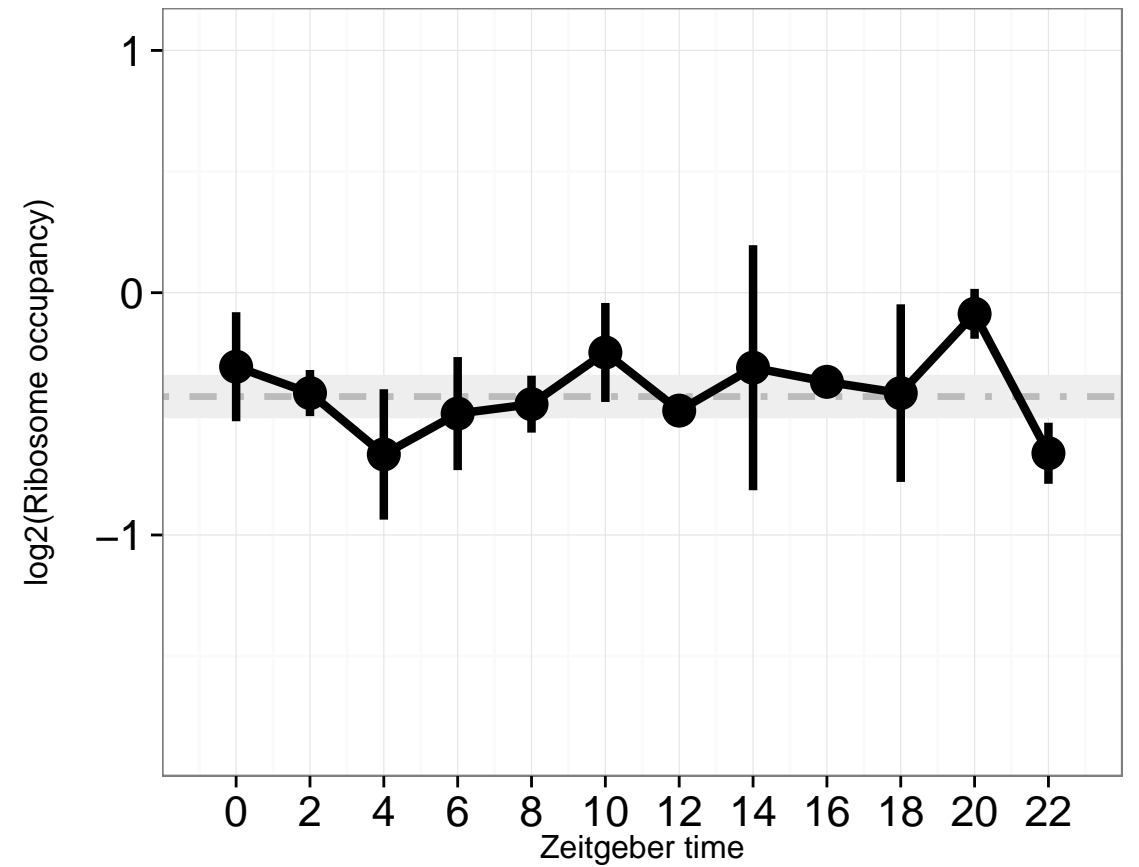

Supplement: SuppDataset_1.zip [file Stk10_set_A.pdf › Supplemental Dataset 1/A-mRNA_nonrhyth_translation_nonrhyth/Stk10_set_A.pdf]

## Stk11

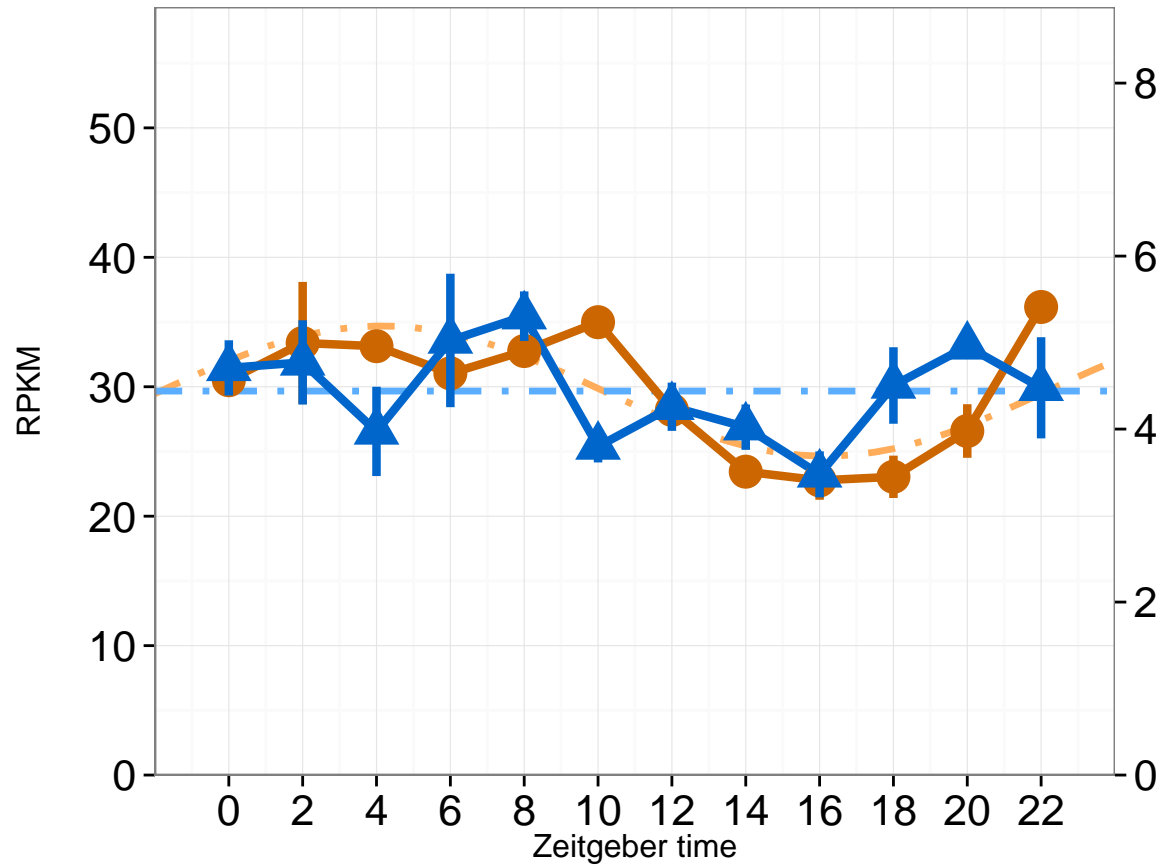

## Stk11

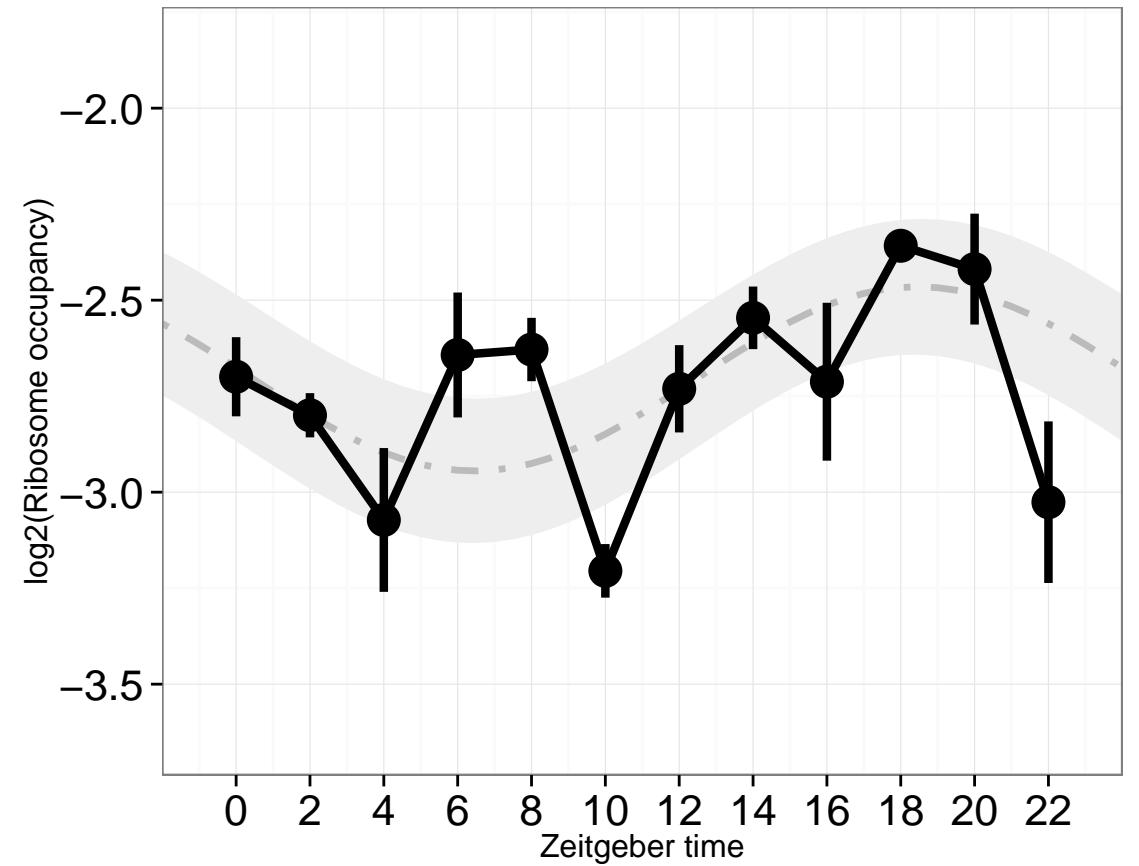

Supplement: SuppDataset_1.zip [file Stk11_set_A.pdf › Supplemental Dataset 1/A-mRNA_nonrhyth_translation_nonrhyth/Stk11_set_A.pdf]

# Stk11ip

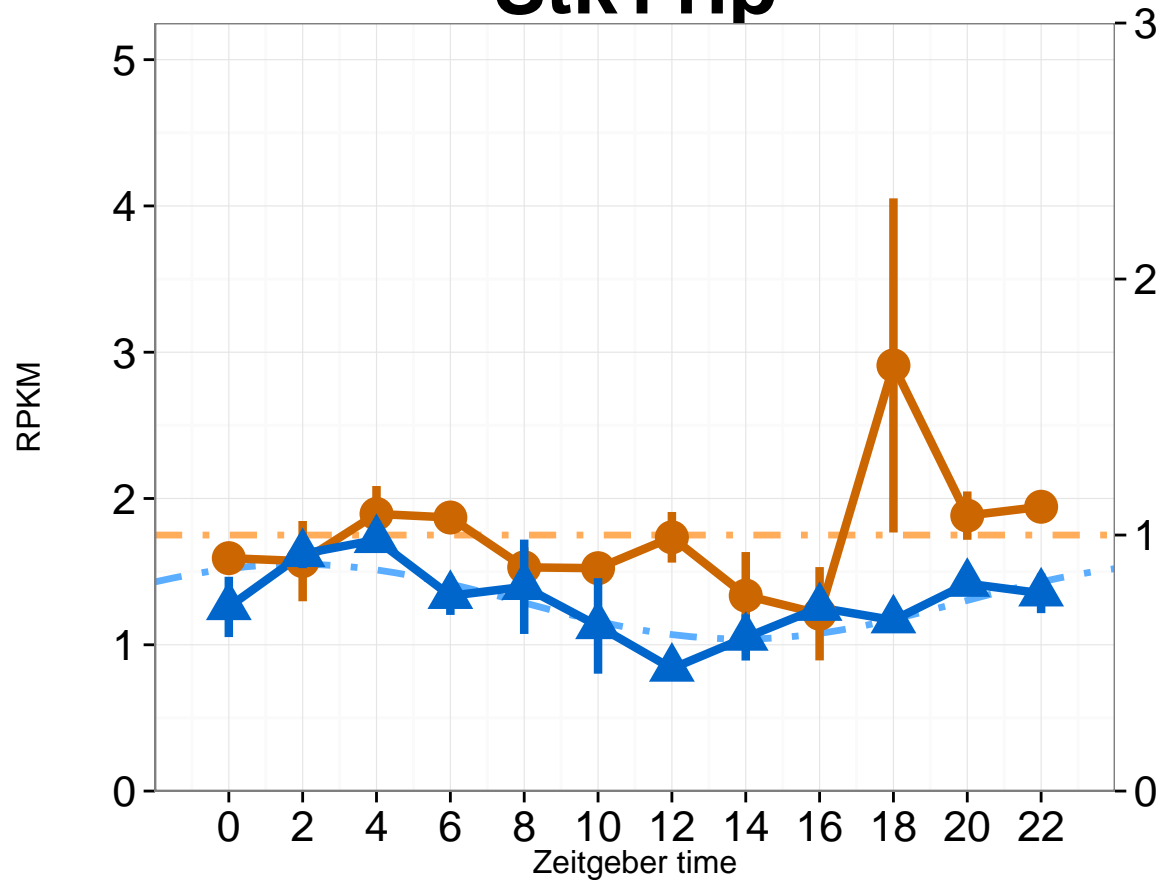

# Stk11ip

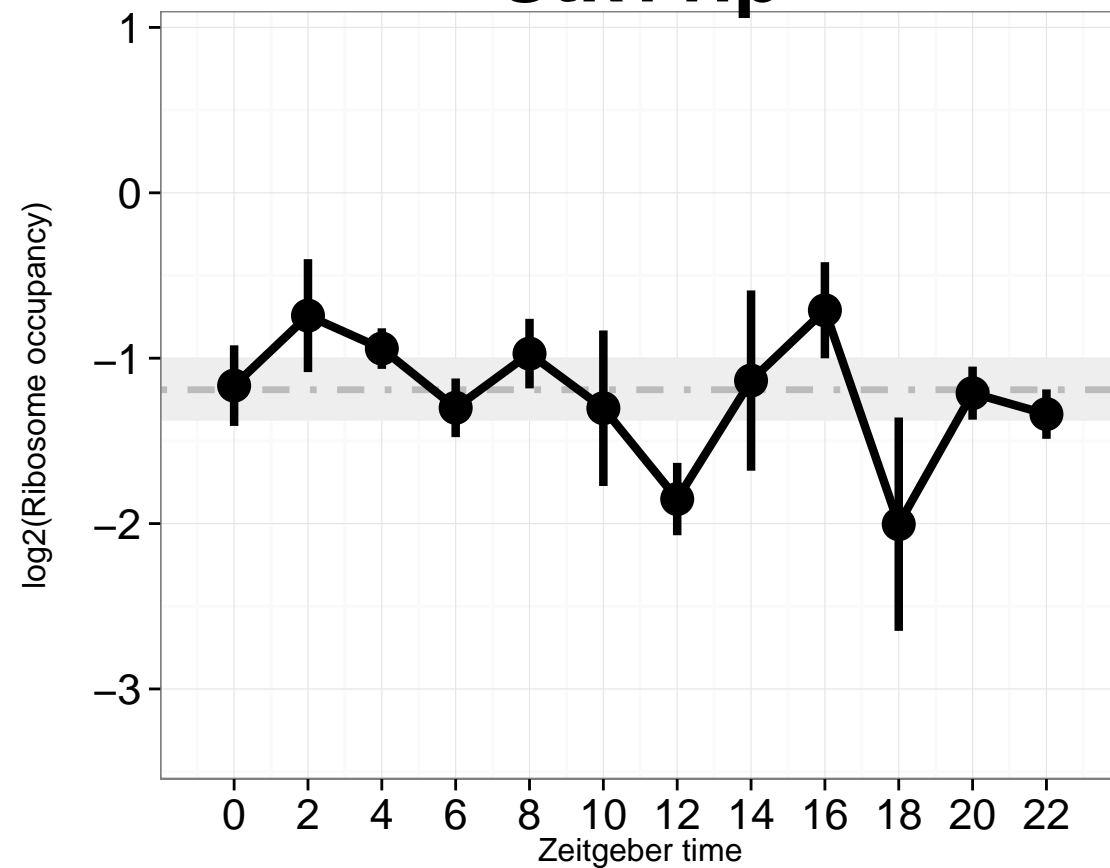

Supplement: SuppDataset_1.zip [file Stk11ip_set_A.pdf › Supplemental Dataset 1/A-mRNA_nonrhyth_translation_nonrhyth/Stk11ip_set_A.pdf]

# Stk16

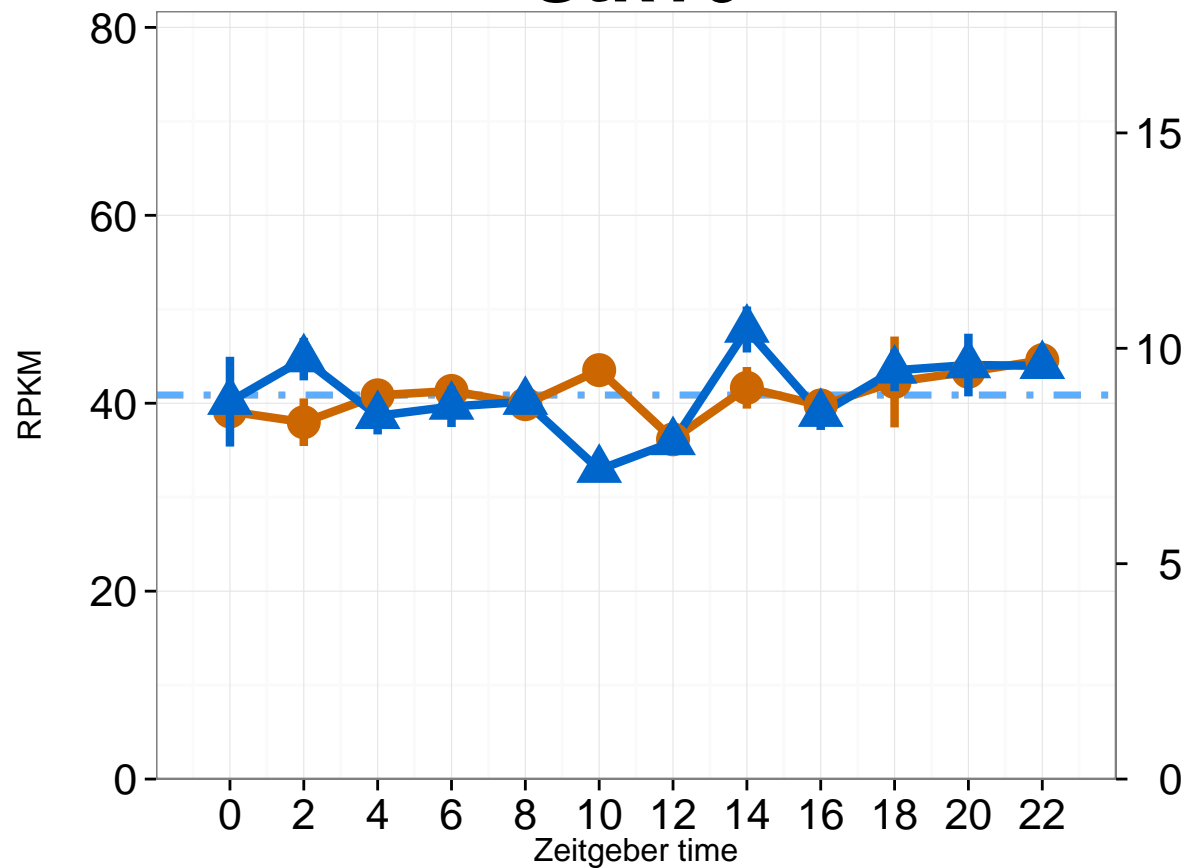

# Stk16

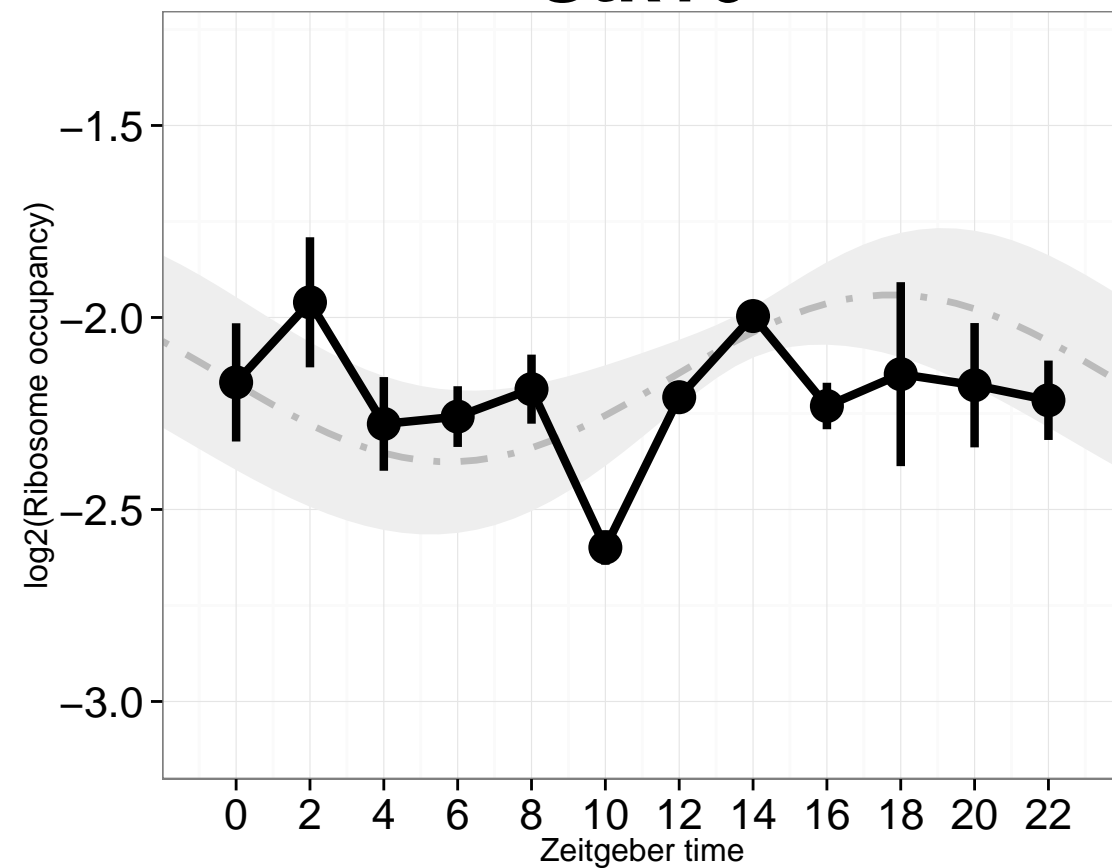

Supplement: SuppDataset_1.zip [file Stk16_set_A.pdf › Supplemental Dataset 1/A-mRNA_nonrhyth_translation_nonrhyth/Stk16_set_A.pdf]

# Stk17b

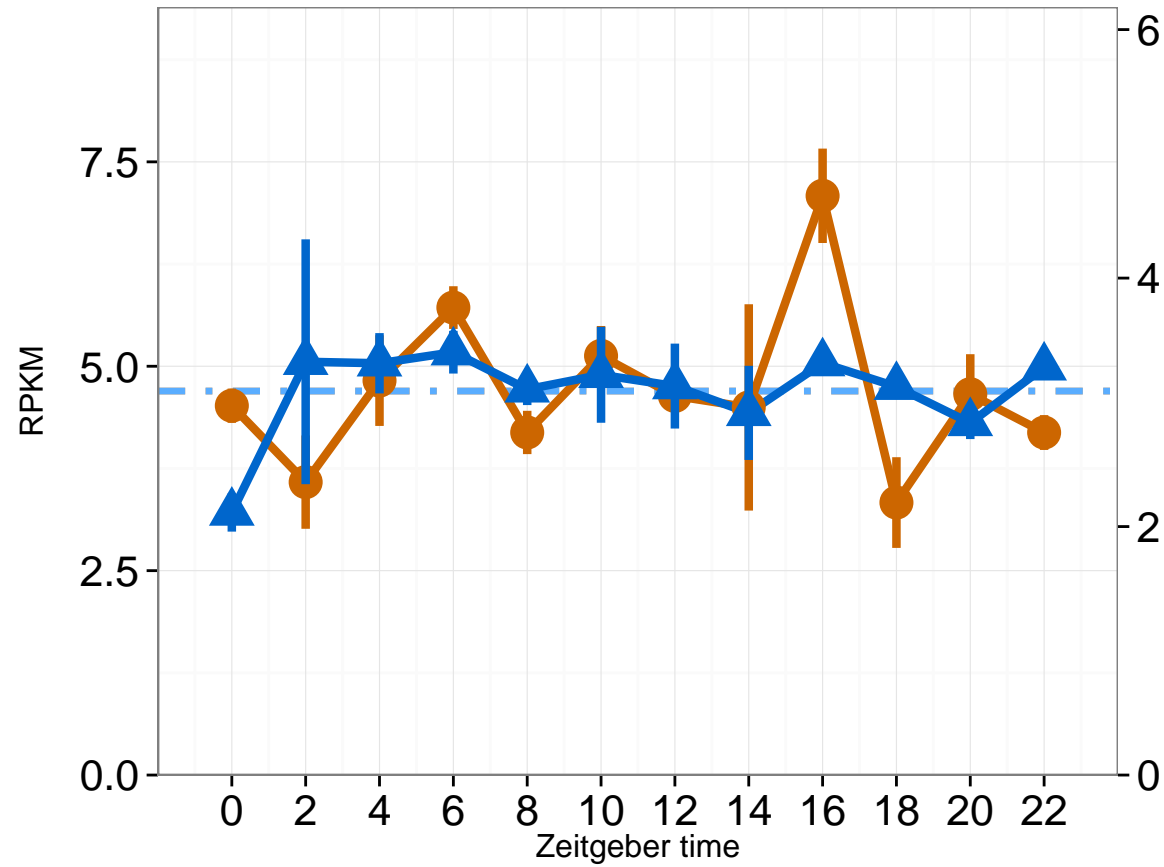

# Stk17b

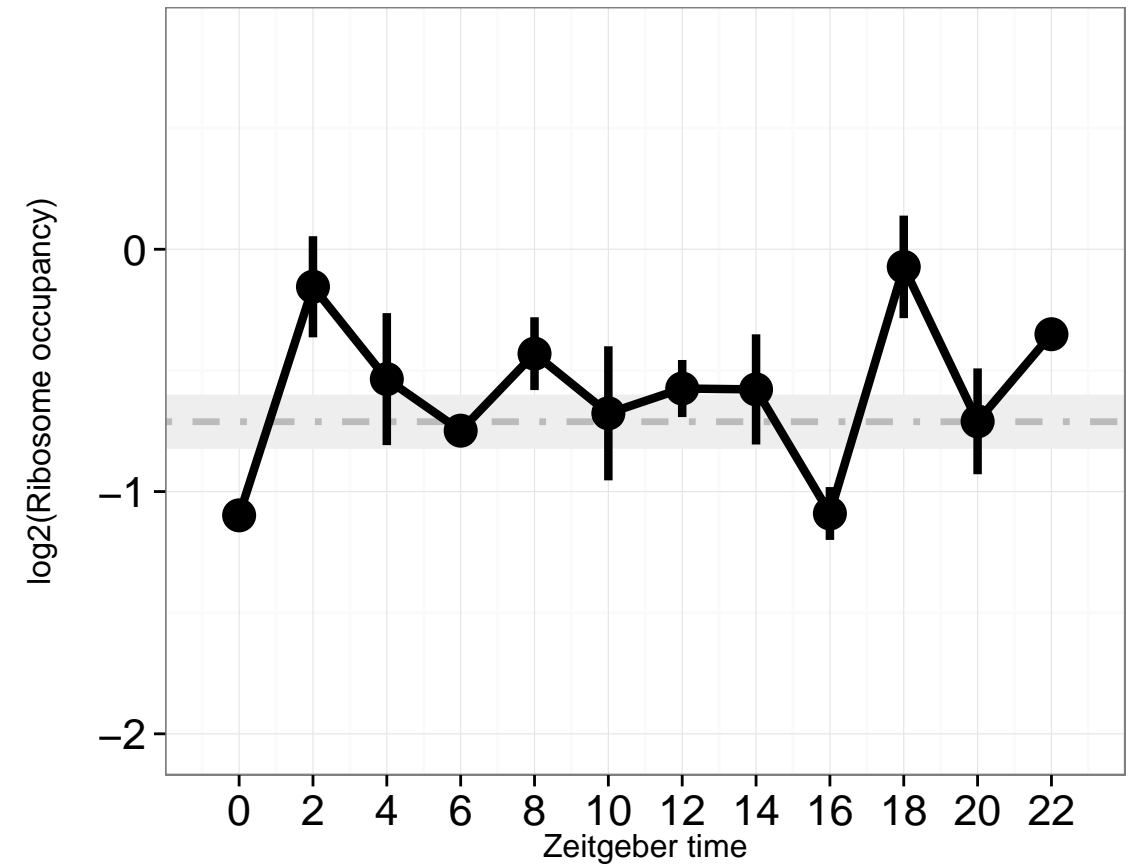

Supplement: SuppDataset_1.zip [file Stk17b_set_A.pdf › Supplemental Dataset 1/A-mRNA_nonrhyth_translation_nonrhyth/Stk17b_set_A.pdf]

# Stk19

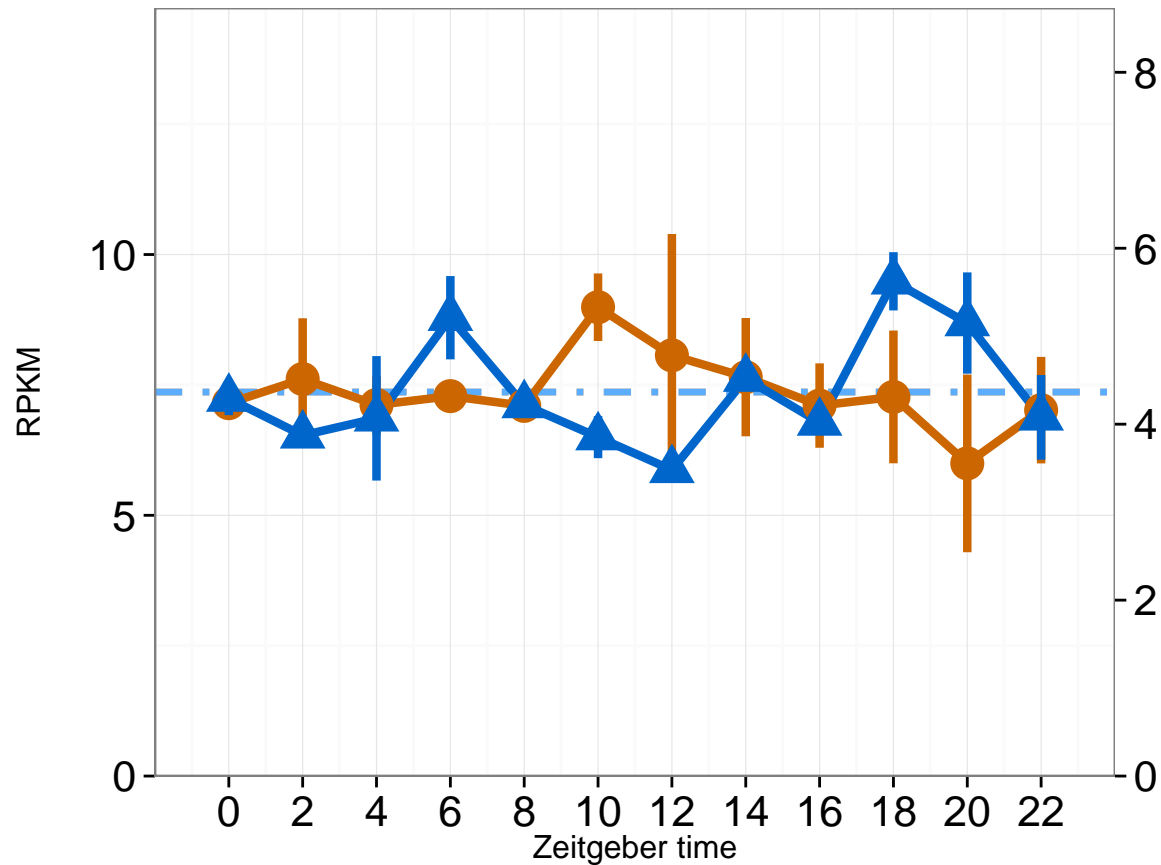

# Stk19

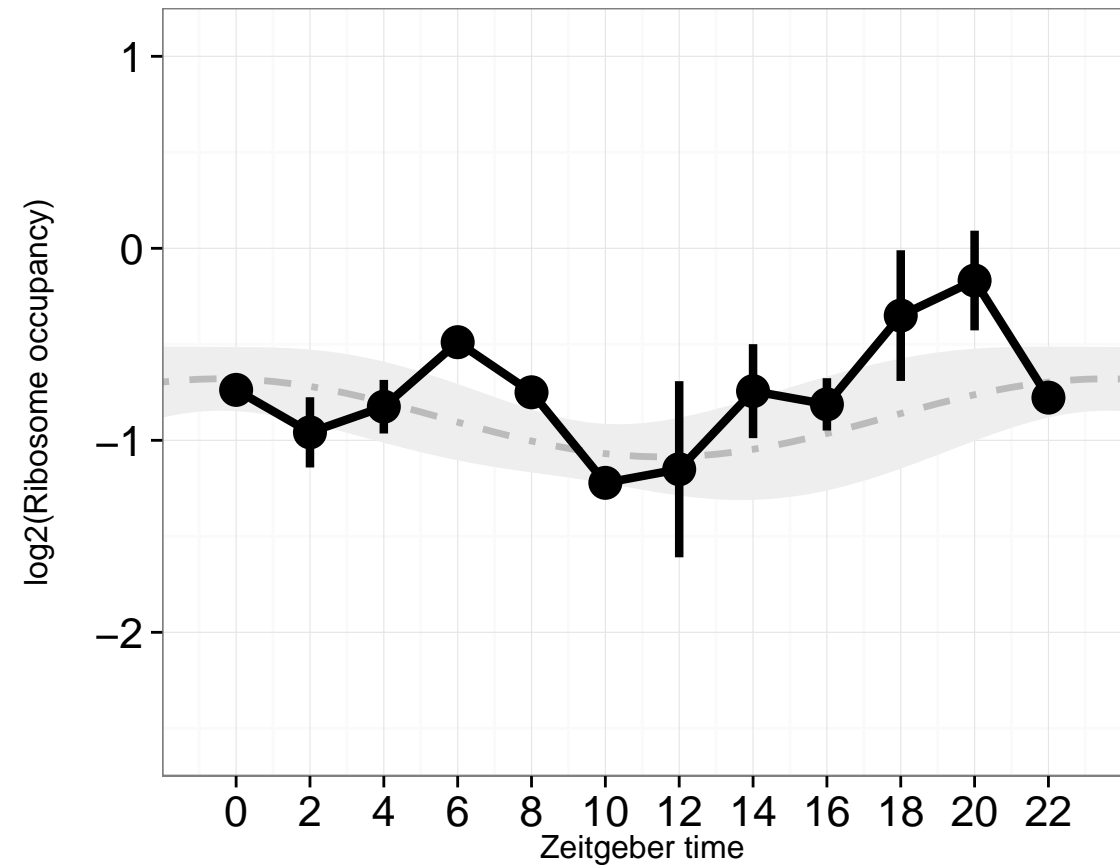

Supplement: SuppDataset_1.zip [file Stk19_set_A.pdf › Supplemental Dataset 1/A-mRNA_nonrhyth_translation_nonrhyth/Stk19_set_A.pdf]

## Stk24

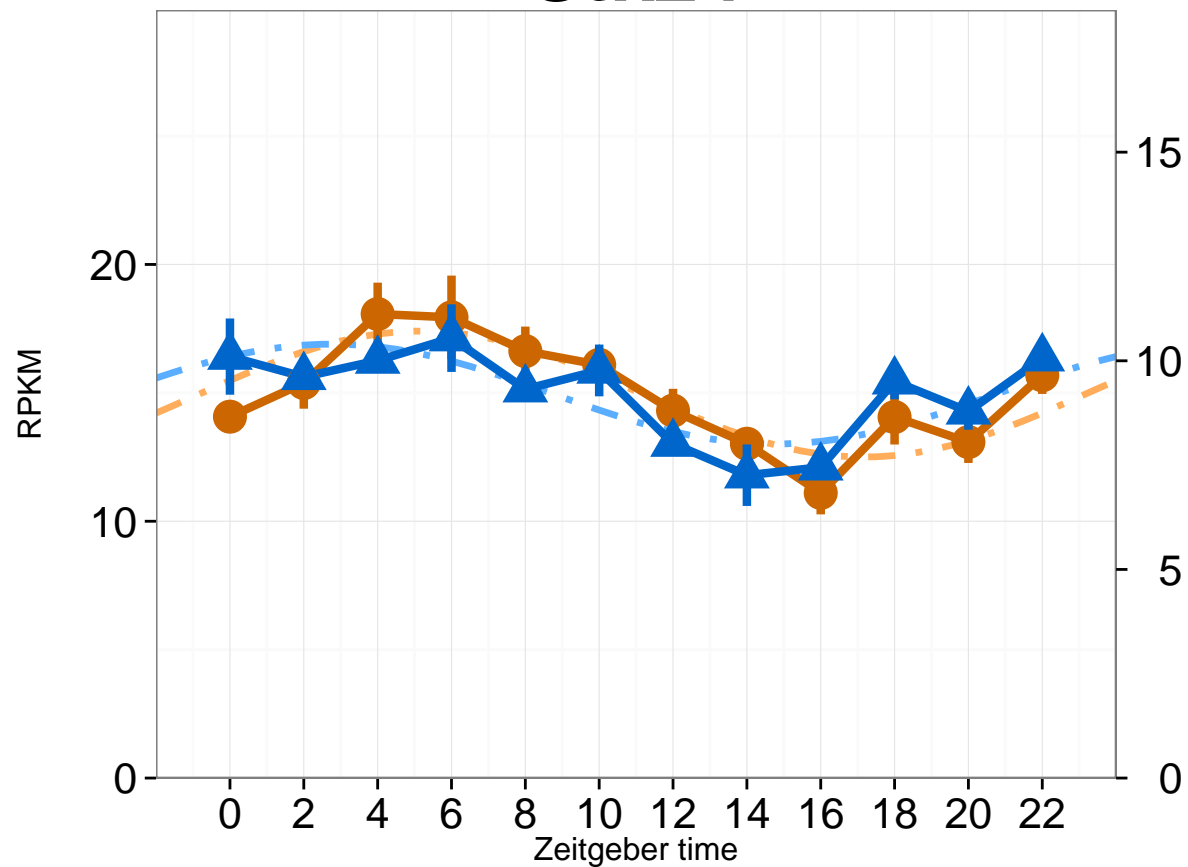

## Stk24

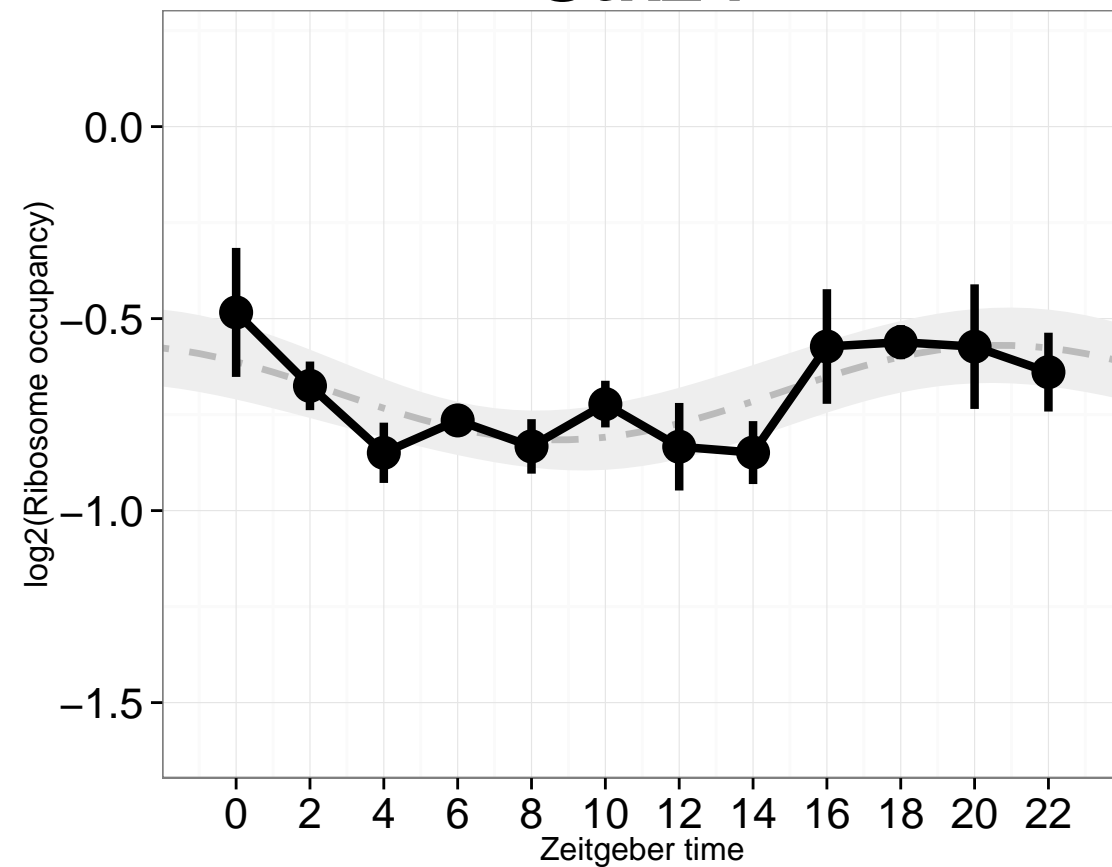

Supplement: SuppDataset_1.zip [file Stk24_set_A.pdf › Supplemental Dataset 1/A-mRNA_nonrhyth_translation_nonrhyth/Stk24_set_A.pdf]

# Stk25

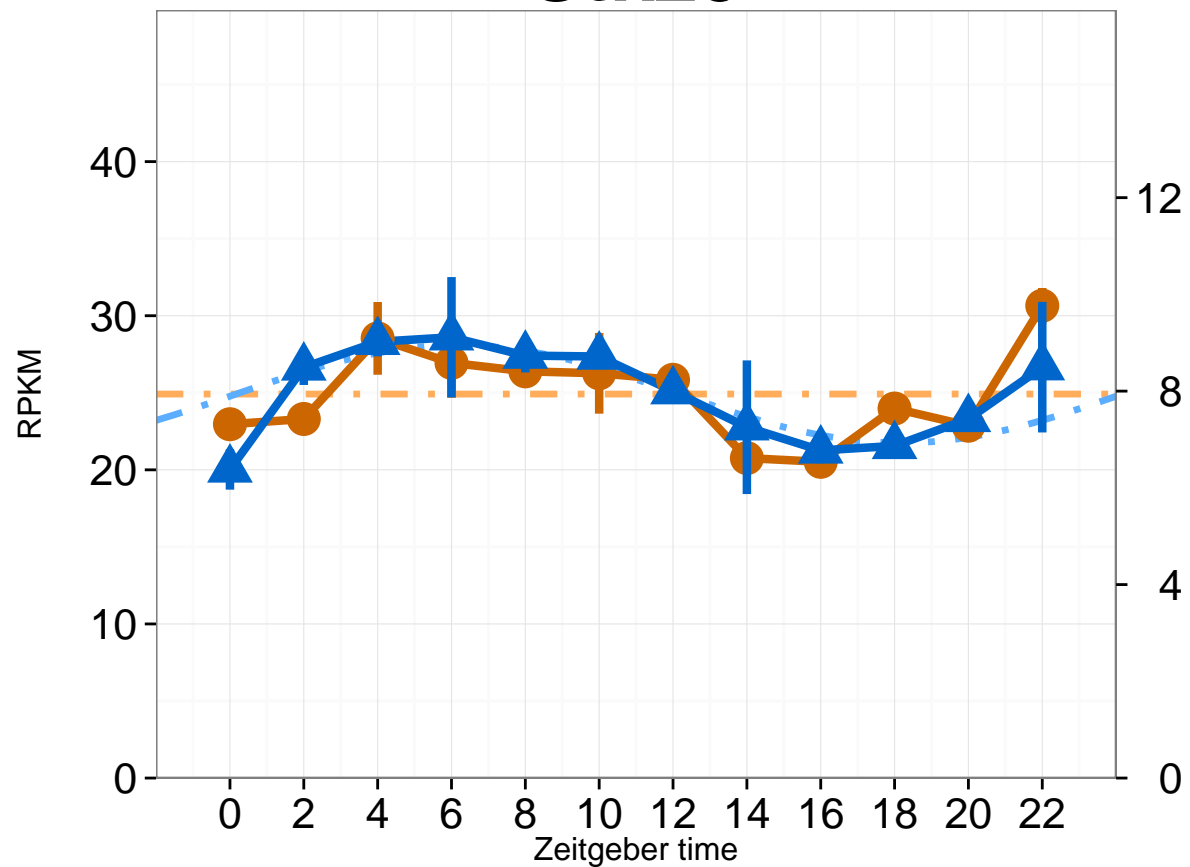

# Stk25

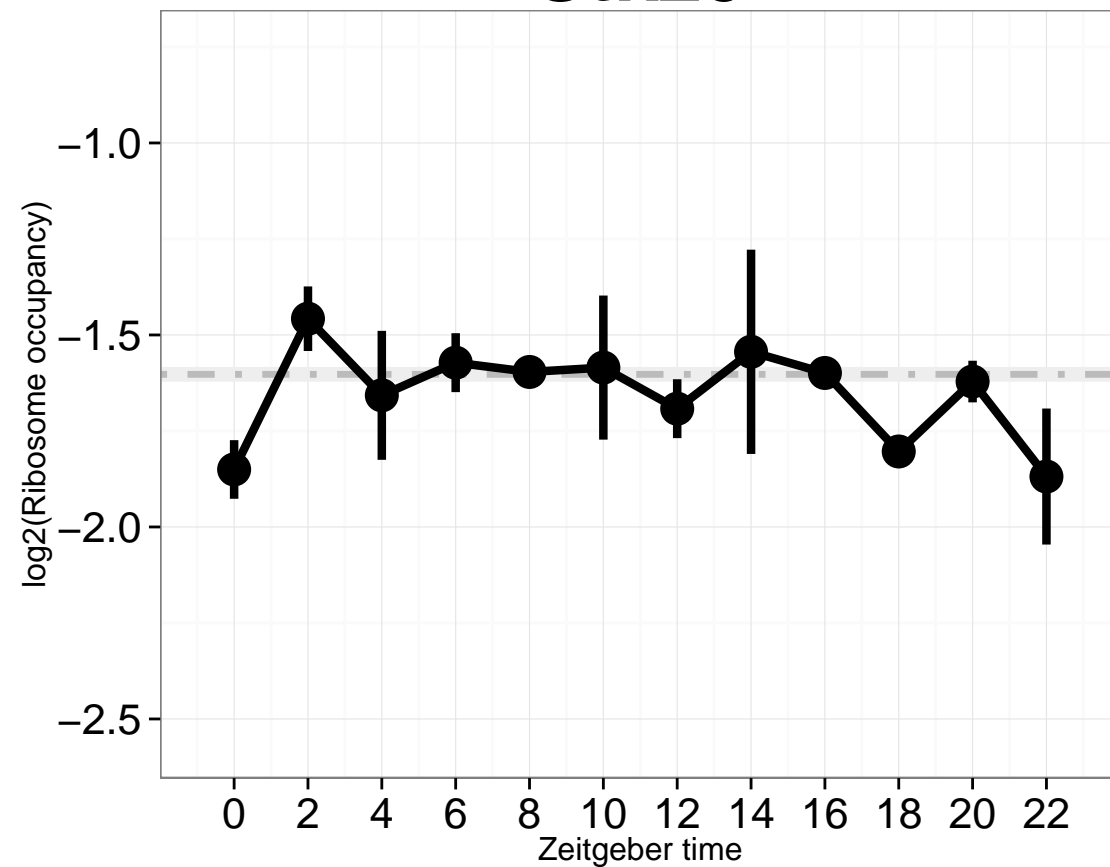

Supplement: SuppDataset_1.zip [file Stk25_set_A.pdf › Supplemental Dataset 1/A-mRNA_nonrhyth_translation_nonrhyth/Stk25_set_A.pdf]

## Stk38

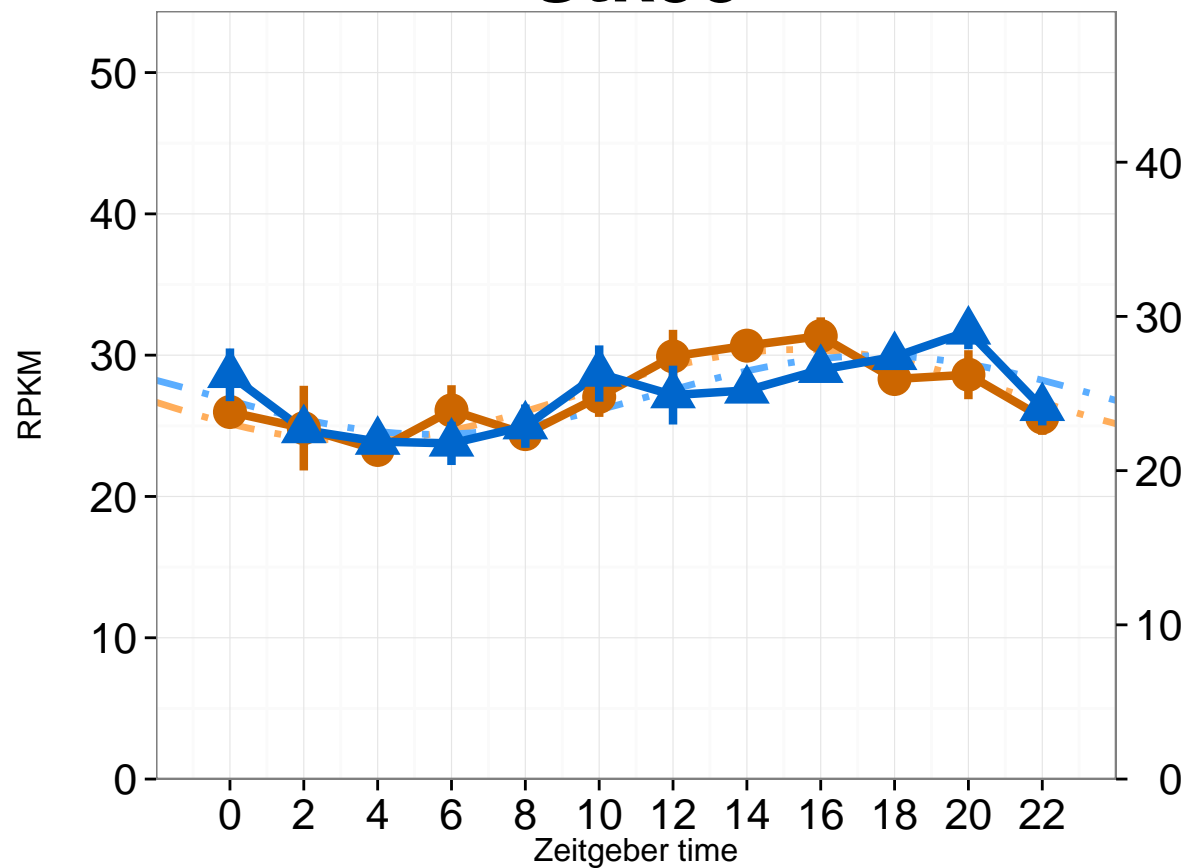

## Stk38

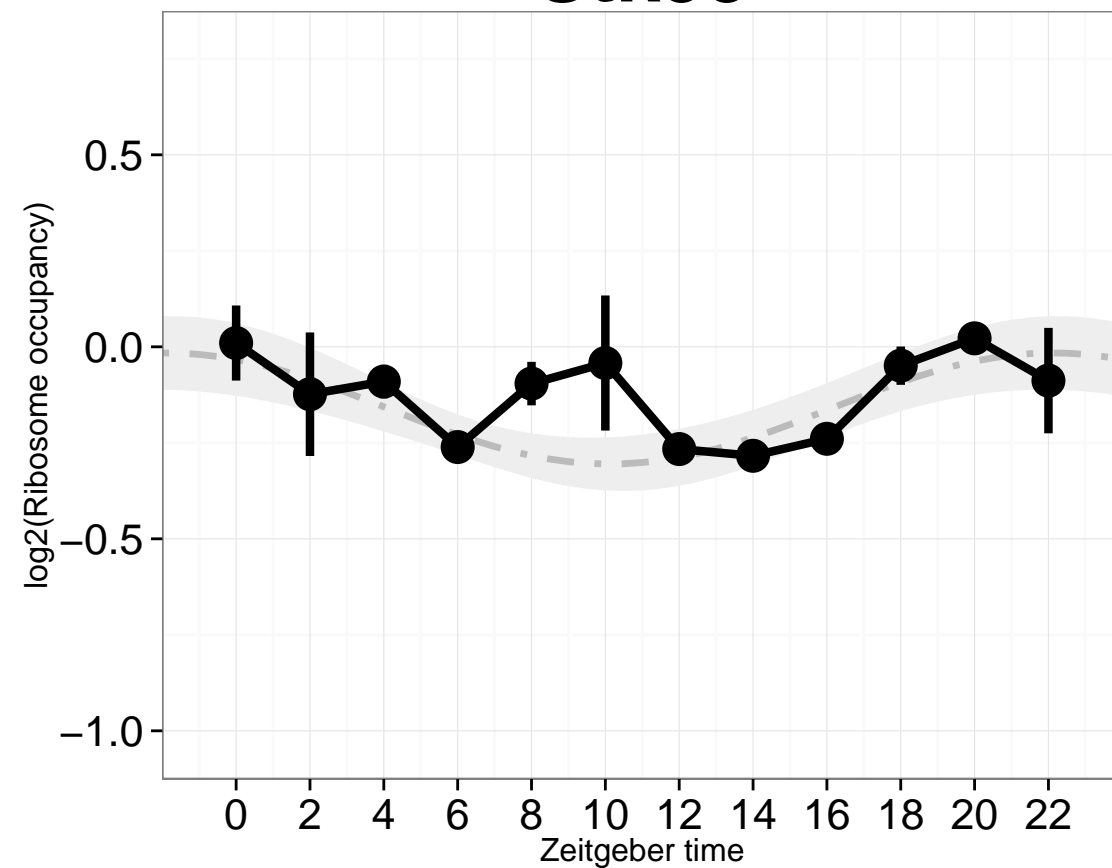

Supplement: SuppDataset_1.zip [file Stk38_set_A.pdf › Supplemental Dataset 1/A-mRNA_nonrhyth_translation_nonrhyth/Stk38_set_A.pdf]

# Stk39

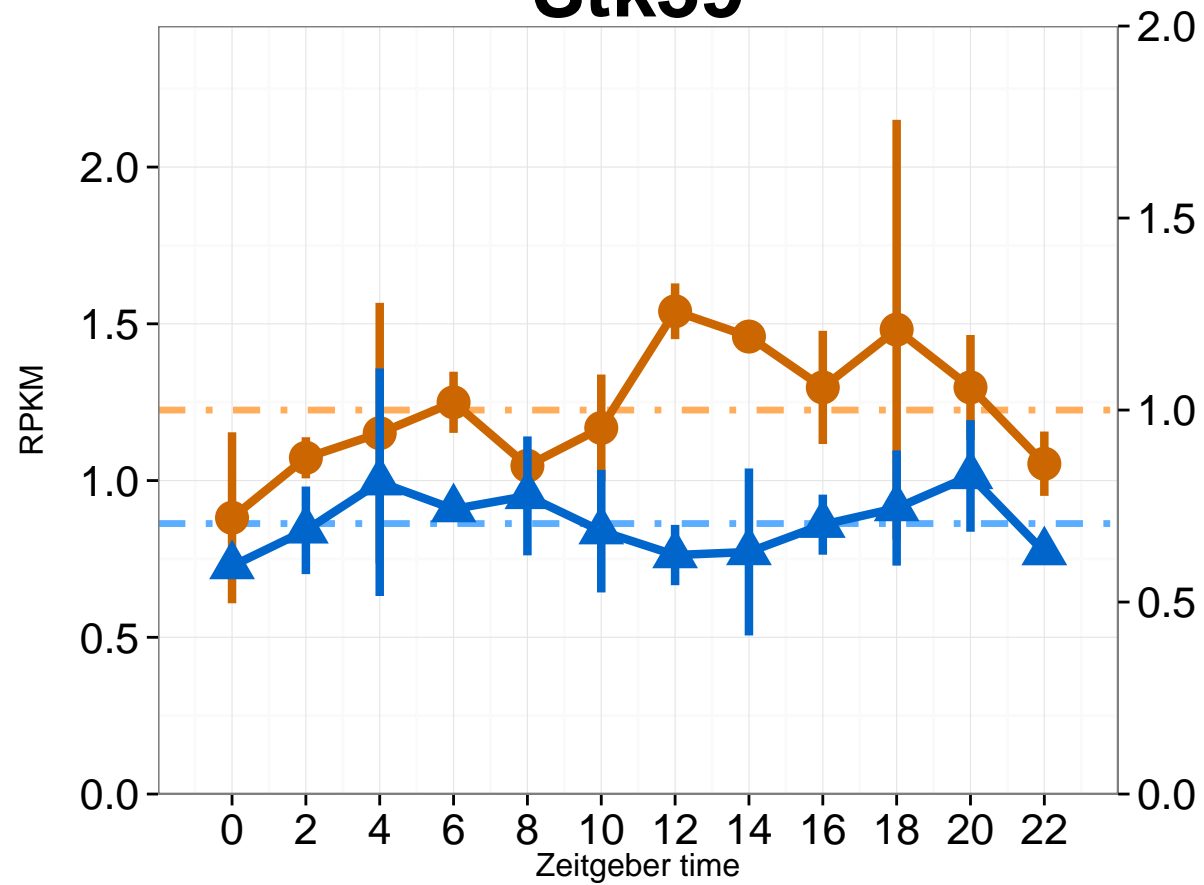

# Stk39

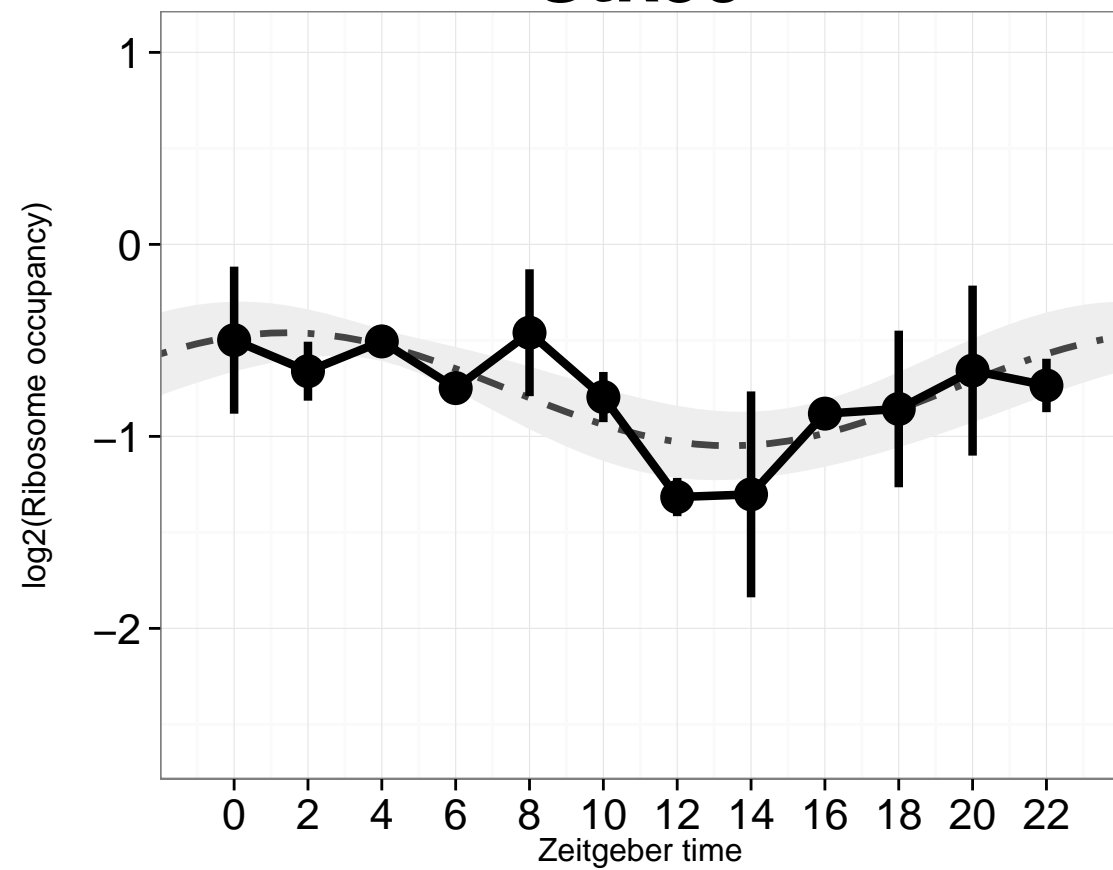

Supplement: SuppDataset_1.zip [file Stk39_set_A.pdf › Supplemental Dataset 1/A-mRNA_nonrhyth_translation_nonrhyth/Stk39_set_A.pdf]

## Stk3

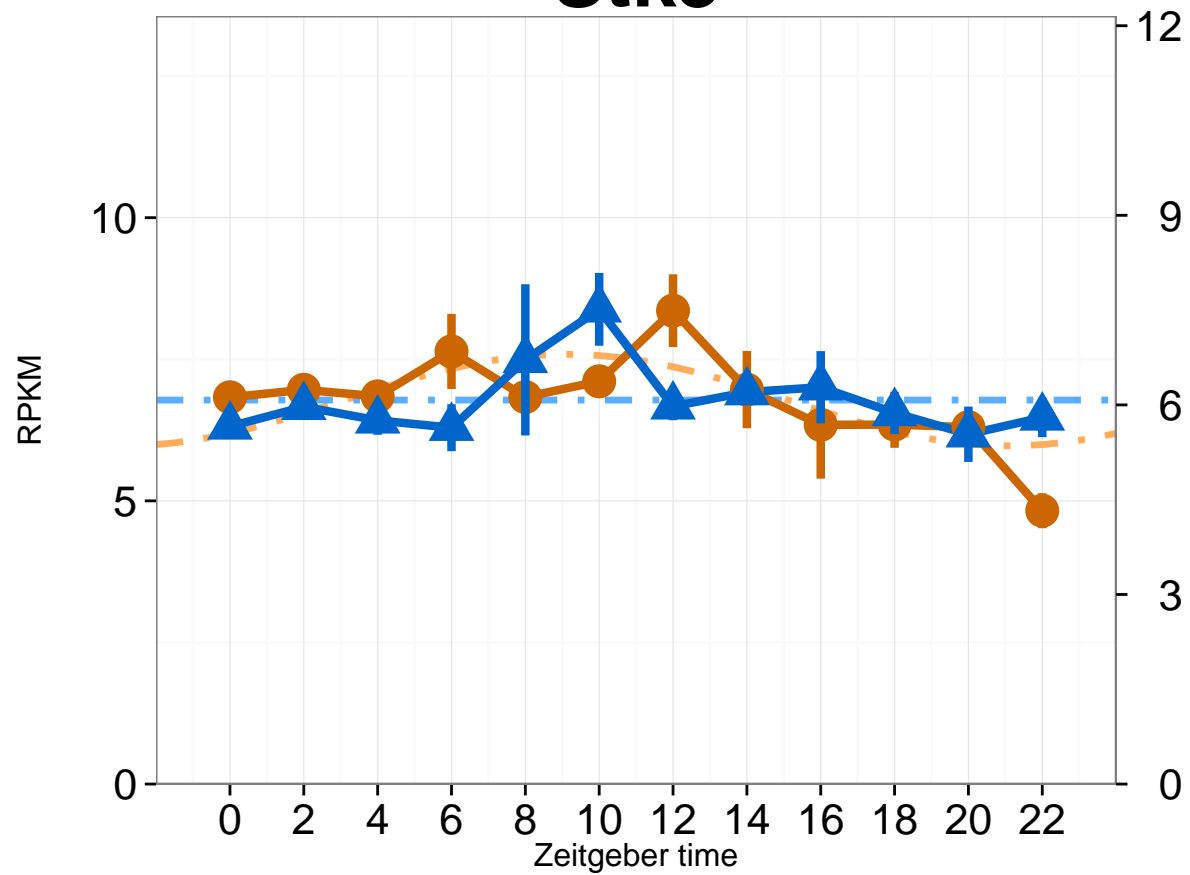

## Stk3

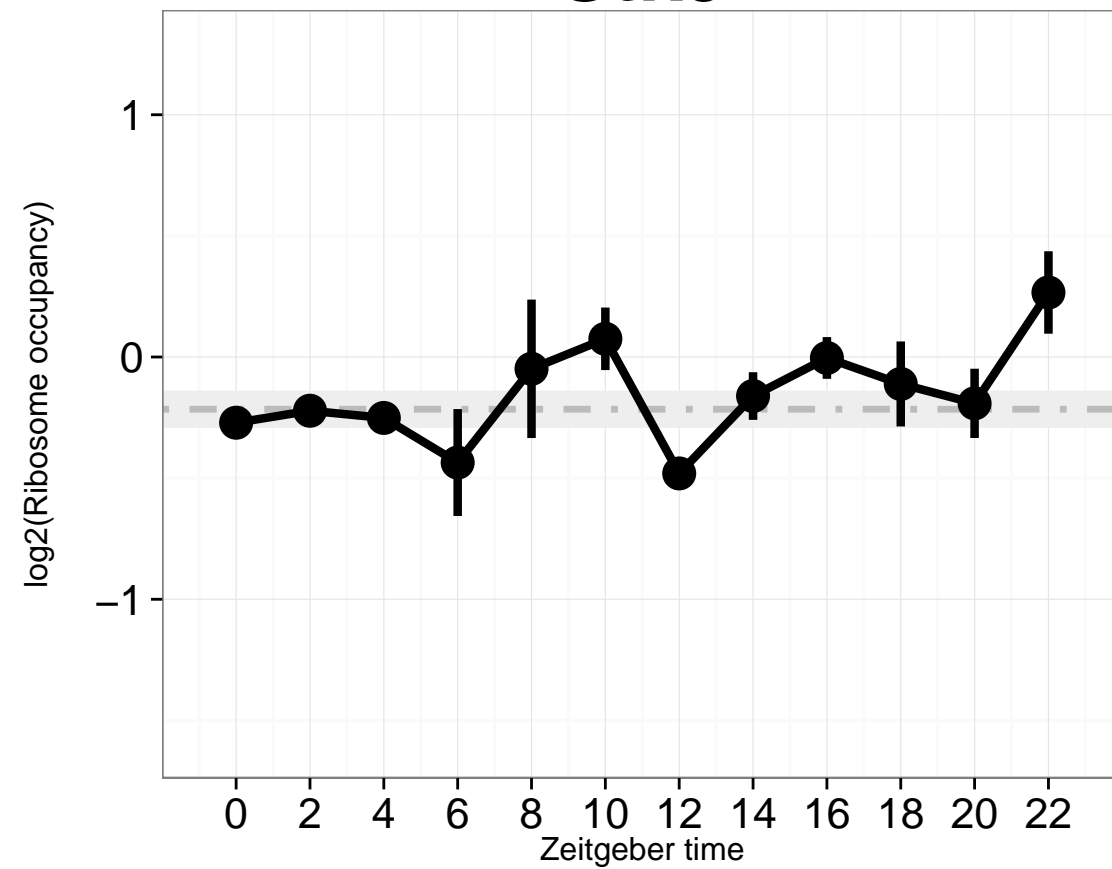

Supplement: SuppDataset_1.zip [file Stk3_set_A.pdf › Supplemental Dataset 1/A-mRNA_nonrhyth_translation_nonrhyth/Stk3_set_A.pdf]

# Stk40

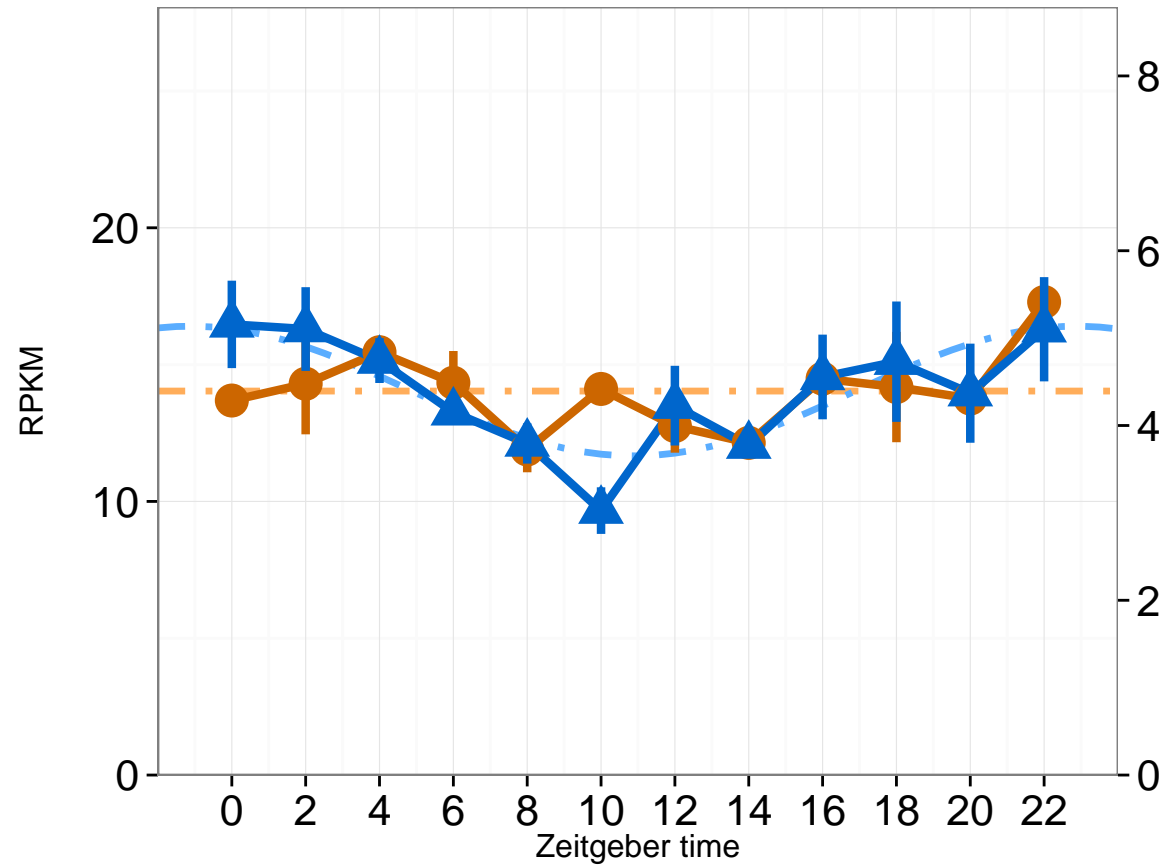

# Stk40

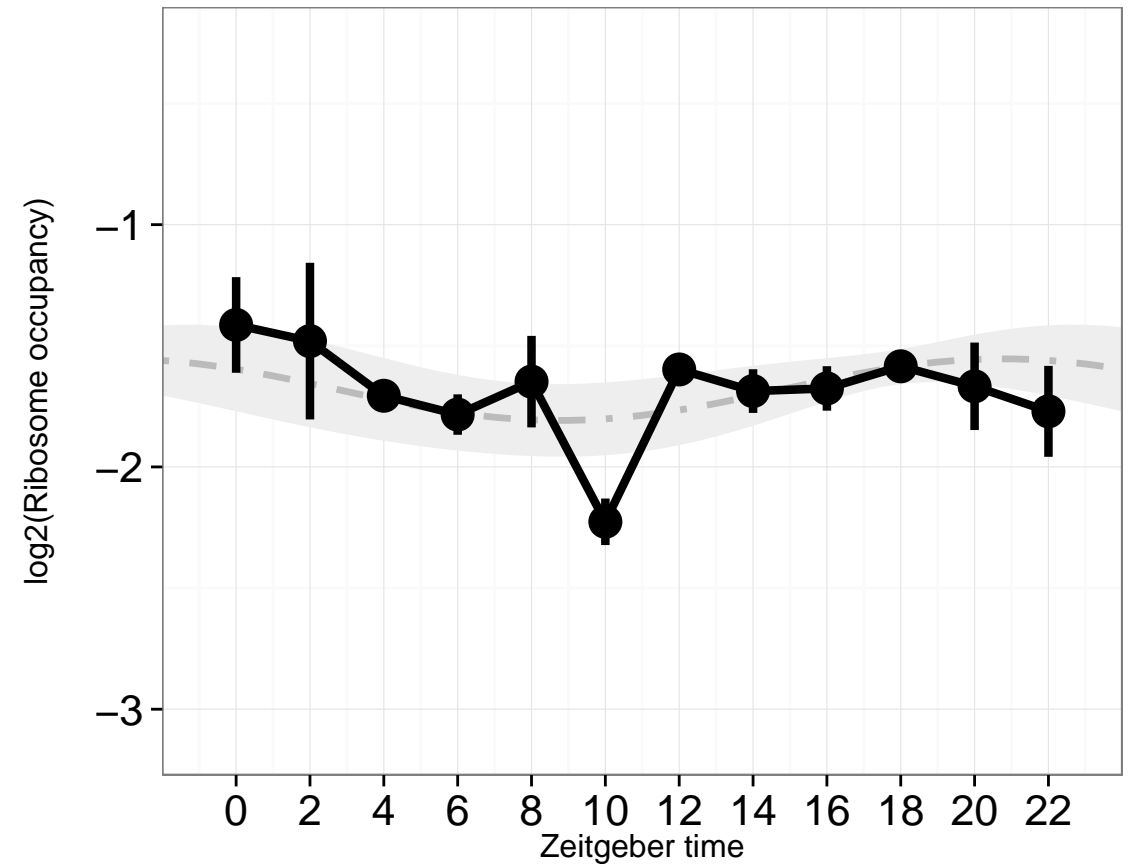

Supplement: SuppDataset_1.zip [file Stk40_set_A.pdf › Supplemental Dataset 1/A-mRNA_nonrhyth_translation_nonrhyth/Stk40_set_A.pdf]

## Stk4

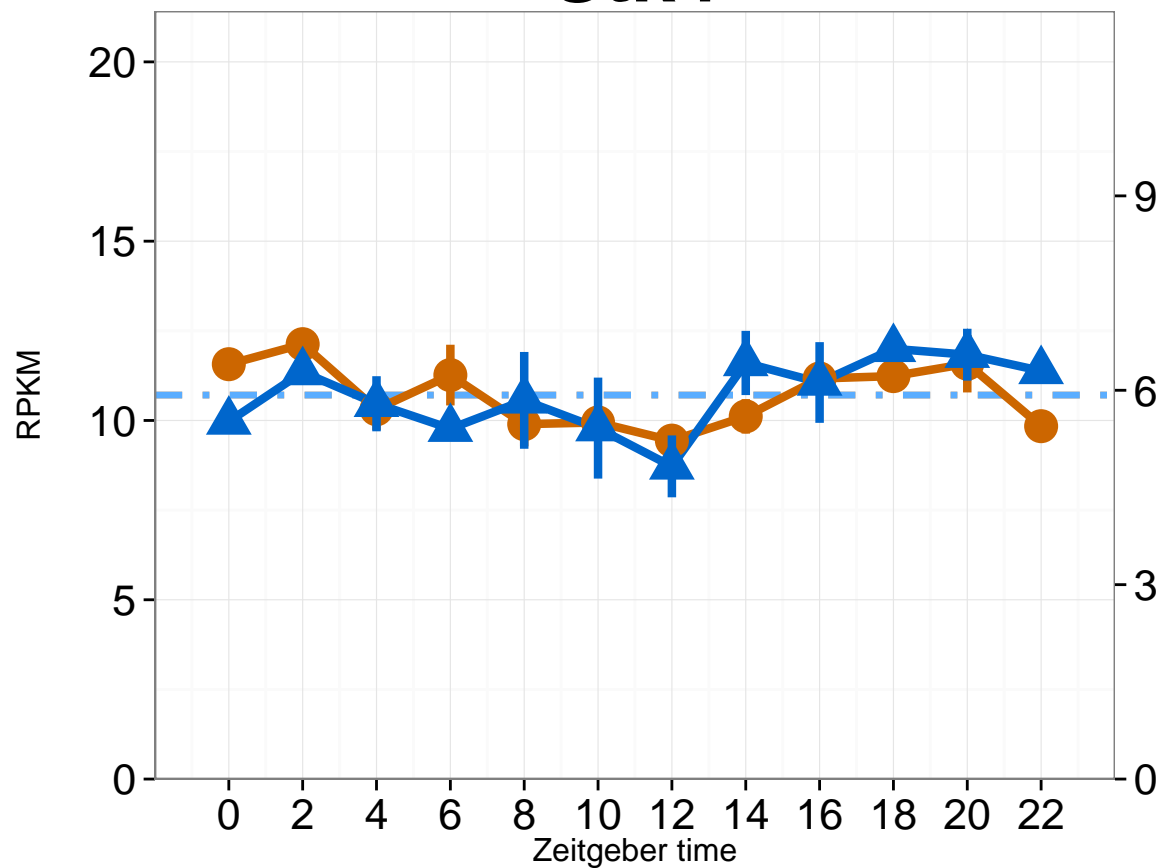

## Stk4

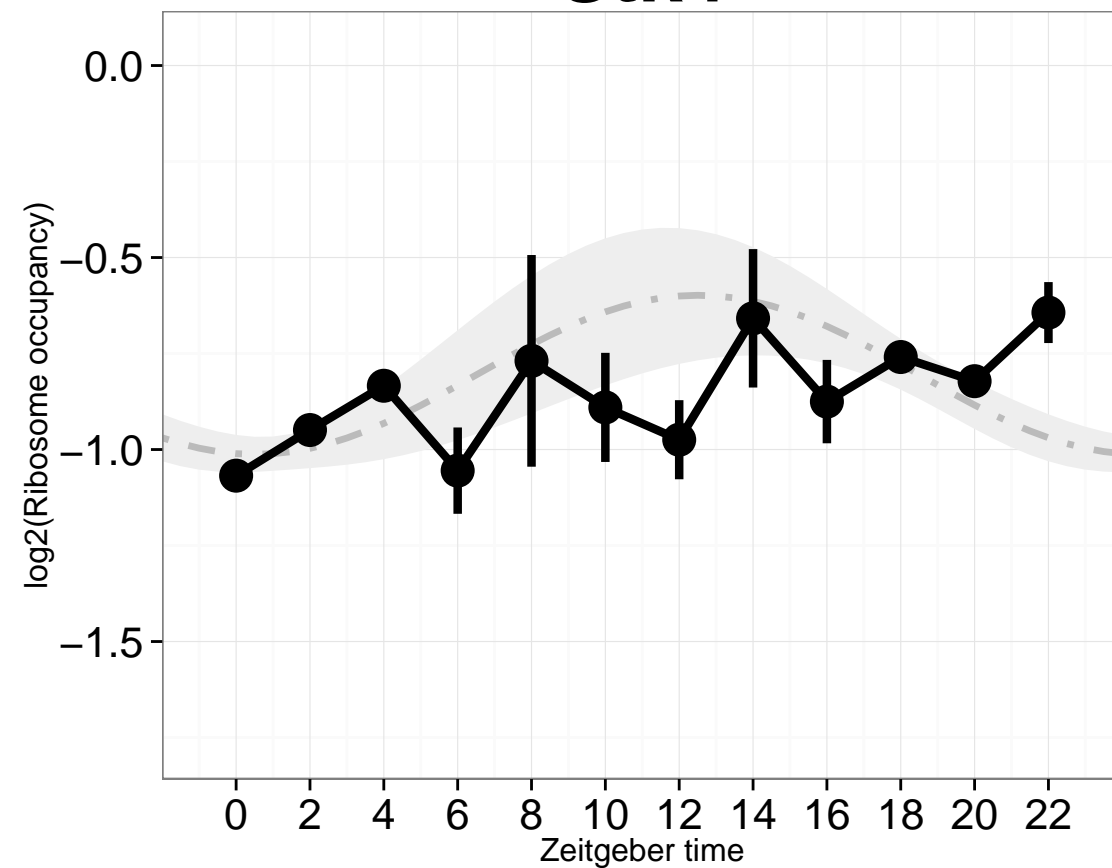

Supplement: SuppDataset_1.zip [file Stk4_set_A.pdf › Supplemental Dataset 1/A-mRNA_nonrhyth_translation_nonrhyth/Stk4_set_A.pdf]

## Stoml2

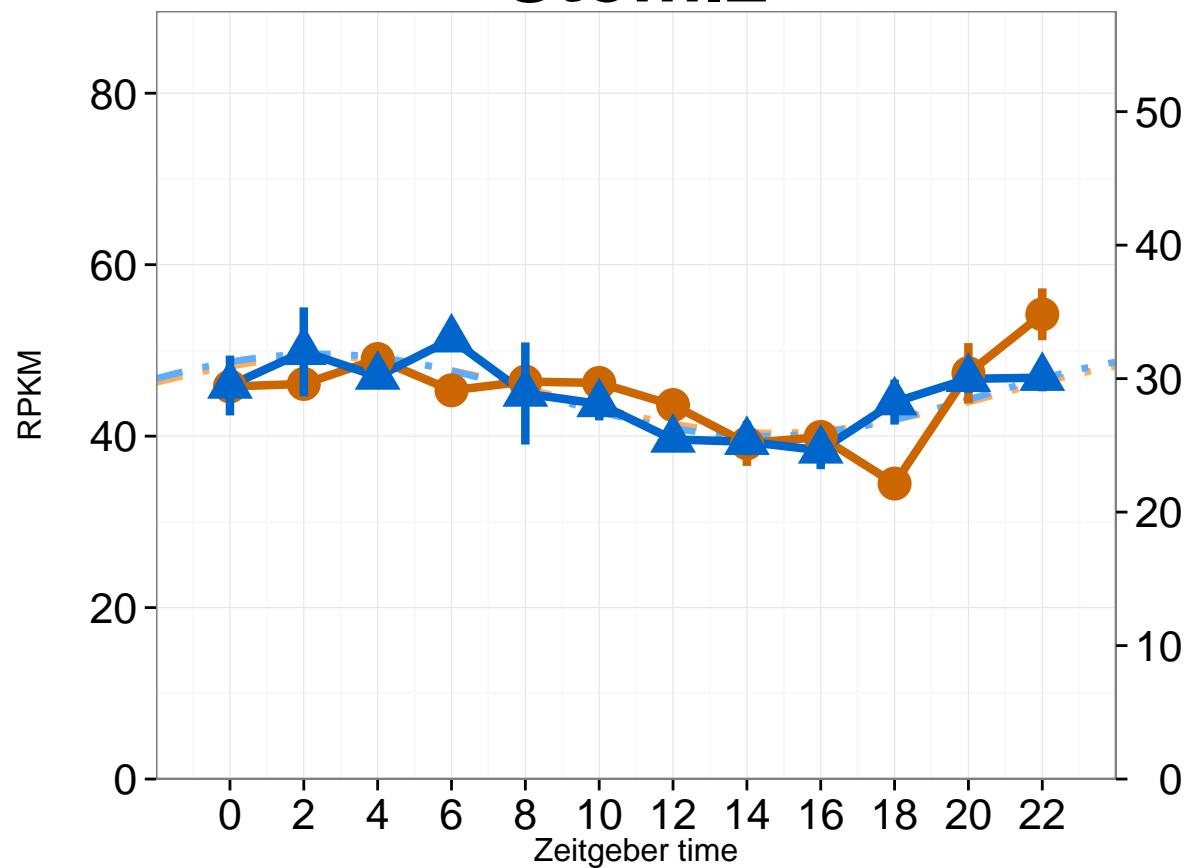

## Stoml2

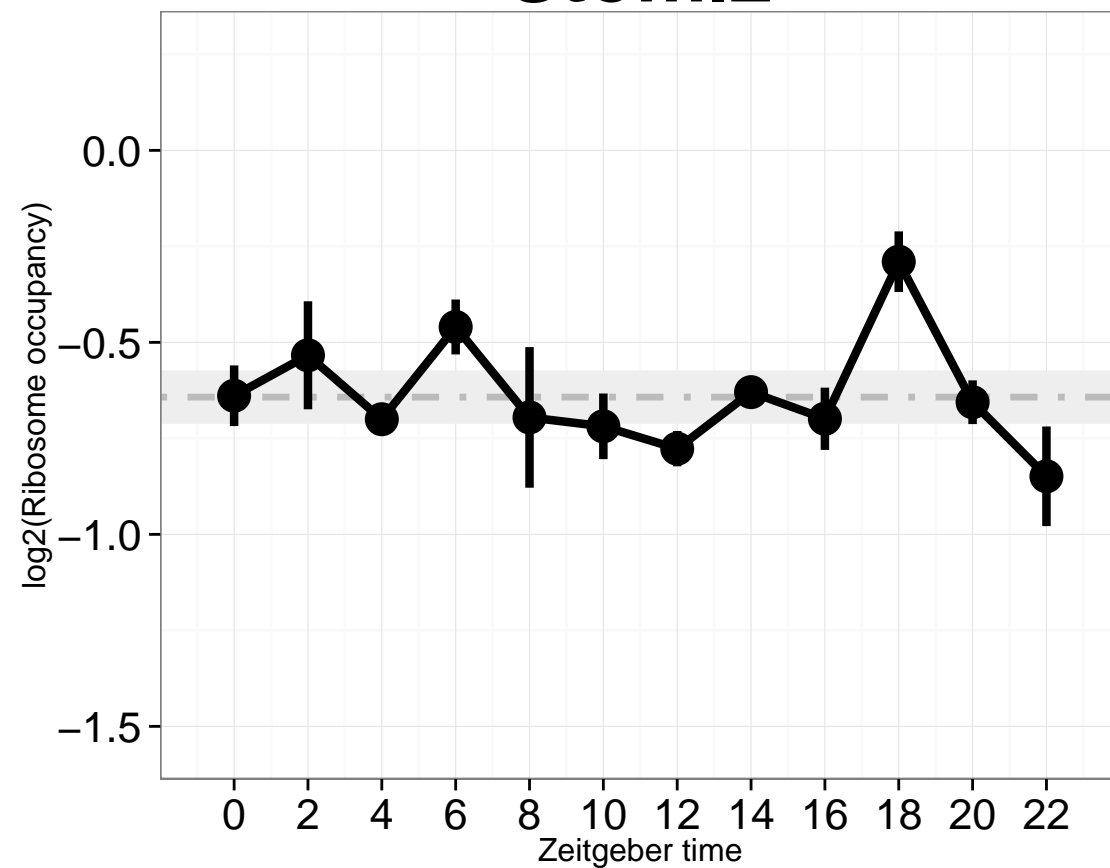

Supplement: SuppDataset_1.zip [file Stoml2_set_A.pdf › Supplemental Dataset 1/A-mRNA_nonrhyth_translation_nonrhyth/Stoml2_set_A.pdf]

# Ston1

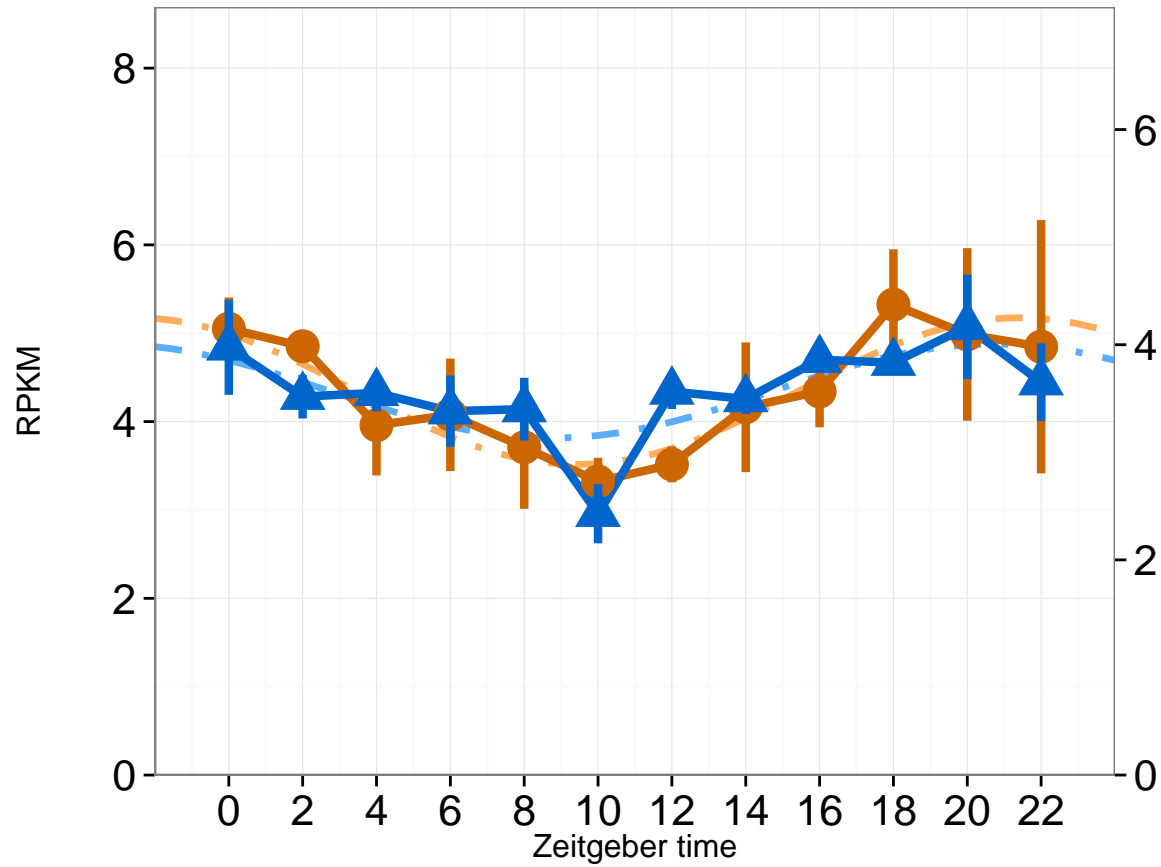

# Ston1

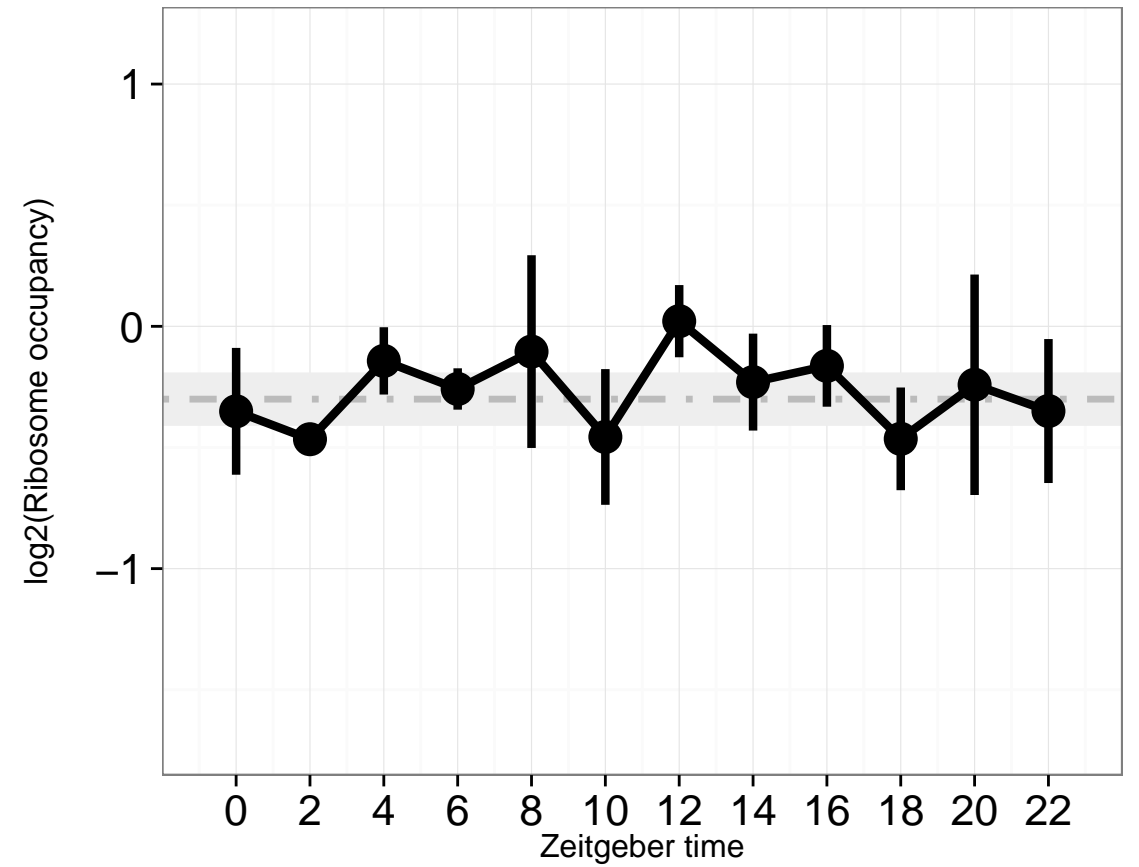

Supplement: SuppDataset_1.zip [file Ston1_set_A.pdf › Supplemental Dataset 1/A-mRNA_nonrhyth_translation_nonrhyth/Ston1_set_A.pdf]

## Stox2

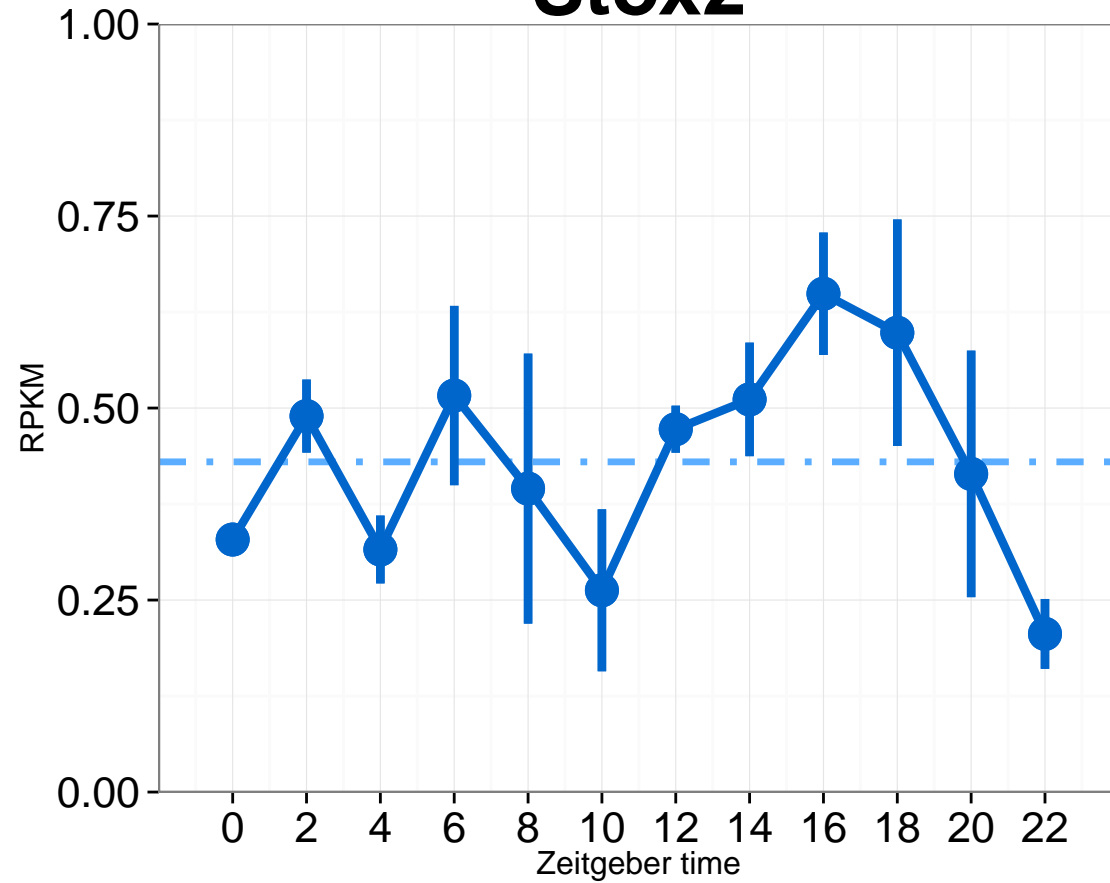

## Stox2 log2(Ribosome occupancy)

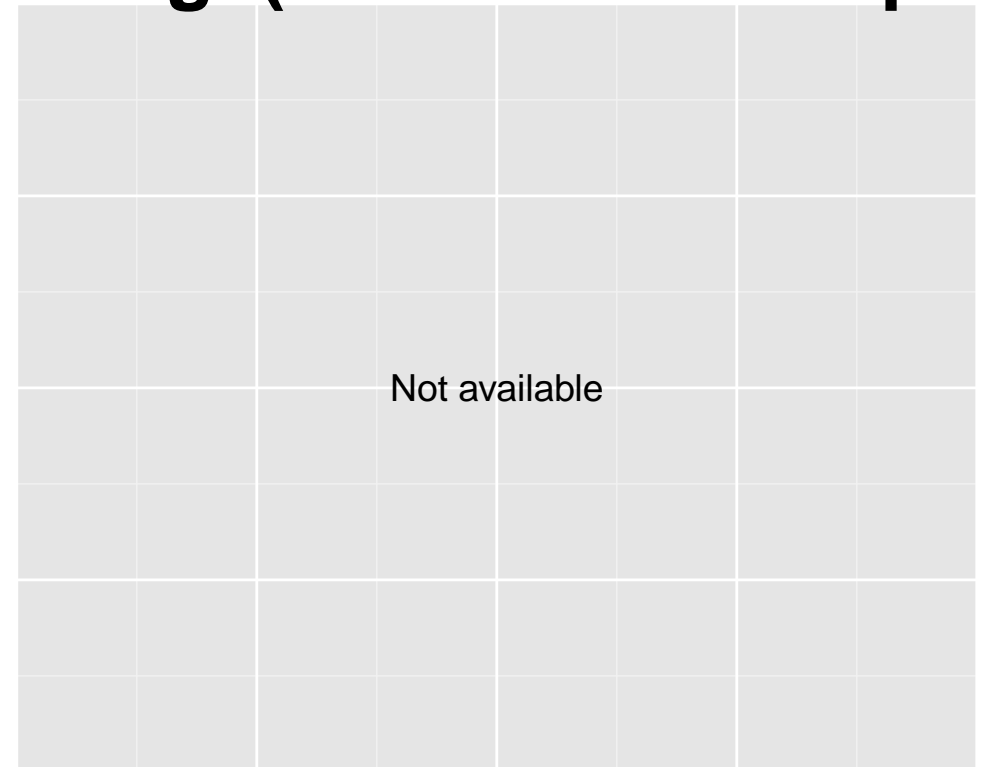

Supplement: SuppDataset_1.zip [file Stox2_set_A.pdf › Supplemental Dataset 1/A-mRNA_nonrhyth_translation_nonrhyth/Stox2_set_A.pdf]

## Strada

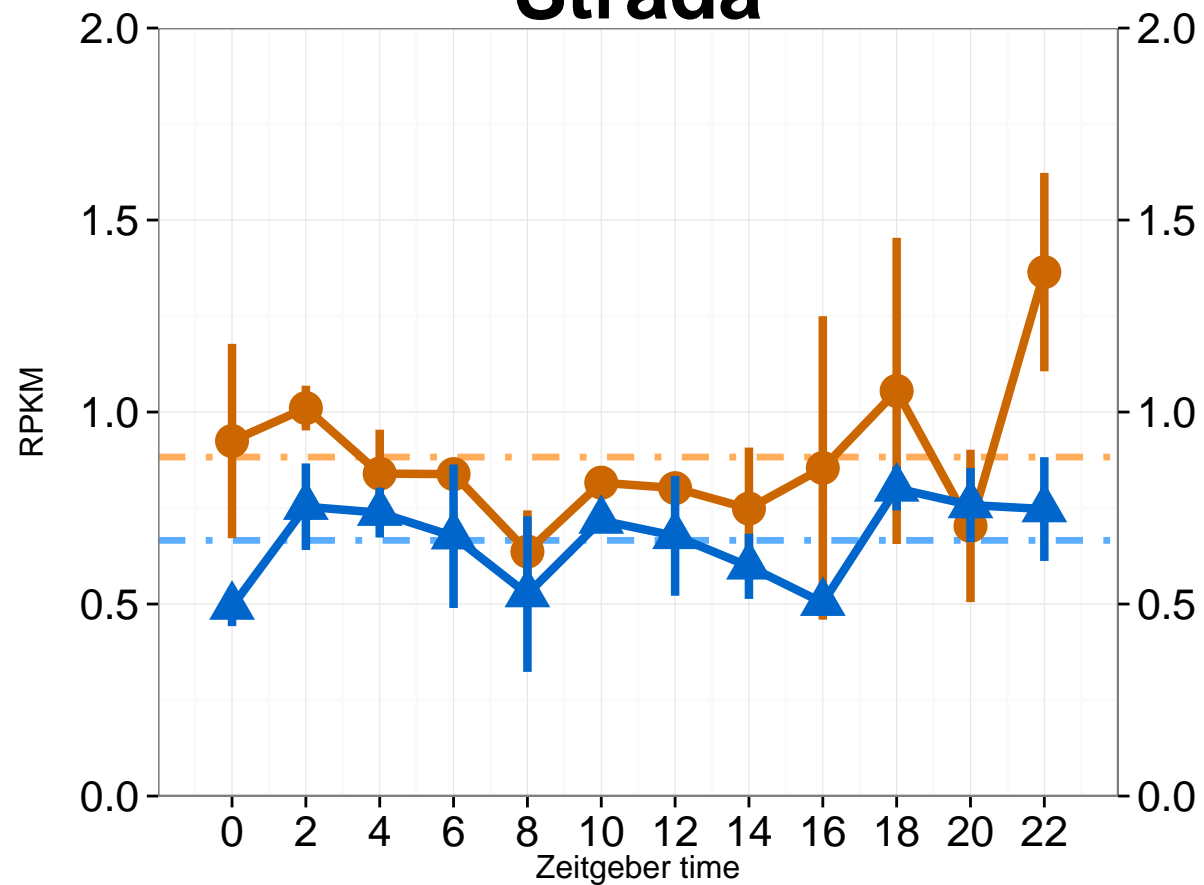

## Strada

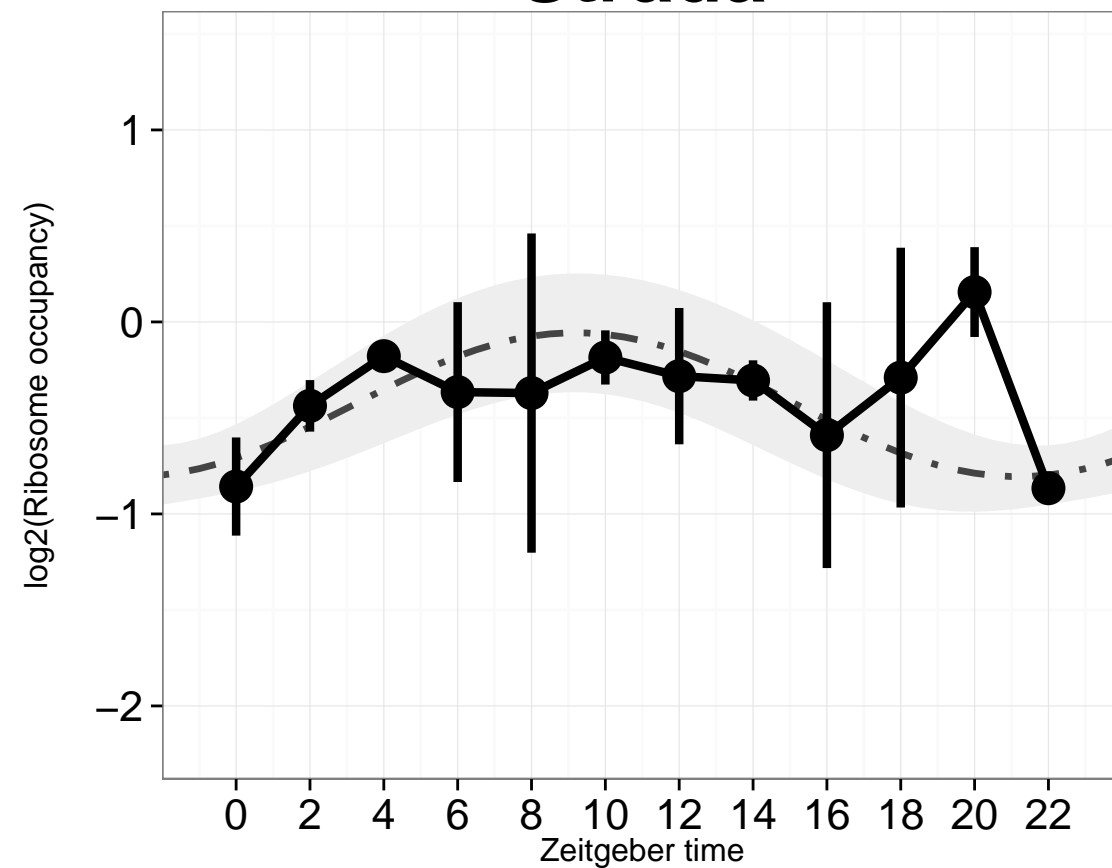

Supplement: SuppDataset_1.zip [file Strada_set_A.pdf › Supplemental Dataset 1/A-mRNA_nonrhyth_translation_nonrhyth/Strada_set_A.pdf]

## Stradb

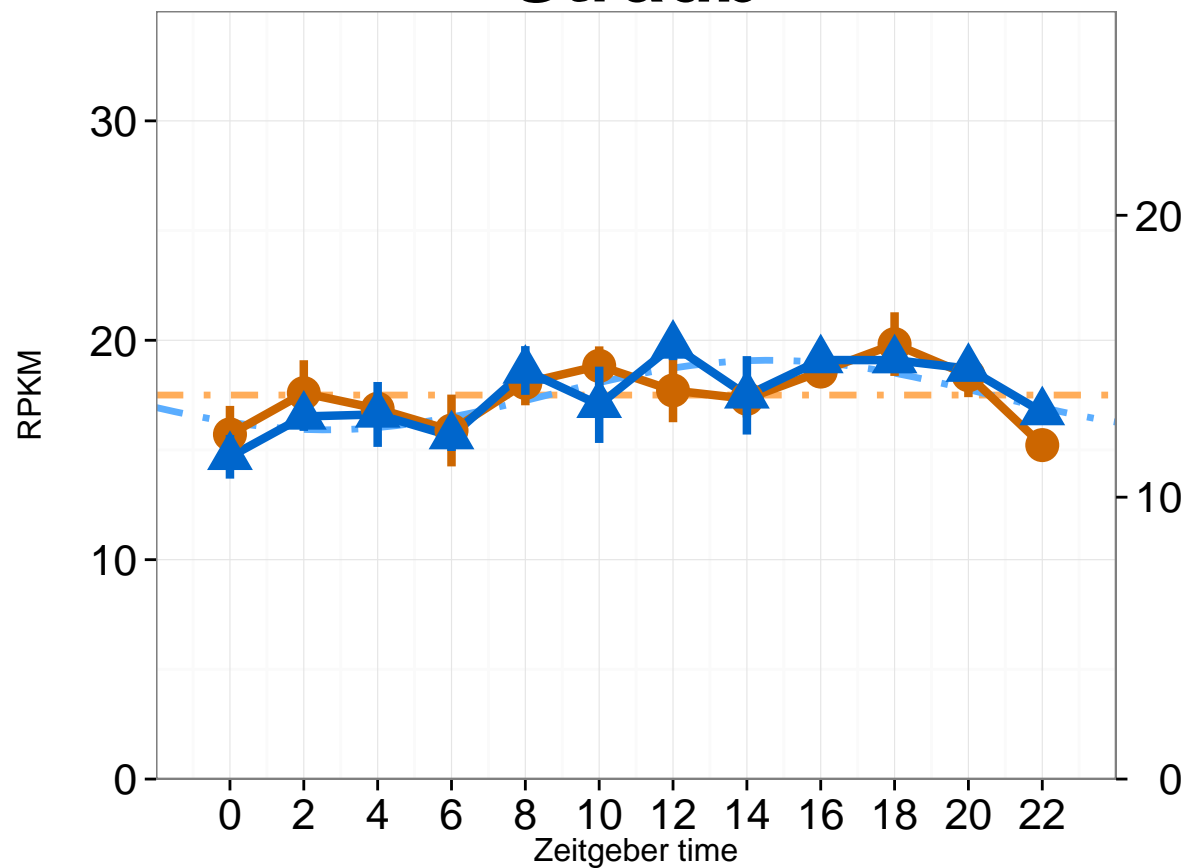

## Stradb

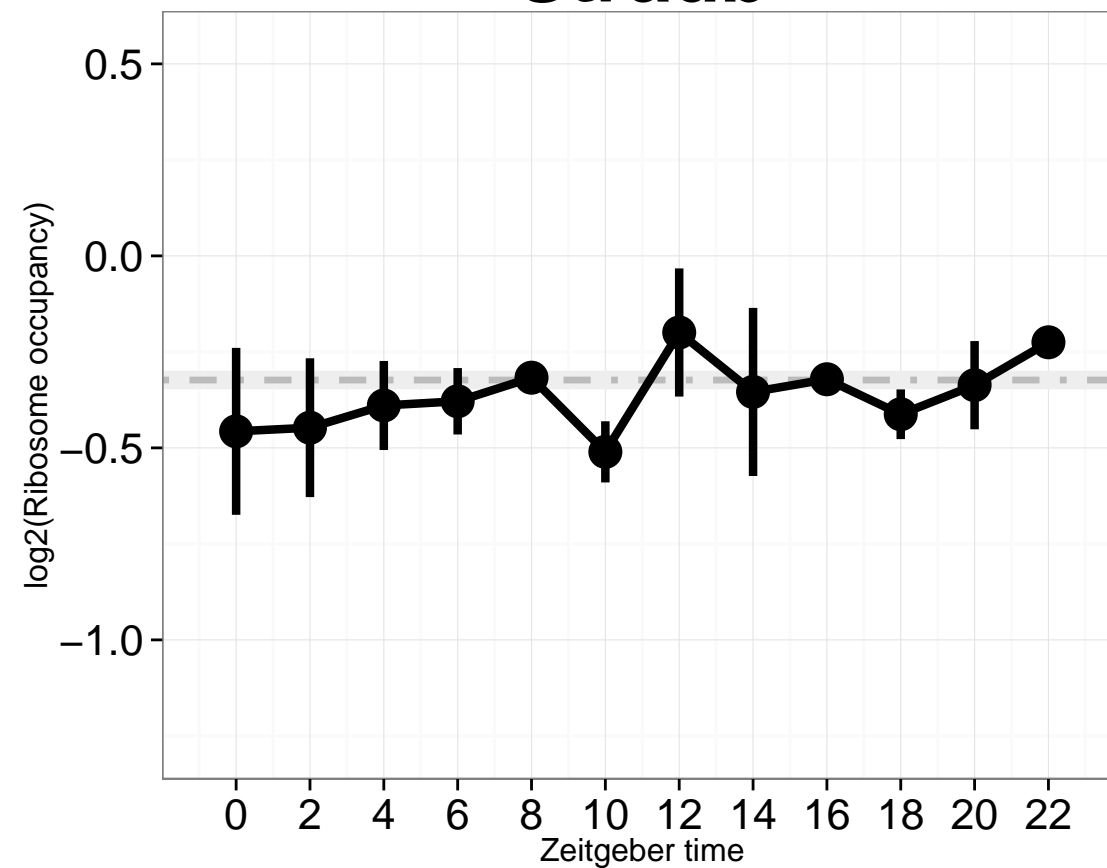

Supplement: SuppDataset_1.zip [file Stradb_set_A.pdf › Supplemental Dataset 1/A-mRNA_nonrhyth_translation_nonrhyth/Stradb_set_A.pdf]

## Strap

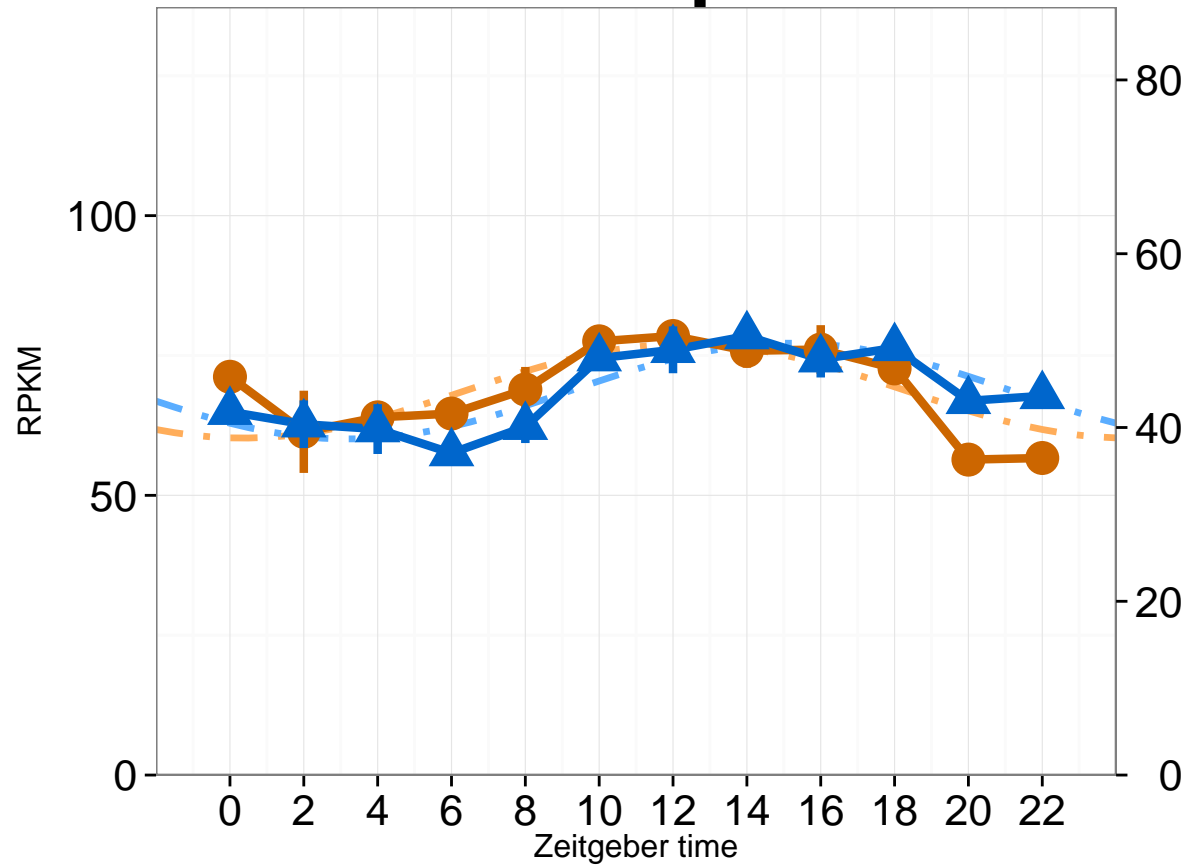

## Strap

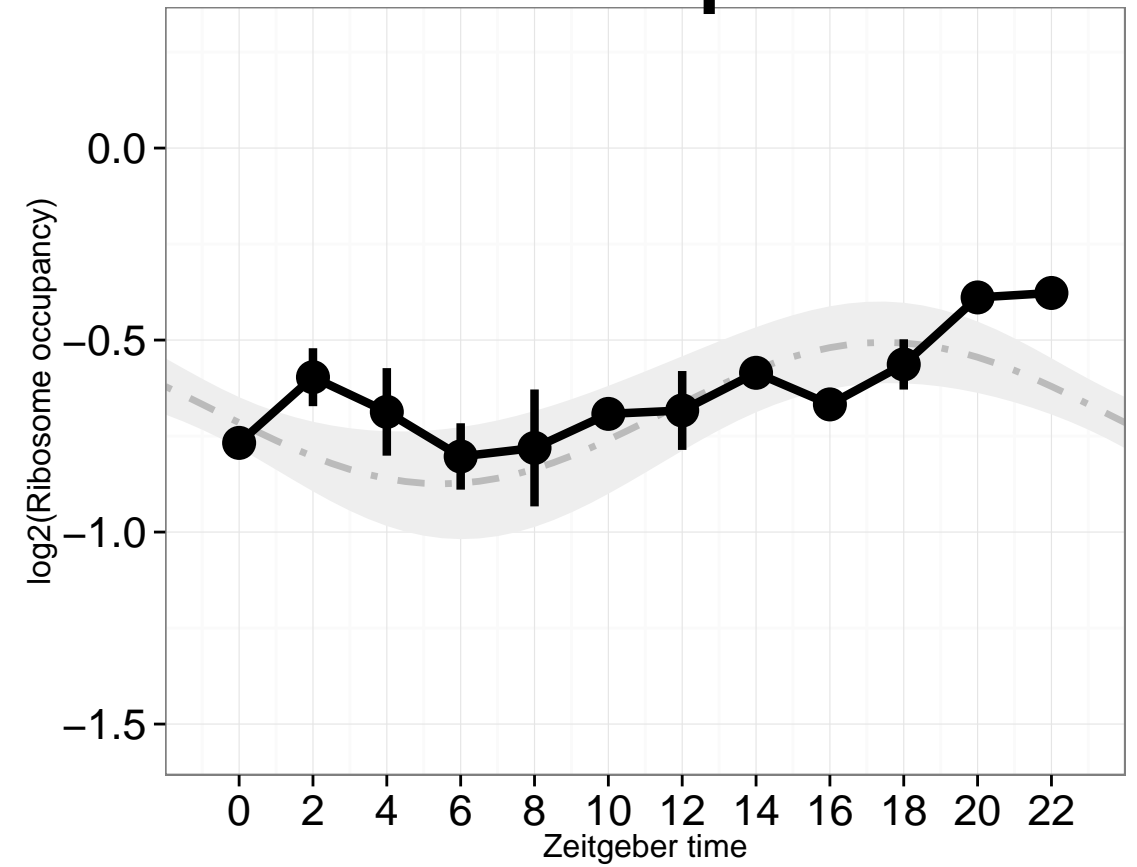

Supplement: SuppDataset_1.zip [file Strap_set_A.pdf › Supplemental Dataset 1/A-mRNA_nonrhyth_translation_nonrhyth/Strap_set_A.pdf]

## Strbp

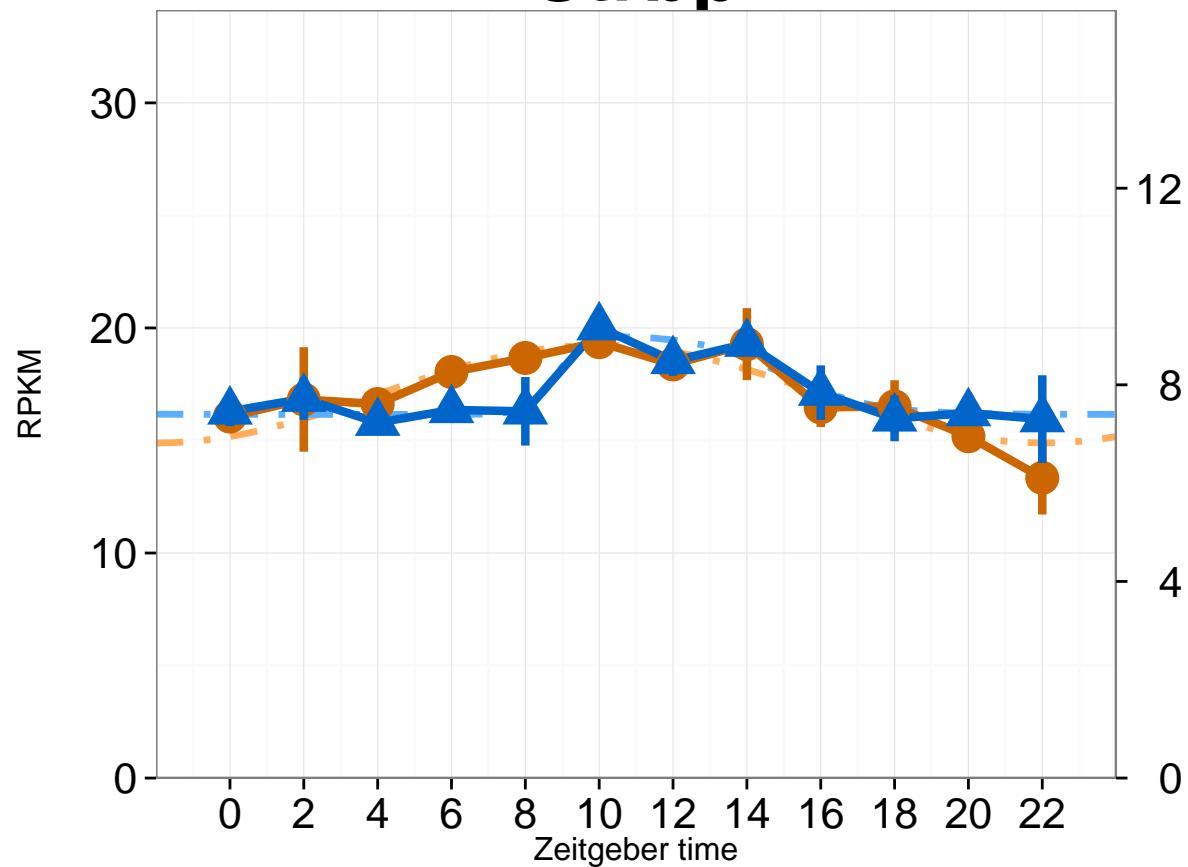

## Strbp

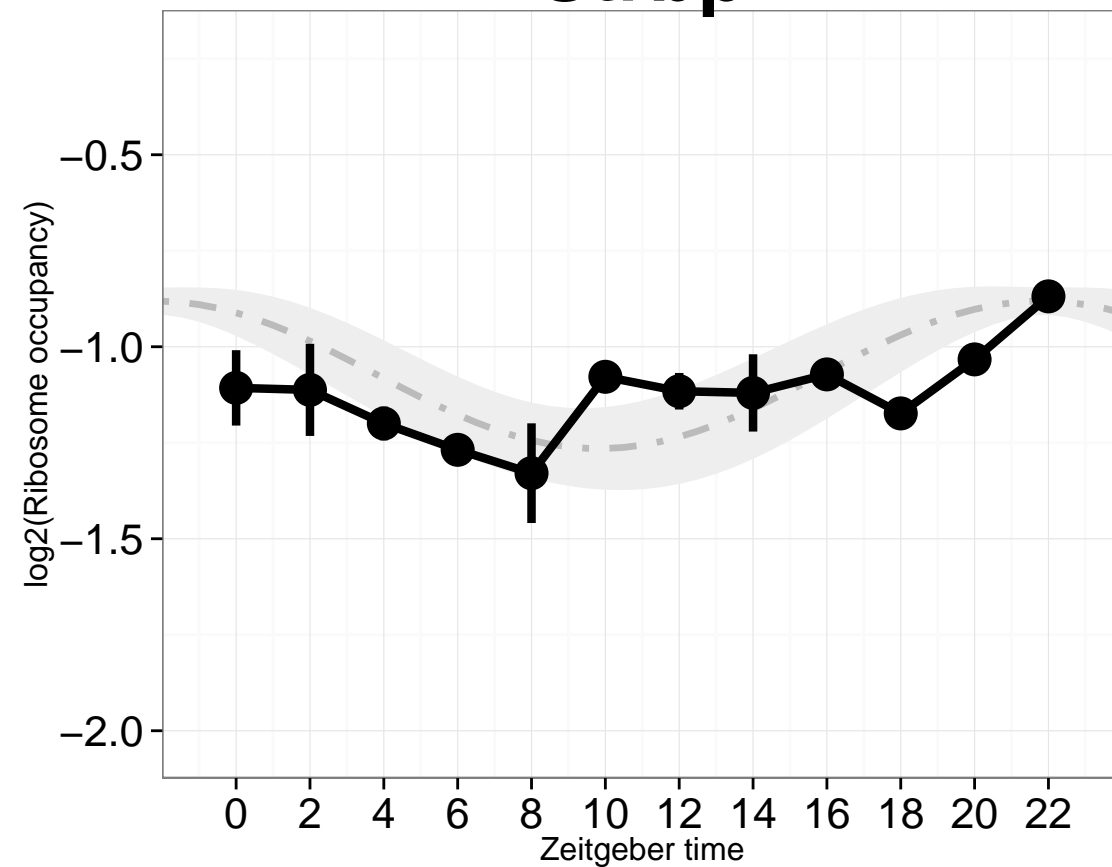

Supplement: SuppDataset_1.zip [file Strbp_set_A.pdf › Supplemental Dataset 1/A-mRNA_nonrhyth_translation_nonrhyth/Strbp_set_A.pdf]

# Strip1

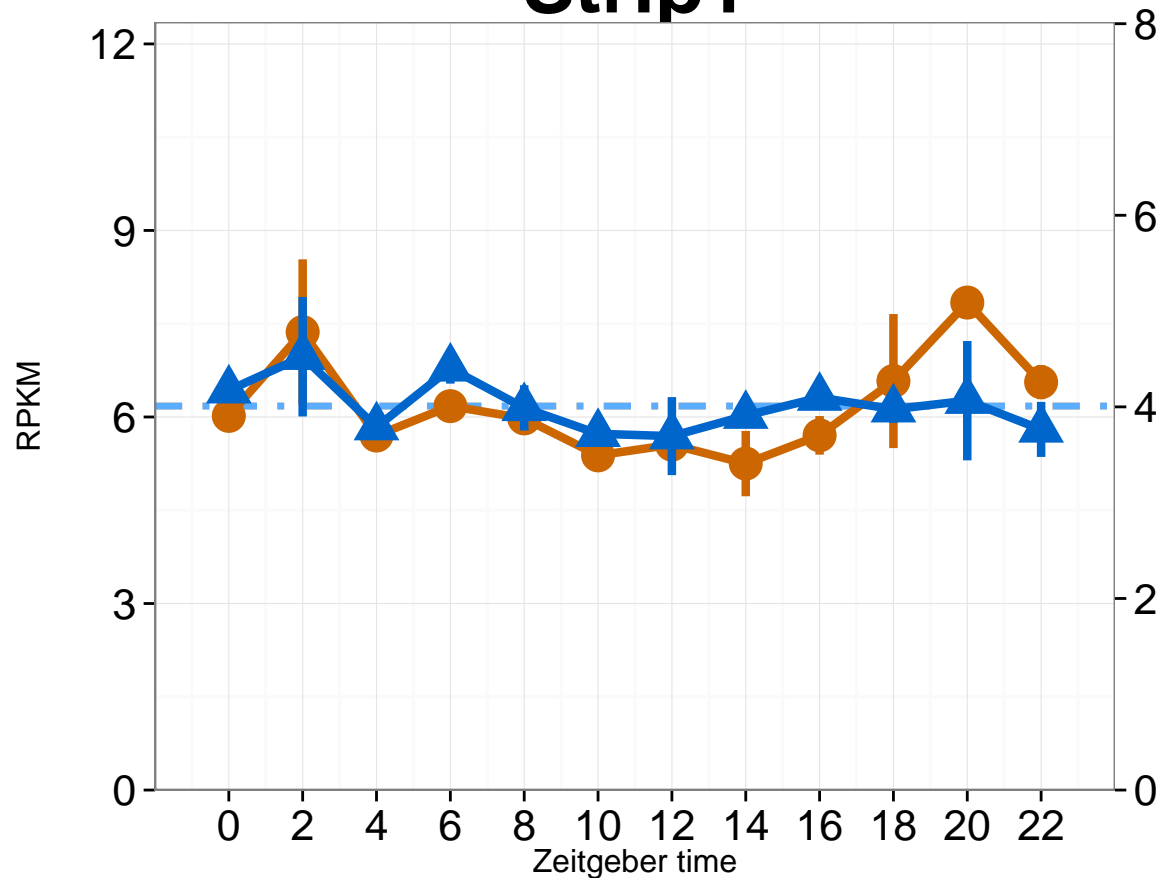

# Strip1

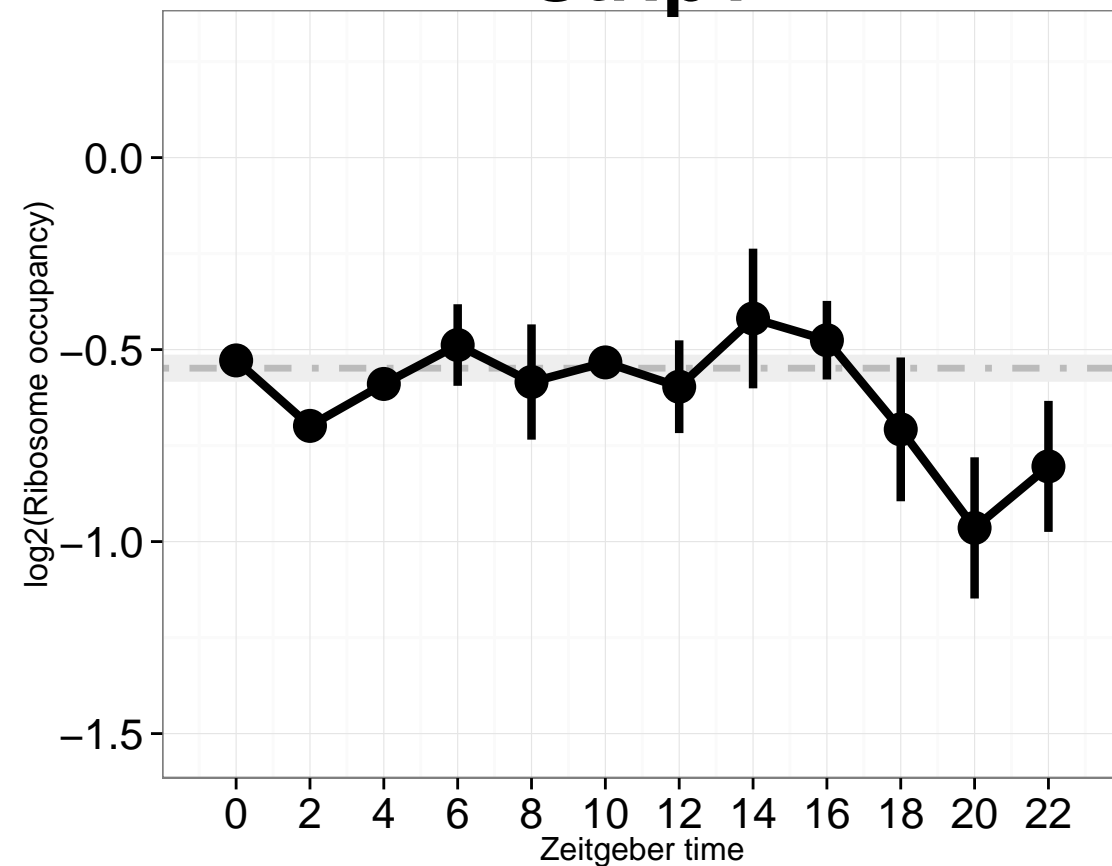

Supplement: SuppDataset_1.zip [file Strip1_set_A.pdf › Supplemental Dataset 1/A-mRNA_nonrhyth_translation_nonrhyth/Strip1_set_A.pdf]

# Strn3

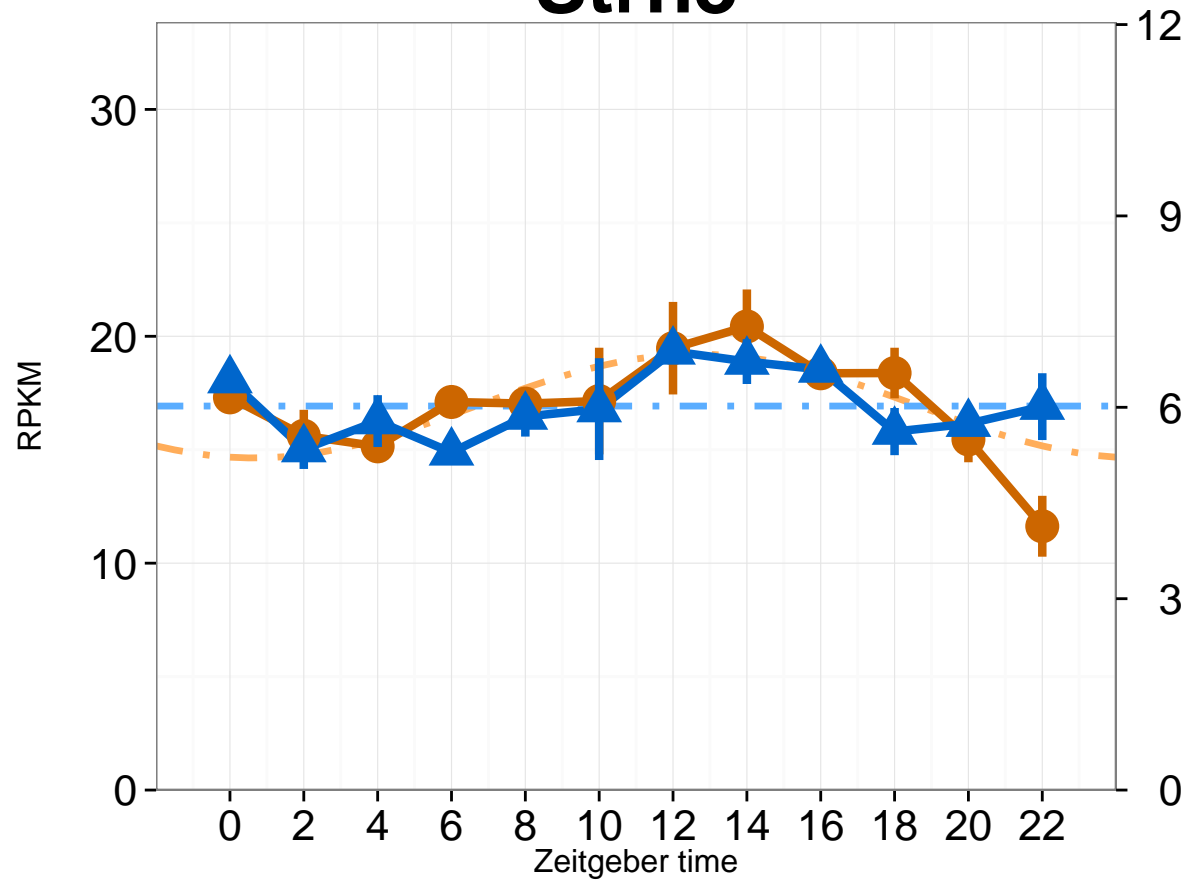

# Strn3

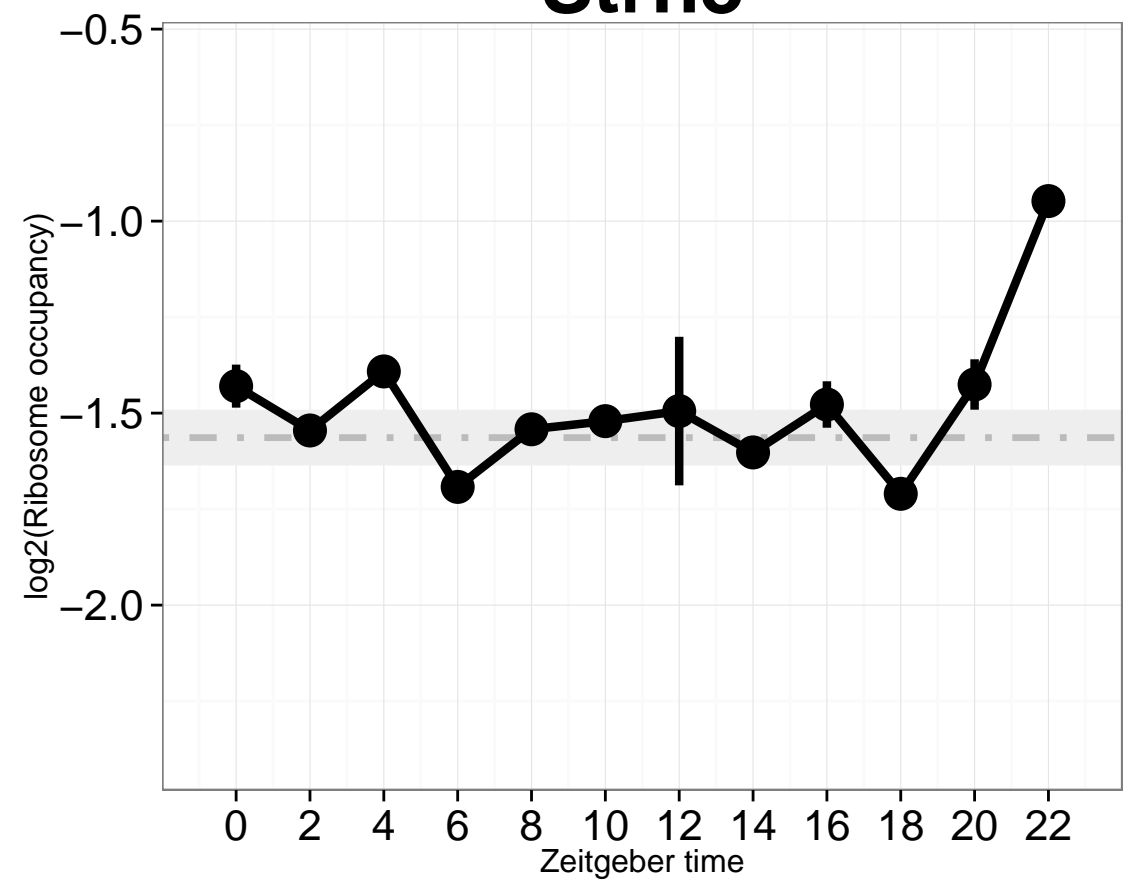

Supplement: SuppDataset_1.zip [file Strn3_set_A.pdf › Supplemental Dataset 1/A-mRNA_nonrhyth_translation_nonrhyth/Strn3_set_A.pdf]

# Strn4

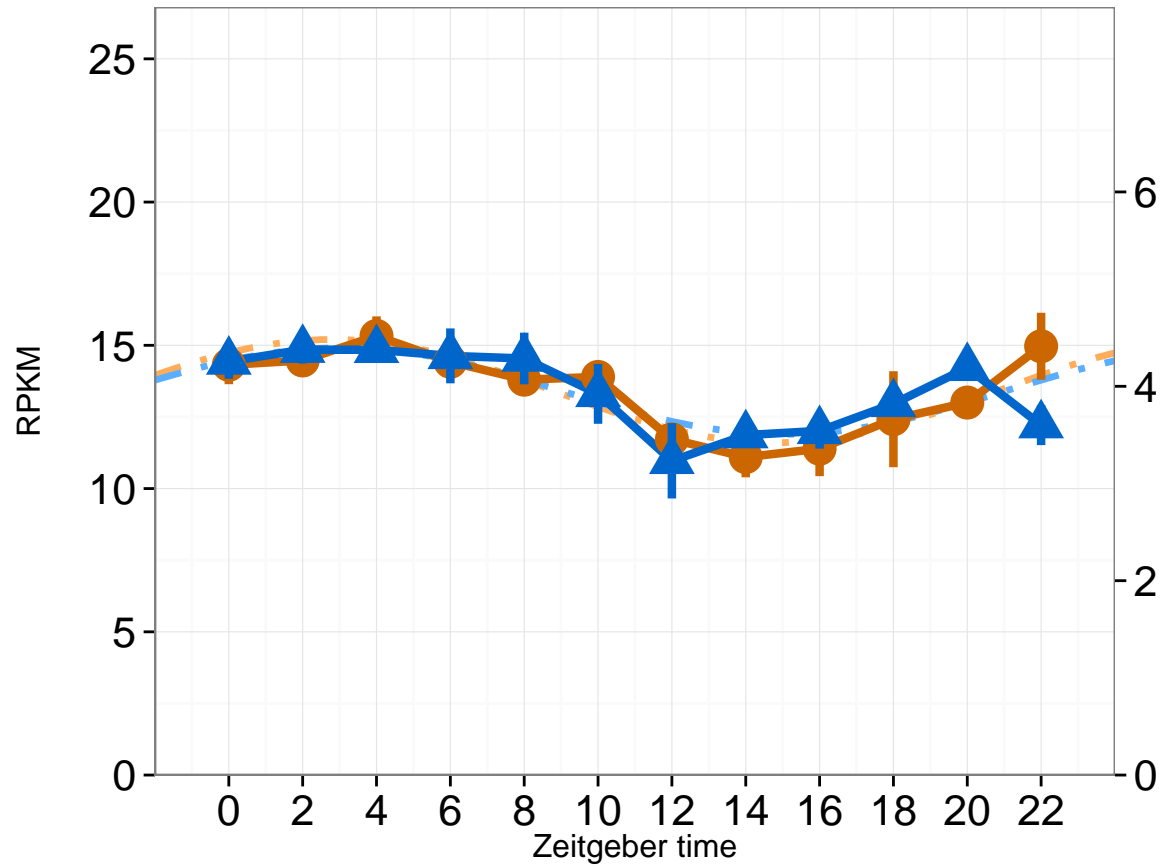

# Strn4

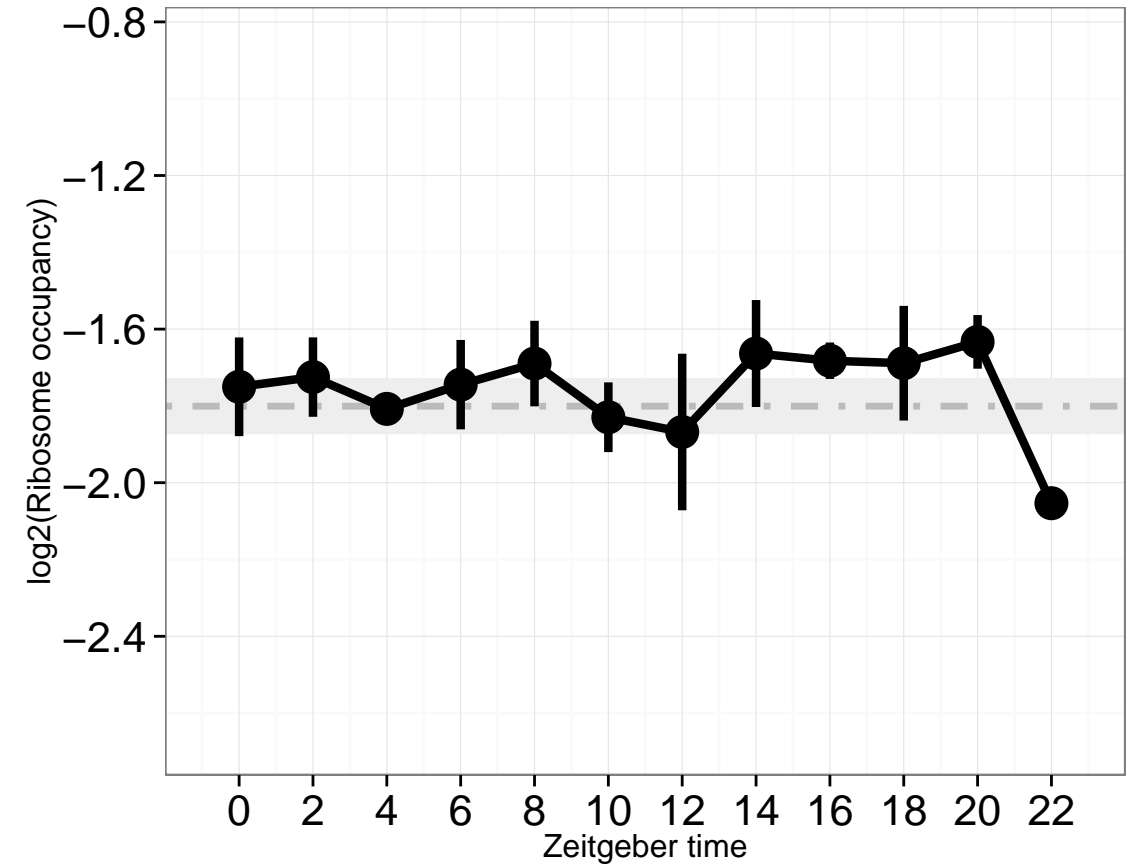

Supplement: SuppDataset_1.zip [file Strn4_set_A.pdf › Supplemental Dataset 1/A-mRNA_nonrhyth_translation_nonrhyth/Strn4_set_A.pdf]

## Strn

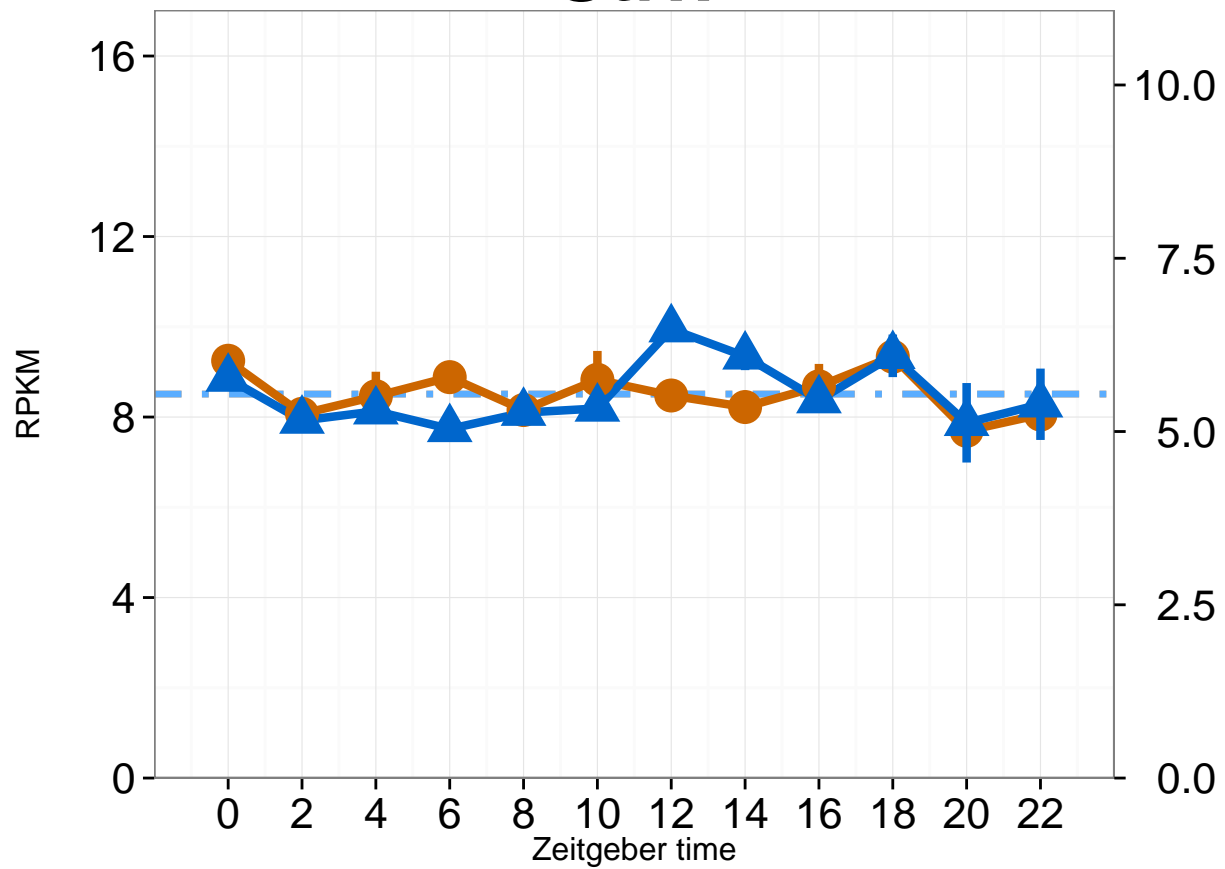

## Strn

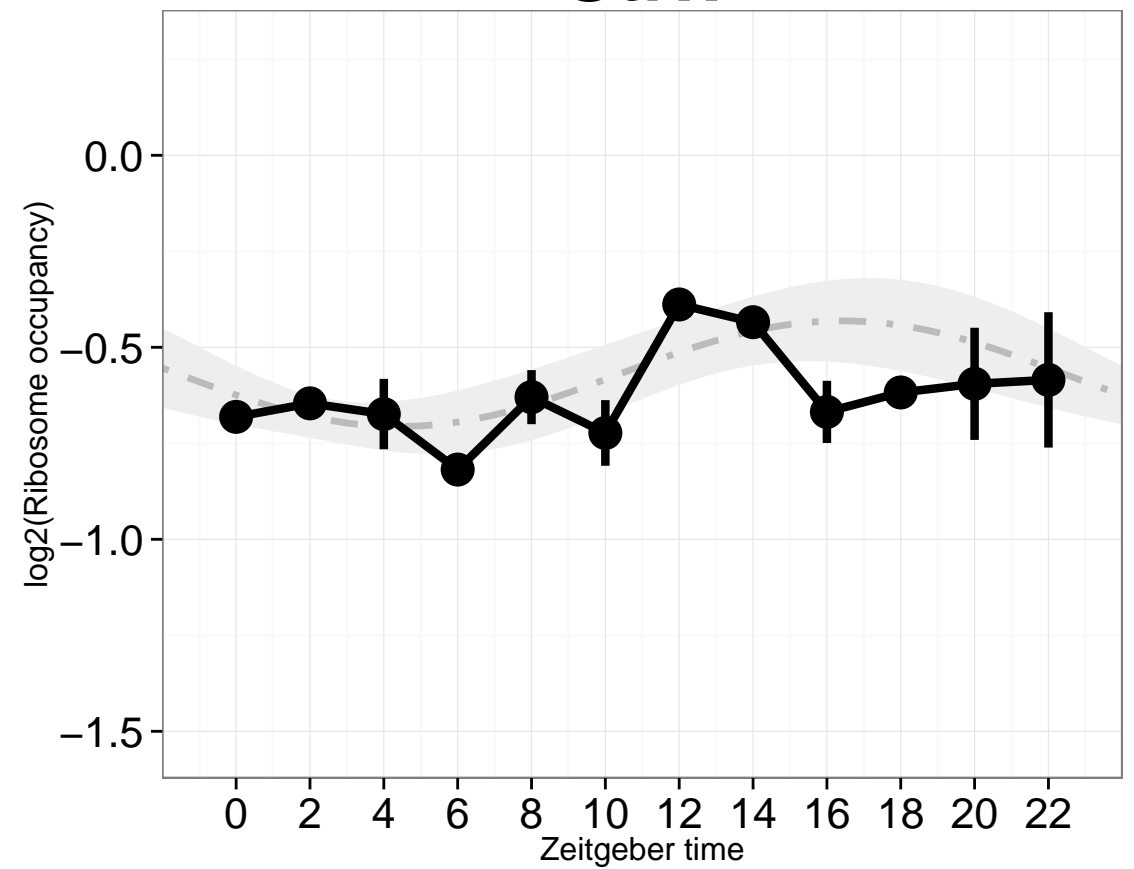

Supplement: SuppDataset_1.zip [file Strn_set_A.pdf › Supplemental Dataset 1/A-mRNA_nonrhyth_translation_nonrhyth/Strn_set_A.pdf]

# Stt3a

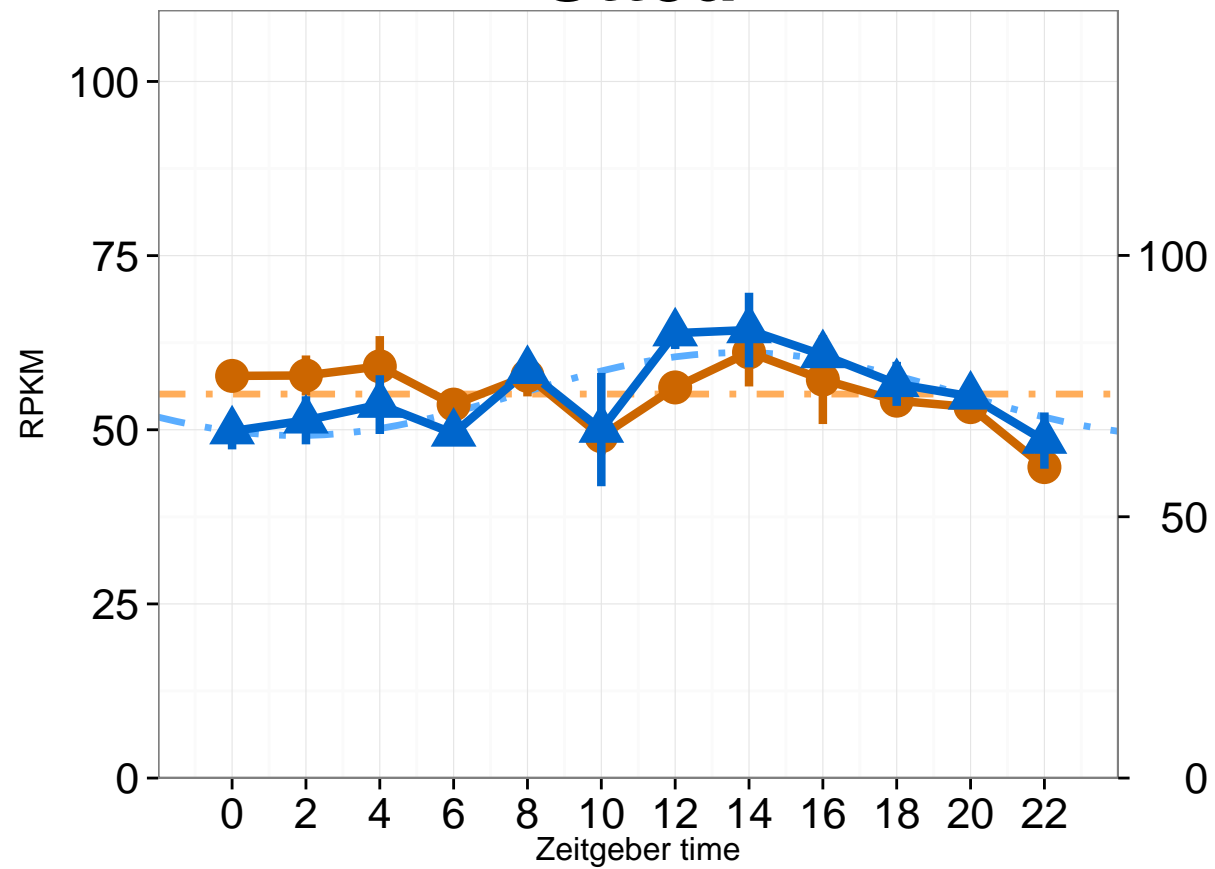

# Stt3a

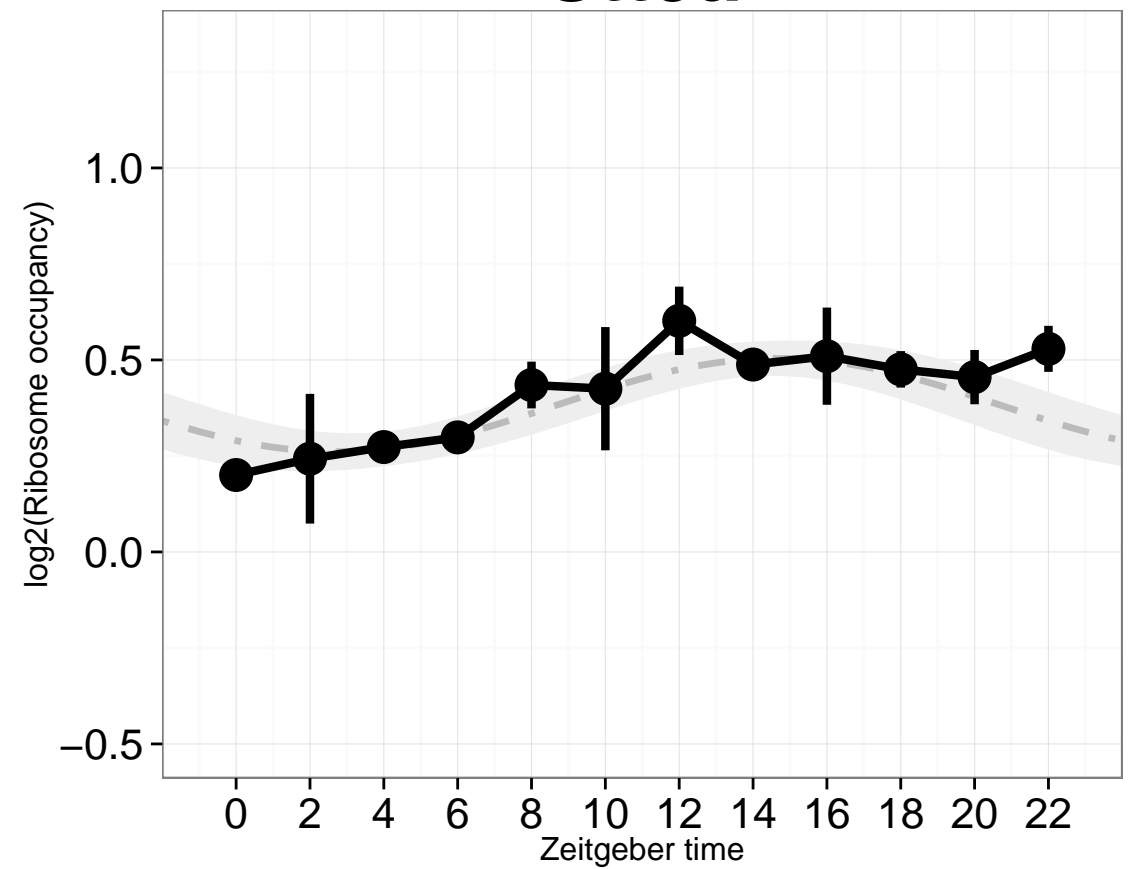

Supplement: SuppDataset_1.zip [file Stt3a_set_A.pdf › Supplemental Dataset 1/A-mRNA_nonrhyth_translation_nonrhyth/Stt3a_set_A.pdf]

## Stt3b

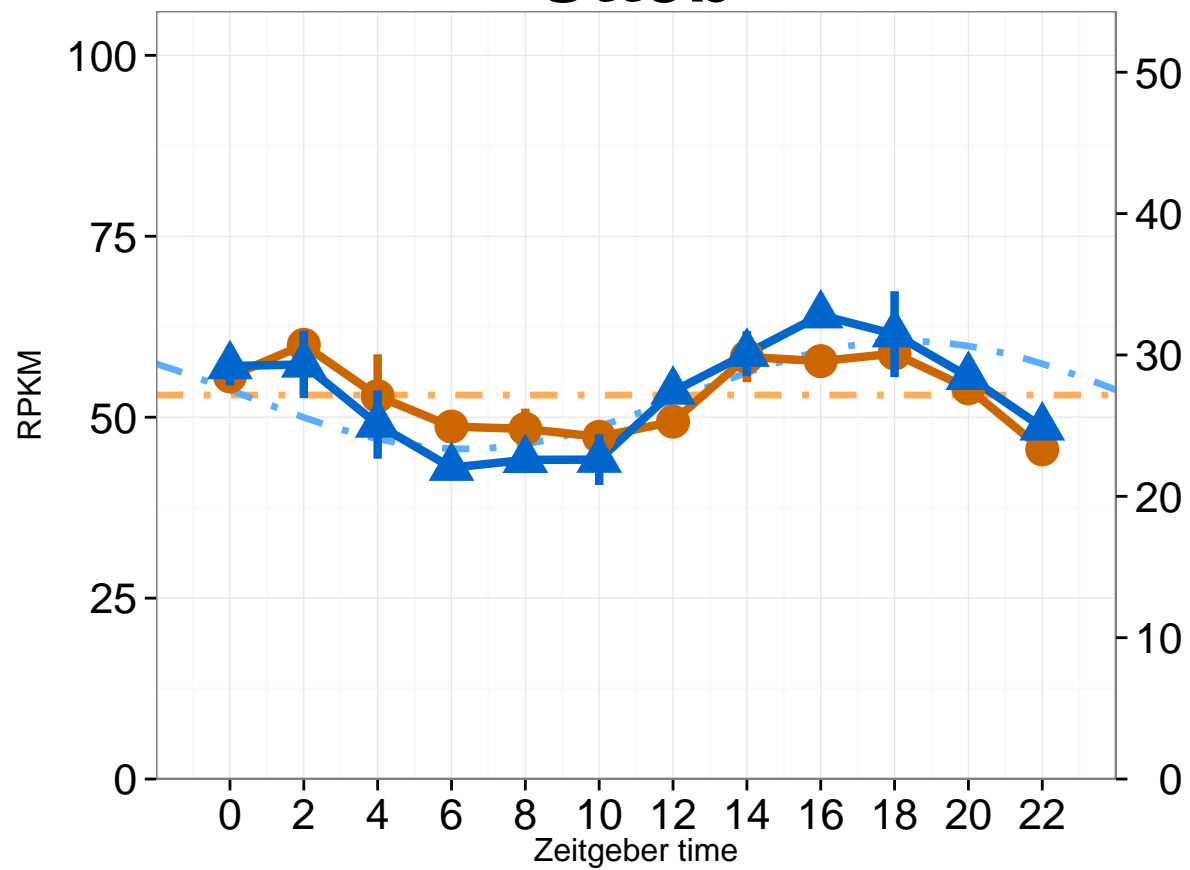

## Stt3b

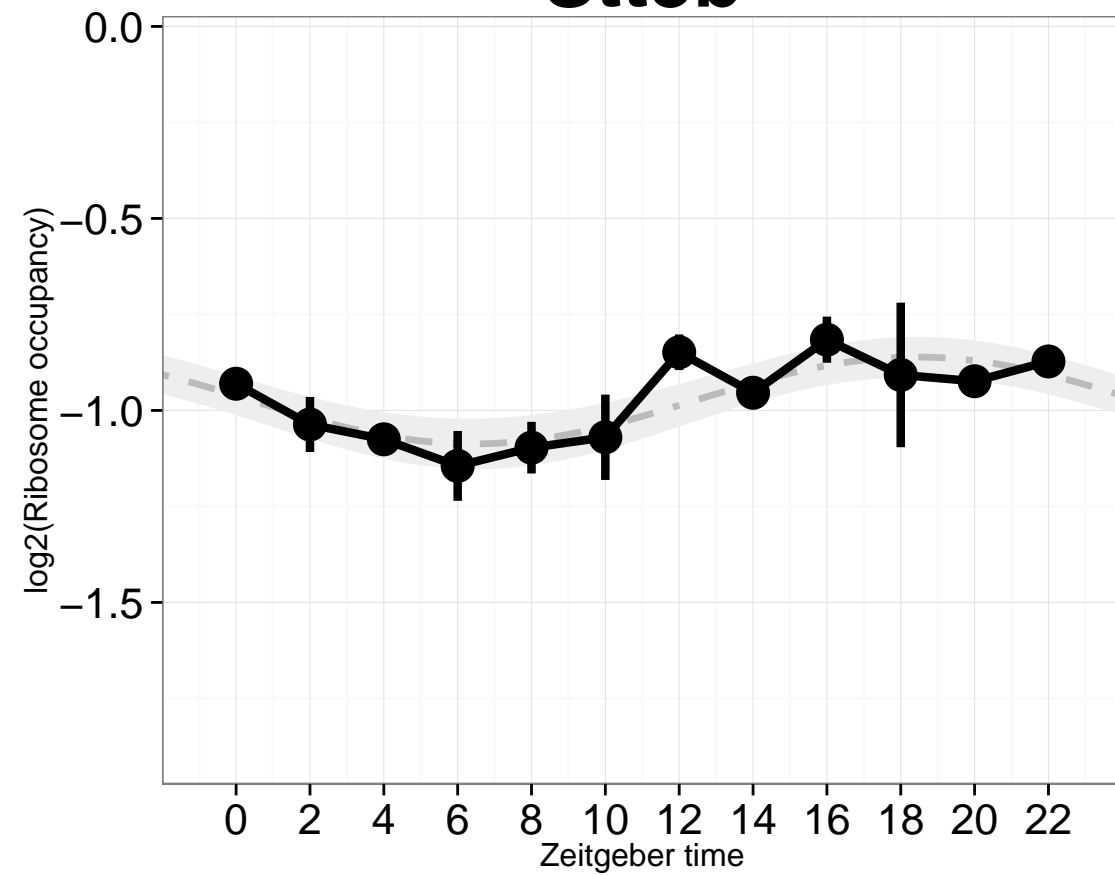

Supplement: SuppDataset_1.zip [file Stt3b_set_A.pdf › Supplemental Dataset 1/A-mRNA_nonrhyth_translation_nonrhyth/Stt3b_set_A.pdf]

## Stub1

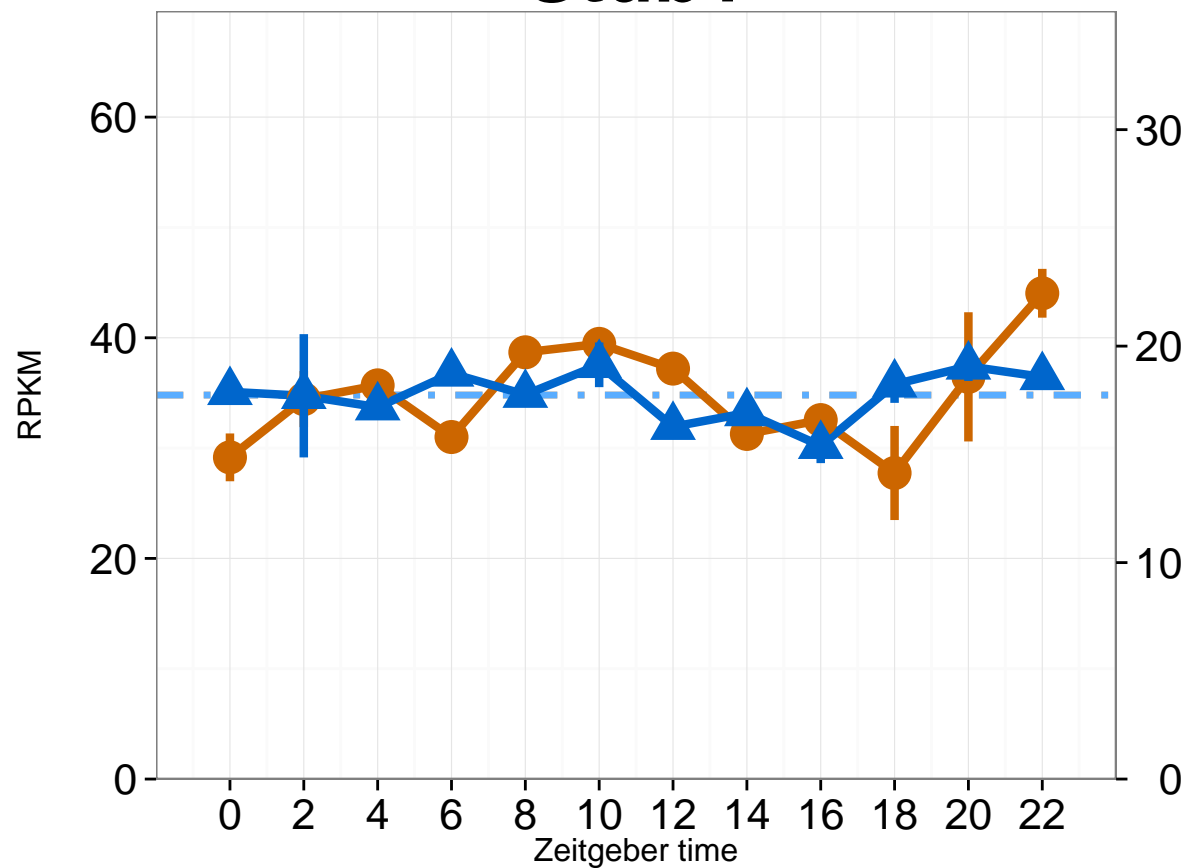

## Stub1

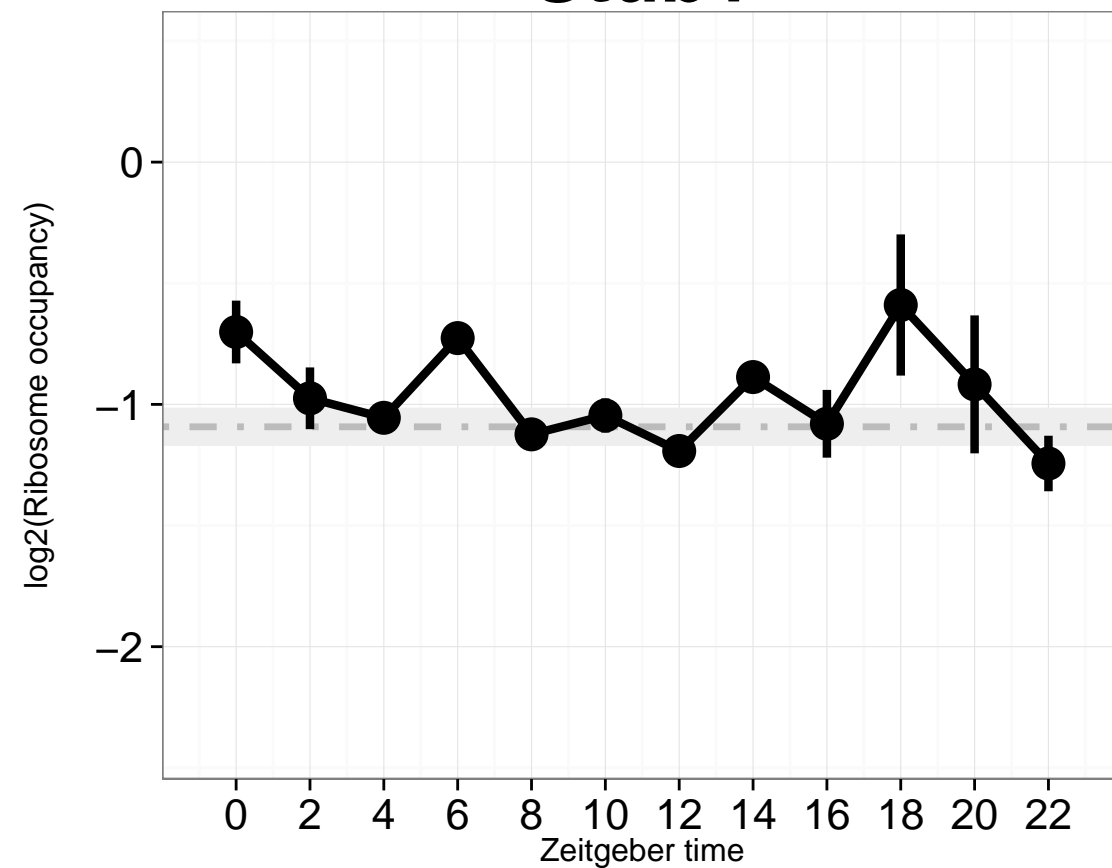

Supplement: SuppDataset_1.zip [file Stub1_set_A.pdf › Supplemental Dataset 1/A-mRNA_nonrhyth_translation_nonrhyth/Stub1_set_A.pdf]

## Stx12

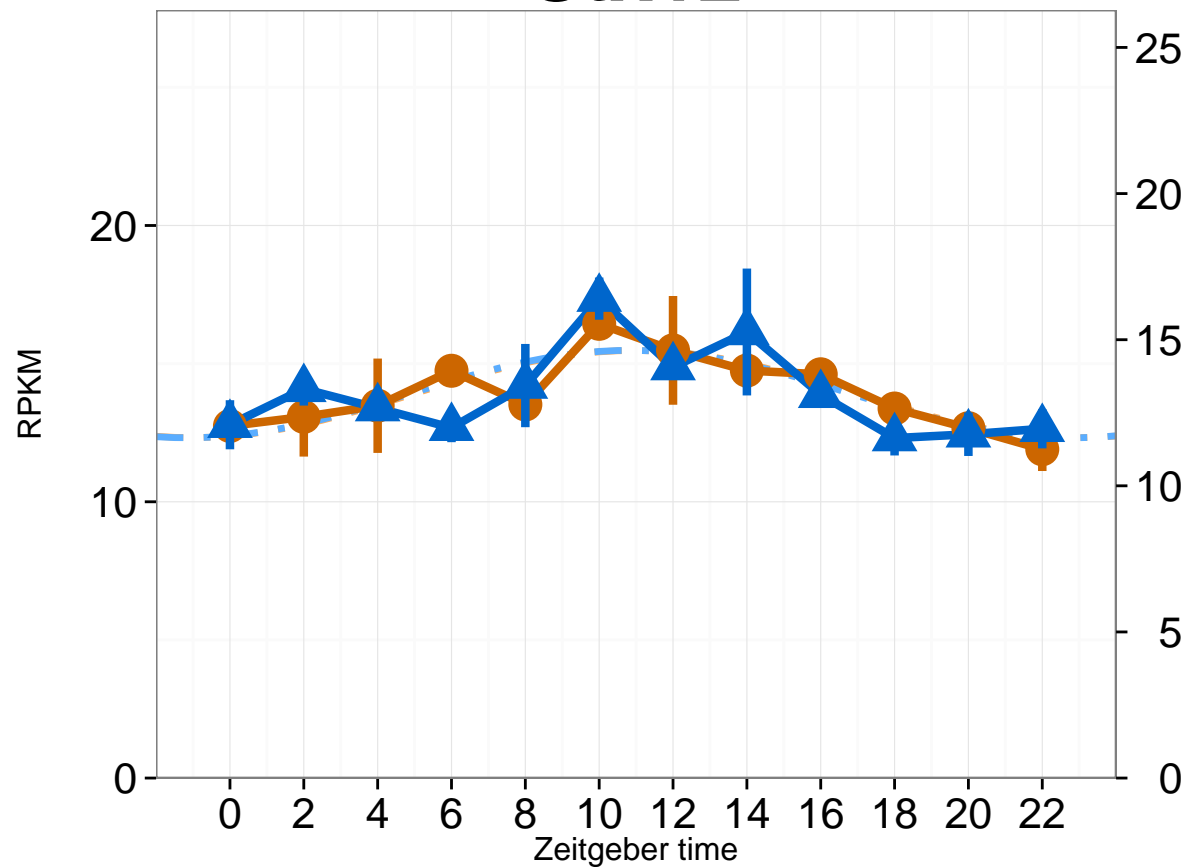

## Stx12

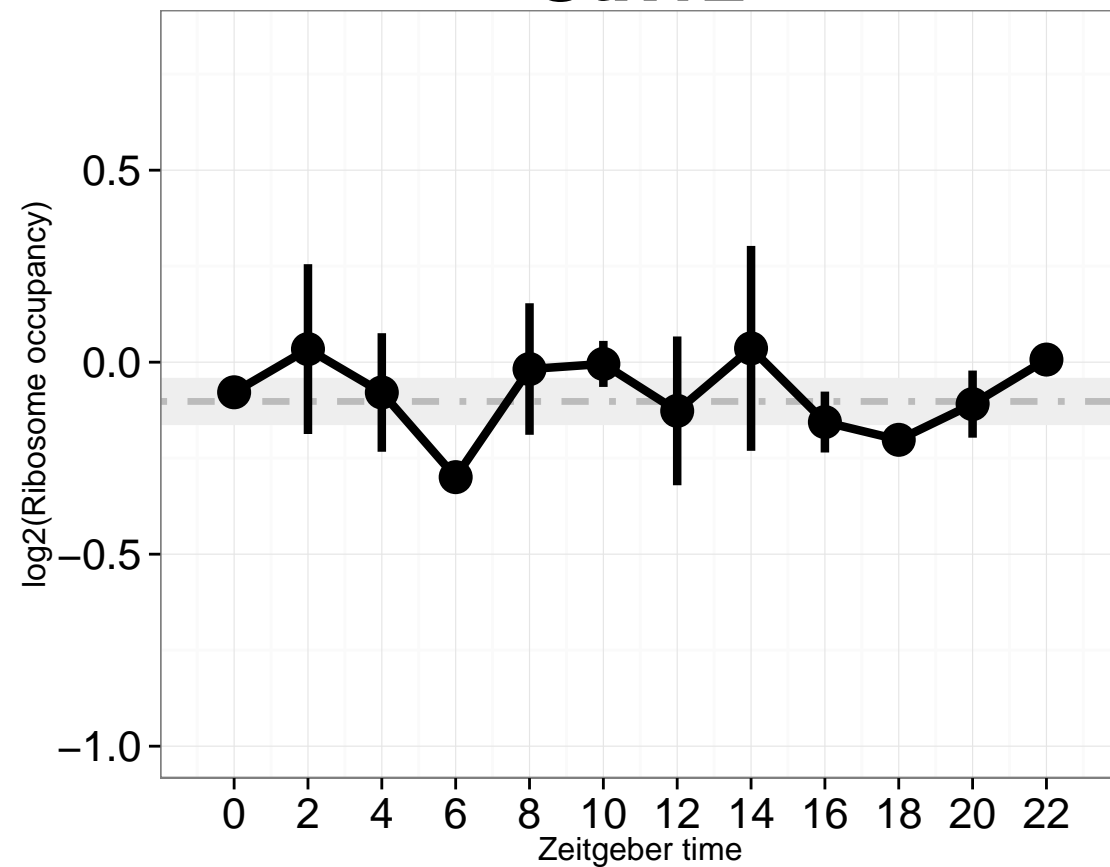

Supplement: SuppDataset_1.zip [file Stx12_set_A.pdf › Supplemental Dataset 1/A-mRNA_nonrhyth_translation_nonrhyth/Stx12_set_A.pdf]

# Stx16

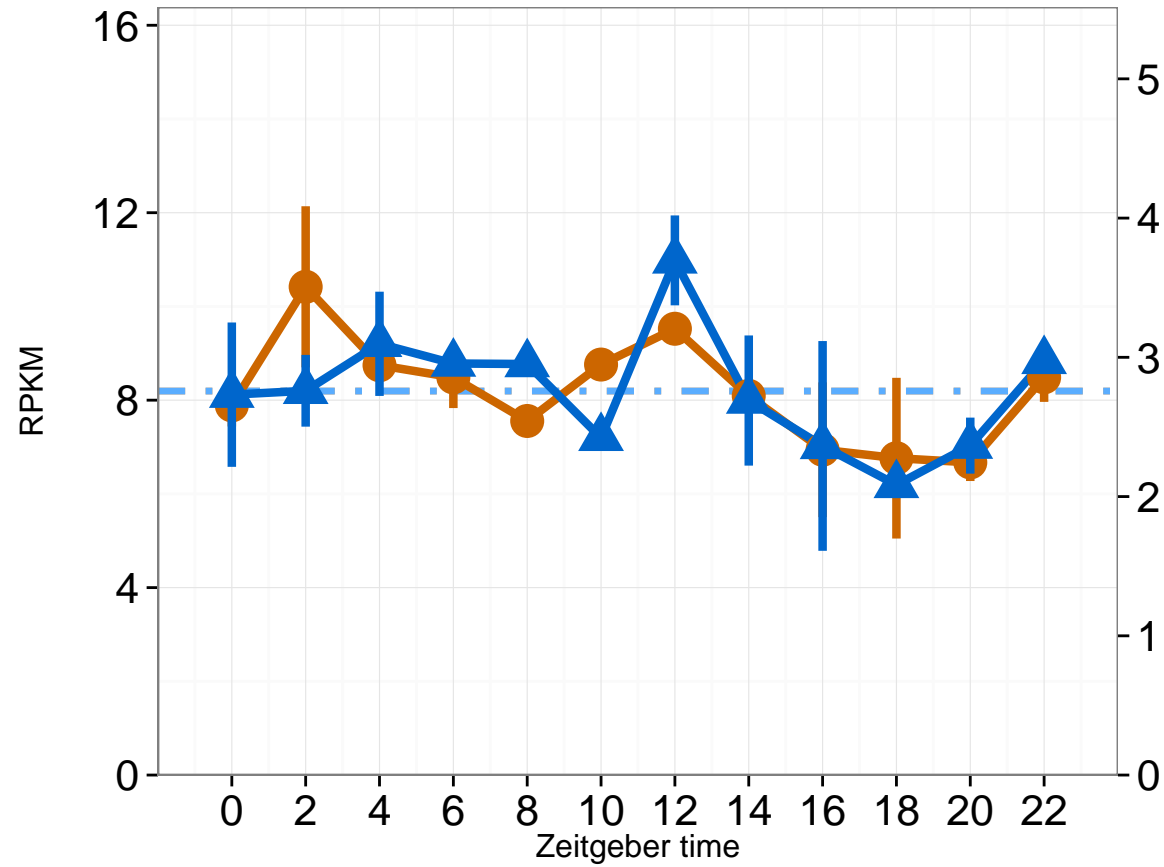

# Stx16

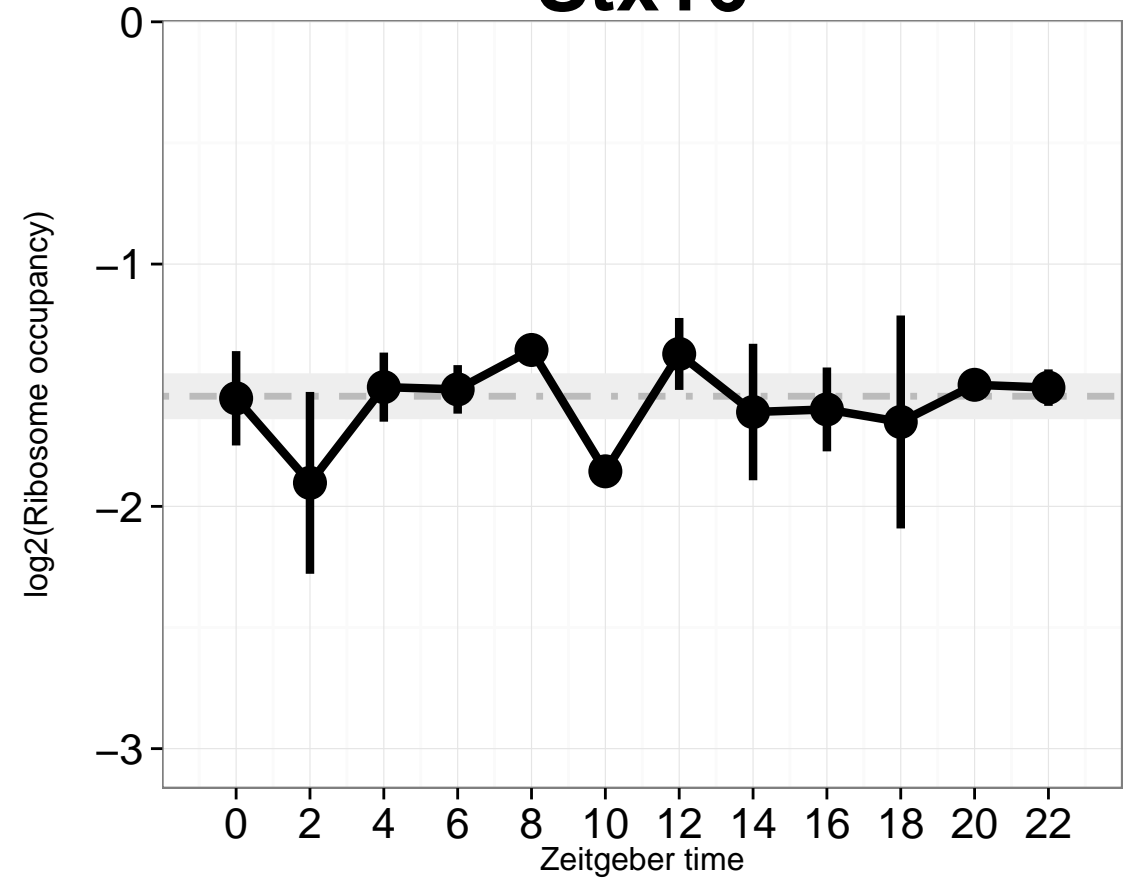

Supplement: SuppDataset_1.zip [file Stx16_set_A.pdf › Supplemental Dataset 1/A-mRNA_nonrhyth_translation_nonrhyth/Stx16_set_A.pdf]
