# Supplementary figures and images for: Ribosome profiling reveals the rhythmic liver translatome and circadian clock regulation by upstream open reading frames (part 72 of 113)
Source: HighWire-hosted journal article supplement (doi:10.1101/gr.195404.115), 2015-10-20

# Stx17

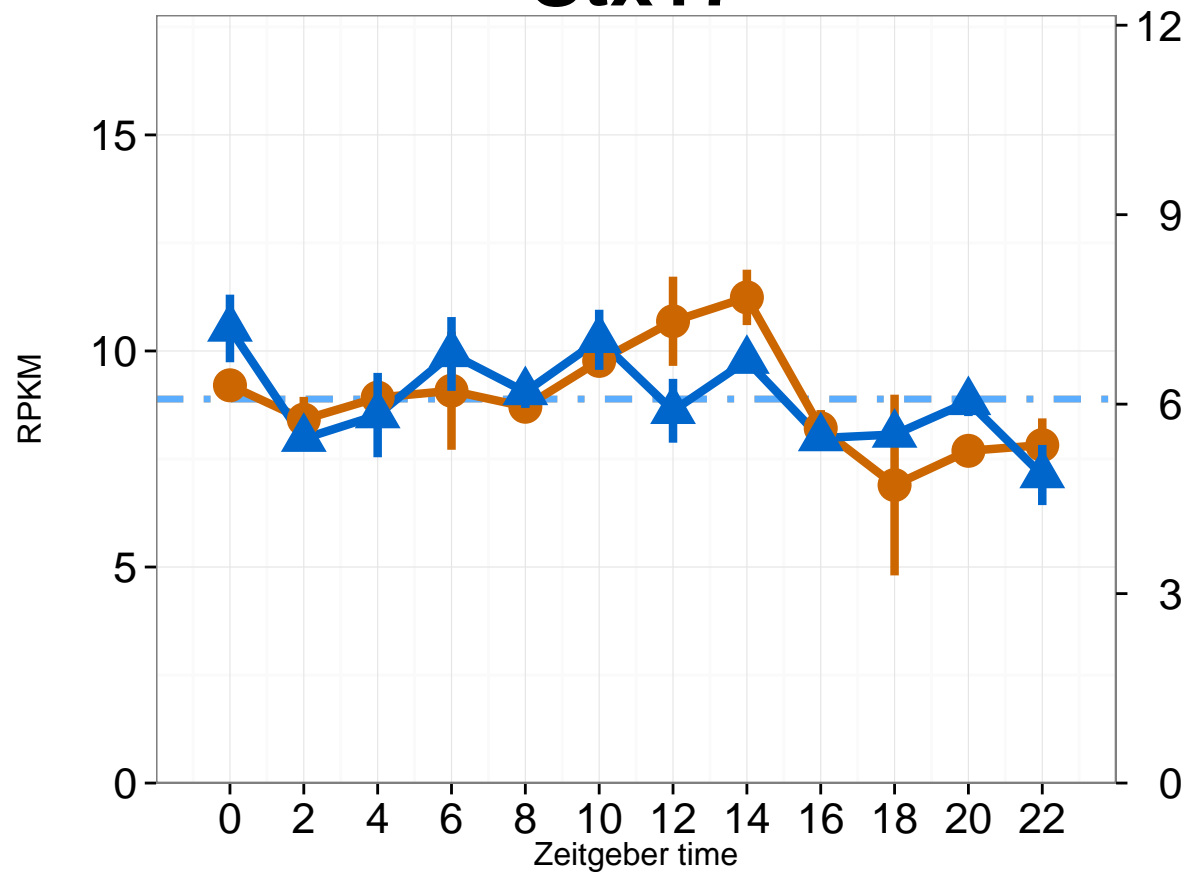

# Stx17

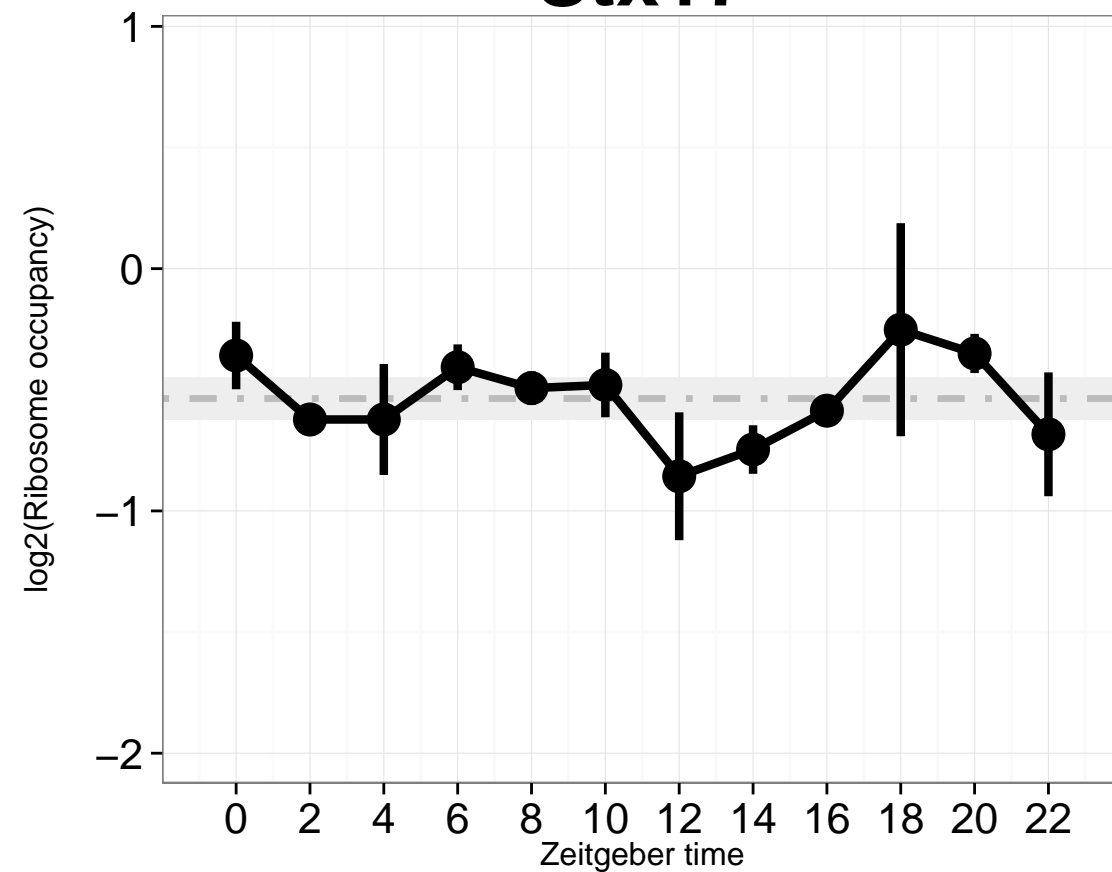

Supplement: SuppDataset_1.zip [file Stx17_set_A.pdf › Supplemental Dataset 1/A-mRNA_nonrhyth_translation_nonrhyth/Stx17_set_A.pdf]

# Stx18

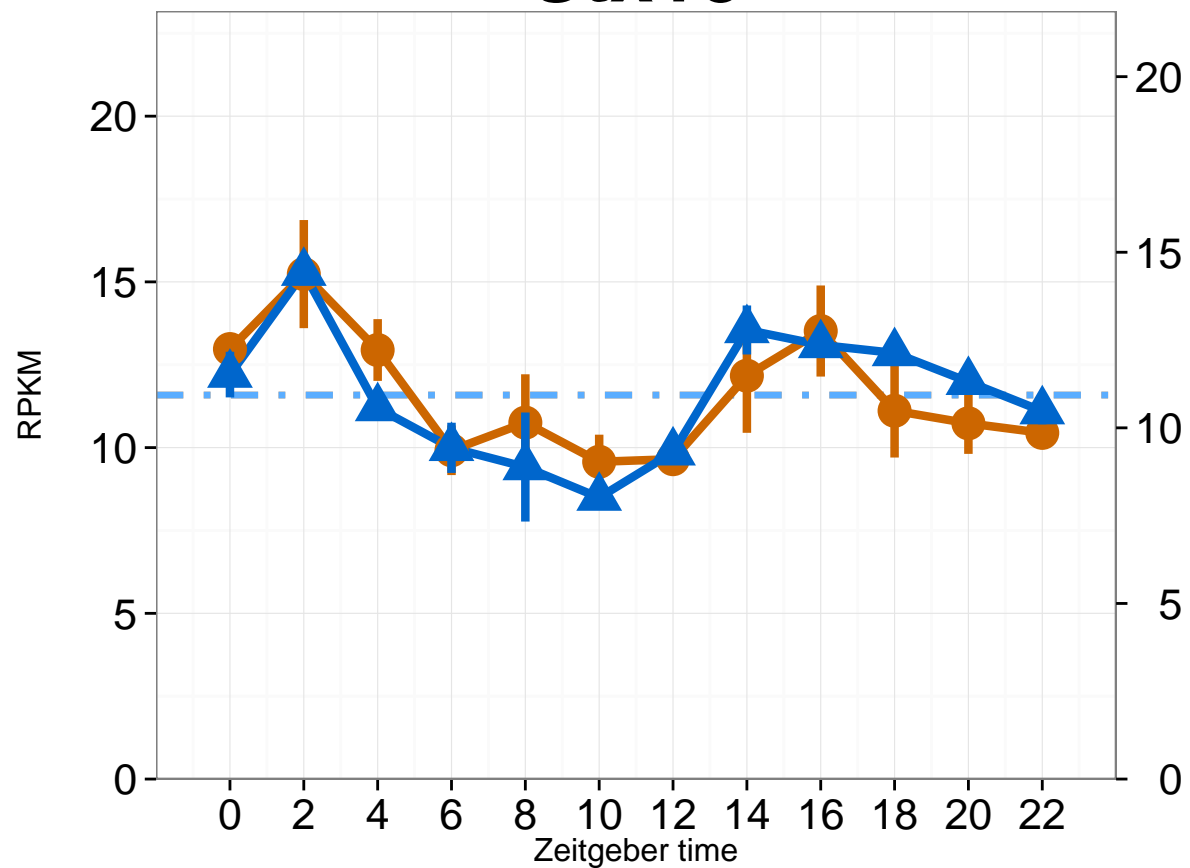

# Stx18

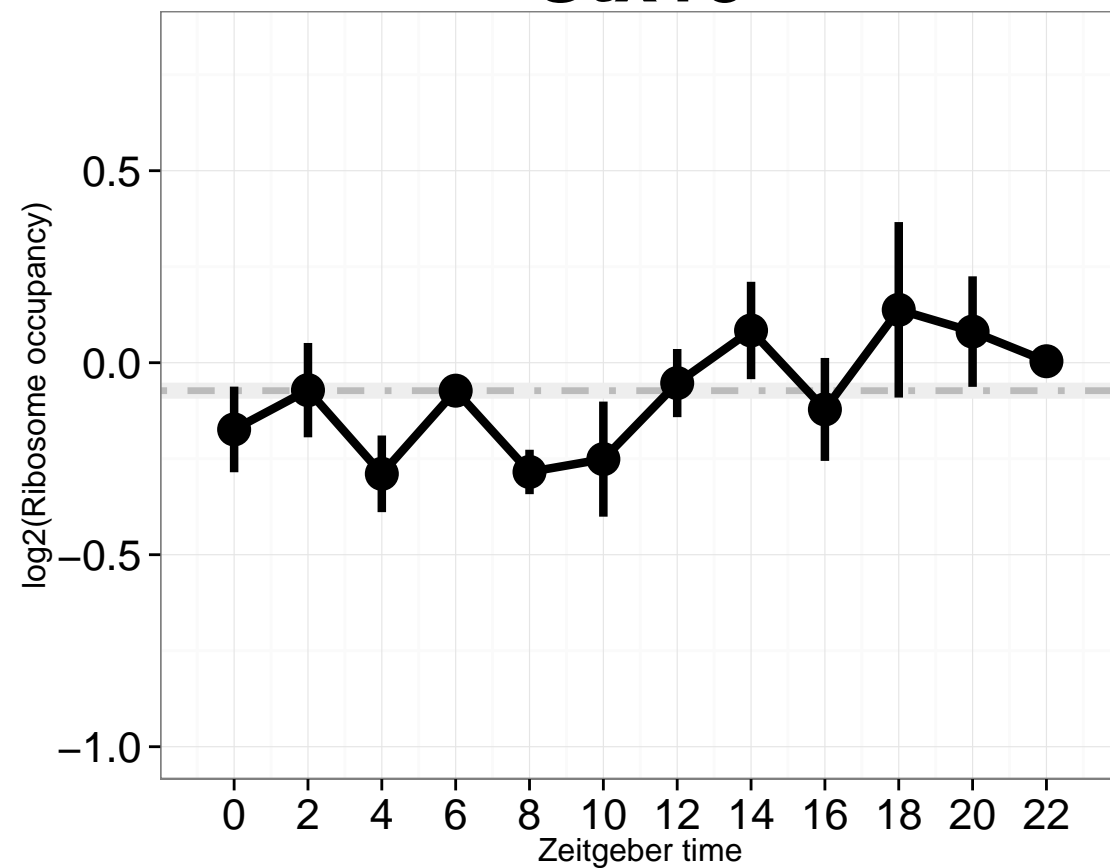

Supplement: SuppDataset_1.zip [file Stx18_set_A.pdf › Supplemental Dataset 1/A-mRNA_nonrhyth_translation_nonrhyth/Stx18_set_A.pdf]

## Stx3

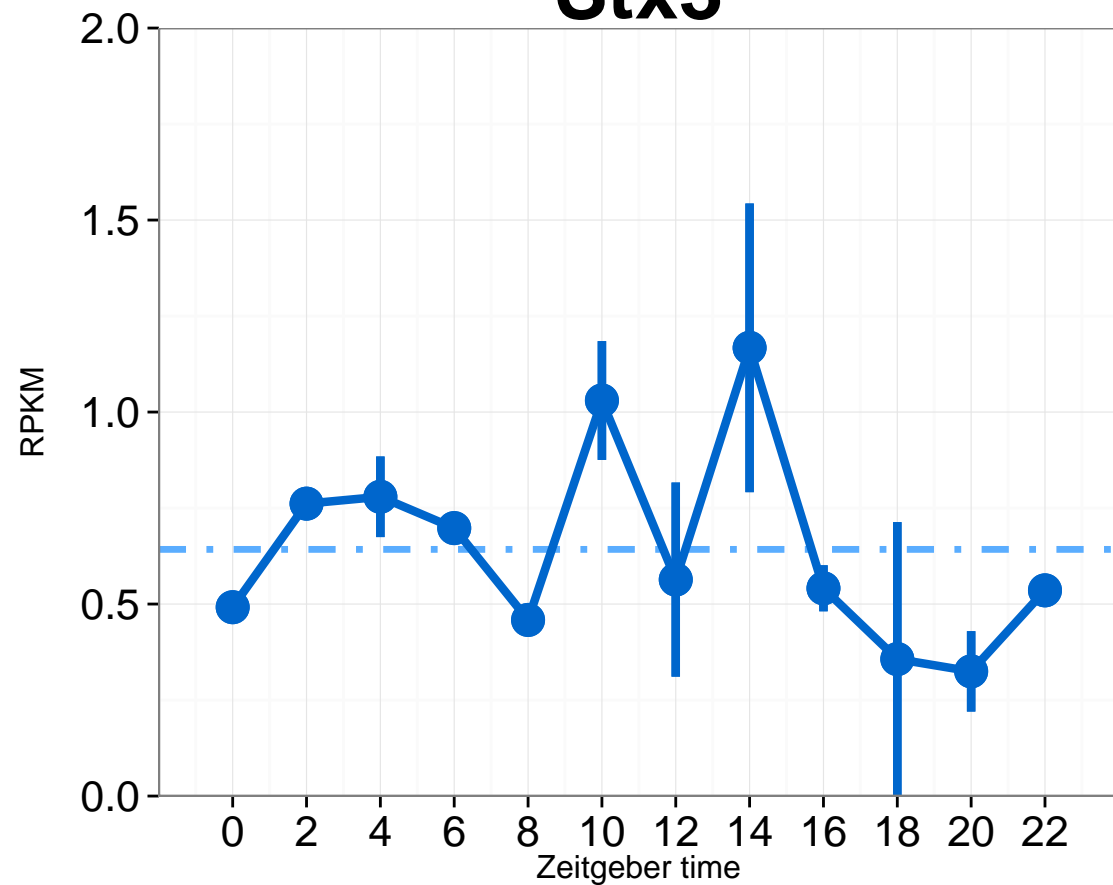

## Stx3 log2(Ribosome occupancy)

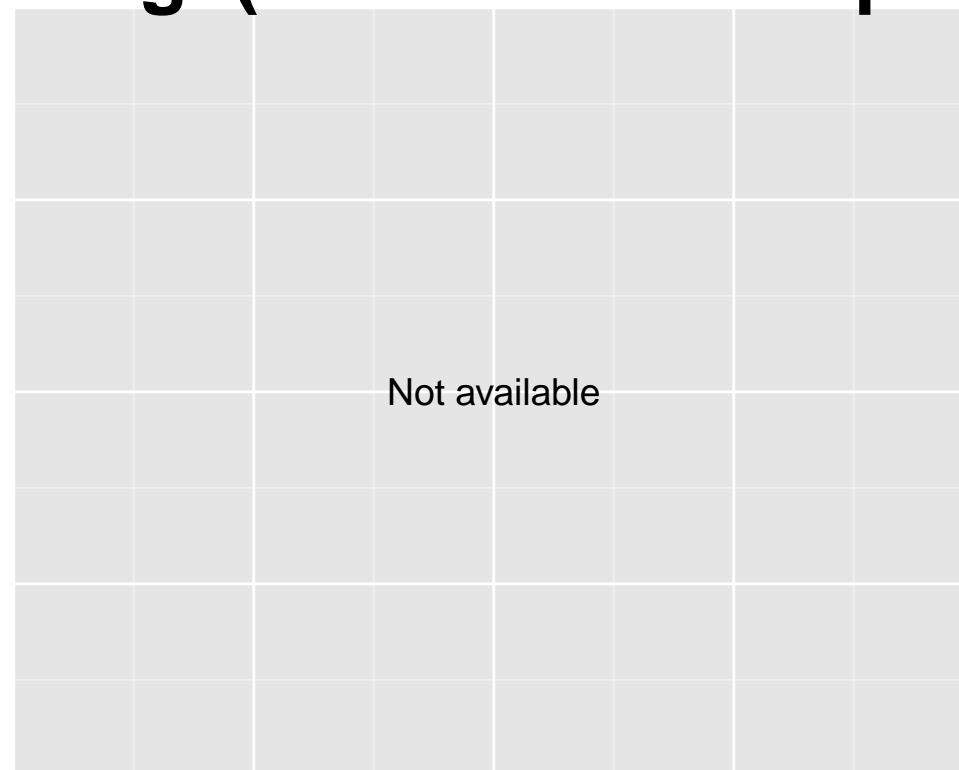

Supplement: SuppDataset_1.zip [file Stx3_set_A.pdf › Supplemental Dataset 1/A-mRNA_nonrhyth_translation_nonrhyth/Stx3_set_A.pdf]

## Stx5a

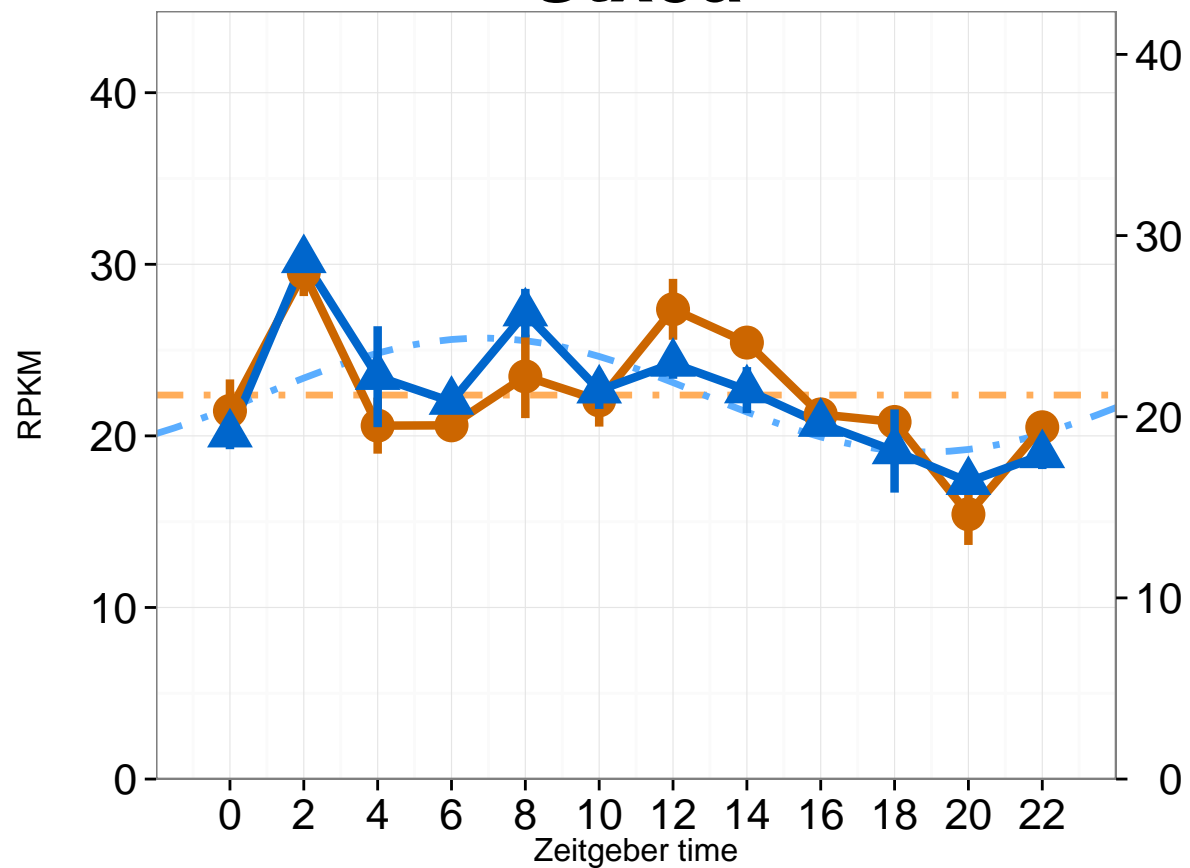

## Stx5a

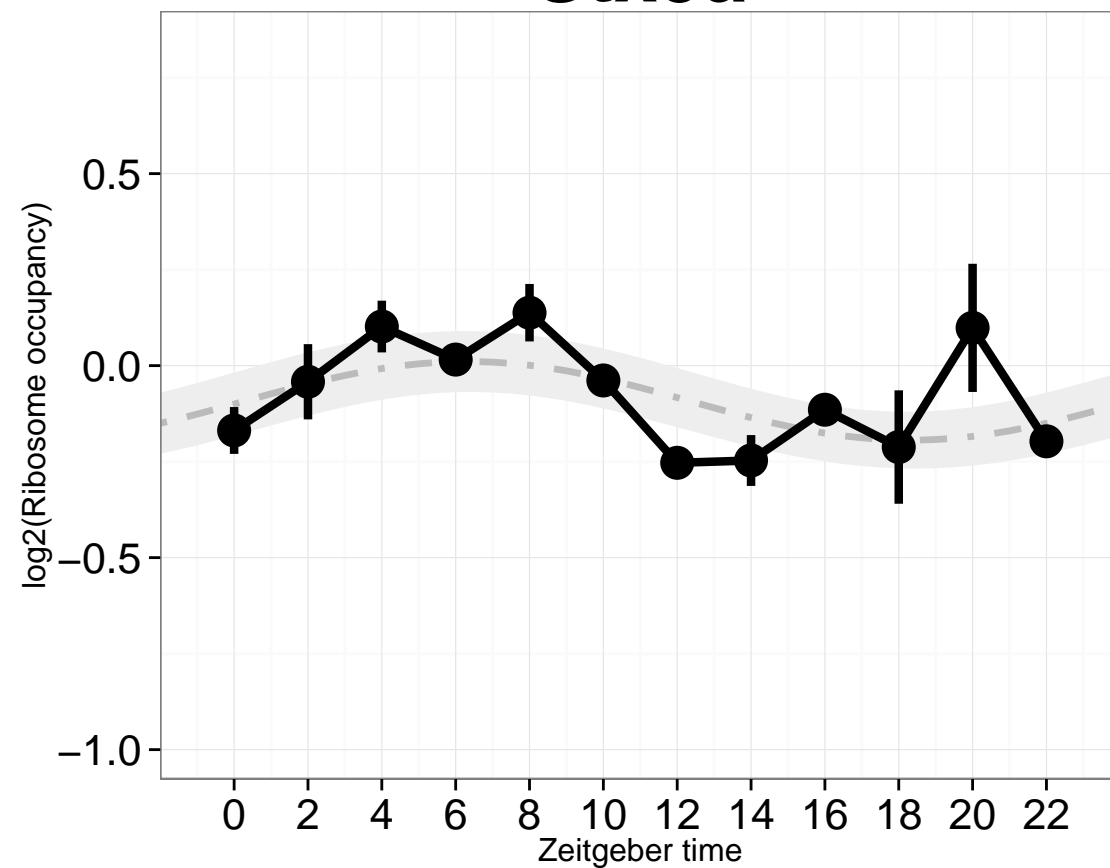

Supplement: SuppDataset_1.zip [file Stx5a_set_A.pdf › Supplemental Dataset 1/A-mRNA_nonrhyth_translation_nonrhyth/Stx5a_set_A.pdf]

# Stx6

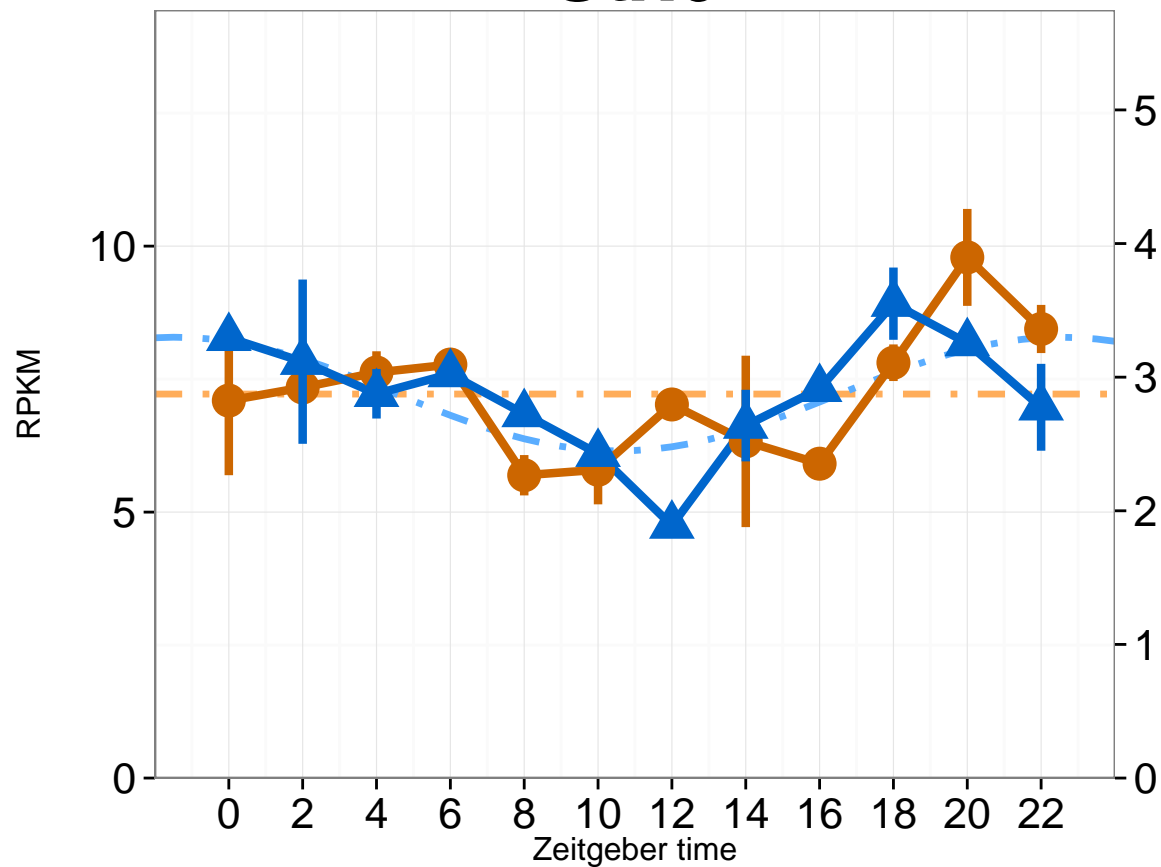

# Stx6

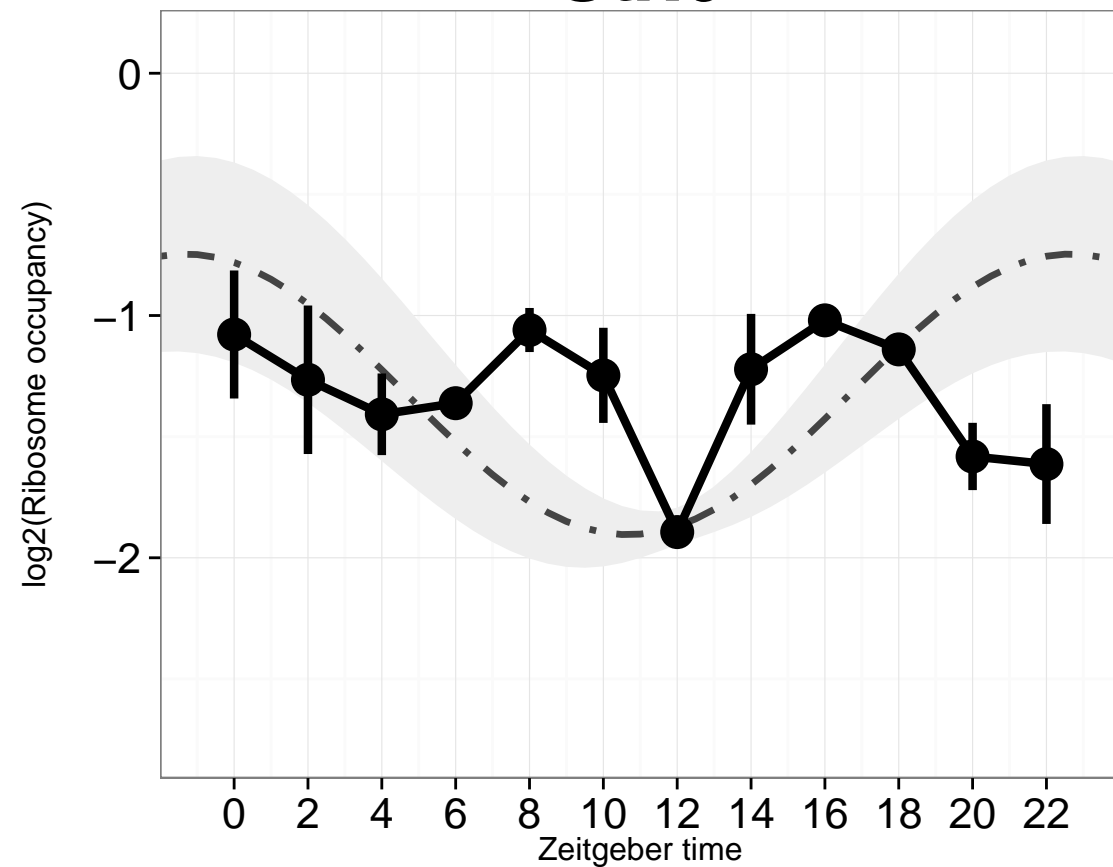

Supplement: SuppDataset_1.zip [file Stx6_set_A.pdf › Supplemental Dataset 1/A-mRNA_nonrhyth_translation_nonrhyth/Stx6_set_A.pdf]

## Stx7

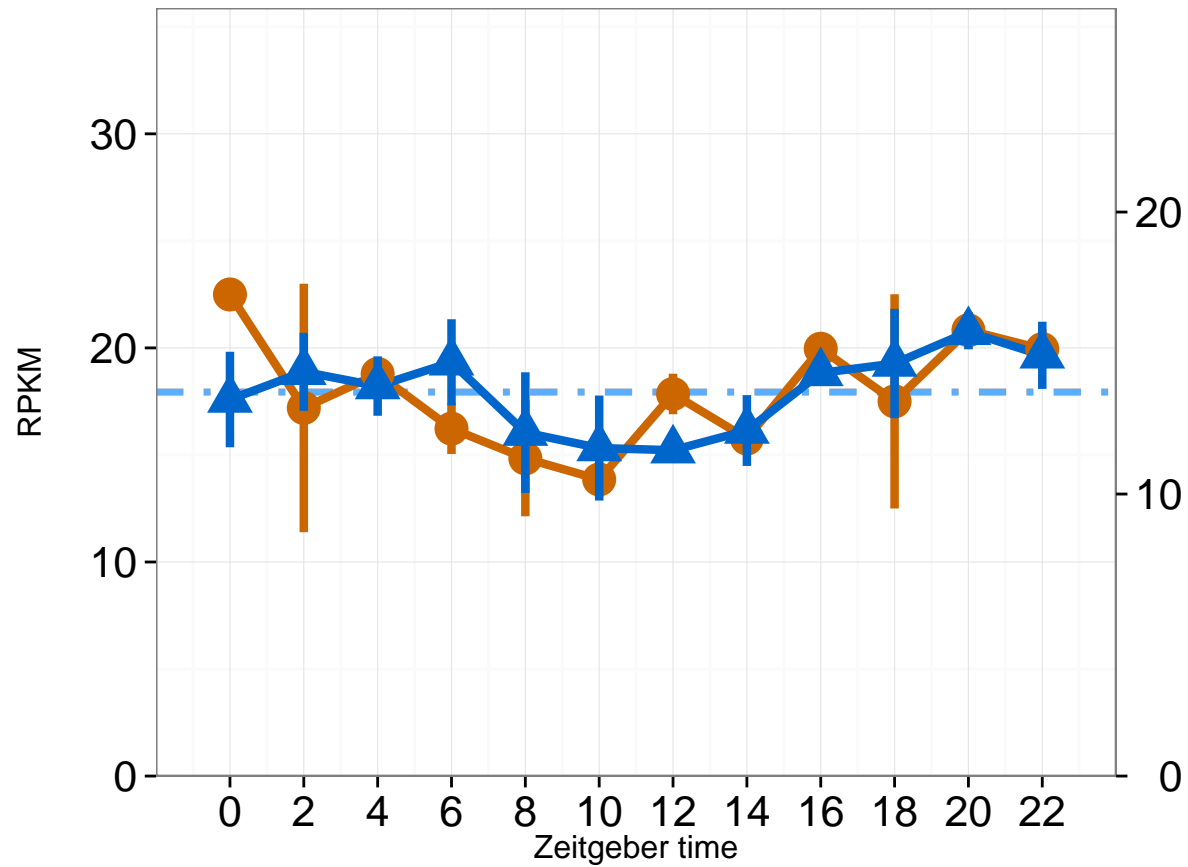

## Stx7

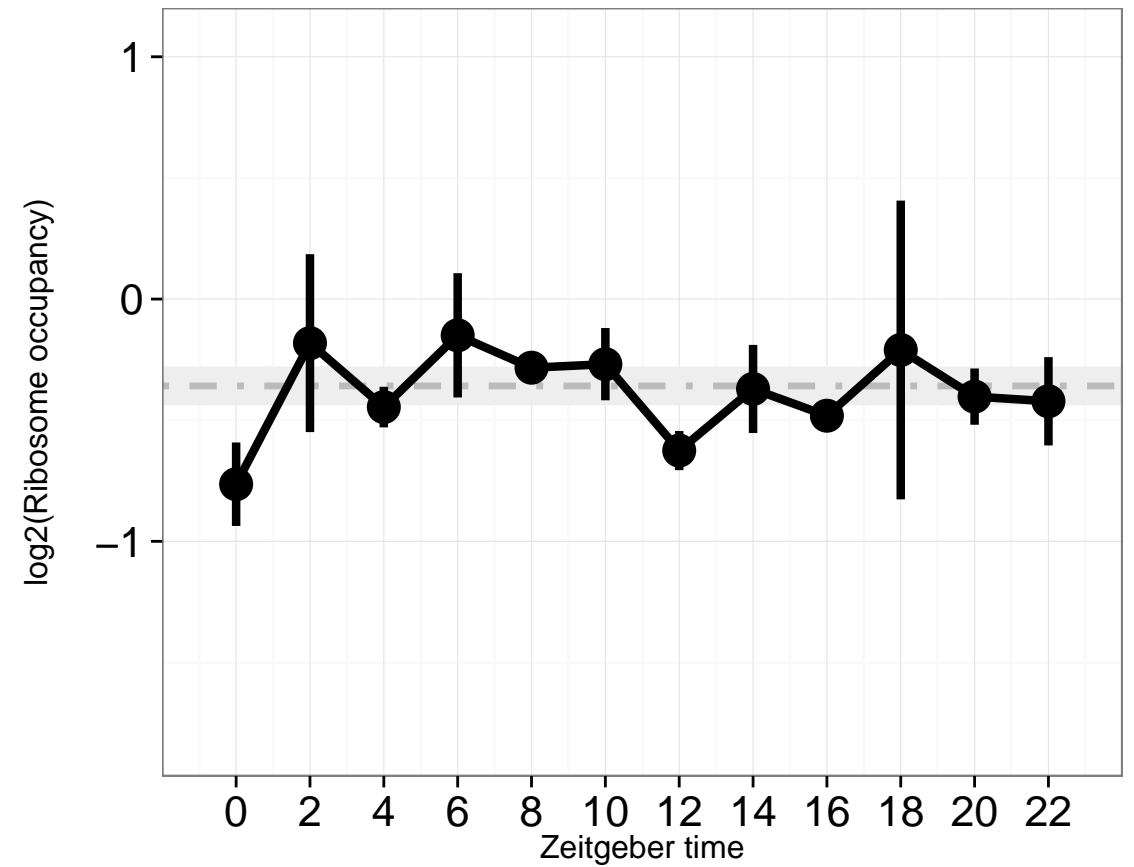

Supplement: SuppDataset_1.zip [file Stx7_set_A.pdf › Supplemental Dataset 1/A-mRNA_nonrhyth_translation_nonrhyth/Stx7_set_A.pdf]

## Stx8

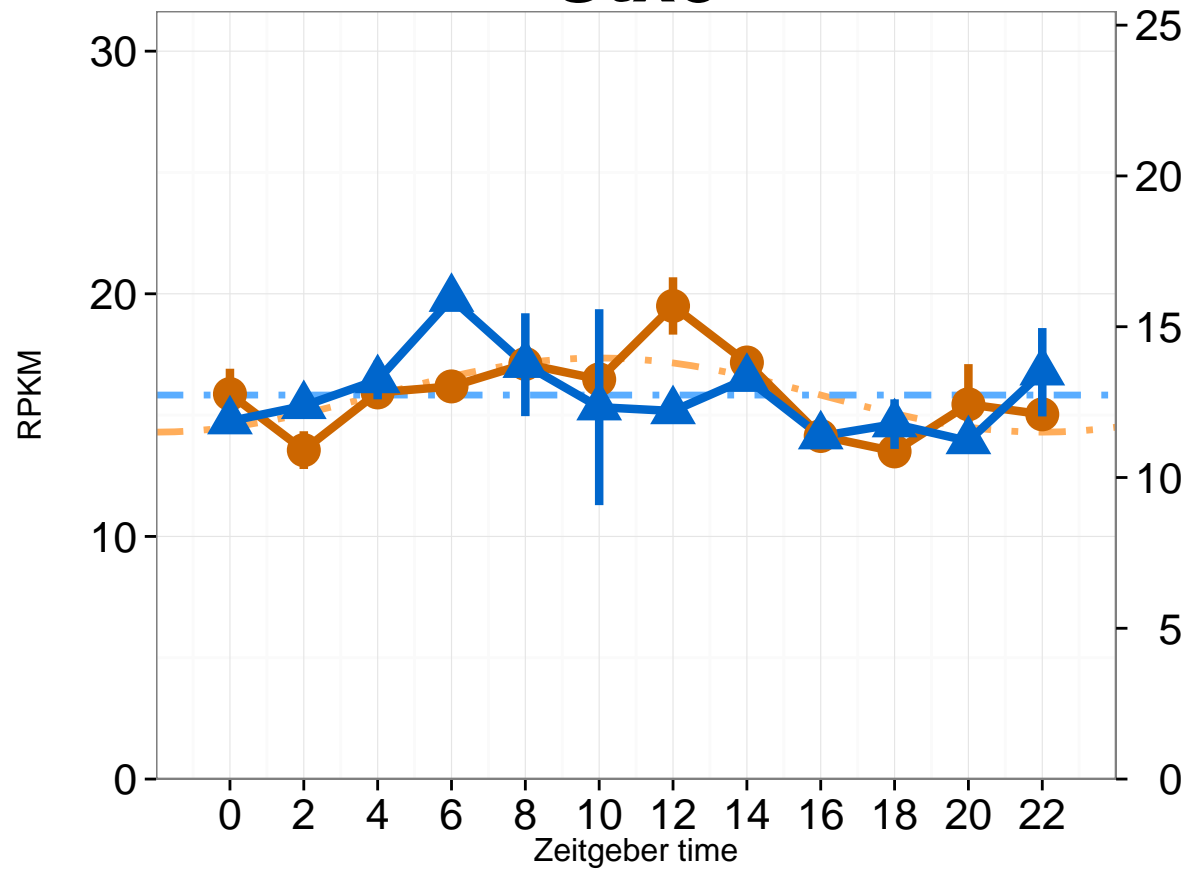

## Stx8

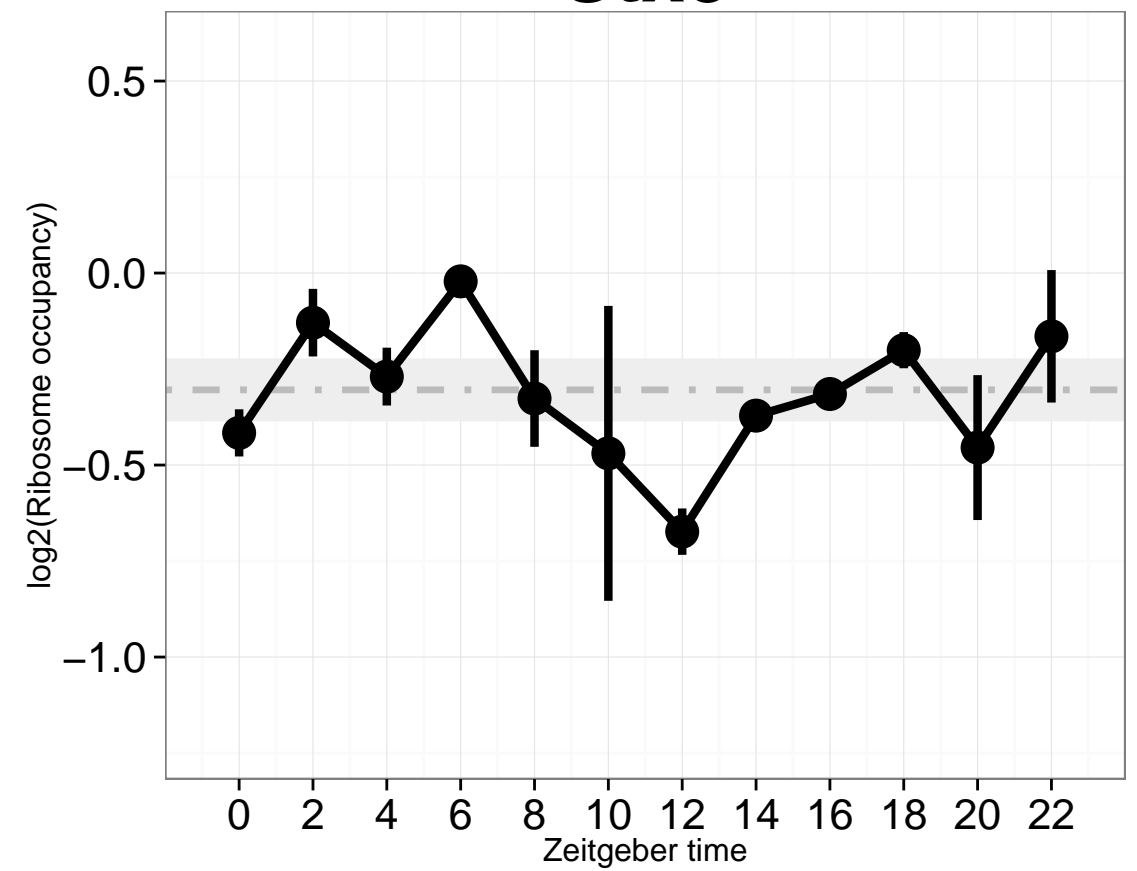

Supplement: SuppDataset_1.zip [file Stx8_set_A.pdf › Supplemental Dataset 1/A-mRNA_nonrhyth_translation_nonrhyth/Stx8_set_A.pdf]

# Stxbp1

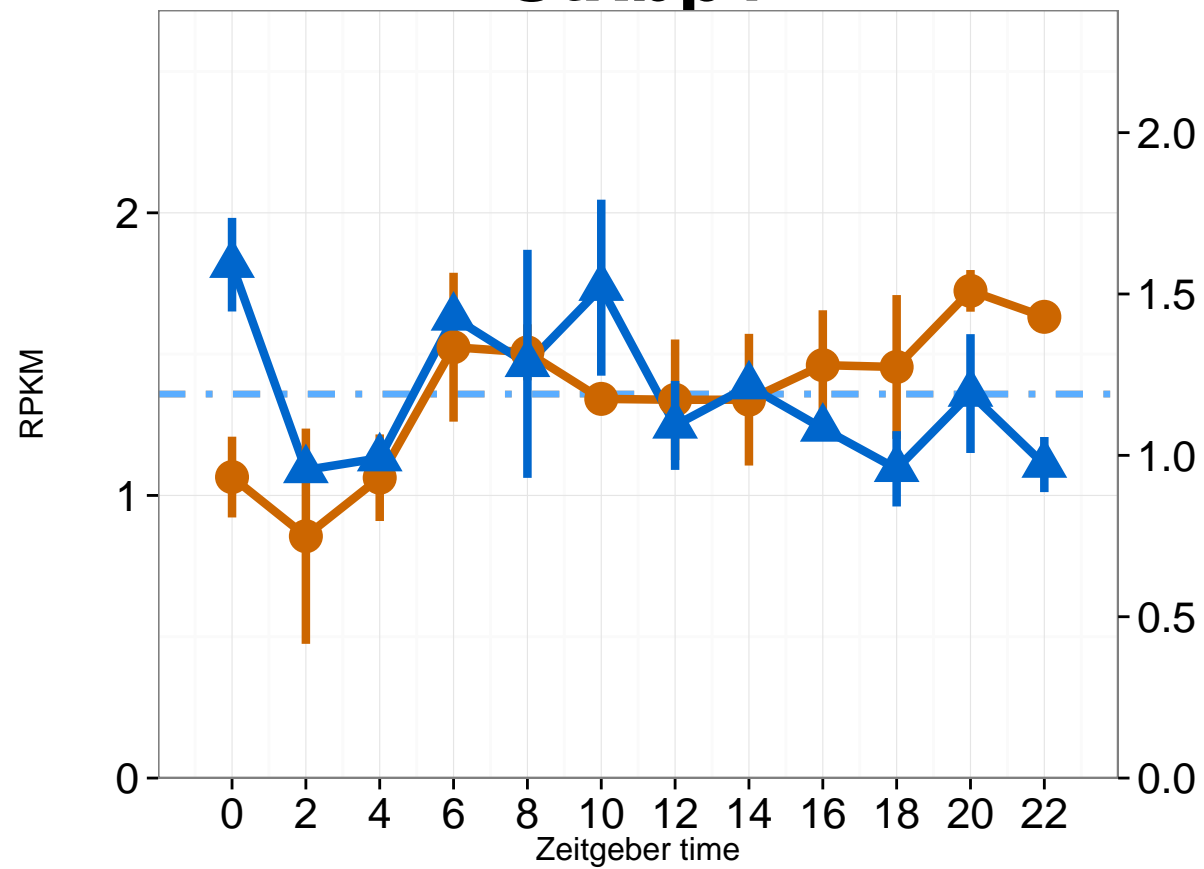

# Stxbp1

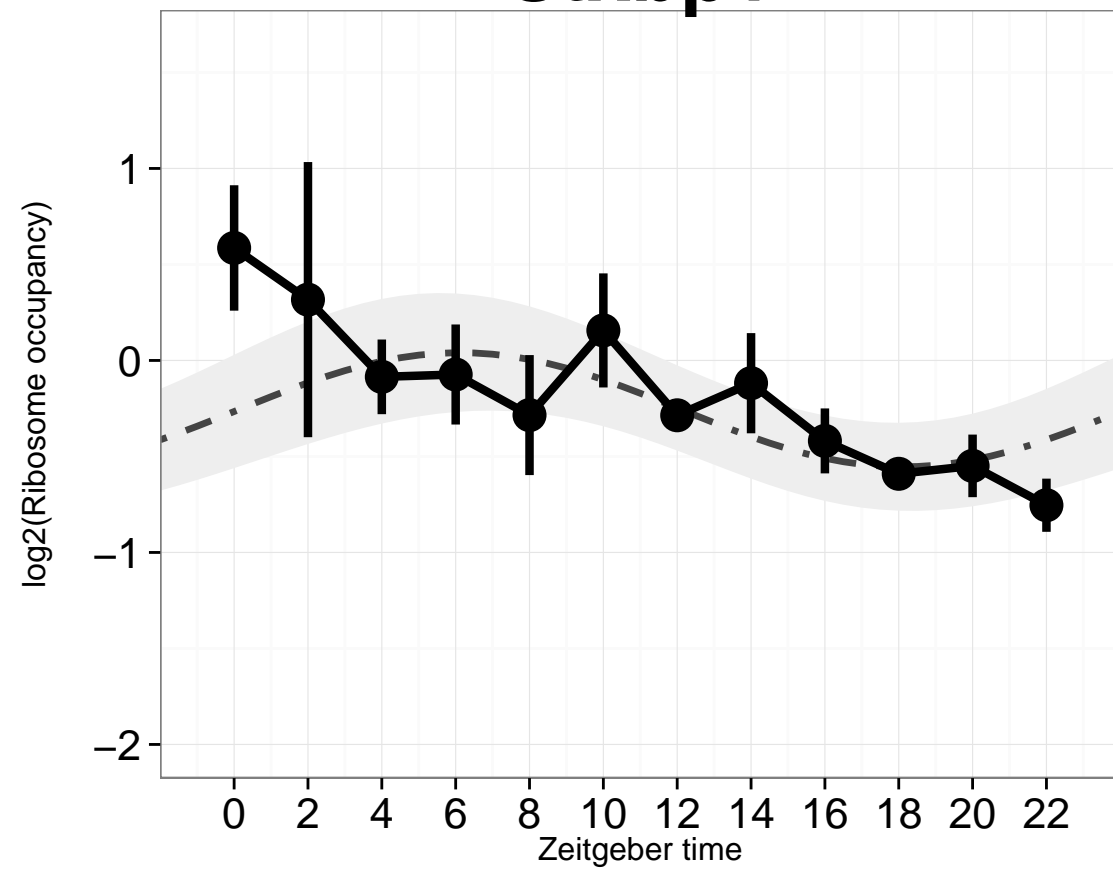

Supplement: SuppDataset_1.zip [file Stxbp1_set_A.pdf › Supplemental Dataset 1/A-mRNA_nonrhyth_translation_nonrhyth/Stxbp1_set_A.pdf]

## Stxbp2

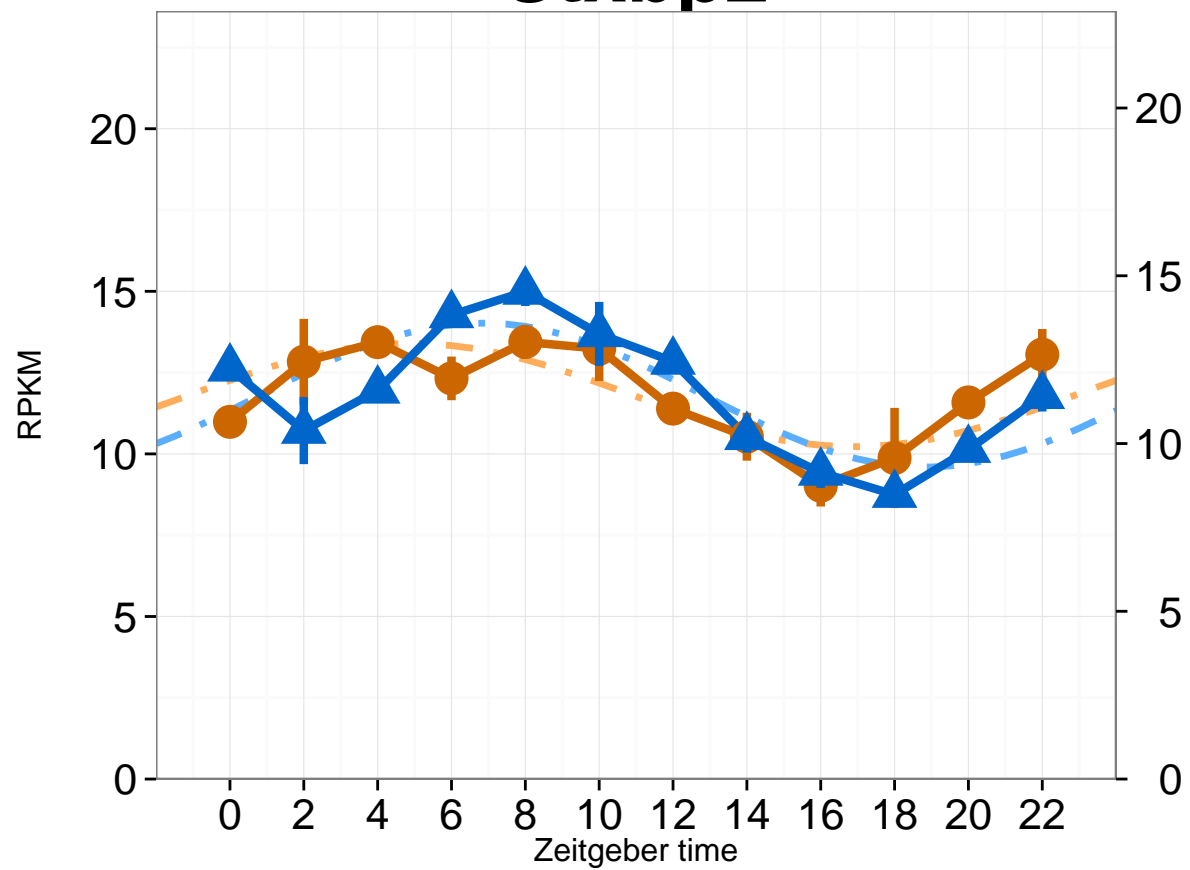

## Stxbp2

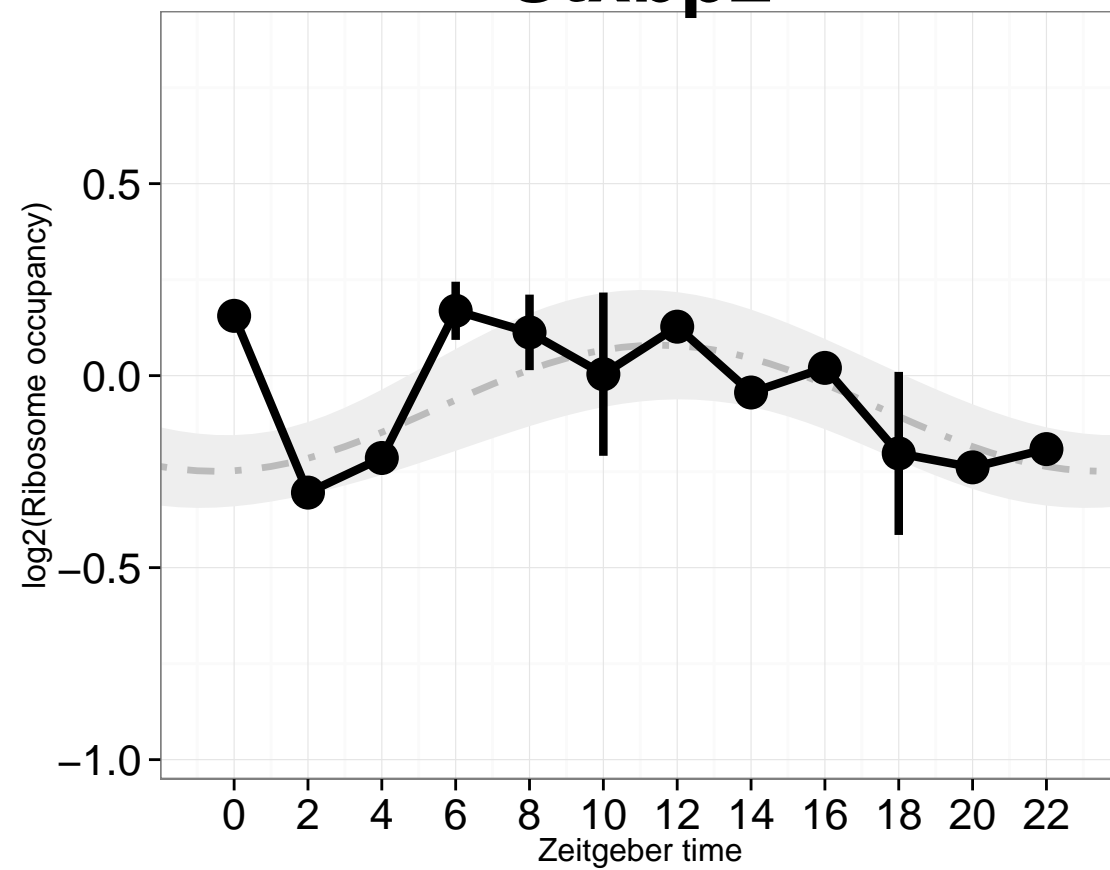

Supplement: SuppDataset_1.zip [file Stxbp2_set_A.pdf › Supplemental Dataset 1/A-mRNA_nonrhyth_translation_nonrhyth/Stxbp2_set_A.pdf]

# Stxbp3a

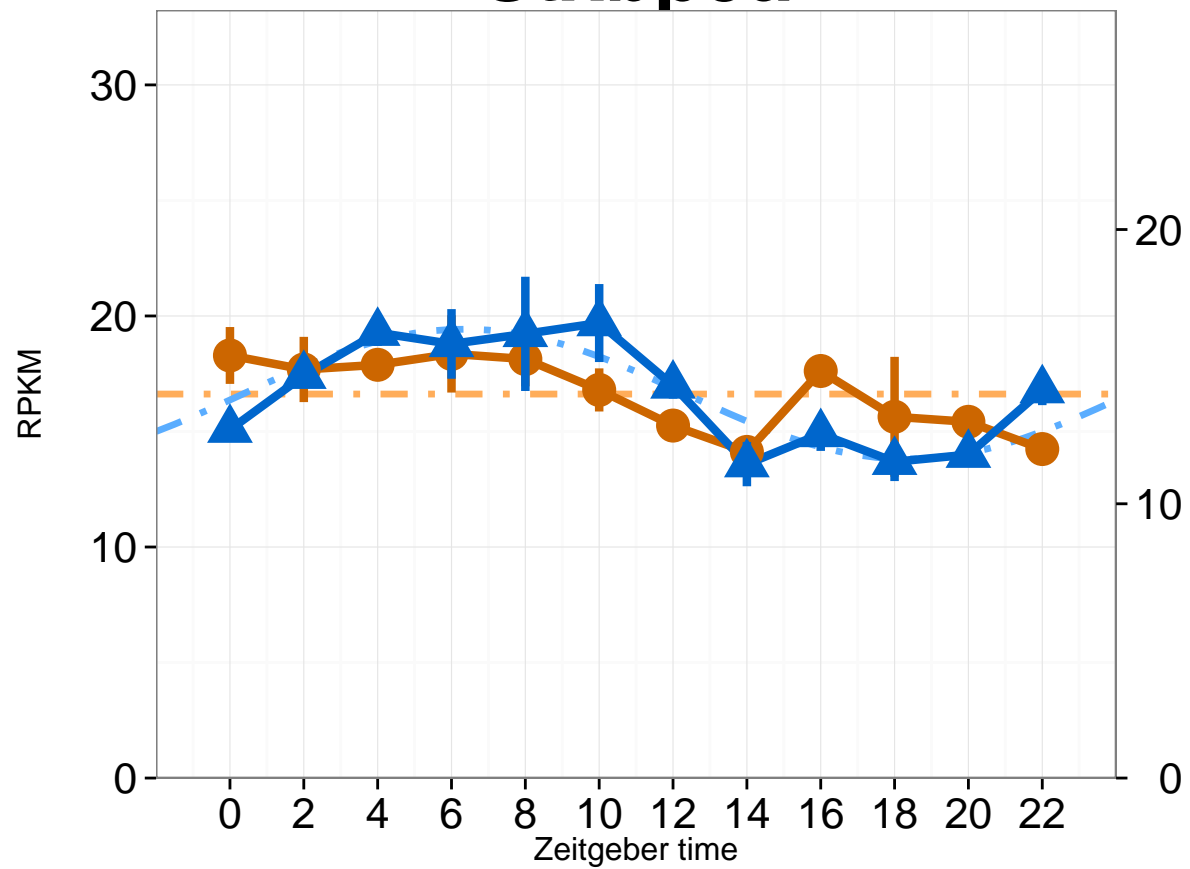

# Stxbp3a

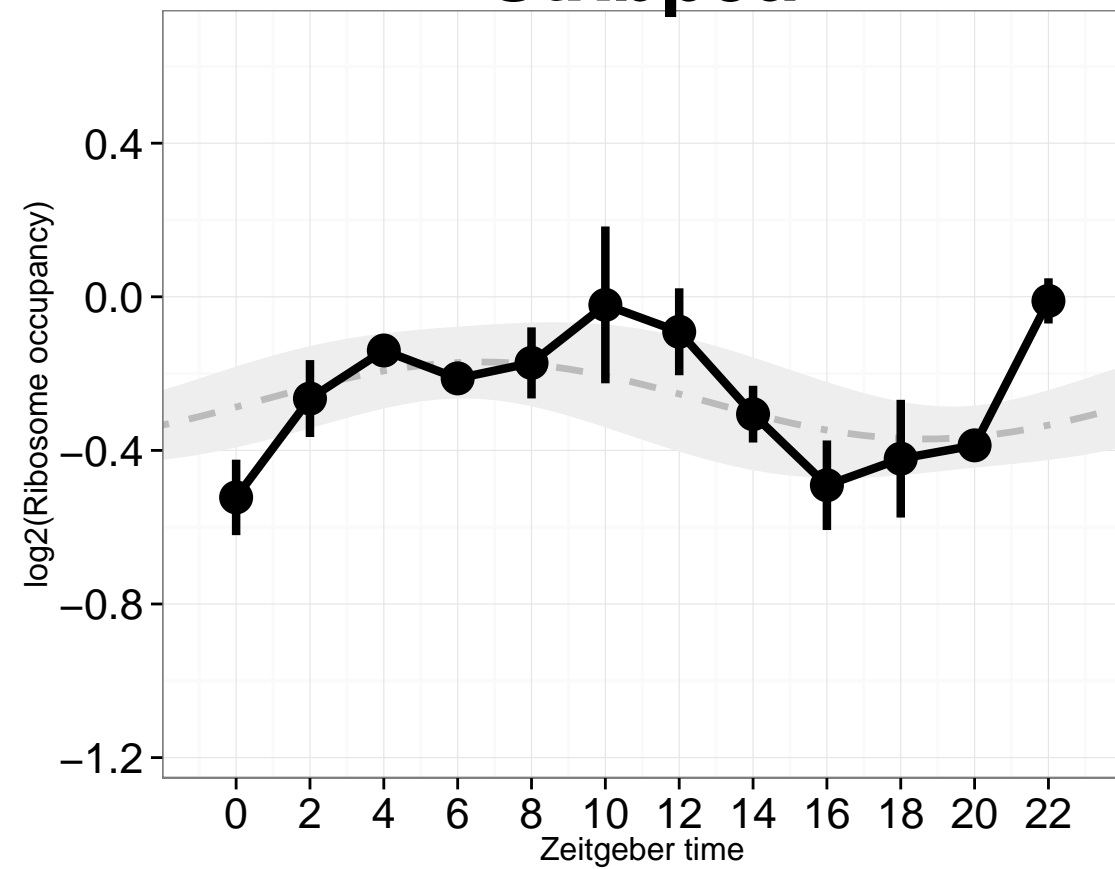

Supplement: SuppDataset_1.zip [file Stxbp3a_set_A.pdf › Supplemental Dataset 1/A-mRNA_nonrhyth_translation_nonrhyth/Stxbp3a_set_A.pdf]

## Stxbp5

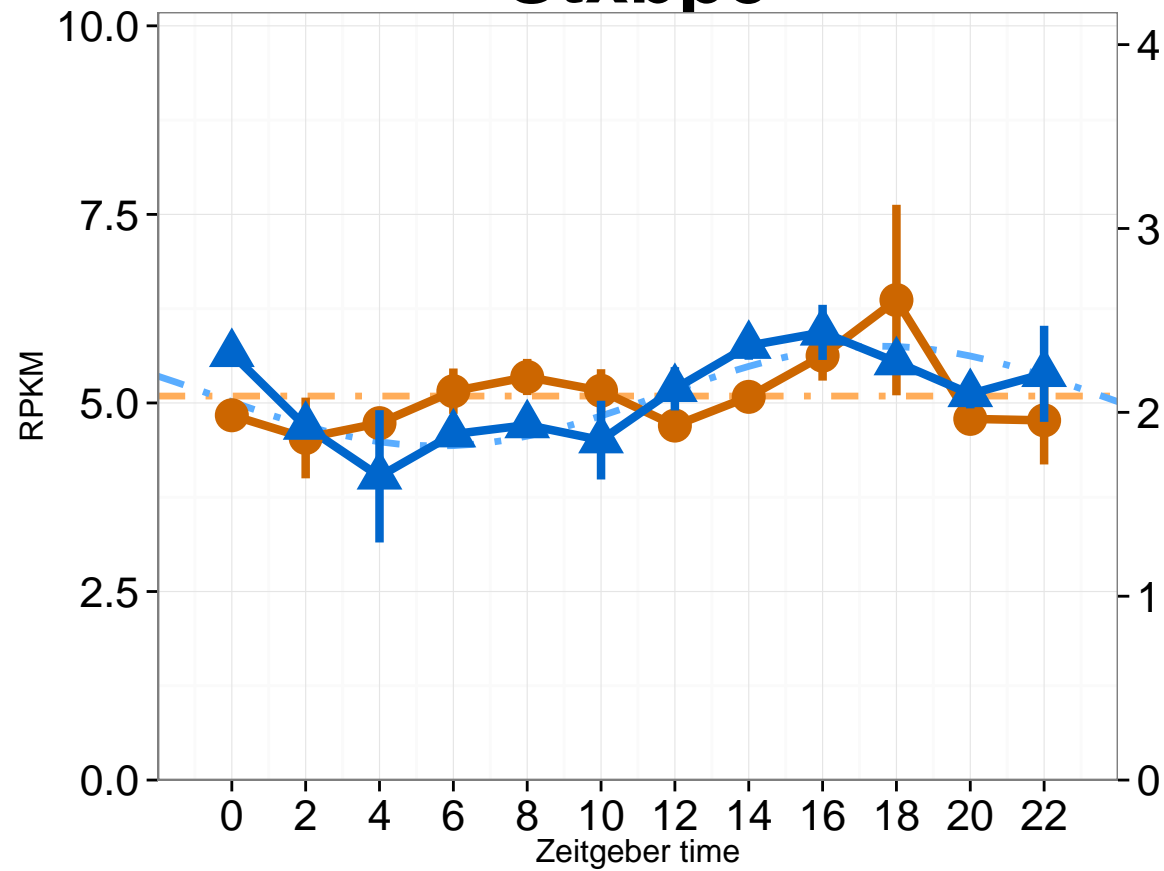

## Stxbp5

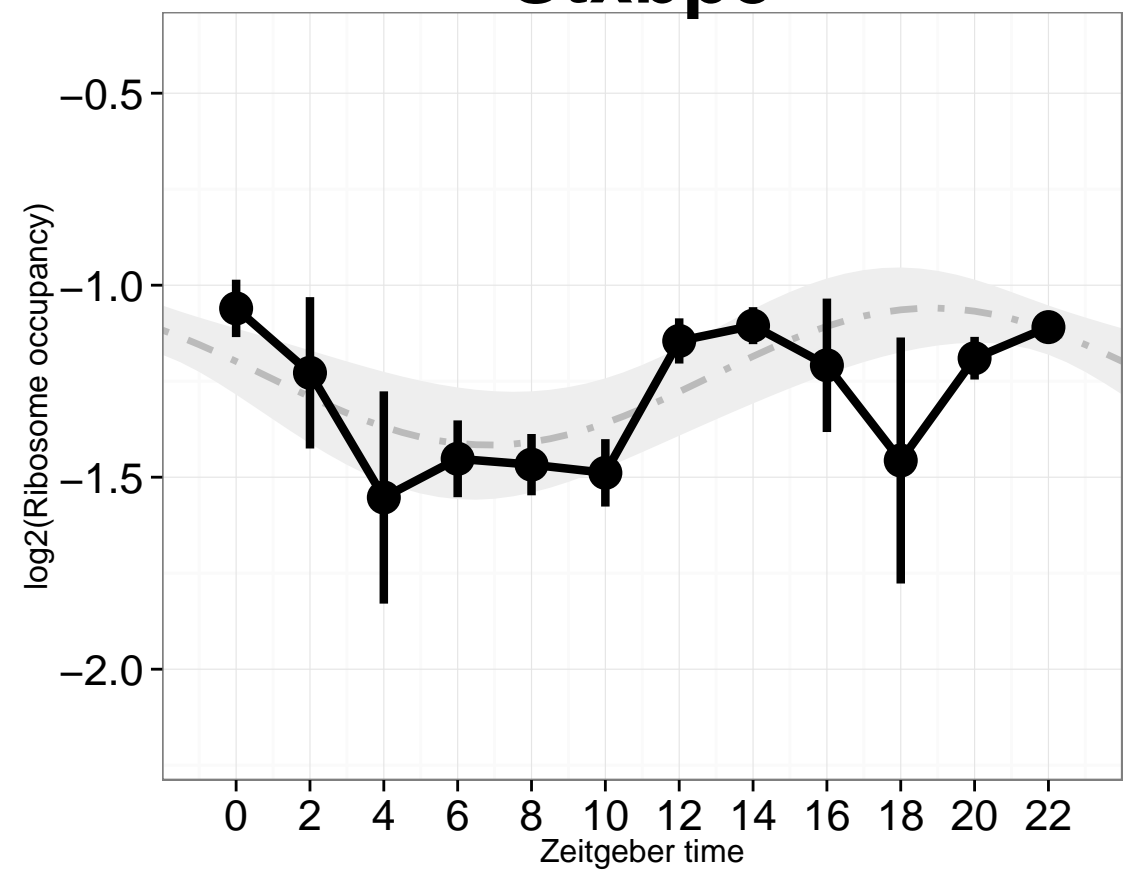

Supplement: SuppDataset_1.zip [file Stxbp5_set_A.pdf › Supplemental Dataset 1/A-mRNA_nonrhyth_translation_nonrhyth/Stxbp5_set_A.pdf]

# Stxbp6

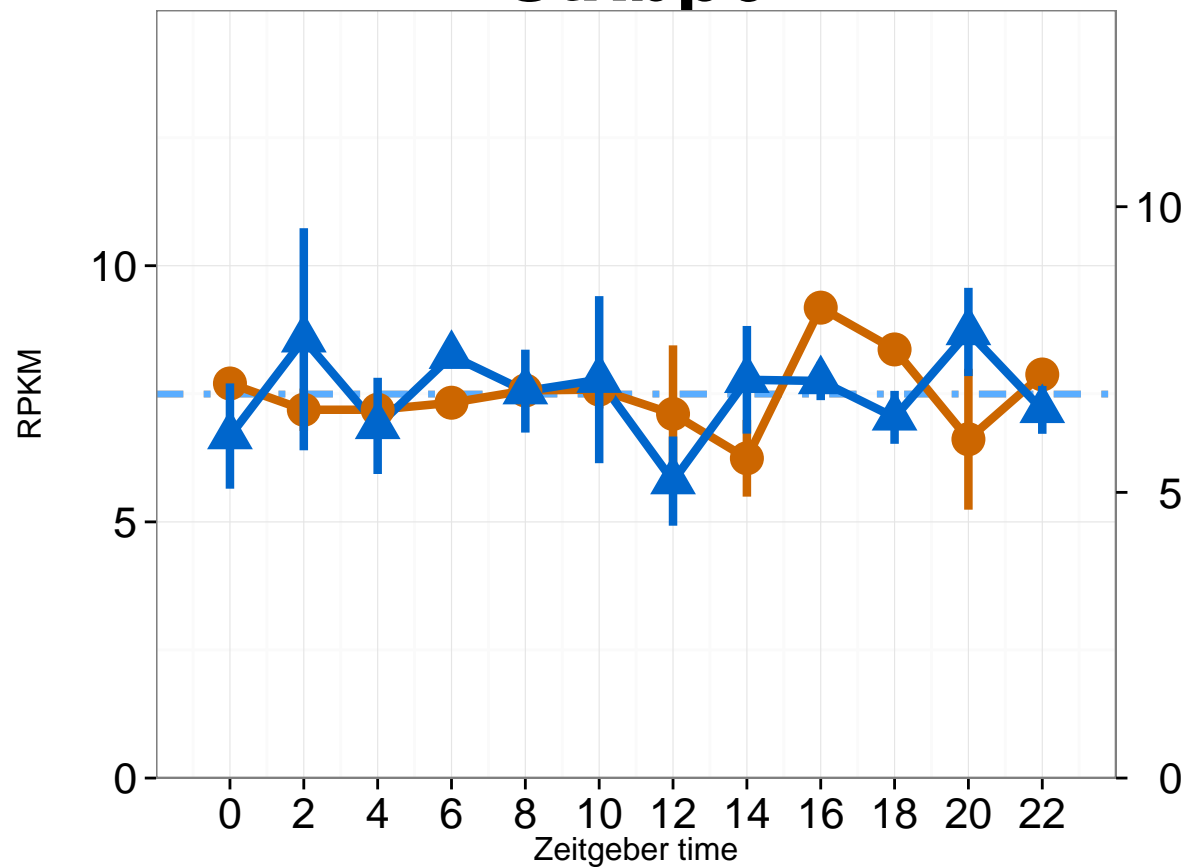

# Stxbp6

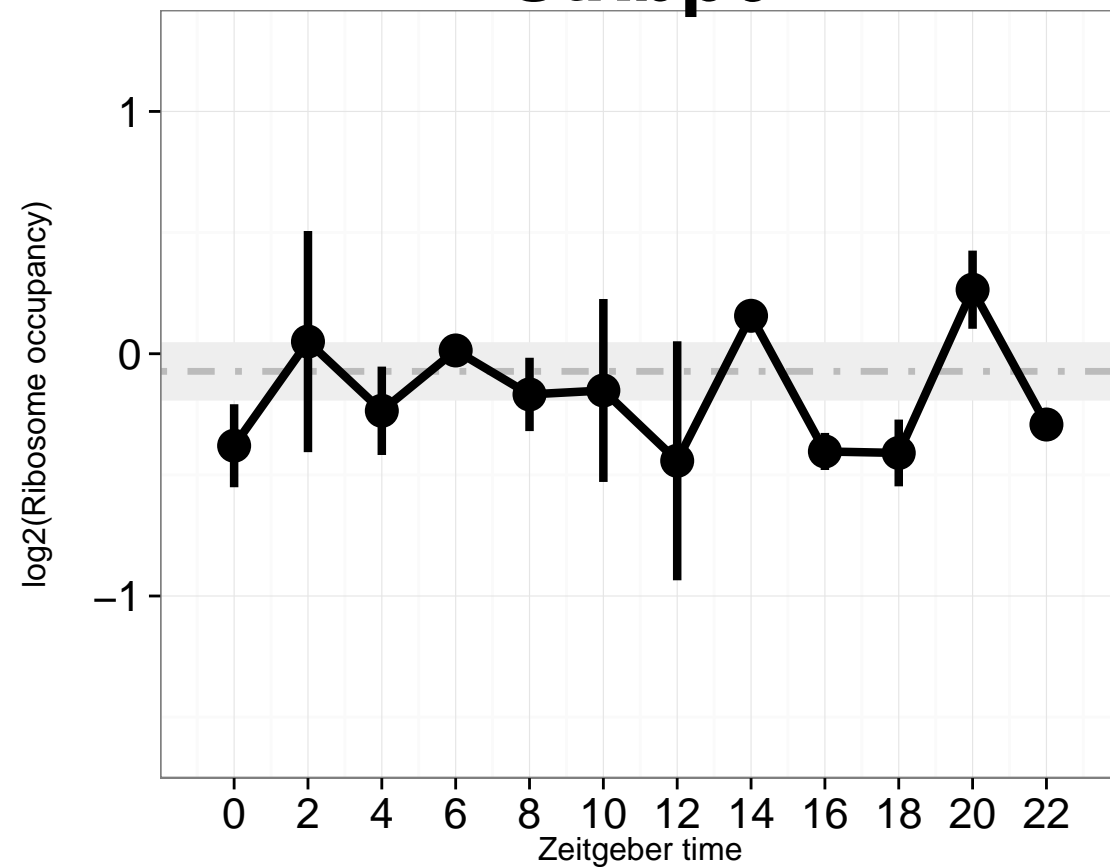

Supplement: SuppDataset_1.zip [file Stxbp6_set_A.pdf › Supplemental Dataset 1/A-mRNA_nonrhyth_translation_nonrhyth/Stxbp6_set_A.pdf]

# Sub1

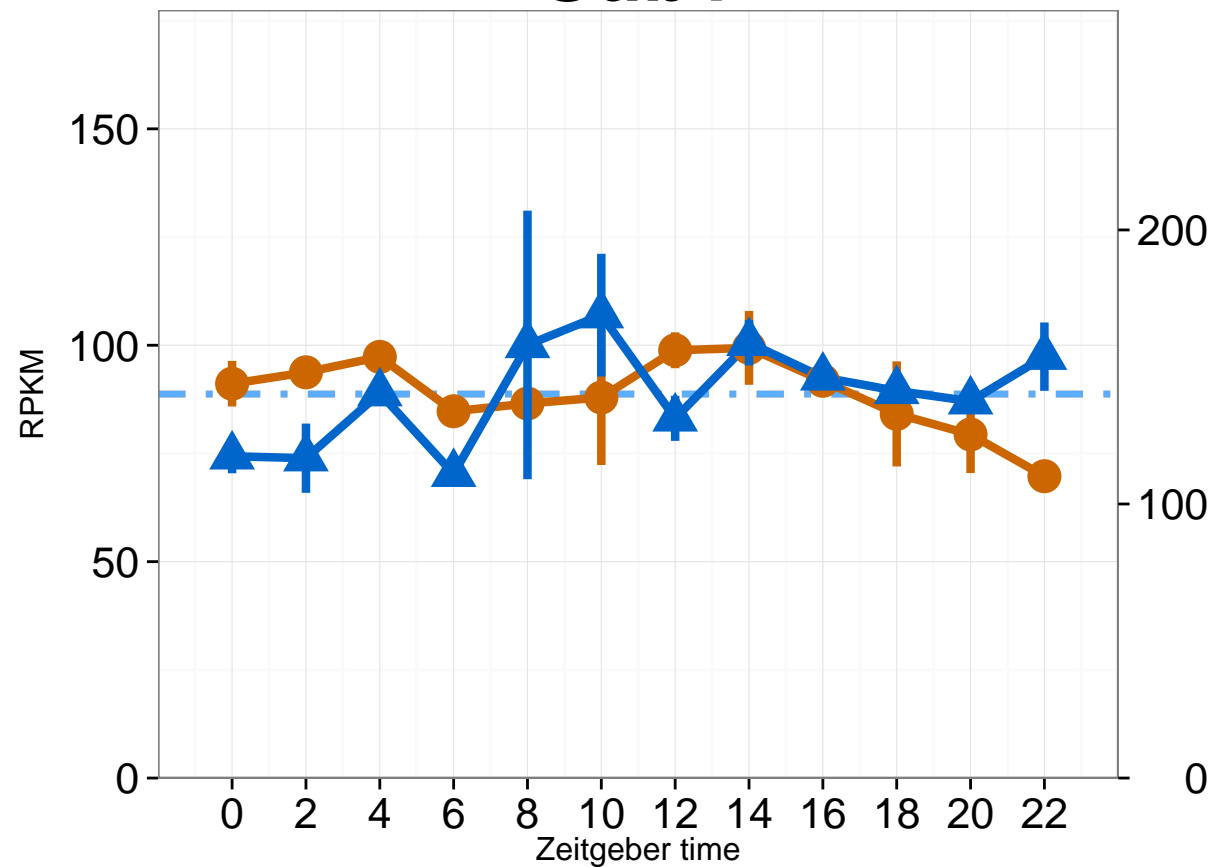

# Sub1

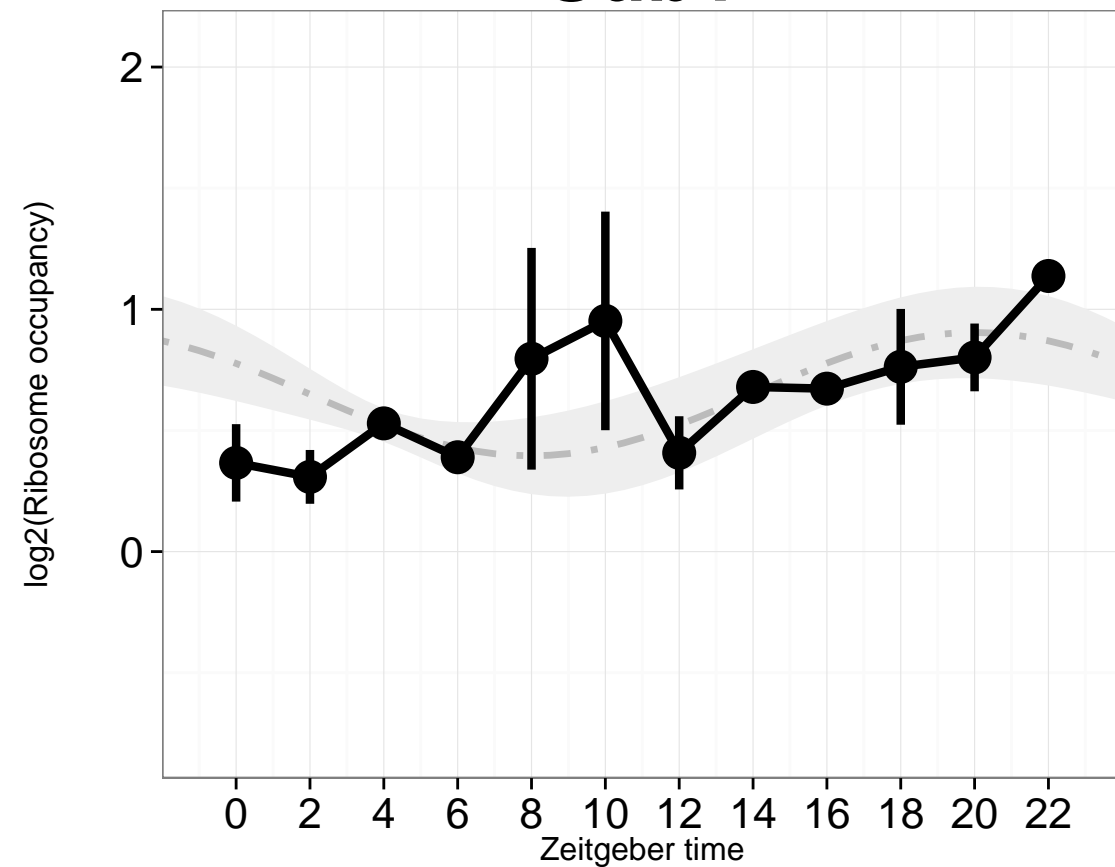

Supplement: SuppDataset_1.zip [file Sub1_set_A.pdf › Supplemental Dataset 1/A-mRNA_nonrhyth_translation_nonrhyth/Sub1_set_A.pdf]

## Suc1a2

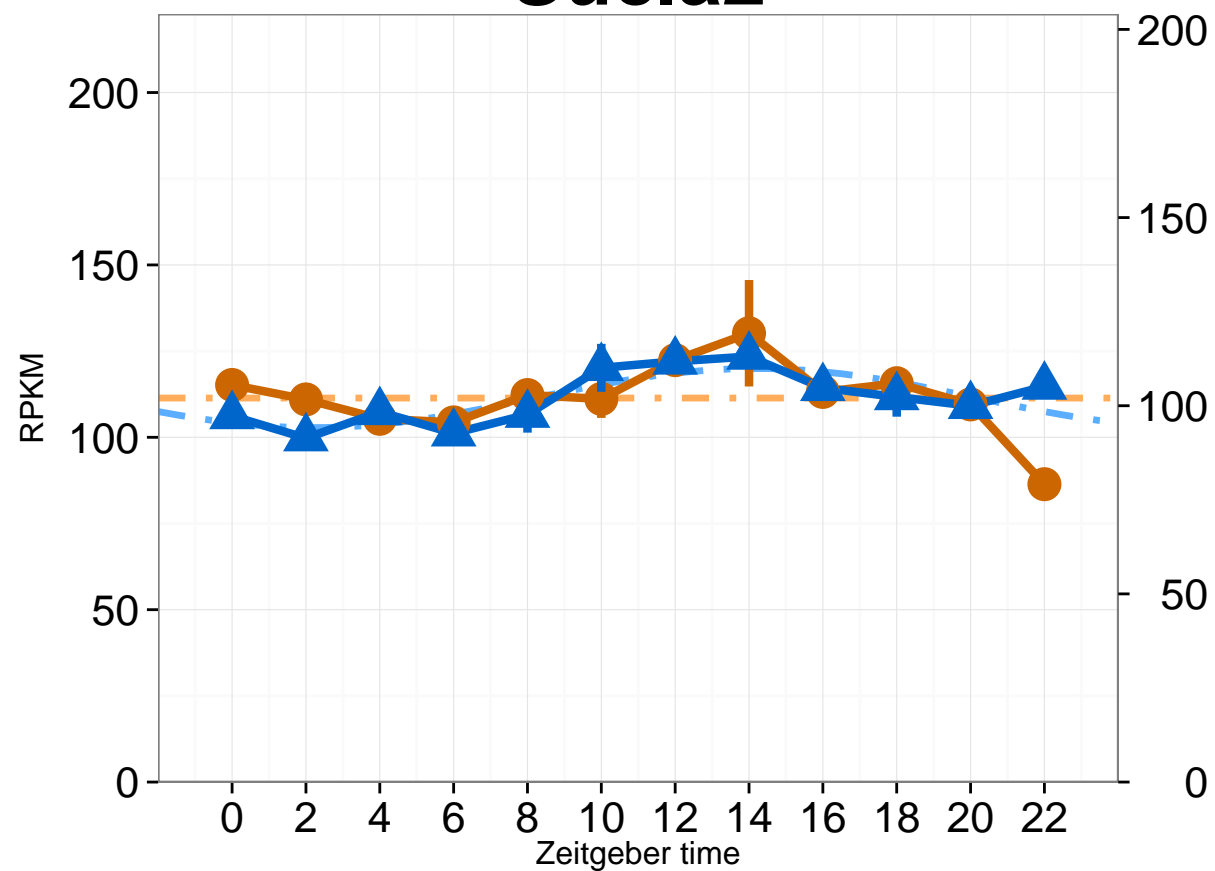

## Suc1a2

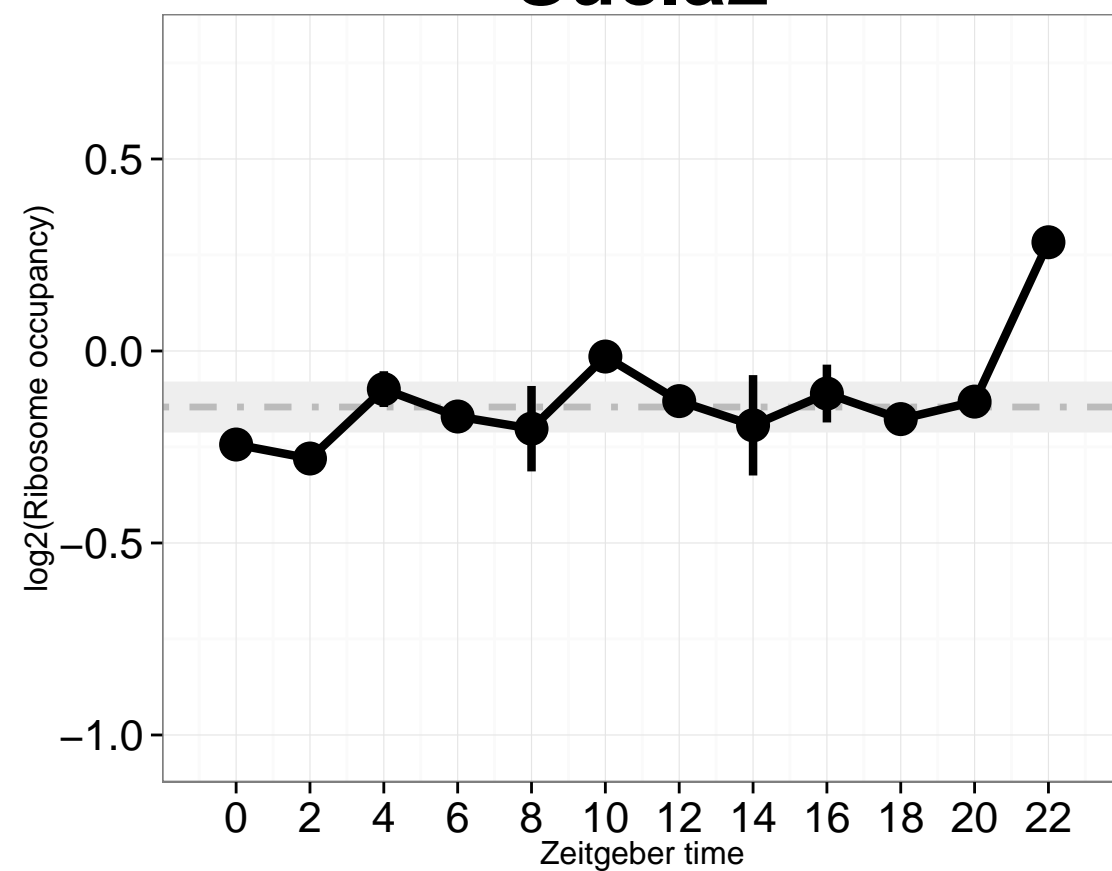

Supplement: SuppDataset_1.zip [file Sucla2_set_A.pdf › Supplemental Dataset 1/A-mRNA_nonrhyth_translation_nonrhyth/Sucla2_set_A.pdf]

# Suc1g1

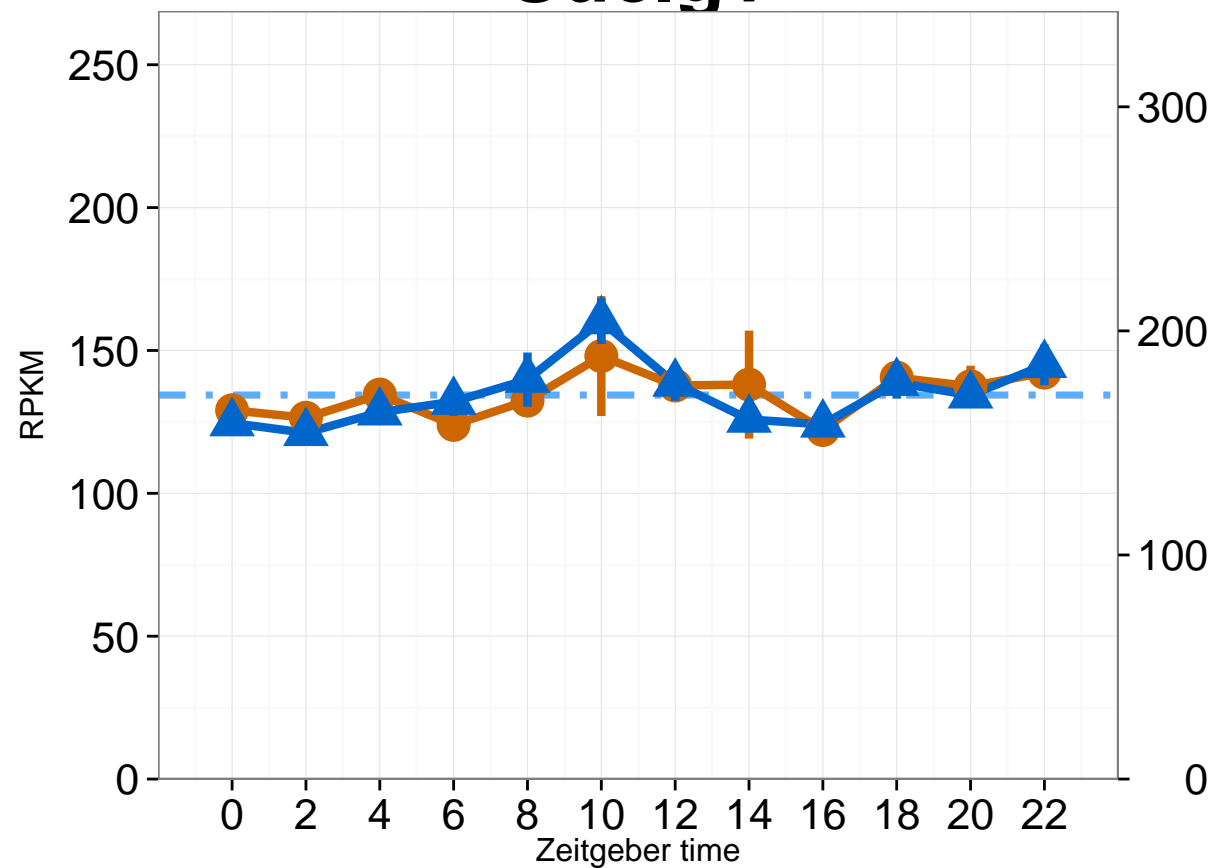

# Suc1g1

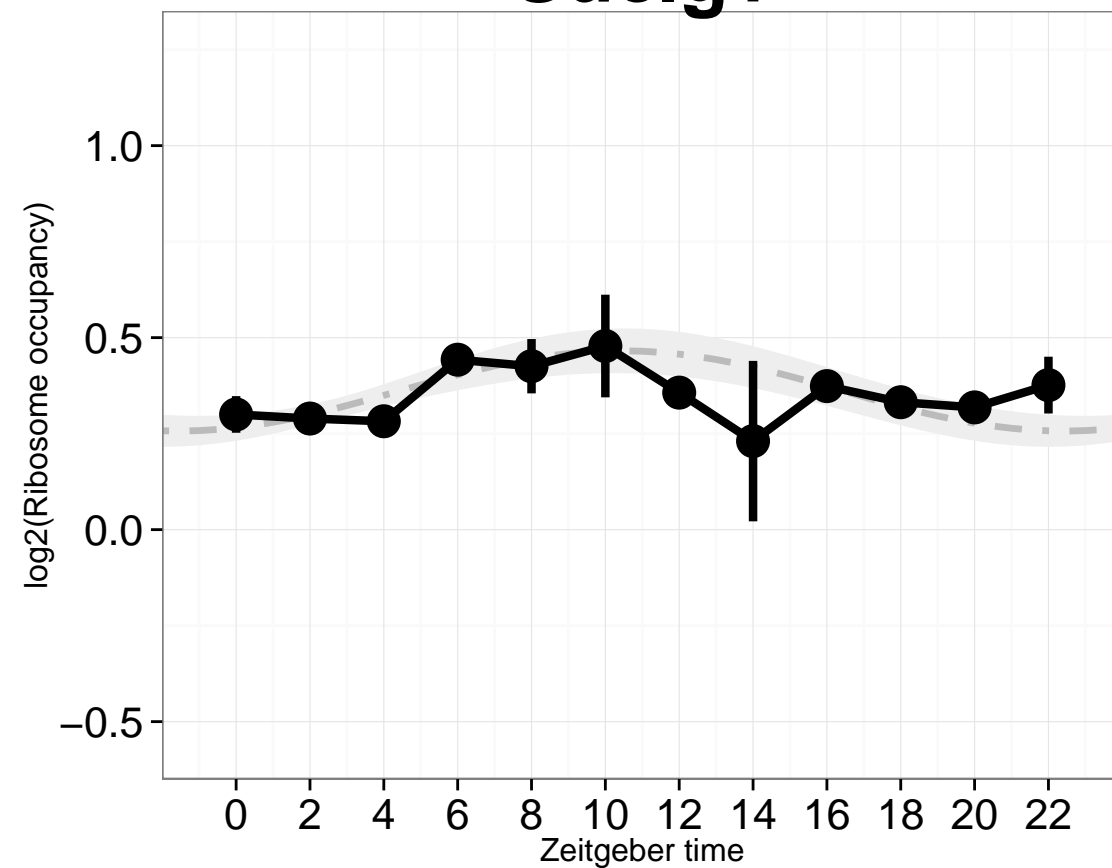

Supplement: SuppDataset_1.zip [file Suclg1_set_A.pdf › Supplemental Dataset 1/A-mRNA_nonrhyth_translation_nonrhyth/Suclg1_set_A.pdf]

## Suc1g2

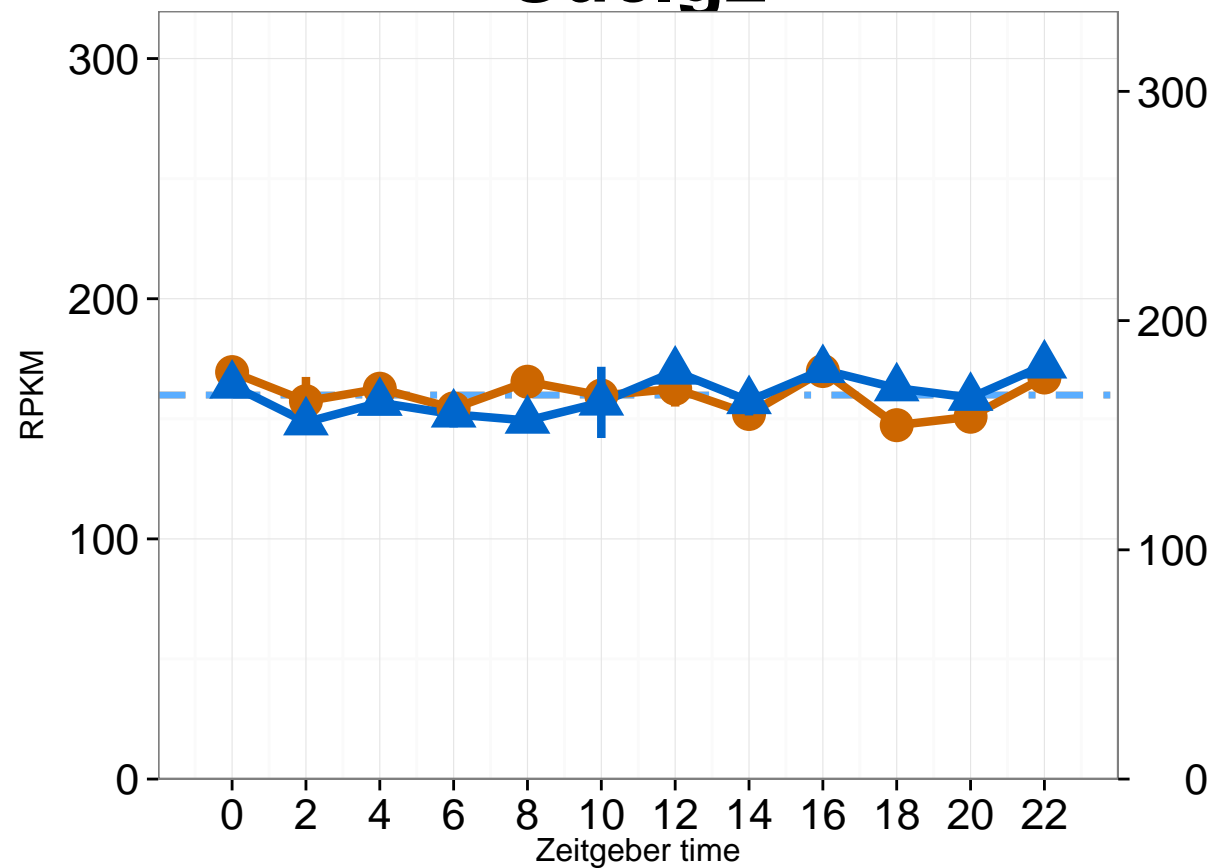

## Suc1g2

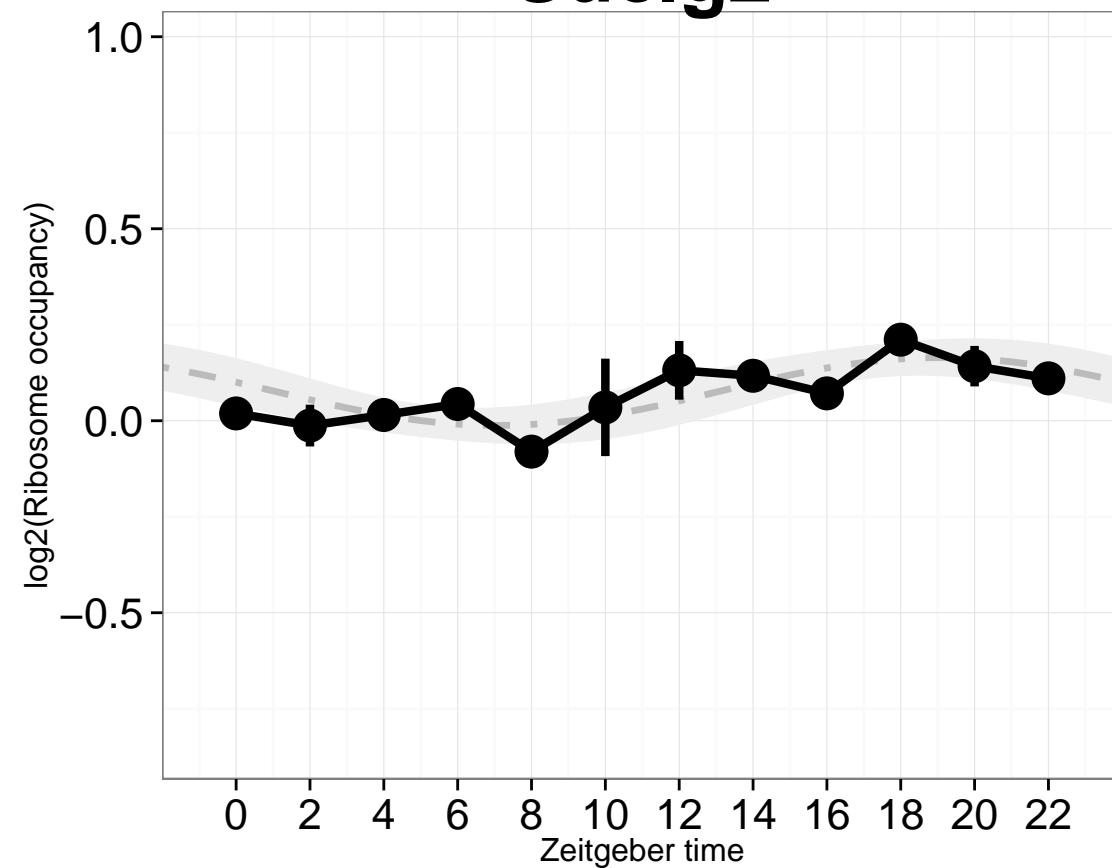

Supplement: SuppDataset_1.zip [file Suclg2_set_A.pdf › Supplemental Dataset 1/A-mRNA_nonrhyth_translation_nonrhyth/Suclg2_set_A.pdf]

## Sucnr1

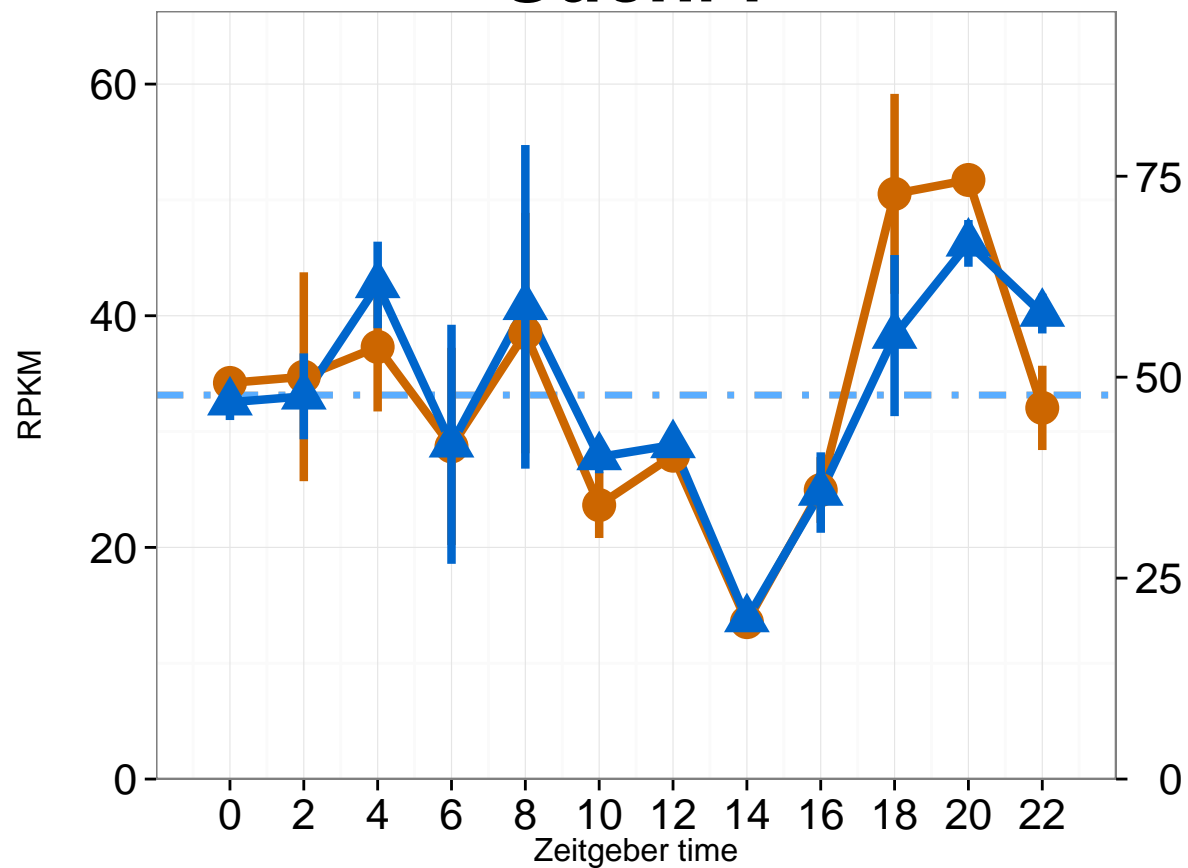

## Sucnr1

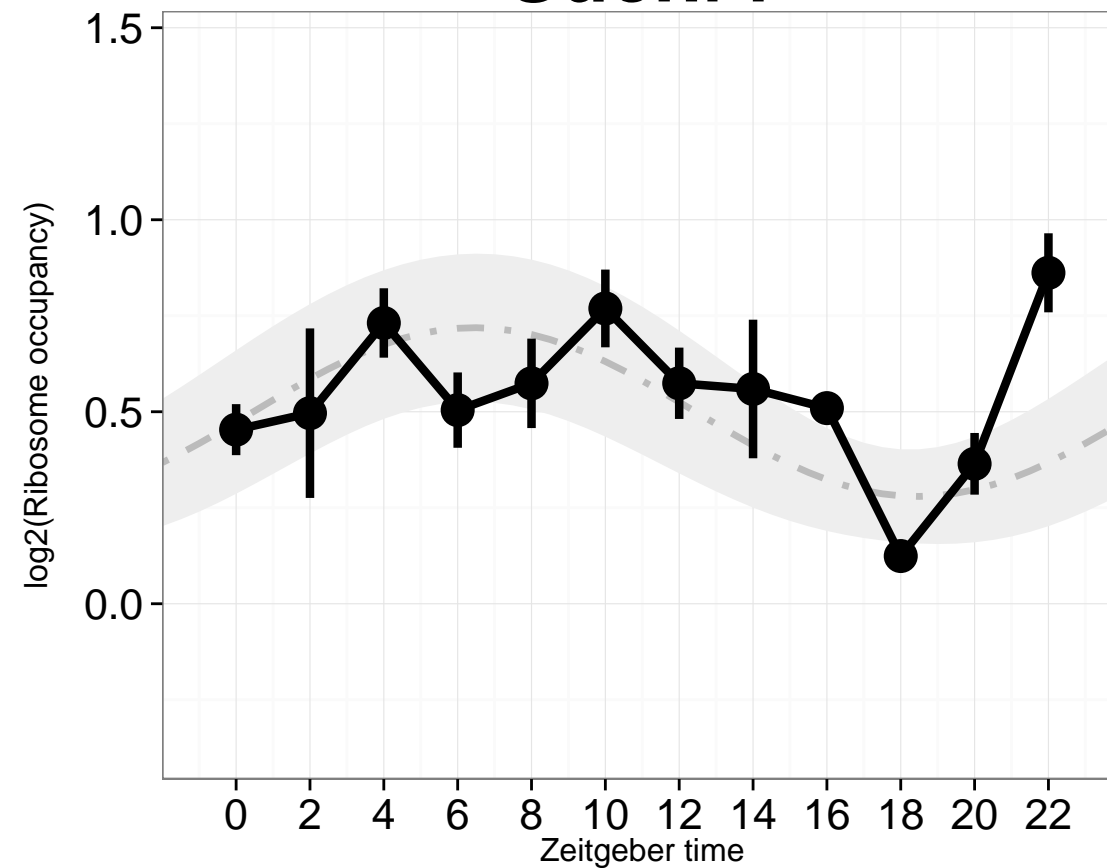

Supplement: SuppDataset_1.zip [file Sucnr1_set_A.pdf › Supplemental Dataset 1/A-mRNA_nonrhyth_translation_nonrhyth/Sucnr1_set_A.pdf]

# Suds3

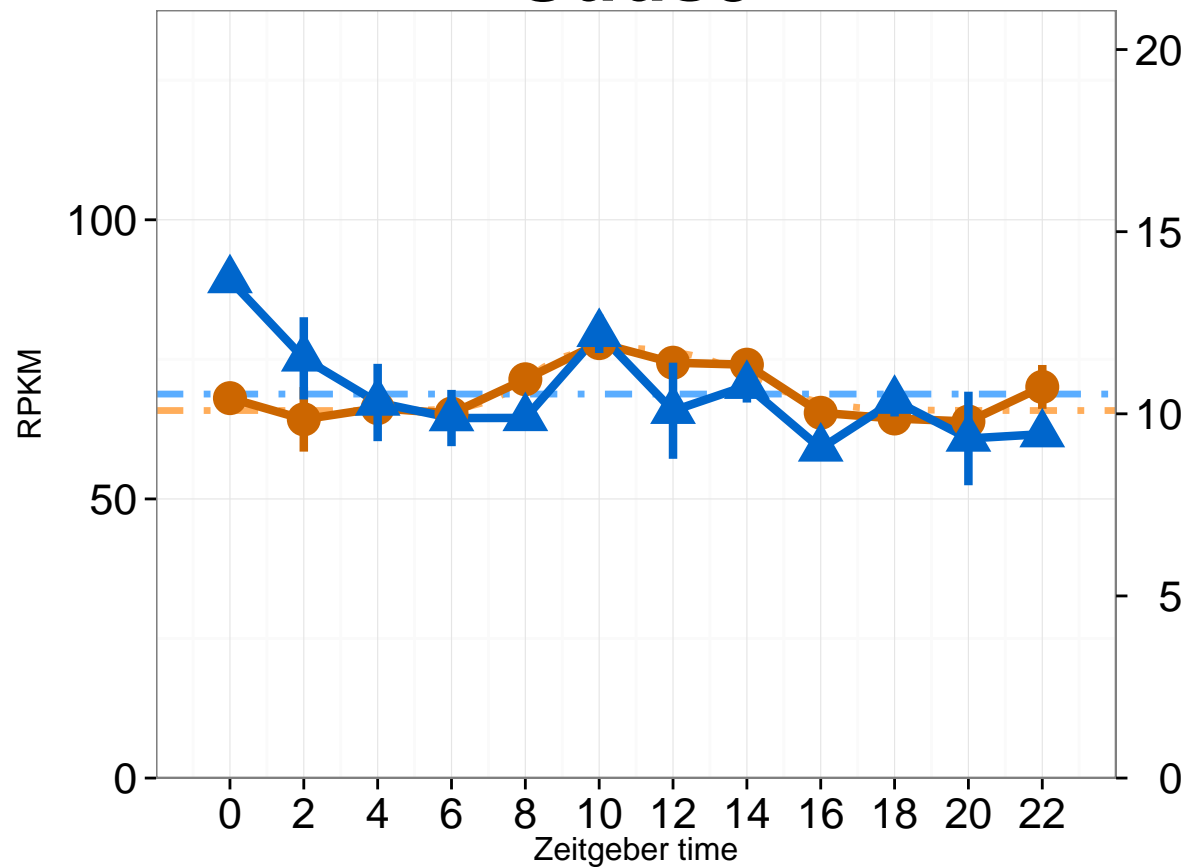

# Suds3

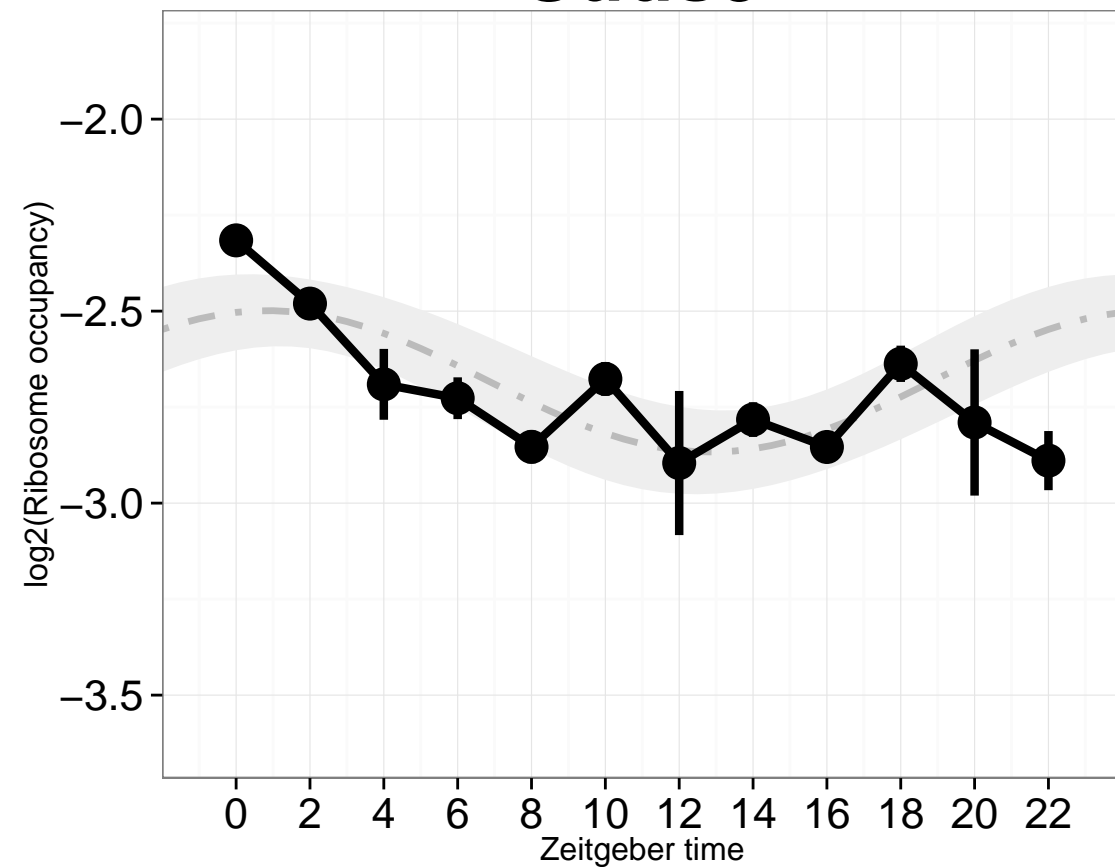

Supplement: SuppDataset_1.zip [file Suds3_set_A.pdf › Supplemental Dataset 1/A-mRNA_nonrhyth_translation_nonrhyth/Suds3_set_A.pdf]

## Sufu

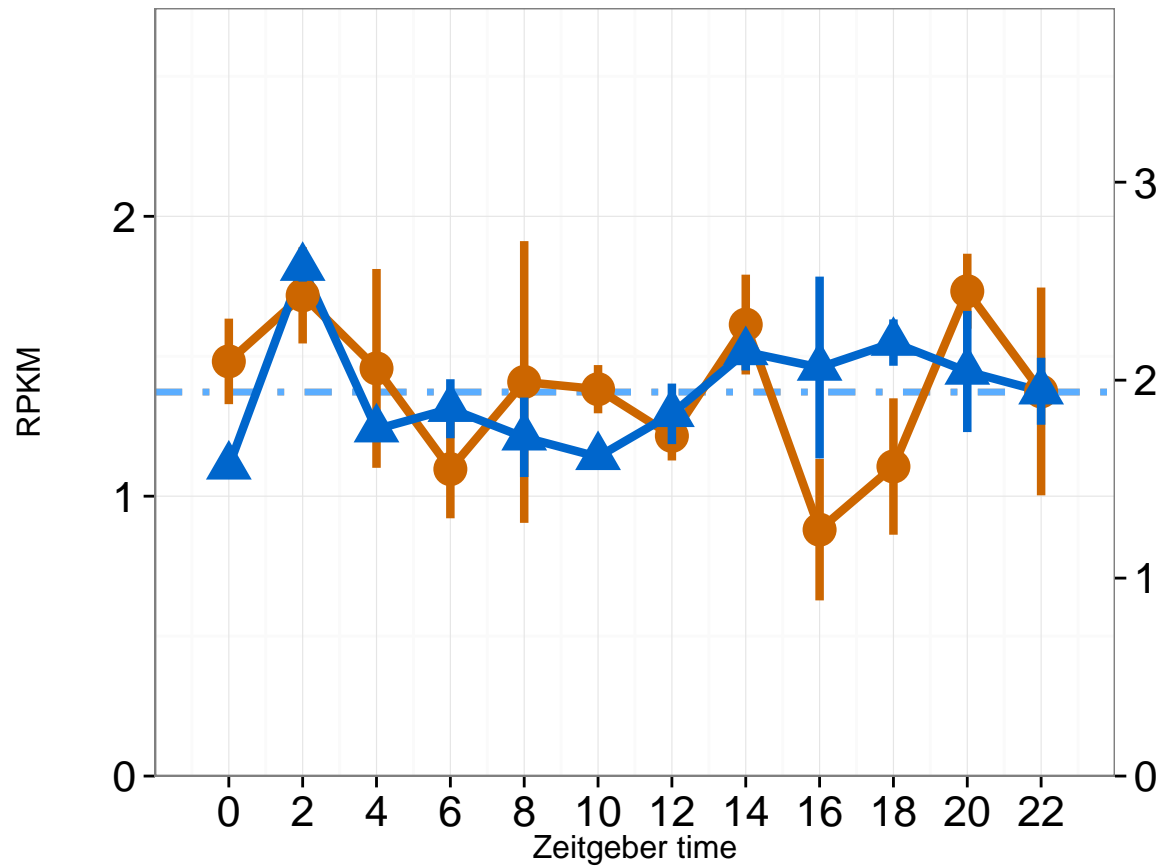

## Sufu

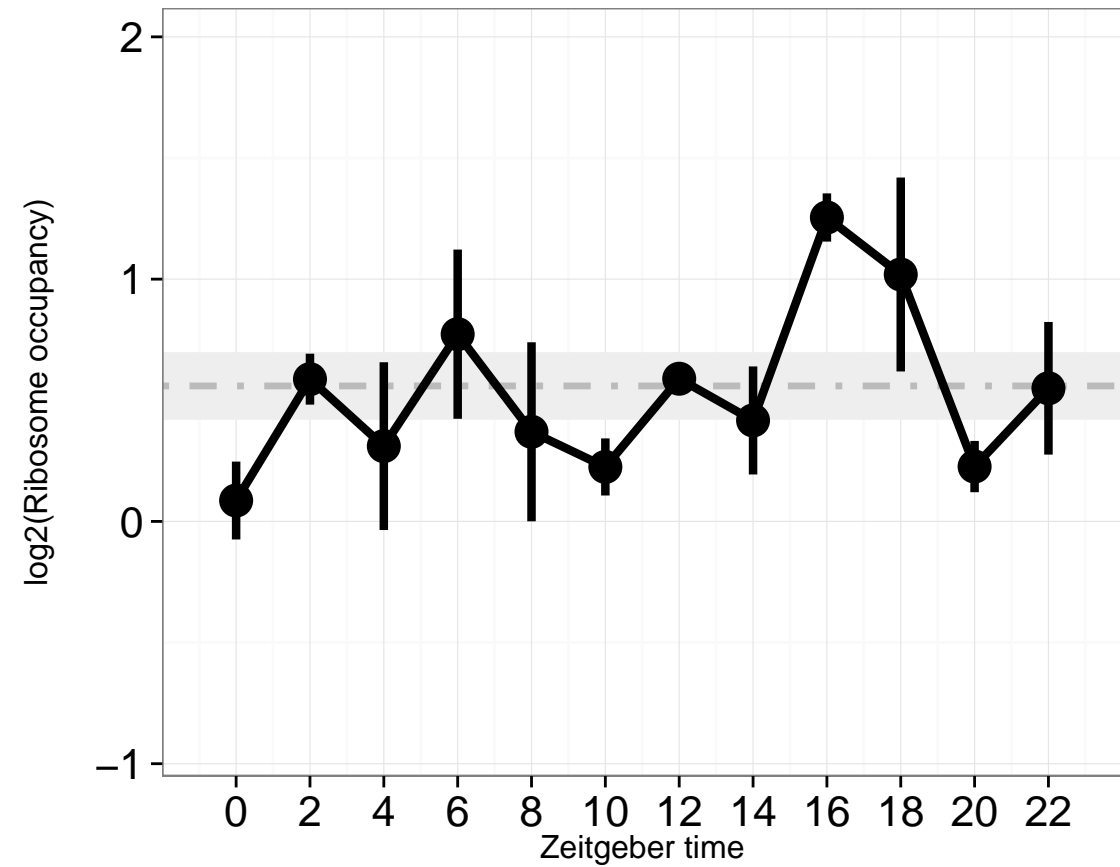

Supplement: SuppDataset_1.zip [file Sufu_set_A.pdf › Supplemental Dataset 1/A-mRNA_nonrhyth_translation_nonrhyth/Sufu_set_A.pdf]

# Sugp1

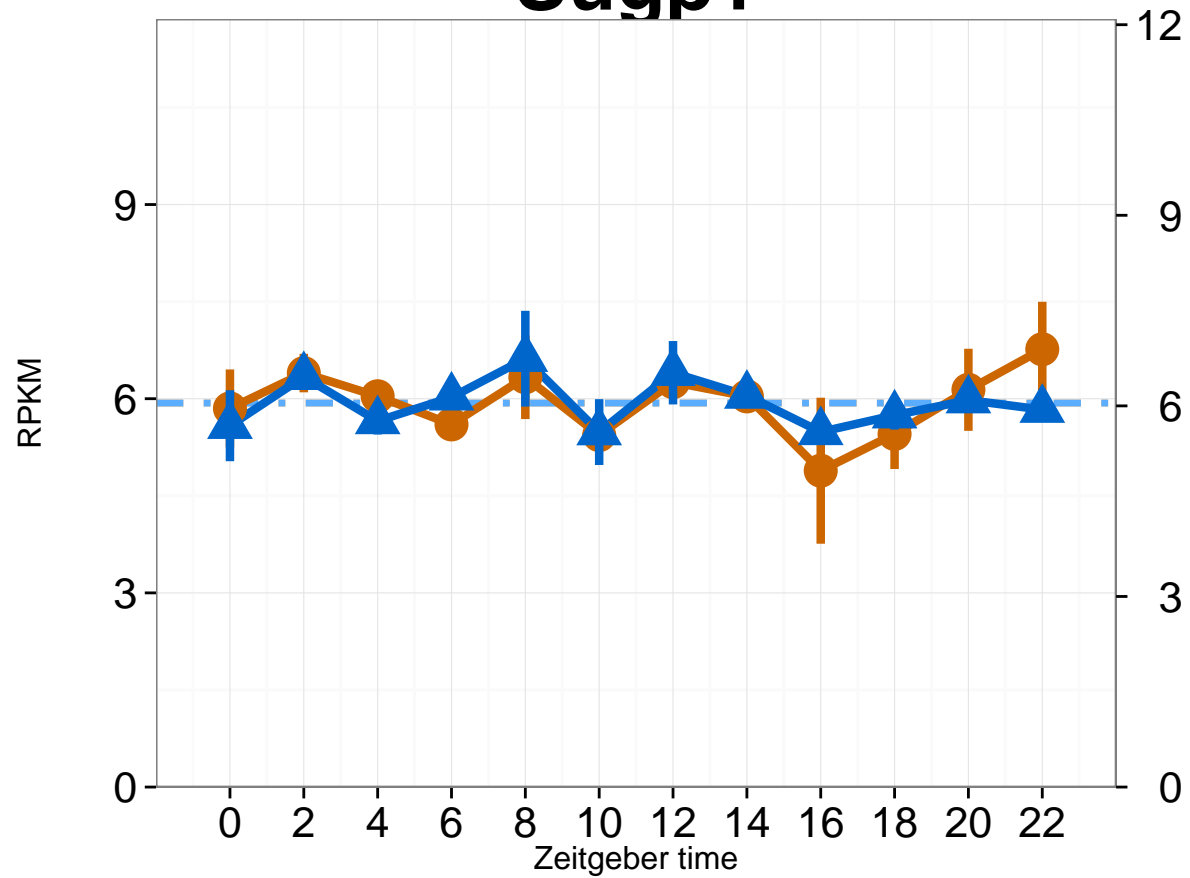

# Sugp1

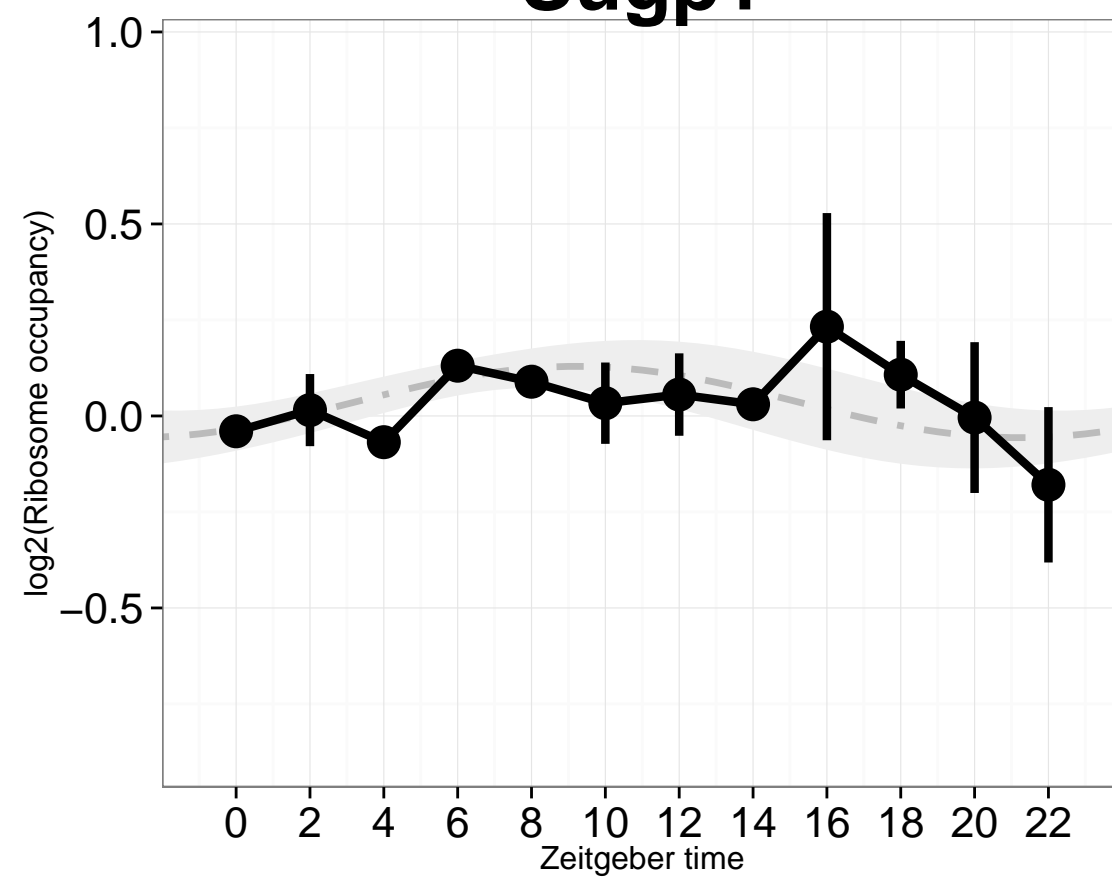

Supplement: SuppDataset_1.zip [file Sugp1_set_A.pdf › Supplemental Dataset 1/A-mRNA_nonrhyth_translation_nonrhyth/Sugp1_set_A.pdf]

## Sugp2

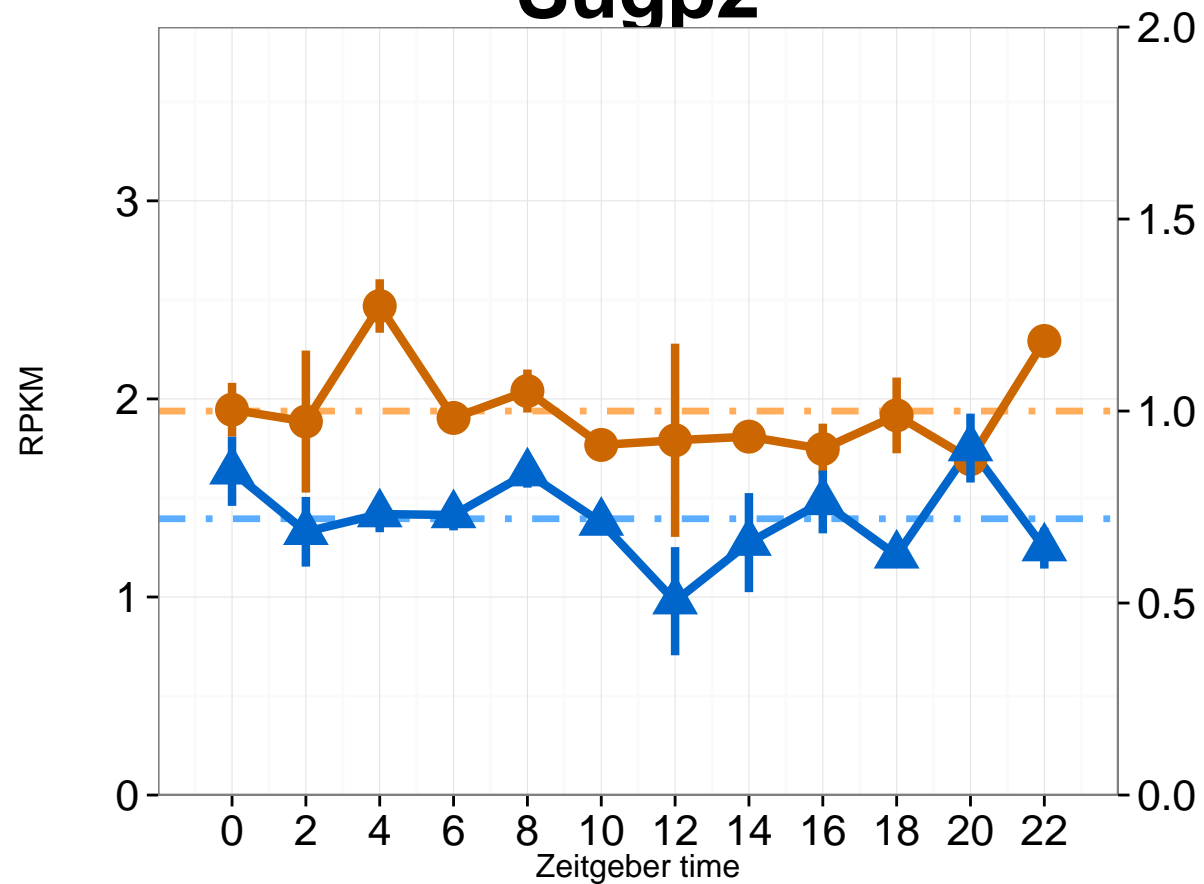

## Sugp2

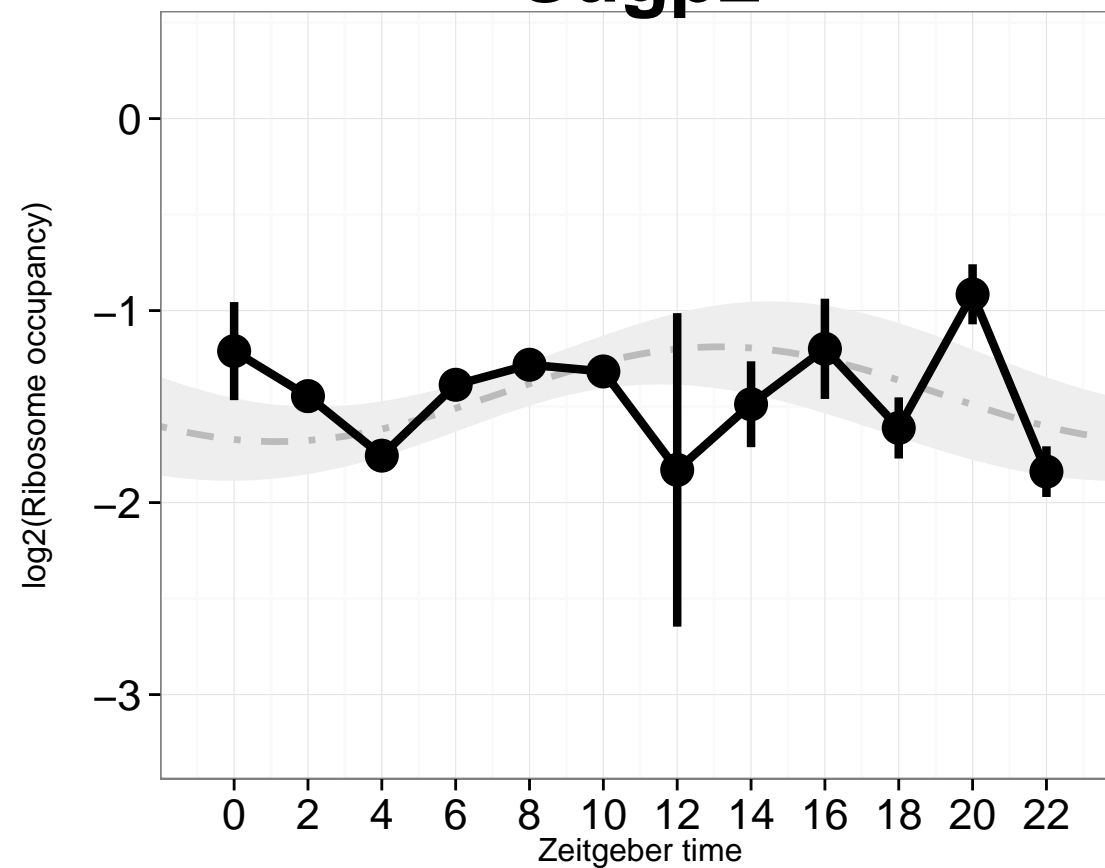

Supplement: SuppDataset_1.zip [file Sugp2_set_A.pdf › Supplemental Dataset 1/A-mRNA_nonrhyth_translation_nonrhyth/Sugp2_set_A.pdf]

# Sugt1

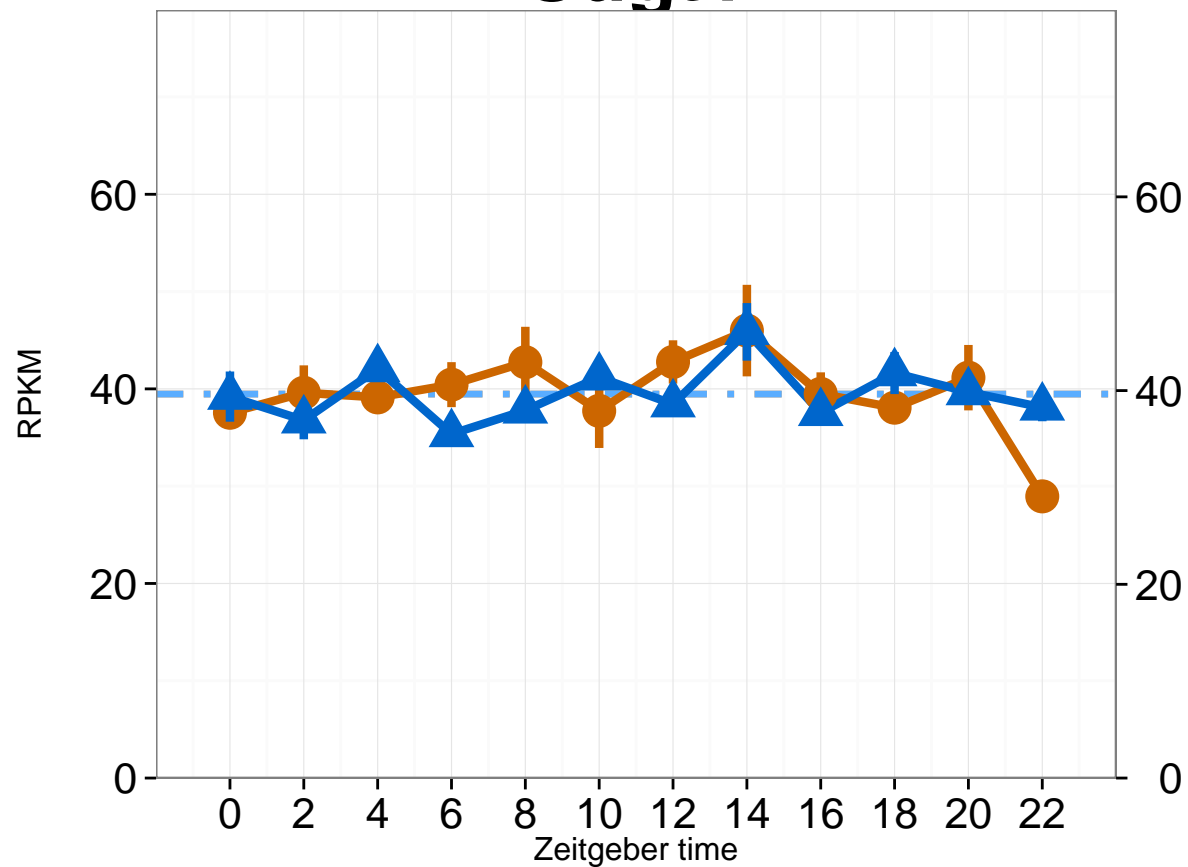

# Sugt1

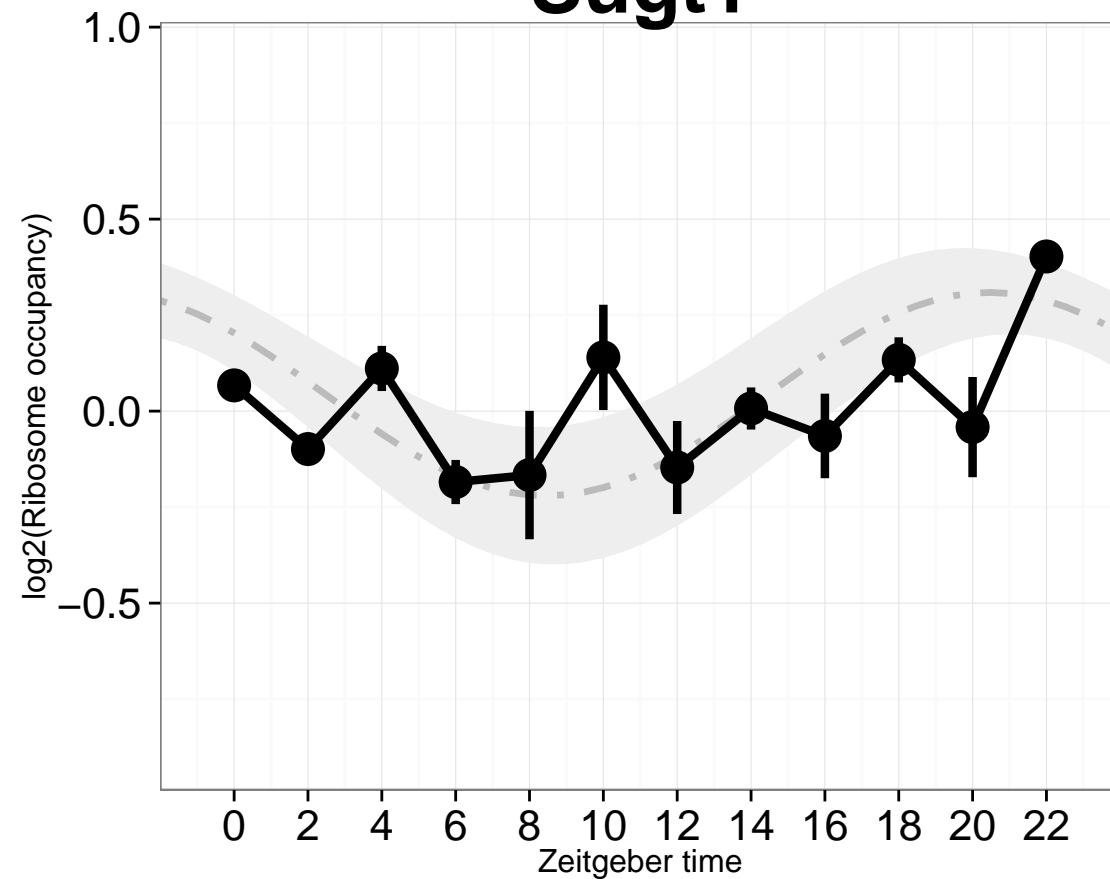

Supplement: SuppDataset_1.zip [file Sugt1_set_A.pdf › Supplemental Dataset 1/A-mRNA_nonrhyth_translation_nonrhyth/Sugt1_set_A.pdf]

## Sulf2

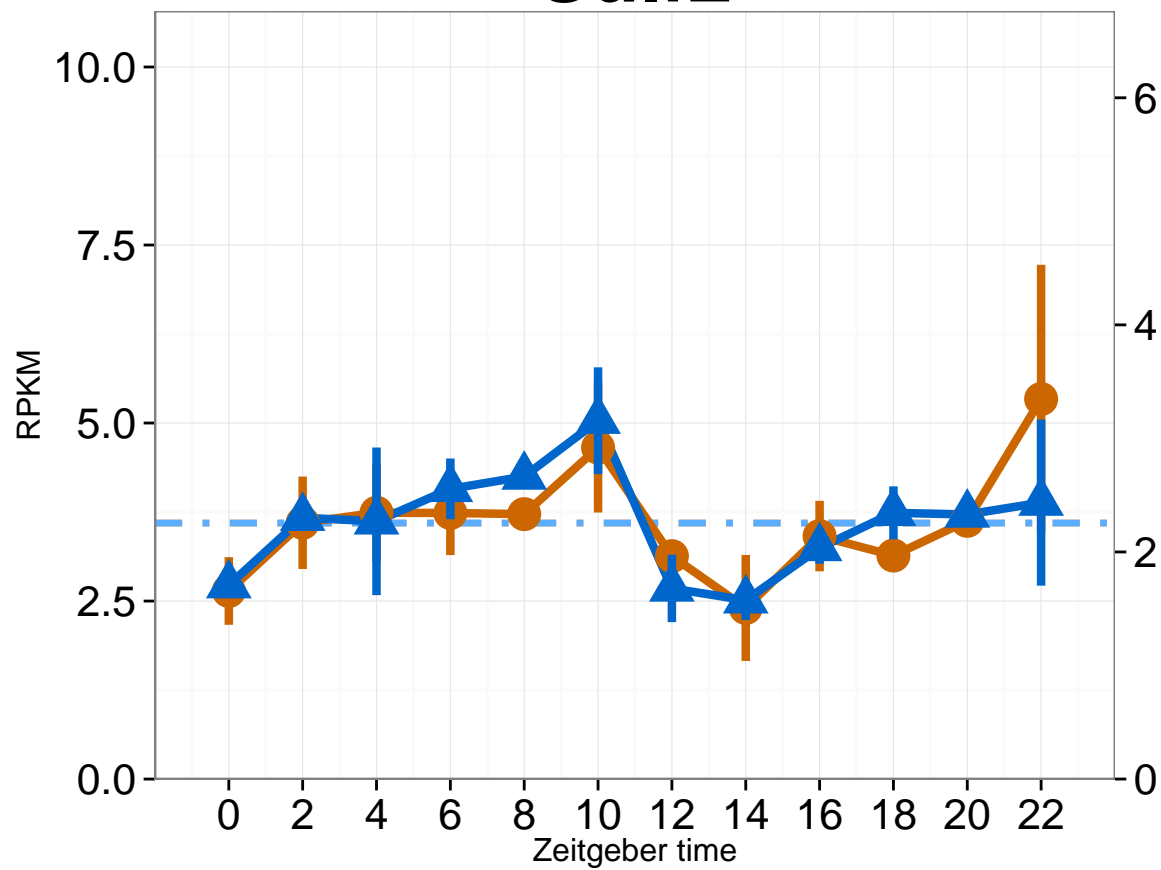

## Sulf2

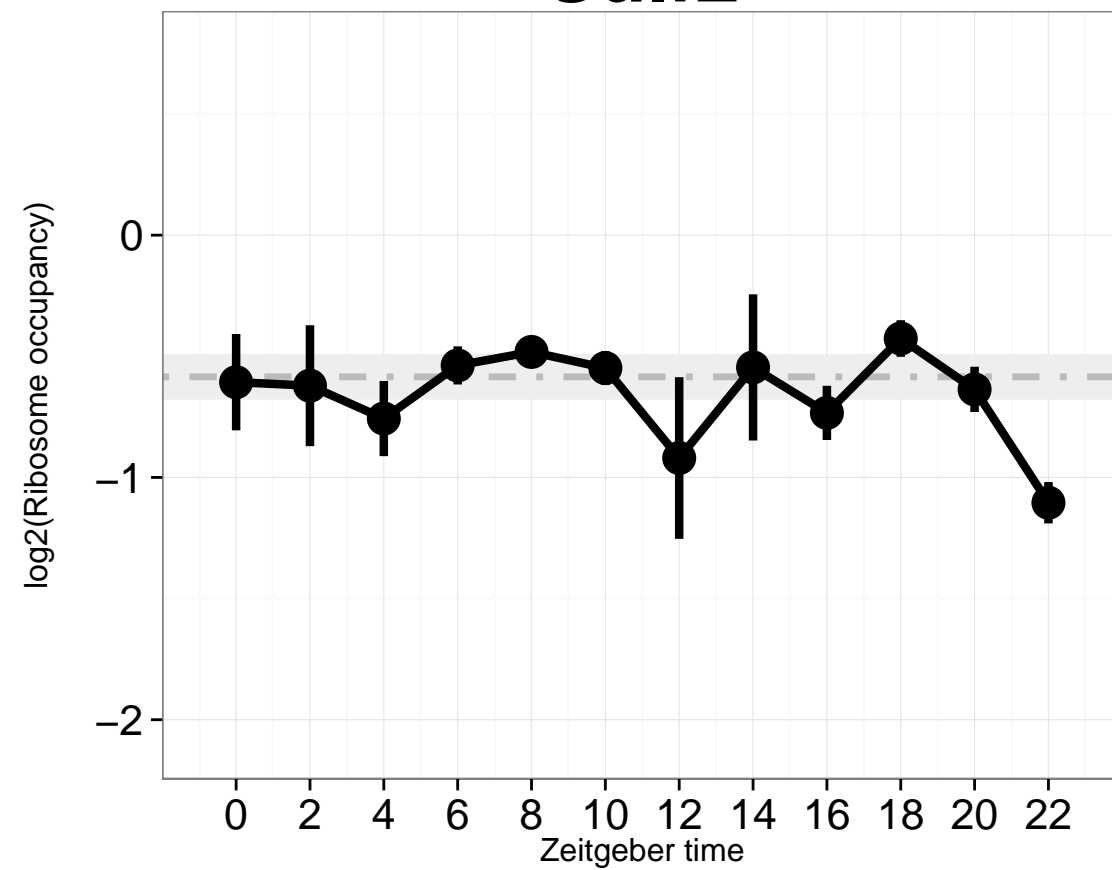

Supplement: SuppDataset_1.zip [file Sulf2_set_A.pdf › Supplemental Dataset 1/A-mRNA_nonrhyth_translation_nonrhyth/Sulf2_set_A.pdf]

# Sult1b1

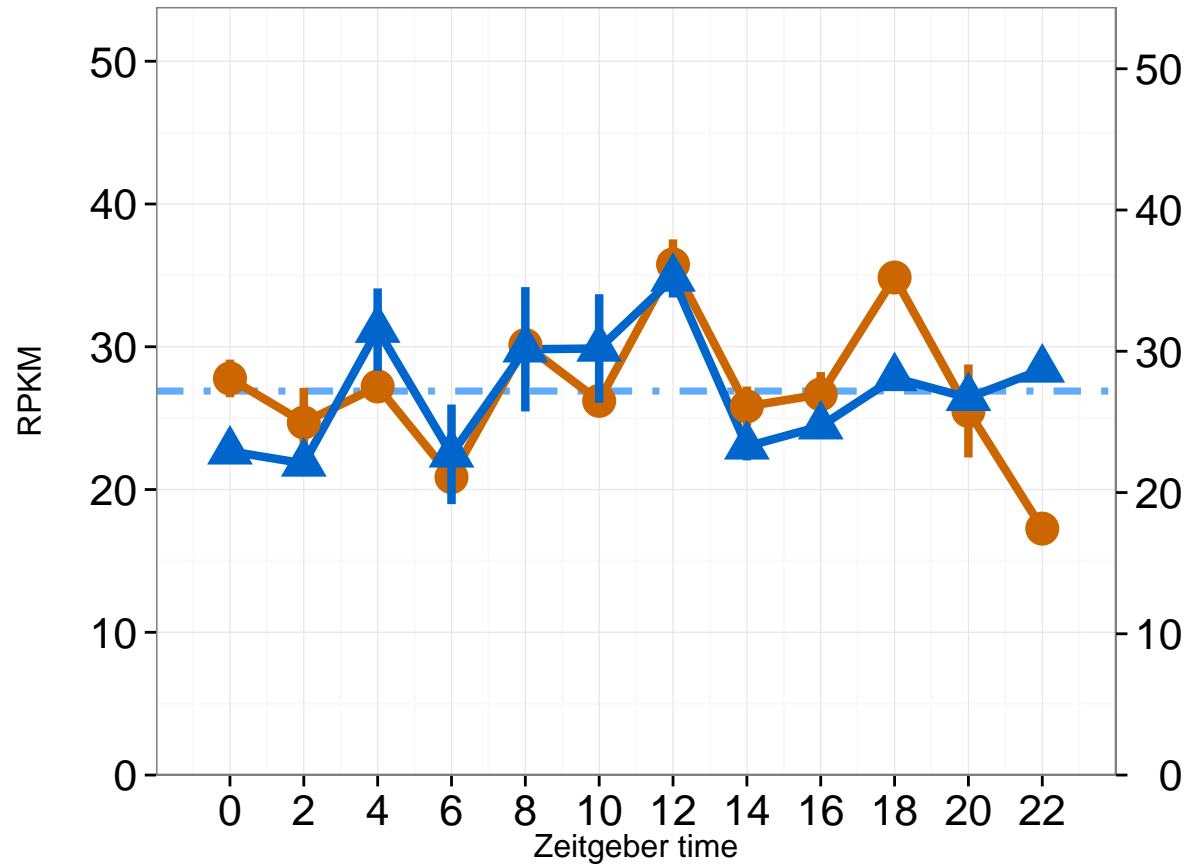

# Sult1b1

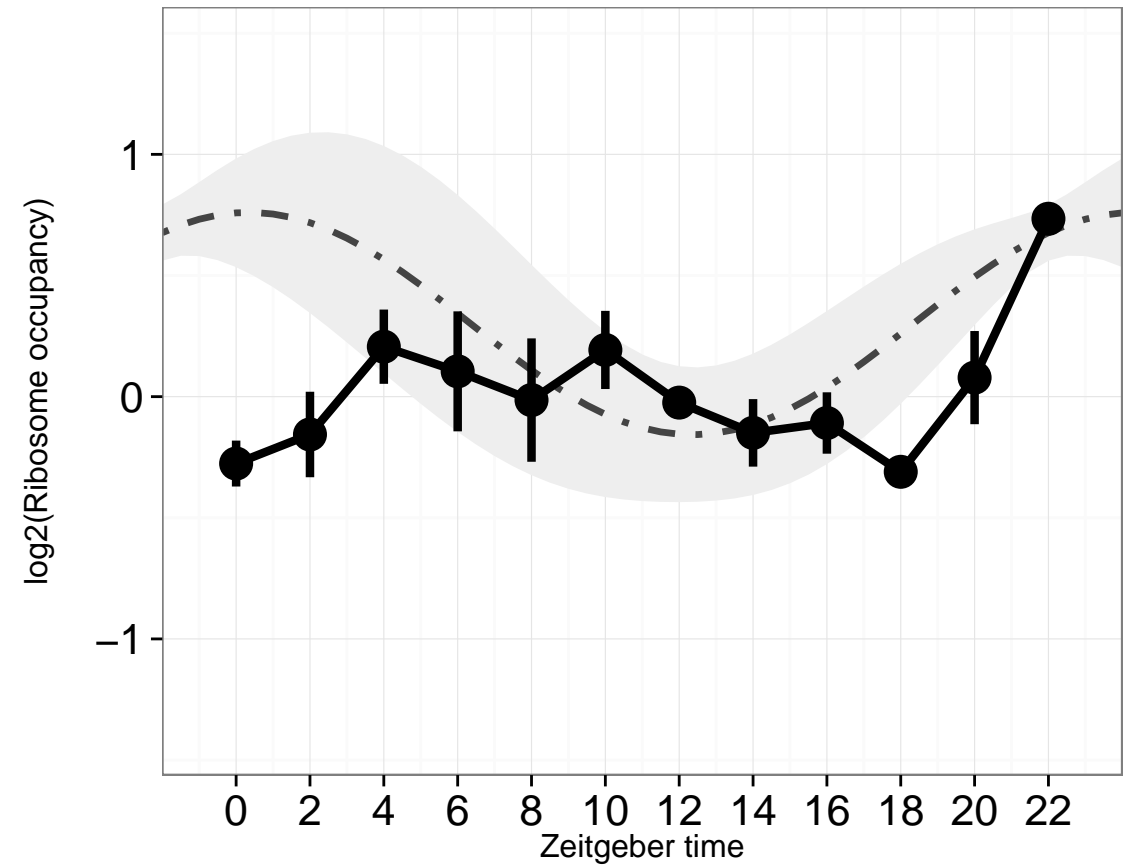

Supplement: SuppDataset_1.zip [file Sult1b1_set_A.pdf › Supplemental Dataset 1/A-mRNA_nonrhyth_translation_nonrhyth/Sult1b1_set_A.pdf]

## Sult2a7

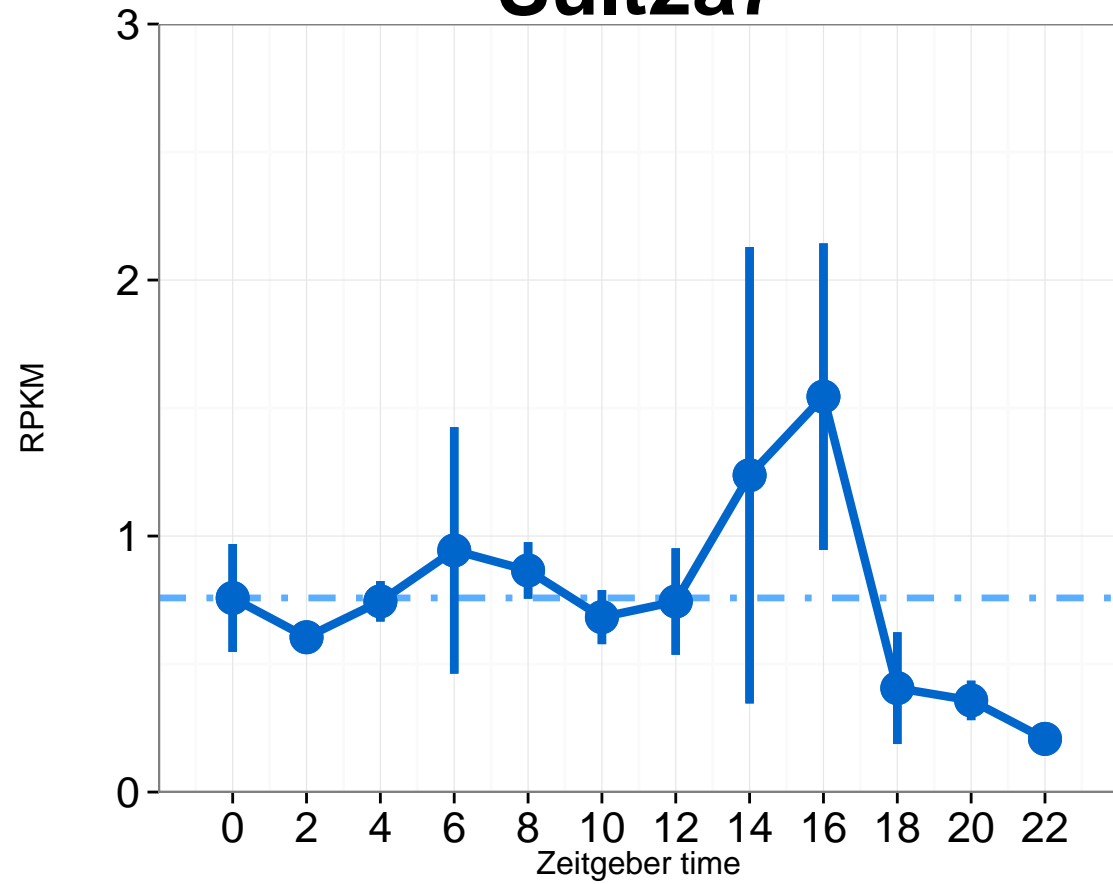

## Sult2a7 log2(Ribosome occupancy)

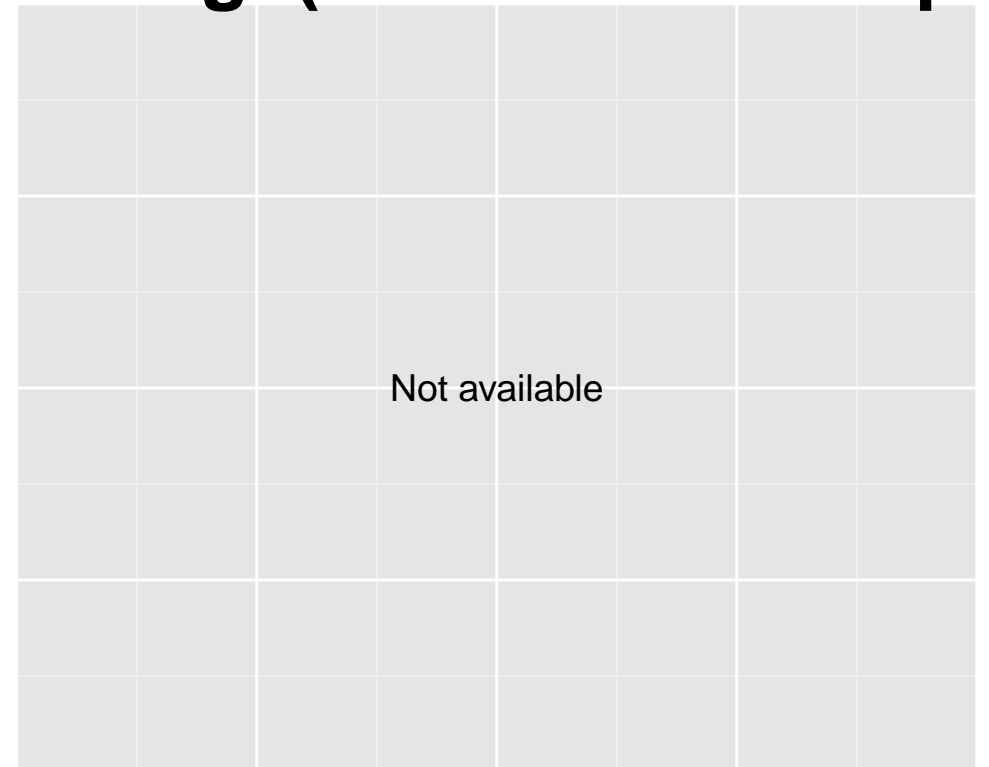

Supplement: SuppDataset_1.zip [file Sult2a7_set_A.pdf › Supplemental Dataset 1/A-mRNA_nonrhyth_translation_nonrhyth/Sult2a7_set_A.pdf]

# Sumf1

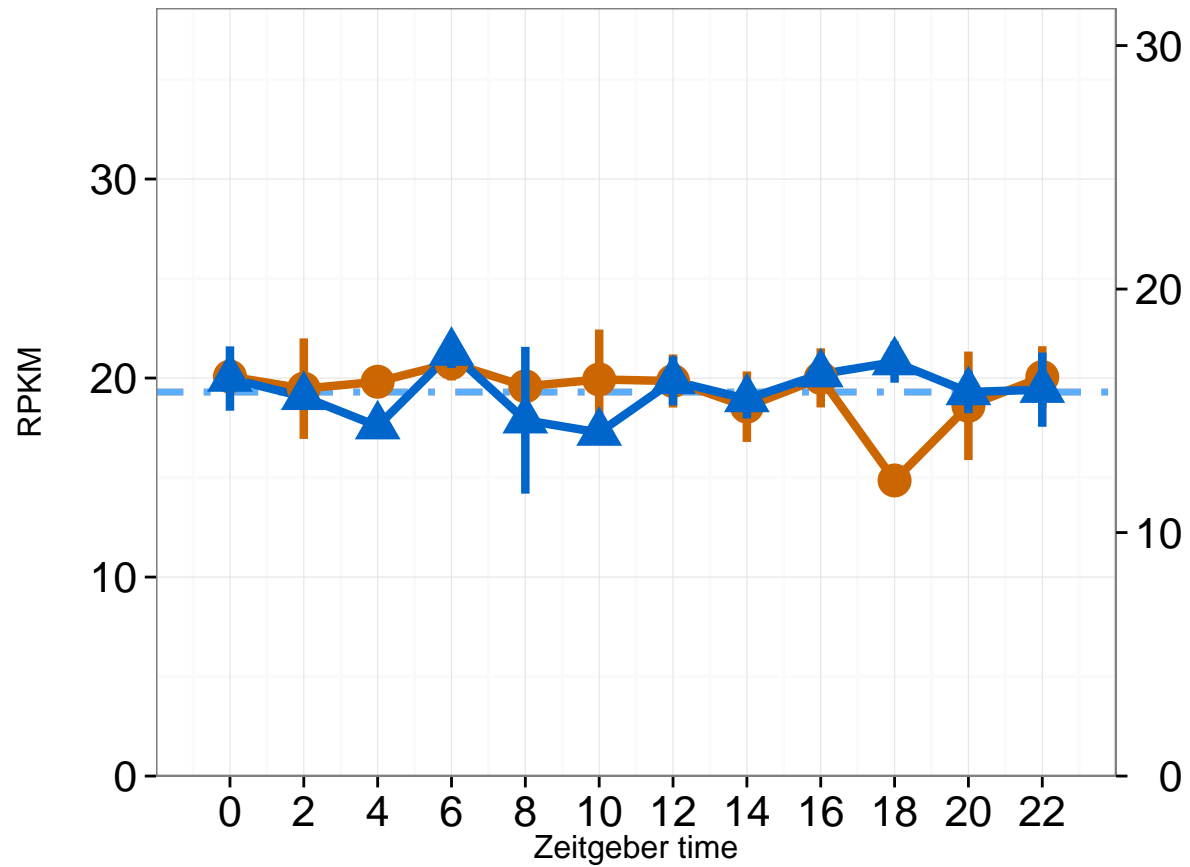

# Sumf1

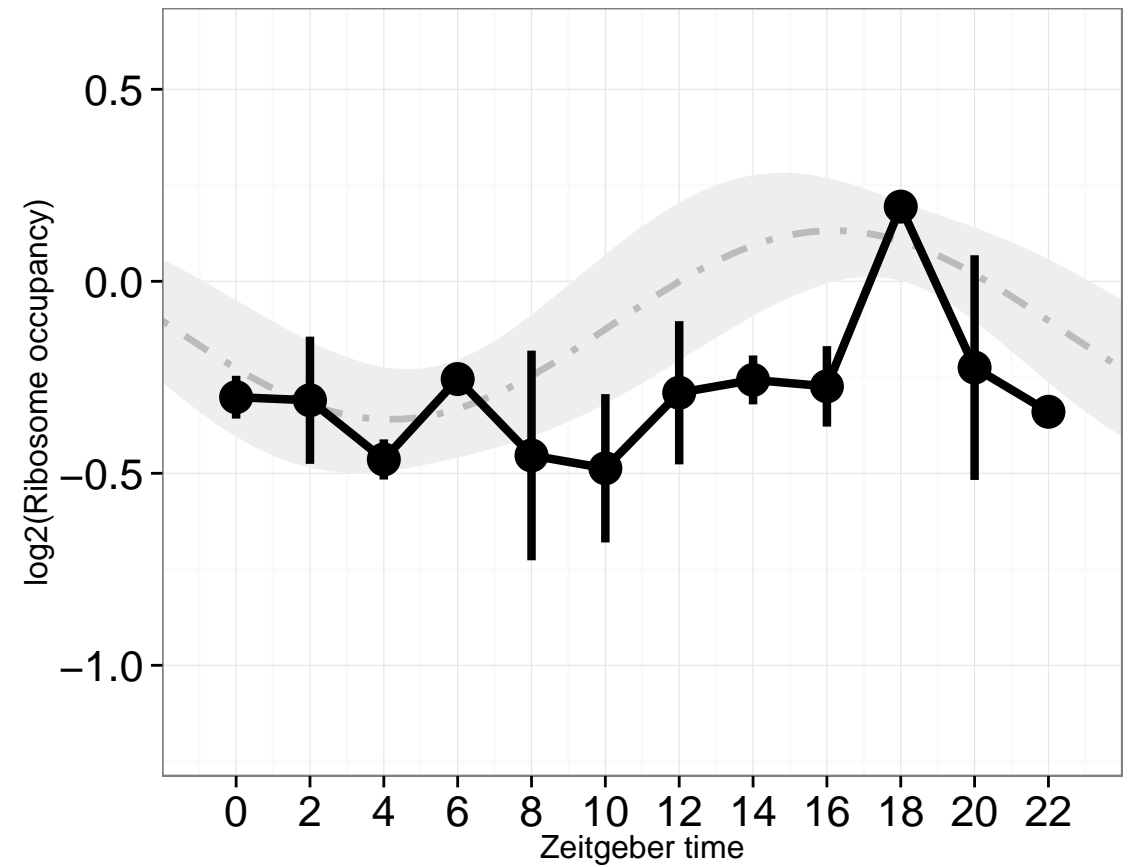

Supplement: SuppDataset_1.zip [file Sumf1_set_A.pdf › Supplemental Dataset 1/A-mRNA_nonrhyth_translation_nonrhyth/Sumf1_set_A.pdf]

## Sumf2

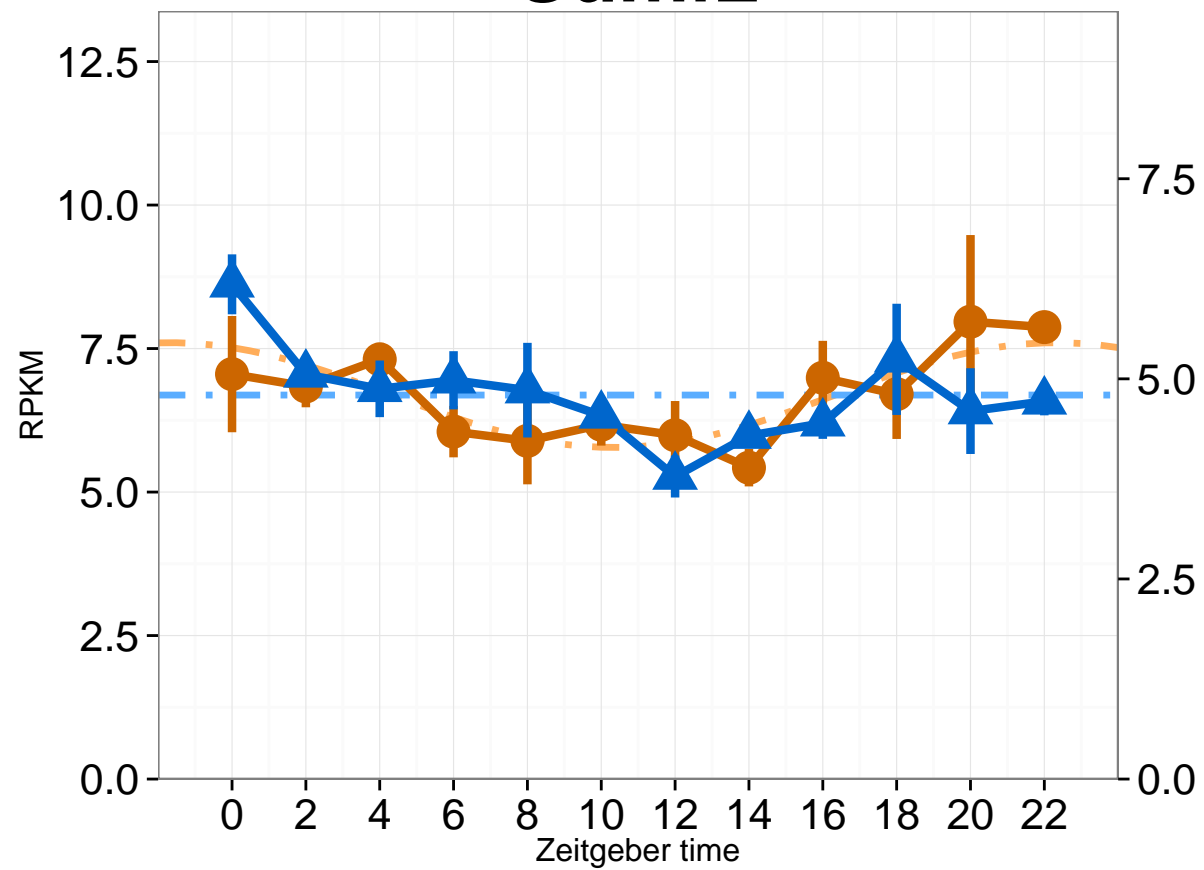

## Sumf2

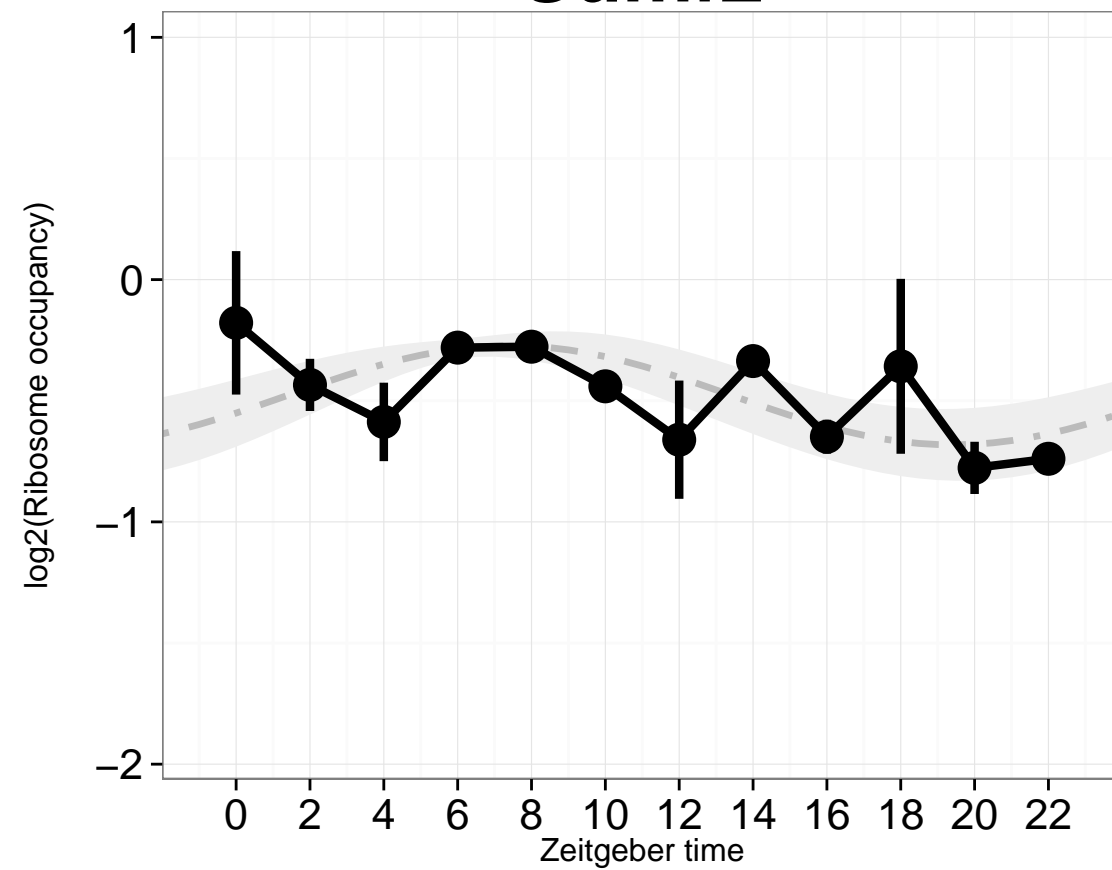

Supplement: SuppDataset_1.zip [file Sumf2_set_A.pdf › Supplemental Dataset 1/A-mRNA_nonrhyth_translation_nonrhyth/Sumf2_set_A.pdf]

## Sumo1

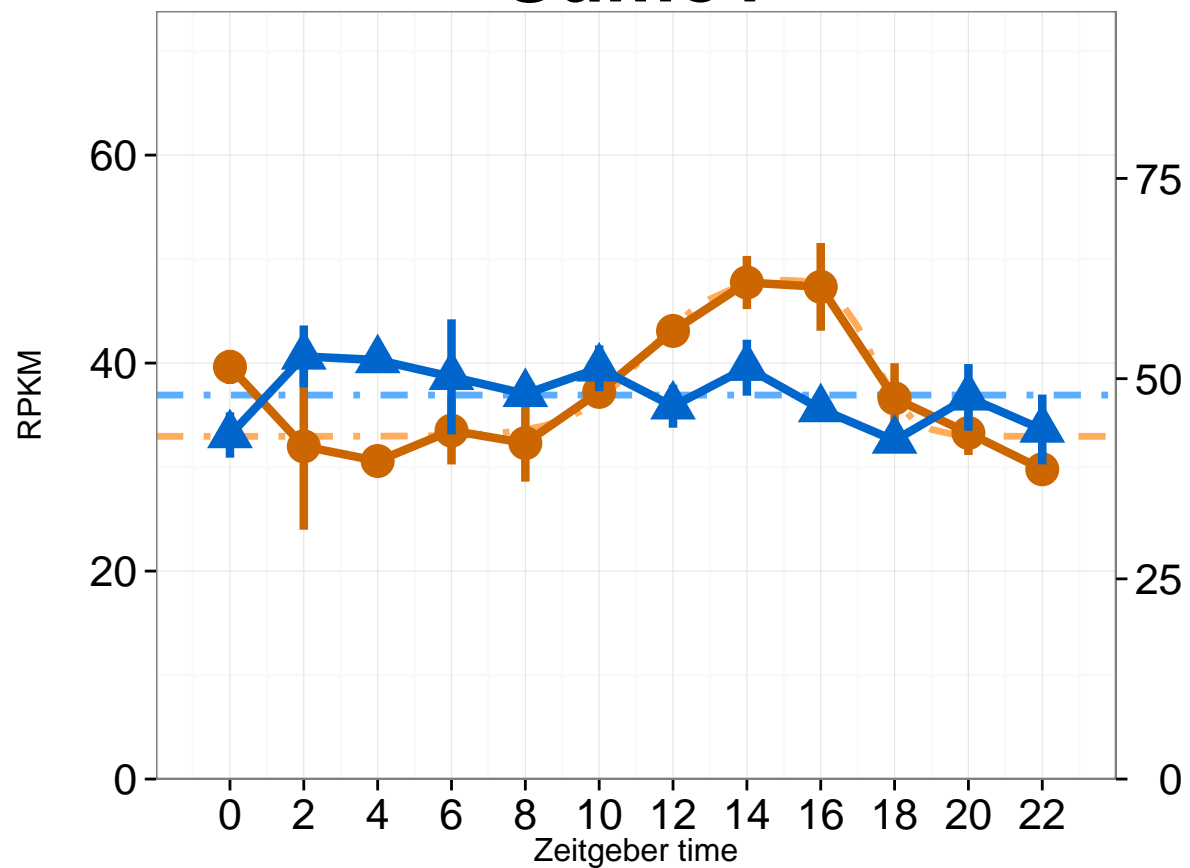

## Sumo1

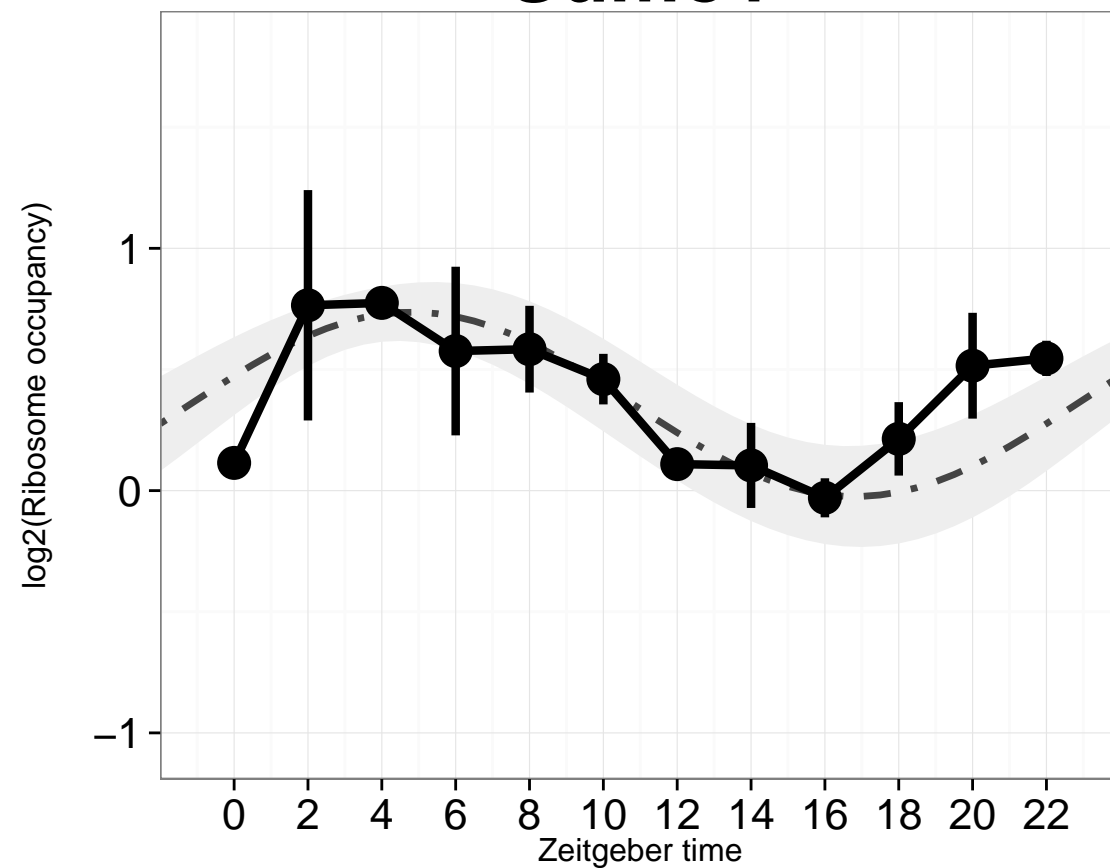

Supplement: SuppDataset_1.zip [file Sumo1_set_A.pdf › Supplemental Dataset 1/A-mRNA_nonrhyth_translation_nonrhyth/Sumo1_set_A.pdf]

## Sumo2

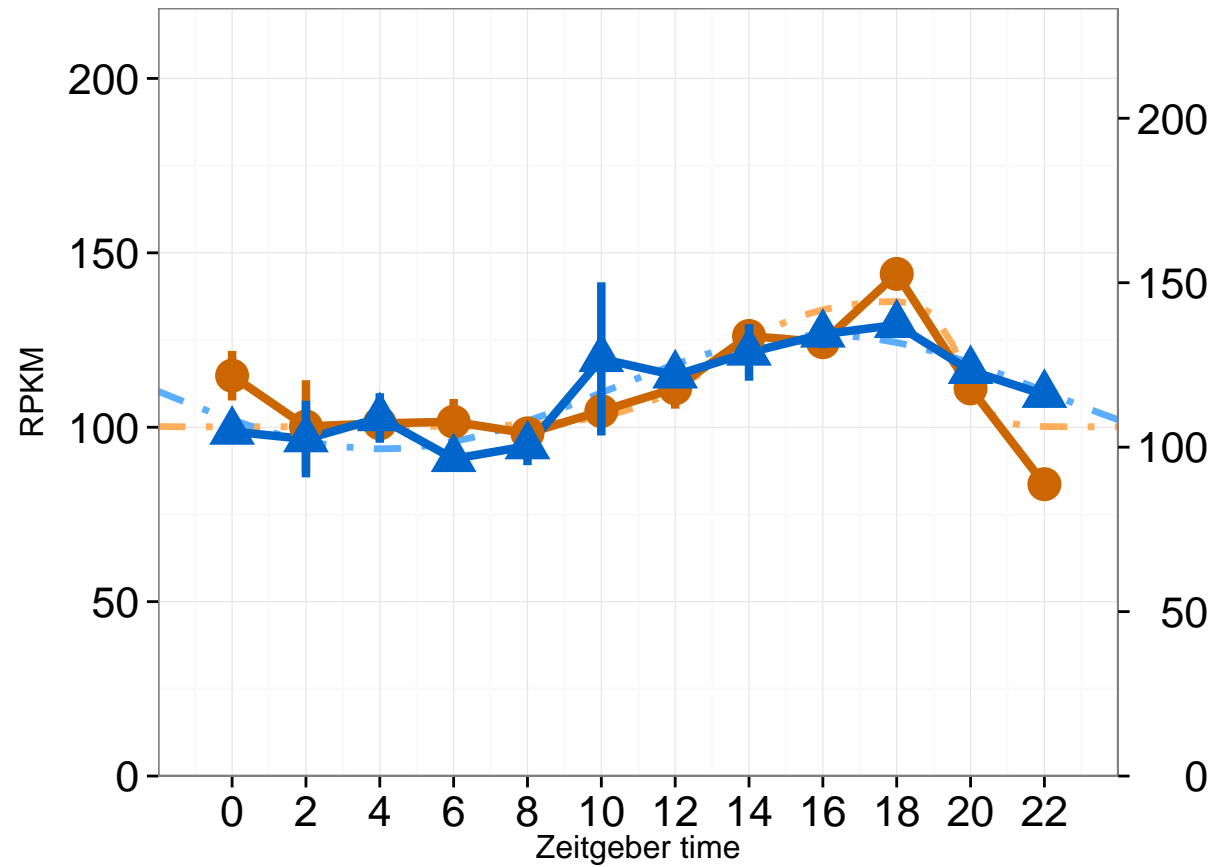

## Sumo2

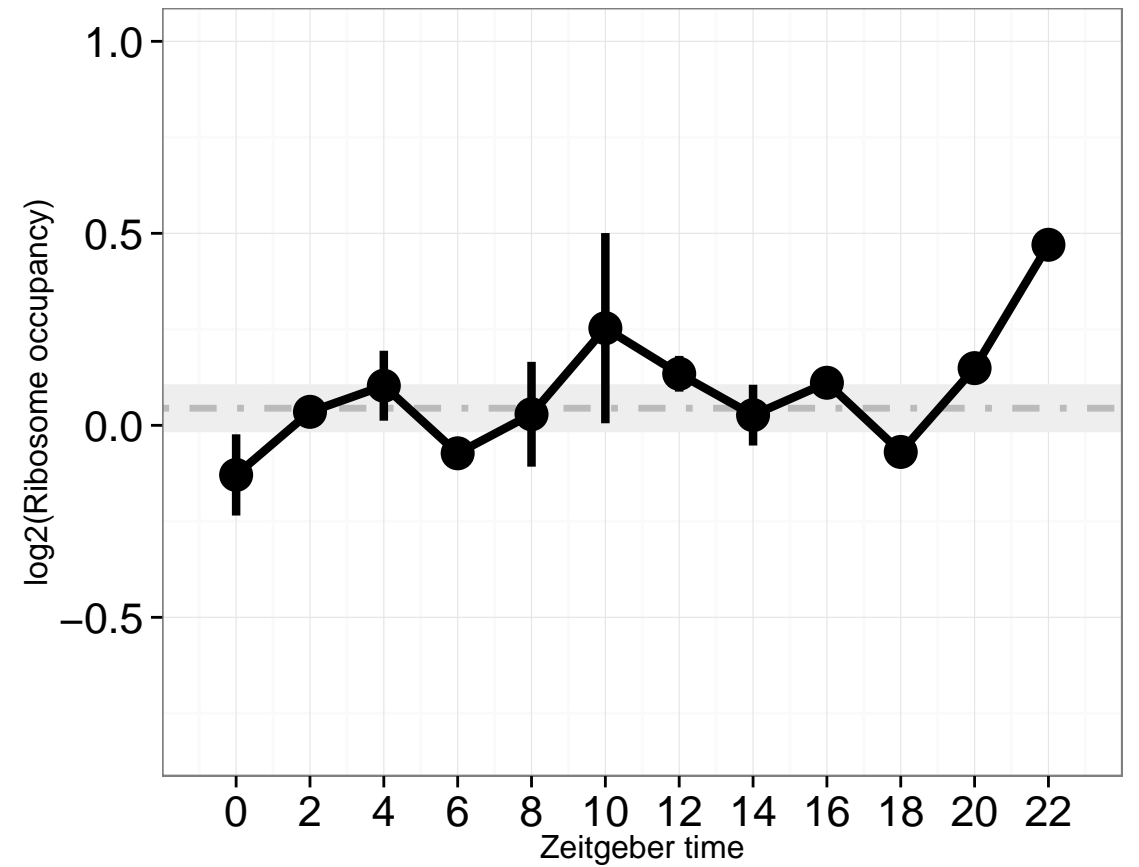

Supplement: SuppDataset_1.zip [file Sumo2_set_A.pdf › Supplemental Dataset 1/A-mRNA_nonrhyth_translation_nonrhyth/Sumo2_set_A.pdf]

## Sumo3

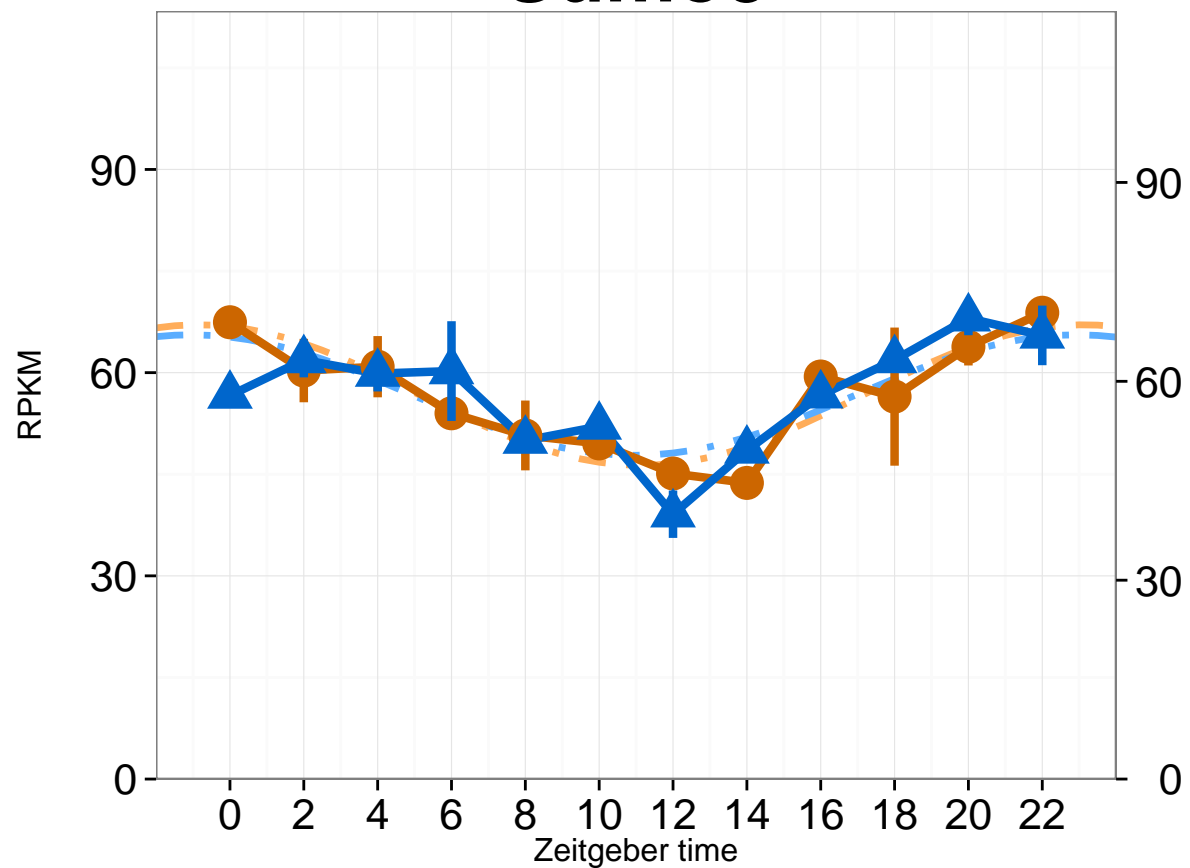

## Sumo3

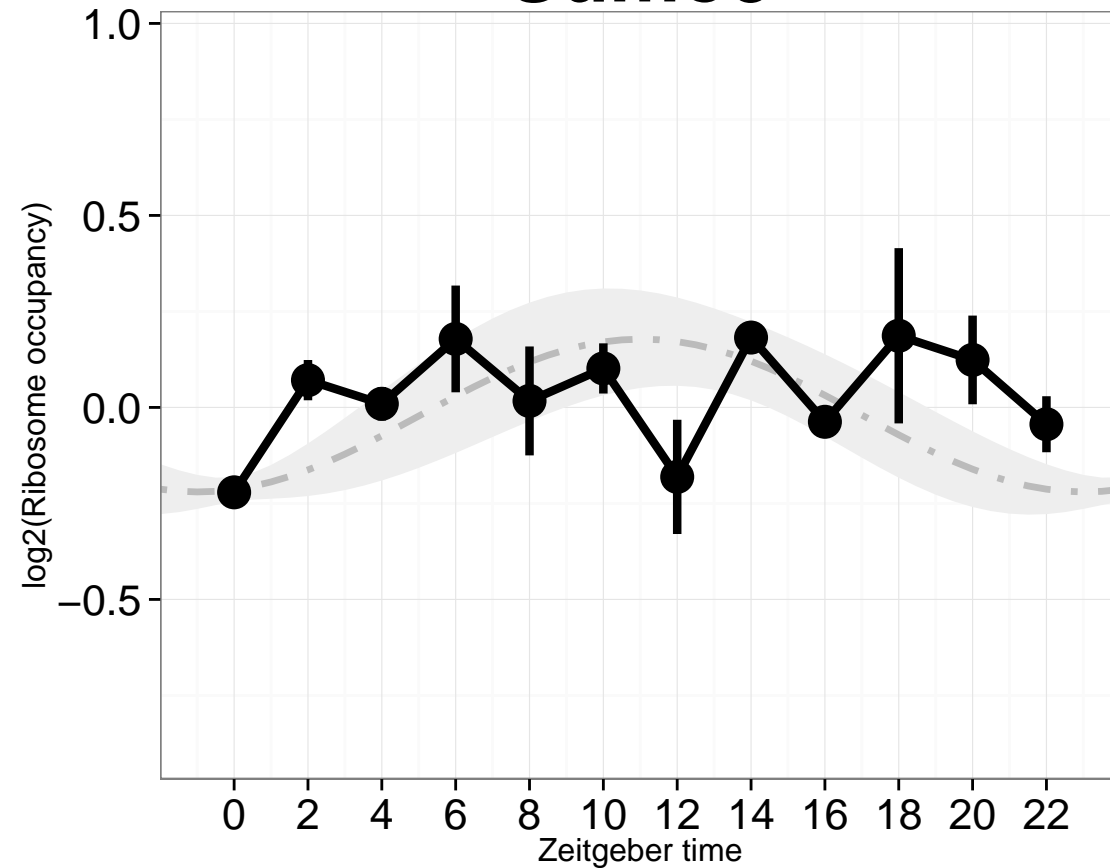

Supplement: SuppDataset_1.zip [file Sumo3_set_A.pdf › Supplemental Dataset 1/A-mRNA_nonrhyth_translation_nonrhyth/Sumo3_set_A.pdf]

# Sun1

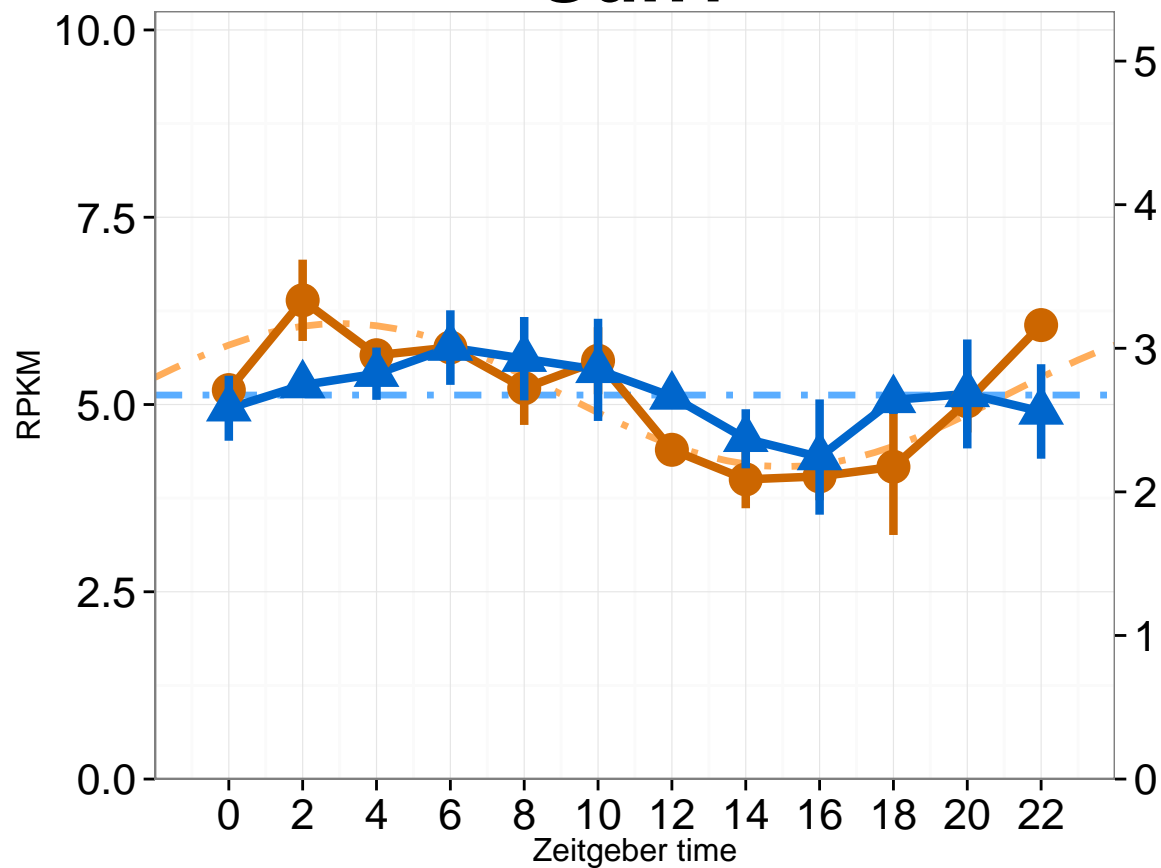

# Sun1

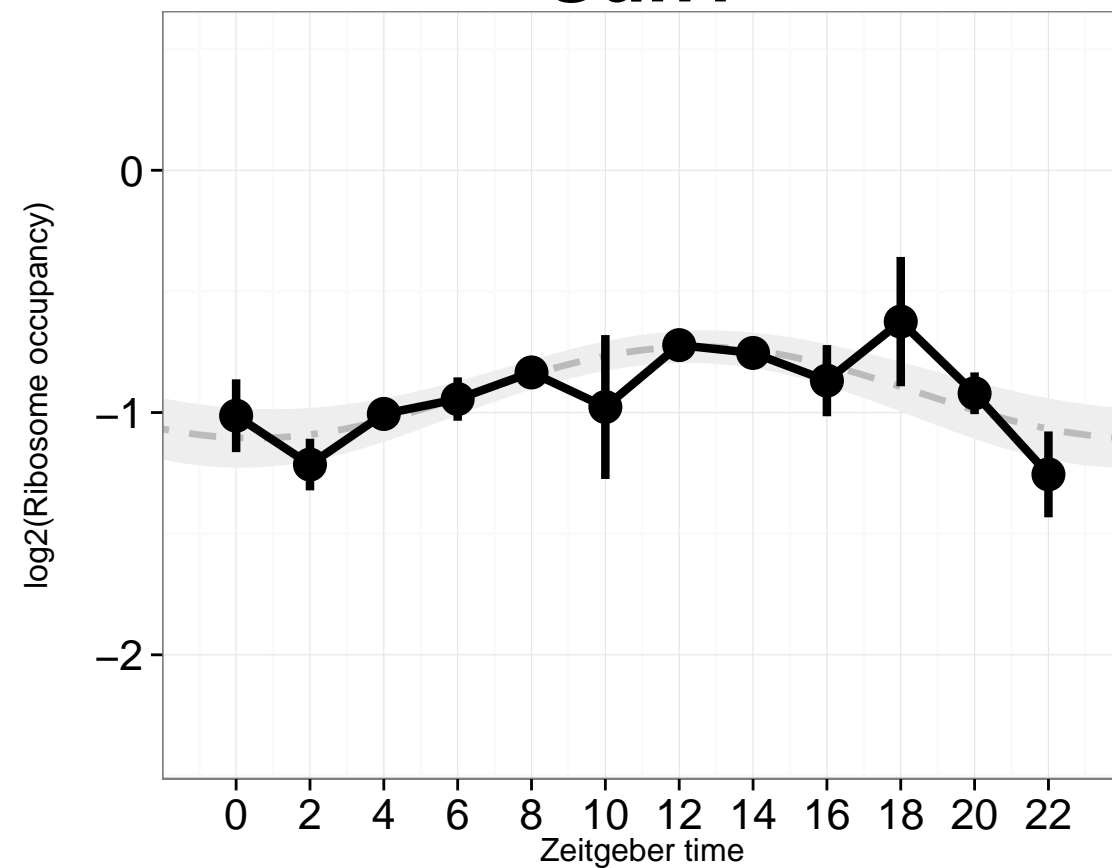

Supplement: SuppDataset_1.zip [file Sun1_set_A.pdf › Supplemental Dataset 1/A-mRNA_nonrhyth_translation_nonrhyth/Sun1_set_A.pdf]

# Supt16

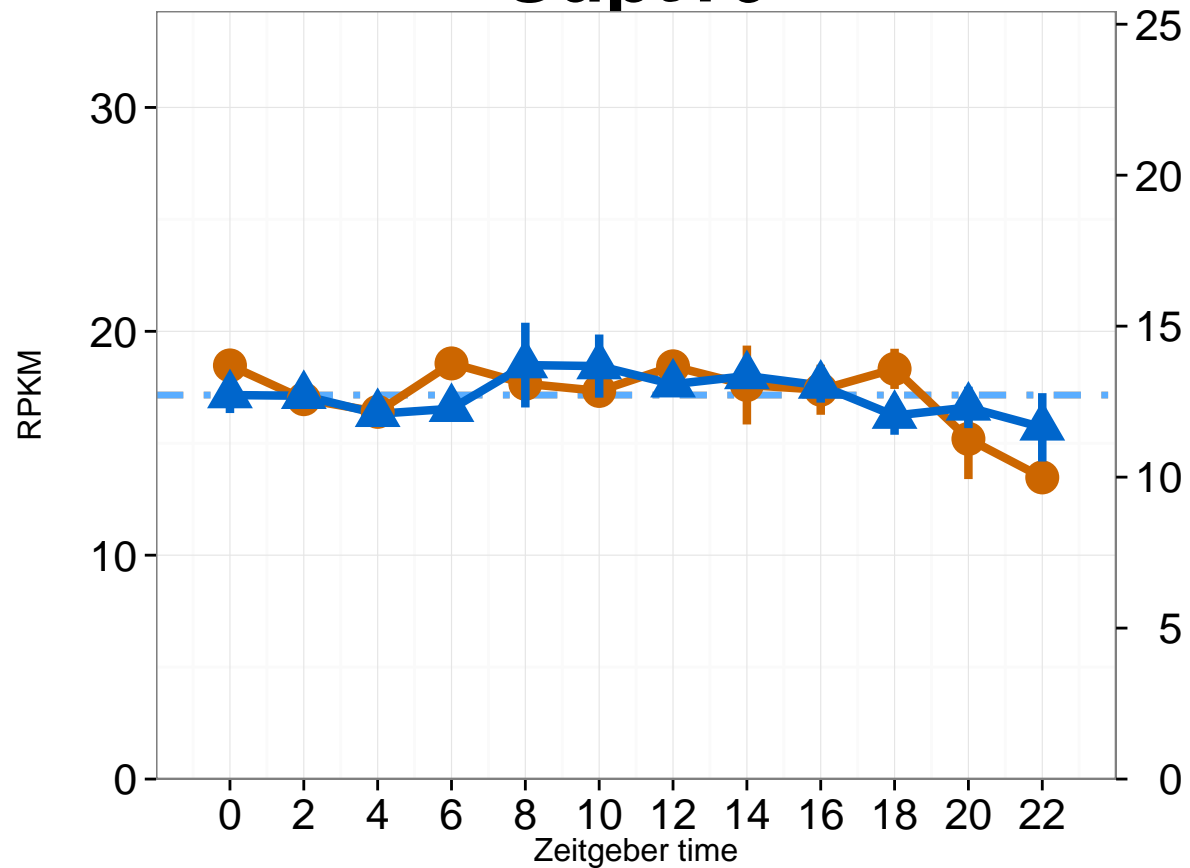

# Supt16

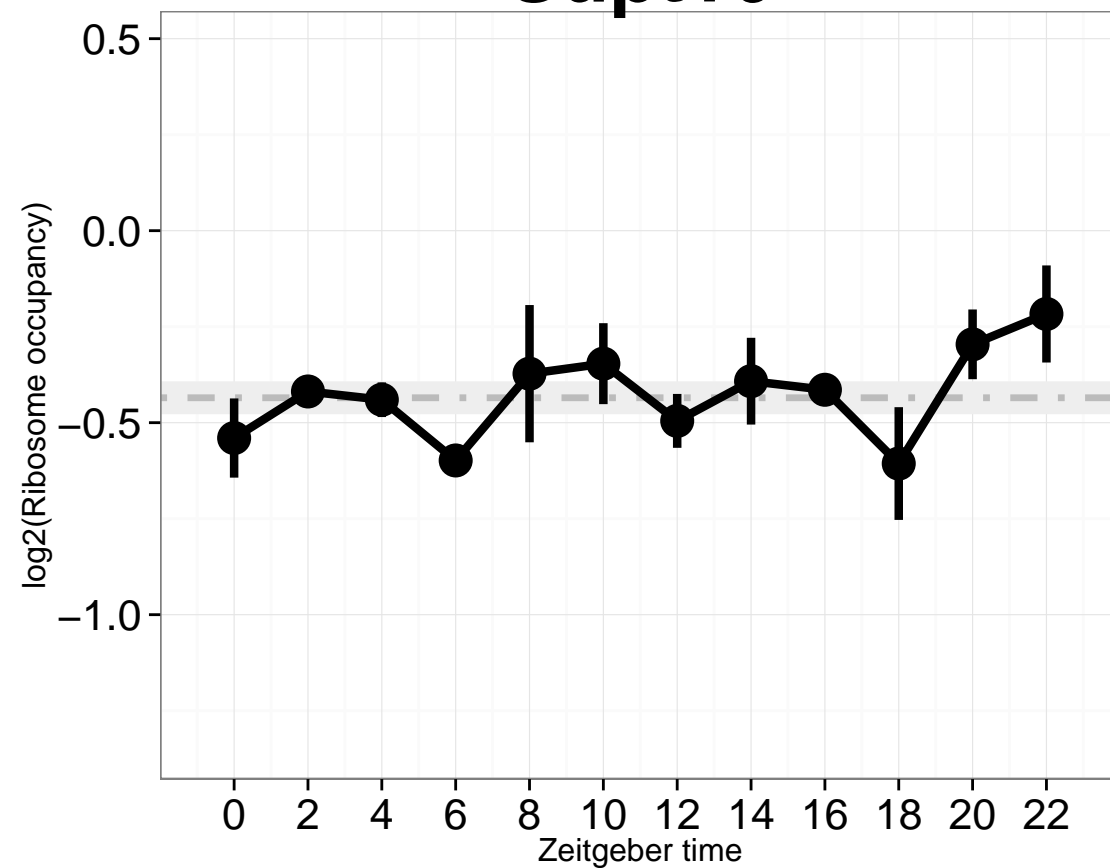

Supplement: SuppDataset_1.zip [file Supt16_set_A.pdf › Supplemental Dataset 1/A-mRNA_nonrhyth_translation_nonrhyth/Supt16_set_A.pdf]

# Supt20

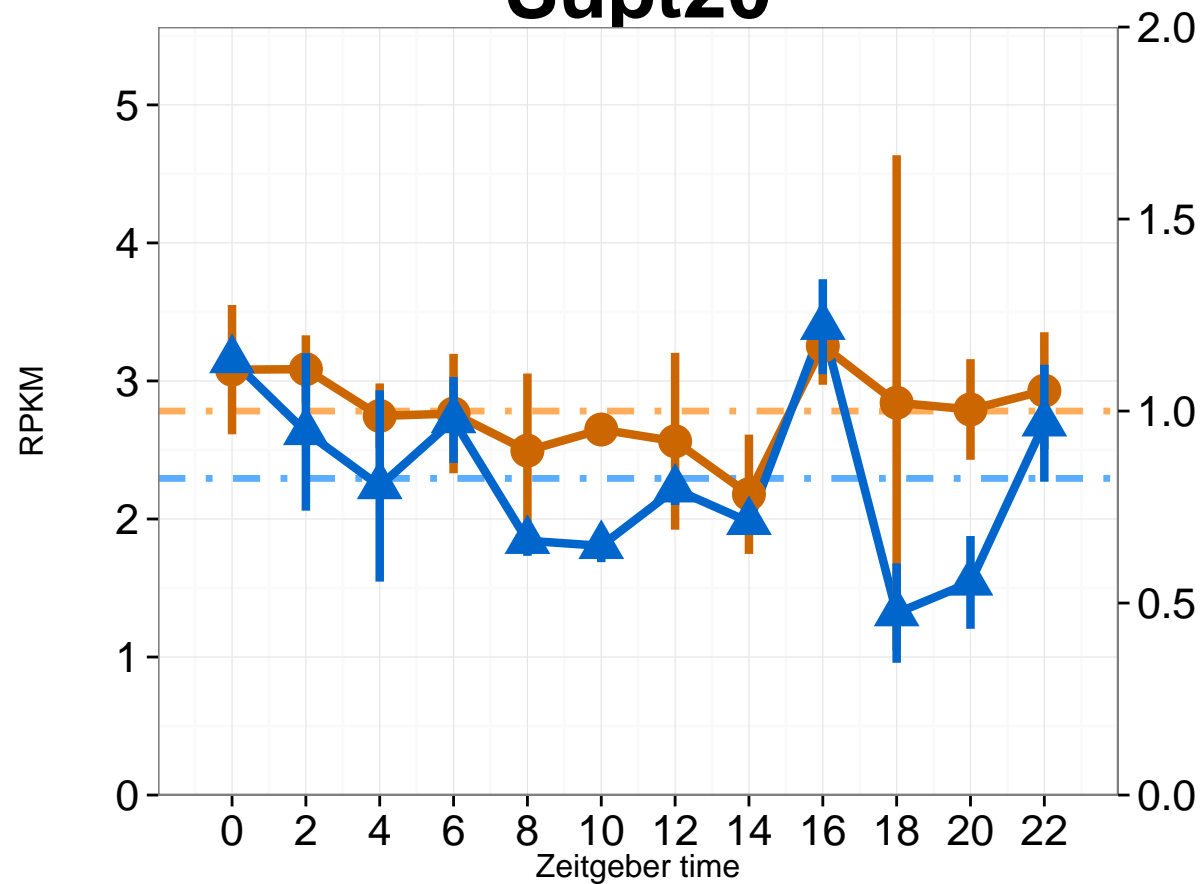

# Supt20

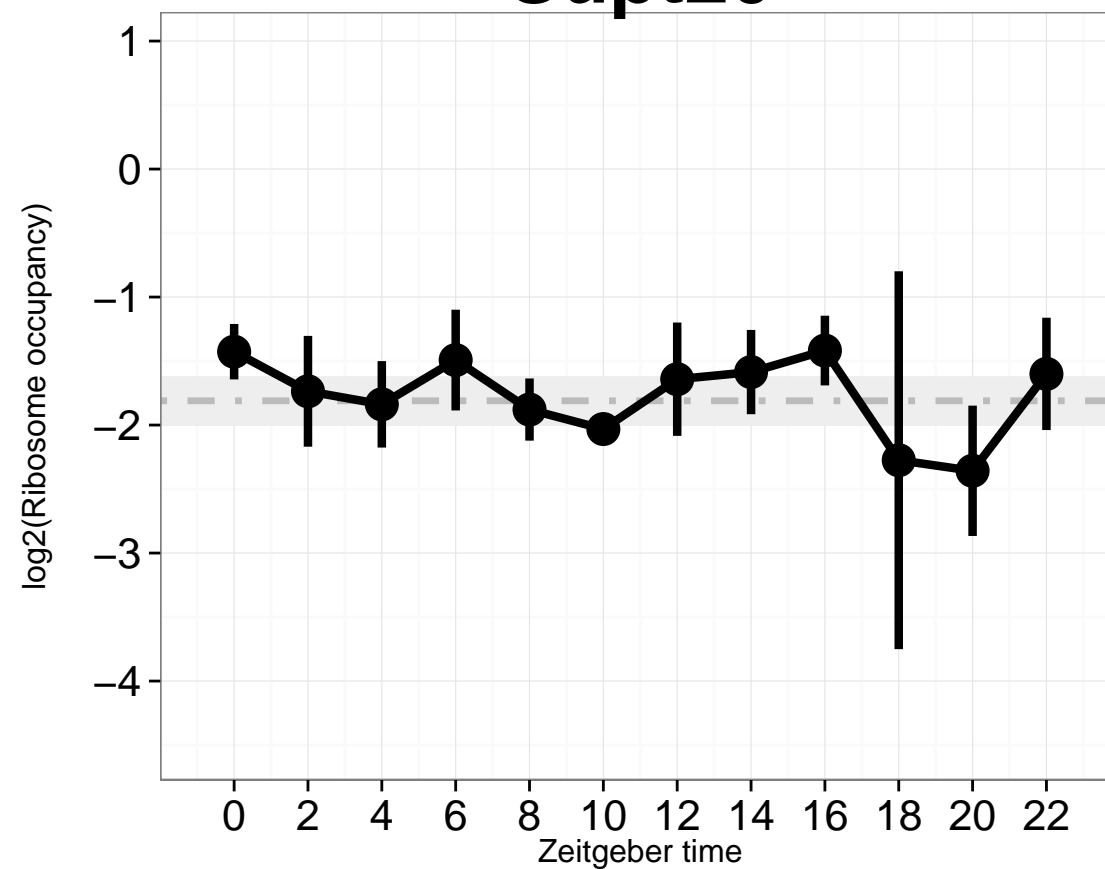

Supplement: SuppDataset_1.zip [file Supt20_set_A.pdf › Supplemental Dataset 1/A-mRNA_nonrhyth_translation_nonrhyth/Supt20_set_A.pdf]

# Supt3

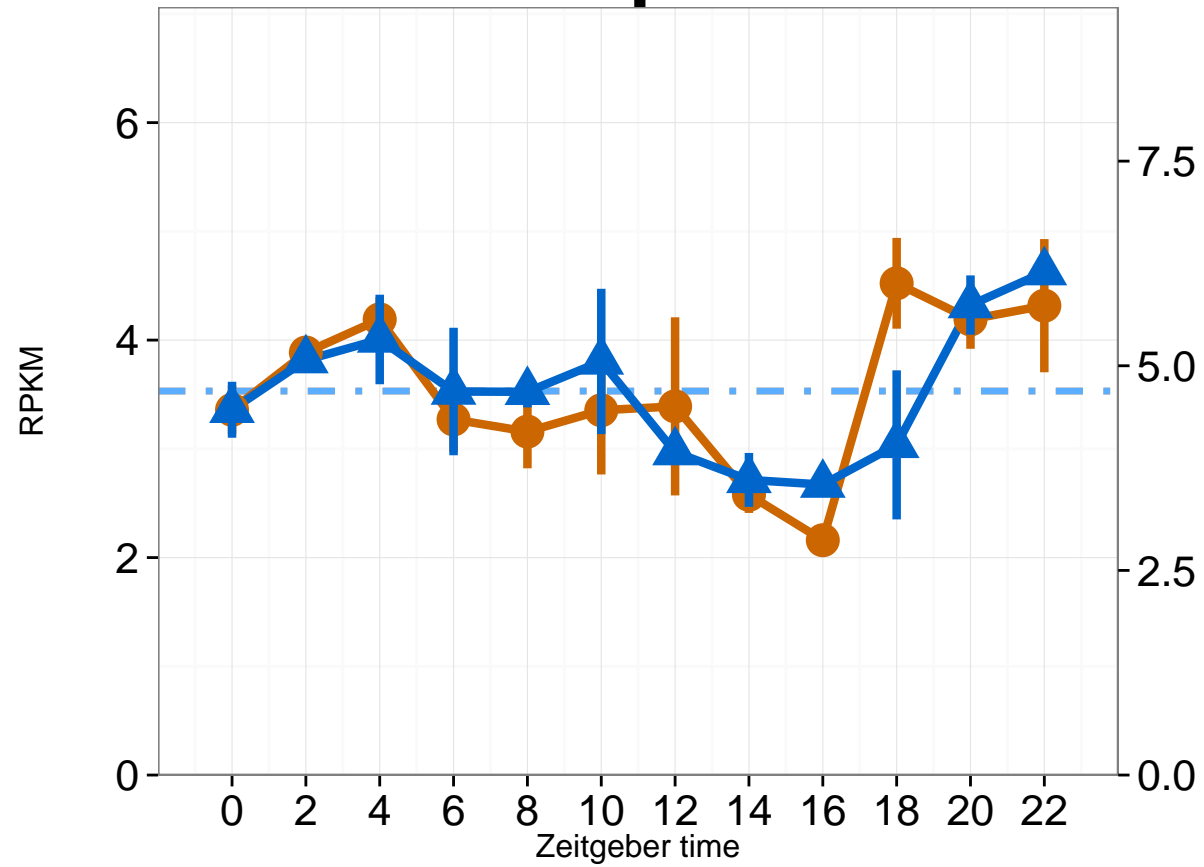

# Supt3

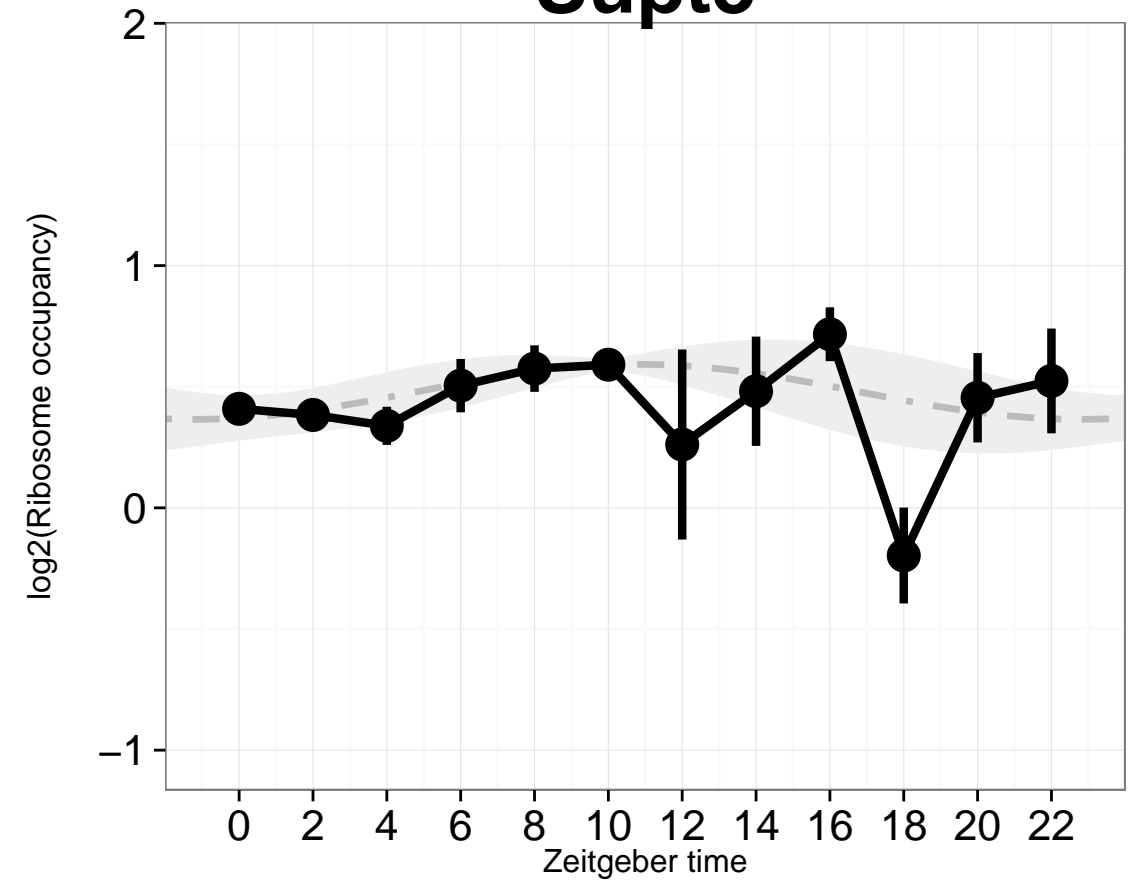

Supplement: SuppDataset_1.zip [file Supt3_set_A.pdf › Supplemental Dataset 1/A-mRNA_nonrhyth_translation_nonrhyth/Supt3_set_A.pdf]

# Supt4a

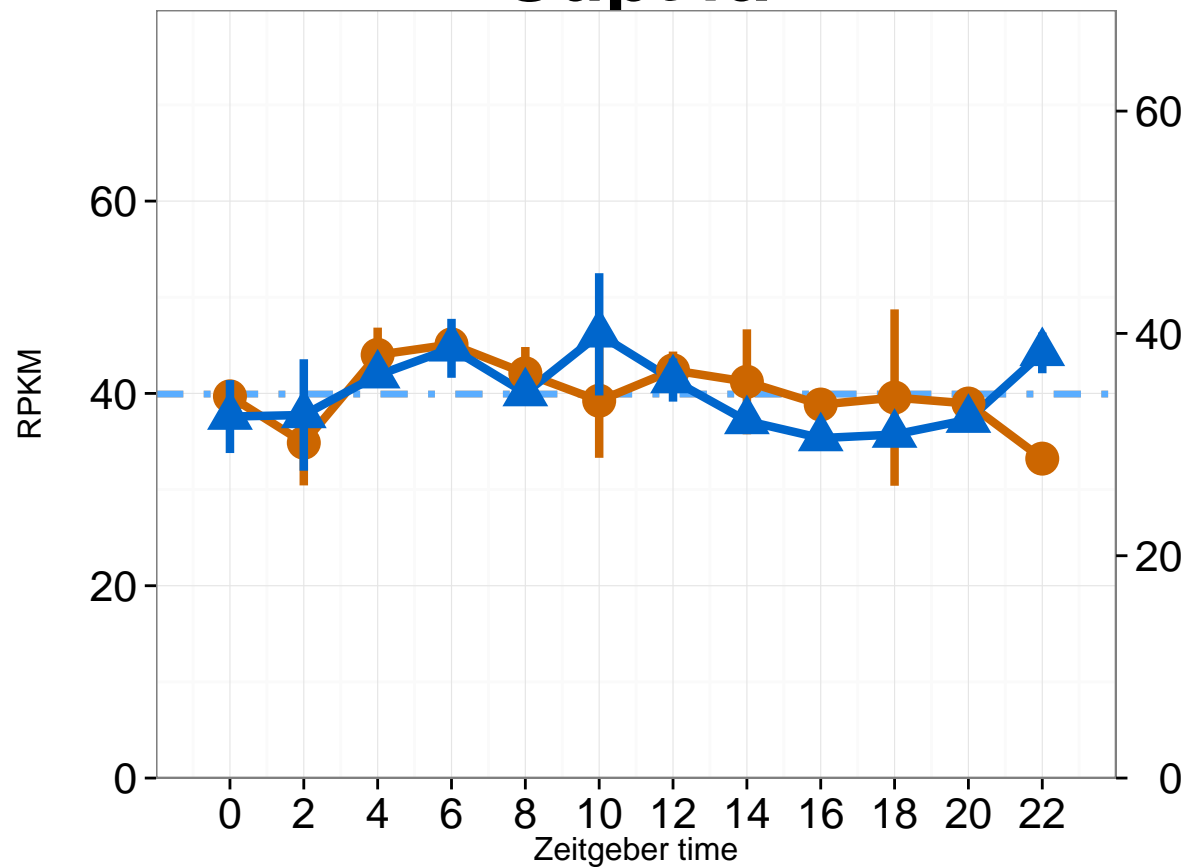

# Supt4a

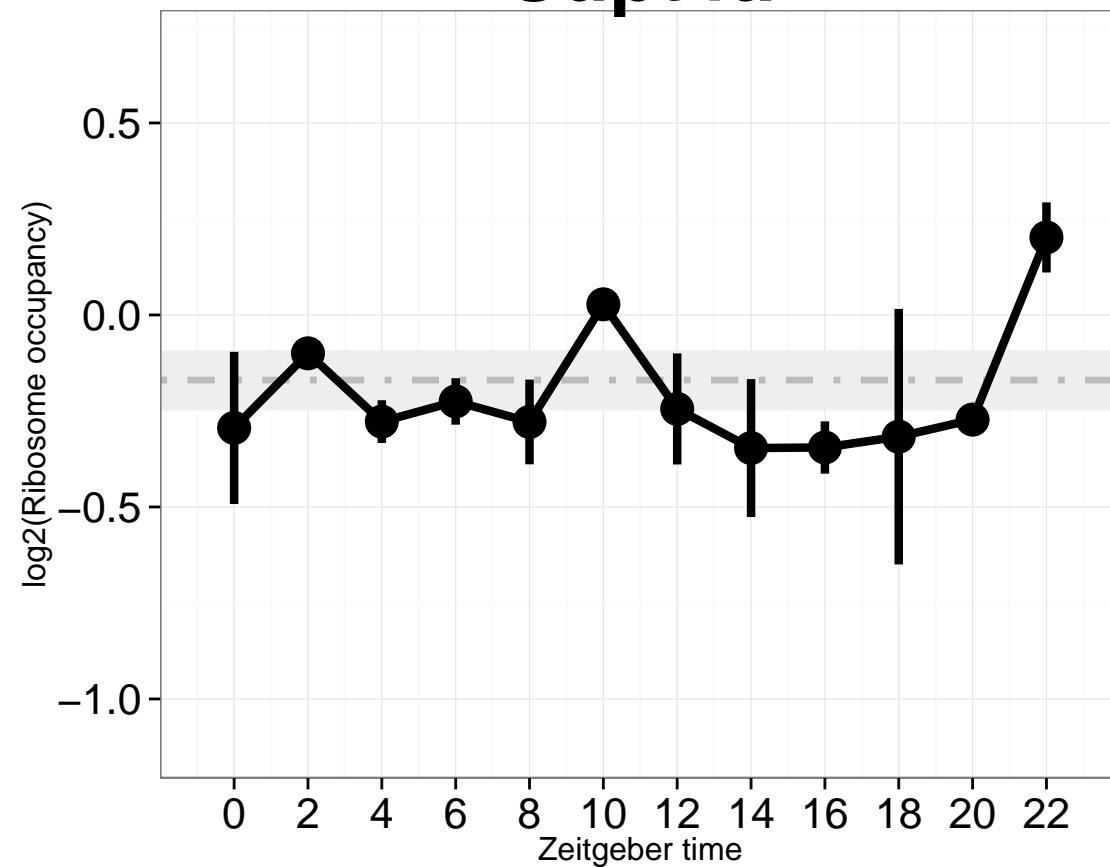

Supplement: SuppDataset_1.zip [file Supt4a_set_A.pdf › Supplemental Dataset 1/A-mRNA_nonrhyth_translation_nonrhyth/Supt4a_set_A.pdf]

# Supt5

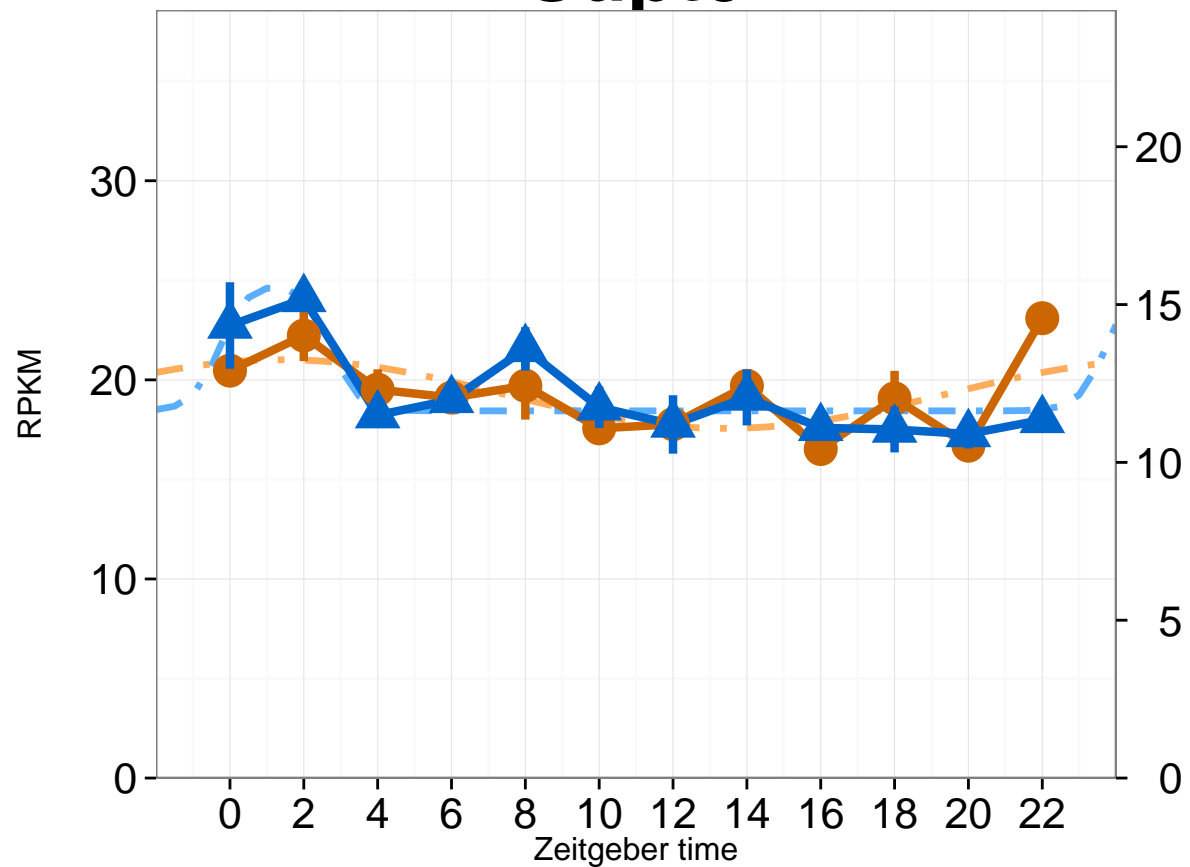

# Supt5

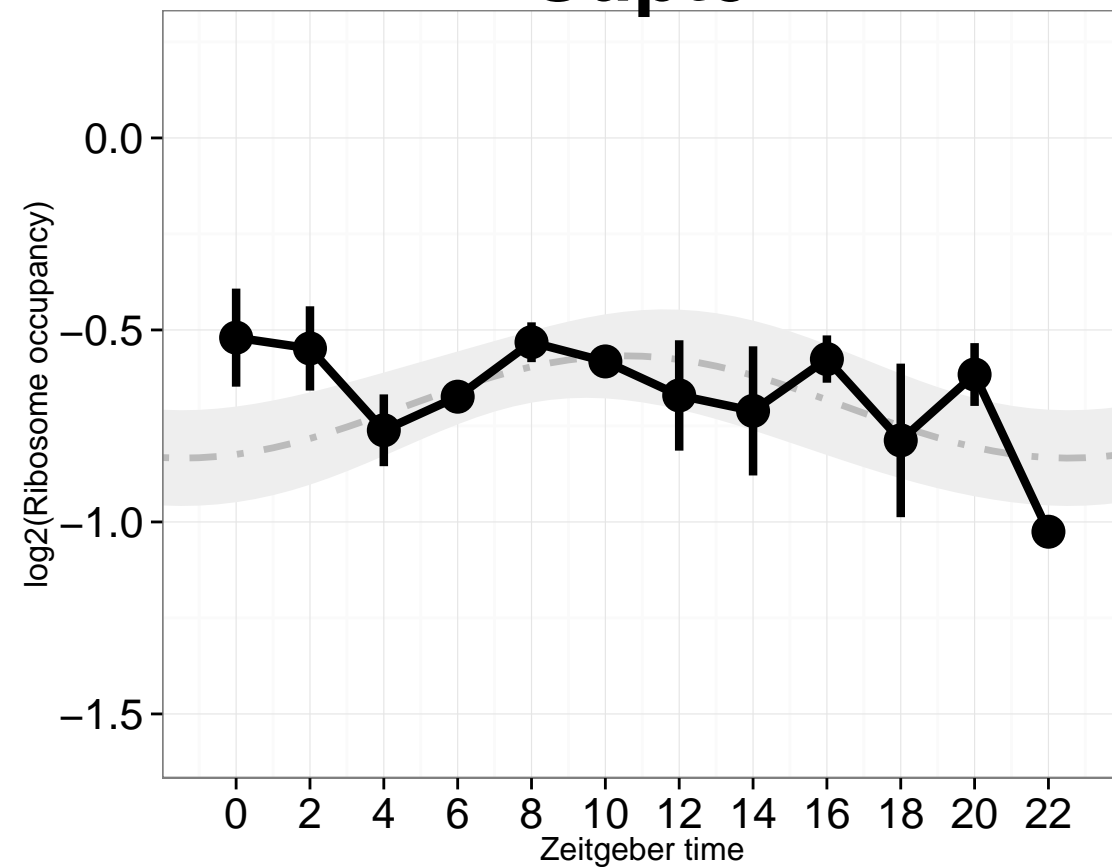

Supplement: SuppDataset_1.zip [file Supt5_set_A.pdf › Supplemental Dataset 1/A-mRNA_nonrhyth_translation_nonrhyth/Supt5_set_A.pdf]

# Supt6

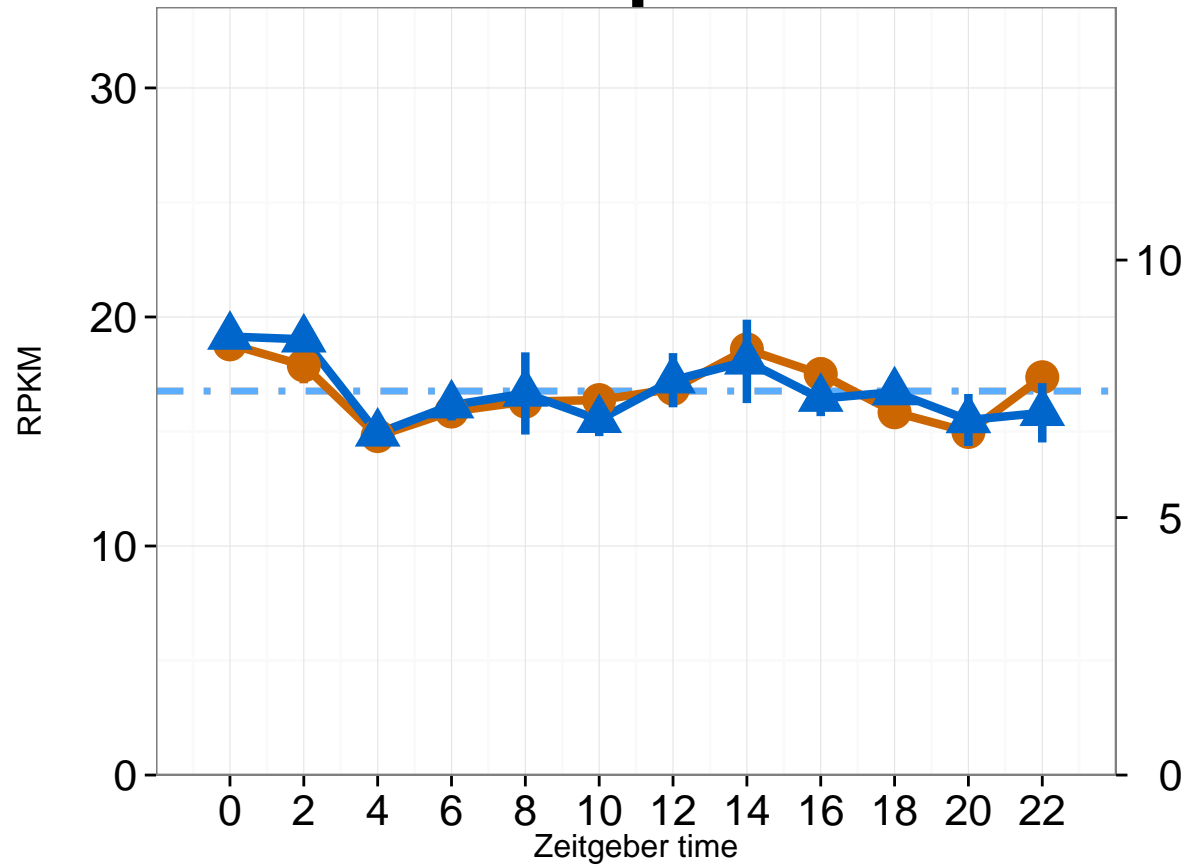

# Supt6

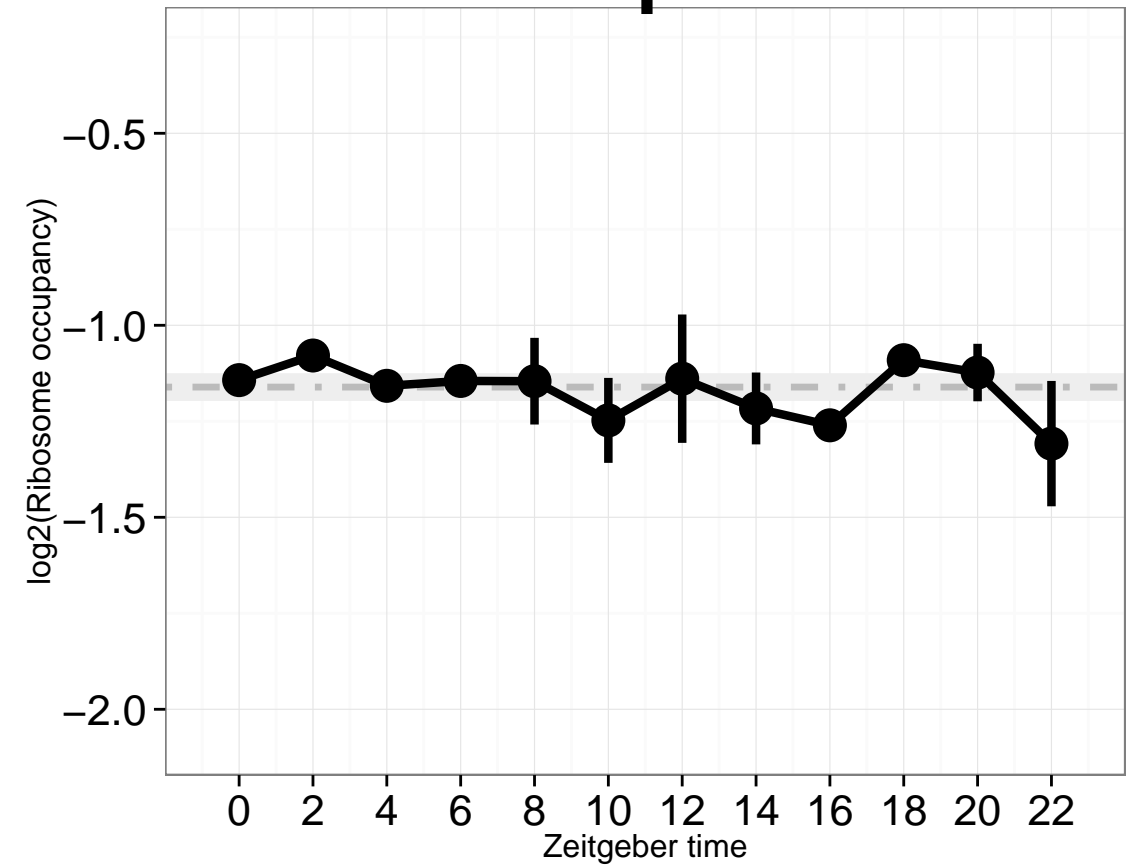

Supplement: SuppDataset_1.zip [file Supt6_set_A.pdf › Supplemental Dataset 1/A-mRNA_nonrhyth_translation_nonrhyth/Supt6_set_A.pdf]

# Supt7I

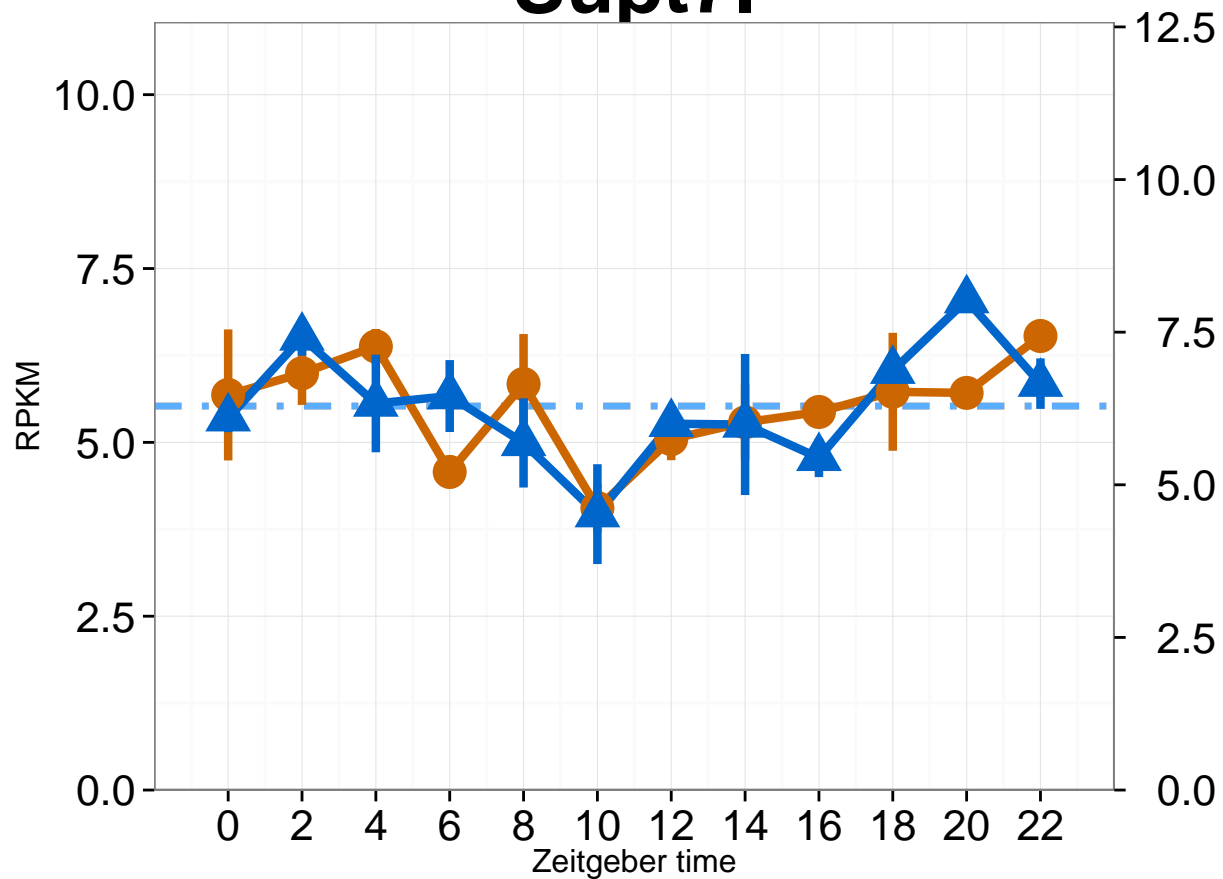

# Supt7I

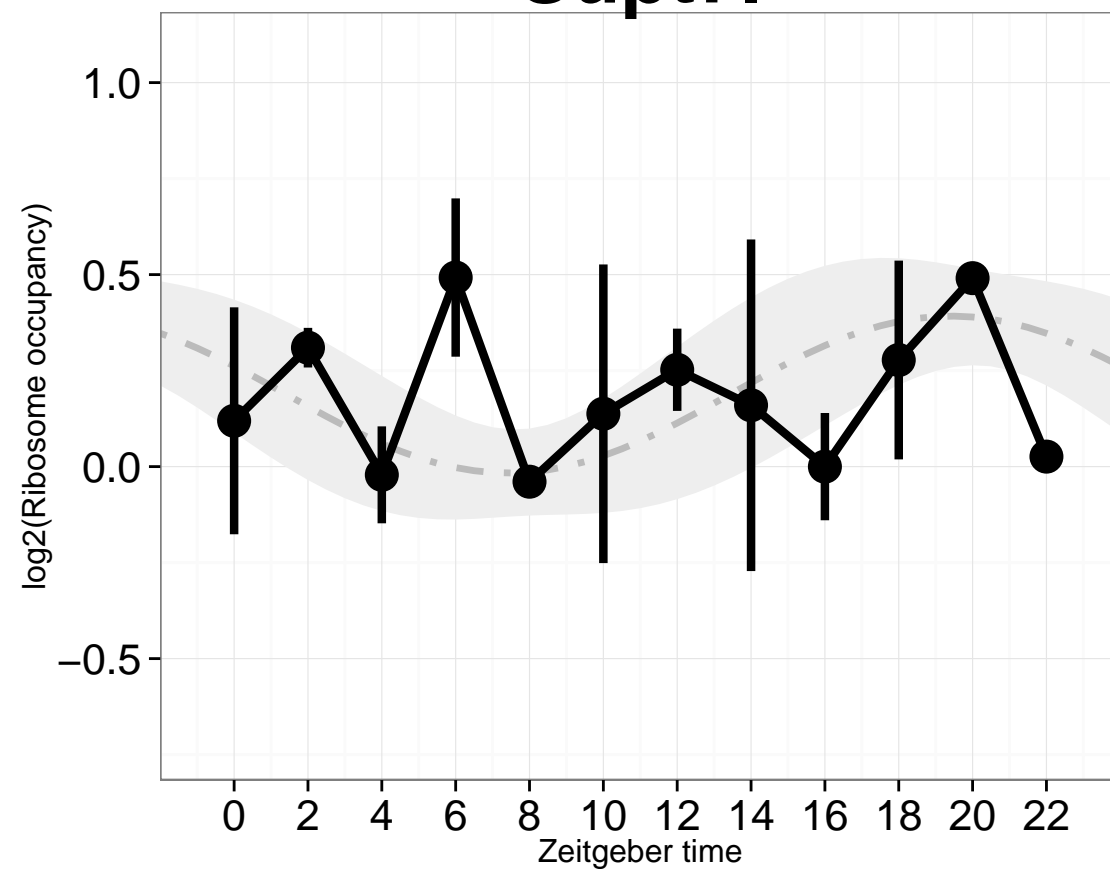

Supplement: SuppDataset_1.zip [file Supt7l_set_A.pdf › Supplemental Dataset 1/A-mRNA_nonrhyth_translation_nonrhyth/Supt7l_set_A.pdf]

## Supv3l1

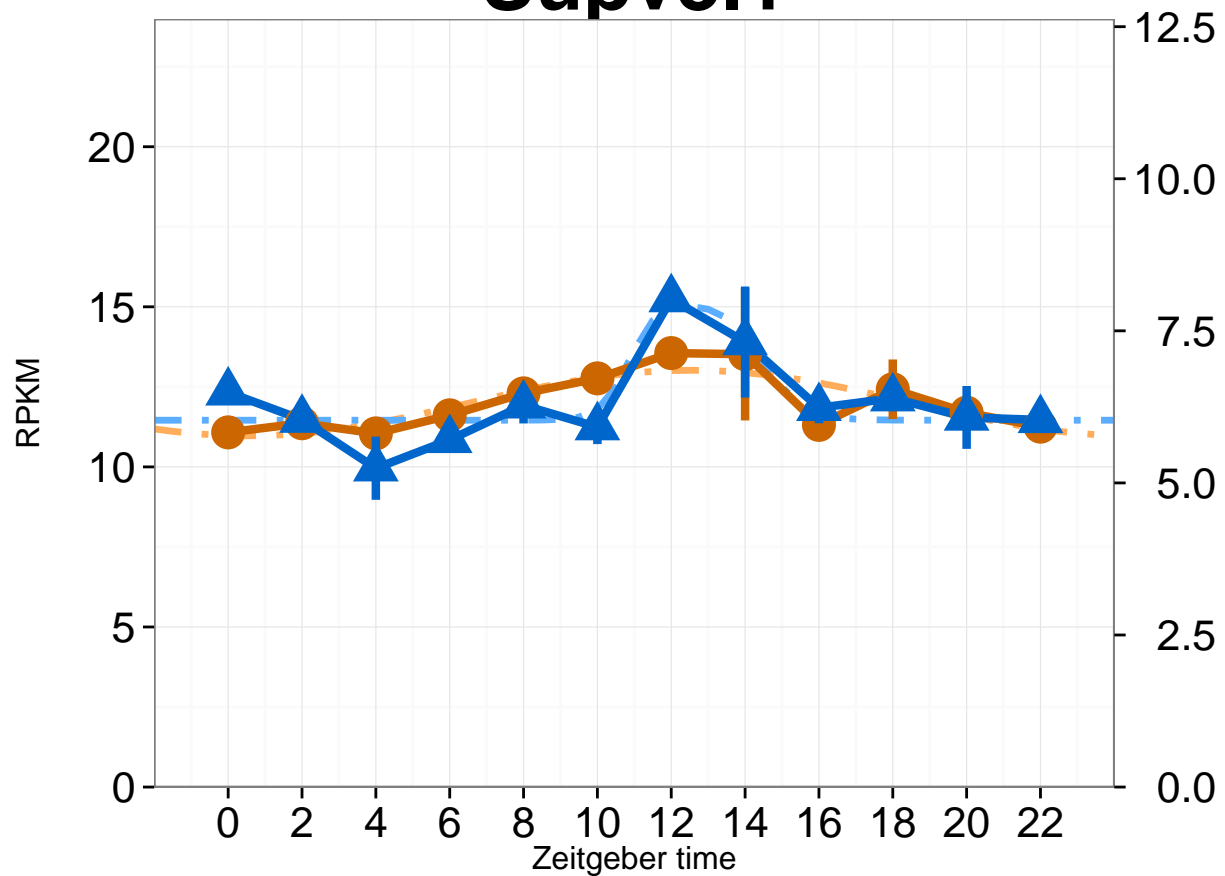

## Supv3l1

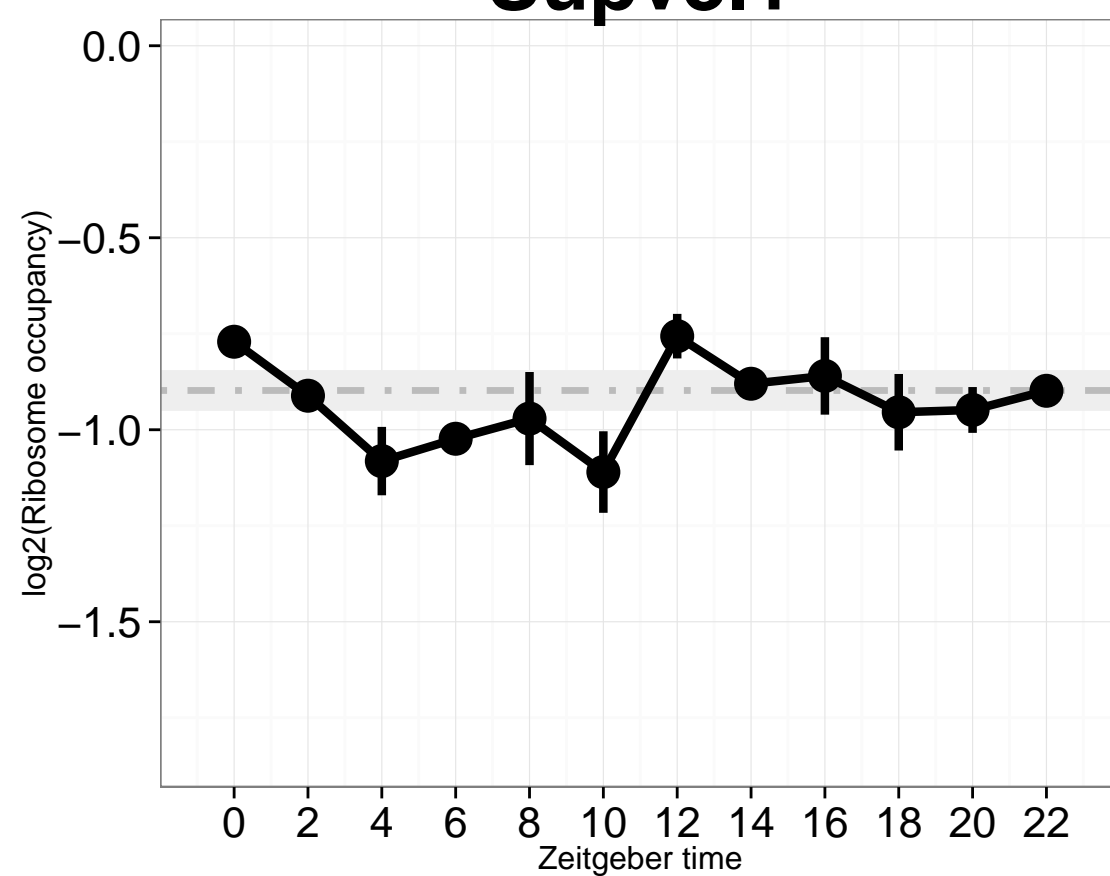

Supplement: SuppDataset_1.zip [file Supv3l1_set_A.pdf › Supplemental Dataset 1/A-mRNA_nonrhyth_translation_nonrhyth/Supv3l1_set_A.pdf]

## Surf1

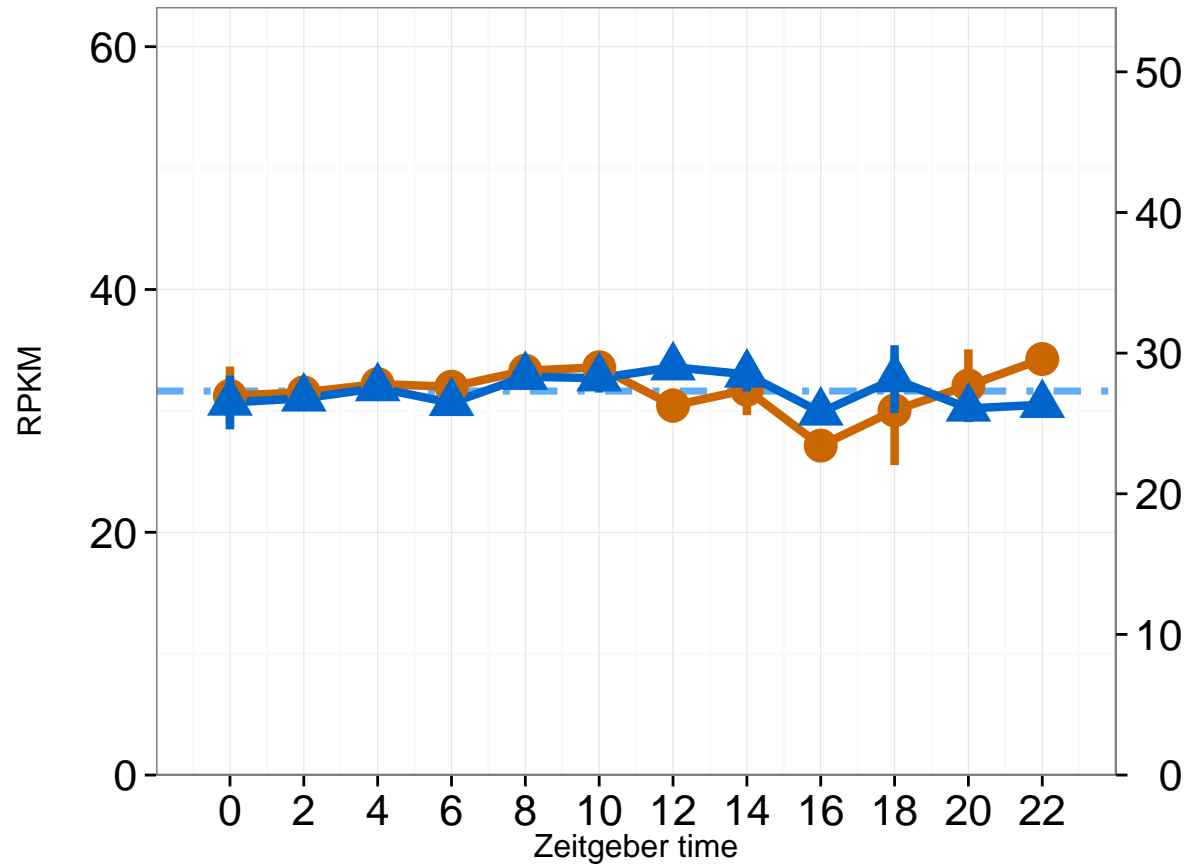

## Surf1

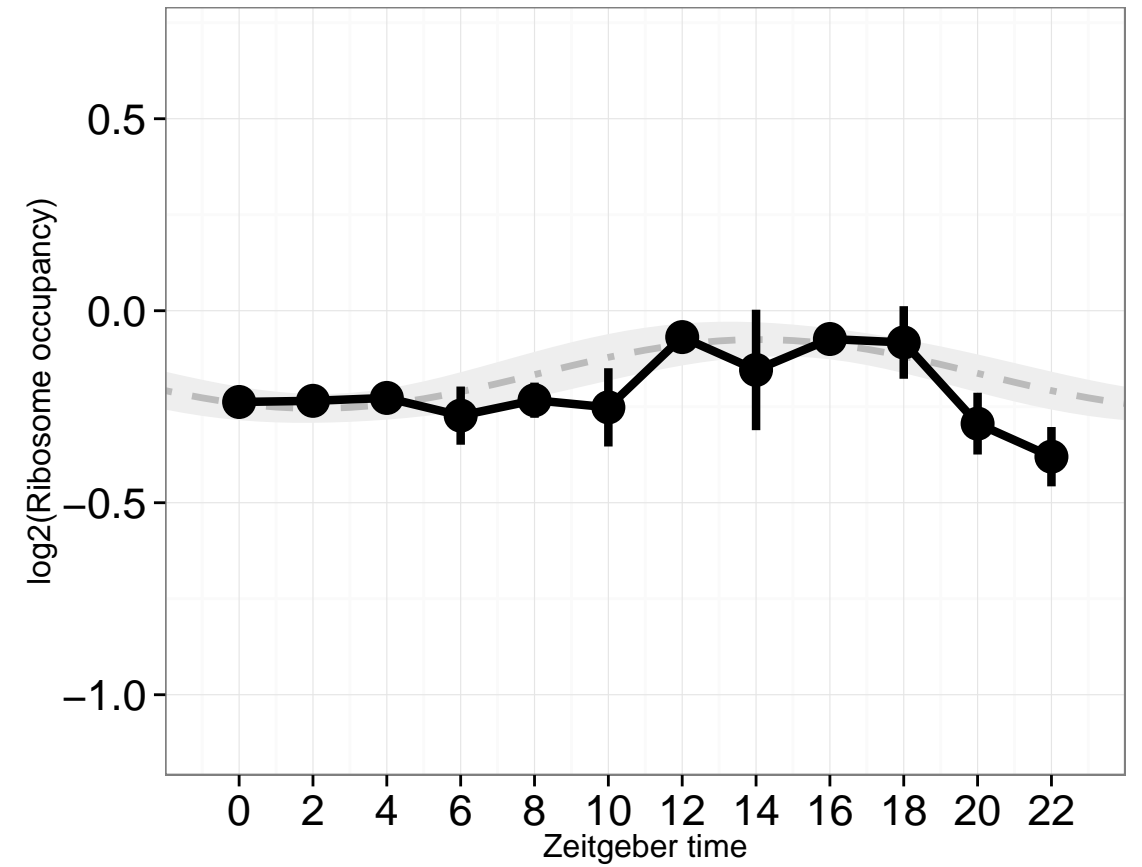

Supplement: SuppDataset_1.zip [file Surf1_set_A.pdf › Supplemental Dataset 1/A-mRNA_nonrhyth_translation_nonrhyth/Surf1_set_A.pdf]

## Surf4

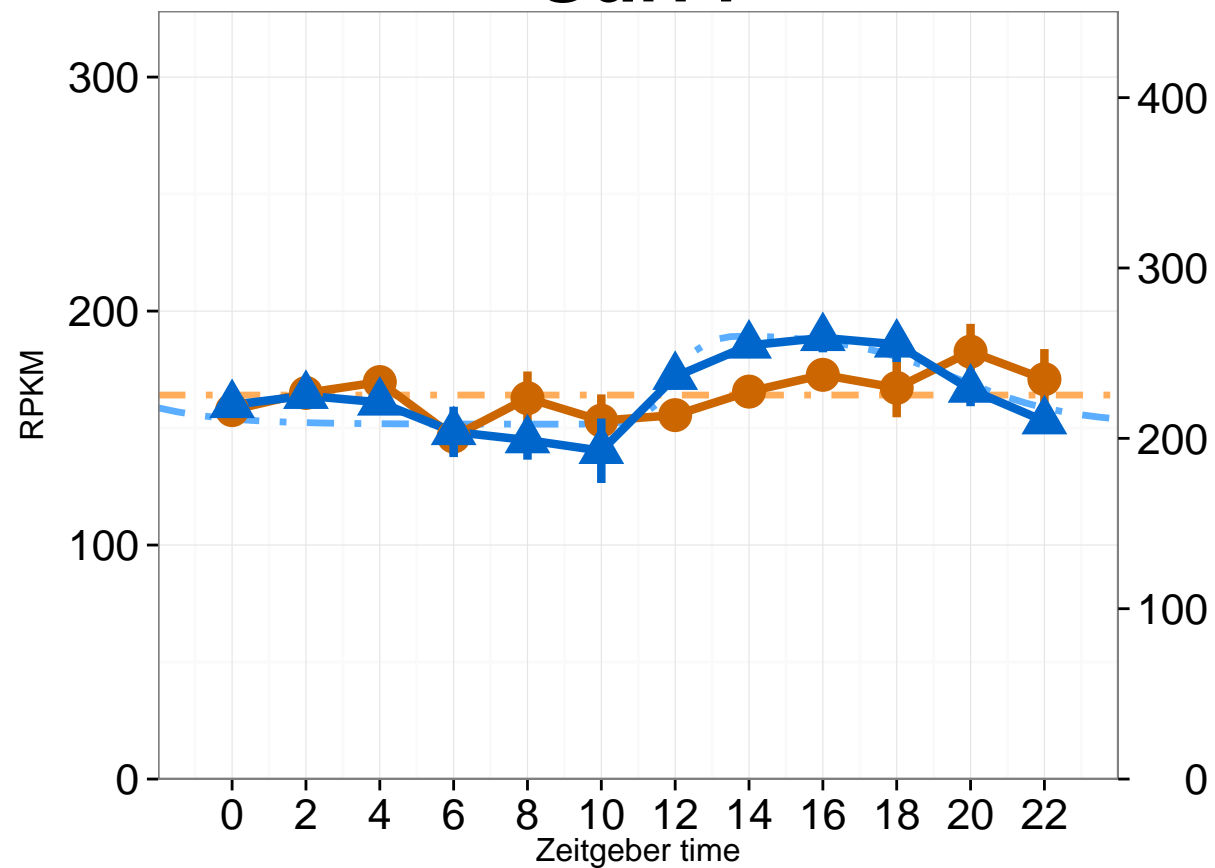

## Surf4

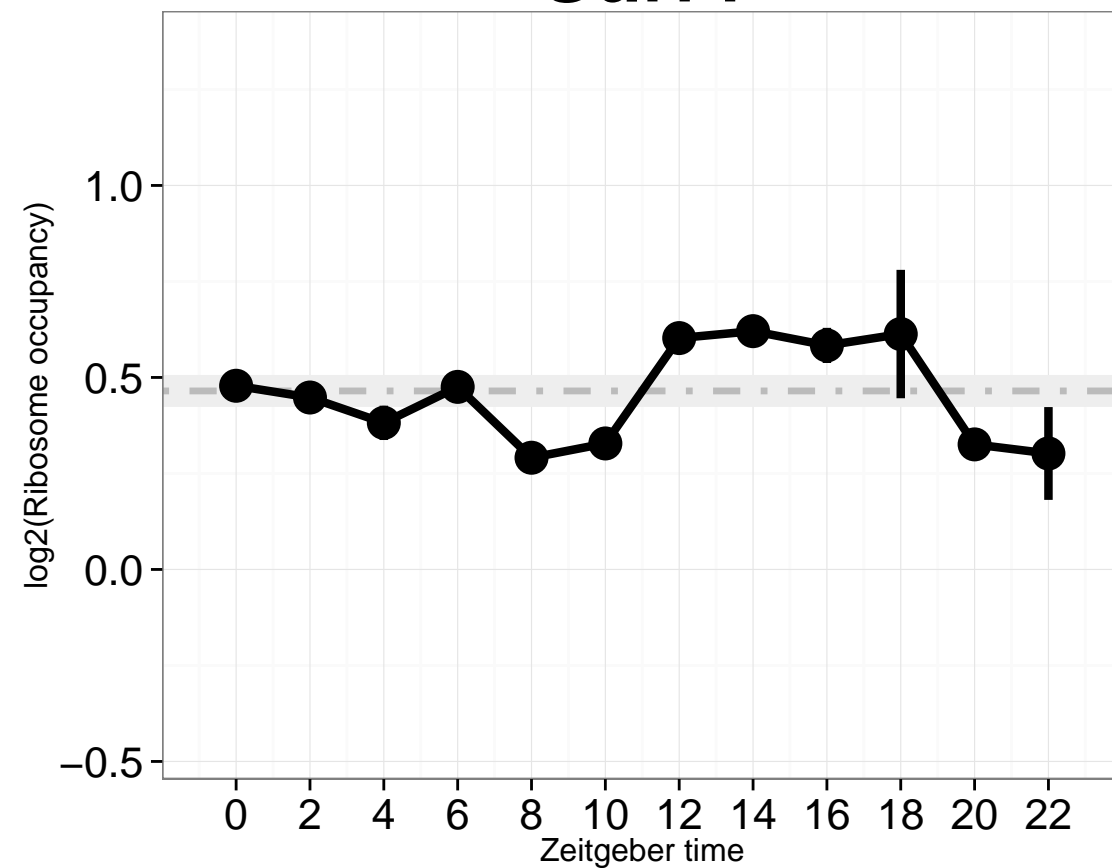

Supplement: SuppDataset_1.zip [file Surf4_set_A.pdf › Supplemental Dataset 1/A-mRNA_nonrhyth_translation_nonrhyth/Surf4_set_A.pdf]

## Surf6

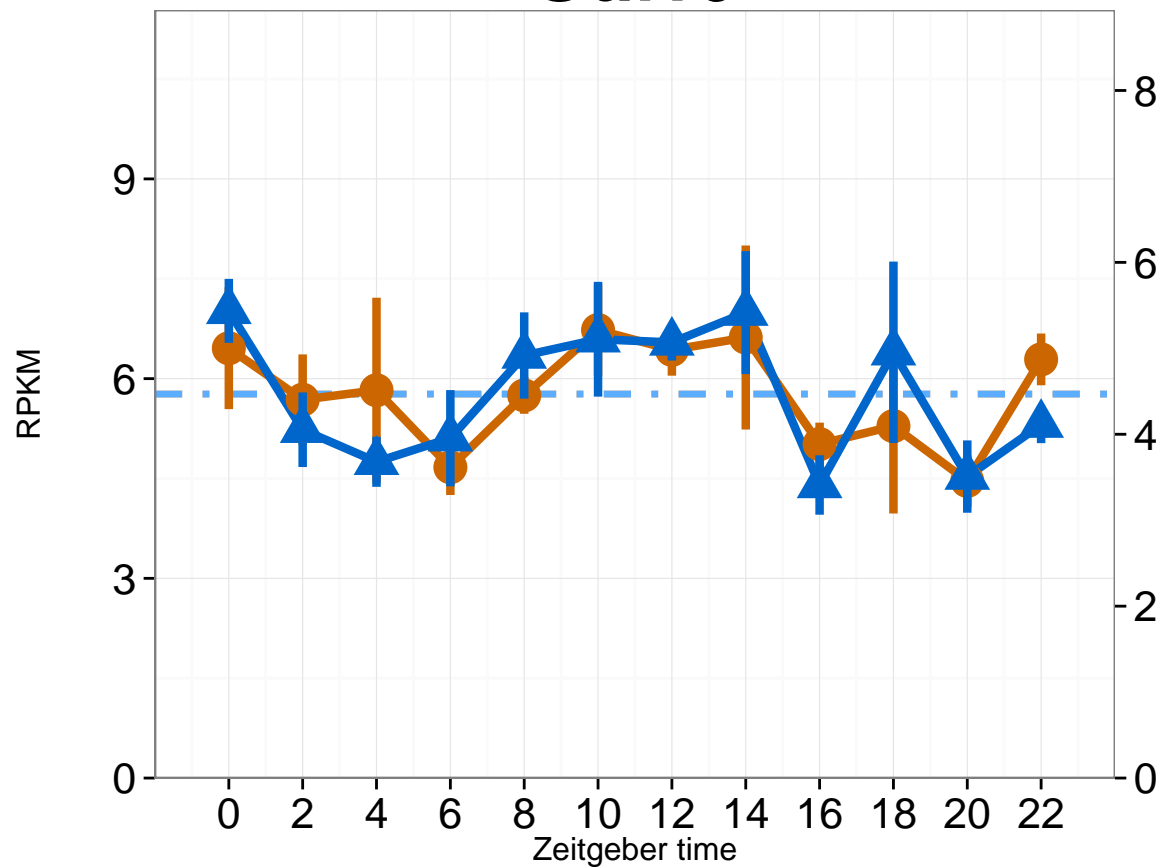

## Surf6

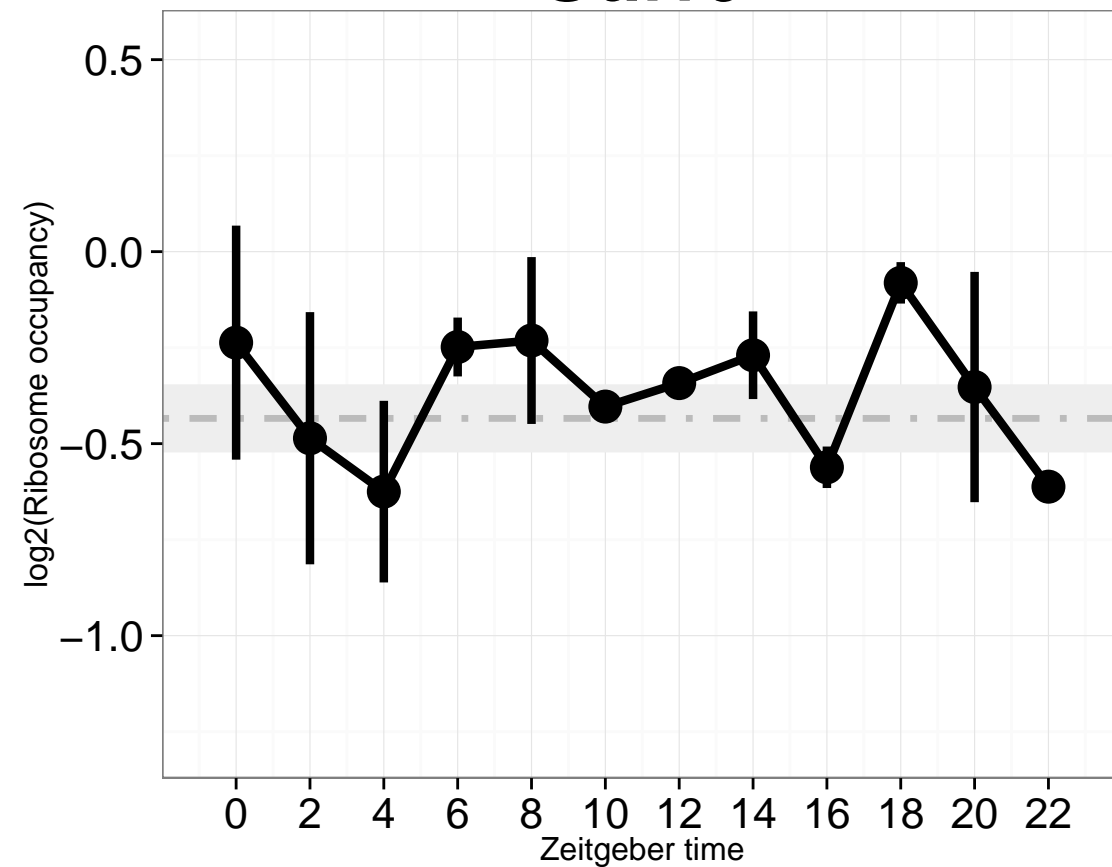

Supplement: SuppDataset_1.zip [file Surf6_set_A.pdf › Supplemental Dataset 1/A-mRNA_nonrhyth_translation_nonrhyth/Surf6_set_A.pdf]

## Susd4

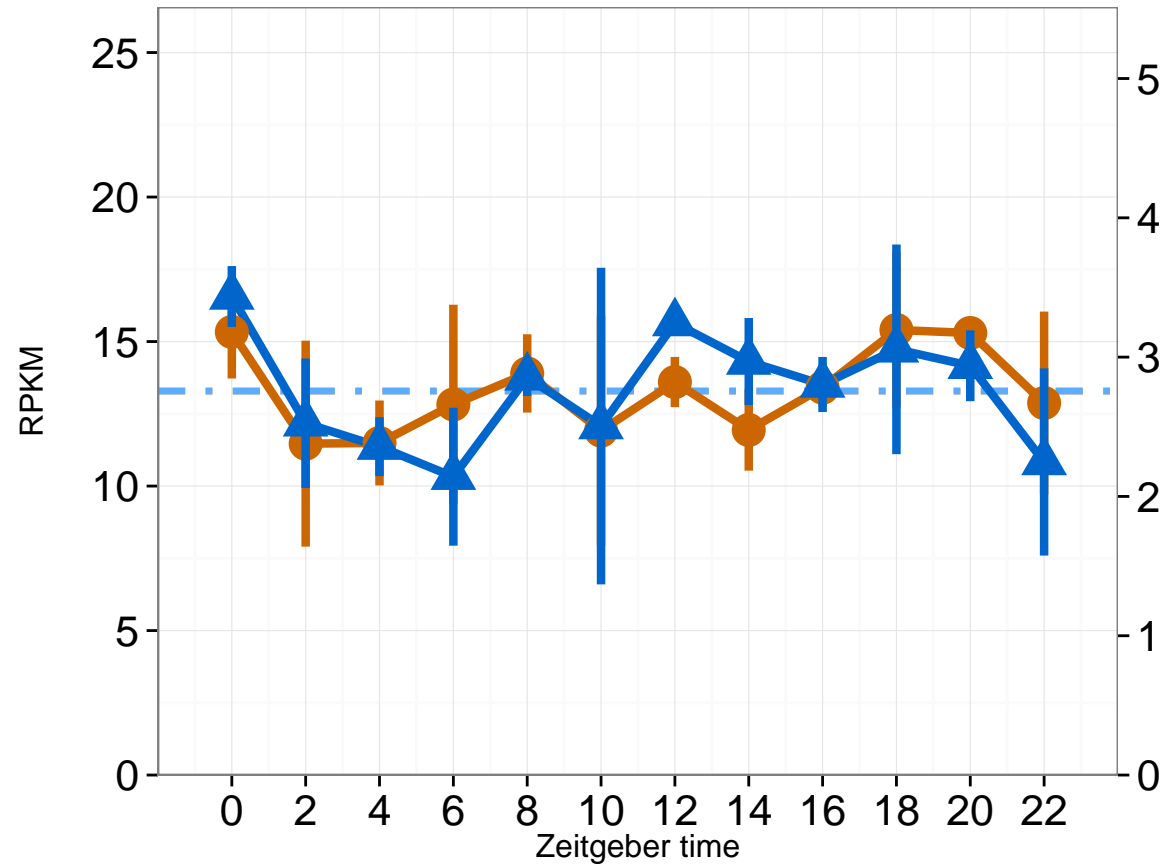

## Susd4

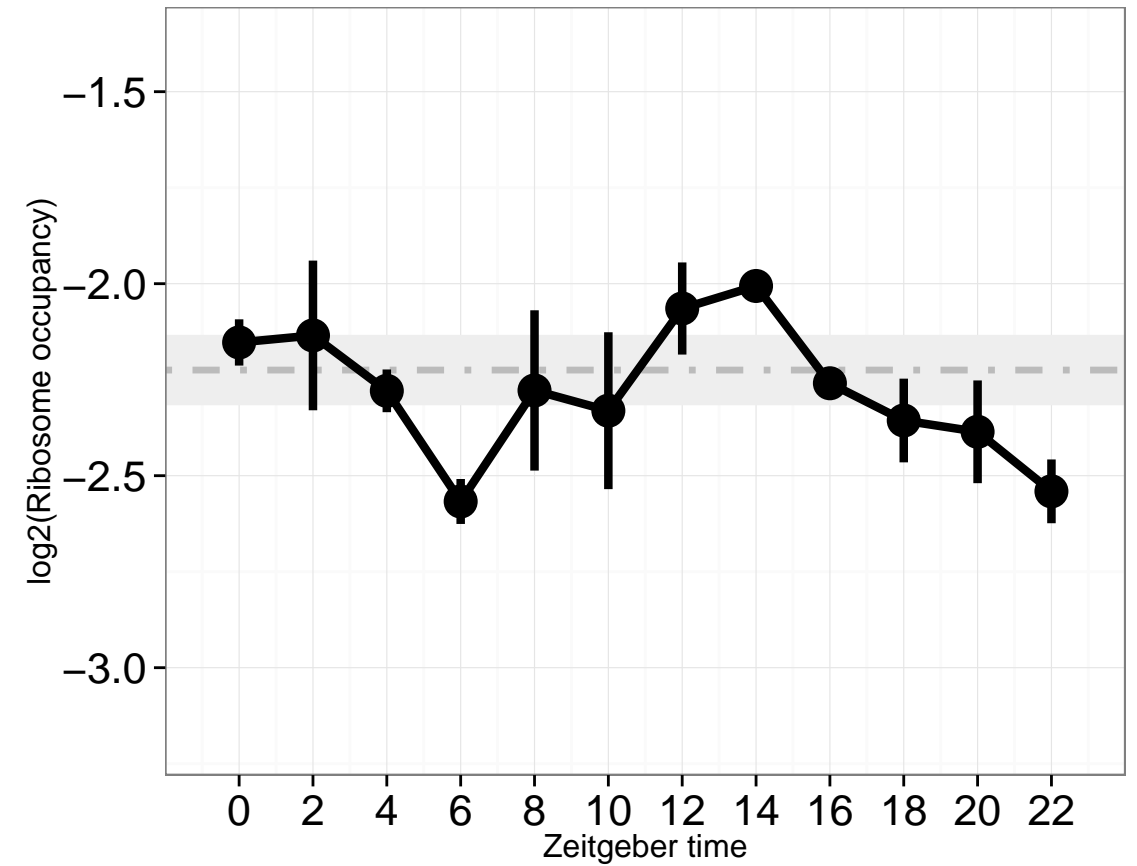

Supplement: SuppDataset_1.zip [file Susd4_set_A.pdf › Supplemental Dataset 1/A-mRNA_nonrhyth_translation_nonrhyth/Susd4_set_A.pdf]

**Suv39h1**

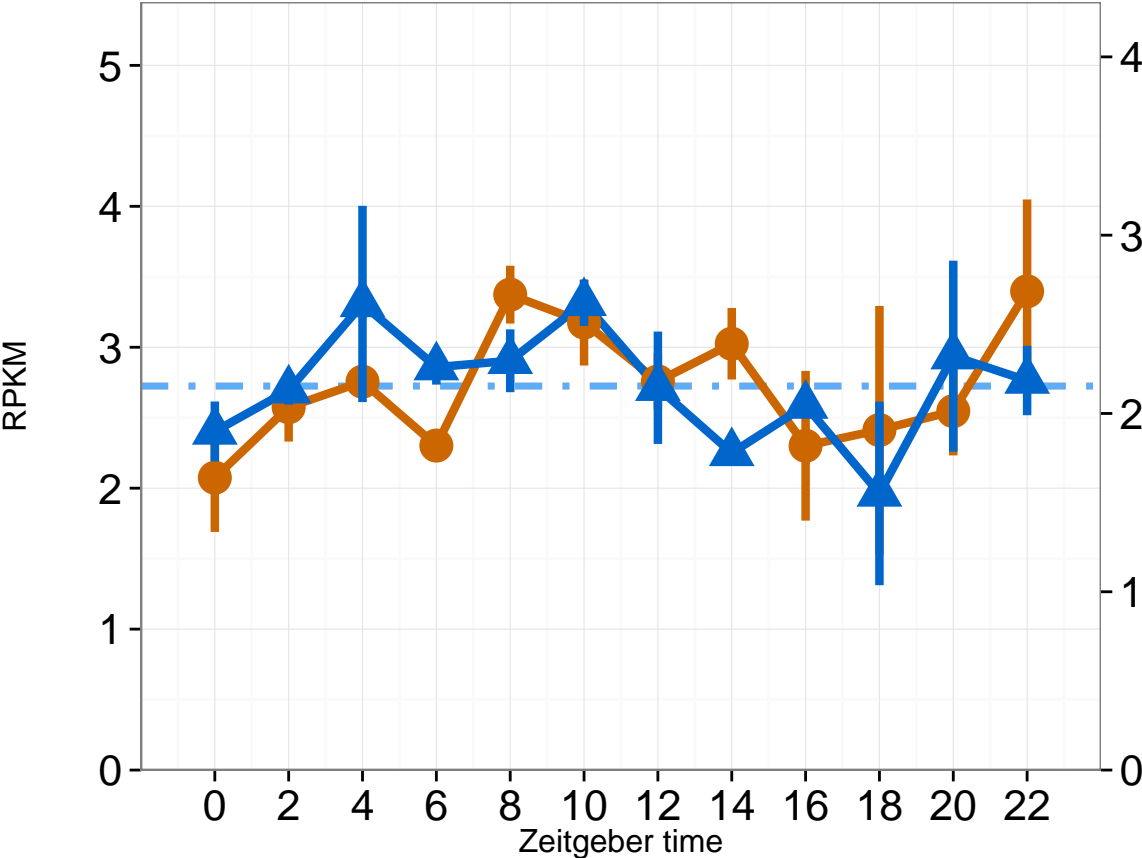

**Suv39h1**

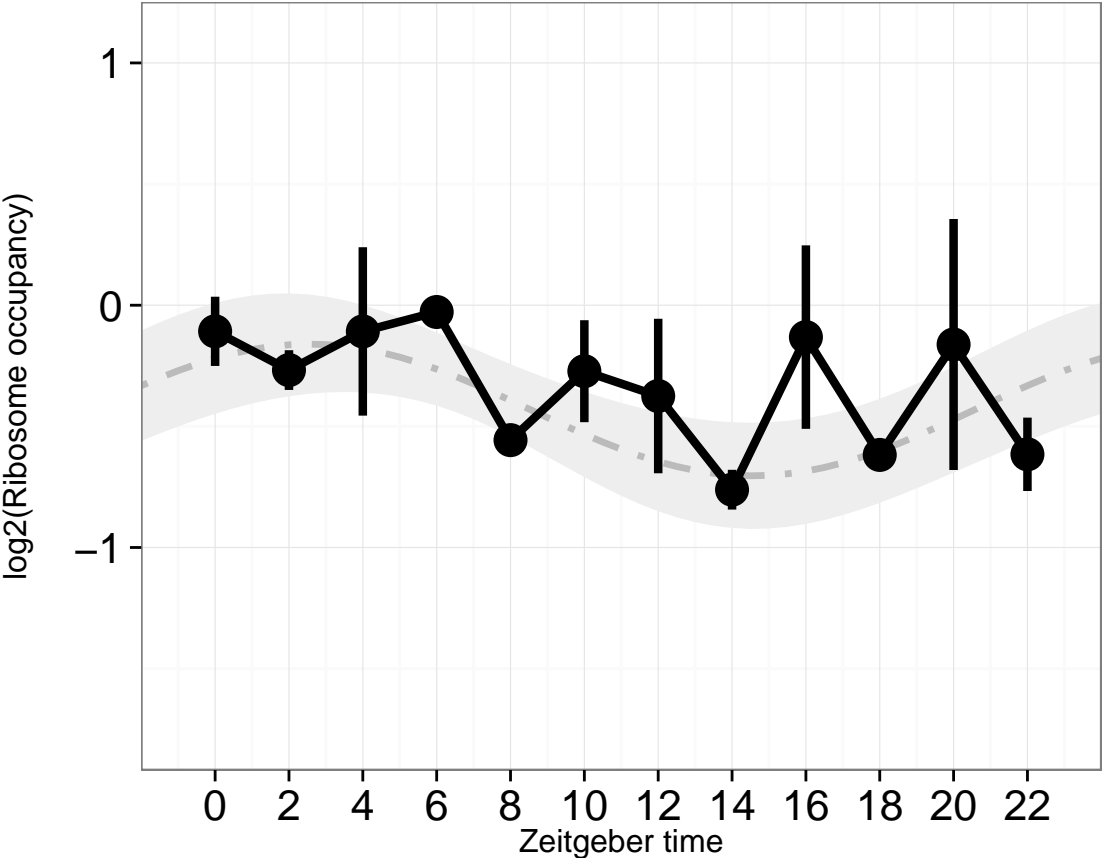

Supplement: SuppDataset_1.zip [file Suv39h1_set_A.pdf › Supplemental Dataset 1/A-mRNA_nonrhyth_translation_nonrhyth/Suv39h1_set_A.pdf]

## Suv420h1

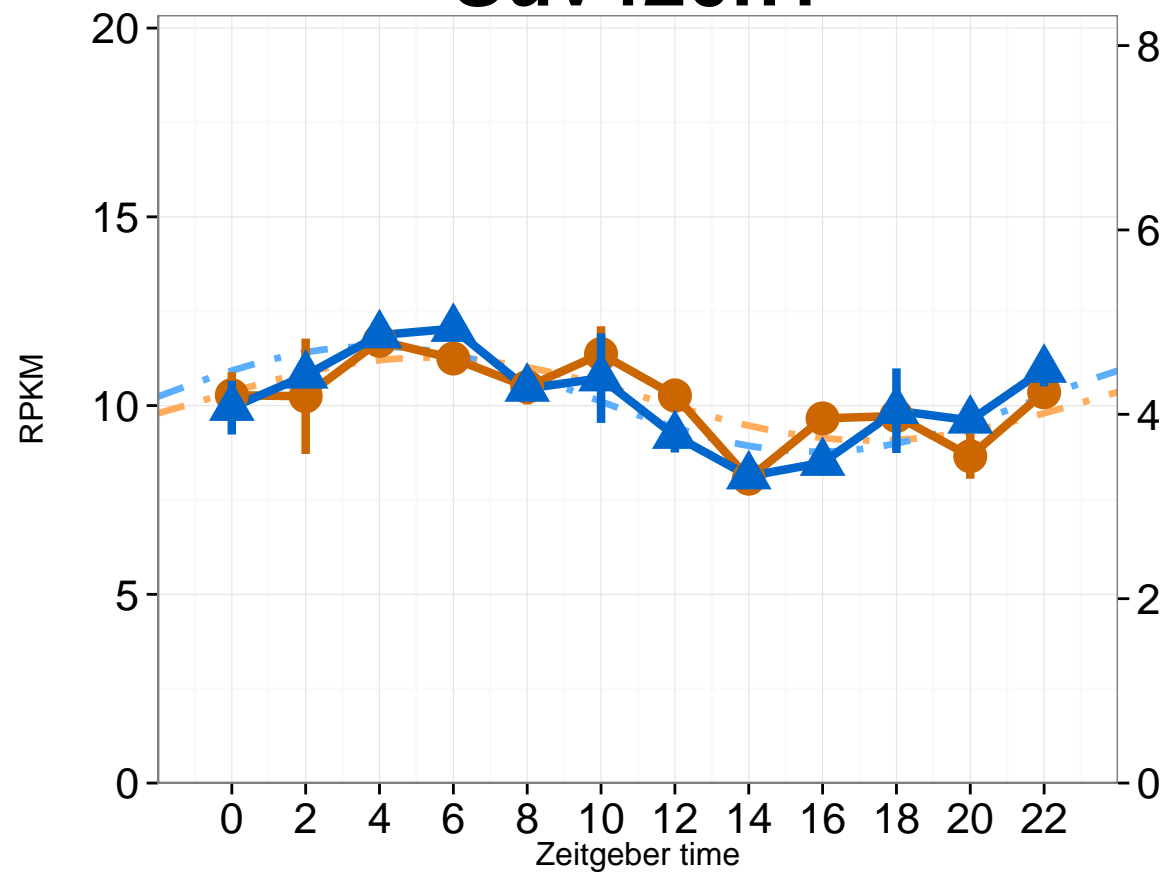

## Suv420h1

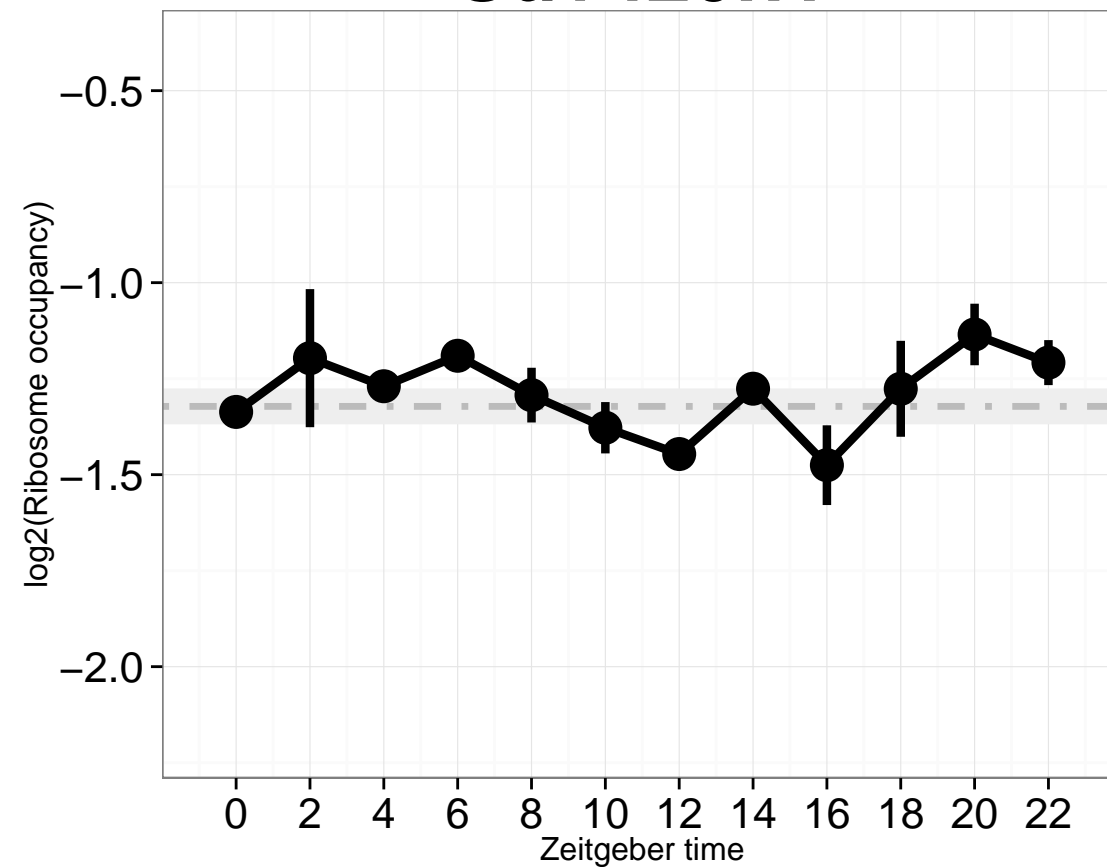

Supplement: SuppDataset_1.zip [file Suv420h1_set_A.pdf › Supplemental Dataset 1/A-mRNA_nonrhyth_translation_nonrhyth/Suv420h1_set_A.pdf]

# Suv420h2

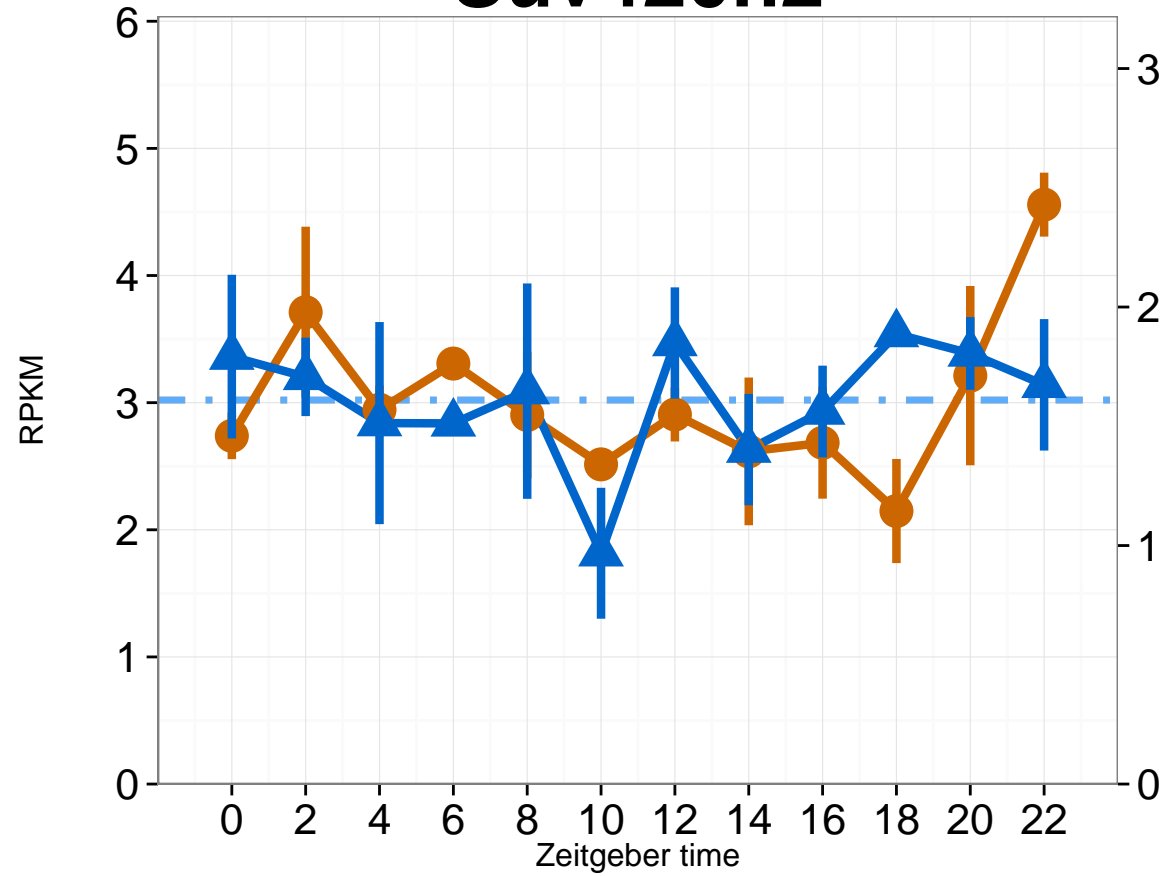

# Suv420h2

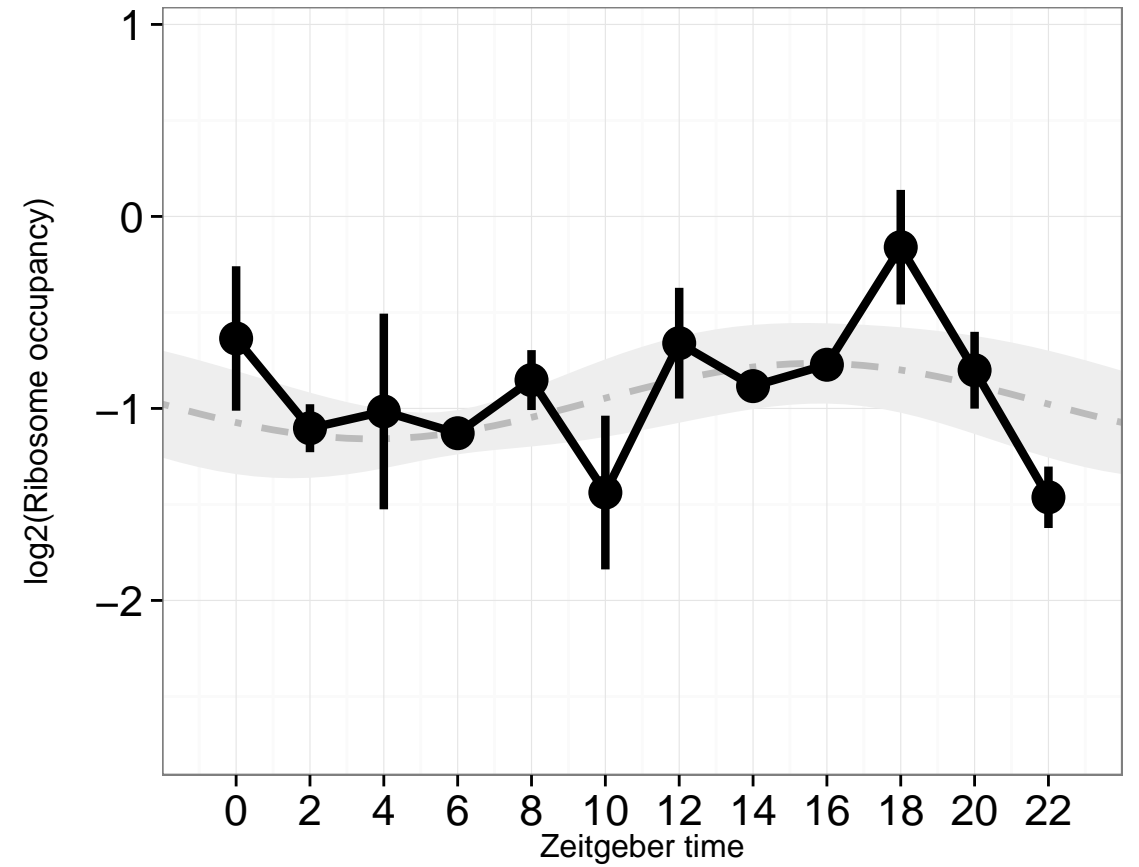

Supplement: SuppDataset_1.zip [file Suv420h2_set_A.pdf › Supplemental Dataset 1/A-mRNA_nonrhyth_translation_nonrhyth/Suv420h2_set_A.pdf]

# Suz12

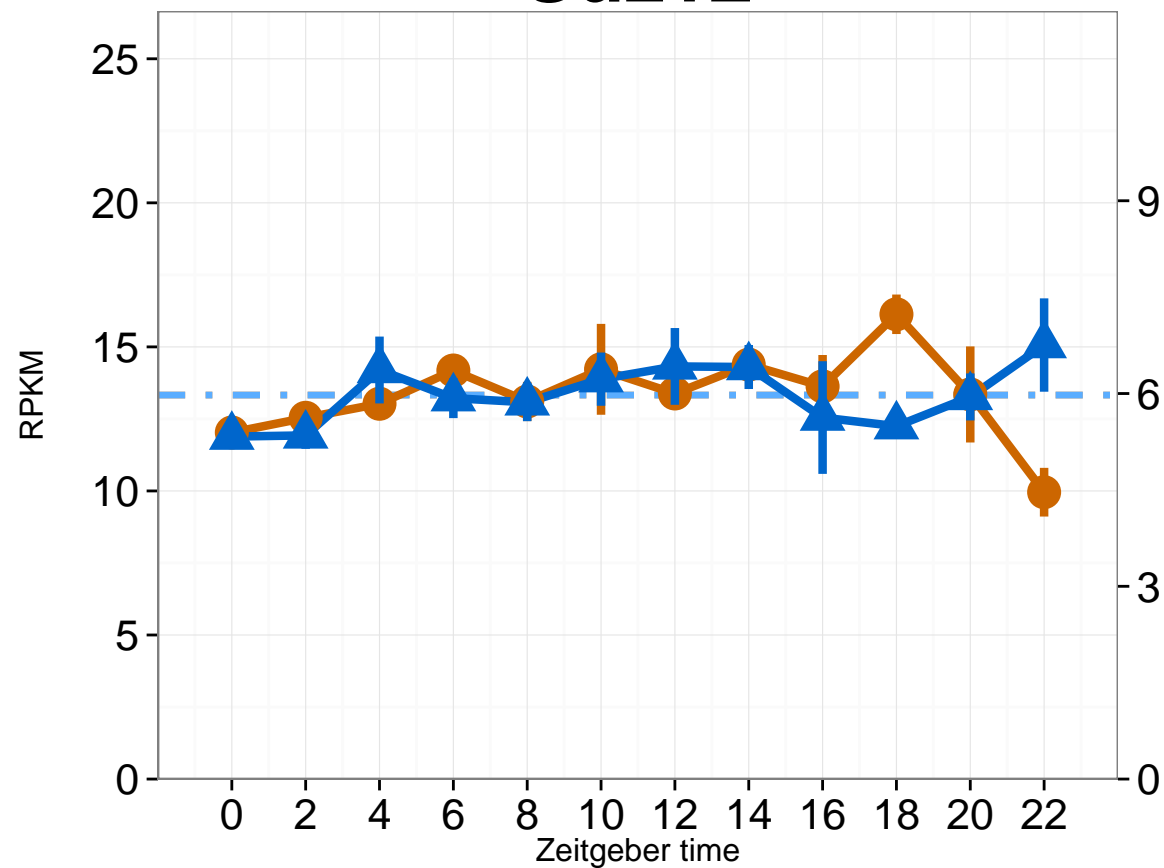

# Suz12

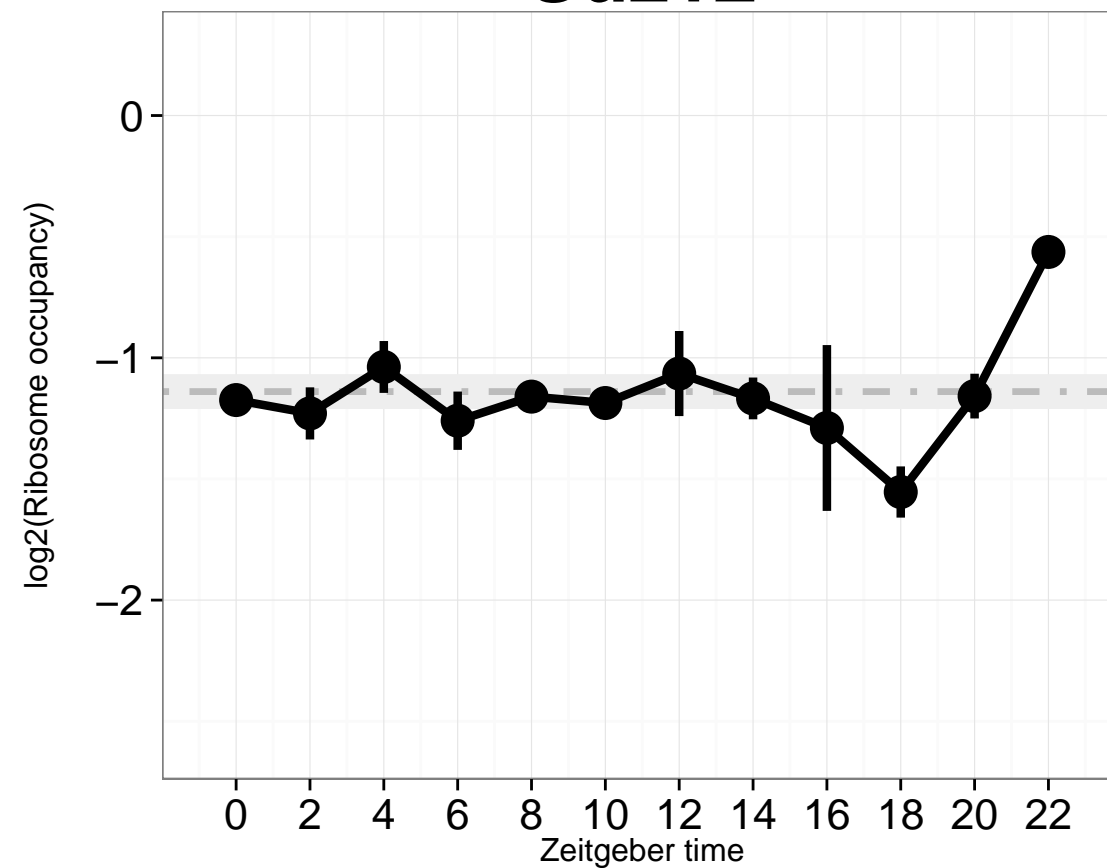

Supplement: SuppDataset_1.zip [file Suz12_set_A.pdf › Supplemental Dataset 1/A-mRNA_nonrhyth_translation_nonrhyth/Suz12_set_A.pdf]

## Svil

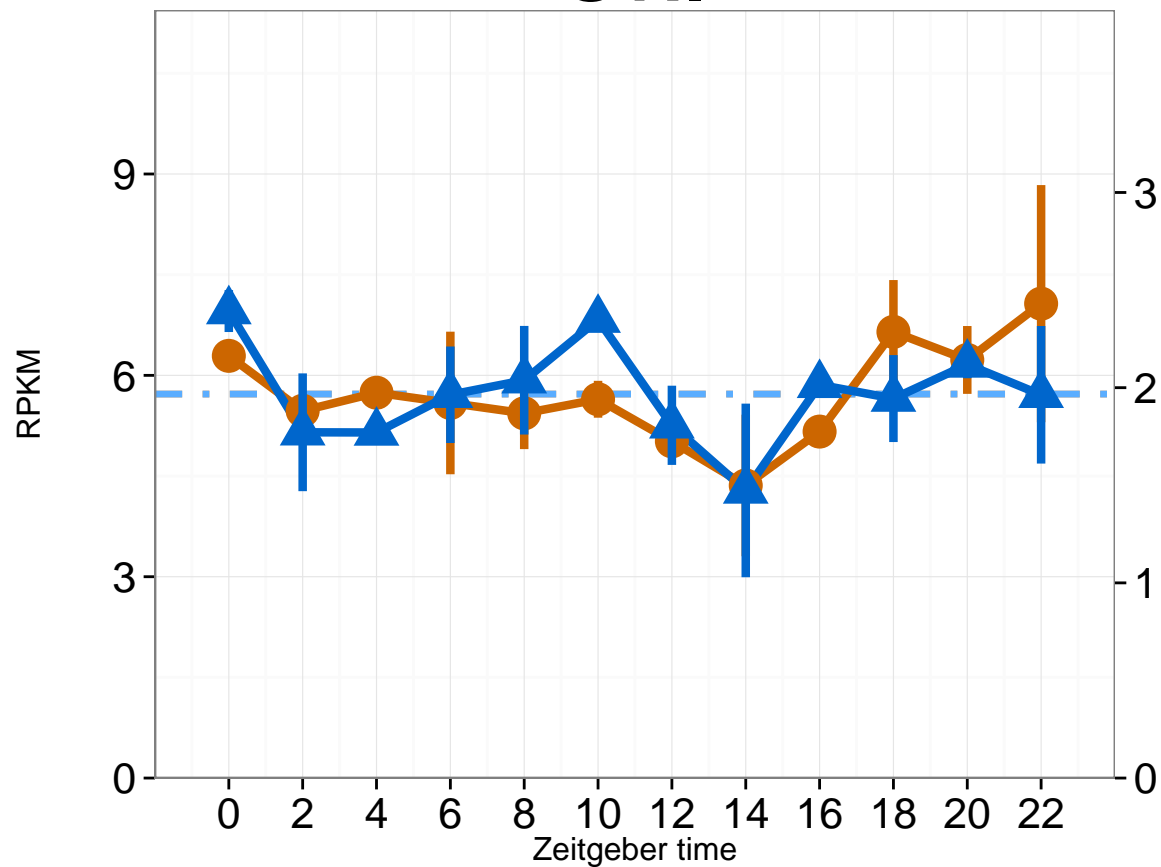

## Svil

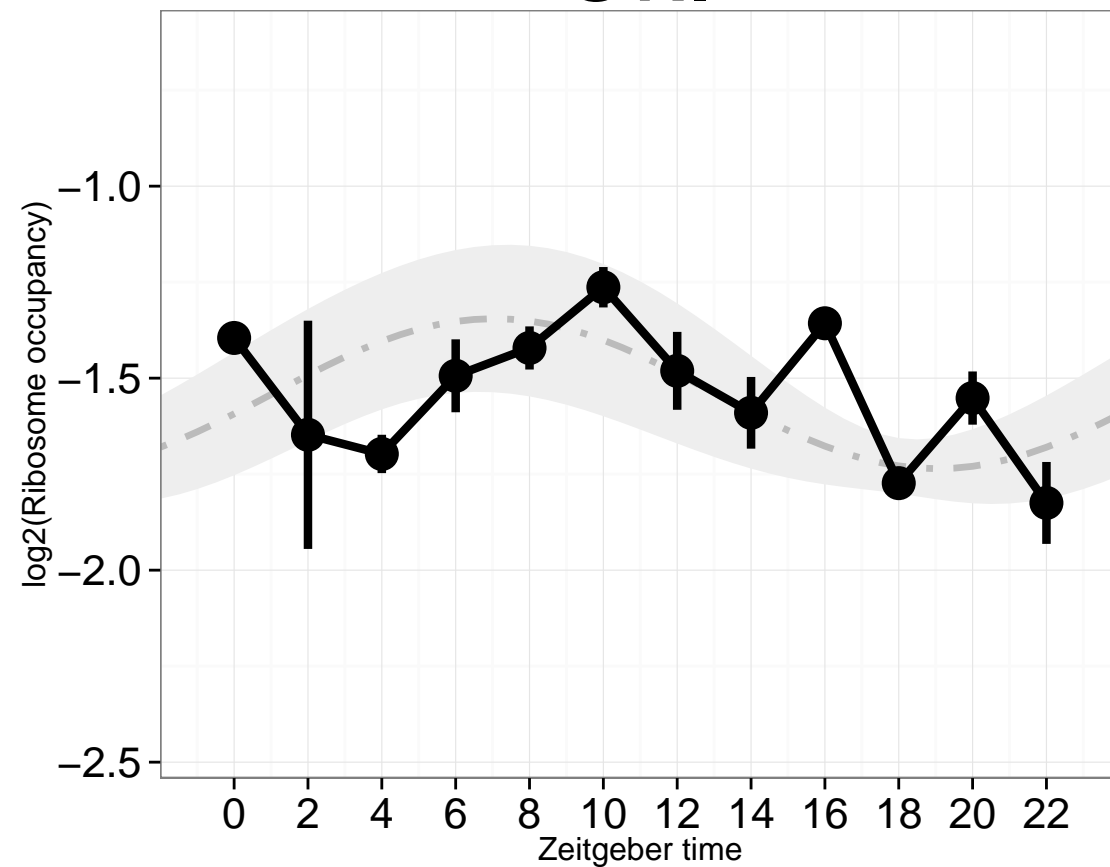

Supplement: SuppDataset_1.zip [file Svil_set_A.pdf › Supplemental Dataset 1/A-mRNA_nonrhyth_translation_nonrhyth/Svil_set_A.pdf]

## Svip

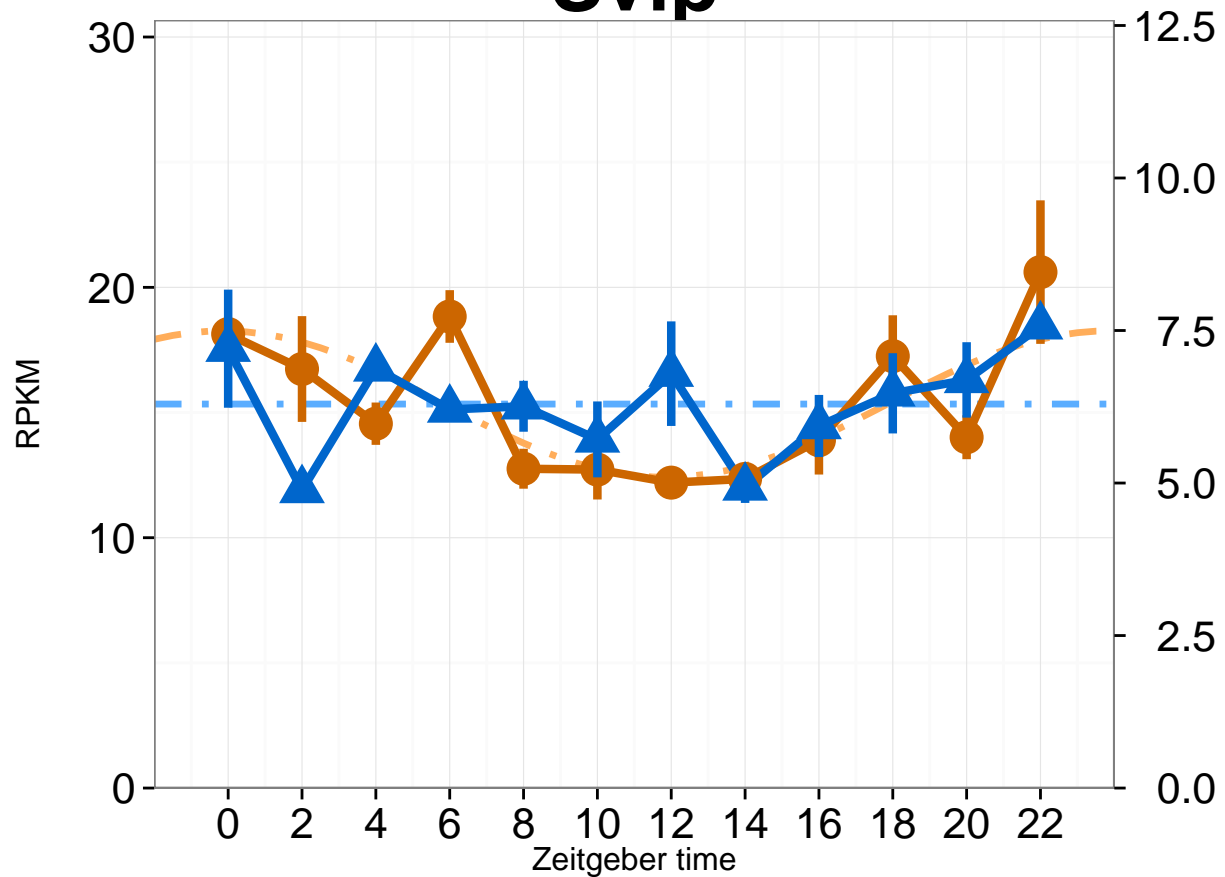

## Svip

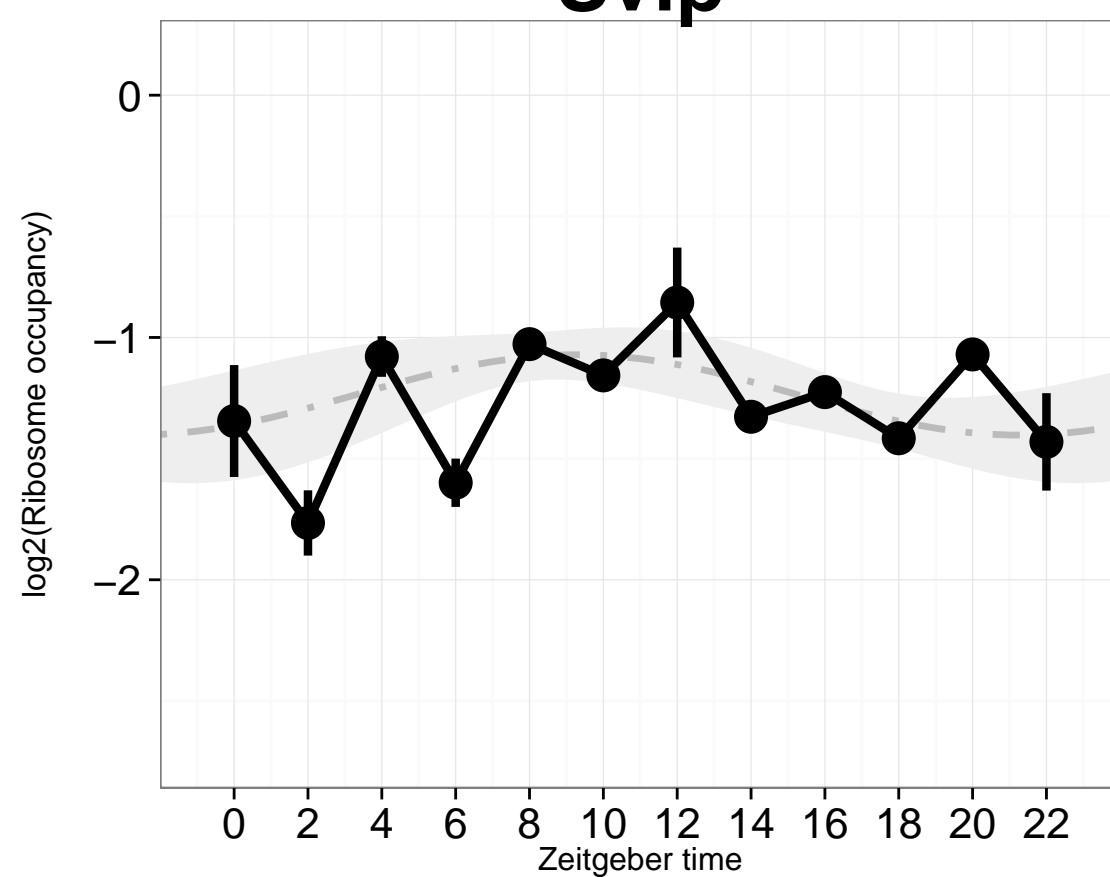

Supplement: SuppDataset_1.zip [file Svip_set_A.pdf › Supplemental Dataset 1/A-mRNA_nonrhyth_translation_nonrhyth/Svip_set_A.pdf]

## Swap70

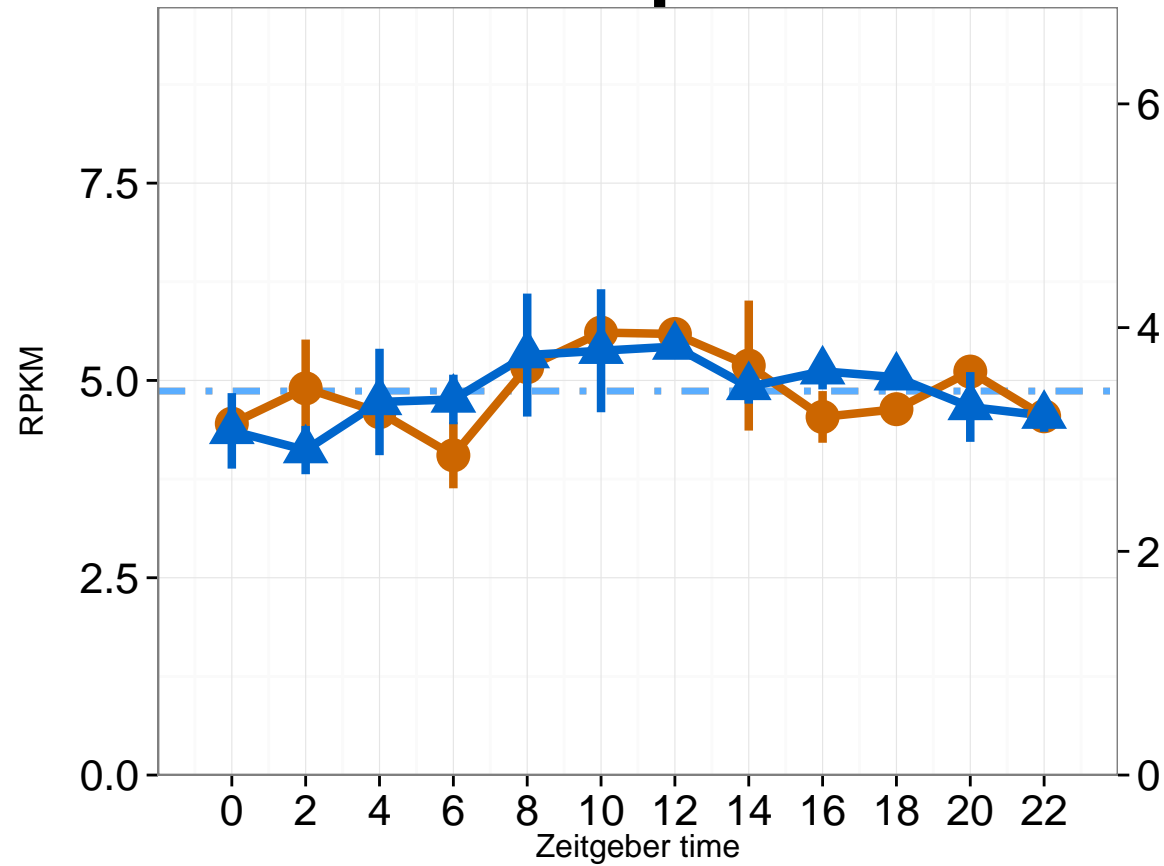

## Swap70

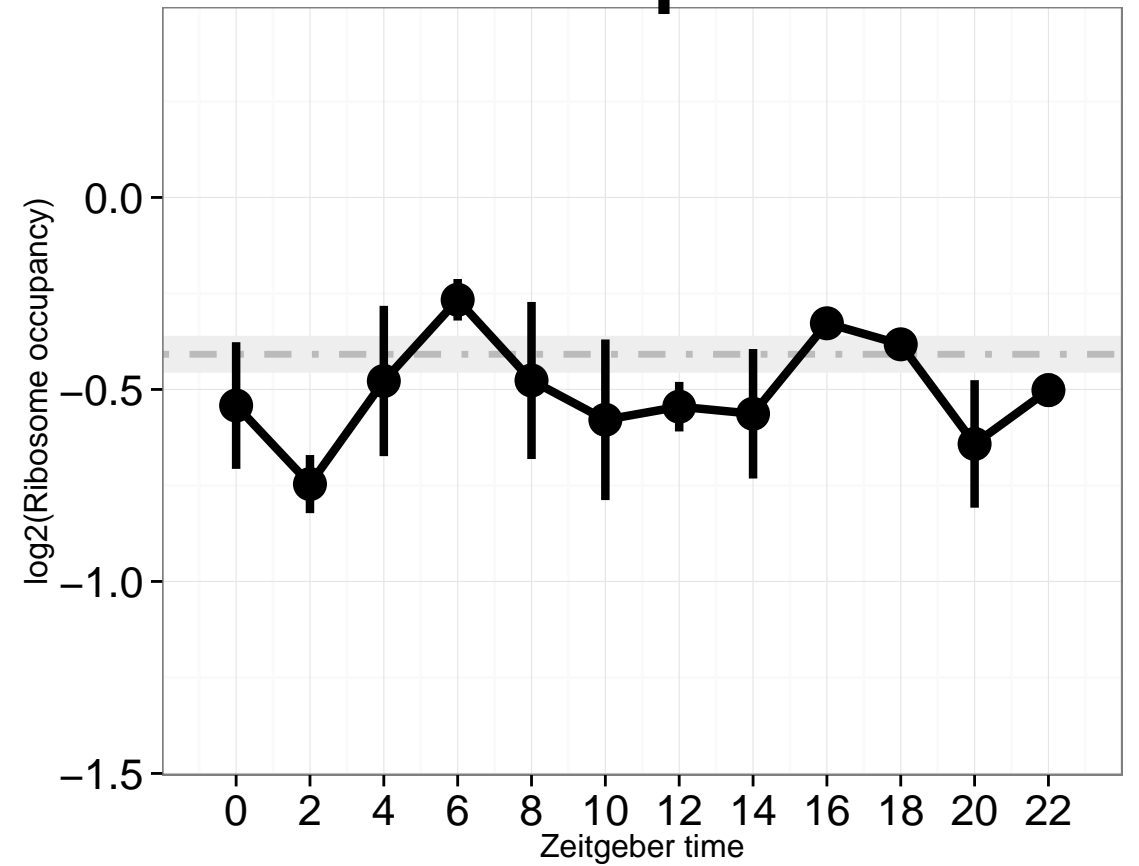

Supplement: SuppDataset_1.zip [file Swap70_set_A.pdf › Supplemental Dataset 1/A-mRNA_nonrhyth_translation_nonrhyth/Swap70_set_A.pdf]

## Swi5

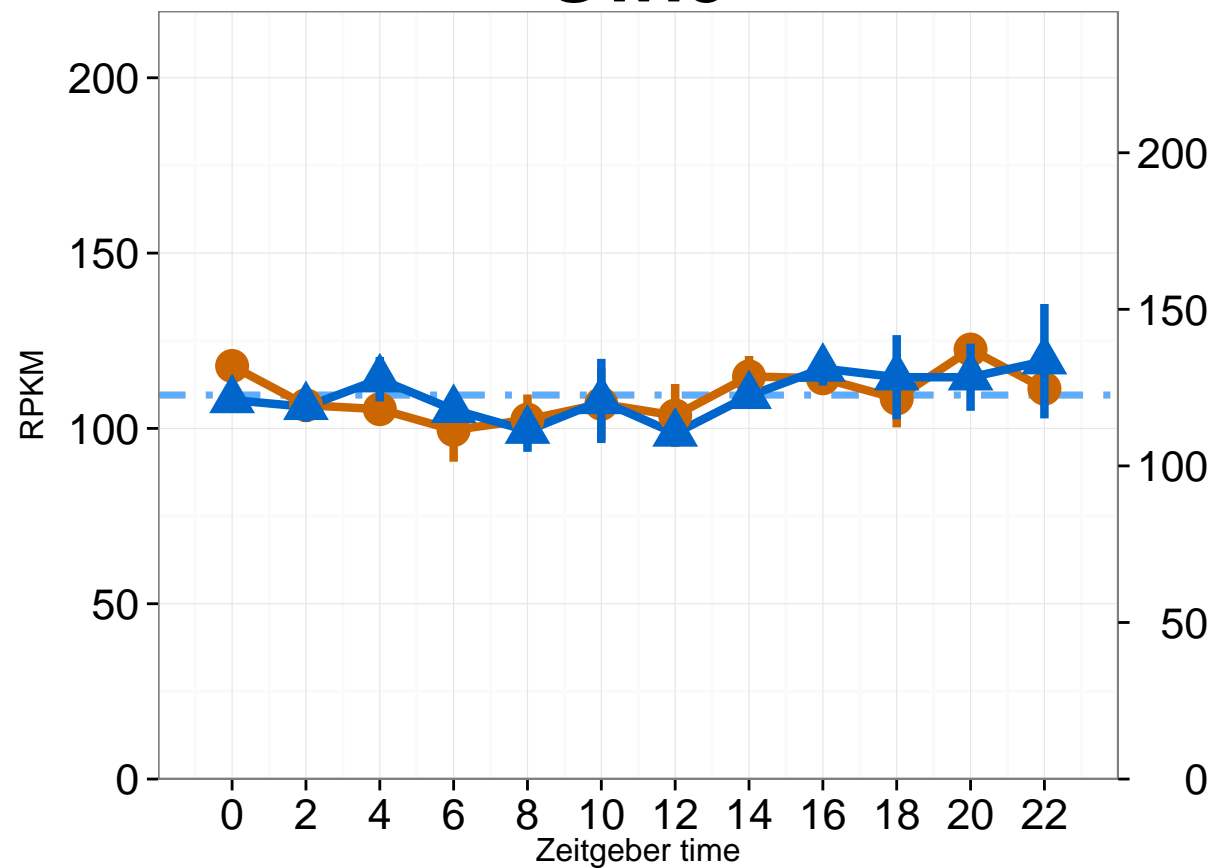

## Swi5

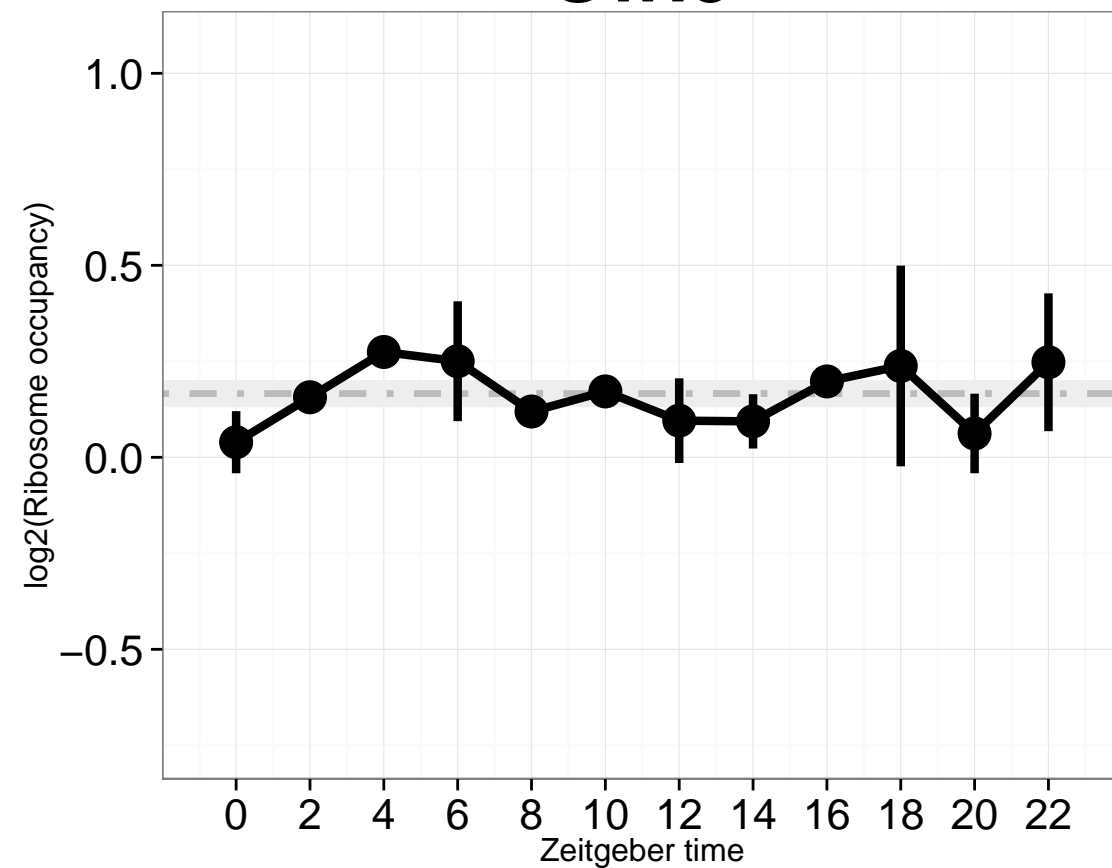

Supplement: SuppDataset_1.zip [file Swi5_set_A.pdf › Supplemental Dataset 1/A-mRNA_nonrhyth_translation_nonrhyth/Swi5_set_A.pdf]

## Swsap1

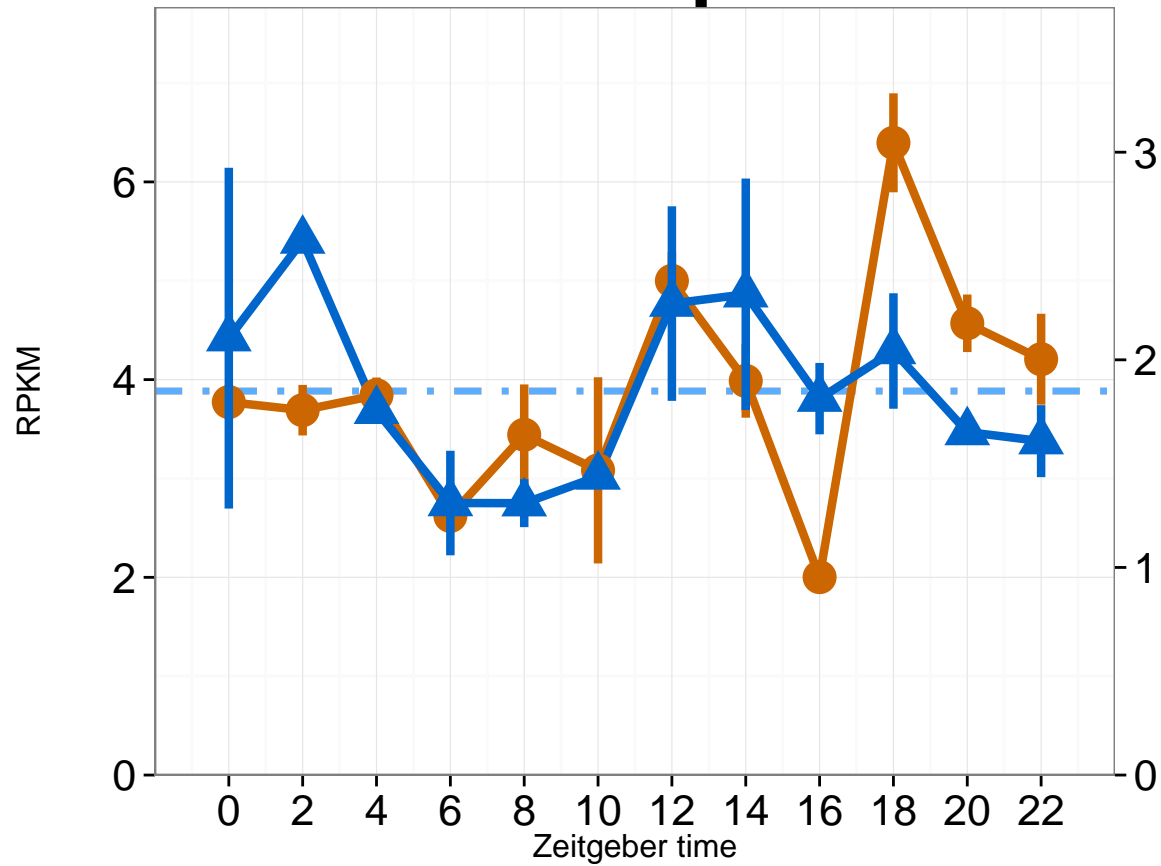

## Swsap1

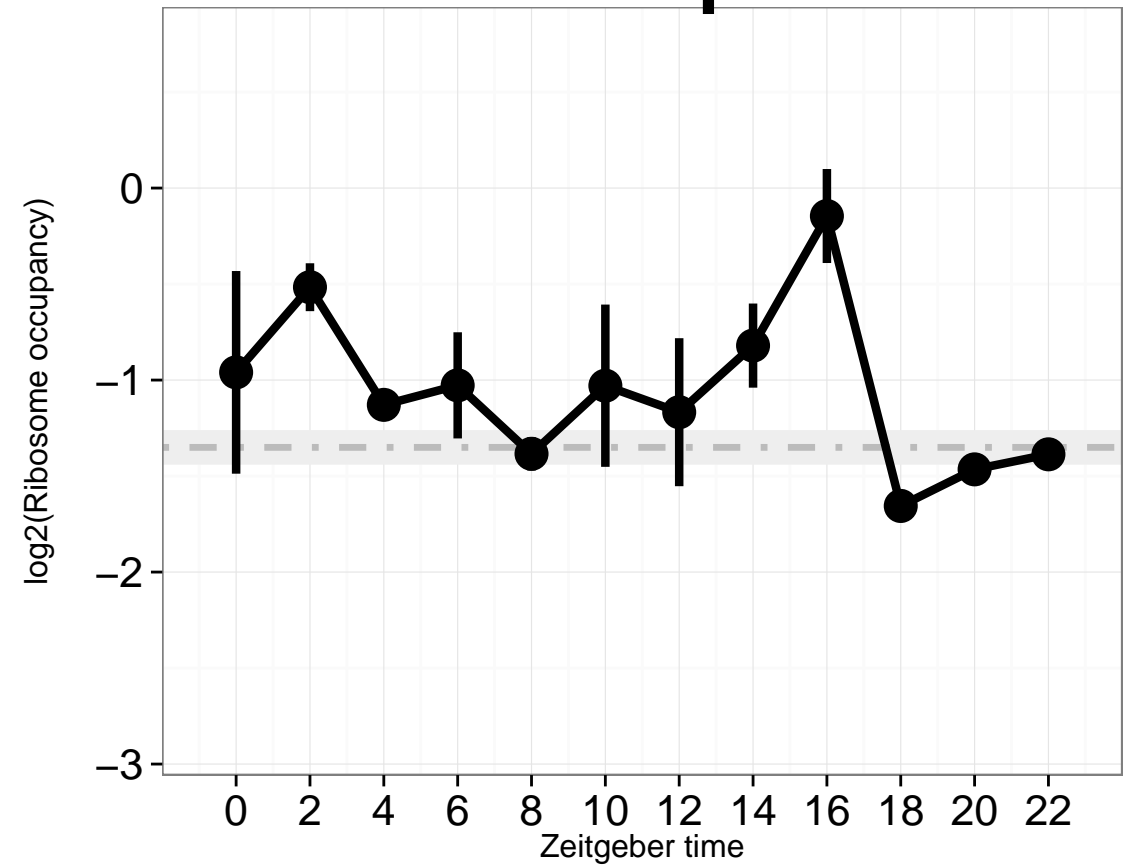

Supplement: SuppDataset_1.zip [file Swsap1_set_A.pdf › Supplemental Dataset 1/A-mRNA_nonrhyth_translation_nonrhyth/Swsap1_set_A.pdf]

# Syap1

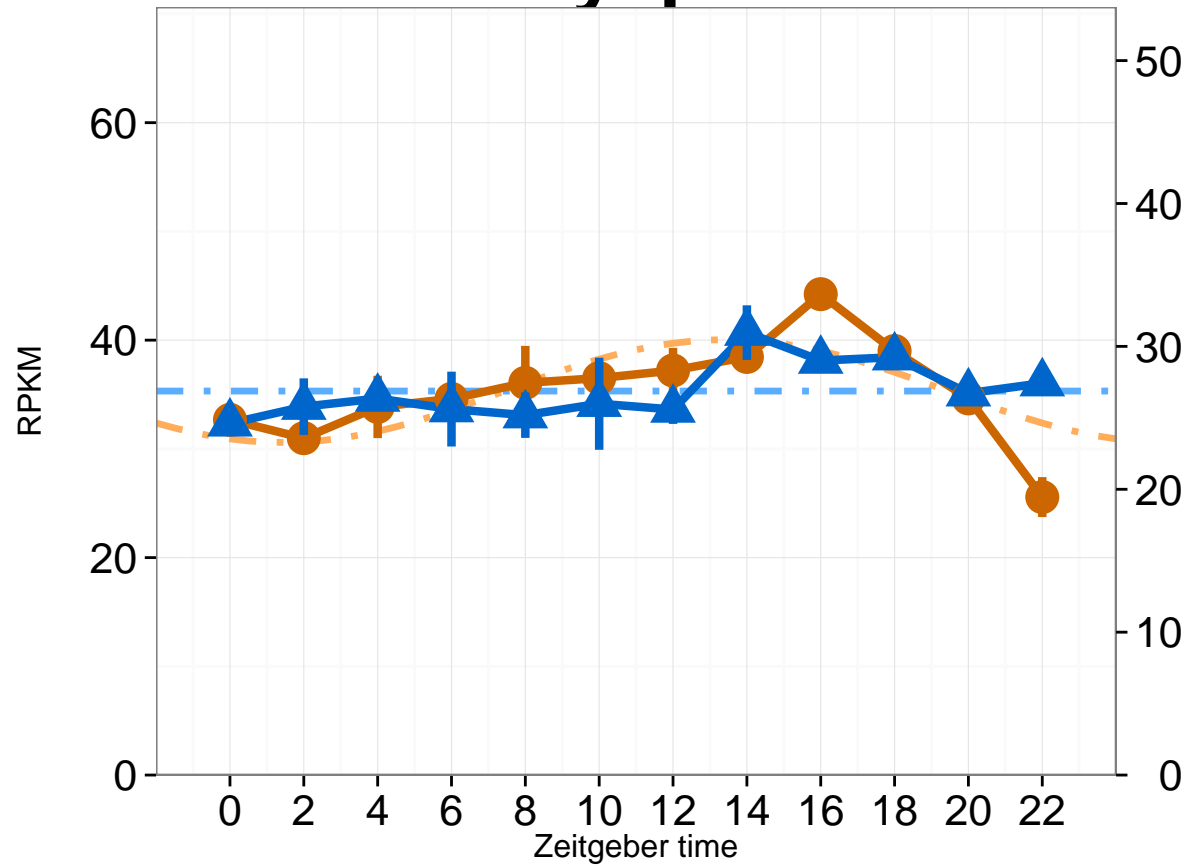

# Syap1

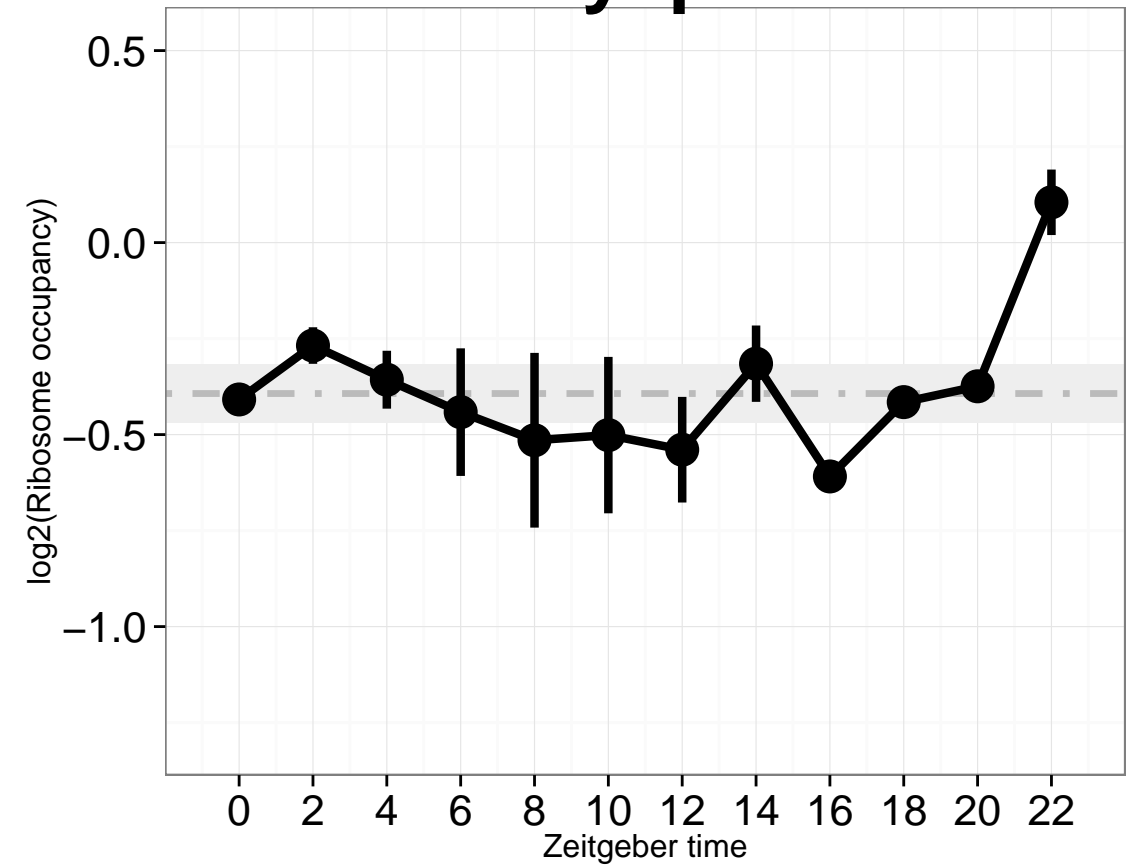

Supplement: SuppDataset_1.zip [file Syap1_set_A.pdf › Supplemental Dataset 1/A-mRNA_nonrhyth_translation_nonrhyth/Syap1_set_A.pdf]

# Syde1

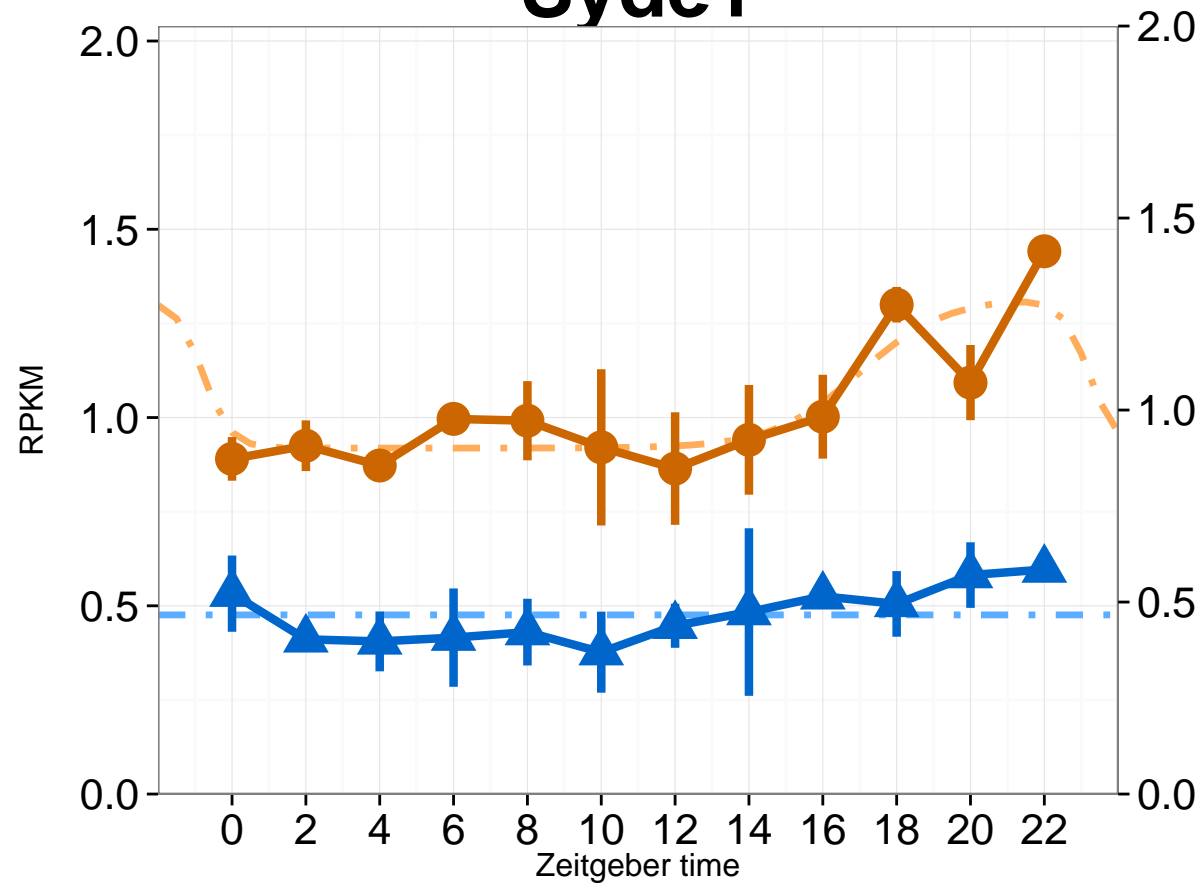

# Syde1

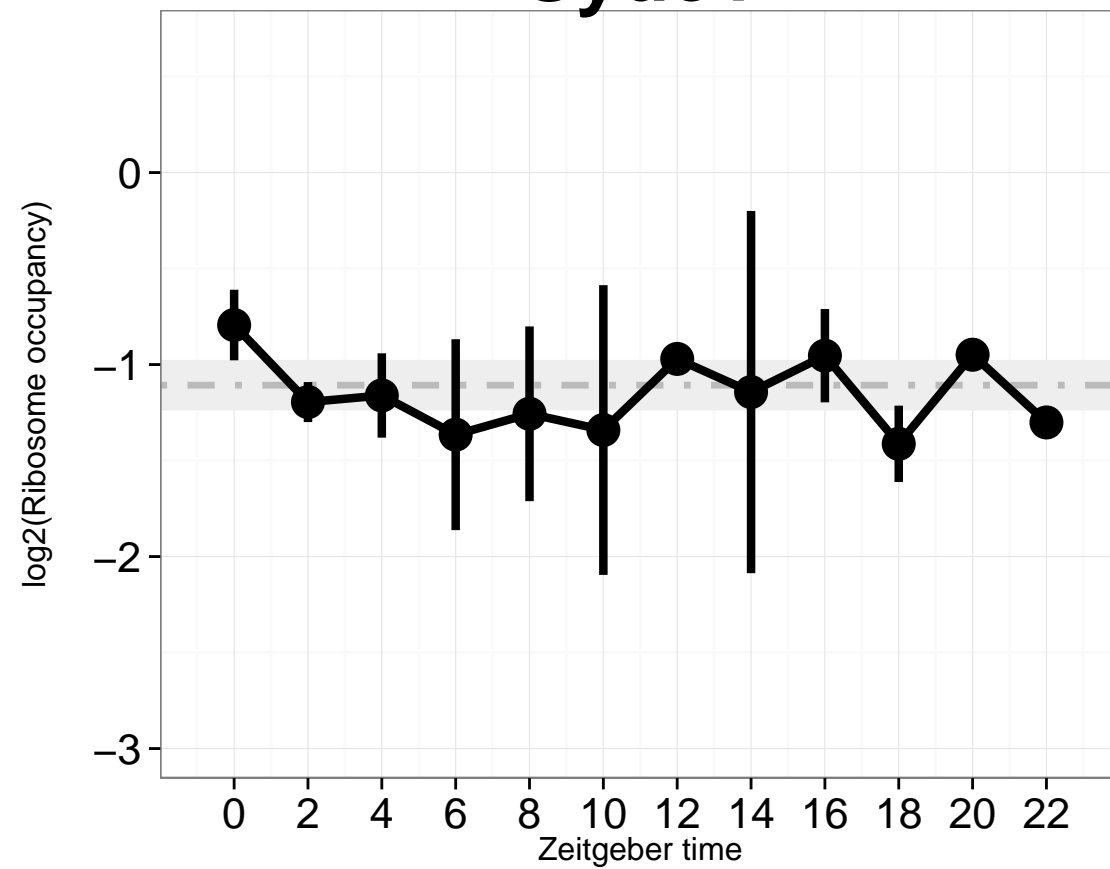

Supplement: SuppDataset_1.zip [file Syde1_set_A.pdf › Supplemental Dataset 1/A-mRNA_nonrhyth_translation_nonrhyth/Syde1_set_A.pdf]

## Syf2

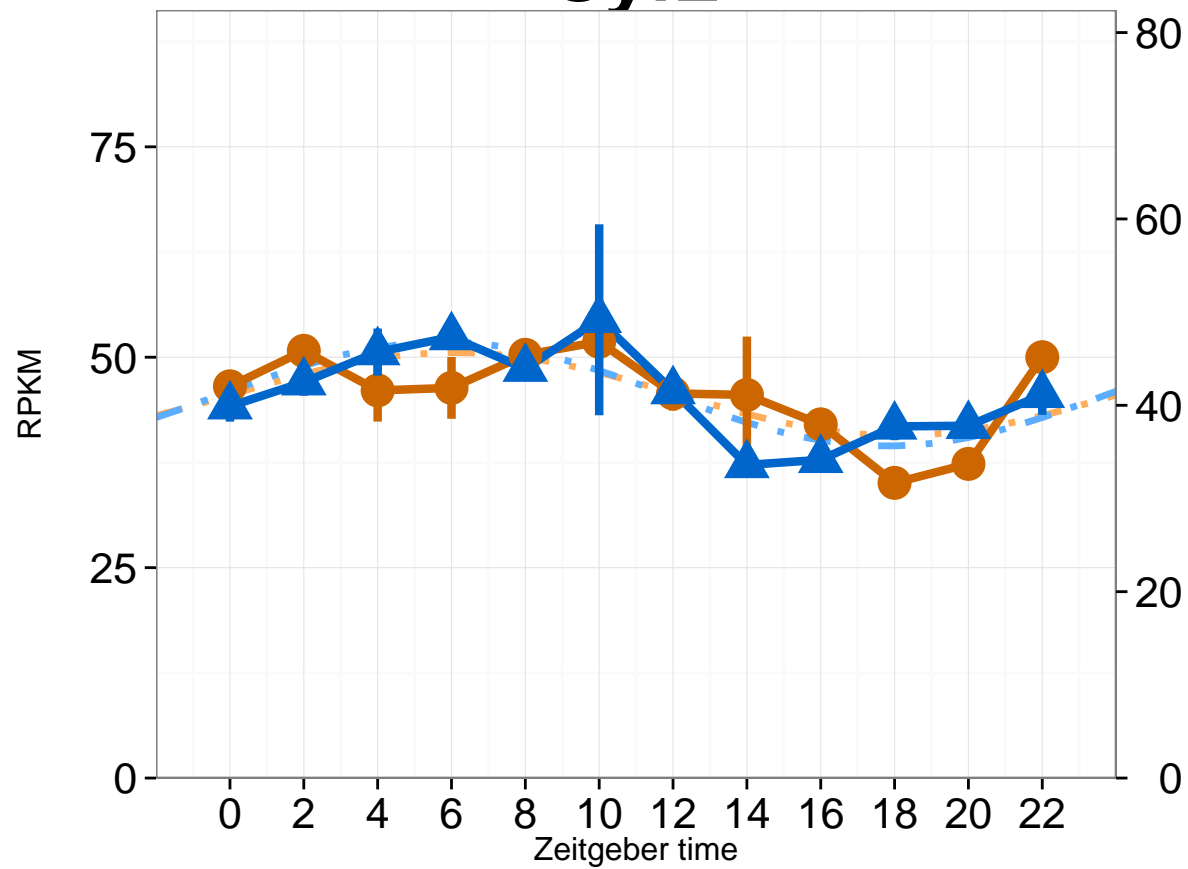

## Syf2

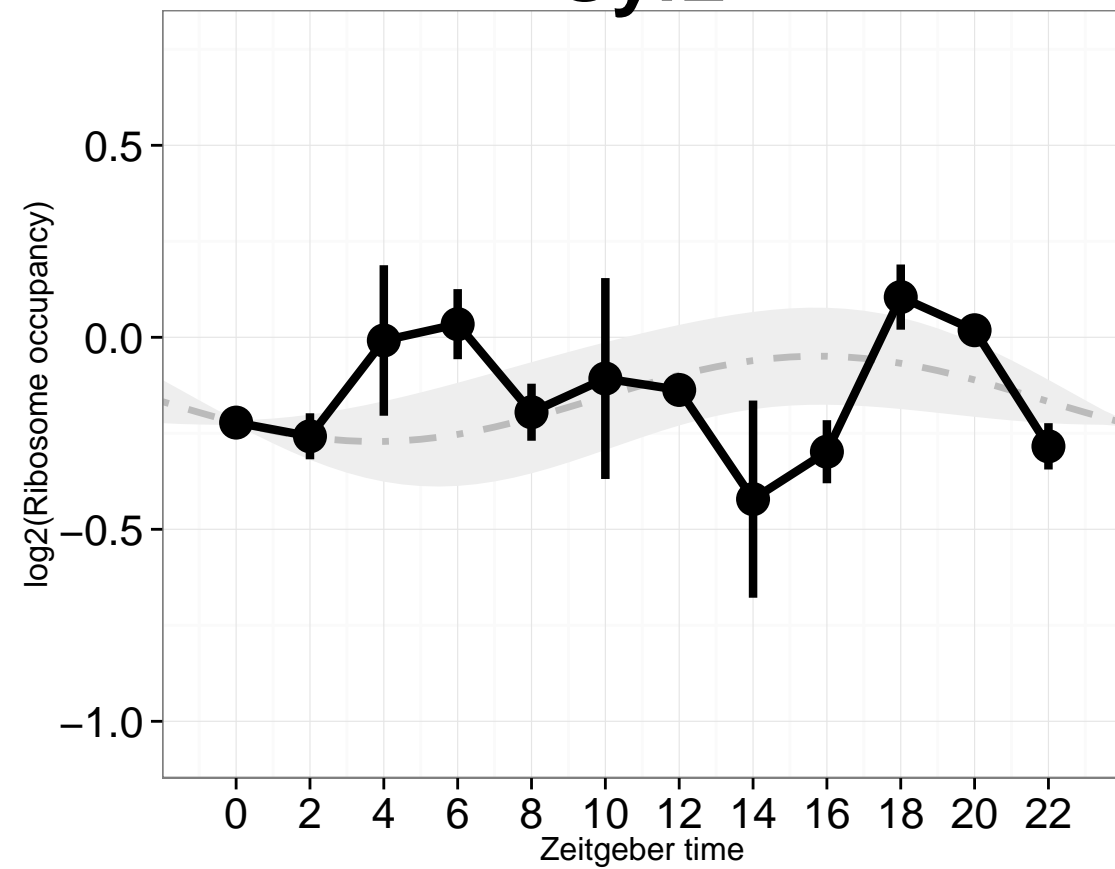

Supplement: SuppDataset_1.zip [file Syf2_set_A.pdf › Supplemental Dataset 1/A-mRNA_nonrhyth_translation_nonrhyth/Syf2_set_A.pdf]

## Syk

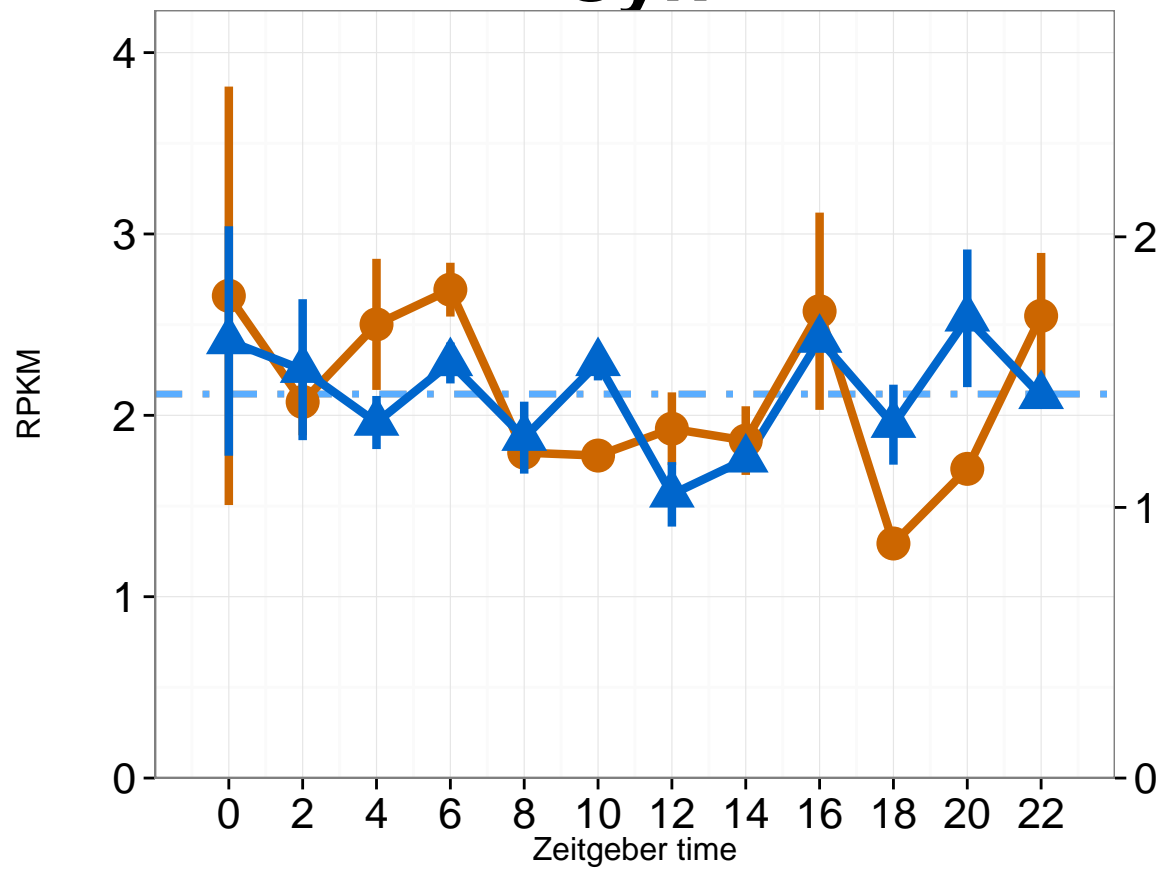

## Syk

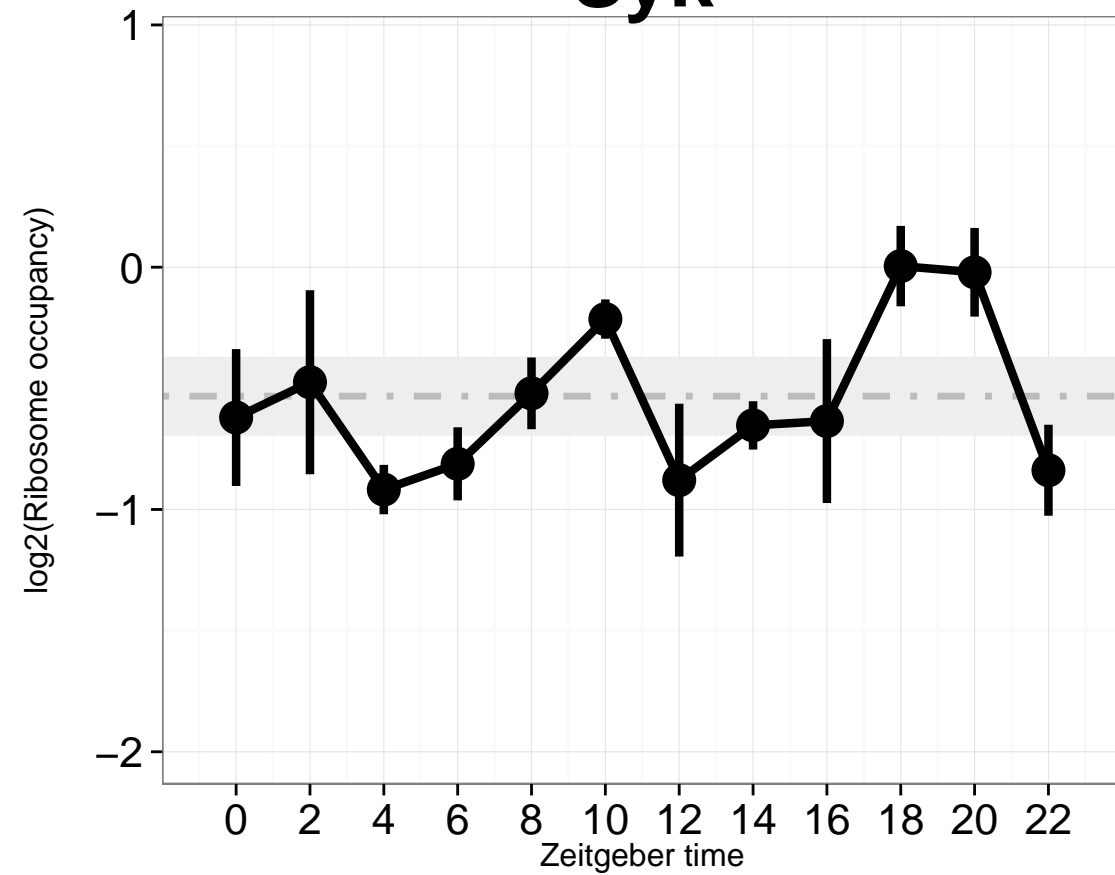

Supplement: SuppDataset_1.zip [file Syk_set_A.pdf › Supplemental Dataset 1/A-mRNA_nonrhyth_translation_nonrhyth/Syk_set_A.pdf]

## Sympk

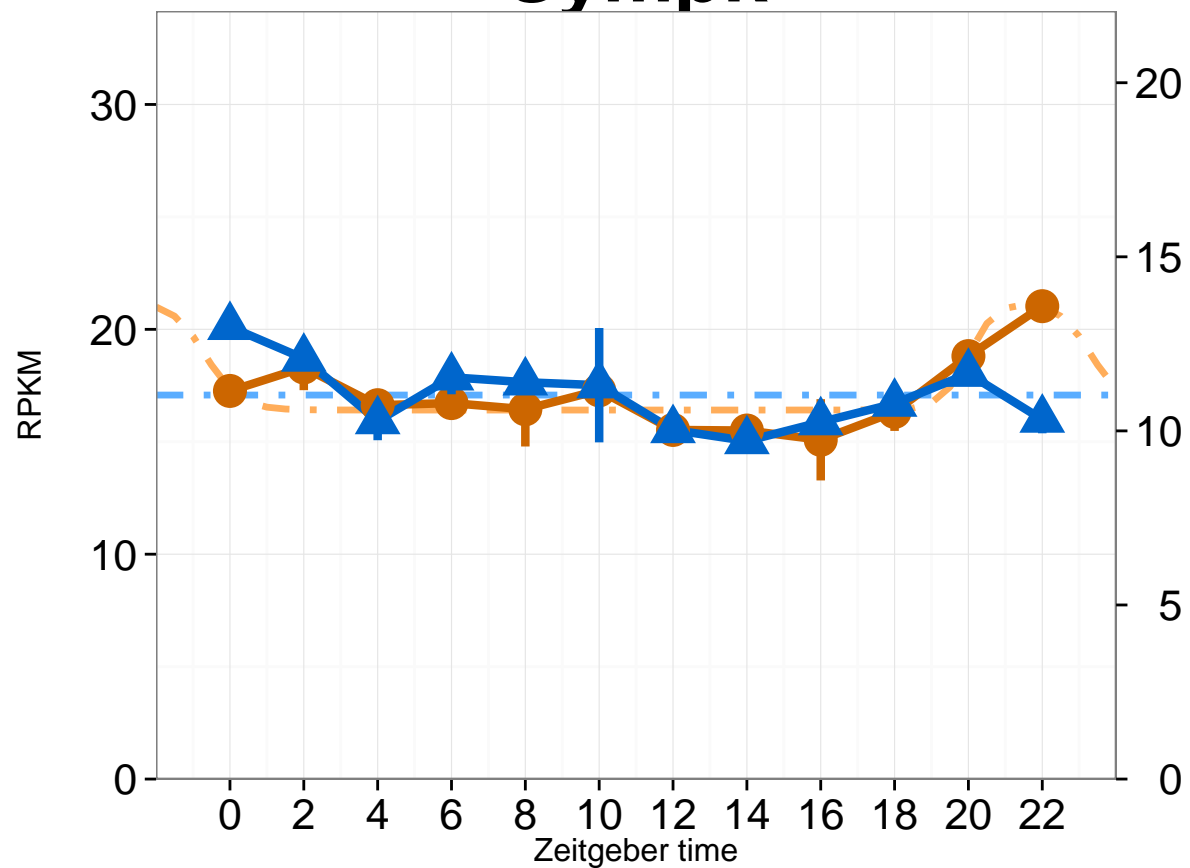

## Sympk

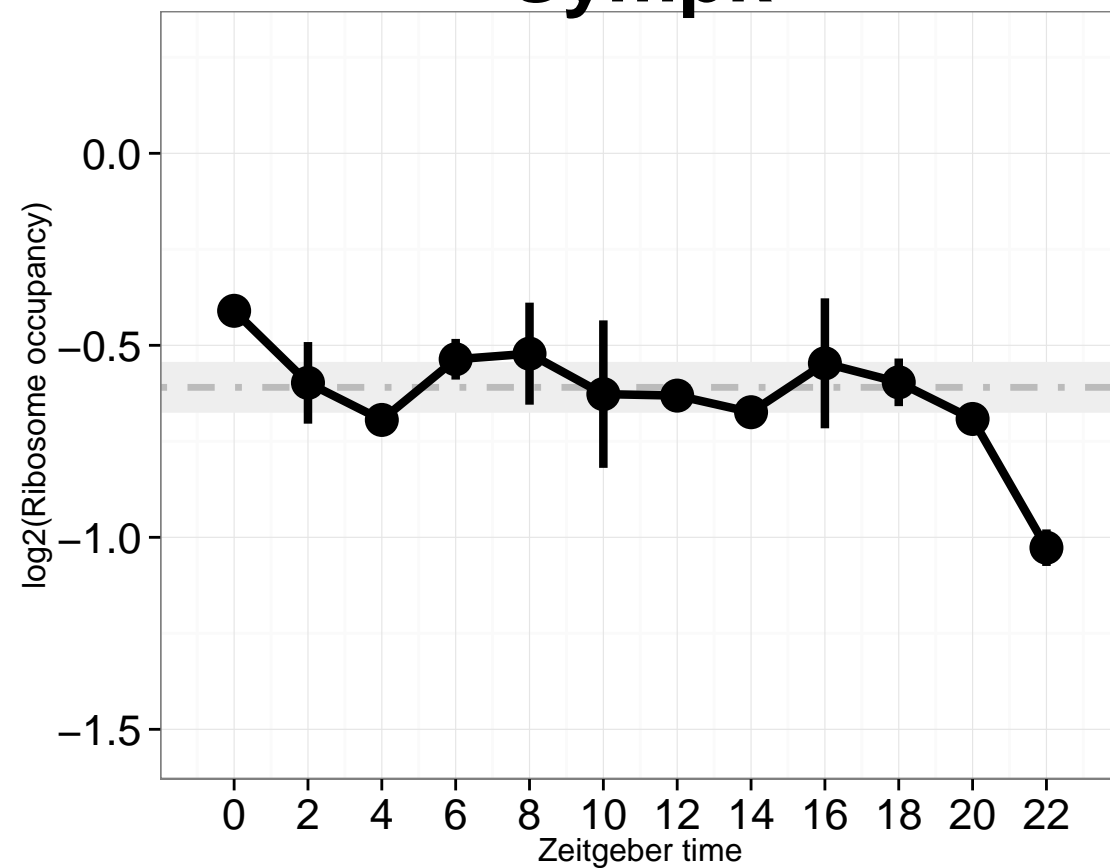

Supplement: SuppDataset_1.zip [file Sympk_set_A.pdf › Supplemental Dataset 1/A-mRNA_nonrhyth_translation_nonrhyth/Sympk_set_A.pdf]

## Syn3

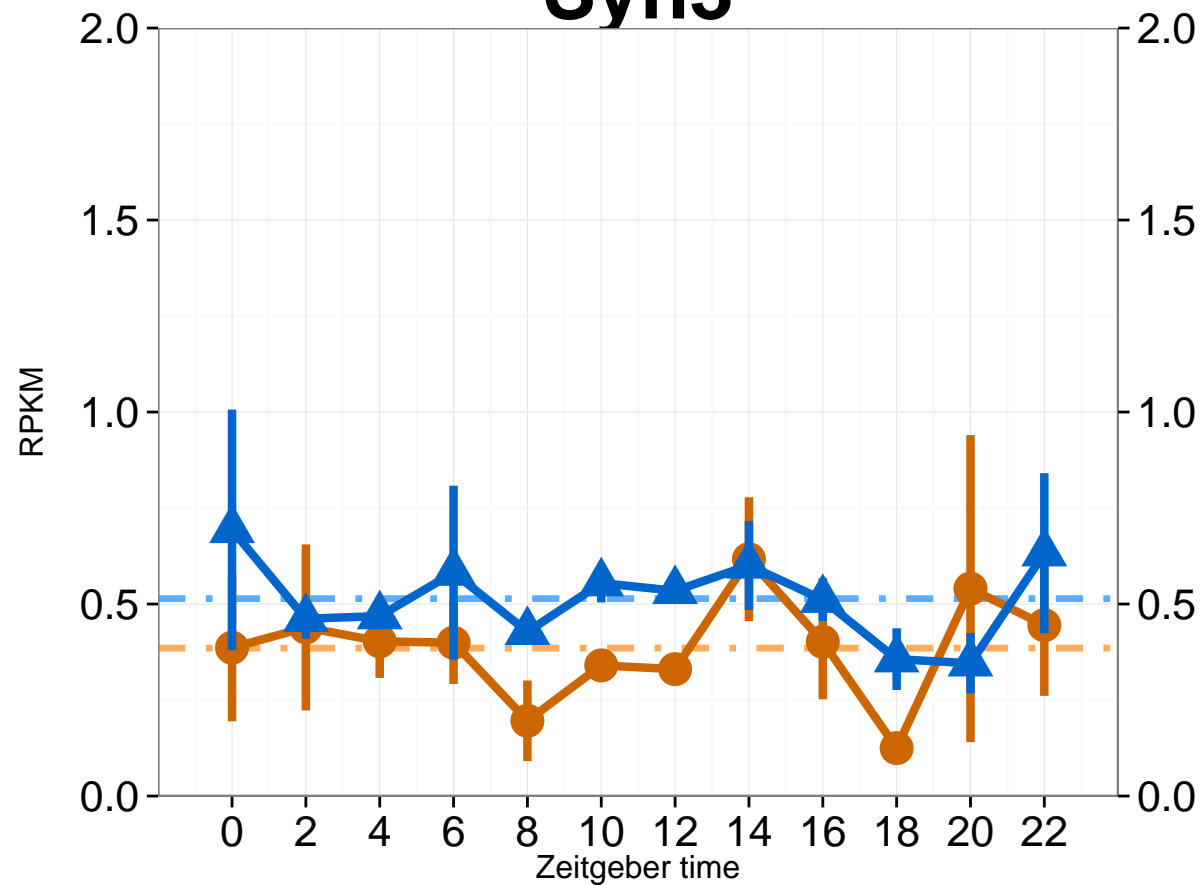

## Syn3

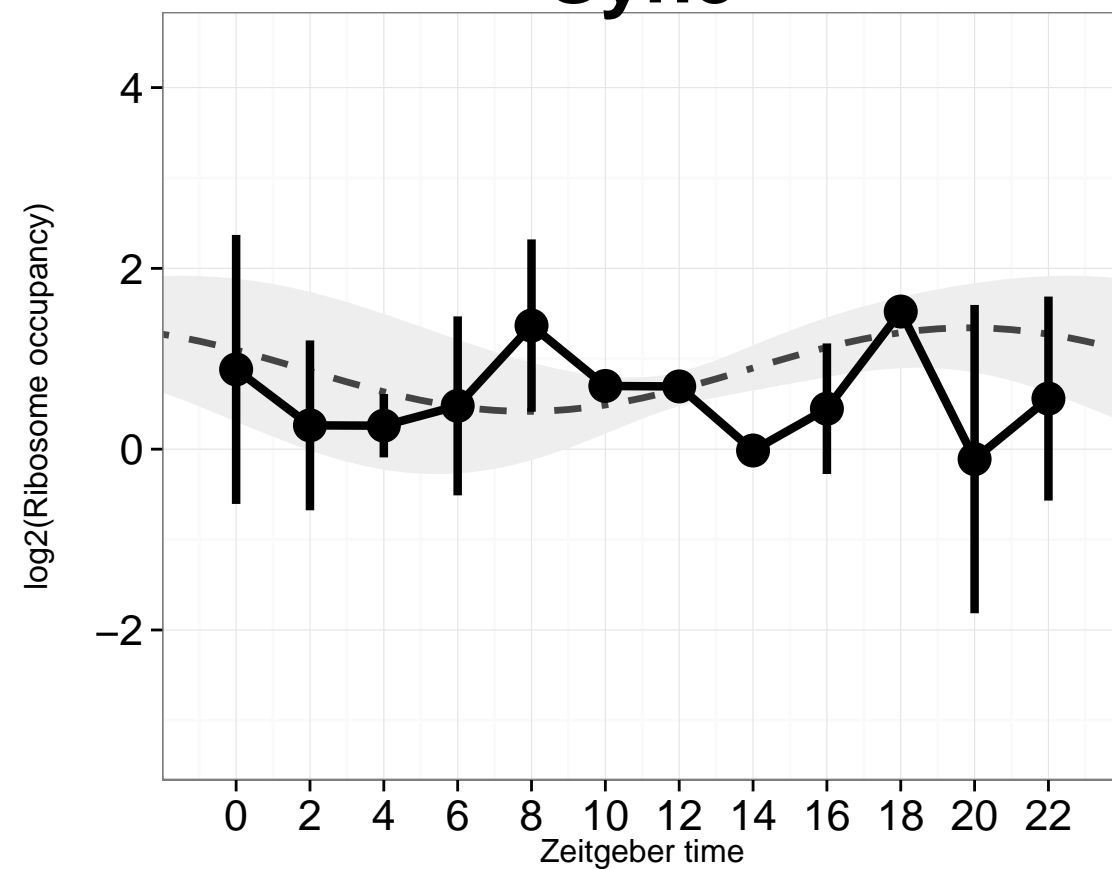

Supplement: SuppDataset_1.zip [file Syn3_set_A.pdf › Supplemental Dataset 1/A-mRNA_nonrhyth_translation_nonrhyth/Syn3_set_A.pdf]

## Syncrip

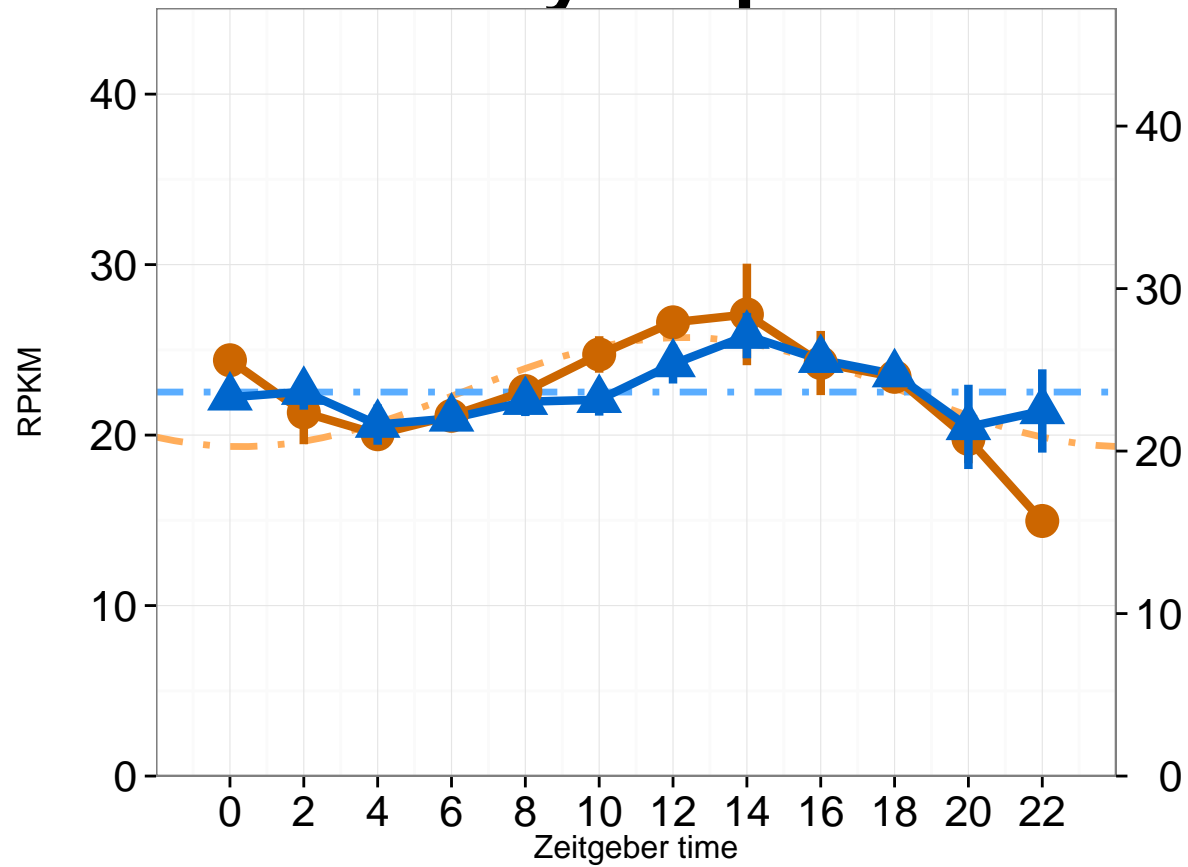

## Syncrip

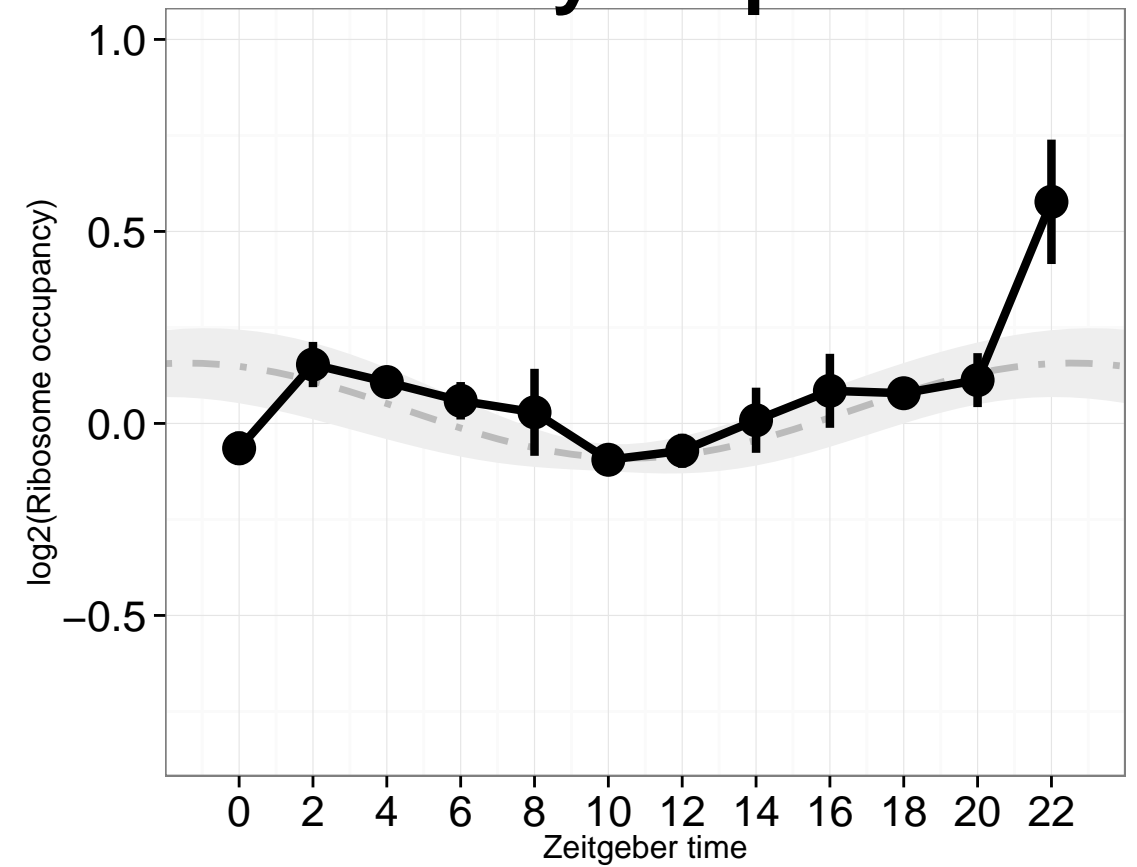

Supplement: SuppDataset_1.zip [file Syncrip_set_A.pdf › Supplemental Dataset 1/A-mRNA_nonrhyth_translation_nonrhyth/Syncrip_set_A.pdf]

# Syne1

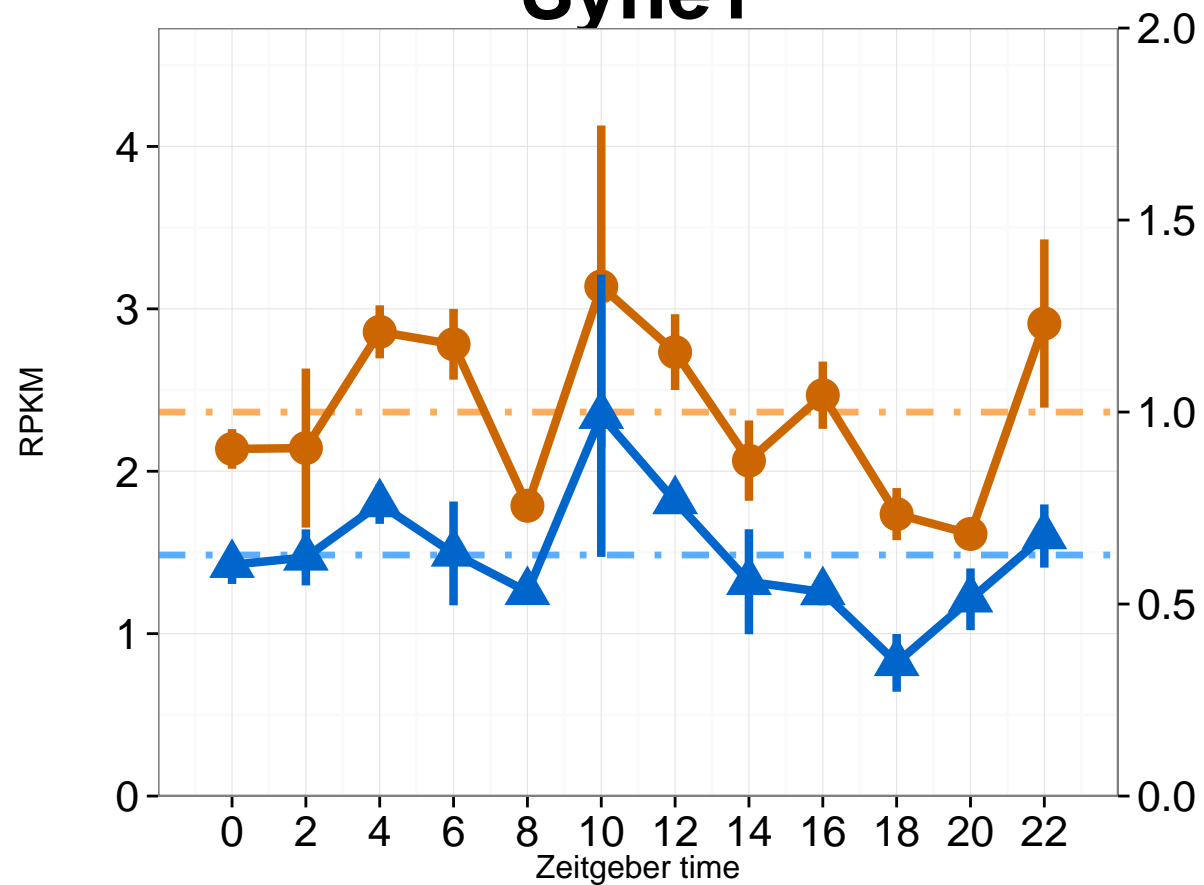

# Syne1

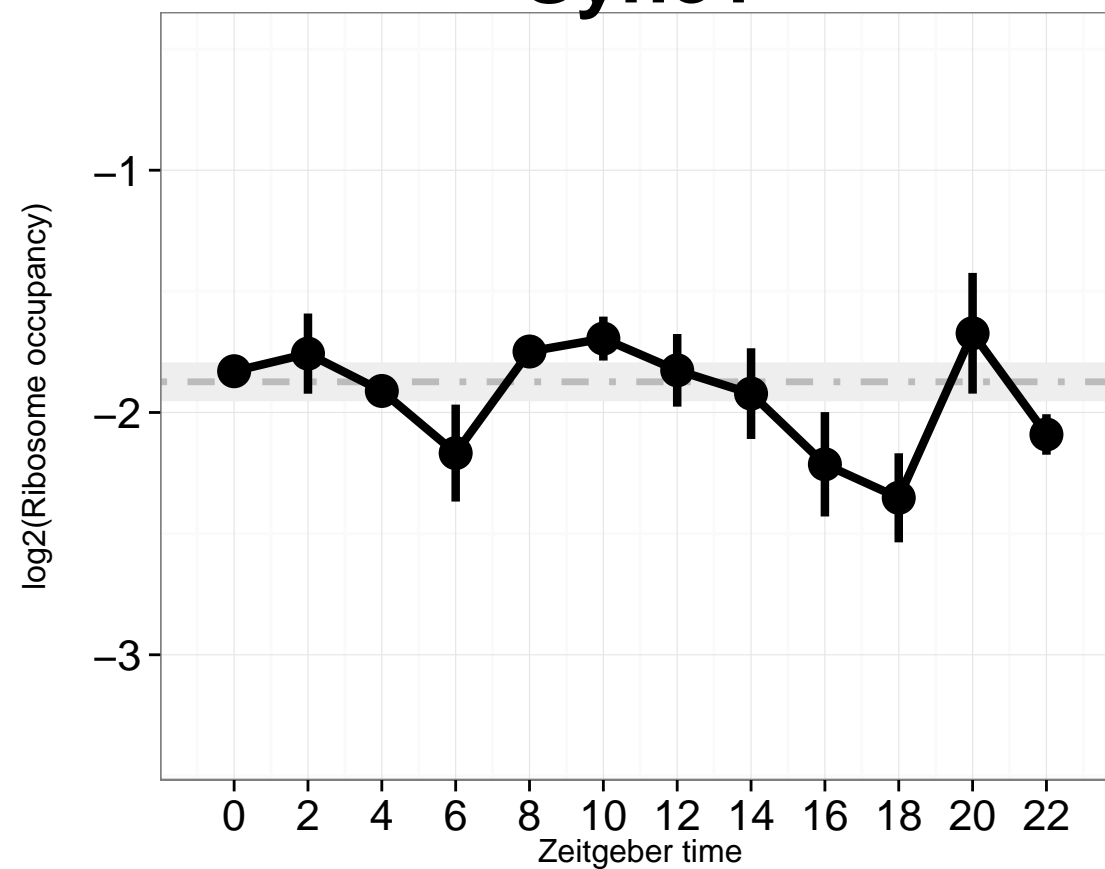

Supplement: SuppDataset_1.zip [file Syne1_set_A.pdf › Supplemental Dataset 1/A-mRNA_nonrhyth_translation_nonrhyth/Syne1_set_A.pdf]

## Syngnr2

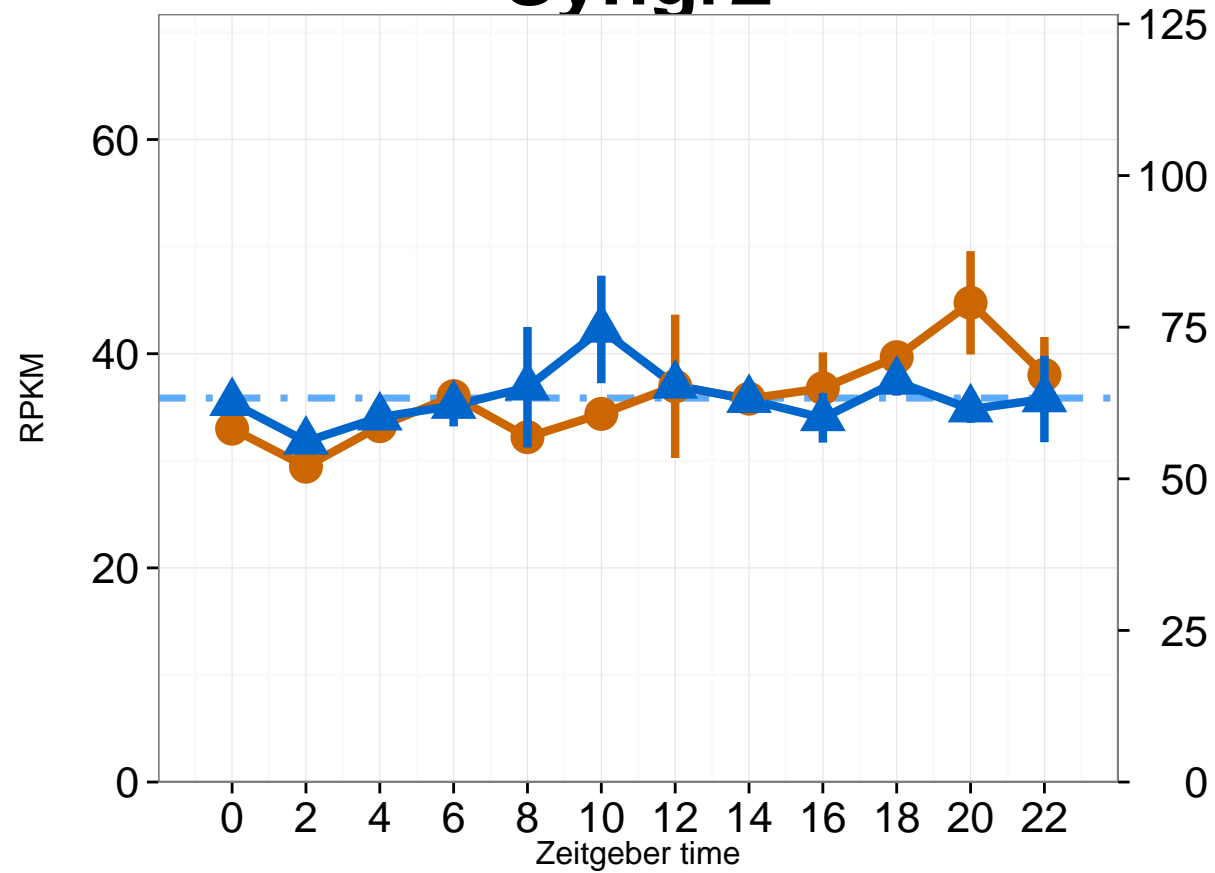

## Syngnr2

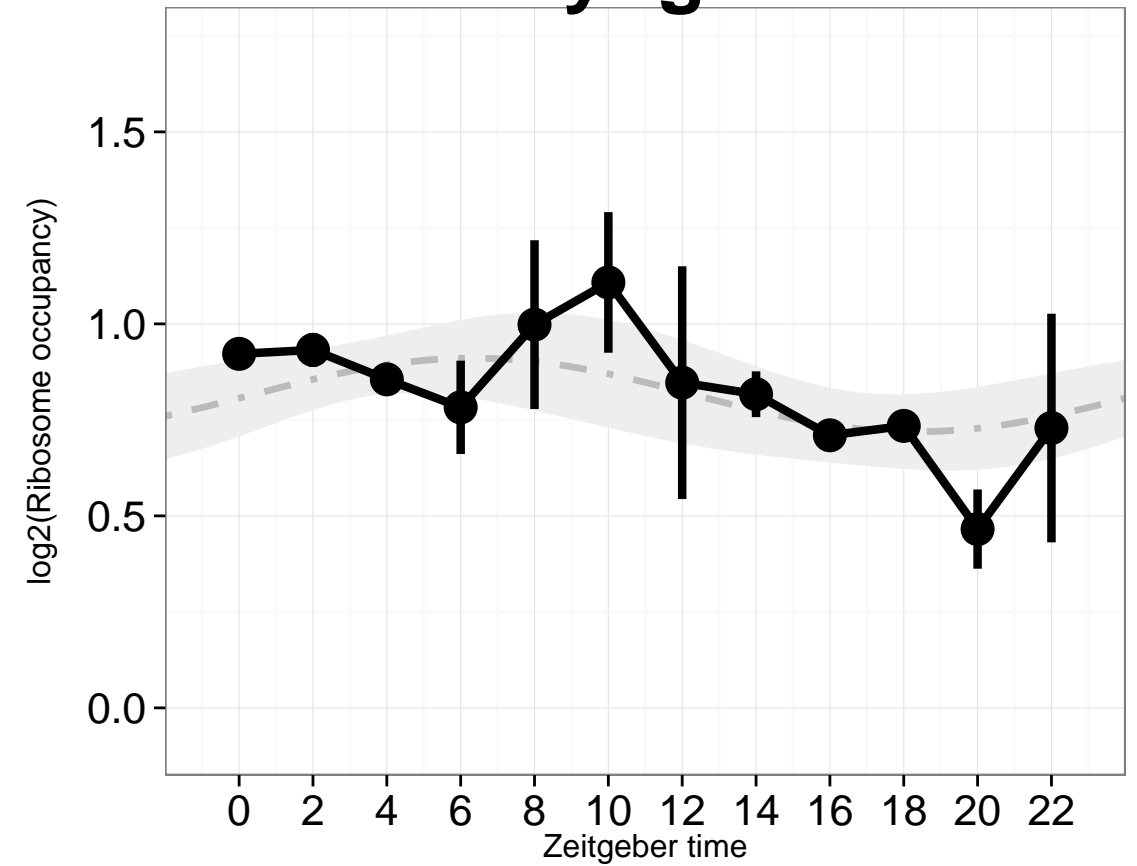

Supplement: SuppDataset_1.zip [file Syngr2_set_A.pdf › Supplemental Dataset 1/A-mRNA_nonrhyth_translation_nonrhyth/Syngr2_set_A.pdf]

# Synj1

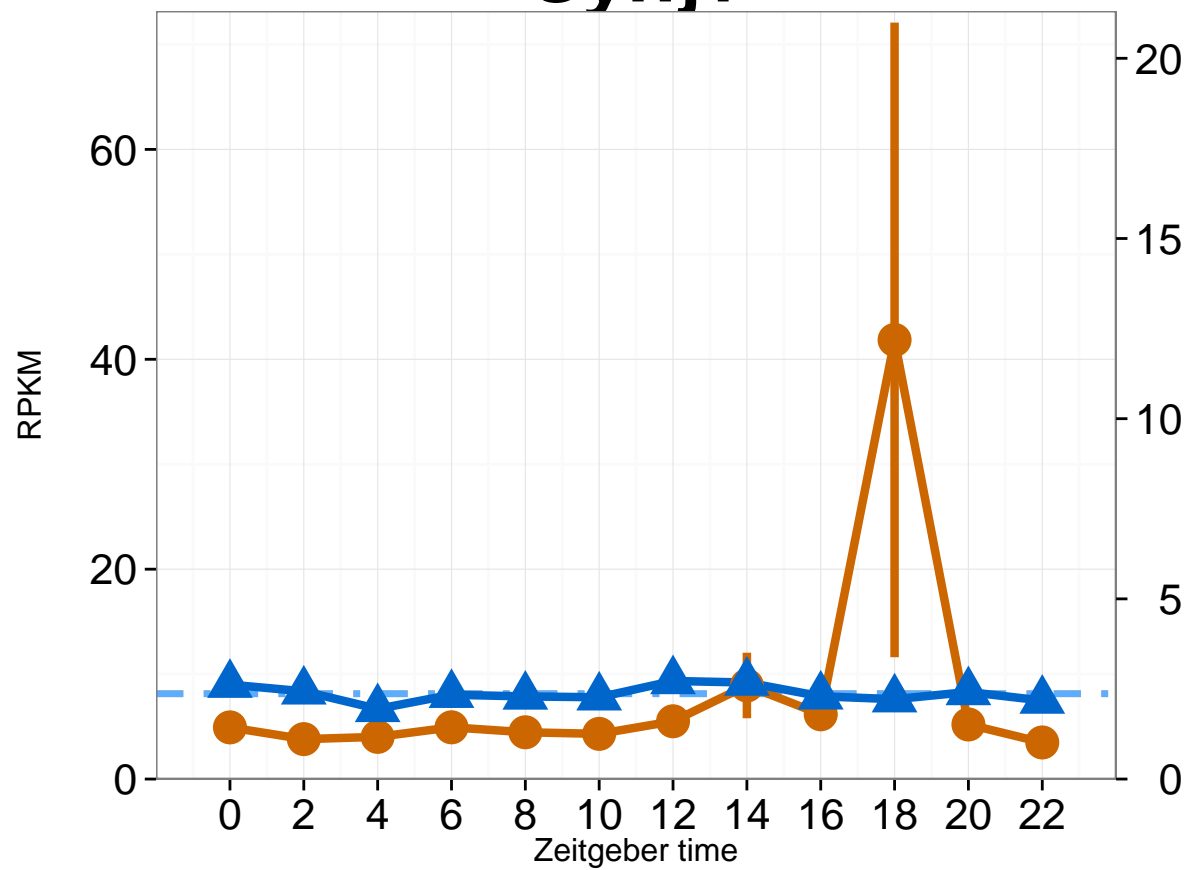

# Synj1

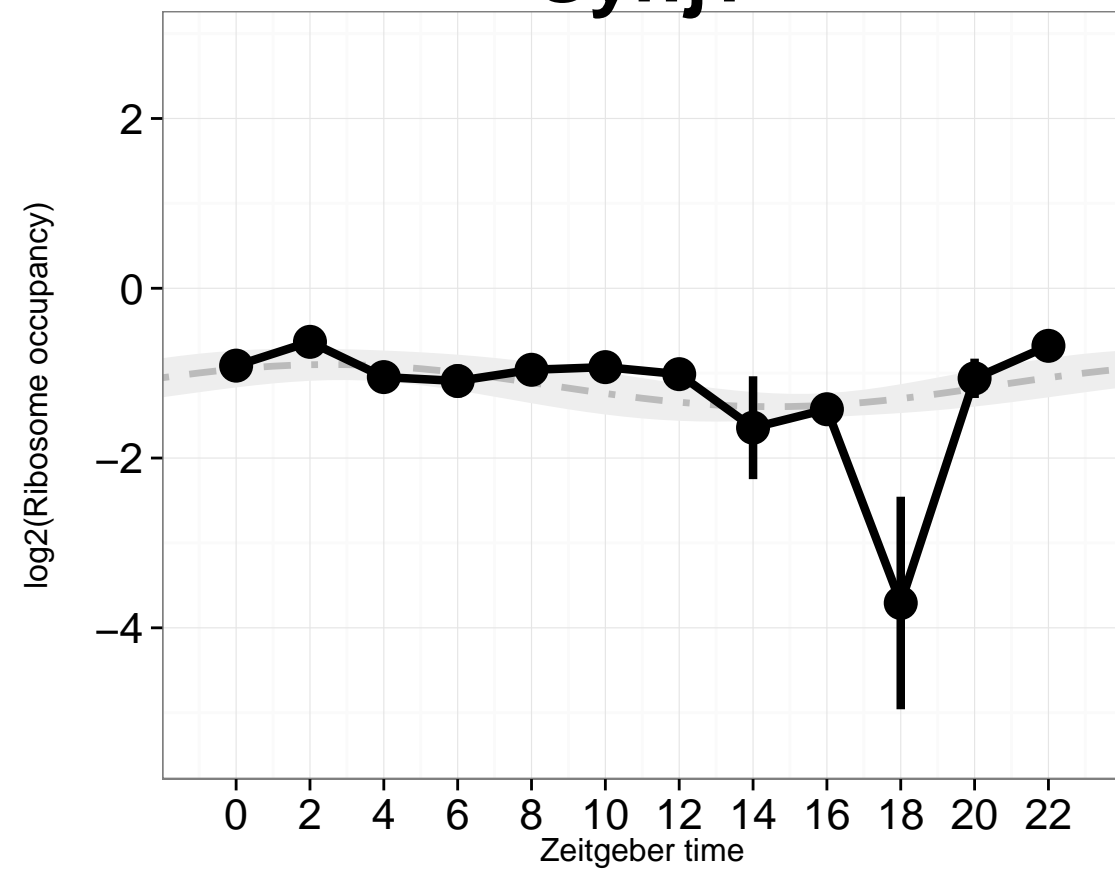

Supplement: SuppDataset_1.zip [file Synj1_set_A.pdf › Supplemental Dataset 1/A-mRNA_nonrhyth_translation_nonrhyth/Synj1_set_A.pdf]

## Synj2bp

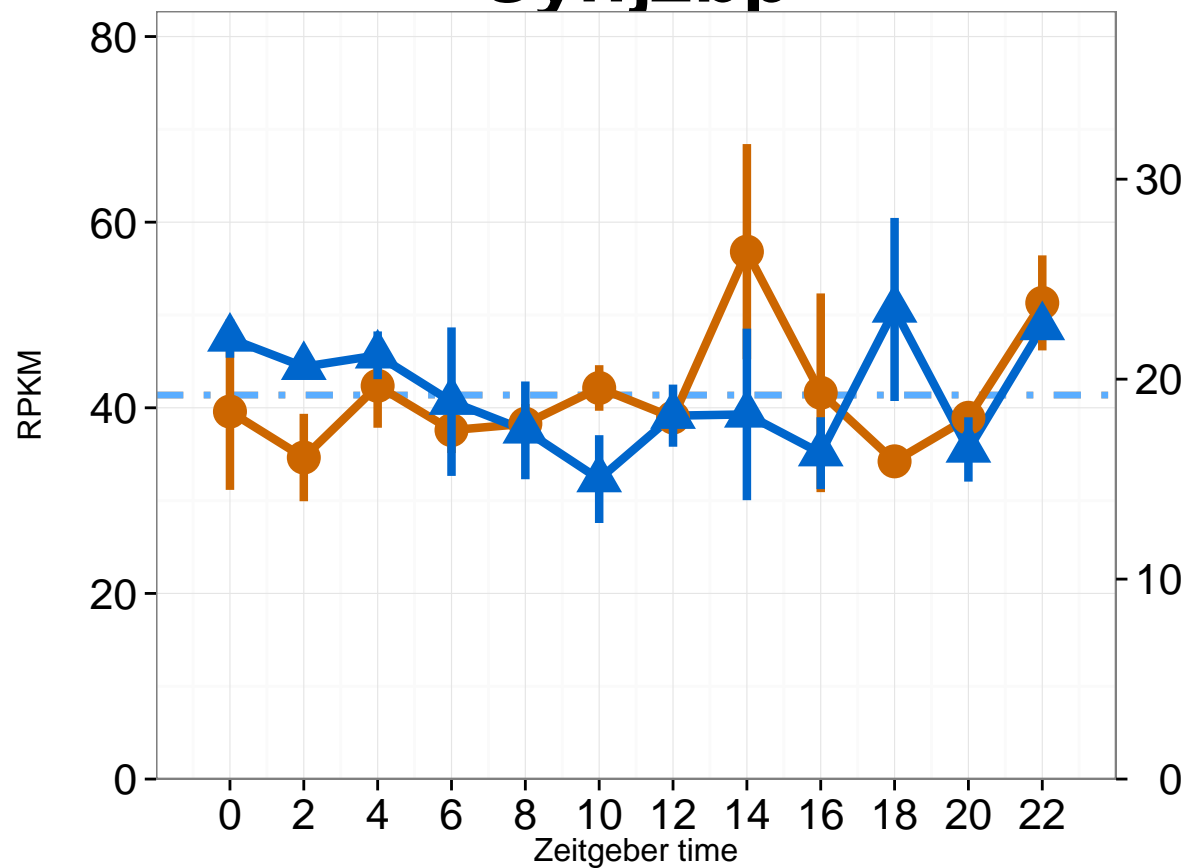

## Synj2bp

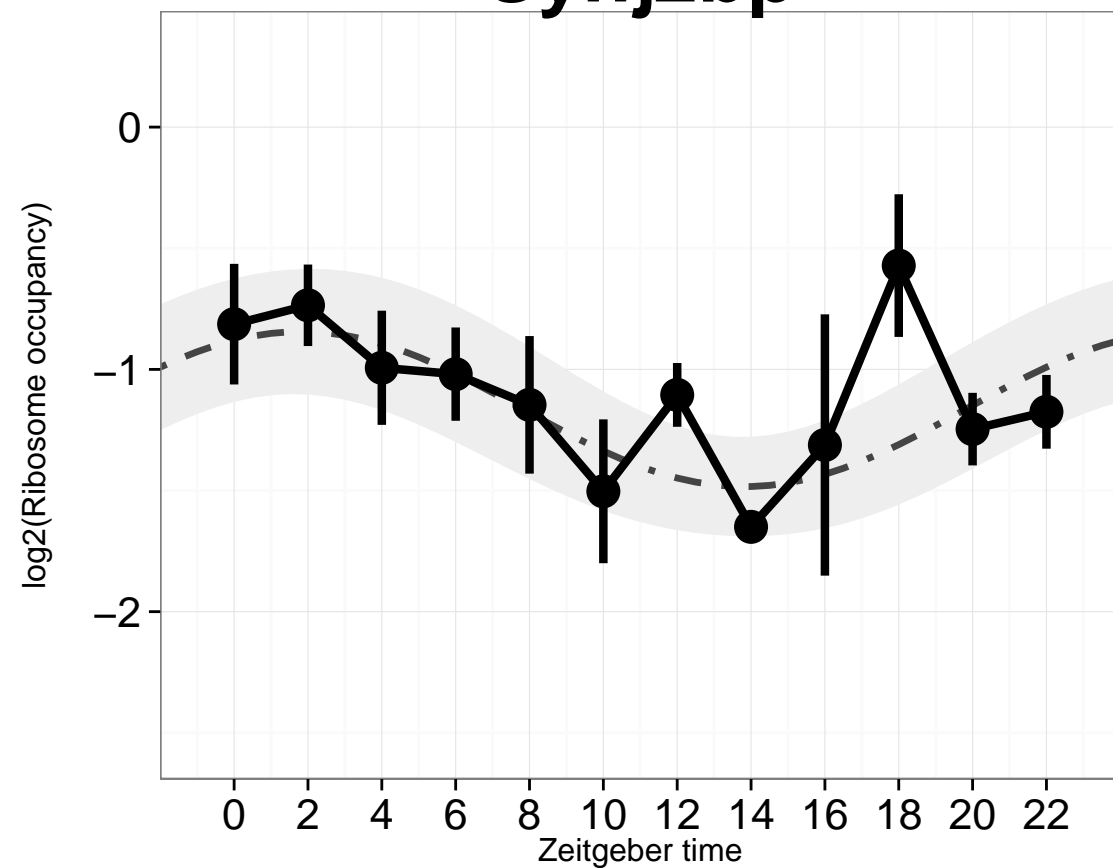

Supplement: SuppDataset_1.zip [file Synj2bp_set_A.pdf › Supplemental Dataset 1/A-mRNA_nonrhyth_translation_nonrhyth/Synj2bp_set_A.pdf]

## Synpo

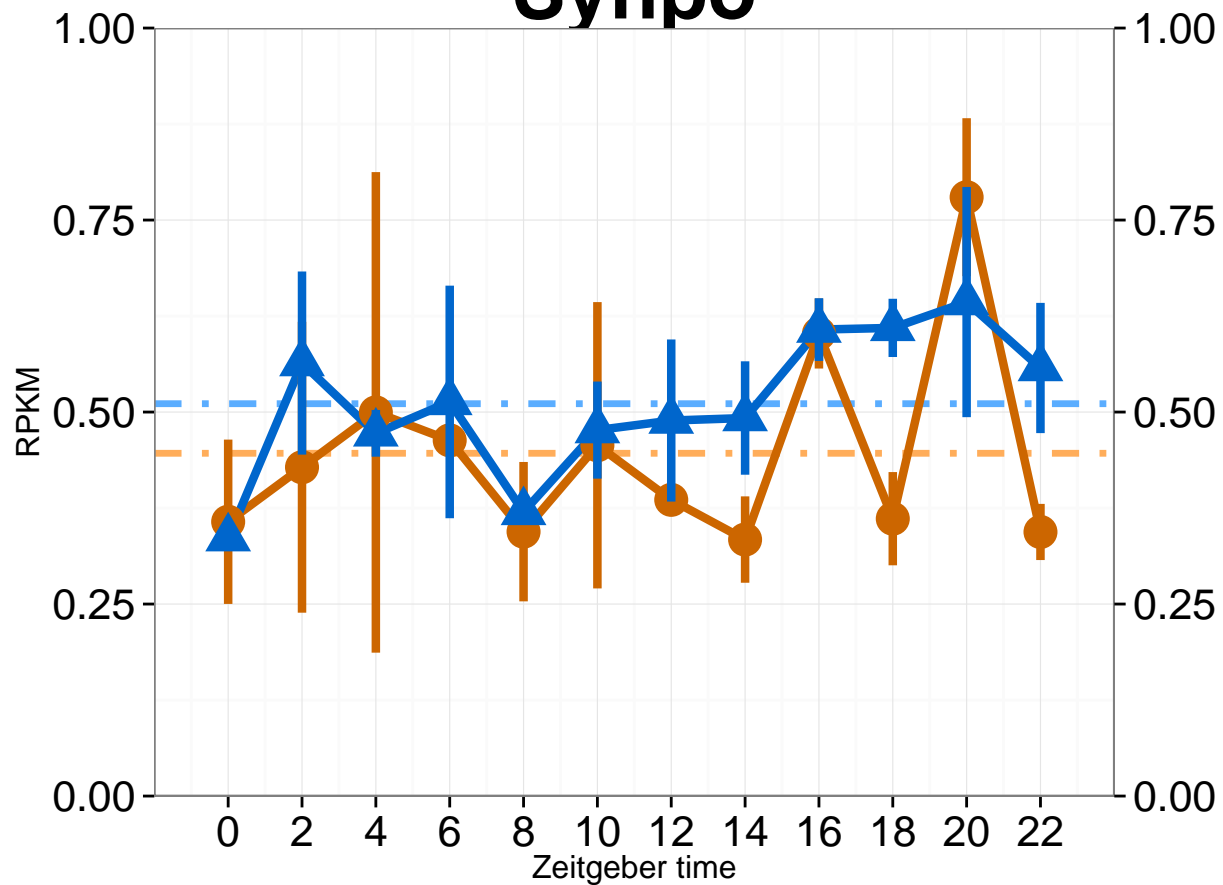

## Synpo

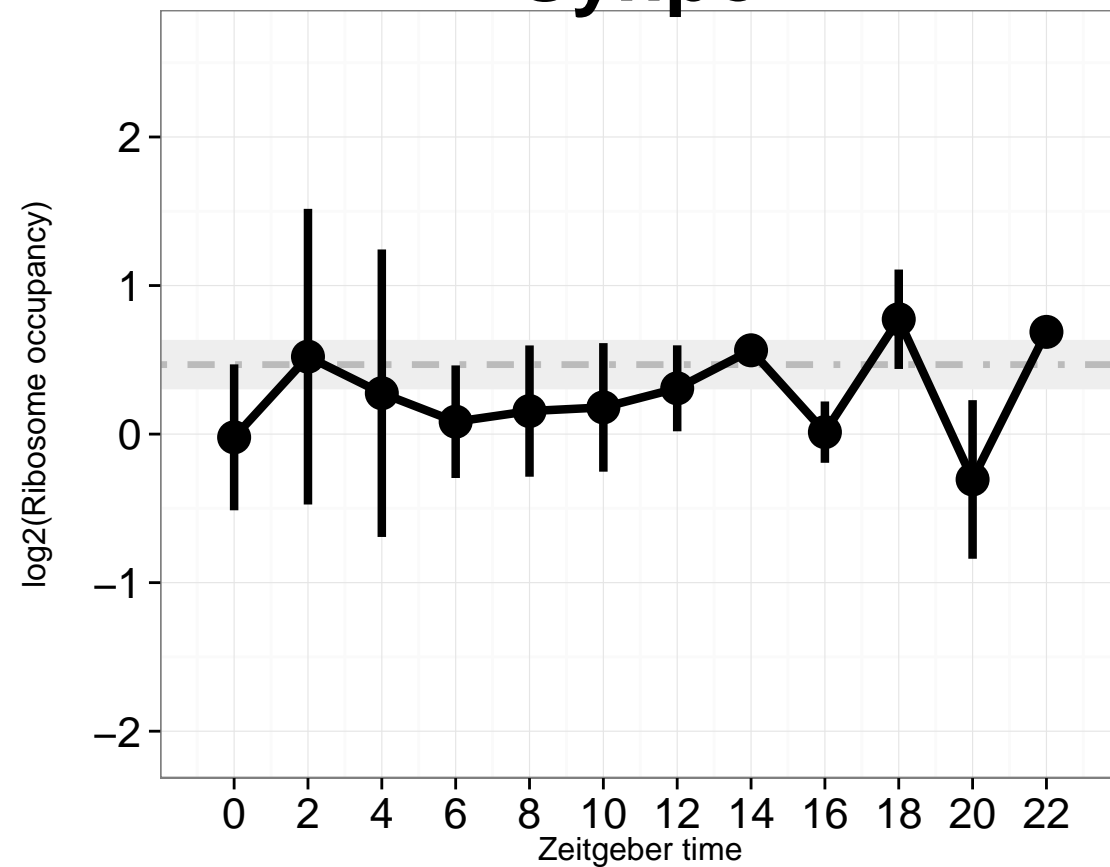

Supplement: SuppDataset_1.zip [file Synpo_set_A.pdf › Supplemental Dataset 1/A-mRNA_nonrhyth_translation_nonrhyth/Synpo_set_A.pdf]

## Synrg

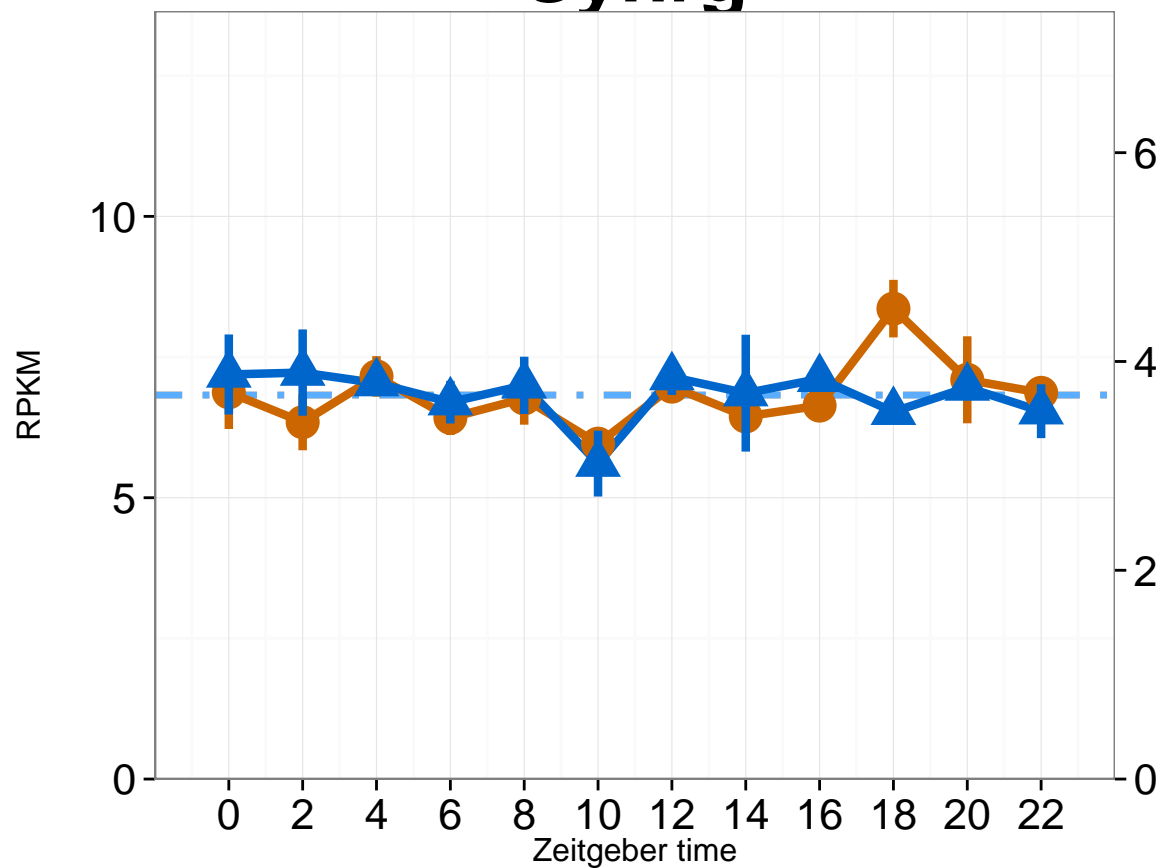

## Synrg

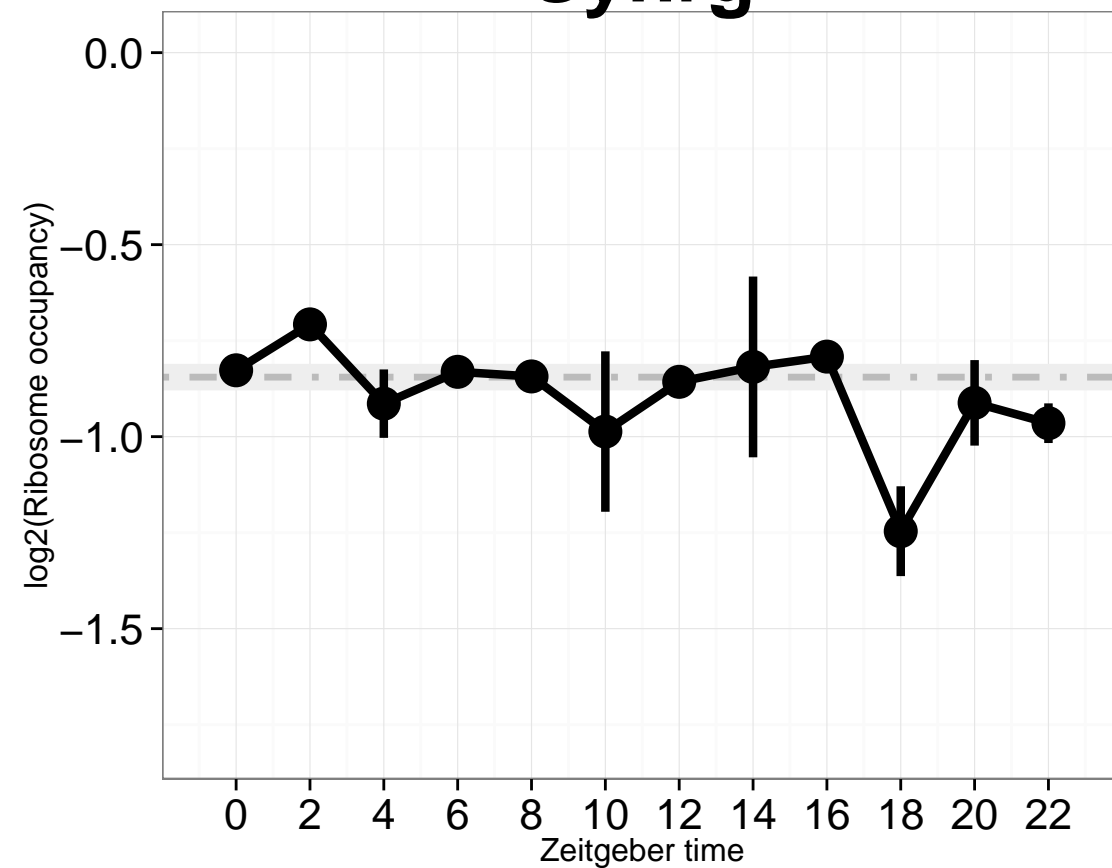

Supplement: SuppDataset_1.zip [file Synrg_set_A.pdf › Supplemental Dataset 1/A-mRNA_nonrhyth_translation_nonrhyth/Synrg_set_A.pdf]

## Sypl

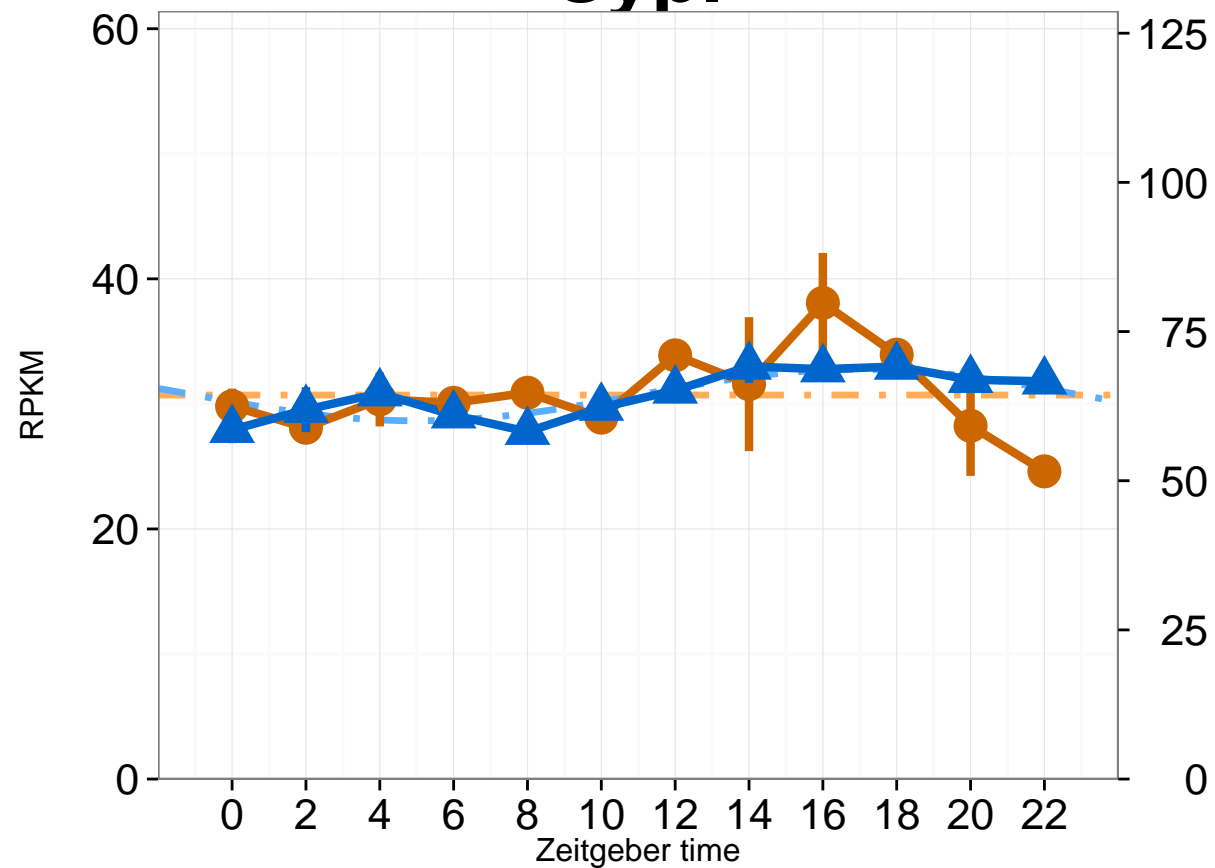

## Sypl

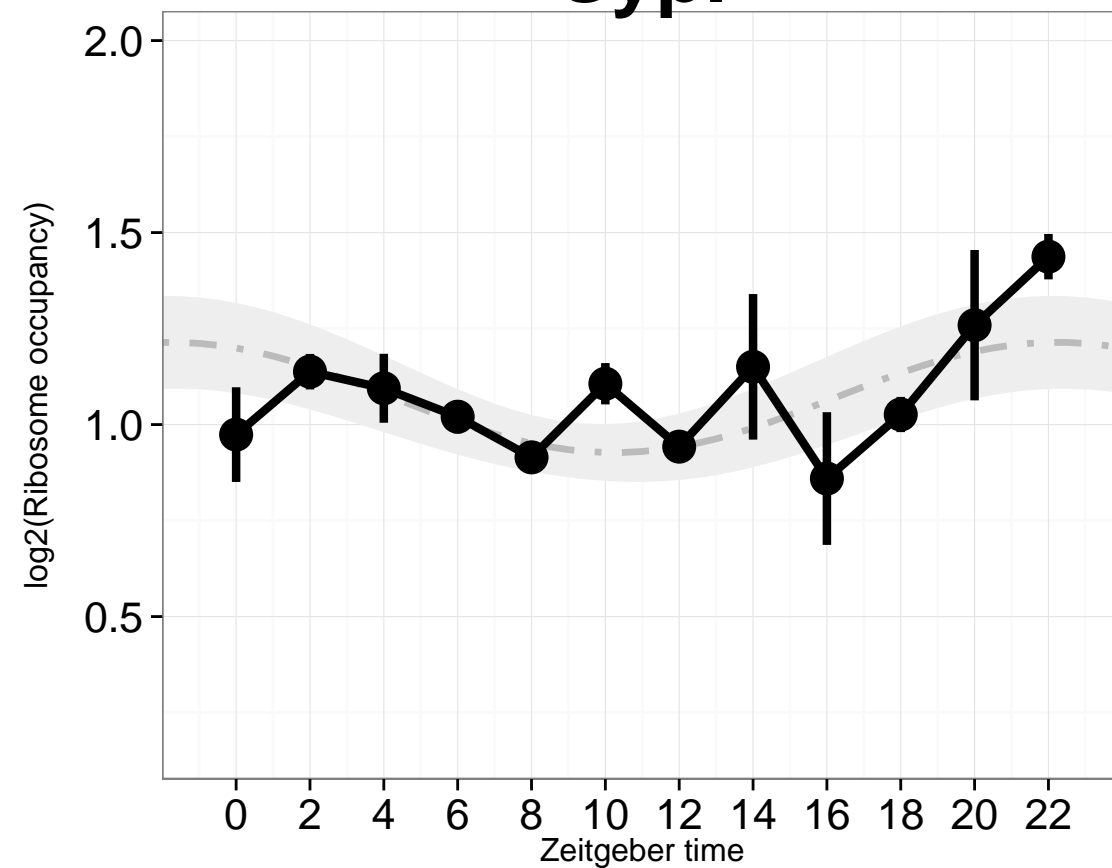

Supplement: SuppDataset_1.zip [file Sypl_set_A.pdf › Supplemental Dataset 1/A-mRNA_nonrhyth_translation_nonrhyth/Sypl_set_A.pdf]

# Sys1

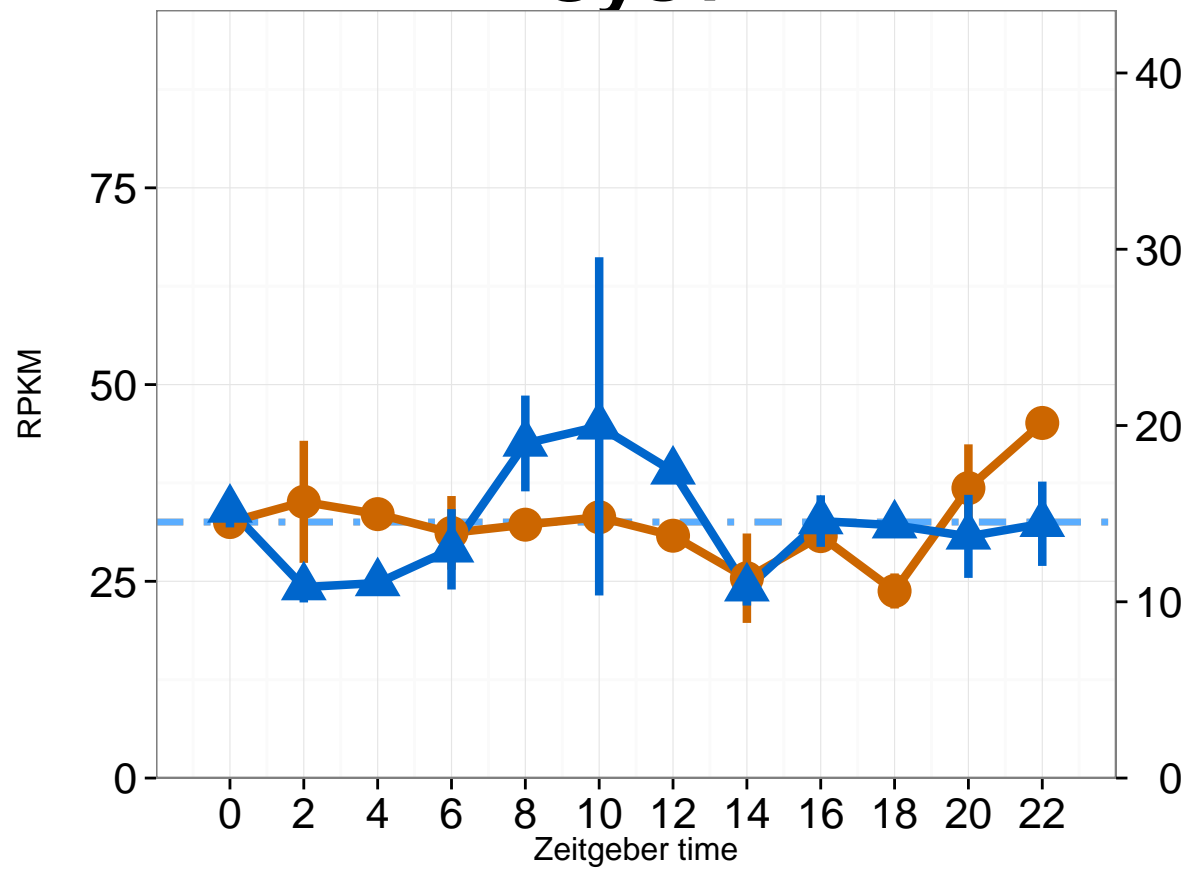

# Sys1

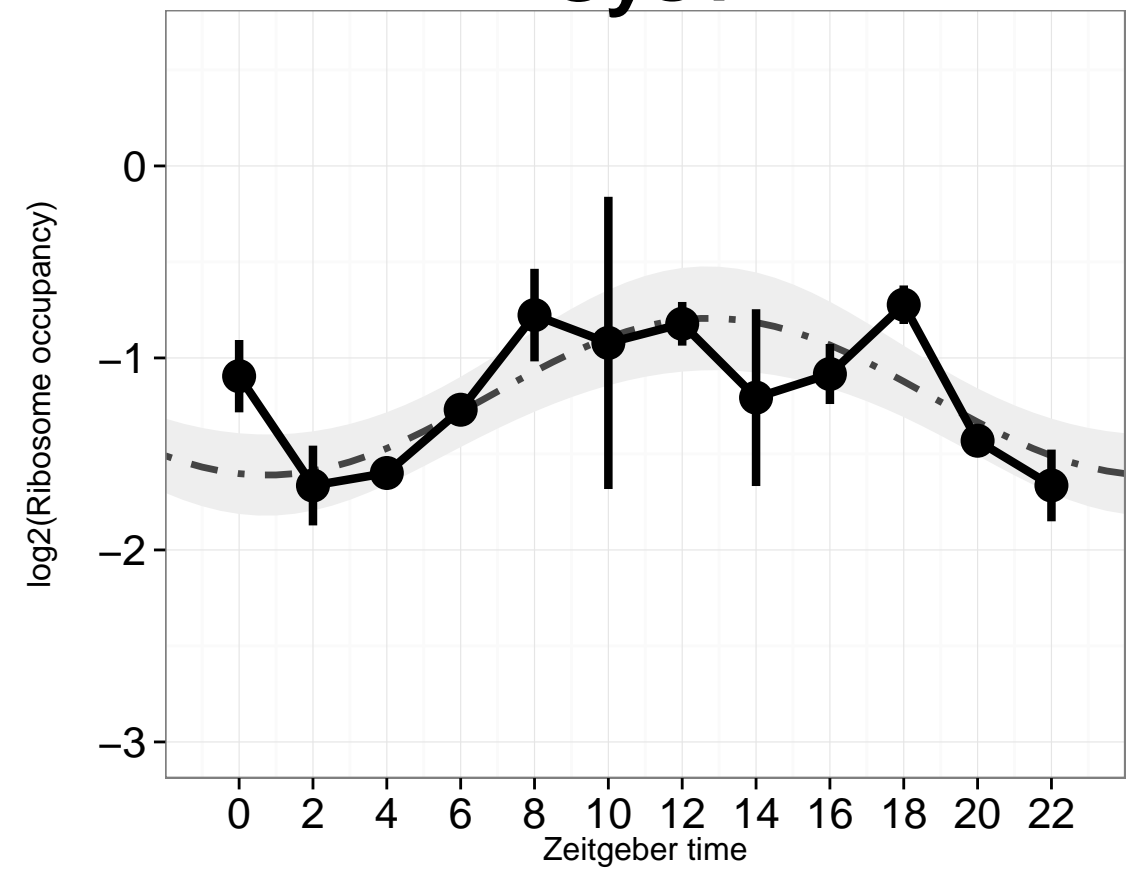

Supplement: SuppDataset_1.zip [file Sys1_set_A.pdf › Supplemental Dataset 1/A-mRNA_nonrhyth_translation_nonrhyth/Sys1_set_A.pdf]

# Sytl1

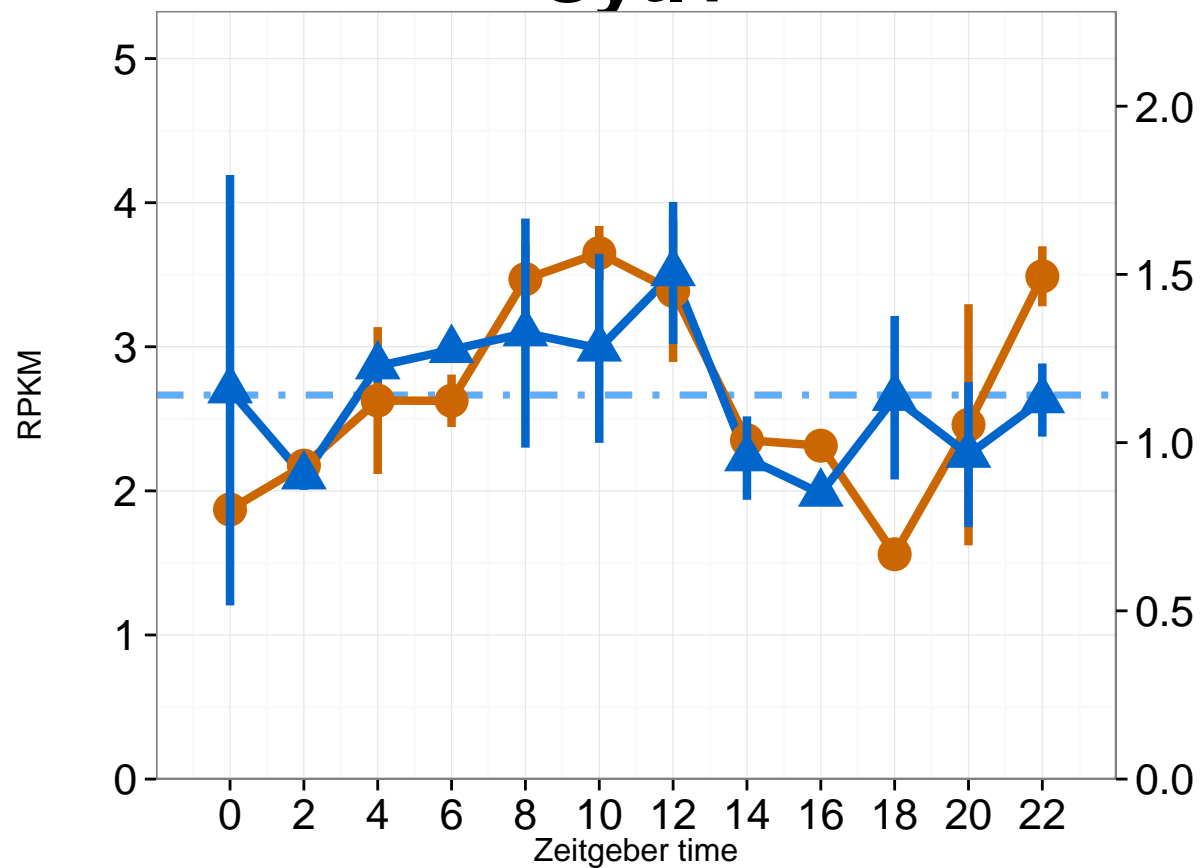

# Sytl1

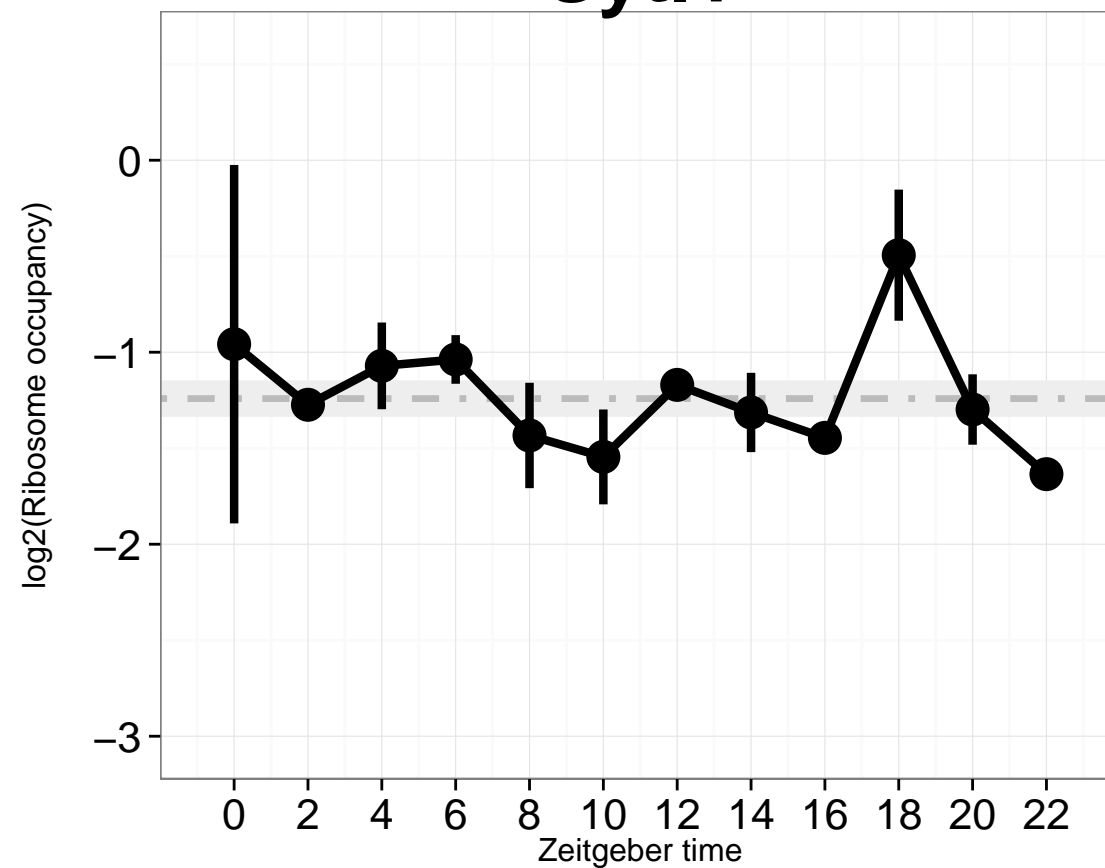

Supplement: SuppDataset_1.zip [file Sytl1_set_A.pdf › Supplemental Dataset 1/A-mRNA_nonrhyth_translation_nonrhyth/Sytl1_set_A.pdf]

## Syt12

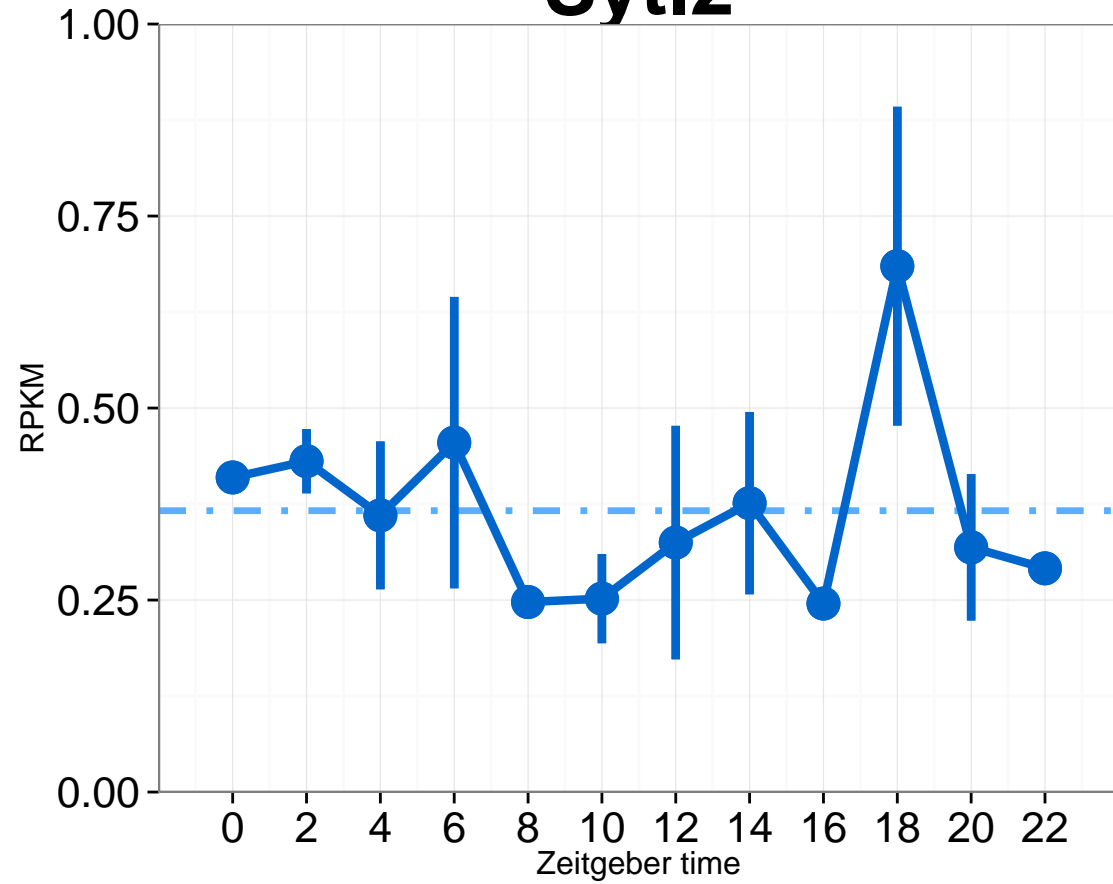

## Syt12 log2(Ribosome occupancy)

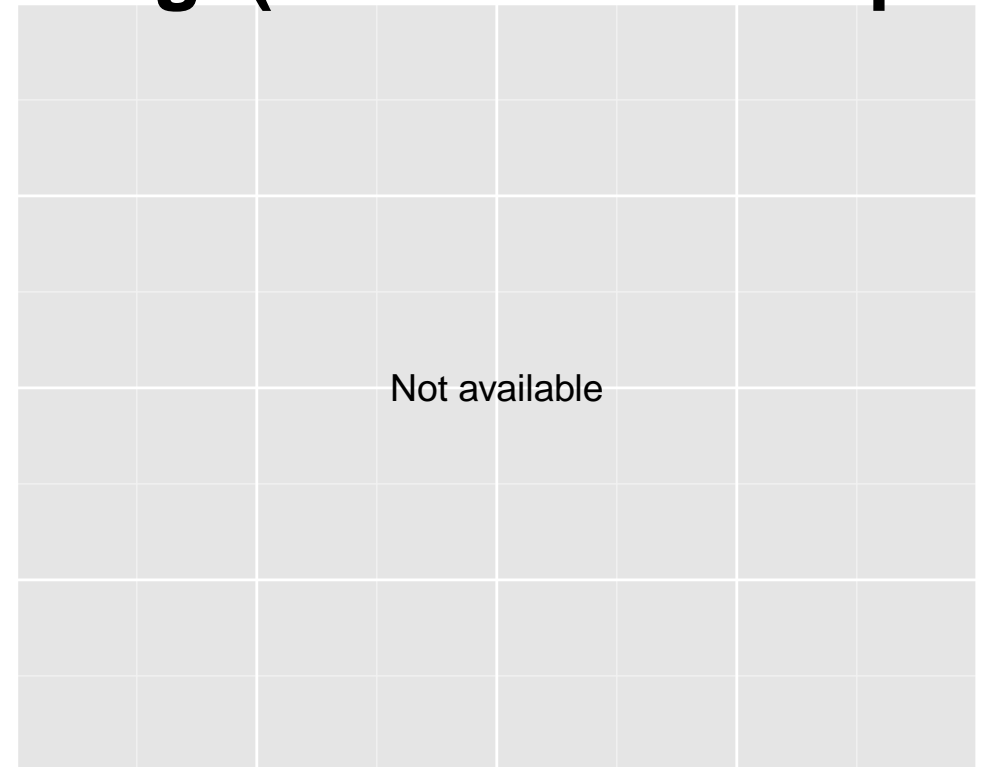

Supplement: SuppDataset_1.zip [file Sytl2_set_A.pdf › Supplemental Dataset 1/A-mRNA_nonrhyth_translation_nonrhyth/Sytl2_set_A.pdf]

# Syvn1

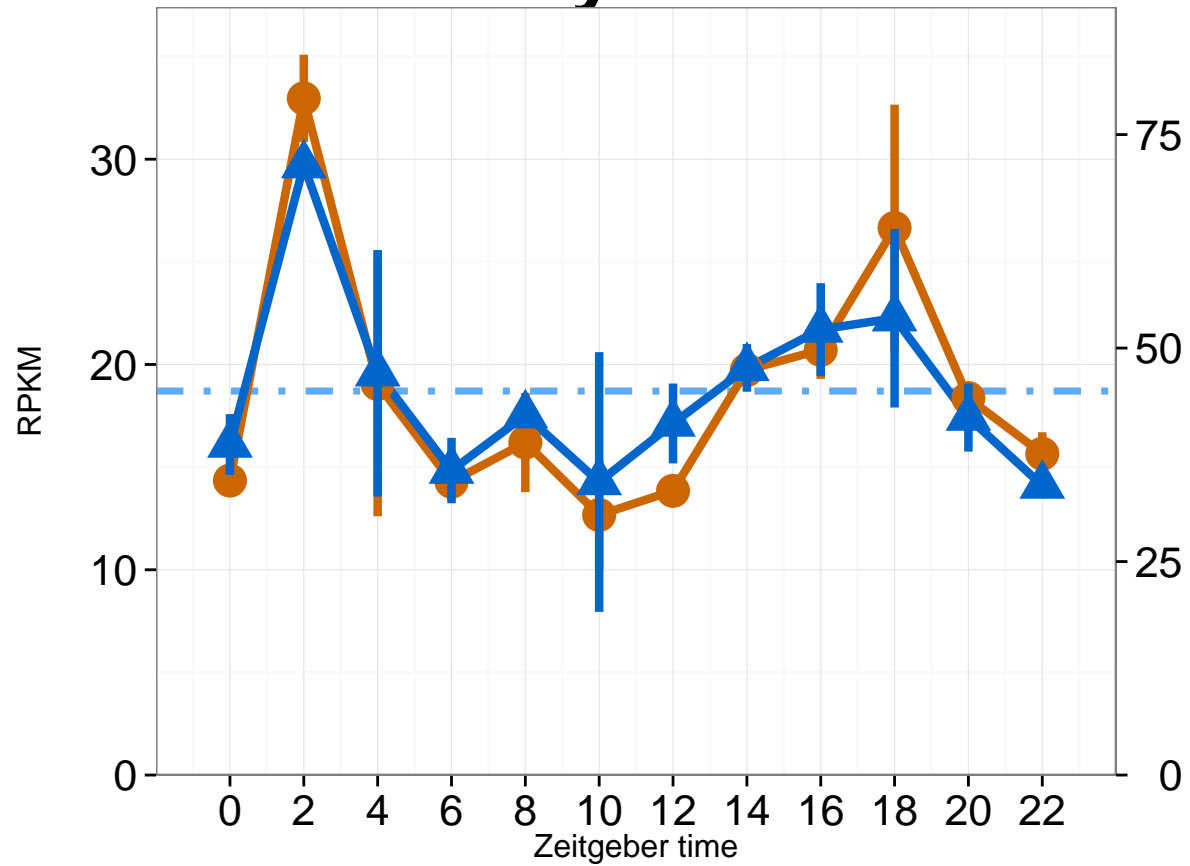

# Syvn1

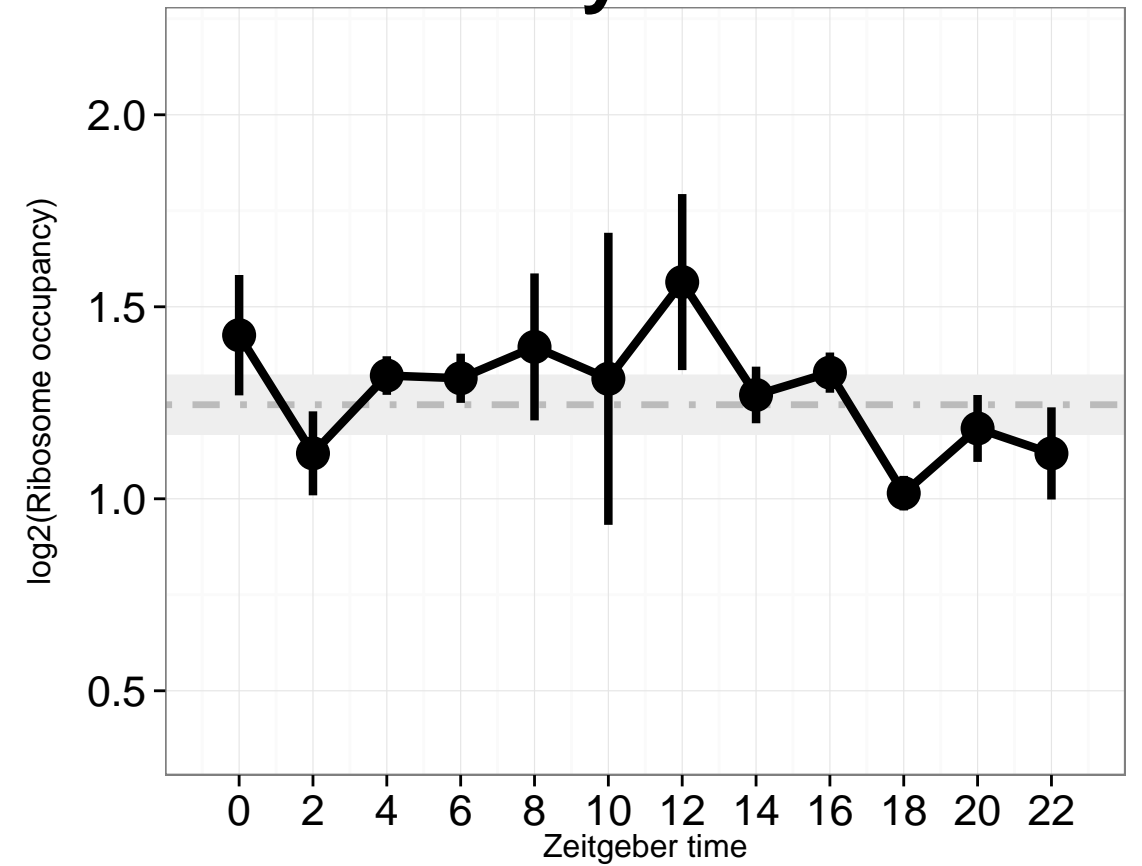

Supplement: SuppDataset_1.zip [file Syvn1_set_A.pdf › Supplemental Dataset 1/A-mRNA_nonrhyth_translation_nonrhyth/Syvn1_set_A.pdf]

## Szrd1

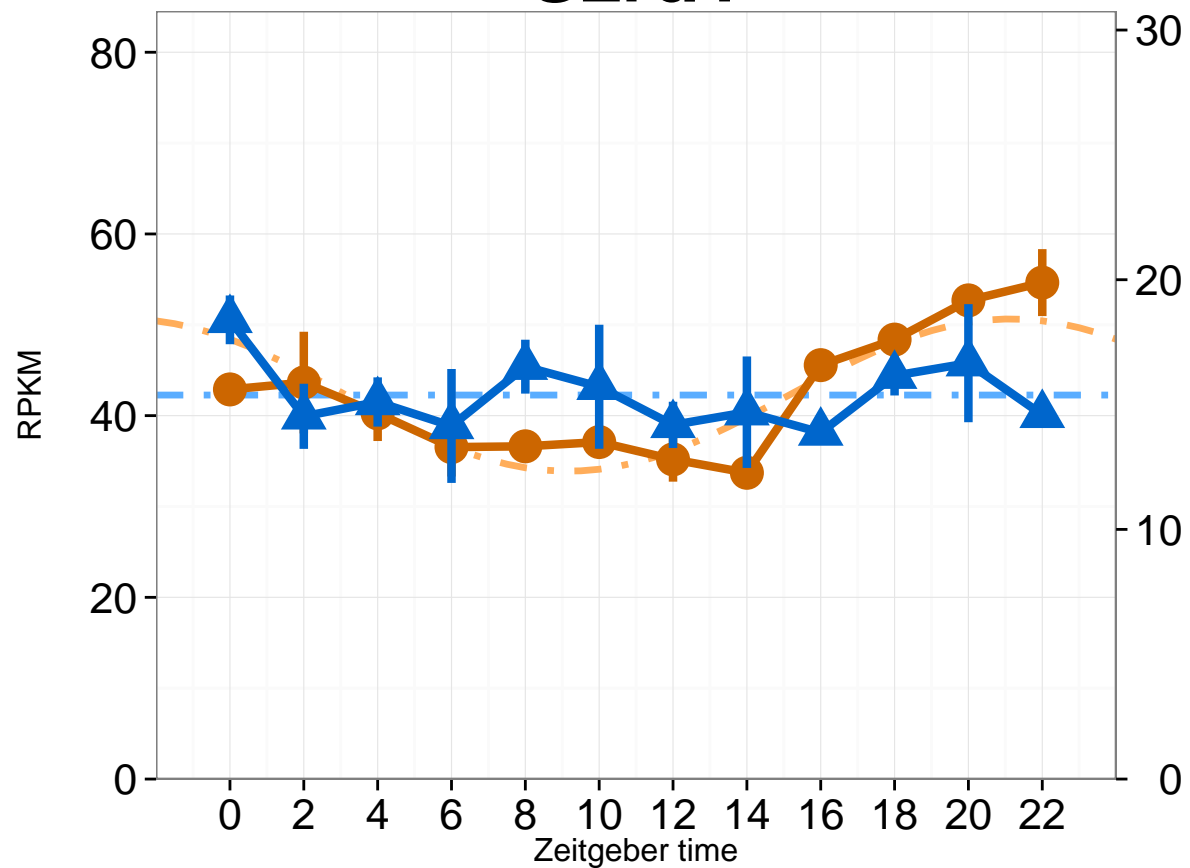

## Szrd1

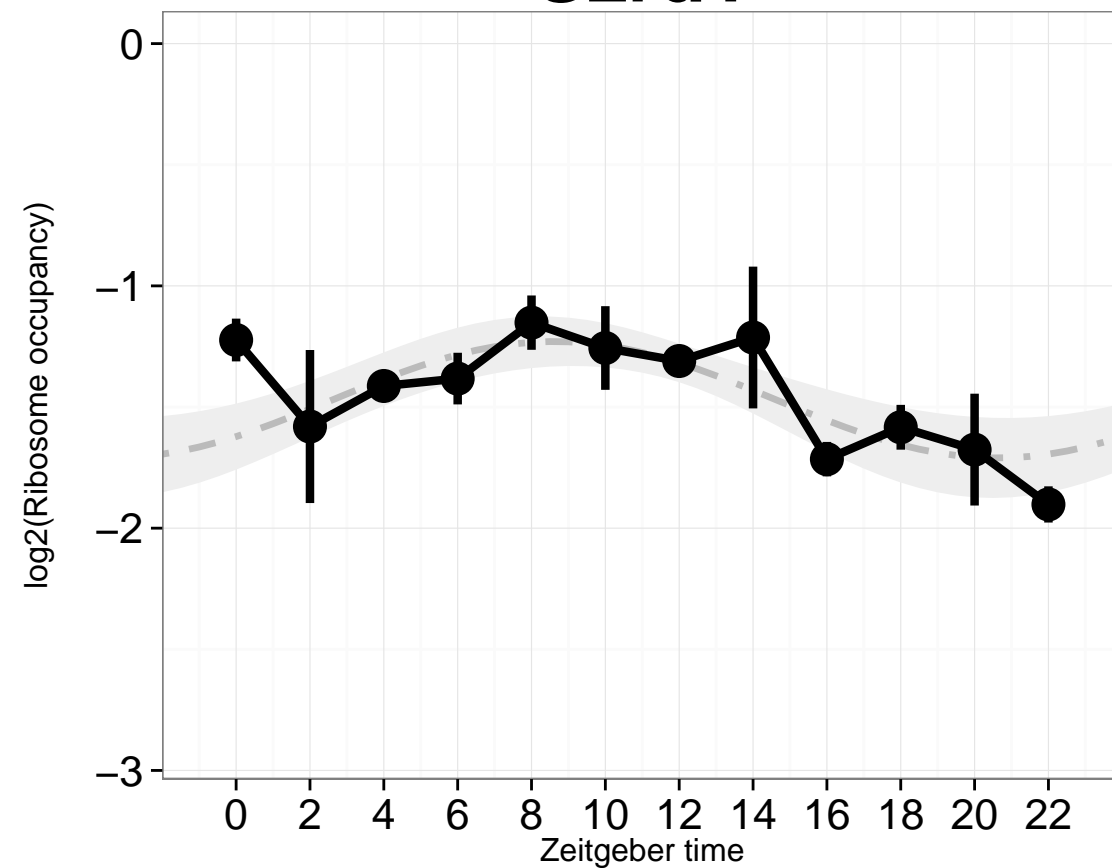

Supplement: SuppDataset_1.zip [file Szrd1_set_A.pdf › Supplemental Dataset 1/A-mRNA_nonrhyth_translation_nonrhyth/Szrd1_set_A.pdf]

# Tab3

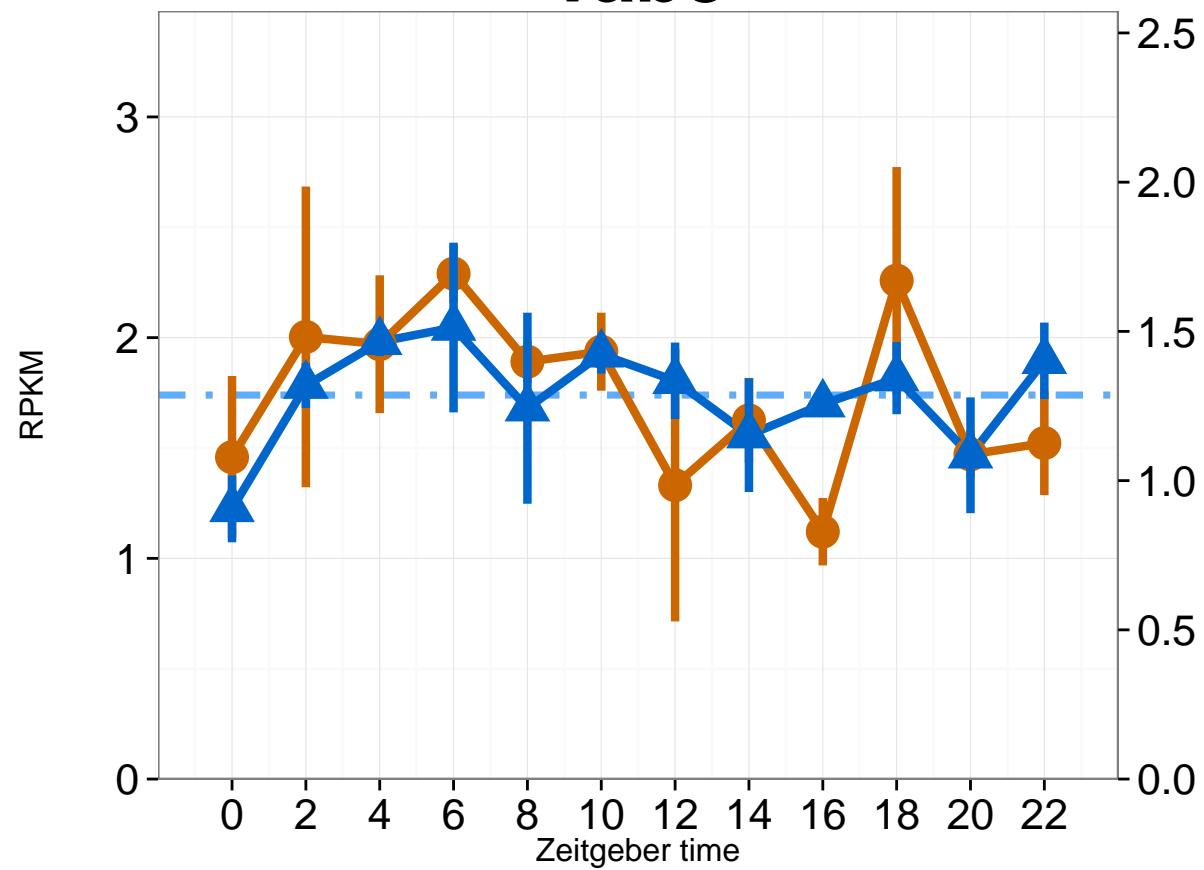

# Tab3

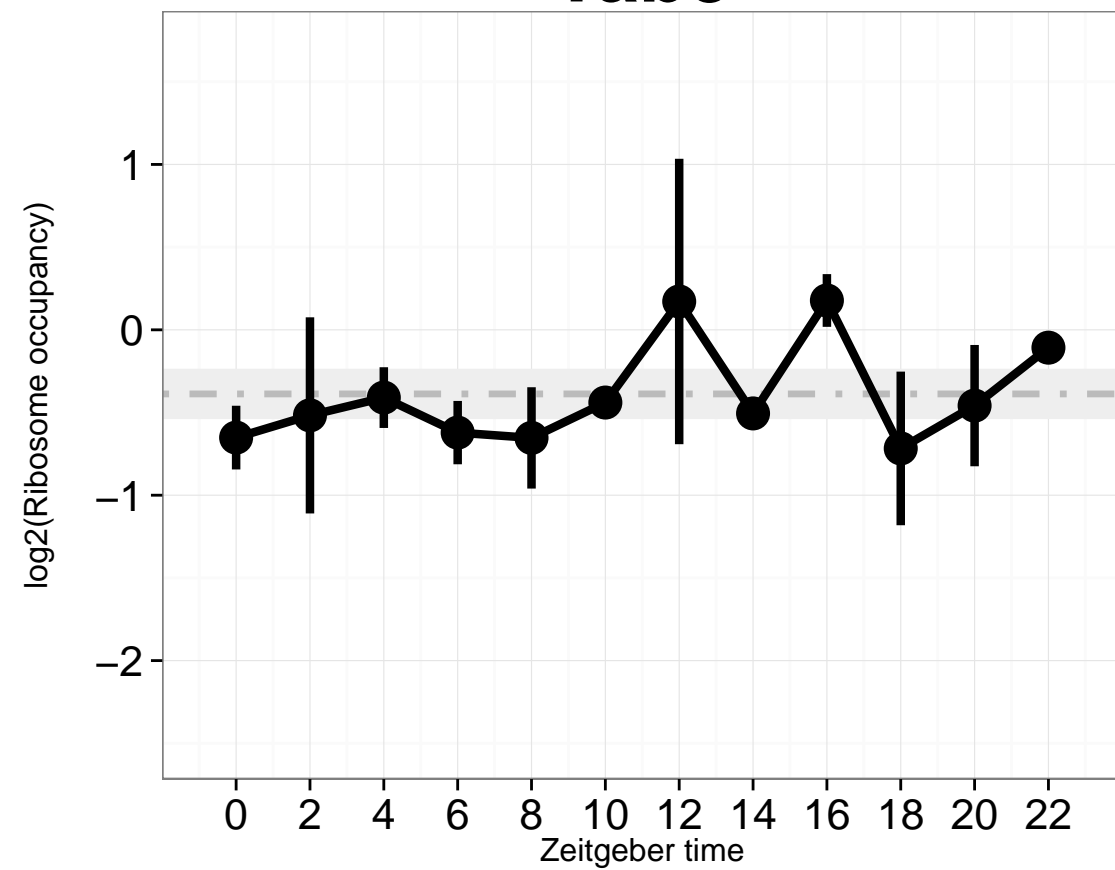

Supplement: SuppDataset_1.zip [file Tab3_set_A.pdf › Supplemental Dataset 1/A-mRNA_nonrhyth_translation_nonrhyth/Tab3_set_A.pdf]

## Tacc1

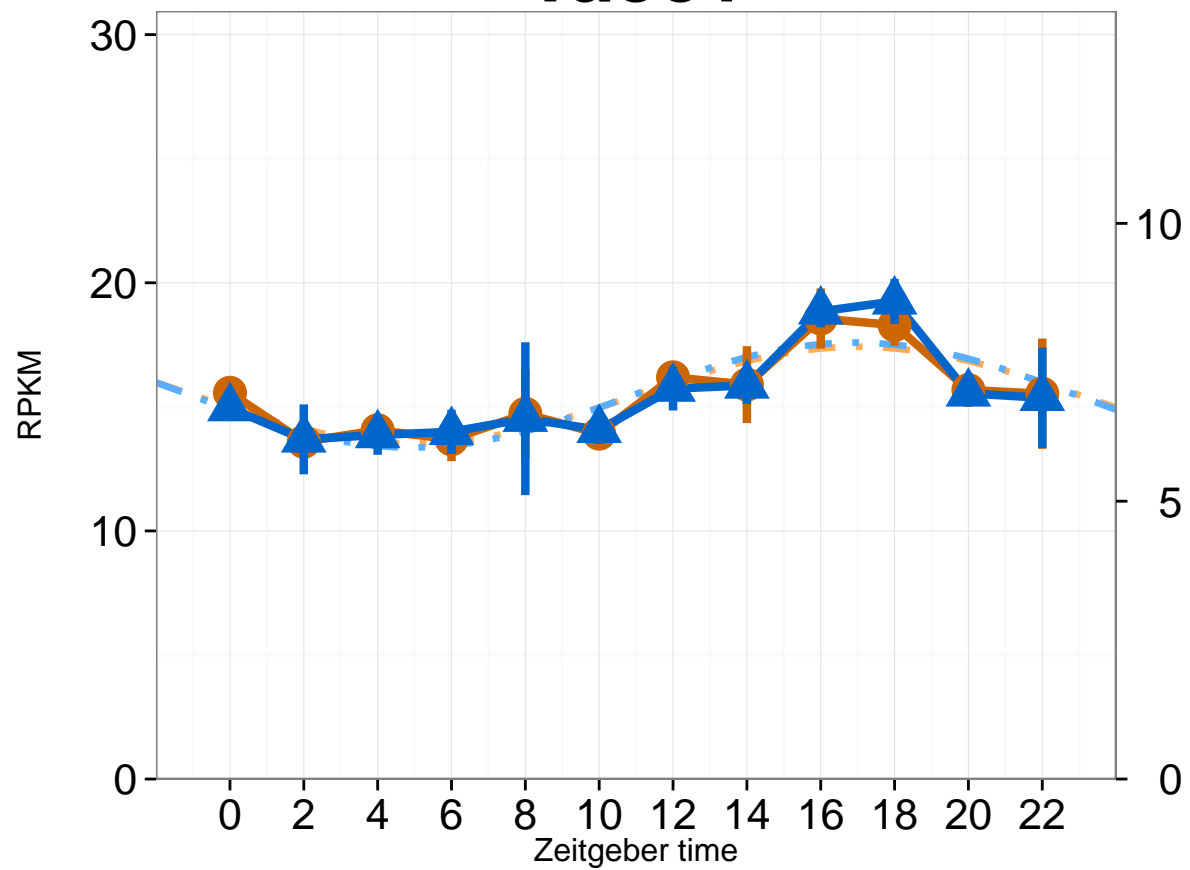

## Tacc1

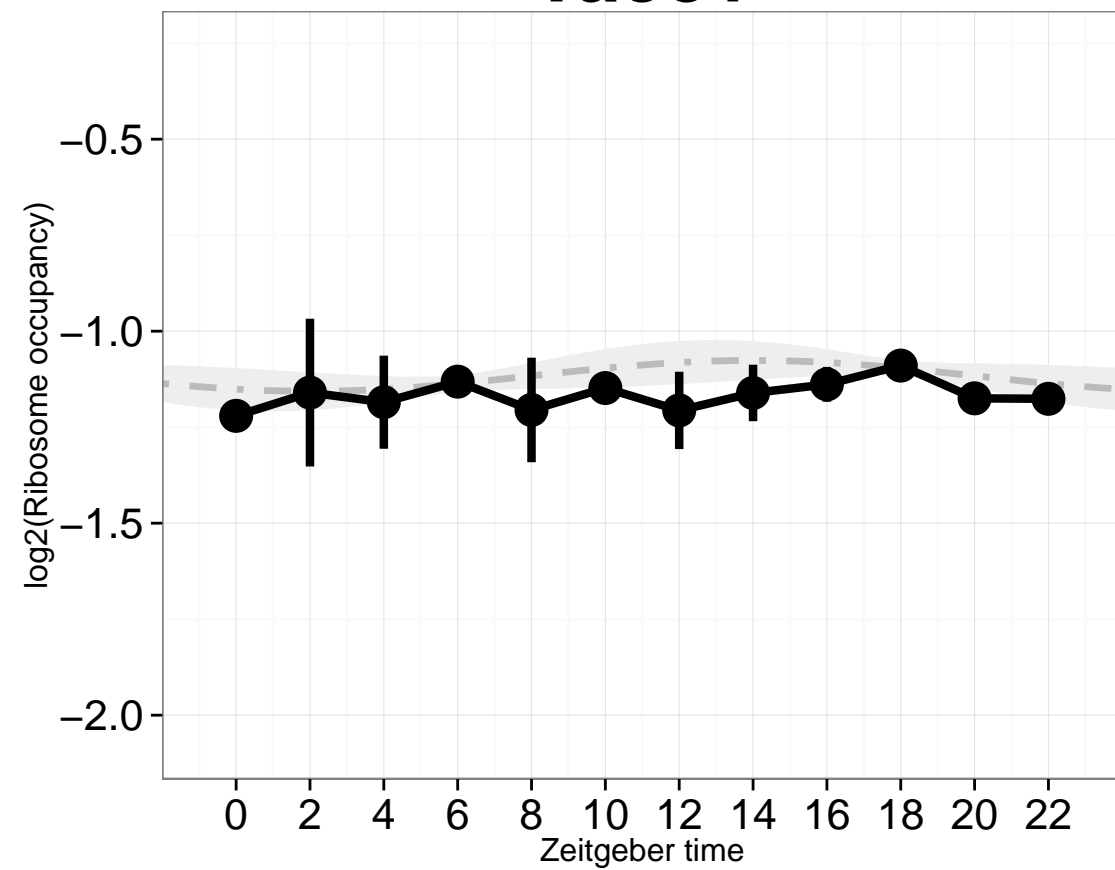

Supplement: SuppDataset_1.zip [file Tacc1_set_A.pdf › Supplemental Dataset 1/A-mRNA_nonrhyth_translation_nonrhyth/Tacc1_set_A.pdf]

# Tacc3

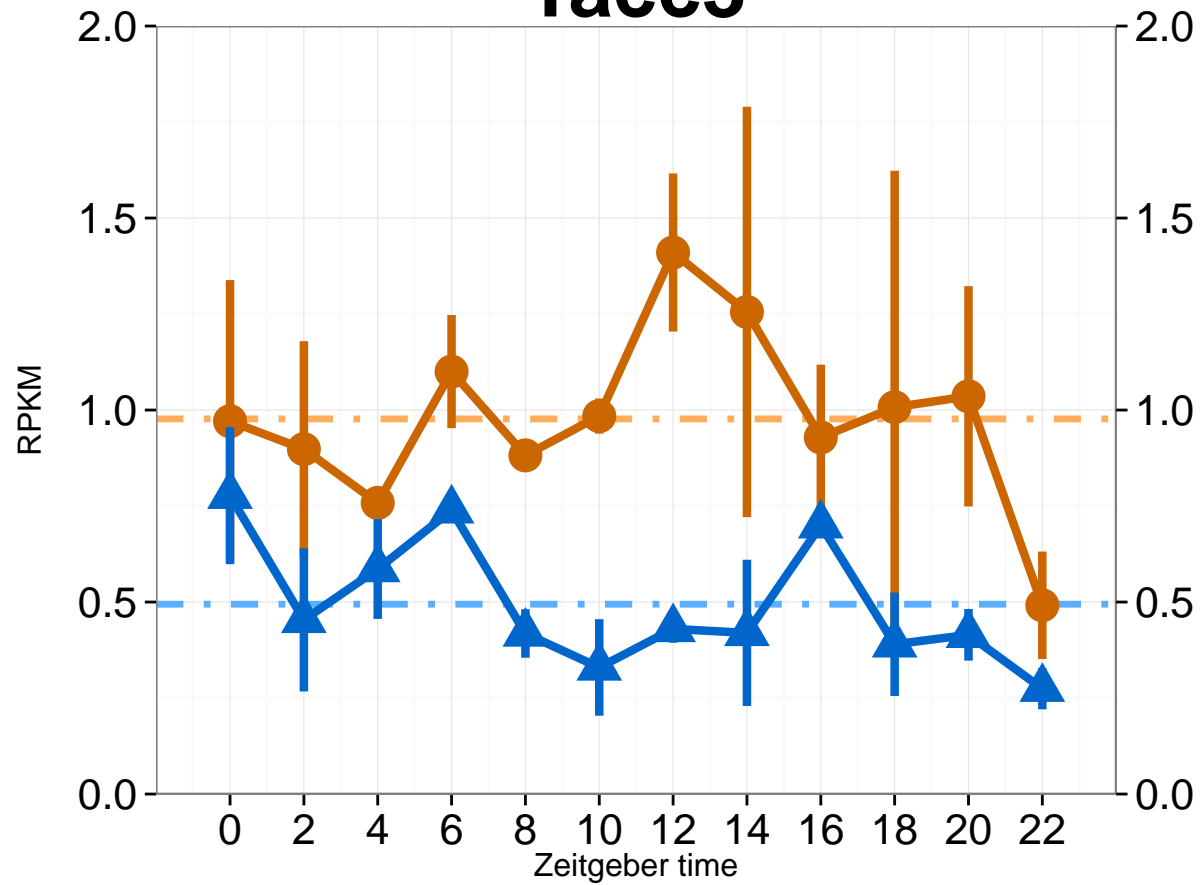

# Tacc3

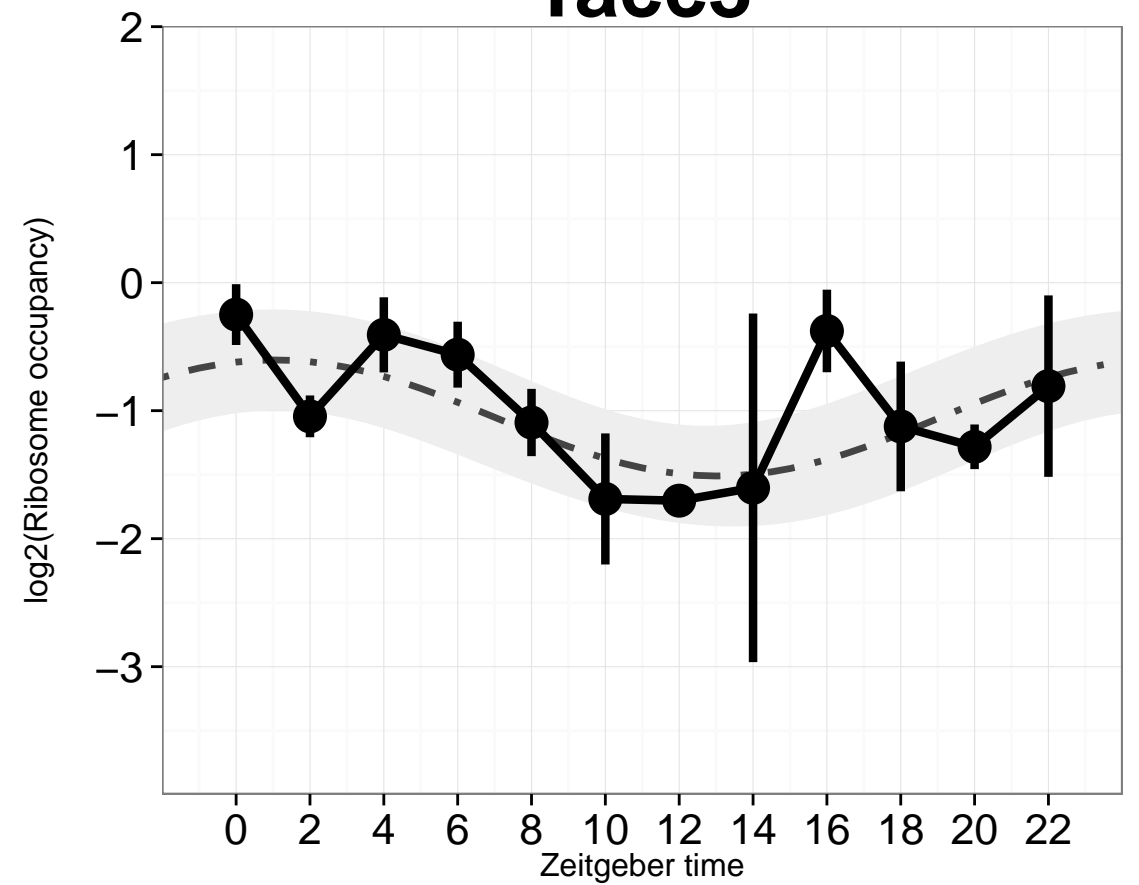

Supplement: SuppDataset_1.zip [file Tacc3_set_A.pdf › Supplemental Dataset 1/A-mRNA_nonrhyth_translation_nonrhyth/Tacc3_set_A.pdf]

# Taco1

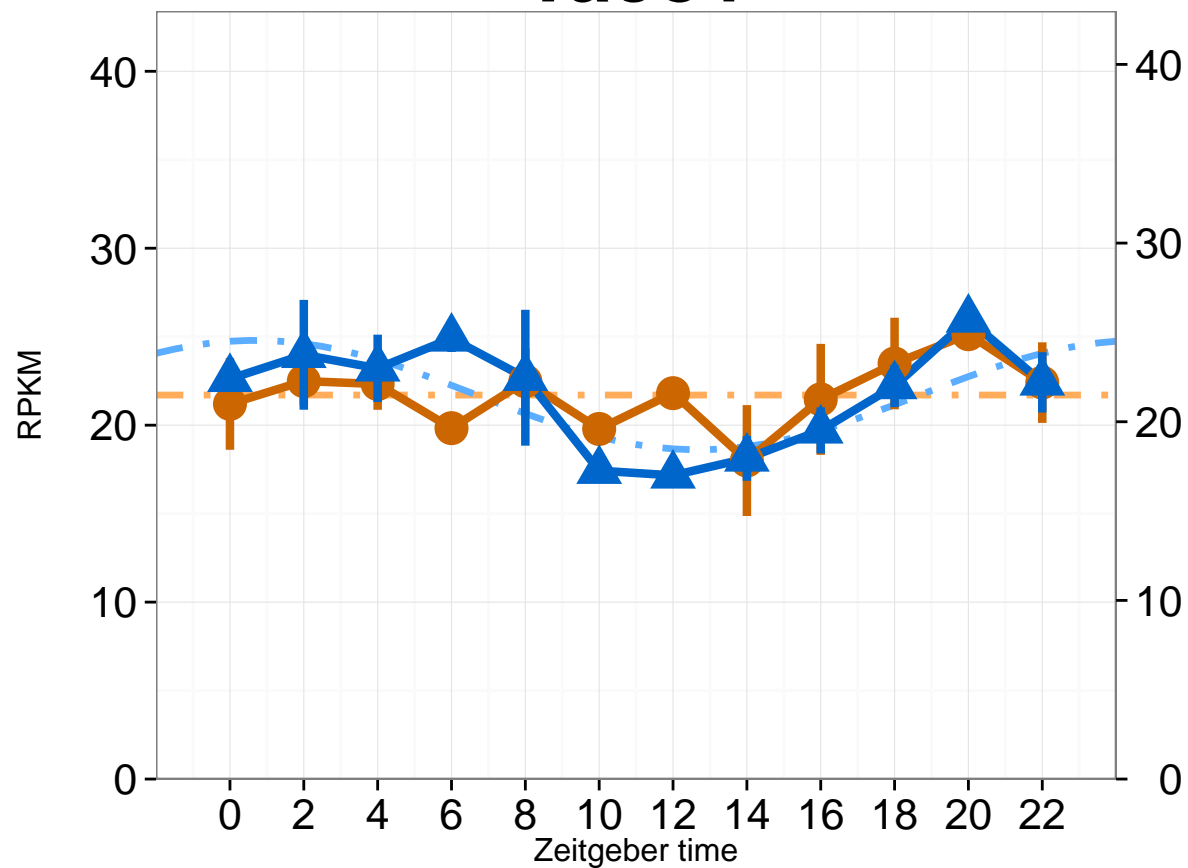

# Taco1

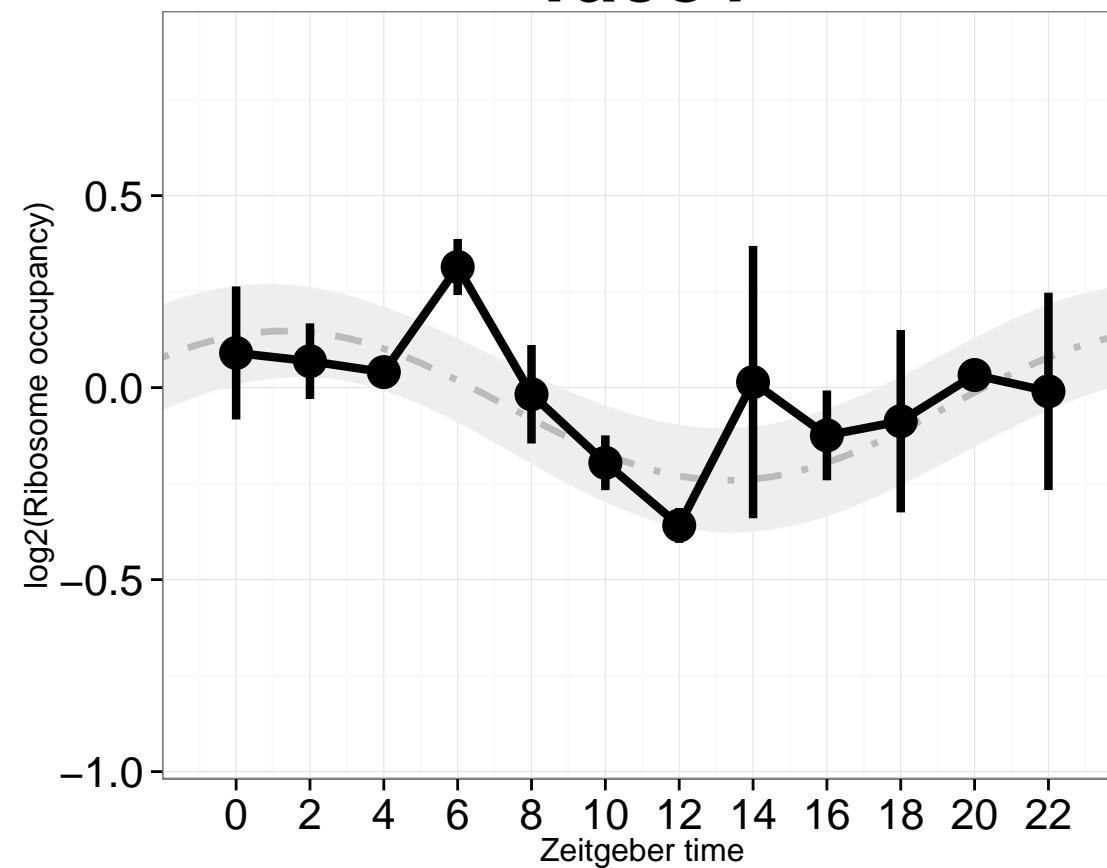

Supplement: SuppDataset_1.zip [file Taco1_set_A.pdf › Supplemental Dataset 1/A-mRNA_nonrhyth_translation_nonrhyth/Taco1_set_A.pdf]

# Tada1

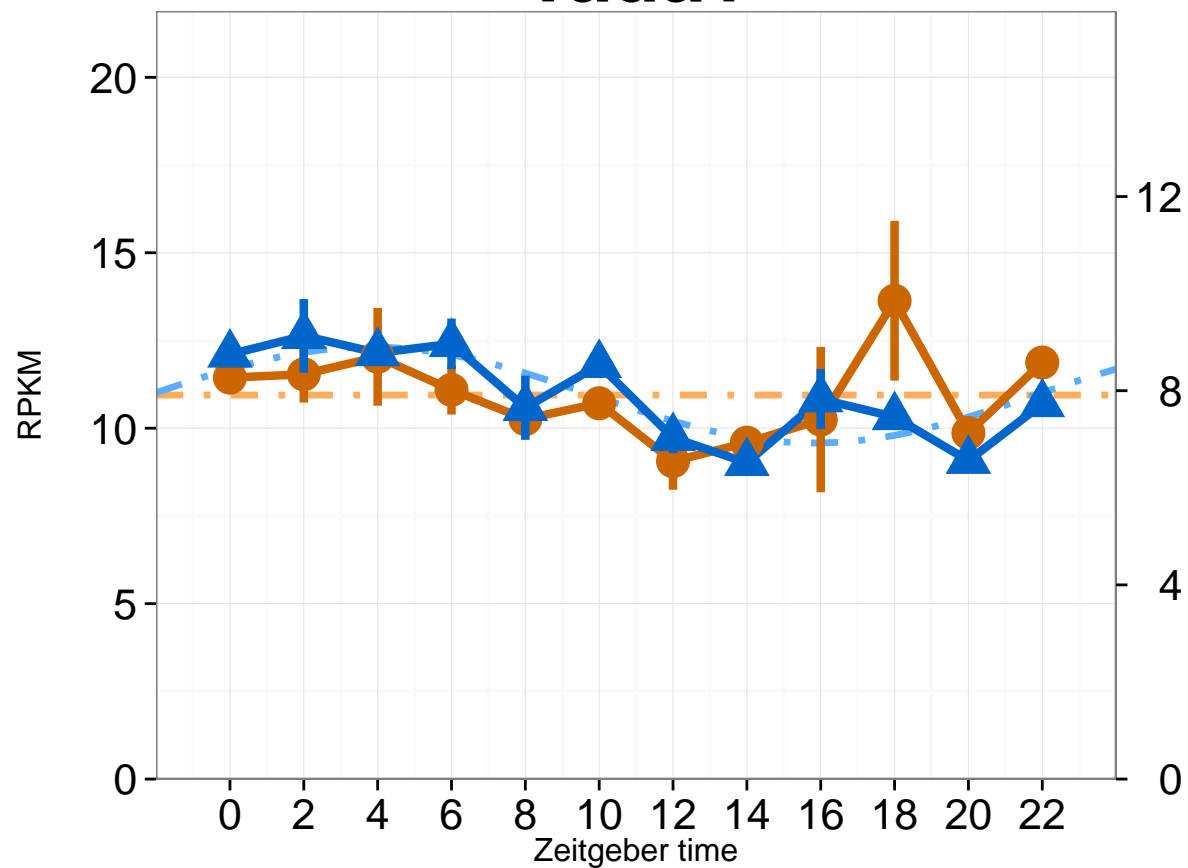

# Tada1

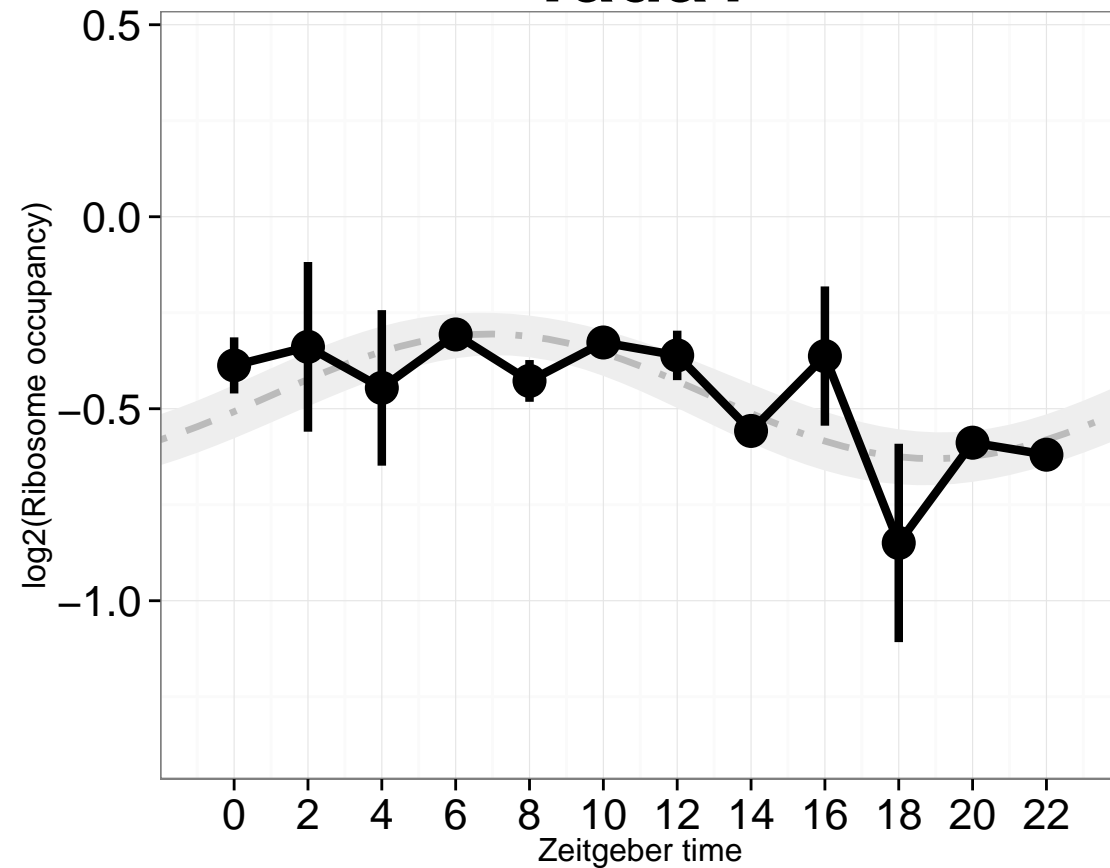

Supplement: SuppDataset_1.zip [file Tada1_set_A.pdf › Supplemental Dataset 1/A-mRNA_nonrhyth_translation_nonrhyth/Tada1_set_A.pdf]

# Taf10

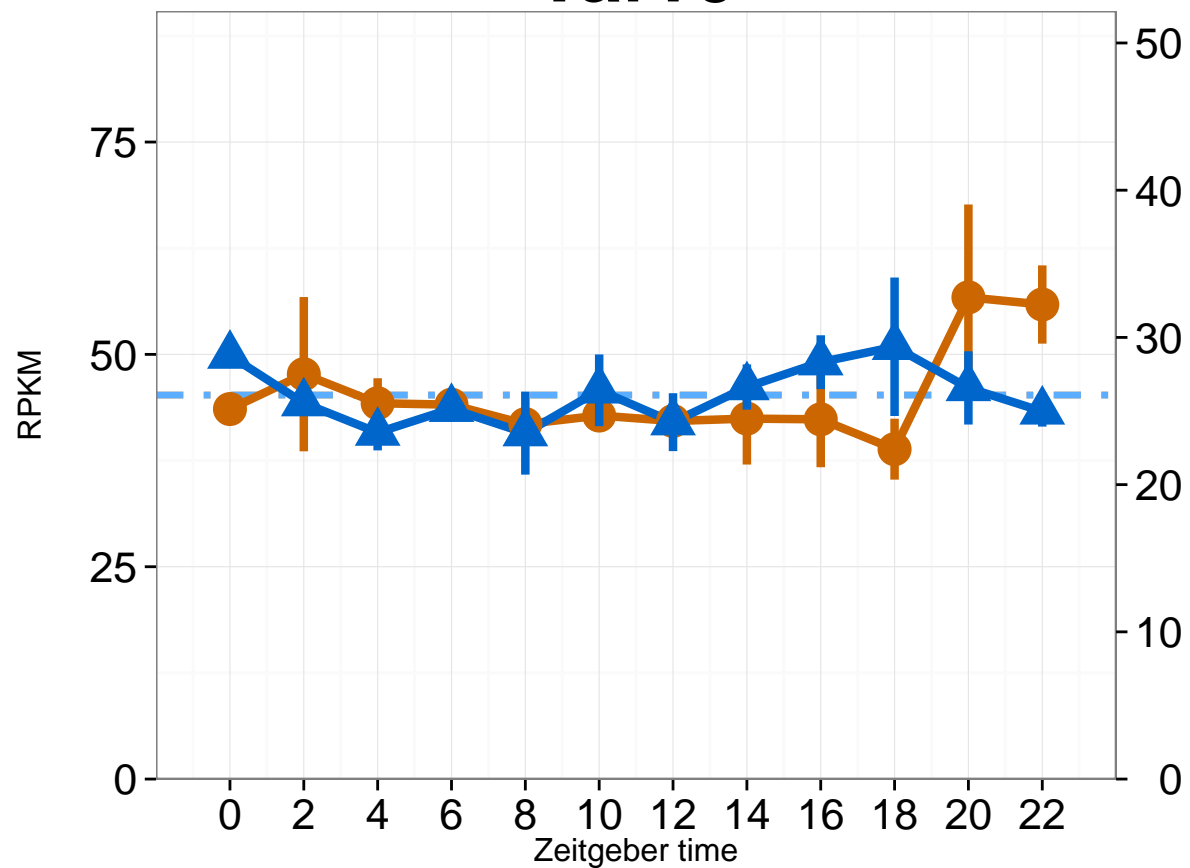

# Taf10

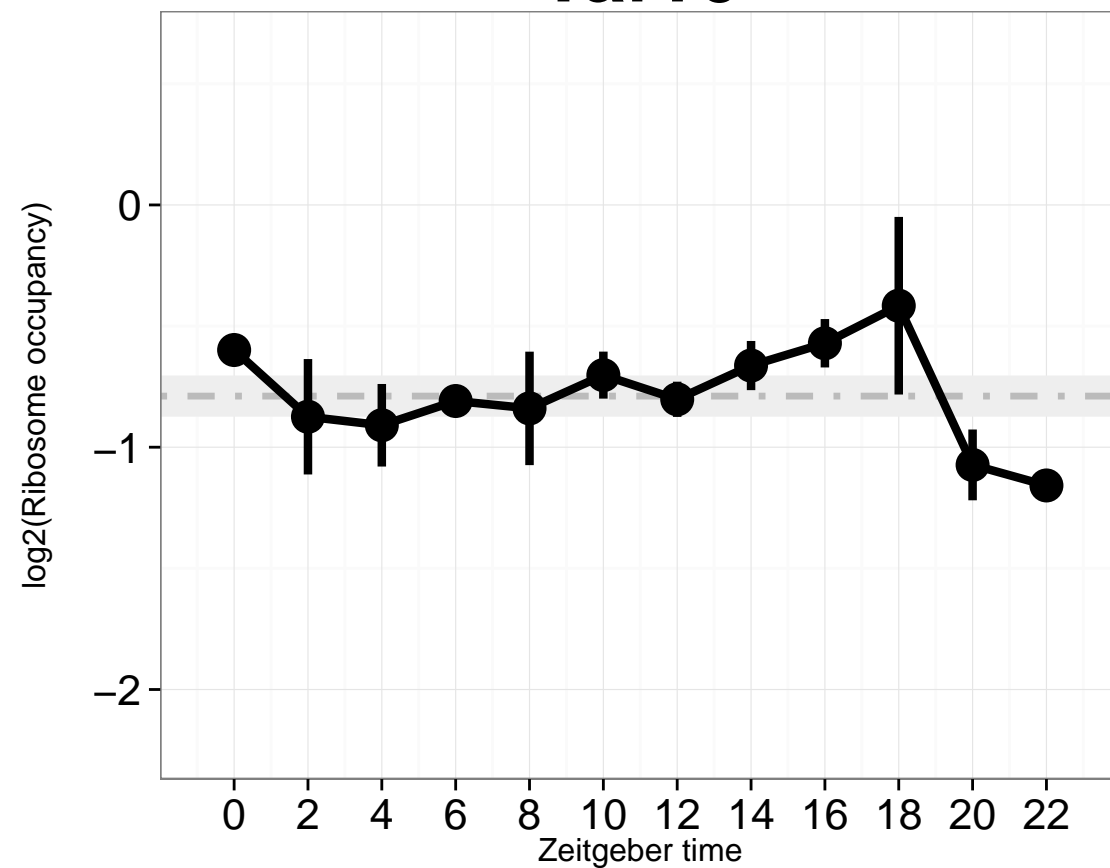

Supplement: SuppDataset_1.zip [file Taf10_set_A.pdf › Supplemental Dataset 1/A-mRNA_nonrhyth_translation_nonrhyth/Taf10_set_A.pdf]

# Taf11

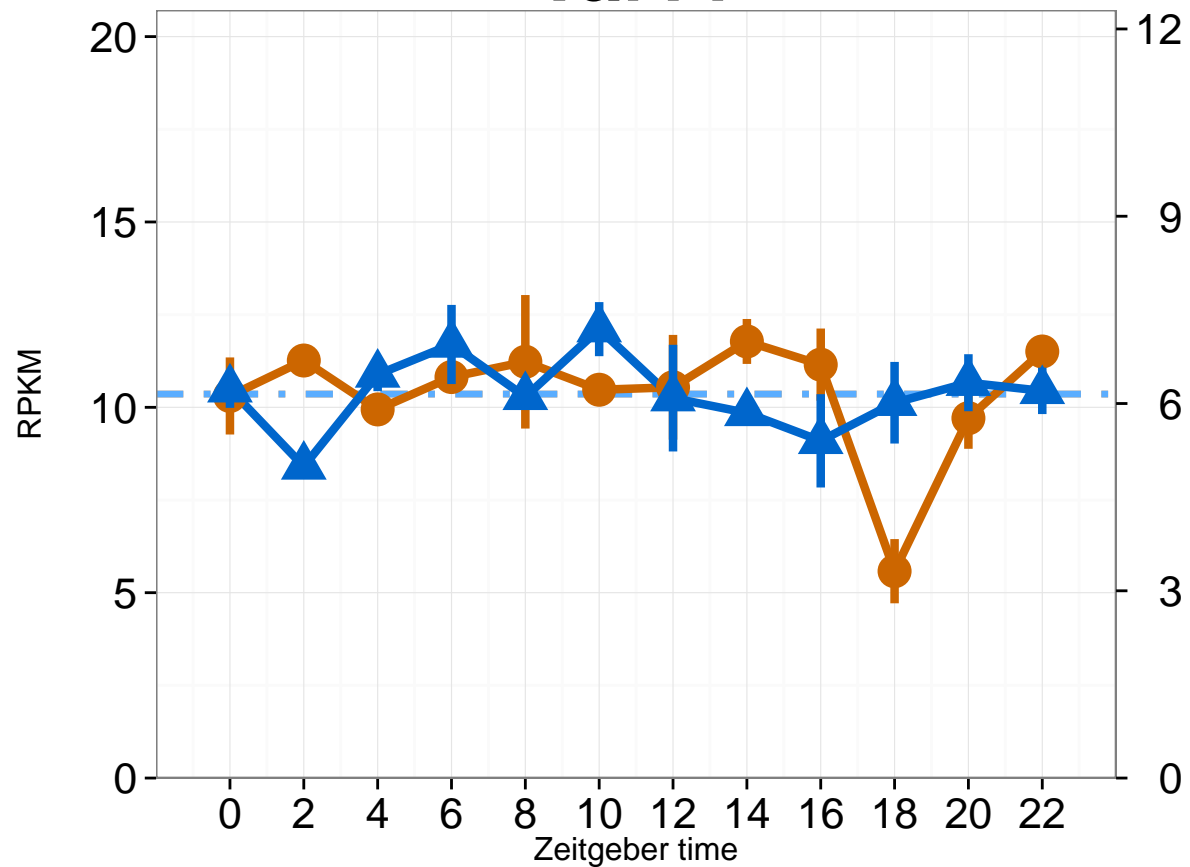

# Taf11

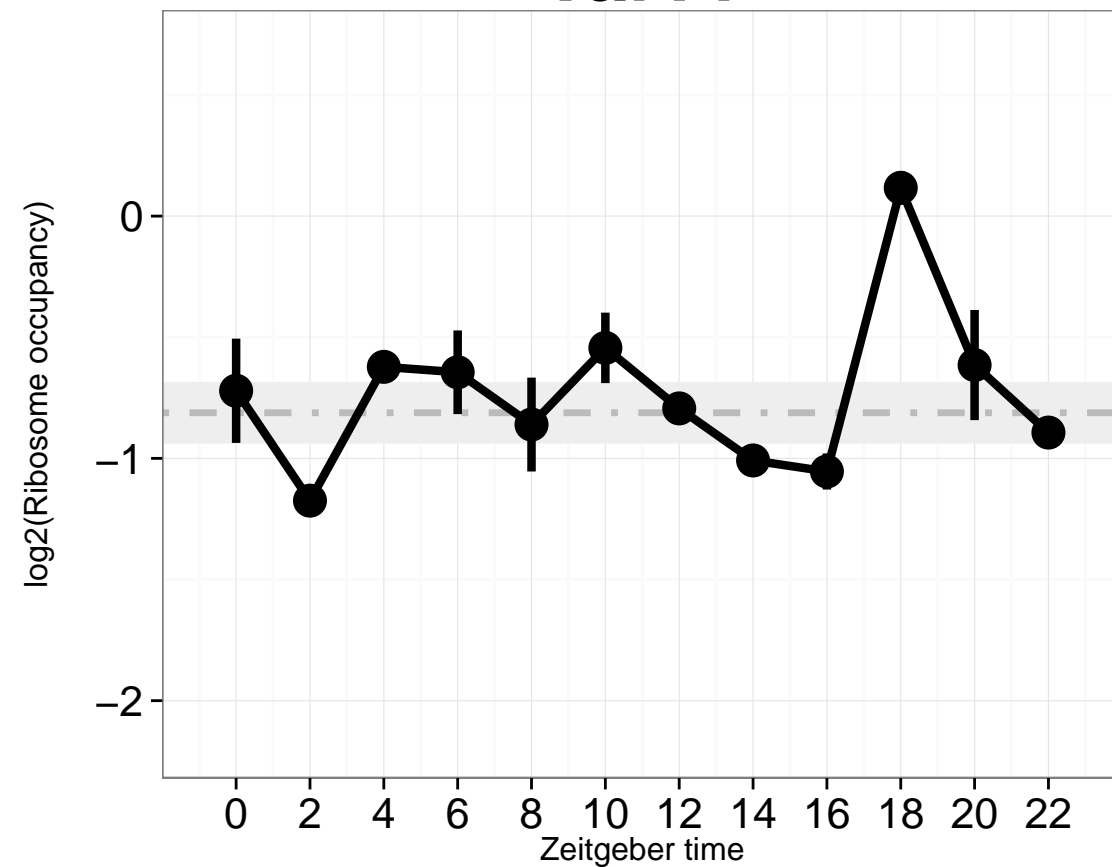

Supplement: SuppDataset_1.zip [file Taf11_set_A.pdf › Supplemental Dataset 1/A-mRNA_nonrhyth_translation_nonrhyth/Taf11_set_A.pdf]

# Taf12

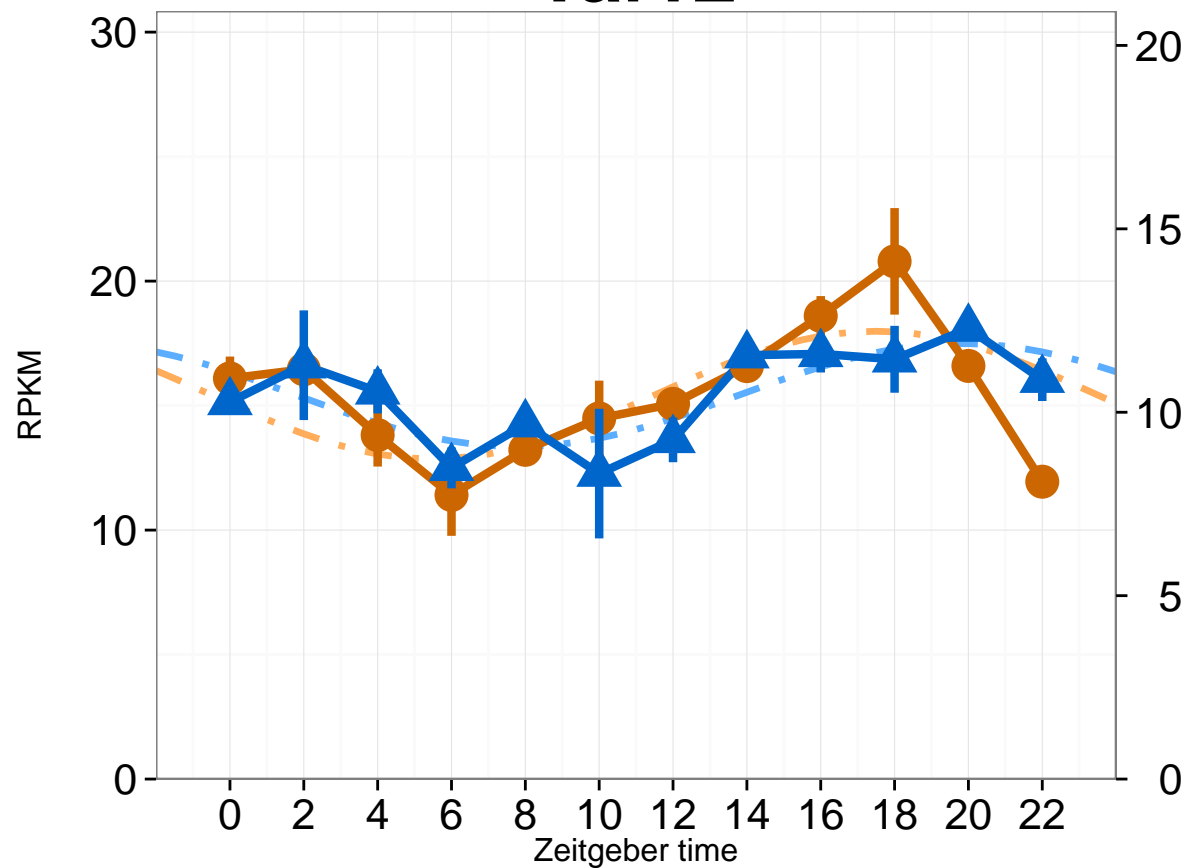

# Taf12

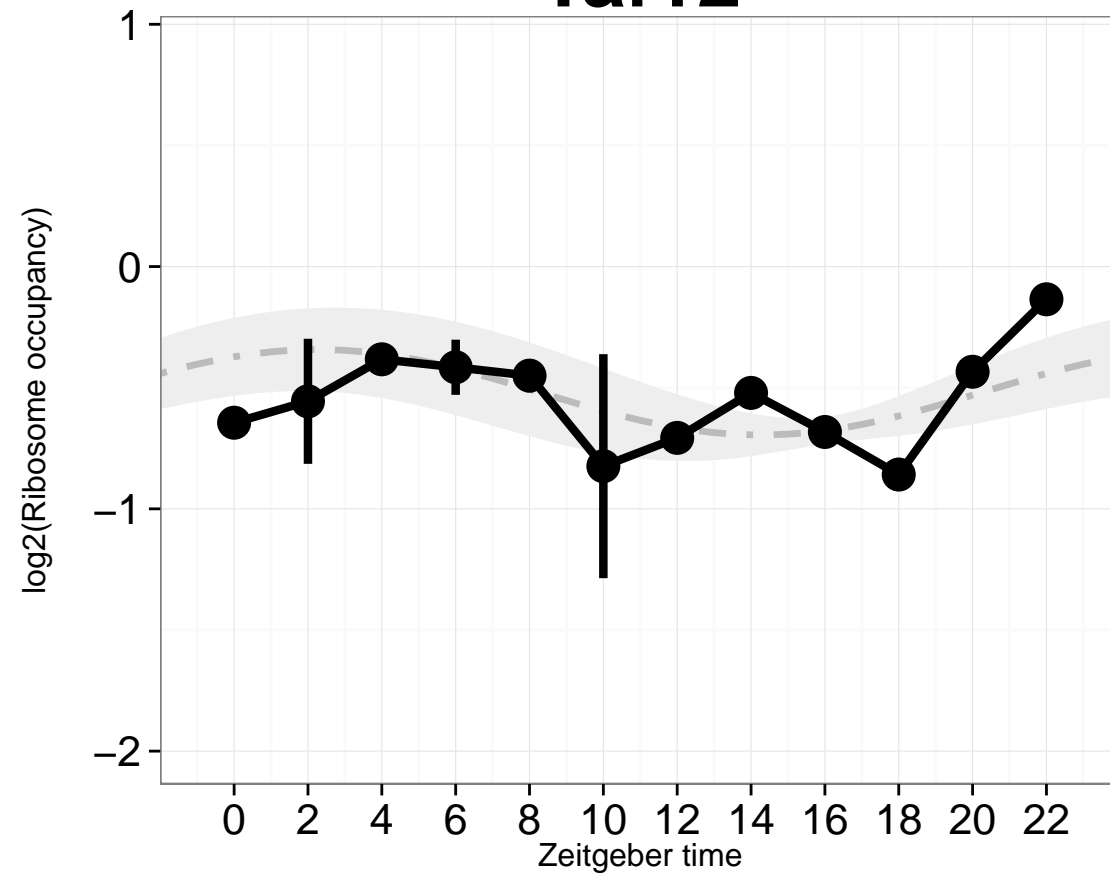

Supplement: SuppDataset_1.zip [file Taf12_set_A.pdf › Supplemental Dataset 1/A-mRNA_nonrhyth_translation_nonrhyth/Taf12_set_A.pdf]

## Taf13

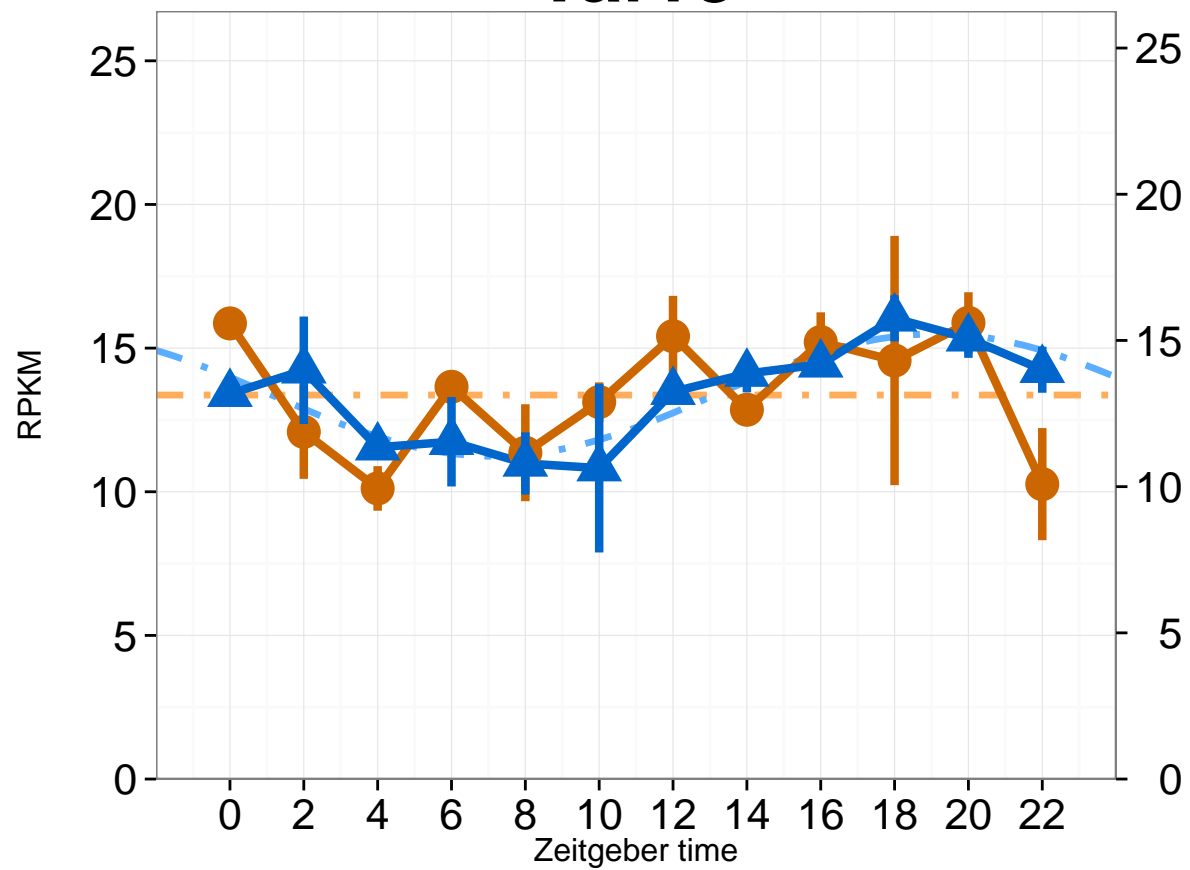

## Taf13

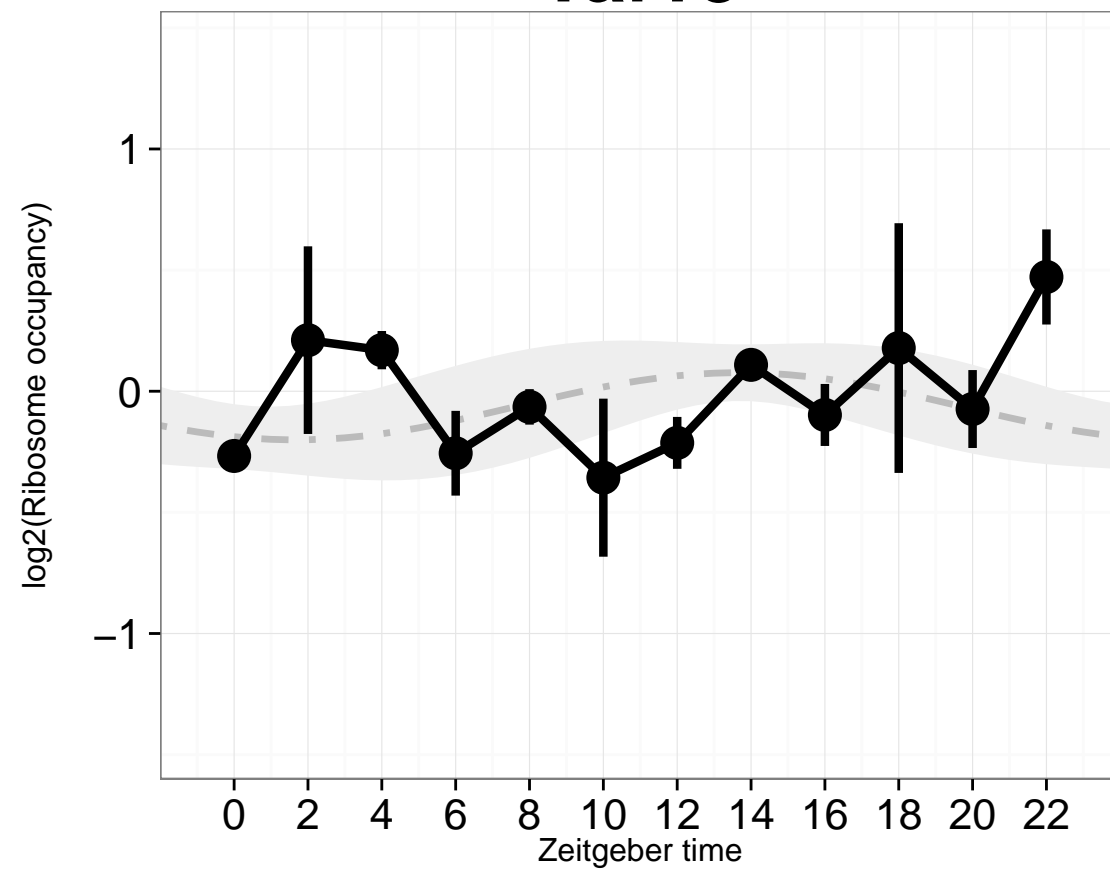

Supplement: SuppDataset_1.zip [file Taf13_set_A.pdf › Supplemental Dataset 1/A-mRNA_nonrhyth_translation_nonrhyth/Taf13_set_A.pdf]

# Taf15

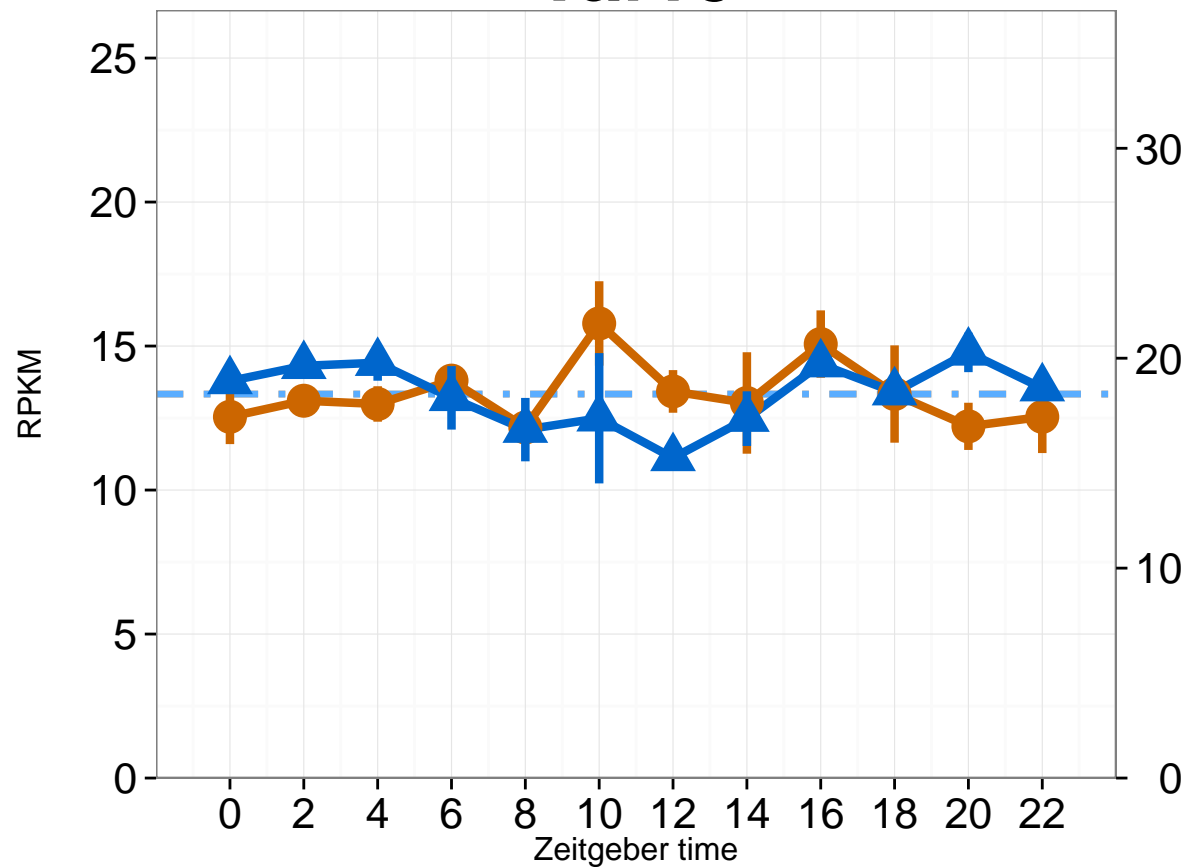

# Taf15

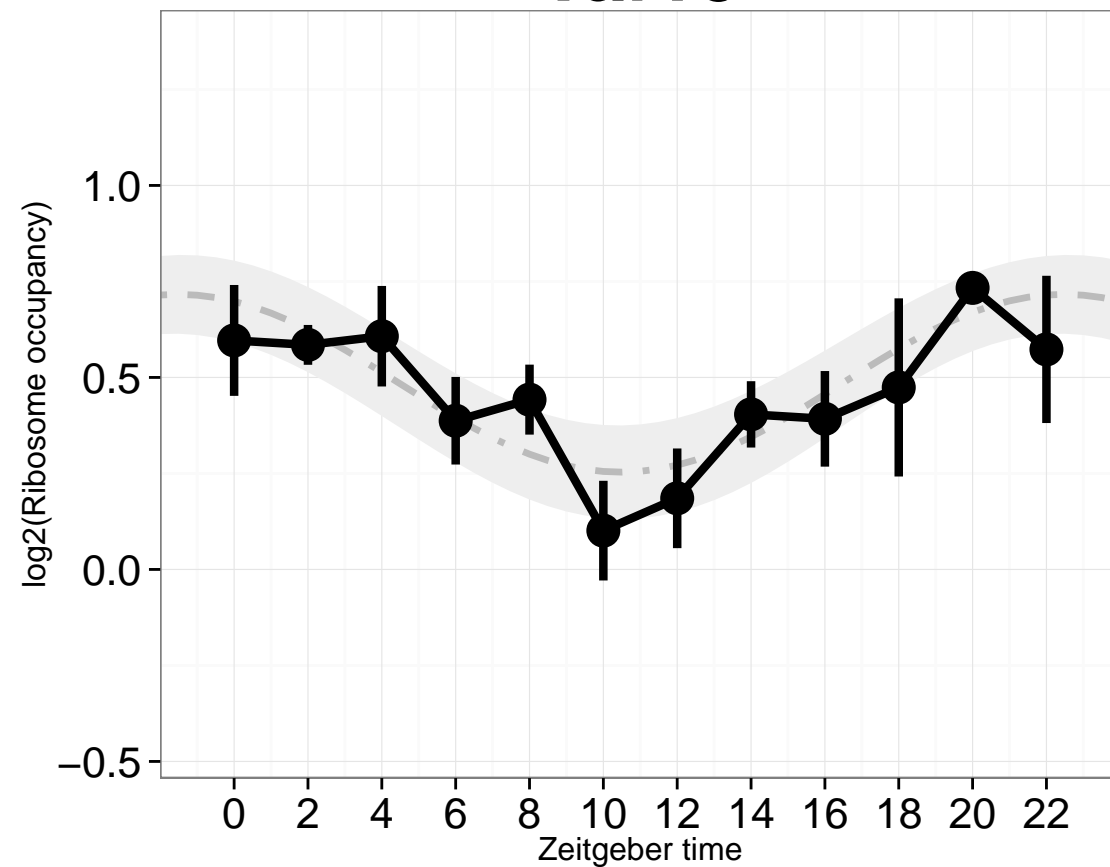

Supplement: SuppDataset_1.zip [file Taf15_set_A.pdf › Supplemental Dataset 1/A-mRNA_nonrhyth_translation_nonrhyth/Taf15_set_A.pdf]

# Taf1

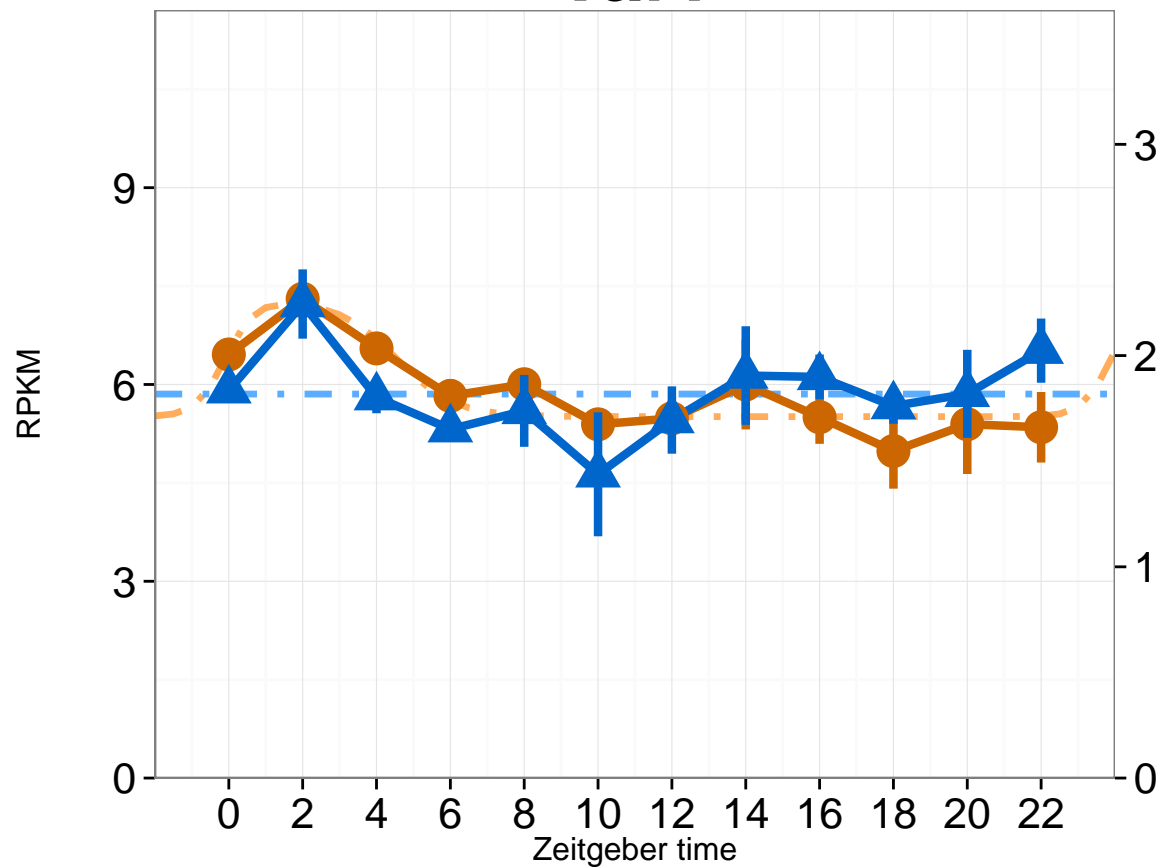

# Taf1

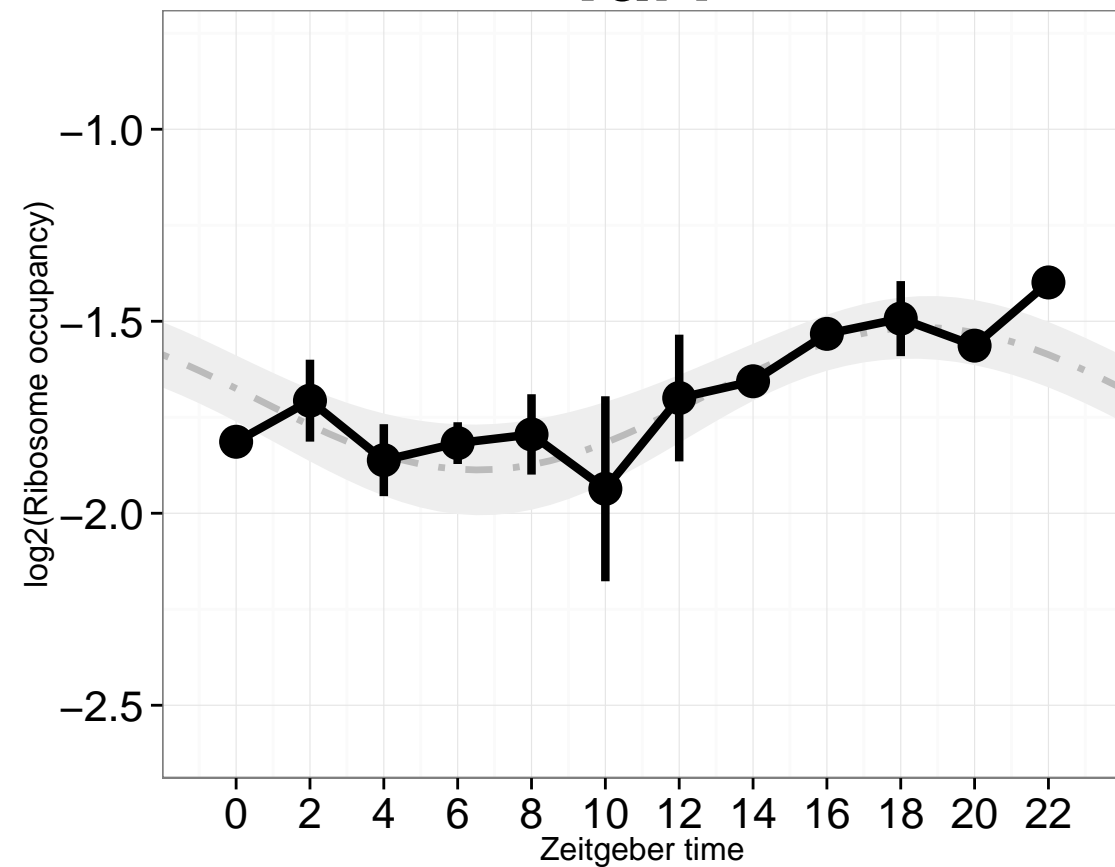

Supplement: SuppDataset_1.zip [file Taf1_set_A.pdf › Supplemental Dataset 1/A-mRNA_nonrhyth_translation_nonrhyth/Taf1_set_A.pdf]

# Taf1a

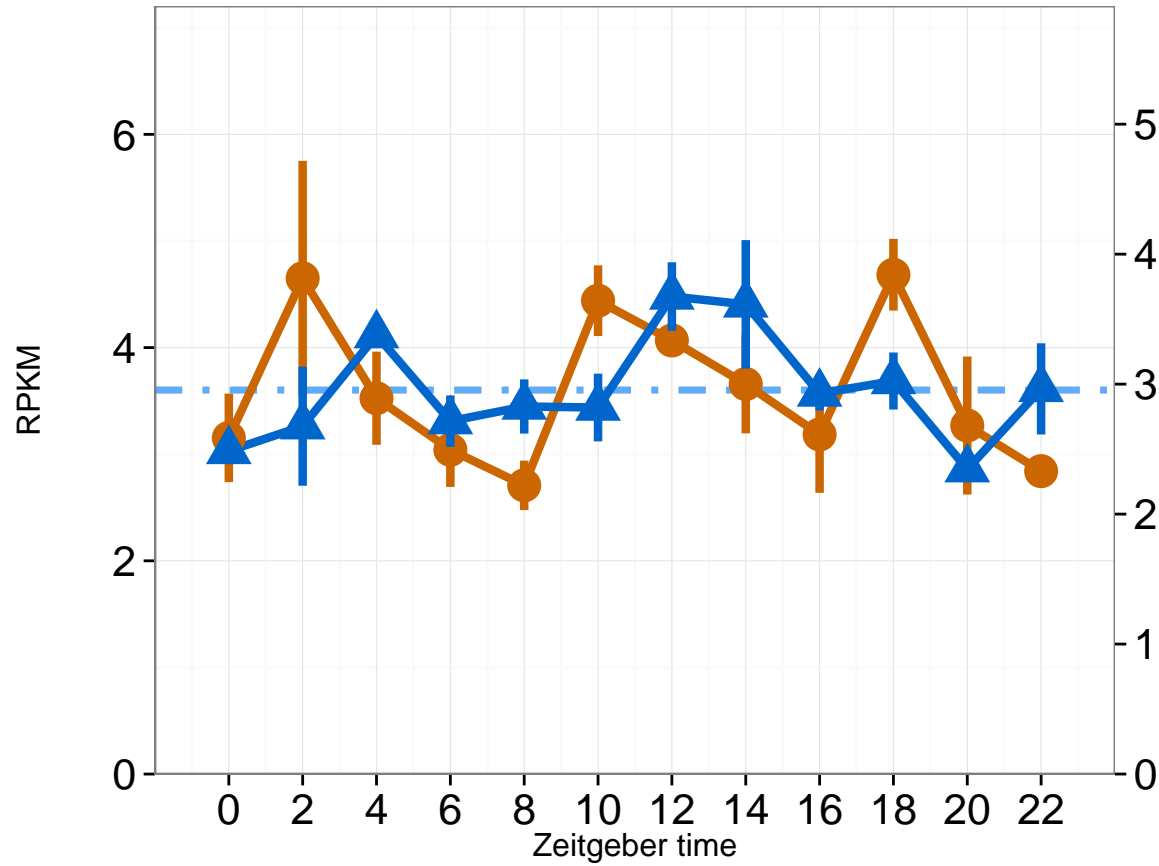

# Taf1a

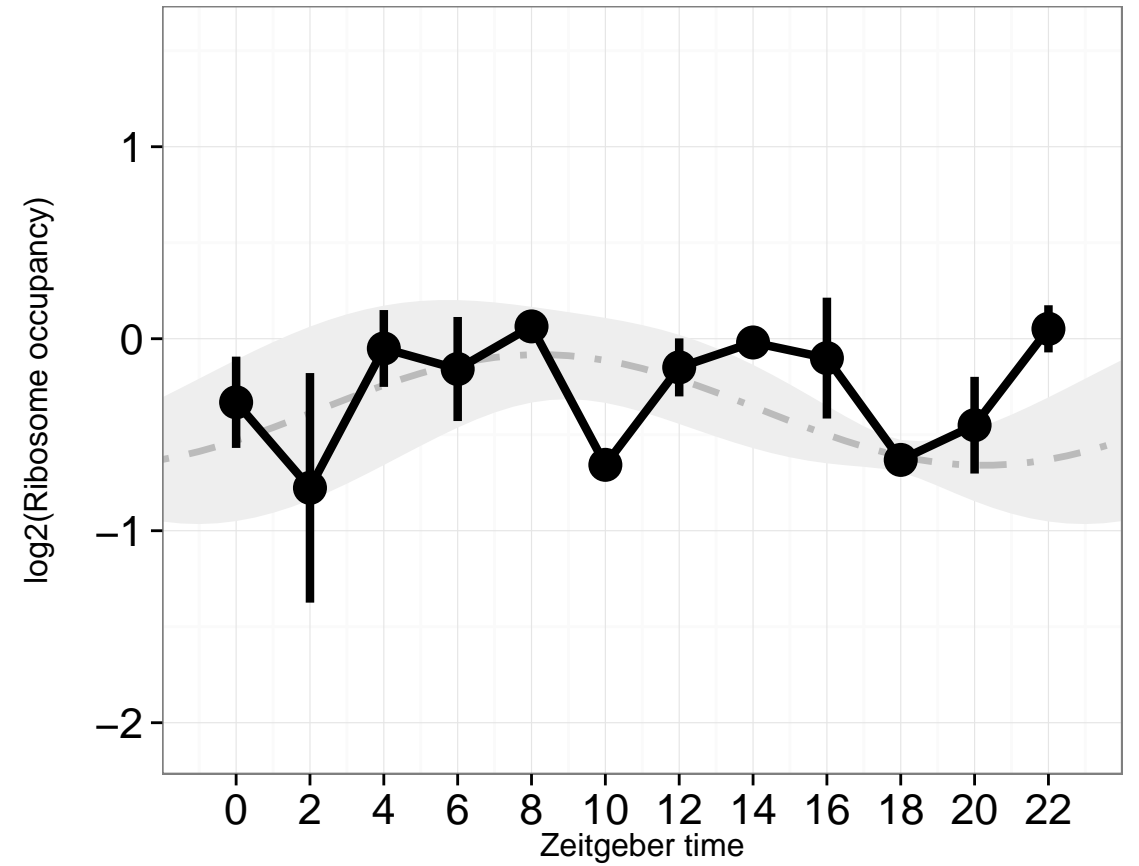

Supplement: SuppDataset_1.zip [file Taf1a_set_A.pdf › Supplemental Dataset 1/A-mRNA_nonrhyth_translation_nonrhyth/Taf1a_set_A.pdf]

## Taf3

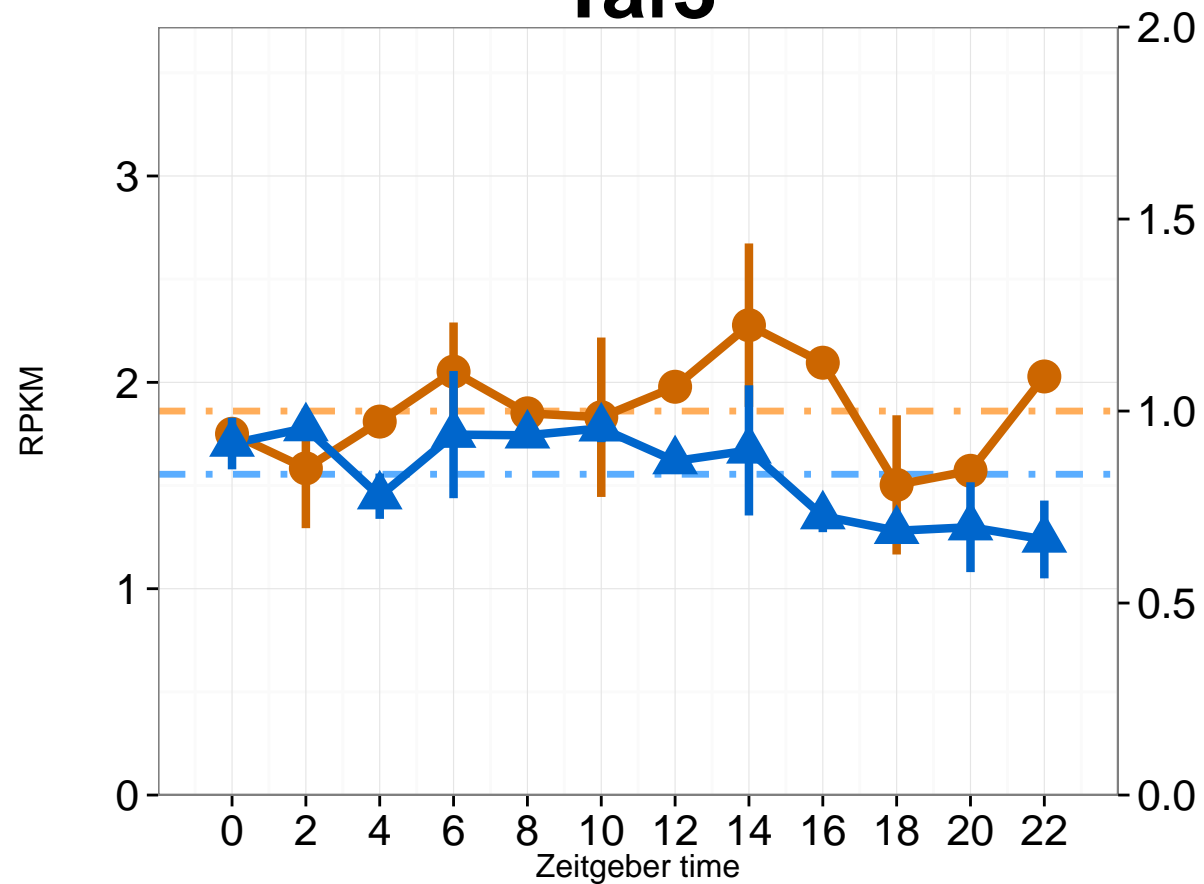

## Taf3

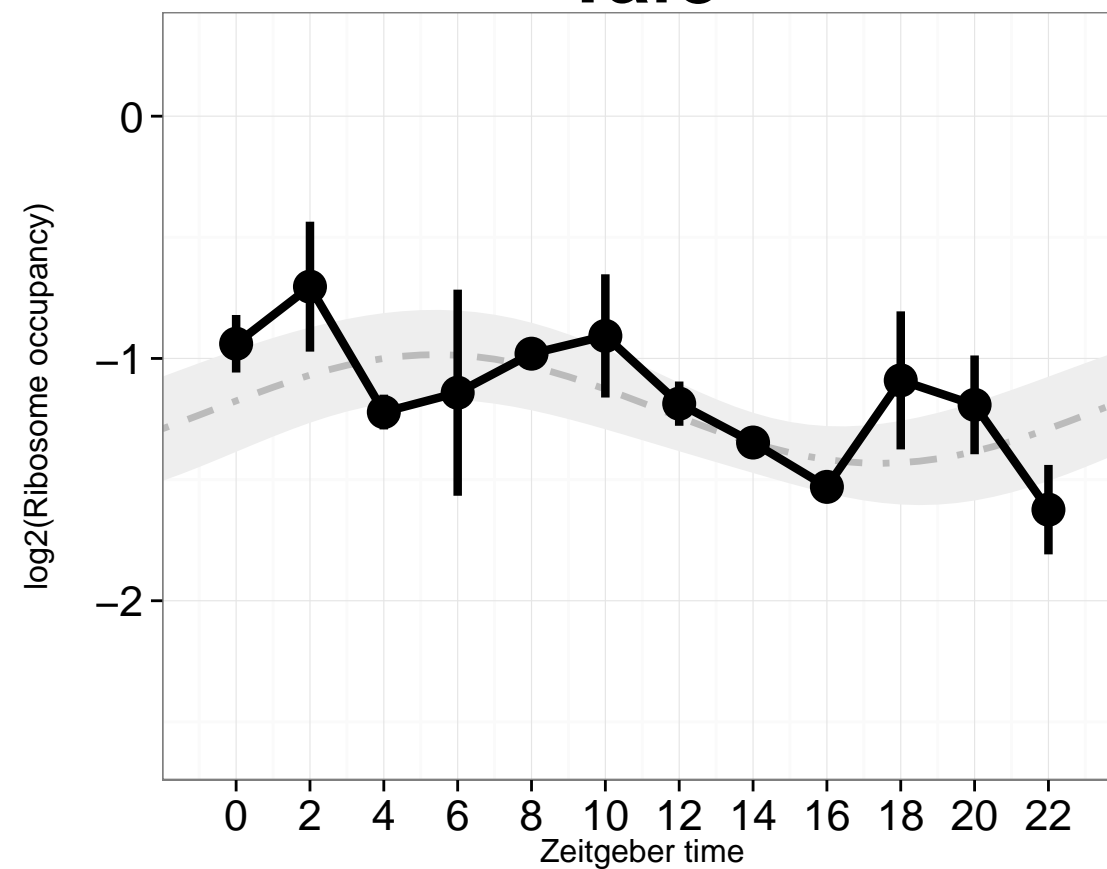

Supplement: SuppDataset_1.zip [file Taf3_set_A.pdf › Supplemental Dataset 1/A-mRNA_nonrhyth_translation_nonrhyth/Taf3_set_A.pdf]

# Taf5

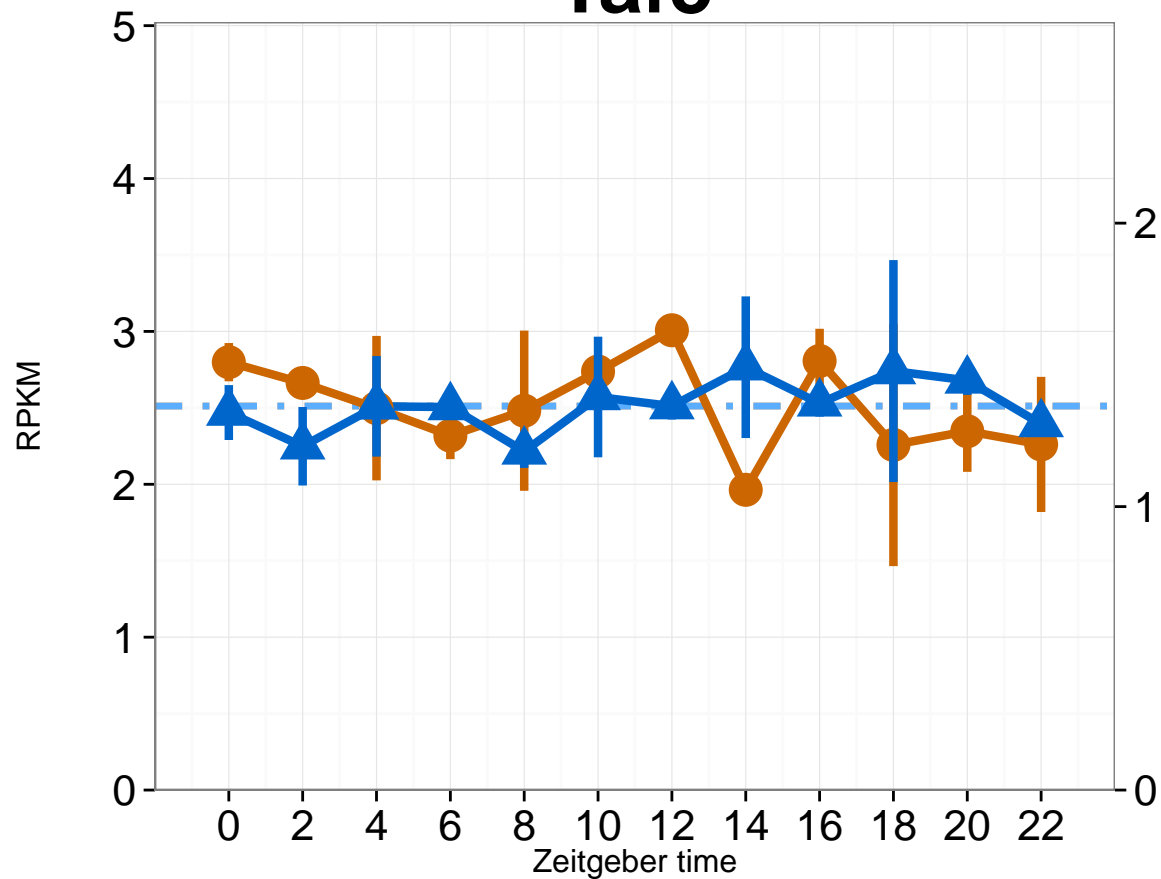

# Taf5

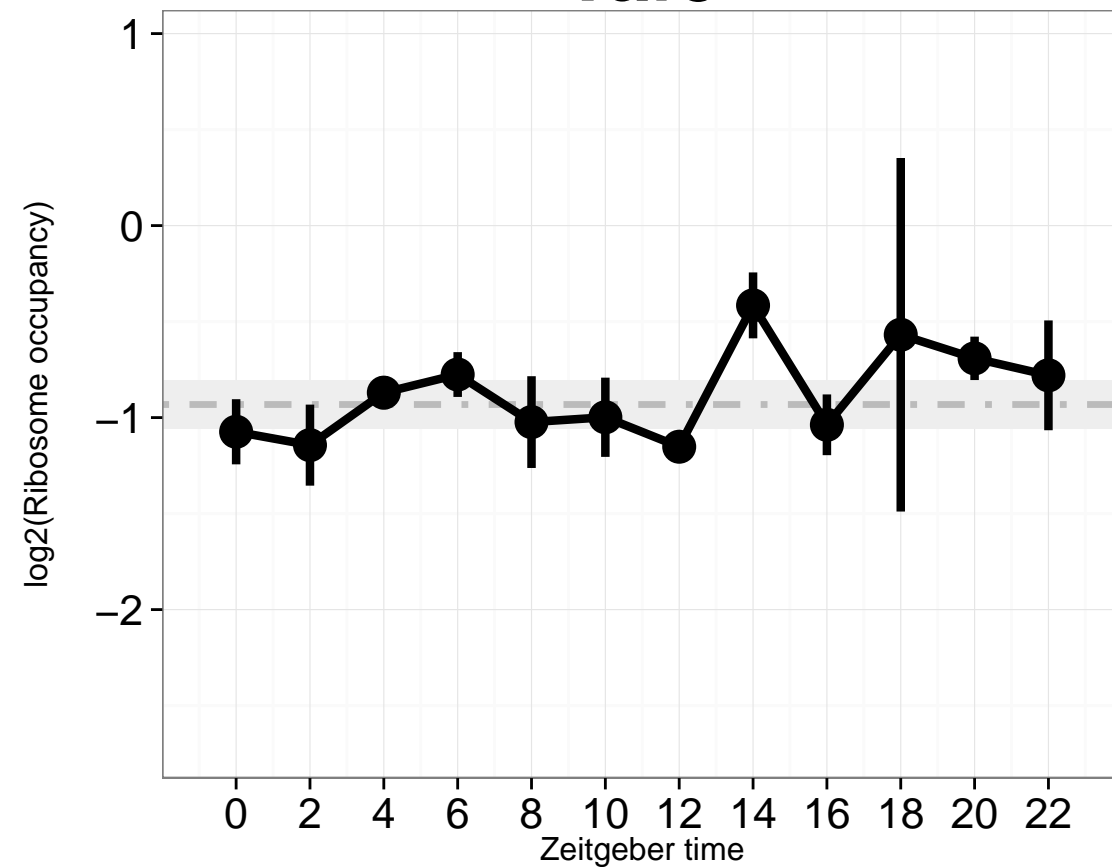

Supplement: SuppDataset_1.zip [file Taf5_set_A.pdf › Supplemental Dataset 1/A-mRNA_nonrhyth_translation_nonrhyth/Taf5_set_A.pdf]

# Taf6

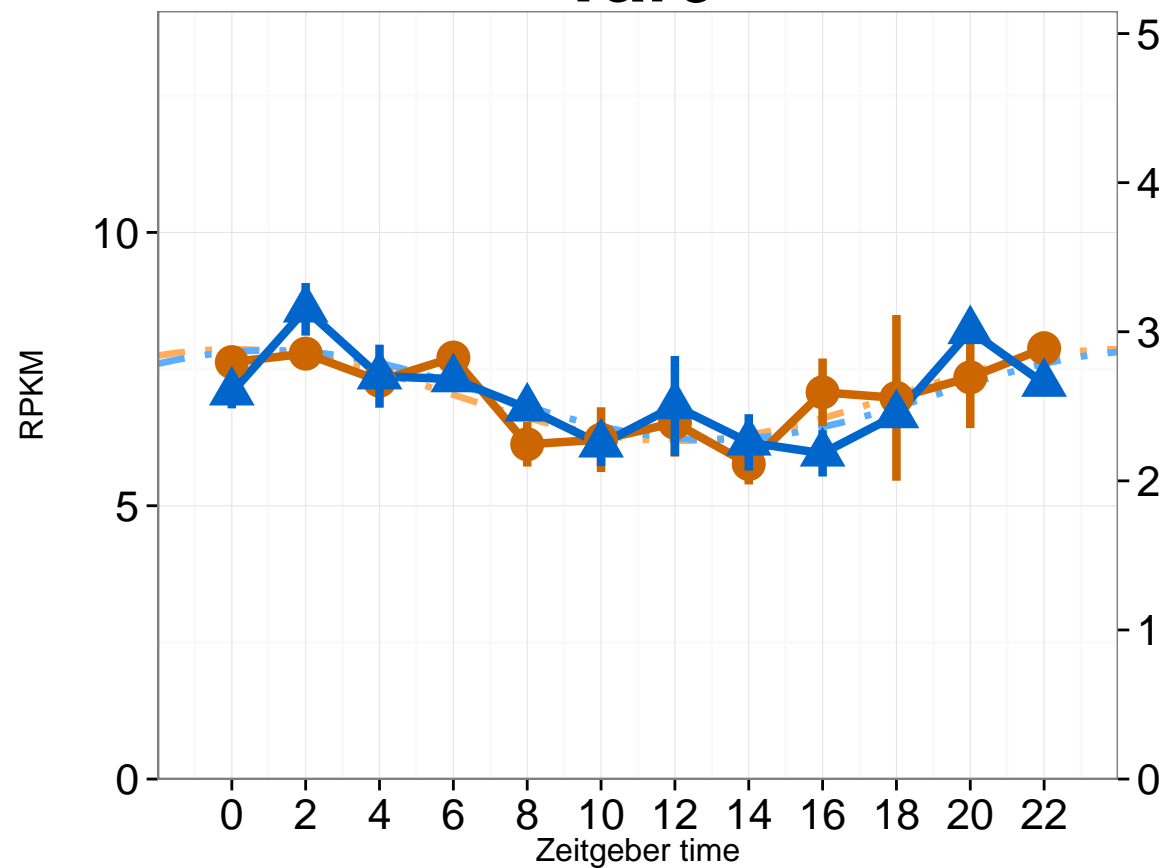

# Taf6

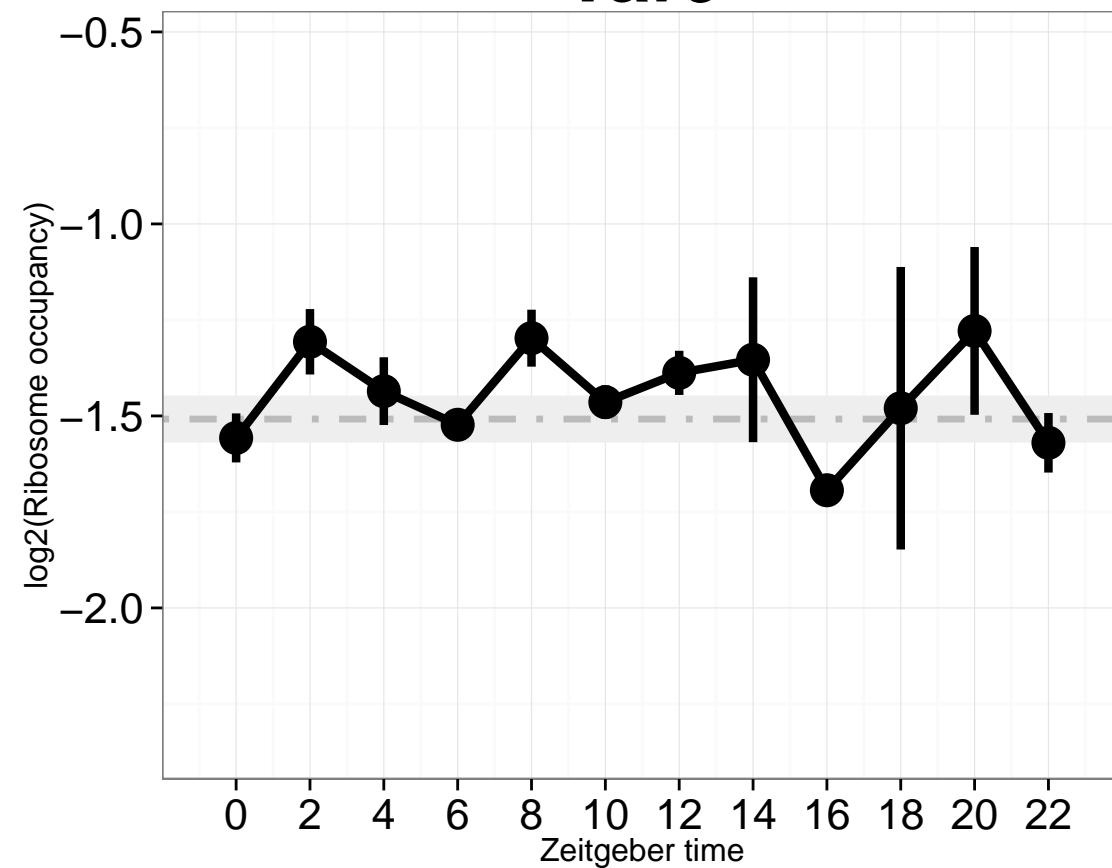

Supplement: SuppDataset_1.zip [file Taf6_set_A.pdf › Supplemental Dataset 1/A-mRNA_nonrhyth_translation_nonrhyth/Taf6_set_A.pdf]

## Taf6l

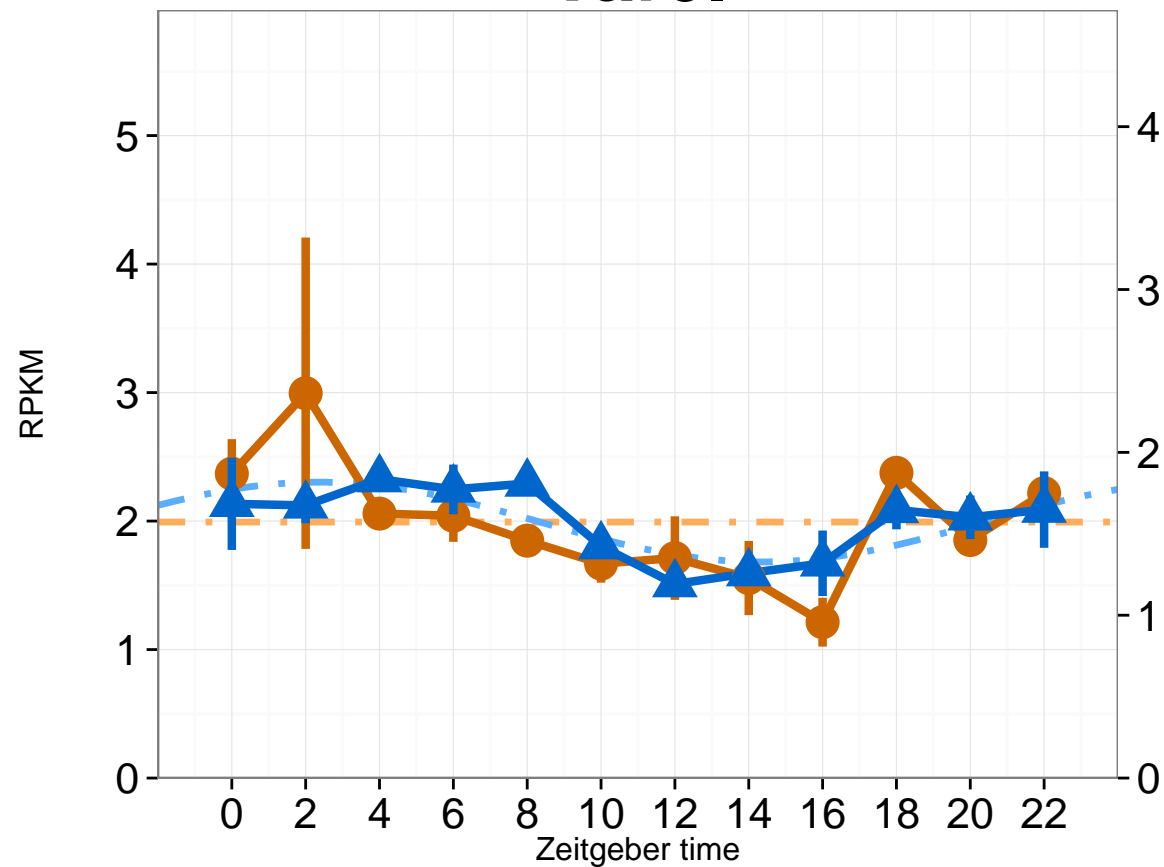

## Taf6l

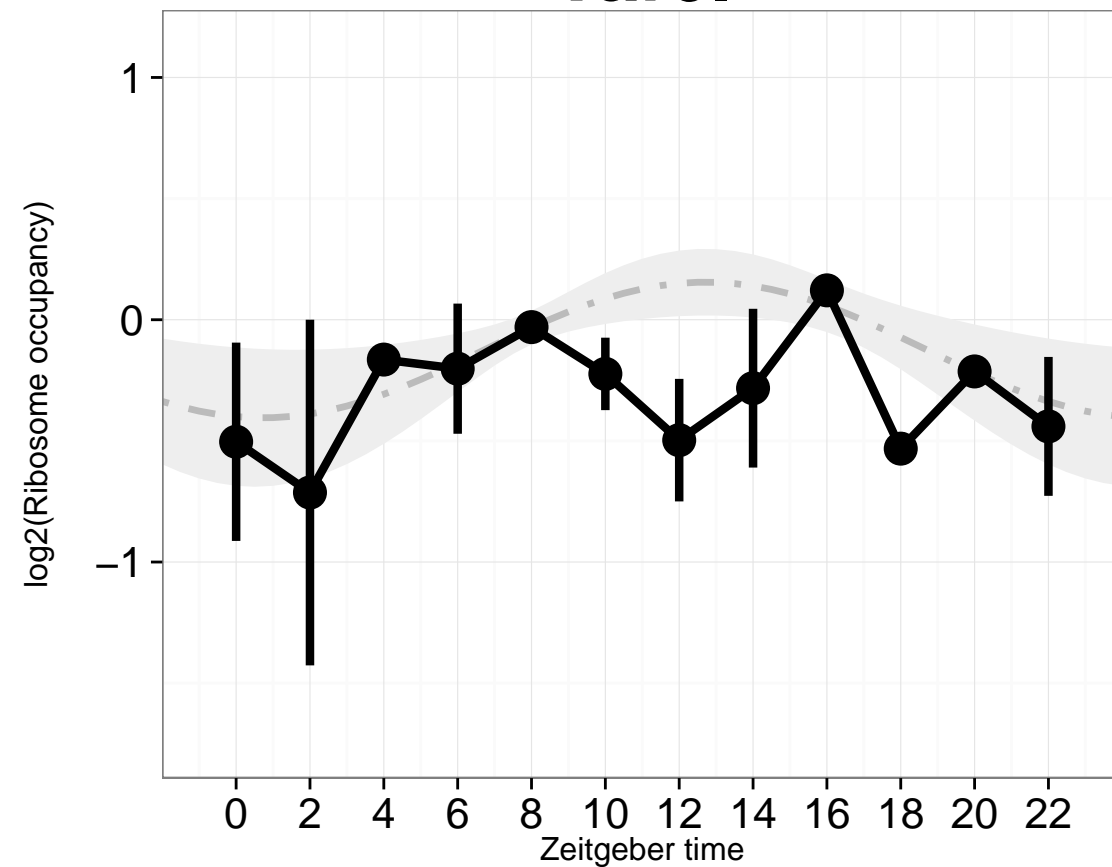

Supplement: SuppDataset_1.zip [file Taf6l_set_A.pdf › Supplemental Dataset 1/A-mRNA_nonrhyth_translation_nonrhyth/Taf6l_set_A.pdf]

## Taf7

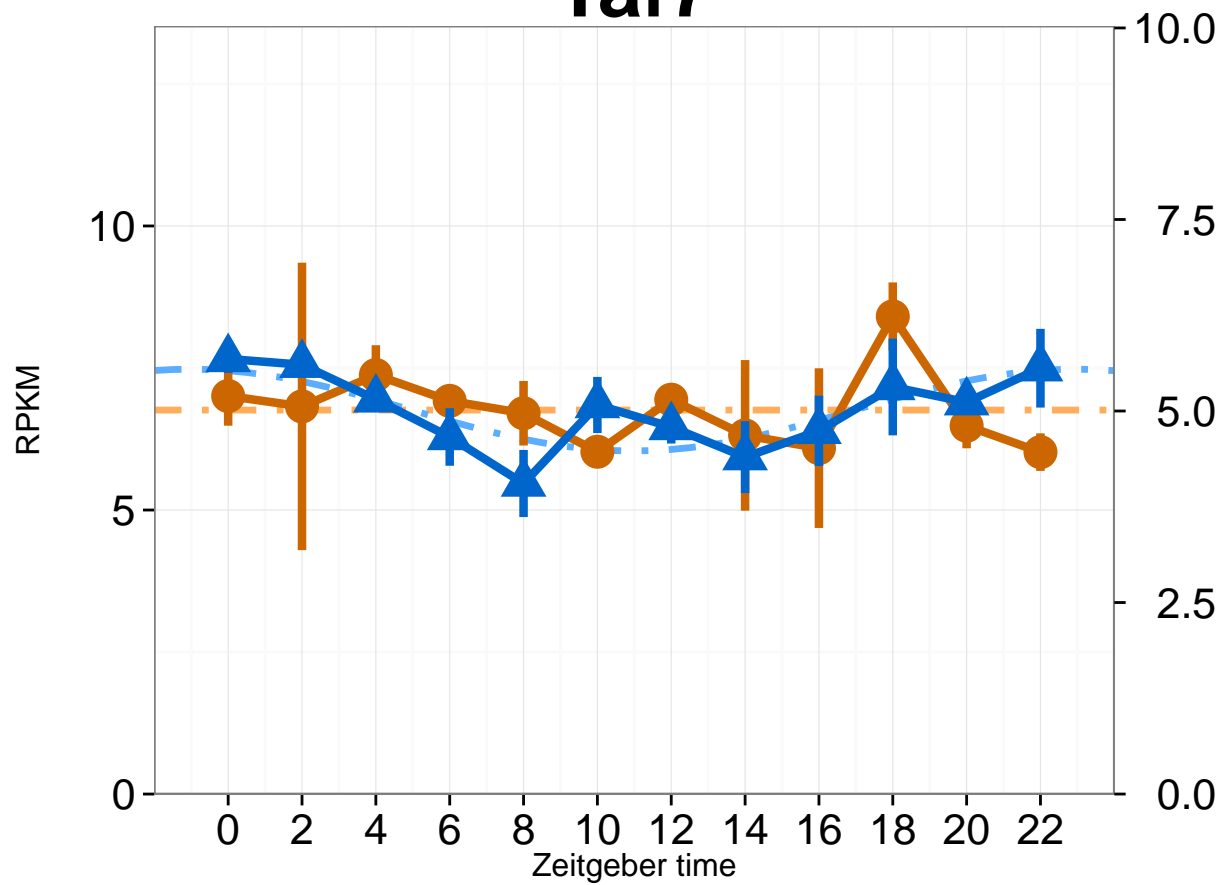

## Taf7

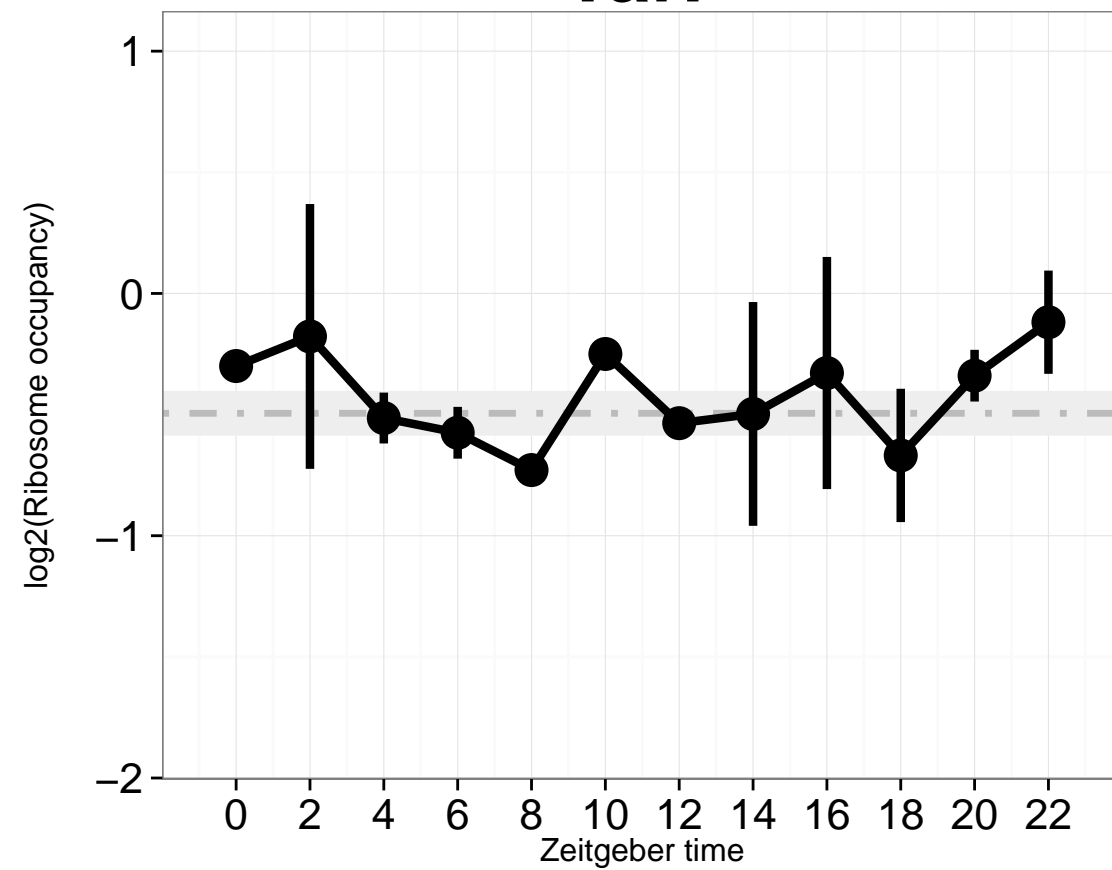

Supplement: SuppDataset_1.zip [file Taf7_set_A.pdf › Supplemental Dataset 1/A-mRNA_nonrhyth_translation_nonrhyth/Taf7_set_A.pdf]

# Taf8

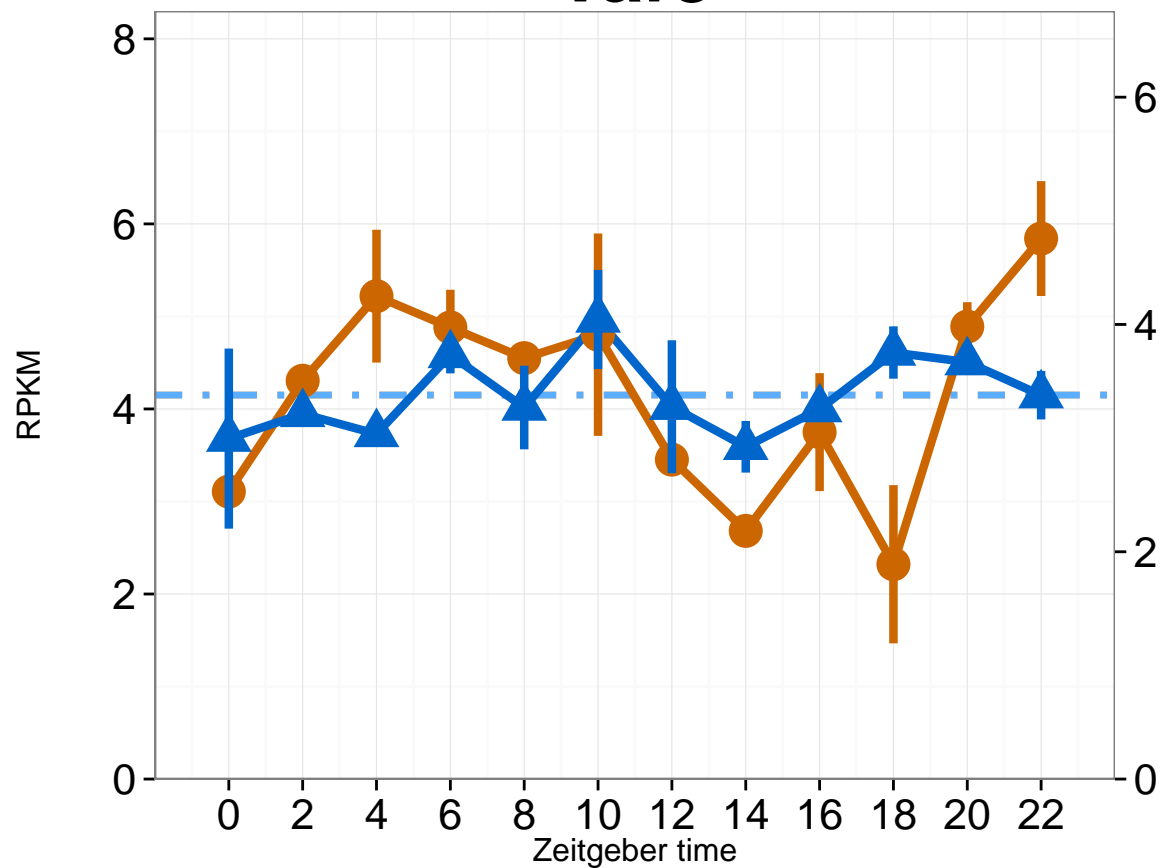

# Taf8

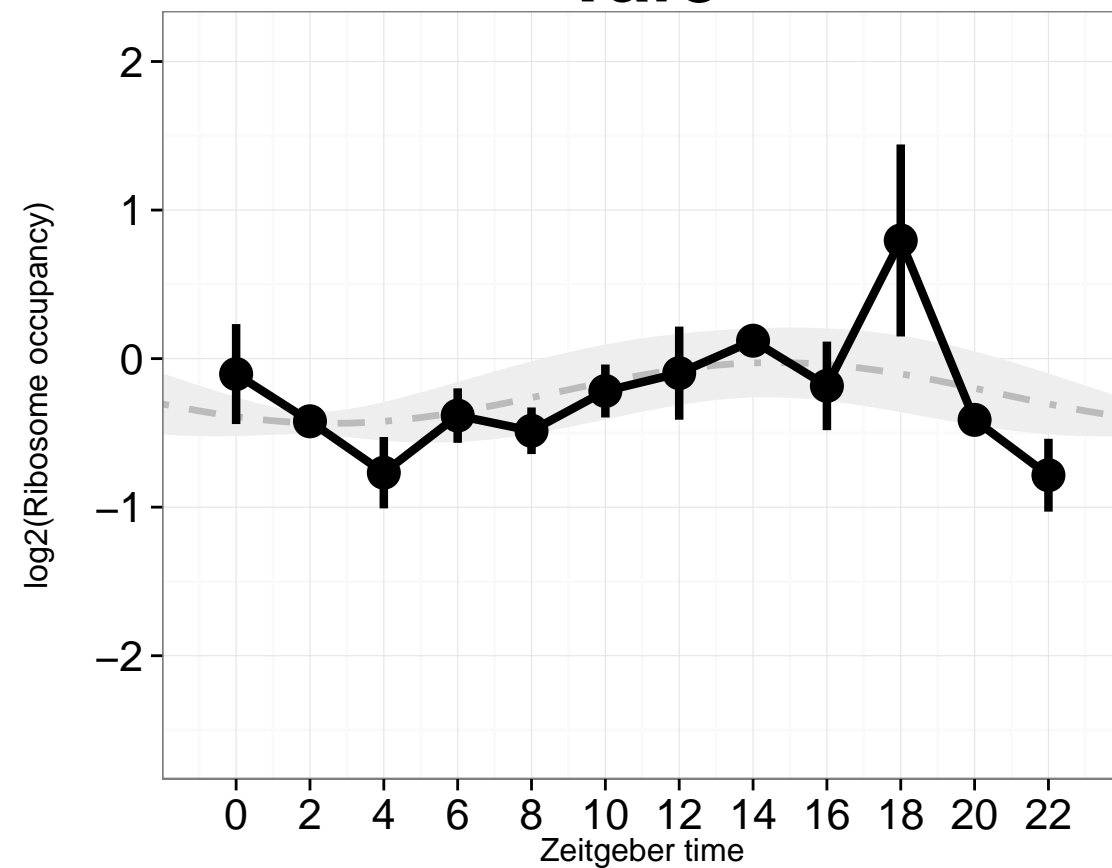

Supplement: SuppDataset_1.zip [file Taf8_set_A.pdf › Supplemental Dataset 1/A-mRNA_nonrhyth_translation_nonrhyth/Taf8_set_A.pdf]

## Taf9

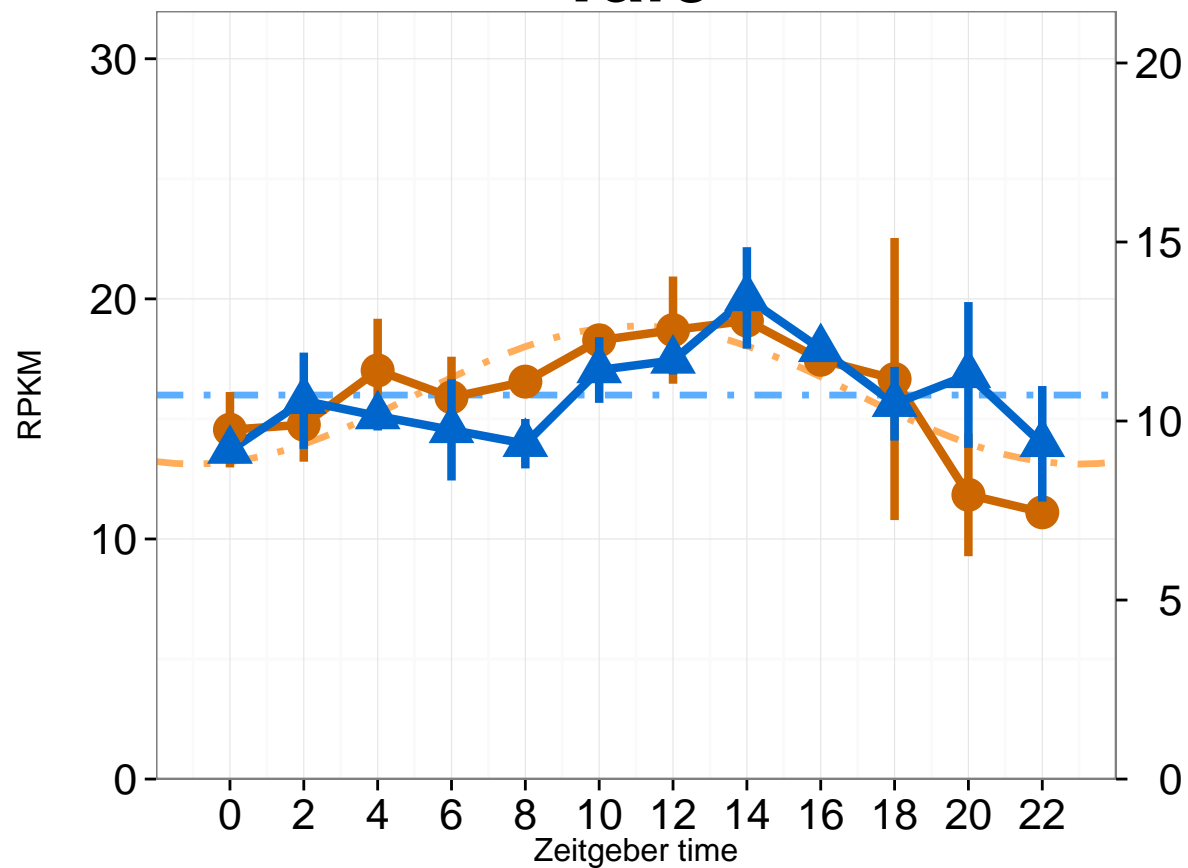

## Taf9

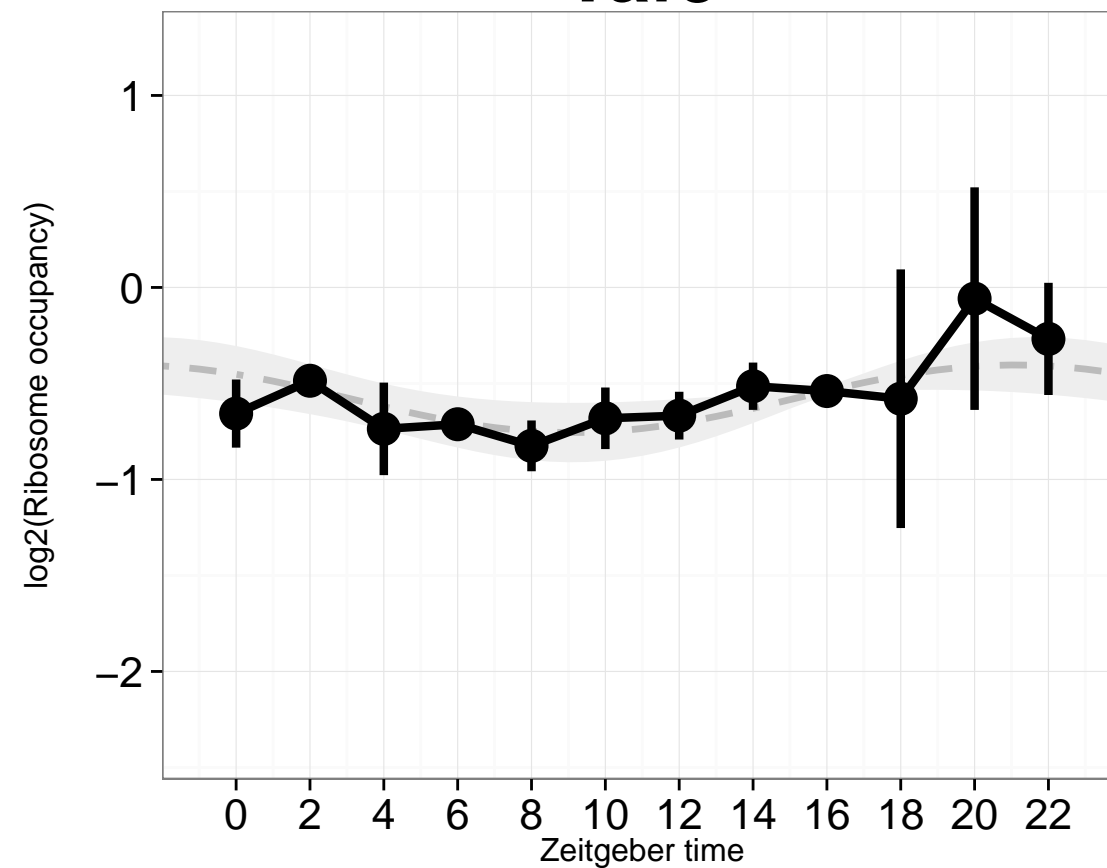

Supplement: SuppDataset_1.zip [file Taf9_set_A.pdf › Supplemental Dataset 1/A-mRNA_nonrhyth_translation_nonrhyth/Taf9_set_A.pdf]

# Tagap1

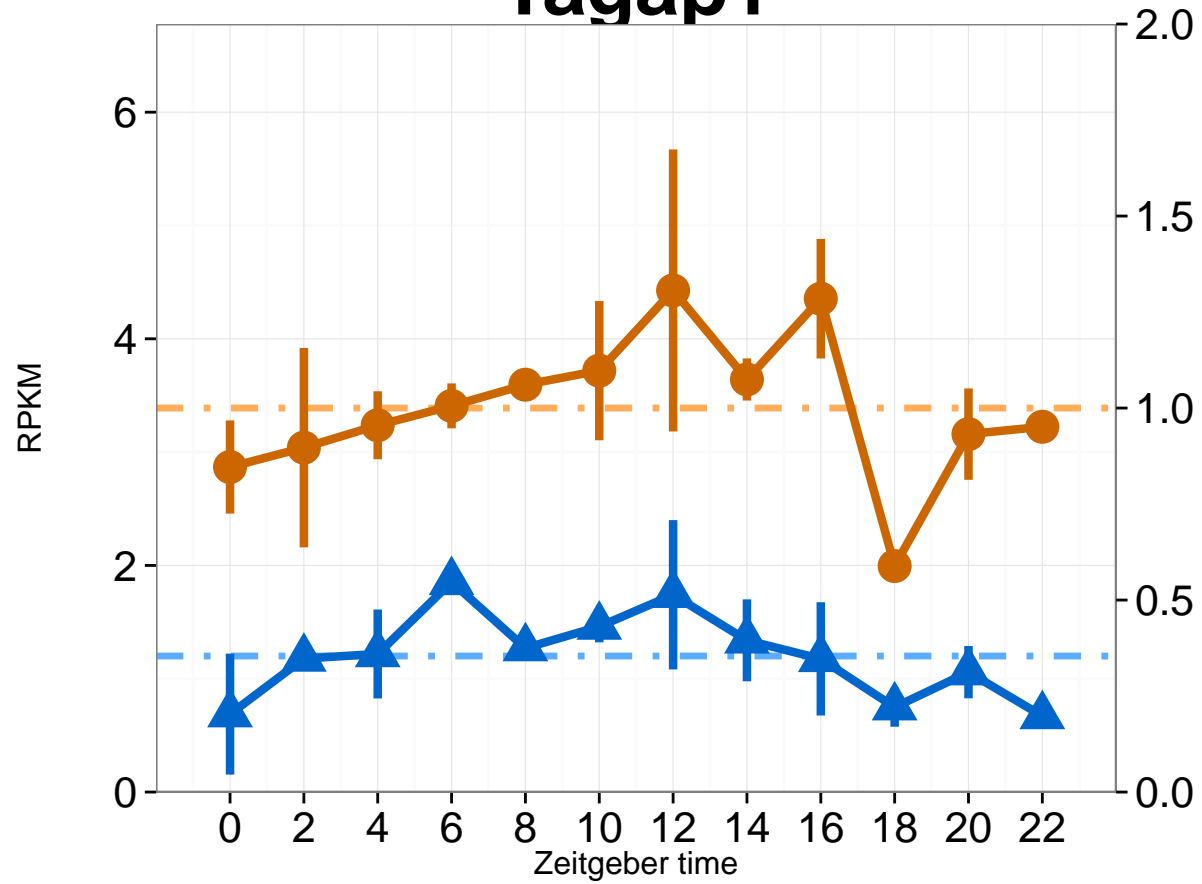

# Tagap1

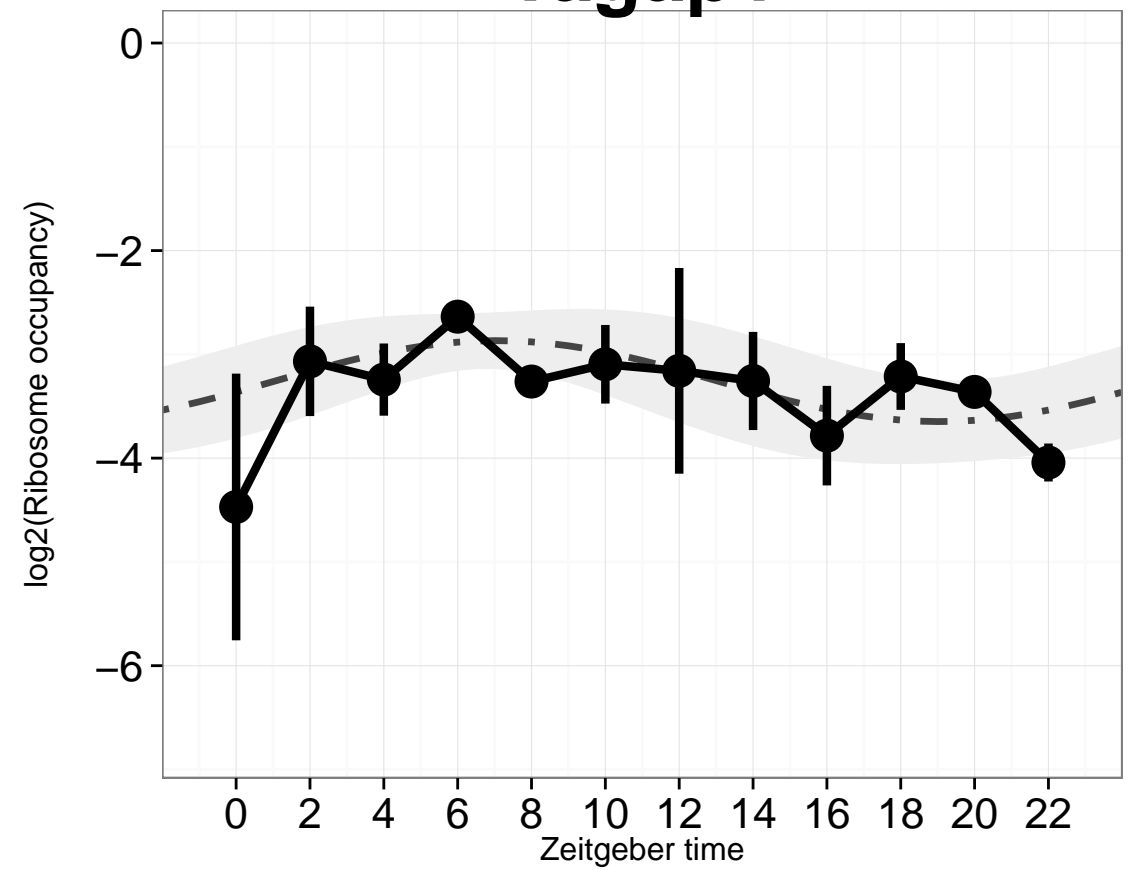

Supplement: SuppDataset_1.zip [file Tagap1_set_A.pdf › Supplemental Dataset 1/A-mRNA_nonrhyth_translation_nonrhyth/Tagap1_set_A.pdf]

# TagIn2

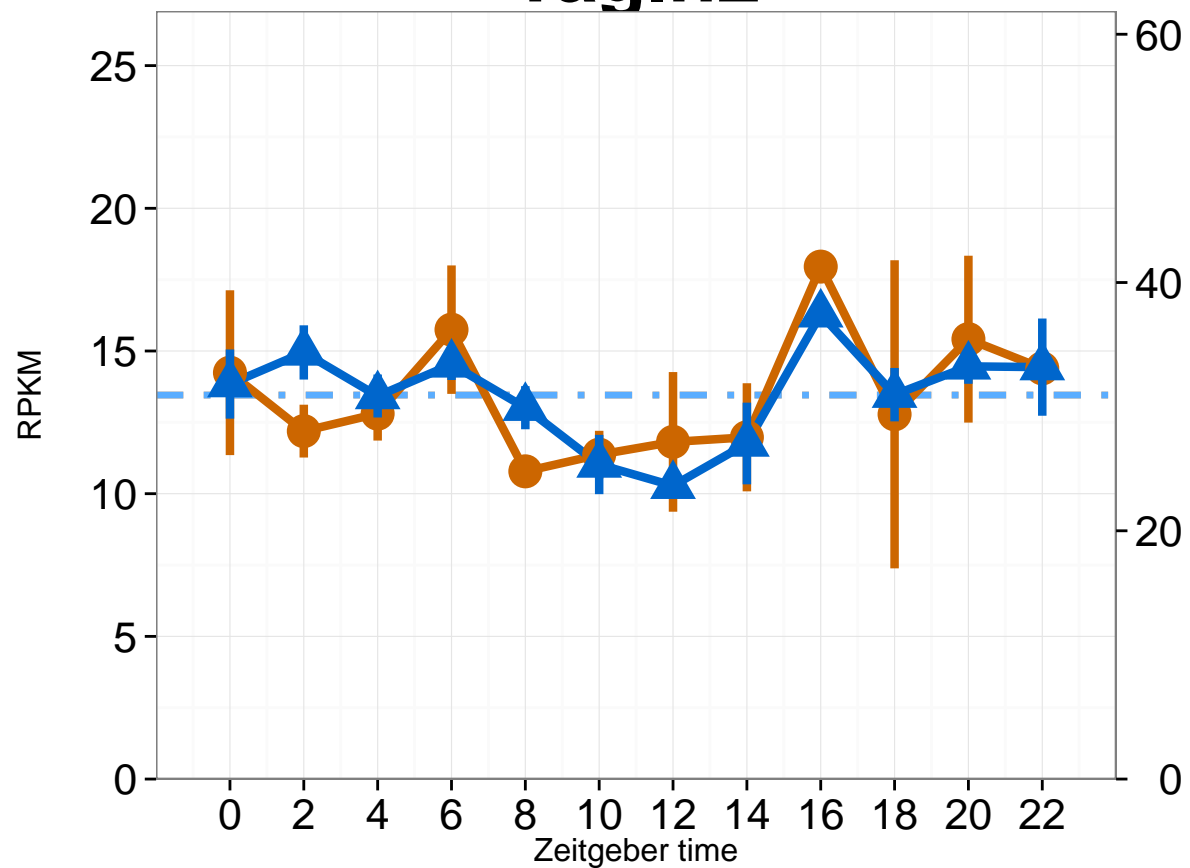

# TagIn2

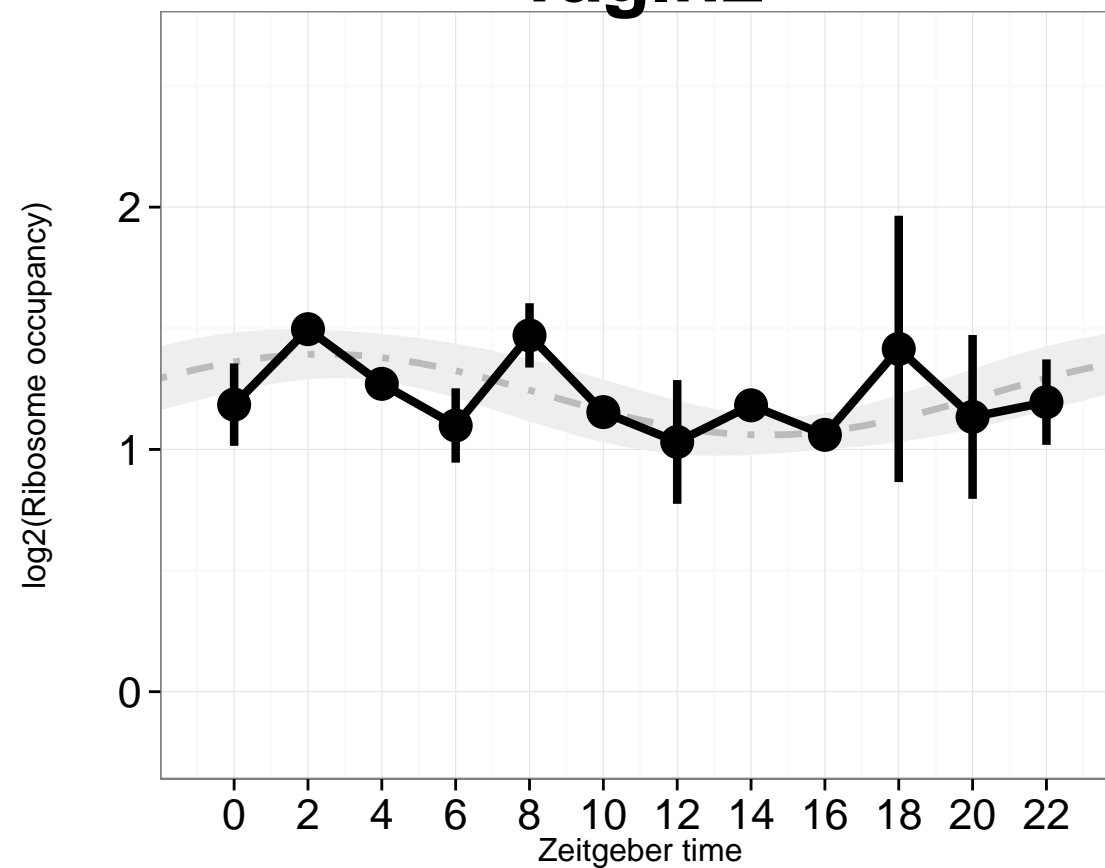

Supplement: SuppDataset_1.zip [file Tagln2_set_A.pdf › Supplemental Dataset 1/A-mRNA_nonrhyth_translation_nonrhyth/Tagln2_set_A.pdf]

## TagIn

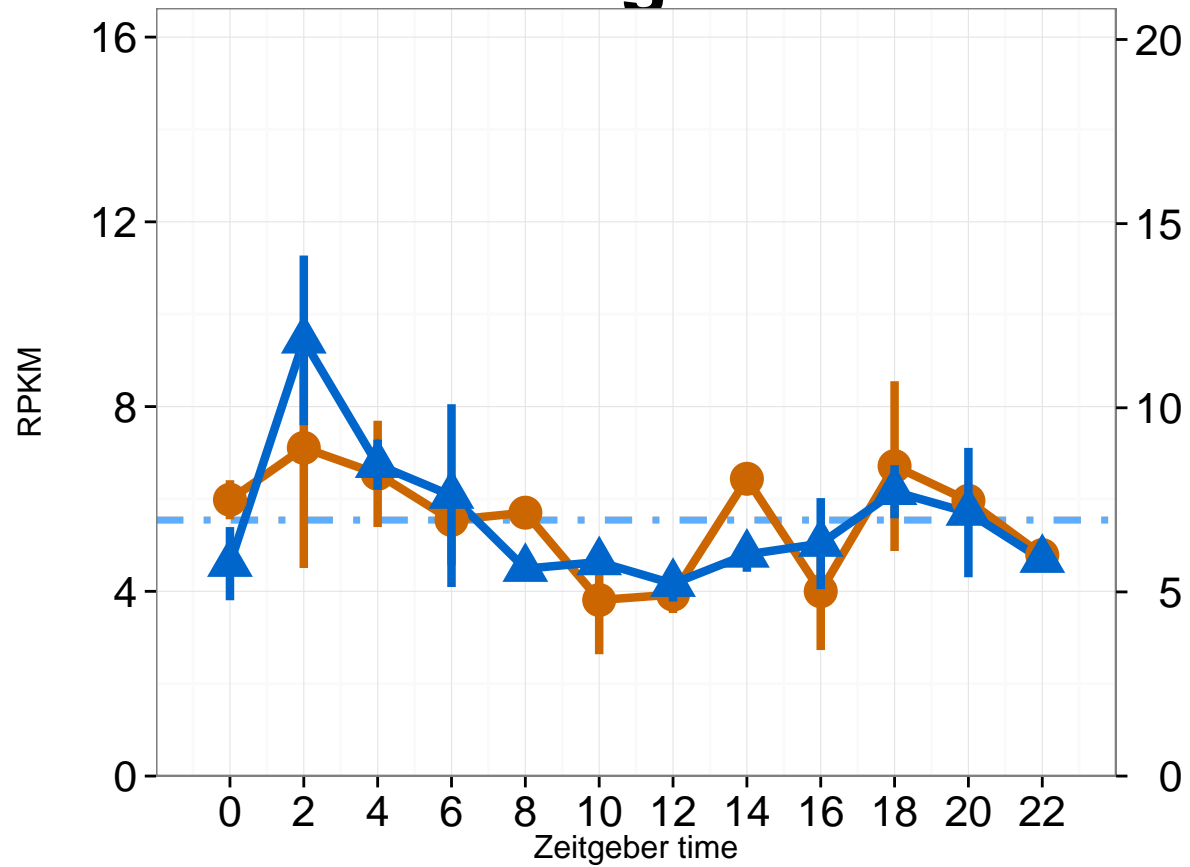

## TagIn

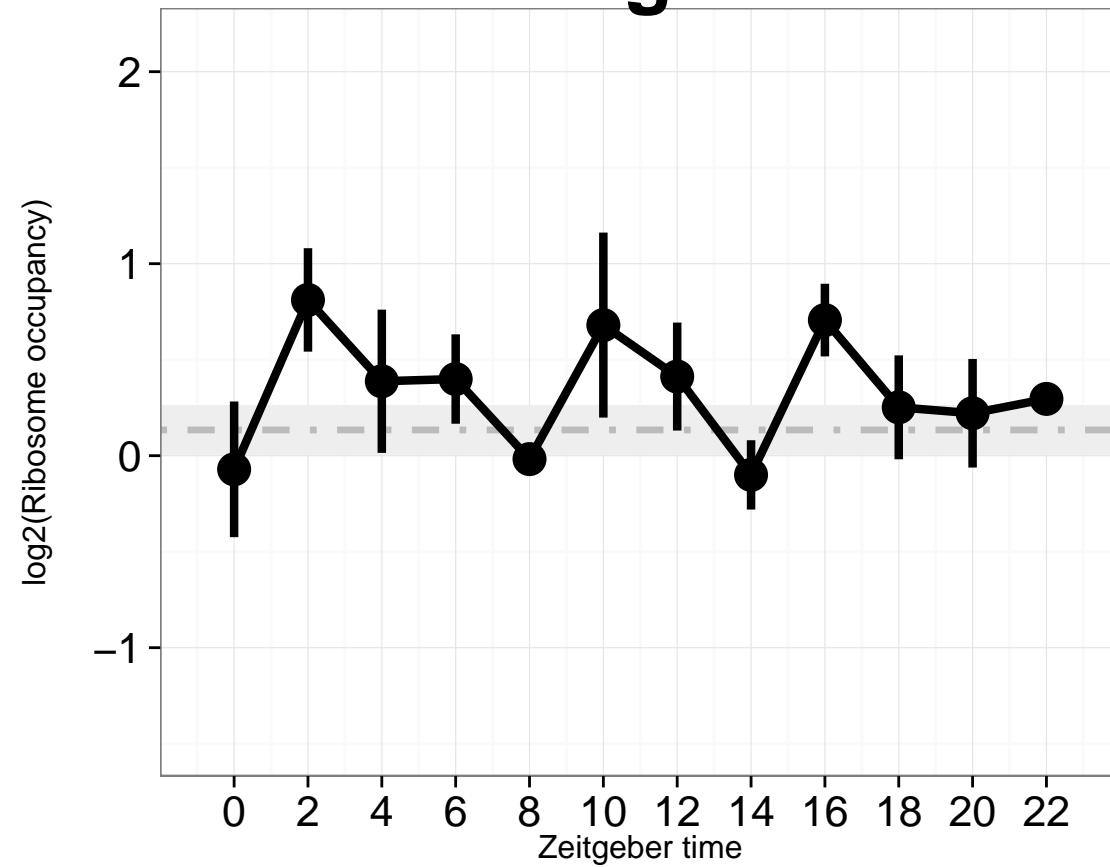

Supplement: SuppDataset_1.zip [file Tagln_set_A.pdf › Supplemental Dataset 1/A-mRNA_nonrhyth_translation_nonrhyth/Tagln_set_A.pdf]

# Taldo1

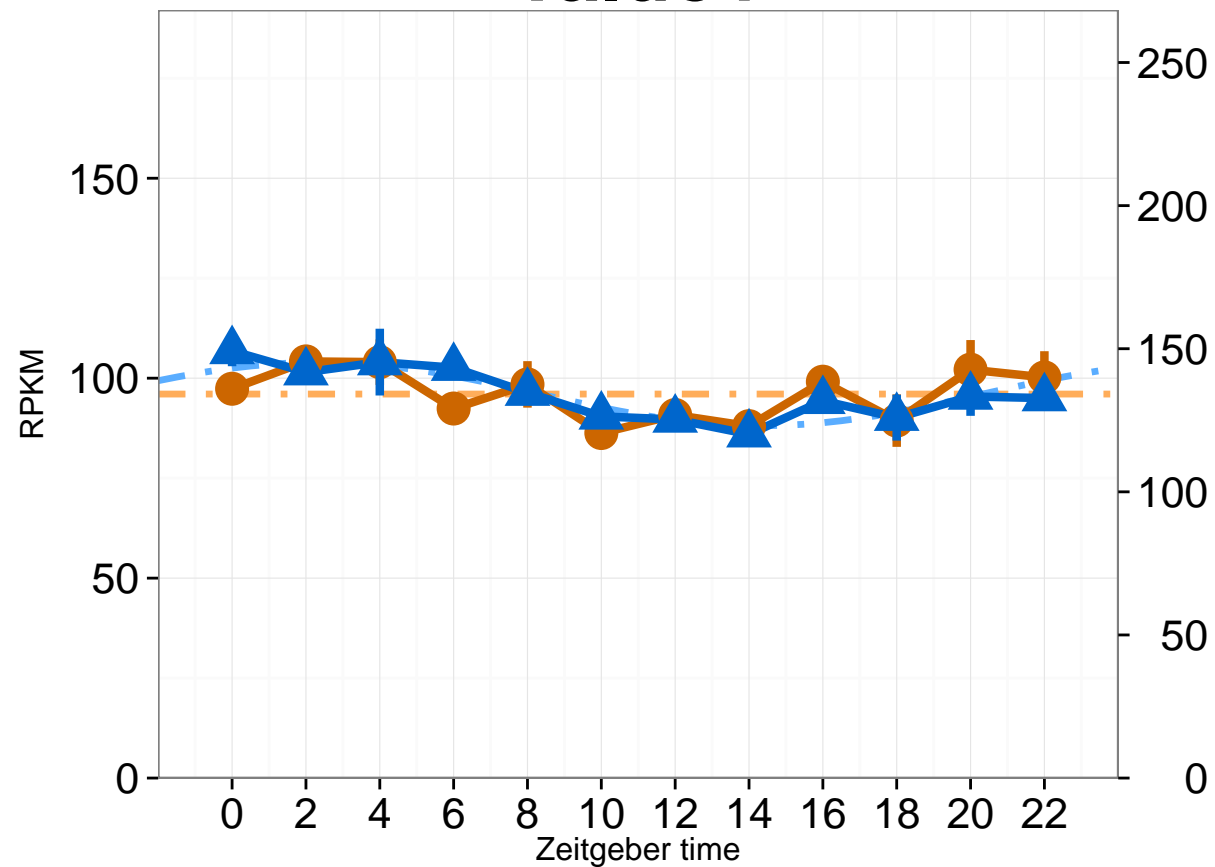

# Taldo1

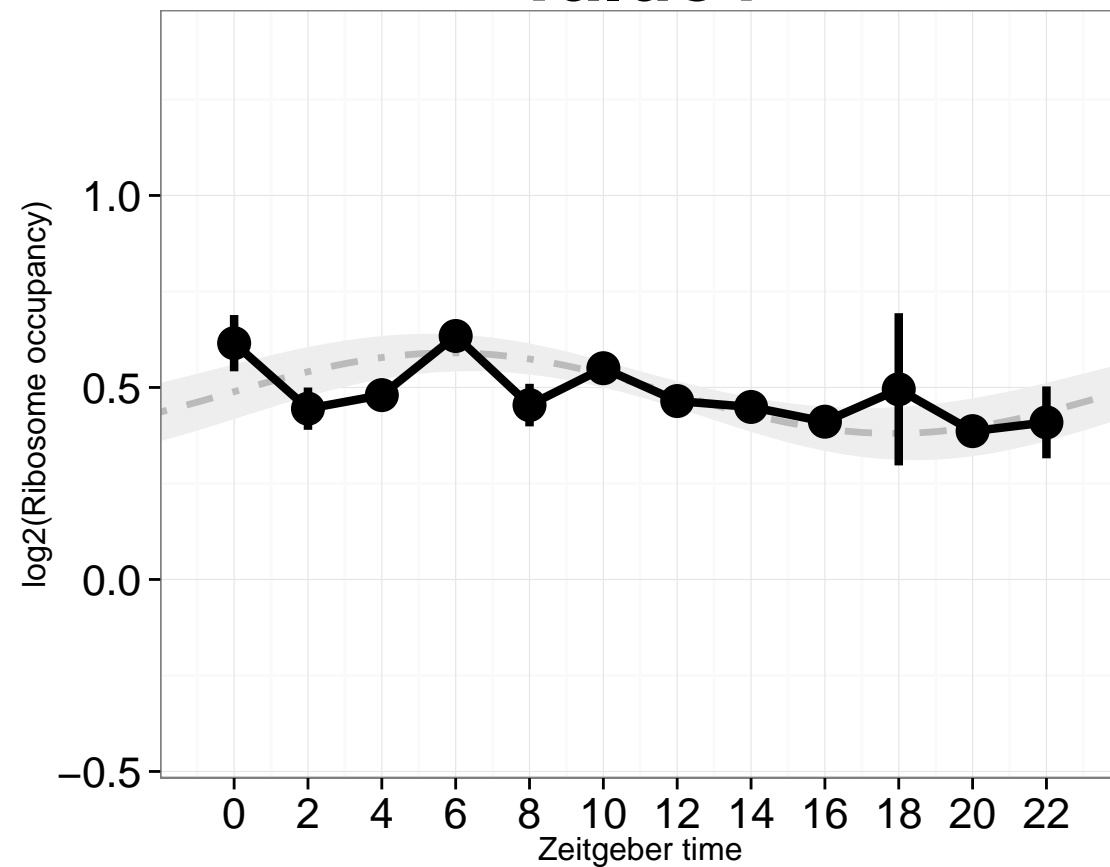

Supplement: SuppDataset_1.zip [file Taldo1_set_A.pdf › Supplemental Dataset 1/A-mRNA_nonrhyth_translation_nonrhyth/Taldo1_set_A.pdf]

# Tamm41

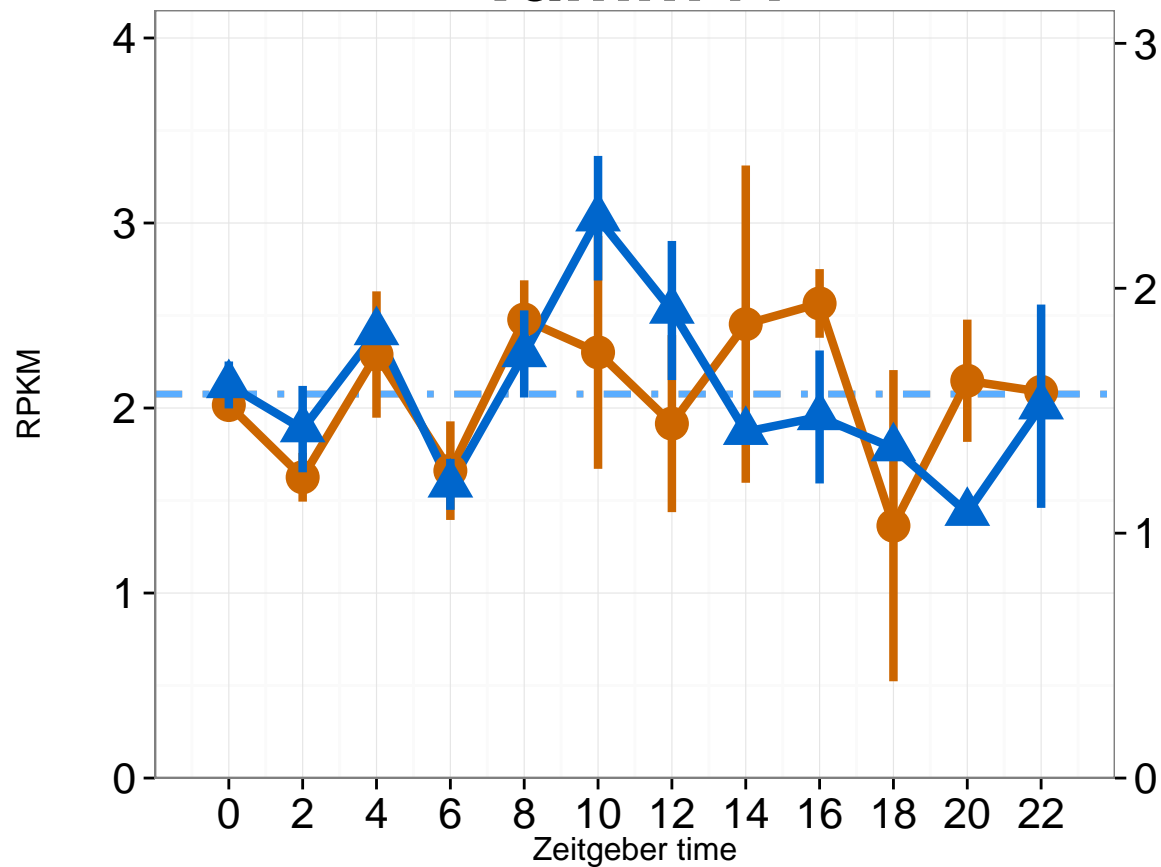

# Tamm41

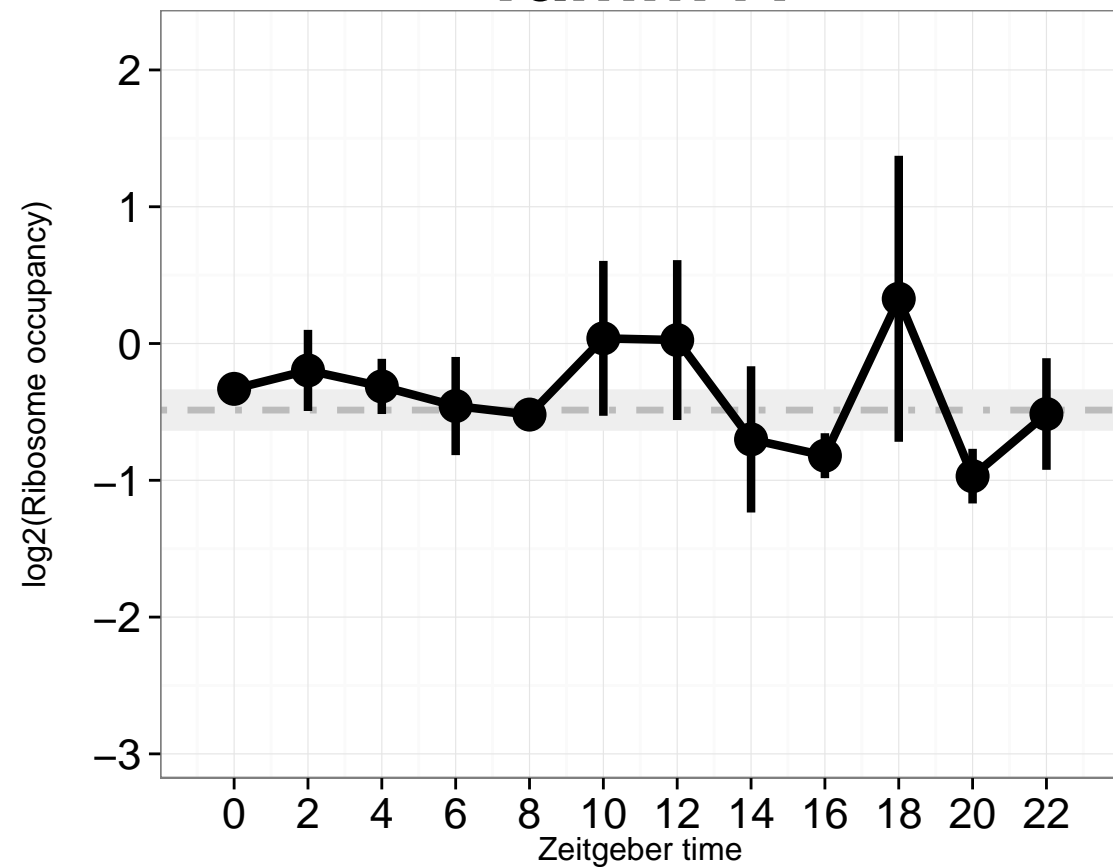

Supplement: SuppDataset_1.zip [file Tamm41_set_A.pdf › Supplemental Dataset 1/A-mRNA_nonrhyth_translation_nonrhyth/Tamm41_set_A.pdf]

# Tanc1

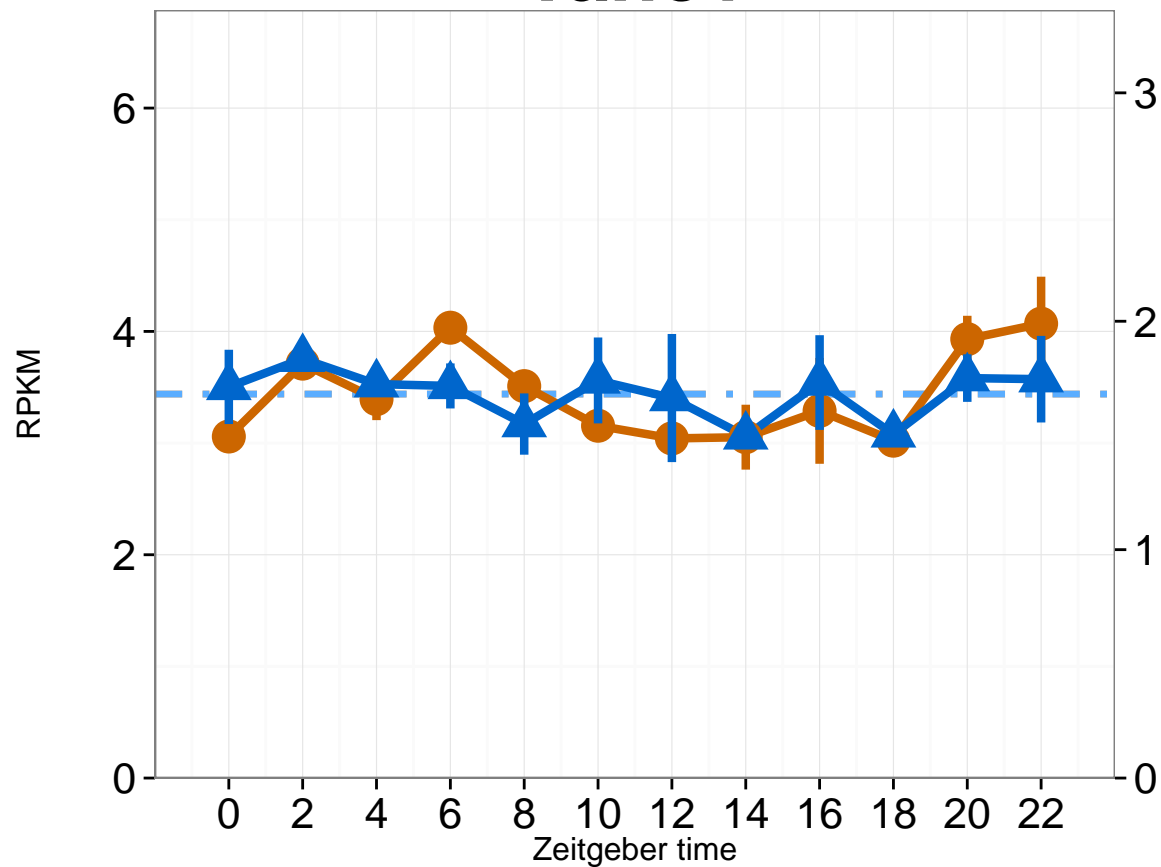

# Tanc1

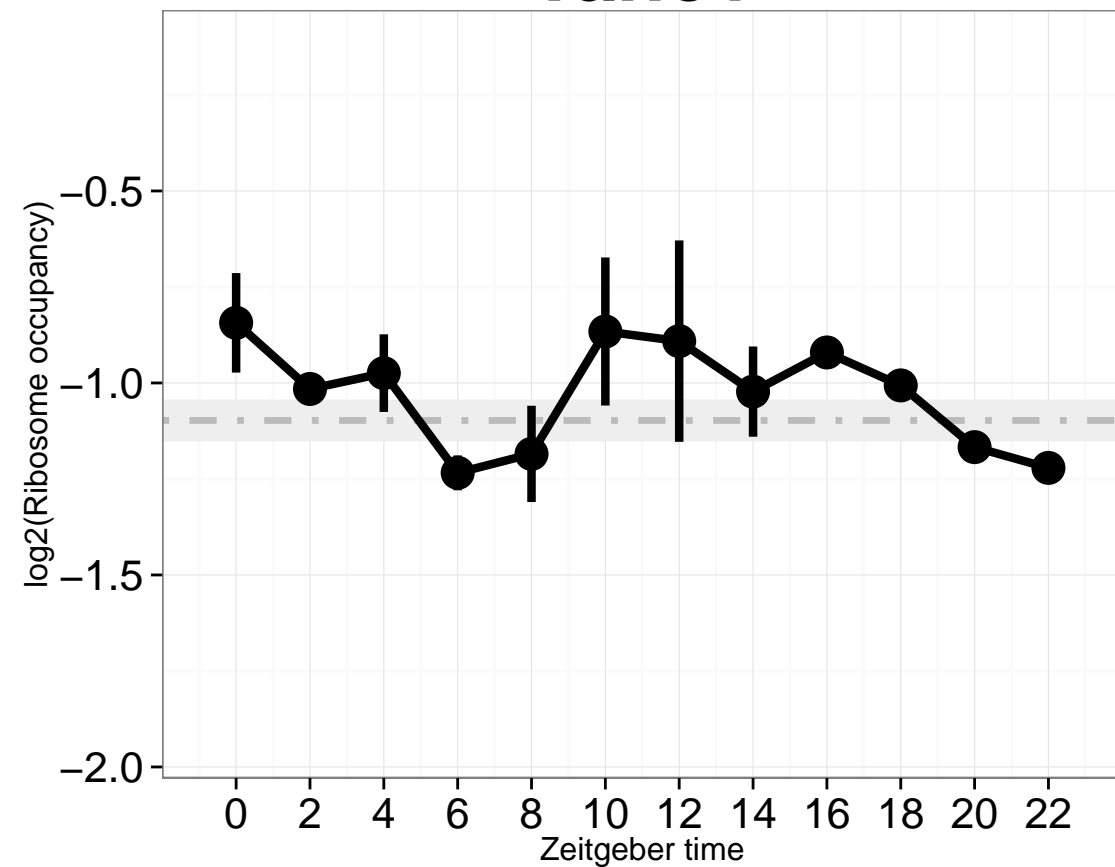

Supplement: SuppDataset_1.zip [file Tanc1_set_A.pdf › Supplemental Dataset 1/A-mRNA_nonrhyth_translation_nonrhyth/Tanc1_set_A.pdf]

# Tanc2

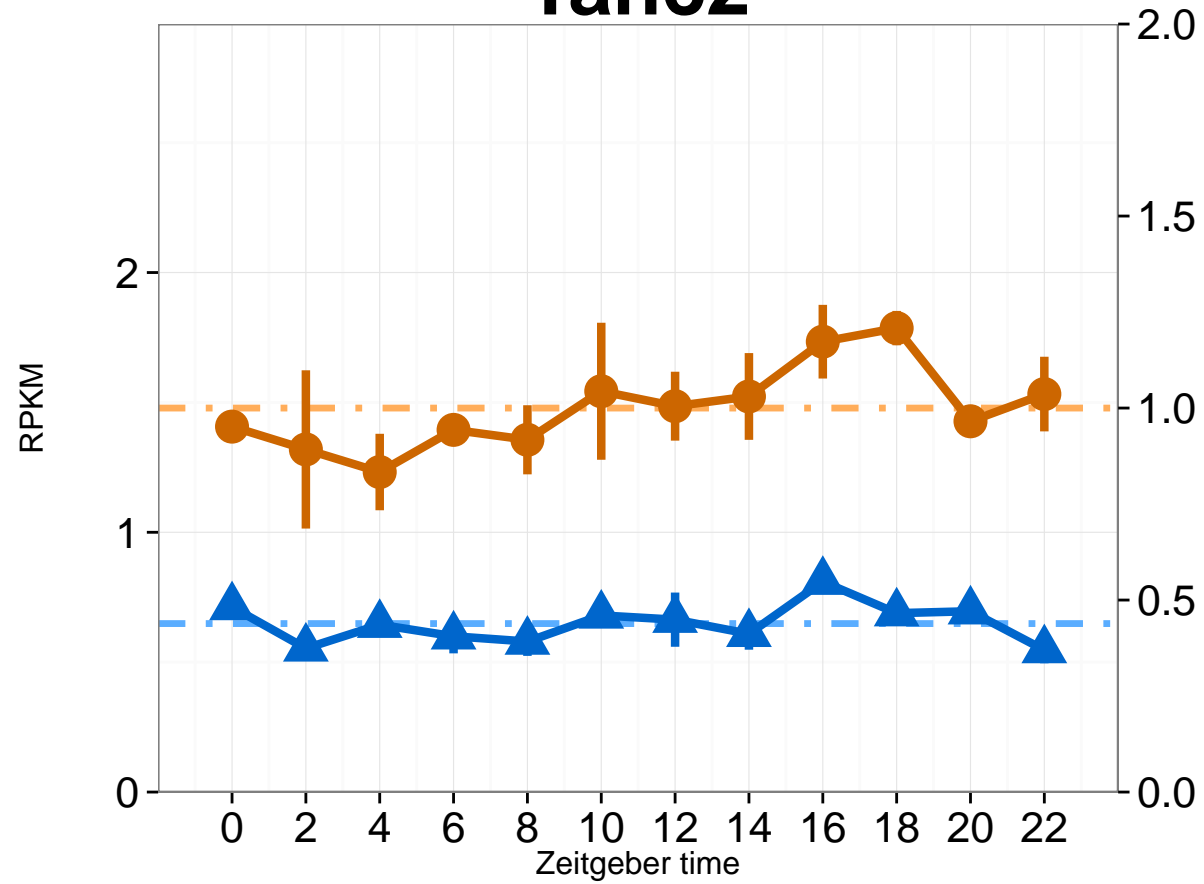

# Tanc2

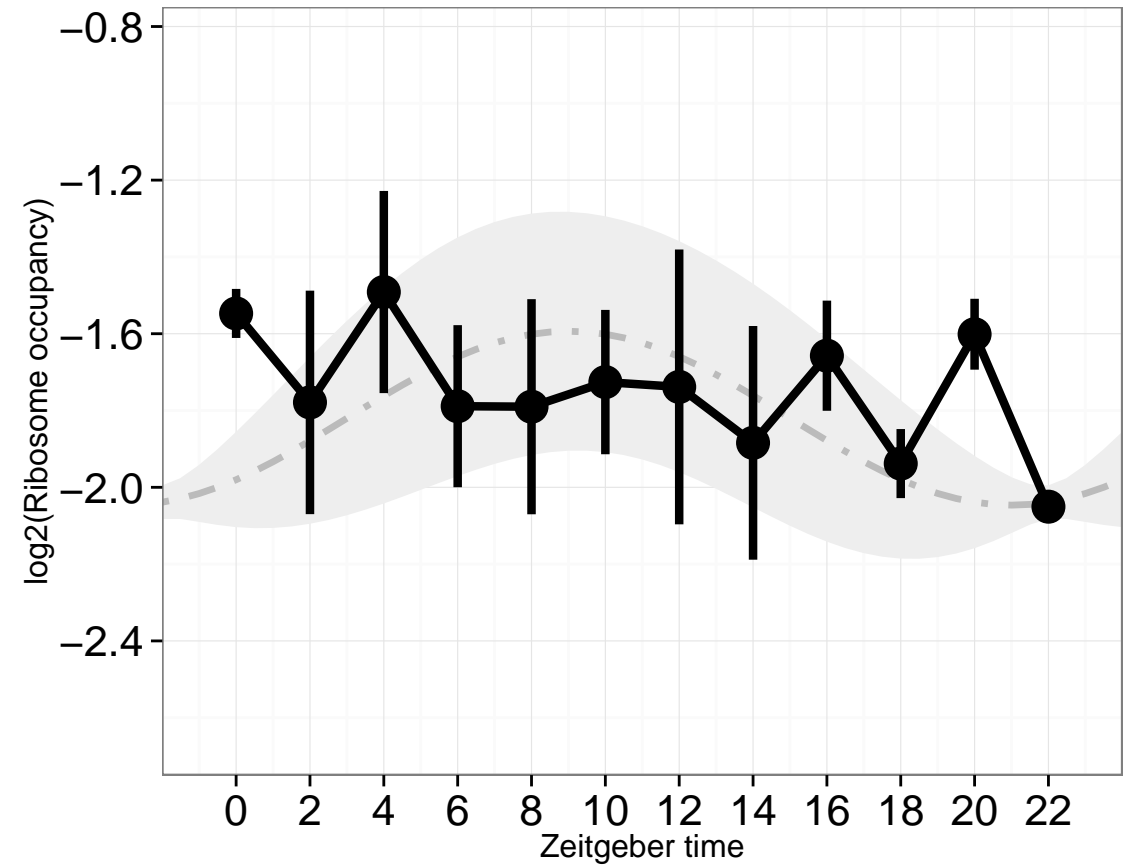

Supplement: SuppDataset_1.zip [file Tanc2_set_A.pdf › Supplemental Dataset 1/A-mRNA_nonrhyth_translation_nonrhyth/Tanc2_set_A.pdf]

# Tango6

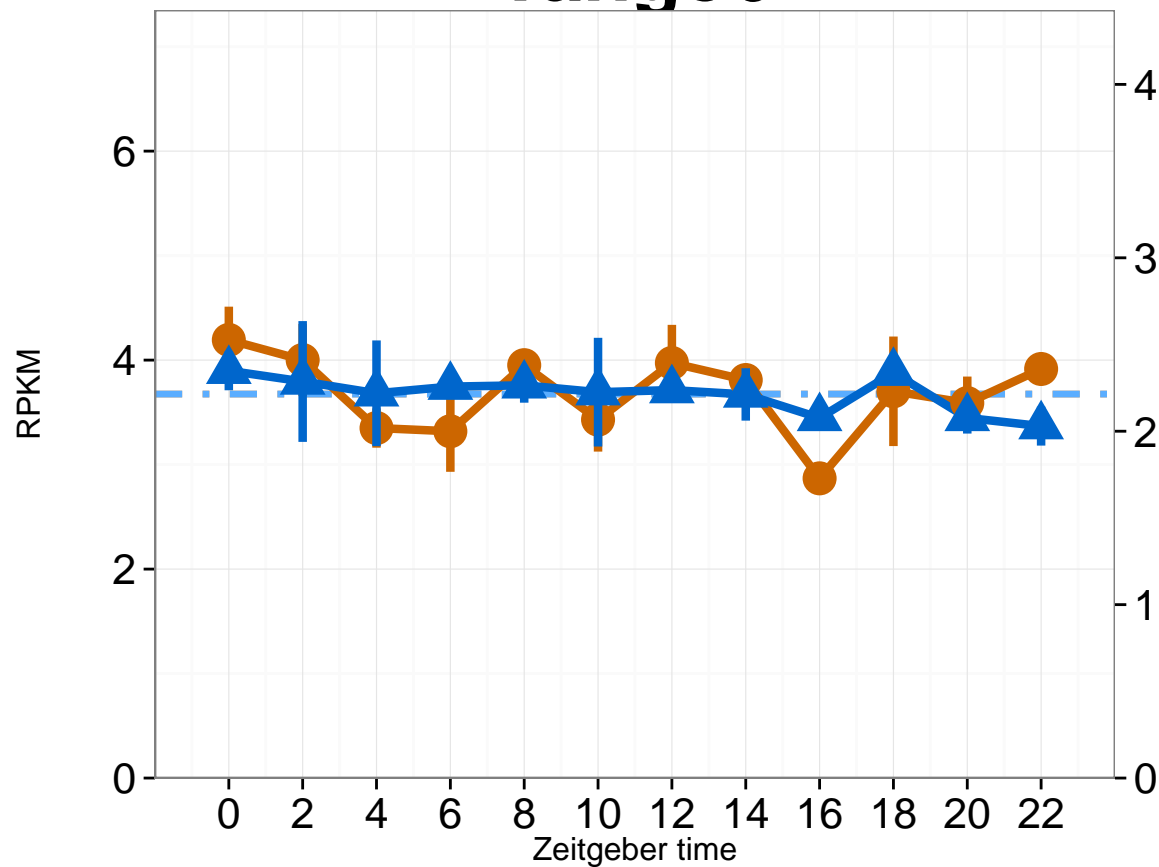

# Tango6

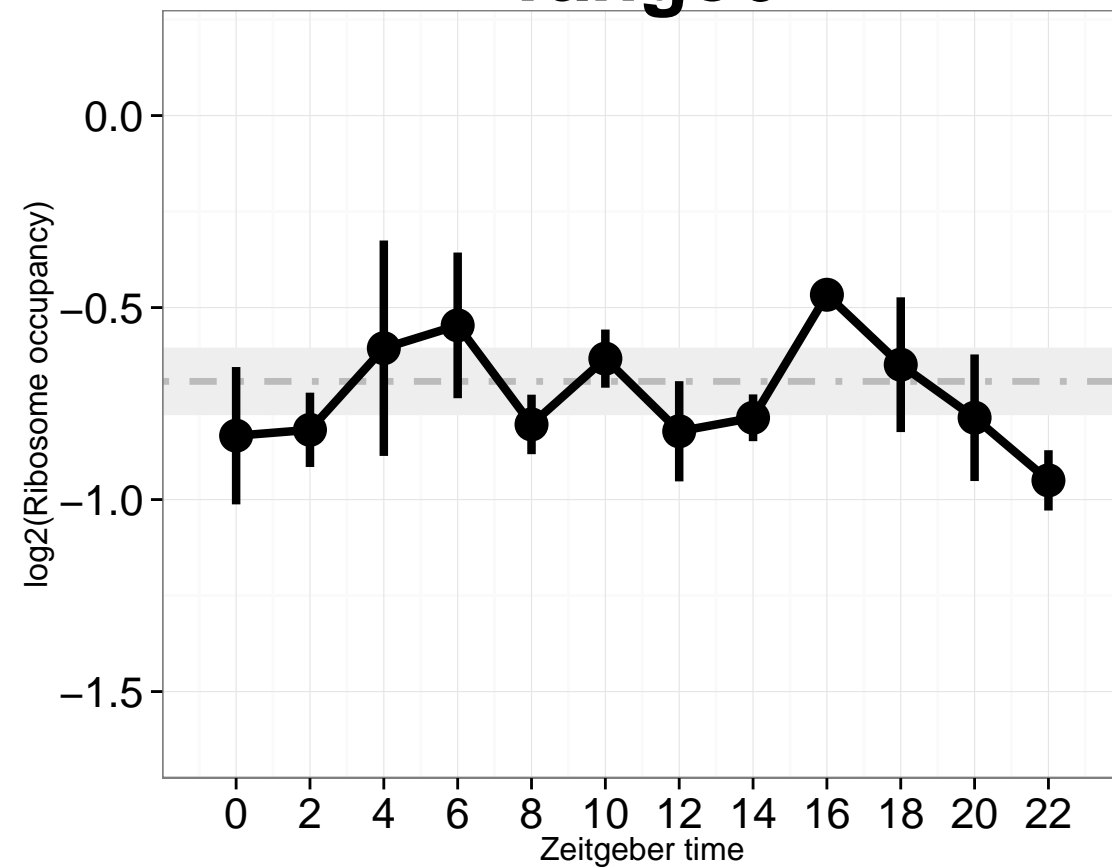

Supplement: SuppDataset_1.zip [file Tango6_set_A.pdf › Supplemental Dataset 1/A-mRNA_nonrhyth_translation_nonrhyth/Tango6_set_A.pdf]

## Tank

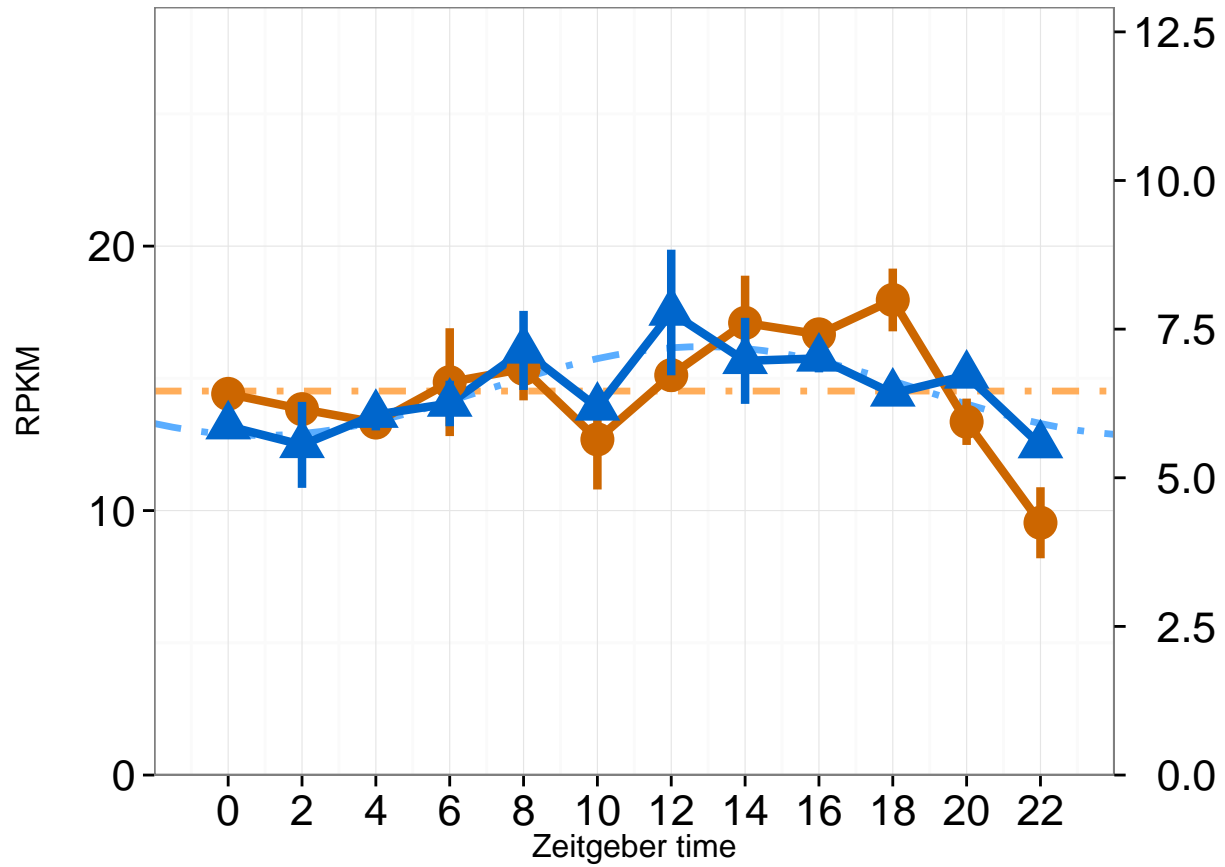

## Tank

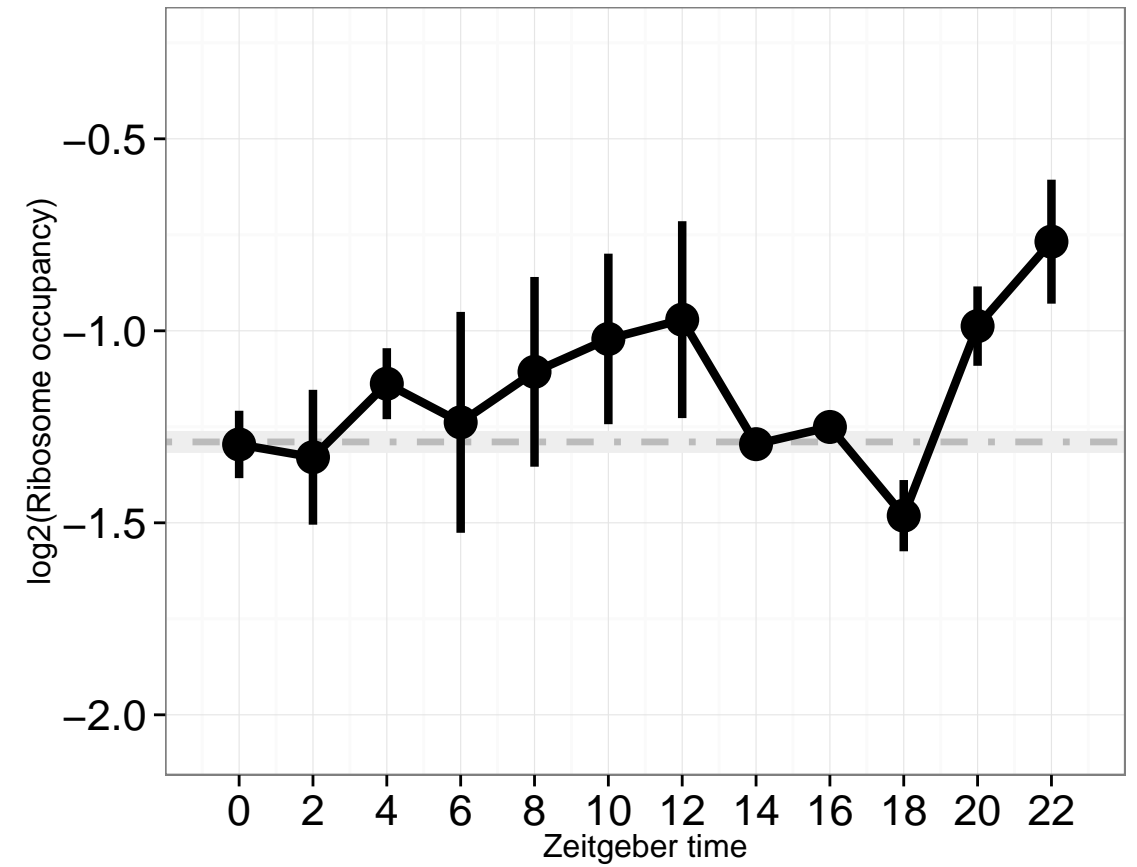

Supplement: SuppDataset_1.zip [file Tank_set_A.pdf › Supplemental Dataset 1/A-mRNA_nonrhyth_translation_nonrhyth/Tank_set_A.pdf]

# Taok1

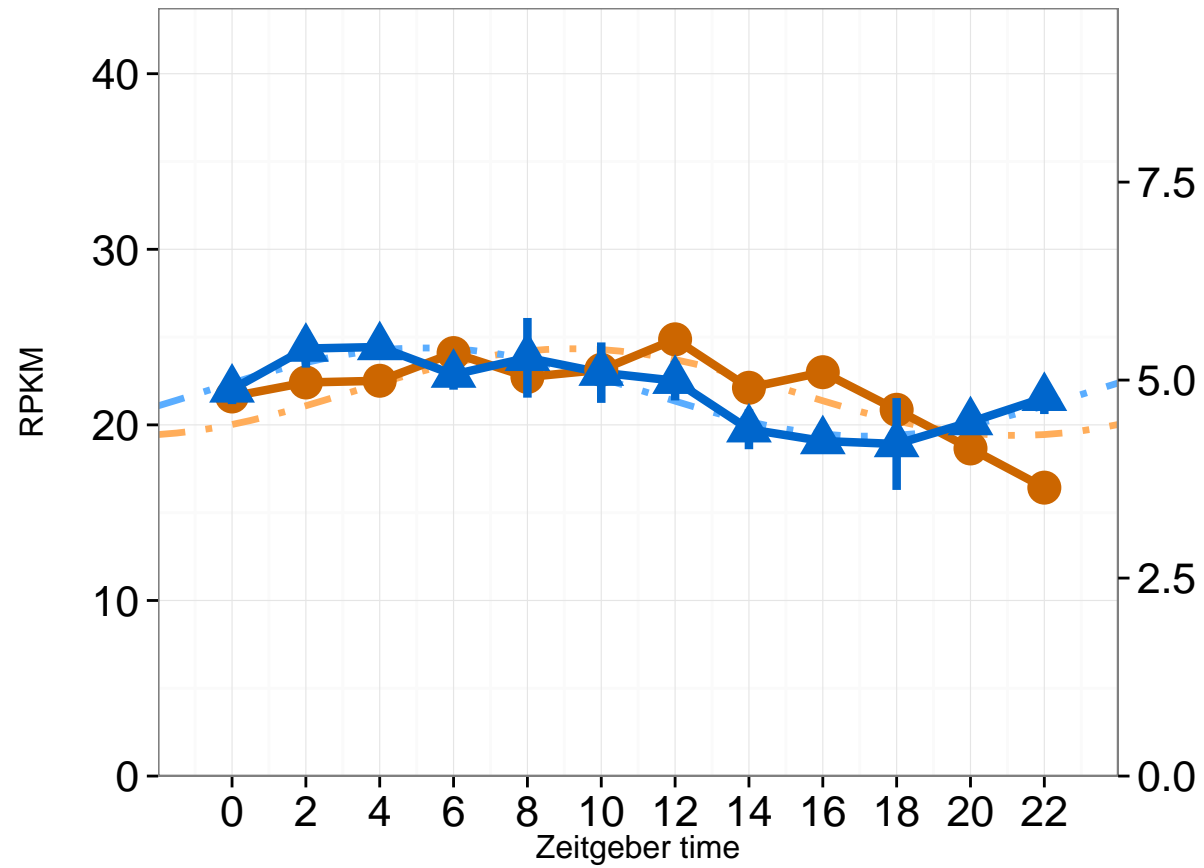

# Taok1

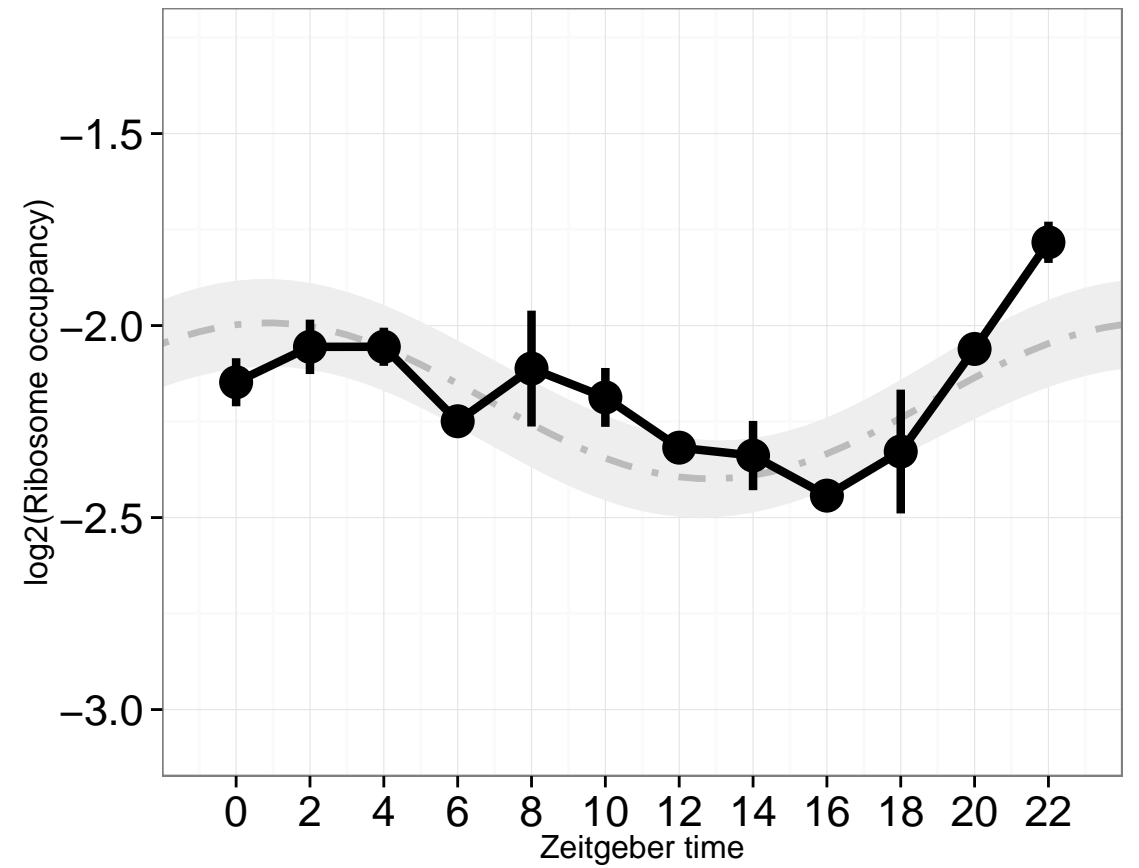

Supplement: SuppDataset_1.zip [file Taok1_set_A.pdf › Supplemental Dataset 1/A-mRNA_nonrhyth_translation_nonrhyth/Taok1_set_A.pdf]
