# Supplementary figures and images for: Ribosome profiling reveals the rhythmic liver translatome and circadian clock regulation by upstream open reading frames (part 112 of 113)
Source: HighWire-hosted journal article supplement (doi:10.1101/gr.195404.115), 2015-10-20

## Suox

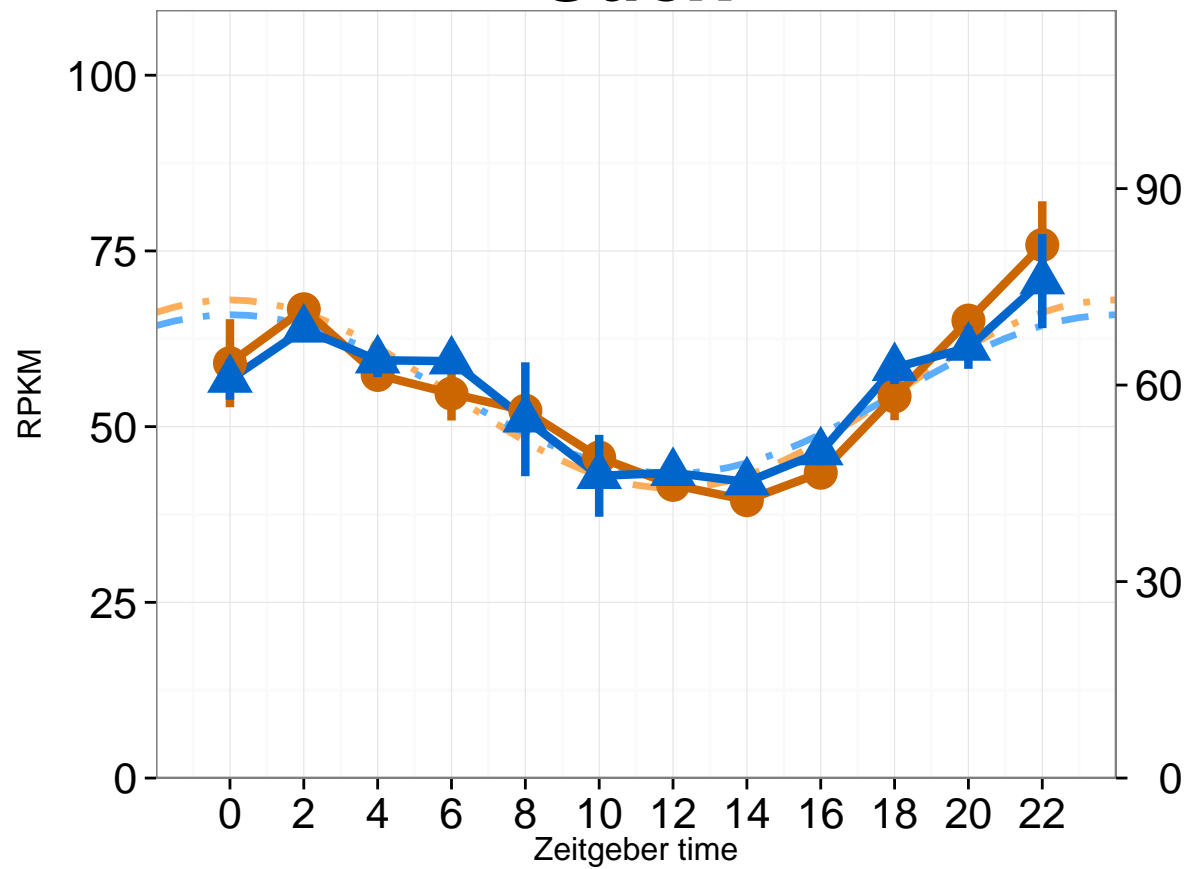

## Suox

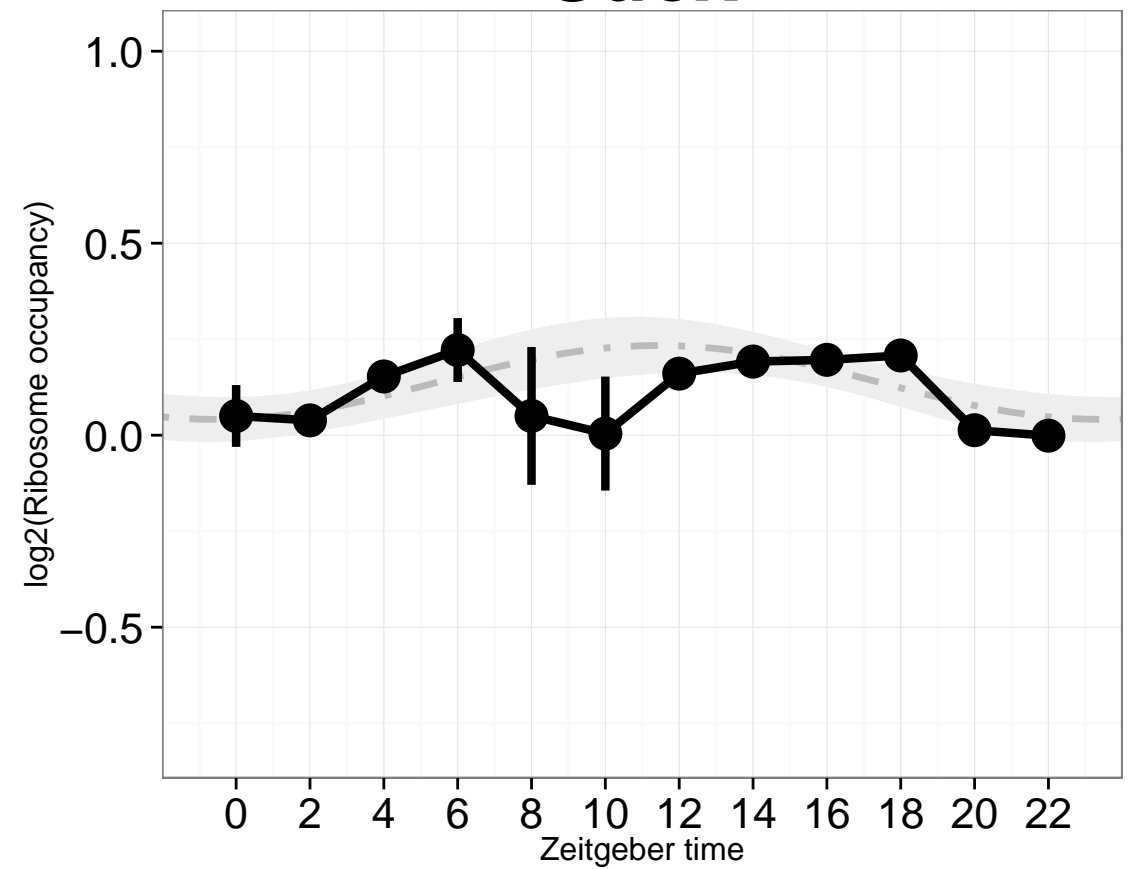

Supplement: SuppDataset_1.zip [file Suox_set_D.pdf › Supplemental Dataset 1/D-mRNA_rhythm_translation_rhyth/Suox_set_D.pdf]

## Syde2

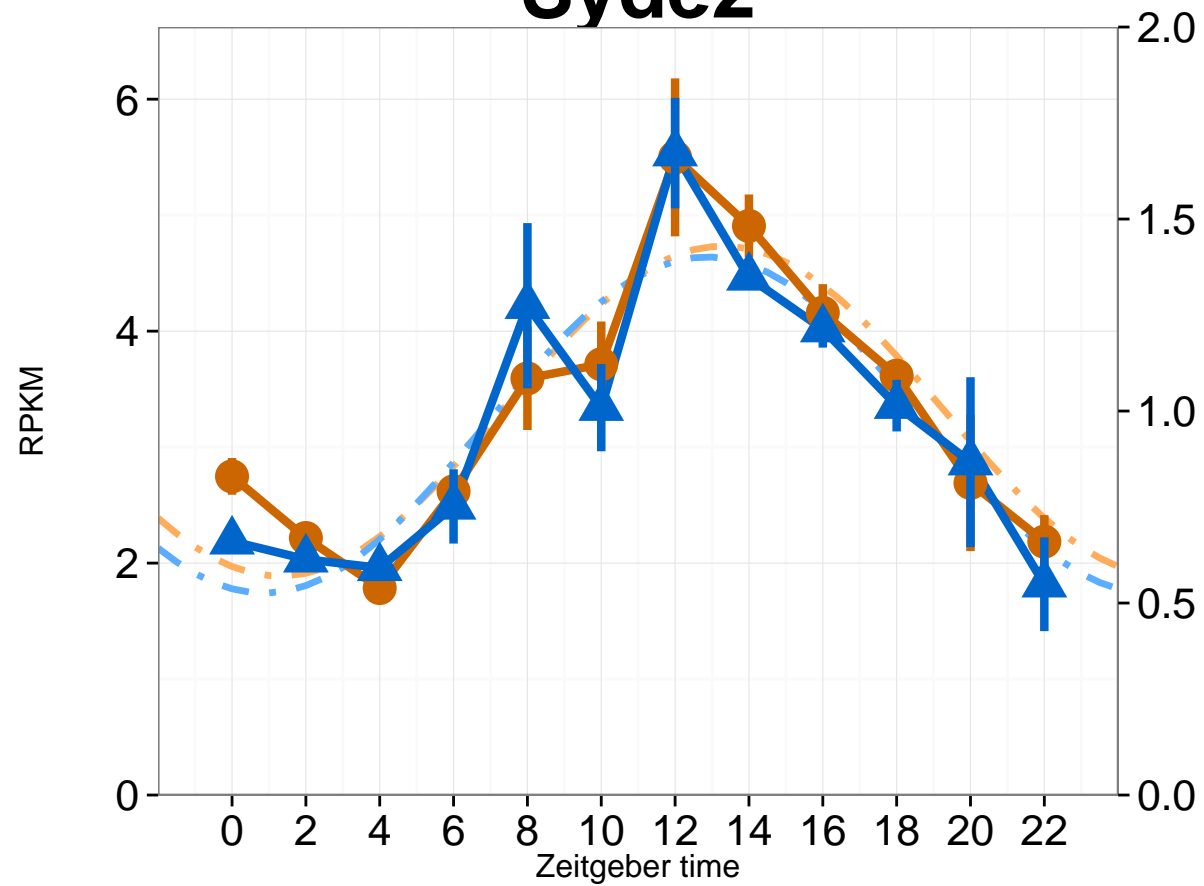

## Syde2

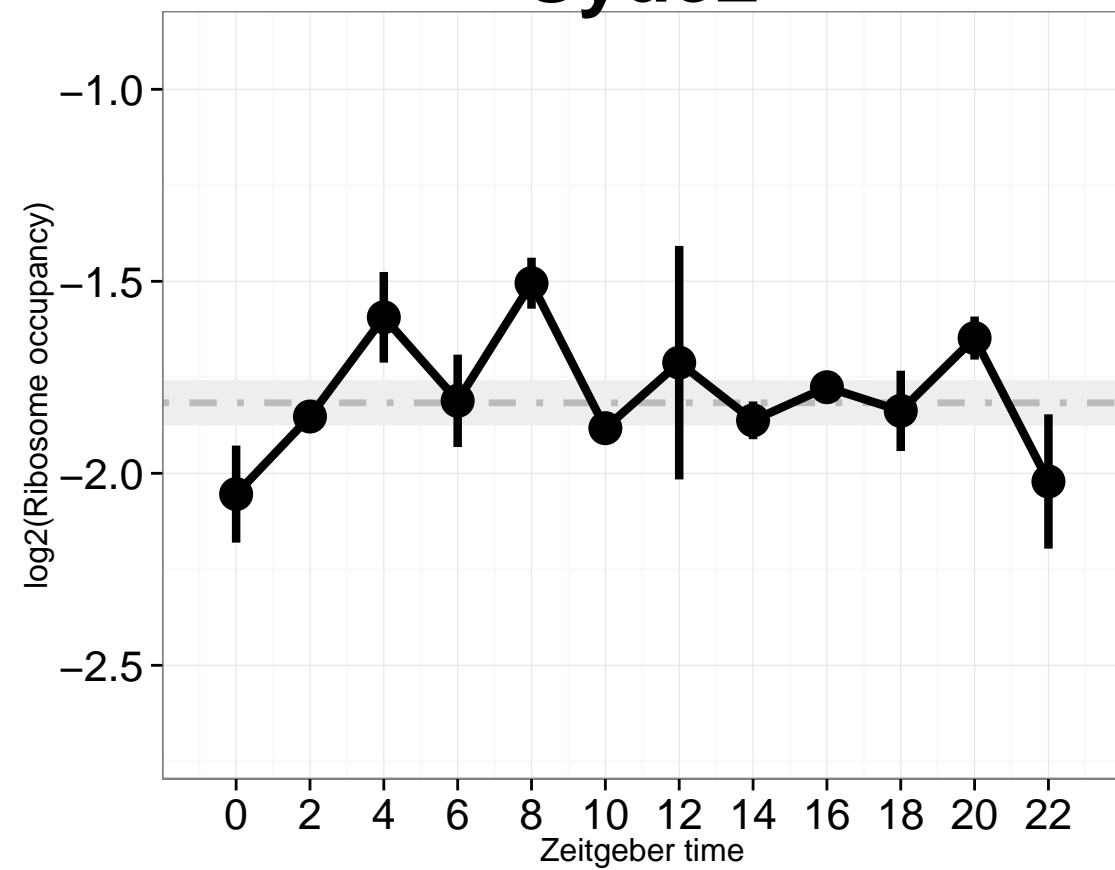

Supplement: SuppDataset_1.zip [file Syde2_set_D.pdf › Supplemental Dataset 1/D-mRNA_rhythm_translation_rhyth/Syde2_set_D.pdf]

# Syne1

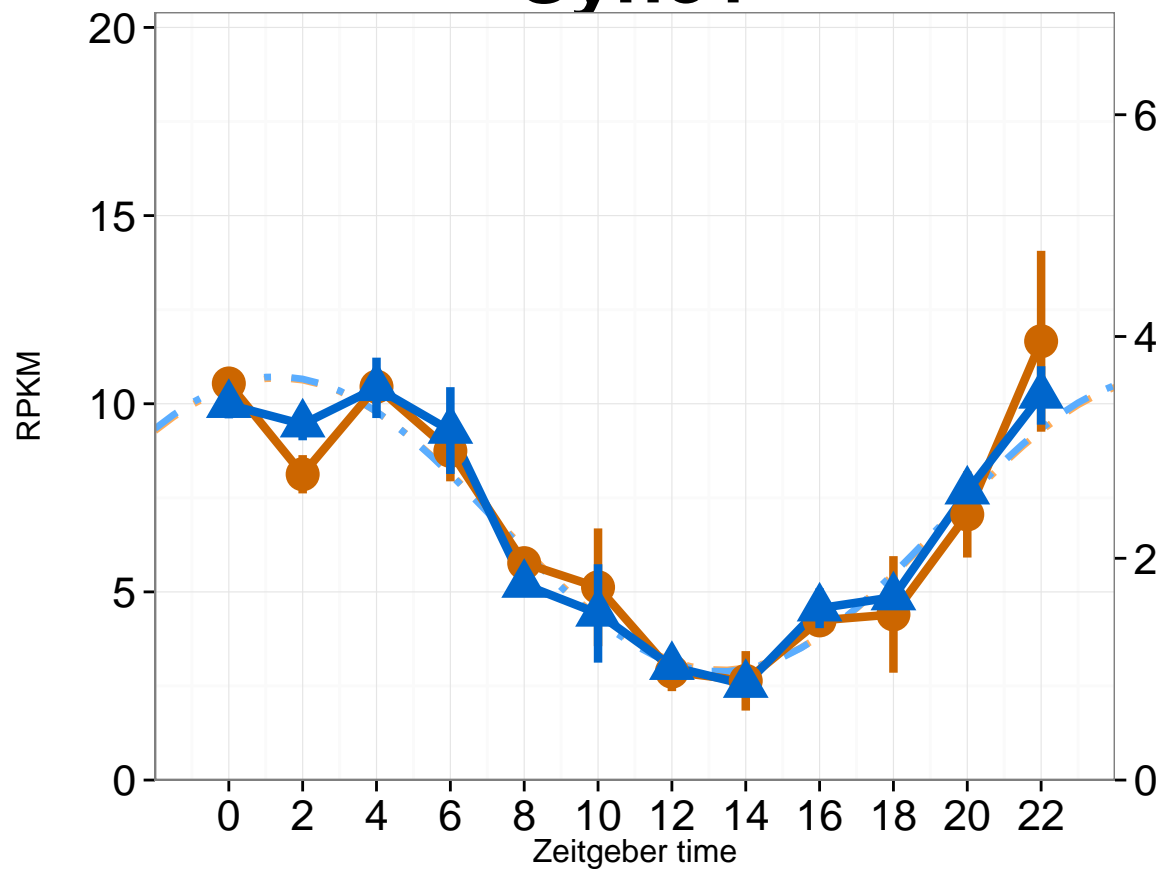

# Syne1

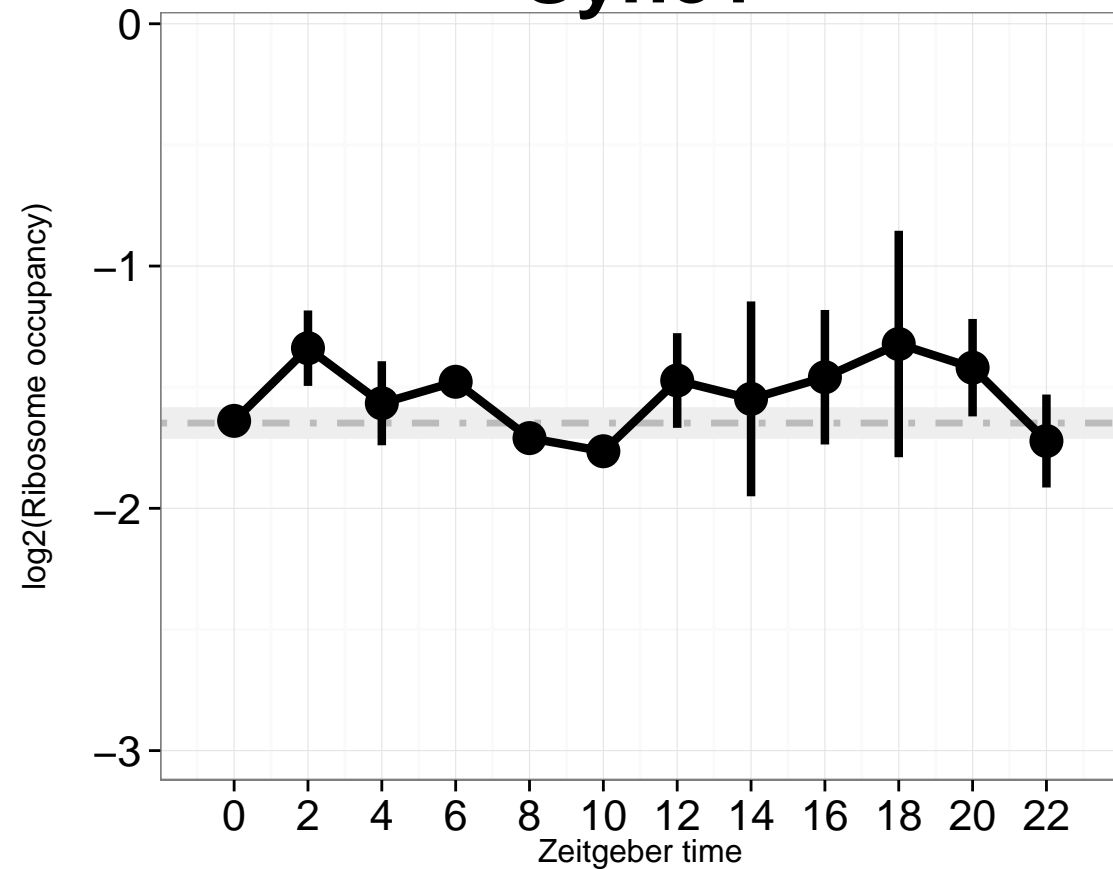

Supplement: SuppDataset_1.zip [file Syne1_set_D.pdf › Supplemental Dataset 1/D-mRNA_rhythm_translation_rhyth/Syne1_set_D.pdf]

## Syne3

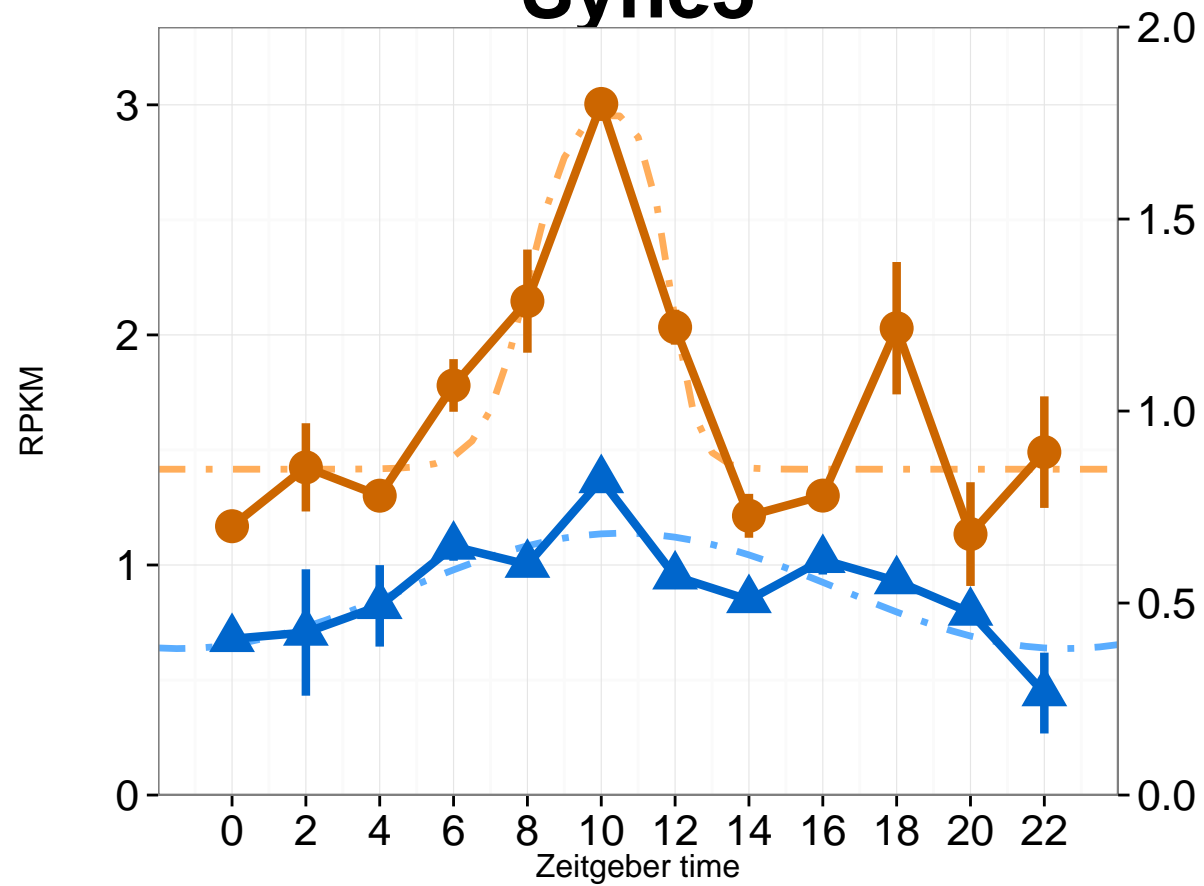

## Syne3

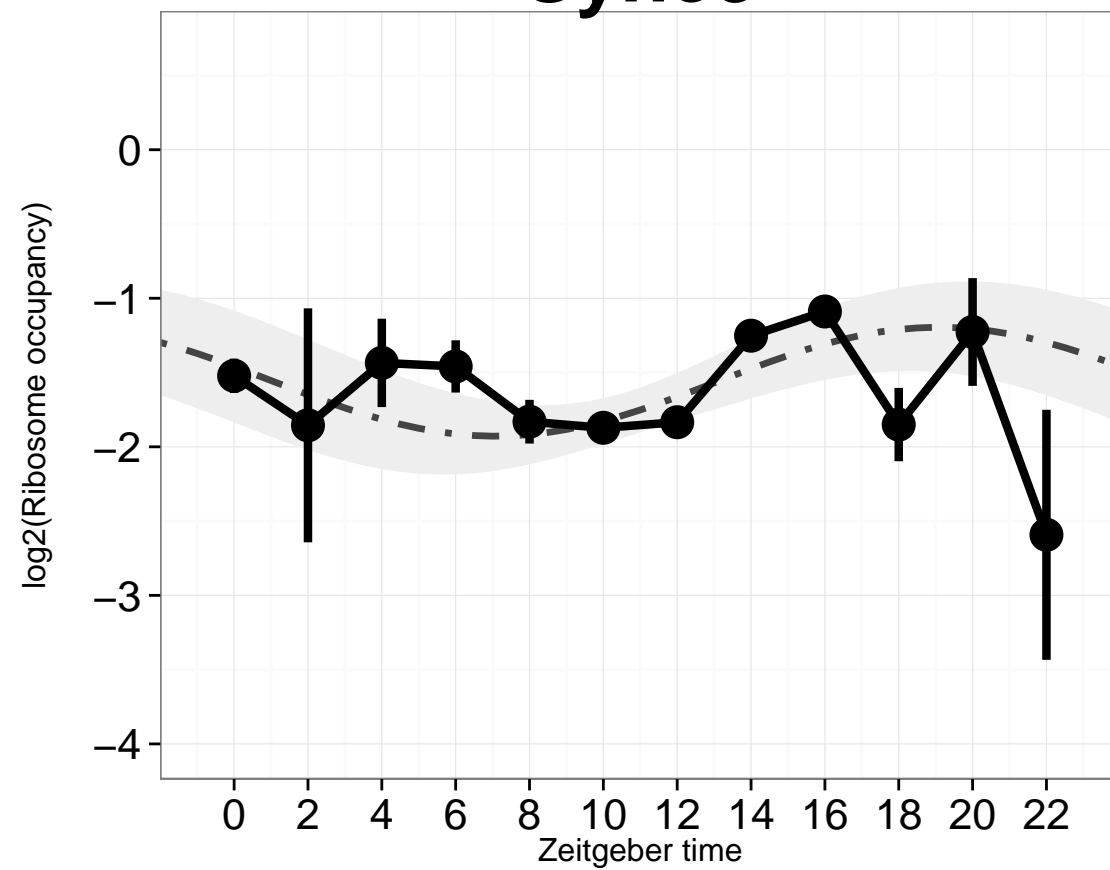

Supplement: SuppDataset_1.zip [file Syne3_set_D.pdf › Supplemental Dataset 1/D-mRNA_rhythm_translation_rhyth/Syne3_set_D.pdf]

# Syne4

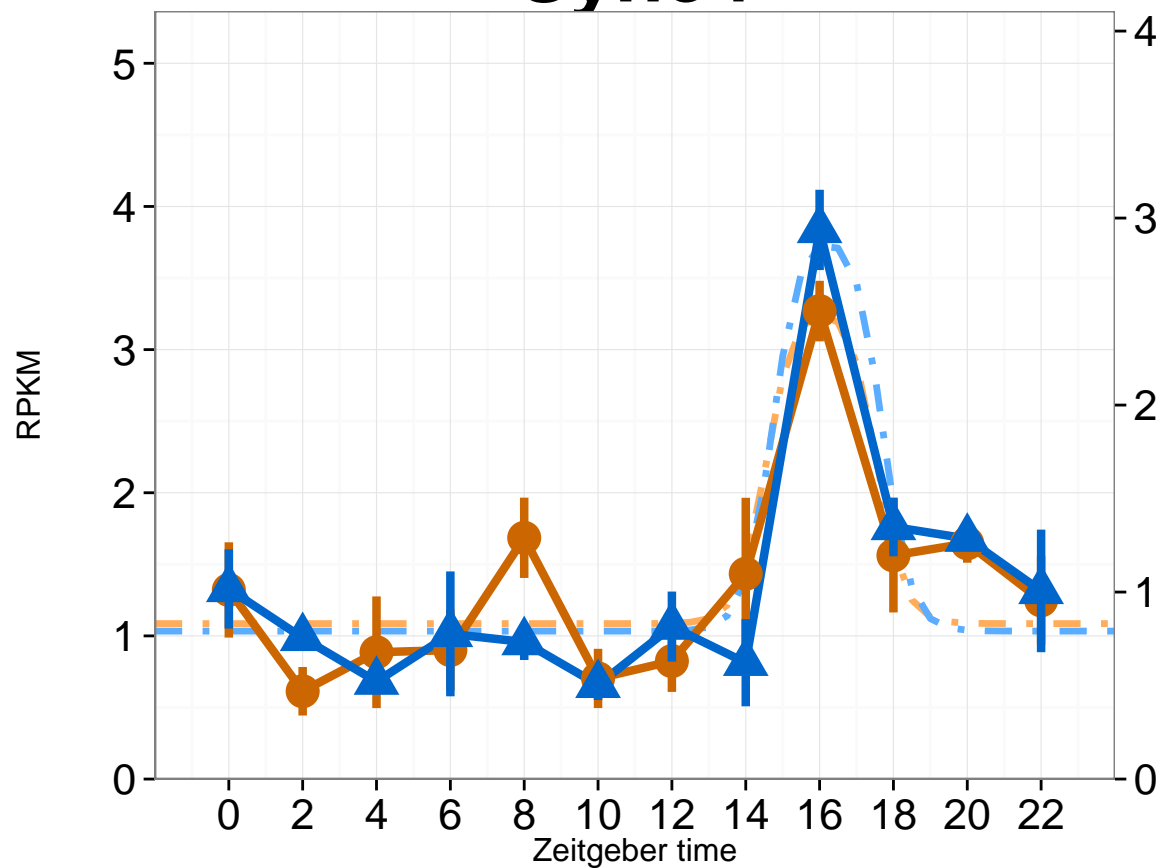

# Syne4

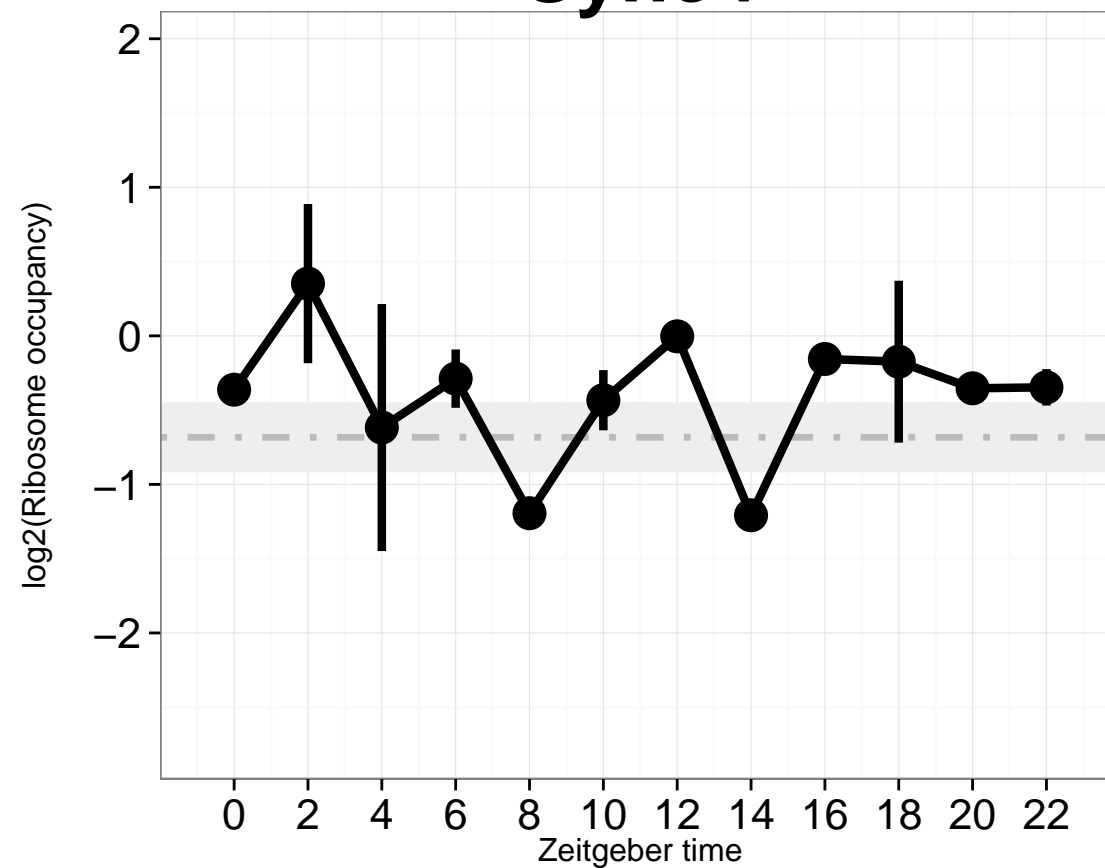

Supplement: SuppDataset_1.zip [file Syne4_set_D.pdf › Supplemental Dataset 1/D-mRNA_rhythm_translation_rhyth/Syne4_set_D.pdf]

## Synj2

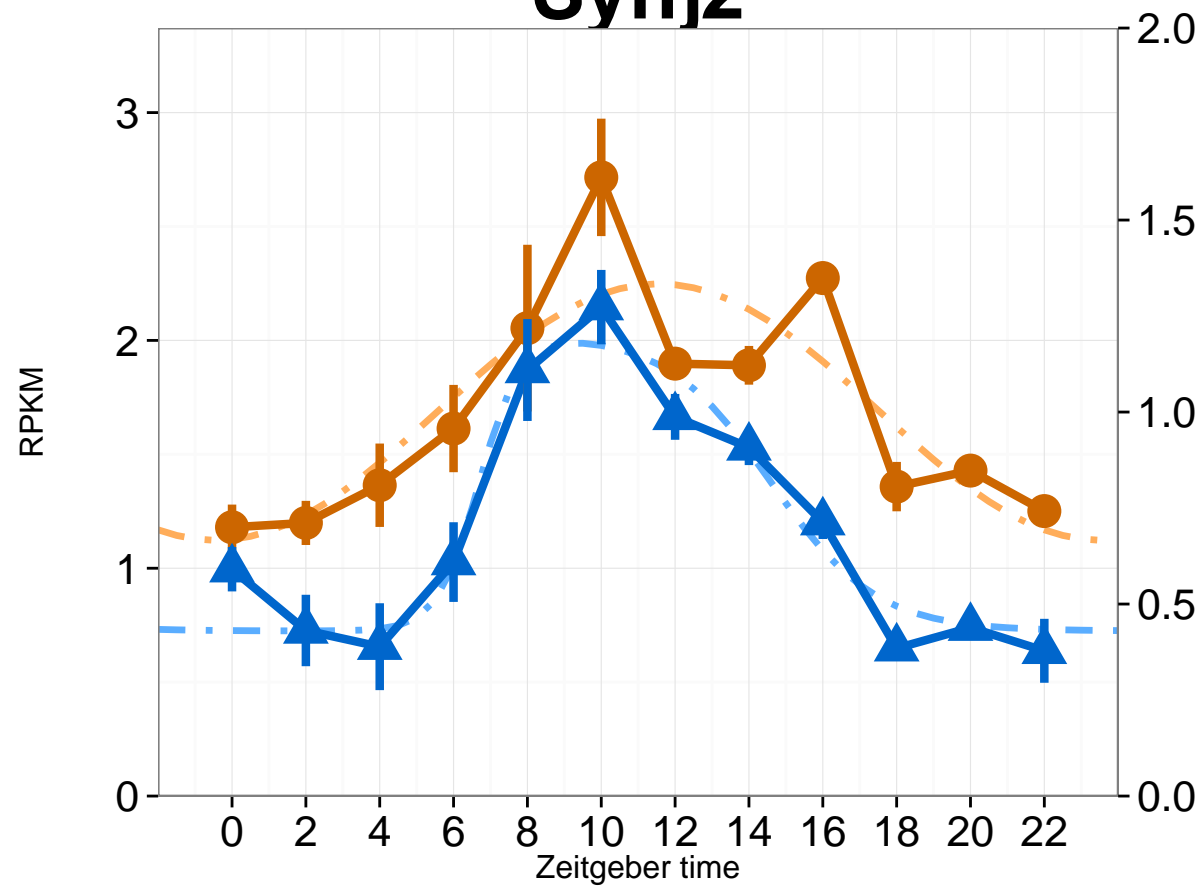

## Synj2

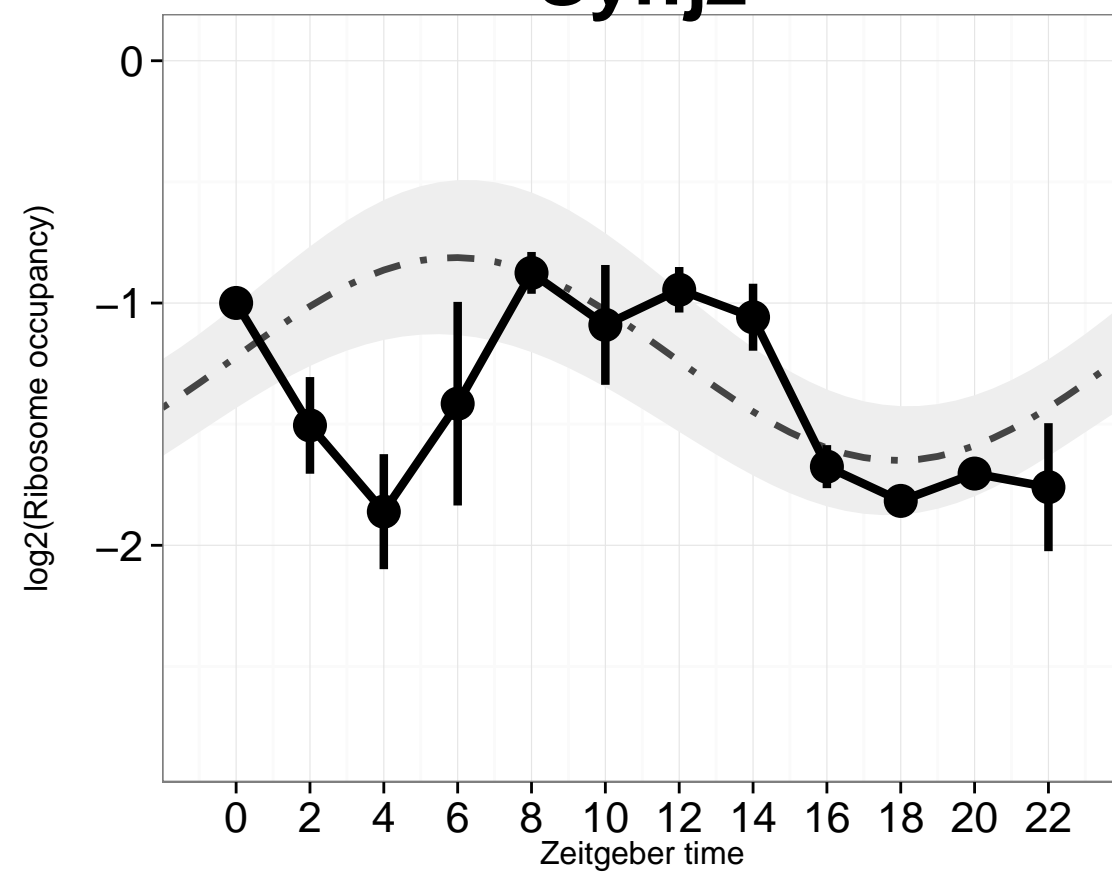

Supplement: SuppDataset_1.zip [file Synj2_set_D.pdf › Supplemental Dataset 1/D-mRNA_rhythm_translation_rhyth/Synj2_set_D.pdf]

# Syt11

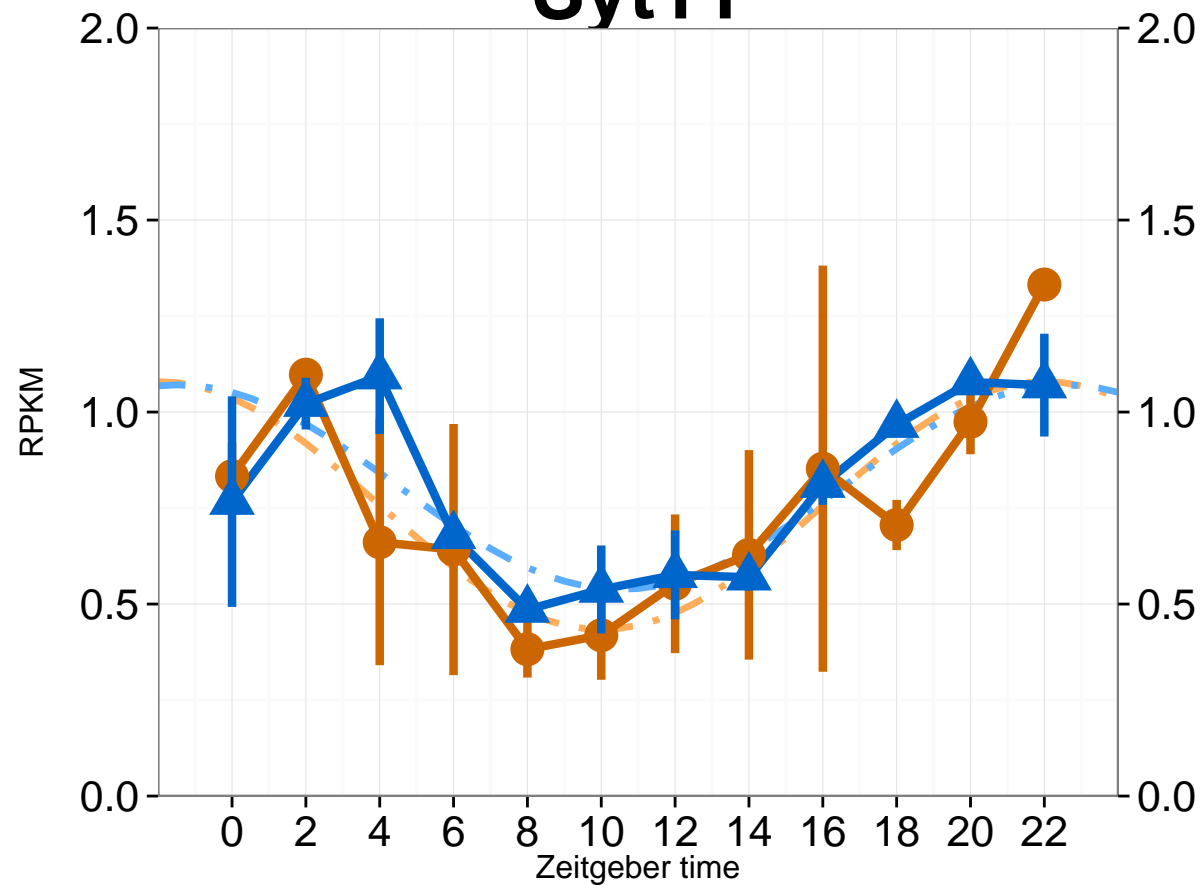

# Syt11

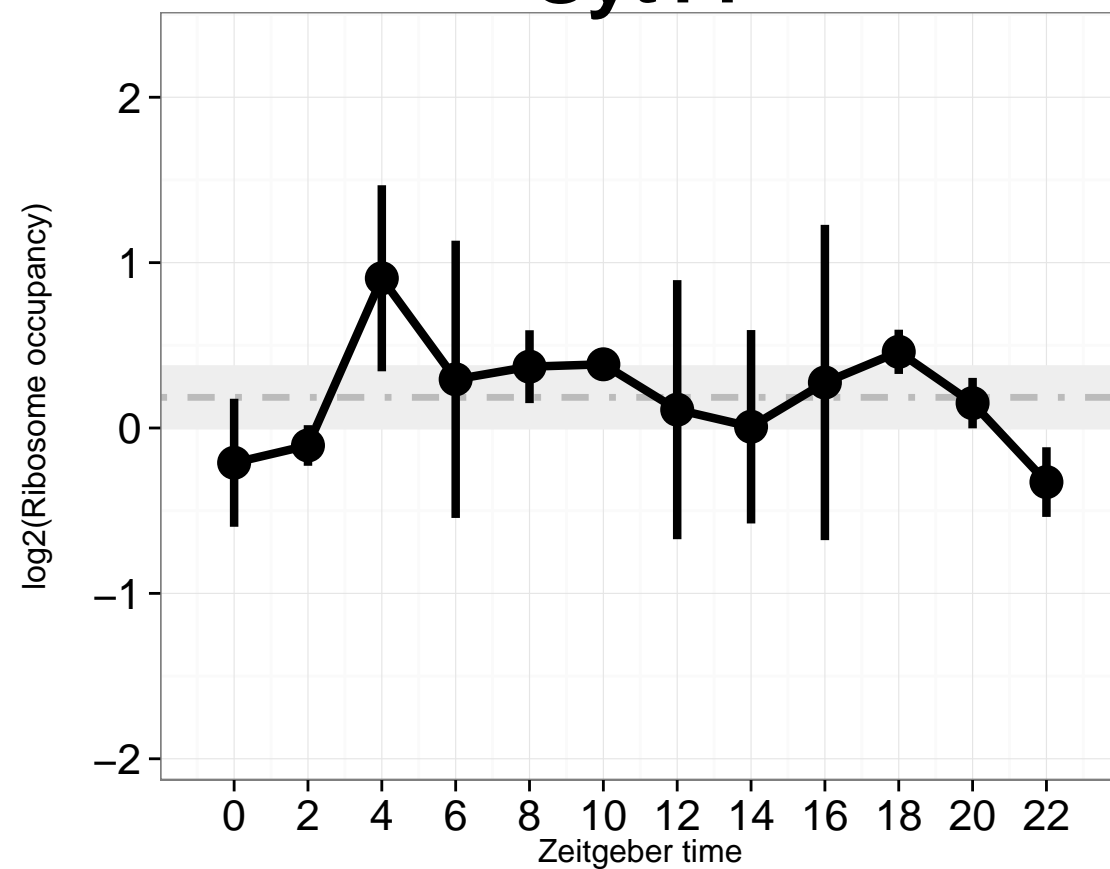

Supplement: SuppDataset_1.zip [file Syt11_set_D.pdf › Supplemental Dataset 1/D-mRNA_rhythm_translation_rhyth/Syt11_set_D.pdf]

# Syt12

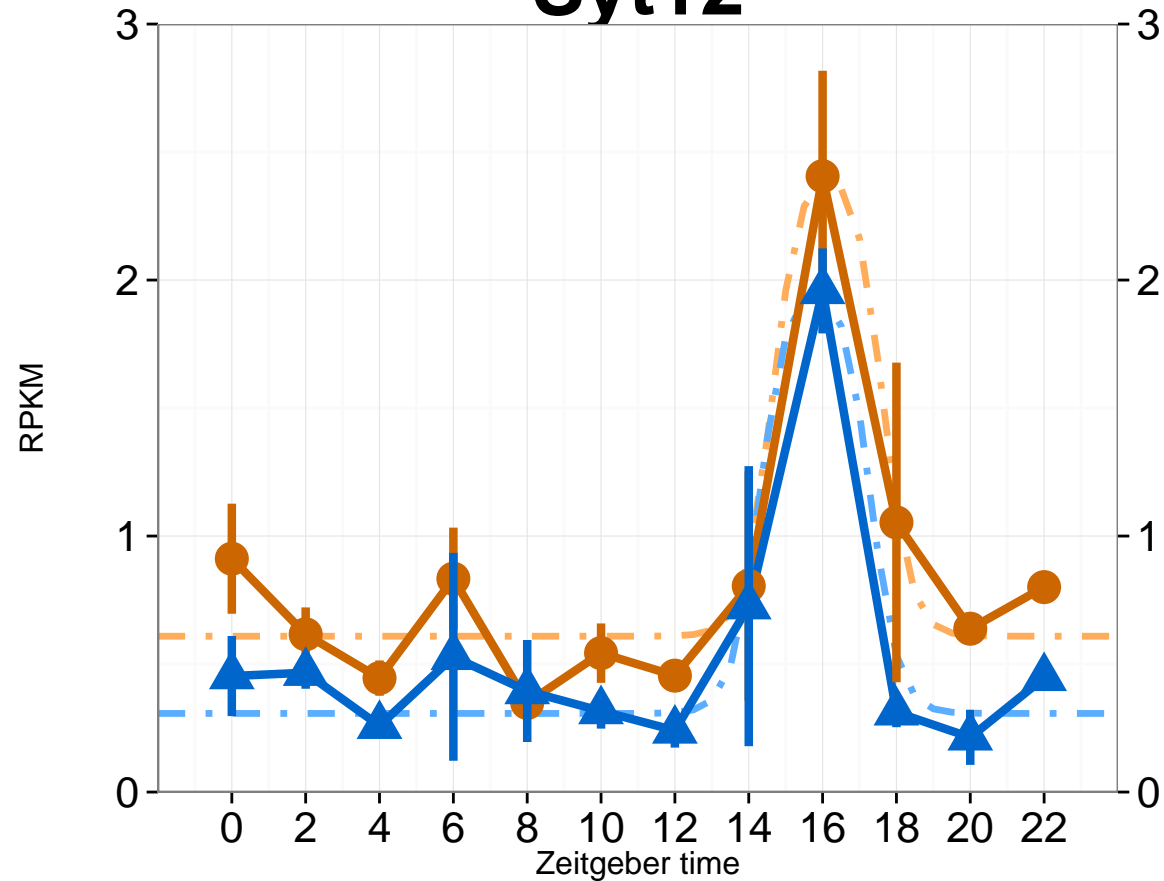

# Syt12

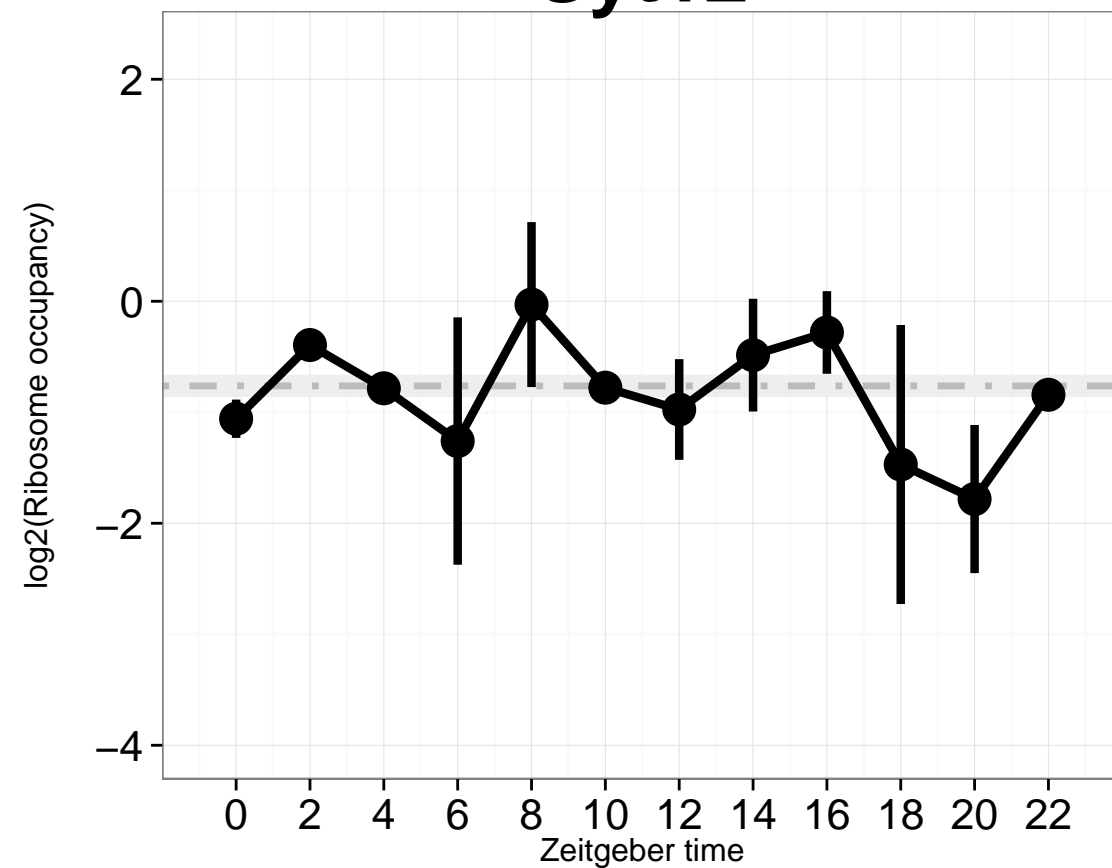

Supplement: SuppDataset_1.zip [file Syt12_set_D.pdf › Supplemental Dataset 1/D-mRNA_rhythm_translation_rhyth/Syt12_set_D.pdf]

## Syt1

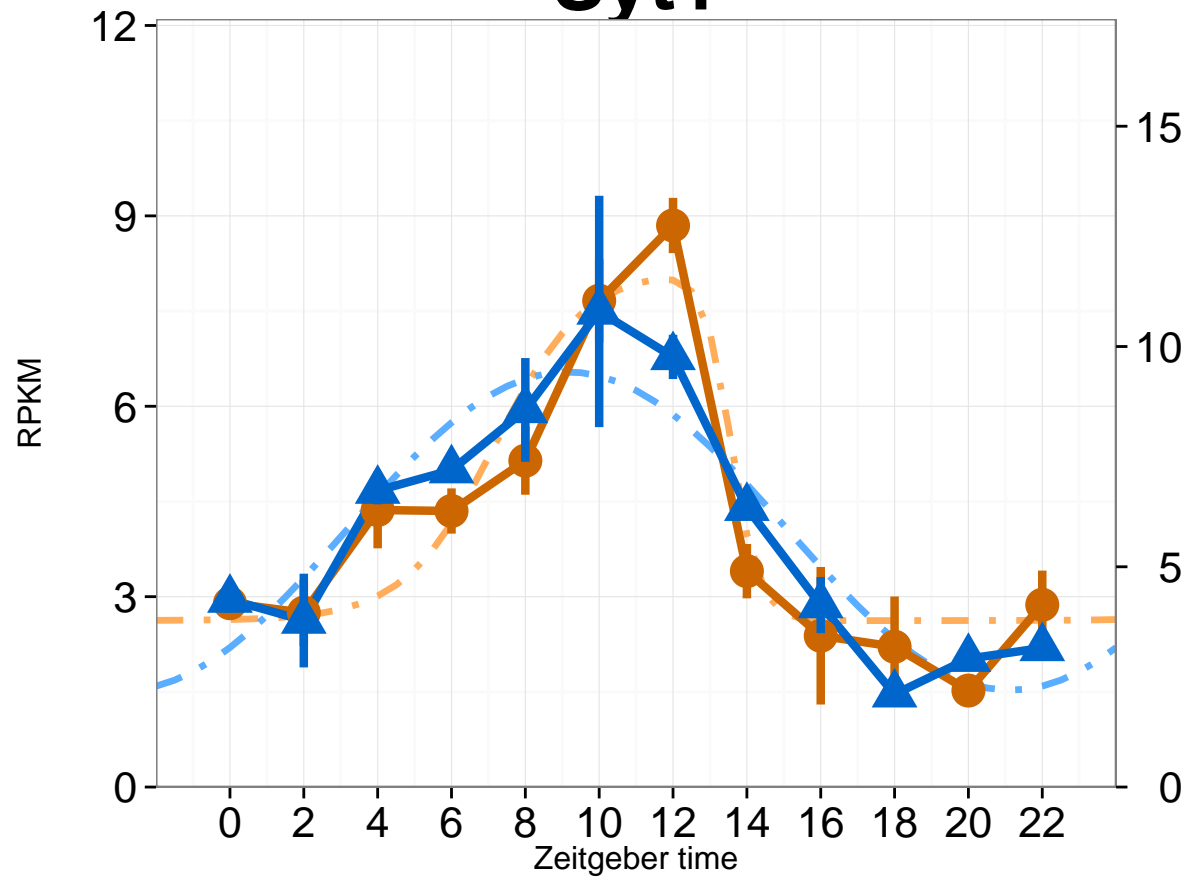

## Syt1

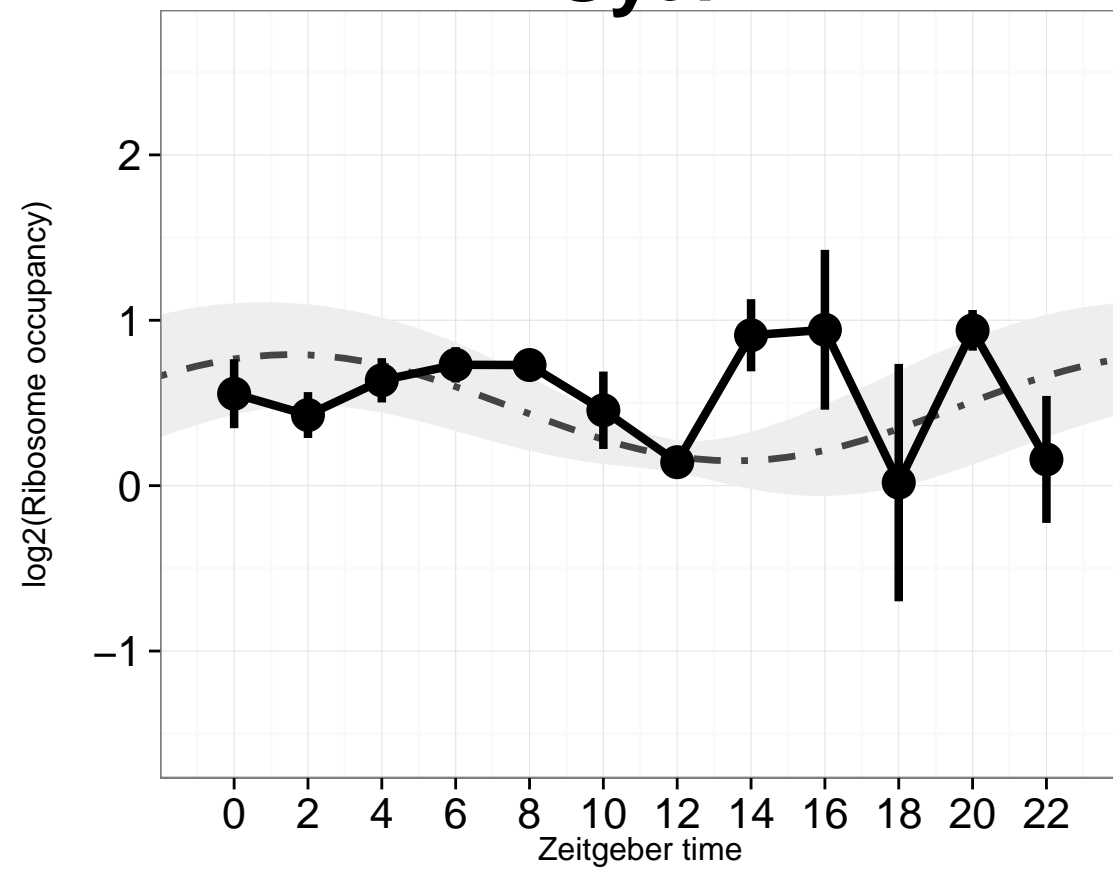

Supplement: SuppDataset_1.zip [file Syt1_set_D.pdf › Supplemental Dataset 1/D-mRNA_rhythm_translation_rhyth/Syt1_set_D.pdf]

## Syt3

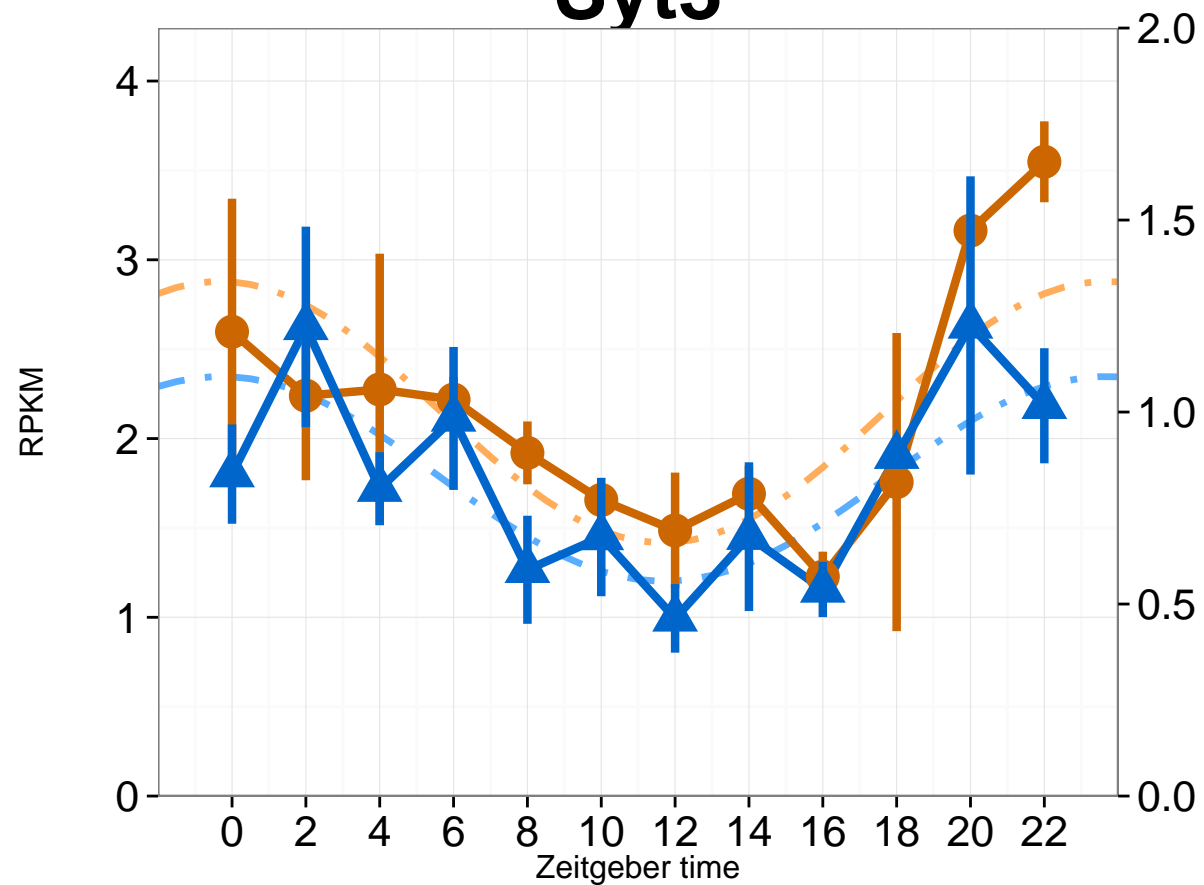

## Syt3

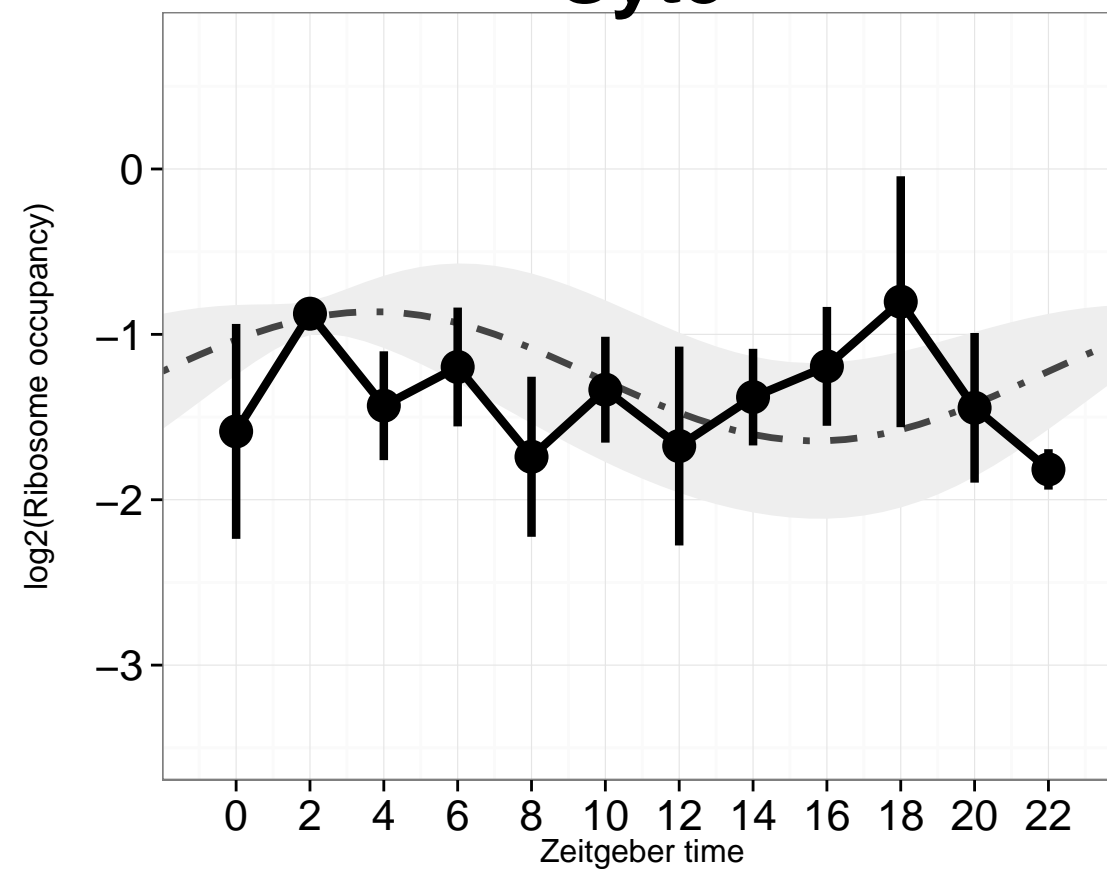

Supplement: SuppDataset_1.zip [file Syt3_set_D.pdf › Supplemental Dataset 1/D-mRNA_rhythm_translation_rhyth/Syt3_set_D.pdf]

## Szt2

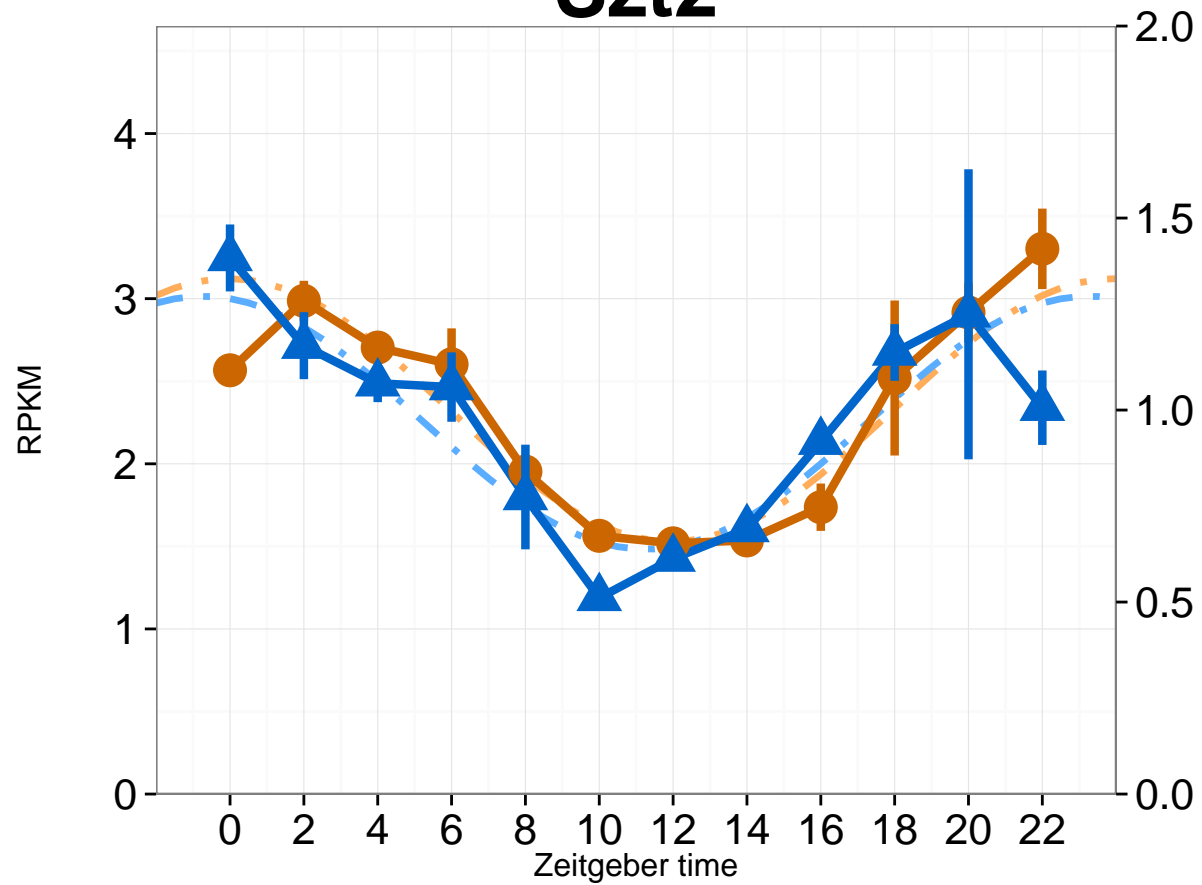

## Szt2

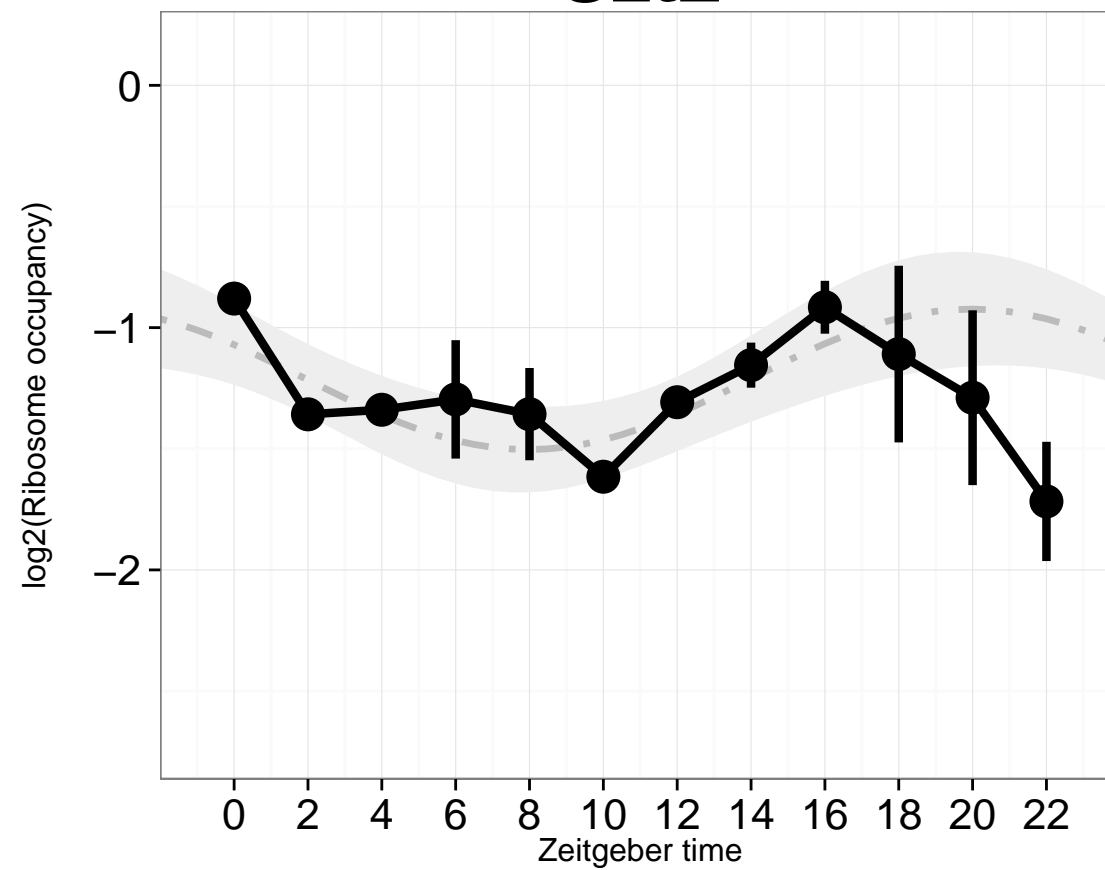

Supplement: SuppDataset_1.zip [file Szt2_set_D.pdf › Supplemental Dataset 1/D-mRNA_rhythm_translation_rhyth/Szt2_set_D.pdf]

**Tab1**

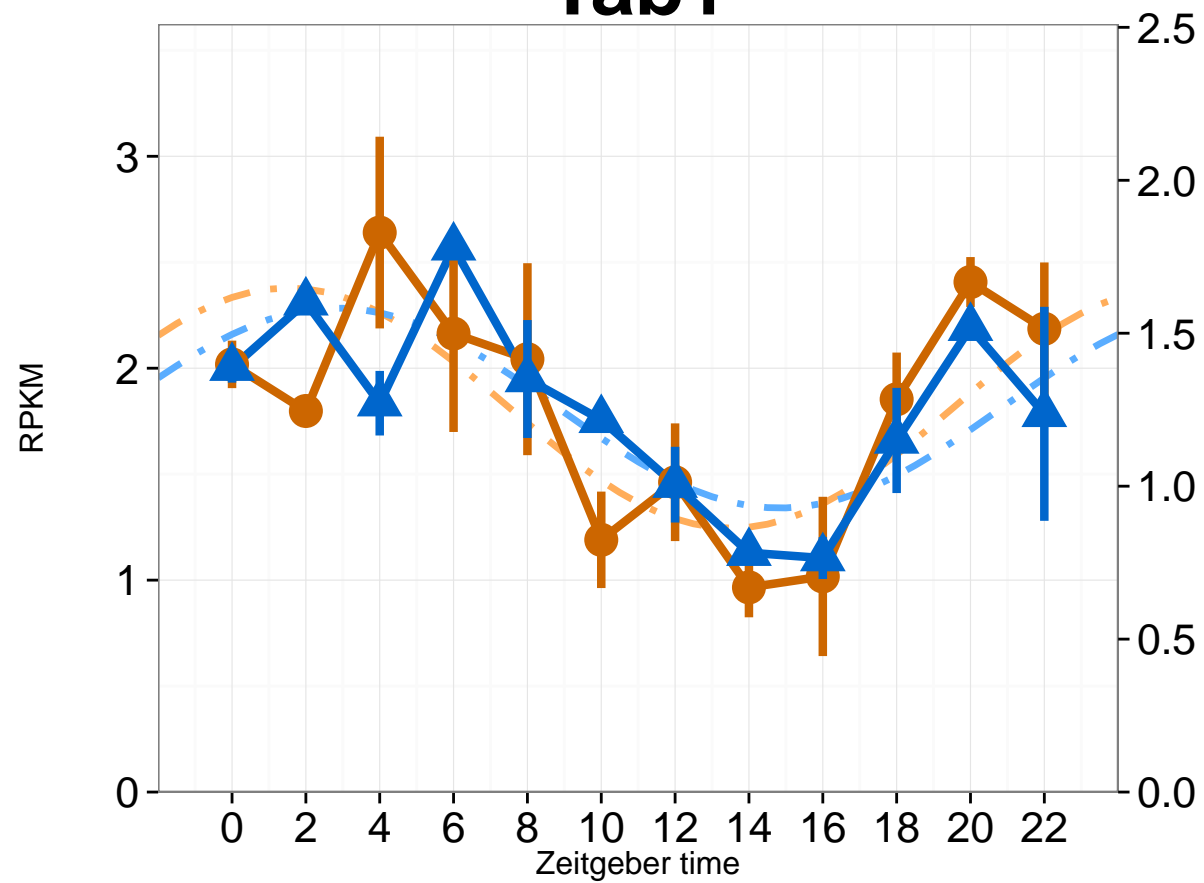

**Tab1**

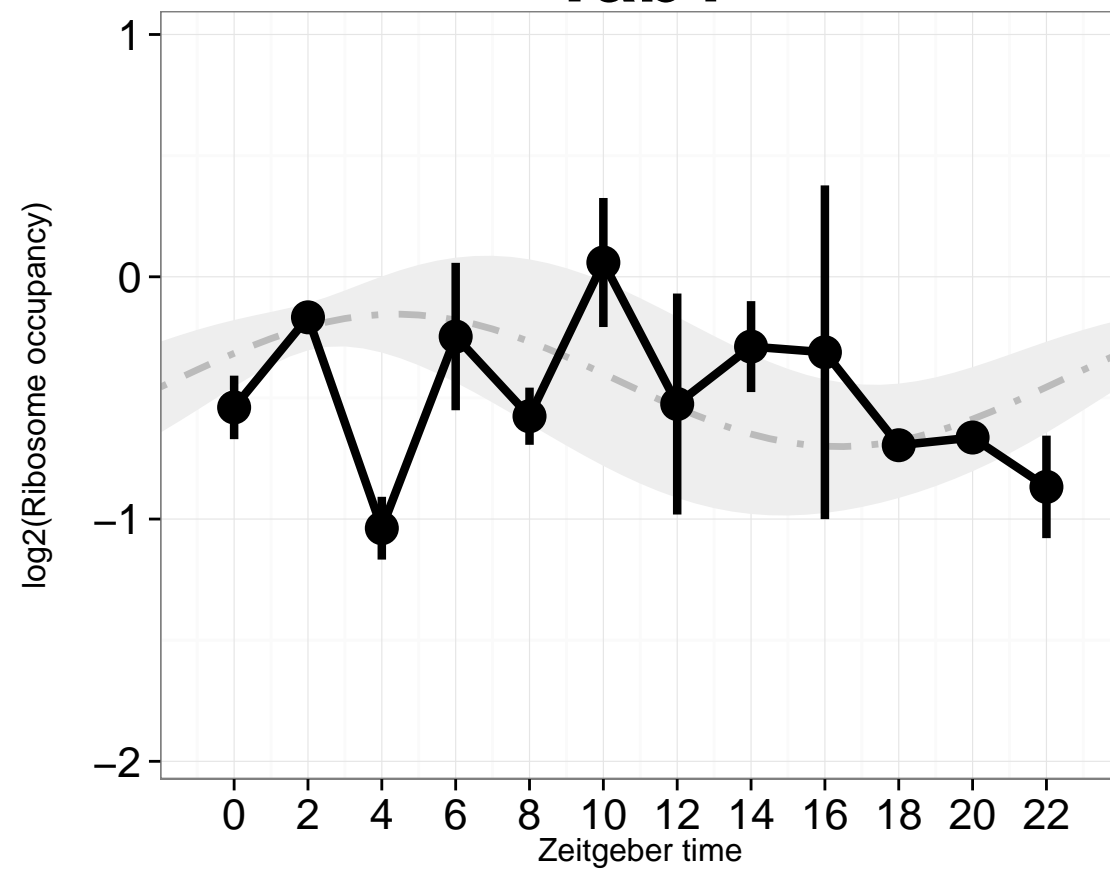

Supplement: SuppDataset_1.zip [file Tab1_set_D.pdf › Supplemental Dataset 1/D-mRNA_rhythm_translation_rhyth/Tab1_set_D.pdf]

# Tab2

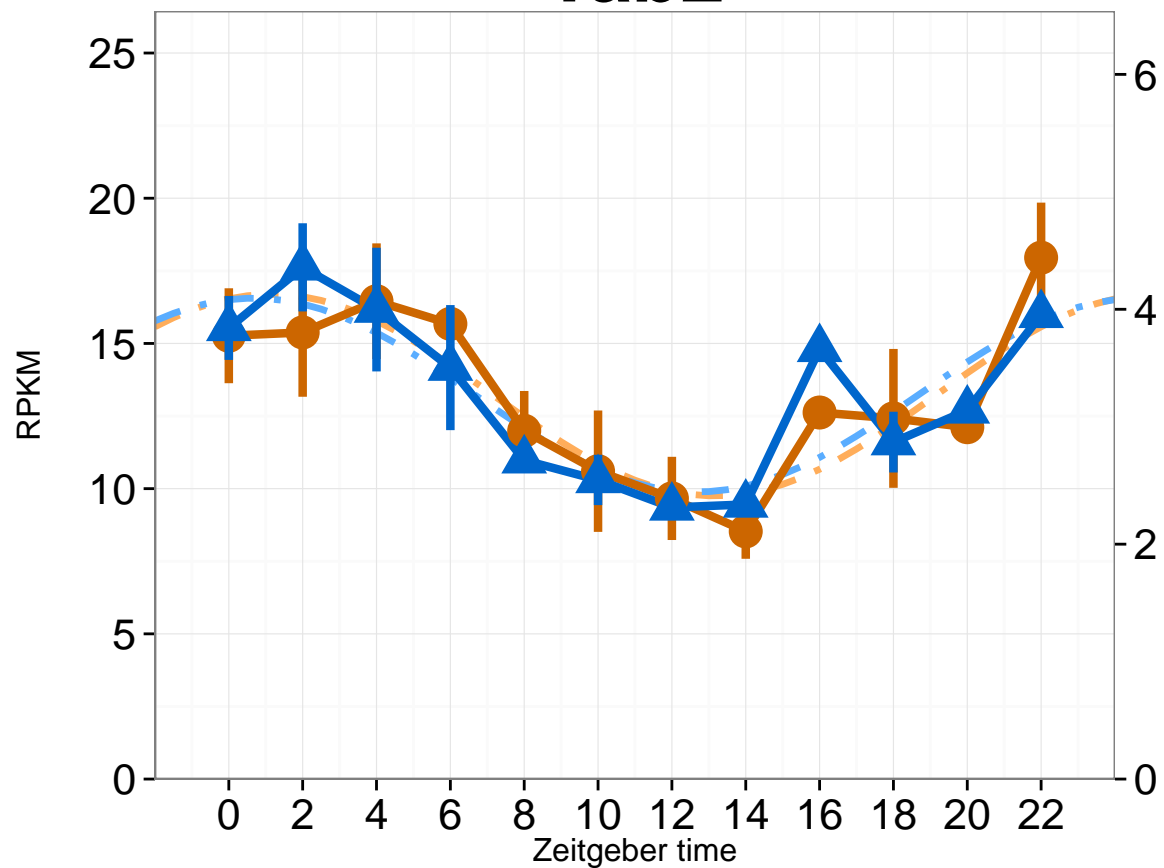

# Tab2

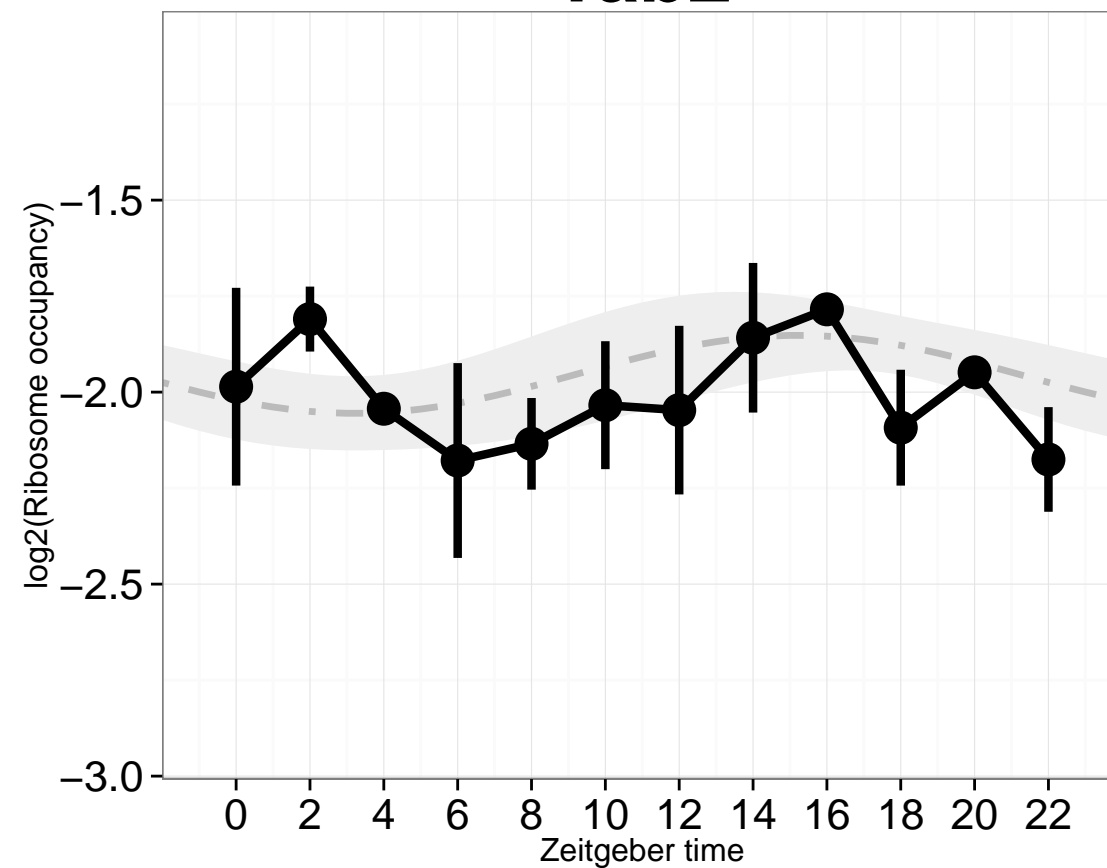

Supplement: SuppDataset_1.zip [file Tab2_set_D.pdf › Supplemental Dataset 1/D-mRNA_rhythm_translation_rhyth/Tab2_set_D.pdf]

# Tacc2

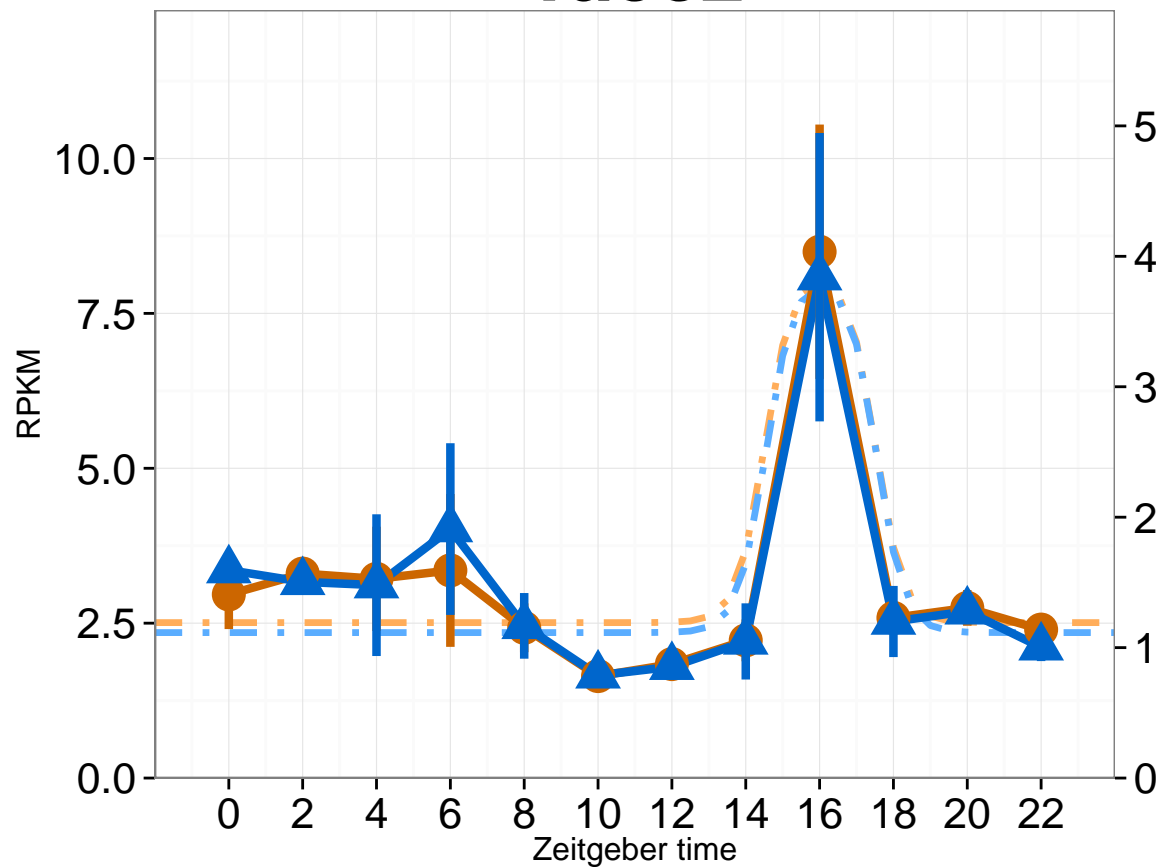

# Tacc2

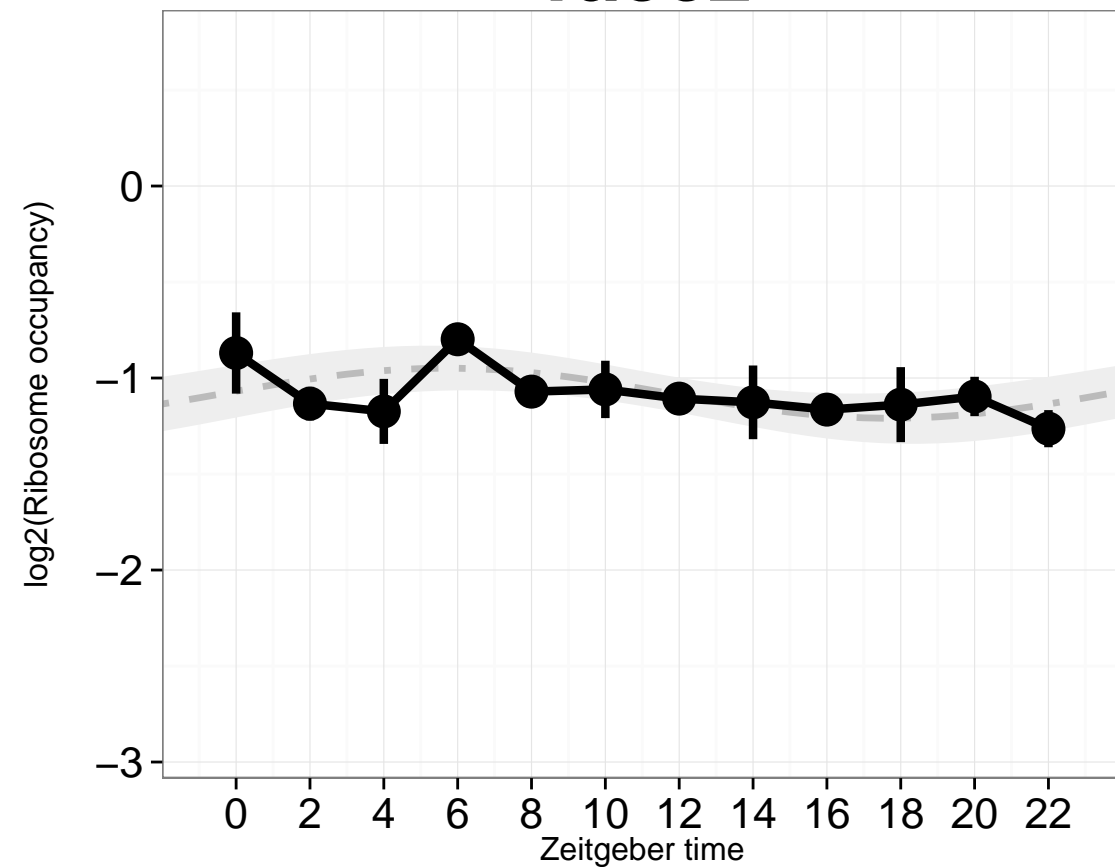

Supplement: SuppDataset_1.zip [file Tacc2_set_D.pdf › Supplemental Dataset 1/D-mRNA_rhythm_translation_rhyth/Tacc2_set_D.pdf]

# Tada3

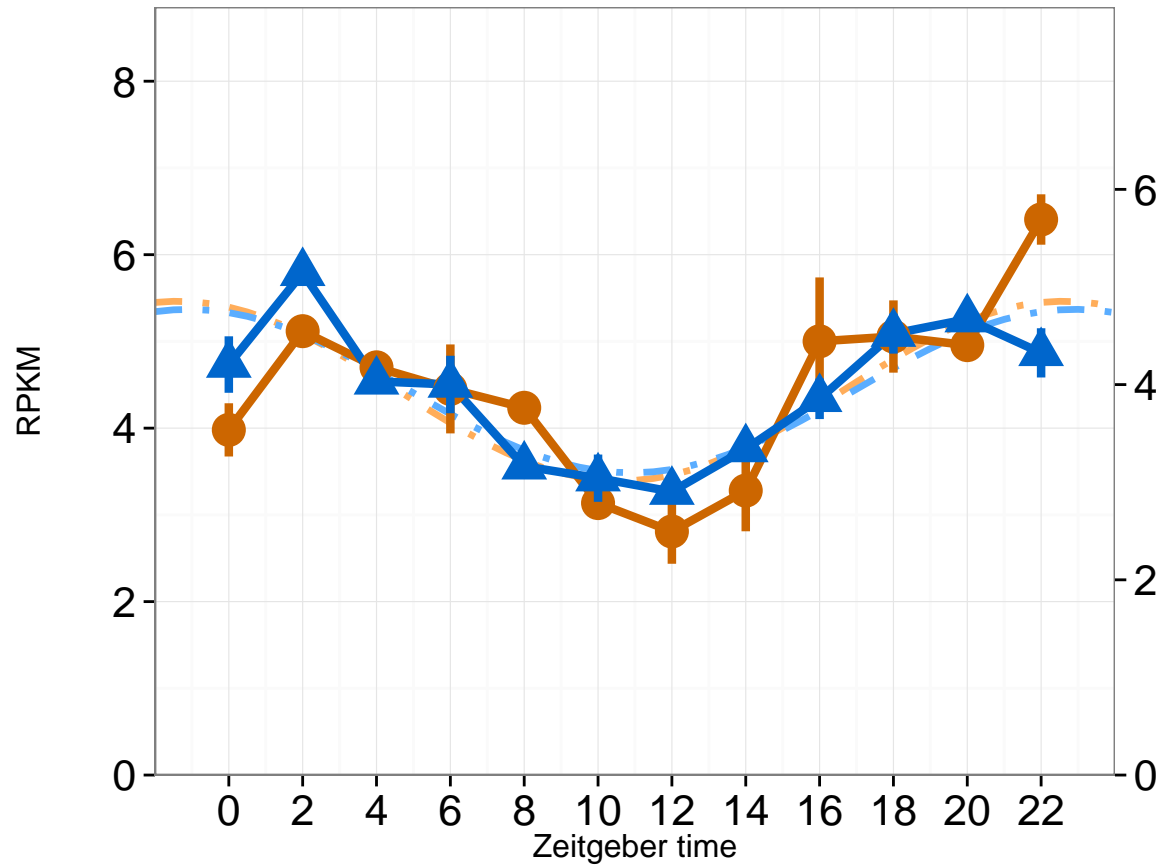

# Tada3

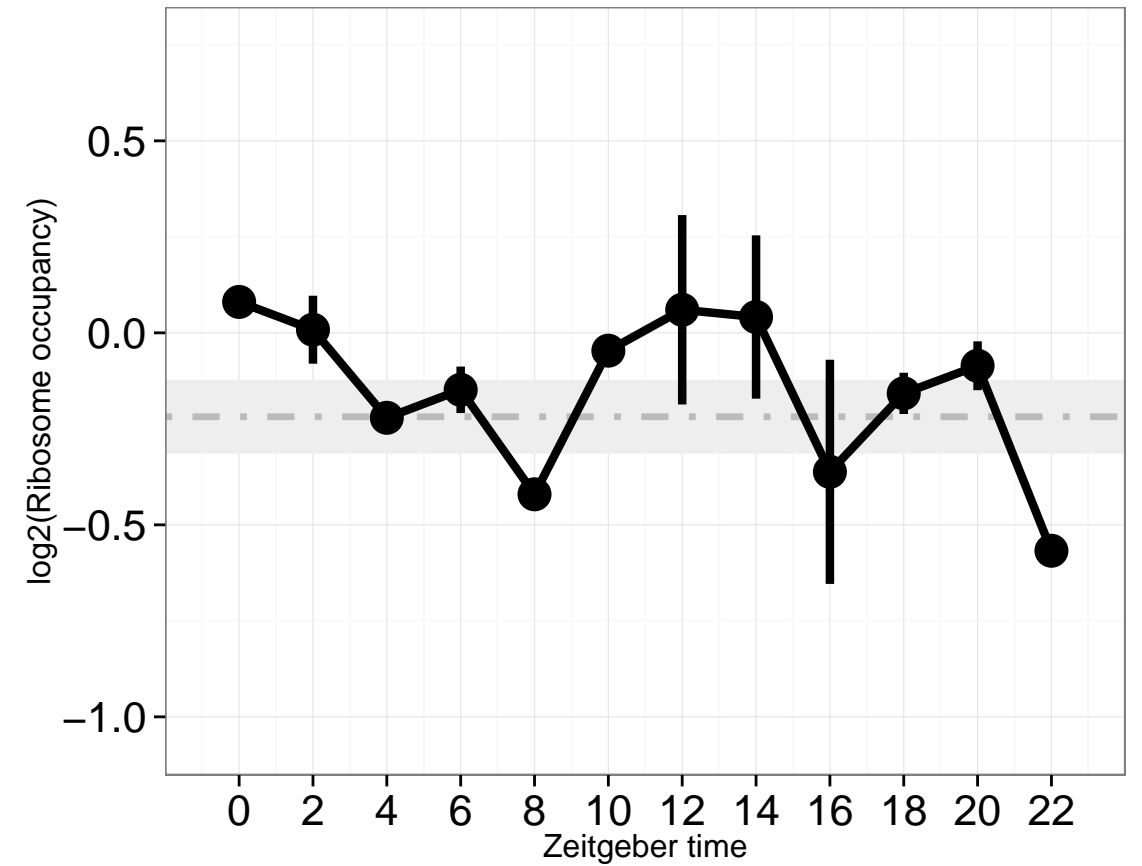

Supplement: SuppDataset_1.zip [file Tada3_set_D.pdf › Supplemental Dataset 1/D-mRNA_rhythm_translation_rhyth/Tada3_set_D.pdf]

# Taf1b

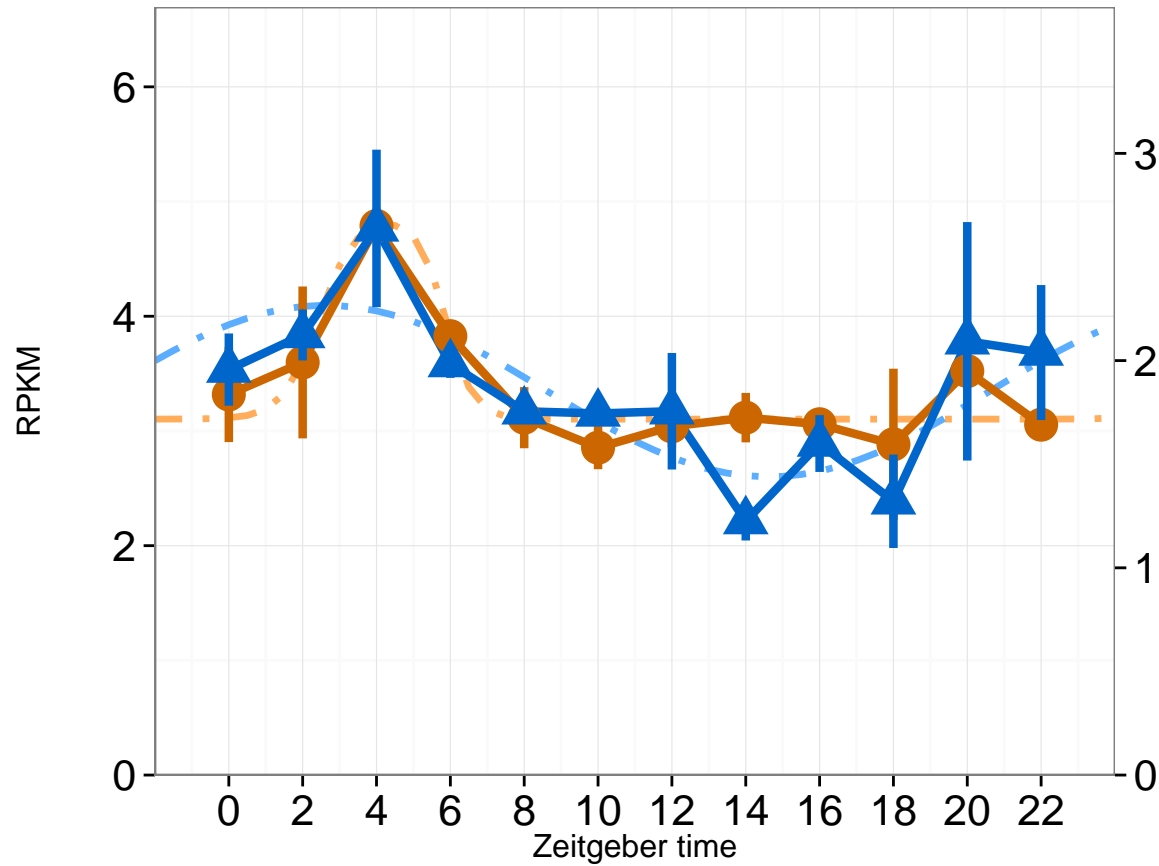

# Taf1b

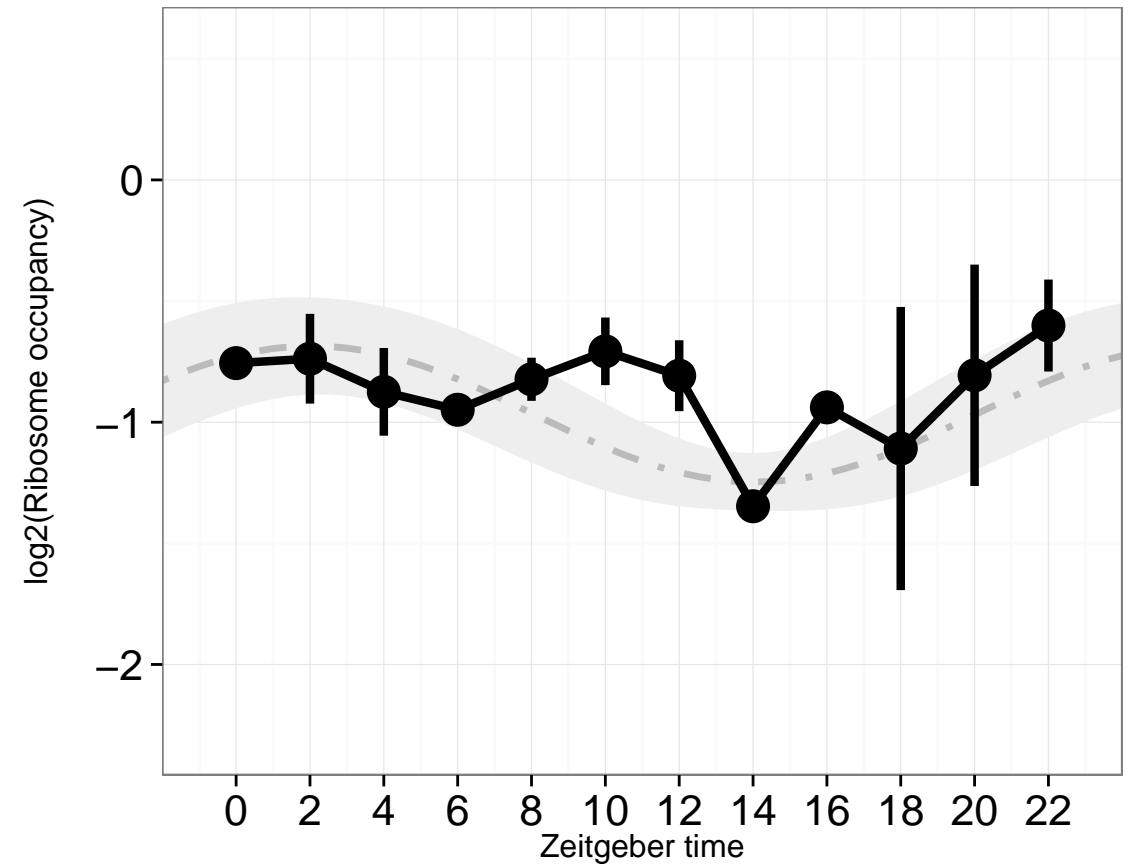

Supplement: SuppDataset_1.zip [file Taf1b_set_D.pdf › Supplemental Dataset 1/D-mRNA_rhythm_translation_rhyth/Taf1b_set_D.pdf]

# Taf1c

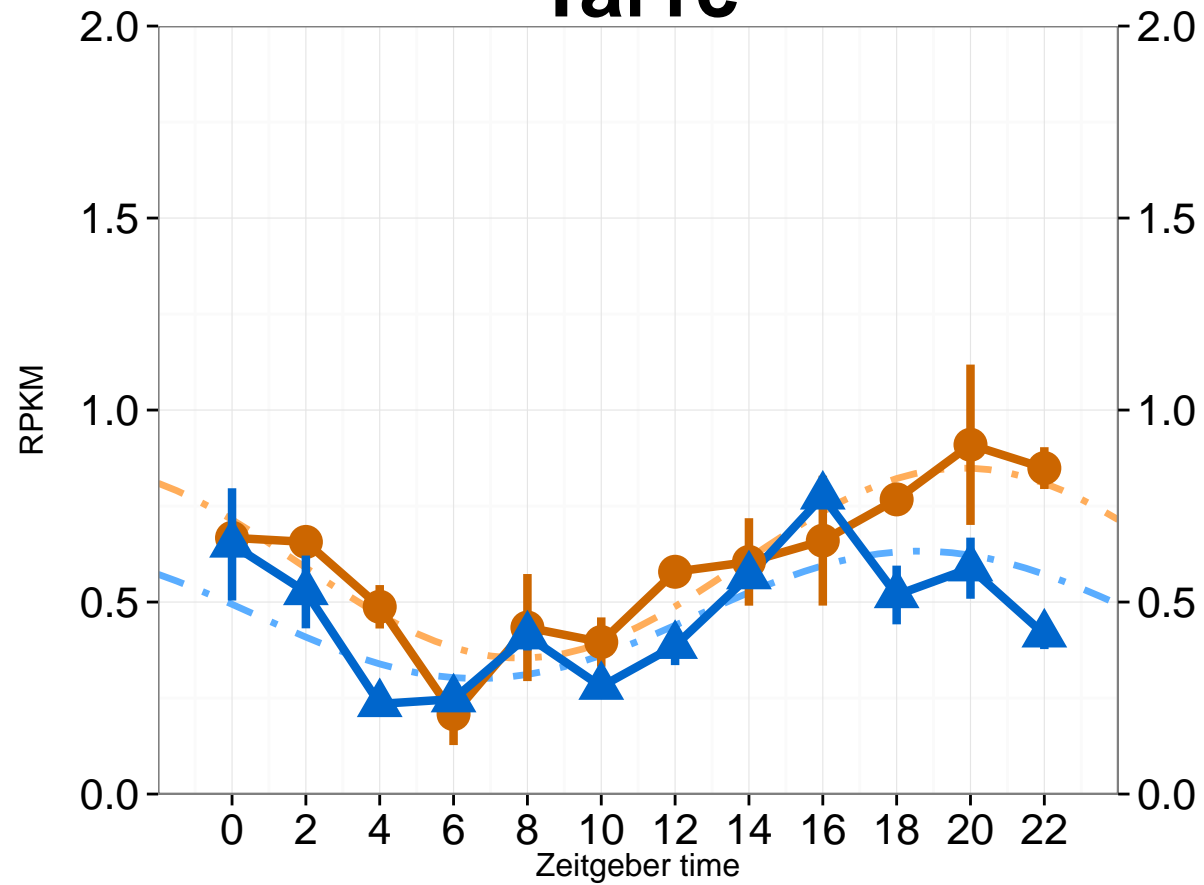

# Taf1c

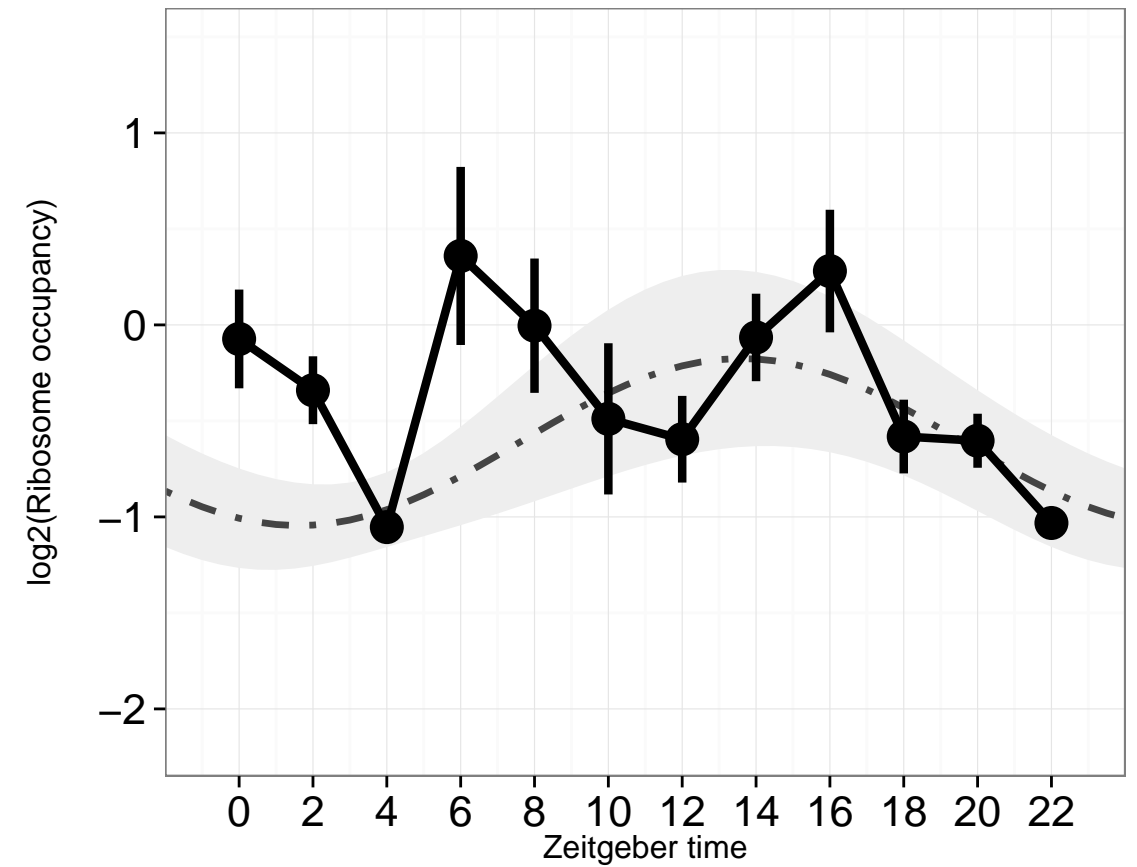

Supplement: SuppDataset_1.zip [file Taf1c_set_D.pdf › Supplemental Dataset 1/D-mRNA_rhythm_translation_rhyth/Taf1c_set_D.pdf]

# Taf1d

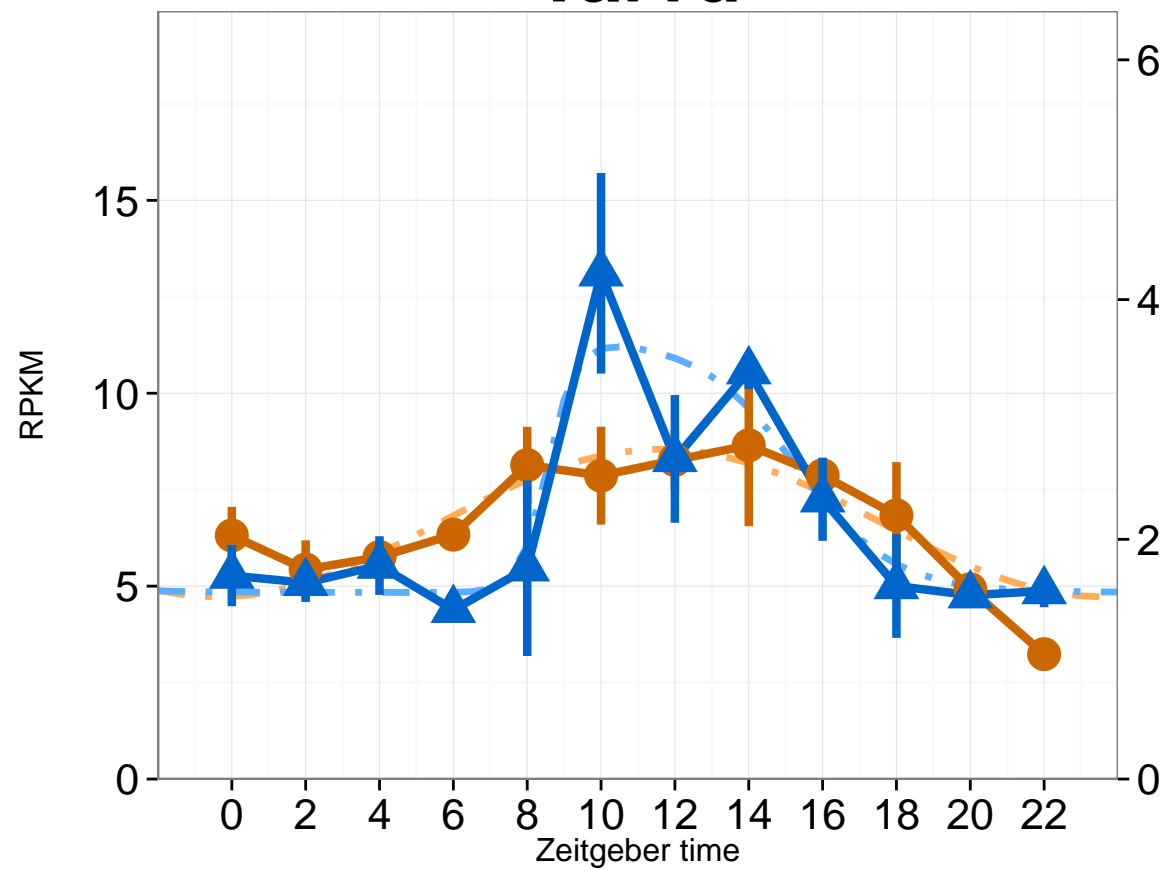

# Taf1d

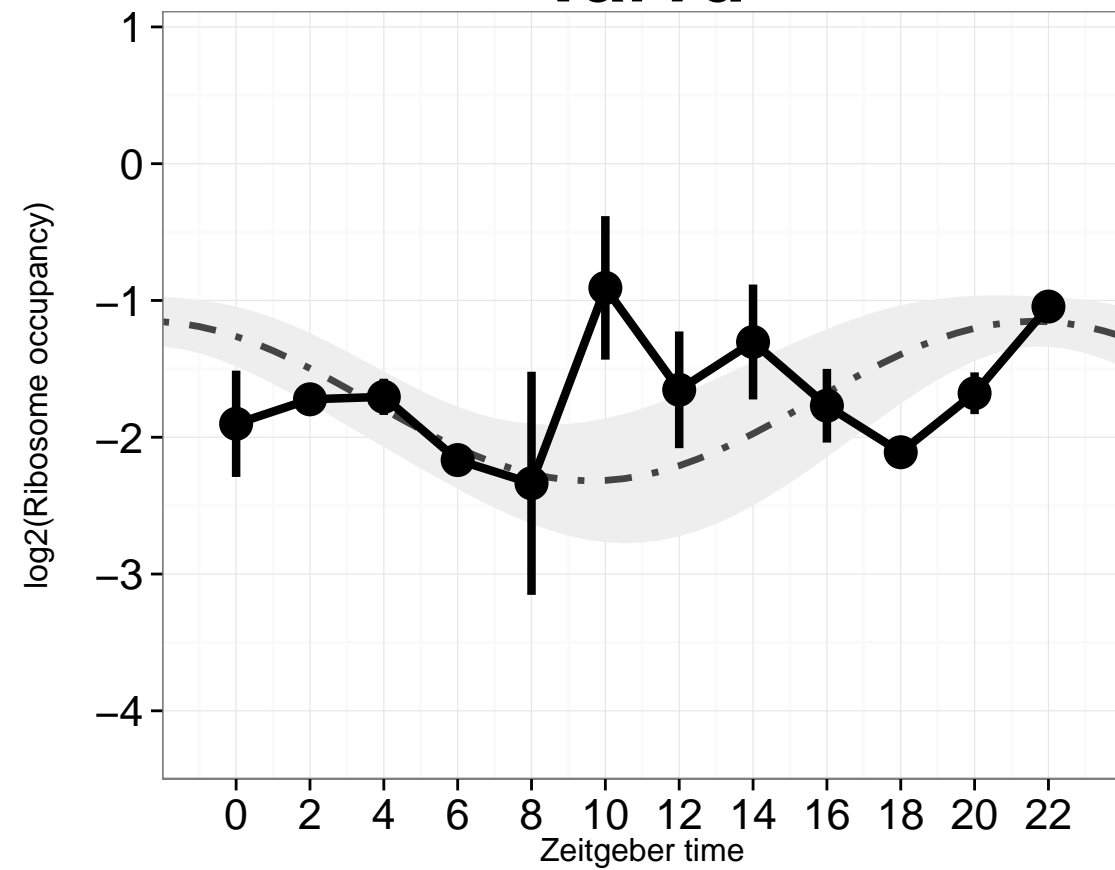

Supplement: SuppDataset_1.zip [file Taf1d_set_D.pdf › Supplemental Dataset 1/D-mRNA_rhythm_translation_rhyth/Taf1d_set_D.pdf]

## Tardbp

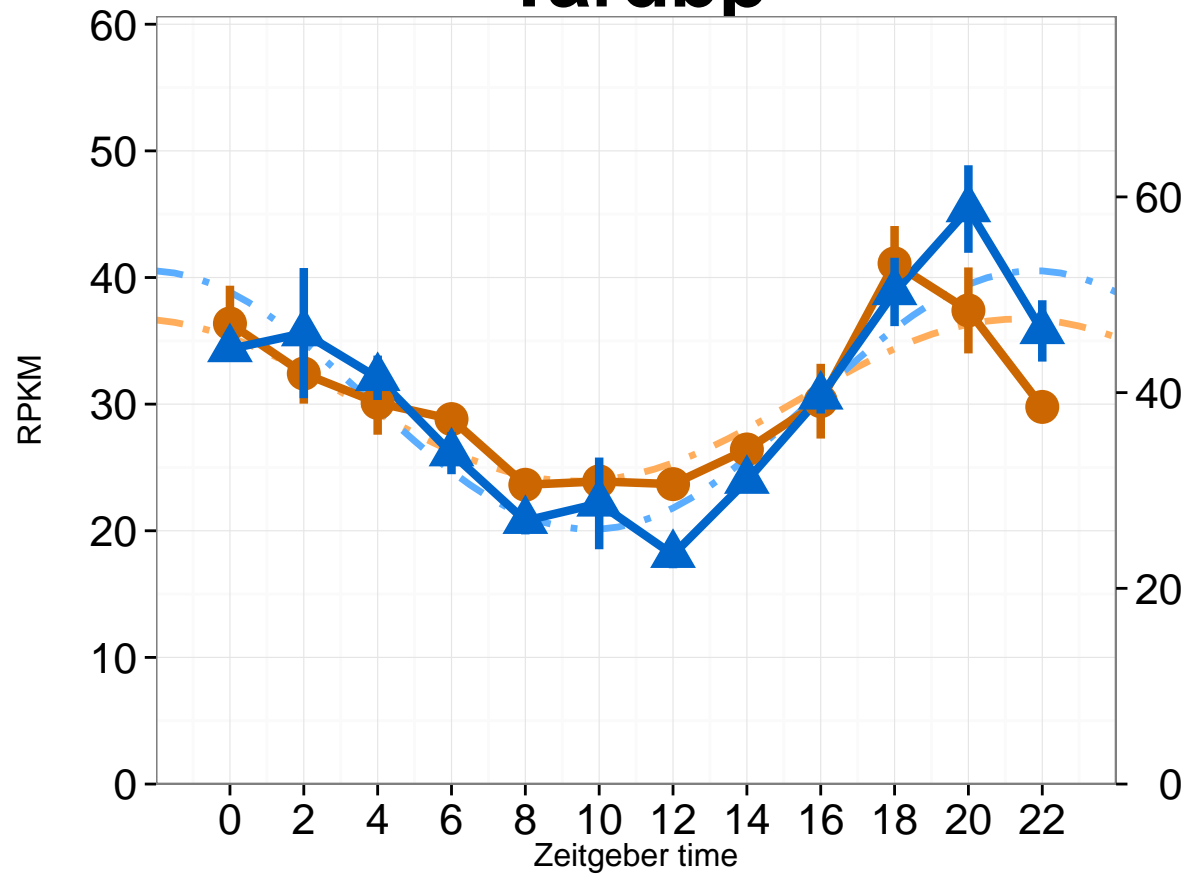

## Tardbp

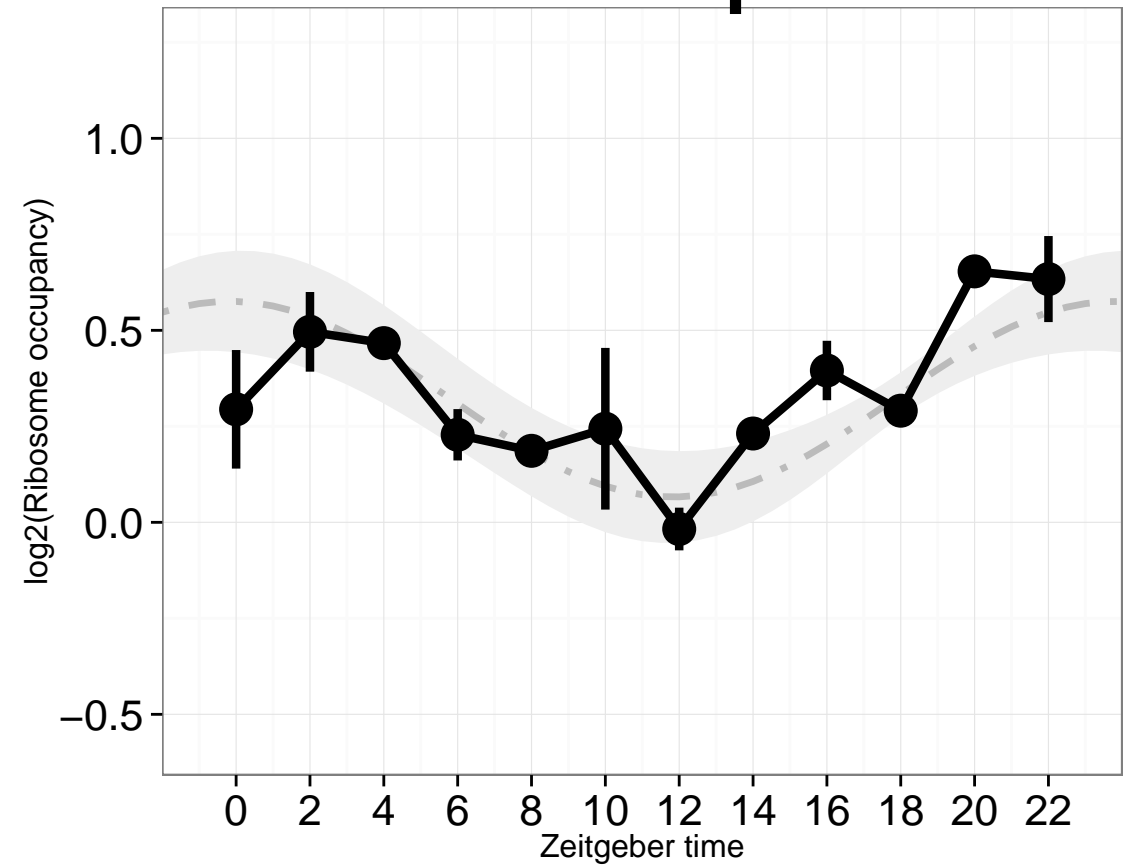

Supplement: SuppDataset_1.zip [file Tardbp_set_D.pdf › Supplemental Dataset 1/D-mRNA_rhythm_translation_rhyth/Tardbp_set_D.pdf]

## Tars

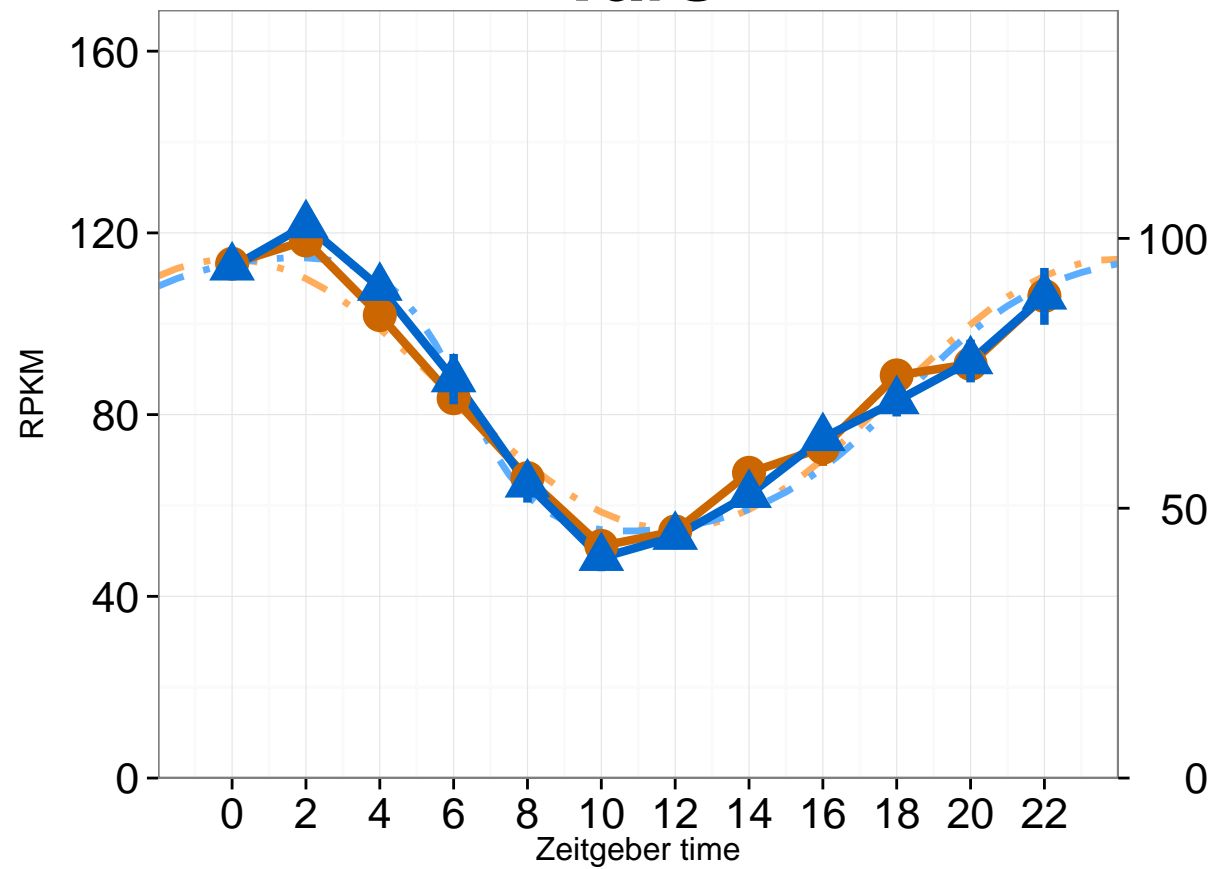

## Tars

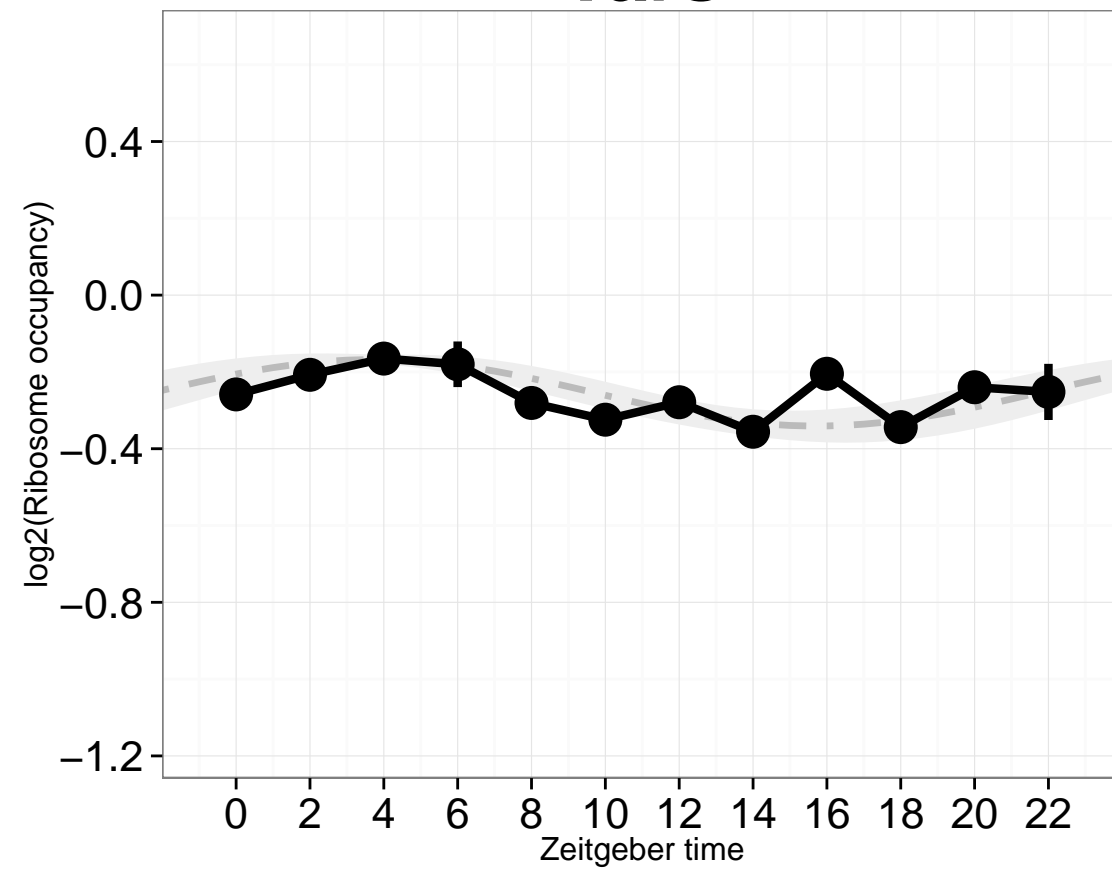

Supplement: SuppDataset_1.zip [file Tars_set_D.pdf › Supplemental Dataset 1/D-mRNA_rhythm_translation_rhyth/Tars_set_D.pdf]

## Tat

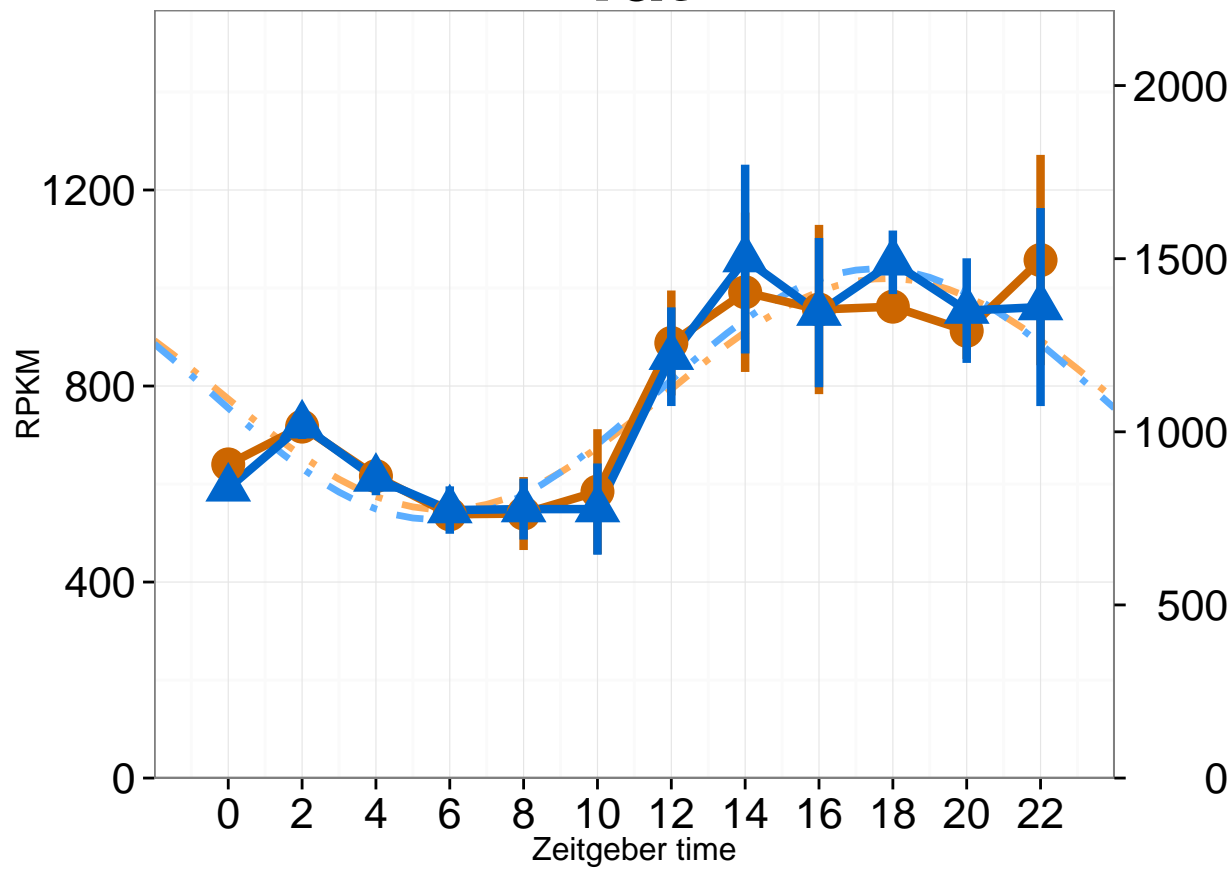

## Tat

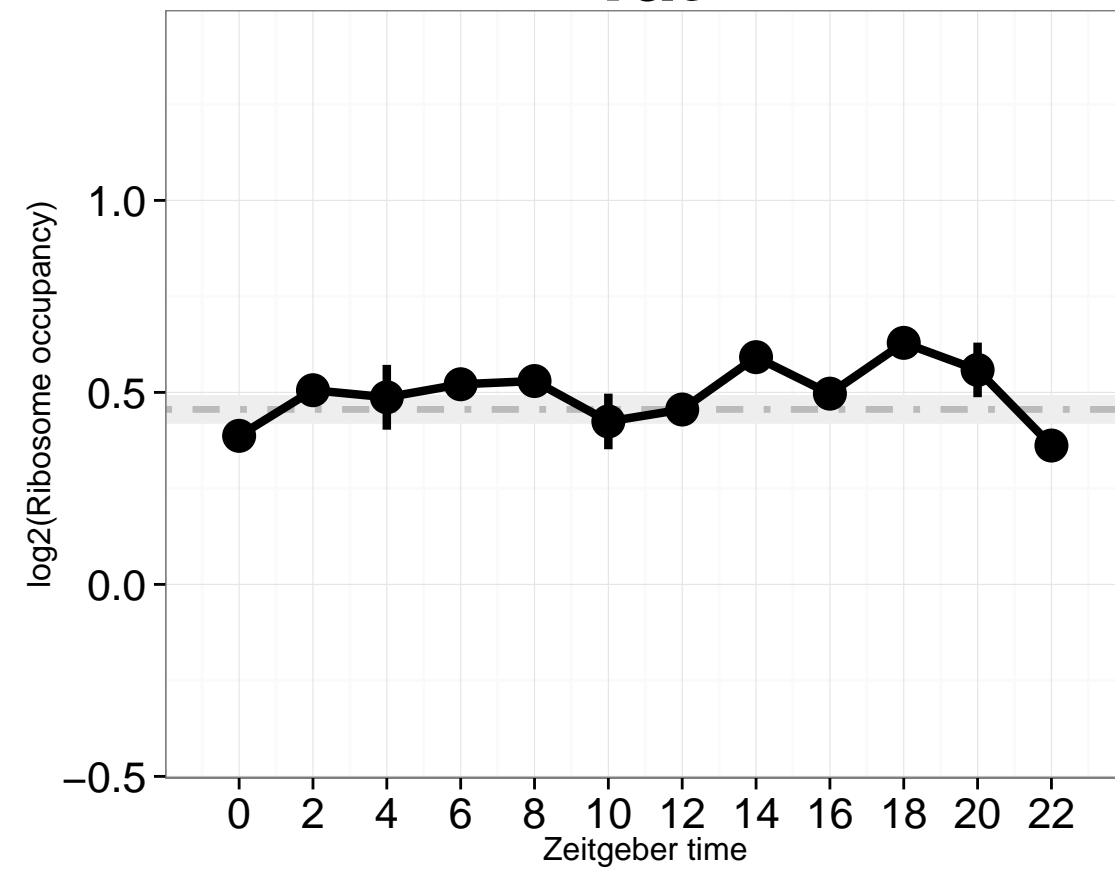

Supplement: SuppDataset_1.zip [file Tat_set_D.pdf › Supplemental Dataset 1/D-mRNA_rhythm_translation_rhyth/Tat_set_D.pdf]

# Tbc1d10a

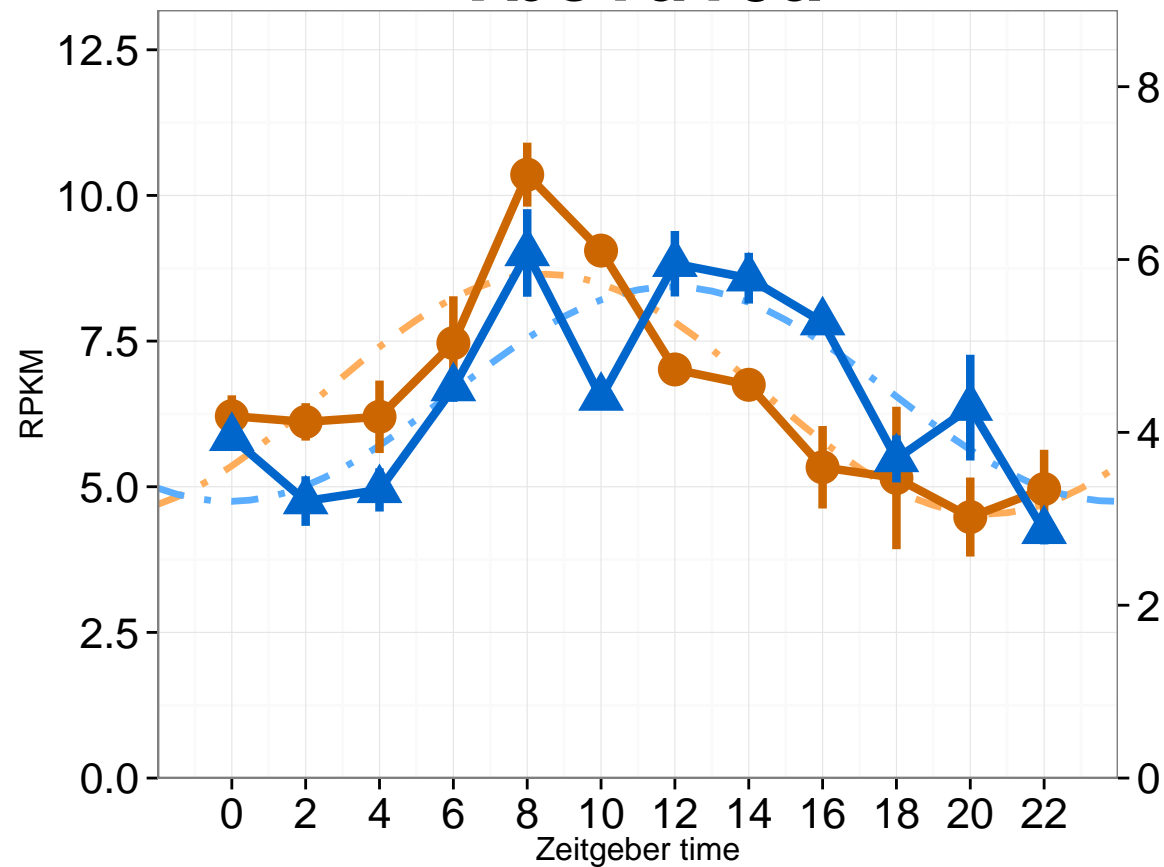

# Tbc1d10a

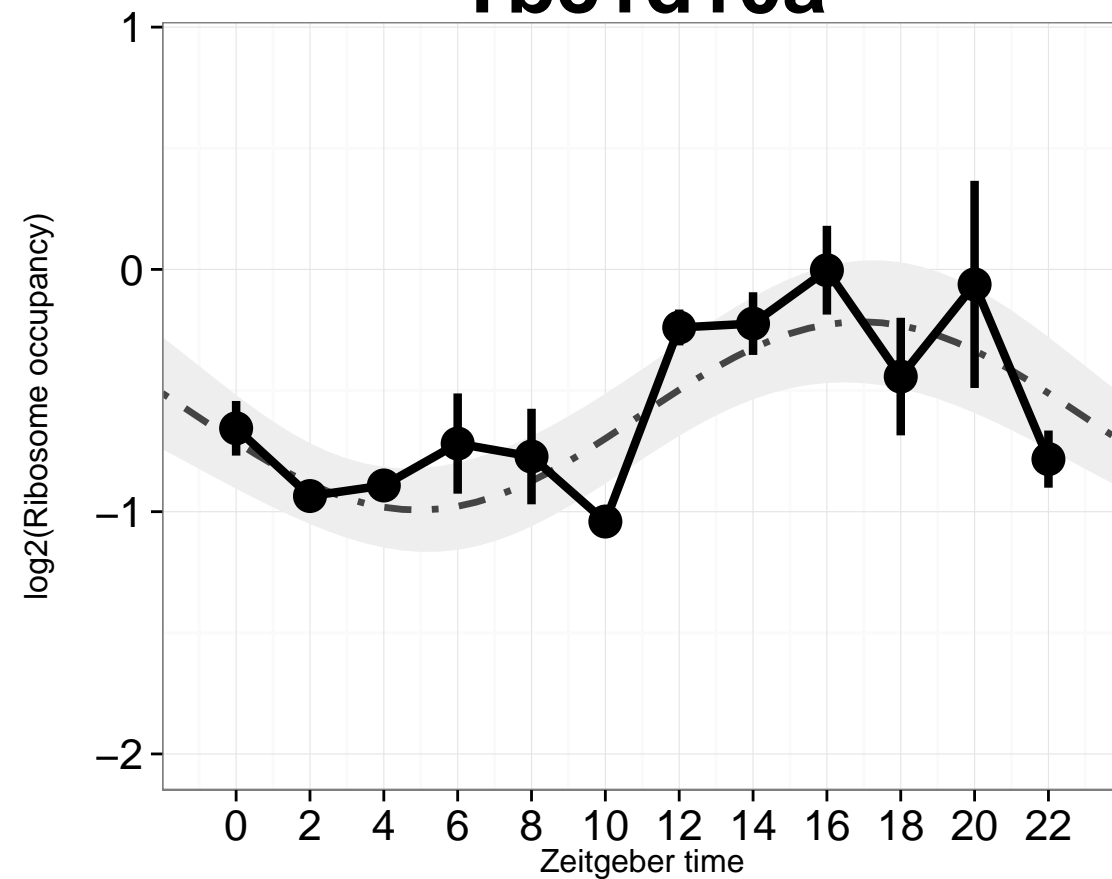

Supplement: SuppDataset_1.zip [file Tbc1d10a_set_D.pdf › Supplemental Dataset 1/D-mRNA_rhythm_translation_rhyth/Tbc1d10a_set_D.pdf]

# Tbc1d16

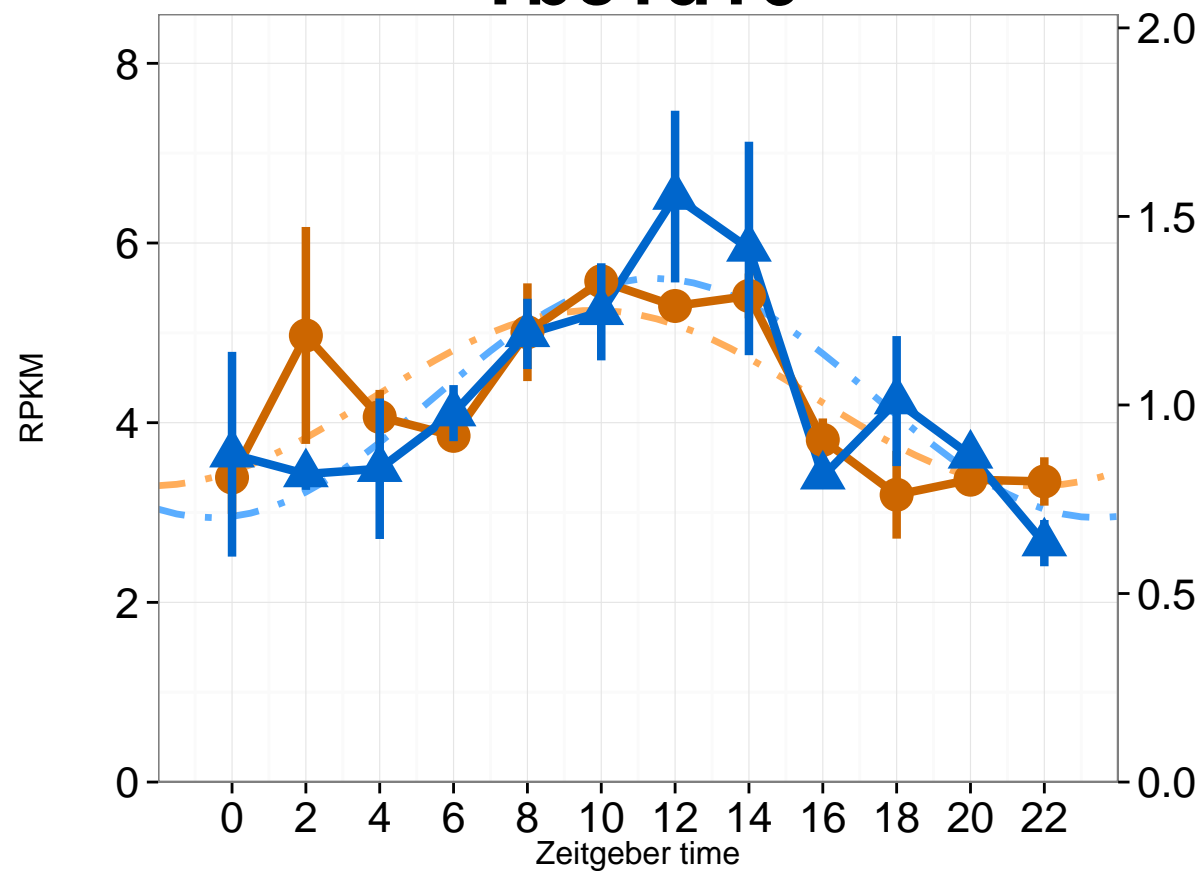

# Tbc1d16

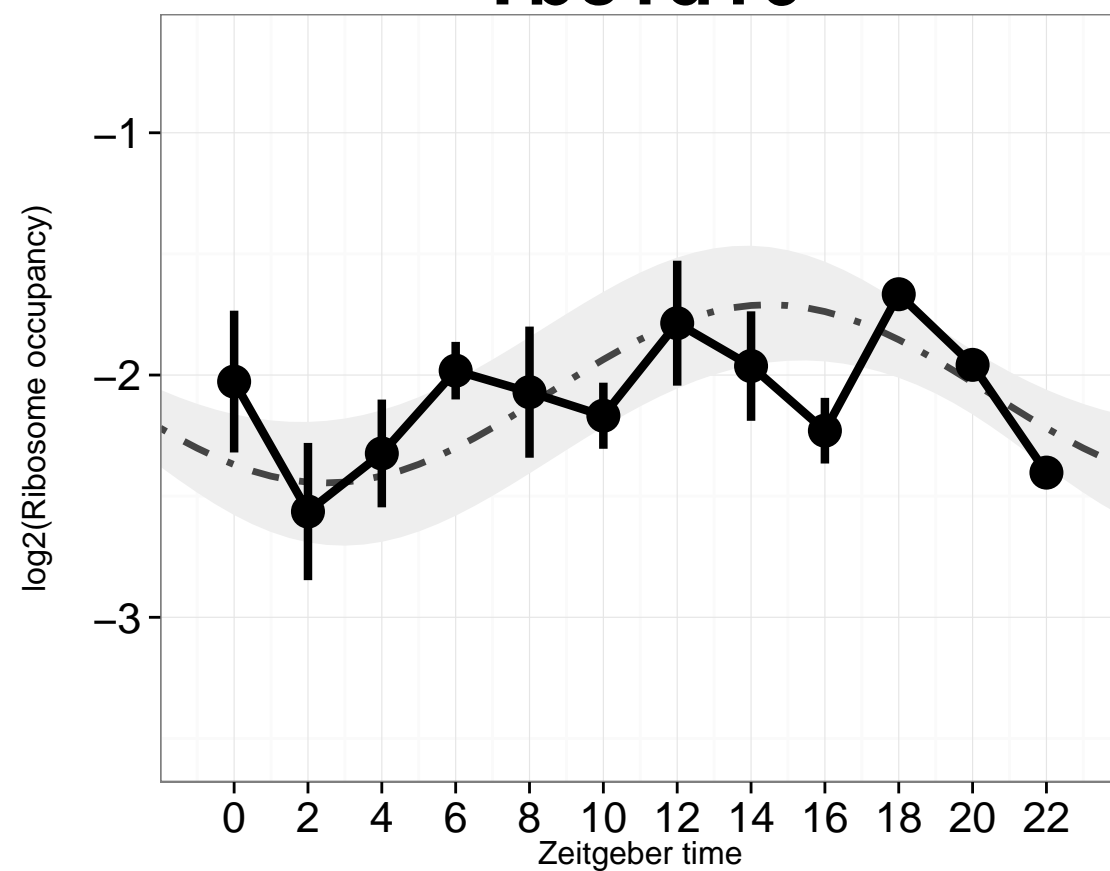

Supplement: SuppDataset_1.zip [file Tbc1d16_set_D.pdf › Supplemental Dataset 1/D-mRNA_rhythm_translation_rhyth/Tbc1d16_set_D.pdf]

# Tbc1d17

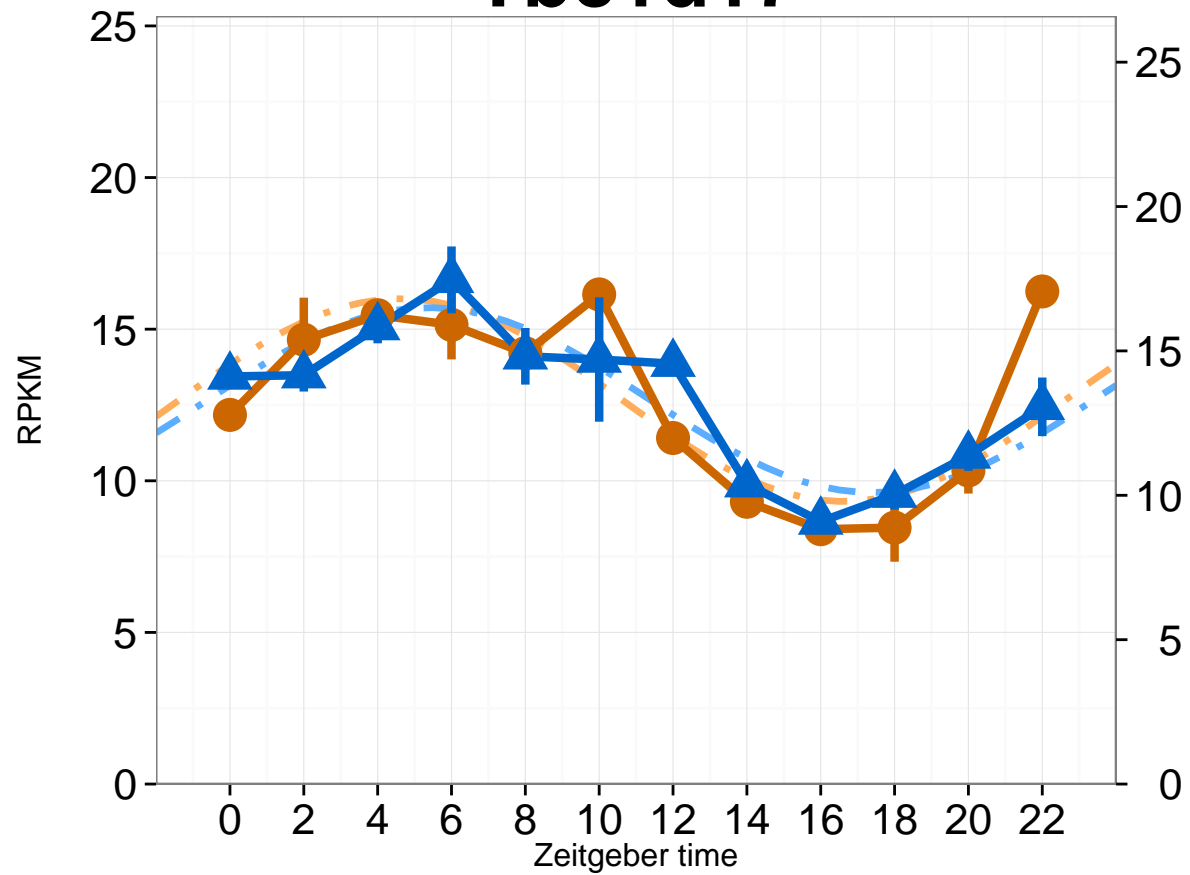

# Tbc1d17

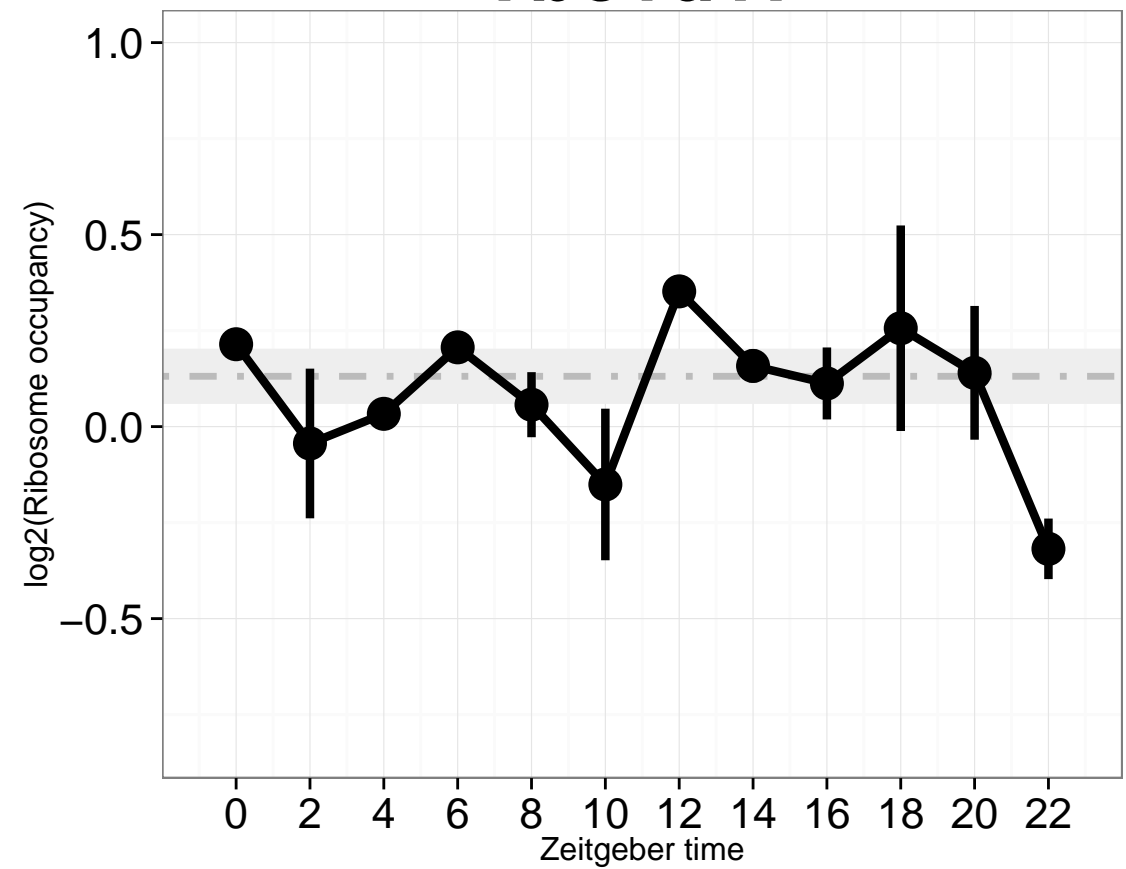

Supplement: SuppDataset_1.zip [file Tbc1d17_set_D.pdf › Supplemental Dataset 1/D-mRNA_rhythm_translation_rhyth/Tbc1d17_set_D.pdf]

# Tbc1d2

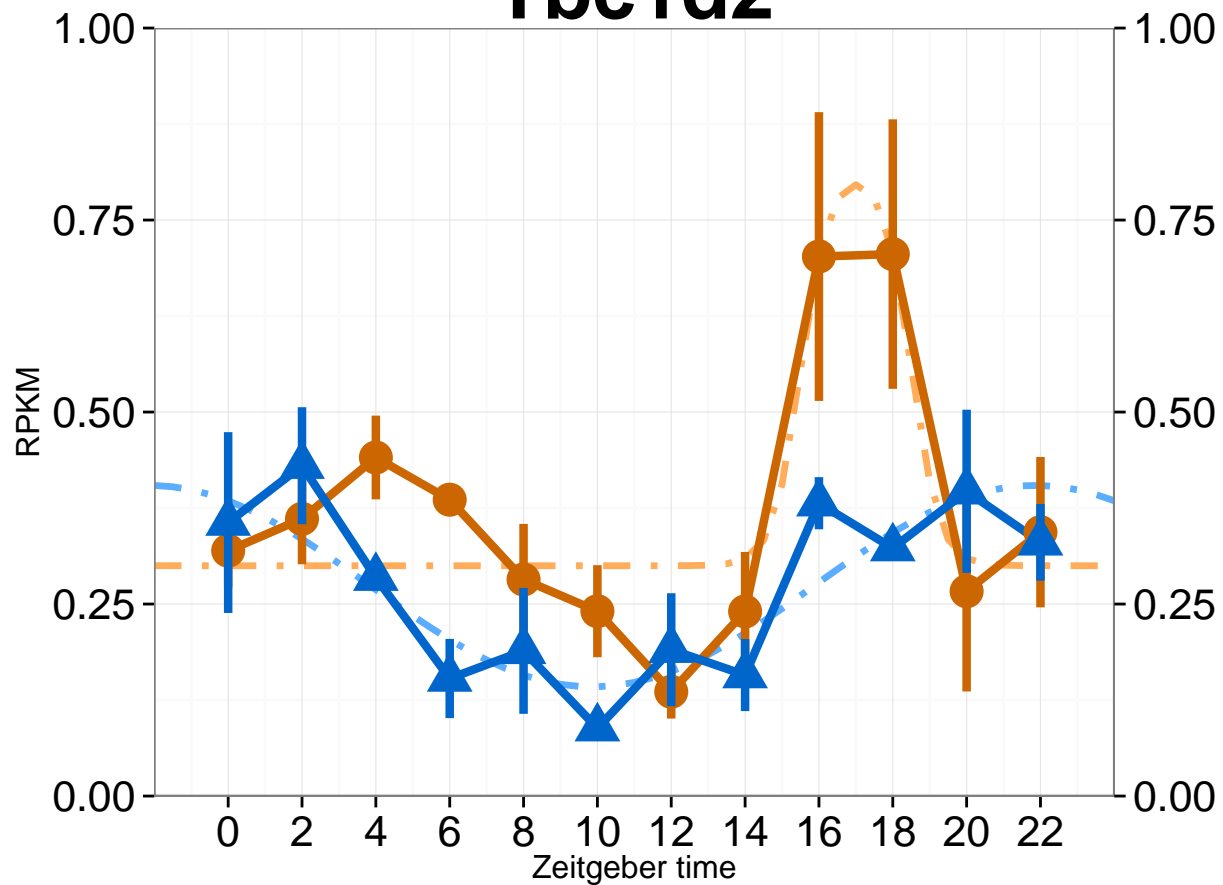

# Tbc1d2

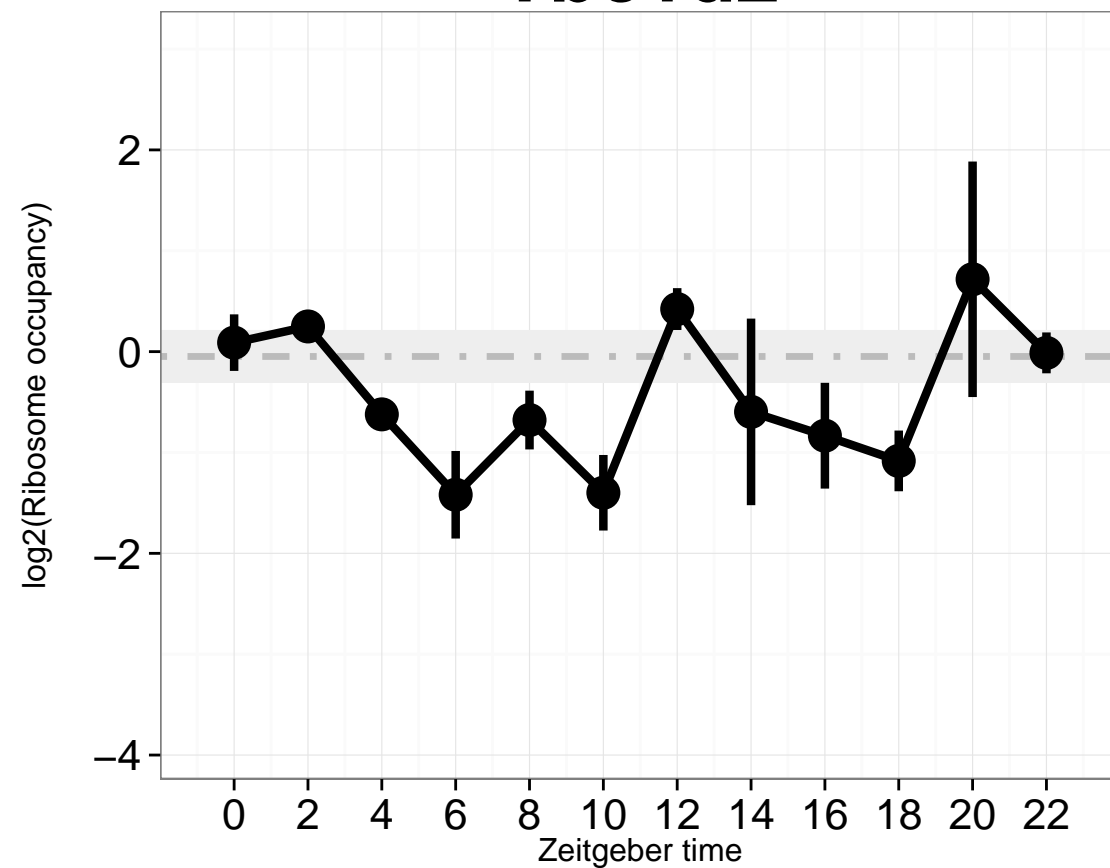

Supplement: SuppDataset_1.zip [file Tbc1d2_set_D.pdf › Supplemental Dataset 1/D-mRNA_rhythm_translation_rhyth/Tbc1d2_set_D.pdf]

## Tbcel

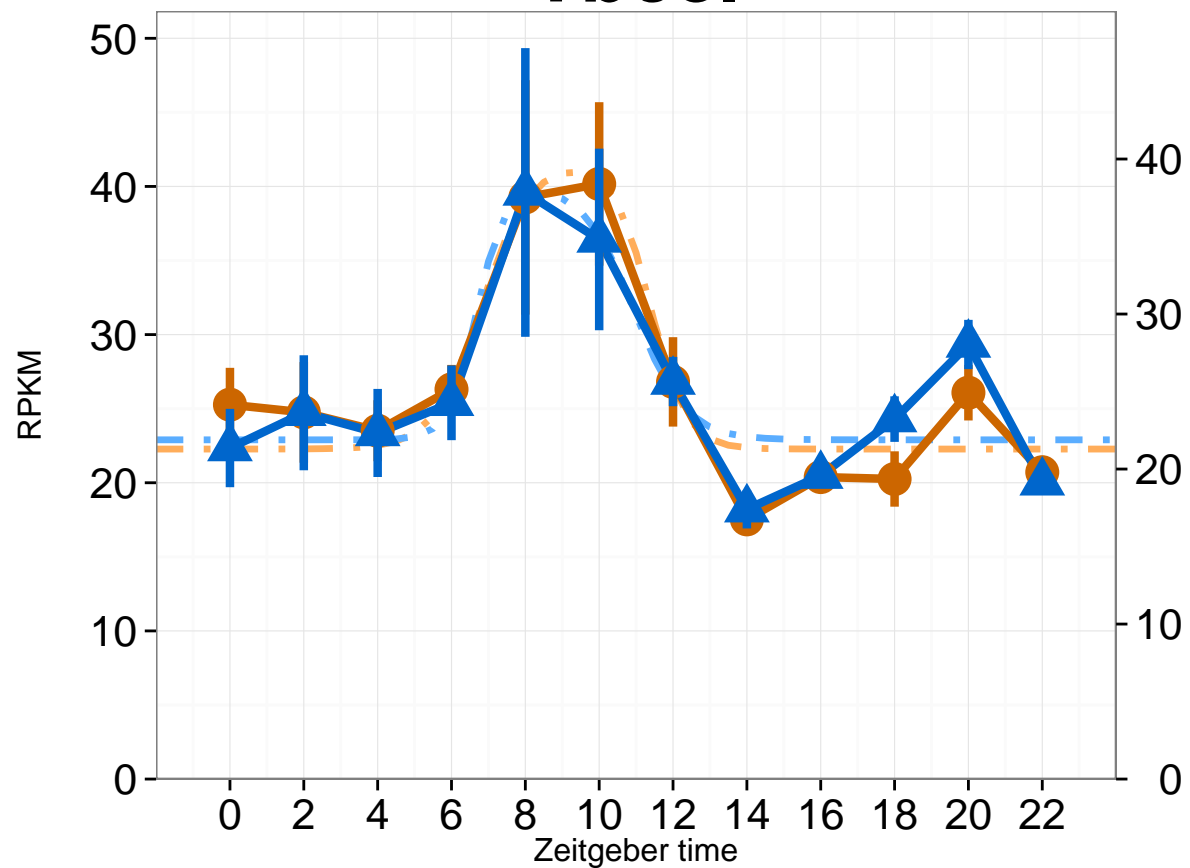

## Tbcel

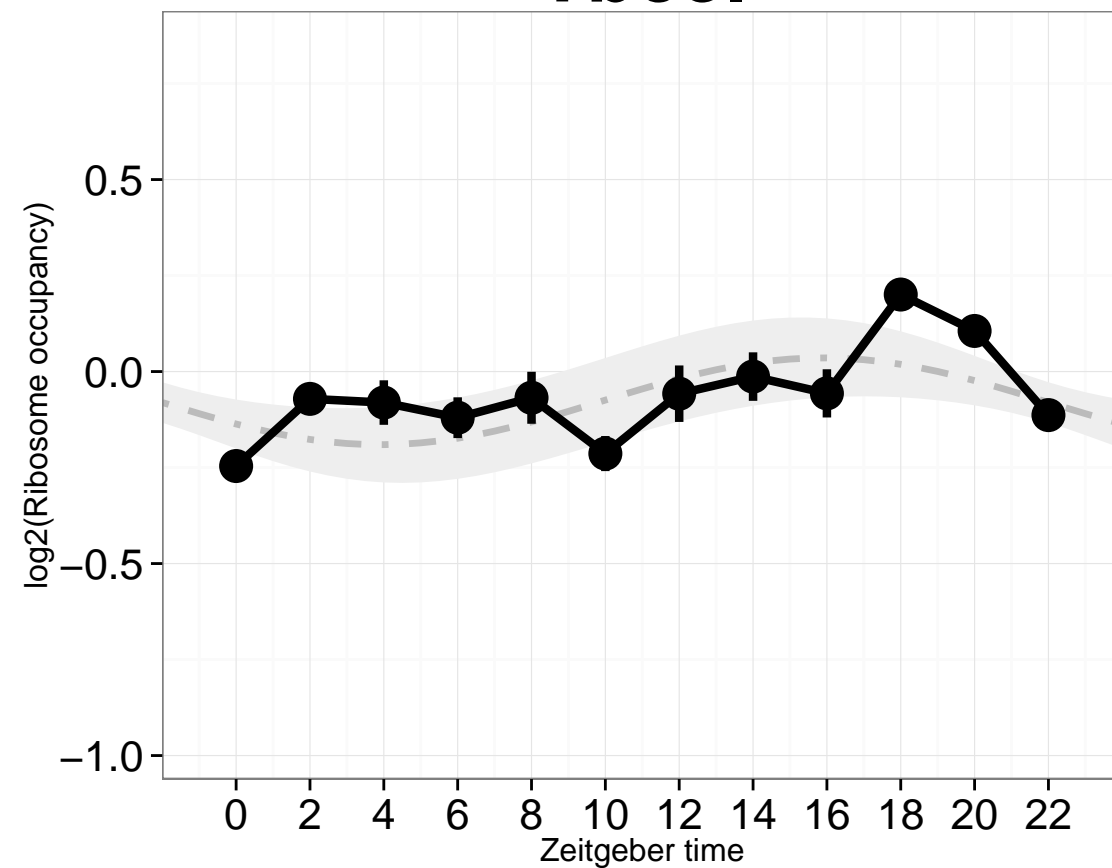

Supplement: SuppDataset_1.zip [file Tbcel_set_D.pdf › Supplemental Dataset 1/D-mRNA_rhythm_translation_rhyth/Tbcel_set_D.pdf]

# Tcp11l2

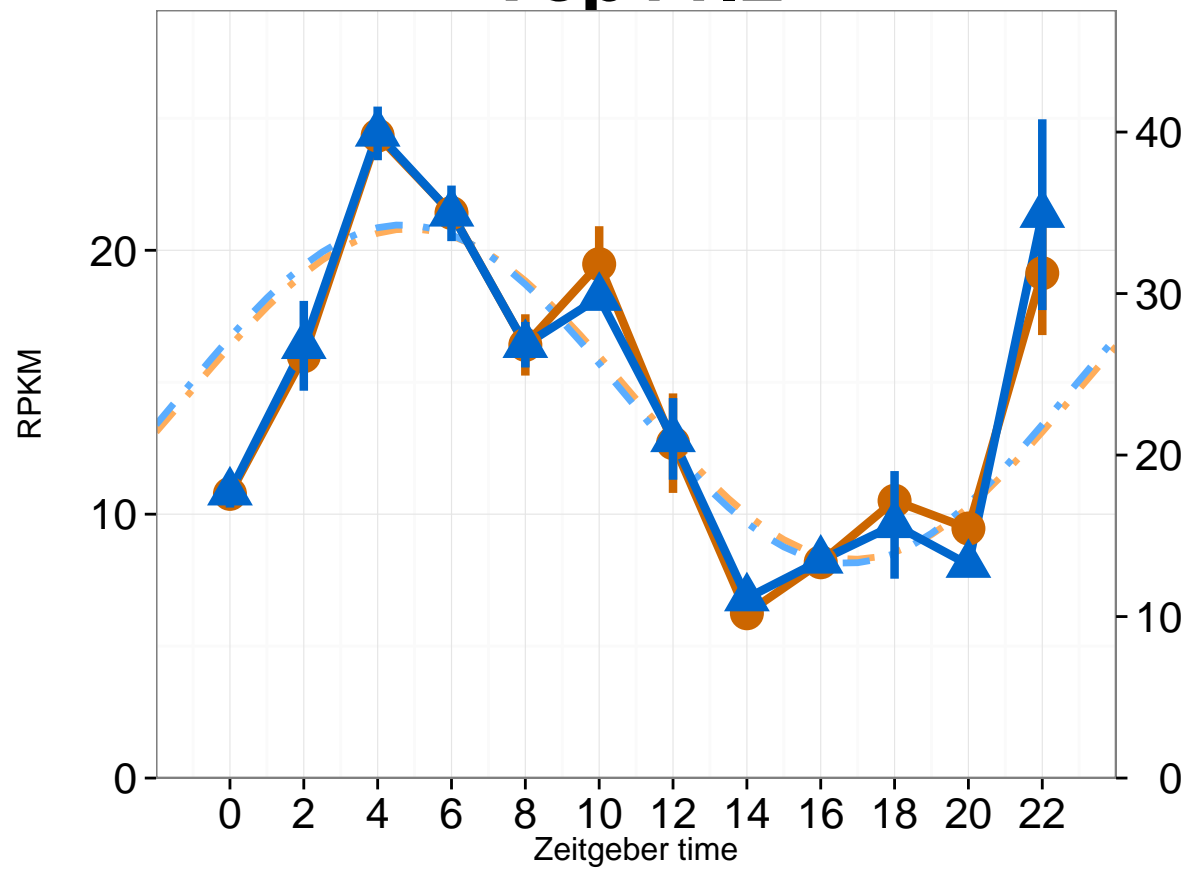

# Tcp11l2

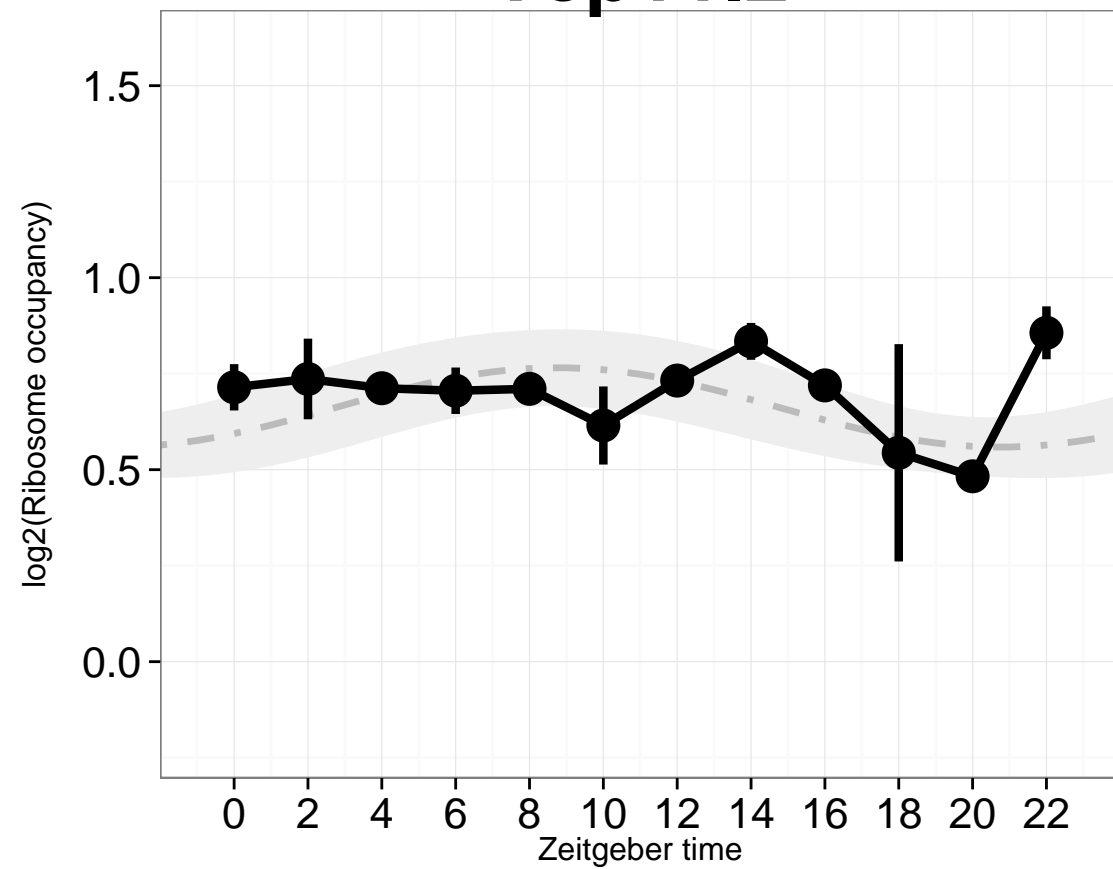

Supplement: SuppDataset_1.zip [file Tcp11l2_set_D.pdf › Supplemental Dataset 1/D-mRNA_rhythm_translation_rhyth/Tcp11l2_set_D.pdf]

## Tcta

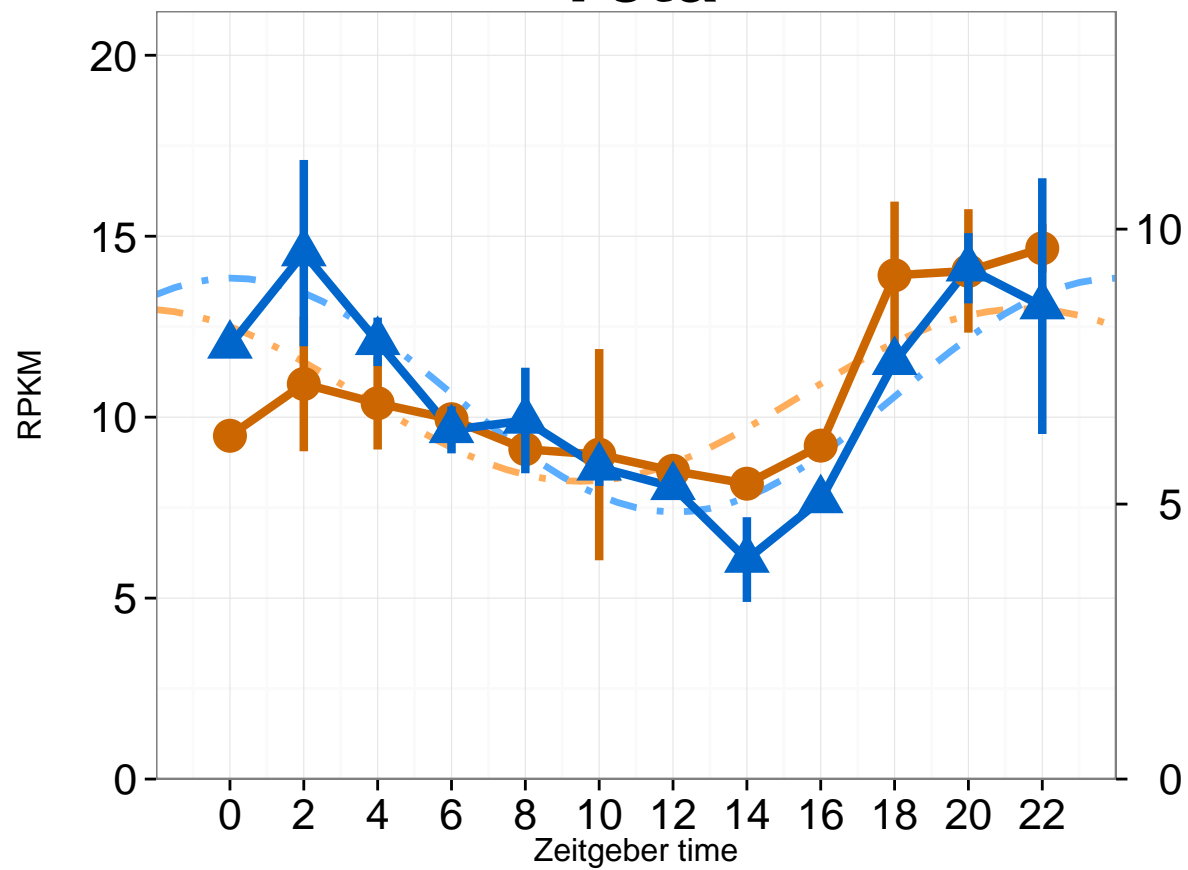

## Tcta

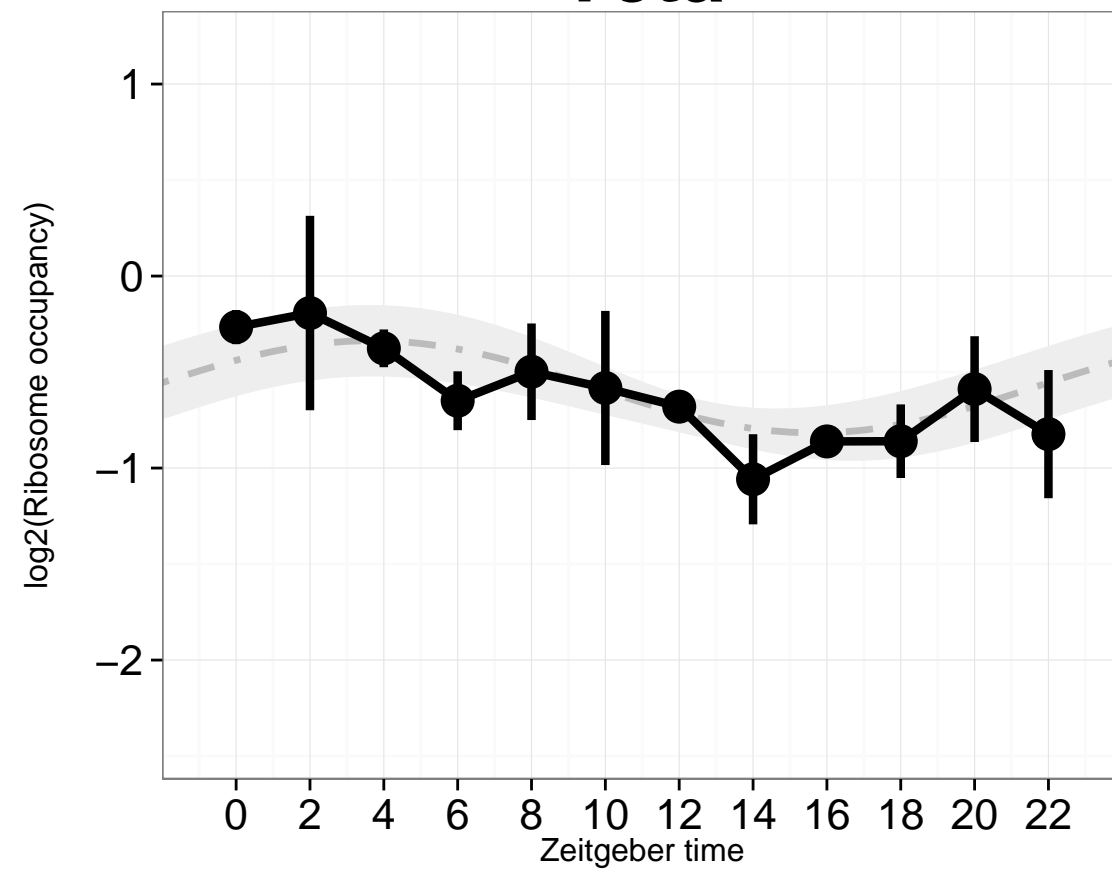

Supplement: SuppDataset_1.zip [file Tcta_set_D.pdf › Supplemental Dataset 1/D-mRNA_rhythm_translation_rhyth/Tcta_set_D.pdf]

## Tef

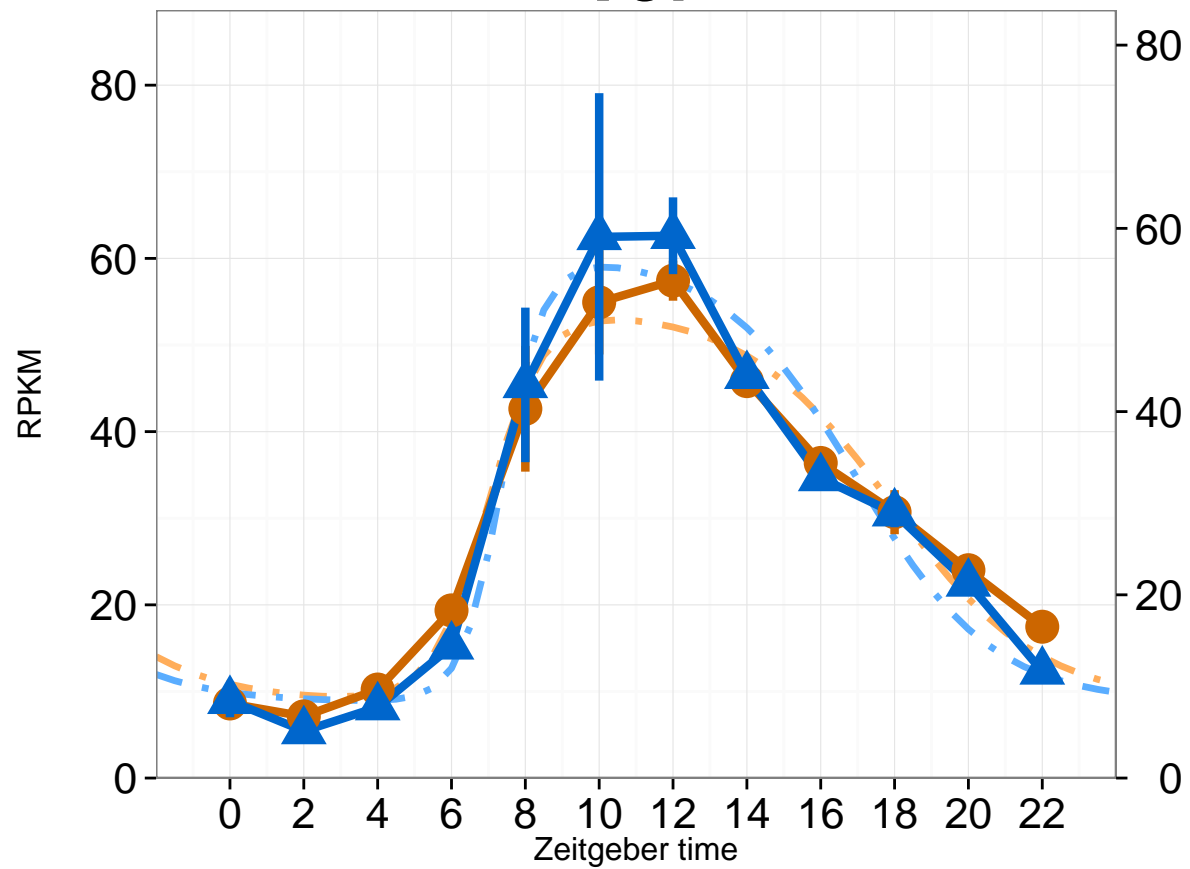

## Tef

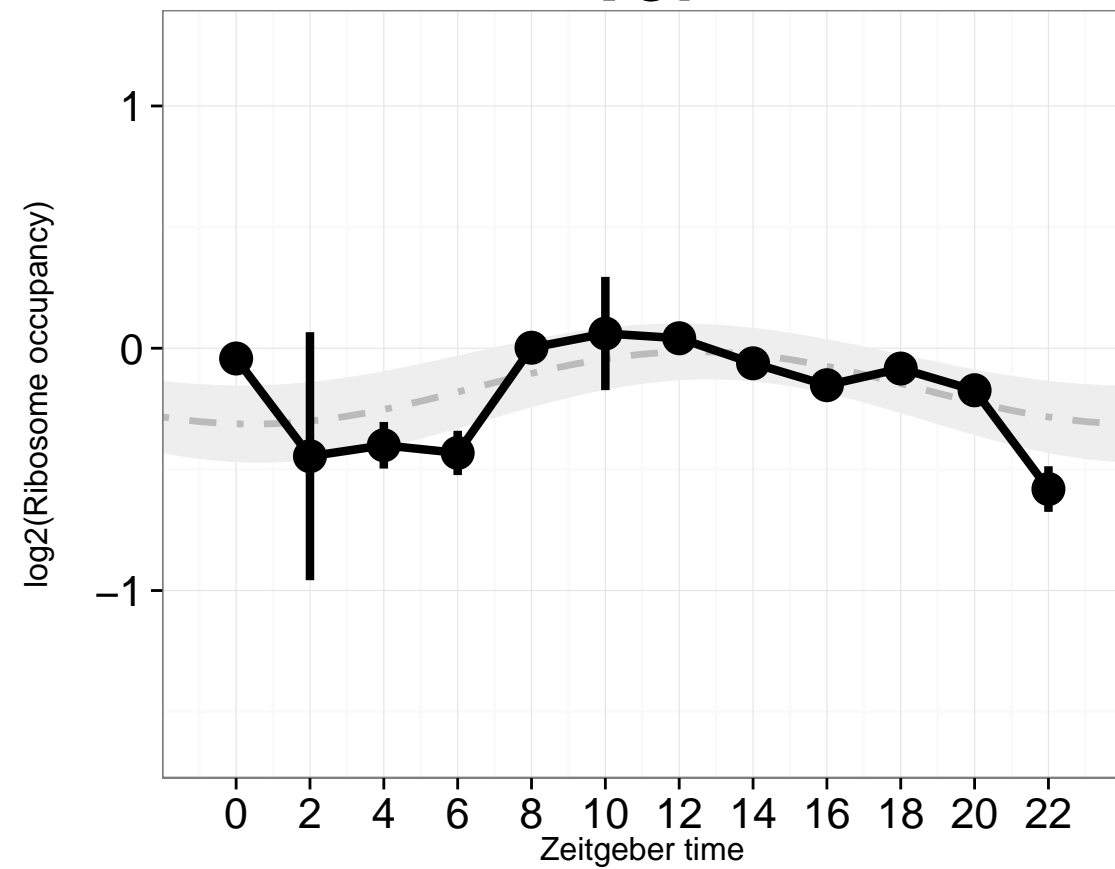

Supplement: SuppDataset_1.zip [file Tef_set_D.pdf › Supplemental Dataset 1/D-mRNA_rhythm_translation_rhyth/Tef_set_D.pdf]

# Tenc1

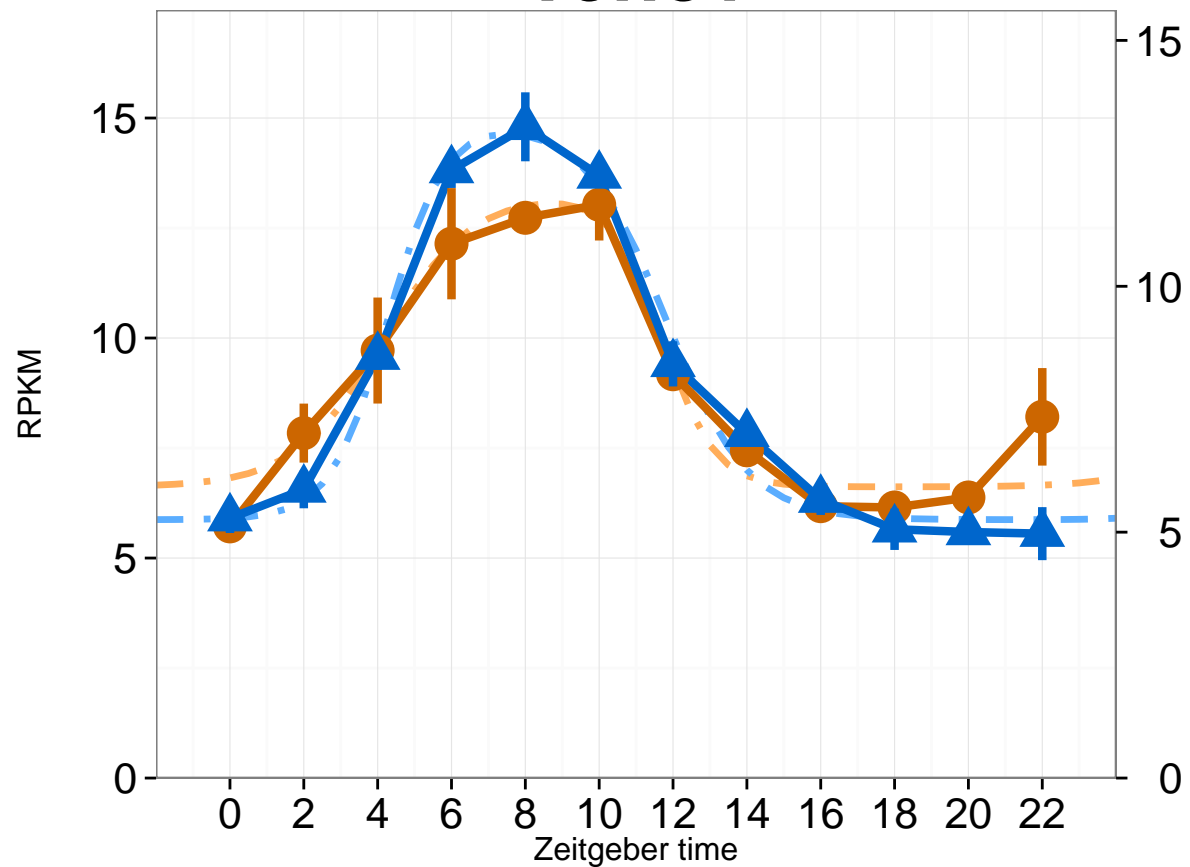

# Tenc1

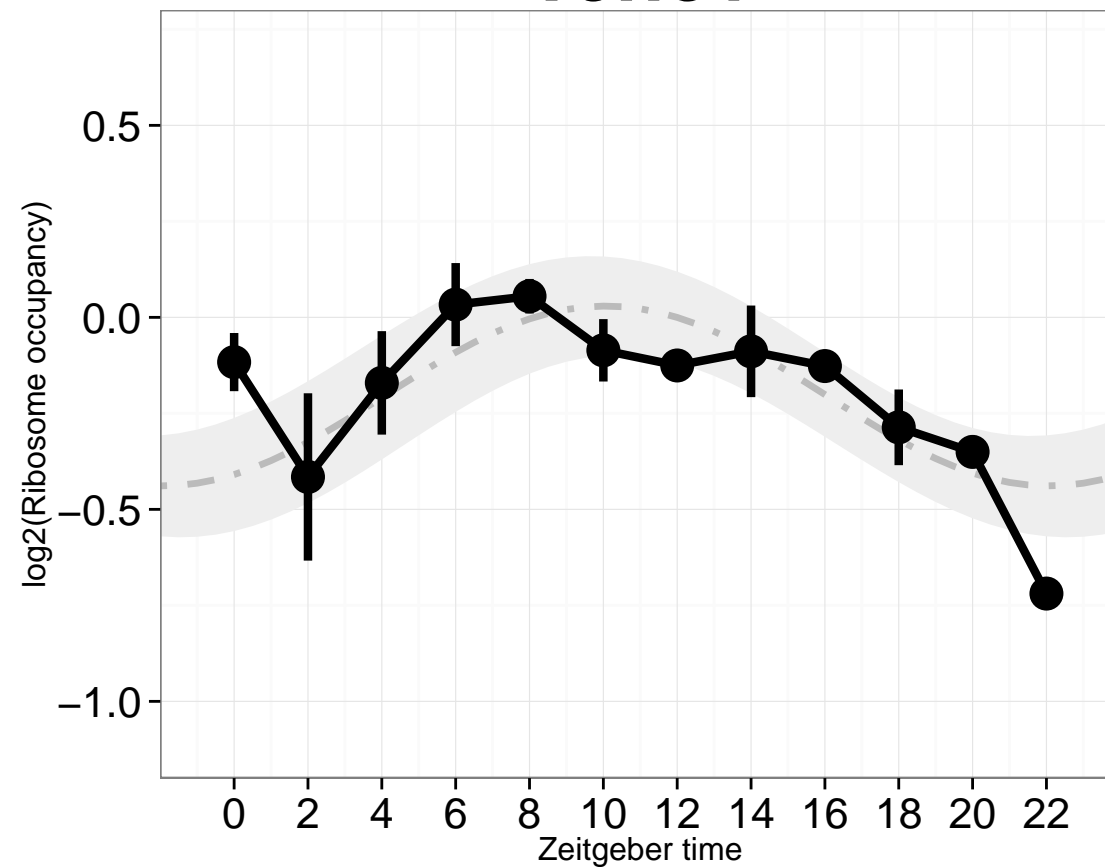

Supplement: SuppDataset_1.zip [file Tenc1_set_D.pdf › Supplemental Dataset 1/D-mRNA_rhythm_translation_rhyth/Tenc1_set_D.pdf]

# Tenm3

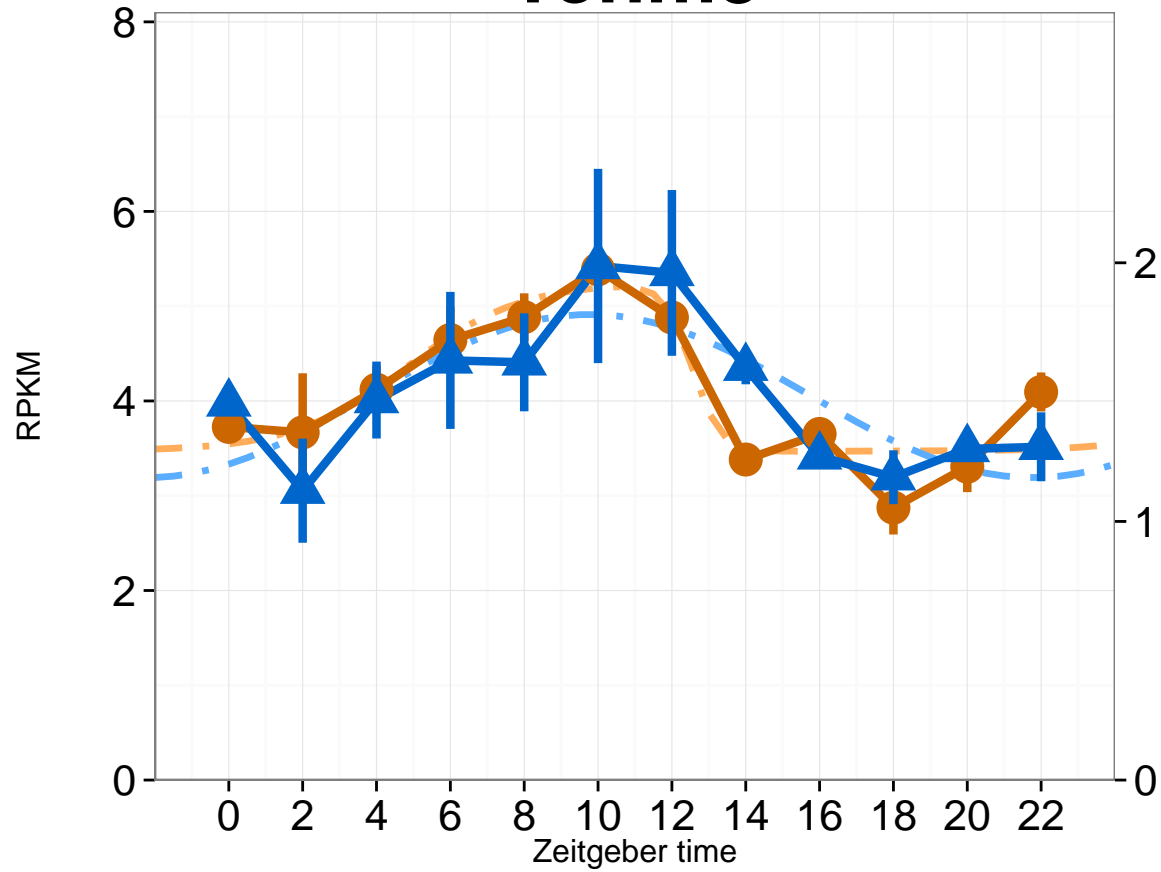

# Tenm3

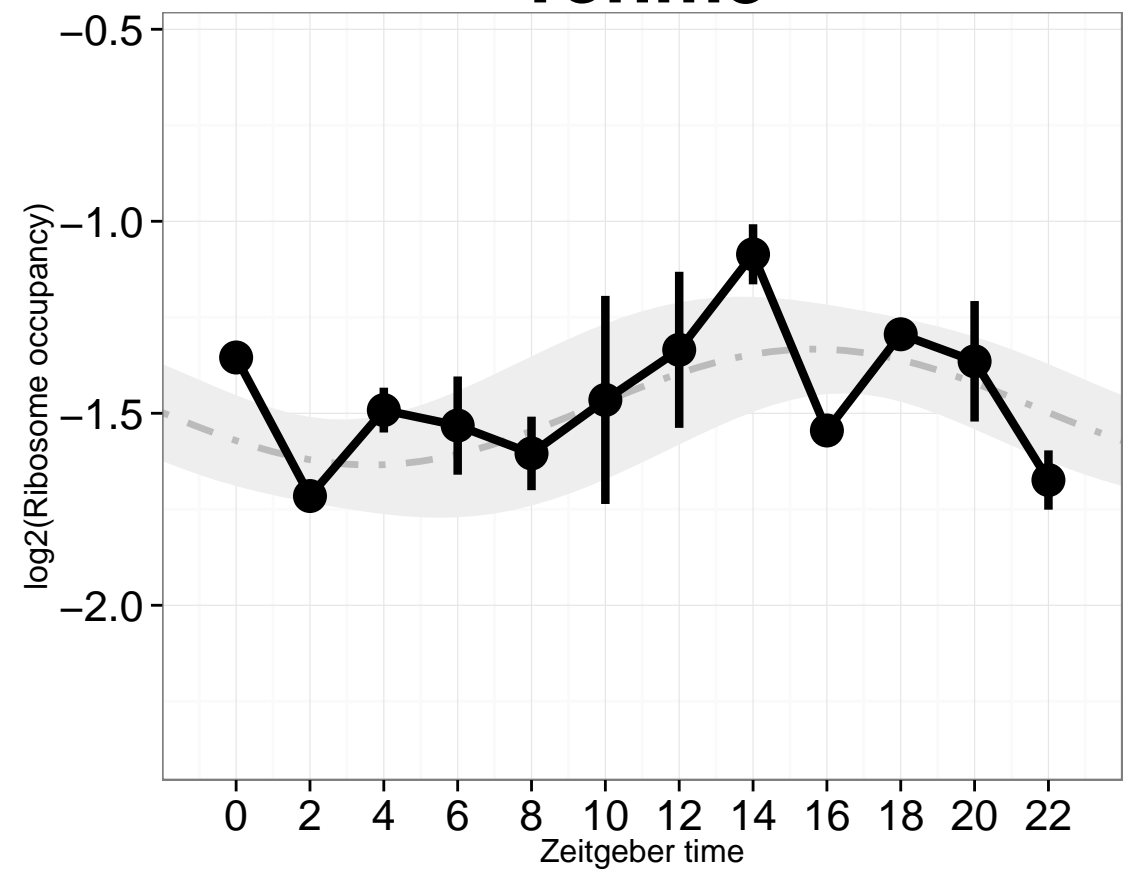

Supplement: SuppDataset_1.zip [file Tenm3_set_D.pdf › Supplemental Dataset 1/D-mRNA_rhythm_translation_rhyth/Tenm3_set_D.pdf]

# Tfpi2

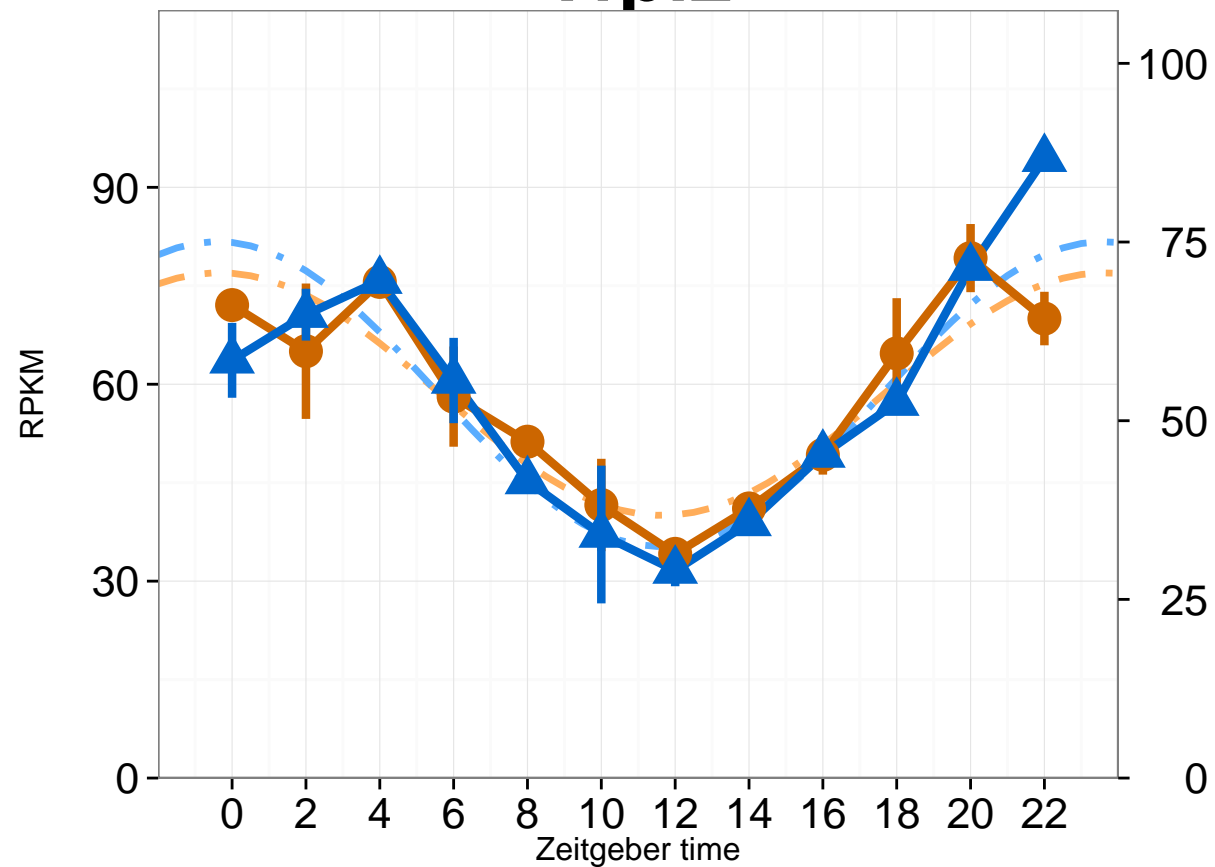

# Tfpi2

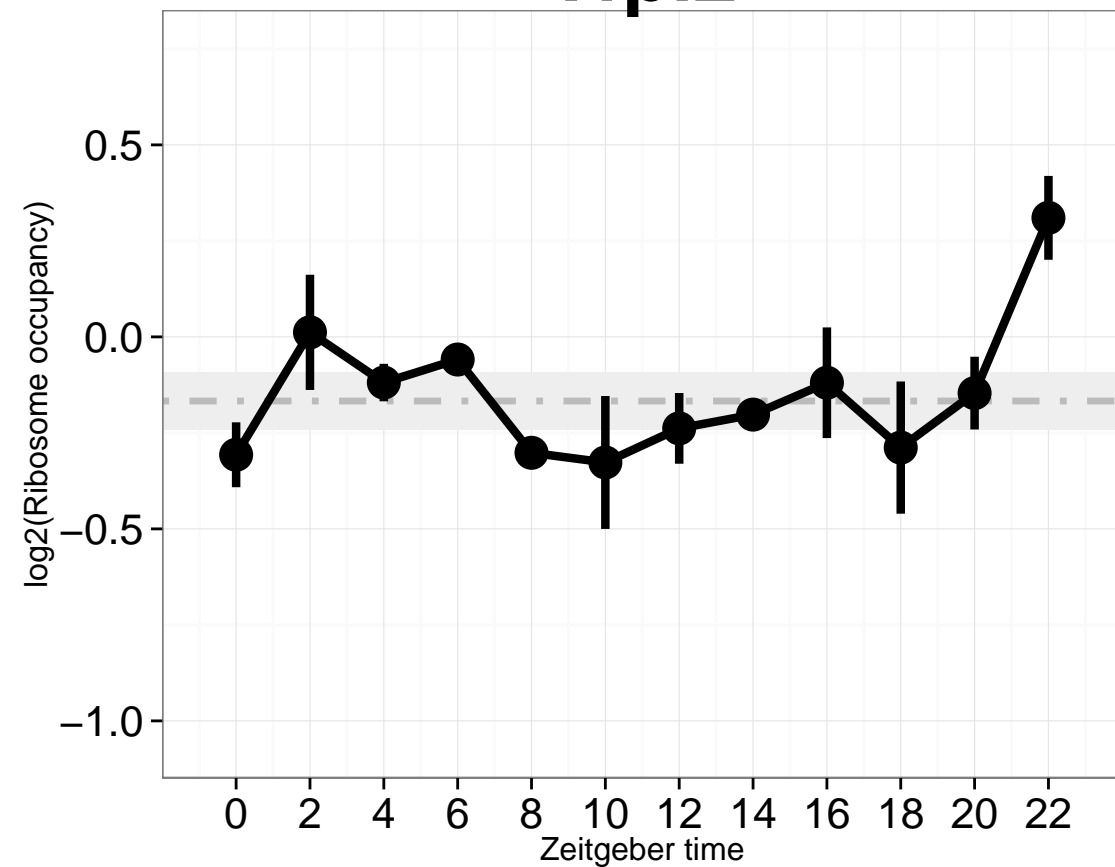

Supplement: SuppDataset_1.zip [file Tfpi2_set_D.pdf › Supplemental Dataset 1/D-mRNA_rhythm_translation_rhyth/Tfpi2_set_D.pdf]

## Tfrc

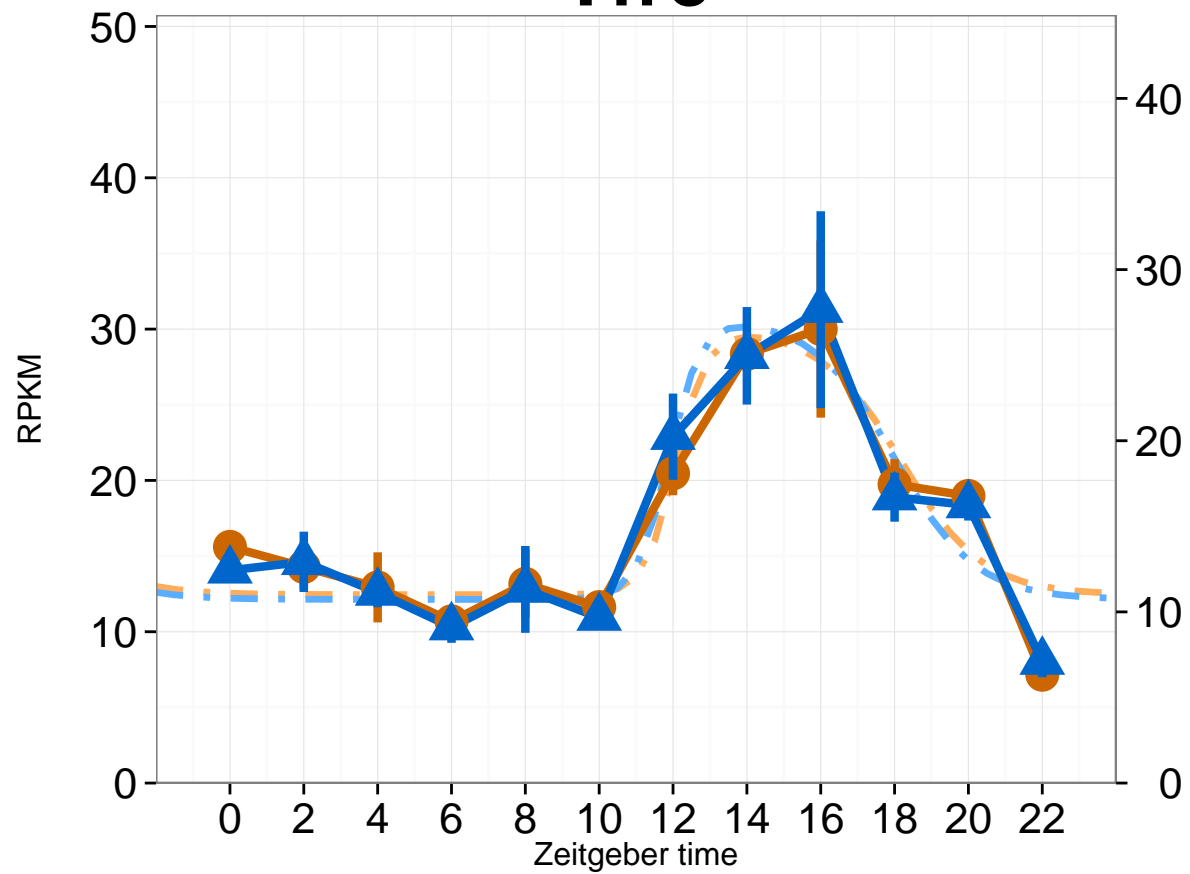

## Tfrc

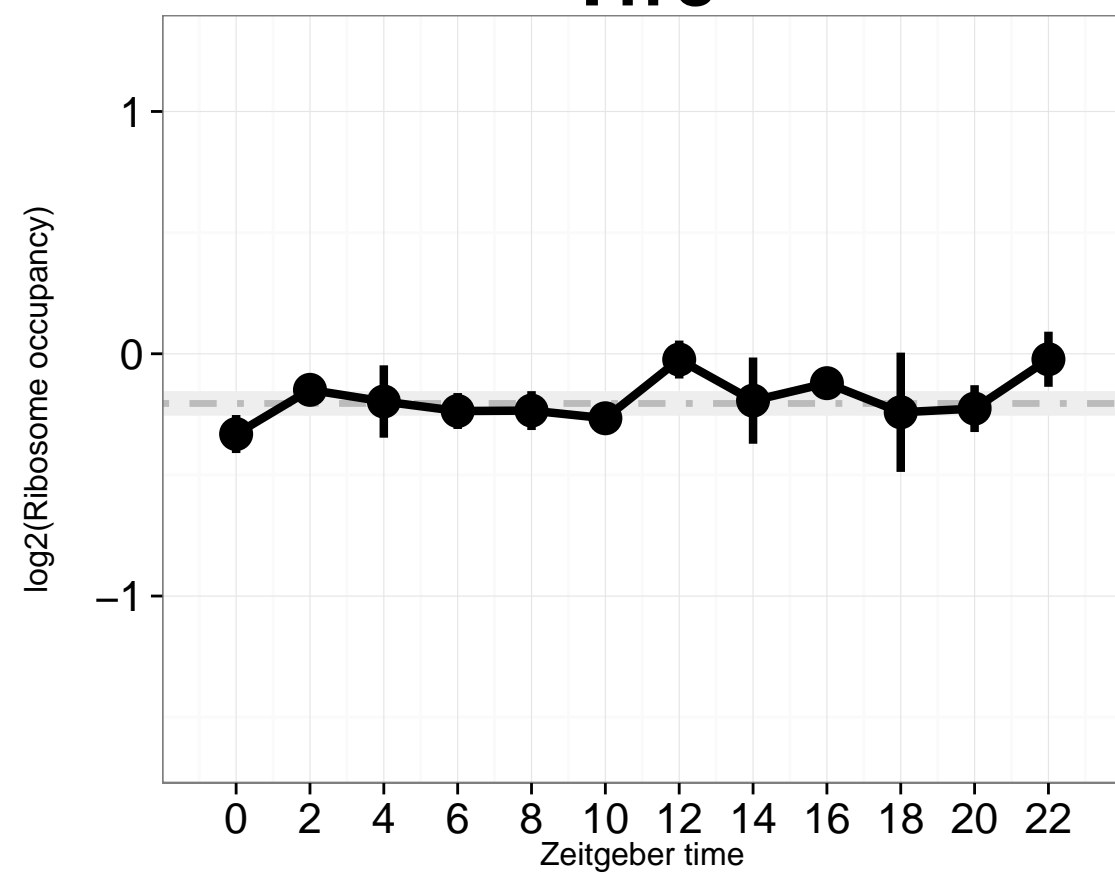

Supplement: SuppDataset_1.zip [file Tfrc_set_D.pdf › Supplemental Dataset 1/D-mRNA_rhythm_translation_rhyth/Tfrc_set_D.pdf]

## Tgfbr1

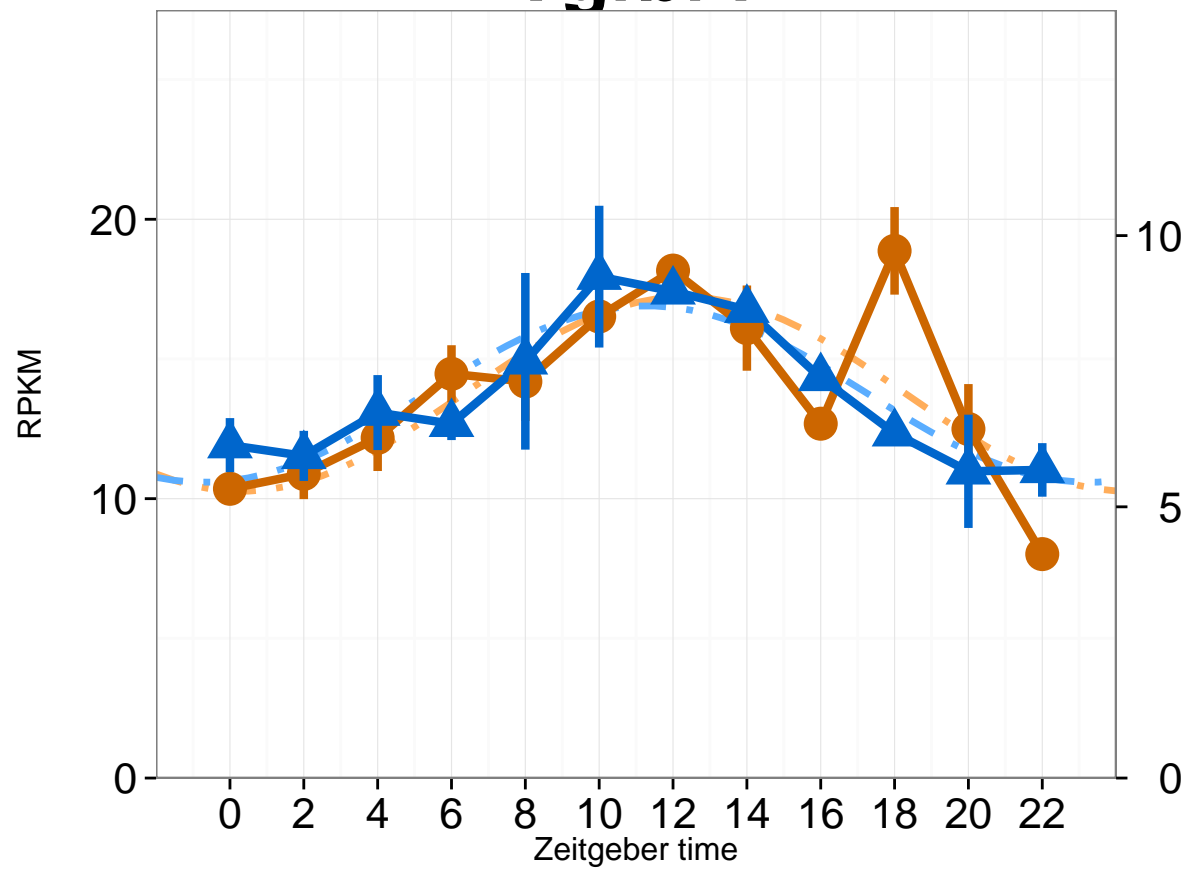

## Tgfbr1

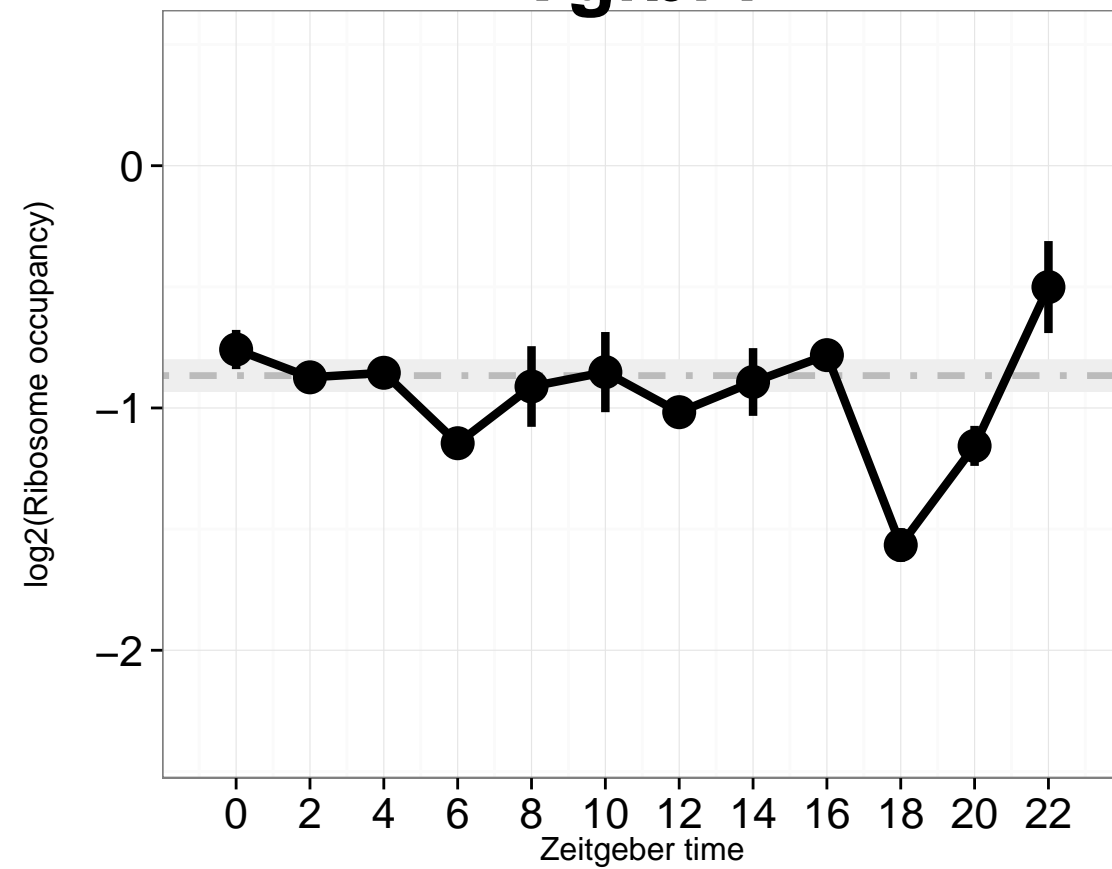

Supplement: SuppDataset_1.zip [file Tgfbr1_set_D.pdf › Supplemental Dataset 1/D-mRNA_rhythm_translation_rhyth/Tgfbr1_set_D.pdf]

# Tgm1

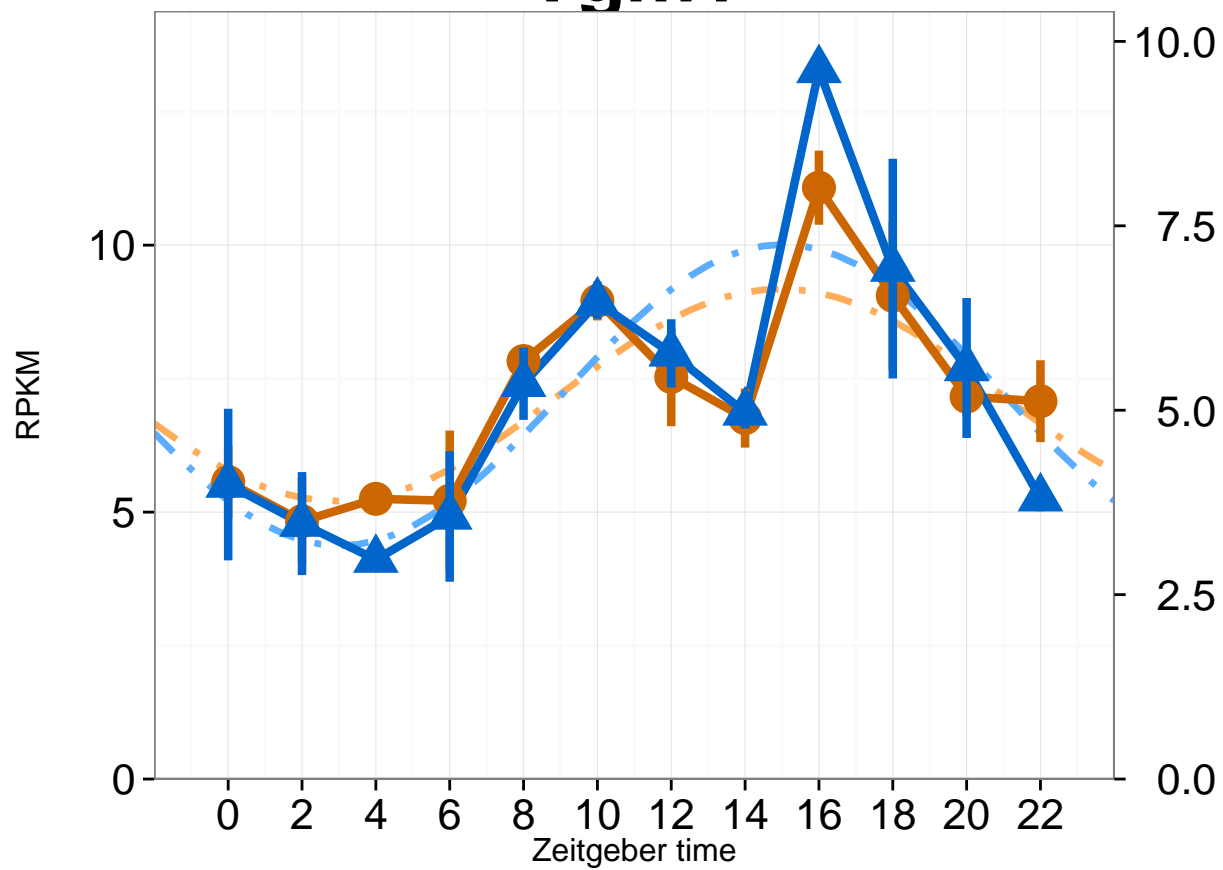

# Tgm1

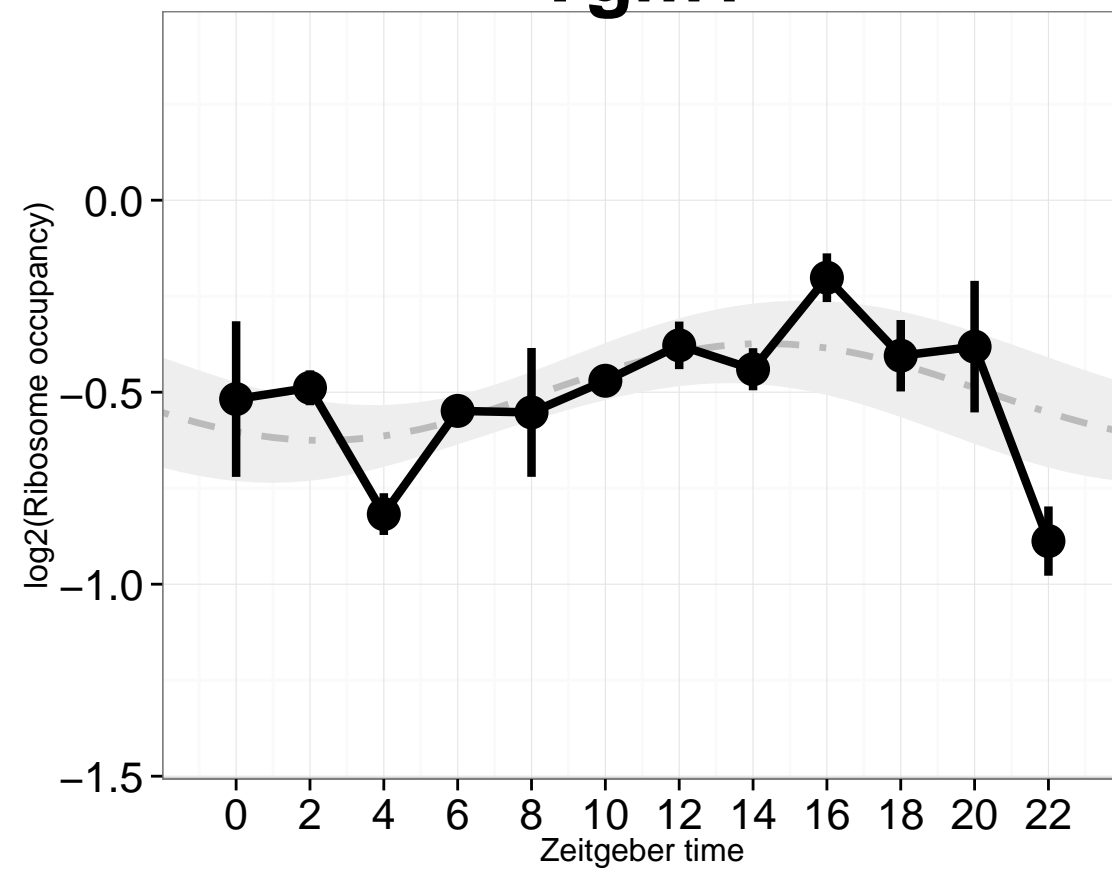

Supplement: SuppDataset_1.zip [file Tgm1_set_D.pdf › Supplemental Dataset 1/D-mRNA_rhythm_translation_rhyth/Tgm1_set_D.pdf]

# Tha1

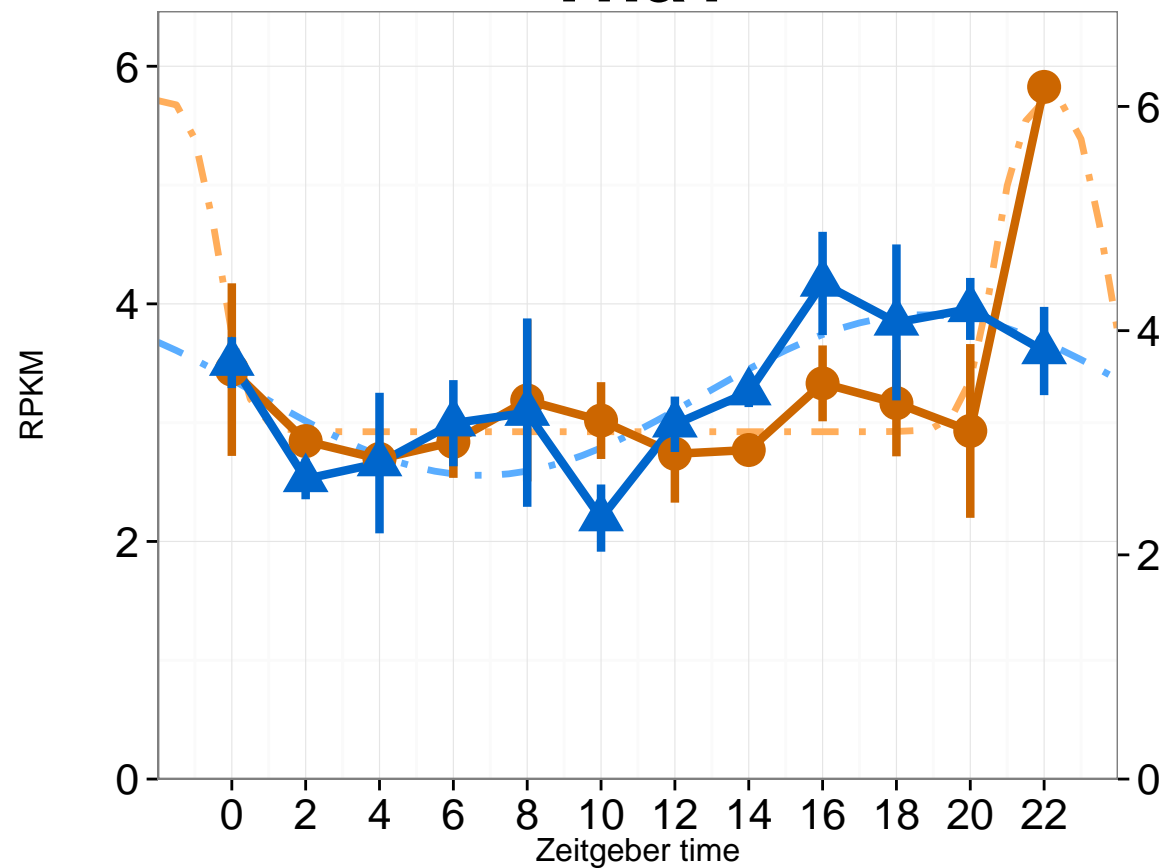

# Tha1

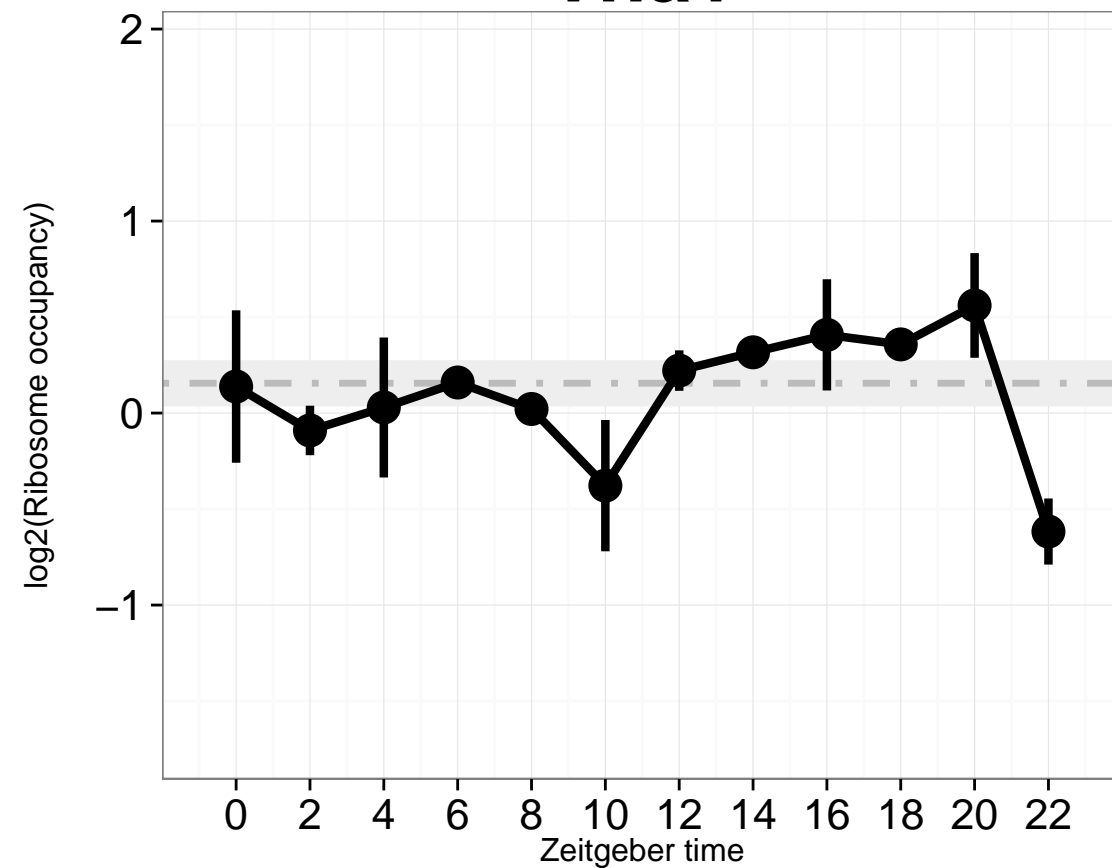

Supplement: SuppDataset_1.zip [file Tha1_set_D.pdf › Supplemental Dataset 1/D-mRNA_rhythm_translation_rhyth/Tha1_set_D.pdf]

# Thpo

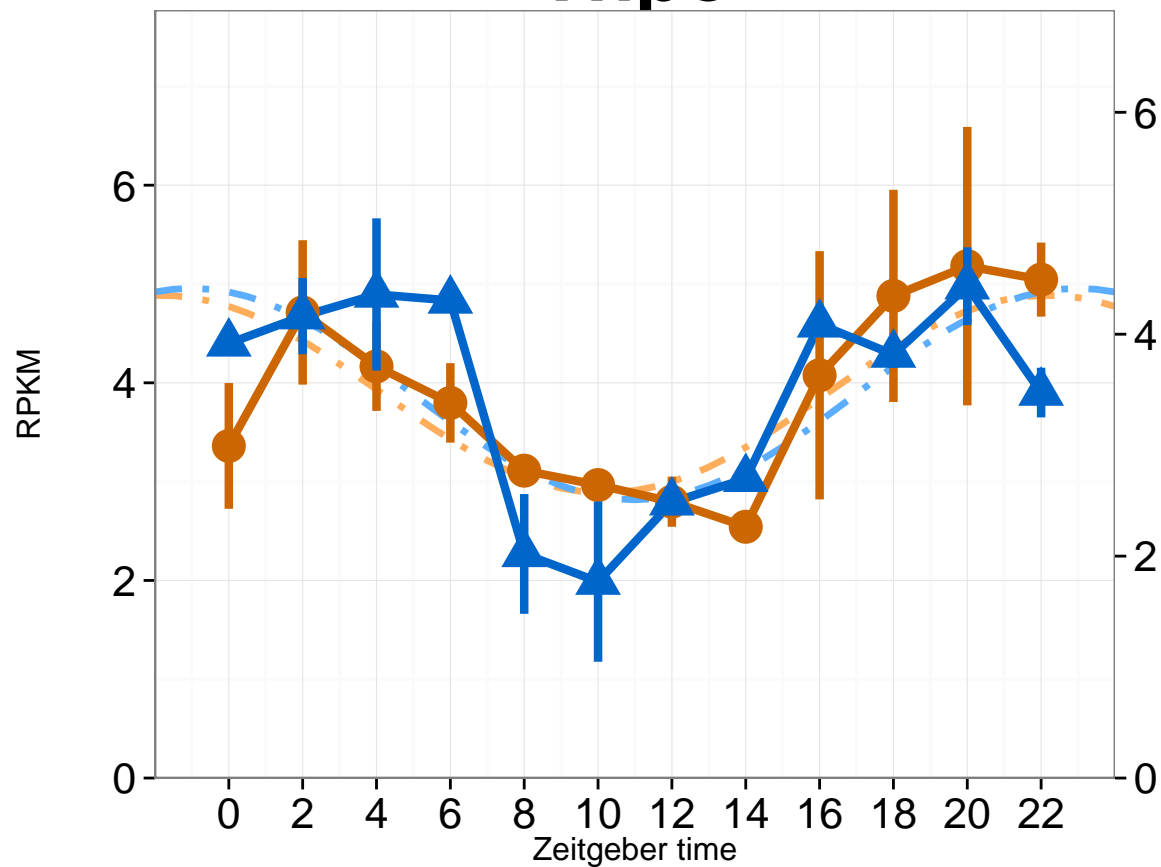

# Thpo

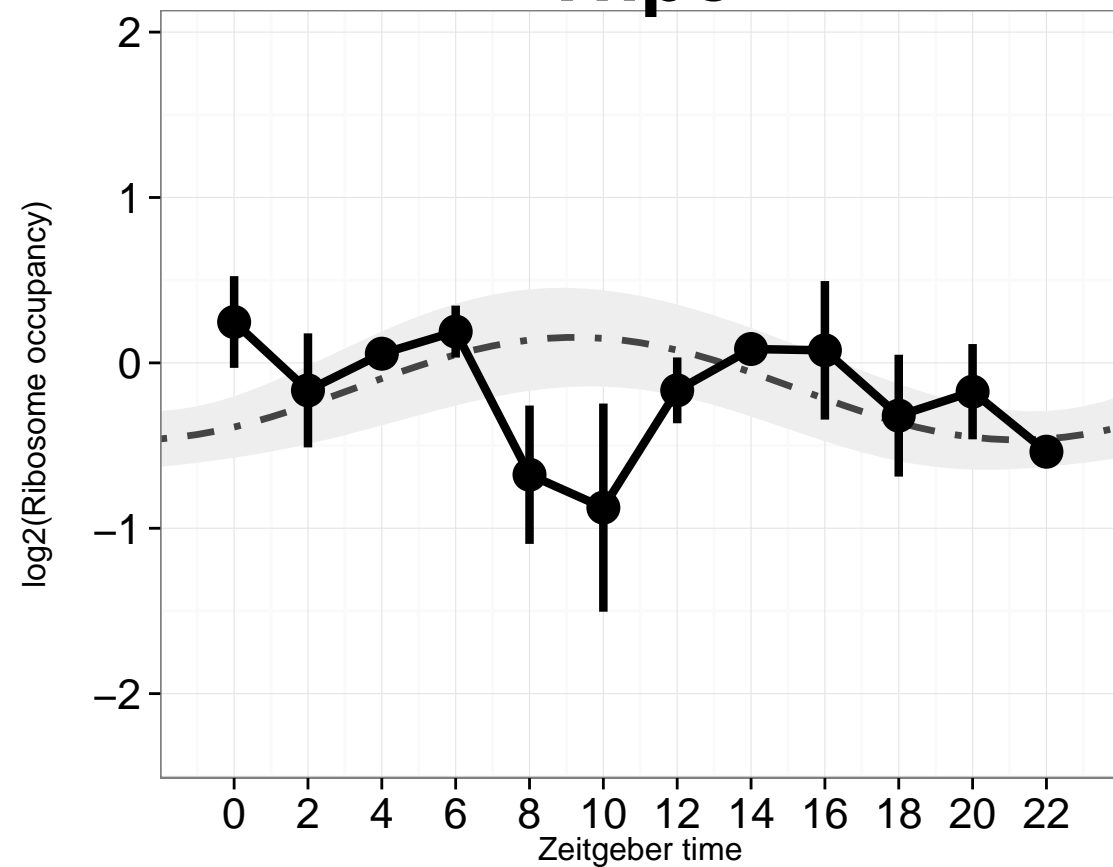

Supplement: SuppDataset_1.zip [file Thpo_set_D.pdf › Supplemental Dataset 1/D-mRNA_rhythm_translation_rhyth/Thpo_set_D.pdf]

## Thra

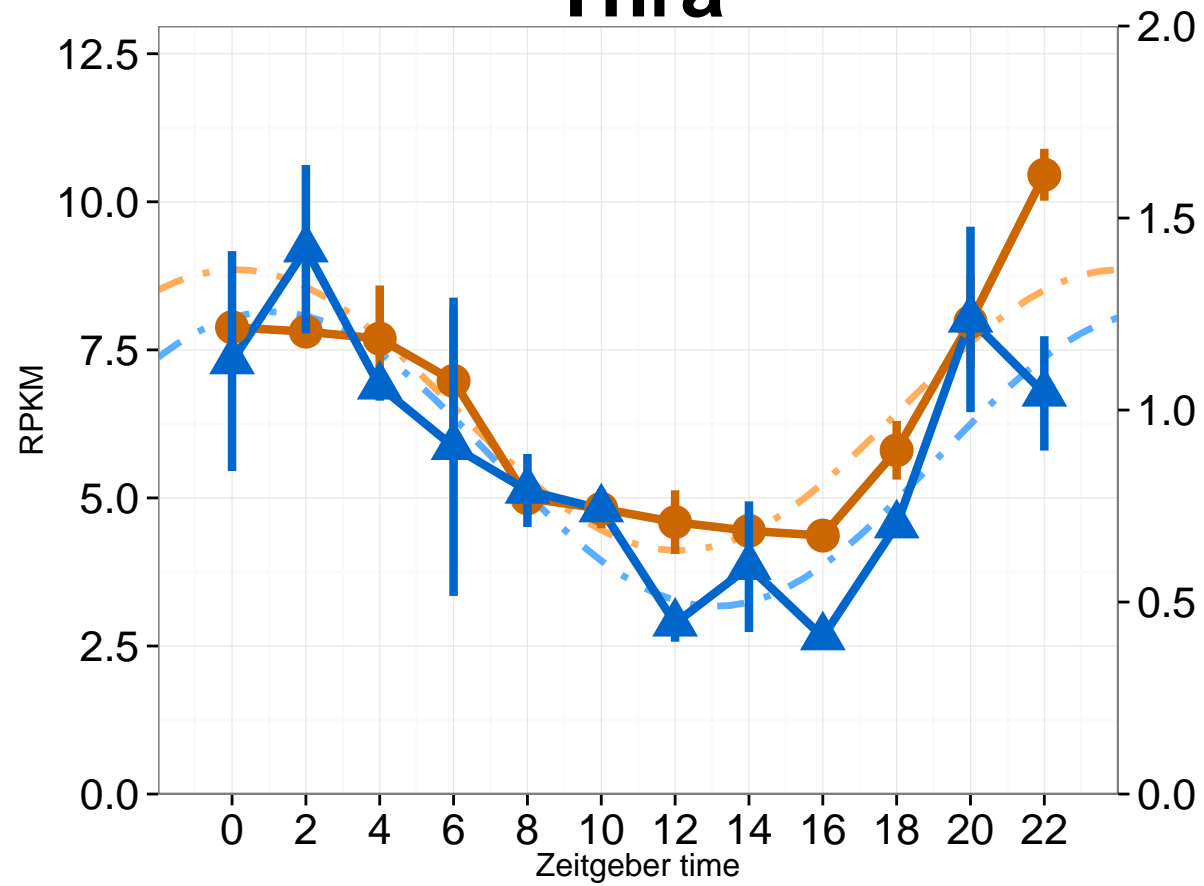

## Thra

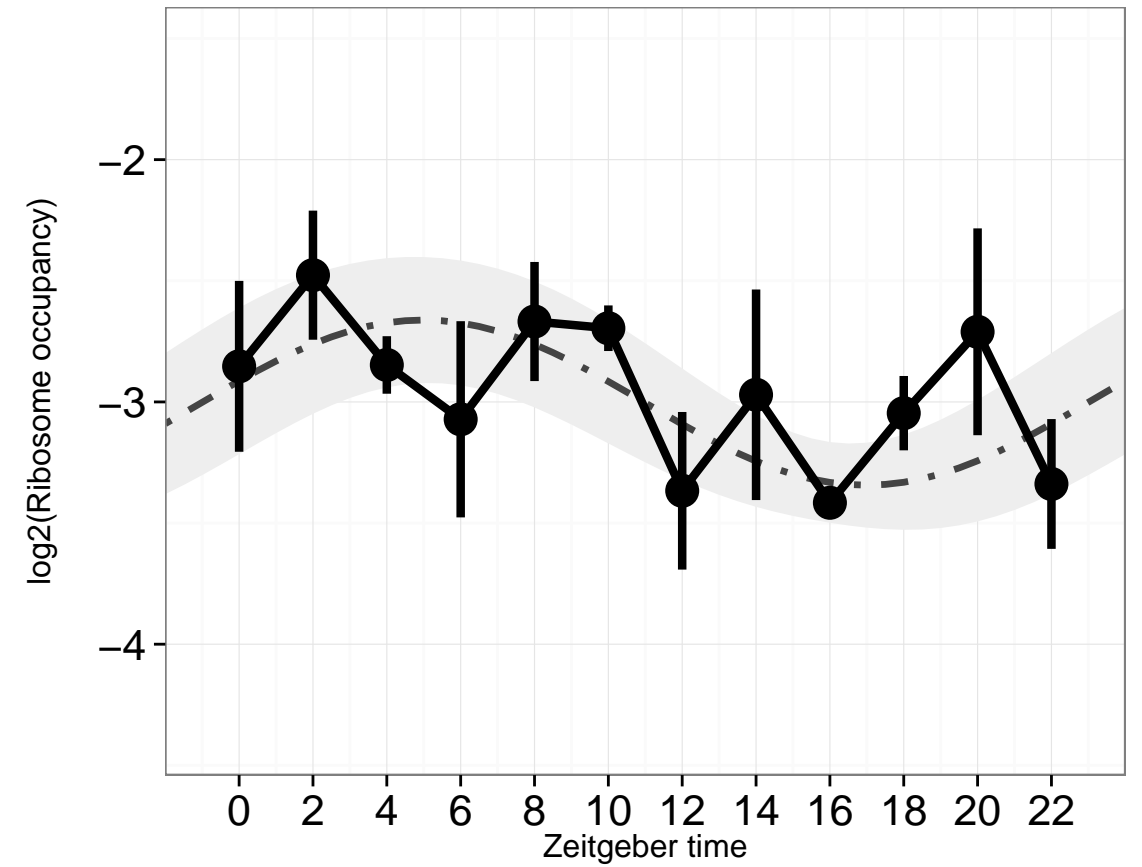

Supplement: SuppDataset_1.zip [file Thra_set_D.pdf › Supplemental Dataset 1/D-mRNA_rhythm_translation_rhyth/Thra_set_D.pdf]

## Thrap3

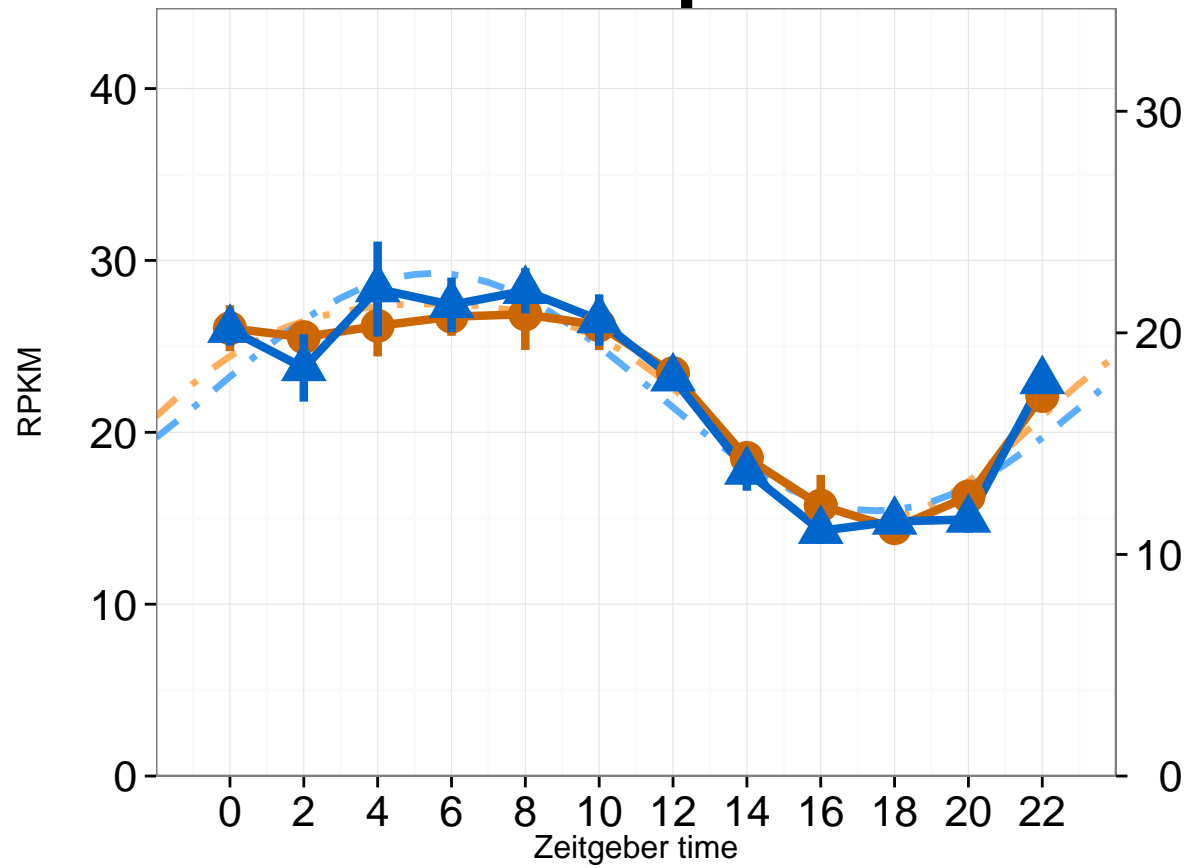

## Thrap3

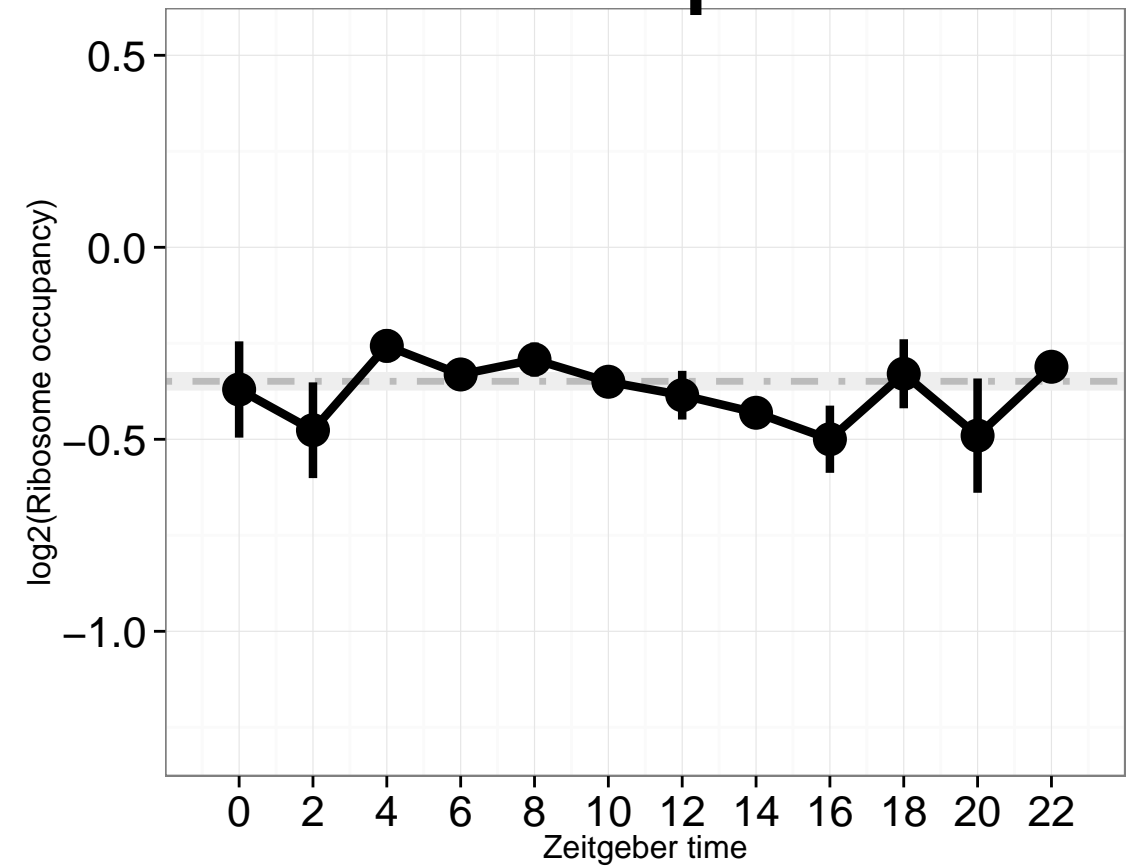

Supplement: SuppDataset_1.zip [file Thrap3_set_D.pdf › Supplemental Dataset 1/D-mRNA_rhythm_translation_rhyth/Thrap3_set_D.pdf]

# Thrsp

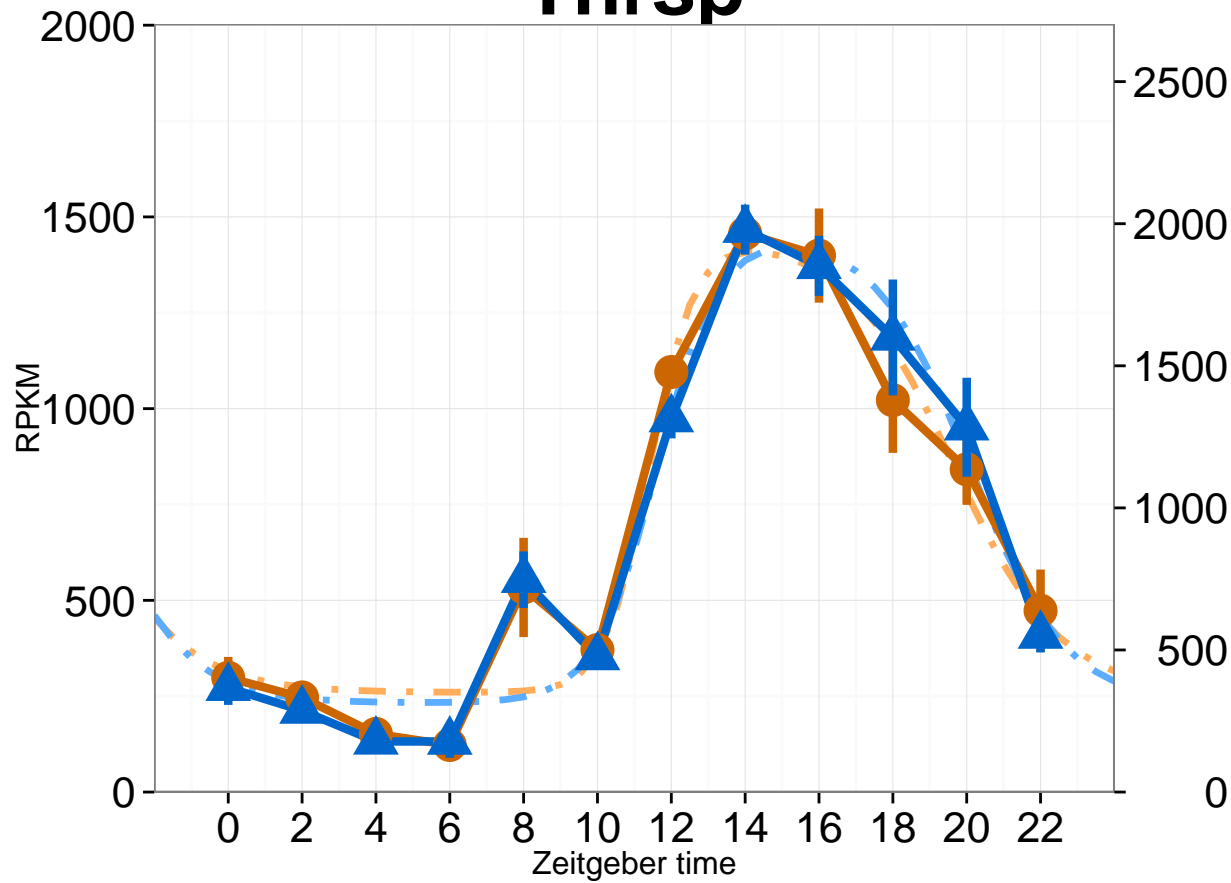

# Thrsp

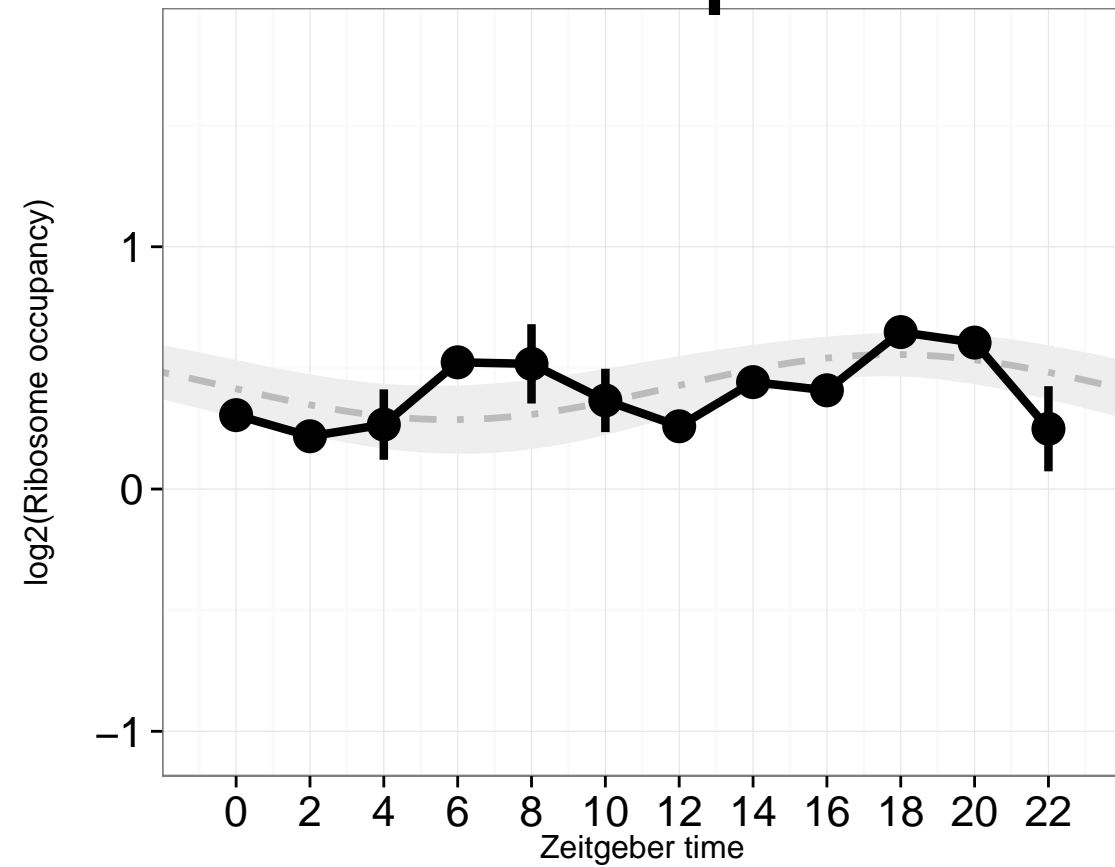

Supplement: SuppDataset_1.zip [file Thrsp_set_D.pdf › Supplemental Dataset 1/D-mRNA_rhythm_translation_rhyth/Thrsp_set_D.pdf]

## Thtpa

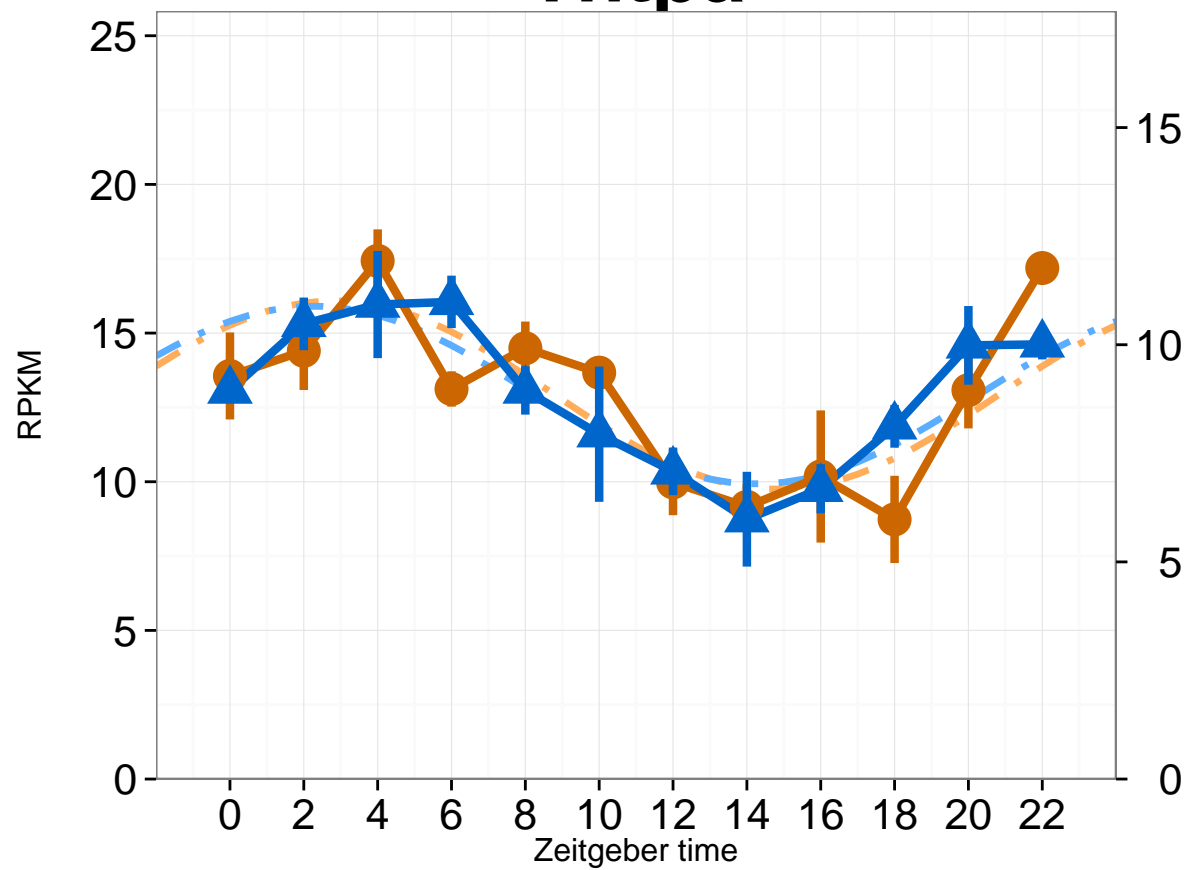

## Thtpa

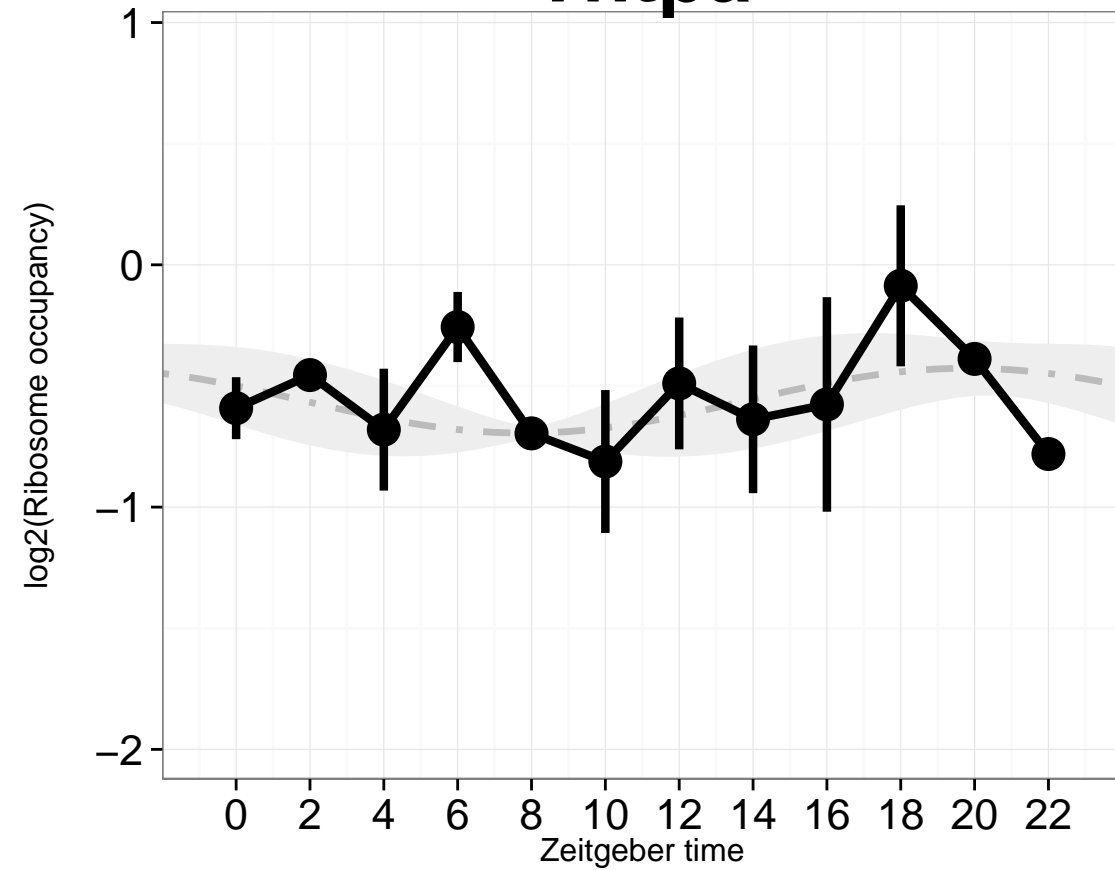

Supplement: SuppDataset_1.zip [file Thtpa_set_D.pdf › Supplemental Dataset 1/D-mRNA_rhythm_translation_rhyth/Thtpa_set_D.pdf]

## Tifa

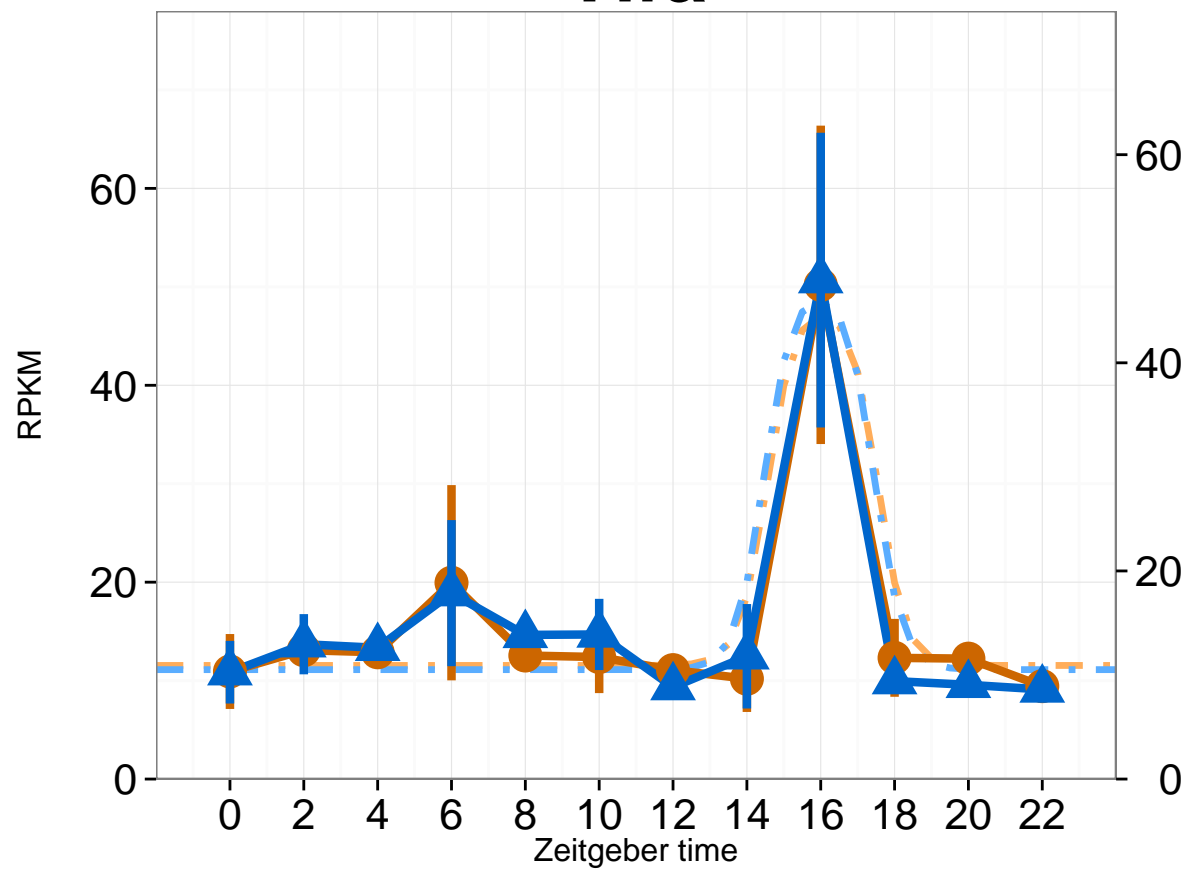

## Tifa

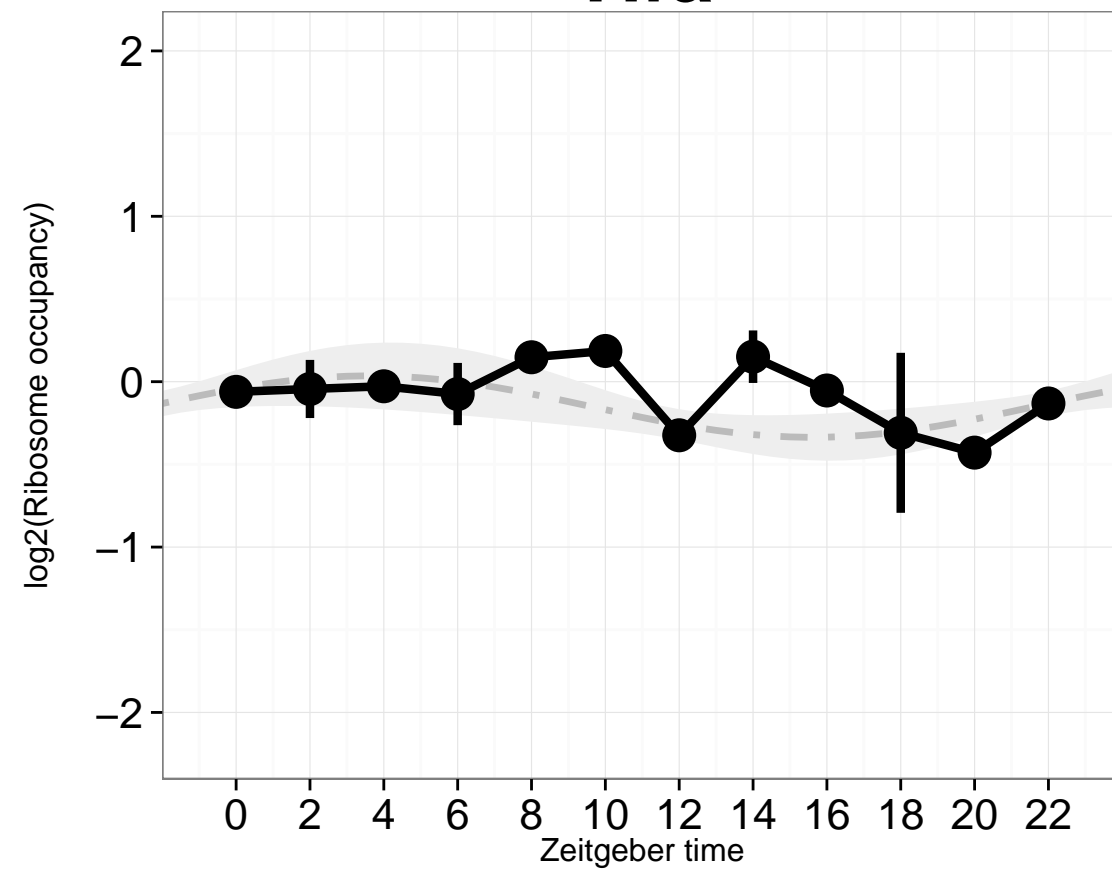

Supplement: SuppDataset_1.zip [file Tifa_set_D.pdf › Supplemental Dataset 1/D-mRNA_rhythm_translation_rhyth/Tifa_set_D.pdf]

## Tiparp

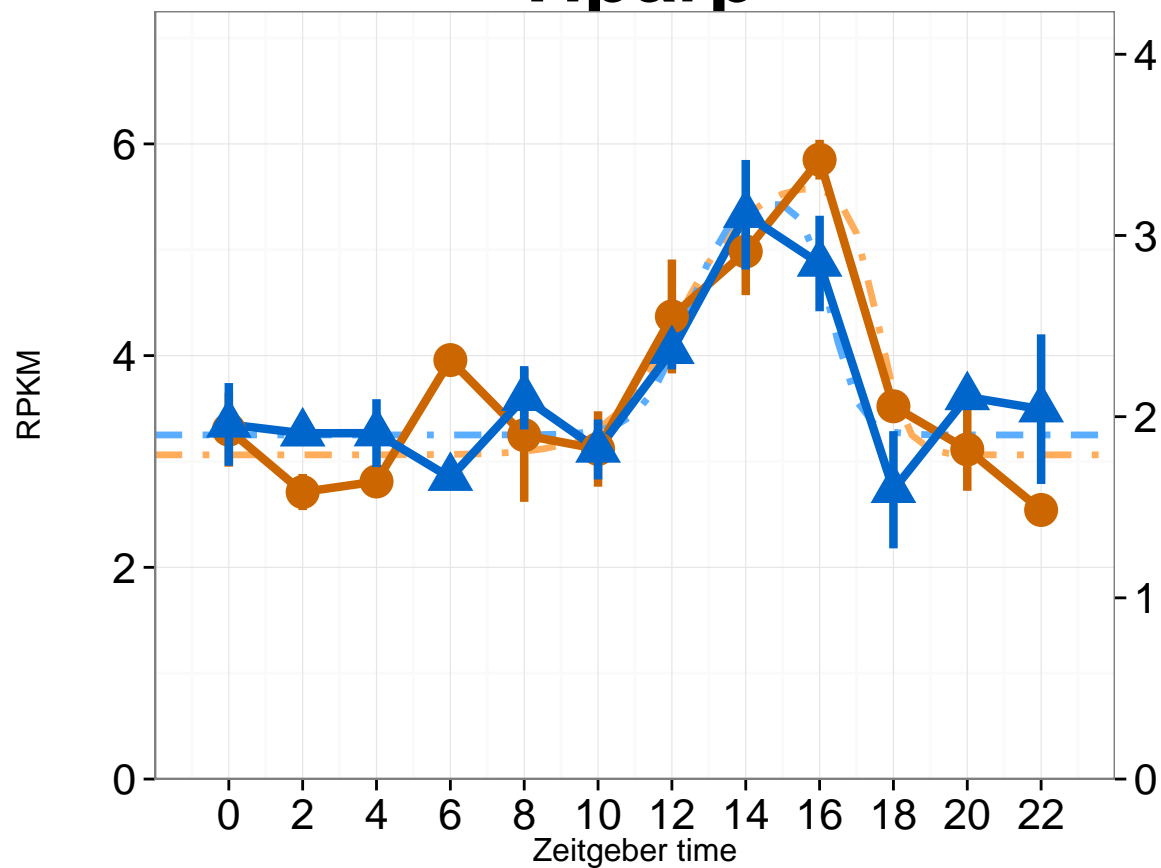

## Tiparp

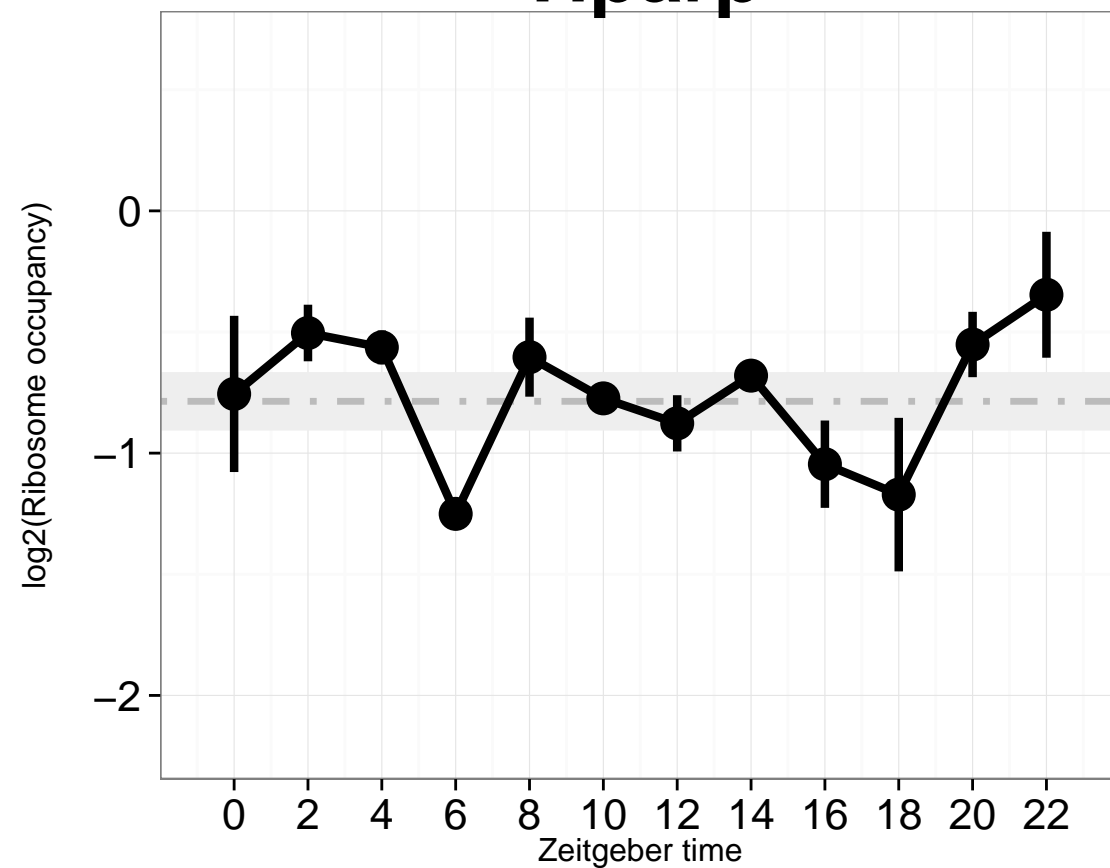

Supplement: SuppDataset_1.zip [file Tiparp_set_D.pdf › Supplemental Dataset 1/D-mRNA_rhythm_translation_rhyth/Tiparp_set_D.pdf]

## Tjp2

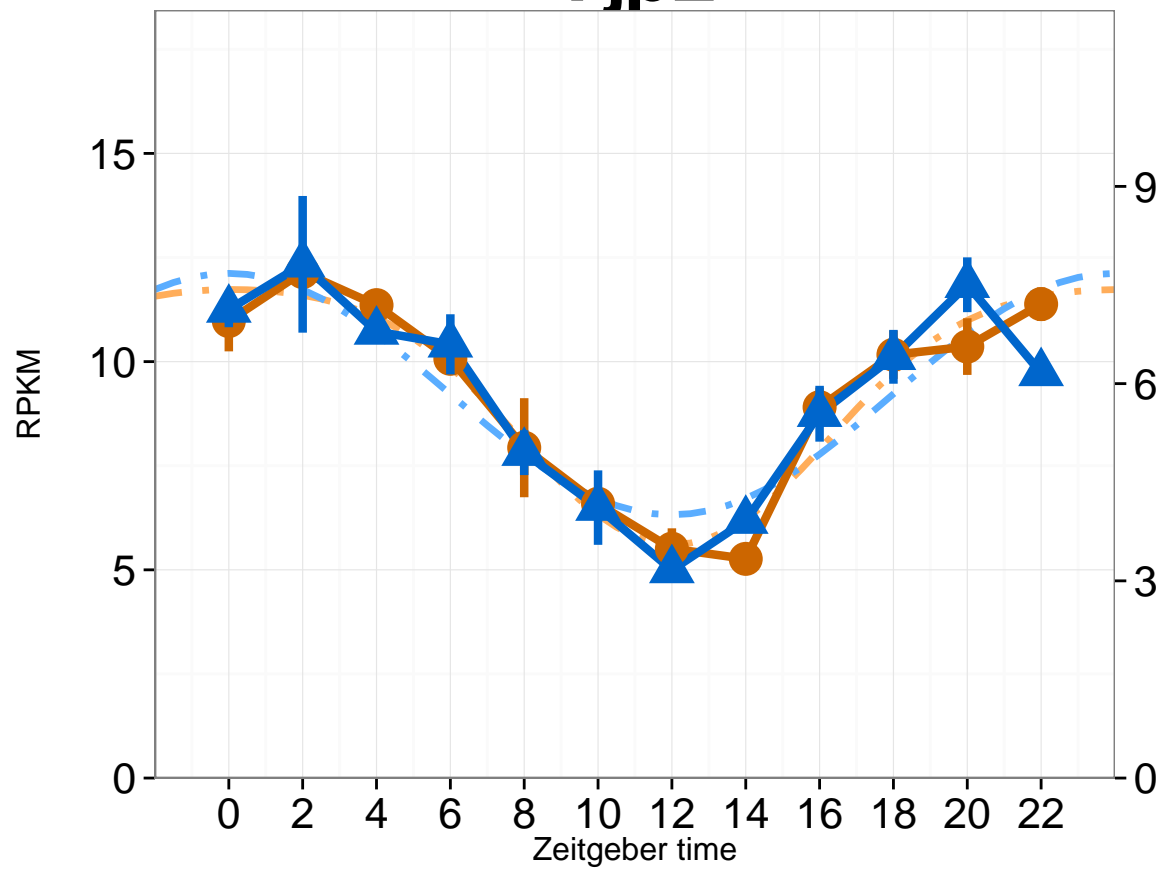

## Tjp2

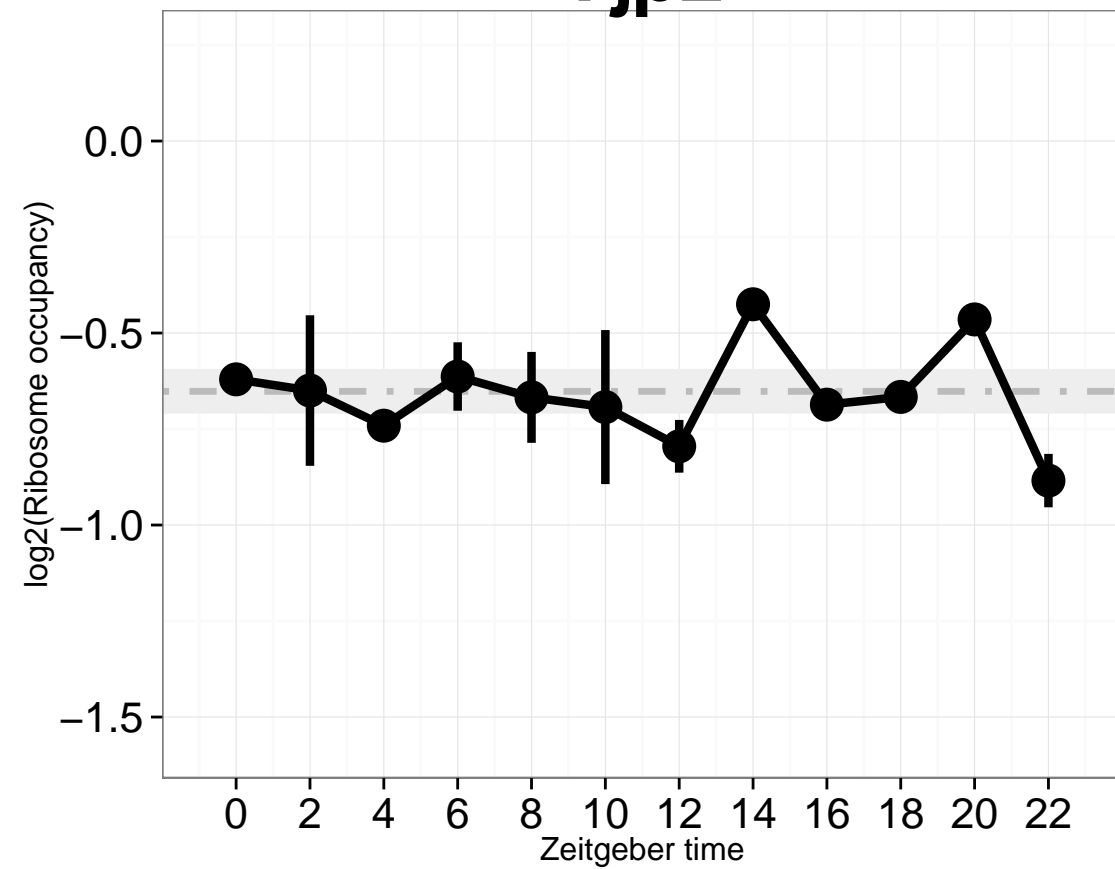

Supplement: SuppDataset_1.zip [file Tjp2_set_D.pdf › Supplemental Dataset 1/D-mRNA_rhythm_translation_rhyth/Tjp2_set_D.pdf]

## Tjp3

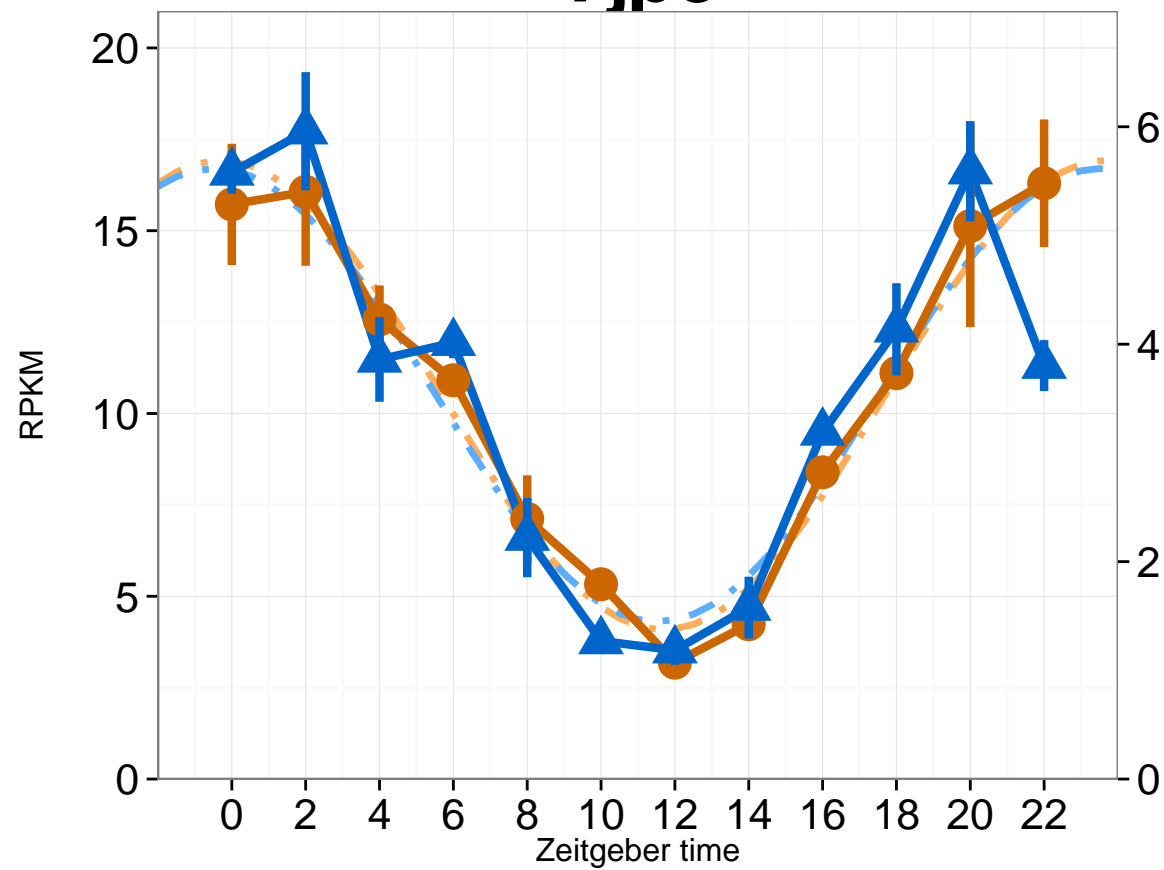

## Tjp3

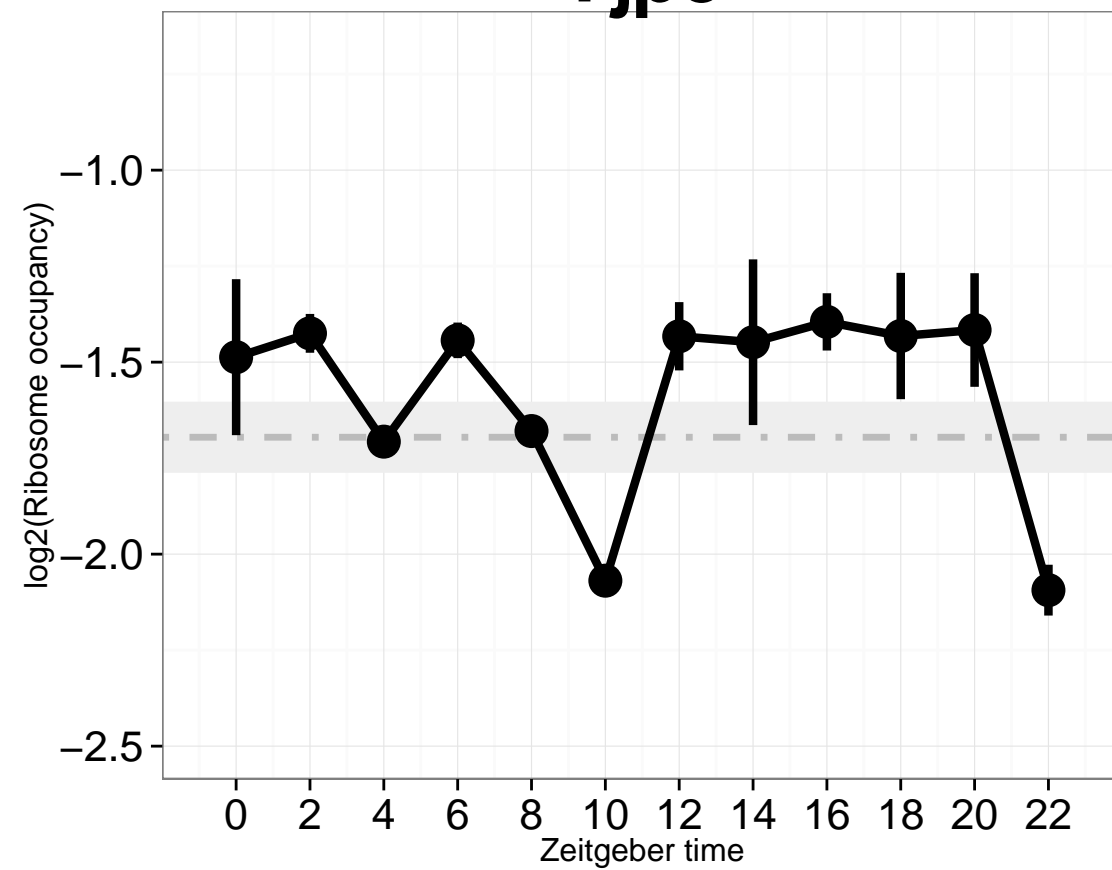

Supplement: SuppDataset_1.zip [file Tjp3_set_D.pdf › Supplemental Dataset 1/D-mRNA_rhythm_translation_rhyth/Tjp3_set_D.pdf]

## Tlcd2

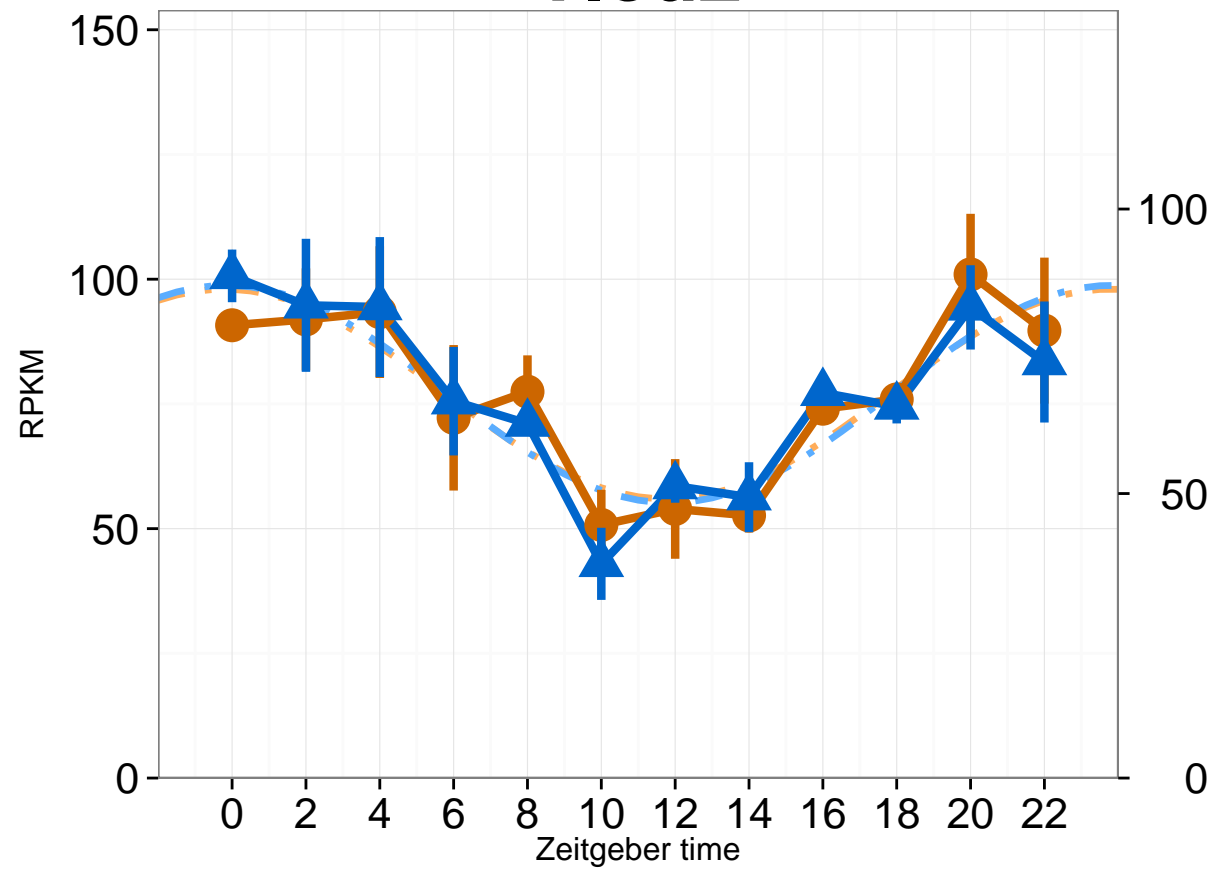

## Tlcd2

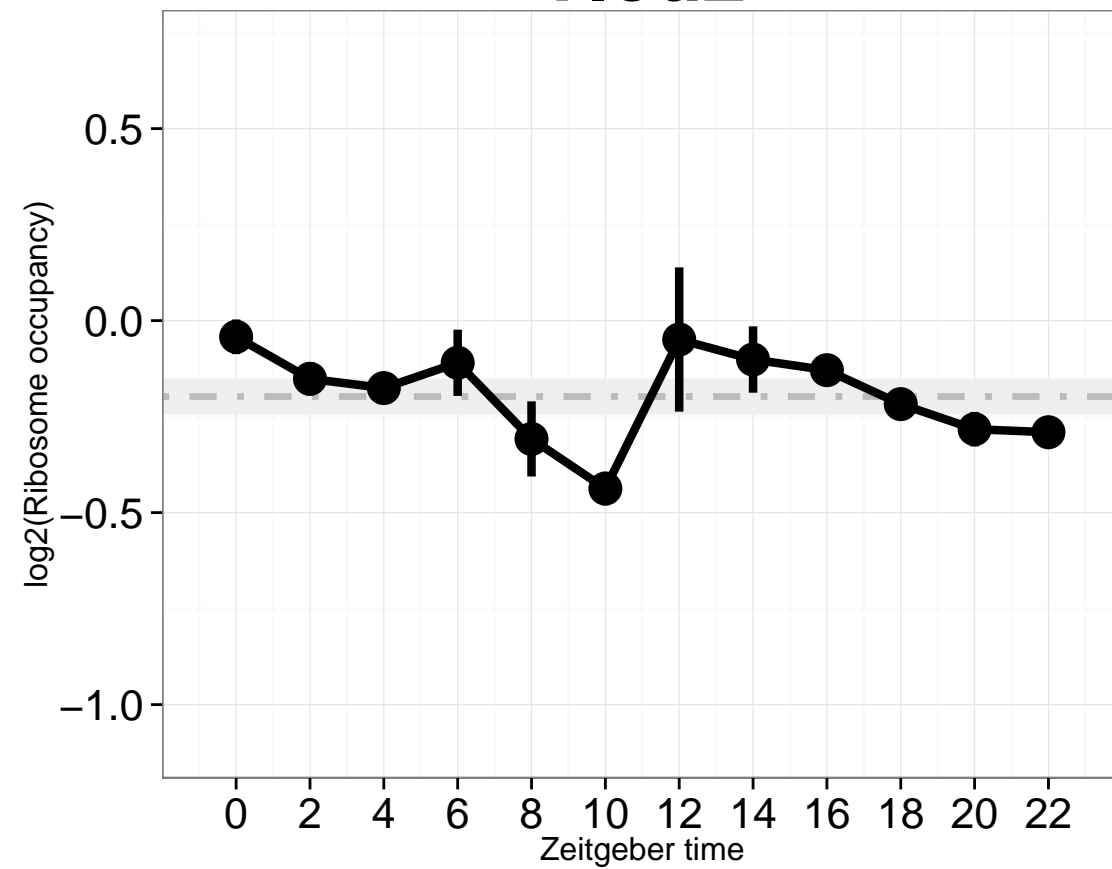

Supplement: SuppDataset_1.zip [file Tlcd2_set_D.pdf › Supplemental Dataset 1/D-mRNA_rhythm_translation_rhyth/Tlcd2_set_D.pdf]

# Tmc7

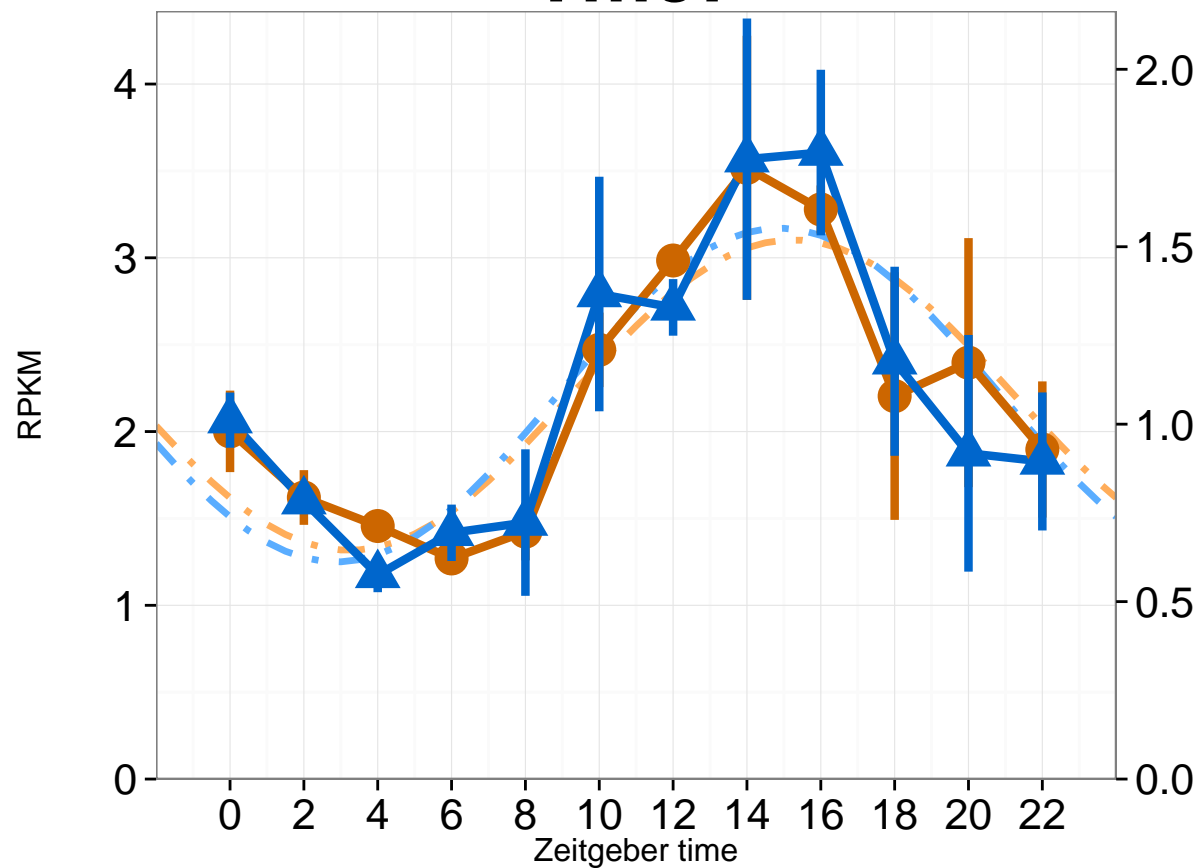

# Tmc7

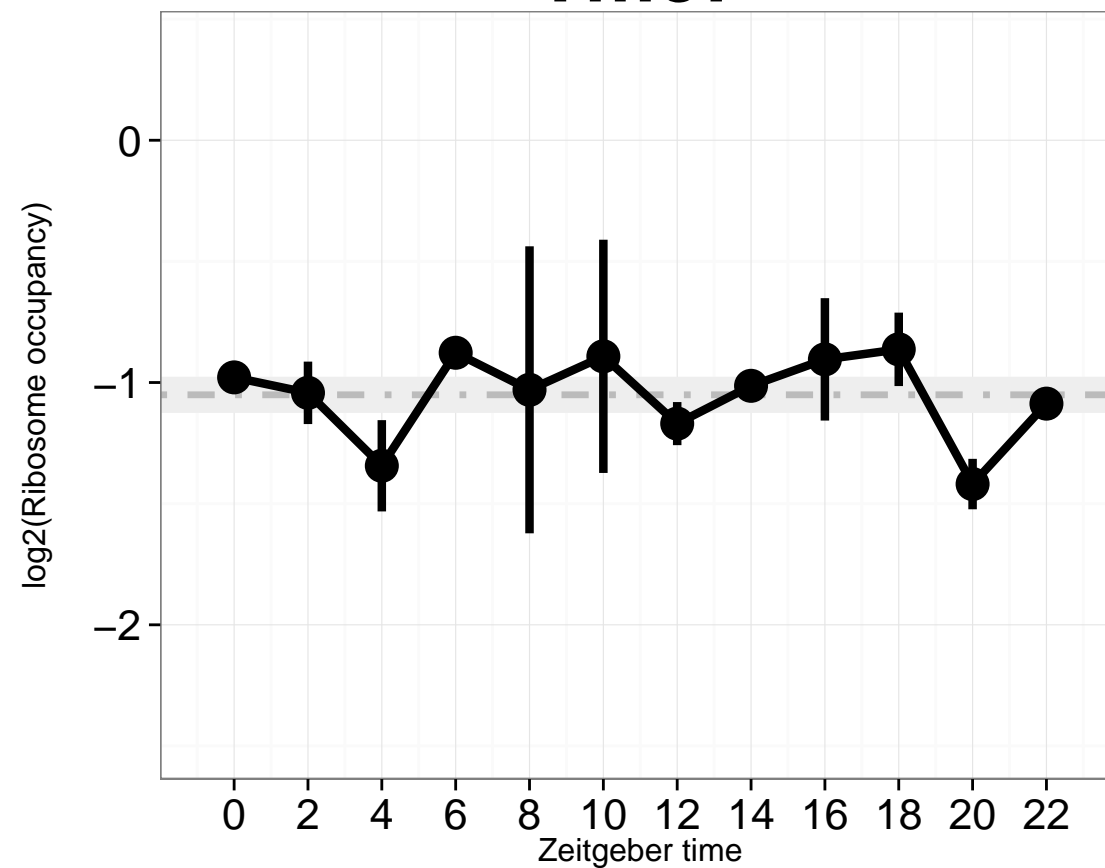

Supplement: SuppDataset_1.zip [file Tmc7_set_D.pdf › Supplemental Dataset 1/D-mRNA_rhythm_translation_rhyth/Tmc7_set_D.pdf]

# Tmcc1

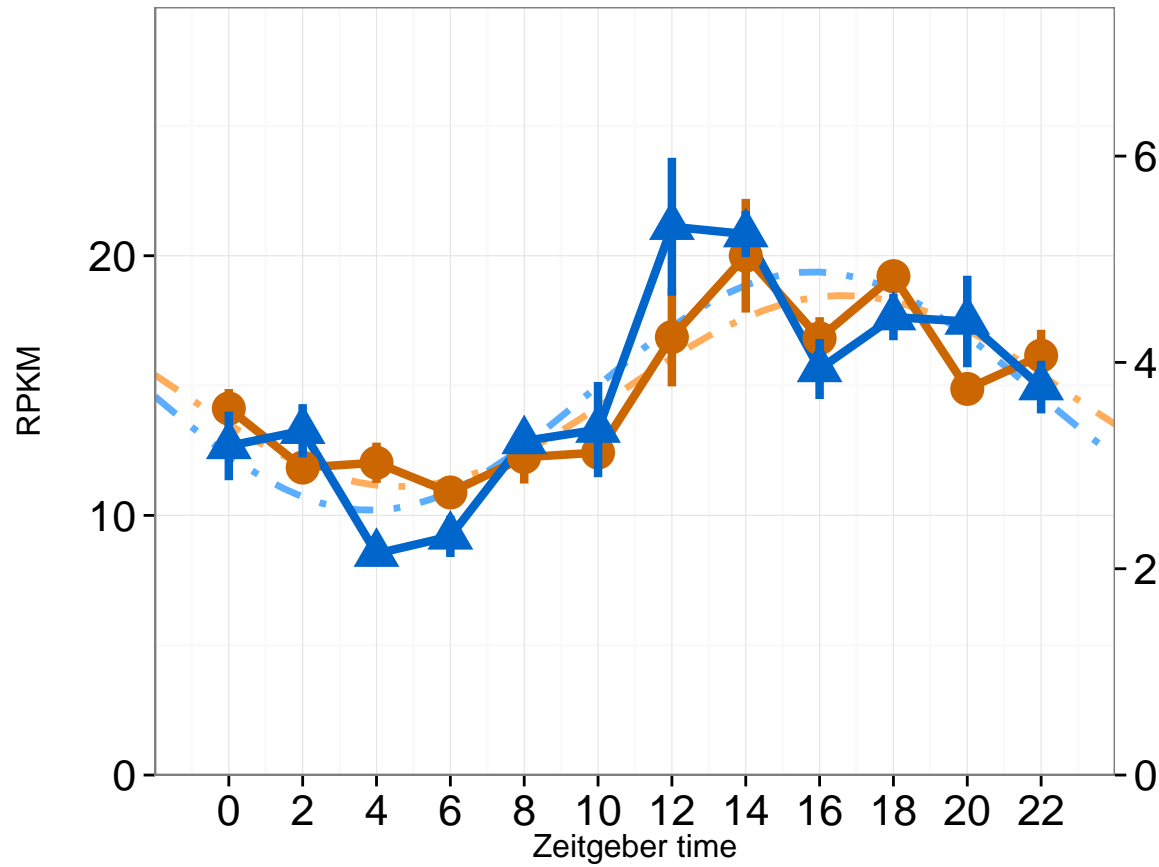

# Tmcc1

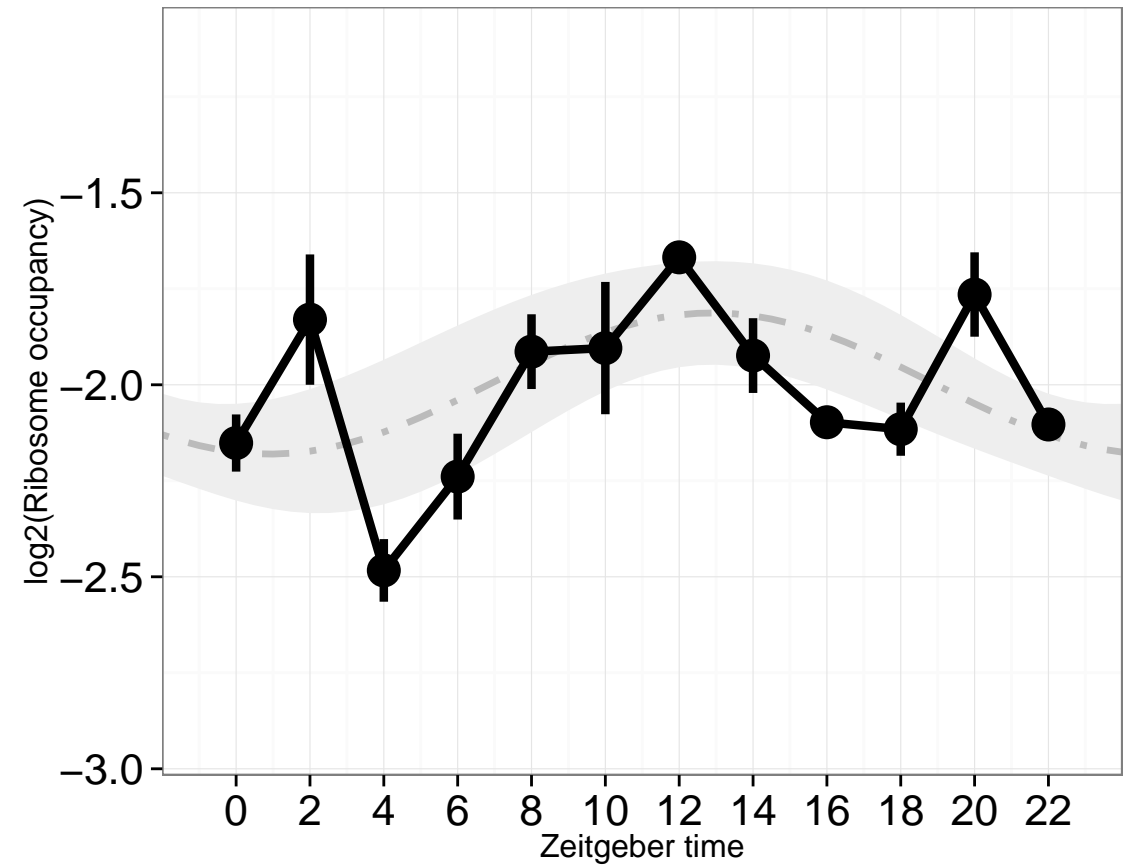

Supplement: SuppDataset_1.zip [file Tmcc1_set_D.pdf › Supplemental Dataset 1/D-mRNA_rhythm_translation_rhyth/Tmcc1_set_D.pdf]

## Tmco4

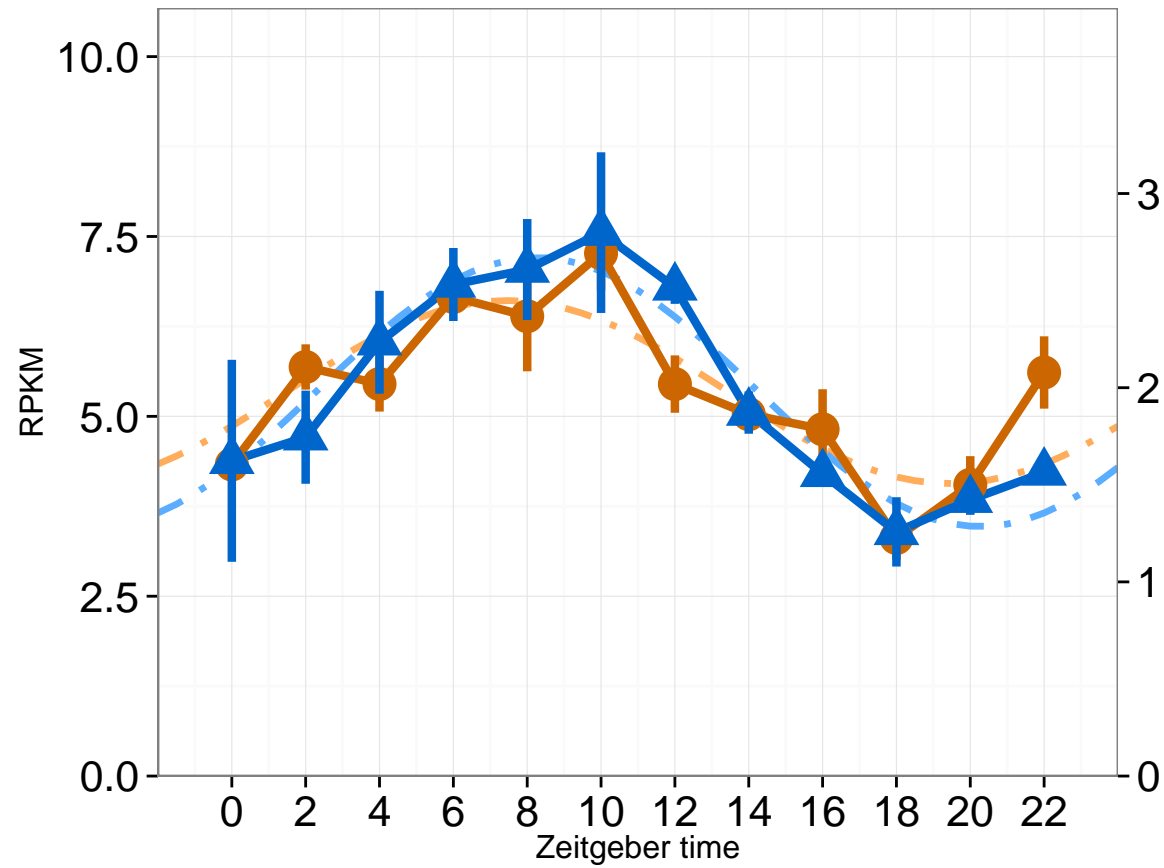

## Tmco4

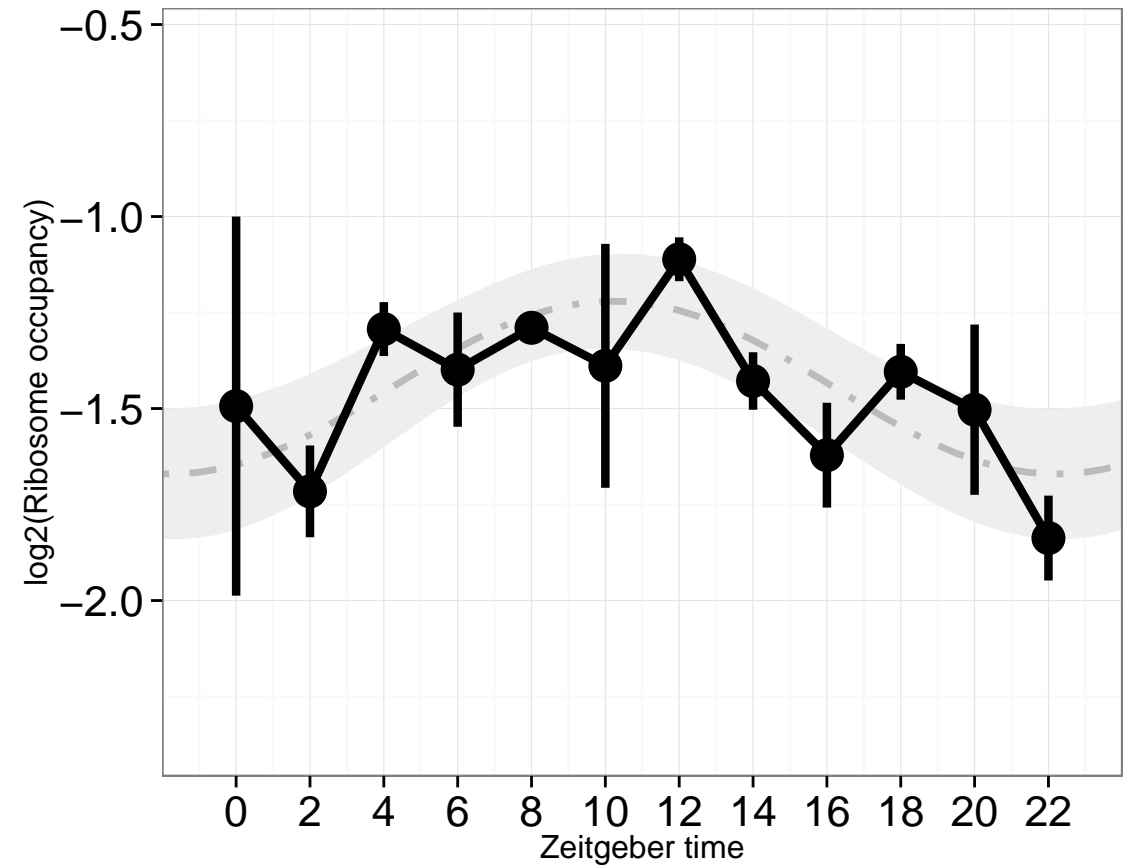

Supplement: SuppDataset_1.zip [file Tmco4_set_D.pdf › Supplemental Dataset 1/D-mRNA_rhythm_translation_rhyth/Tmco4_set_D.pdf]

## Tmco6

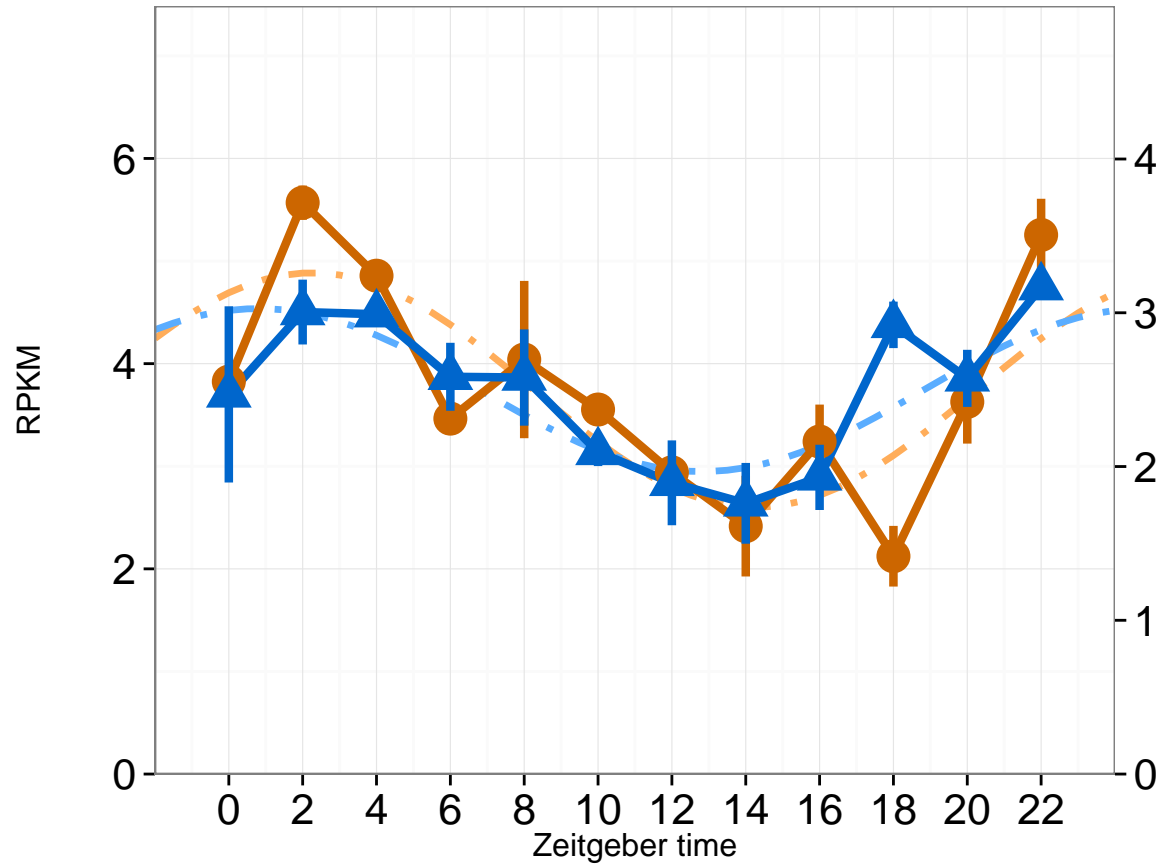

## Tmco6

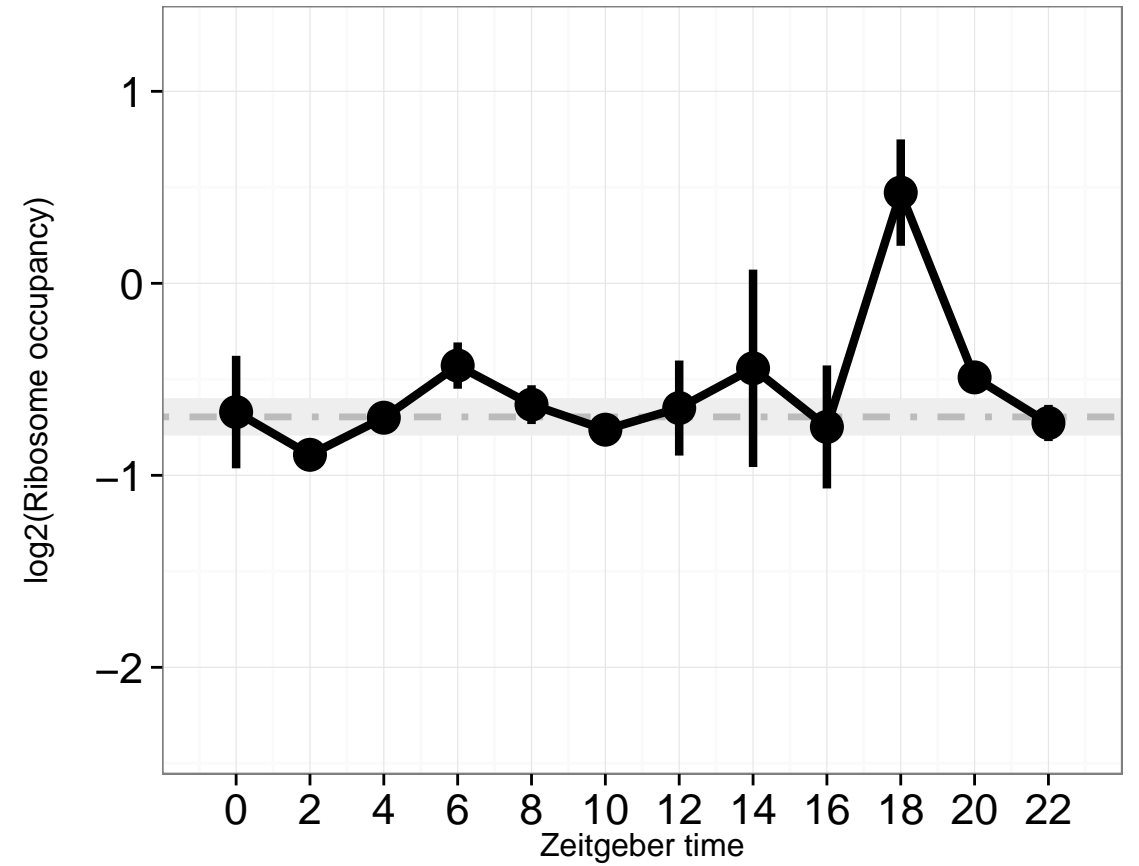

Supplement: SuppDataset_1.zip [file Tmco6_set_D.pdf › Supplemental Dataset 1/D-mRNA_rhythm_translation_rhyth/Tmco6_set_D.pdf]

## Tmed5

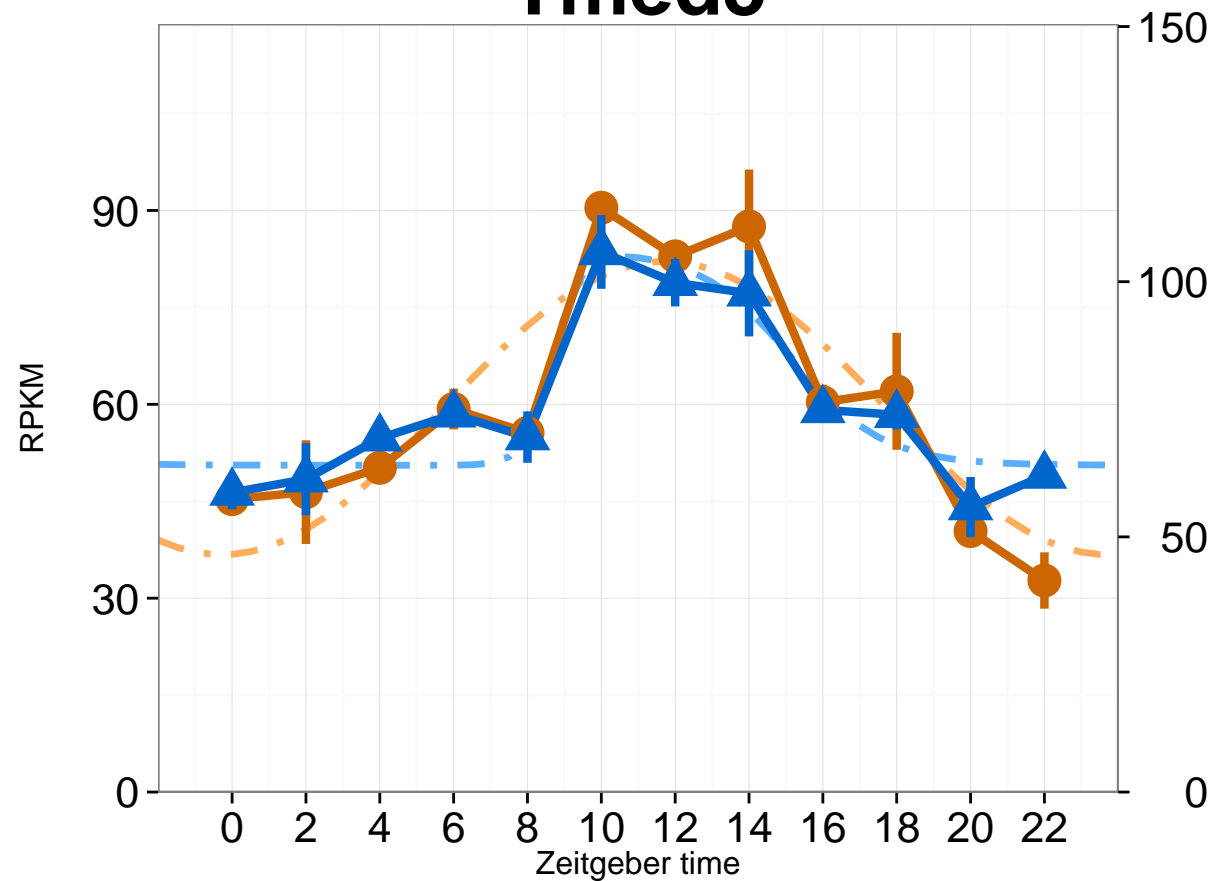

## Tmed5

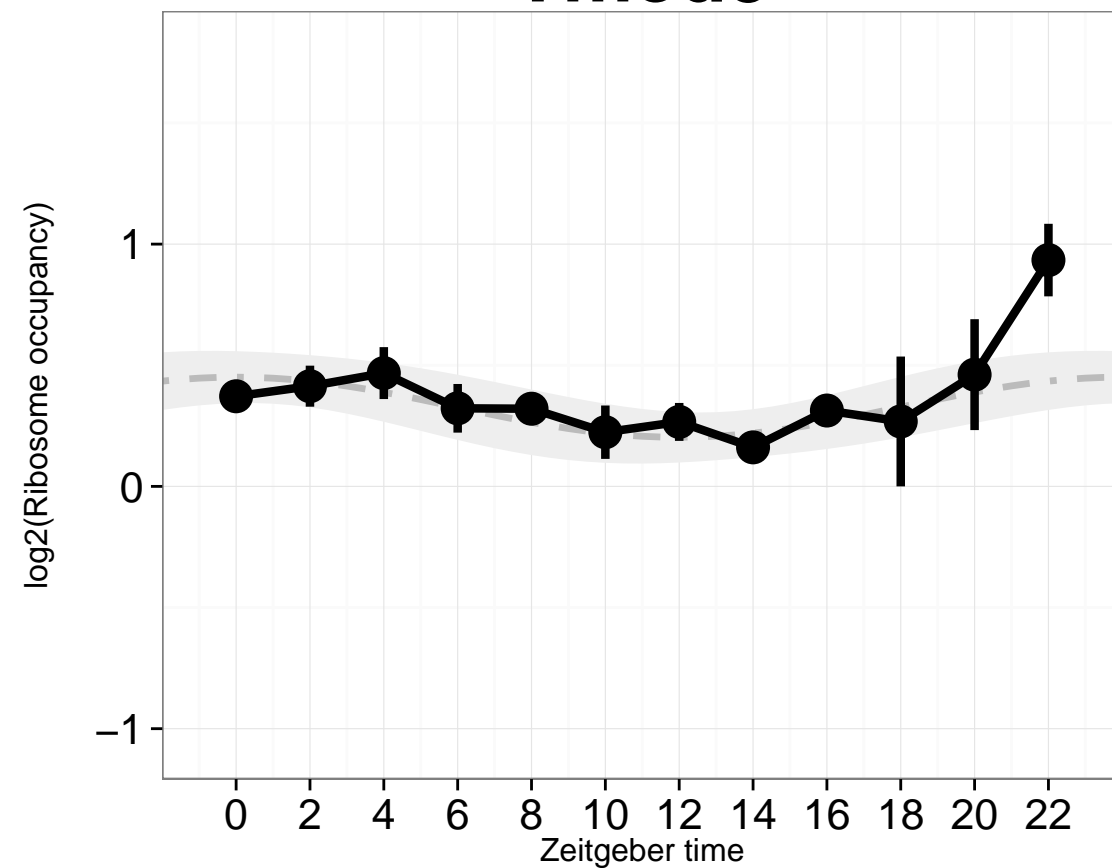

Supplement: SuppDataset_1.zip [file Tmed5_set_D.pdf › Supplemental Dataset 1/D-mRNA_rhythm_translation_rhyth/Tmed5_set_D.pdf]

# Tmem101

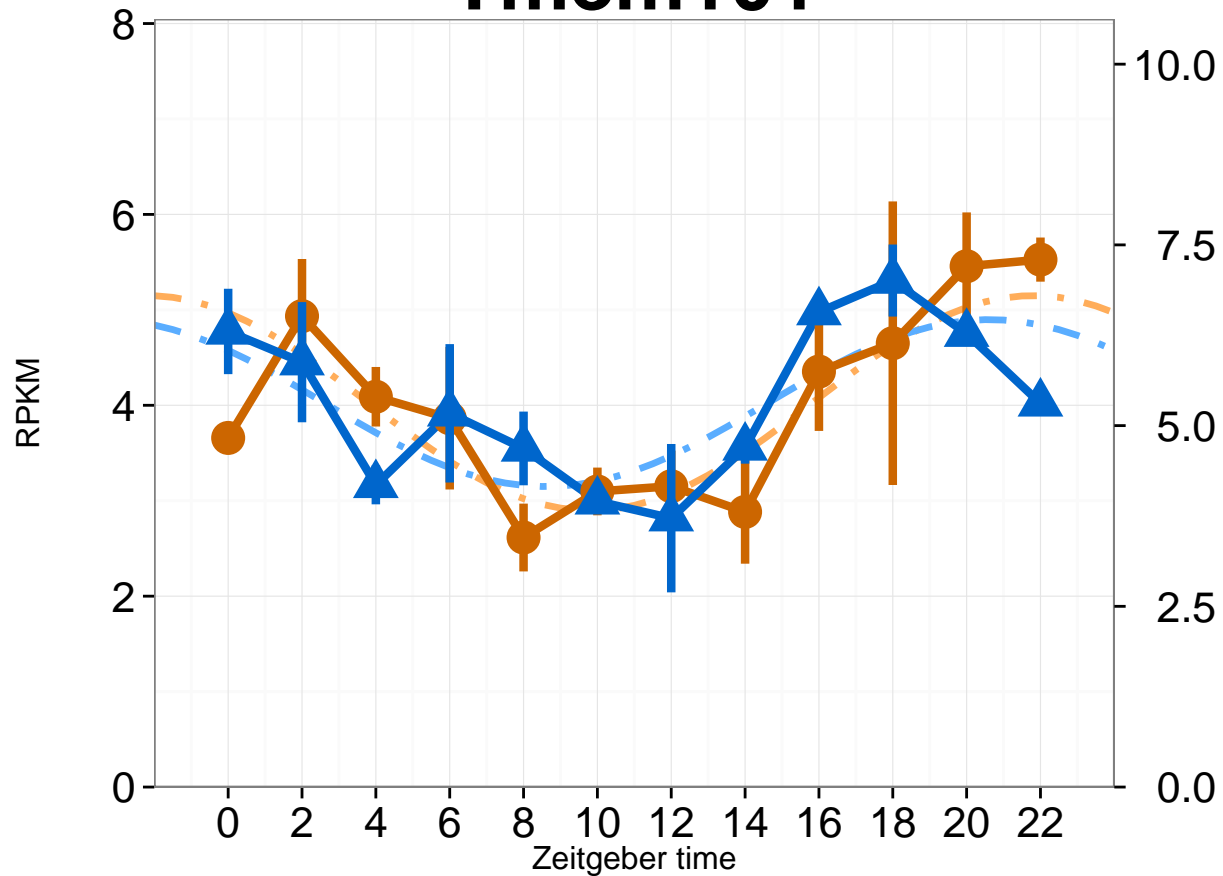

# Tmem101

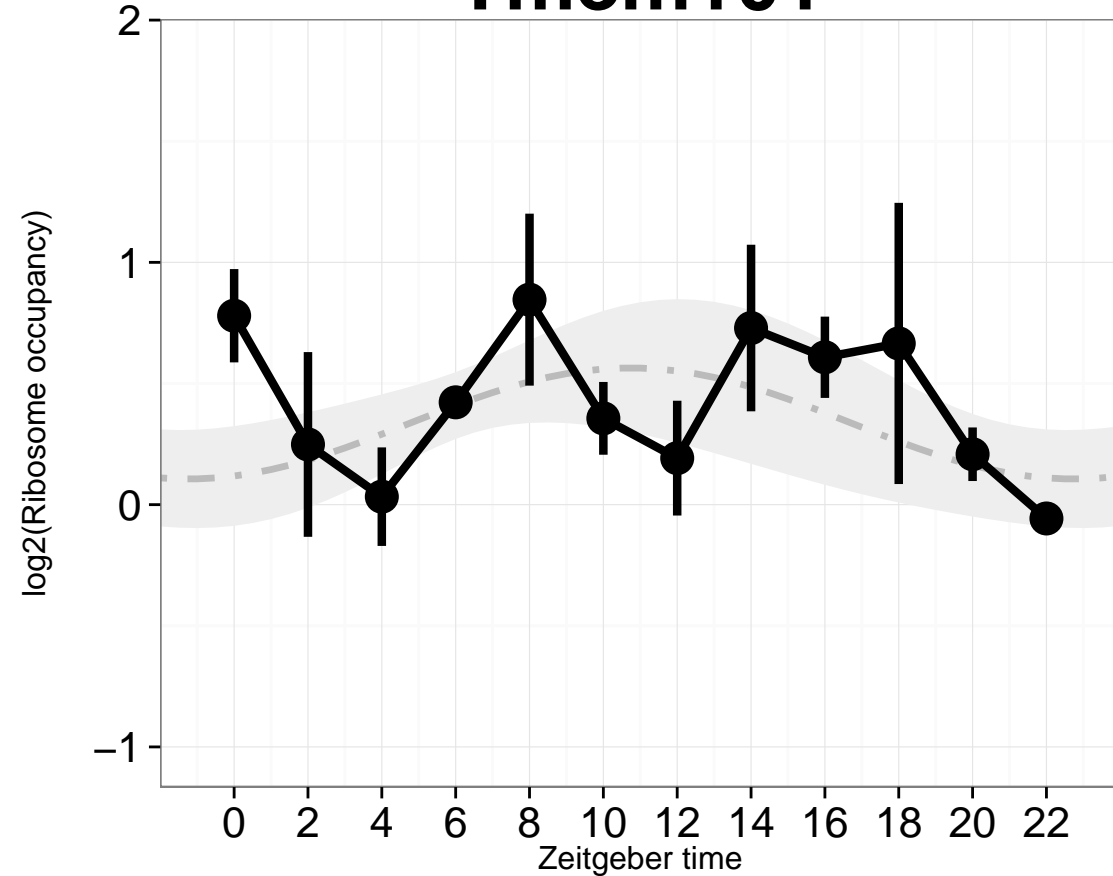

Supplement: SuppDataset_1.zip [file Tmem101_set_D.pdf › Supplemental Dataset 1/D-mRNA_rhythm_translation_rhyth/Tmem101_set_D.pdf]

# Tmem120b

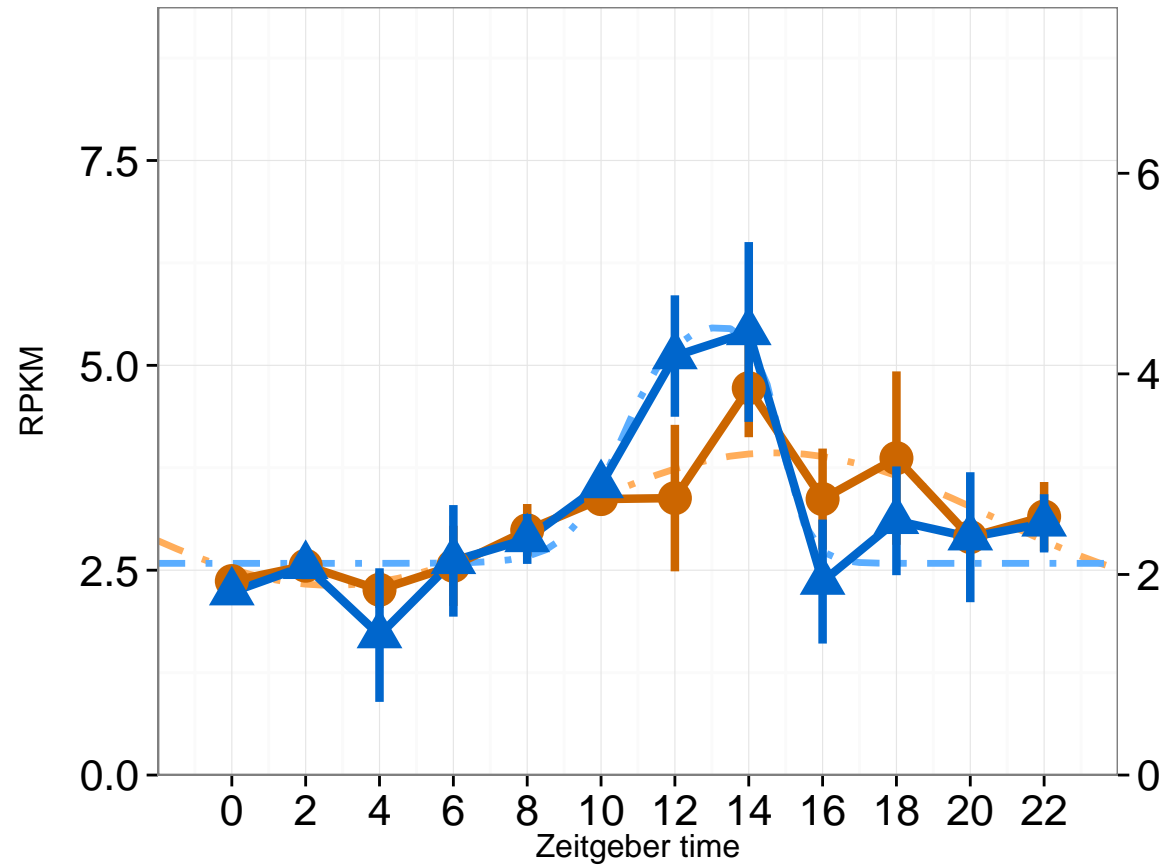

# Tmem120b

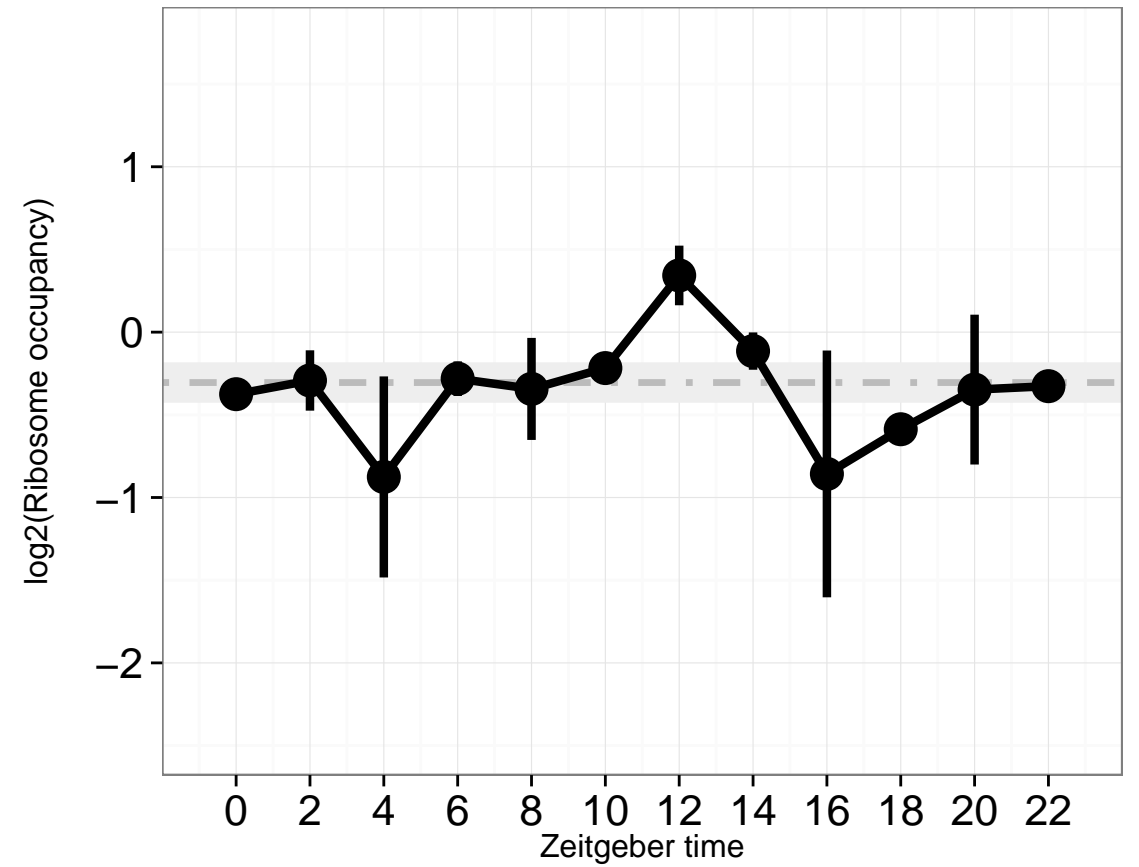

Supplement: SuppDataset_1.zip [file Tmem120b_set_D.pdf › Supplemental Dataset 1/D-mRNA_rhythm_translation_rhyth/Tmem120b_set_D.pdf]

## Tmem140

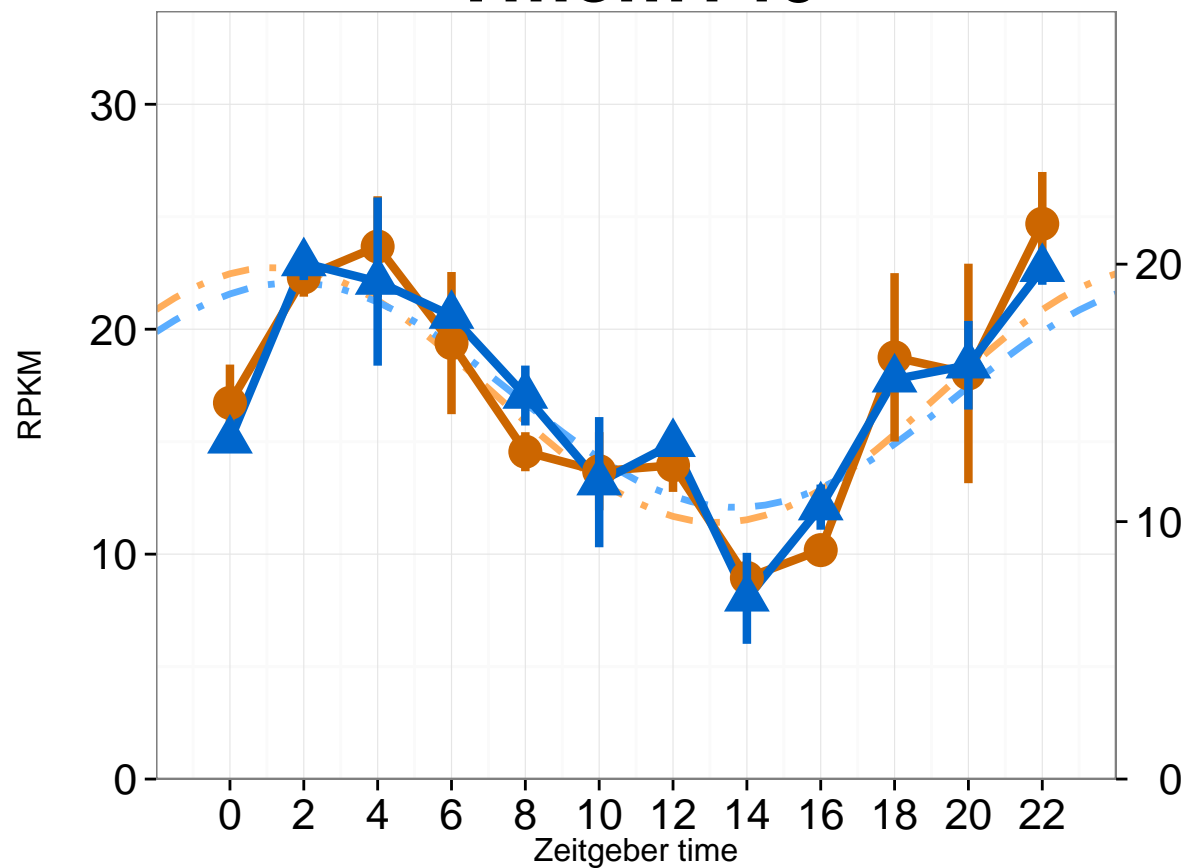

## Tmem140

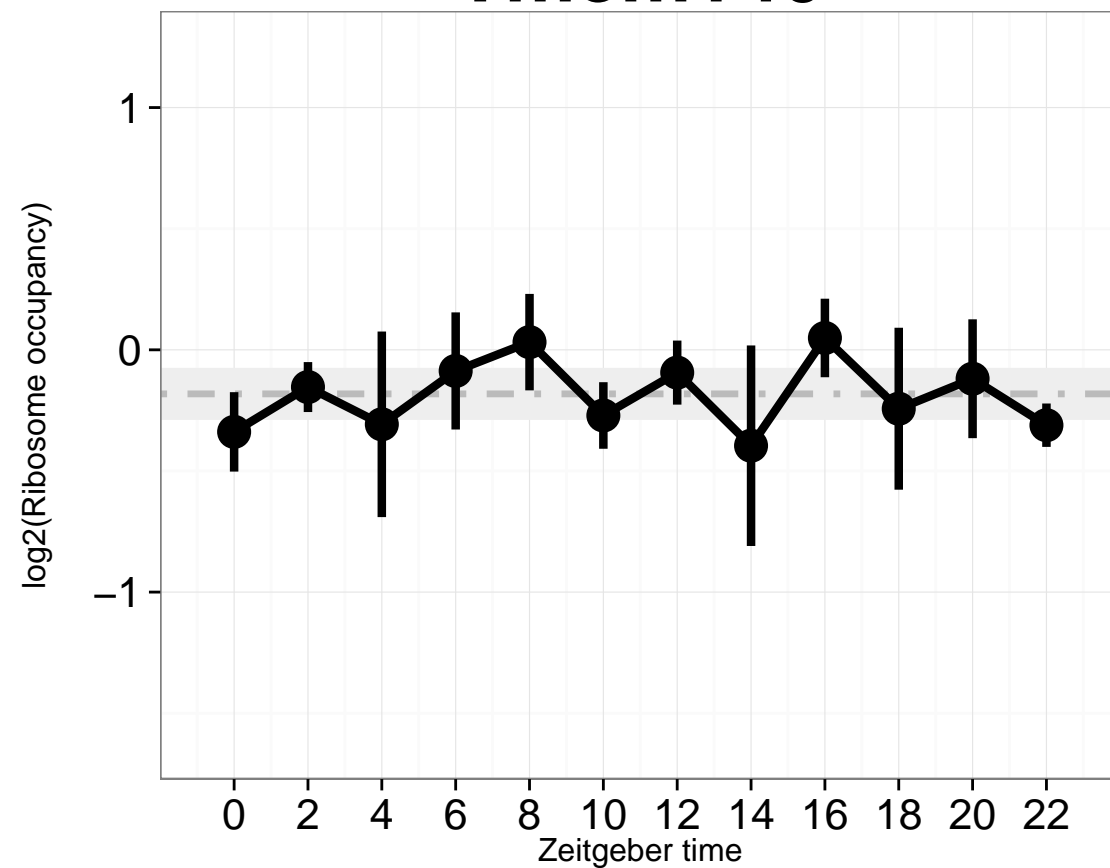

Supplement: SuppDataset_1.zip [file Tmem140_set_D.pdf › Supplemental Dataset 1/D-mRNA_rhythm_translation_rhyth/Tmem140_set_D.pdf]

# Tmem150a

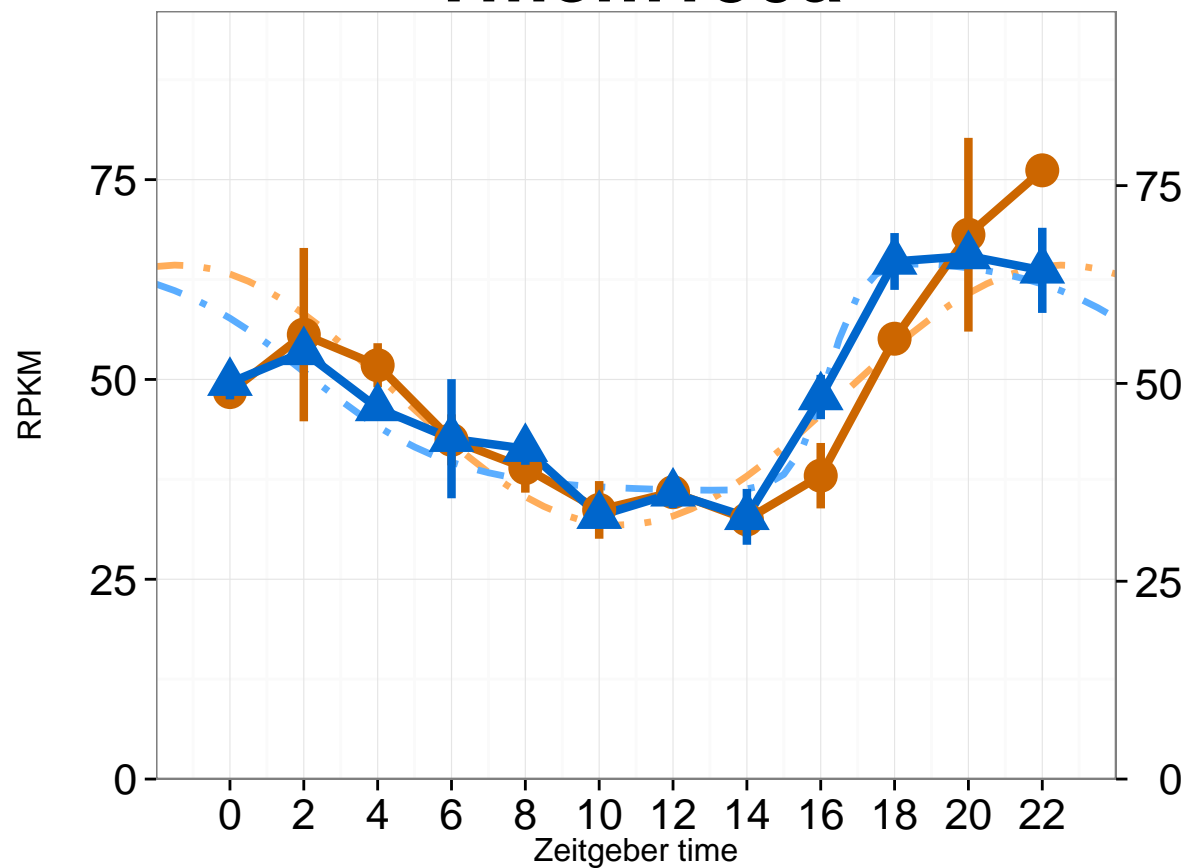

# Tmem150a

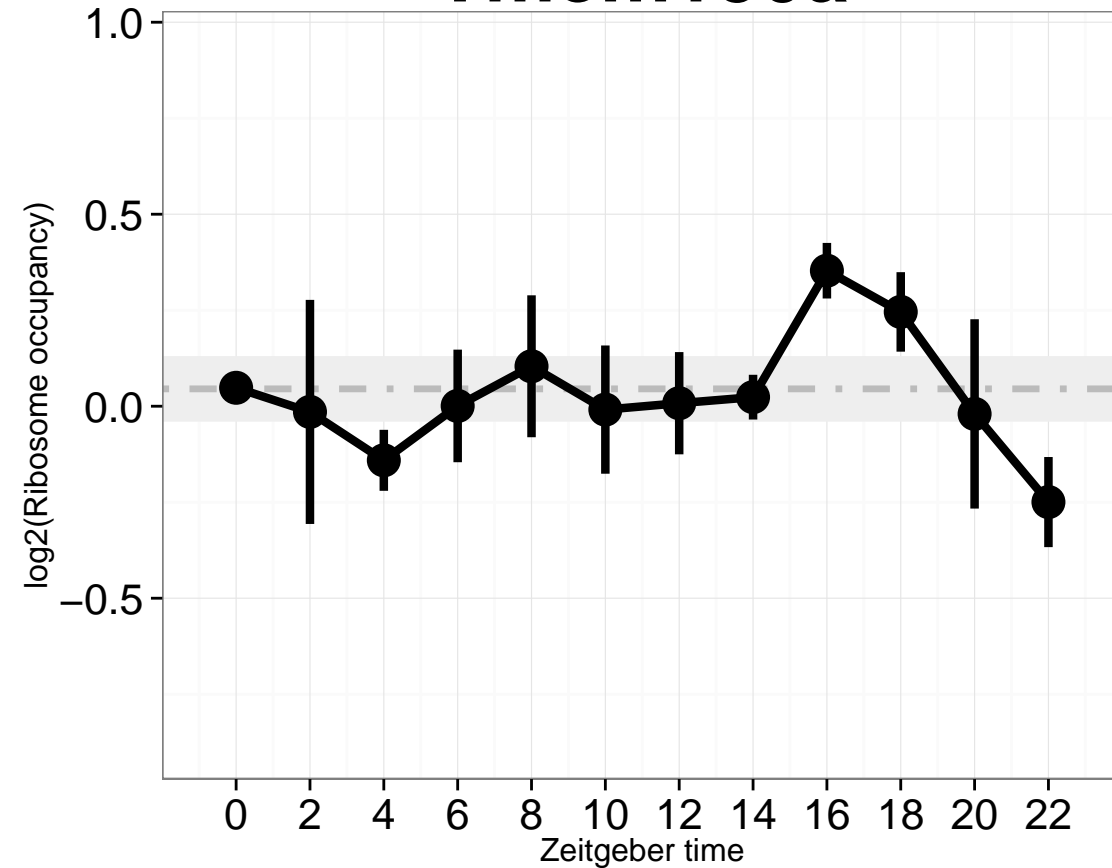

Supplement: SuppDataset_1.zip [file Tmem150a_set_D.pdf › Supplemental Dataset 1/D-mRNA_rhythm_translation_rhyth/Tmem150a_set_D.pdf]

# Tmem176b

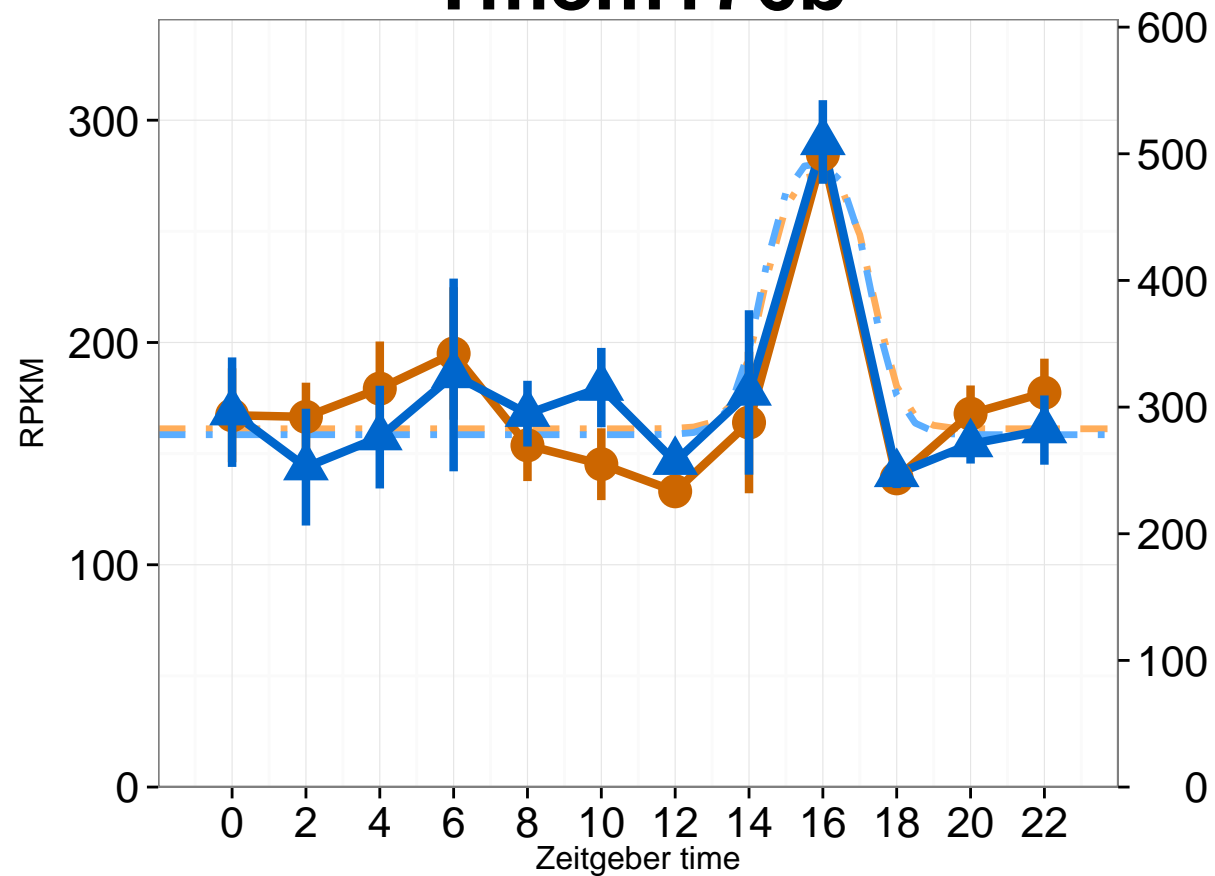

# Tmem176b

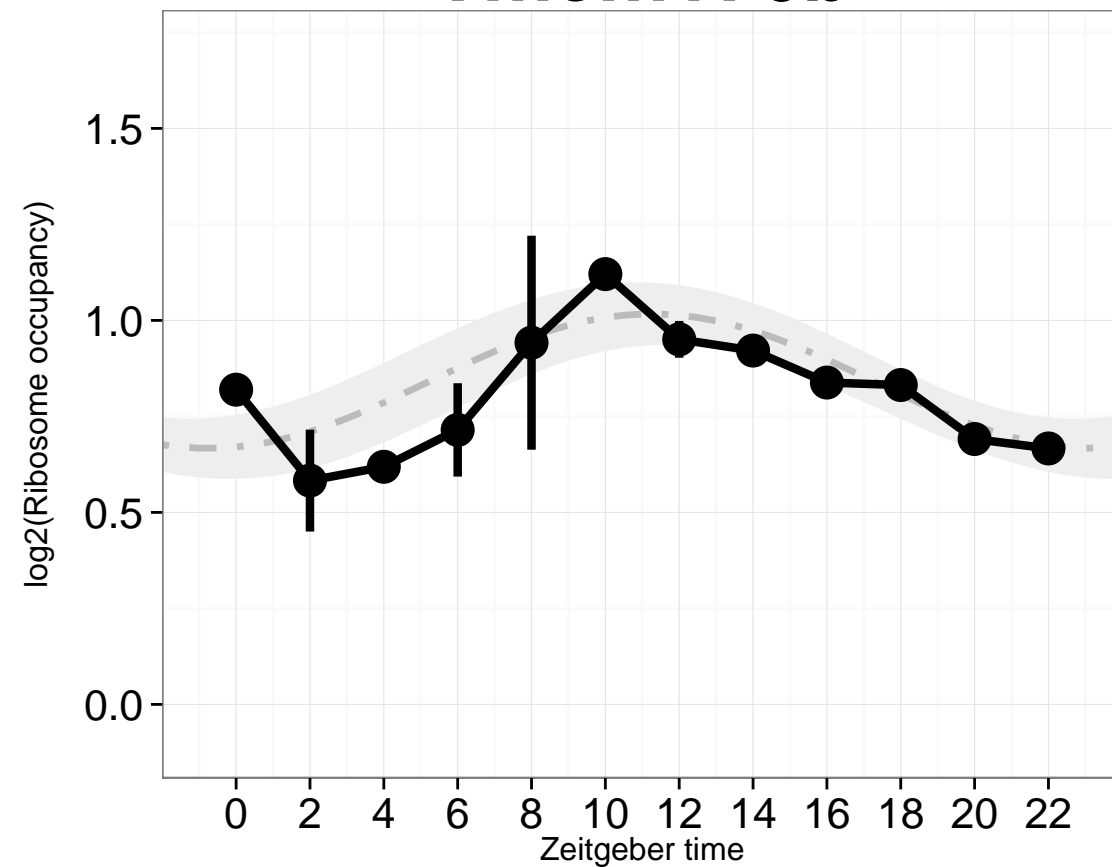

Supplement: SuppDataset_1.zip [file Tmem176b_set_D.pdf › Supplemental Dataset 1/D-mRNA_rhythm_translation_rhyth/Tmem176b_set_D.pdf]

# Tmem180

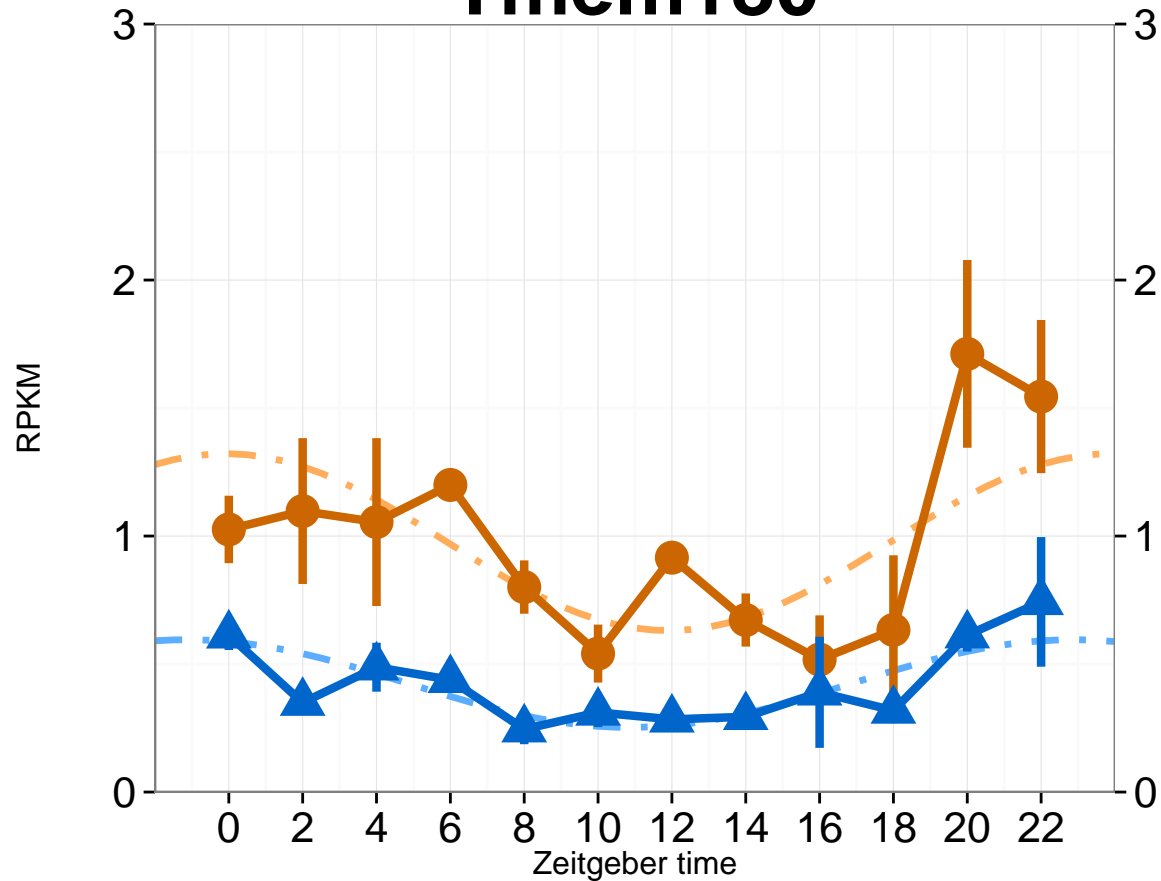

# Tmem180

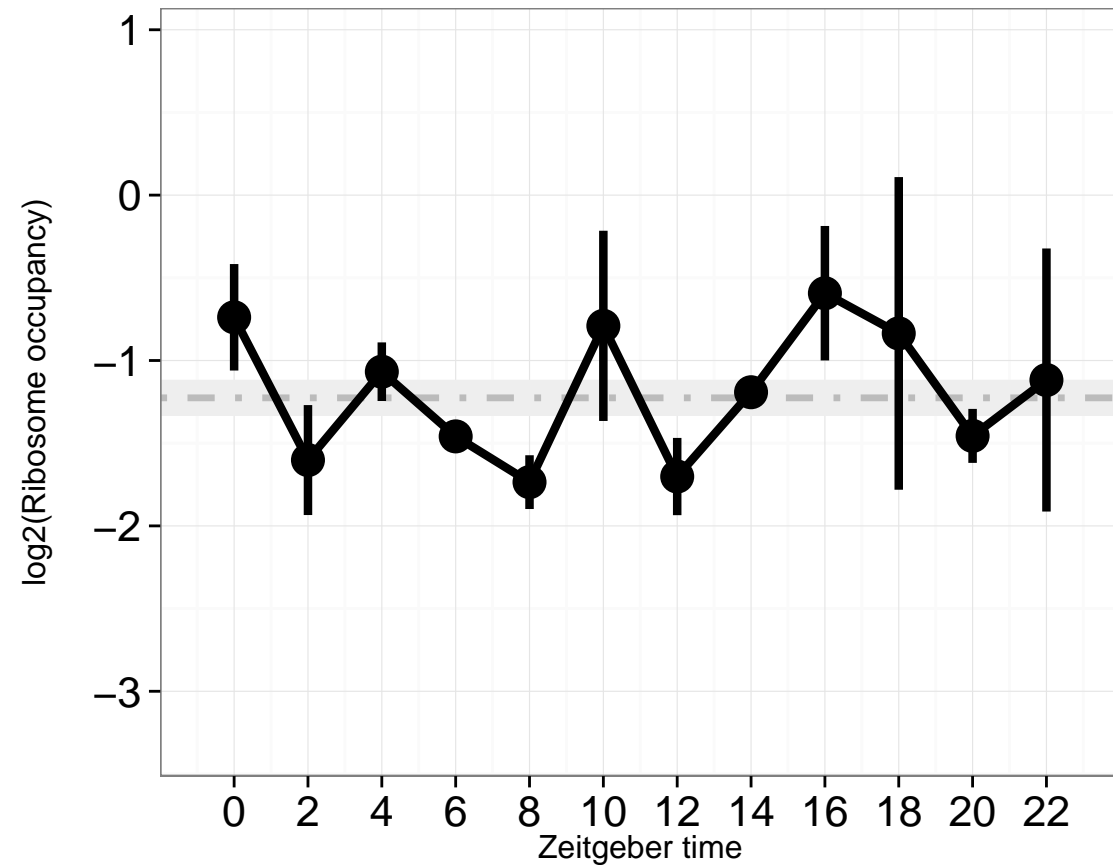

Supplement: SuppDataset_1.zip [file Tmem180_set_D.pdf › Supplemental Dataset 1/D-mRNA_rhythm_translation_rhyth/Tmem180_set_D.pdf]

# Tmem189

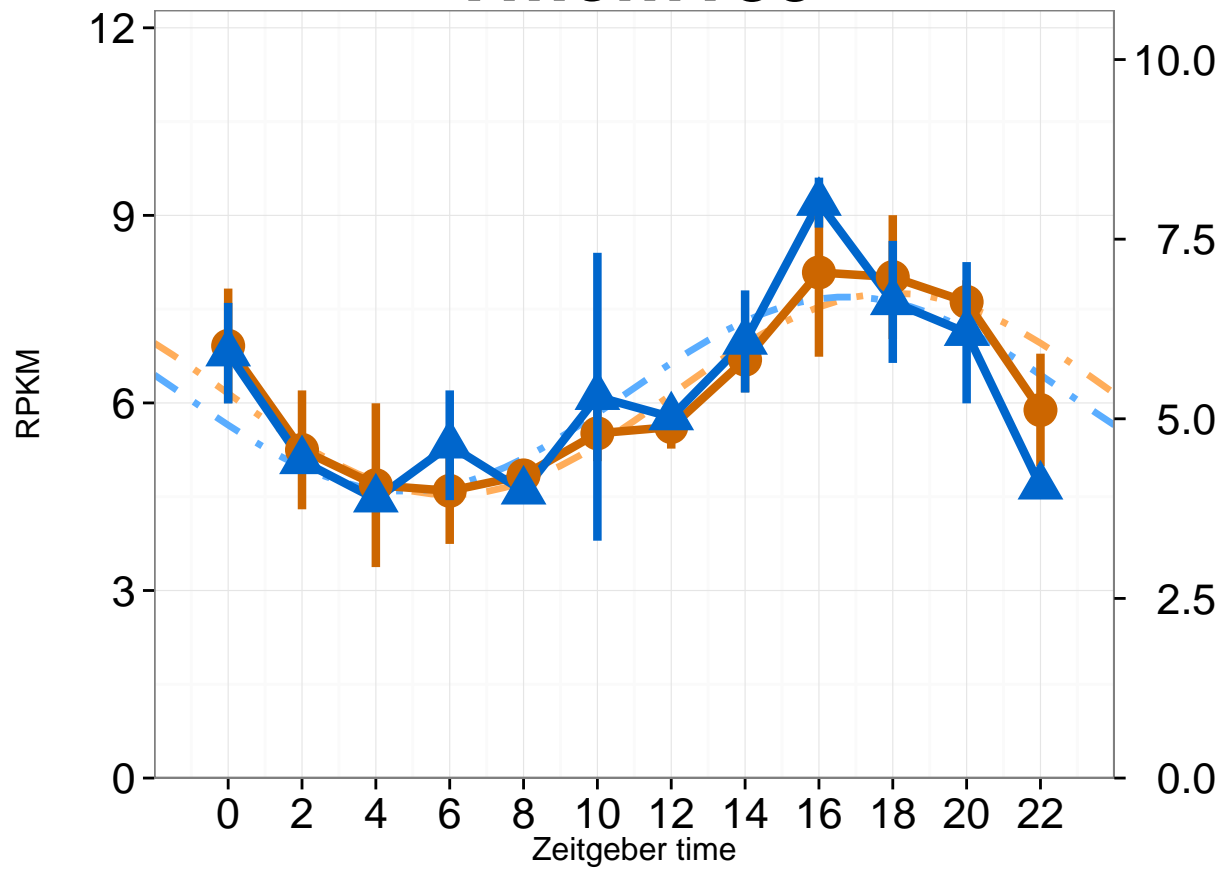

# Tmem189

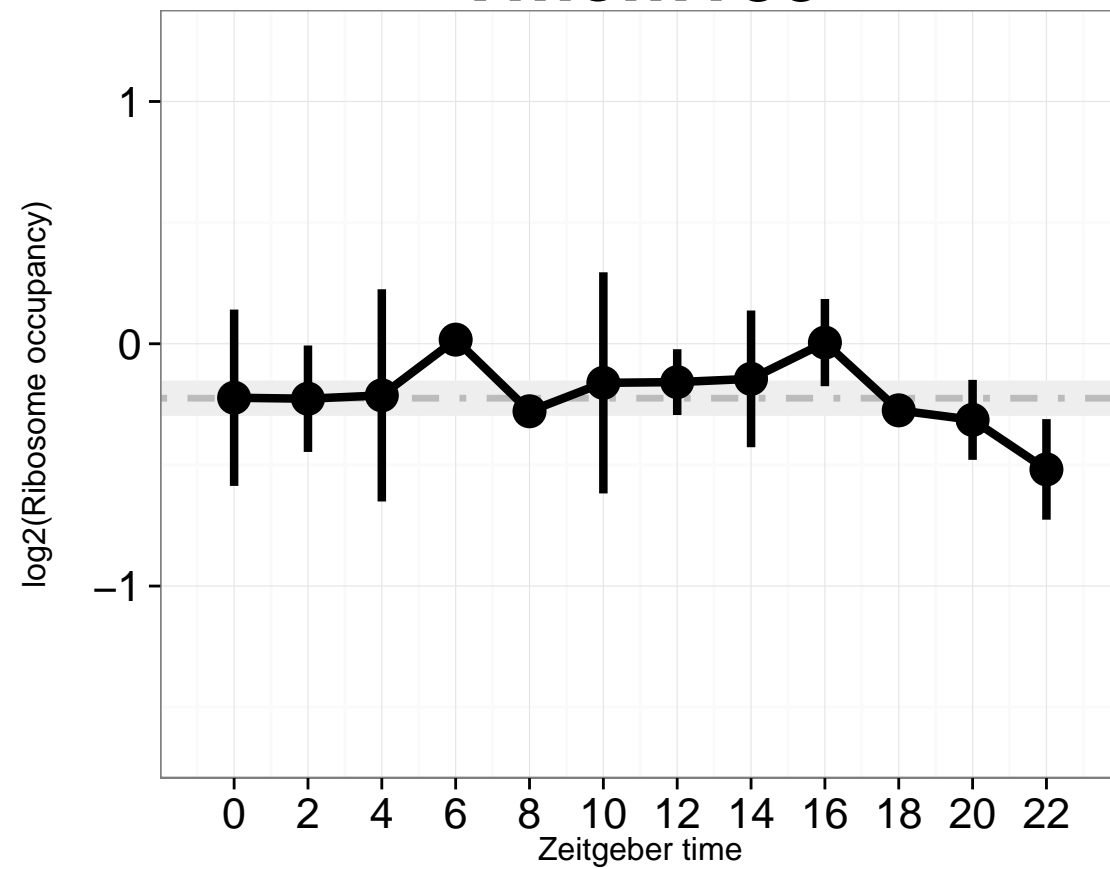

Supplement: SuppDataset_1.zip [file Tmem189_set_D.pdf › Supplemental Dataset 1/D-mRNA_rhythm_translation_rhyth/Tmem189_set_D.pdf]

# Tmem37

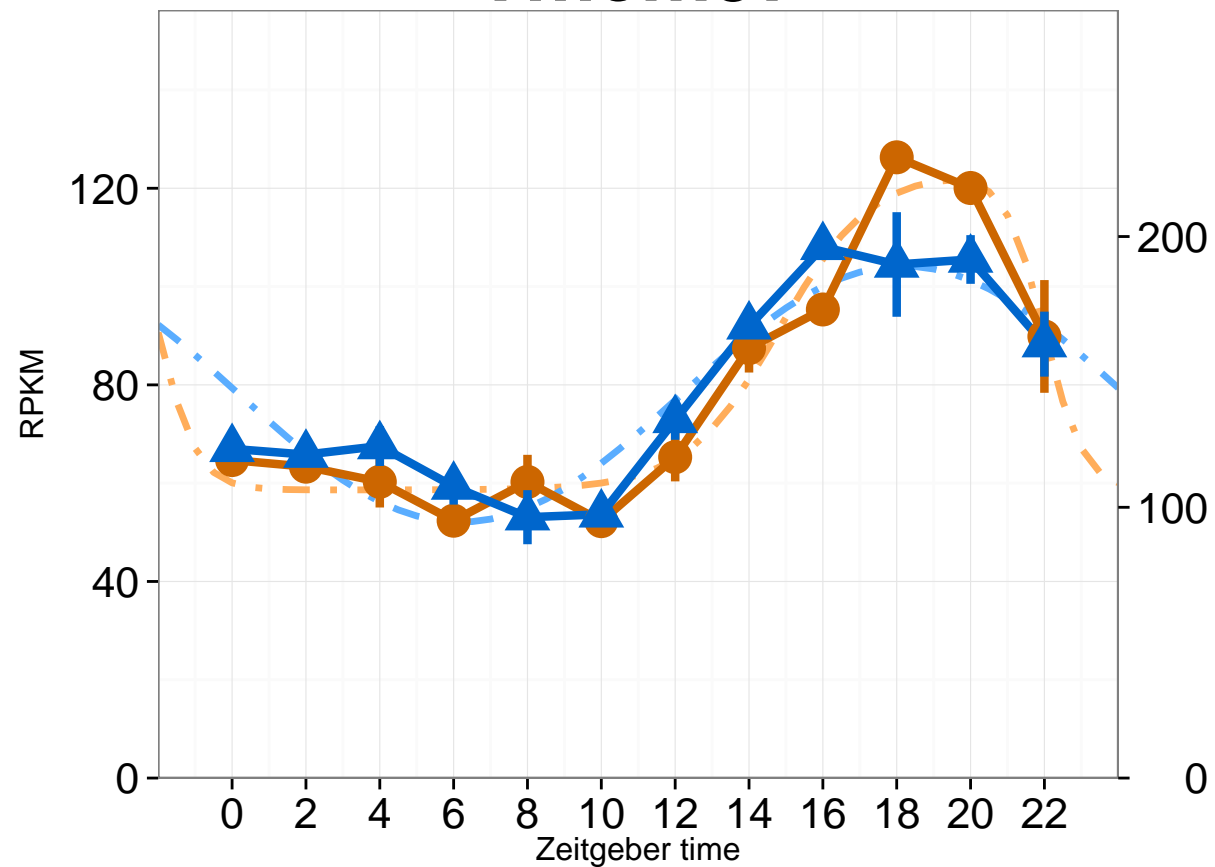

# Tmem37

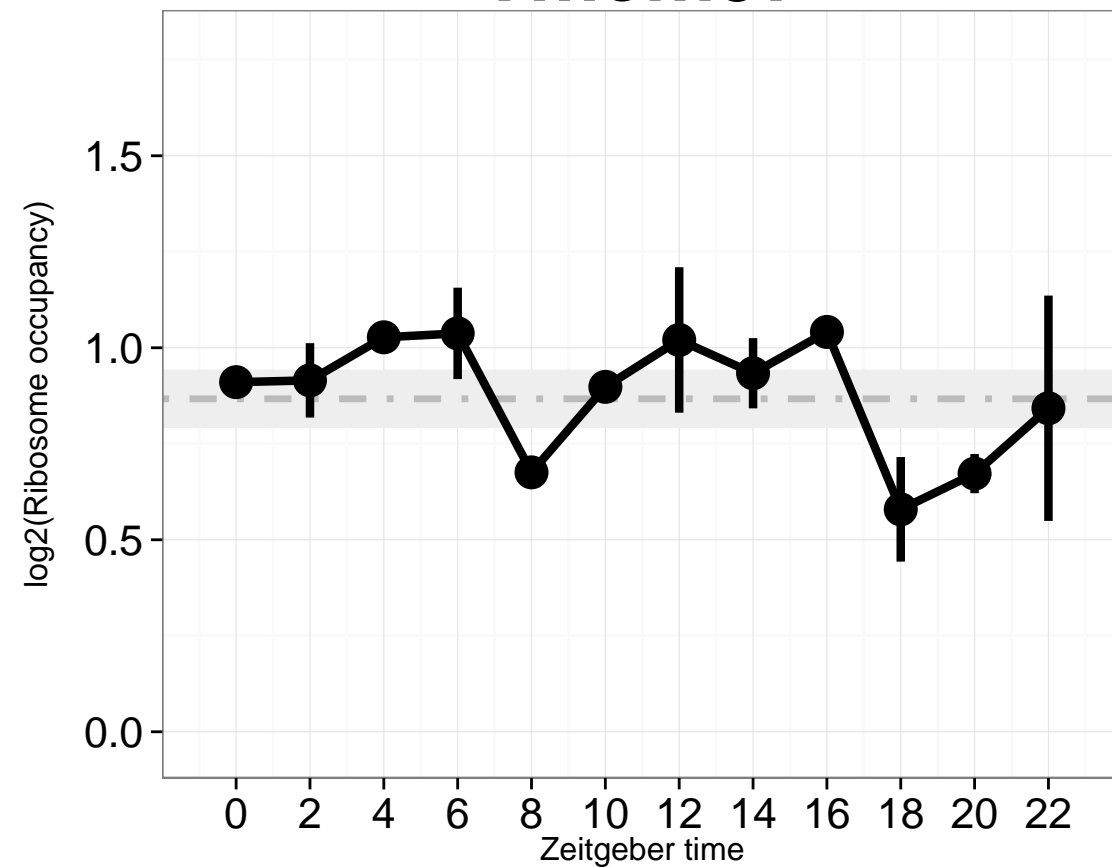

Supplement: SuppDataset_1.zip [file Tmem37_set_D.pdf › Supplemental Dataset 1/D-mRNA_rhythm_translation_rhyth/Tmem37_set_D.pdf]

## Tmem57

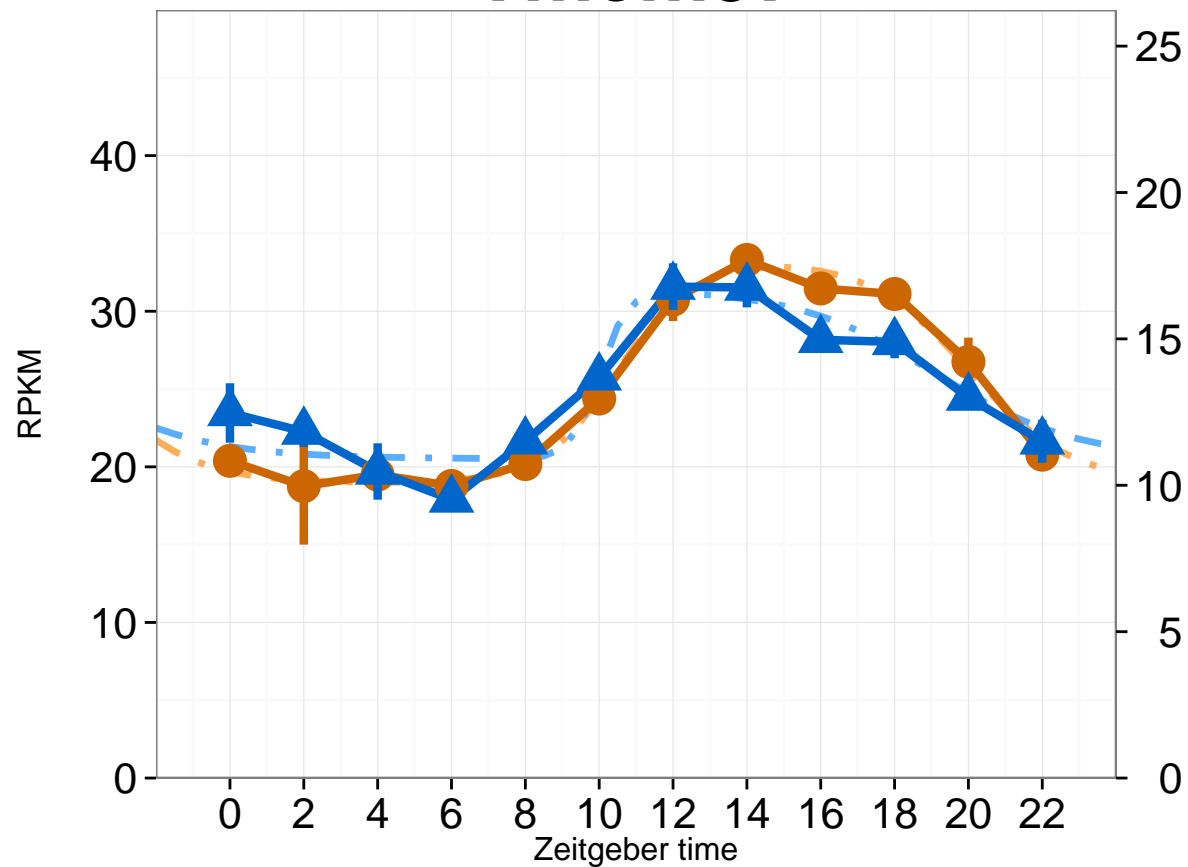

## Tmem57

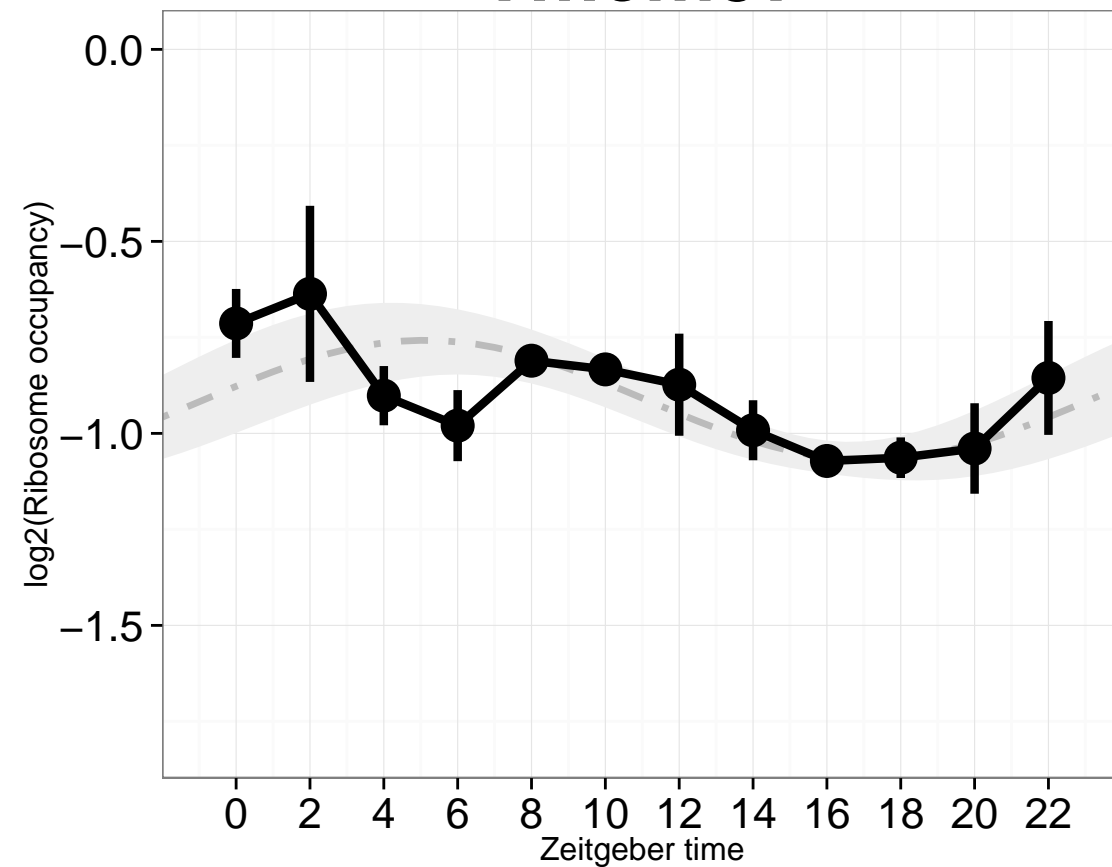

Supplement: SuppDataset_1.zip [file Tmem57_set_D.pdf › Supplemental Dataset 1/D-mRNA_rhythm_translation_rhyth/Tmem57_set_D.pdf]

# Tmem86a

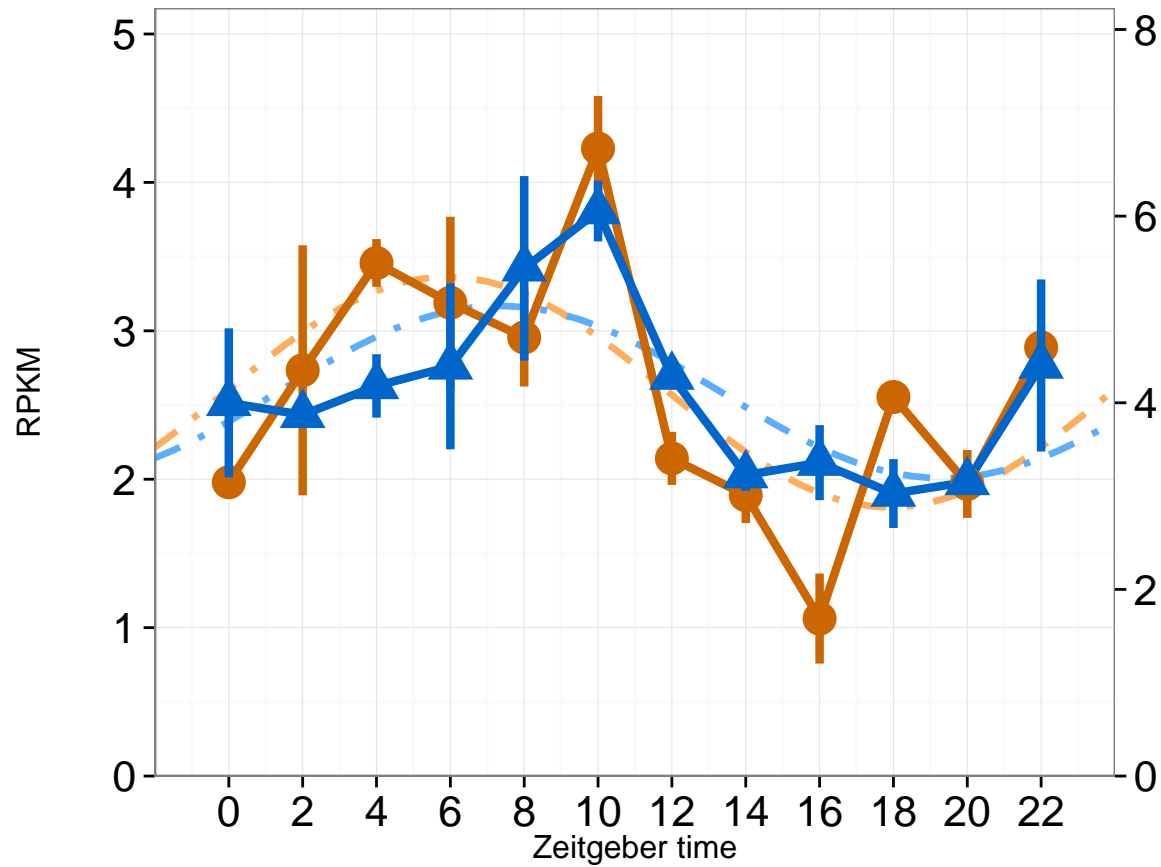

# Tmem86a

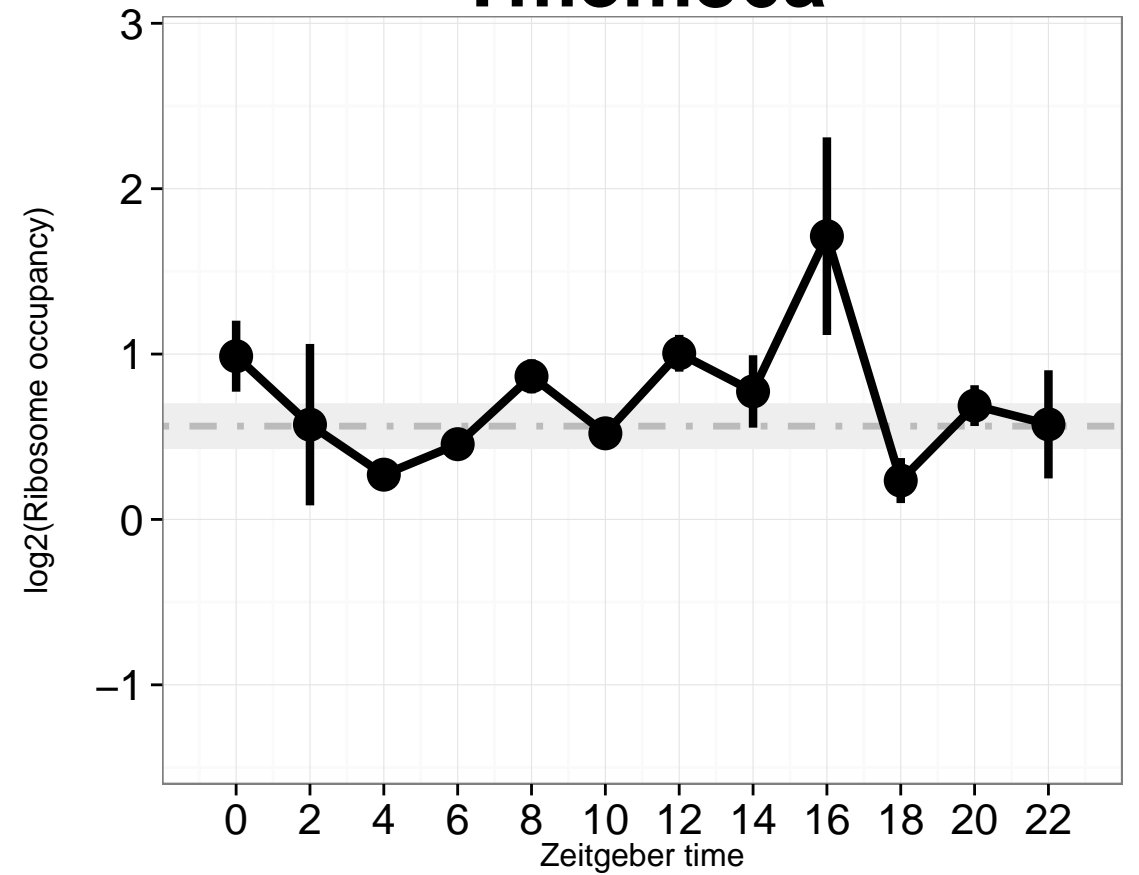

Supplement: SuppDataset_1.zip [file Tmem86a_set_D.pdf › Supplemental Dataset 1/D-mRNA_rhythm_translation_rhyth/Tmem86a_set_D.pdf]

# Tmem97

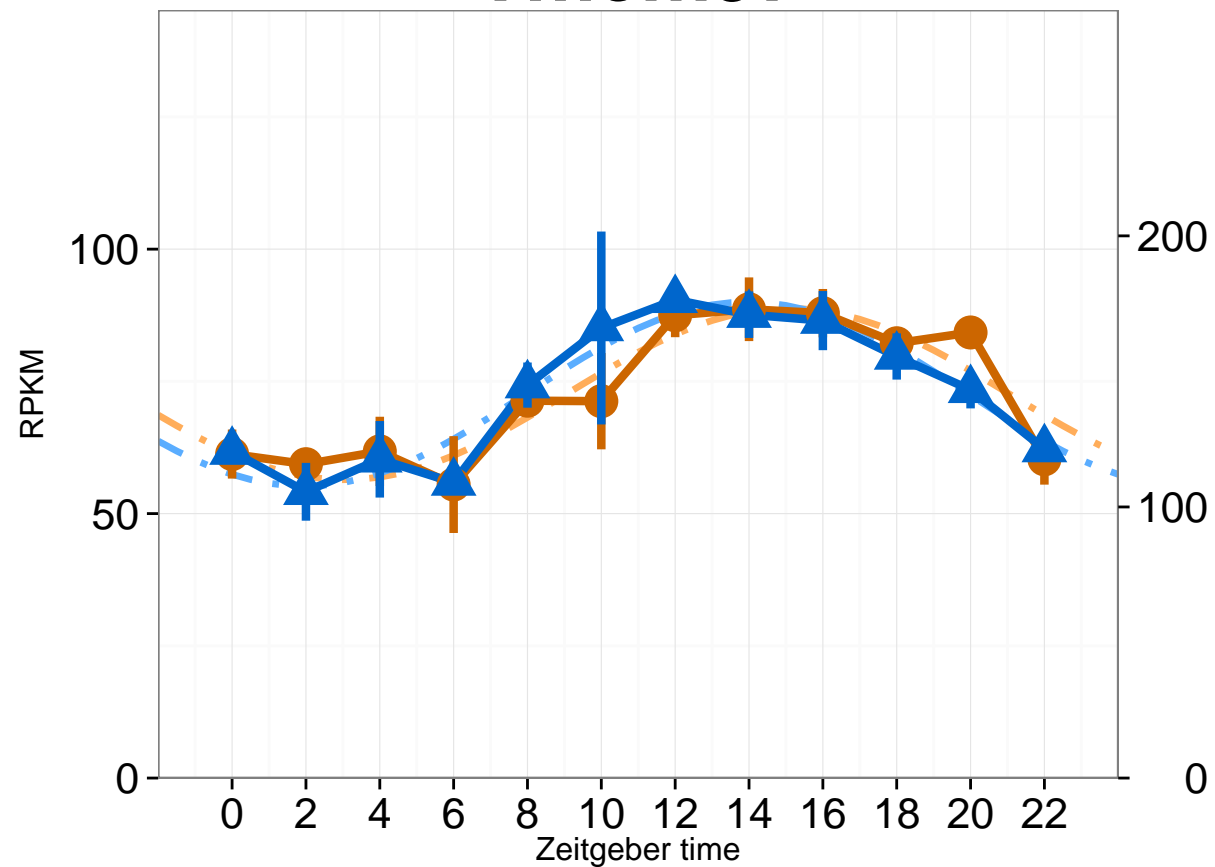

# Tmem97

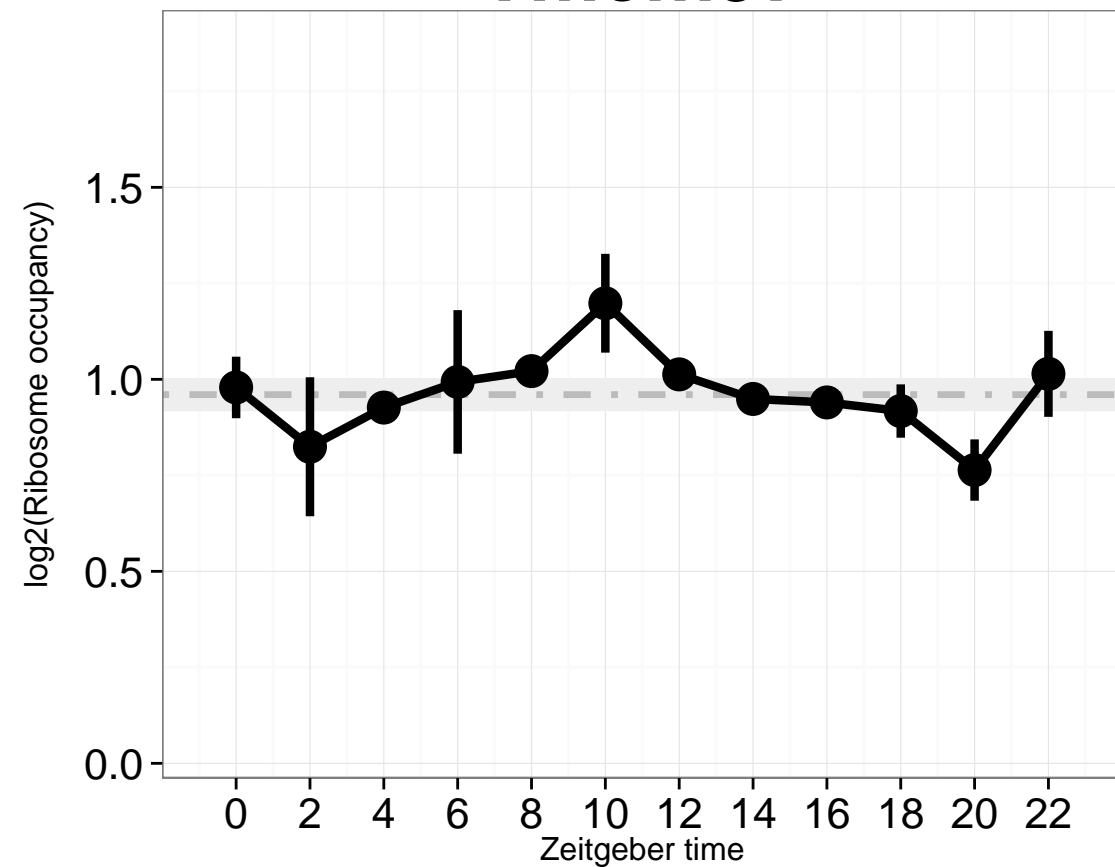

Supplement: SuppDataset_1.zip [file Tmem97_set_D.pdf › Supplemental Dataset 1/D-mRNA_rhythm_translation_rhyth/Tmem97_set_D.pdf]

# Tmie

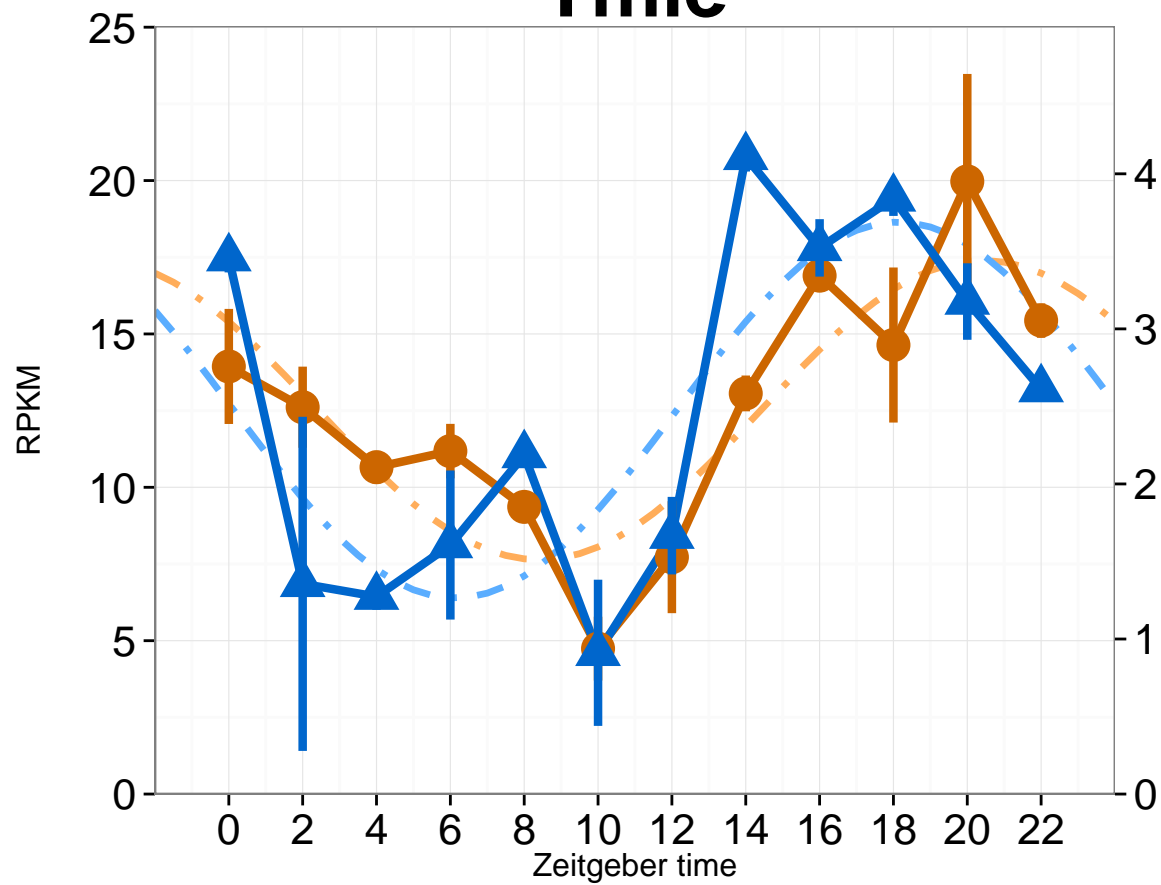

# Tmie

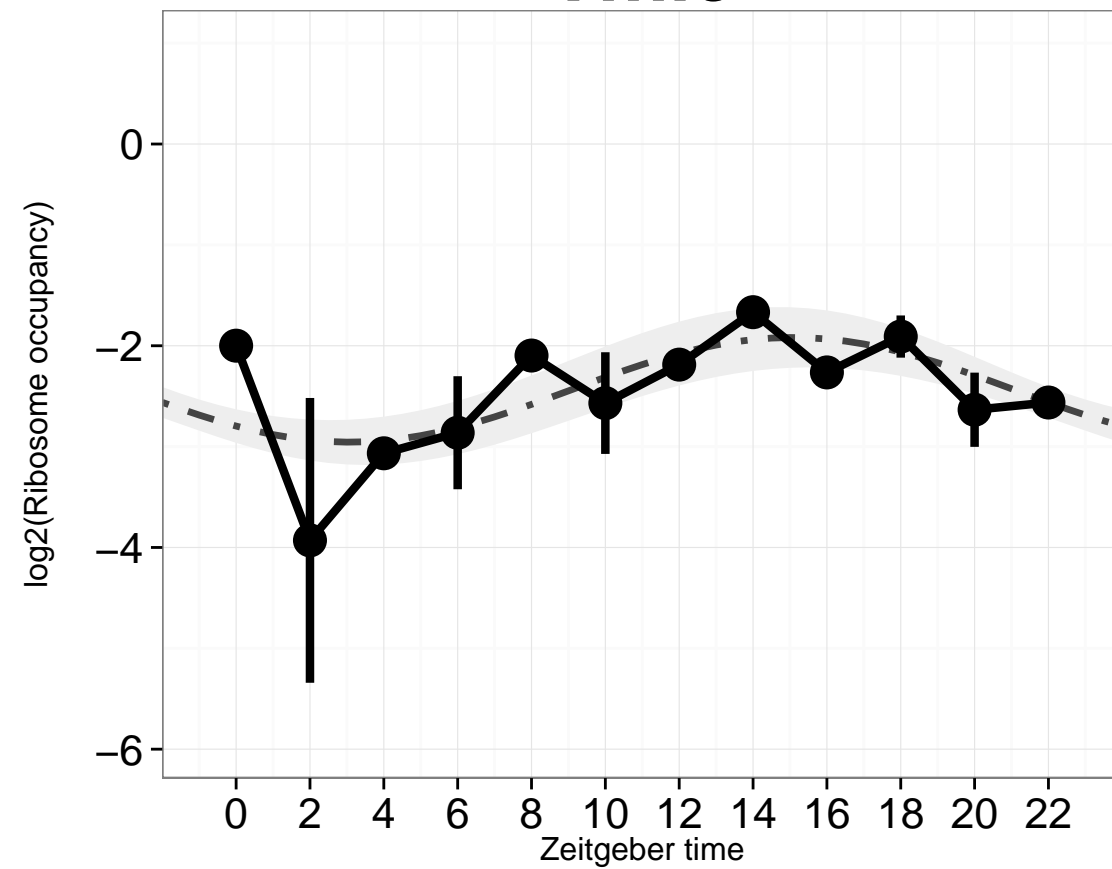

Supplement: SuppDataset_1.zip [file Tmie_set_D.pdf › Supplemental Dataset 1/D-mRNA_rhythm_translation_rhyth/Tmie_set_D.pdf]

# Tmtc2

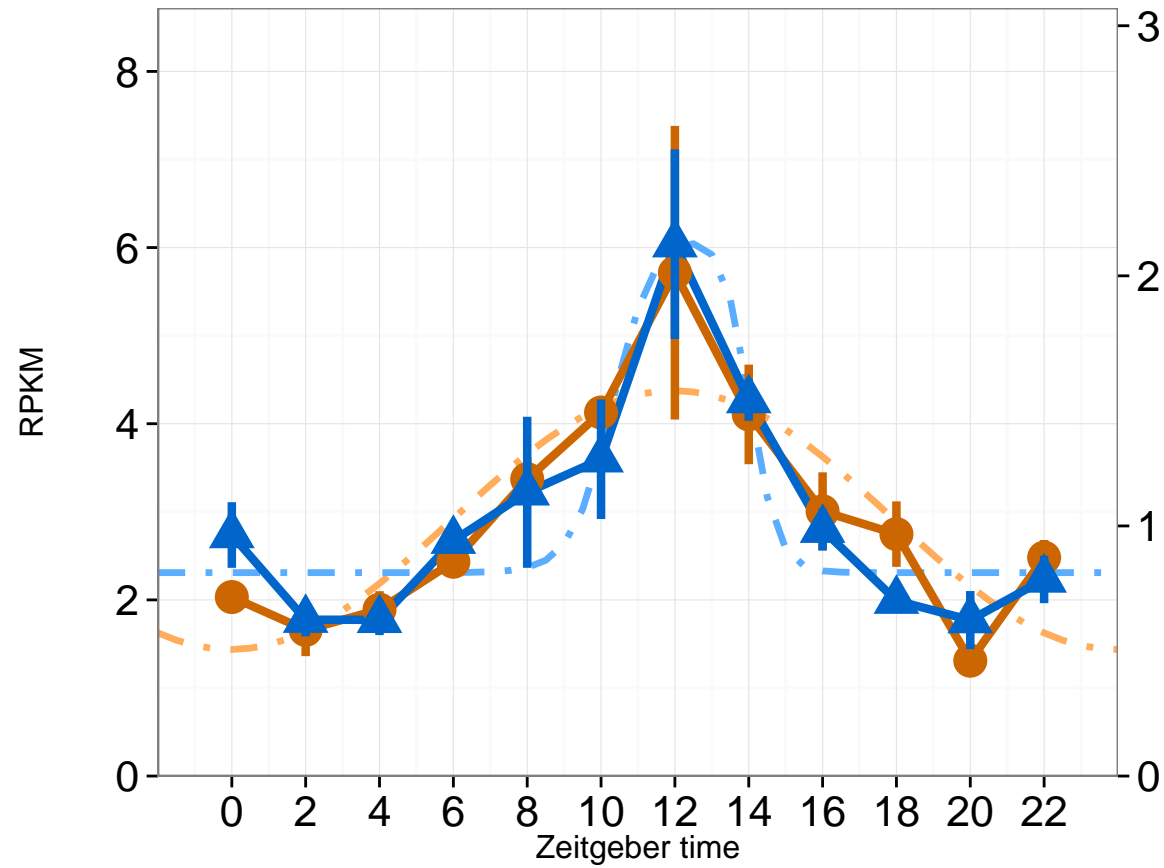

# Tmtc2

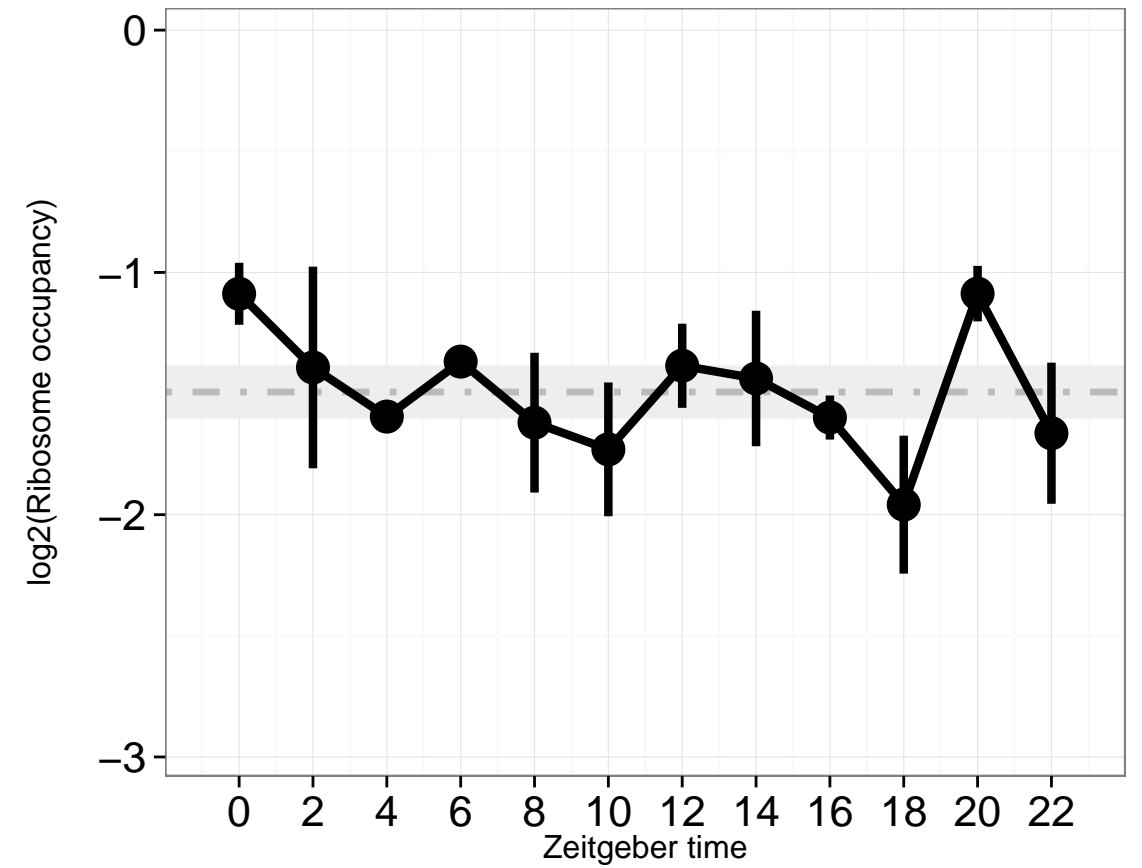

Supplement: SuppDataset_1.zip [file Tmtc2_set_D.pdf › Supplemental Dataset 1/D-mRNA_rhythm_translation_rhyth/Tmtc2_set_D.pdf]

## Tnfaip2

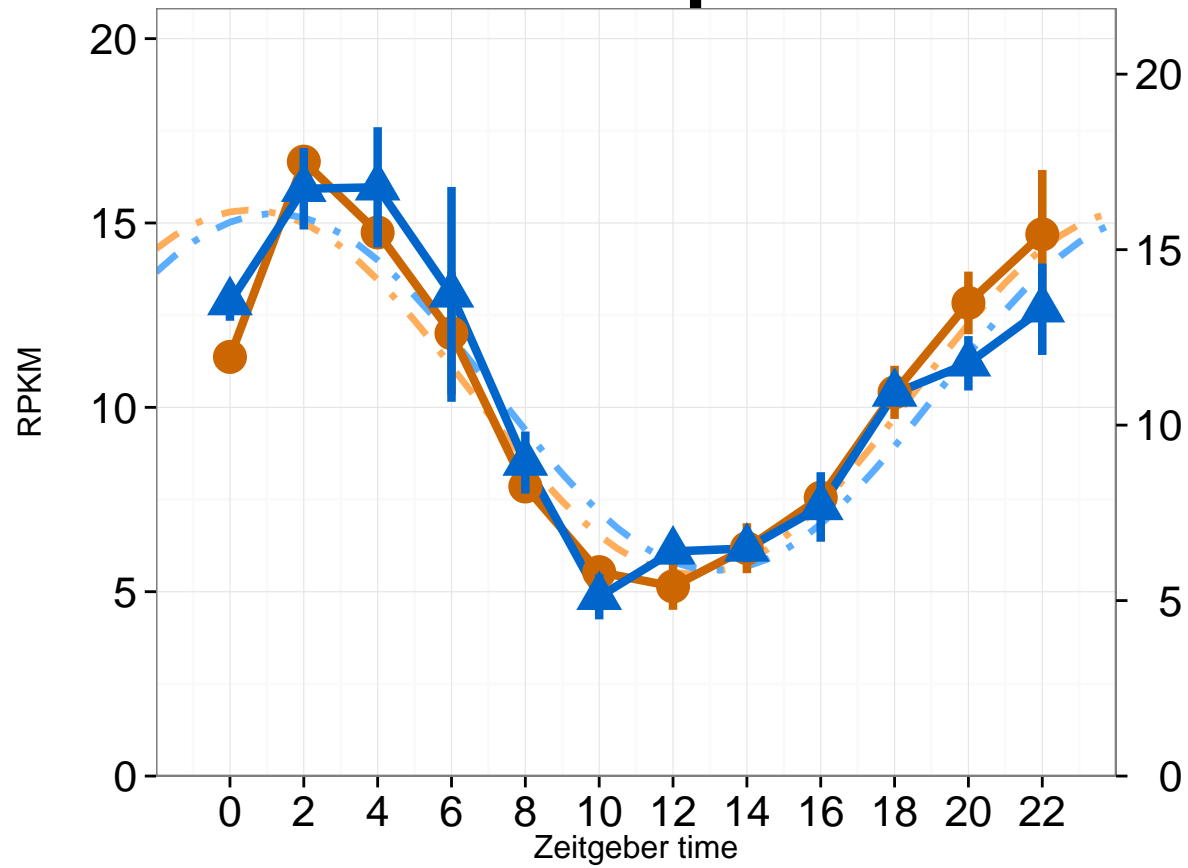

## Tnfaip2

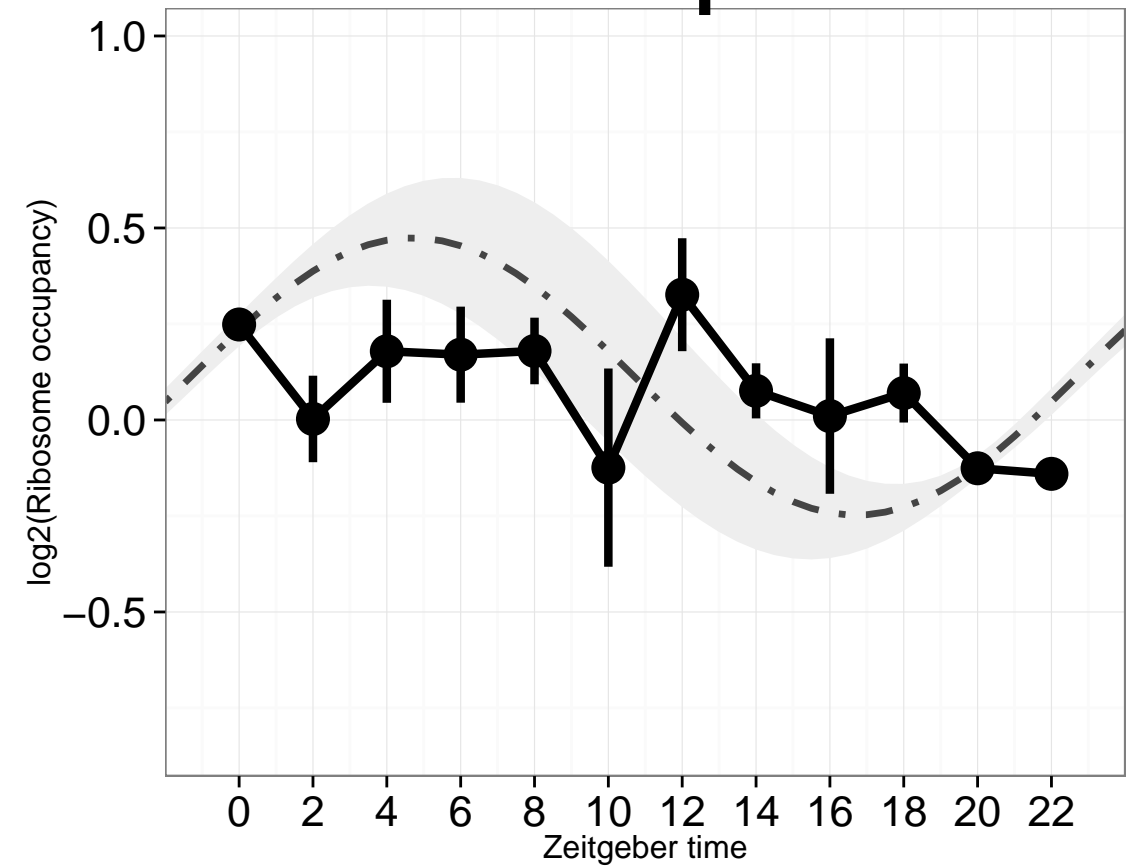

Supplement: SuppDataset_1.zip [file Tnfaip2_set_D.pdf › Supplemental Dataset 1/D-mRNA_rhythm_translation_rhyth/Tnfaip2_set_D.pdf]

# Tnfaip8l1

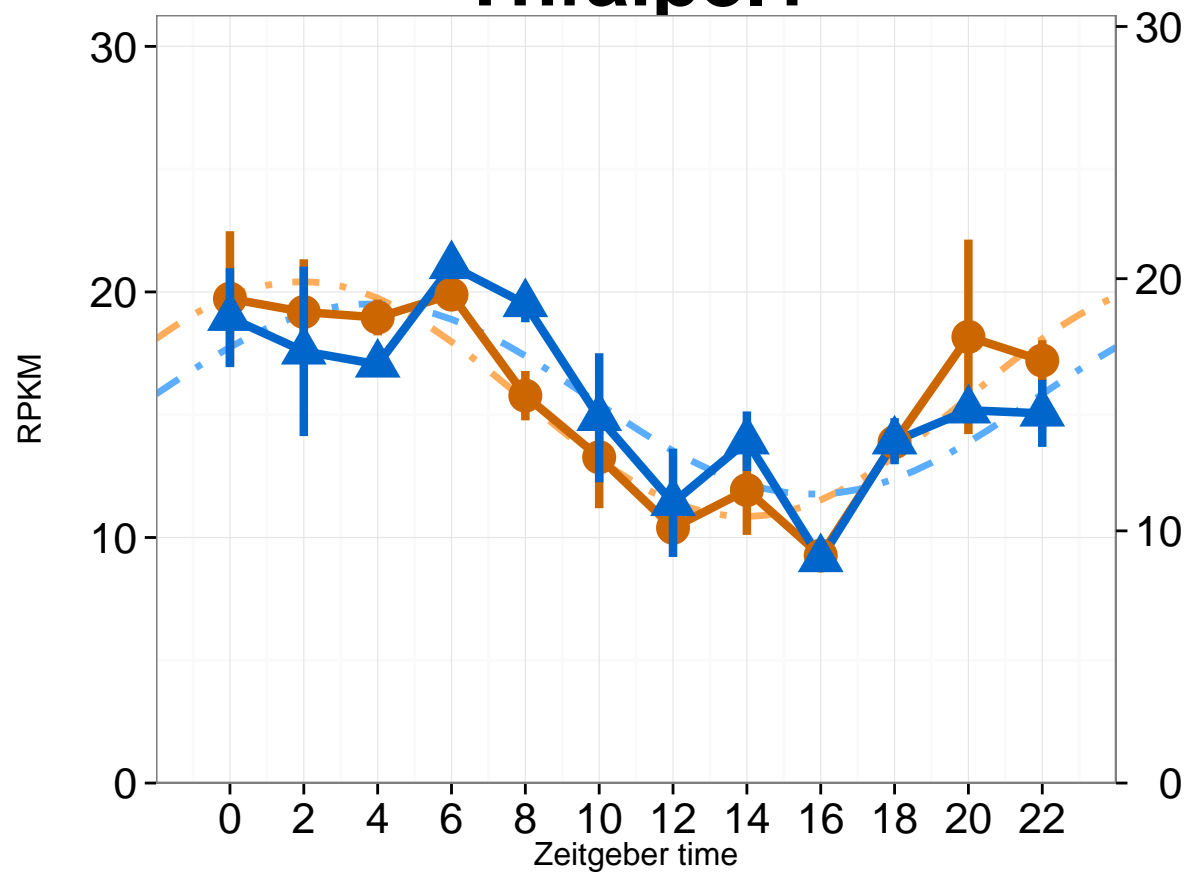

# Tnfaip8l1

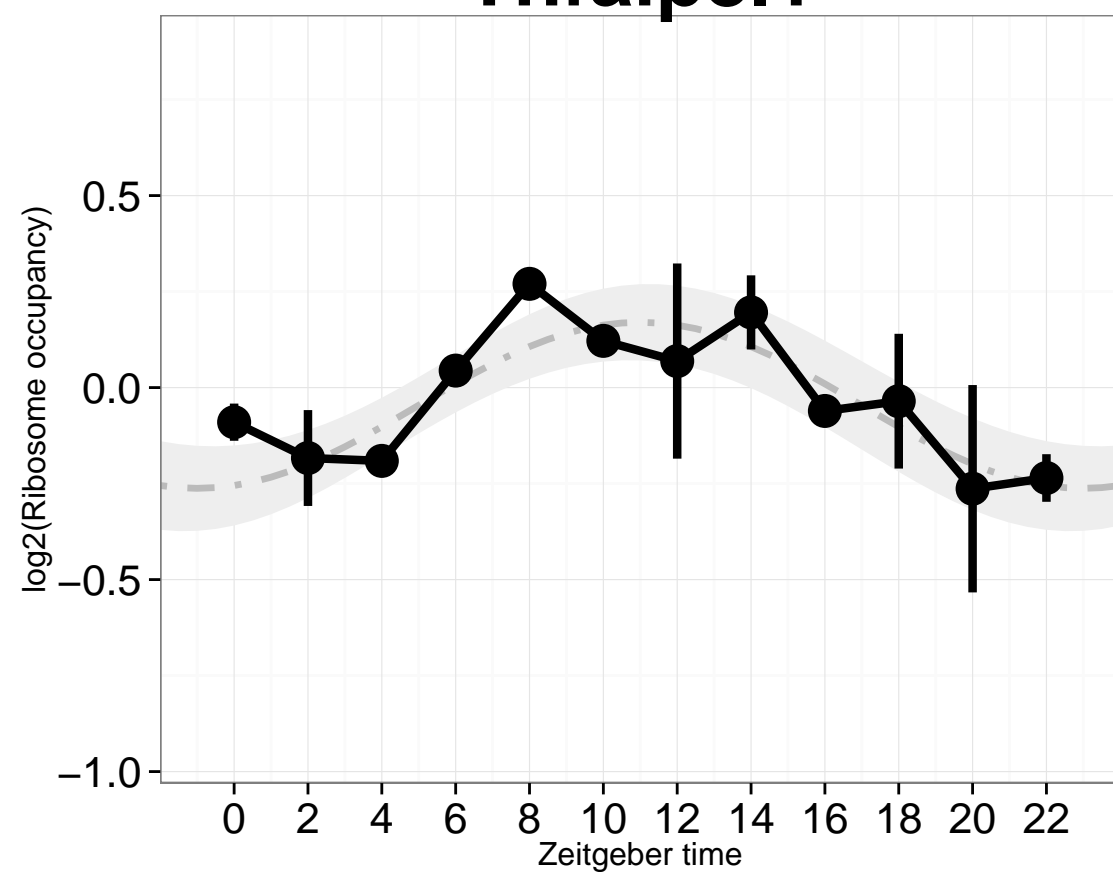

Supplement: SuppDataset_1.zip [file Tnfaip8l1_set_D.pdf › Supplemental Dataset 1/D-mRNA_rhythm_translation_rhyth/Tnfaip8l1_set_D.pdf]

## Tnfrsf19

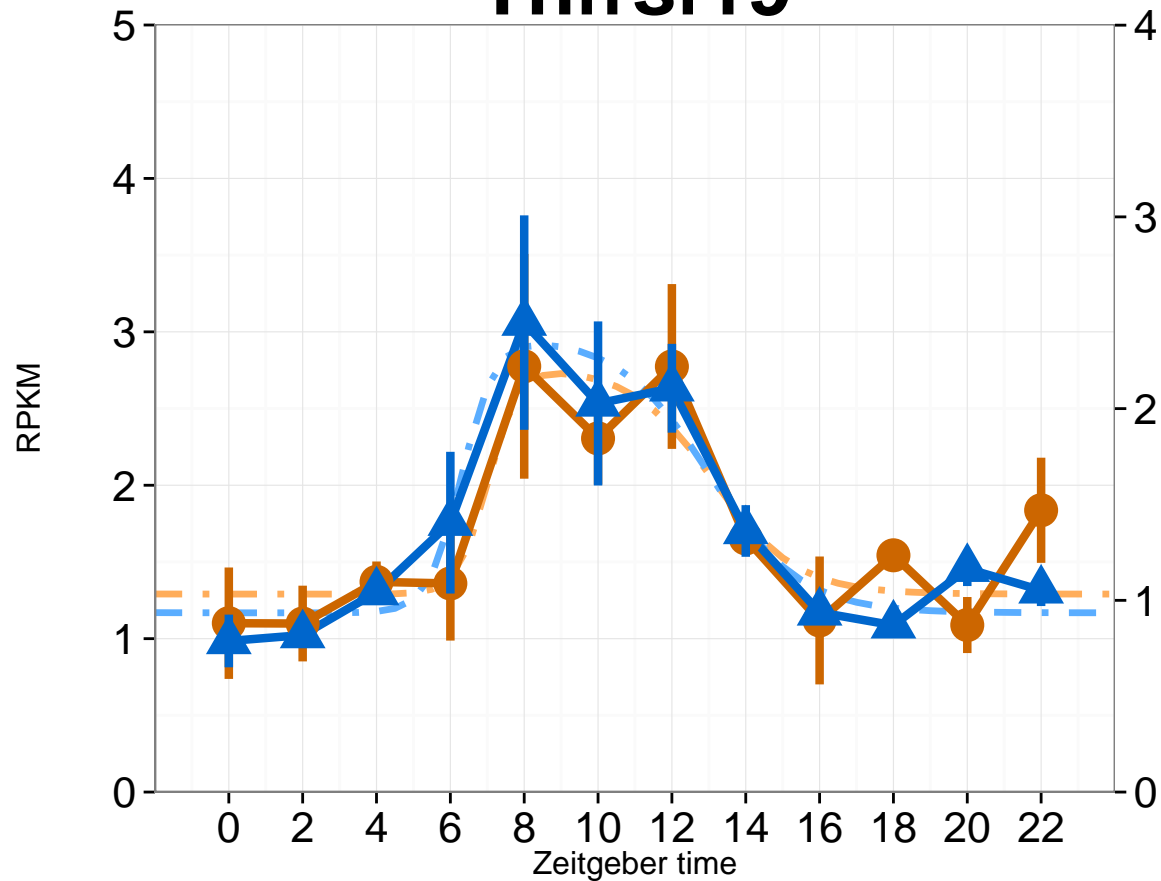

## Tnfrsf19

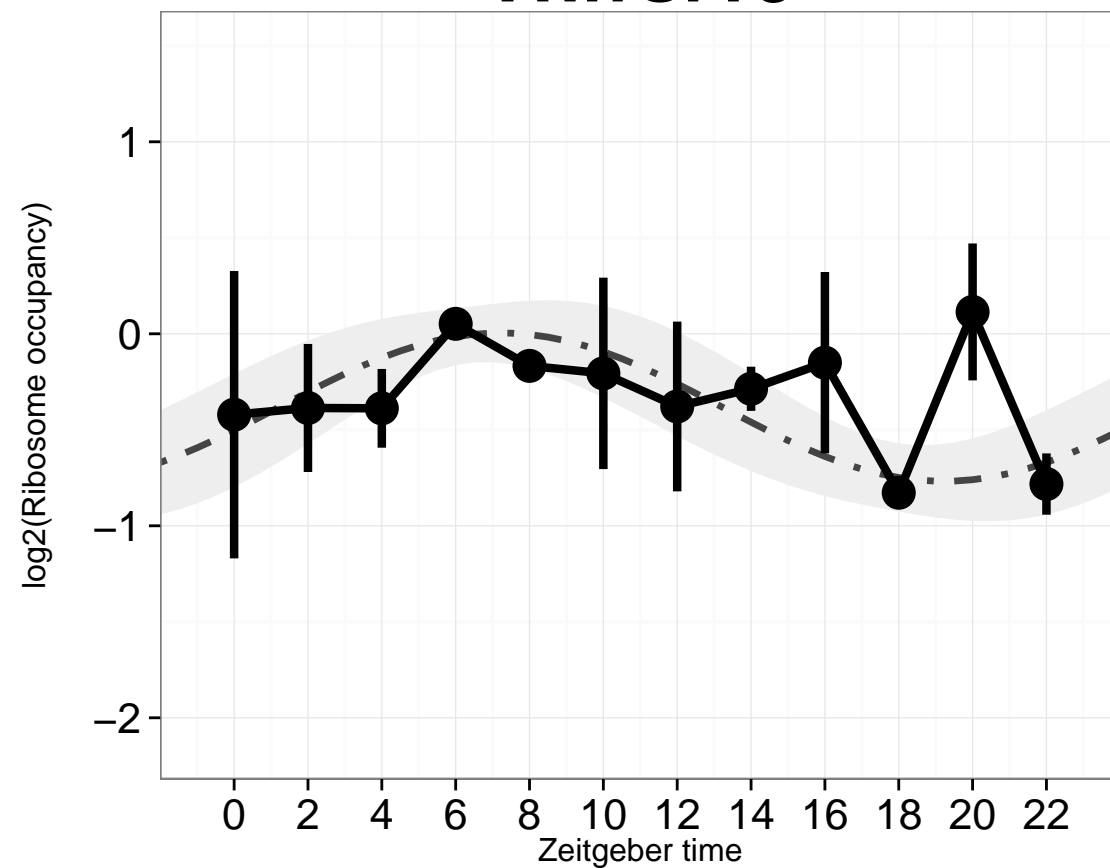

Supplement: SuppDataset_1.zip [file Tnfrsf19_set_D.pdf › Supplemental Dataset 1/D-mRNA_rhythm_translation_rhyth/Tnfrsf19_set_D.pdf]

## Tnk2

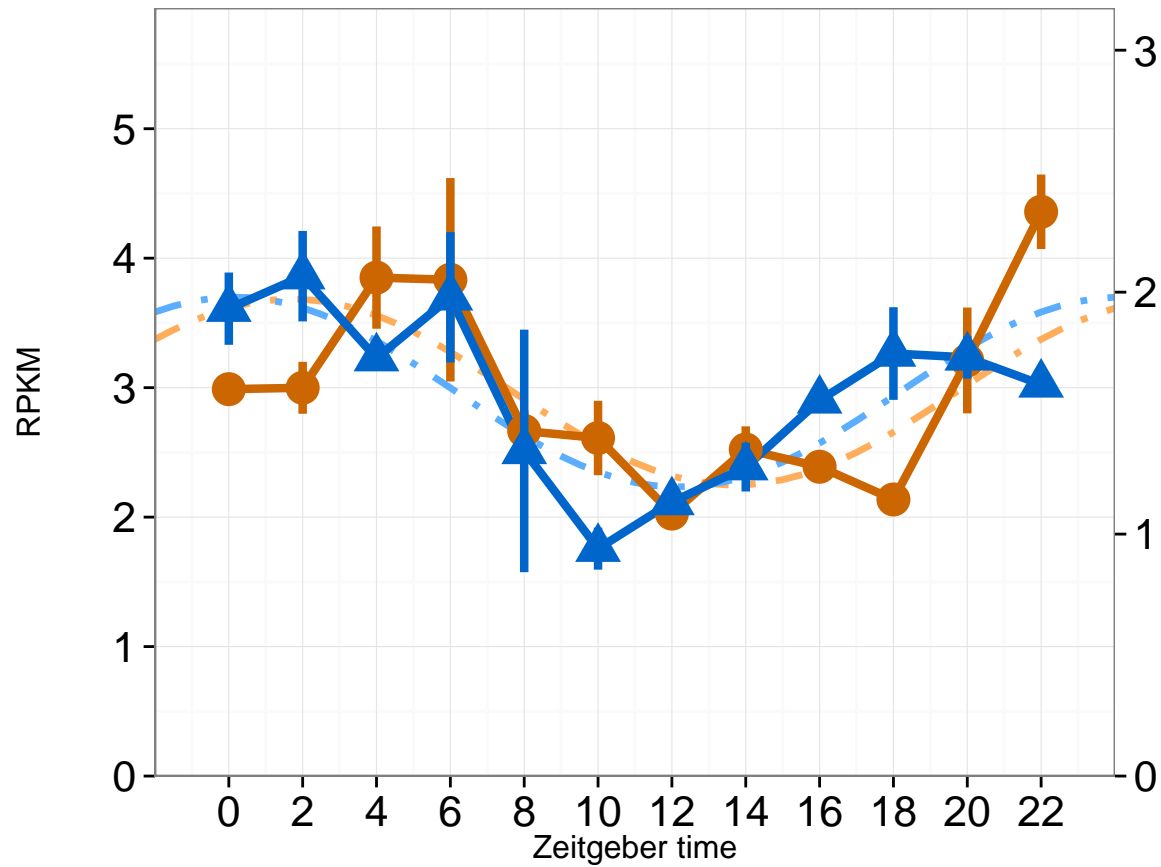

## Tnk2

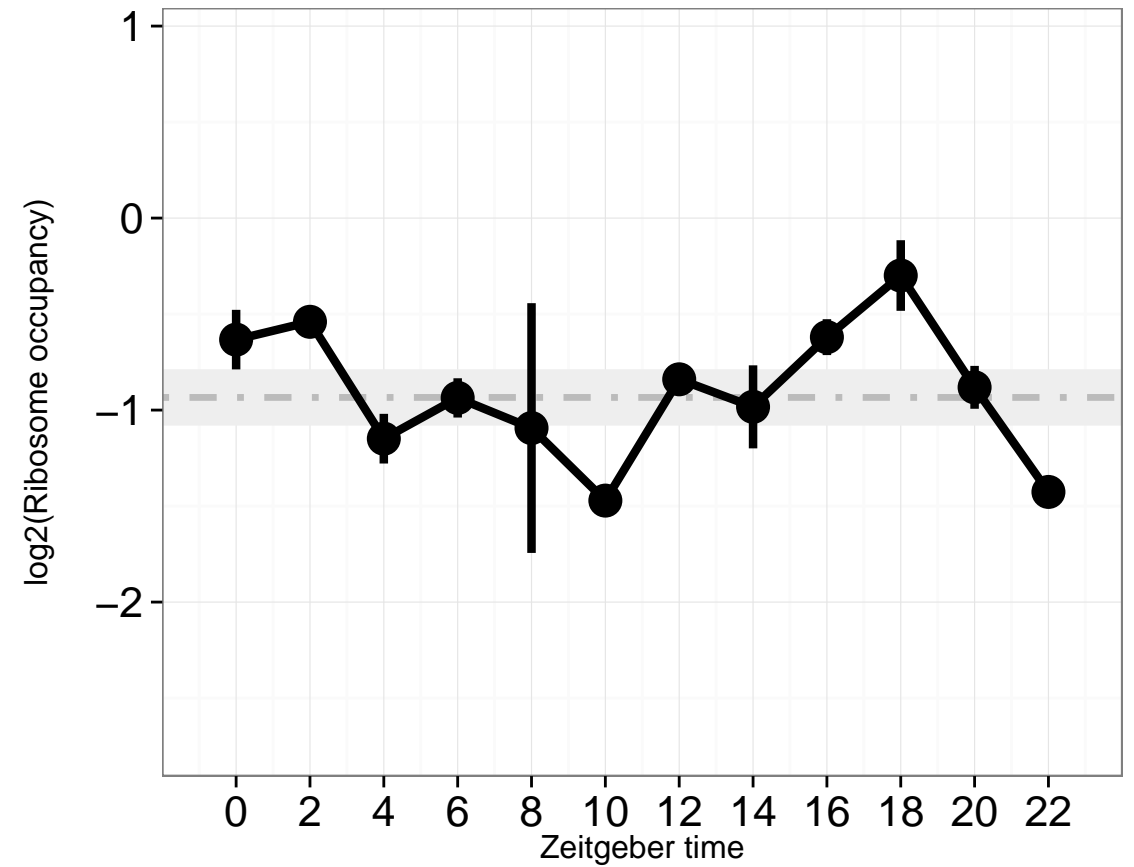

Supplement: SuppDataset_1.zip [file Tnk2_set_D.pdf › Supplemental Dataset 1/D-mRNA_rhythm_translation_rhyth/Tnk2_set_D.pdf]

# Tob2

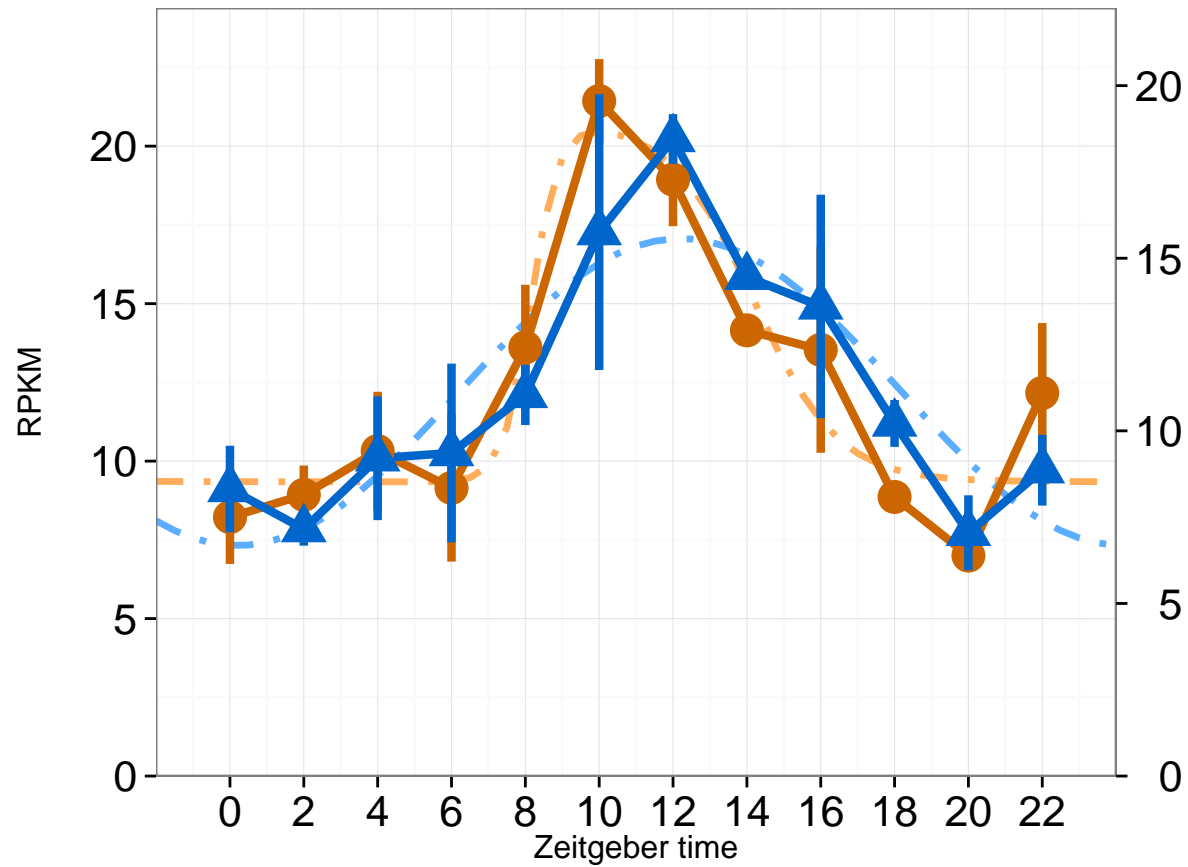

# Tob2

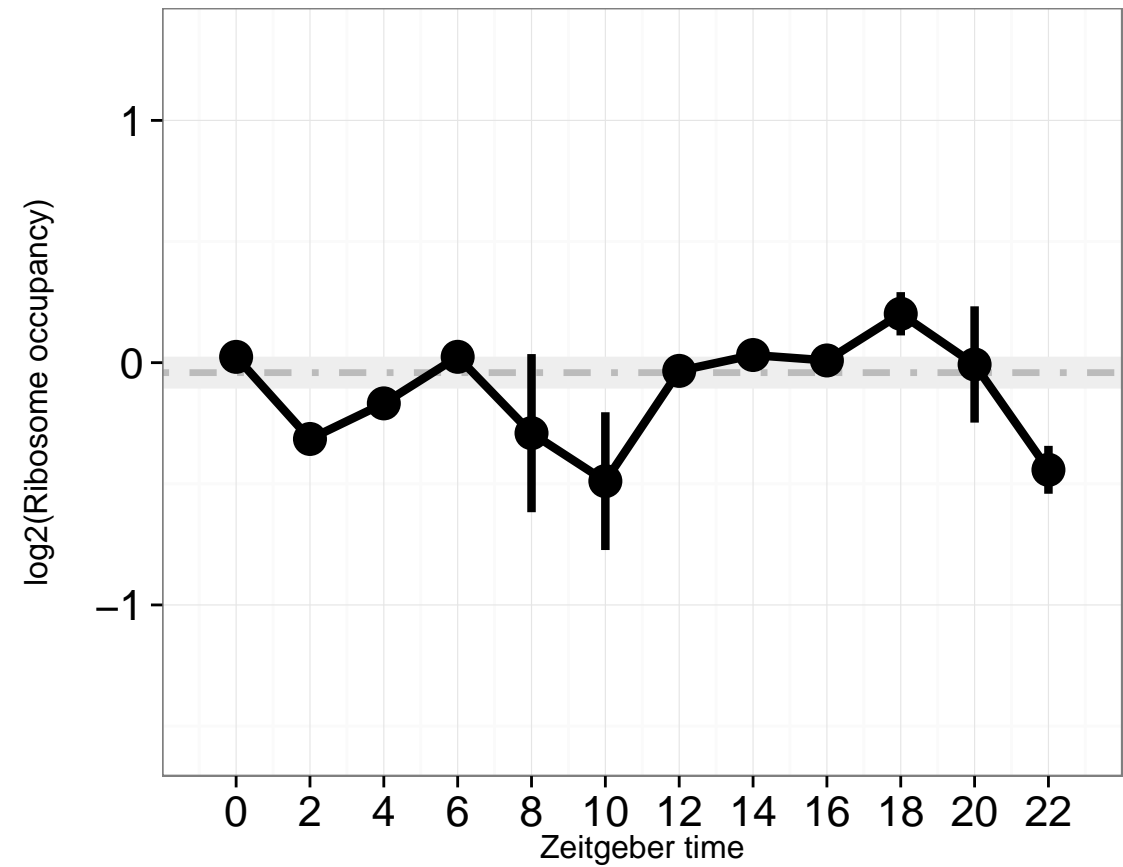

Supplement: SuppDataset_1.zip [file Tob2_set_D.pdf › Supplemental Dataset 1/D-mRNA_rhythm_translation_rhyth/Tob2_set_D.pdf]

# Tor3a

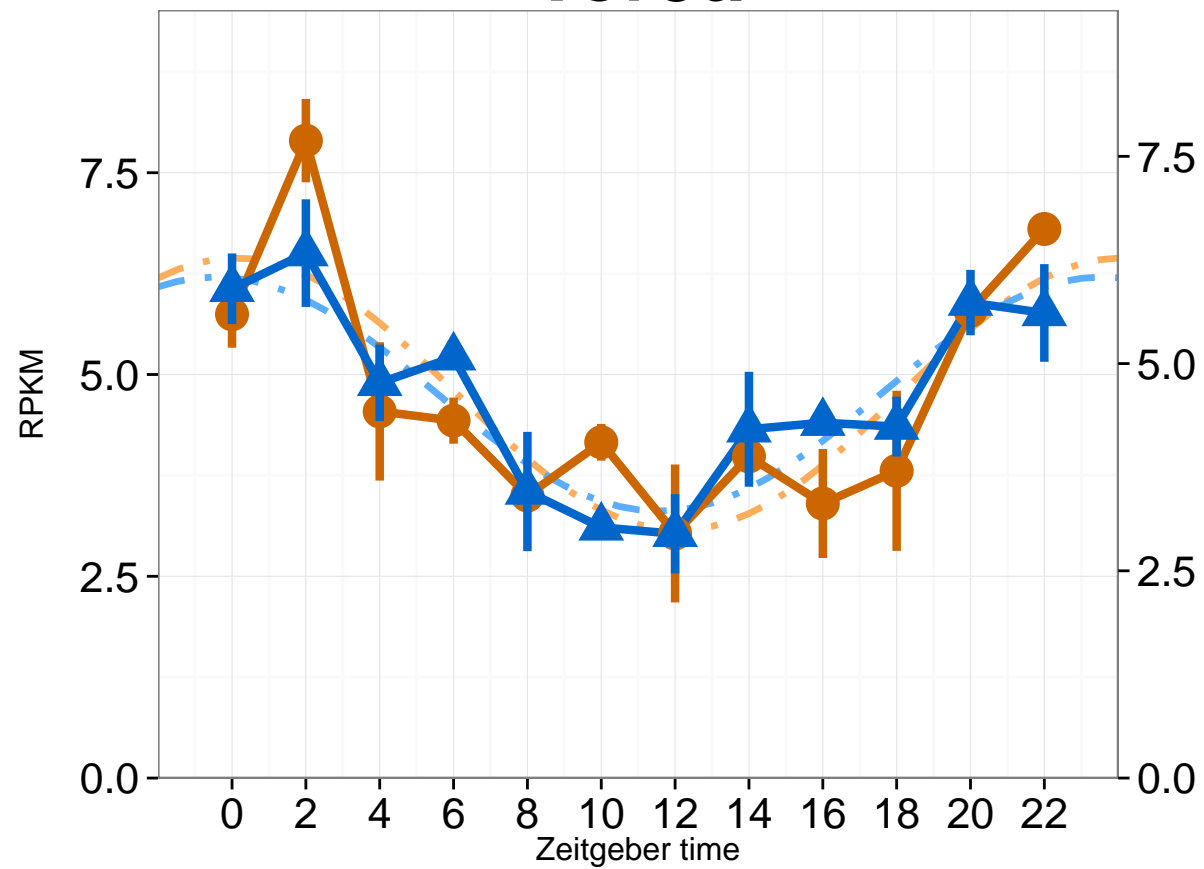

# Tor3a

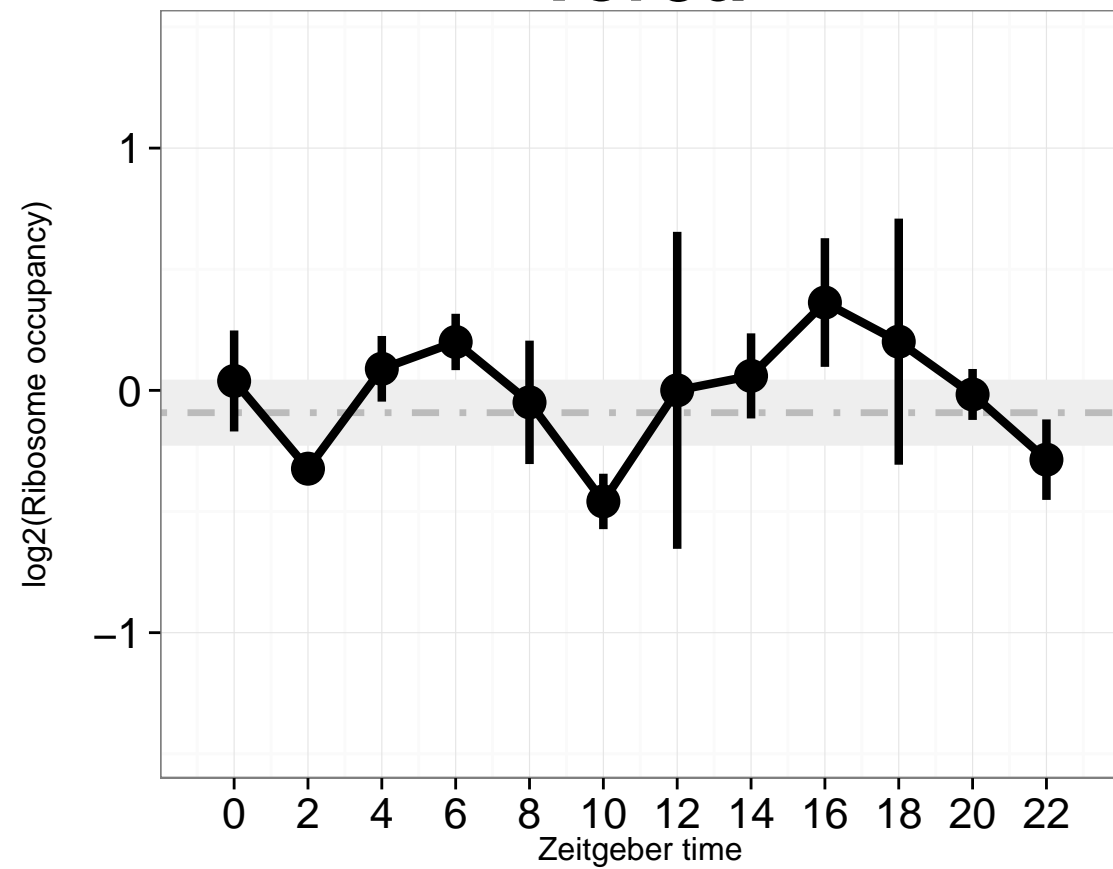

Supplement: SuppDataset_1.zip [file Tor3a_set_D.pdf › Supplemental Dataset 1/D-mRNA_rhythm_translation_rhyth/Tor3a_set_D.pdf]

## Tox

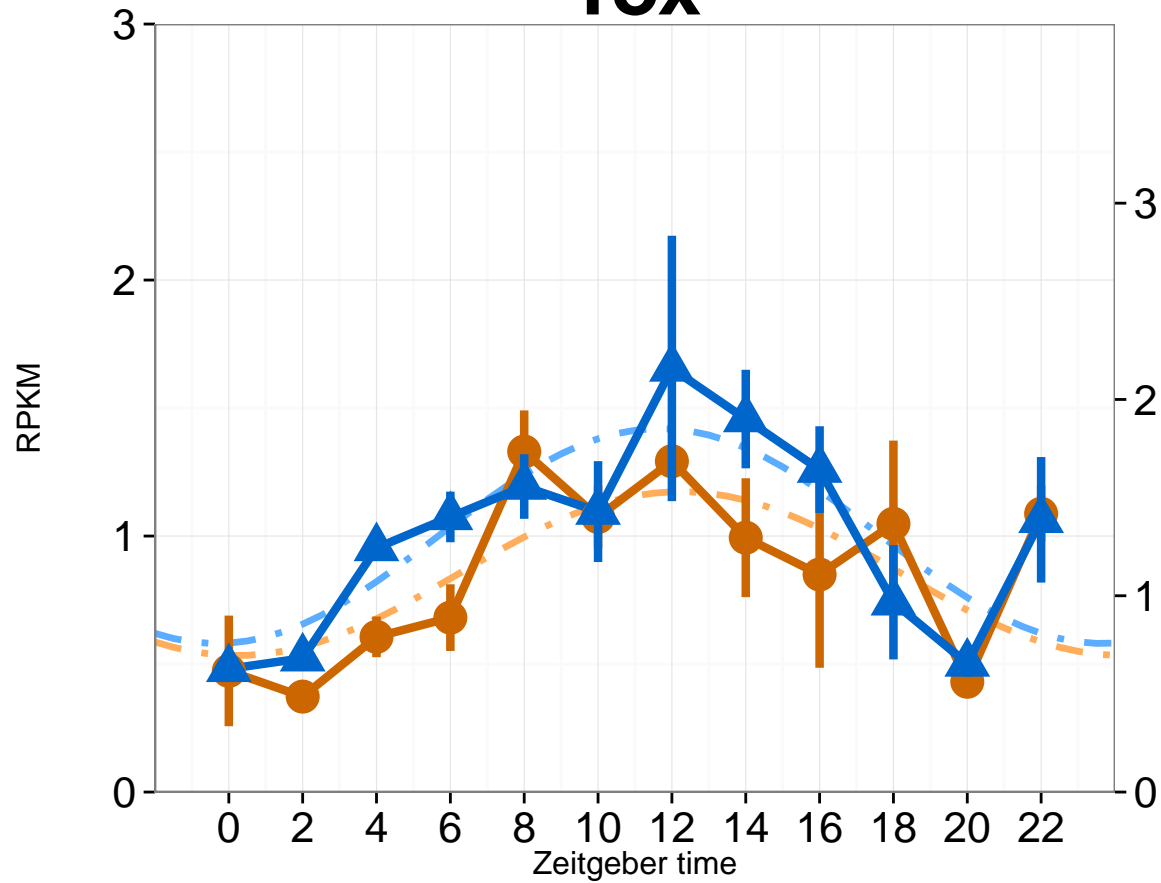

## Tox

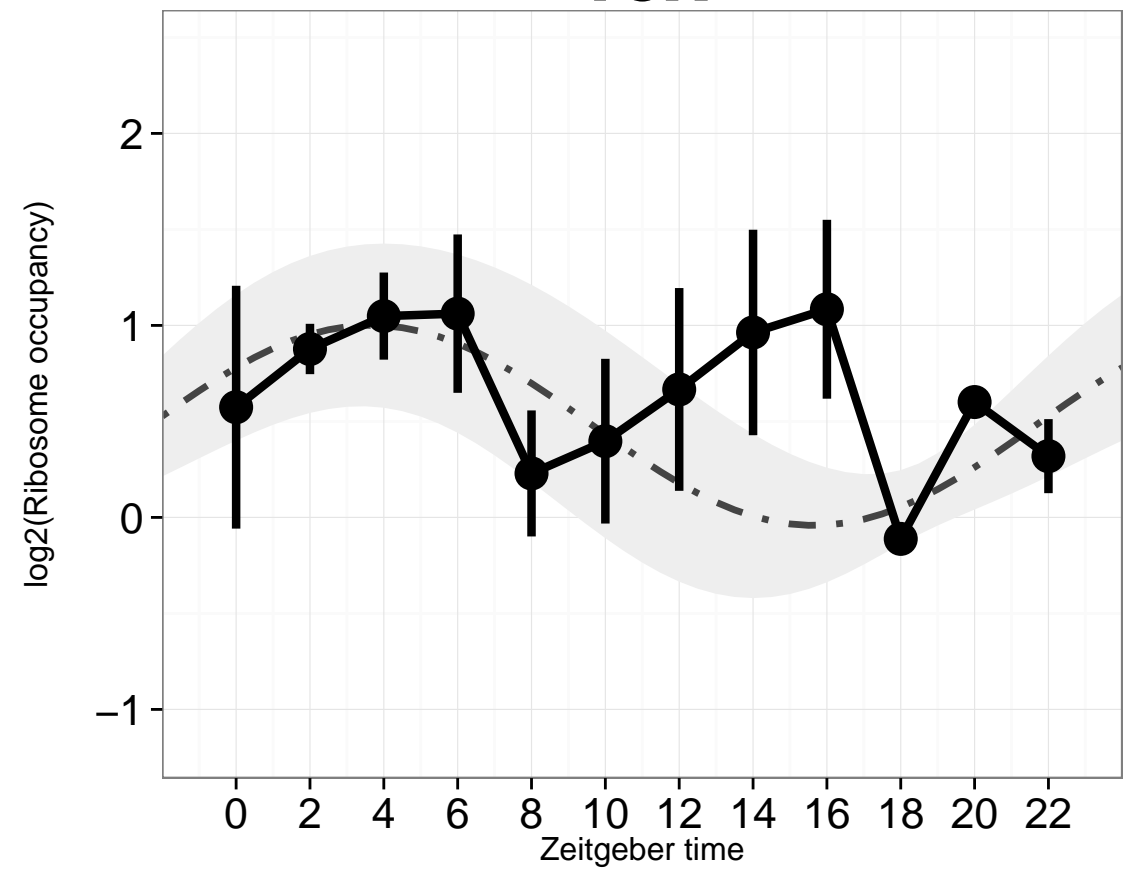

Supplement: SuppDataset_1.zip [file Tox_set_D.pdf › Supplemental Dataset 1/D-mRNA_rhythm_translation_rhyth/Tox_set_D.pdf]

**Tppp**

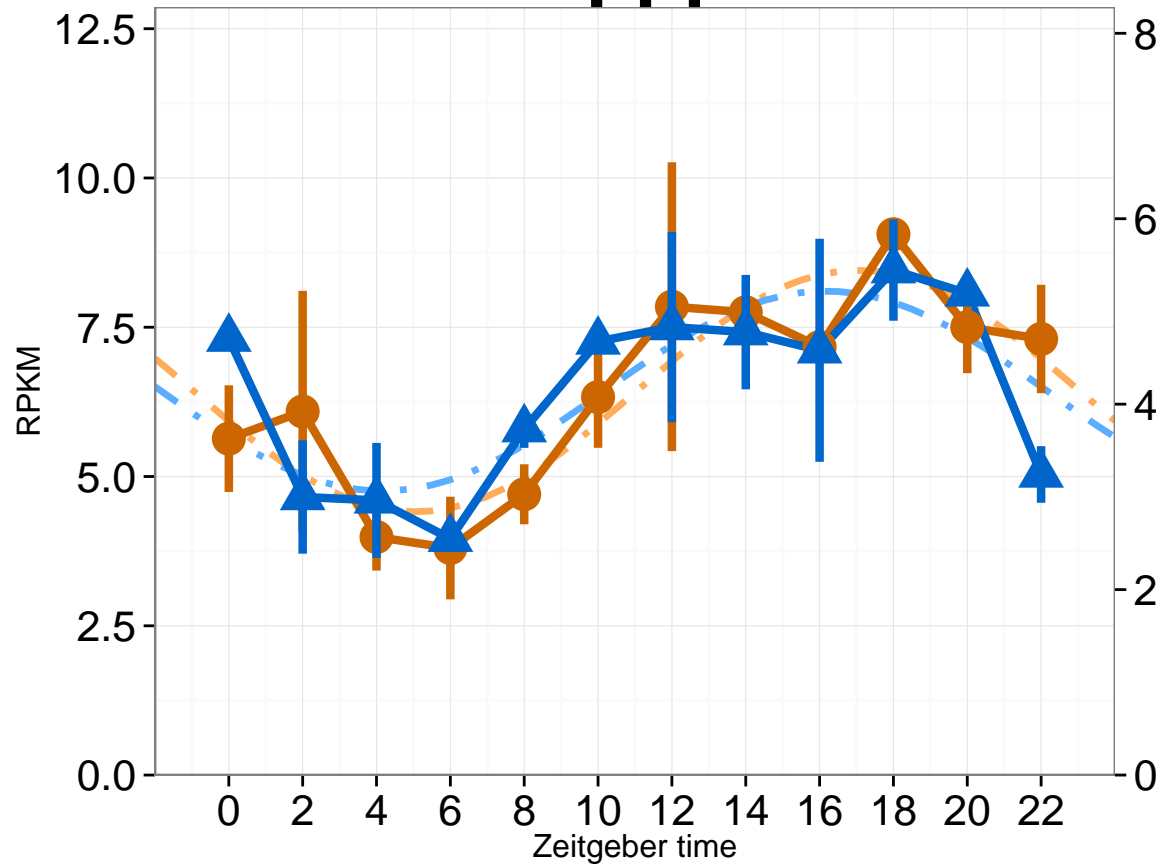

**Tppp**

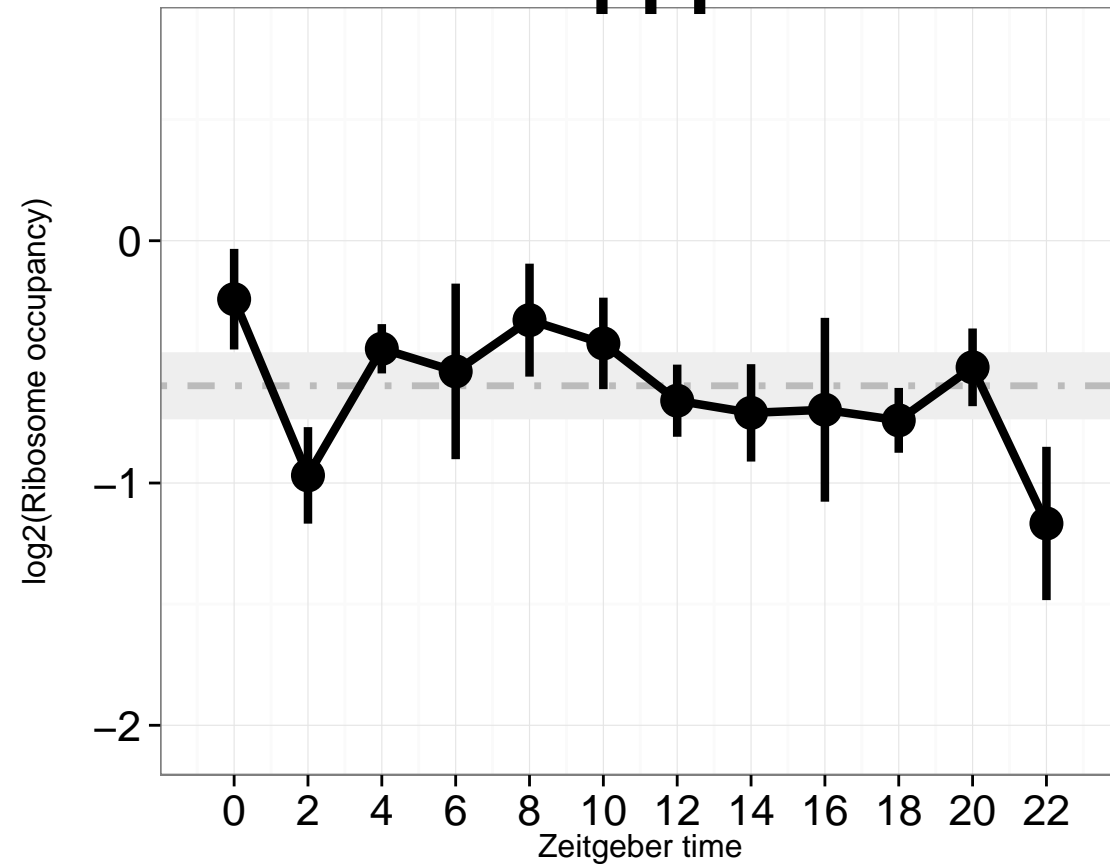

Supplement: SuppDataset_1.zip [file Tppp_set_D.pdf › Supplemental Dataset 1/D-mRNA_rhythm_translation_rhyth/Tppp_set_D.pdf]

# Tpst2

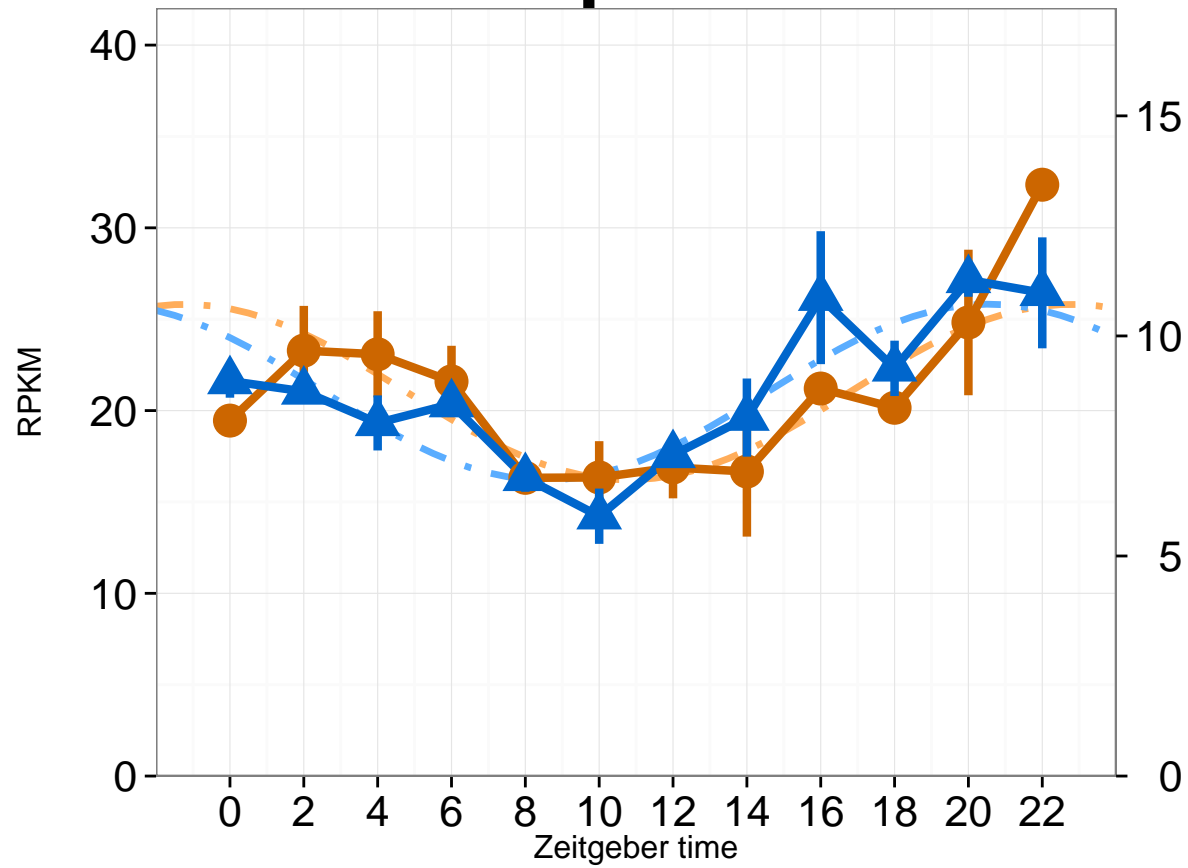

# Tpst2

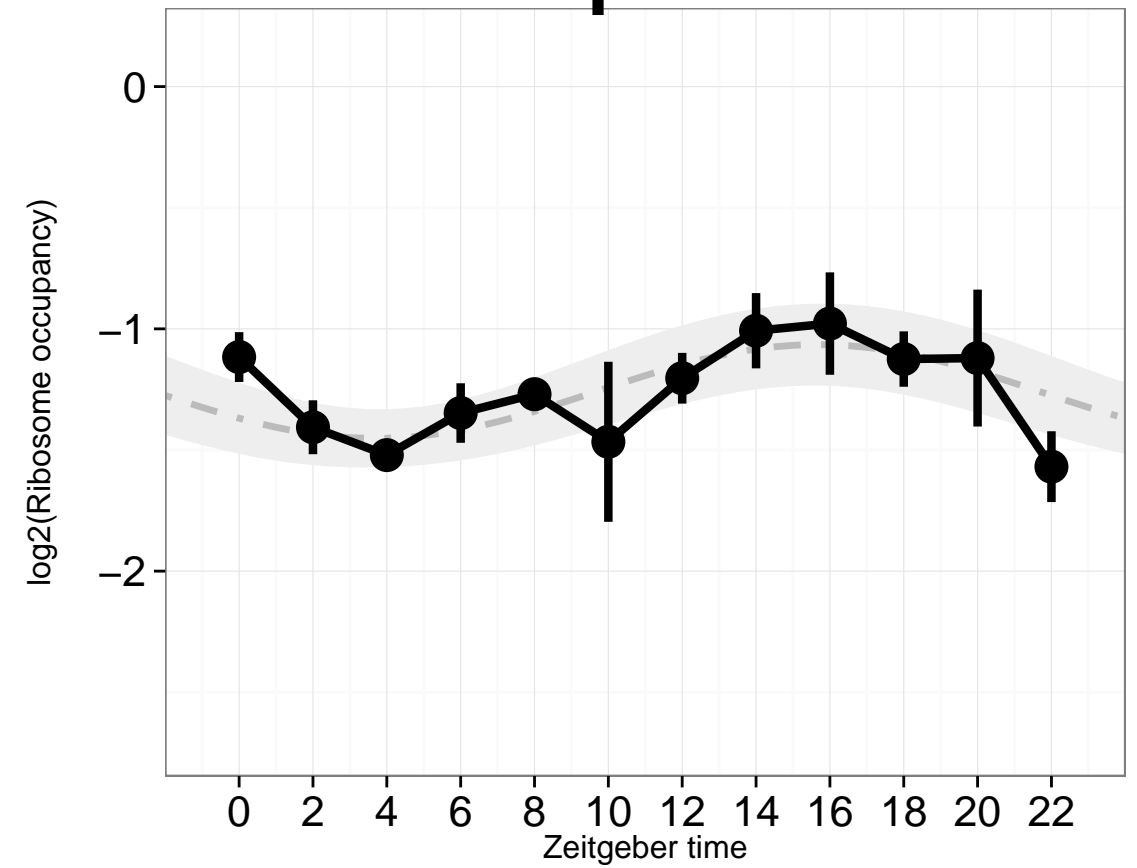

Supplement: SuppDataset_1.zip [file Tpst2_set_D.pdf › Supplemental Dataset 1/D-mRNA_rhythm_translation_rhyth/Tpst2_set_D.pdf]

# Tra2a

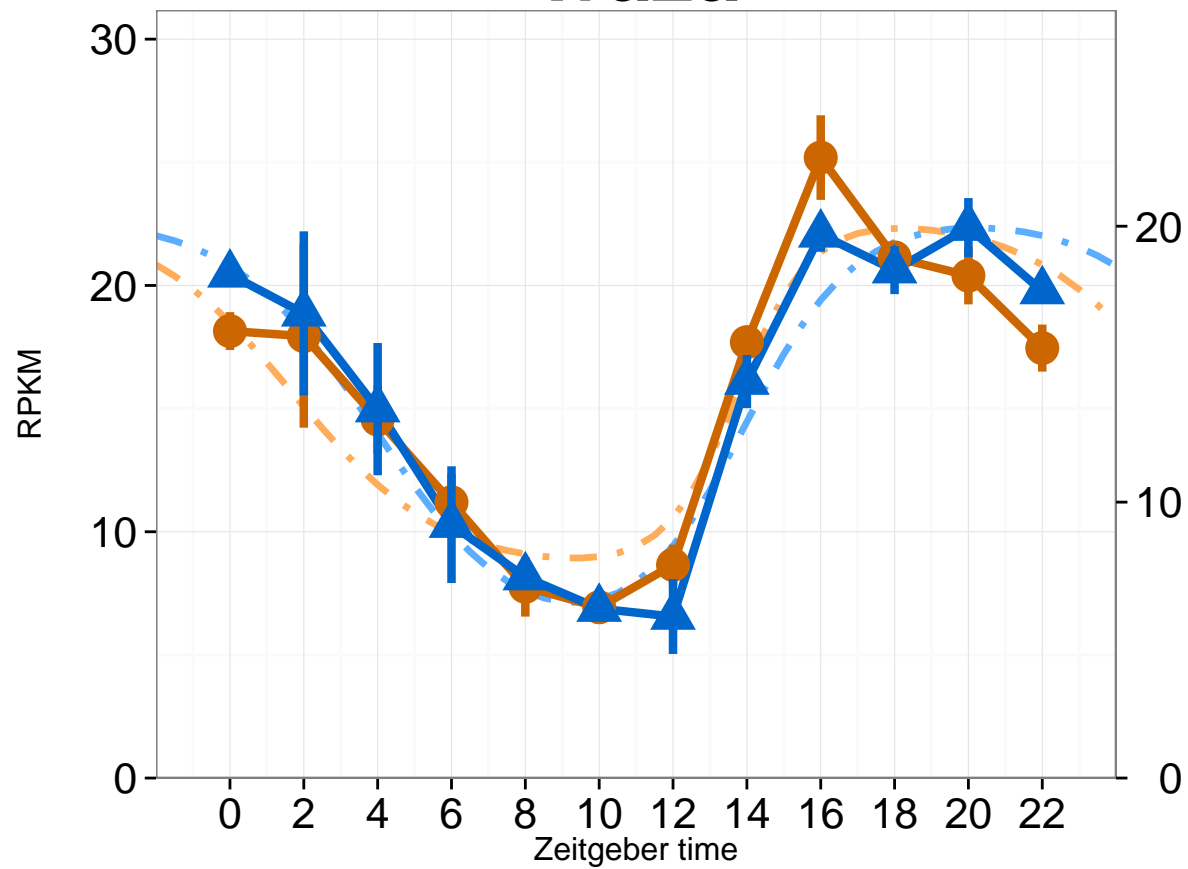

# Tra2a

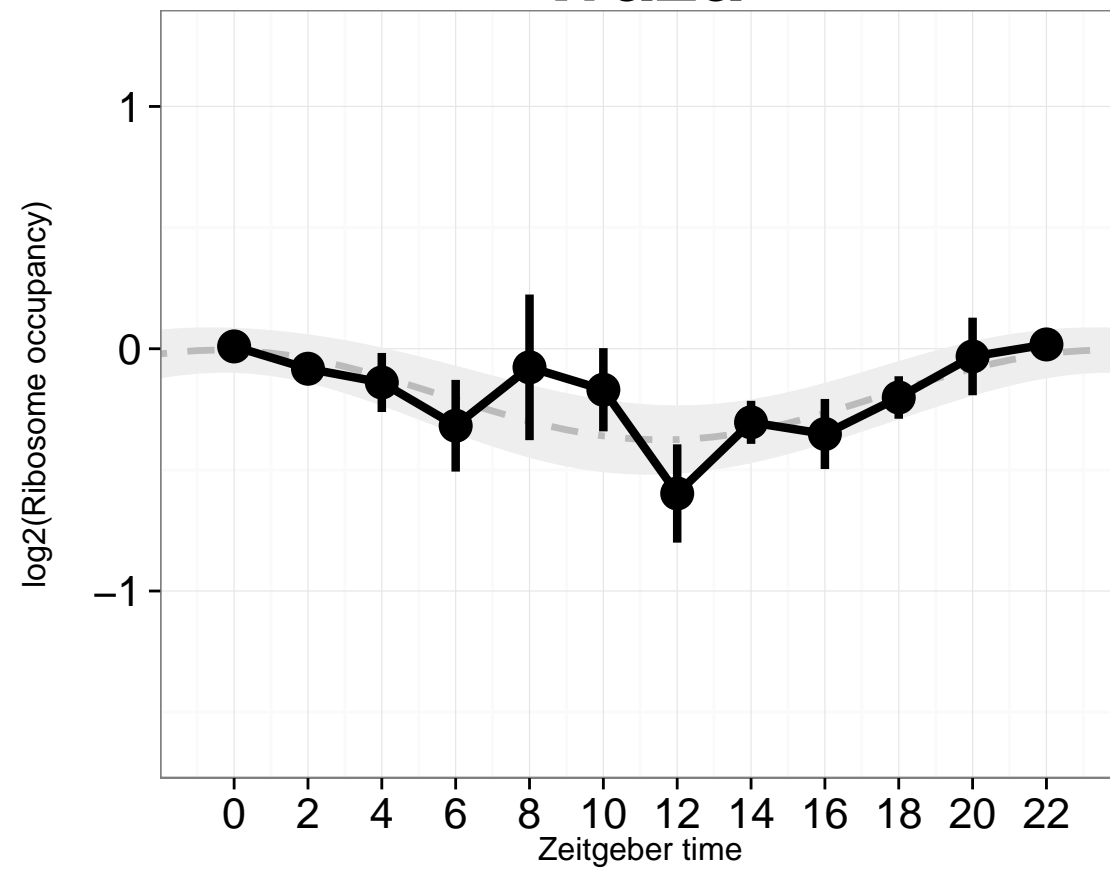

Supplement: SuppDataset_1.zip [file Tra2a_set_D.pdf › Supplemental Dataset 1/D-mRNA_rhythm_translation_rhyth/Tra2a_set_D.pdf]

# Tra2b

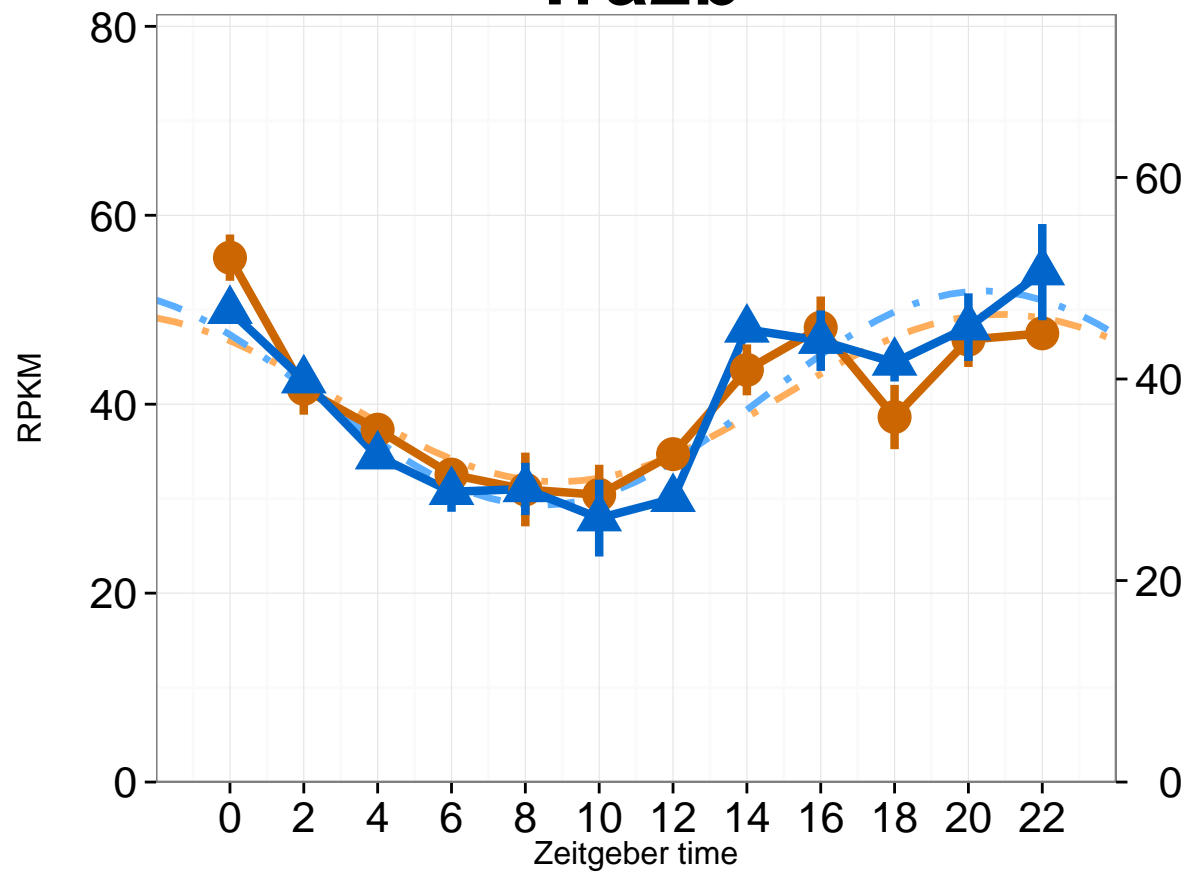

# Tra2b

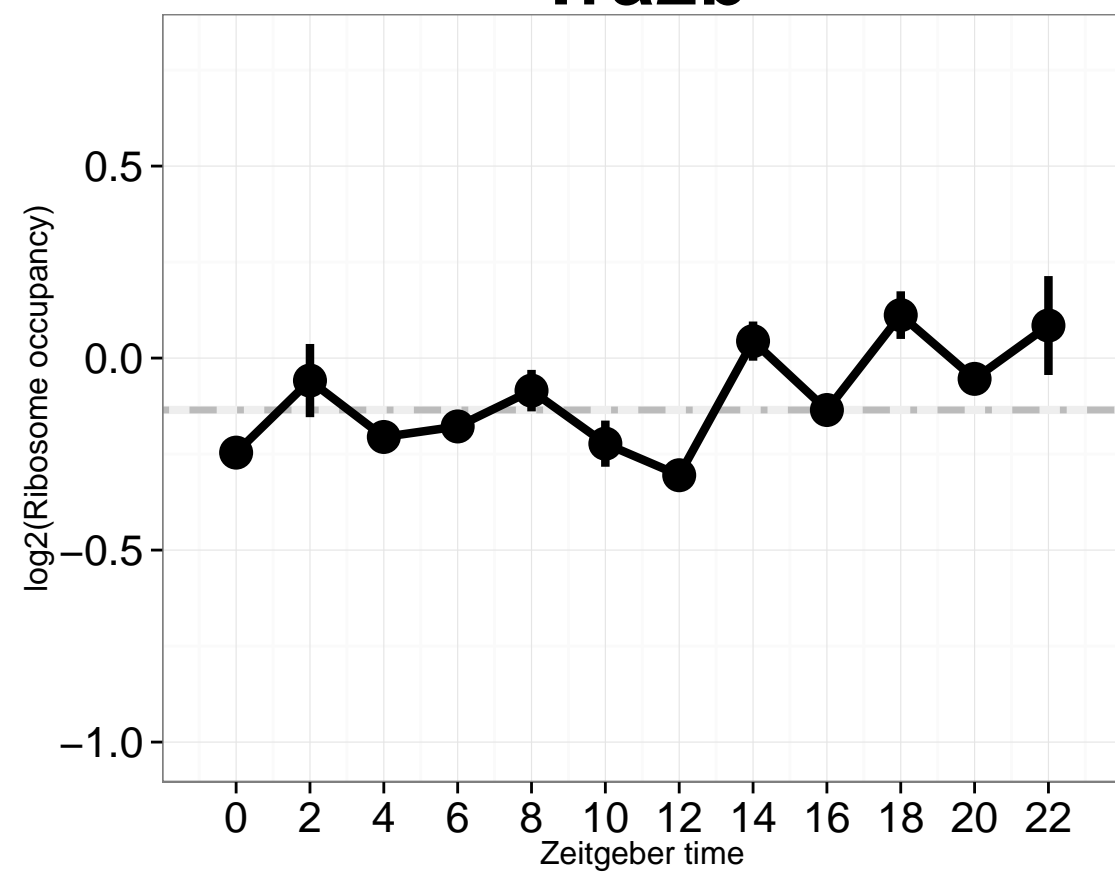

Supplement: SuppDataset_1.zip [file Tra2b_set_D.pdf › Supplemental Dataset 1/D-mRNA_rhythm_translation_rhyth/Tra2b_set_D.pdf]

# Traf3ip2

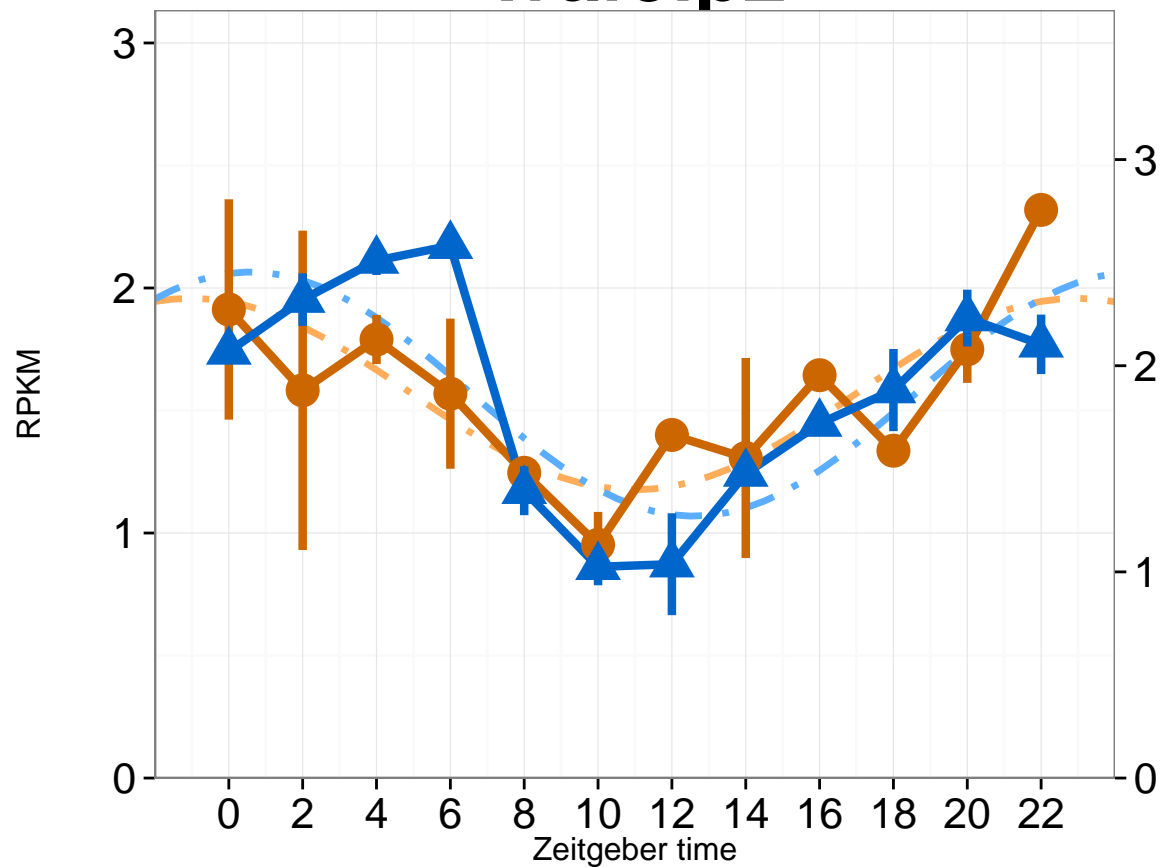

# Traf3ip2

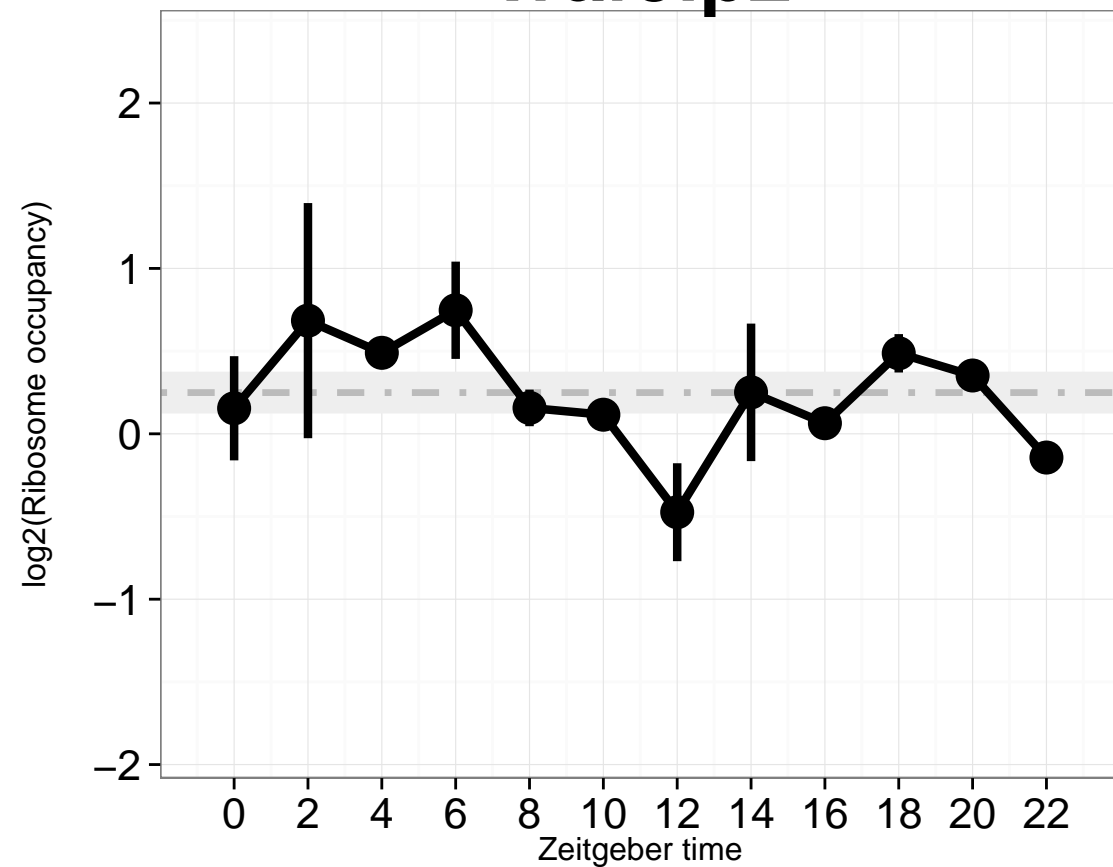

Supplement: SuppDataset_1.zip [file Traf3ip2_set_D.pdf › Supplemental Dataset 1/D-mRNA_rhythm_translation_rhyth/Traf3ip2_set_D.pdf]

## Trf

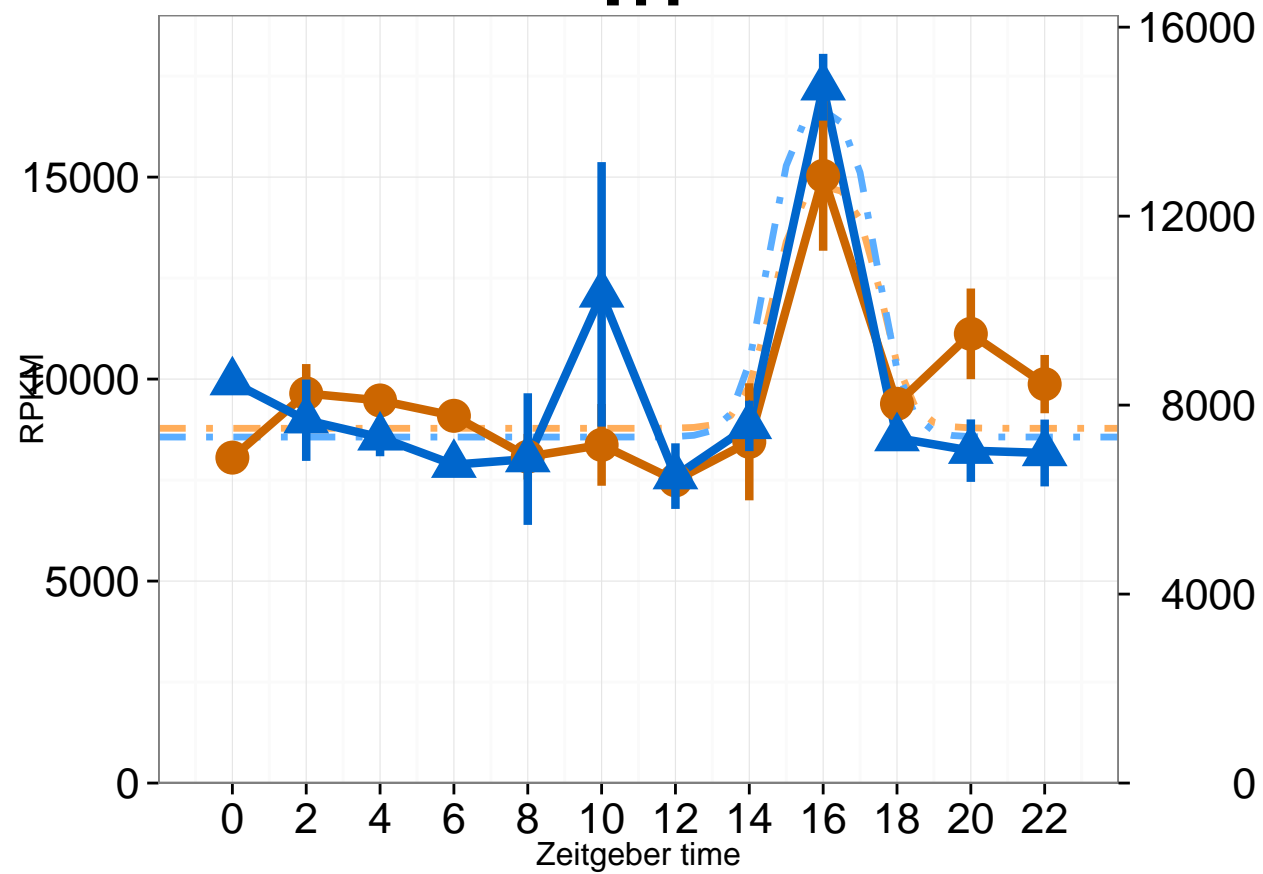

## Trf

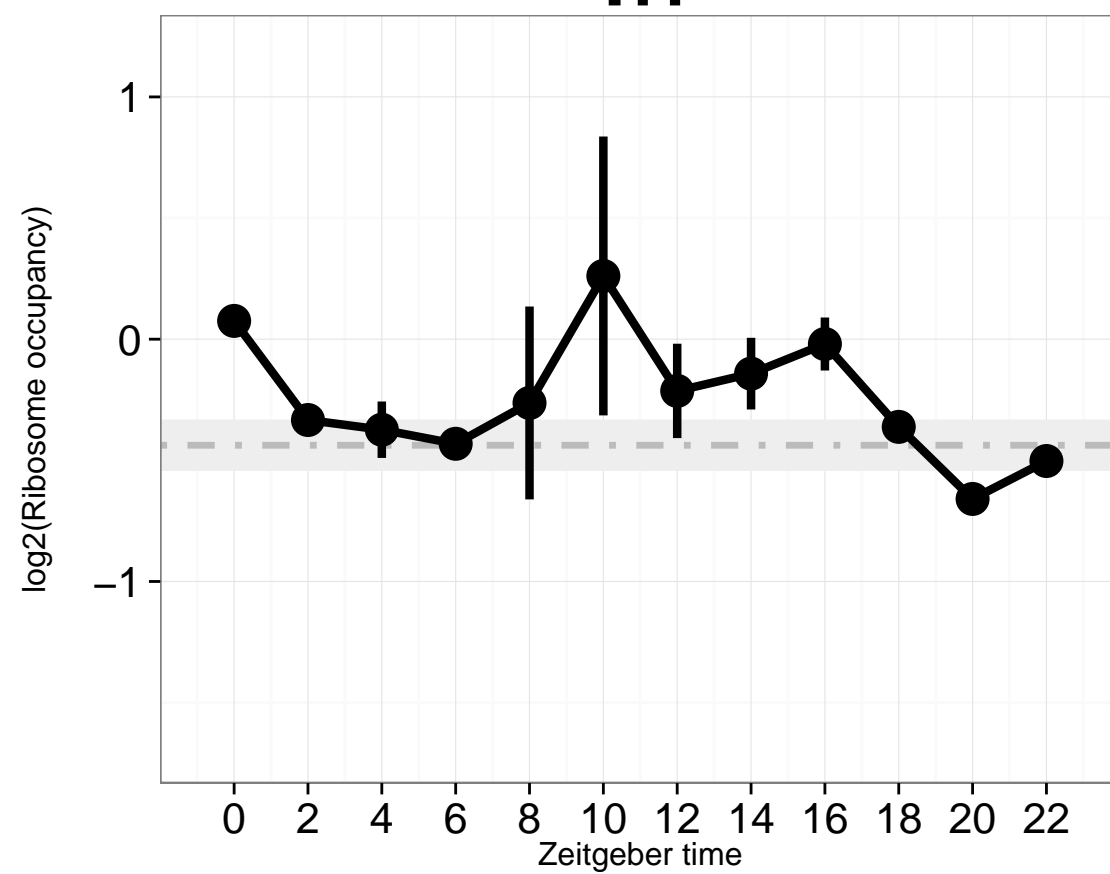

Supplement: SuppDataset_1.zip [file Trf_set_D.pdf › Supplemental Dataset 1/D-mRNA_rhythm_translation_rhyth/Trf_set_D.pdf]

# Trib3

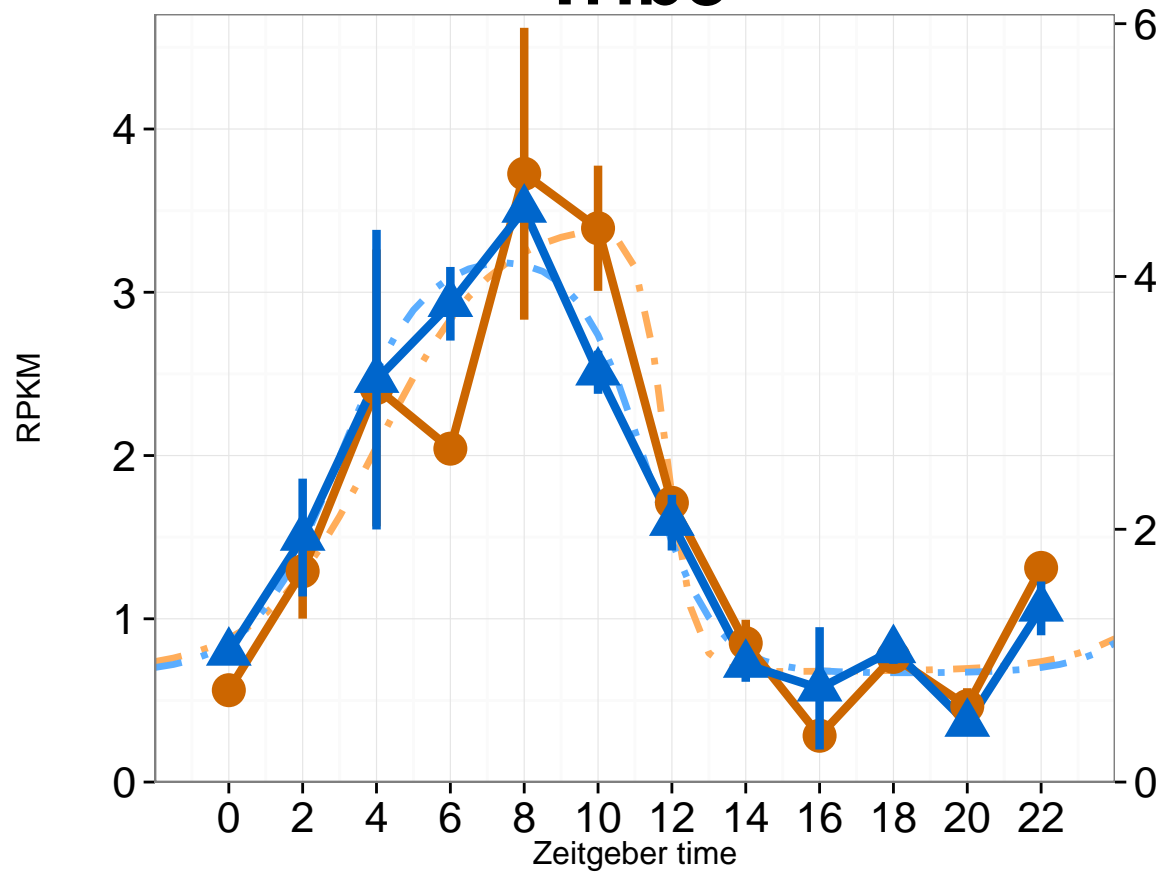

# Trib3

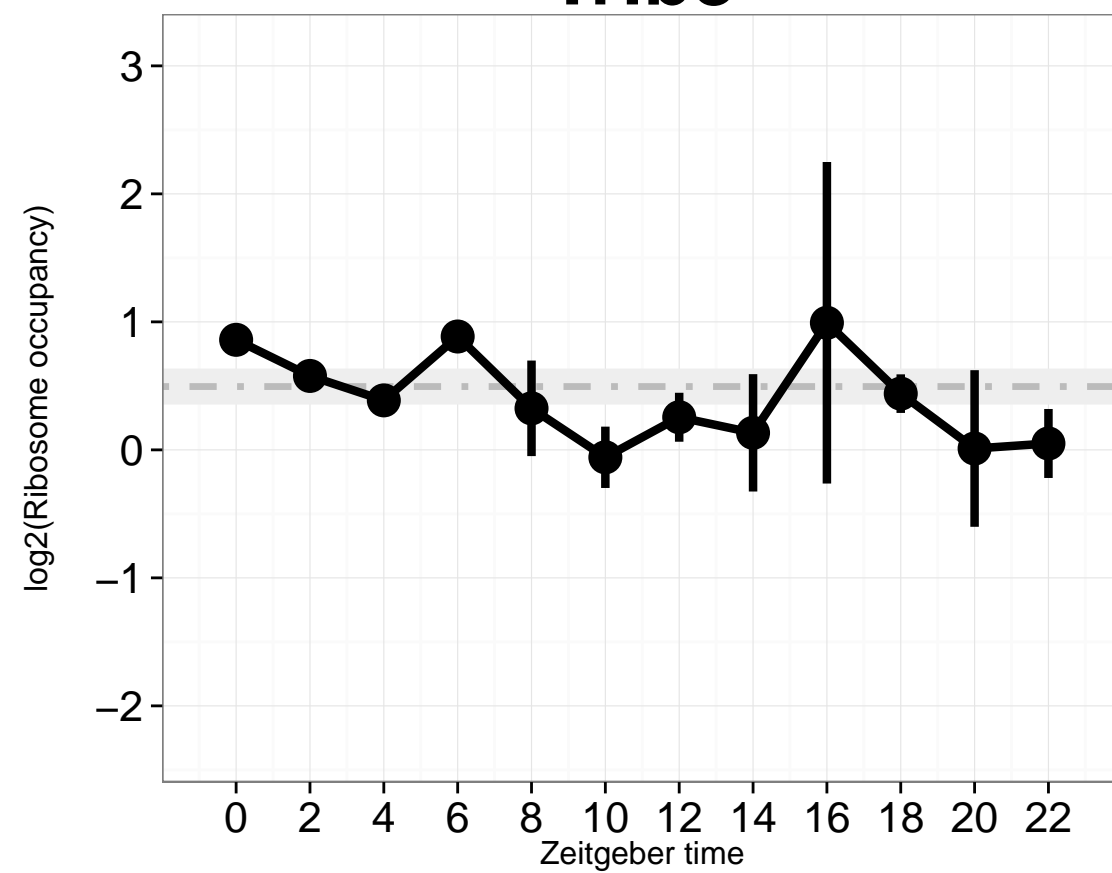

Supplement: SuppDataset_1.zip [file Trib3_set_D.pdf › Supplemental Dataset 1/D-mRNA_rhythm_translation_rhyth/Trib3_set_D.pdf]

# Trim12c

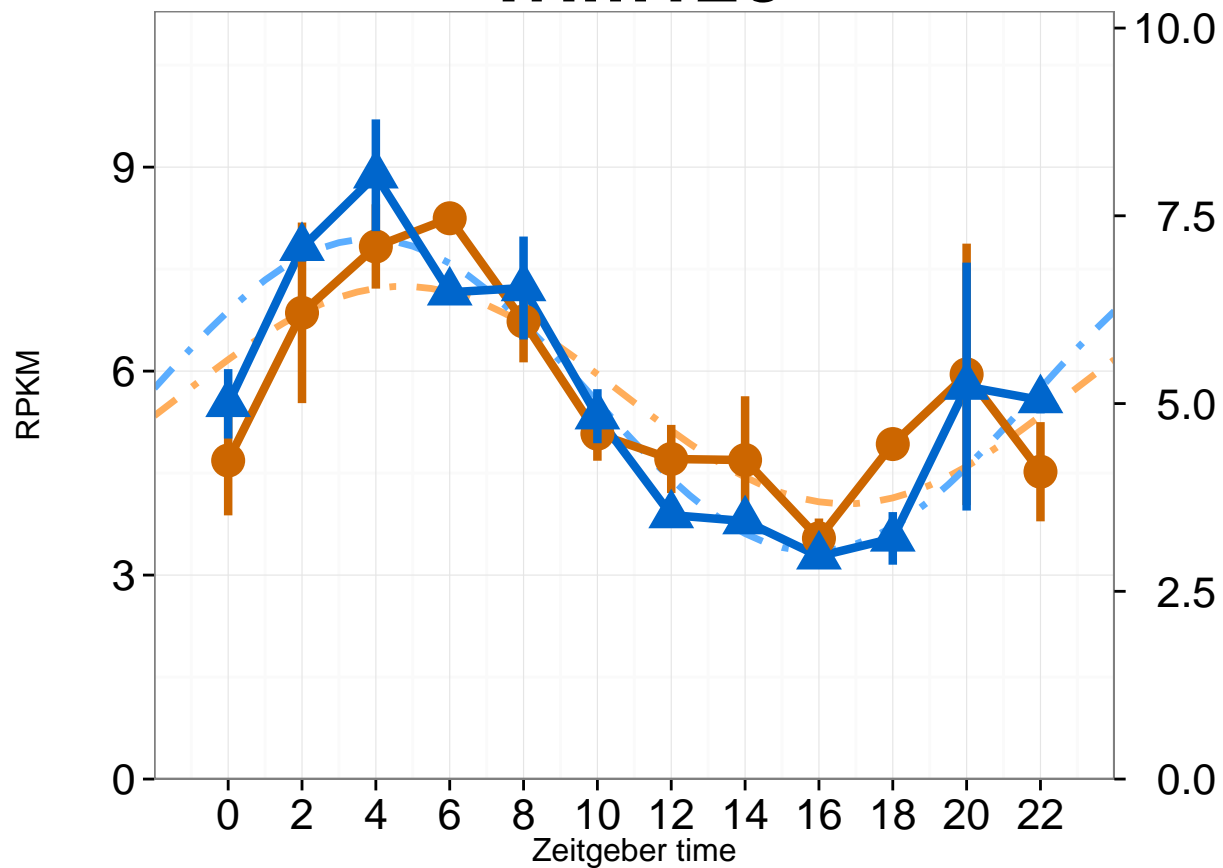

# Trim12c

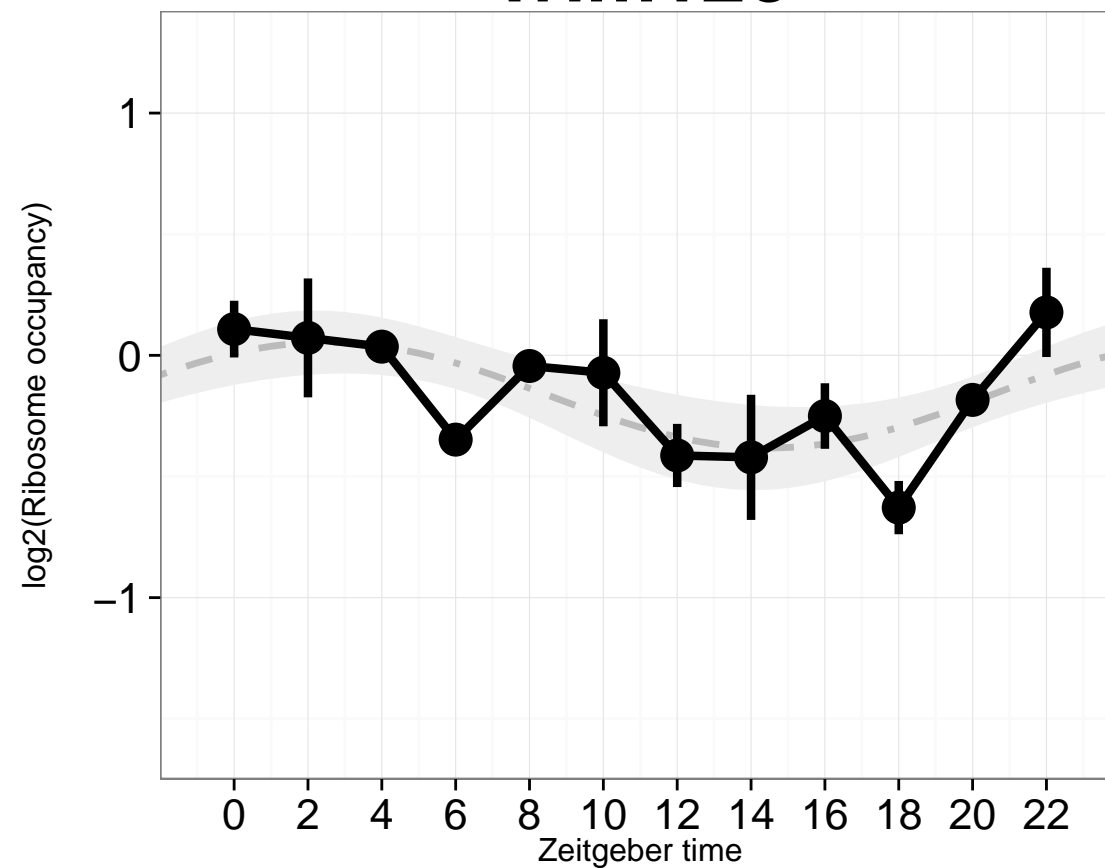

Supplement: SuppDataset_1.zip [file Trim12c_set_D.pdf › Supplemental Dataset 1/D-mRNA_rhythm_translation_rhyth/Trim12c_set_D.pdf]

# Trim14

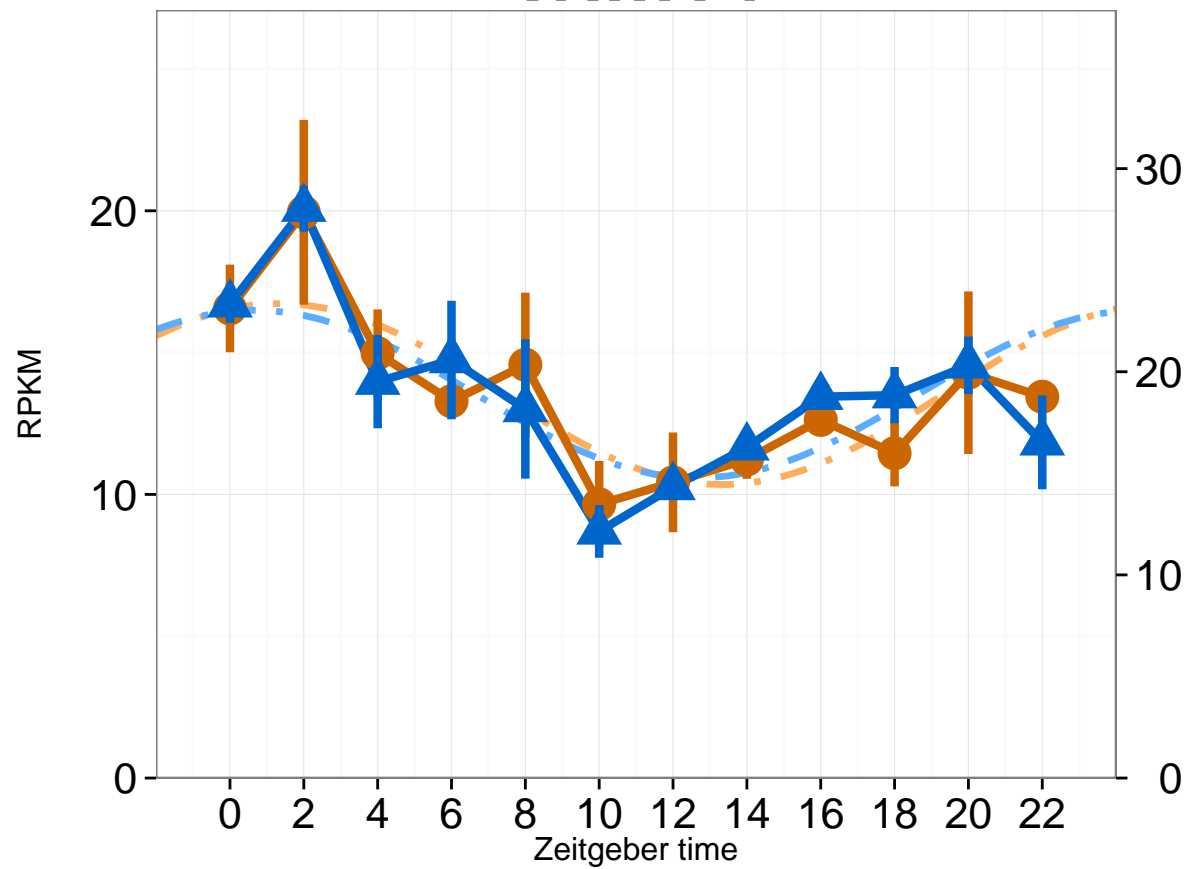

# Trim14

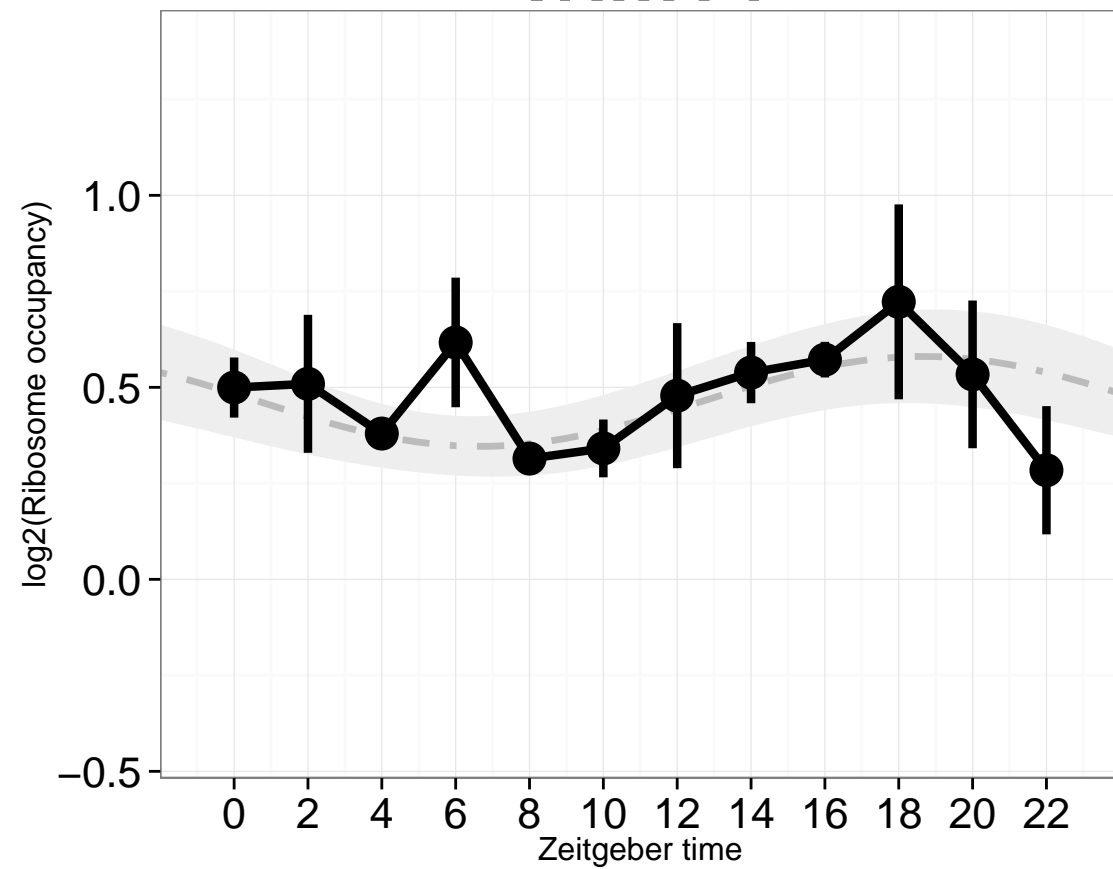

Supplement: SuppDataset_1.zip [file Trim14_set_D.pdf › Supplemental Dataset 1/D-mRNA_rhythm_translation_rhyth/Trim14_set_D.pdf]

# Trim24

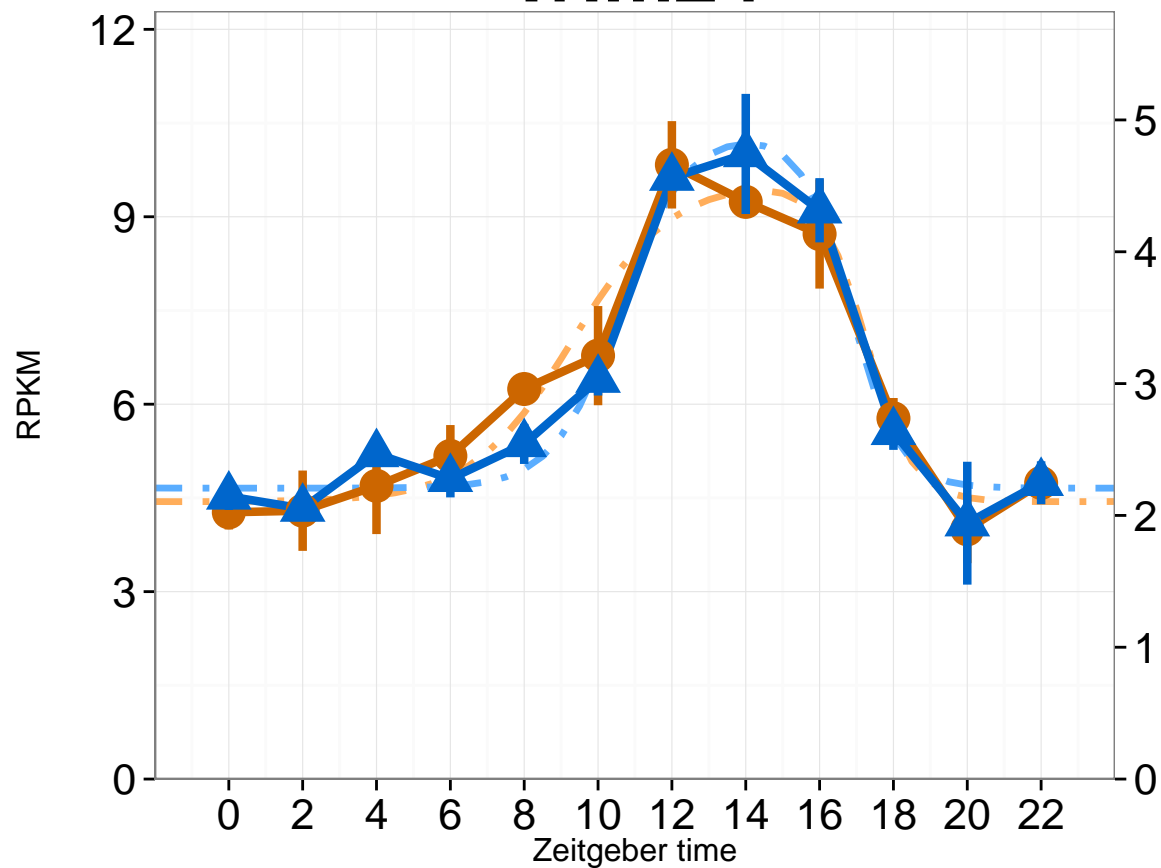

# Trim24

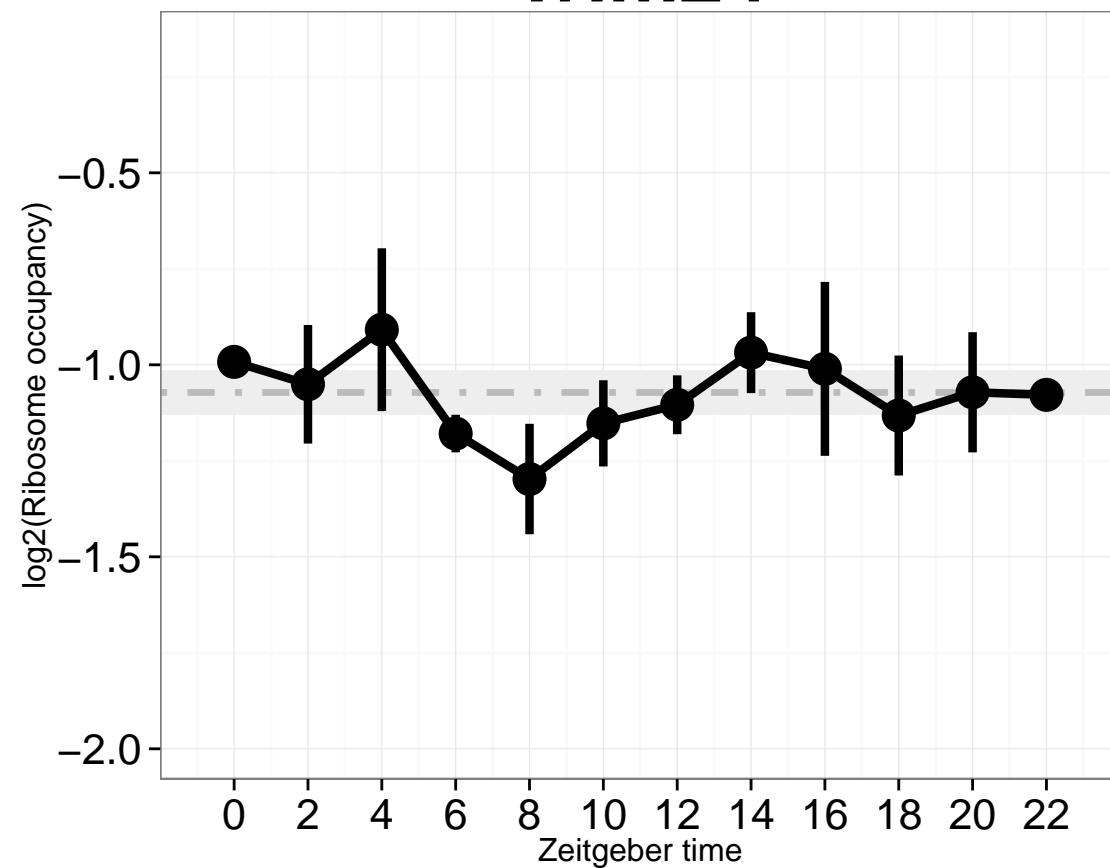

Supplement: SuppDataset_1.zip [file Trim24_set_D.pdf › Supplemental Dataset 1/D-mRNA_rhythm_translation_rhyth/Trim24_set_D.pdf]

# Trim2

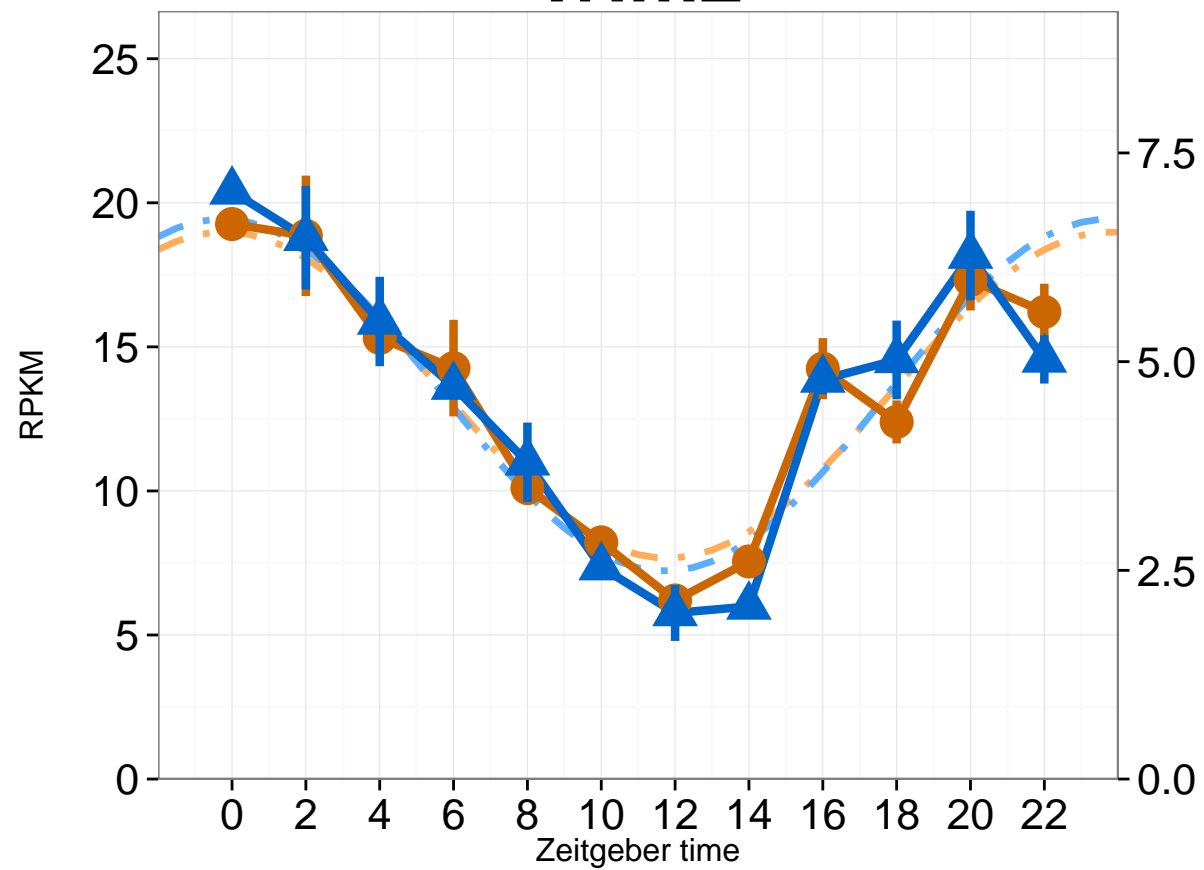

# Trim2

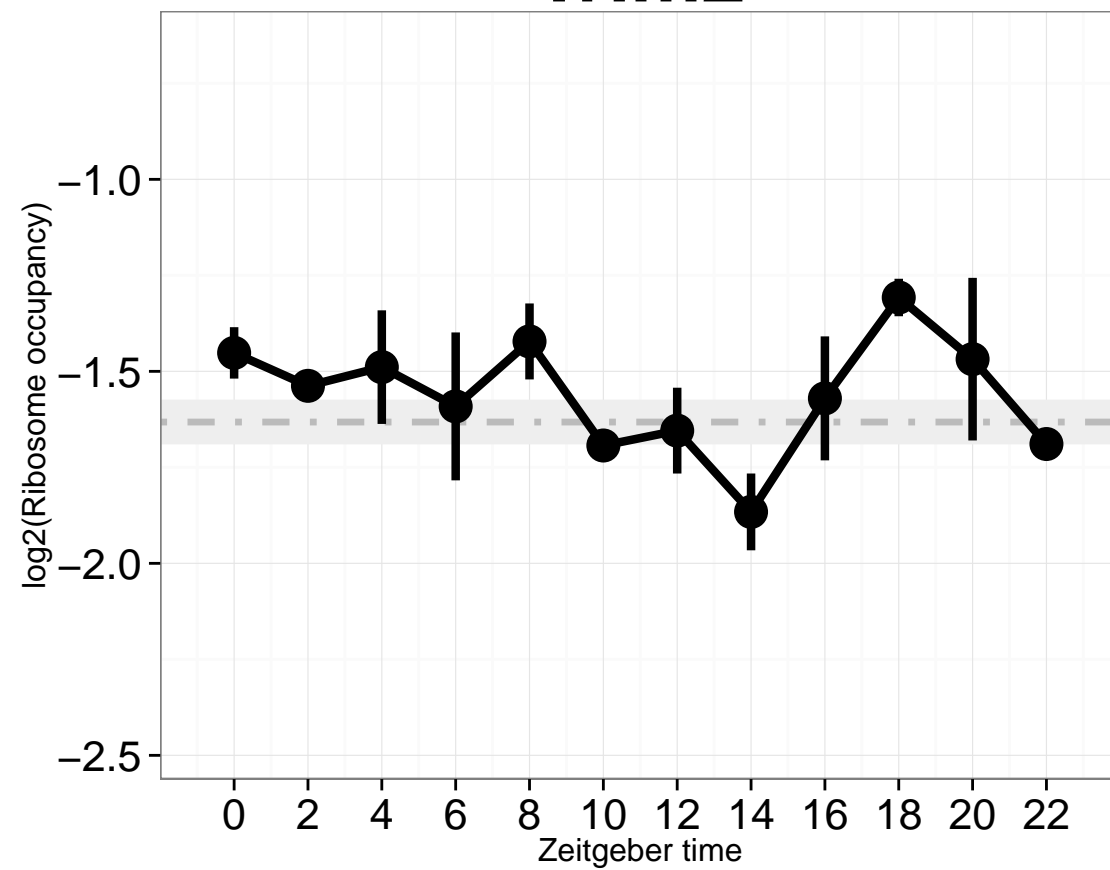

Supplement: SuppDataset_1.zip [file Trim2_set_D.pdf › Supplemental Dataset 1/D-mRNA_rhythm_translation_rhyth/Trim2_set_D.pdf]

# Trim65

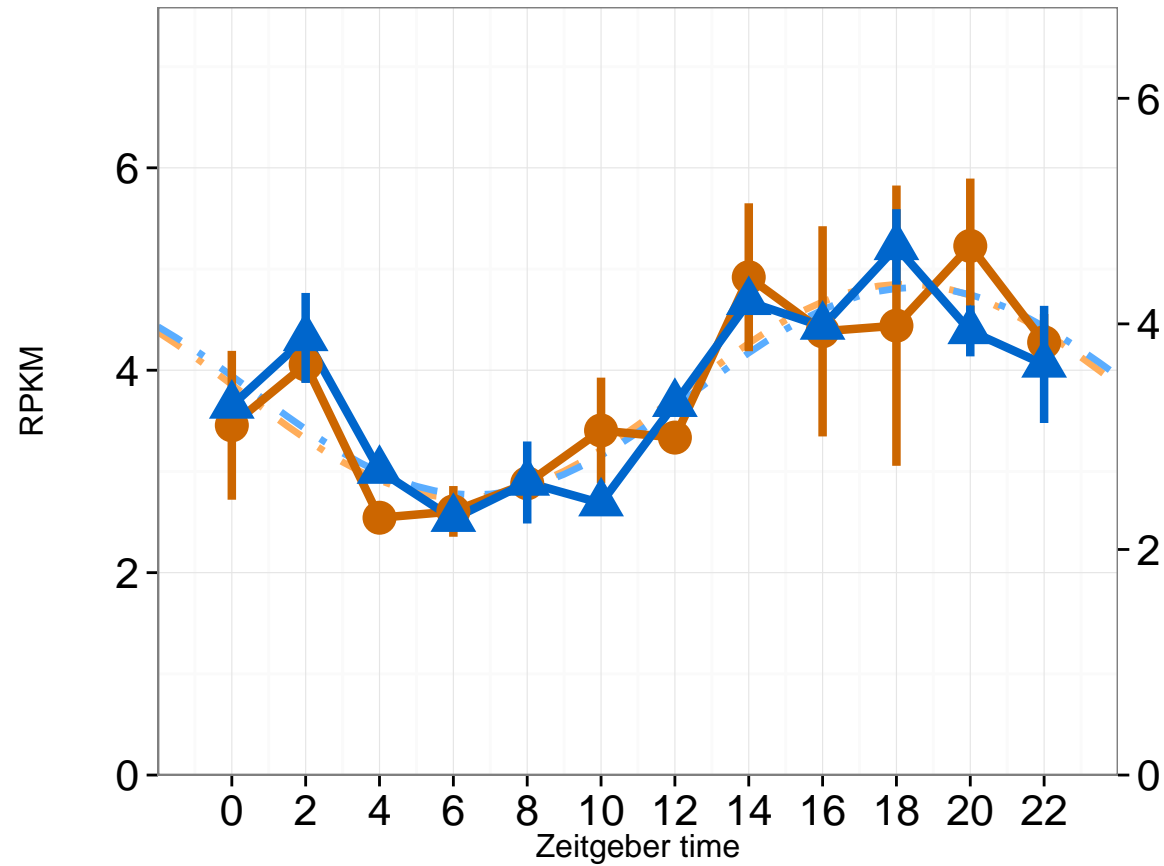

# Trim65

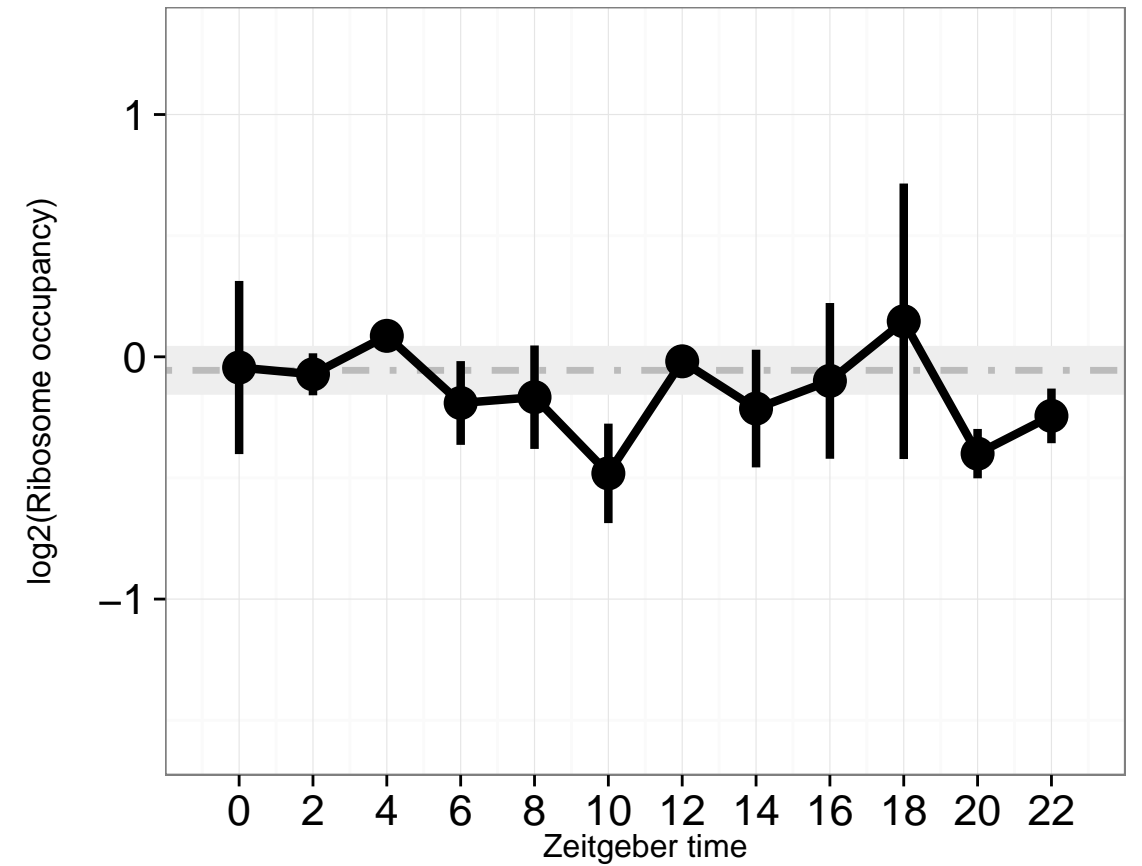

Supplement: SuppDataset_1.zip [file Trim65_set_D.pdf › Supplemental Dataset 1/D-mRNA_rhythm_translation_rhyth/Trim65_set_D.pdf]

# Trim68

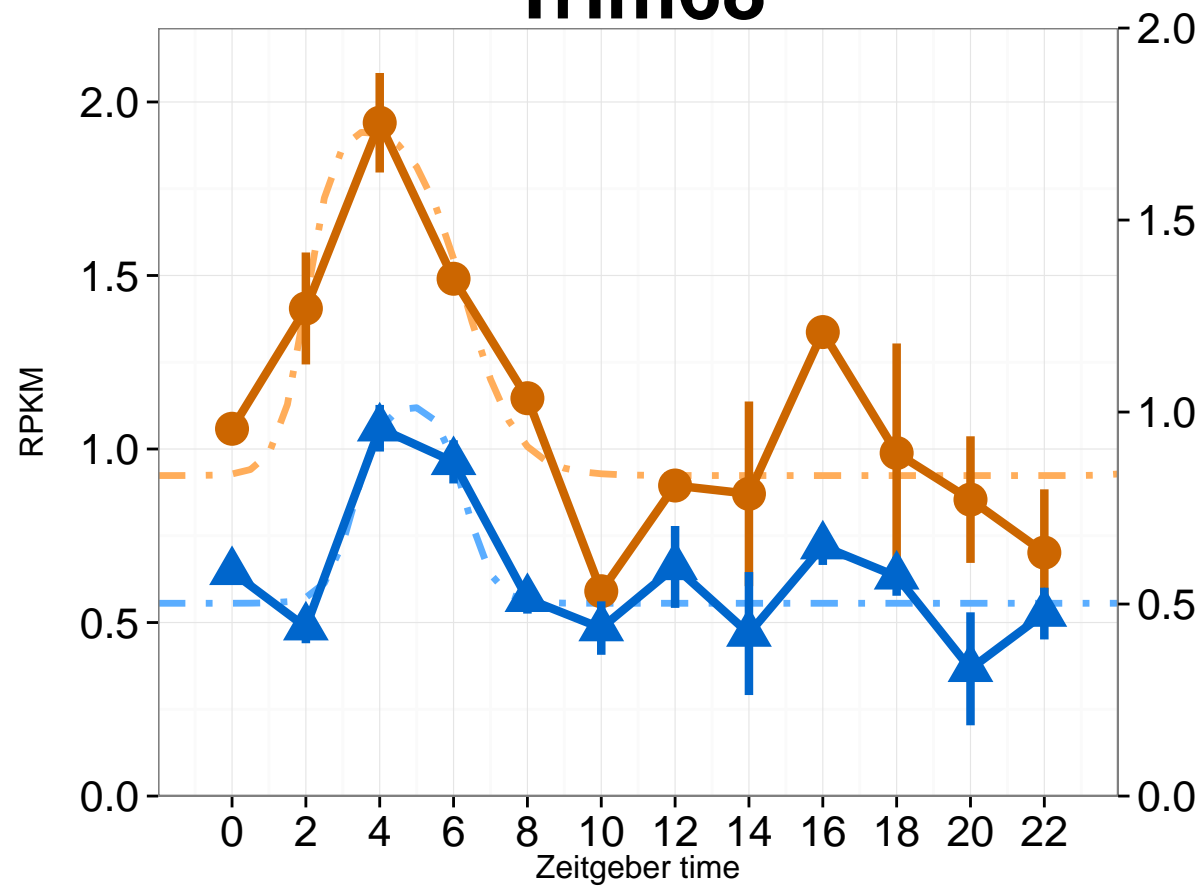

# Trim68

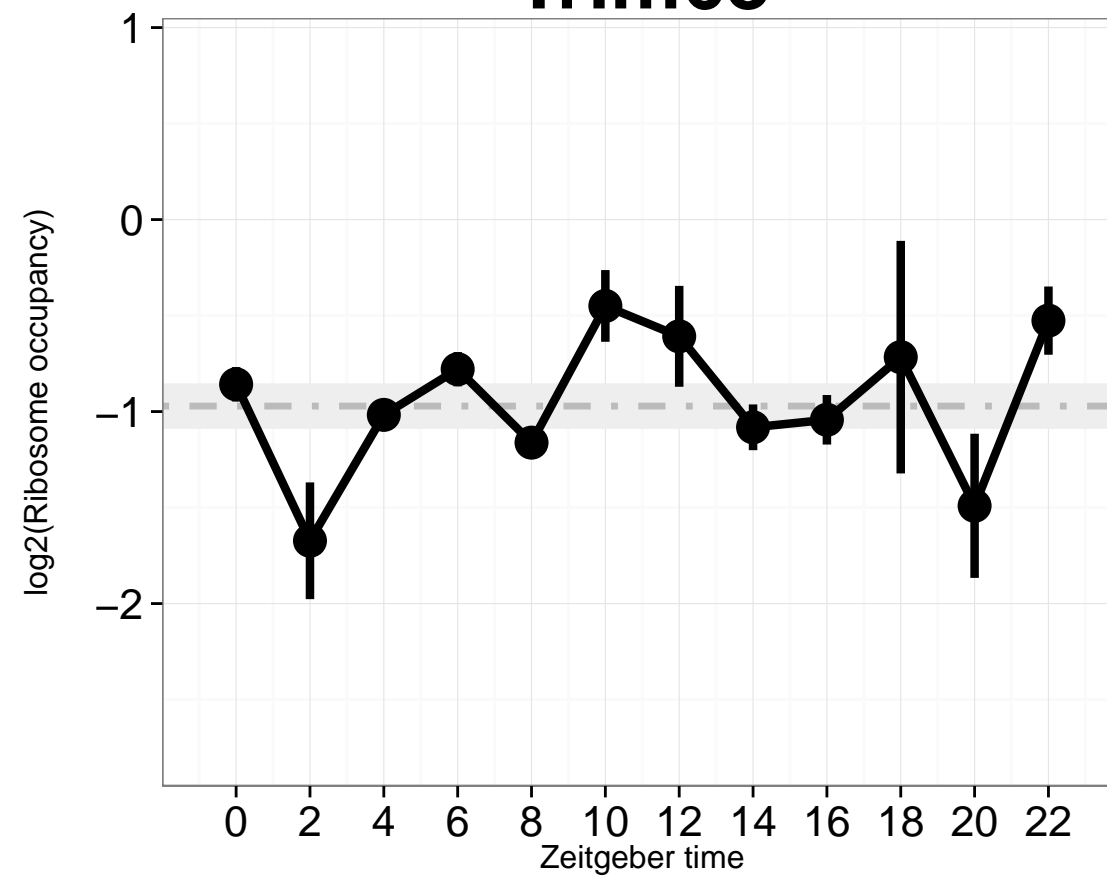

Supplement: SuppDataset_1.zip [file Trim68_set_D.pdf › Supplemental Dataset 1/D-mRNA_rhythm_translation_rhyth/Trim68_set_D.pdf]

# Trp53i11

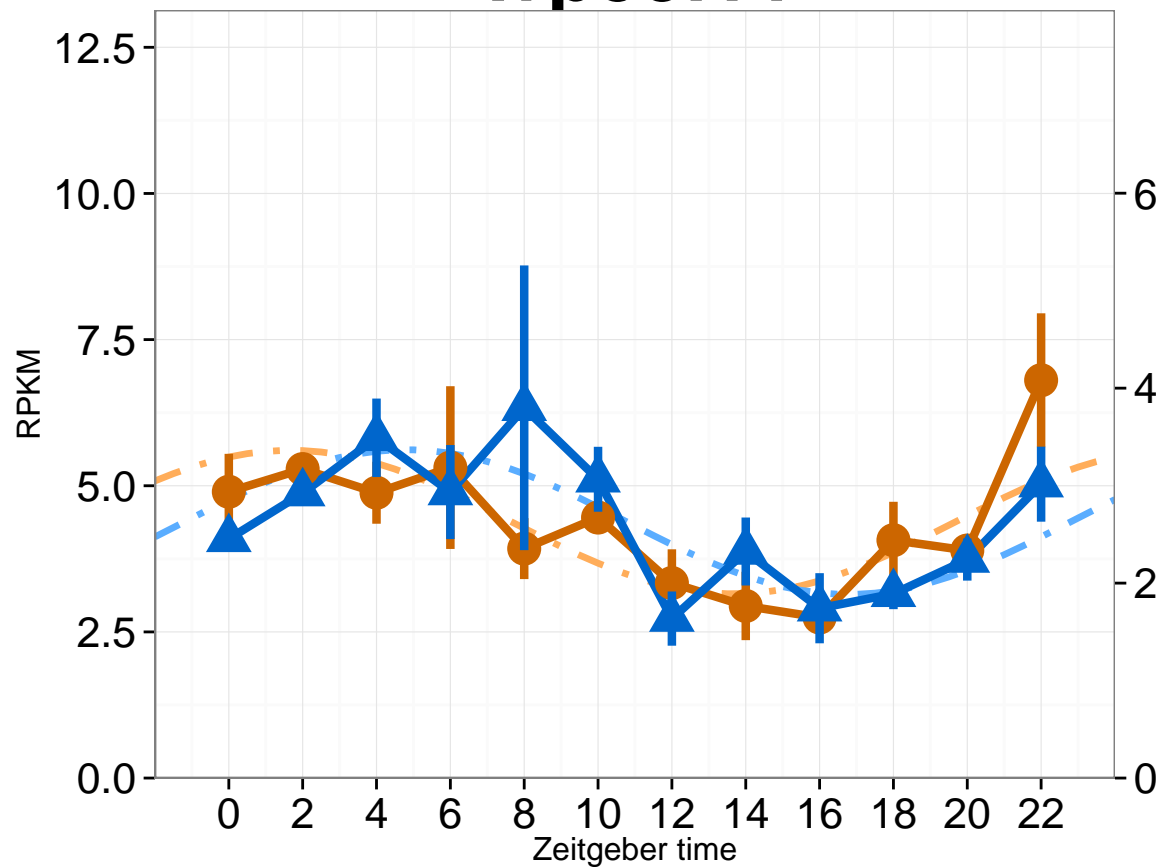

# Trp53i11

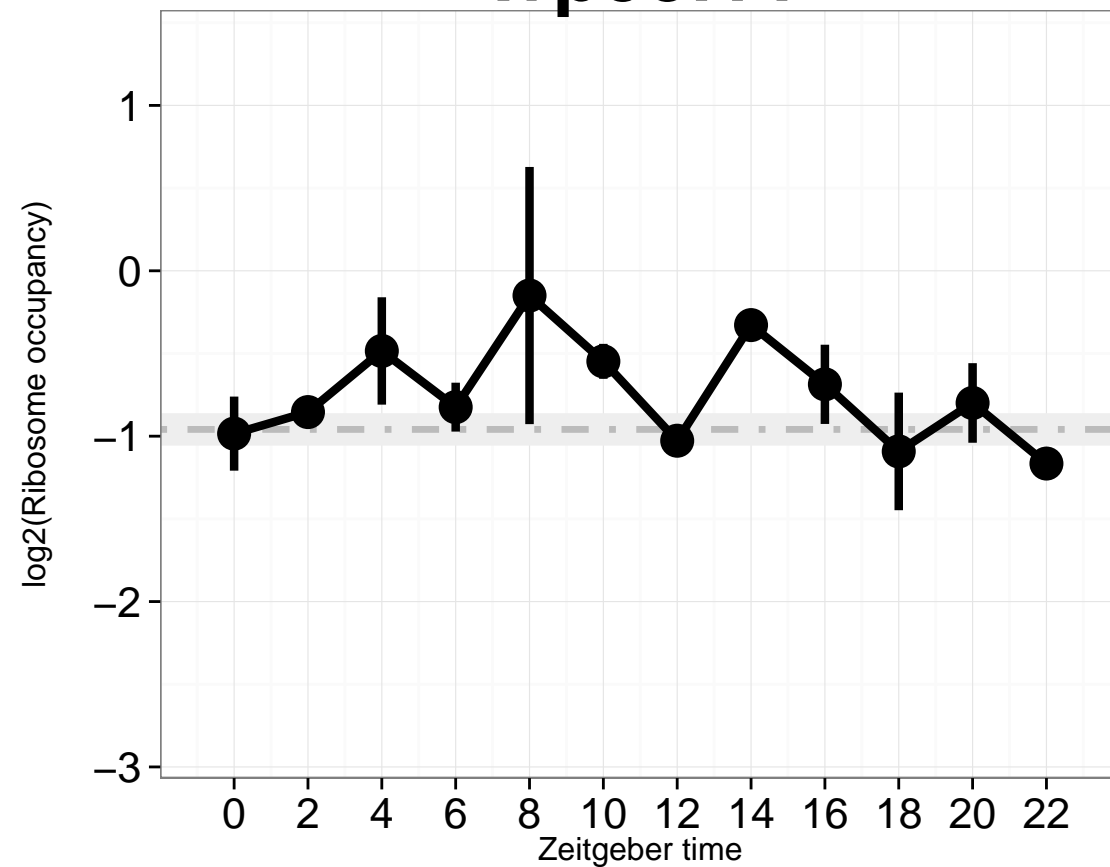

Supplement: SuppDataset_1.zip [file Trp53i11_set_D.pdf › Supplemental Dataset 1/D-mRNA_rhythm_translation_rhyth/Trp53i11_set_D.pdf]

# Trp53inp2

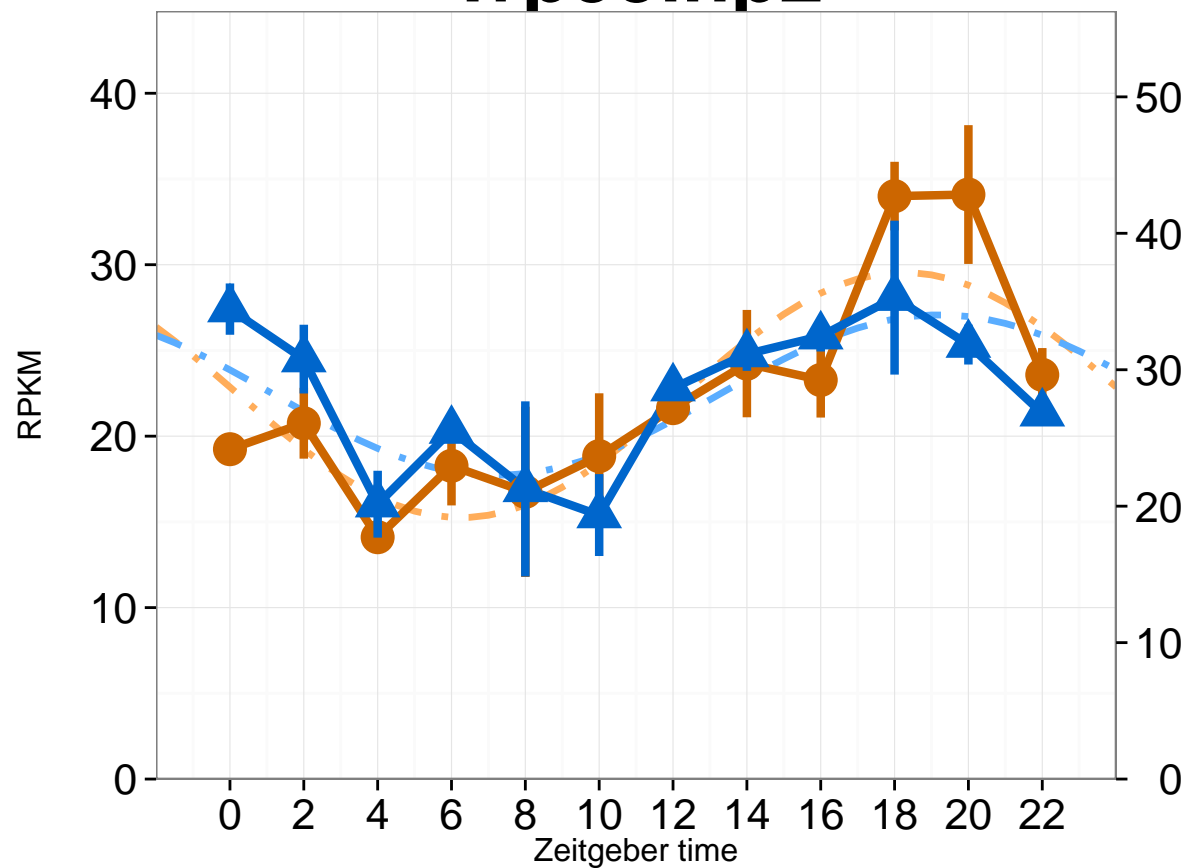

# Trp53inp2

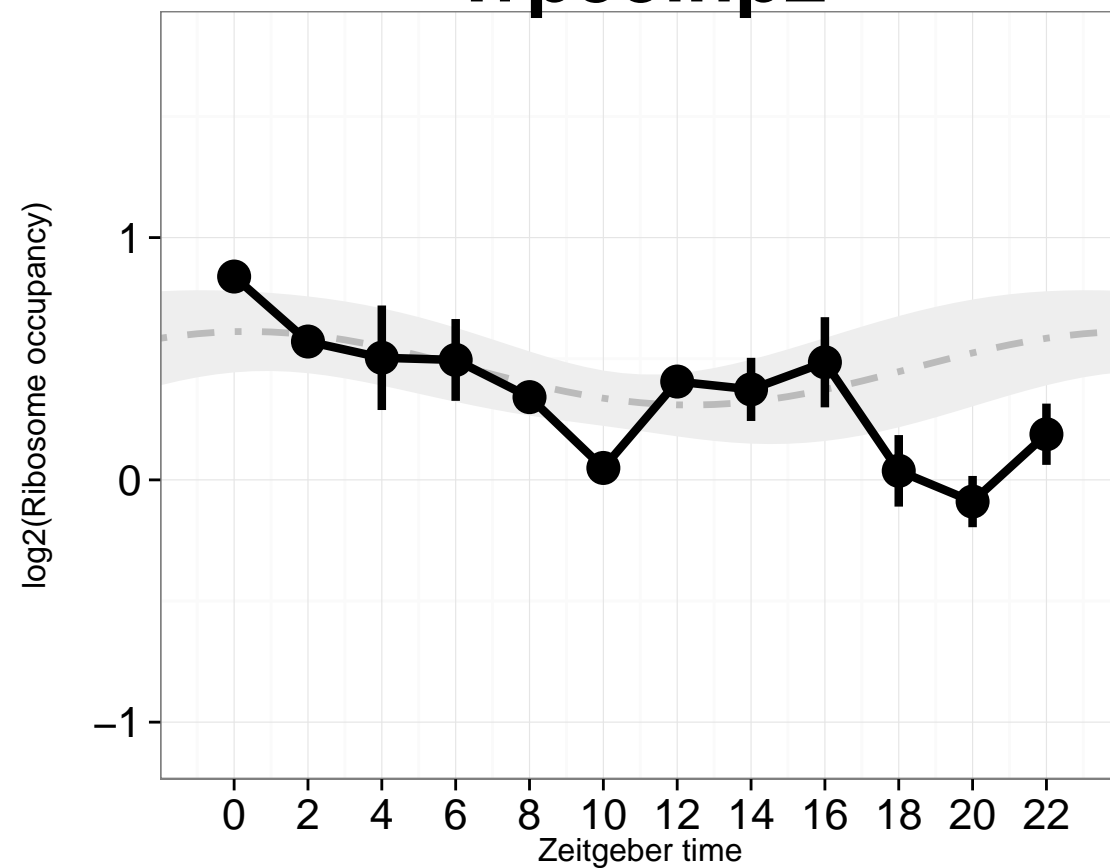

Supplement: SuppDataset_1.zip [file Trp53inp2_set_D.pdf › Supplemental Dataset 1/D-mRNA_rhythm_translation_rhyth/Trp53inp2_set_D.pdf]

## Try4

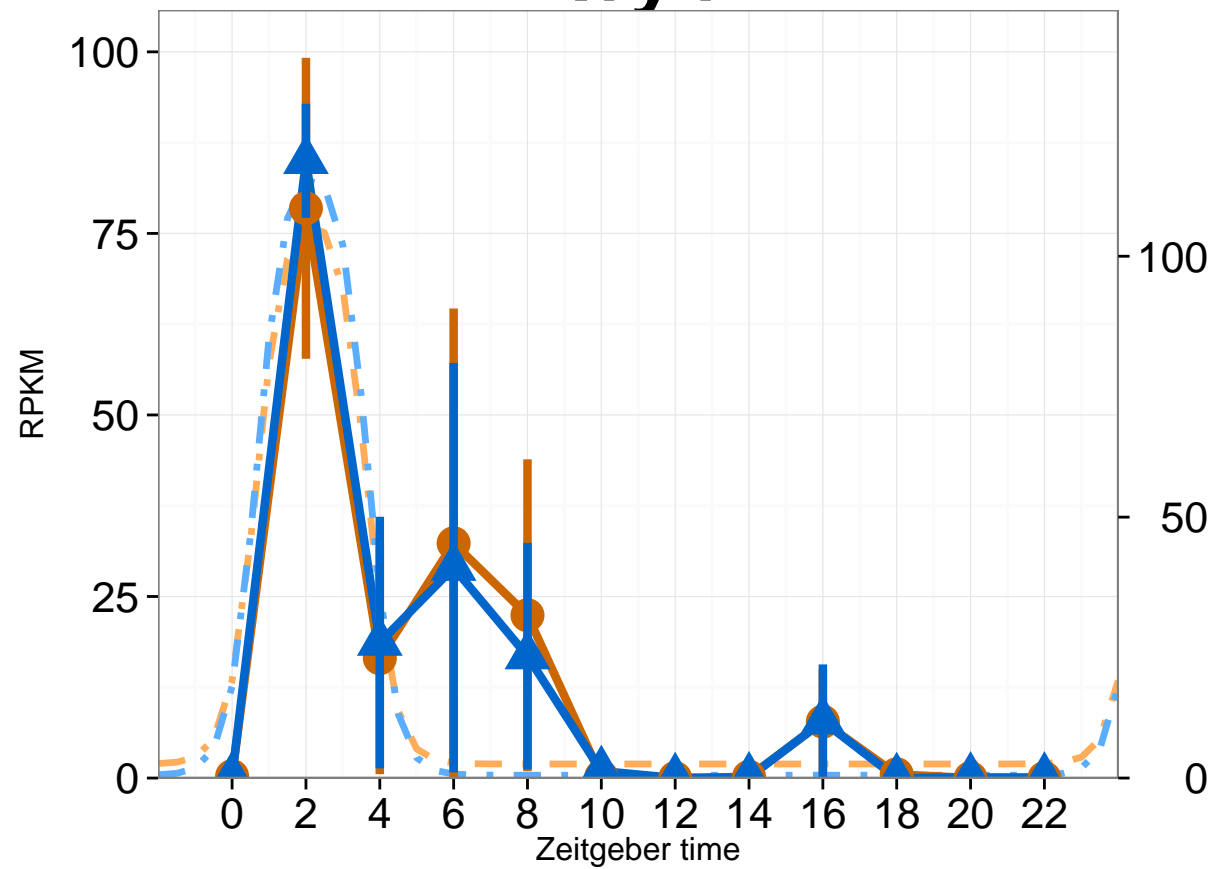

## Try4

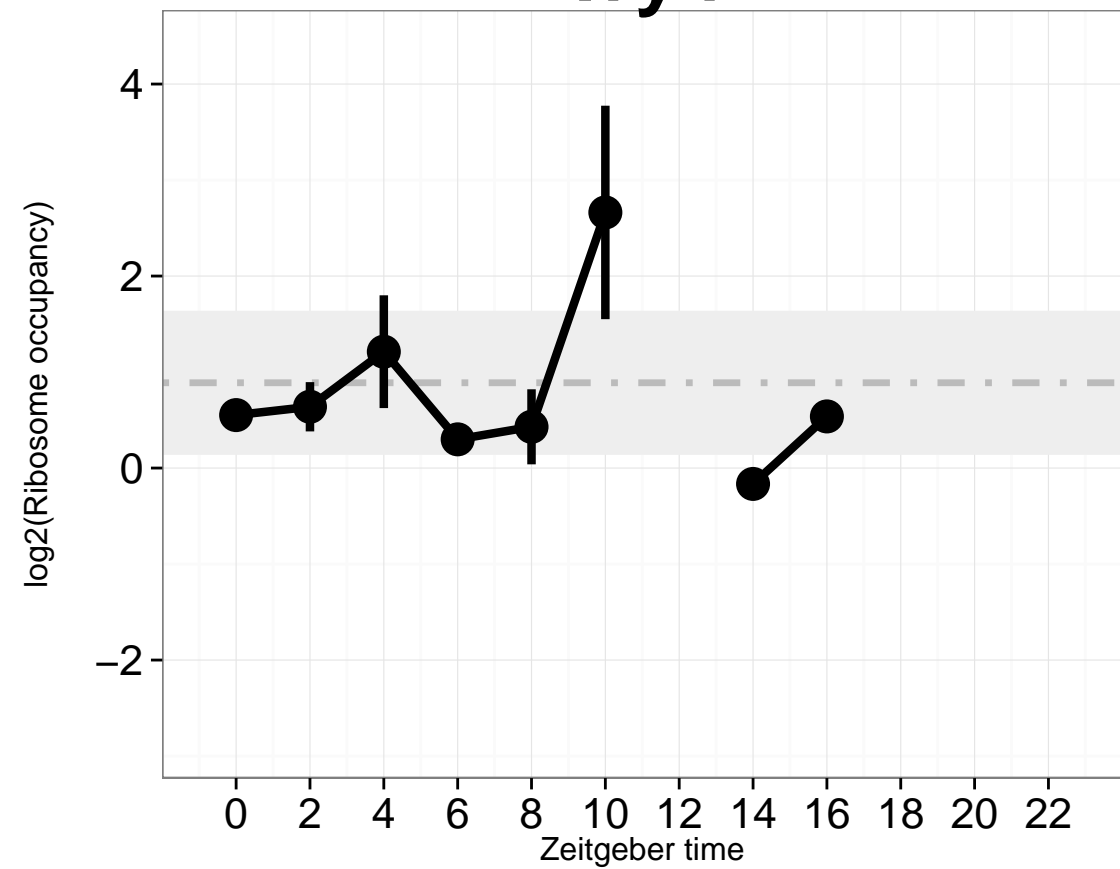

Supplement: SuppDataset_1.zip [file Try4_set_D.pdf › Supplemental Dataset 1/D-mRNA_rhythm_translation_rhyth/Try4_set_D.pdf]

# Tsc22d3

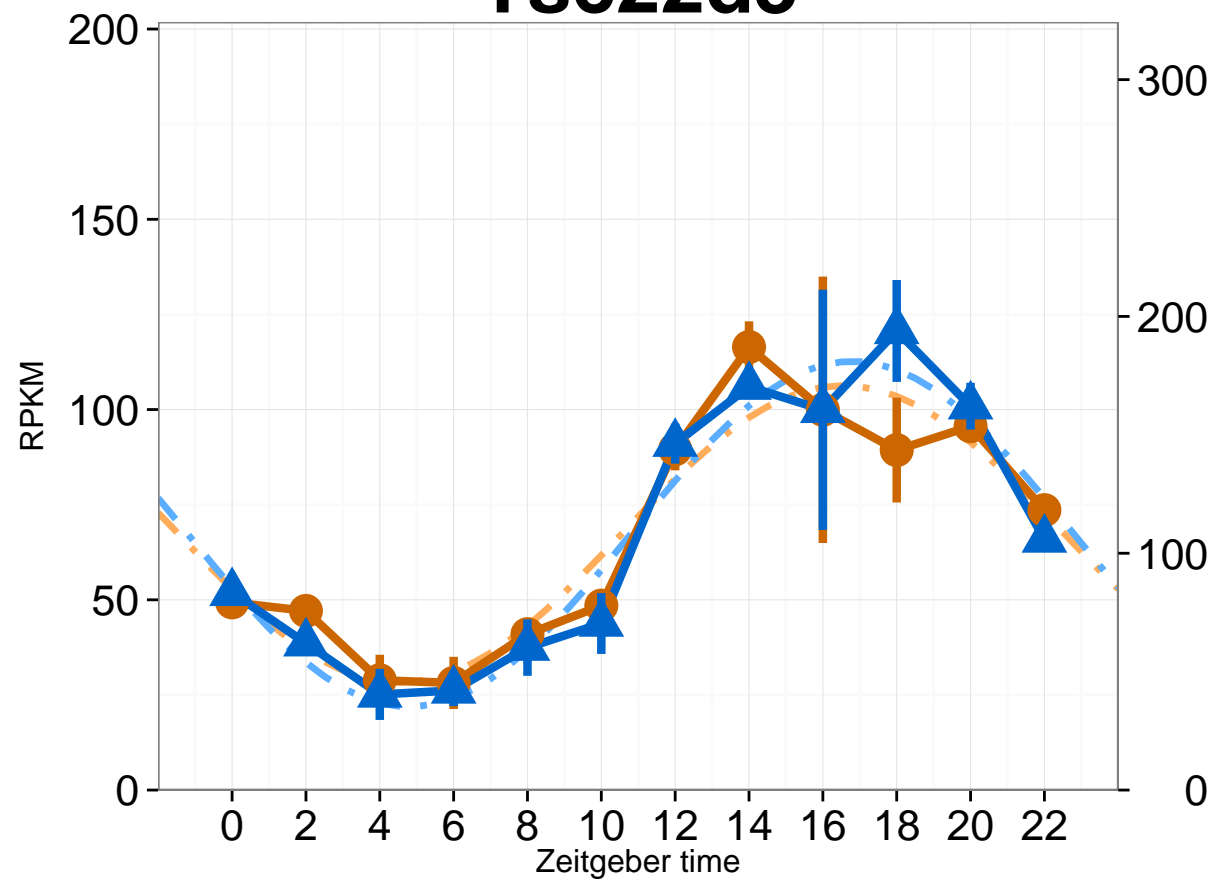

# Tsc22d3

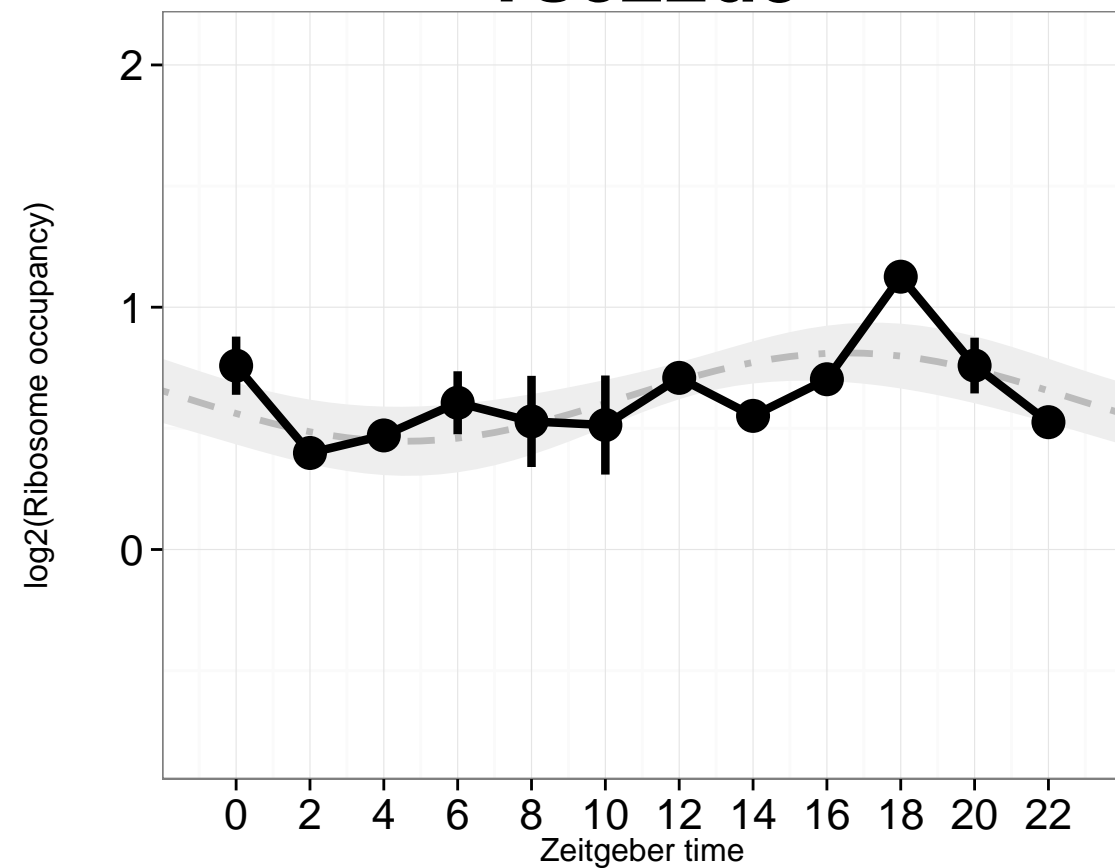

Supplement: SuppDataset_1.zip [file Tsc22d3_set_D.pdf › Supplemental Dataset 1/D-mRNA_rhythm_translation_rhyth/Tsc22d3_set_D.pdf]

## Tsku

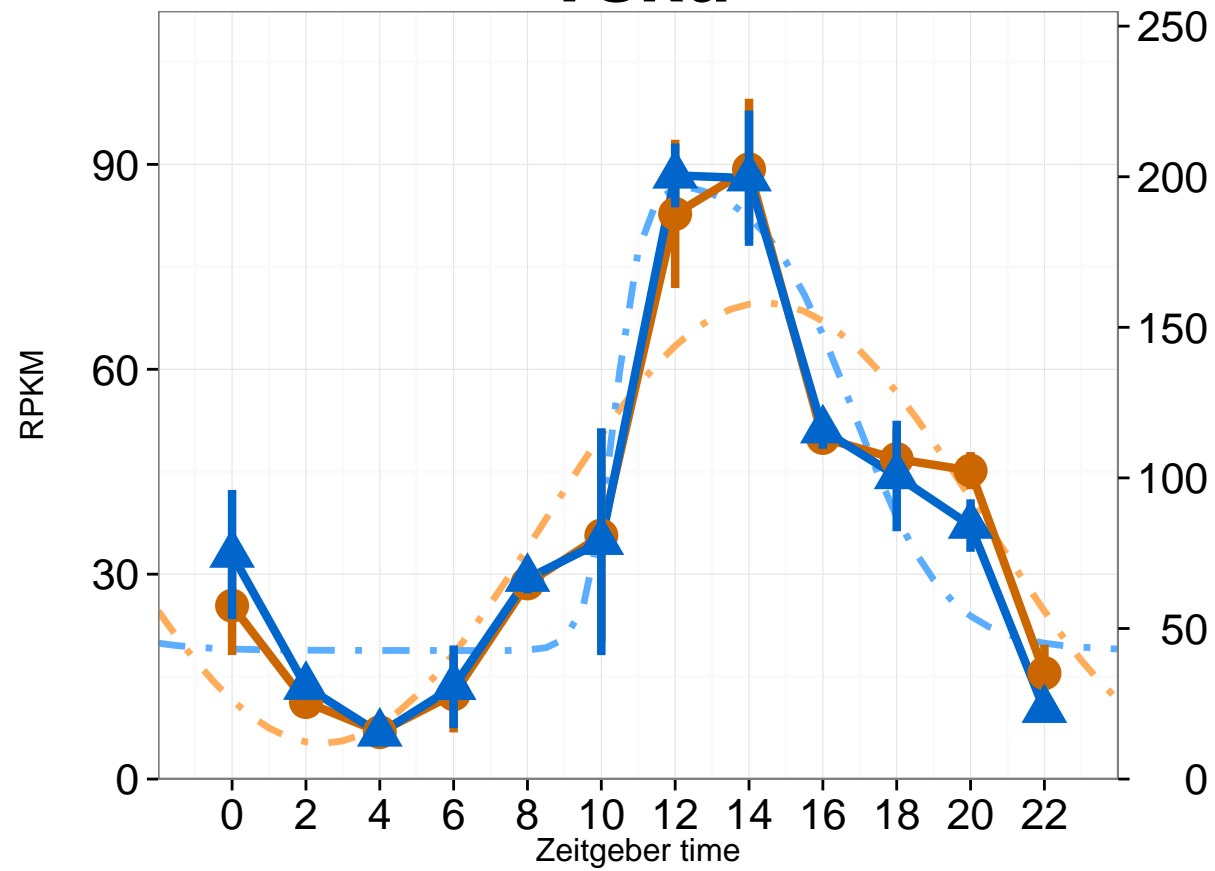

## Tsku

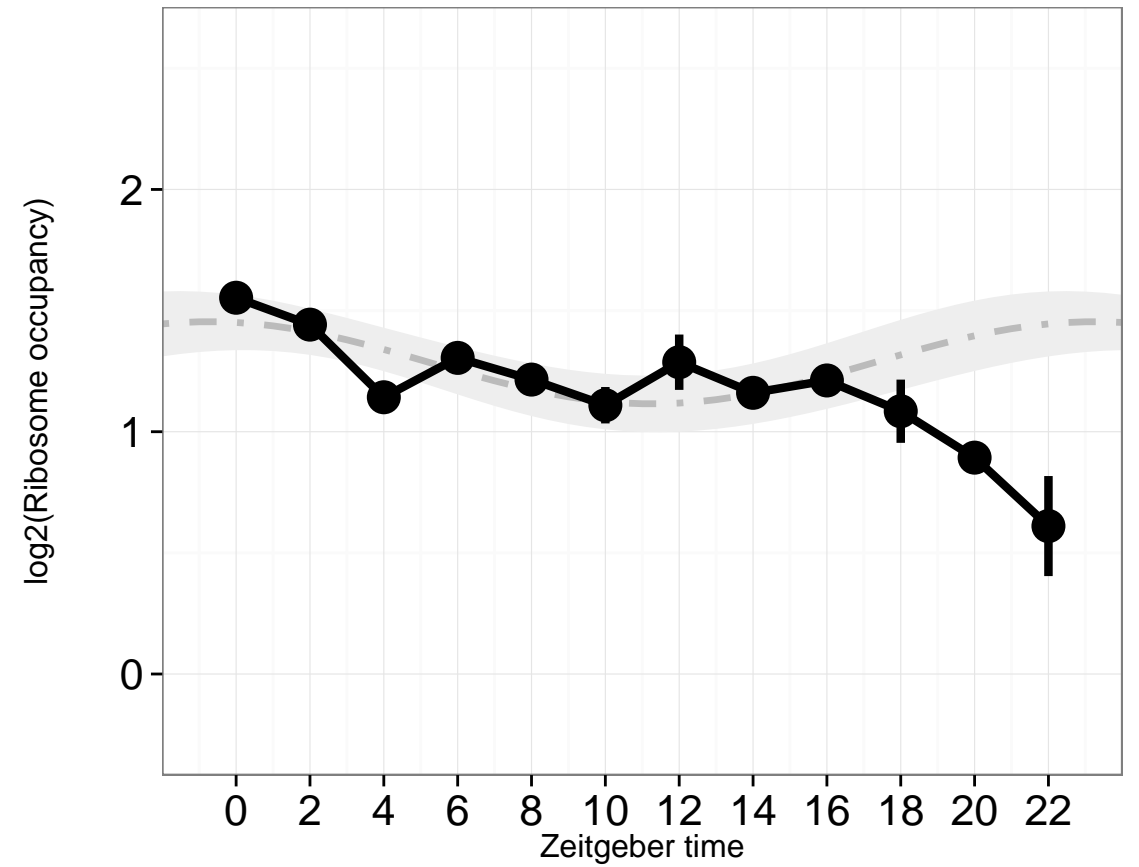

Supplement: SuppDataset_1.zip [file Tsku_set_D.pdf › Supplemental Dataset 1/D-mRNA_rhythm_translation_rhyth/Tsku_set_D.pdf]

# Tspan14

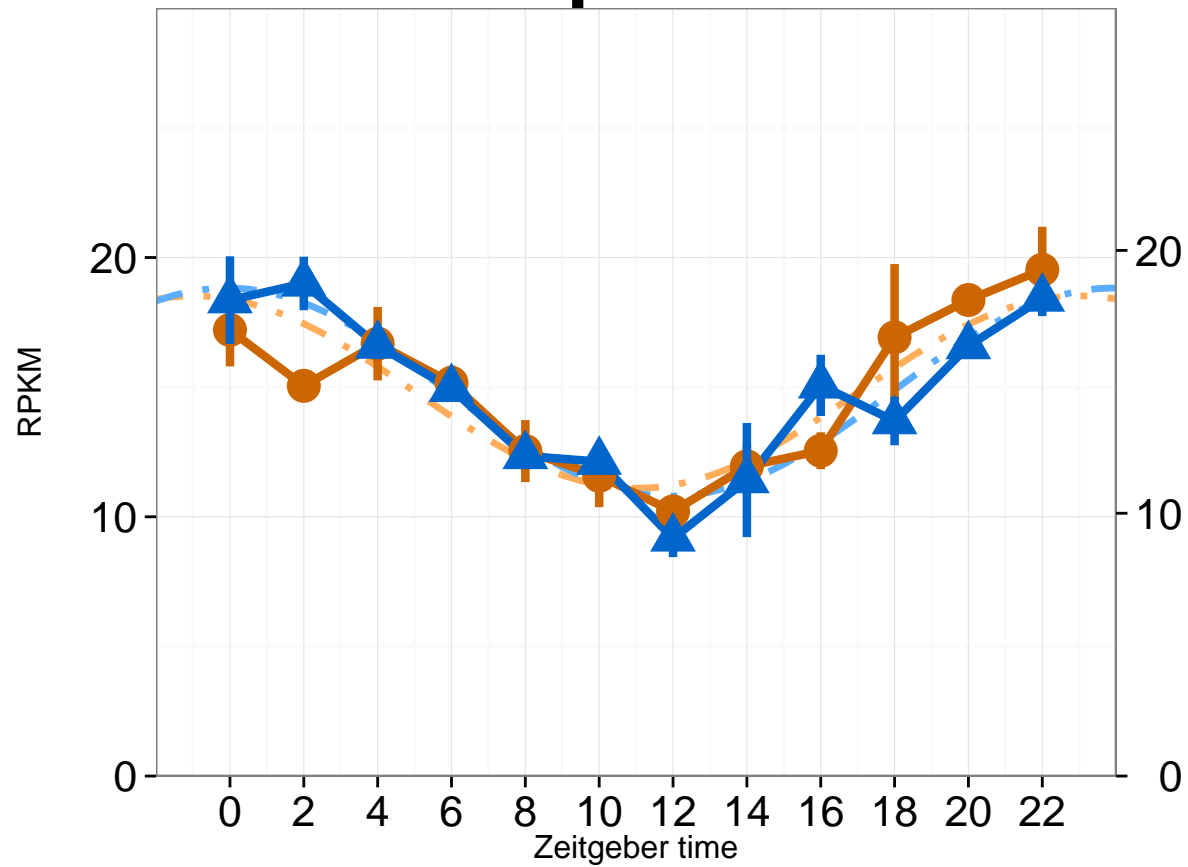

# Tspan14

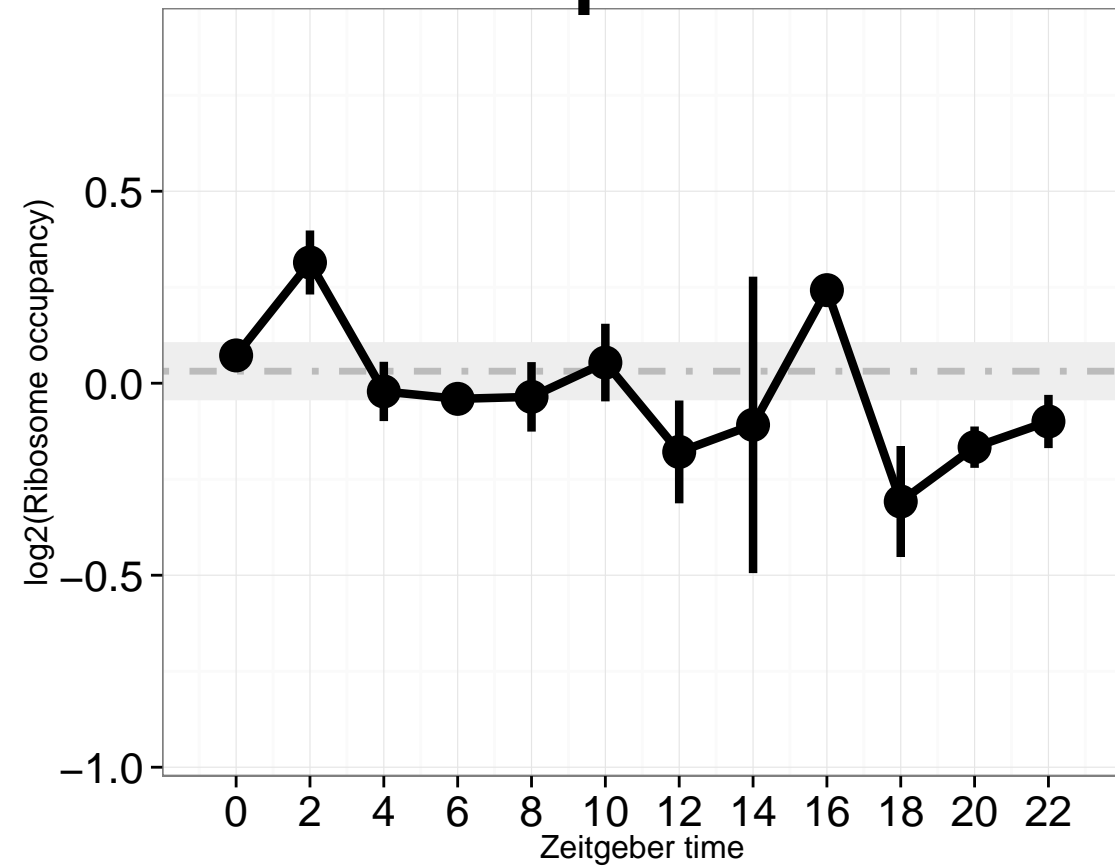

Supplement: SuppDataset_1.zip [file Tspan14_set_D.pdf › Supplemental Dataset 1/D-mRNA_rhythm_translation_rhyth/Tspan14_set_D.pdf]

# Tspan33

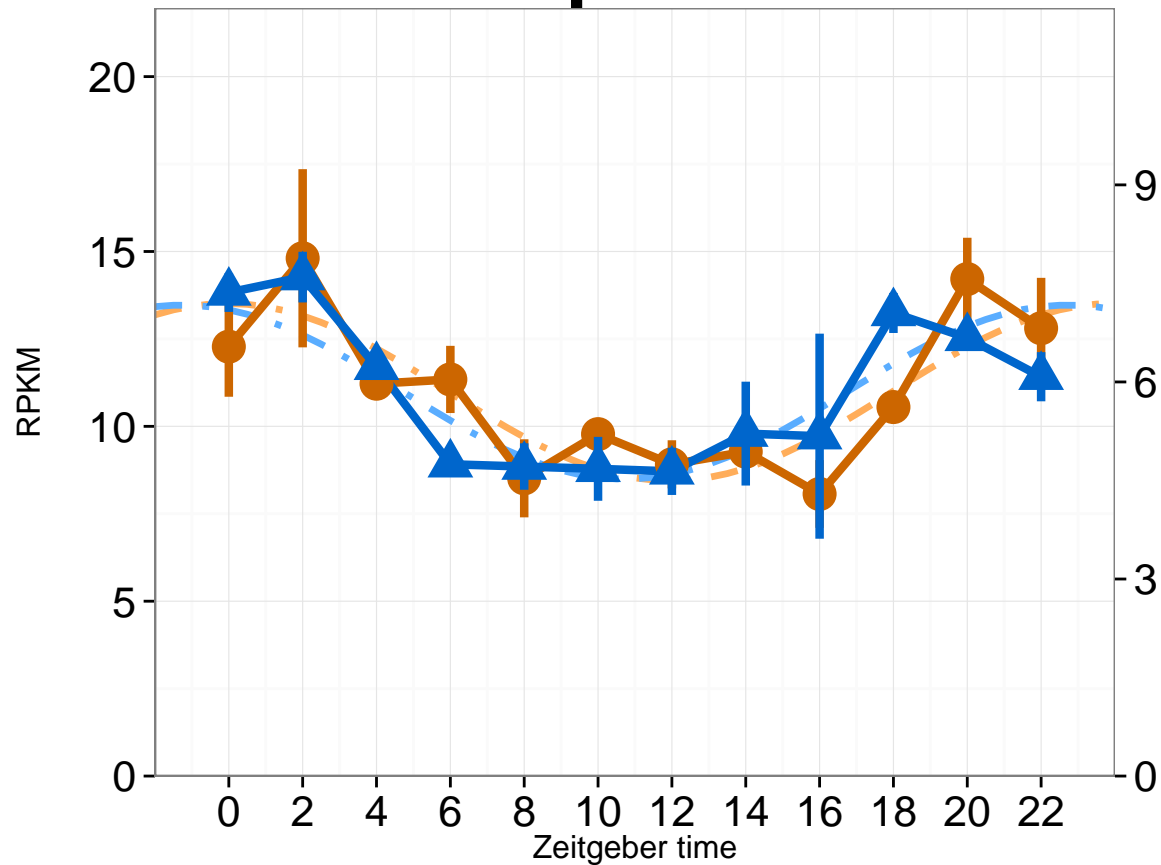

# Tspan33

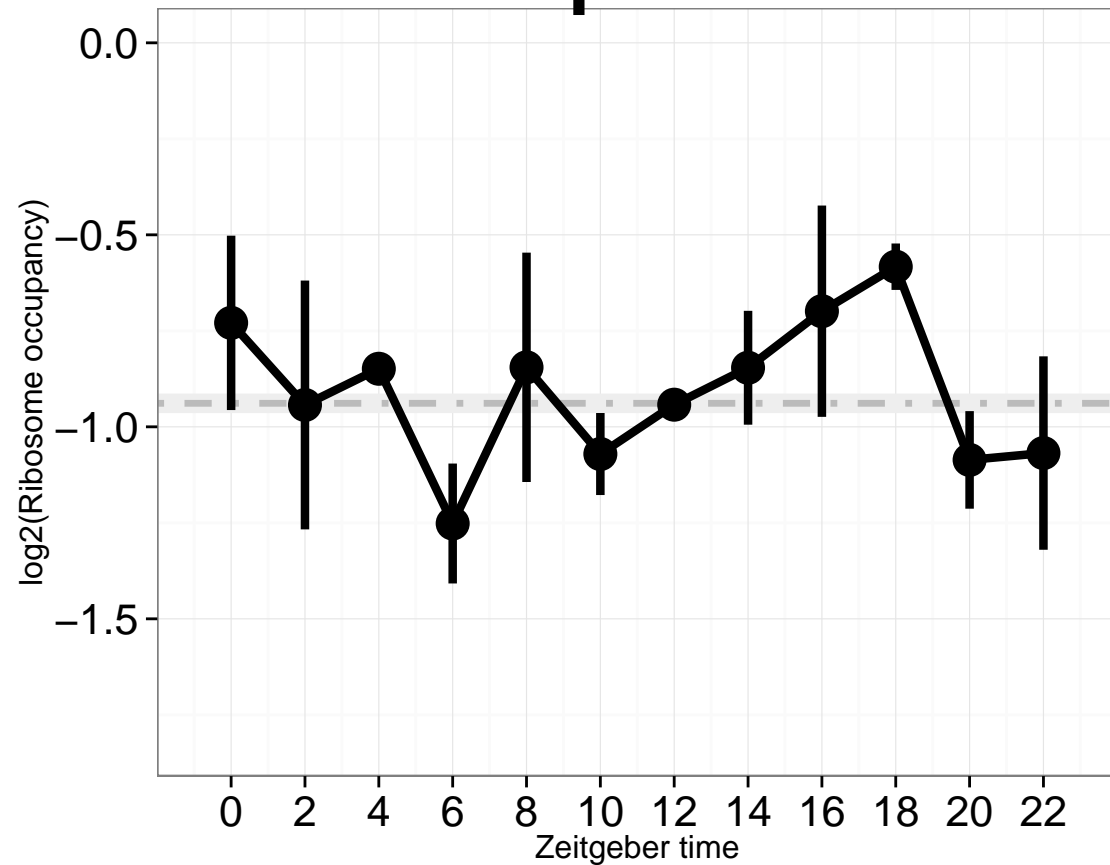

Supplement: SuppDataset_1.zip [file Tspan33_set_D.pdf › Supplemental Dataset 1/D-mRNA_rhythm_translation_rhyth/Tspan33_set_D.pdf]

# Tspan4

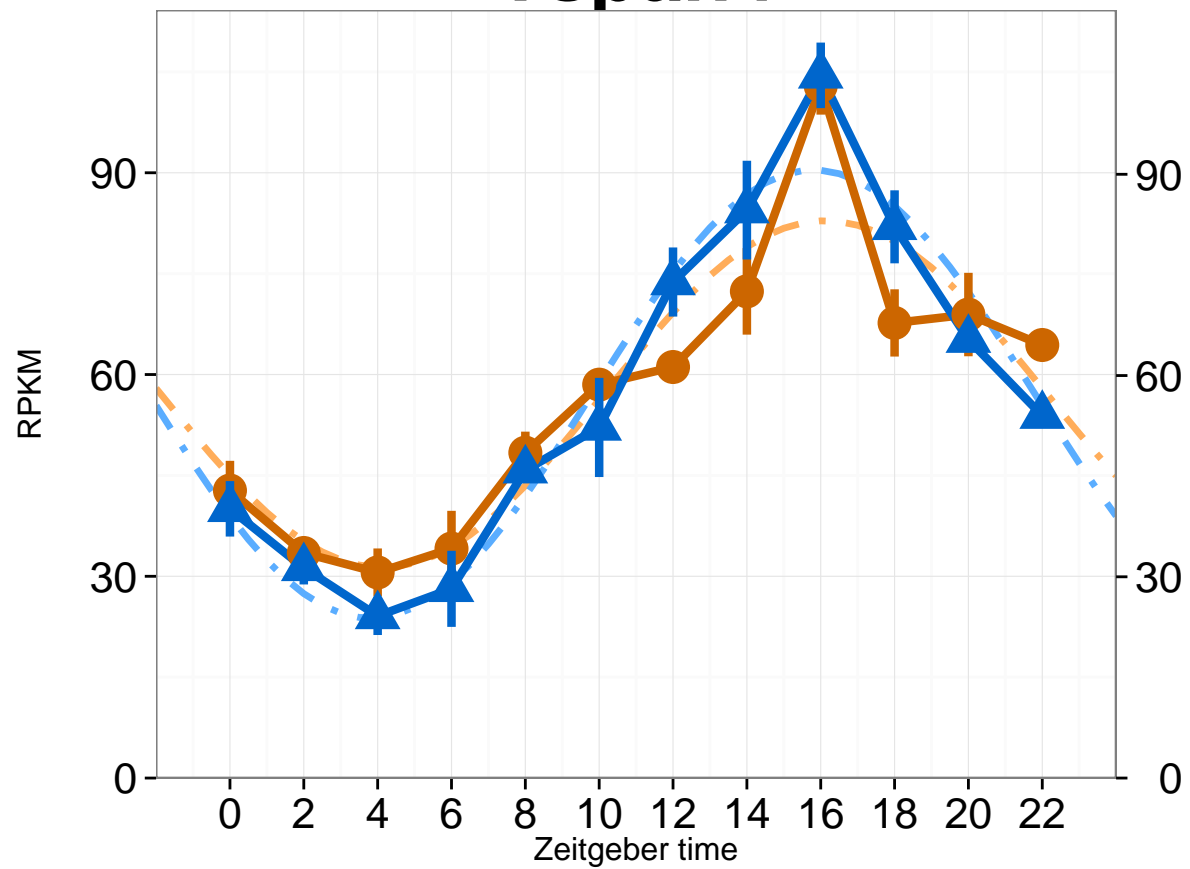

# Tspan4

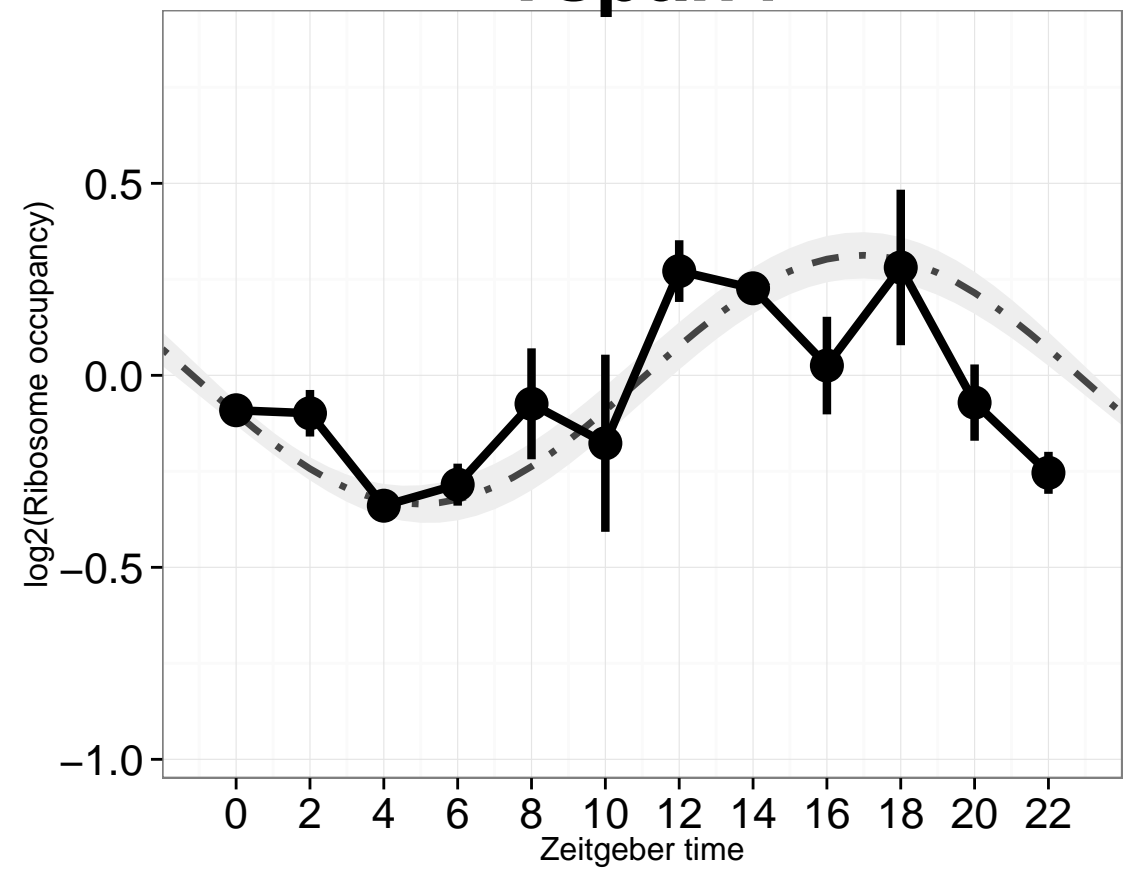

Supplement: SuppDataset_1.zip [file Tspan4_set_D.pdf › Supplemental Dataset 1/D-mRNA_rhythm_translation_rhyth/Tspan4_set_D.pdf]

## Tspyl4

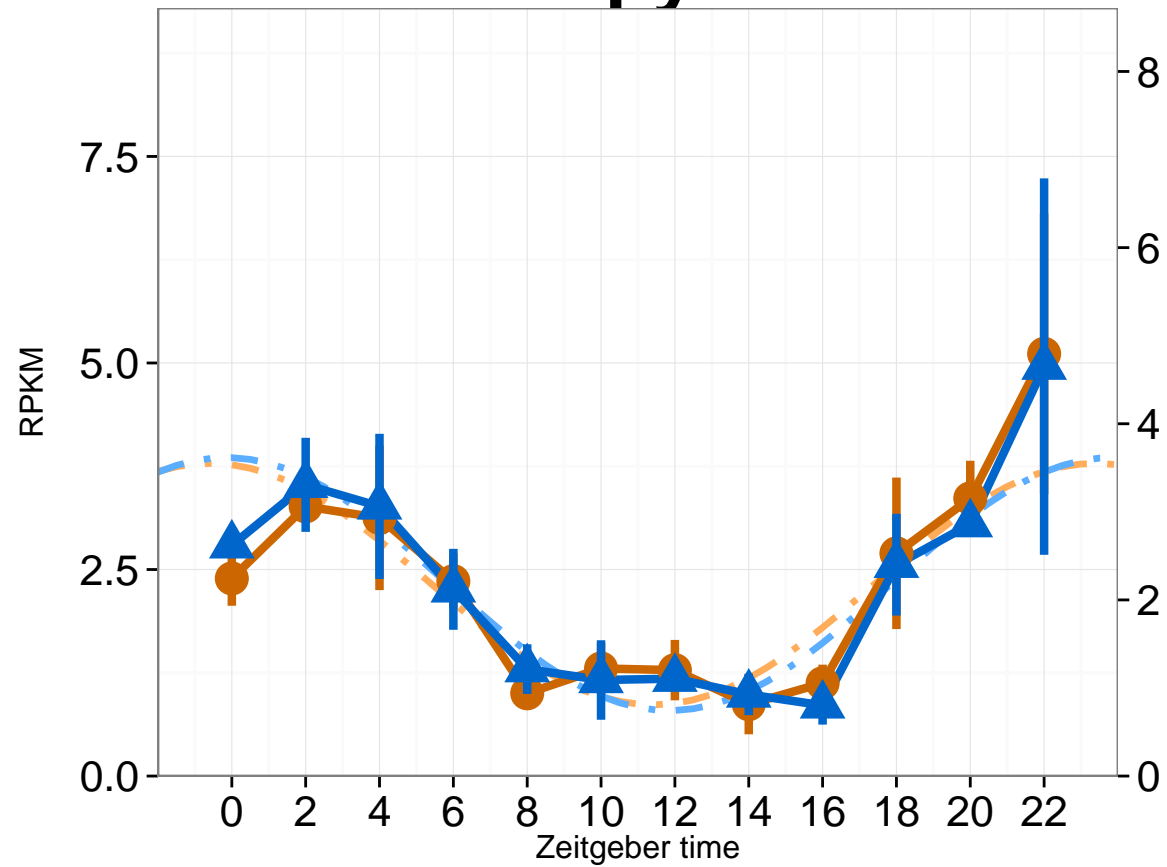

## Tspyl4

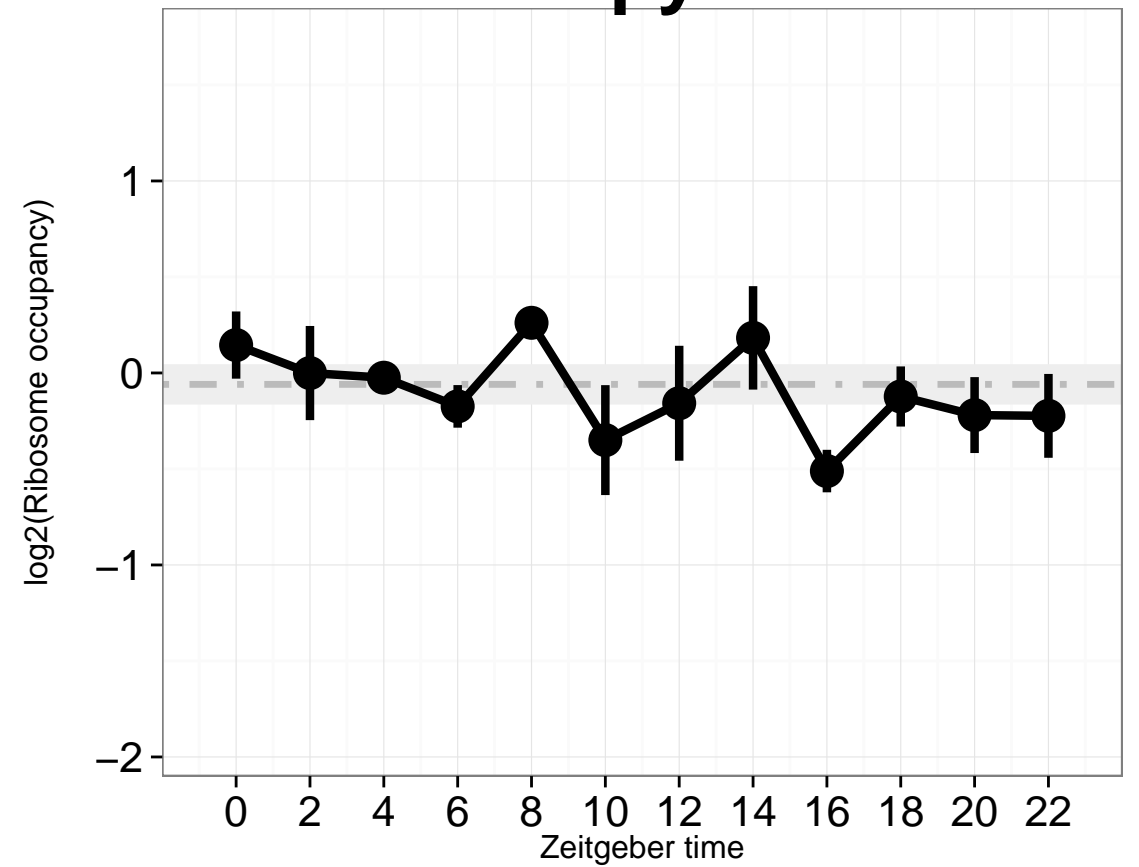

Supplement: SuppDataset_1.zip [file Tspyl4_set_D.pdf › Supplemental Dataset 1/D-mRNA_rhythm_translation_rhyth/Tspyl4_set_D.pdf]

## Tssc1

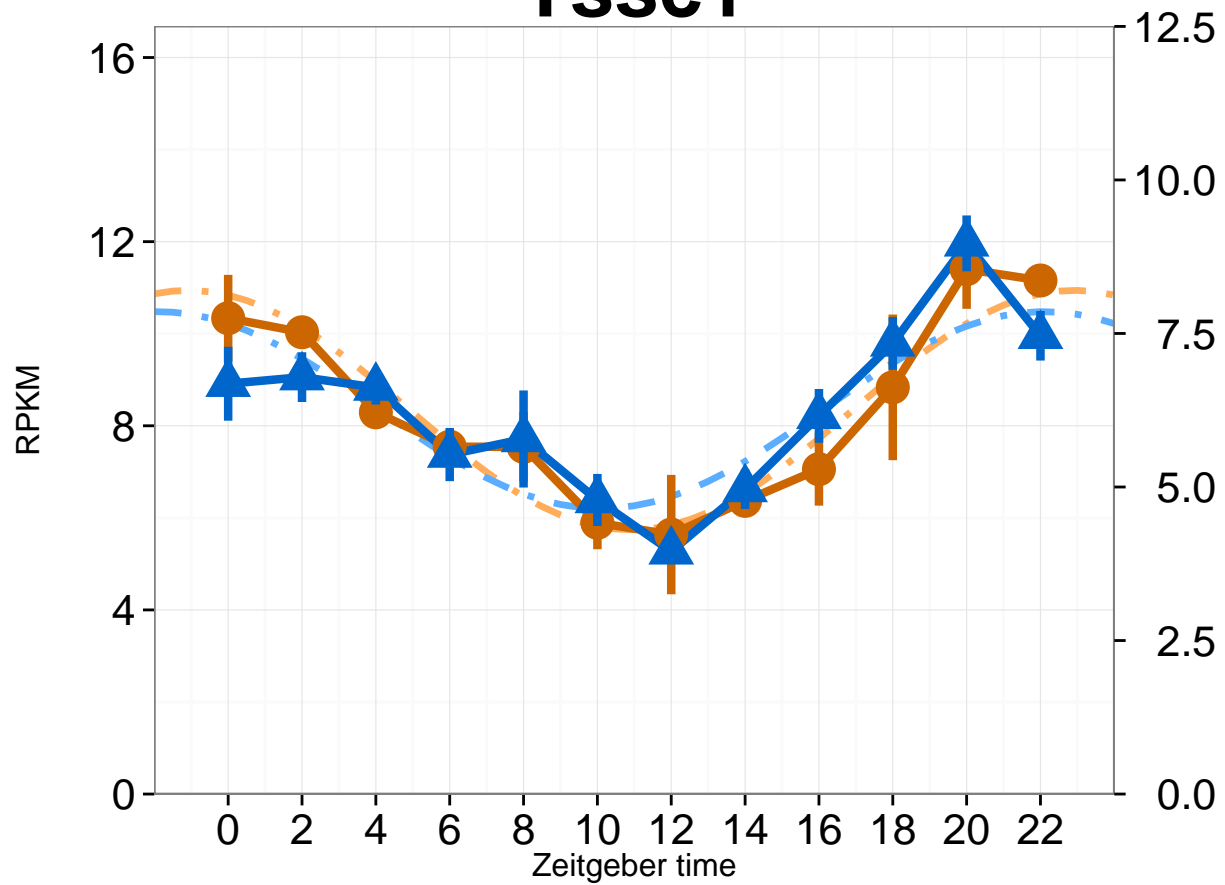

## Tssc1

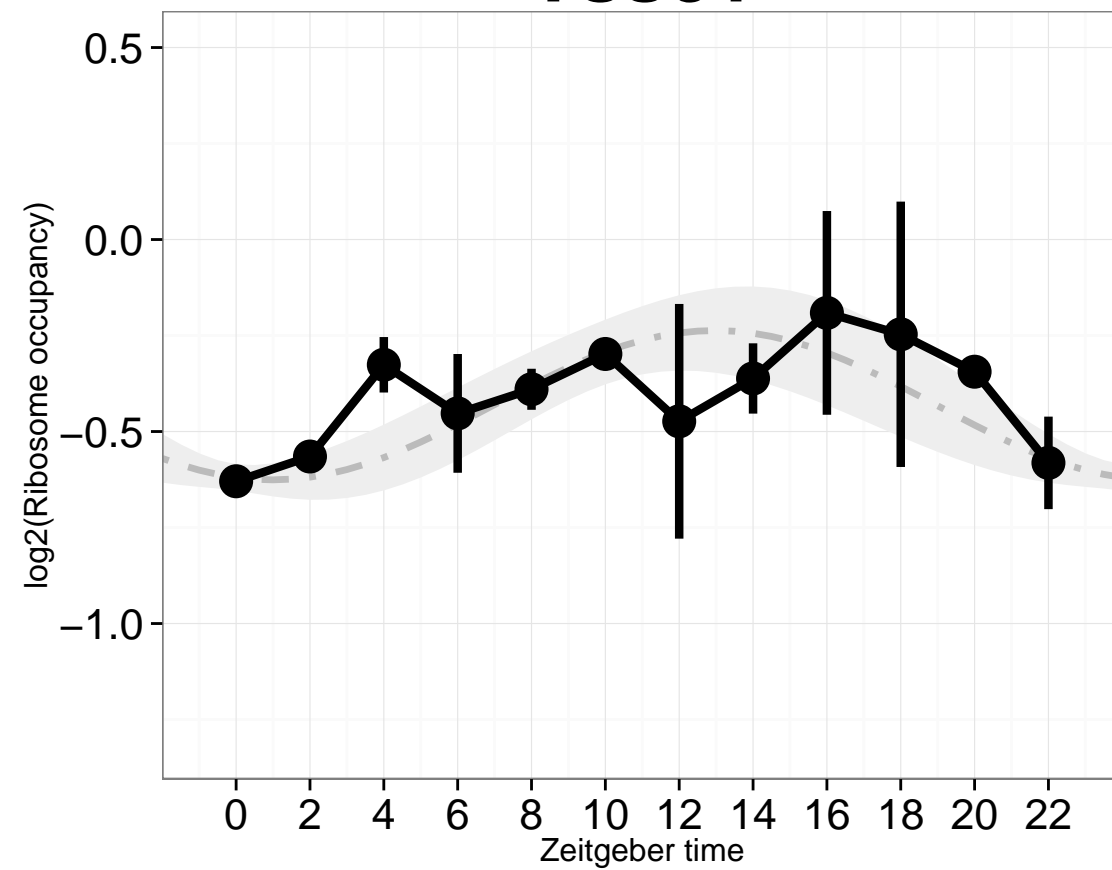

Supplement: SuppDataset_1.zip [file Tssc1_set_D.pdf › Supplemental Dataset 1/D-mRNA_rhythm_translation_rhyth/Tssc1_set_D.pdf]

# Ttc23

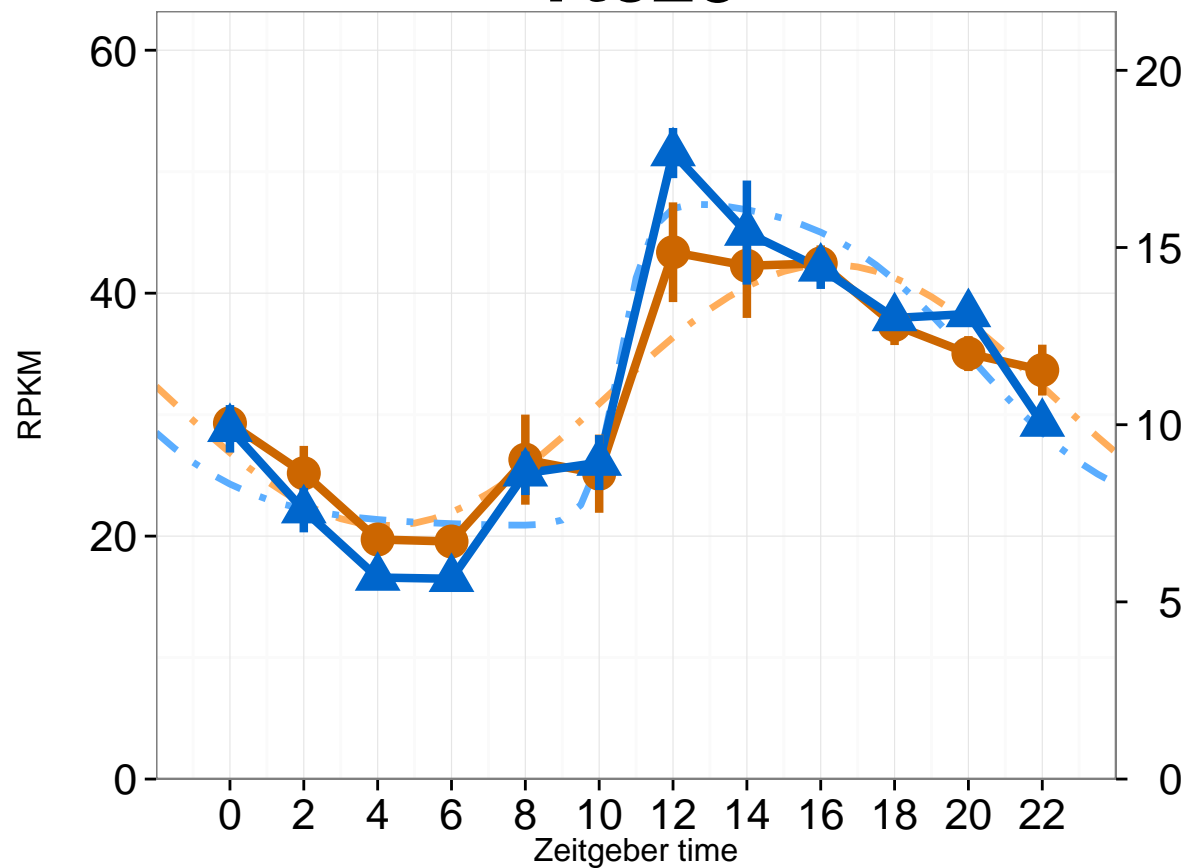

# Ttc23

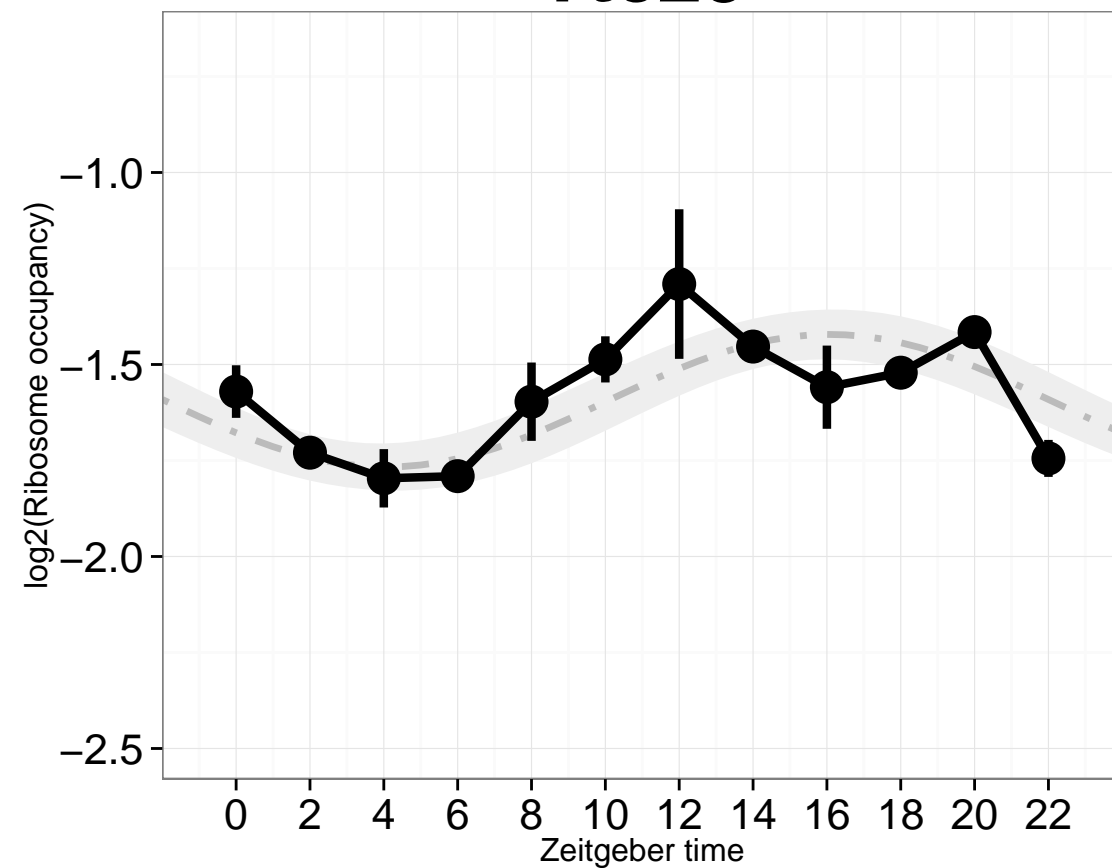

Supplement: SuppDataset_1.zip [file Ttc23_set_D.pdf › Supplemental Dataset 1/D-mRNA_rhythm_translation_rhyth/Ttc23_set_D.pdf]

# Ttc39a

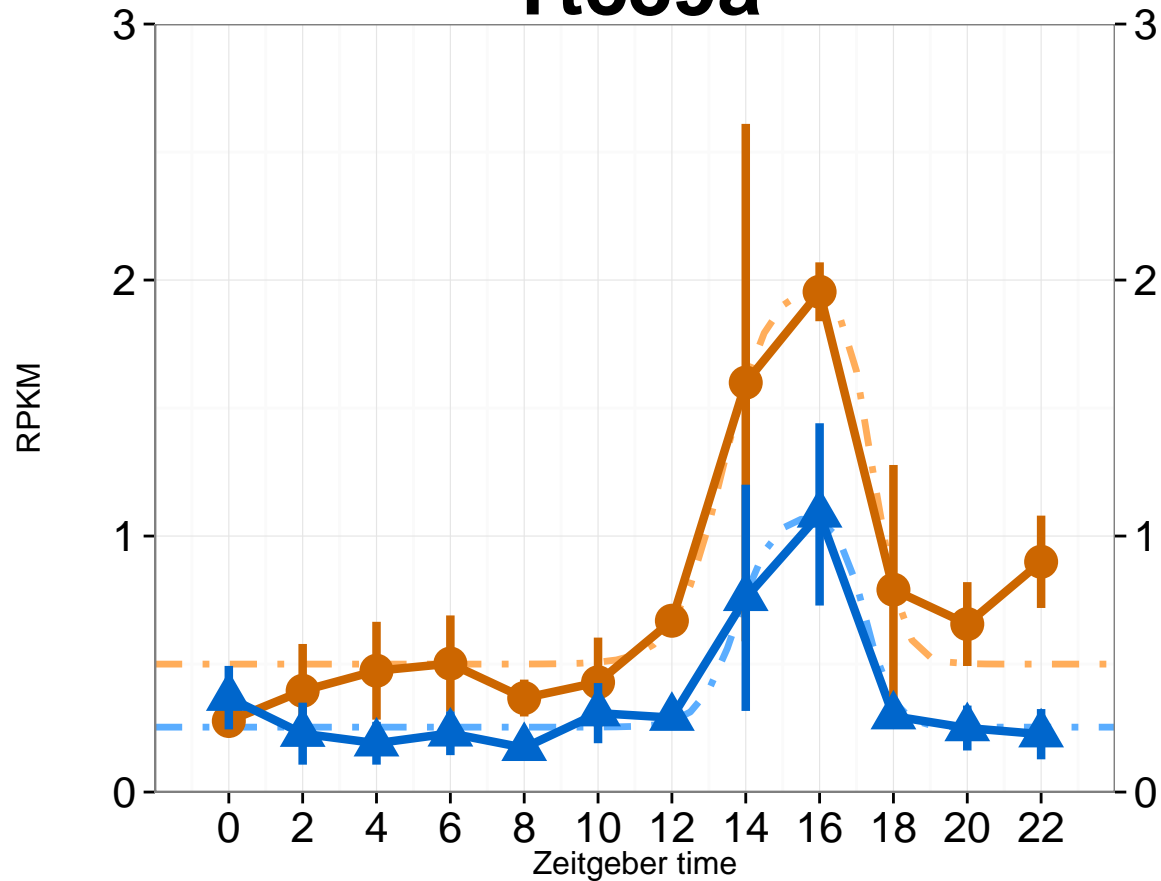

# Ttc39a

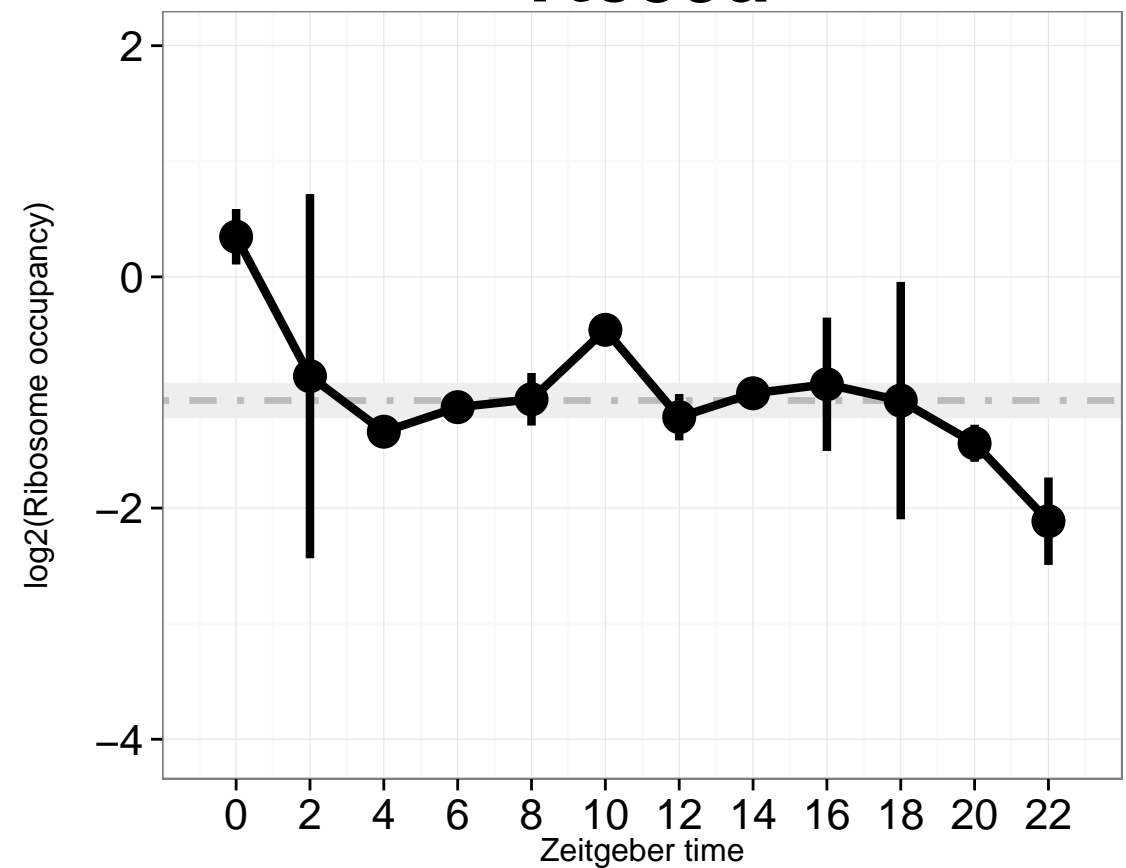

Supplement: SuppDataset_1.zip [file Ttc39a_set_D.pdf › Supplemental Dataset 1/D-mRNA_rhythm_translation_rhyth/Ttc39a_set_D.pdf]

## Ttc39b

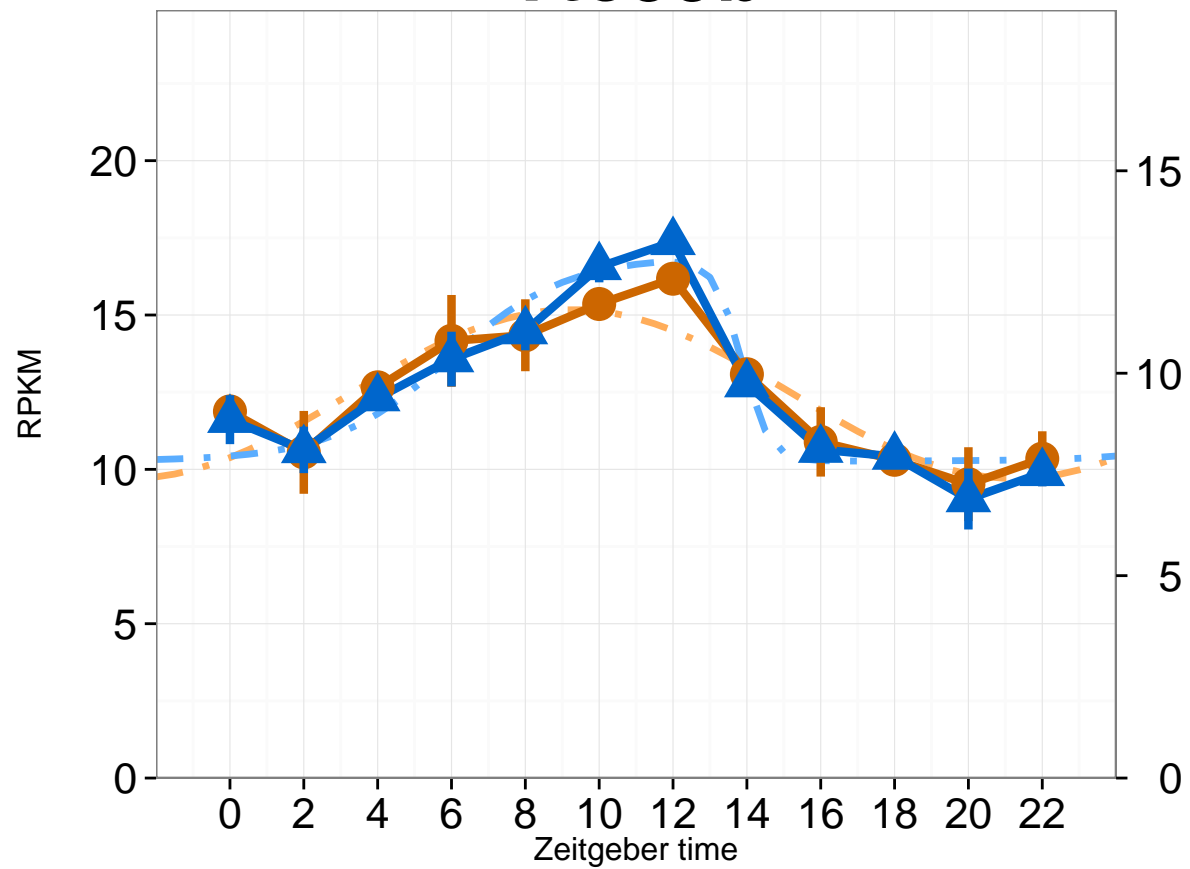

## Ttc39b

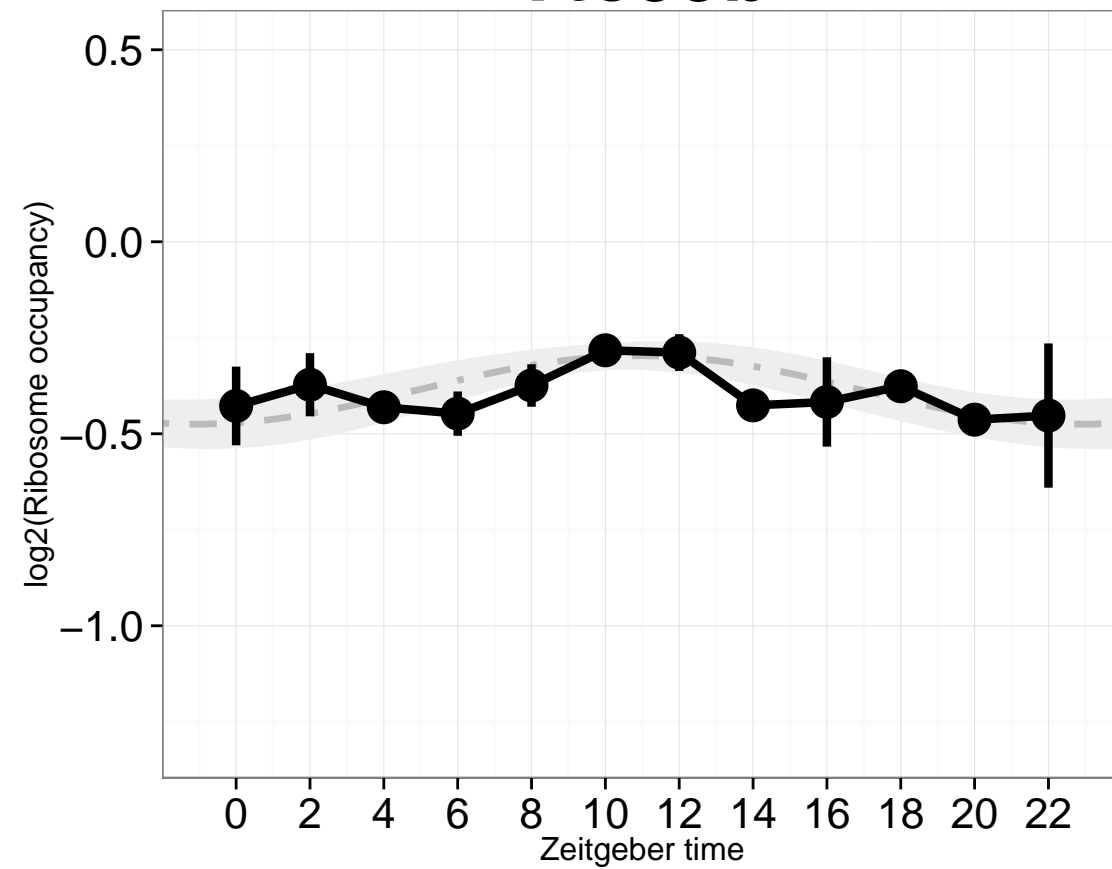

Supplement: SuppDataset_1.zip [file Ttc39b_set_D.pdf › Supplemental Dataset 1/D-mRNA_rhythm_translation_rhyth/Ttc39b_set_D.pdf]

# Tuba4a

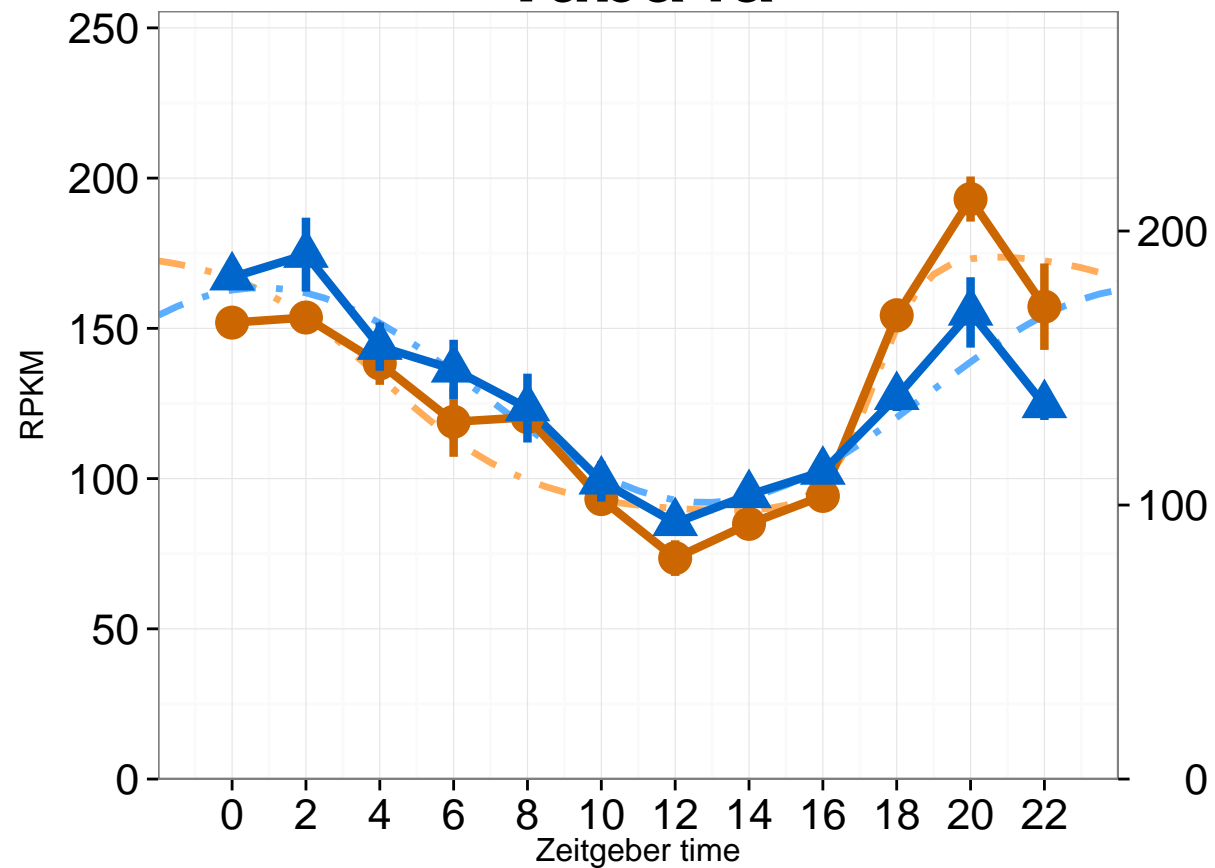

# Tuba4a

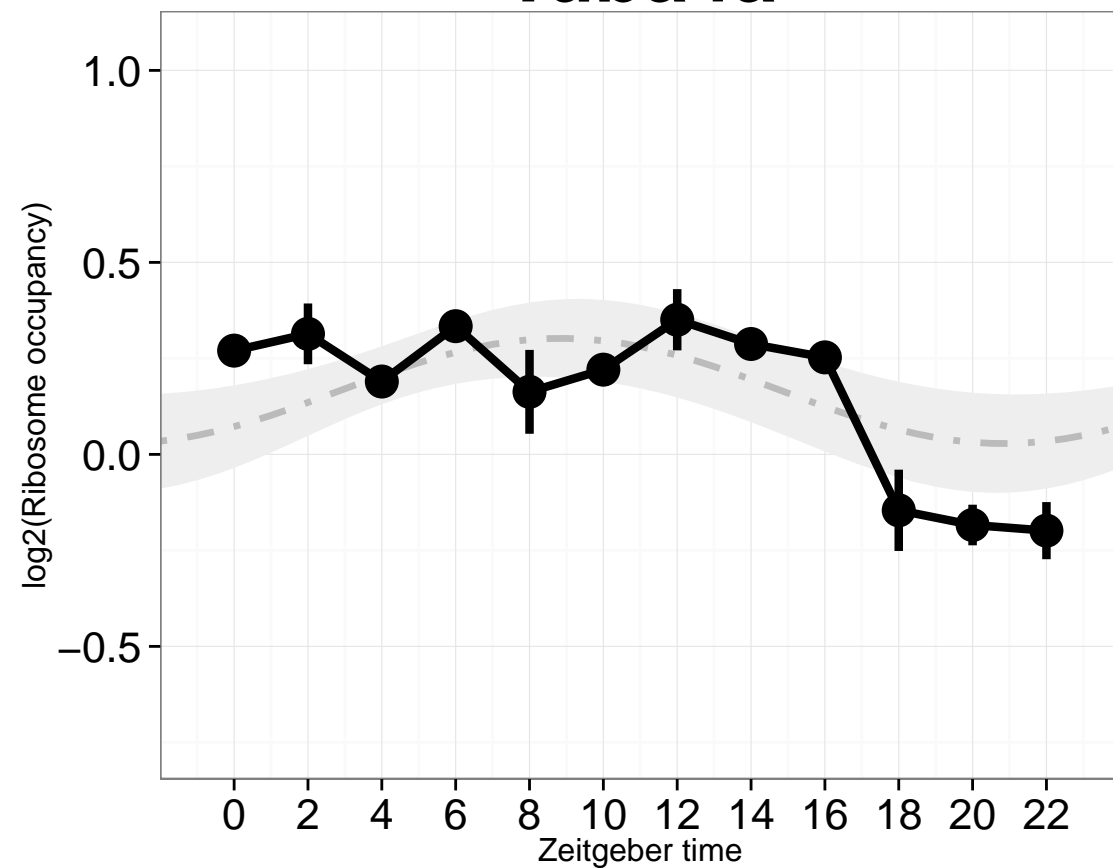

Supplement: SuppDataset_1.zip [file Tuba4a_set_D.pdf › Supplemental Dataset 1/D-mRNA_rhythm_translation_rhyth/Tuba4a_set_D.pdf]

# Tubb2a

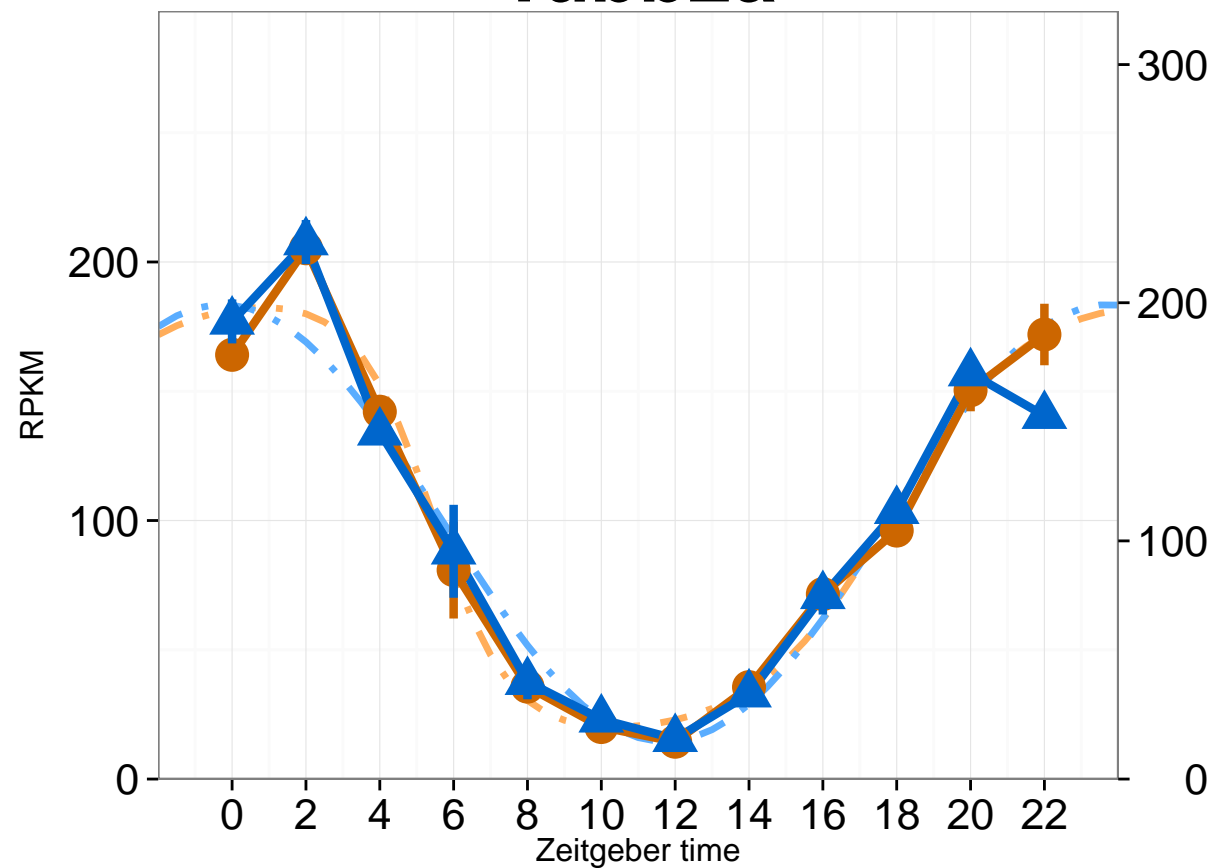

# Tubb2a

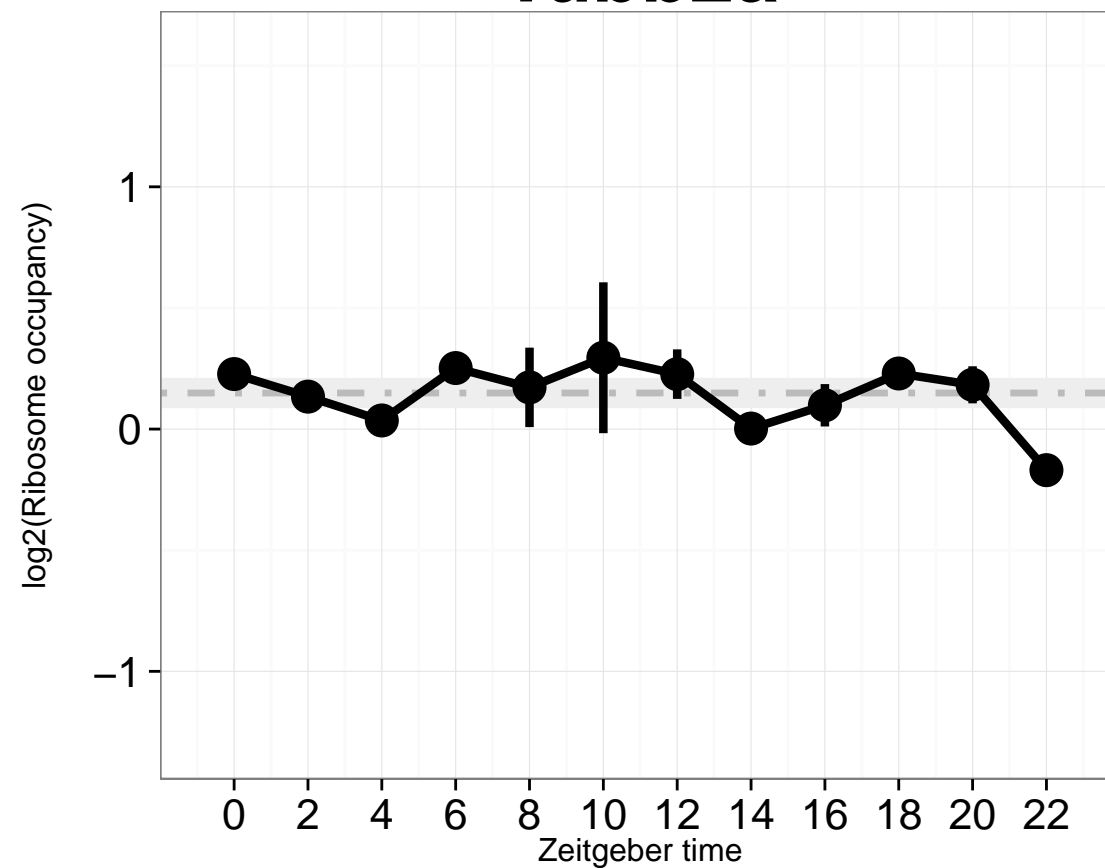

Supplement: SuppDataset_1.zip [file Tubb2a_set_D.pdf › Supplemental Dataset 1/D-mRNA_rhythm_translation_rhyth/Tubb2a_set_D.pdf]

# Tubb4b

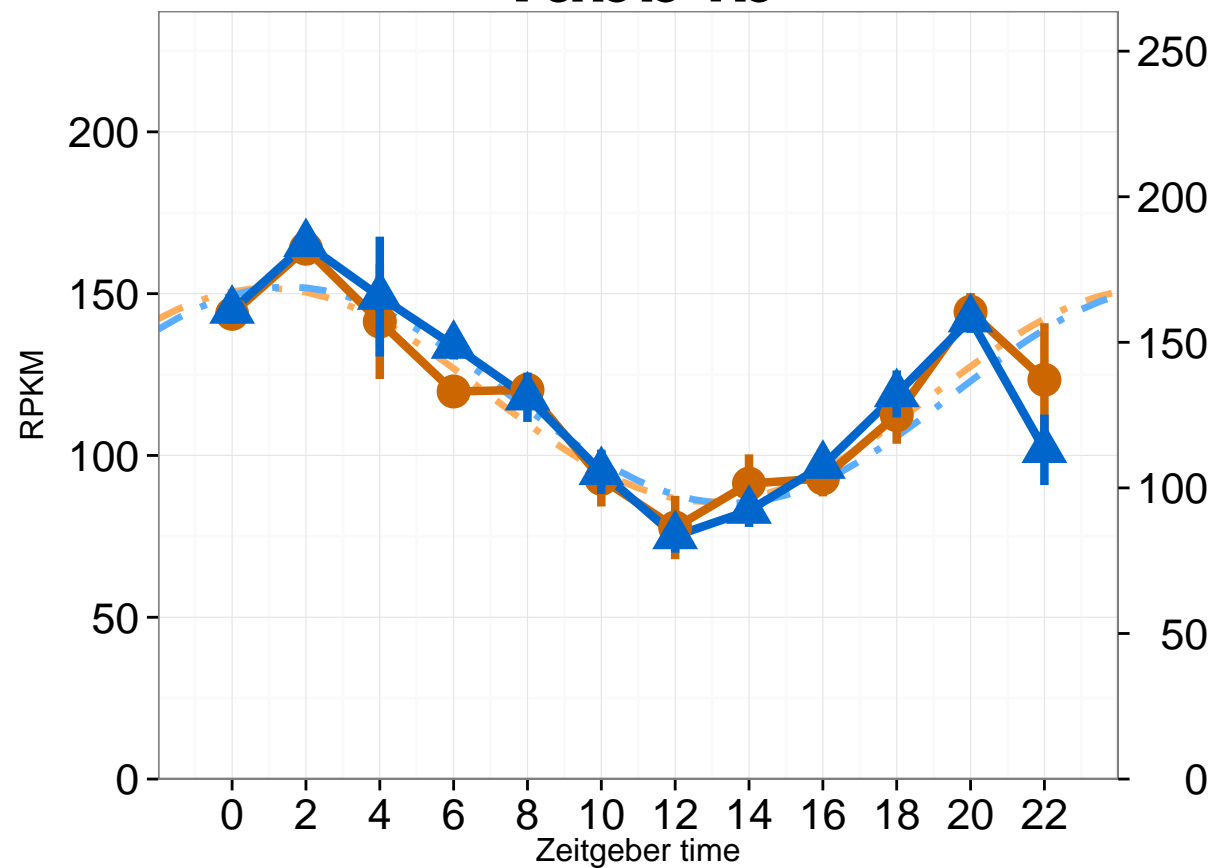

# Tubb4b

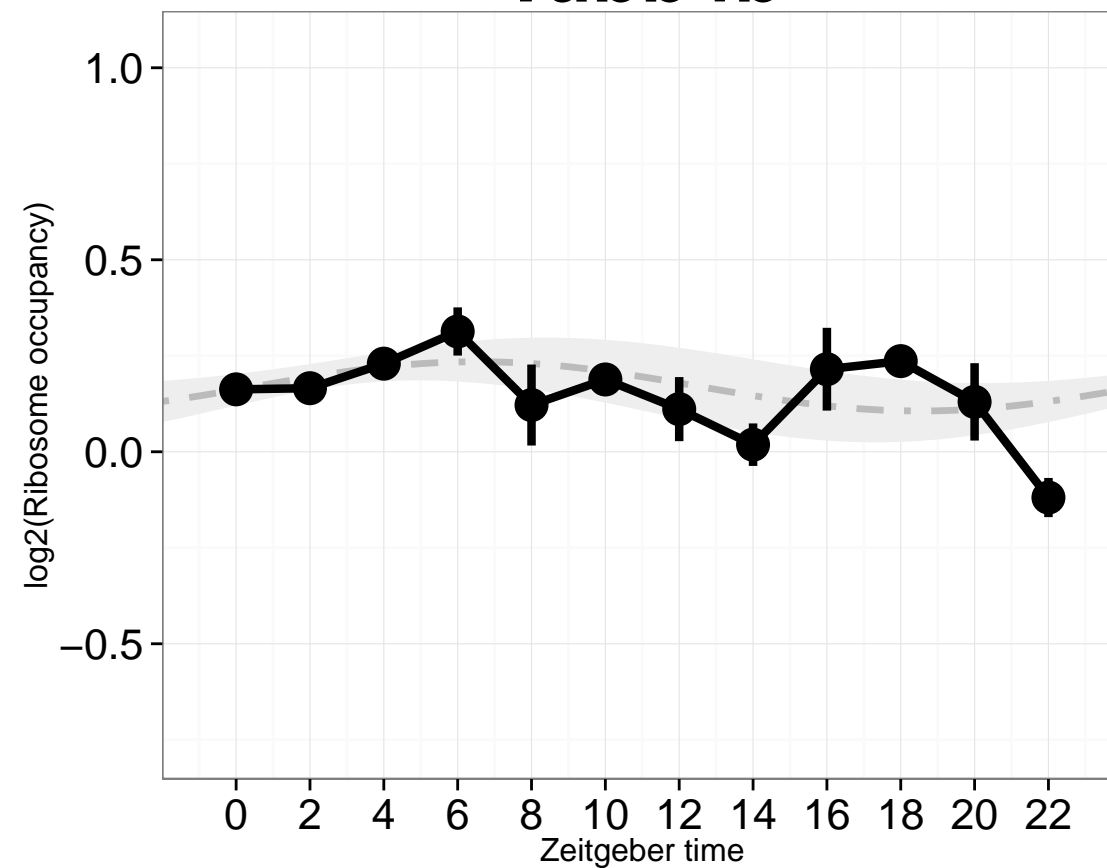

Supplement: SuppDataset_1.zip [file Tubb4b_set_D.pdf › Supplemental Dataset 1/D-mRNA_rhythm_translation_rhyth/Tubb4b_set_D.pdf]
