# Supplementary figures and images for: Ribosome profiling reveals the rhythmic liver translatome and circadian clock regulation by upstream open reading frames (part 73 of 113)
Source: HighWire-hosted journal article supplement (doi:10.1101/gr.195404.115), 2015-10-20

# Taok2

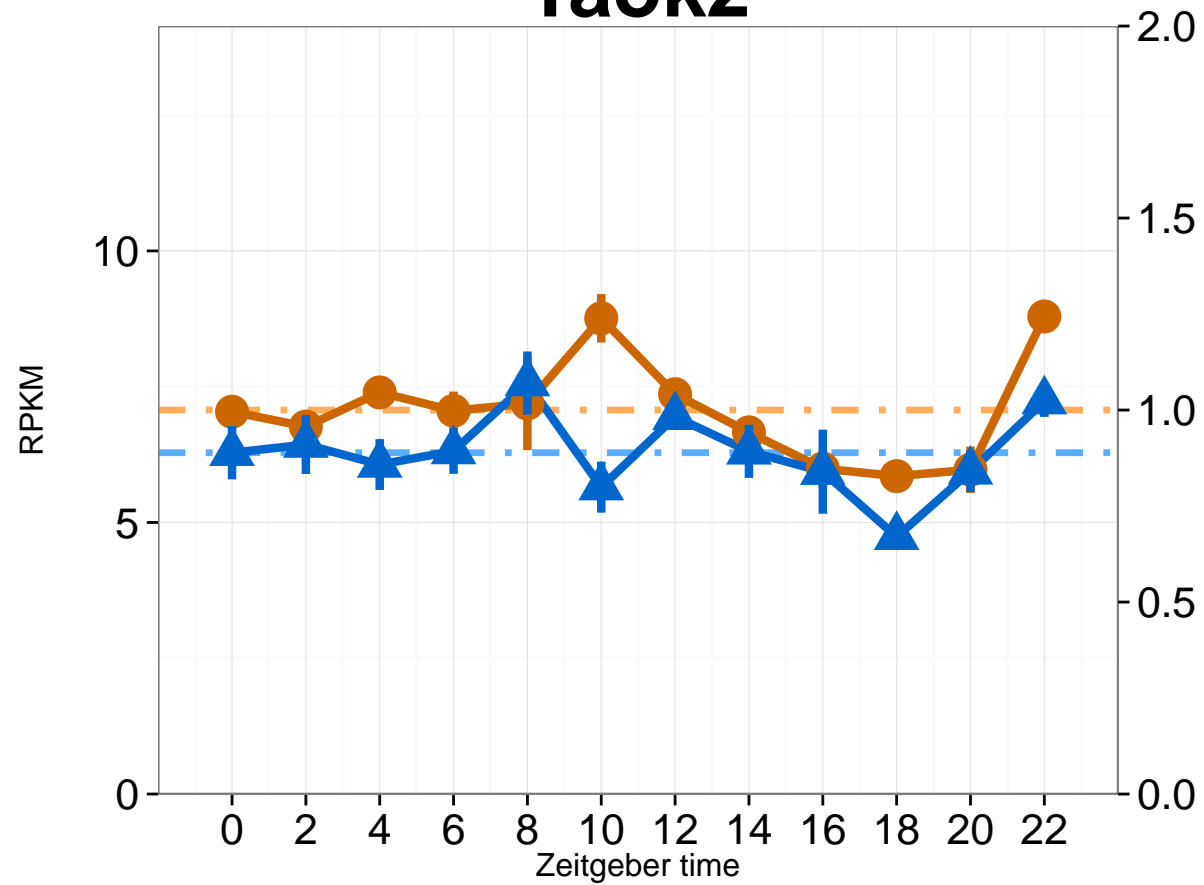

# Taok2

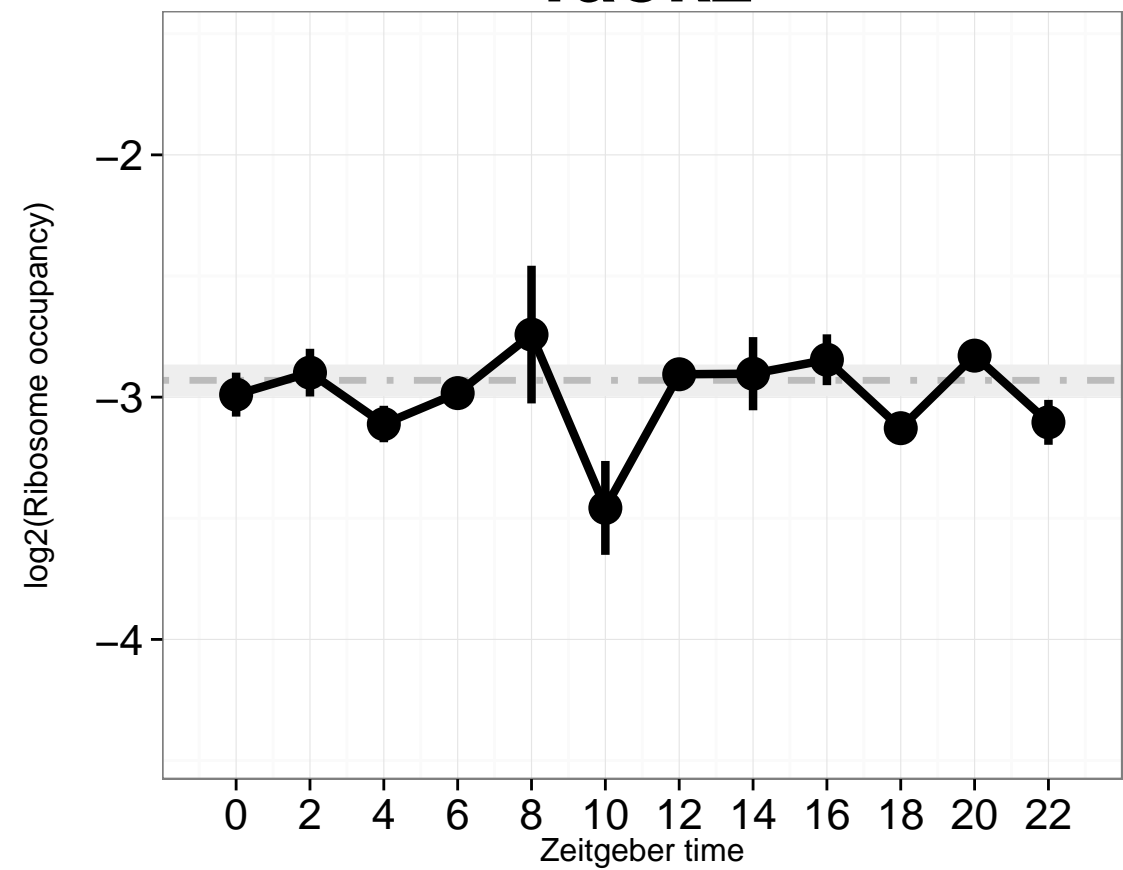

Supplement: SuppDataset_1.zip [file Taok2_set_A.pdf › Supplemental Dataset 1/A-mRNA_nonrhyth_translation_nonrhyth/Taok2_set_A.pdf]

# Taok3

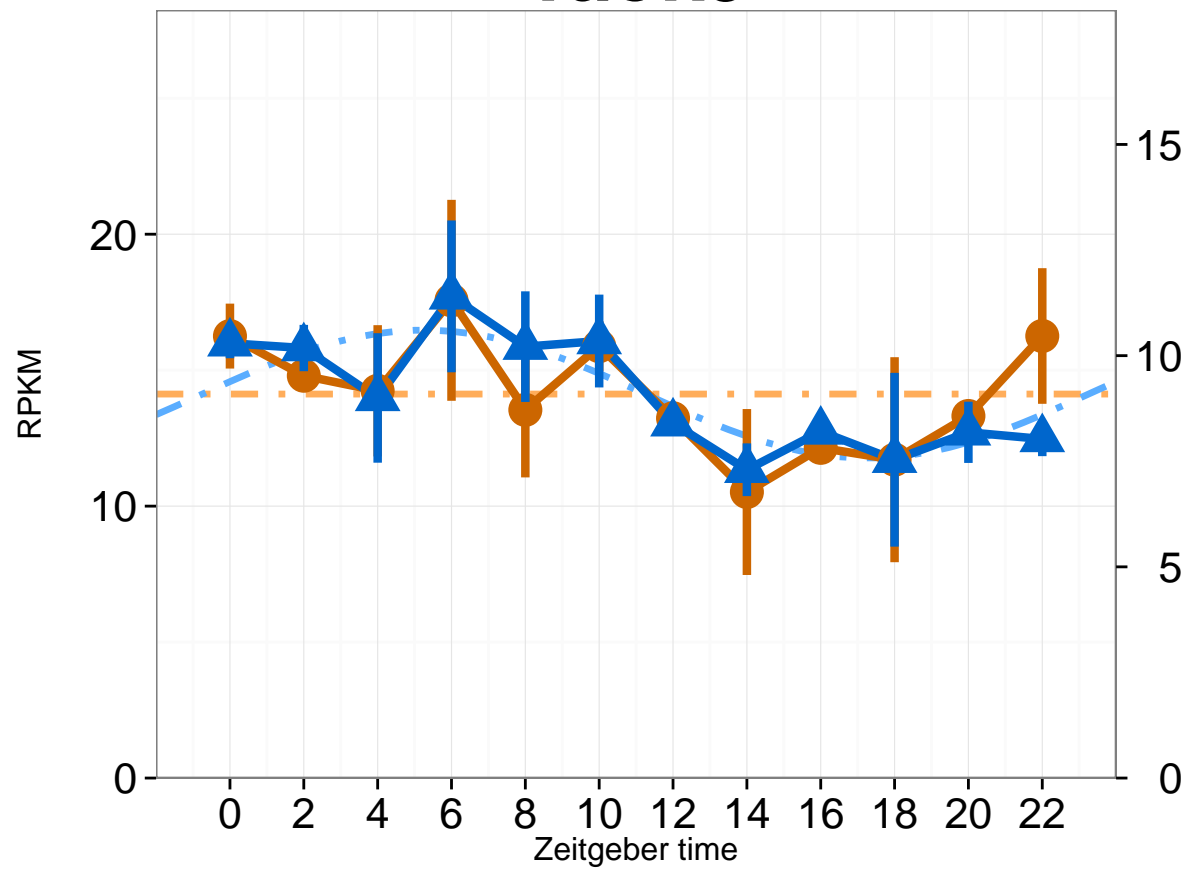

# Taok3

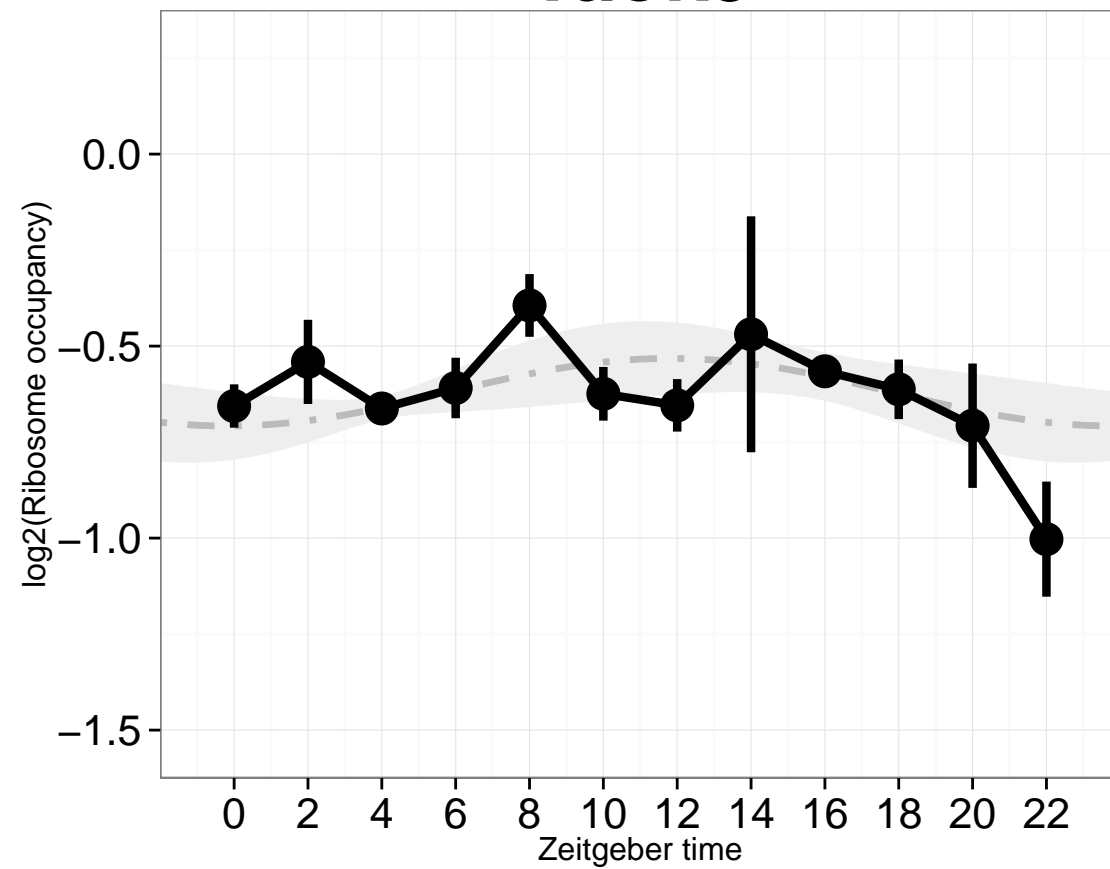

Supplement: SuppDataset_1.zip [file Taok3_set_A.pdf › Supplemental Dataset 1/A-mRNA_nonrhyth_translation_nonrhyth/Taok3_set_A.pdf]

## Tap2

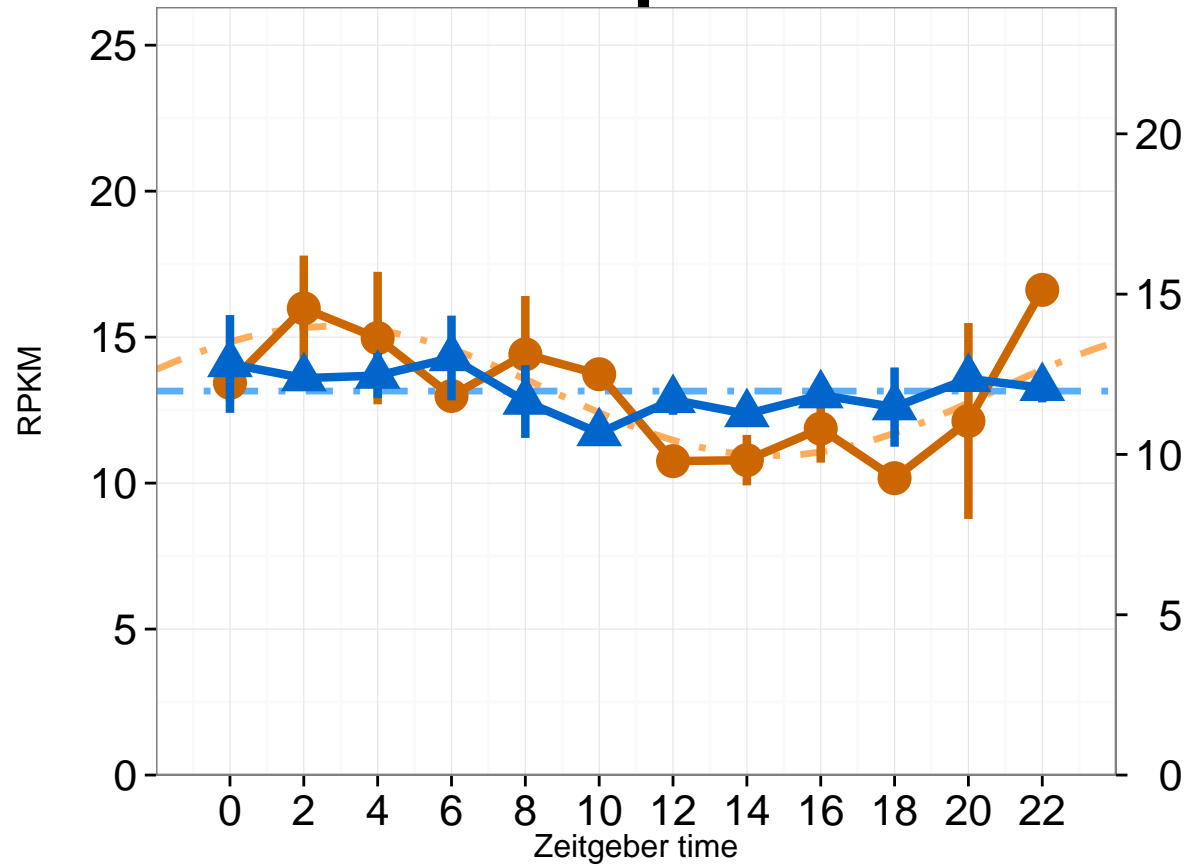

## Tap2

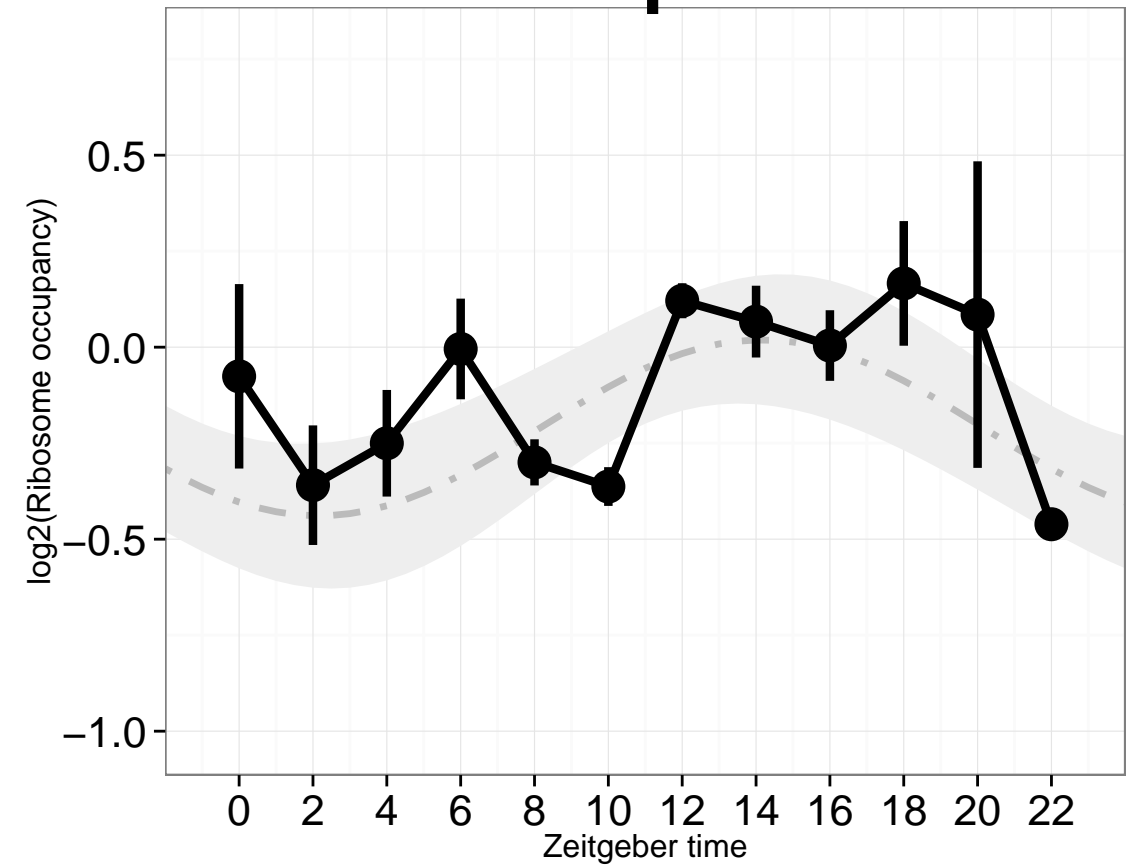

Supplement: SuppDataset_1.zip [file Tap2_set_A.pdf › Supplemental Dataset 1/A-mRNA_nonrhyth_translation_nonrhyth/Tap2_set_A.pdf]

## Tapbp

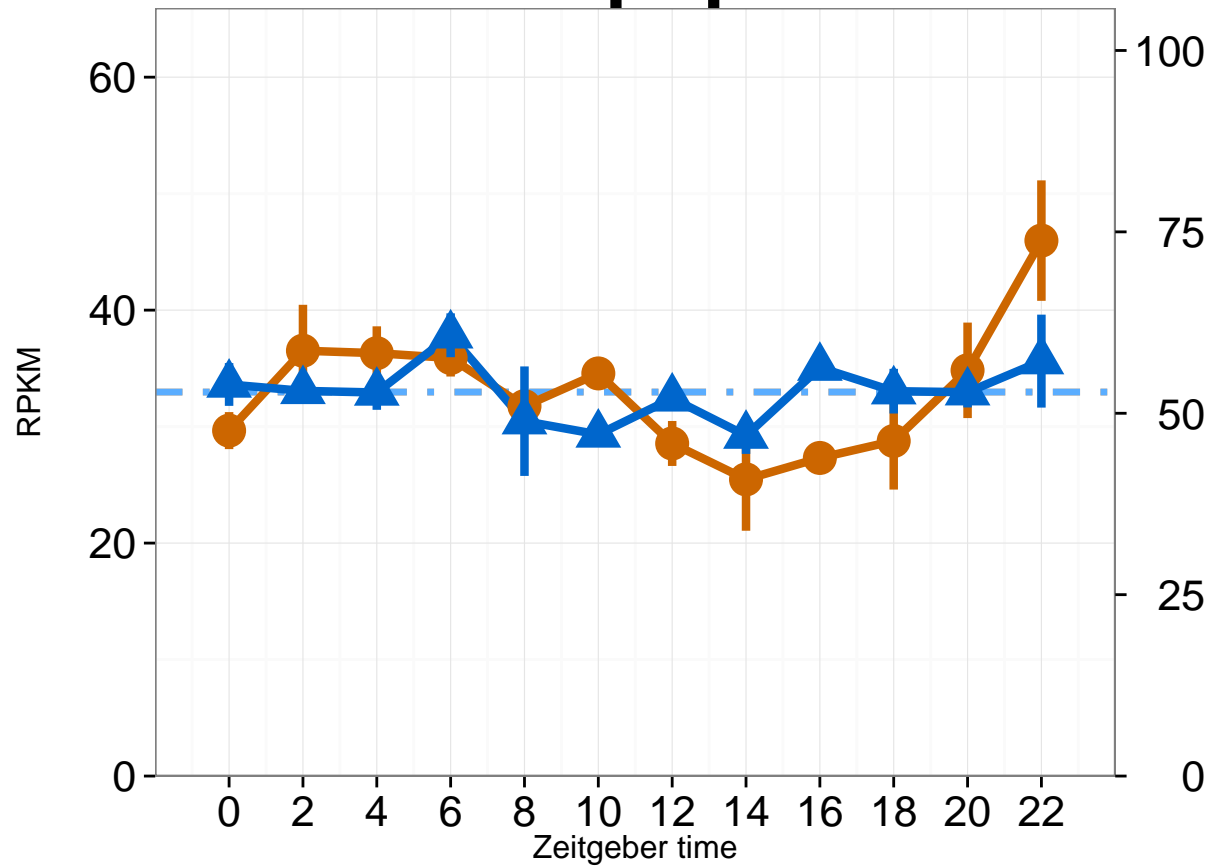

## Tapbp

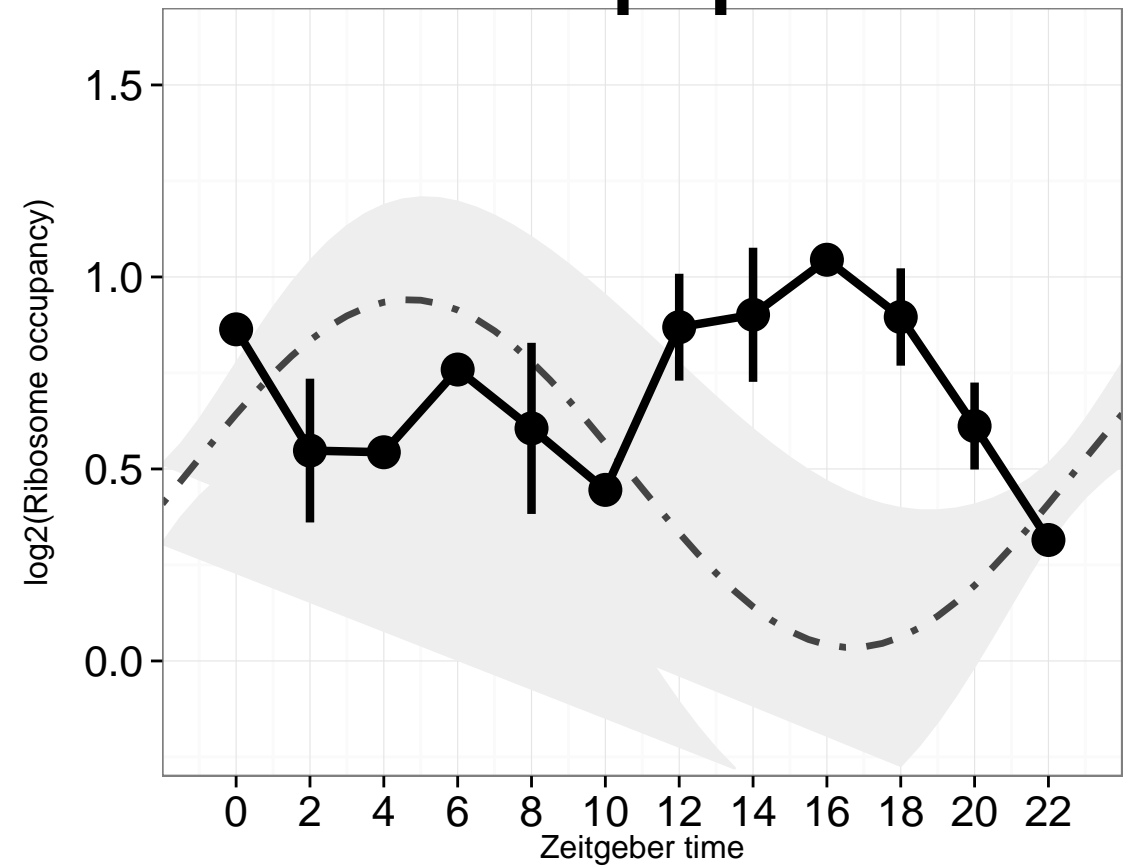

Supplement: SuppDataset_1.zip [file Tapbp_set_A.pdf › Supplemental Dataset 1/A-mRNA_nonrhyth_translation_nonrhyth/Tapbp_set_A.pdf]

## Tapbpl

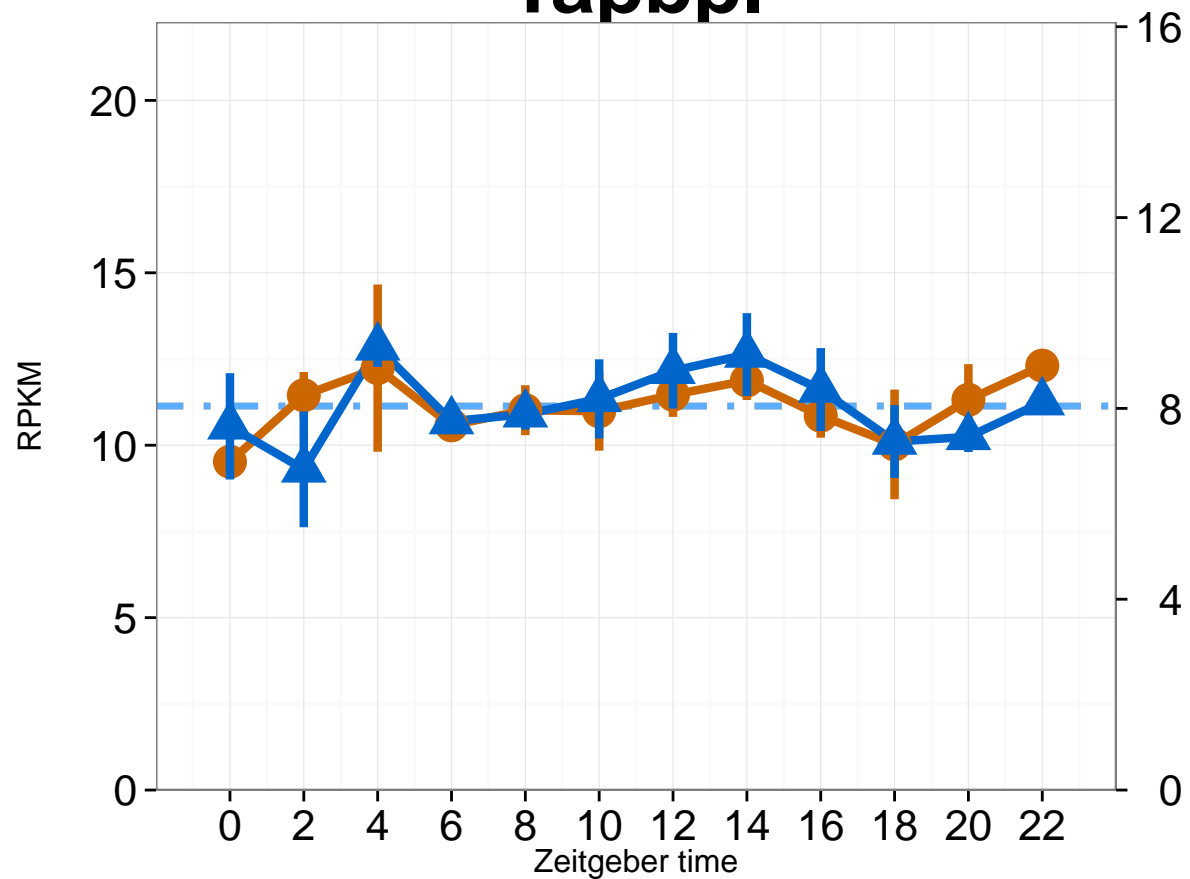

## Tapbpl

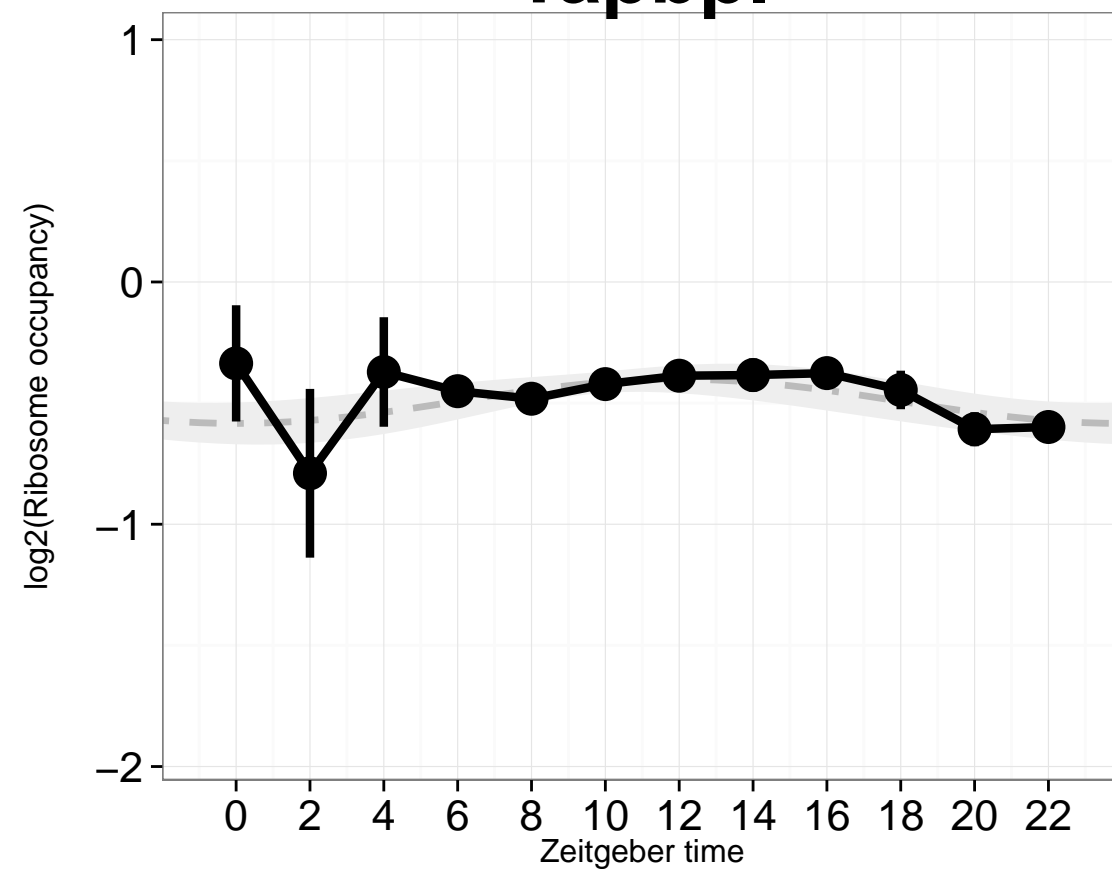

Supplement: SuppDataset_1.zip [file Tapbpl_set_A.pdf › Supplemental Dataset 1/A-mRNA_nonrhyth_translation_nonrhyth/Tapbpl_set_A.pdf]

# Tapt1

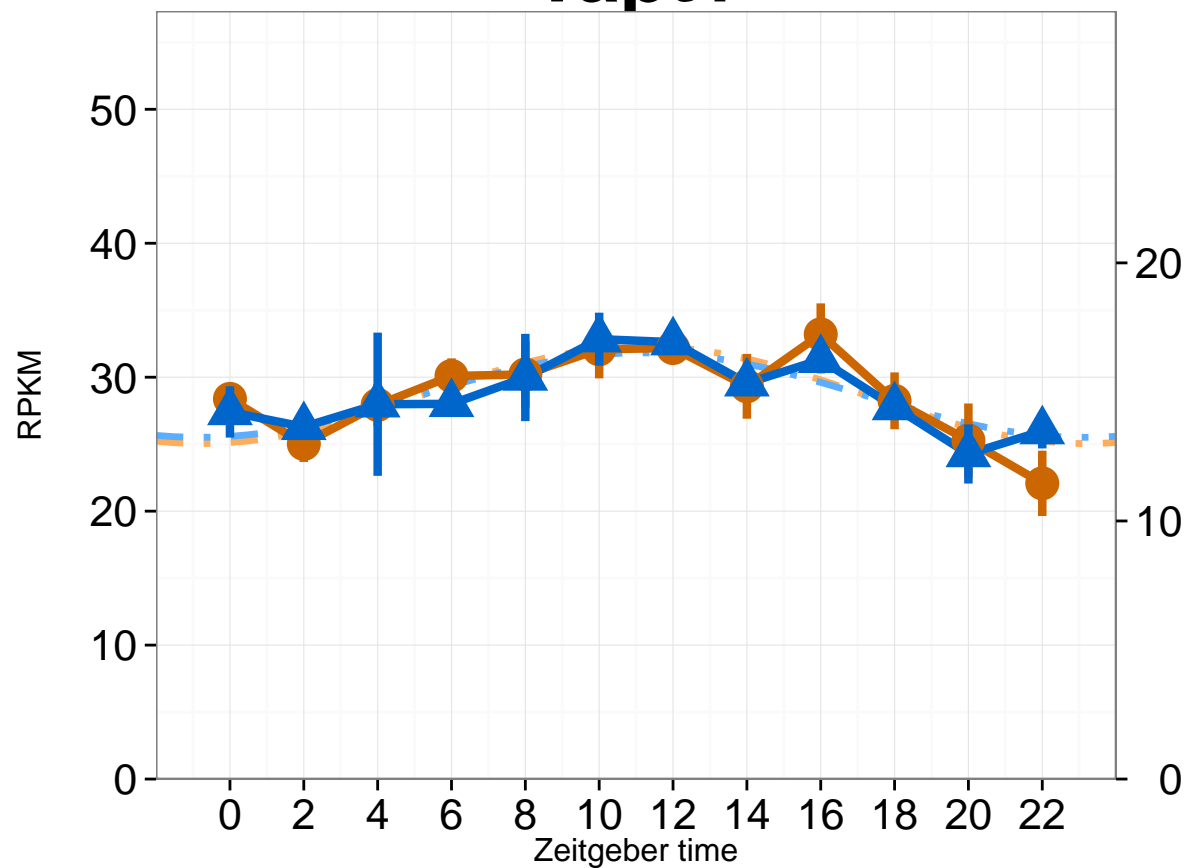

# Tapt1

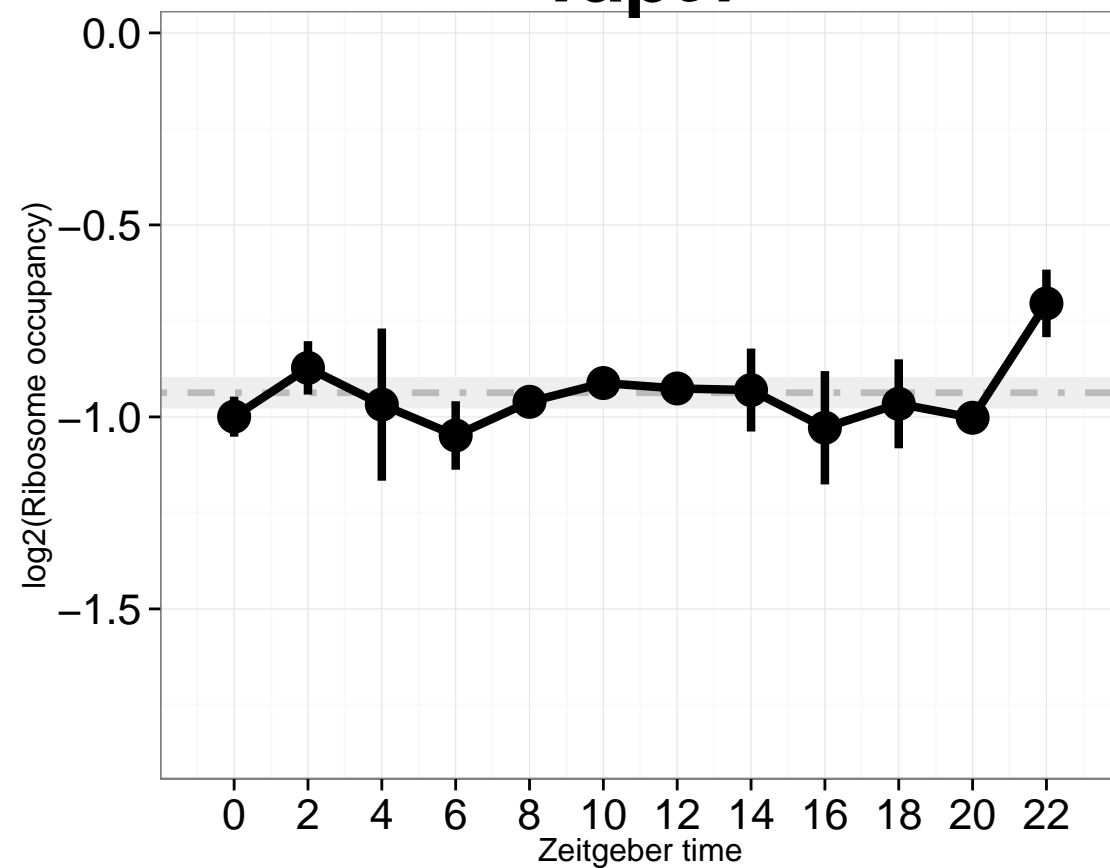

Supplement: SuppDataset_1.zip [file Tapt1_set_A.pdf › Supplemental Dataset 1/A-mRNA_nonrhyth_translation_nonrhyth/Tapt1_set_A.pdf]

## Tarbp2

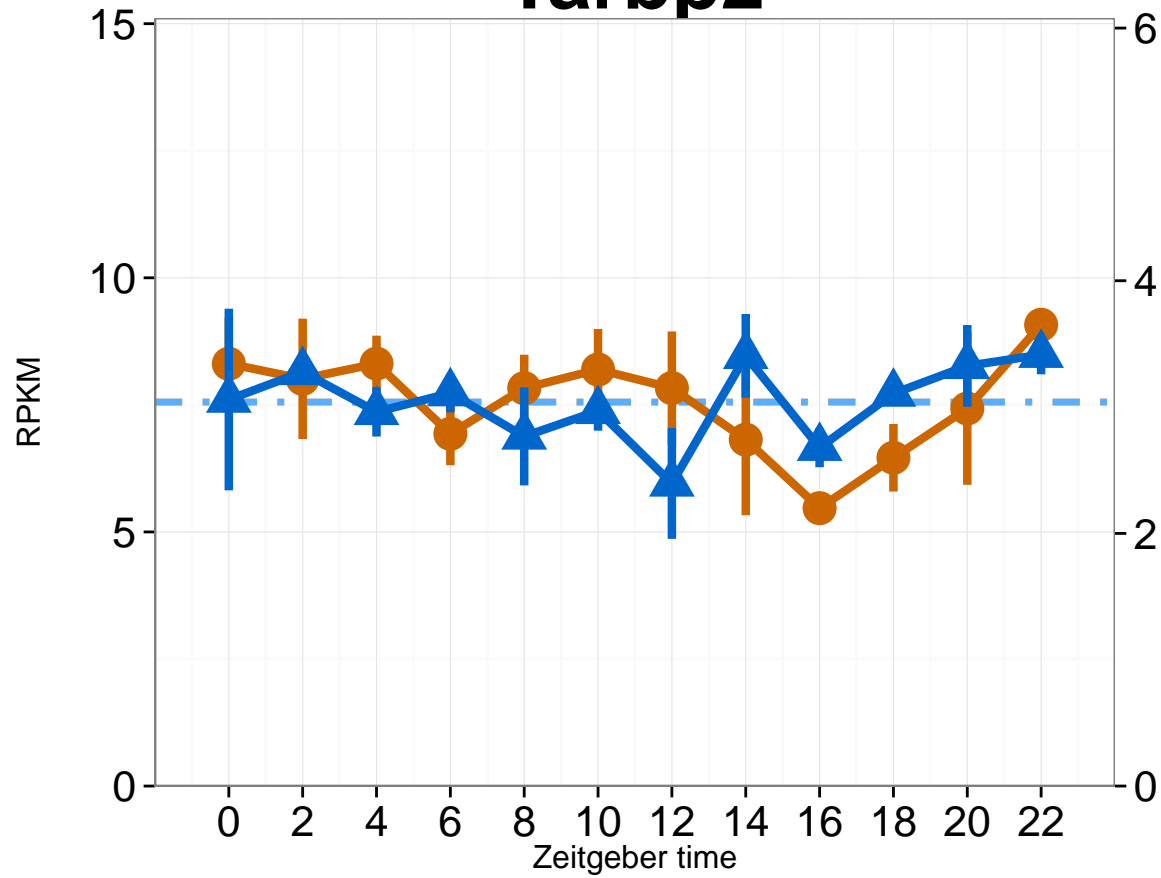

## Tarbp2

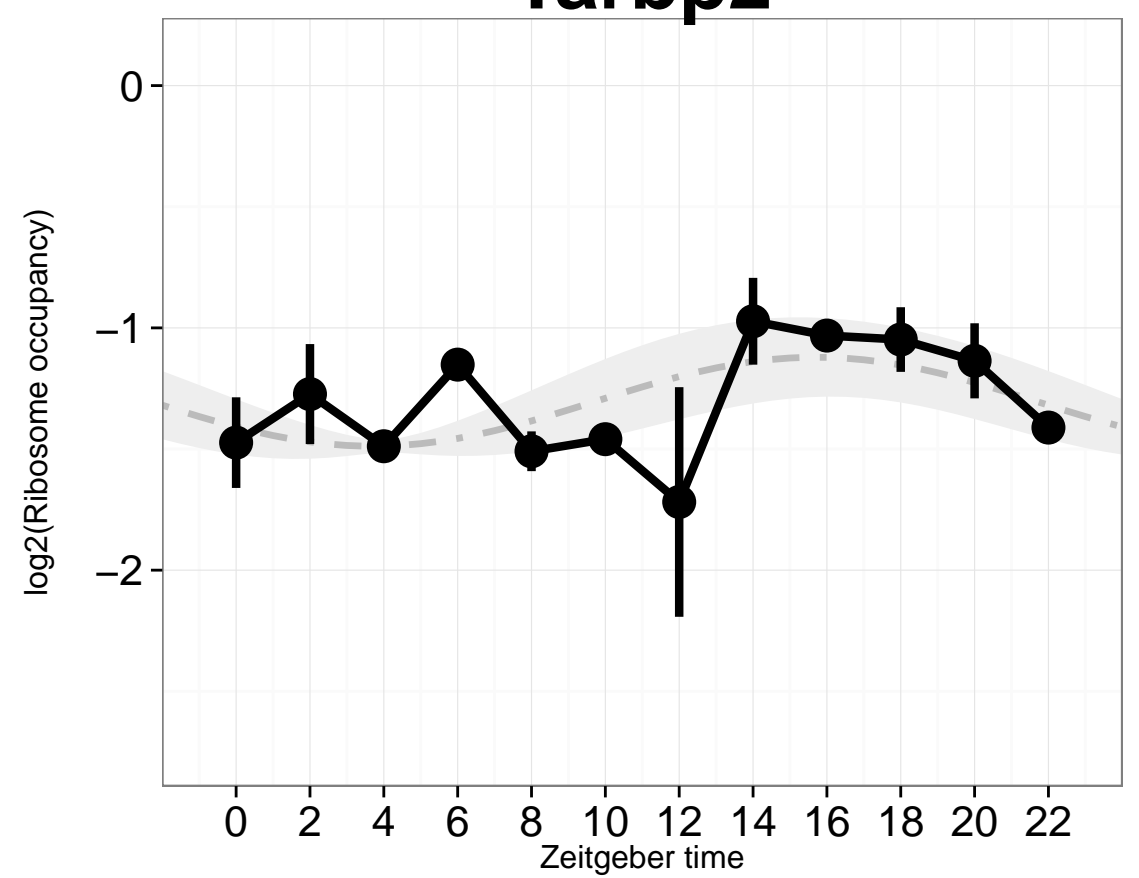

Supplement: SuppDataset_1.zip [file Tarbp2_set_A.pdf › Supplemental Dataset 1/A-mRNA_nonrhyth_translation_nonrhyth/Tarbp2_set_A.pdf]

## Tars2

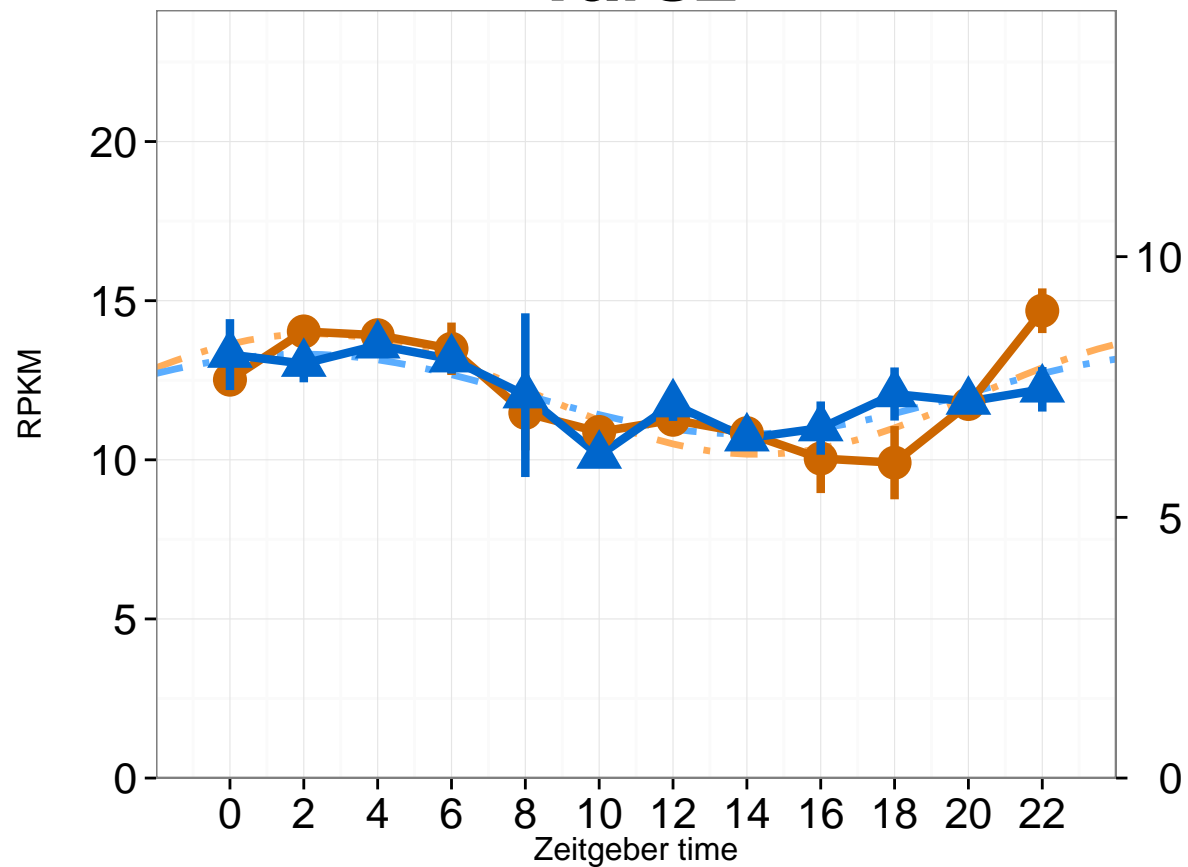

## Tars2

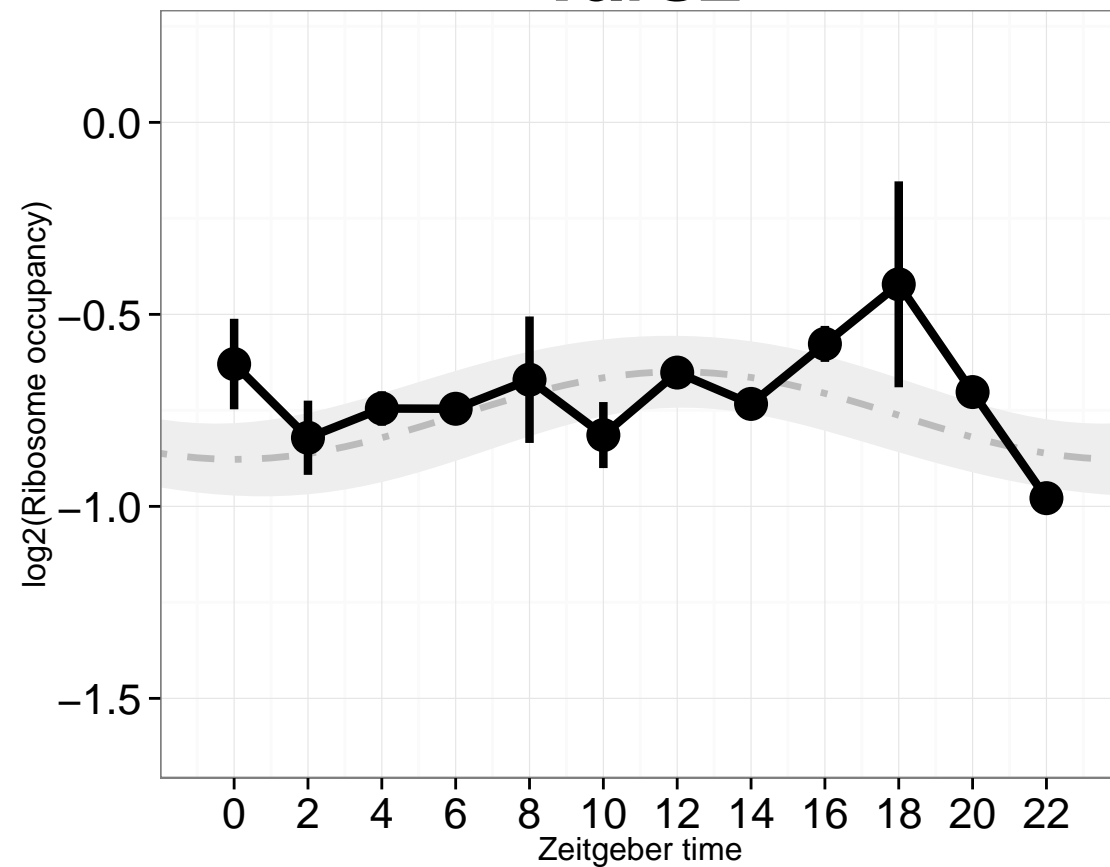

Supplement: SuppDataset_1.zip [file Tars2_set_A.pdf › Supplemental Dataset 1/A-mRNA_nonrhyth_translation_nonrhyth/Tars2_set_A.pdf]

## Tarsl2

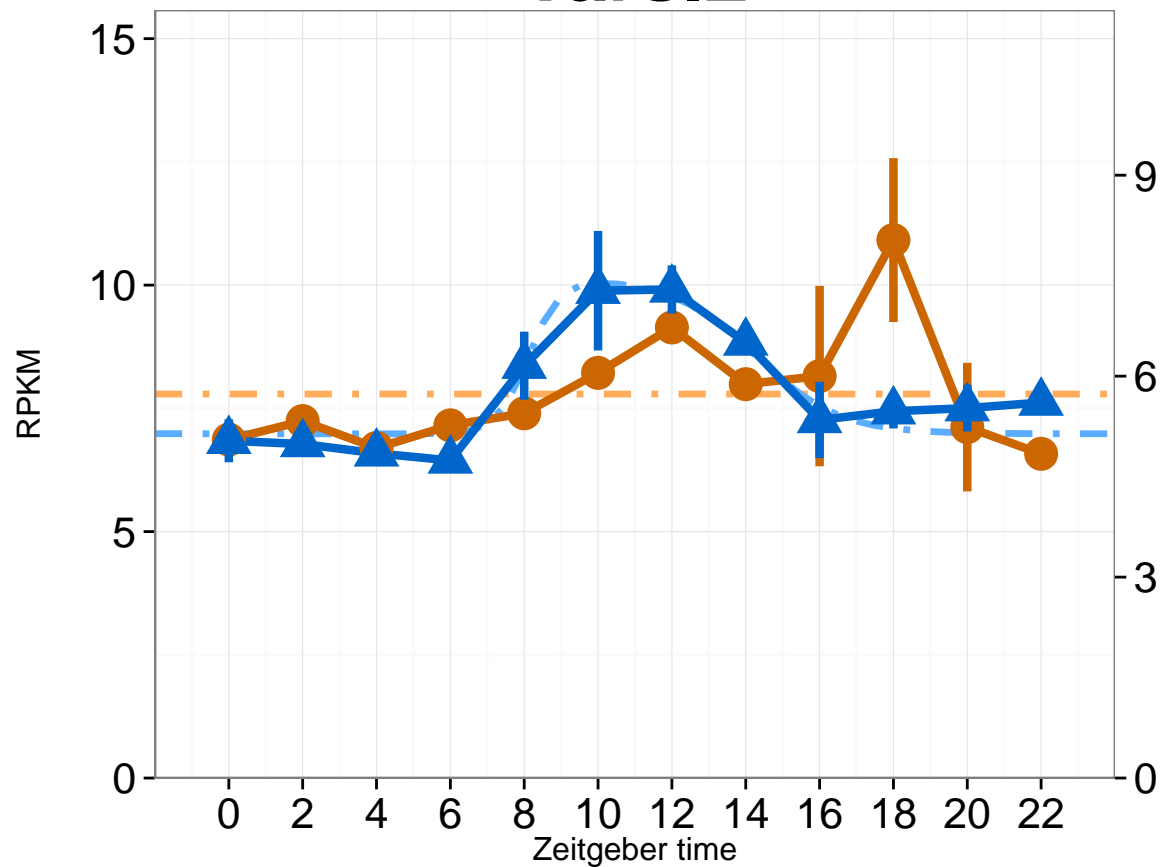

## Tarsl2

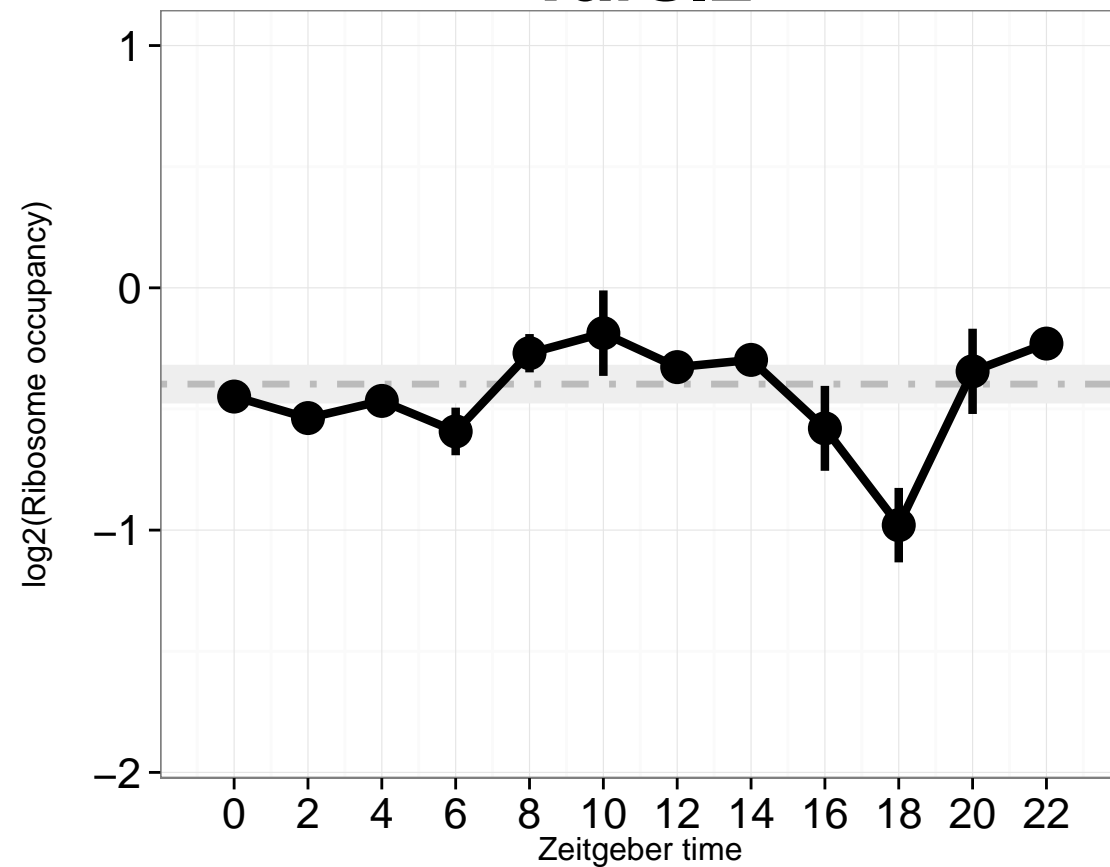

Supplement: SuppDataset_1.zip [file Tarsl2_set_A.pdf › Supplemental Dataset 1/A-mRNA_nonrhyth_translation_nonrhyth/Tarsl2_set_A.pdf]

# Tasp1

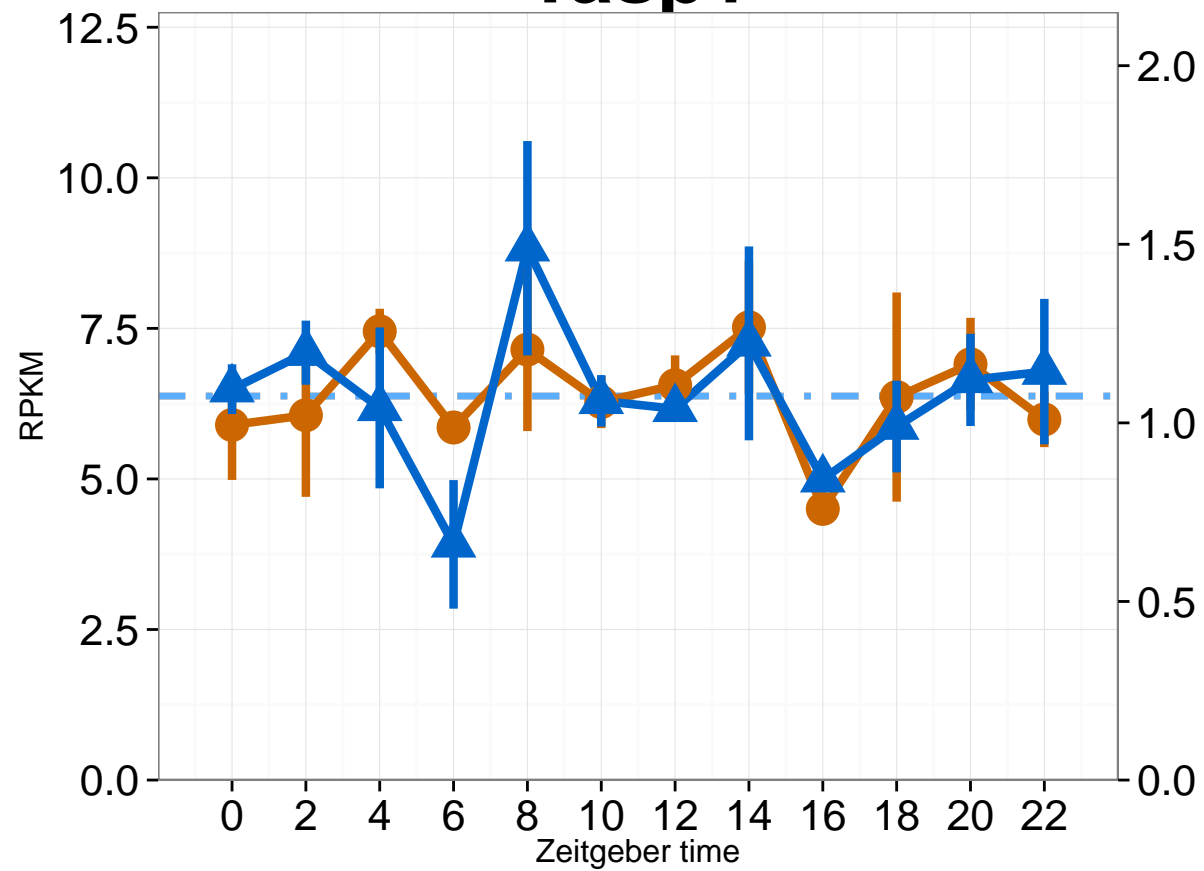

# Tasp1

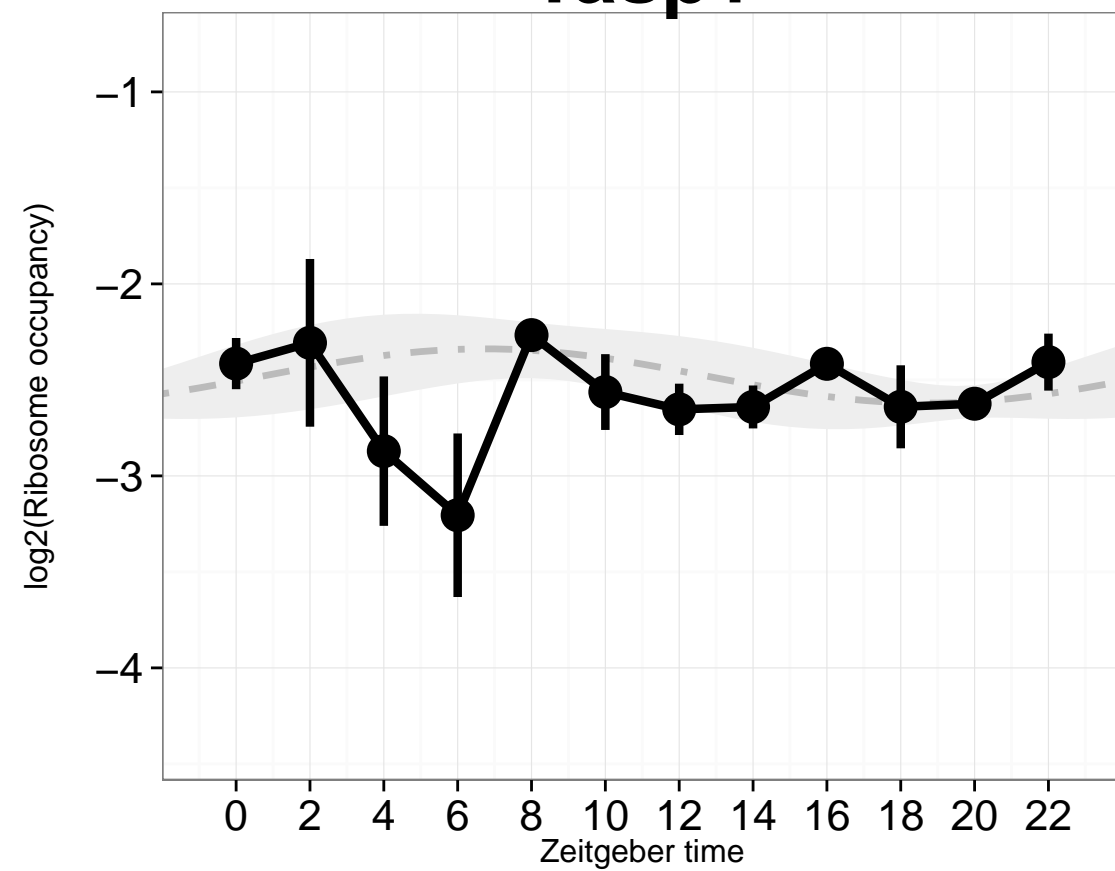

Supplement: SuppDataset_1.zip [file Tasp1_set_A.pdf › Supplemental Dataset 1/A-mRNA_nonrhyth_translation_nonrhyth/Tasp1_set_A.pdf]

# Tatdn1

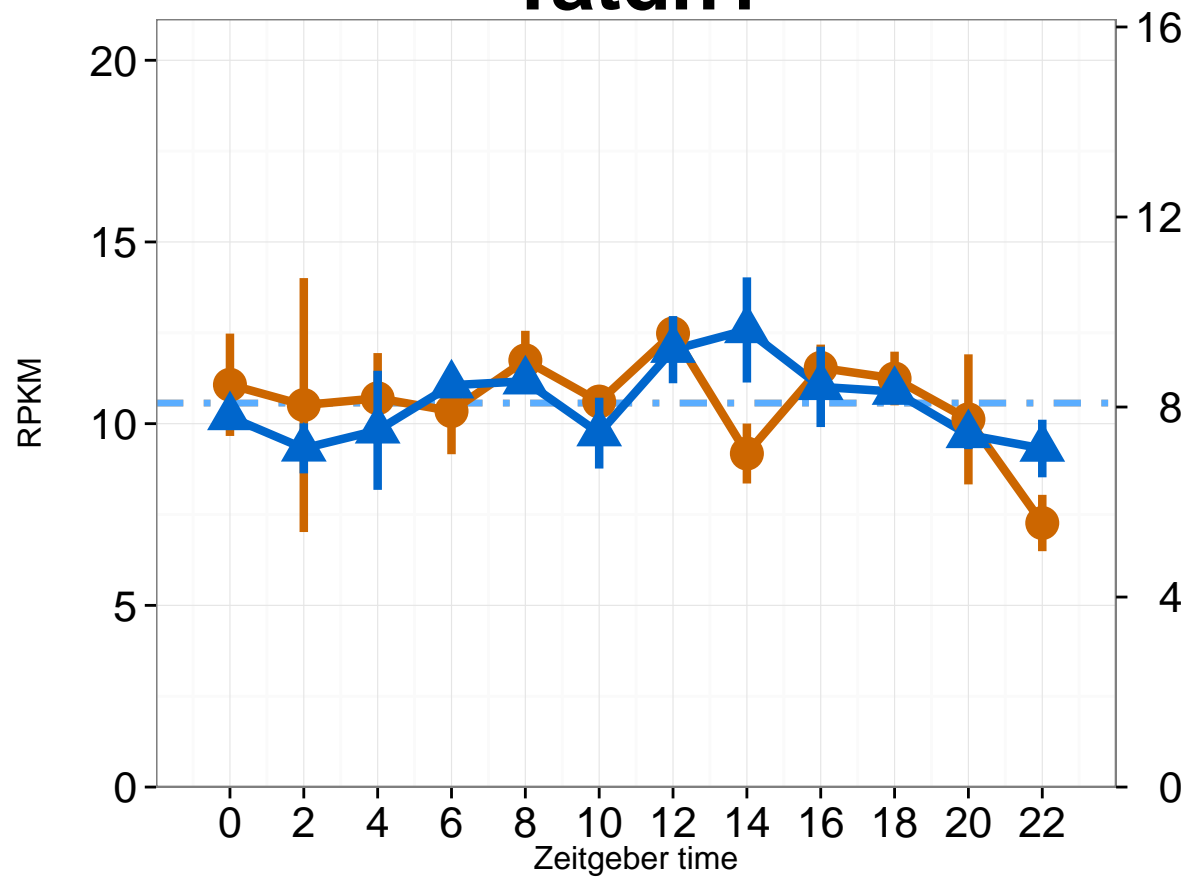

# Tatdn1

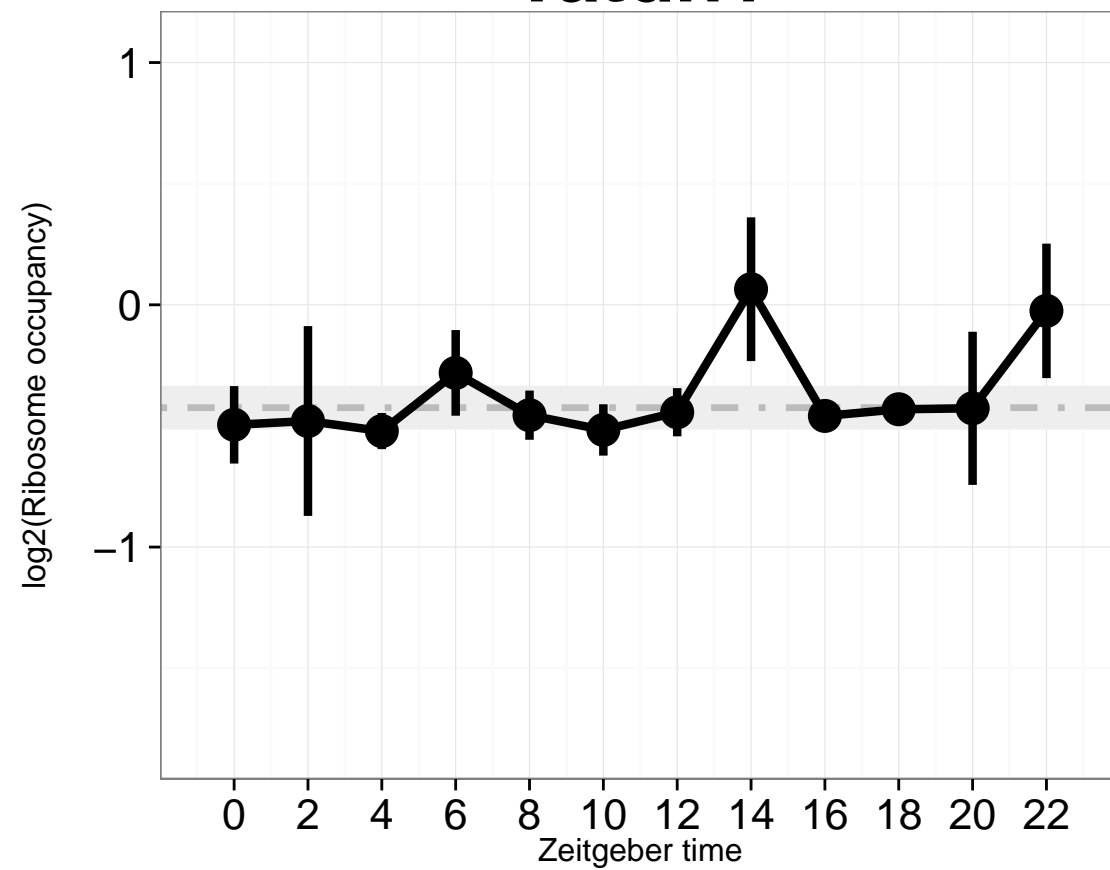

Supplement: SuppDataset_1.zip [file Tatdn1_set_A.pdf › Supplemental Dataset 1/A-mRNA_nonrhyth_translation_nonrhyth/Tatdn1_set_A.pdf]

# Tatdn2

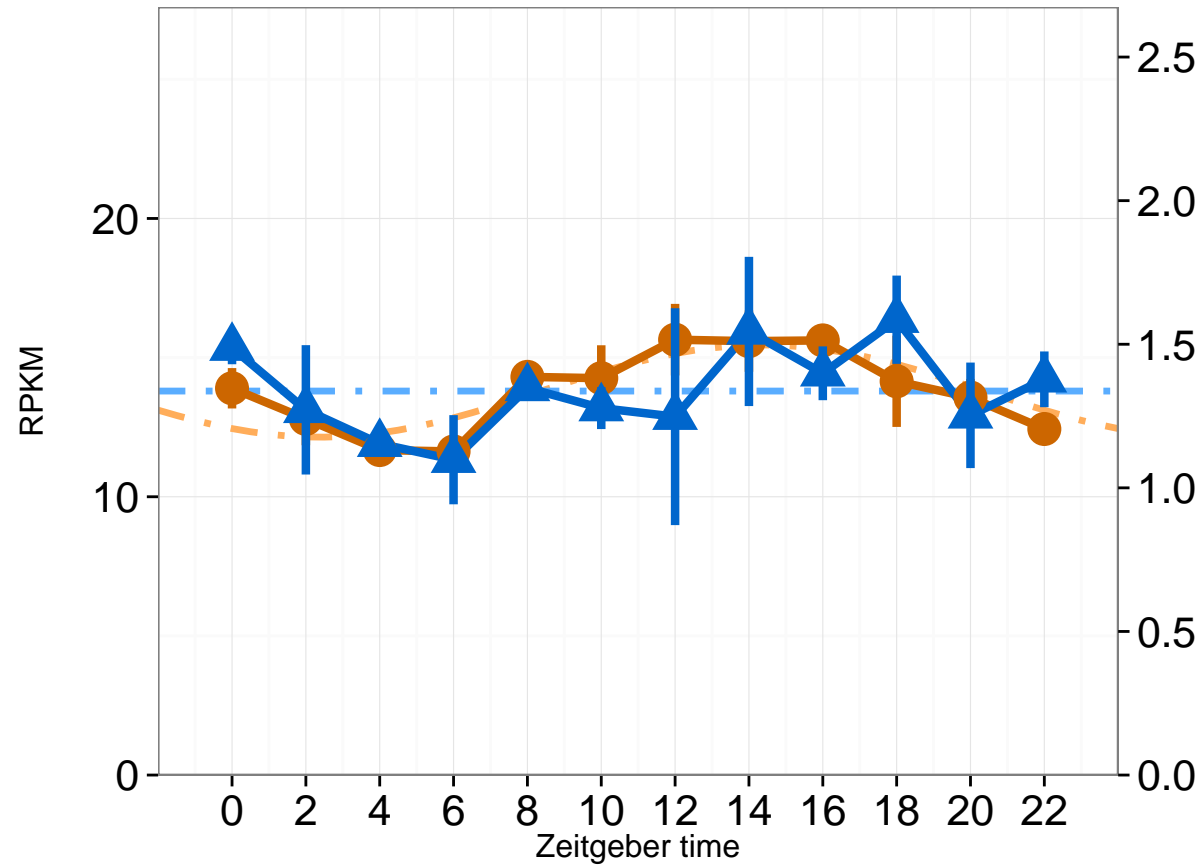

# Tatdn2

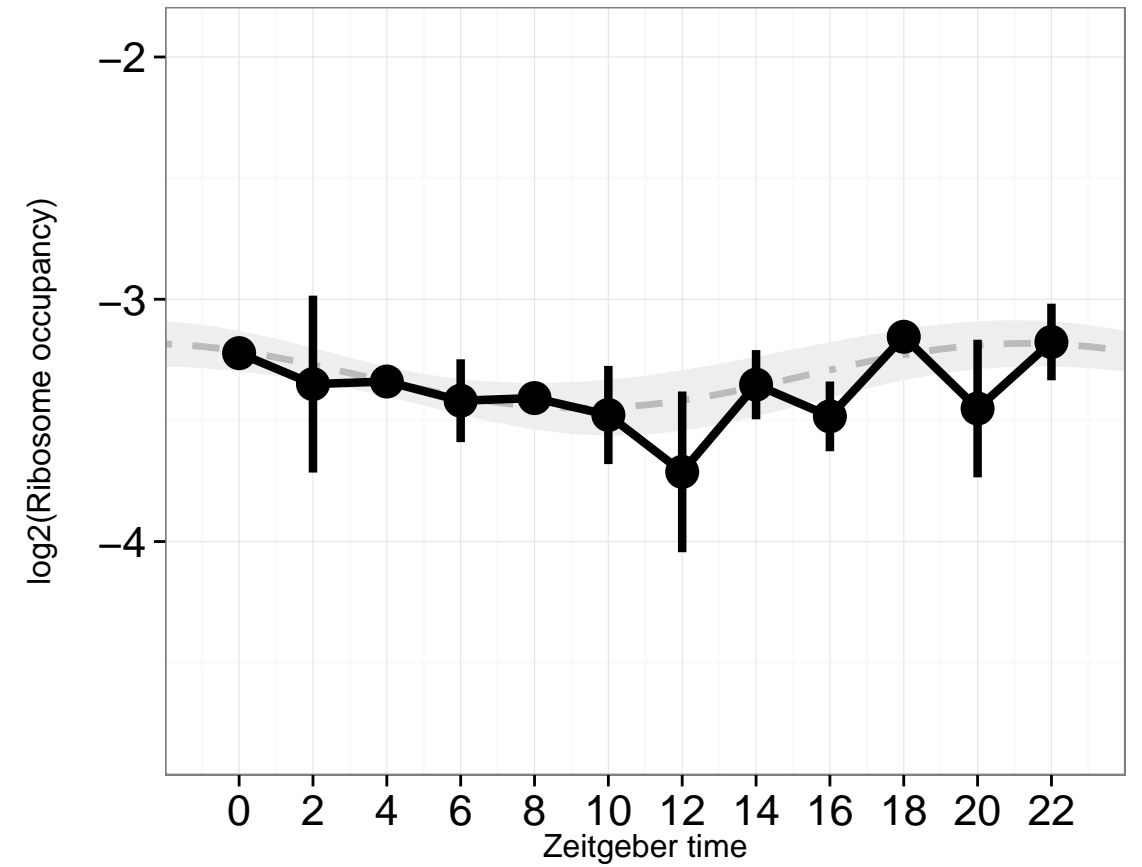

Supplement: SuppDataset_1.zip [file Tatdn2_set_A.pdf › Supplemental Dataset 1/A-mRNA_nonrhyth_translation_nonrhyth/Tatdn2_set_A.pdf]

# Tax1bp1

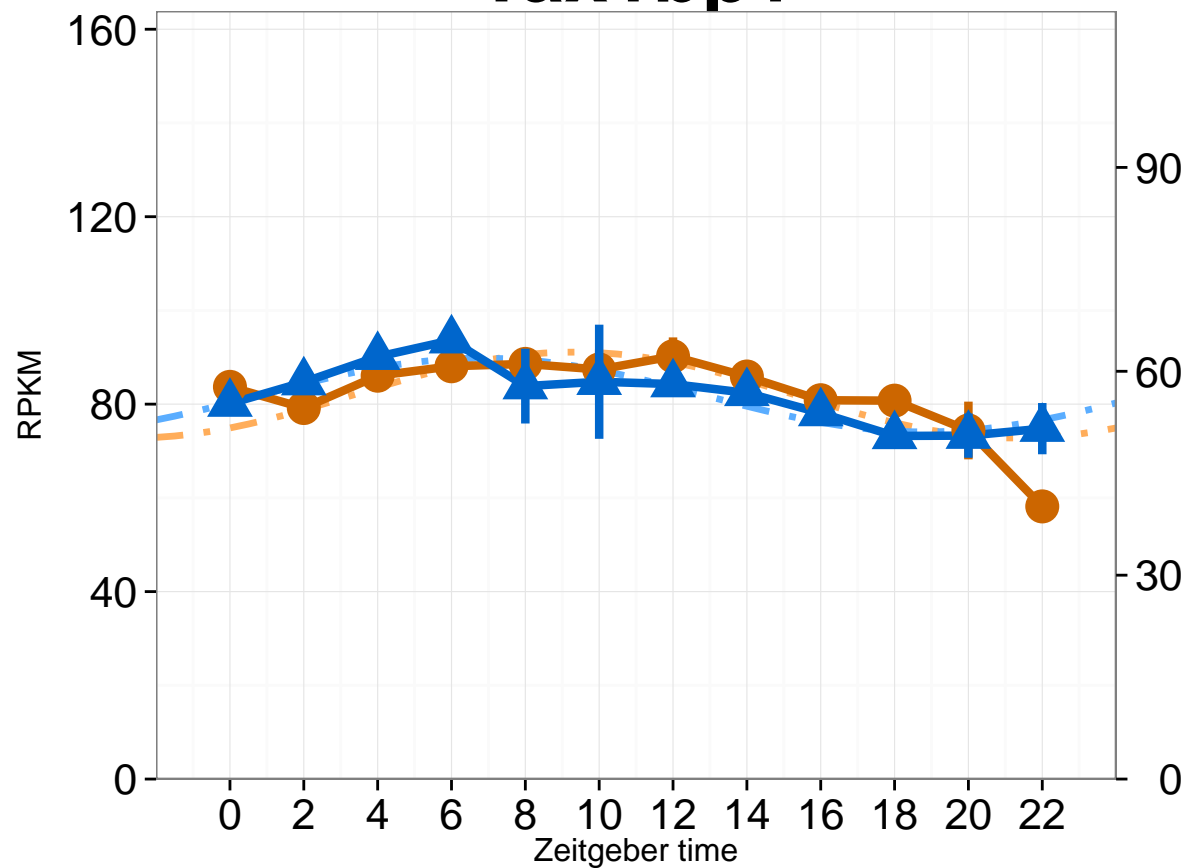

# Tax1bp1

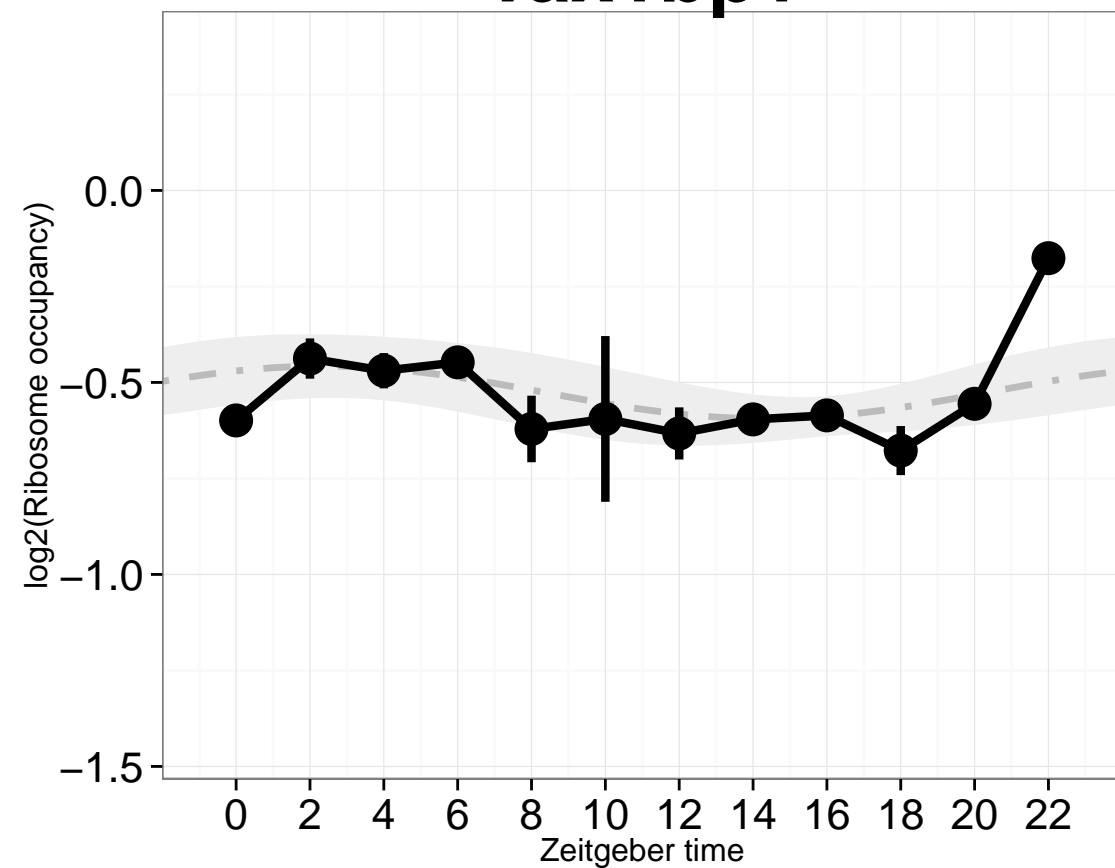

Supplement: SuppDataset_1.zip [file Tax1bp1_set_A.pdf › Supplemental Dataset 1/A-mRNA_nonrhyth_translation_nonrhyth/Tax1bp1_set_A.pdf]

# Tax1bp3

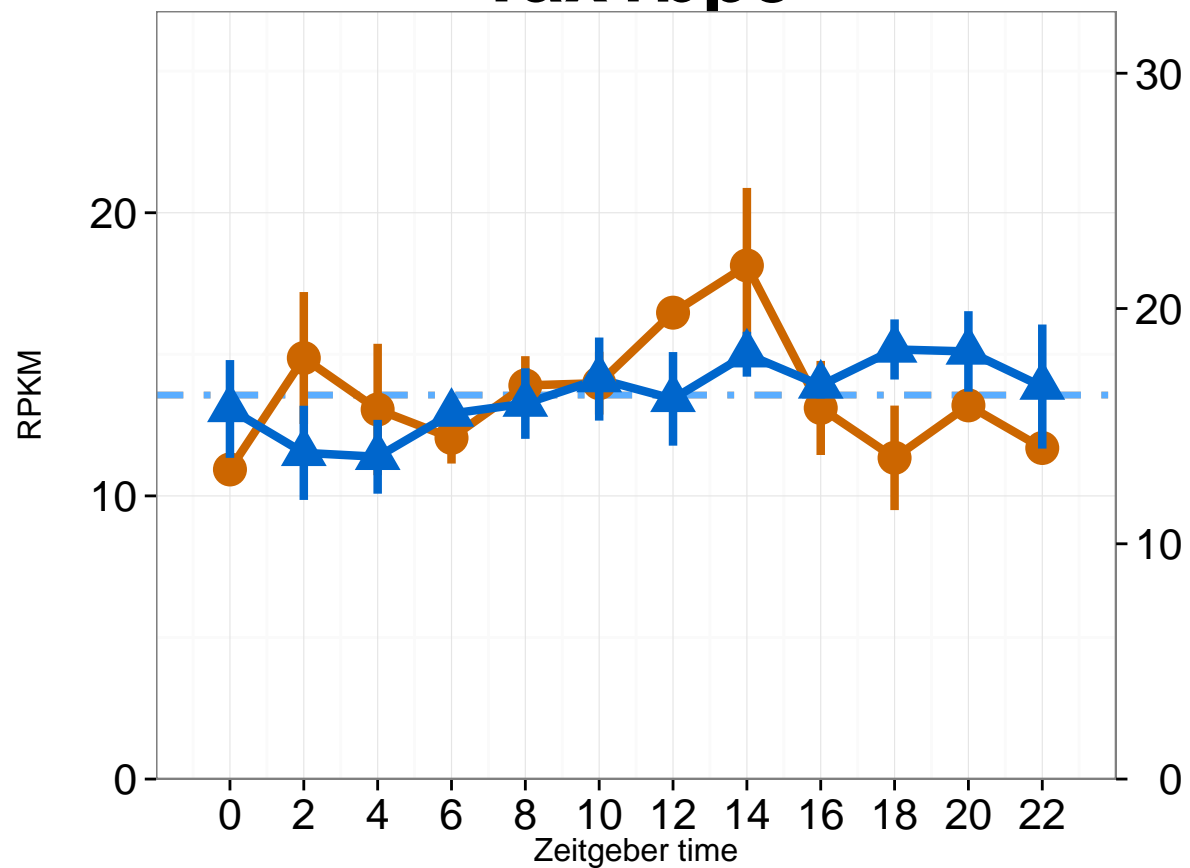

# Tax1bp3

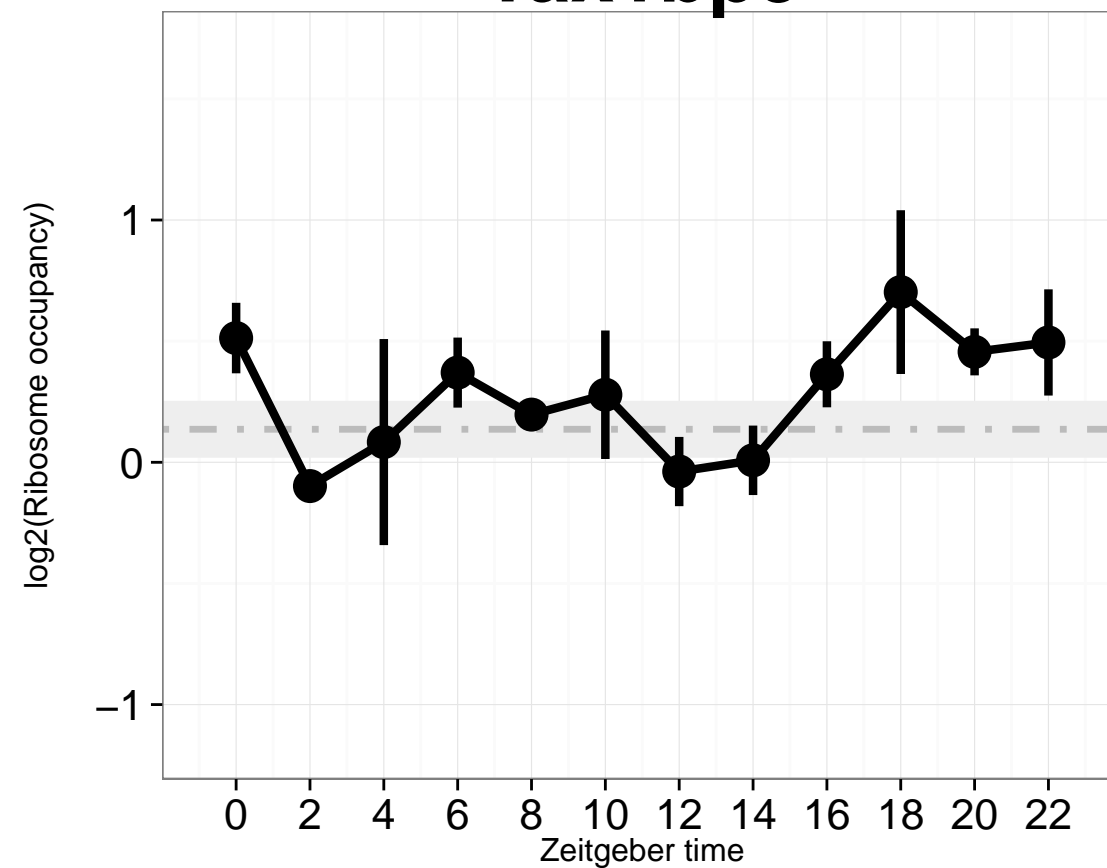

Supplement: SuppDataset_1.zip [file Tax1bp3_set_A.pdf › Supplemental Dataset 1/A-mRNA_nonrhyth_translation_nonrhyth/Tax1bp3_set_A.pdf]

## Taz

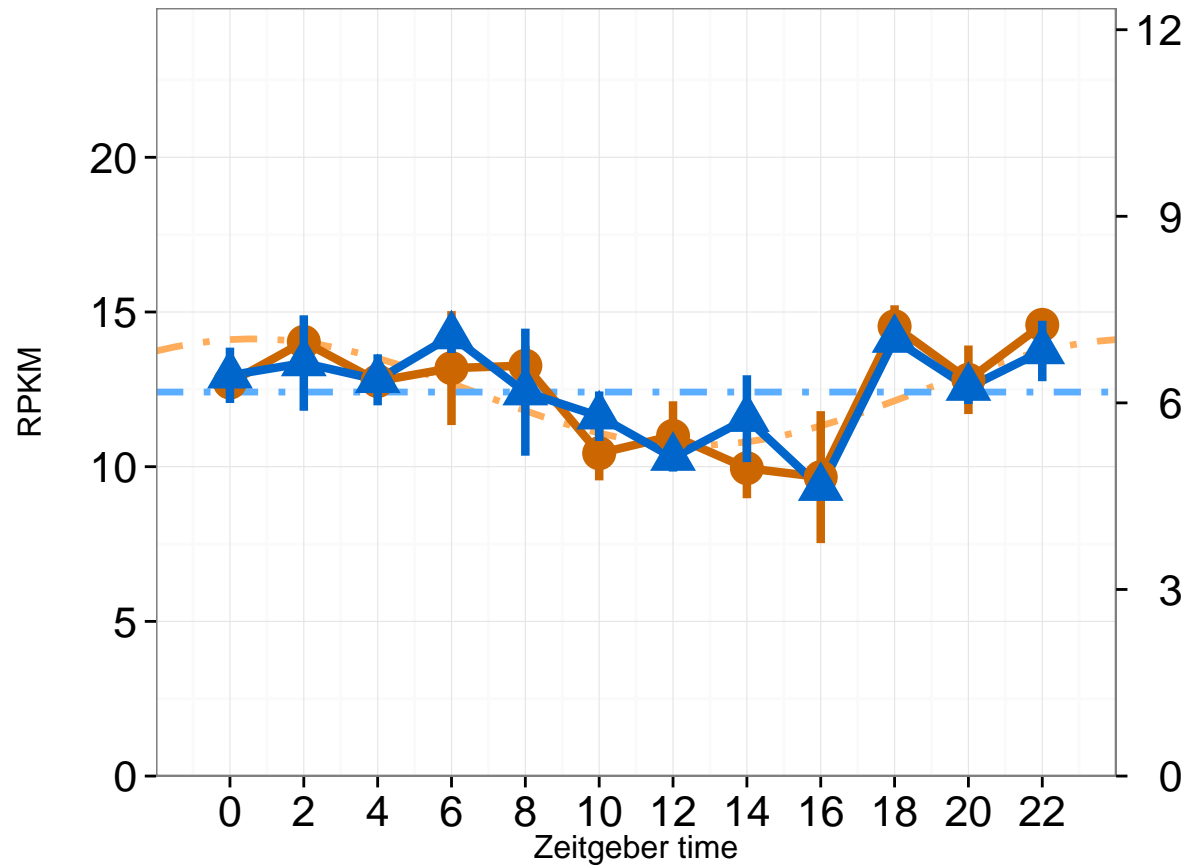

## Taz

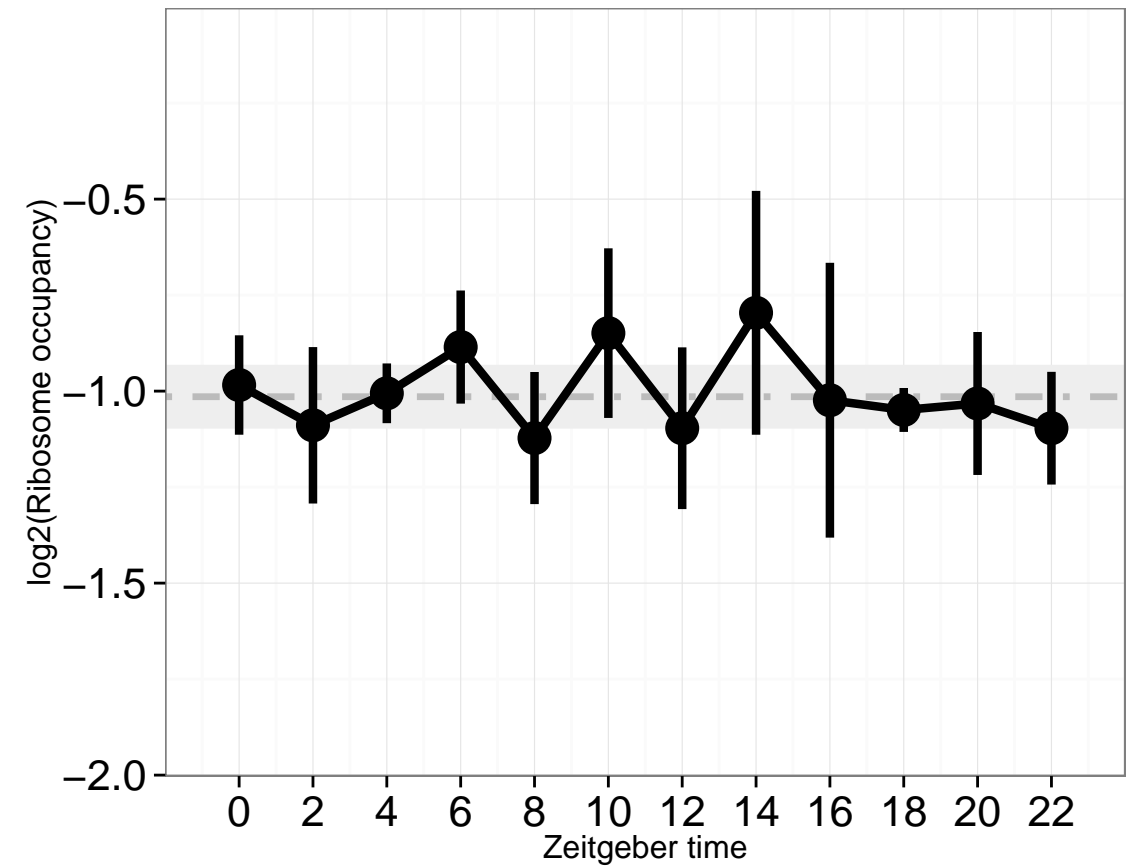

Supplement: SuppDataset_1.zip [file Taz_set_A.pdf › Supplemental Dataset 1/A-mRNA_nonrhyth_translation_nonrhyth/Taz_set_A.pdf]

# Tbc1d10b

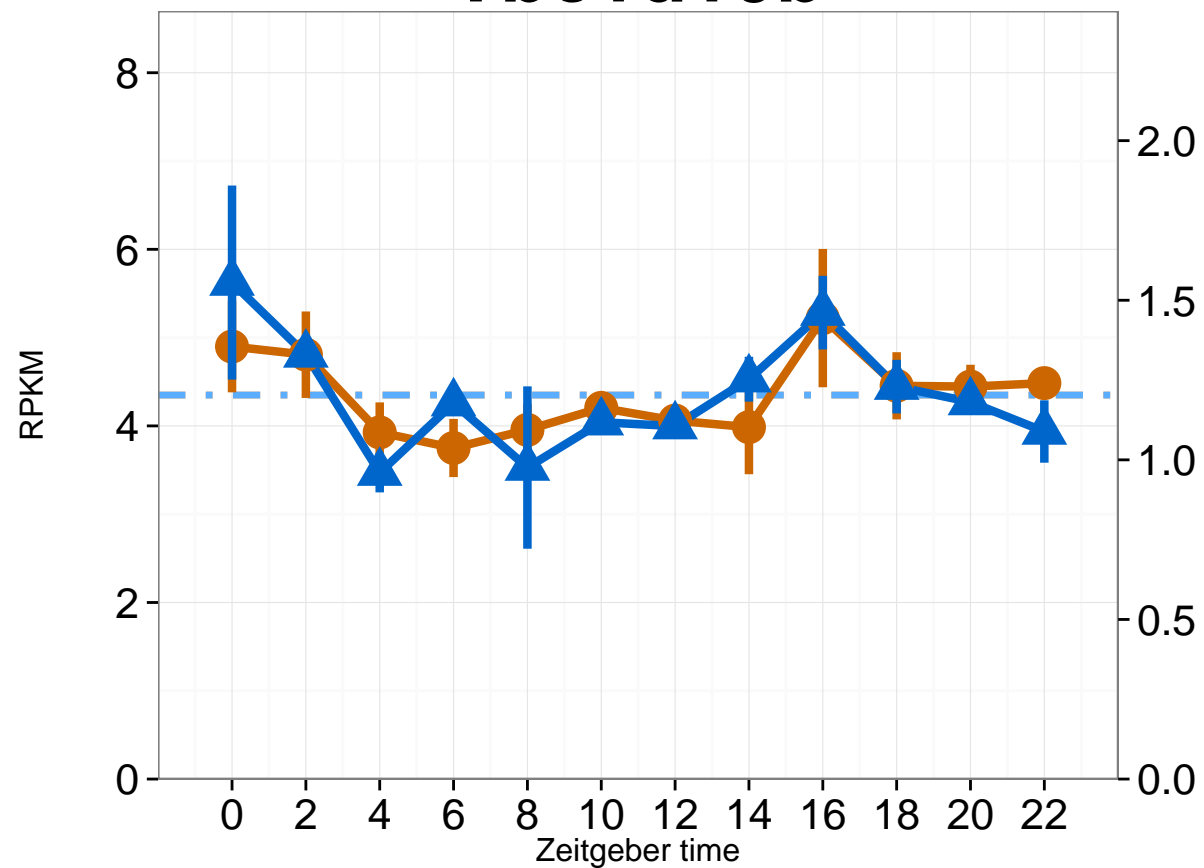

# Tbc1d10b

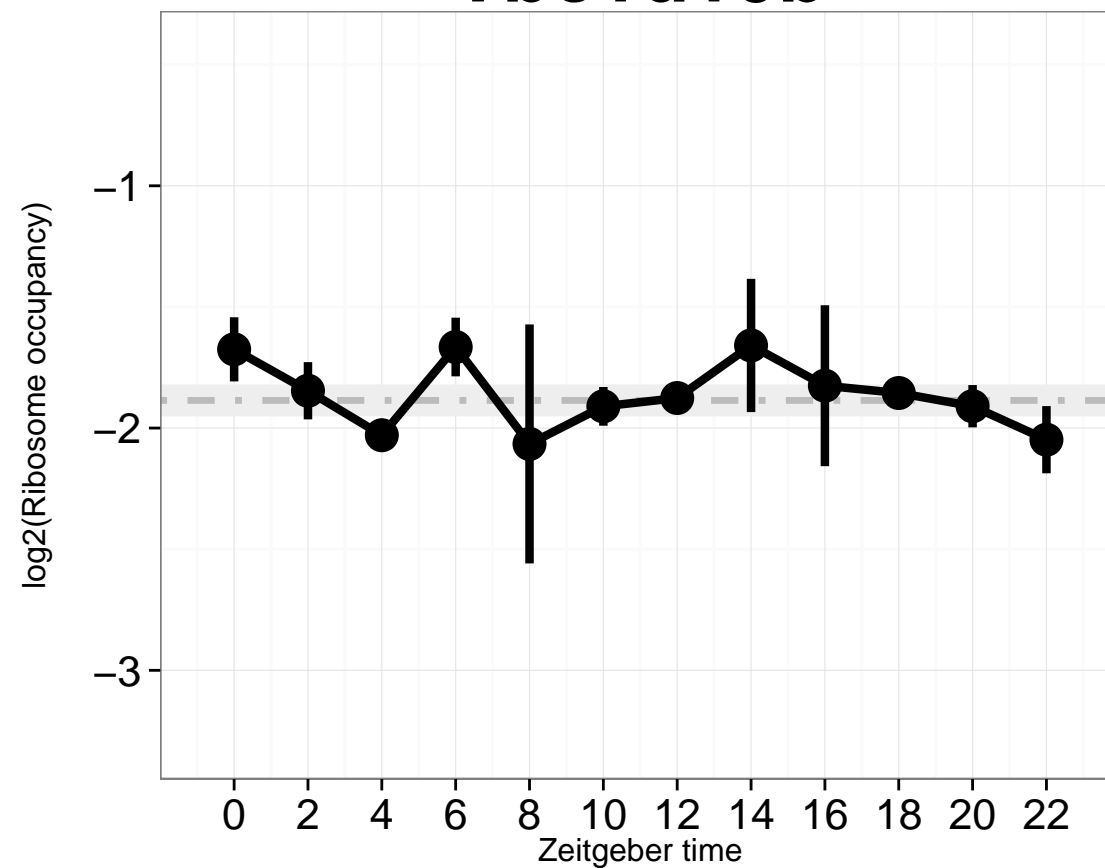

Supplement: SuppDataset_1.zip [file Tbc1d10b_set_A.pdf › Supplemental Dataset 1/A-mRNA_nonrhyth_translation_nonrhyth/Tbc1d10b_set_A.pdf]

# Tbc1d12

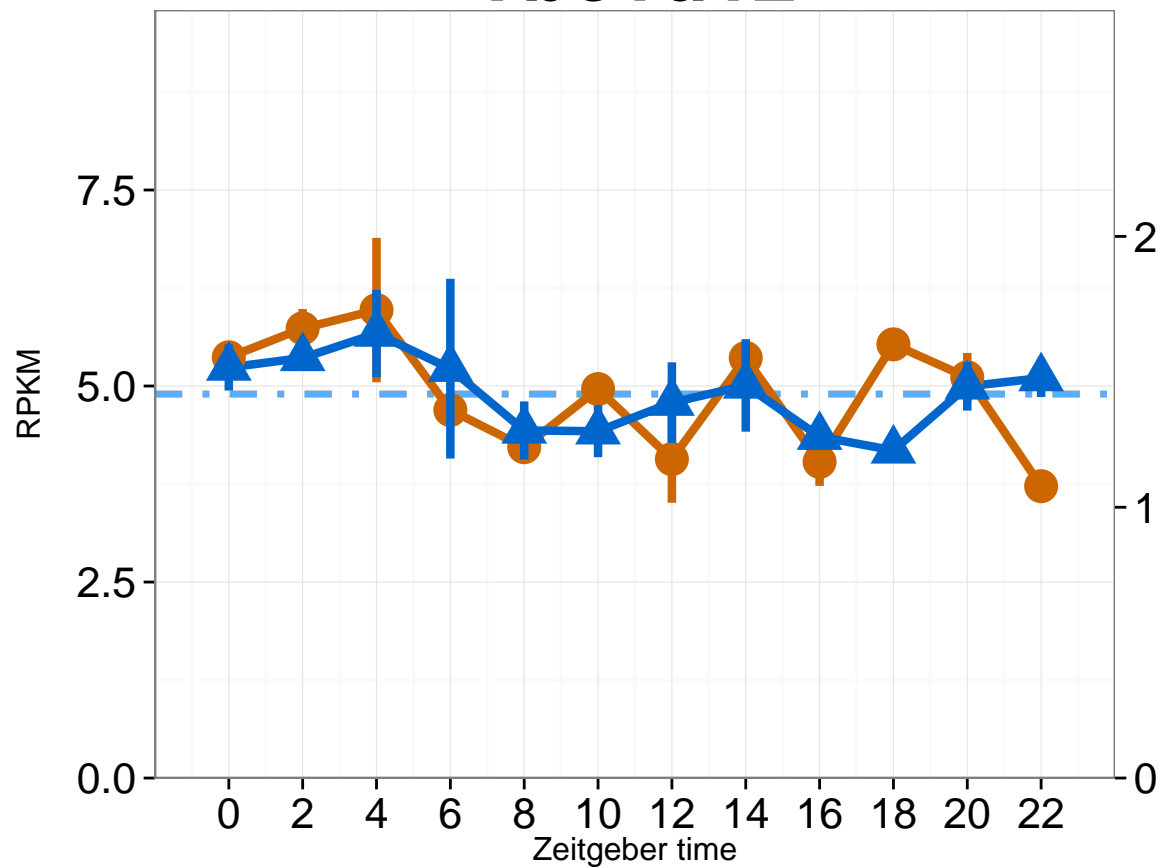

# Tbc1d12

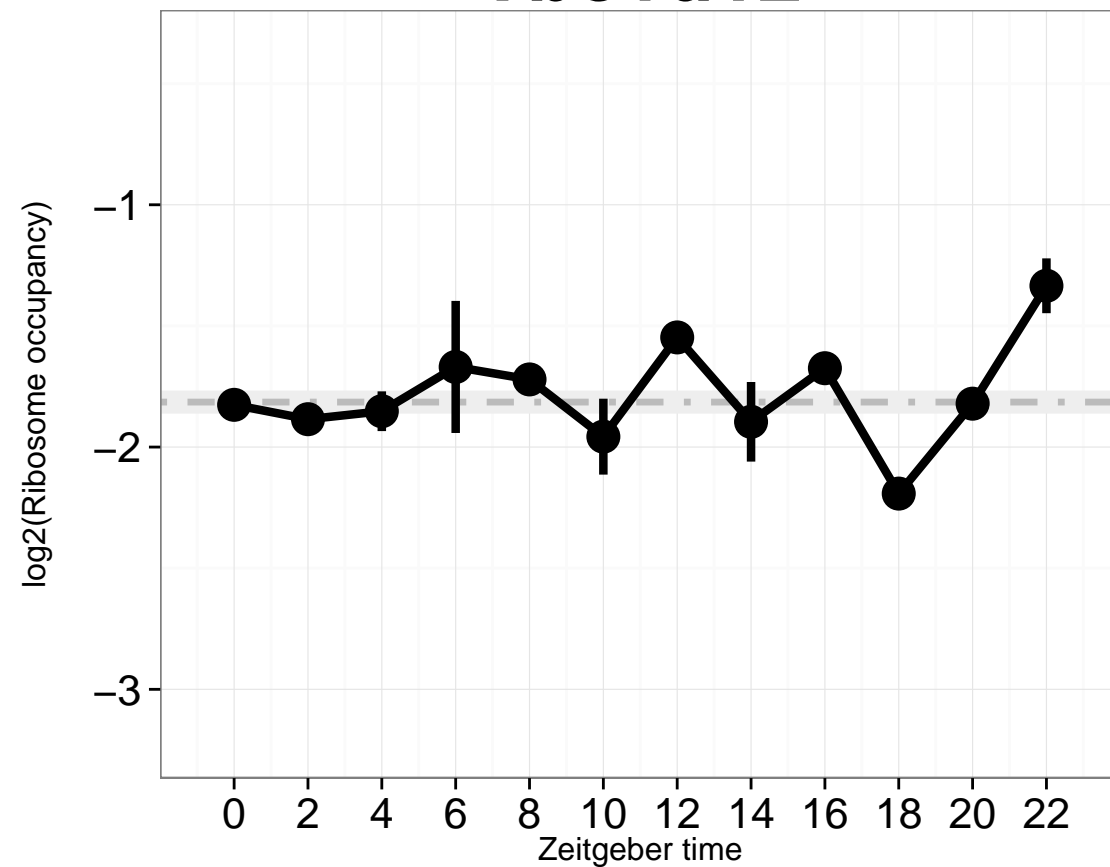

Supplement: SuppDataset_1.zip [file Tbc1d12_set_A.pdf › Supplemental Dataset 1/A-mRNA_nonrhyth_translation_nonrhyth/Tbc1d12_set_A.pdf]

# Tbc1d13

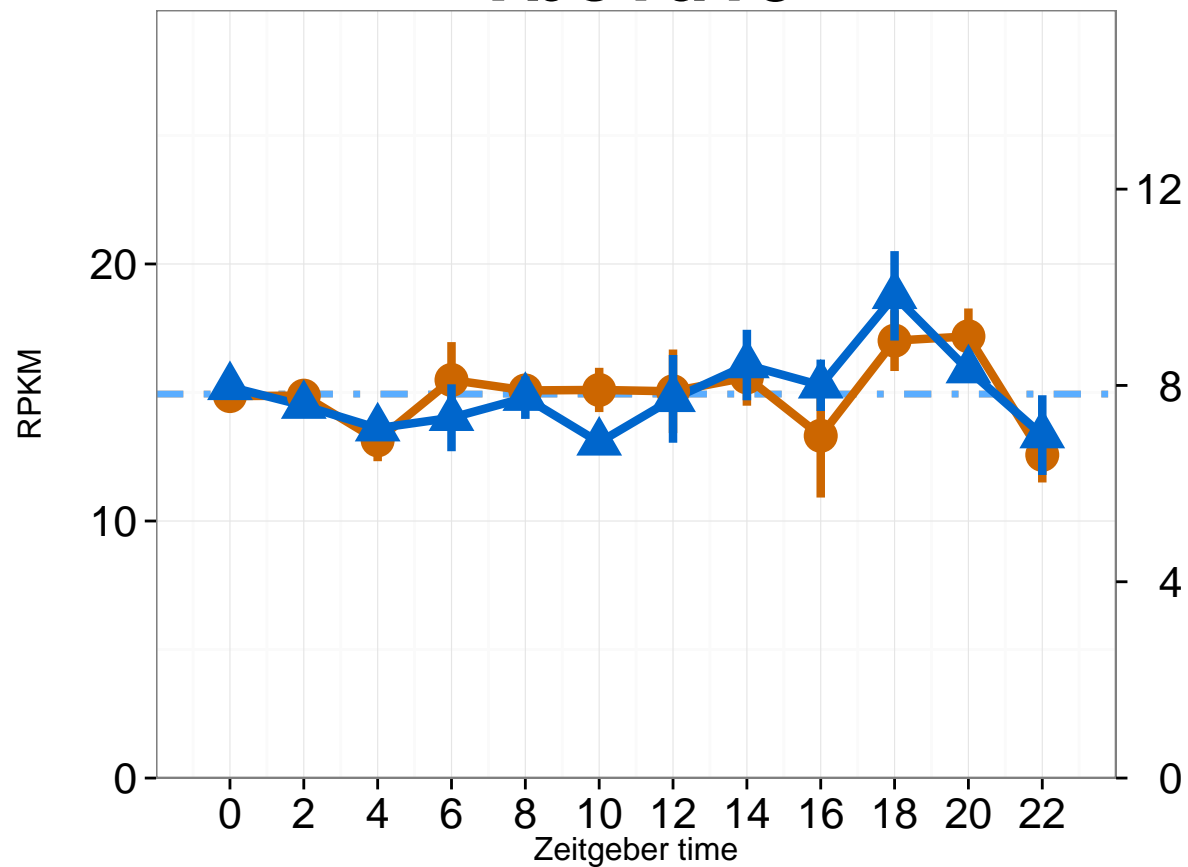

# Tbc1d13

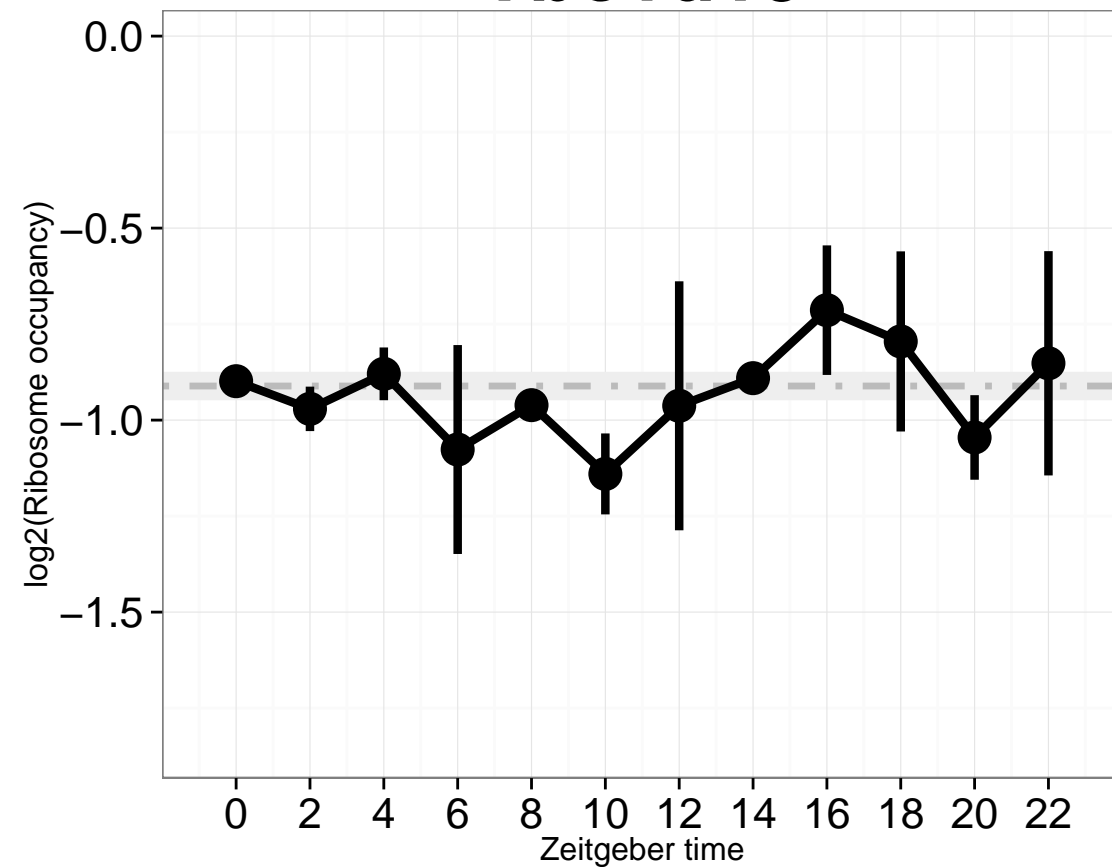

Supplement: SuppDataset_1.zip [file Tbc1d13_set_A.pdf › Supplemental Dataset 1/A-mRNA_nonrhyth_translation_nonrhyth/Tbc1d13_set_A.pdf]

# Tbc1d14

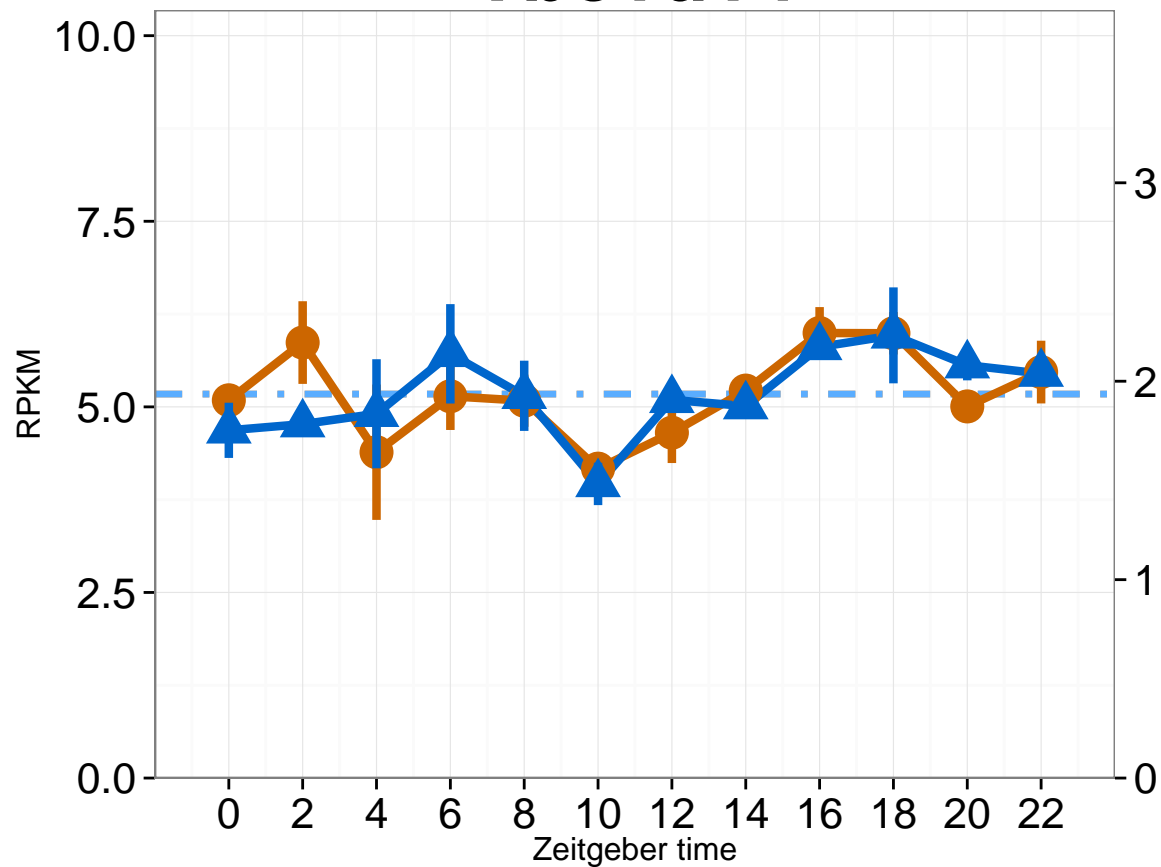

# Tbc1d14

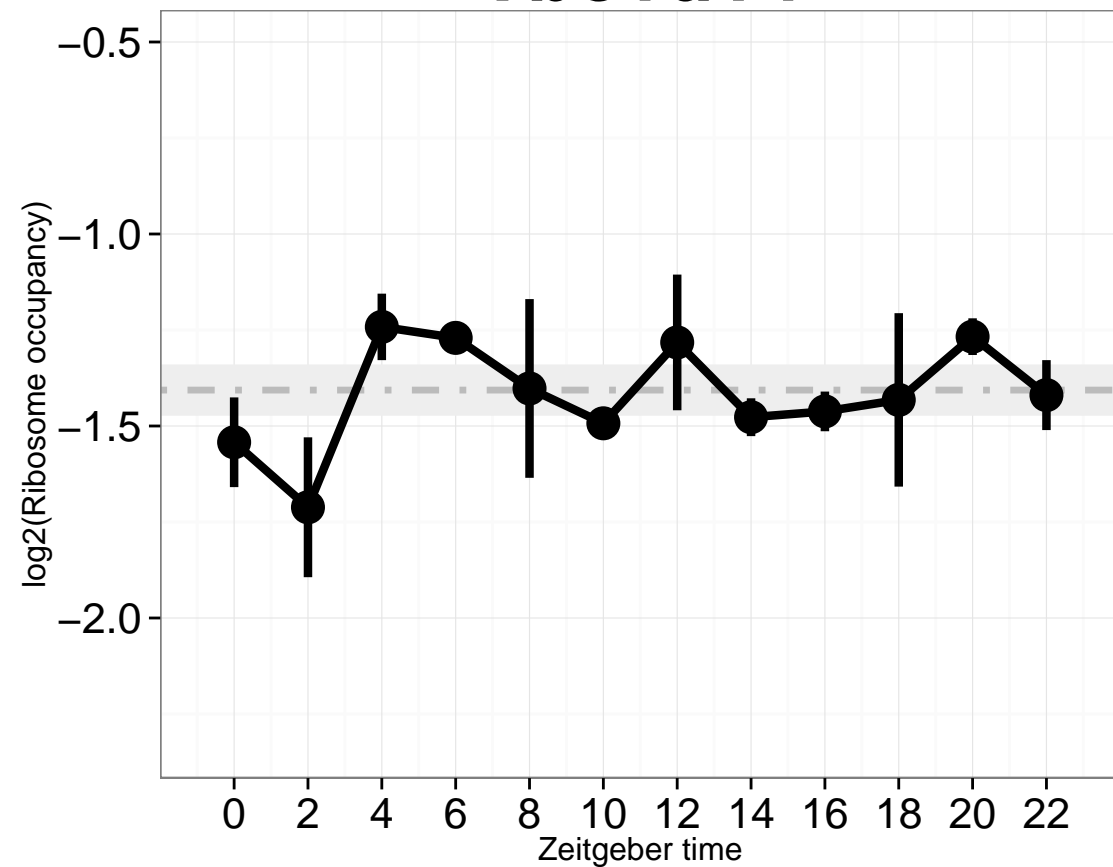

Supplement: SuppDataset_1.zip [file Tbc1d14_set_A.pdf › Supplemental Dataset 1/A-mRNA_nonrhyth_translation_nonrhyth/Tbc1d14_set_A.pdf]

# Tbc1d19

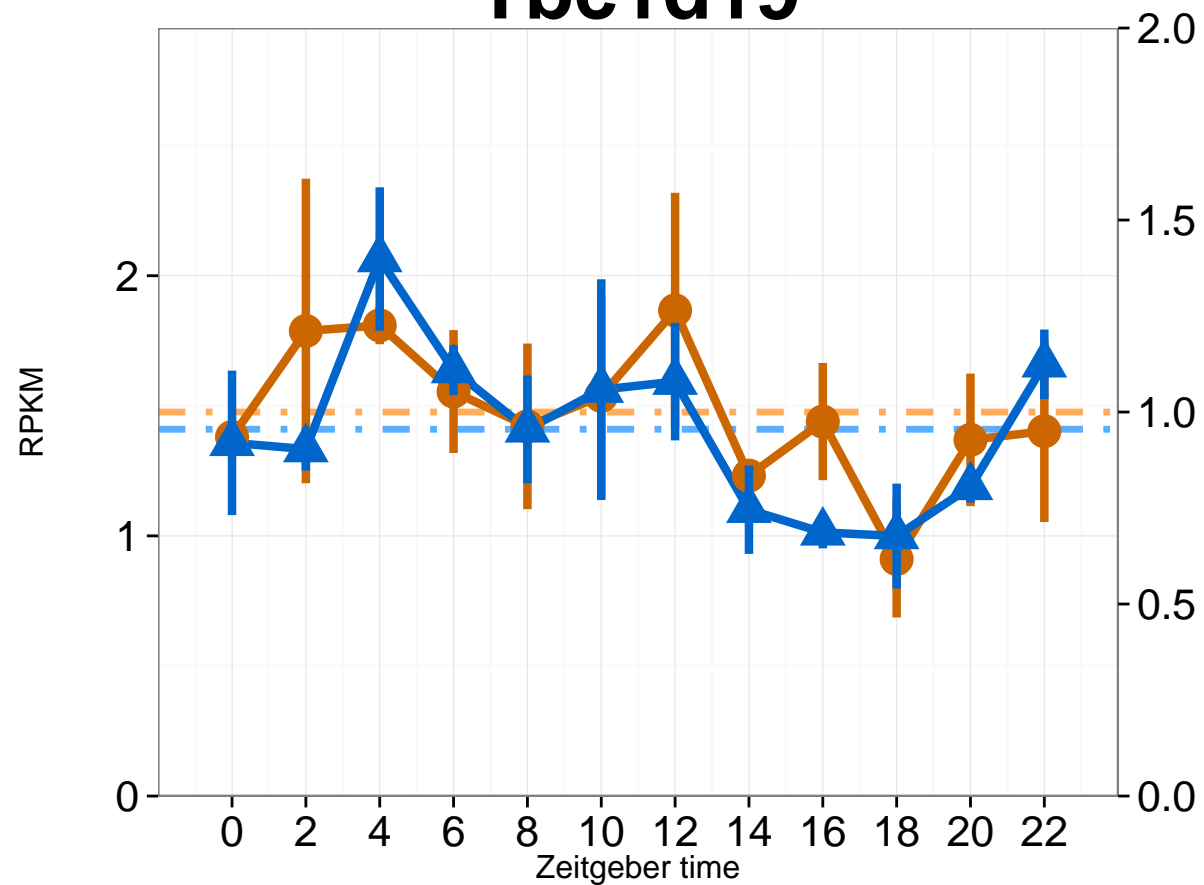

# Tbc1d19

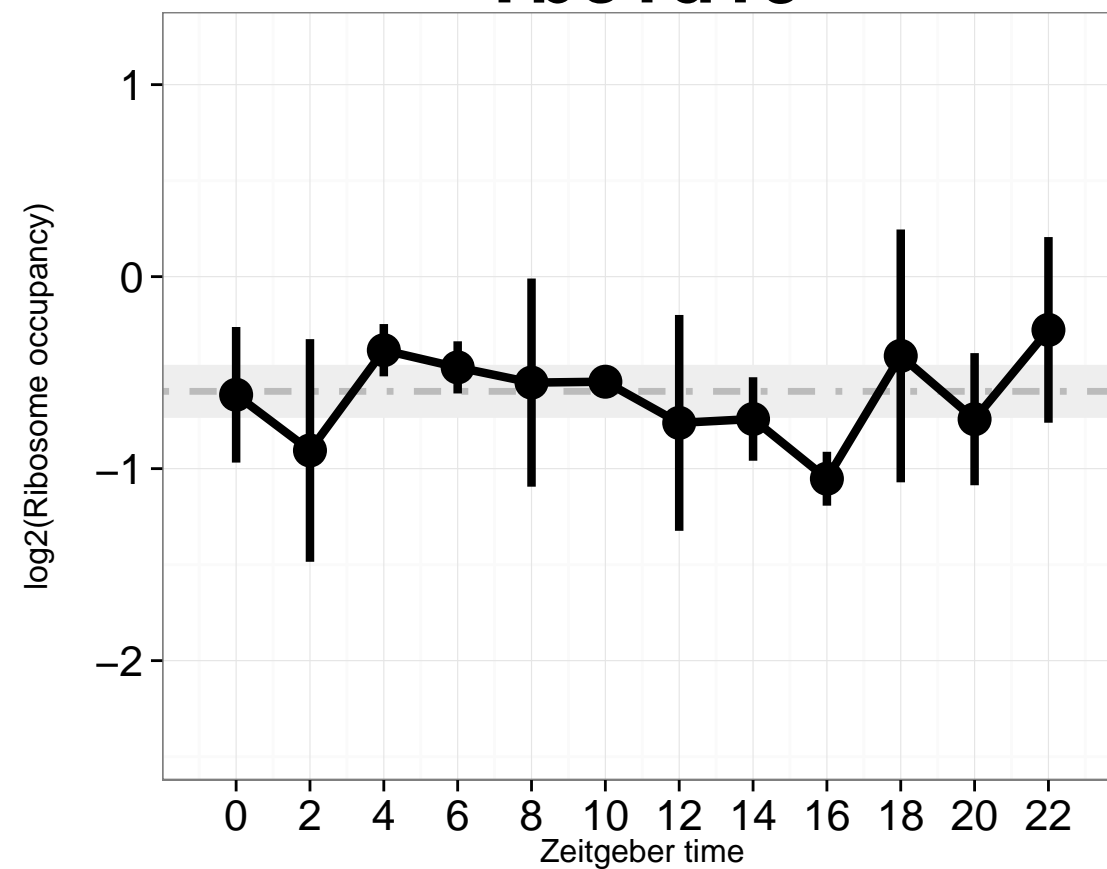

Supplement: SuppDataset_1.zip [file Tbc1d19_set_A.pdf › Supplemental Dataset 1/A-mRNA_nonrhyth_translation_nonrhyth/Tbc1d19_set_A.pdf]

# Tbc1d1

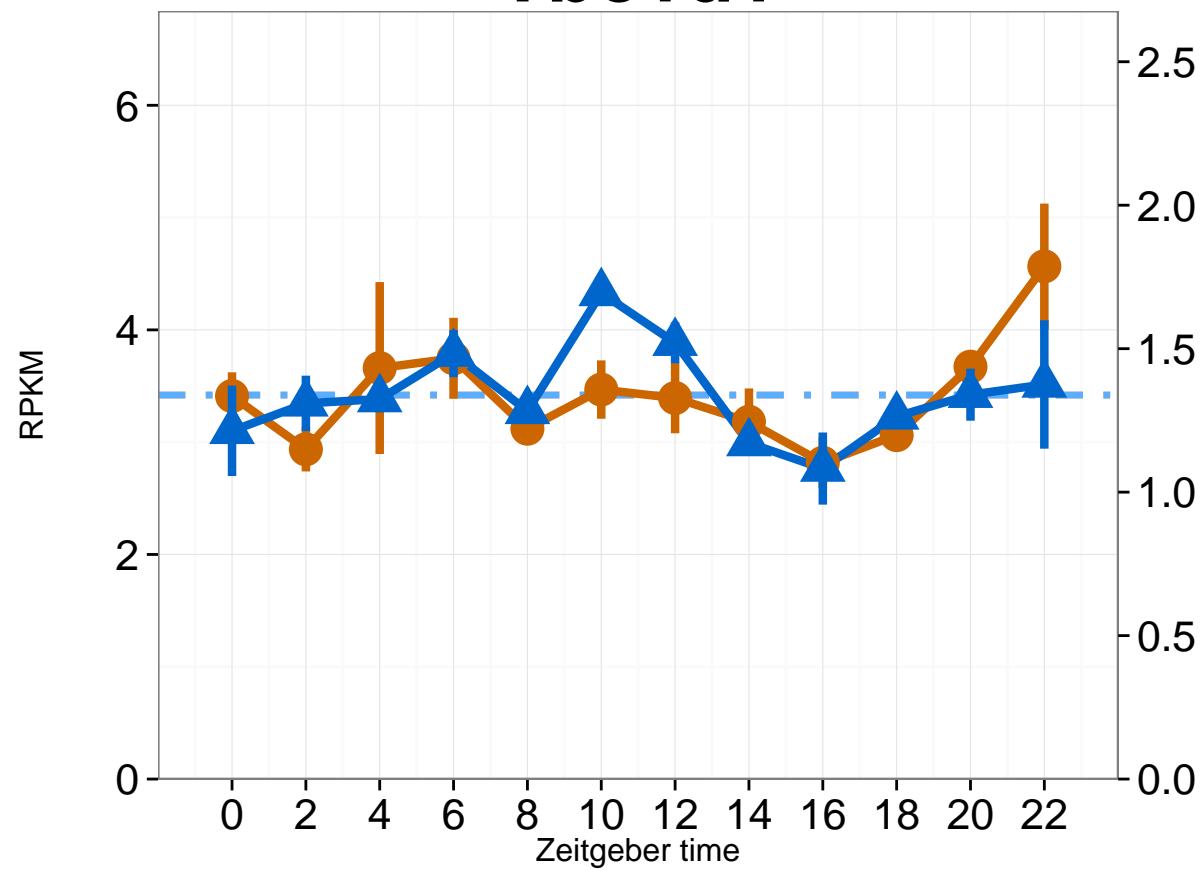

# Tbc1d1

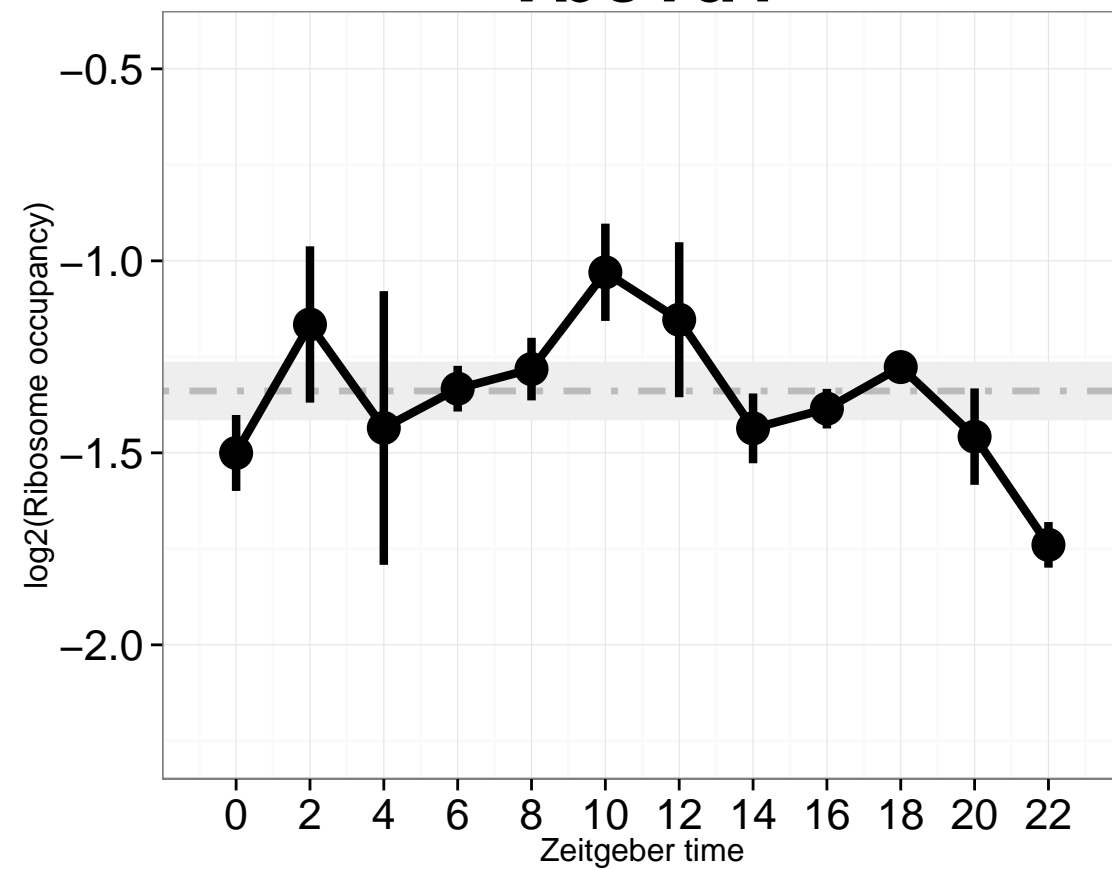

Supplement: SuppDataset_1.zip [file Tbc1d1_set_A.pdf › Supplemental Dataset 1/A-mRNA_nonrhyth_translation_nonrhyth/Tbc1d1_set_A.pdf]

# Tbc1d20

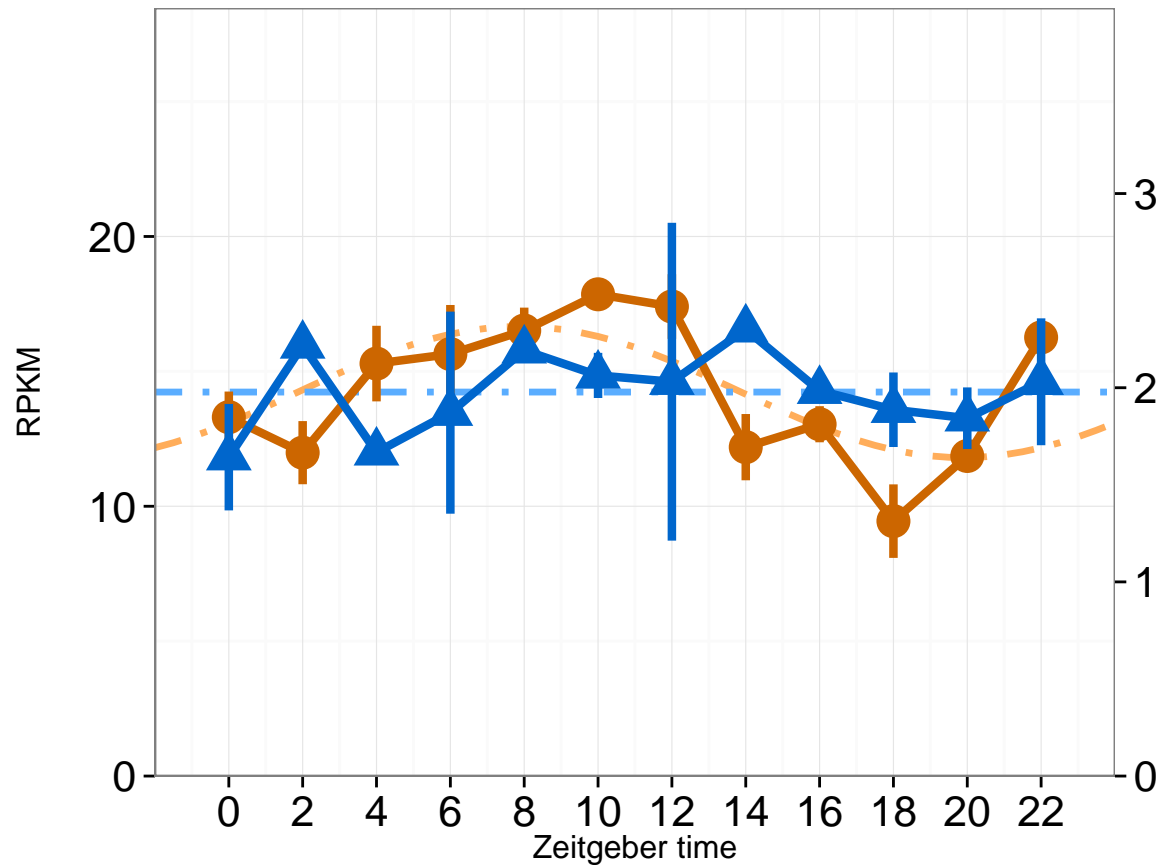

# Tbc1d20

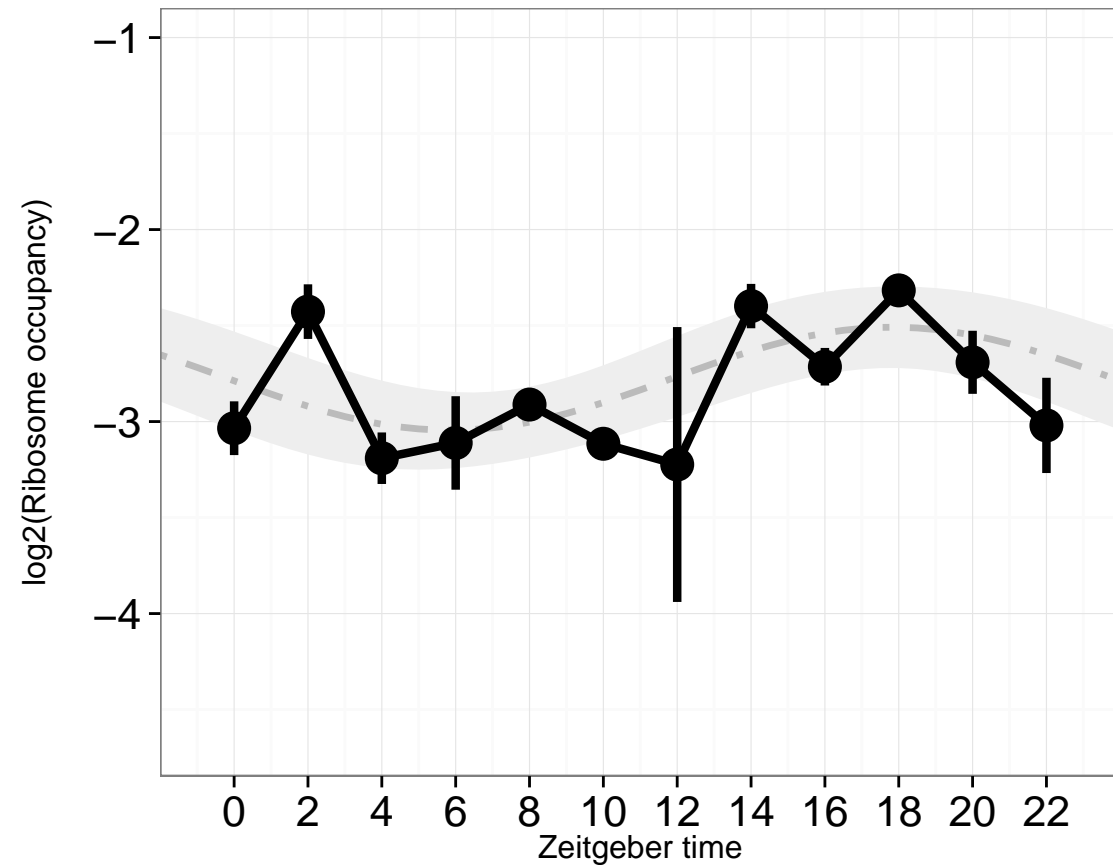

Supplement: SuppDataset_1.zip [file Tbc1d20_set_A.pdf › Supplemental Dataset 1/A-mRNA_nonrhyth_translation_nonrhyth/Tbc1d20_set_A.pdf]

# Tbc1d22a

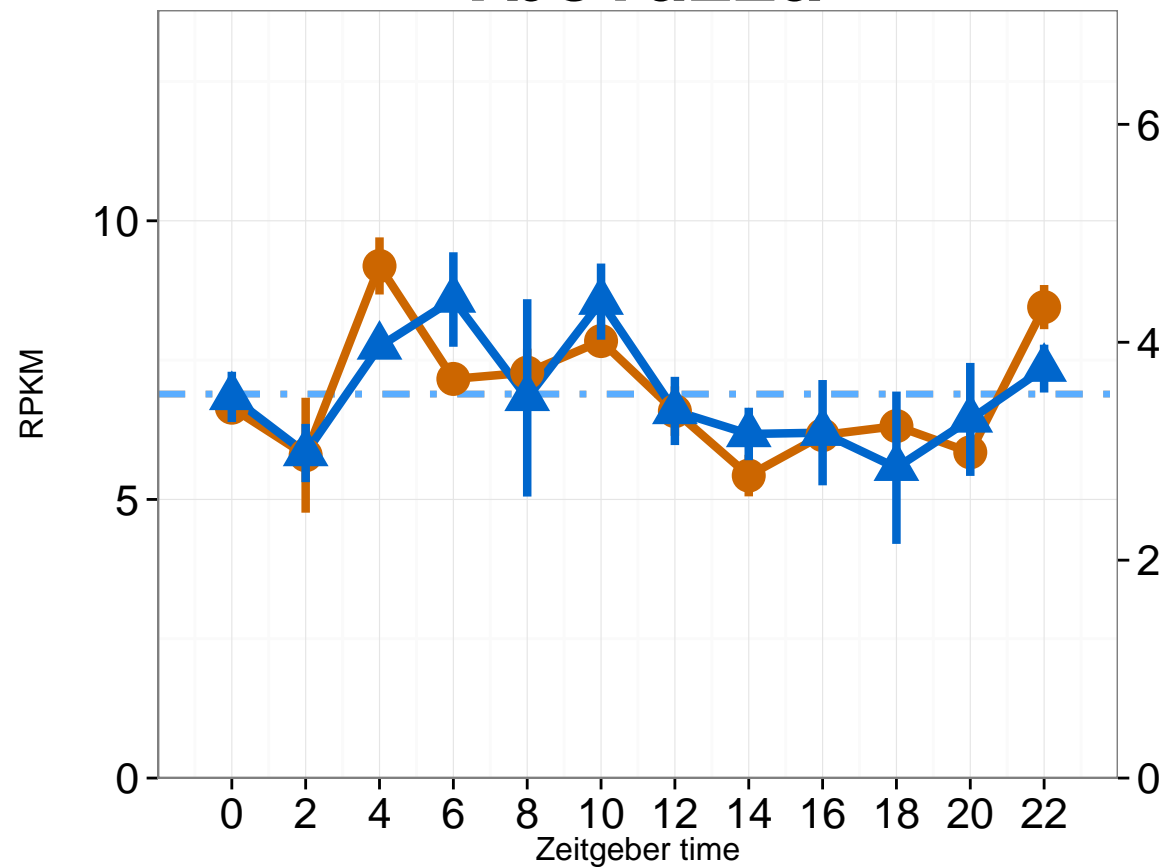

# Tbc1d22a

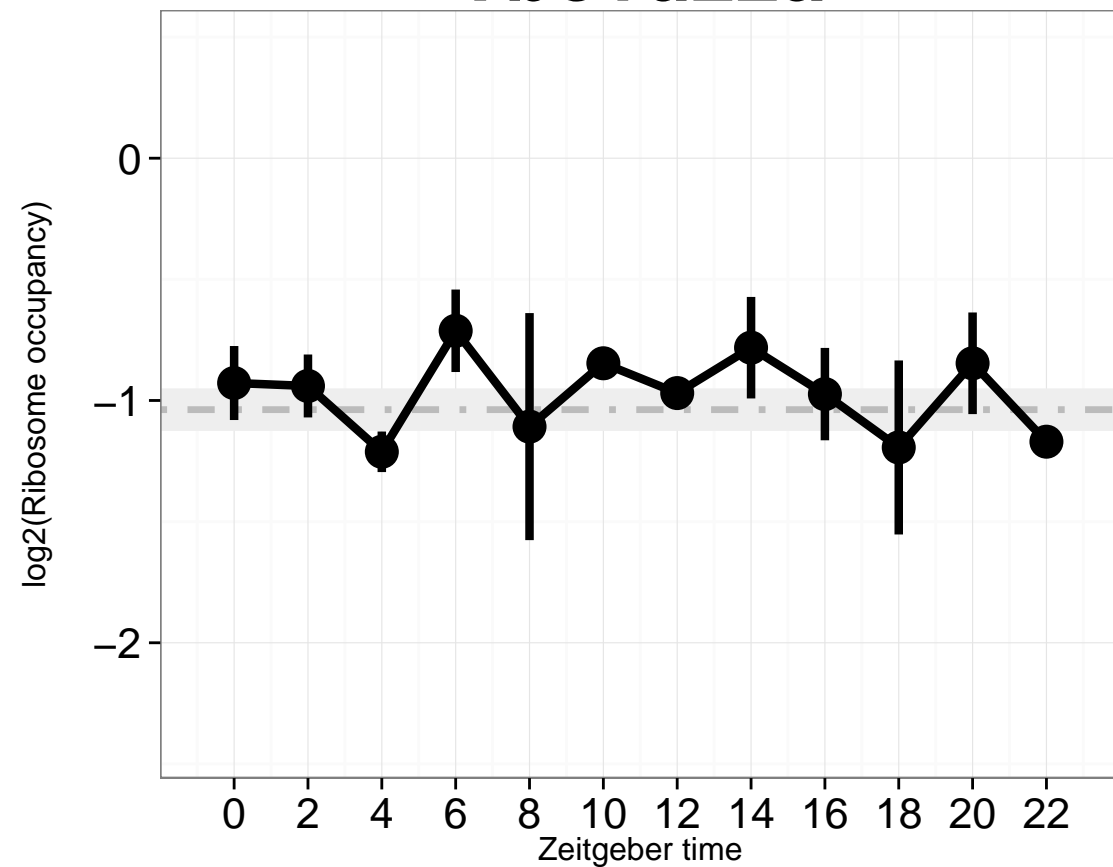

Supplement: SuppDataset_1.zip [file Tbc1d22a_set_A.pdf › Supplemental Dataset 1/A-mRNA_nonrhyth_translation_nonrhyth/Tbc1d22a_set_A.pdf]

**Tbc1d25**

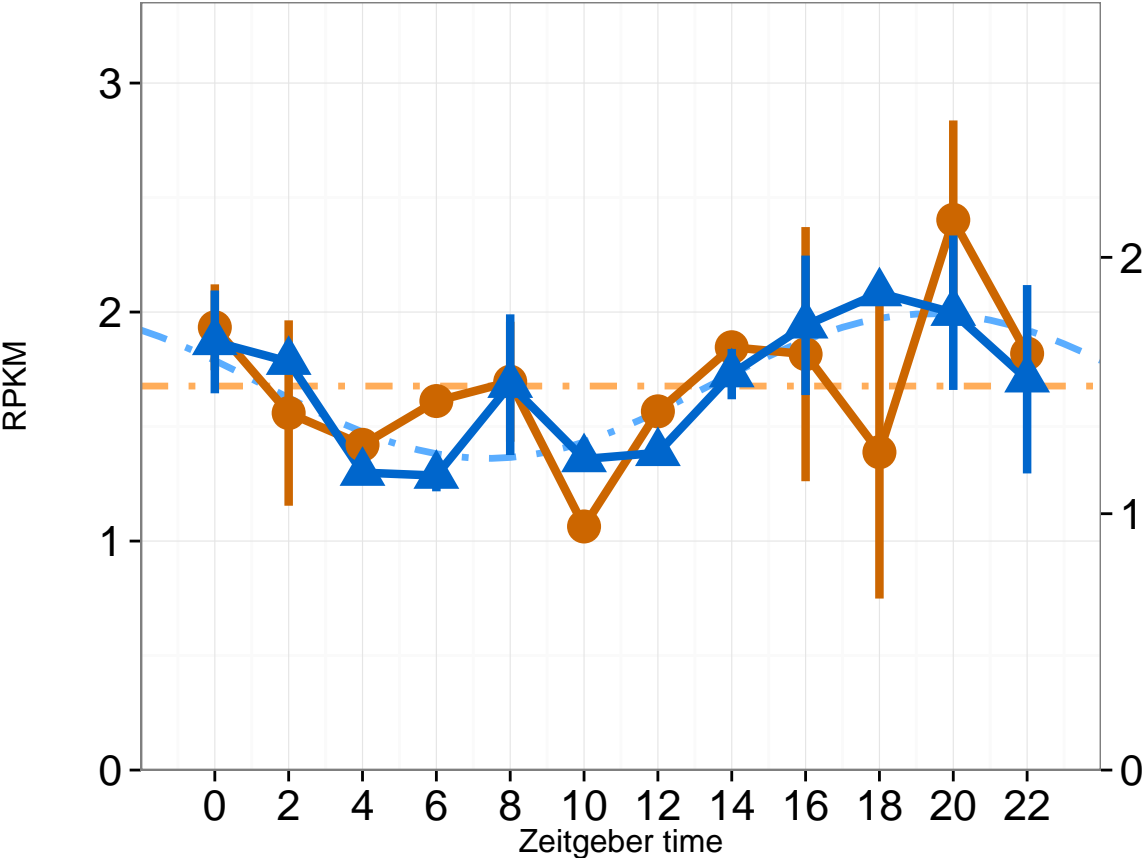

**Tbc1d25**

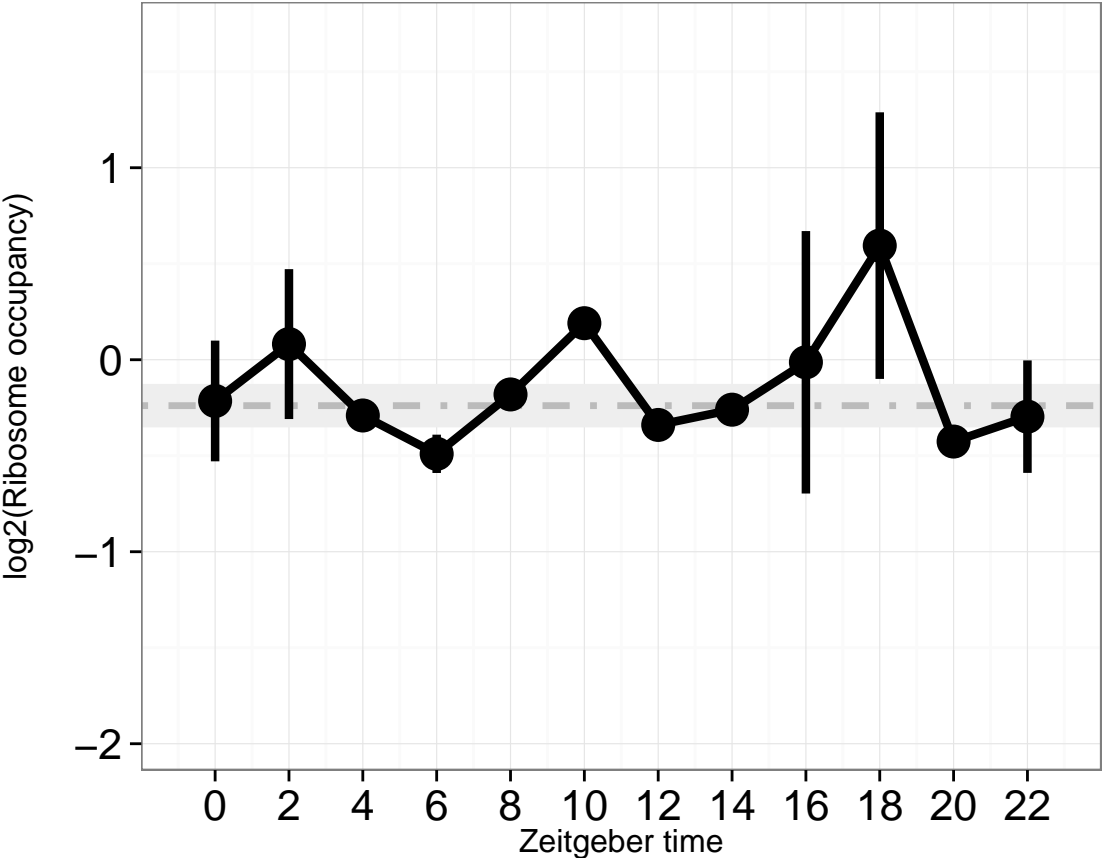

Supplement: SuppDataset_1.zip [file Tbc1d25_set_A.pdf › Supplemental Dataset 1/A-mRNA_nonrhyth_translation_nonrhyth/Tbc1d25_set_A.pdf]

# Tbc1d2b

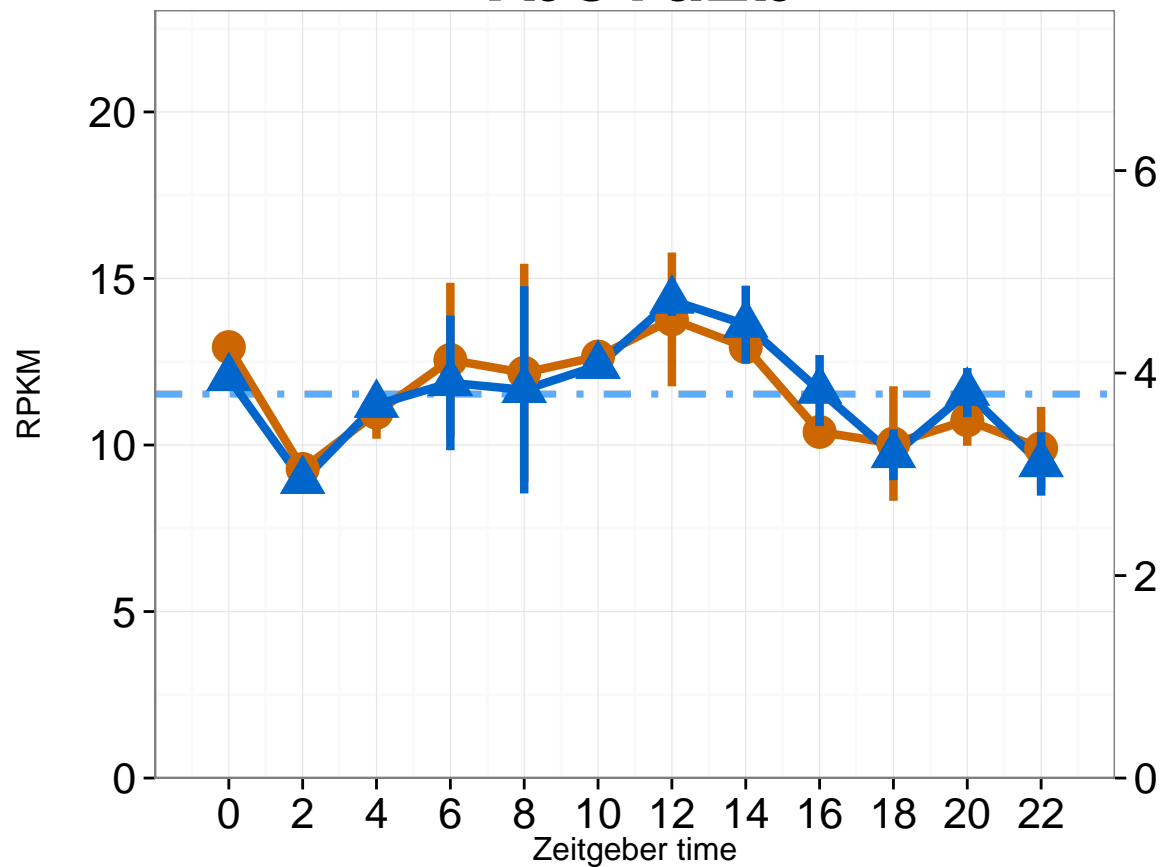

# Tbc1d2b

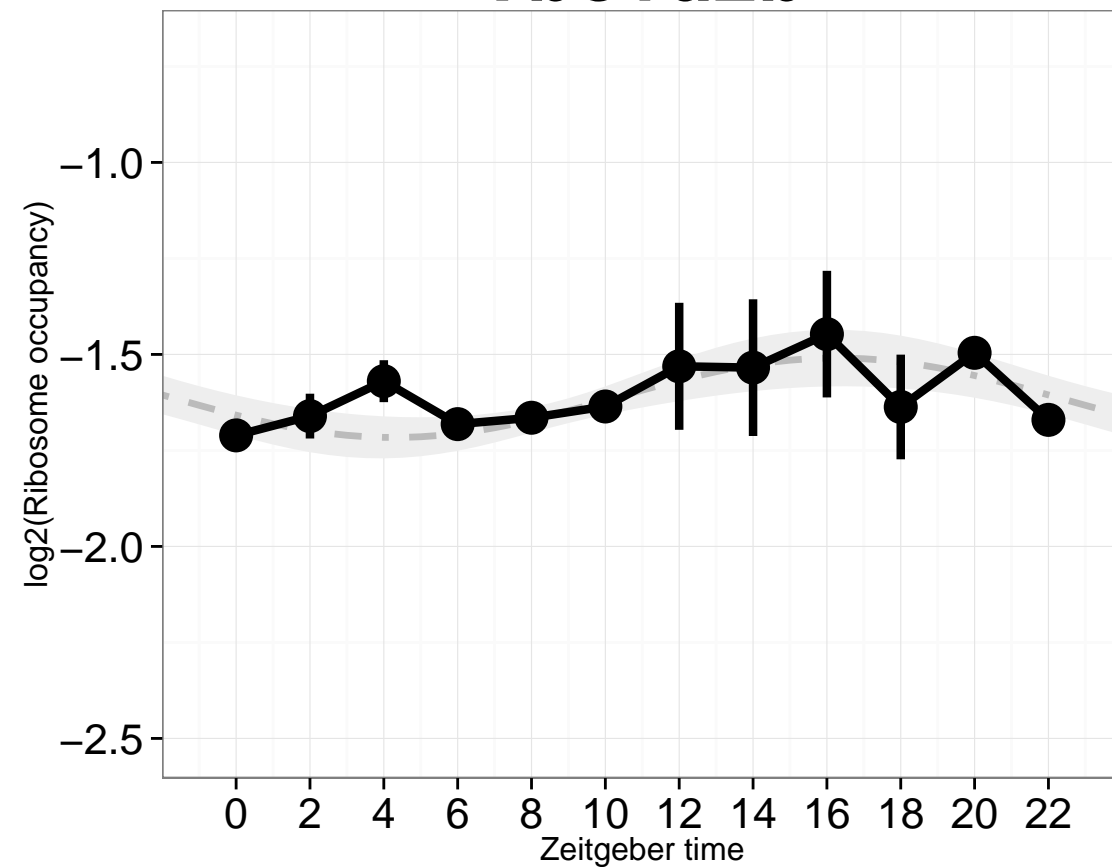

Supplement: SuppDataset_1.zip [file Tbc1d2b_set_A.pdf › Supplemental Dataset 1/A-mRNA_nonrhyth_translation_nonrhyth/Tbc1d2b_set_A.pdf]

# Tbc1d30

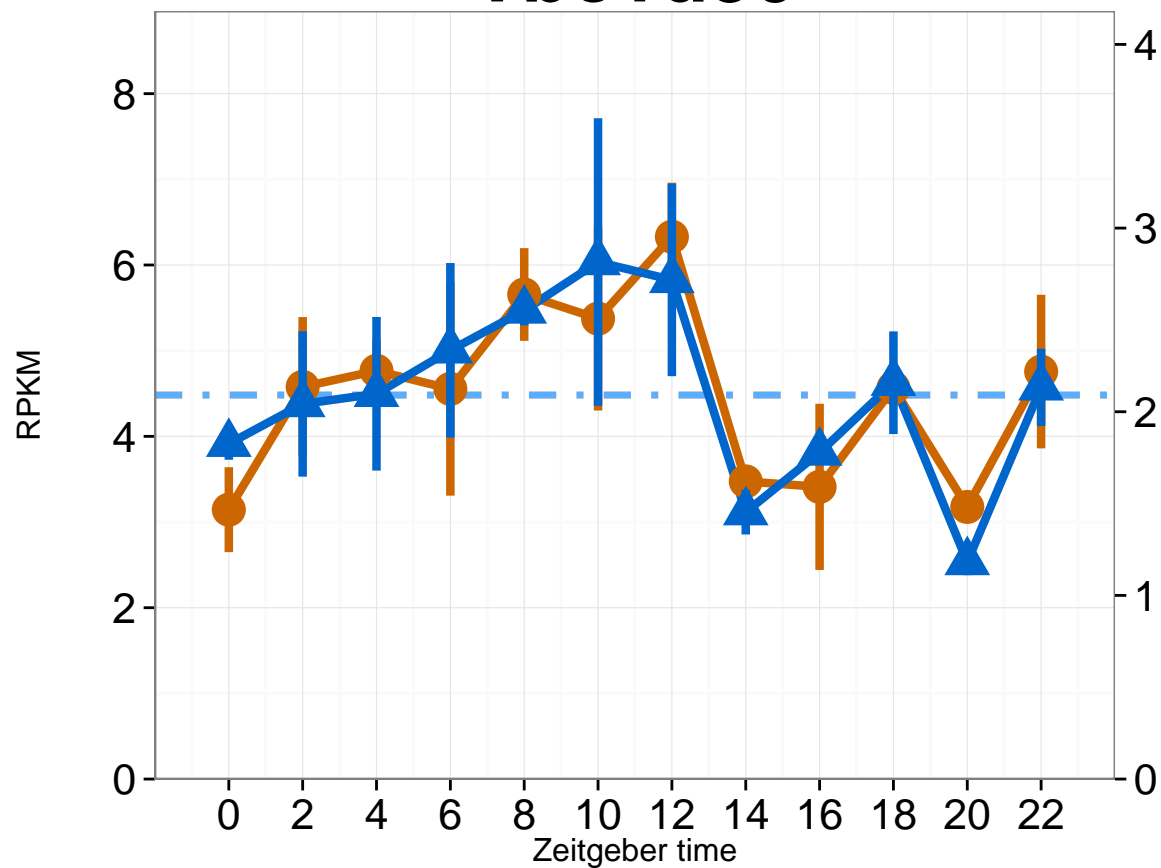

# Tbc1d30

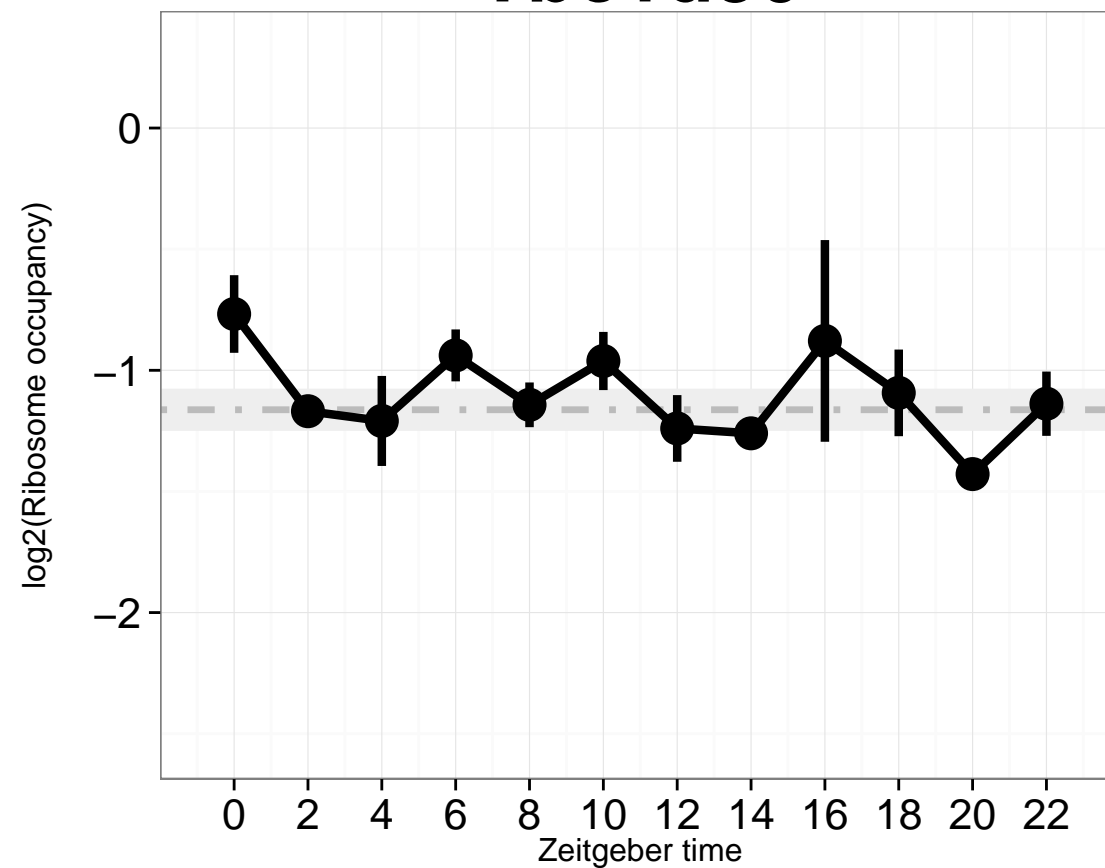

Supplement: SuppDataset_1.zip [file Tbc1d30_set_A.pdf › Supplemental Dataset 1/A-mRNA_nonrhyth_translation_nonrhyth/Tbc1d30_set_A.pdf]

**Tbc1d31**

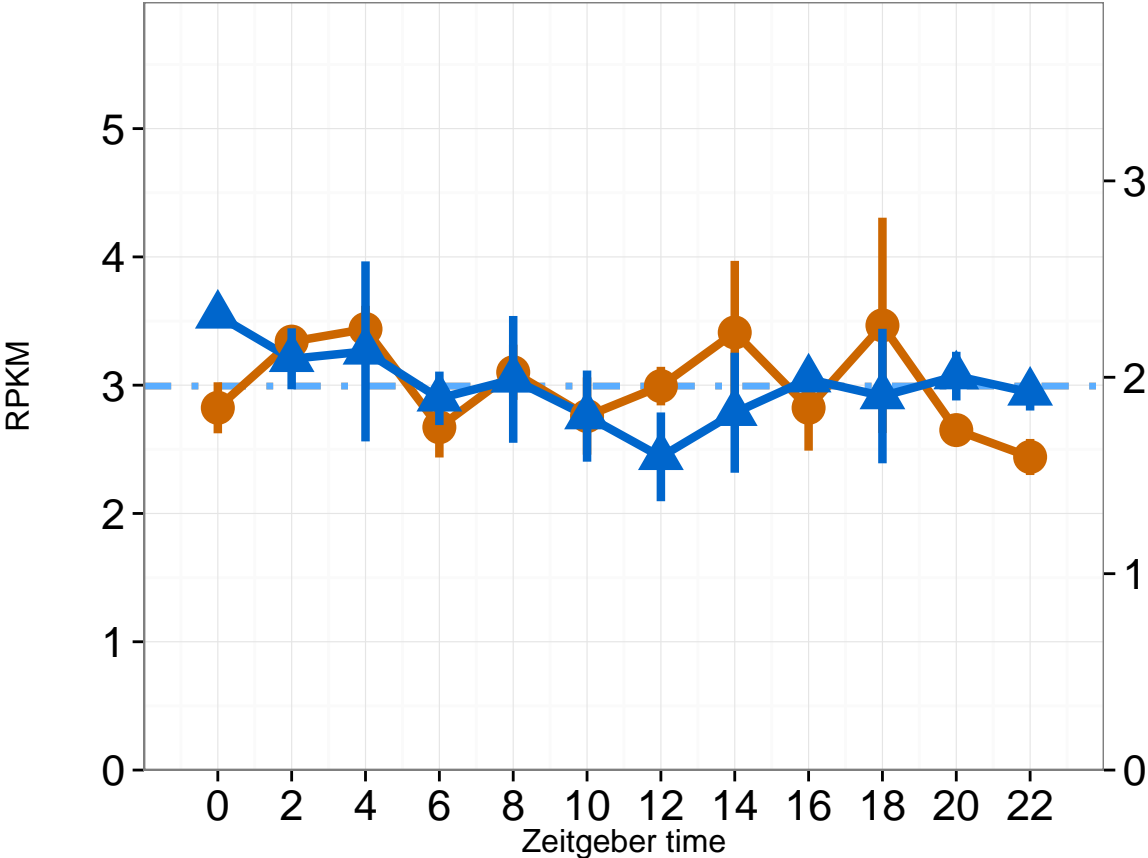

**Tbc1d31**

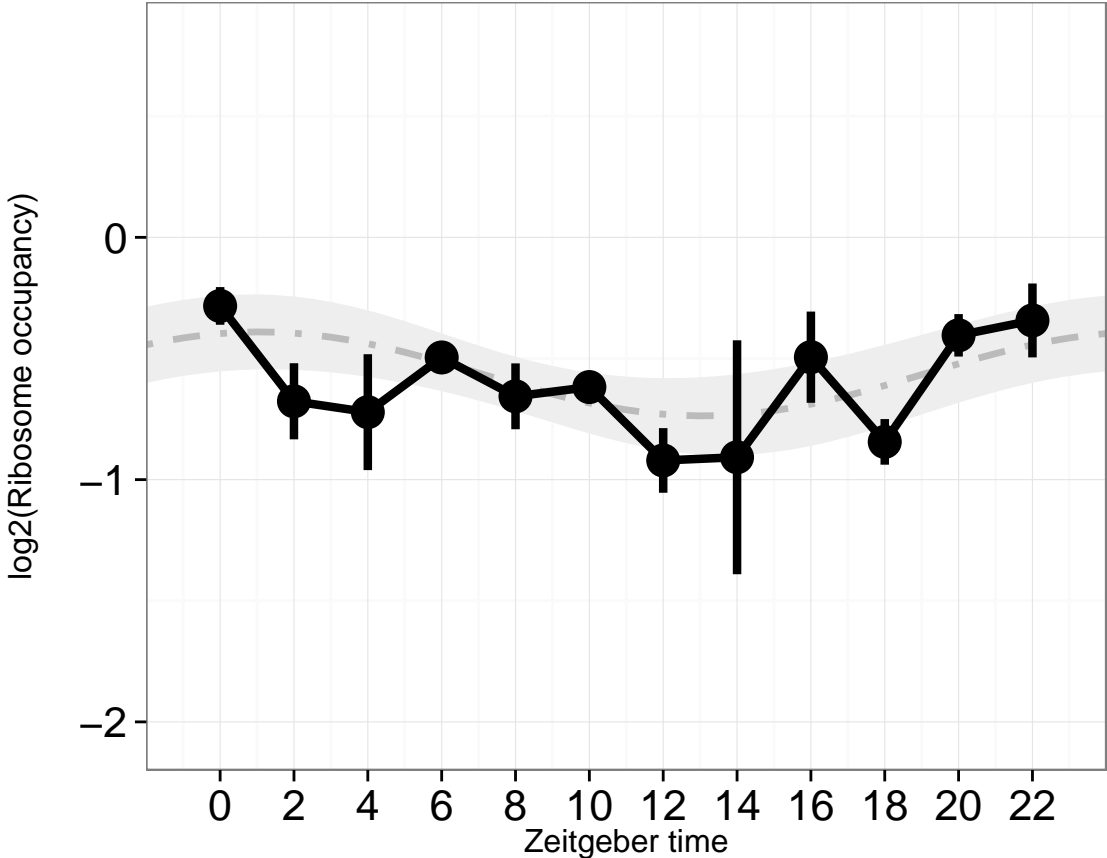

Supplement: SuppDataset_1.zip [file Tbc1d31_set_A.pdf › Supplemental Dataset 1/A-mRNA_nonrhyth_translation_nonrhyth/Tbc1d31_set_A.pdf]

**Tbc1d32**

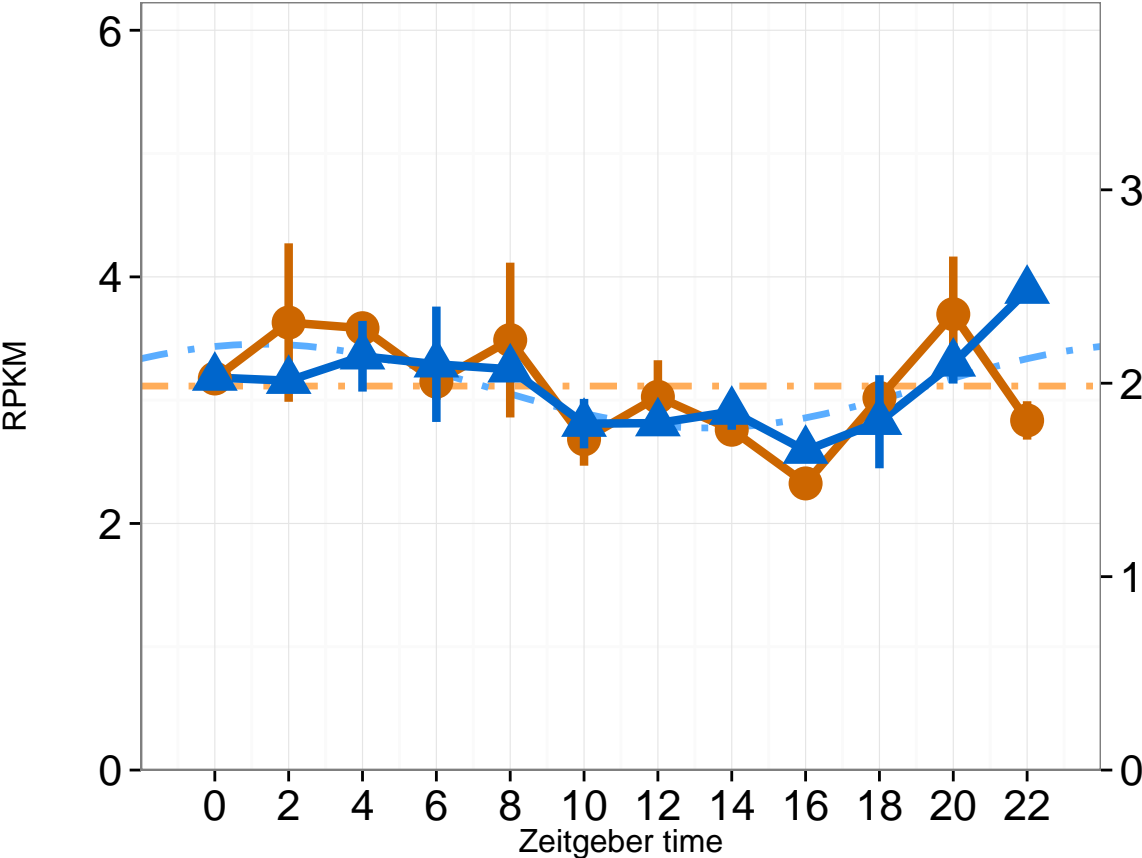

**Tbc1d32**

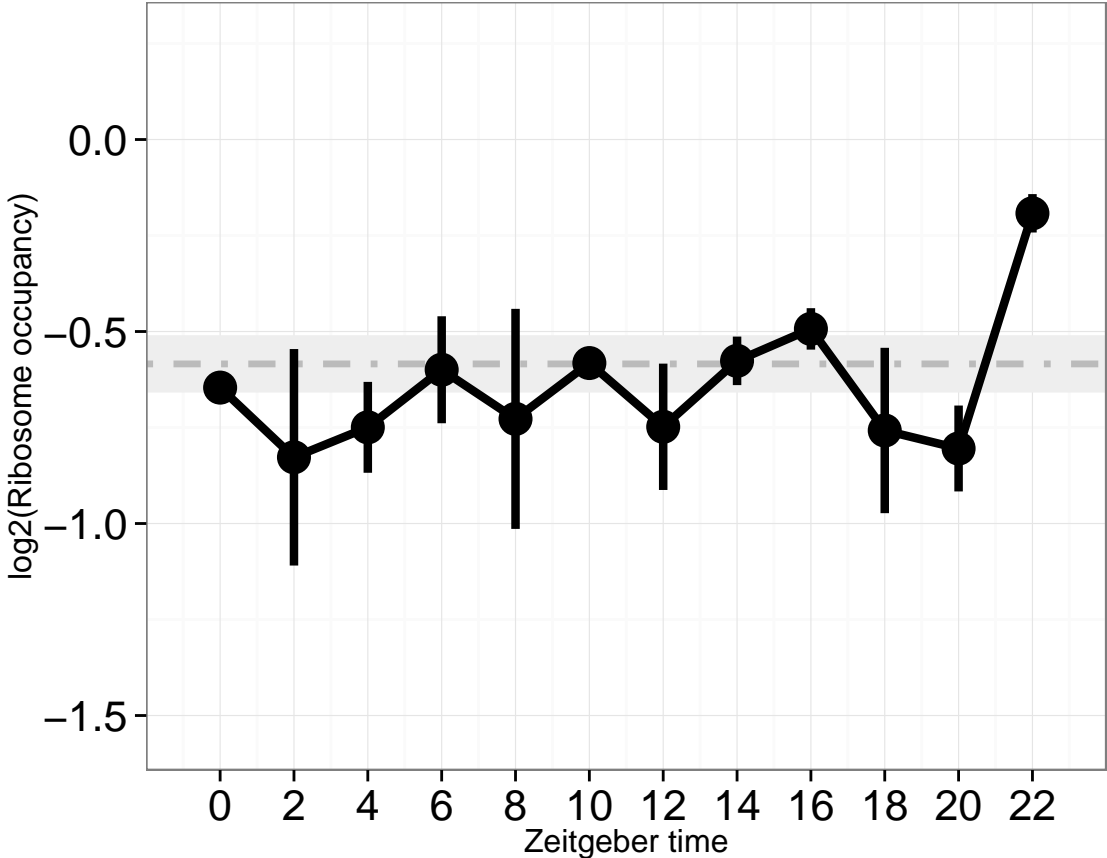

Supplement: SuppDataset_1.zip [file Tbc1d32_set_A.pdf › Supplemental Dataset 1/A-mRNA_nonrhyth_translation_nonrhyth/Tbc1d32_set_A.pdf]

# Tbc1d4

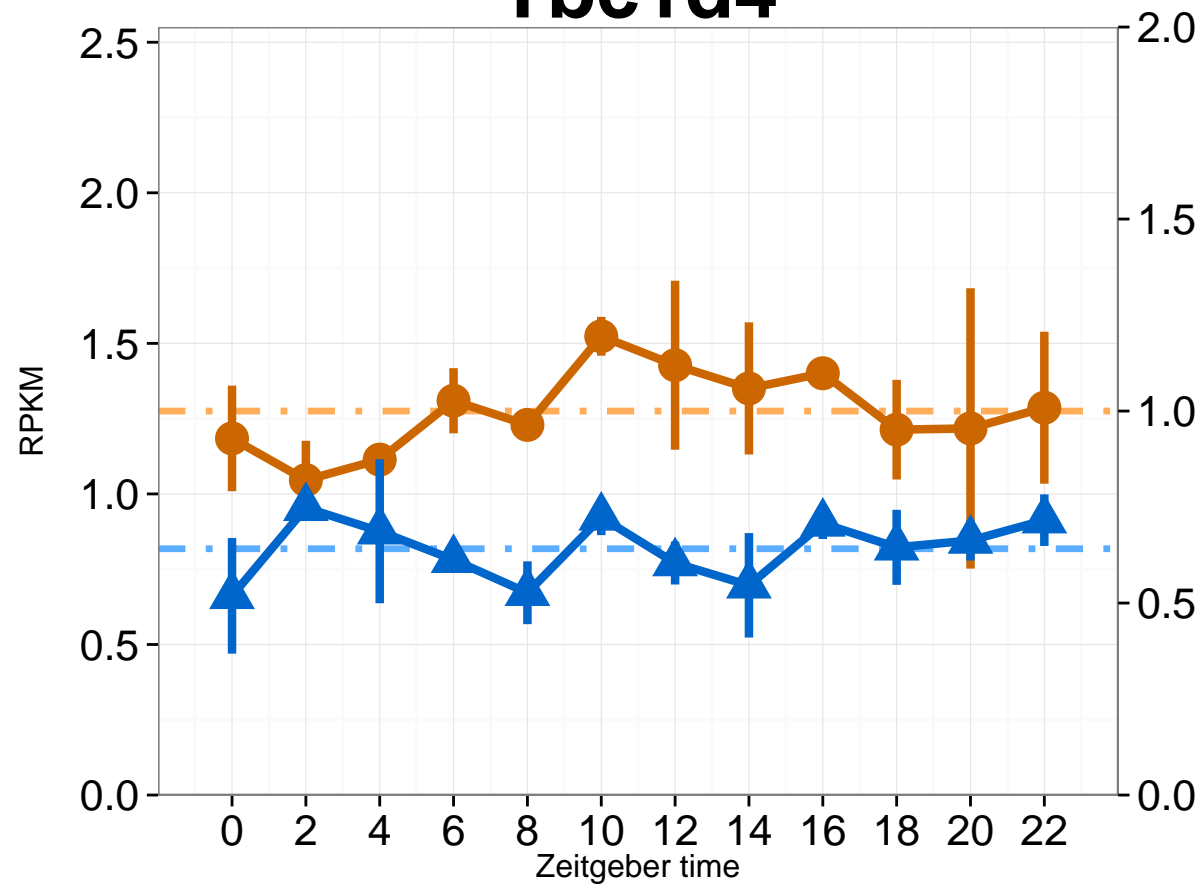

# Tbc1d4

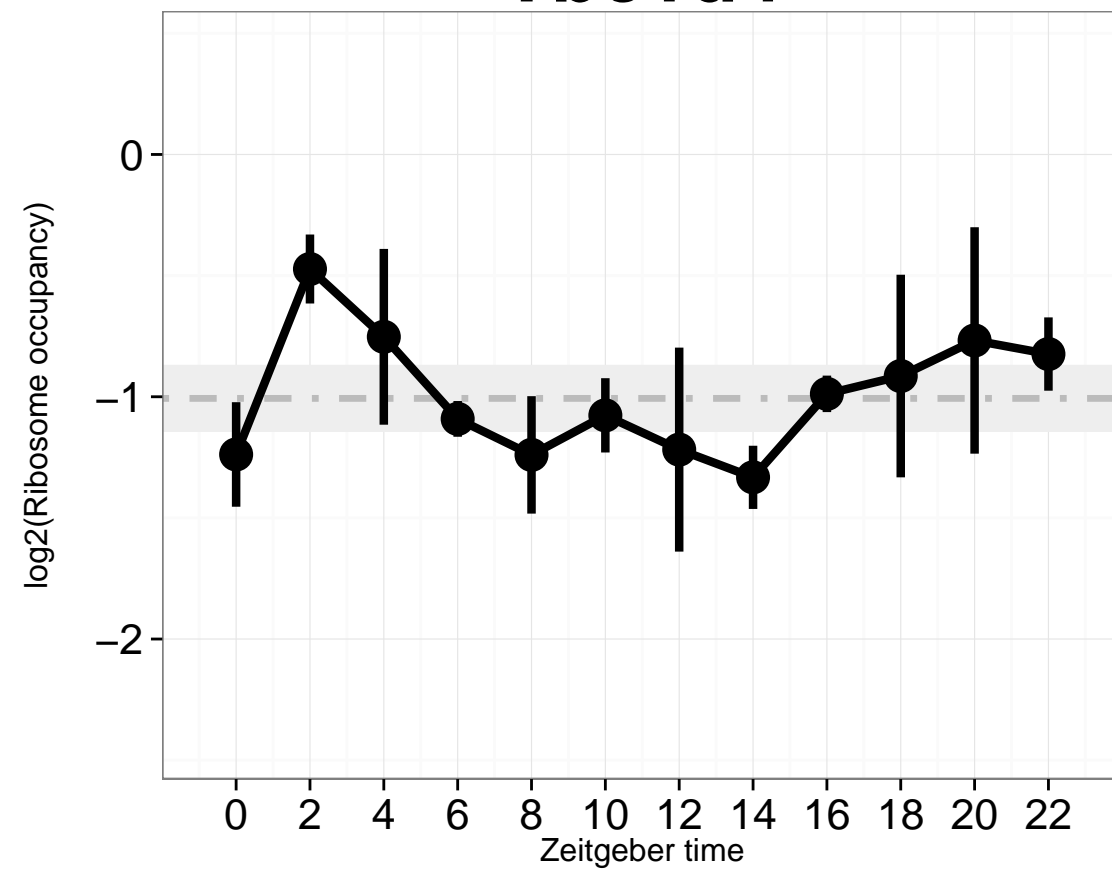

Supplement: SuppDataset_1.zip [file Tbc1d4_set_A.pdf › Supplemental Dataset 1/A-mRNA_nonrhyth_translation_nonrhyth/Tbc1d4_set_A.pdf]

# Tbc1d5

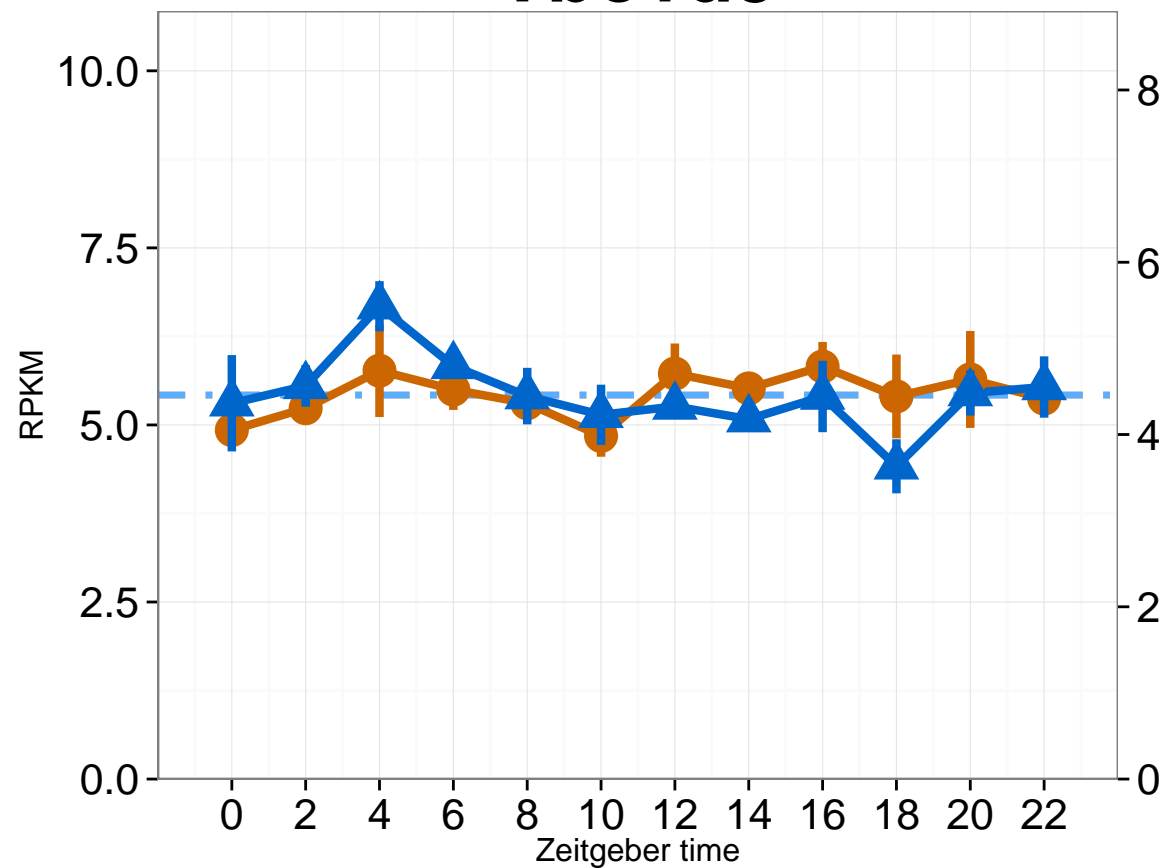

# Tbc1d5

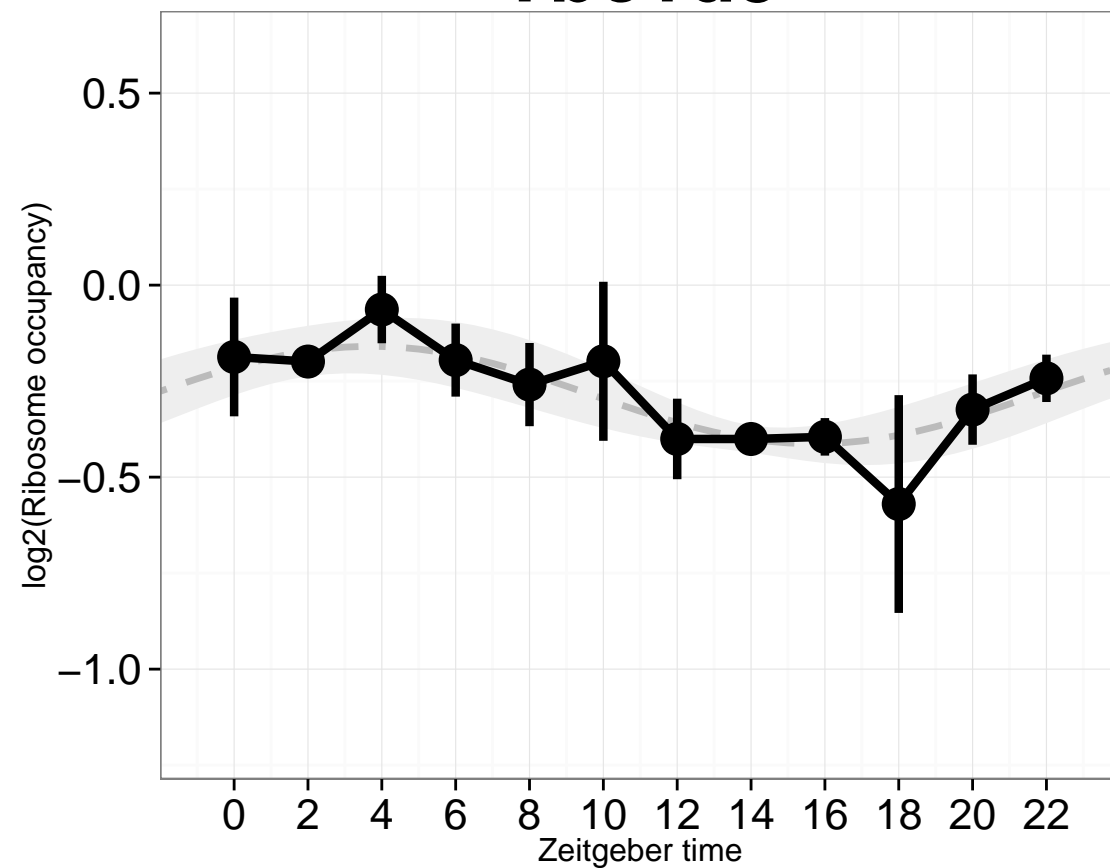

Supplement: SuppDataset_1.zip [file Tbc1d5_set_A.pdf › Supplemental Dataset 1/A-mRNA_nonrhyth_translation_nonrhyth/Tbc1d5_set_A.pdf]

## Tbc1d7

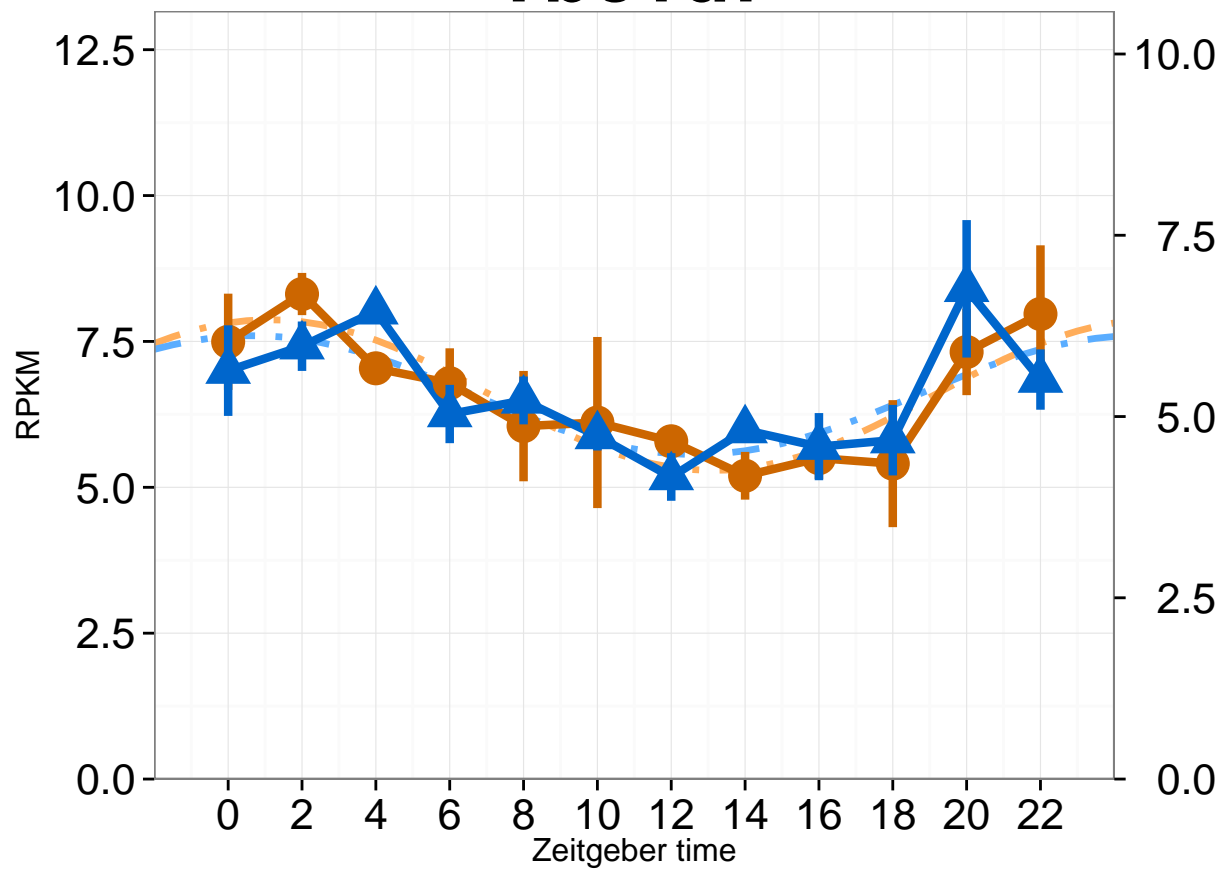

## Tbc1d7

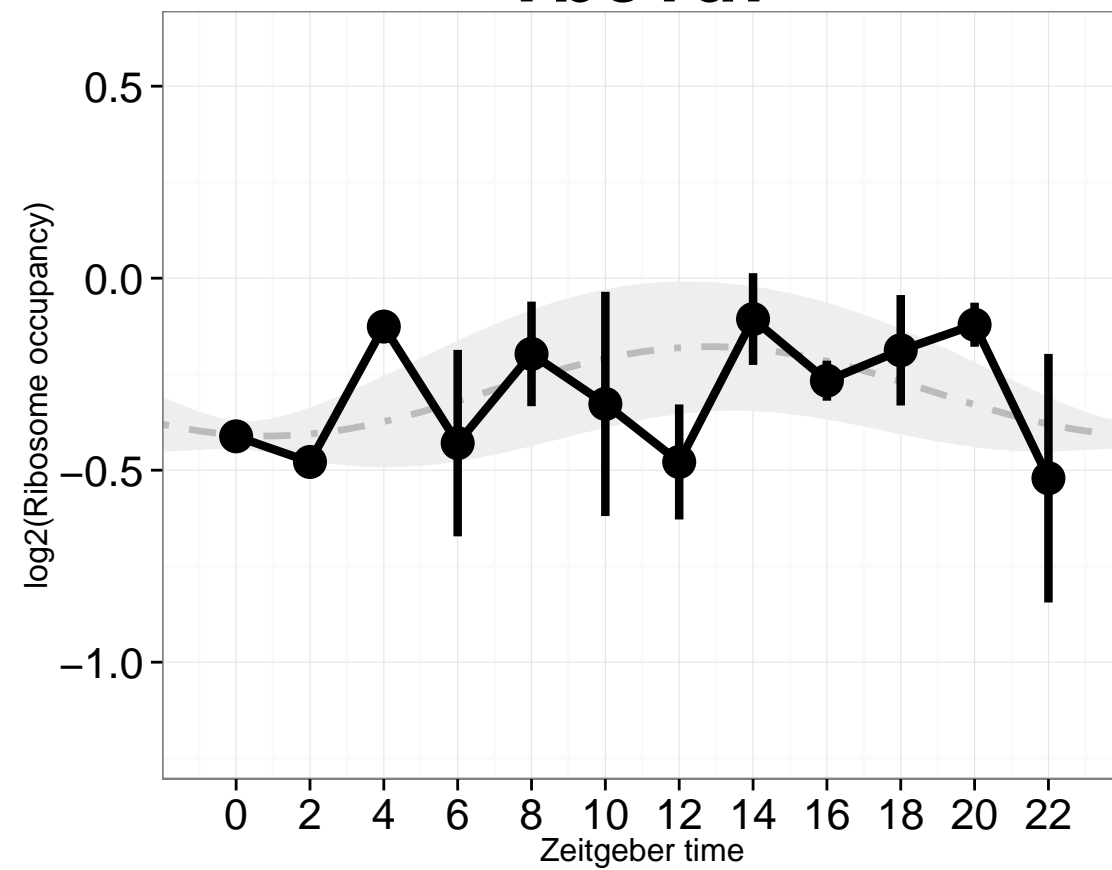

Supplement: SuppDataset_1.zip [file Tbc1d7_set_A.pdf › Supplemental Dataset 1/A-mRNA_nonrhyth_translation_nonrhyth/Tbc1d7_set_A.pdf]

# Tbc1d8

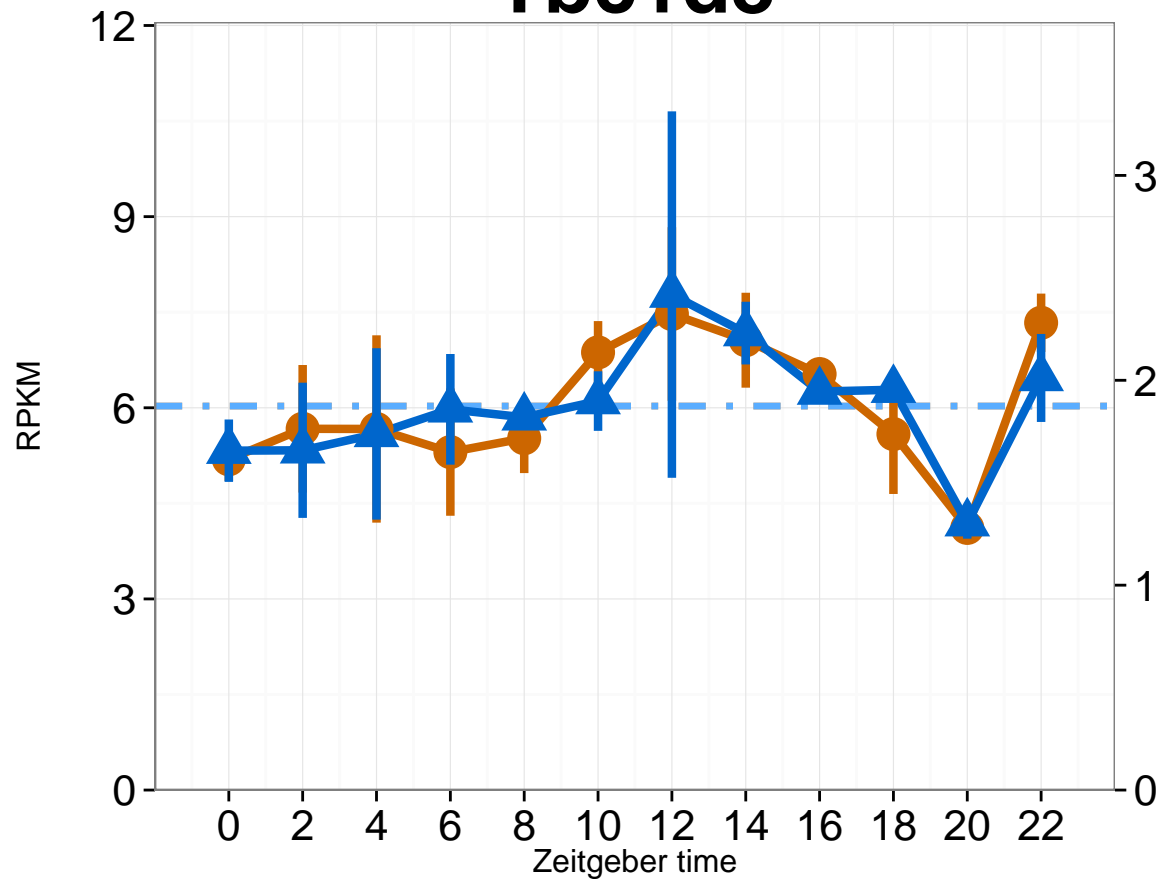

# Tbc1d8

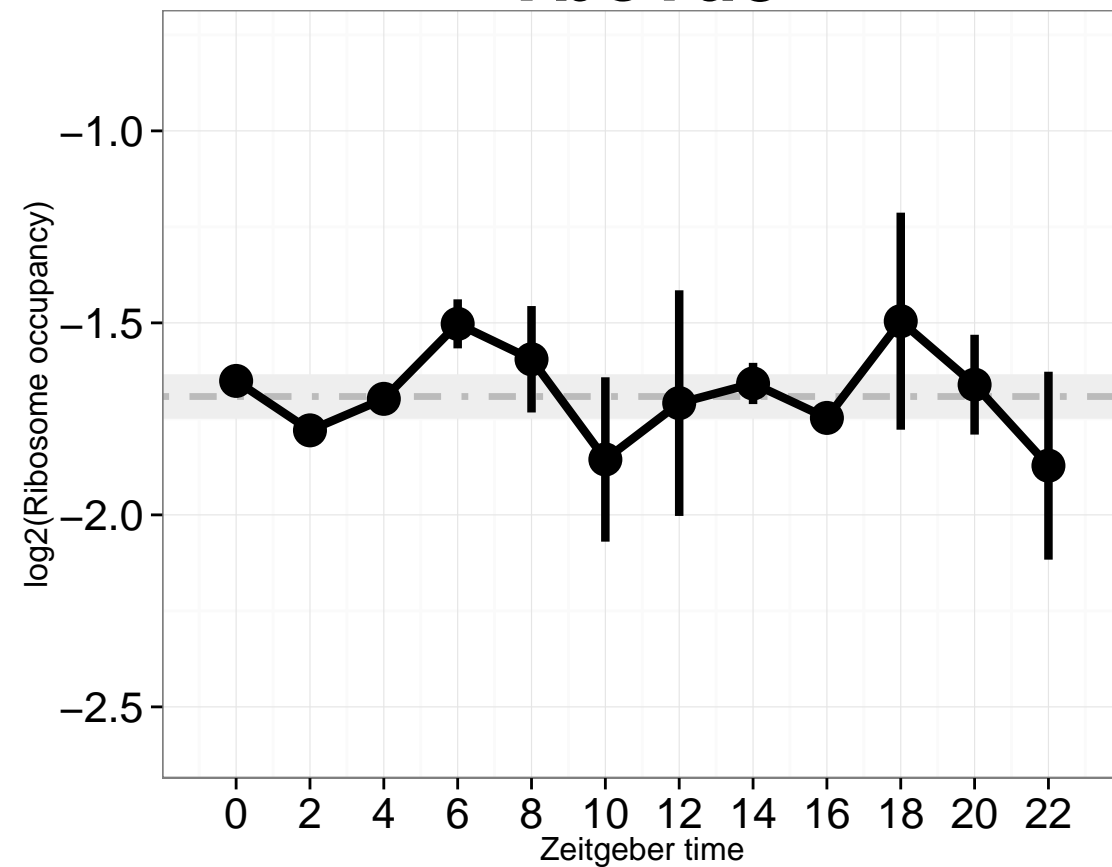

Supplement: SuppDataset_1.zip [file Tbc1d8_set_A.pdf › Supplemental Dataset 1/A-mRNA_nonrhyth_translation_nonrhyth/Tbc1d8_set_A.pdf]

# Tbc1d9

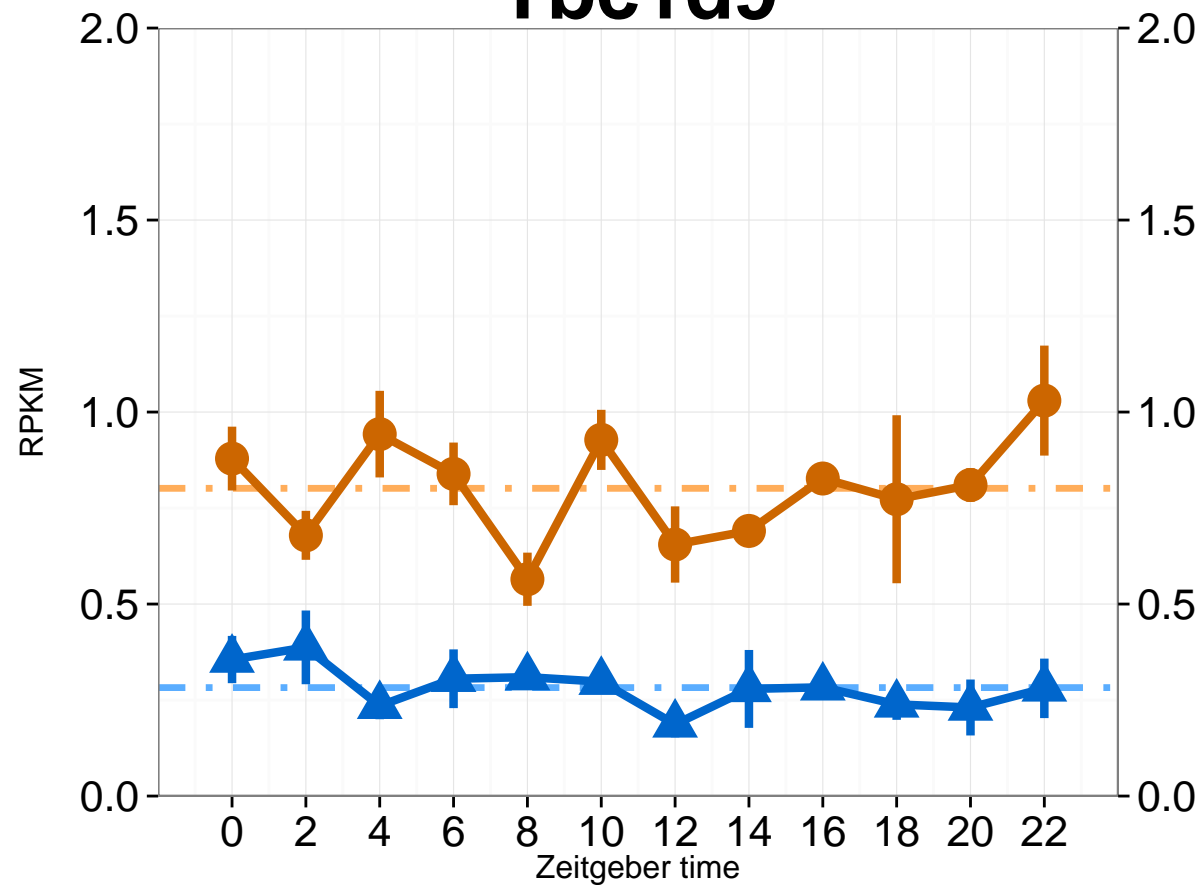

# Tbc1d9

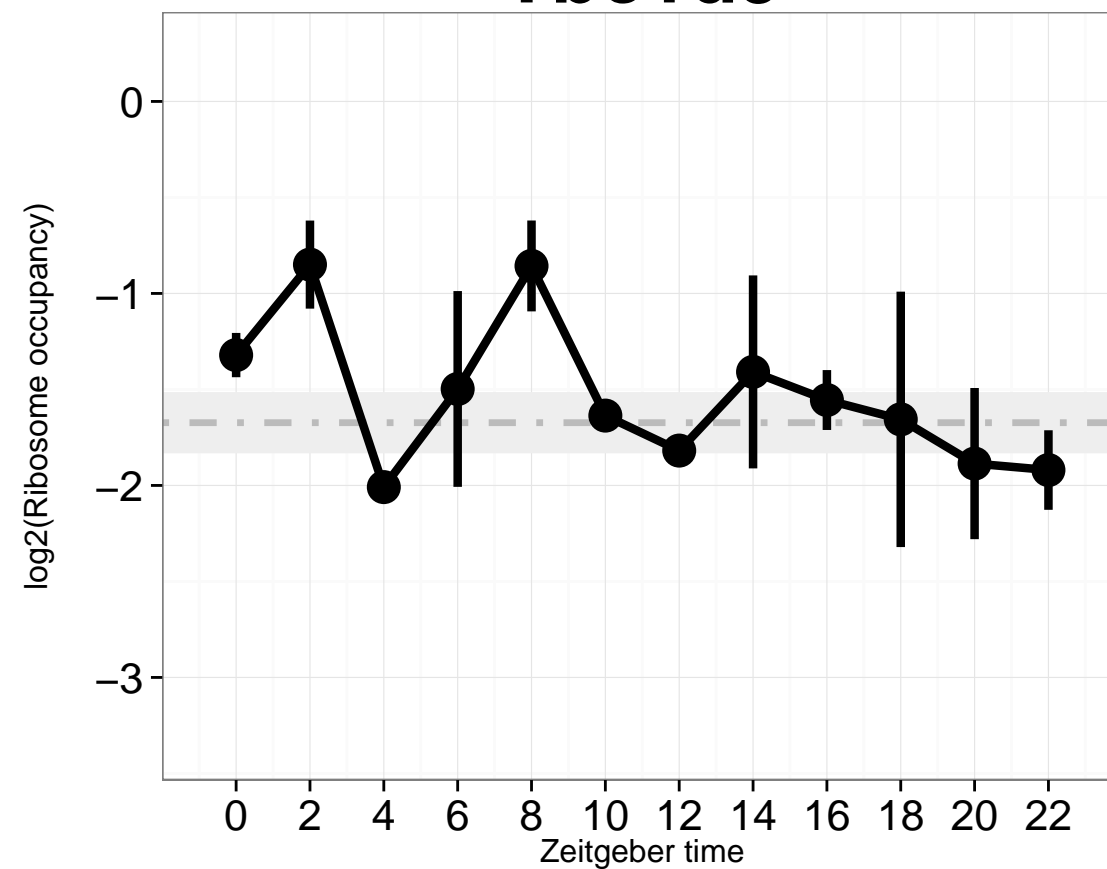

Supplement: SuppDataset_1.zip [file Tbc1d9_set_A.pdf › Supplemental Dataset 1/A-mRNA_nonrhyth_translation_nonrhyth/Tbc1d9_set_A.pdf]

# Tbc1d9b

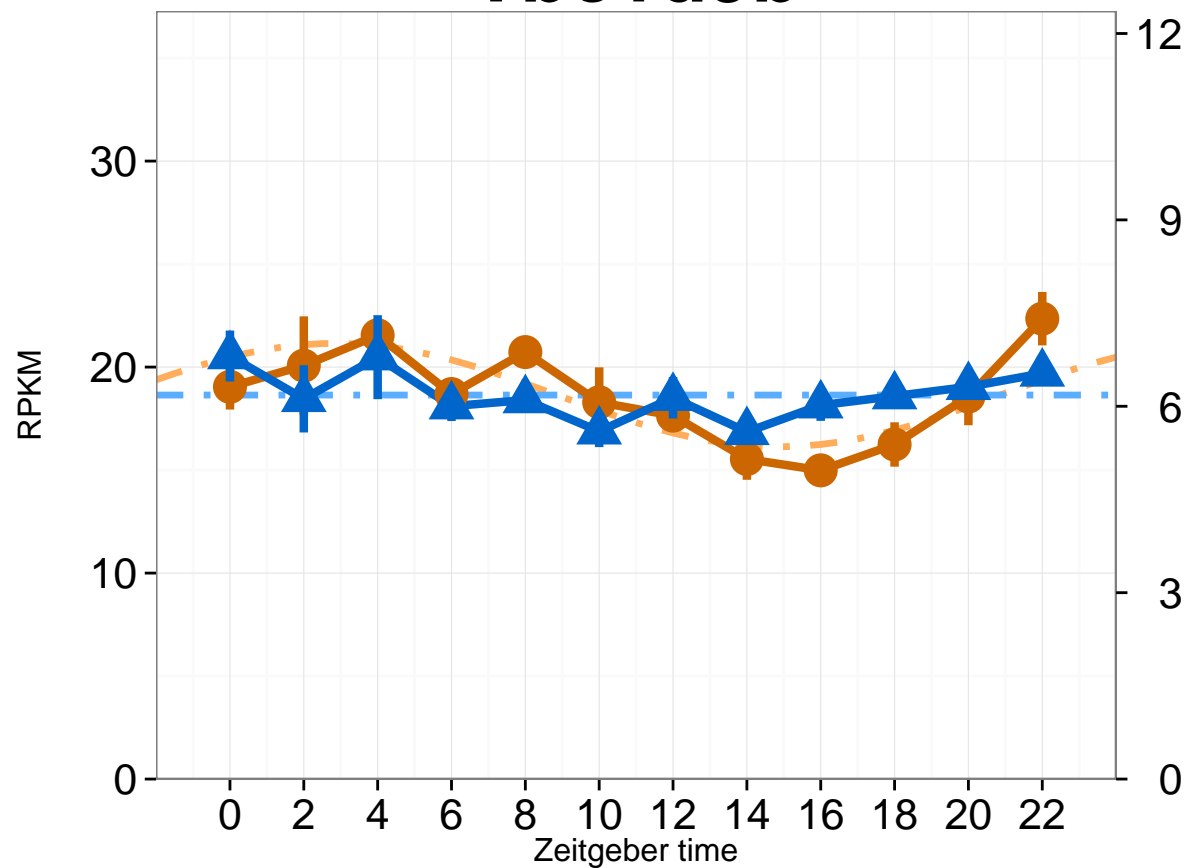

# Tbc1d9b

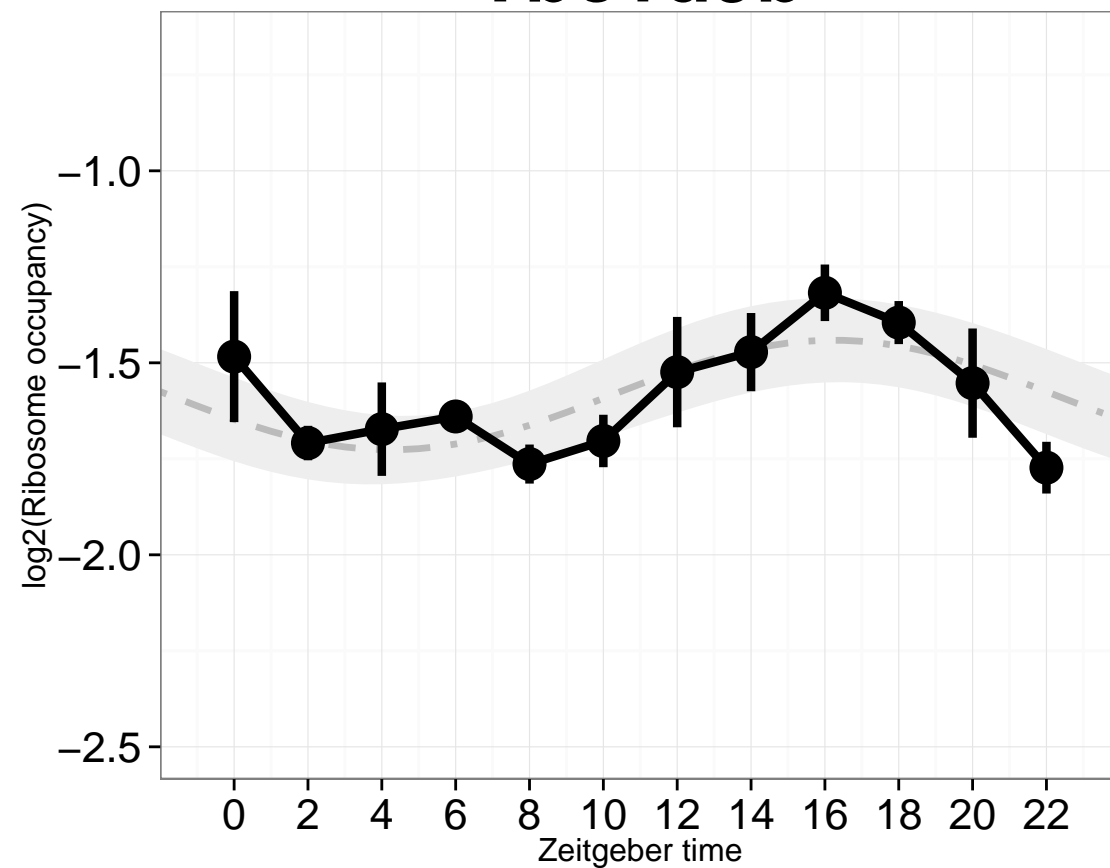

Supplement: SuppDataset_1.zip [file Tbc1d9b_set_A.pdf › Supplemental Dataset 1/A-mRNA_nonrhyth_translation_nonrhyth/Tbc1d9b_set_A.pdf]

# Tbca

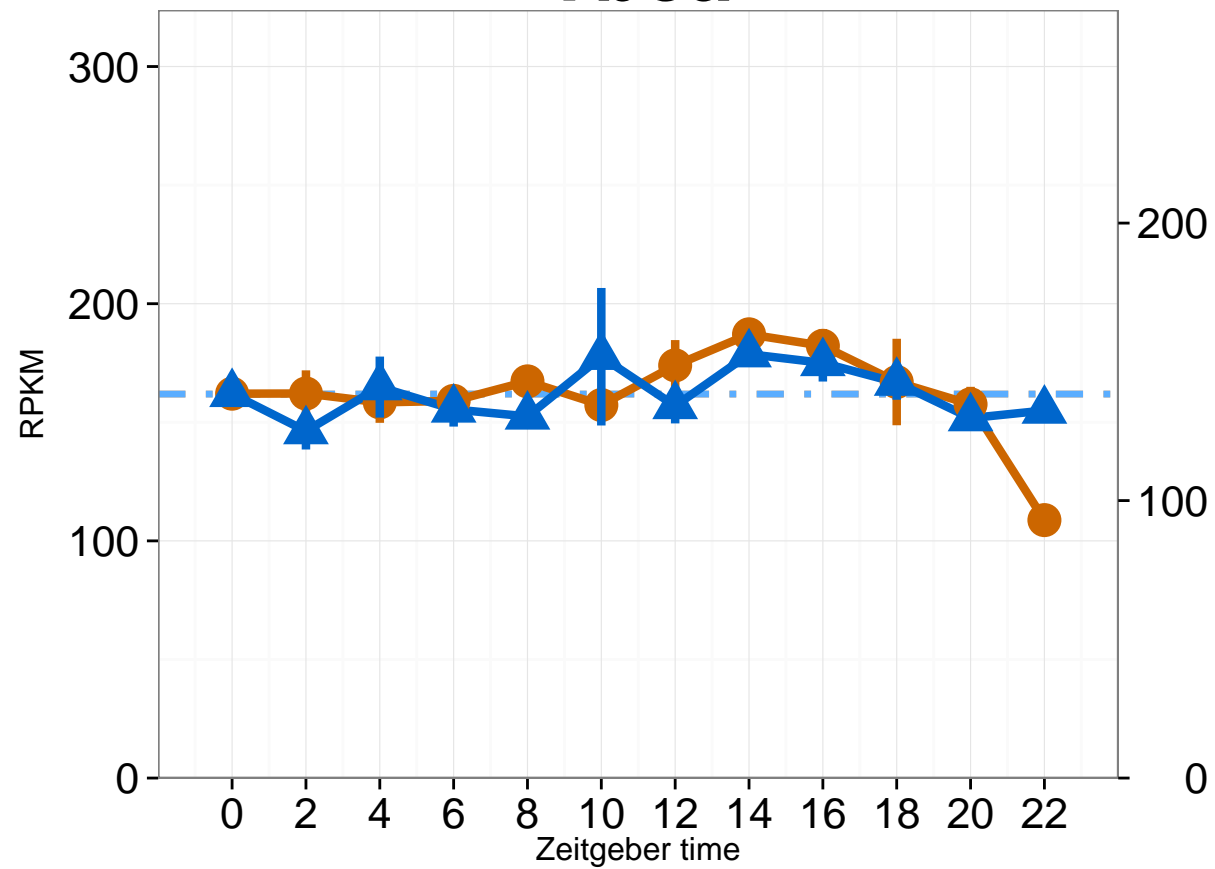

# Tbca

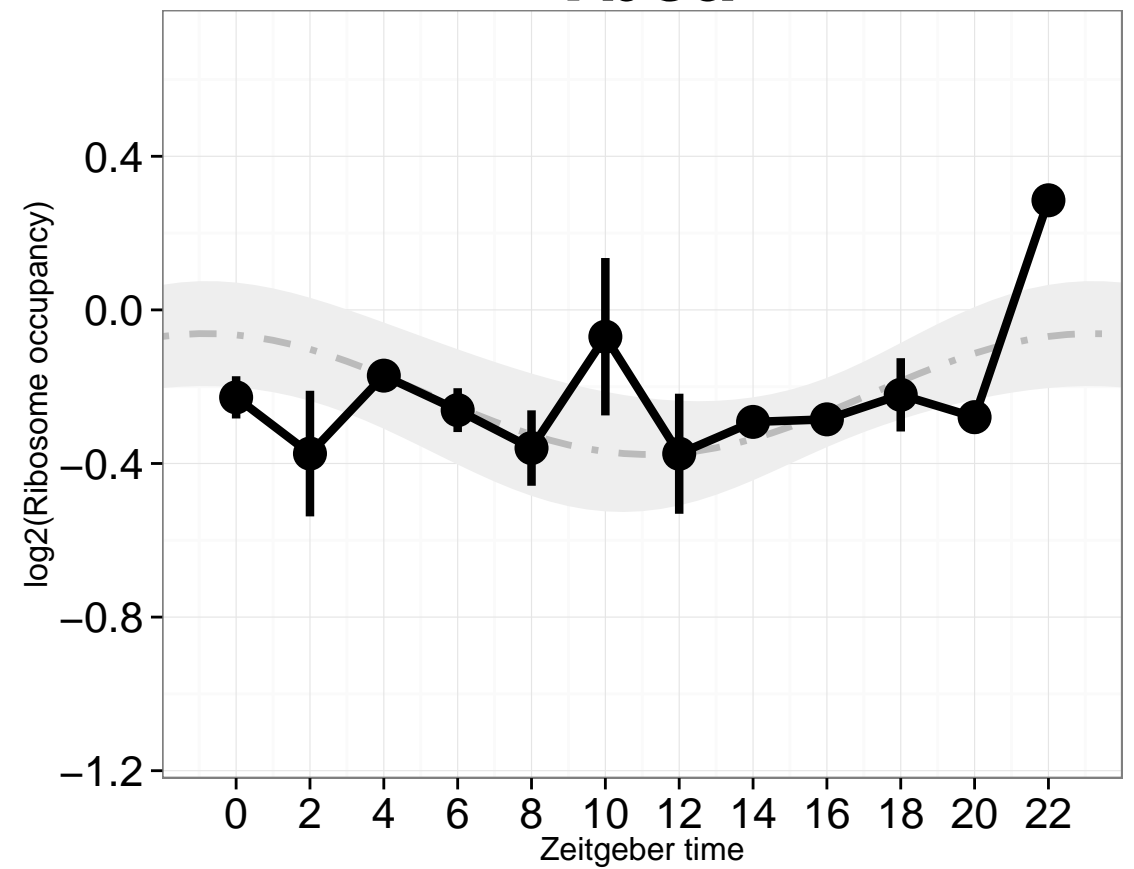

Supplement: SuppDataset_1.zip [file Tbca_set_A.pdf › Supplemental Dataset 1/A-mRNA_nonrhyth_translation_nonrhyth/Tbca_set_A.pdf]

## Tbcb

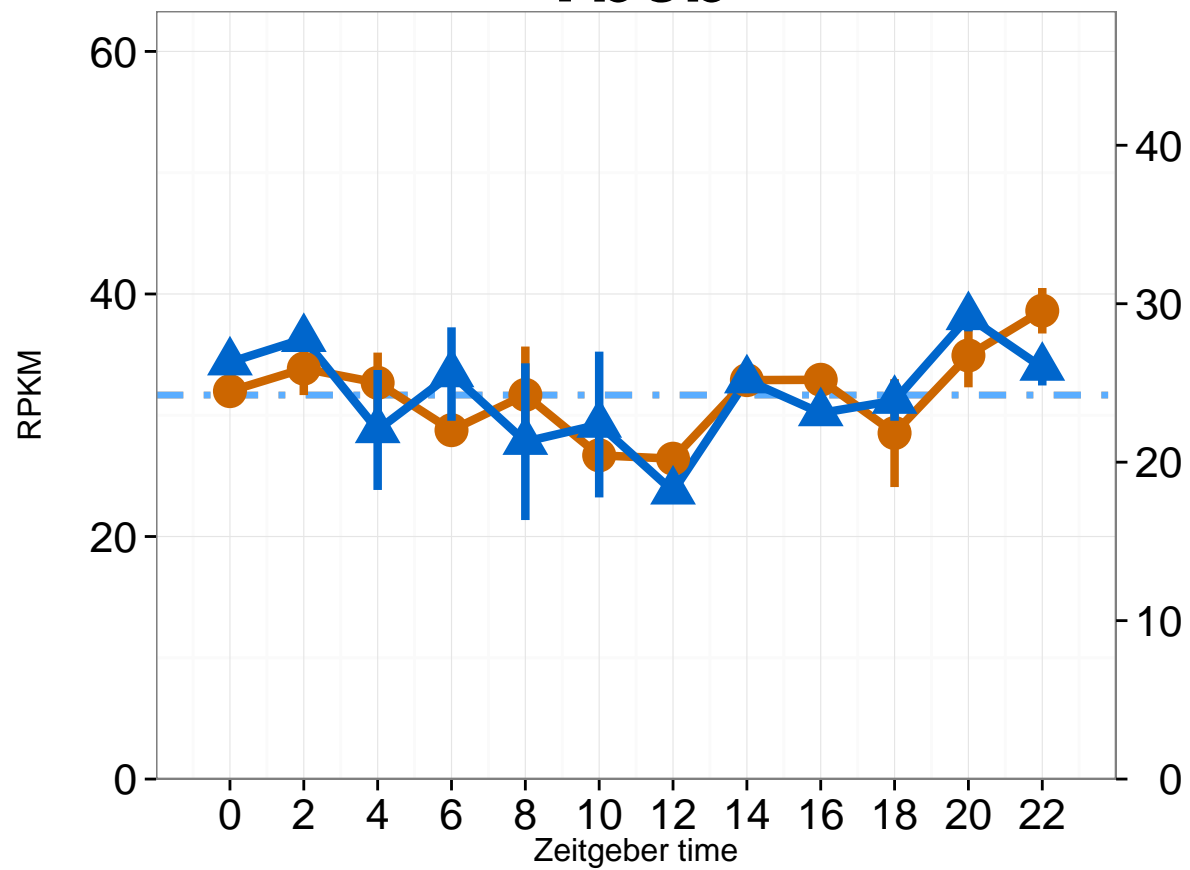

## Tbcb

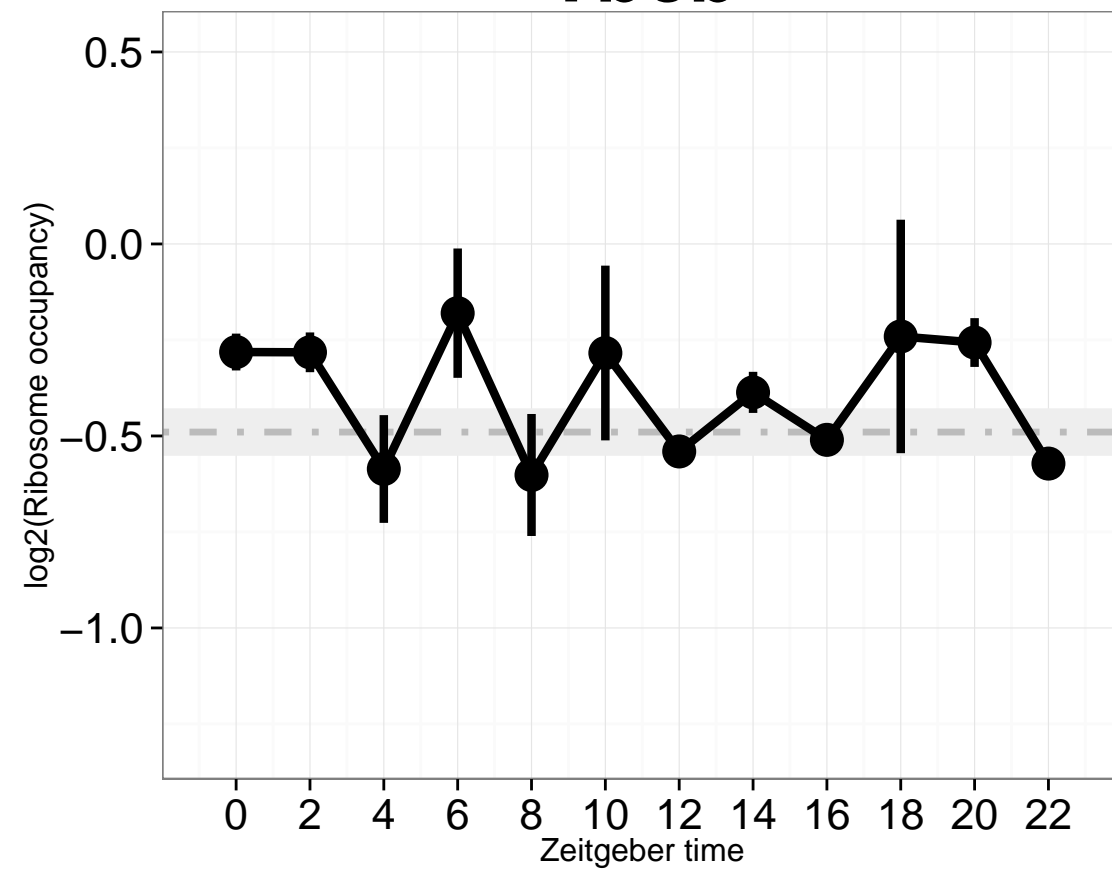

Supplement: SuppDataset_1.zip [file Tbcb_set_A.pdf › Supplemental Dataset 1/A-mRNA_nonrhyth_translation_nonrhyth/Tbcb_set_A.pdf]

## Tbcc

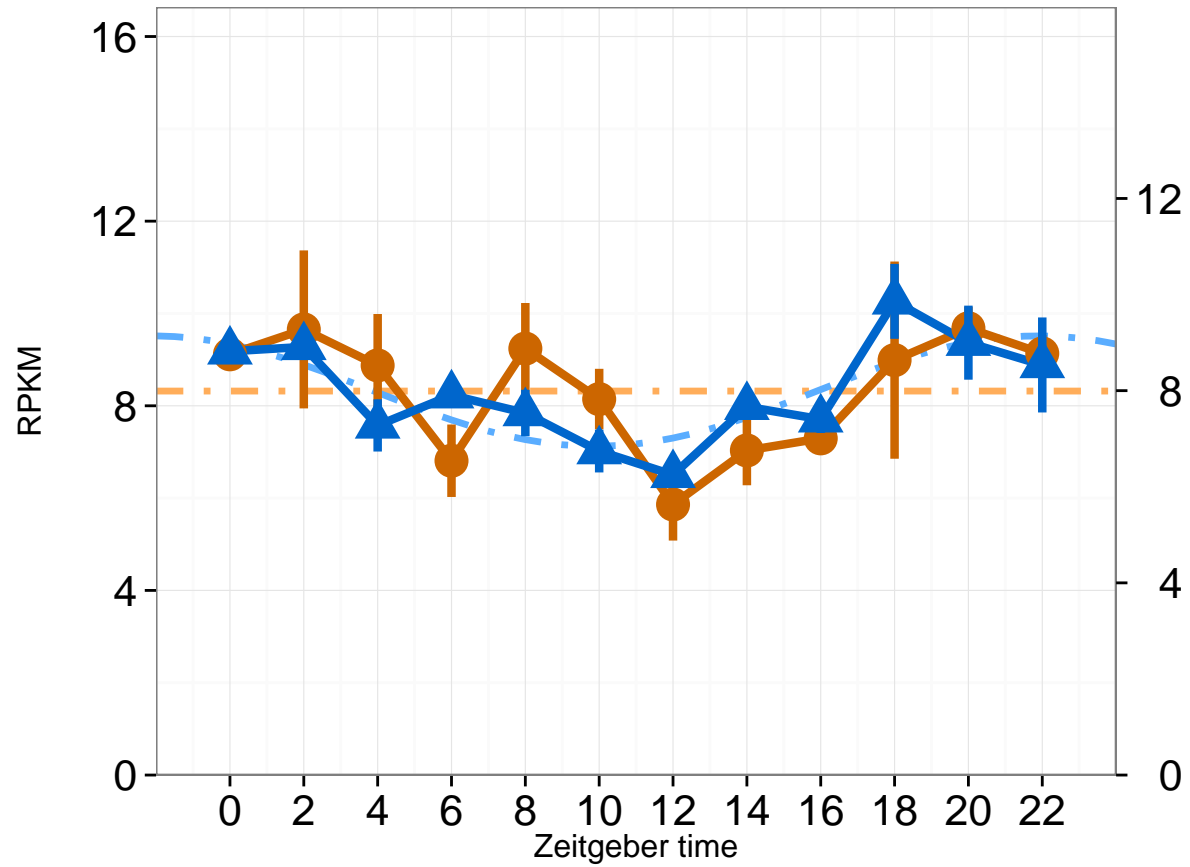

## Tbcc

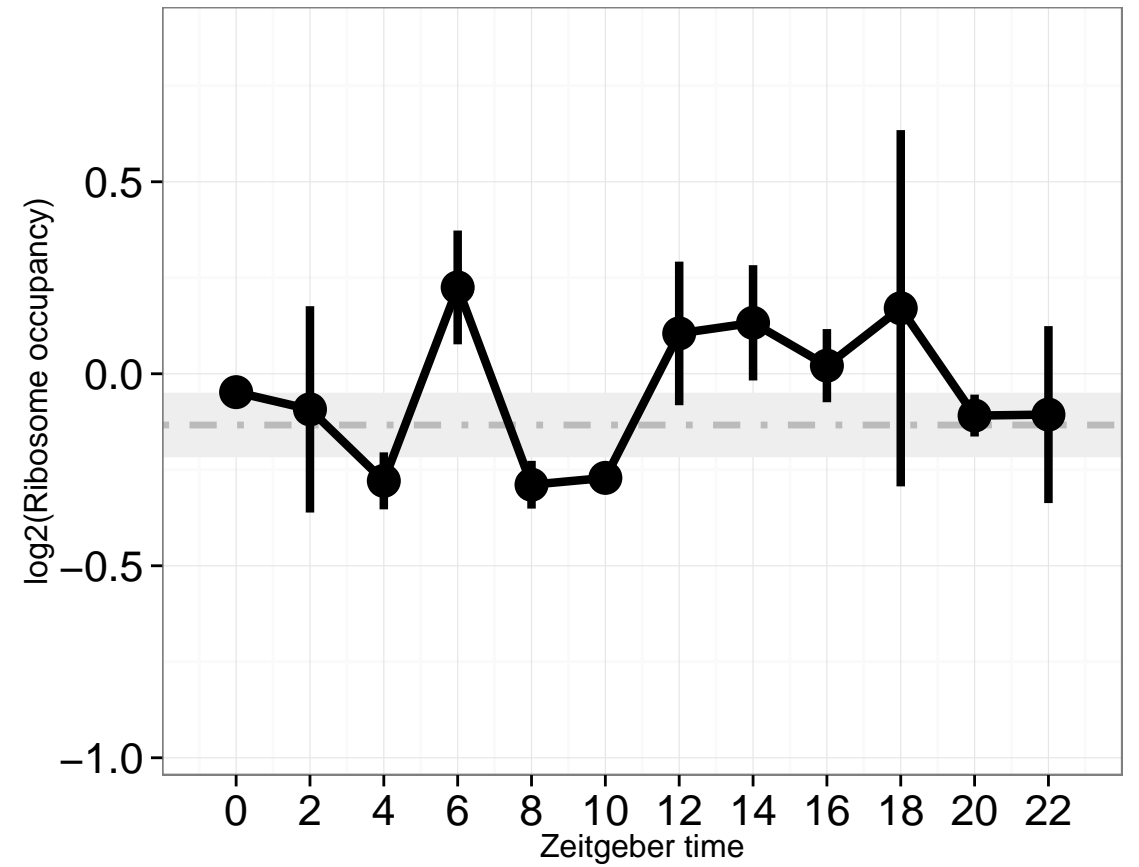

Supplement: SuppDataset_1.zip [file Tbcc_set_A.pdf › Supplemental Dataset 1/A-mRNA_nonrhyth_translation_nonrhyth/Tbcc_set_A.pdf]

# Tbccd1

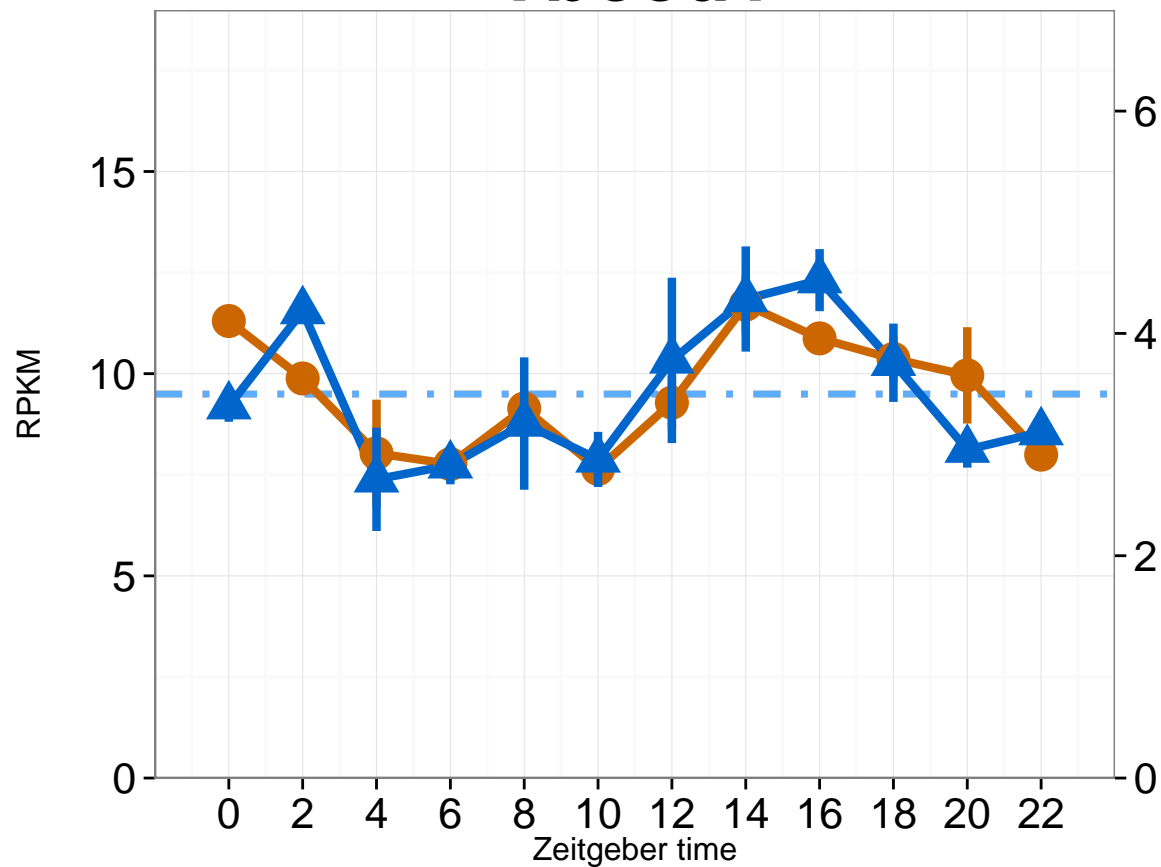

# Tbccd1

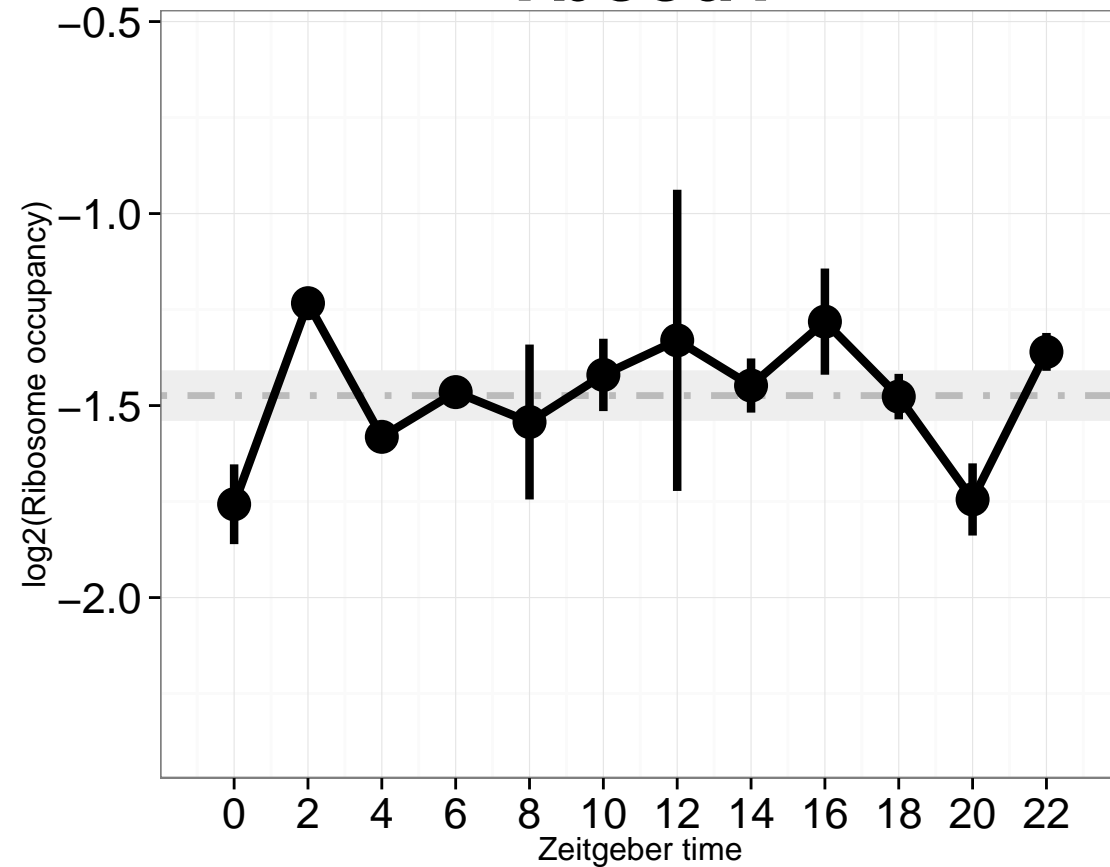

Supplement: SuppDataset_1.zip [file Tbccd1_set_A.pdf › Supplemental Dataset 1/A-mRNA_nonrhyth_translation_nonrhyth/Tbccd1_set_A.pdf]

## Tbcd

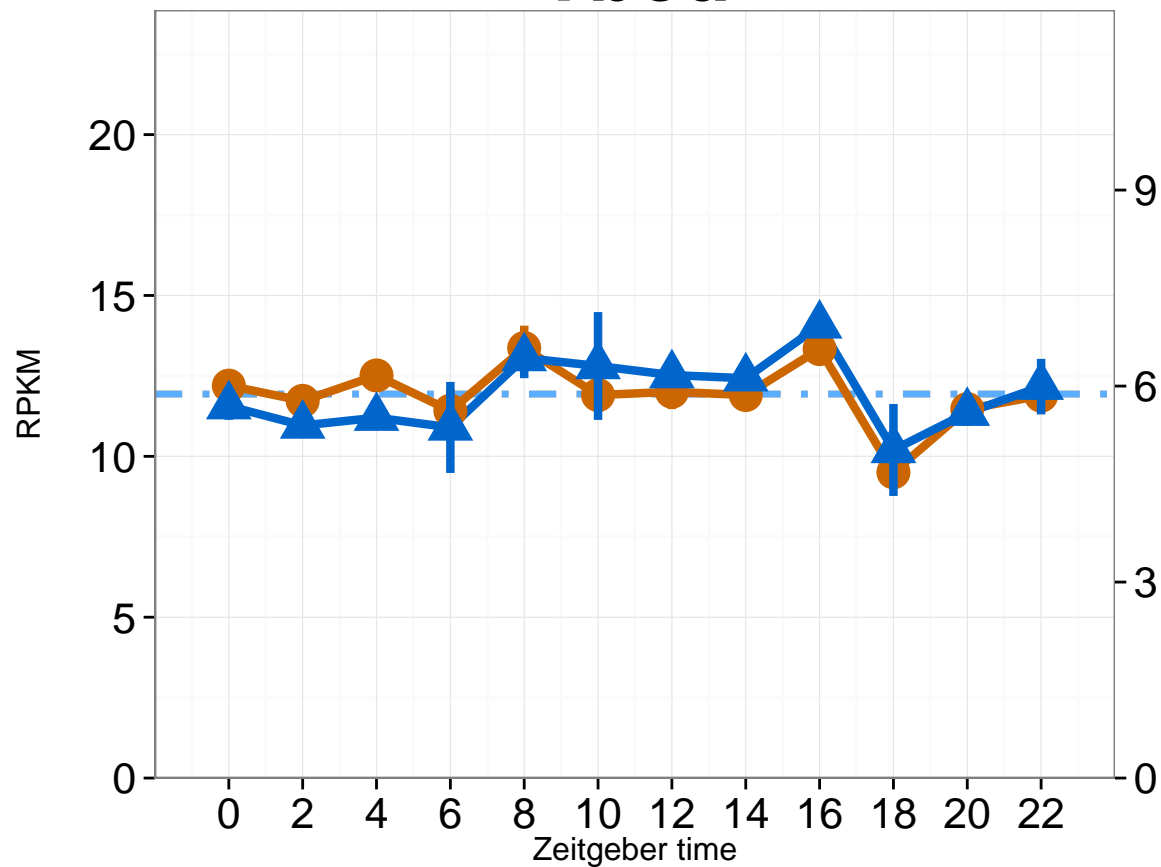

## Tbcd

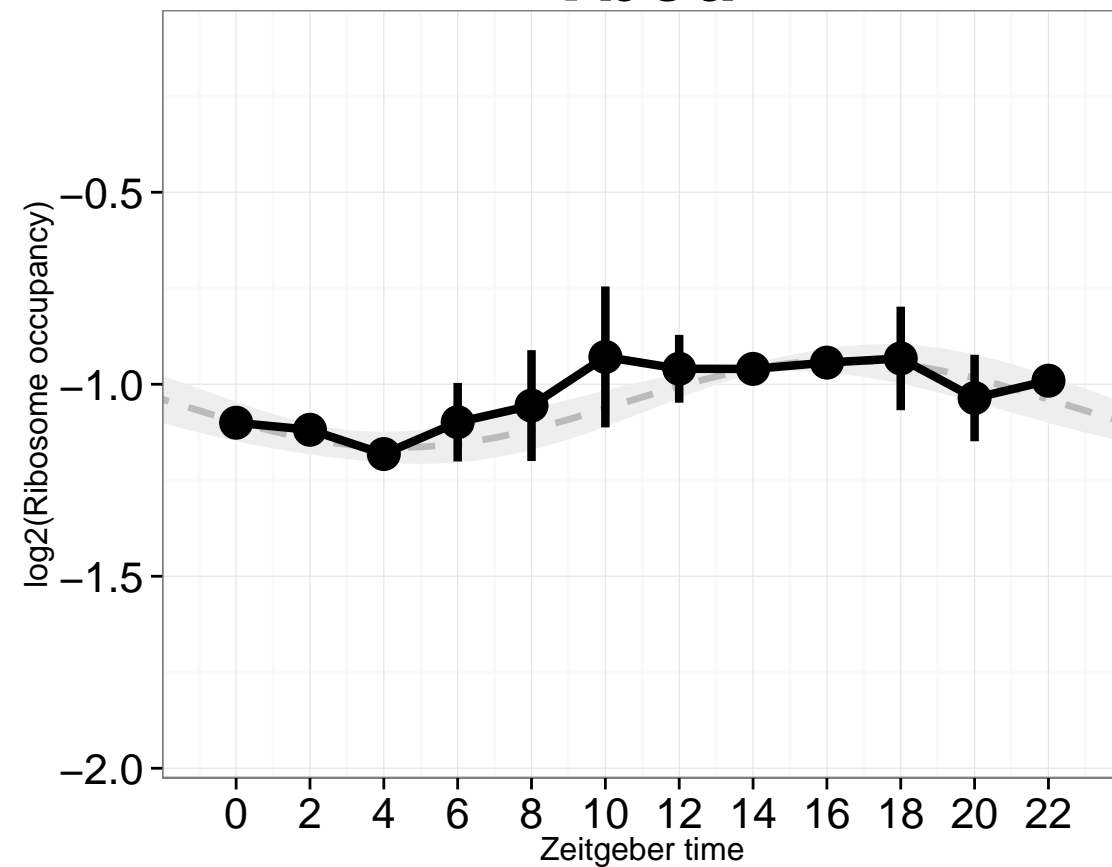

Supplement: SuppDataset_1.zip [file Tbcd_set_A.pdf › Supplemental Dataset 1/A-mRNA_nonrhyth_translation_nonrhyth/Tbcd_set_A.pdf]

# Tbce

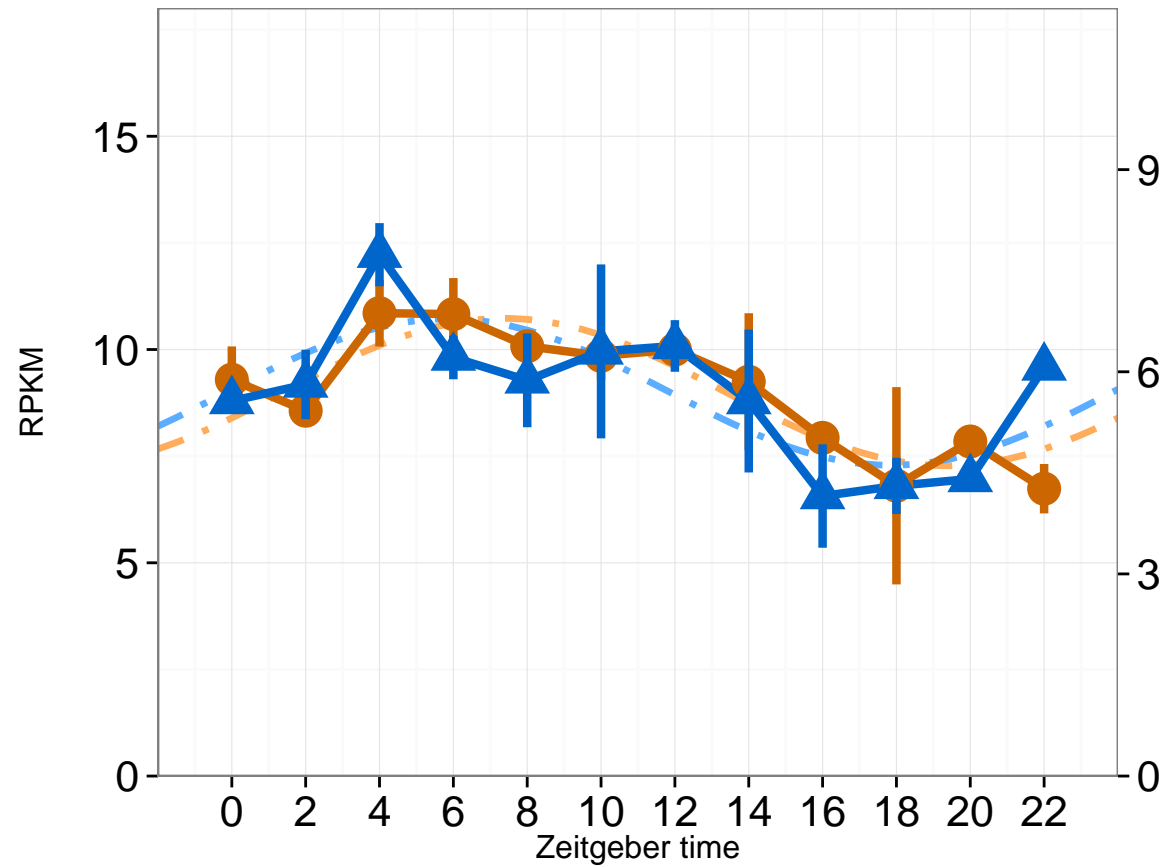

# Tbce

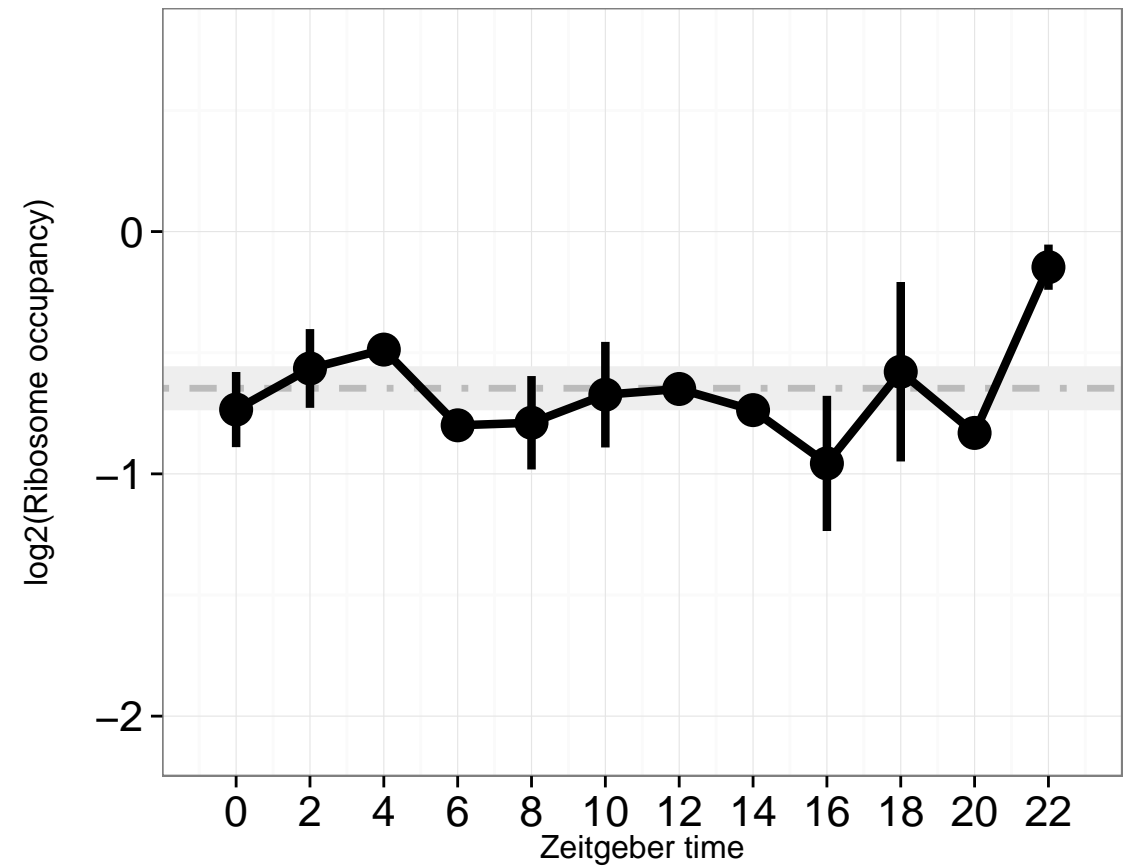

Supplement: SuppDataset_1.zip [file Tbce_set_A.pdf › Supplemental Dataset 1/A-mRNA_nonrhyth_translation_nonrhyth/Tbce_set_A.pdf]

# Tbck

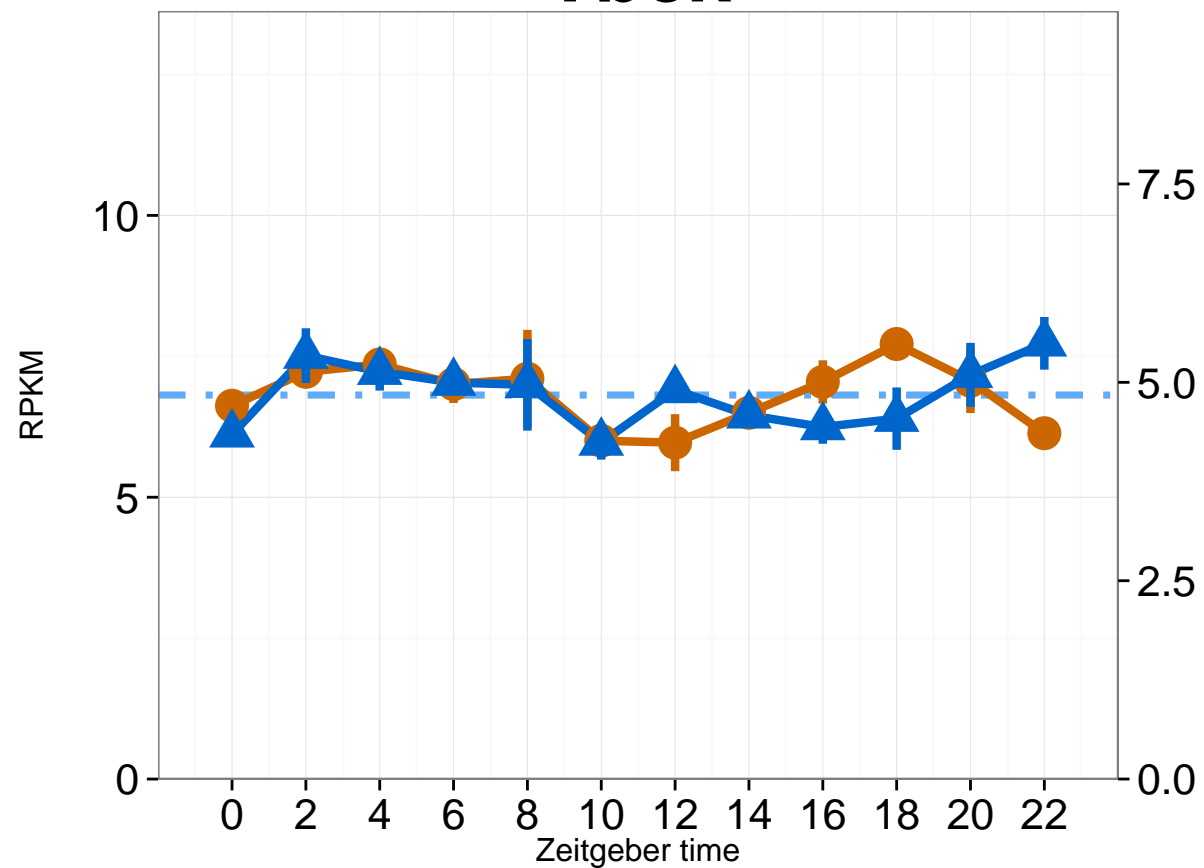

# Tbck

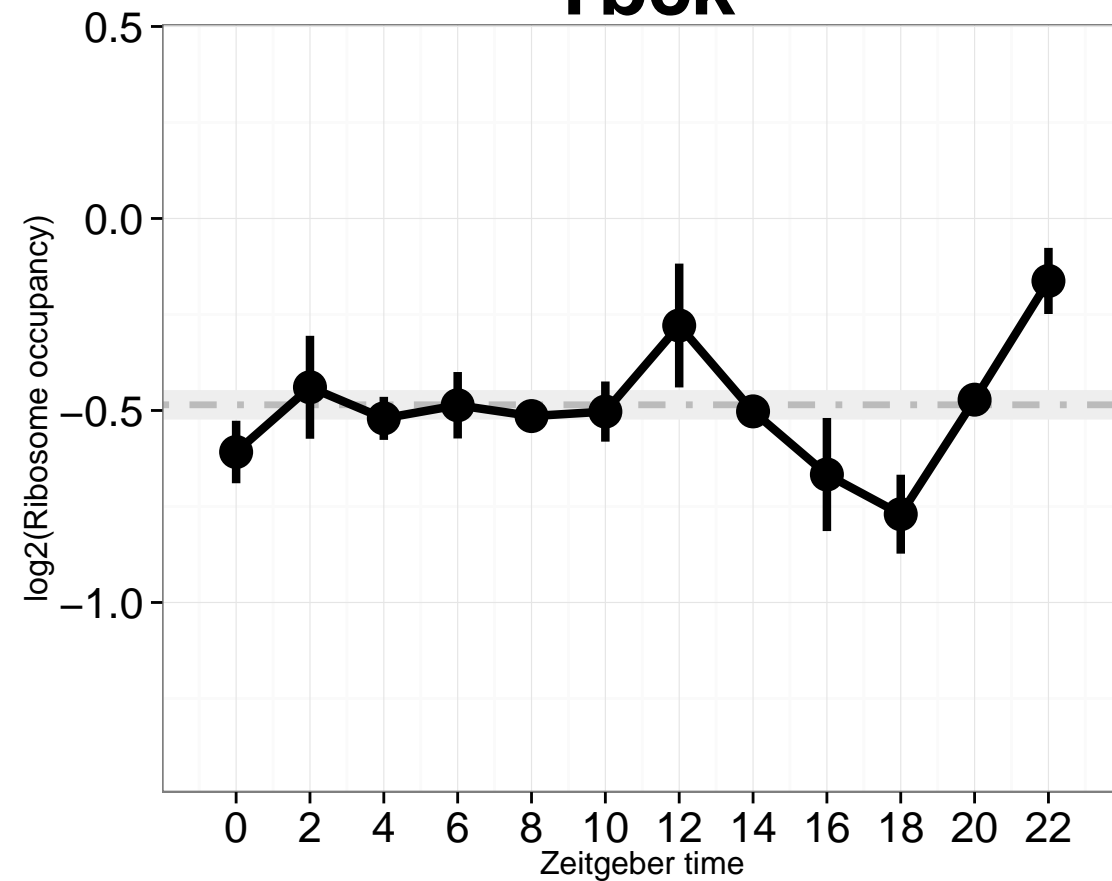

Supplement: SuppDataset_1.zip [file Tbck_set_A.pdf › Supplemental Dataset 1/A-mRNA_nonrhyth_translation_nonrhyth/Tbck_set_A.pdf]

## Tbk1

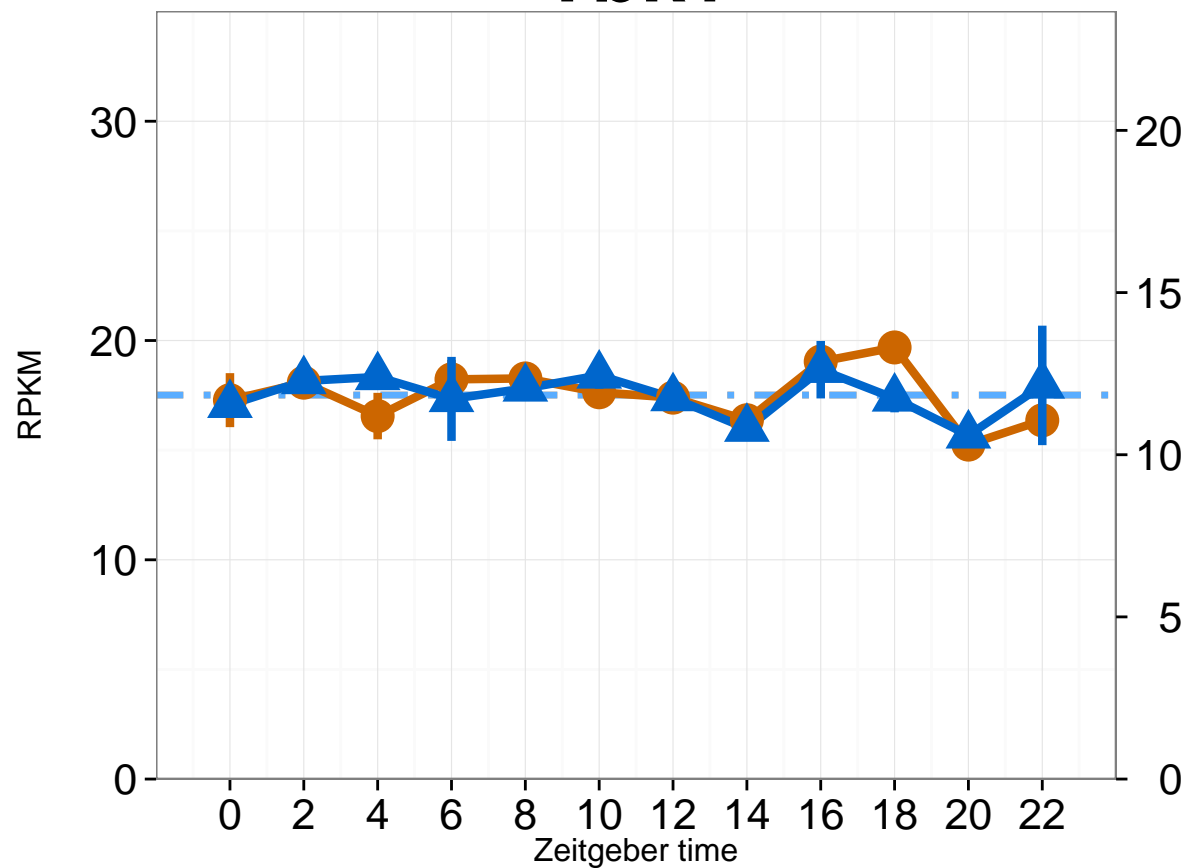

## Tbk1

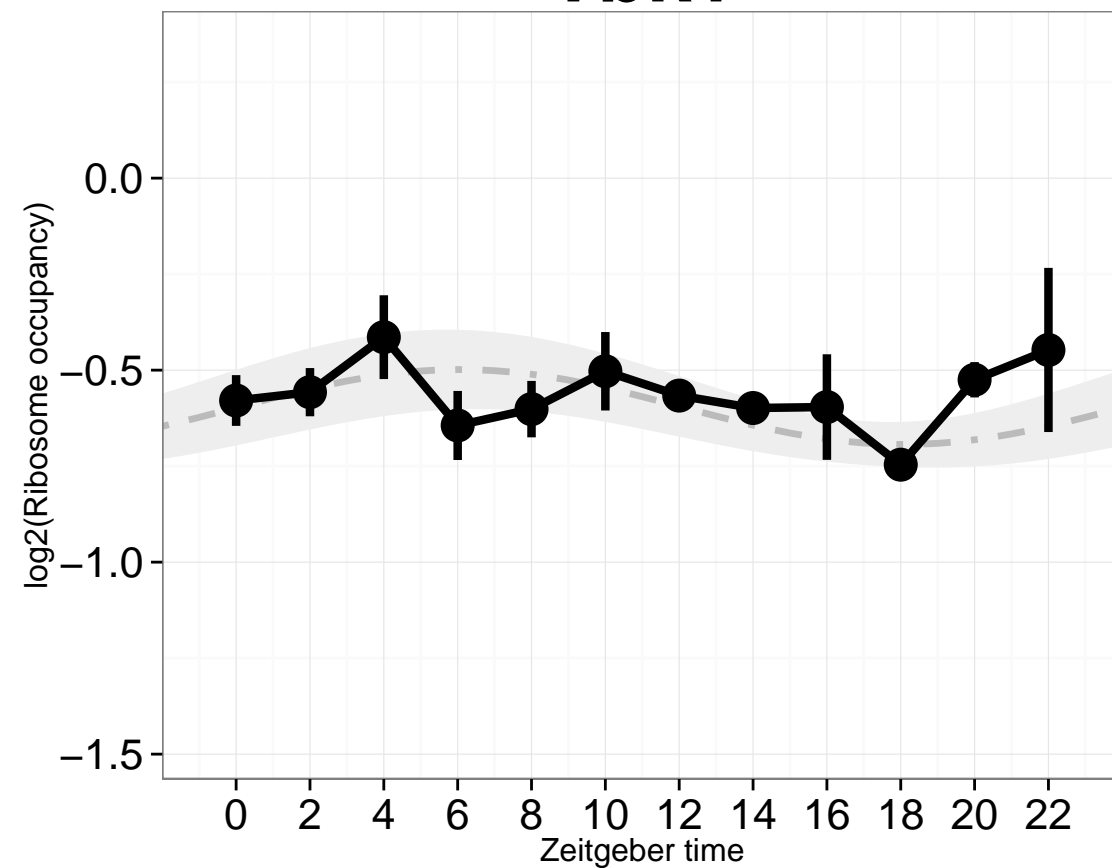

Supplement: SuppDataset_1.zip [file Tbk1_set_A.pdf › Supplemental Dataset 1/A-mRNA_nonrhyth_translation_nonrhyth/Tbk1_set_A.pdf]

# Tbl1x

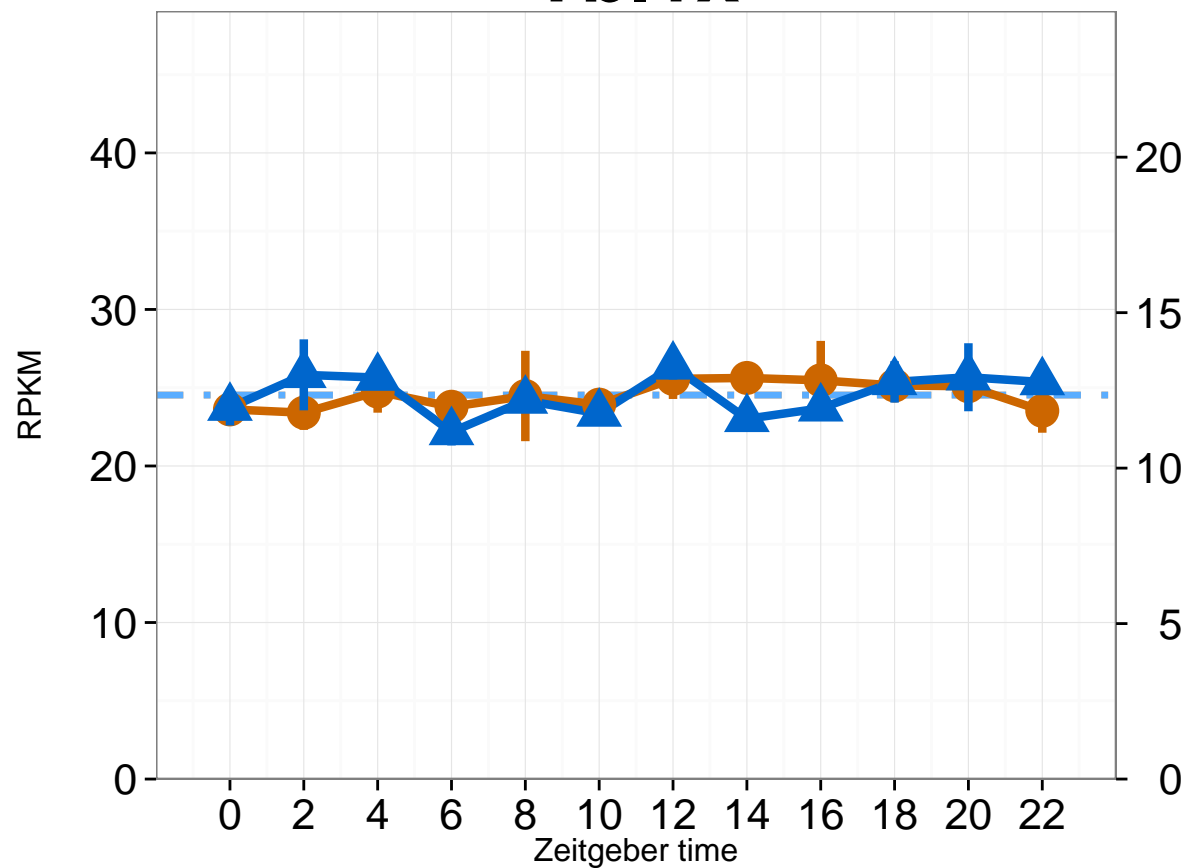

# Tbl1x

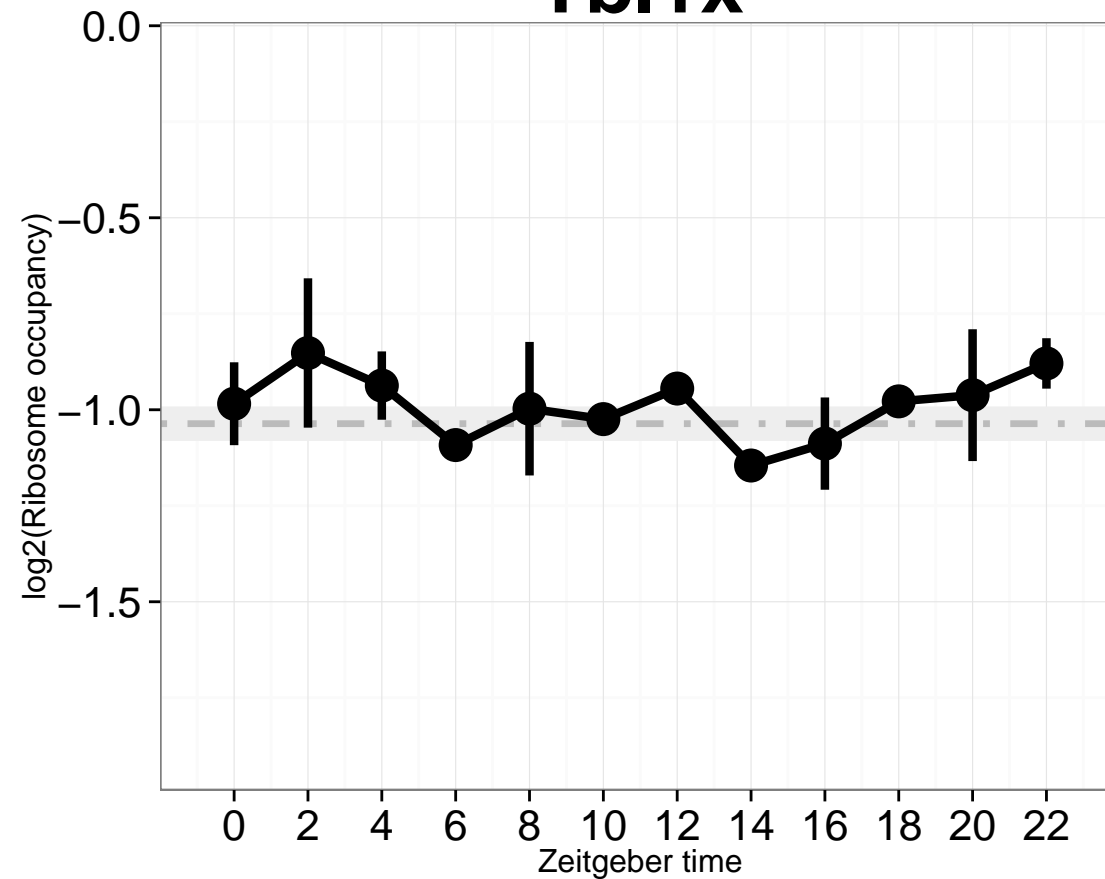

Supplement: SuppDataset_1.zip [file Tbl1x_set_A.pdf › Supplemental Dataset 1/A-mRNA_nonrhyth_translation_nonrhyth/Tbl1x_set_A.pdf]

# Tbl1xr1

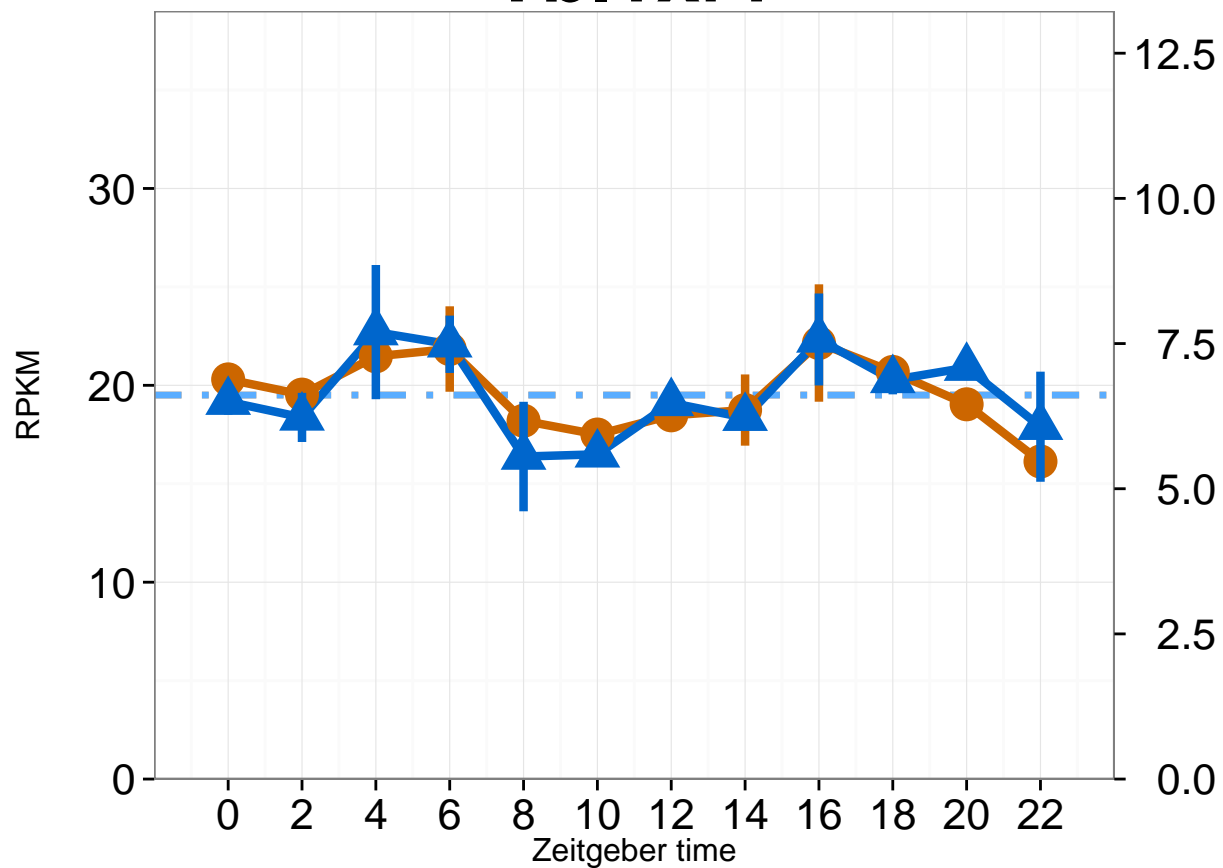

# Tbl1xr1

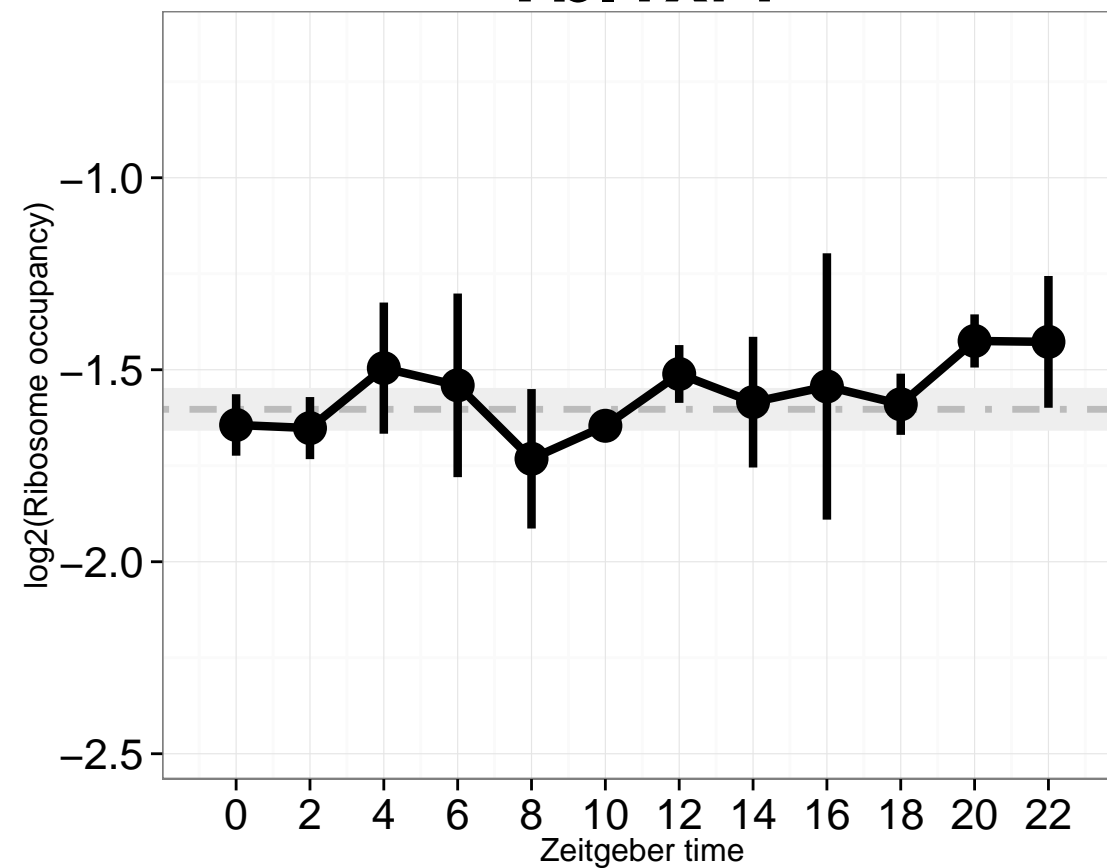

Supplement: SuppDataset_1.zip [file Tbl1xr1_set_A.pdf › Supplemental Dataset 1/A-mRNA_nonrhyth_translation_nonrhyth/Tbl1xr1_set_A.pdf]

## Tbl2

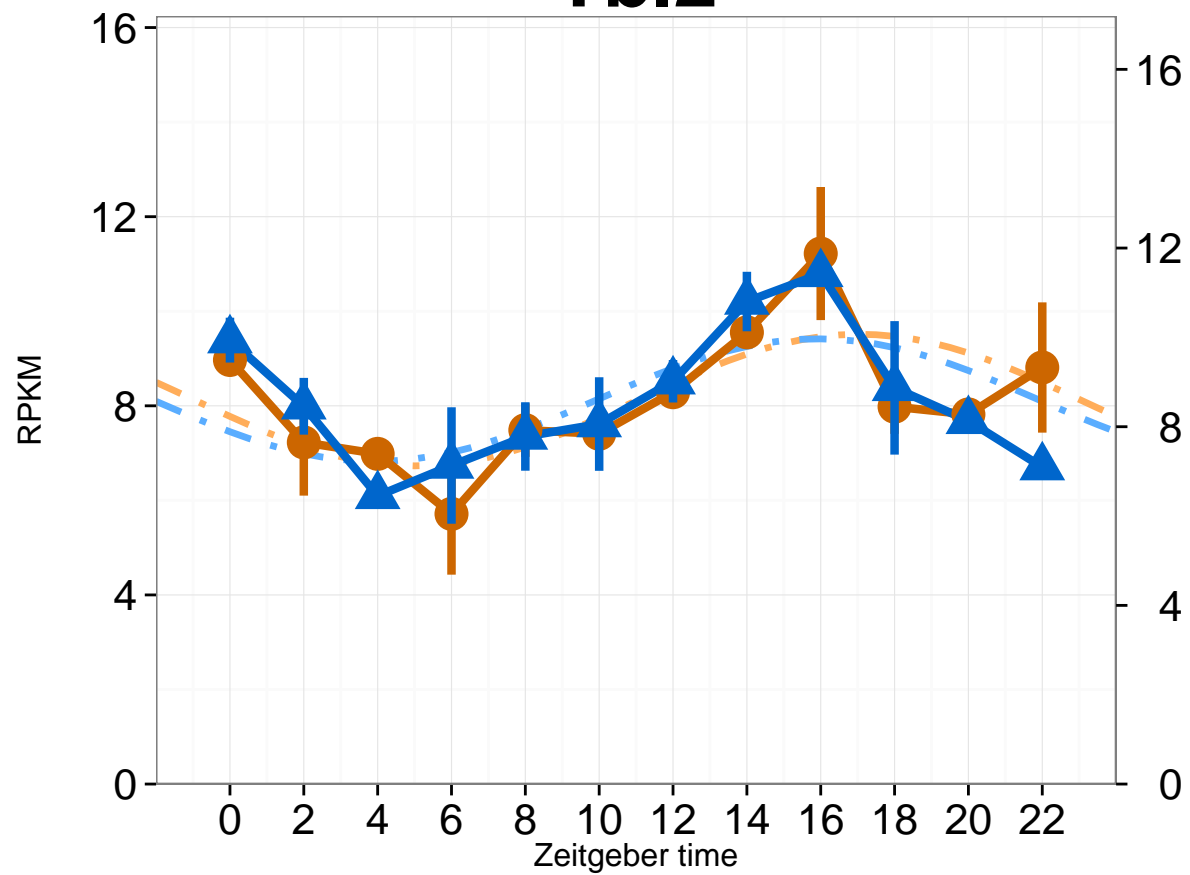

## Tbl2

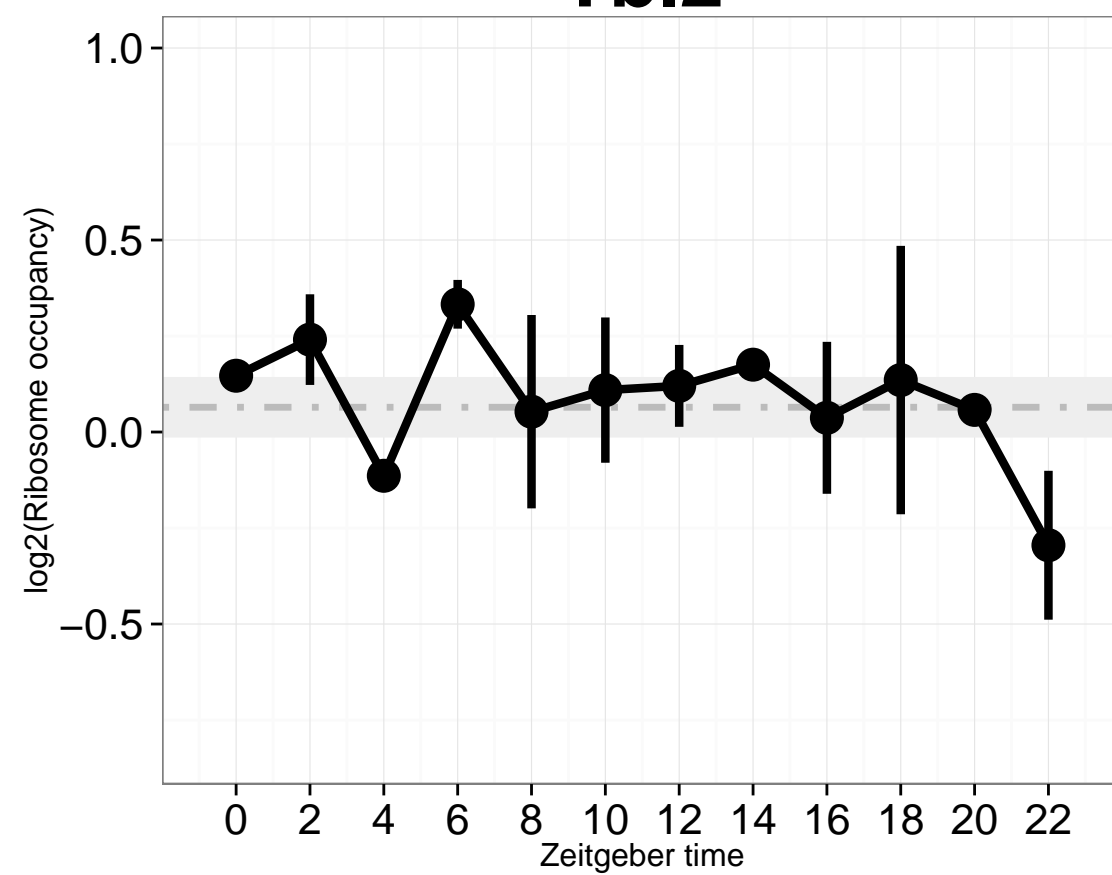

Supplement: SuppDataset_1.zip [file Tbl2_set_A.pdf › Supplemental Dataset 1/A-mRNA_nonrhyth_translation_nonrhyth/Tbl2_set_A.pdf]

## Tbl3

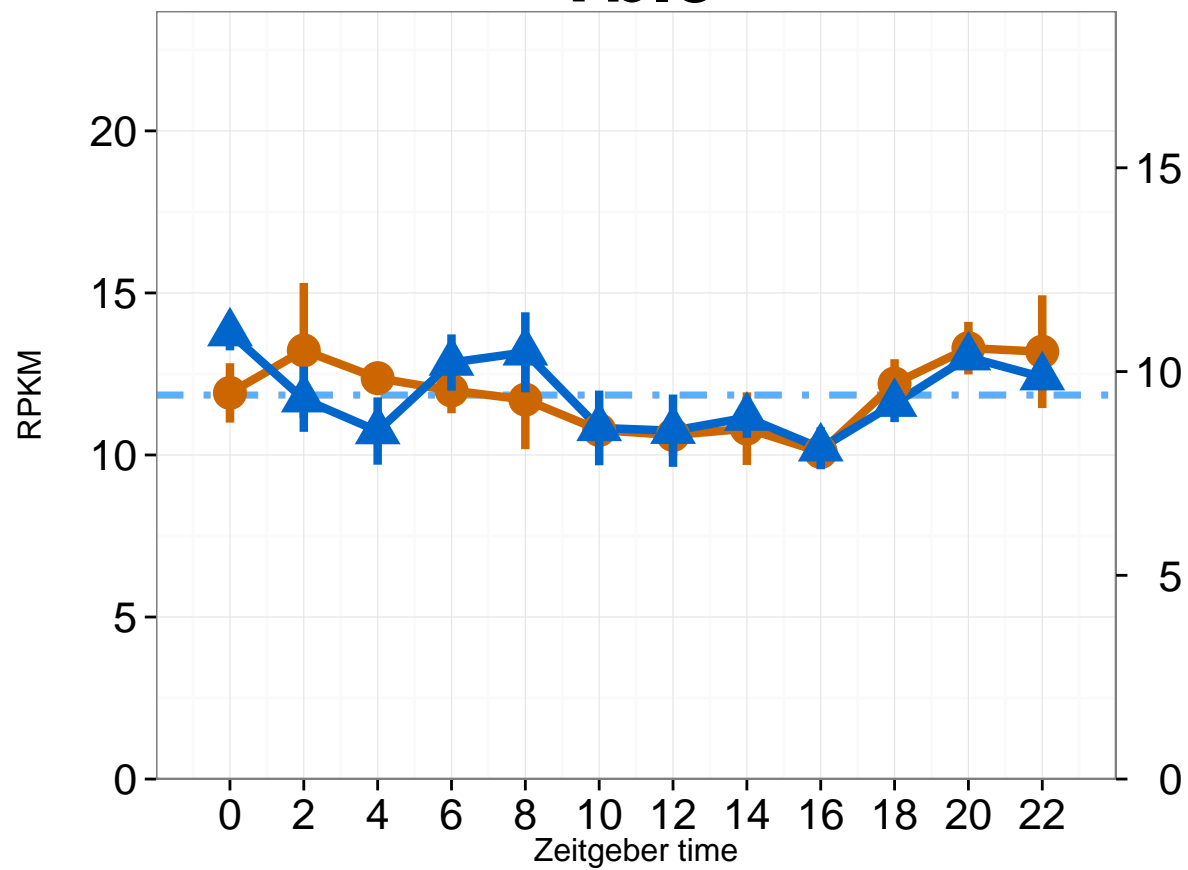

## Tbl3

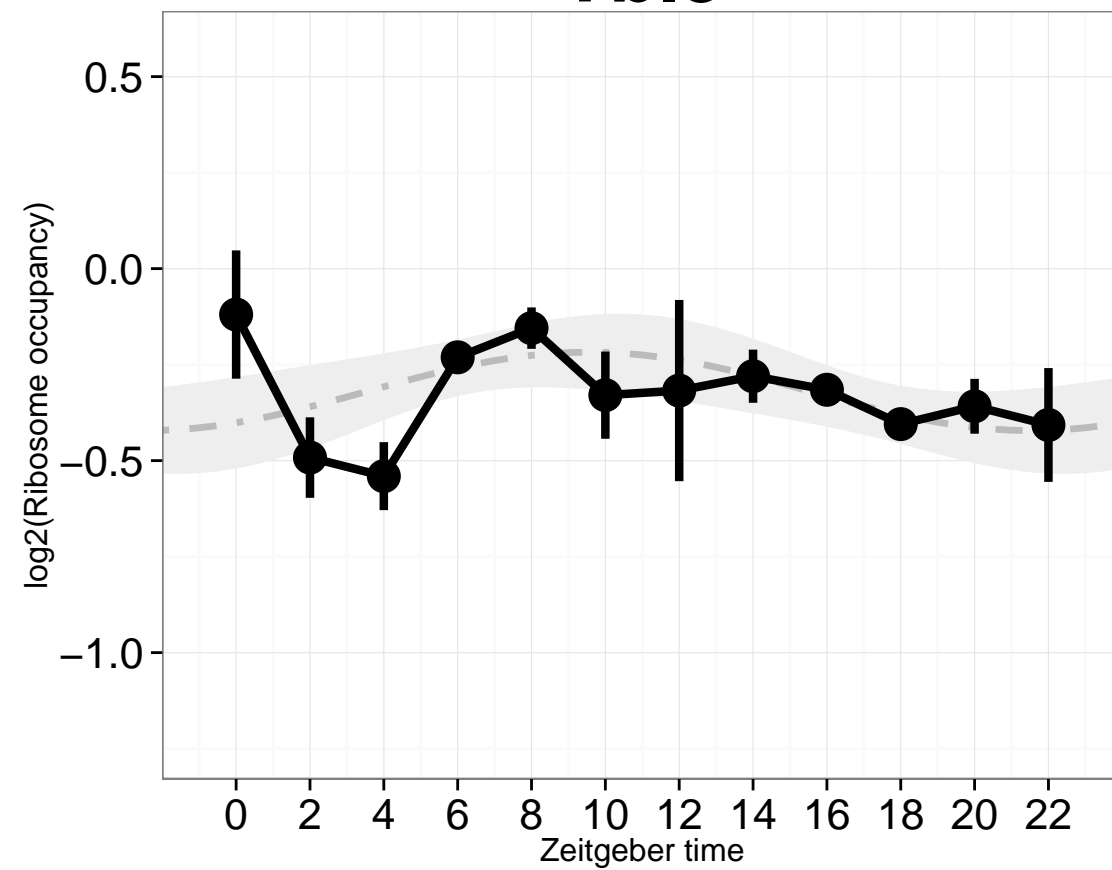

Supplement: SuppDataset_1.zip [file Tbl3_set_A.pdf › Supplemental Dataset 1/A-mRNA_nonrhyth_translation_nonrhyth/Tbl3_set_A.pdf]

## Tbp

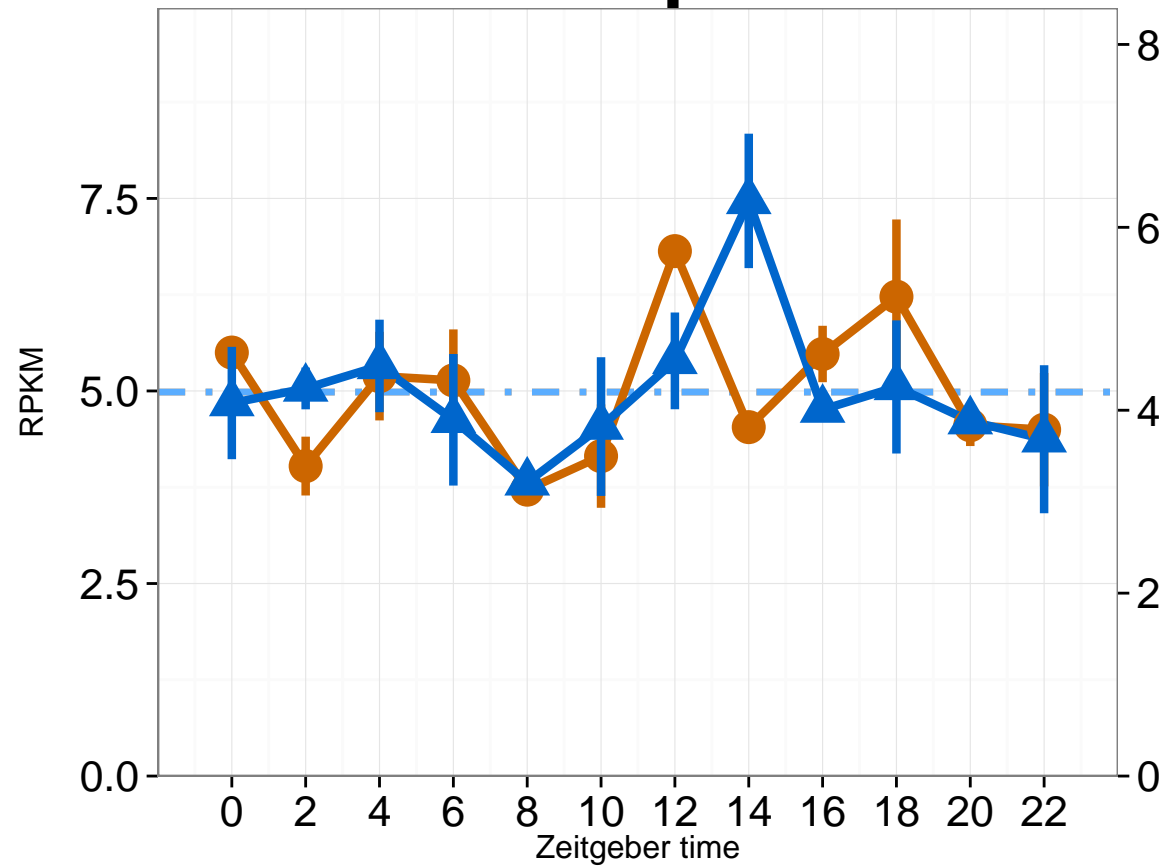

## Tbp

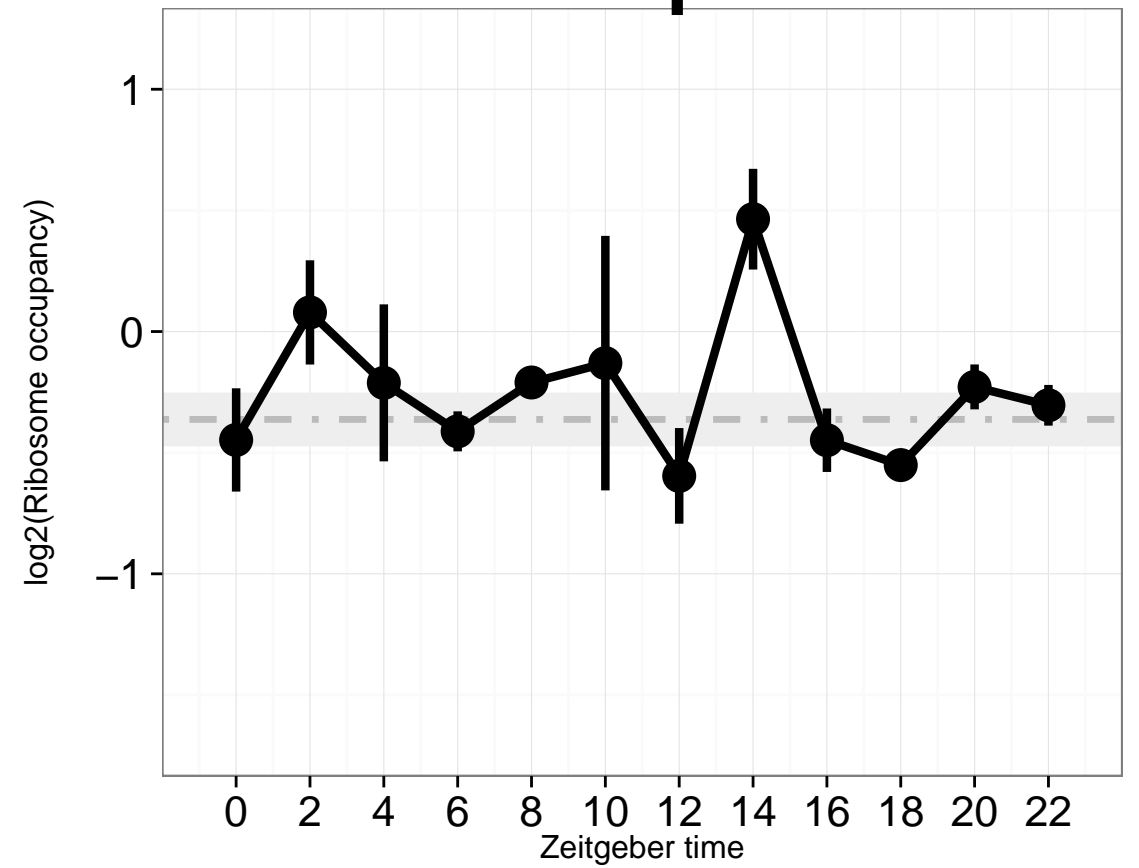

Supplement: SuppDataset_1.zip [file Tbp_set_A.pdf › Supplemental Dataset 1/A-mRNA_nonrhyth_translation_nonrhyth/Tbp_set_A.pdf]

# Tbpl1

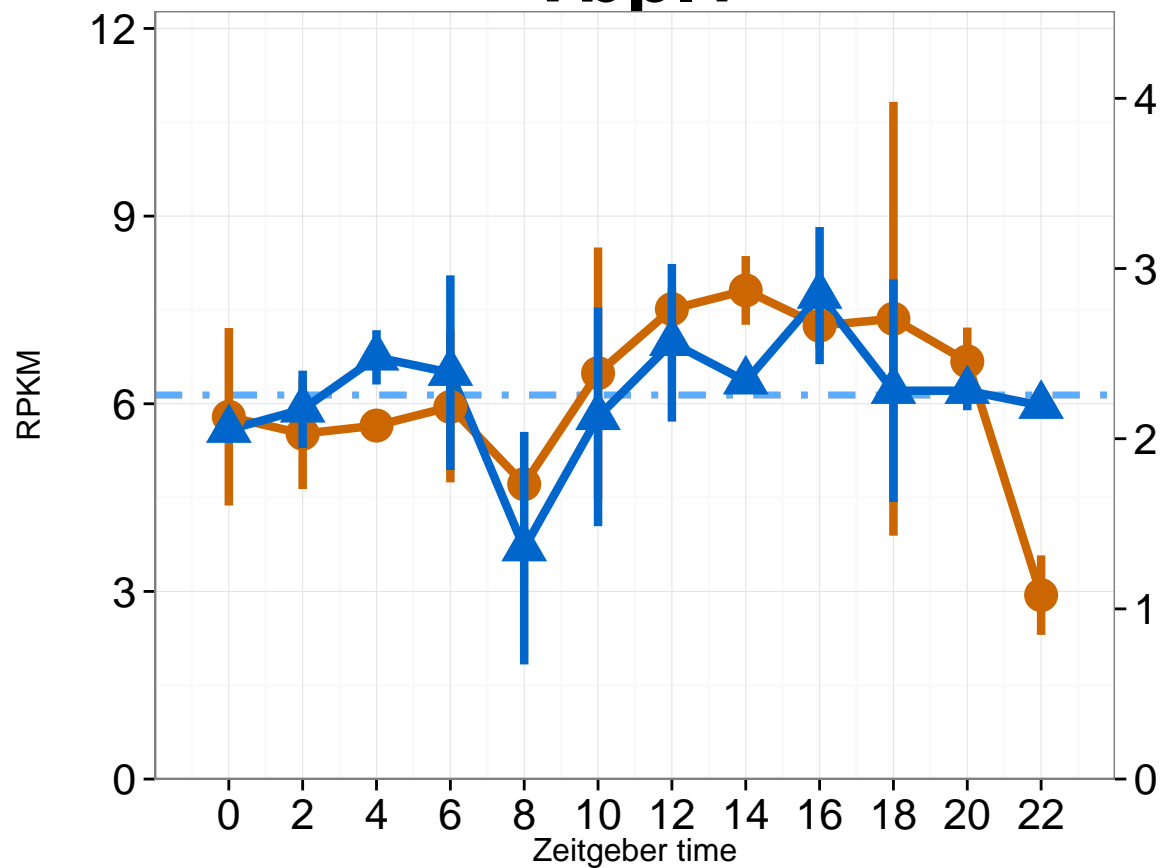

# Tbpl1

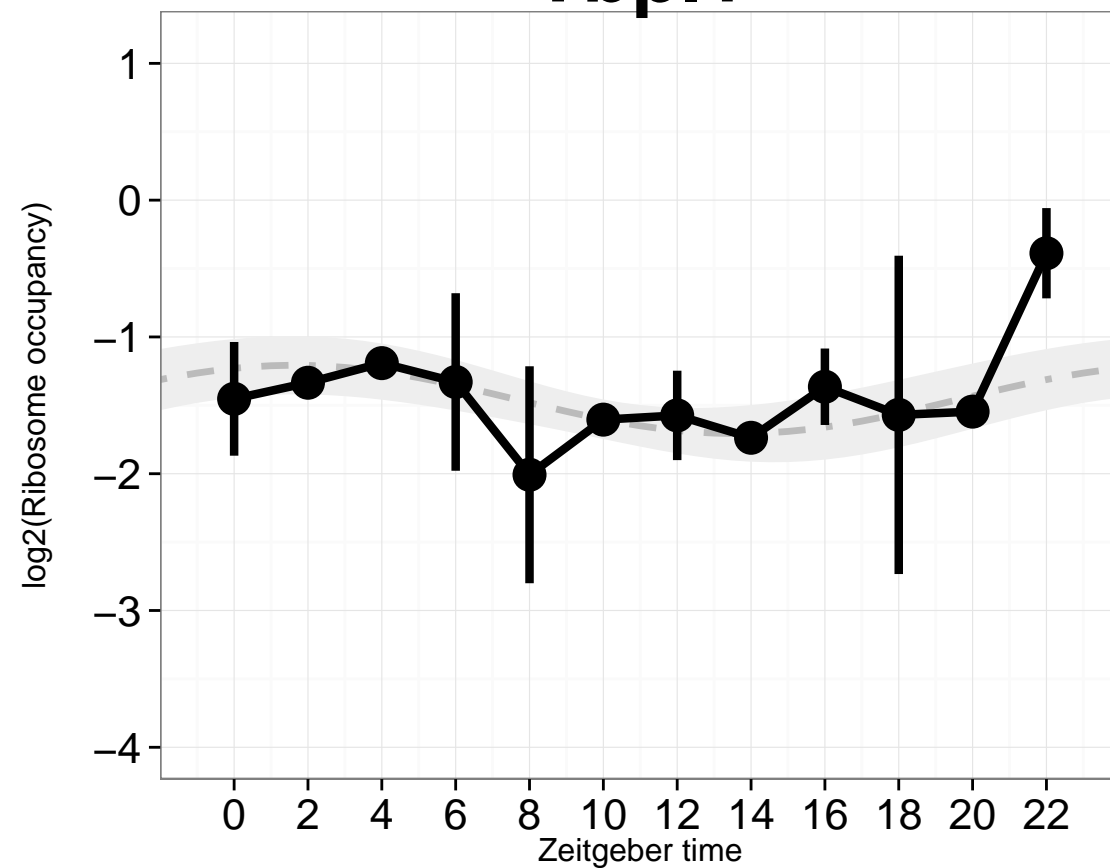

Supplement: SuppDataset_1.zip [file Tbpl1_set_A.pdf › Supplemental Dataset 1/A-mRNA_nonrhyth_translation_nonrhyth/Tbpl1_set_A.pdf]

# Tbrg1

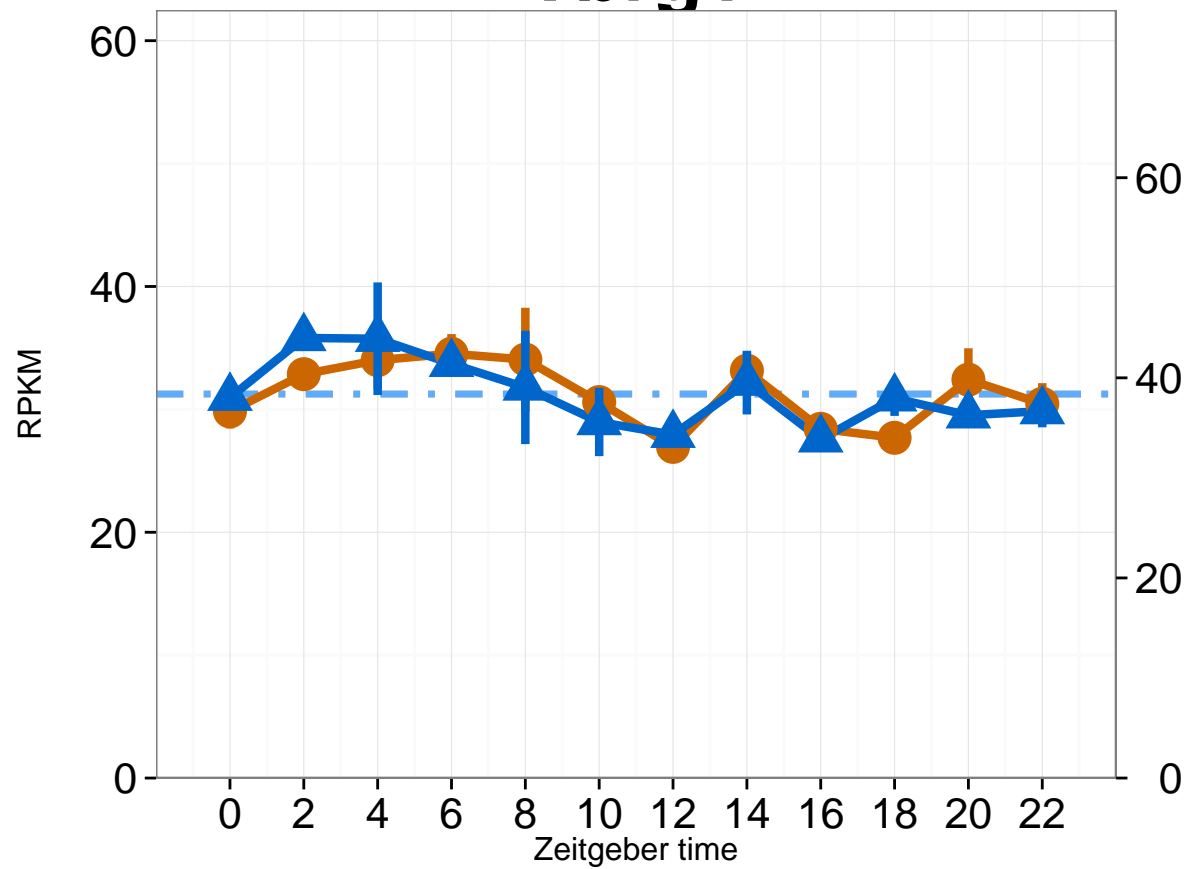

# Tbrg1

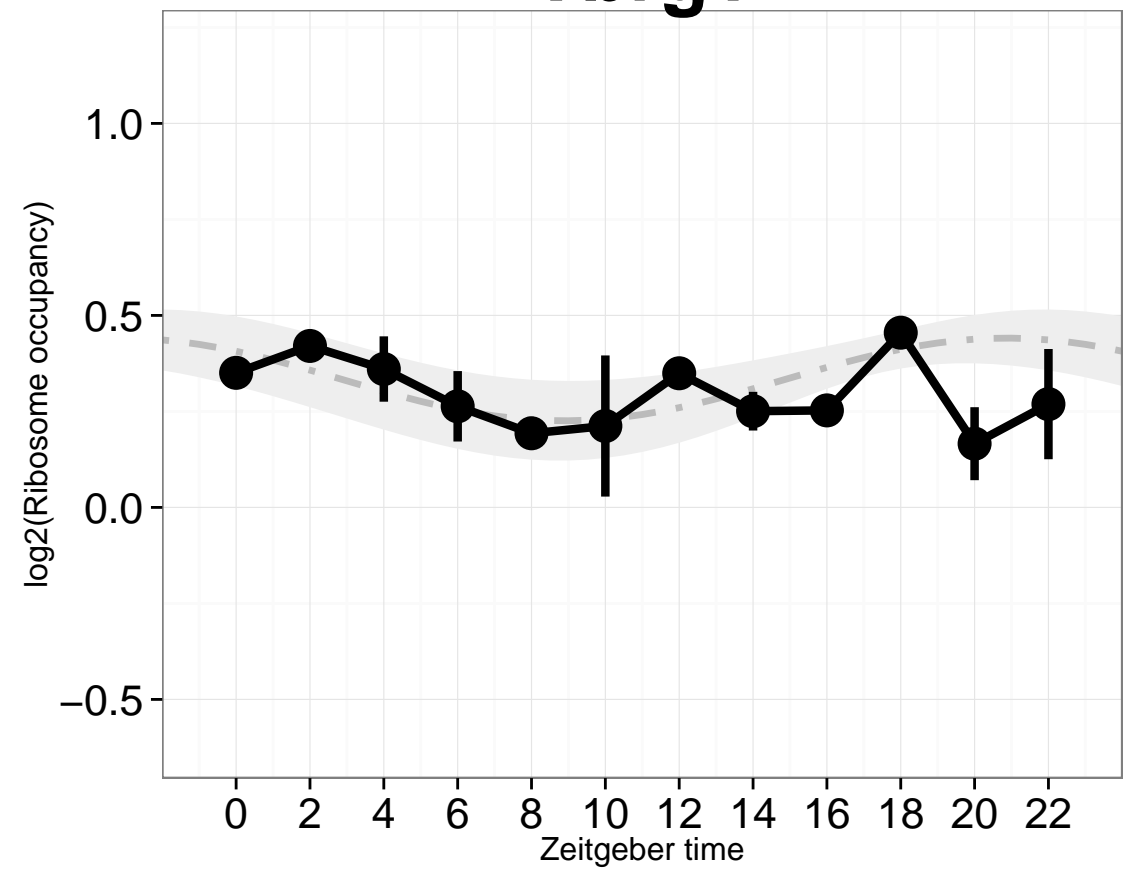

Supplement: SuppDataset_1.zip [file Tbrg1_set_A.pdf › Supplemental Dataset 1/A-mRNA_nonrhyth_translation_nonrhyth/Tbrg1_set_A.pdf]

# Tbrg4

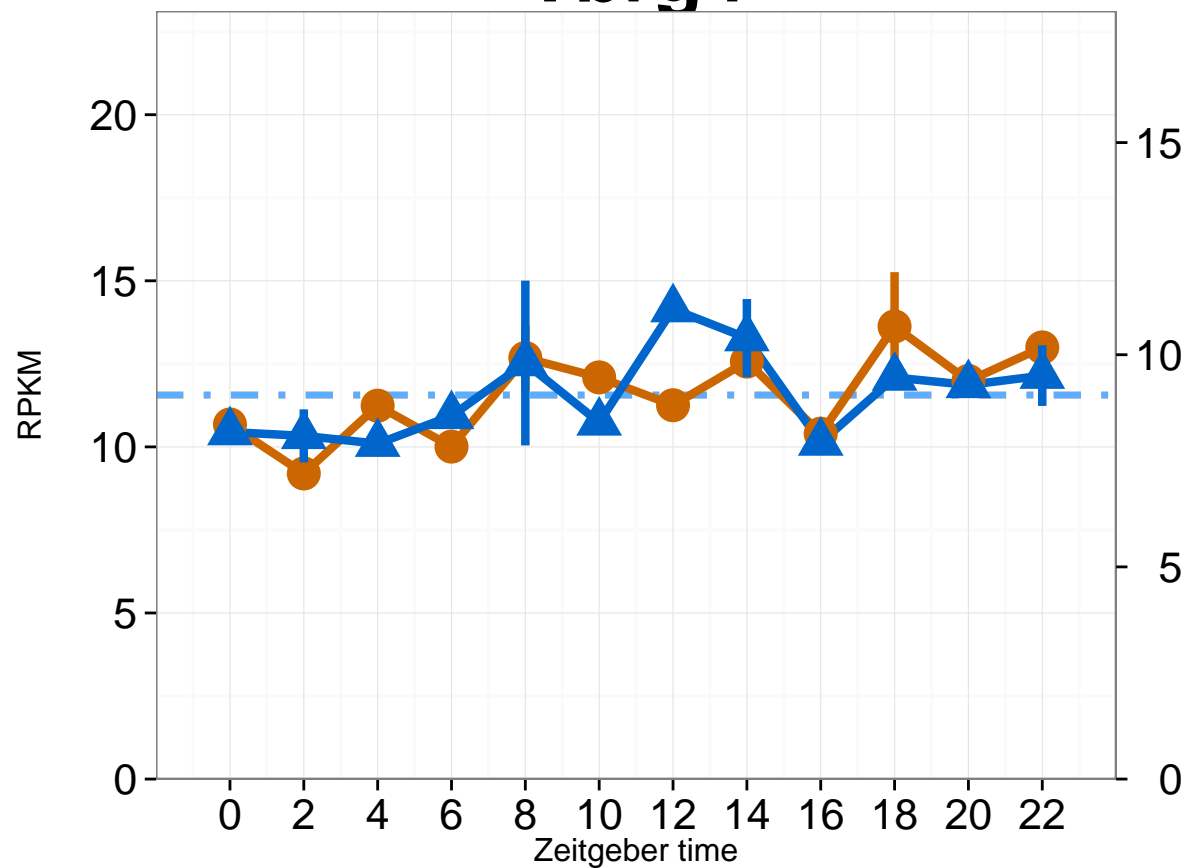

# Tbrg4

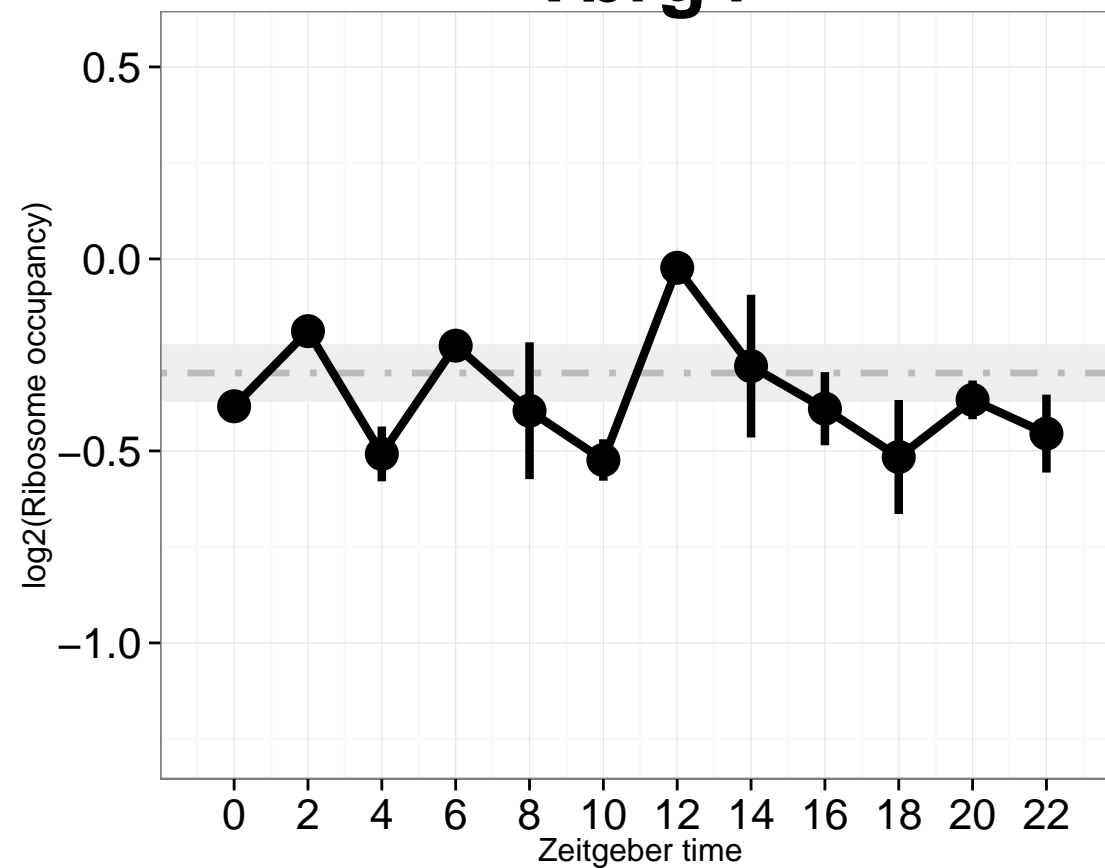

Supplement: SuppDataset_1.zip [file Tbrg4_set_A.pdf › Supplemental Dataset 1/A-mRNA_nonrhyth_translation_nonrhyth/Tbrg4_set_A.pdf]

## Tbx20

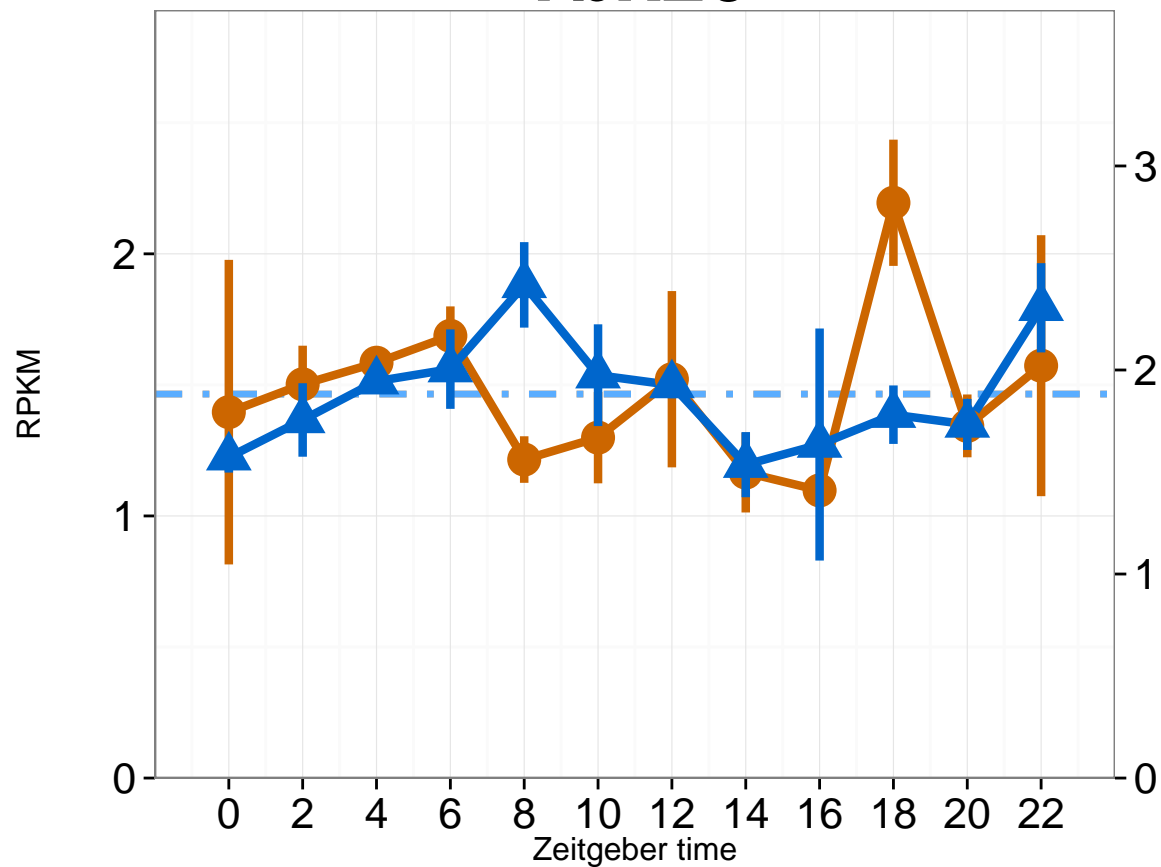

## Tbx20

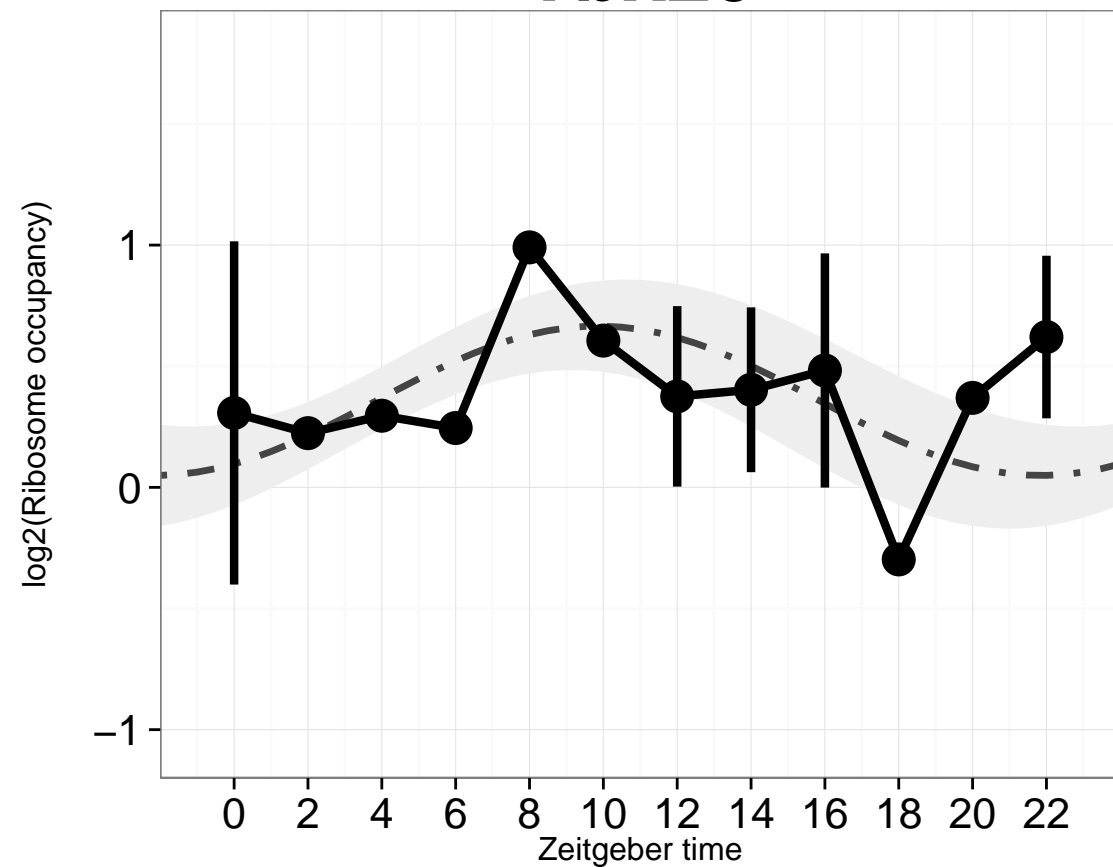

Supplement: SuppDataset_1.zip [file Tbx20_set_A.pdf › Supplemental Dataset 1/A-mRNA_nonrhyth_translation_nonrhyth/Tbx20_set_A.pdf]

## Tbx2

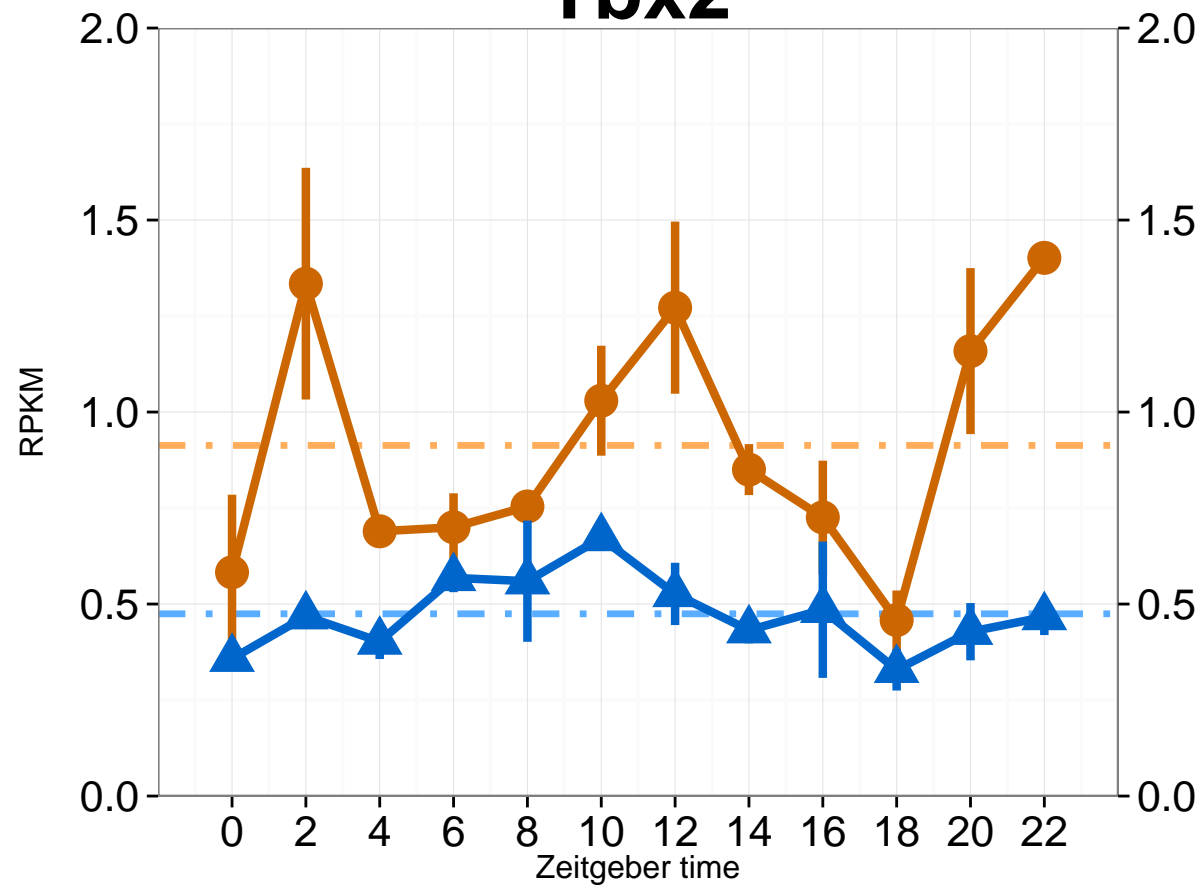

## Tbx2

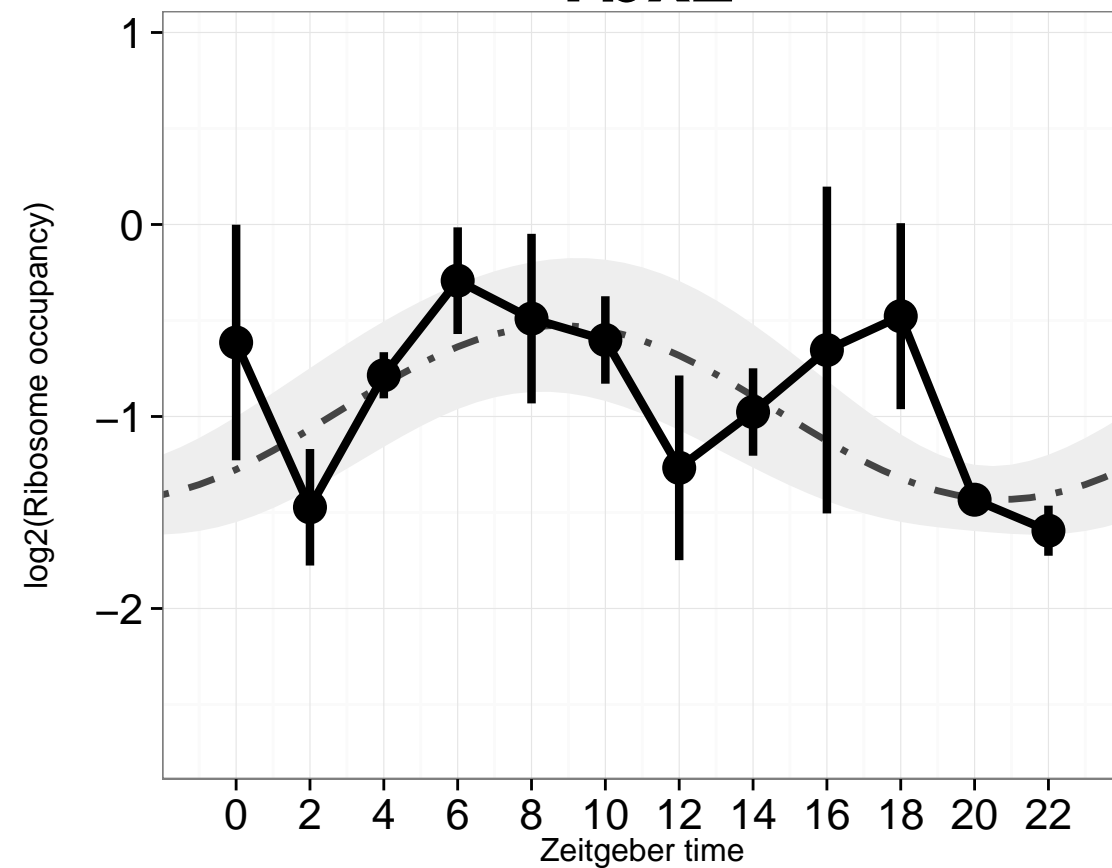

Supplement: SuppDataset_1.zip [file Tbx2_set_A.pdf › Supplemental Dataset 1/A-mRNA_nonrhyth_translation_nonrhyth/Tbx2_set_A.pdf]

## Tbx3

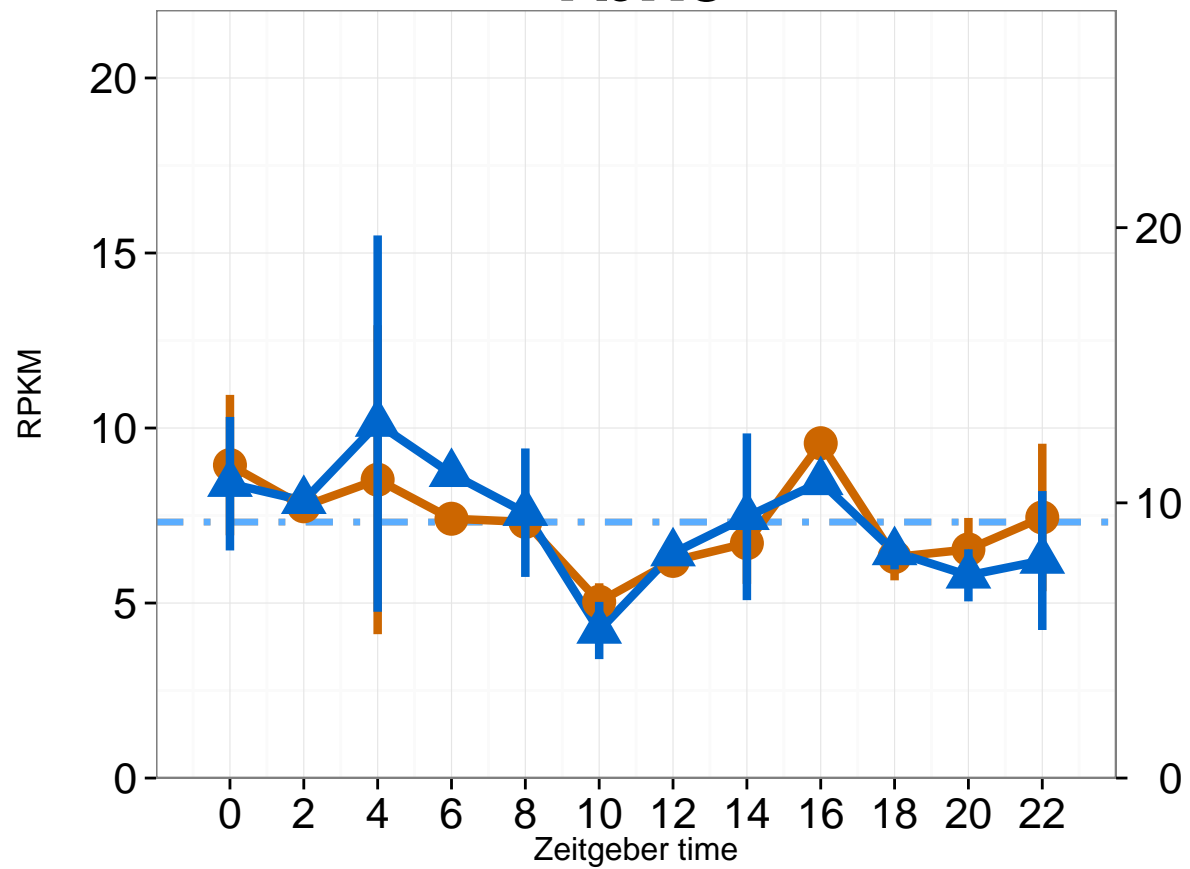

## Tbx3

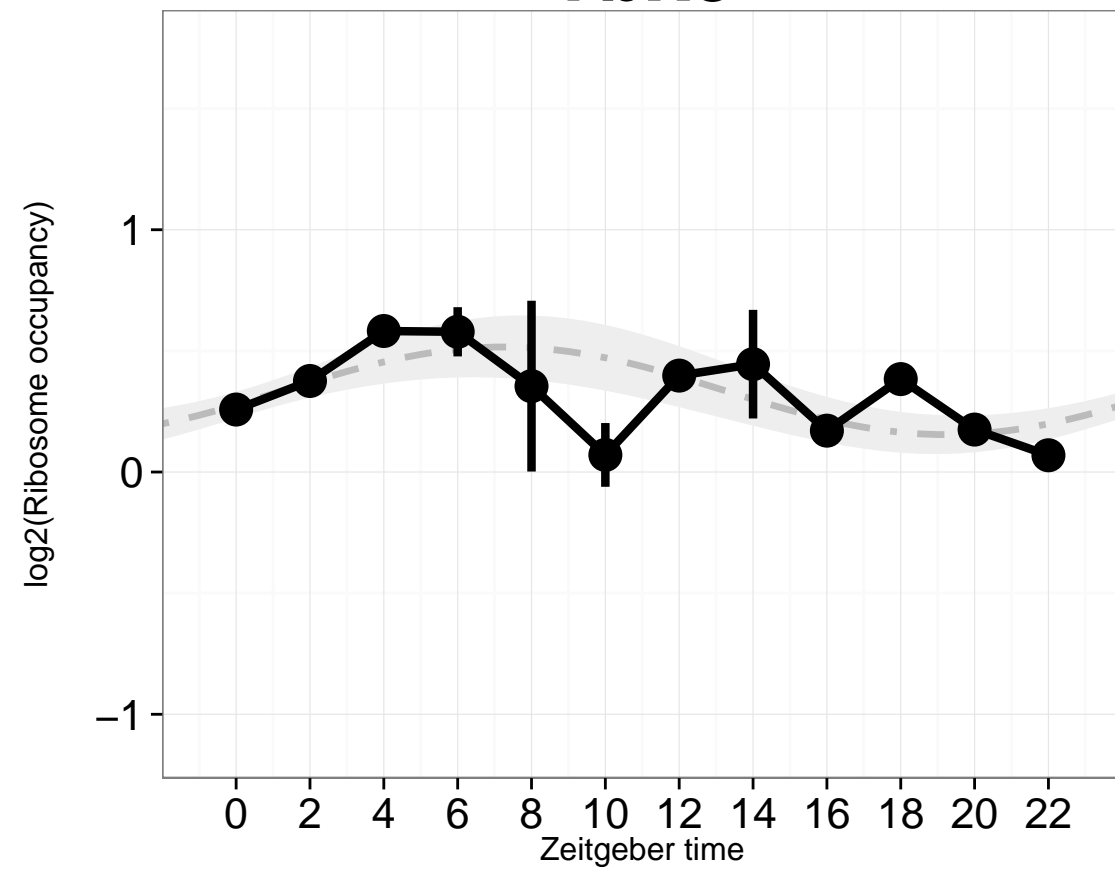

Supplement: SuppDataset_1.zip [file Tbx3_set_A.pdf › Supplemental Dataset 1/A-mRNA_nonrhyth_translation_nonrhyth/Tbx3_set_A.pdf]

# Tbxa2r

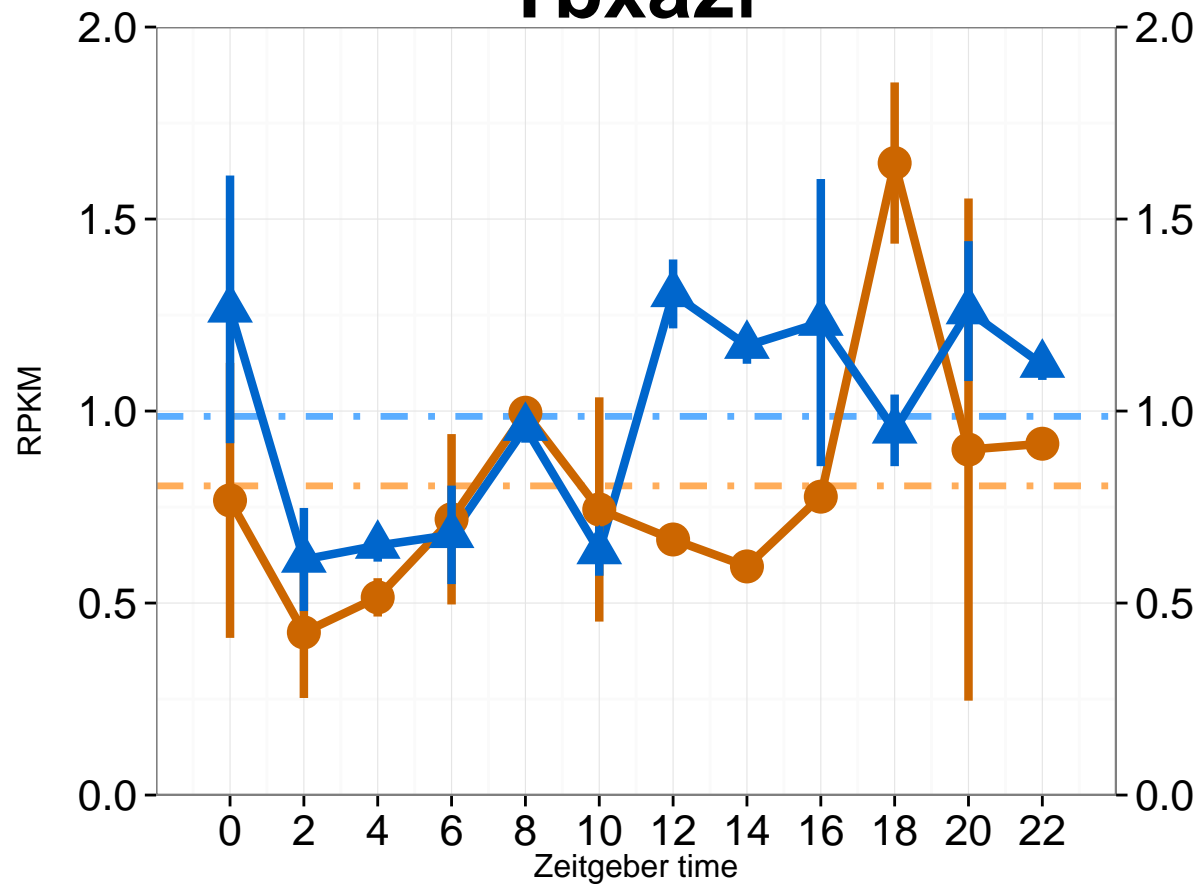

# Tbxa2r

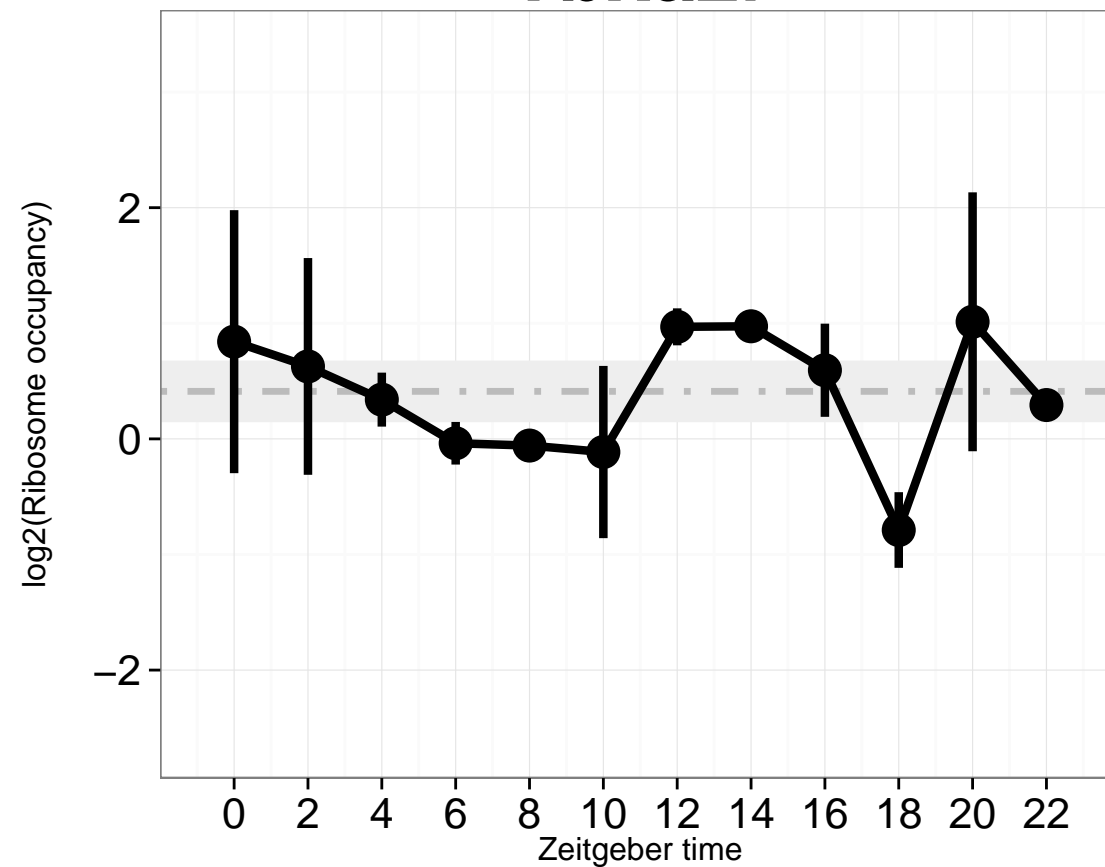

Supplement: SuppDataset_1.zip [file Tbxa2r_set_A.pdf › Supplemental Dataset 1/A-mRNA_nonrhyth_translation_nonrhyth/Tbxa2r_set_A.pdf]

## Tbxas1

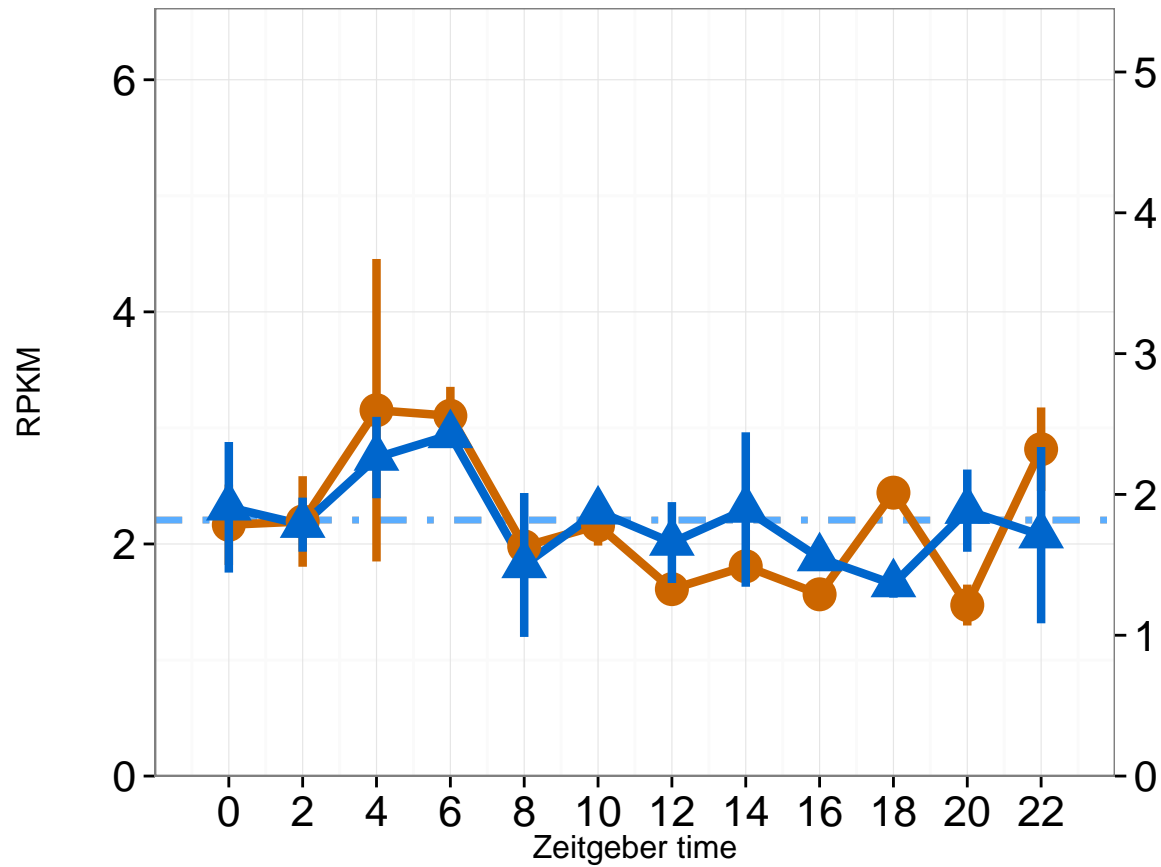

## Tbxas1

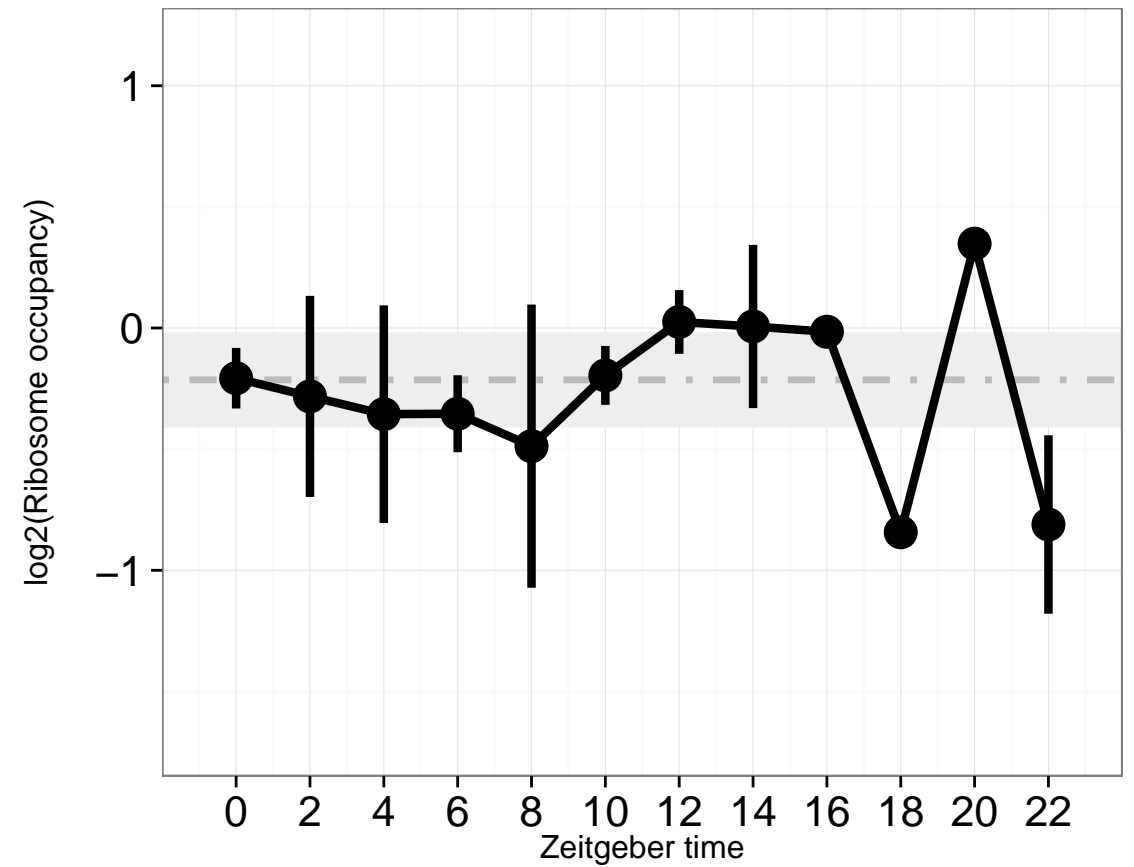

Supplement: SuppDataset_1.zip [file Tbxas1_set_A.pdf › Supplemental Dataset 1/A-mRNA_nonrhyth_translation_nonrhyth/Tbxas1_set_A.pdf]

# Tc2n

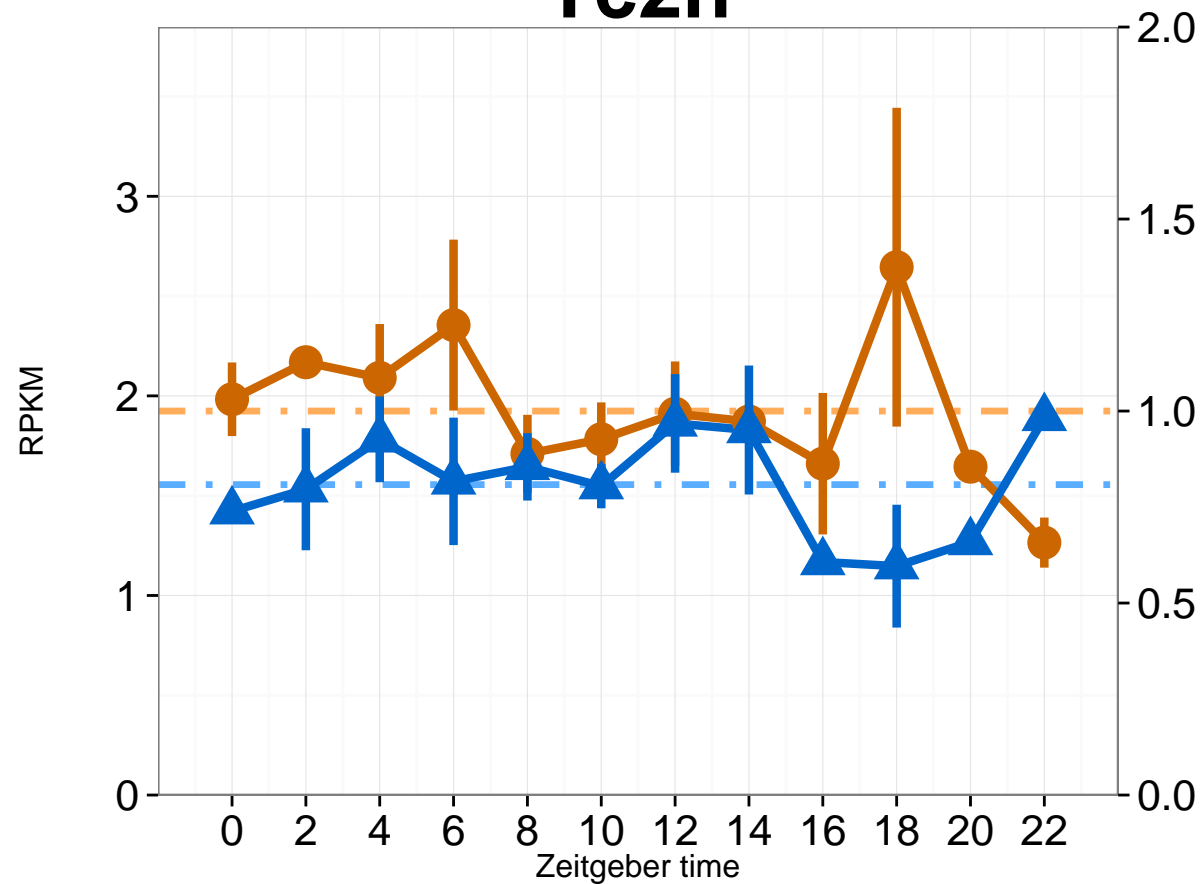

# Tc2n

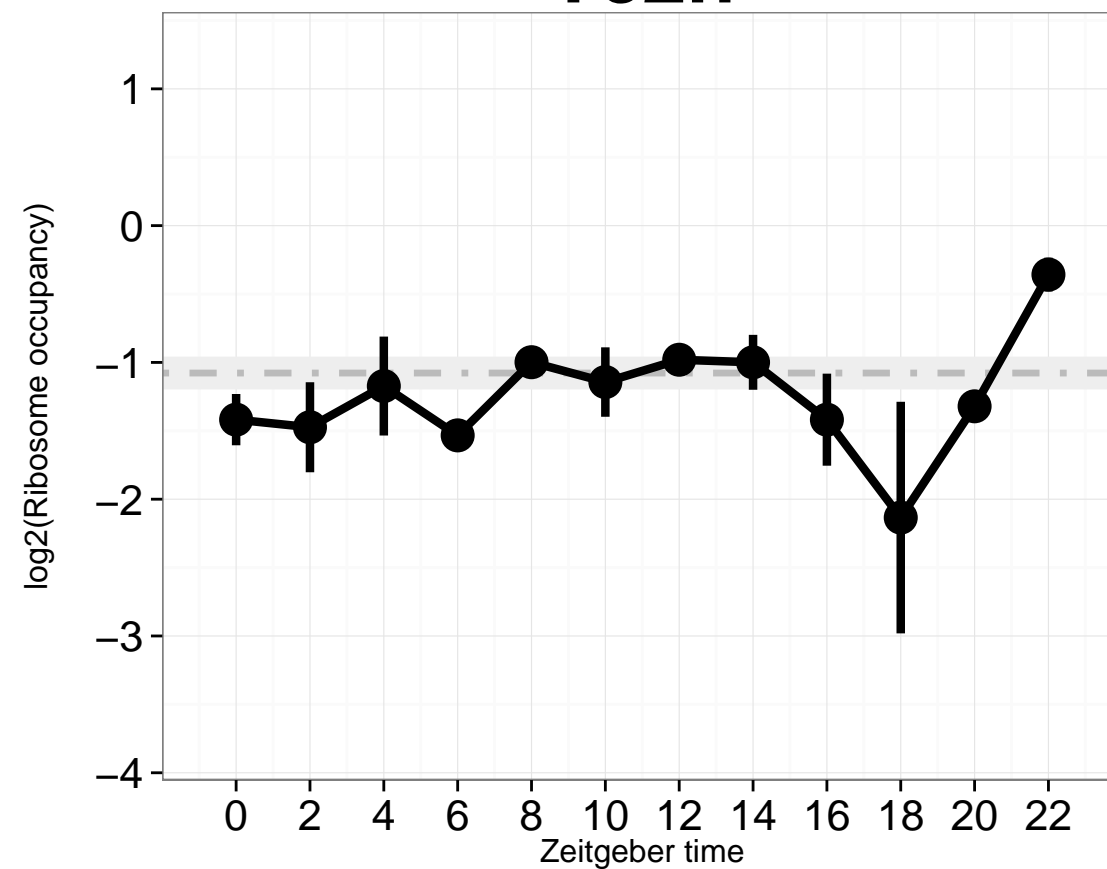

Supplement: SuppDataset_1.zip [file Tc2n_set_A.pdf › Supplemental Dataset 1/A-mRNA_nonrhyth_translation_nonrhyth/Tc2n_set_A.pdf]

## Tcaim

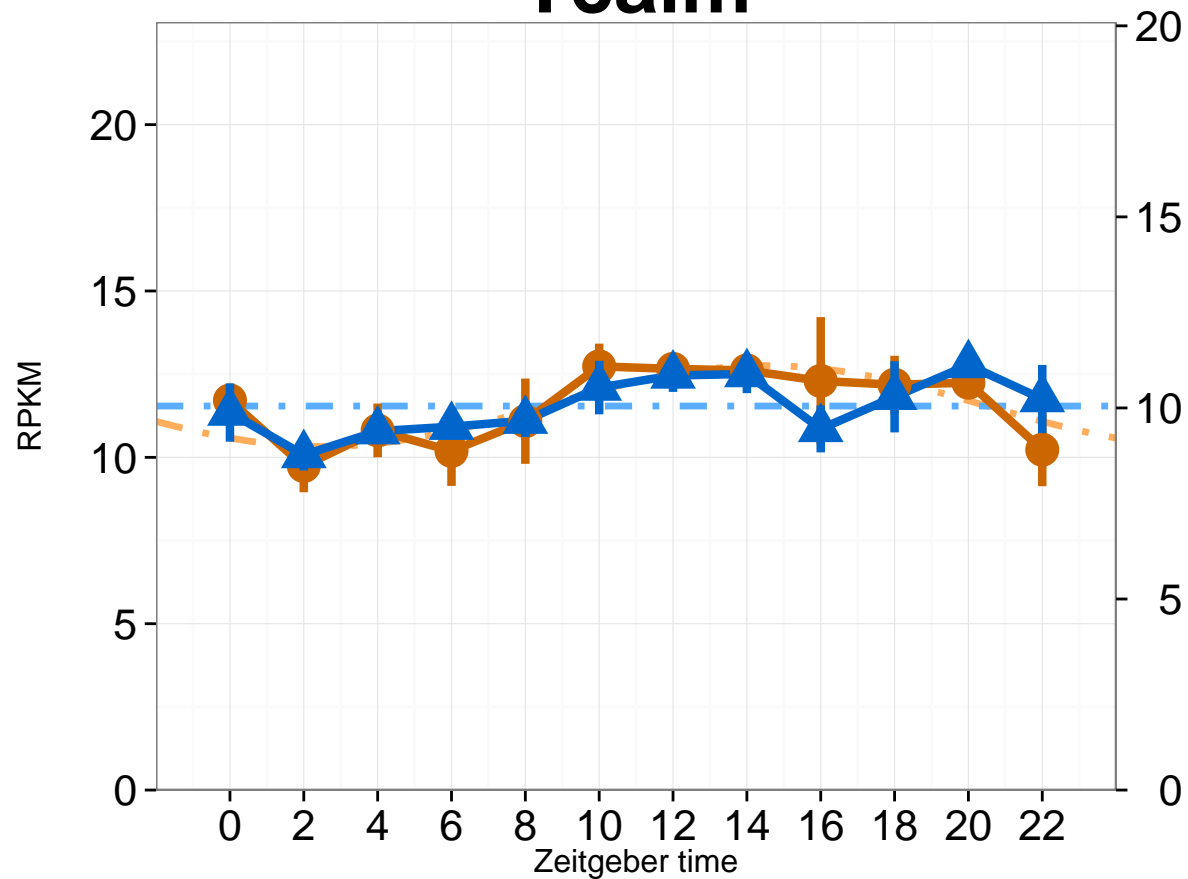

## Tcaim

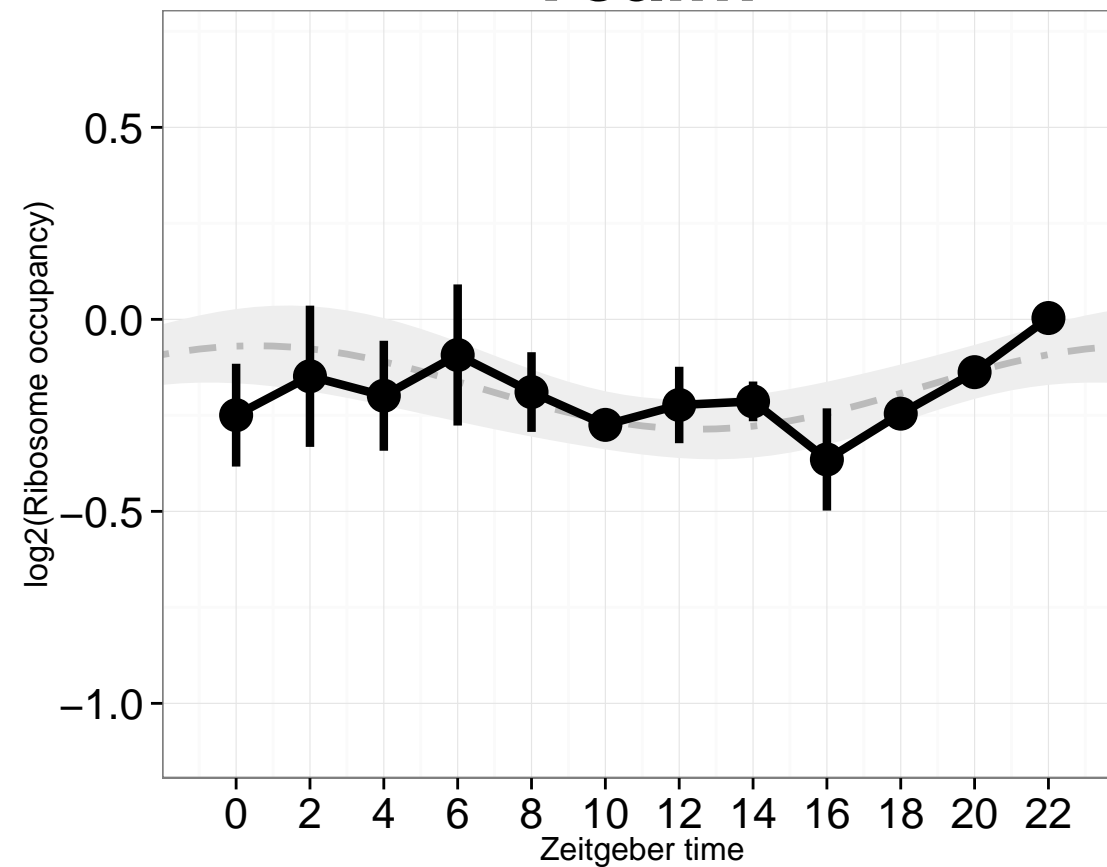

Supplement: SuppDataset_1.zip [file Tcaim_set_A.pdf › Supplemental Dataset 1/A-mRNA_nonrhyth_translation_nonrhyth/Tcaim_set_A.pdf]

# Tcea1

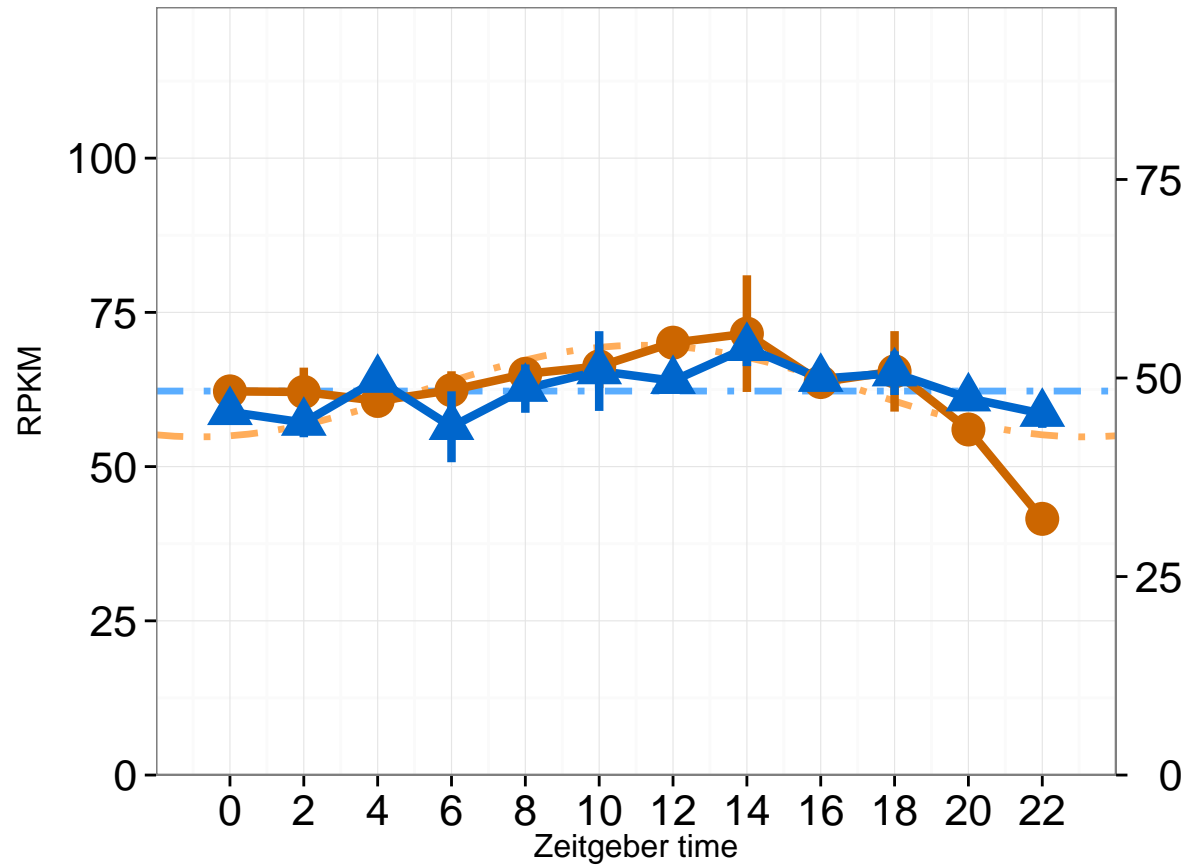

# Tcea1

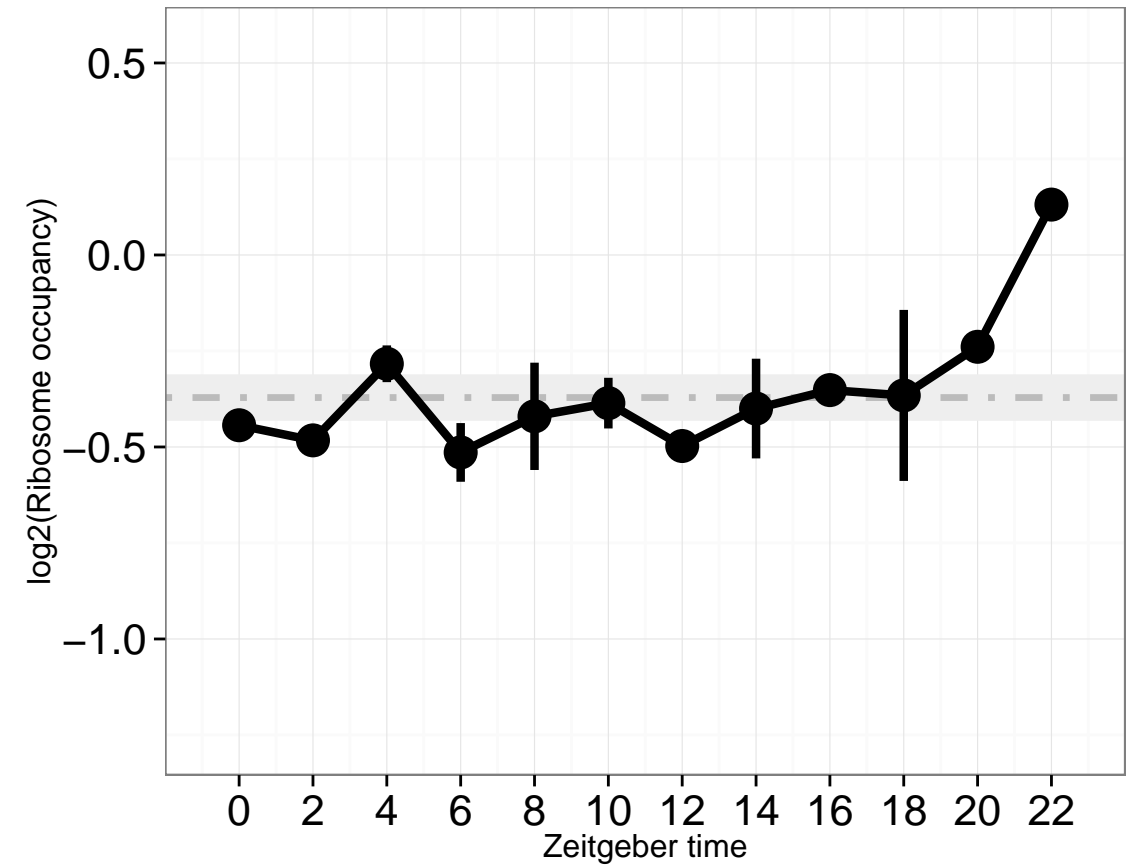

Supplement: SuppDataset_1.zip [file Tcea1_set_A.pdf › Supplemental Dataset 1/A-mRNA_nonrhyth_translation_nonrhyth/Tcea1_set_A.pdf]

## Tcea3

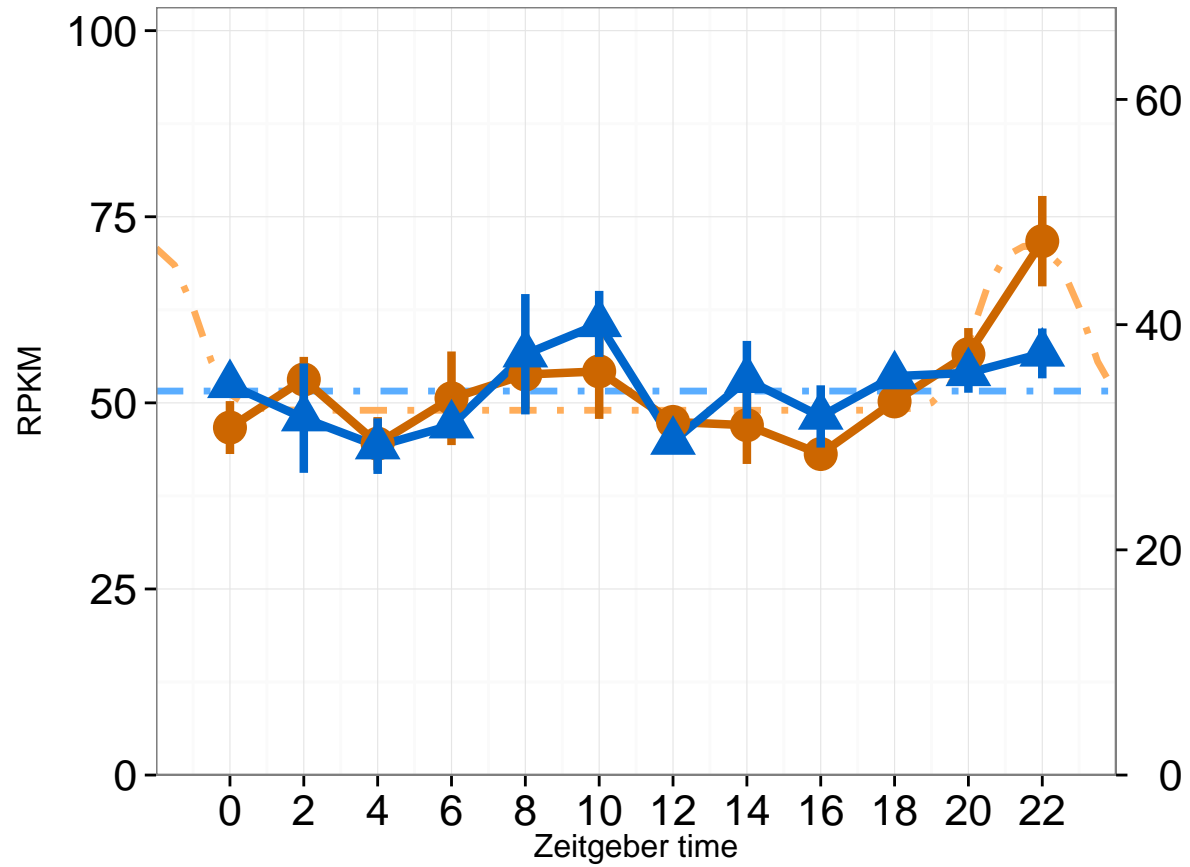

## Tcea3

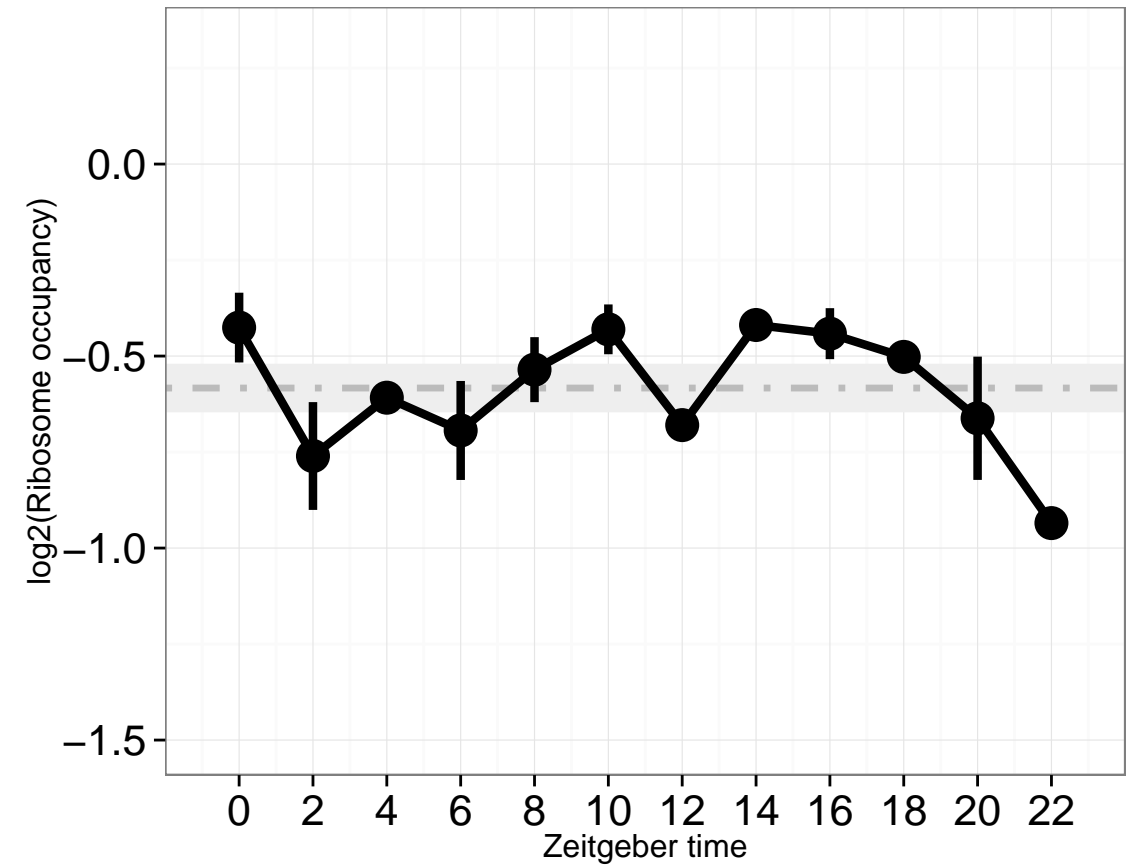

Supplement: SuppDataset_1.zip [file Tcea3_set_A.pdf › Supplemental Dataset 1/A-mRNA_nonrhyth_translation_nonrhyth/Tcea3_set_A.pdf]

# Tceal1

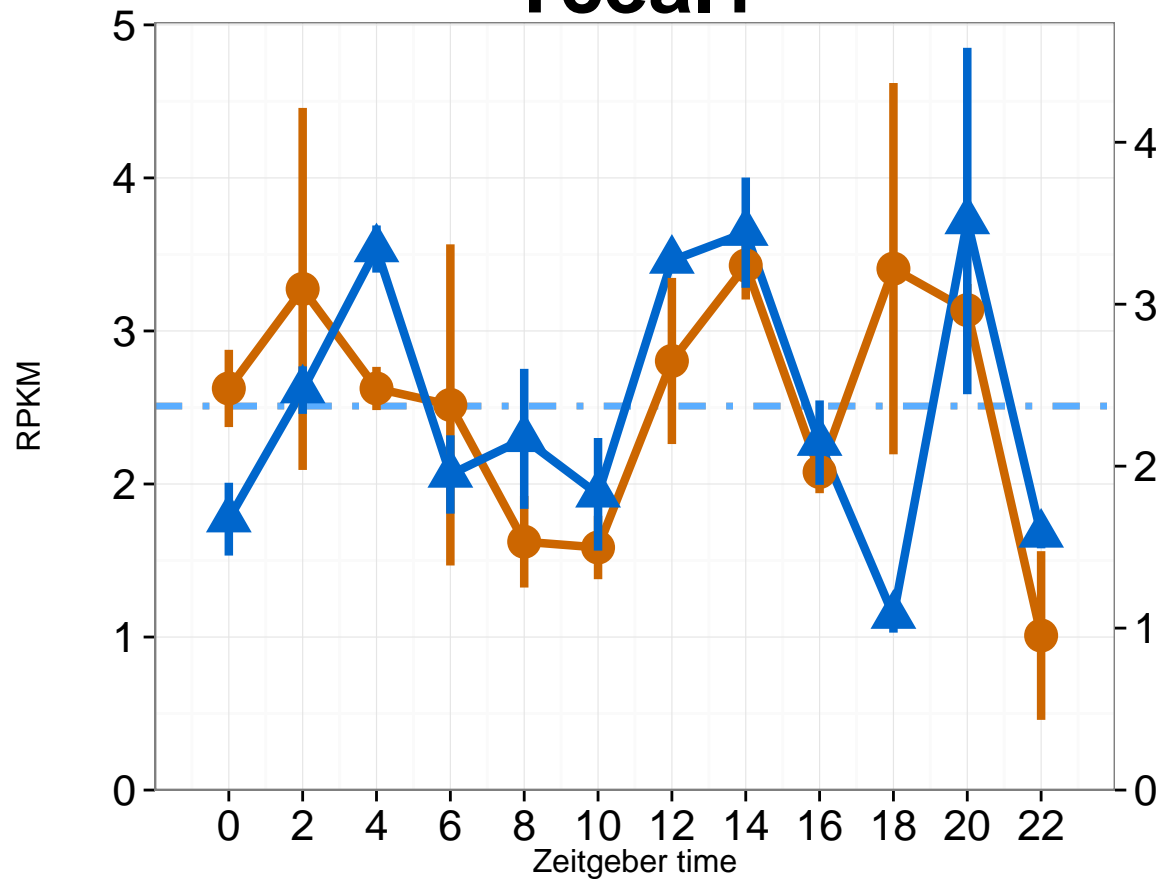

# Tceal1

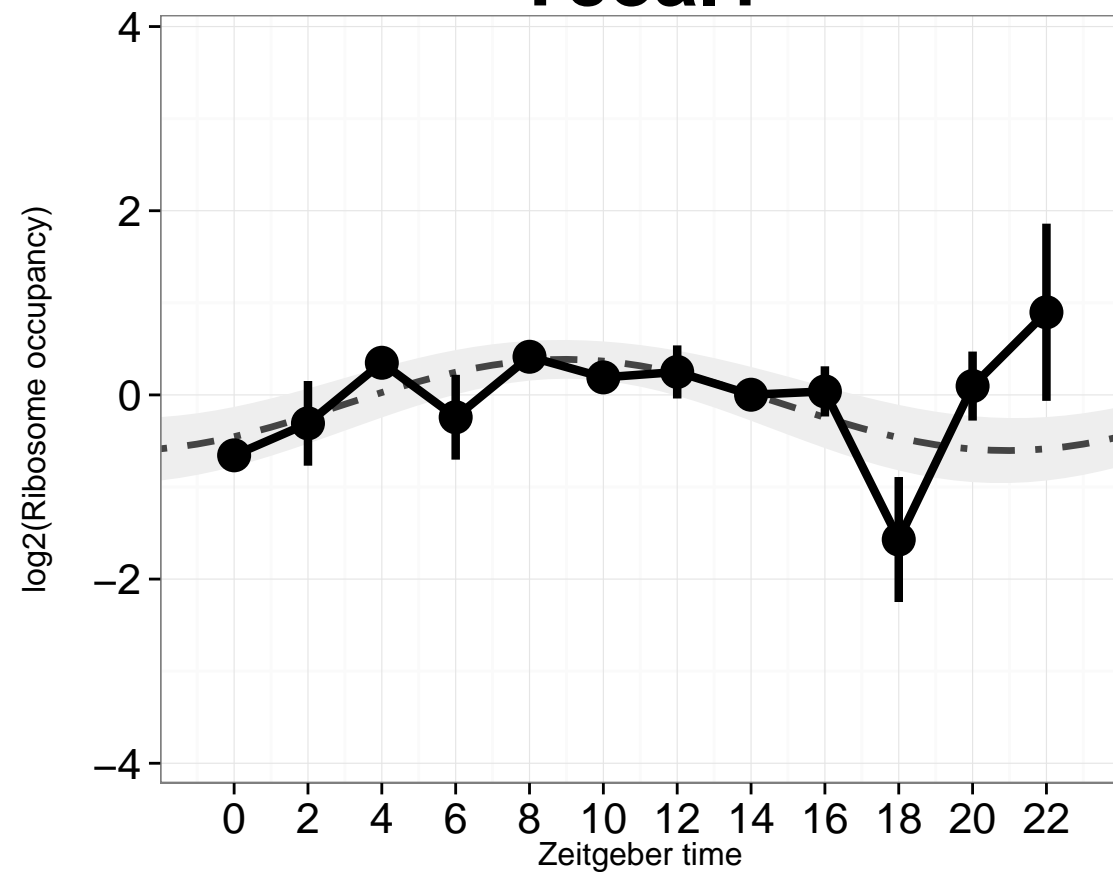

Supplement: SuppDataset_1.zip [file Tceal1_set_A.pdf › Supplemental Dataset 1/A-mRNA_nonrhyth_translation_nonrhyth/Tceal1_set_A.pdf]

## Tceal8

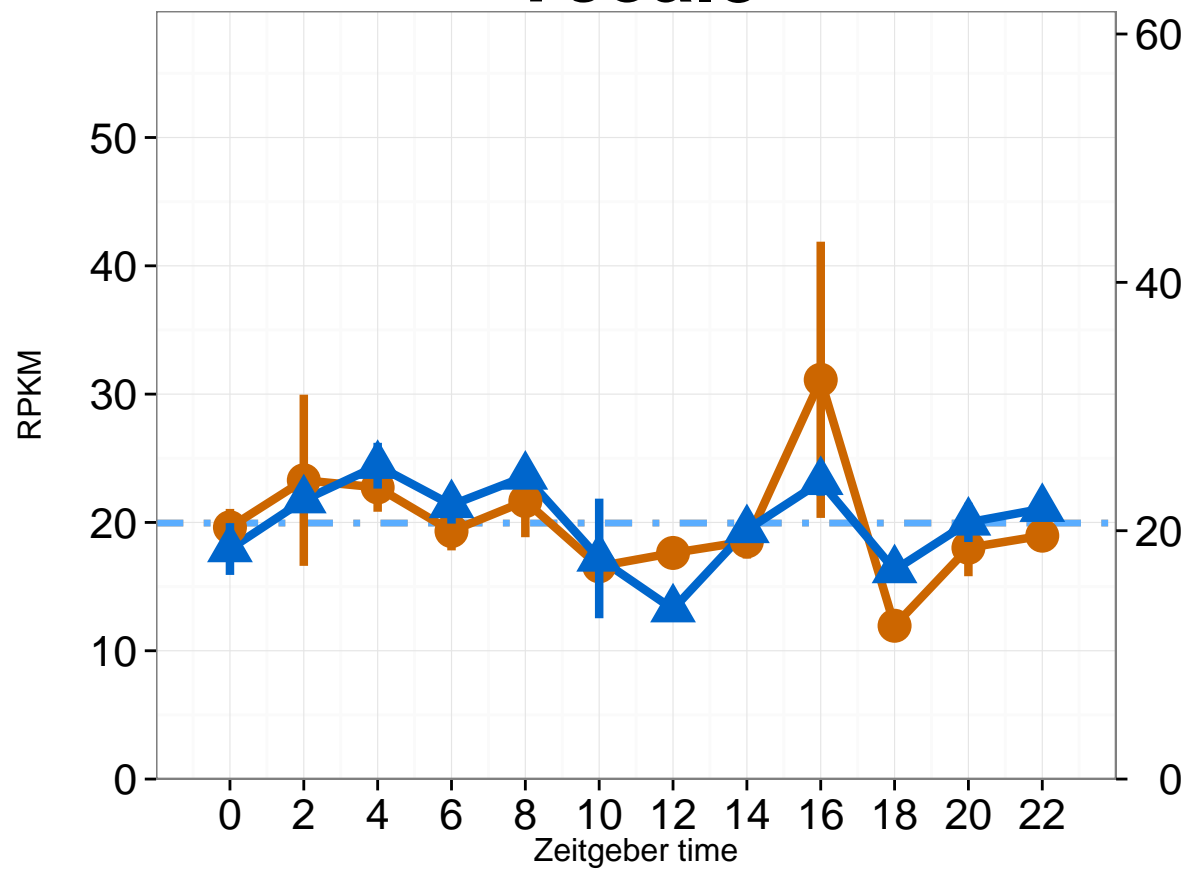

## Tceal8

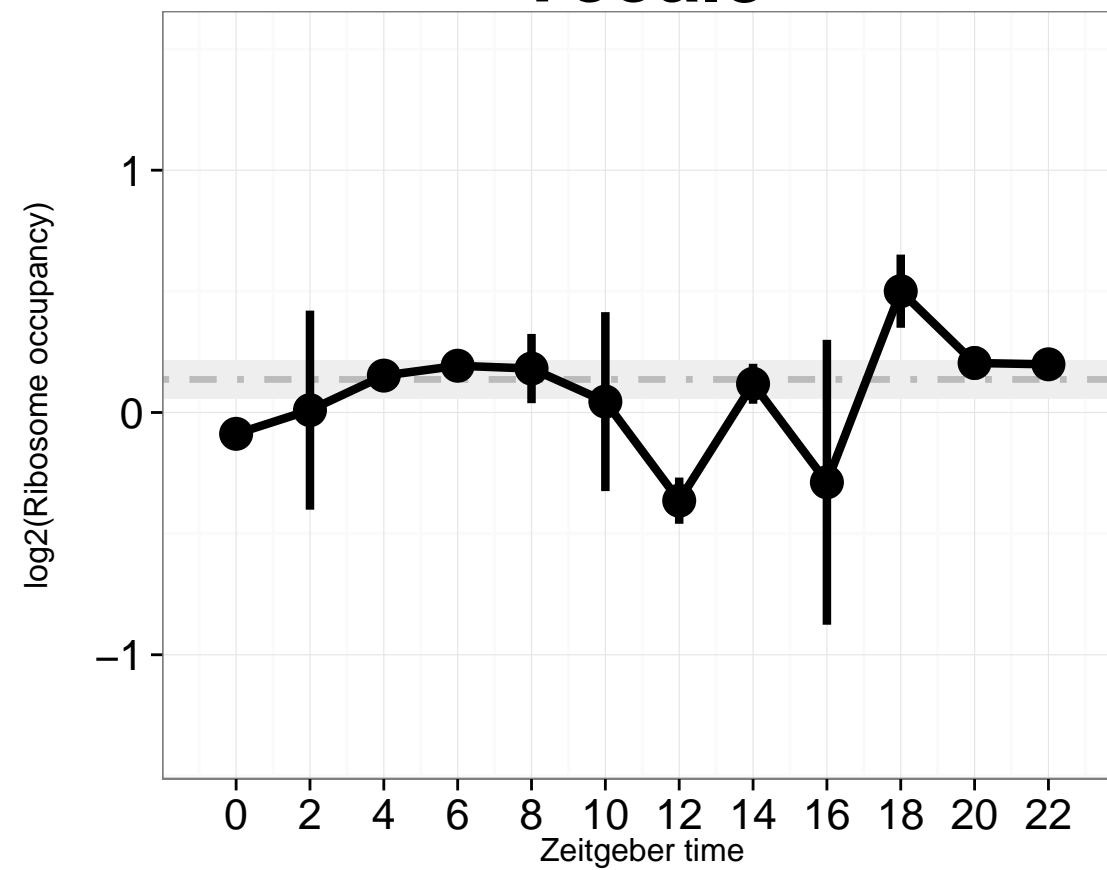

Supplement: SuppDataset_1.zip [file Tceal8_set_A.pdf › Supplemental Dataset 1/A-mRNA_nonrhyth_translation_nonrhyth/Tceal8_set_A.pdf]

## Tceanc2

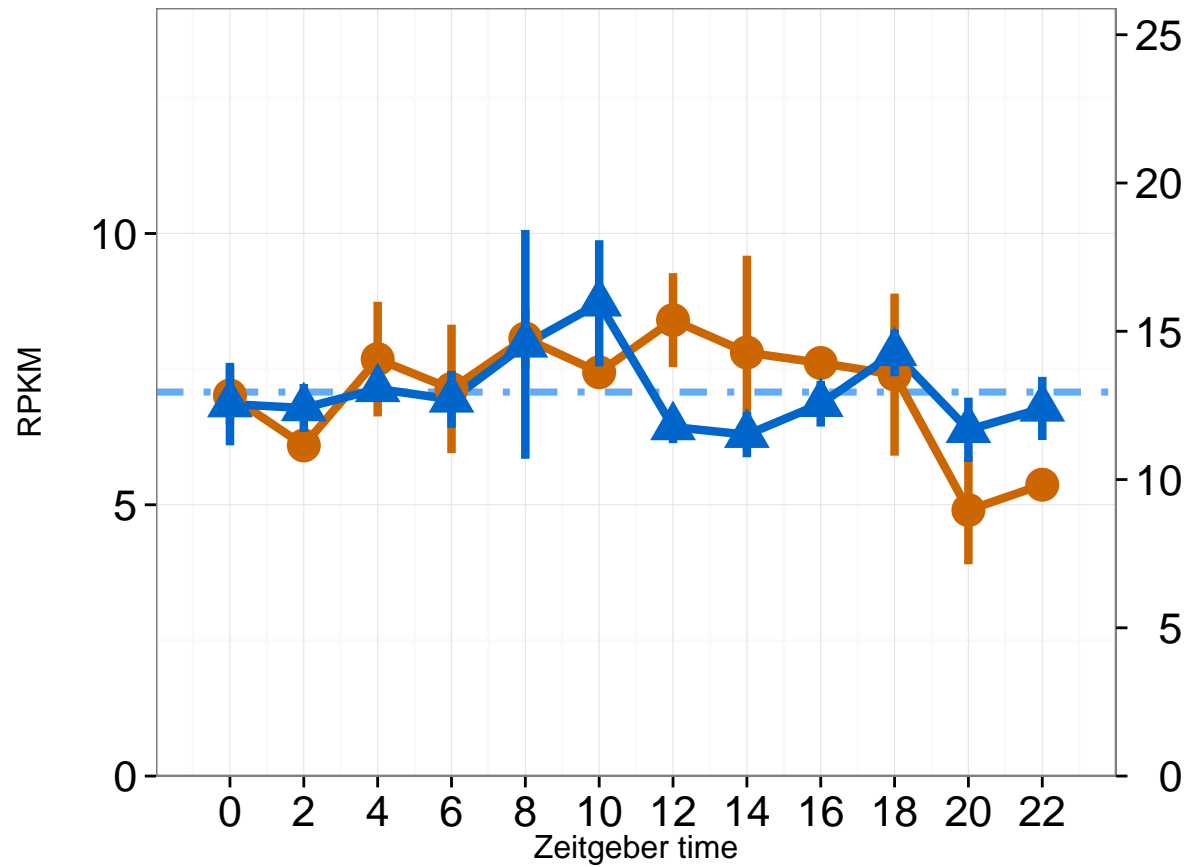

## Tceanc2

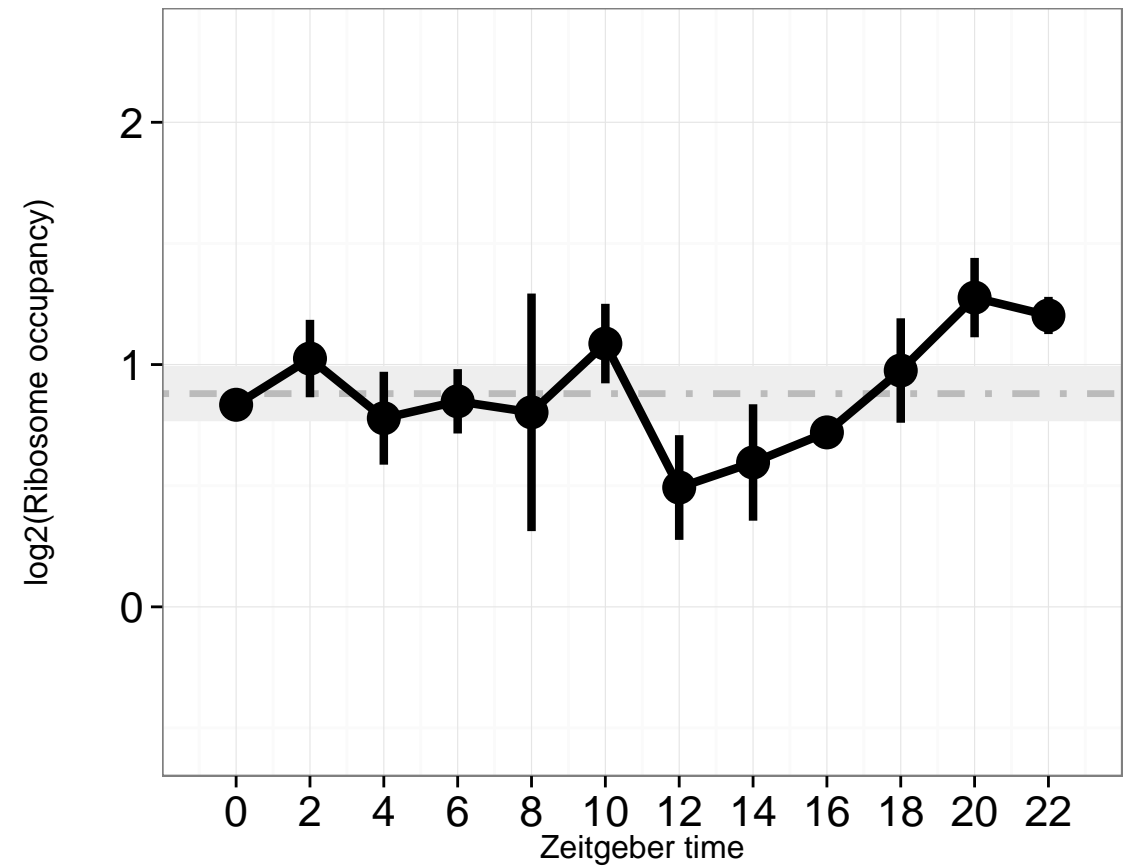

Supplement: SuppDataset_1.zip [file Tceanc2_set_A.pdf › Supplemental Dataset 1/A-mRNA_nonrhyth_translation_nonrhyth/Tceanc2_set_A.pdf]

## Tceb1

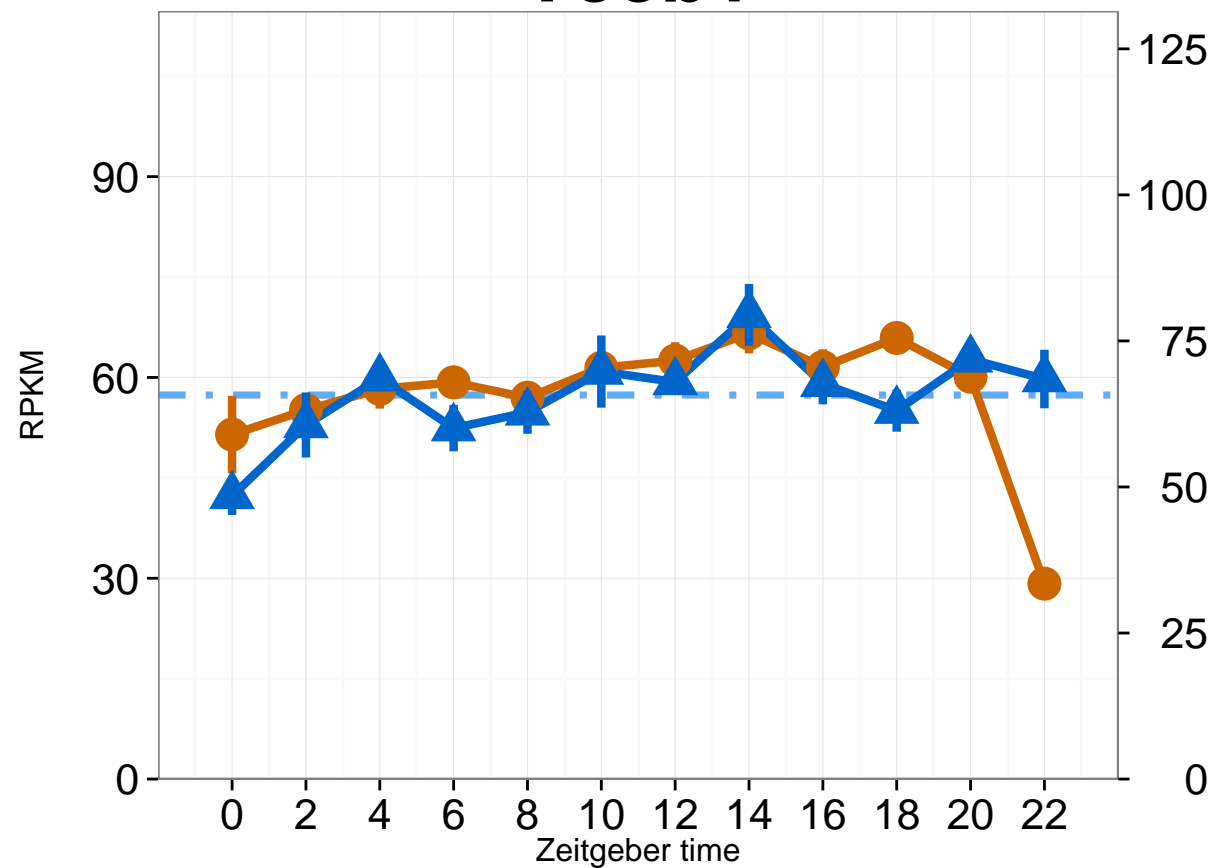

## Tceb1

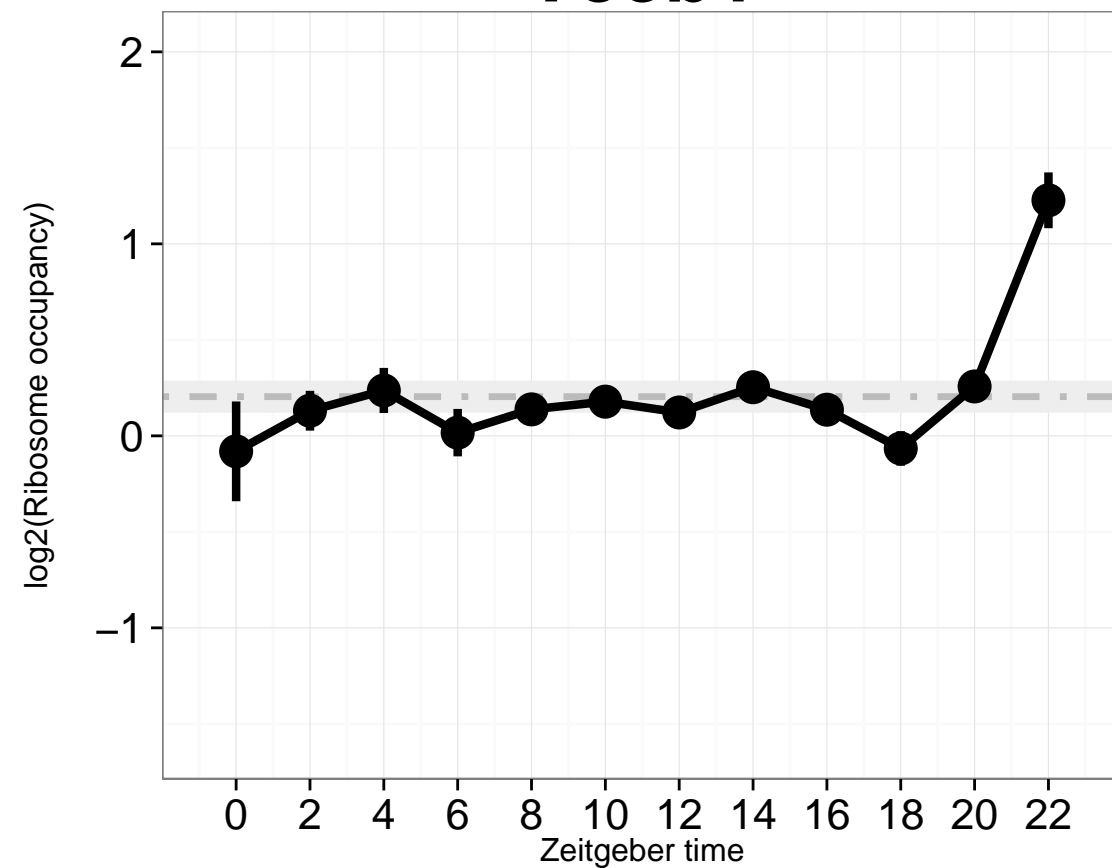

Supplement: SuppDataset_1.zip [file Tceb1_set_A.pdf › Supplemental Dataset 1/A-mRNA_nonrhyth_translation_nonrhyth/Tceb1_set_A.pdf]

## Tceb3

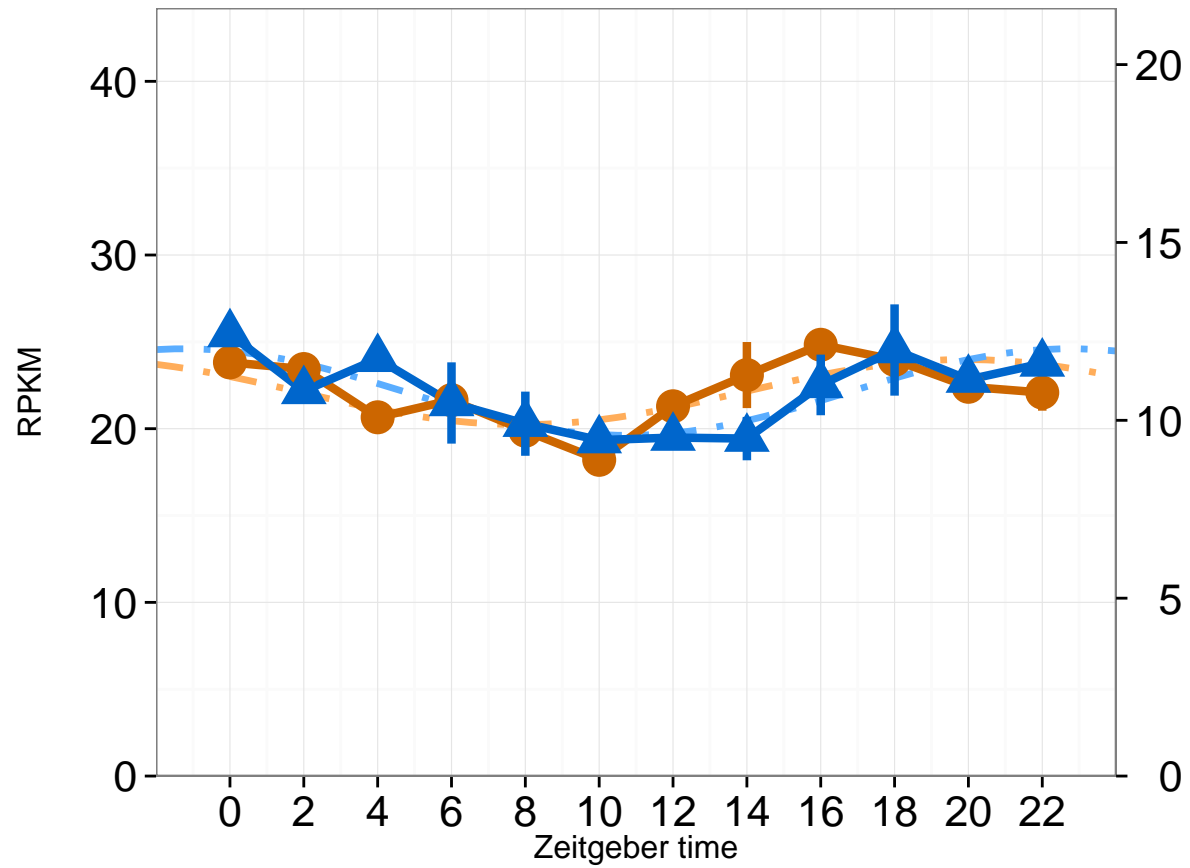

## Tceb3

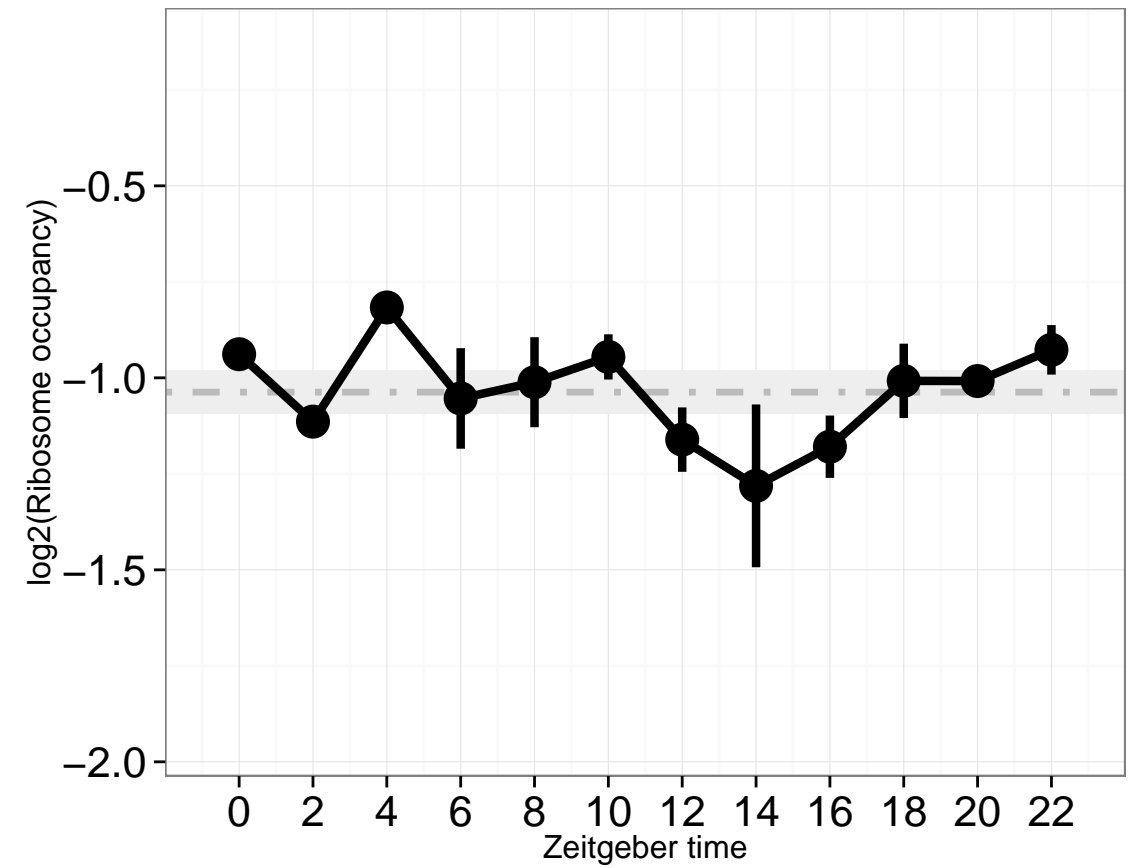

Supplement: SuppDataset_1.zip [file Tceb3_set_A.pdf › Supplemental Dataset 1/A-mRNA_nonrhyth_translation_nonrhyth/Tceb3_set_A.pdf]

# Tcerg1

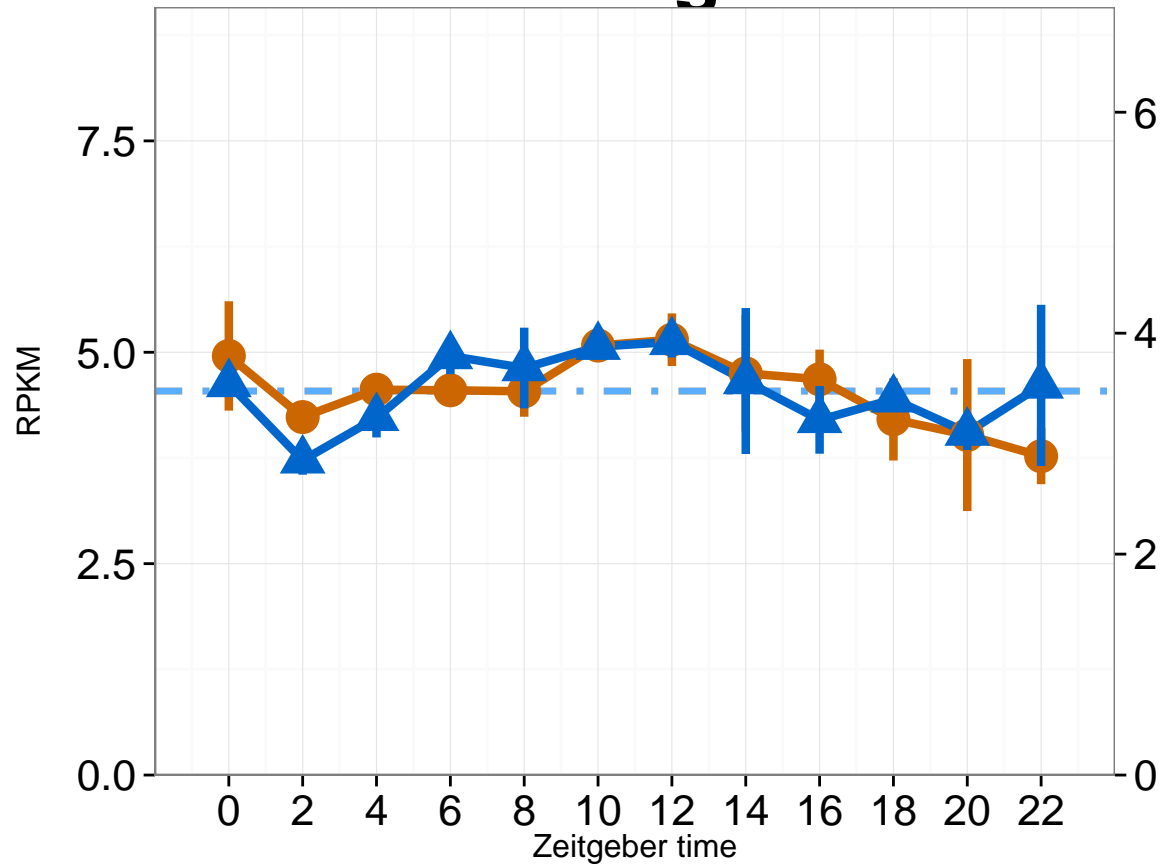

# Tcerg1

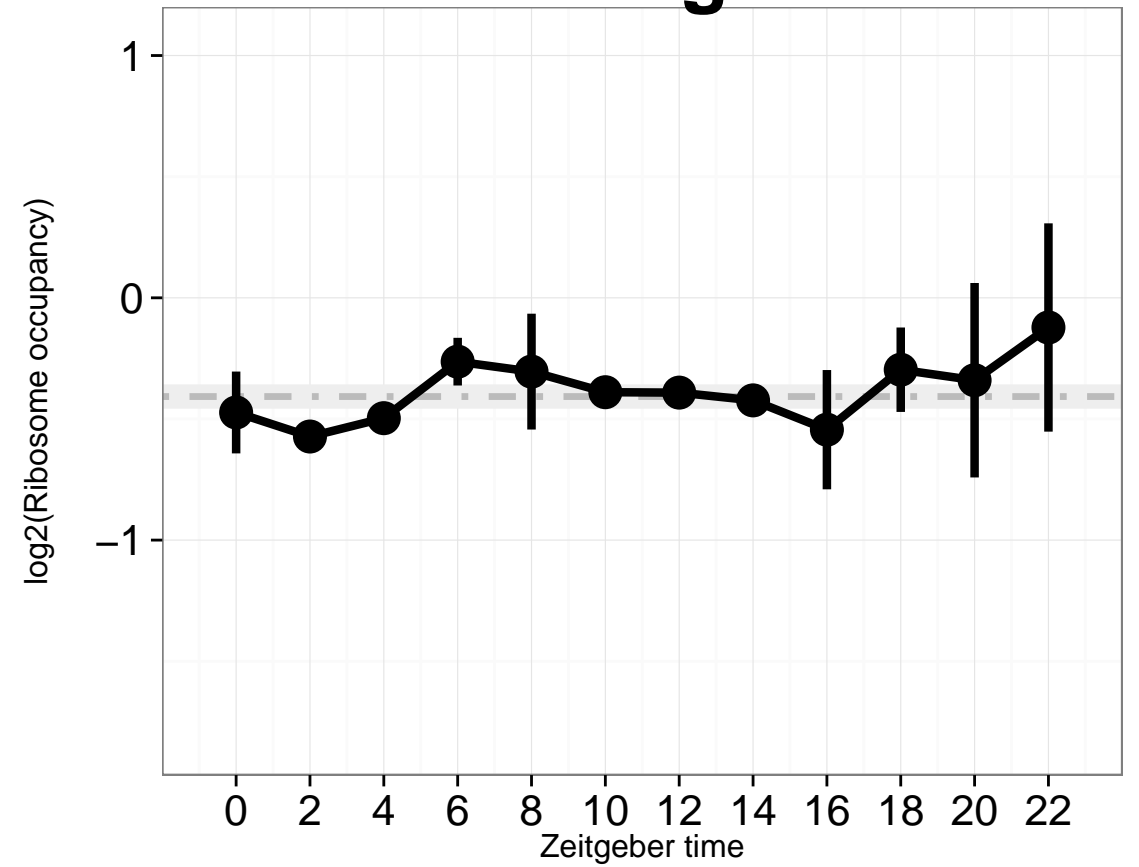

Supplement: SuppDataset_1.zip [file Tcerg1_set_A.pdf › Supplemental Dataset 1/A-mRNA_nonrhyth_translation_nonrhyth/Tcerg1_set_A.pdf]

## Tcf12

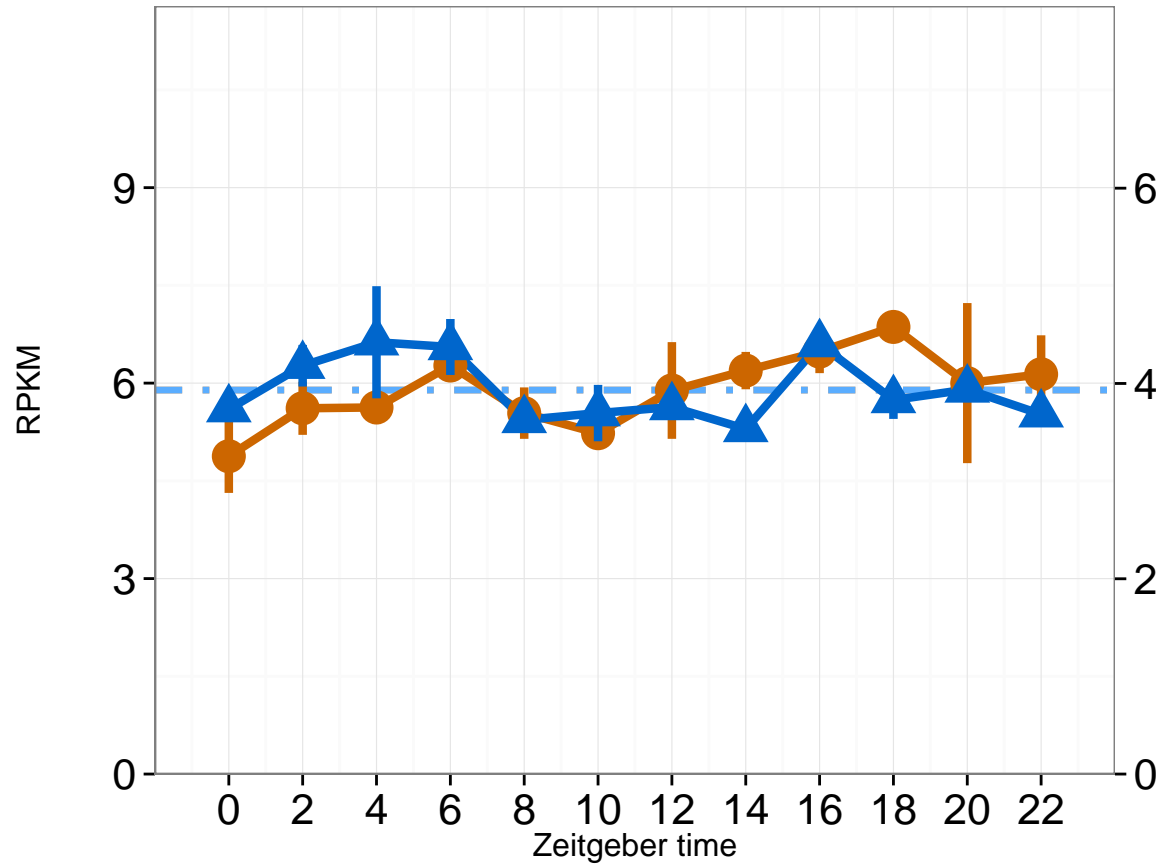

## Tcf12

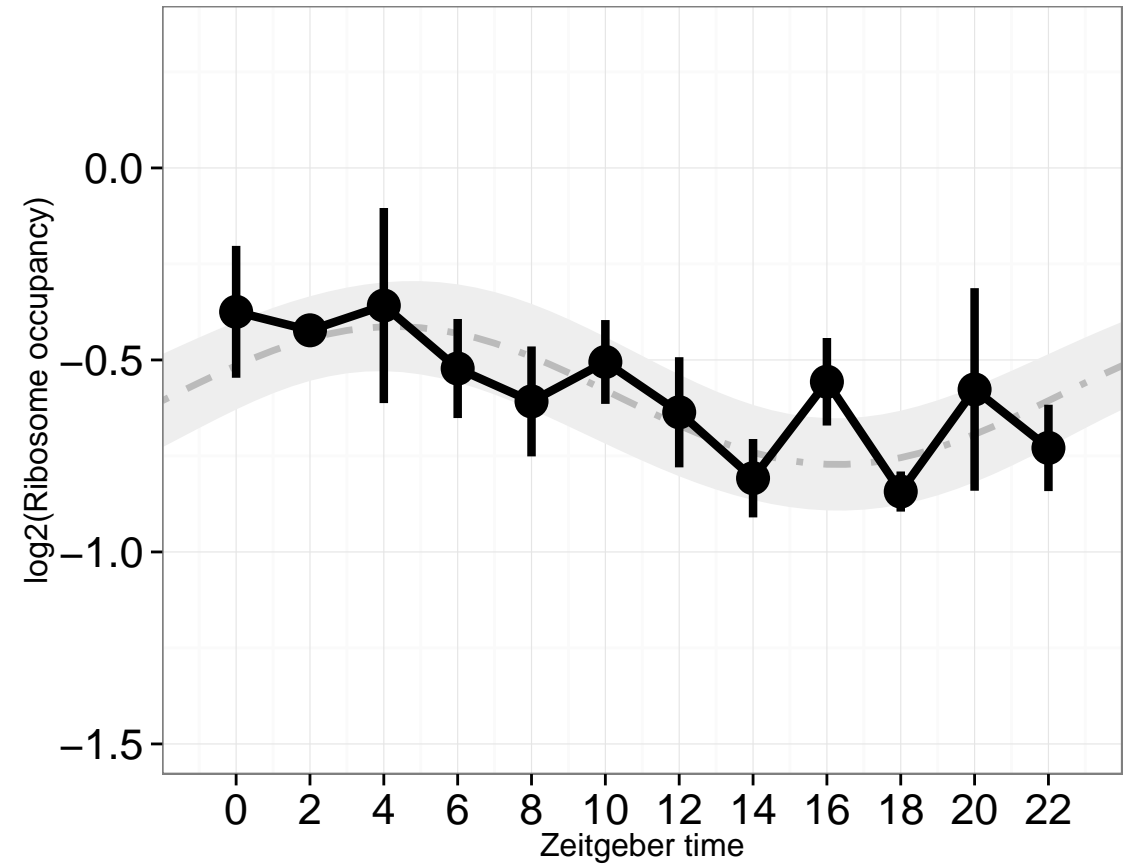

Supplement: SuppDataset_1.zip [file Tcf12_set_A.pdf › Supplemental Dataset 1/A-mRNA_nonrhyth_translation_nonrhyth/Tcf12_set_A.pdf]

## Tcf19

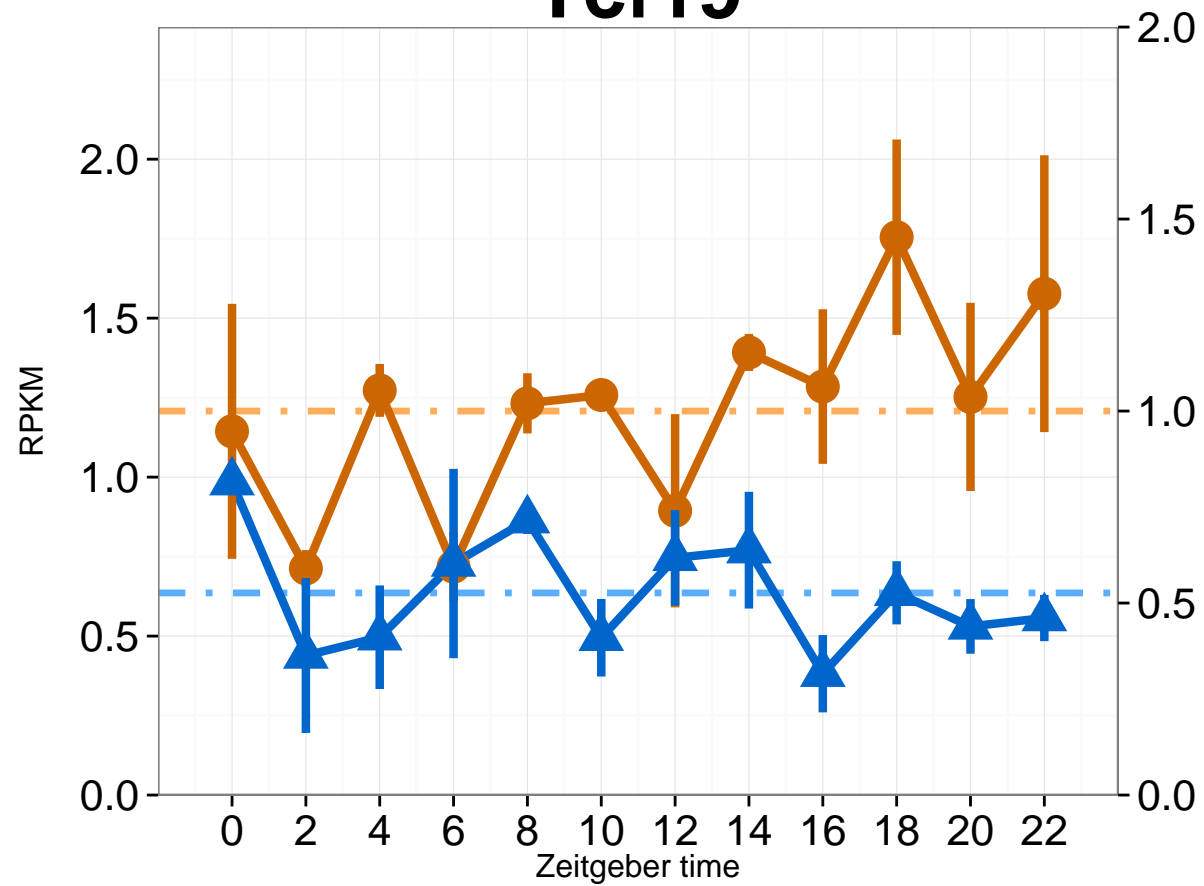

## Tcf19

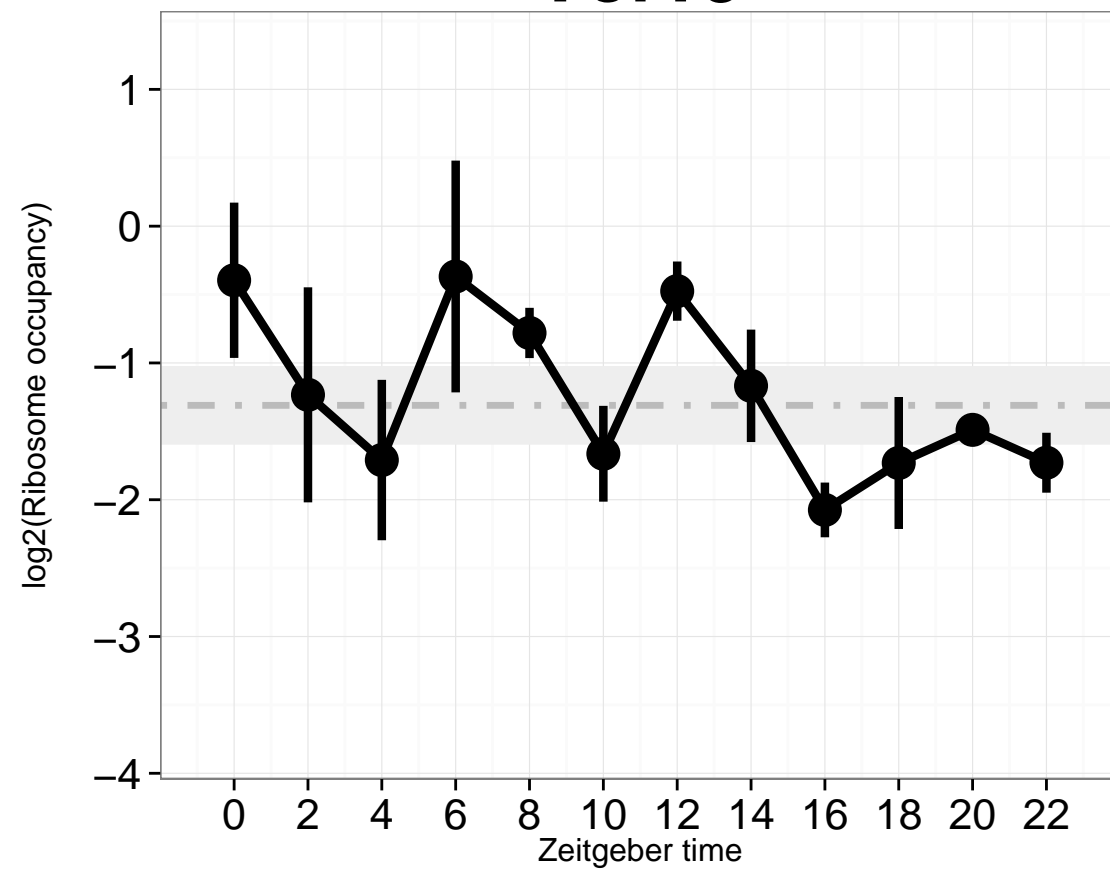

Supplement: SuppDataset_1.zip [file Tcf19_set_A.pdf › Supplemental Dataset 1/A-mRNA_nonrhyth_translation_nonrhyth/Tcf19_set_A.pdf]

## Tcf20

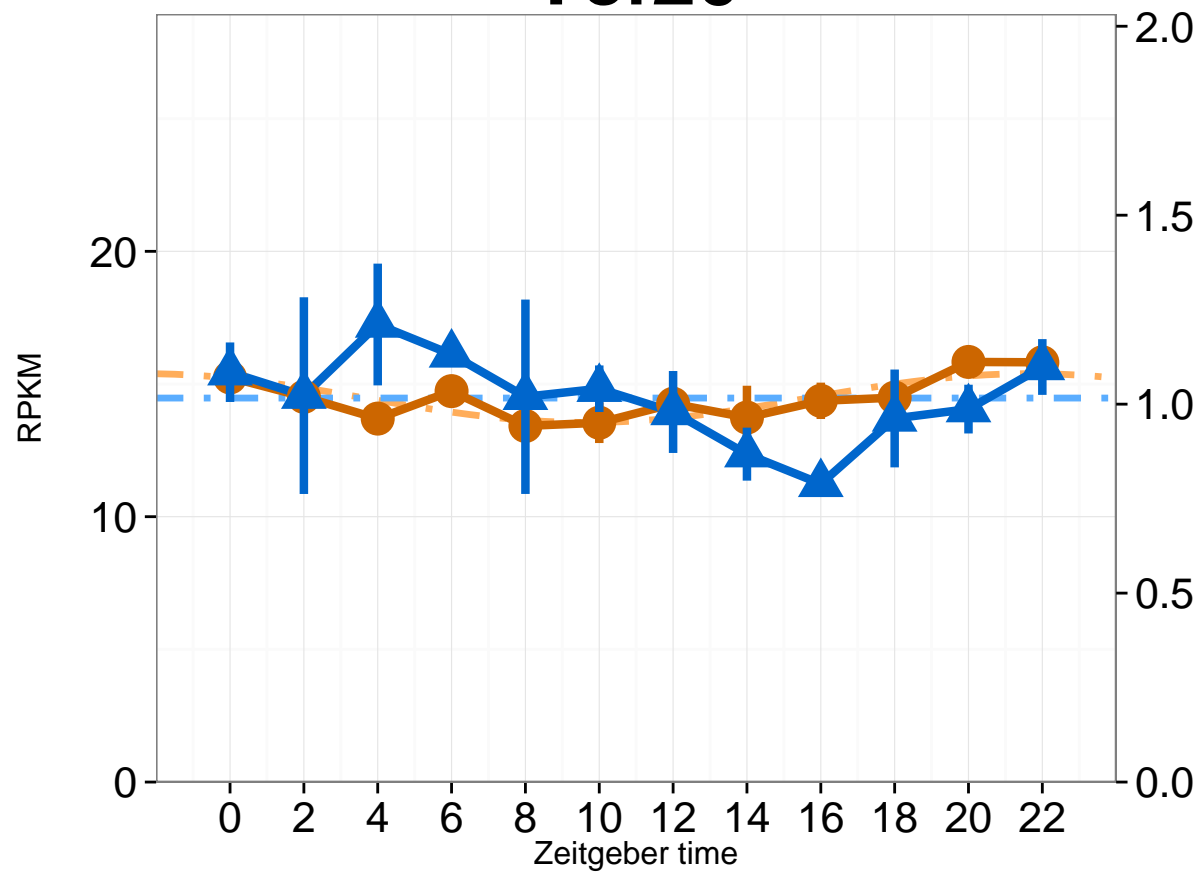

## Tcf20

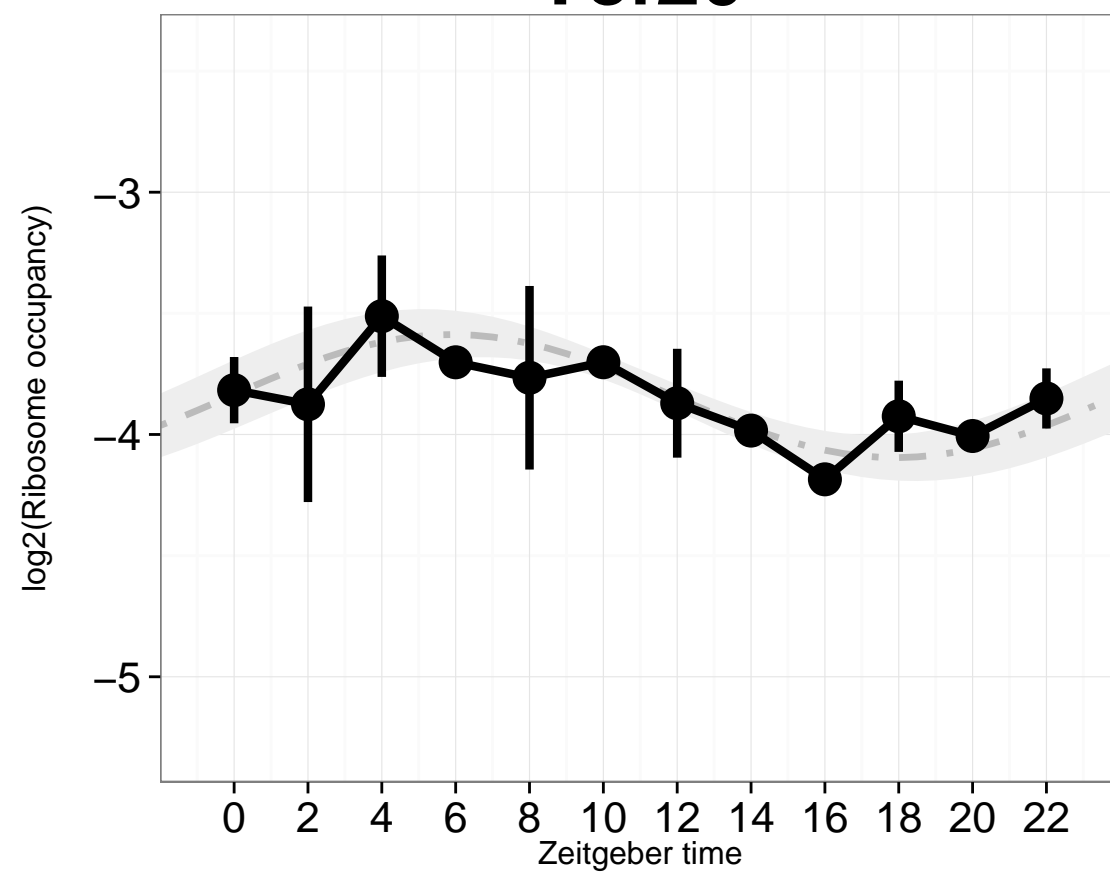

Supplement: SuppDataset_1.zip [file Tcf20_set_A.pdf › Supplemental Dataset 1/A-mRNA_nonrhyth_translation_nonrhyth/Tcf20_set_A.pdf]

## Tcf21

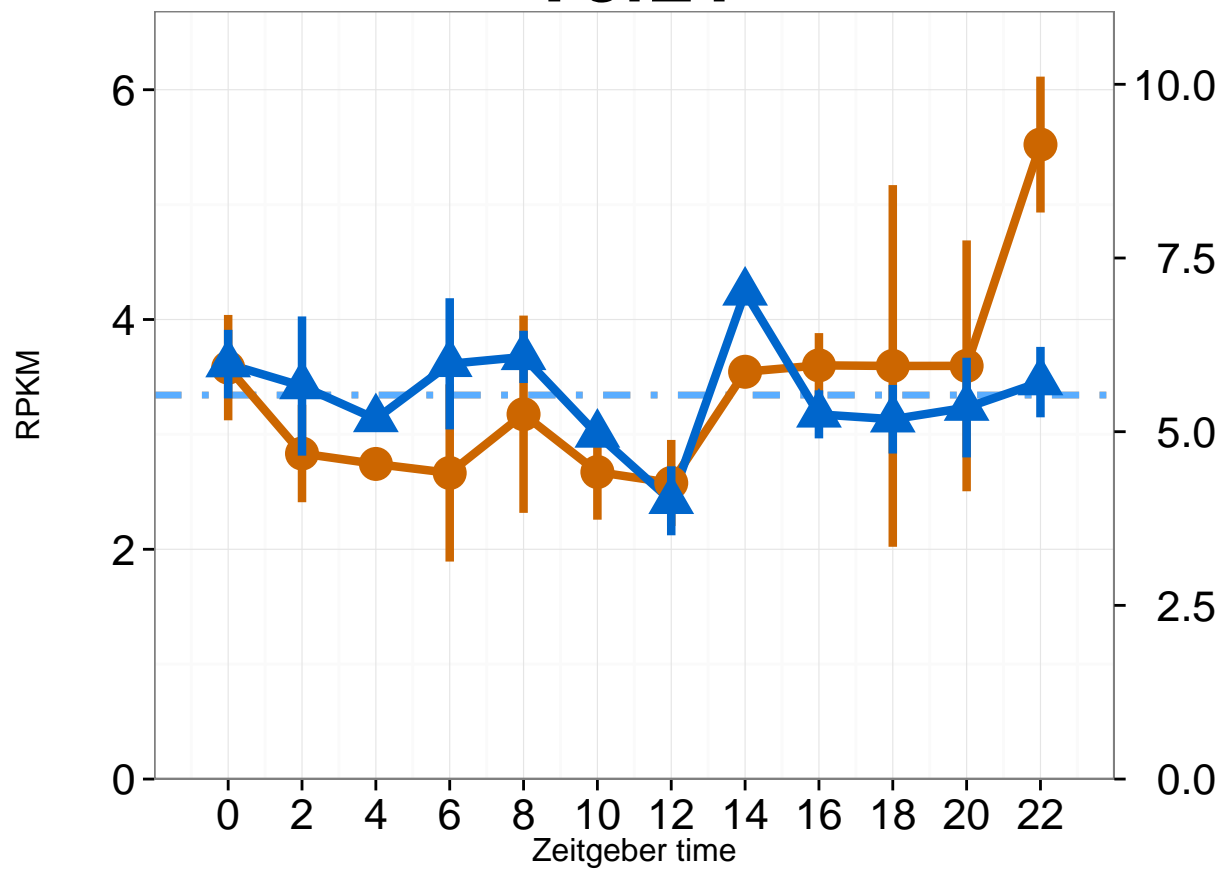

## Tcf21

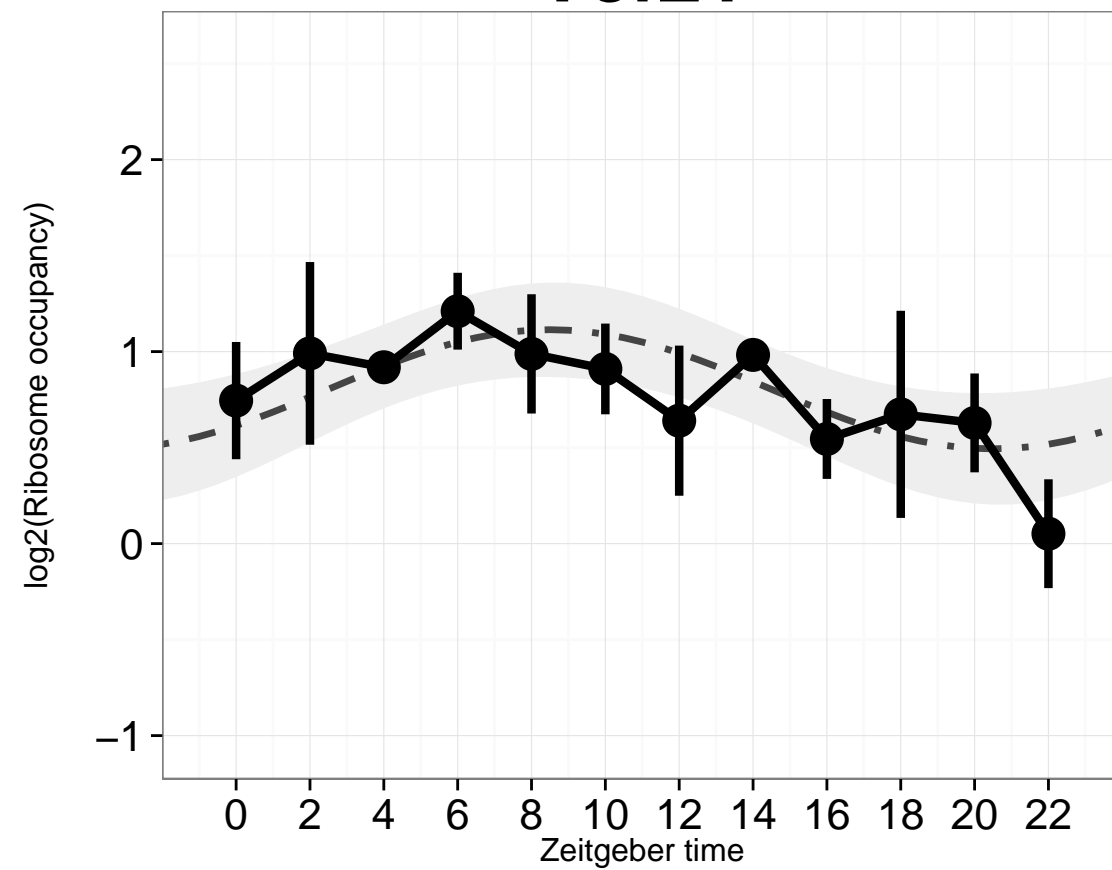

Supplement: SuppDataset_1.zip [file Tcf21_set_A.pdf › Supplemental Dataset 1/A-mRNA_nonrhyth_translation_nonrhyth/Tcf21_set_A.pdf]

## Tcf3

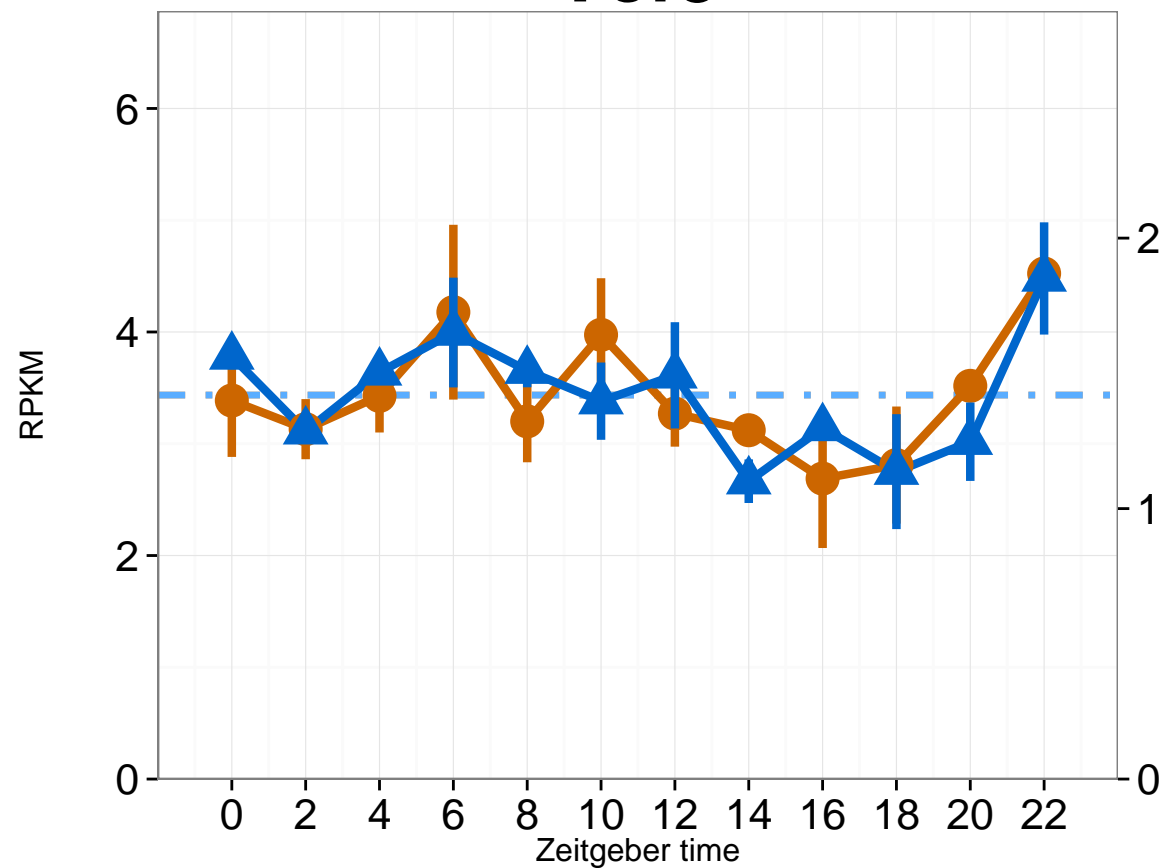

## Tcf3

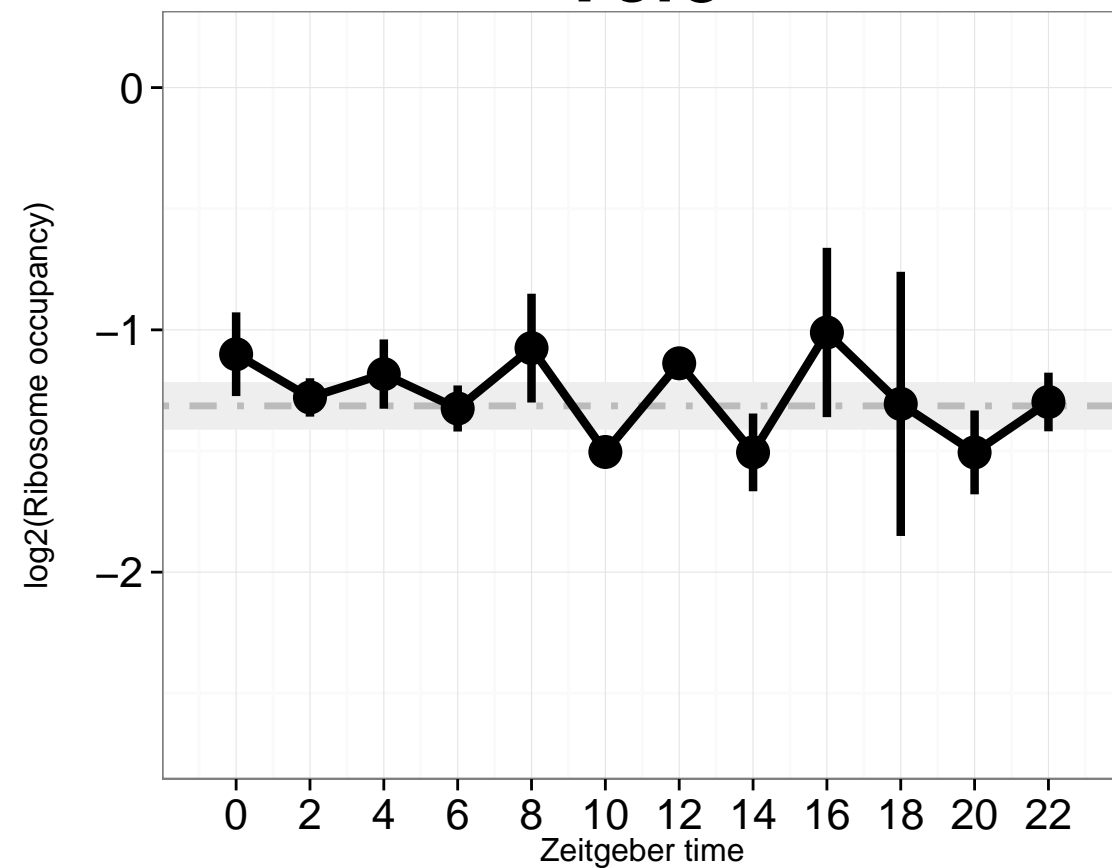

Supplement: SuppDataset_1.zip [file Tcf3_set_A.pdf › Supplemental Dataset 1/A-mRNA_nonrhyth_translation_nonrhyth/Tcf3_set_A.pdf]

## Tcf4

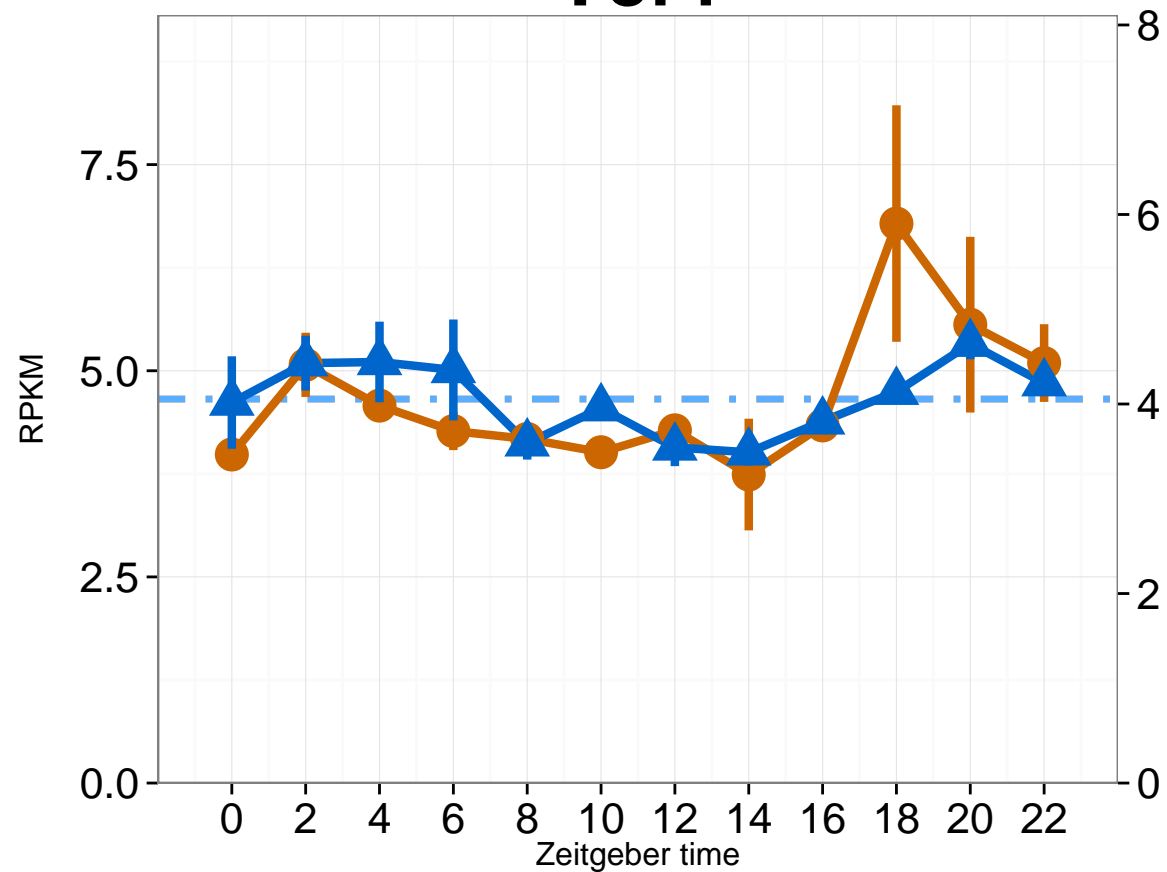

## Tcf4

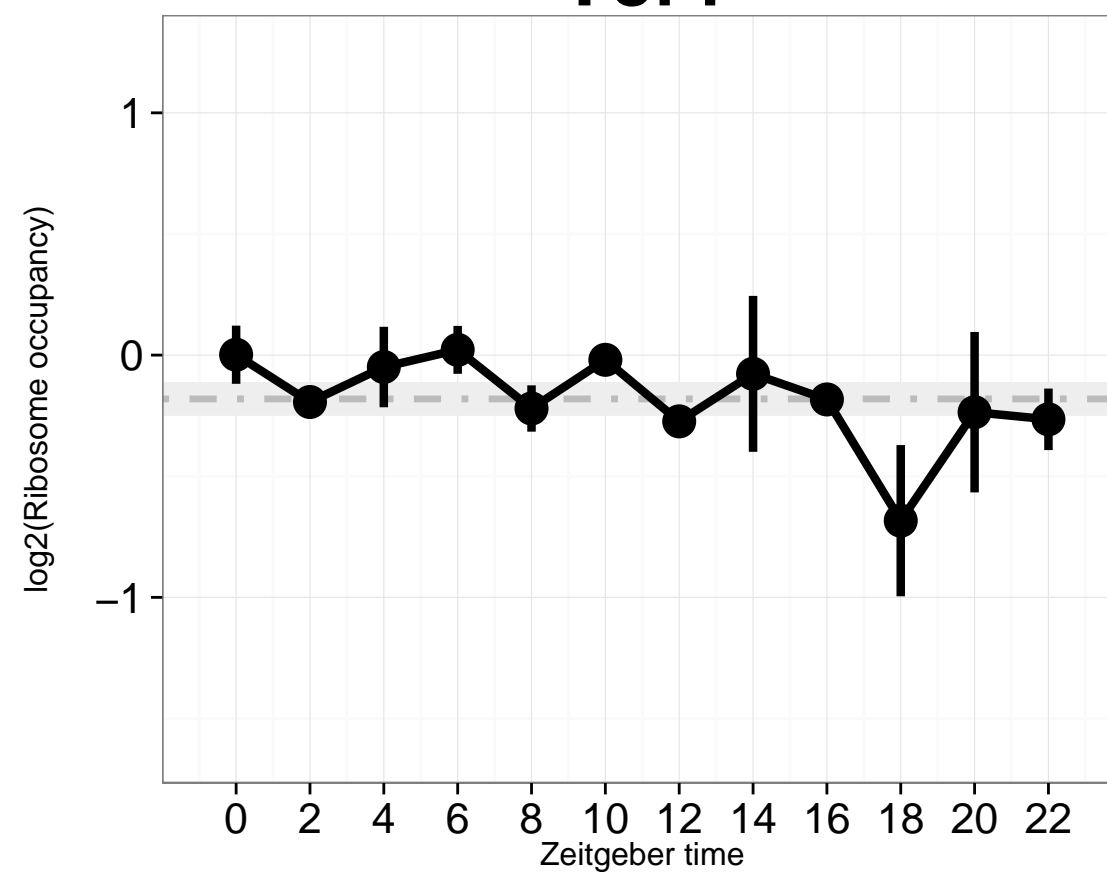

Supplement: SuppDataset_1.zip [file Tcf4_set_A.pdf › Supplemental Dataset 1/A-mRNA_nonrhyth_translation_nonrhyth/Tcf4_set_A.pdf]

## Tcf7

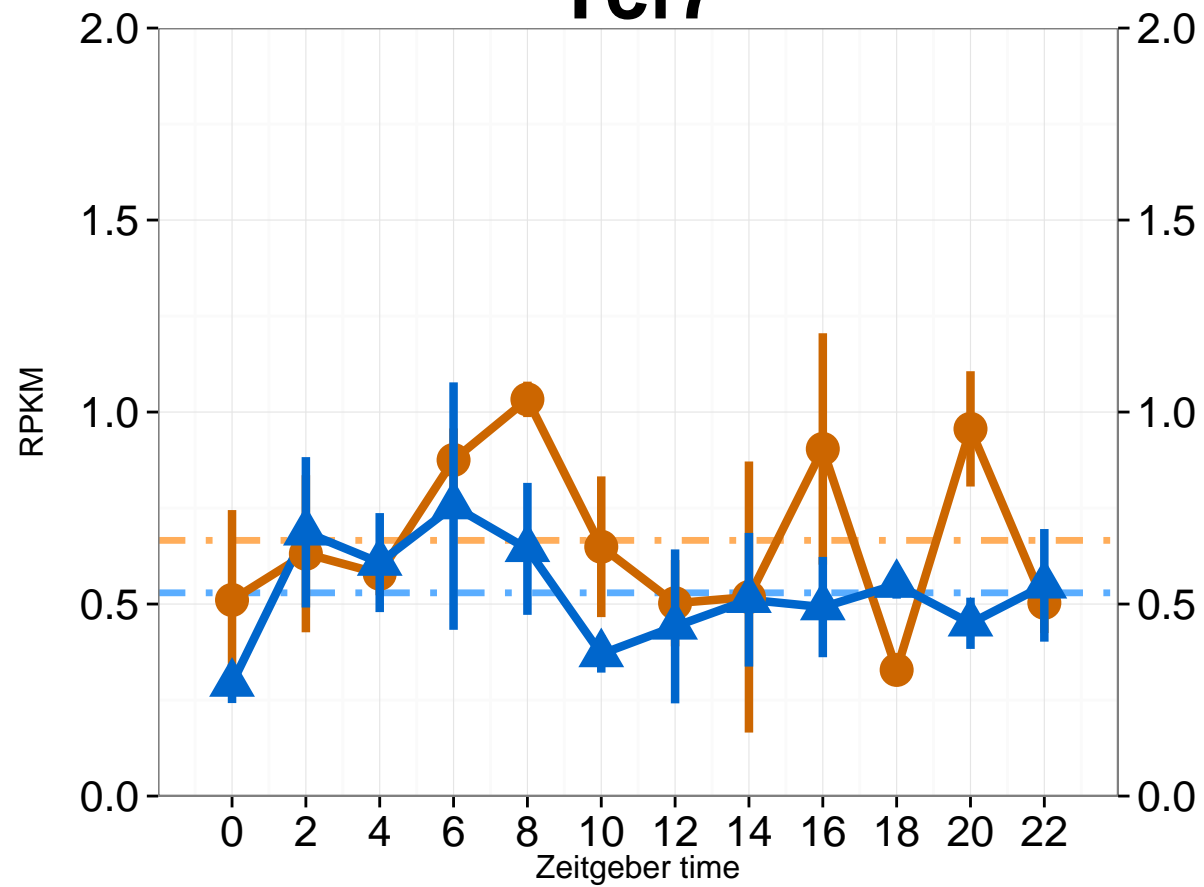

## Tcf7

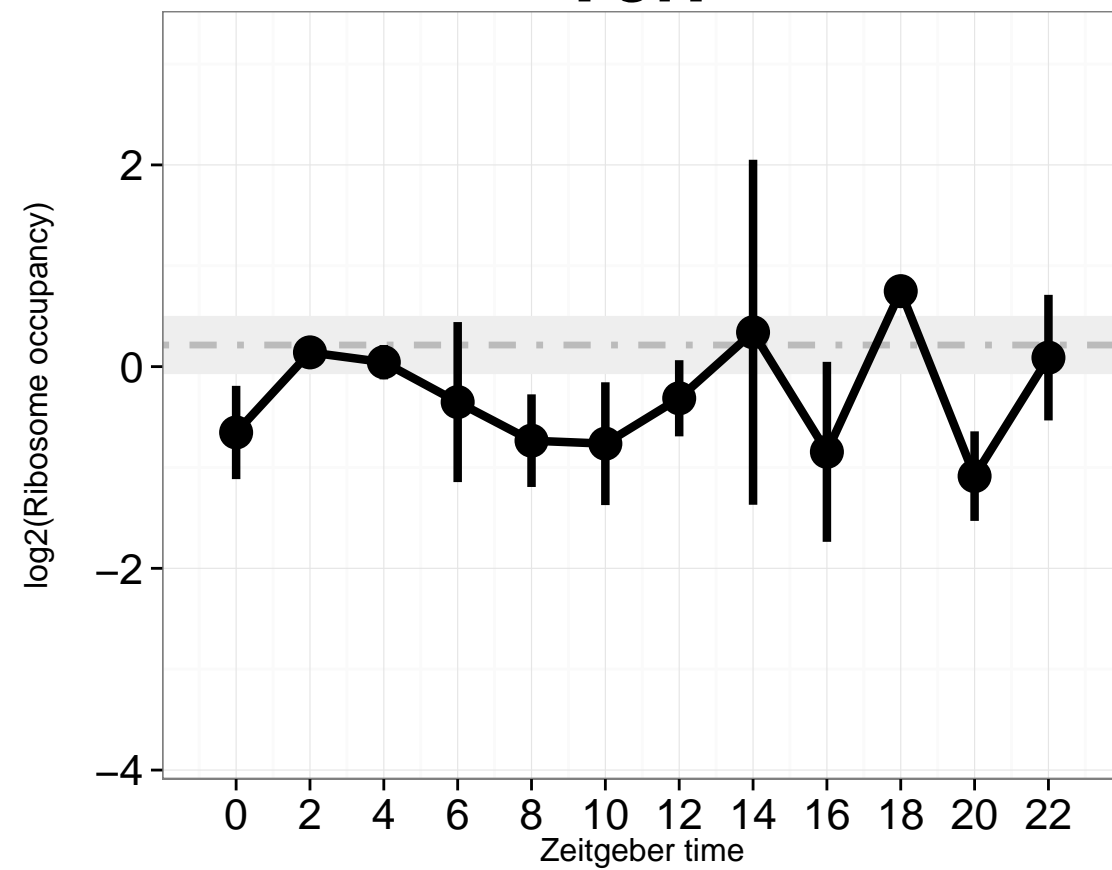

Supplement: SuppDataset_1.zip [file Tcf7_set_A.pdf › Supplemental Dataset 1/A-mRNA_nonrhyth_translation_nonrhyth/Tcf7_set_A.pdf]

## Tcf7l1

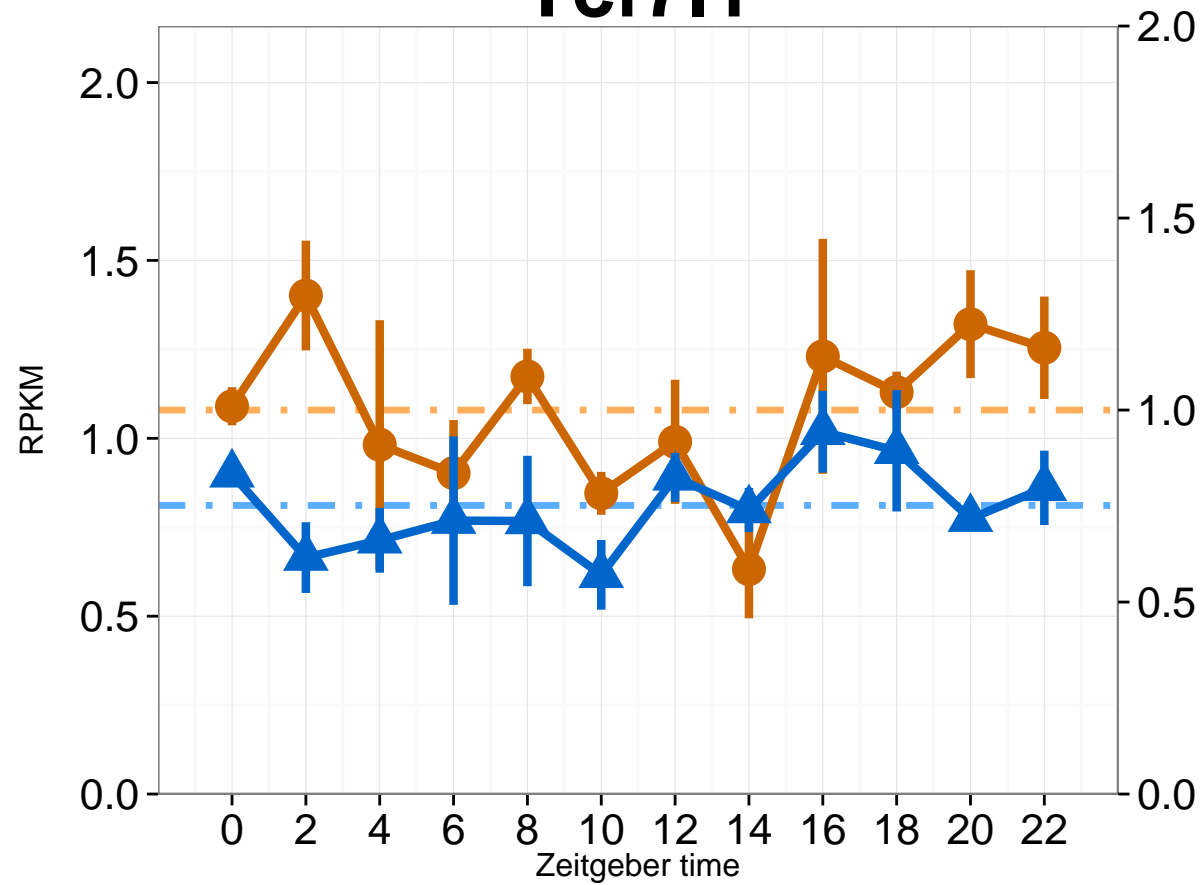

## Tcf7l1

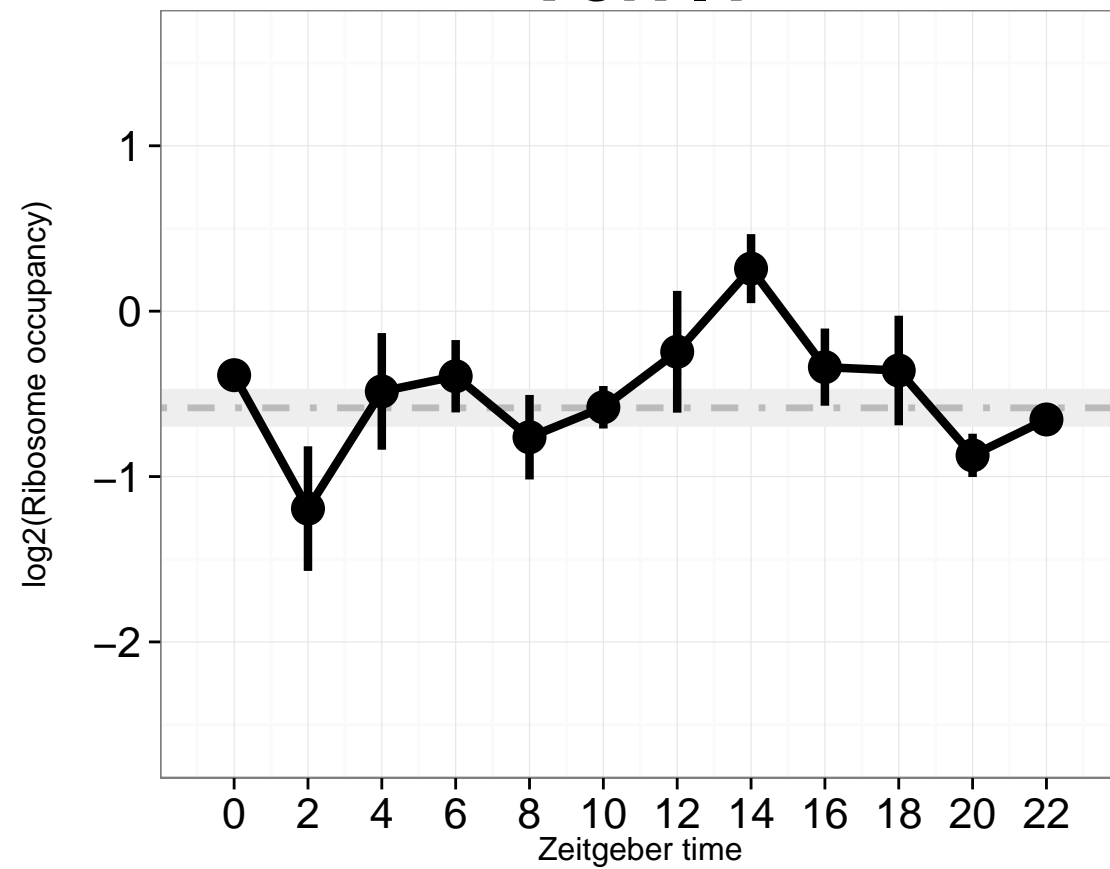

Supplement: SuppDataset_1.zip [file Tcf7l1_set_A.pdf › Supplemental Dataset 1/A-mRNA_nonrhyth_translation_nonrhyth/Tcf7l1_set_A.pdf]

## Tcf7l2

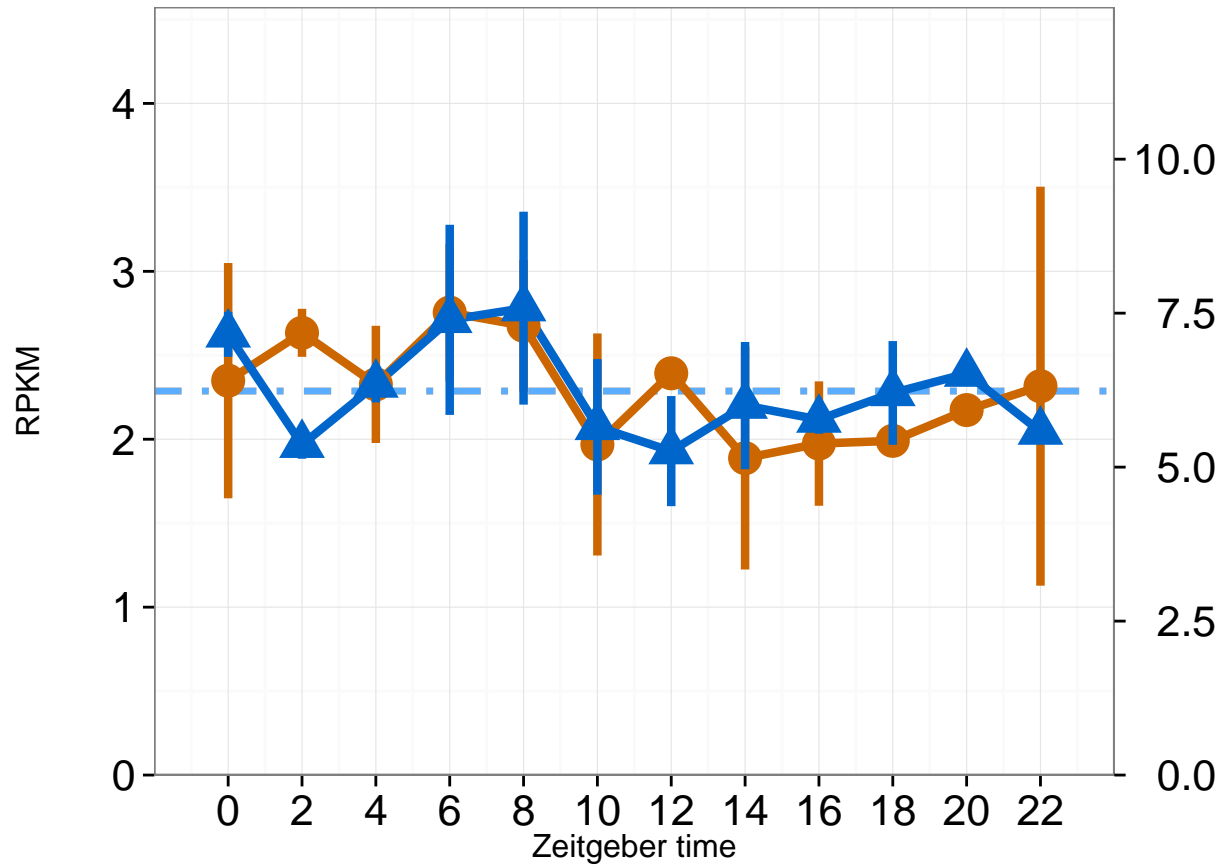

## Tcf7l2

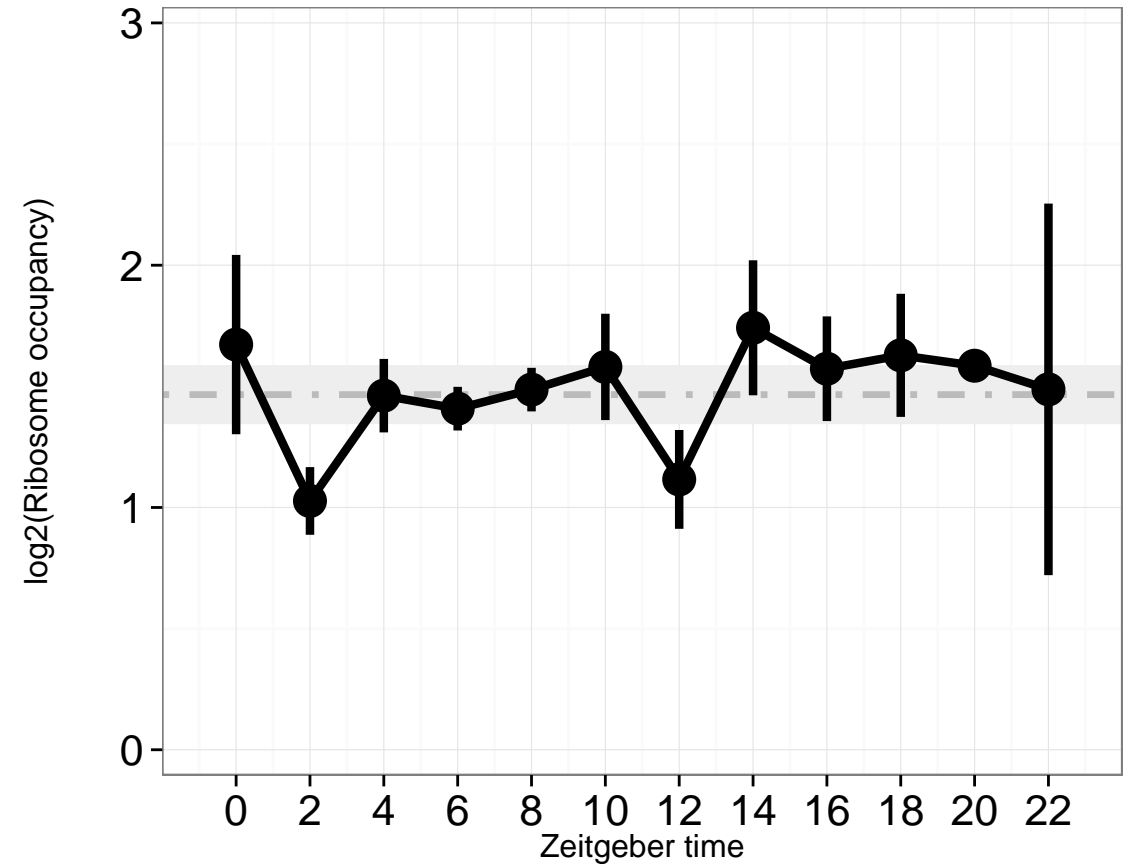

Supplement: SuppDataset_1.zip [file Tcf7l2_set_A.pdf › Supplemental Dataset 1/A-mRNA_nonrhyth_translation_nonrhyth/Tcf7l2_set_A.pdf]

# Tcirg1

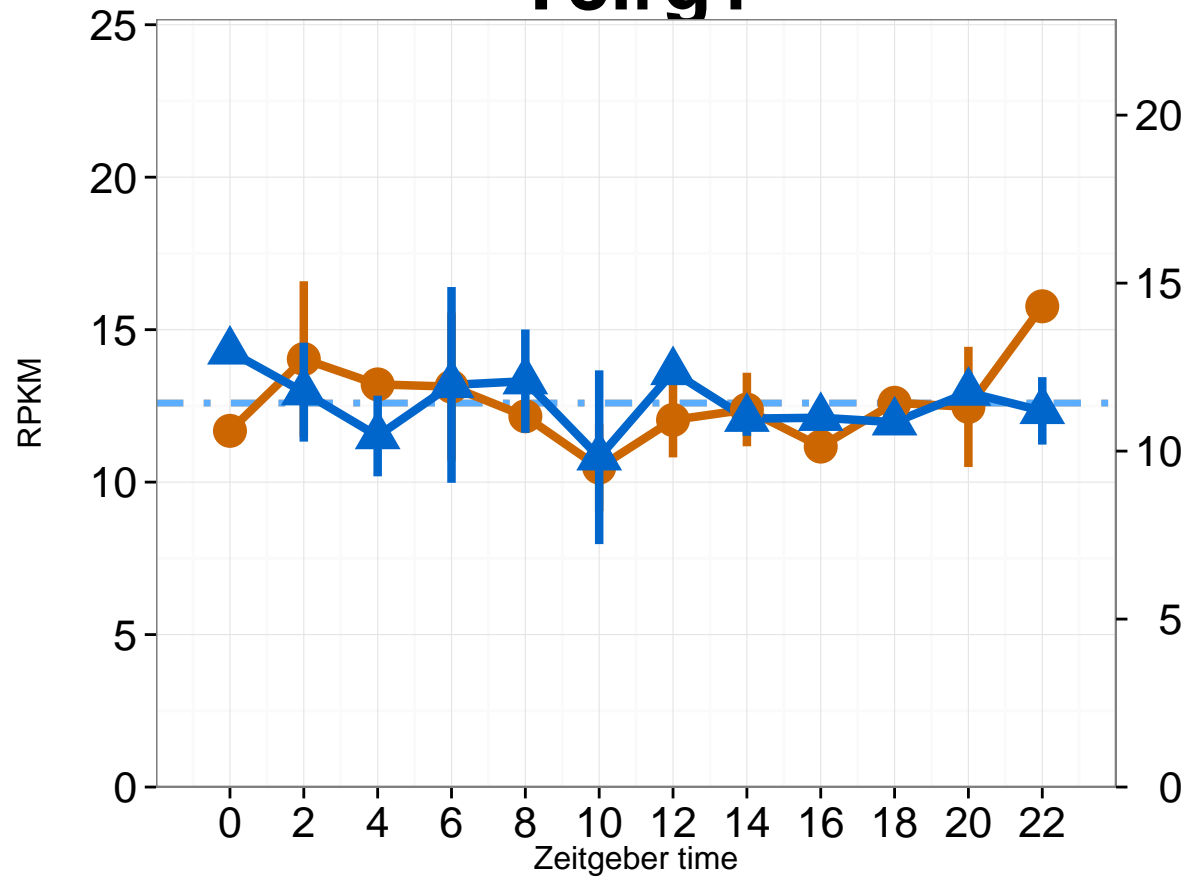

# Tcirg1

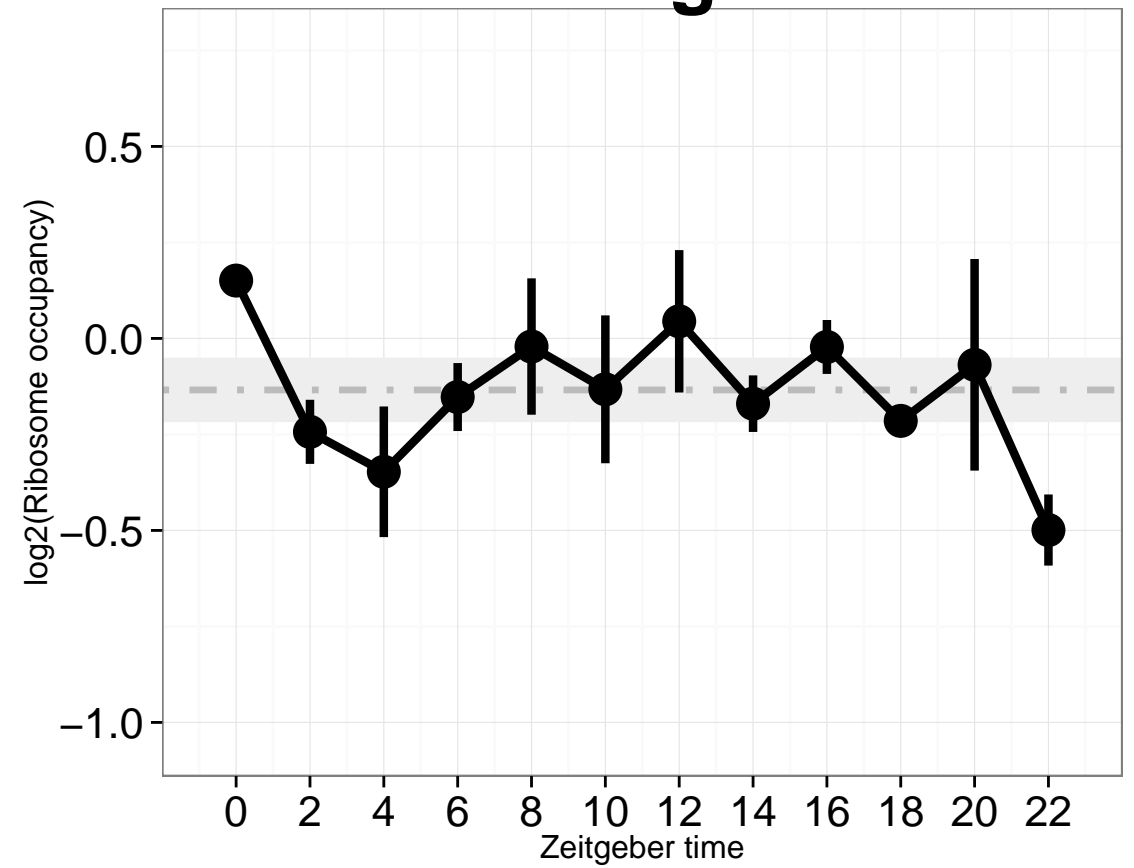

Supplement: SuppDataset_1.zip [file Tcirg1_set_A.pdf › Supplemental Dataset 1/A-mRNA_nonrhyth_translation_nonrhyth/Tcirg1_set_A.pdf]

## Tcn2

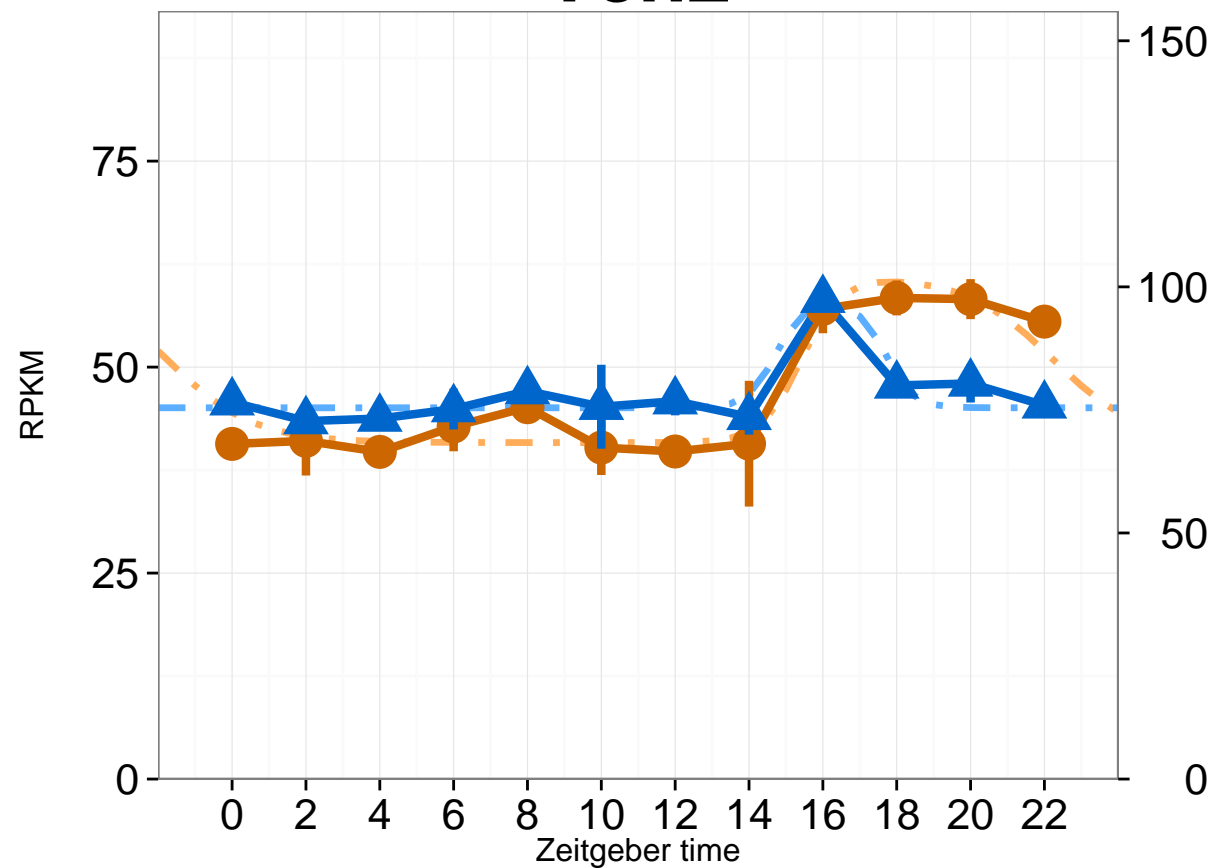

## Tcn2

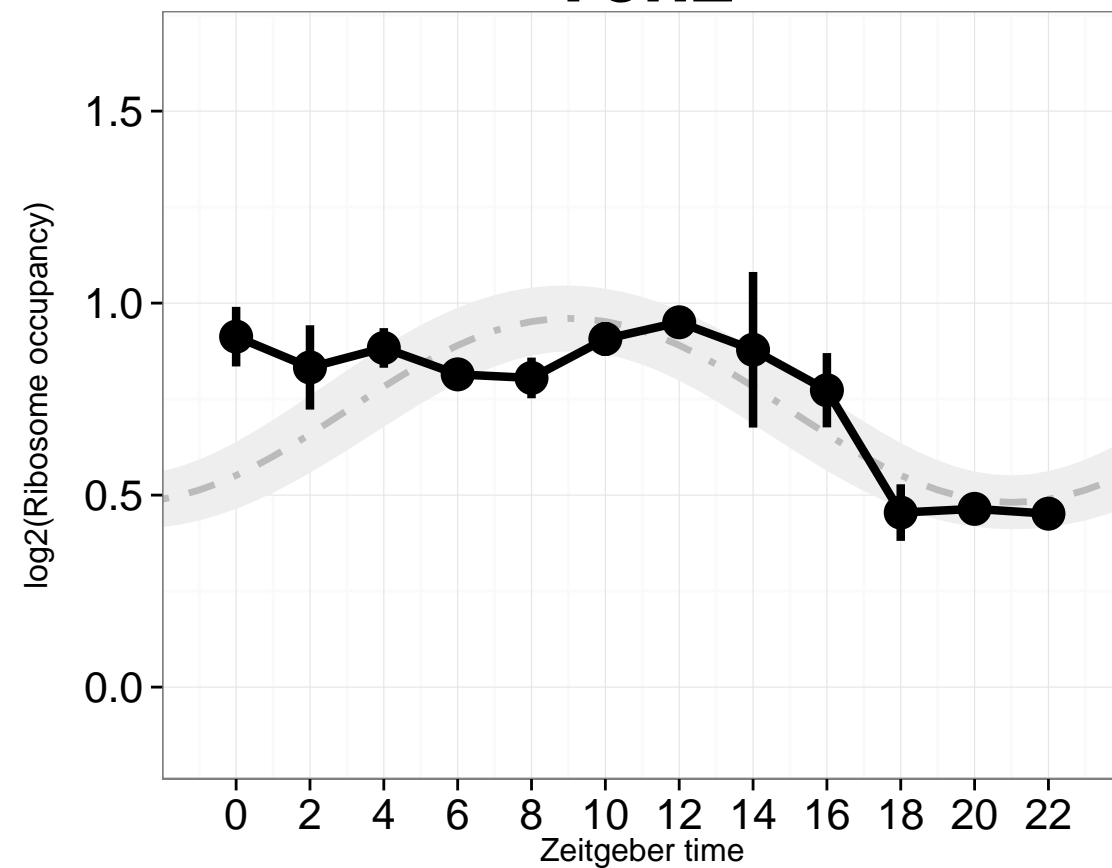

Supplement: SuppDataset_1.zip [file Tcn2_set_A.pdf › Supplemental Dataset 1/A-mRNA_nonrhyth_translation_nonrhyth/Tcn2_set_A.pdf]

## Tcof1

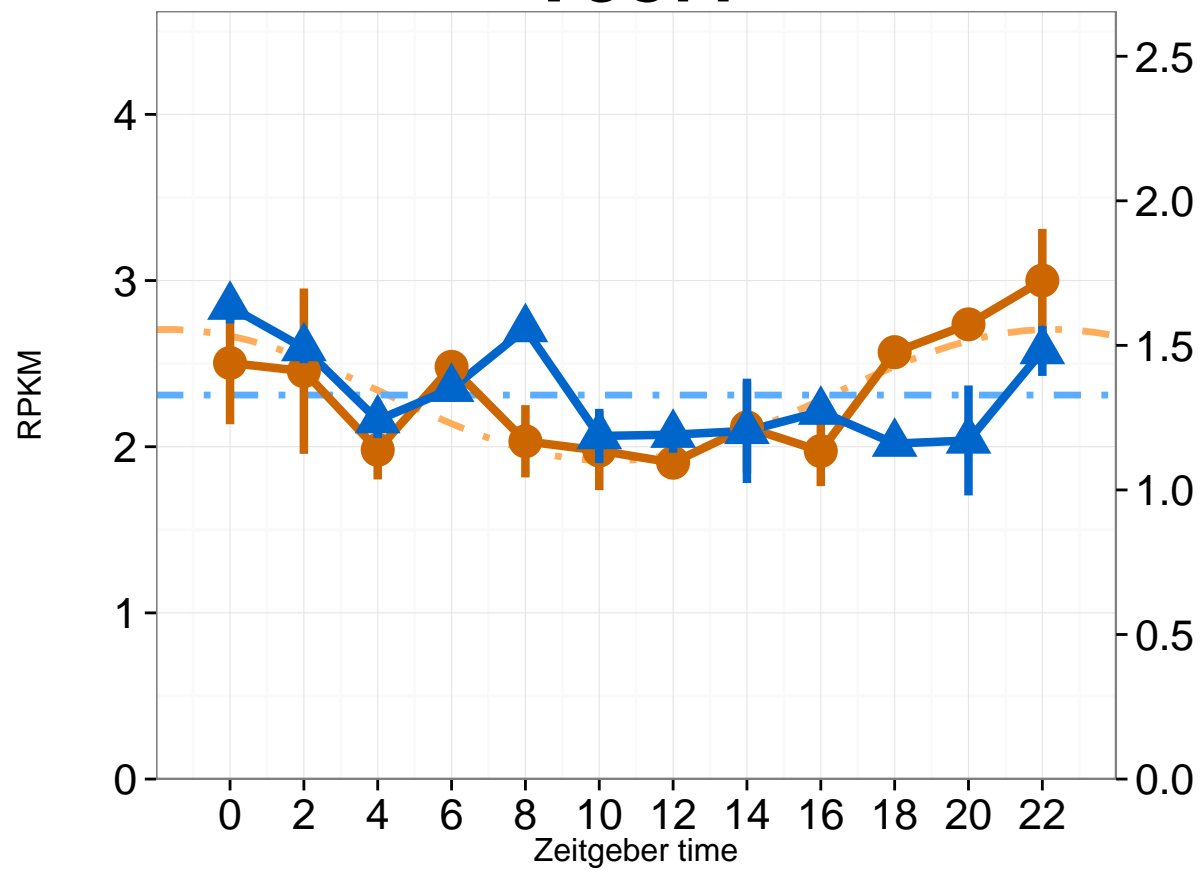

## Tcof1

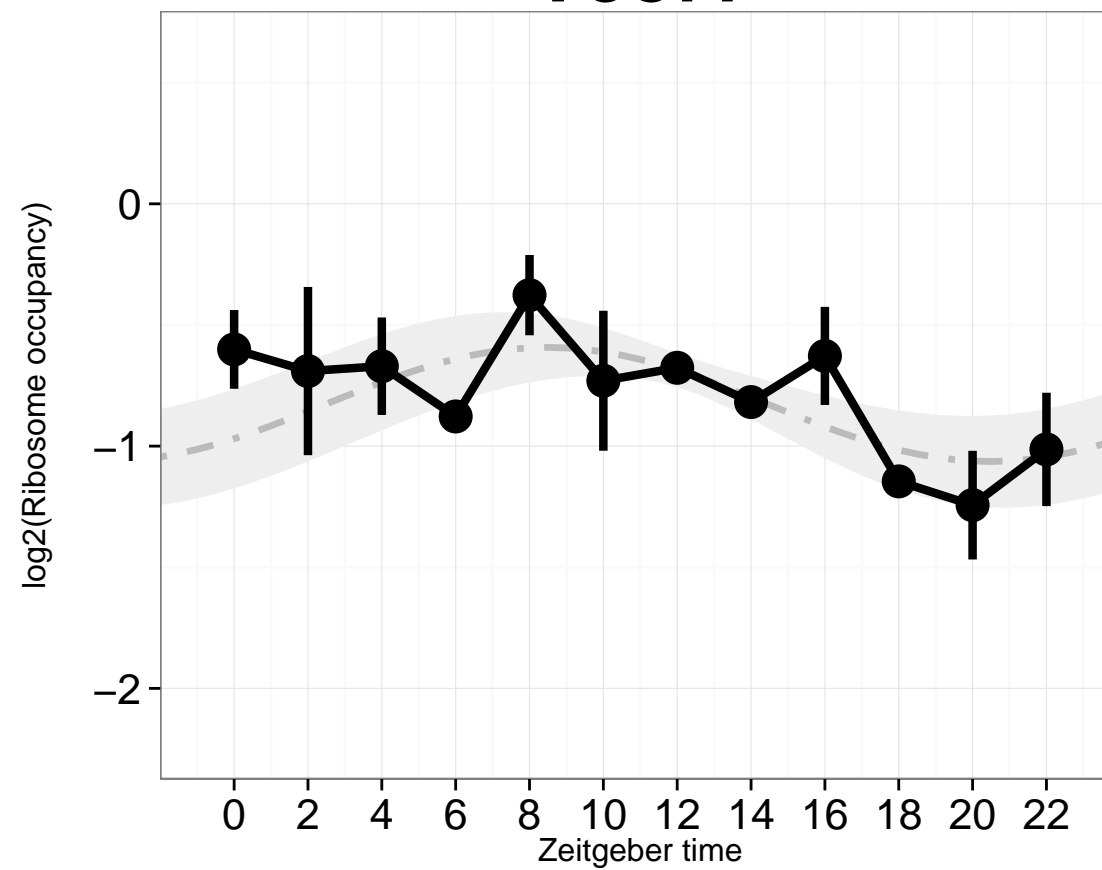

Supplement: SuppDataset_1.zip [file Tcof1_set_A.pdf › Supplemental Dataset 1/A-mRNA_nonrhyth_translation_nonrhyth/Tcof1_set_A.pdf]

# Tcp11l1

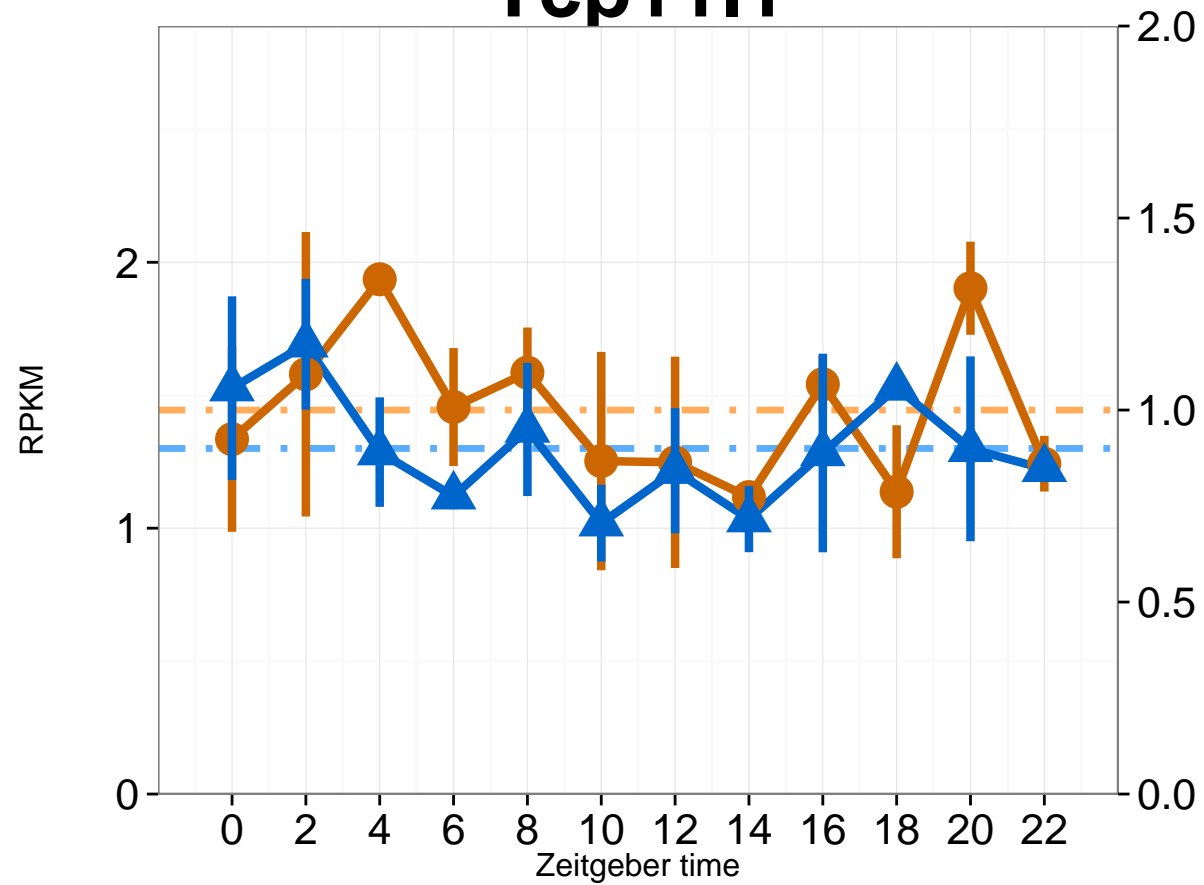

# Tcp11l1

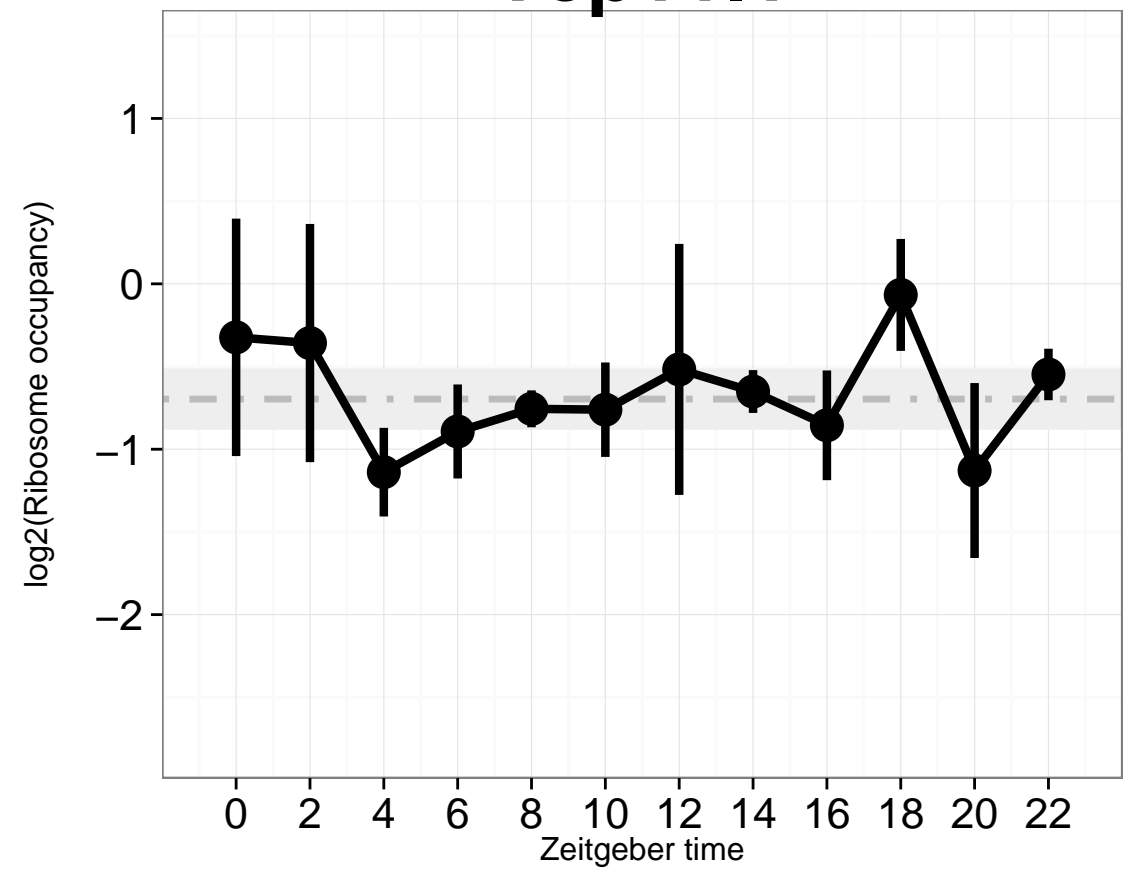

Supplement: SuppDataset_1.zip [file Tcp11l1_set_A.pdf › Supplemental Dataset 1/A-mRNA_nonrhyth_translation_nonrhyth/Tcp11l1_set_A.pdf]

# Tctex1d2

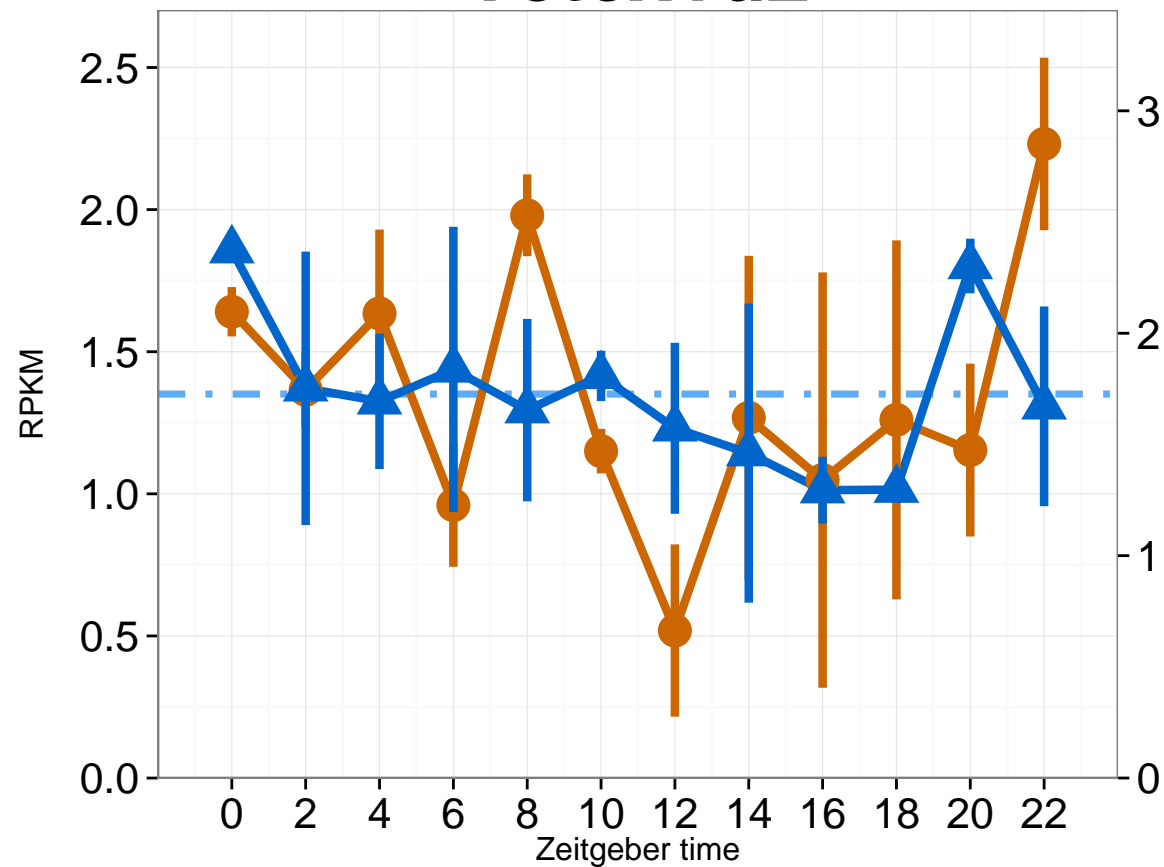

# Tctex1d2

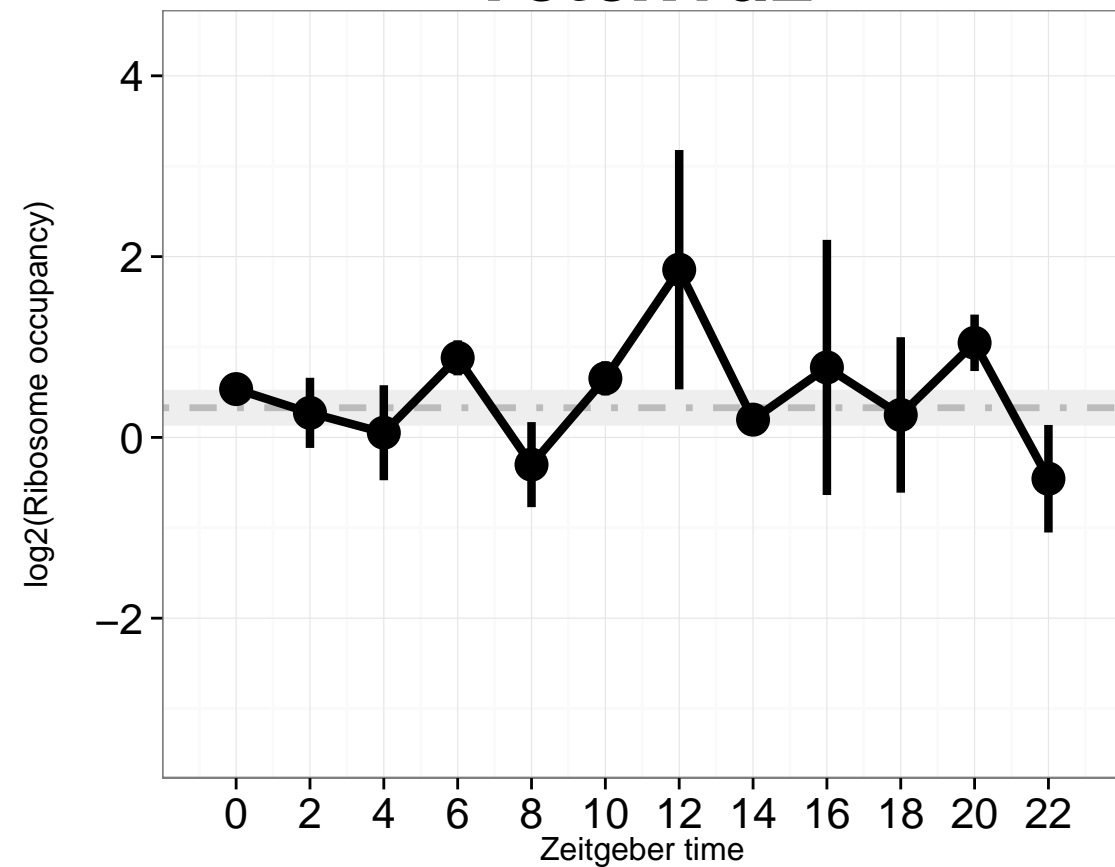

Supplement: SuppDataset_1.zip [file Tctex1d2_set_A.pdf › Supplemental Dataset 1/A-mRNA_nonrhyth_translation_nonrhyth/Tctex1d2_set_A.pdf]

# Tctn1

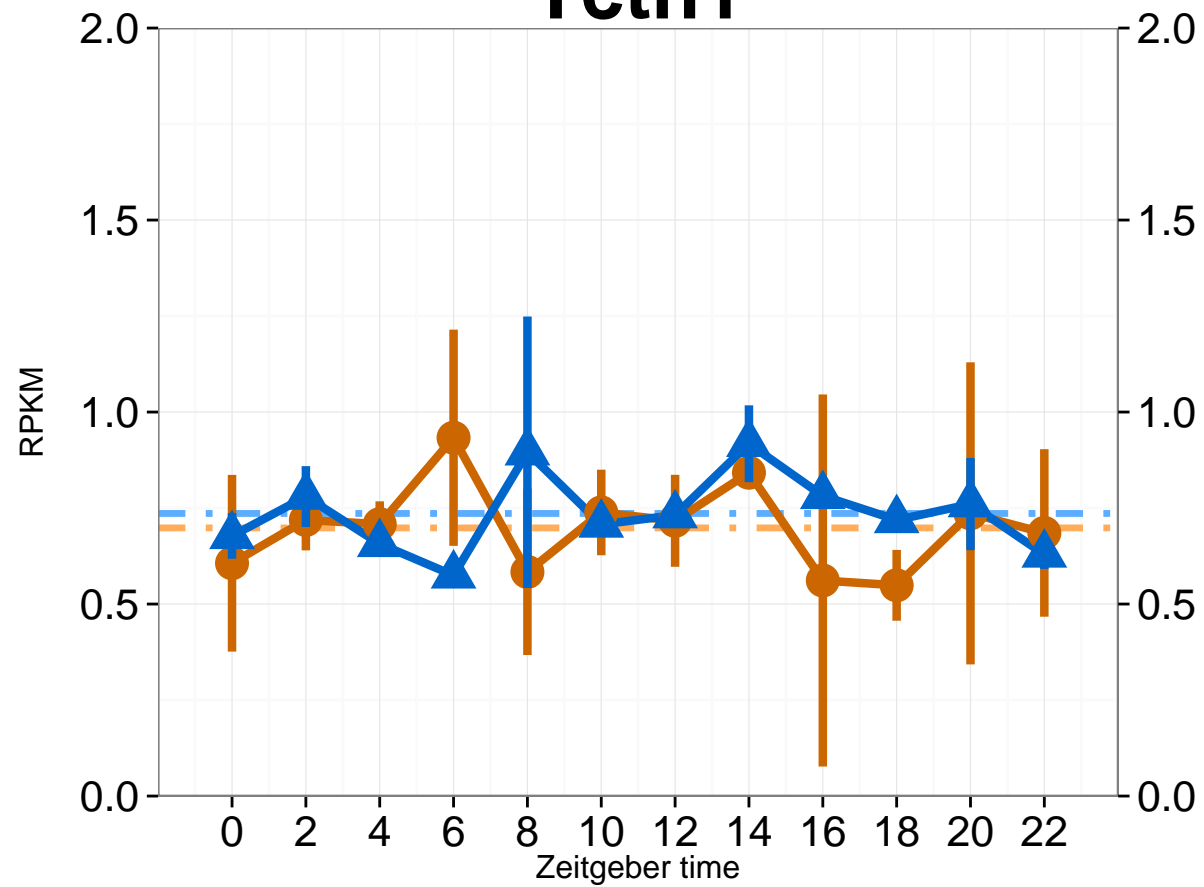

# Tctn1

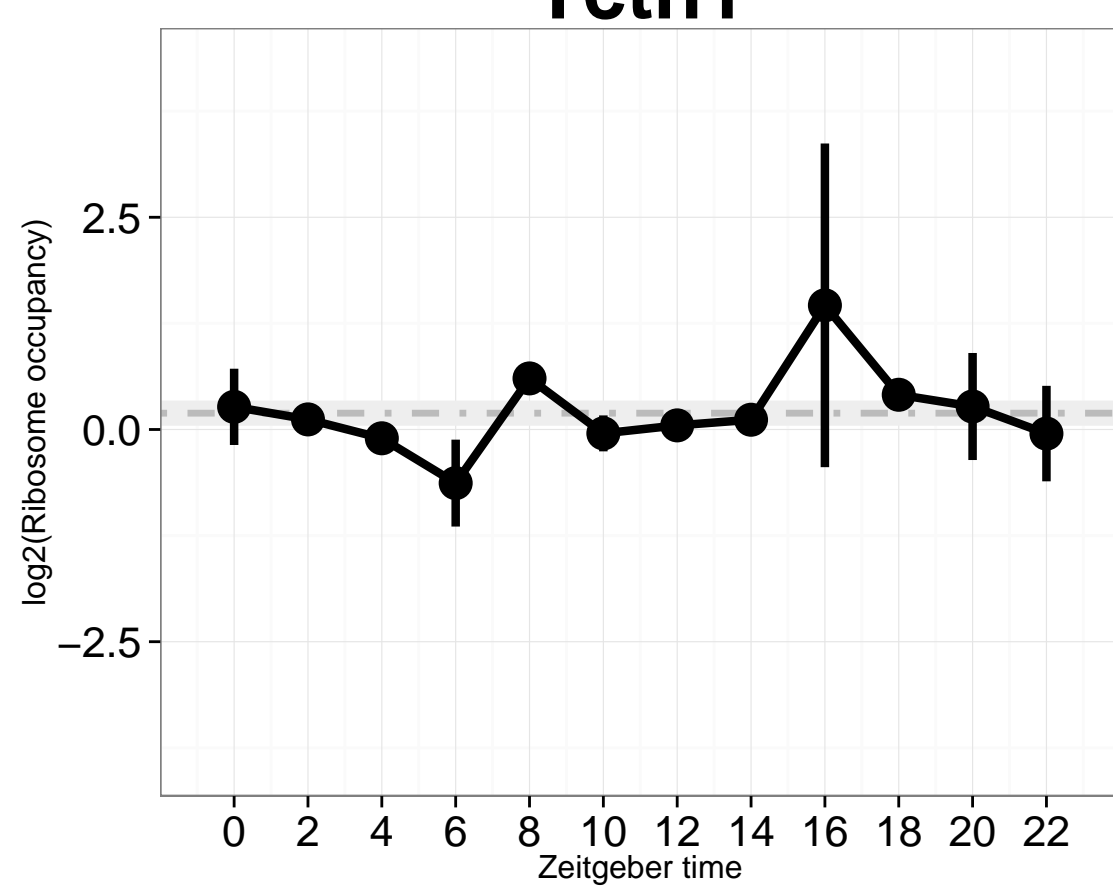

Supplement: SuppDataset_1.zip [file Tctn1_set_A.pdf › Supplemental Dataset 1/A-mRNA_nonrhyth_translation_nonrhyth/Tctn1_set_A.pdf]

## Tctn2

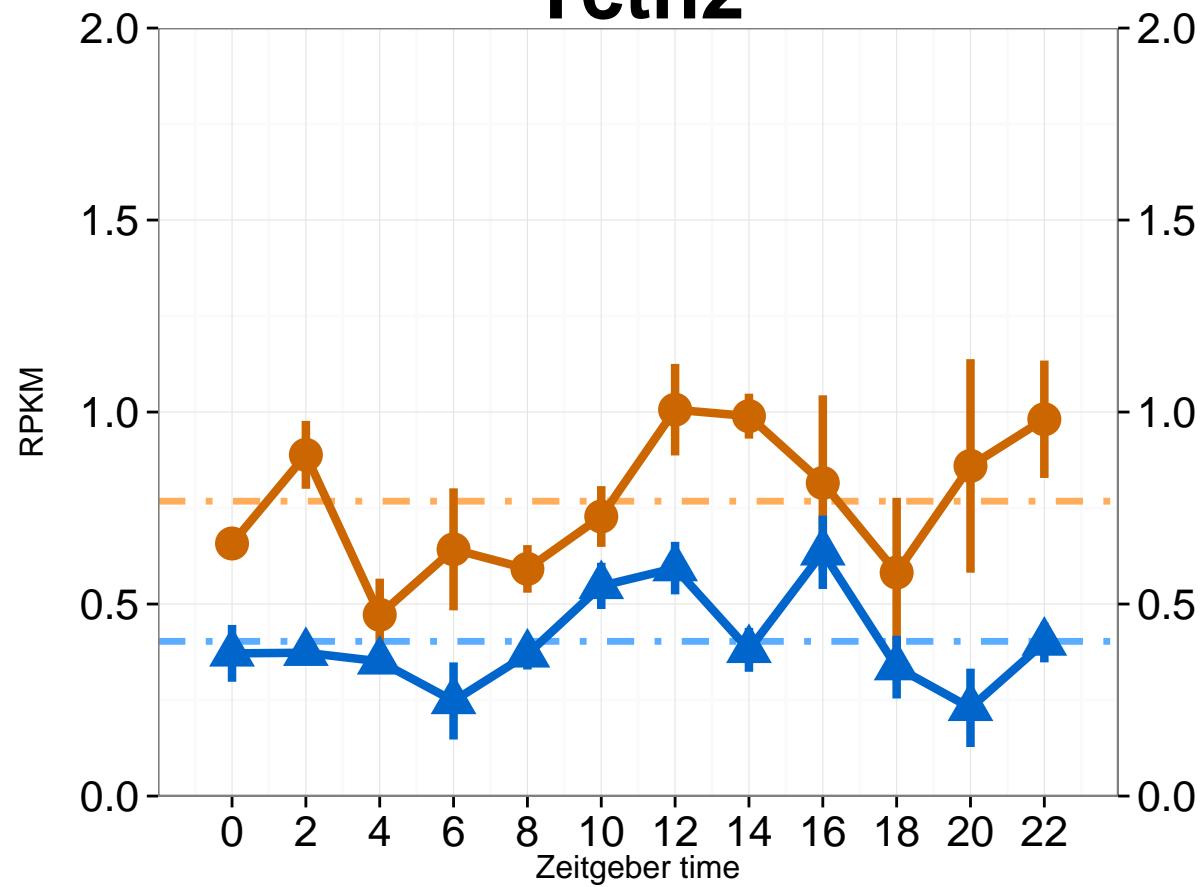

## Tctn2

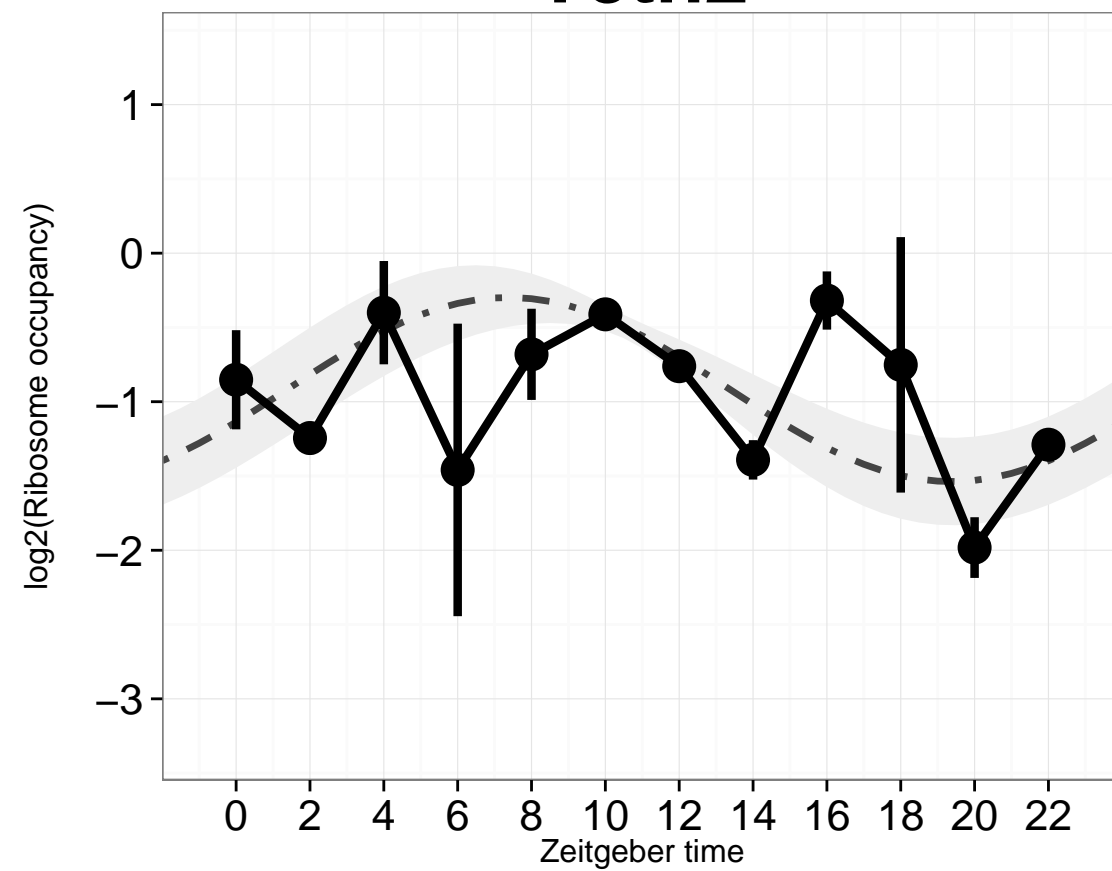

Supplement: SuppDataset_1.zip [file Tctn2_set_A.pdf › Supplemental Dataset 1/A-mRNA_nonrhyth_translation_nonrhyth/Tctn2_set_A.pdf]

# Tdg

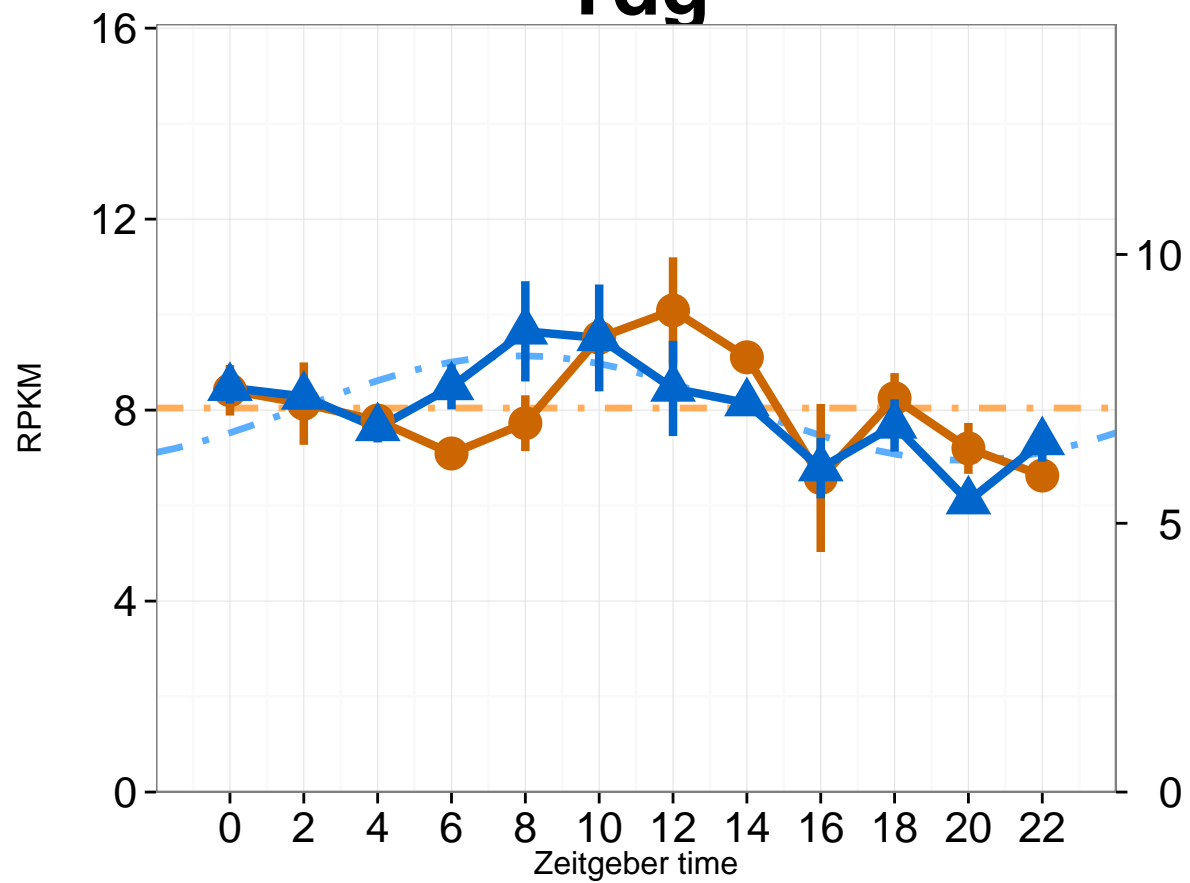

# Tdg

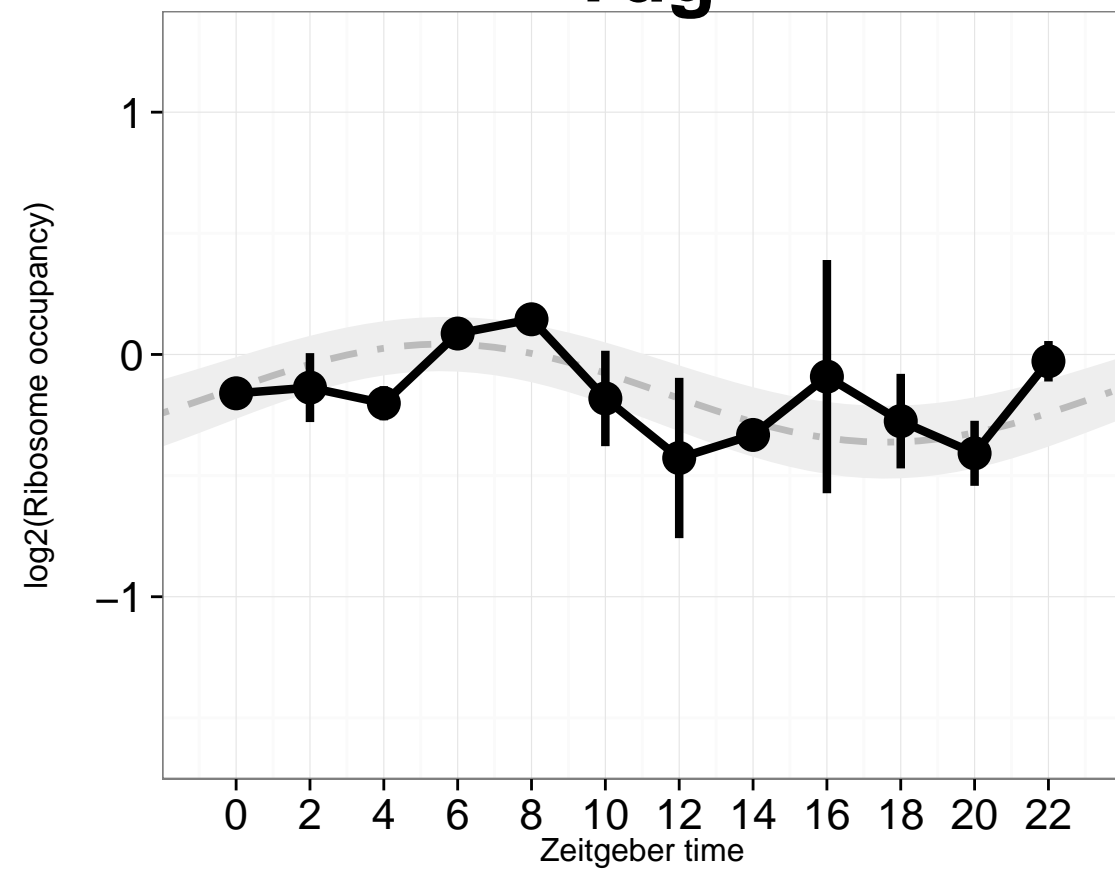

Supplement: SuppDataset_1.zip [file Tdg_set_A.pdf › Supplemental Dataset 1/A-mRNA_nonrhyth_translation_nonrhyth/Tdg_set_A.pdf]

## Tdo2

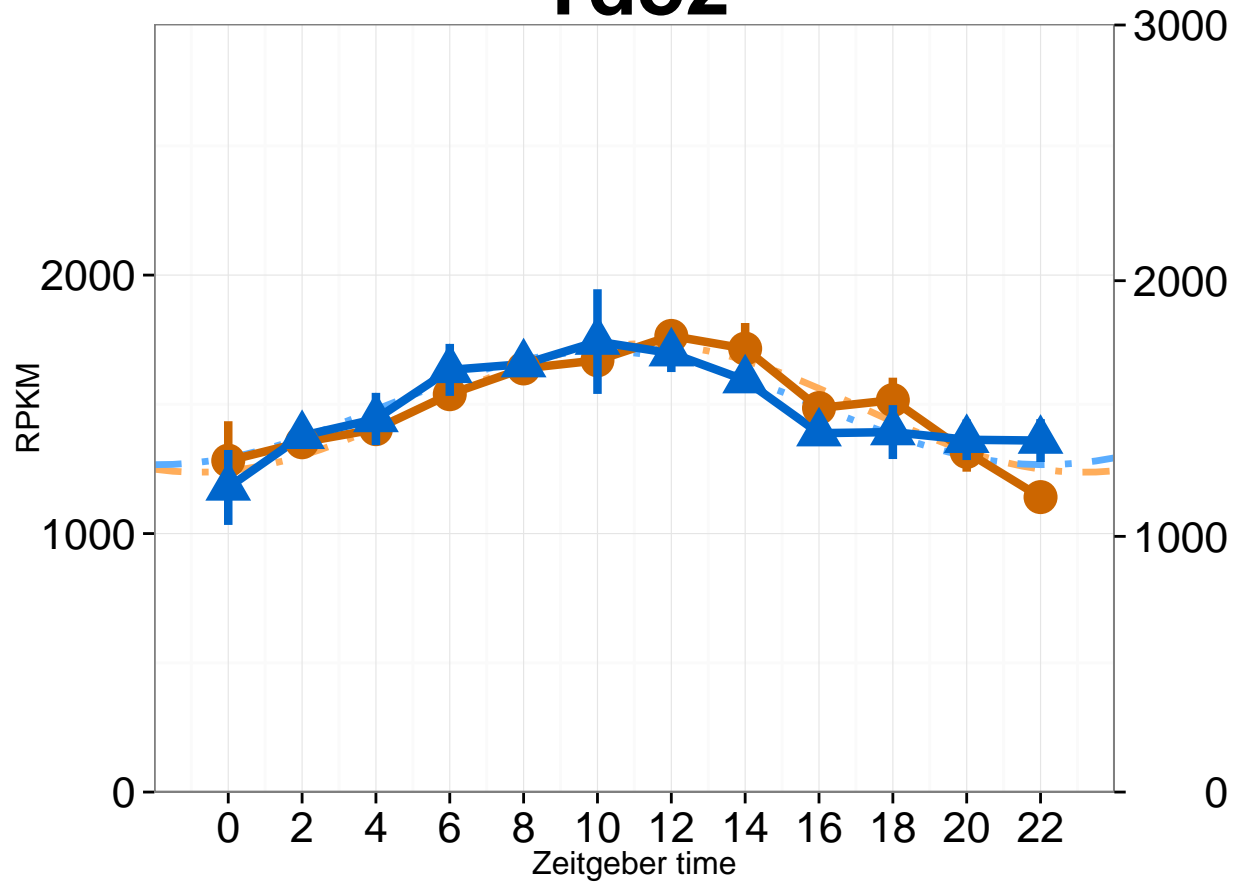

## Tdo2

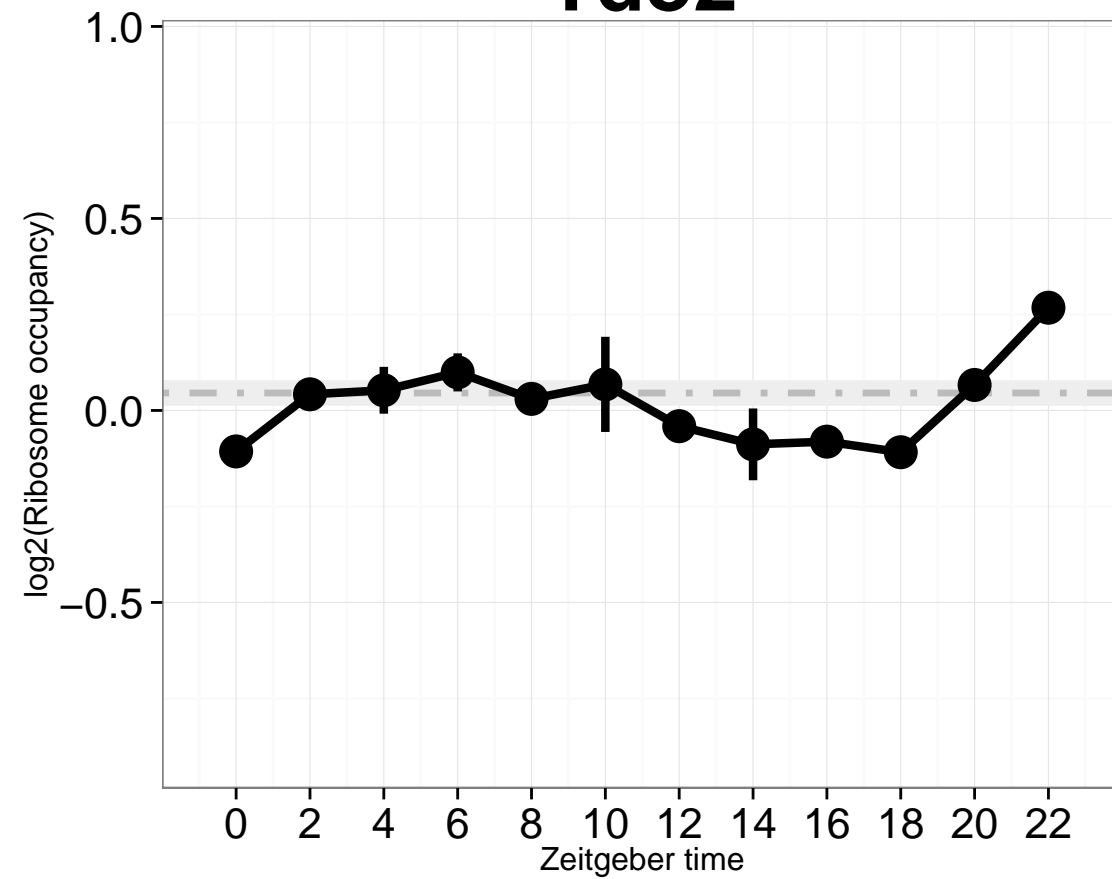

Supplement: SuppDataset_1.zip [file Tdo2_set_A.pdf › Supplemental Dataset 1/A-mRNA_nonrhyth_translation_nonrhyth/Tdo2_set_A.pdf]

## Tdp1

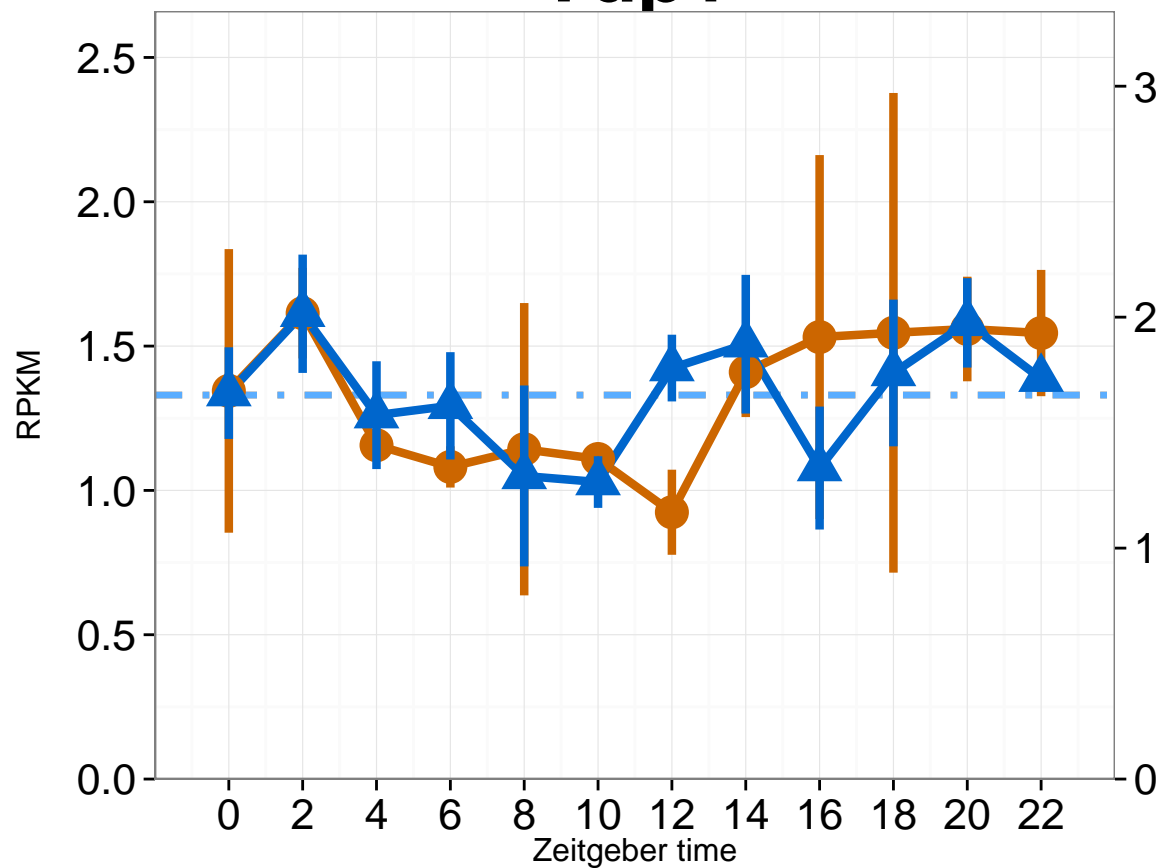

## Tdp1

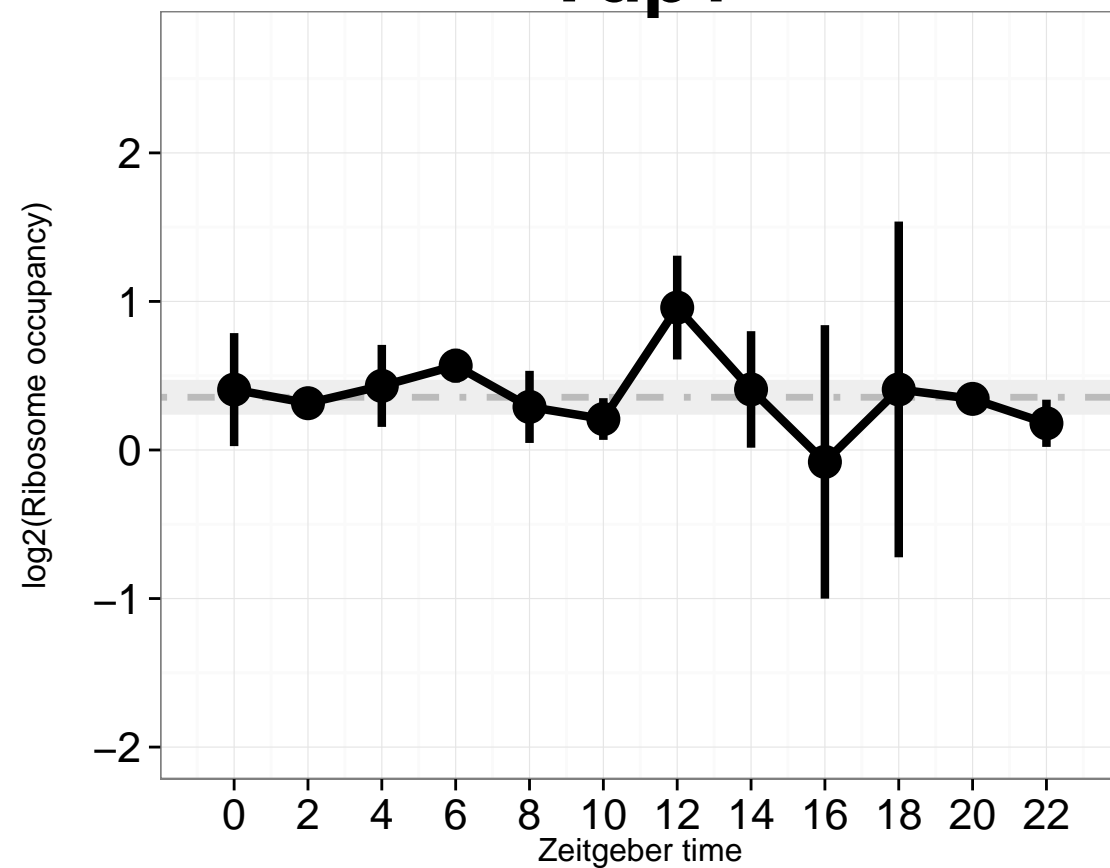

Supplement: SuppDataset_1.zip [file Tdp1_set_A.pdf › Supplemental Dataset 1/A-mRNA_nonrhyth_translation_nonrhyth/Tdp1_set_A.pdf]

## Tdp2

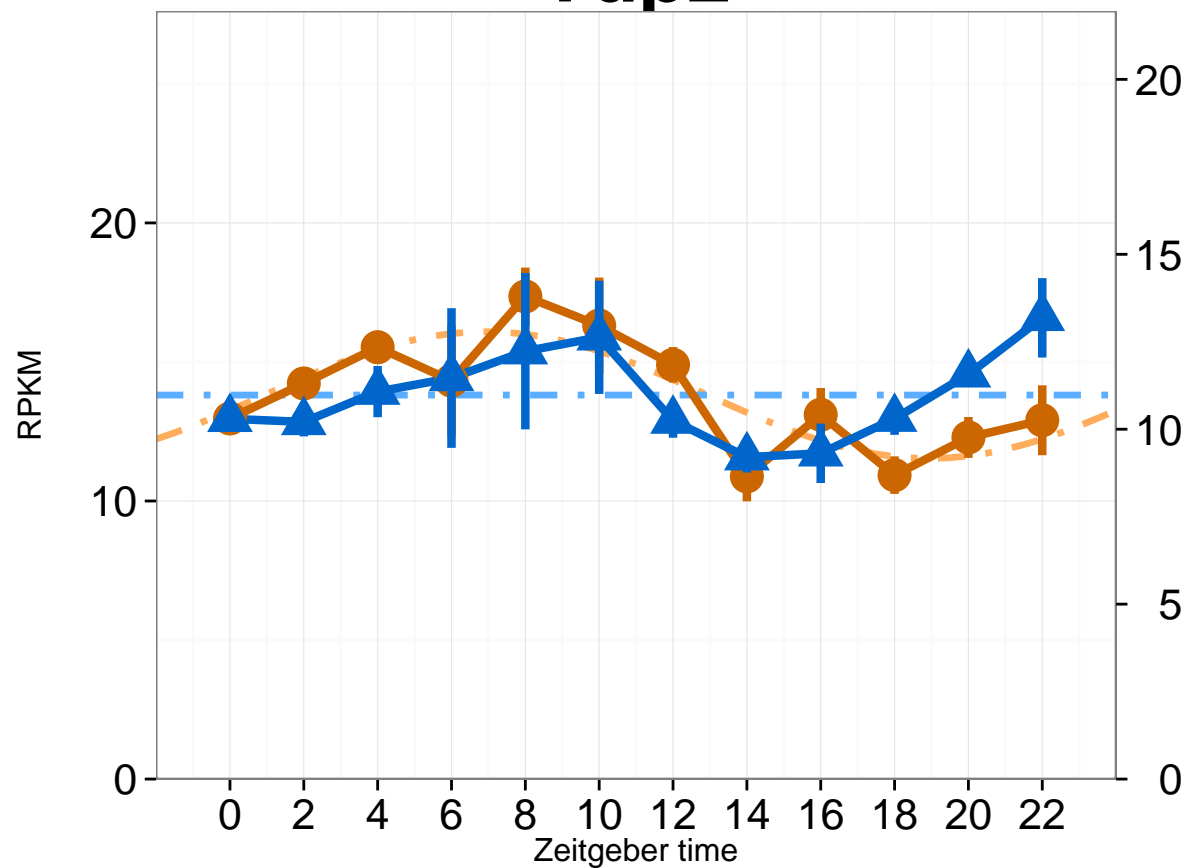

## Tdp2

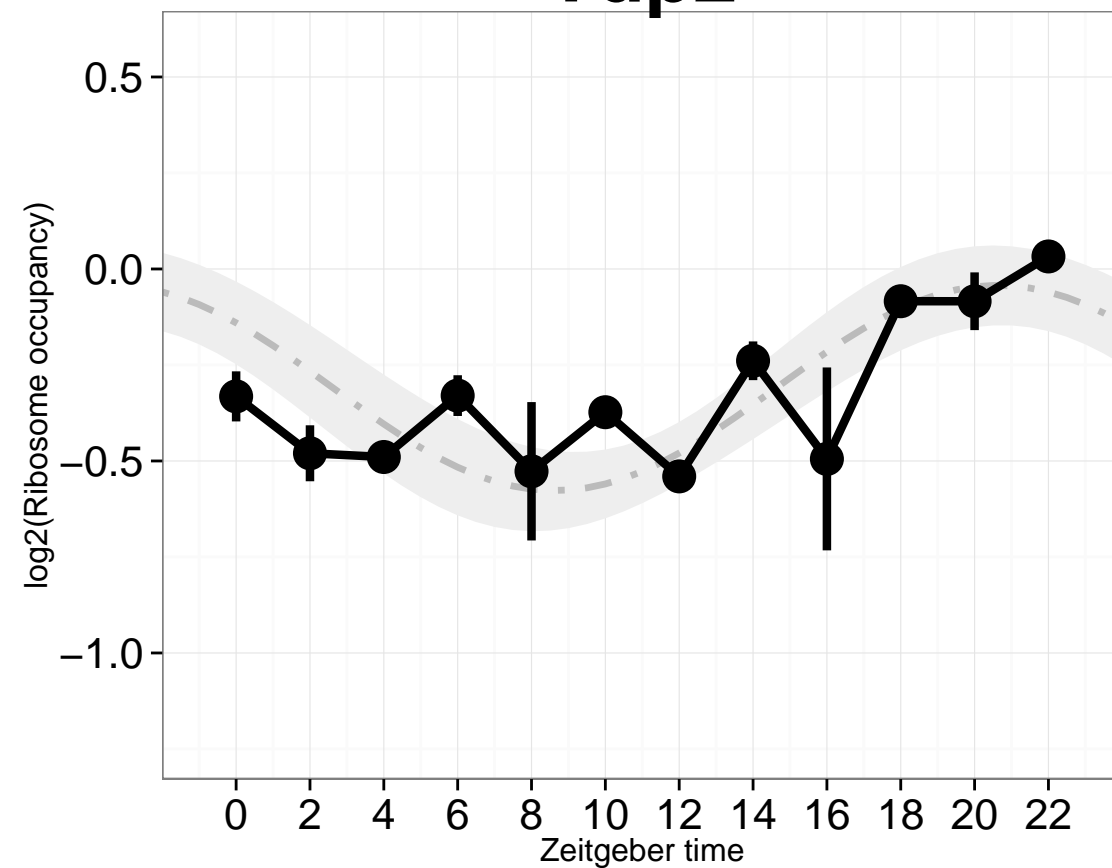

Supplement: SuppDataset_1.zip [file Tdp2_set_A.pdf › Supplemental Dataset 1/A-mRNA_nonrhyth_translation_nonrhyth/Tdp2_set_A.pdf]

## Tdrd3

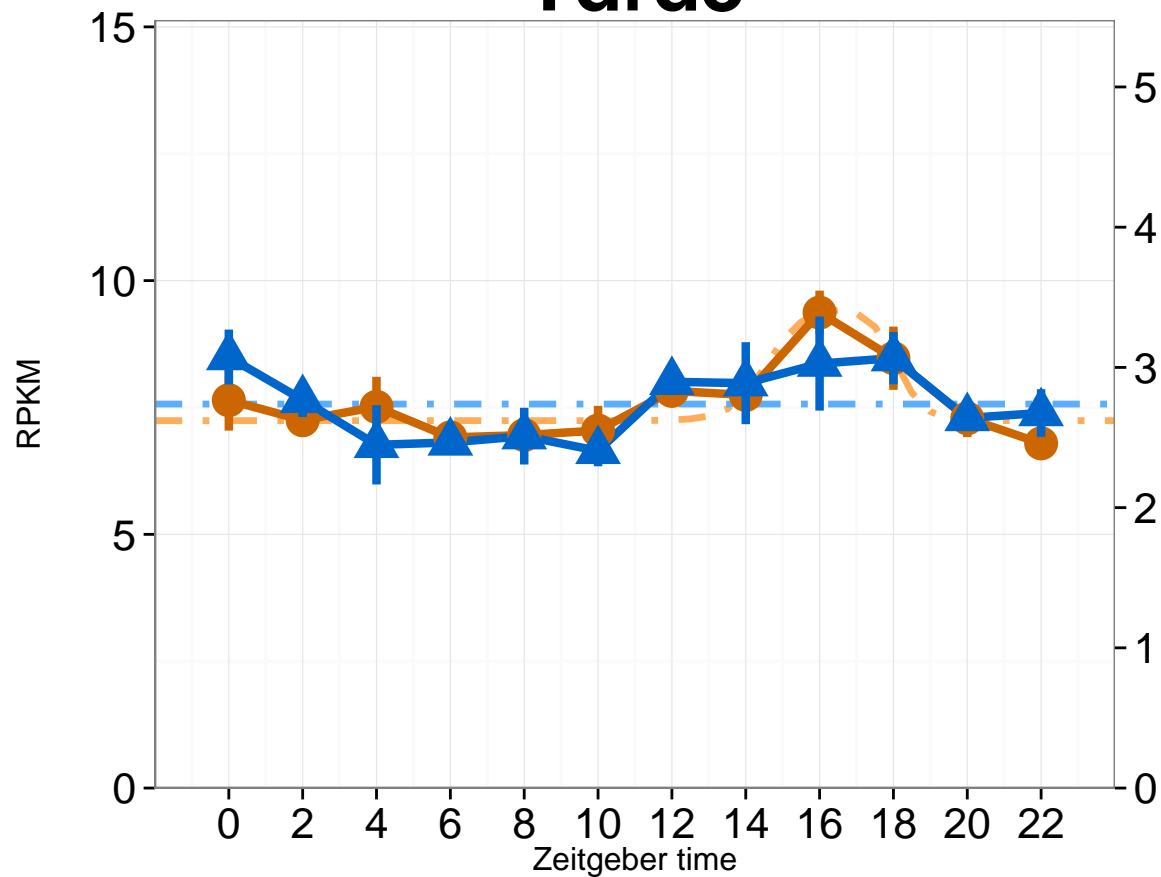

## Tdrd3

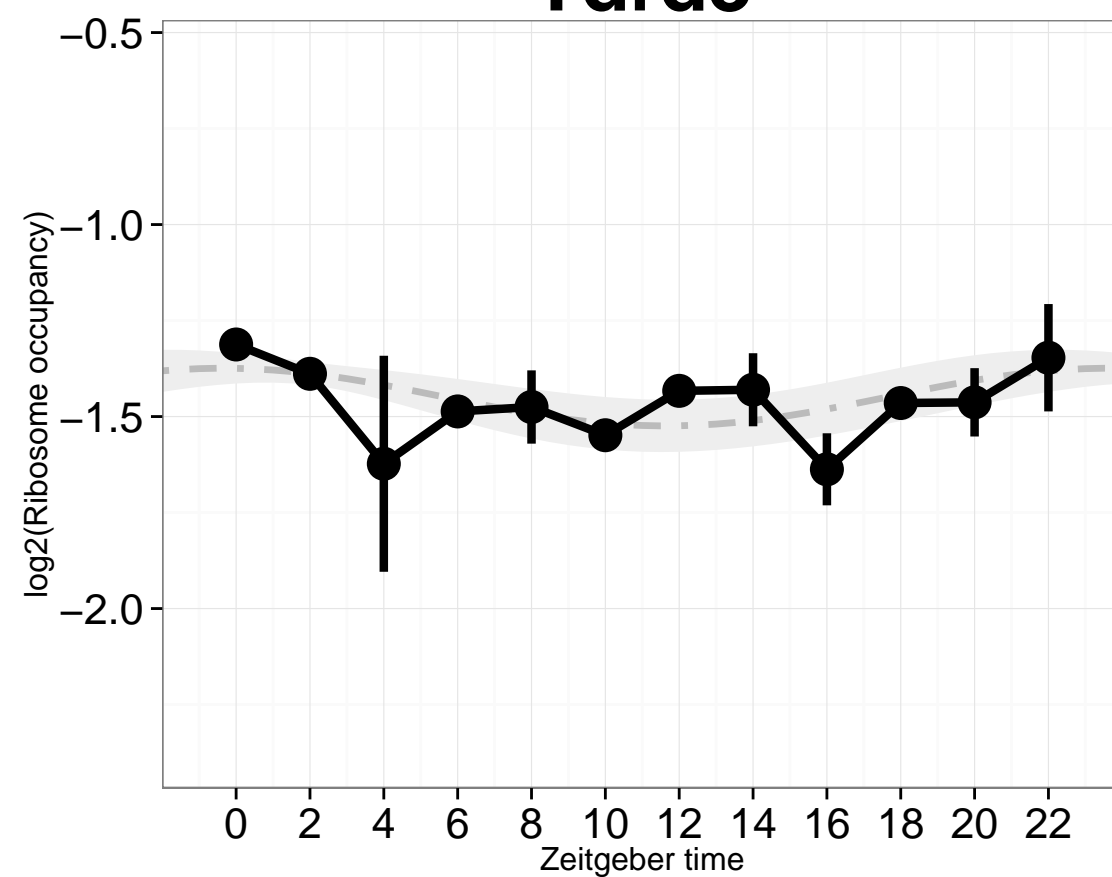

Supplement: SuppDataset_1.zip [file Tdrd3_set_A.pdf › Supplemental Dataset 1/A-mRNA_nonrhyth_translation_nonrhyth/Tdrd3_set_A.pdf]

## Tdrd7

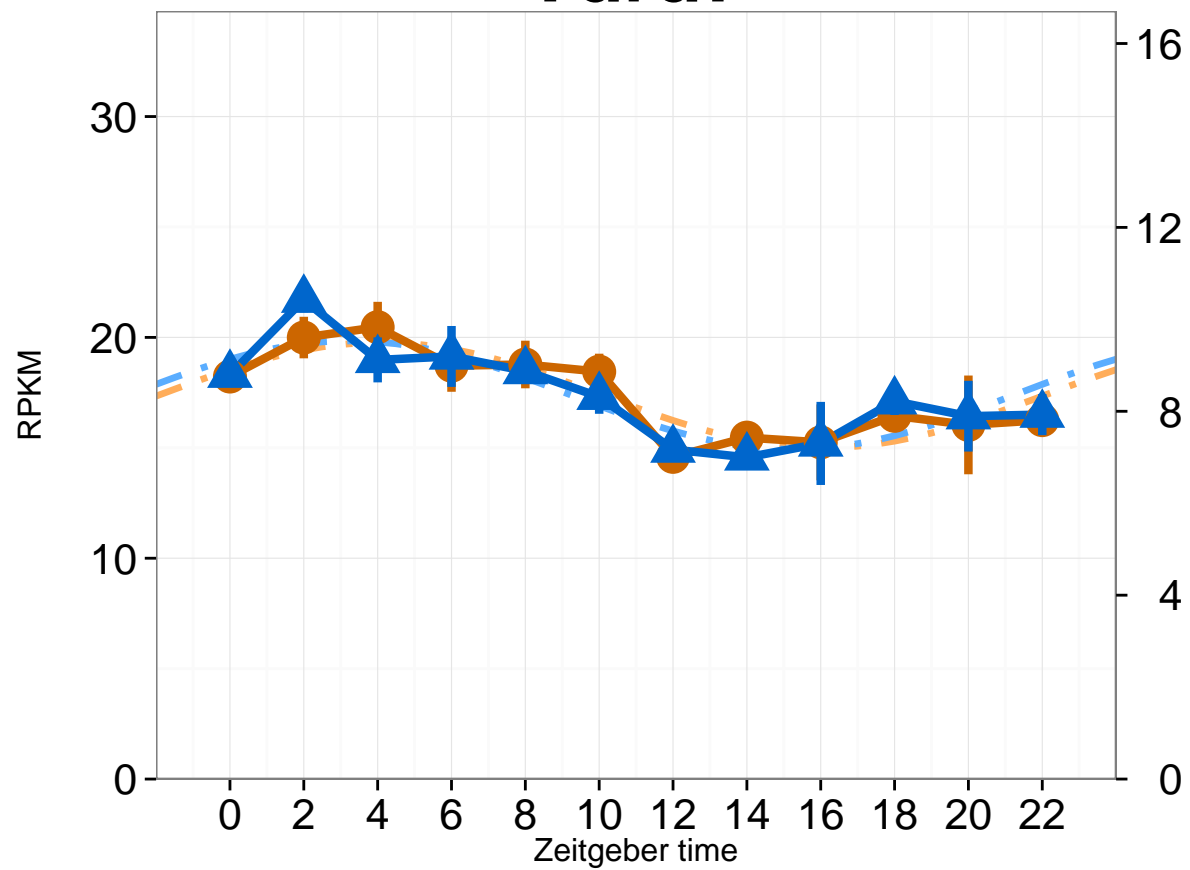

## Tdrd7

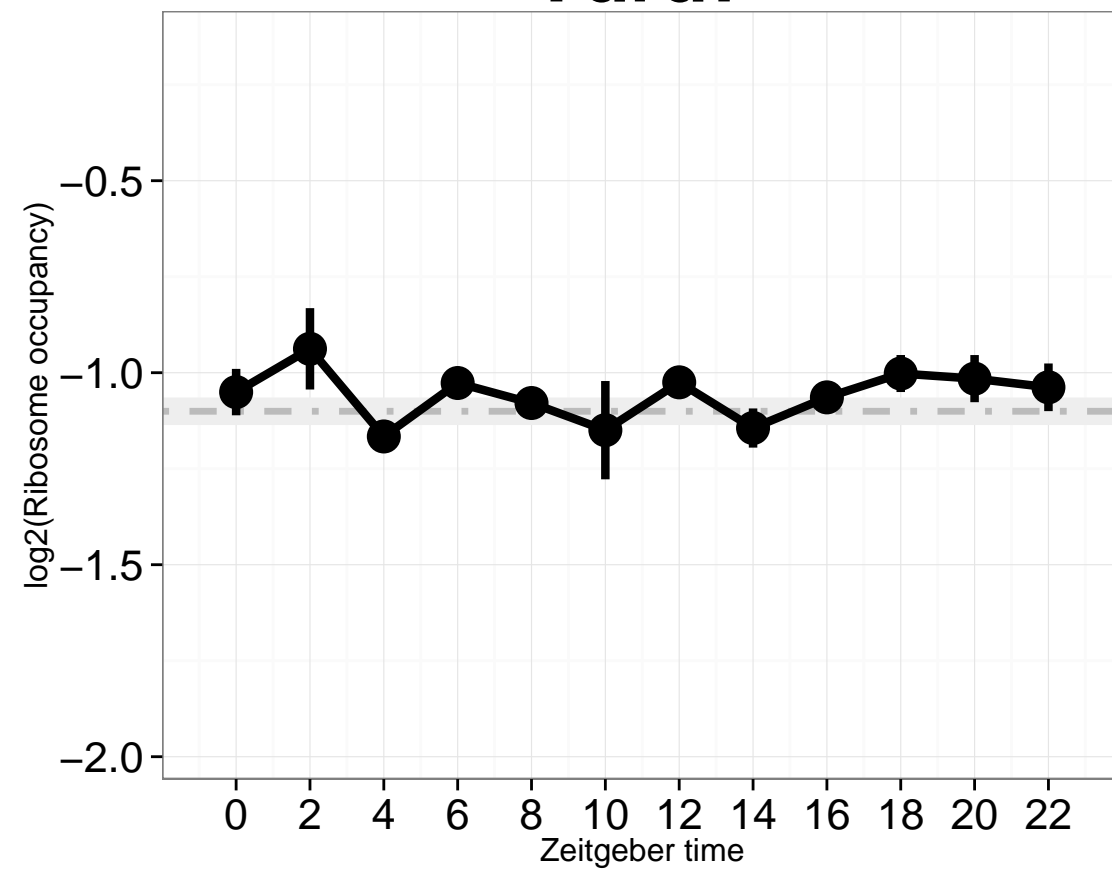

Supplement: SuppDataset_1.zip [file Tdrd7_set_A.pdf › Supplemental Dataset 1/A-mRNA_nonrhyth_translation_nonrhyth/Tdrd7_set_A.pdf]

# Tdrp

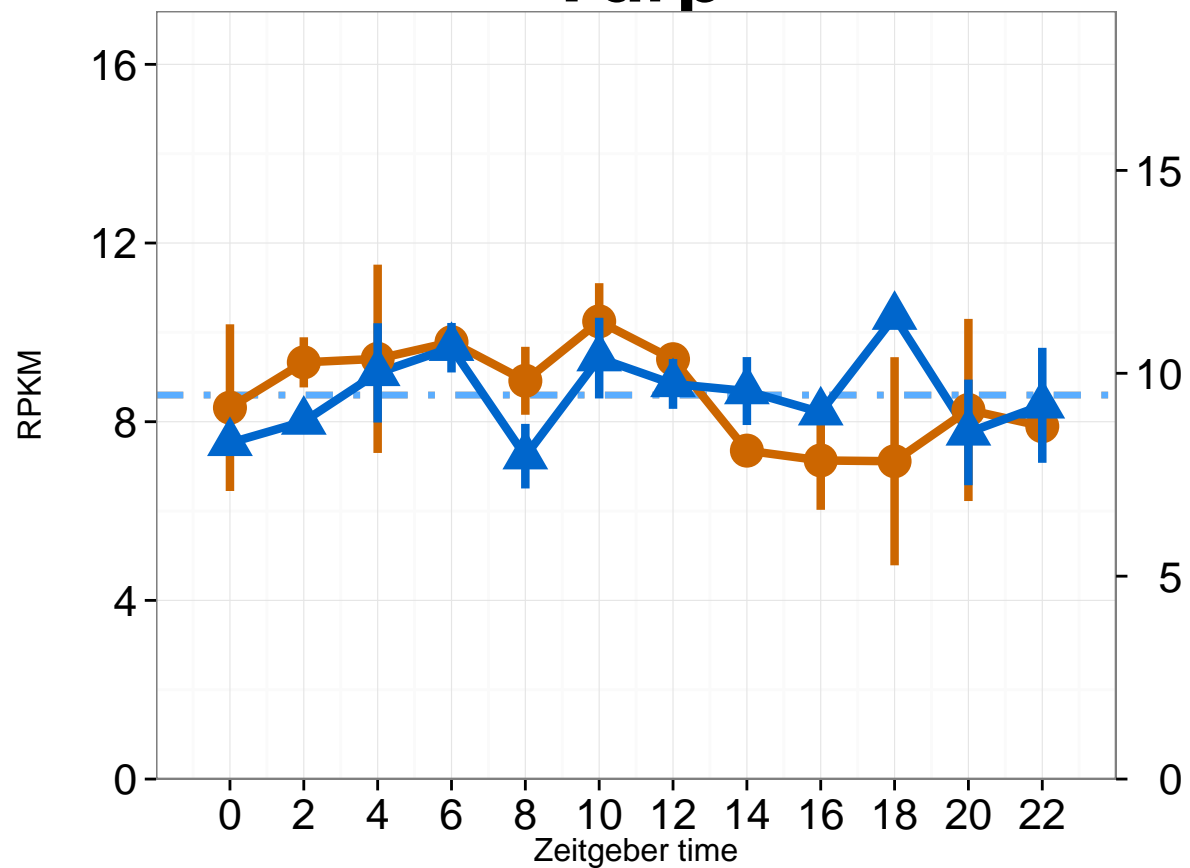

# Tdrp

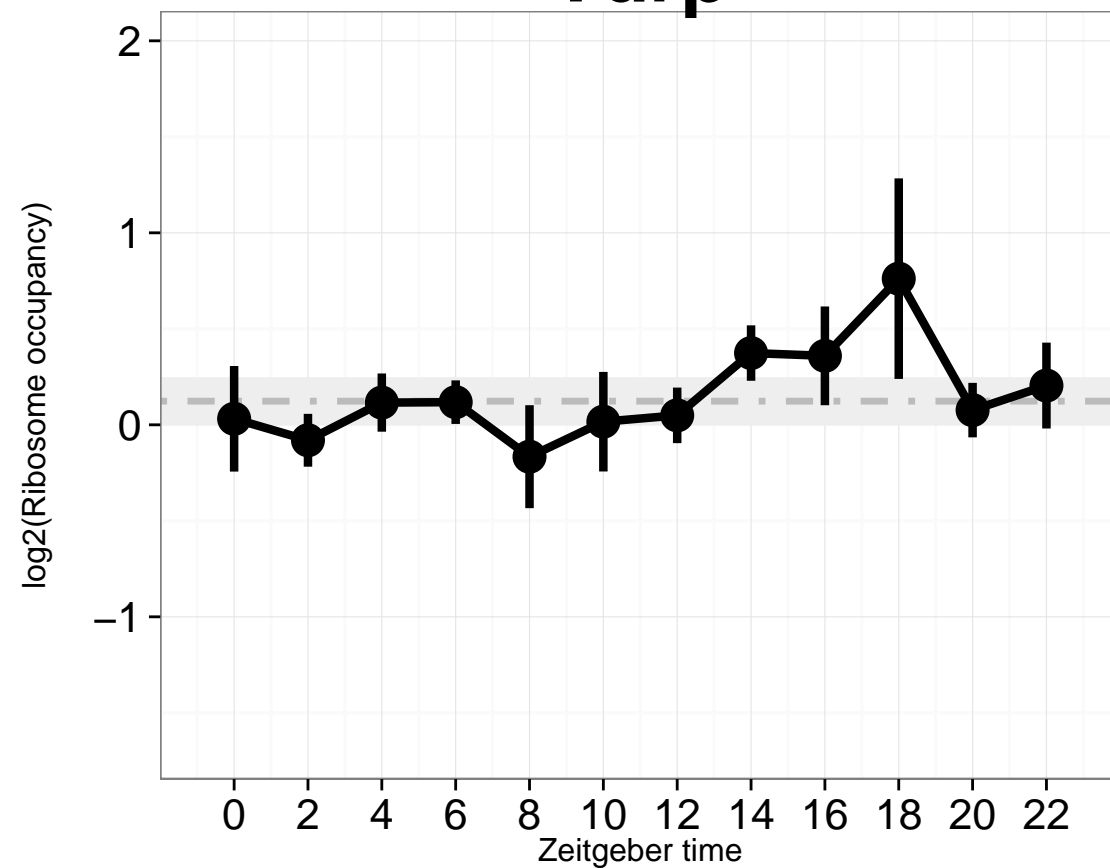

Supplement: SuppDataset_1.zip [file Tdrp_set_A.pdf › Supplemental Dataset 1/A-mRNA_nonrhyth_translation_nonrhyth/Tdrp_set_A.pdf]

# Tead1

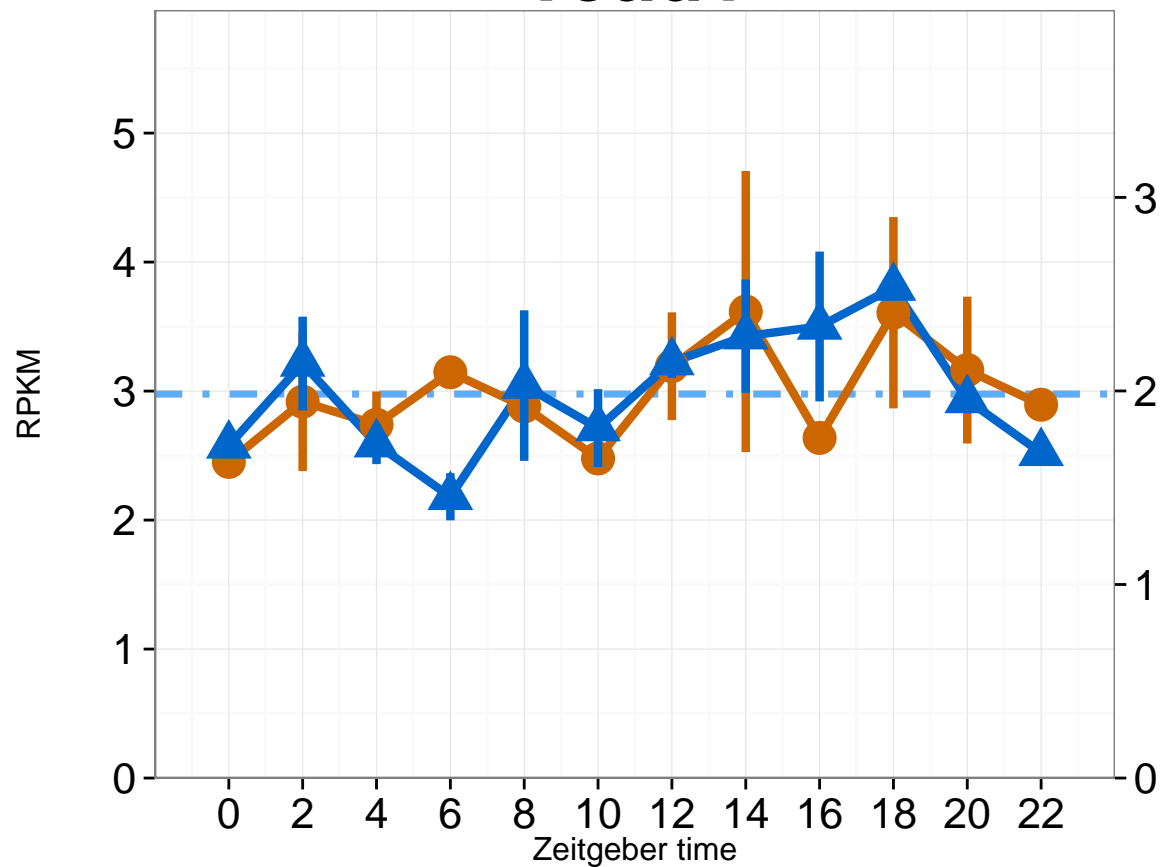

# Tead1

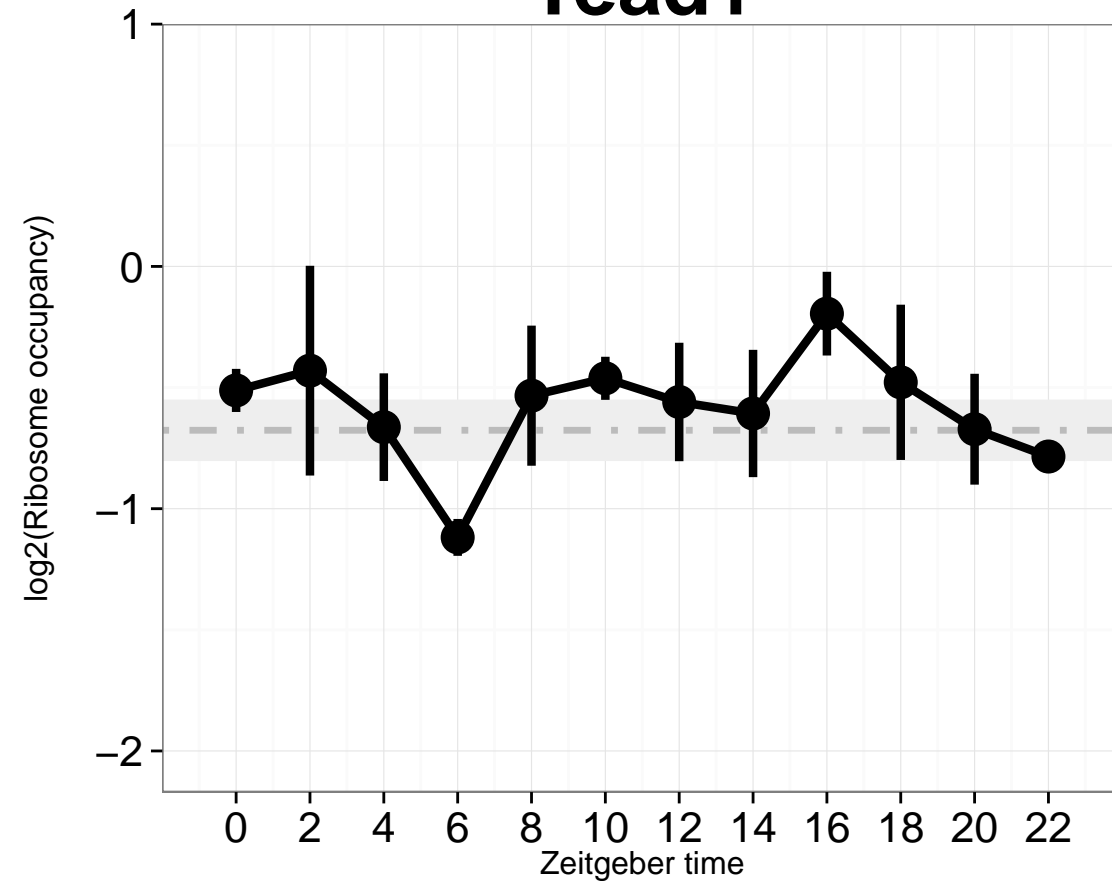

Supplement: SuppDataset_1.zip [file Tead1_set_A.pdf › Supplemental Dataset 1/A-mRNA_nonrhyth_translation_nonrhyth/Tead1_set_A.pdf]

# Tead3

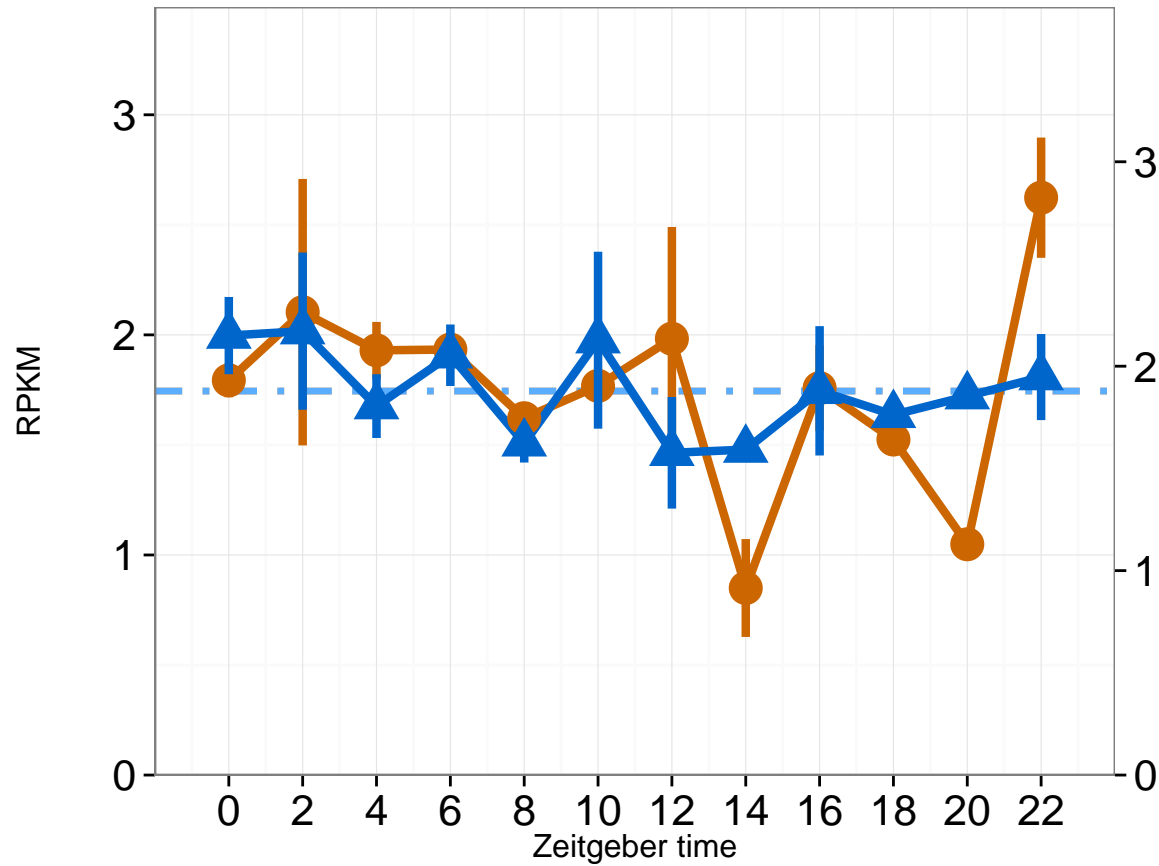

# Tead3

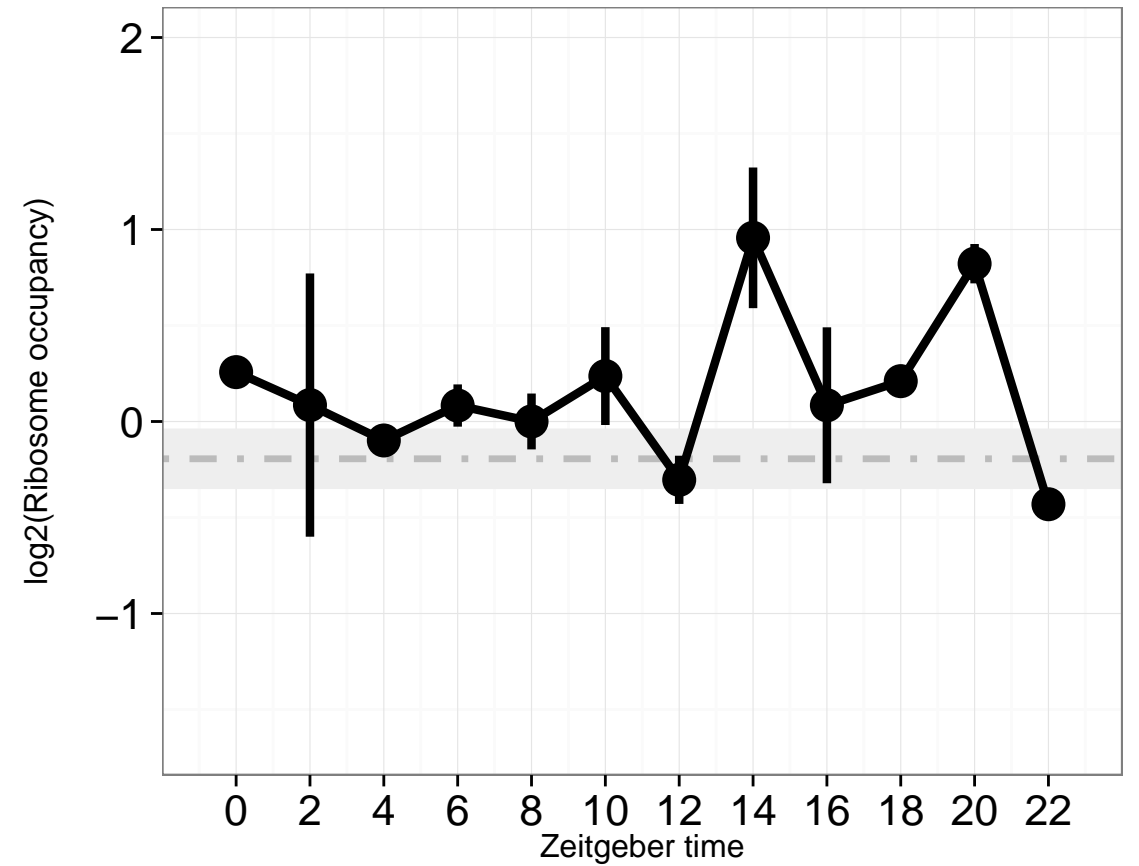

Supplement: SuppDataset_1.zip [file Tead3_set_A.pdf › Supplemental Dataset 1/A-mRNA_nonrhyth_translation_nonrhyth/Tead3_set_A.pdf]

## Tec

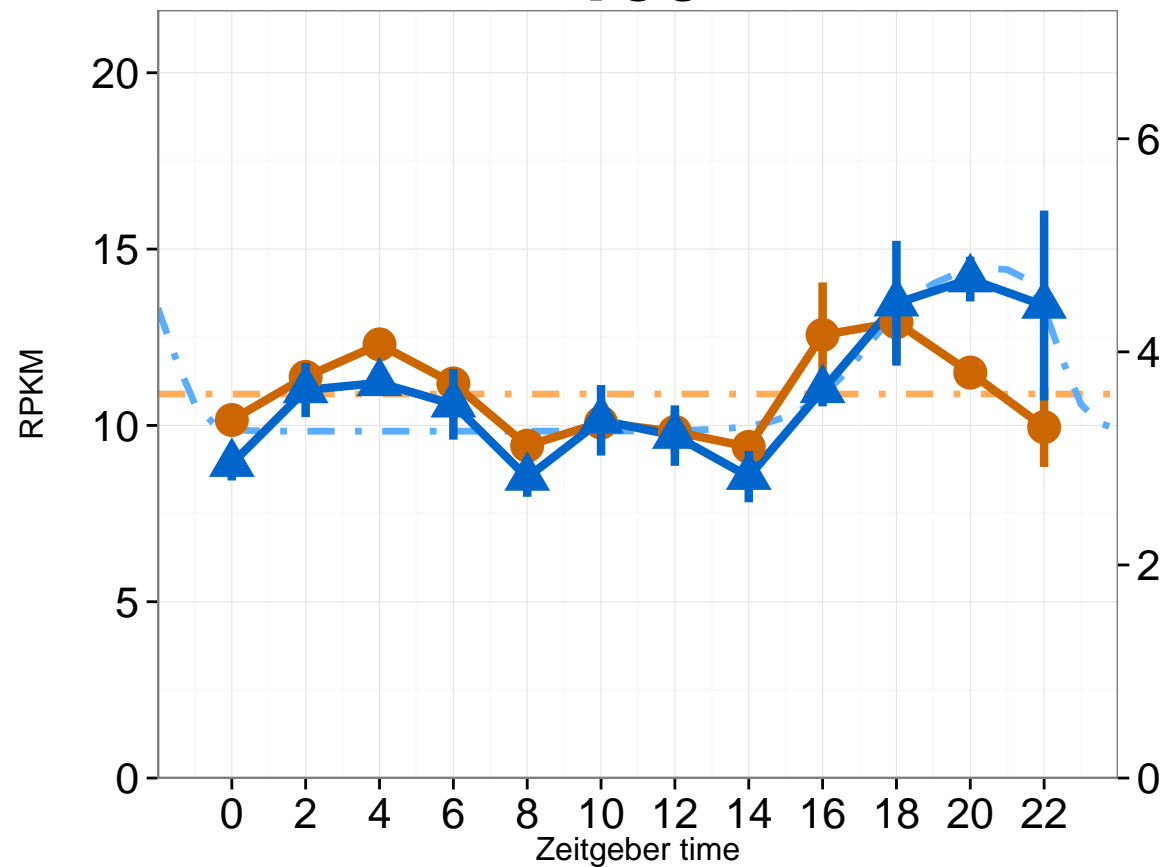

## Tec

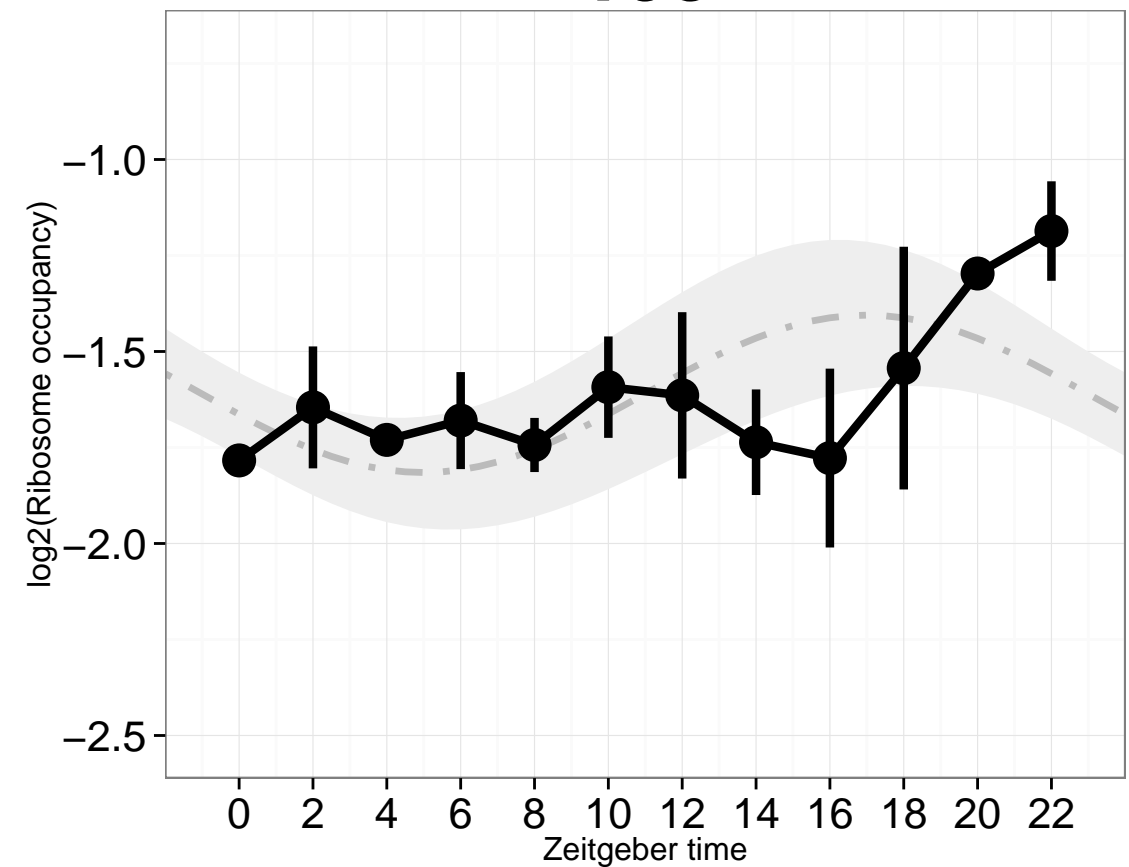

Supplement: SuppDataset_1.zip [file Tec_set_A.pdf › Supplemental Dataset 1/A-mRNA_nonrhyth_translation_nonrhyth/Tec_set_A.pdf]

## Tecr

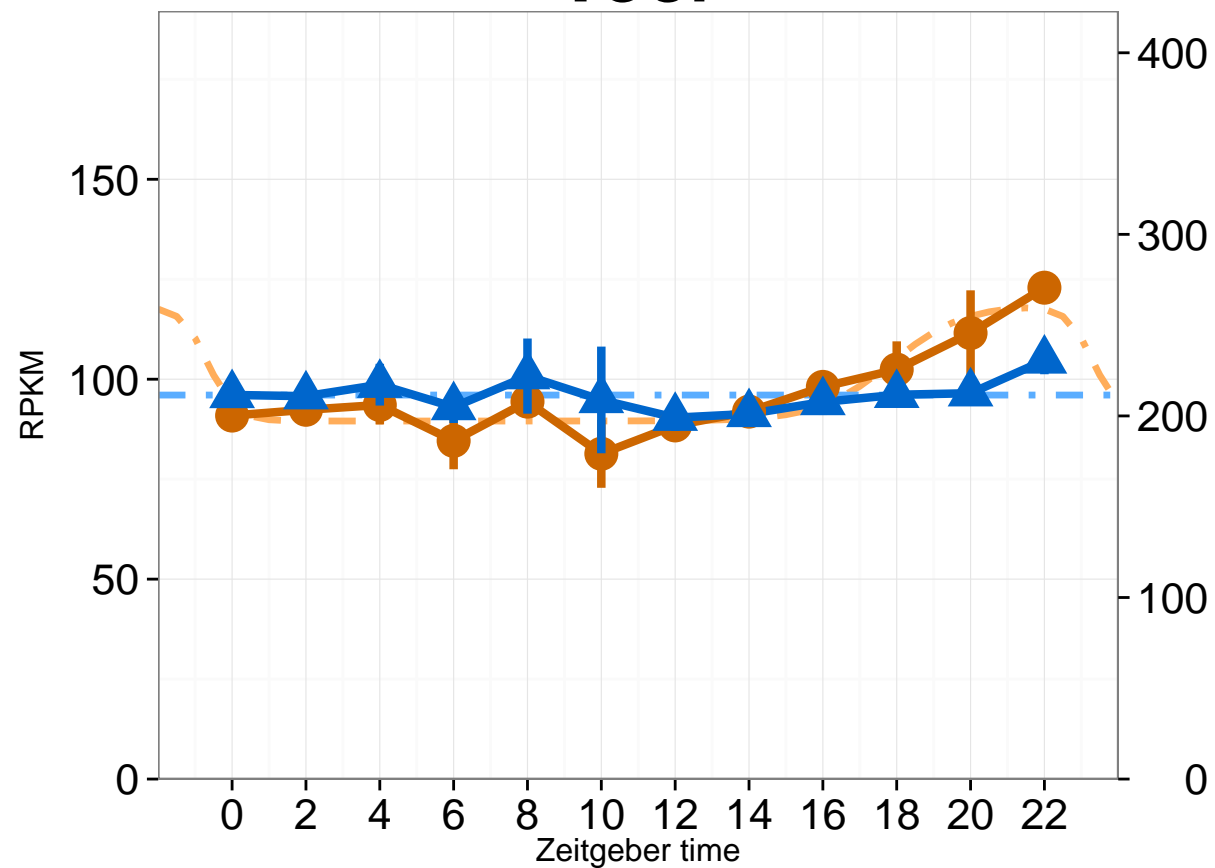

## Tecr

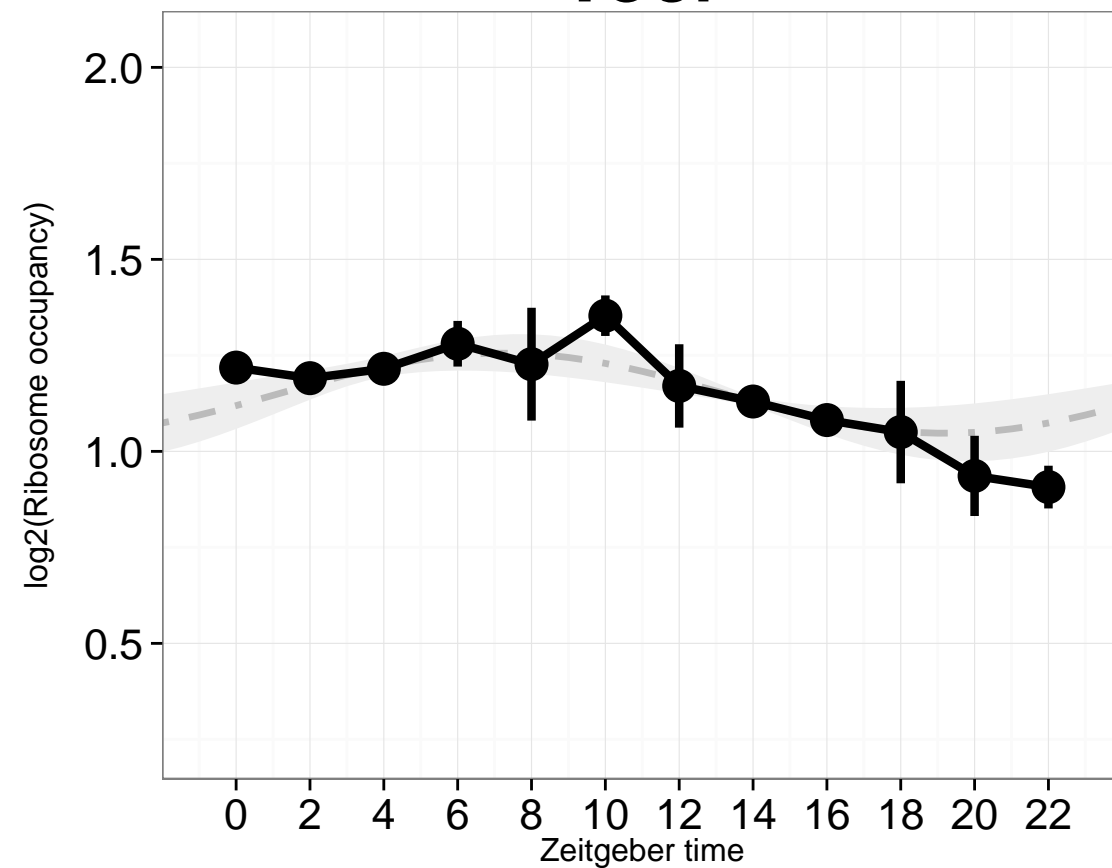

Supplement: SuppDataset_1.zip [file Tecr_set_A.pdf › Supplemental Dataset 1/A-mRNA_nonrhyth_translation_nonrhyth/Tecr_set_A.pdf]

## Tefm

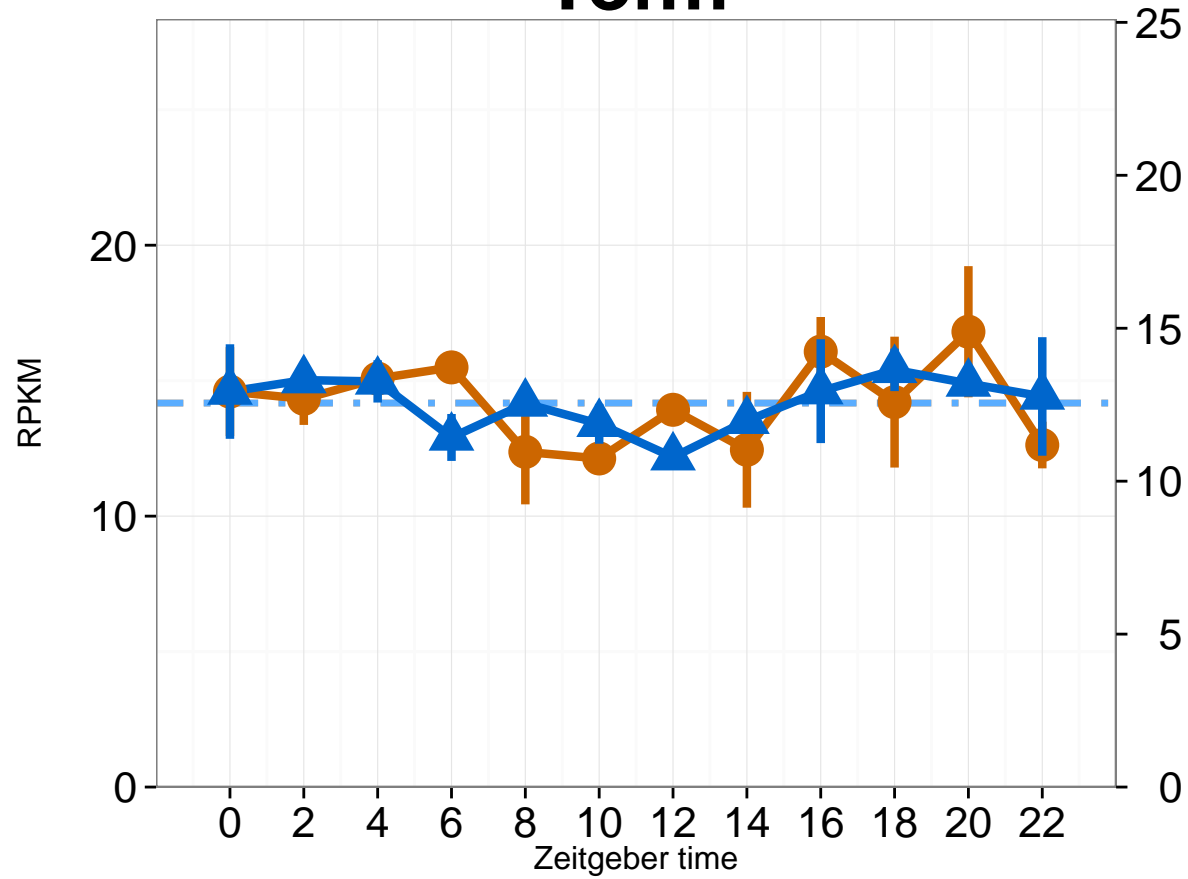

## Tefm

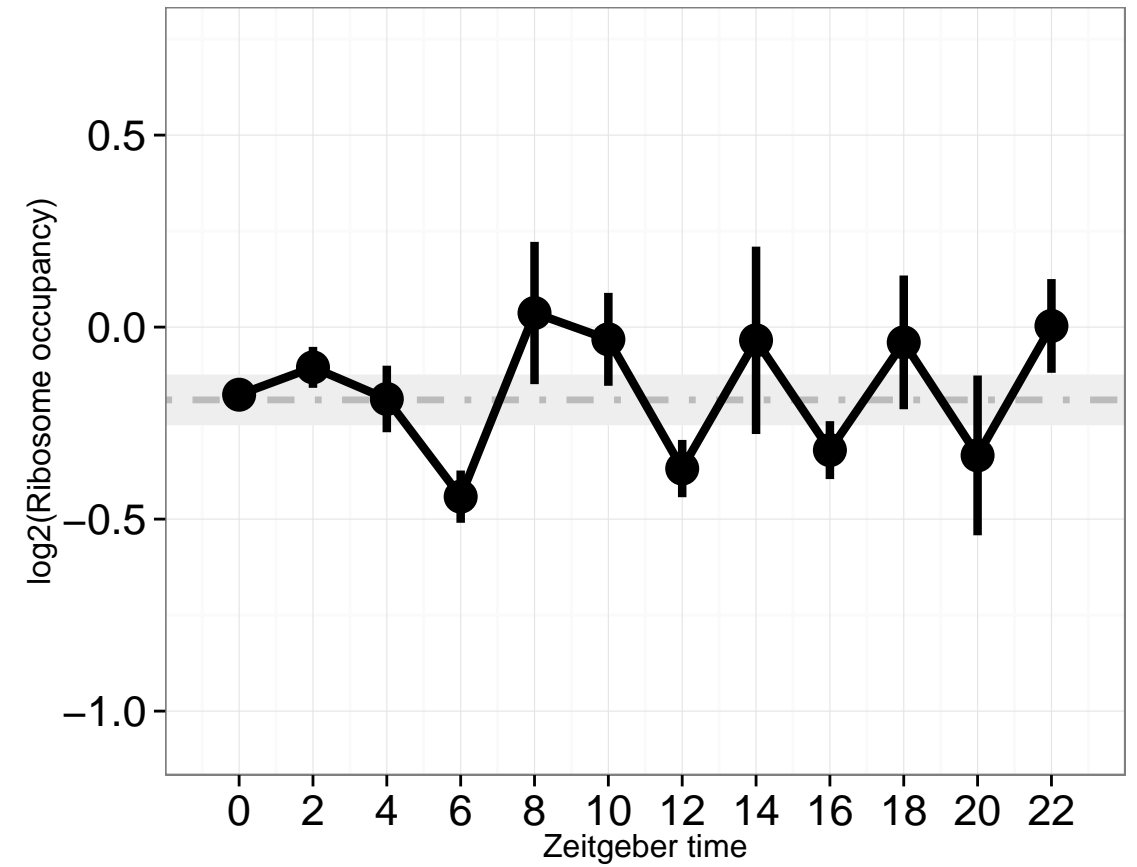

Supplement: SuppDataset_1.zip [file Tefm_set_A.pdf › Supplemental Dataset 1/A-mRNA_nonrhyth_translation_nonrhyth/Tefm_set_A.pdf]

## Tek

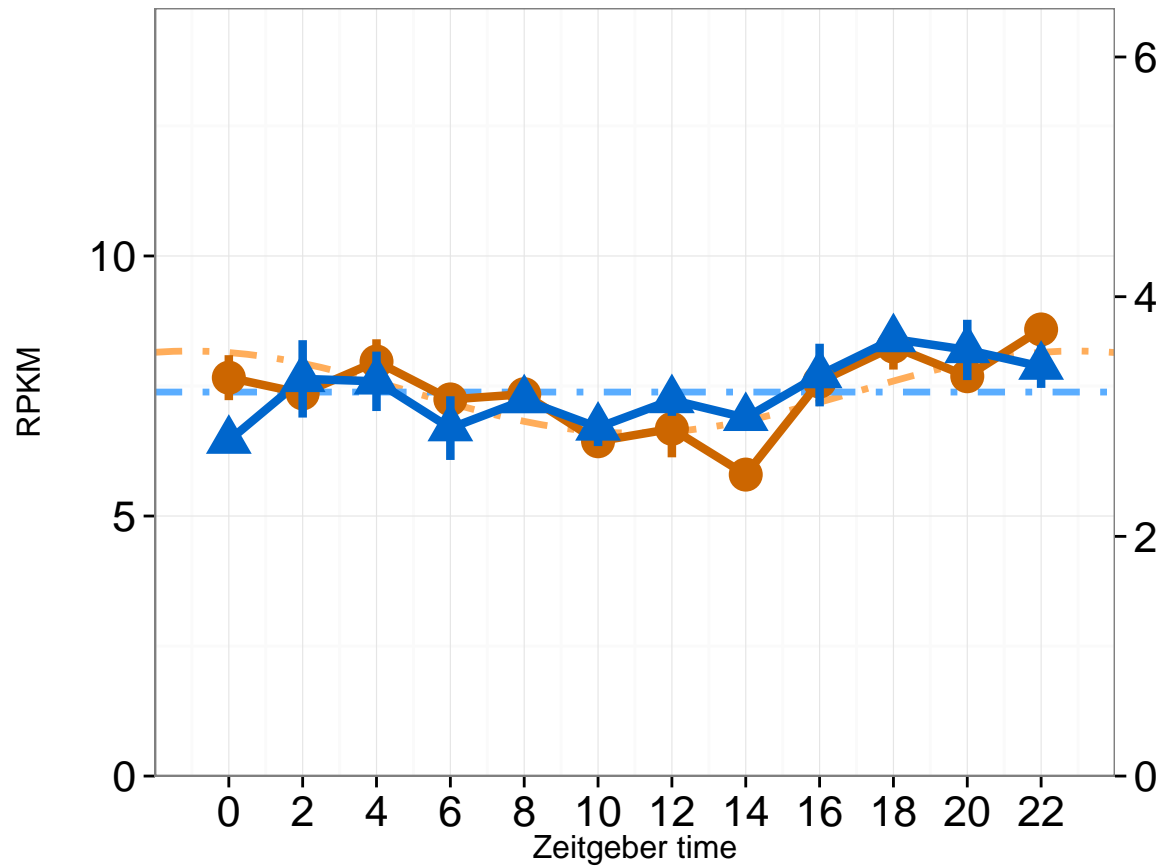

## Tek

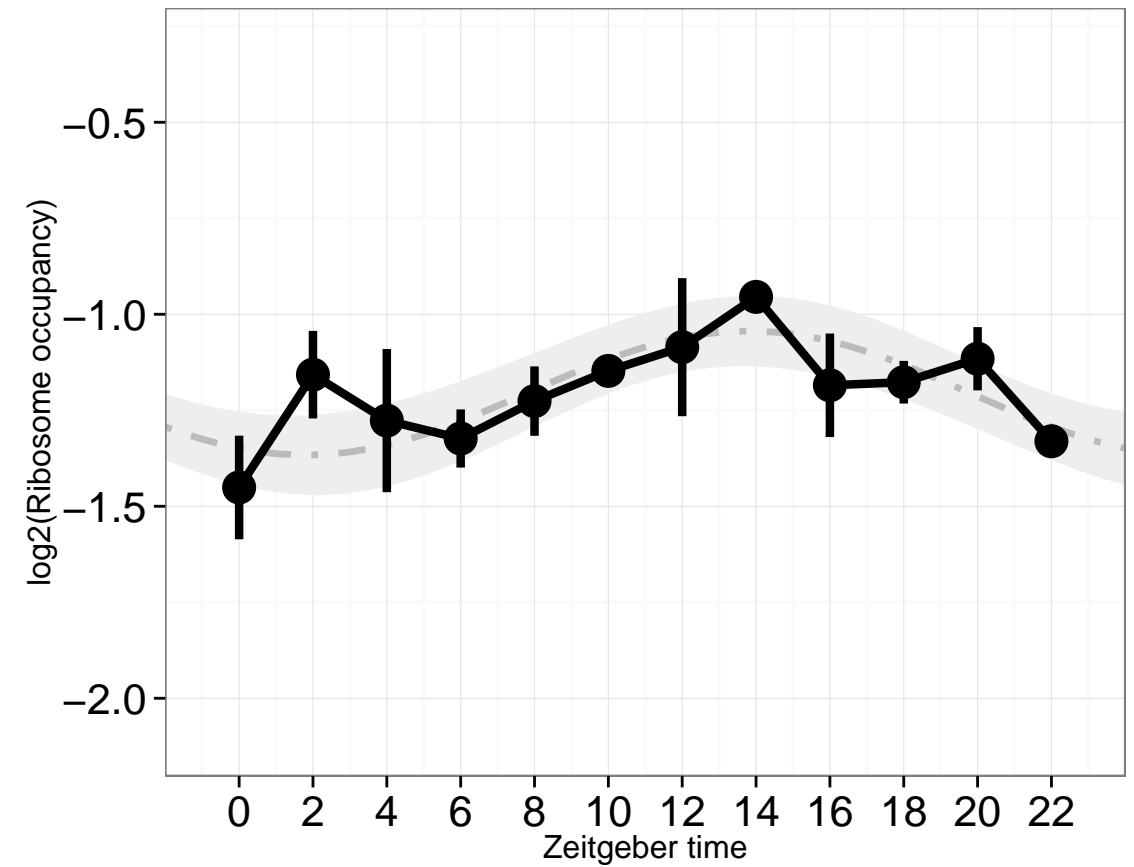

Supplement: SuppDataset_1.zip [file Tek_set_A.pdf › Supplemental Dataset 1/A-mRNA_nonrhyth_translation_nonrhyth/Tek_set_A.pdf]

# Tep1

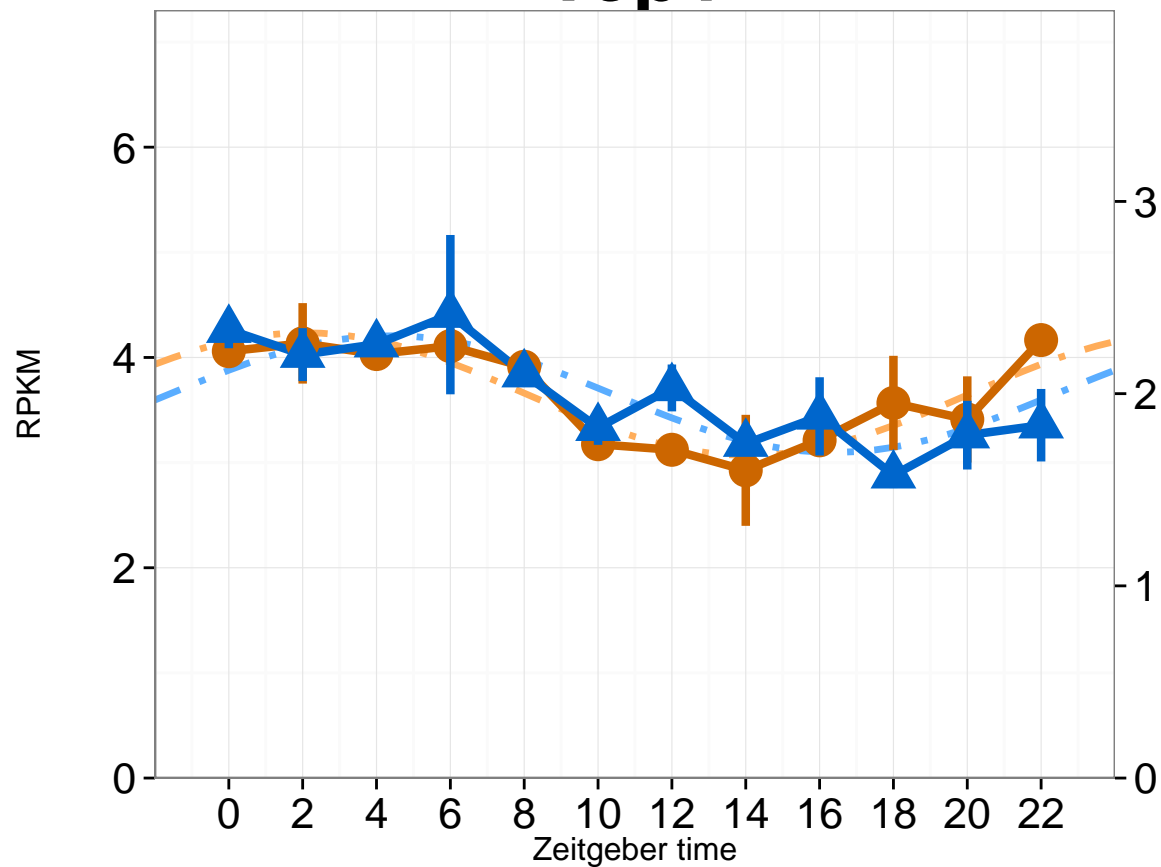

# Tep1

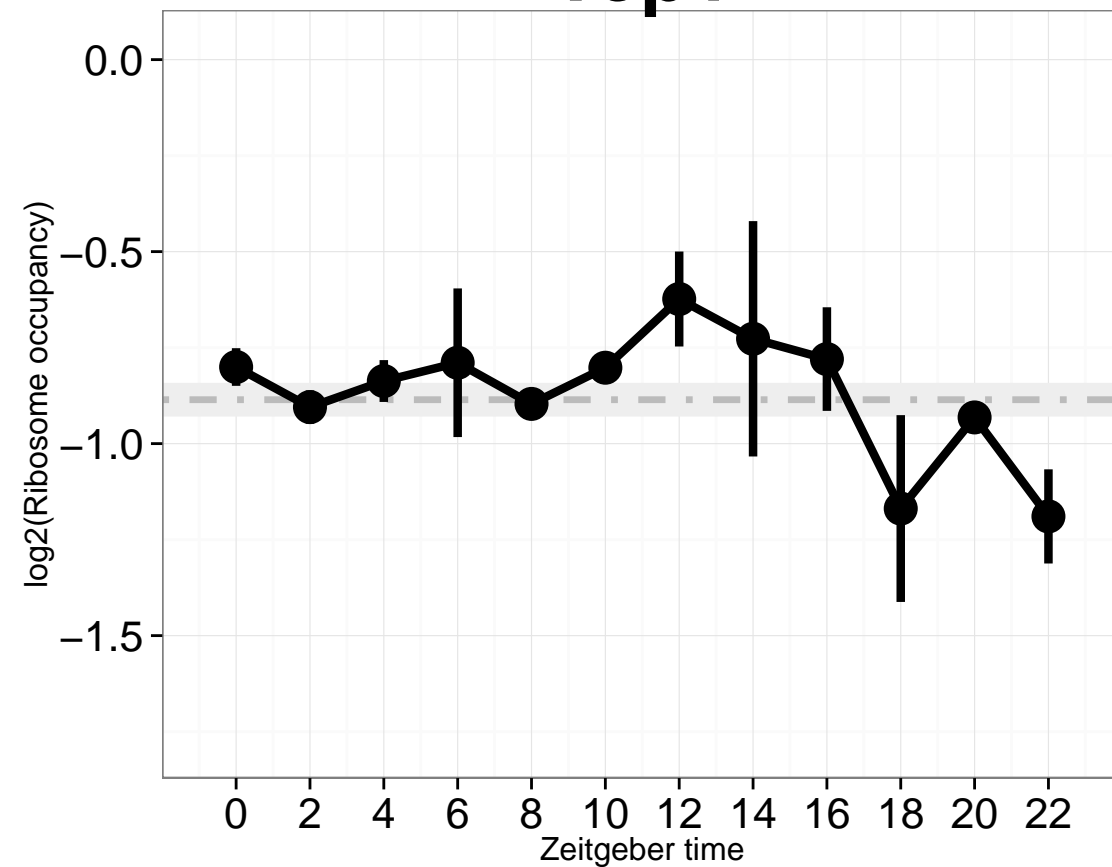

Supplement: SuppDataset_1.zip [file Tep1_set_A.pdf › Supplemental Dataset 1/A-mRNA_nonrhyth_translation_nonrhyth/Tep1_set_A.pdf]

# Terf1

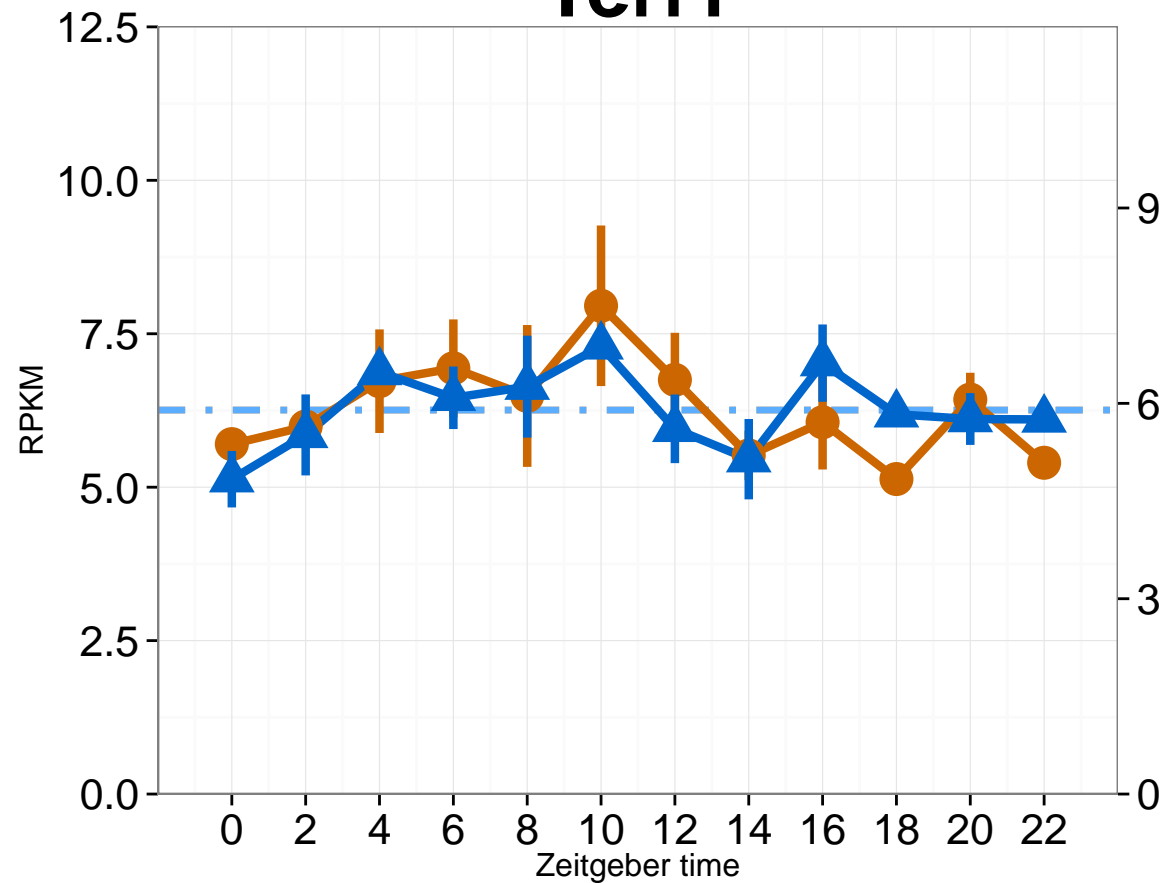

# Terf1

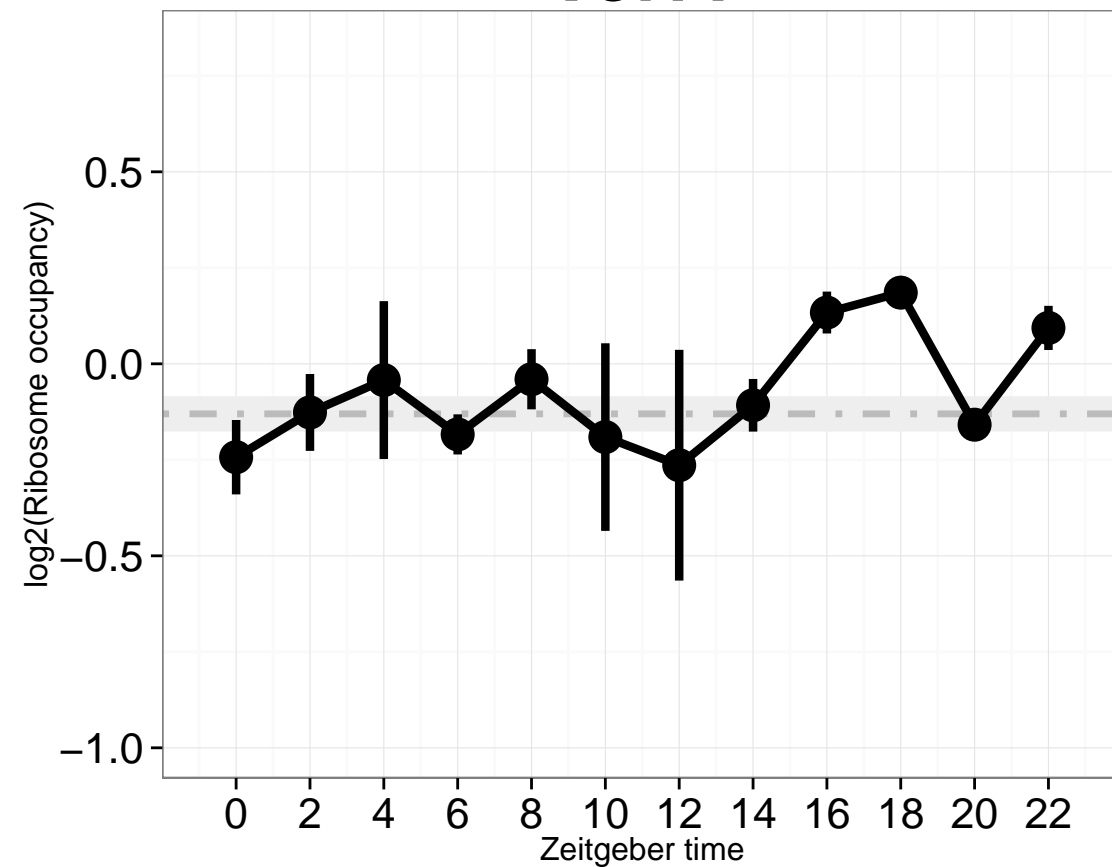

Supplement: SuppDataset_1.zip [file Terf1_set_A.pdf › Supplemental Dataset 1/A-mRNA_nonrhyth_translation_nonrhyth/Terf1_set_A.pdf]

## Terf2

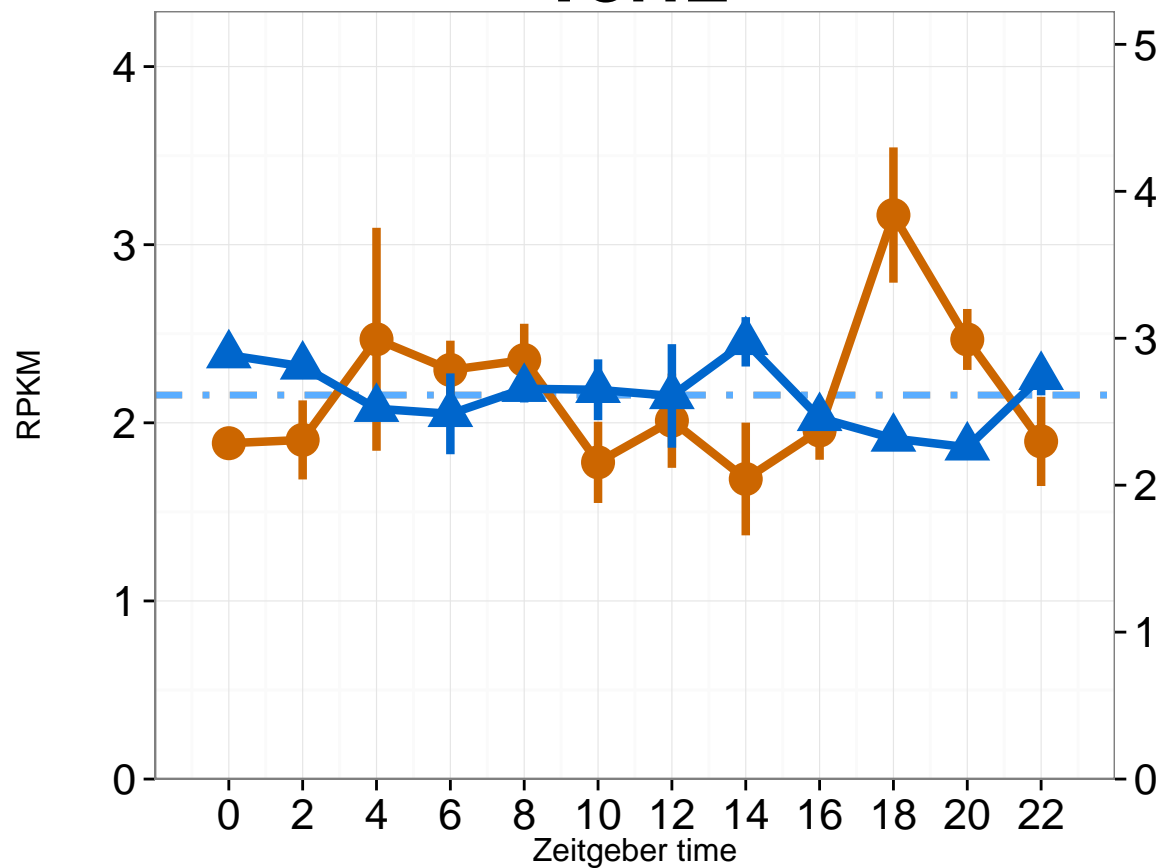

## Terf2

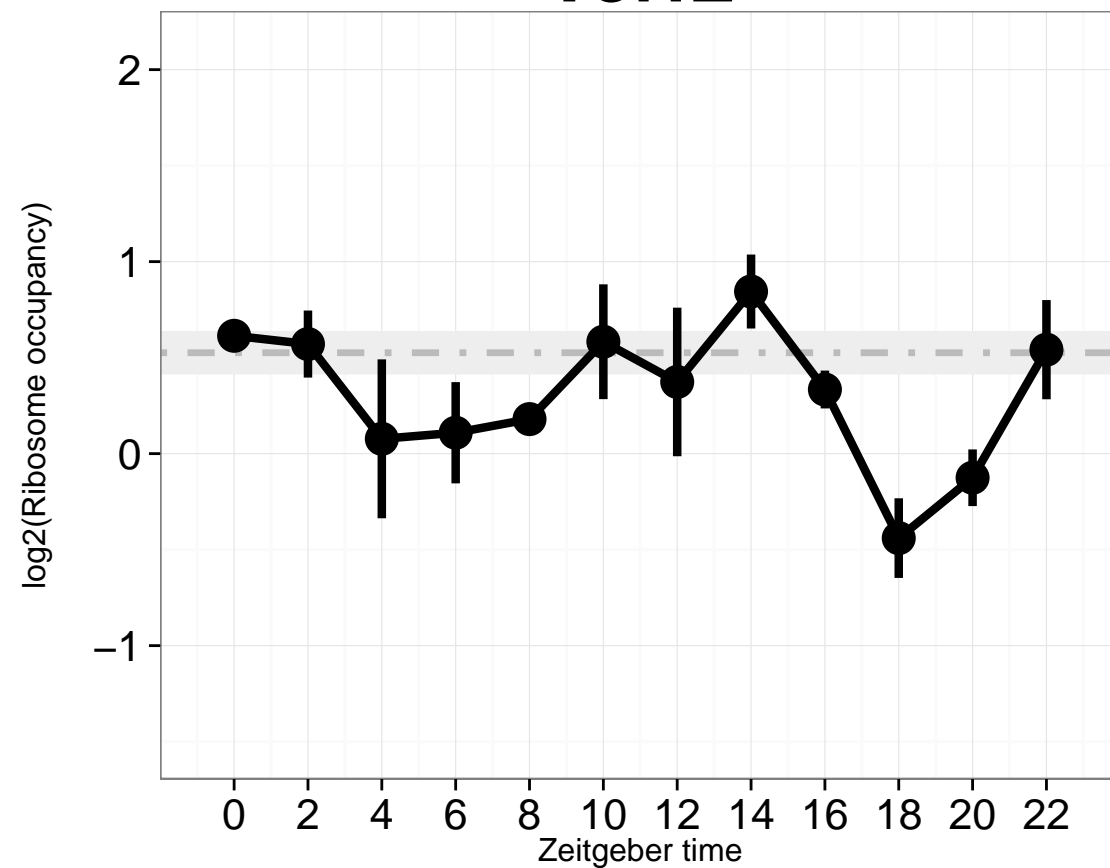

Supplement: SuppDataset_1.zip [file Terf2_set_A.pdf › Supplemental Dataset 1/A-mRNA_nonrhyth_translation_nonrhyth/Terf2_set_A.pdf]

# Terf2ip

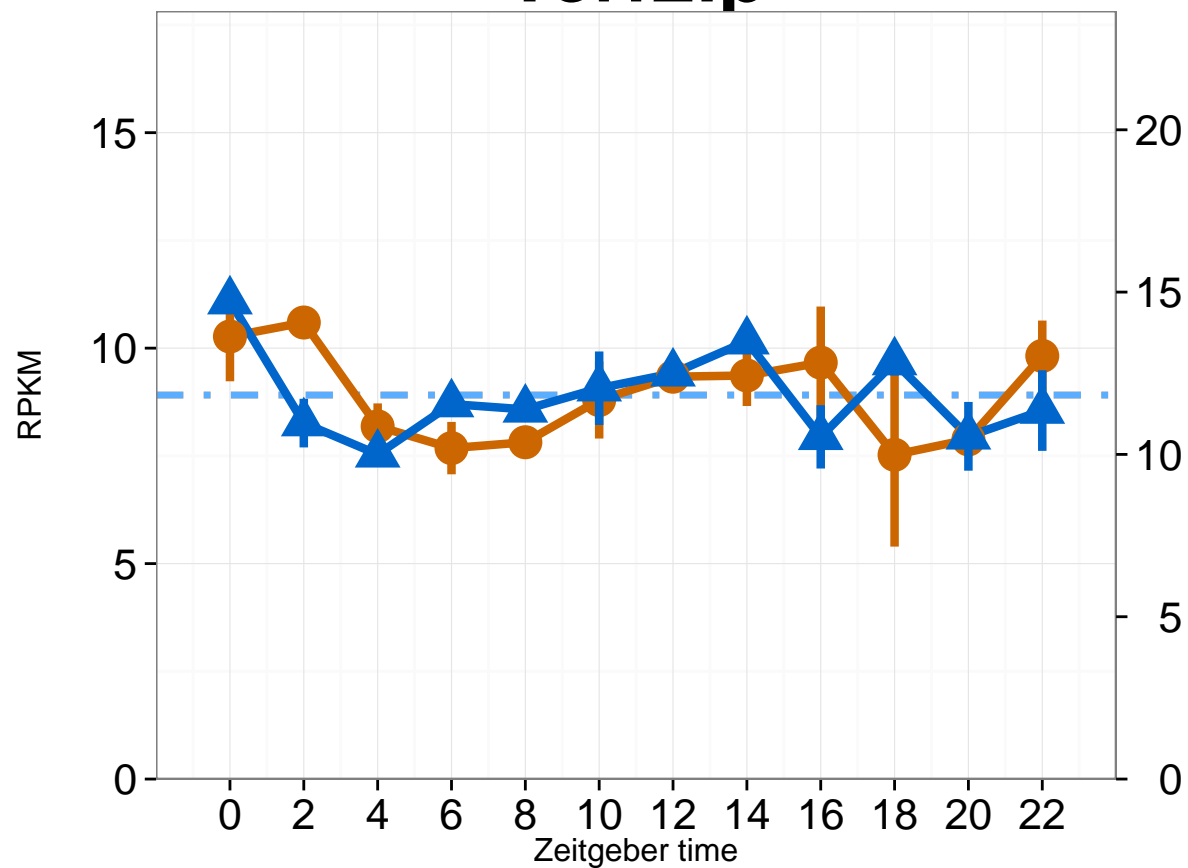

# Terf2ip

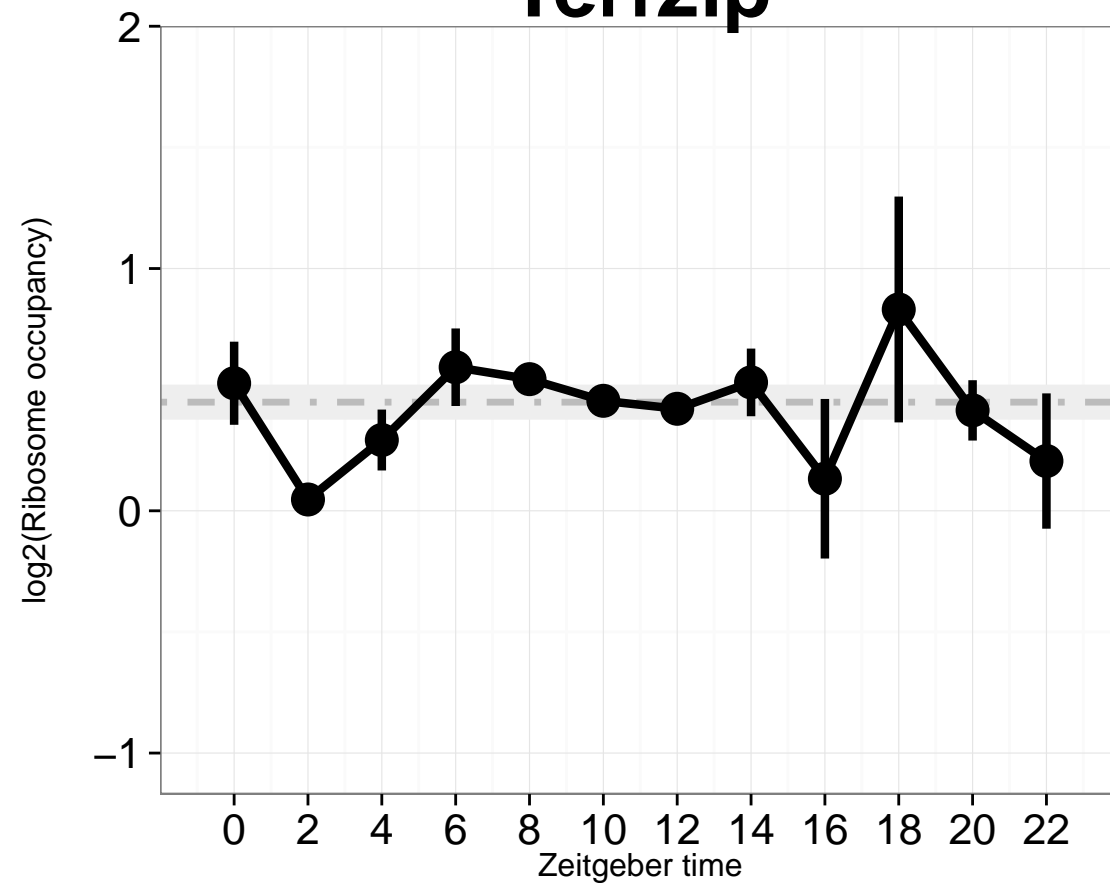

Supplement: SuppDataset_1.zip [file Terf2ip_set_A.pdf › Supplemental Dataset 1/A-mRNA_nonrhyth_translation_nonrhyth/Terf2ip_set_A.pdf]

## Tert

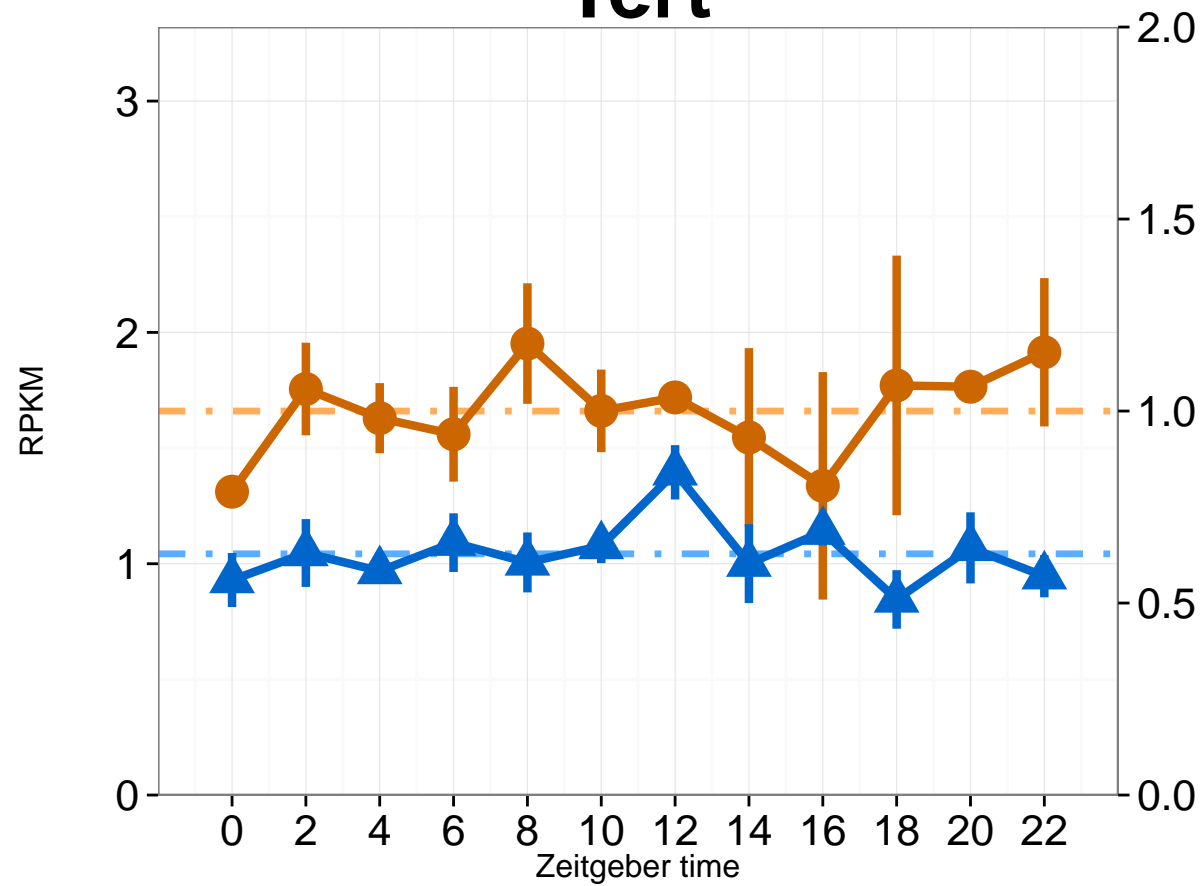

## Tert

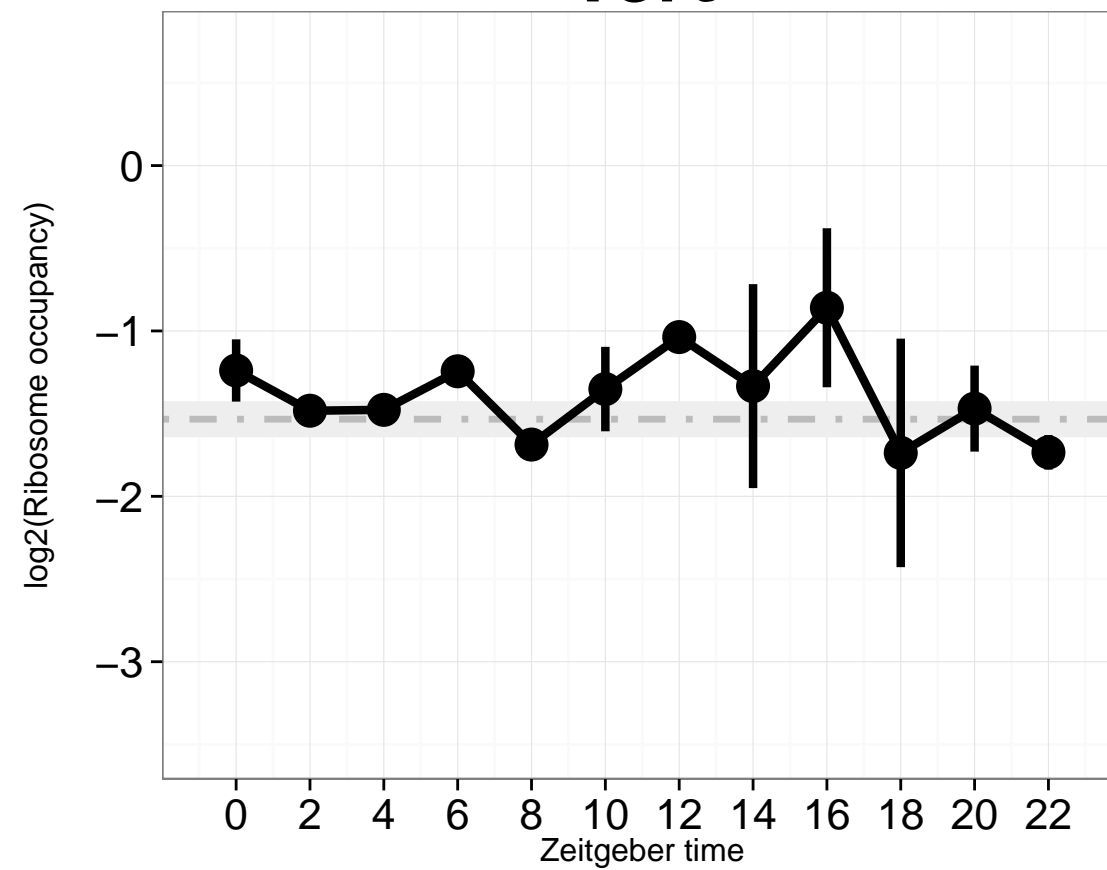

Supplement: SuppDataset_1.zip [file Tert_set_A.pdf › Supplemental Dataset 1/A-mRNA_nonrhyth_translation_nonrhyth/Tert_set_A.pdf]

## Tes

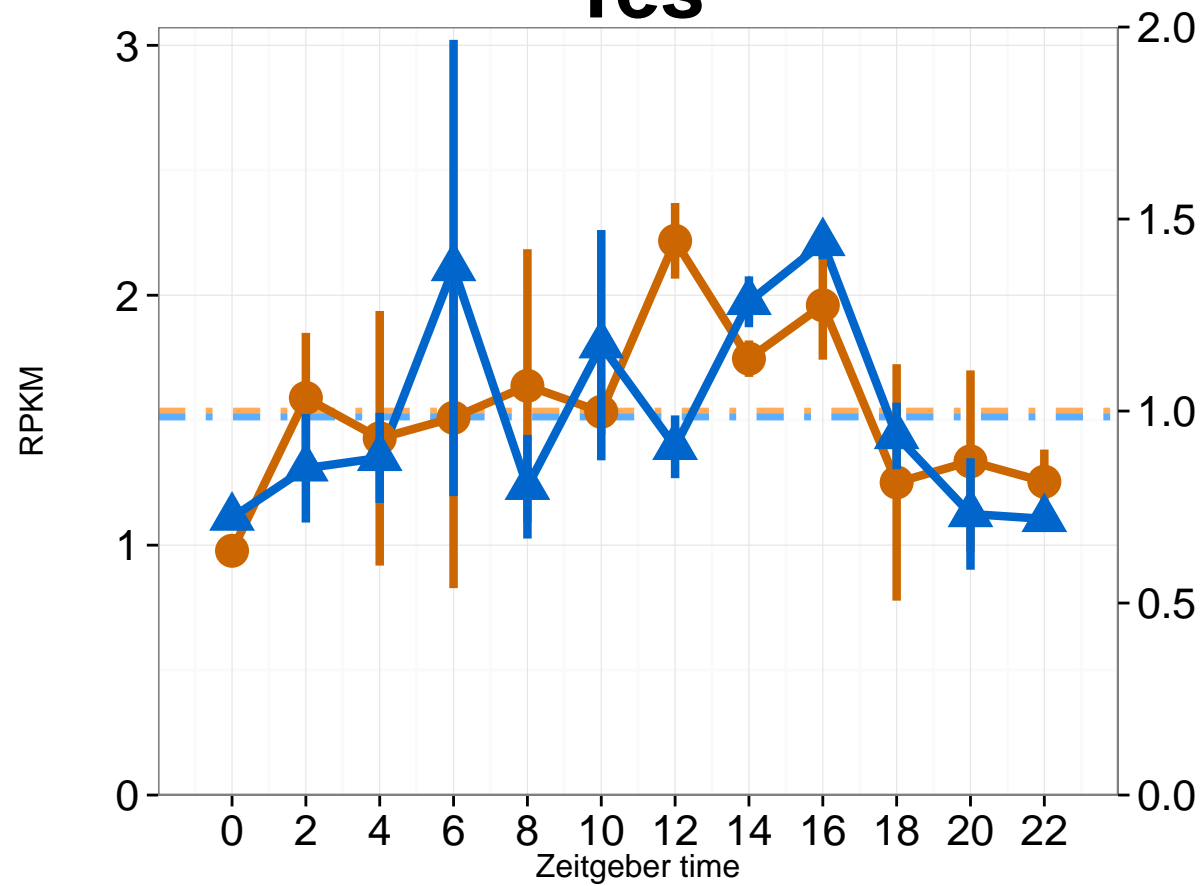

## Tes

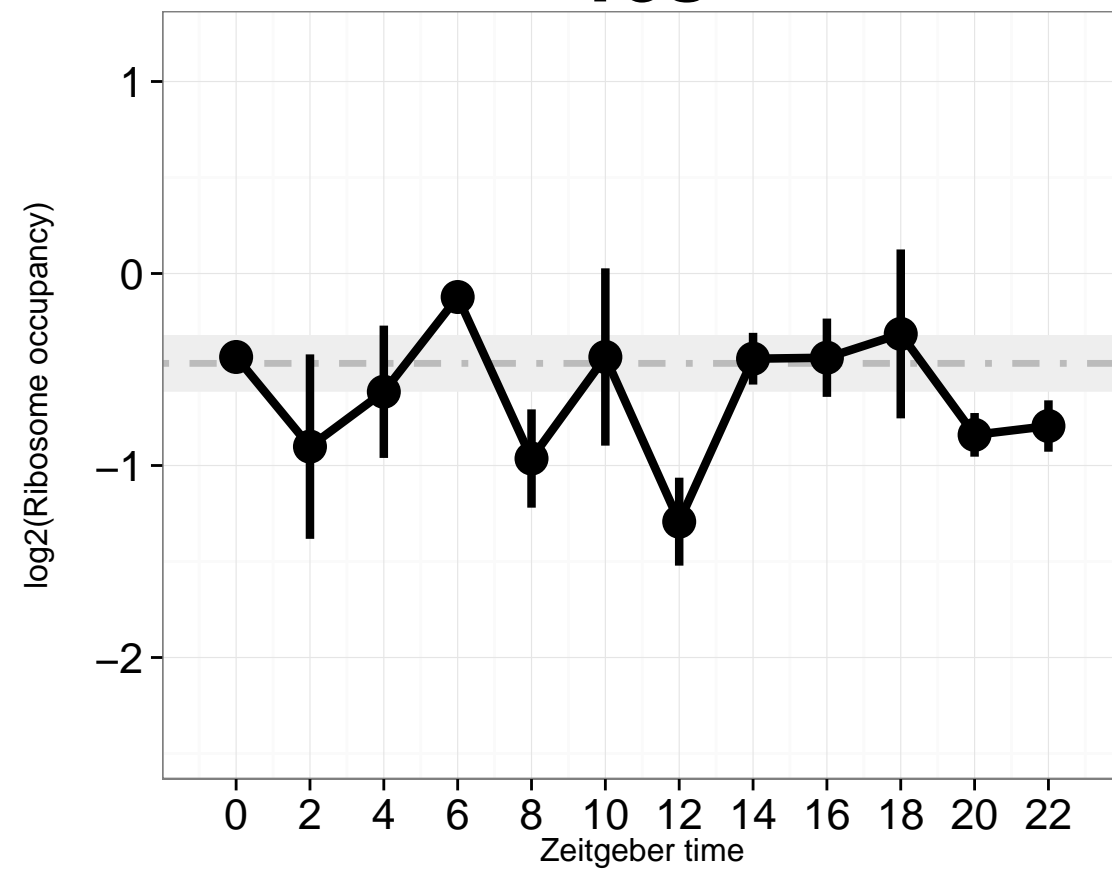

Supplement: SuppDataset_1.zip [file Tes_set_A.pdf › Supplemental Dataset 1/A-mRNA_nonrhyth_translation_nonrhyth/Tes_set_A.pdf]
