# Supplementary figures and images for: Ribosome profiling reveals the rhythmic liver translatome and circadian clock regulation by upstream open reading frames (part 74 of 113)
Source: HighWire-hosted journal article supplement (doi:10.1101/gr.195404.115), 2015-10-20

# Task1

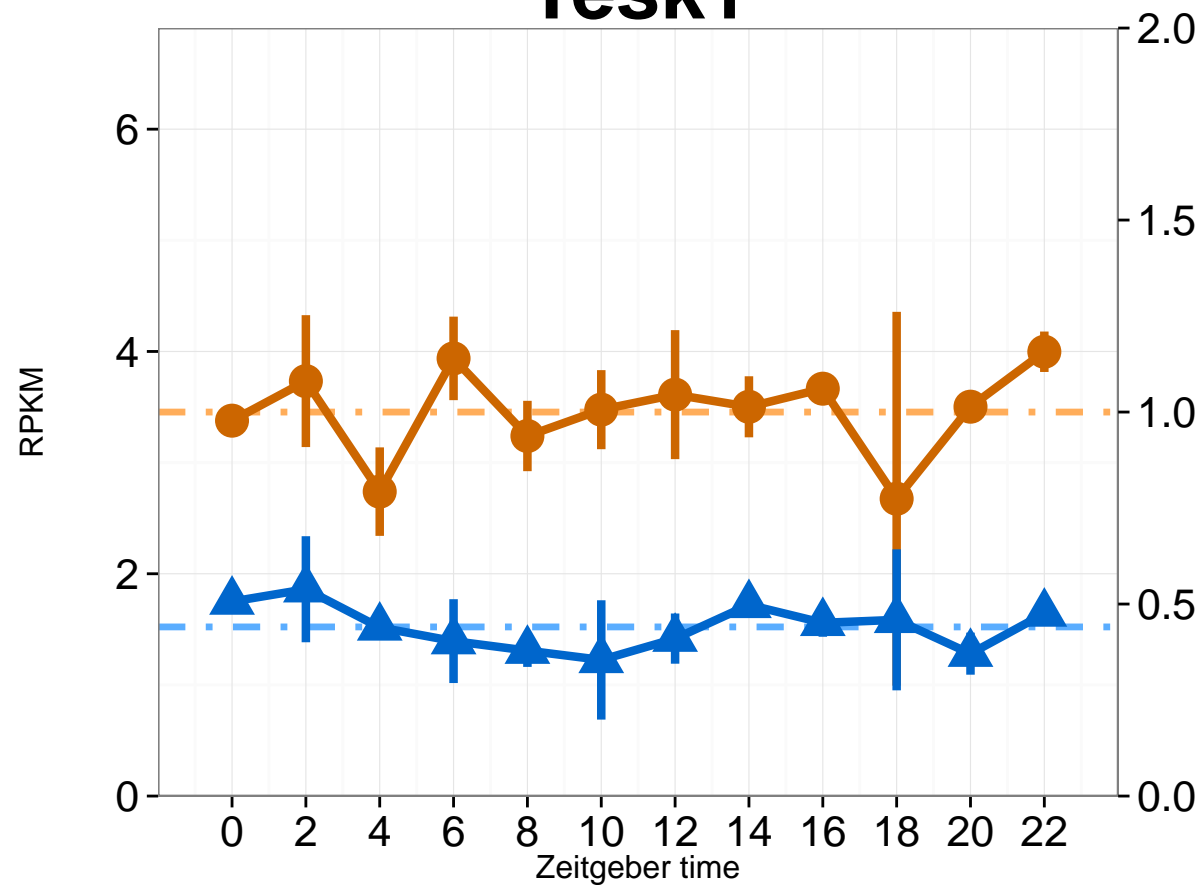

# Task1

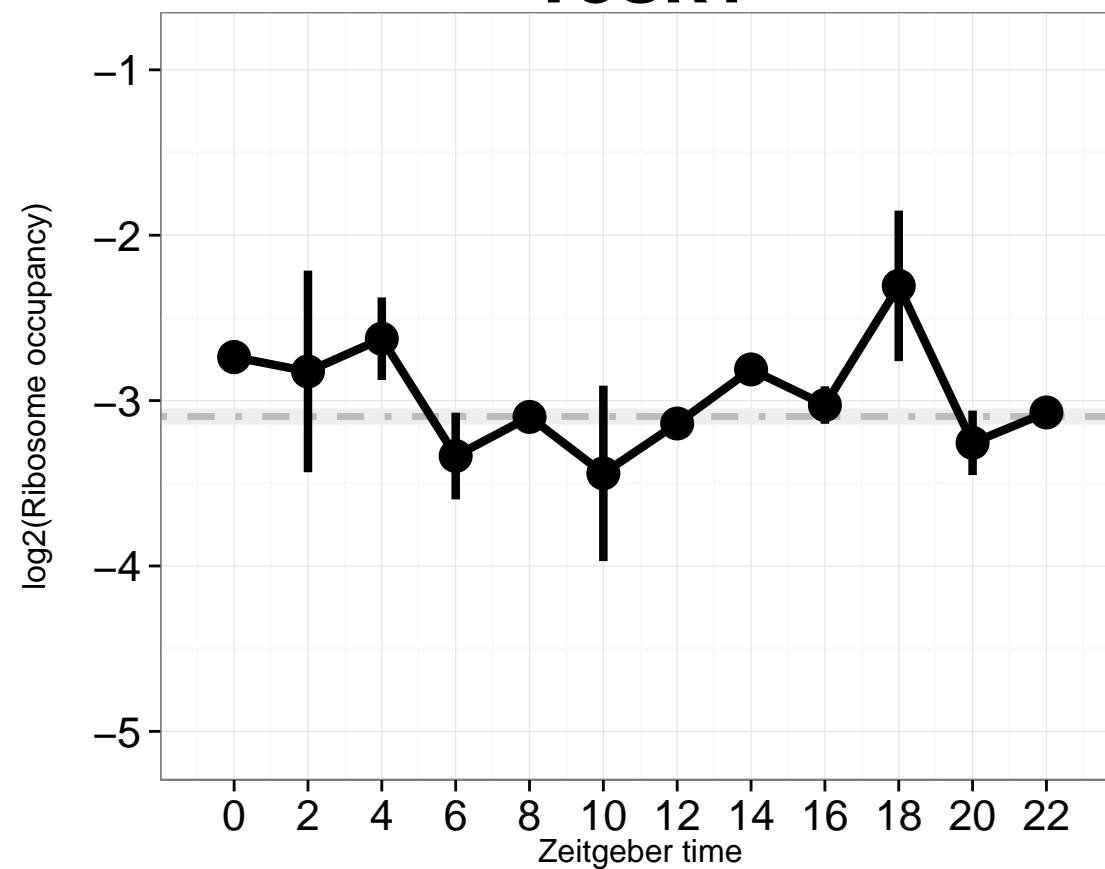

Supplement: SuppDataset_1.zip [file Tesk1_set_A.pdf › Supplemental Dataset 1/A-mRNA_nonrhyth_translation_nonrhyth/Tesk1_set_A.pdf]

# Task2

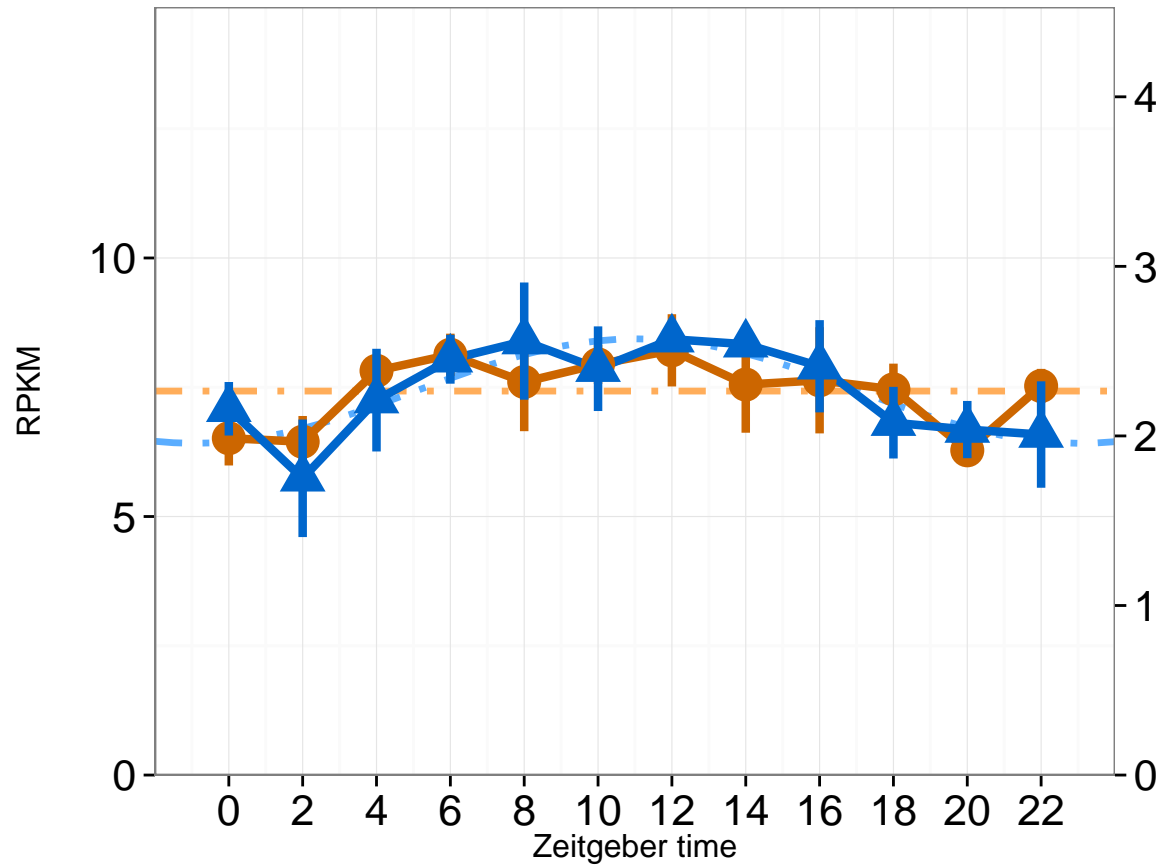

# Task2

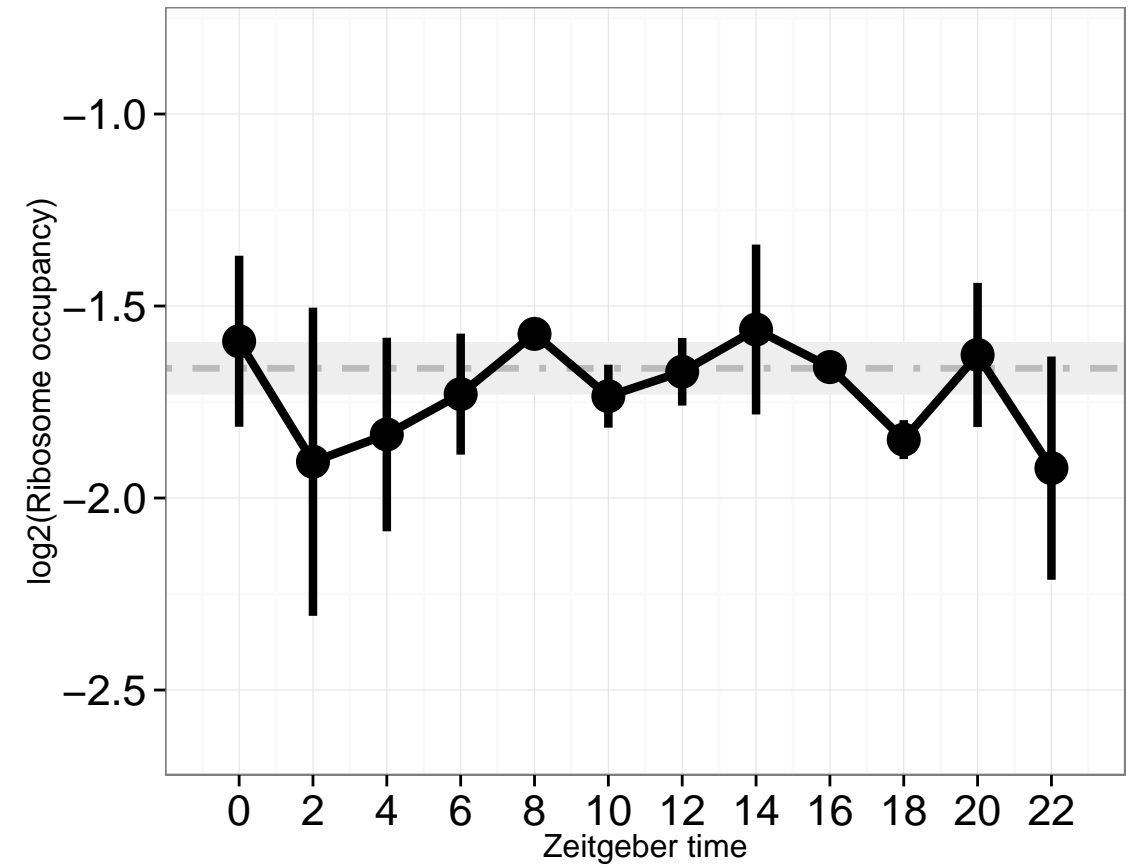

Supplement: SuppDataset_1.zip [file Tesk2_set_A.pdf › Supplemental Dataset 1/A-mRNA_nonrhyth_translation_nonrhyth/Tesk2_set_A.pdf]

## Tet2

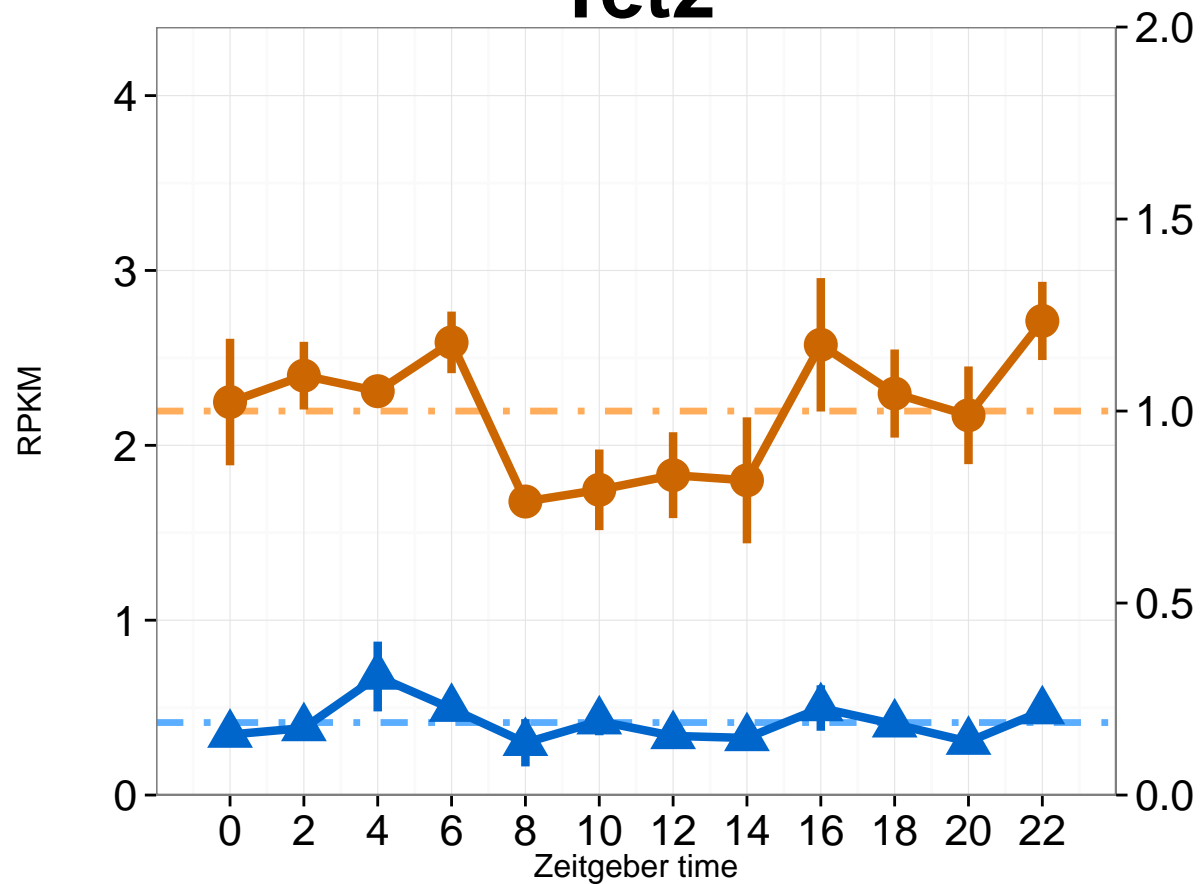

## Tet2

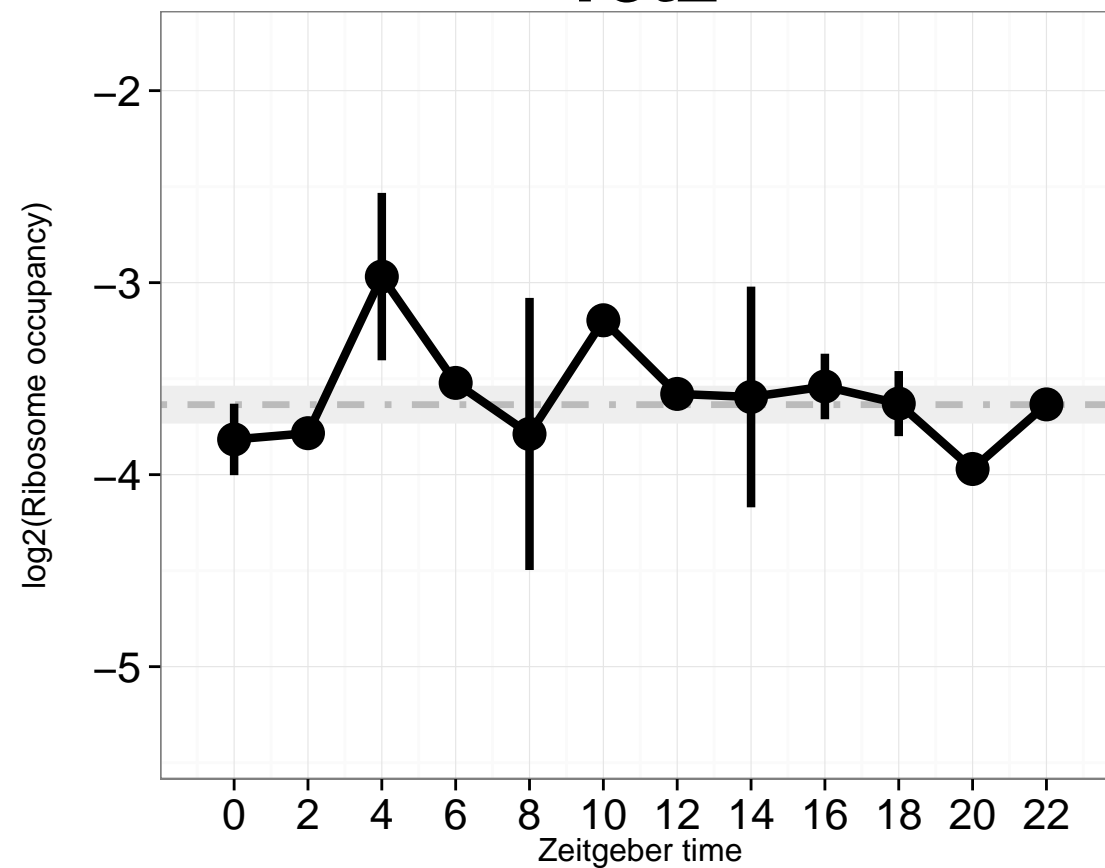

Supplement: SuppDataset_1.zip [file Tet2_set_A.pdf › Supplemental Dataset 1/A-mRNA_nonrhyth_translation_nonrhyth/Tet2_set_A.pdf]

## Tet3

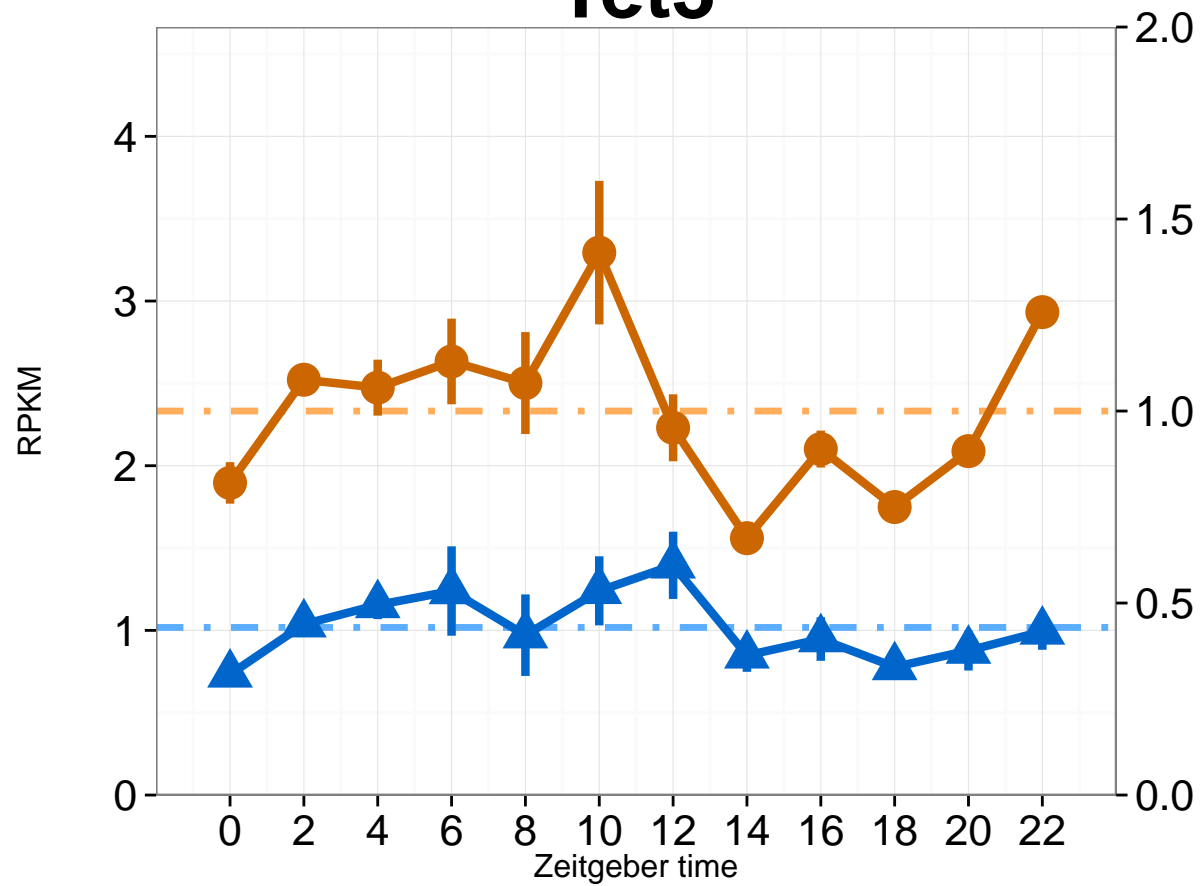

## Tet3

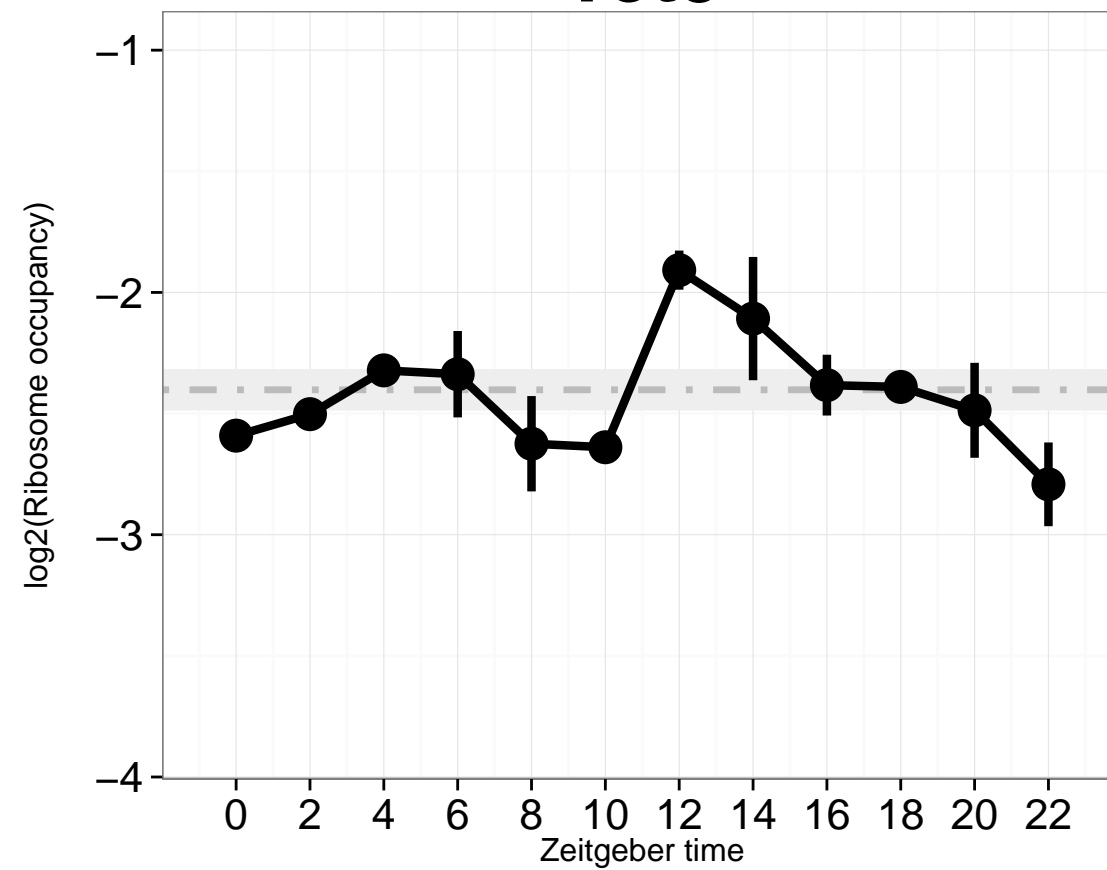

Supplement: SuppDataset_1.zip [file Tet3_set_A.pdf › Supplemental Dataset 1/A-mRNA_nonrhyth_translation_nonrhyth/Tet3_set_A.pdf]

# Tex10

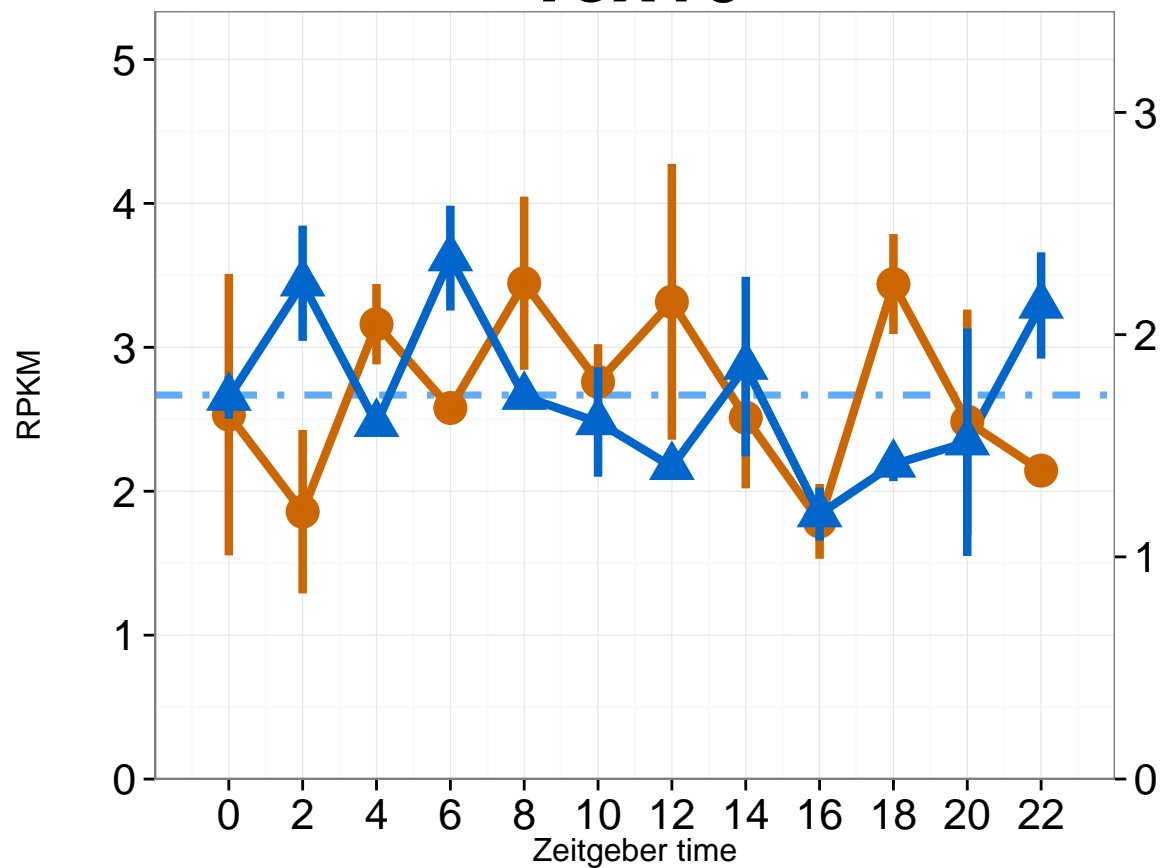

# Tex10

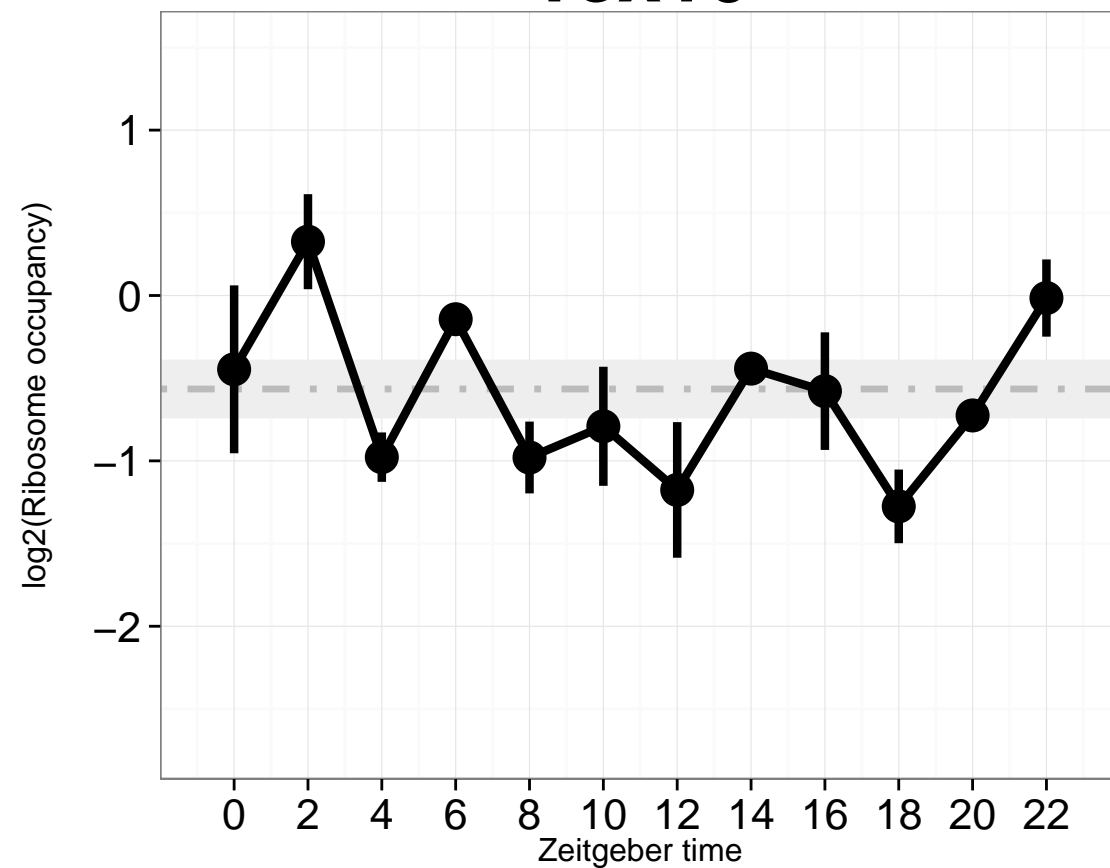

Supplement: SuppDataset_1.zip [file Tex10_set_A.pdf › Supplemental Dataset 1/A-mRNA_nonrhyth_translation_nonrhyth/Tex10_set_A.pdf]

## Tex261

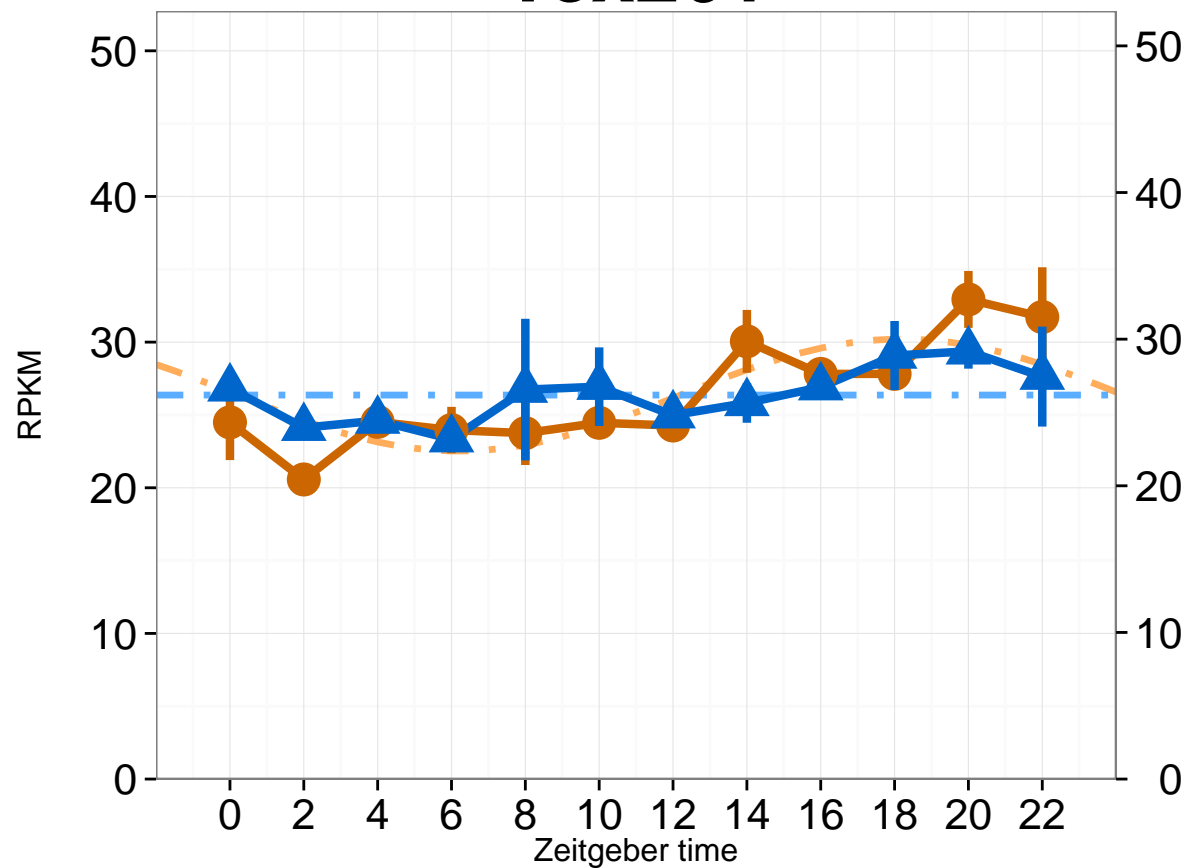

## Tex261

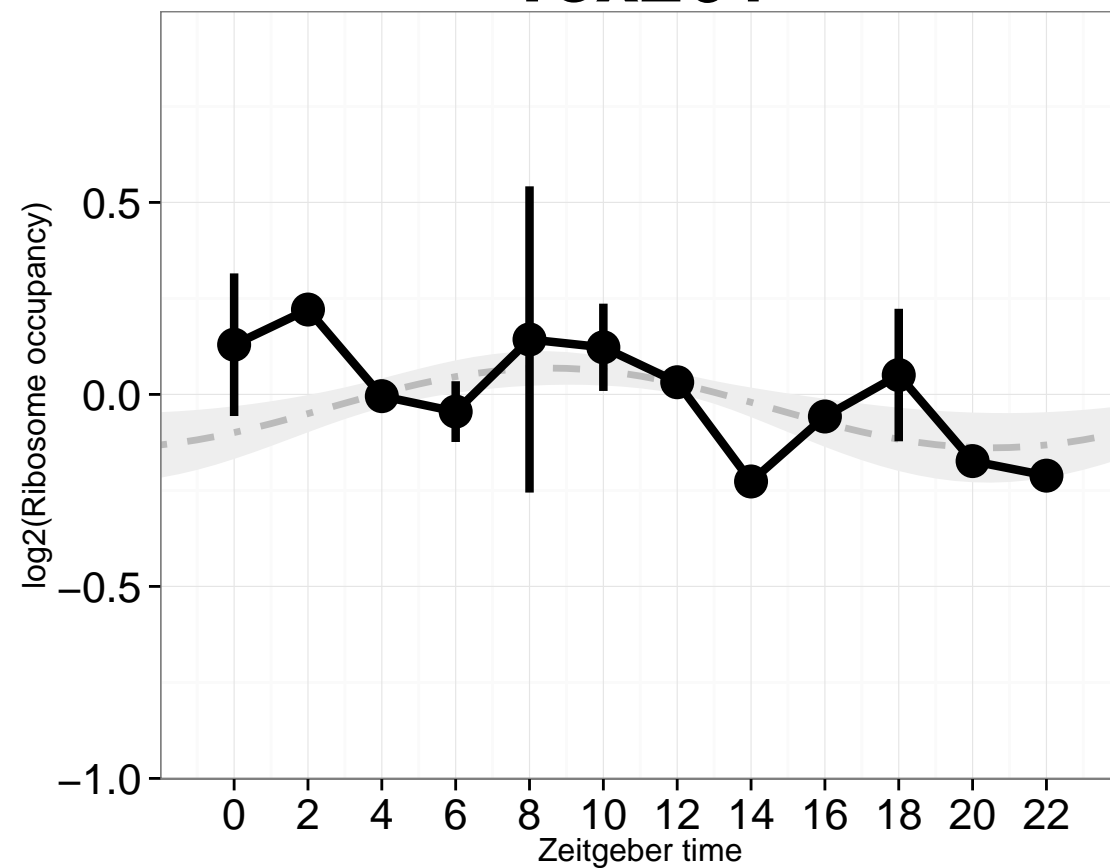

Supplement: SuppDataset_1.zip [file Tex261_set_A.pdf › Supplemental Dataset 1/A-mRNA_nonrhyth_translation_nonrhyth/Tex261_set_A.pdf]

## Tex264

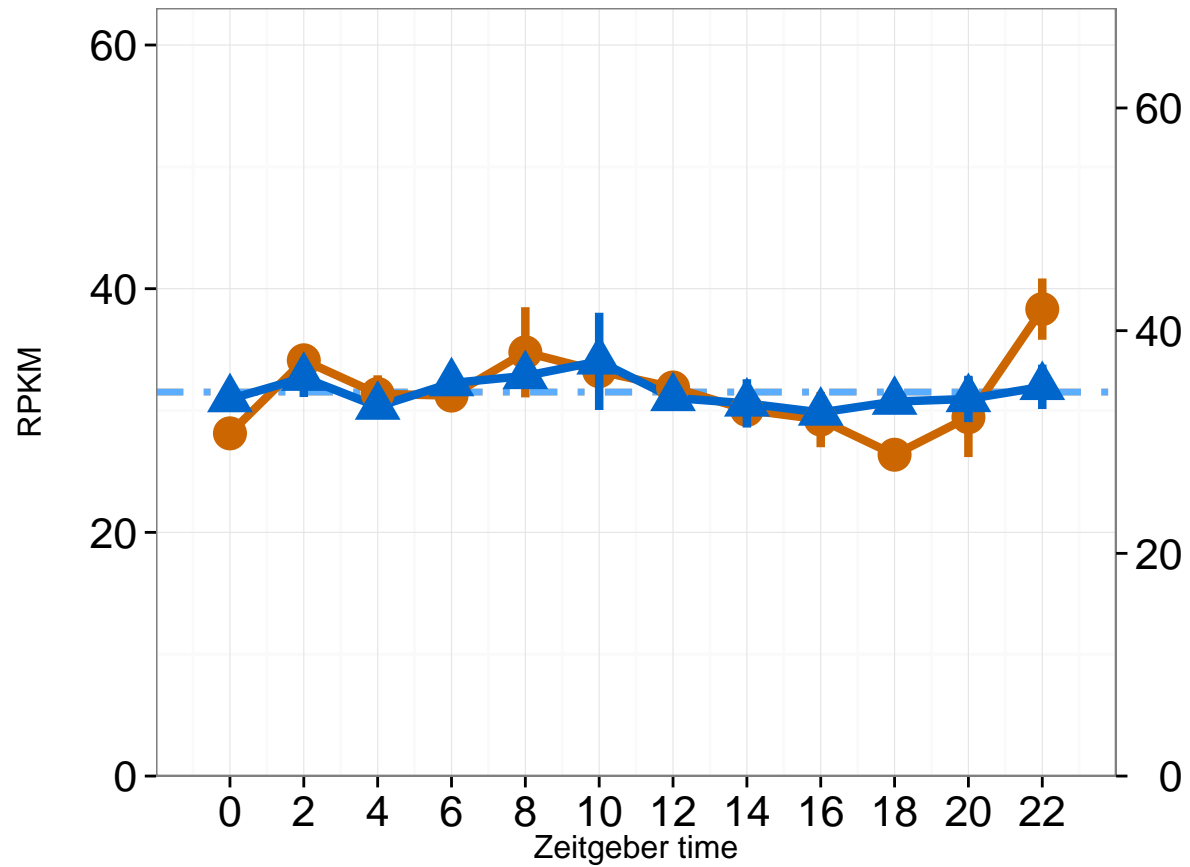

## Tex264

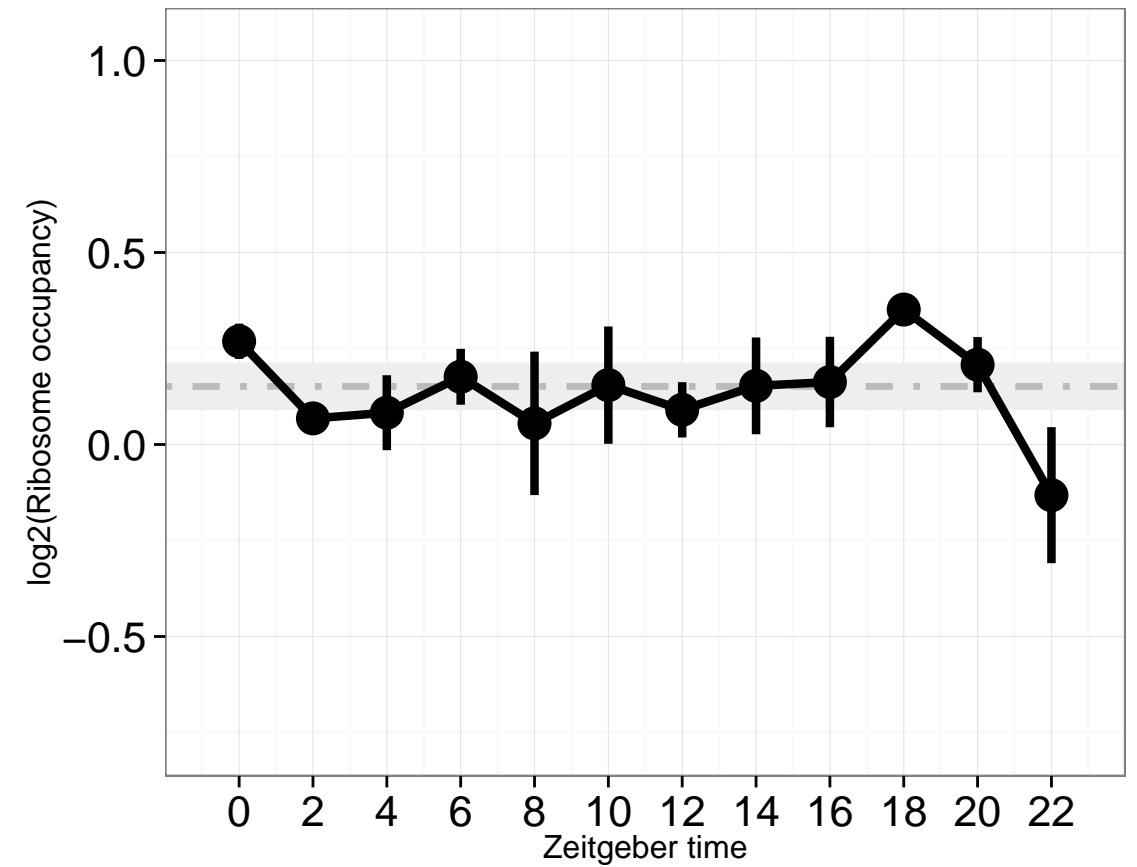

Supplement: SuppDataset_1.zip [file Tex264_set_A.pdf › Supplemental Dataset 1/A-mRNA_nonrhyth_translation_nonrhyth/Tex264_set_A.pdf]

## Tex2

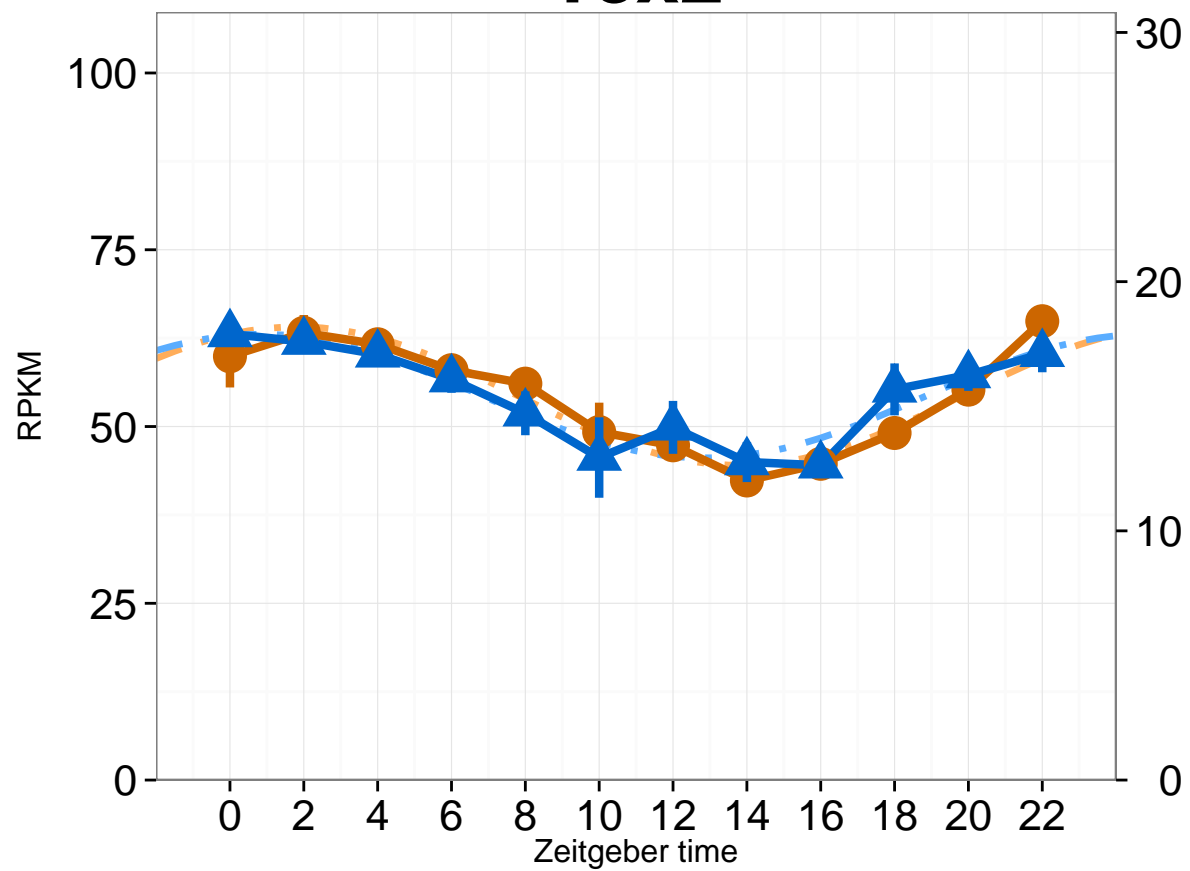

## Tex2

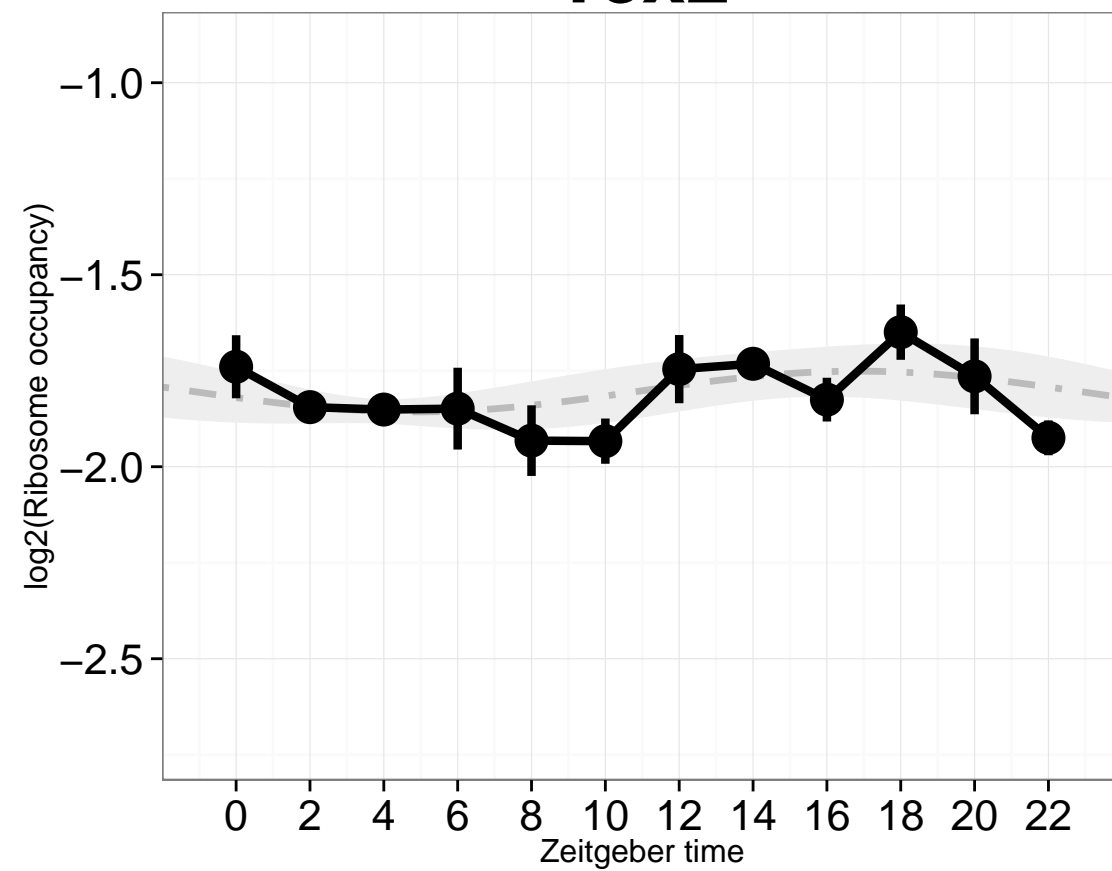

Supplement: SuppDataset_1.zip [file Tex2_set_A.pdf › Supplemental Dataset 1/A-mRNA_nonrhyth_translation_nonrhyth/Tex2_set_A.pdf]

## Tex30

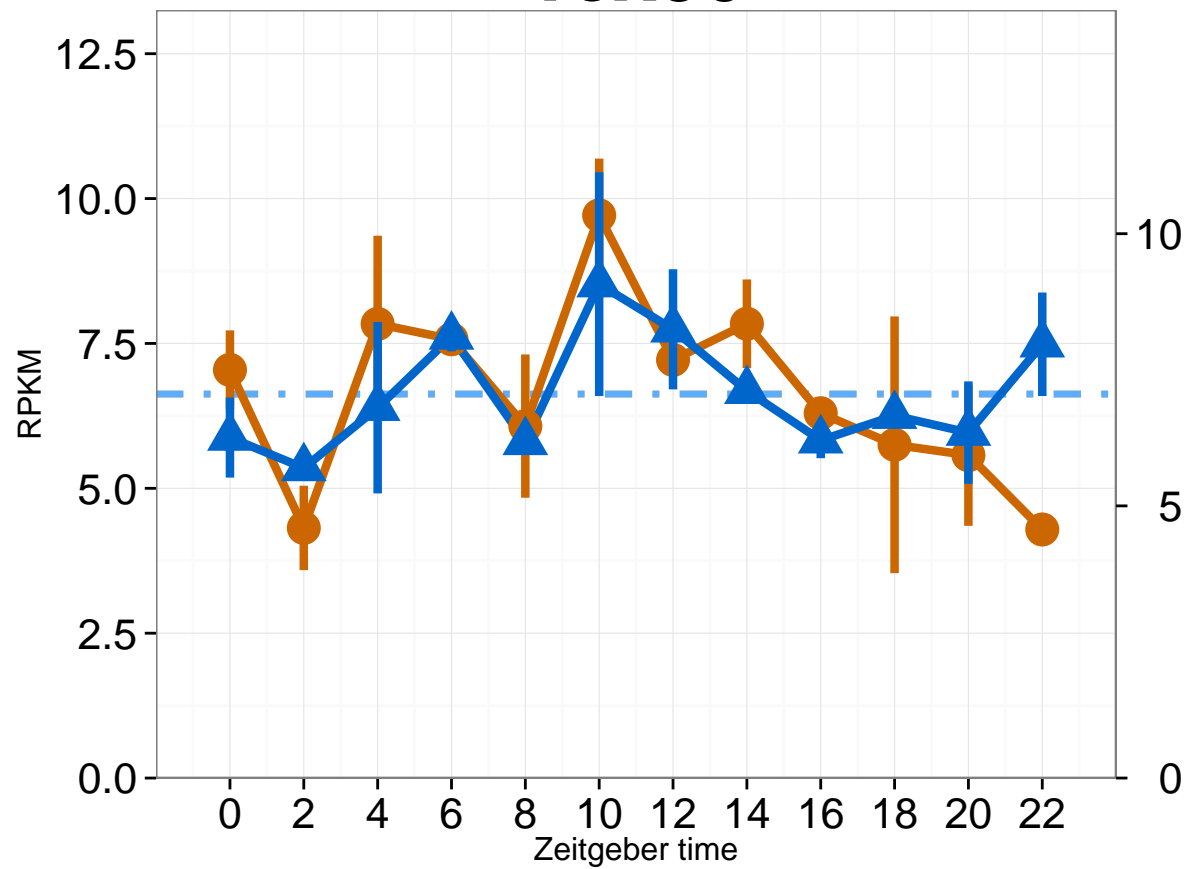

## Tex30

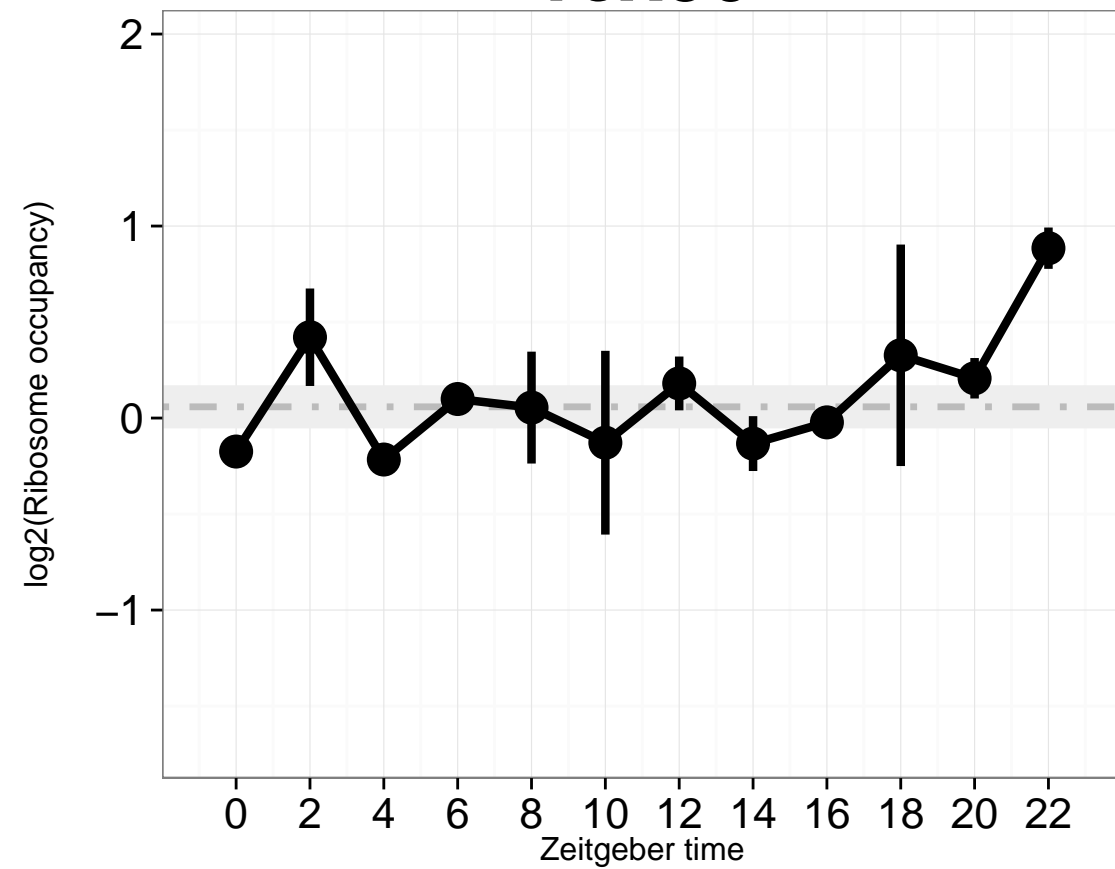

Supplement: SuppDataset_1.zip [file Tex30_set_A.pdf › Supplemental Dataset 1/A-mRNA_nonrhyth_translation_nonrhyth/Tex30_set_A.pdf]

## Tfam

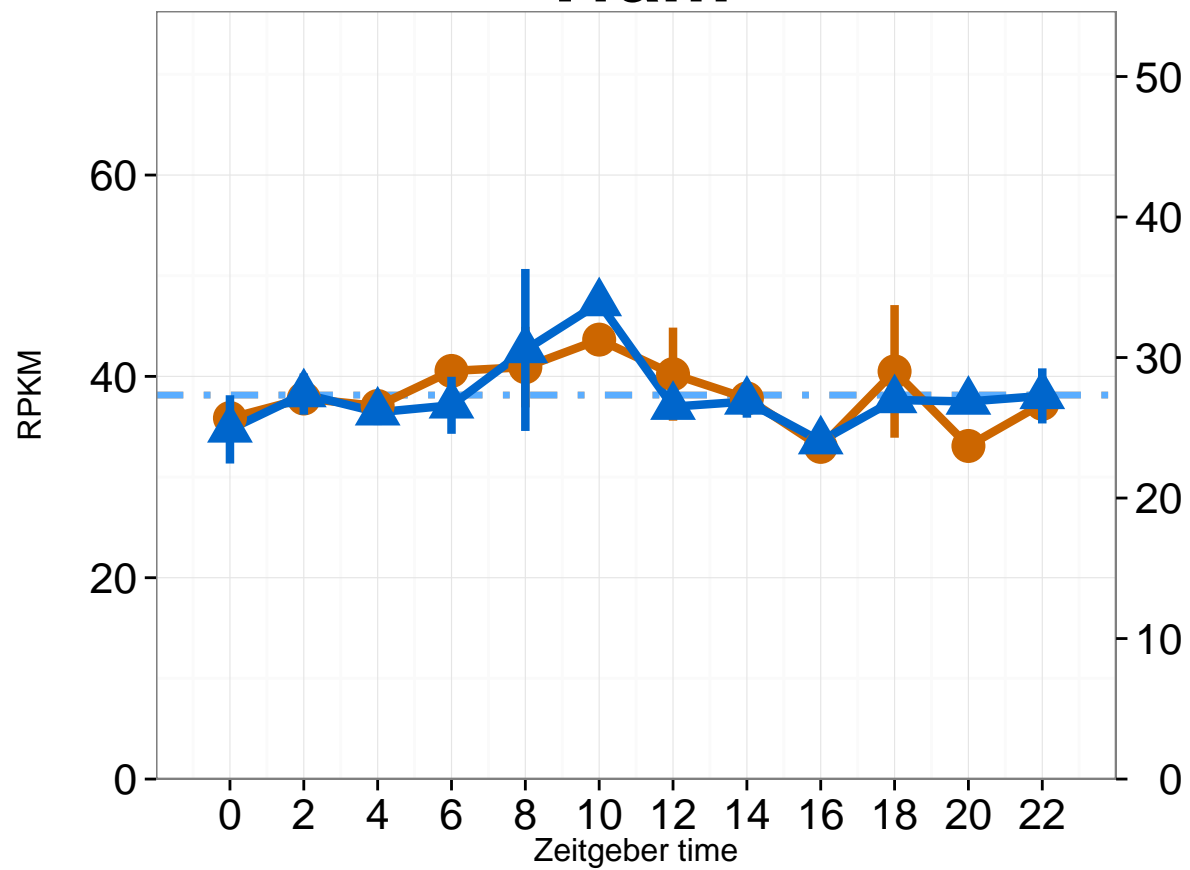

## Tfam

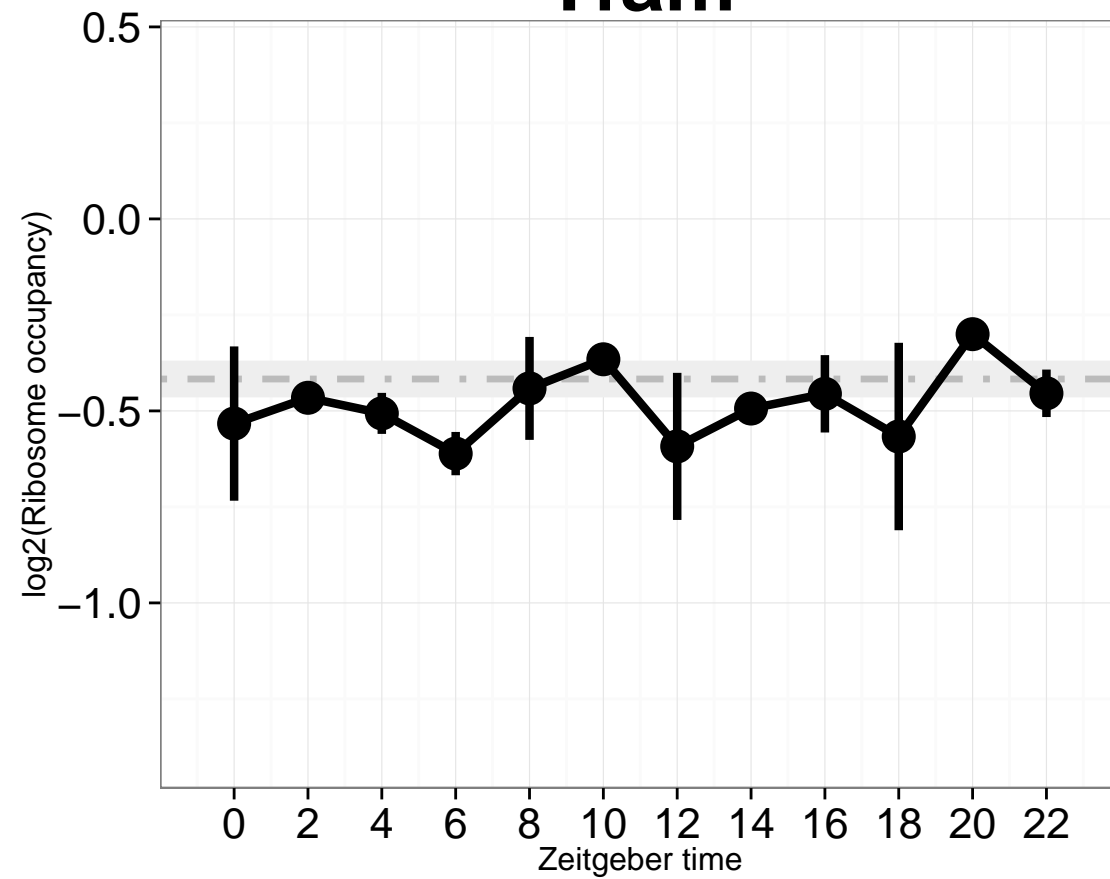

Supplement: SuppDataset_1.zip [file Tfam_set_A.pdf › Supplemental Dataset 1/A-mRNA_nonrhyth_translation_nonrhyth/Tfam_set_A.pdf]

# Tfap4

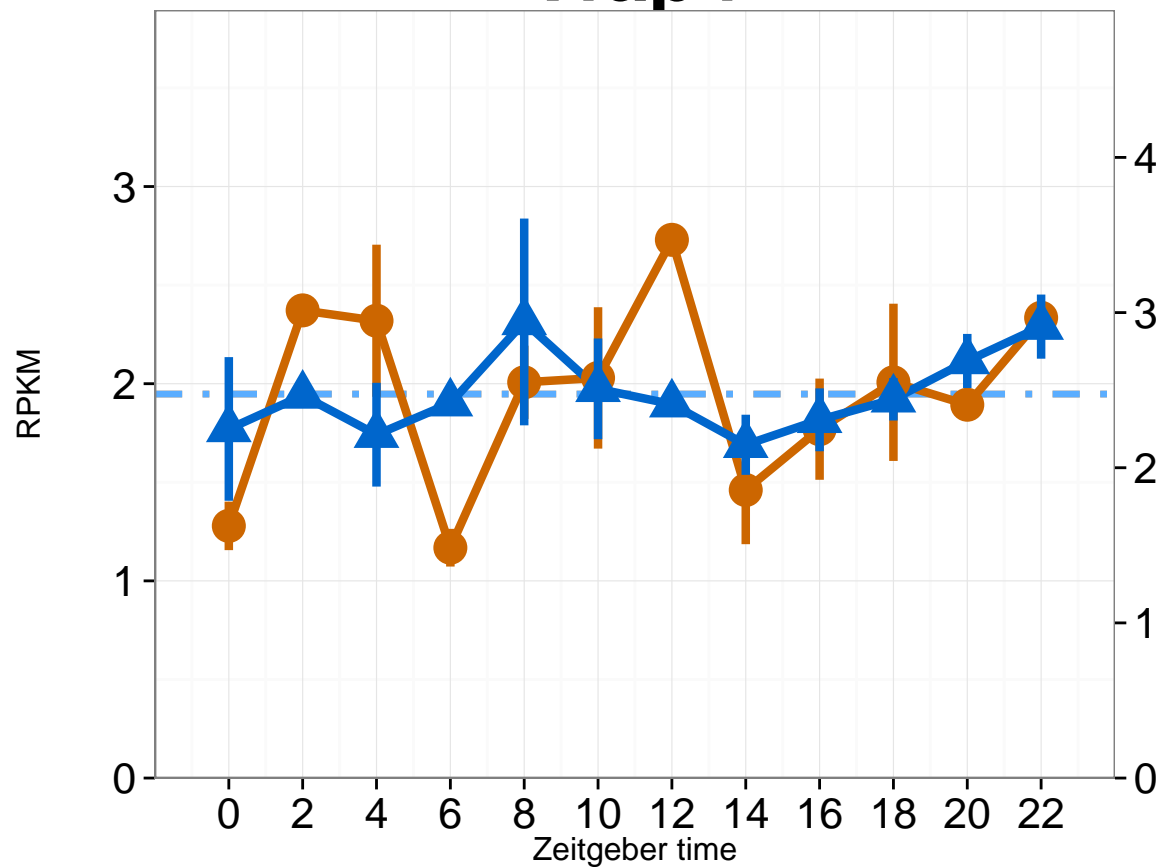

# Tfap4

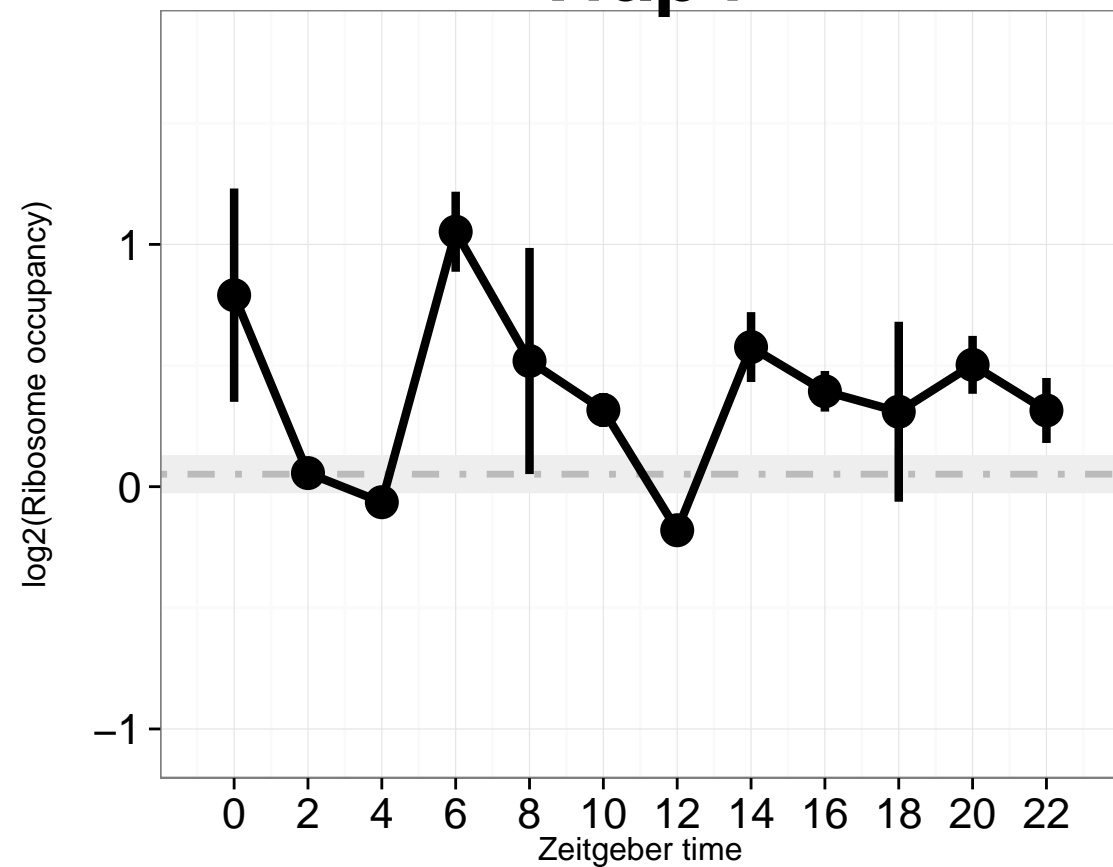

Supplement: SuppDataset_1.zip [file Tfap4_set_A.pdf › Supplemental Dataset 1/A-mRNA_nonrhyth_translation_nonrhyth/Tfap4_set_A.pdf]

# Tfb1m

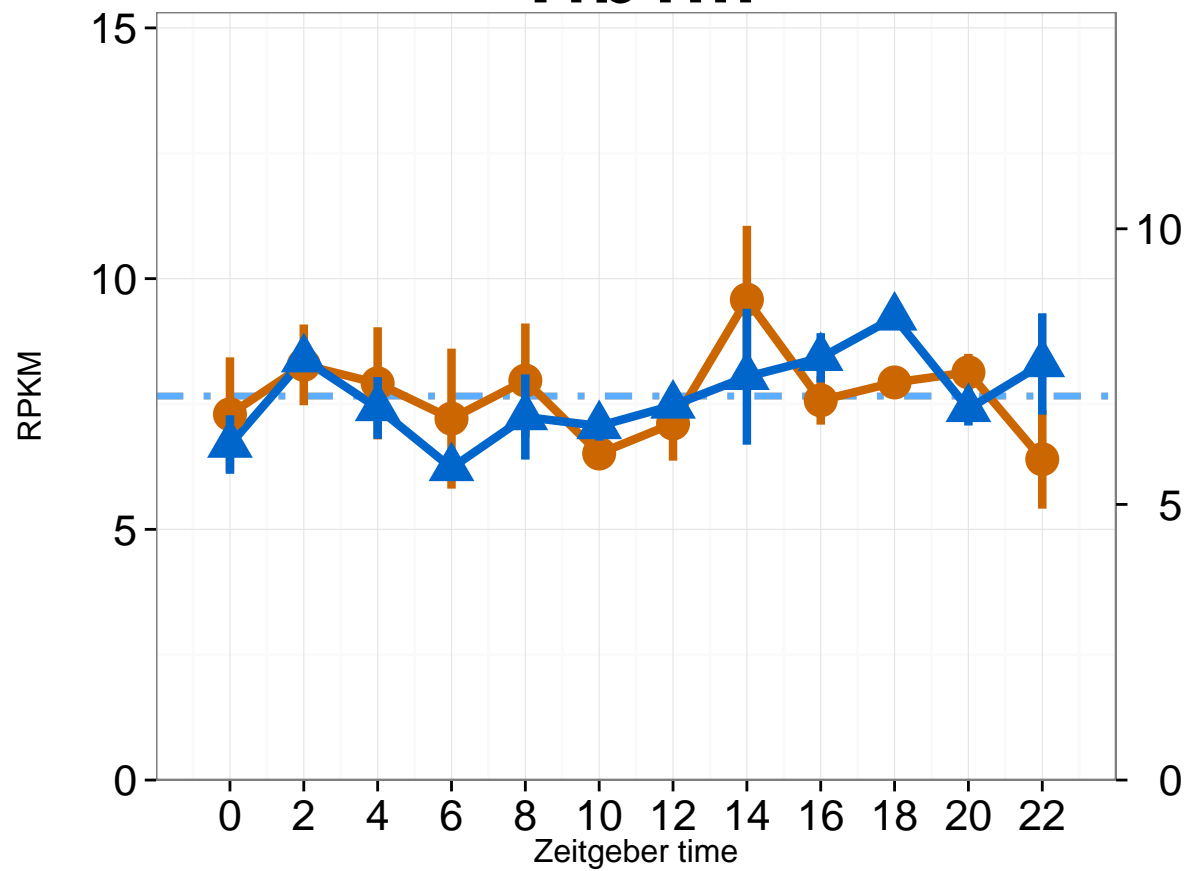

# Tfb1m

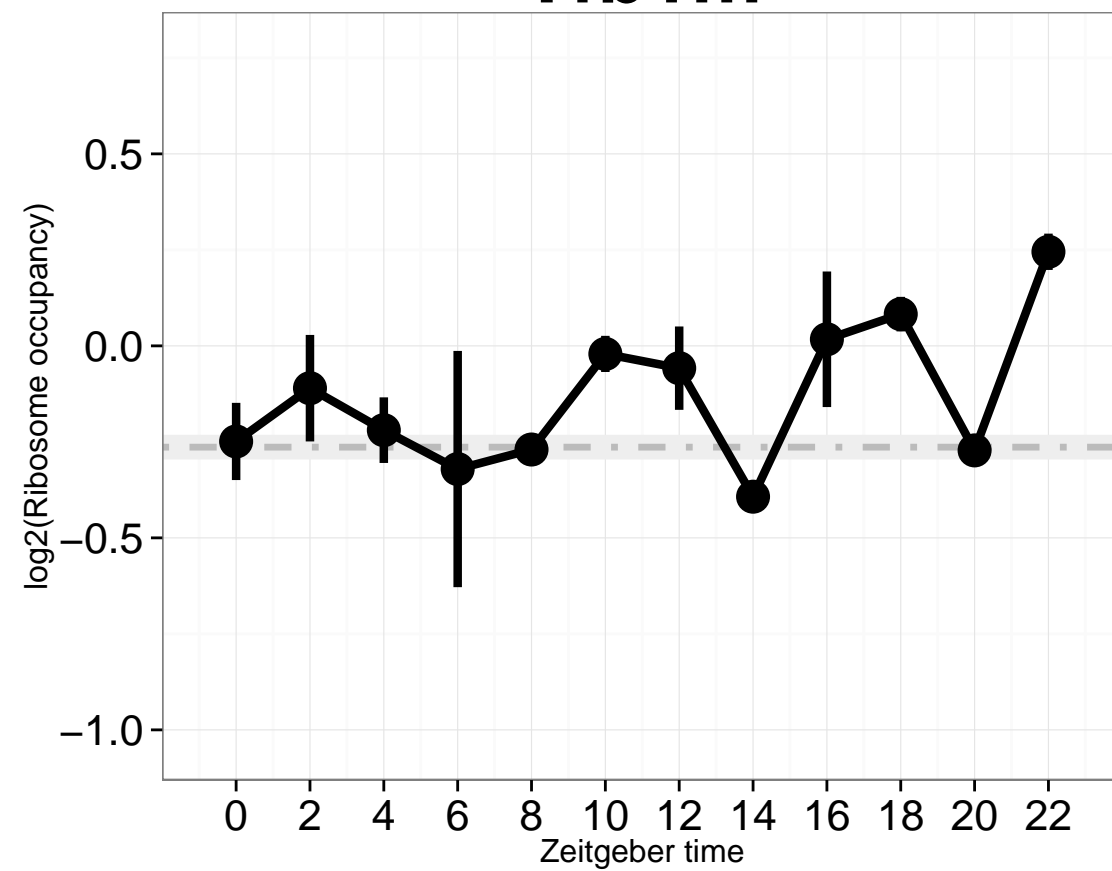

Supplement: SuppDataset_1.zip [file Tfb1m_set_A.pdf › Supplemental Dataset 1/A-mRNA_nonrhyth_translation_nonrhyth/Tfb1m_set_A.pdf]

# Tfb2m

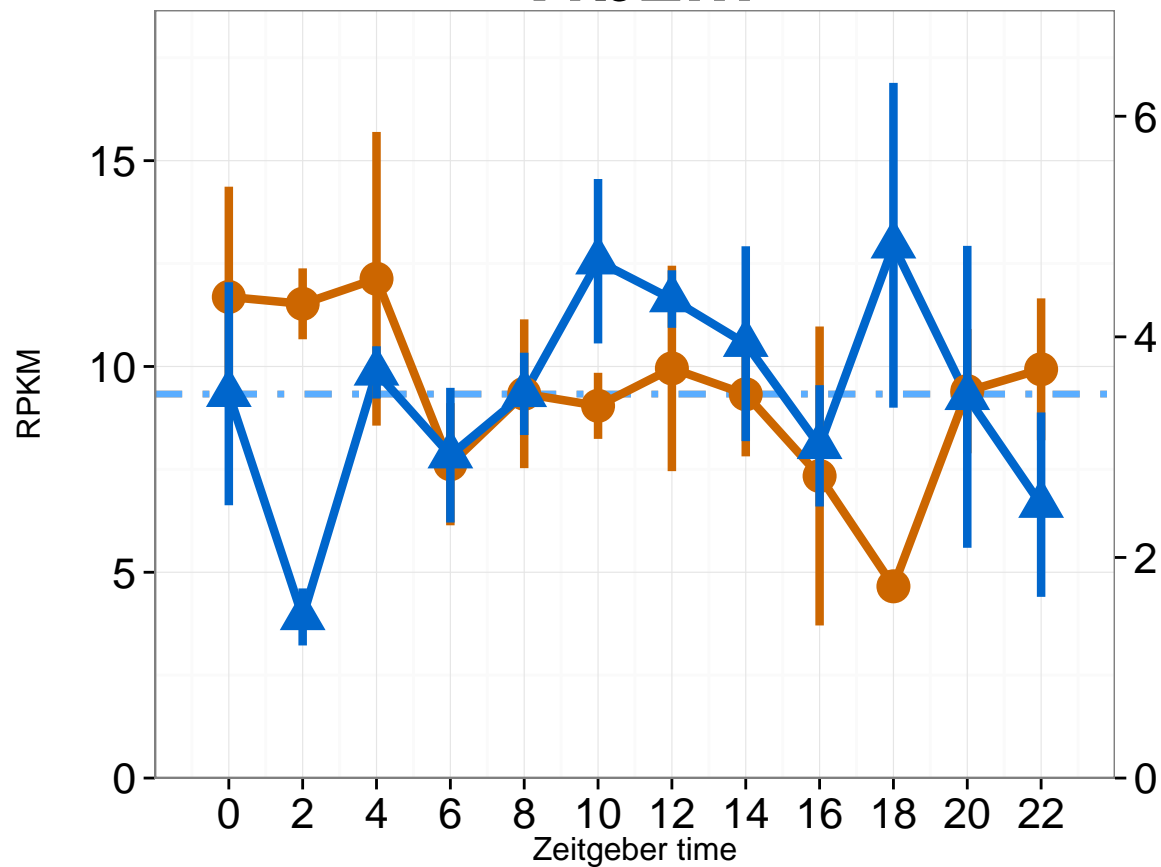

# Tfb2m

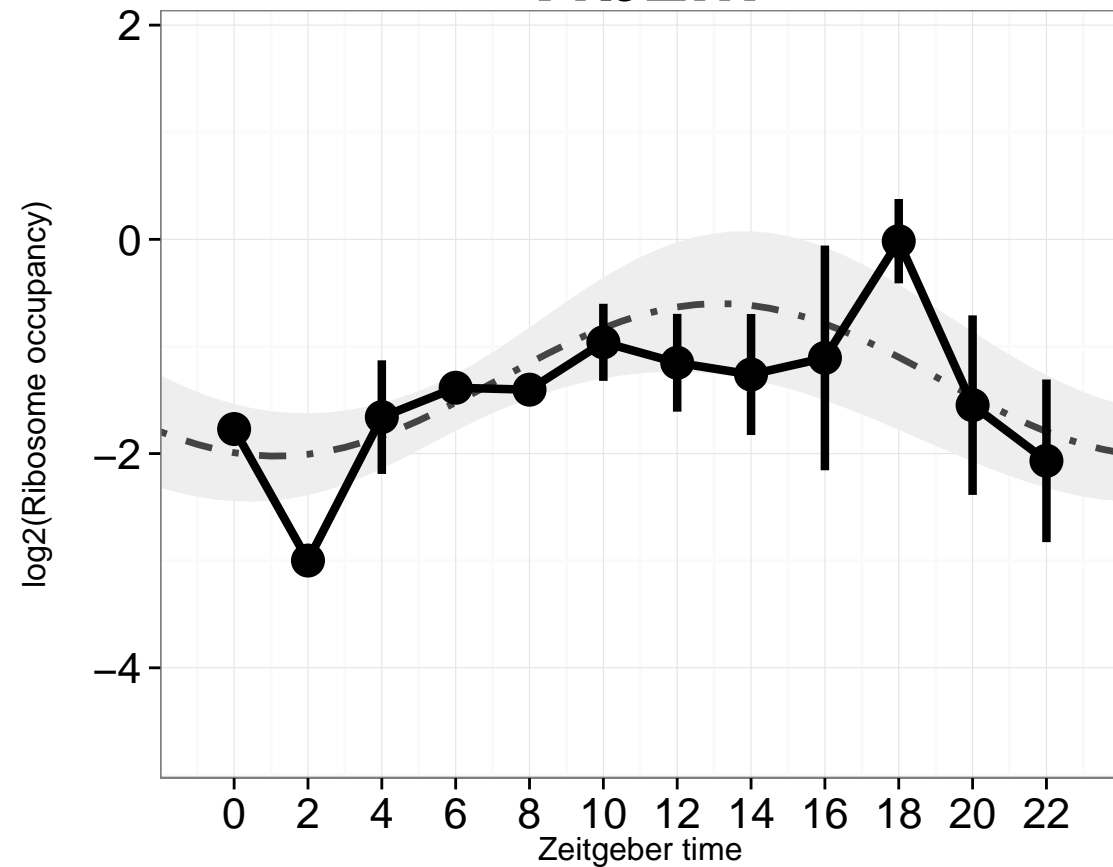

Supplement: SuppDataset_1.zip [file Tfb2m_set_A.pdf › Supplemental Dataset 1/A-mRNA_nonrhyth_translation_nonrhyth/Tfb2m_set_A.pdf]

# Tfcp2

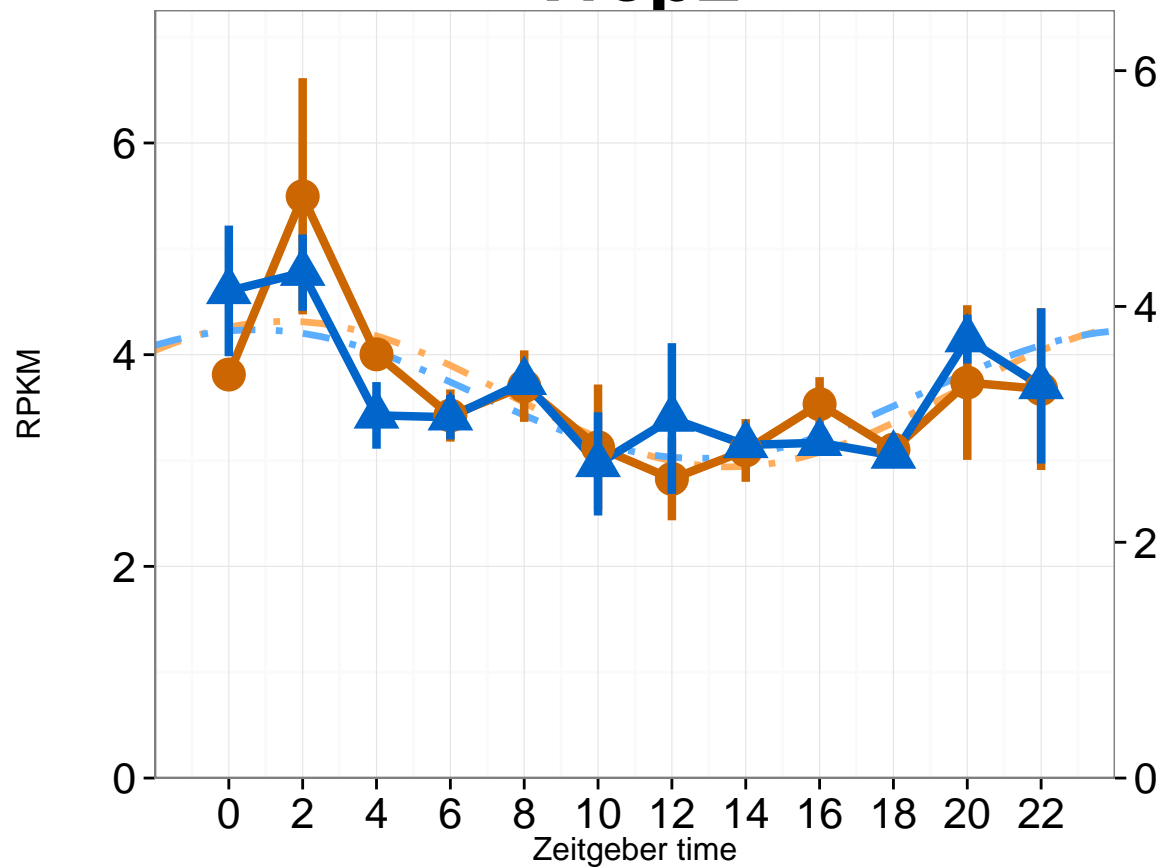

# Tfcp2

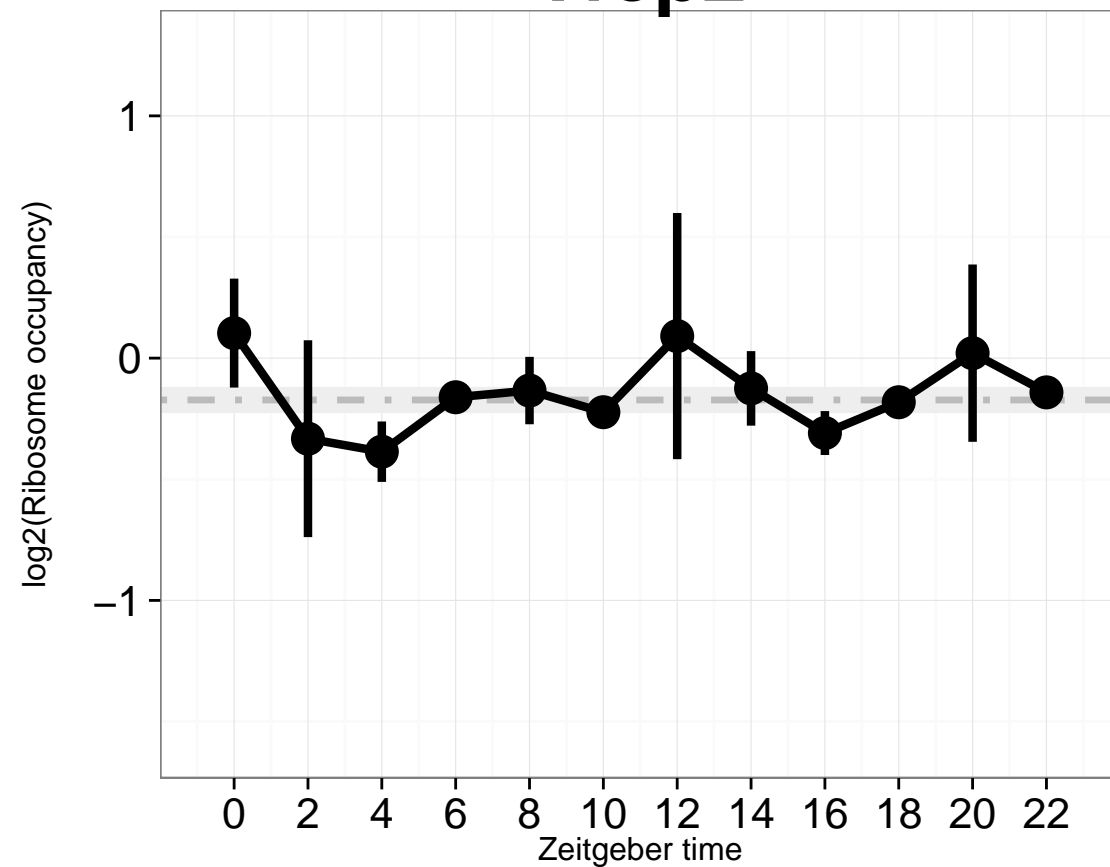

Supplement: SuppDataset_1.zip [file Tfcp2_set_A.pdf › Supplemental Dataset 1/A-mRNA_nonrhyth_translation_nonrhyth/Tfcp2_set_A.pdf]

# Tfcp2l1

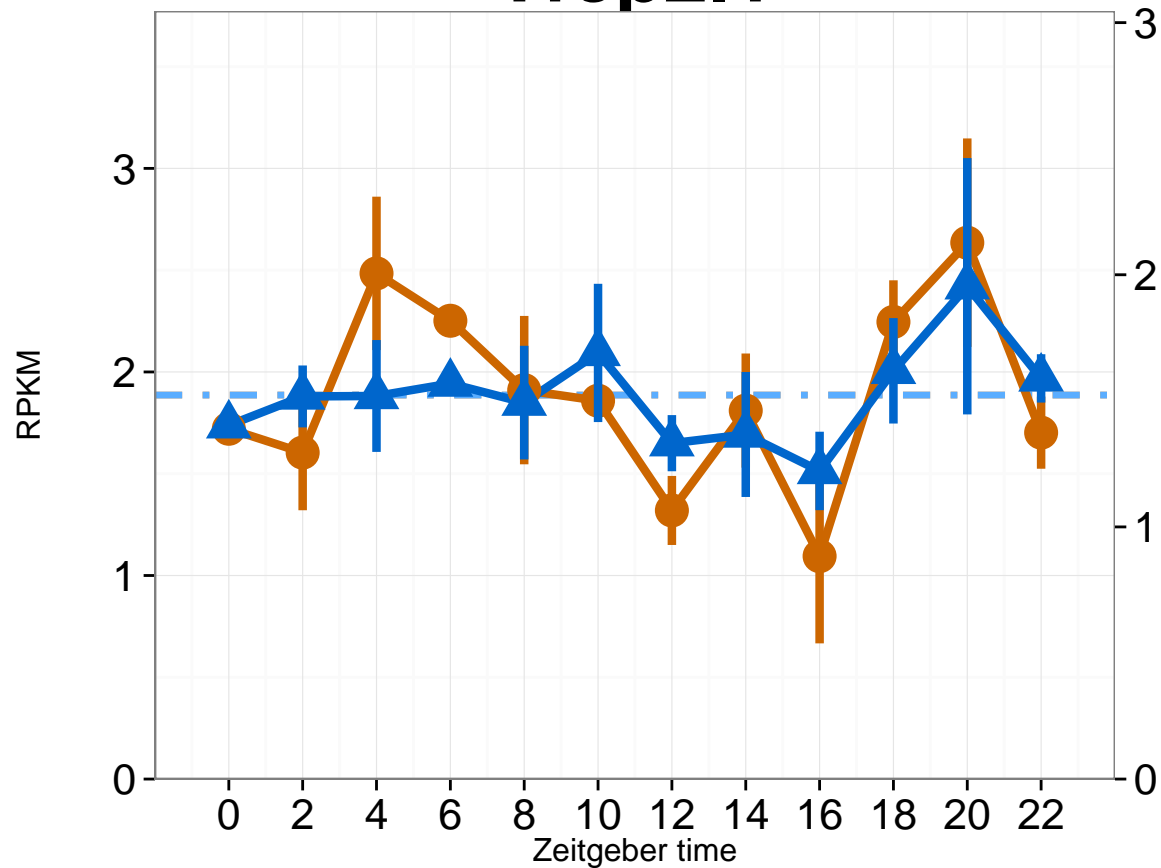

# Tfcp2l1

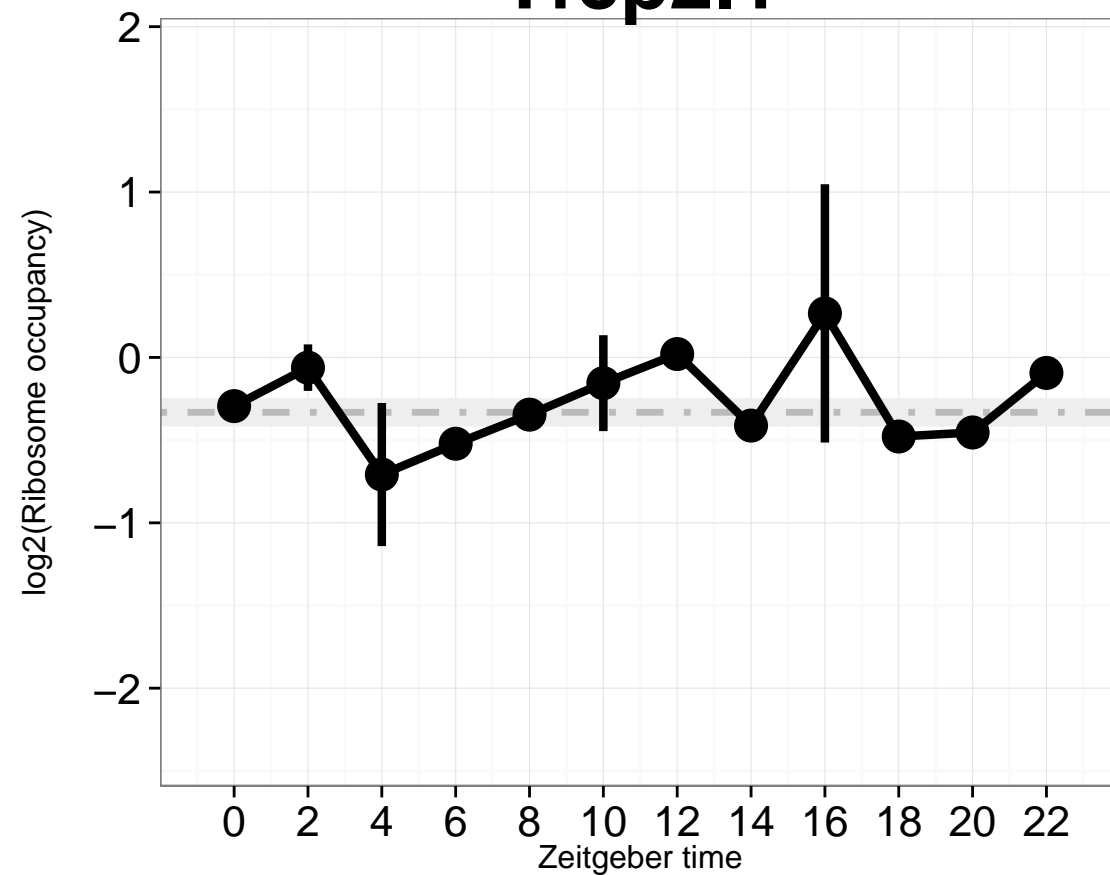

Supplement: SuppDataset_1.zip [file Tfcp2l1_set_A.pdf › Supplemental Dataset 1/A-mRNA_nonrhyth_translation_nonrhyth/Tfcp2l1_set_A.pdf]

# Tfdp1

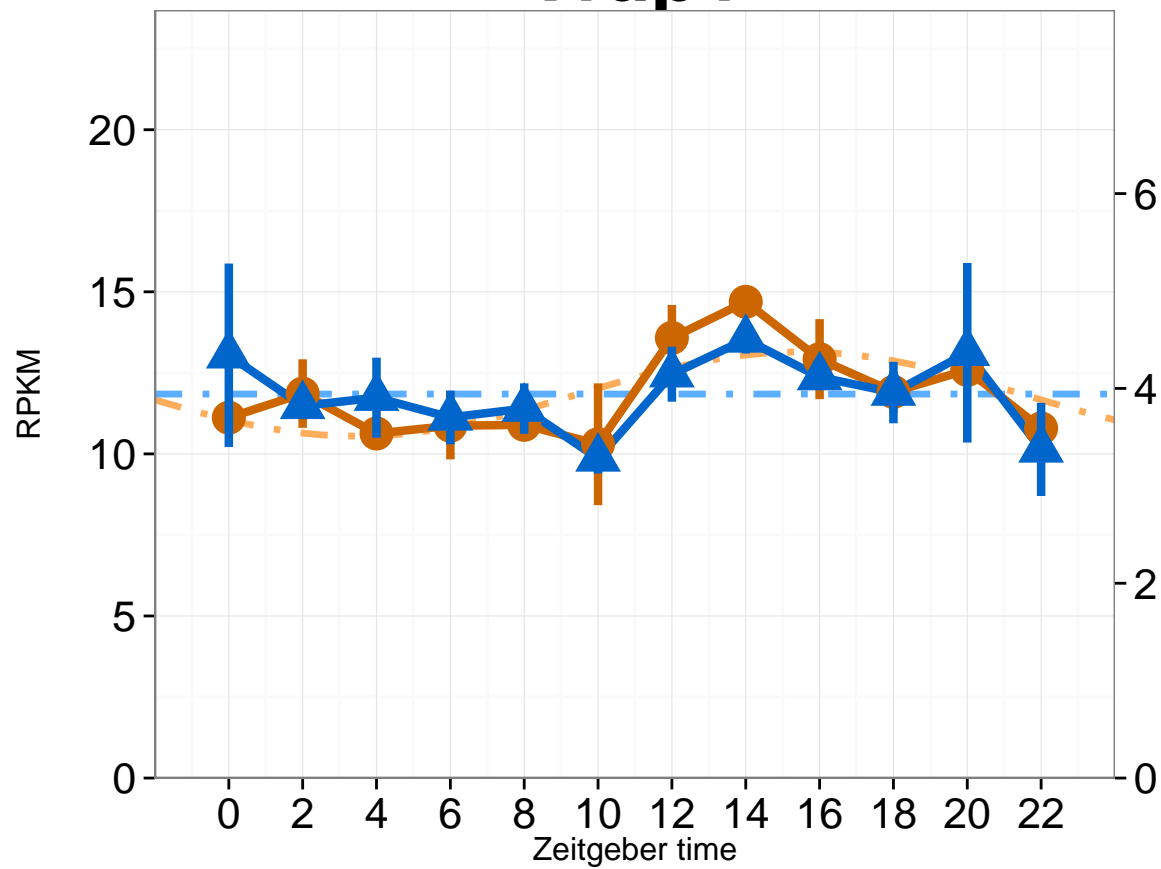

# Tfdp1

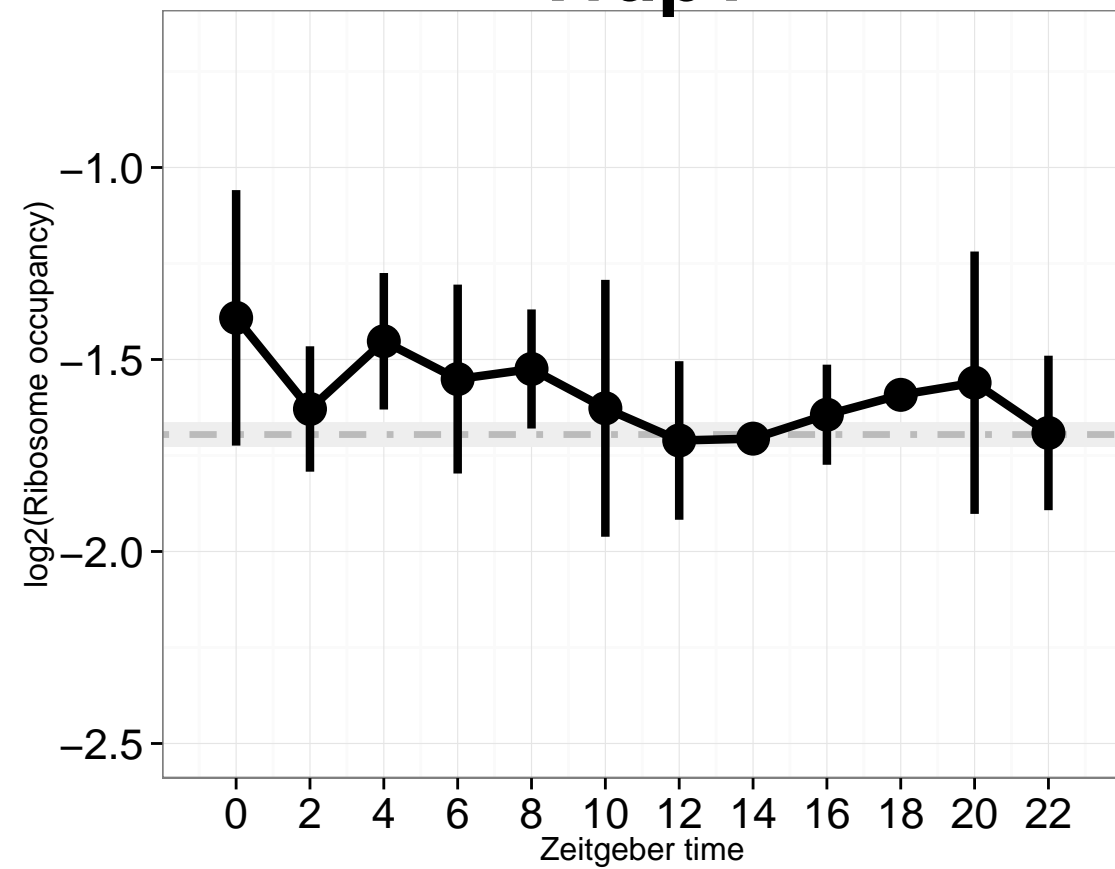

Supplement: SuppDataset_1.zip [file Tfdp1_set_A.pdf › Supplemental Dataset 1/A-mRNA_nonrhyth_translation_nonrhyth/Tfdp1_set_A.pdf]

# Tfdp2

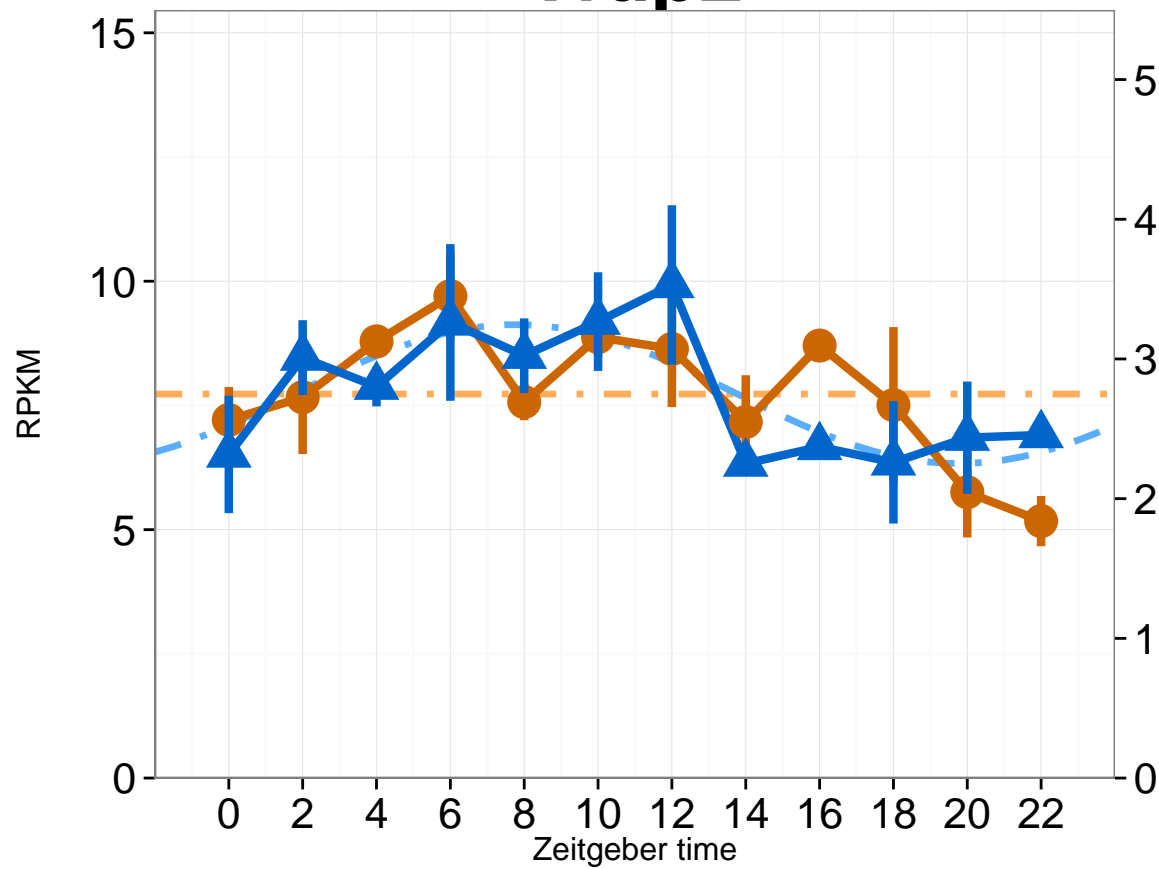

# Tfdp2

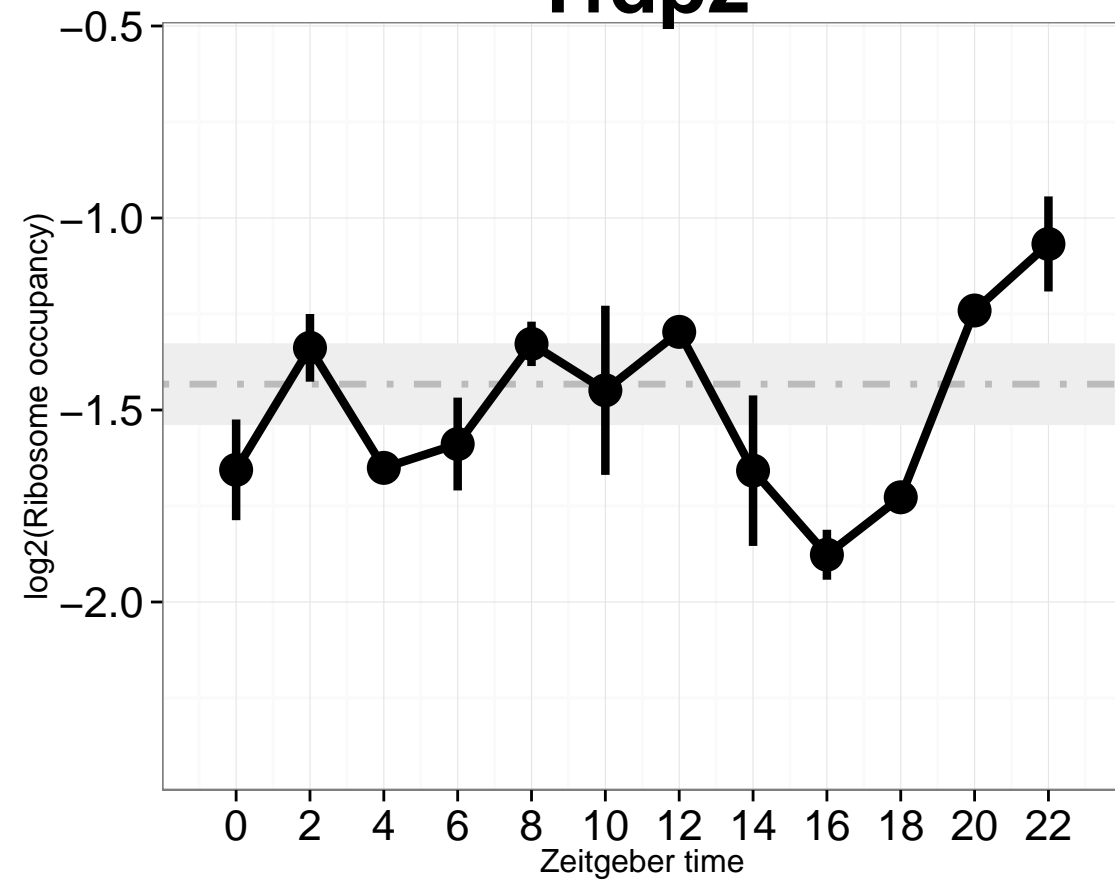

Supplement: SuppDataset_1.zip [file Tfdp2_set_A.pdf › Supplemental Dataset 1/A-mRNA_nonrhyth_translation_nonrhyth/Tfdp2_set_A.pdf]

## Tfe3

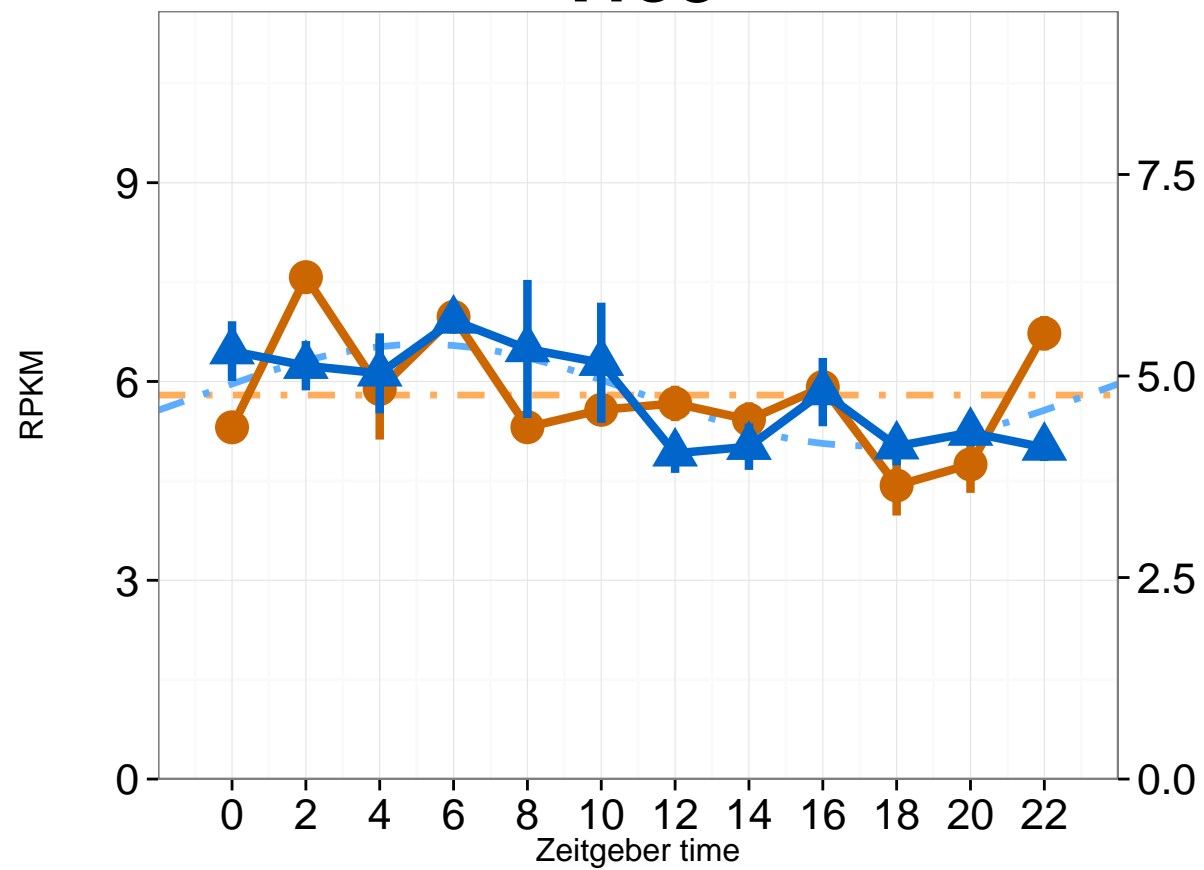

## Tfe3

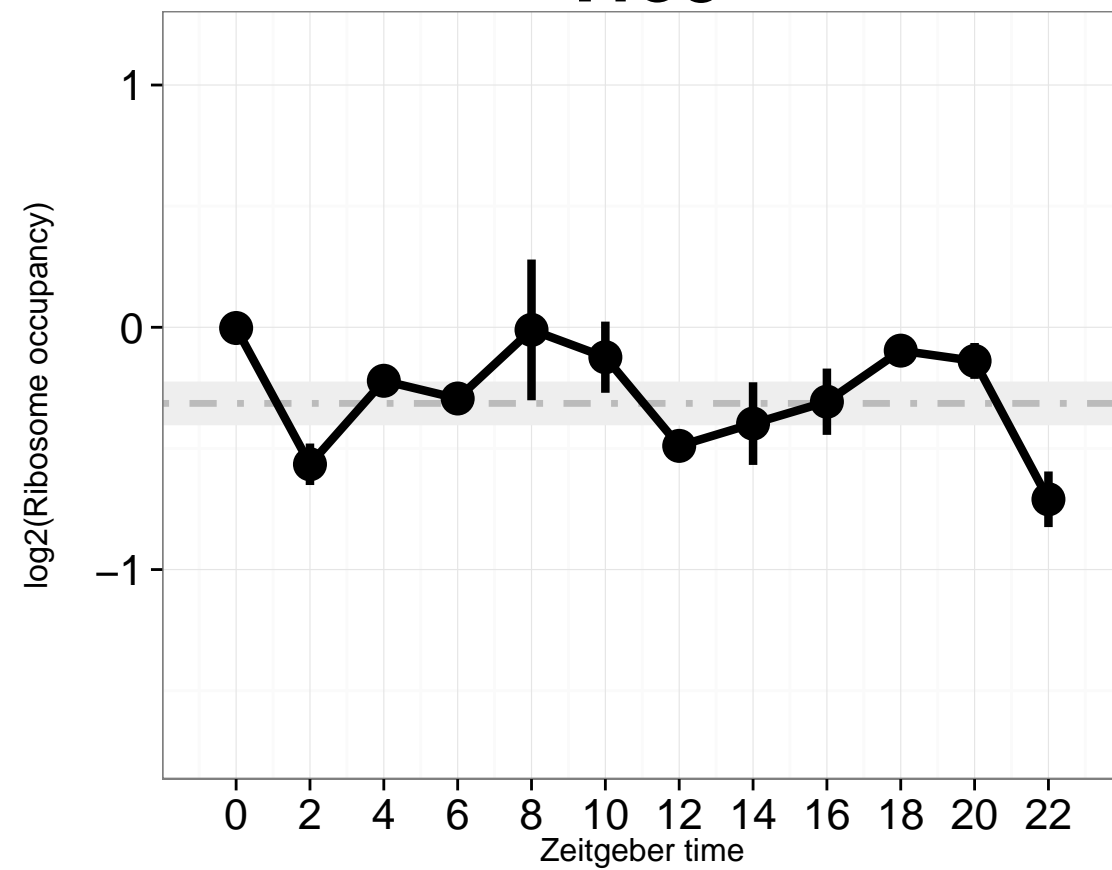

Supplement: SuppDataset_1.zip [file Tfe3_set_A.pdf › Supplemental Dataset 1/A-mRNA_nonrhyth_translation_nonrhyth/Tfe3_set_A.pdf]

# Tfeb

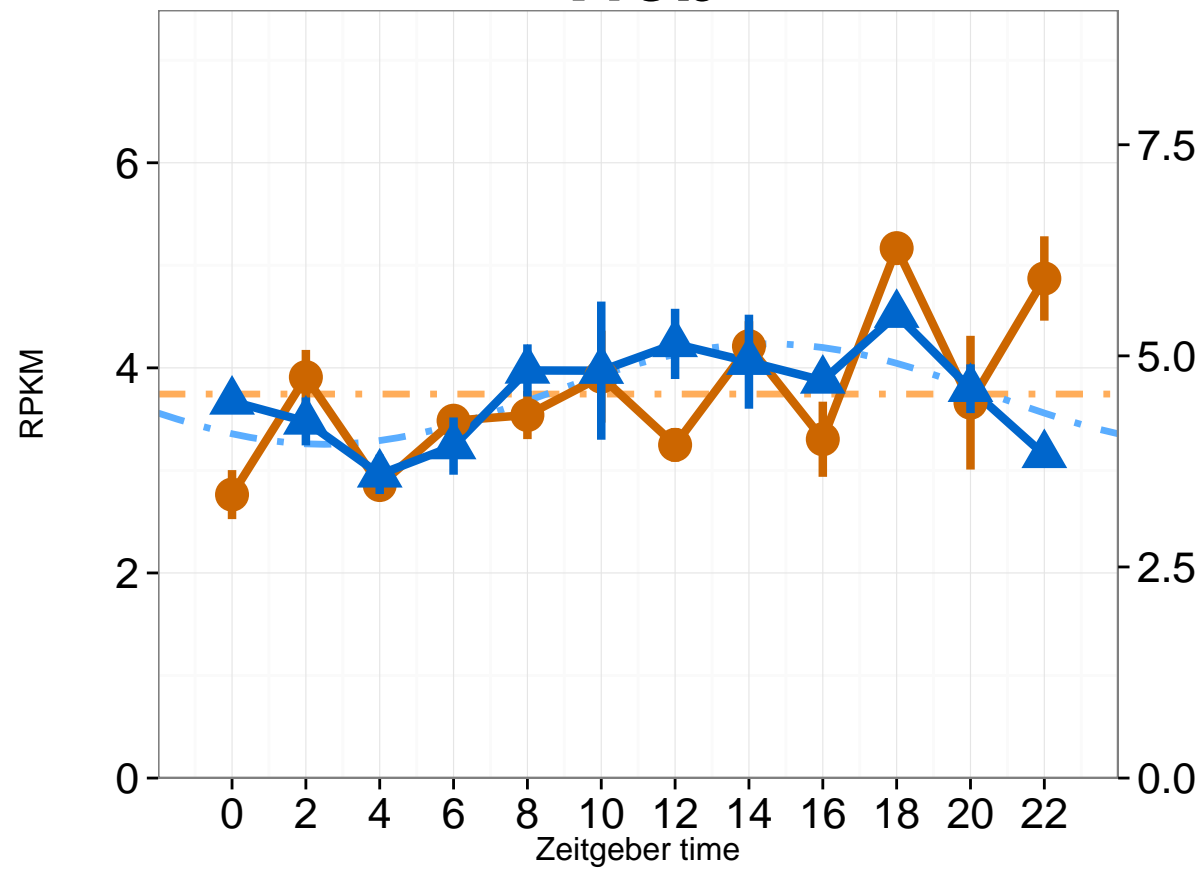

# Tfeb

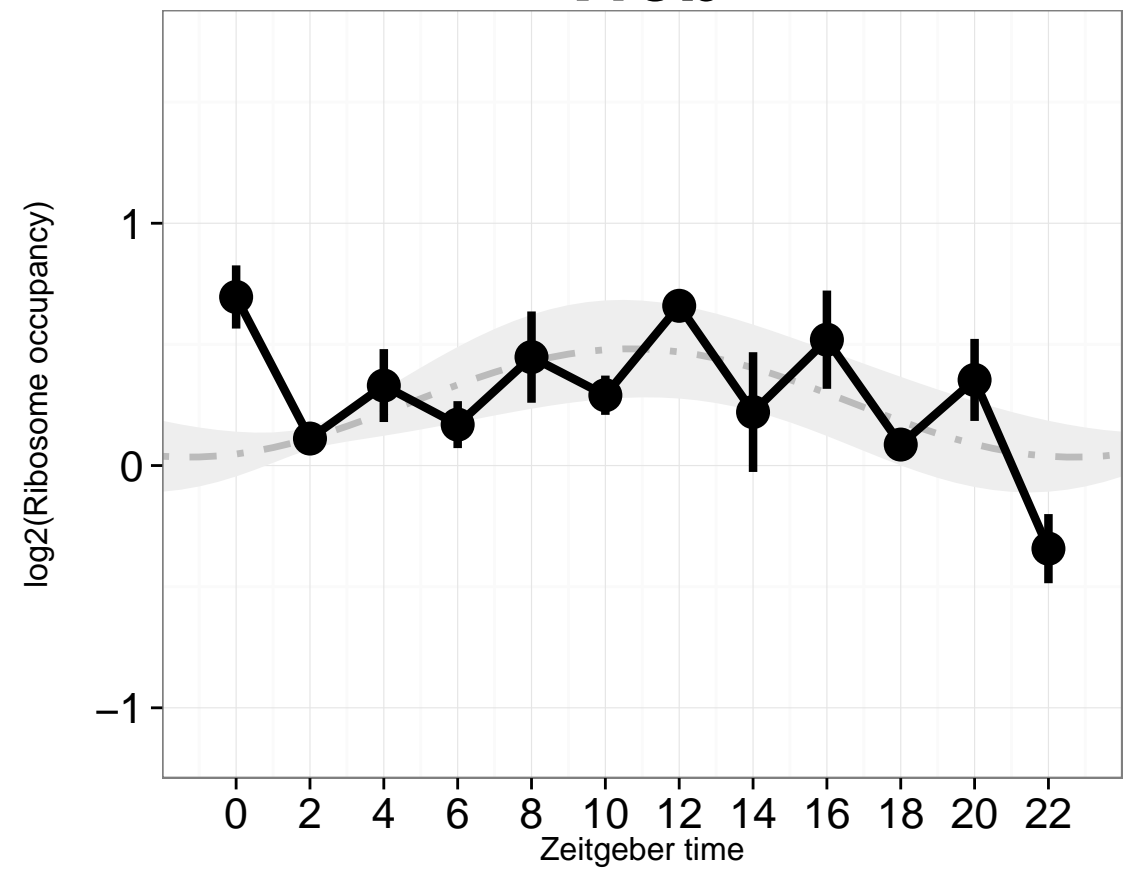

Supplement: SuppDataset_1.zip [file Tfeb_set_A.pdf › Supplemental Dataset 1/A-mRNA_nonrhyth_translation_nonrhyth/Tfeb_set_A.pdf]

## Tfec

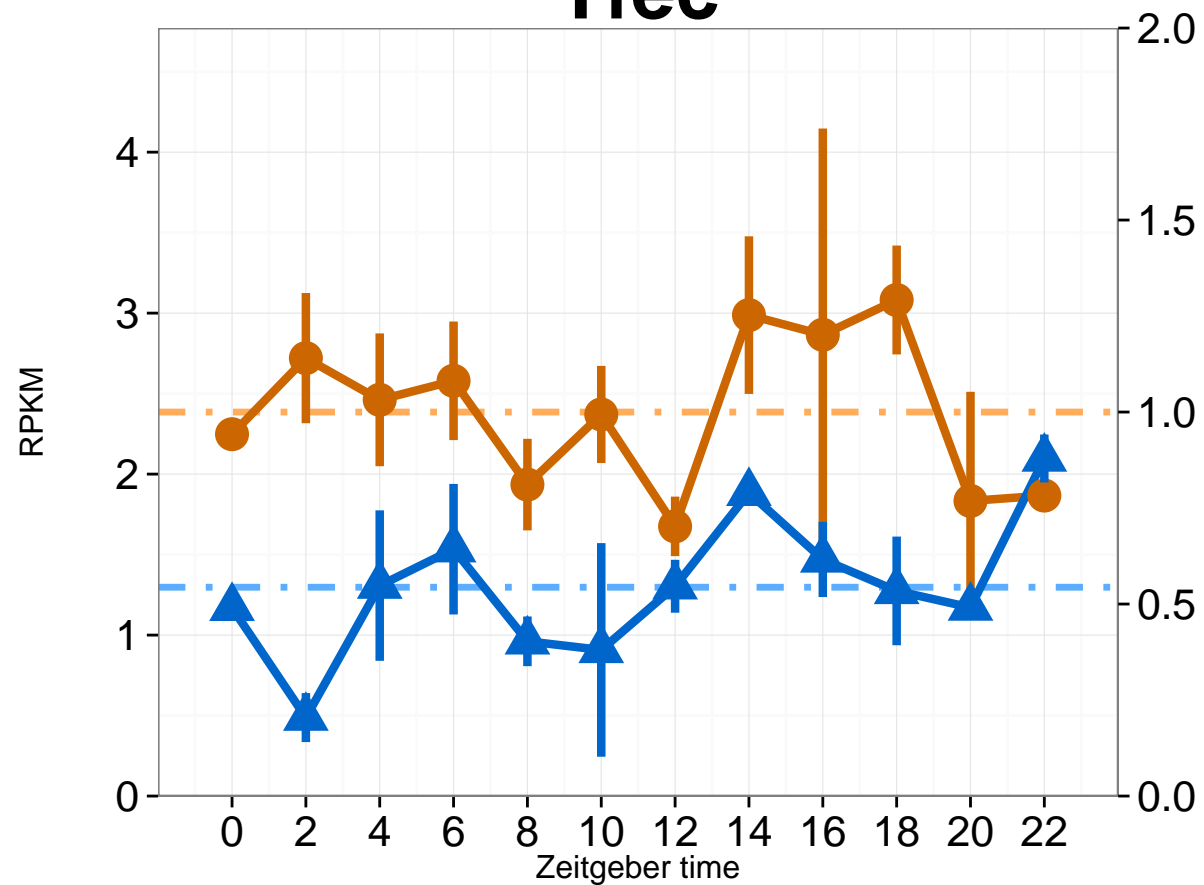

## Tfec

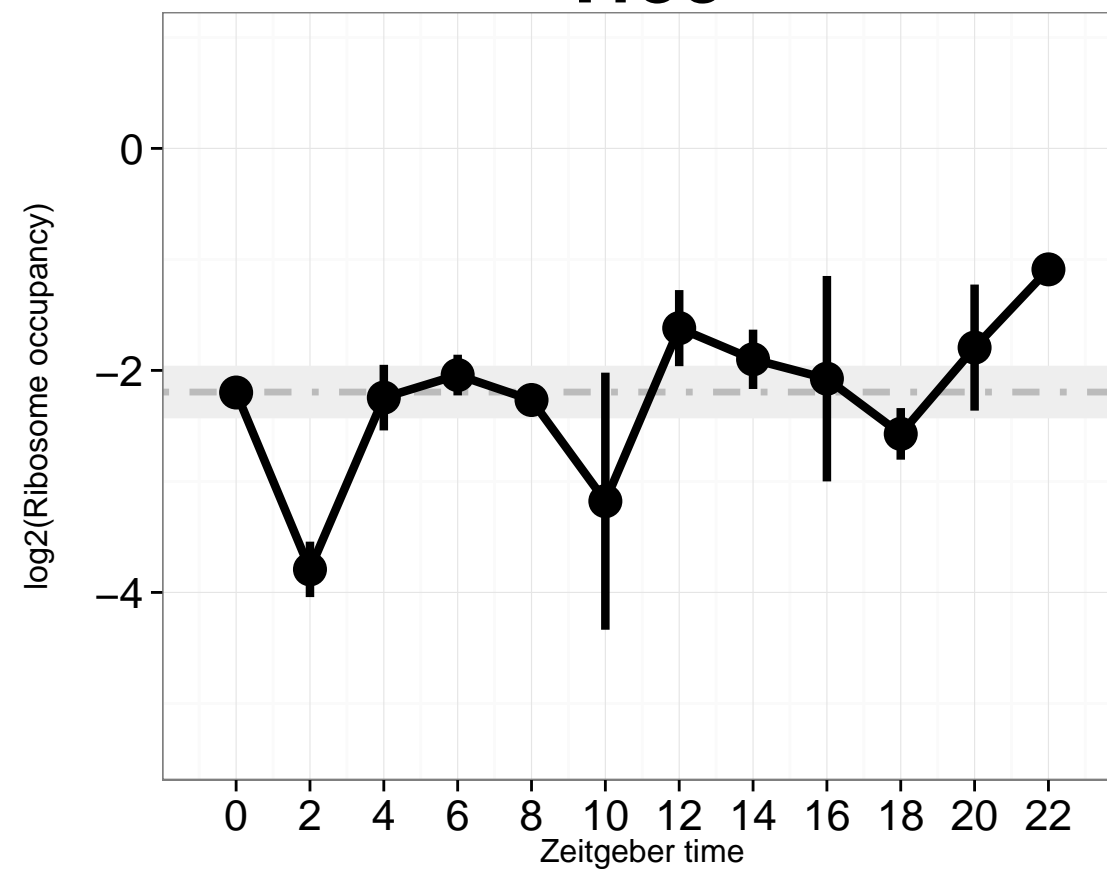

Supplement: SuppDataset_1.zip [file Tfec_set_A.pdf › Supplemental Dataset 1/A-mRNA_nonrhyth_translation_nonrhyth/Tfec_set_A.pdf]

## Tff3

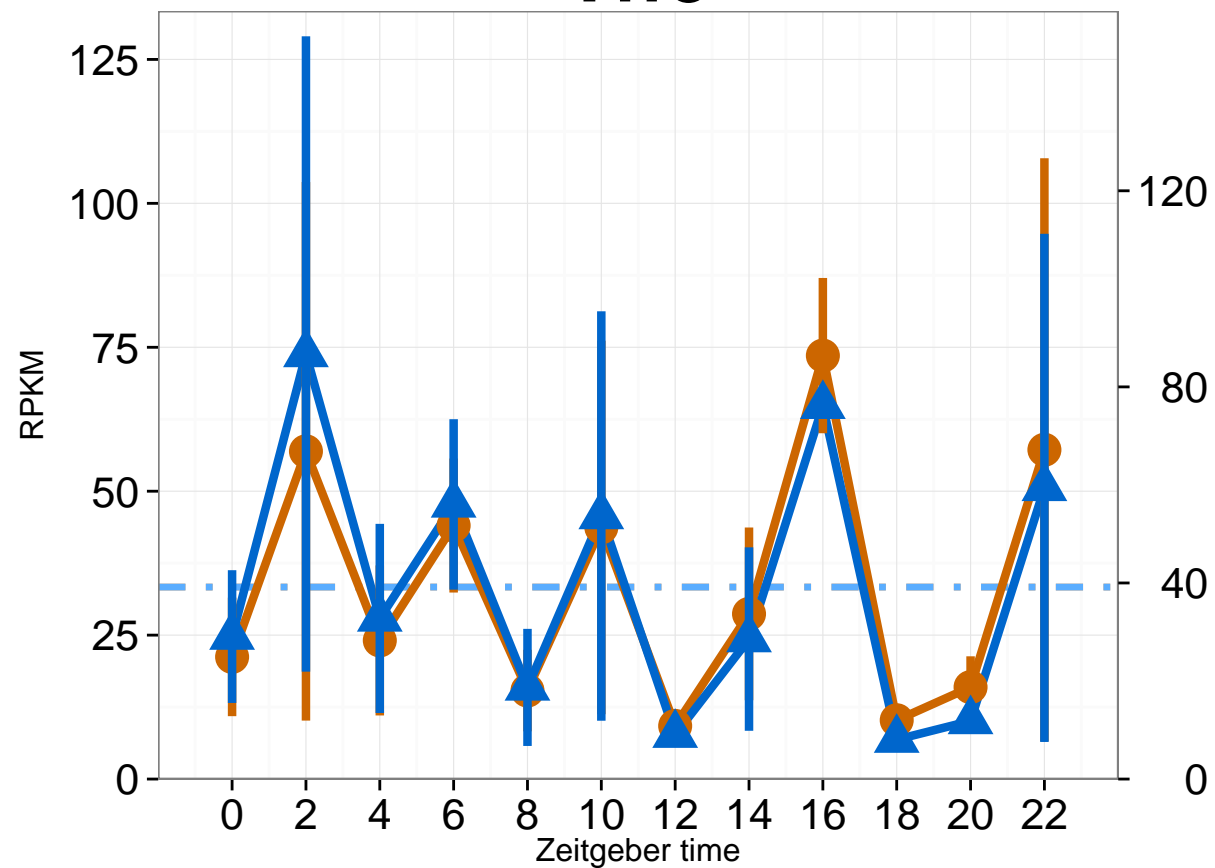

## Tff3

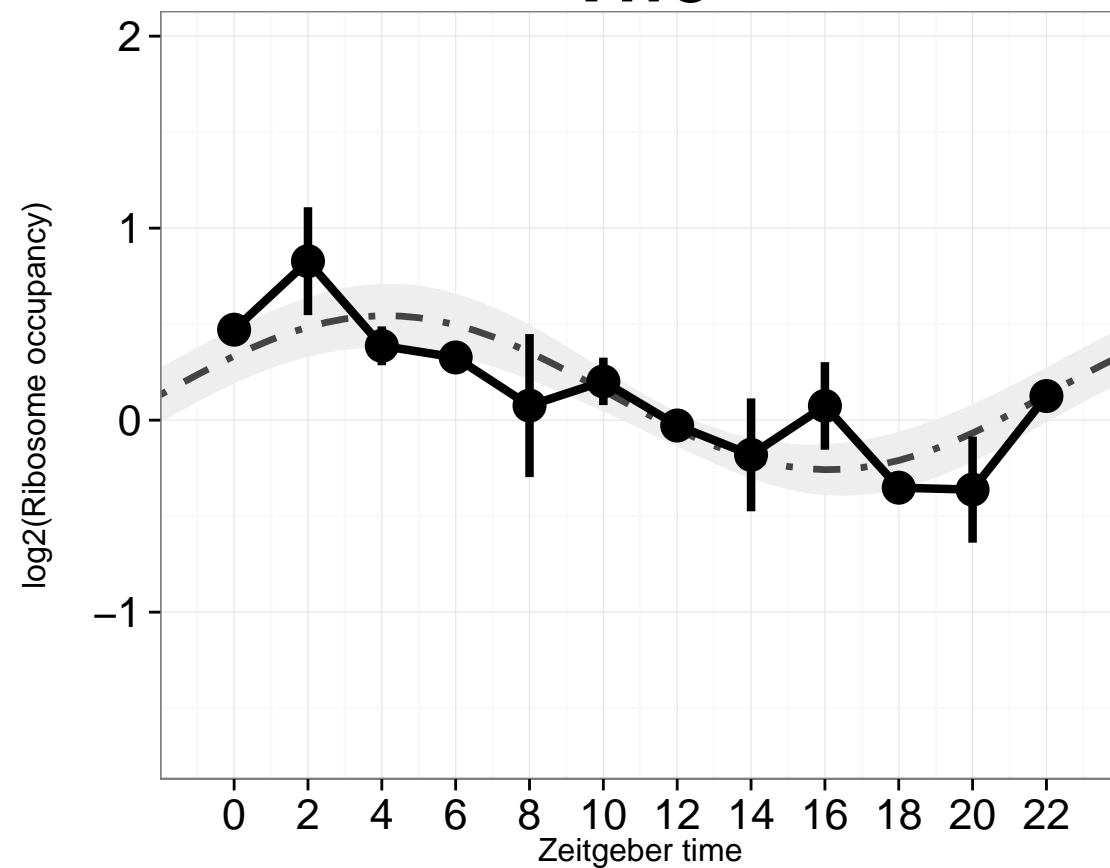

Supplement: SuppDataset_1.zip [file Tff3_set_A.pdf › Supplemental Dataset 1/A-mRNA_nonrhyth_translation_nonrhyth/Tff3_set_A.pdf]

## Tfg

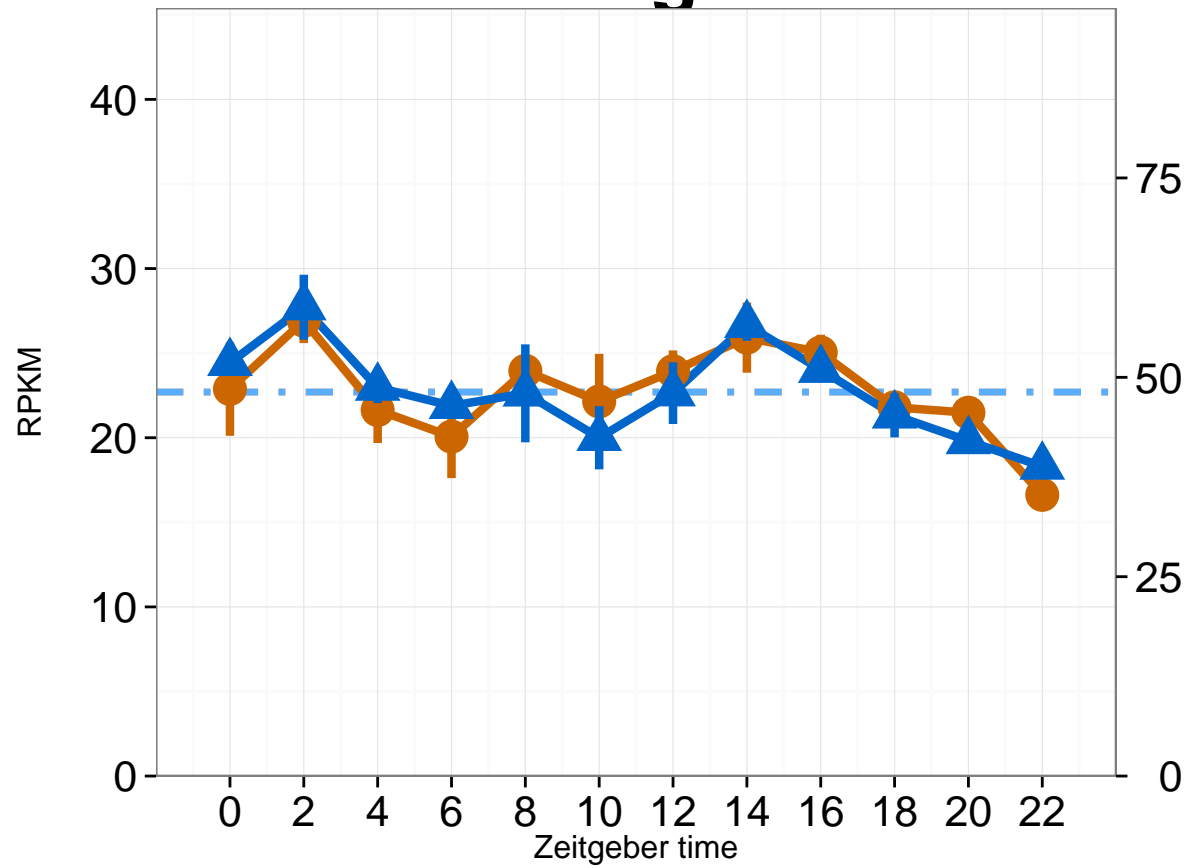

## Tfg

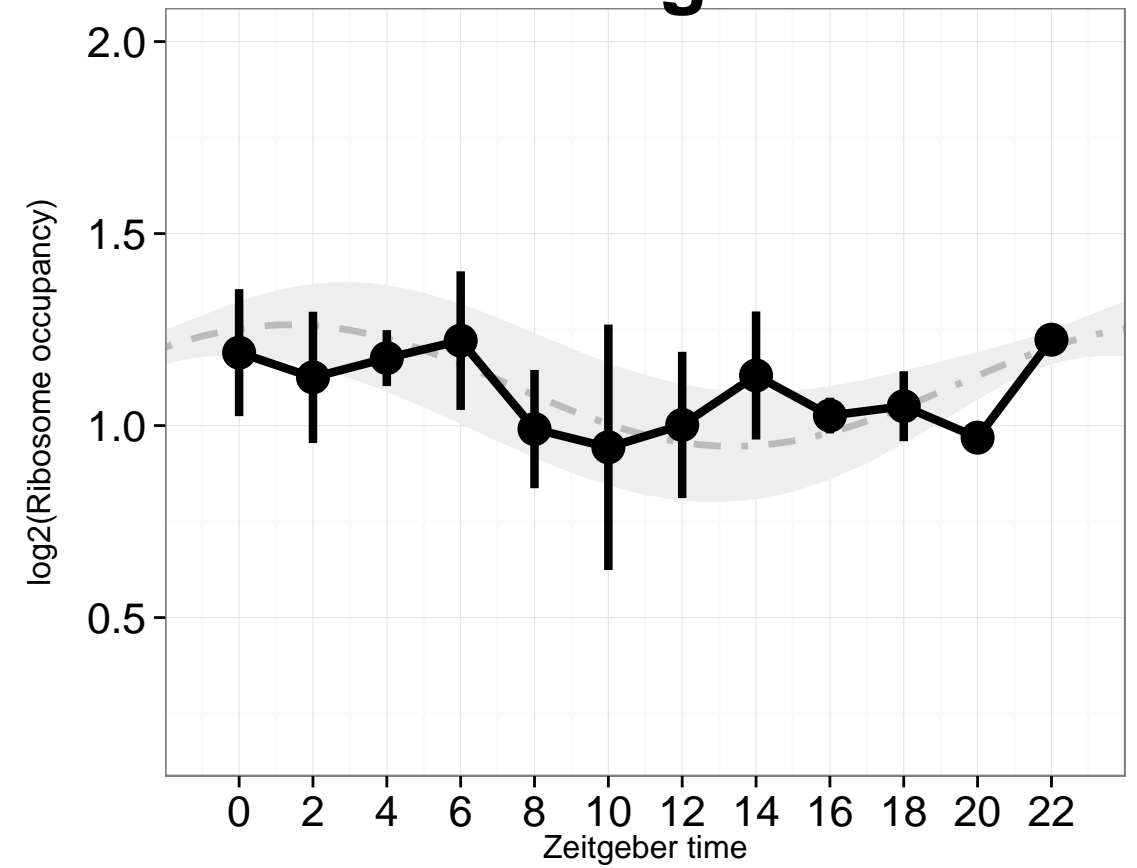

Supplement: SuppDataset_1.zip [file Tfg_set_A.pdf › Supplemental Dataset 1/A-mRNA_nonrhyth_translation_nonrhyth/Tfg_set_A.pdf]

# Tfip11

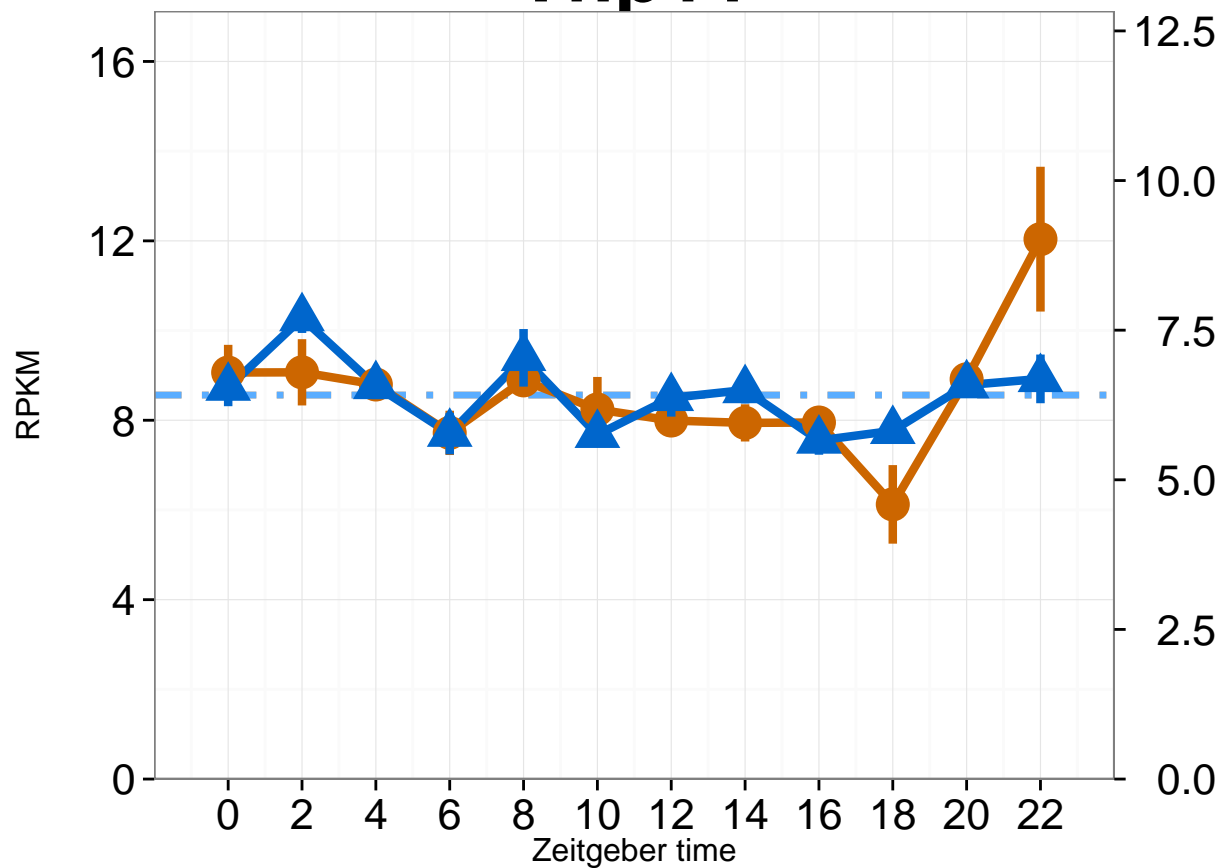

# Tfip11

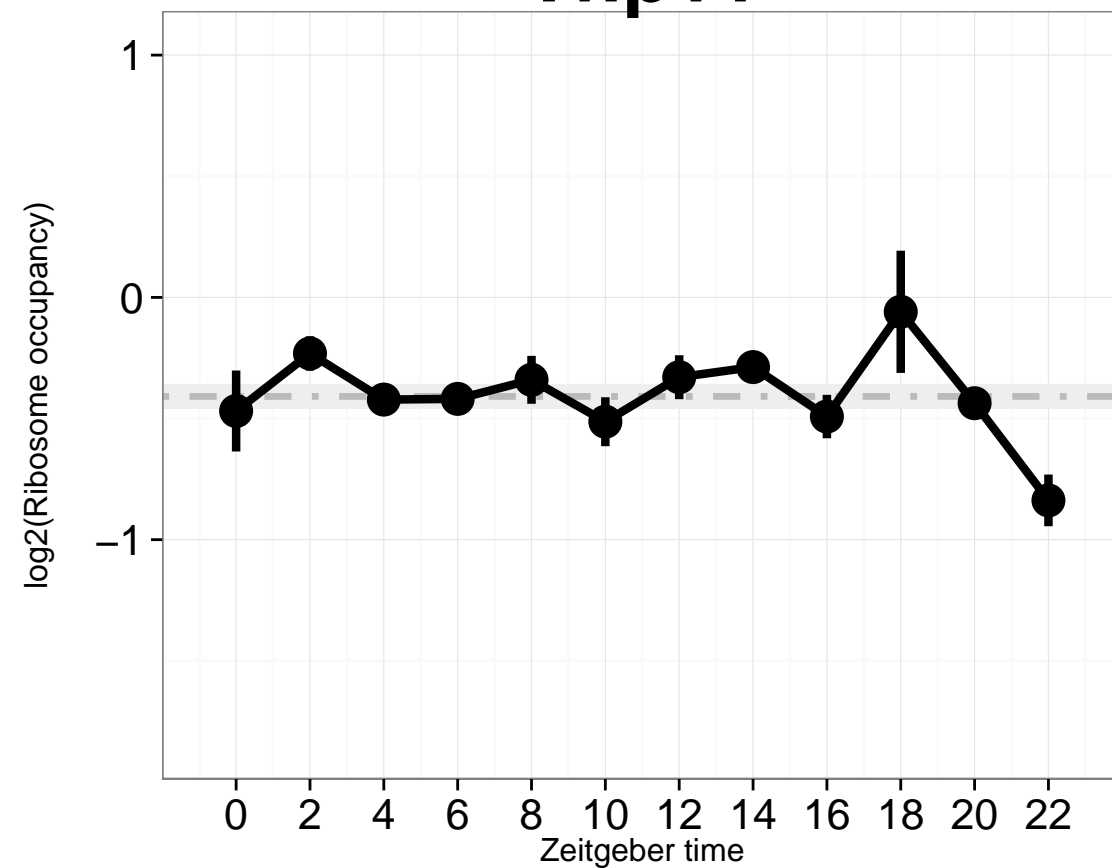

Supplement: SuppDataset_1.zip [file Tfip11_set_A.pdf › Supplemental Dataset 1/A-mRNA_nonrhyth_translation_nonrhyth/Tfip11_set_A.pdf]

## Tfpi

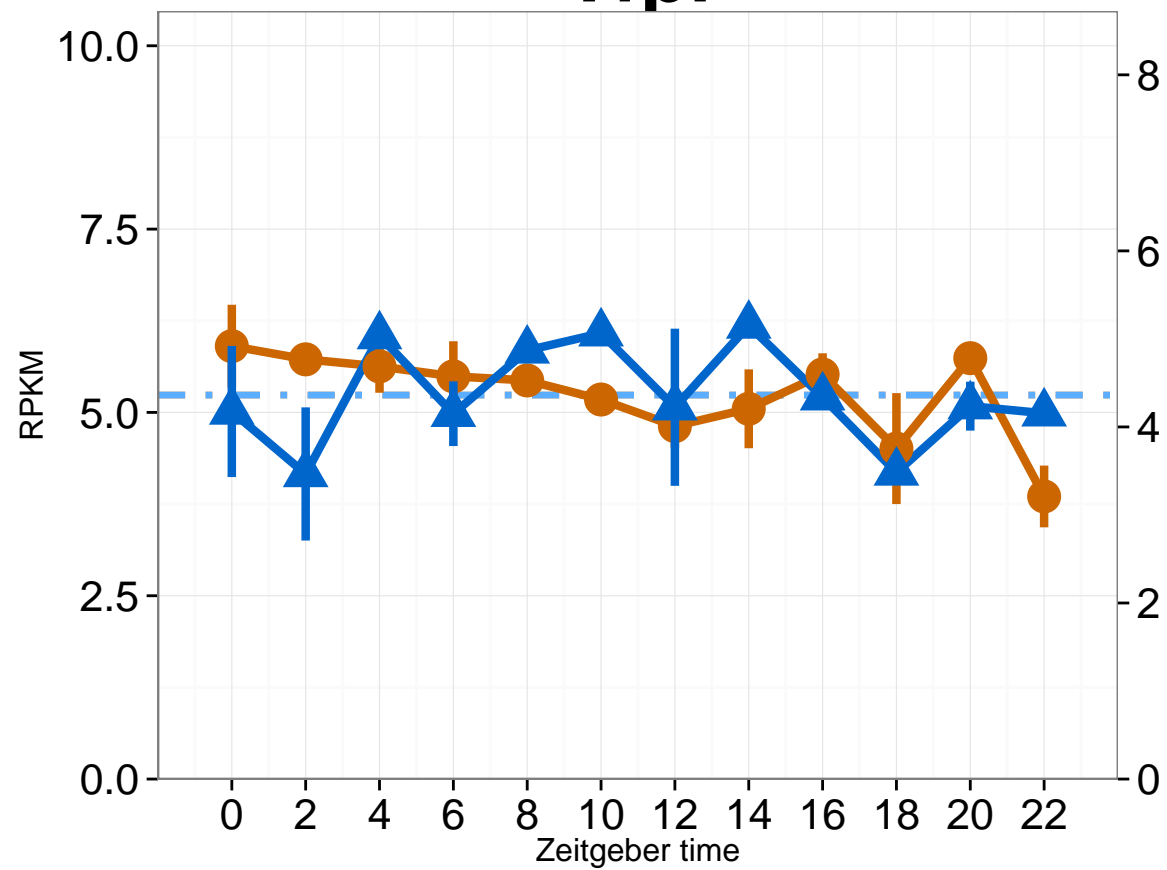

## Tfpi

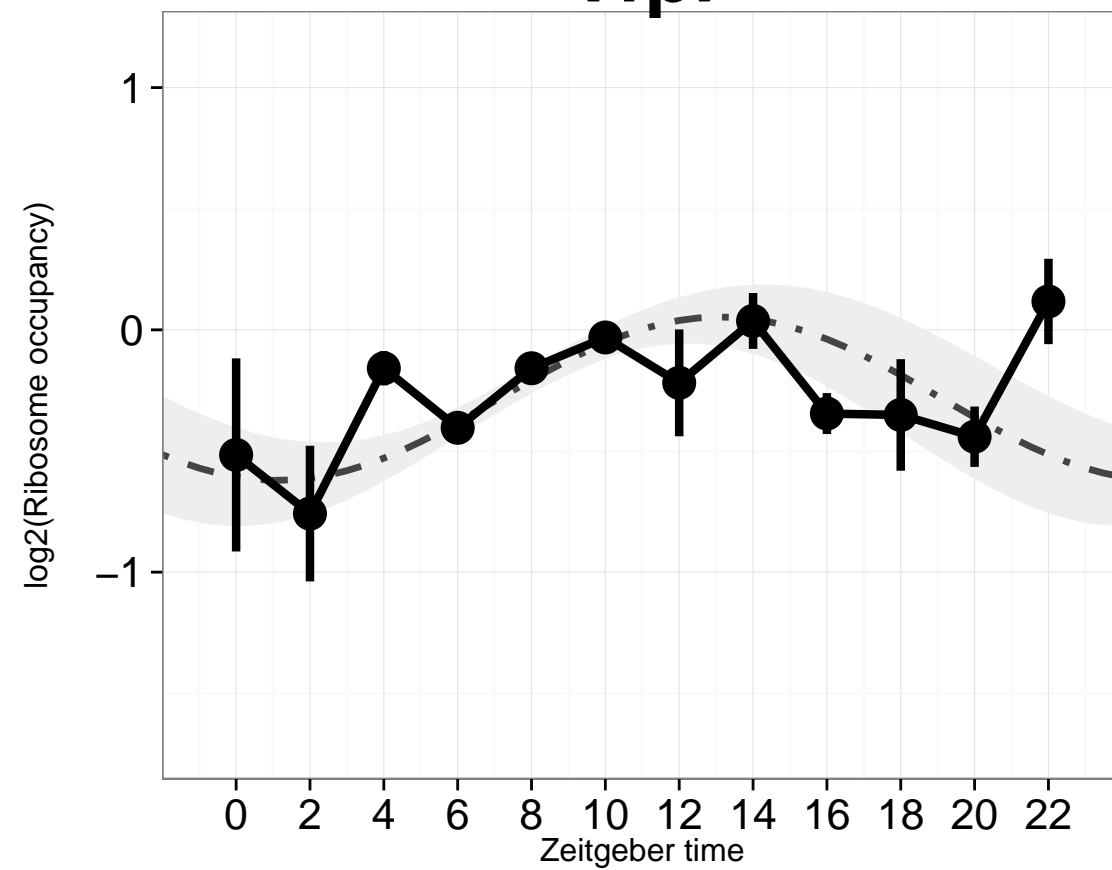

Supplement: SuppDataset_1.zip [file Tfpi_set_A.pdf › Supplemental Dataset 1/A-mRNA_nonrhyth_translation_nonrhyth/Tfpi_set_A.pdf]

## Tfpt

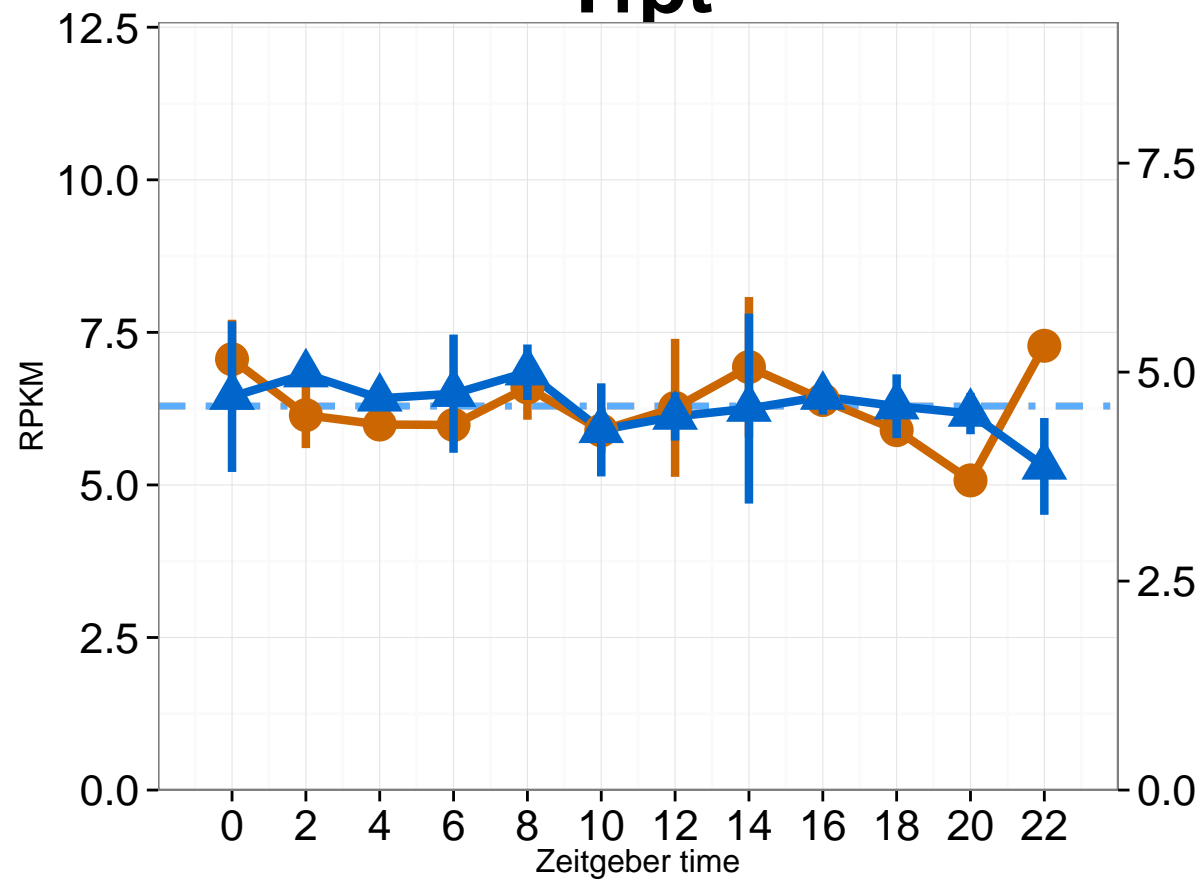

## Tfpt

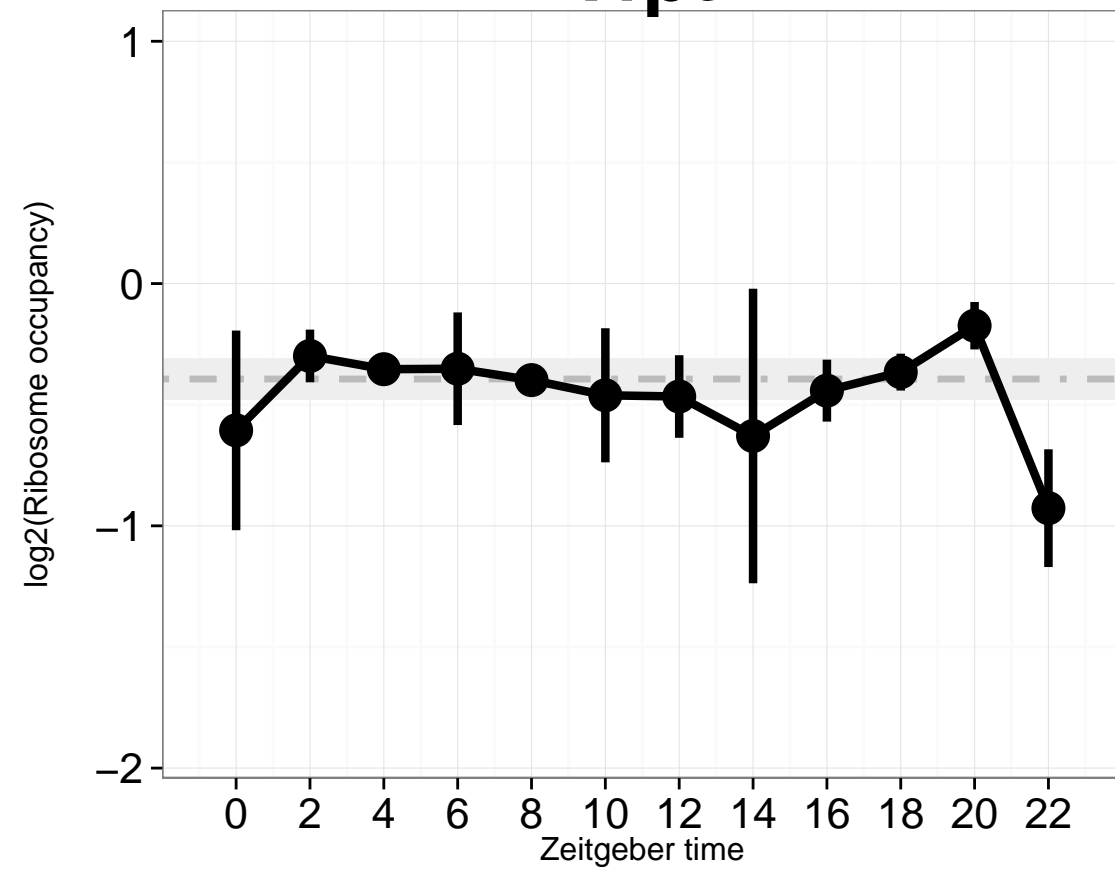

Supplement: SuppDataset_1.zip [file Tfpt_set_A.pdf › Supplemental Dataset 1/A-mRNA_nonrhyth_translation_nonrhyth/Tfpt_set_A.pdf]

## Tfr2

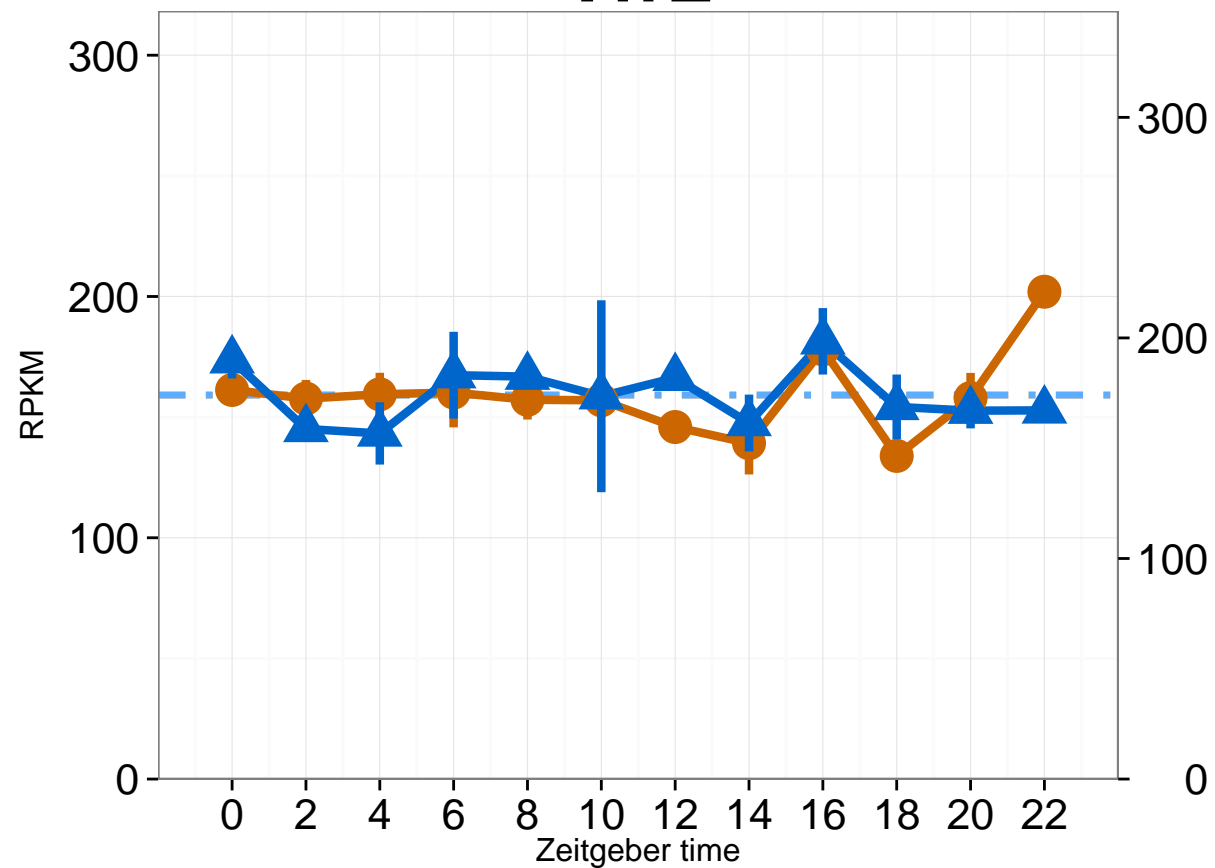

## Tfr2

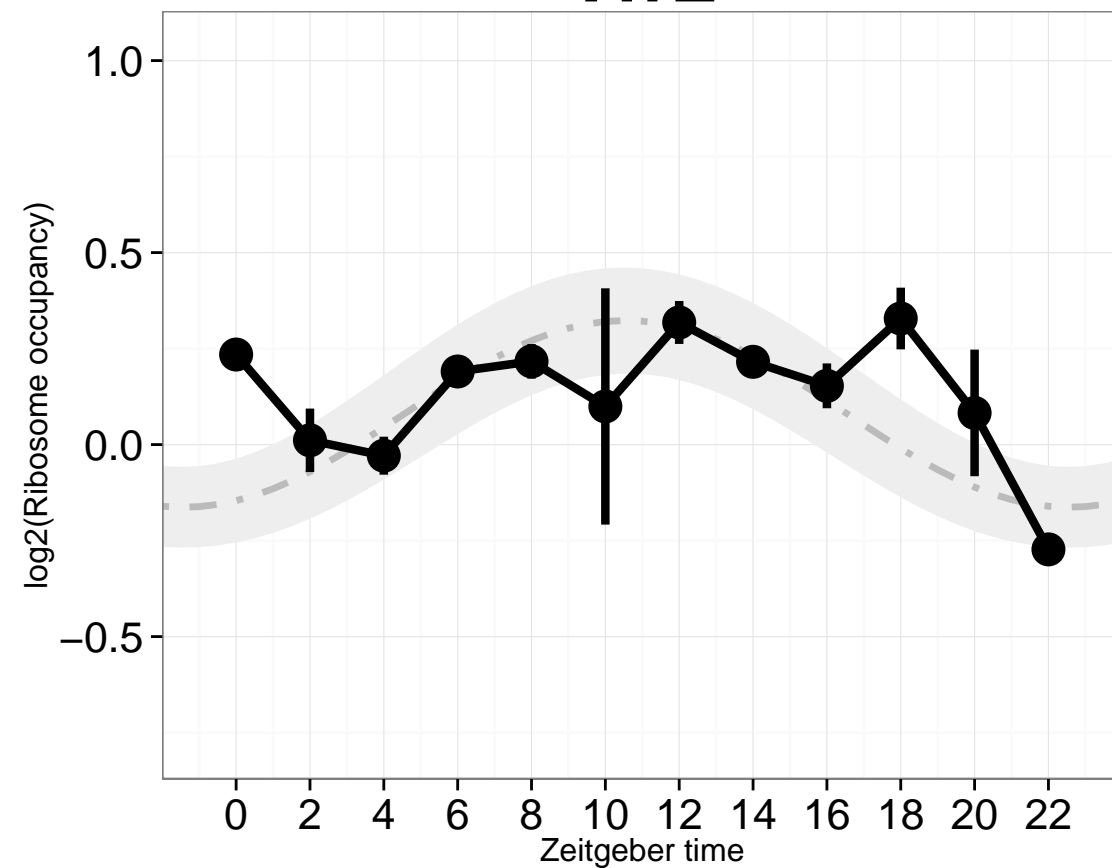

Supplement: SuppDataset_1.zip [file Tfr2_set_A.pdf › Supplemental Dataset 1/A-mRNA_nonrhyth_translation_nonrhyth/Tfr2_set_A.pdf]

## Tgds

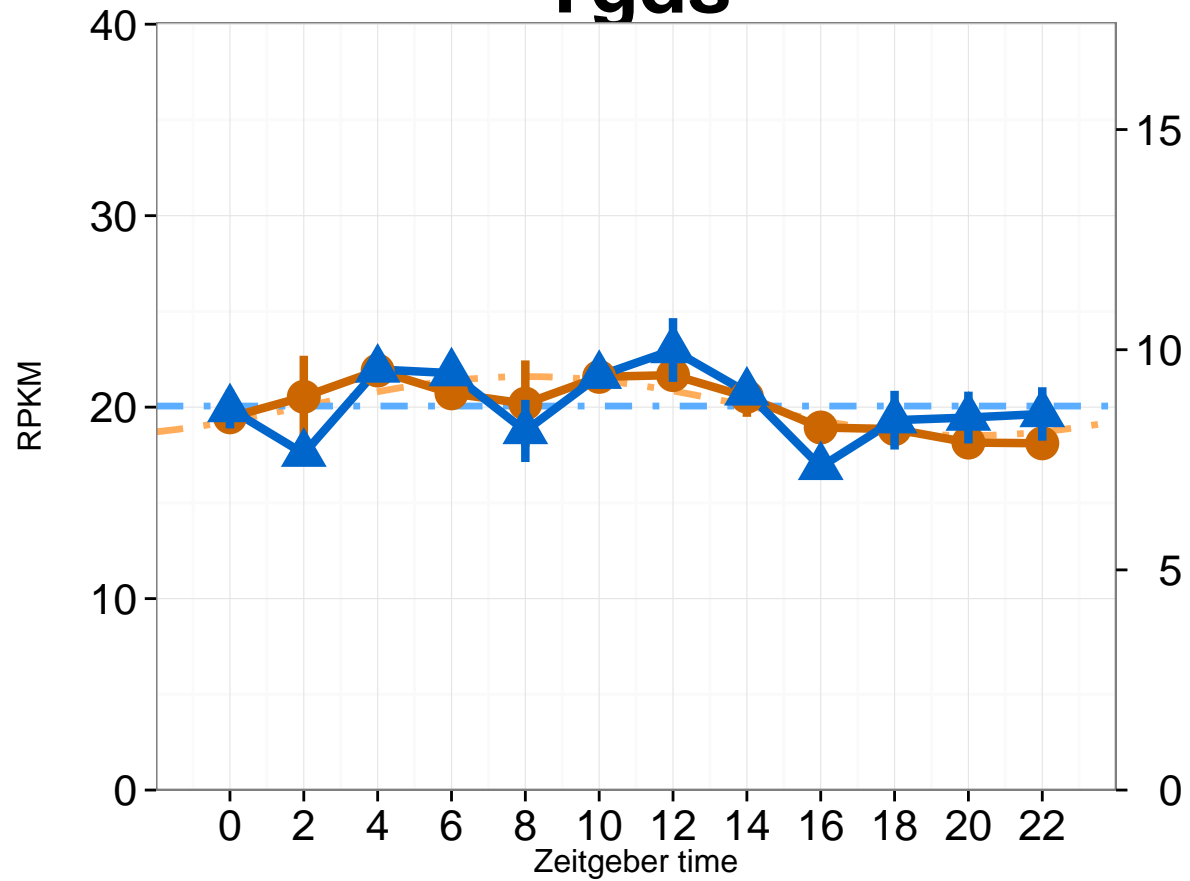

## Tgds

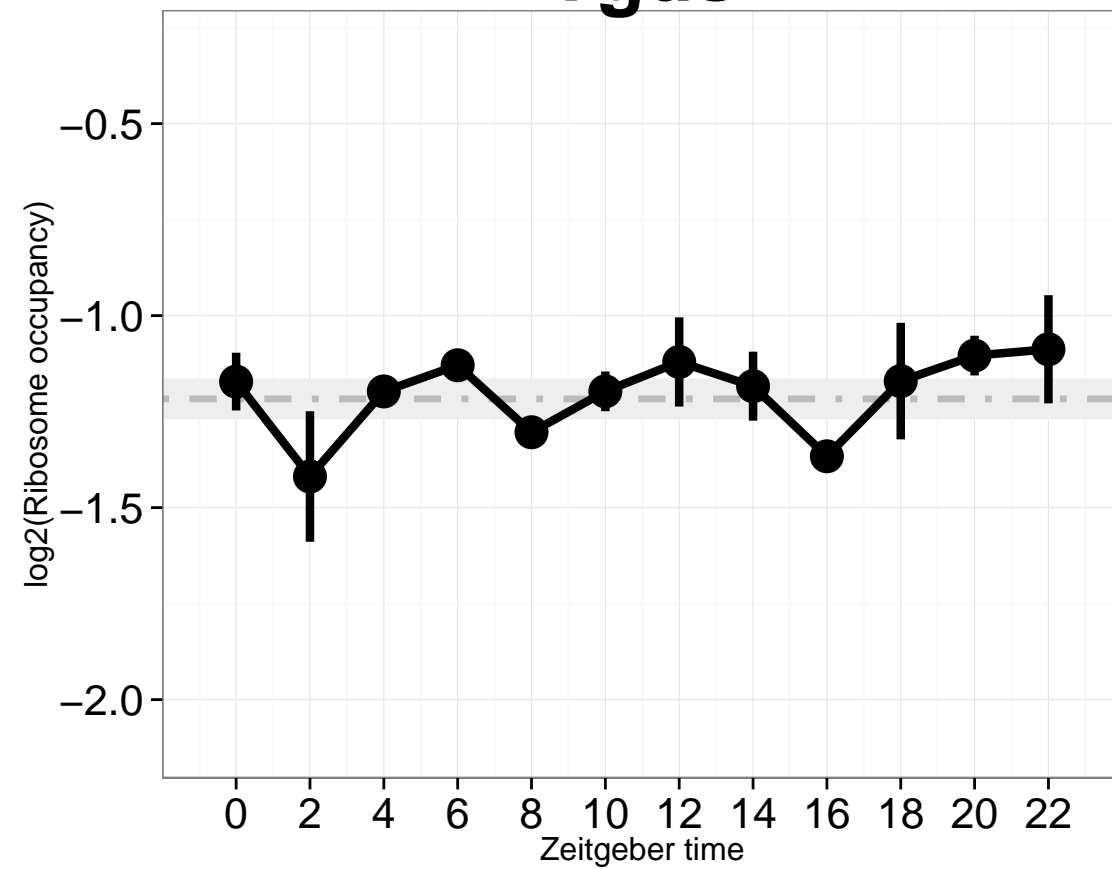

Supplement: SuppDataset_1.zip [file Tgds_set_A.pdf › Supplemental Dataset 1/A-mRNA_nonrhyth_translation_nonrhyth/Tgds_set_A.pdf]

## Tgfa

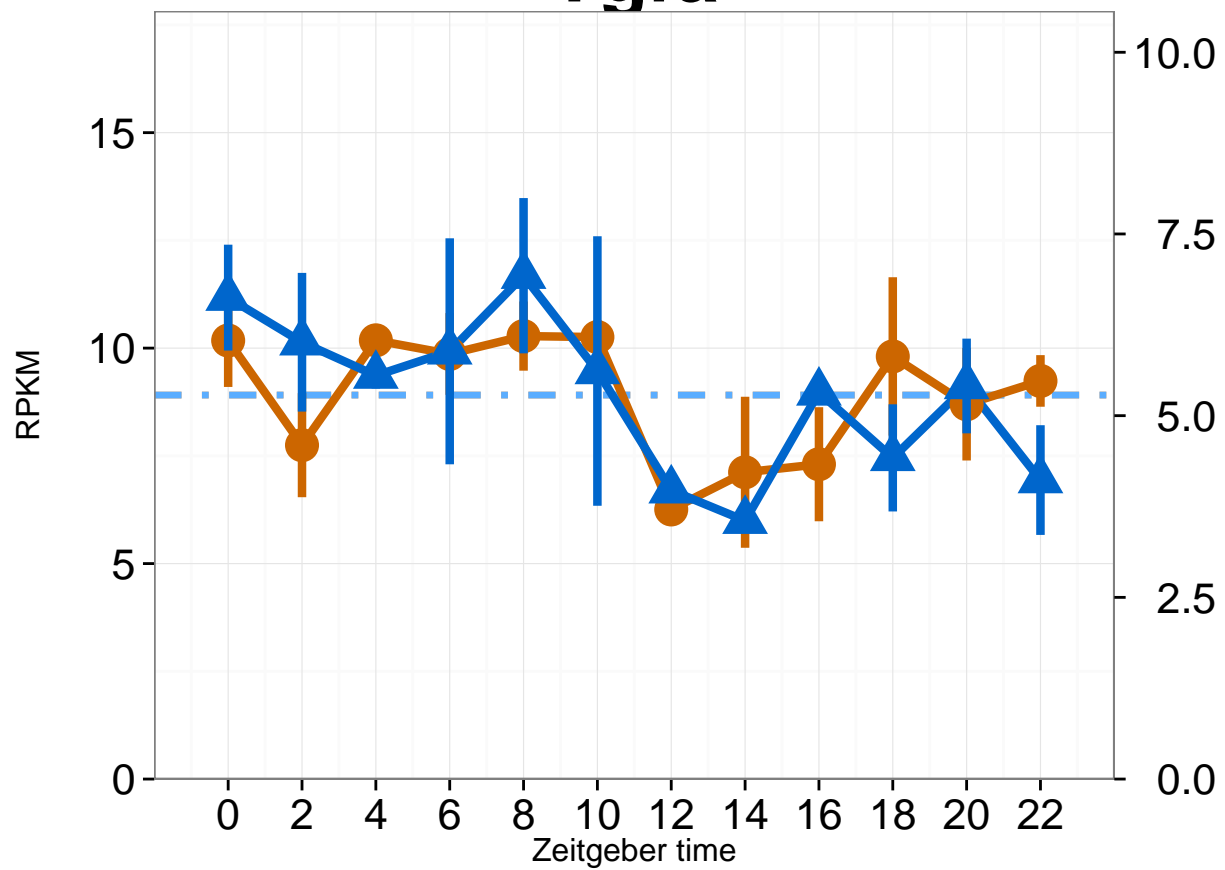

## Tgfa

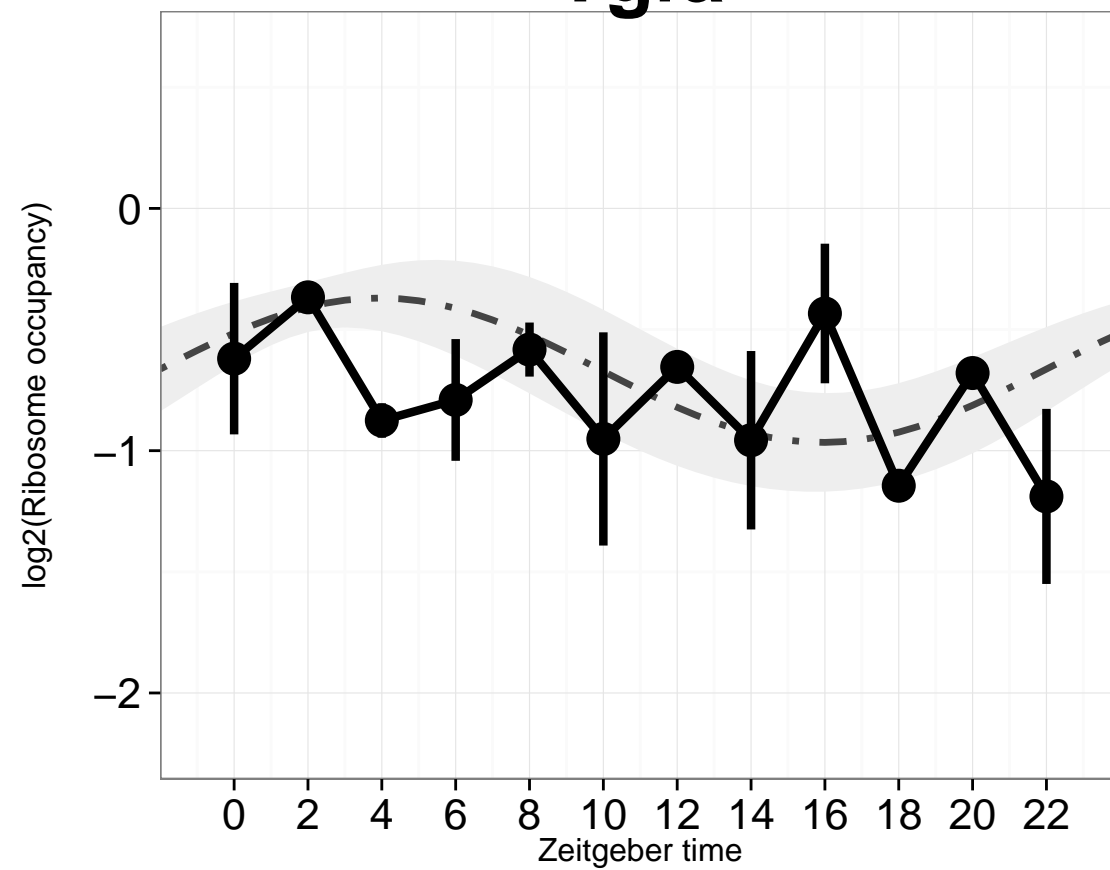

Supplement: SuppDataset_1.zip [file Tgfa_set_A.pdf › Supplemental Dataset 1/A-mRNA_nonrhyth_translation_nonrhyth/Tgfa_set_A.pdf]

## Tgfb1

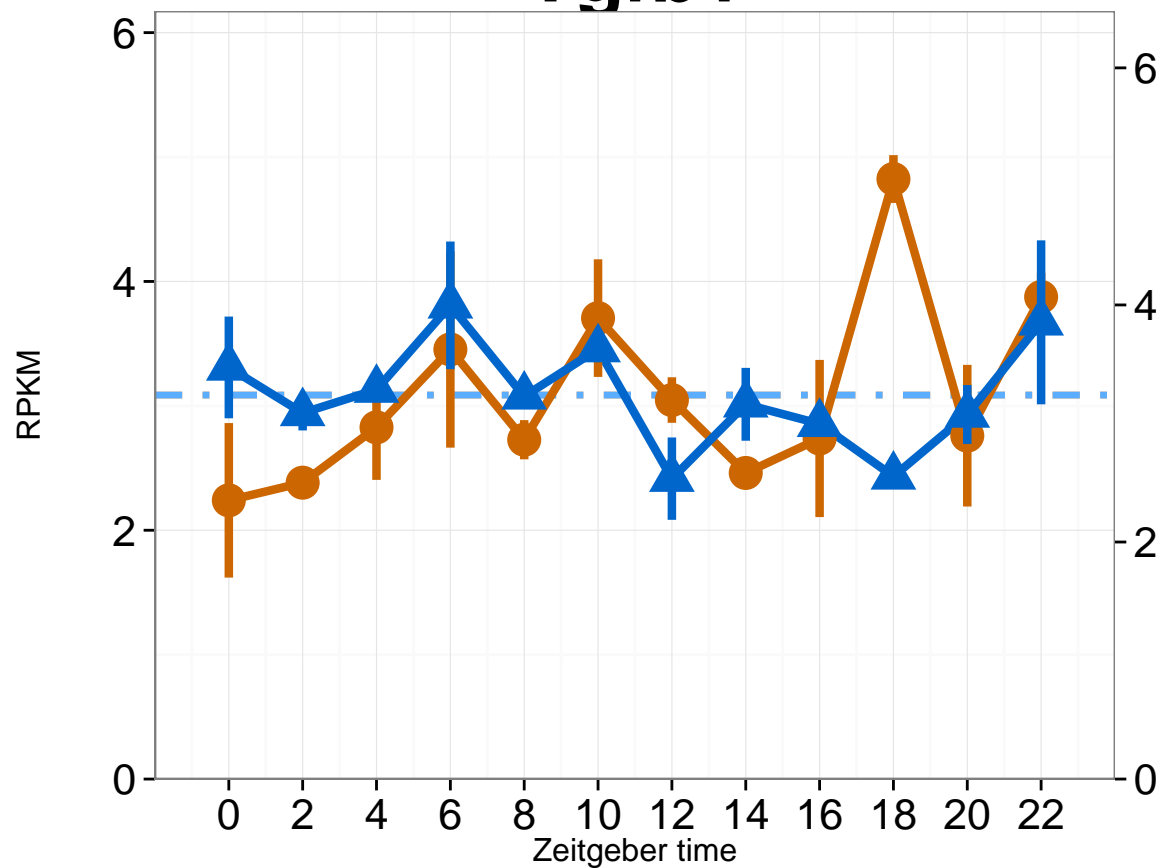

## Tgfb1

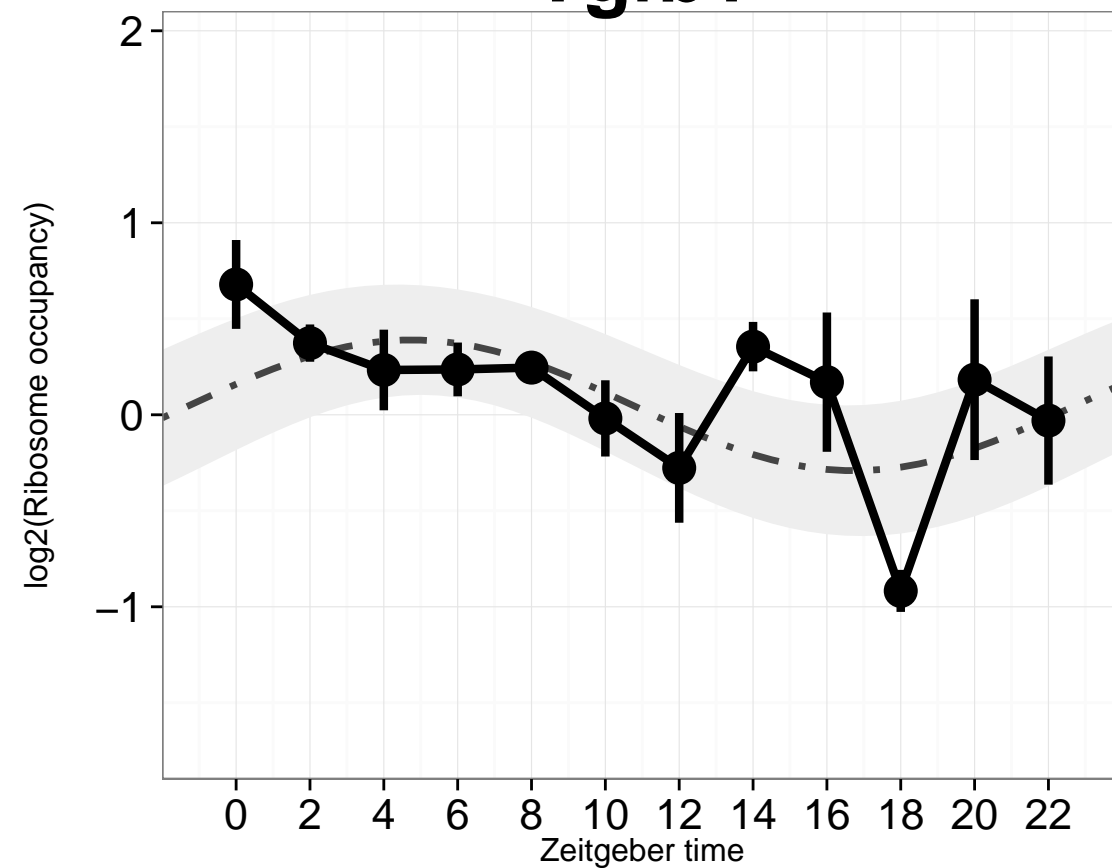

Supplement: SuppDataset_1.zip [file Tgfb1_set_A.pdf › Supplemental Dataset 1/A-mRNA_nonrhyth_translation_nonrhyth/Tgfb1_set_A.pdf]

# Tgfb1i1

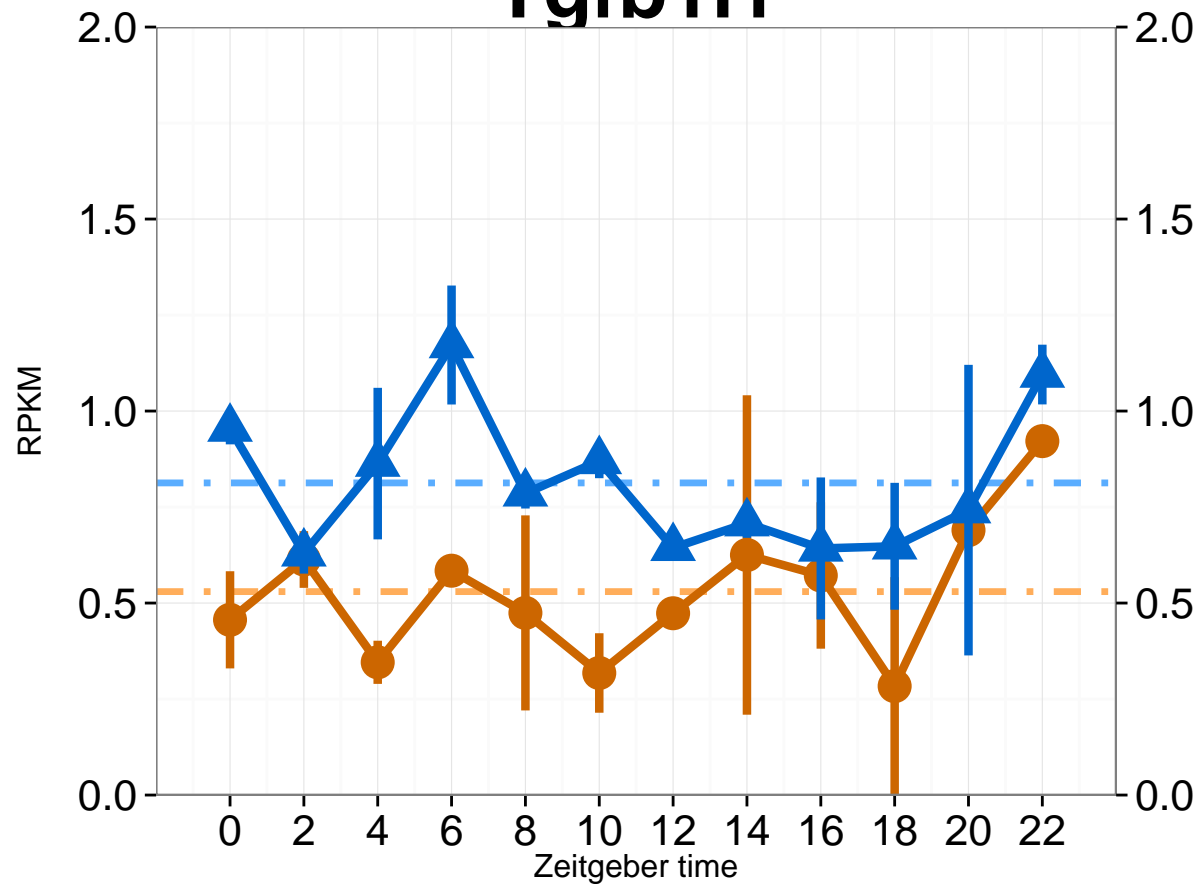

# Tgfb1i1

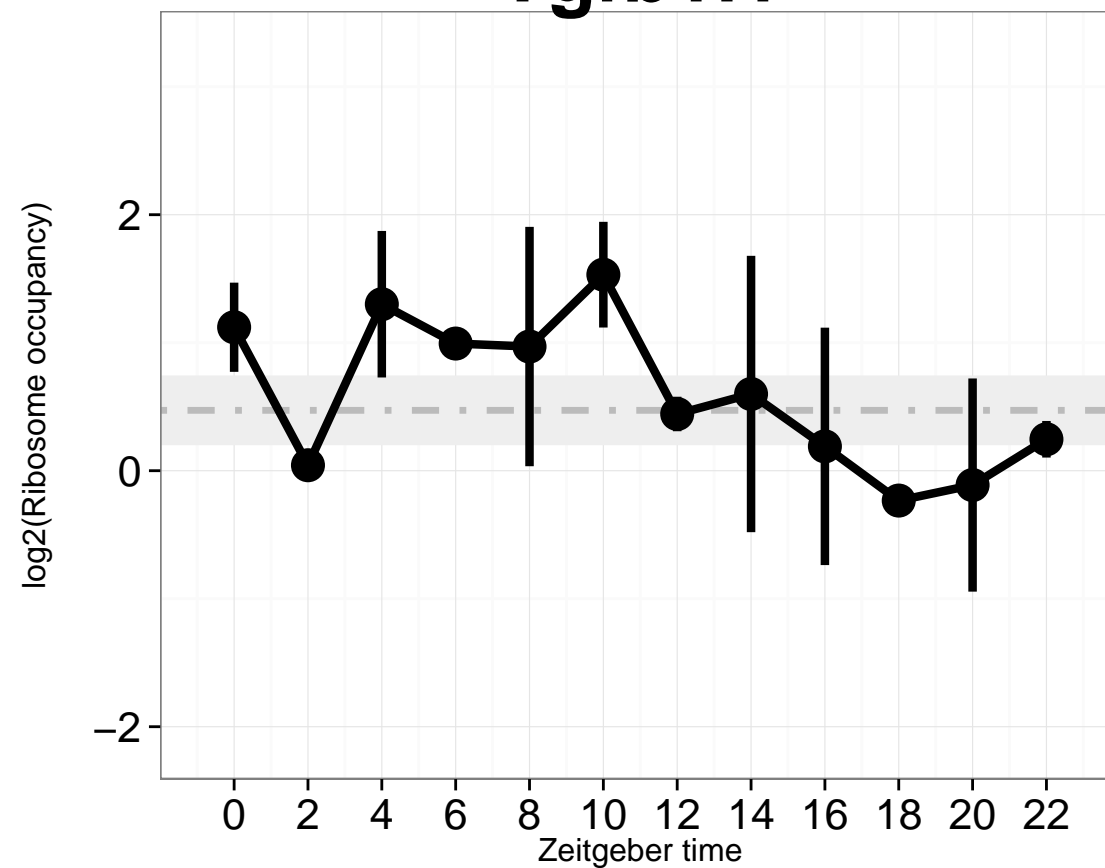

Supplement: SuppDataset_1.zip [file Tgfb1i1_set_A.pdf › Supplemental Dataset 1/A-mRNA_nonrhyth_translation_nonrhyth/Tgfb1i1_set_A.pdf]

## Tgfb1

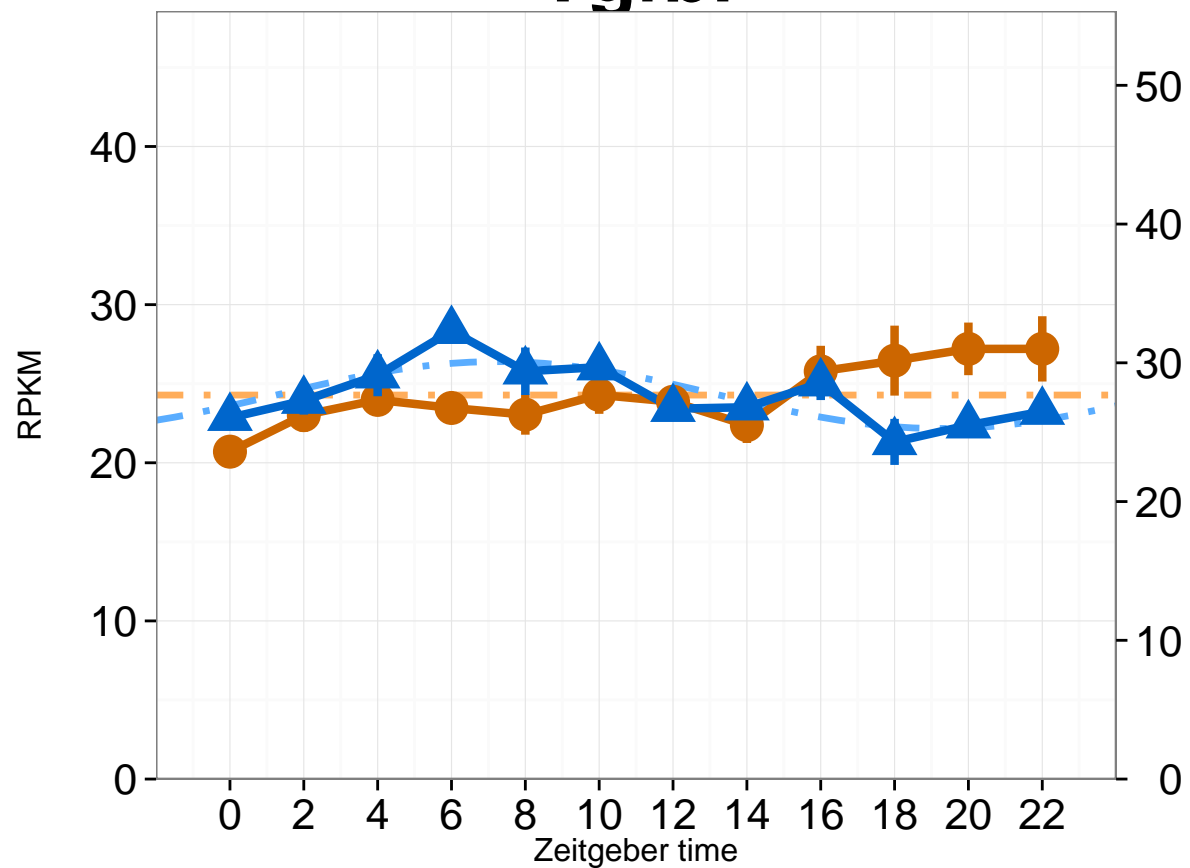

## Tgfb1

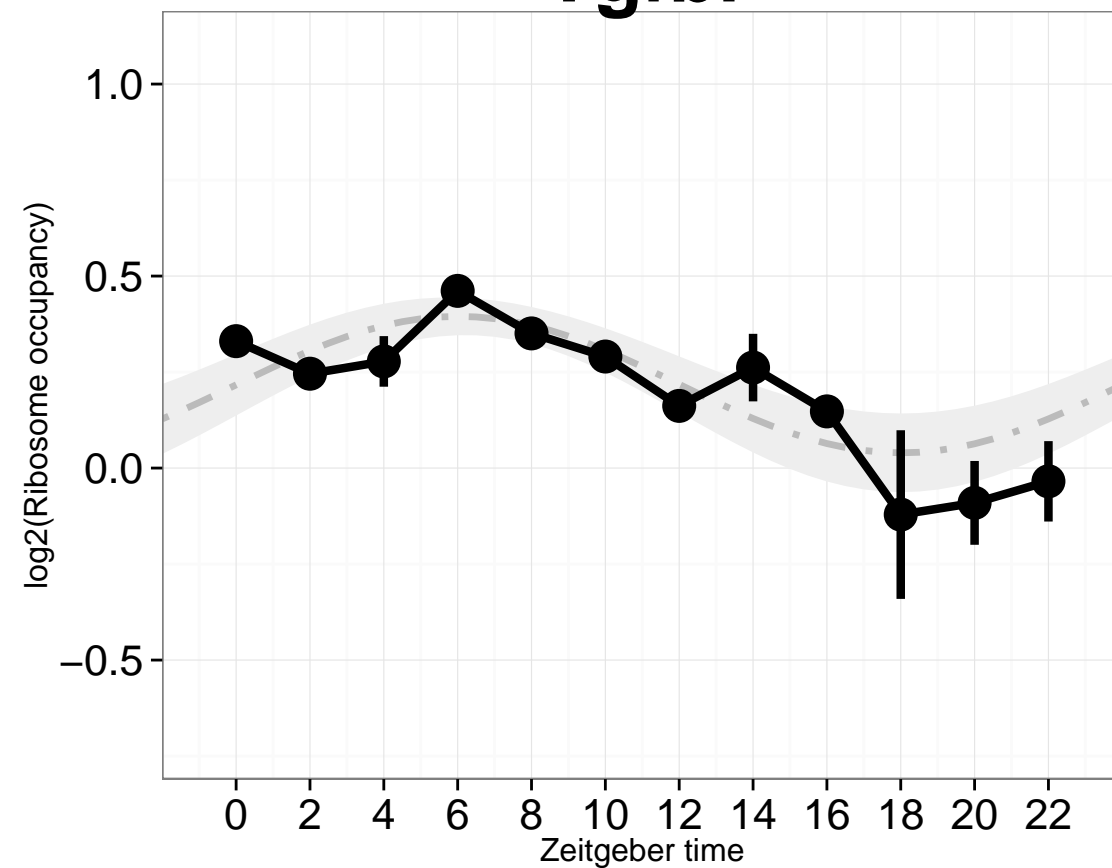

Supplement: SuppDataset_1.zip [file Tgfbi_set_A.pdf › Supplemental Dataset 1/A-mRNA_nonrhyth_translation_nonrhyth/Tgfbi_set_A.pdf]

## Tgfbr2

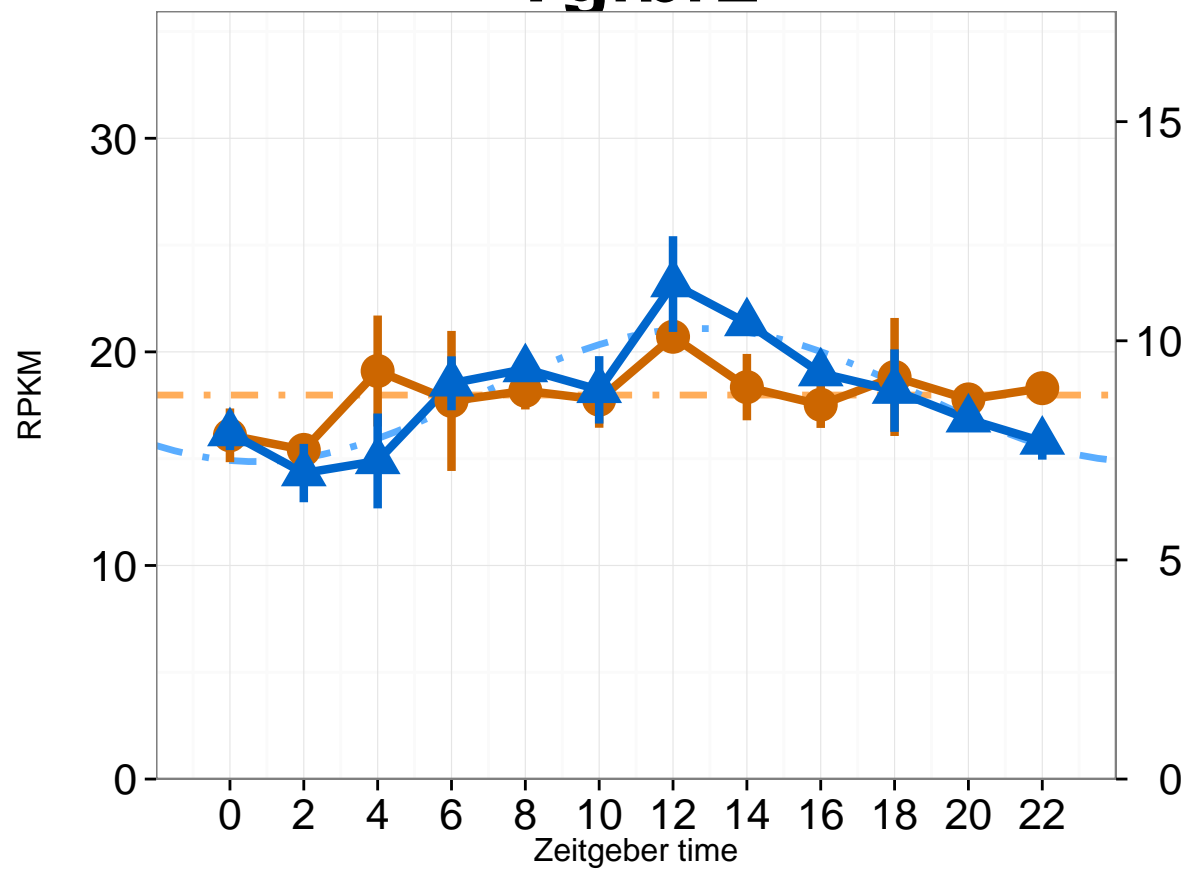

## Tgfbr2

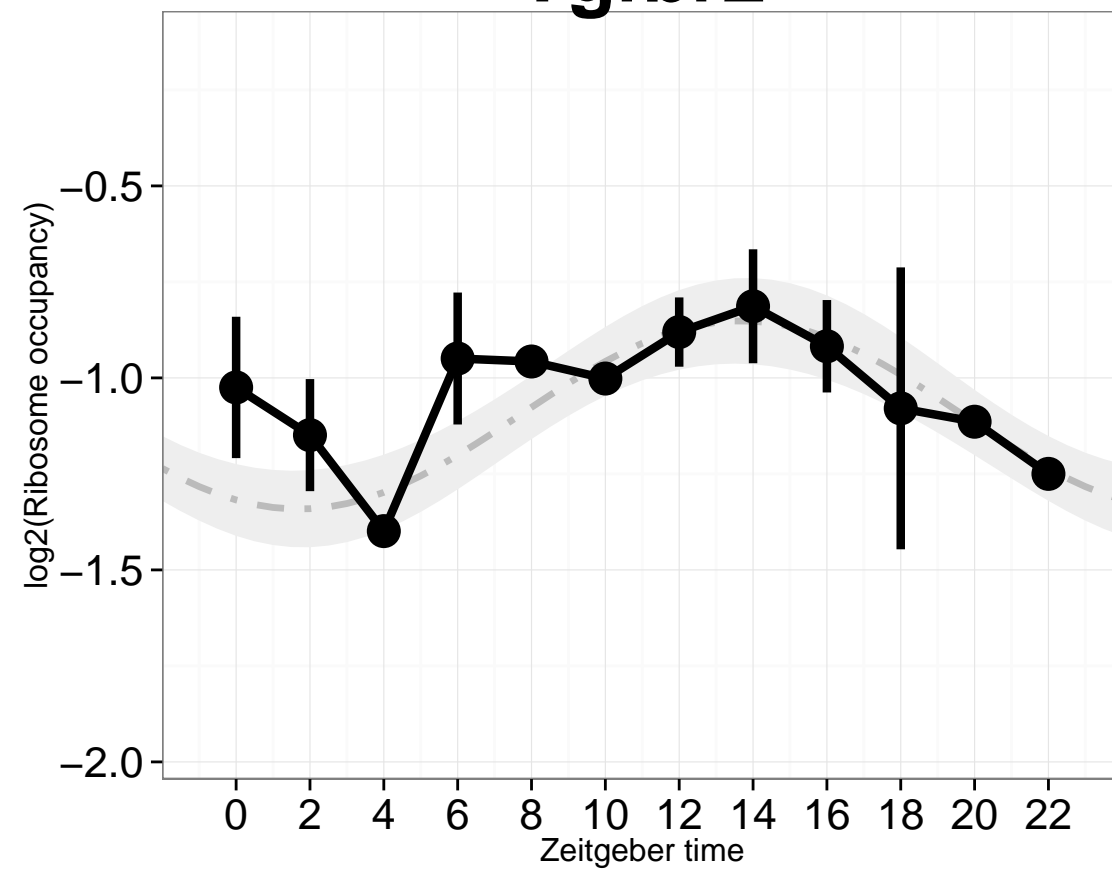

Supplement: SuppDataset_1.zip [file Tgfbr2_set_A.pdf › Supplemental Dataset 1/A-mRNA_nonrhyth_translation_nonrhyth/Tgfbr2_set_A.pdf]

# Tgfbrap1

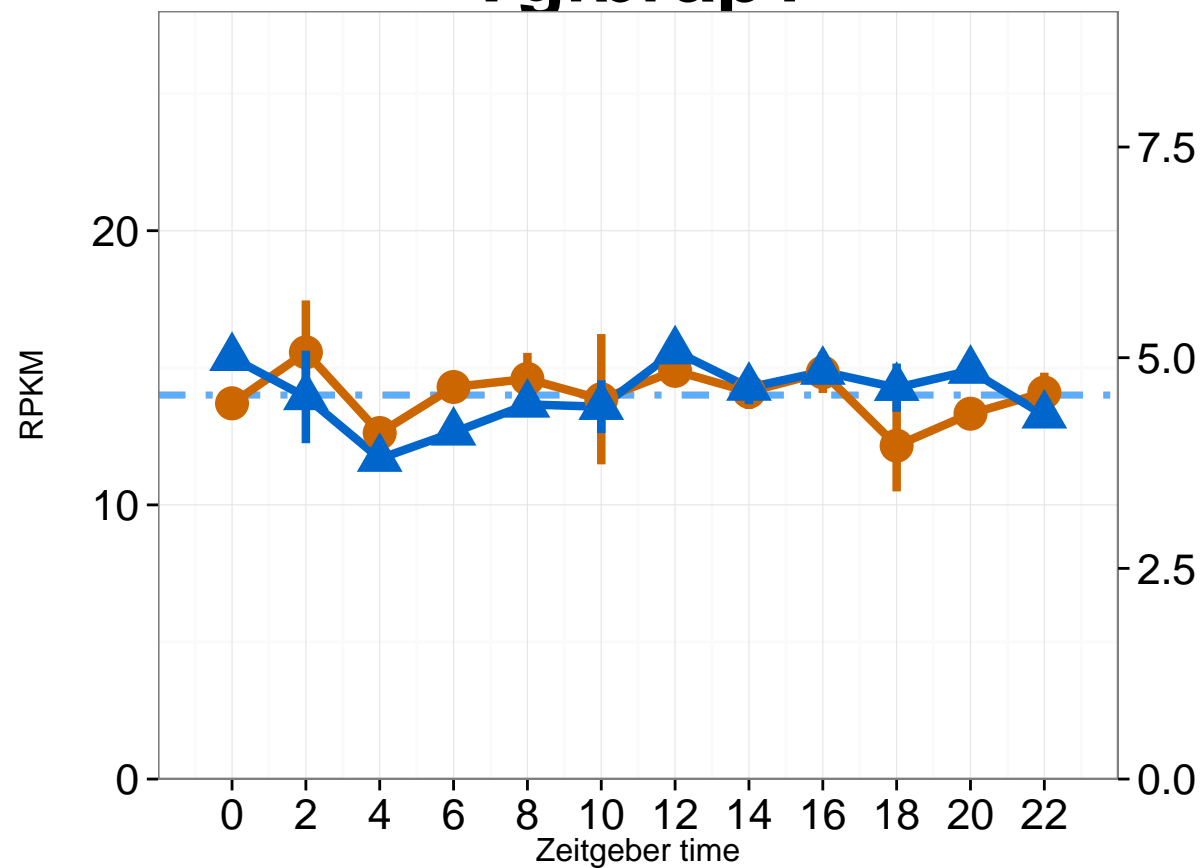

# Tgfbrap1

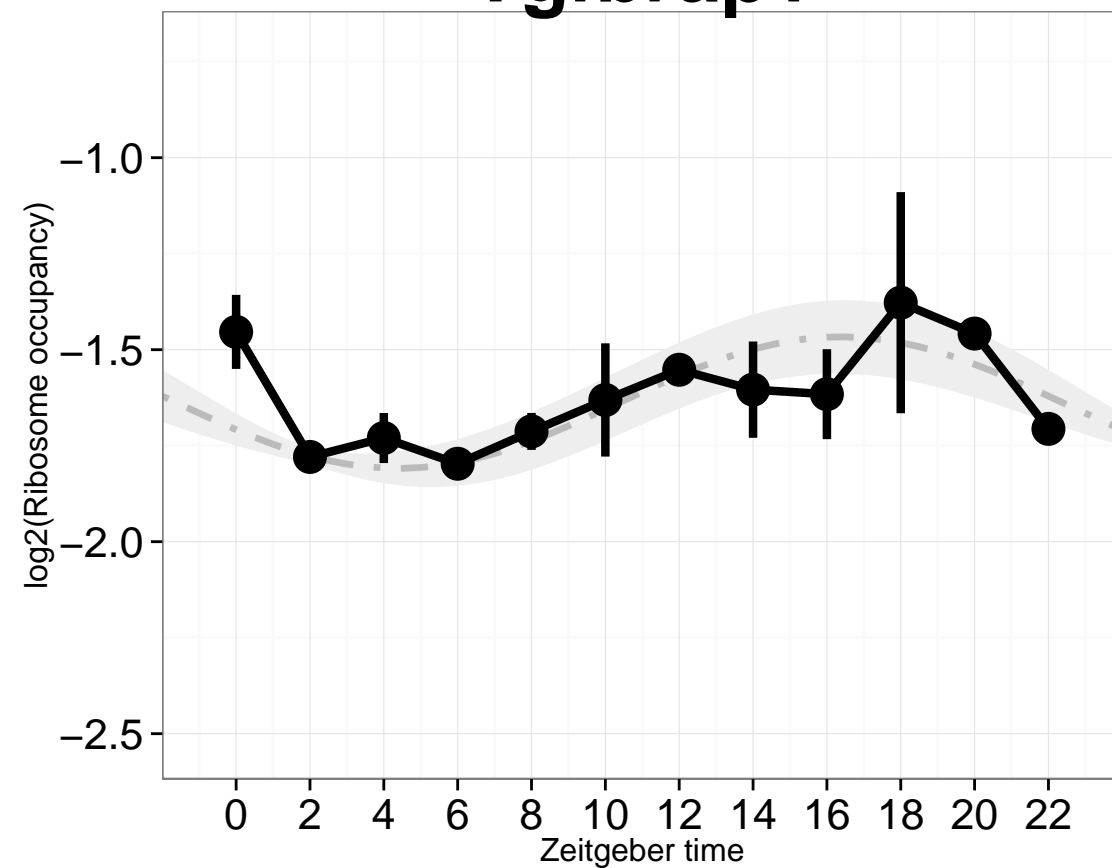

Supplement: SuppDataset_1.zip [file Tgfbrap1_set_A.pdf › Supplemental Dataset 1/A-mRNA_nonrhyth_translation_nonrhyth/Tgfbrap1_set_A.pdf]

## Tgif1

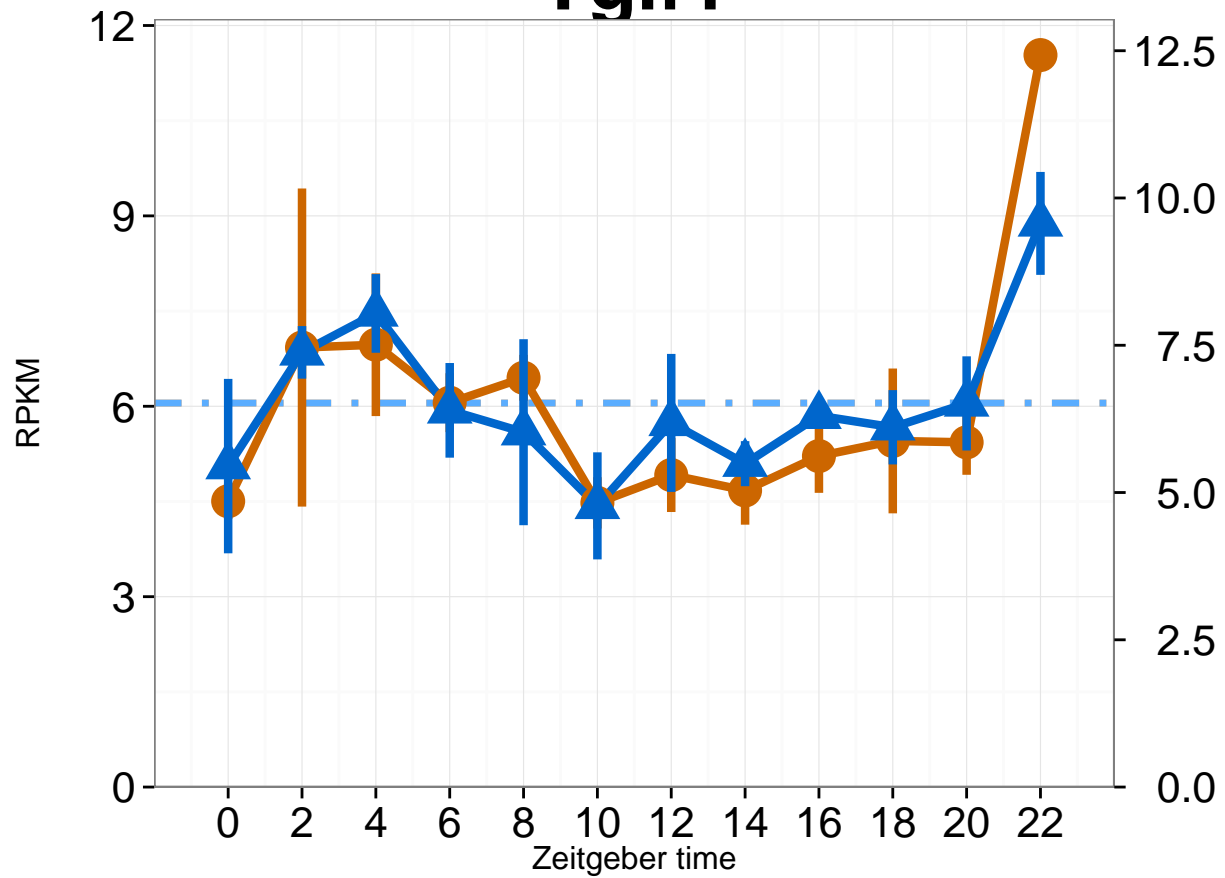

## Tgif1

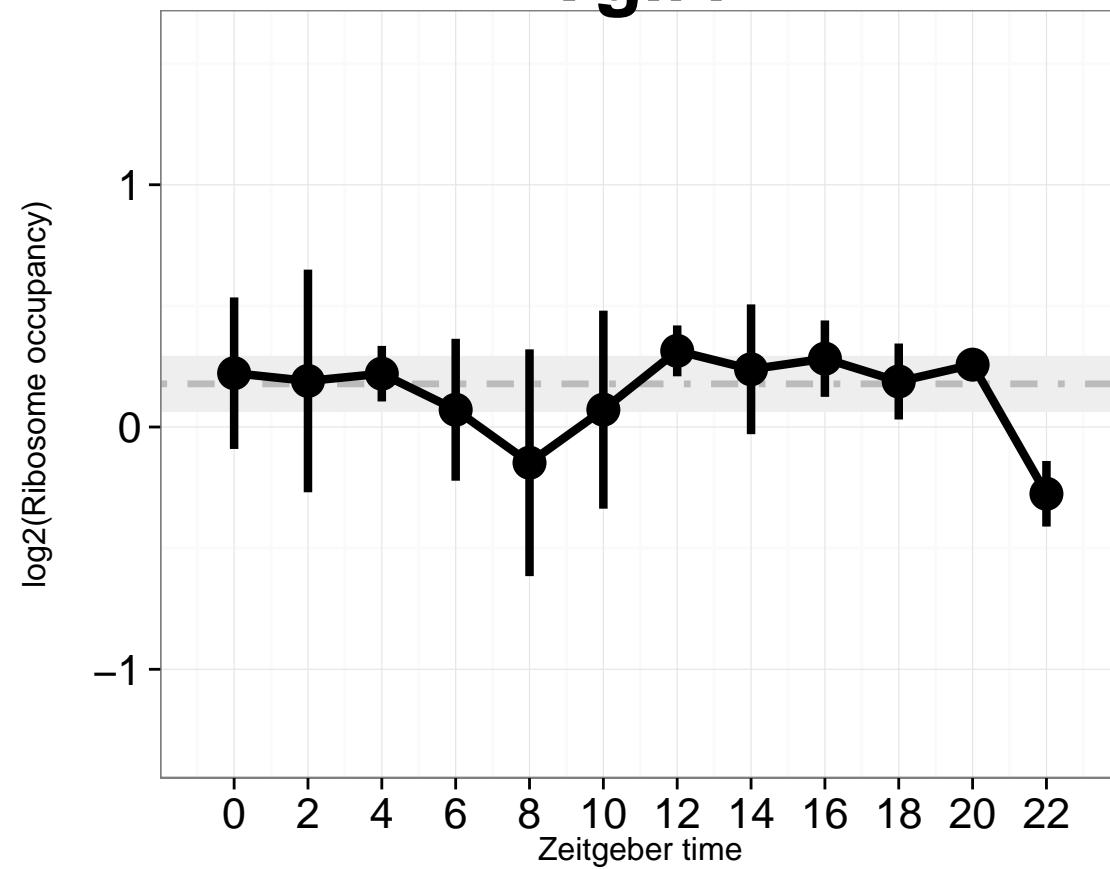

Supplement: SuppDataset_1.zip [file Tgif1_set_A.pdf › Supplemental Dataset 1/A-mRNA_nonrhyth_translation_nonrhyth/Tgif1_set_A.pdf]

## Tgs1

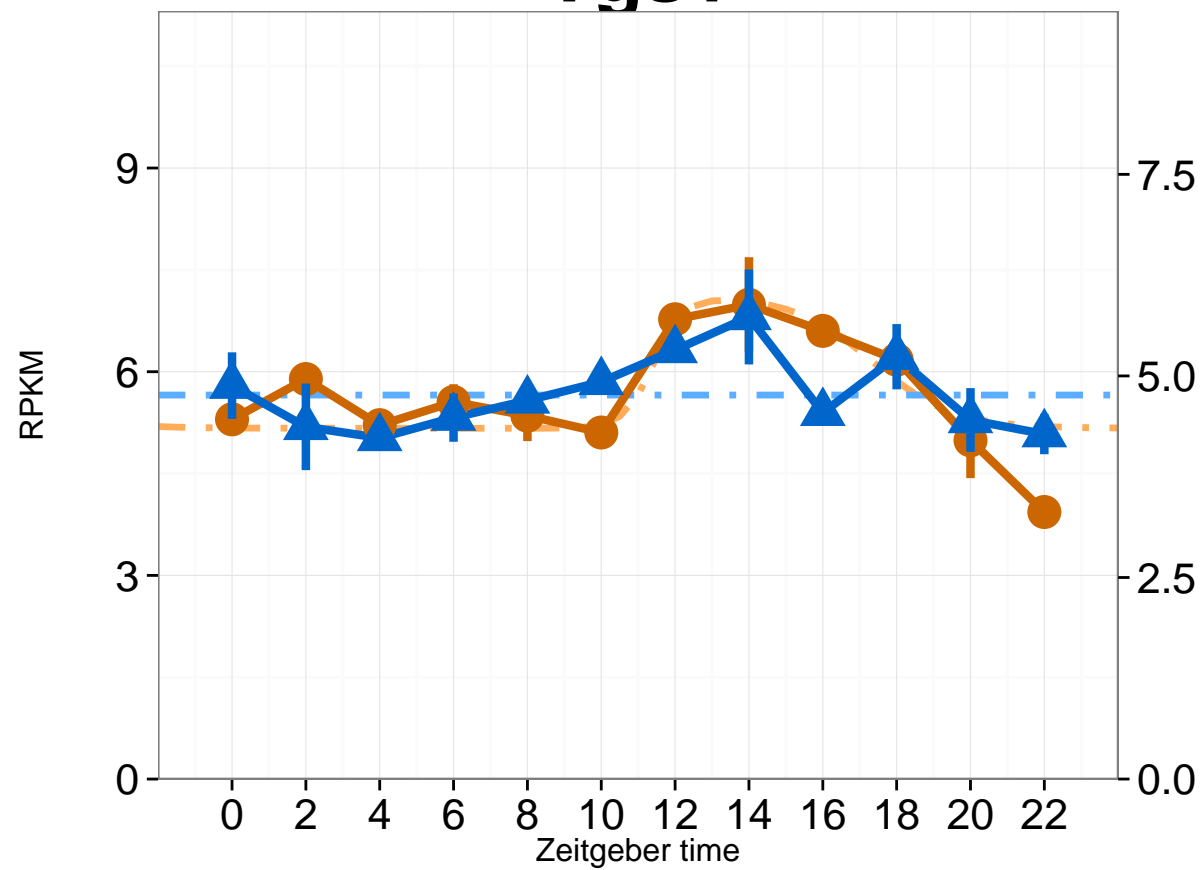

## Tgs1

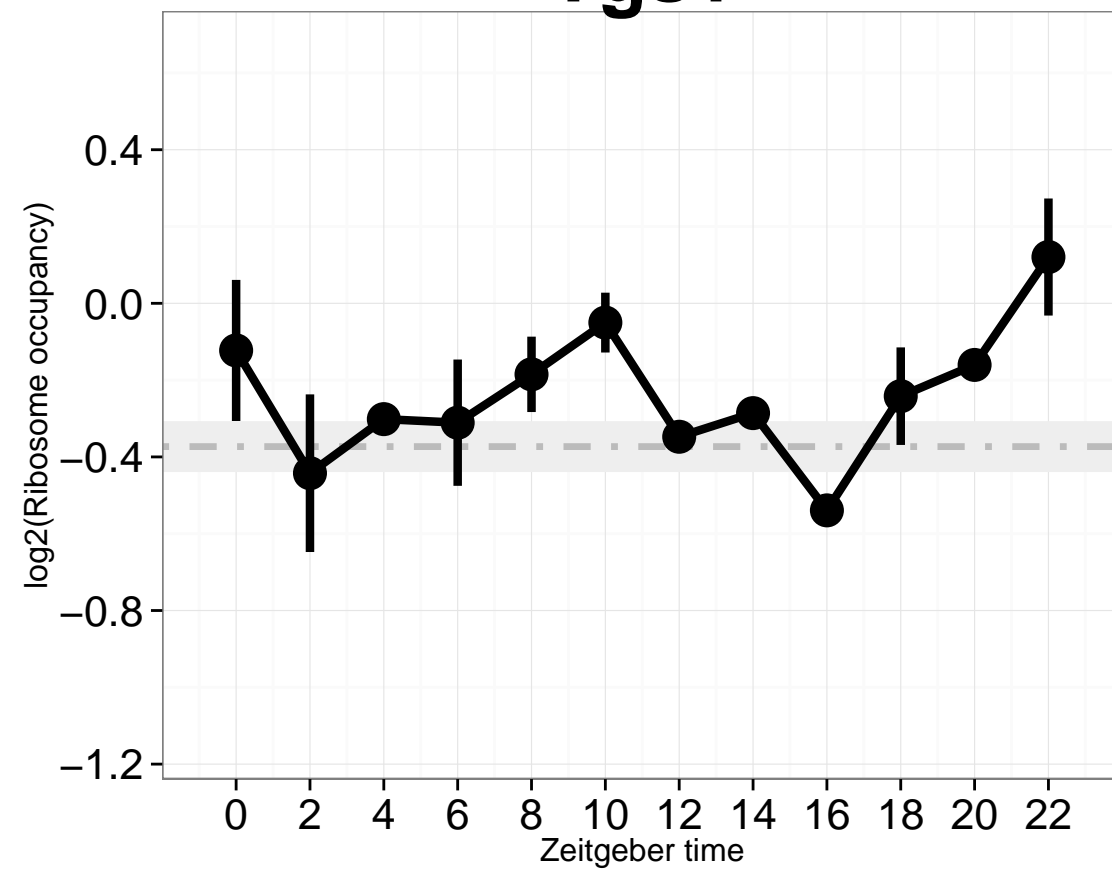

Supplement: SuppDataset_1.zip [file Tgs1_set_A.pdf › Supplemental Dataset 1/A-mRNA_nonrhyth_translation_nonrhyth/Tgs1_set_A.pdf]

# Tgtp2

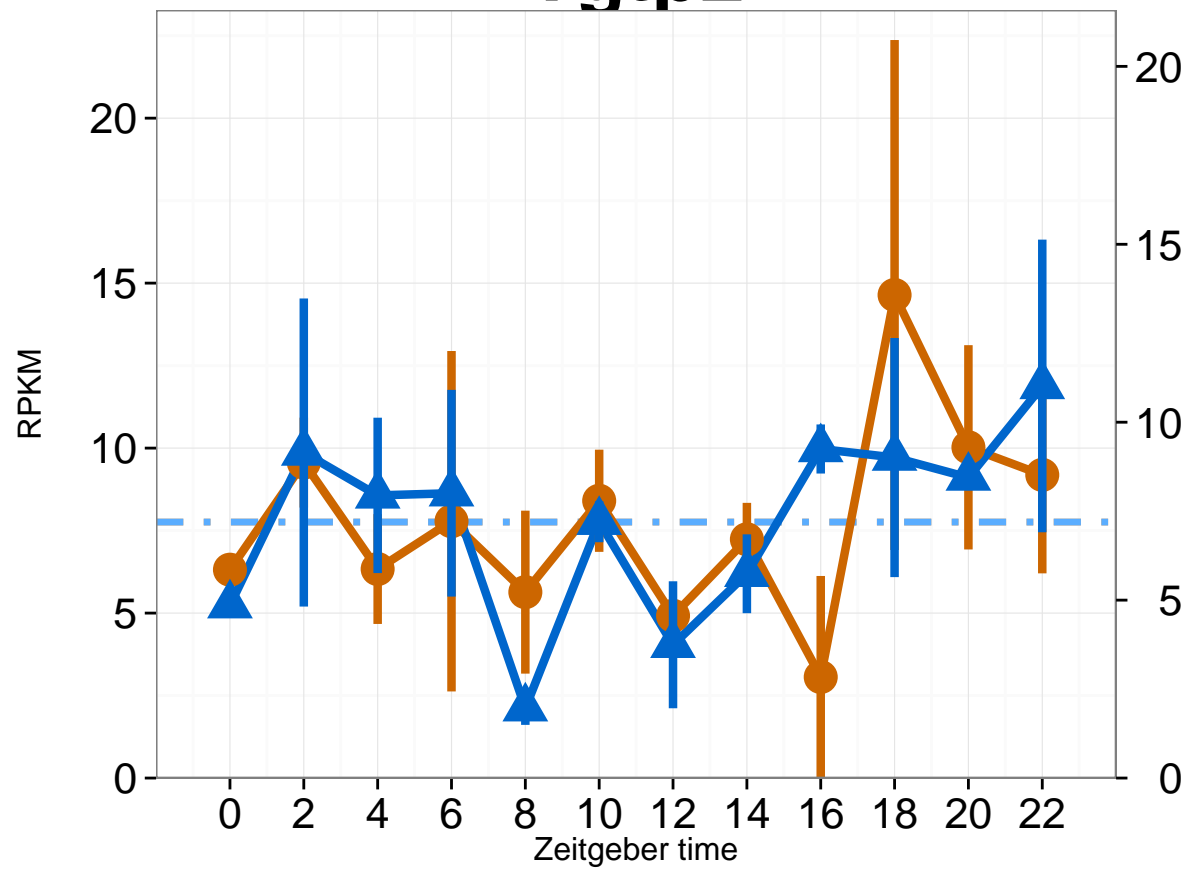

# Tgtp2

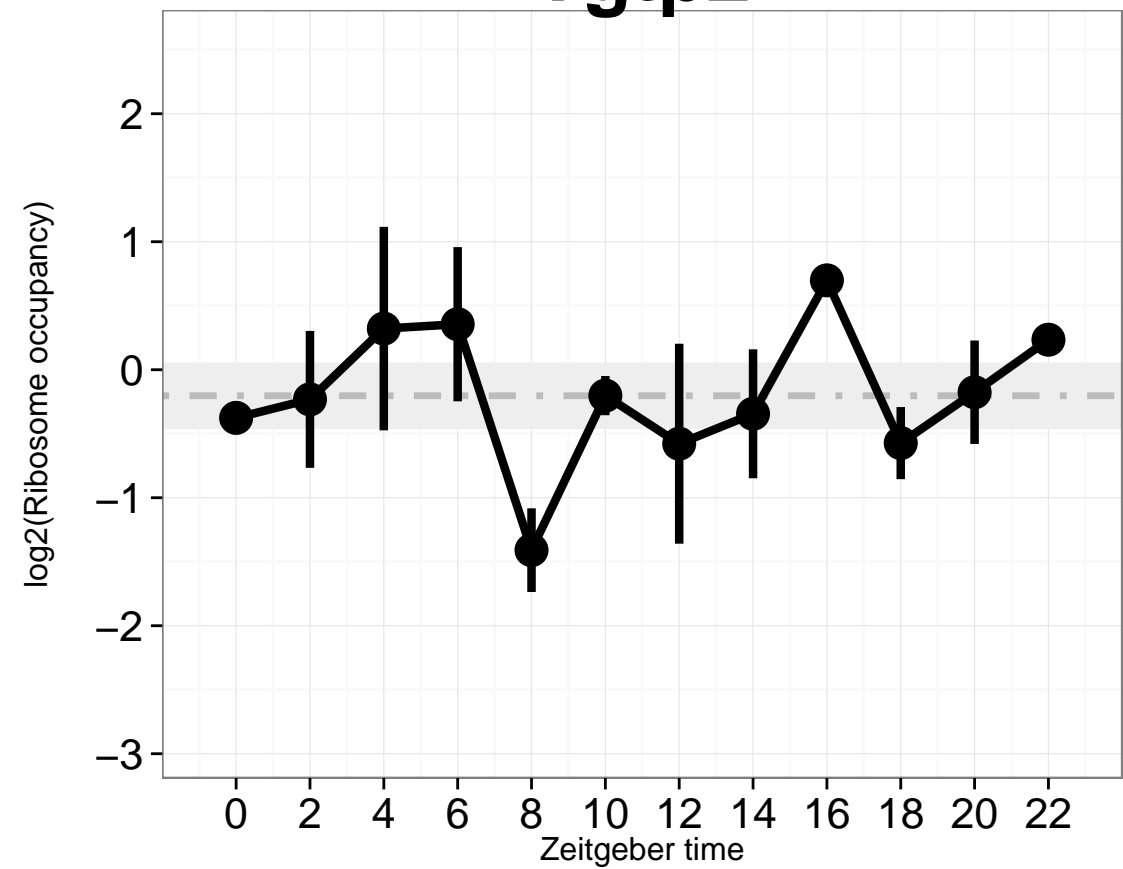

Supplement: SuppDataset_1.zip [file Tgtp2_set_A.pdf › Supplemental Dataset 1/A-mRNA_nonrhyth_translation_nonrhyth/Tgtp2_set_A.pdf]

## Thada

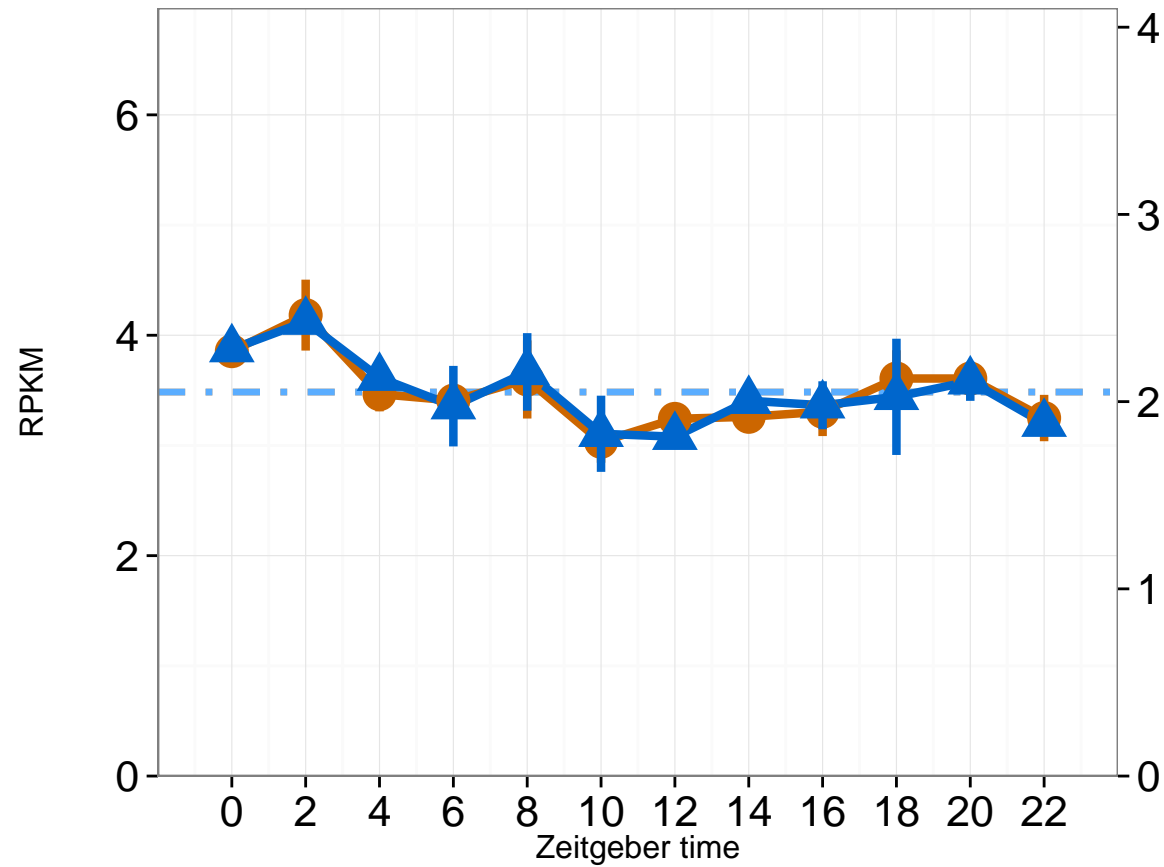

## Thada

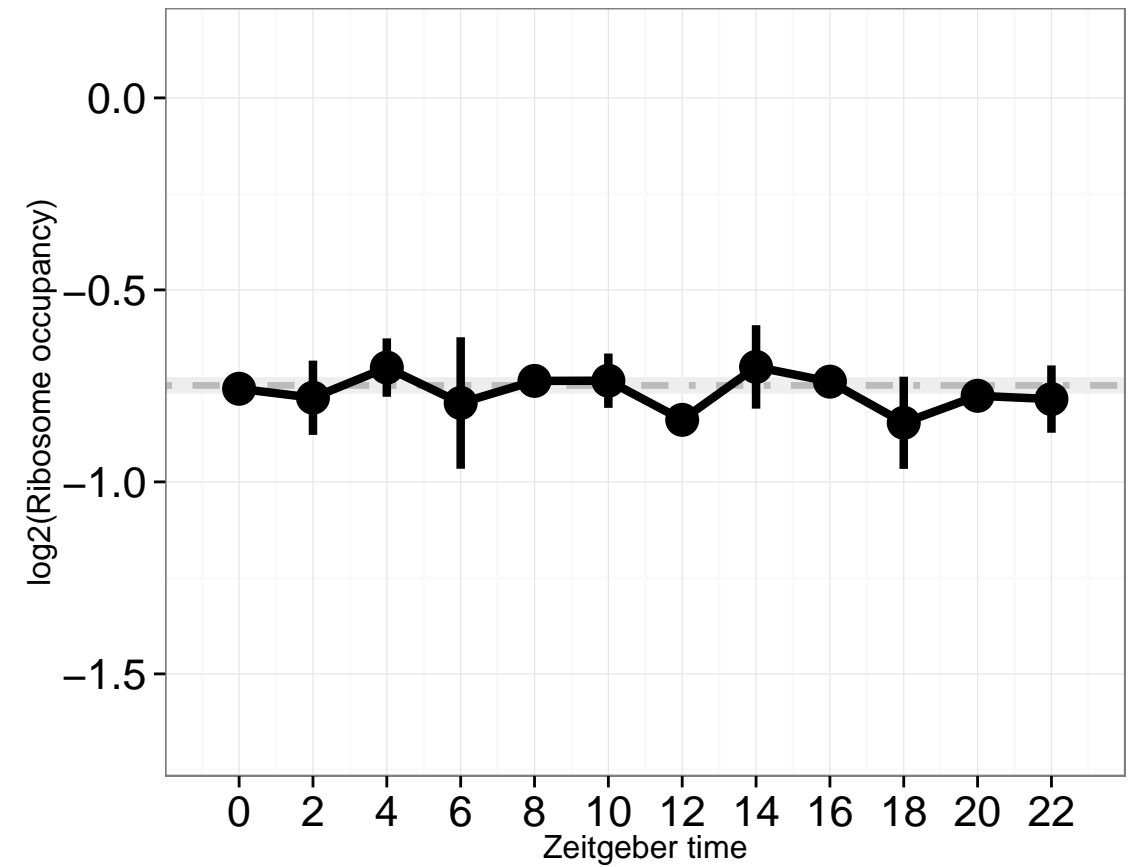

Supplement: SuppDataset_1.zip [file Thada_set_A.pdf › Supplemental Dataset 1/A-mRNA_nonrhyth_translation_nonrhyth/Thada_set_A.pdf]

## Thap11

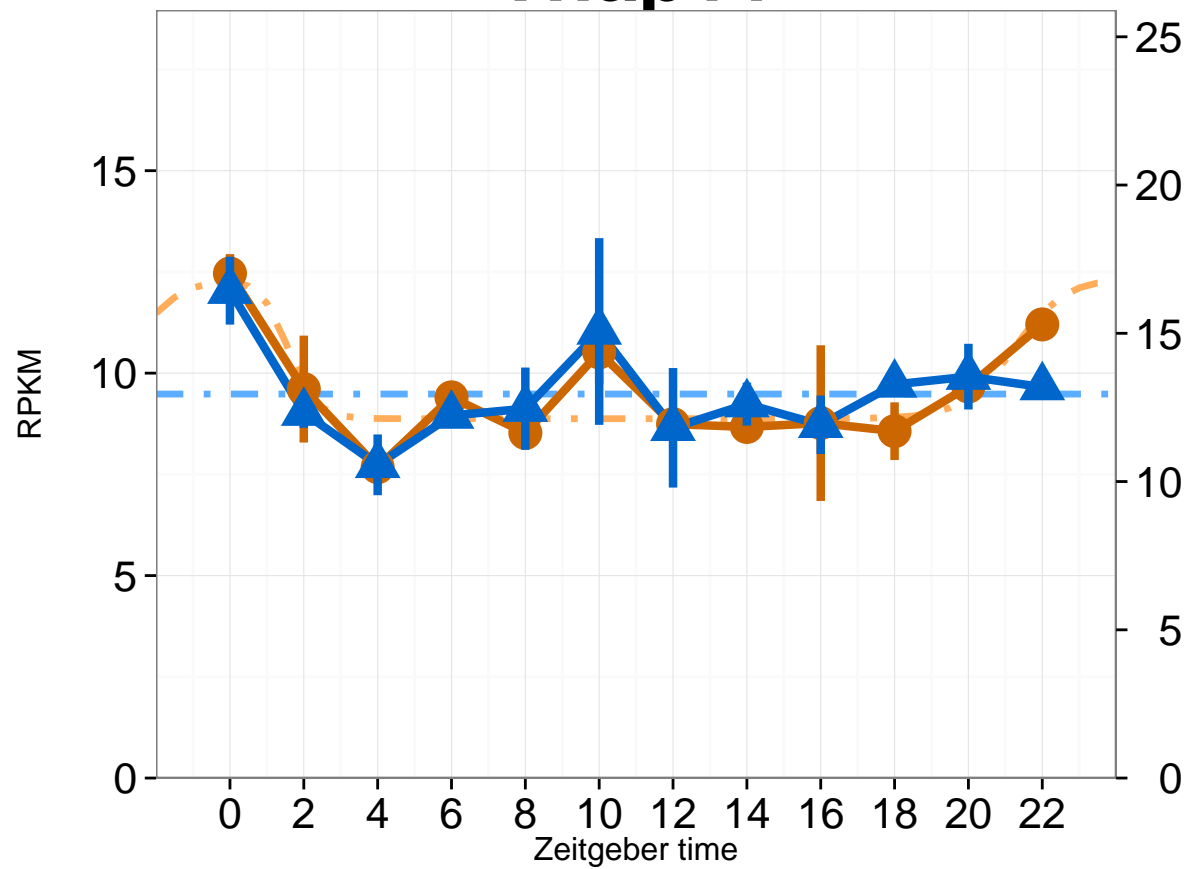

## Thap11

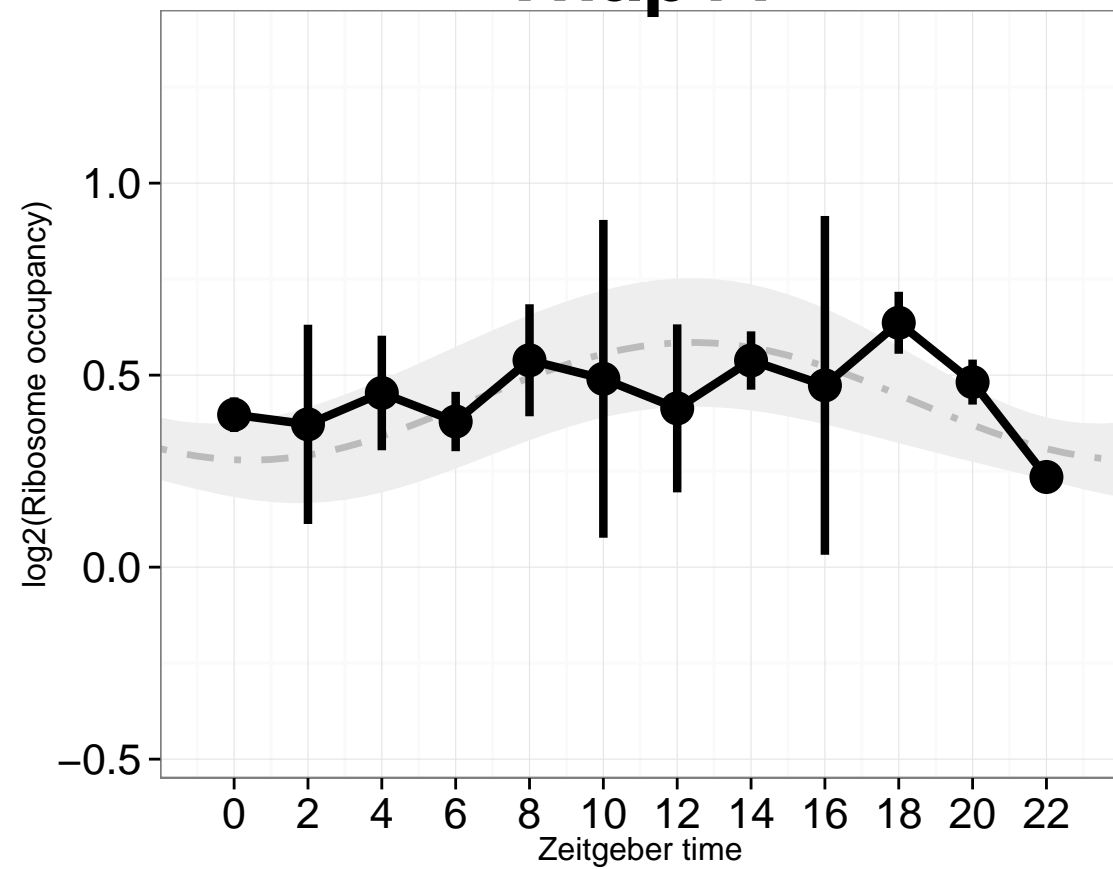

Supplement: SuppDataset_1.zip [file Thap11_set_A.pdf › Supplemental Dataset 1/A-mRNA_nonrhyth_translation_nonrhyth/Thap11_set_A.pdf]

## Thap2

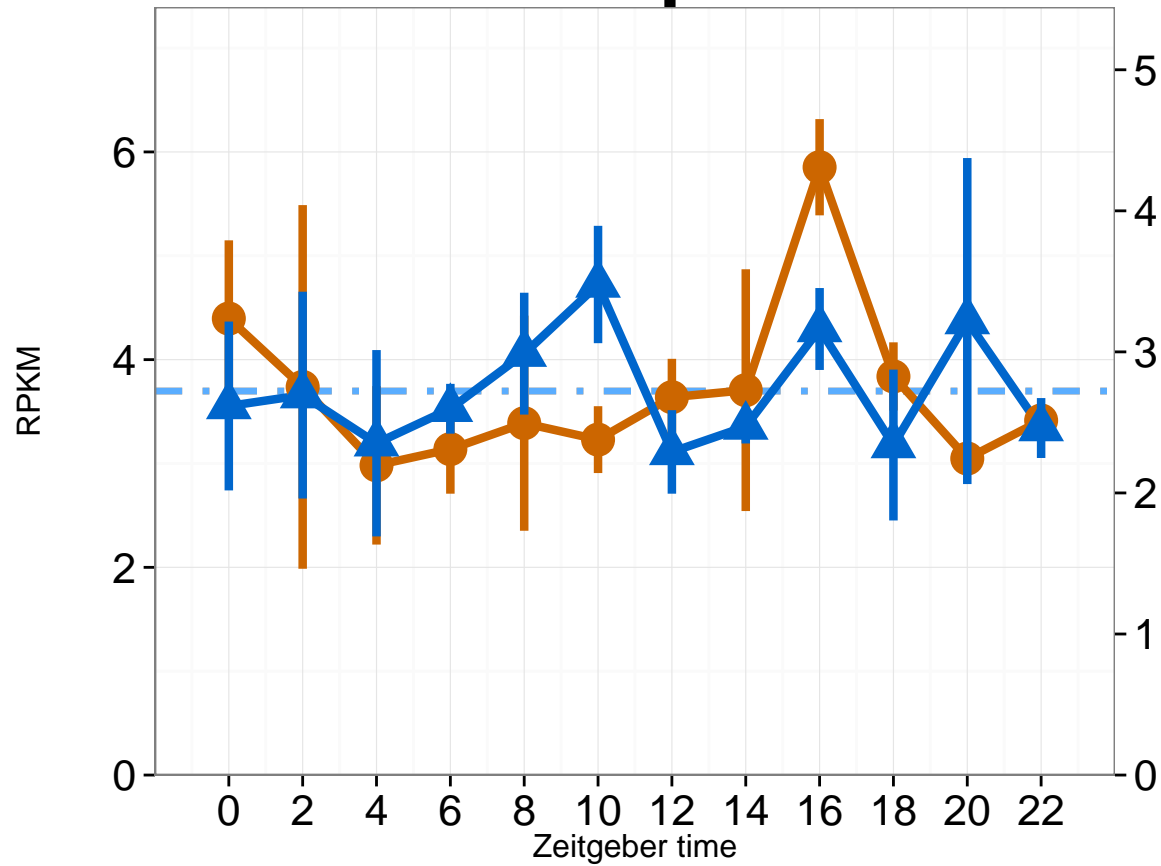

## Thap2

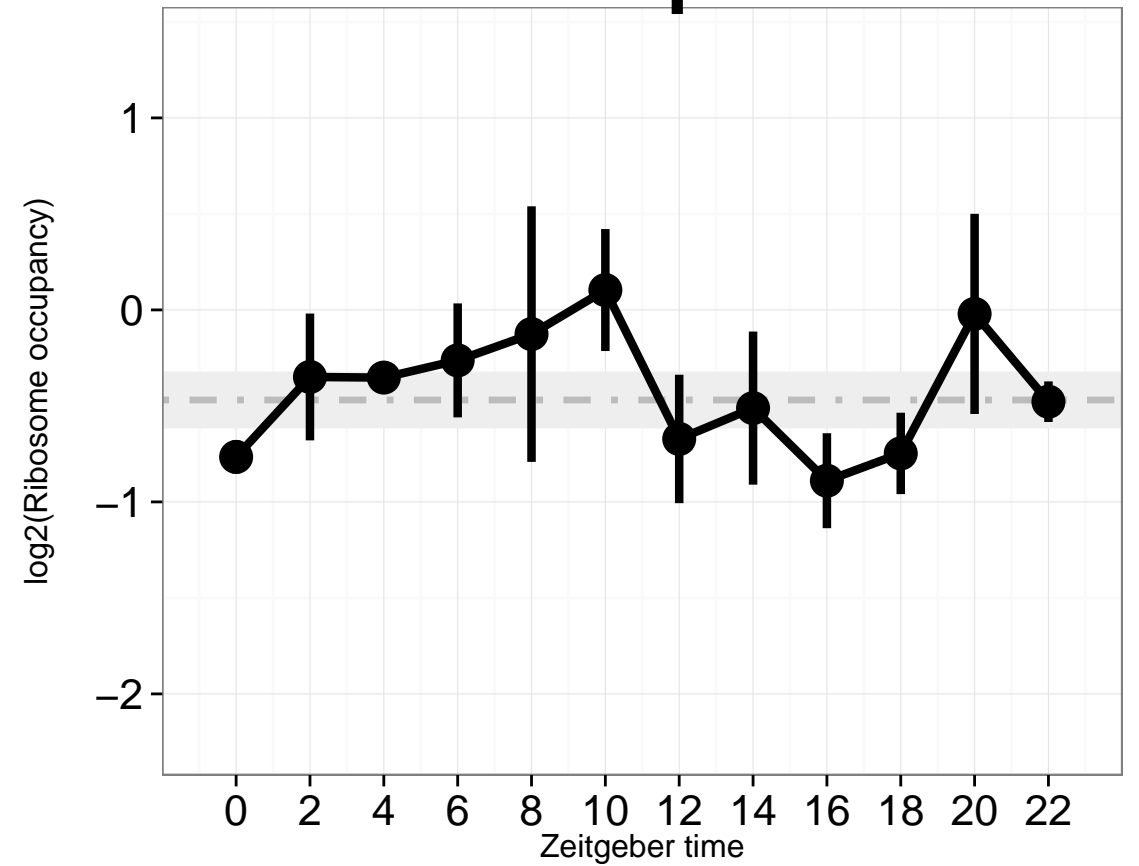

Supplement: SuppDataset_1.zip [file Thap2_set_A.pdf › Supplemental Dataset 1/A-mRNA_nonrhyth_translation_nonrhyth/Thap2_set_A.pdf]

# Thap3

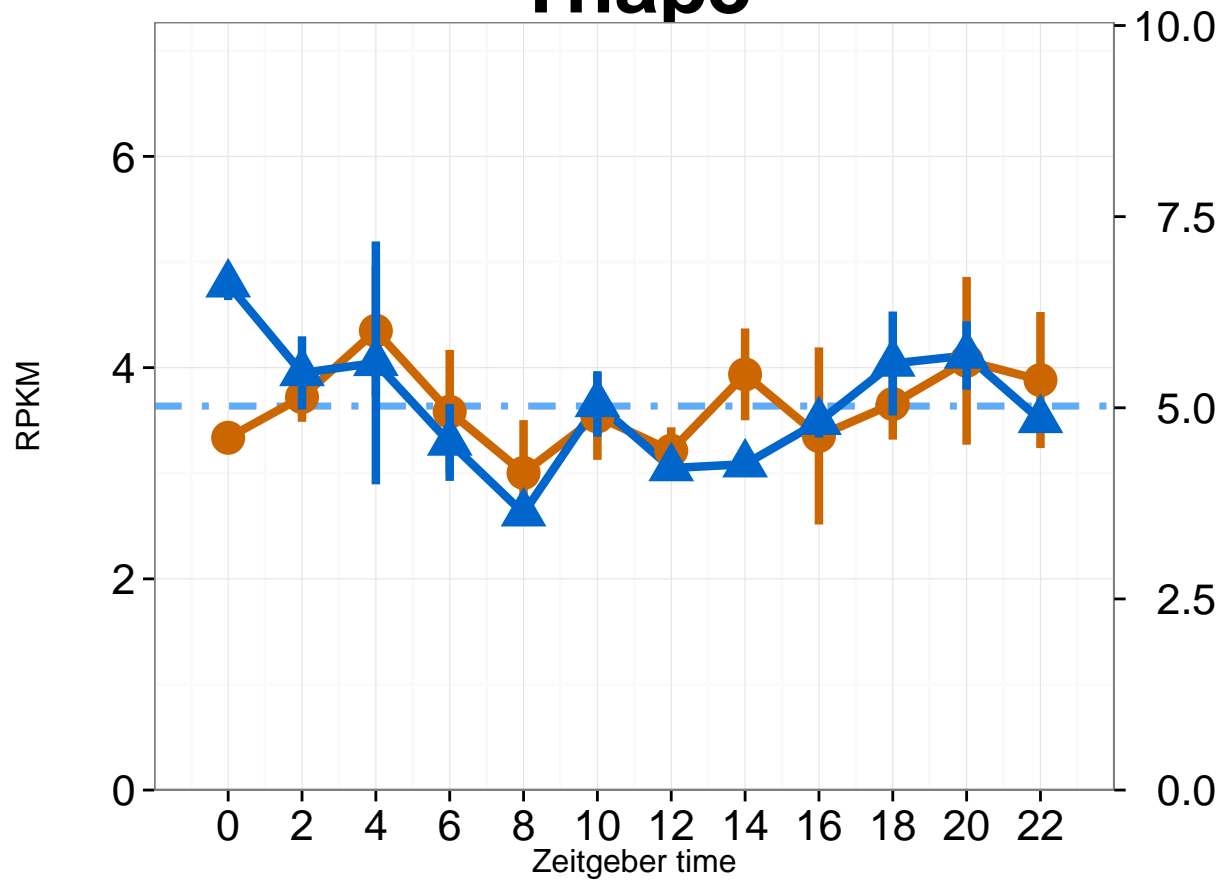

# Thap3

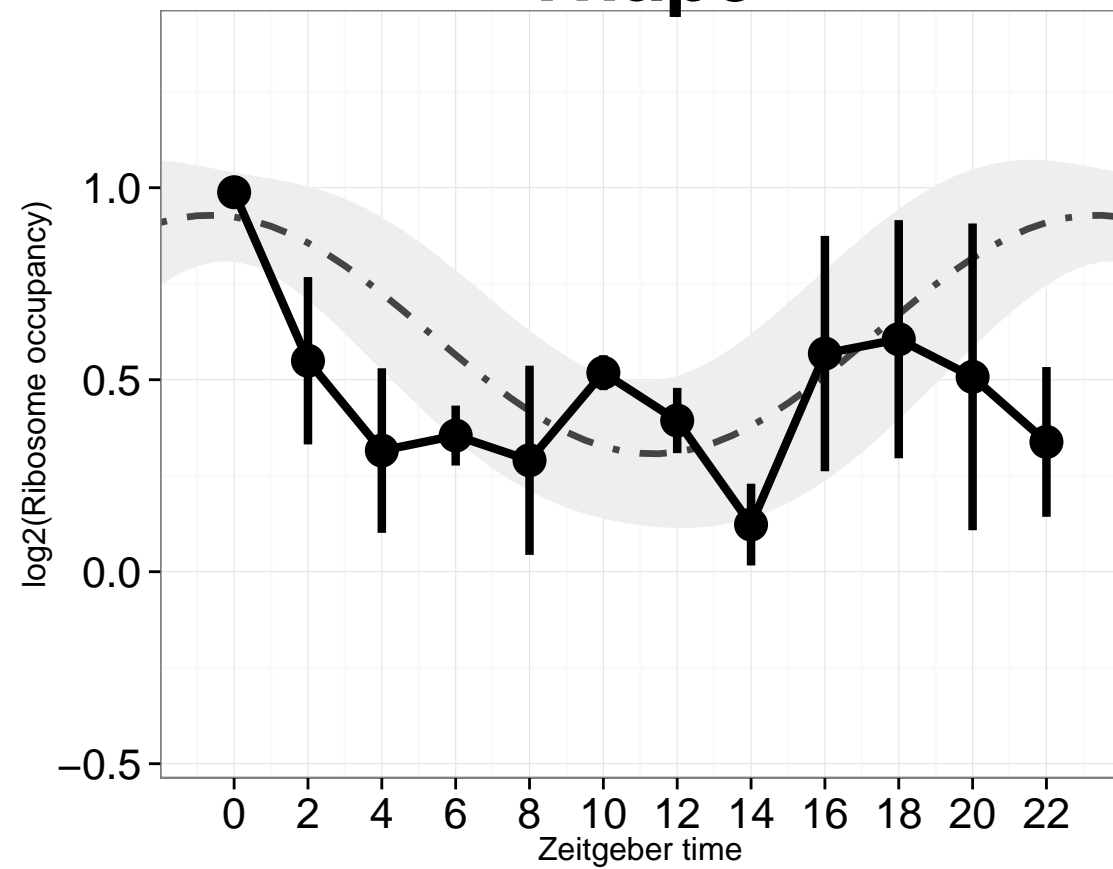

Supplement: SuppDataset_1.zip [file Thap3_set_A.pdf › Supplemental Dataset 1/A-mRNA_nonrhyth_translation_nonrhyth/Thap3_set_A.pdf]

# Thap4

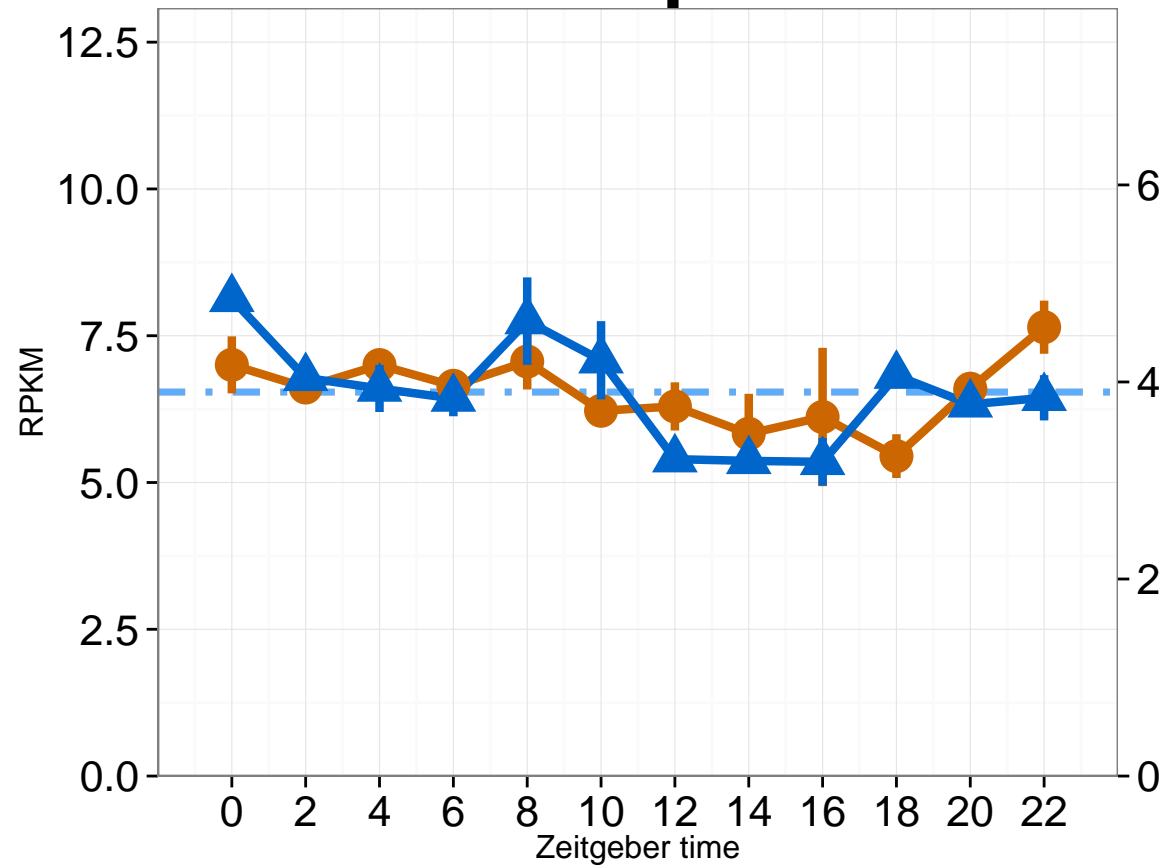

# Thap4

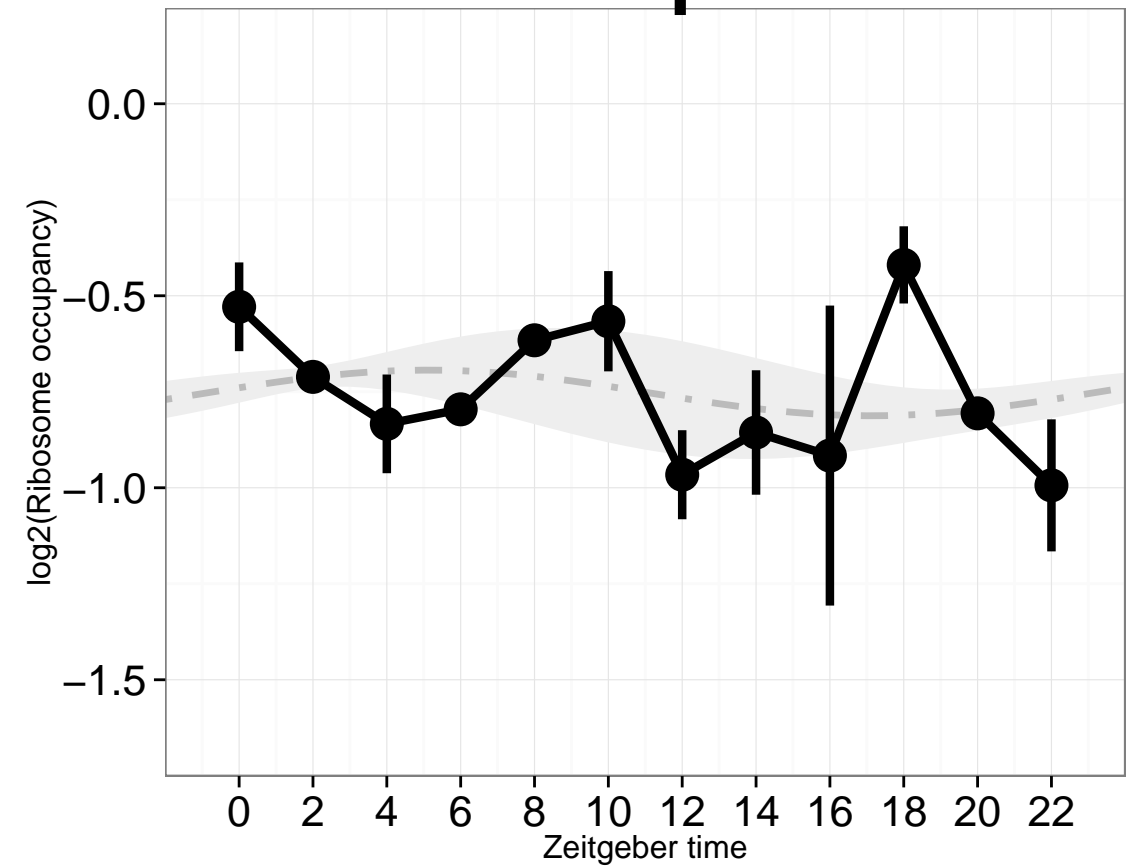

Supplement: SuppDataset_1.zip [file Thap4_set_A.pdf › Supplemental Dataset 1/A-mRNA_nonrhyth_translation_nonrhyth/Thap4_set_A.pdf]

## Thap7

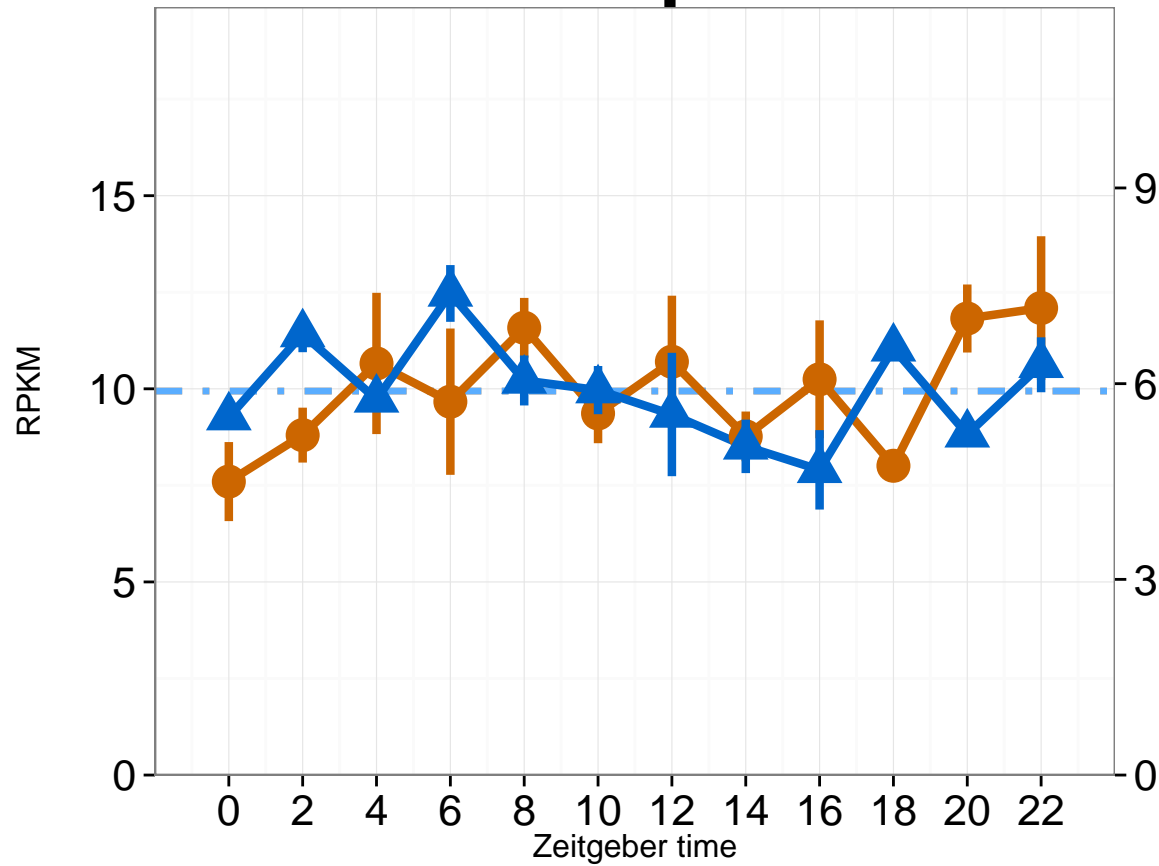

## Thap7

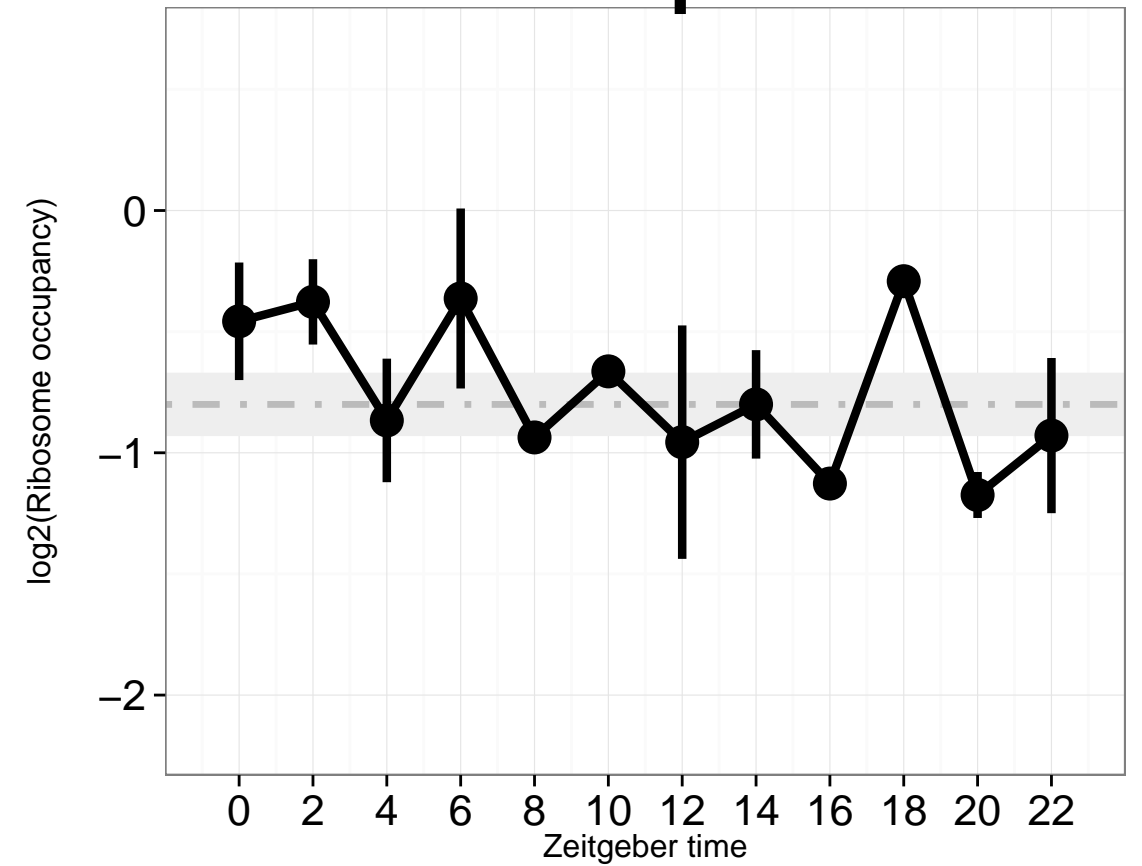

Supplement: SuppDataset_1.zip [file Thap7_set_A.pdf › Supplemental Dataset 1/A-mRNA_nonrhyth_translation_nonrhyth/Thap7_set_A.pdf]

# Thbs1

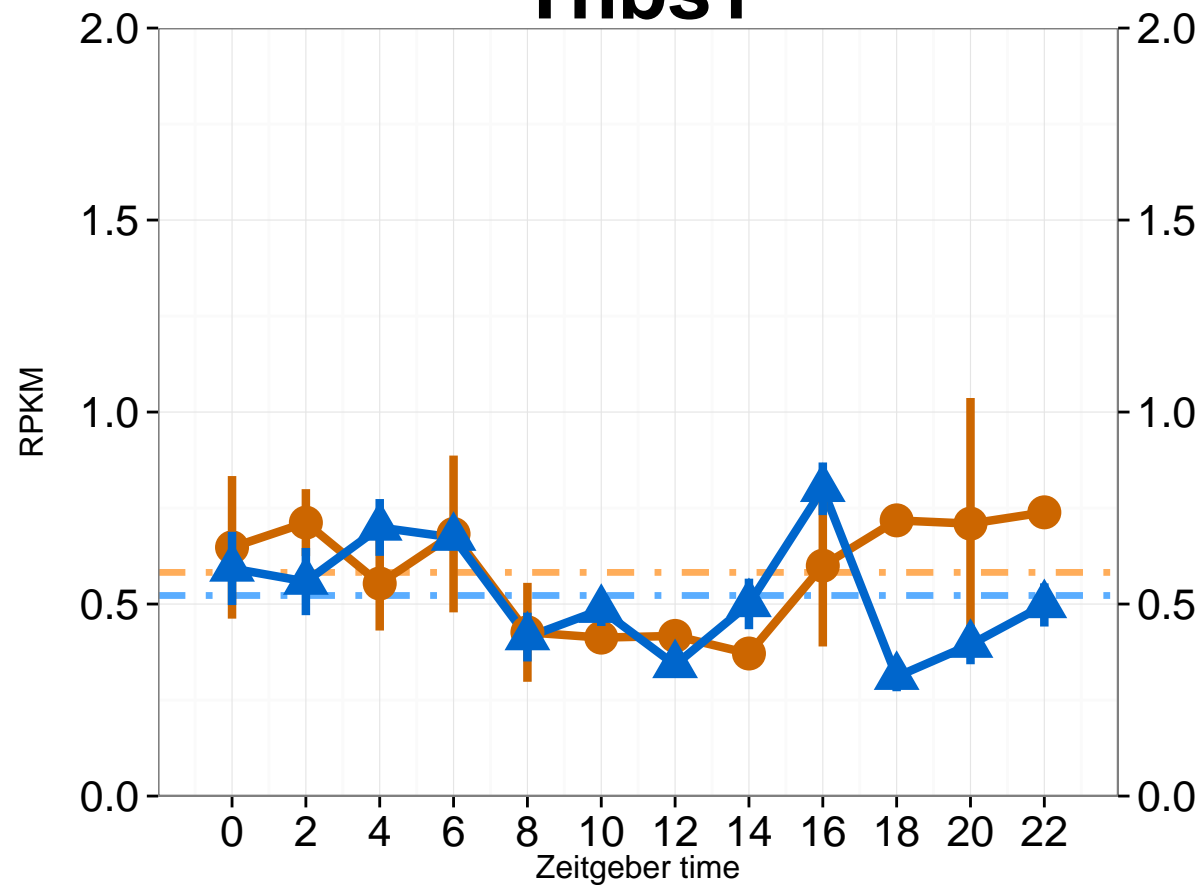

# Thbs1

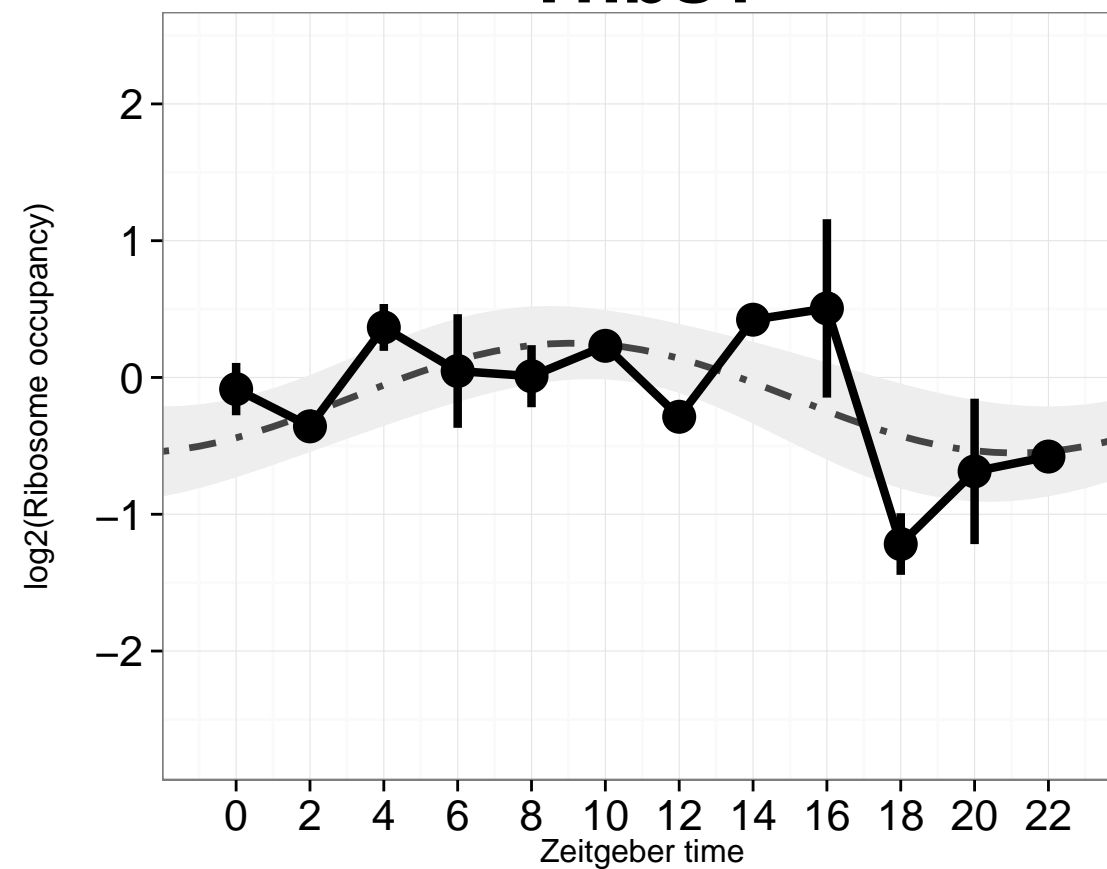

Supplement: SuppDataset_1.zip [file Thbs1_set_A.pdf › Supplemental Dataset 1/A-mRNA_nonrhyth_translation_nonrhyth/Thbs1_set_A.pdf]

# Thbs2

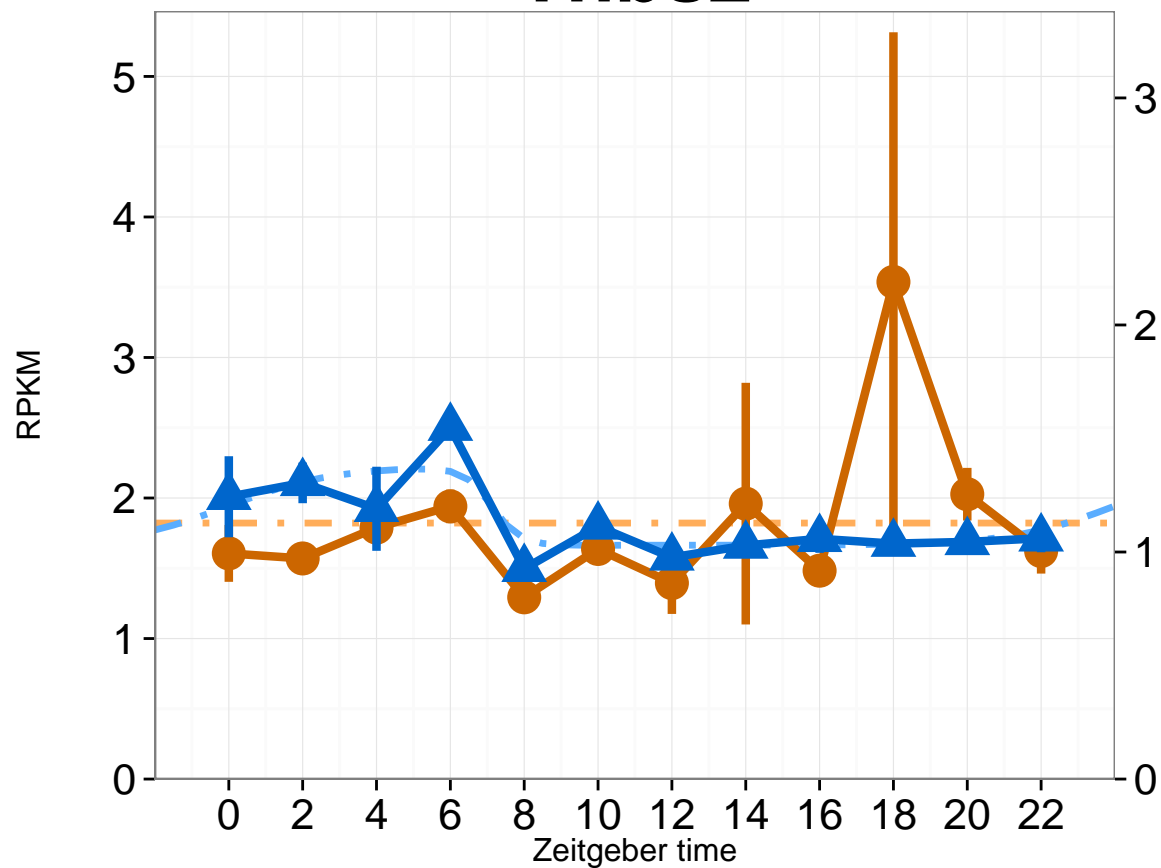

# Thbs2

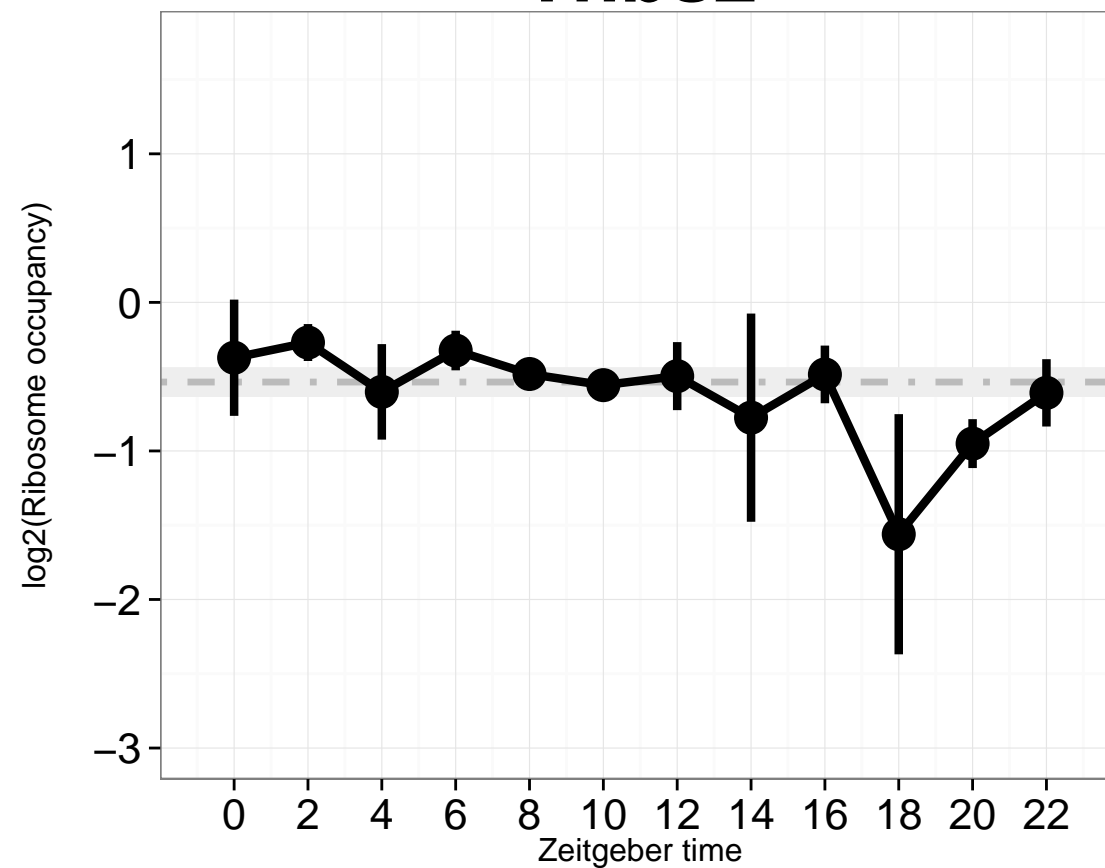

Supplement: SuppDataset_1.zip [file Thbs2_set_A.pdf › Supplemental Dataset 1/A-mRNA_nonrhyth_translation_nonrhyth/Thbs2_set_A.pdf]

# Them4

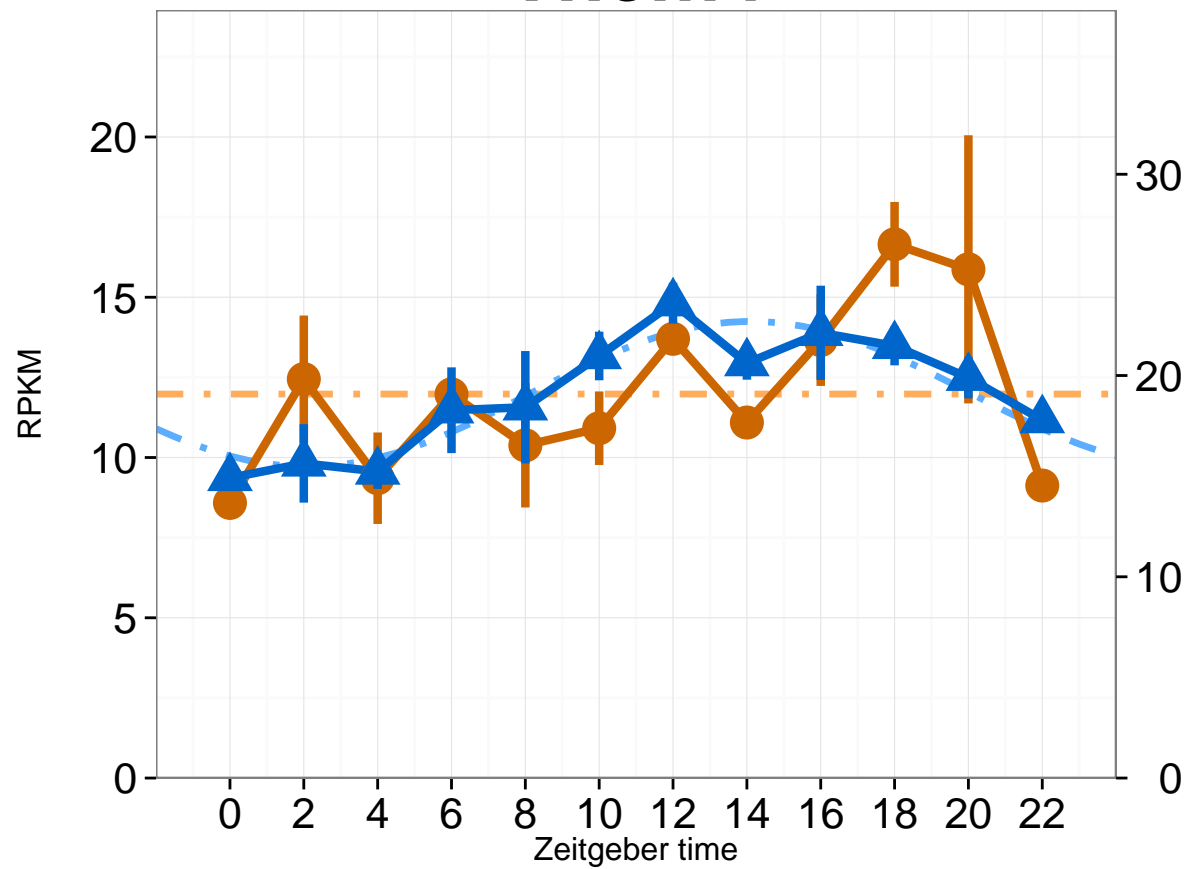

# Them4

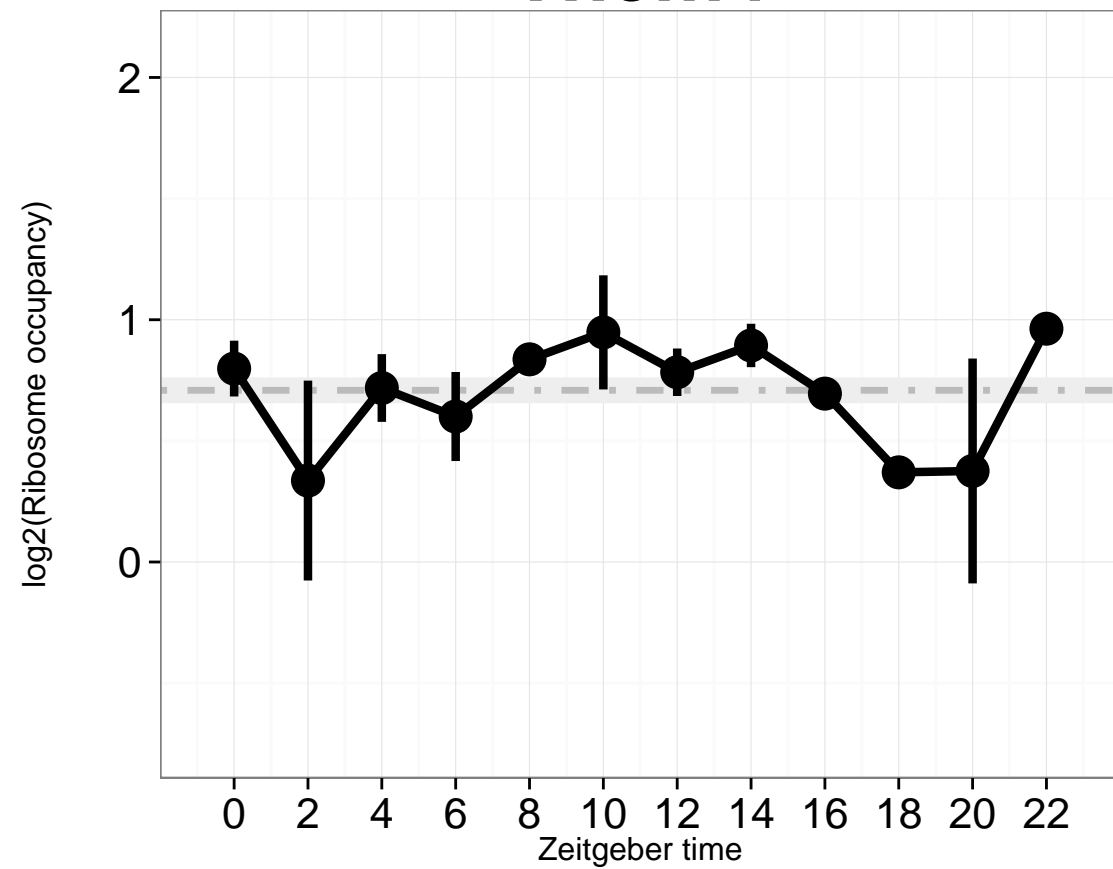

Supplement: SuppDataset_1.zip [file Them4_set_A.pdf › Supplemental Dataset 1/A-mRNA_nonrhyth_translation_nonrhyth/Them4_set_A.pdf]

## Themis2

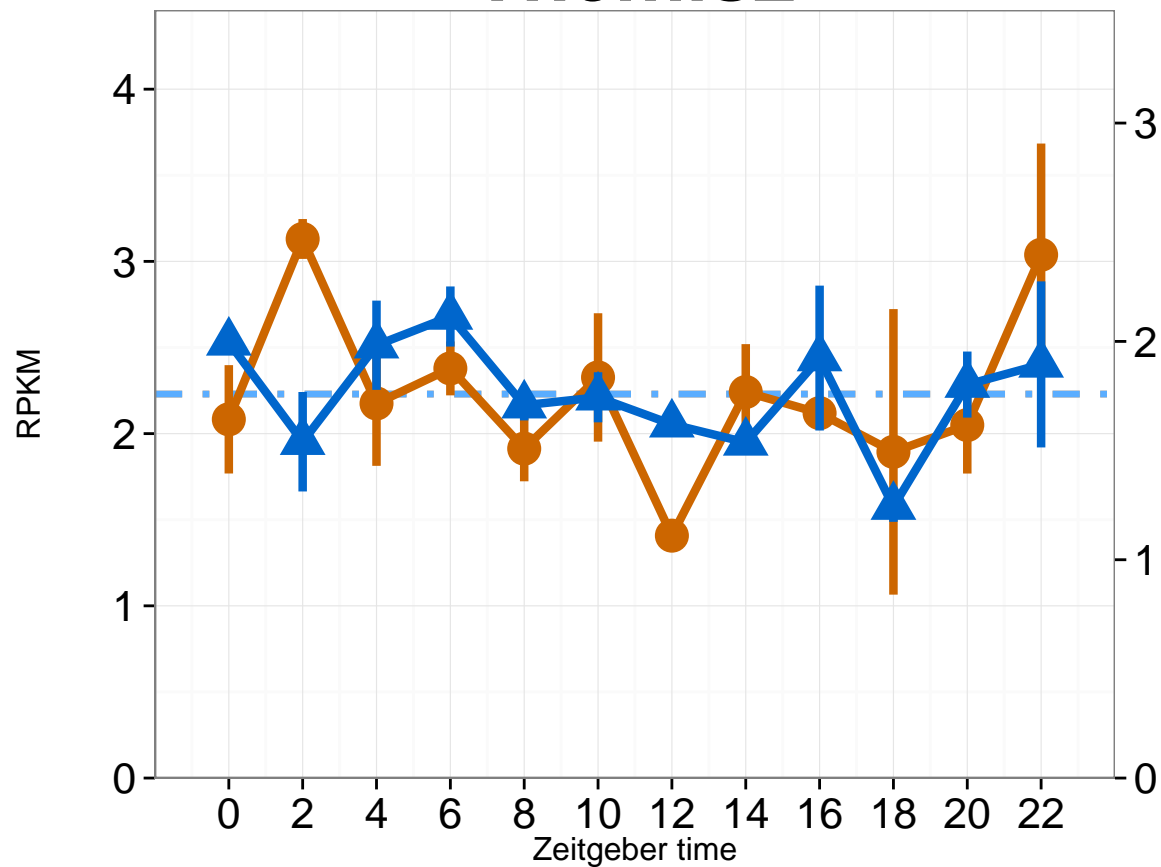

## Themis2

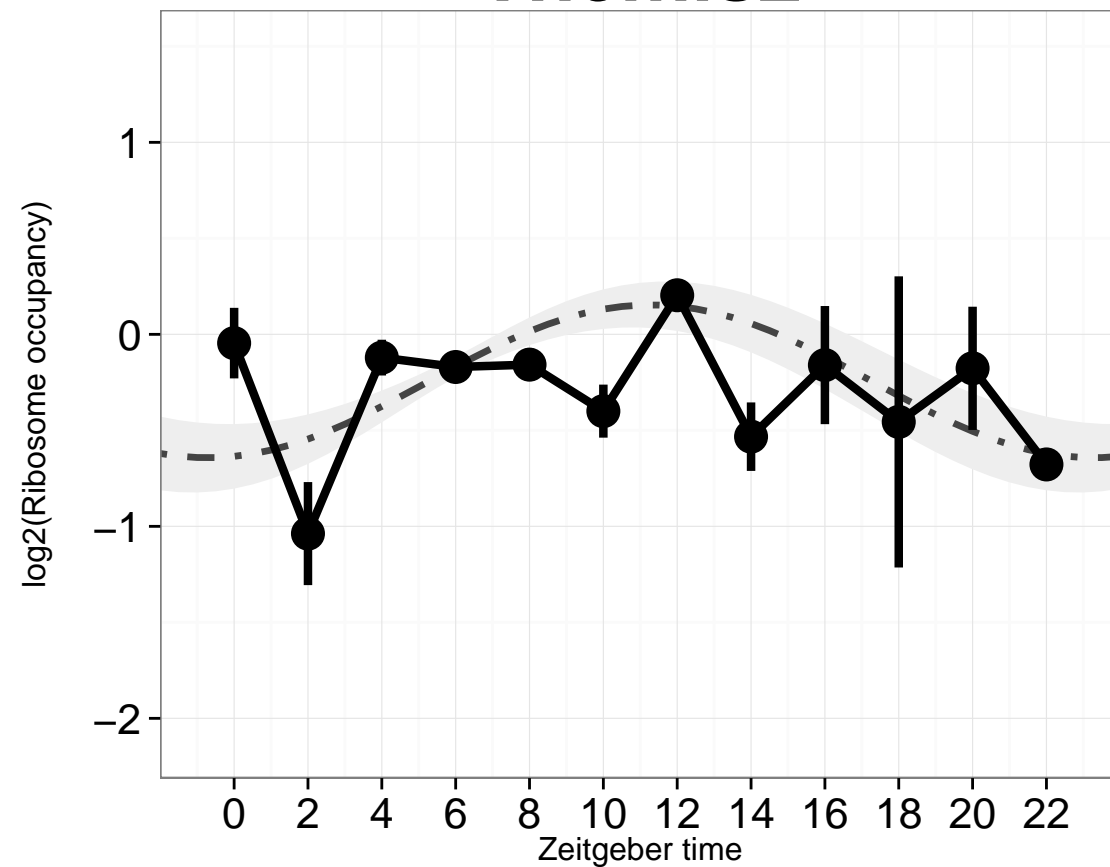

Supplement: SuppDataset_1.zip [file Themis2_set_A.pdf › Supplemental Dataset 1/A-mRNA_nonrhyth_translation_nonrhyth/Themis2_set_A.pdf]

## Thg1l

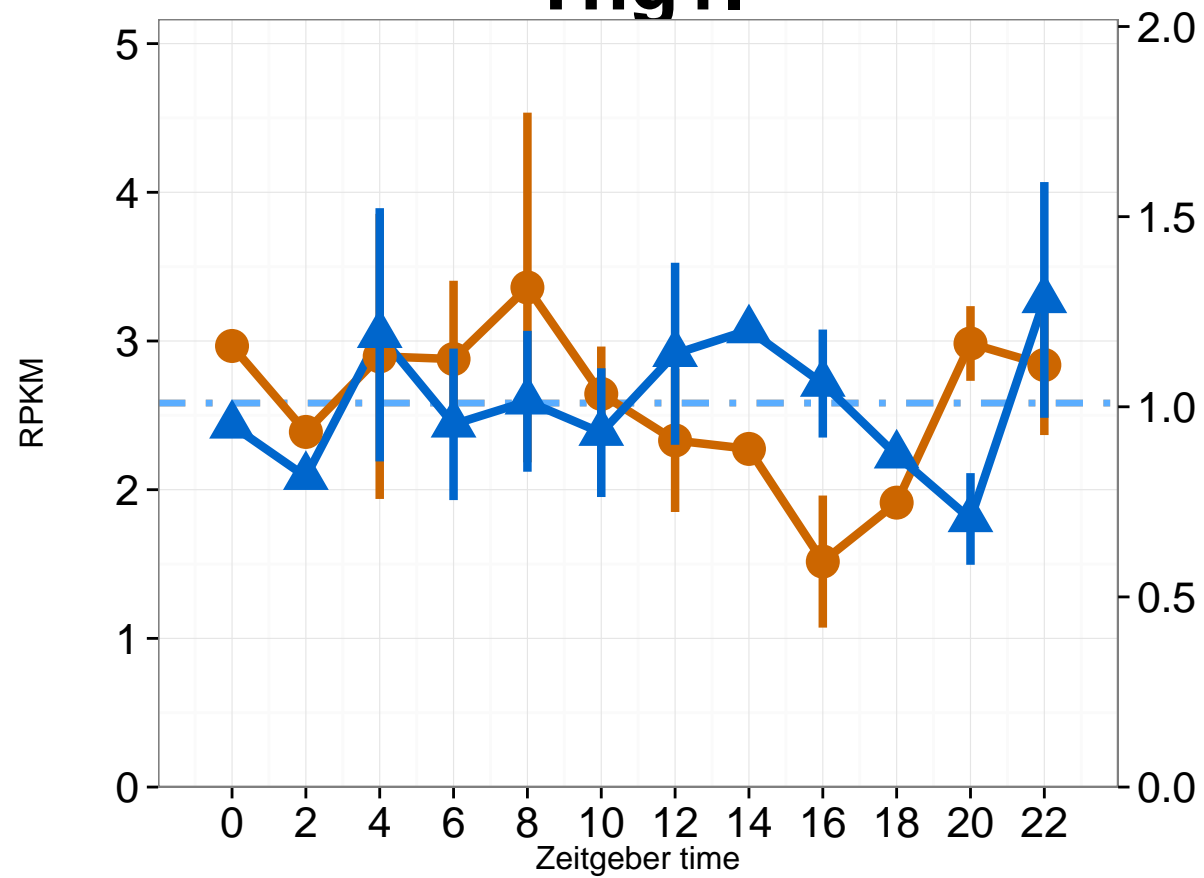

## Thg1l

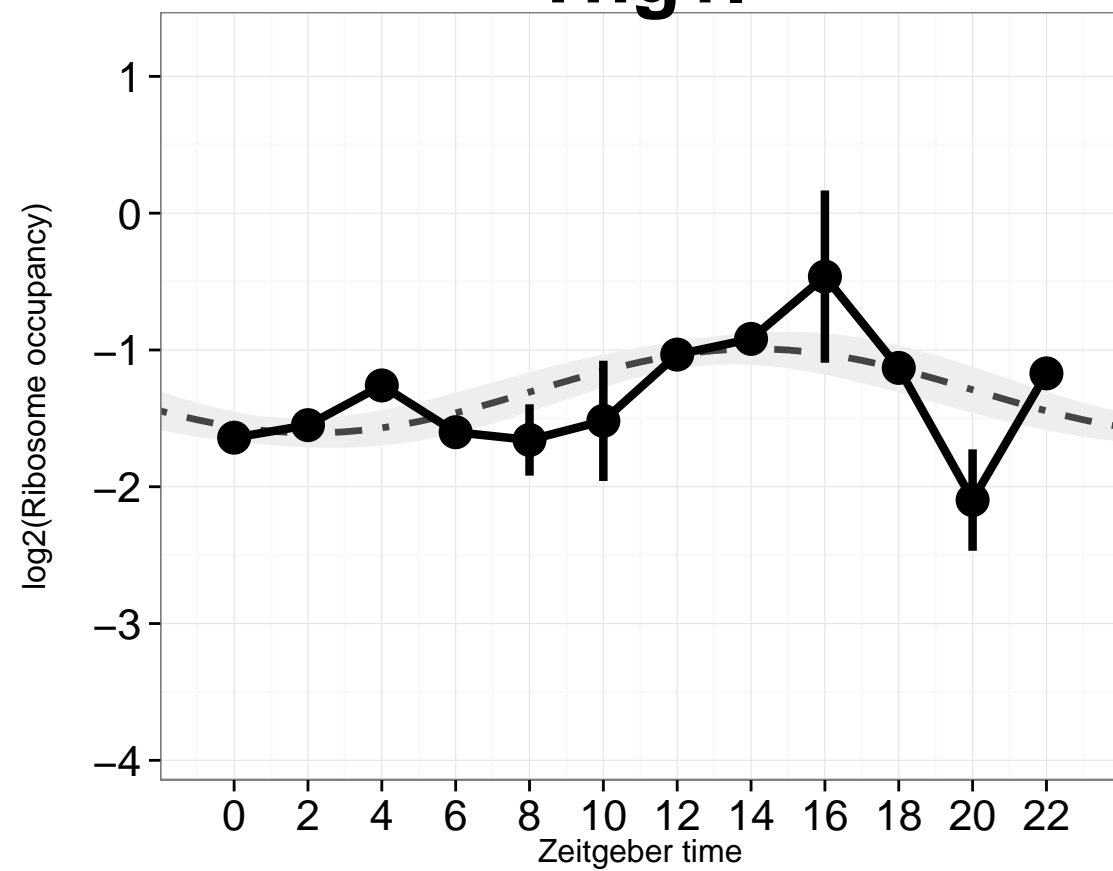

Supplement: SuppDataset_1.zip [file Thg1l_set_A.pdf › Supplemental Dataset 1/A-mRNA_nonrhyth_translation_nonrhyth/Thg1l_set_A.pdf]

## Thns1

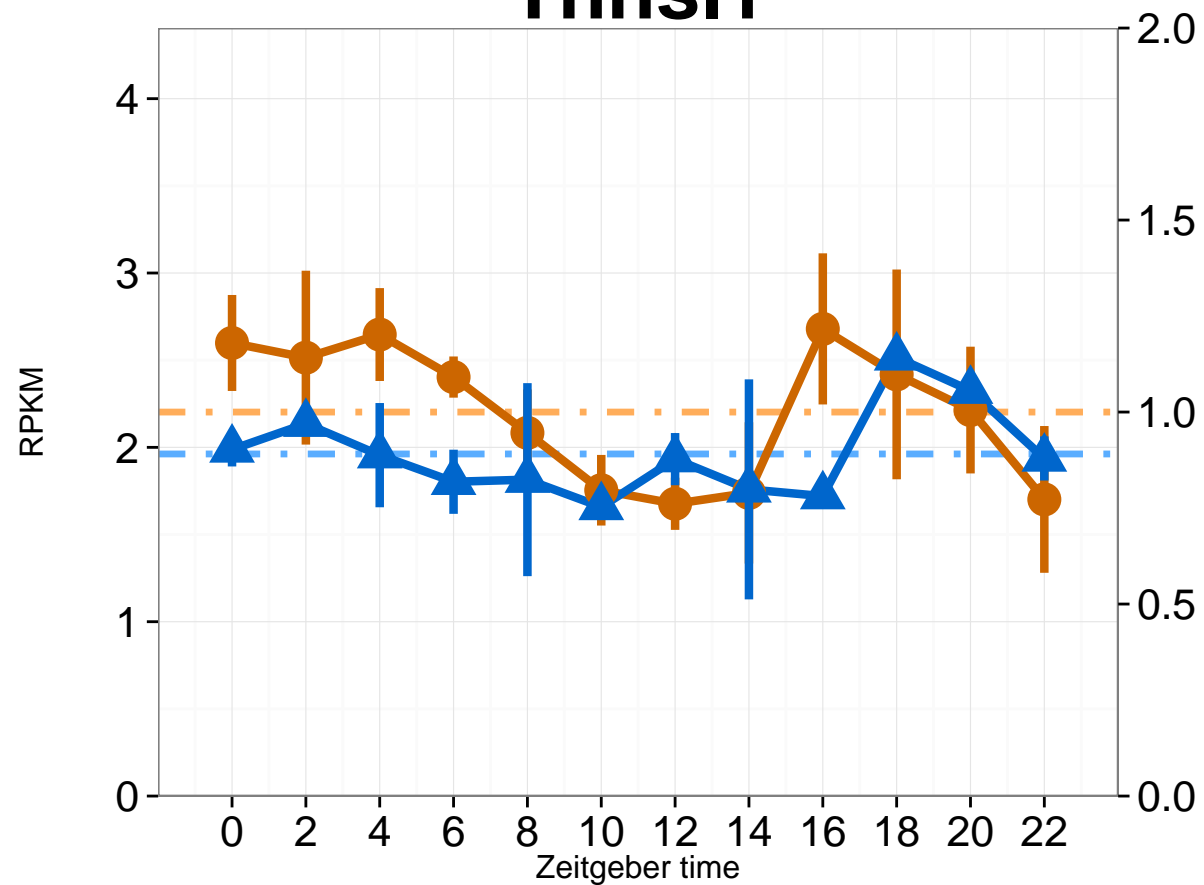

## Thns1

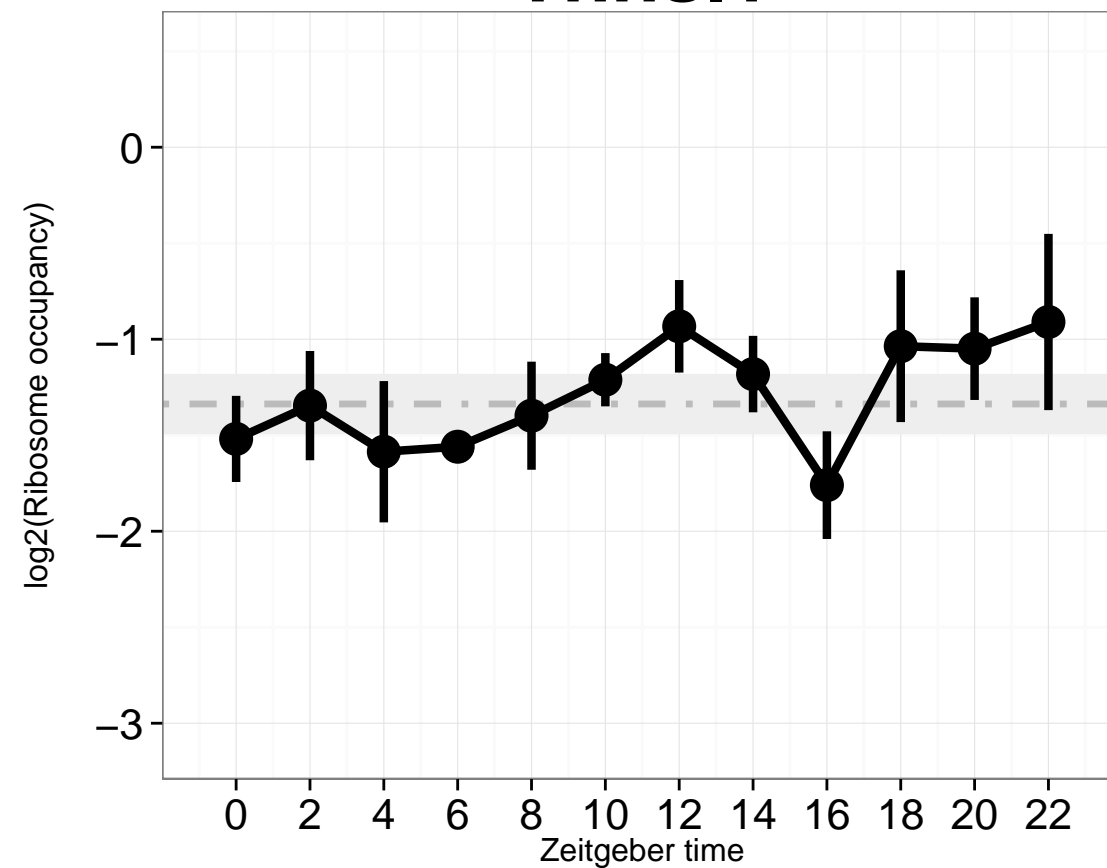

Supplement: SuppDataset_1.zip [file Thnsl1_set_A.pdf › Supplemental Dataset 1/A-mRNA_nonrhyth_translation_nonrhyth/Thnsl1_set_A.pdf]

## Thns12

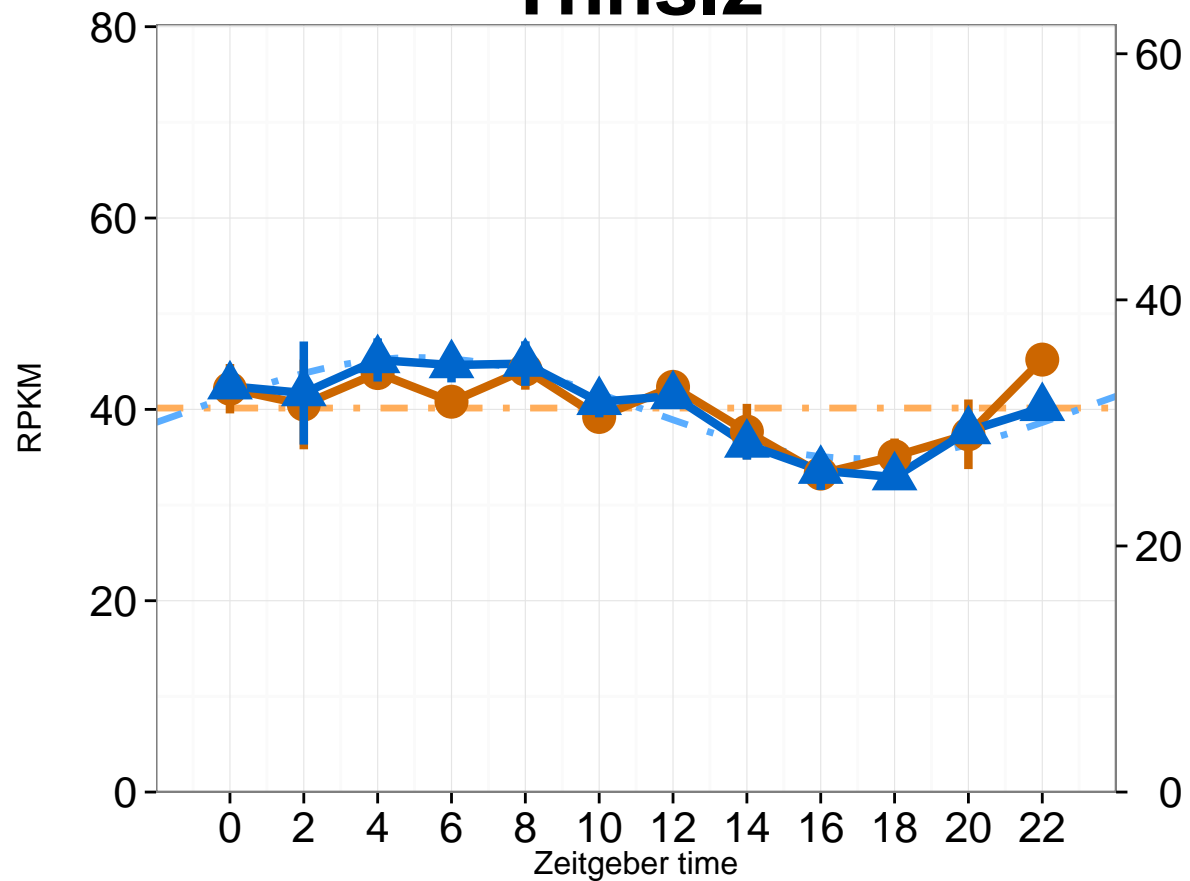

## Thns12

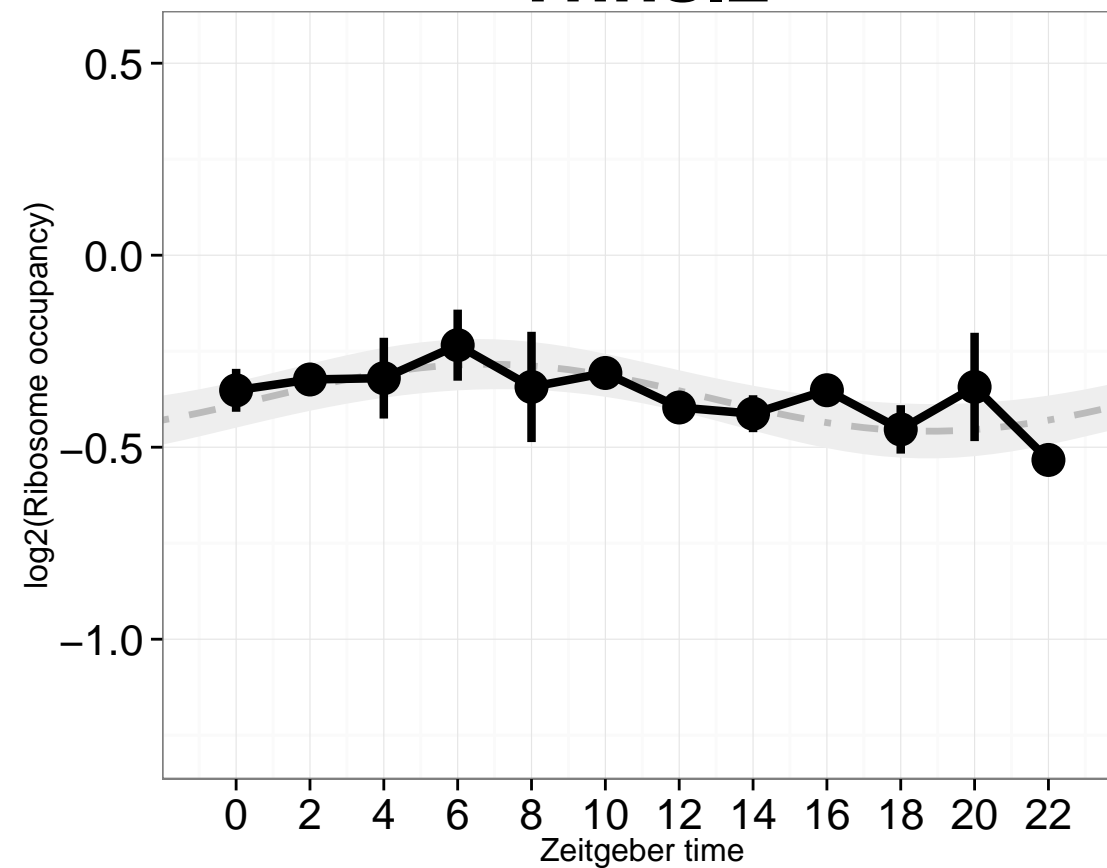

Supplement: SuppDataset_1.zip [file Thnsl2_set_A.pdf › Supplemental Dataset 1/A-mRNA_nonrhyth_translation_nonrhyth/Thnsl2_set_A.pdf]

# Thoc1

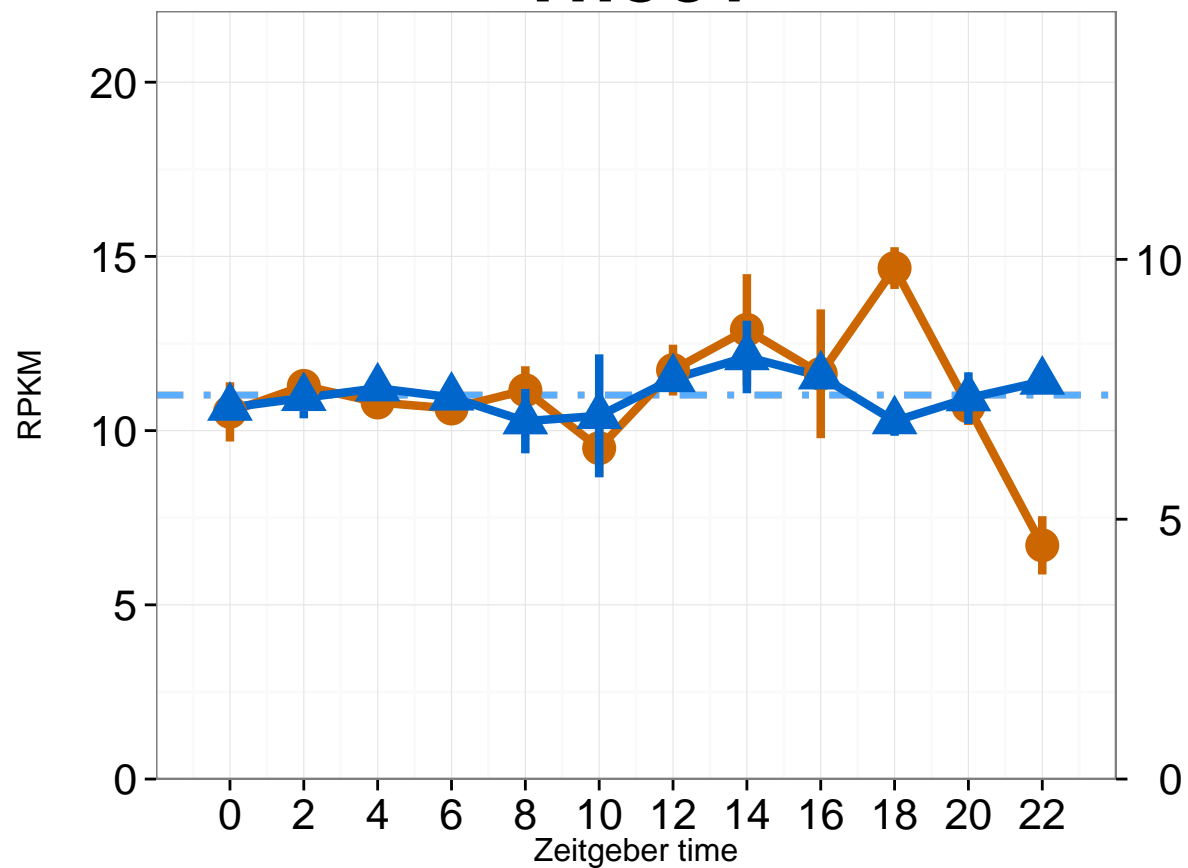

# Thoc1

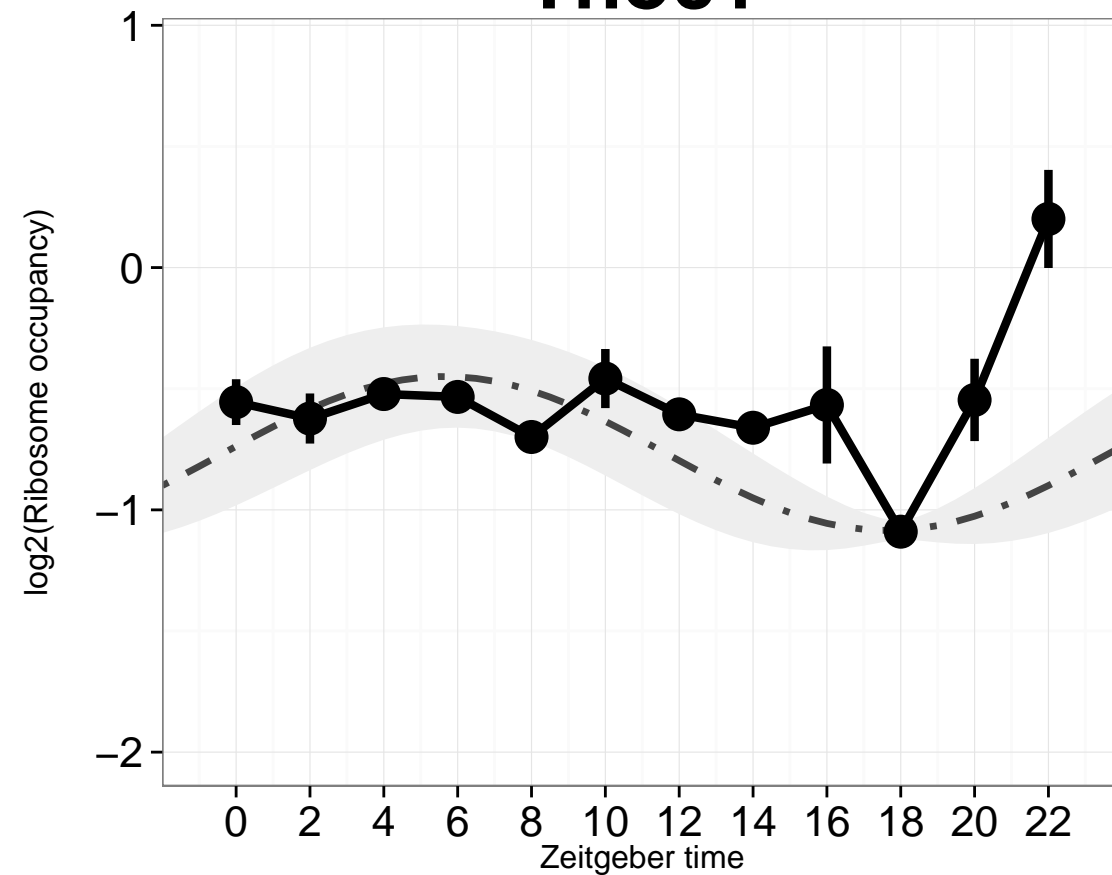

Supplement: SuppDataset_1.zip [file Thoc1_set_A.pdf › Supplemental Dataset 1/A-mRNA_nonrhyth_translation_nonrhyth/Thoc1_set_A.pdf]

## Thoc2

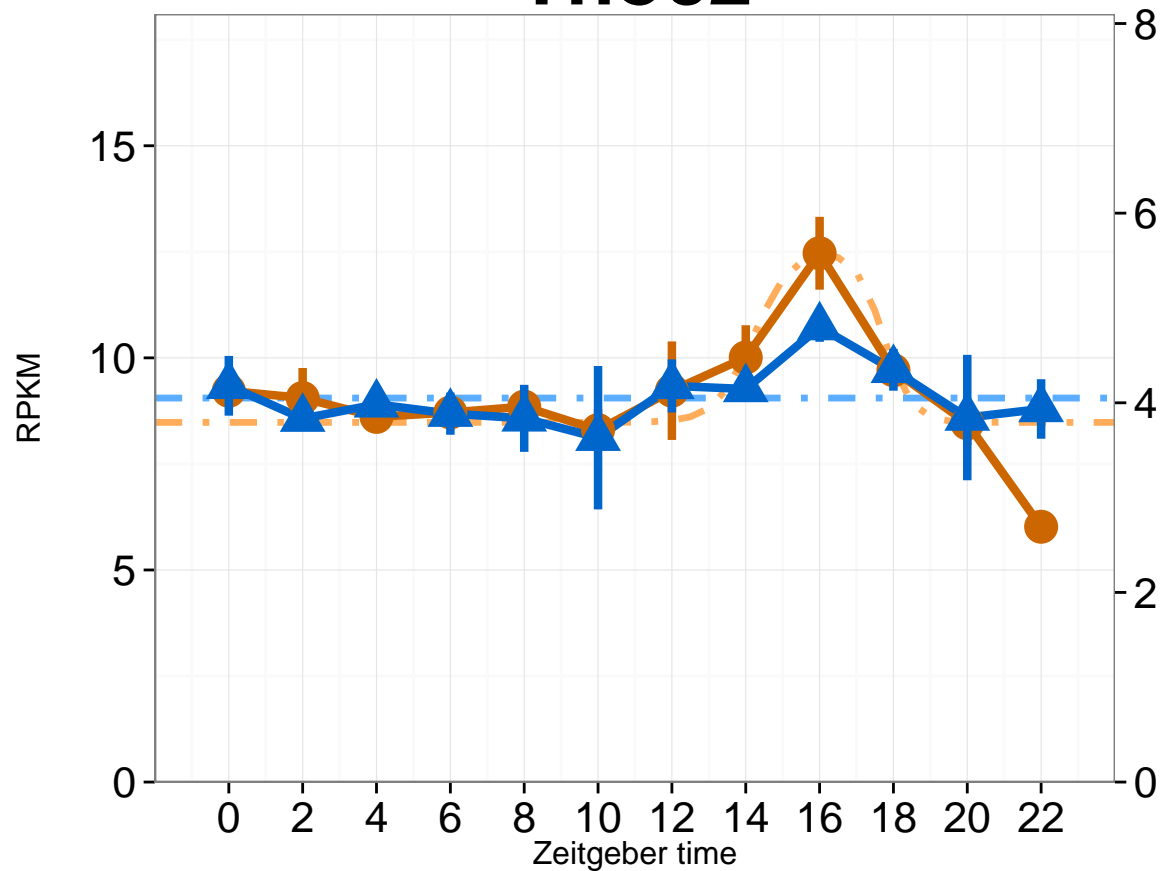

## Thoc2

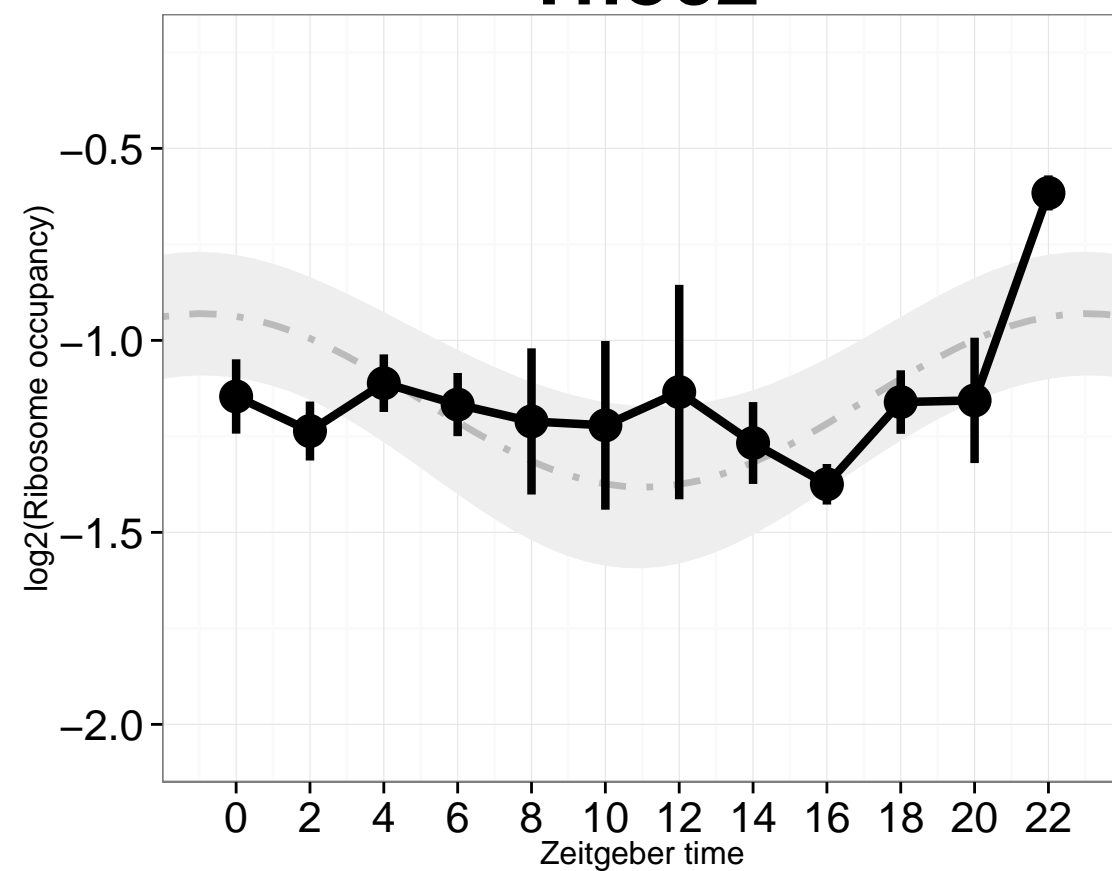

Supplement: SuppDataset_1.zip [file Thoc2_set_A.pdf › Supplemental Dataset 1/A-mRNA_nonrhyth_translation_nonrhyth/Thoc2_set_A.pdf]

## Thoc3

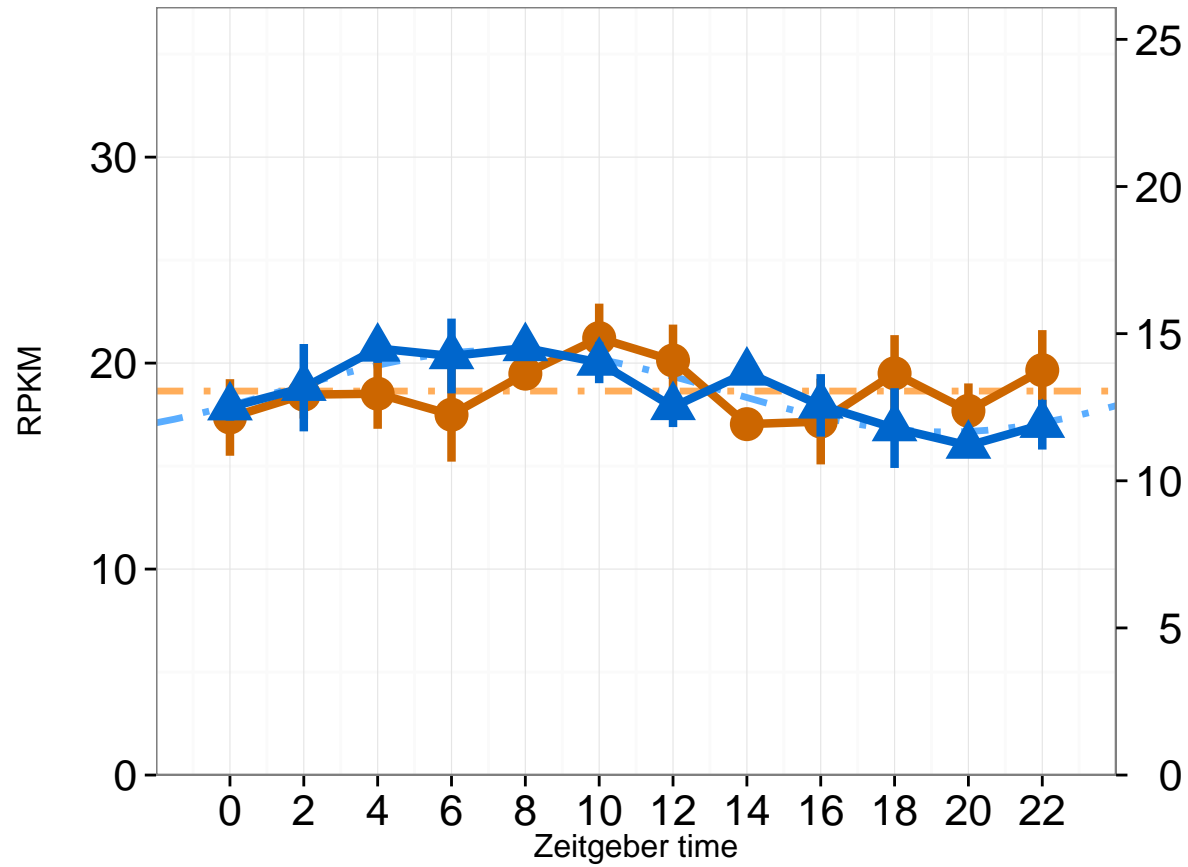

## Thoc3

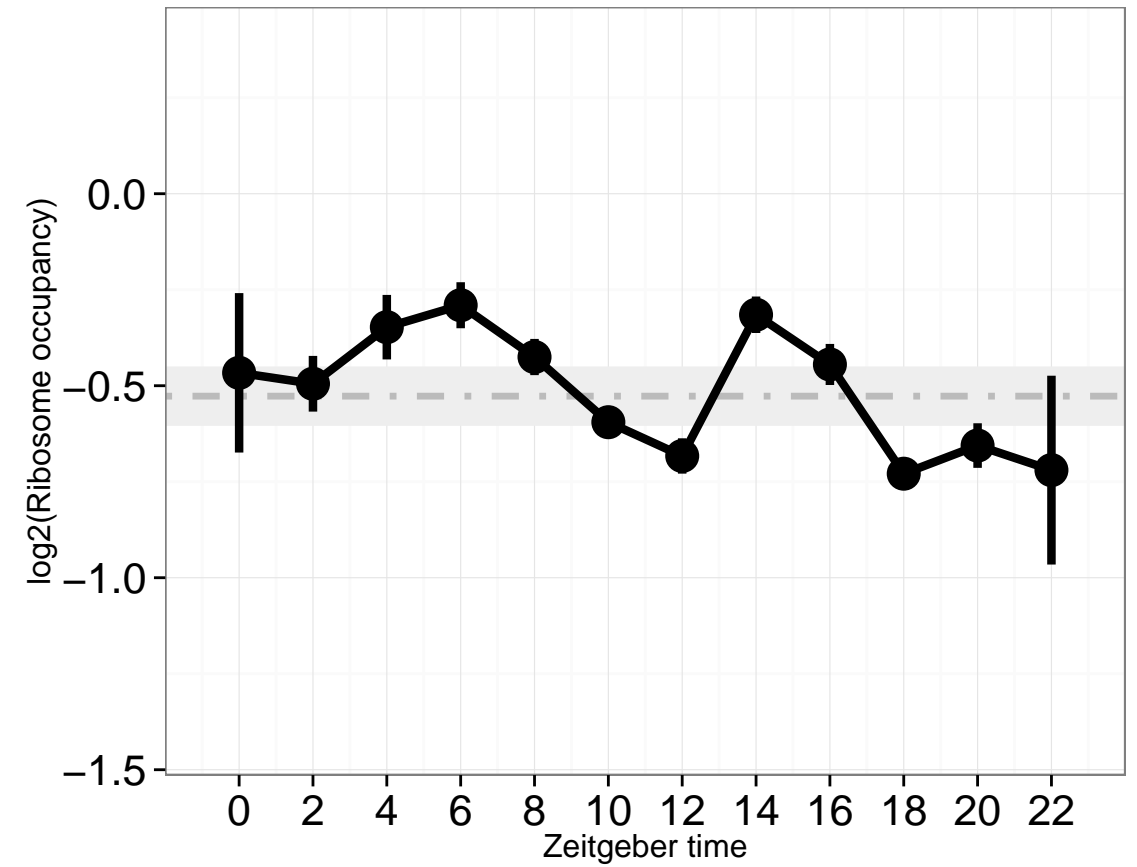

Supplement: SuppDataset_1.zip [file Thoc3_set_A.pdf › Supplemental Dataset 1/A-mRNA_nonrhyth_translation_nonrhyth/Thoc3_set_A.pdf]

## Thoc5

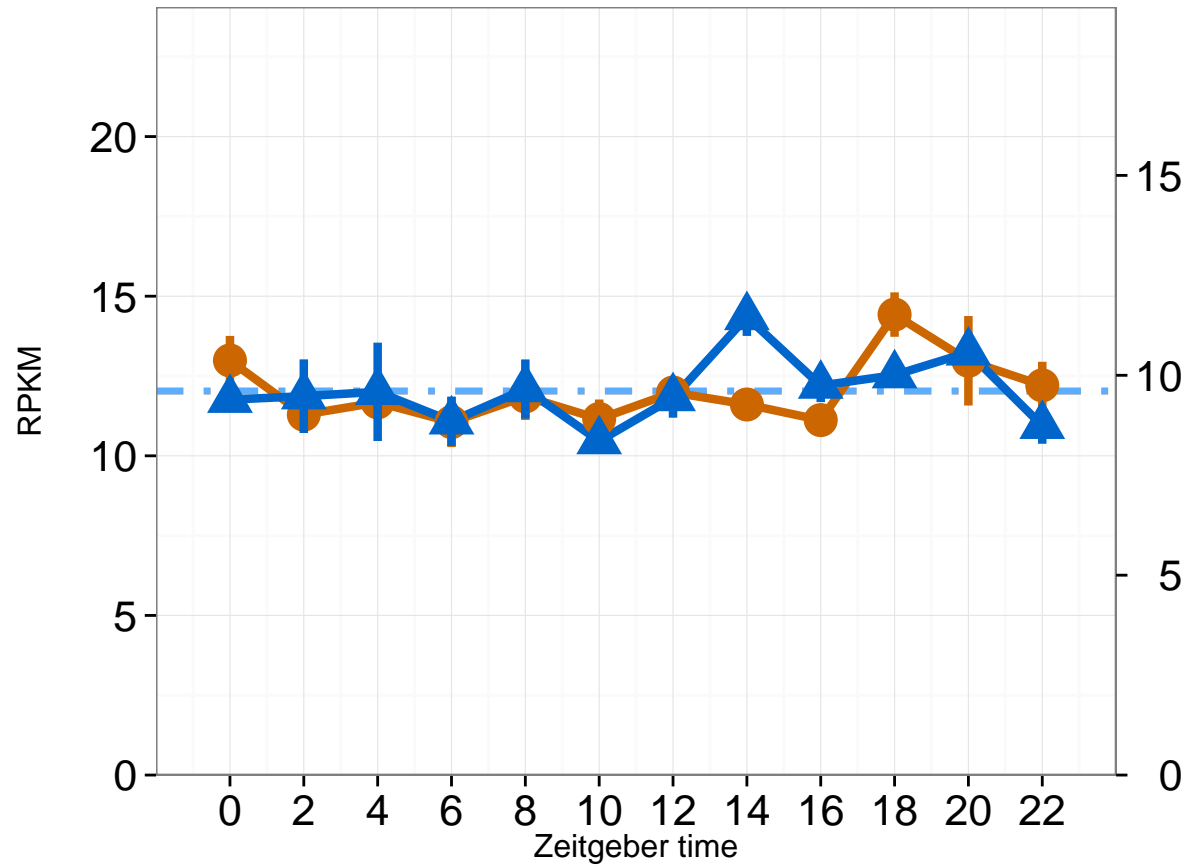

## Thoc5

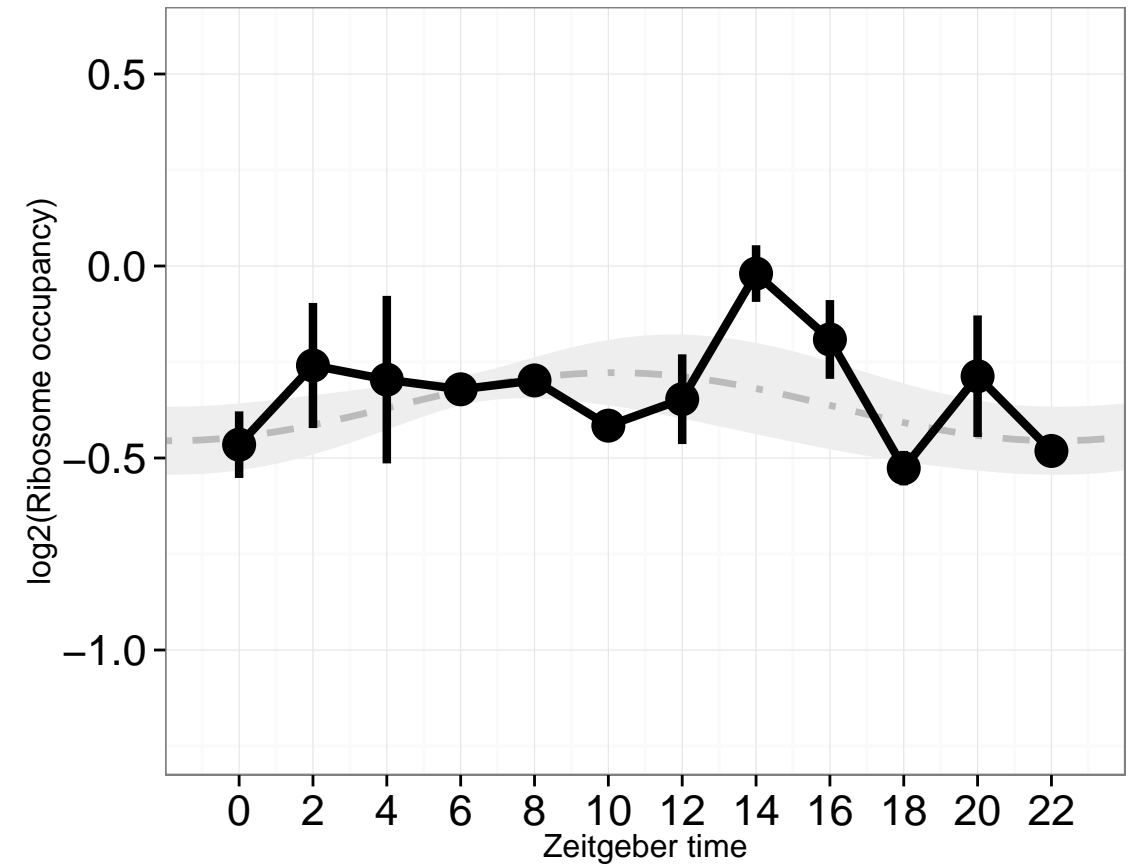

Supplement: SuppDataset_1.zip [file Thoc5_set_A.pdf › Supplemental Dataset 1/A-mRNA_nonrhyth_translation_nonrhyth/Thoc5_set_A.pdf]

## Thoc7

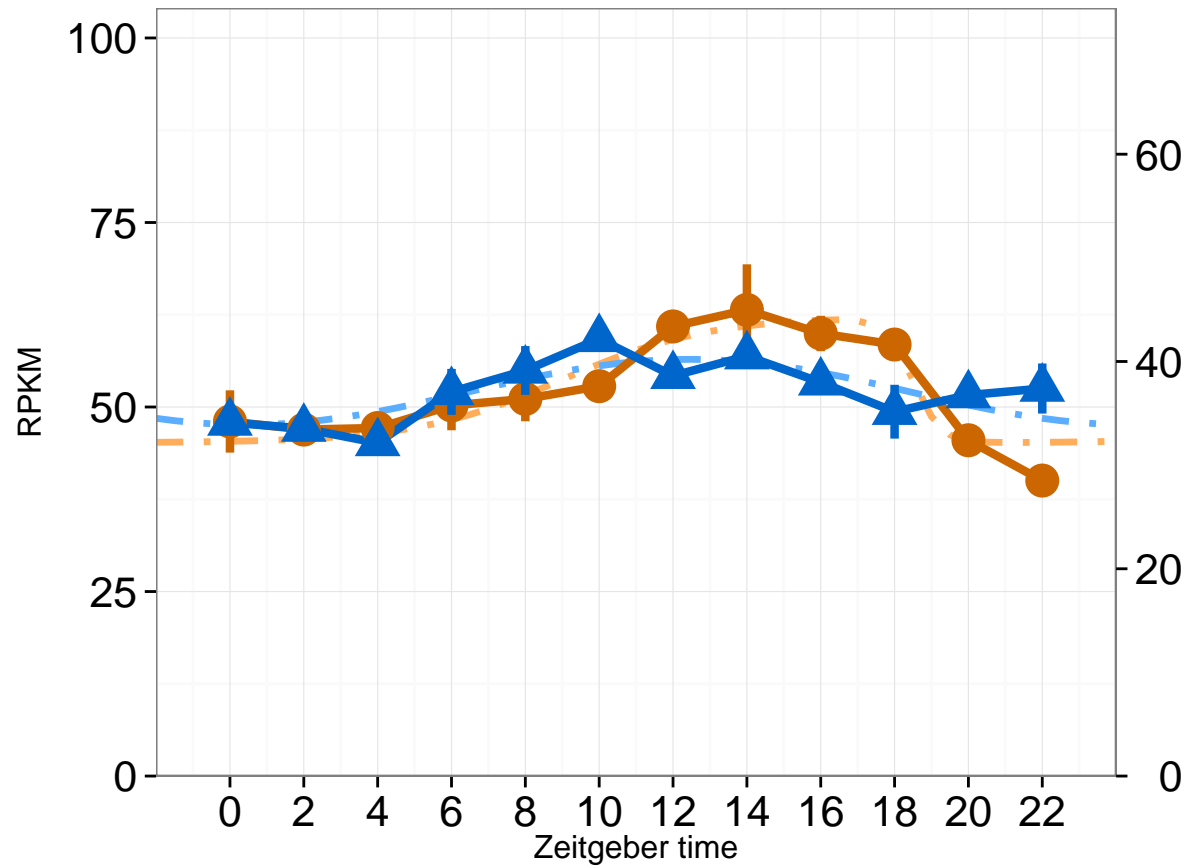

## Thoc7

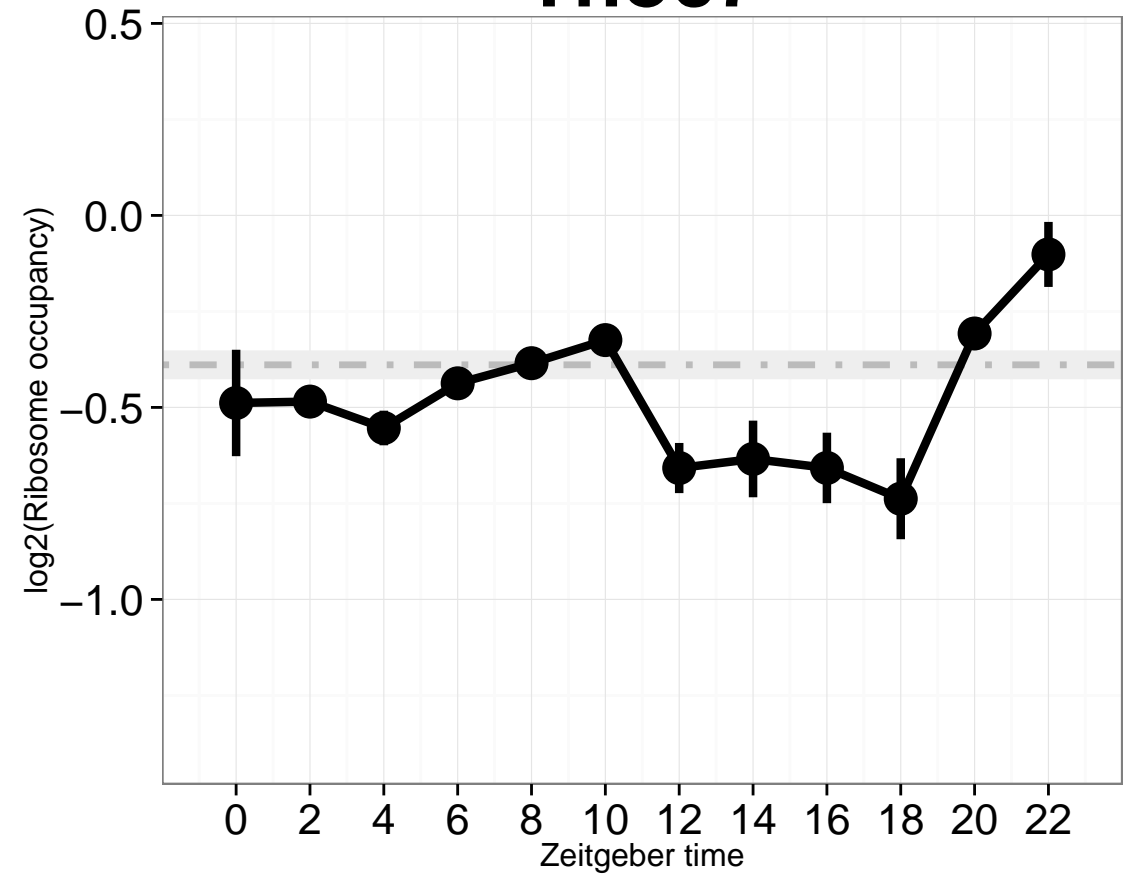

Supplement: SuppDataset_1.zip [file Thoc7_set_A.pdf › Supplemental Dataset 1/A-mRNA_nonrhyth_translation_nonrhyth/Thoc7_set_A.pdf]

# Thop1

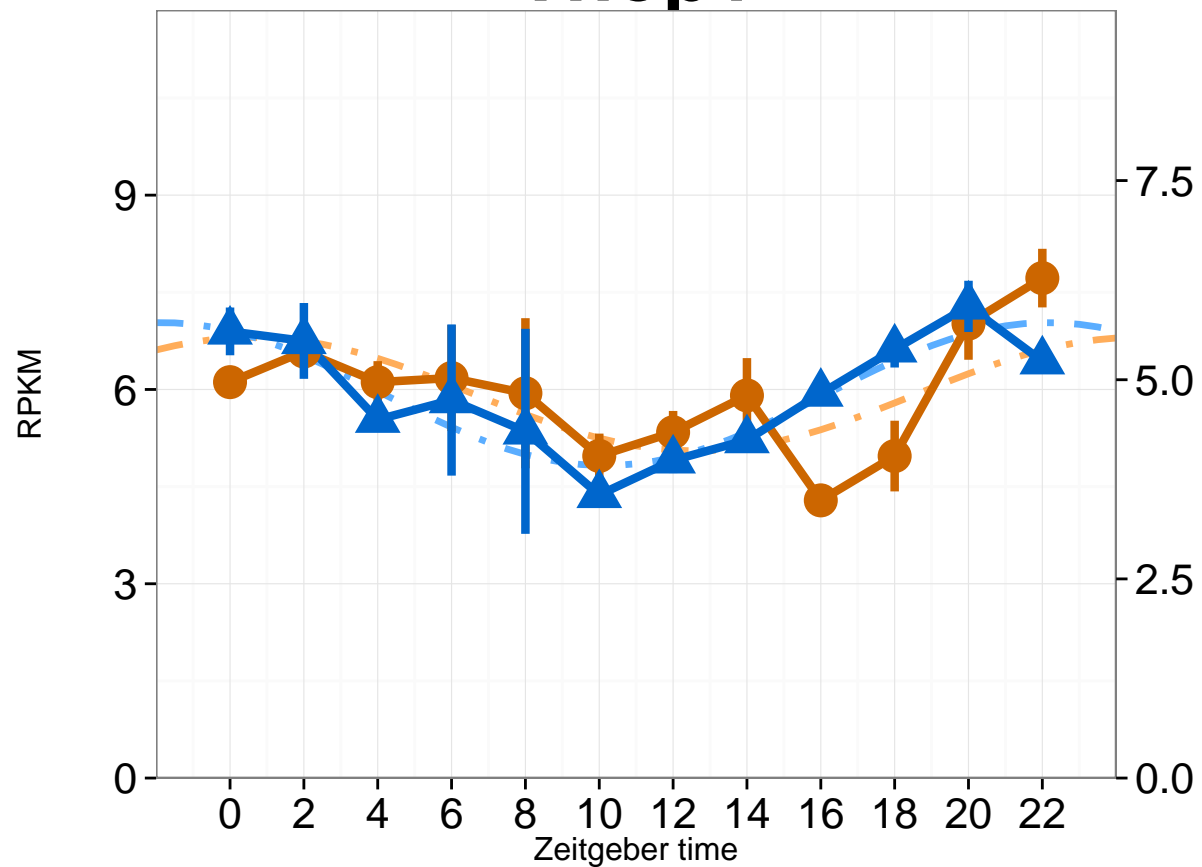

# Thop1

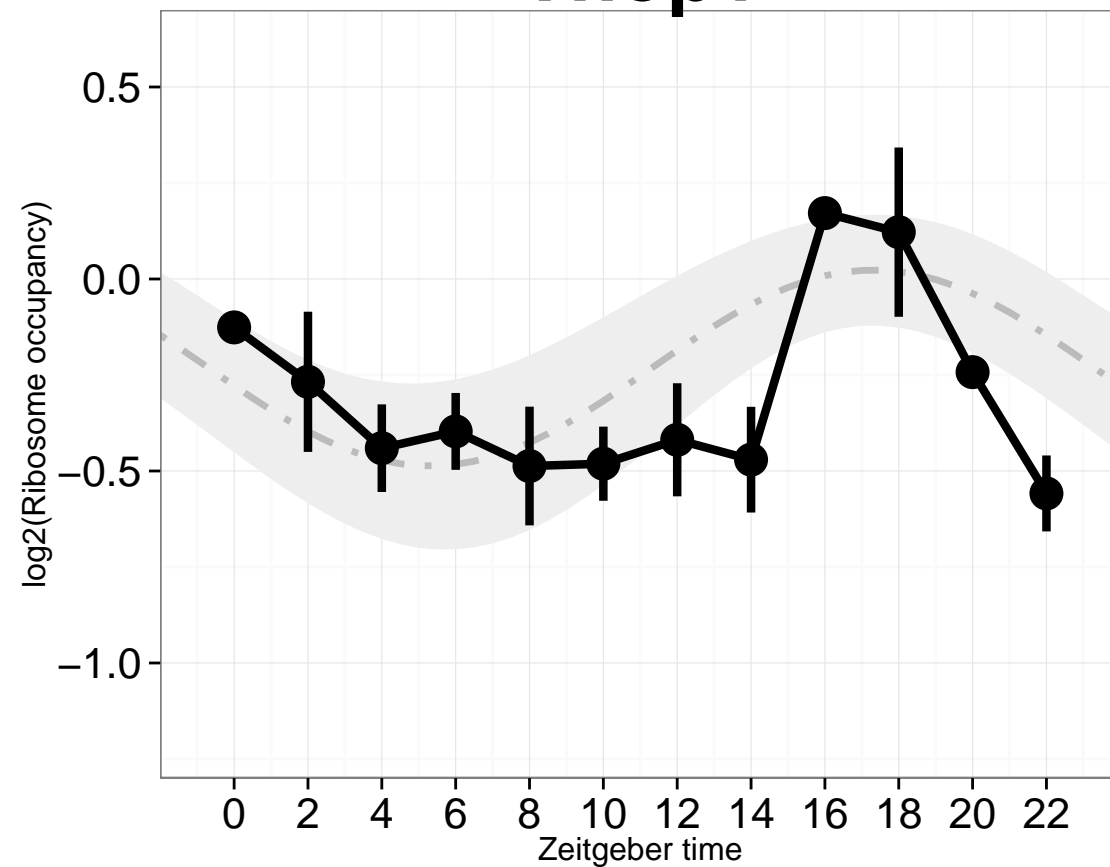

Supplement: SuppDataset_1.zip [file Thop1_set_A.pdf › Supplemental Dataset 1/A-mRNA_nonrhyth_translation_nonrhyth/Thop1_set_A.pdf]

## Thrb

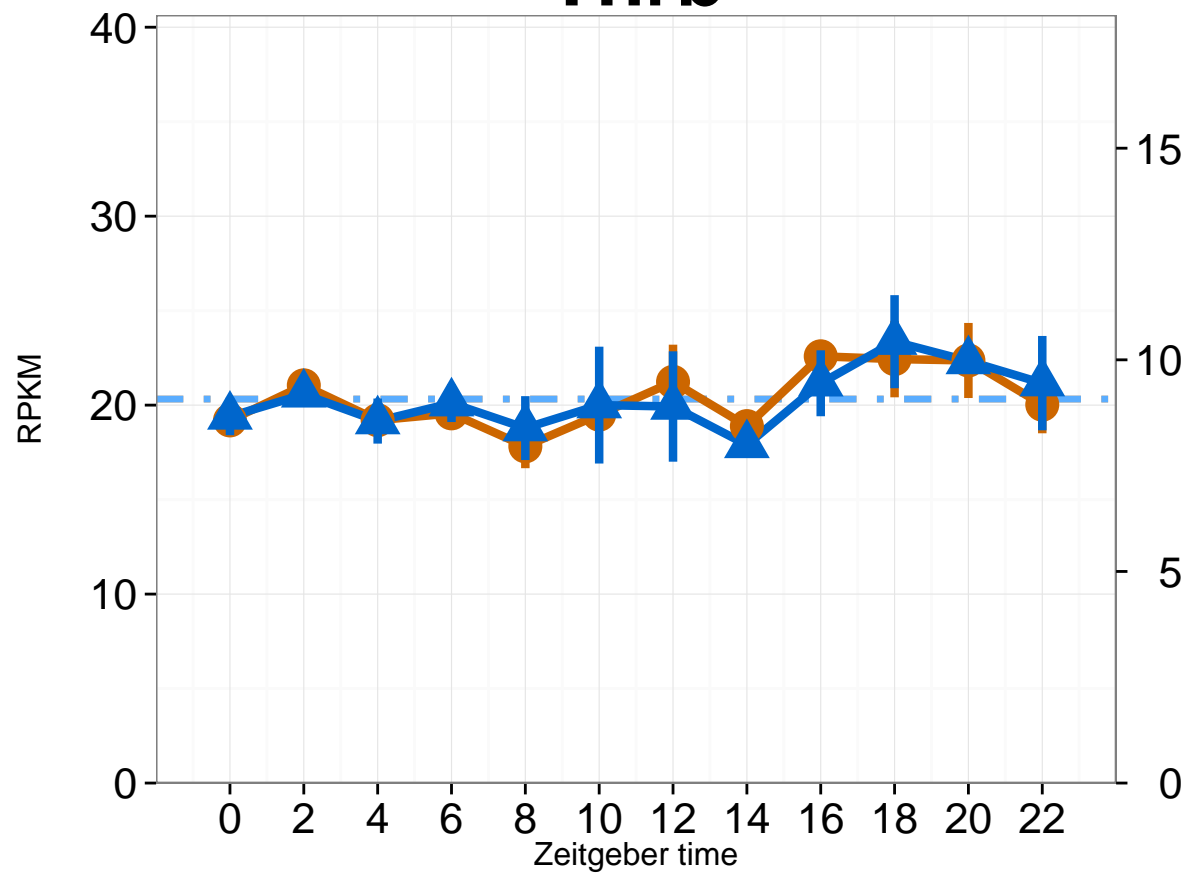

## Thrb

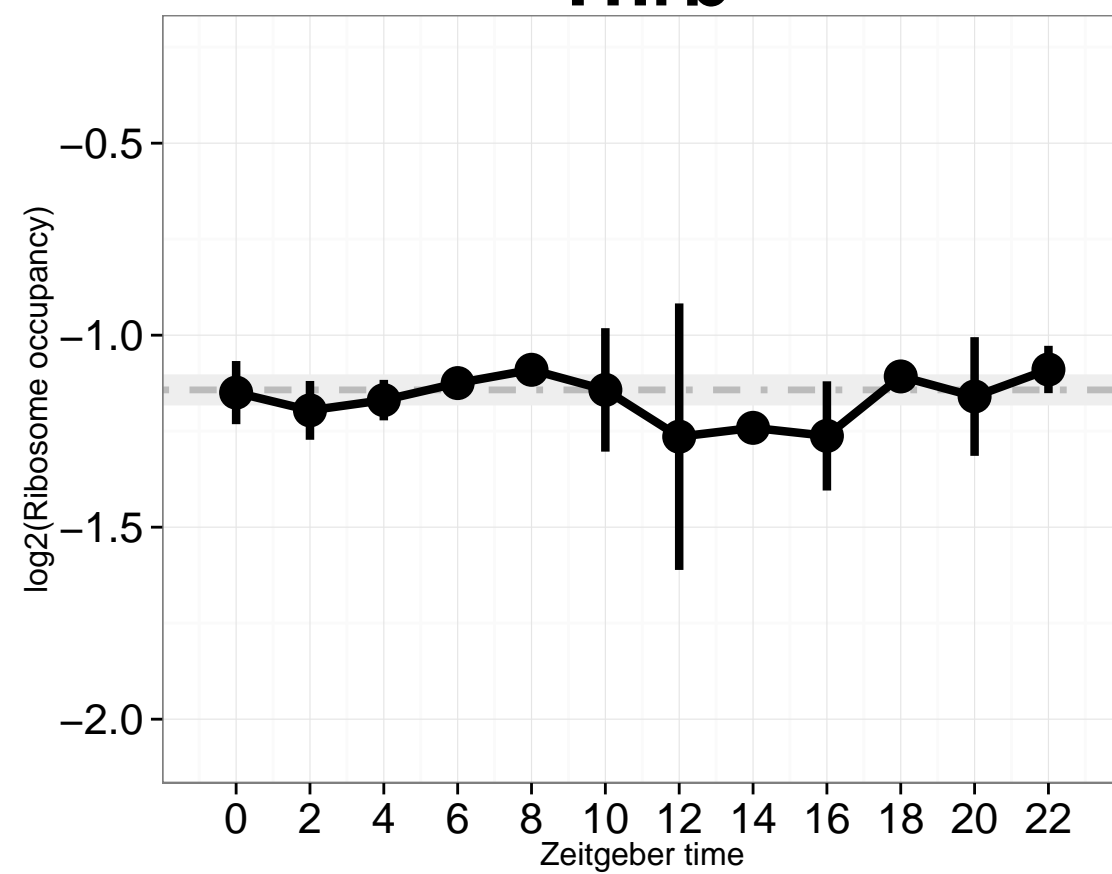

Supplement: SuppDataset_1.zip [file Thrb_set_A.pdf › Supplemental Dataset 1/A-mRNA_nonrhyth_translation_nonrhyth/Thrb_set_A.pdf]

# Thsd1

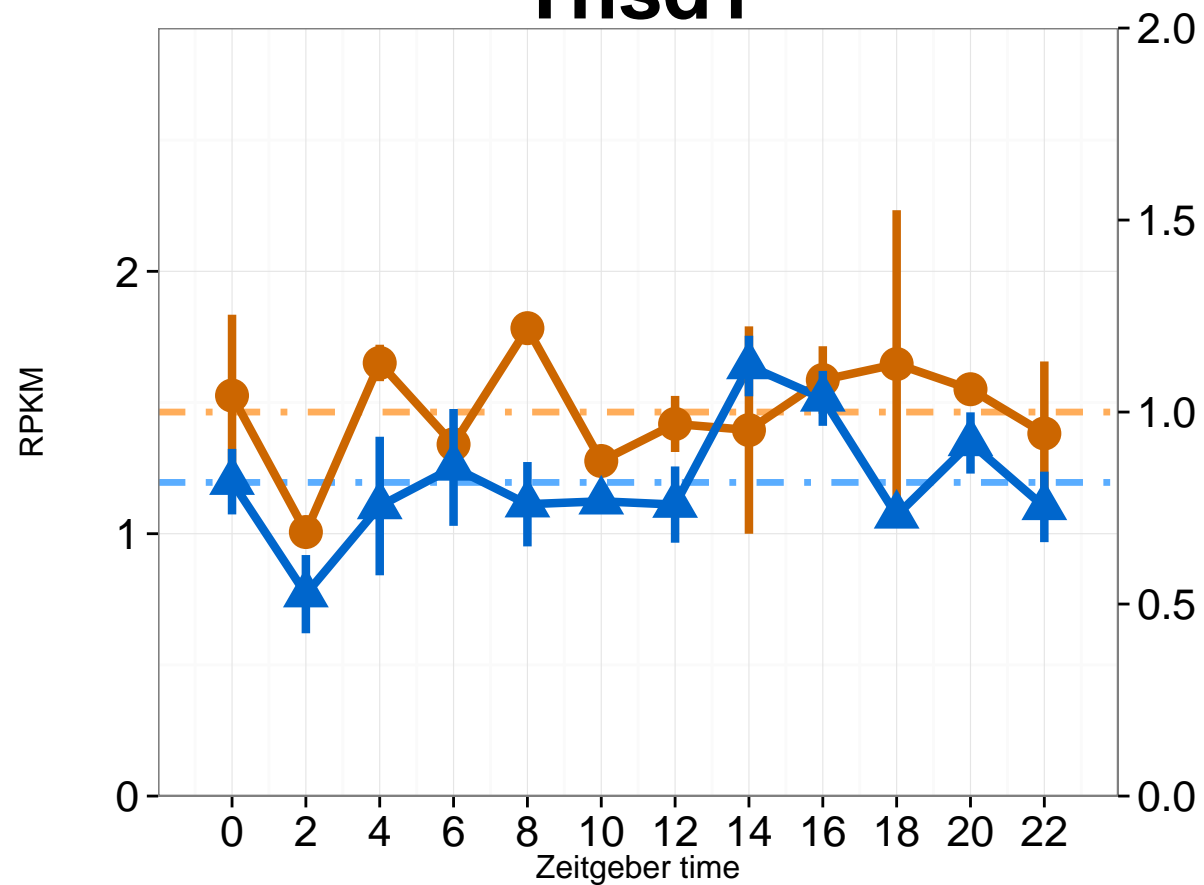

# Thsd1

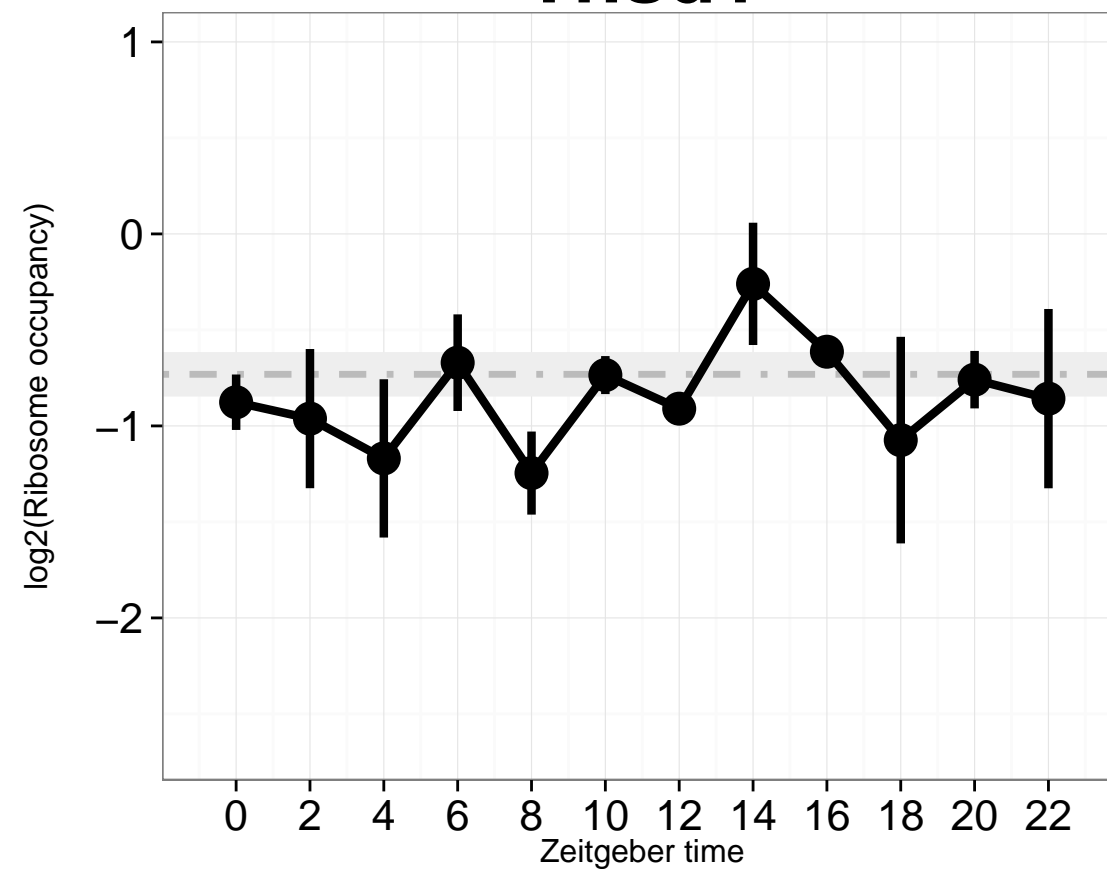

Supplement: SuppDataset_1.zip [file Thsd1_set_A.pdf › Supplemental Dataset 1/A-mRNA_nonrhyth_translation_nonrhyth/Thsd1_set_A.pdf]

## Thumpd1

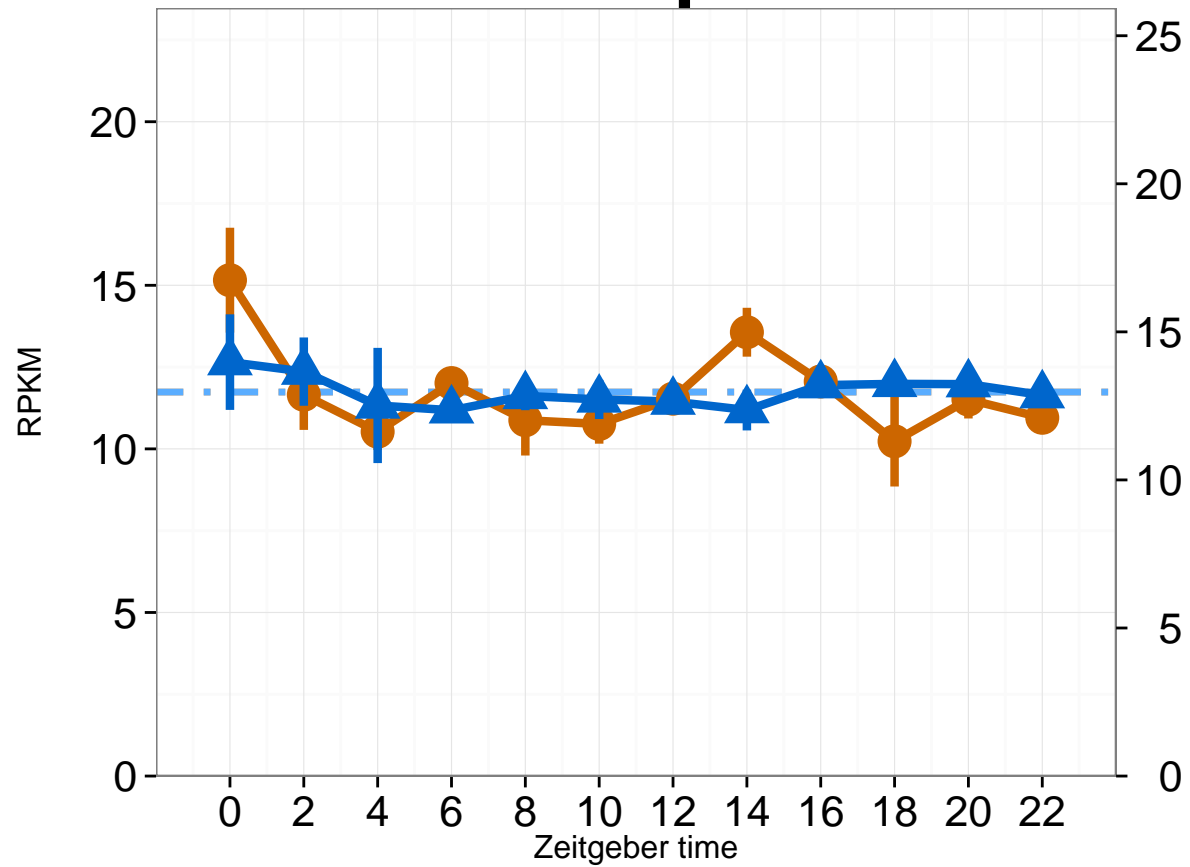

## Thumpd1

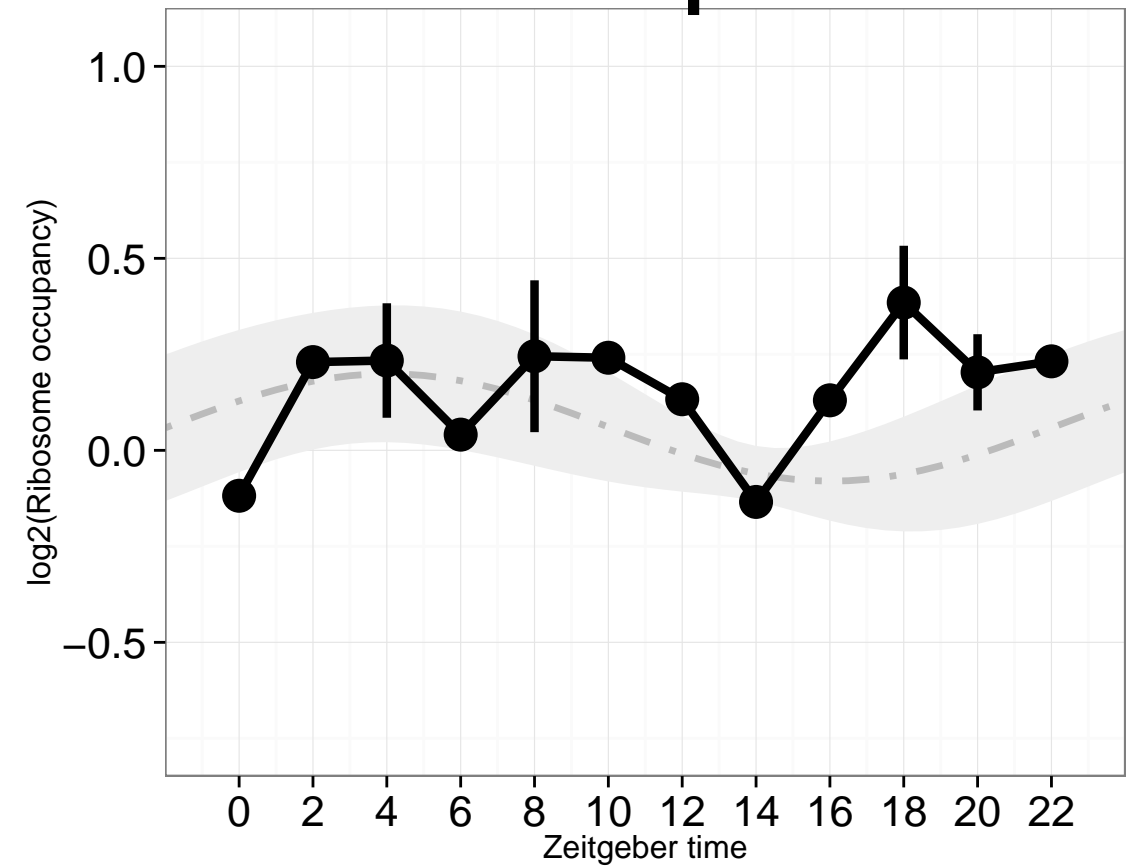

Supplement: SuppDataset_1.zip [file Thumpd1_set_A.pdf › Supplemental Dataset 1/A-mRNA_nonrhyth_translation_nonrhyth/Thumpd1_set_A.pdf]

## Thumpd2

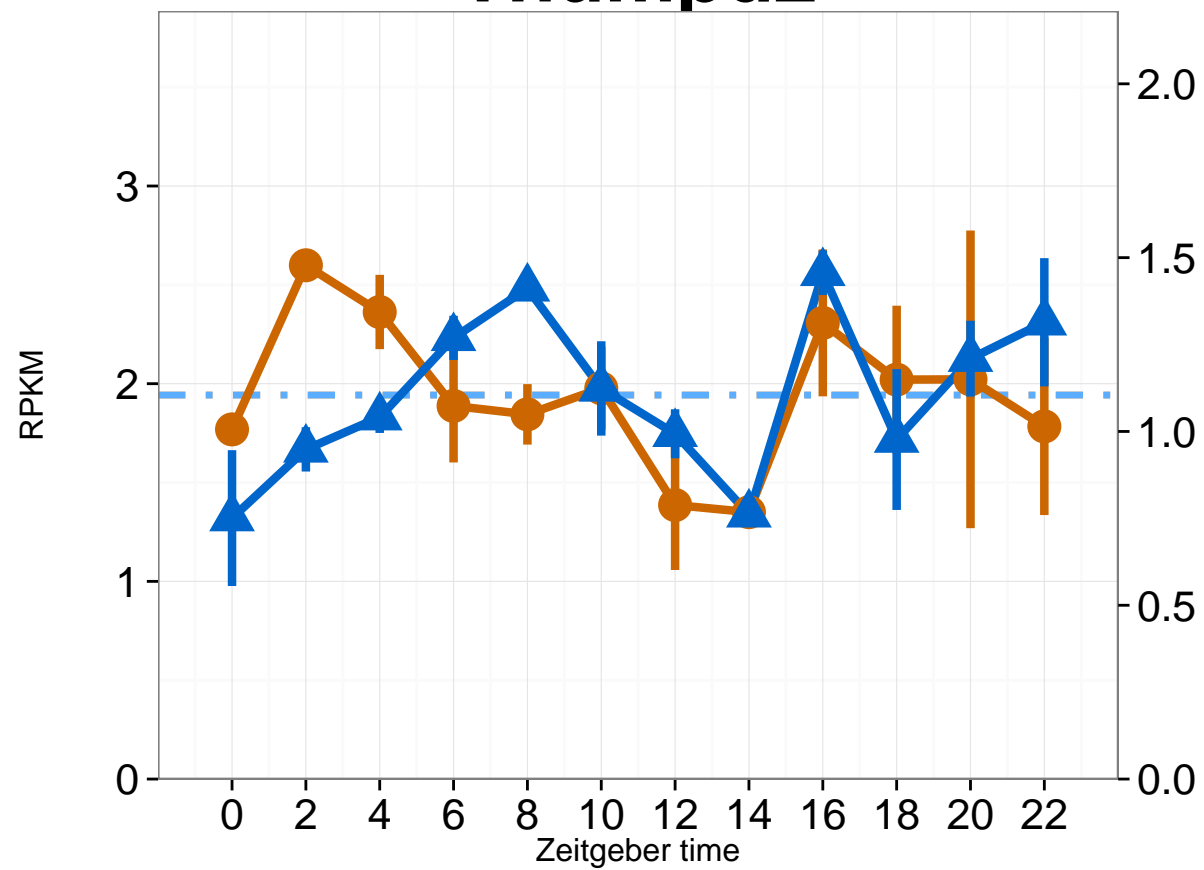

## Thumpd2

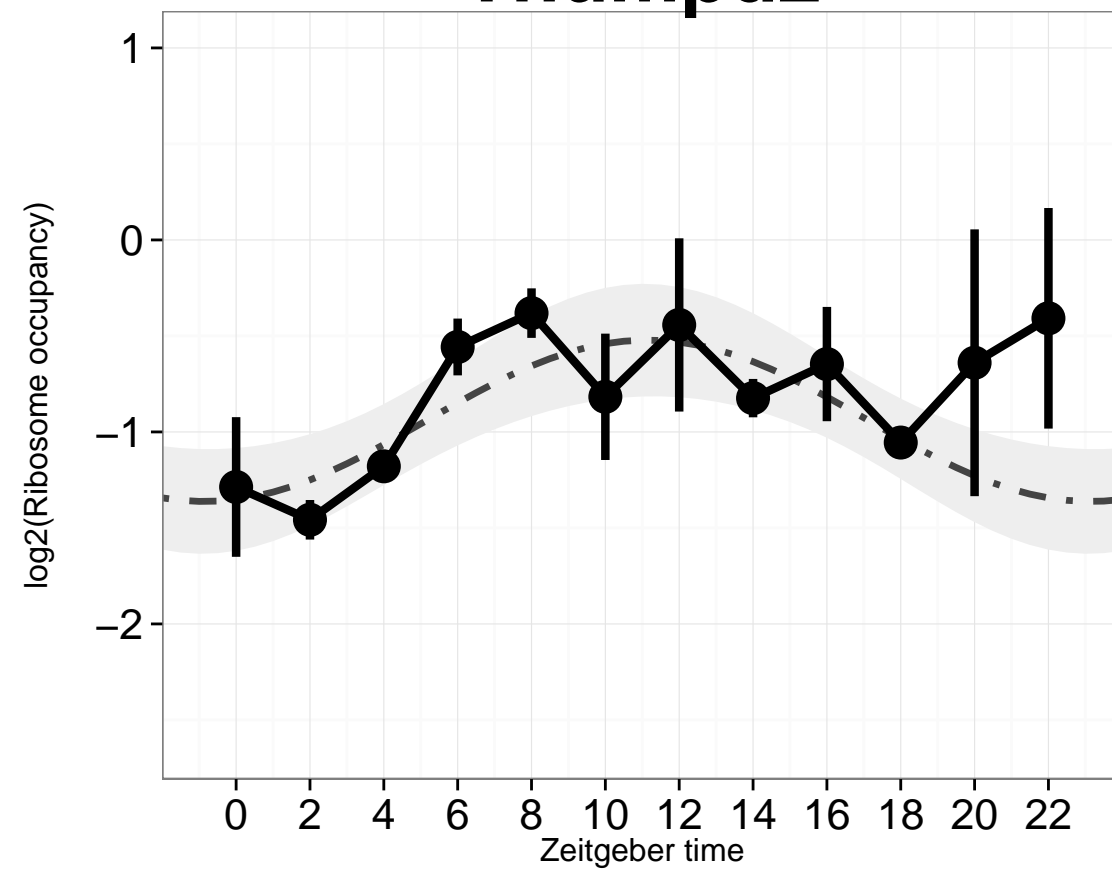

Supplement: SuppDataset_1.zip [file Thumpd2_set_A.pdf › Supplemental Dataset 1/A-mRNA_nonrhyth_translation_nonrhyth/Thumpd2_set_A.pdf]

## Thumpd3

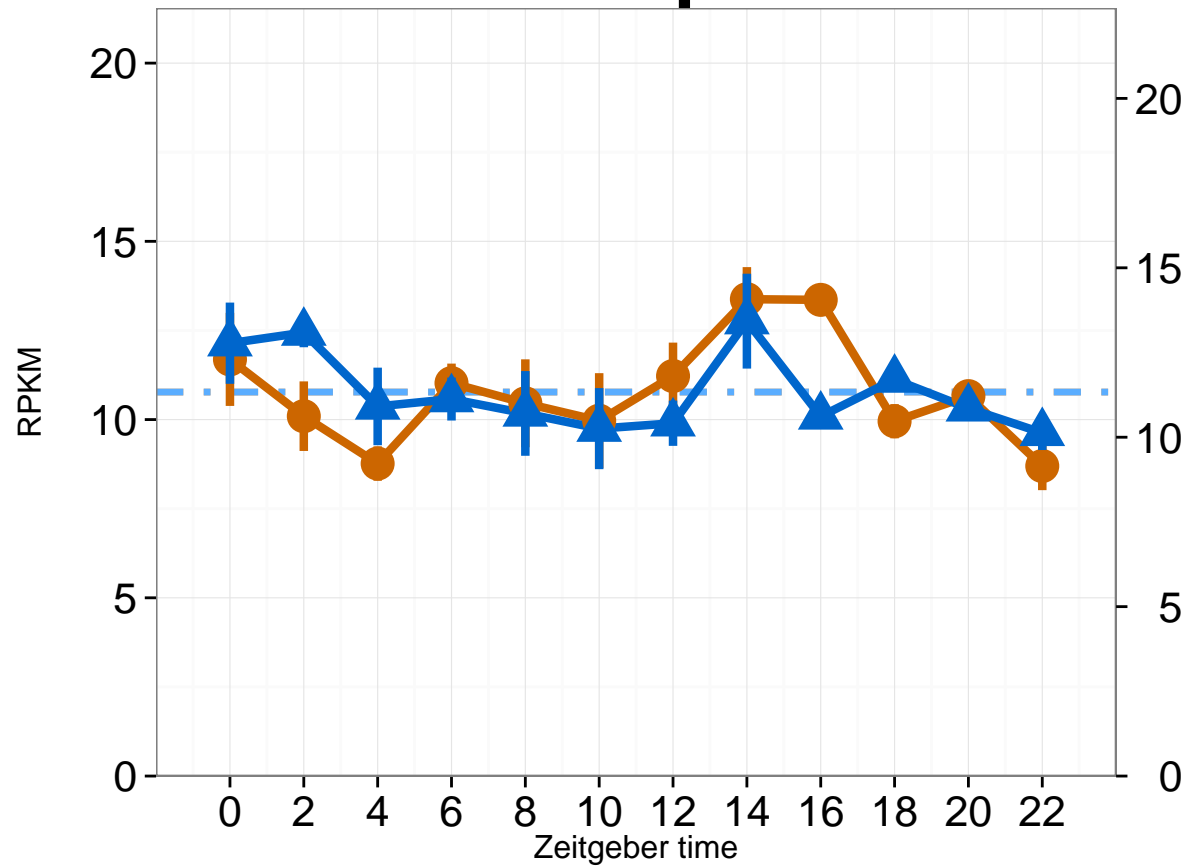

## Thumpd3

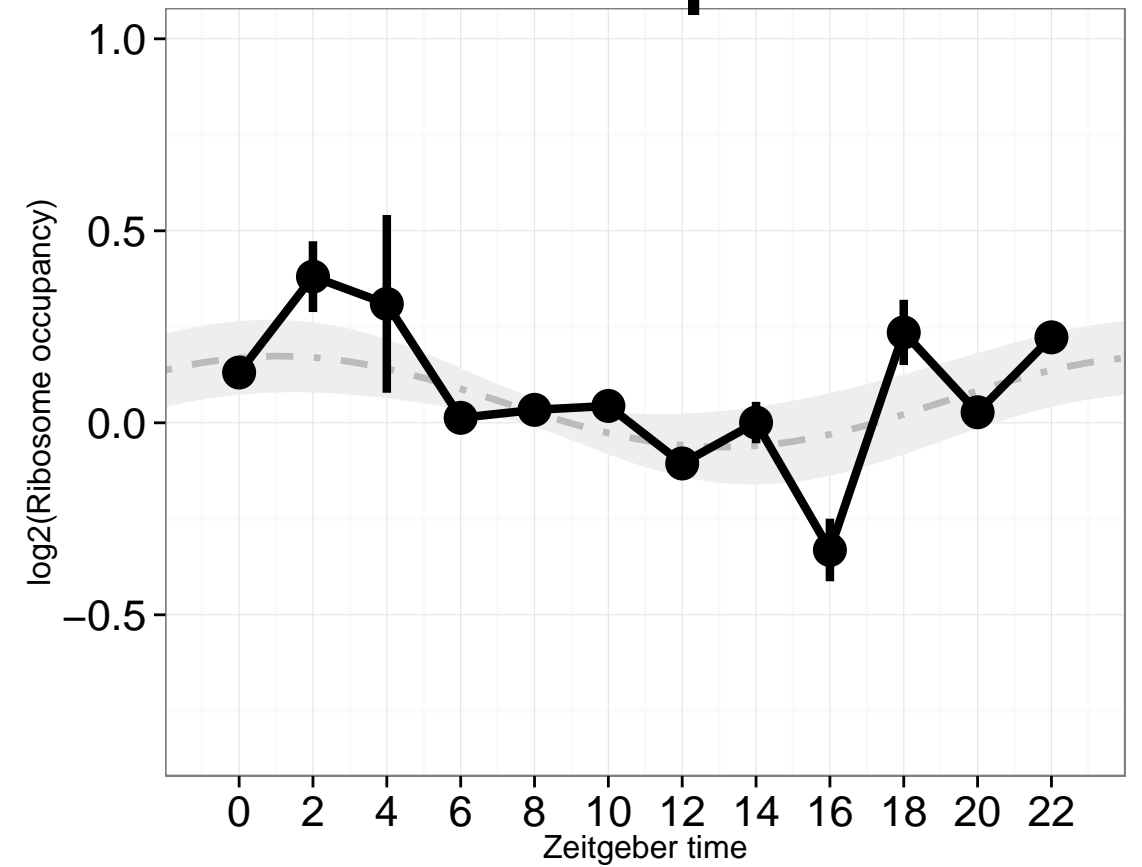

Supplement: SuppDataset_1.zip [file Thumpd3_set_A.pdf › Supplemental Dataset 1/A-mRNA_nonrhyth_translation_nonrhyth/Thumpd3_set_A.pdf]

**Thy1 TR**

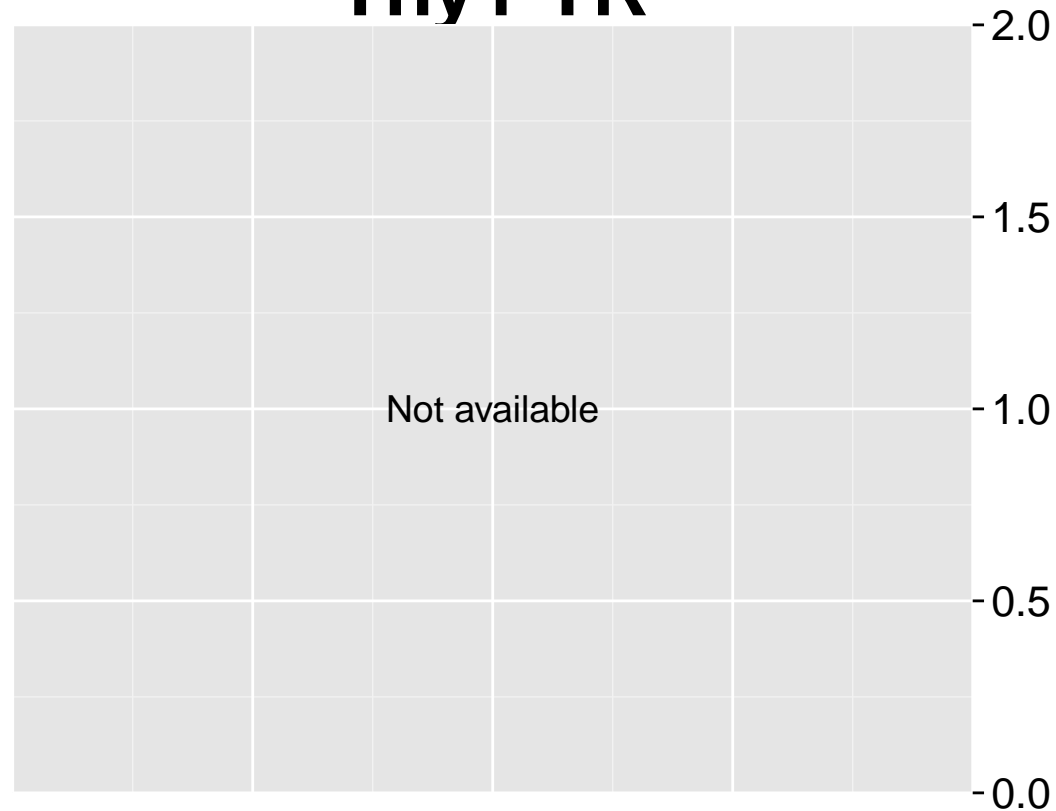

**Thy1 log2(Ribosome occupancy)**

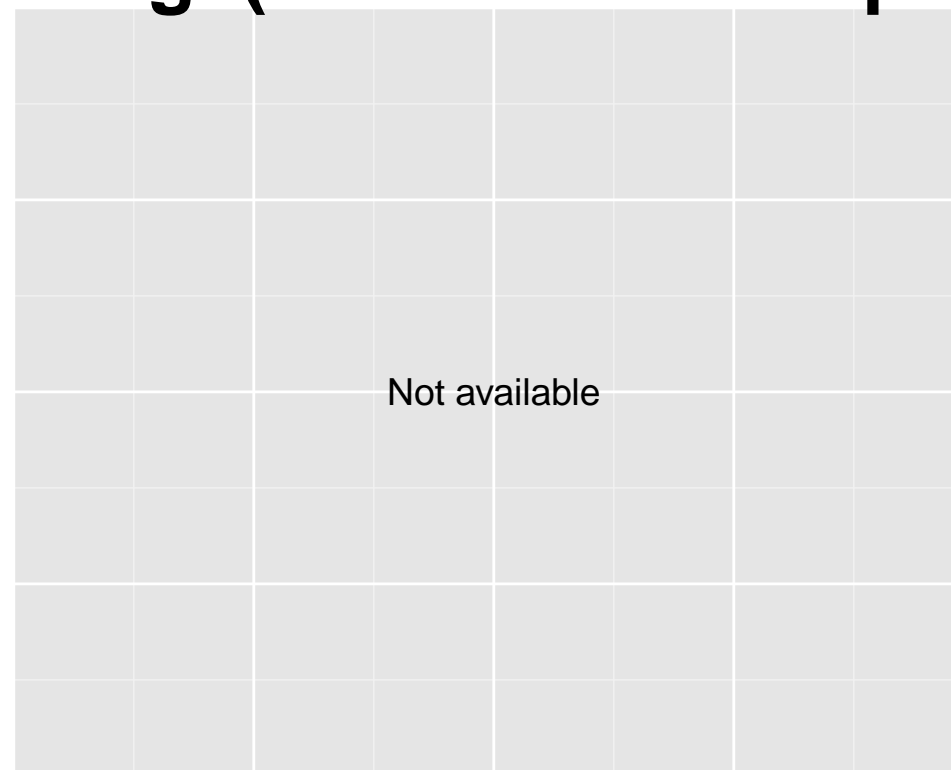

Supplement: SuppDataset_1.zip [file Thy1_set_A.pdf › Supplemental Dataset 1/A-mRNA_nonrhyth_translation_nonrhyth/Thy1_set_A.pdf]

# Thyn1

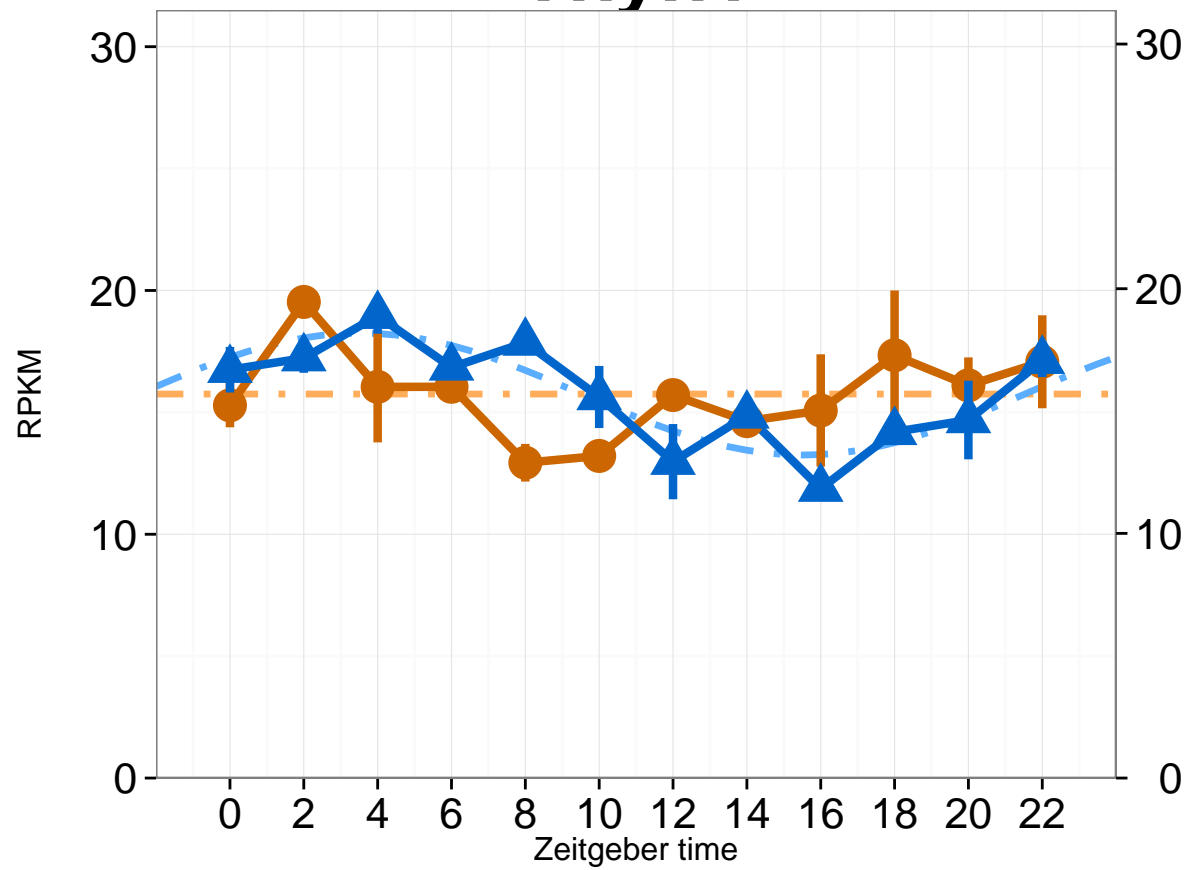

# Thyn1

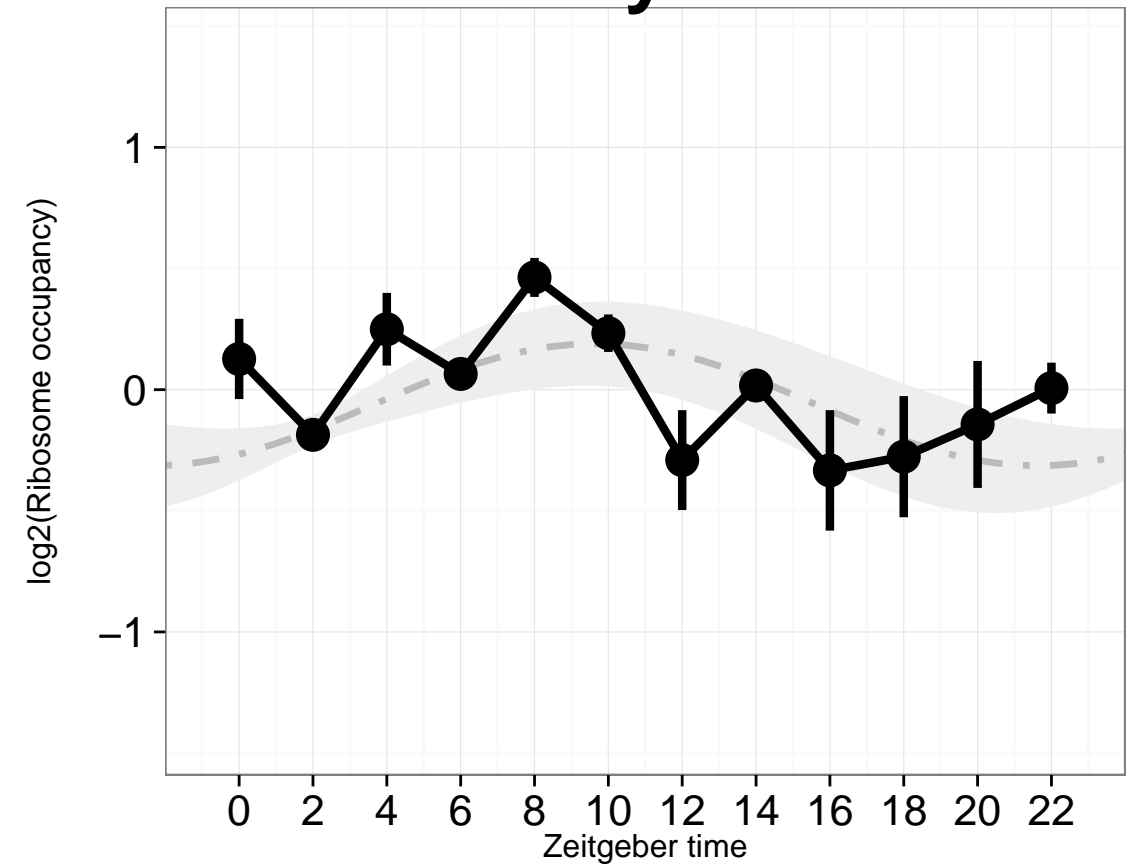

Supplement: SuppDataset_1.zip [file Thyn1_set_A.pdf › Supplemental Dataset 1/A-mRNA_nonrhyth_translation_nonrhyth/Thyn1_set_A.pdf]

## Tia1

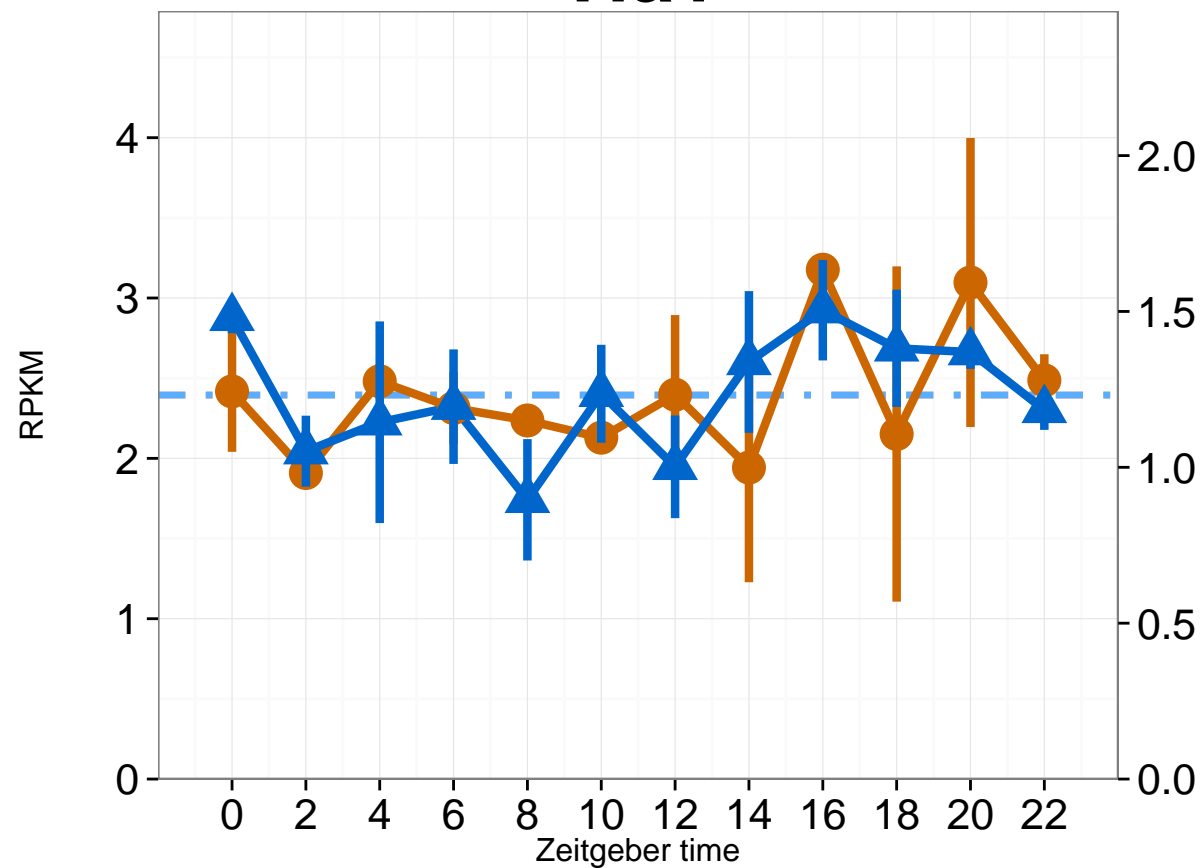

## Tia1

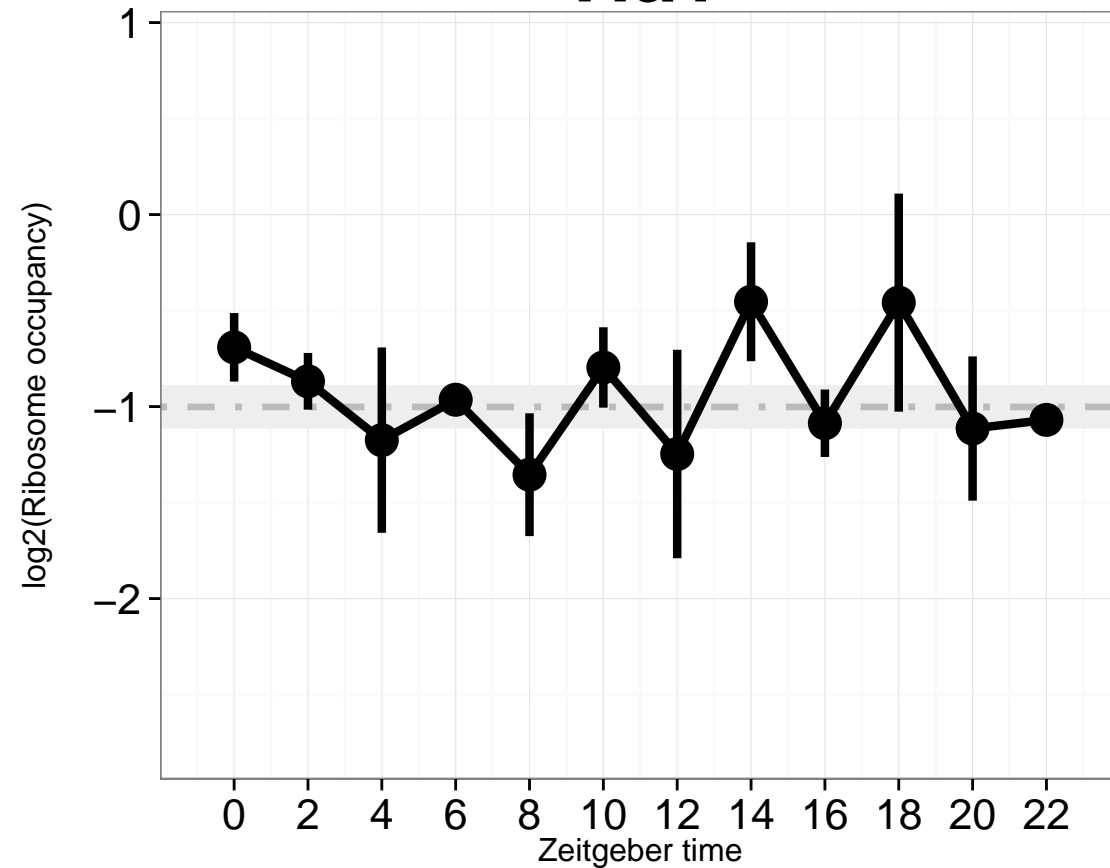

Supplement: SuppDataset_1.zip [file Tia1_set_A.pdf › Supplemental Dataset 1/A-mRNA_nonrhyth_translation_nonrhyth/Tia1_set_A.pdf]

# Tial1

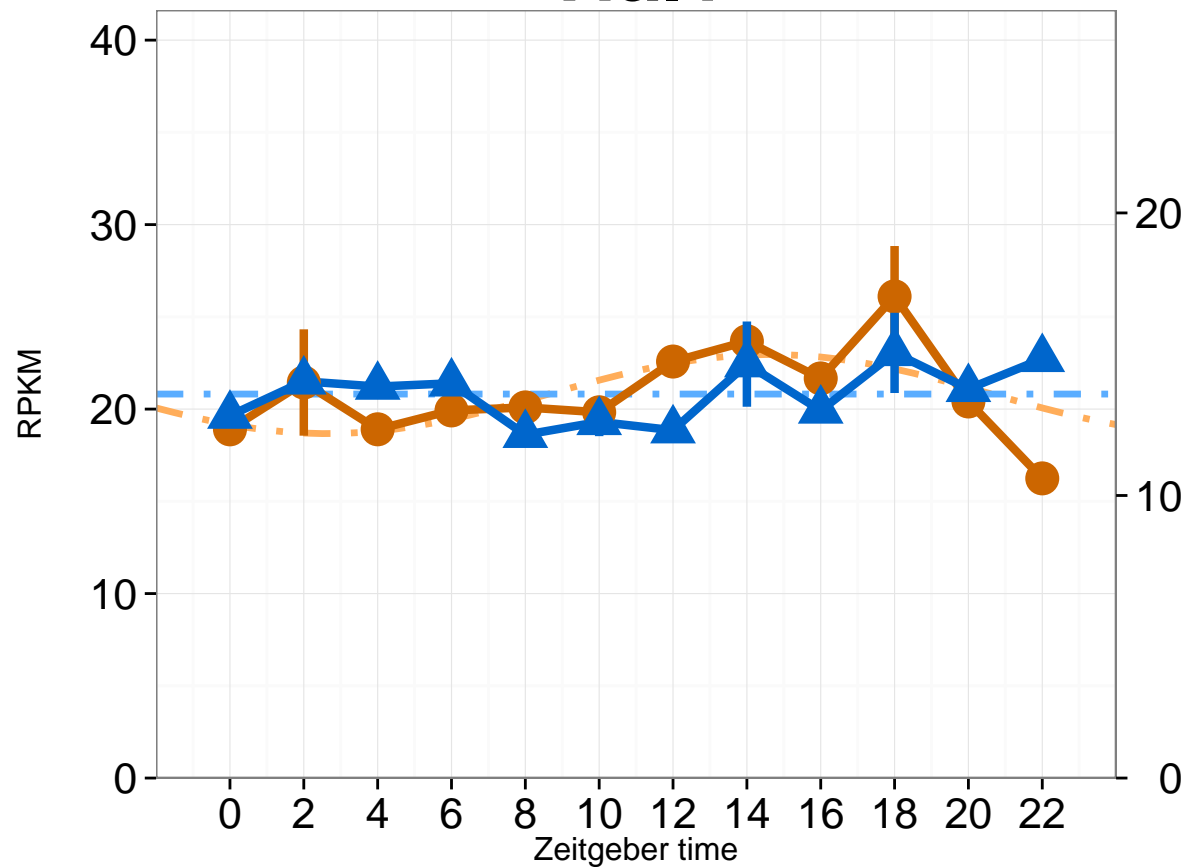

# Tial1

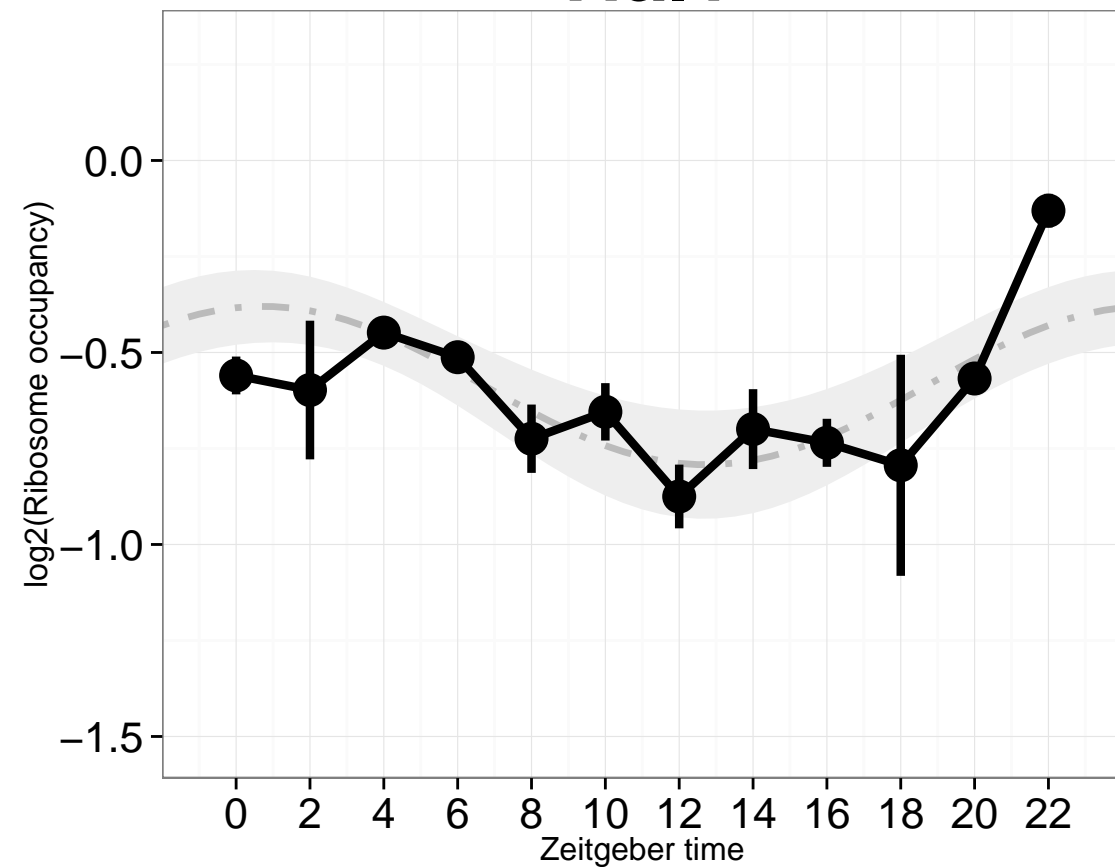

Supplement: SuppDataset_1.zip [file Tial1_set_A.pdf › Supplemental Dataset 1/A-mRNA_nonrhyth_translation_nonrhyth/Tial1_set_A.pdf]

## Tiam2

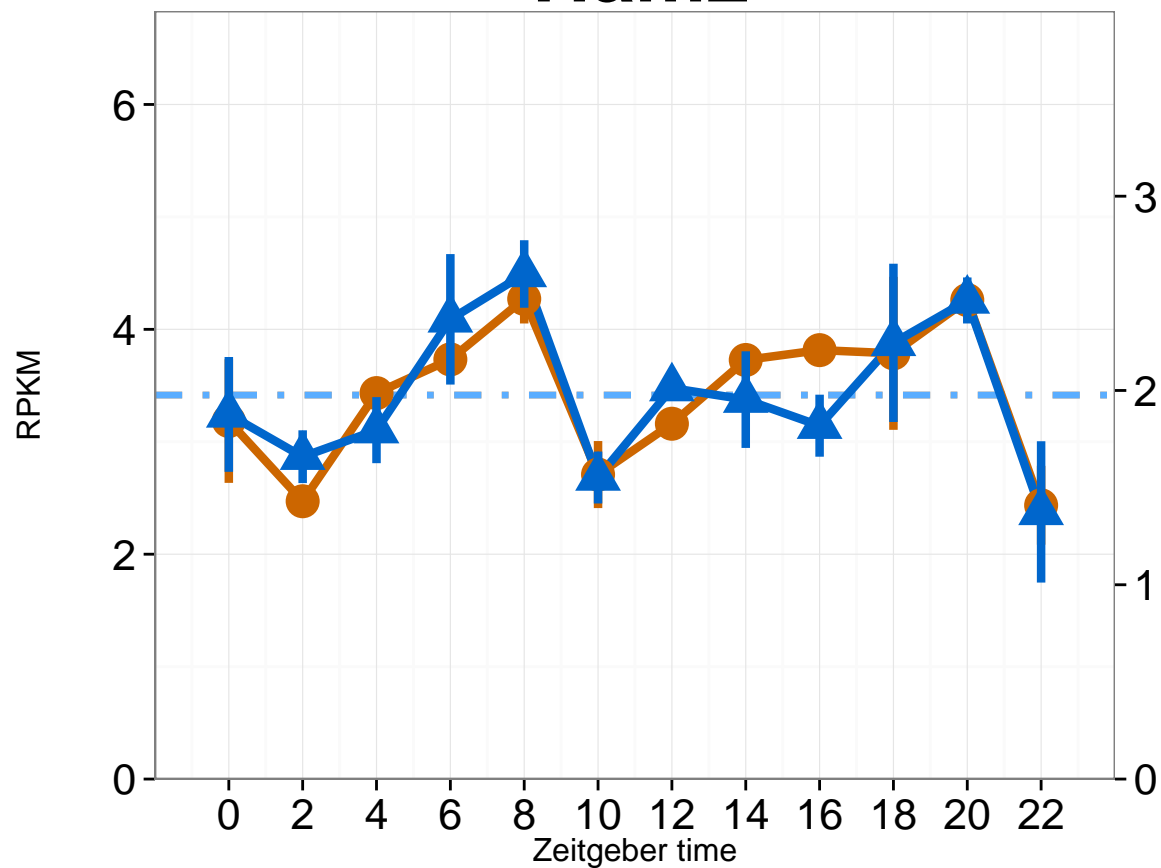

## Tiam2

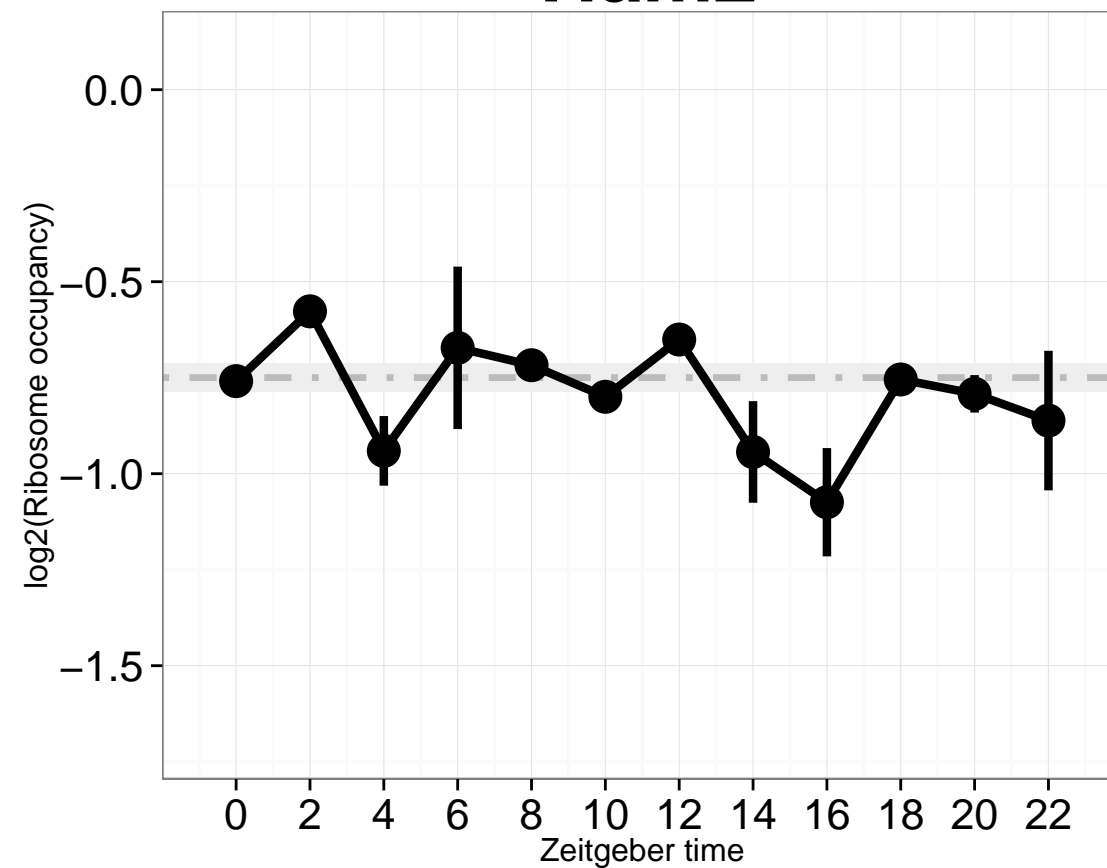

Supplement: SuppDataset_1.zip [file Tiam2_set_A.pdf › Supplemental Dataset 1/A-mRNA_nonrhyth_translation_nonrhyth/Tiam2_set_A.pdf]

# Ticam1

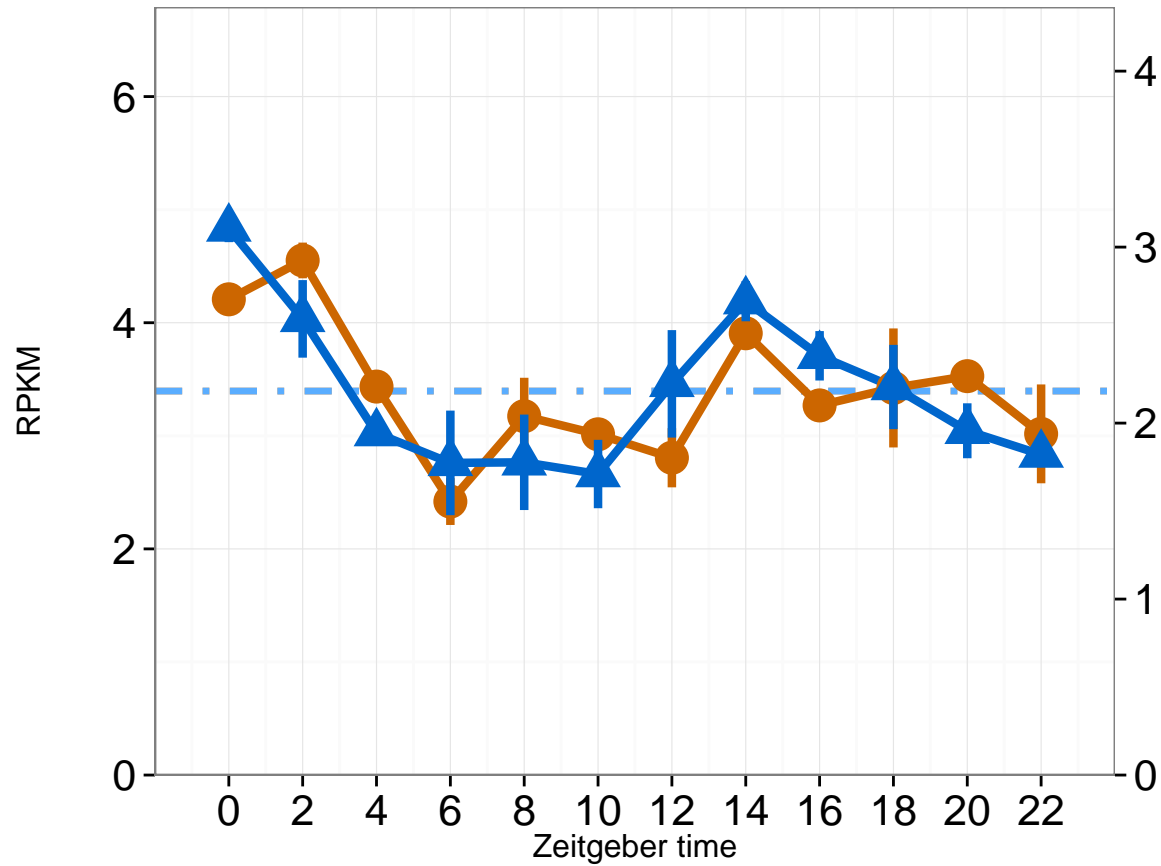

# Ticam1

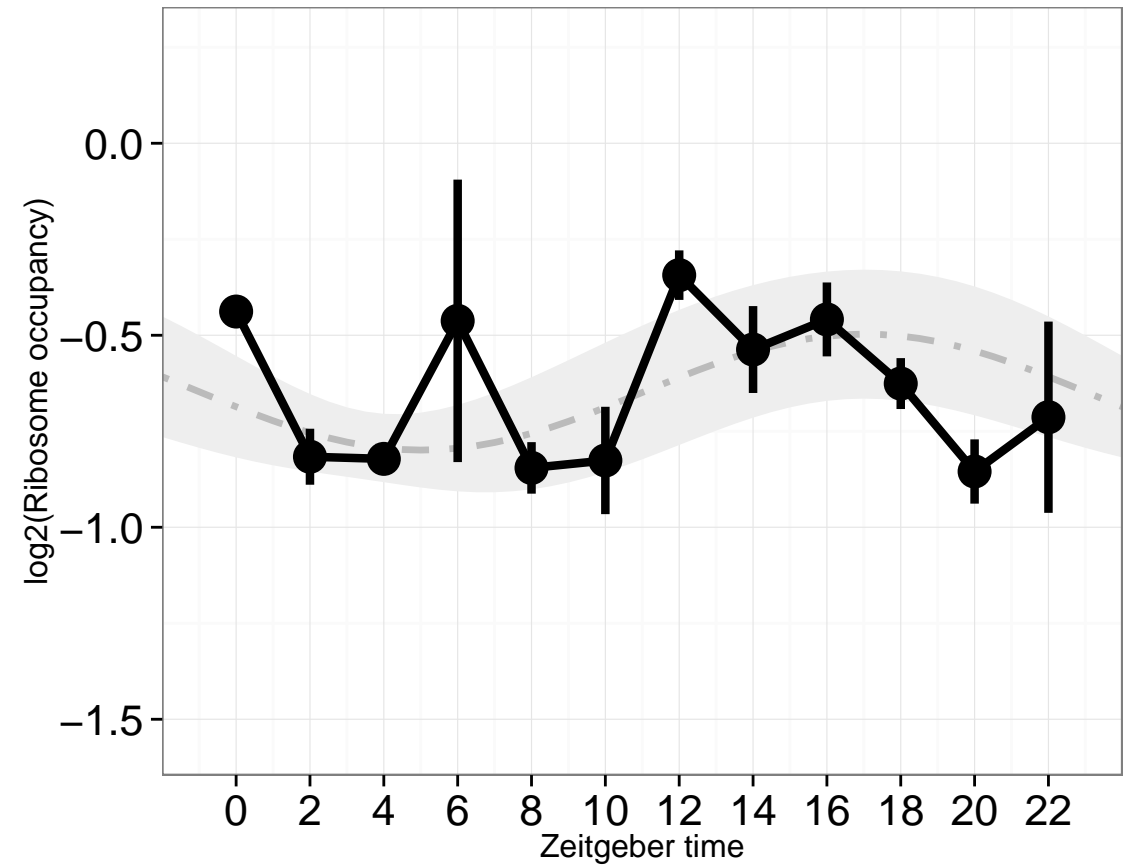

Supplement: SuppDataset_1.zip [file Ticam1_set_A.pdf › Supplemental Dataset 1/A-mRNA_nonrhyth_translation_nonrhyth/Ticam1_set_A.pdf]

## Tie1

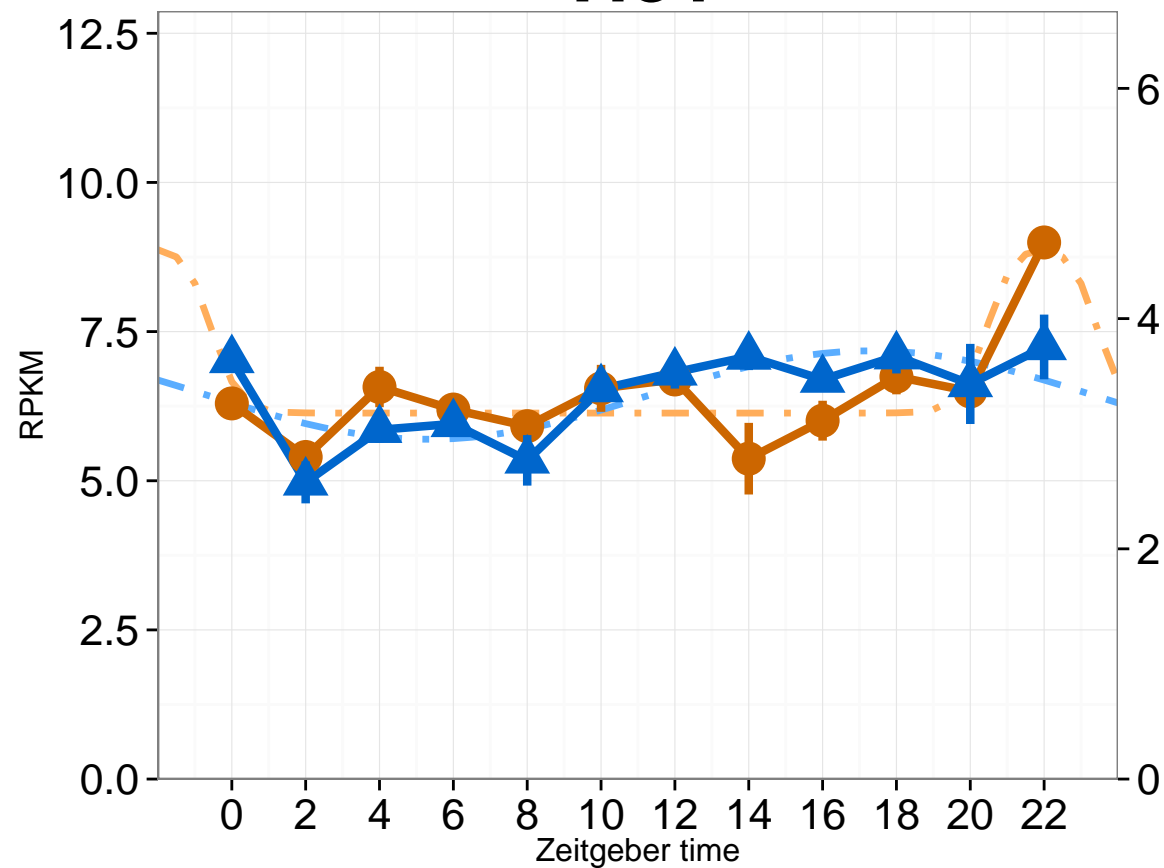

## Tie1

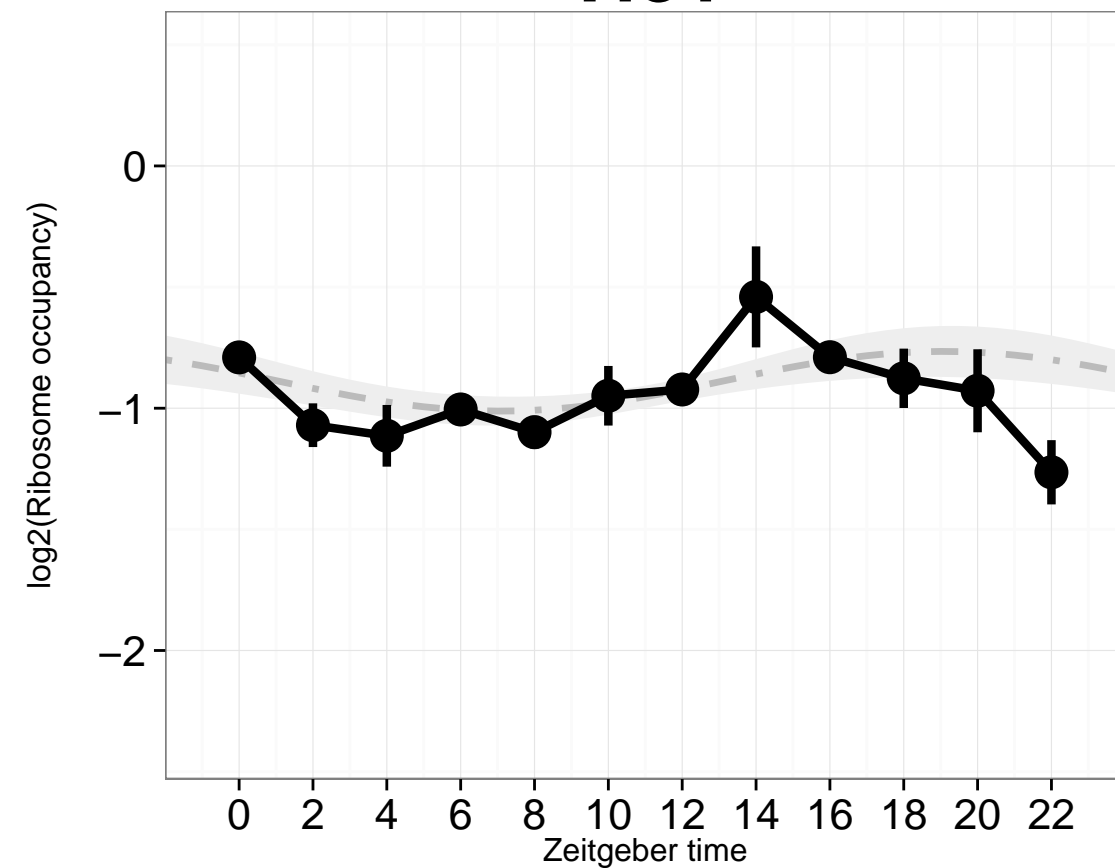

Supplement: SuppDataset_1.zip [file Tie1_set_A.pdf › Supplemental Dataset 1/A-mRNA_nonrhyth_translation_nonrhyth/Tie1_set_A.pdf]

## Tifab

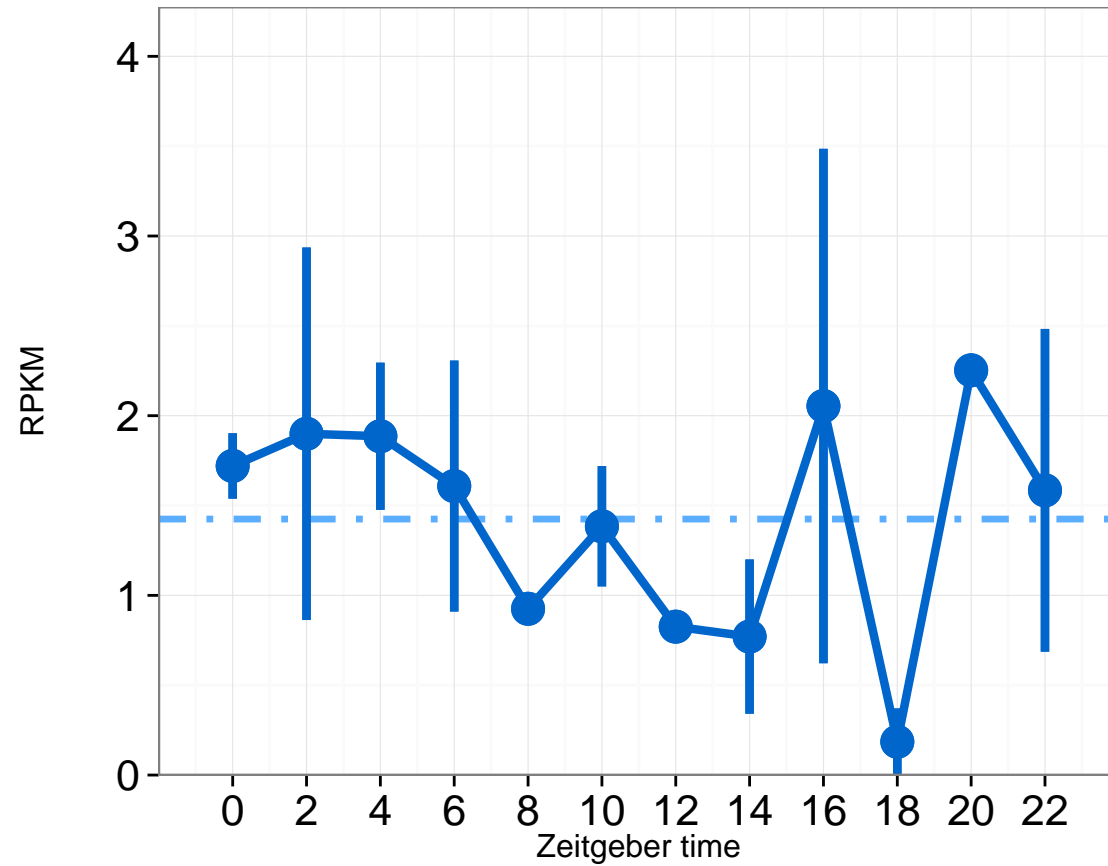

## Tifab log2(Ribosome occupancy)

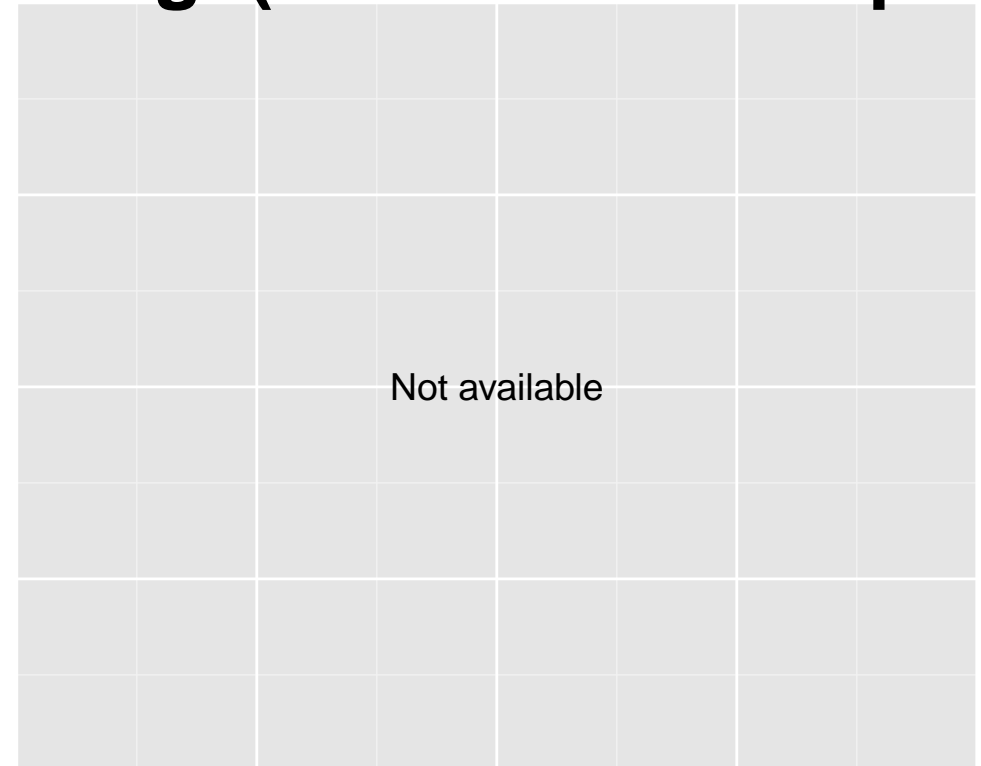

Supplement: SuppDataset_1.zip [file Tifab_set_A.pdf › Supplemental Dataset 1/A-mRNA_nonrhyth_translation_nonrhyth/Tifab_set_A.pdf]

## Timd2

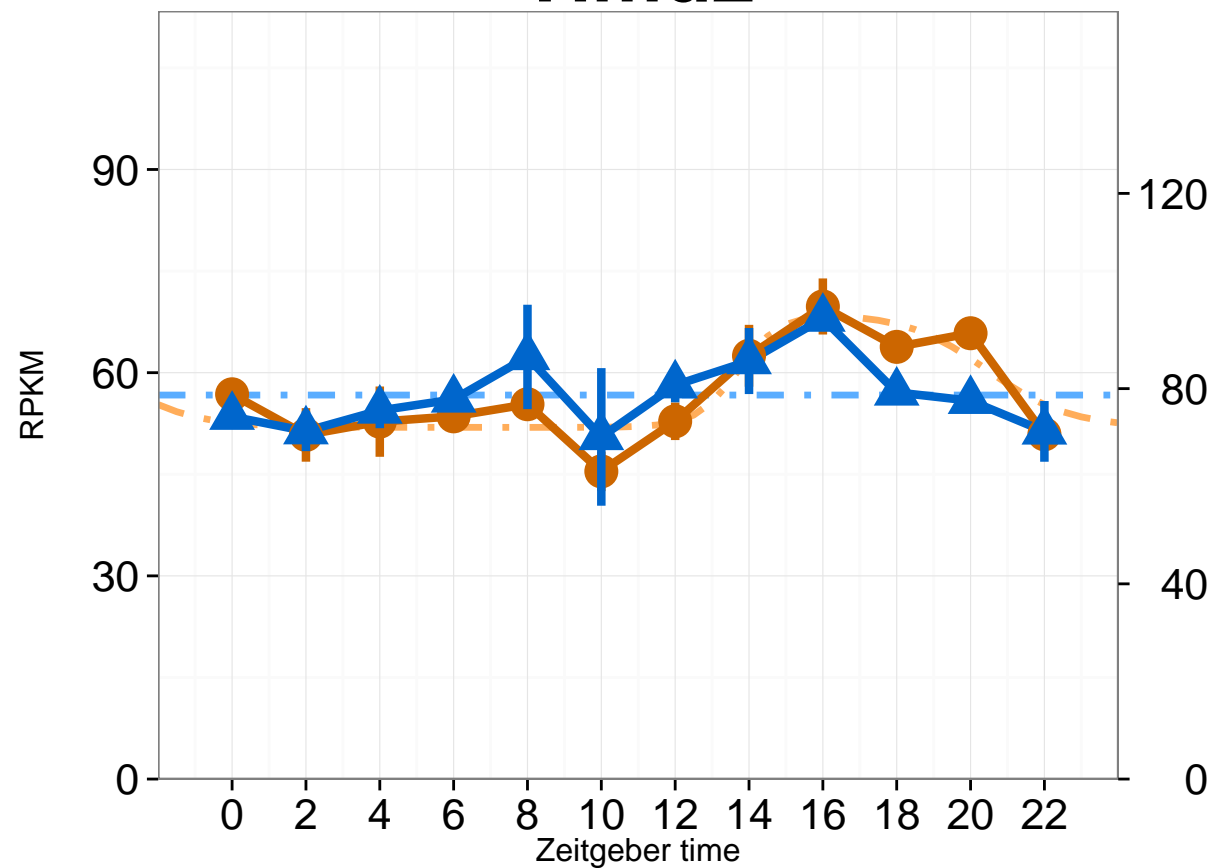

## Timd2

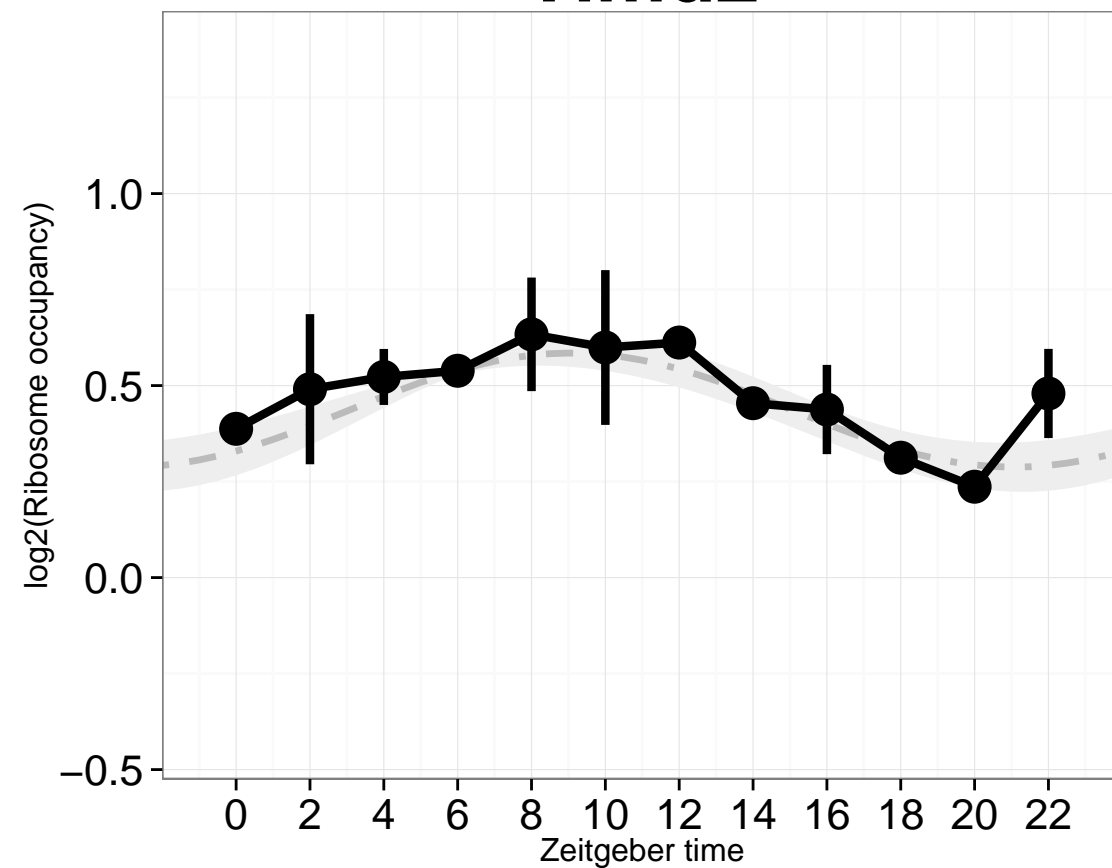

Supplement: SuppDataset_1.zip [file Timd2_set_A.pdf › Supplemental Dataset 1/A-mRNA_nonrhyth_translation_nonrhyth/Timd2_set_A.pdf]

# Timd4

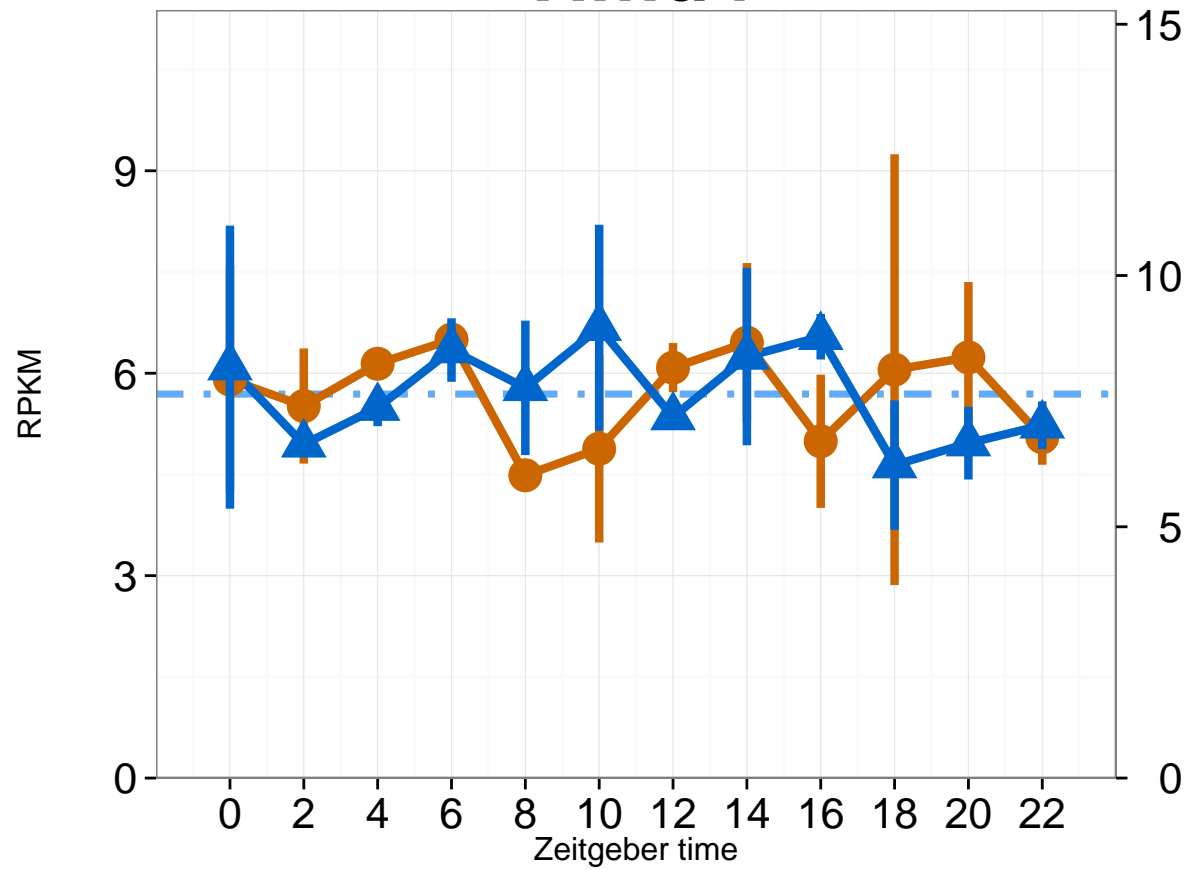

# Timd4

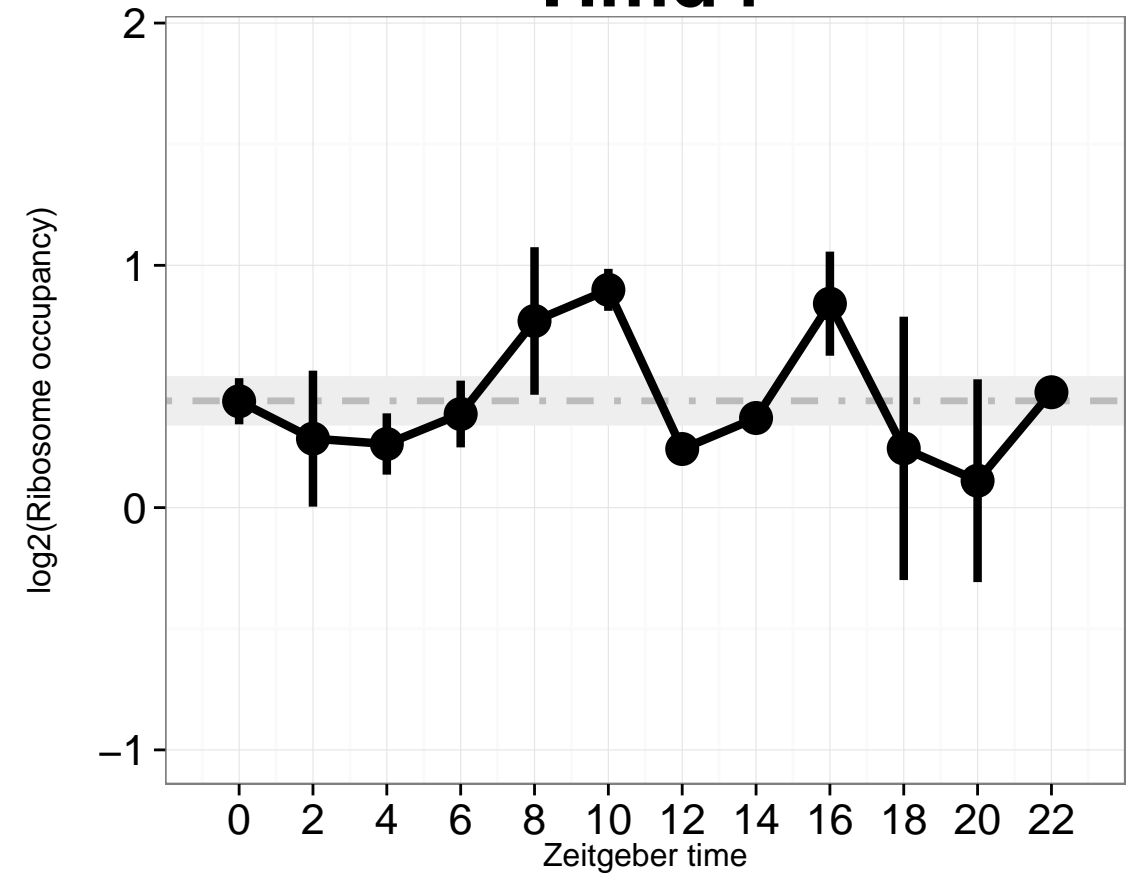

Supplement: SuppDataset_1.zip [file Timd4_set_A.pdf › Supplemental Dataset 1/A-mRNA_nonrhyth_translation_nonrhyth/Timd4_set_A.pdf]

## Timeless

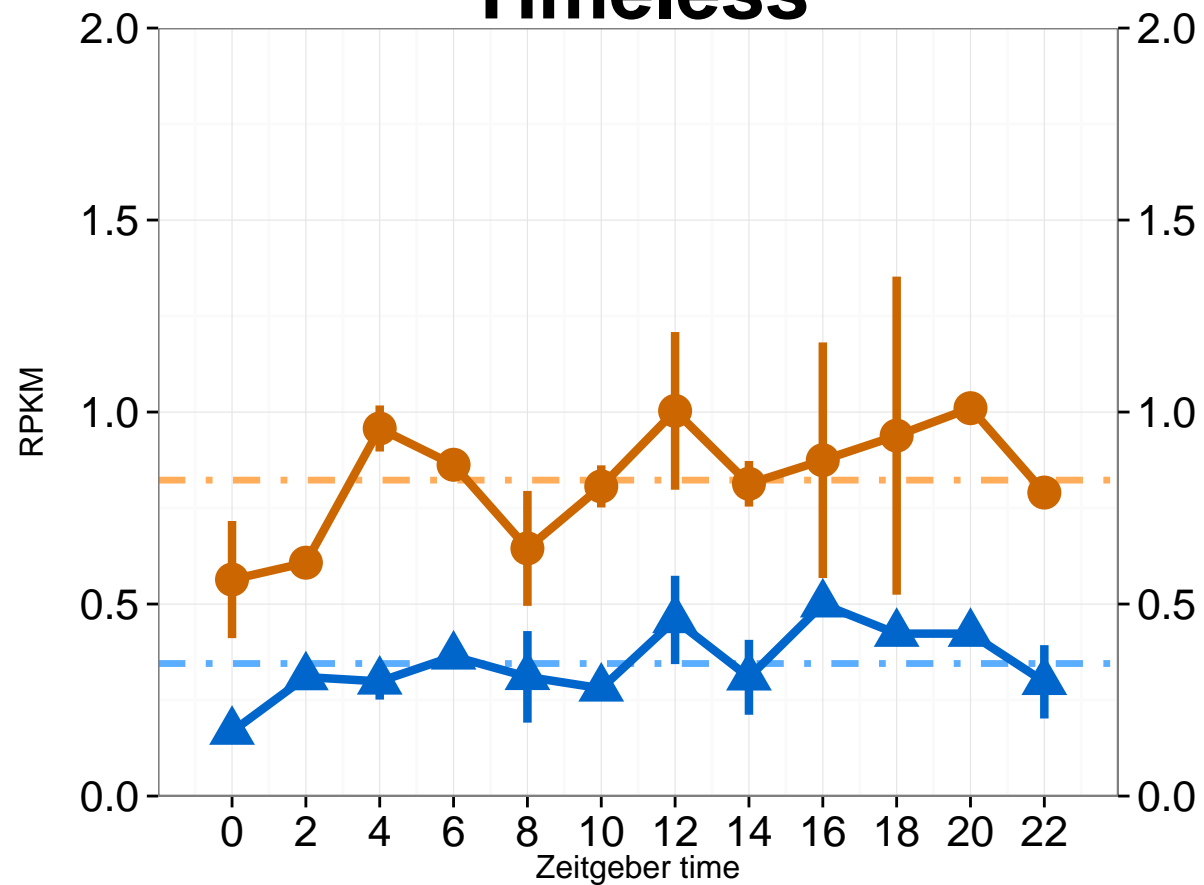

## Timeless

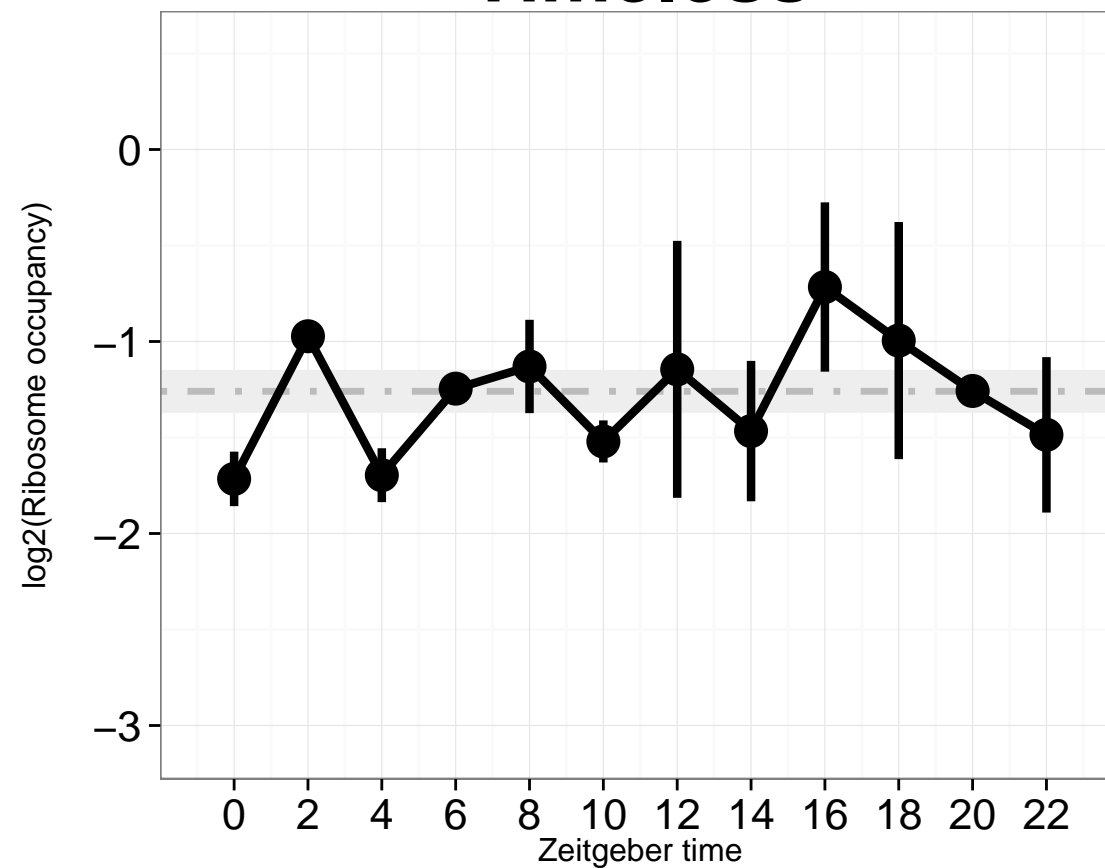

Supplement: SuppDataset_1.zip [file Timeless_set_A.pdf › Supplemental Dataset 1/A-mRNA_nonrhyth_translation_nonrhyth/Timeless_set_A.pdf]

# Timm10

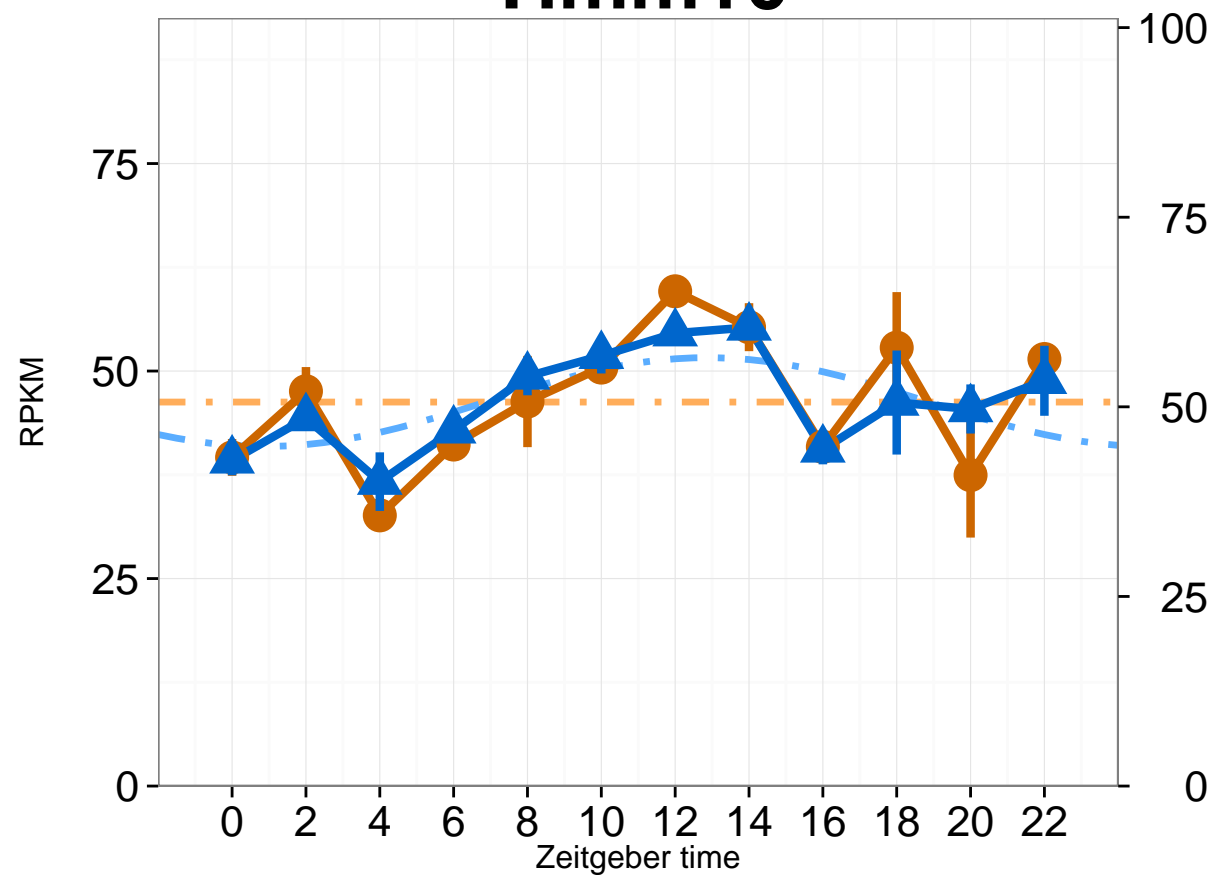

# Timm10

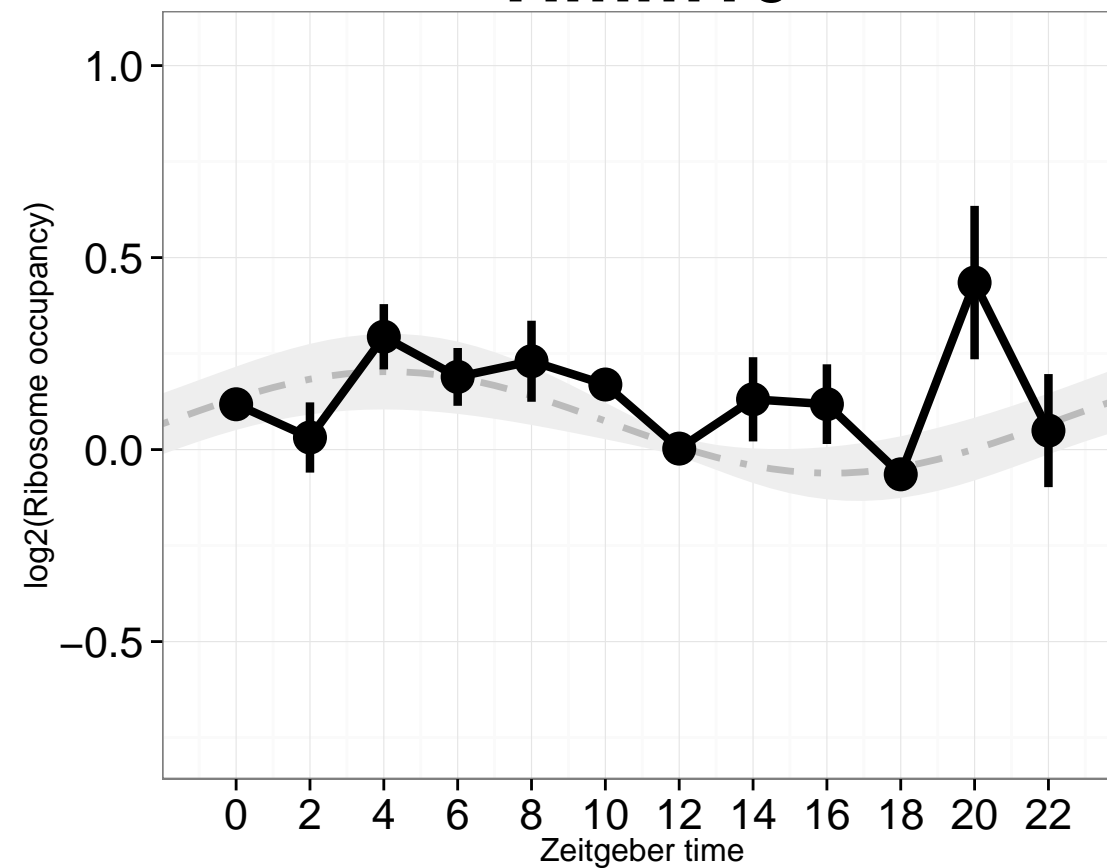

Supplement: SuppDataset_1.zip [file Timm10_set_A.pdf › Supplemental Dataset 1/A-mRNA_nonrhyth_translation_nonrhyth/Timm10_set_A.pdf]

## Timm10b

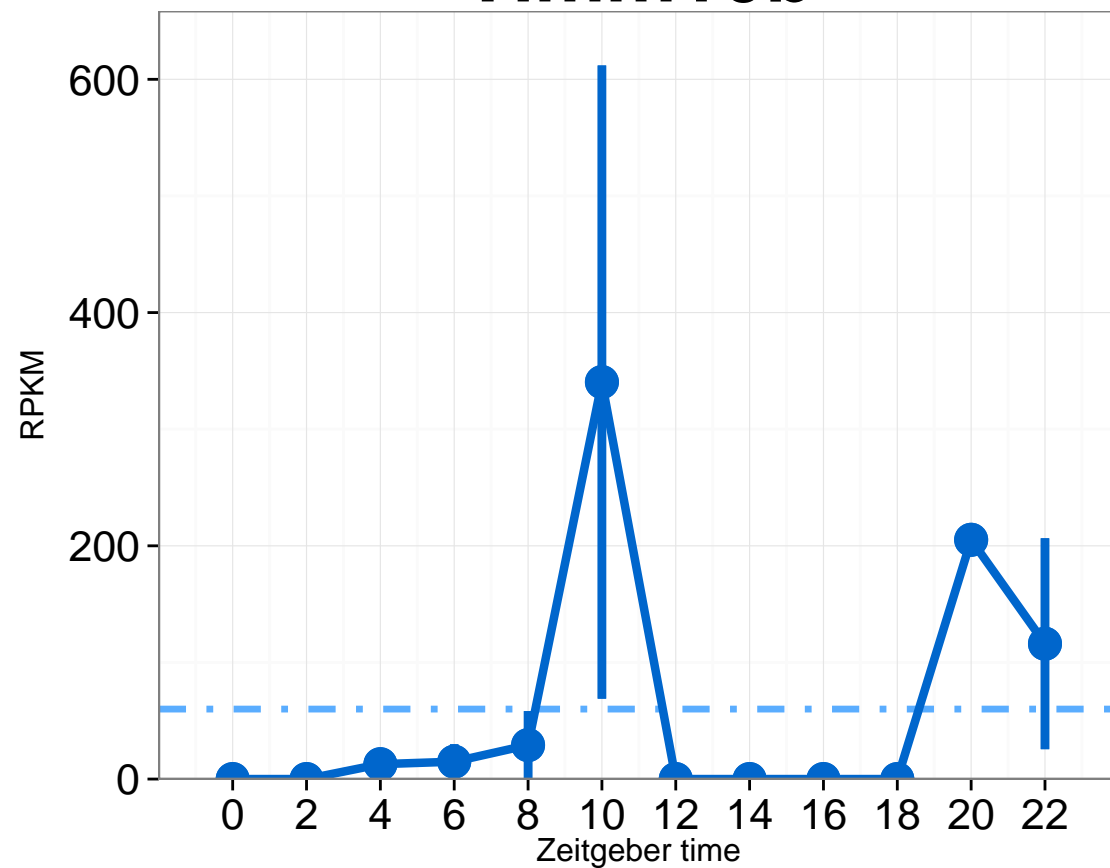

## Timm10b log2(Ribosome occupanc

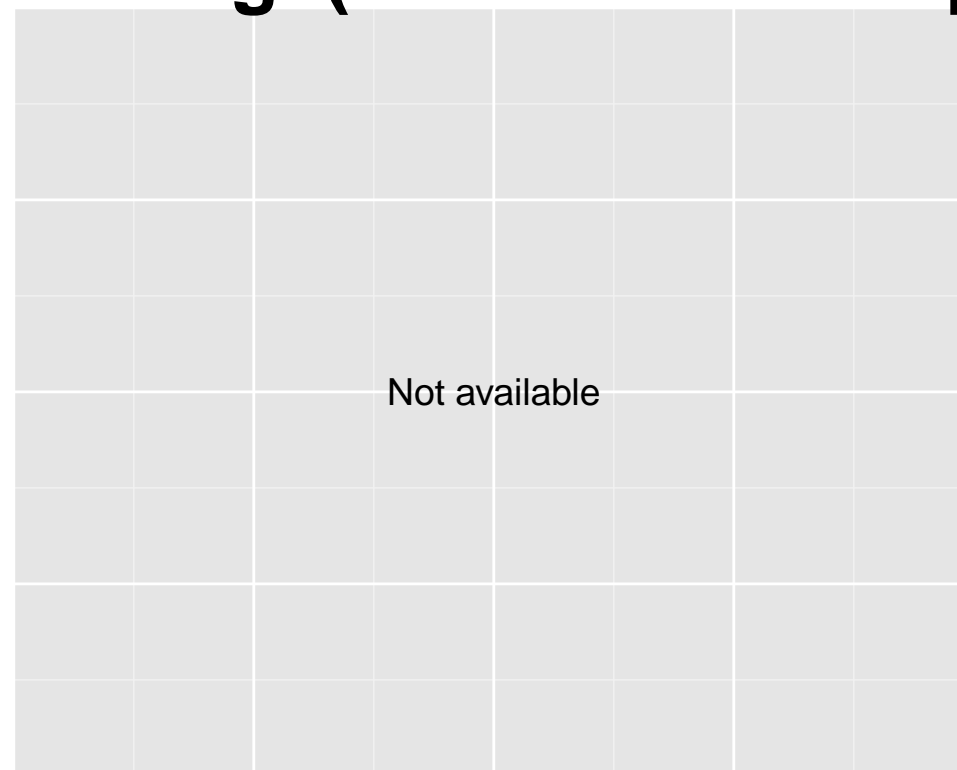

Supplement: SuppDataset_1.zip [file Timm10b_set_A.pdf › Supplemental Dataset 1/A-mRNA_nonrhyth_translation_nonrhyth/Timm10b_set_A.pdf]

# Timm13

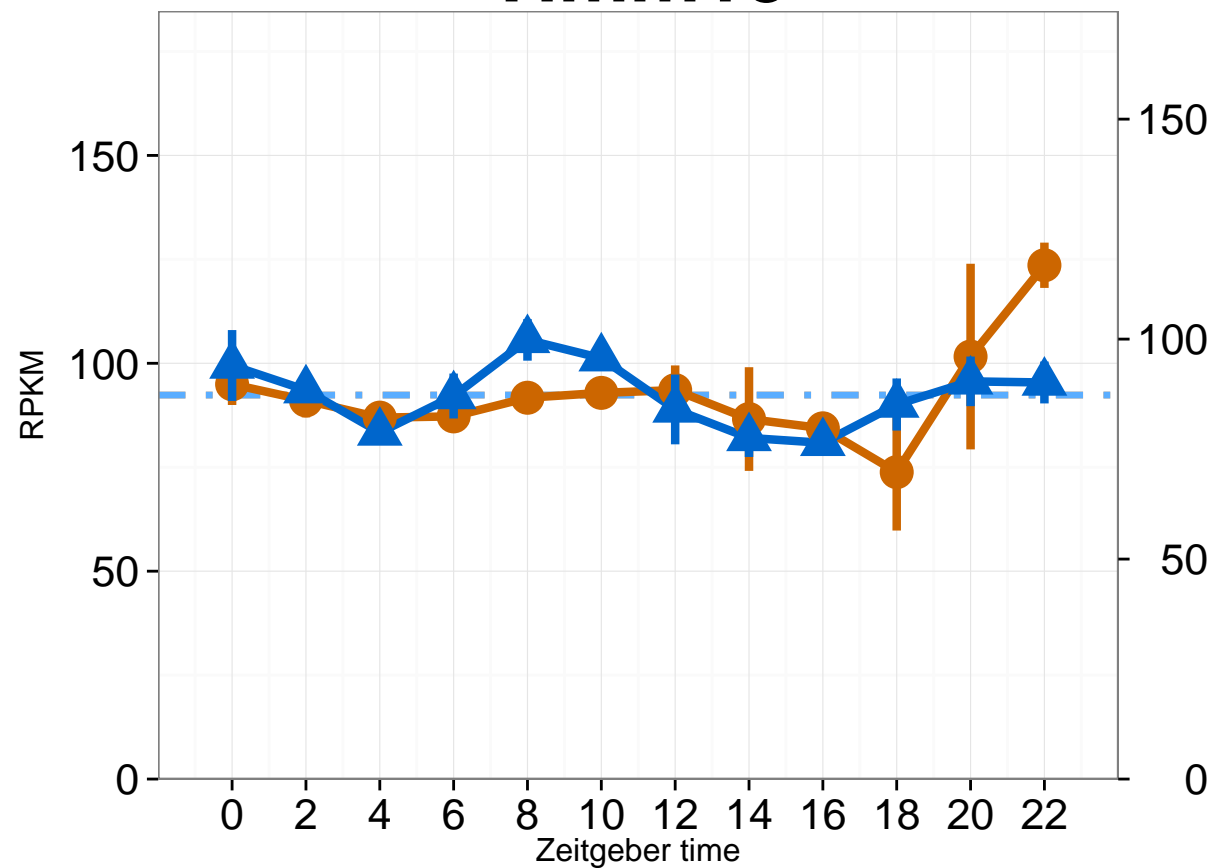

# Timm13

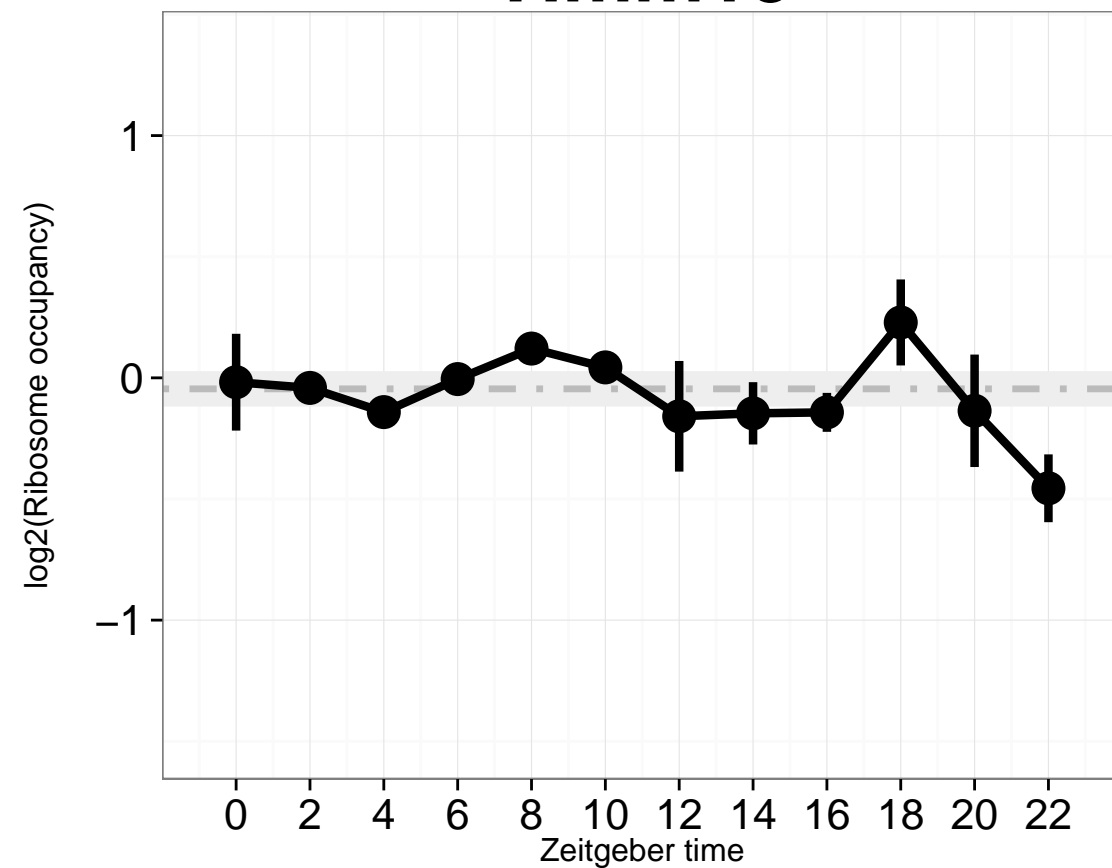

Supplement: SuppDataset_1.zip [file Timm13_set_A.pdf › Supplemental Dataset 1/A-mRNA_nonrhyth_translation_nonrhyth/Timm13_set_A.pdf]

# Timm17b

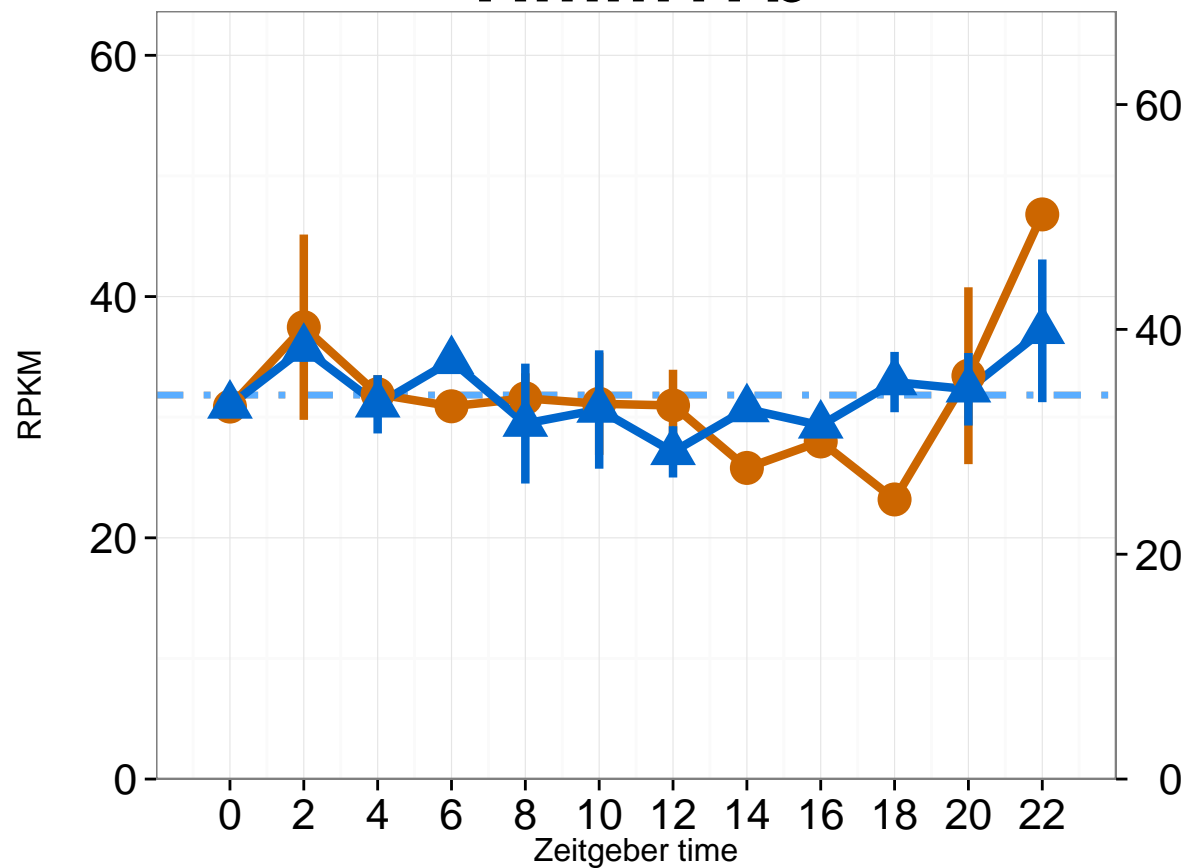

# Timm17b

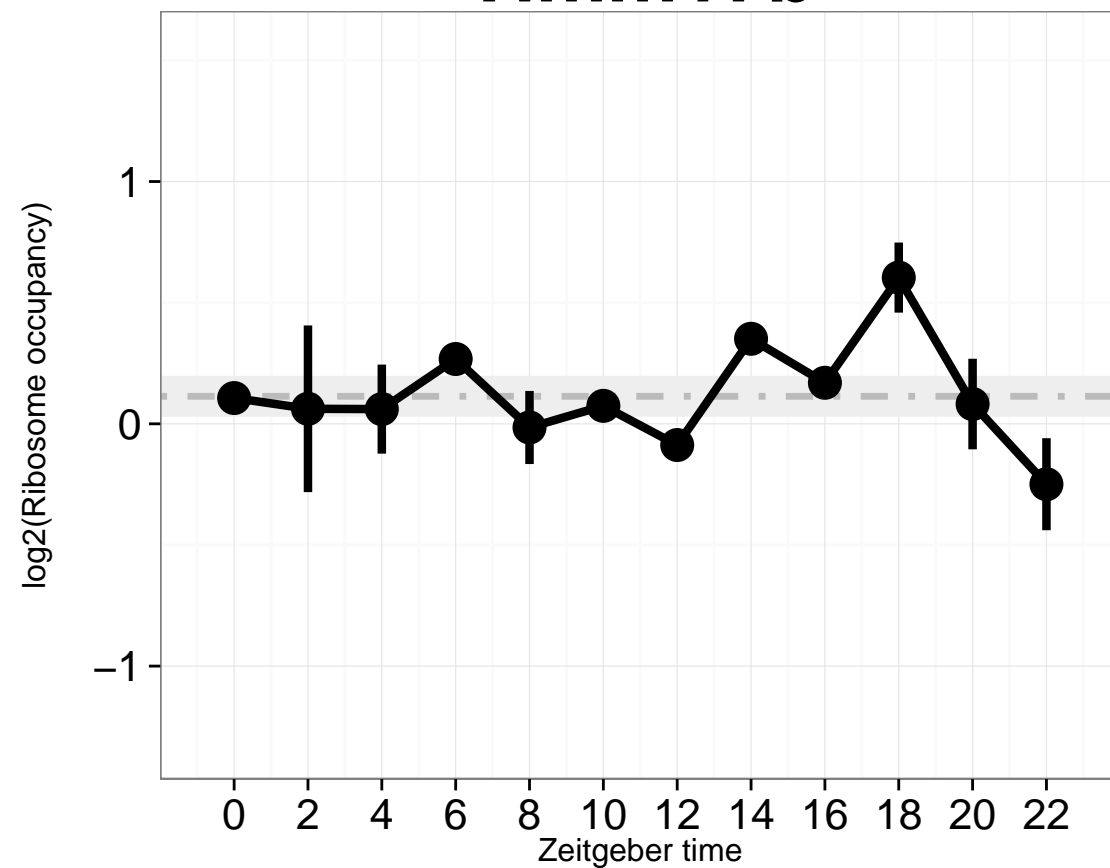

Supplement: SuppDataset_1.zip [file Timm17b_set_A.pdf › Supplemental Dataset 1/A-mRNA_nonrhyth_translation_nonrhyth/Timm17b_set_A.pdf]

# Timm21

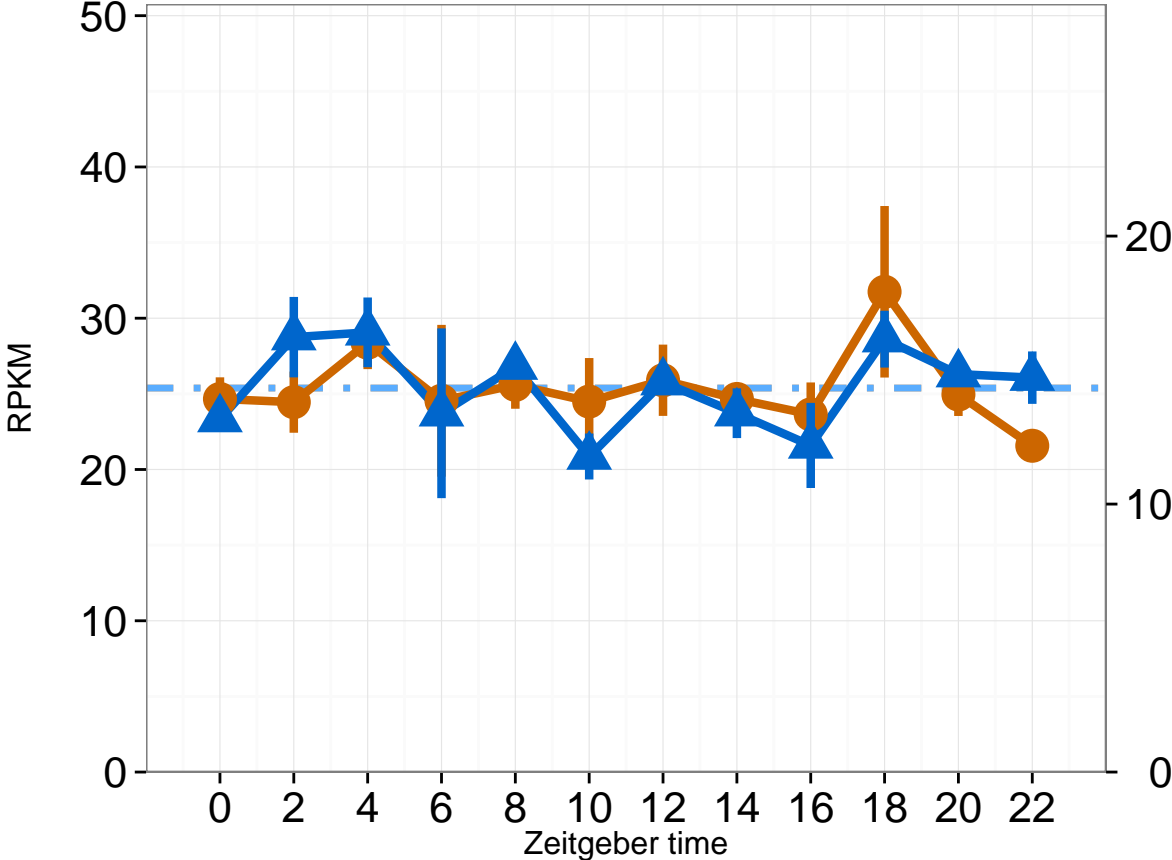

# Timm21

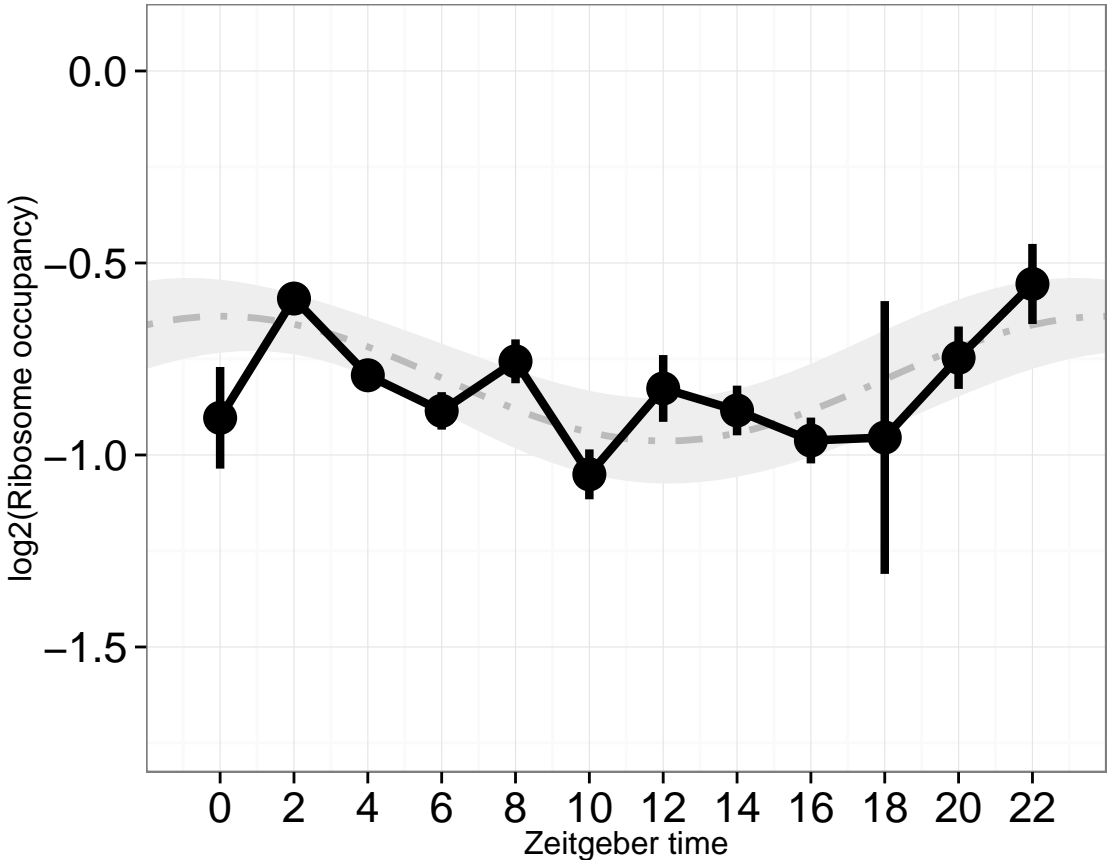

Supplement: SuppDataset_1.zip [file Timm21_set_A.pdf › Supplemental Dataset 1/A-mRNA_nonrhyth_translation_nonrhyth/Timm21_set_A.pdf]

**Timm22**

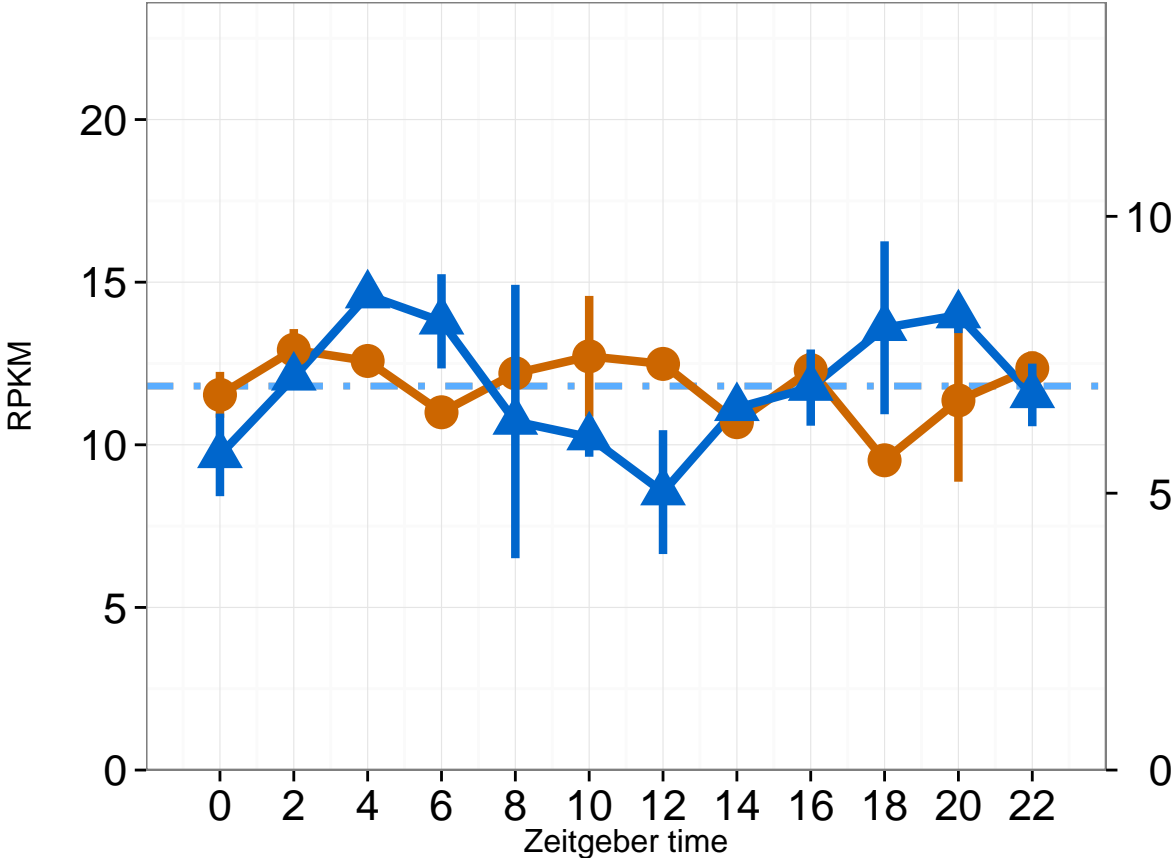

**Timm22**

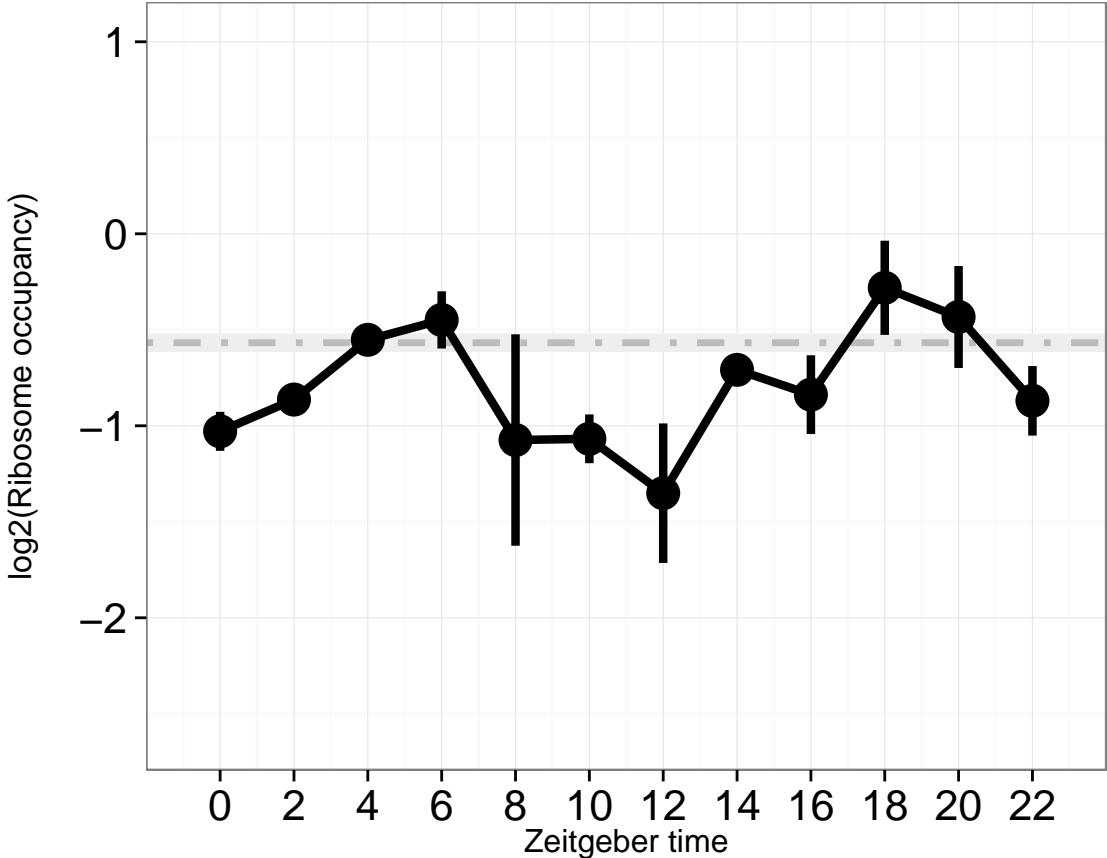

Supplement: SuppDataset_1.zip [file Timm22_set_A.pdf › Supplemental Dataset 1/A-mRNA_nonrhyth_translation_nonrhyth/Timm22_set_A.pdf]

## Timm44

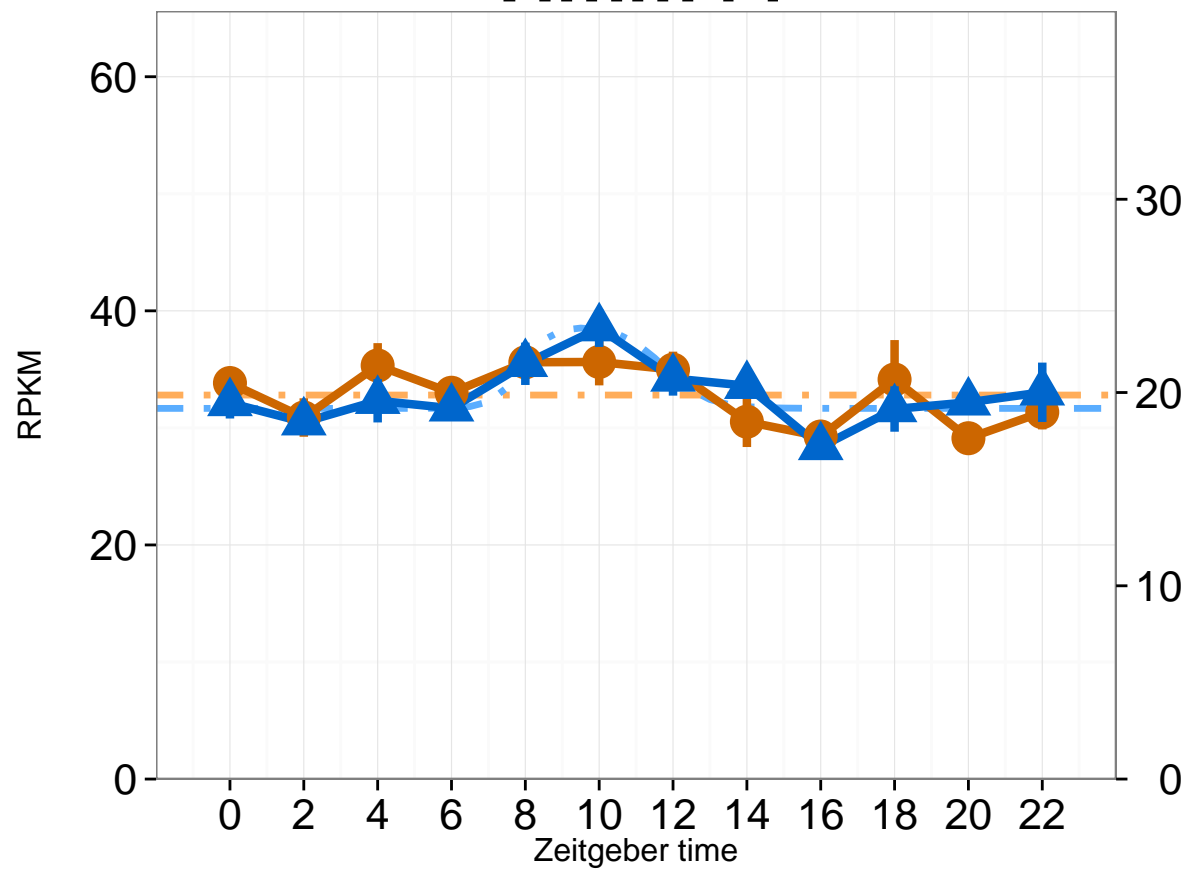

## Timm44

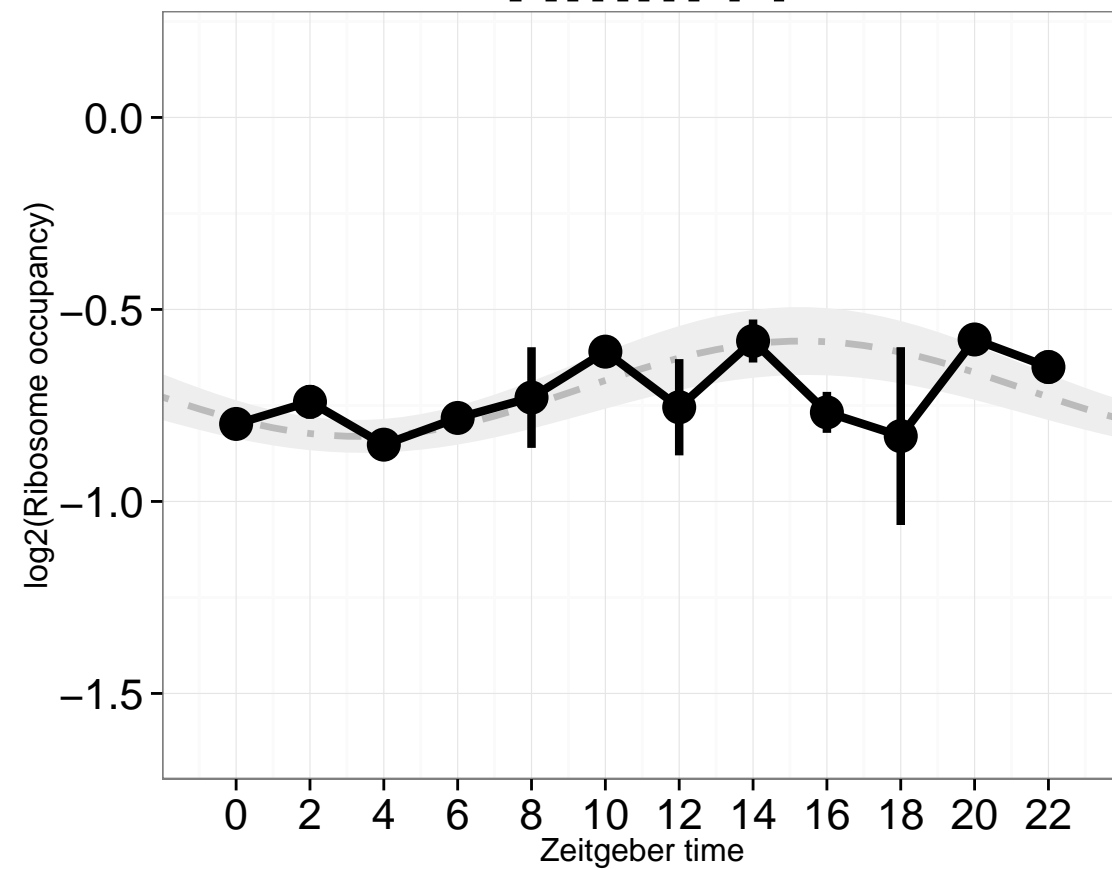

Supplement: SuppDataset_1.zip [file Timm44_set_A.pdf › Supplemental Dataset 1/A-mRNA_nonrhyth_translation_nonrhyth/Timm44_set_A.pdf]

## Timm50

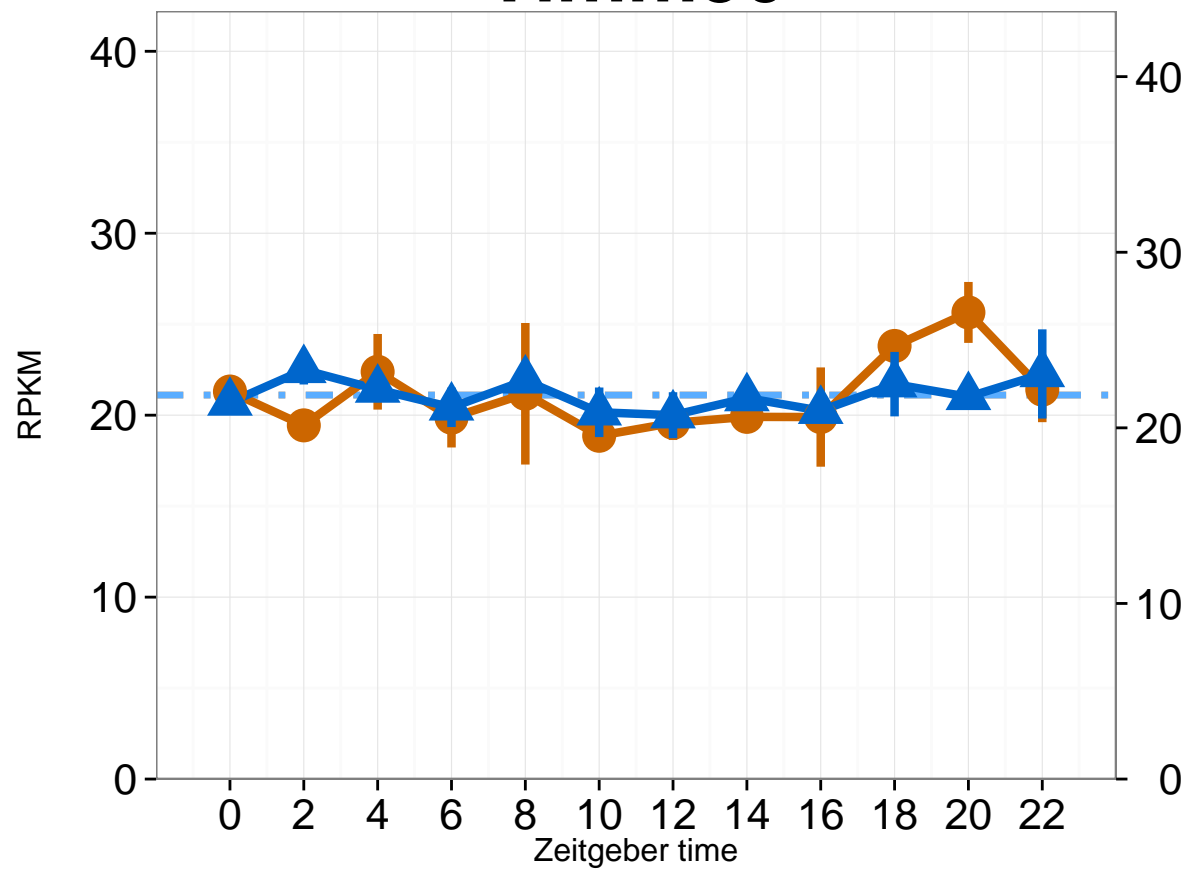

## Timm50

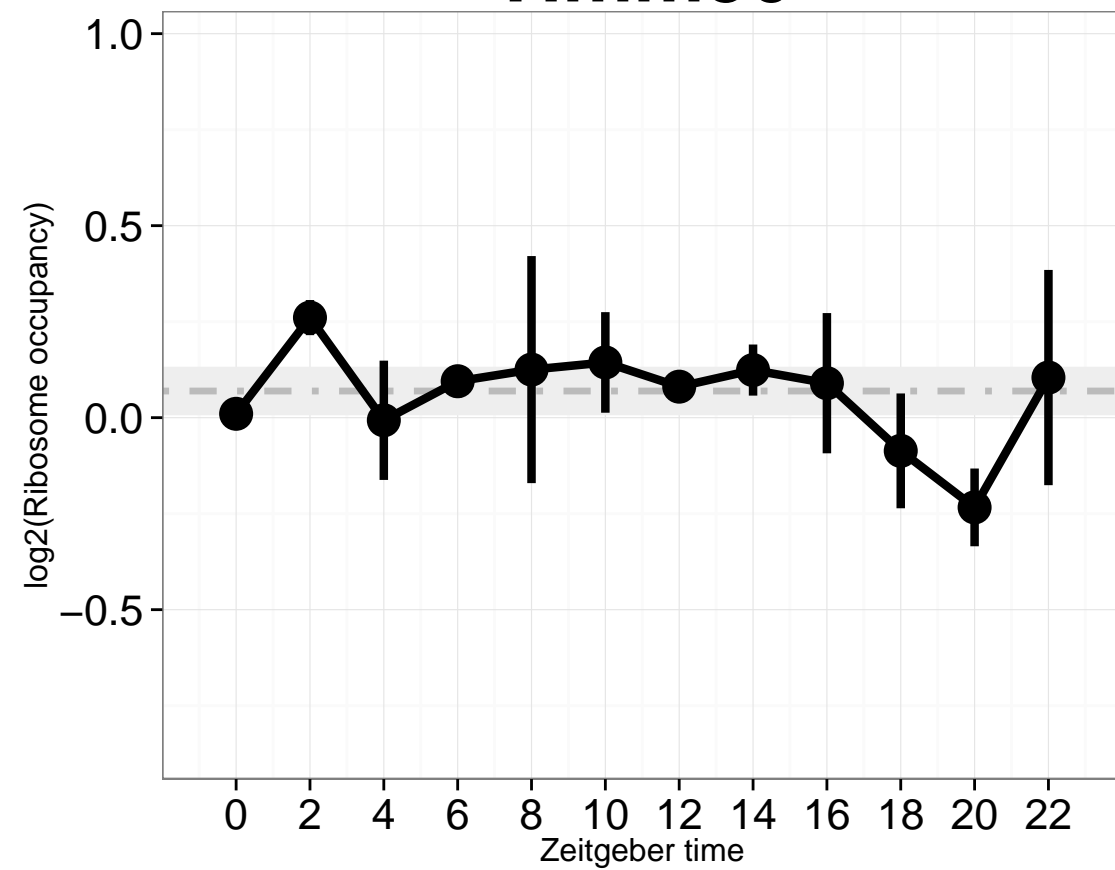

Supplement: SuppDataset_1.zip [file Timm50_set_A.pdf › Supplemental Dataset 1/A-mRNA_nonrhyth_translation_nonrhyth/Timm50_set_A.pdf]

# Timm8b

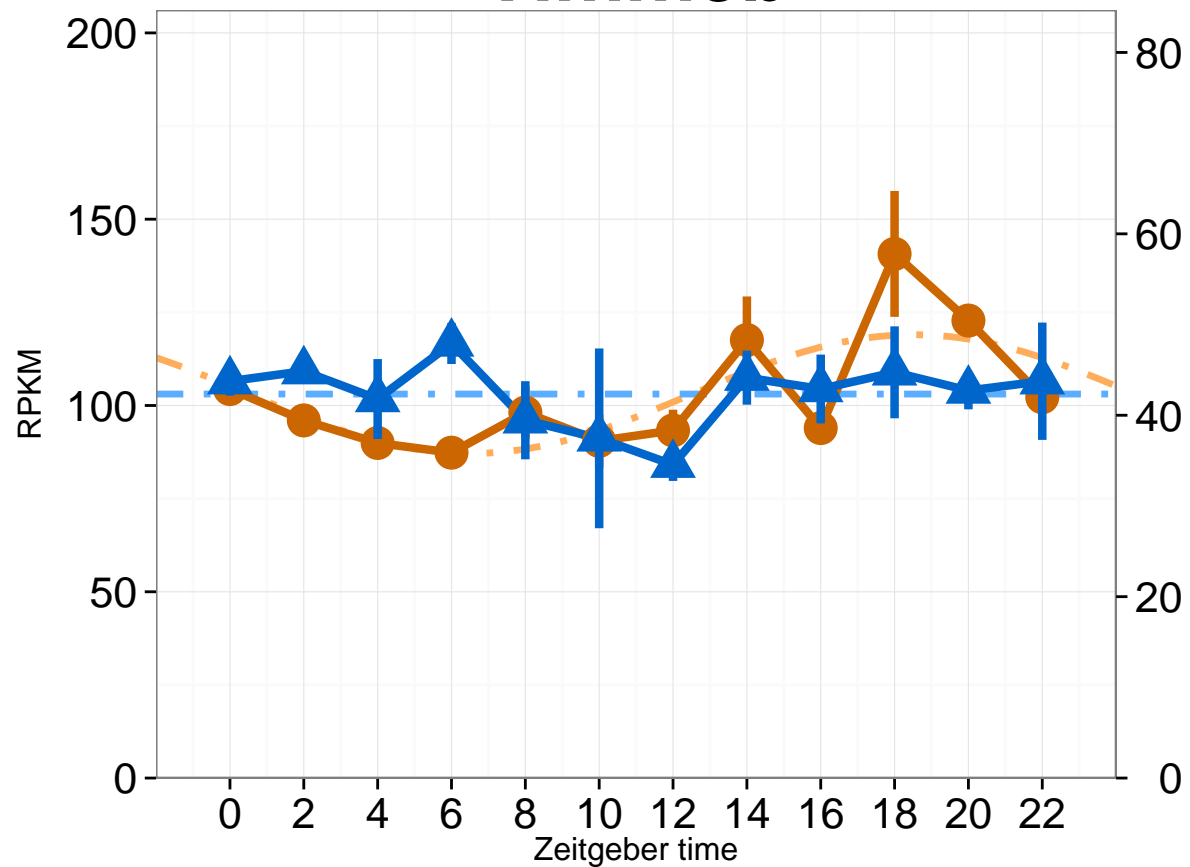

# Timm8b

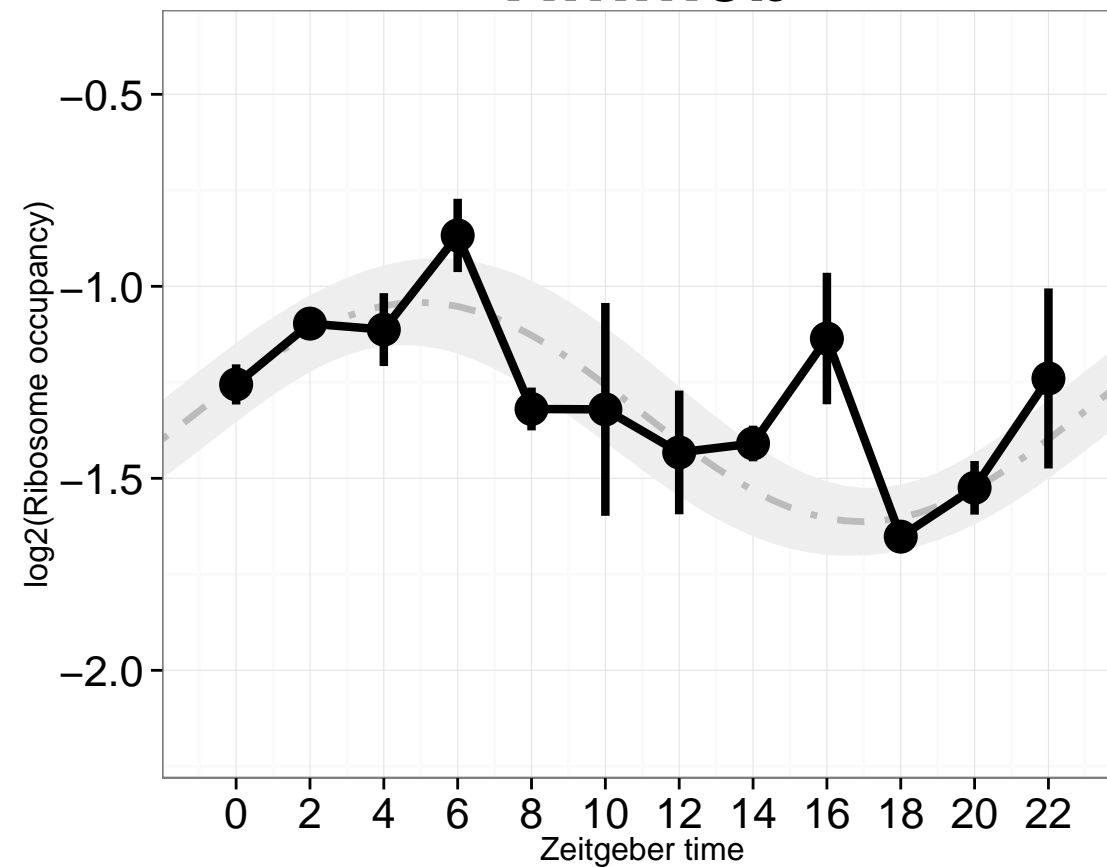

Supplement: SuppDataset_1.zip [file Timm8b_set_A.pdf › Supplemental Dataset 1/A-mRNA_nonrhyth_translation_nonrhyth/Timm8b_set_A.pdf]

# Timmdc1

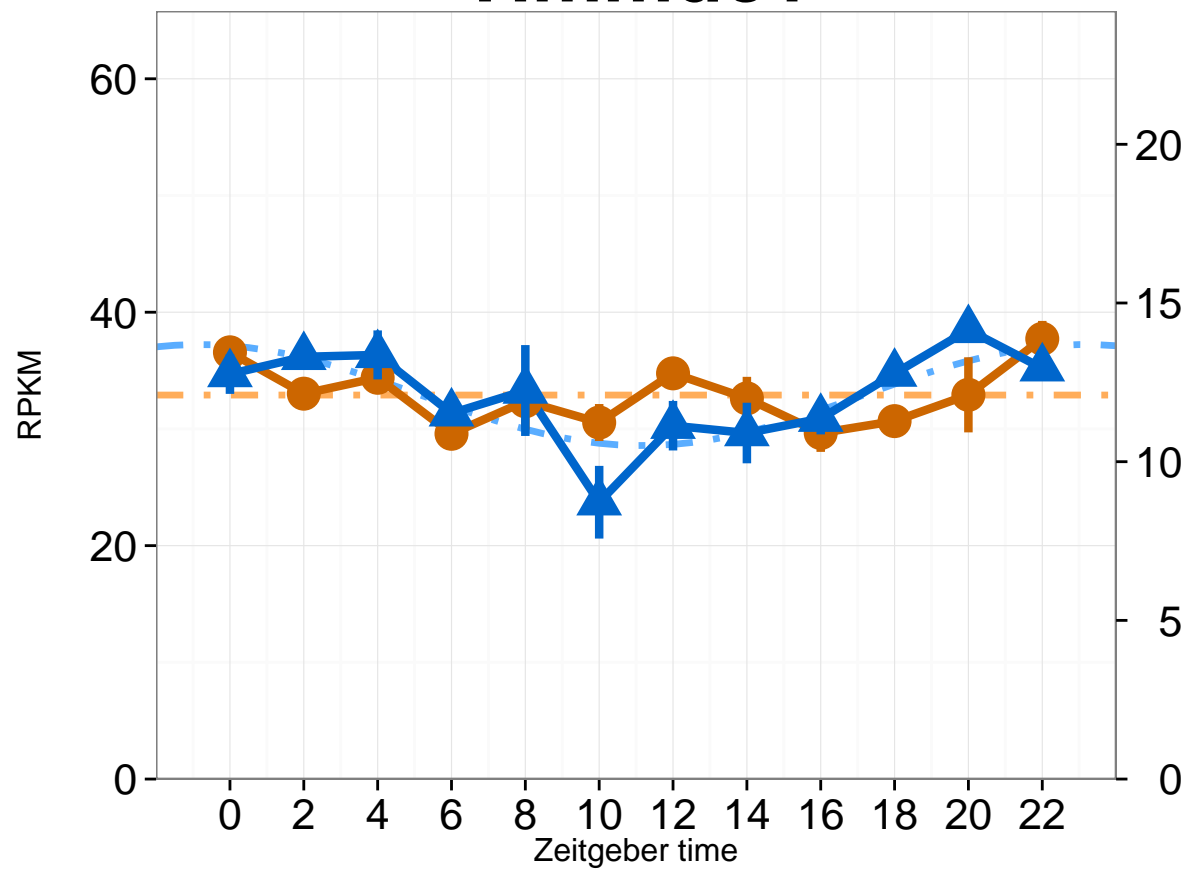

# Timmdc1

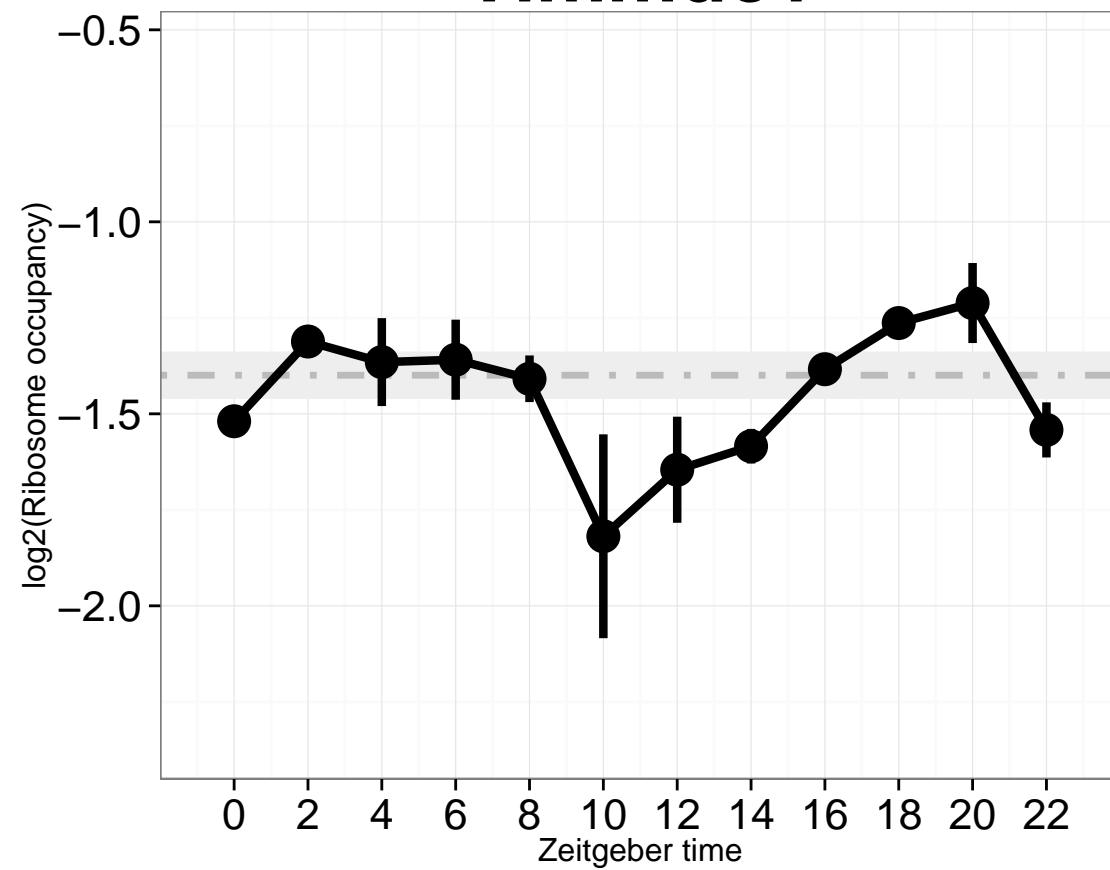

Supplement: SuppDataset_1.zip [file Timmdc1_set_A.pdf › Supplemental Dataset 1/A-mRNA_nonrhyth_translation_nonrhyth/Timmdc1_set_A.pdf]

# Timp2

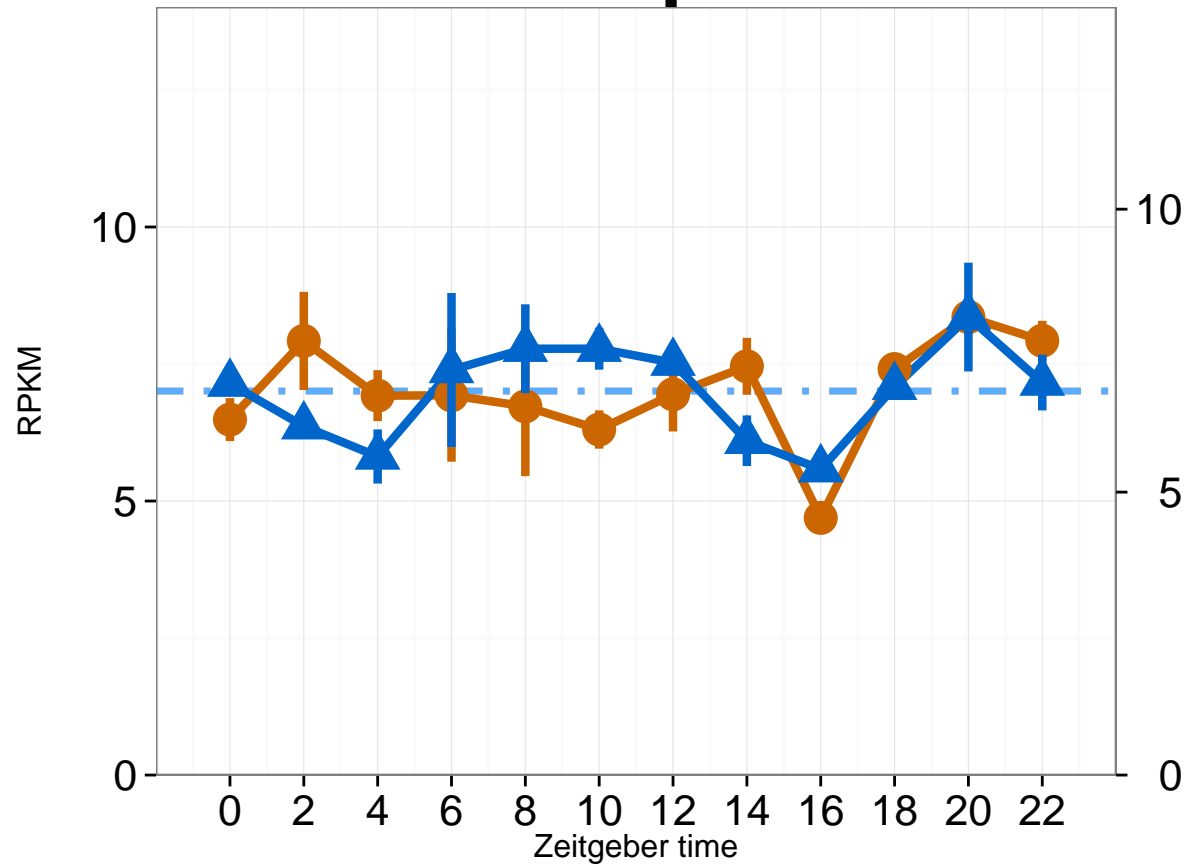

# Timp2

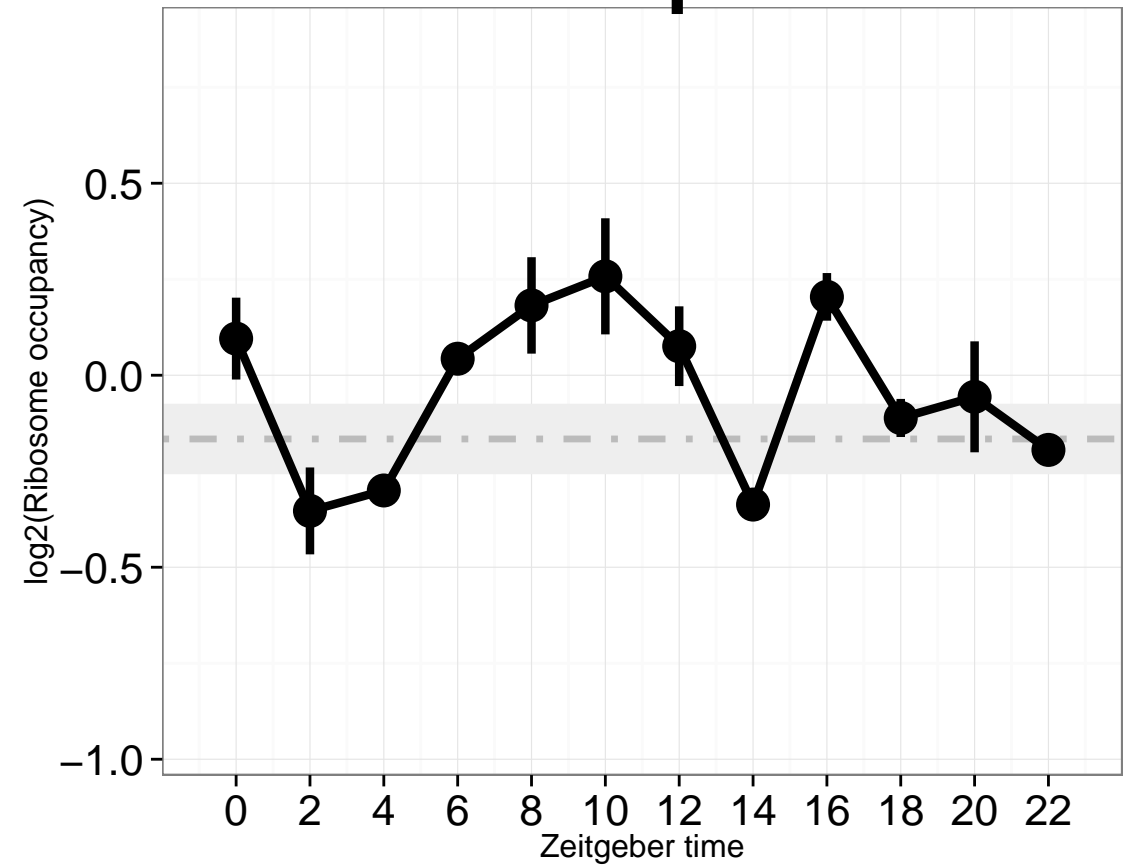

Supplement: SuppDataset_1.zip [file Timp2_set_A.pdf › Supplemental Dataset 1/A-mRNA_nonrhyth_translation_nonrhyth/Timp2_set_A.pdf]

# Tinagl1

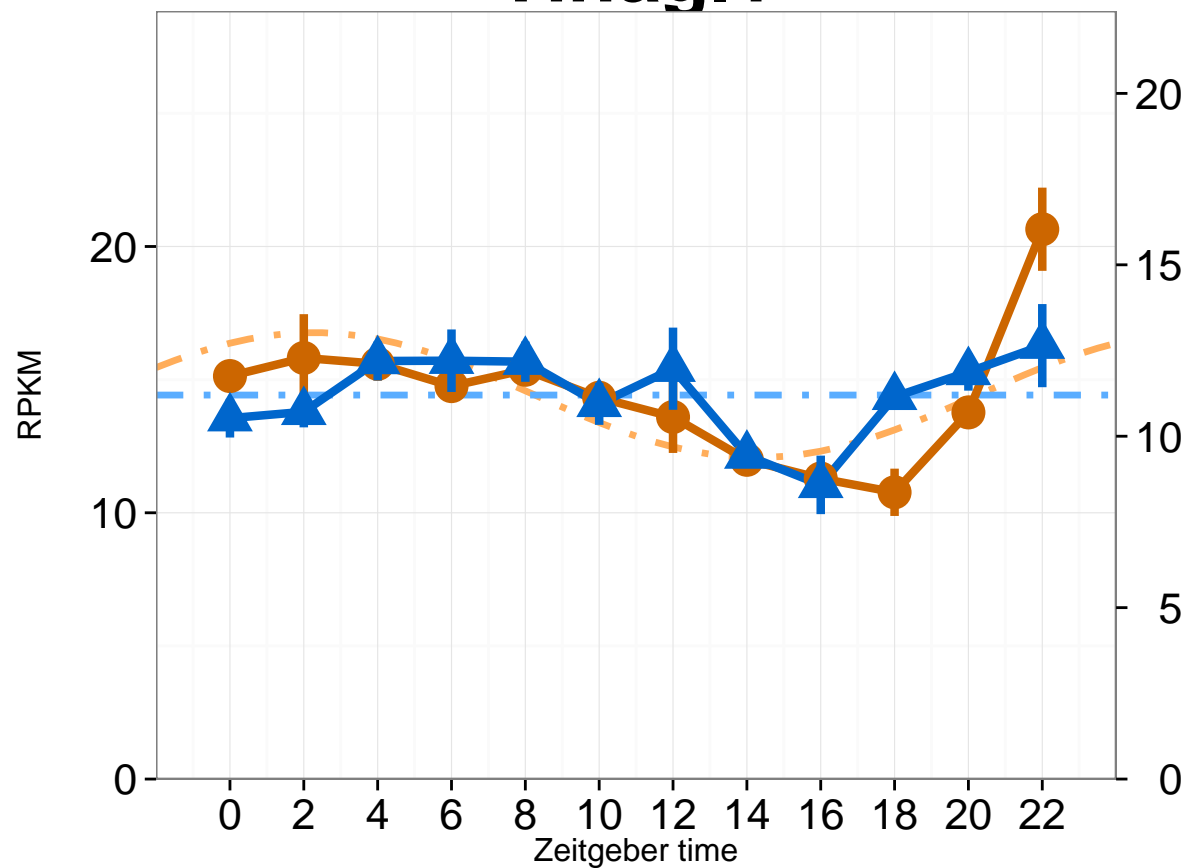

# Tinagl1

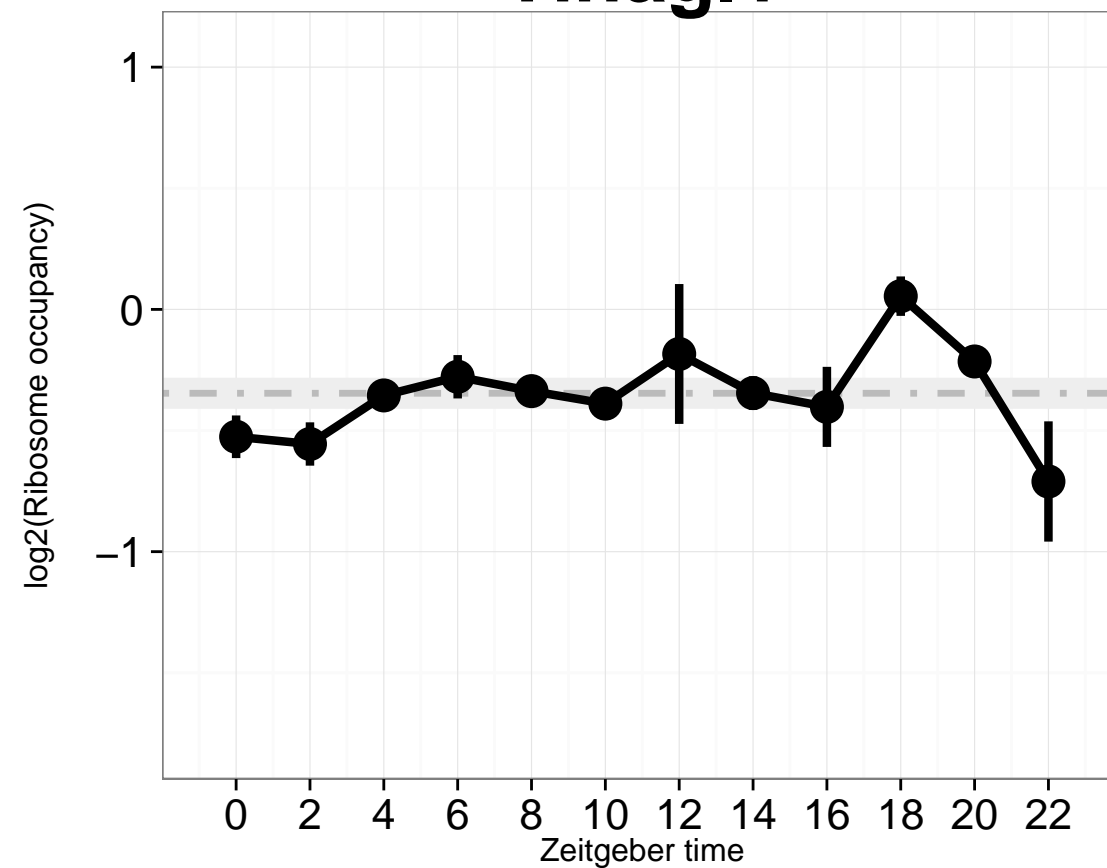

Supplement: SuppDataset_1.zip [file Tinagl1_set_A.pdf › Supplemental Dataset 1/A-mRNA_nonrhyth_translation_nonrhyth/Tinagl1_set_A.pdf]

## Tinf2

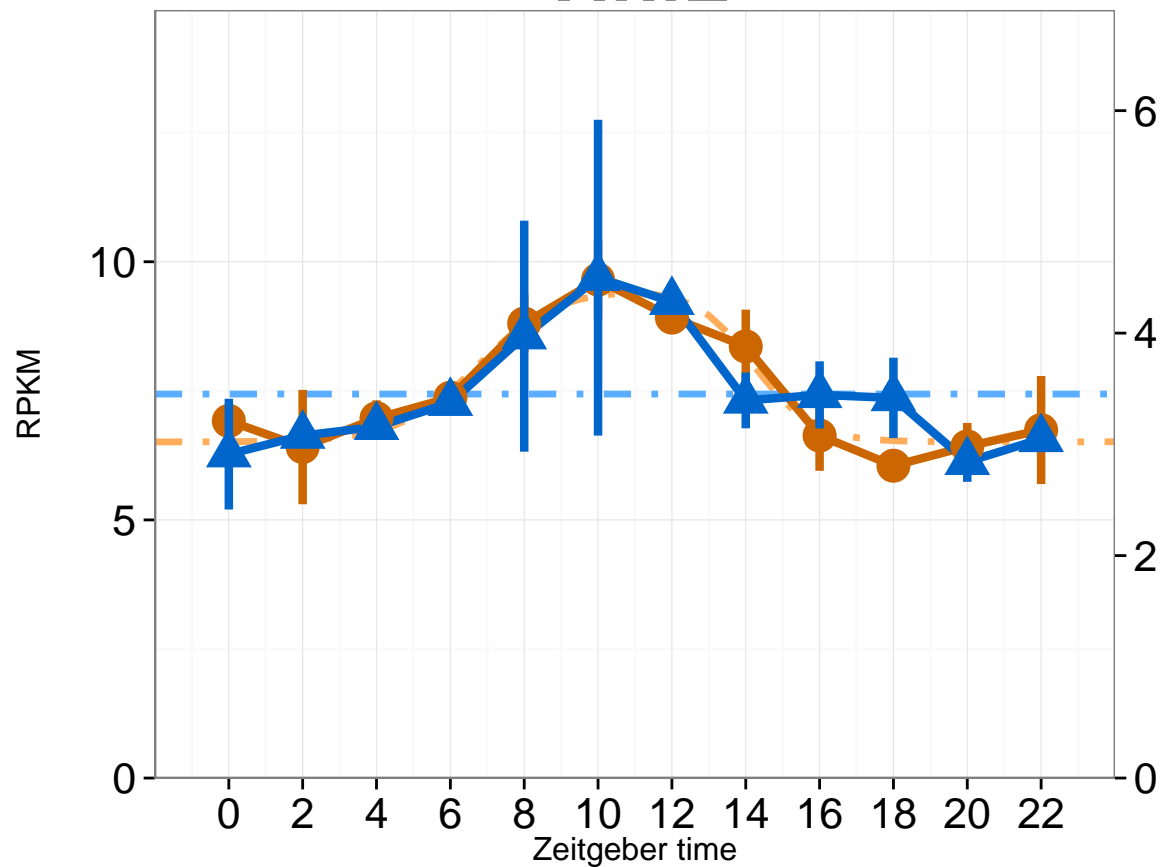

## Tinf2

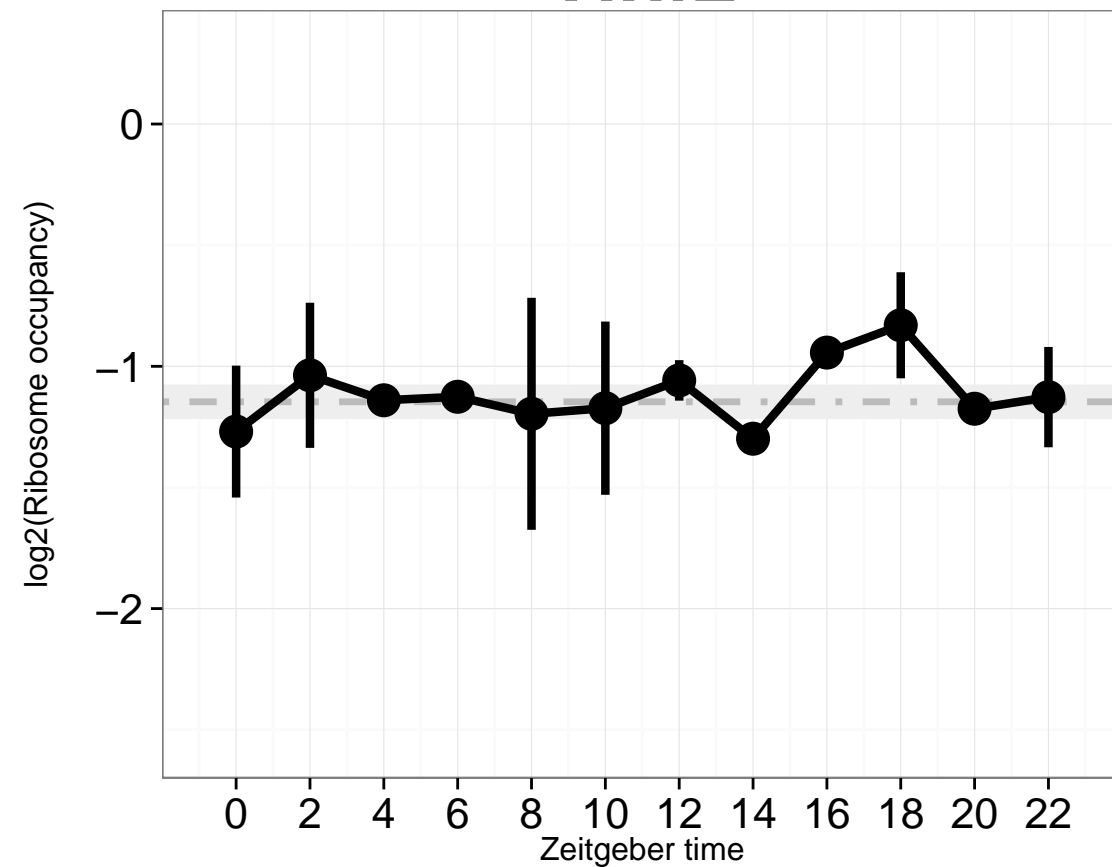

Supplement: SuppDataset_1.zip [file Tinf2_set_A.pdf › Supplemental Dataset 1/A-mRNA_nonrhyth_translation_nonrhyth/Tinf2_set_A.pdf]

## Tipin

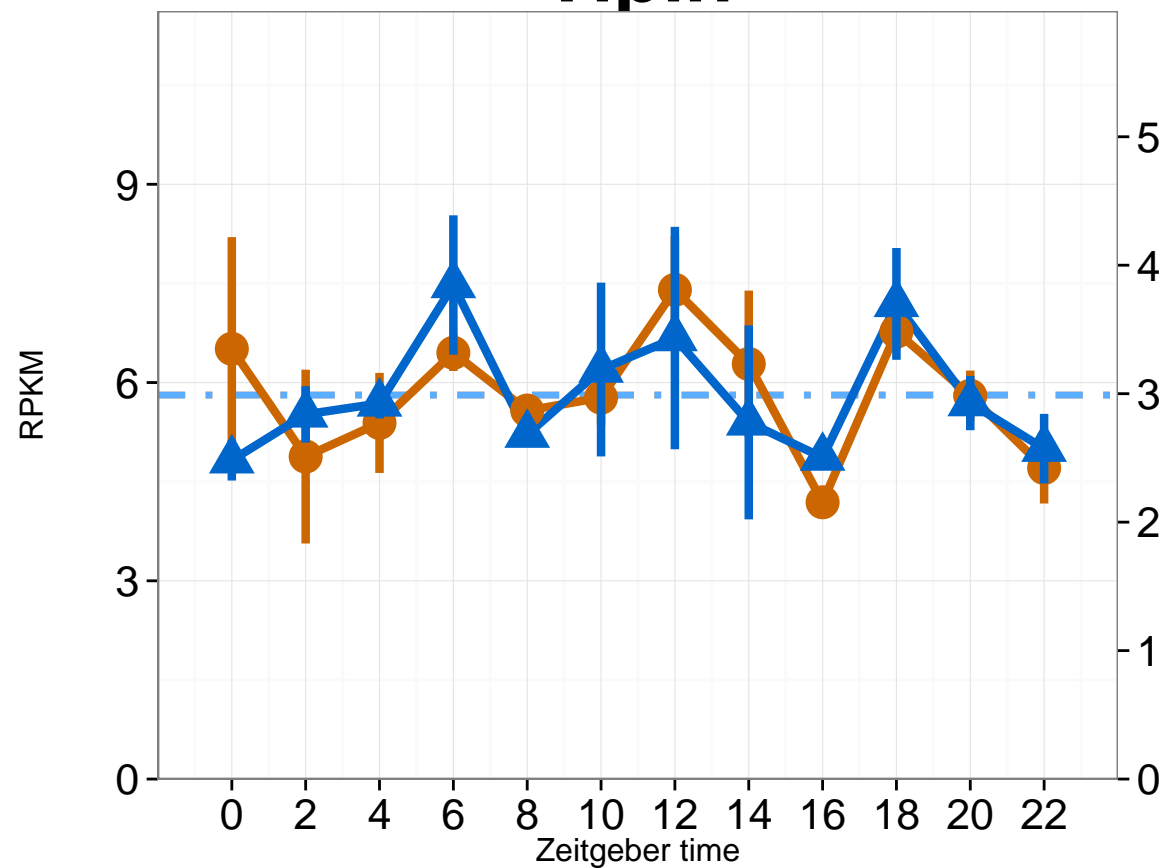

## Tipin

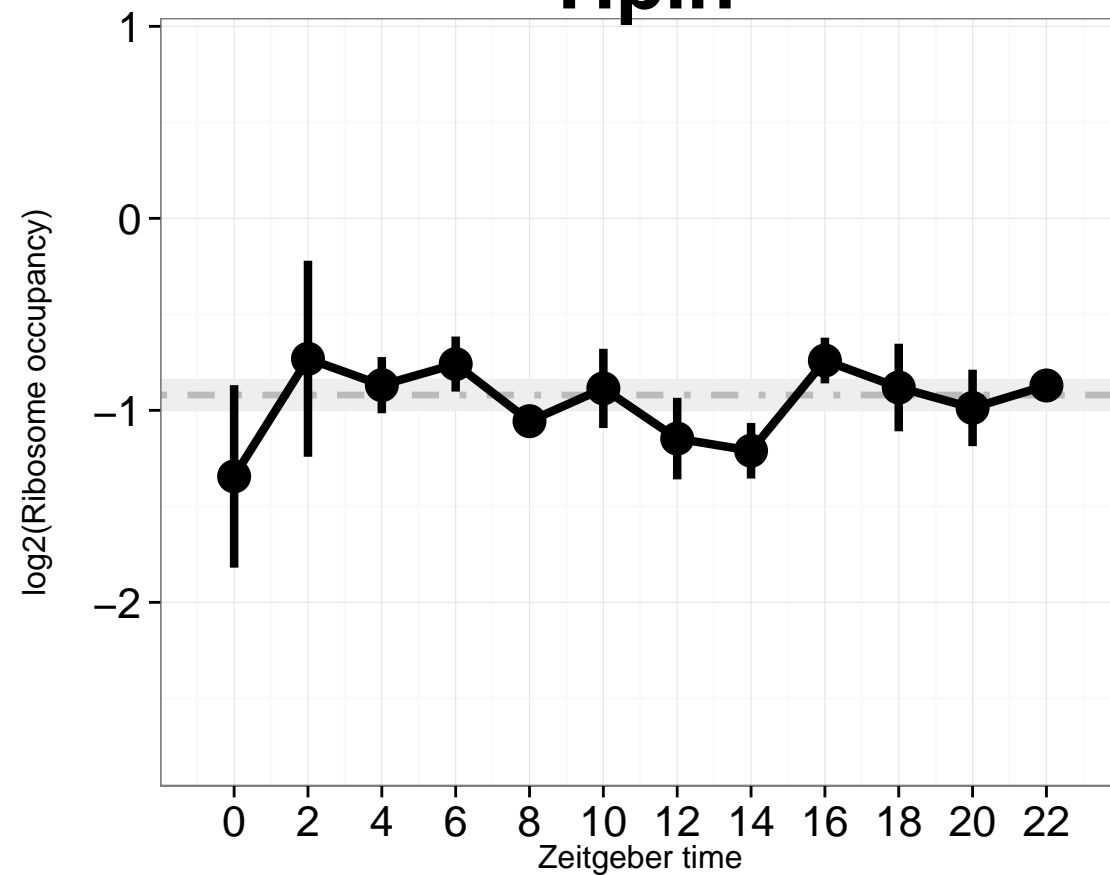

Supplement: SuppDataset_1.zip [file Tipin_set_A.pdf › Supplemental Dataset 1/A-mRNA_nonrhyth_translation_nonrhyth/Tipin_set_A.pdf]

## Tiprl

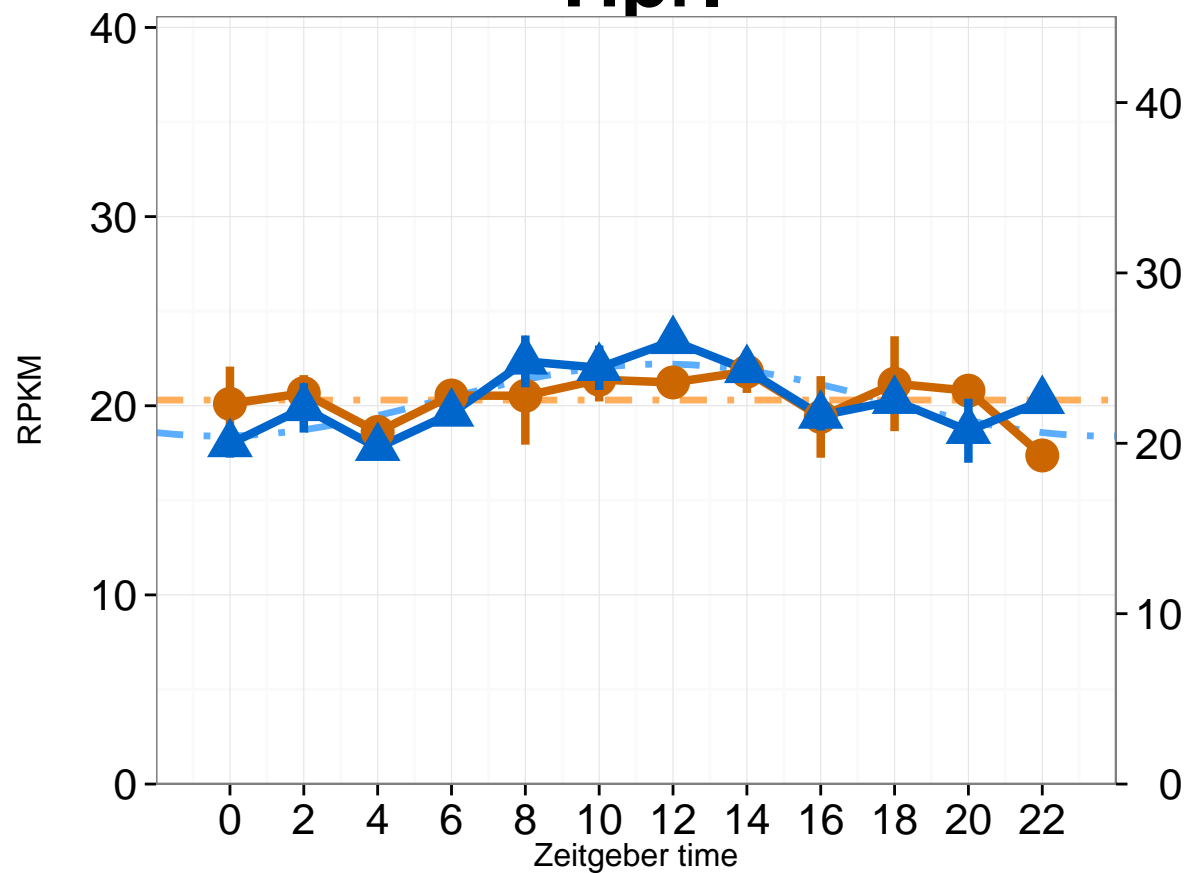

## Tiprl

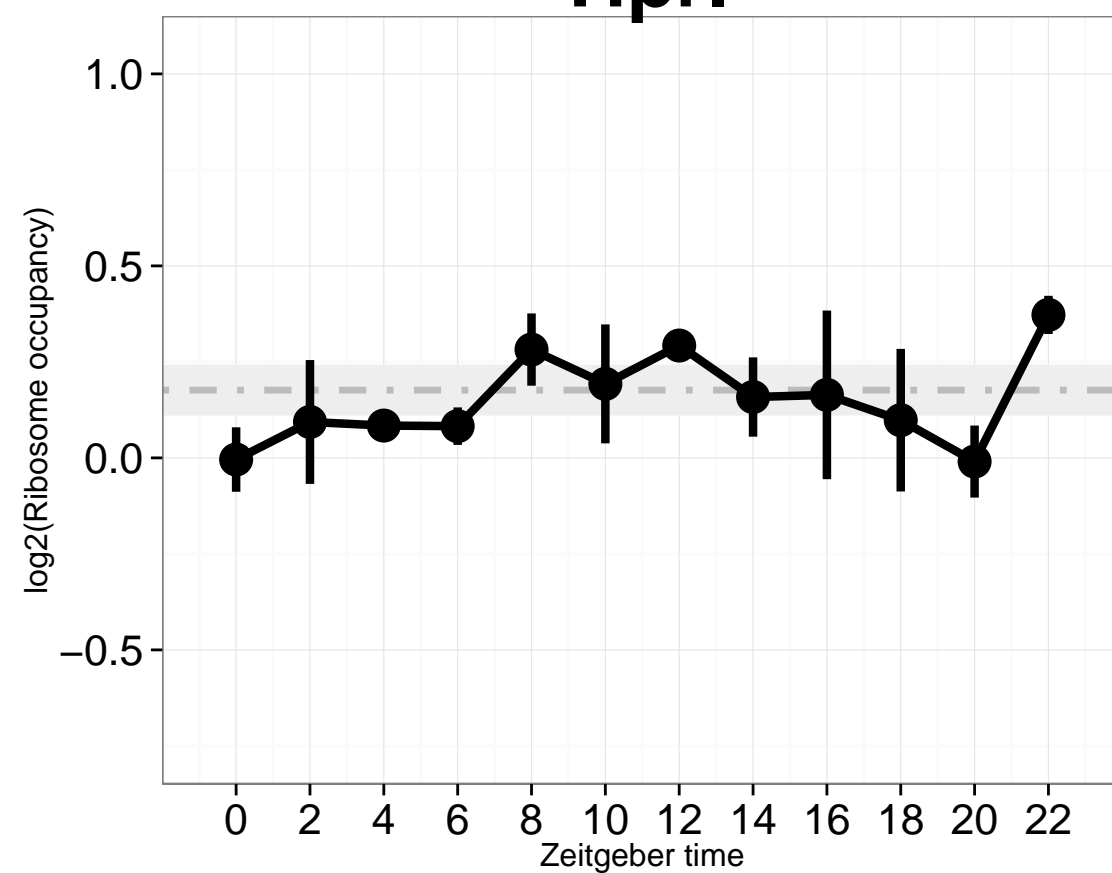

Supplement: SuppDataset_1.zip [file Tiprl_set_A.pdf › Supplemental Dataset 1/A-mRNA_nonrhyth_translation_nonrhyth/Tiprl_set_A.pdf]

# Tirap

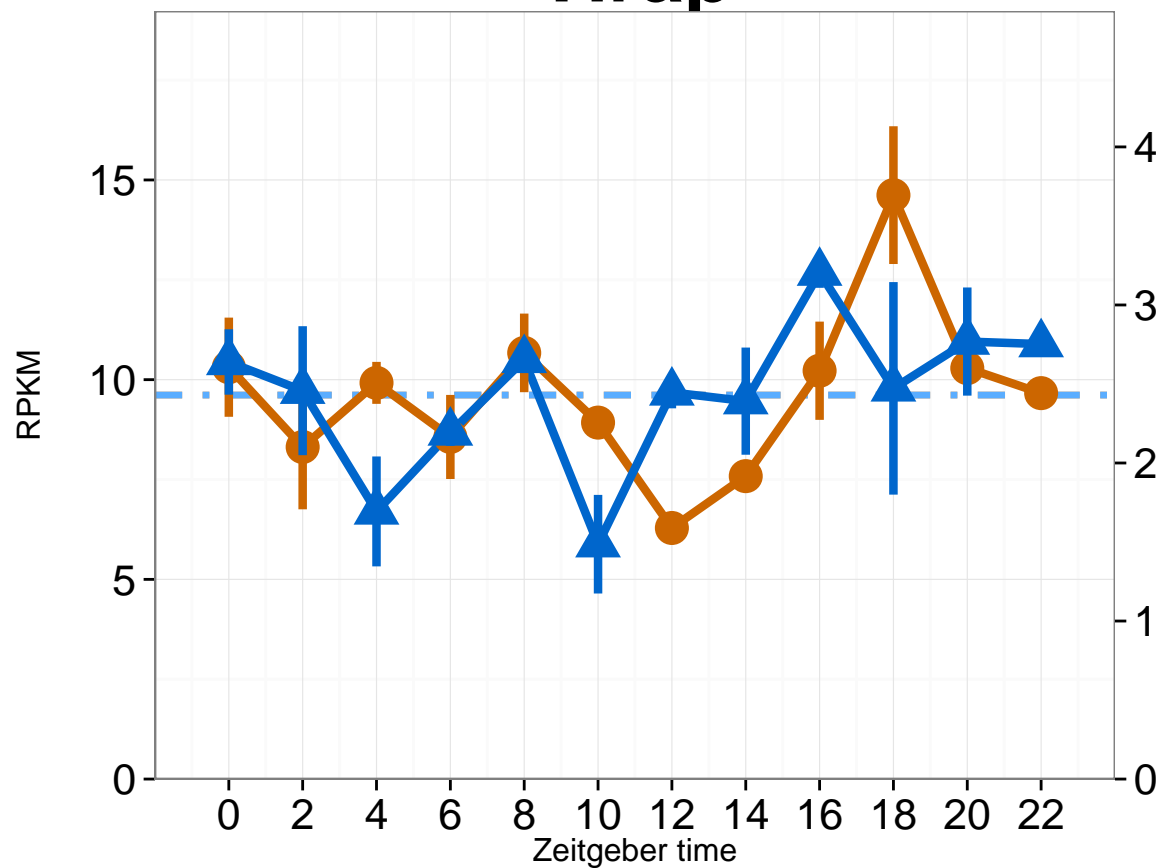

# Tirap

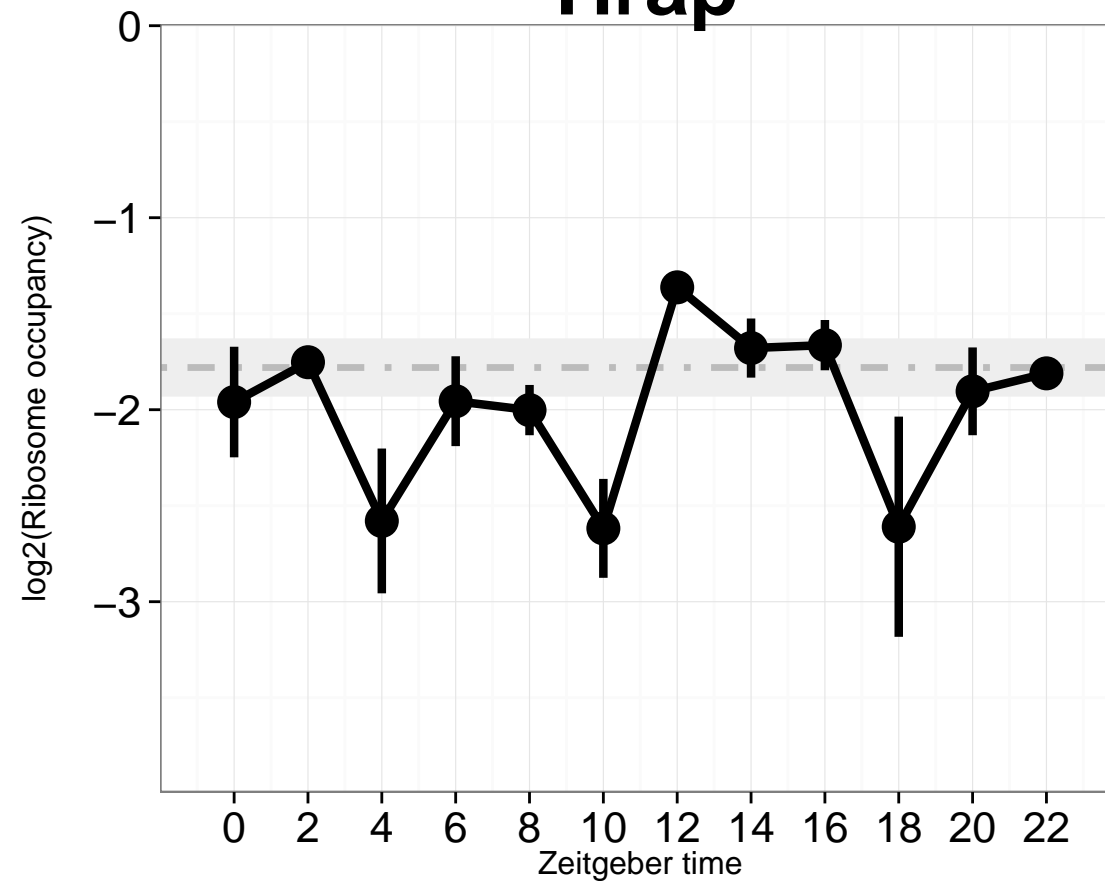

Supplement: SuppDataset_1.zip [file Tirap_set_A.pdf › Supplemental Dataset 1/A-mRNA_nonrhyth_translation_nonrhyth/Tirap_set_A.pdf]

# Tjap1

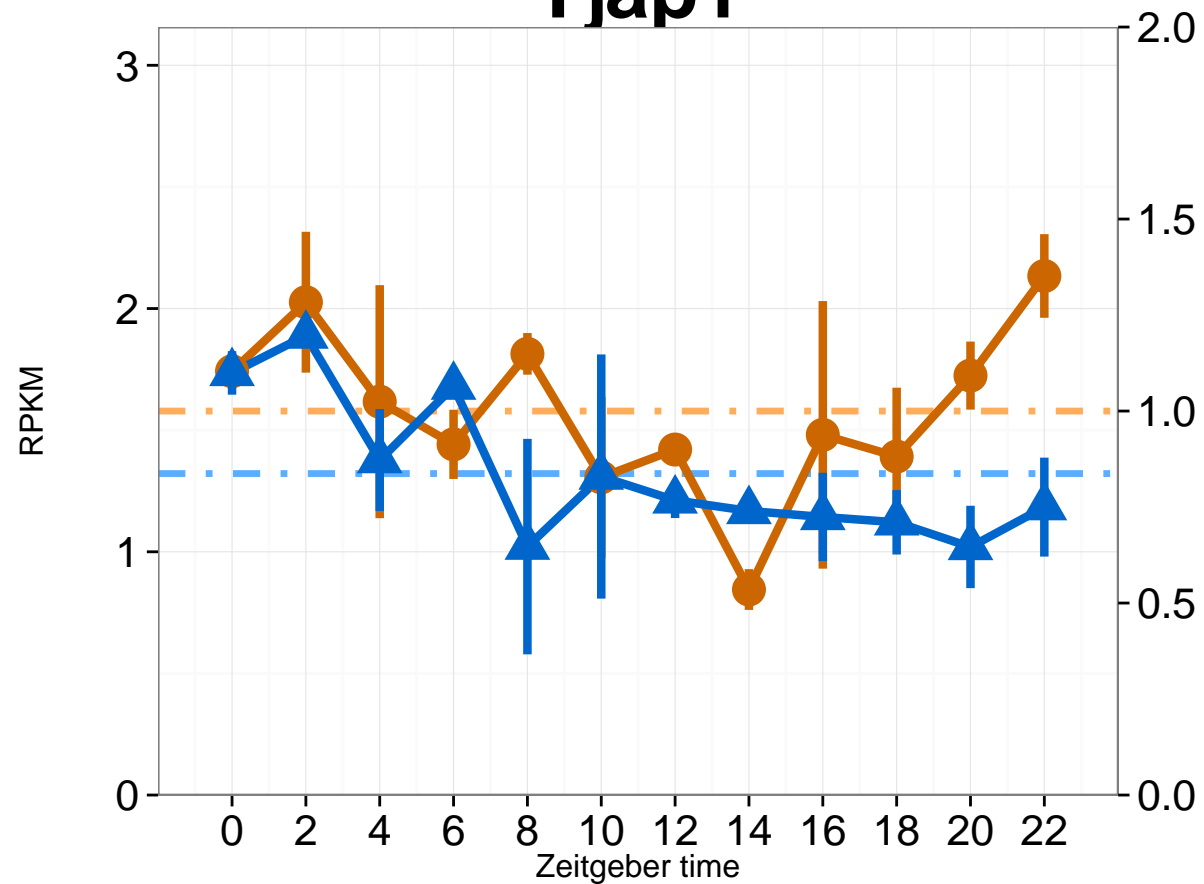

# Tjap1

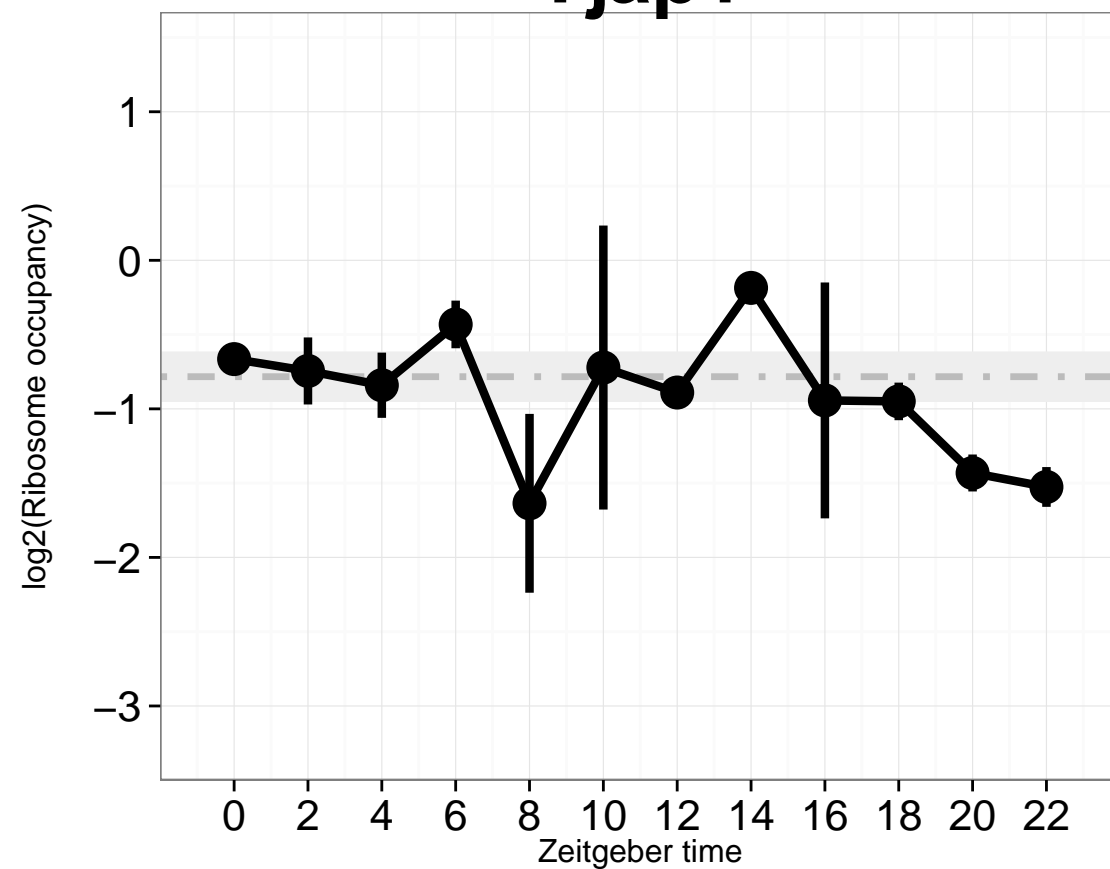

Supplement: SuppDataset_1.zip [file Tjap1_set_A.pdf › Supplemental Dataset 1/A-mRNA_nonrhyth_translation_nonrhyth/Tjap1_set_A.pdf]

# Tjp1

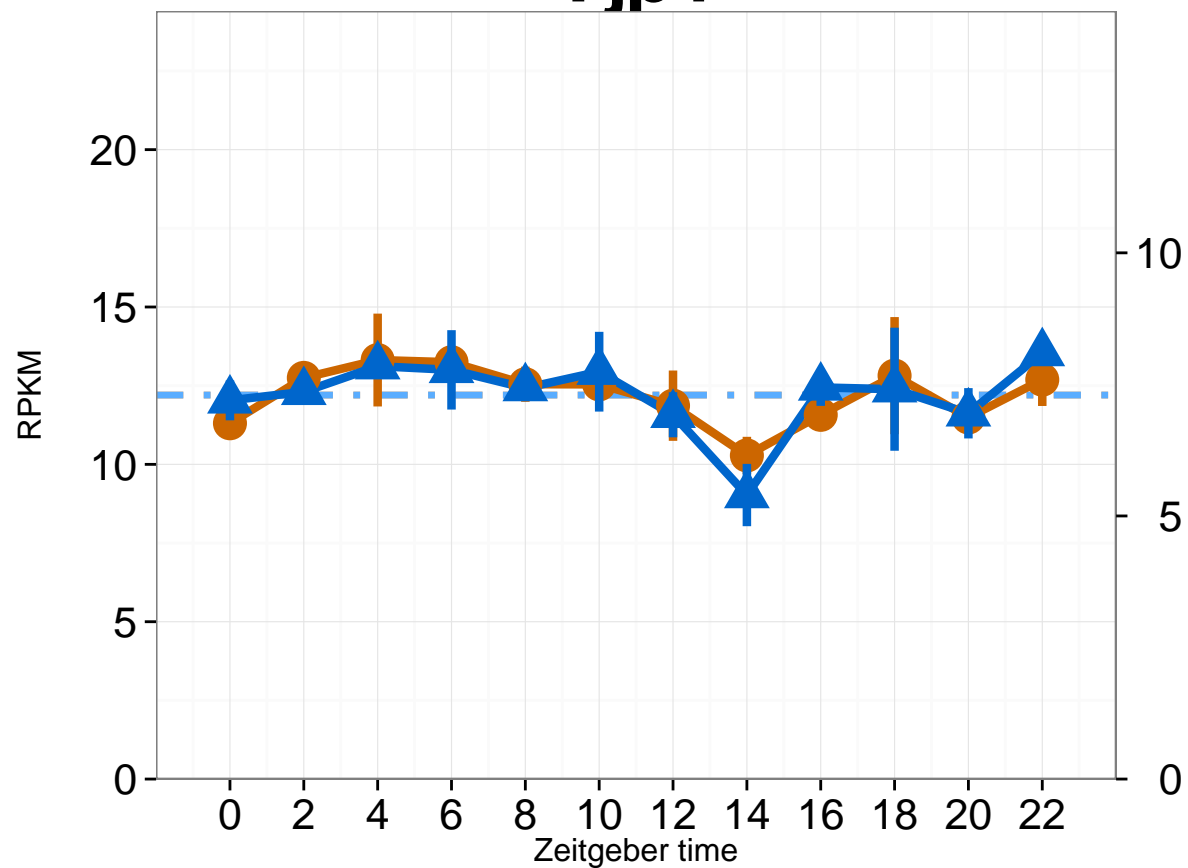

# Tjp1

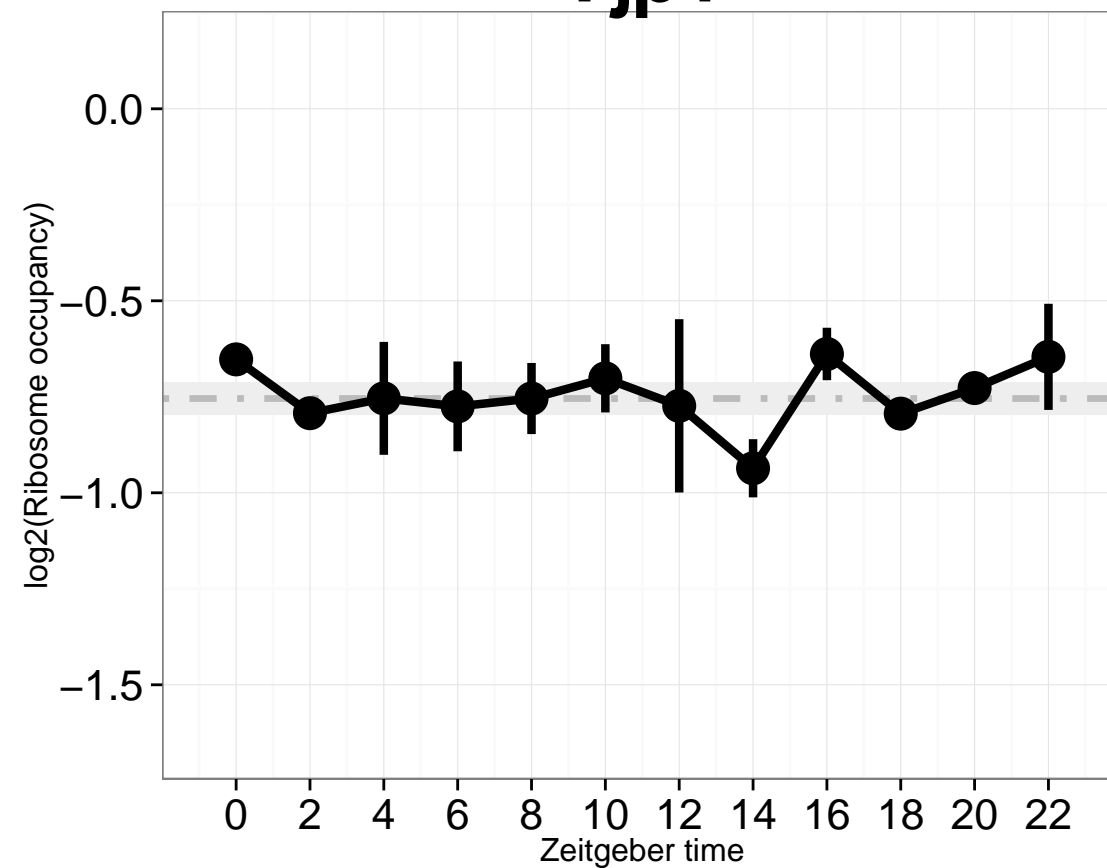

Supplement: SuppDataset_1.zip [file Tjp1_set_A.pdf › Supplemental Dataset 1/A-mRNA_nonrhyth_translation_nonrhyth/Tjp1_set_A.pdf]

## Tk1

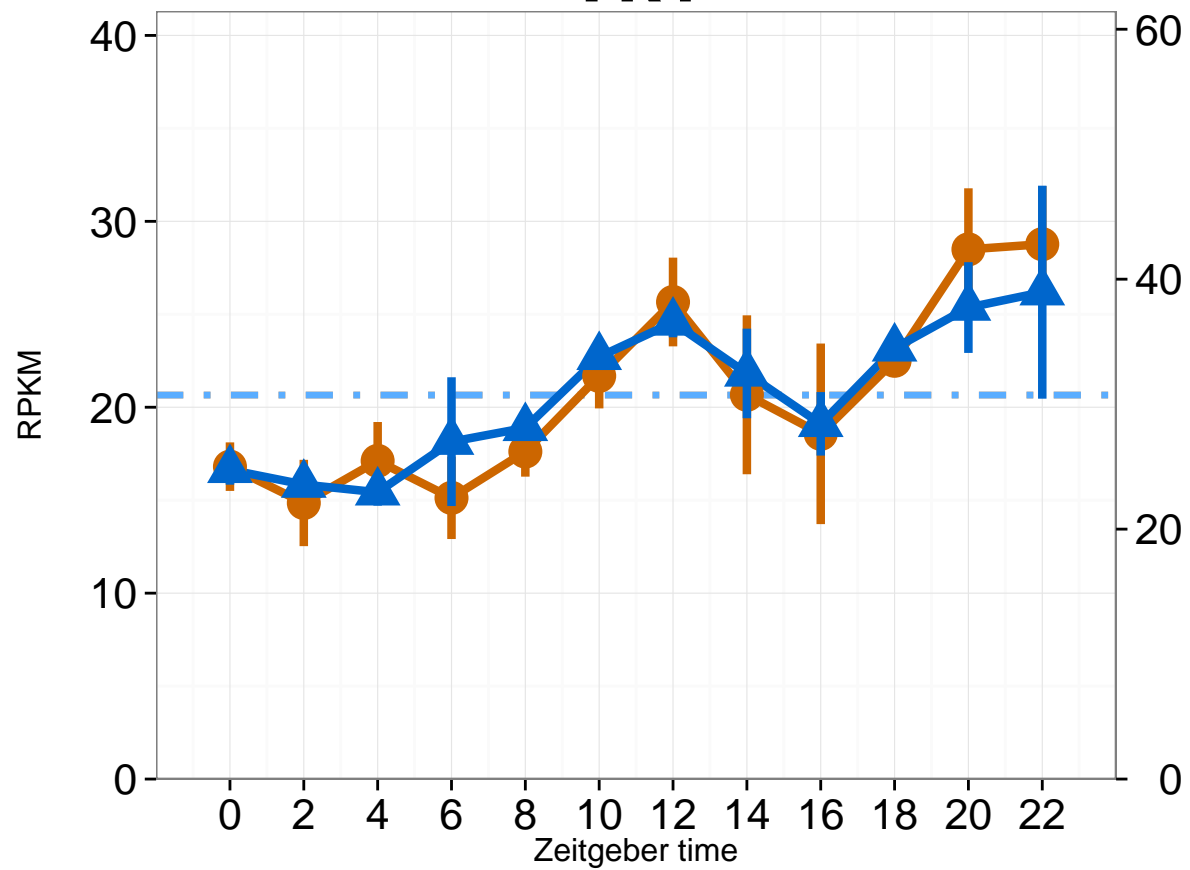

## Tk1

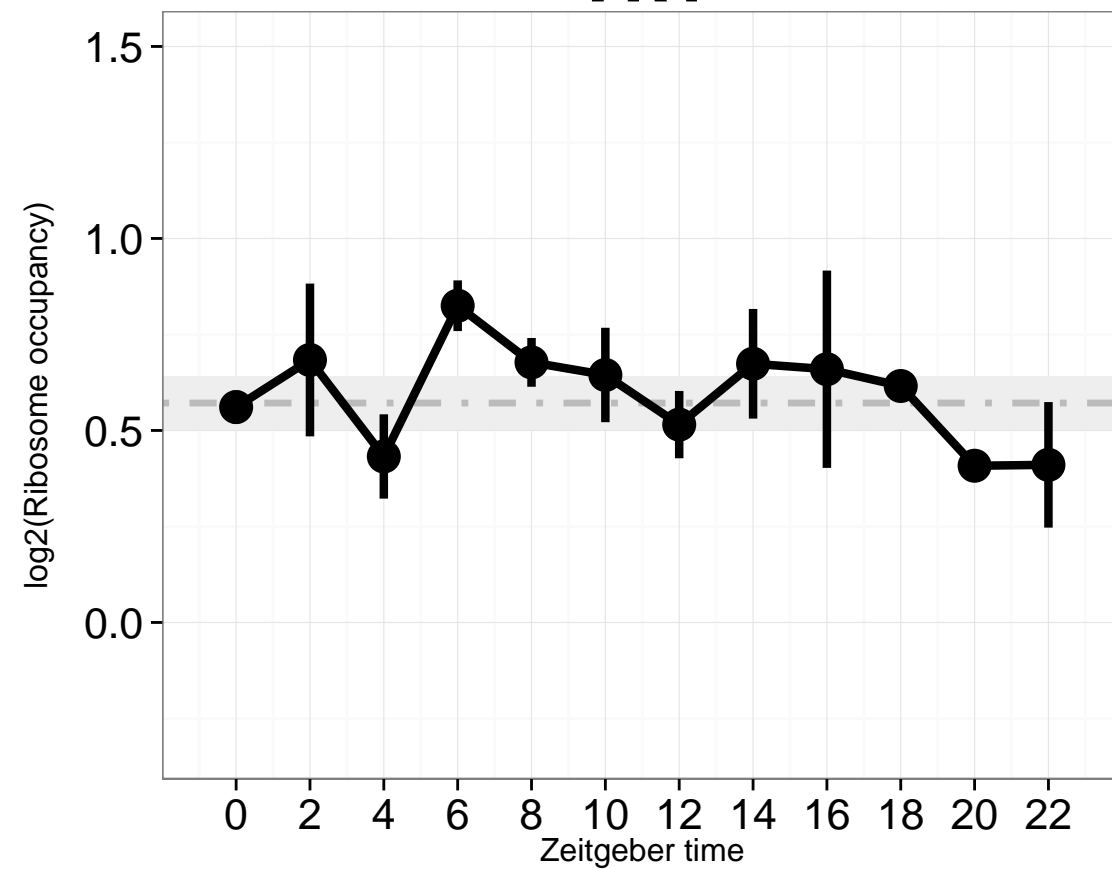

Supplement: SuppDataset_1.zip [file Tk1_set_A.pdf › Supplemental Dataset 1/A-mRNA_nonrhyth_translation_nonrhyth/Tk1_set_A.pdf]

## Tk2

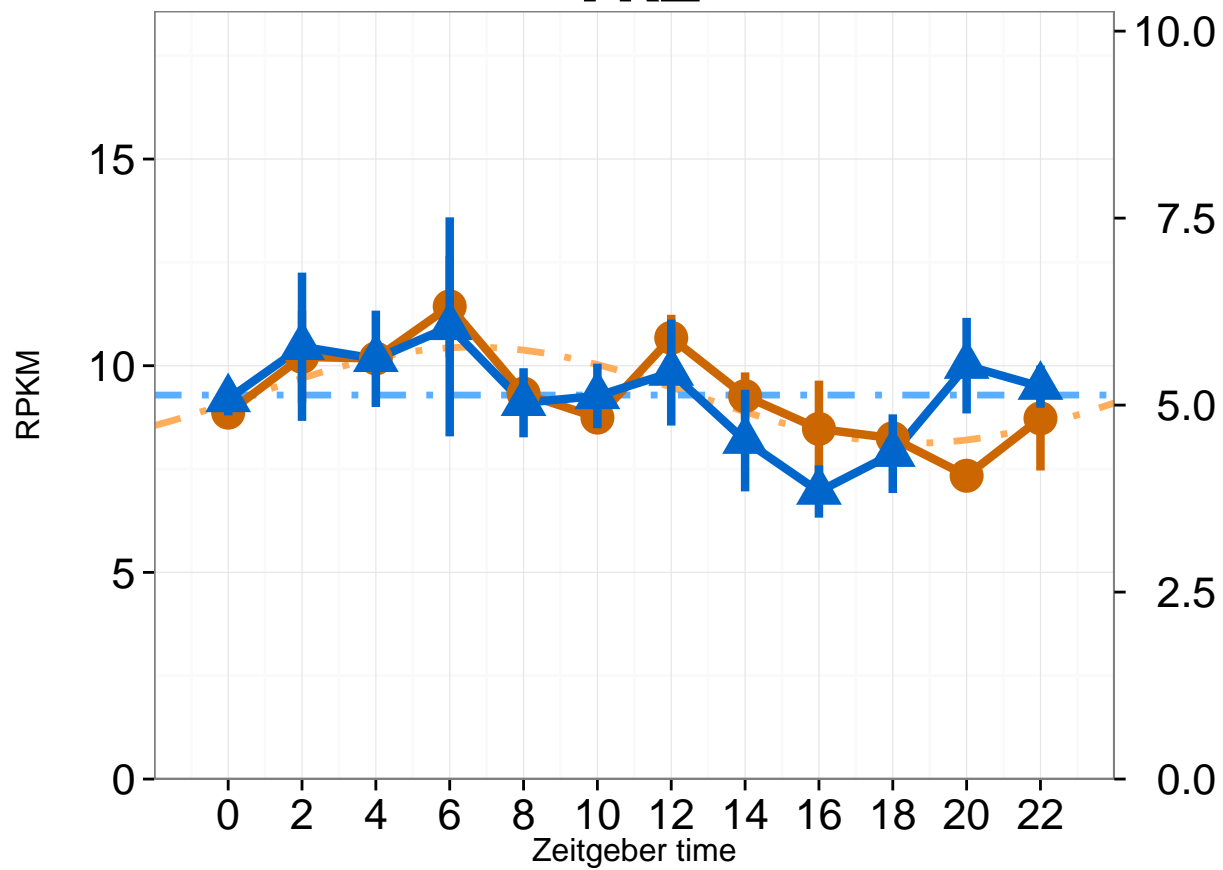

## Tk2

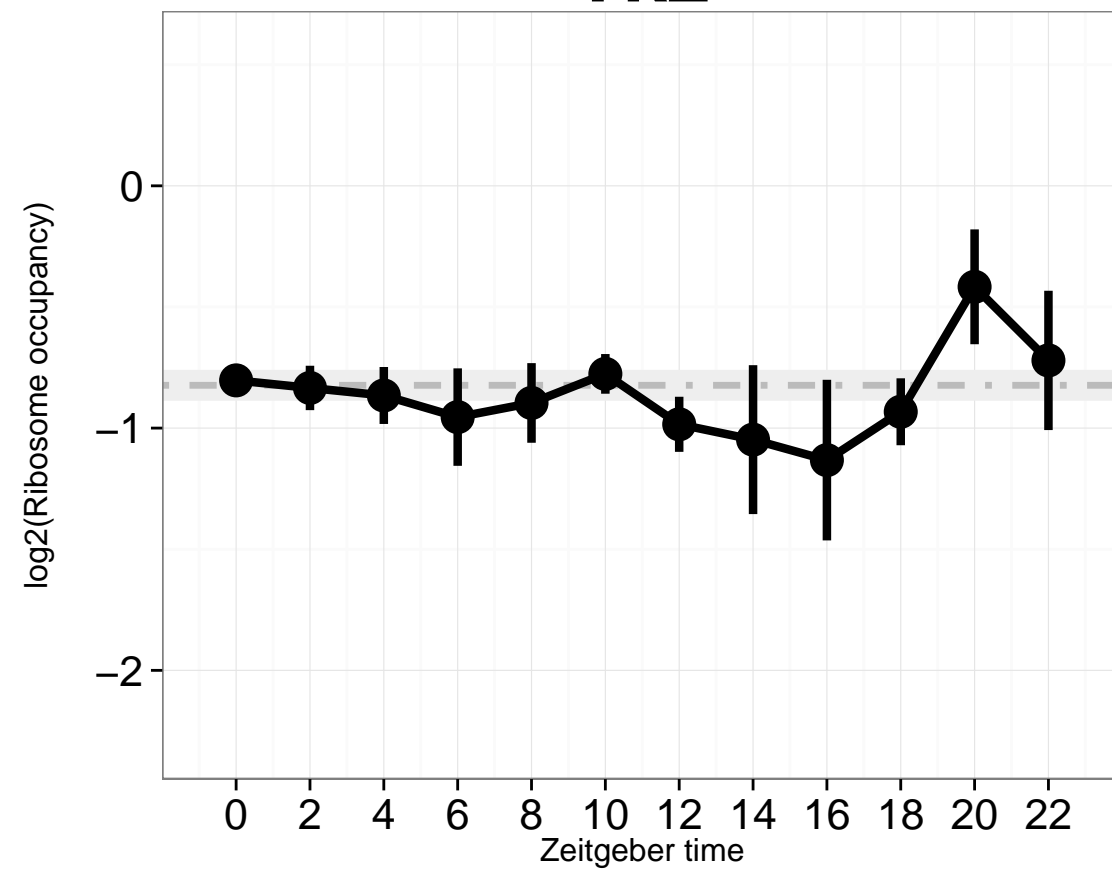

Supplement: SuppDataset_1.zip [file Tk2_set_A.pdf › Supplemental Dataset 1/A-mRNA_nonrhyth_translation_nonrhyth/Tk2_set_A.pdf]

## Tkt

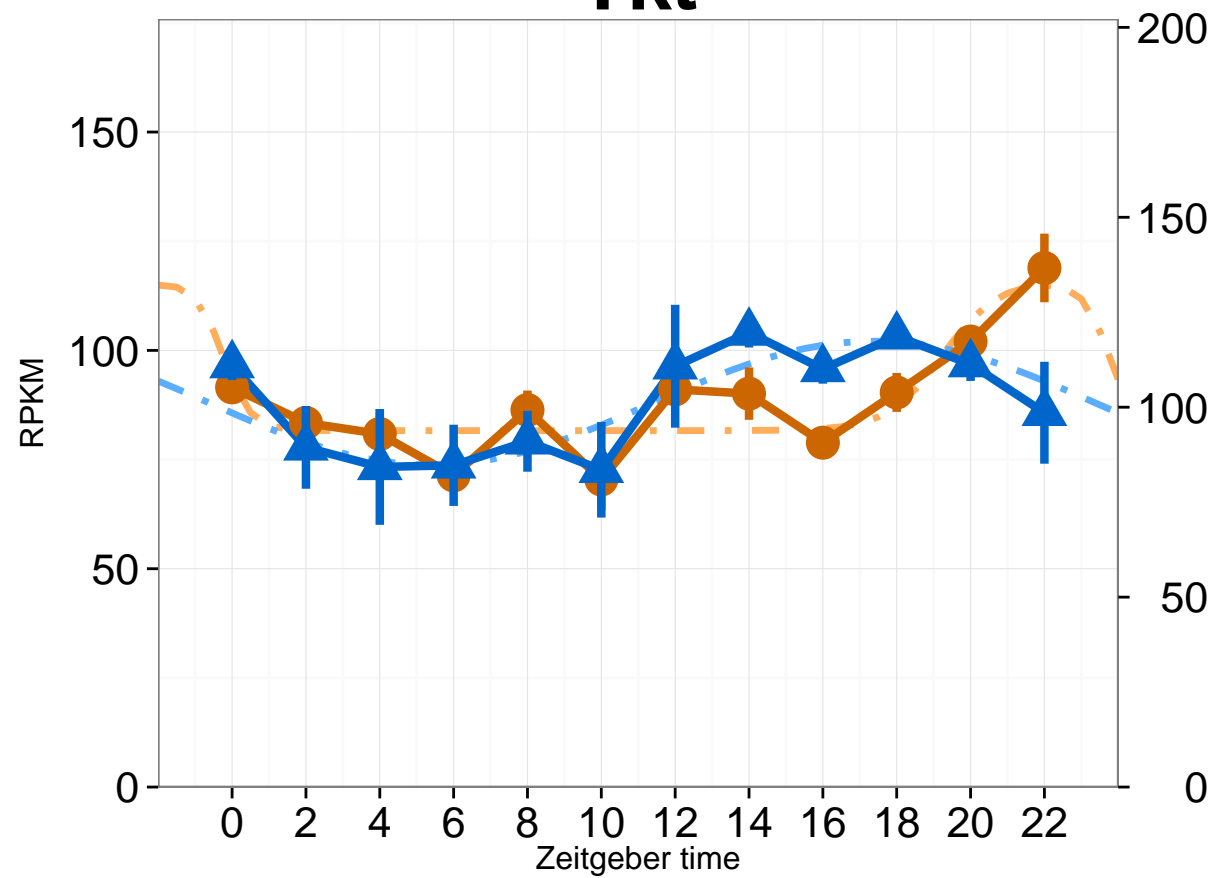

## Tkt

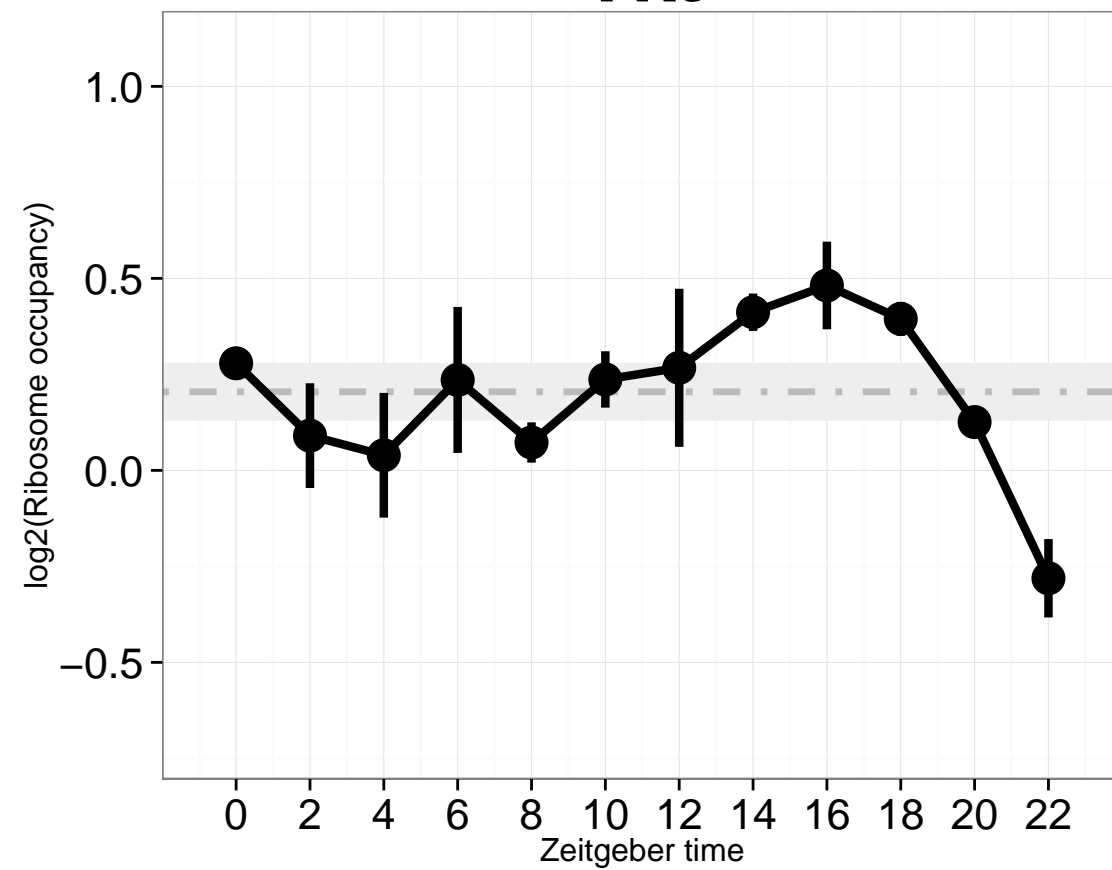

Supplement: SuppDataset_1.zip [file Tkt_set_A.pdf › Supplemental Dataset 1/A-mRNA_nonrhyth_translation_nonrhyth/Tkt_set_A.pdf]

# Tlcd1

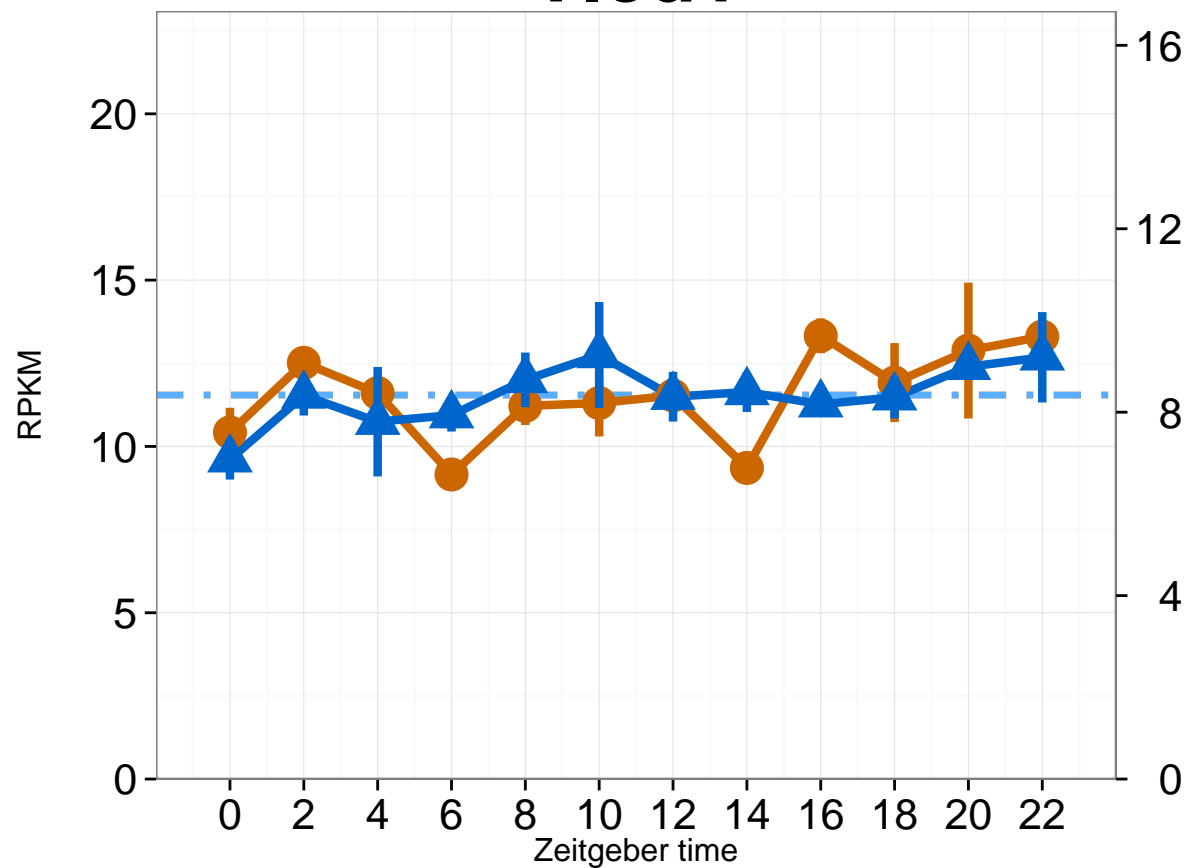

# Tlcd1

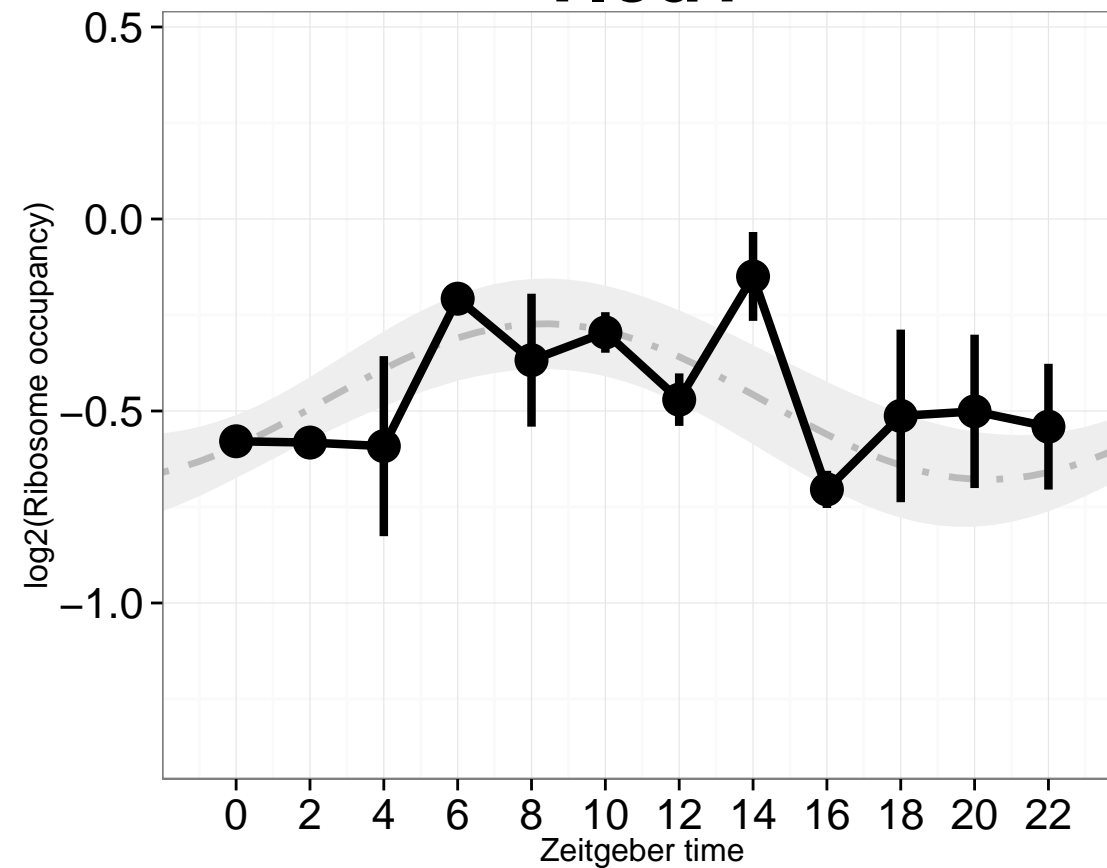

Supplement: SuppDataset_1.zip [file Tlcd1_set_A.pdf › Supplemental Dataset 1/A-mRNA_nonrhyth_translation_nonrhyth/Tlcd1_set_A.pdf]

# Tldc1

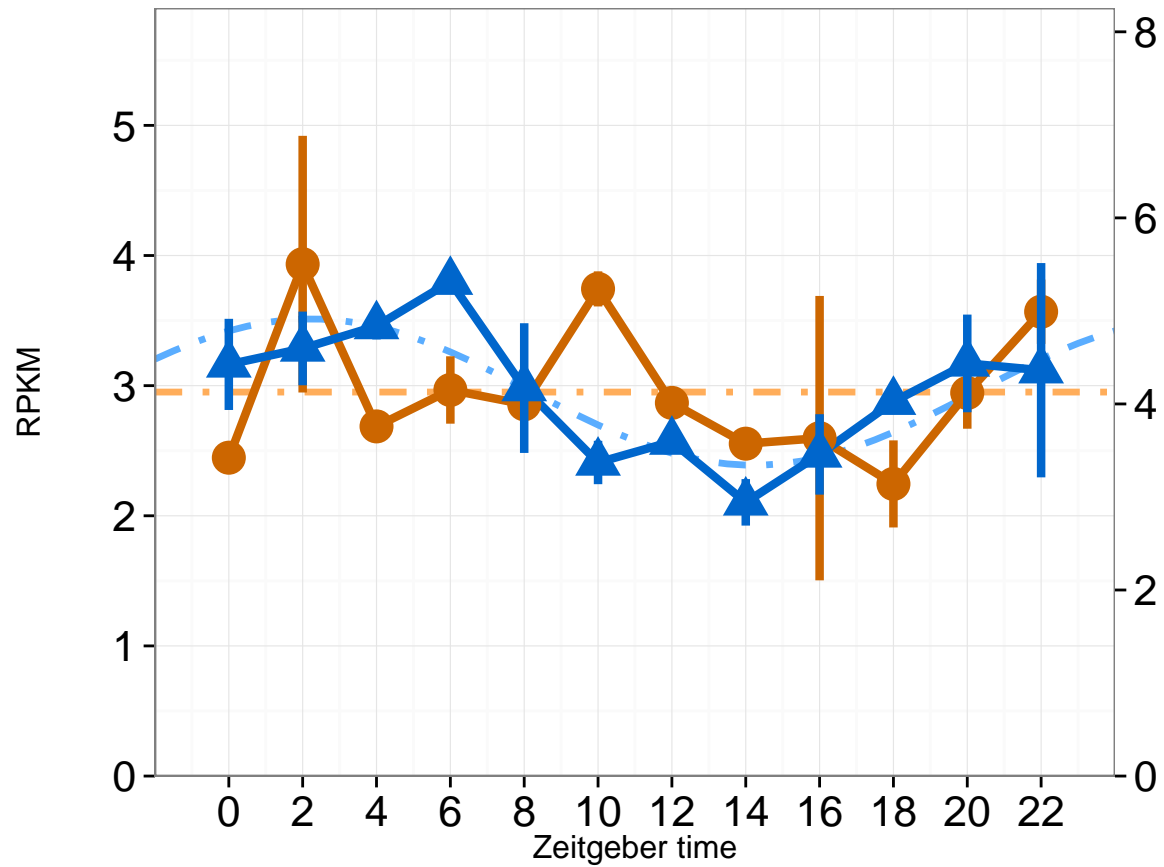

# Tldc1

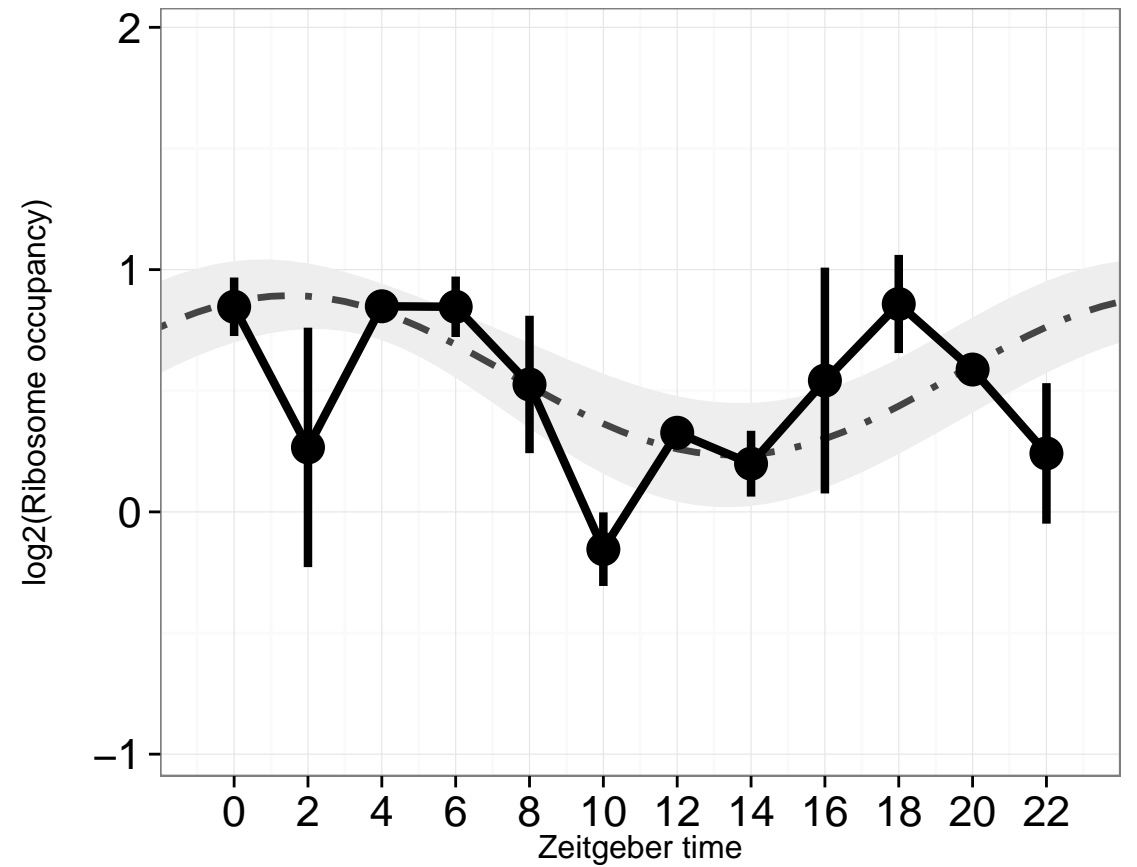

Supplement: SuppDataset_1.zip [file Tldc1_set_A.pdf › Supplemental Dataset 1/A-mRNA_nonrhyth_translation_nonrhyth/Tldc1_set_A.pdf]

# Tle1

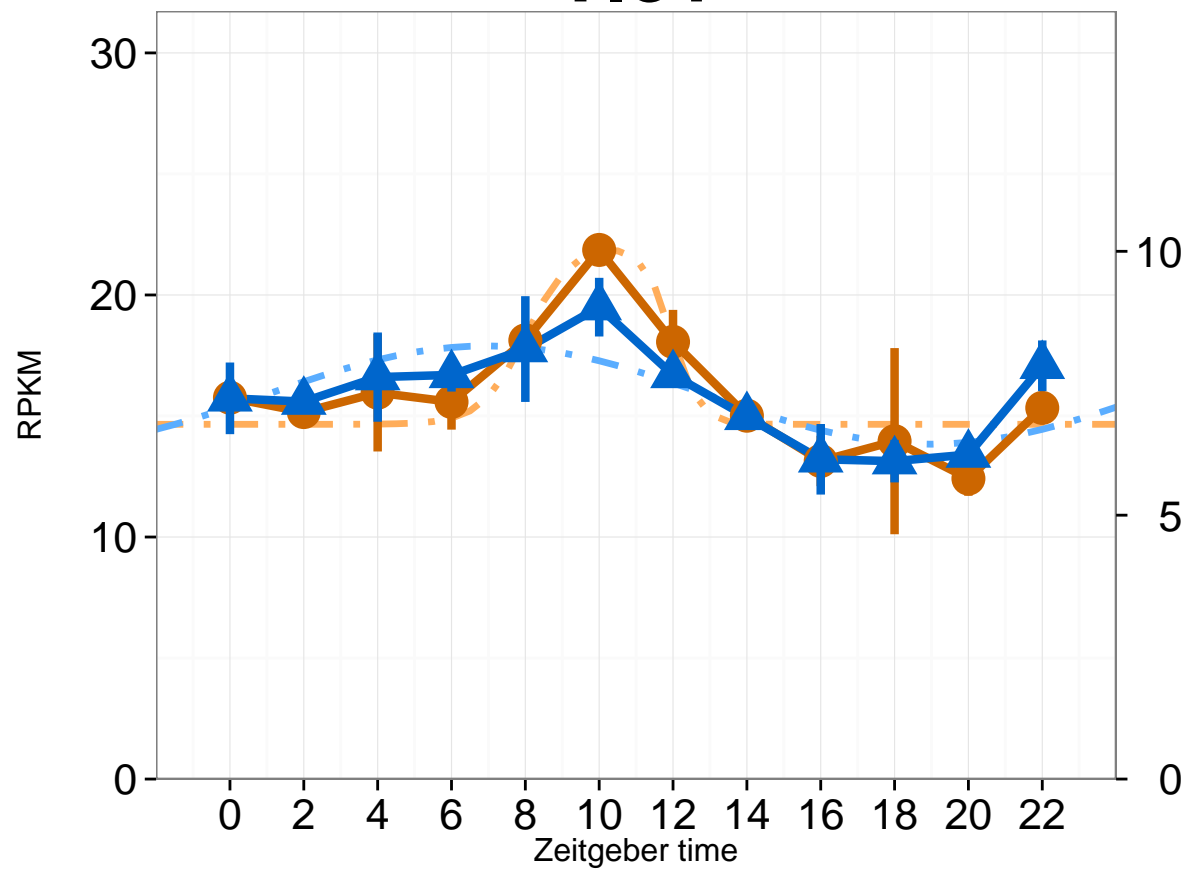

# Tle1

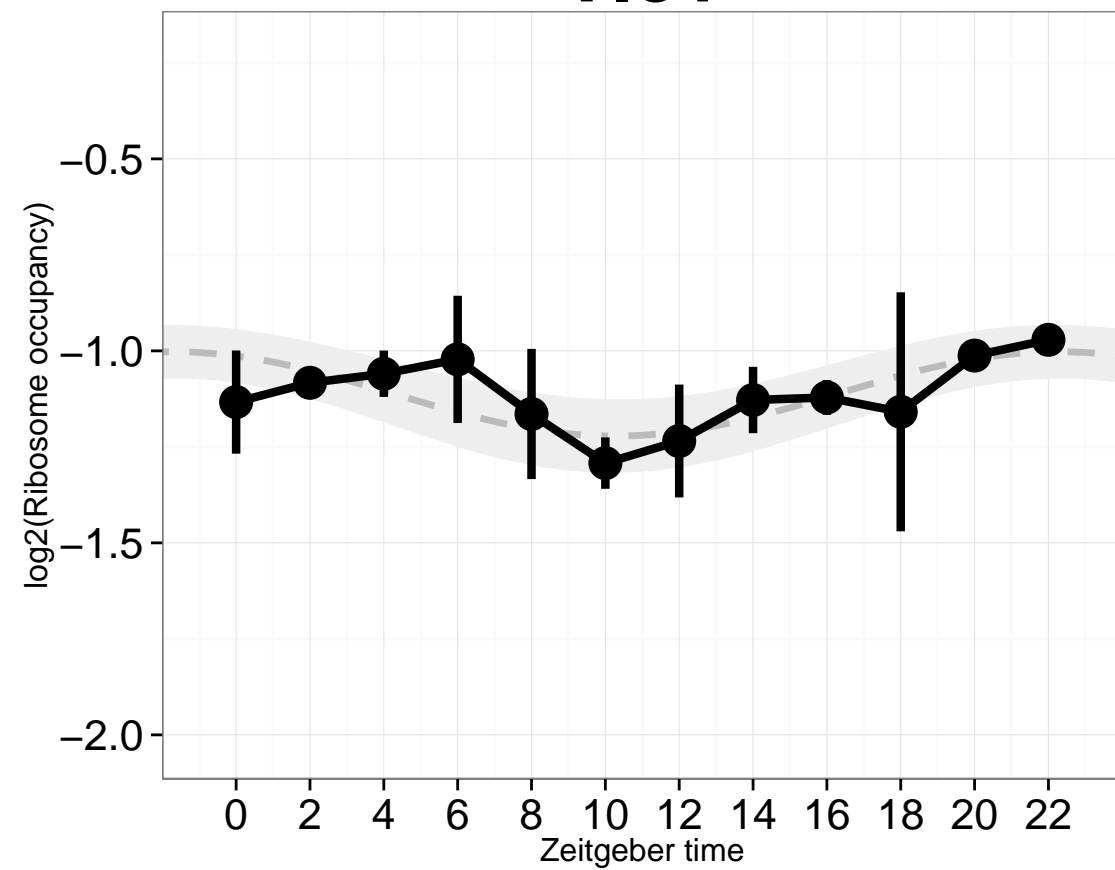

Supplement: SuppDataset_1.zip [file Tle1_set_A.pdf › Supplemental Dataset 1/A-mRNA_nonrhyth_translation_nonrhyth/Tle1_set_A.pdf]

## Tle2

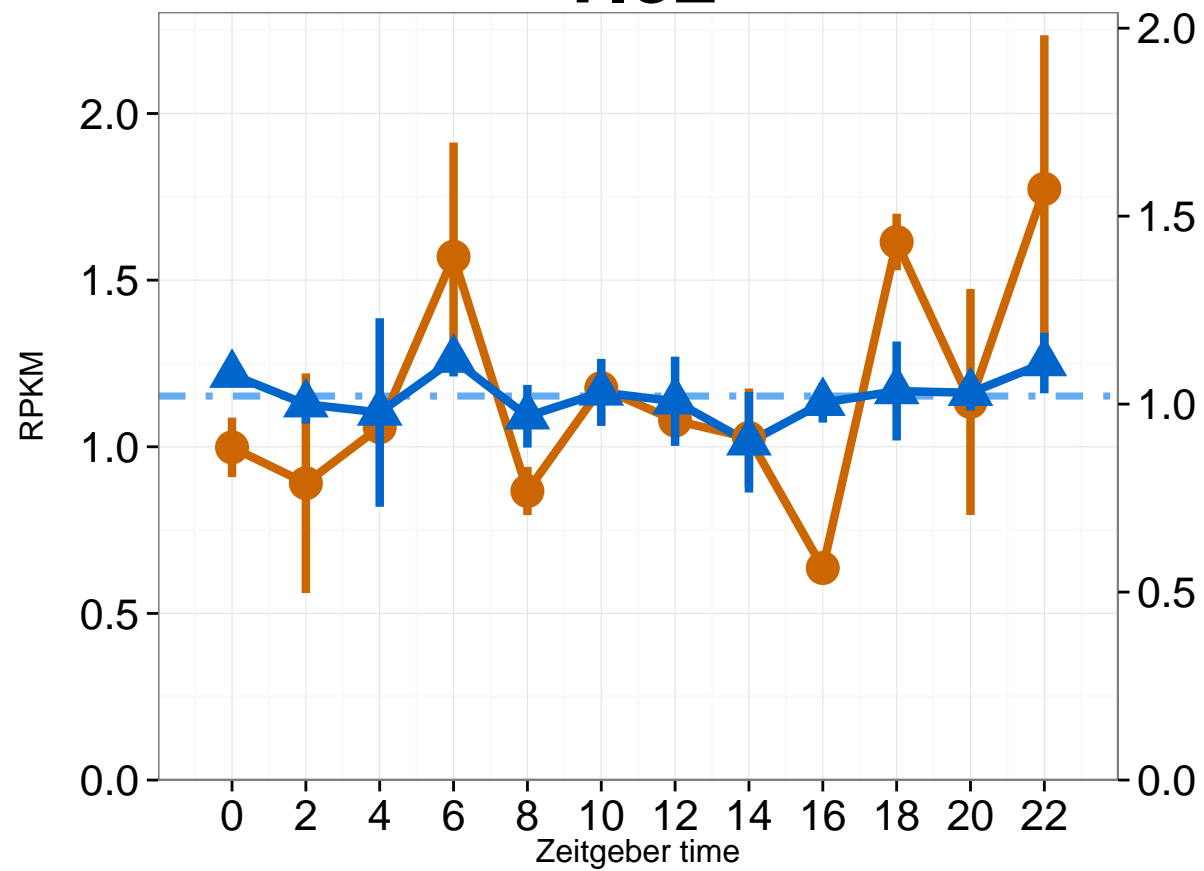

## Tle2

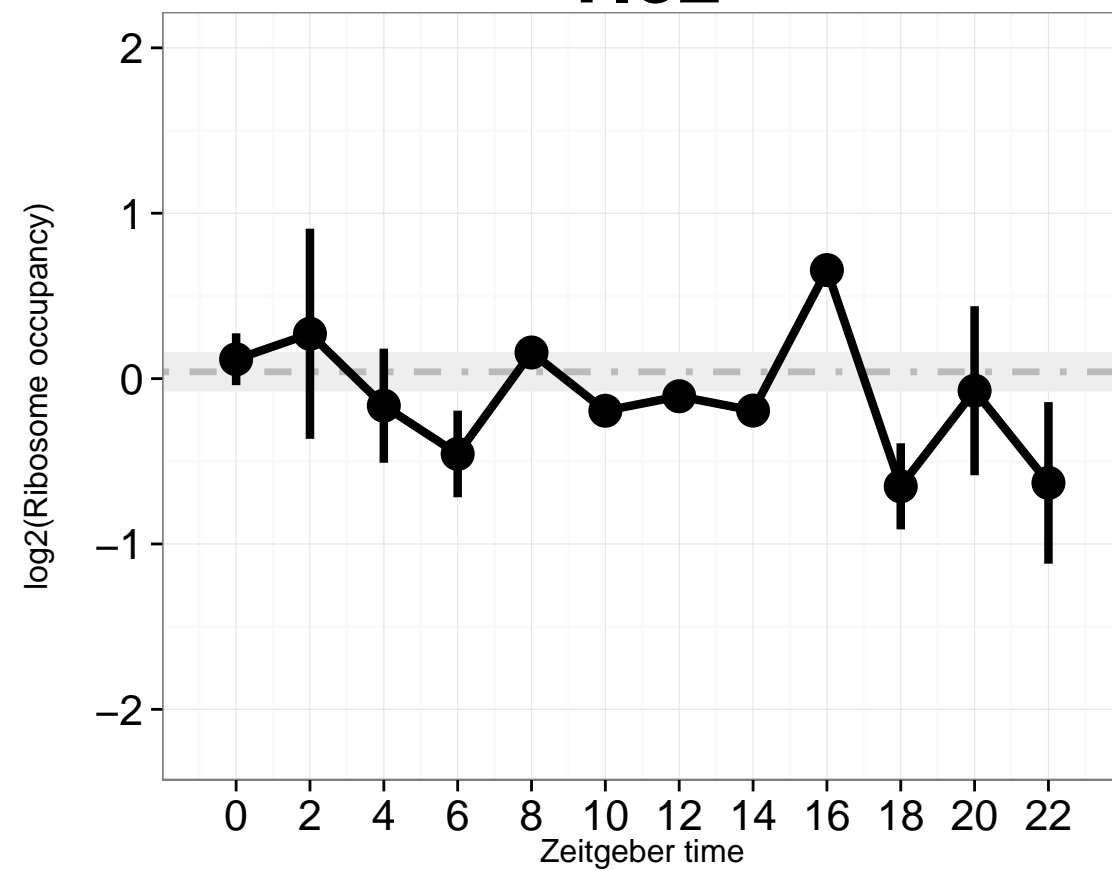

Supplement: SuppDataset_1.zip [file Tle2_set_A.pdf › Supplemental Dataset 1/A-mRNA_nonrhyth_translation_nonrhyth/Tle2_set_A.pdf]

## Tle3

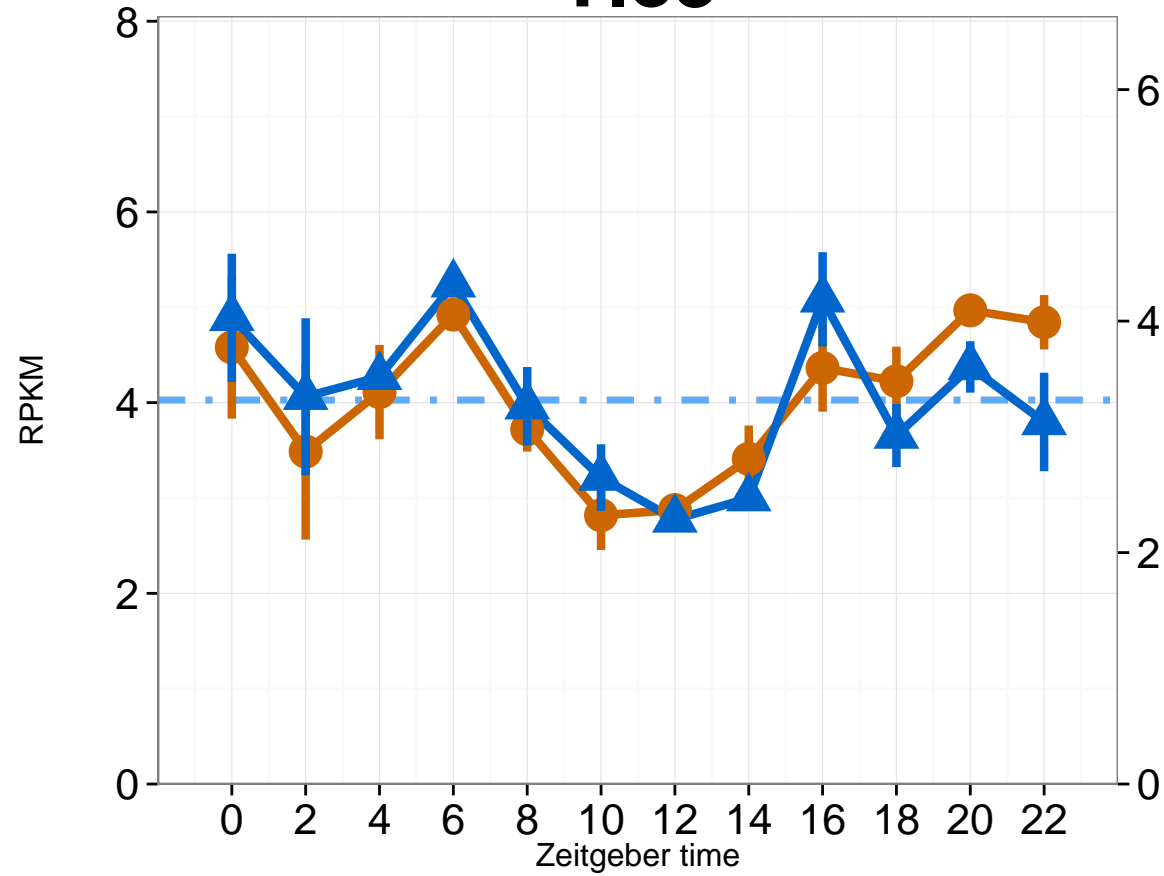

## Tle3

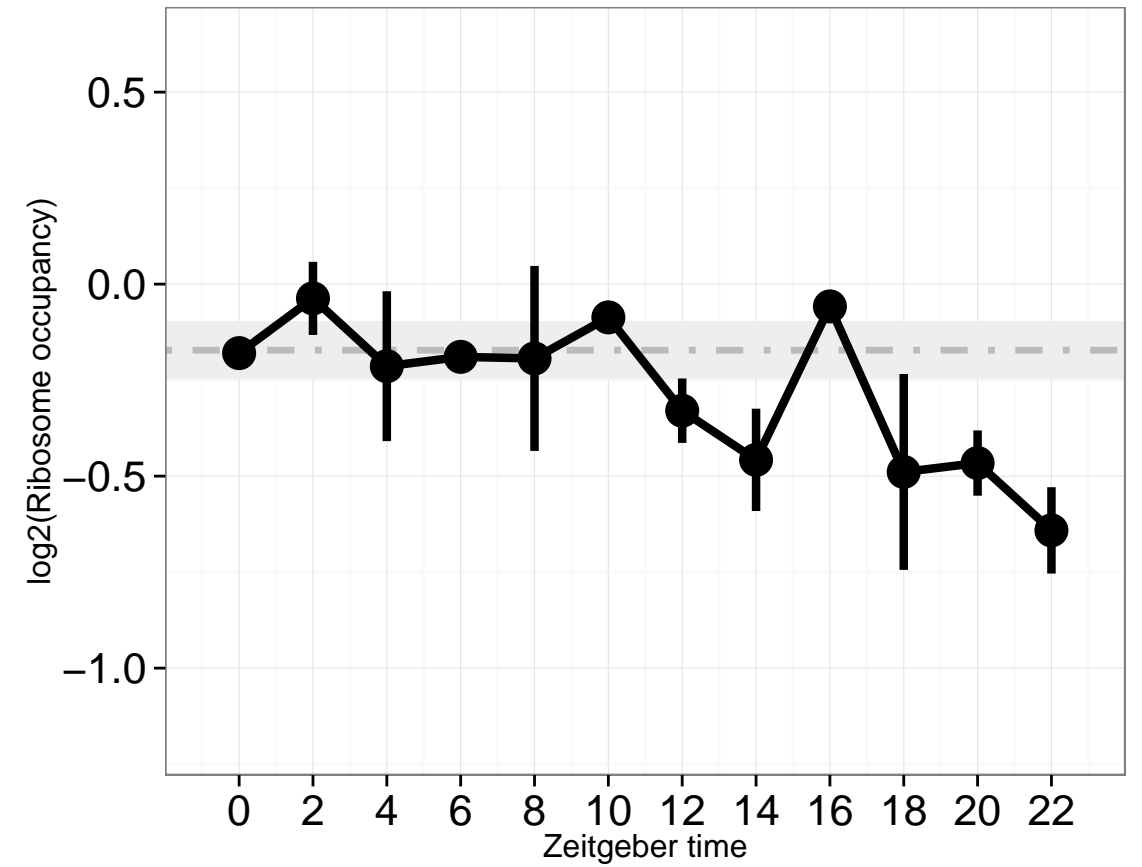

Supplement: SuppDataset_1.zip [file Tle3_set_A.pdf › Supplemental Dataset 1/A-mRNA_nonrhyth_translation_nonrhyth/Tle3_set_A.pdf]

## Tle4

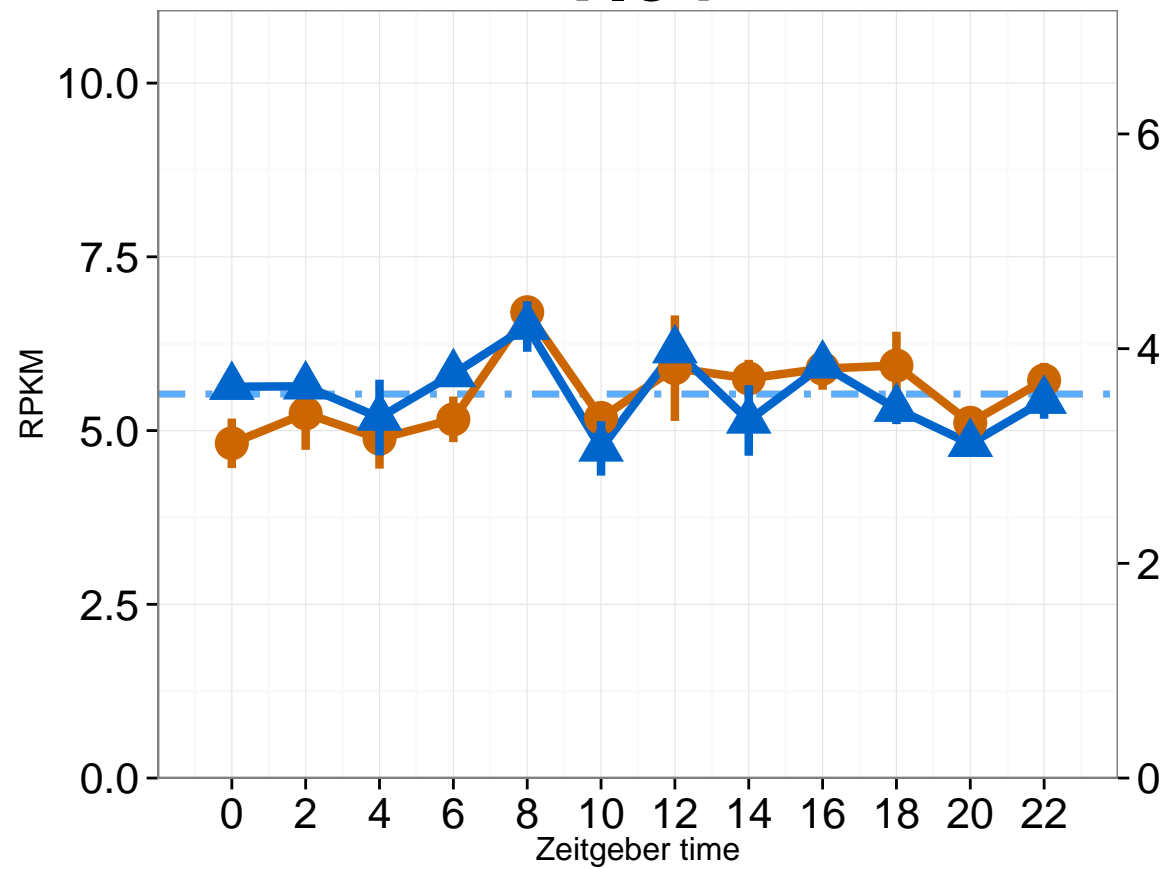

## Tle4

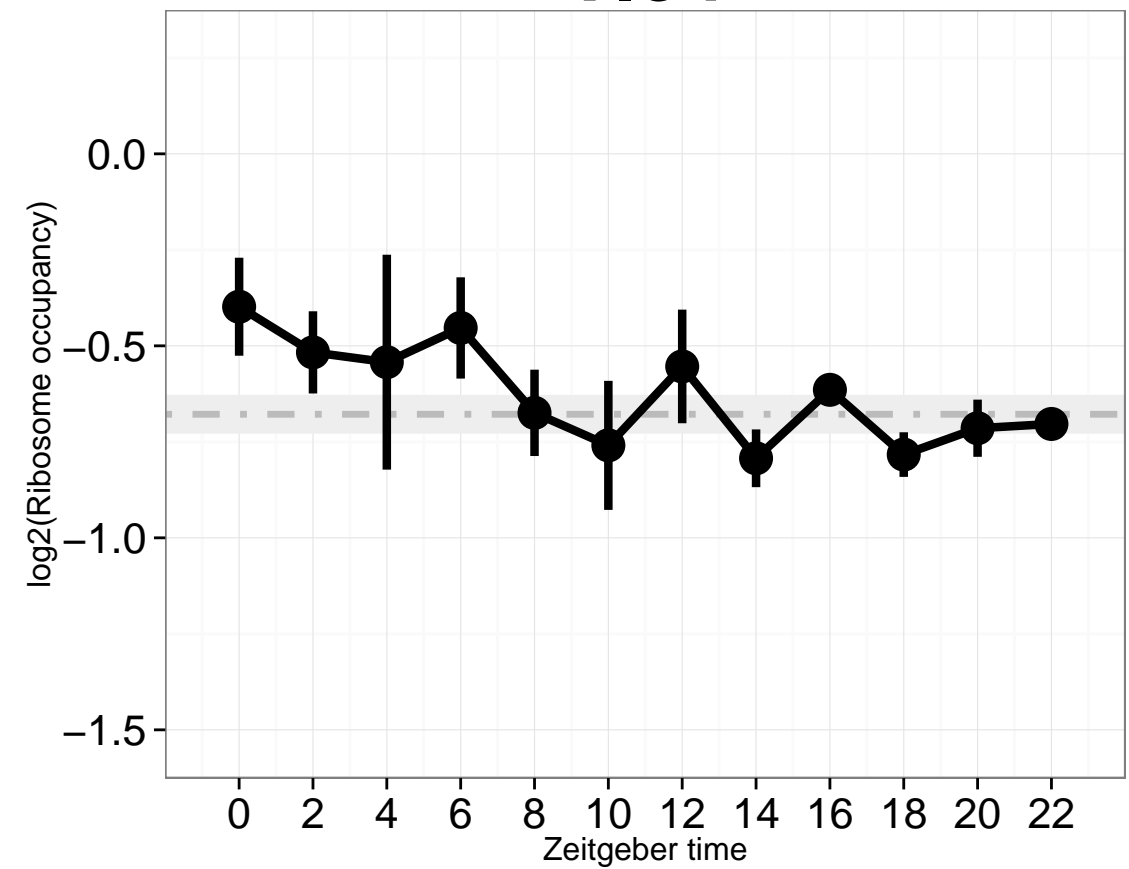

Supplement: SuppDataset_1.zip [file Tle4_set_A.pdf › Supplemental Dataset 1/A-mRNA_nonrhyth_translation_nonrhyth/Tle4_set_A.pdf]

# Tlk1

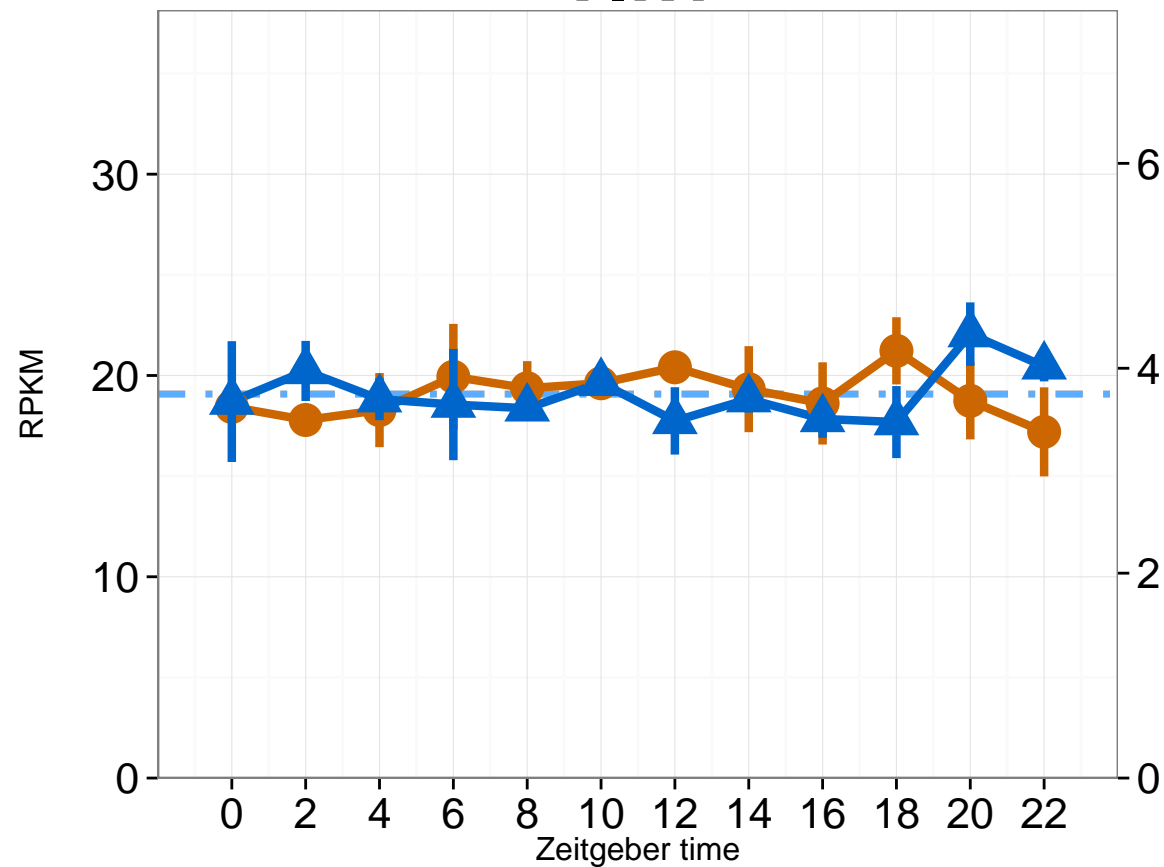

# Tlk1

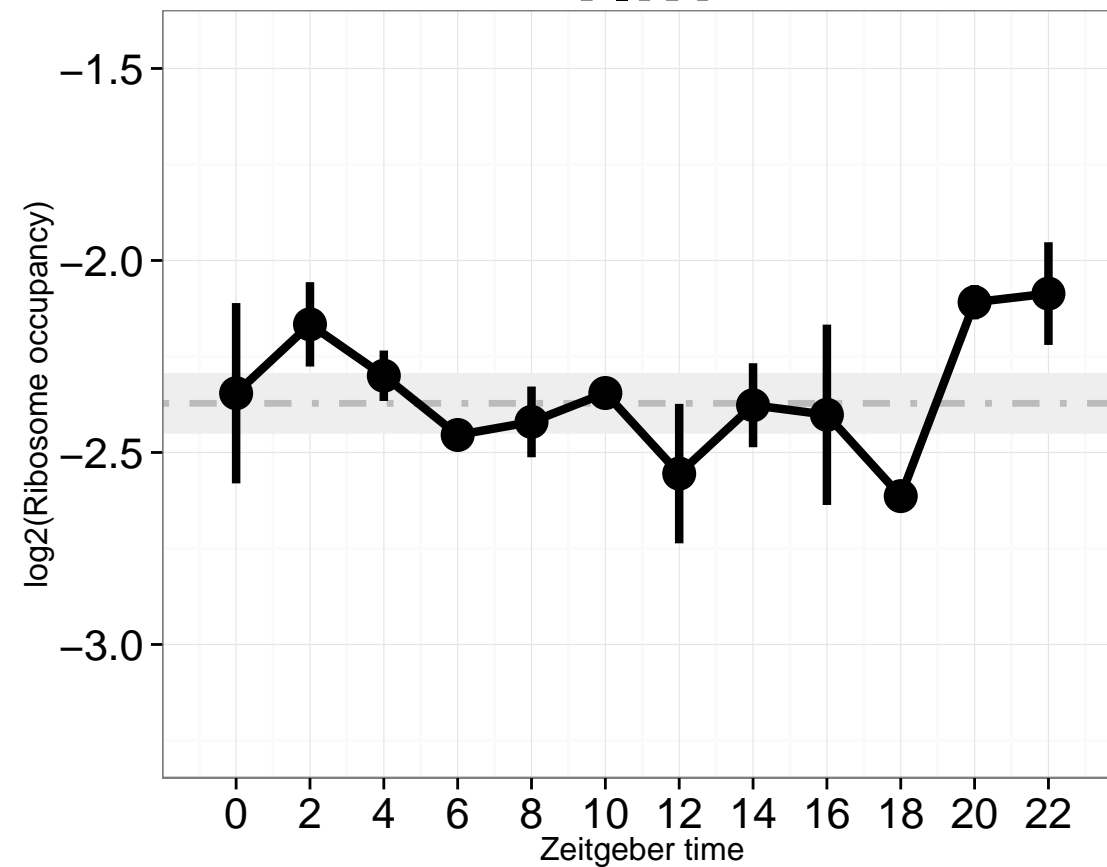

Supplement: SuppDataset_1.zip [file Tlk1_set_A.pdf › Supplemental Dataset 1/A-mRNA_nonrhyth_translation_nonrhyth/Tlk1_set_A.pdf]

## Tik2

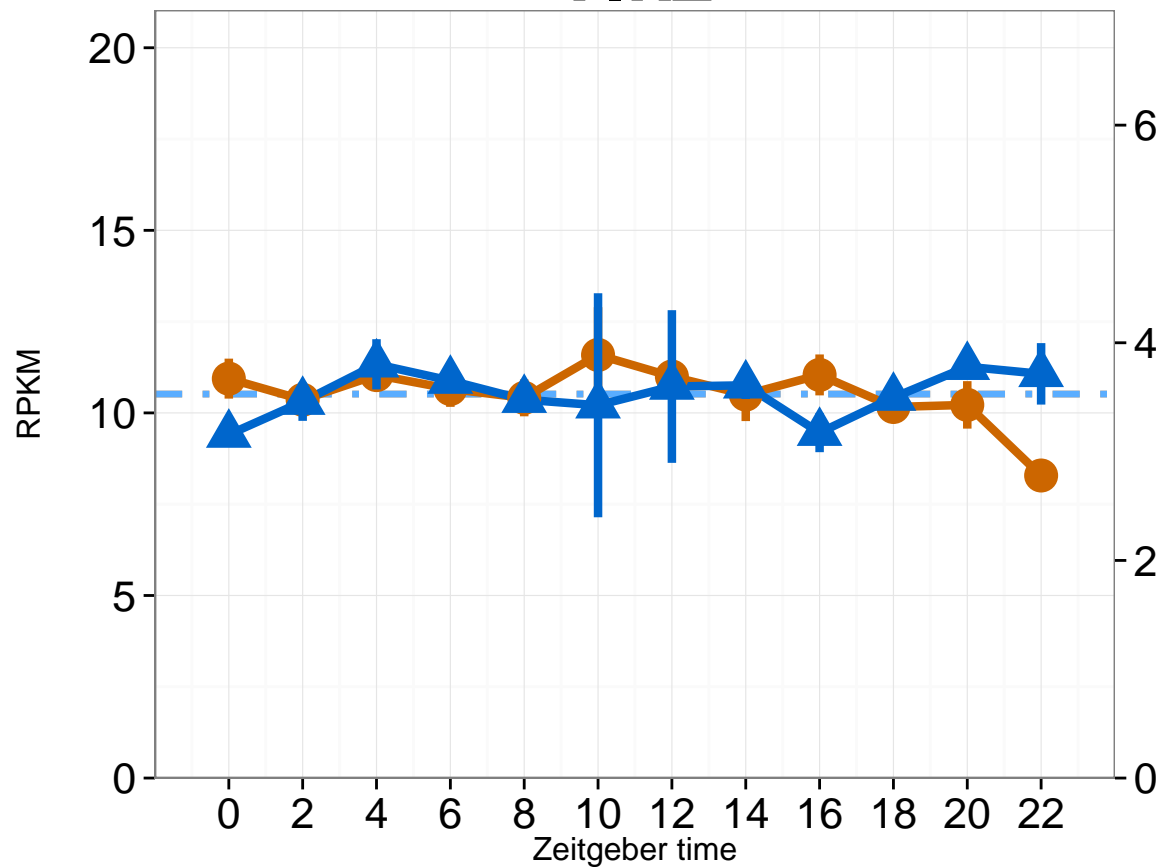

## Tik2

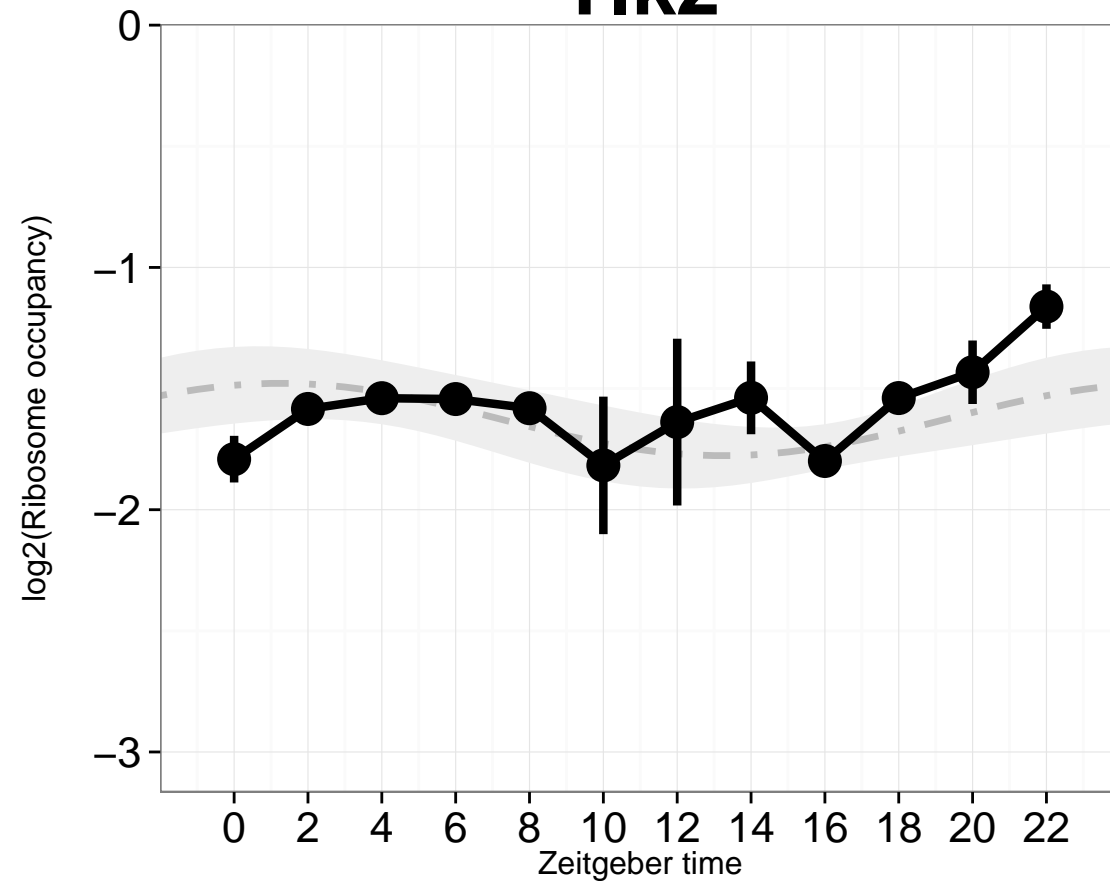

Supplement: SuppDataset_1.zip [file Tlk2_set_A.pdf › Supplemental Dataset 1/A-mRNA_nonrhyth_translation_nonrhyth/Tlk2_set_A.pdf]
