# Supplementary figures and images for: Ribosome profiling reveals the rhythmic liver translatome and circadian clock regulation by upstream open reading frames (part 75 of 113)
Source: HighWire-hosted journal article supplement (doi:10.1101/gr.195404.115), 2015-10-20

## Tln1

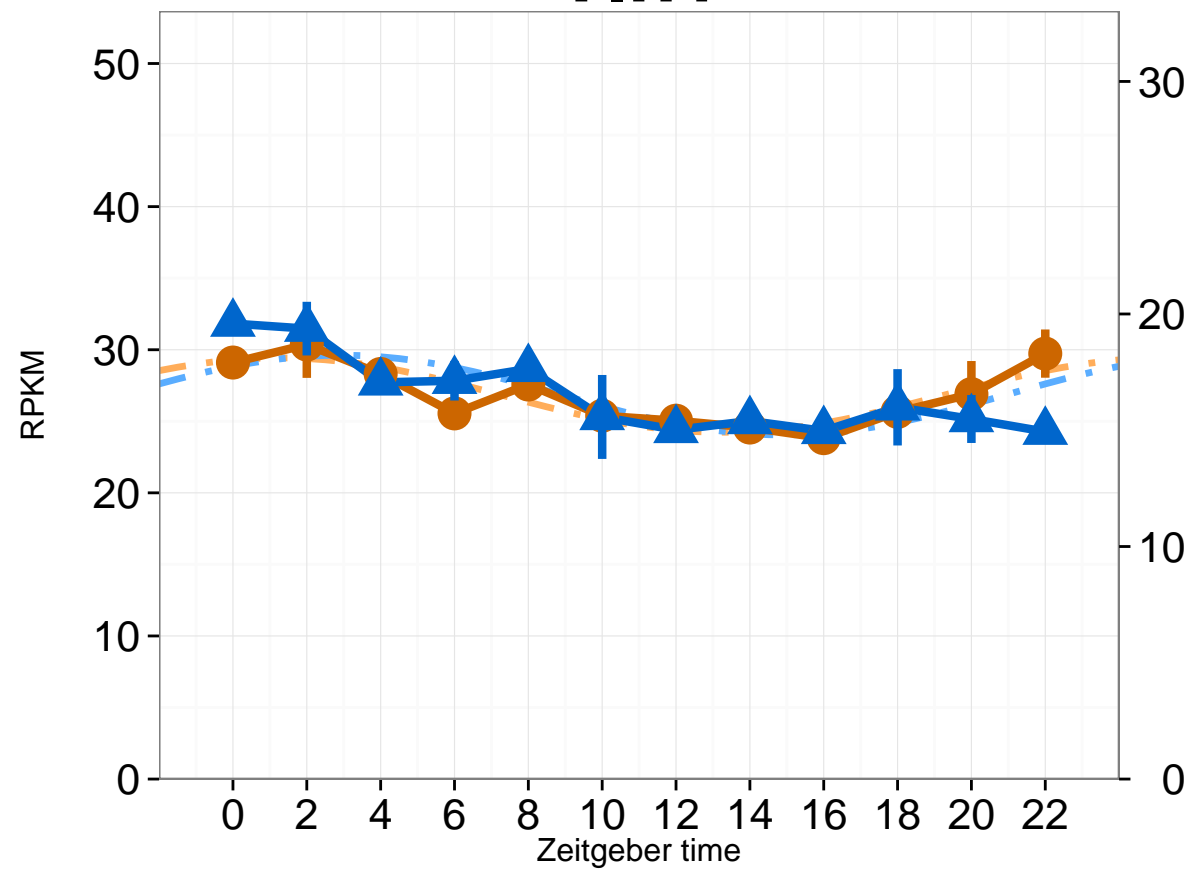

## Tln1

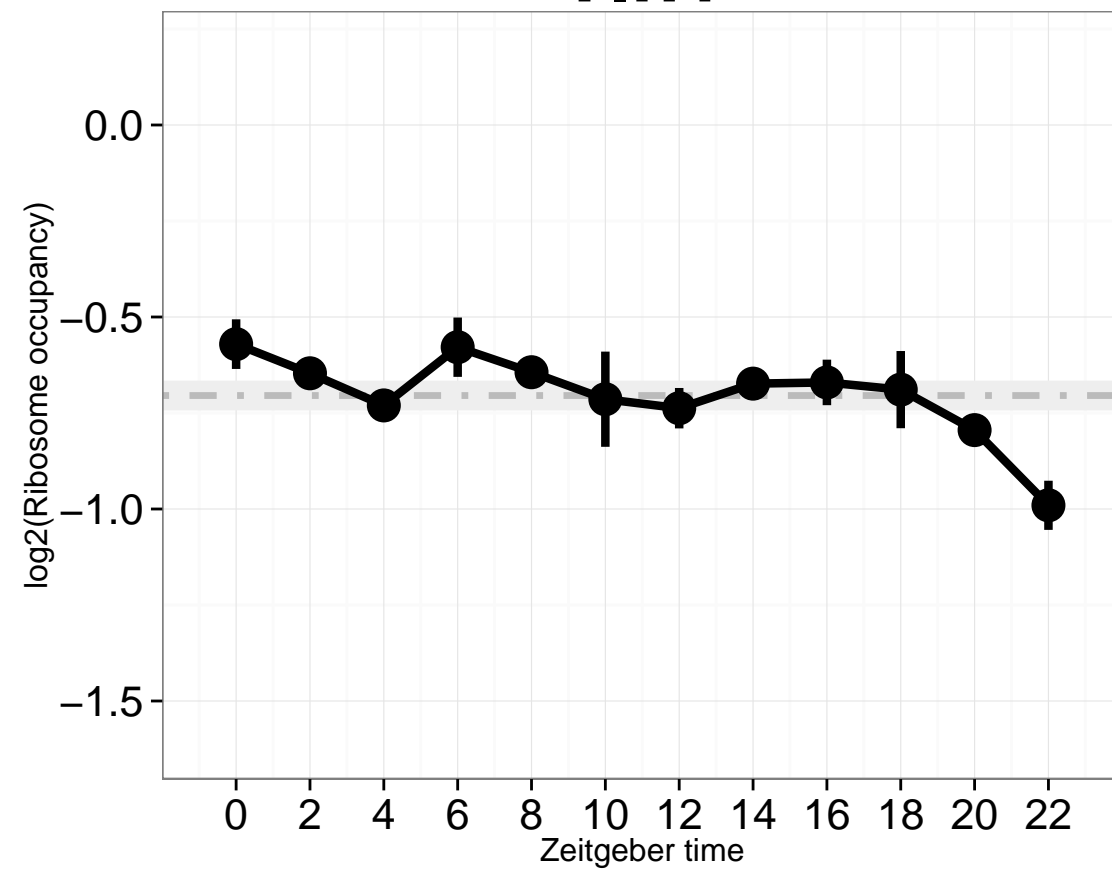

Supplement: SuppDataset_1.zip [file Tln1_set_A.pdf › Supplemental Dataset 1/A-mRNA_nonrhyth_translation_nonrhyth/Tln1_set_A.pdf]

## Tln2

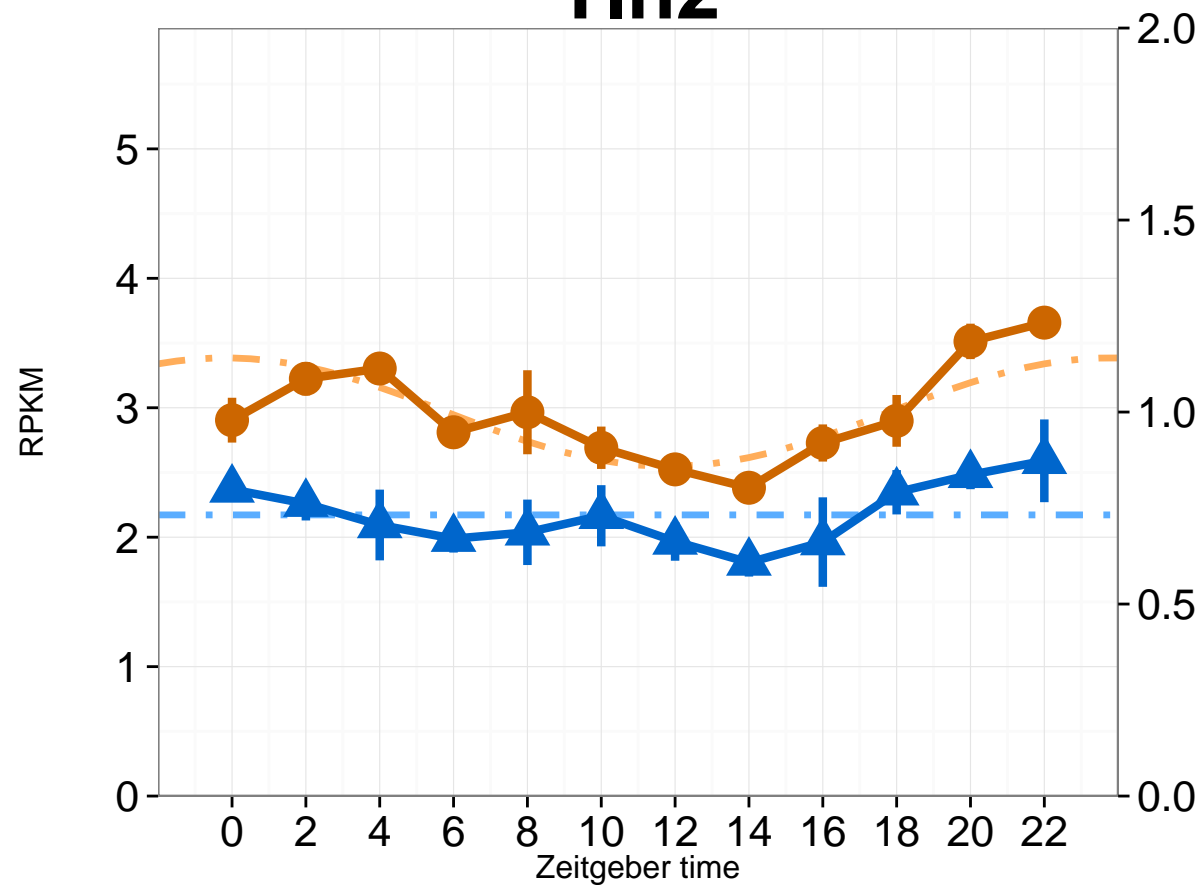

## Tln2

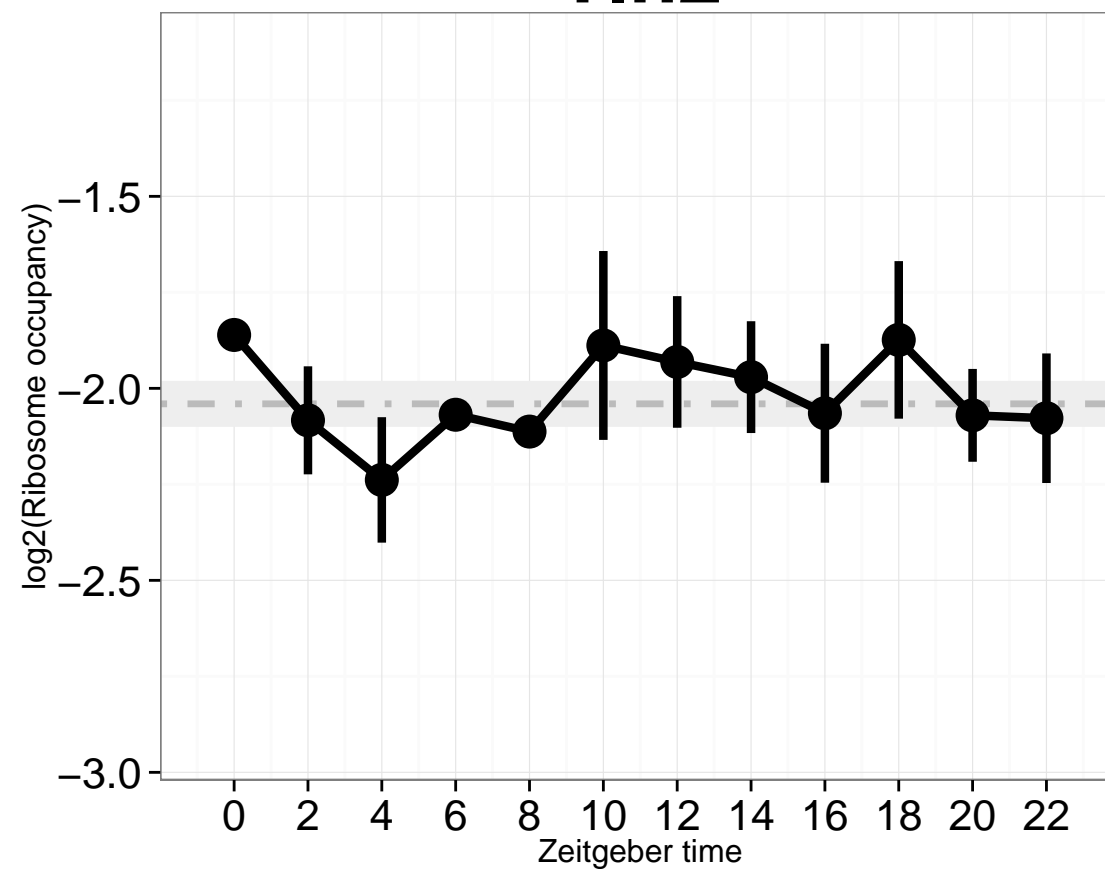

Supplement: SuppDataset_1.zip [file Tln2_set_A.pdf › Supplemental Dataset 1/A-mRNA_nonrhyth_translation_nonrhyth/Tln2_set_A.pdf]

## Tlr12

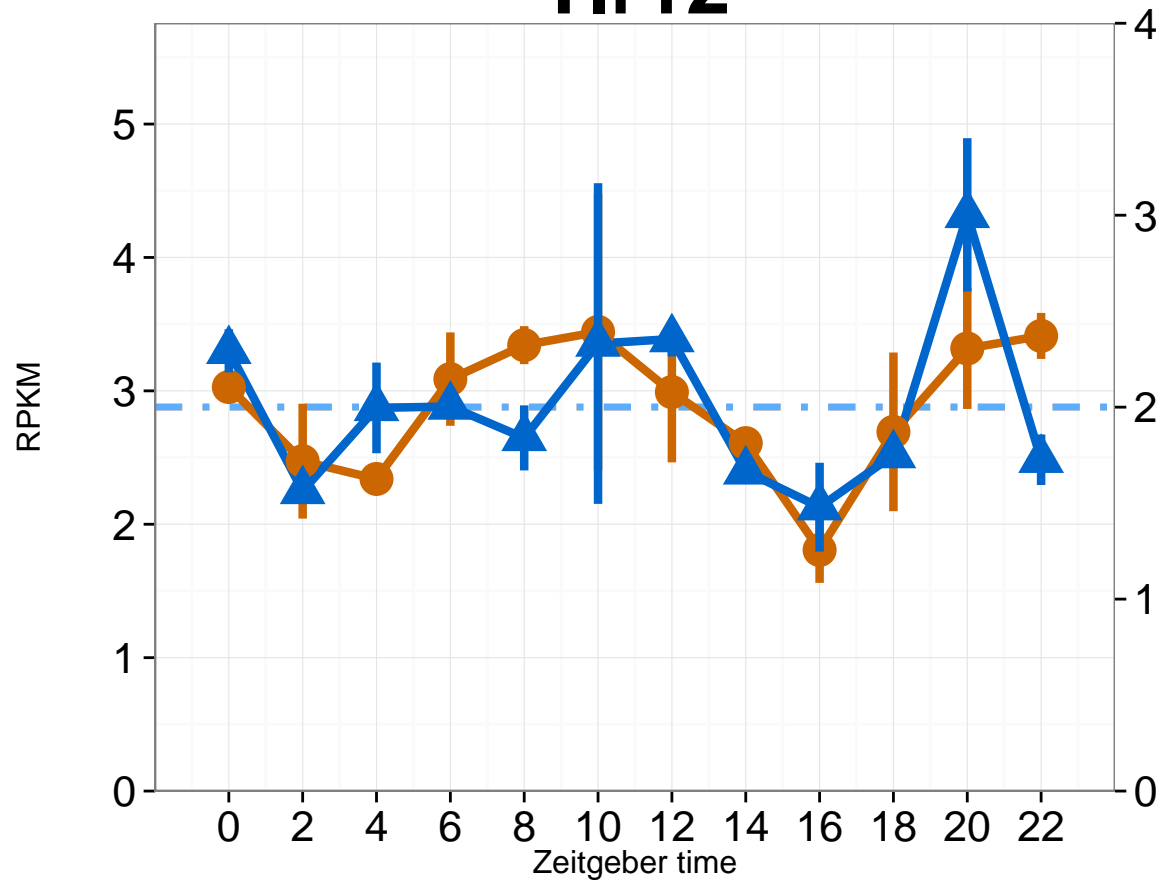

## Tlr12

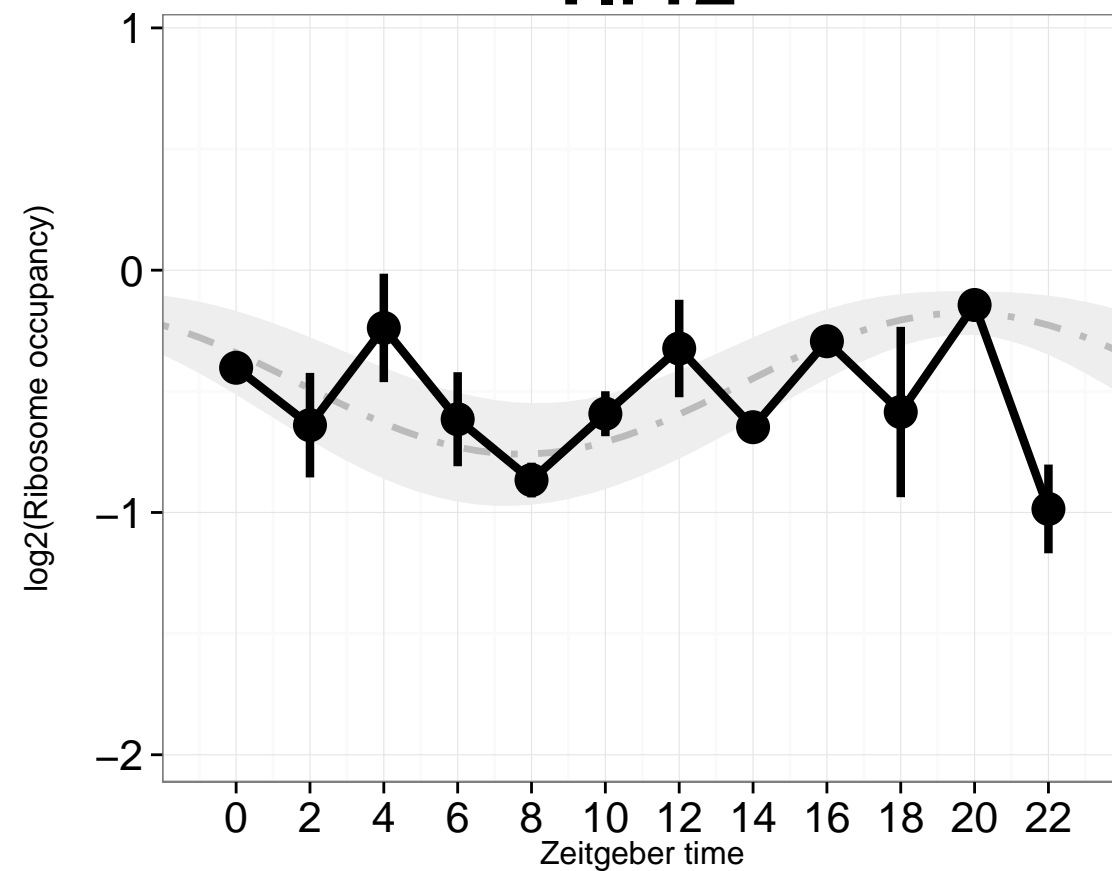

Supplement: SuppDataset_1.zip [file Tlr12_set_A.pdf › Supplemental Dataset 1/A-mRNA_nonrhyth_translation_nonrhyth/Tlr12_set_A.pdf]

## Tlr13

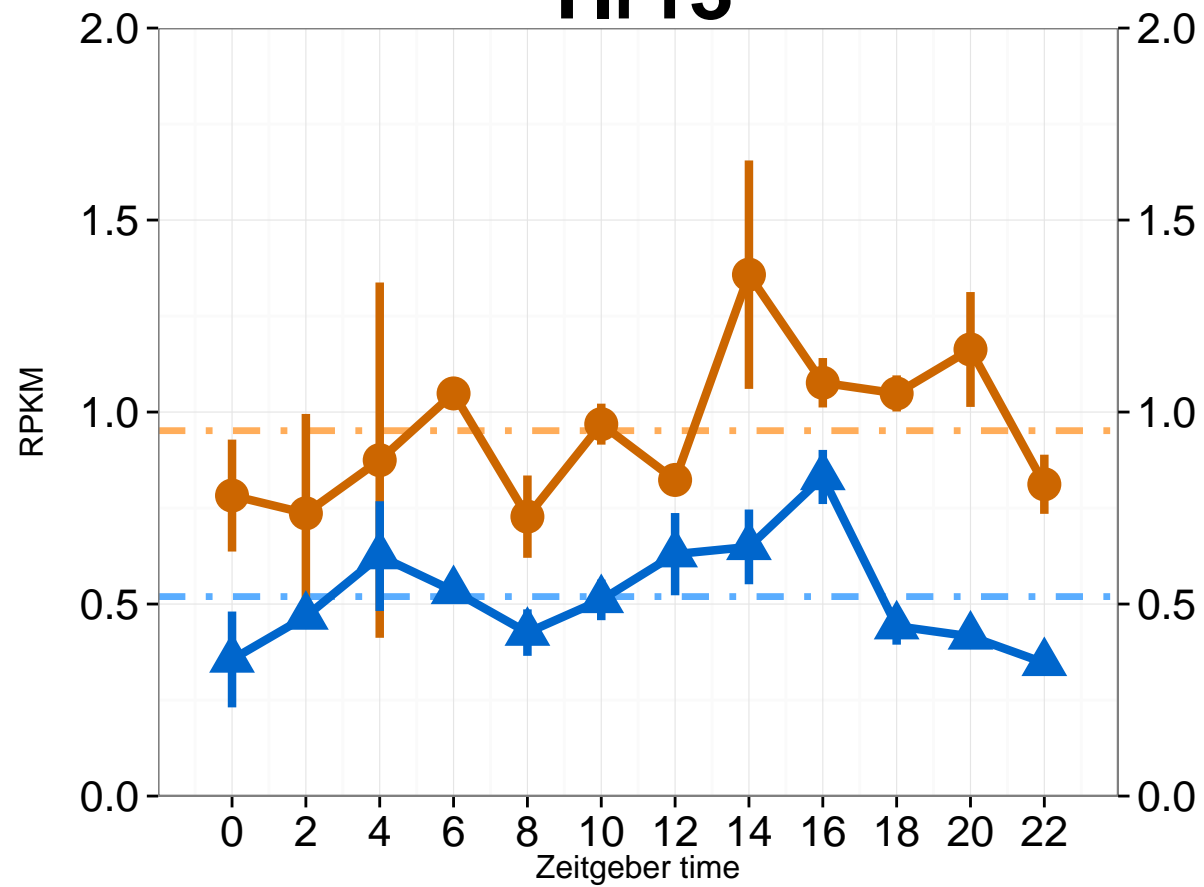

## Tlr13

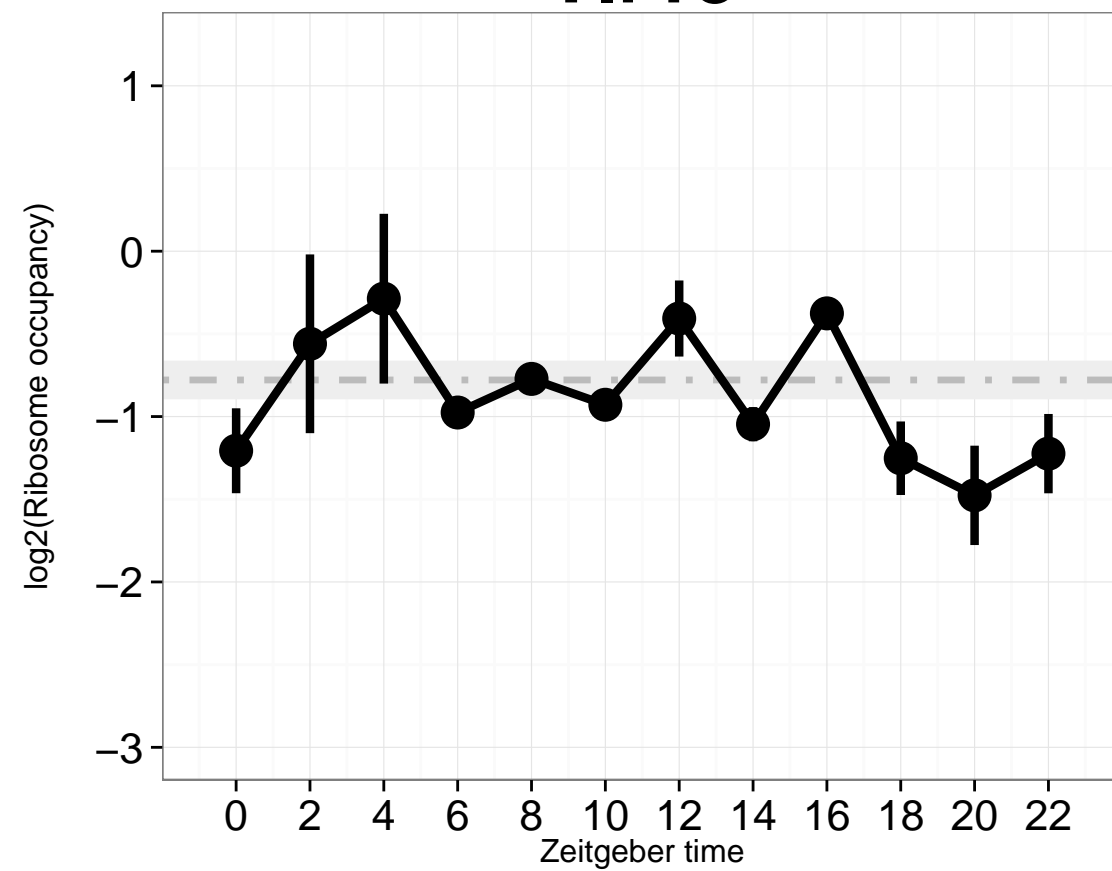

Supplement: SuppDataset_1.zip [file Tlr13_set_A.pdf › Supplemental Dataset 1/A-mRNA_nonrhyth_translation_nonrhyth/Tlr13_set_A.pdf]

## Tlr1

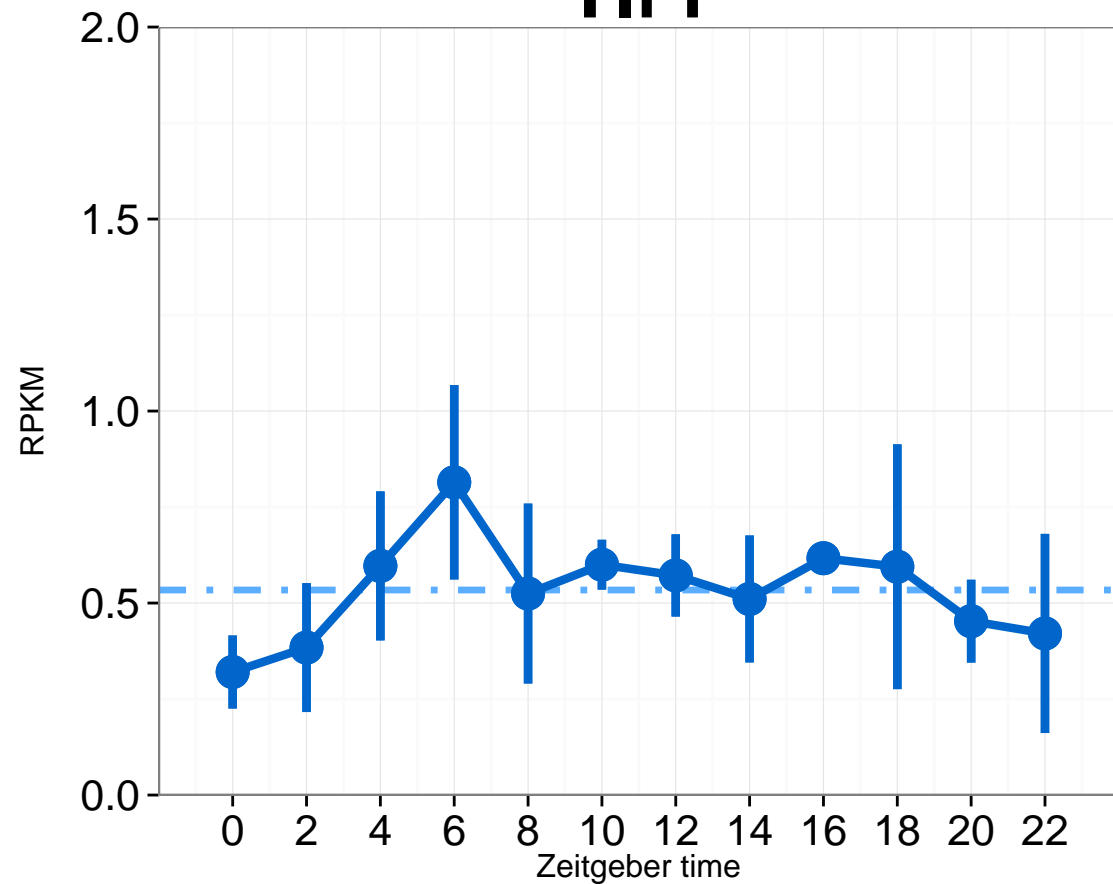

## Tlr1 log2(Ribosome occupancy)

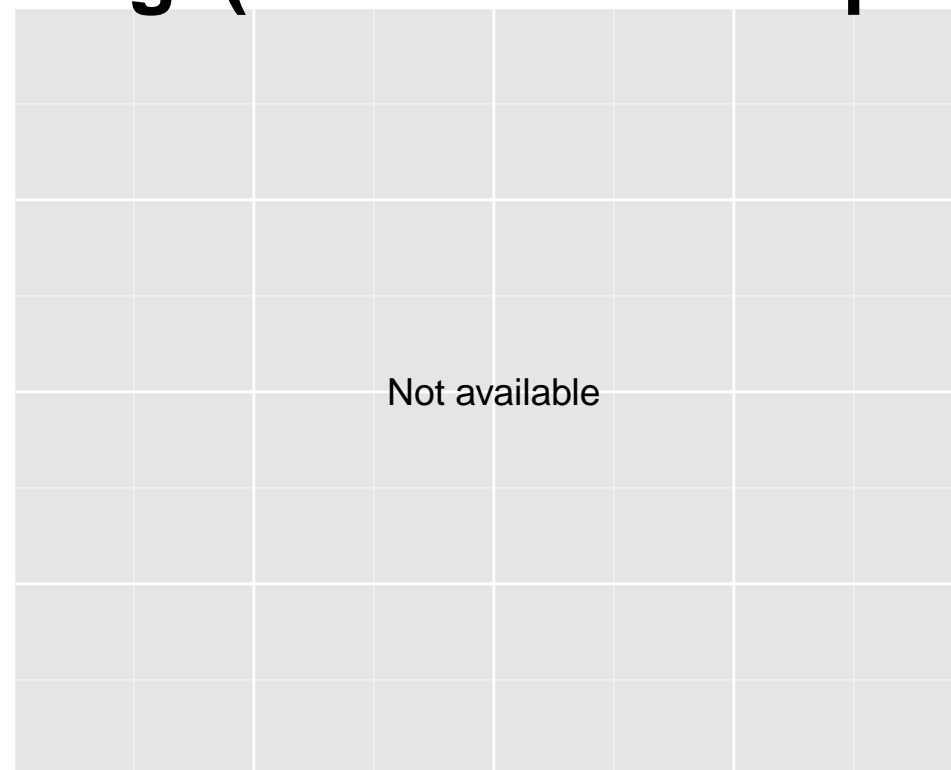

Supplement: SuppDataset_1.zip [file Tlr1_set_A.pdf › Supplemental Dataset 1/A-mRNA_nonrhyth_translation_nonrhyth/Tlr1_set_A.pdf]

## Tlr2

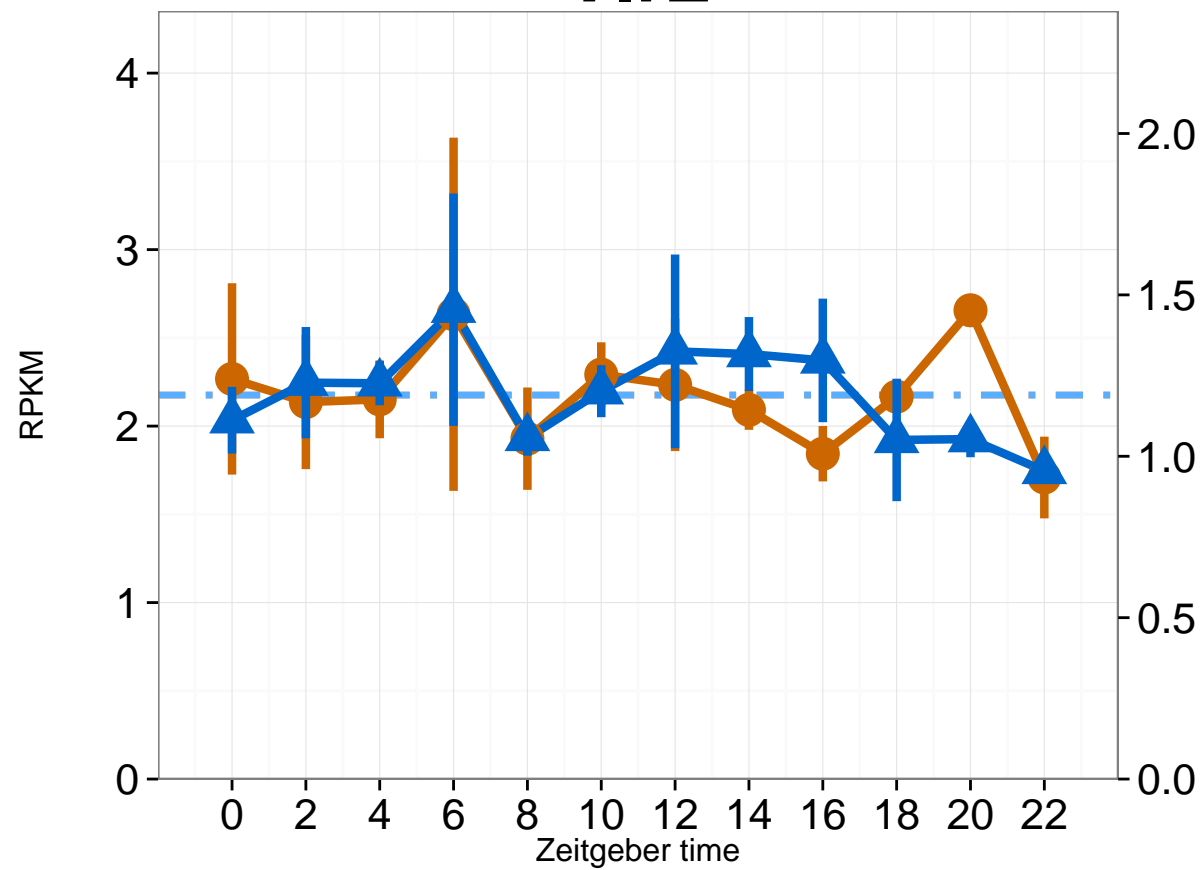

## Tlr2

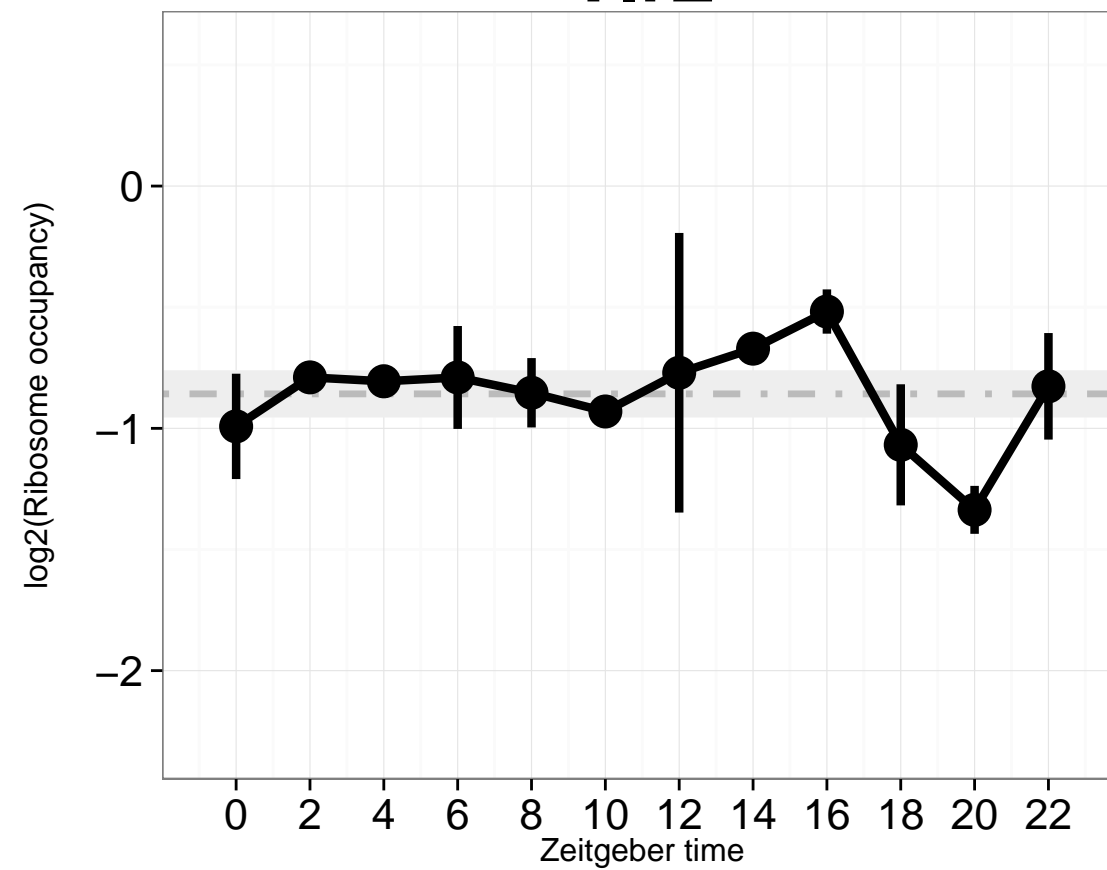

Supplement: SuppDataset_1.zip [file Tlr2_set_A.pdf › Supplemental Dataset 1/A-mRNA_nonrhyth_translation_nonrhyth/Tlr2_set_A.pdf]

## Tlr3

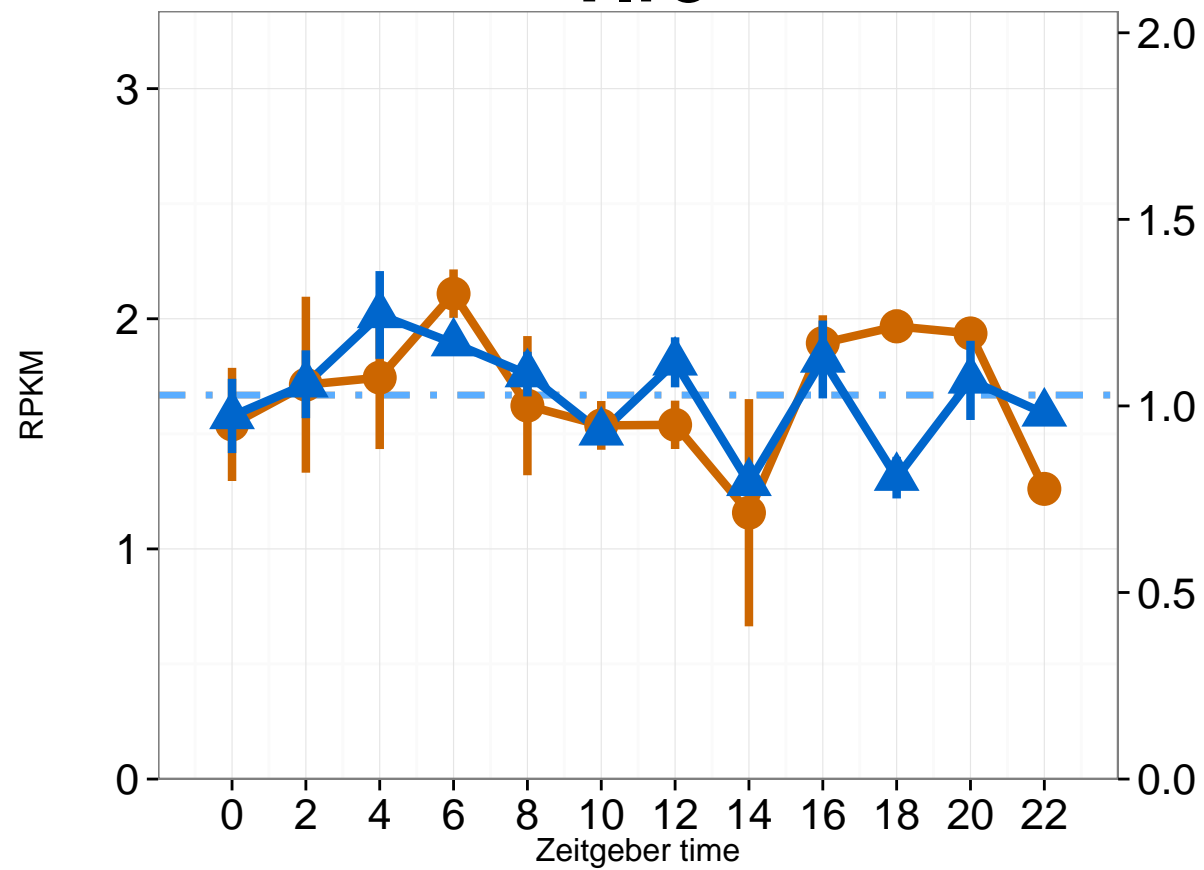

## Tlr3

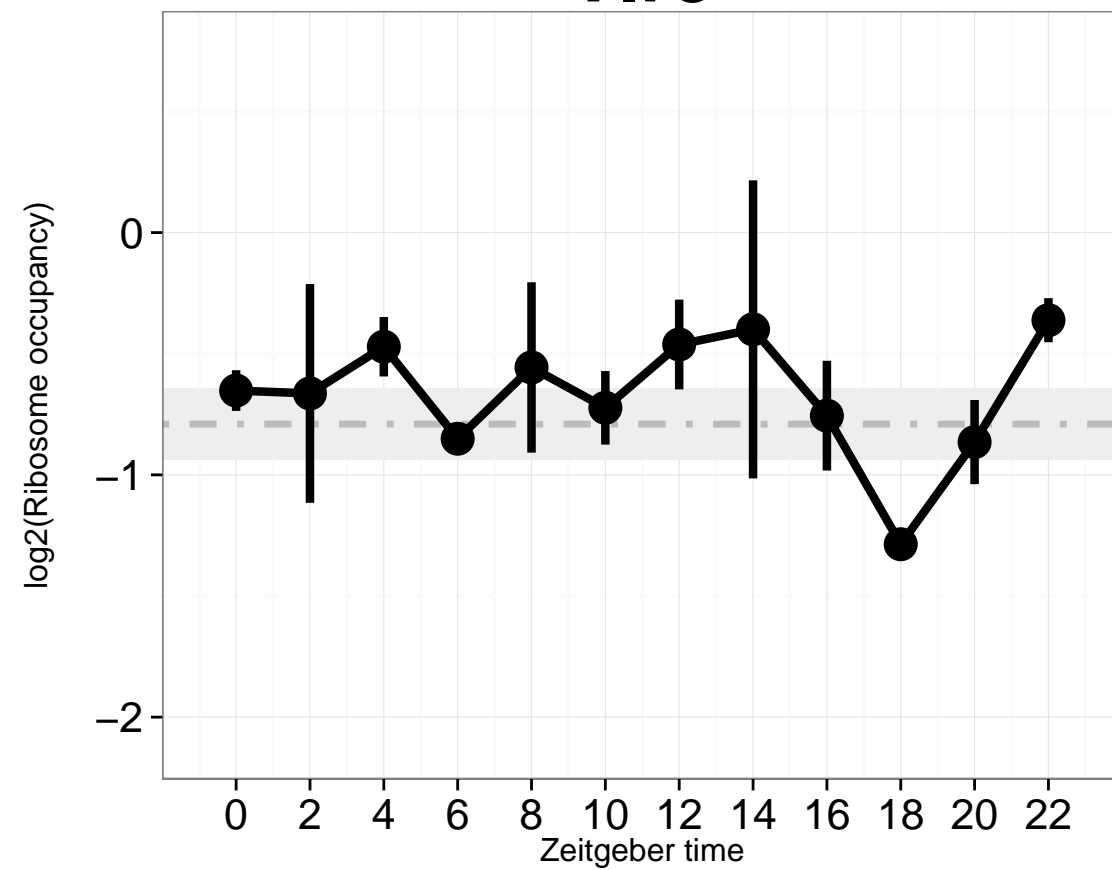

Supplement: SuppDataset_1.zip [file Tlr3_set_A.pdf › Supplemental Dataset 1/A-mRNA_nonrhyth_translation_nonrhyth/Tlr3_set_A.pdf]

## Tlr4

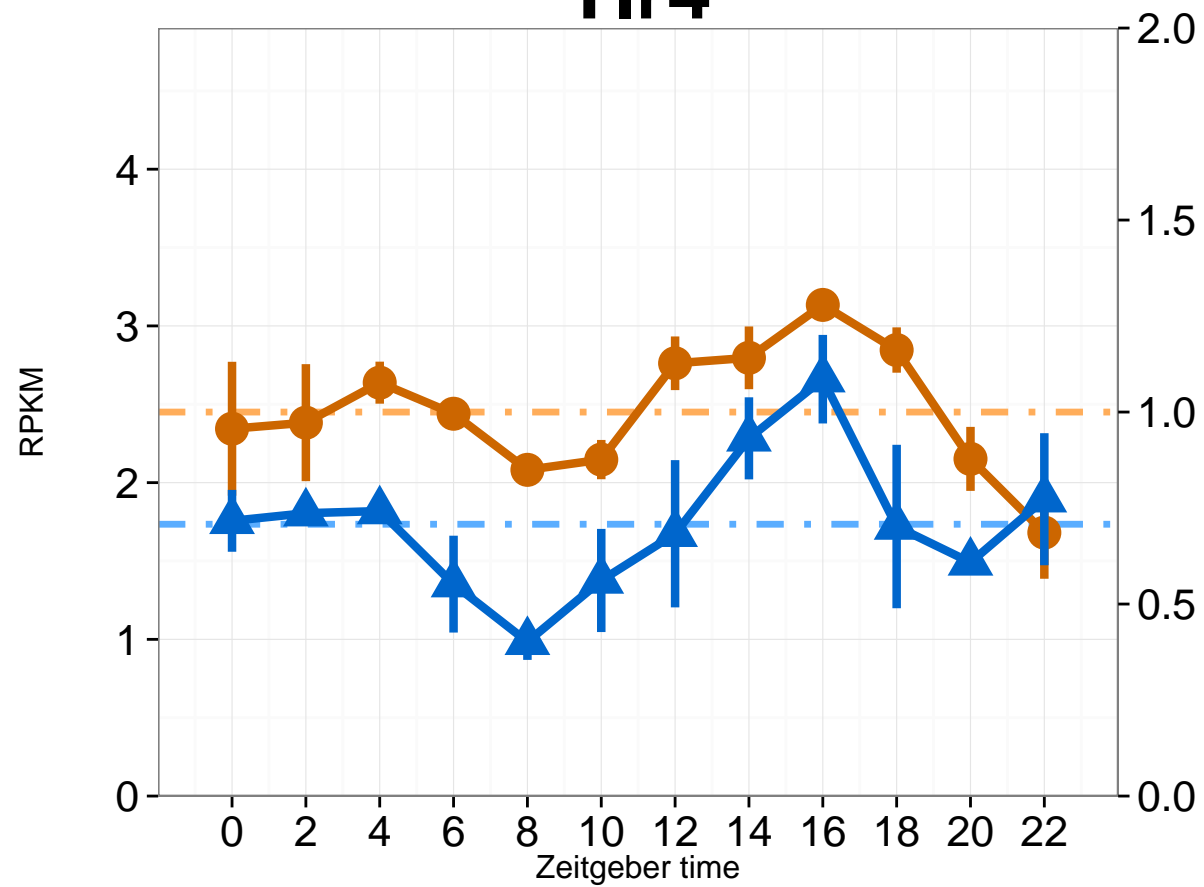

## Tlr4

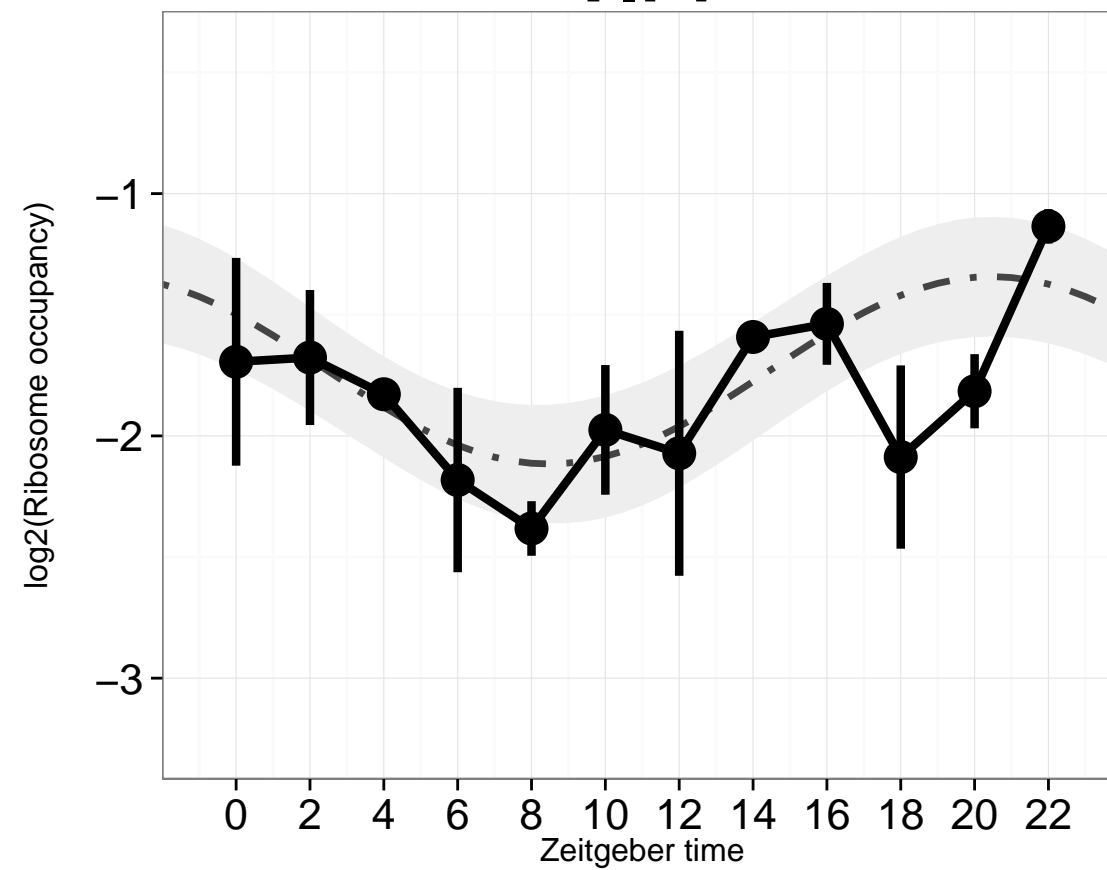

Supplement: SuppDataset_1.zip [file Tlr4_set_A.pdf › Supplemental Dataset 1/A-mRNA_nonrhyth_translation_nonrhyth/Tlr4_set_A.pdf]

## Tlr5

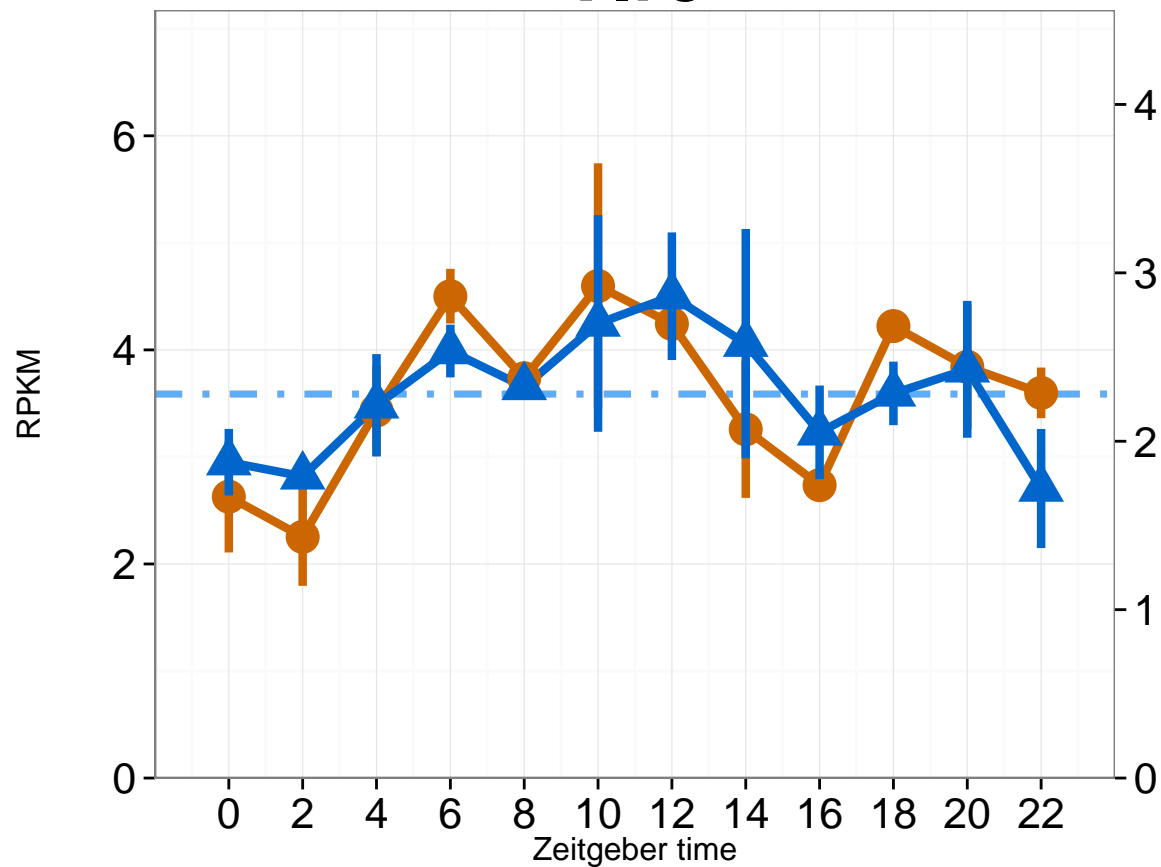

## Tlr5

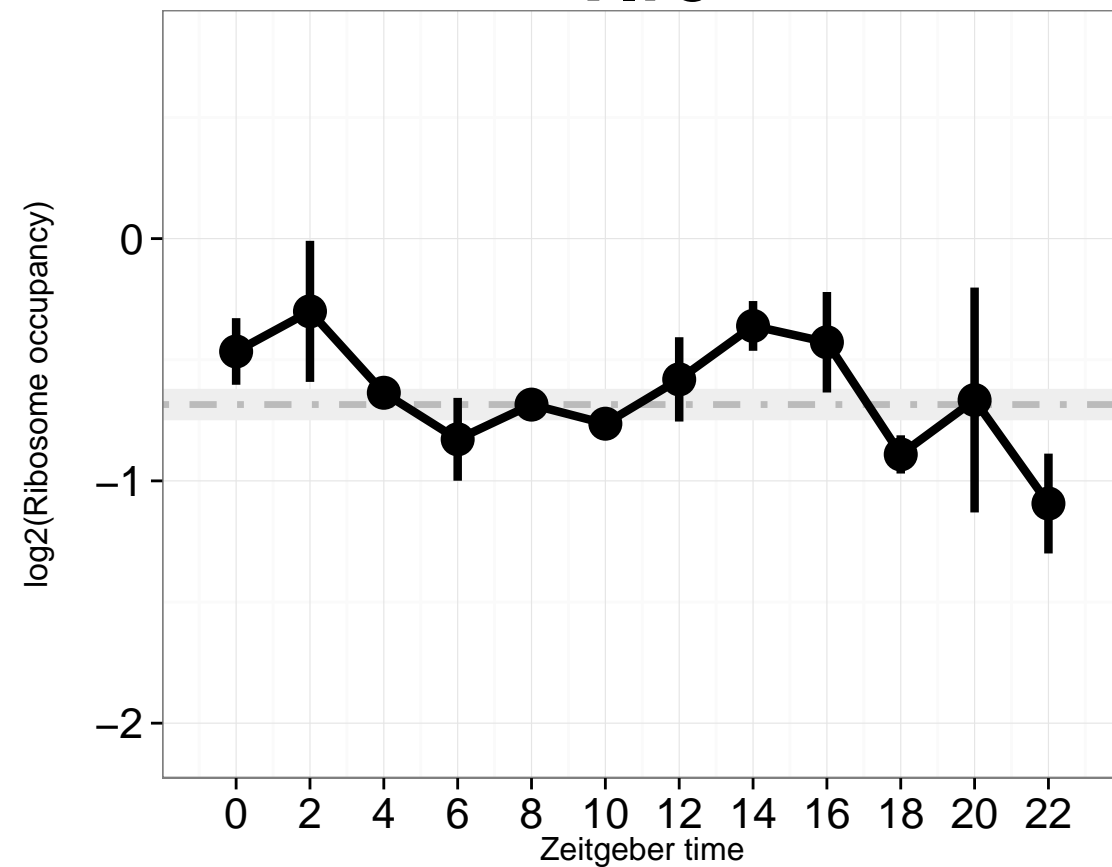

Supplement: SuppDataset_1.zip [file Tlr5_set_A.pdf › Supplemental Dataset 1/A-mRNA_nonrhyth_translation_nonrhyth/Tlr5_set_A.pdf]

## Tlr6

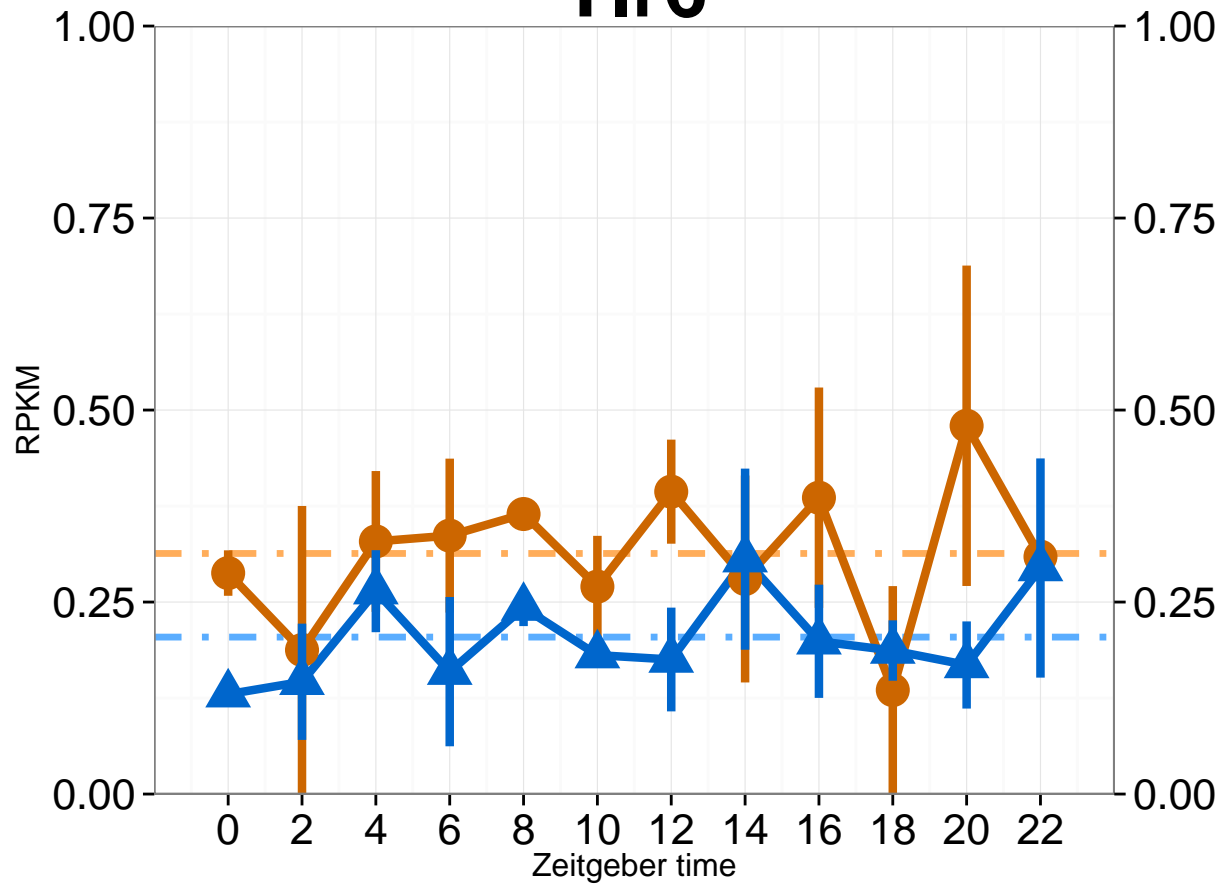

## Tlr6

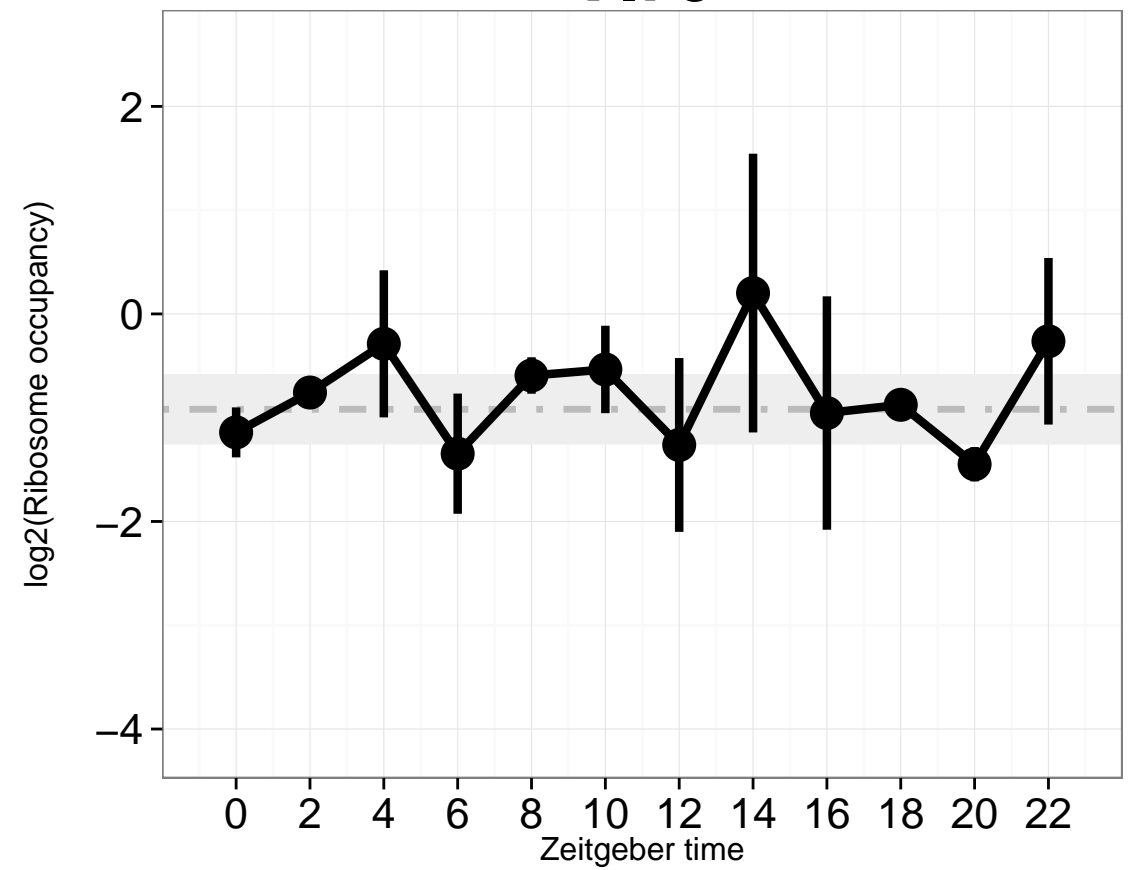

Supplement: SuppDataset_1.zip [file Tlr6_set_A.pdf › Supplemental Dataset 1/A-mRNA_nonrhyth_translation_nonrhyth/Tlr6_set_A.pdf]

## Tlr9

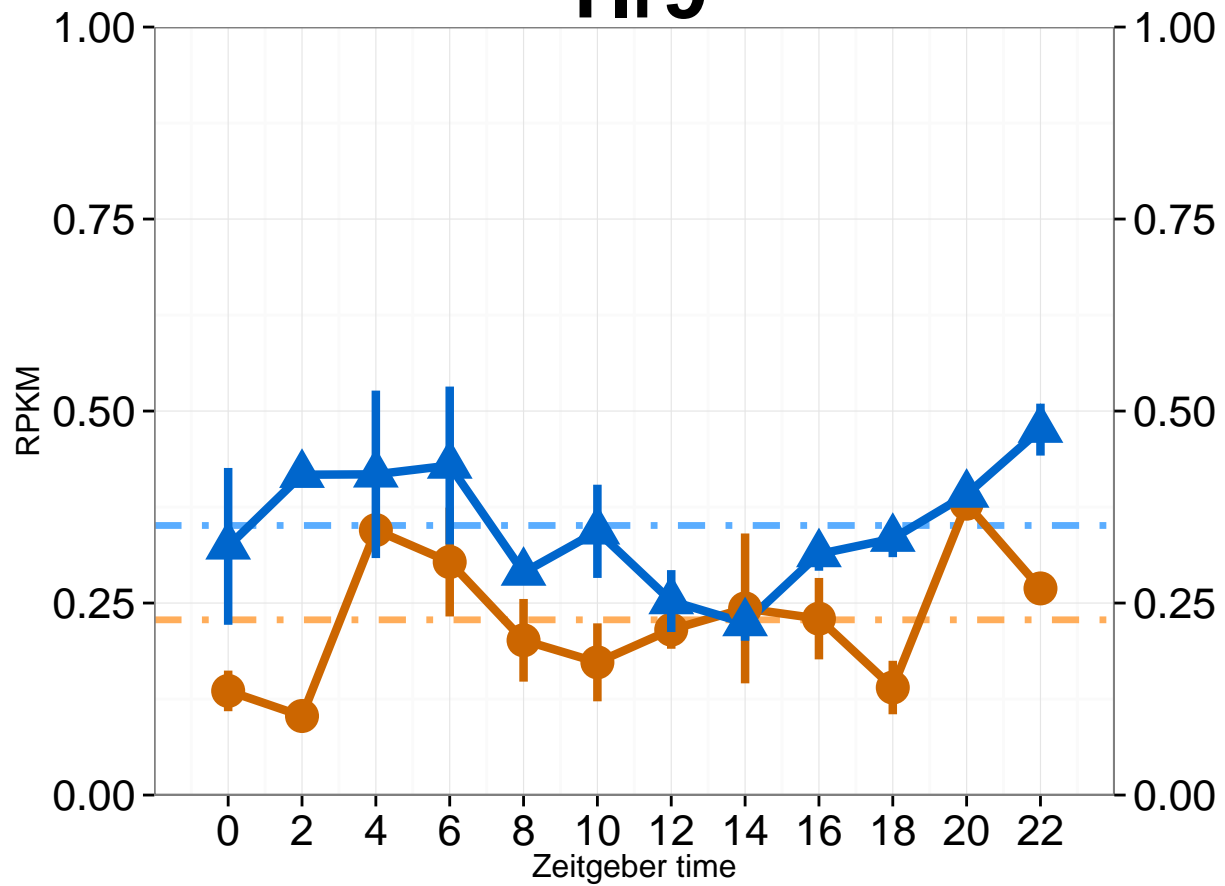

## Tlr9

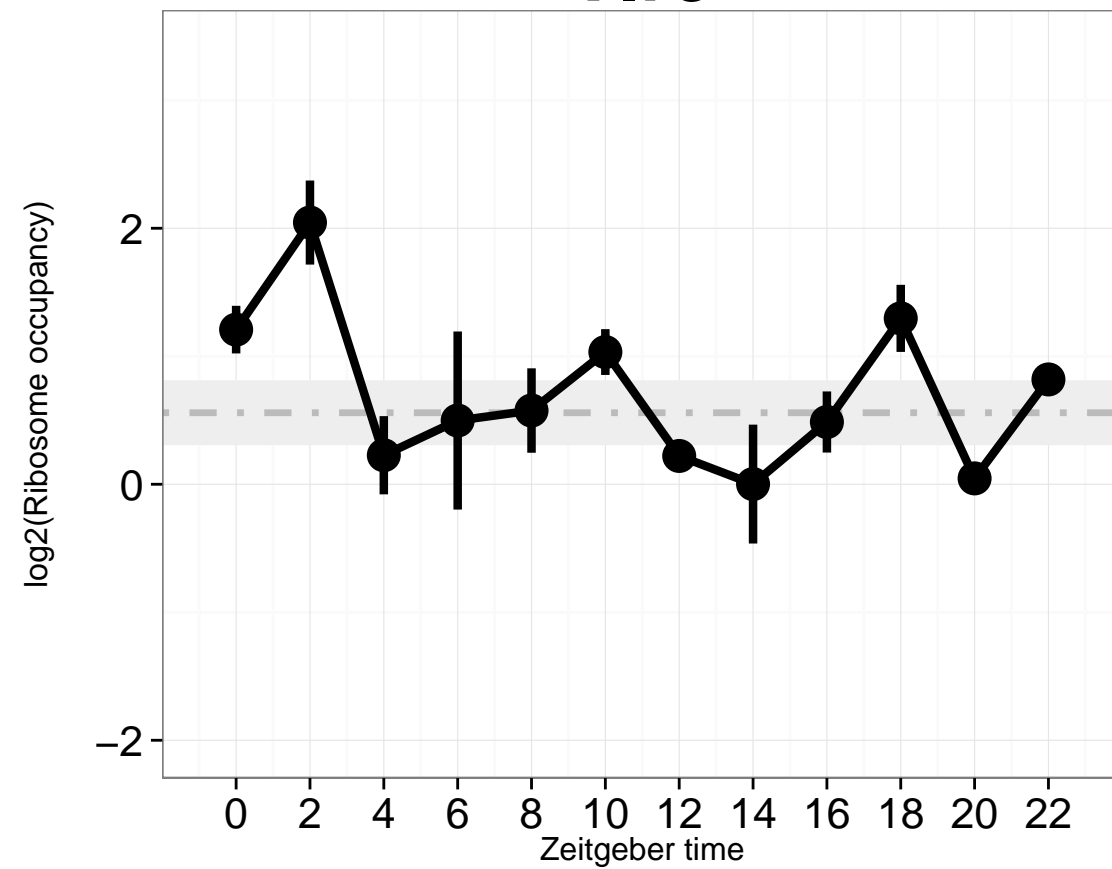

Supplement: SuppDataset_1.zip [file Tlr9_set_A.pdf › Supplemental Dataset 1/A-mRNA_nonrhyth_translation_nonrhyth/Tlr9_set_A.pdf]

# Tm2d1

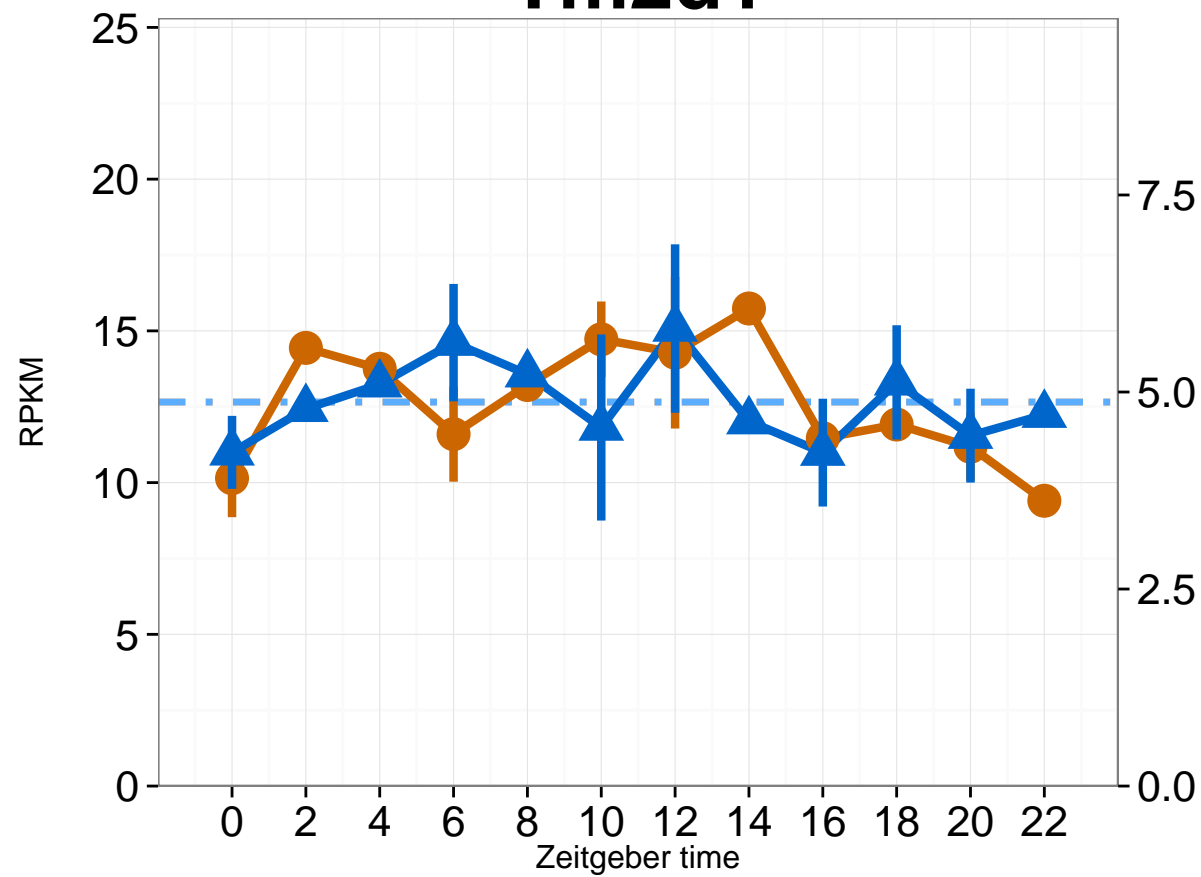

# Tm2d1

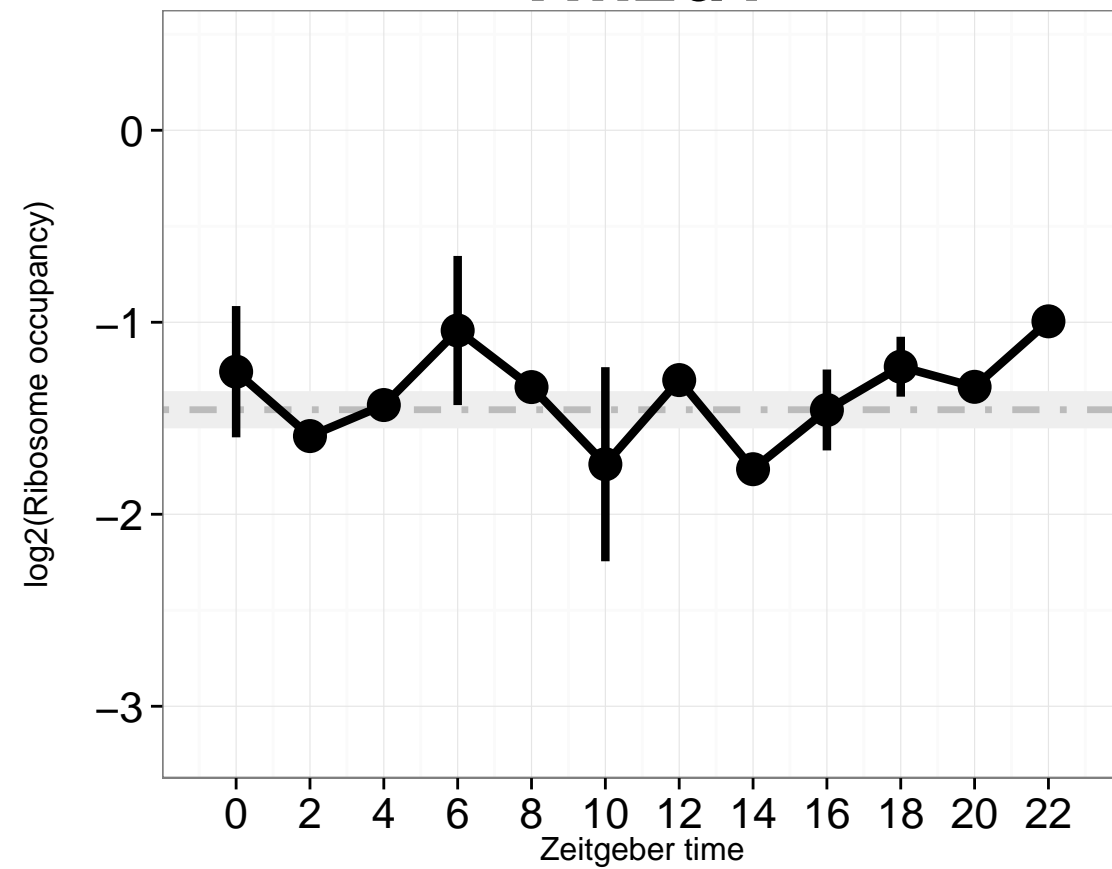

Supplement: SuppDataset_1.zip [file Tm2d1_set_A.pdf › Supplemental Dataset 1/A-mRNA_nonrhyth_translation_nonrhyth/Tm2d1_set_A.pdf]

# Tm2d2

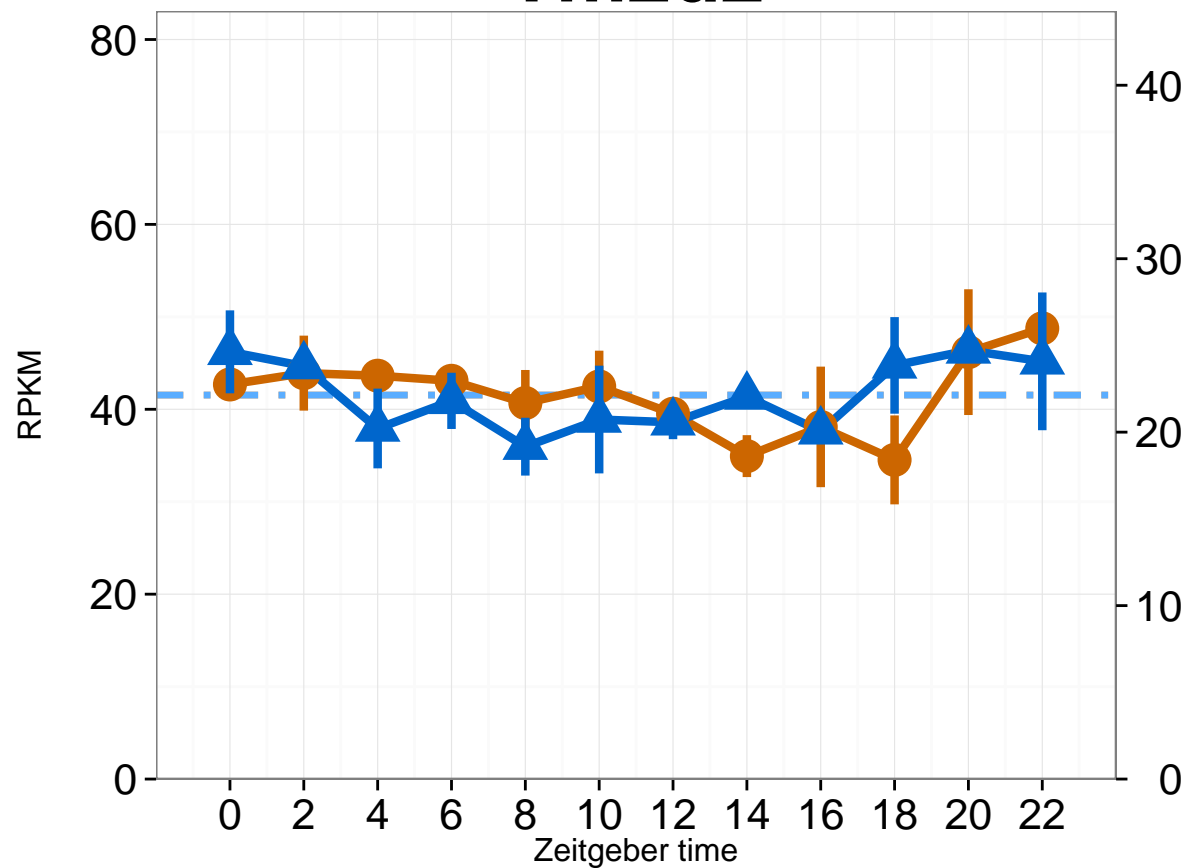

# Tm2d2

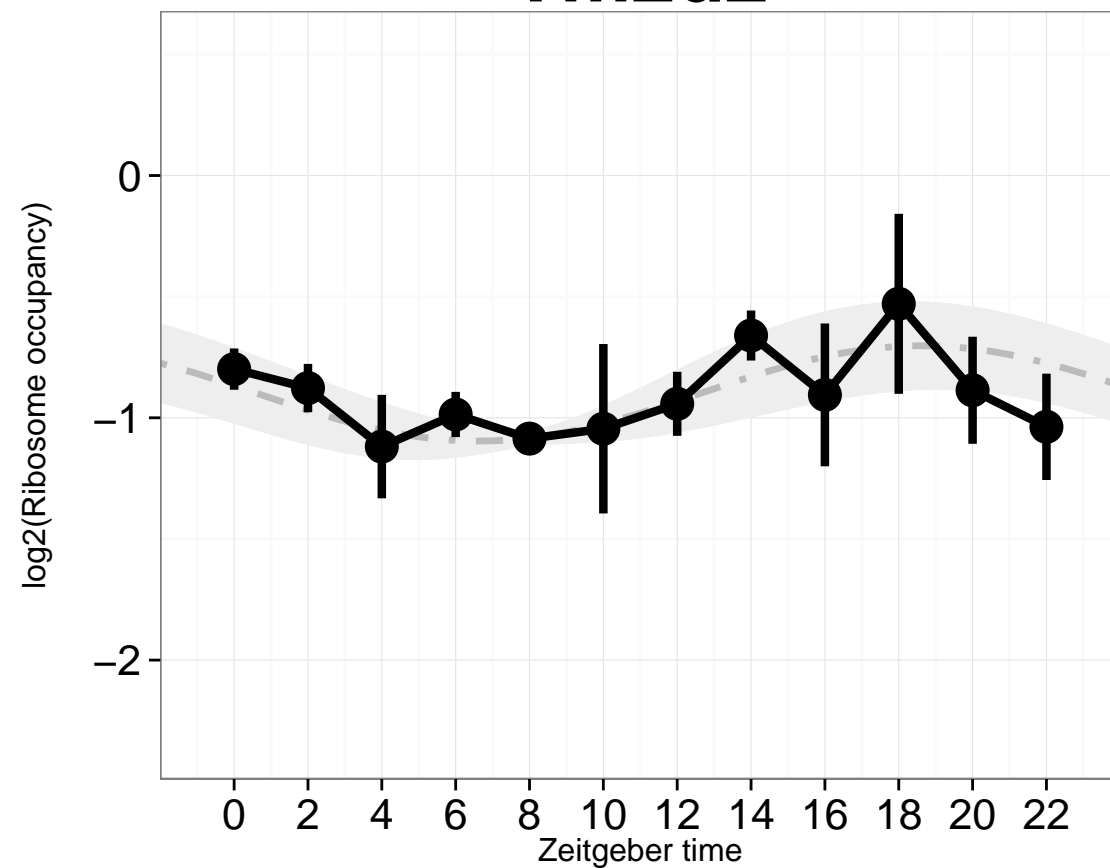

Supplement: SuppDataset_1.zip [file Tm2d2_set_A.pdf › Supplemental Dataset 1/A-mRNA_nonrhyth_translation_nonrhyth/Tm2d2_set_A.pdf]

# Tm2d3

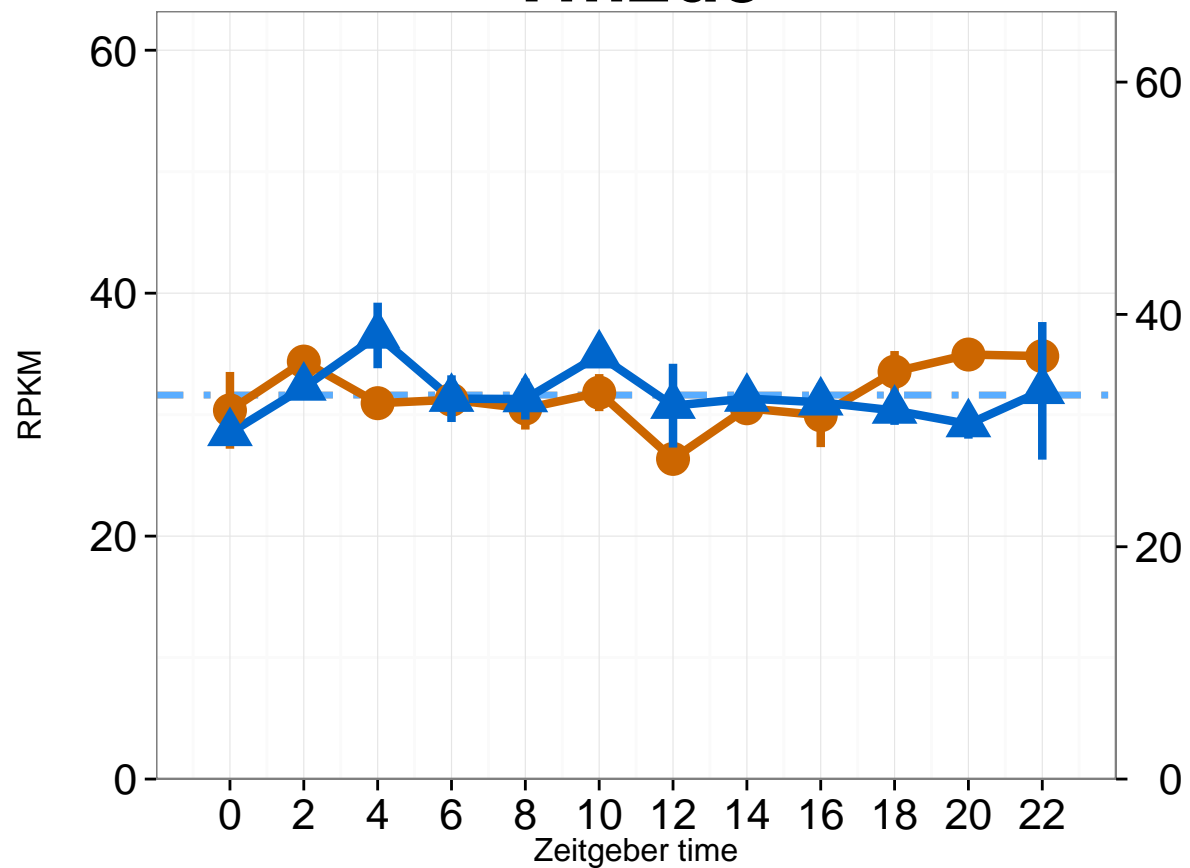

# Tm2d3

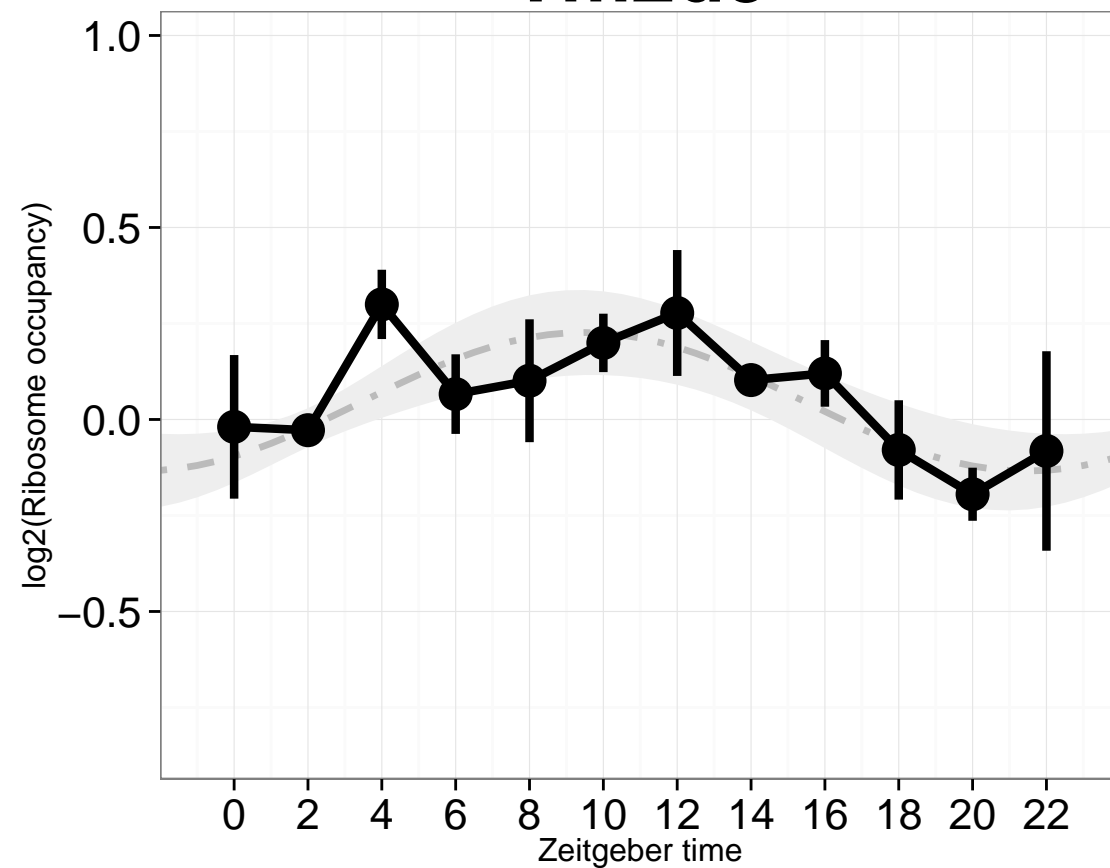

Supplement: SuppDataset_1.zip [file Tm2d3_set_A.pdf › Supplemental Dataset 1/A-mRNA_nonrhyth_translation_nonrhyth/Tm2d3_set_A.pdf]

# Tm4sf4

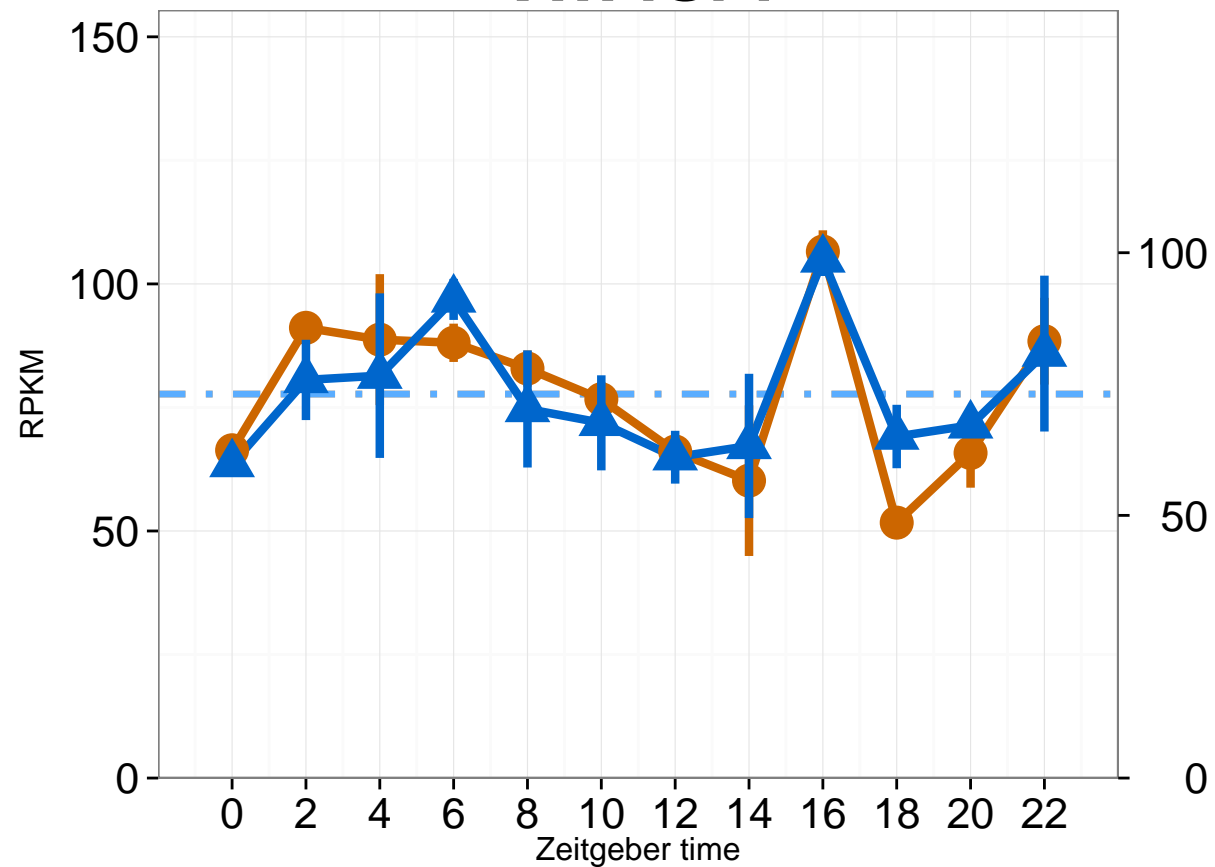

# Tm4sf4

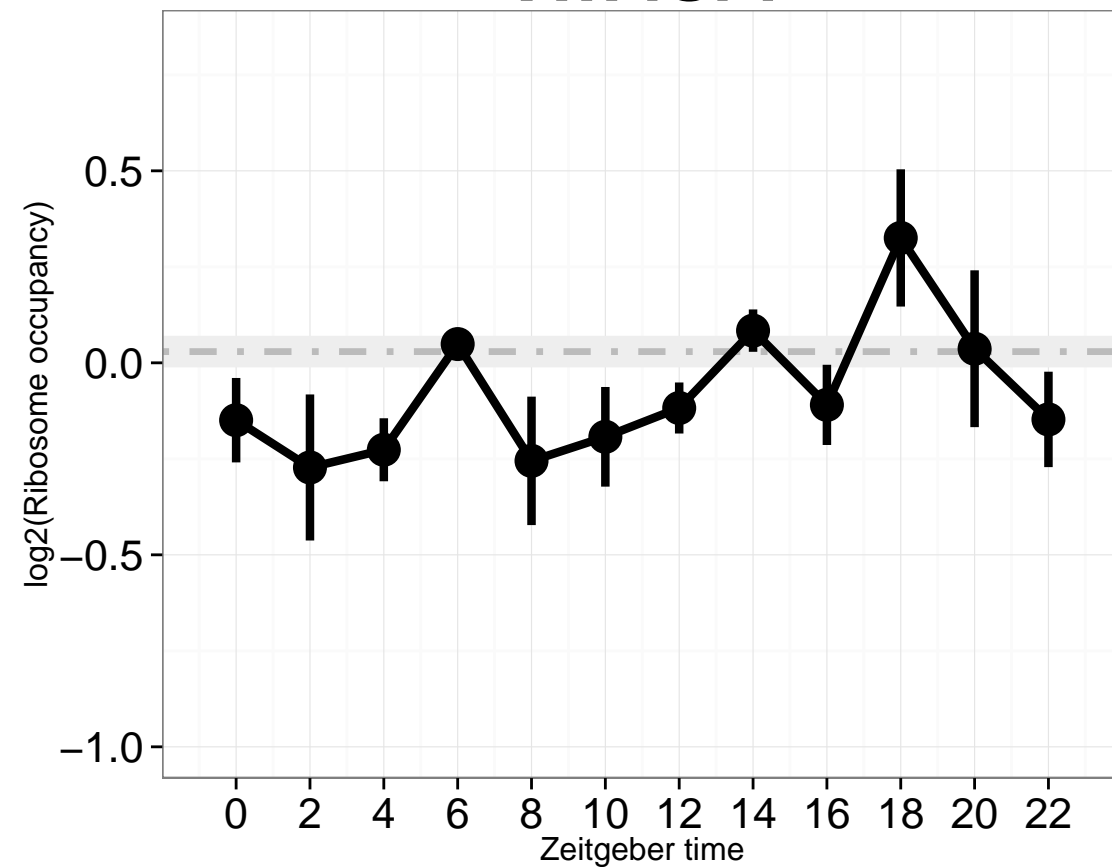

Supplement: SuppDataset_1.zip [file Tm4sf4_set_A.pdf › Supplemental Dataset 1/A-mRNA_nonrhyth_translation_nonrhyth/Tm4sf4_set_A.pdf]

# Tm6sf2

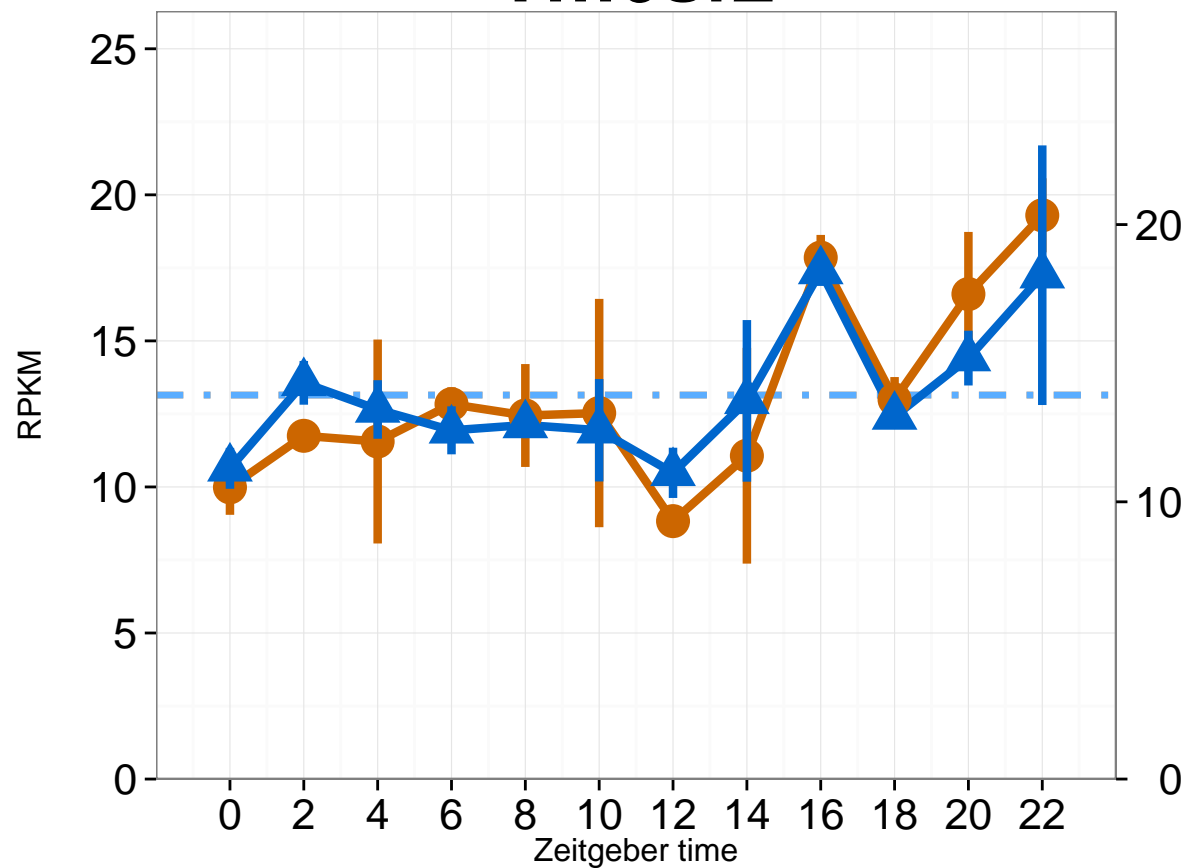

# Tm6sf2

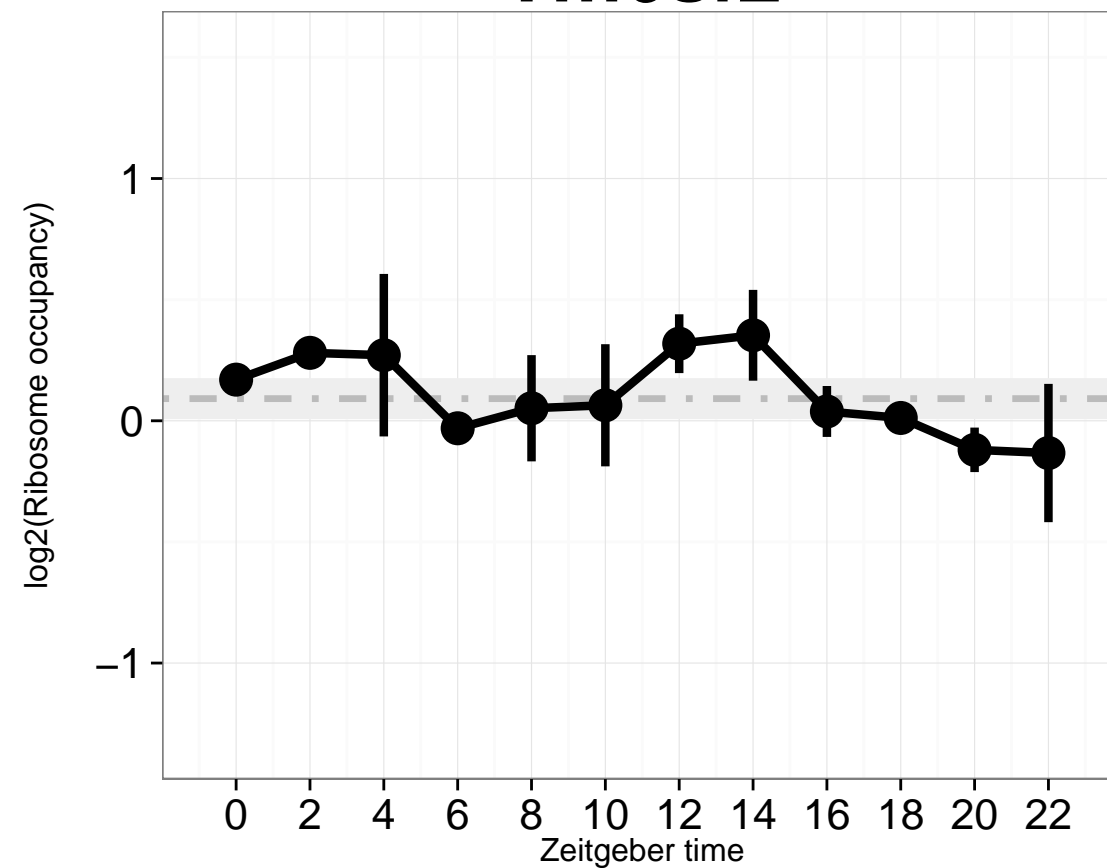

Supplement: SuppDataset_1.zip [file Tm6sf2_set_A.pdf › Supplemental Dataset 1/A-mRNA_nonrhyth_translation_nonrhyth/Tm6sf2_set_A.pdf]

## Tm7sf2

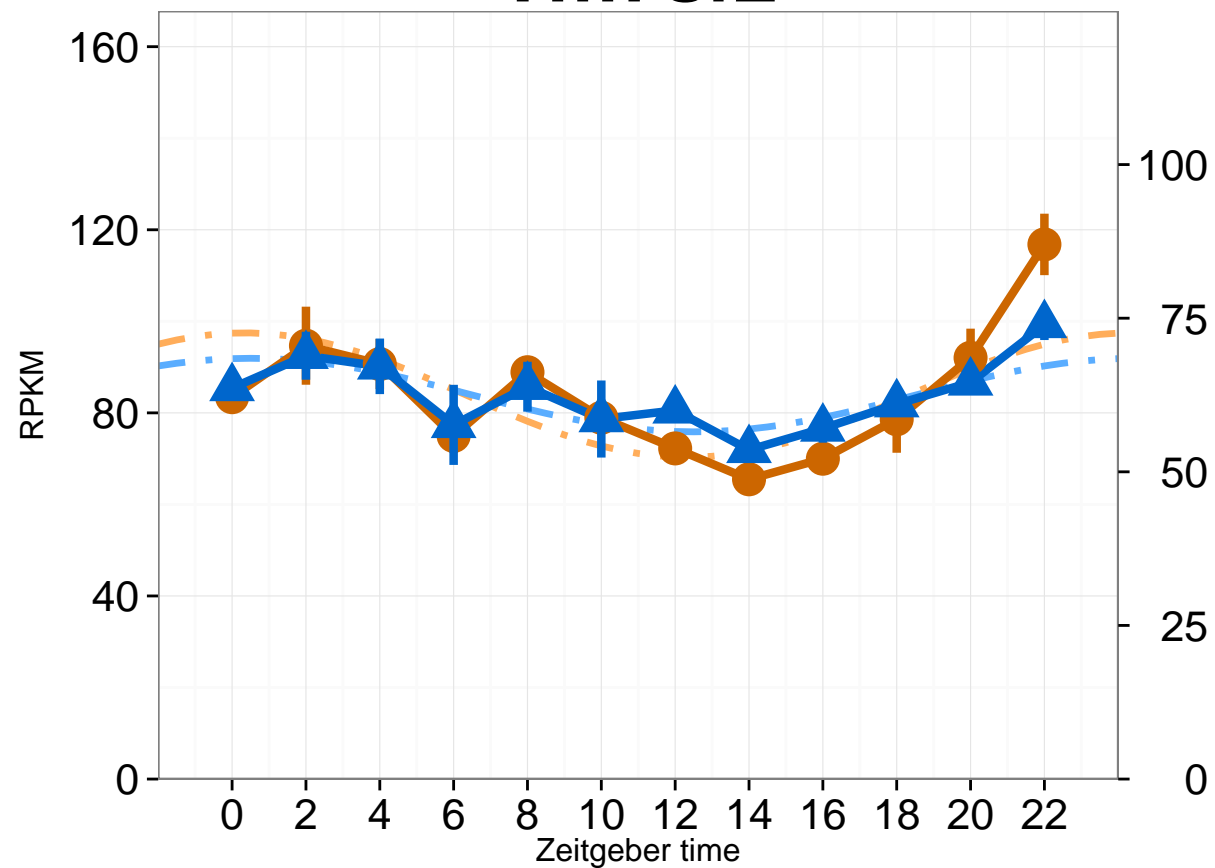

## Tm7sf2

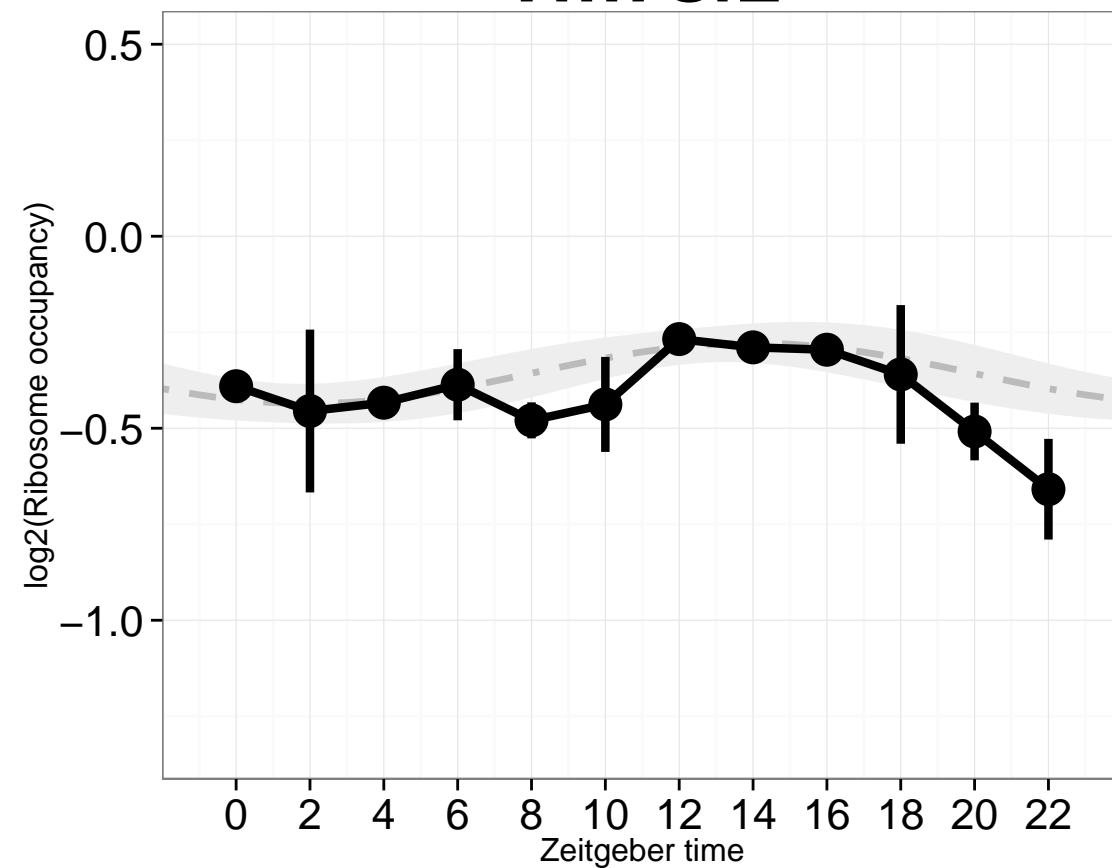

Supplement: SuppDataset_1.zip [file Tm7sf2_set_A.pdf › Supplemental Dataset 1/A-mRNA_nonrhyth_translation_nonrhyth/Tm7sf2_set_A.pdf]

# Tm7sf3

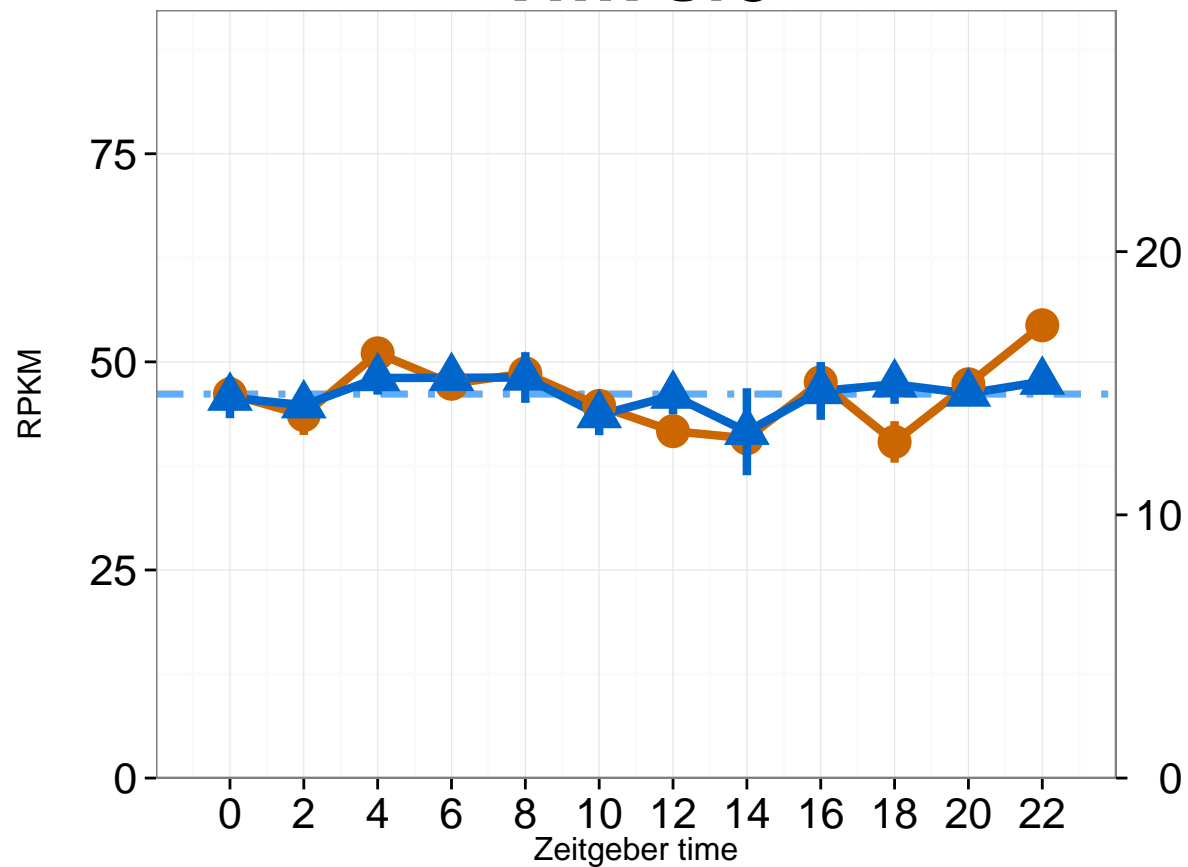

# Tm7sf3

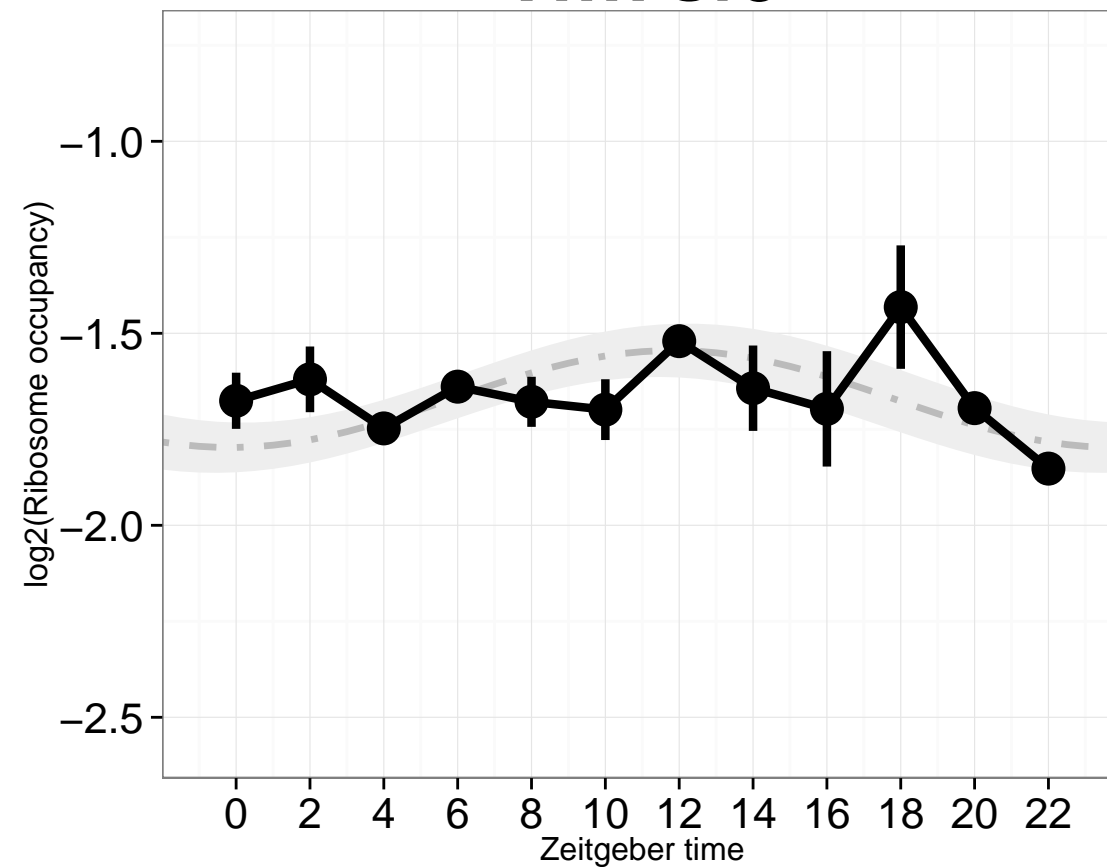

Supplement: SuppDataset_1.zip [file Tm7sf3_set_A.pdf › Supplemental Dataset 1/A-mRNA_nonrhyth_translation_nonrhyth/Tm7sf3_set_A.pdf]

# Tm9sf1

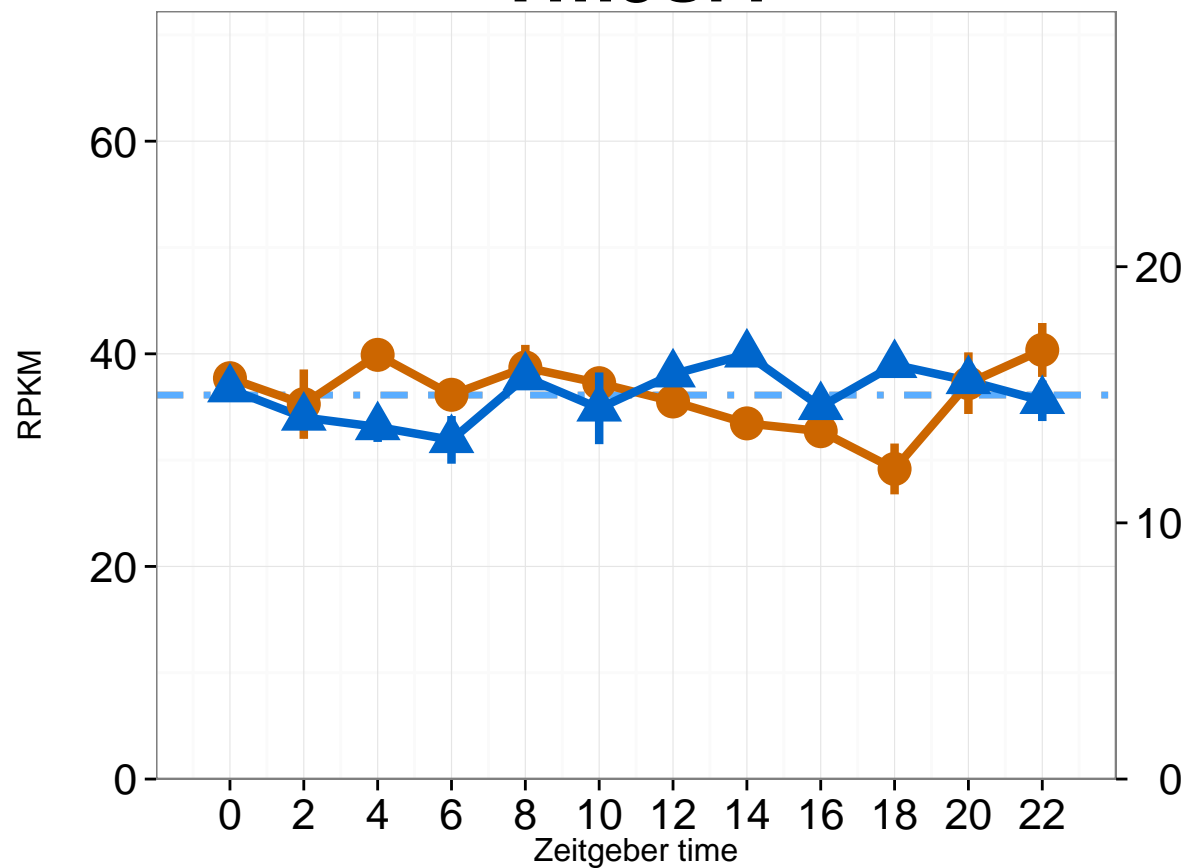

# Tm9sf1

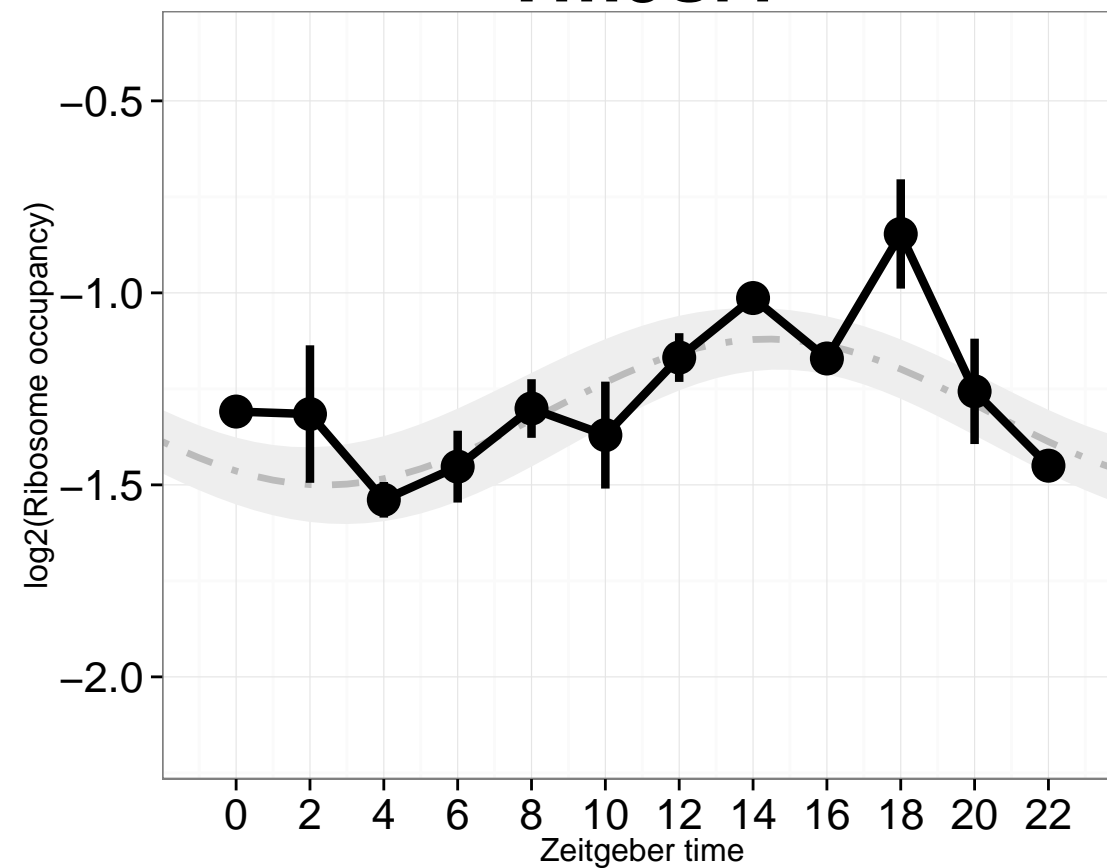

Supplement: SuppDataset_1.zip [file Tm9sf1_set_A.pdf › Supplemental Dataset 1/A-mRNA_nonrhyth_translation_nonrhyth/Tm9sf1_set_A.pdf]

# Tm9sf2

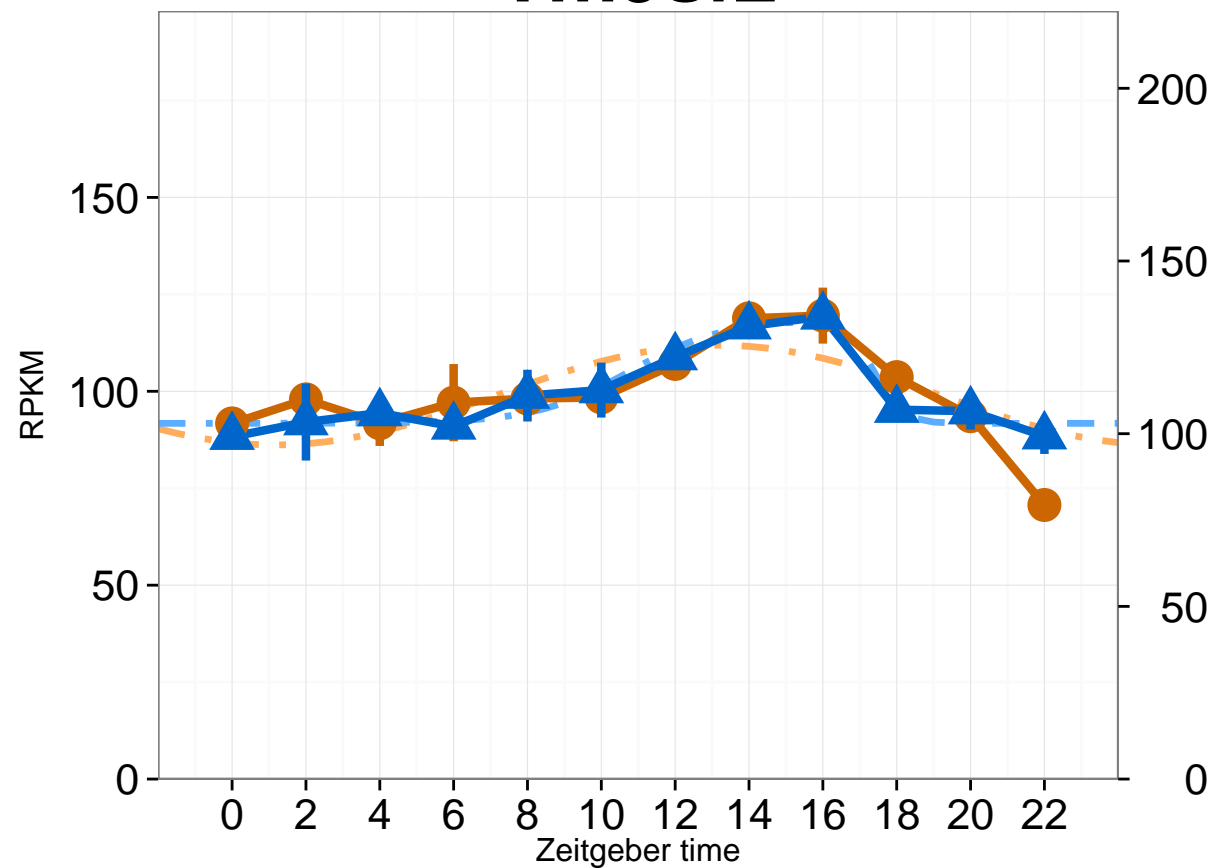

# Tm9sf2

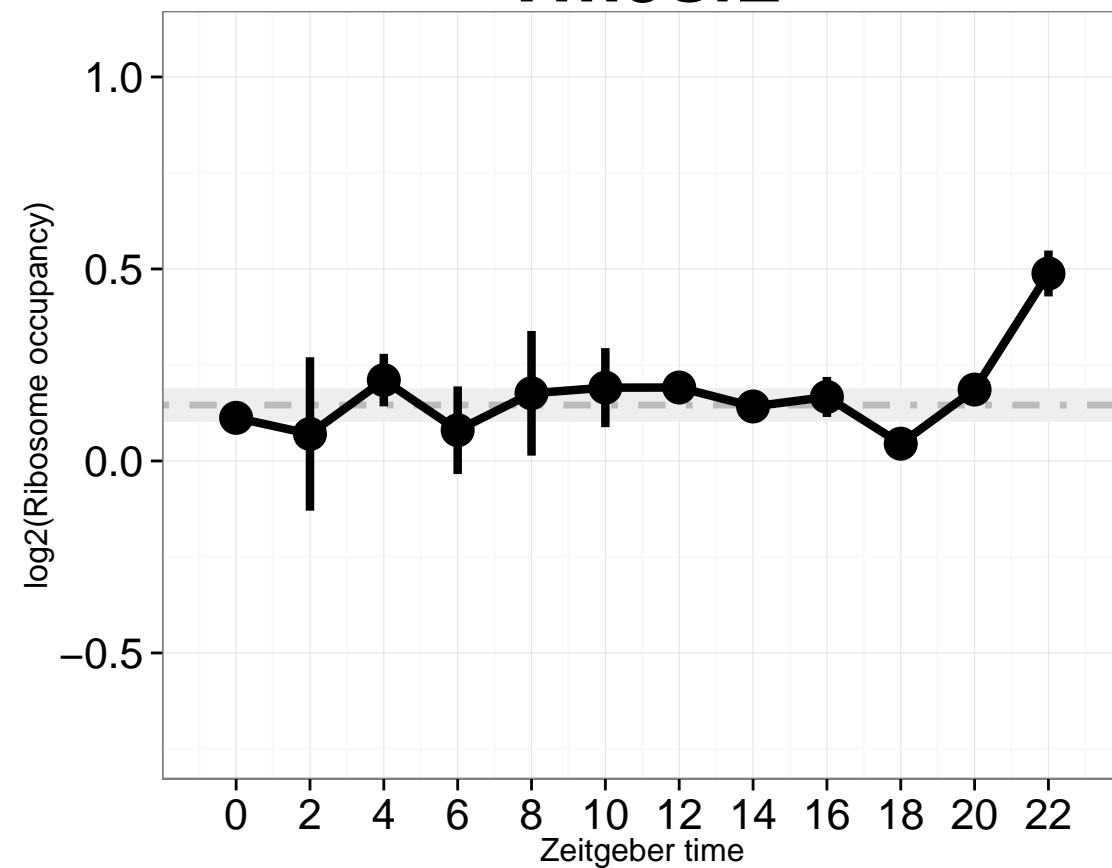

Supplement: SuppDataset_1.zip [file Tm9sf2_set_A.pdf › Supplemental Dataset 1/A-mRNA_nonrhyth_translation_nonrhyth/Tm9sf2_set_A.pdf]

# Tm9sf3

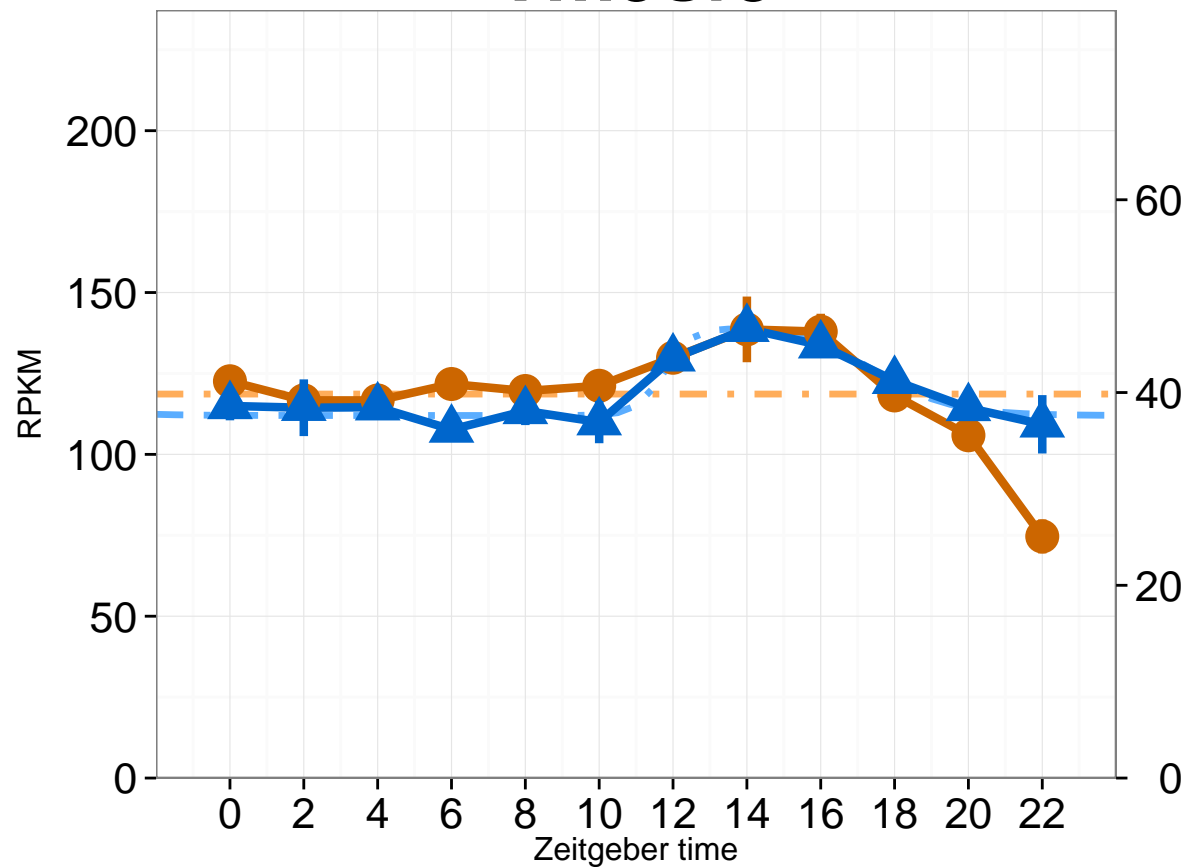

# Tm9sf3

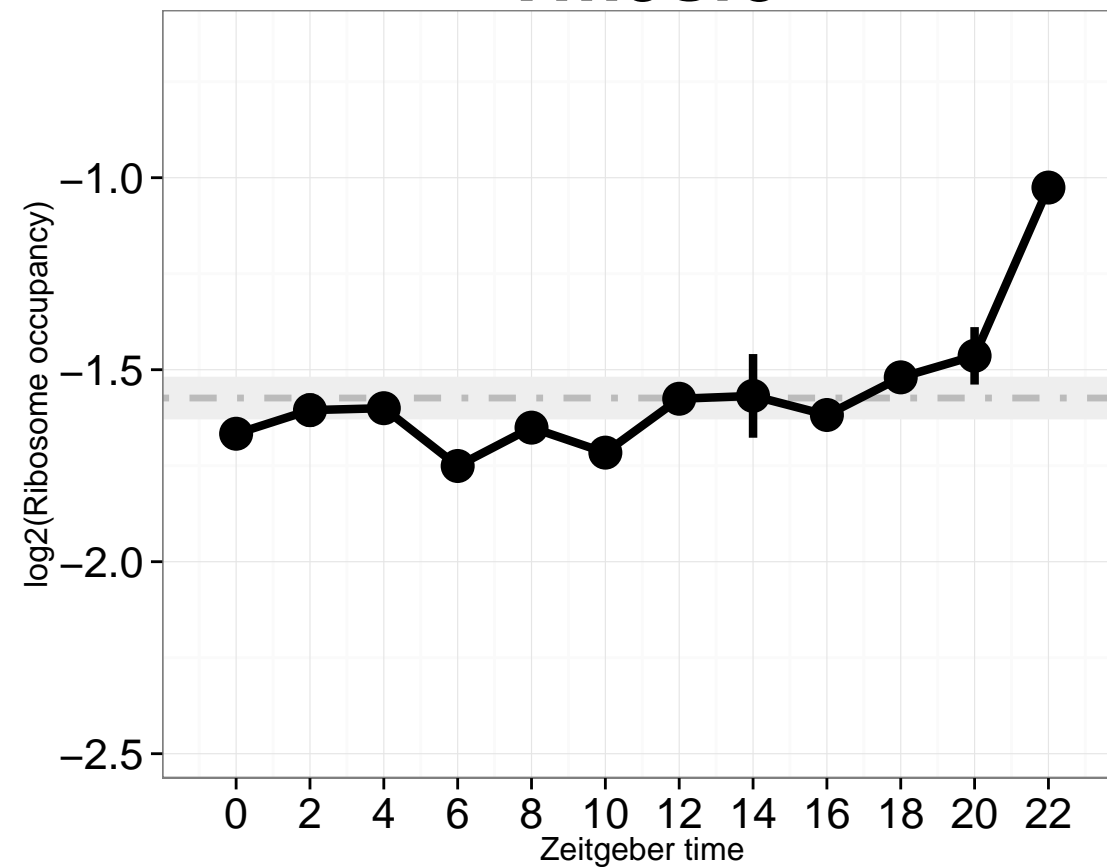

Supplement: SuppDataset_1.zip [file Tm9sf3_set_A.pdf › Supplemental Dataset 1/A-mRNA_nonrhyth_translation_nonrhyth/Tm9sf3_set_A.pdf]

# Tm9sf4

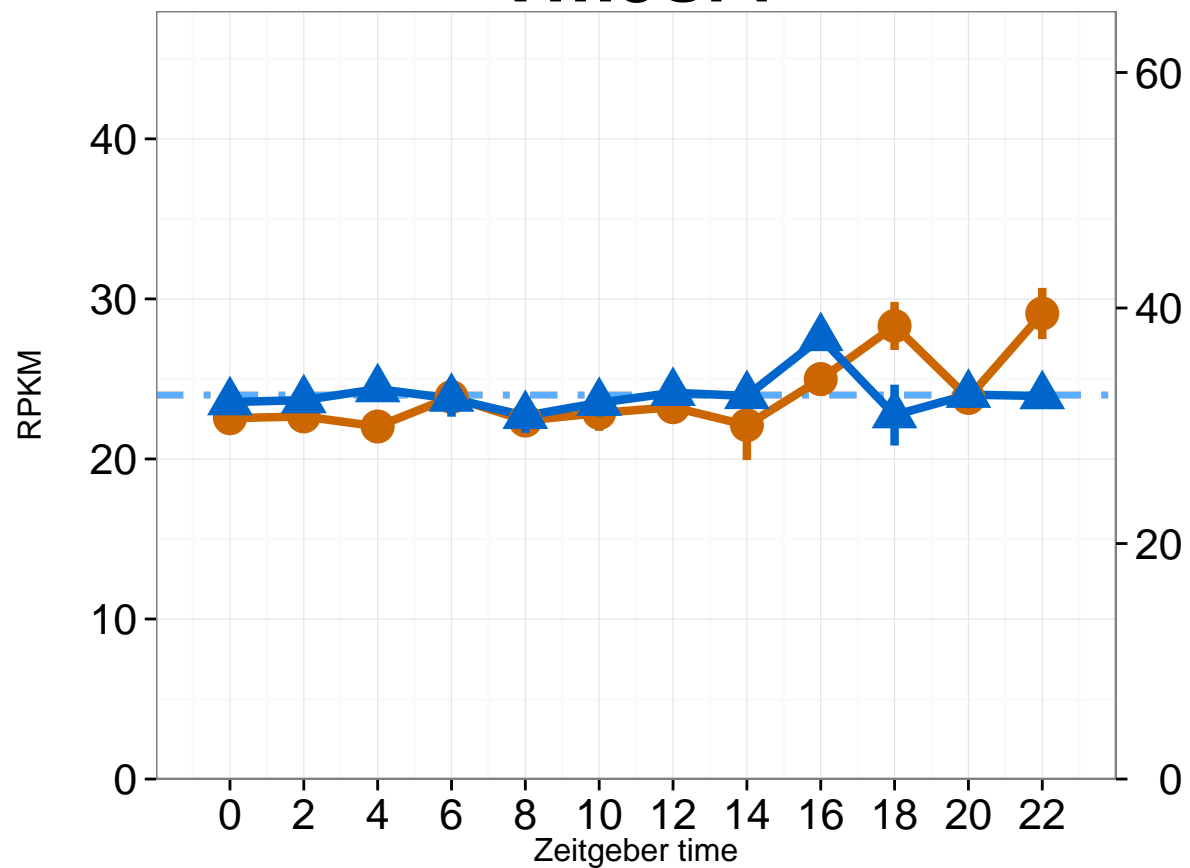

# Tm9sf4

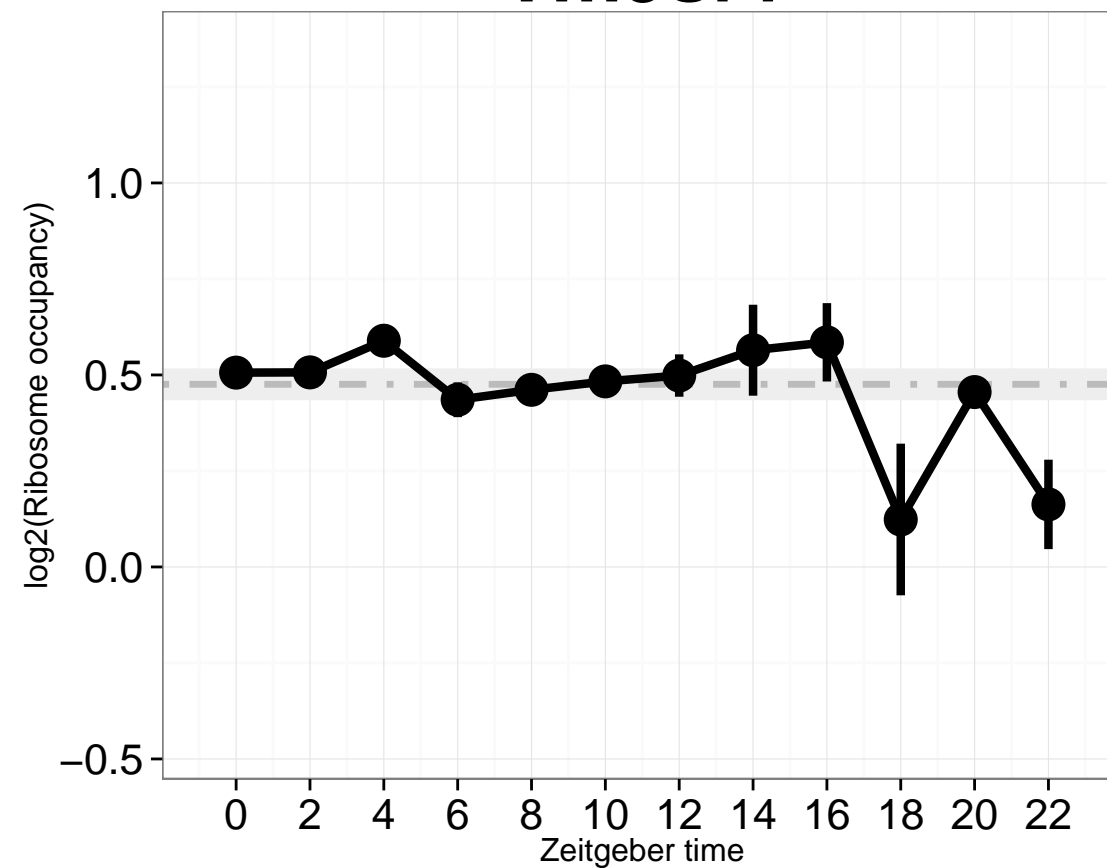

Supplement: SuppDataset_1.zip [file Tm9sf4_set_A.pdf › Supplemental Dataset 1/A-mRNA_nonrhyth_translation_nonrhyth/Tm9sf4_set_A.pdf]

# Tma16

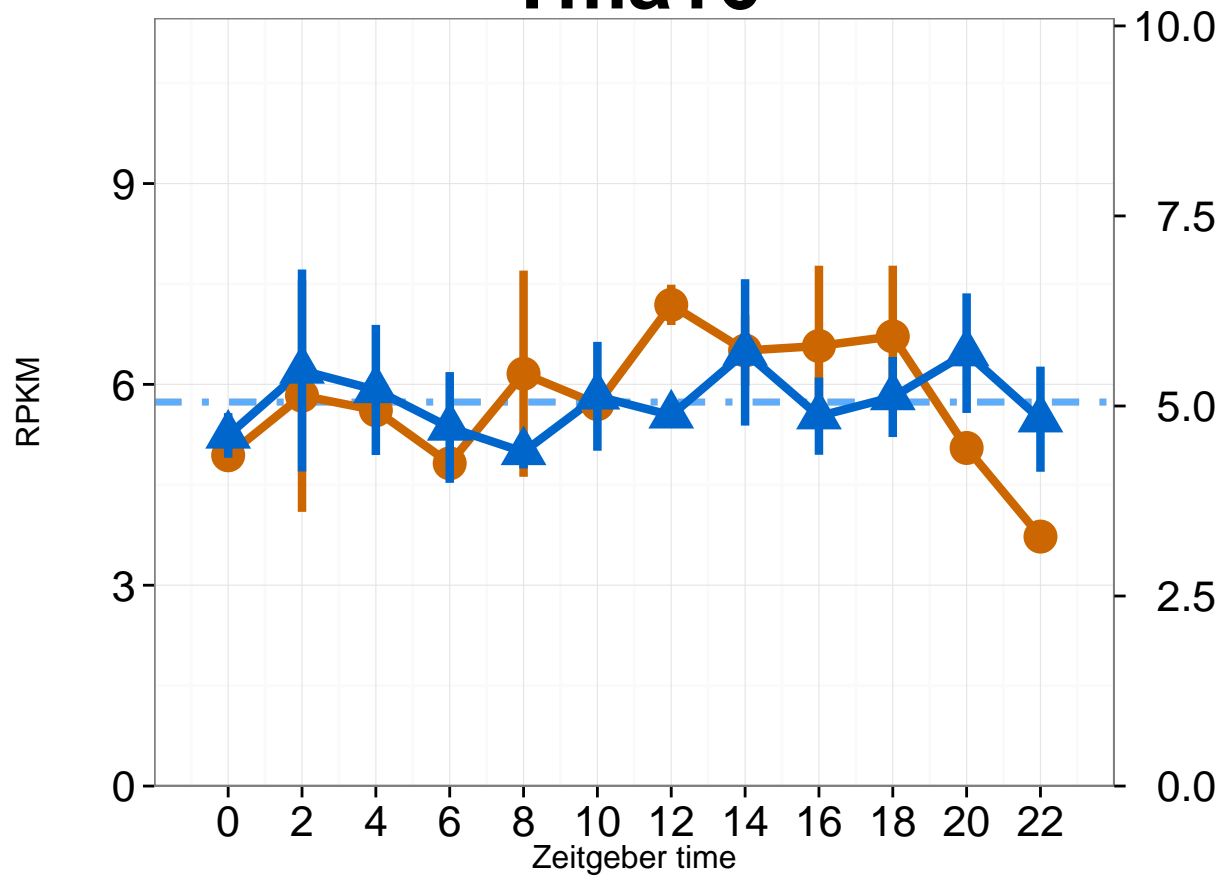

# Tma16

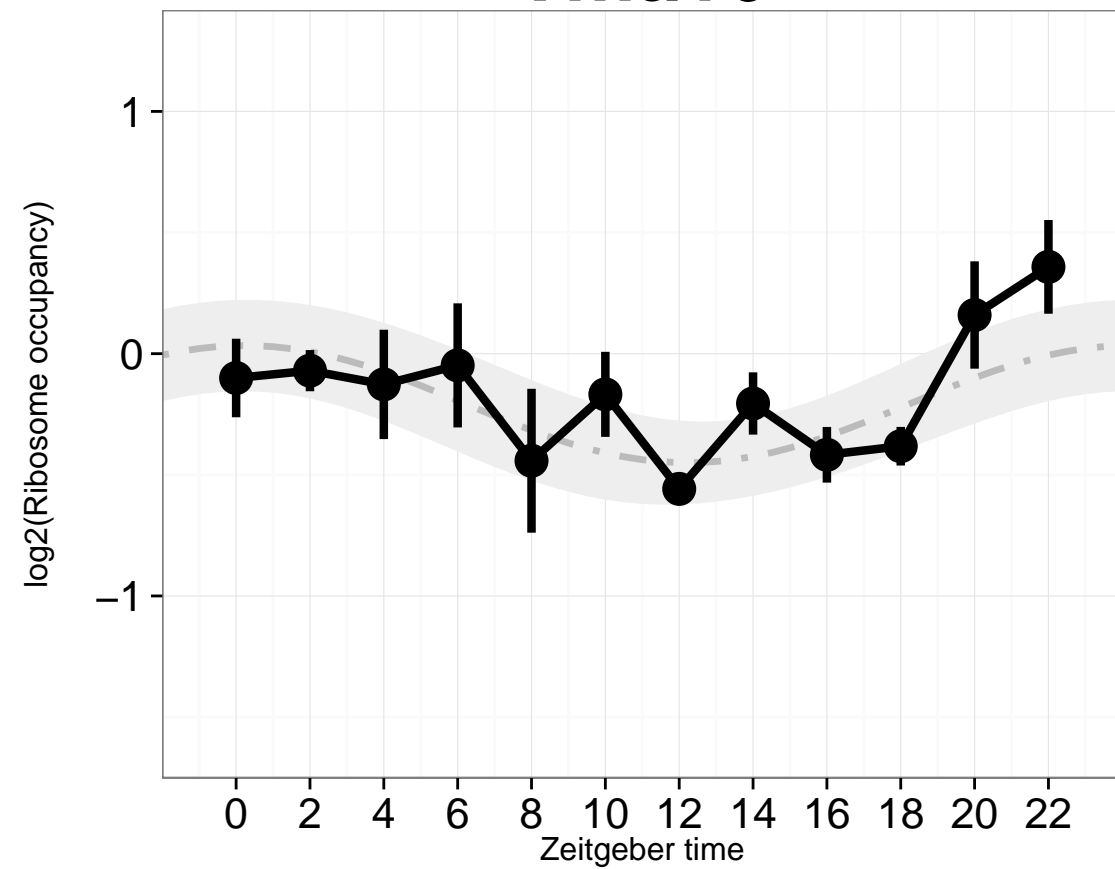

Supplement: SuppDataset_1.zip [file Tma16_set_A.pdf › Supplemental Dataset 1/A-mRNA_nonrhyth_translation_nonrhyth/Tma16_set_A.pdf]

# Tma7

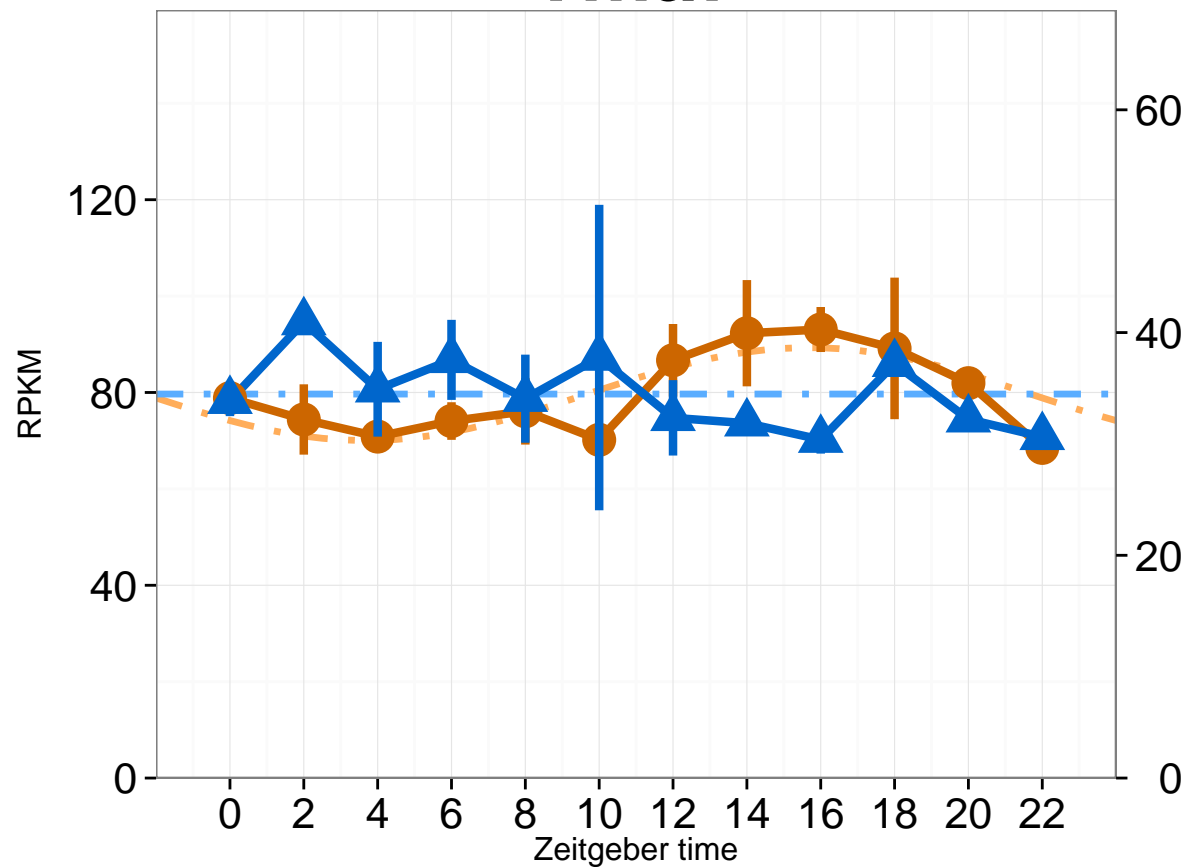

# Tma7

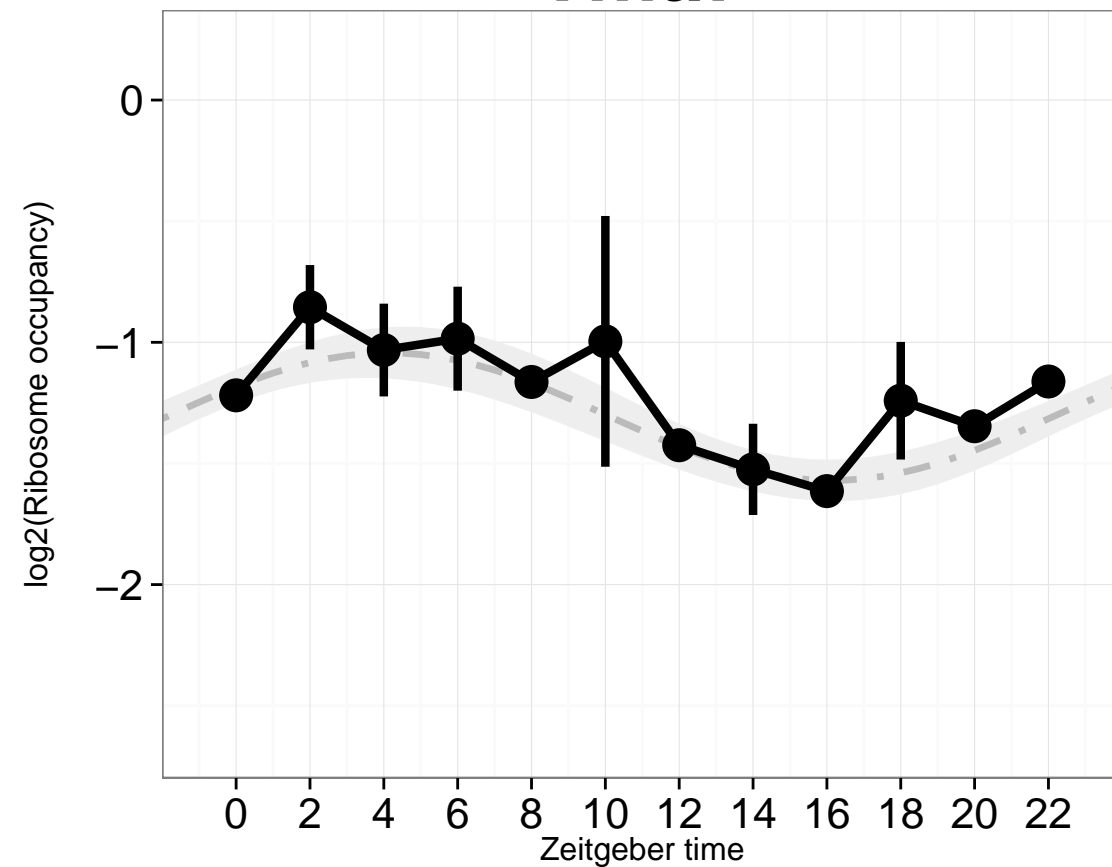

Supplement: SuppDataset_1.zip [file Tma7_set_A.pdf › Supplemental Dataset 1/A-mRNA_nonrhyth_translation_nonrhyth/Tma7_set_A.pdf]

## Tmbim1

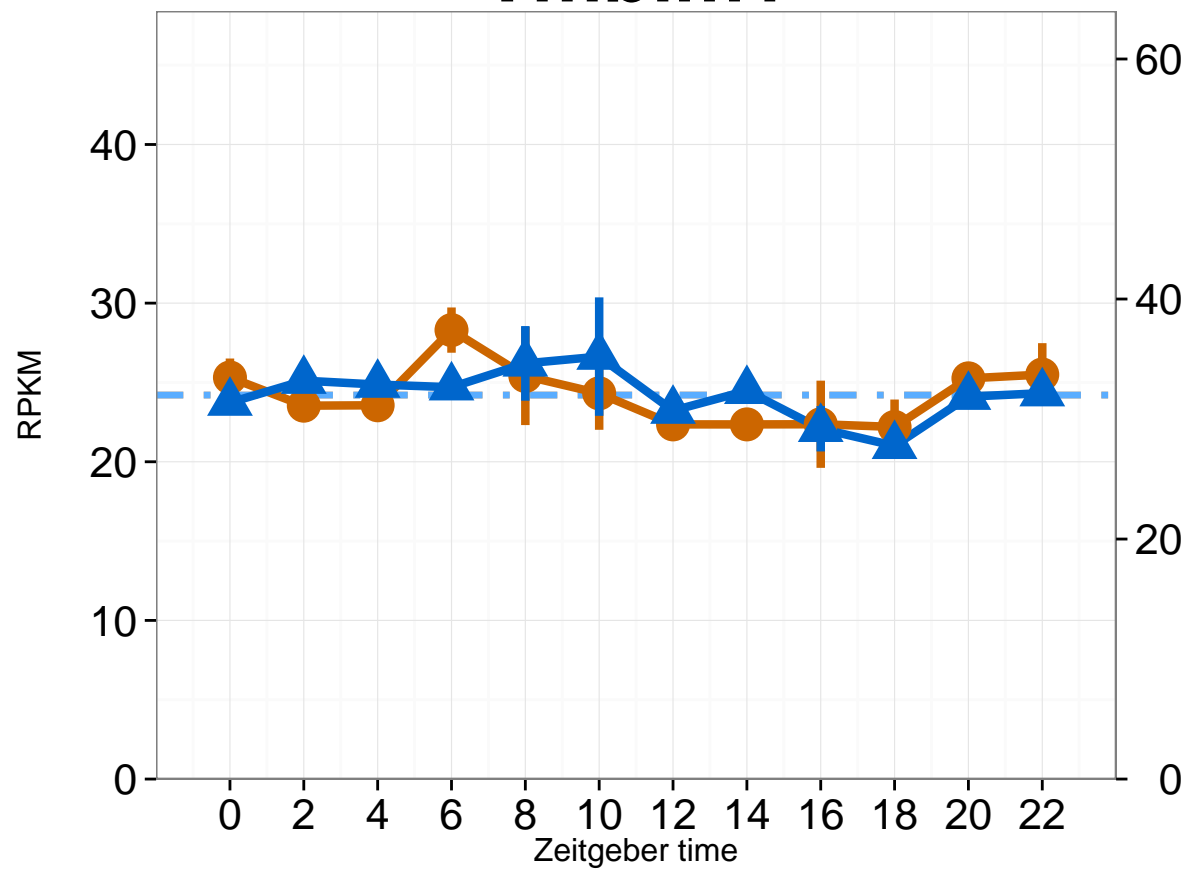

## Tmbim1

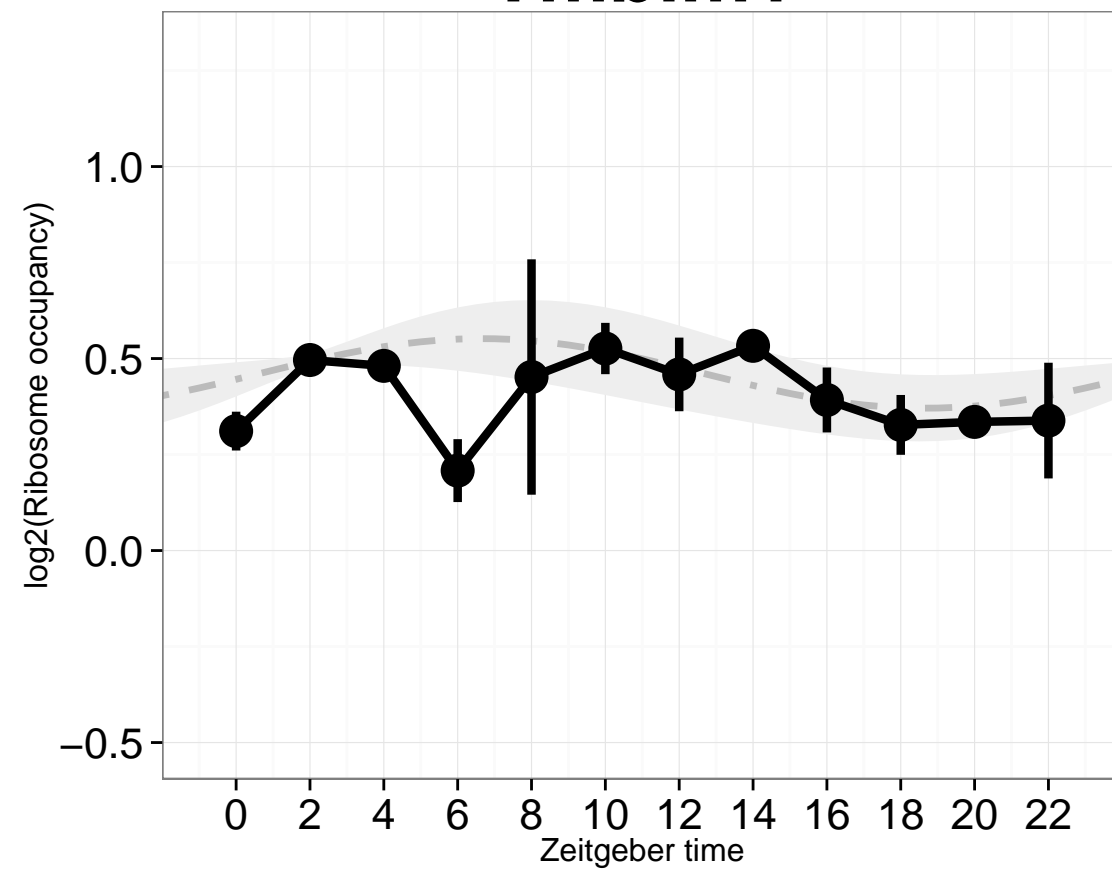

Supplement: SuppDataset_1.zip [file Tmbim1_set_A.pdf › Supplemental Dataset 1/A-mRNA_nonrhyth_translation_nonrhyth/Tmbim1_set_A.pdf]

## Tmbim4

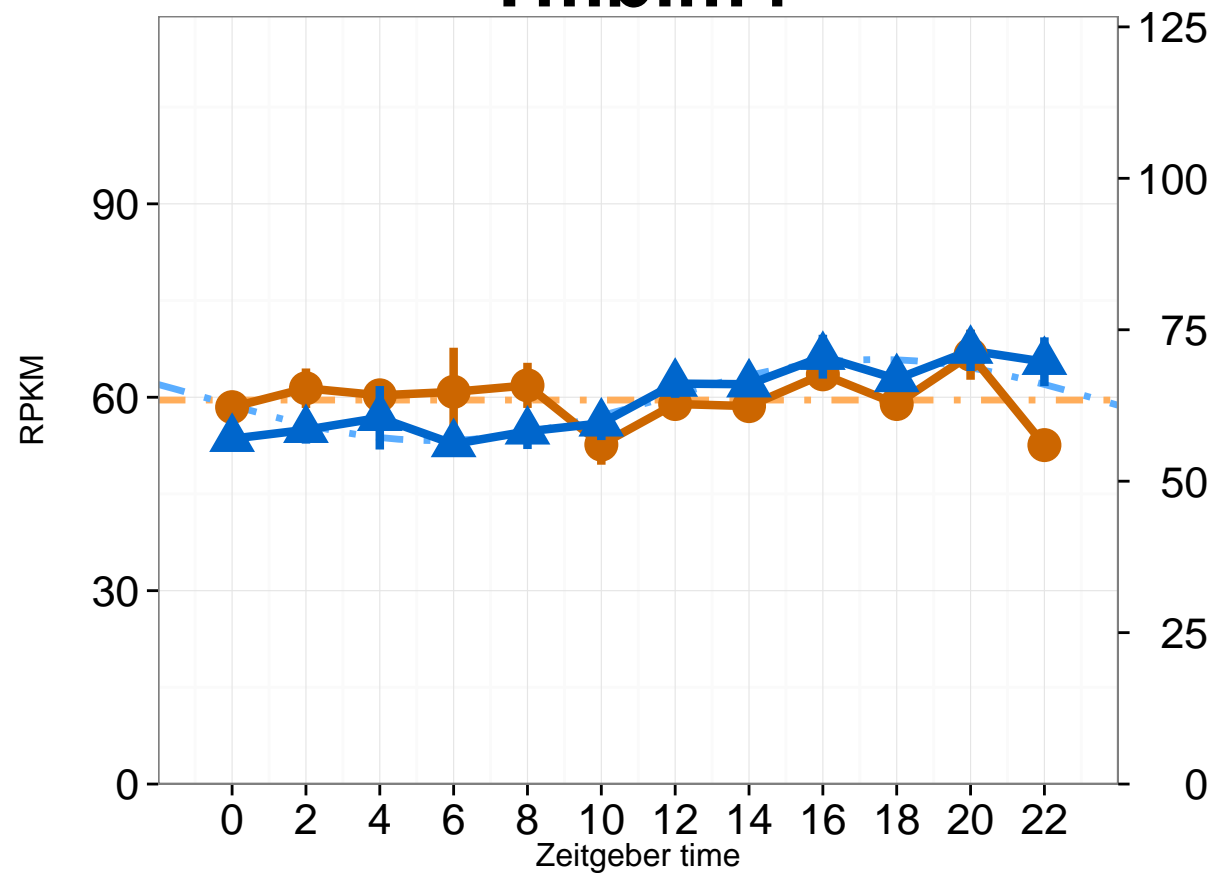

## Tmbim4

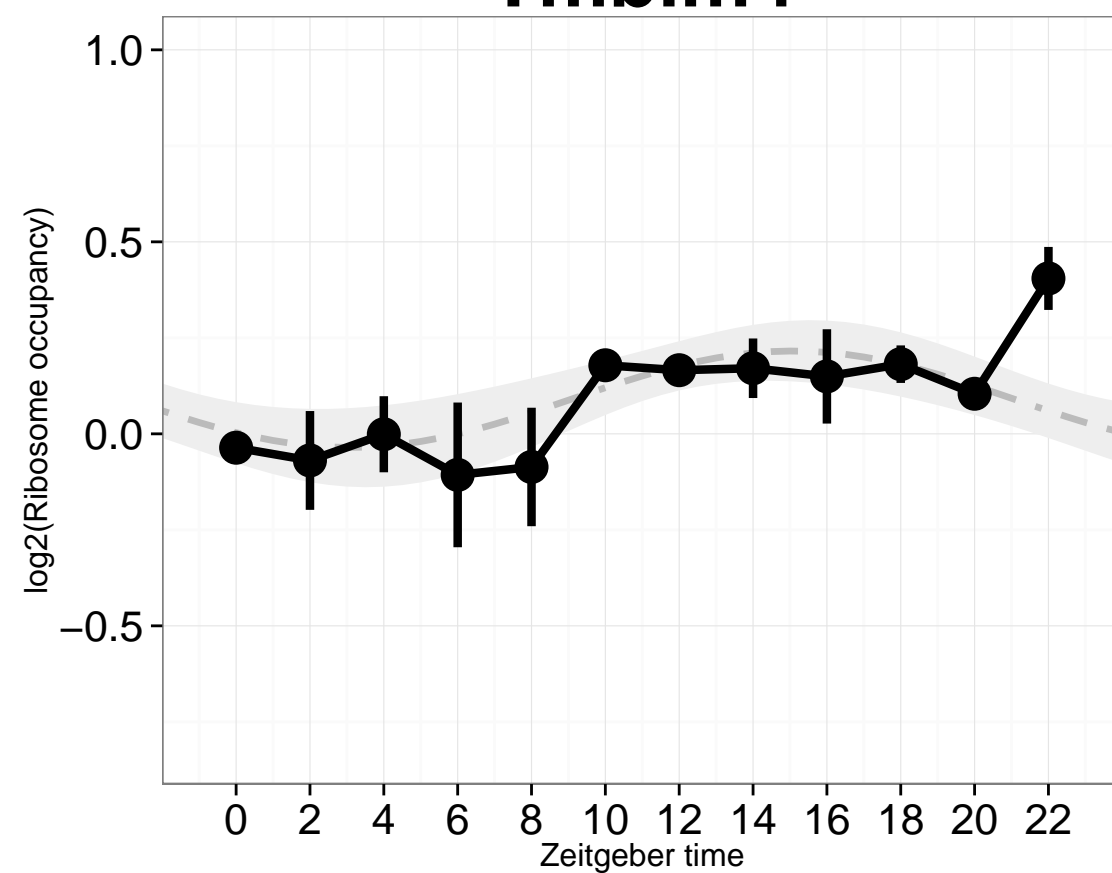

Supplement: SuppDataset_1.zip [file Tmbim4_set_A.pdf › Supplemental Dataset 1/A-mRNA_nonrhyth_translation_nonrhyth/Tmbim4_set_A.pdf]

## Tmbim6

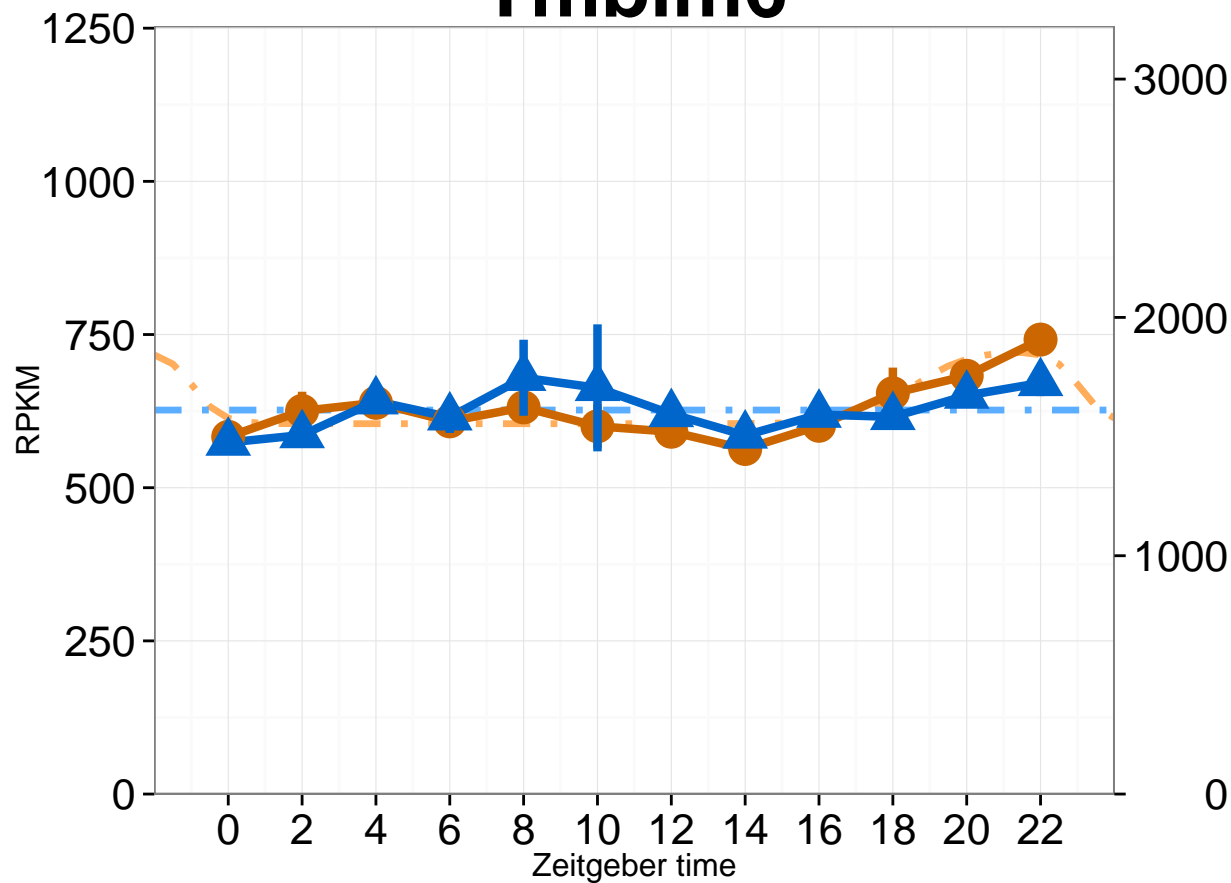

## Tmbim6

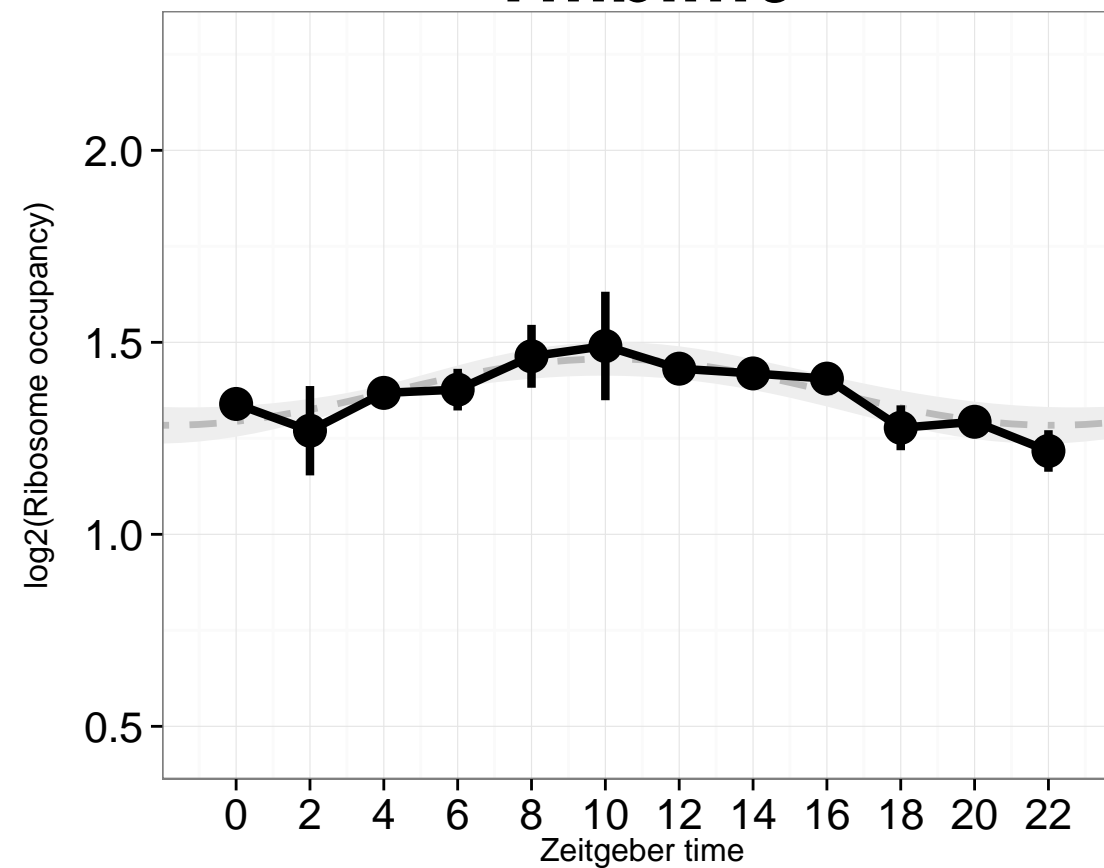

Supplement: SuppDataset_1.zip [file Tmbim6_set_A.pdf › Supplemental Dataset 1/A-mRNA_nonrhyth_translation_nonrhyth/Tmbim6_set_A.pdf]

## Tmc4

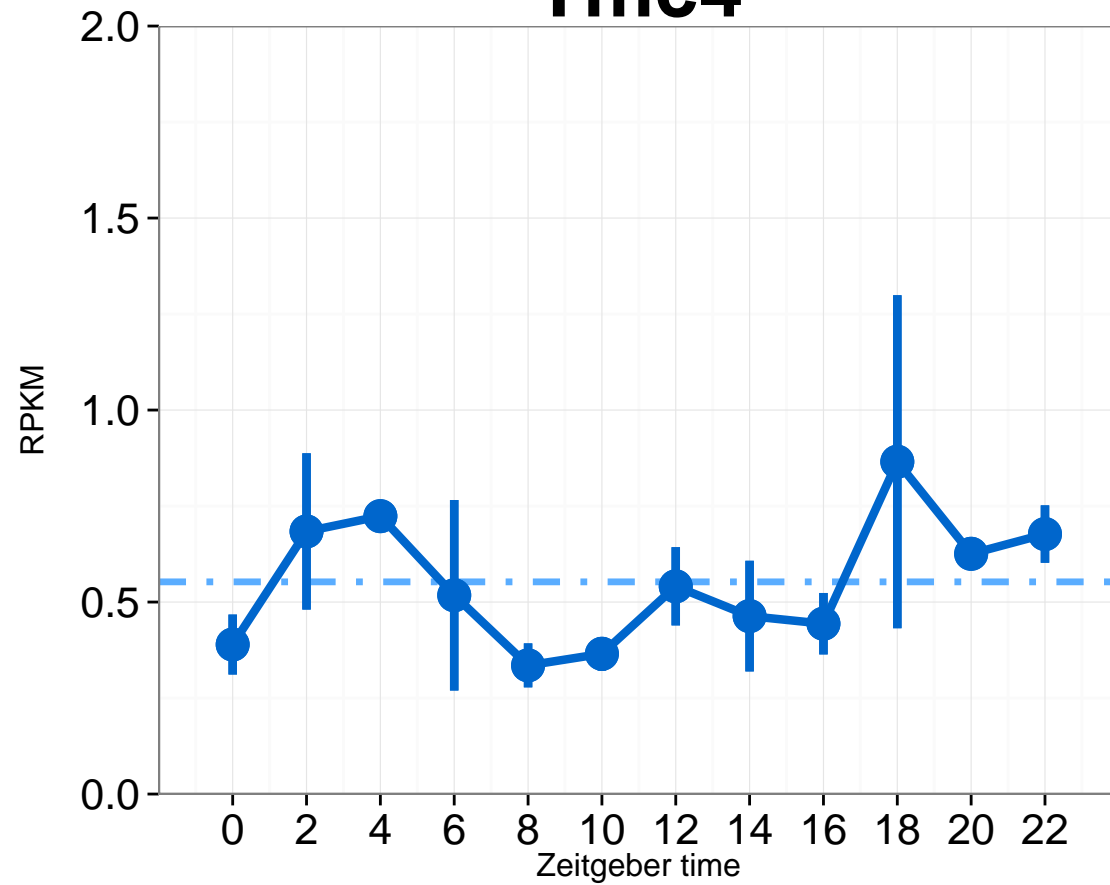

## Tmc4 log2(Ribosome occupancy)

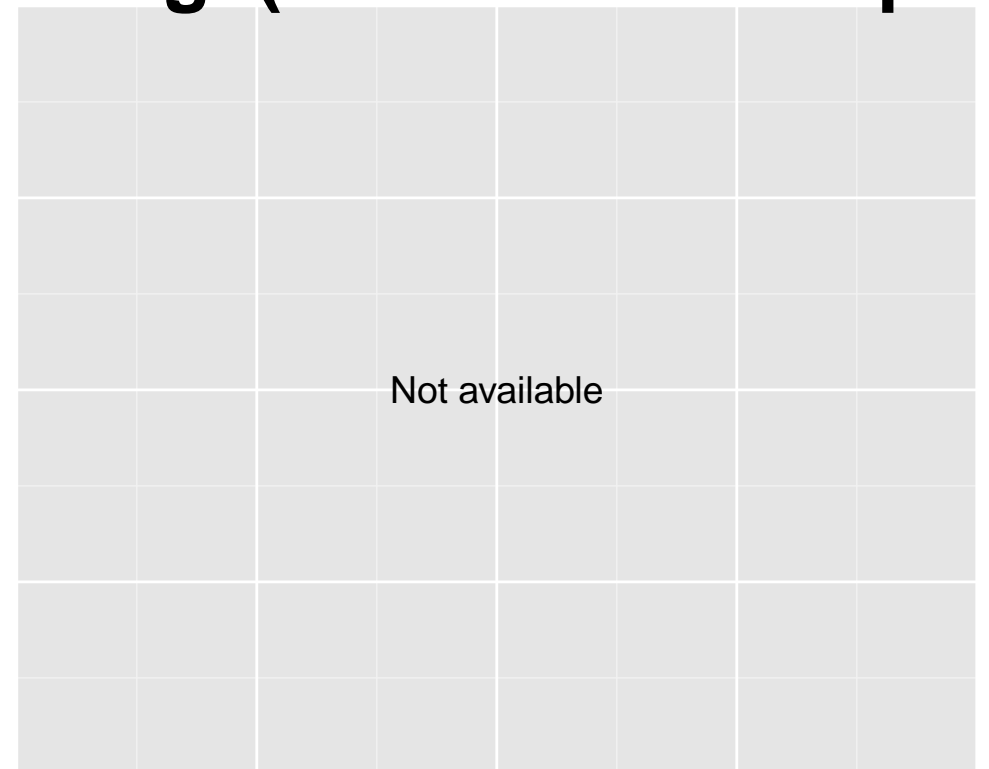

Supplement: SuppDataset_1.zip [file Tmc4_set_A.pdf › Supplemental Dataset 1/A-mRNA_nonrhyth_translation_nonrhyth/Tmc4_set_A.pdf]

# Tmc6

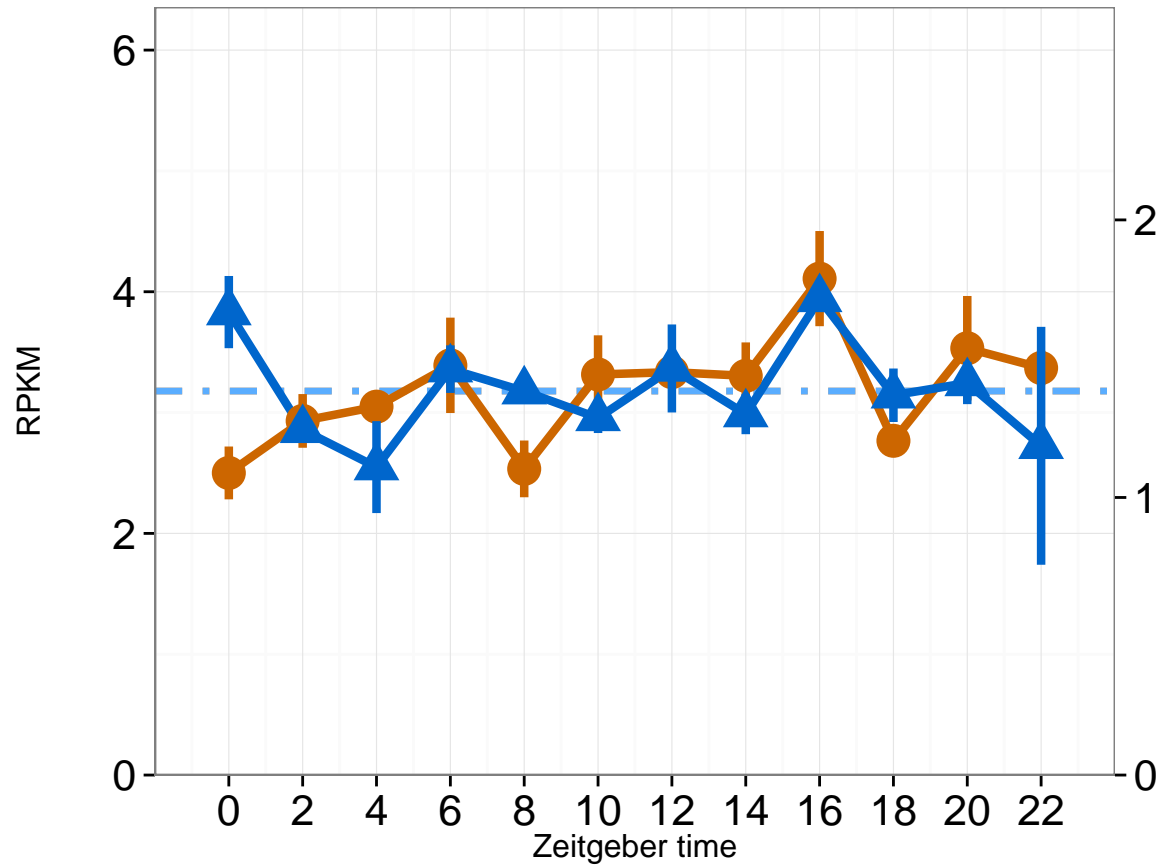

# Tmc6

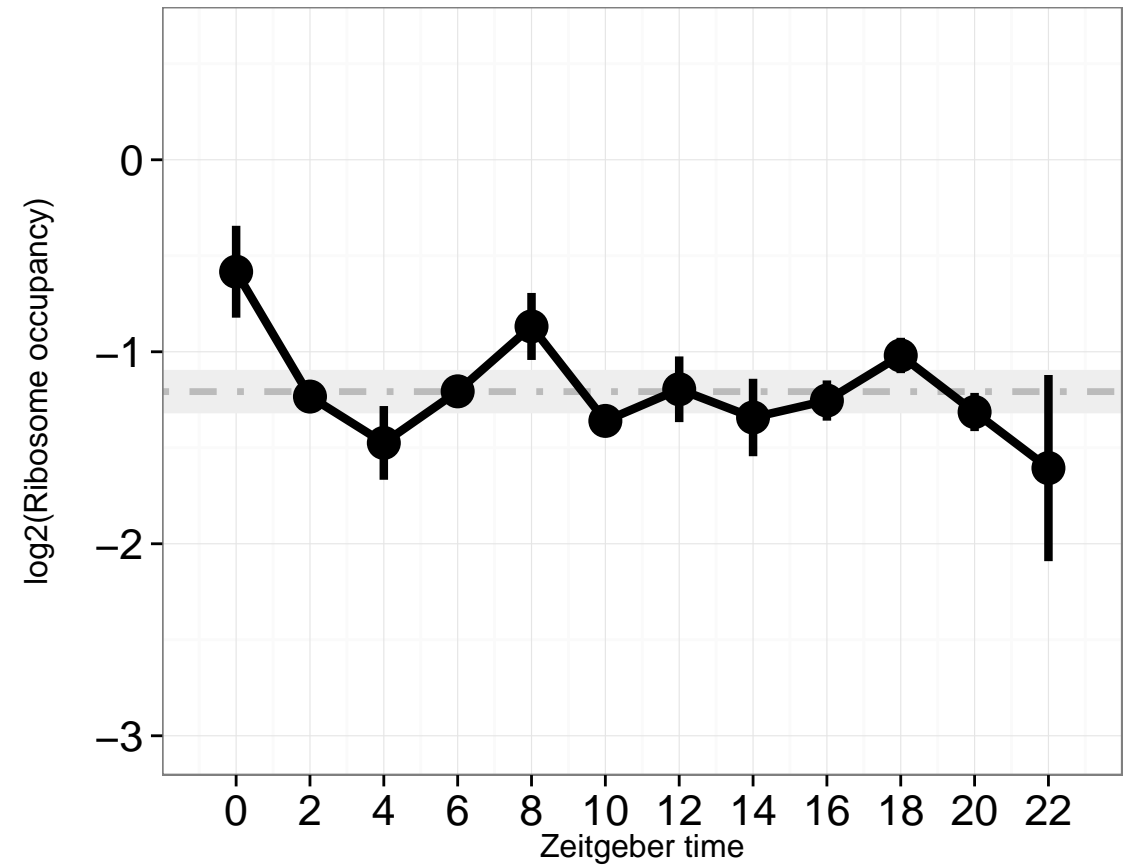

Supplement: SuppDataset_1.zip [file Tmc6_set_A.pdf › Supplemental Dataset 1/A-mRNA_nonrhyth_translation_nonrhyth/Tmc6_set_A.pdf]

# Tmcc2

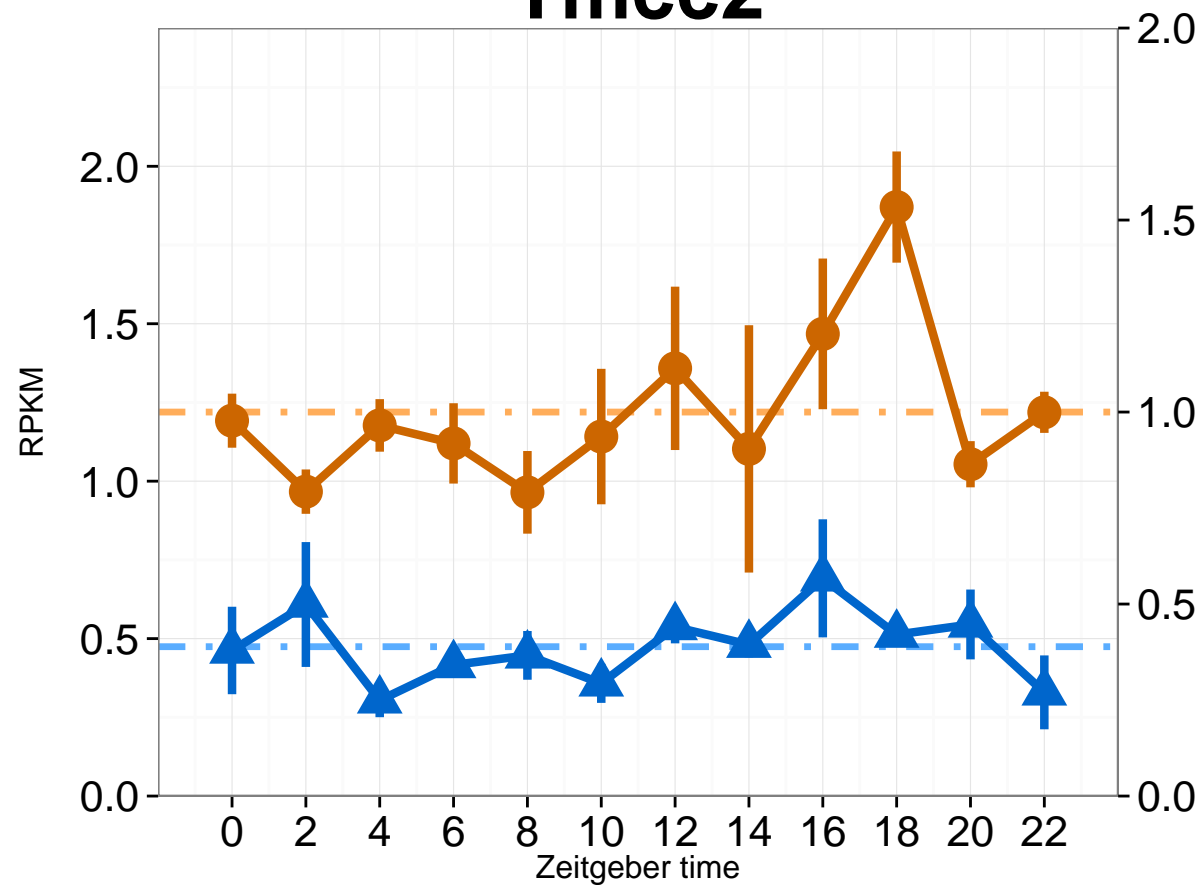

# Tmcc2

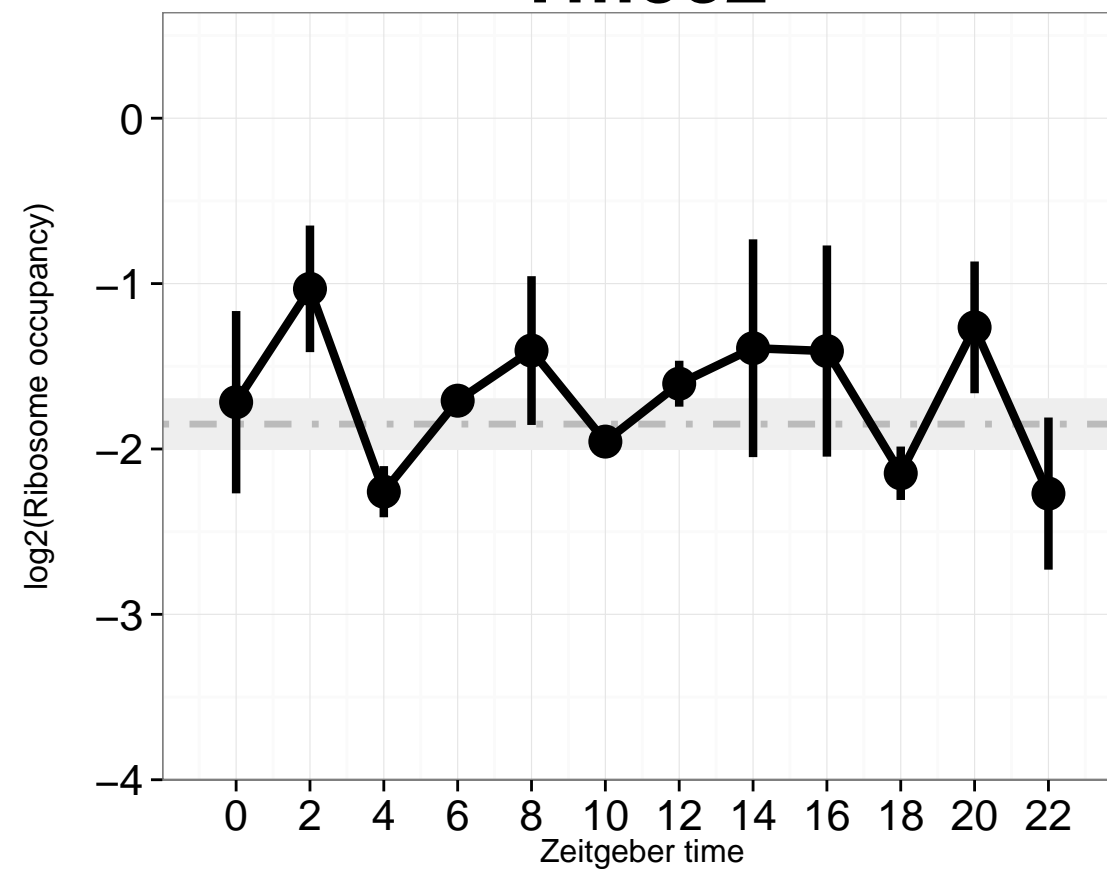

Supplement: SuppDataset_1.zip [file Tmcc2_set_A.pdf › Supplemental Dataset 1/A-mRNA_nonrhyth_translation_nonrhyth/Tmcc2_set_A.pdf]

## Tmcc3

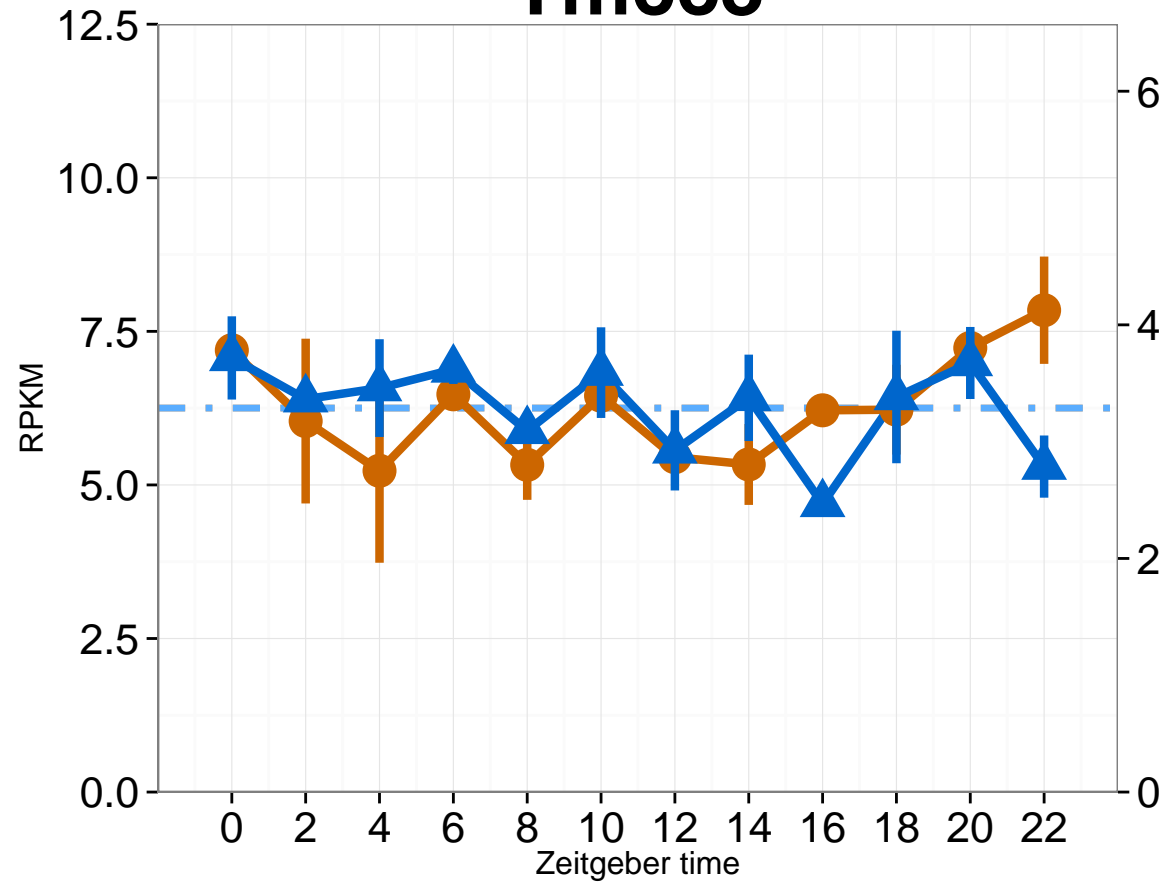

## Tmcc3

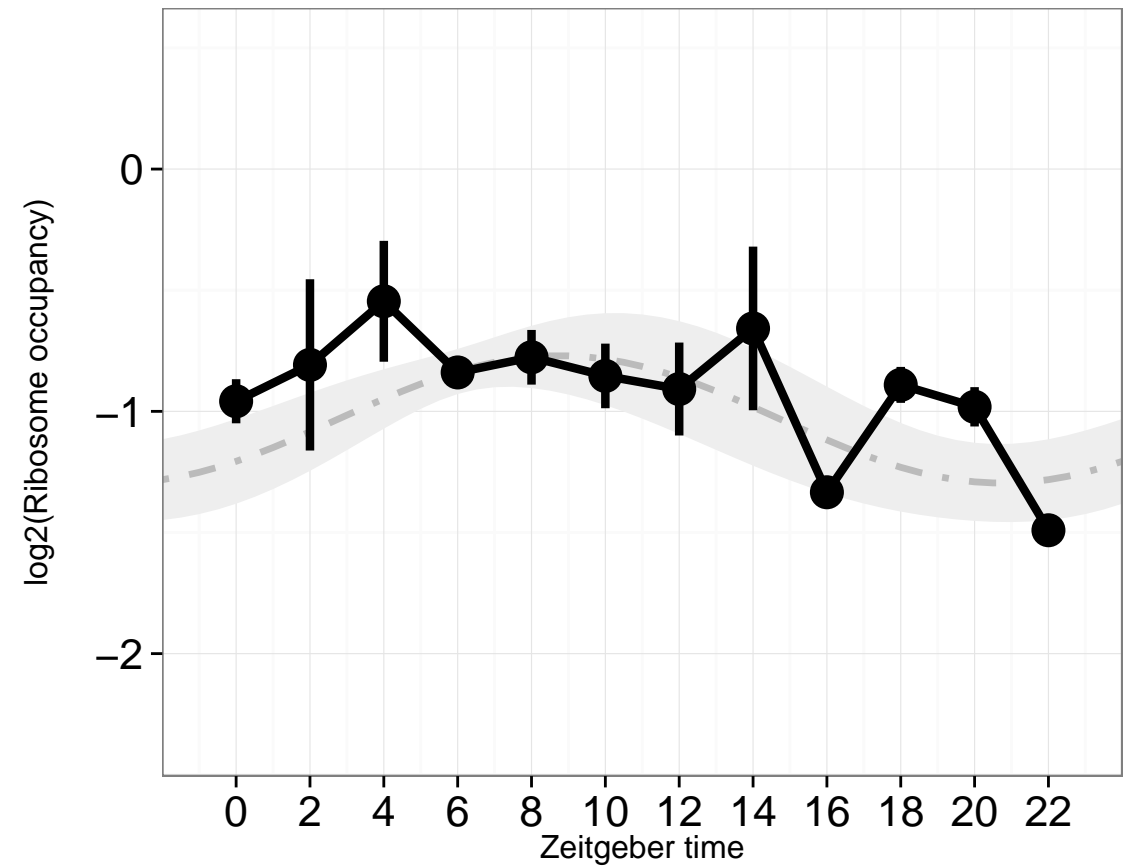

Supplement: SuppDataset_1.zip [file Tmcc3_set_A.pdf › Supplemental Dataset 1/A-mRNA_nonrhyth_translation_nonrhyth/Tmcc3_set_A.pdf]

# Tmco1

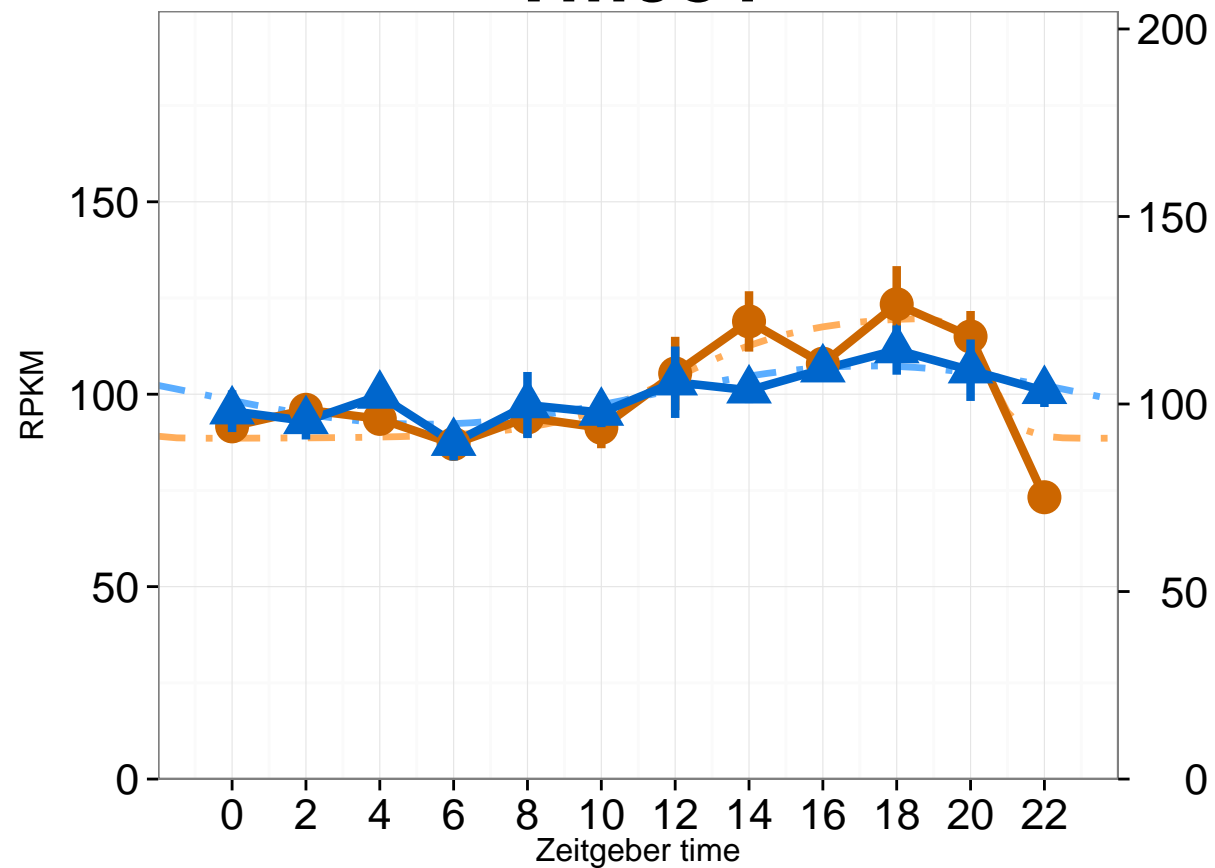

# Tmco1

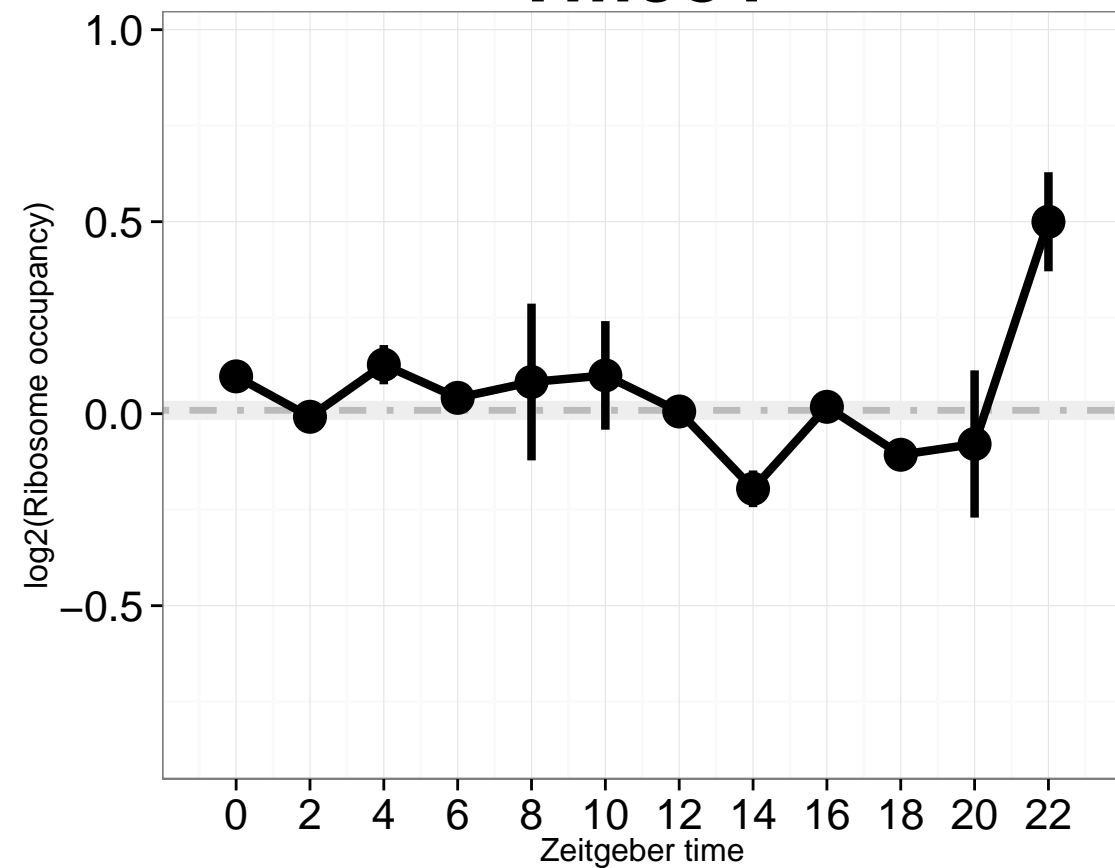

Supplement: SuppDataset_1.zip [file Tmco1_set_A.pdf › Supplemental Dataset 1/A-mRNA_nonrhyth_translation_nonrhyth/Tmco1_set_A.pdf]

# Tmco3

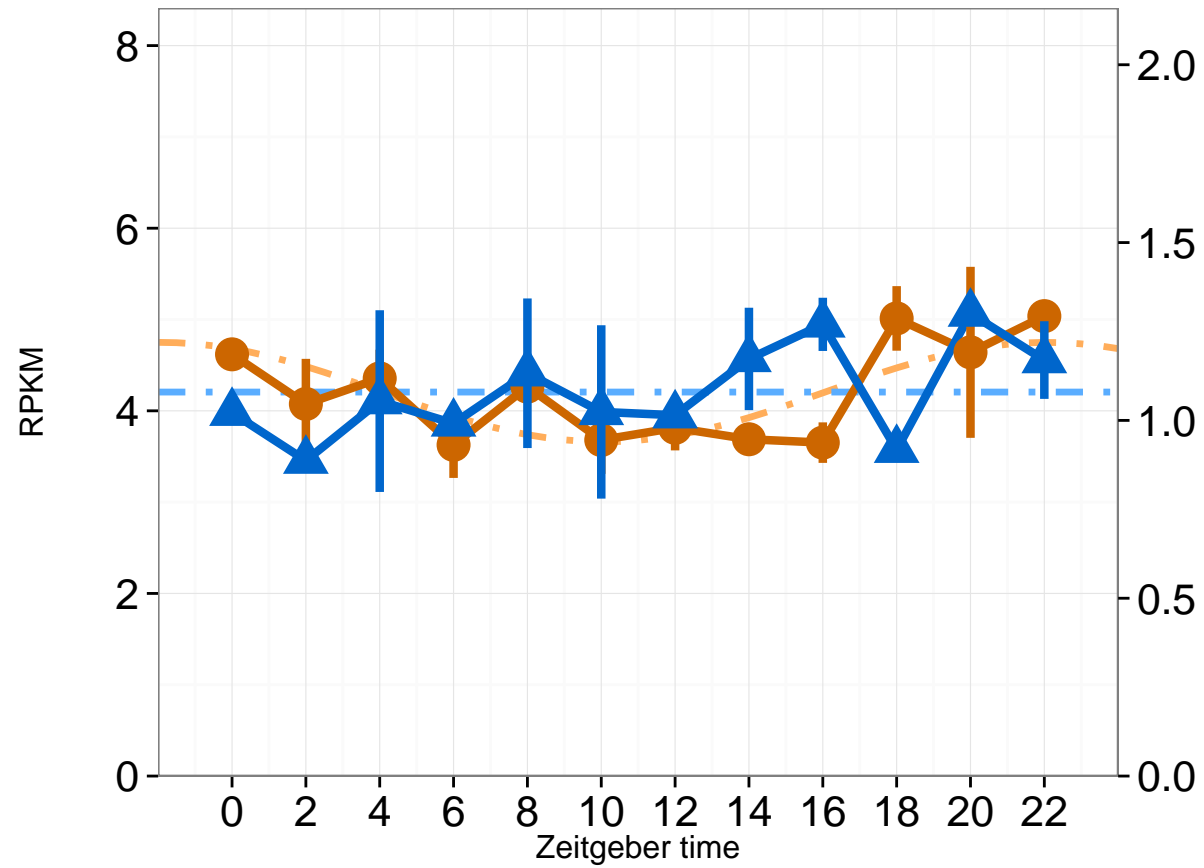

# Tmco3

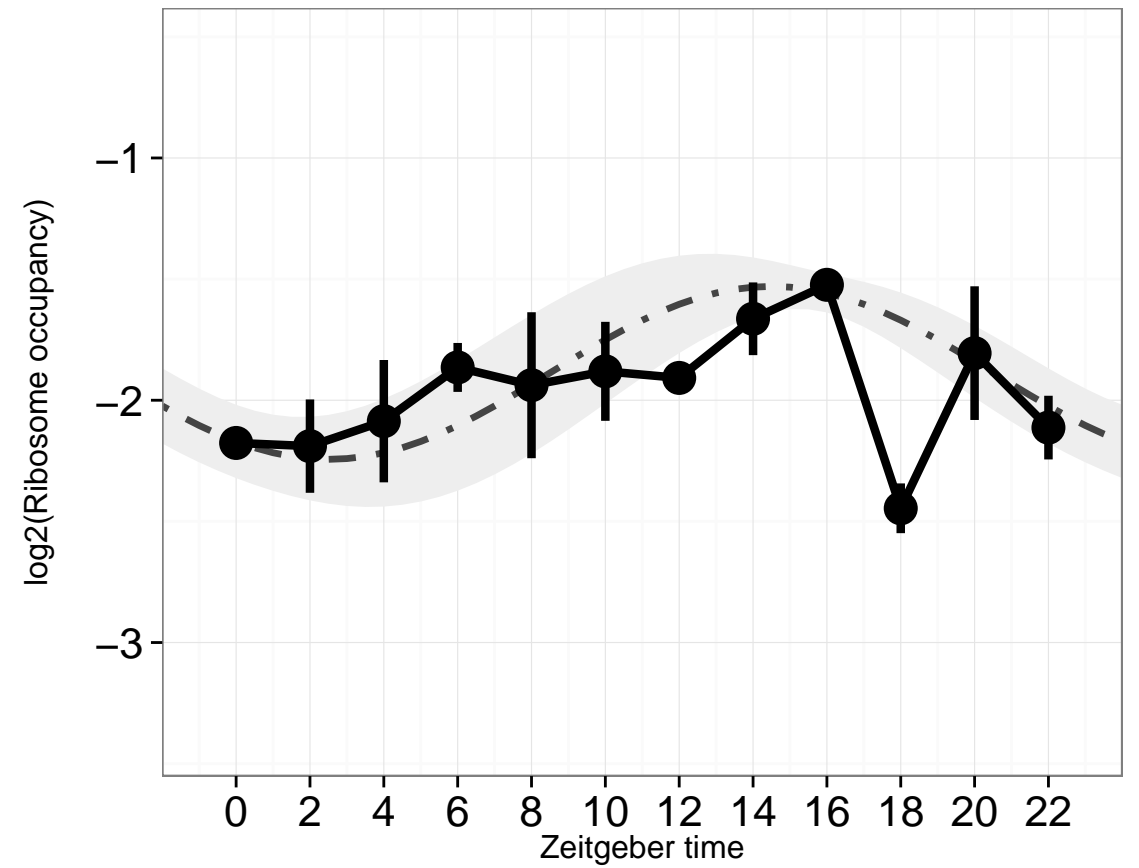

Supplement: SuppDataset_1.zip [file Tmco3_set_A.pdf › Supplemental Dataset 1/A-mRNA_nonrhyth_translation_nonrhyth/Tmco3_set_A.pdf]

## Tmed10

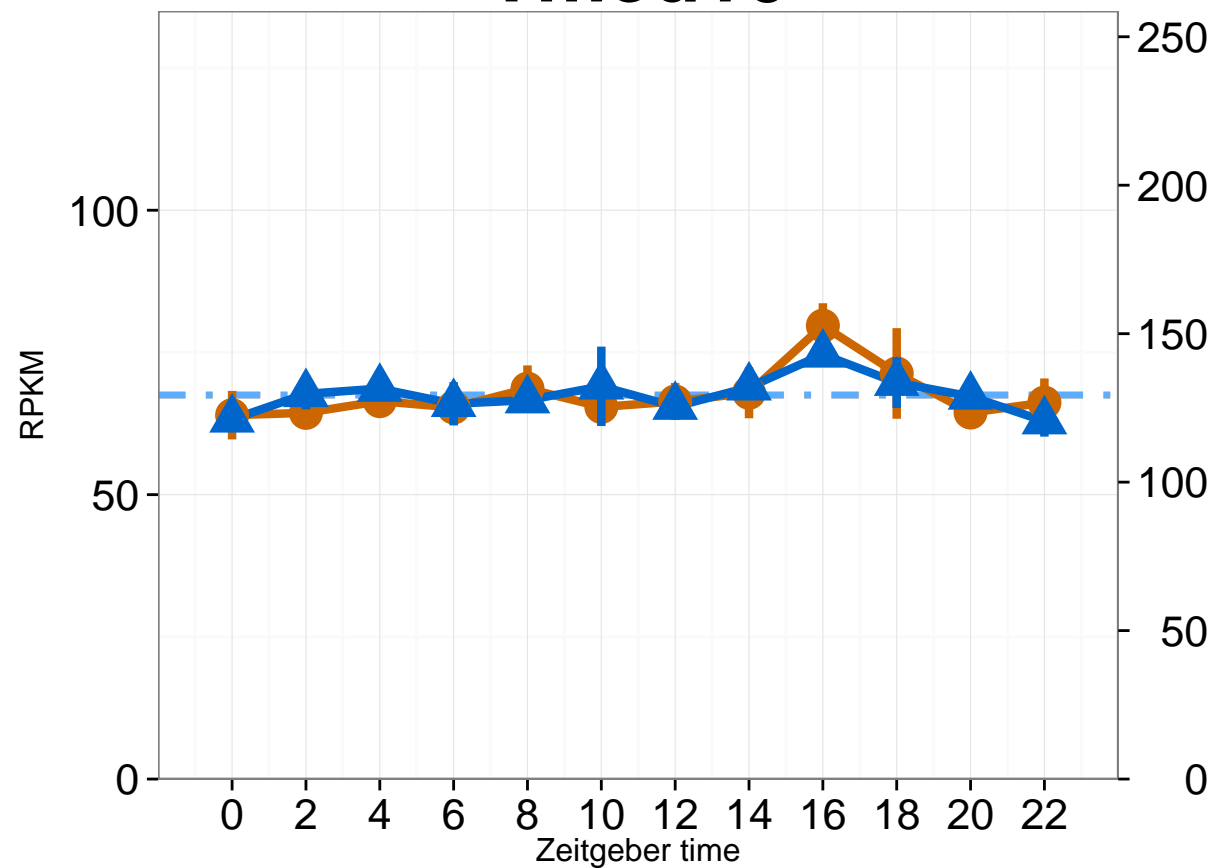

## Tmed10

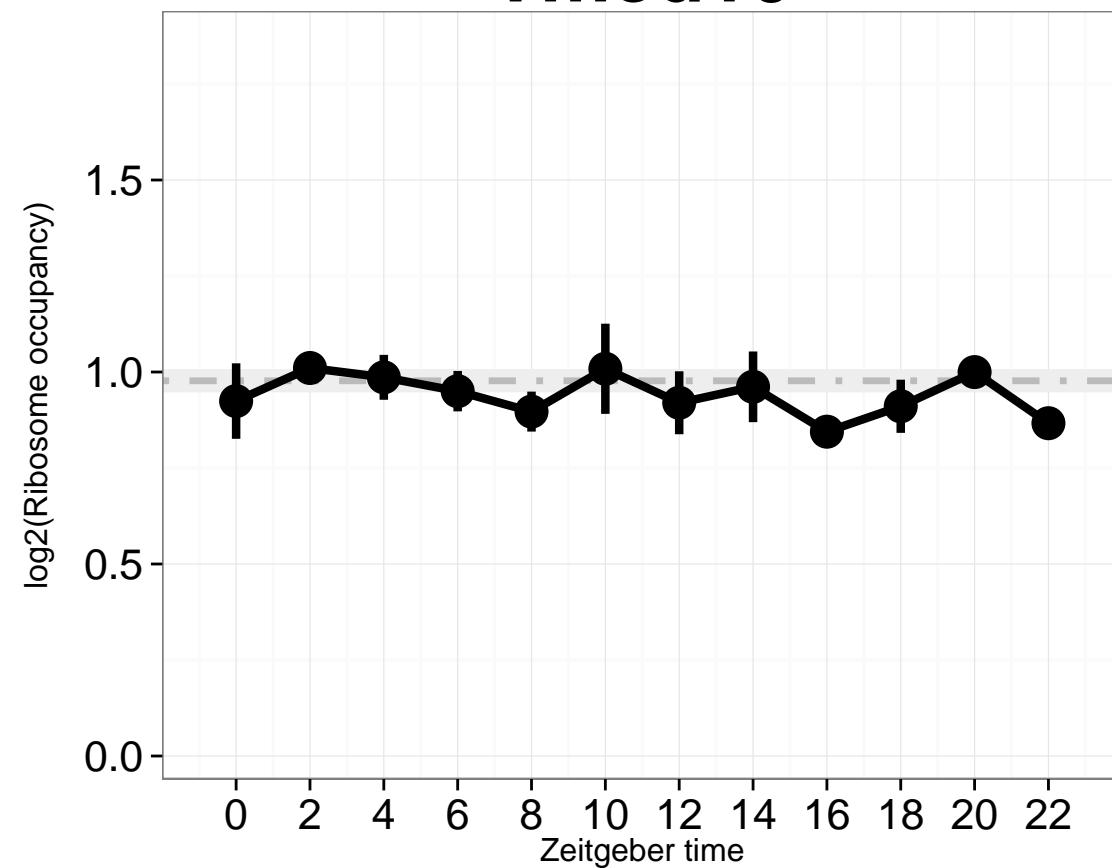

Supplement: SuppDataset_1.zip [file Tmed10_set_A.pdf › Supplemental Dataset 1/A-mRNA_nonrhyth_translation_nonrhyth/Tmed10_set_A.pdf]

# Tmed1

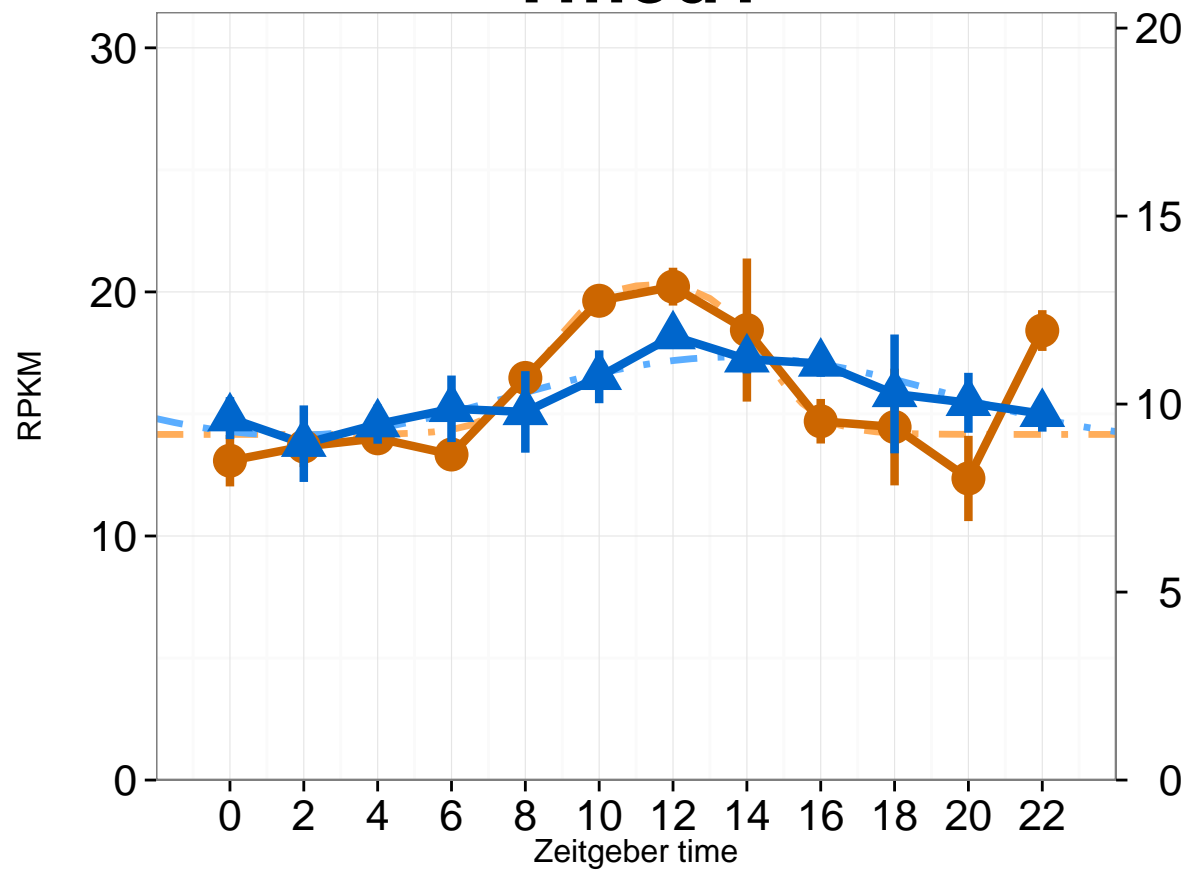

# Tmed1

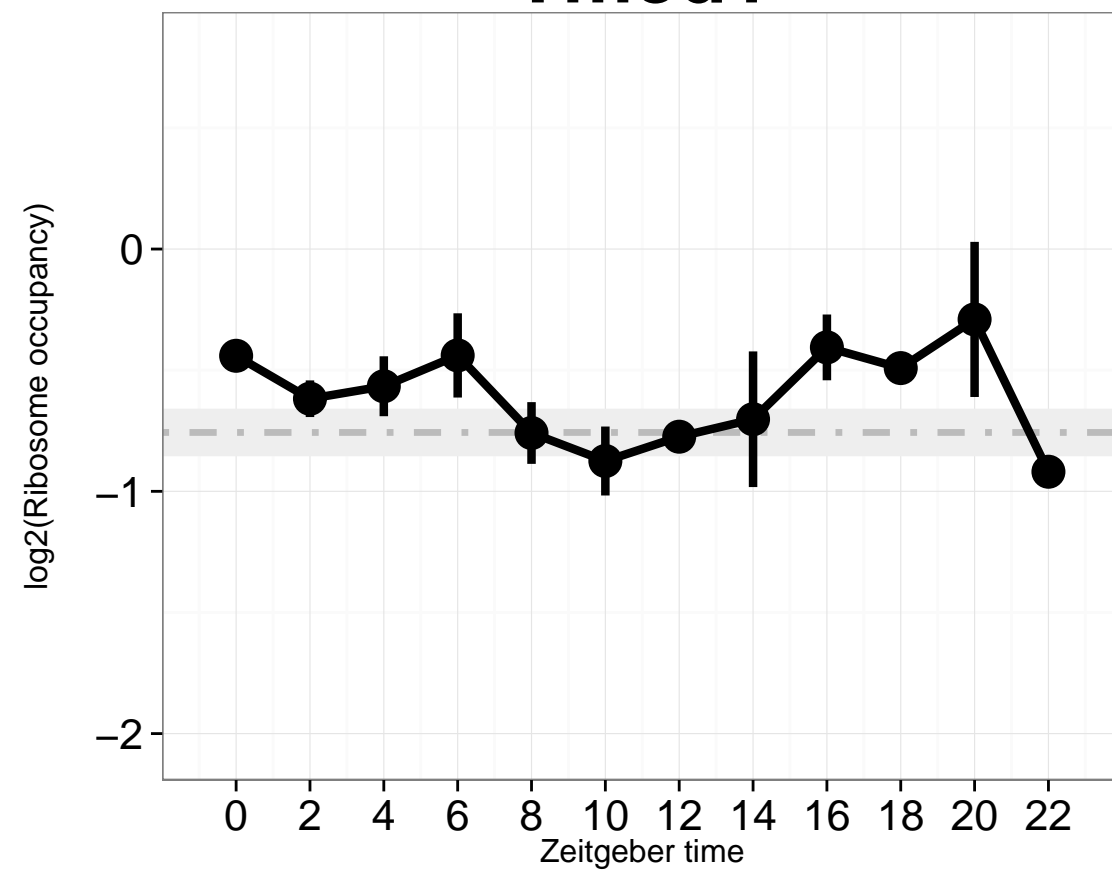

Supplement: SuppDataset_1.zip [file Tmed1_set_A.pdf › Supplemental Dataset 1/A-mRNA_nonrhyth_translation_nonrhyth/Tmed1_set_A.pdf]

## Tmed2

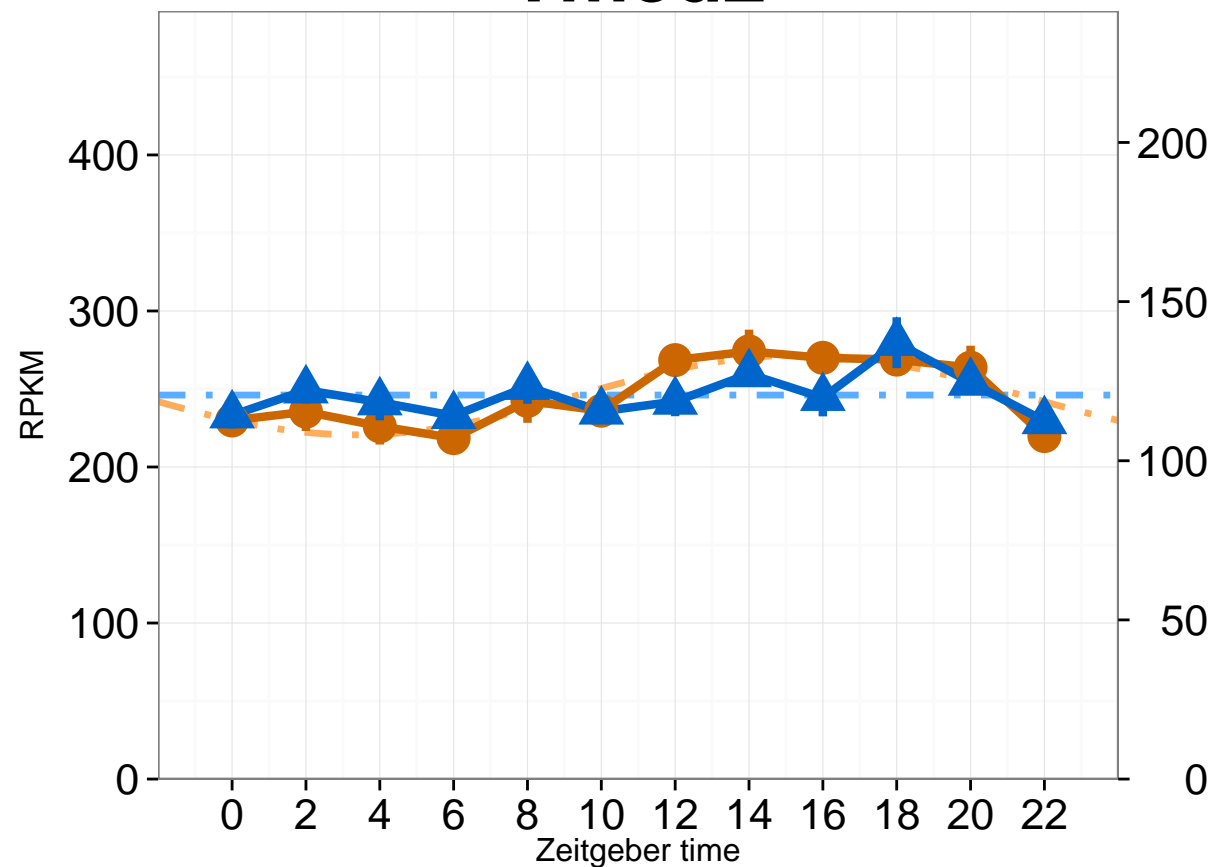

## Tmed2

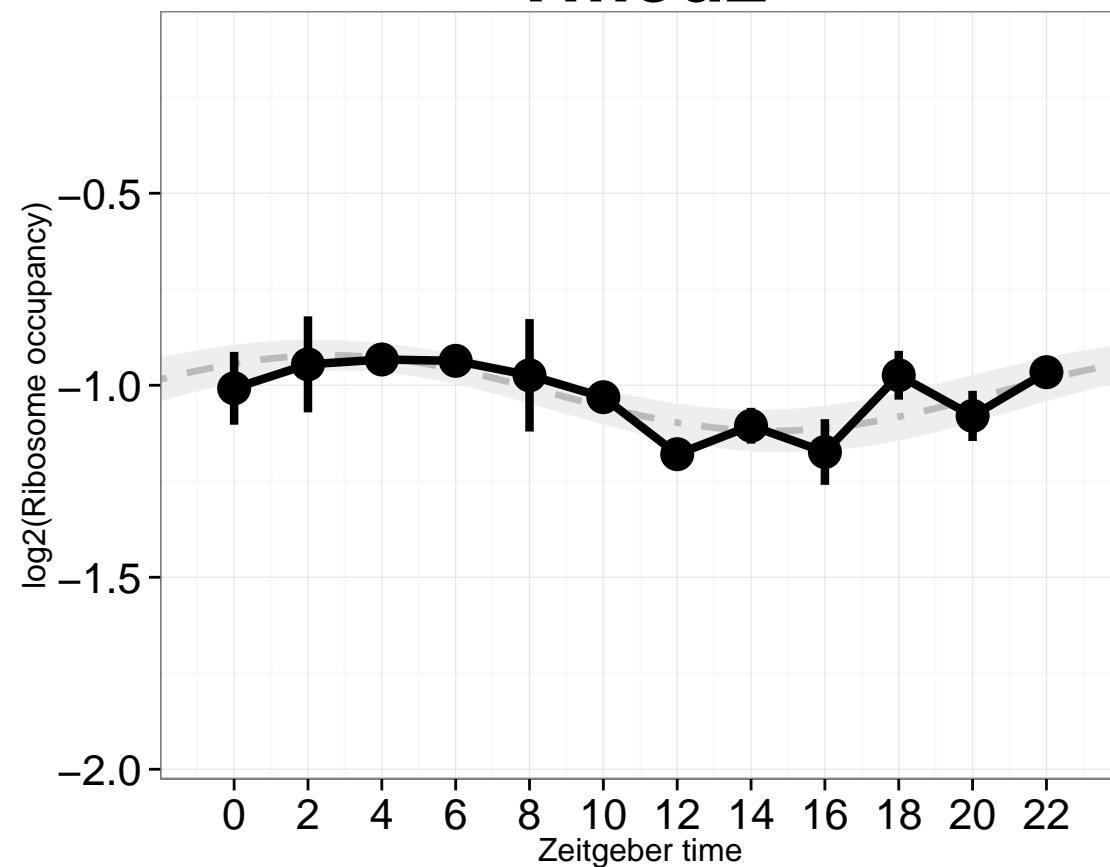

Supplement: SuppDataset_1.zip [file Tmed2_set_A.pdf › Supplemental Dataset 1/A-mRNA_nonrhyth_translation_nonrhyth/Tmed2_set_A.pdf]

# Tmed3

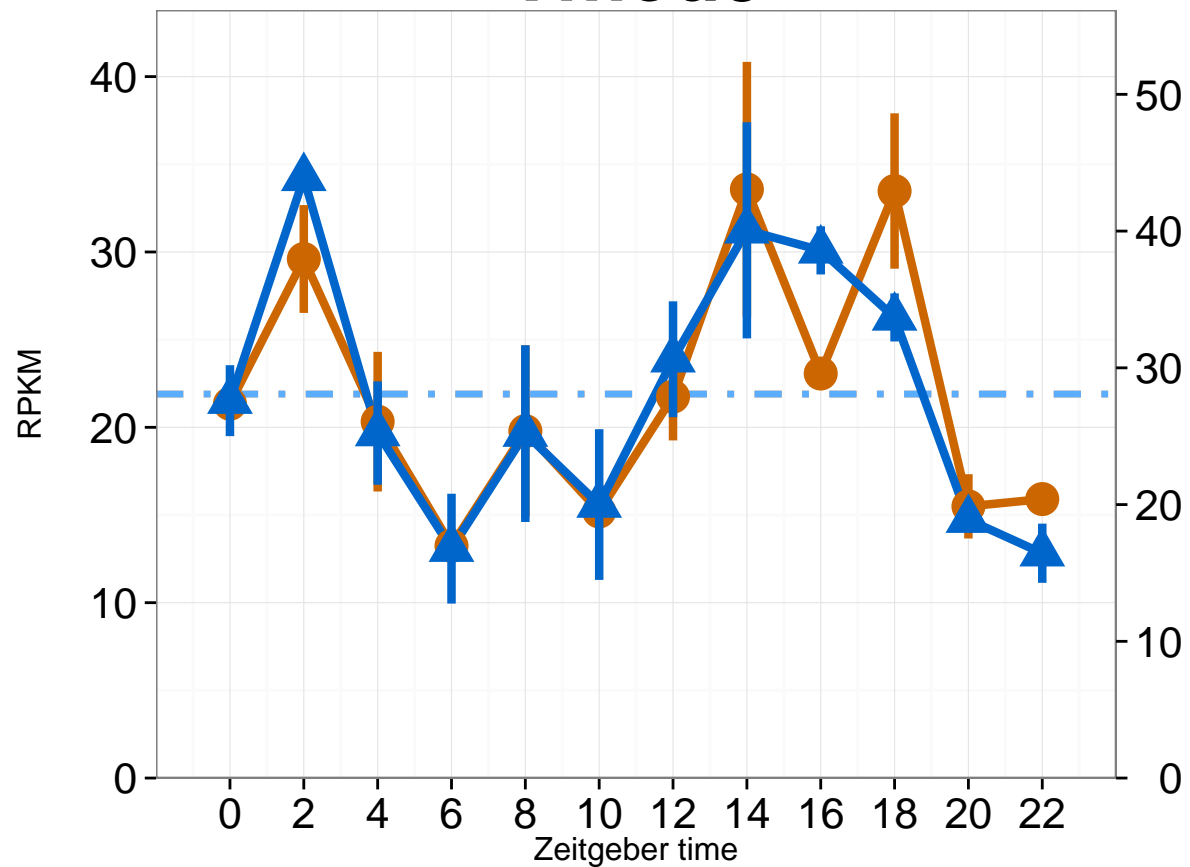

# Tmed3

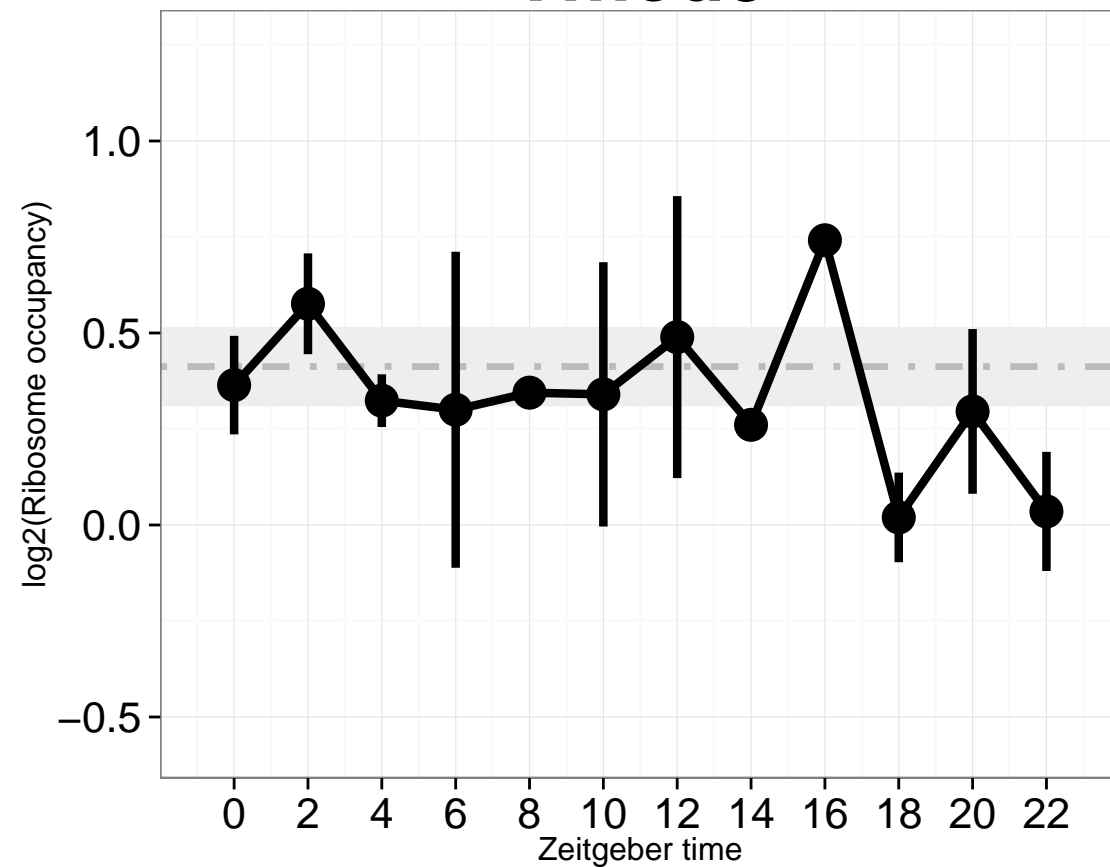

Supplement: SuppDataset_1.zip [file Tmed3_set_A.pdf › Supplemental Dataset 1/A-mRNA_nonrhyth_translation_nonrhyth/Tmed3_set_A.pdf]

# Tmed4

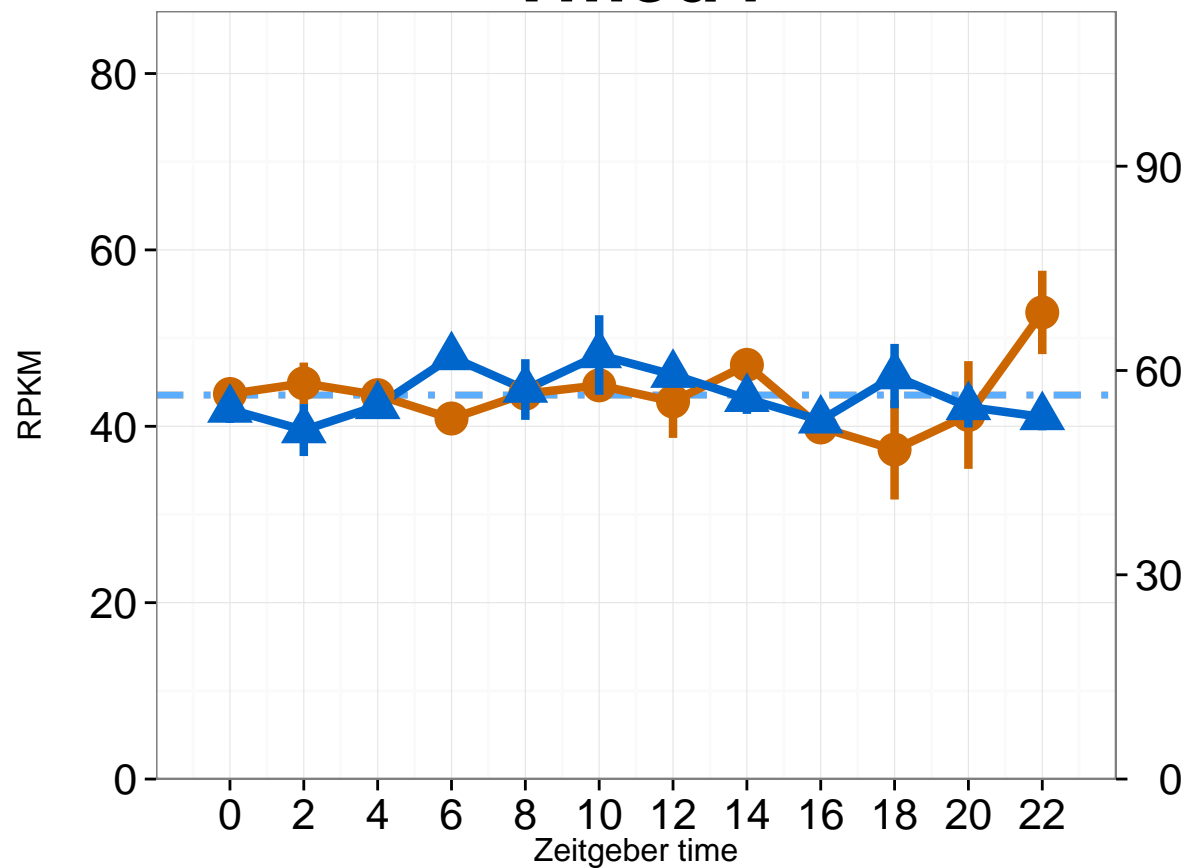

# Tmed4

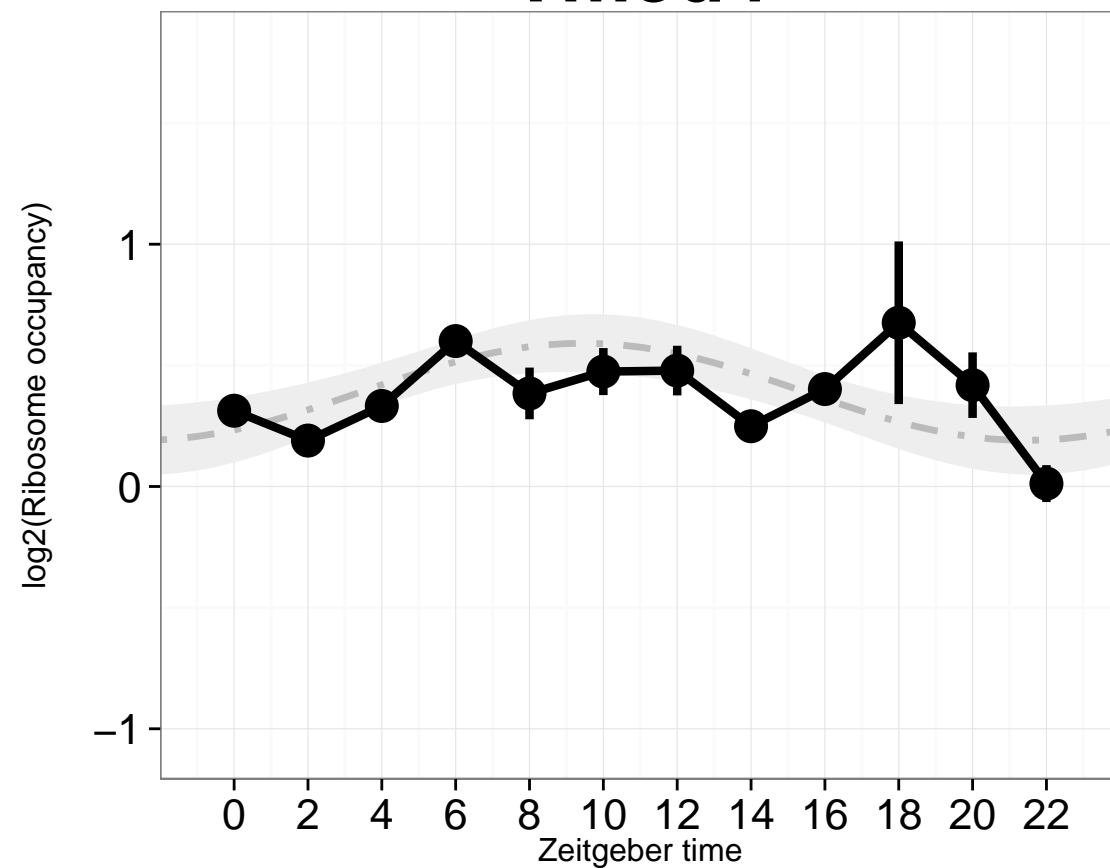

Supplement: SuppDataset_1.zip [file Tmed4_set_A.pdf › Supplemental Dataset 1/A-mRNA_nonrhyth_translation_nonrhyth/Tmed4_set_A.pdf]

## Tmed7

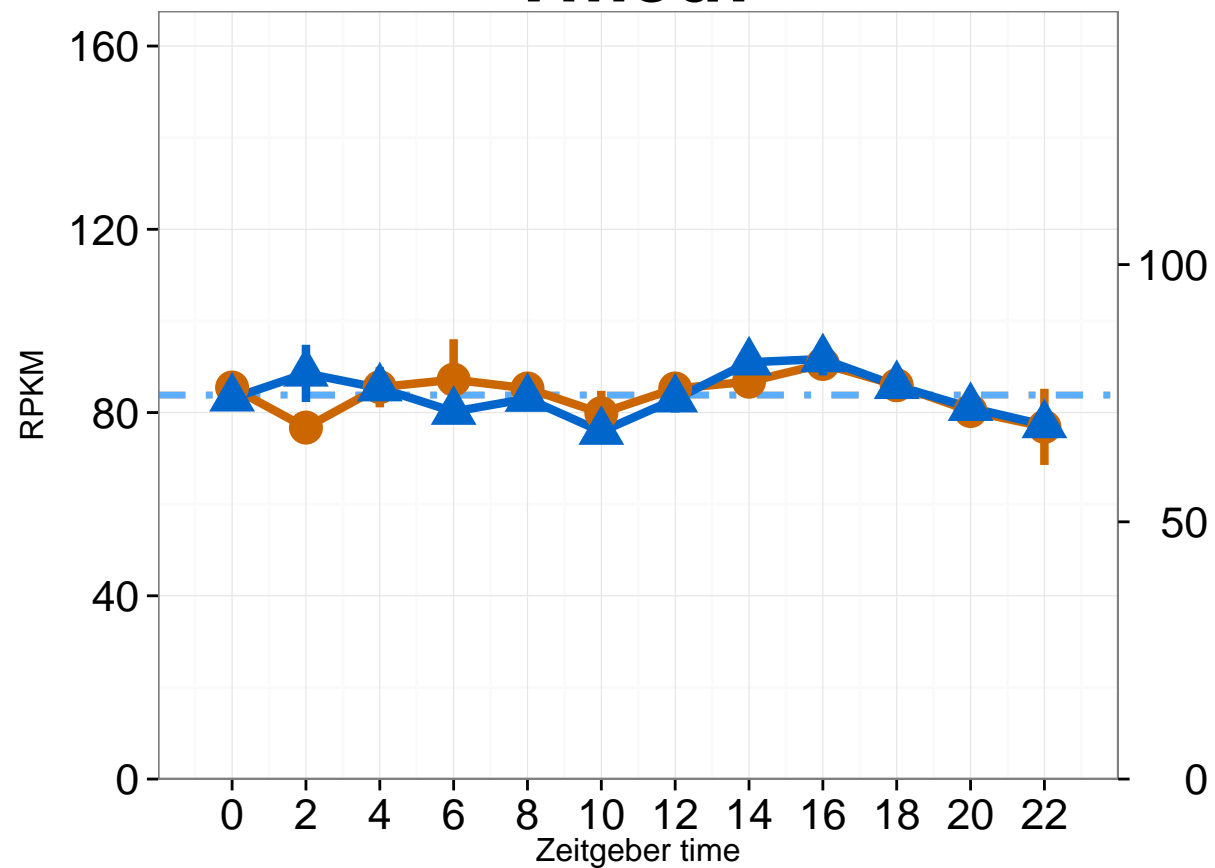

## Tmed7

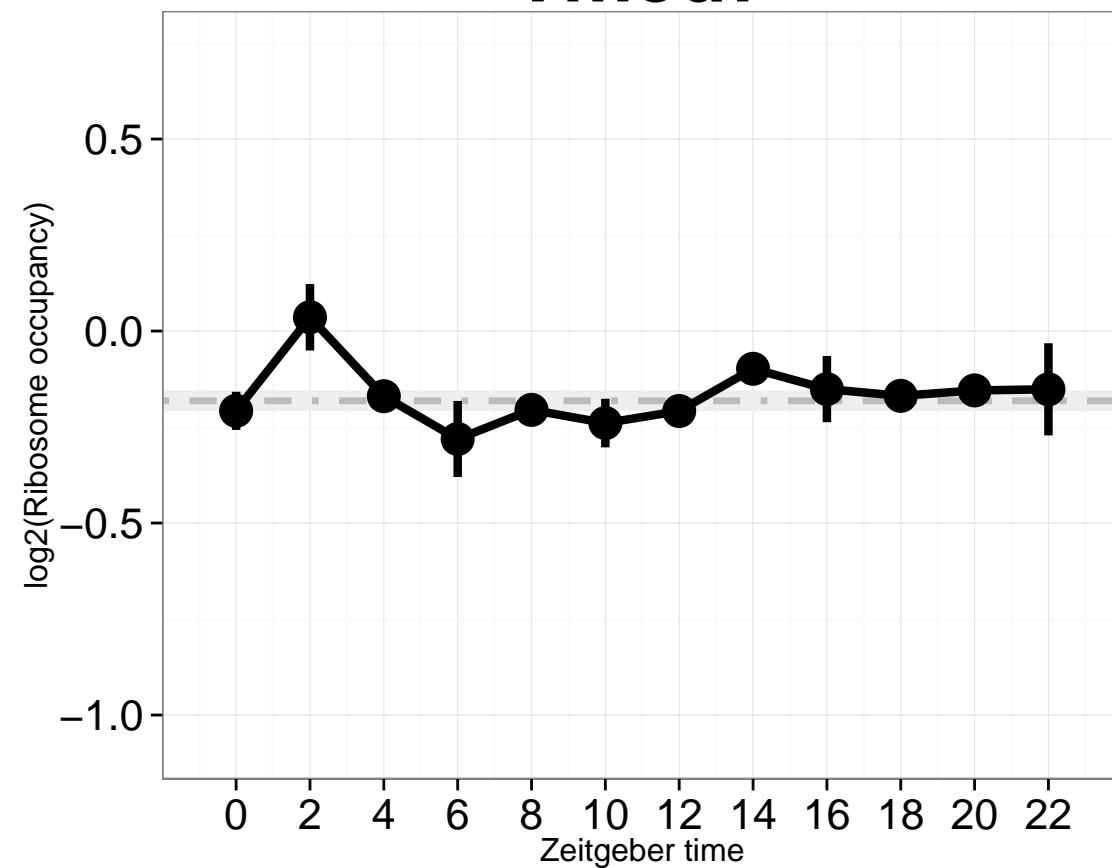

Supplement: SuppDataset_1.zip [file Tmed7_set_A.pdf › Supplemental Dataset 1/A-mRNA_nonrhyth_translation_nonrhyth/Tmed7_set_A.pdf]

## Tmed8

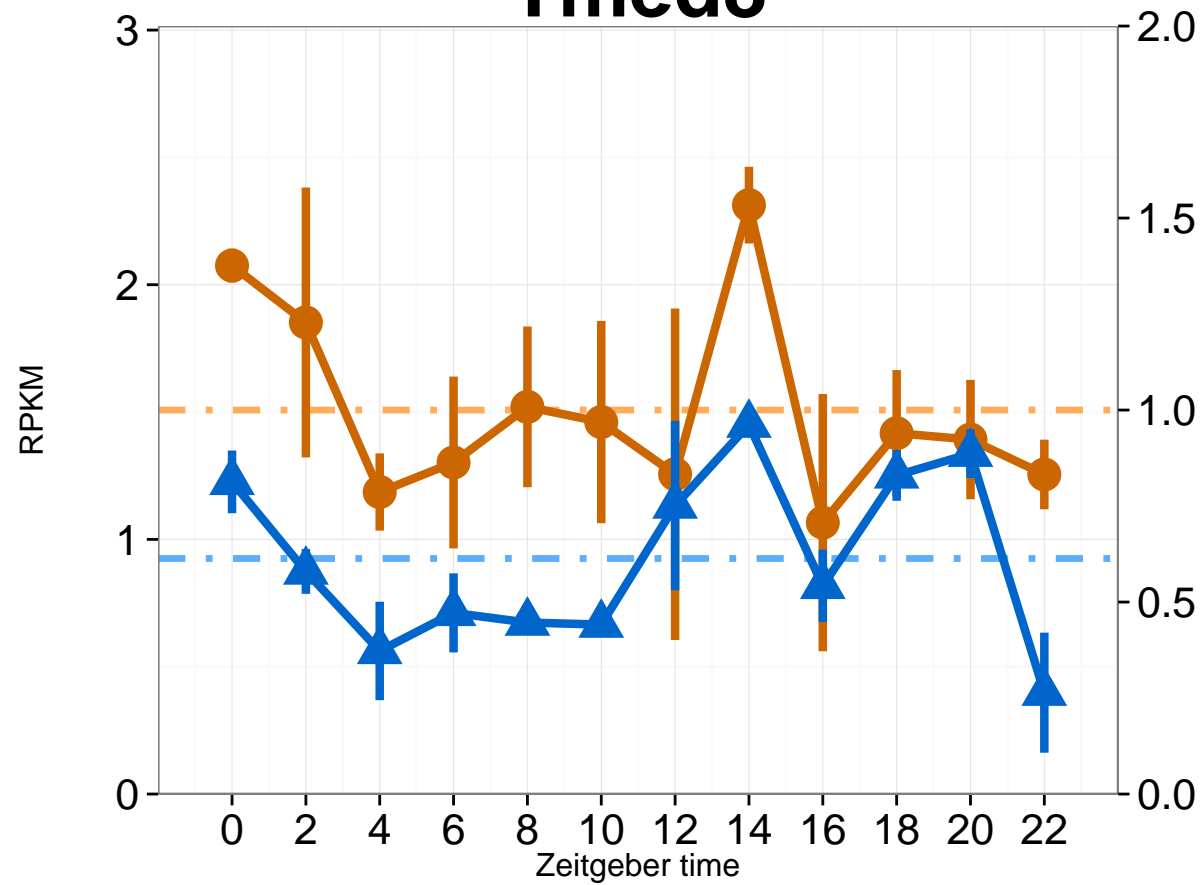

## Tmed8

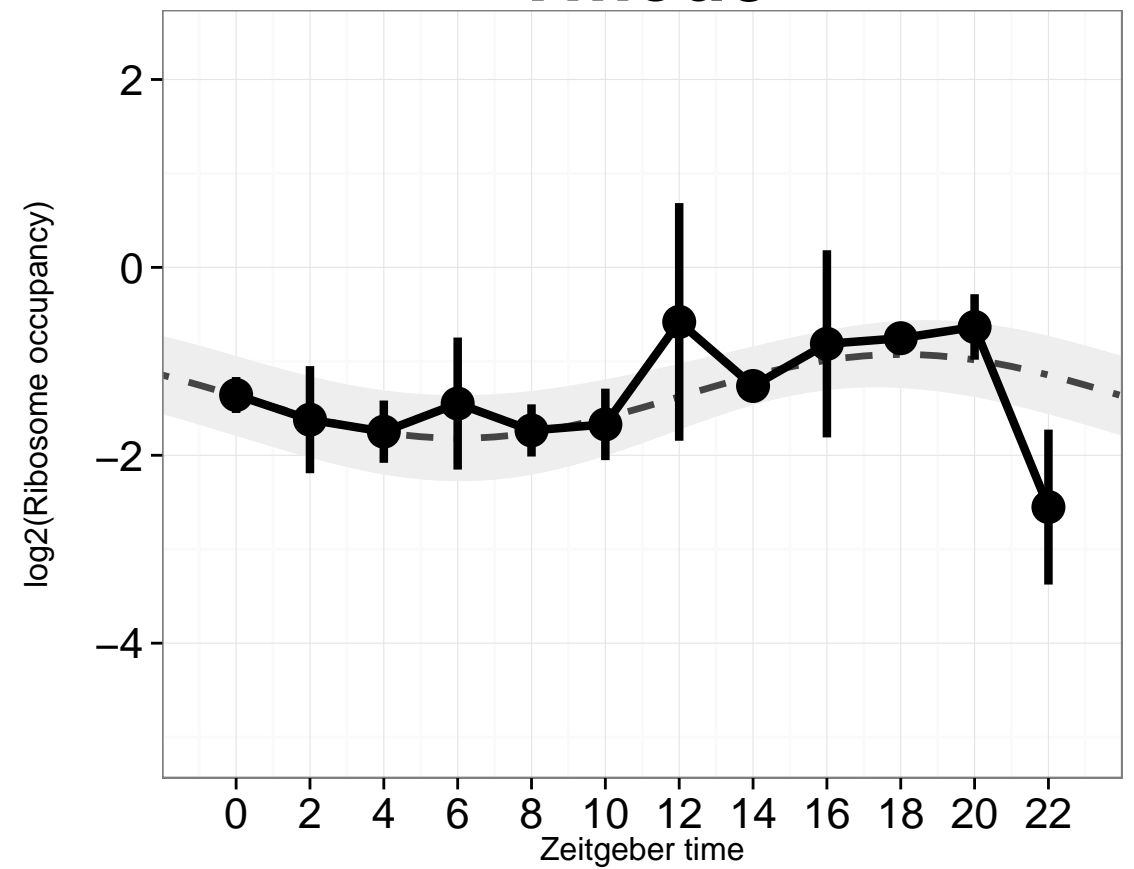

Supplement: SuppDataset_1.zip [file Tmed8_set_A.pdf › Supplemental Dataset 1/A-mRNA_nonrhyth_translation_nonrhyth/Tmed8_set_A.pdf]

# Tmed9

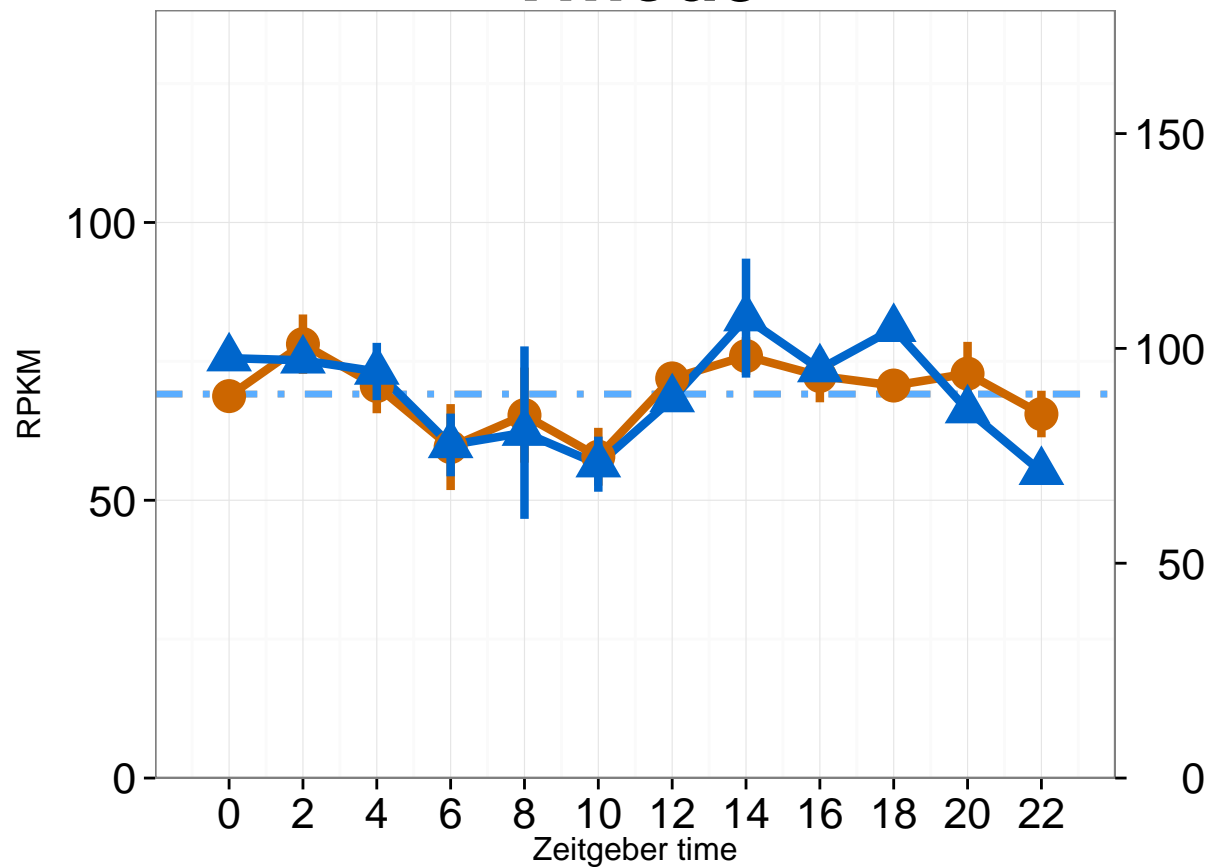

# Tmed9

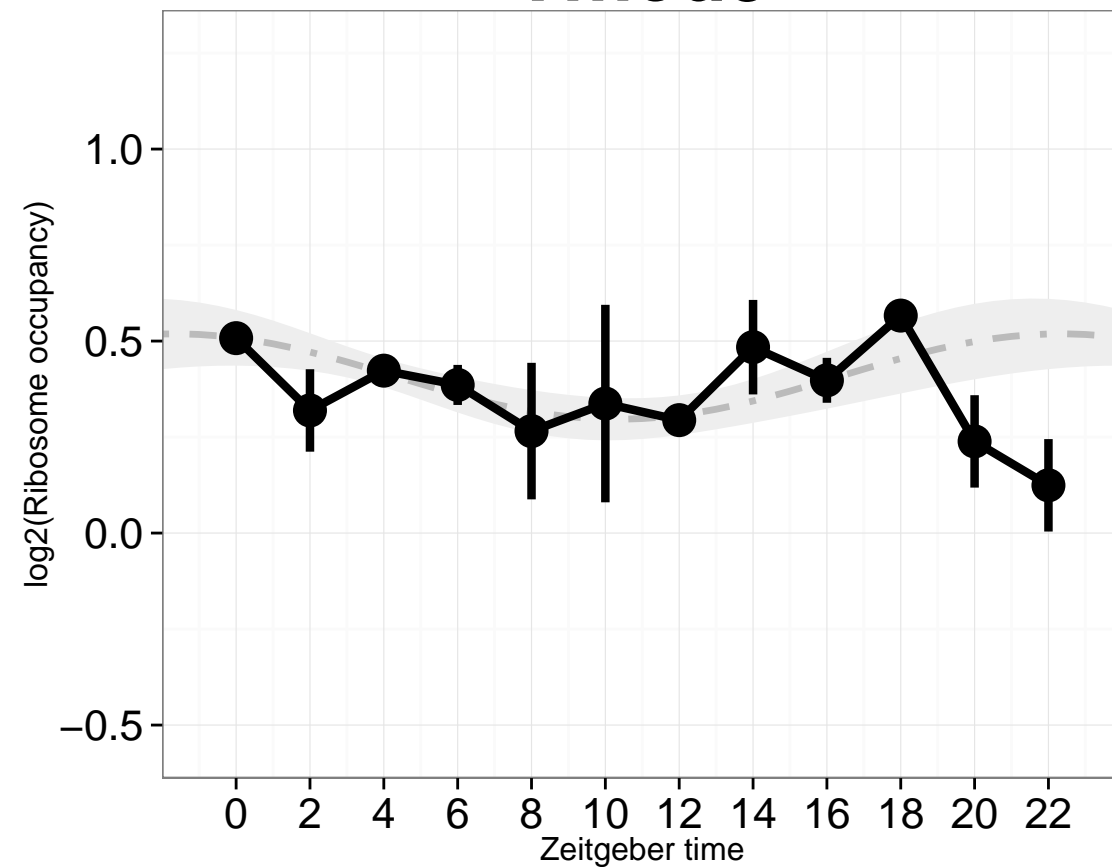

Supplement: SuppDataset_1.zip [file Tmed9_set_A.pdf › Supplemental Dataset 1/A-mRNA_nonrhyth_translation_nonrhyth/Tmed9_set_A.pdf]

## Tmeff2

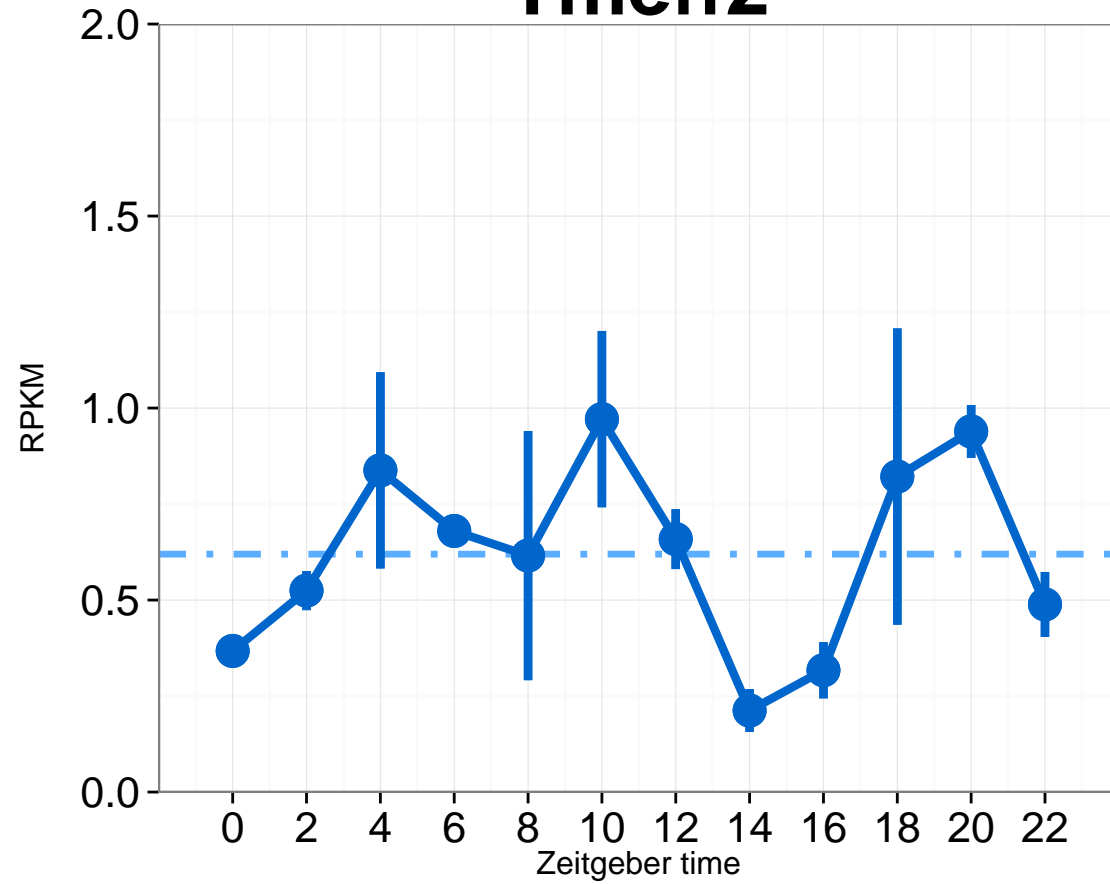

## Tmeff2 log2(Ribosome occupancy

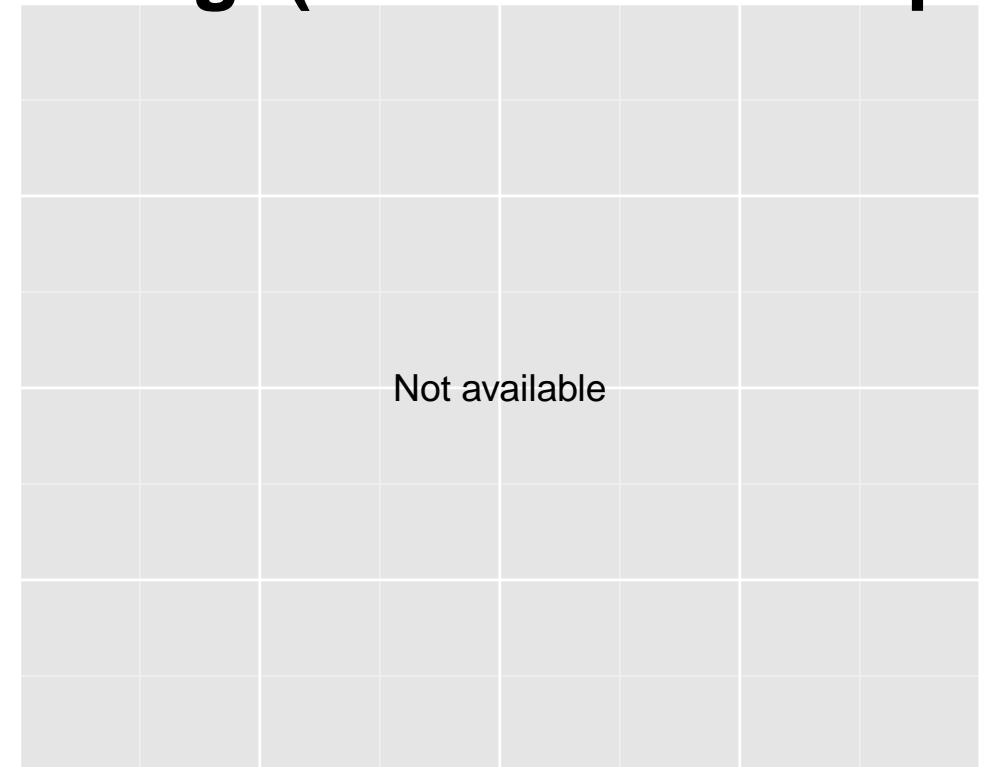

Supplement: SuppDataset_1.zip [file Tmeff2_set_A.pdf › Supplemental Dataset 1/A-mRNA_nonrhyth_translation_nonrhyth/Tmeff2_set_A.pdf]

# Tmem102

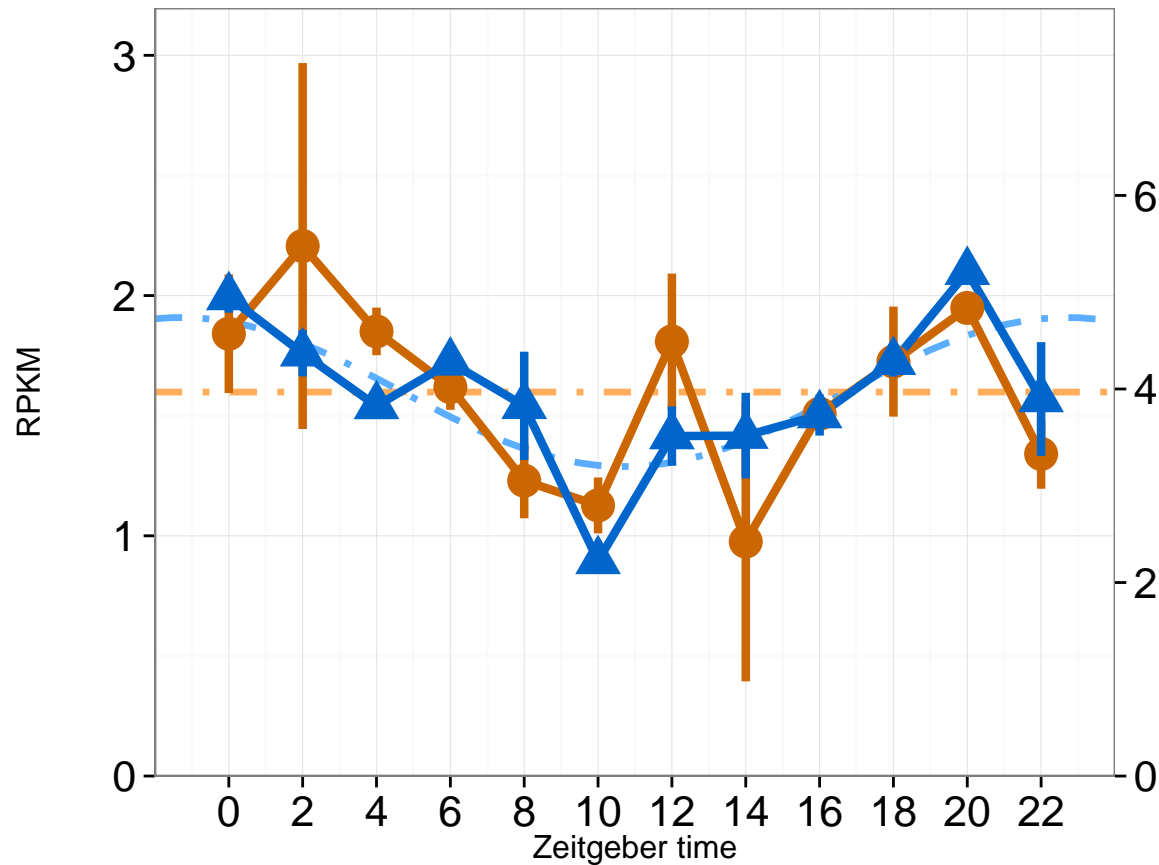

# Tmem102

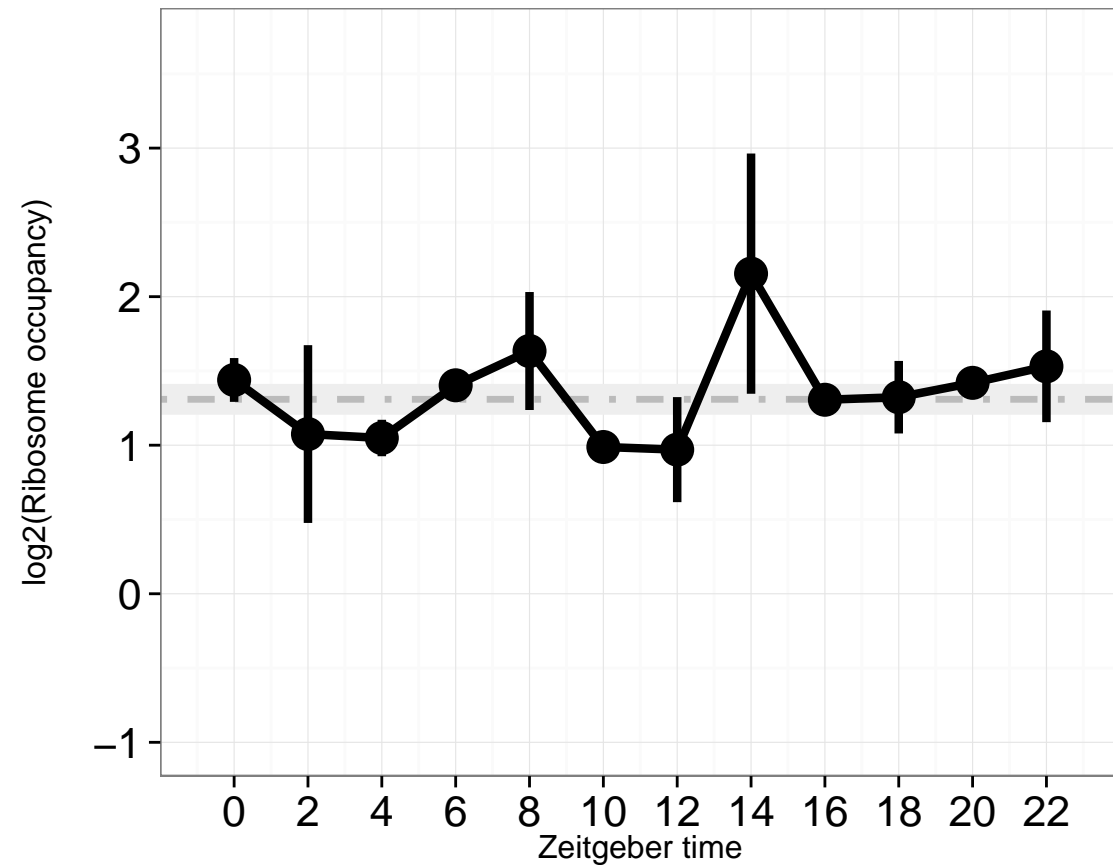

Supplement: SuppDataset_1.zip [file Tmem102_set_A.pdf › Supplemental Dataset 1/A-mRNA_nonrhyth_translation_nonrhyth/Tmem102_set_A.pdf]

# Tmem104

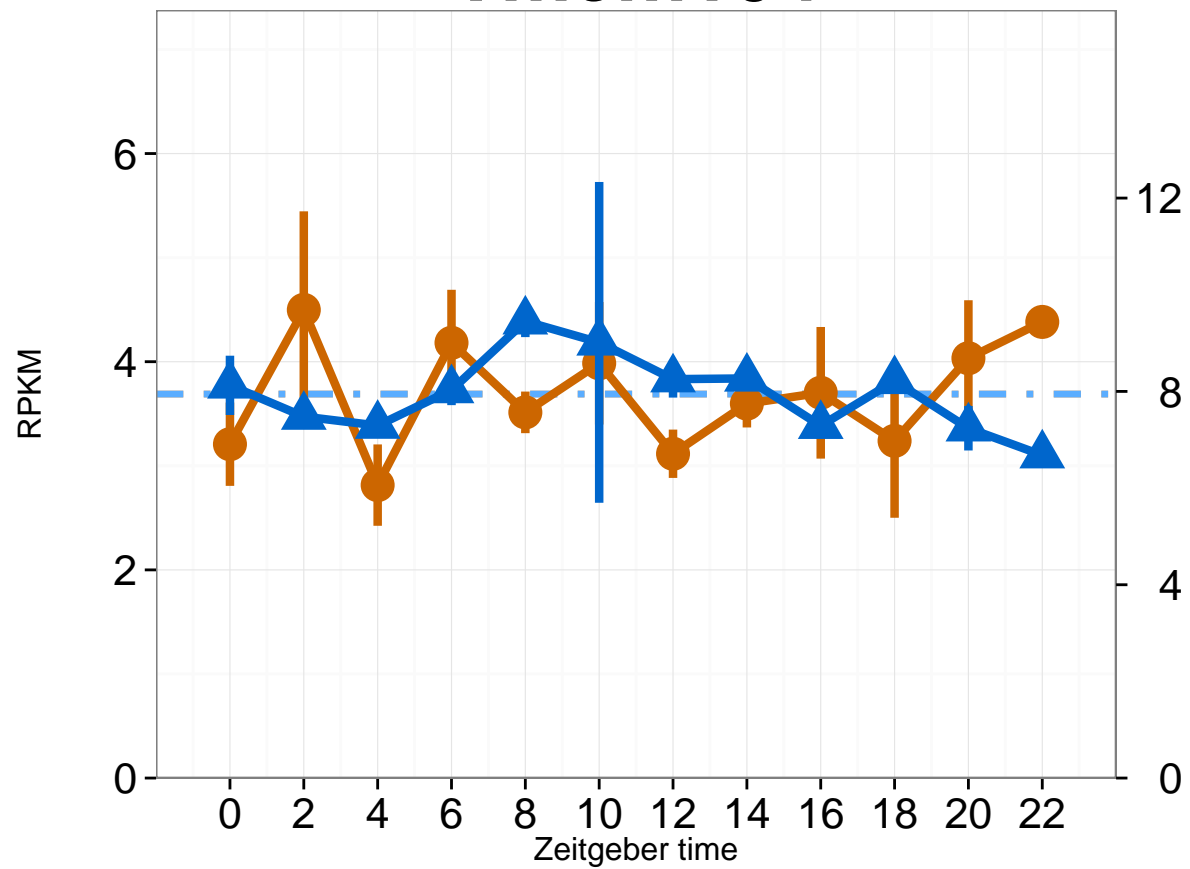

# Tmem104

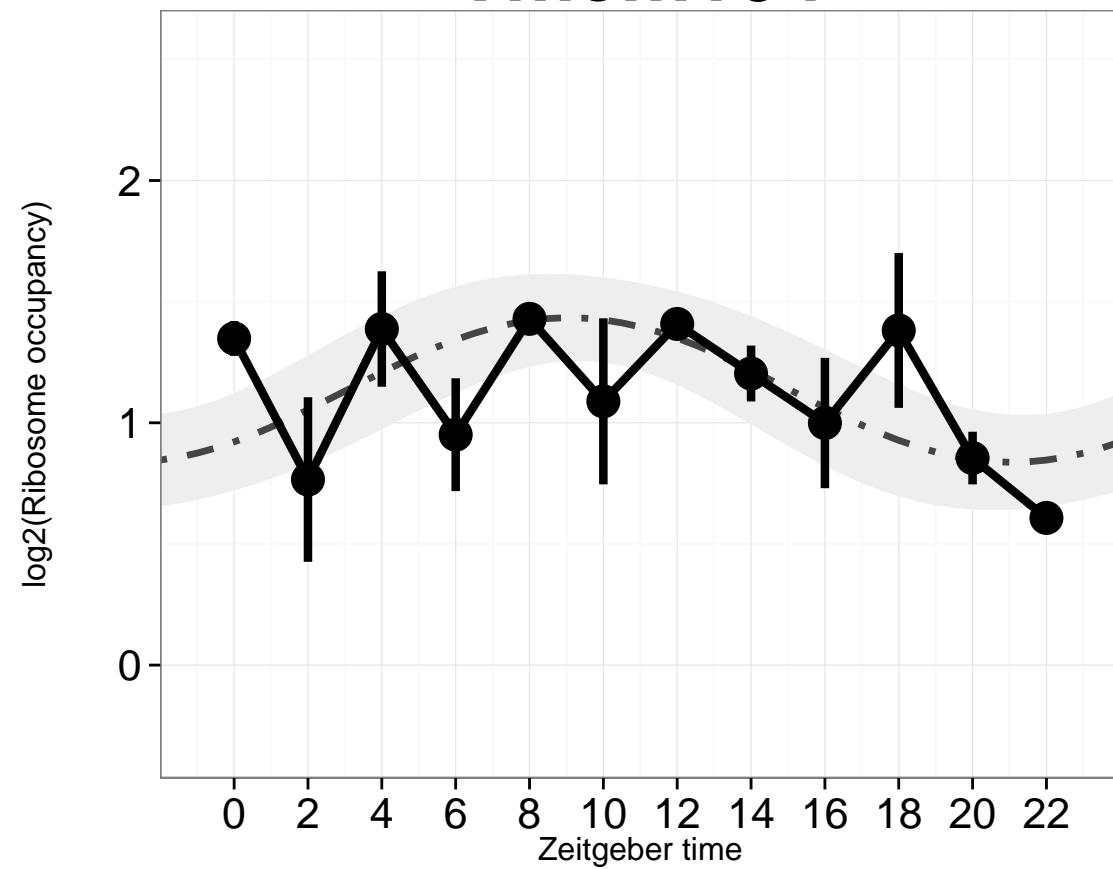

Supplement: SuppDataset_1.zip [file Tmem104_set_A.pdf › Supplemental Dataset 1/A-mRNA_nonrhyth_translation_nonrhyth/Tmem104_set_A.pdf]

# Tmem106b

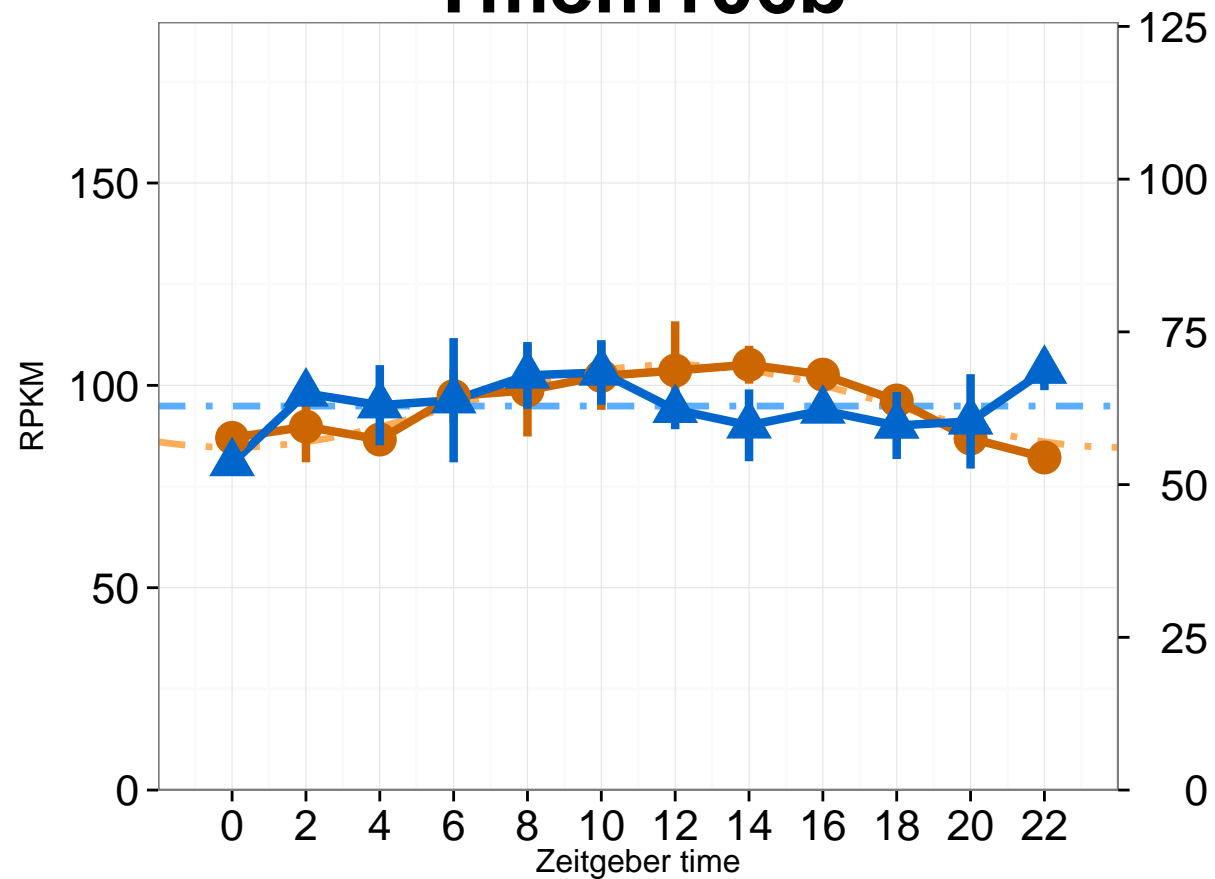

# Tmem106b

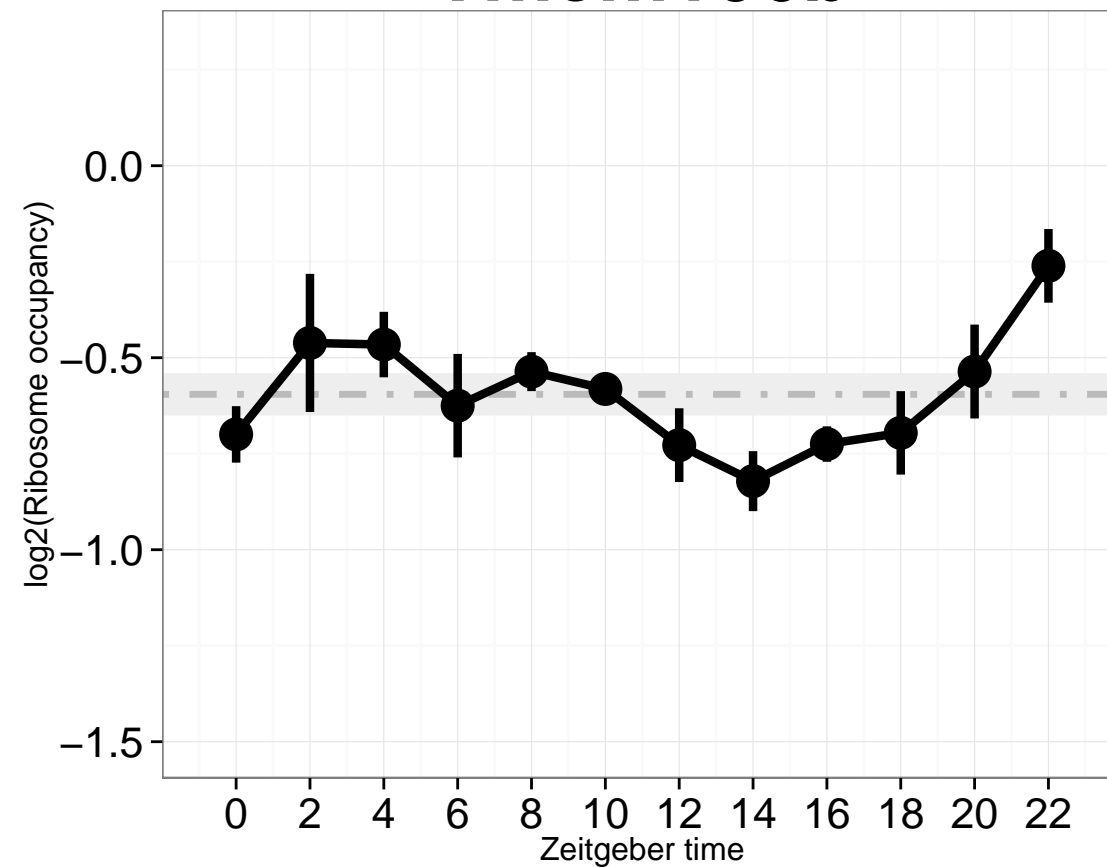

Supplement: SuppDataset_1.zip [file Tmem106b_set_A.pdf › Supplemental Dataset 1/A-mRNA_nonrhyth_translation_nonrhyth/Tmem106b_set_A.pdf]

# Tmem106c

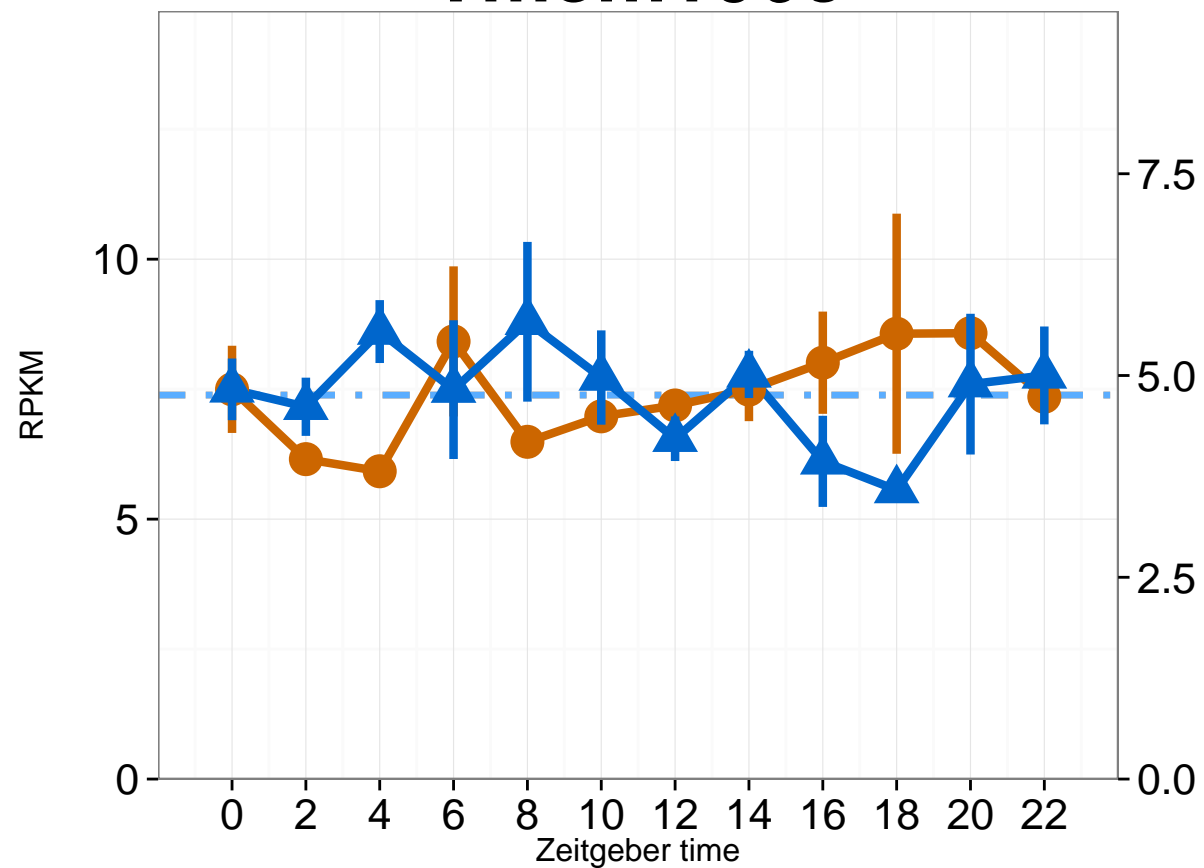

# Tmem106c

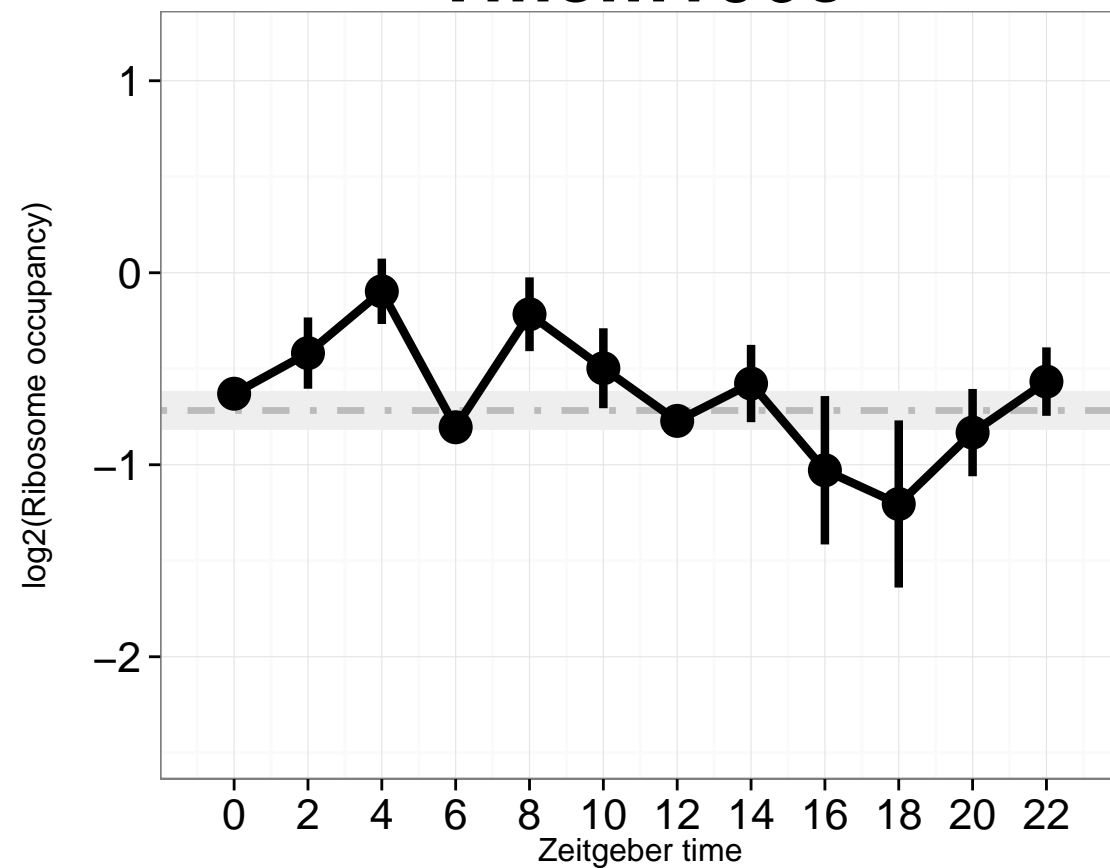

Supplement: SuppDataset_1.zip [file Tmem106c_set_A.pdf › Supplemental Dataset 1/A-mRNA_nonrhyth_translation_nonrhyth/Tmem106c_set_A.pdf]

# Tmem109

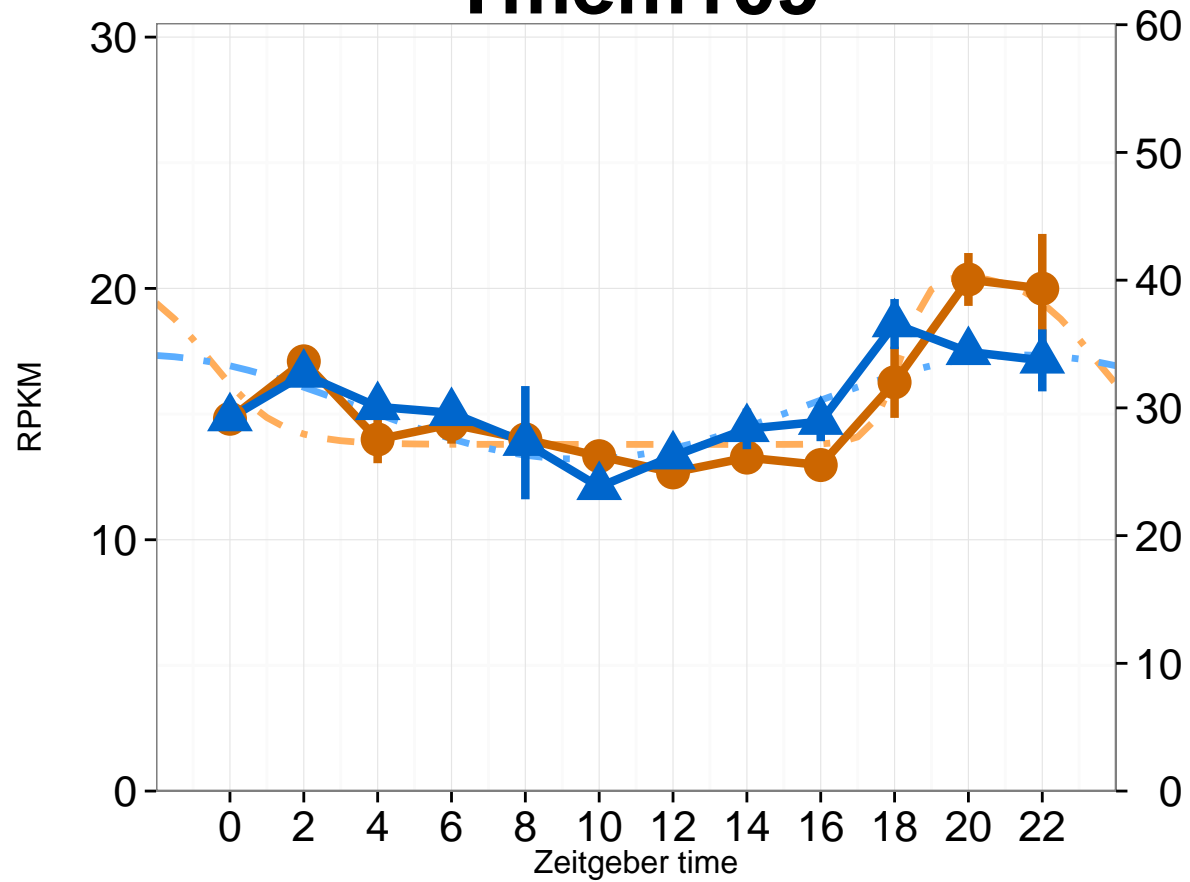

# Tmem109

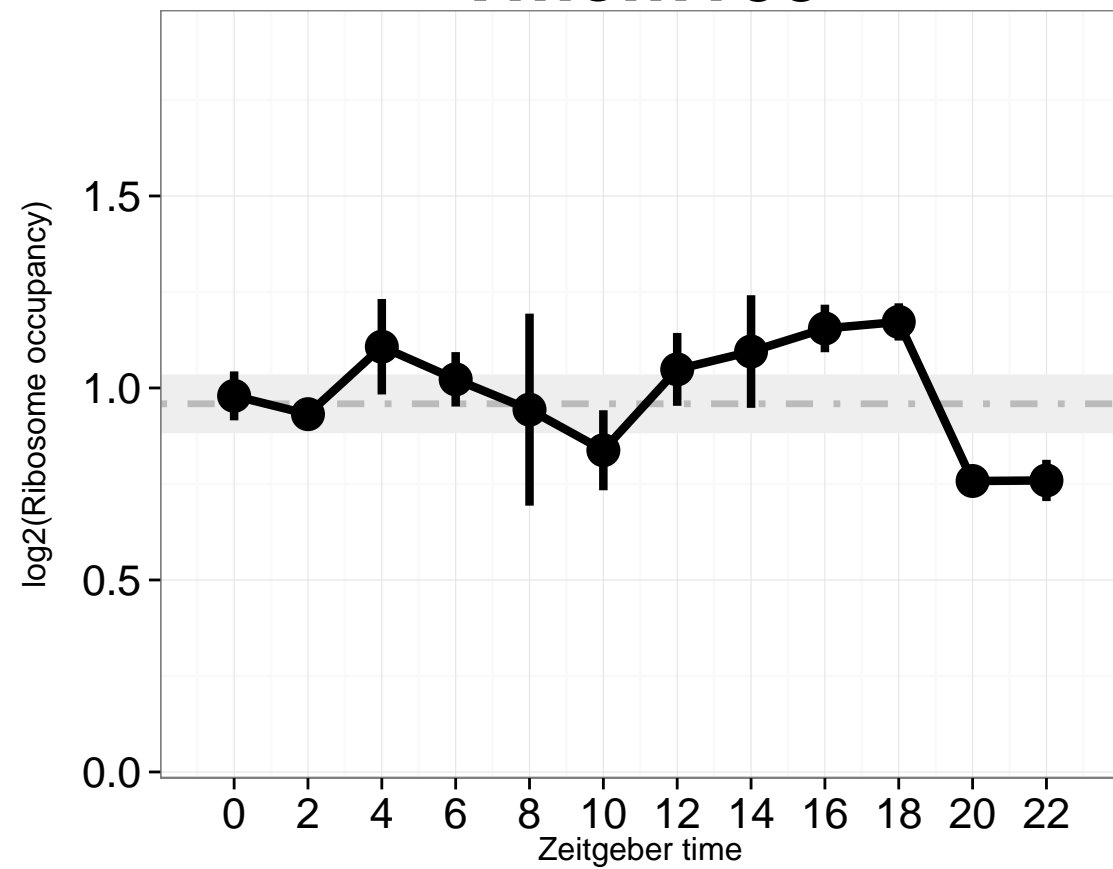

Supplement: SuppDataset_1.zip [file Tmem109_set_A.pdf › Supplemental Dataset 1/A-mRNA_nonrhyth_translation_nonrhyth/Tmem109_set_A.pdf]

# Tmem110

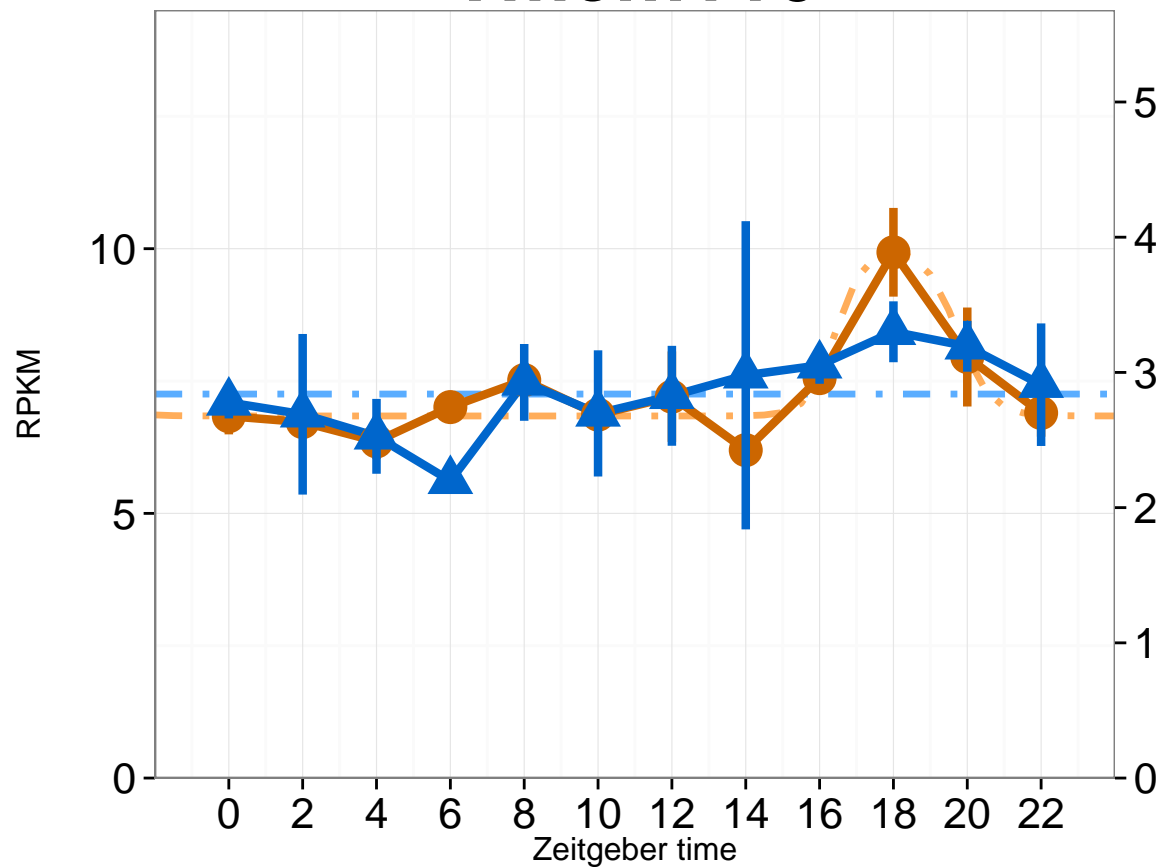

# Tmem110

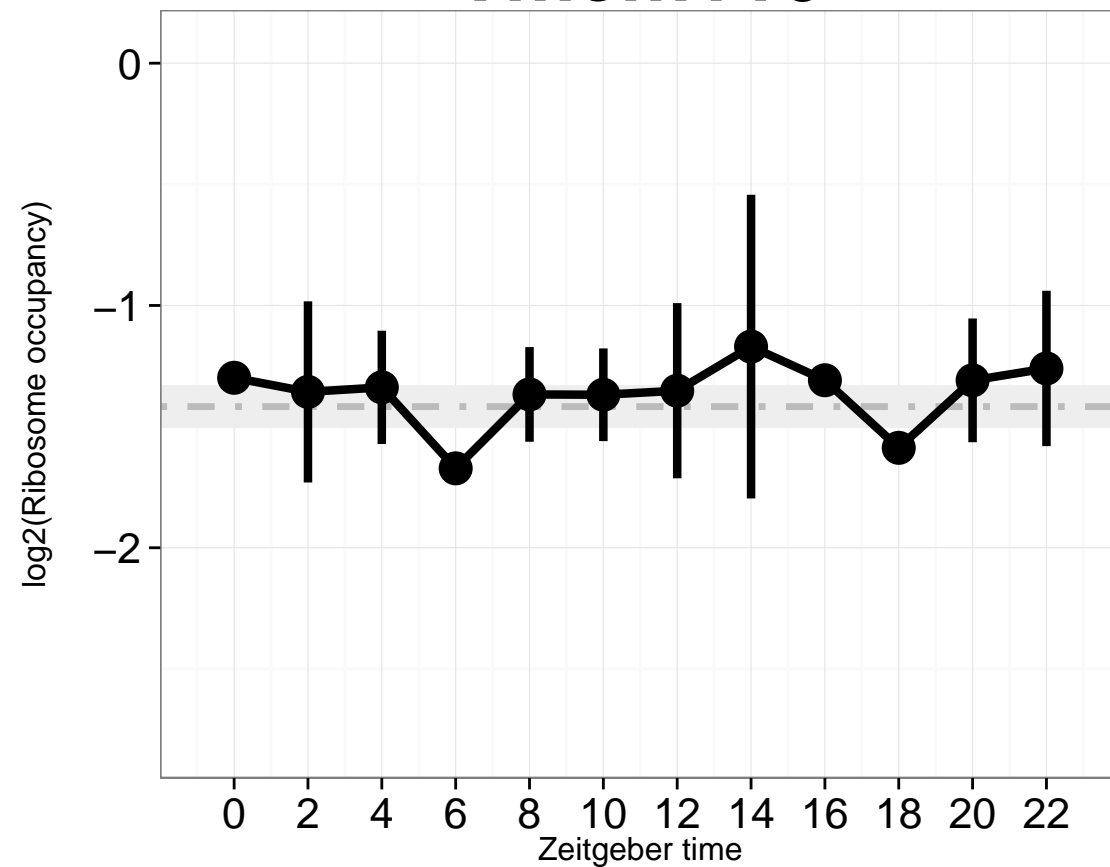

Supplement: SuppDataset_1.zip [file Tmem110_set_A.pdf › Supplemental Dataset 1/A-mRNA_nonrhyth_translation_nonrhyth/Tmem110_set_A.pdf]

# Tmem115

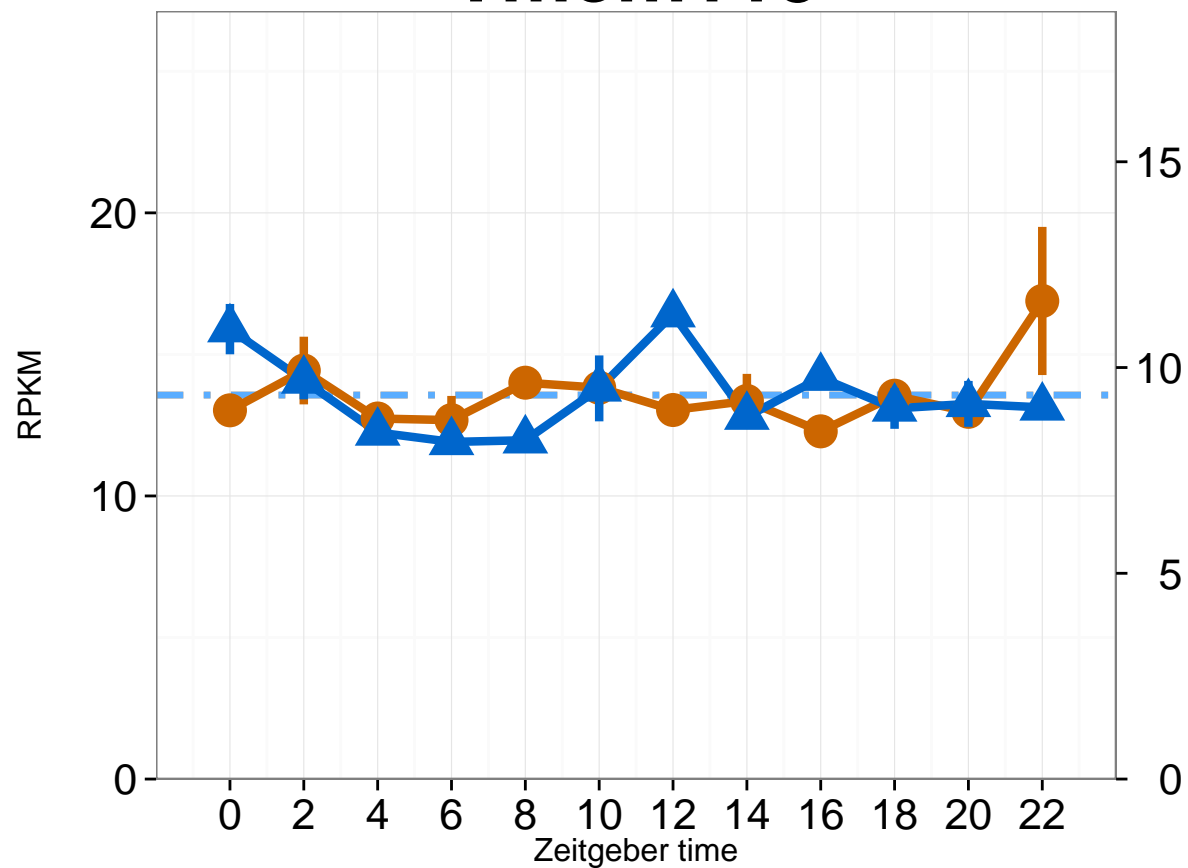

# Tmem115

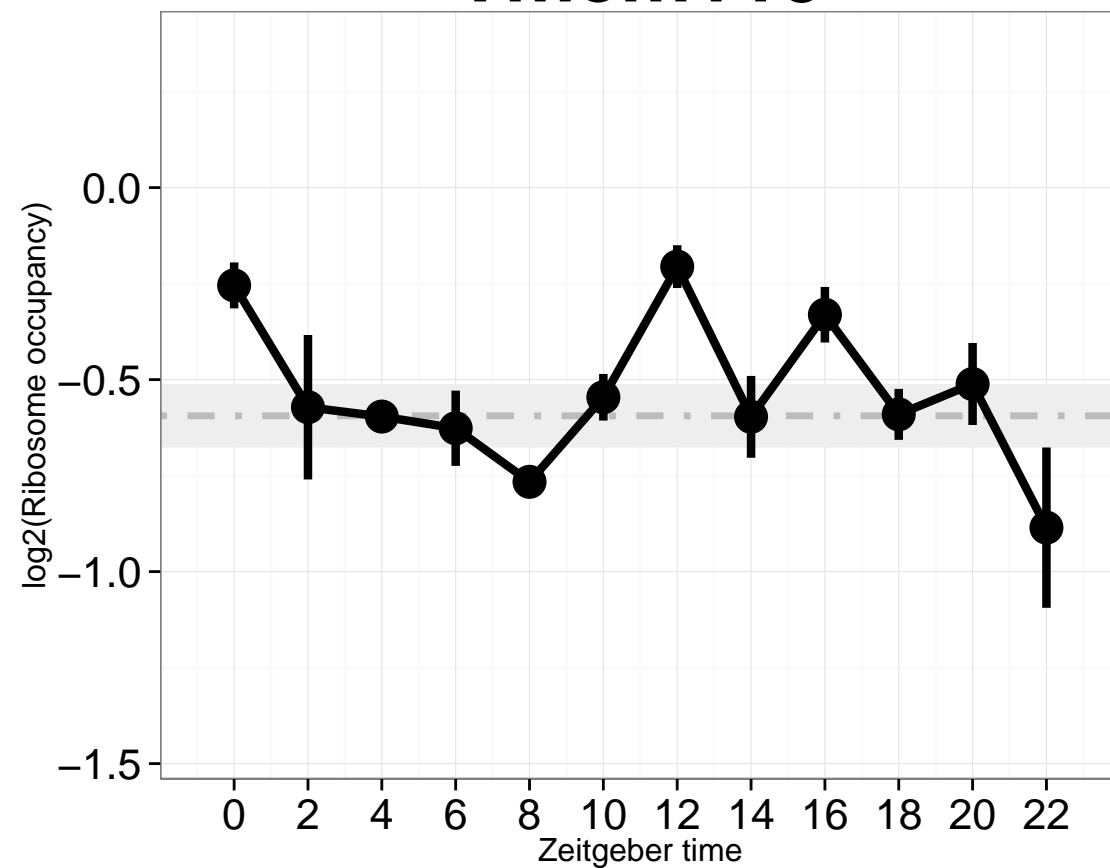

Supplement: SuppDataset_1.zip [file Tmem115_set_A.pdf › Supplemental Dataset 1/A-mRNA_nonrhyth_translation_nonrhyth/Tmem115_set_A.pdf]

# Tmem11

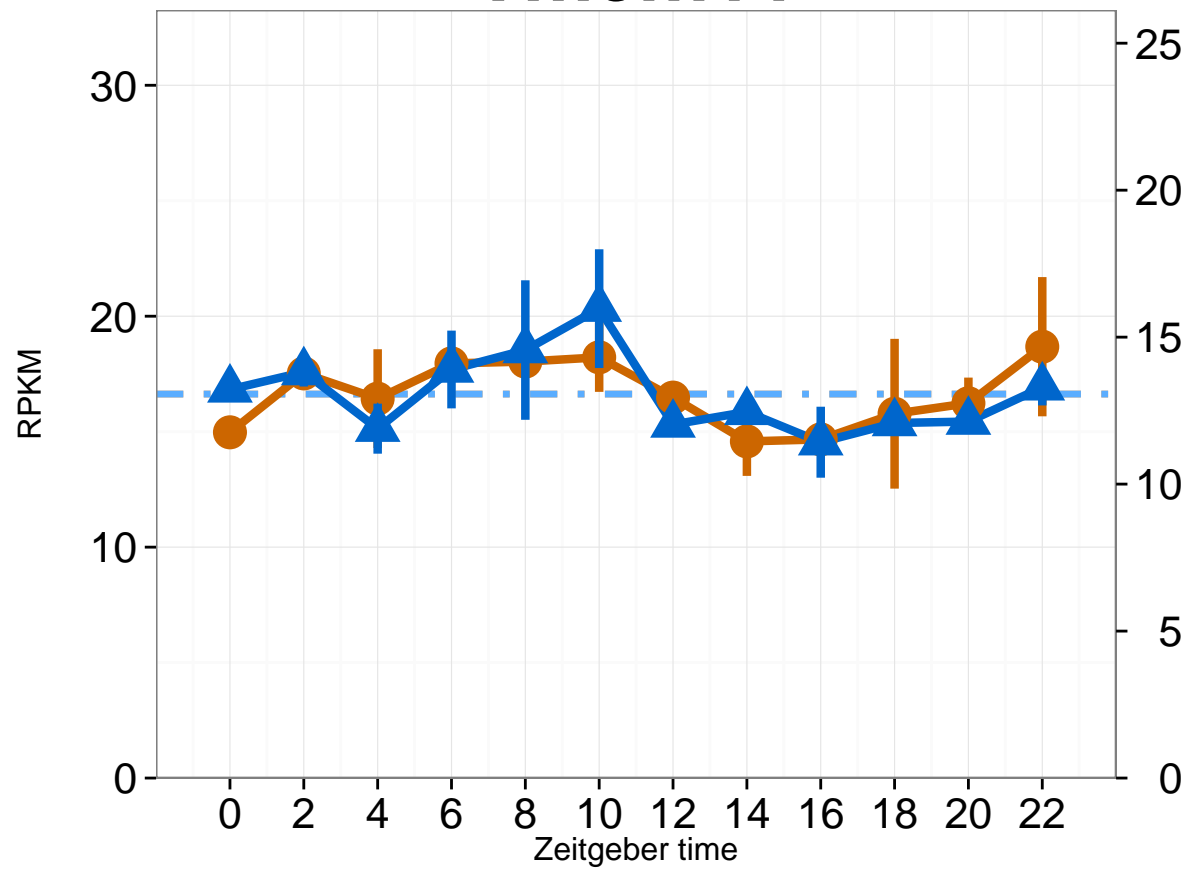

# Tmem11

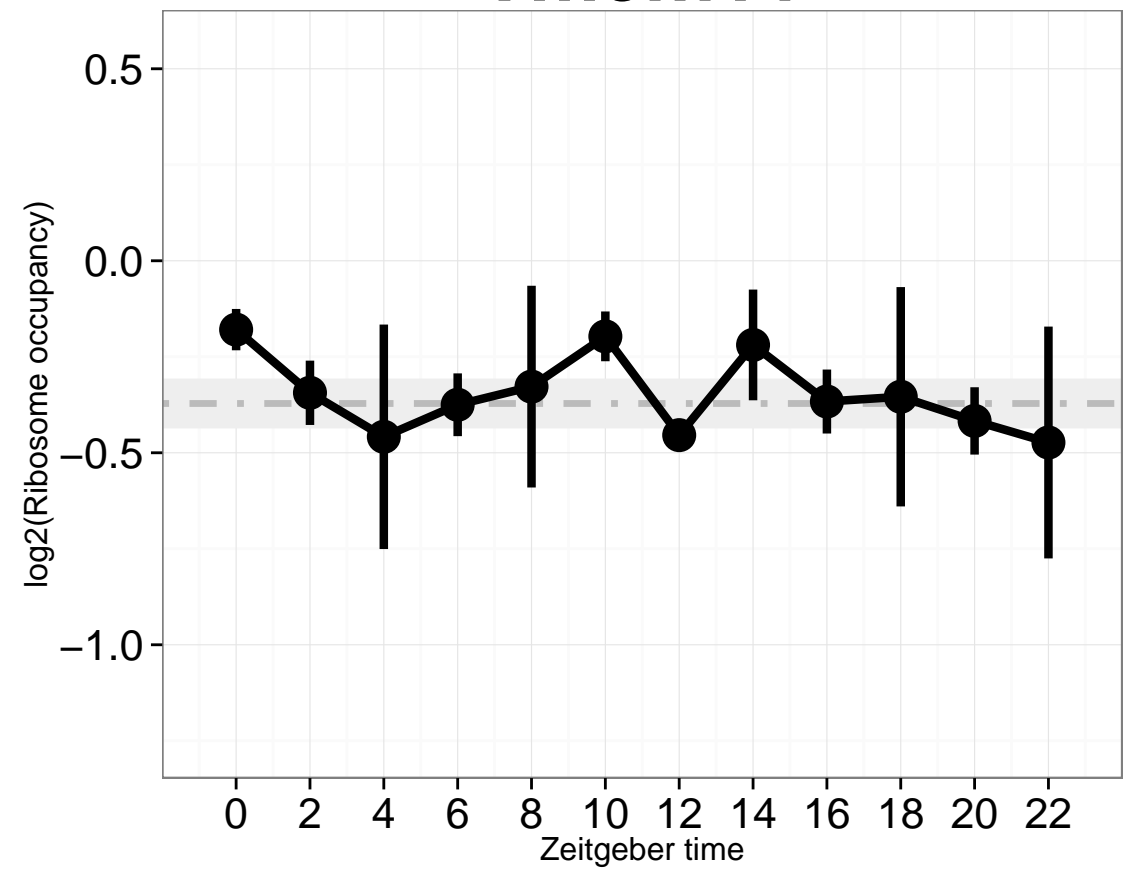

Supplement: SuppDataset_1.zip [file Tmem11_set_A.pdf › Supplemental Dataset 1/A-mRNA_nonrhyth_translation_nonrhyth/Tmem11_set_A.pdf]

# Tmem120a

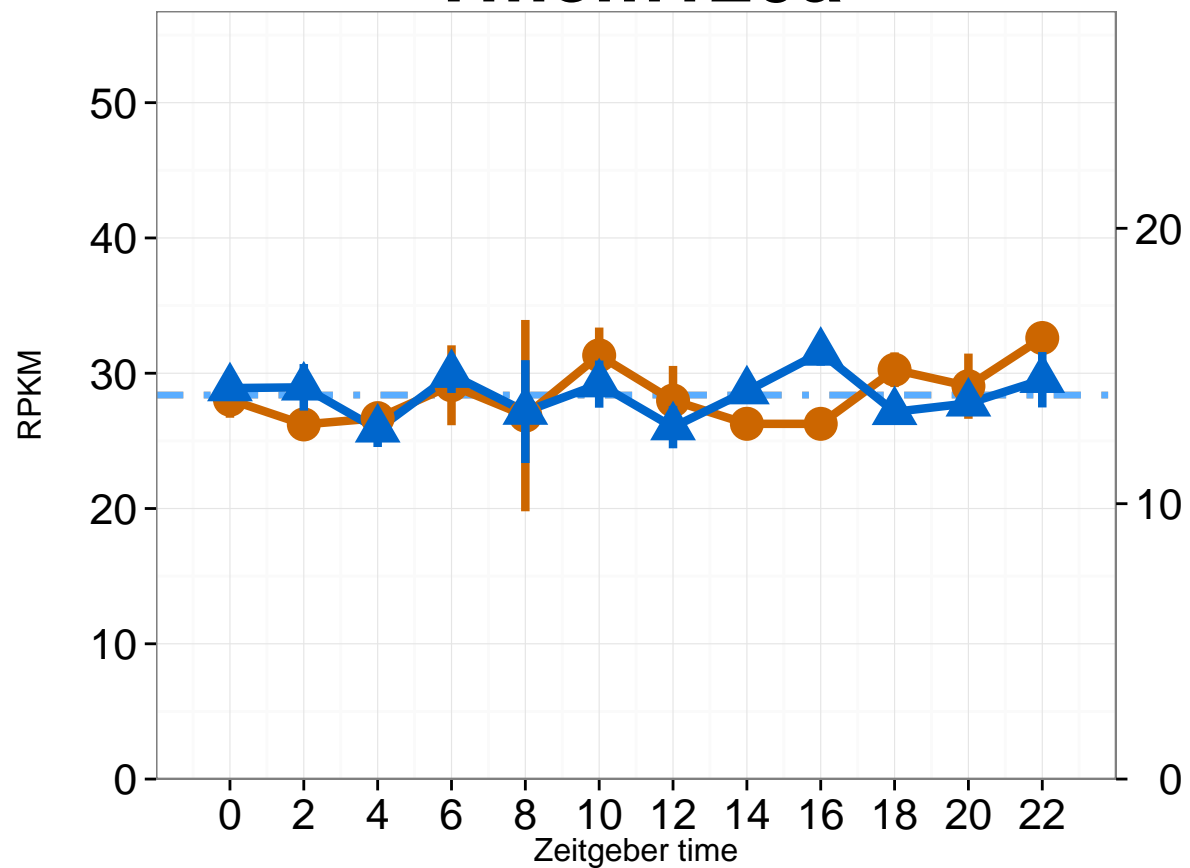

# Tmem120a

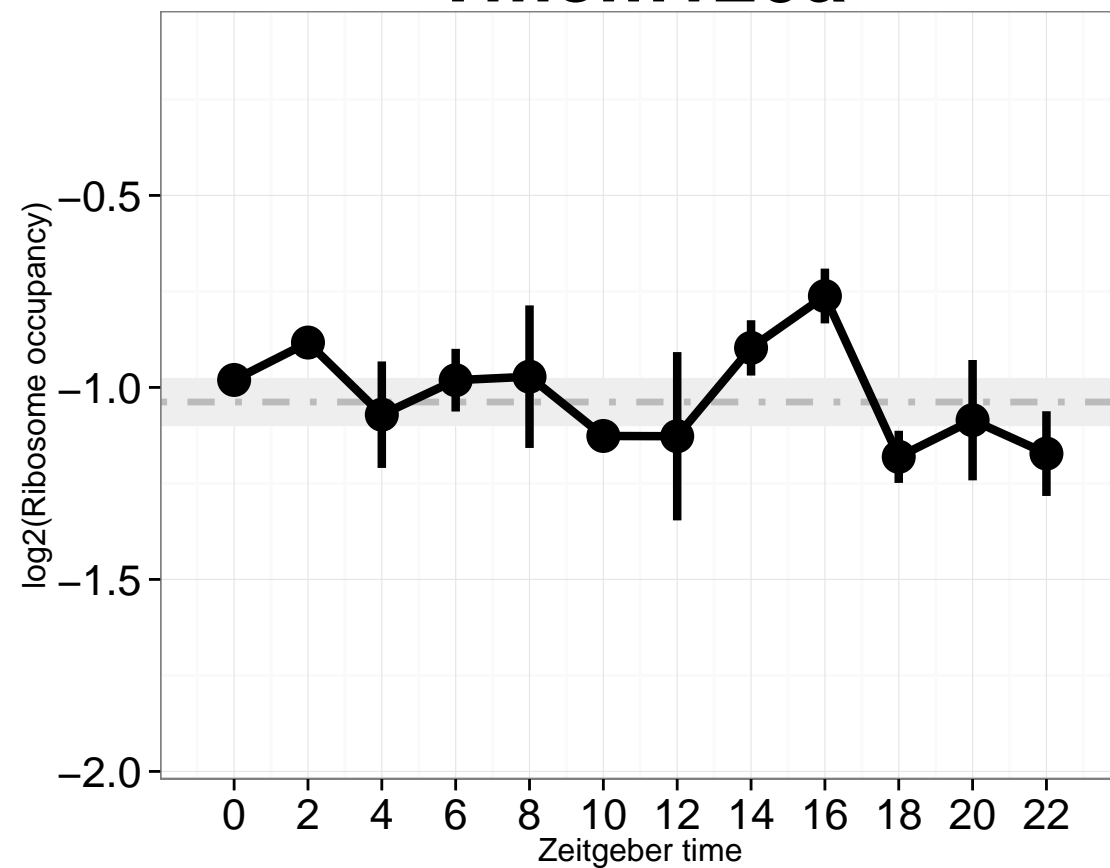

Supplement: SuppDataset_1.zip [file Tmem120a_set_A.pdf › Supplemental Dataset 1/A-mRNA_nonrhyth_translation_nonrhyth/Tmem120a_set_A.pdf]

# Tmem123

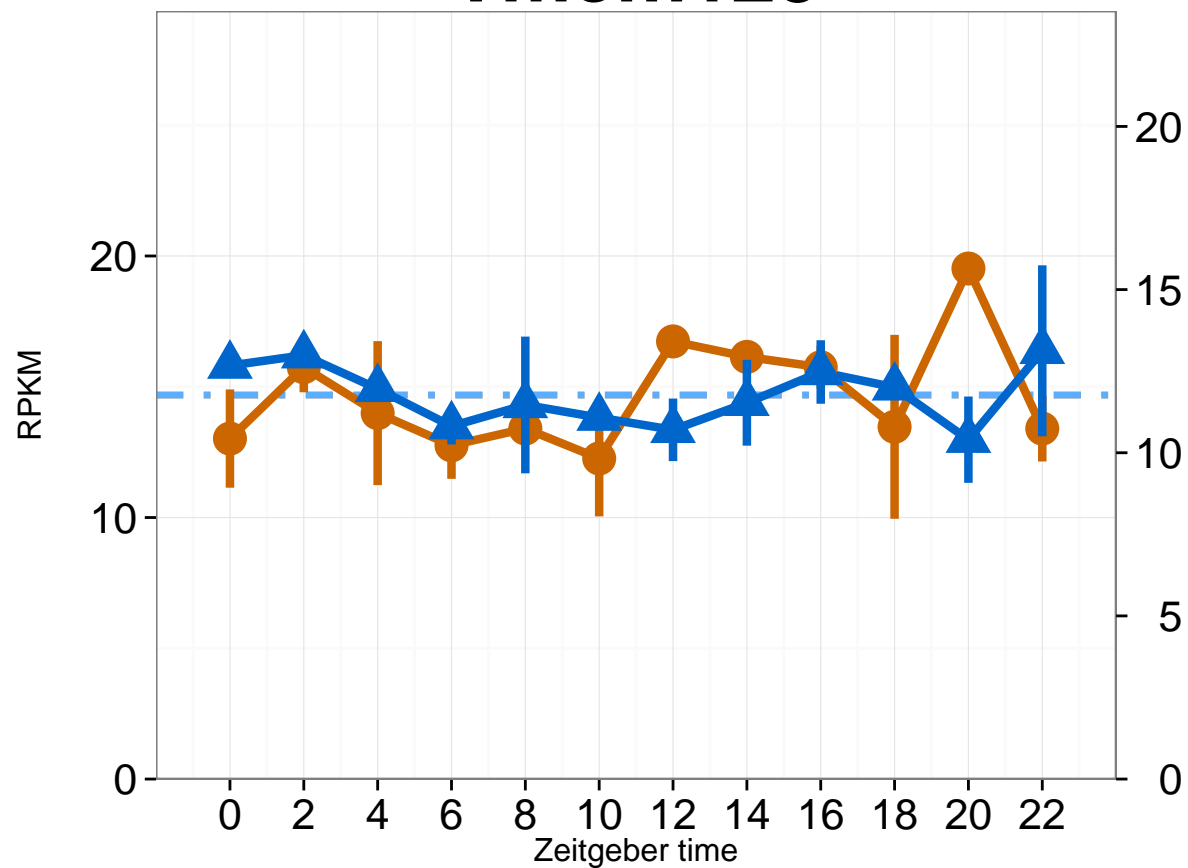

# Tmem123

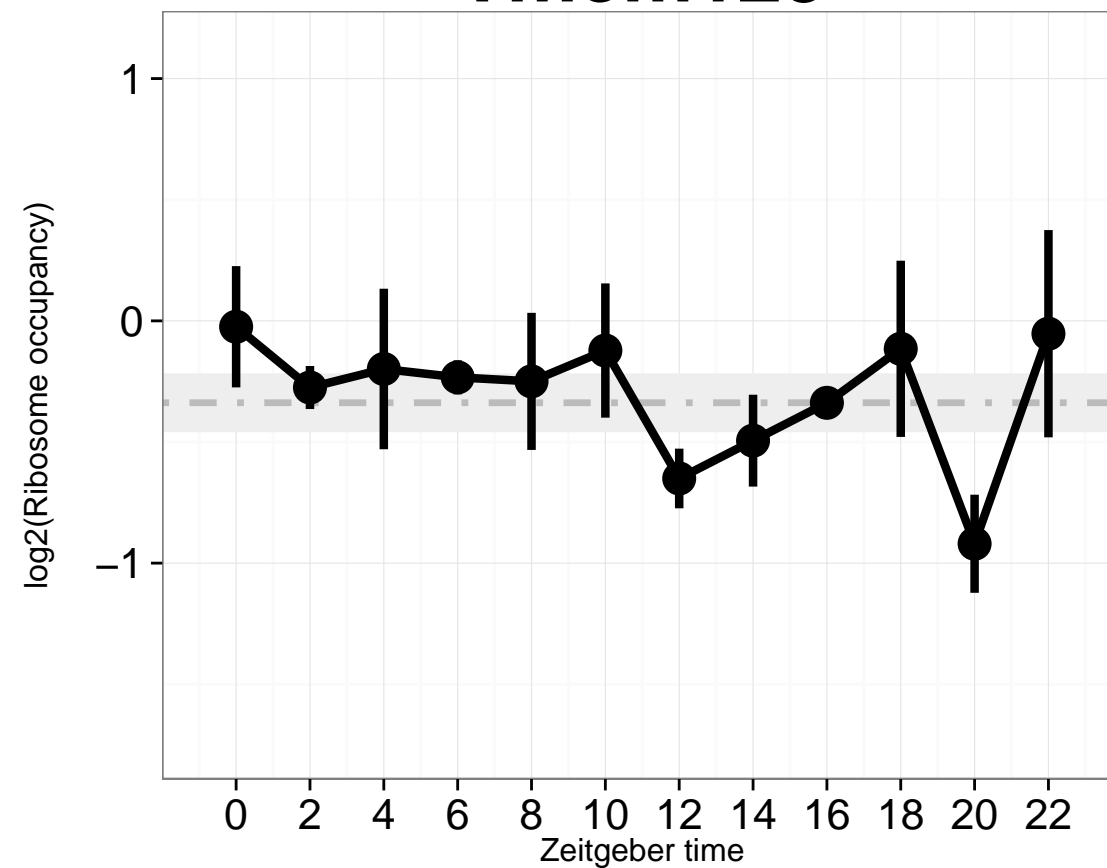

Supplement: SuppDataset_1.zip [file Tmem123_set_A.pdf › Supplemental Dataset 1/A-mRNA_nonrhyth_translation_nonrhyth/Tmem123_set_A.pdf]

# Tmem126a

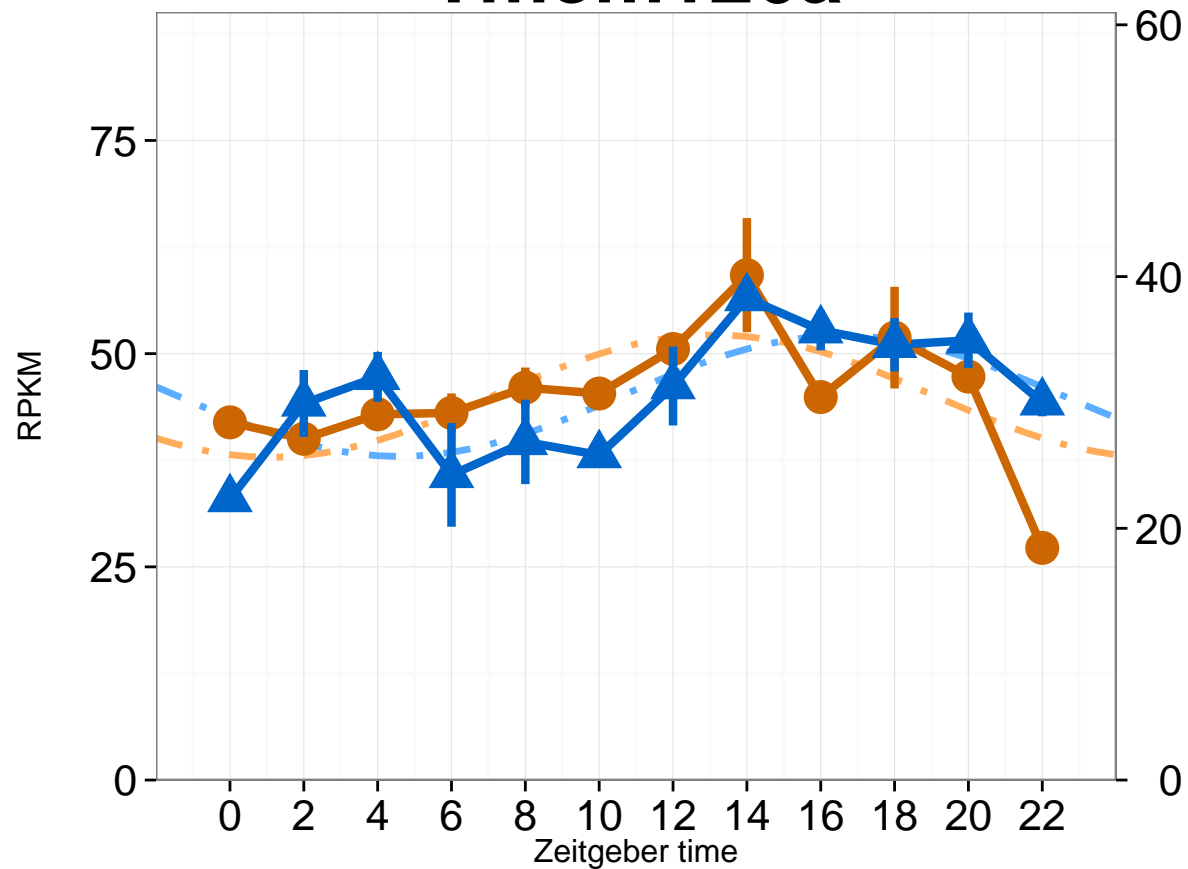

# Tmem126a

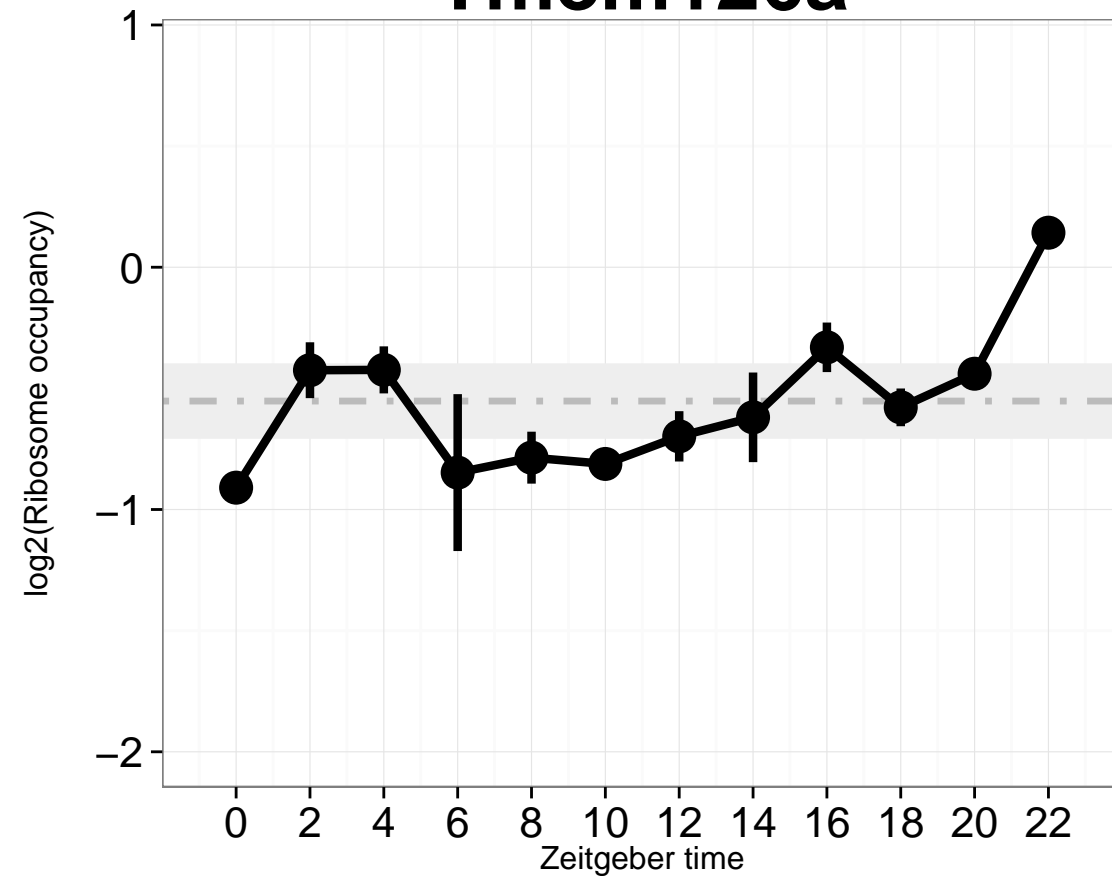

Supplement: SuppDataset_1.zip [file Tmem126a_set_A.pdf › Supplemental Dataset 1/A-mRNA_nonrhyth_translation_nonrhyth/Tmem126a_set_A.pdf]

# Tmem126b

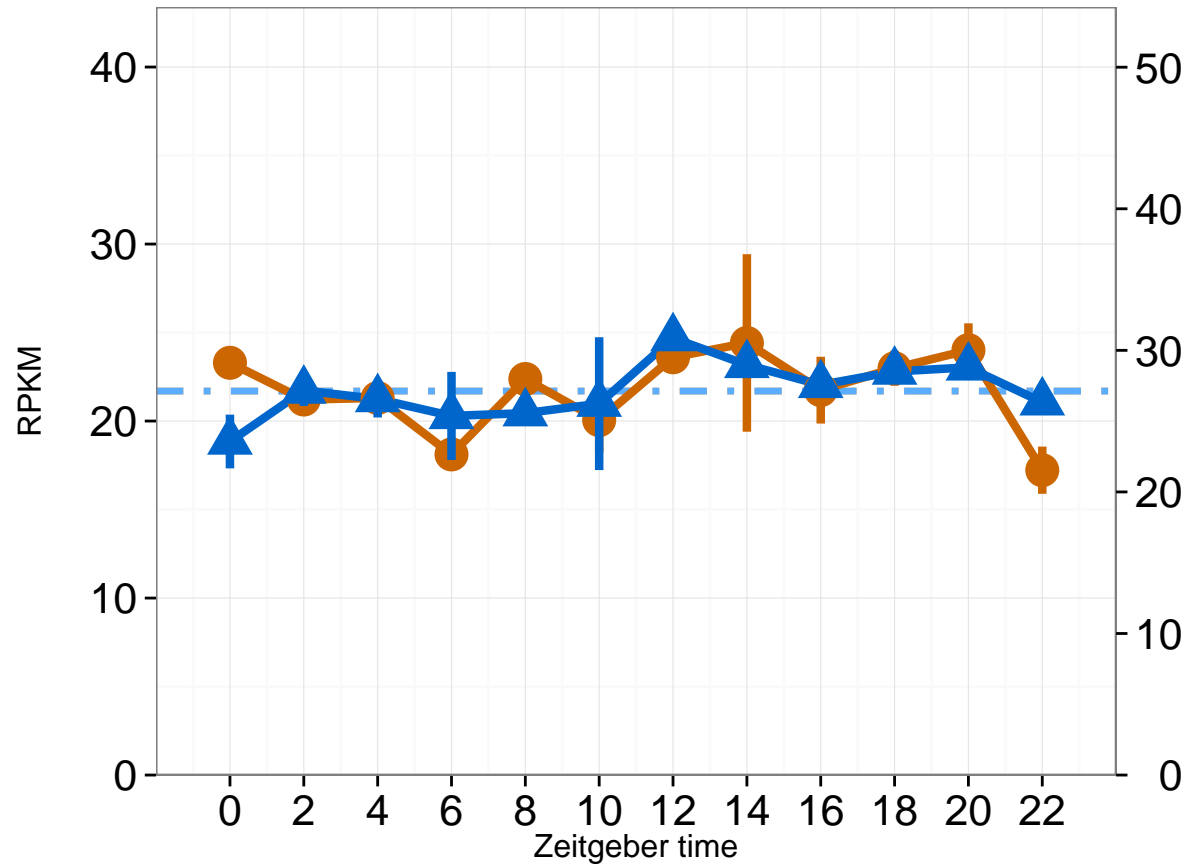

# Tmem126b

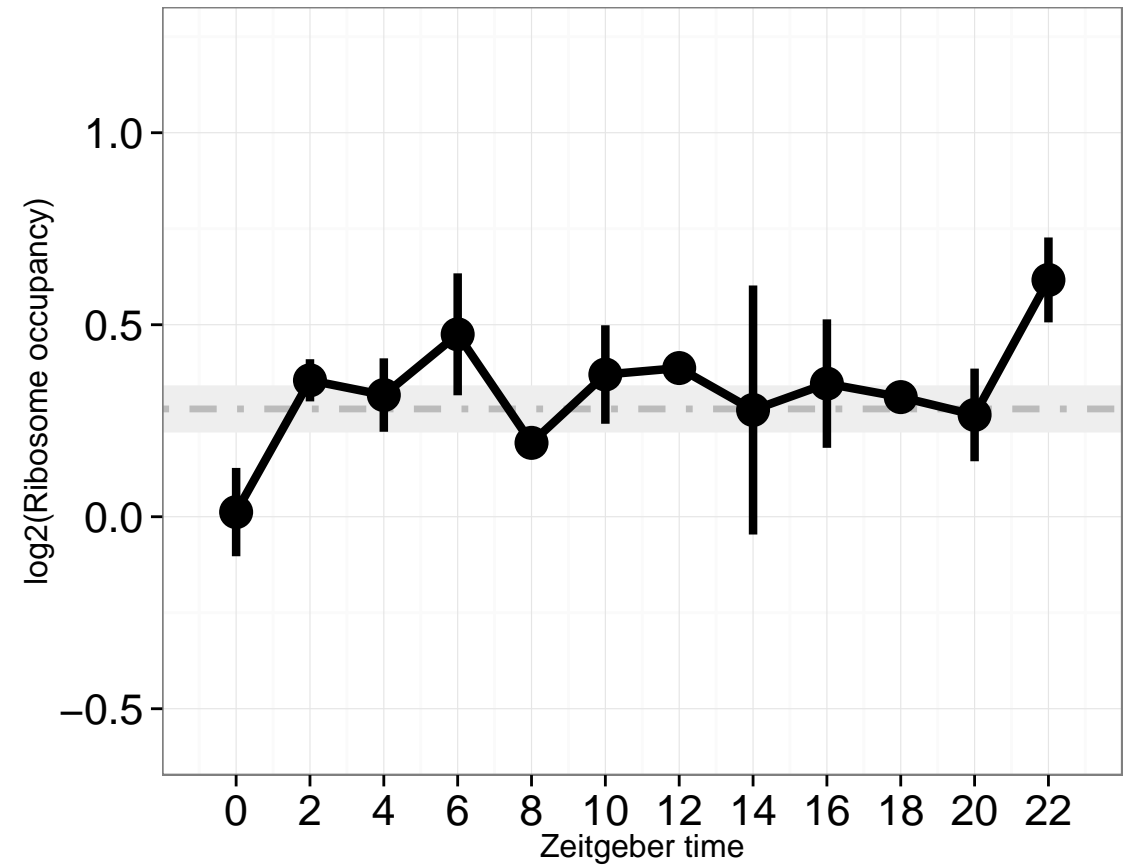

Supplement: SuppDataset_1.zip [file Tmem126b_set_A.pdf › Supplemental Dataset 1/A-mRNA_nonrhyth_translation_nonrhyth/Tmem126b_set_A.pdf]

# Tmem127

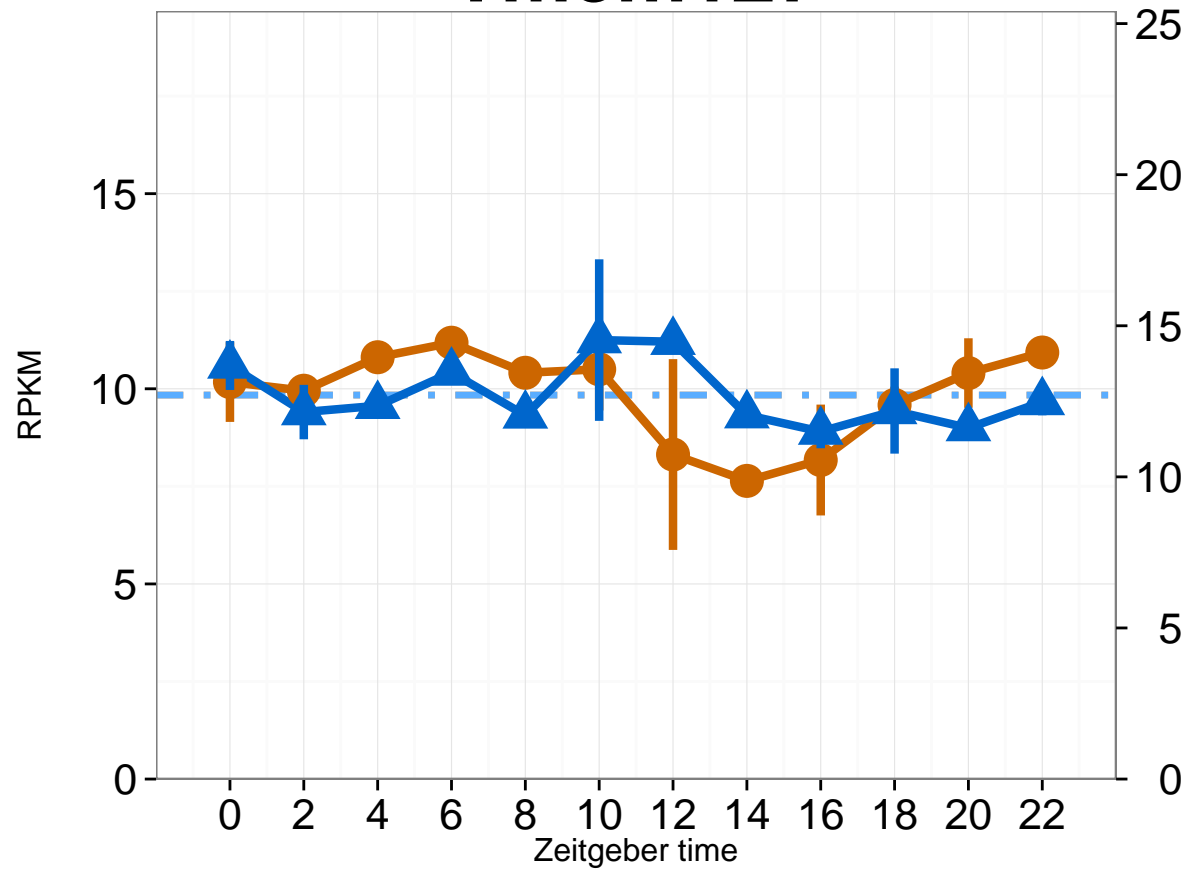

# Tmem127

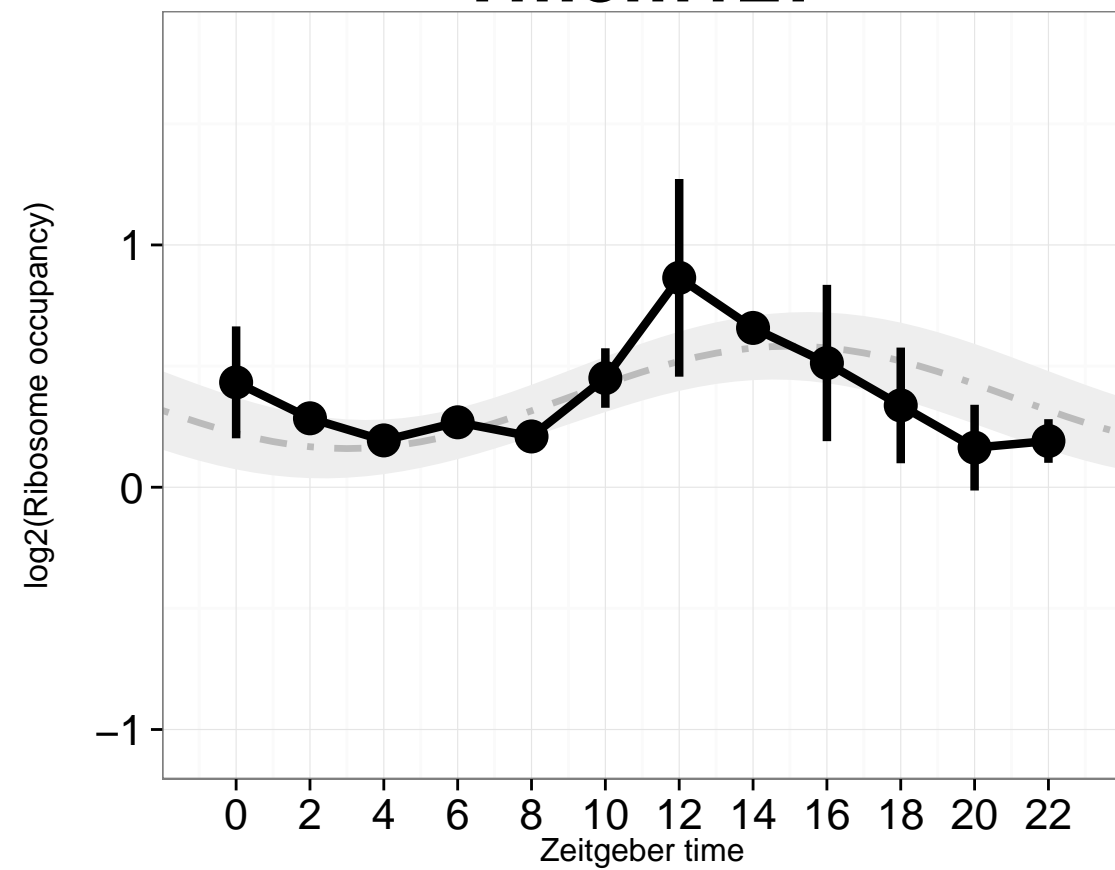

Supplement: SuppDataset_1.zip [file Tmem127_set_A.pdf › Supplemental Dataset 1/A-mRNA_nonrhyth_translation_nonrhyth/Tmem127_set_A.pdf]

# Tmem128

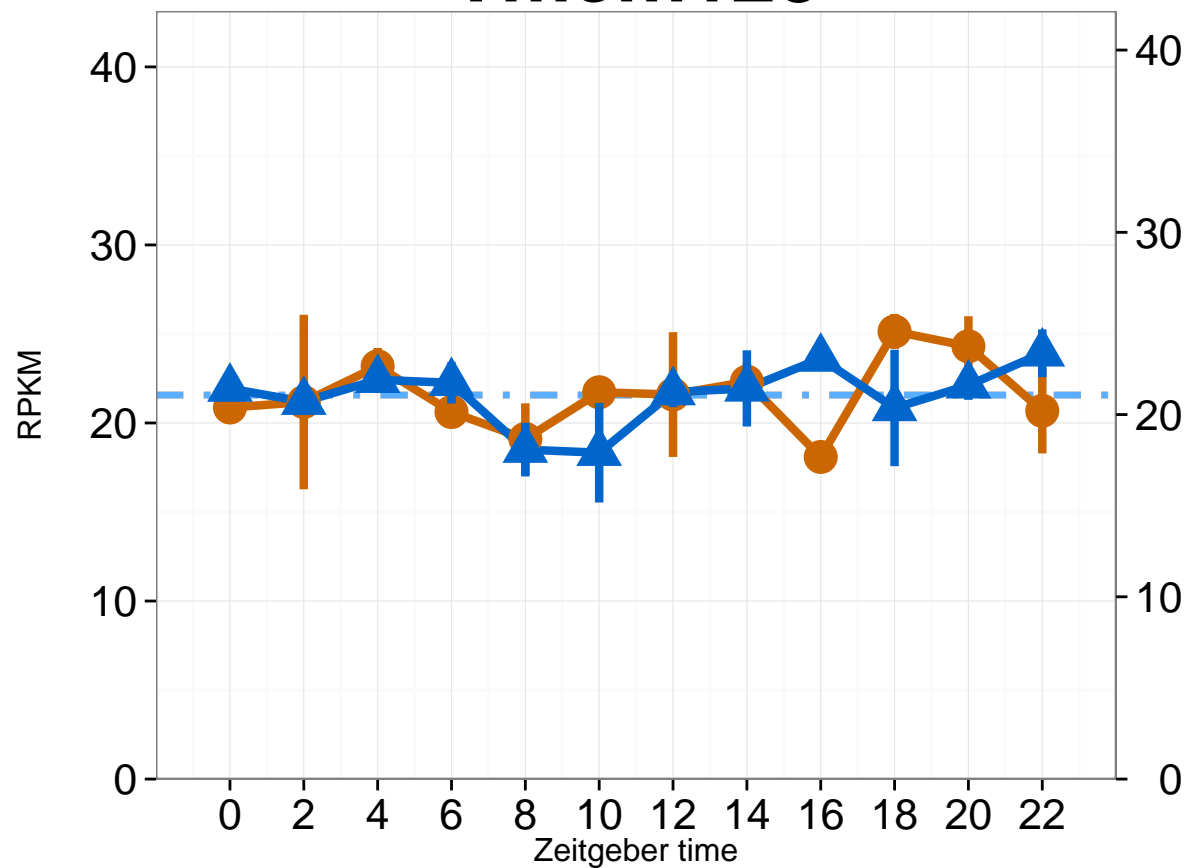

# Tmem128

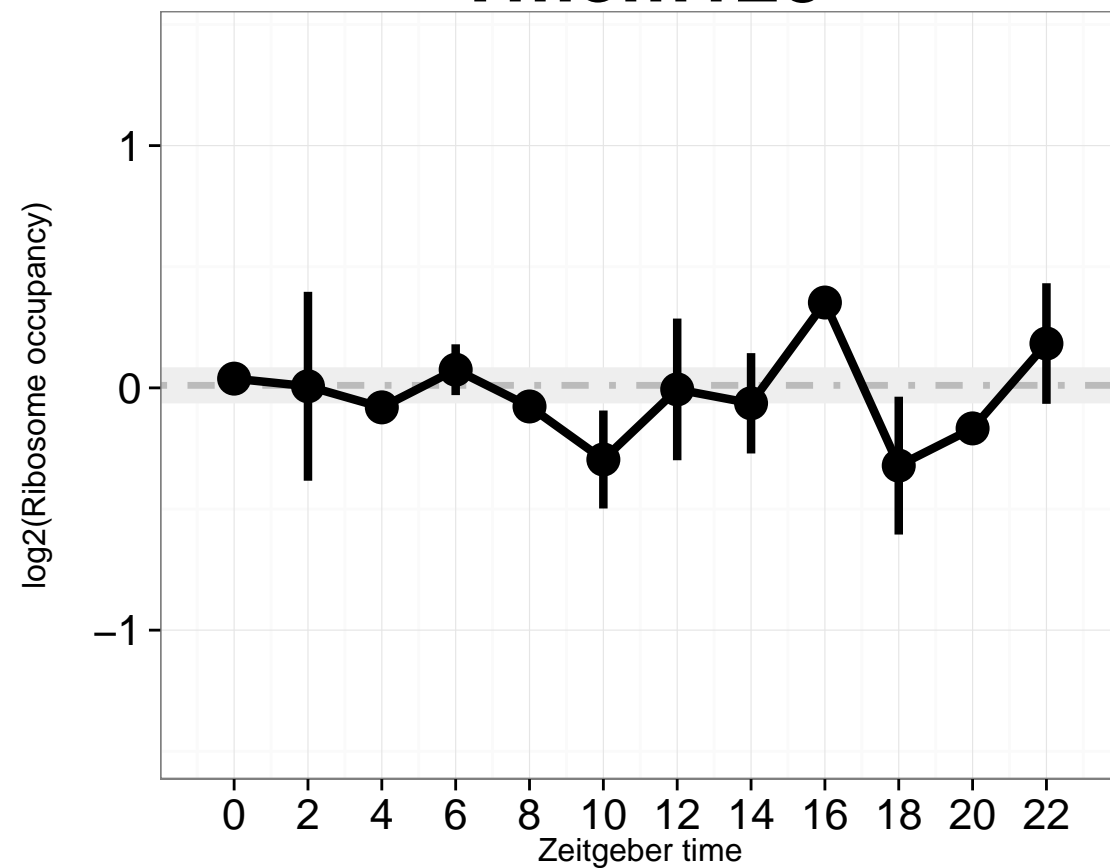

Supplement: SuppDataset_1.zip [file Tmem128_set_A.pdf › Supplemental Dataset 1/A-mRNA_nonrhyth_translation_nonrhyth/Tmem128_set_A.pdf]

# Tmem129

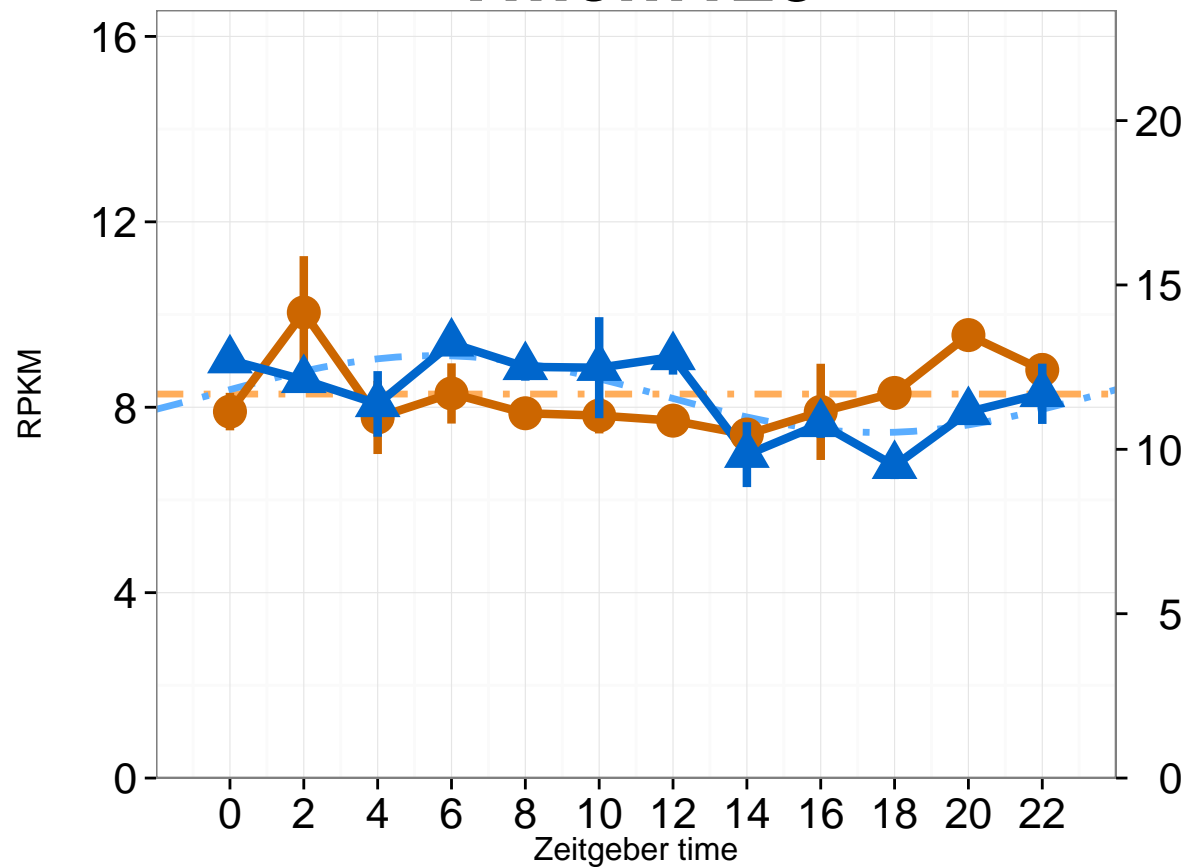

# Tmem129

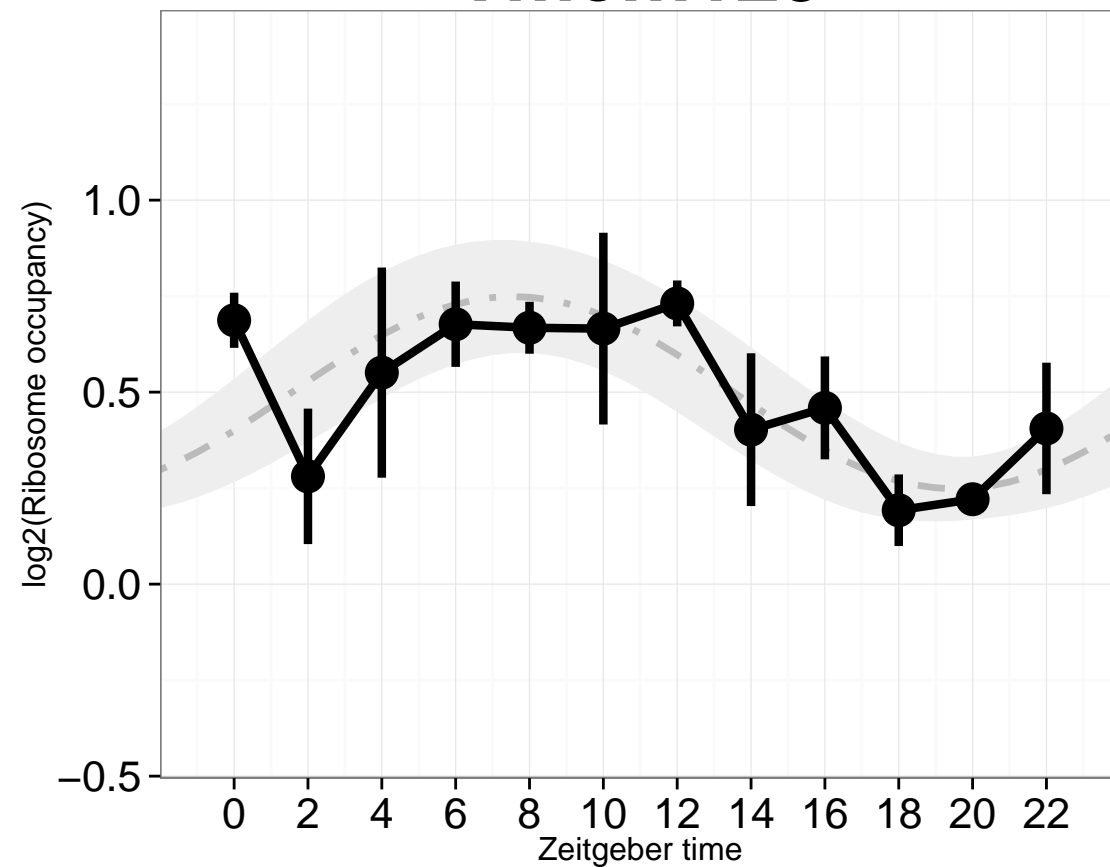

Supplement: SuppDataset_1.zip [file Tmem129_set_A.pdf › Supplemental Dataset 1/A-mRNA_nonrhyth_translation_nonrhyth/Tmem129_set_A.pdf]

# Tmem131

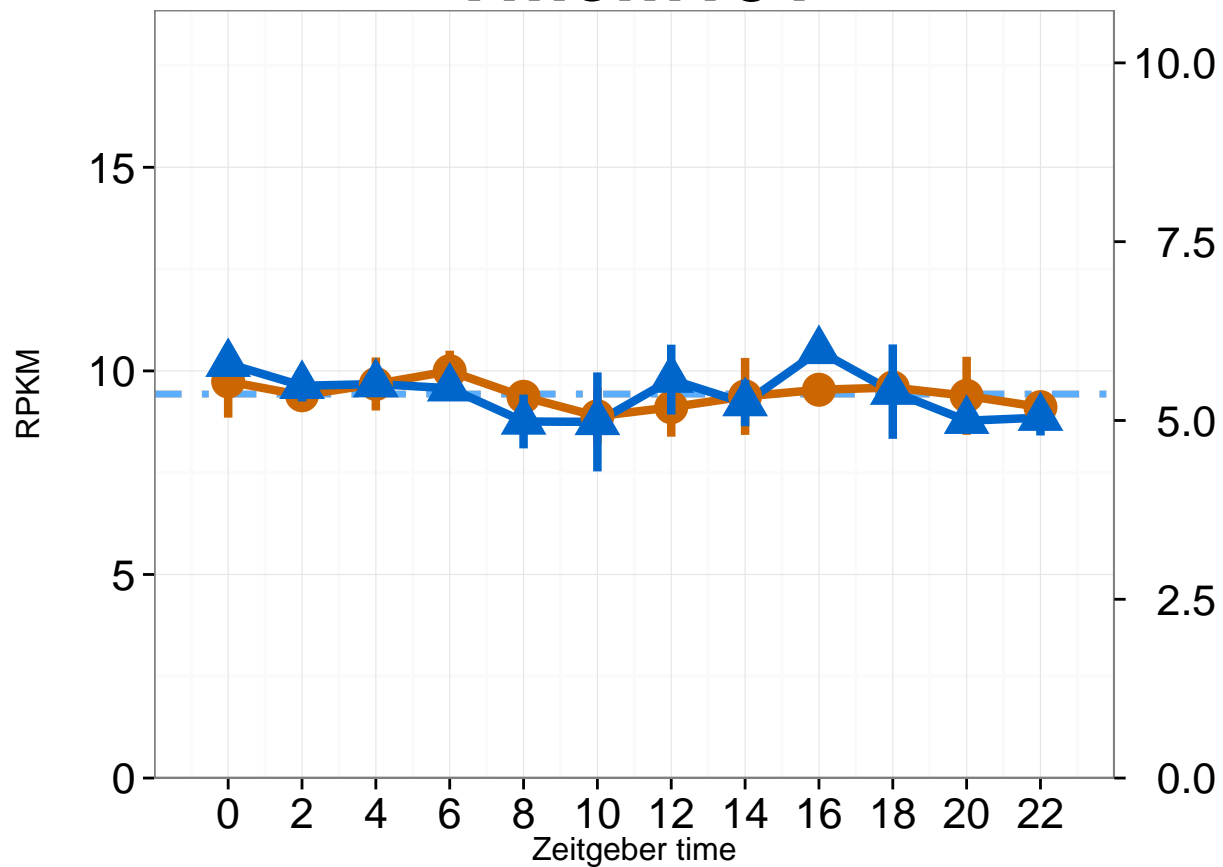

# Tmem131

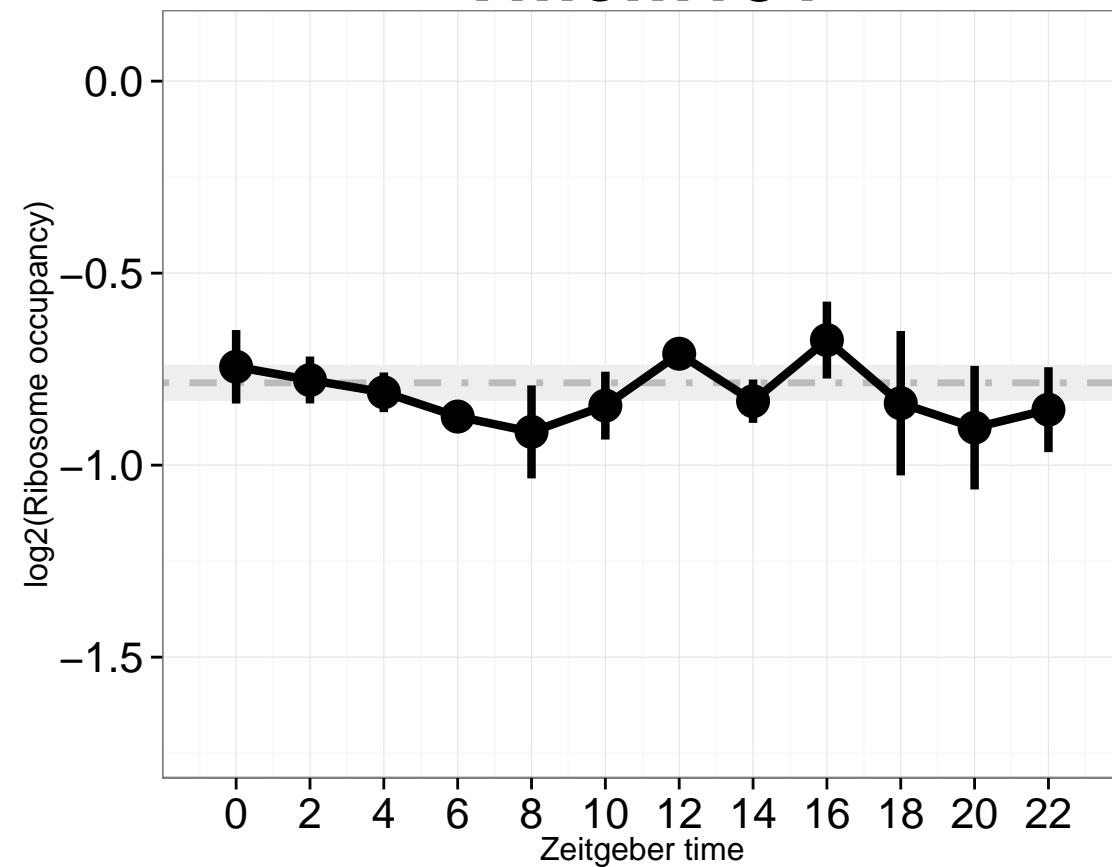

Supplement: SuppDataset_1.zip [file Tmem131_set_A.pdf › Supplemental Dataset 1/A-mRNA_nonrhyth_translation_nonrhyth/Tmem131_set_A.pdf]

## Tmem132a

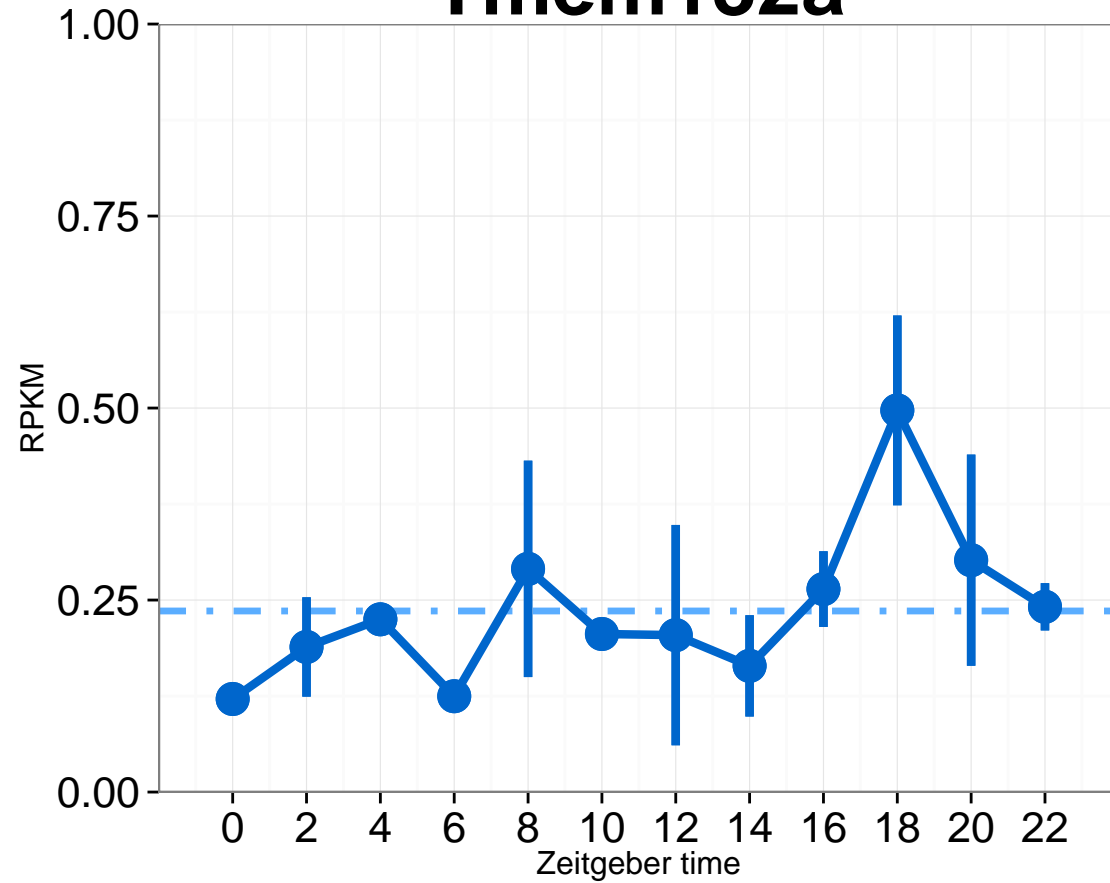

## Tmem132a log2(Ribosome occupan

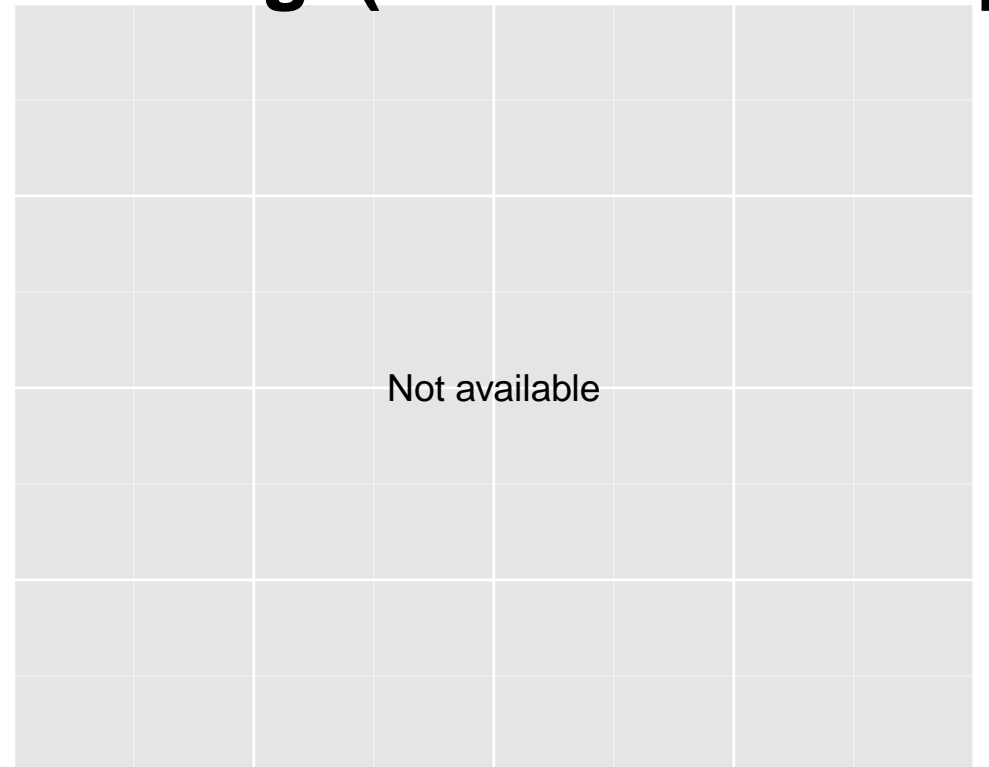

Supplement: SuppDataset_1.zip [file Tmem132a_set_A.pdf › Supplemental Dataset 1/A-mRNA_nonrhyth_translation_nonrhyth/Tmem132a_set_A.pdf]

# Tmem132e

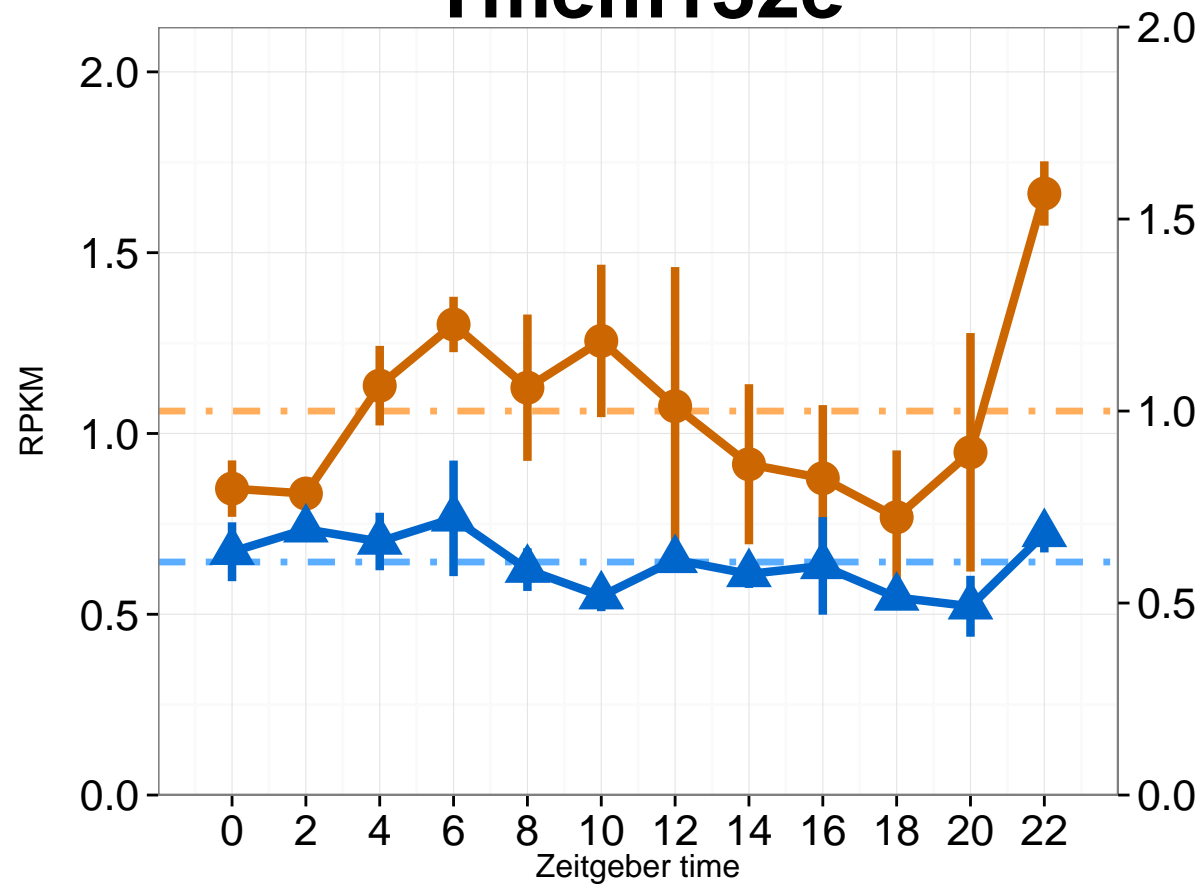

# Tmem132e

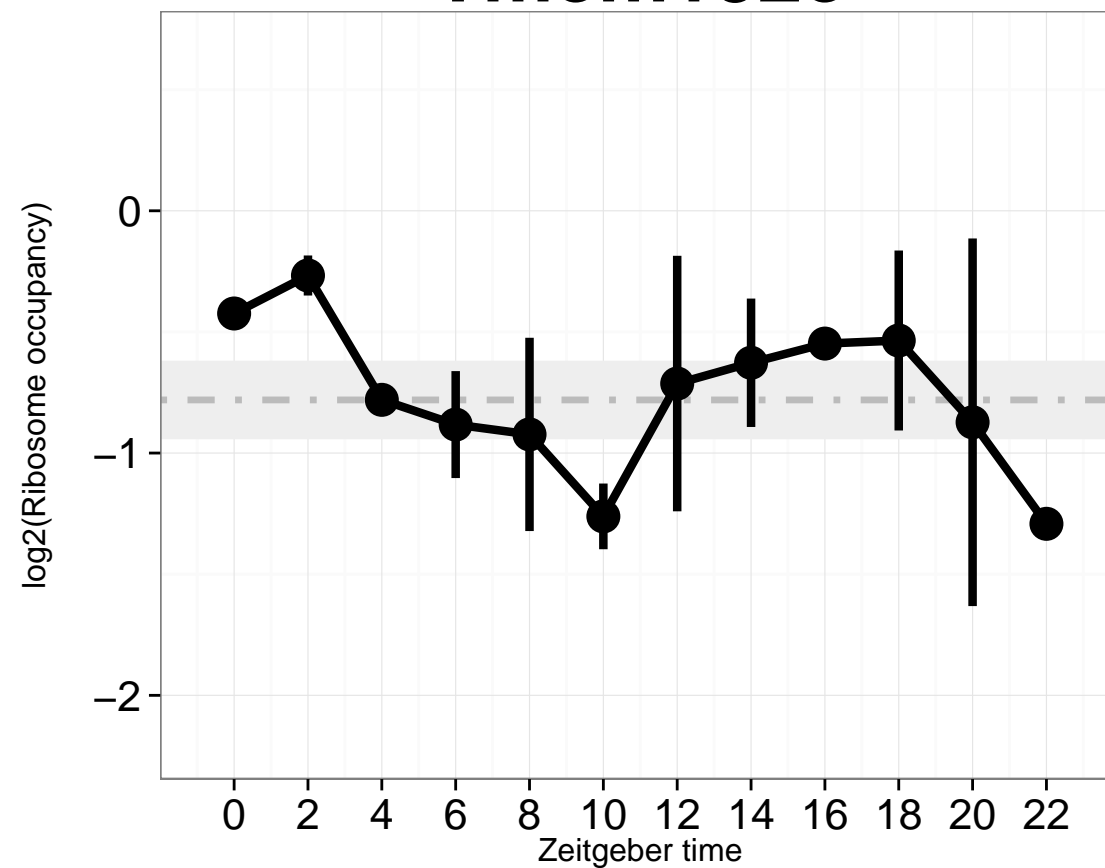

Supplement: SuppDataset_1.zip [file Tmem132e_set_A.pdf › Supplemental Dataset 1/A-mRNA_nonrhyth_translation_nonrhyth/Tmem132e_set_A.pdf]

## Tmem135

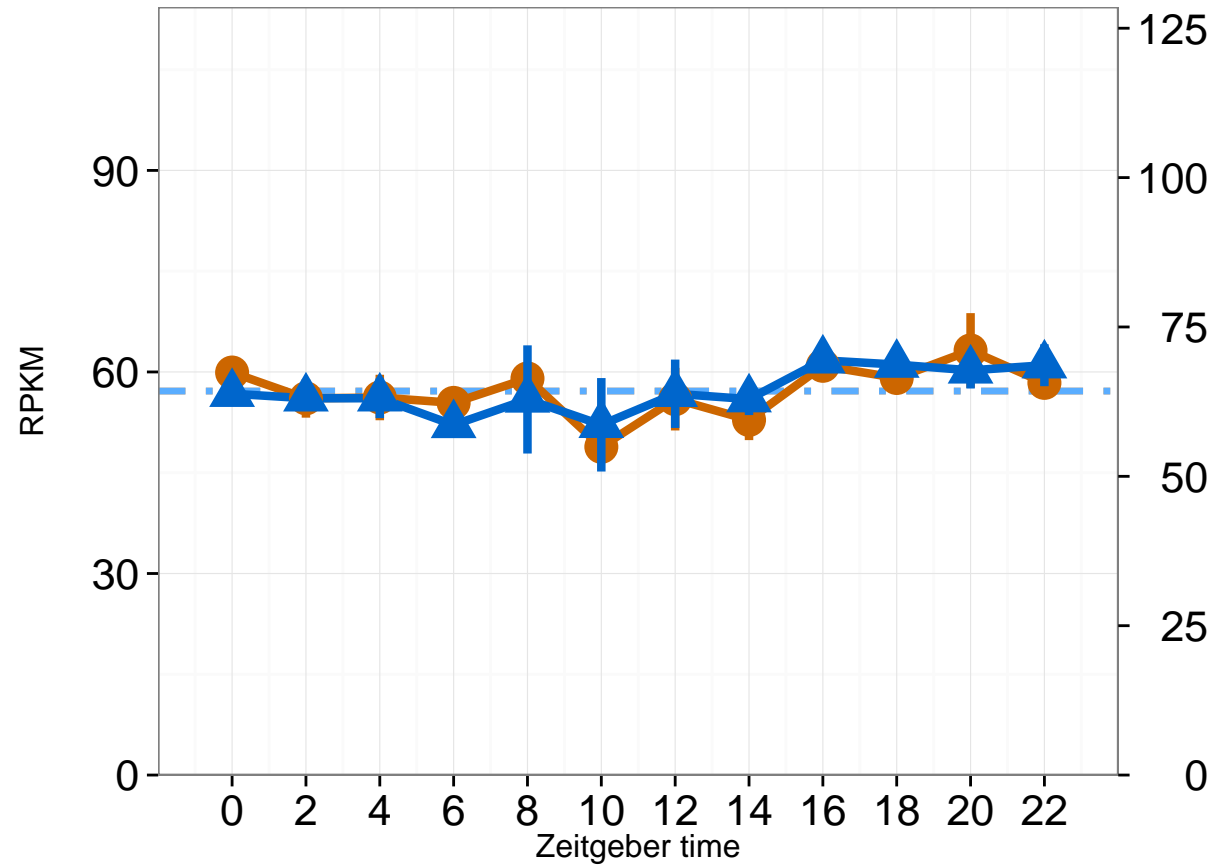

## Tmem135

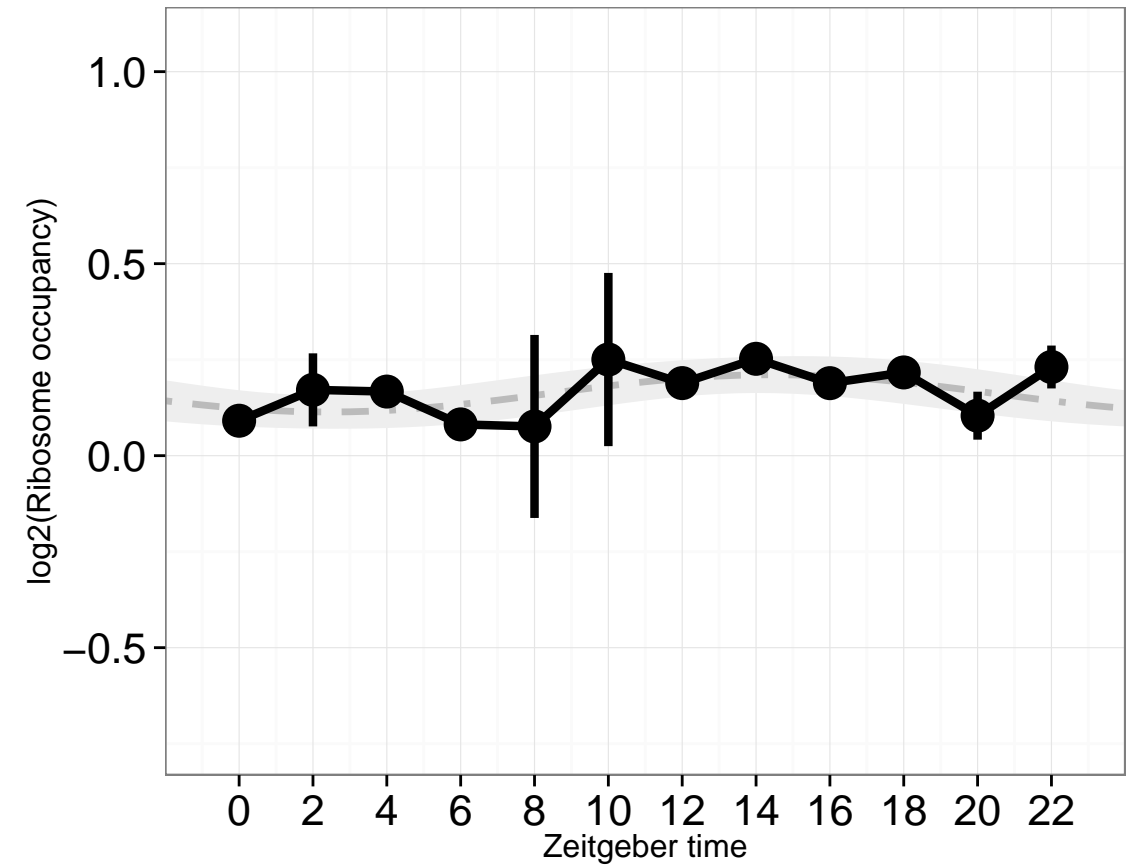

Supplement: SuppDataset_1.zip [file Tmem135_set_A.pdf › Supplemental Dataset 1/A-mRNA_nonrhyth_translation_nonrhyth/Tmem135_set_A.pdf]

# Tmem138

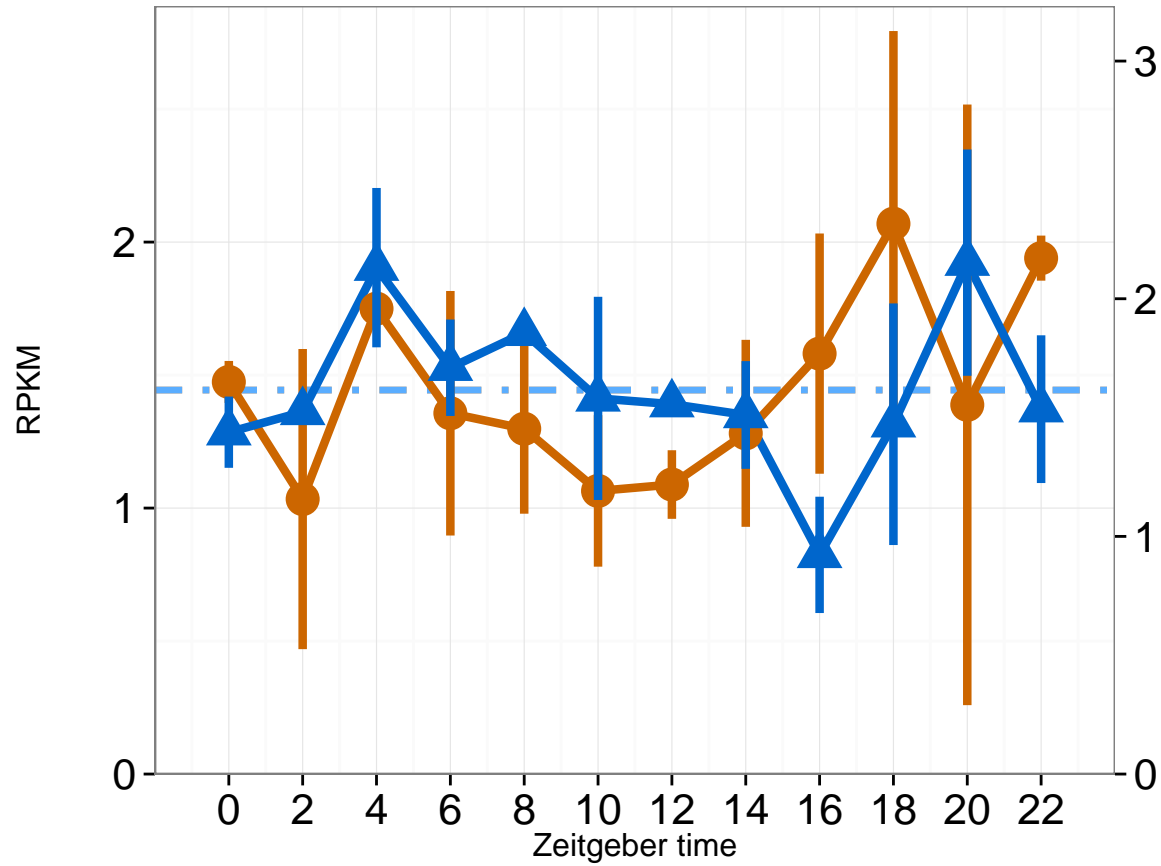

# Tmem138

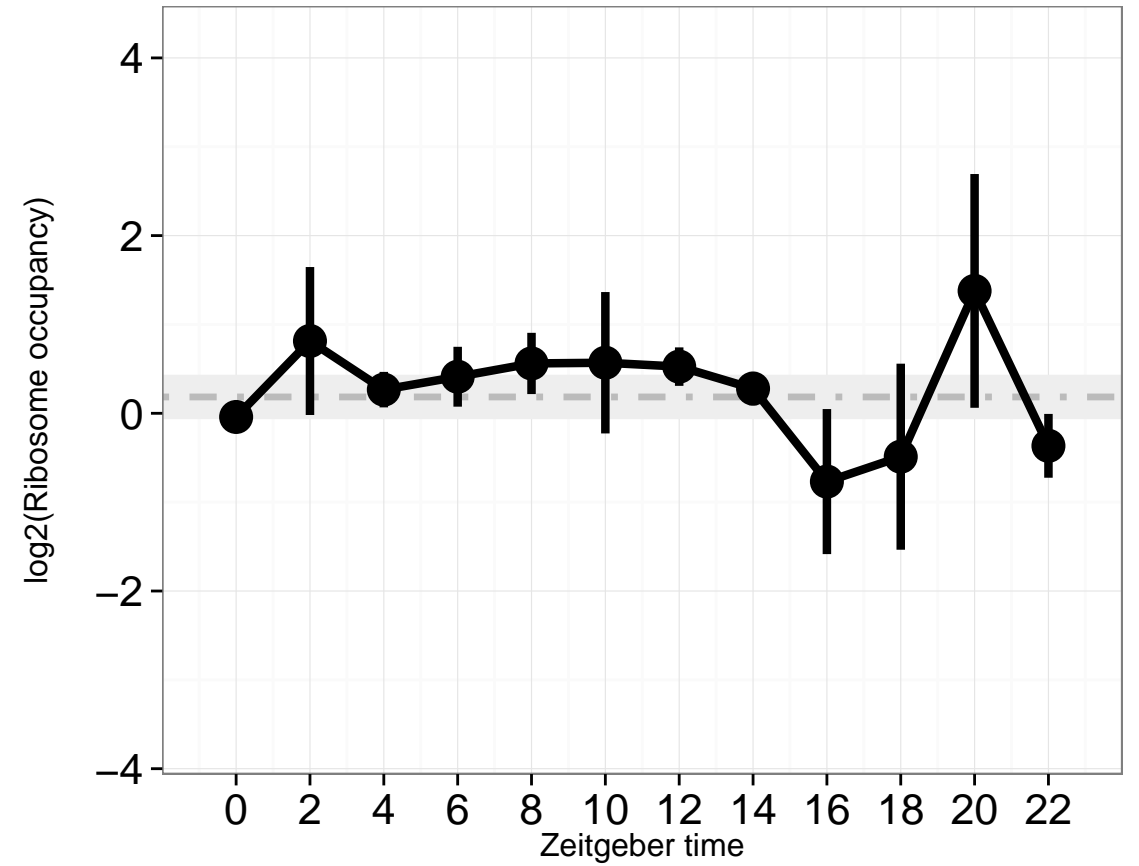

Supplement: SuppDataset_1.zip [file Tmem138_set_A.pdf › Supplemental Dataset 1/A-mRNA_nonrhyth_translation_nonrhyth/Tmem138_set_A.pdf]

# Tmem141

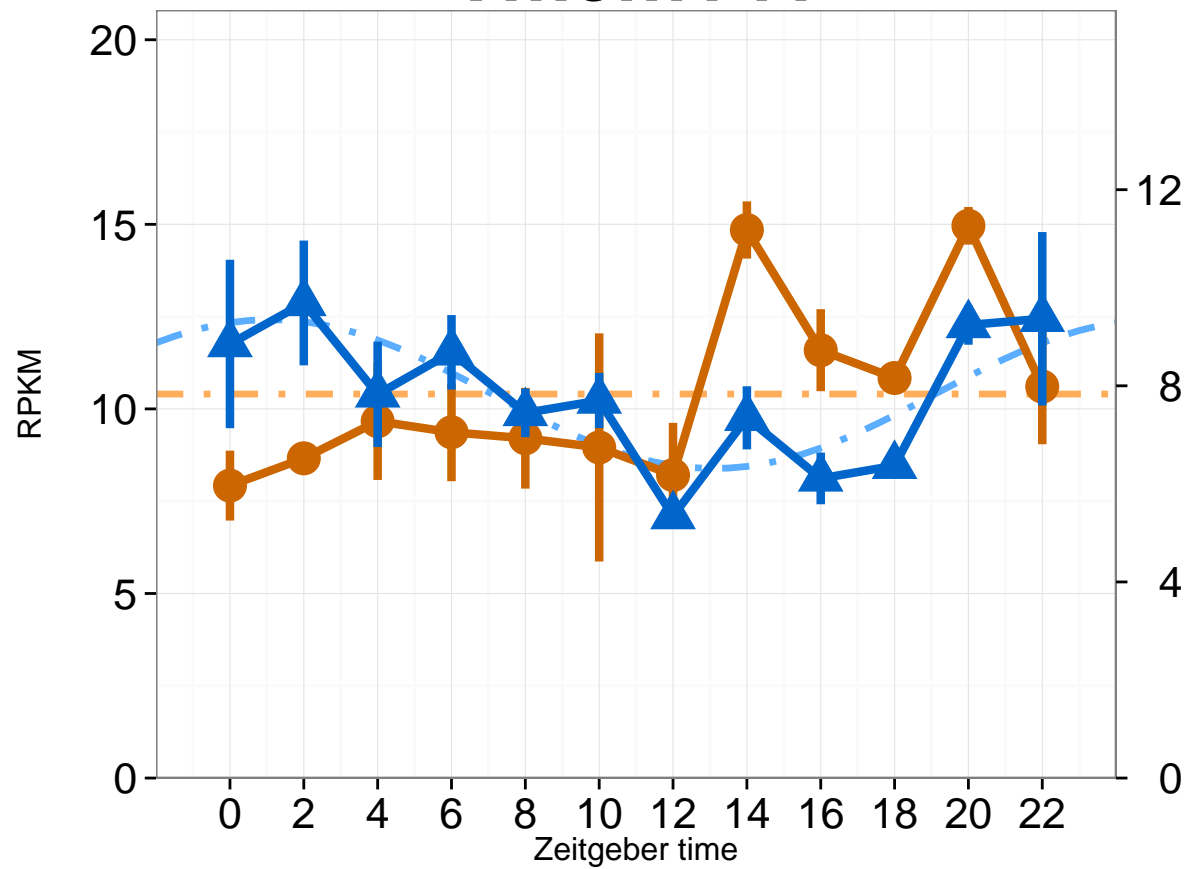

# Tmem141

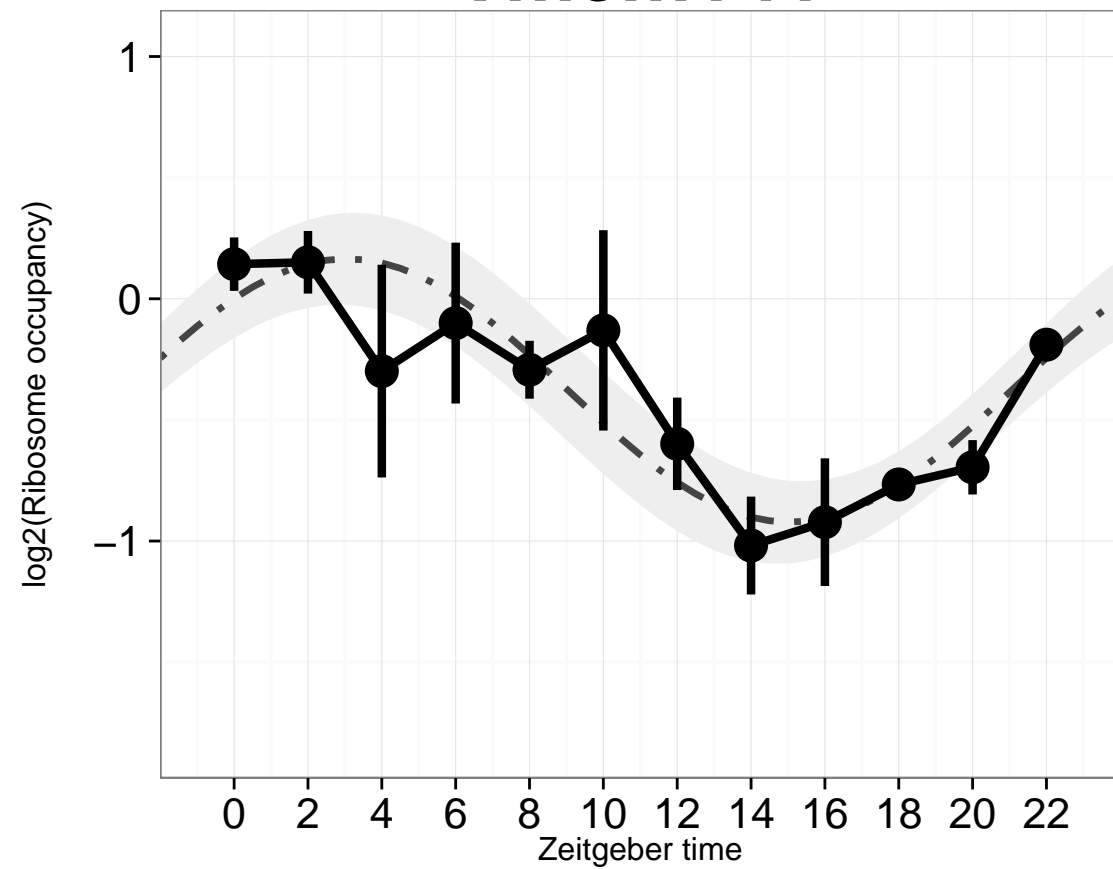

Supplement: SuppDataset_1.zip [file Tmem141_set_A.pdf › Supplemental Dataset 1/A-mRNA_nonrhyth_translation_nonrhyth/Tmem141_set_A.pdf]

# Tmem143

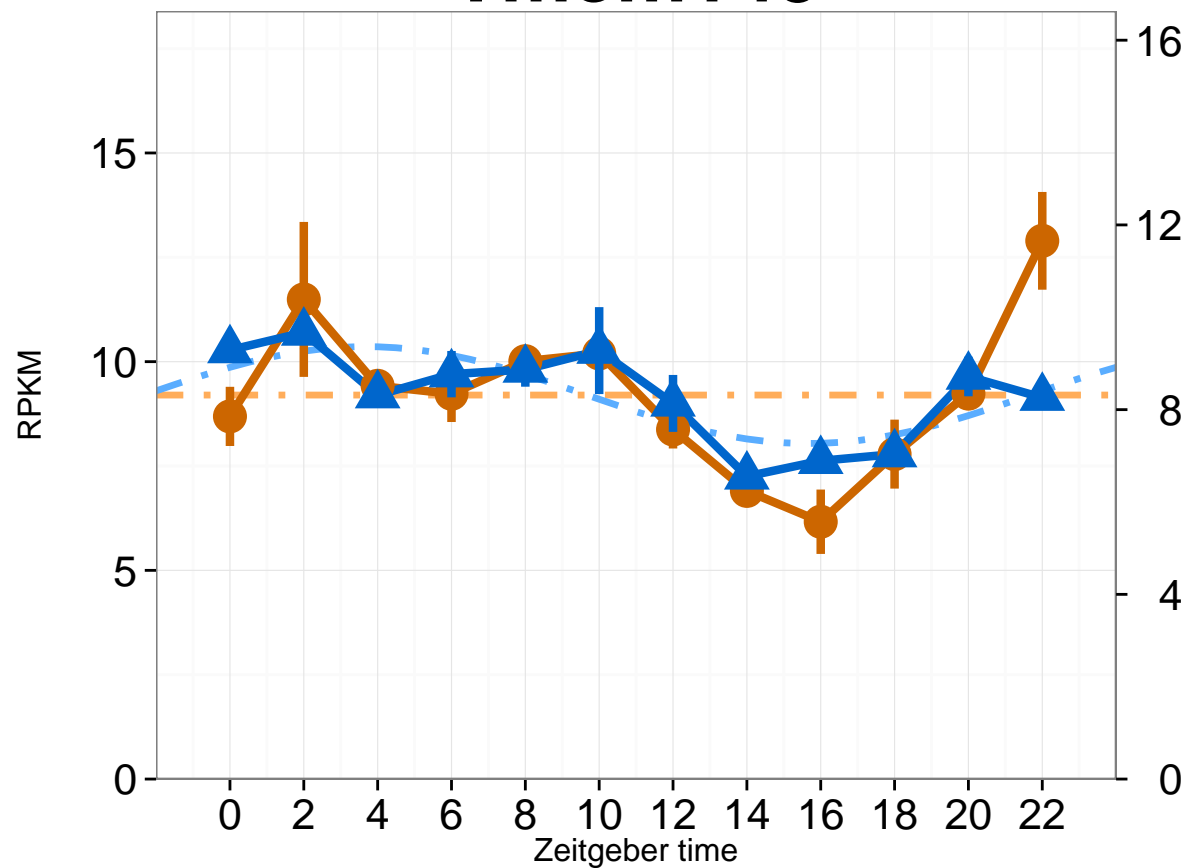

# Tmem143

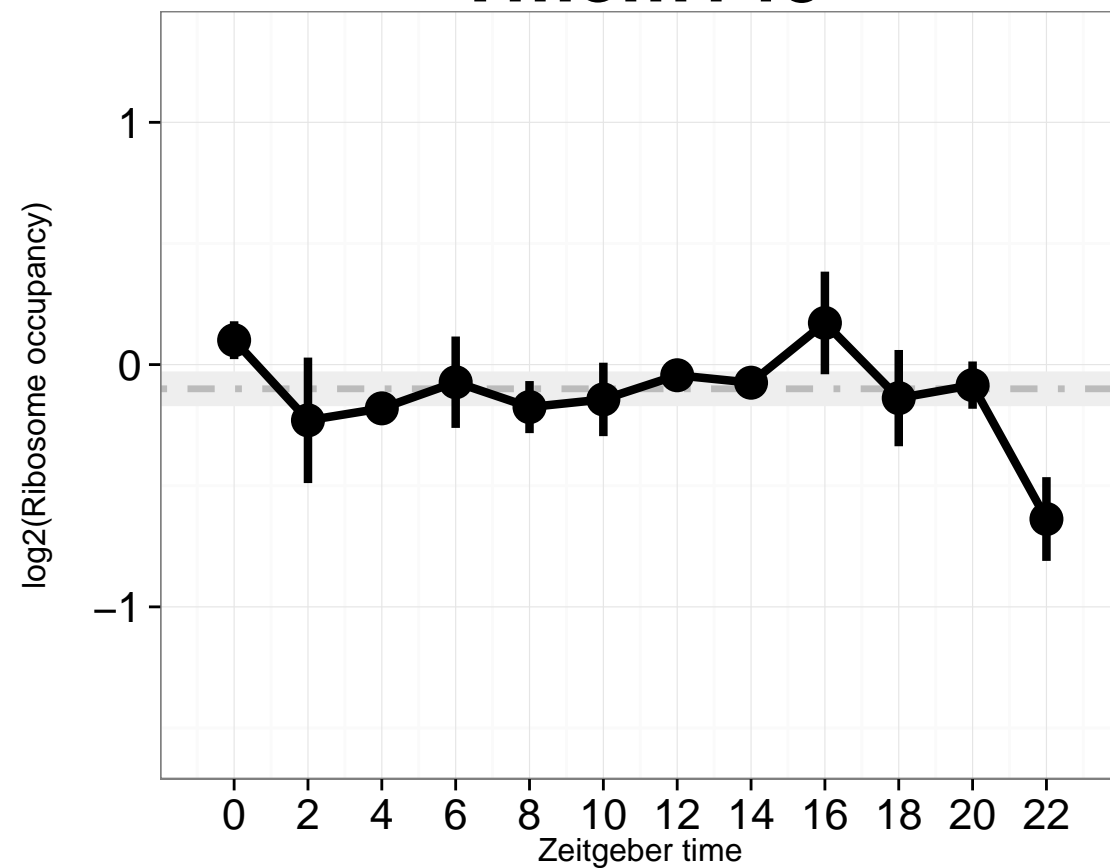

Supplement: SuppDataset_1.zip [file Tmem143_set_A.pdf › Supplemental Dataset 1/A-mRNA_nonrhyth_translation_nonrhyth/Tmem143_set_A.pdf]

# Tmem147

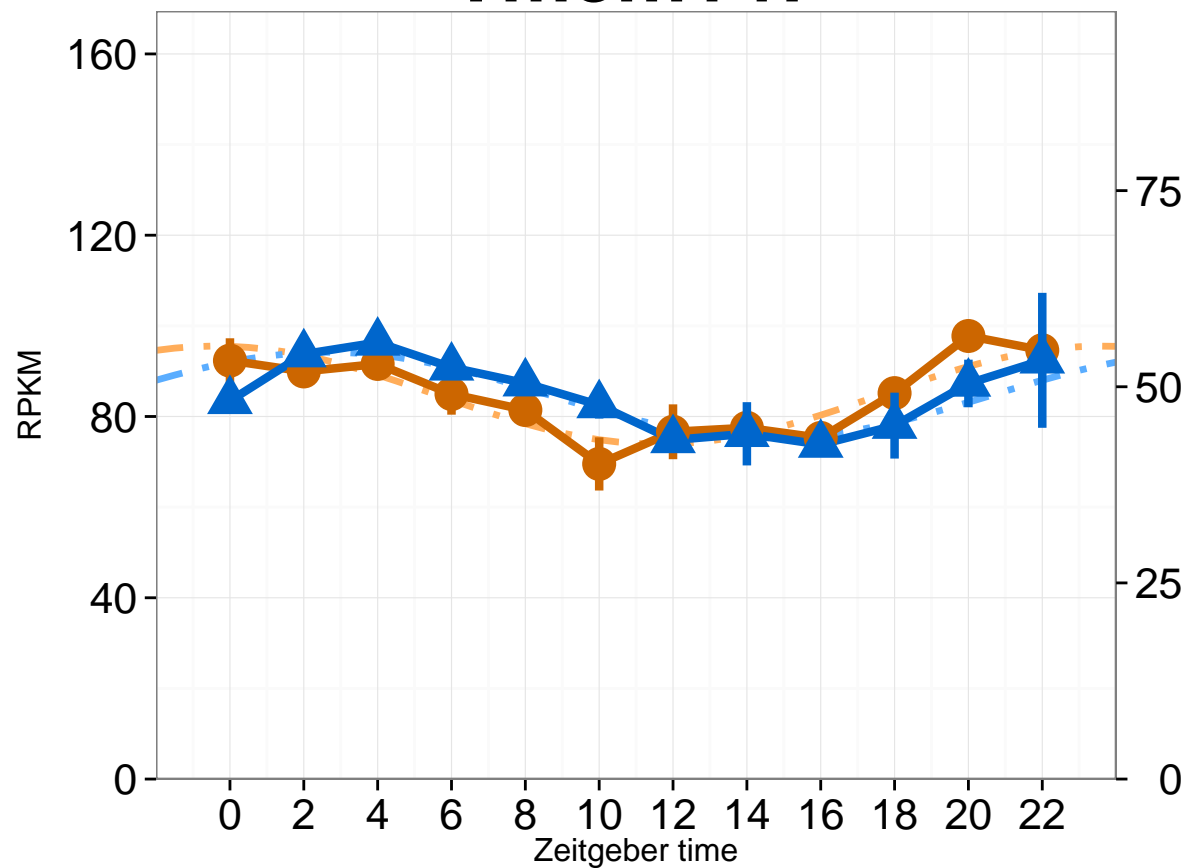

# Tmem147

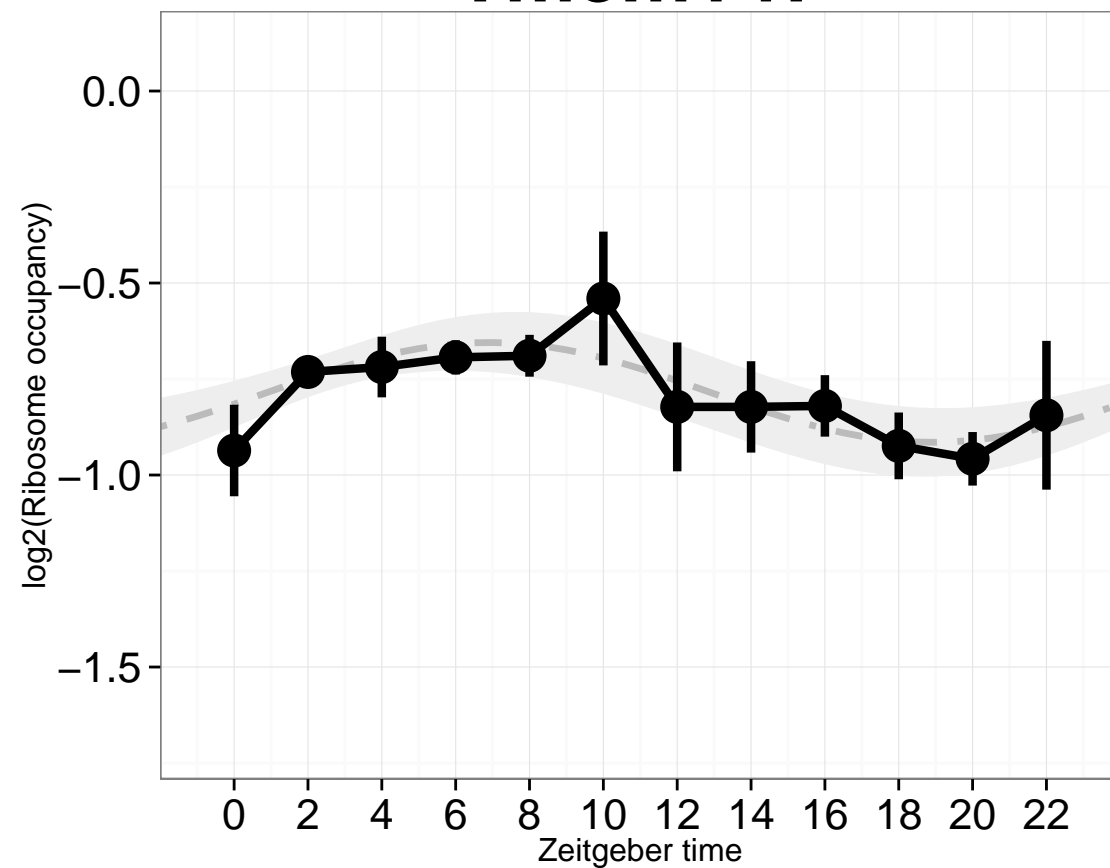

Supplement: SuppDataset_1.zip [file Tmem147_set_A.pdf › Supplemental Dataset 1/A-mRNA_nonrhyth_translation_nonrhyth/Tmem147_set_A.pdf]

# Tmem14c

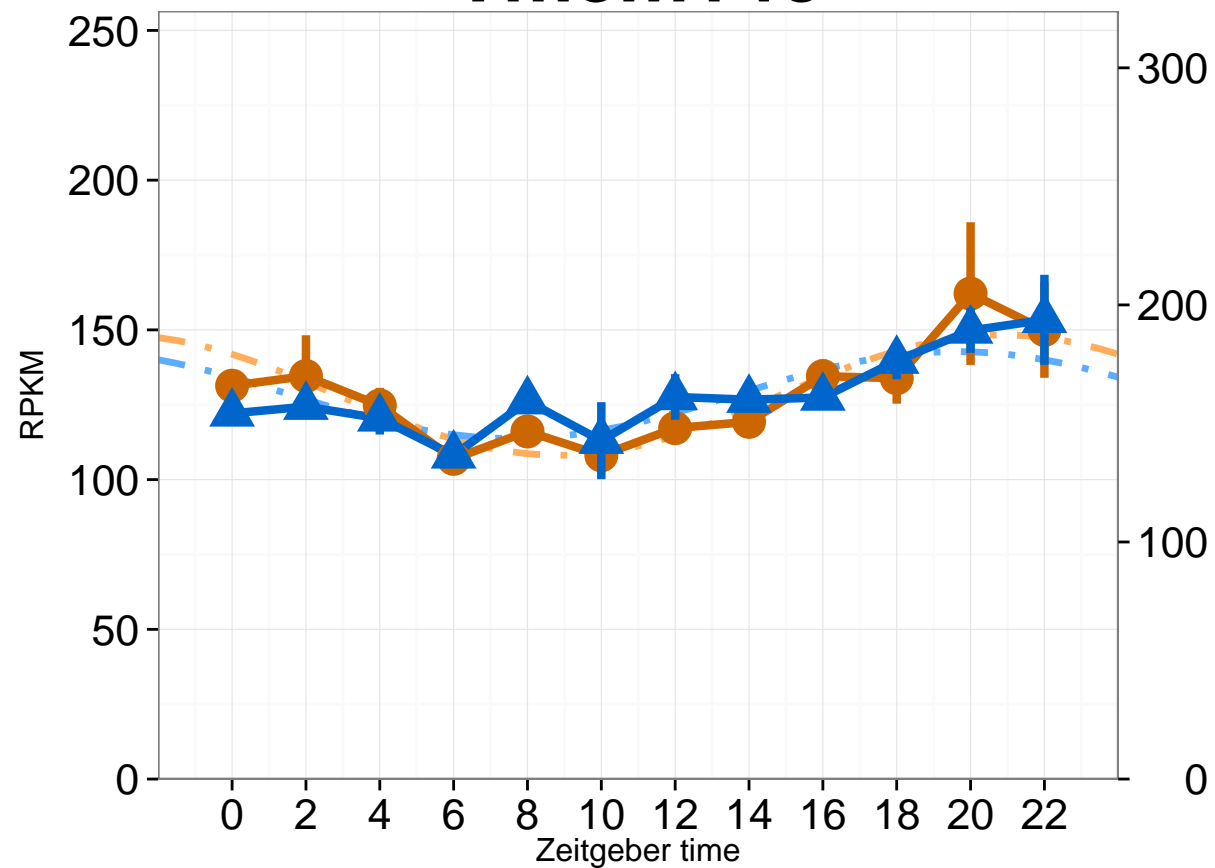

# Tmem14c

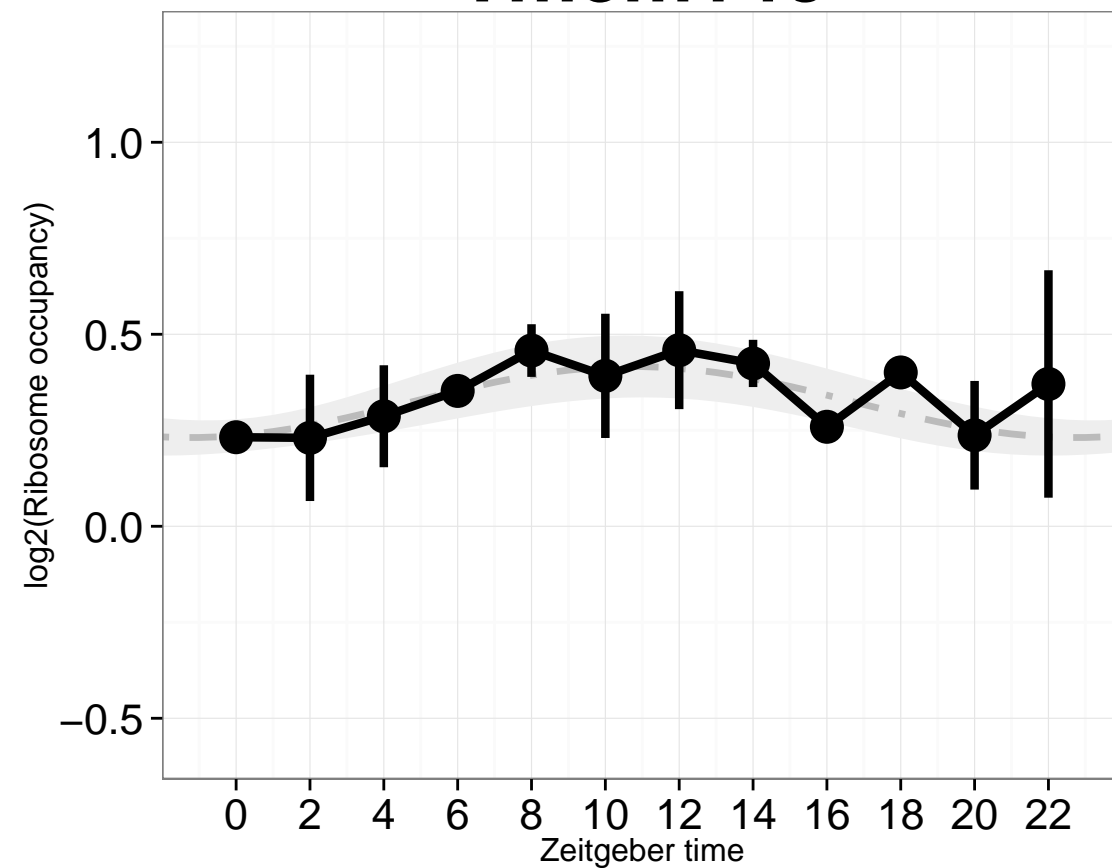

Supplement: SuppDataset_1.zip [file Tmem14c_set_A.pdf › Supplemental Dataset 1/A-mRNA_nonrhyth_translation_nonrhyth/Tmem14c_set_A.pdf]

# Tmem159

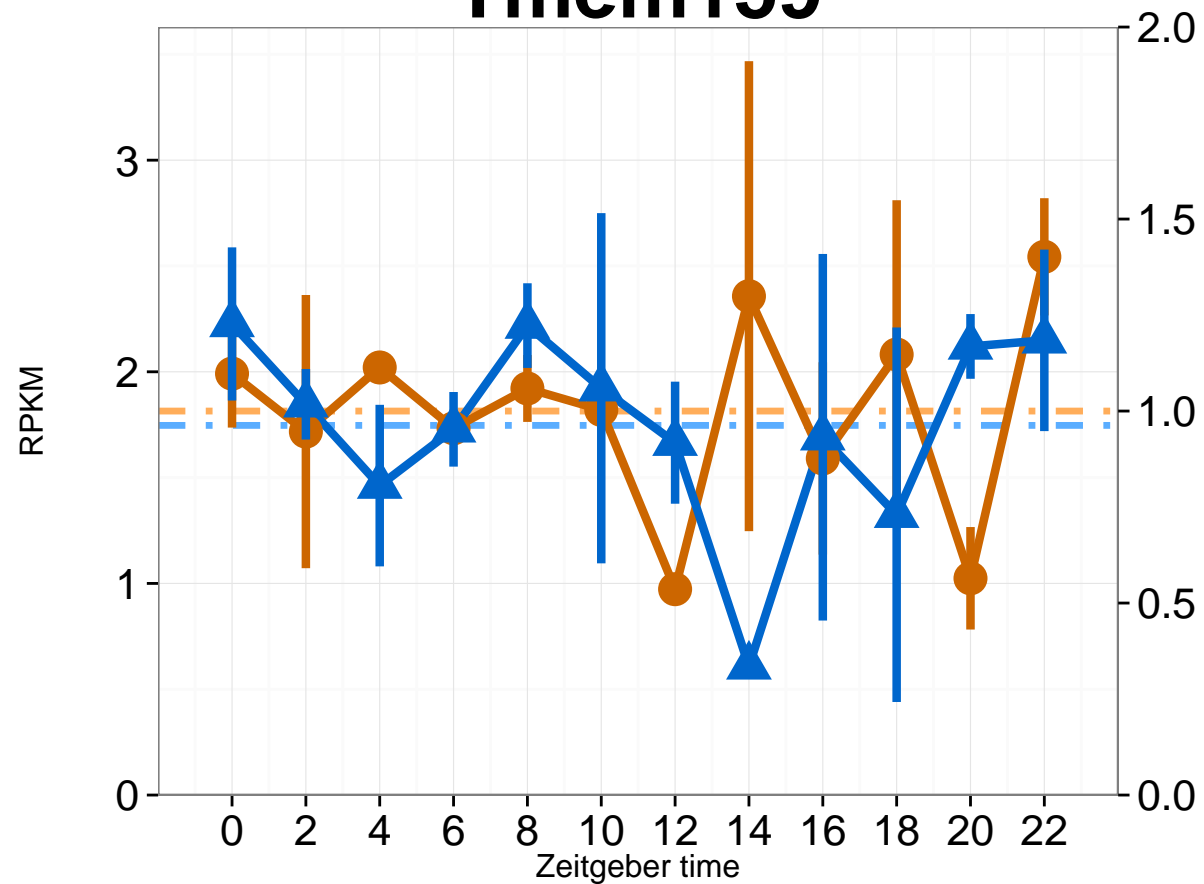

# Tmem159

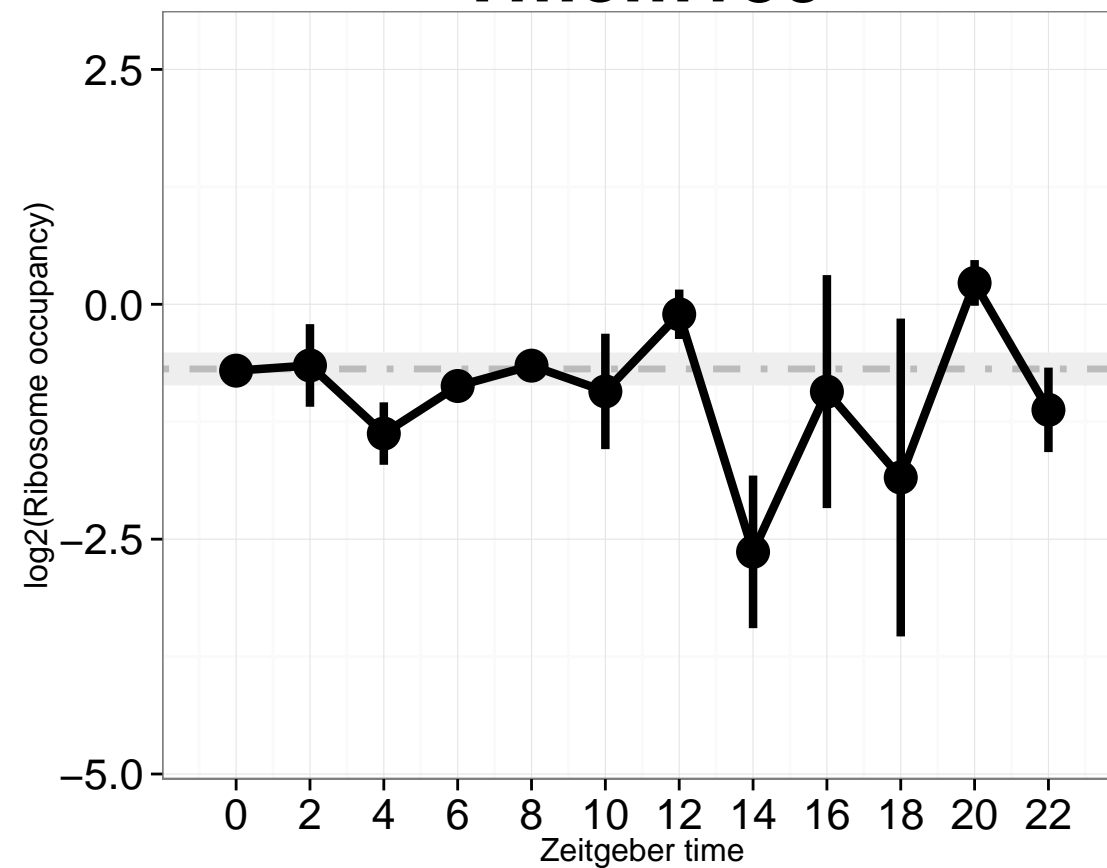

Supplement: SuppDataset_1.zip [file Tmem159_set_A.pdf › Supplemental Dataset 1/A-mRNA_nonrhyth_translation_nonrhyth/Tmem159_set_A.pdf]

# Tmem160

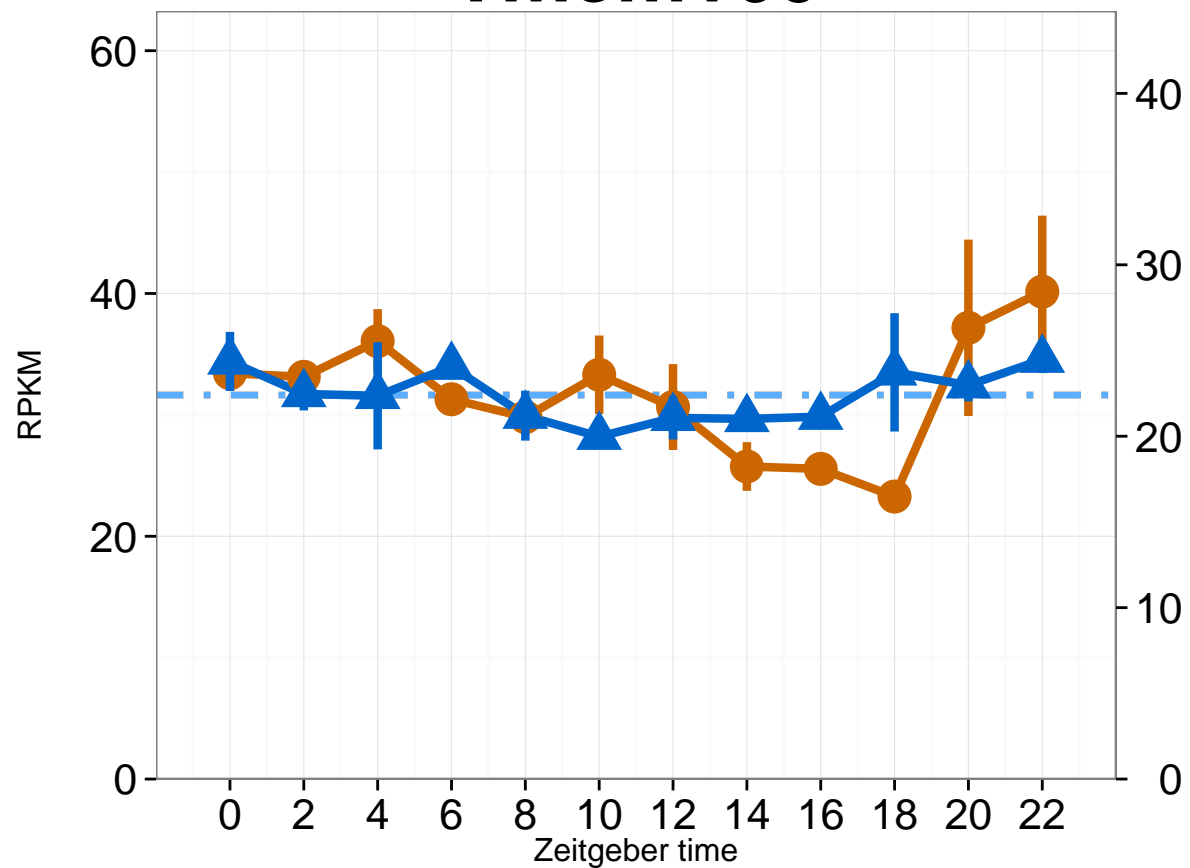

# Tmem160

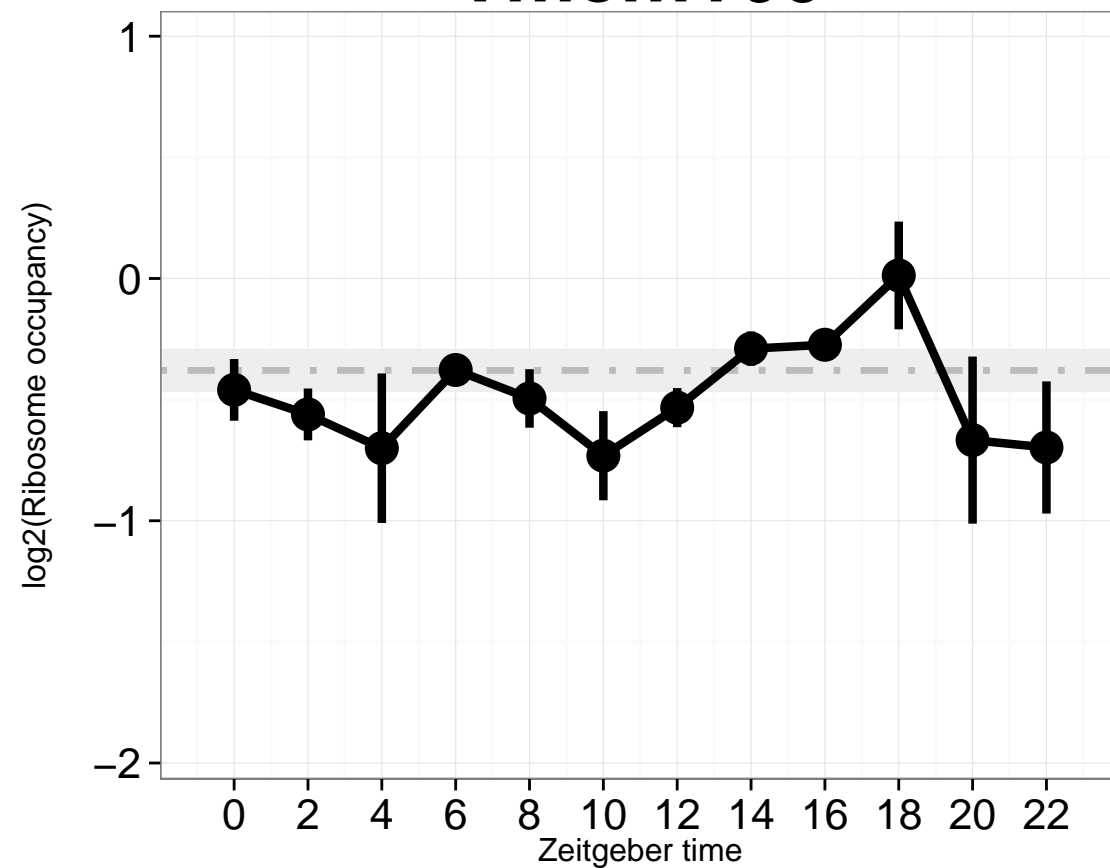

Supplement: SuppDataset_1.zip [file Tmem160_set_A.pdf › Supplemental Dataset 1/A-mRNA_nonrhyth_translation_nonrhyth/Tmem160_set_A.pdf]

# Tmem161a

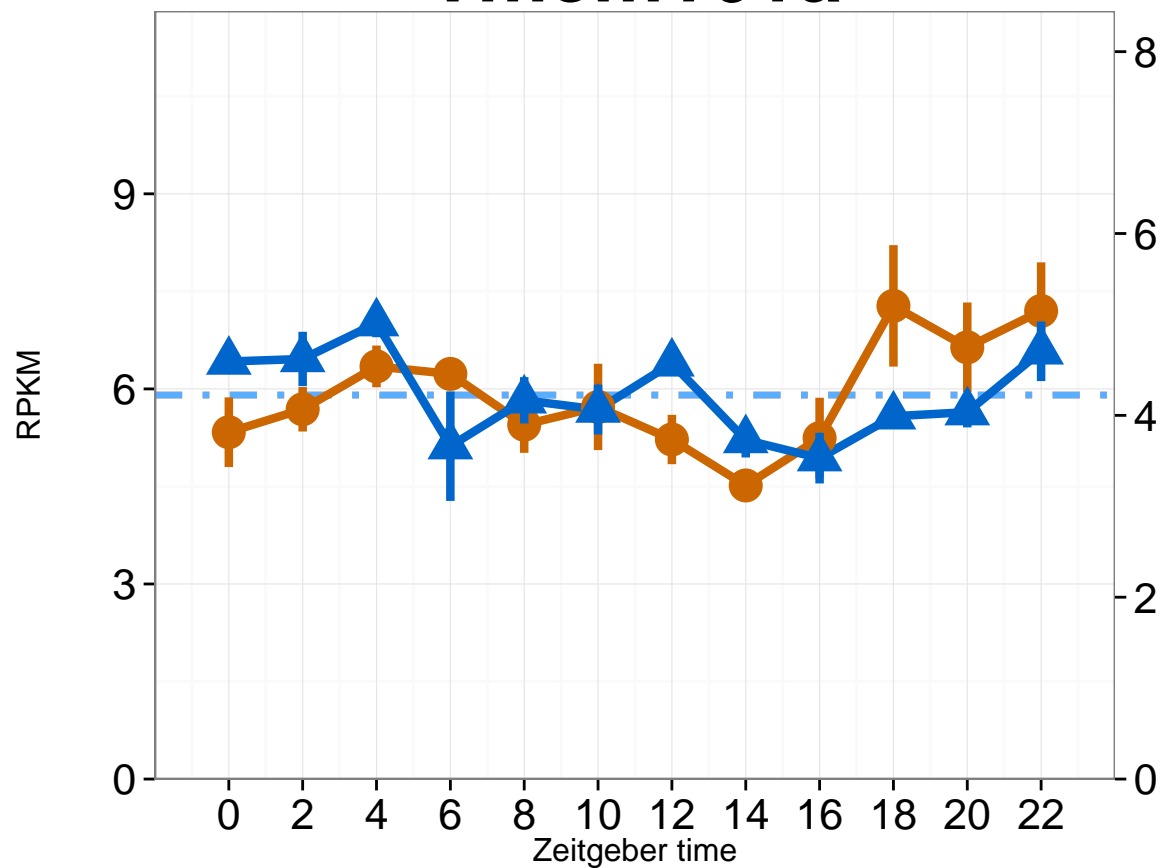

# Tmem161a

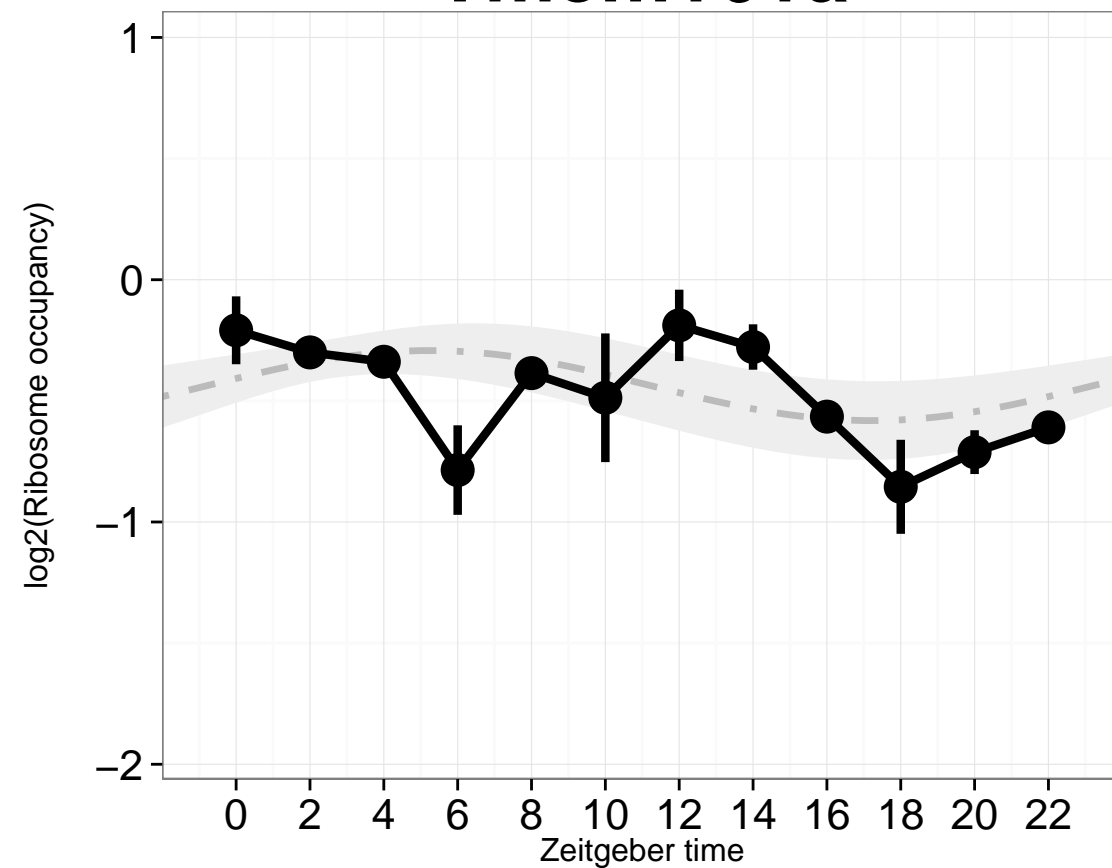

Supplement: SuppDataset_1.zip [file Tmem161a_set_A.pdf › Supplemental Dataset 1/A-mRNA_nonrhyth_translation_nonrhyth/Tmem161a_set_A.pdf]

# Tmem161b

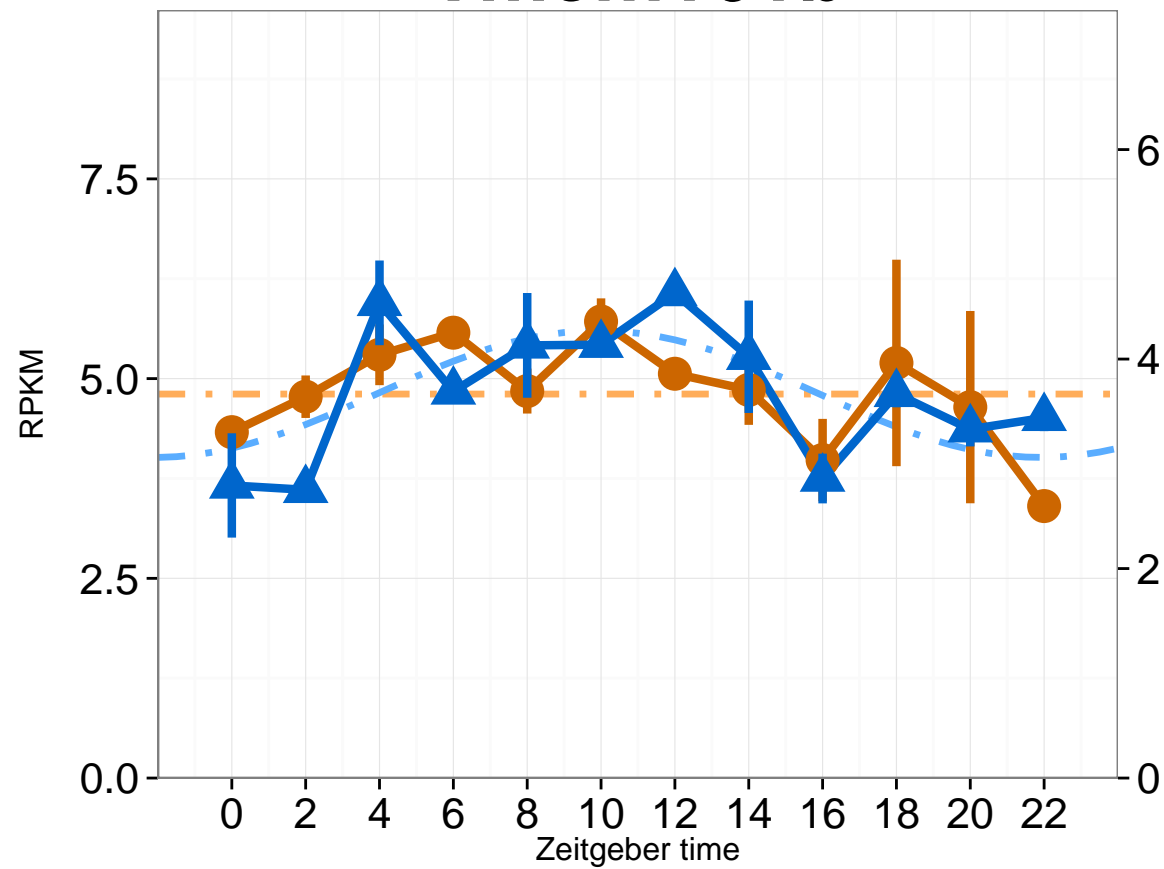

# Tmem161b

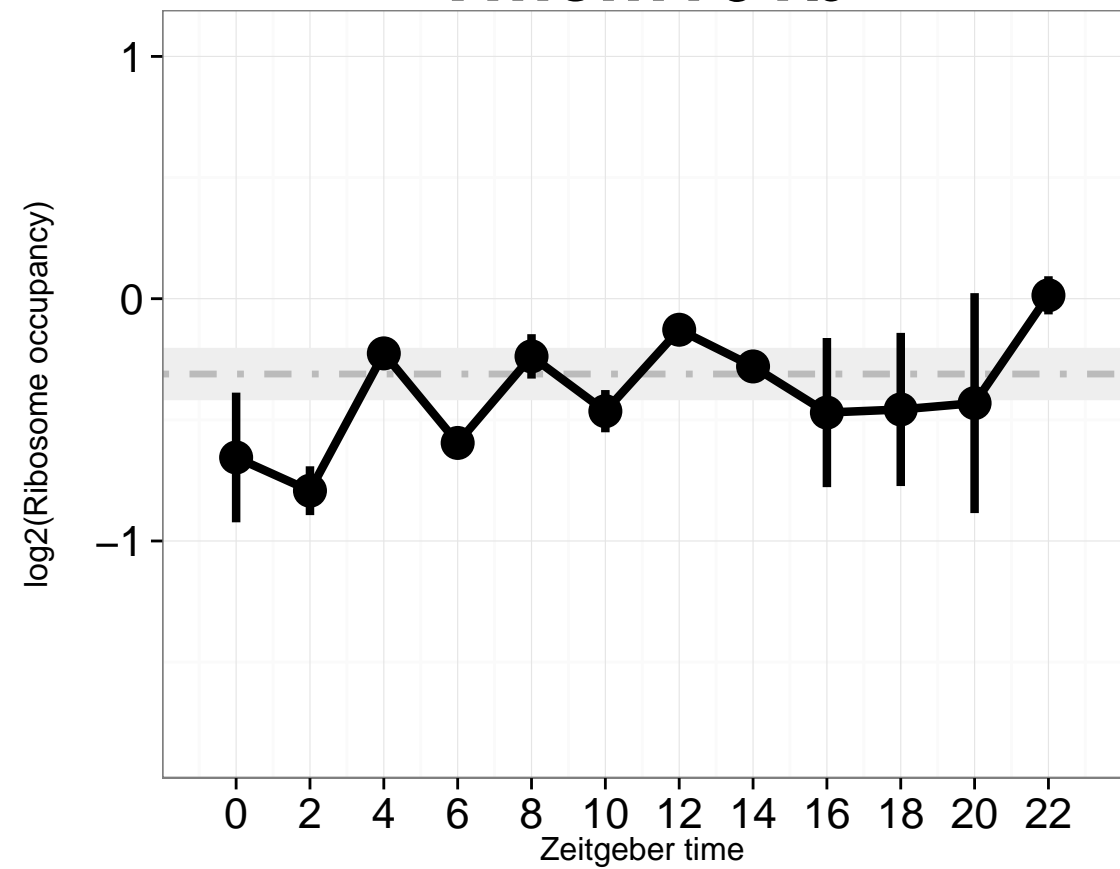

Supplement: SuppDataset_1.zip [file Tmem161b_set_A.pdf › Supplemental Dataset 1/A-mRNA_nonrhyth_translation_nonrhyth/Tmem161b_set_A.pdf]

# Tmem164

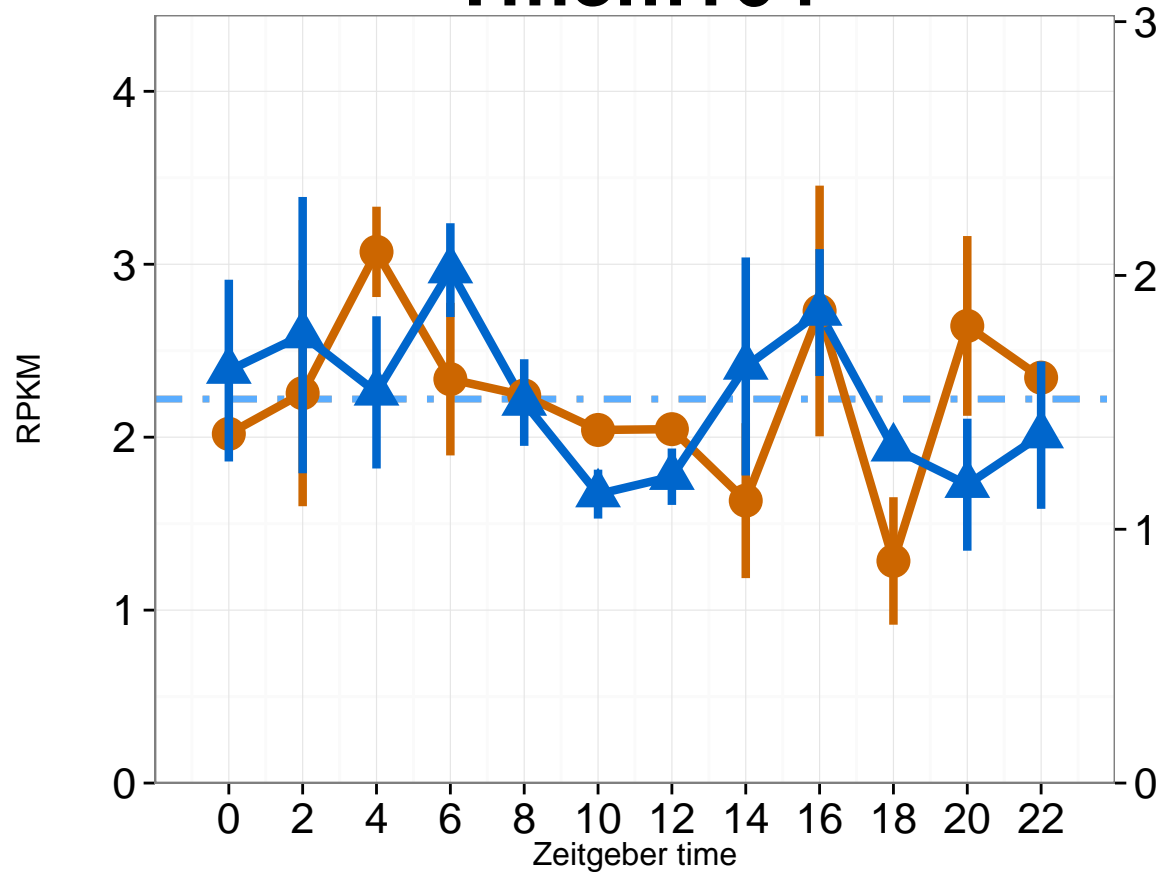

# Tmem164

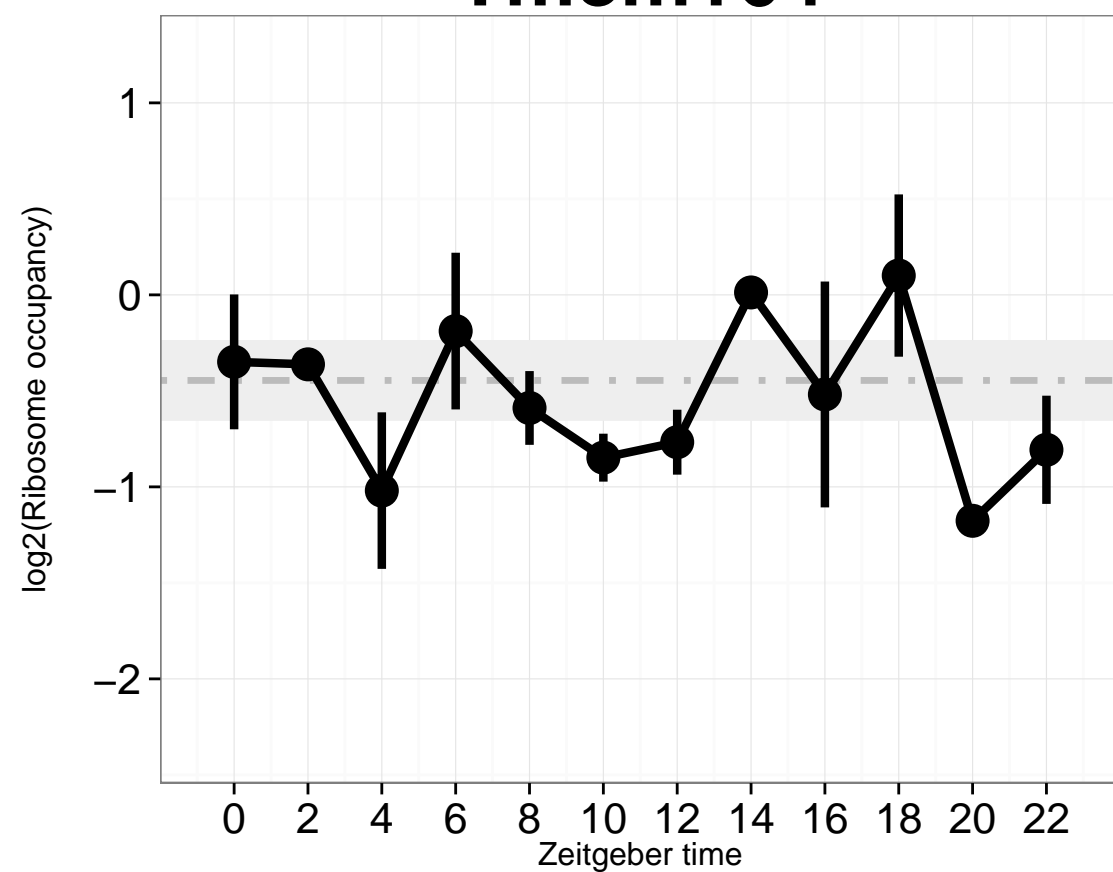

Supplement: SuppDataset_1.zip [file Tmem164_set_A.pdf › Supplemental Dataset 1/A-mRNA_nonrhyth_translation_nonrhyth/Tmem164_set_A.pdf]

# Tmem165

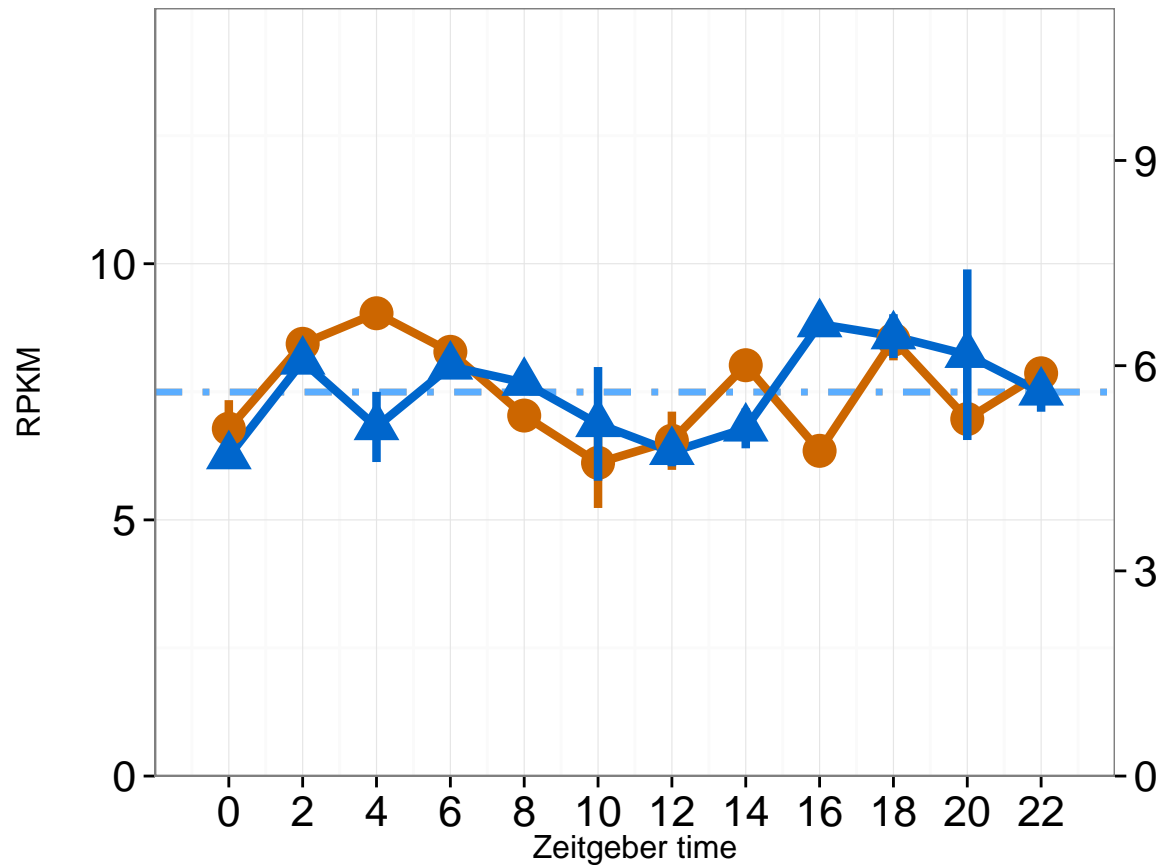

# Tmem165

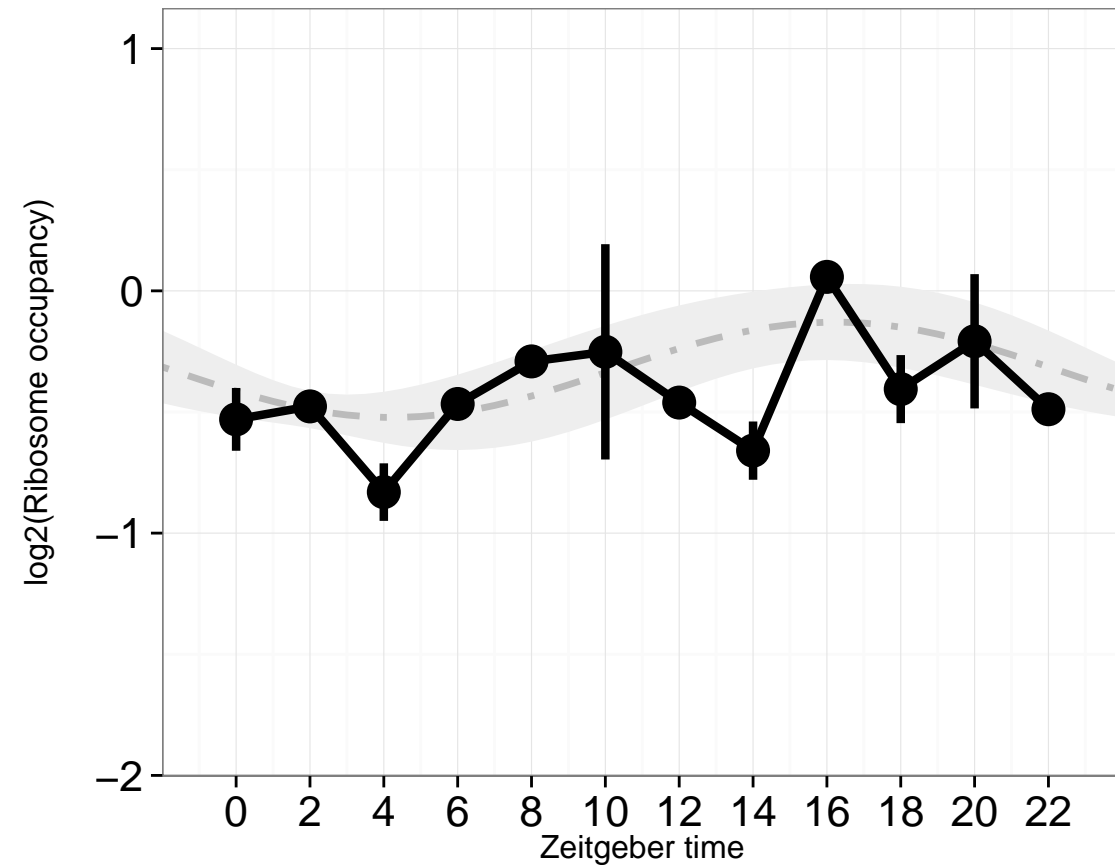

Supplement: SuppDataset_1.zip [file Tmem165_set_A.pdf › Supplemental Dataset 1/A-mRNA_nonrhyth_translation_nonrhyth/Tmem165_set_A.pdf]

# Tmem167

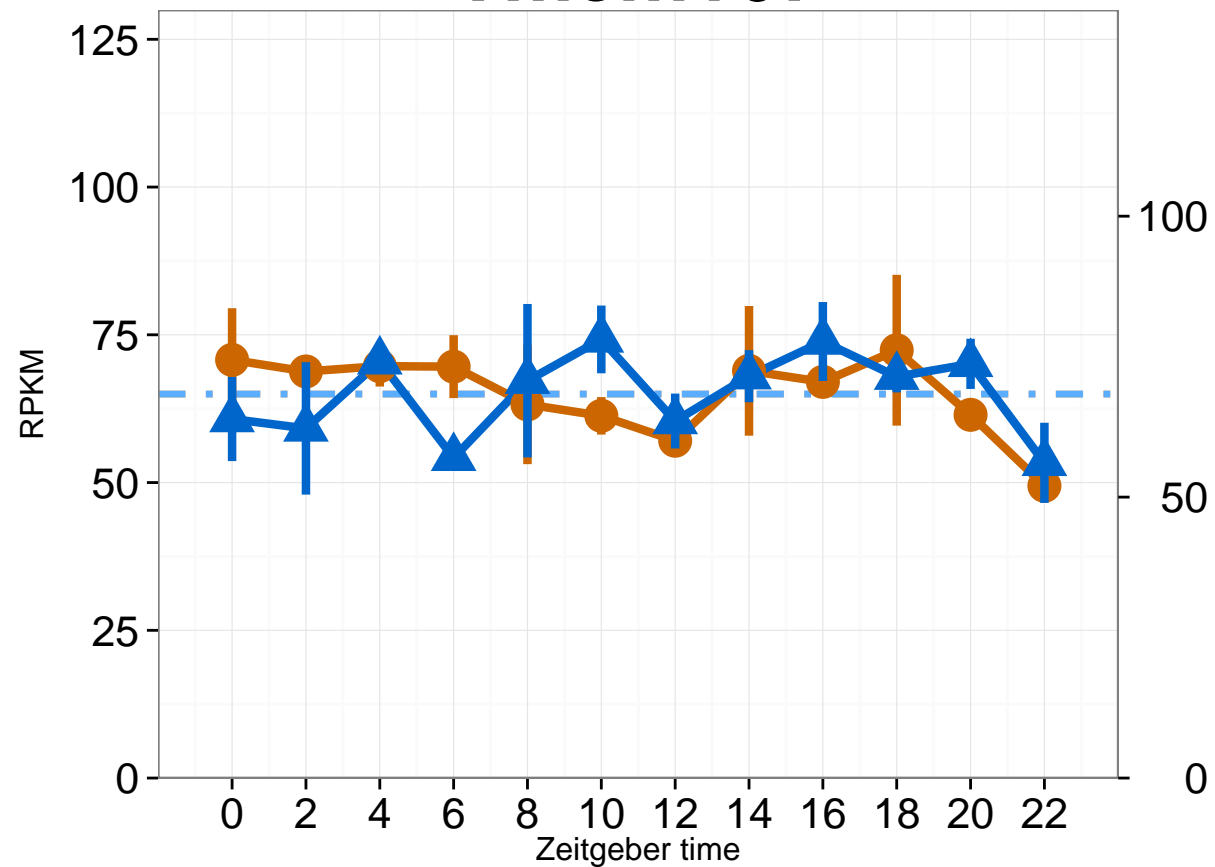

# Tmem167

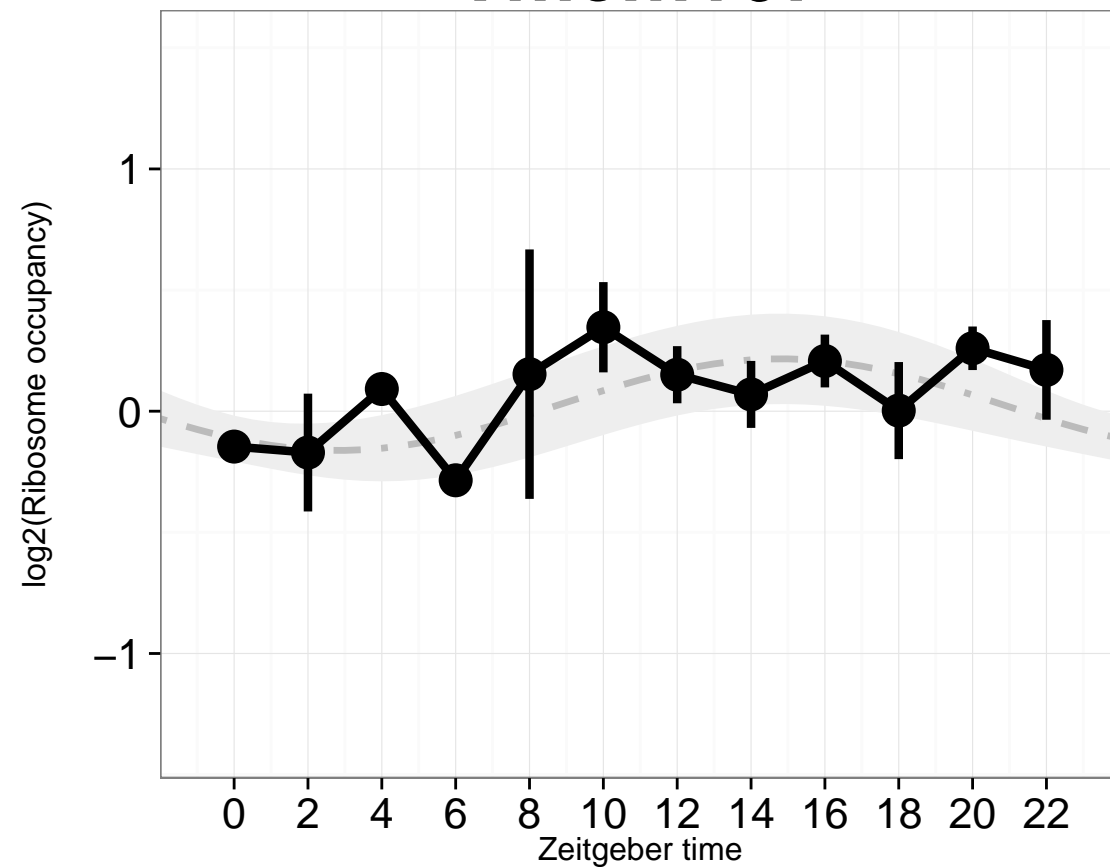

Supplement: SuppDataset_1.zip [file Tmem167_set_A.pdf › Supplemental Dataset 1/A-mRNA_nonrhyth_translation_nonrhyth/Tmem167_set_A.pdf]

# Tmem167b

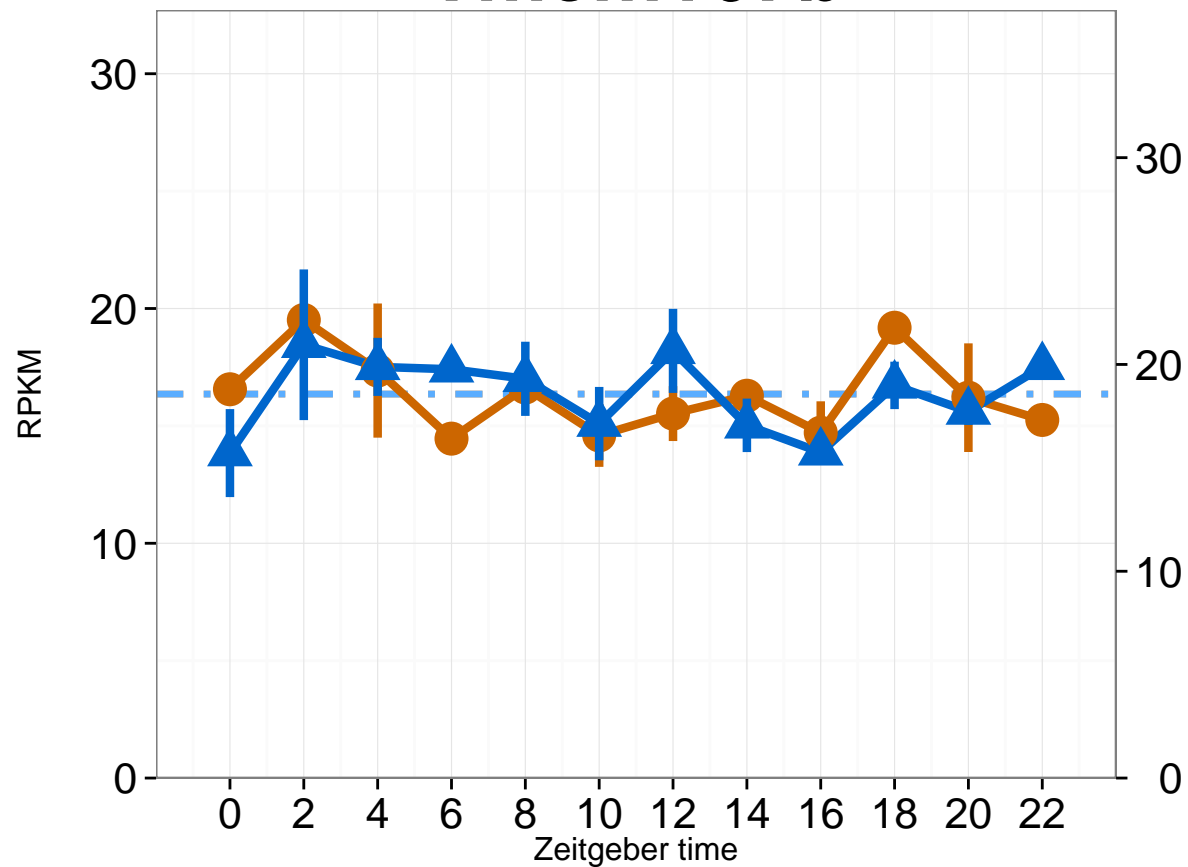

# Tmem167b

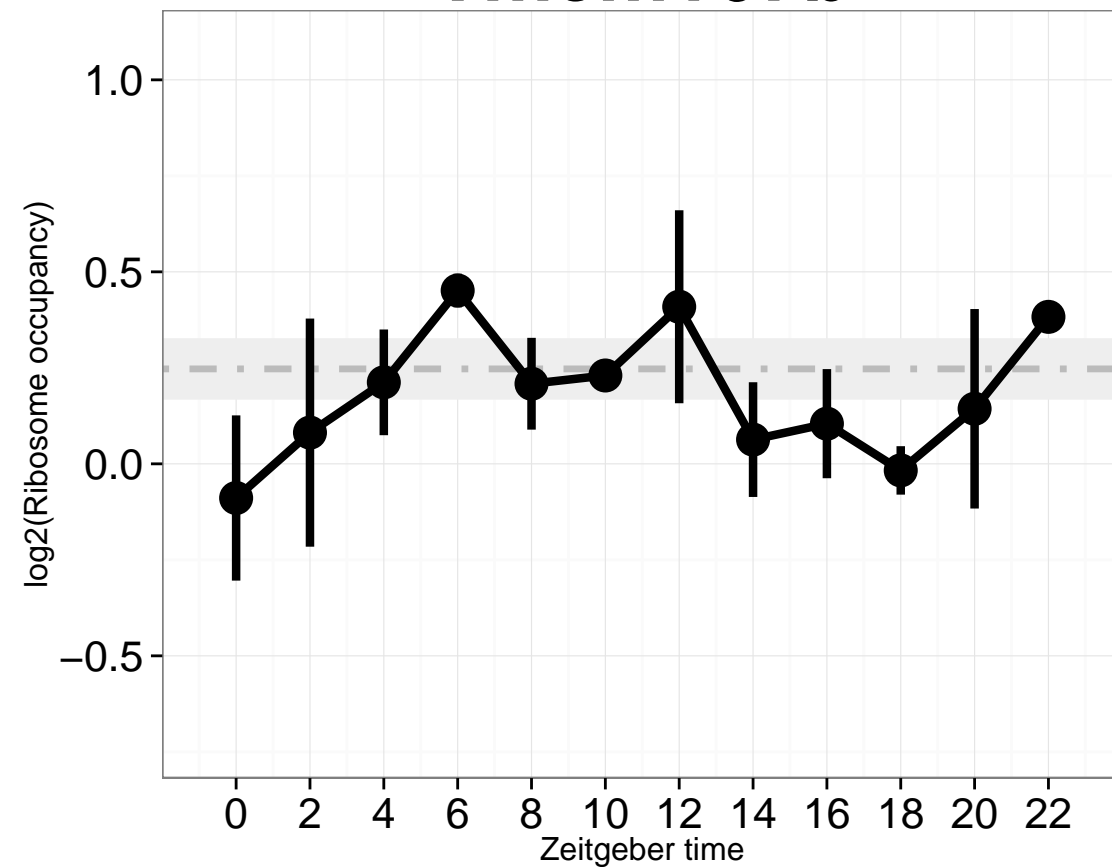

Supplement: SuppDataset_1.zip [file Tmem167b_set_A.pdf › Supplemental Dataset 1/A-mRNA_nonrhyth_translation_nonrhyth/Tmem167b_set_A.pdf]

# Tmem168

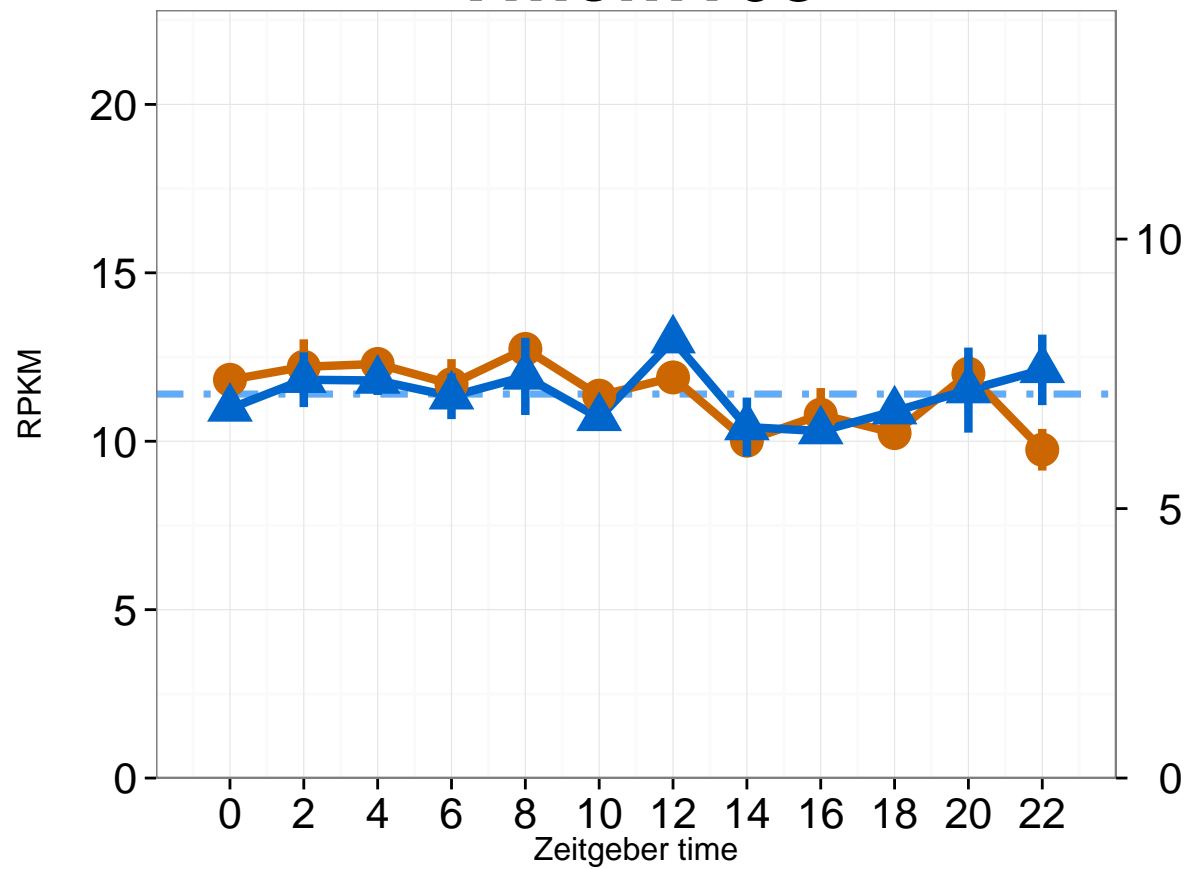

# Tmem168

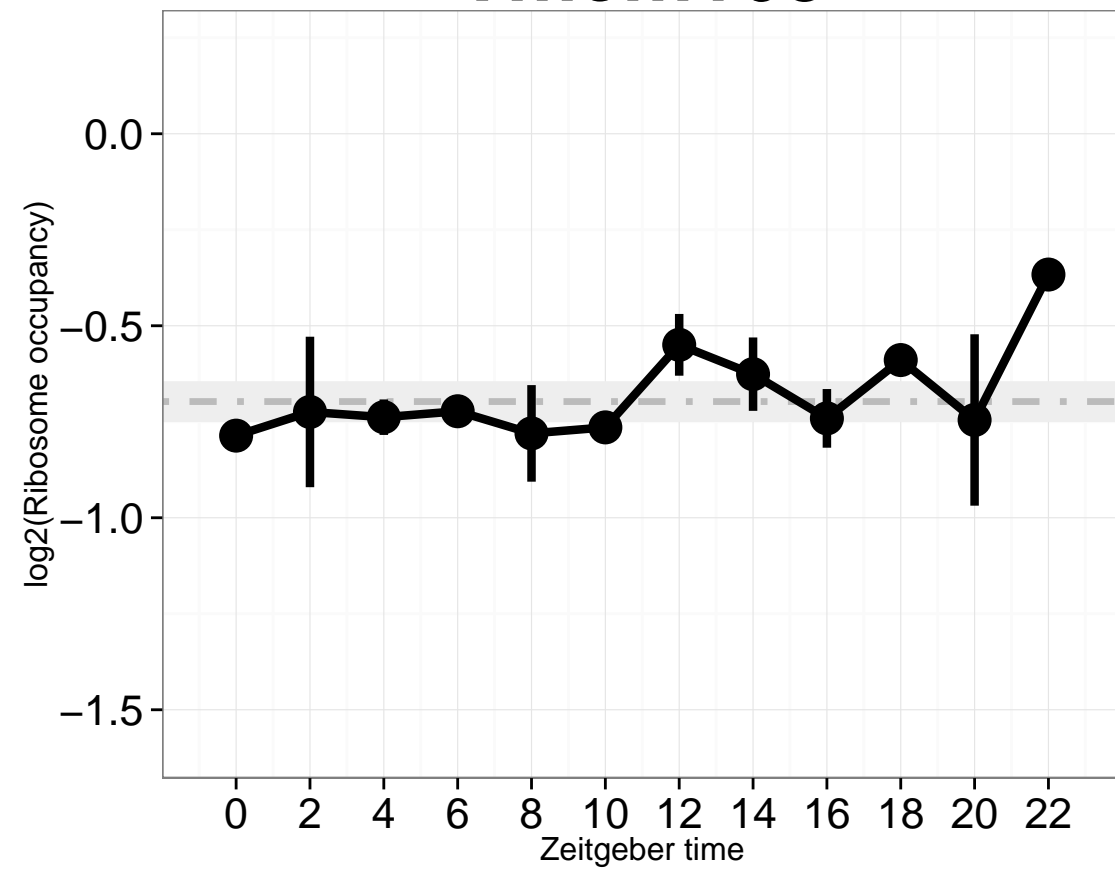

Supplement: SuppDataset_1.zip [file Tmem168_set_A.pdf › Supplemental Dataset 1/A-mRNA_nonrhyth_translation_nonrhyth/Tmem168_set_A.pdf]

## Tmem170

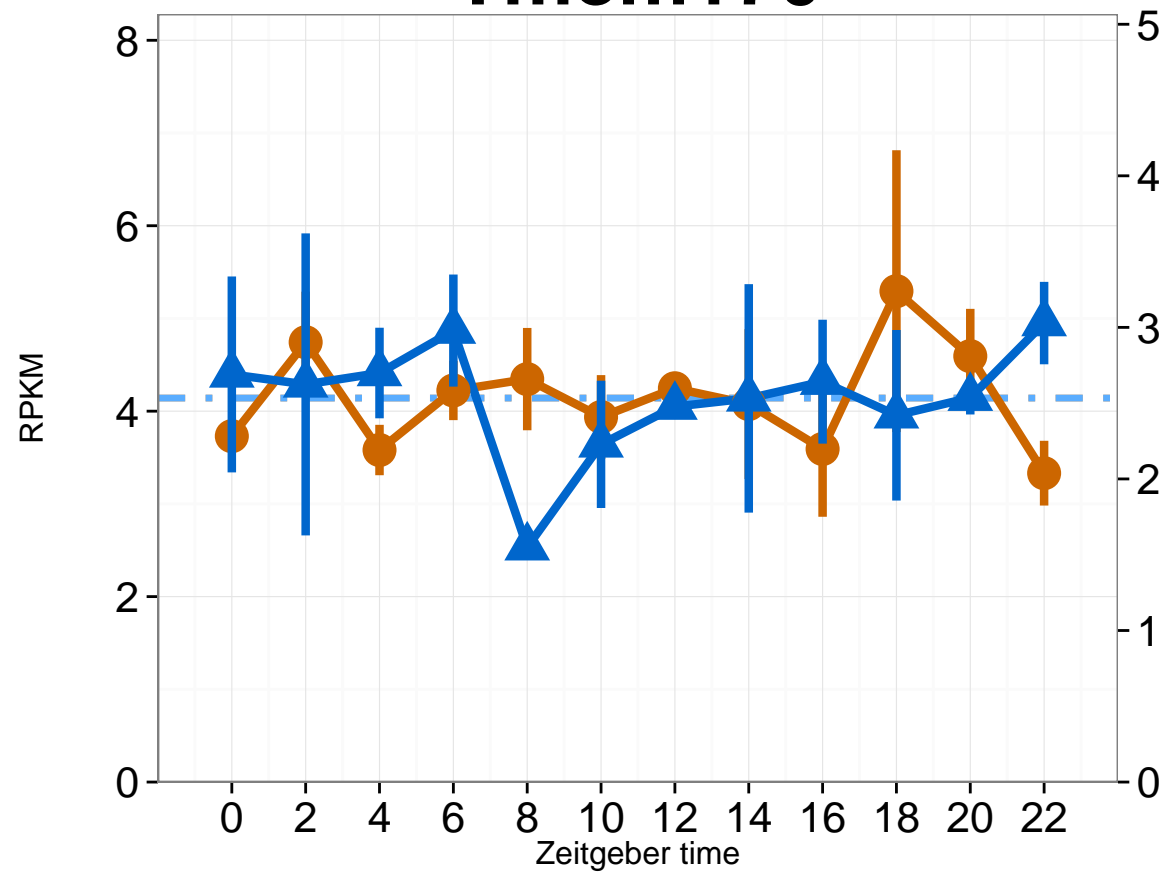

## Tmem170

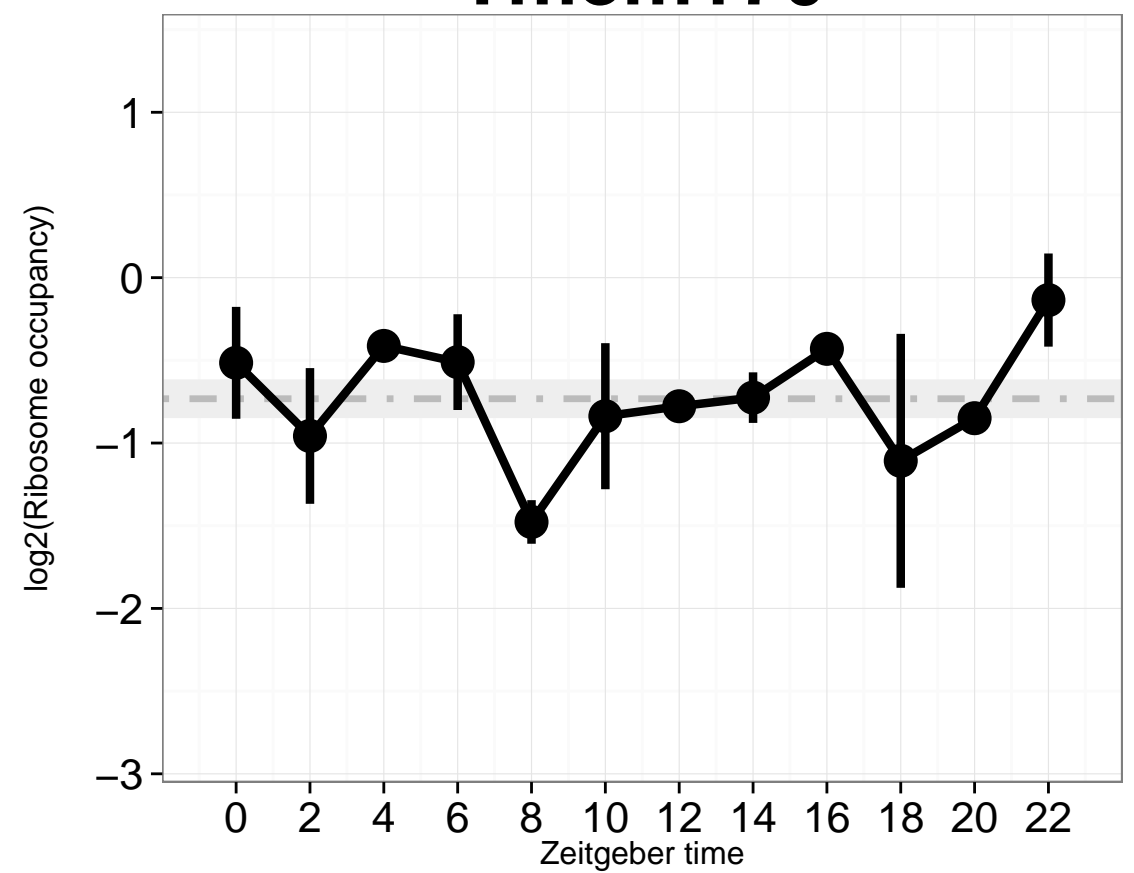

Supplement: SuppDataset_1.zip [file Tmem170_set_A.pdf › Supplemental Dataset 1/A-mRNA_nonrhyth_translation_nonrhyth/Tmem170_set_A.pdf]

# Tmem170b

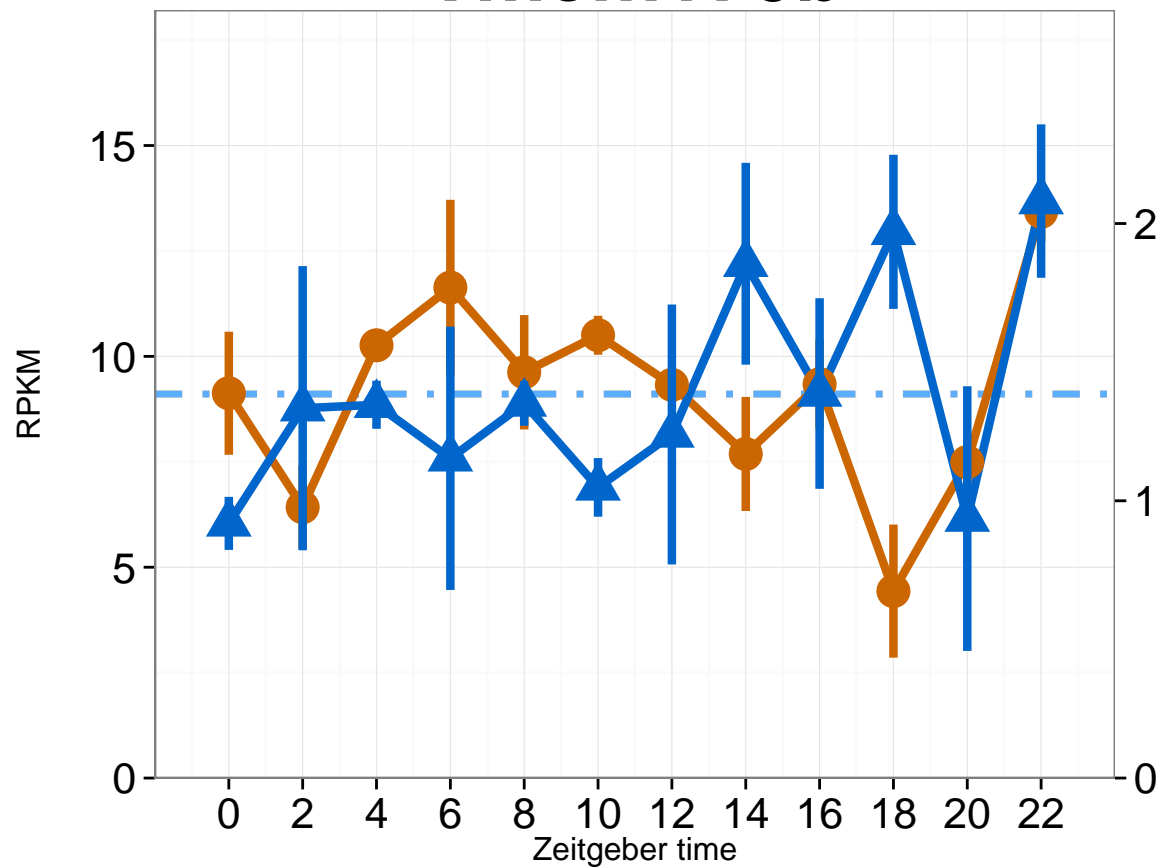

# Tmem170b

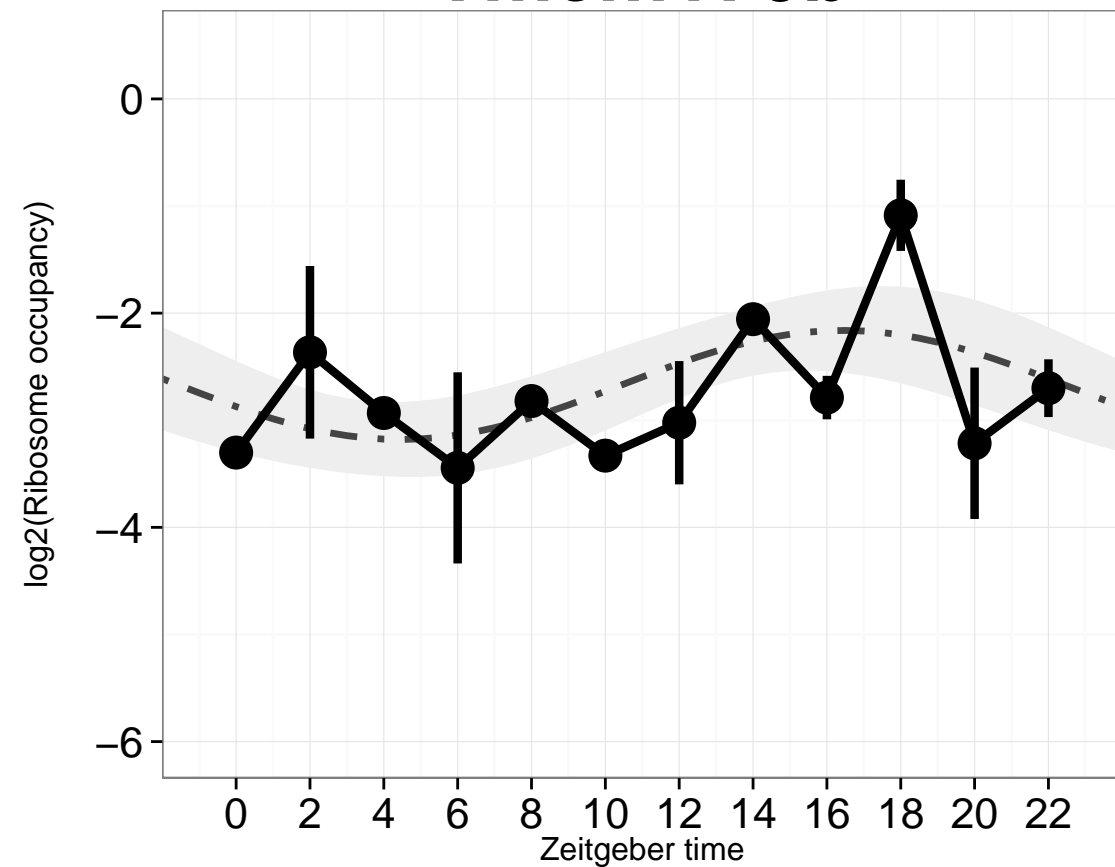

Supplement: SuppDataset_1.zip [file Tmem170b_set_A.pdf › Supplemental Dataset 1/A-mRNA_nonrhyth_translation_nonrhyth/Tmem170b_set_A.pdf]

# Tmem173

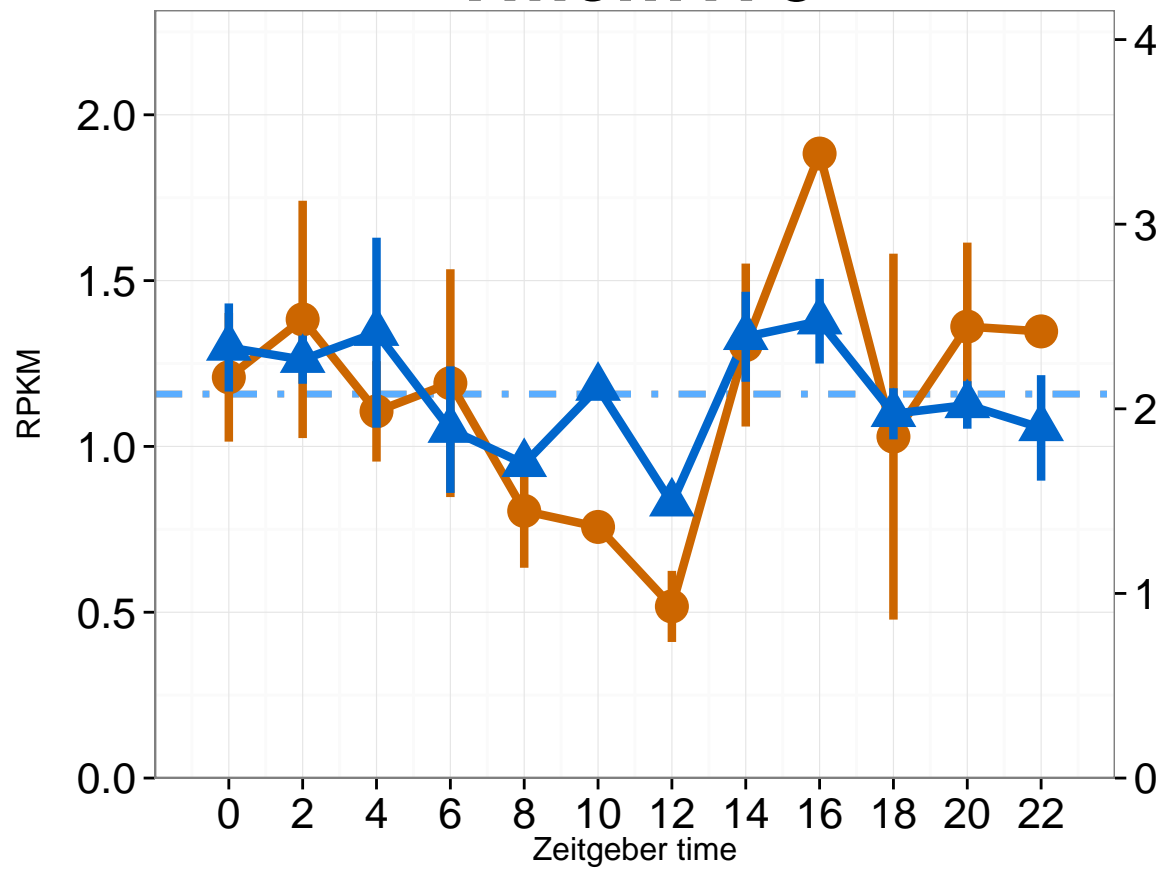

# Tmem173

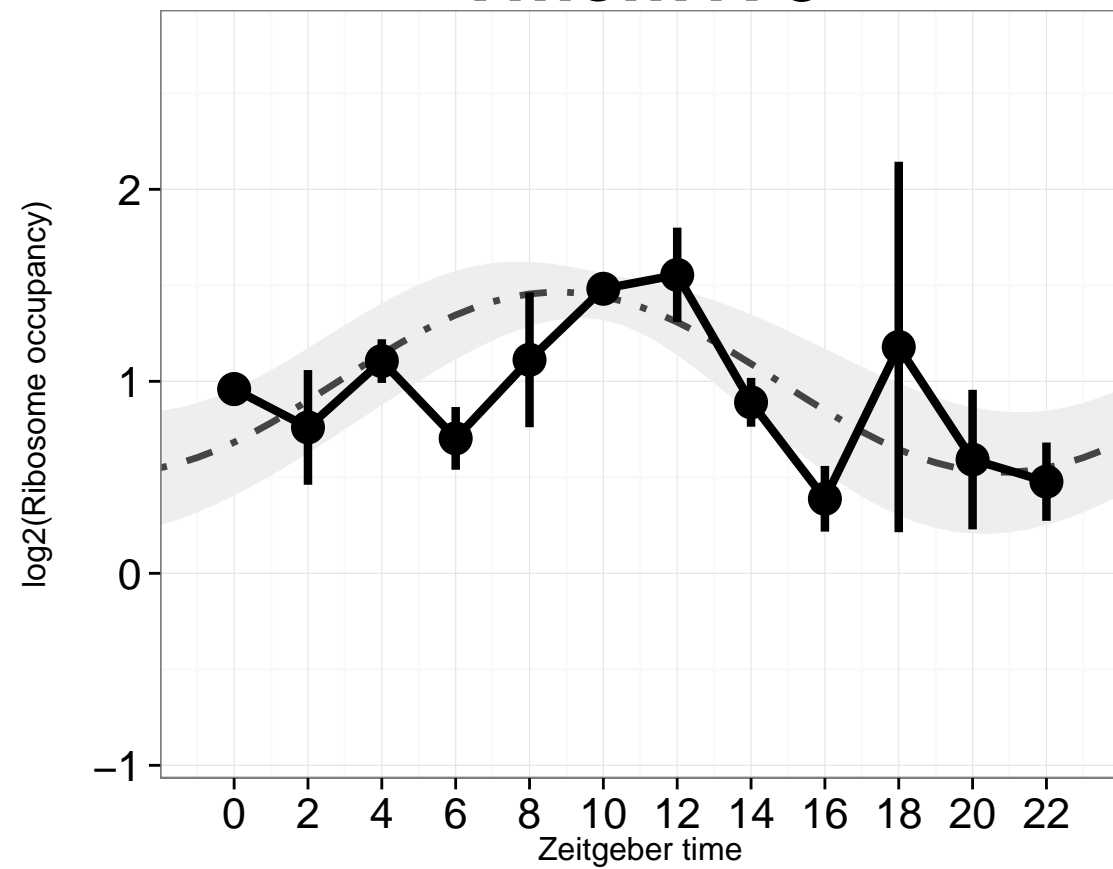

Supplement: SuppDataset_1.zip [file Tmem173_set_A.pdf › Supplemental Dataset 1/A-mRNA_nonrhyth_translation_nonrhyth/Tmem173_set_A.pdf]

# Tmem175

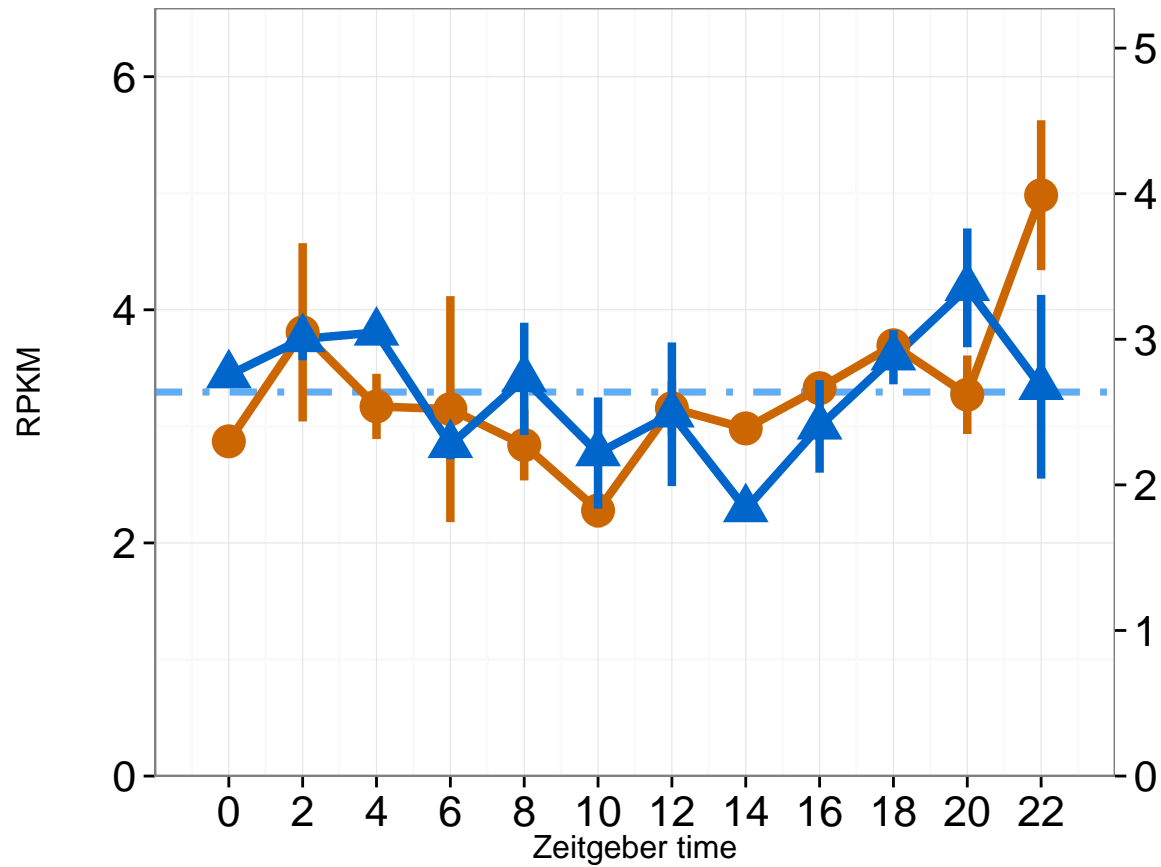

# Tmem175

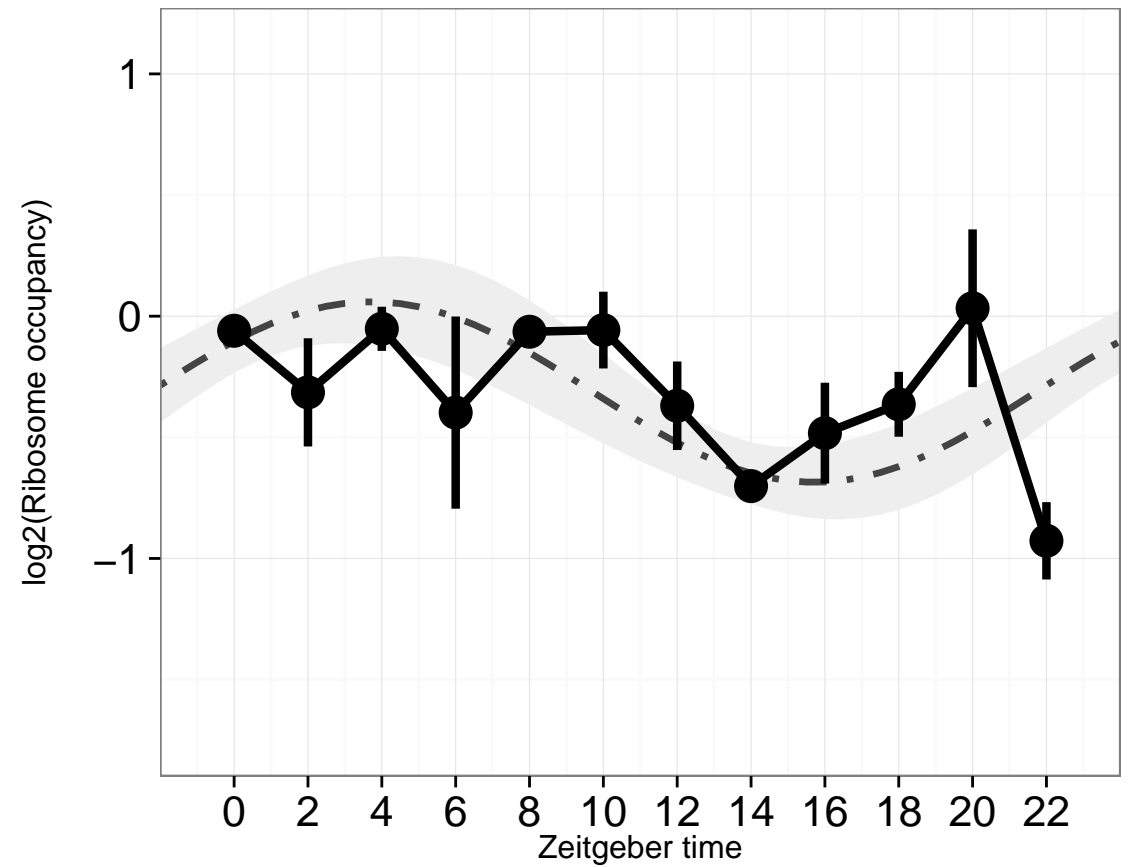

Supplement: SuppDataset_1.zip [file Tmem175_set_A.pdf › Supplemental Dataset 1/A-mRNA_nonrhyth_translation_nonrhyth/Tmem175_set_A.pdf]

# Tmem179b

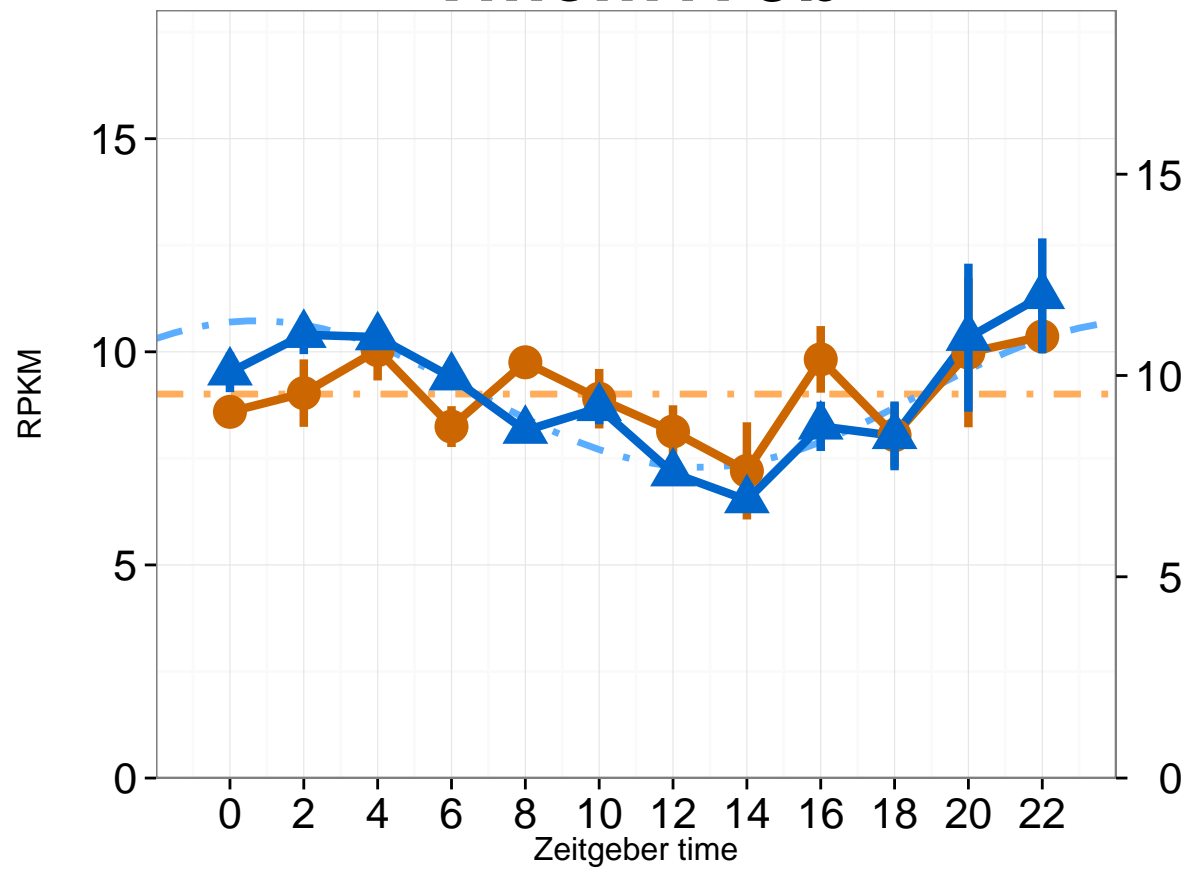

# Tmem179b

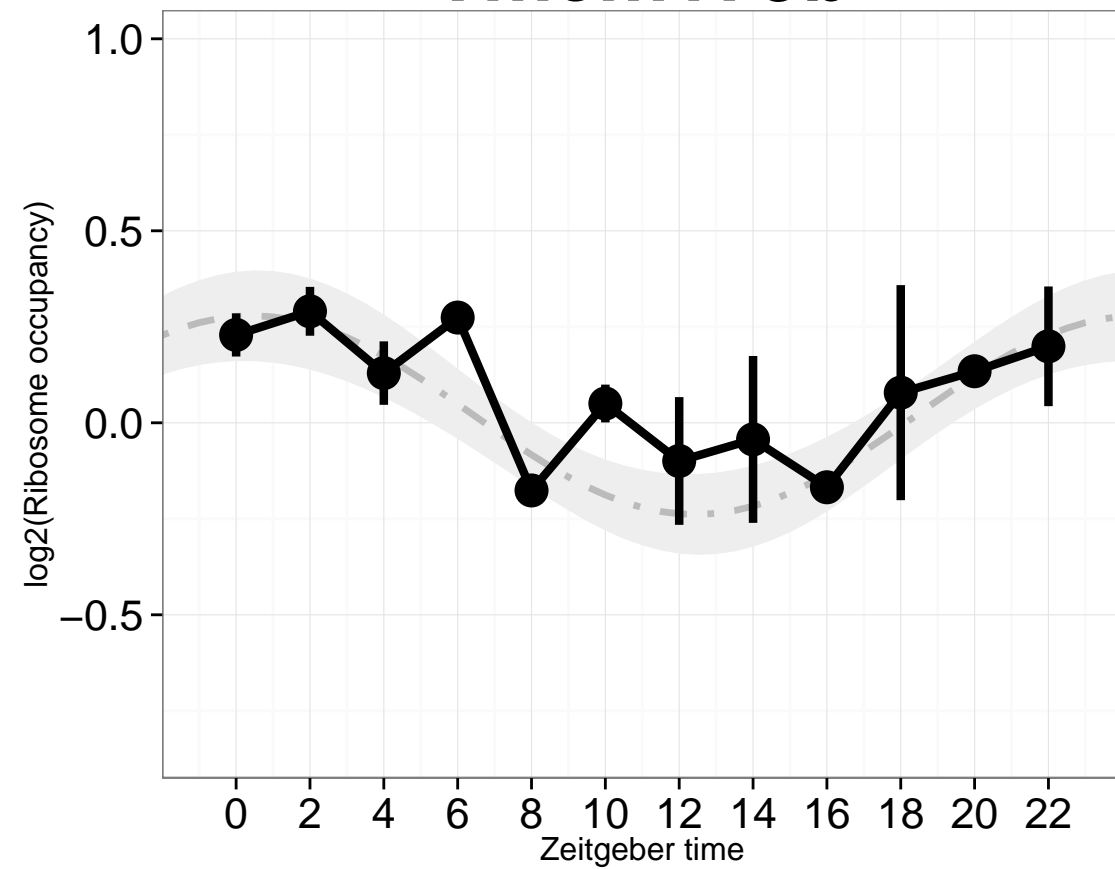

Supplement: SuppDataset_1.zip [file Tmem179b_set_A.pdf › Supplemental Dataset 1/A-mRNA_nonrhyth_translation_nonrhyth/Tmem179b_set_A.pdf]

# Tmem181a

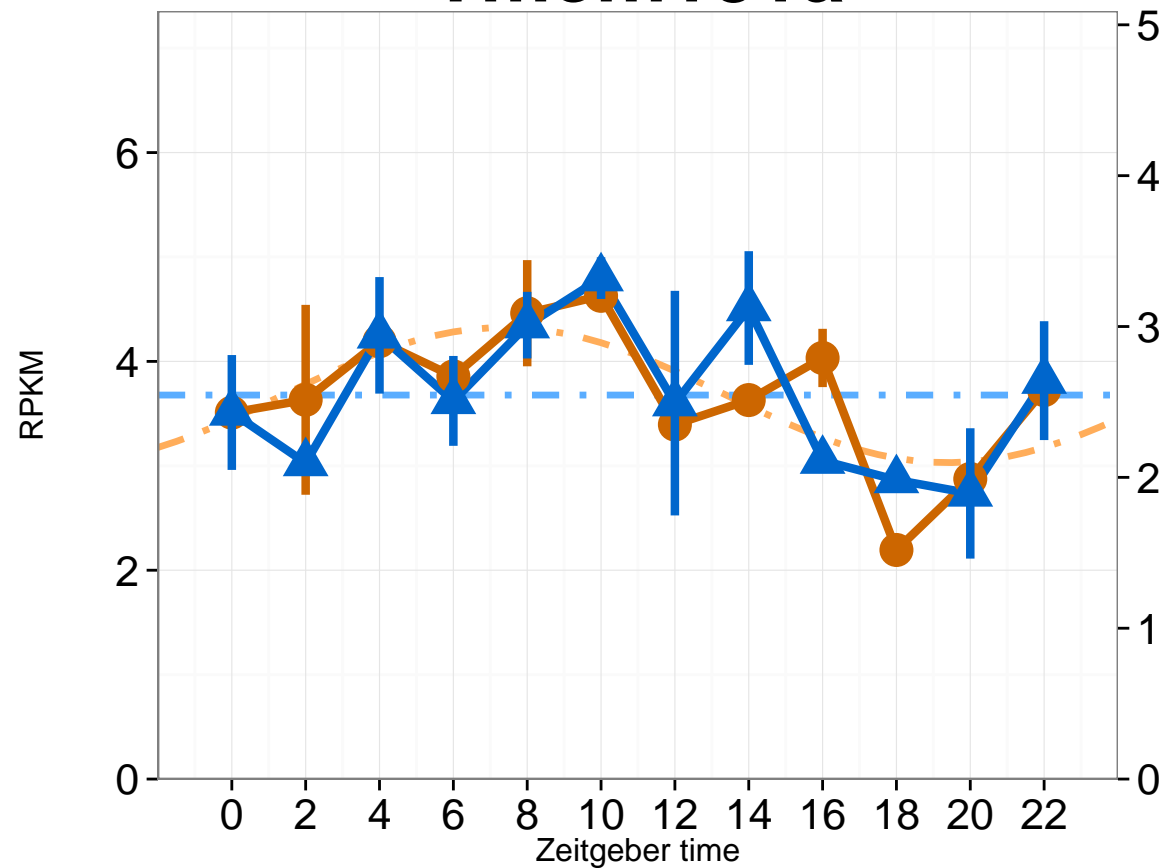

# Tmem181a

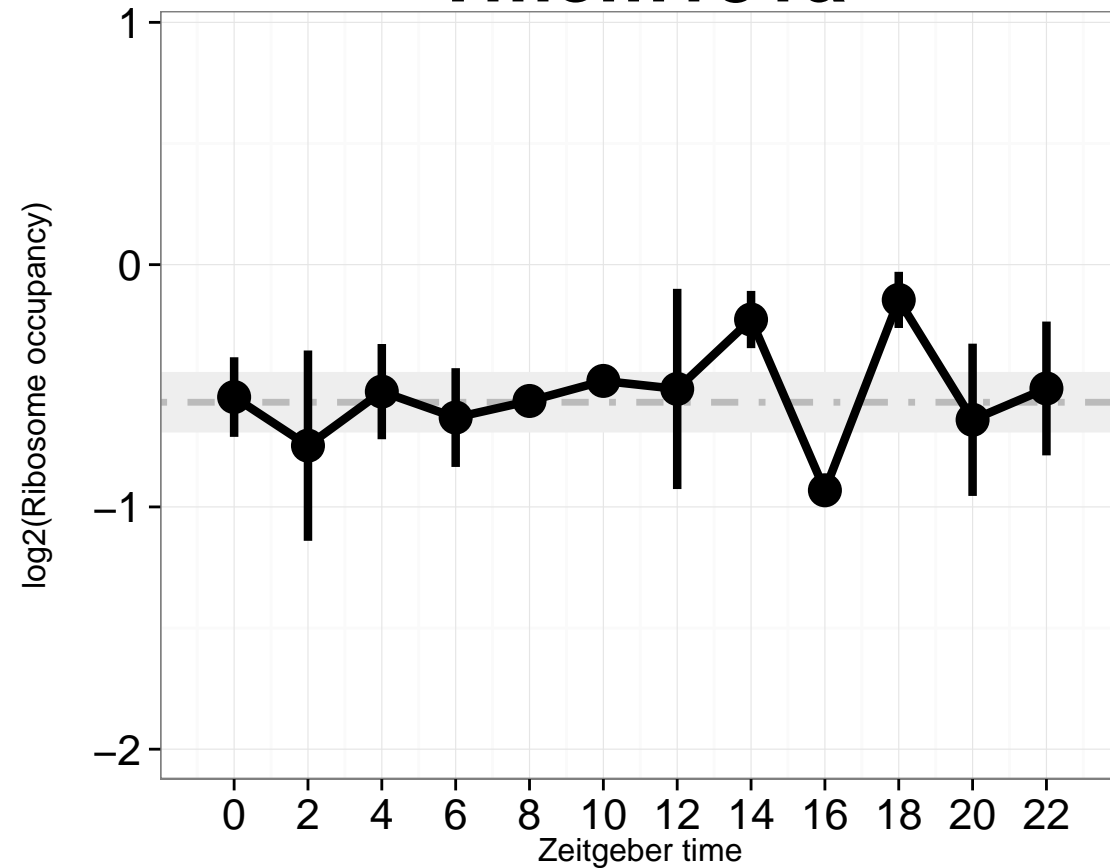

Supplement: SuppDataset_1.zip [file Tmem181a_set_A.pdf › Supplemental Dataset 1/A-mRNA_nonrhyth_translation_nonrhyth/Tmem181a_set_A.pdf]

# Tmem183a

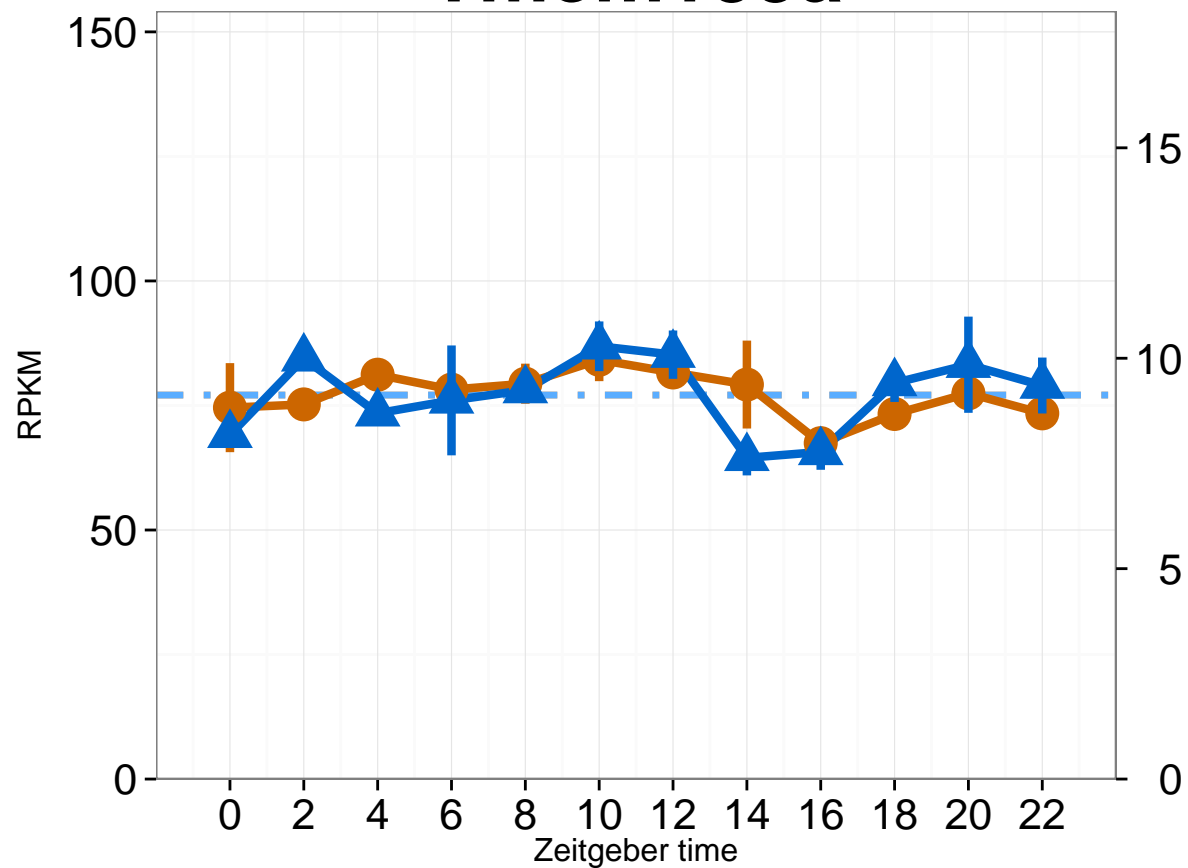

# Tmem183a

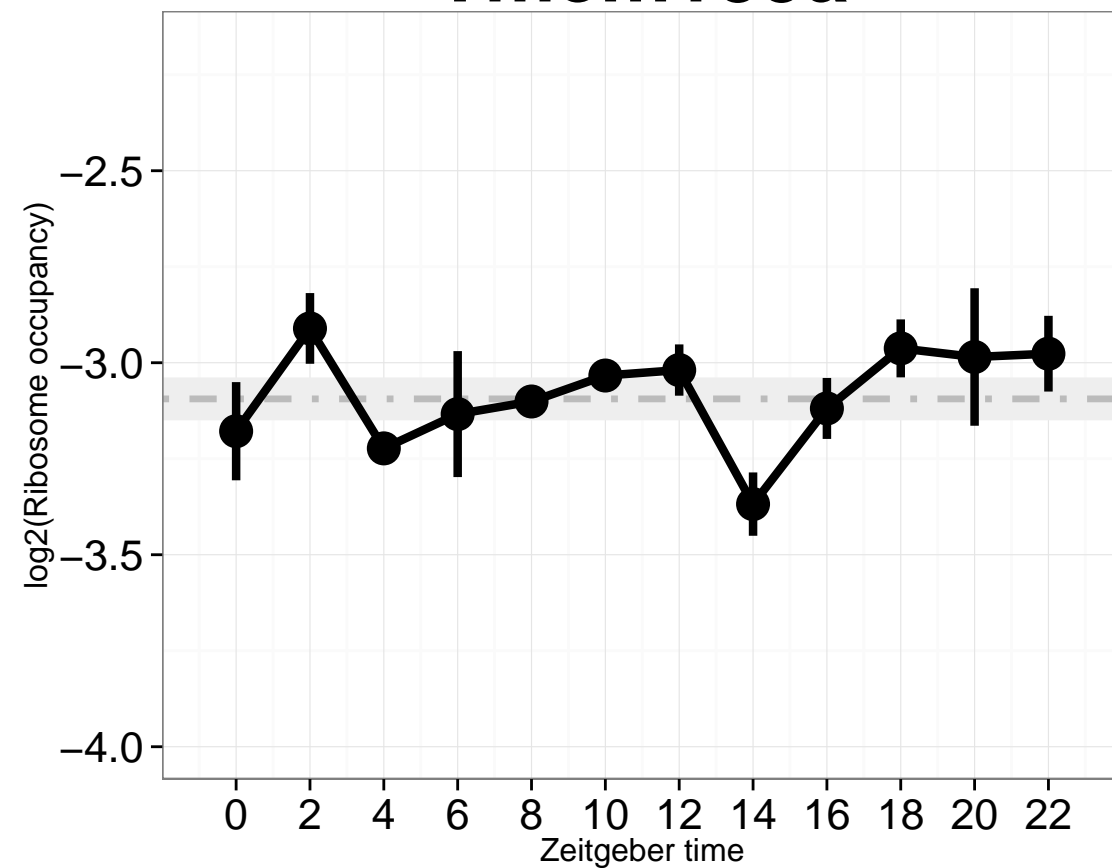

Supplement: SuppDataset_1.zip [file Tmem183a_set_A.pdf › Supplemental Dataset 1/A-mRNA_nonrhyth_translation_nonrhyth/Tmem183a_set_A.pdf]

# Tmem184b

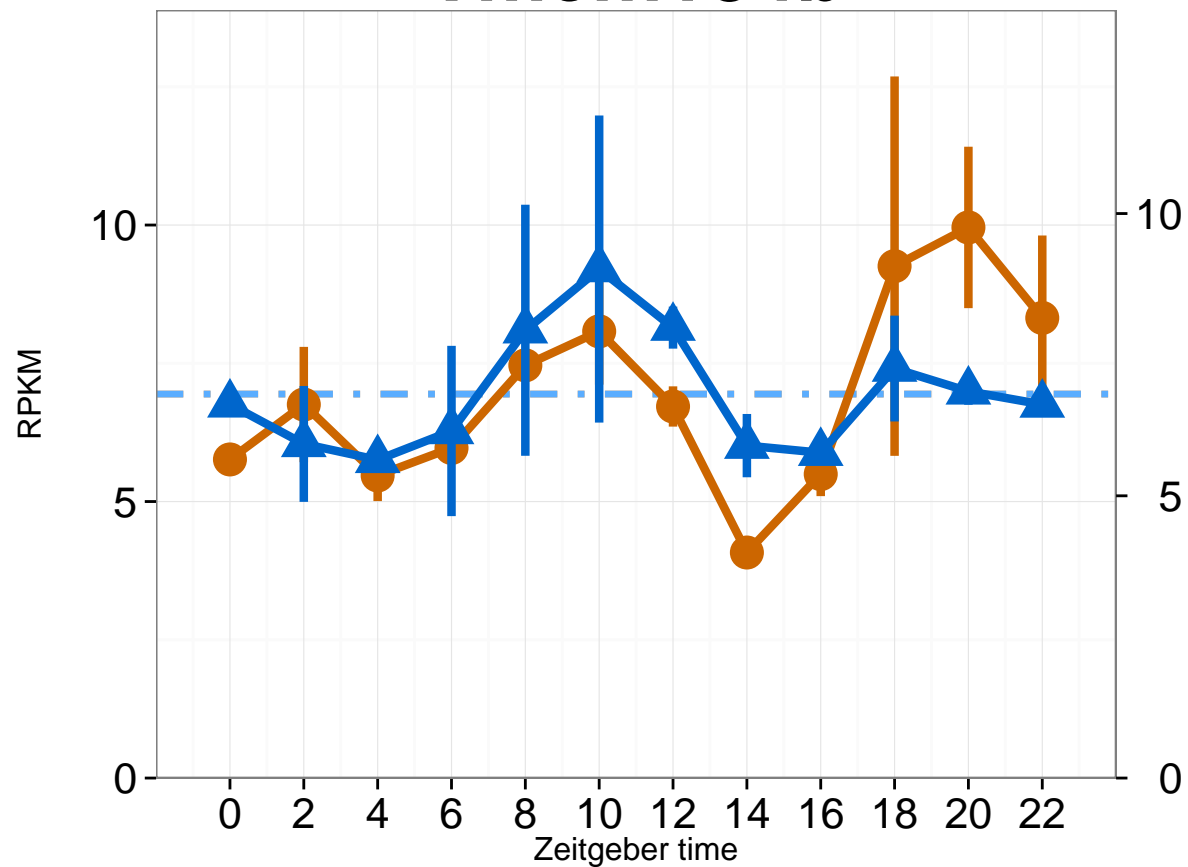

# Tmem184b

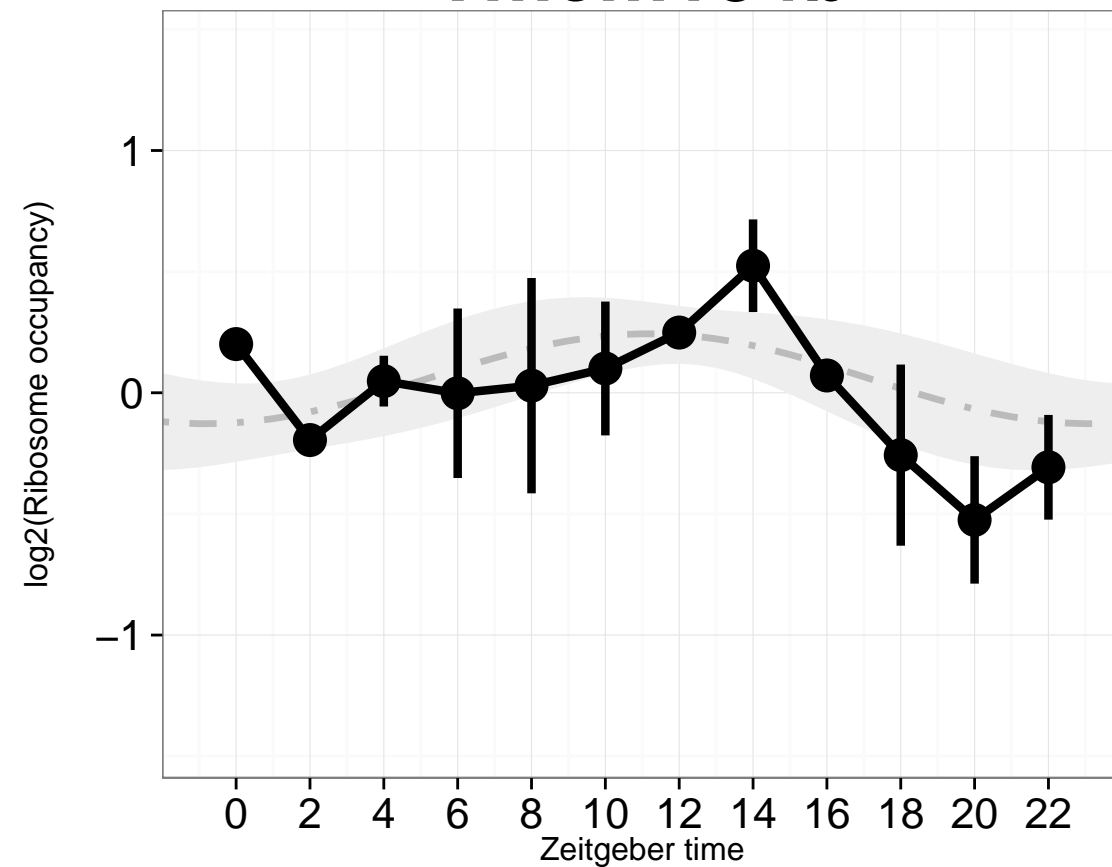

Supplement: SuppDataset_1.zip [file Tmem184b_set_A.pdf › Supplemental Dataset 1/A-mRNA_nonrhyth_translation_nonrhyth/Tmem184b_set_A.pdf]

# Tmem184c

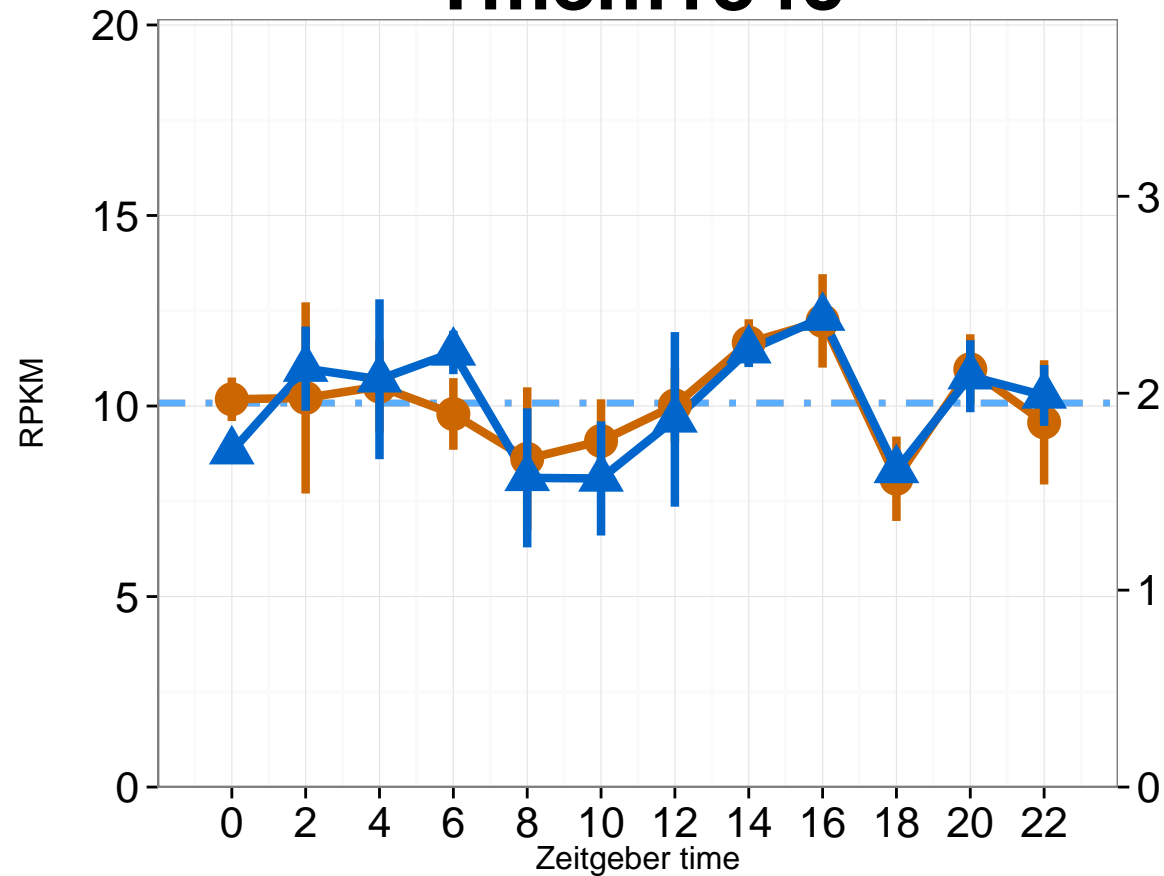

# Tmem184c

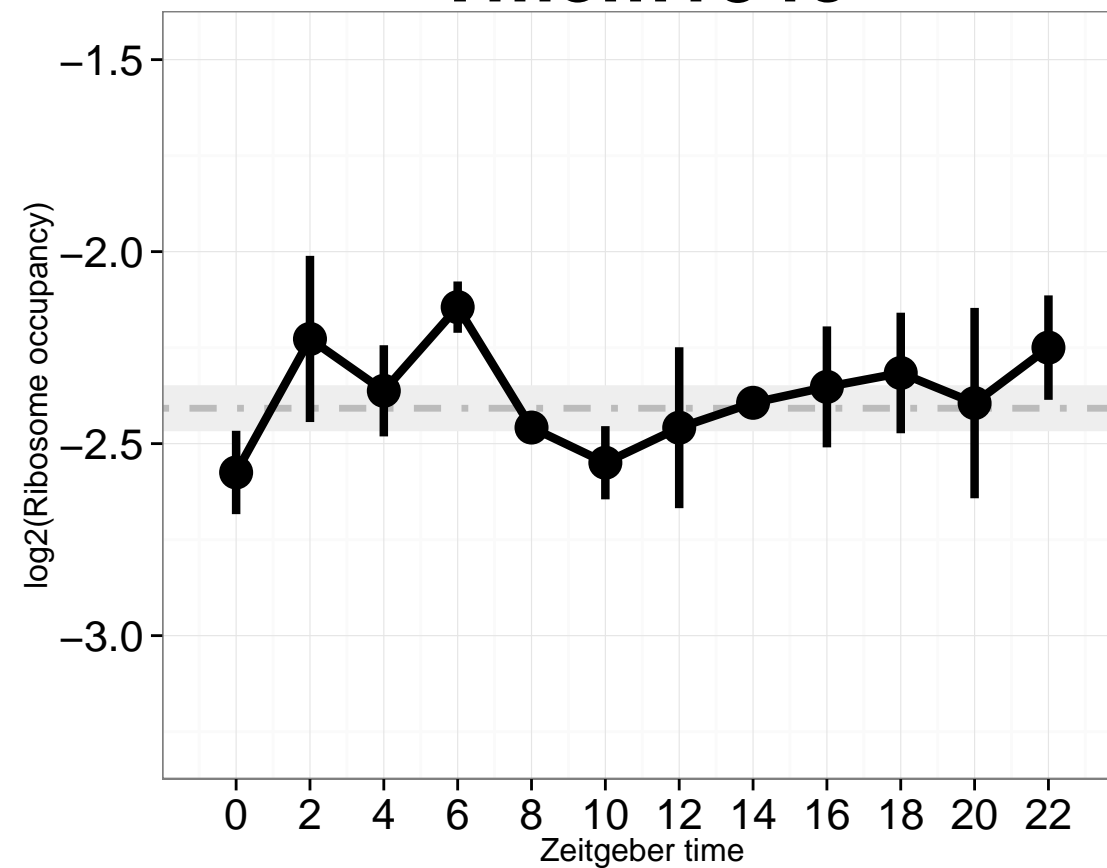

Supplement: SuppDataset_1.zip [file Tmem184c_set_A.pdf › Supplemental Dataset 1/A-mRNA_nonrhyth_translation_nonrhyth/Tmem184c_set_A.pdf]

# Tmem186

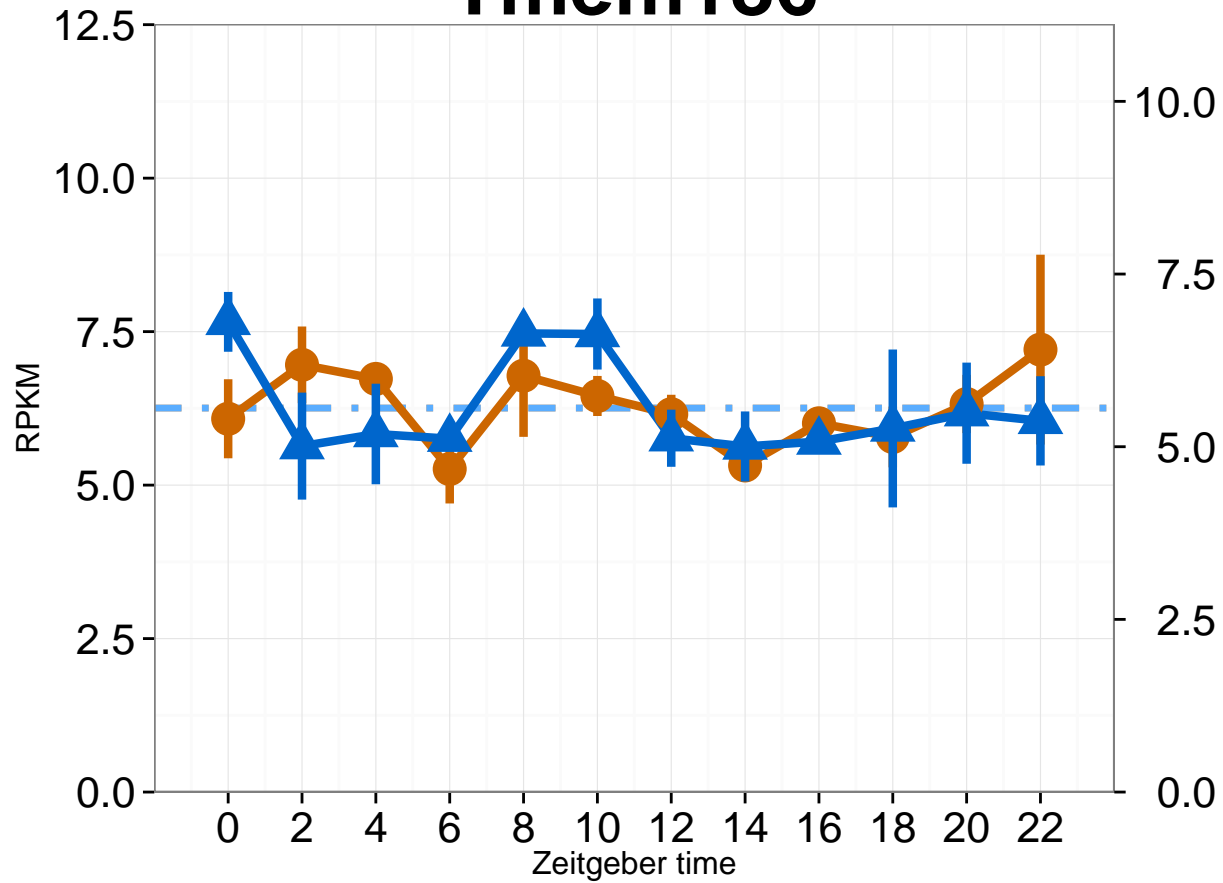

# Tmem186

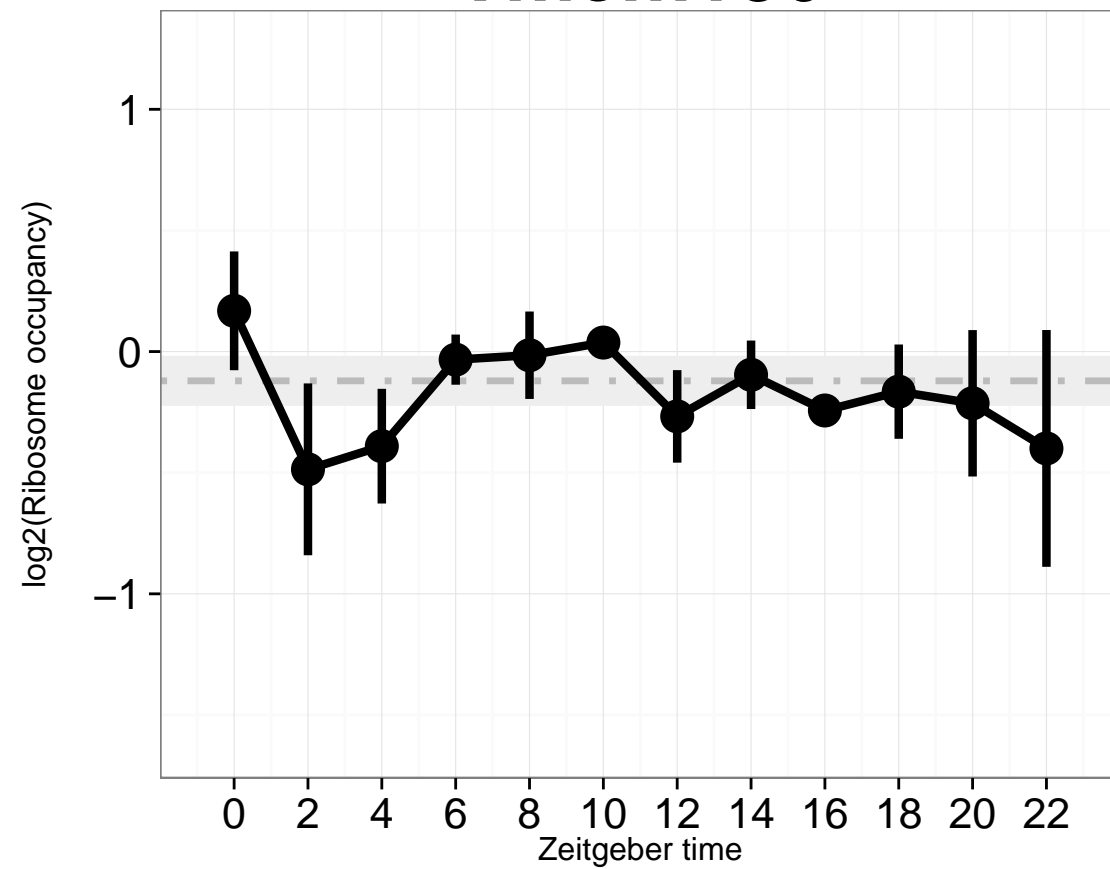

Supplement: SuppDataset_1.zip [file Tmem186_set_A.pdf › Supplemental Dataset 1/A-mRNA_nonrhyth_translation_nonrhyth/Tmem186_set_A.pdf]

# Tmem18

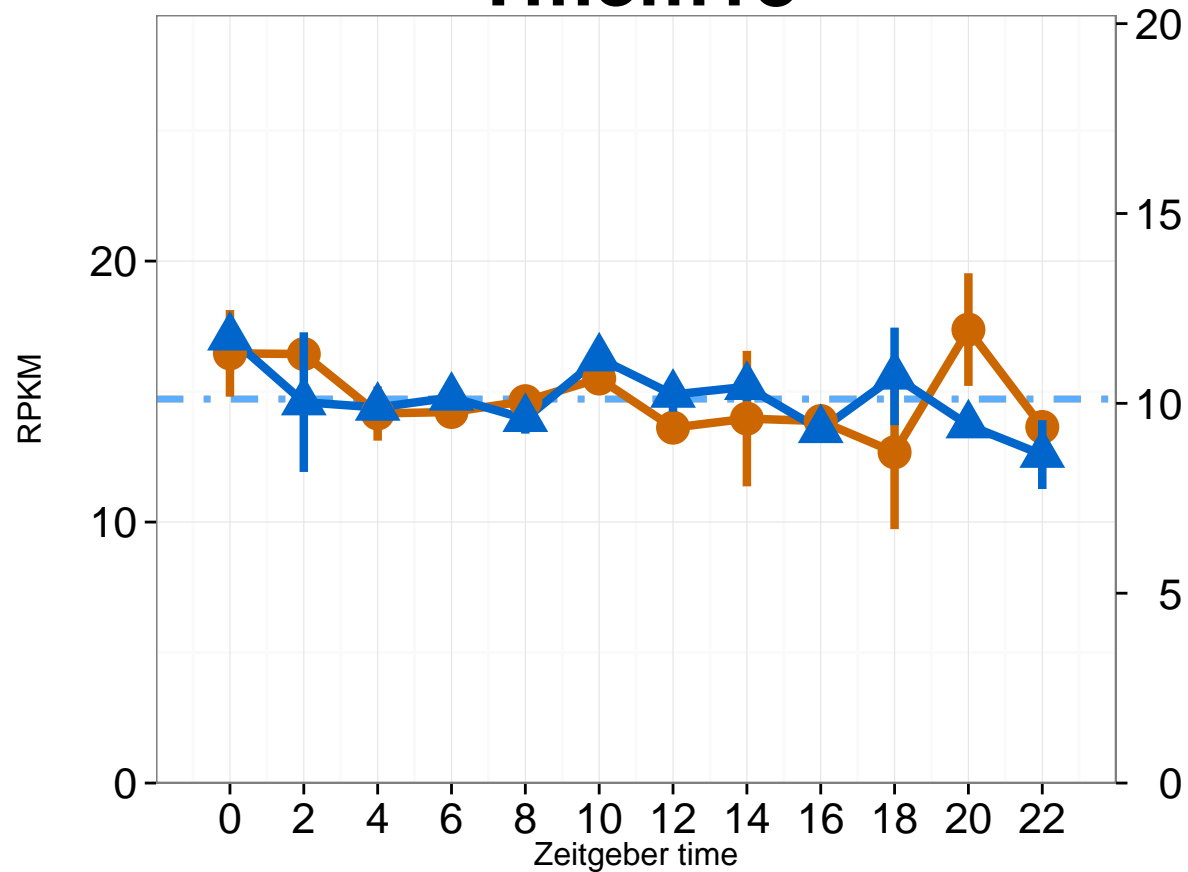

# Tmem18

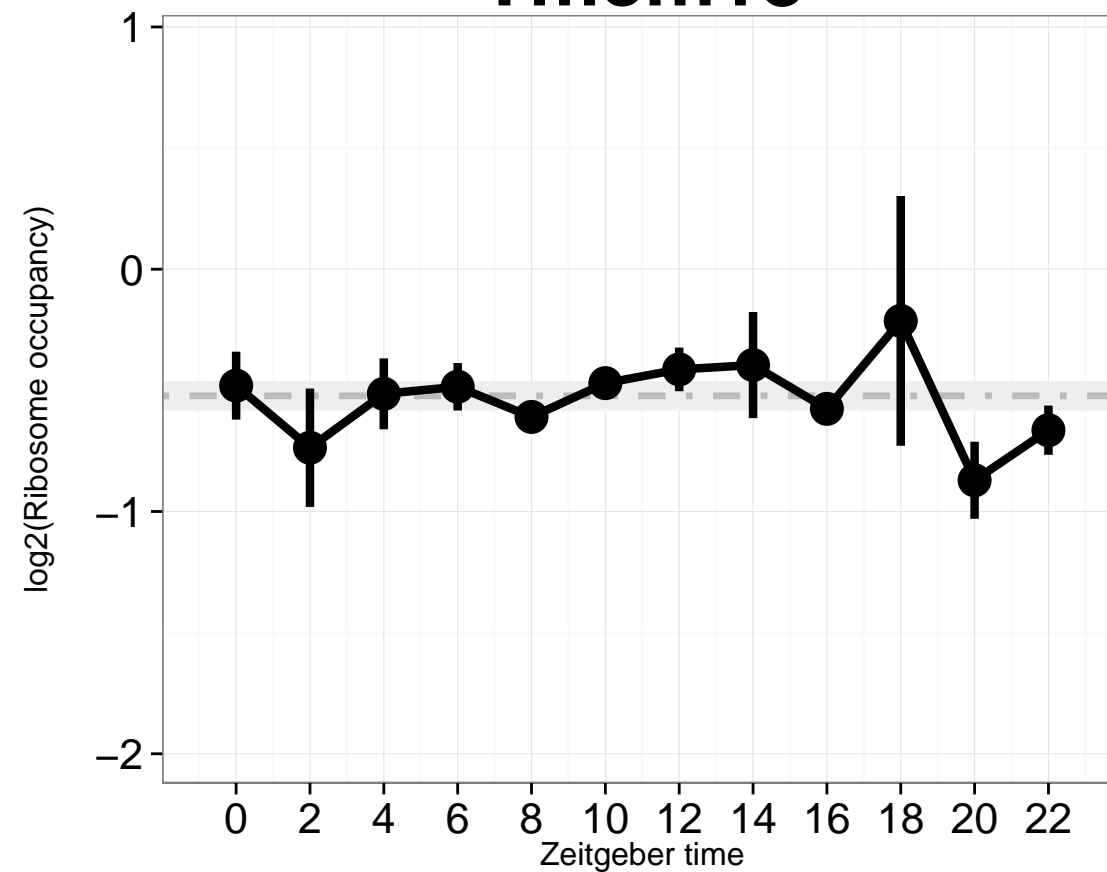

Supplement: SuppDataset_1.zip [file Tmem18_set_A.pdf › Supplemental Dataset 1/A-mRNA_nonrhyth_translation_nonrhyth/Tmem18_set_A.pdf]

# Tmem192

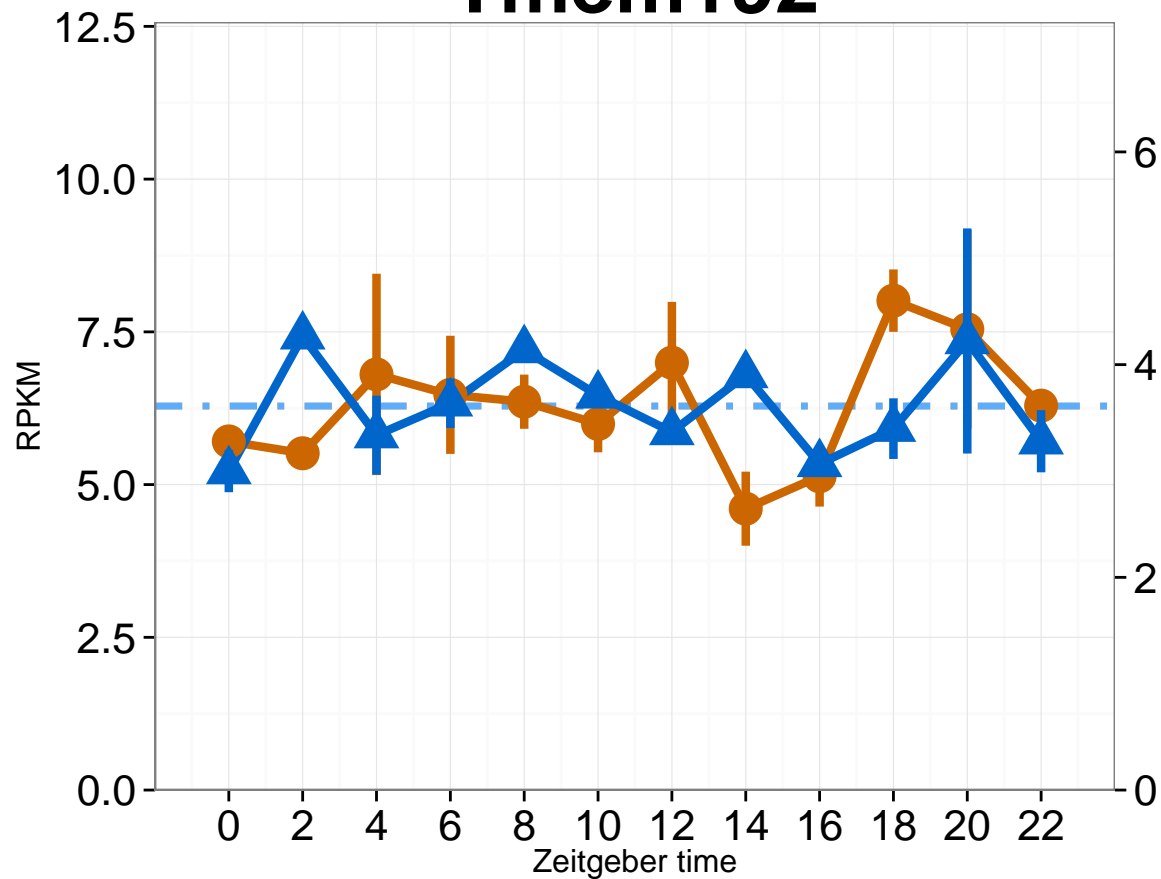

# Tmem192

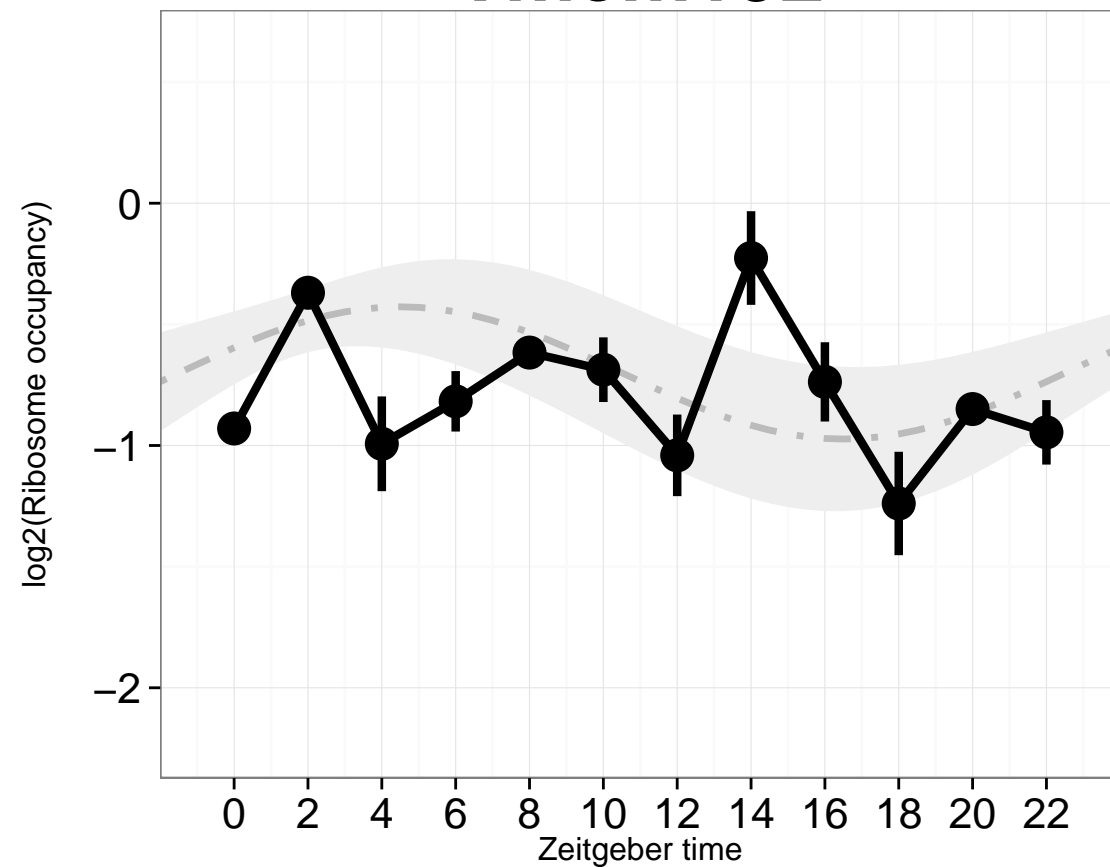

Supplement: SuppDataset_1.zip [file Tmem192_set_A.pdf › Supplemental Dataset 1/A-mRNA_nonrhyth_translation_nonrhyth/Tmem192_set_A.pdf]

## Tmem198b

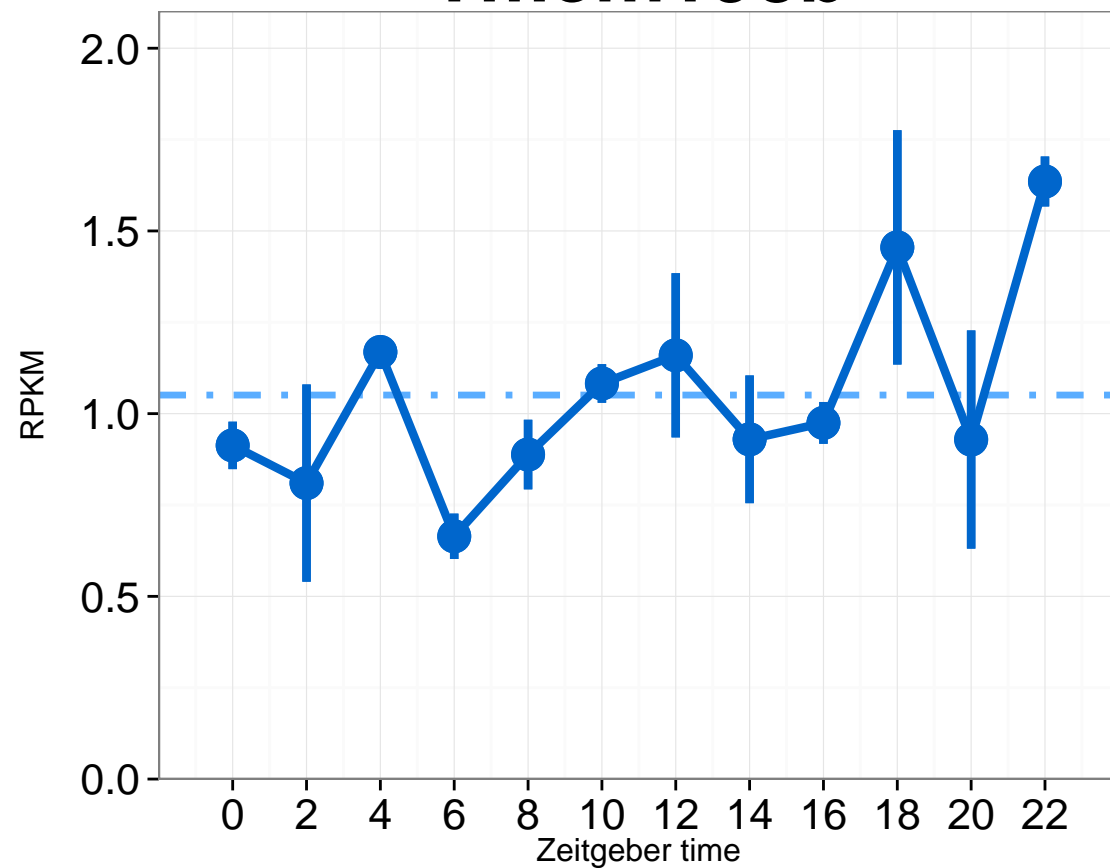

## Tmem198b log2(Ribosome occupan

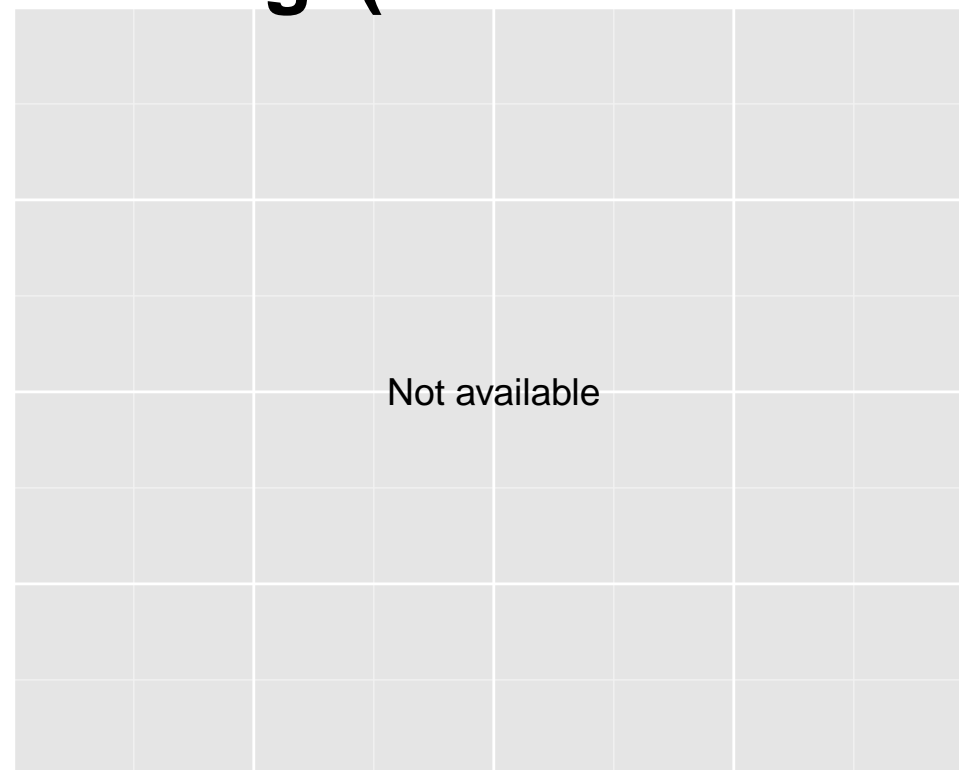

Supplement: SuppDataset_1.zip [file Tmem198b_set_A.pdf › Supplemental Dataset 1/A-mRNA_nonrhyth_translation_nonrhyth/Tmem198b_set_A.pdf]

# Tmem199

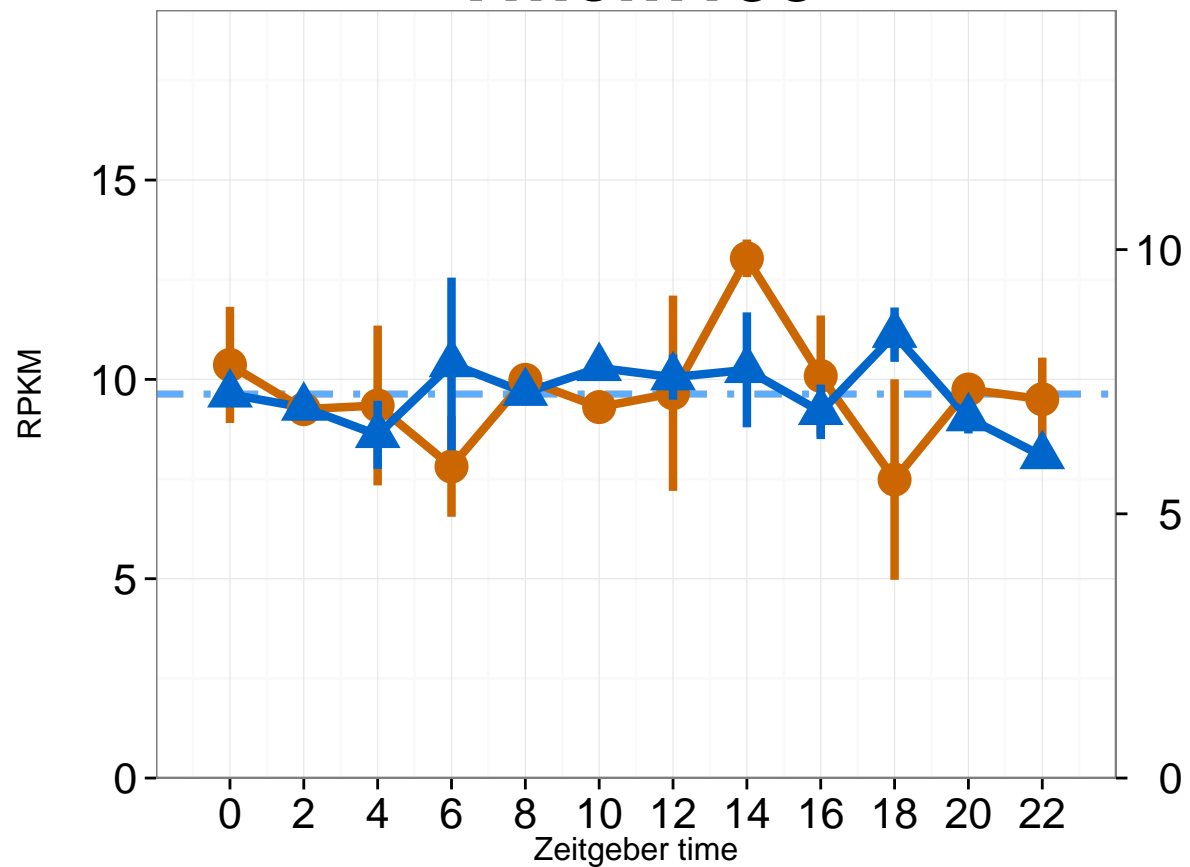

# Tmem199

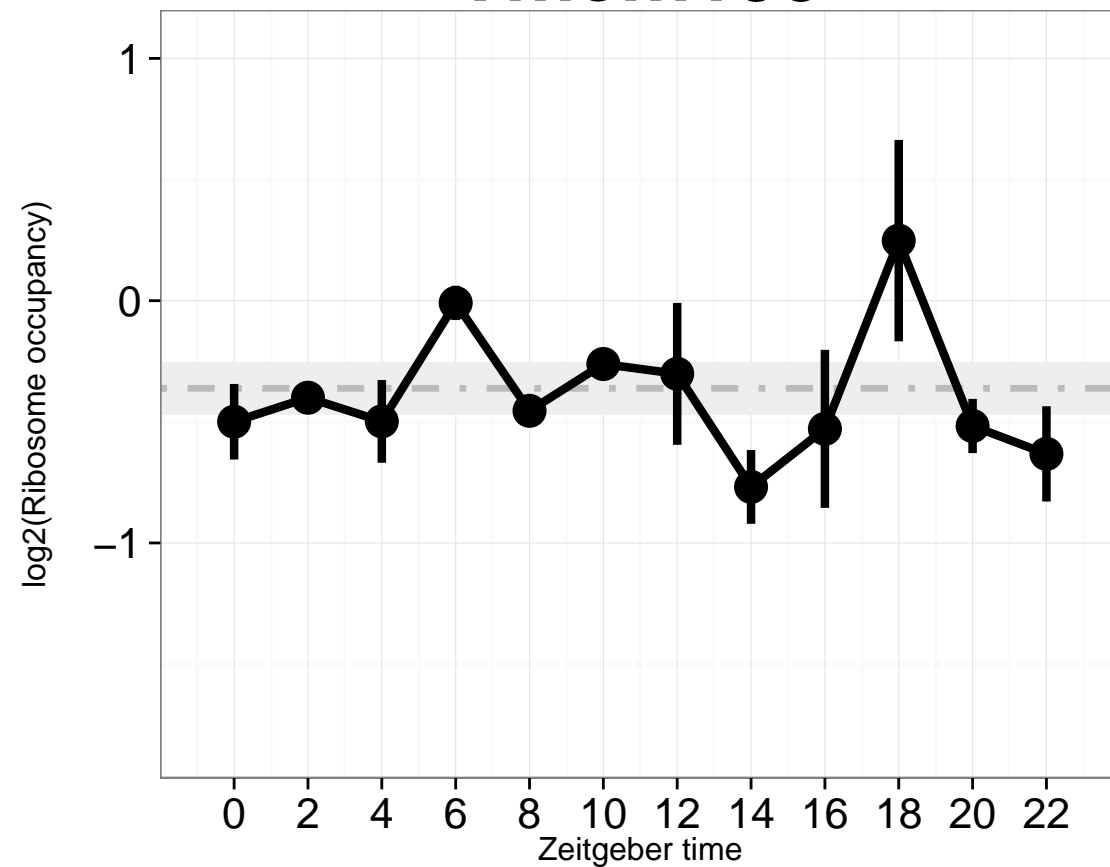

Supplement: SuppDataset_1.zip [file Tmem199_set_A.pdf › Supplemental Dataset 1/A-mRNA_nonrhyth_translation_nonrhyth/Tmem199_set_A.pdf]

# Tmem19

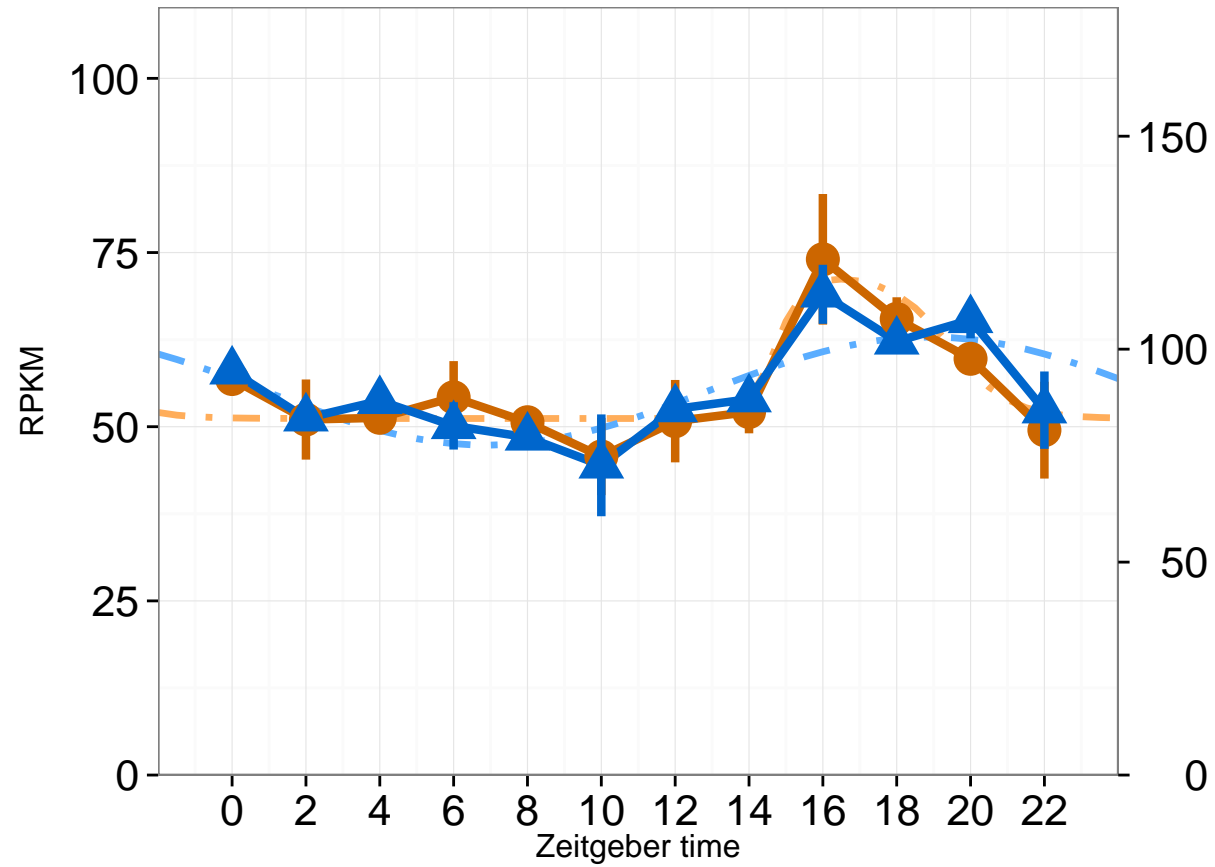

# Tmem19

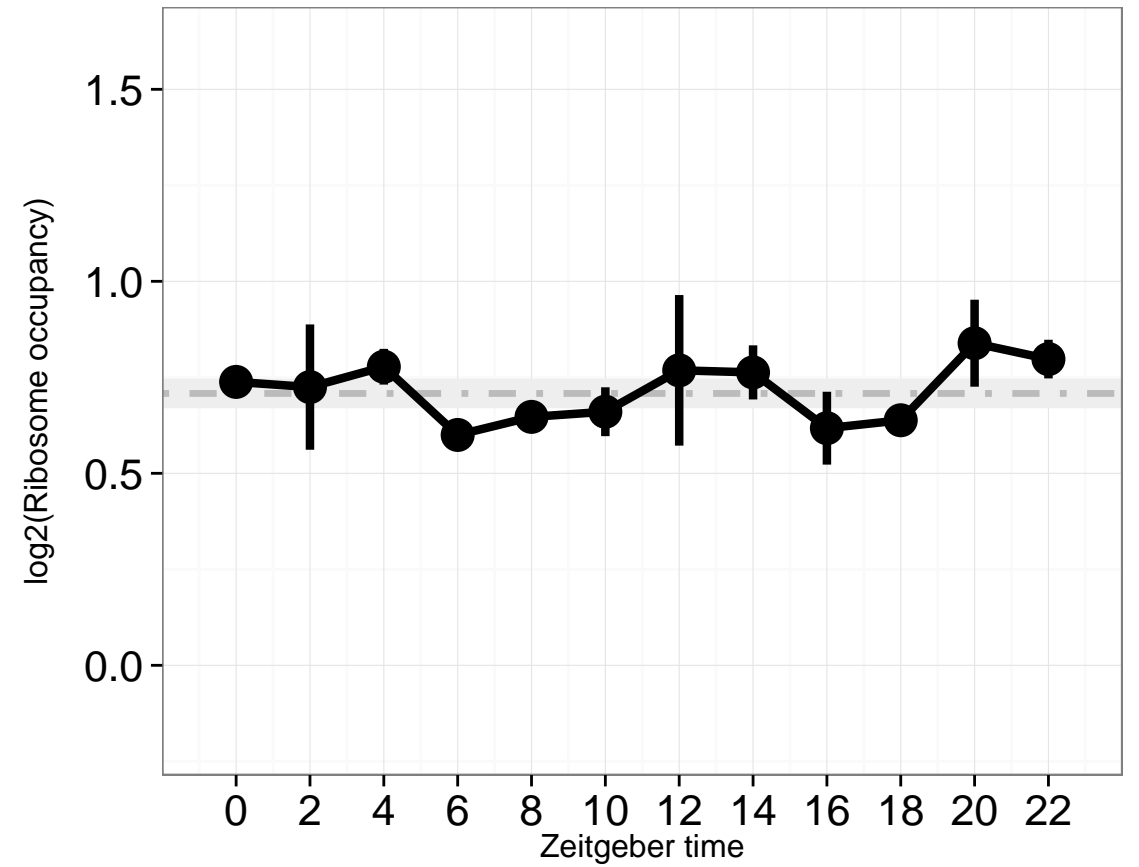

Supplement: SuppDataset_1.zip [file Tmem19_set_A.pdf › Supplemental Dataset 1/A-mRNA_nonrhyth_translation_nonrhyth/Tmem19_set_A.pdf]

# Tmem201

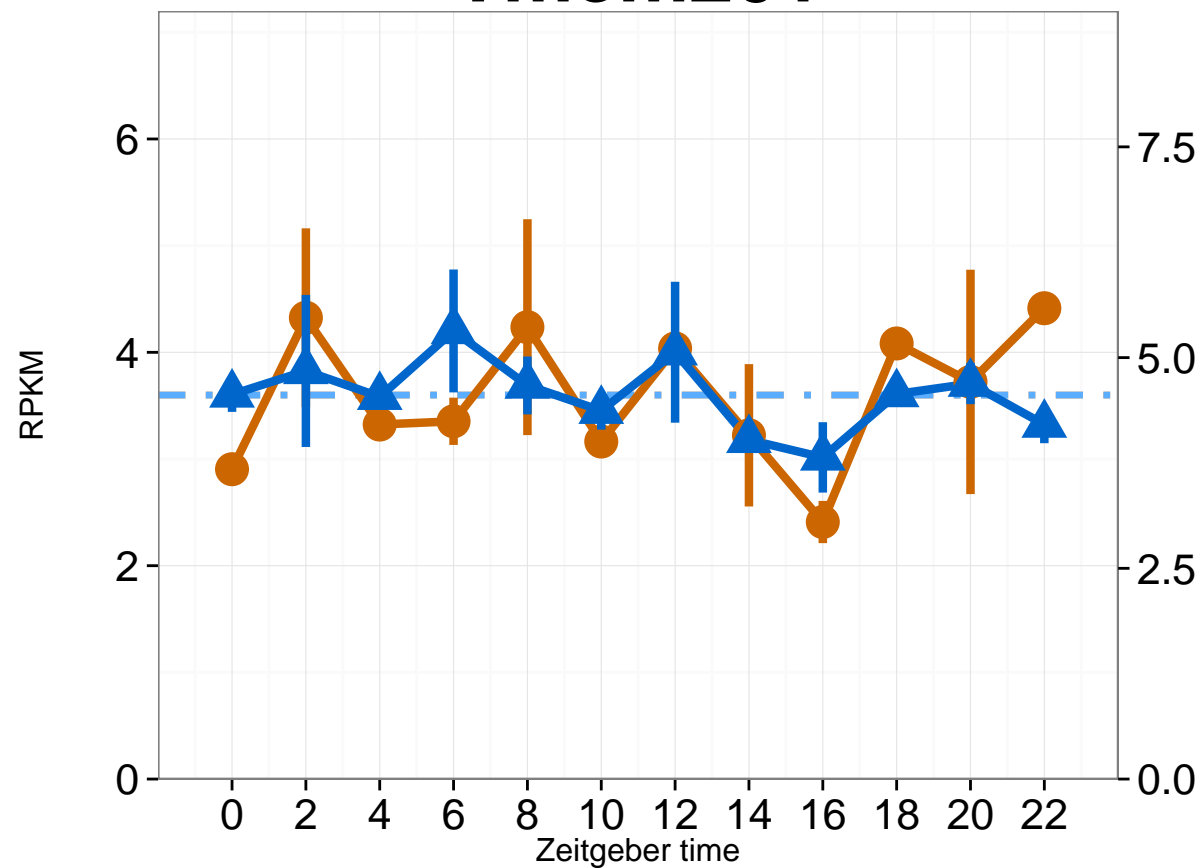

# Tmem201

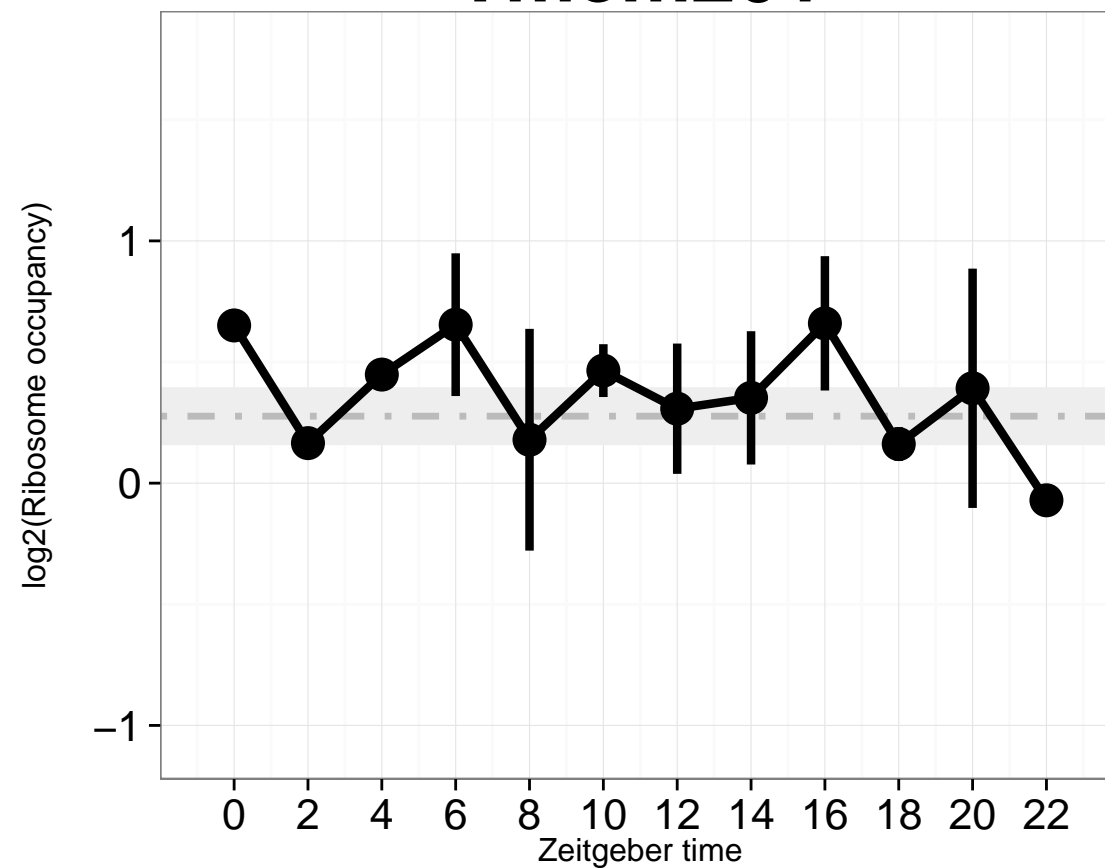

Supplement: SuppDataset_1.zip [file Tmem201_set_A.pdf › Supplemental Dataset 1/A-mRNA_nonrhyth_translation_nonrhyth/Tmem201_set_A.pdf]

# Tmem203

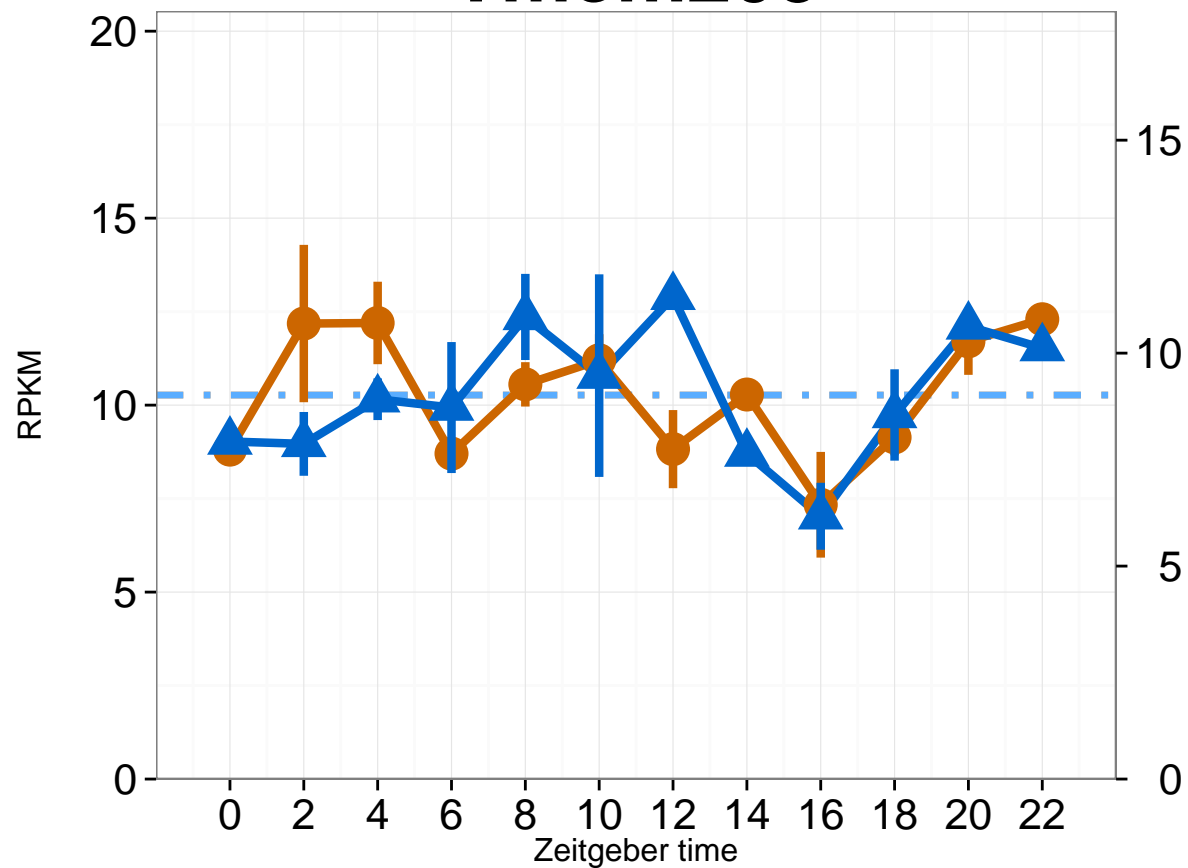

# Tmem203

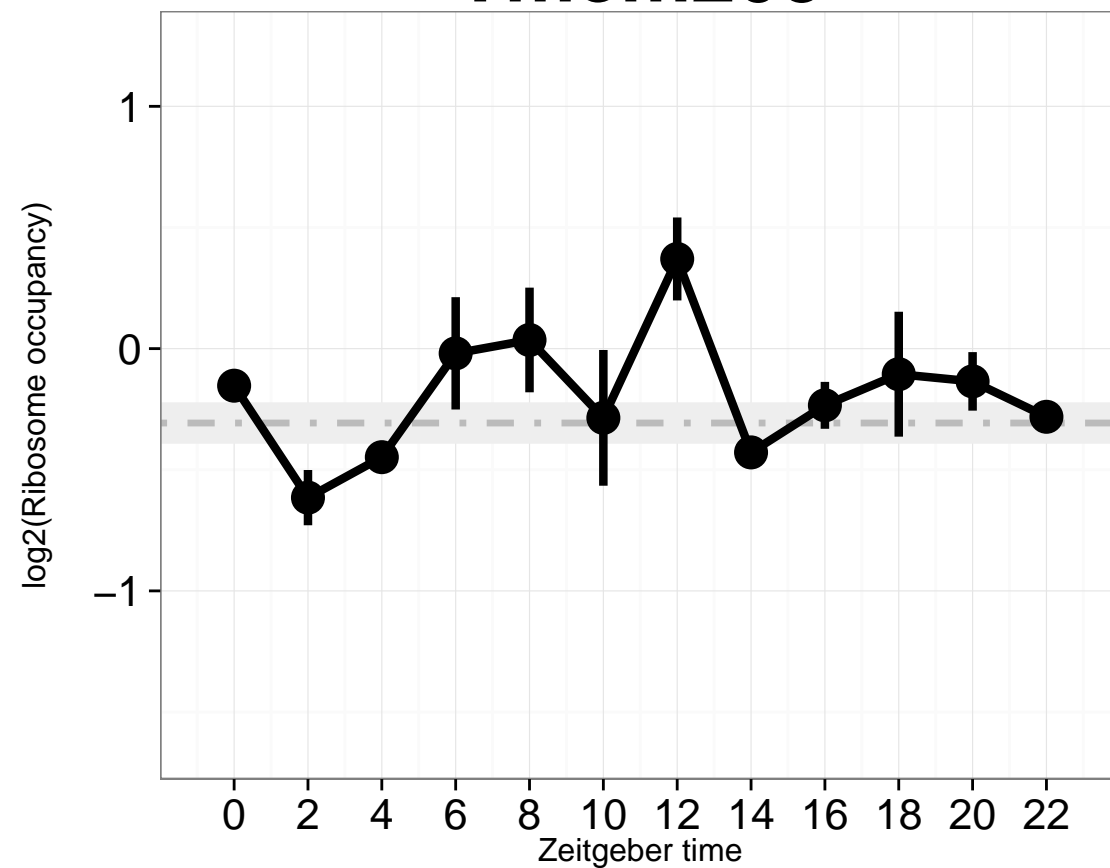

Supplement: SuppDataset_1.zip [file Tmem203_set_A.pdf › Supplemental Dataset 1/A-mRNA_nonrhyth_translation_nonrhyth/Tmem203_set_A.pdf]

# Tmem205

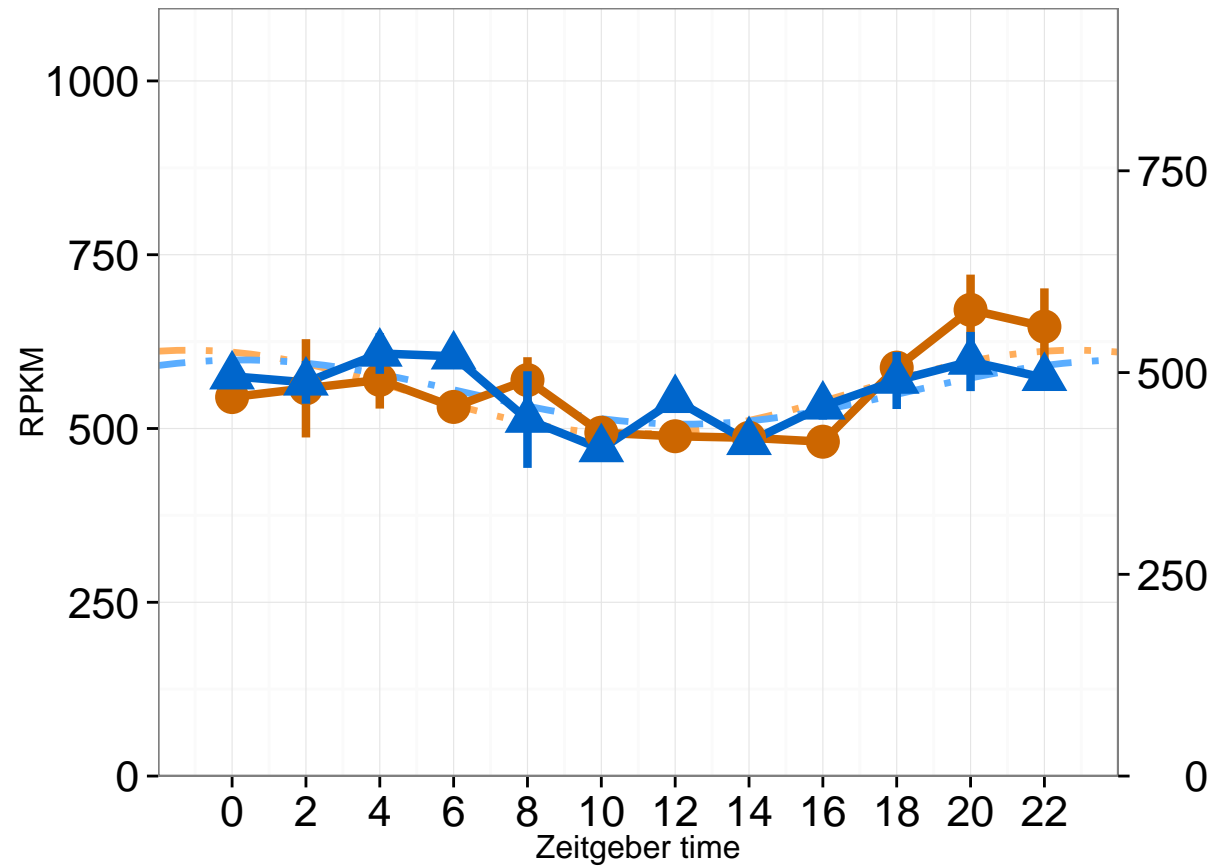

# Tmem205

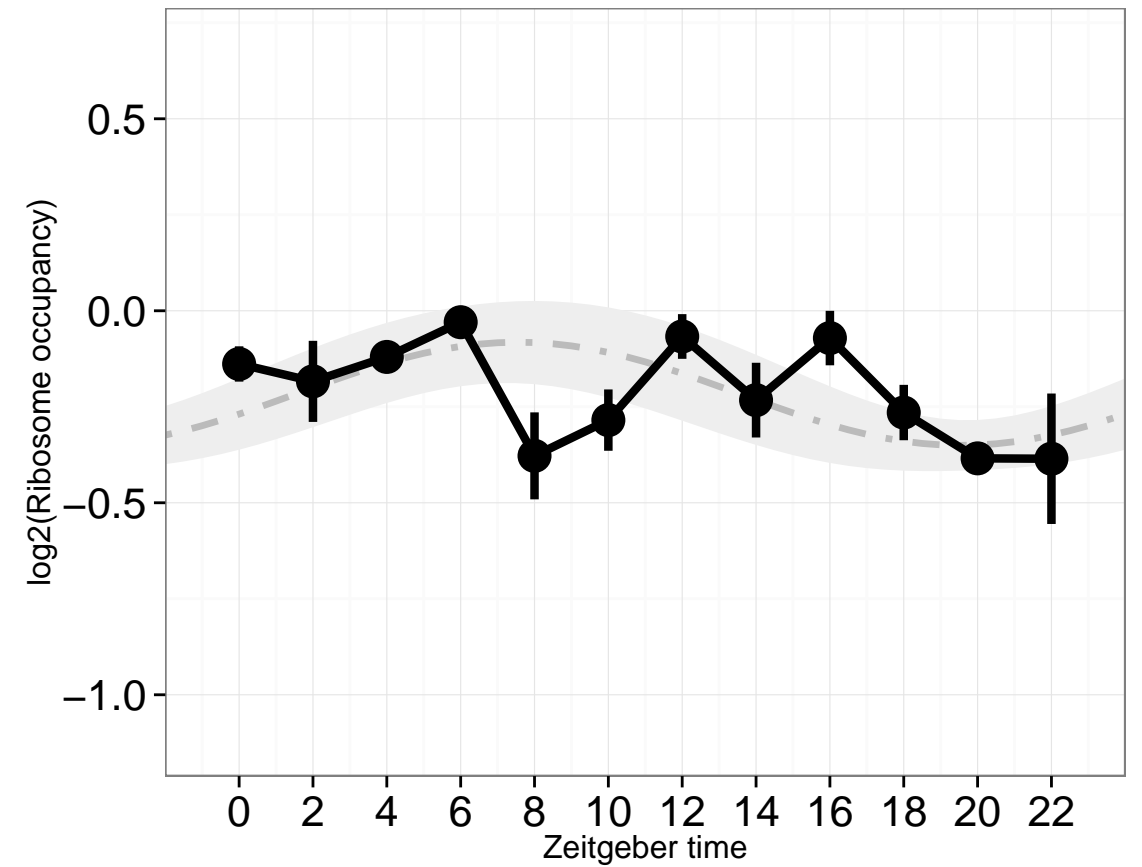

Supplement: SuppDataset_1.zip [file Tmem205_set_A.pdf › Supplemental Dataset 1/A-mRNA_nonrhyth_translation_nonrhyth/Tmem205_set_A.pdf]

# Tmem208

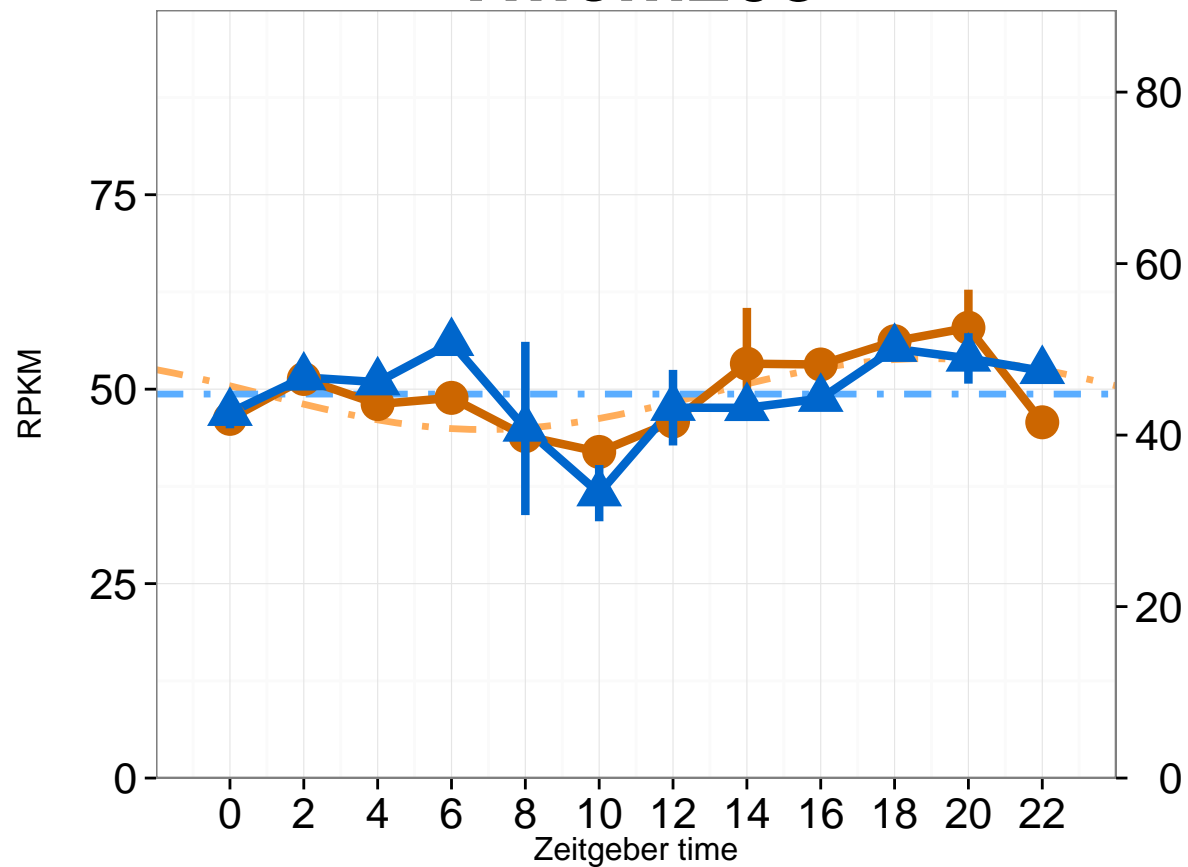

# Tmem208

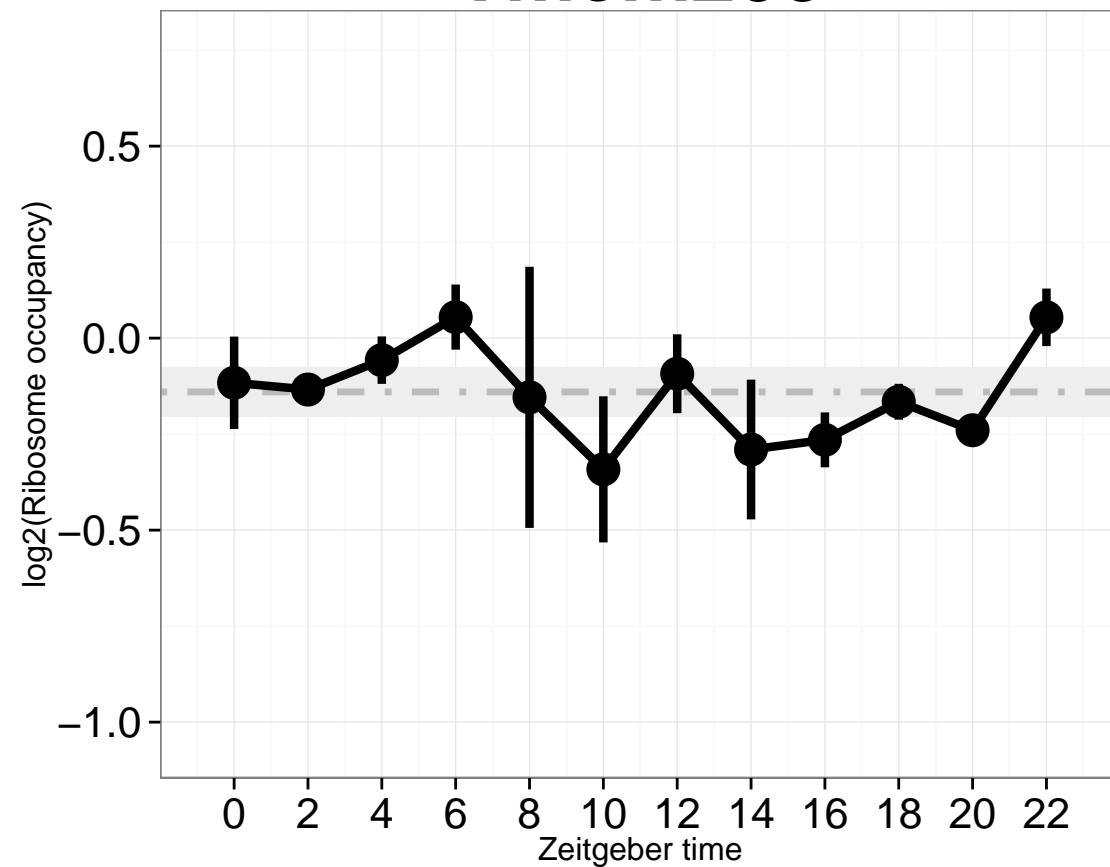

Supplement: SuppDataset_1.zip [file Tmem208_set_A.pdf › Supplemental Dataset 1/A-mRNA_nonrhyth_translation_nonrhyth/Tmem208_set_A.pdf]

# Tmem209

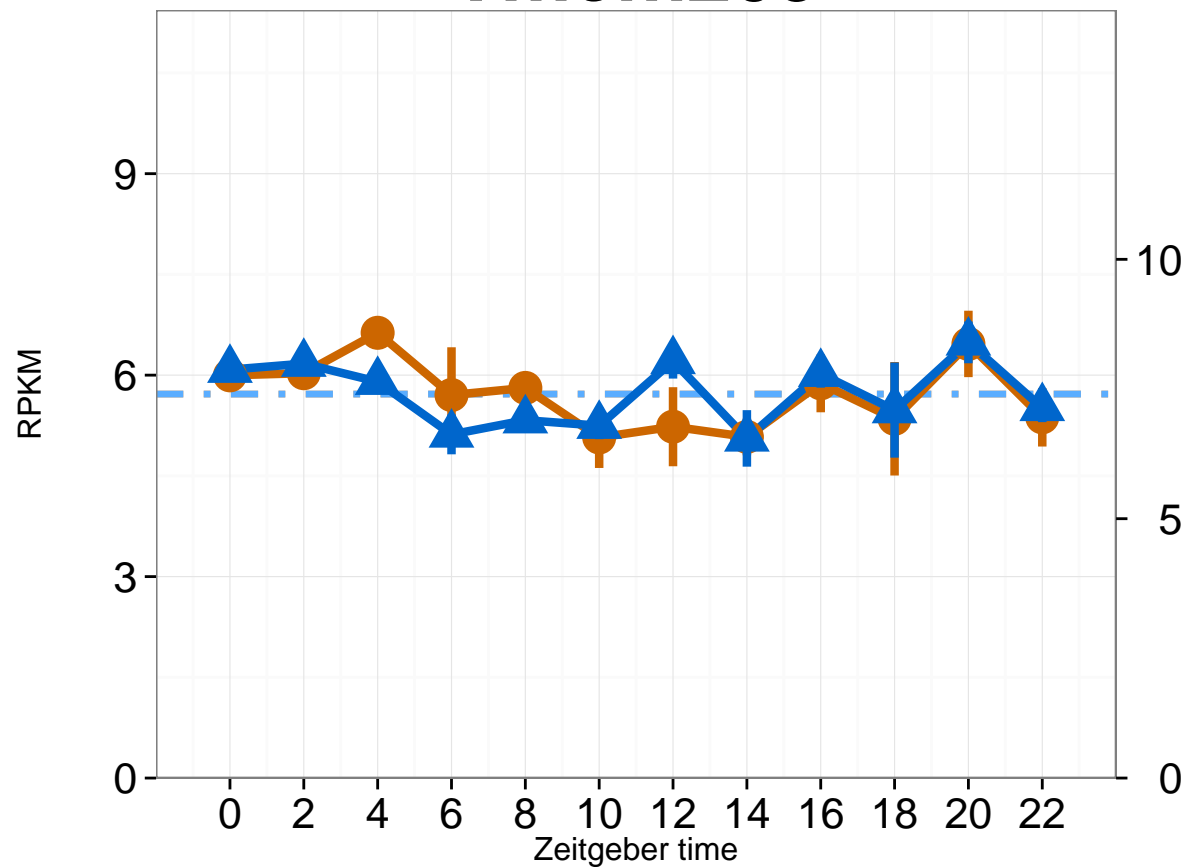

# Tmem209

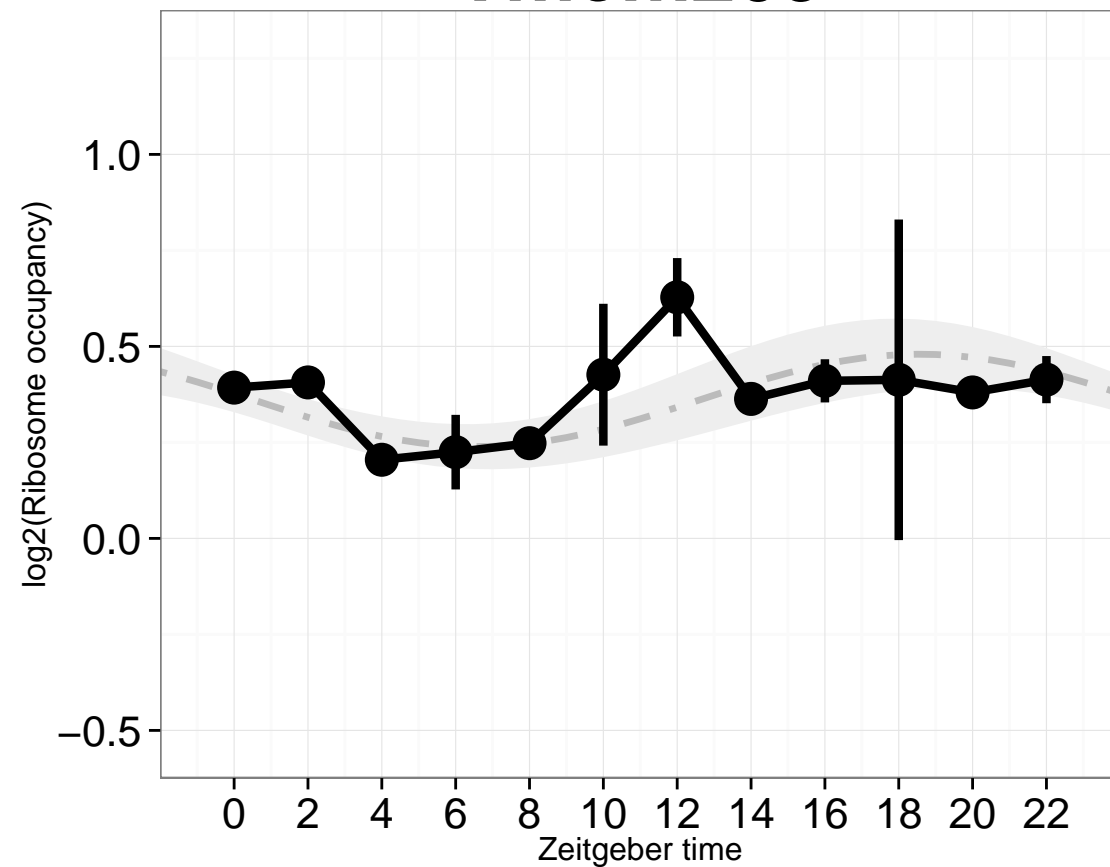

Supplement: SuppDataset_1.zip [file Tmem209_set_A.pdf › Supplemental Dataset 1/A-mRNA_nonrhyth_translation_nonrhyth/Tmem209_set_A.pdf]

# Tmem214

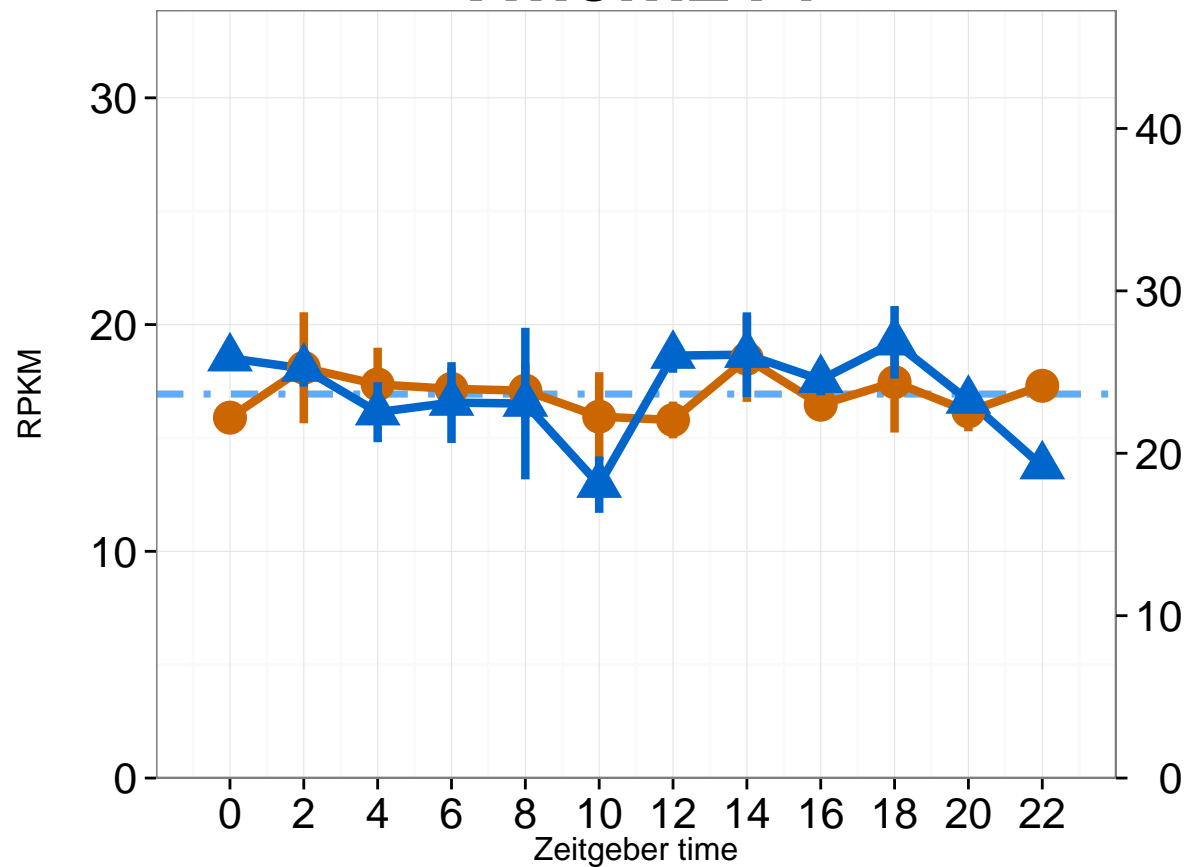

# Tmem214

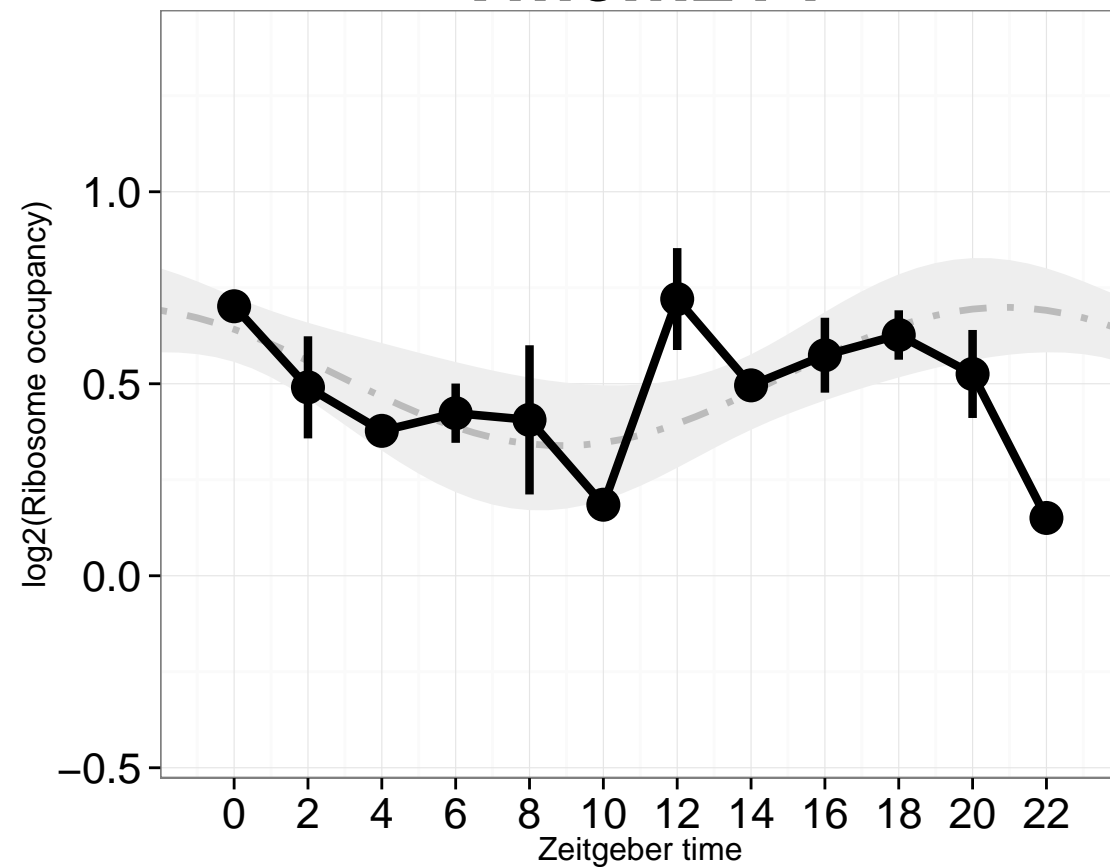

Supplement: SuppDataset_1.zip [file Tmem214_set_A.pdf › Supplemental Dataset 1/A-mRNA_nonrhyth_translation_nonrhyth/Tmem214_set_A.pdf]

# Tmem216

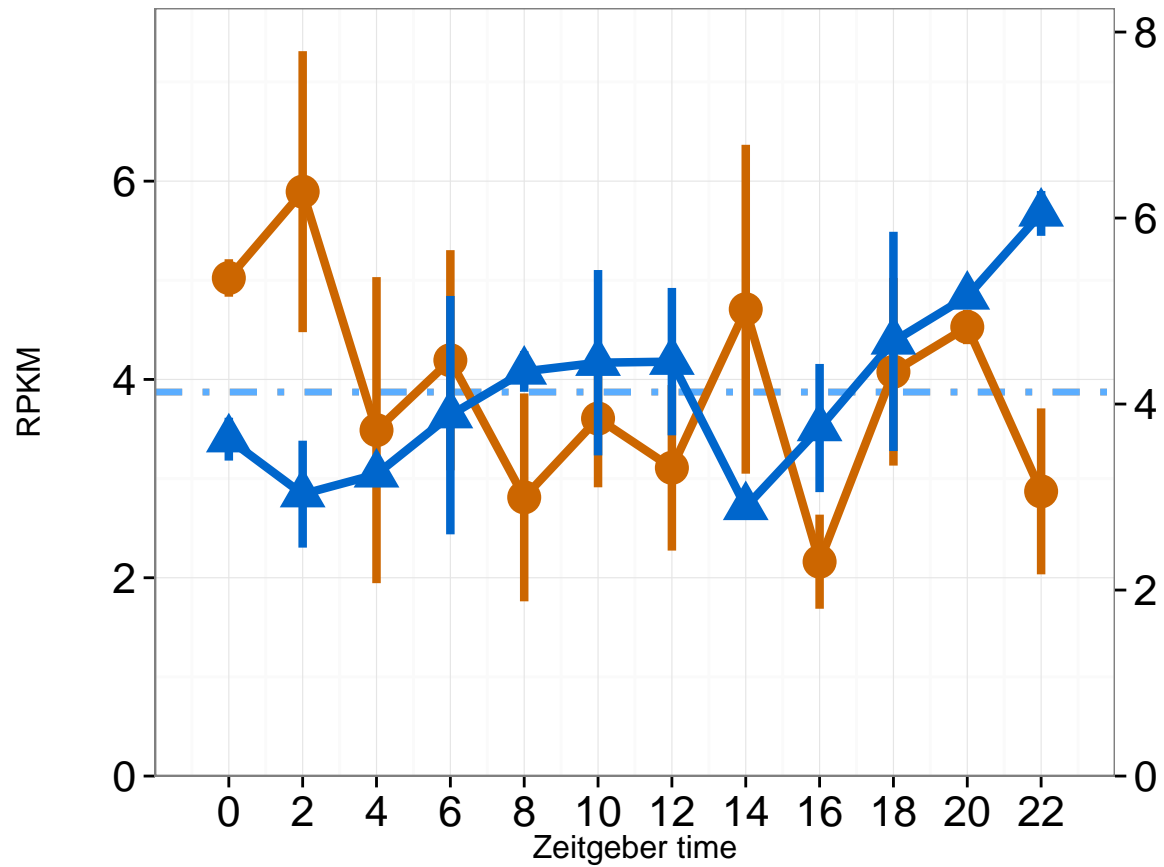

# Tmem216

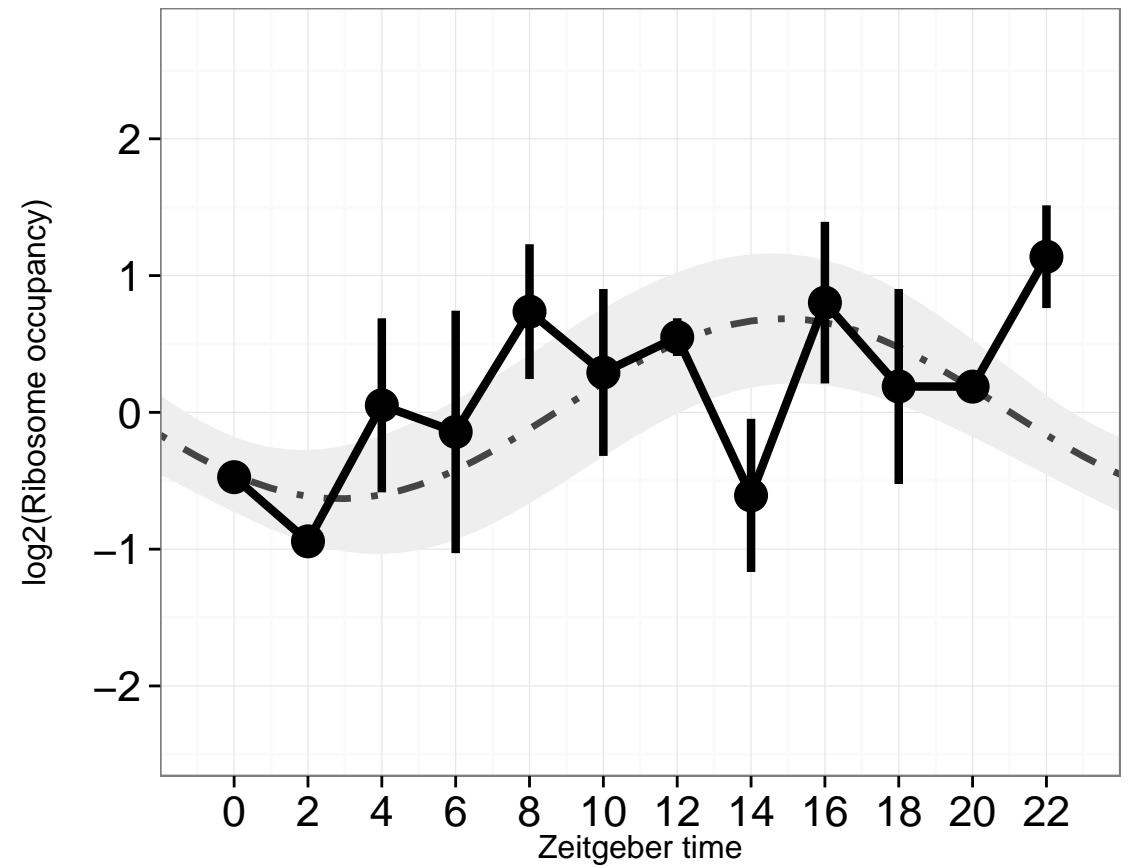

Supplement: SuppDataset_1.zip [file Tmem216_set_A.pdf › Supplemental Dataset 1/A-mRNA_nonrhyth_translation_nonrhyth/Tmem216_set_A.pdf]

# Tmem219

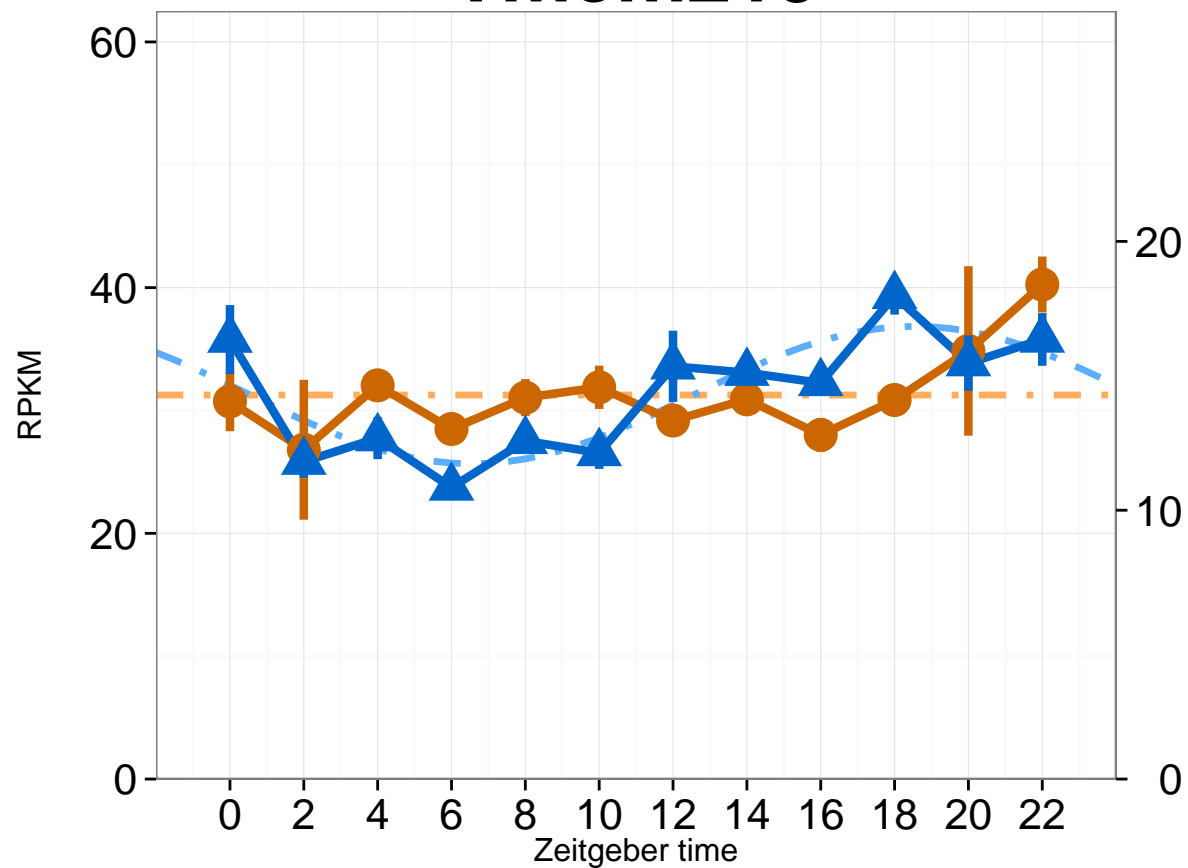

# Tmem219

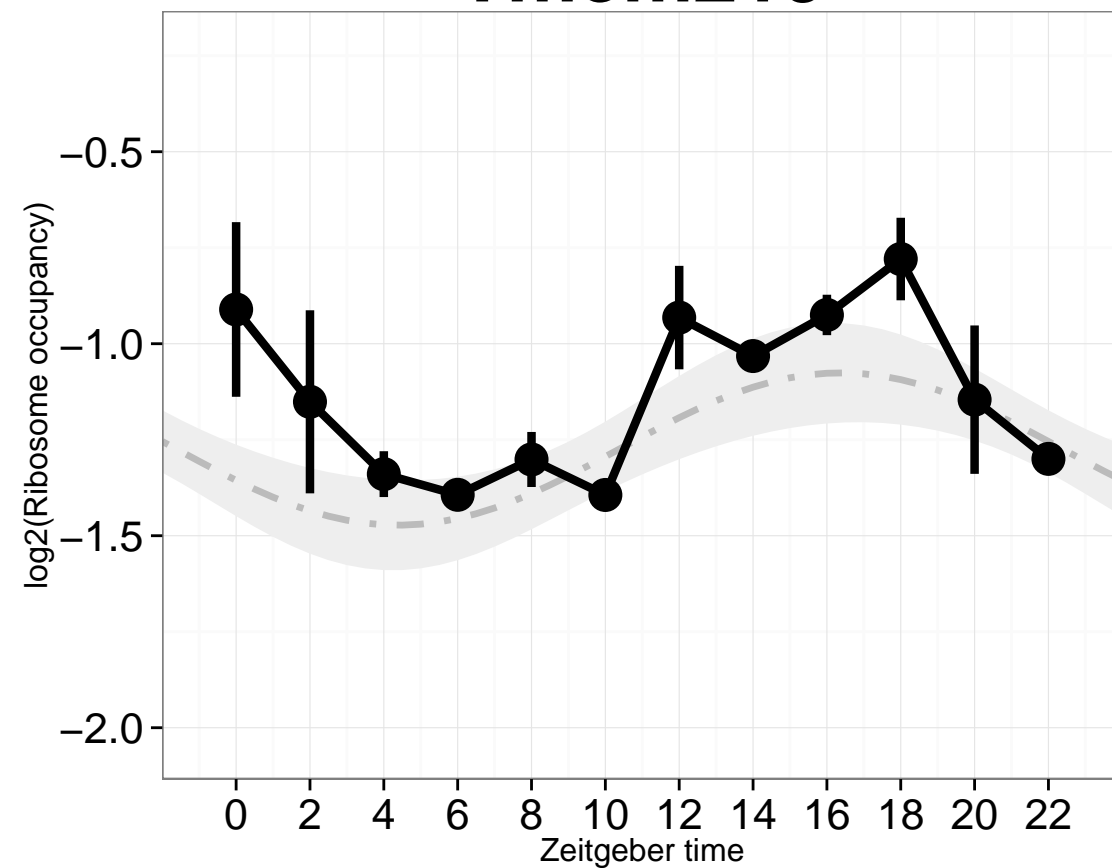

Supplement: SuppDataset_1.zip [file Tmem219_set_A.pdf › Supplemental Dataset 1/A-mRNA_nonrhyth_translation_nonrhyth/Tmem219_set_A.pdf]

## Tmem220

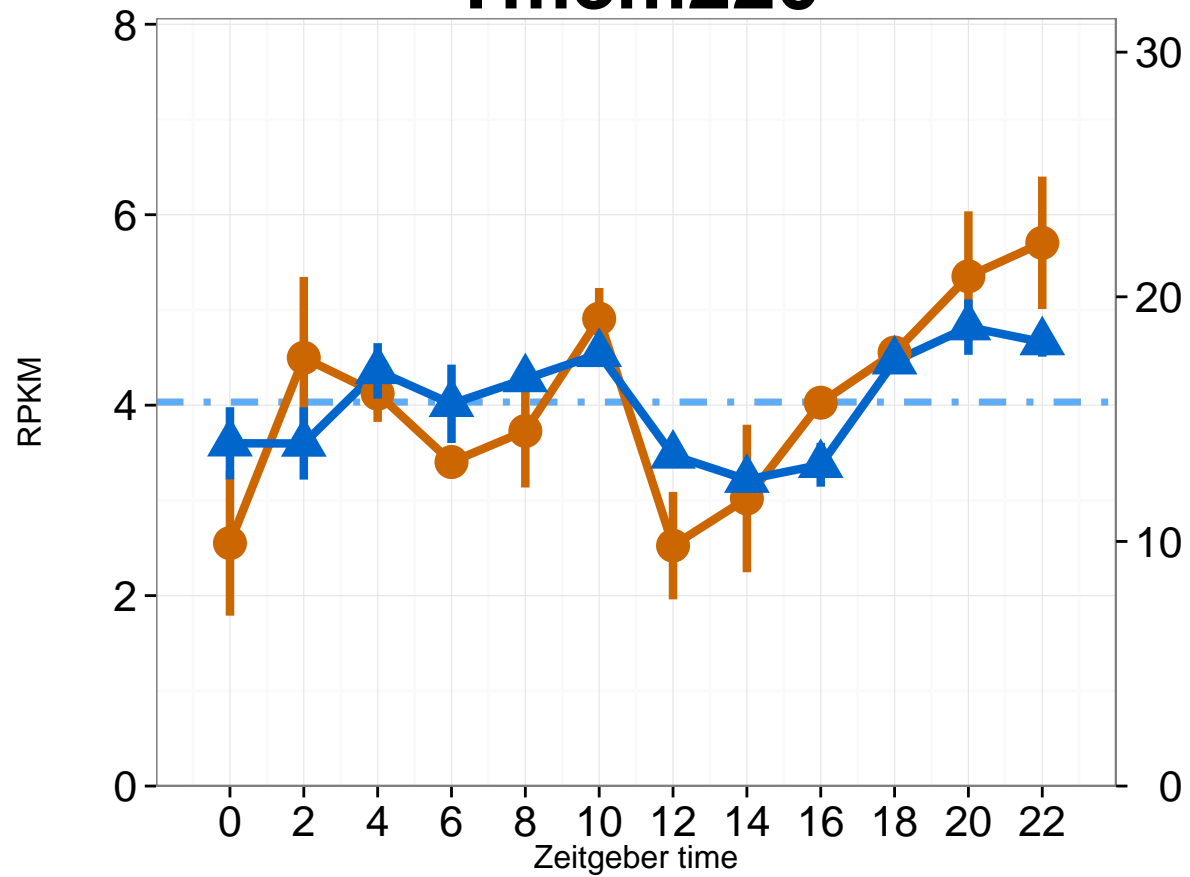

## Tmem220

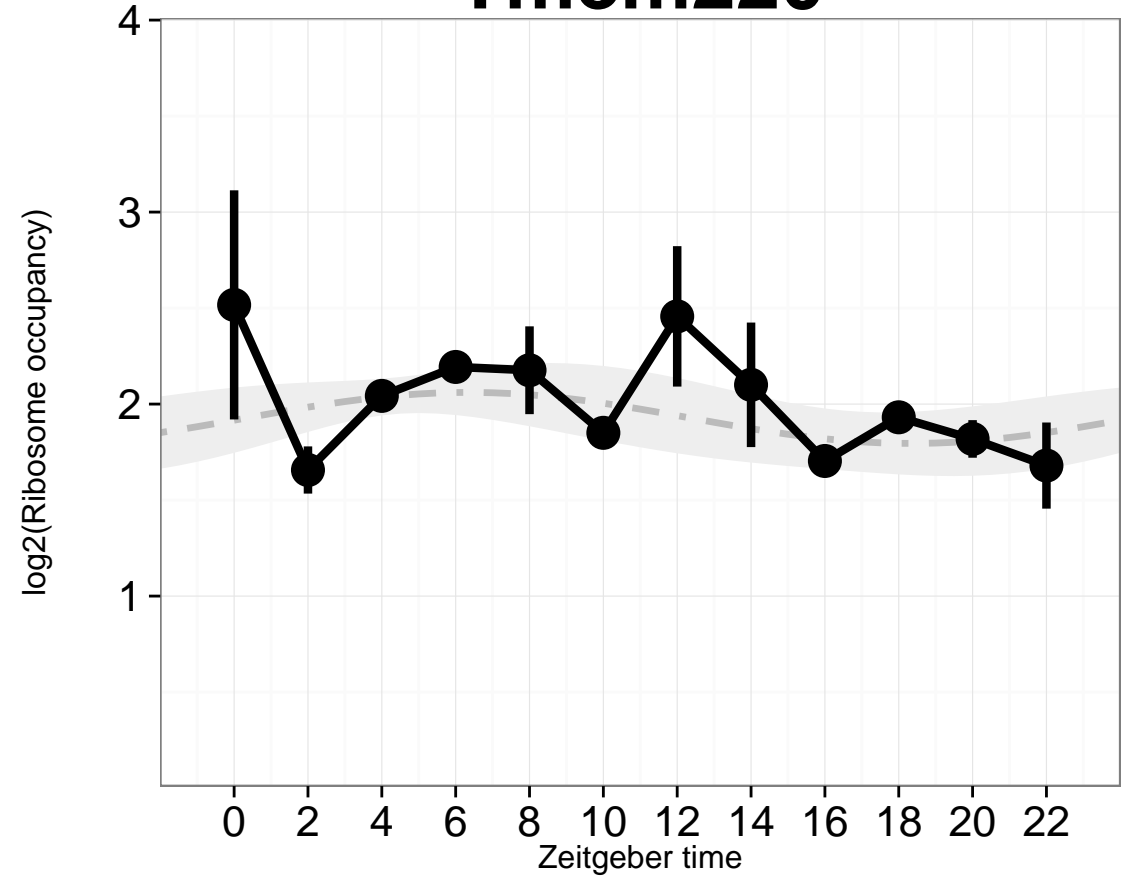

Supplement: SuppDataset_1.zip [file Tmem220_set_A.pdf › Supplemental Dataset 1/A-mRNA_nonrhyth_translation_nonrhyth/Tmem220_set_A.pdf]

## Tmem222

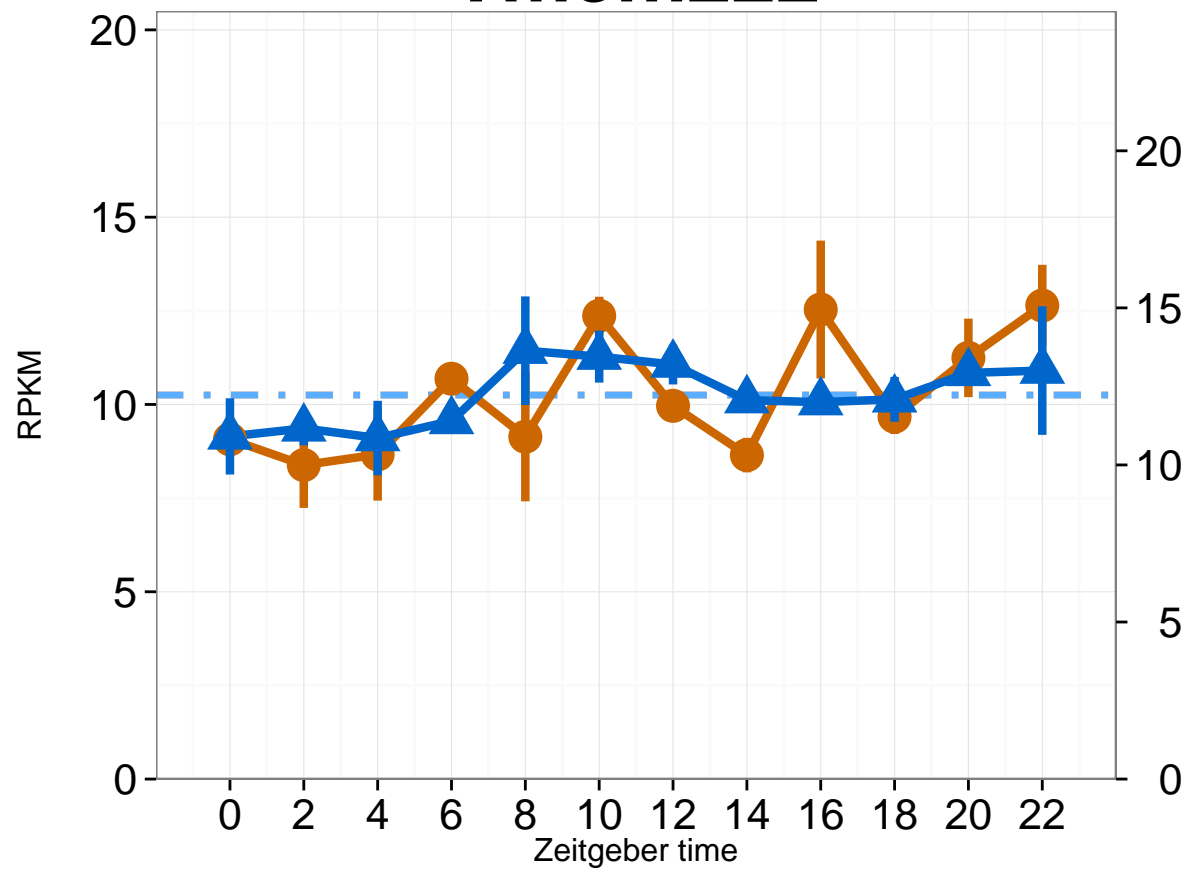

## Tmem222

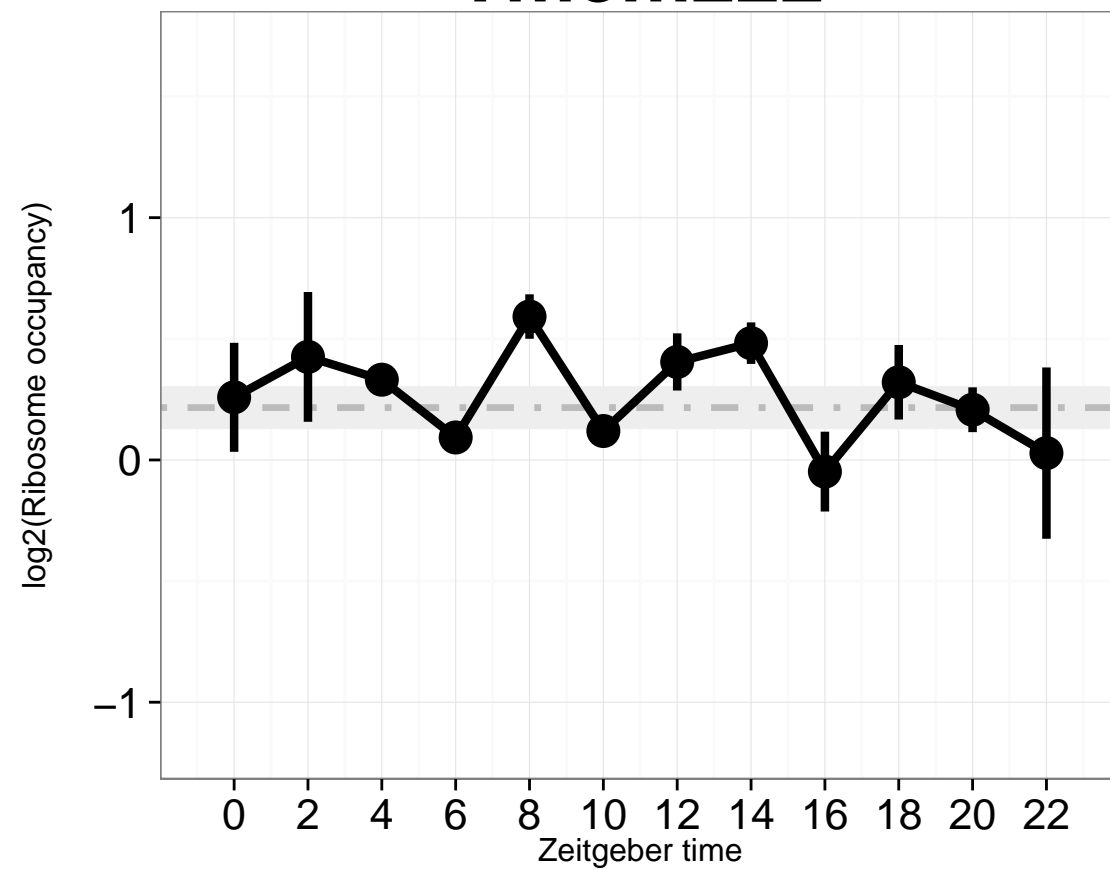

Supplement: SuppDataset_1.zip [file Tmem222_set_A.pdf › Supplemental Dataset 1/A-mRNA_nonrhyth_translation_nonrhyth/Tmem222_set_A.pdf]
