# Supplementary figures and images for: Ribosome profiling reveals the rhythmic liver translatome and circadian clock regulation by upstream open reading frames (part 76 of 113)
Source: HighWire-hosted journal article supplement (doi:10.1101/gr.195404.115), 2015-10-20

# Tmem223

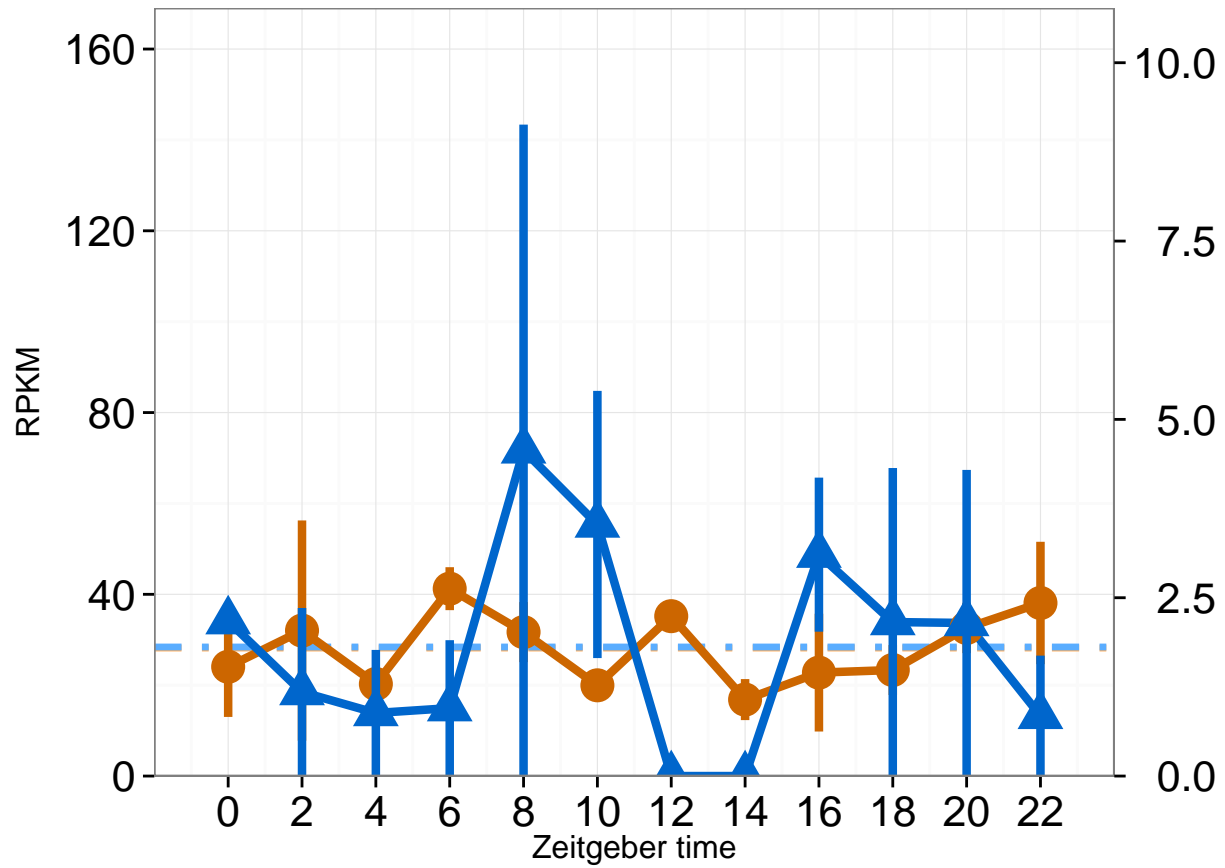

# Tmem223

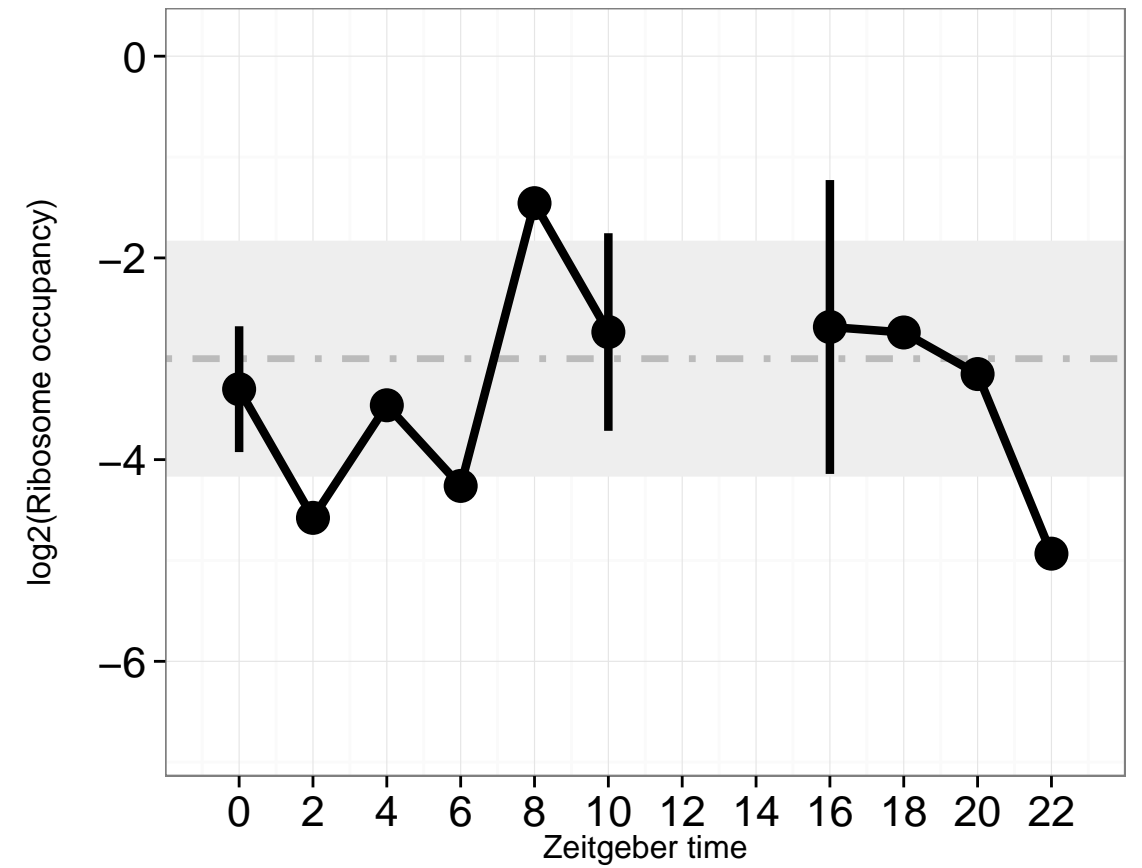

Supplement: SuppDataset_1.zip [file Tmem223_set_A.pdf › Supplemental Dataset 1/A-mRNA_nonrhyth_translation_nonrhyth/Tmem223_set_A.pdf]

## Tmem230

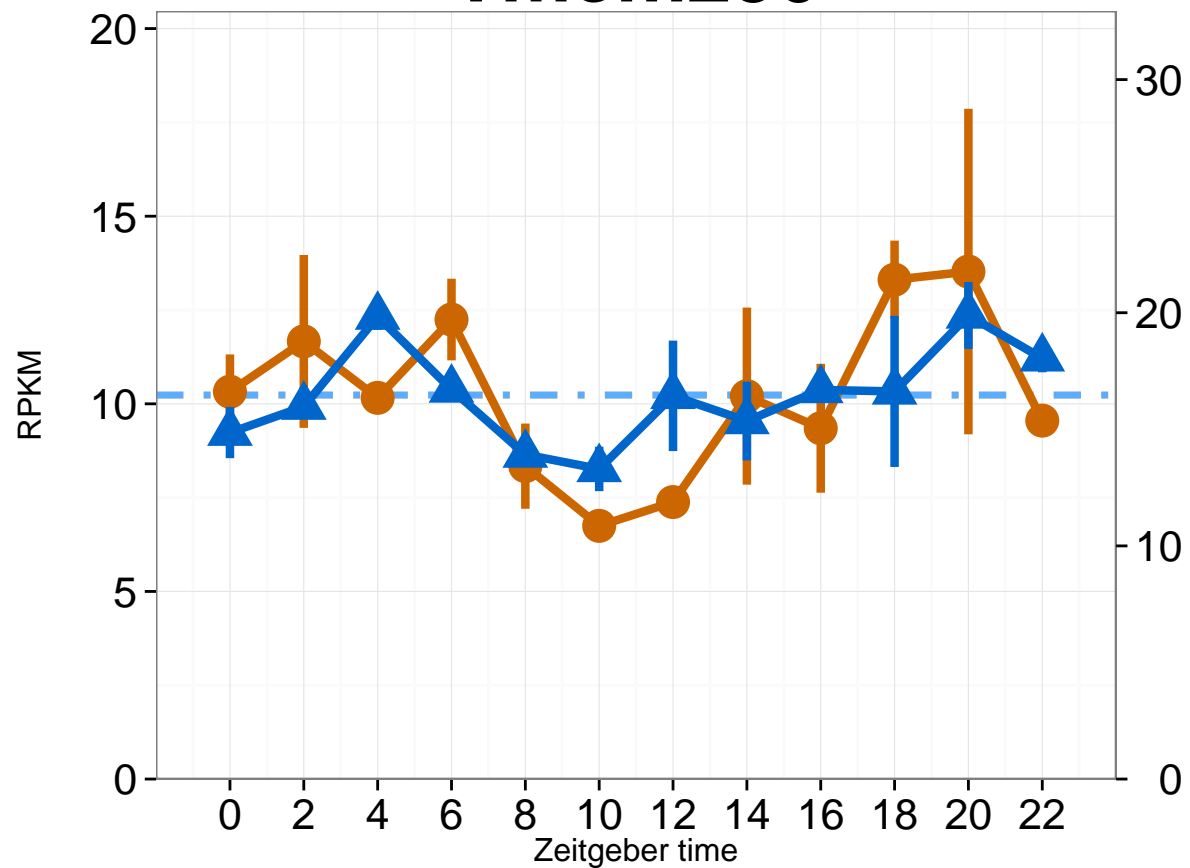

## Tmem230

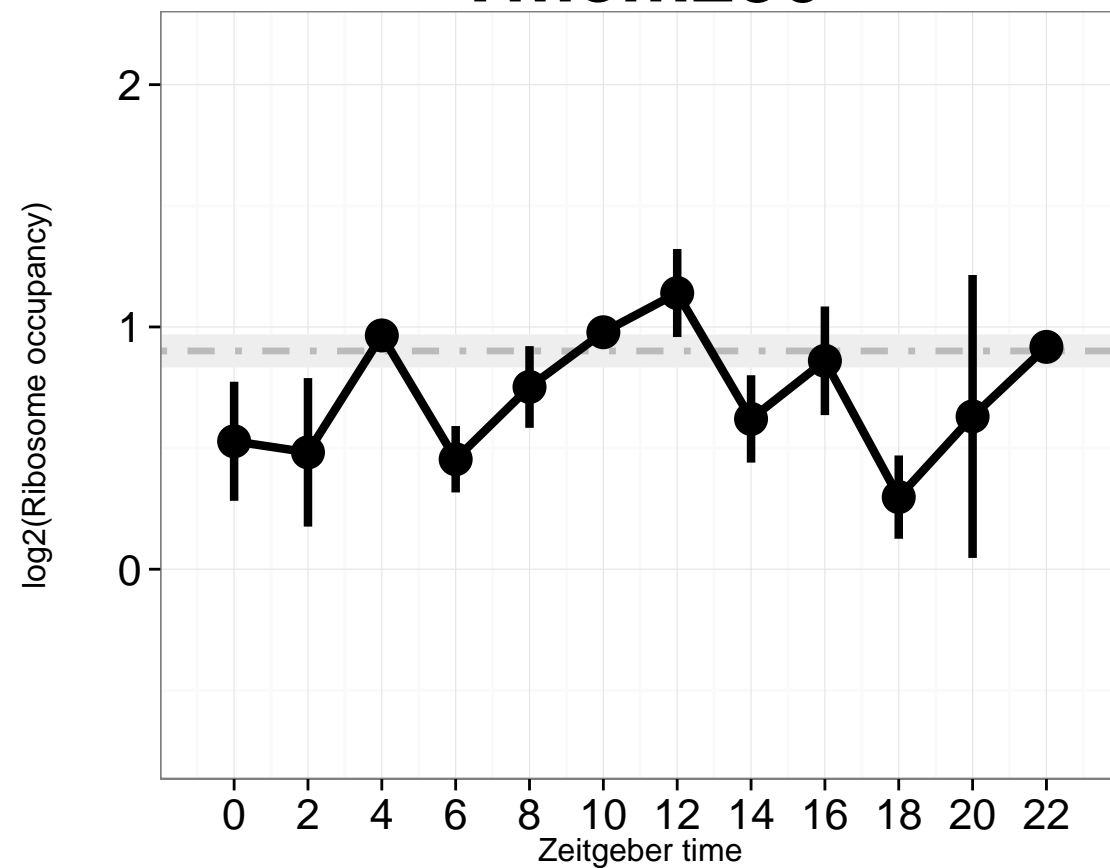

Supplement: SuppDataset_1.zip [file Tmem230_set_A.pdf › Supplemental Dataset 1/A-mRNA_nonrhyth_translation_nonrhyth/Tmem230_set_A.pdf]

# Tmem234

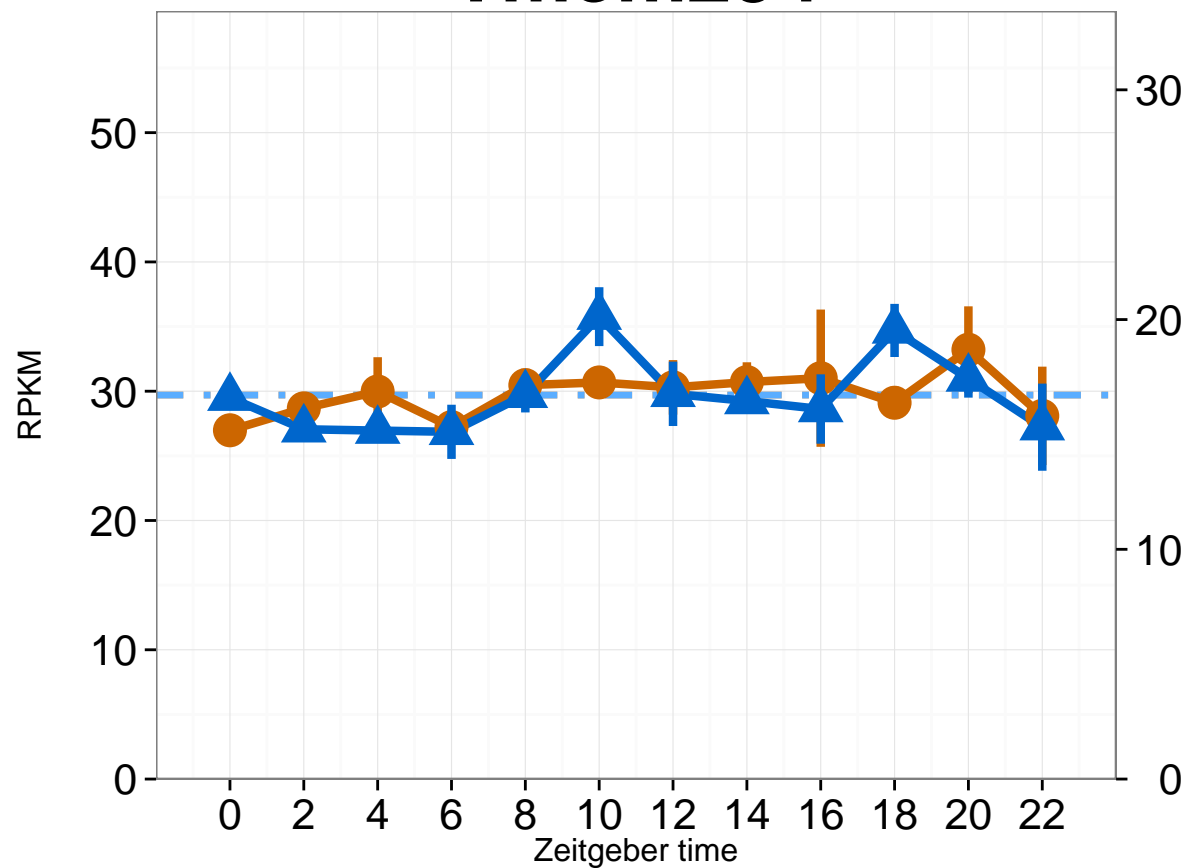

# Tmem234

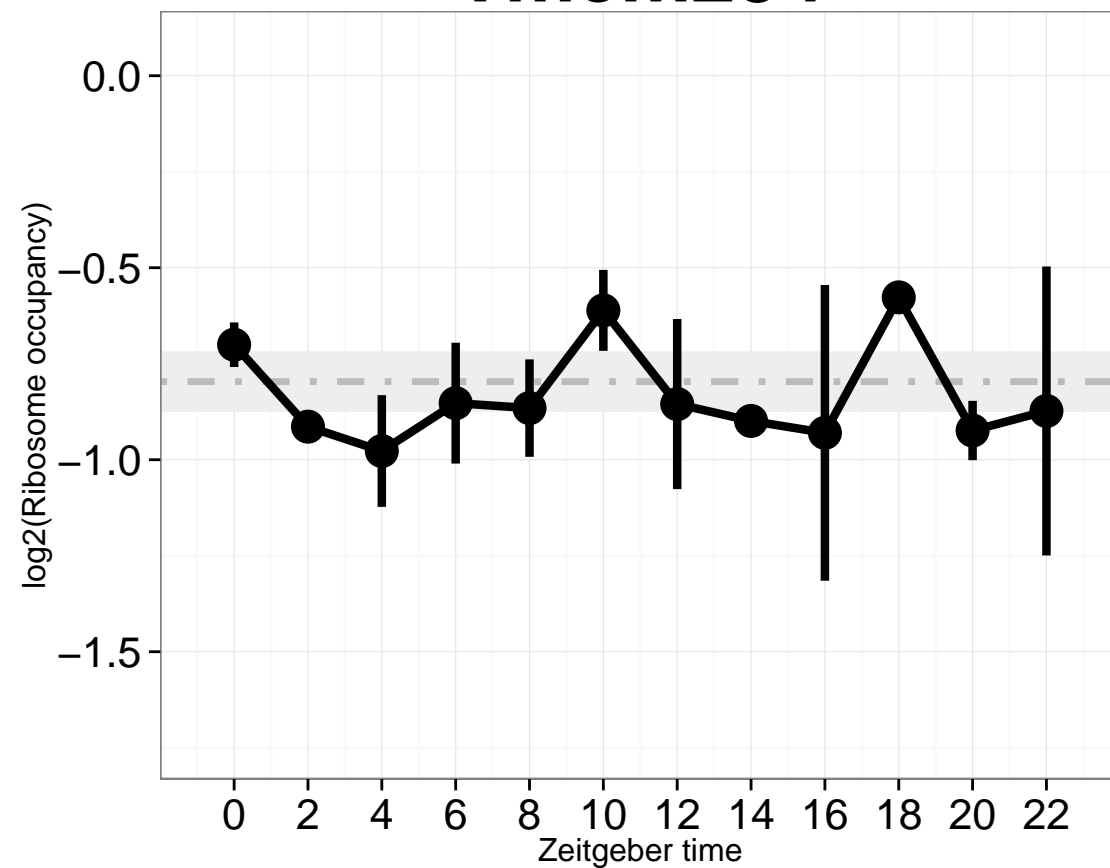

Supplement: SuppDataset_1.zip [file Tmem234_set_A.pdf › Supplemental Dataset 1/A-mRNA_nonrhyth_translation_nonrhyth/Tmem234_set_A.pdf]

# Tmem237

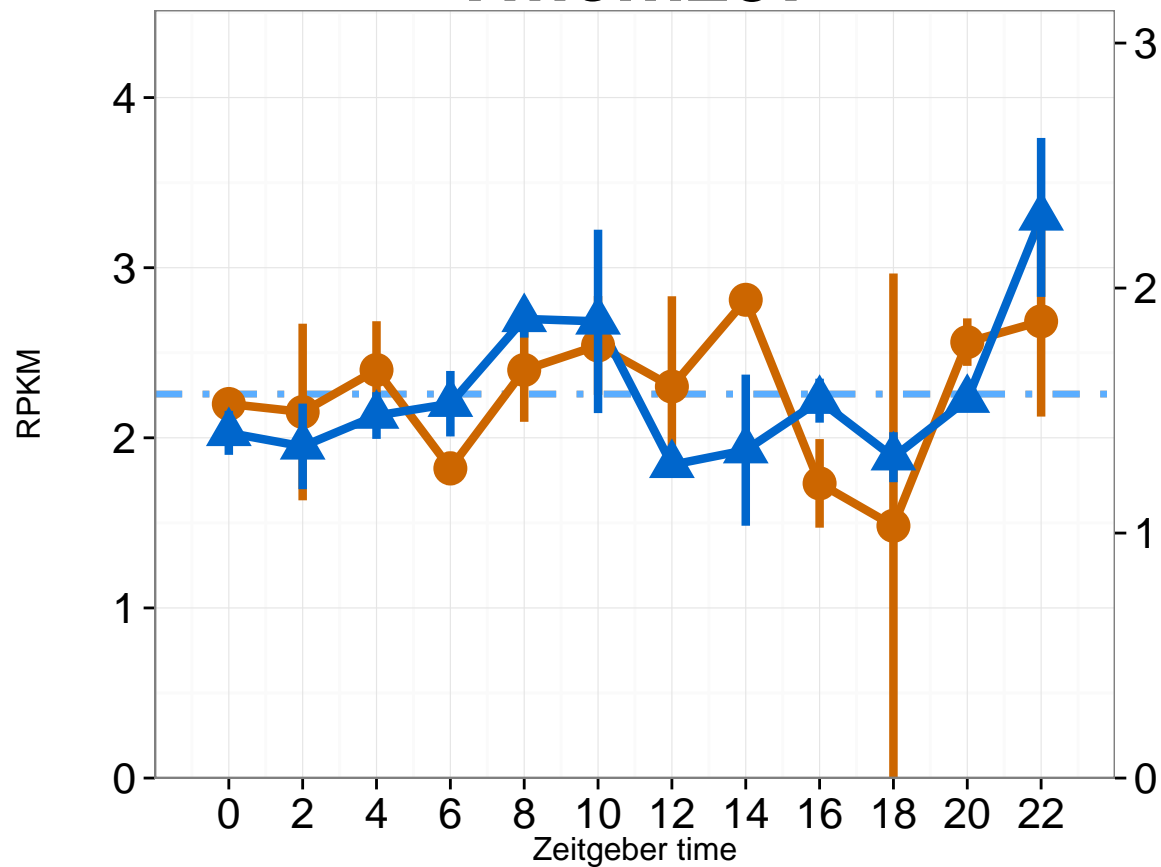

# Tmem237

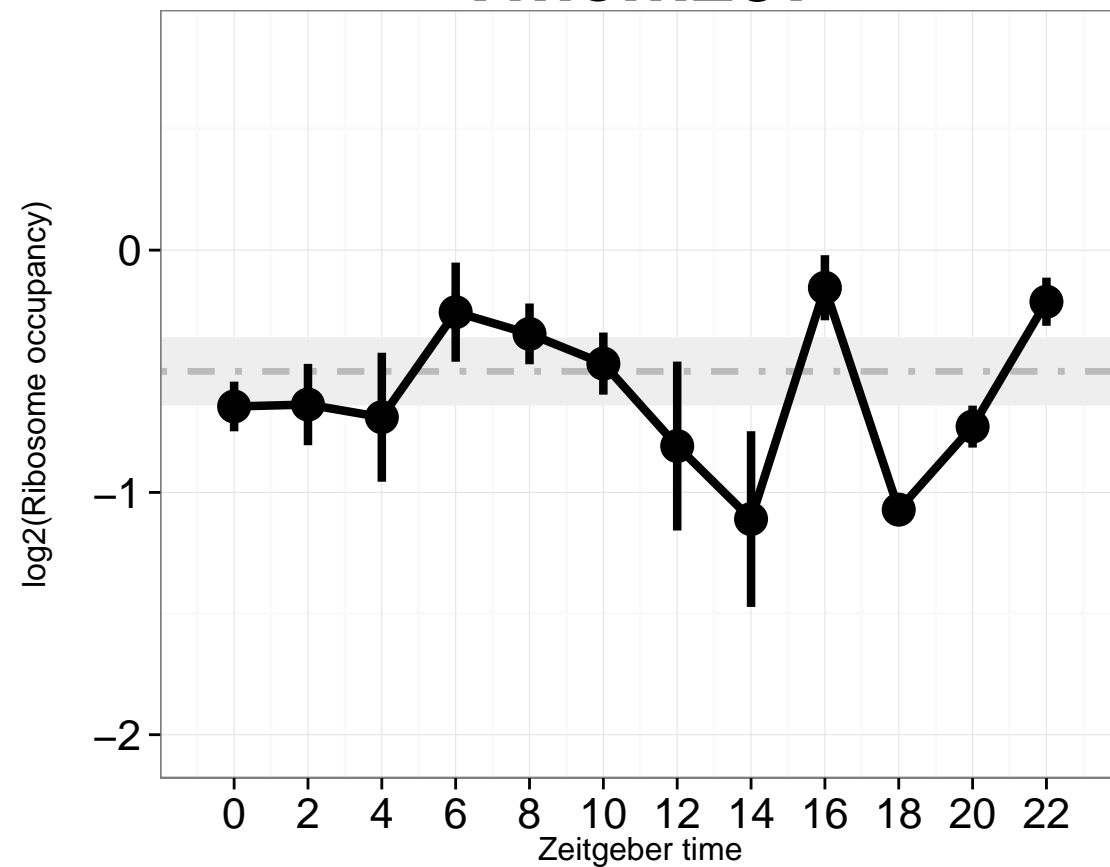

Supplement: SuppDataset_1.zip [file Tmem237_set_A.pdf › Supplemental Dataset 1/A-mRNA_nonrhyth_translation_nonrhyth/Tmem237_set_A.pdf]

# Tmem238

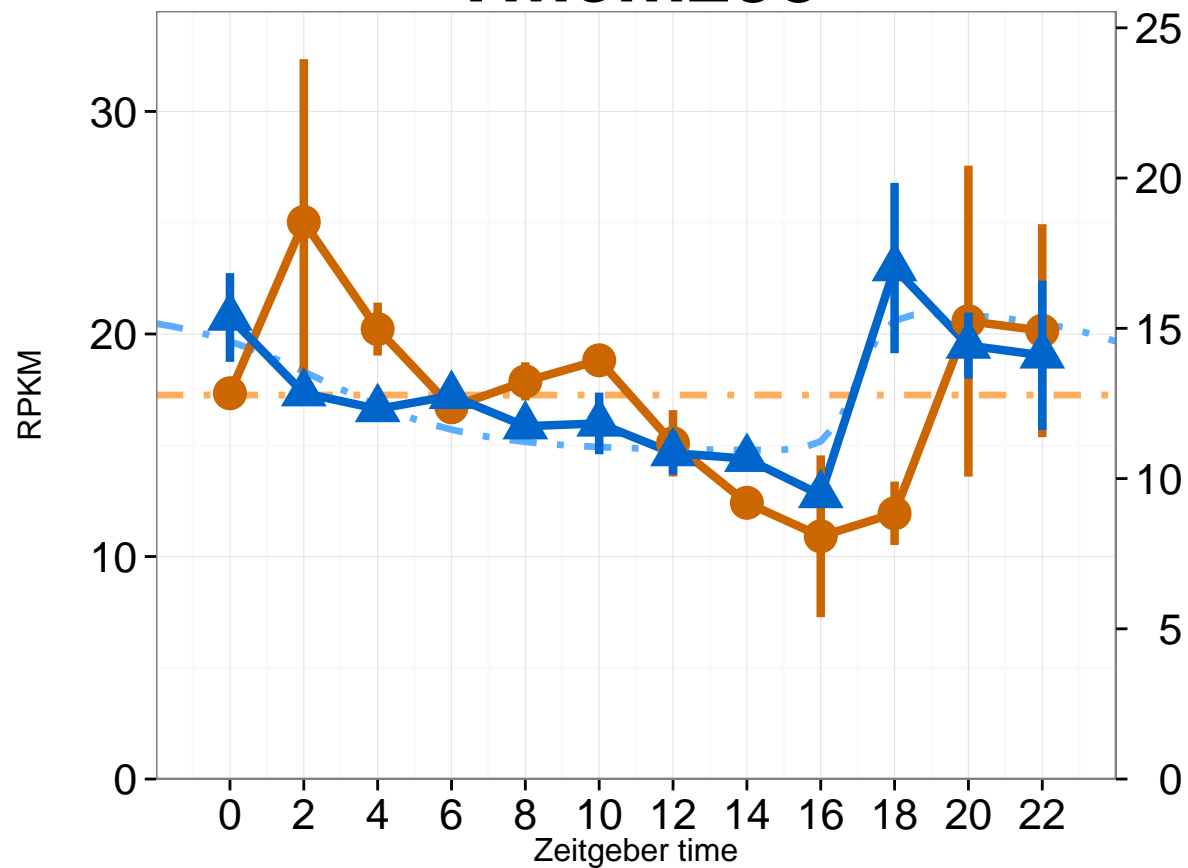

# Tmem238

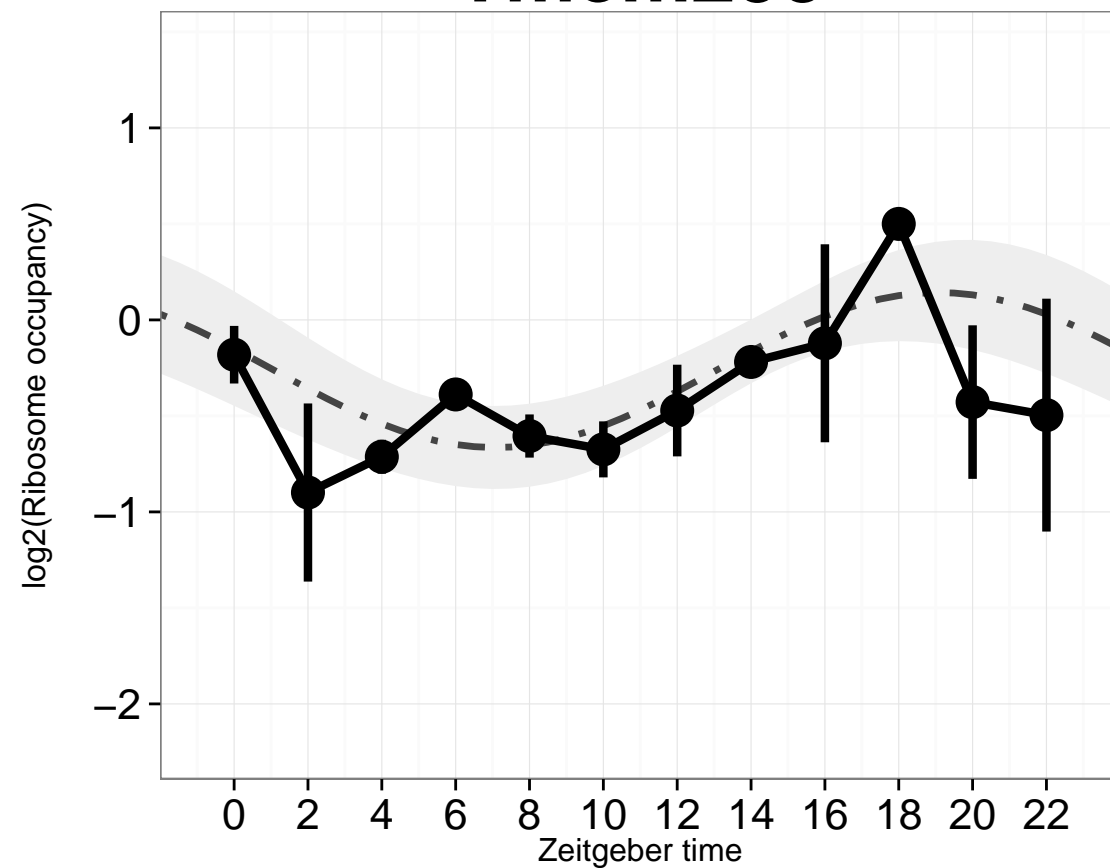

Supplement: SuppDataset_1.zip [file Tmem238_set_A.pdf › Supplemental Dataset 1/A-mRNA_nonrhyth_translation_nonrhyth/Tmem238_set_A.pdf]

# Tmem241

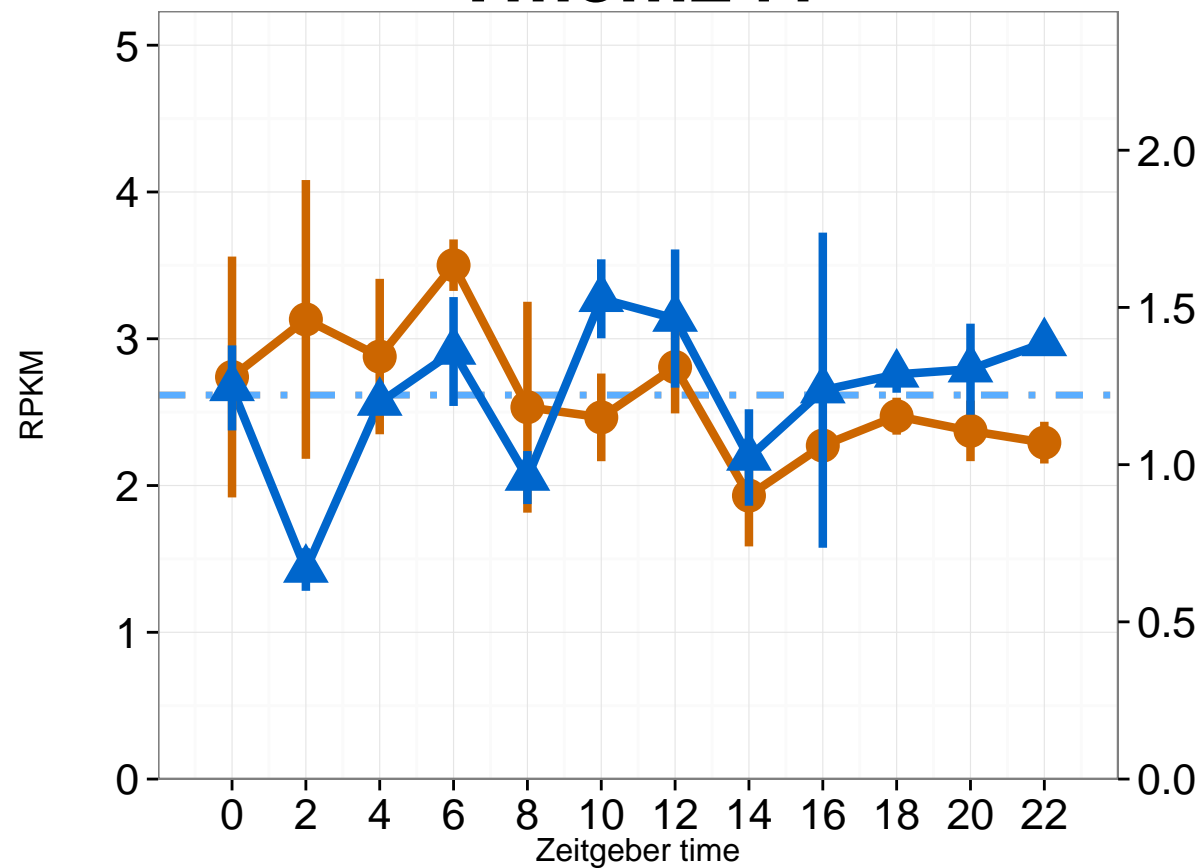

# Tmem241

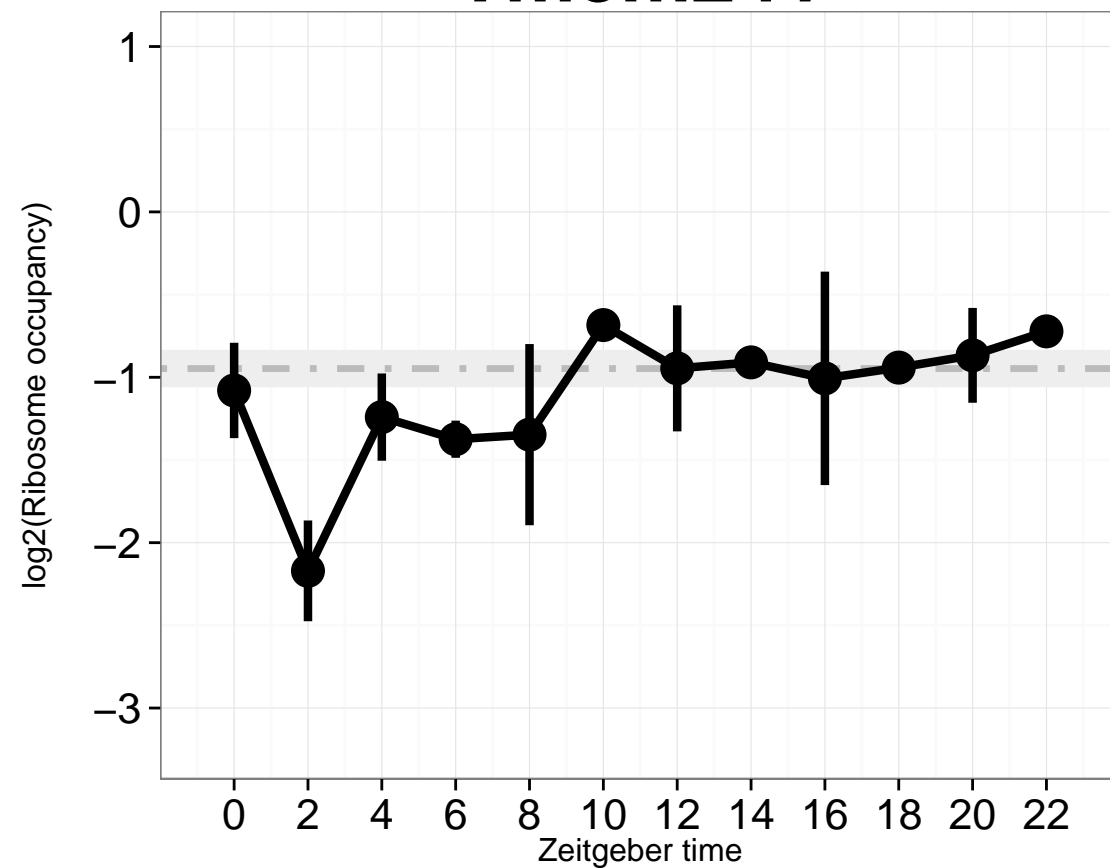

Supplement: SuppDataset_1.zip [file Tmem241_set_A.pdf › Supplemental Dataset 1/A-mRNA_nonrhyth_translation_nonrhyth/Tmem241_set_A.pdf]

# Tmem242

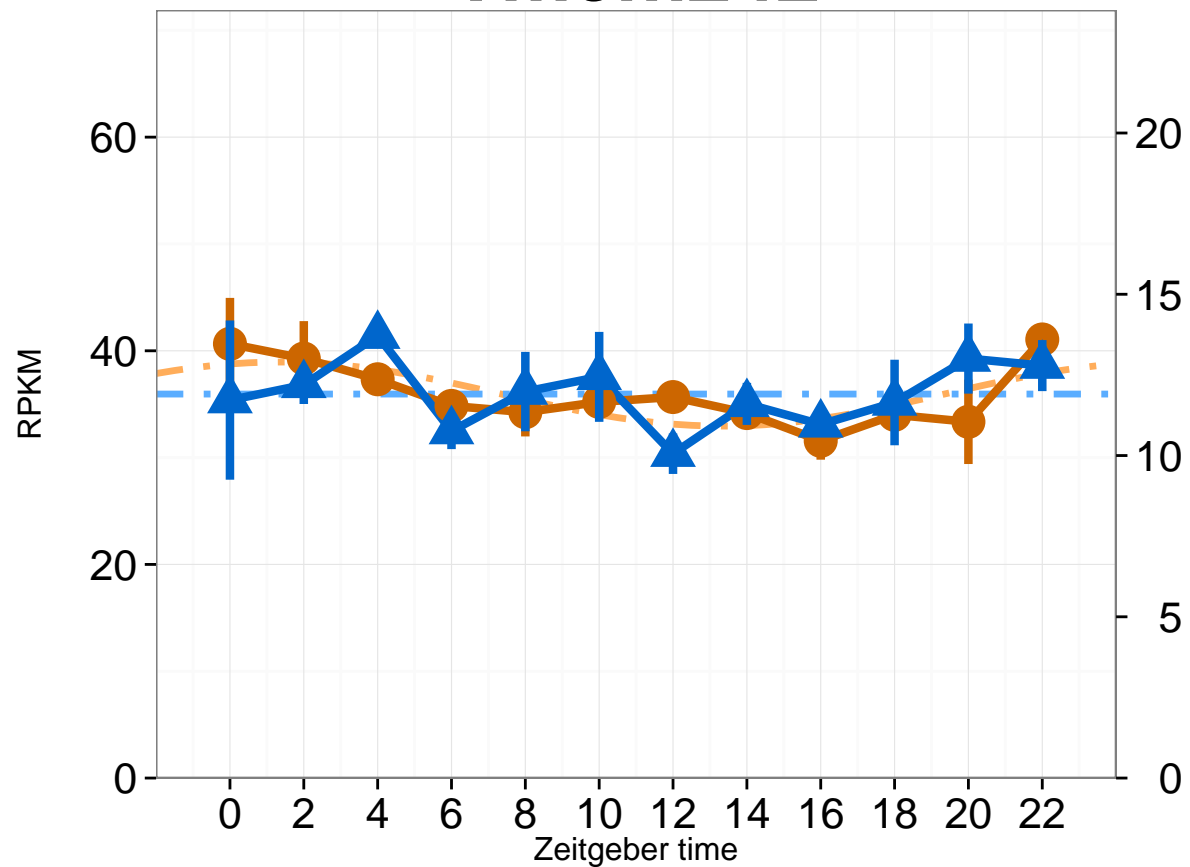

# Tmem242

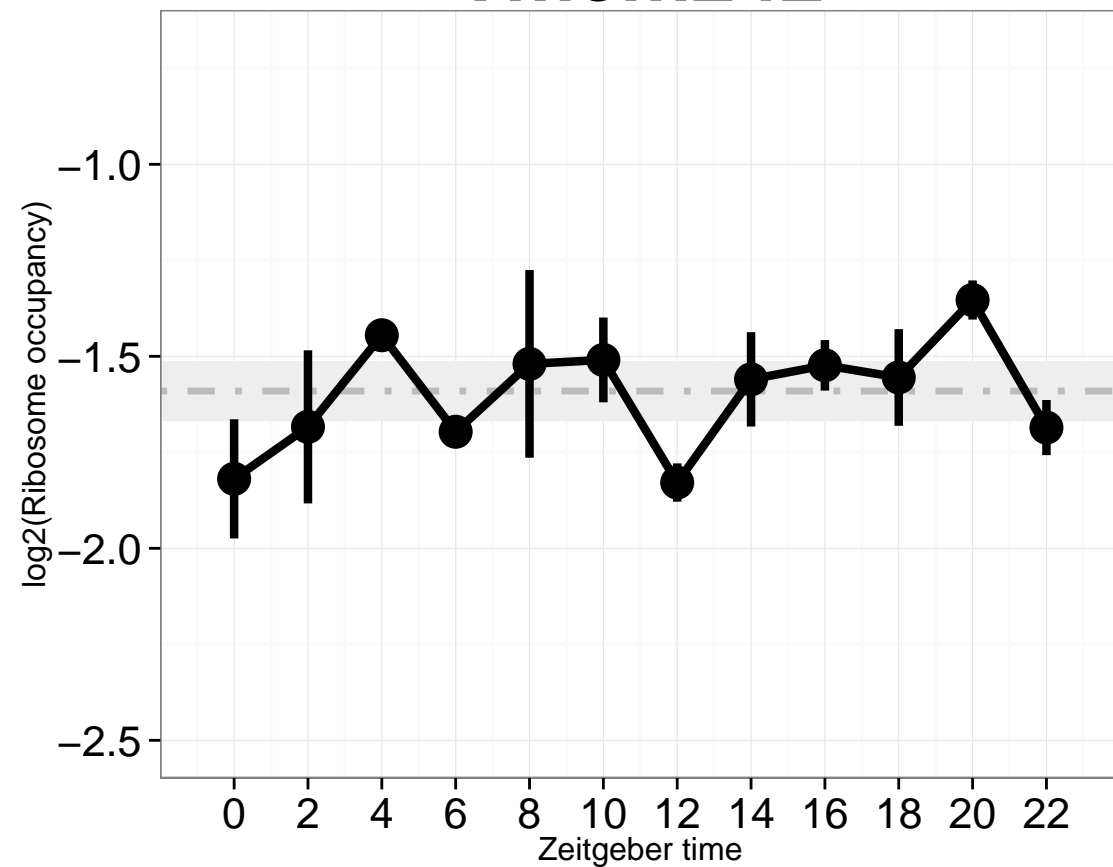

Supplement: SuppDataset_1.zip [file Tmem242_set_A.pdf › Supplemental Dataset 1/A-mRNA_nonrhyth_translation_nonrhyth/Tmem242_set_A.pdf]

# Tmem245

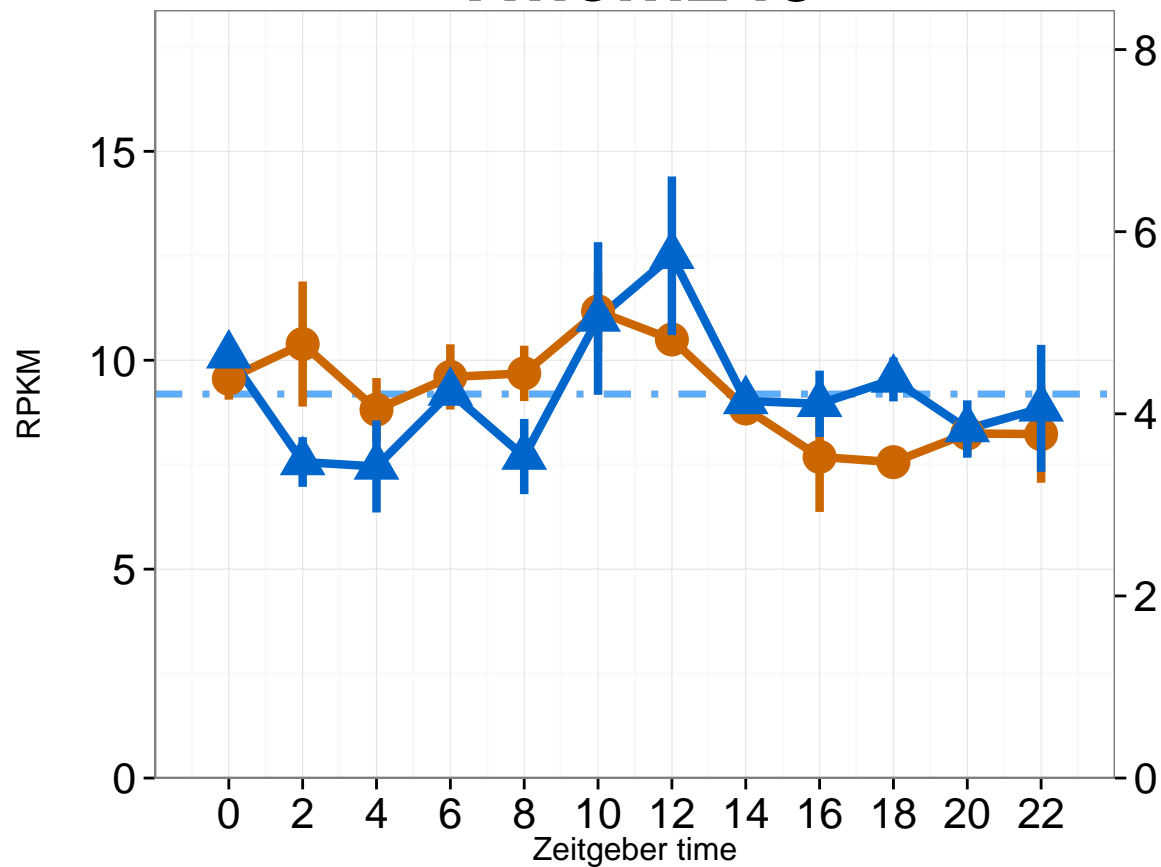

# Tmem245

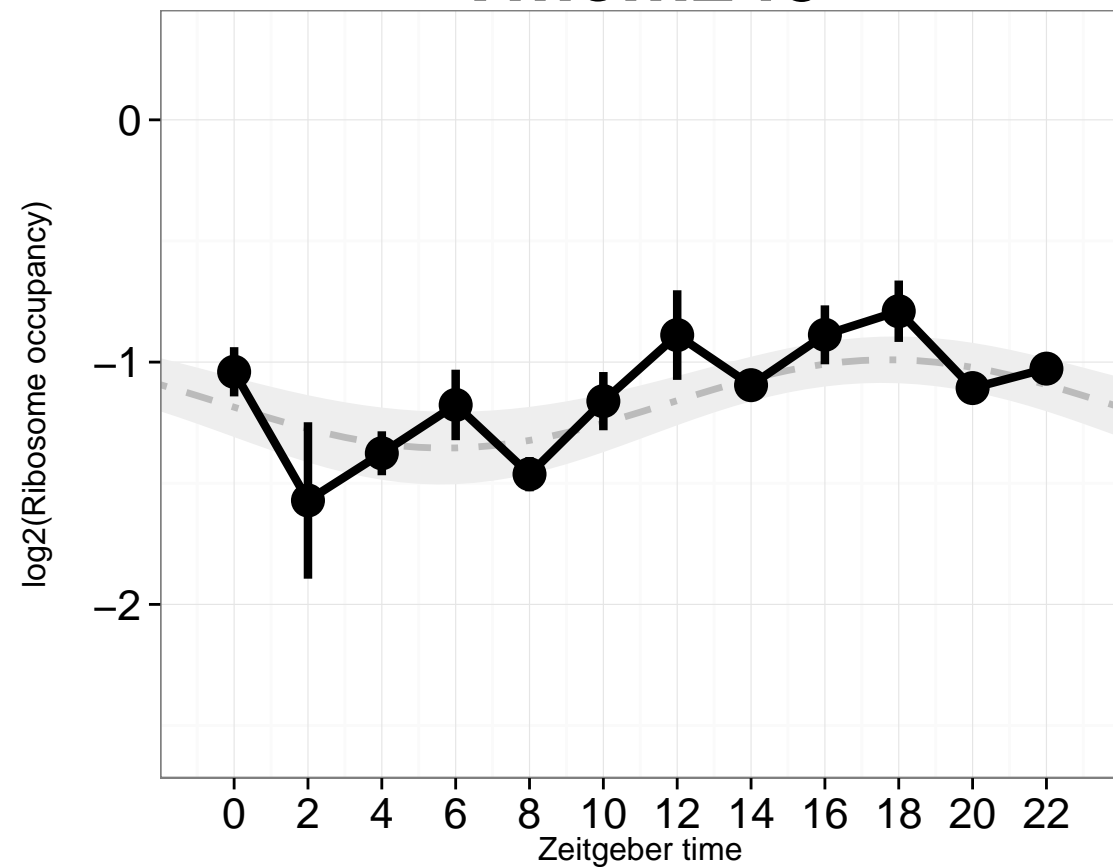

Supplement: SuppDataset_1.zip [file Tmem245_set_A.pdf › Supplemental Dataset 1/A-mRNA_nonrhyth_translation_nonrhyth/Tmem245_set_A.pdf]

# Tmem248

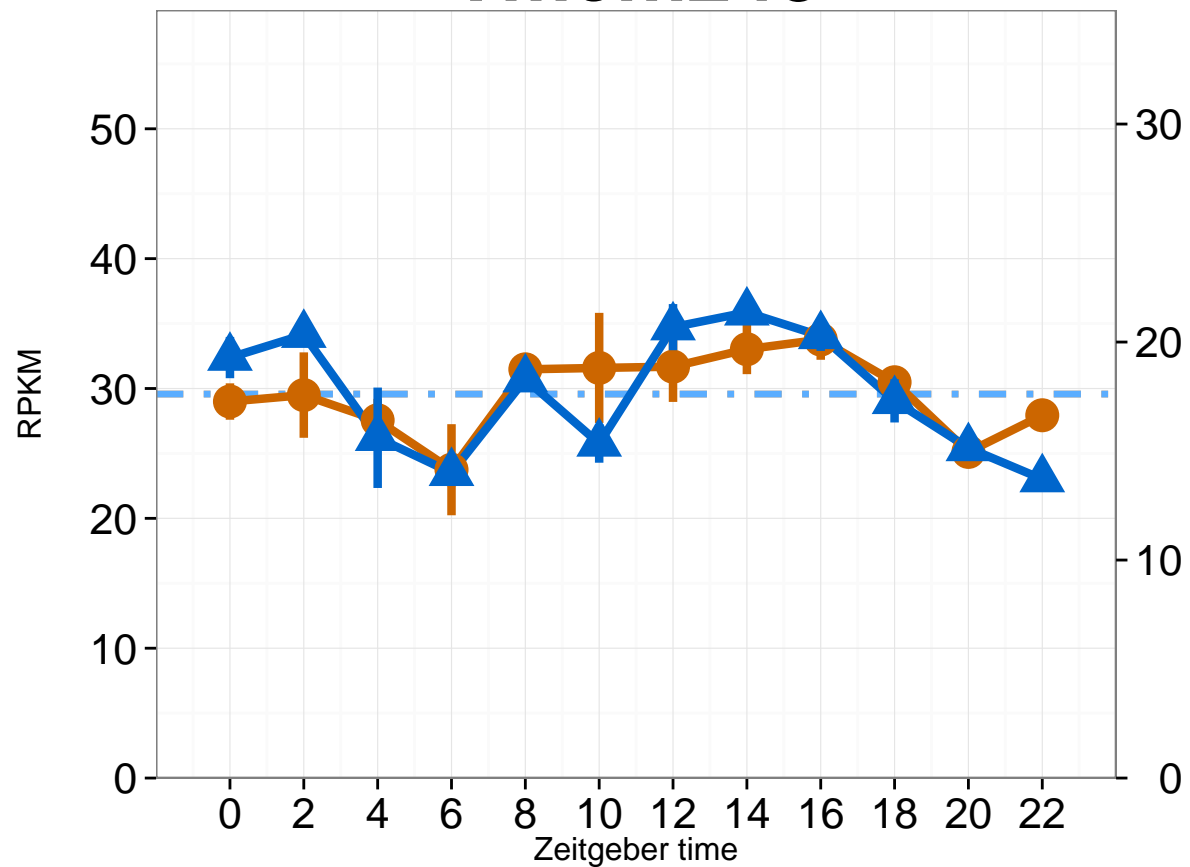

# Tmem248

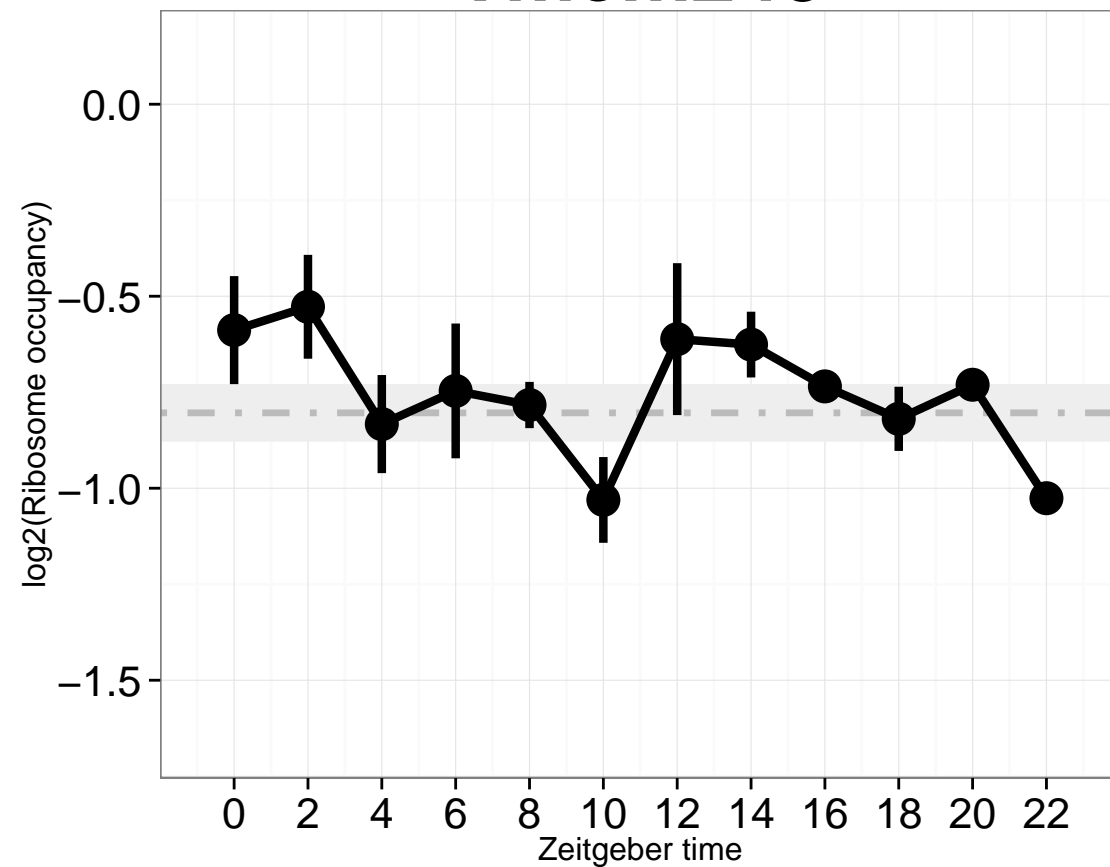

Supplement: SuppDataset_1.zip [file Tmem248_set_A.pdf › Supplemental Dataset 1/A-mRNA_nonrhyth_translation_nonrhyth/Tmem248_set_A.pdf]

# Tmem251

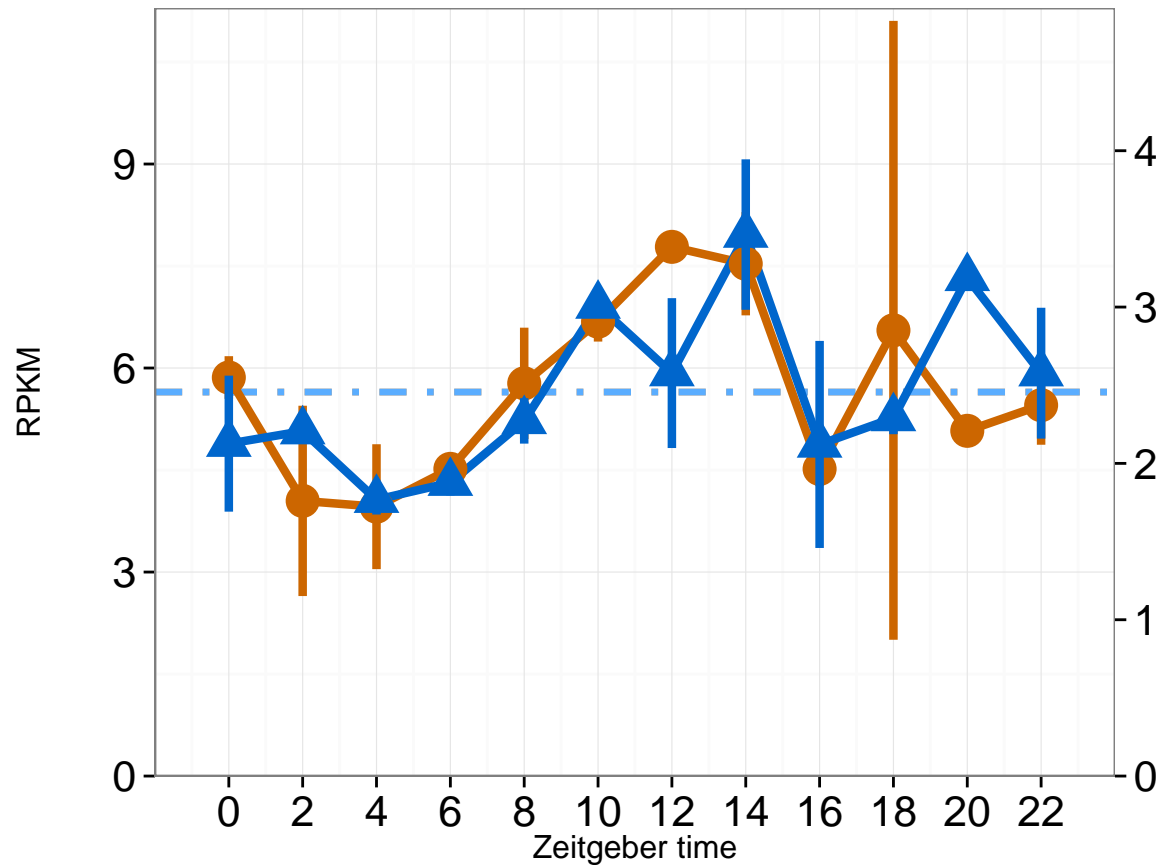

# Tmem251

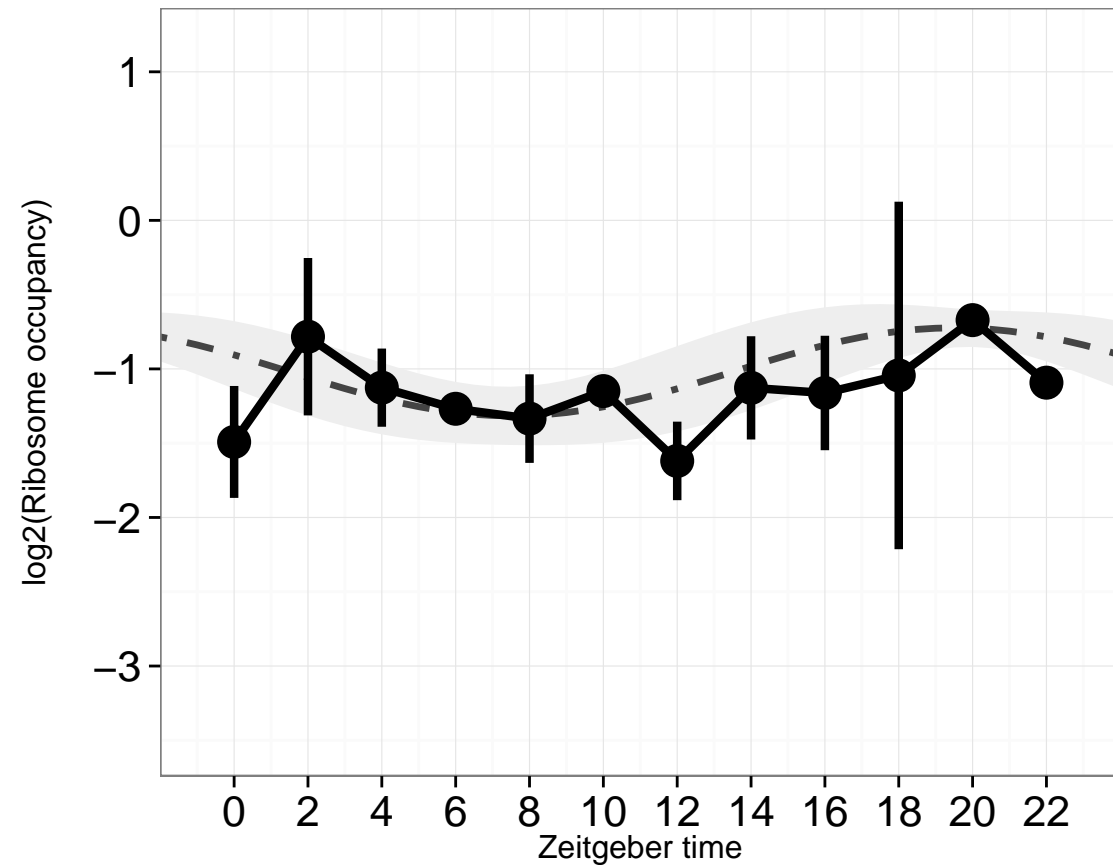

Supplement: SuppDataset_1.zip [file Tmem251_set_A.pdf › Supplemental Dataset 1/A-mRNA_nonrhyth_translation_nonrhyth/Tmem251_set_A.pdf]

# Tmem258

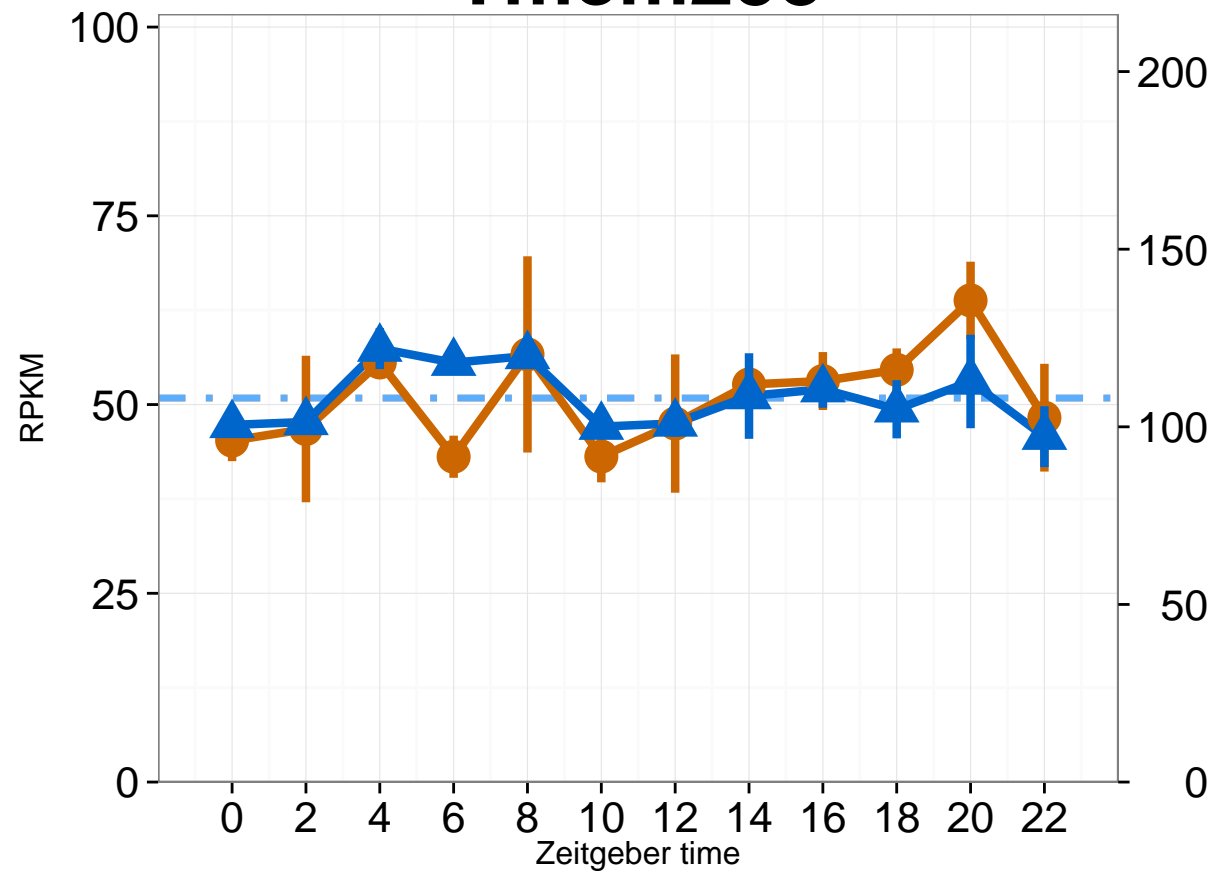

# Tmem258

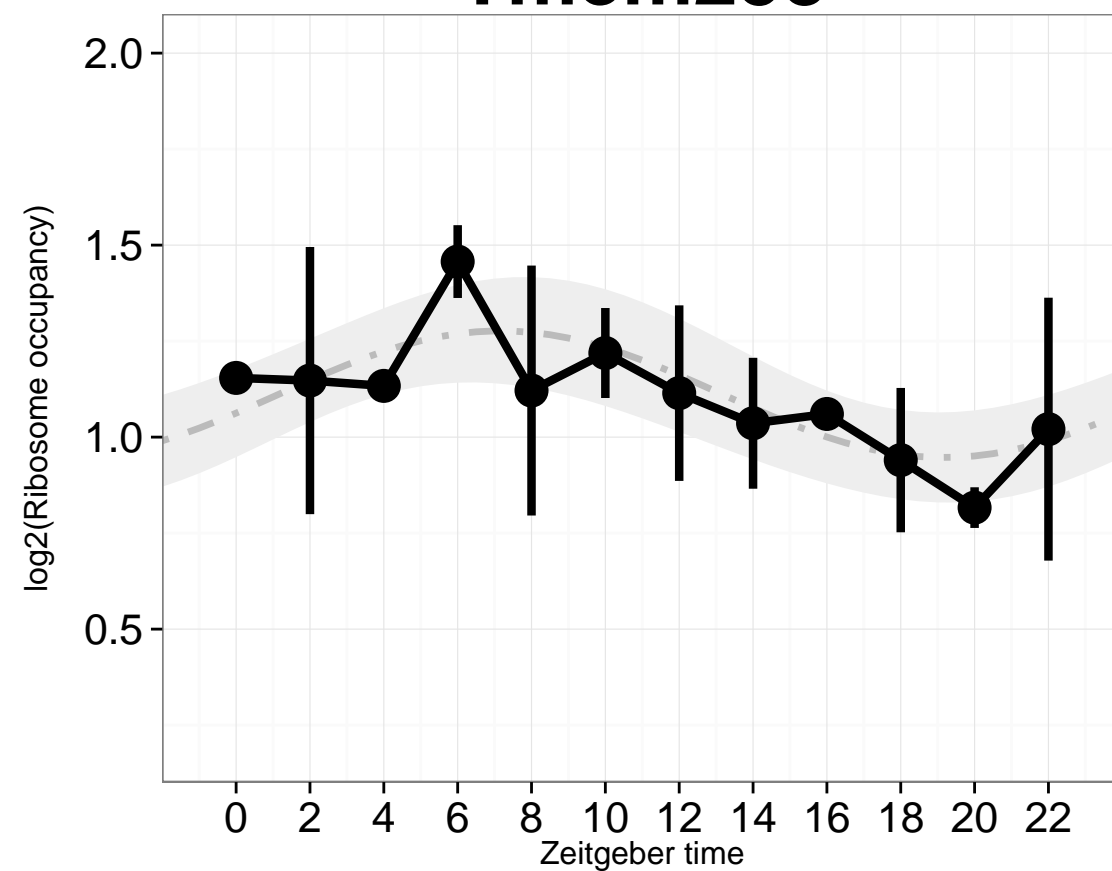

Supplement: SuppDataset_1.zip [file Tmem258_set_A.pdf › Supplemental Dataset 1/A-mRNA_nonrhyth_translation_nonrhyth/Tmem258_set_A.pdf]

# Tmem259

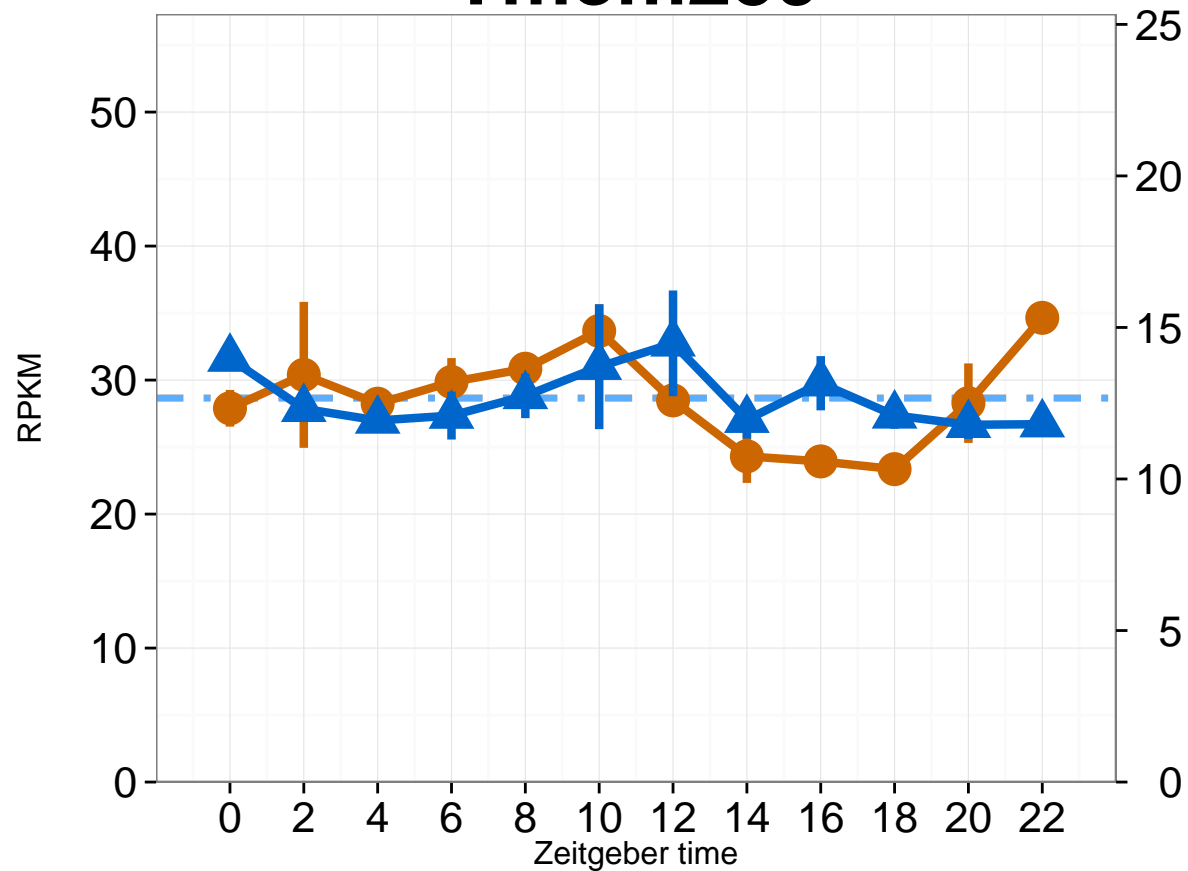

# Tmem259

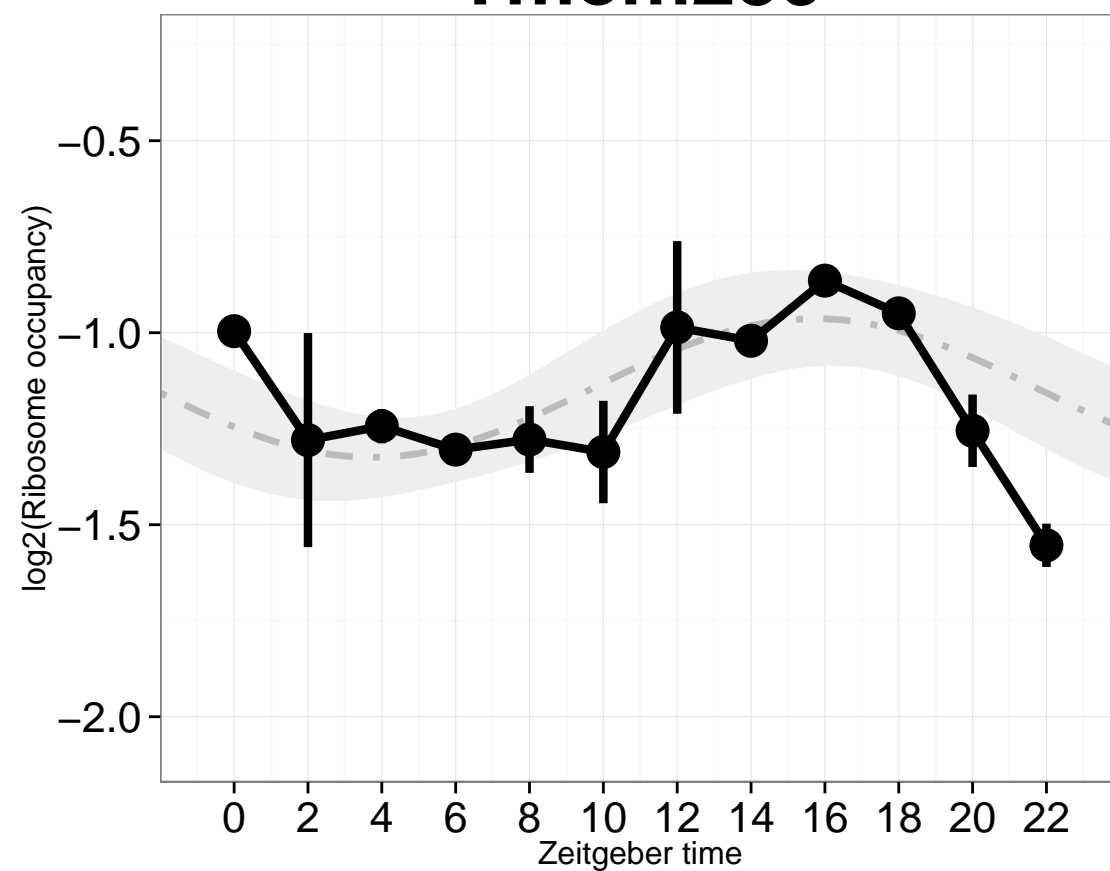

Supplement: SuppDataset_1.zip [file Tmem259_set_A.pdf › Supplemental Dataset 1/A-mRNA_nonrhyth_translation_nonrhyth/Tmem259_set_A.pdf]

# Tmem260

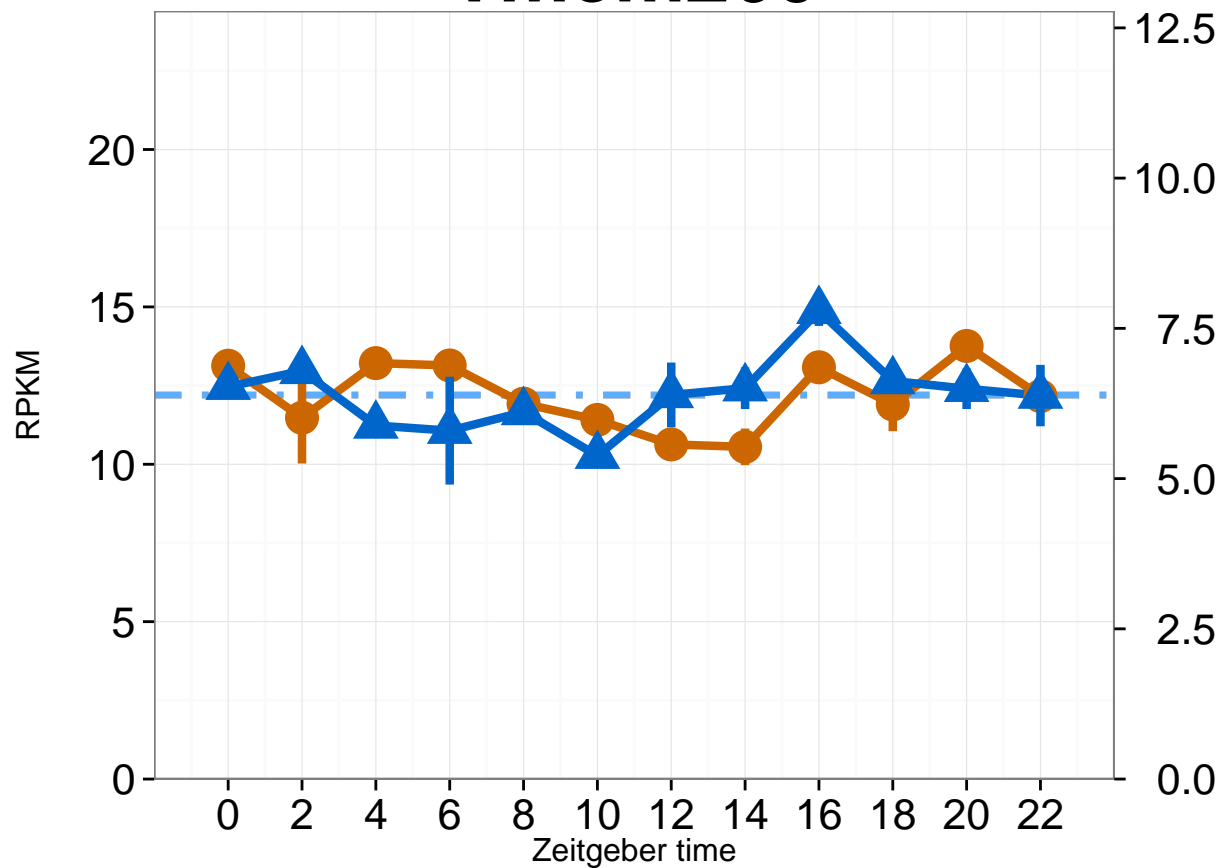

# Tmem260

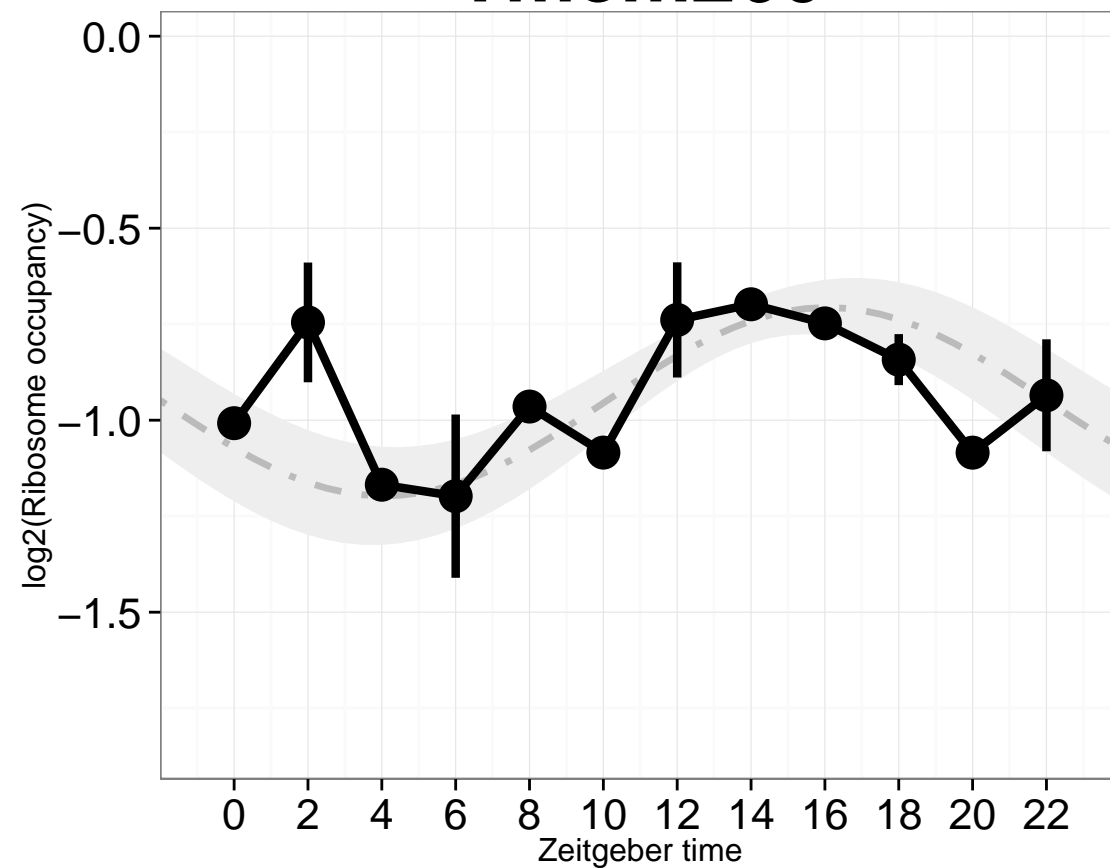

Supplement: SuppDataset_1.zip [file Tmem260_set_A.pdf › Supplemental Dataset 1/A-mRNA_nonrhyth_translation_nonrhyth/Tmem260_set_A.pdf]

# Tmem261

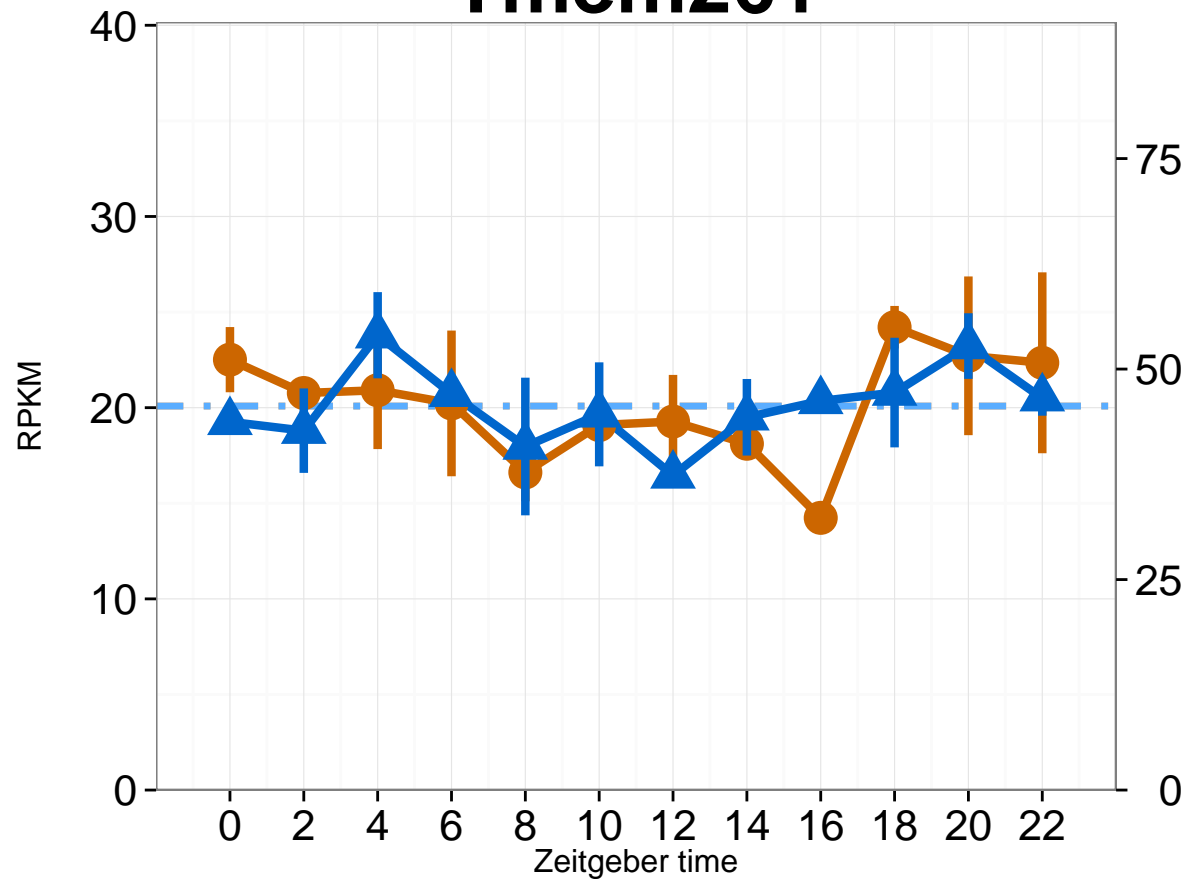

# Tmem261

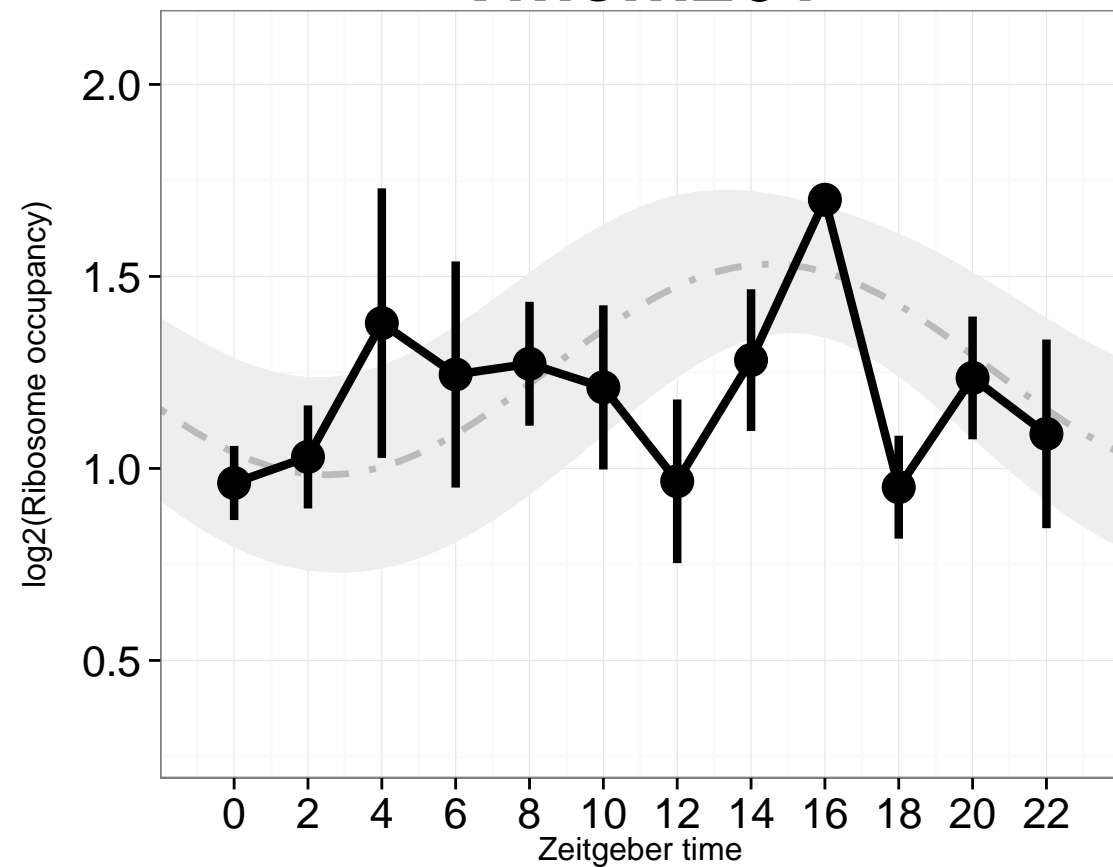

Supplement: SuppDataset_1.zip [file Tmem261_set_A.pdf › Supplemental Dataset 1/A-mRNA_nonrhyth_translation_nonrhyth/Tmem261_set_A.pdf]

# Tmem26

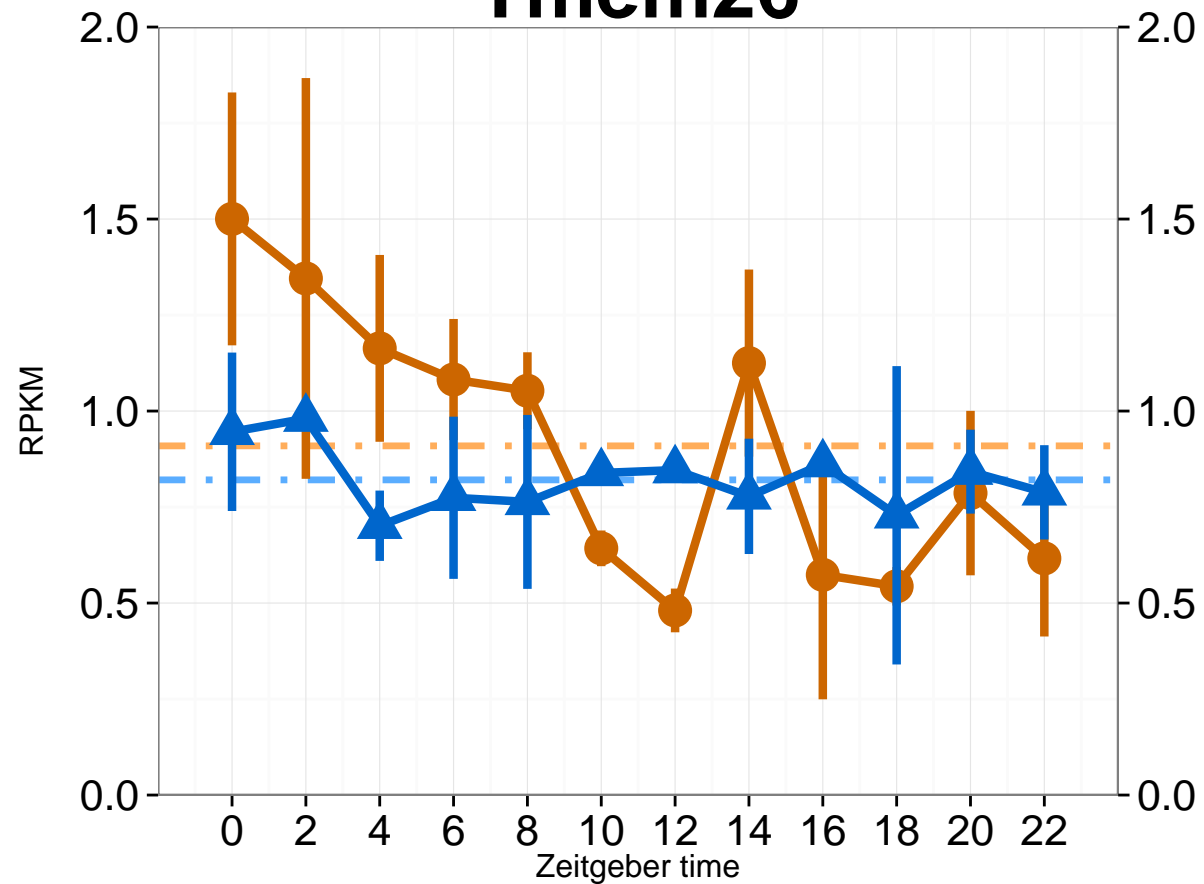

# Tmem26

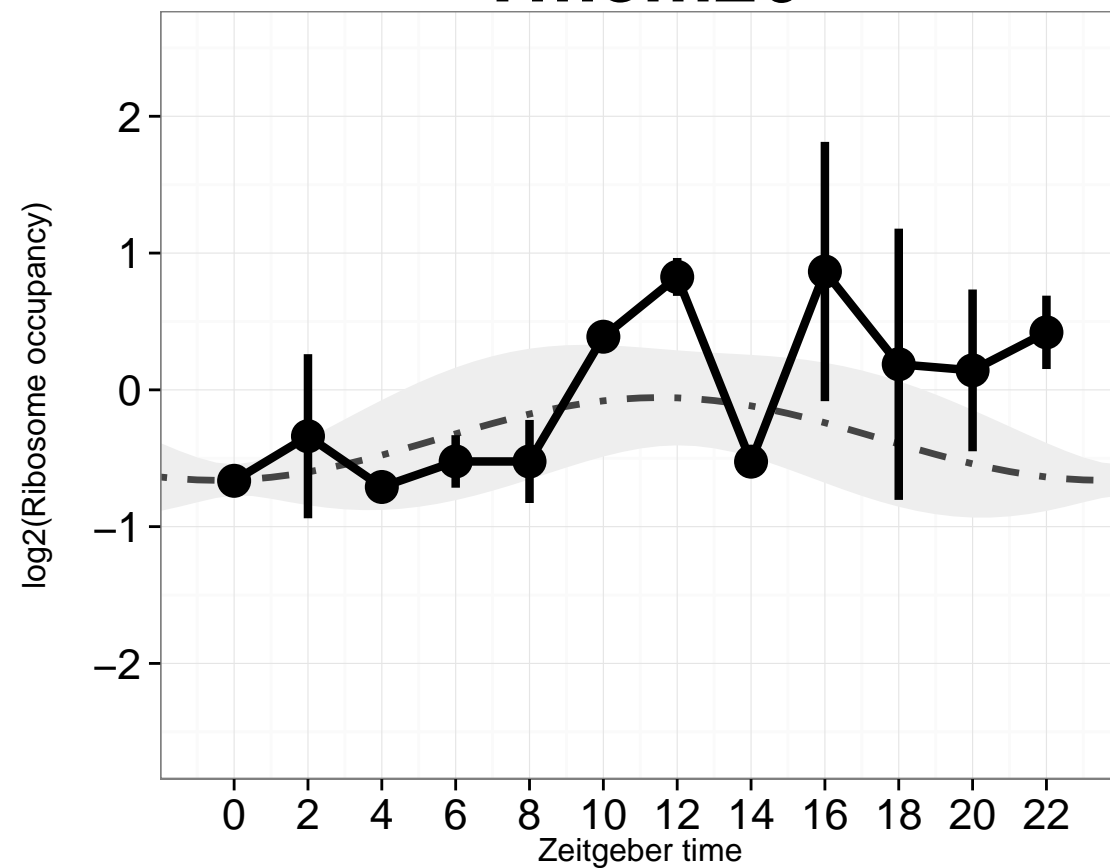

Supplement: SuppDataset_1.zip [file Tmem26_set_A.pdf › Supplemental Dataset 1/A-mRNA_nonrhyth_translation_nonrhyth/Tmem26_set_A.pdf]

# Tmem30a

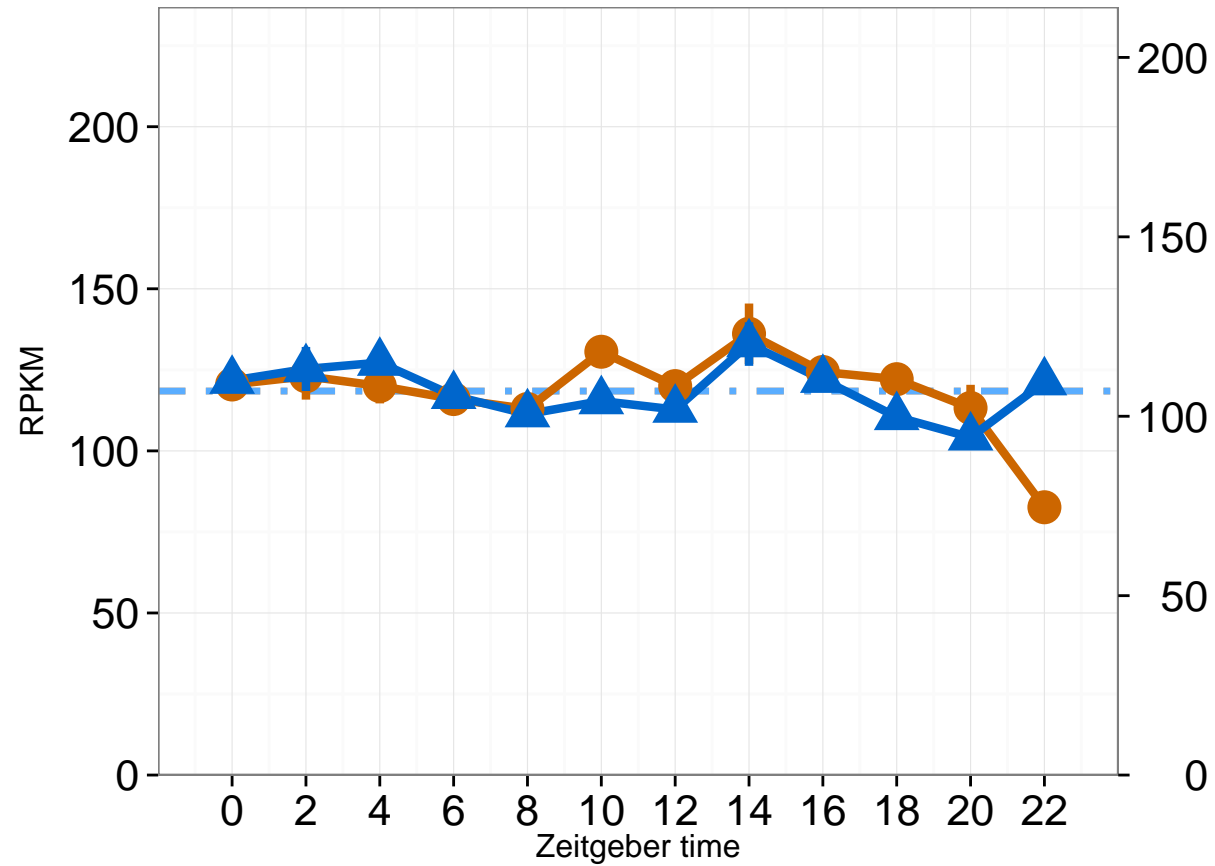

# Tmem30a

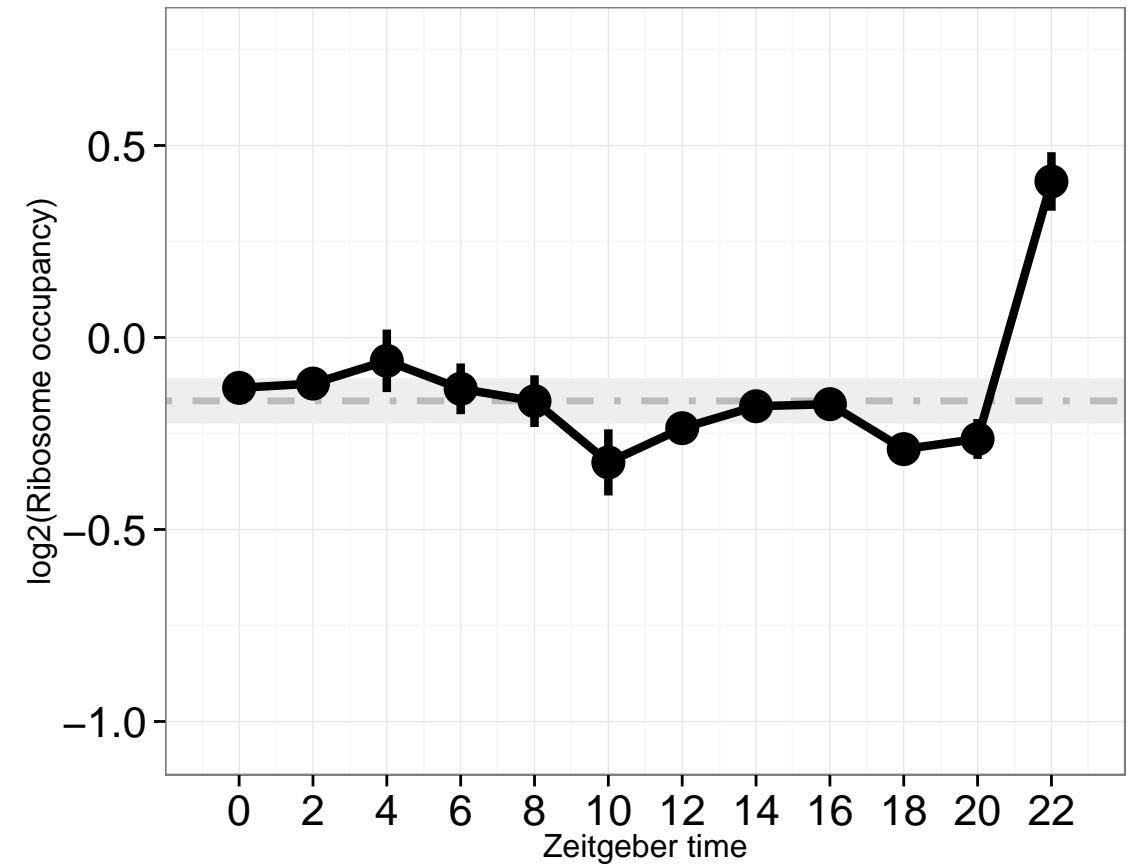

Supplement: SuppDataset_1.zip [file Tmem30a_set_A.pdf › Supplemental Dataset 1/A-mRNA_nonrhyth_translation_nonrhyth/Tmem30a_set_A.pdf]

# Tmem30b

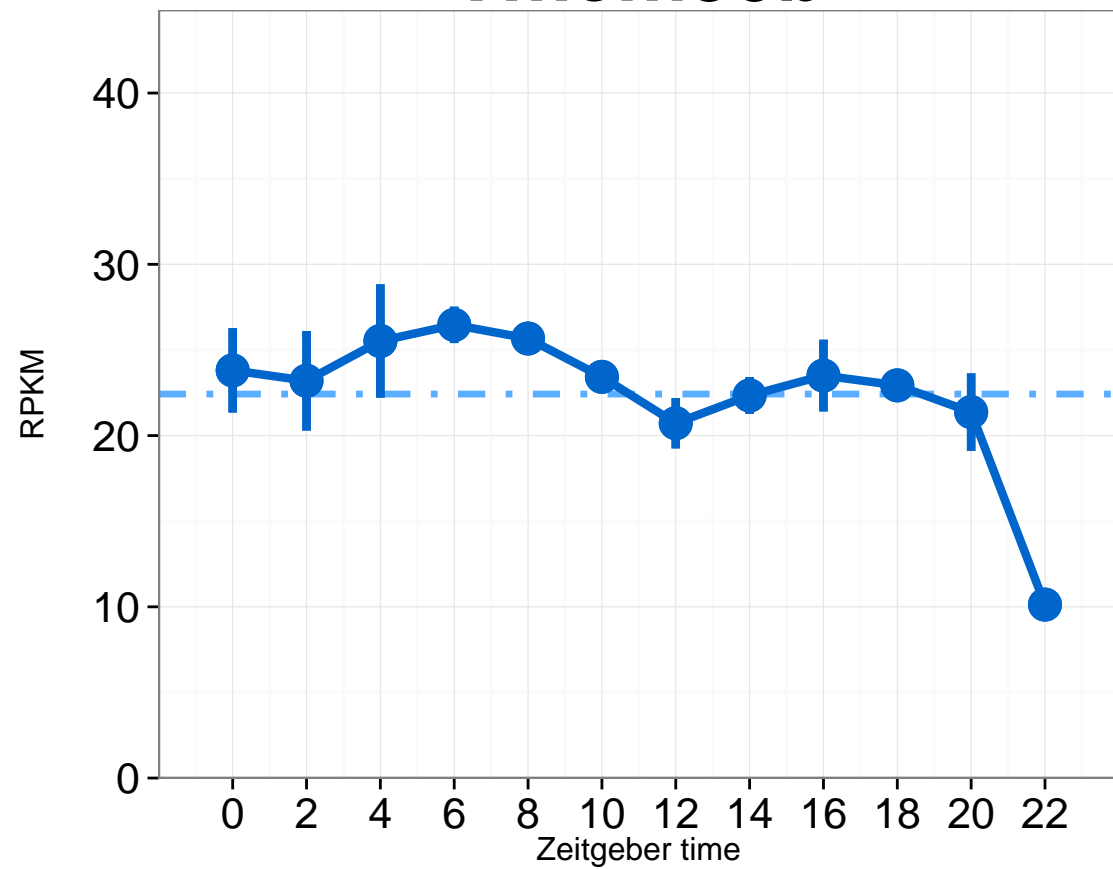

# Tmem30b log2(Ribosome occupancy)

Supplement: SuppDataset_1.zip [file Tmem30b_set_A.pdf › Supplemental Dataset 1/A-mRNA_nonrhyth_translation_nonrhyth/Tmem30b_set_A.pdf]

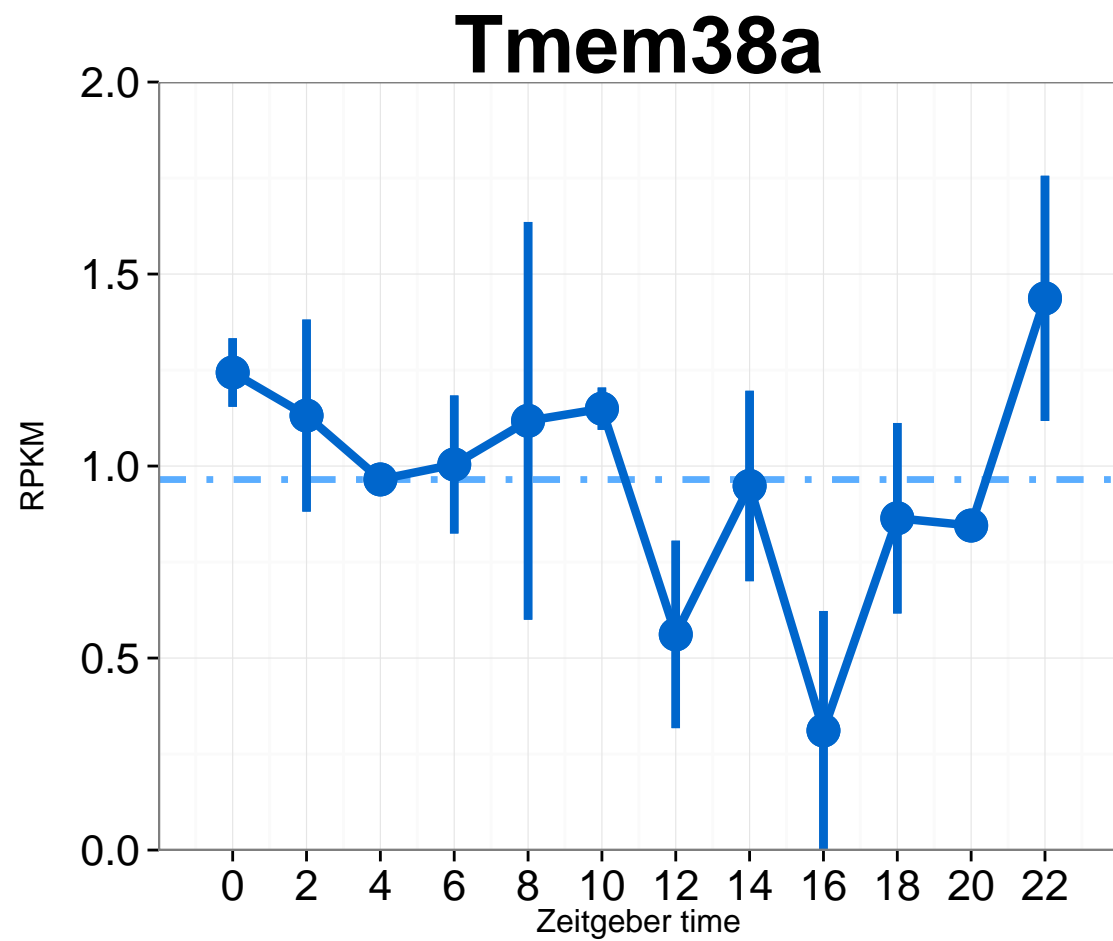

### Tmem38a log2(Ribosome occupancy)

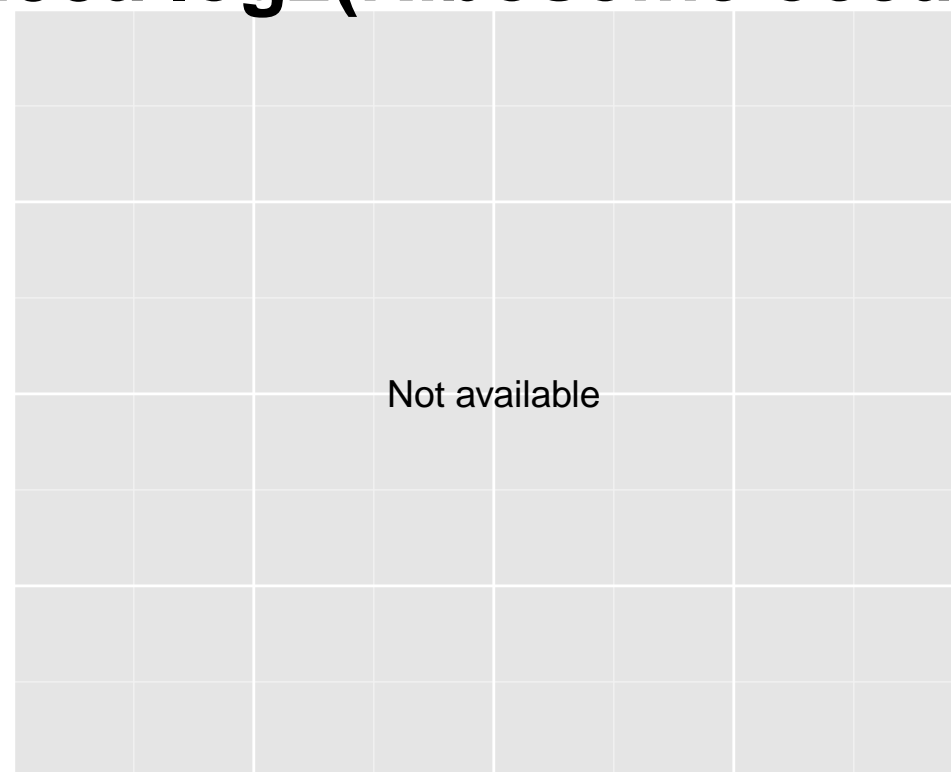

Supplement: SuppDataset_1.zip [file Tmem38a_set_A.pdf › Supplemental Dataset 1/A-mRNA_nonrhyth_translation_nonrhyth/Tmem38a_set_A.pdf]

# Tmem38b

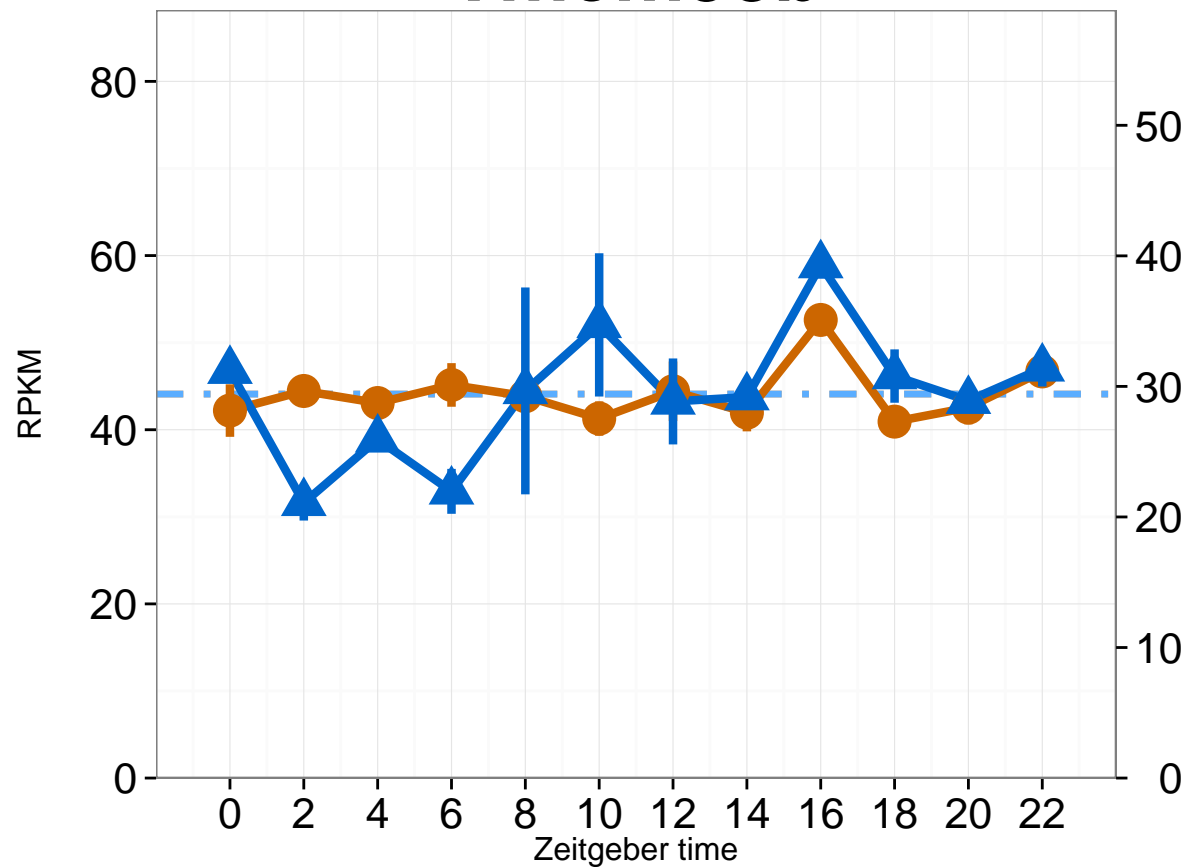

# Tmem38b

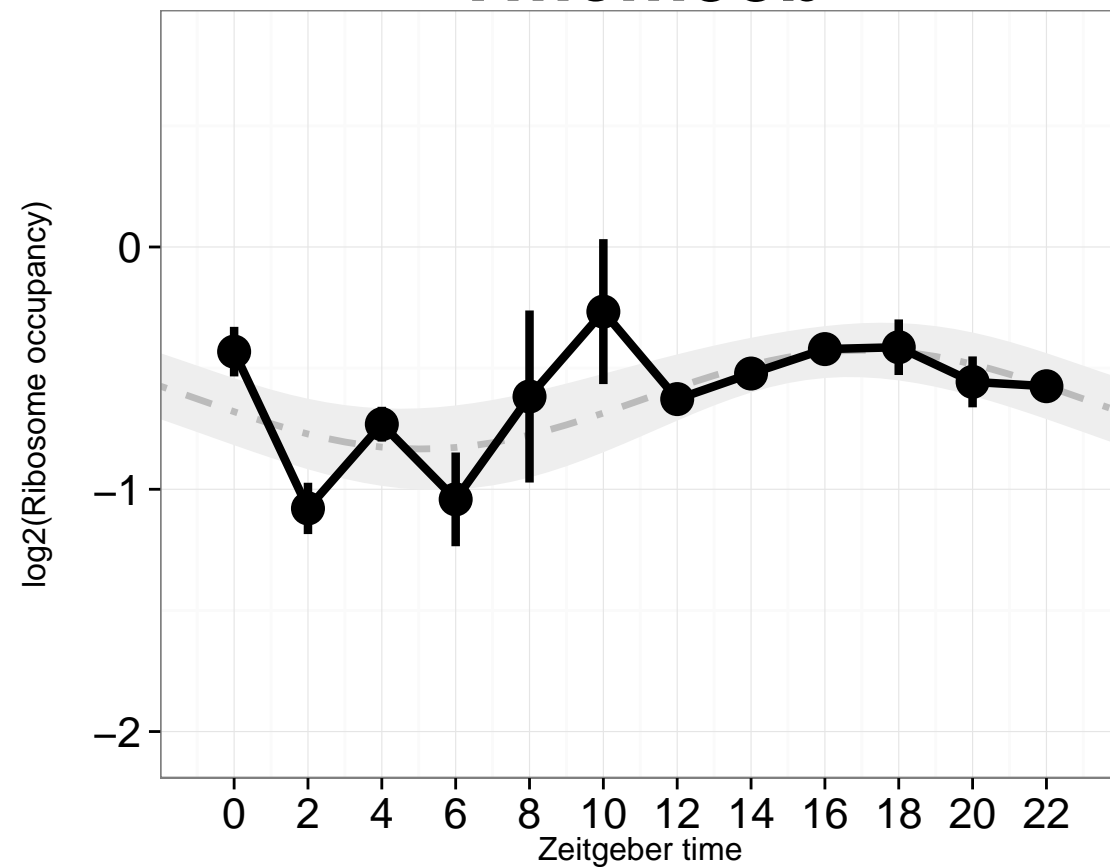

Supplement: SuppDataset_1.zip [file Tmem38b_set_A.pdf › Supplemental Dataset 1/A-mRNA_nonrhyth_translation_nonrhyth/Tmem38b_set_A.pdf]

# Tmem39a

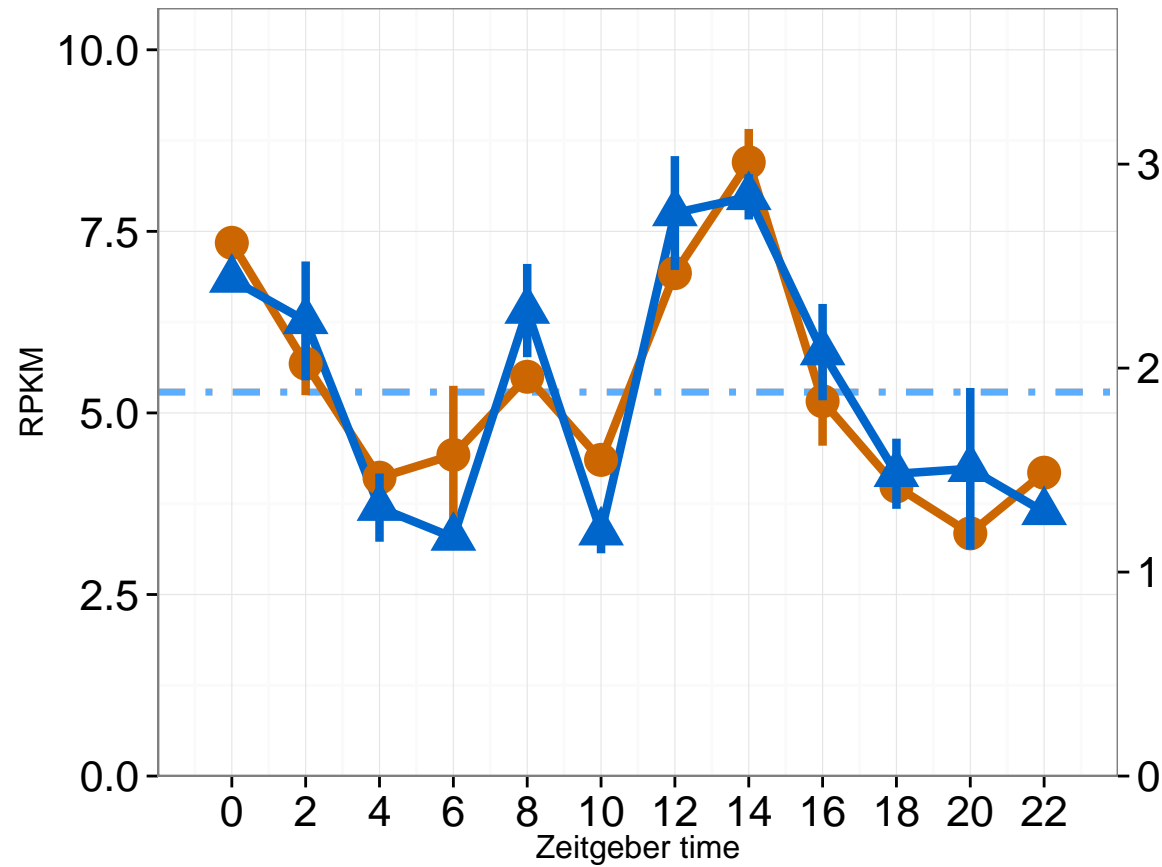

# Tmem39a

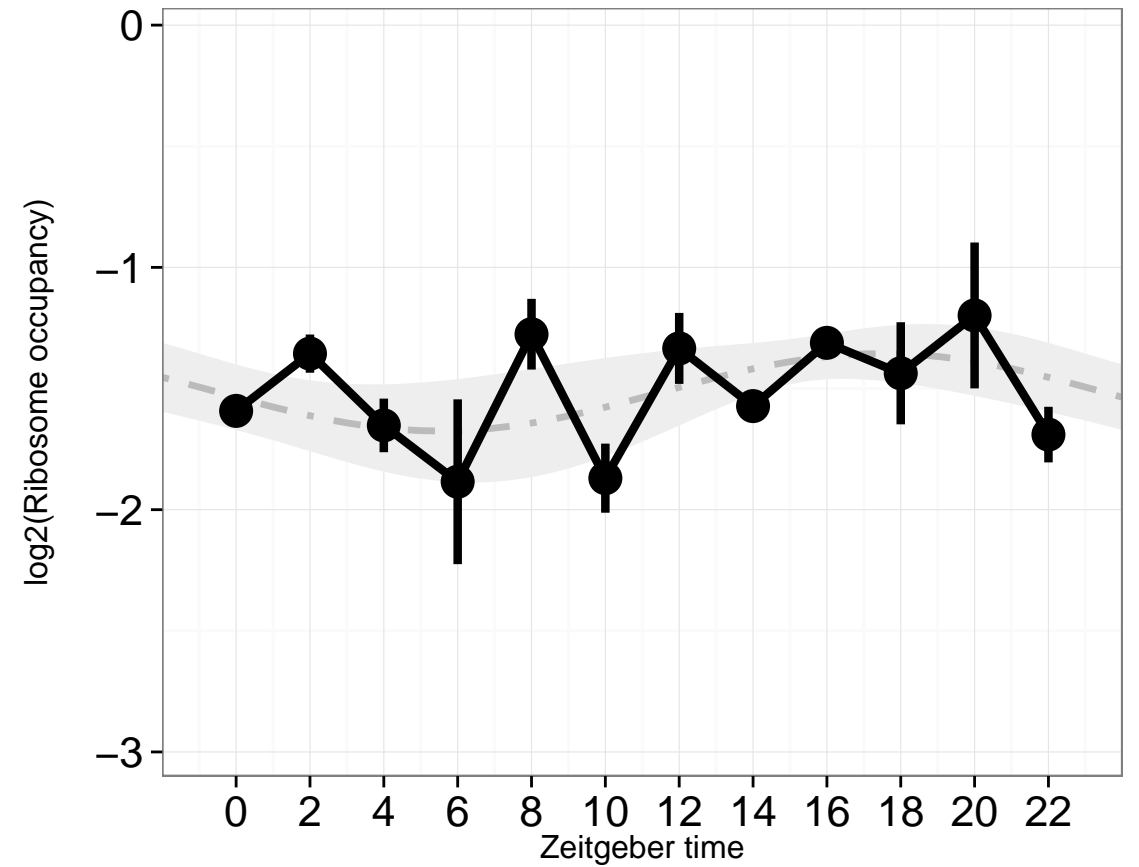

Supplement: SuppDataset_1.zip [file Tmem39a_set_A.pdf › Supplemental Dataset 1/A-mRNA_nonrhyth_translation_nonrhyth/Tmem39a_set_A.pdf]

# Tmem39b

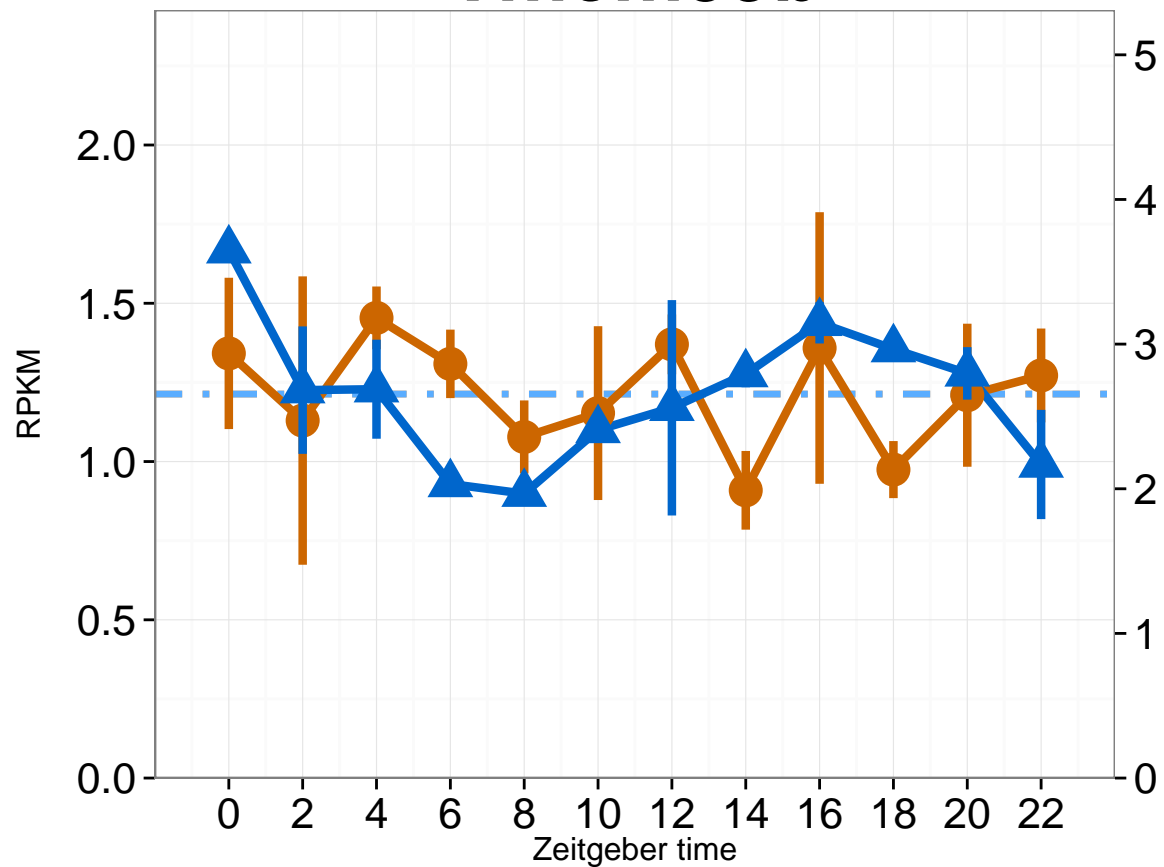

# Tmem39b

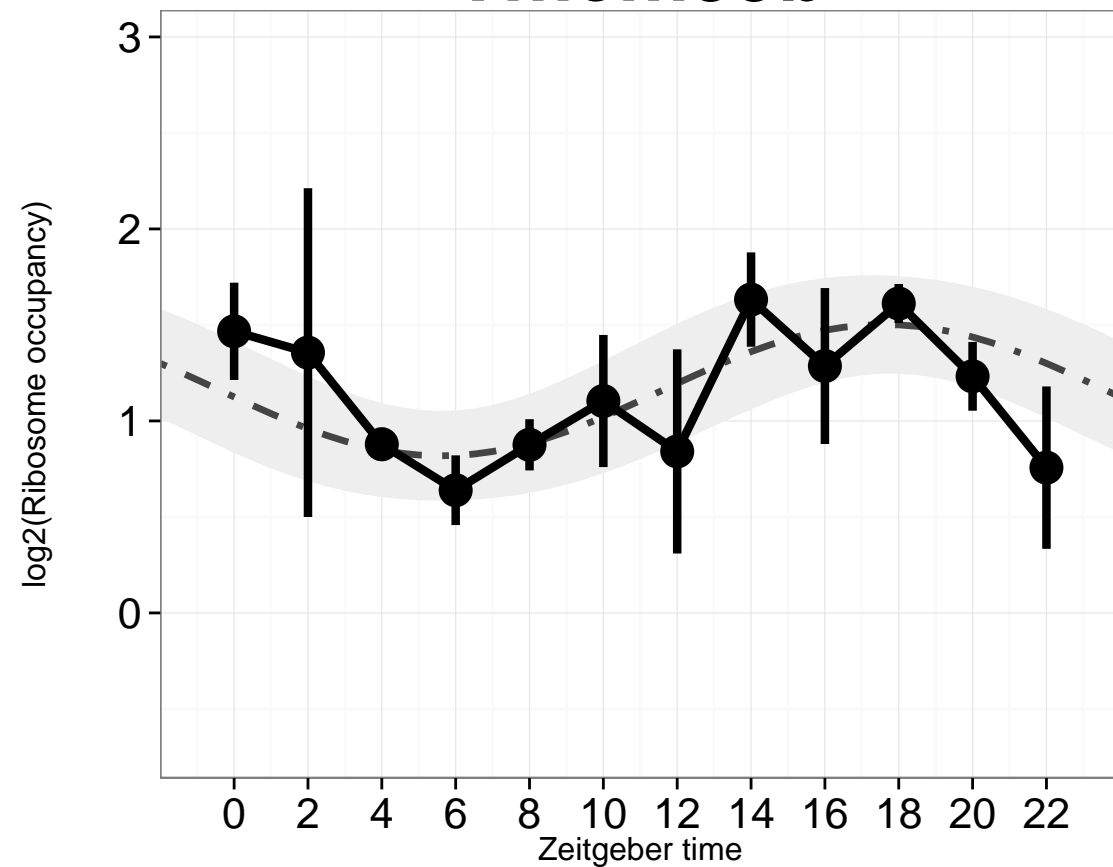

Supplement: SuppDataset_1.zip [file Tmem39b_set_A.pdf › Supplemental Dataset 1/A-mRNA_nonrhyth_translation_nonrhyth/Tmem39b_set_A.pdf]

# Tmem41a

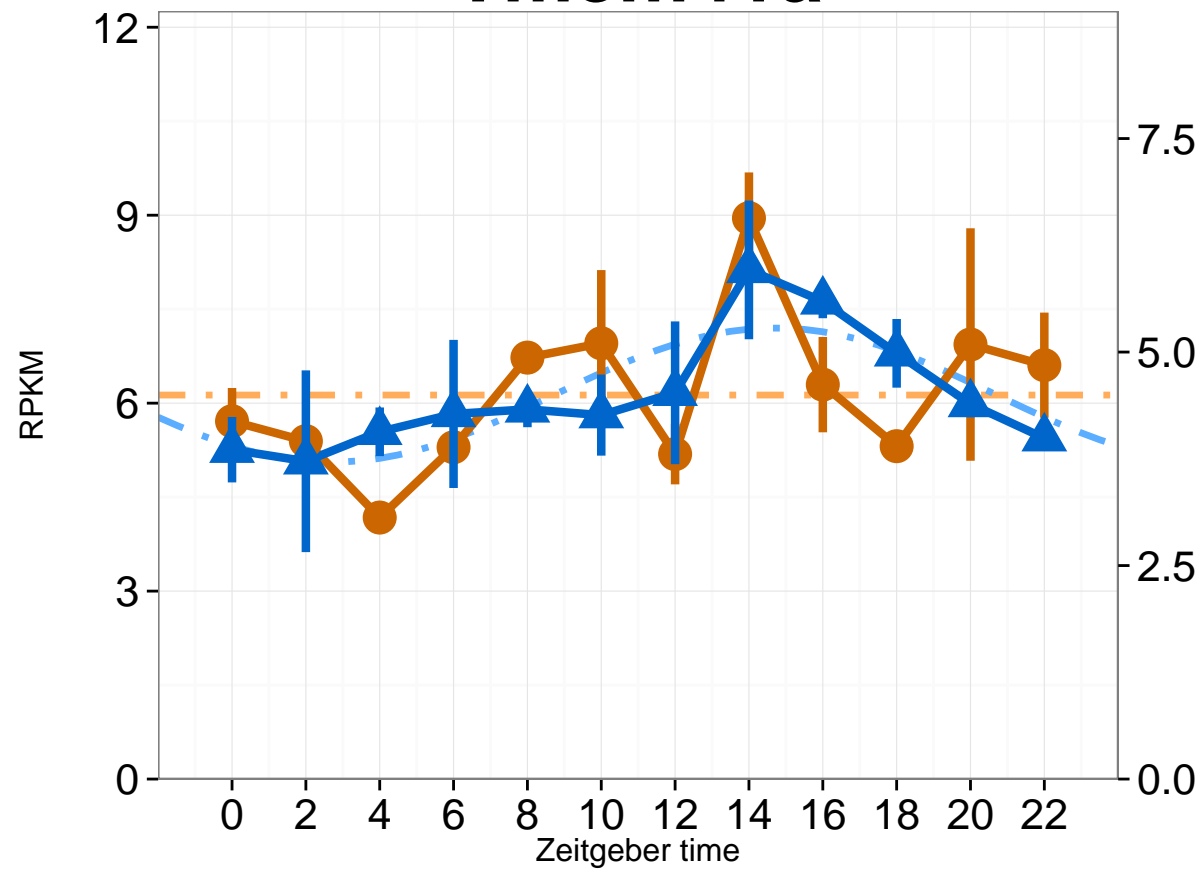

# Tmem41a

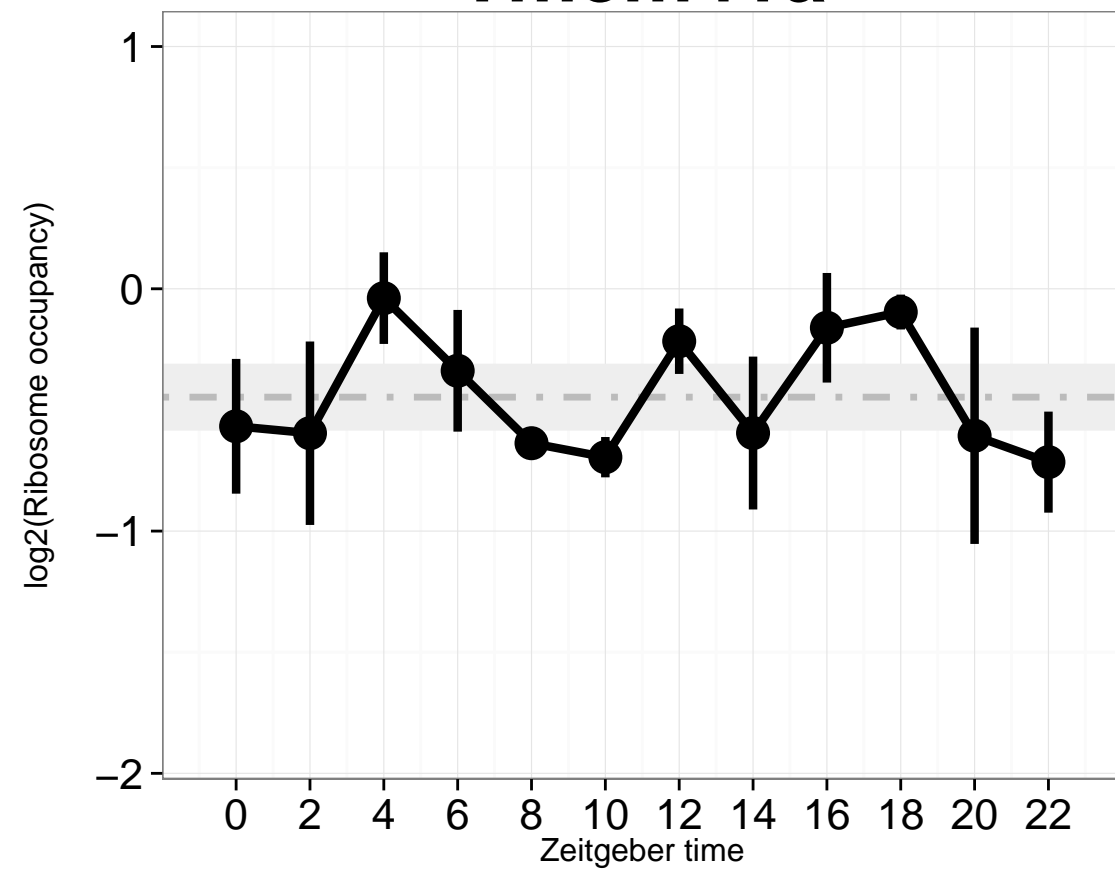

Supplement: SuppDataset_1.zip [file Tmem41a_set_A.pdf › Supplemental Dataset 1/A-mRNA_nonrhyth_translation_nonrhyth/Tmem41a_set_A.pdf]

# Tmem42

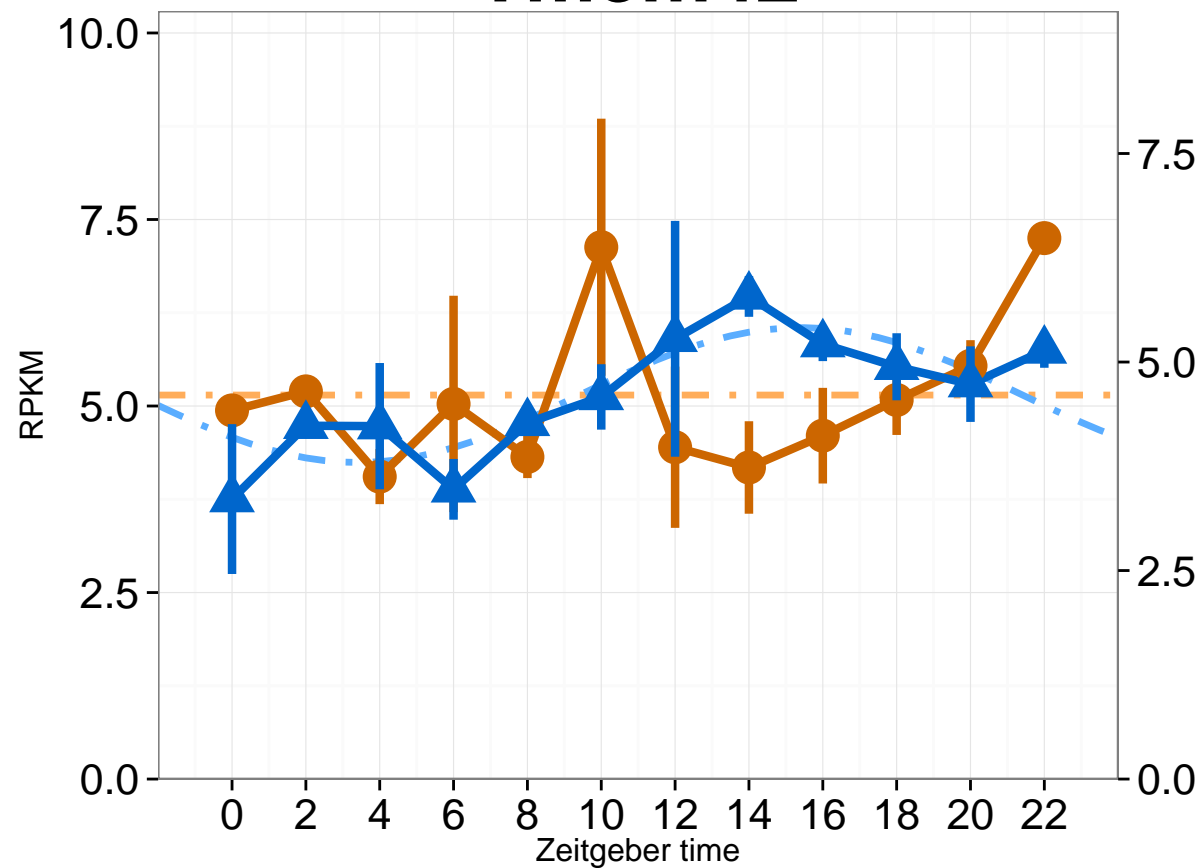

# Tmem42

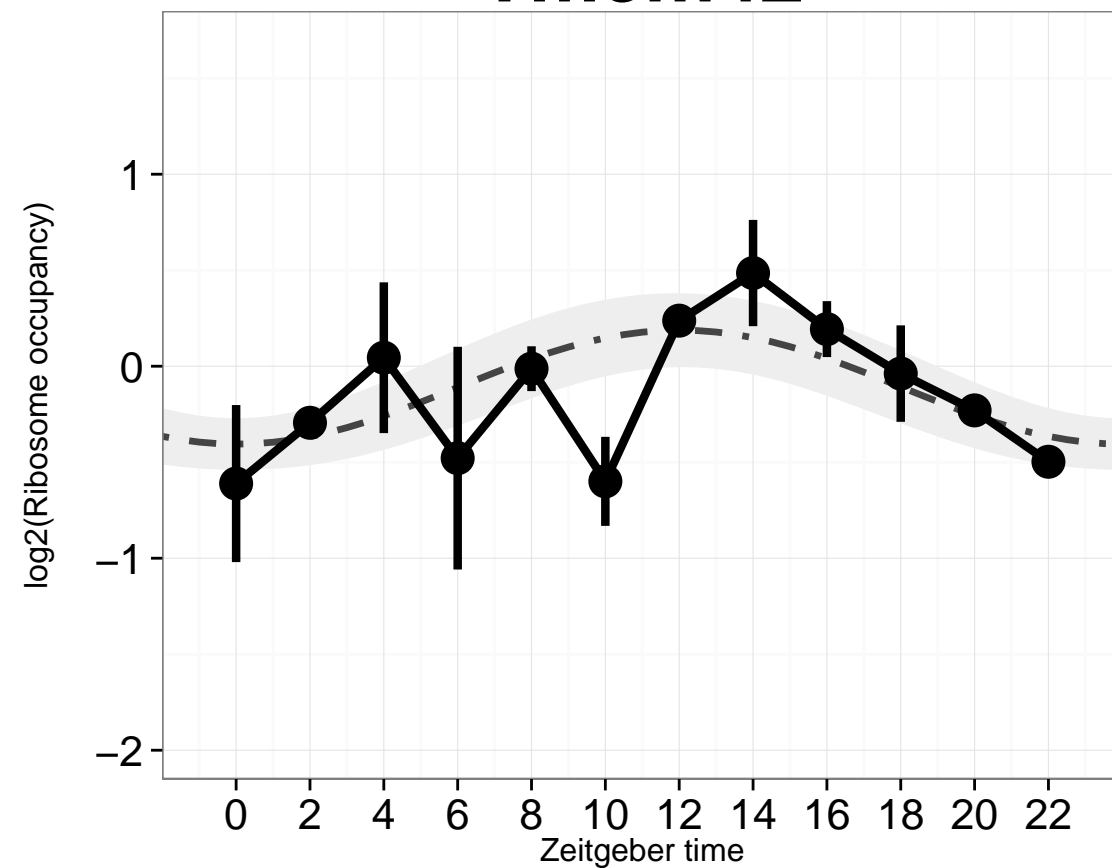

Supplement: SuppDataset_1.zip [file Tmem42_set_A.pdf › Supplemental Dataset 1/A-mRNA_nonrhyth_translation_nonrhyth/Tmem42_set_A.pdf]

# Tmem43

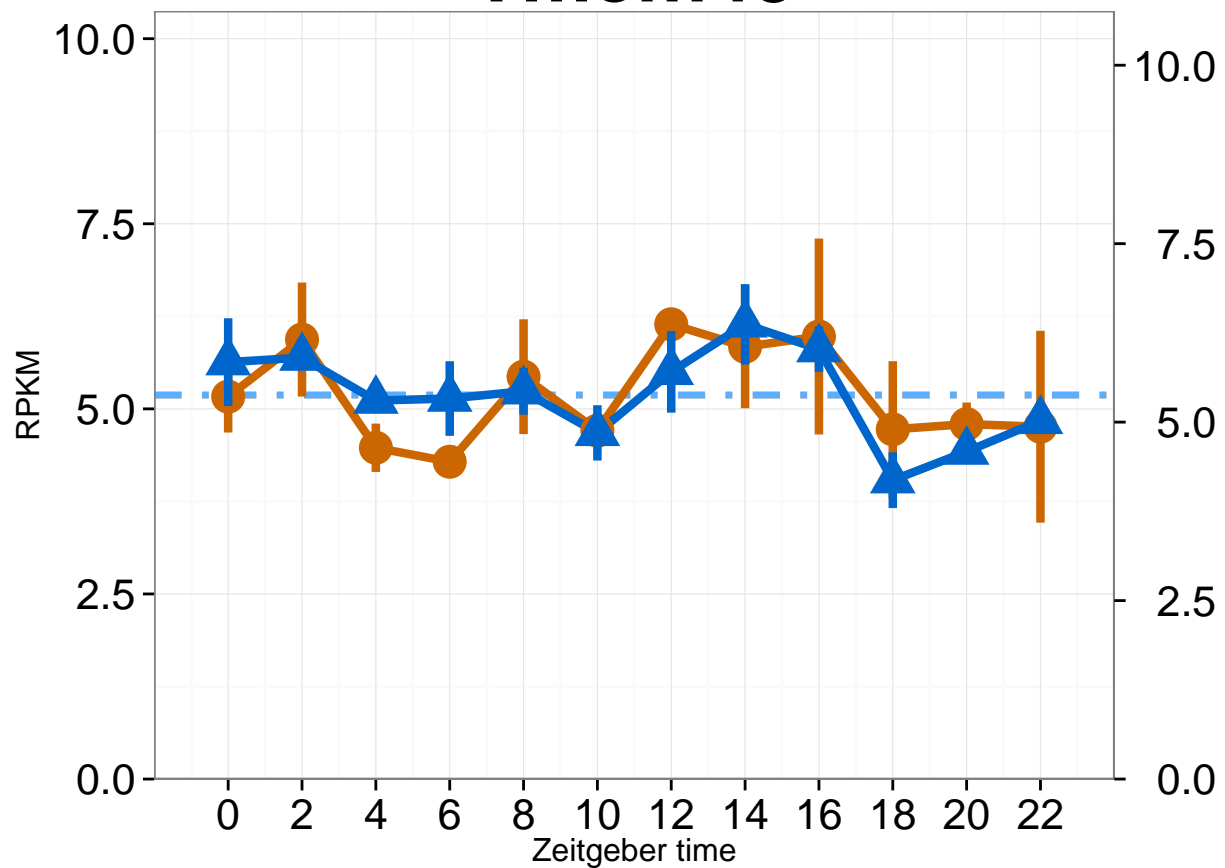

# Tmem43

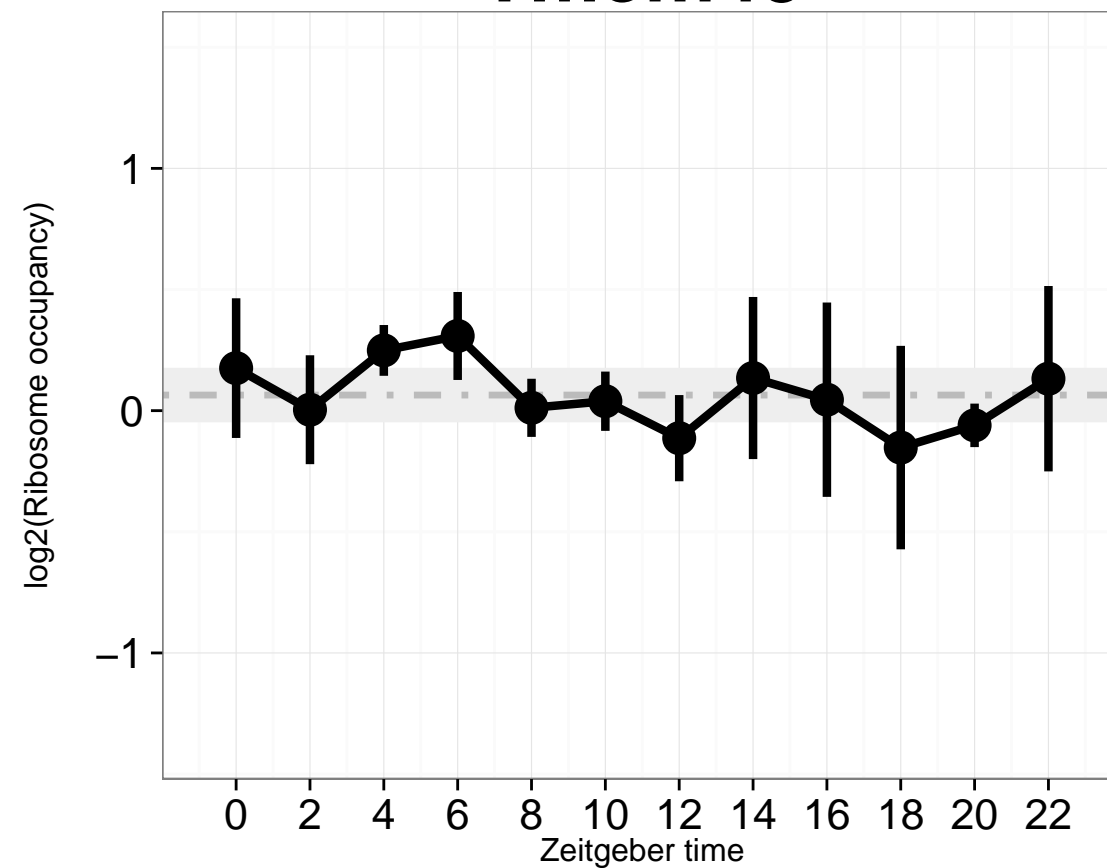

Supplement: SuppDataset_1.zip [file Tmem43_set_A.pdf › Supplemental Dataset 1/A-mRNA_nonrhyth_translation_nonrhyth/Tmem43_set_A.pdf]

# Tmem47

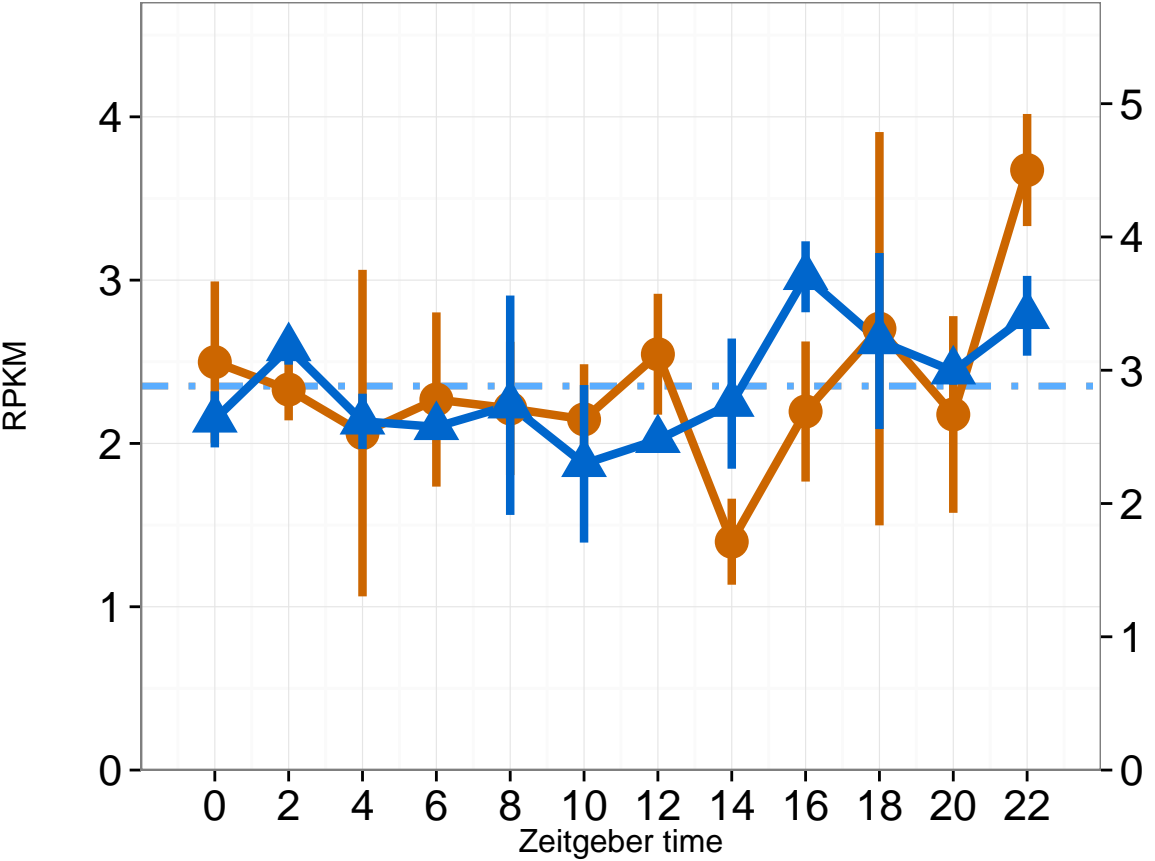

# Tmem47

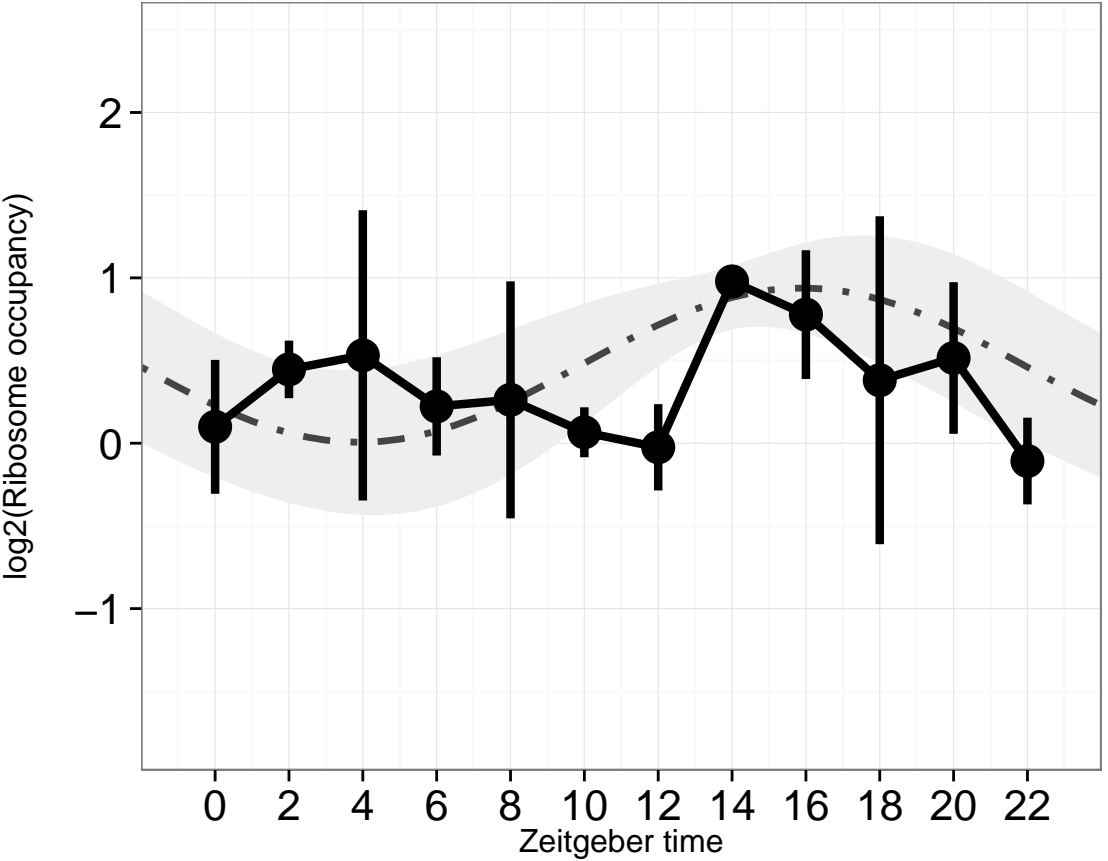

Supplement: SuppDataset_1.zip [file Tmem47_set_A.pdf › Supplemental Dataset 1/A-mRNA_nonrhyth_translation_nonrhyth/Tmem47_set_A.pdf]

# Tmem50a

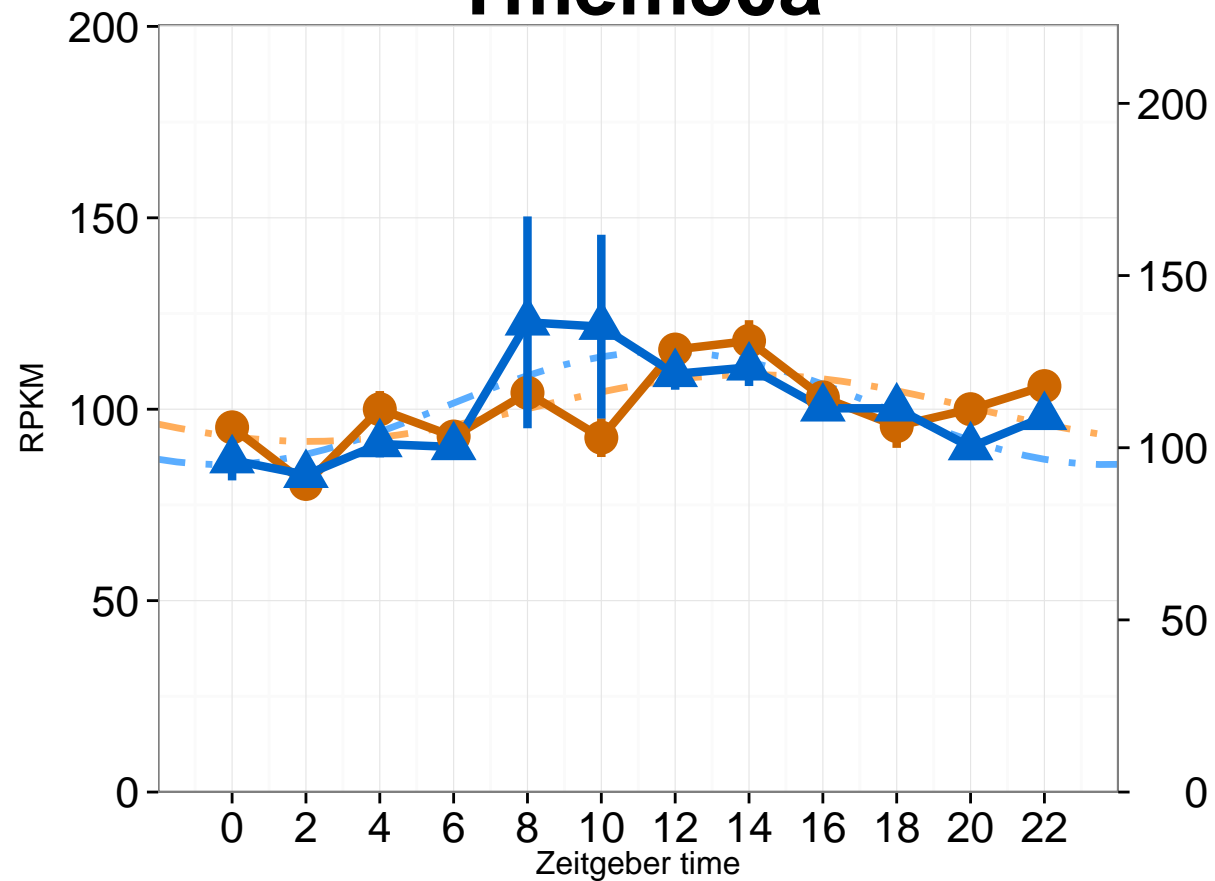

# Tmem50a

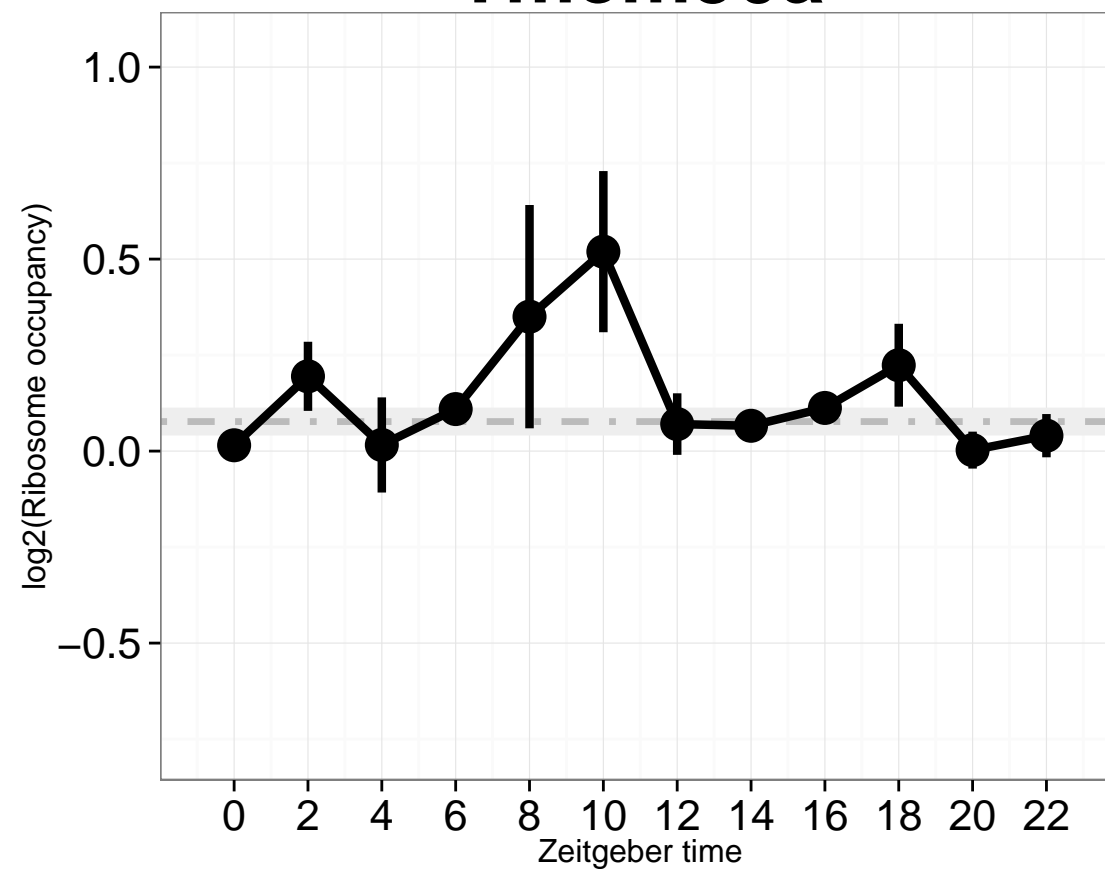

Supplement: SuppDataset_1.zip [file Tmem50a_set_A.pdf › Supplemental Dataset 1/A-mRNA_nonrhyth_translation_nonrhyth/Tmem50a_set_A.pdf]

# Tmem50b

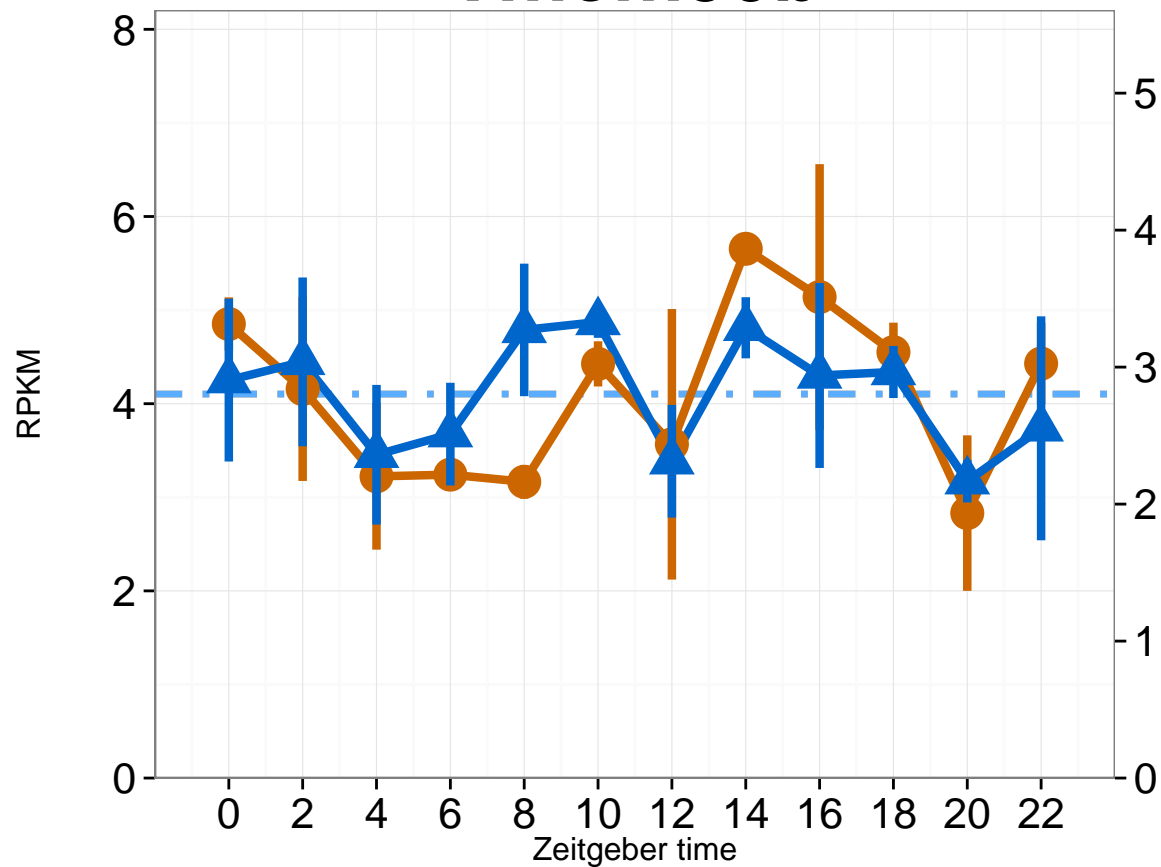

# Tmem50b

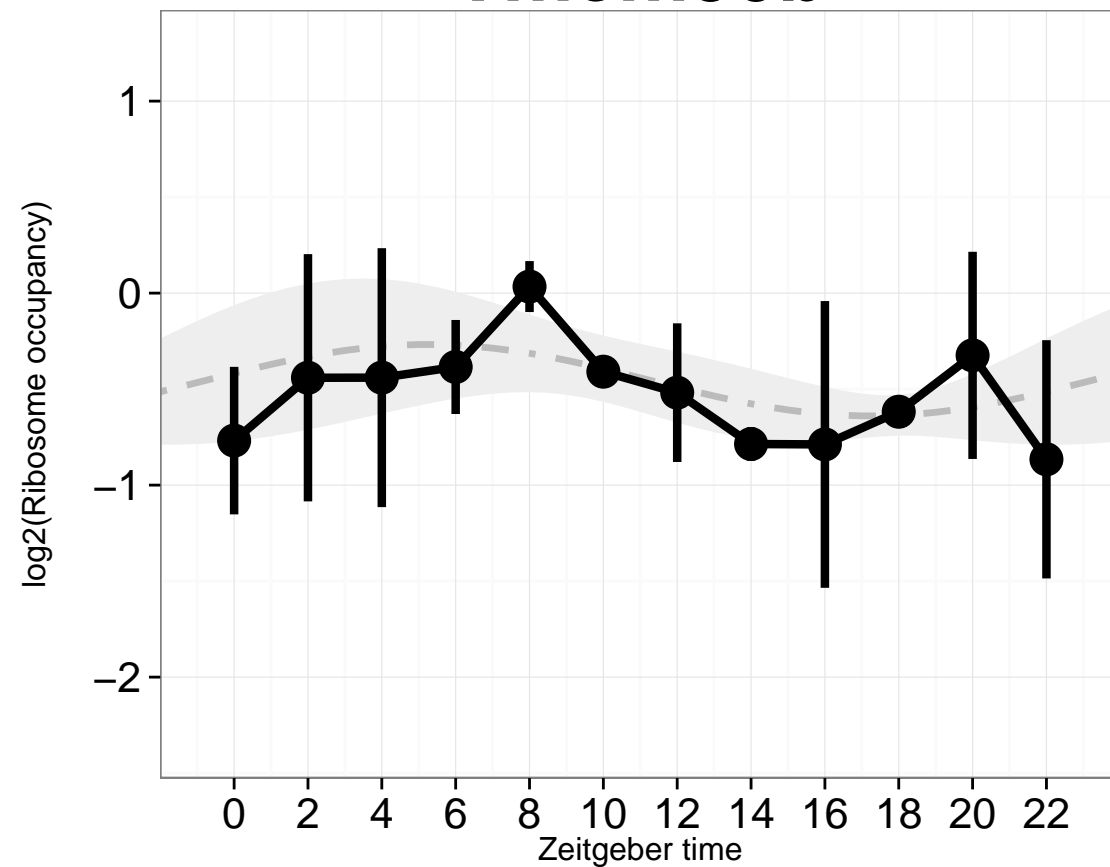

Supplement: SuppDataset_1.zip [file Tmem50b_set_A.pdf › Supplemental Dataset 1/A-mRNA_nonrhyth_translation_nonrhyth/Tmem50b_set_A.pdf]

# Tmem51

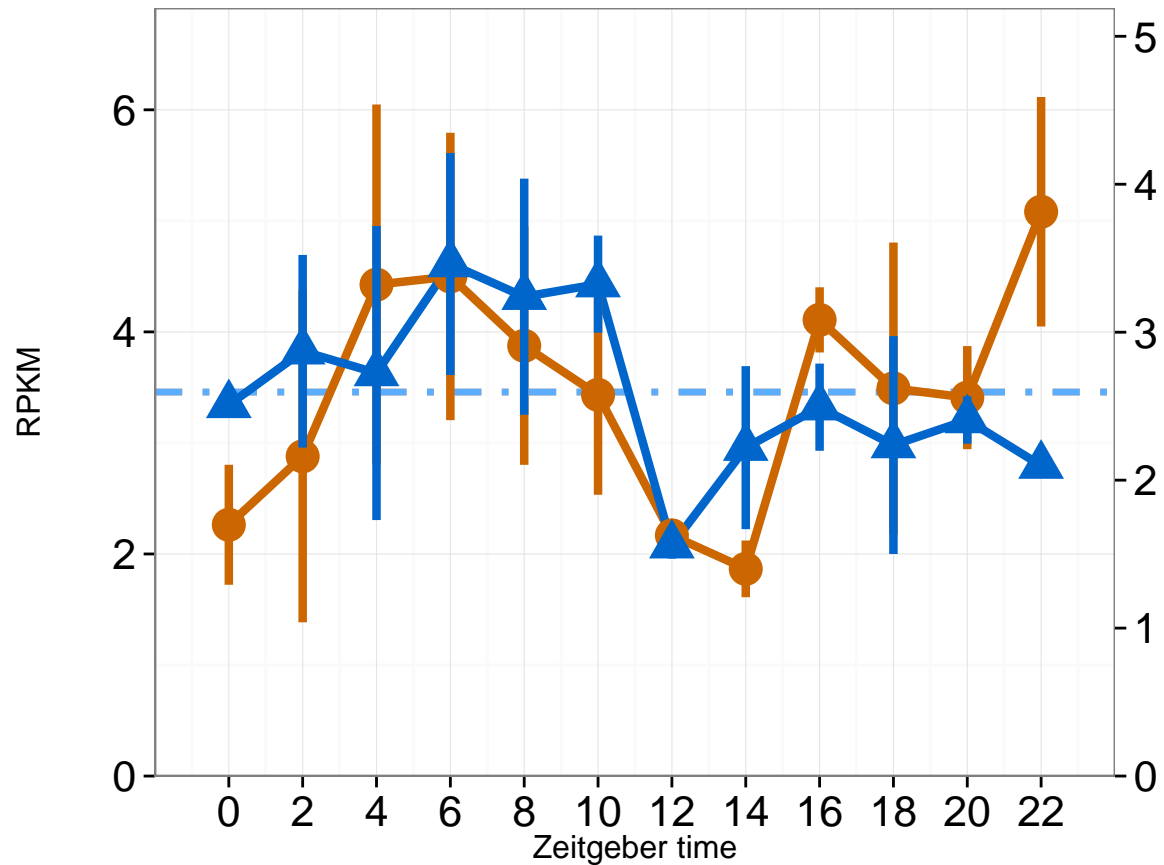

# Tmem51

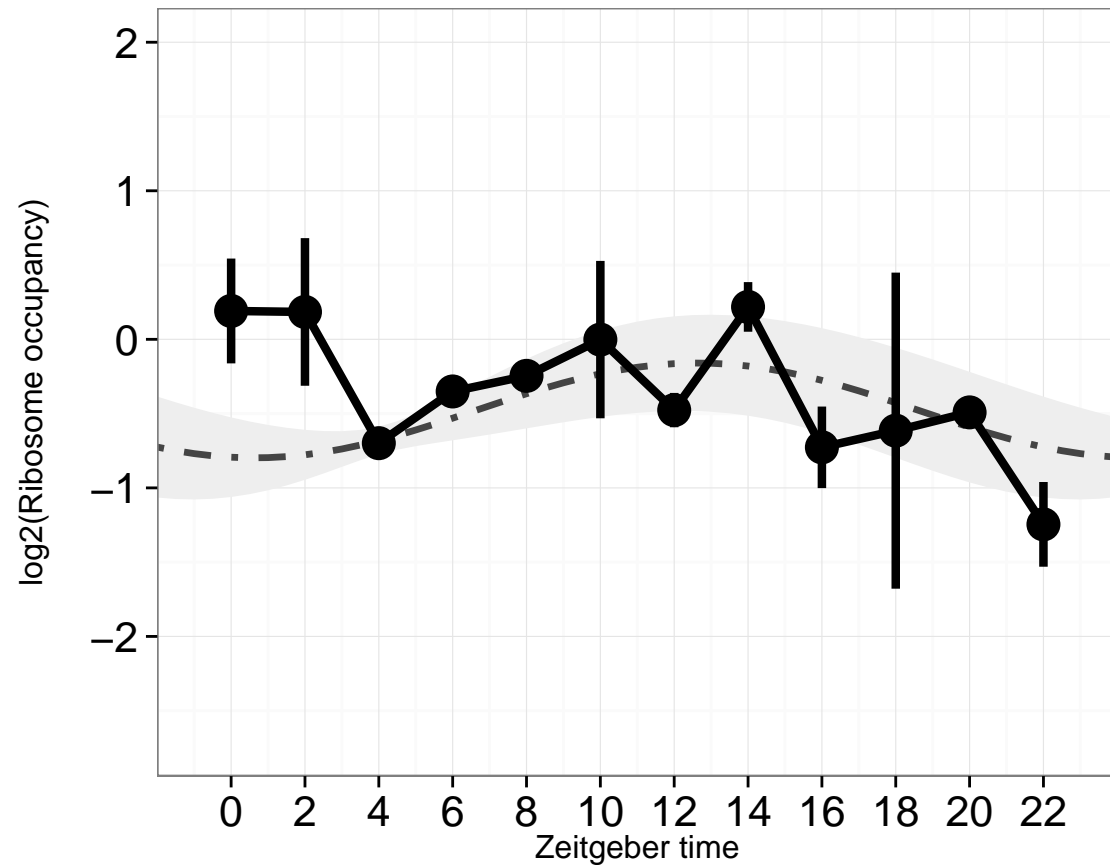

Supplement: SuppDataset_1.zip [file Tmem51_set_A.pdf › Supplemental Dataset 1/A-mRNA_nonrhyth_translation_nonrhyth/Tmem51_set_A.pdf]

## Tmem53

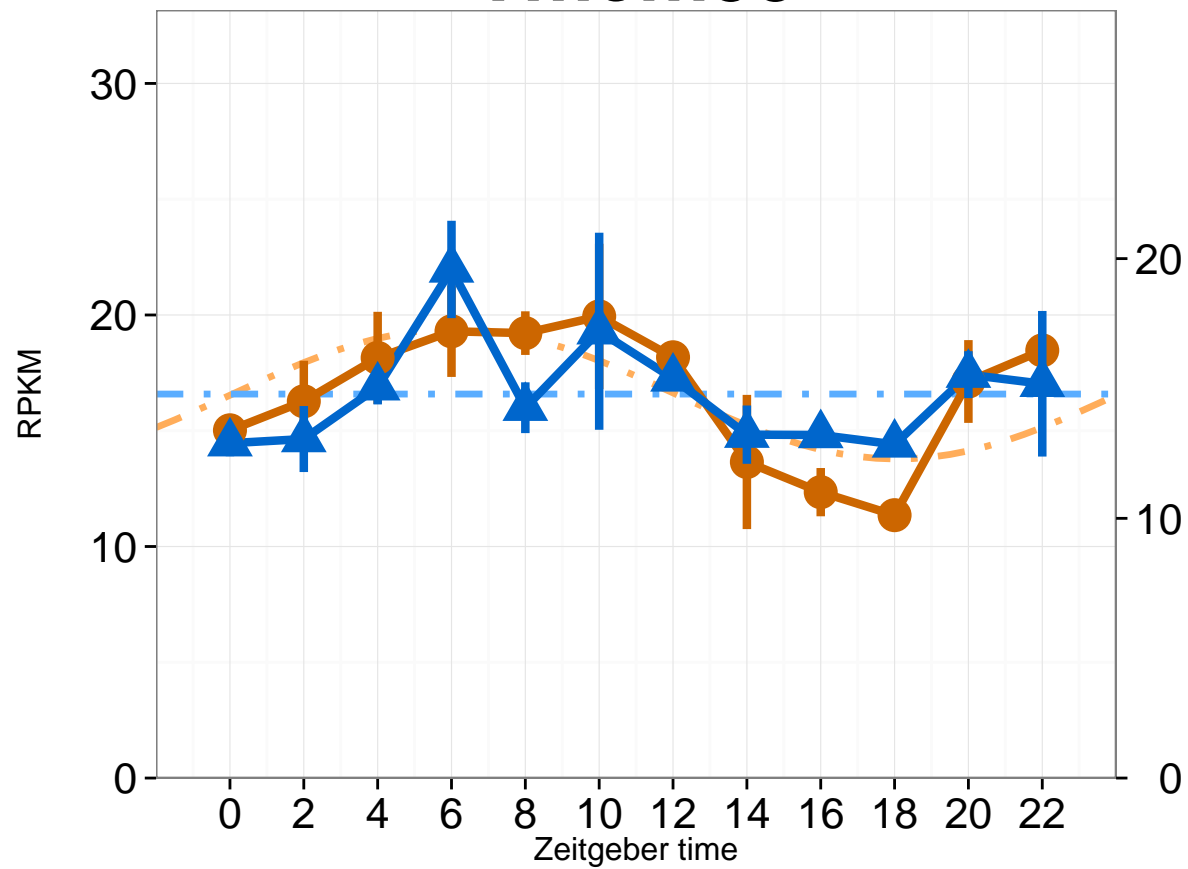

## Tmem53

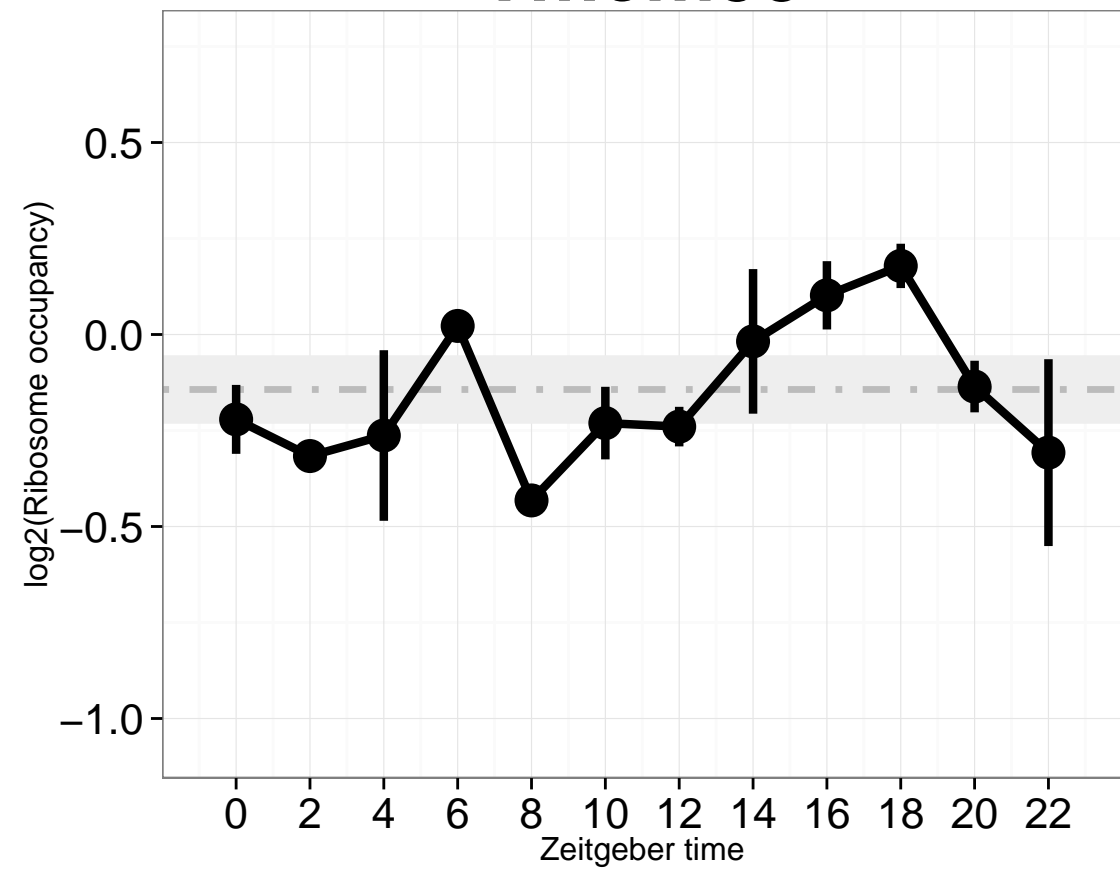

Supplement: SuppDataset_1.zip [file Tmem53_set_A.pdf › Supplemental Dataset 1/A-mRNA_nonrhyth_translation_nonrhyth/Tmem53_set_A.pdf]

# Tmem55a

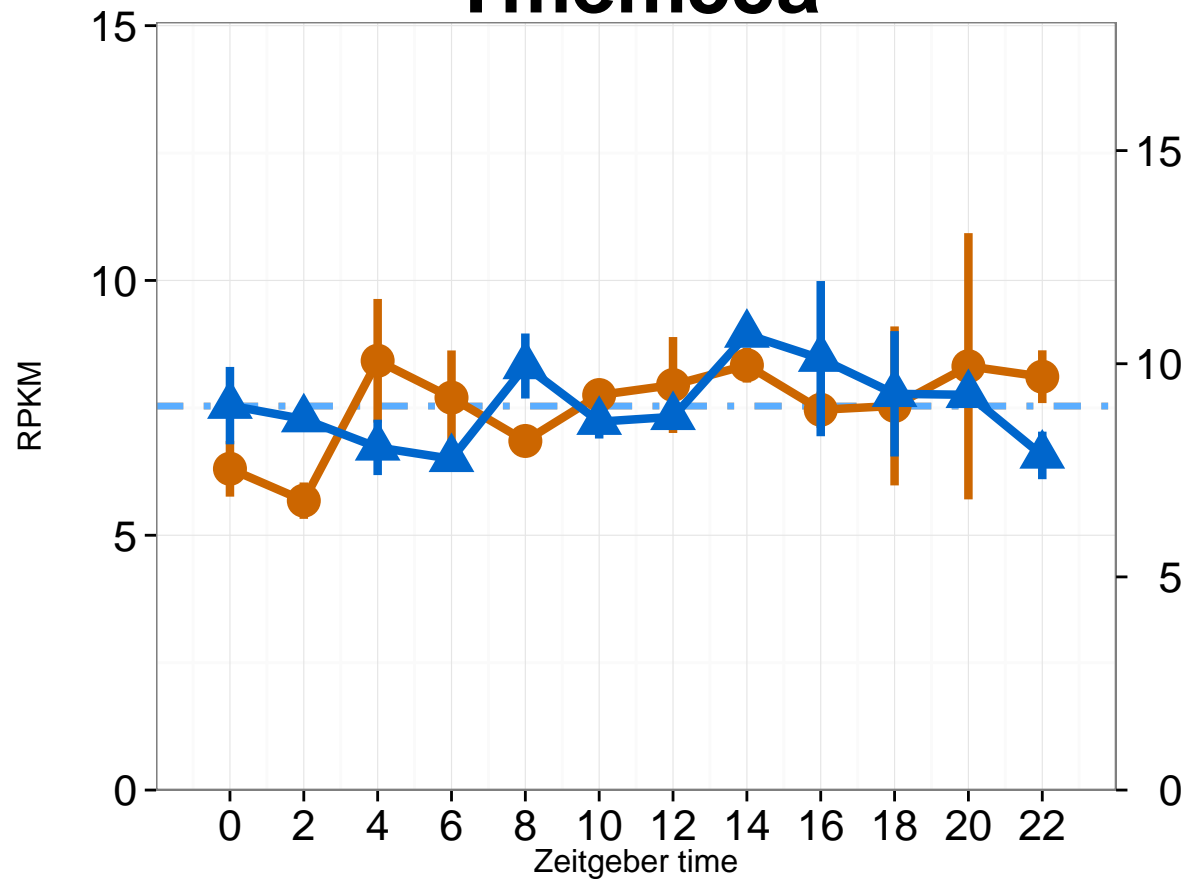

# Tmem55a

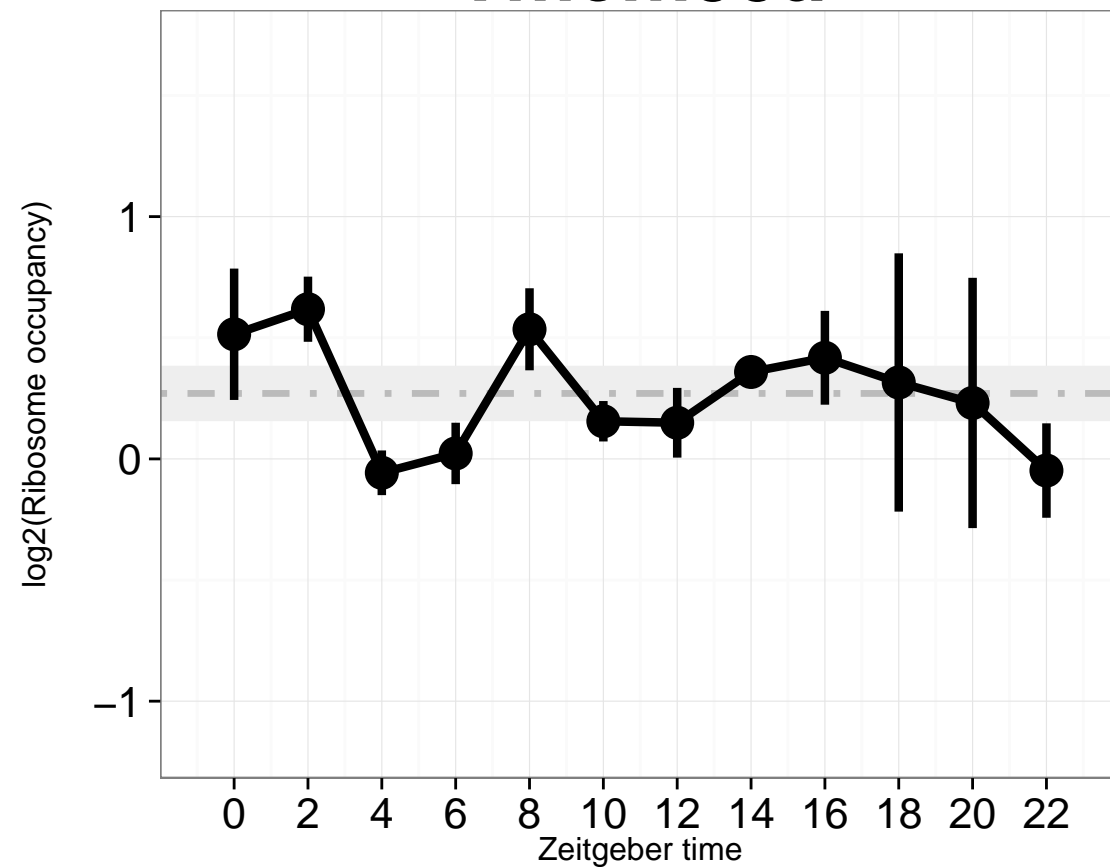

Supplement: SuppDataset_1.zip [file Tmem55a_set_A.pdf › Supplemental Dataset 1/A-mRNA_nonrhyth_translation_nonrhyth/Tmem55a_set_A.pdf]

# Tmem55b

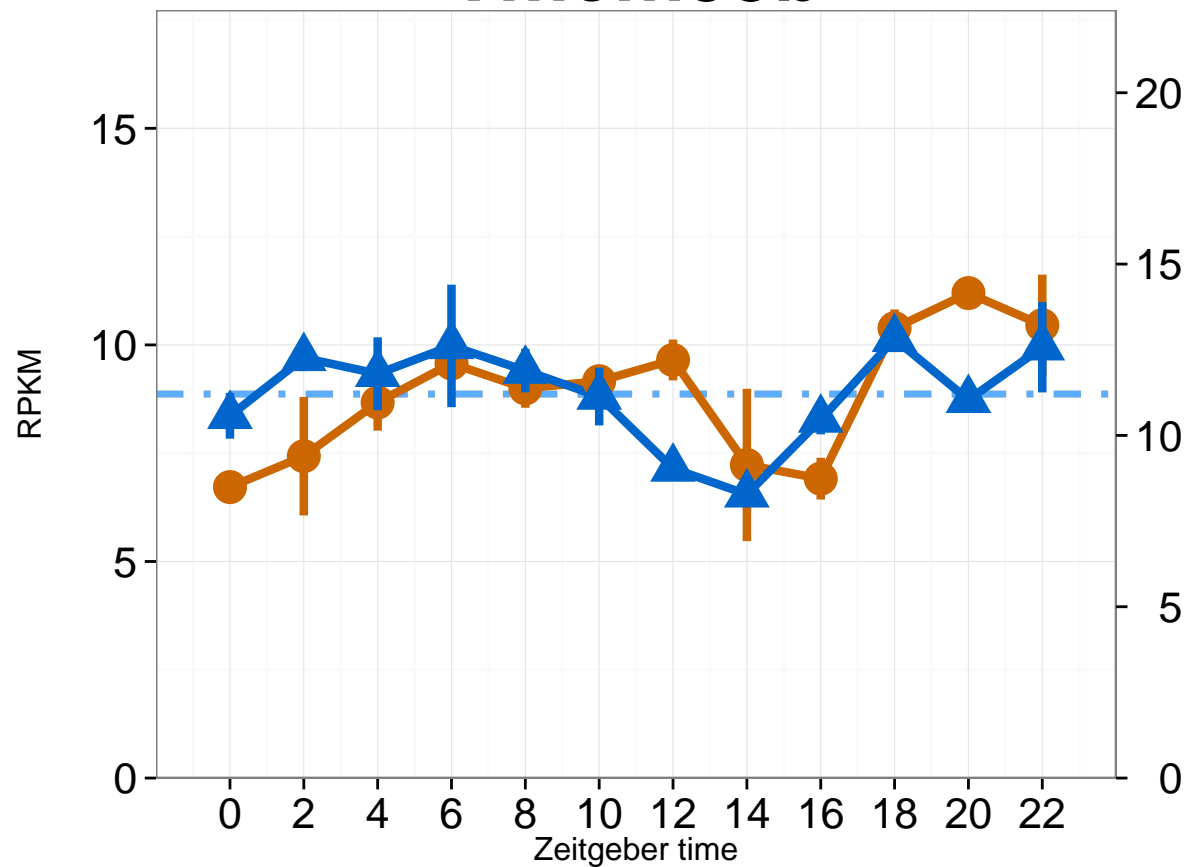

# Tmem55b

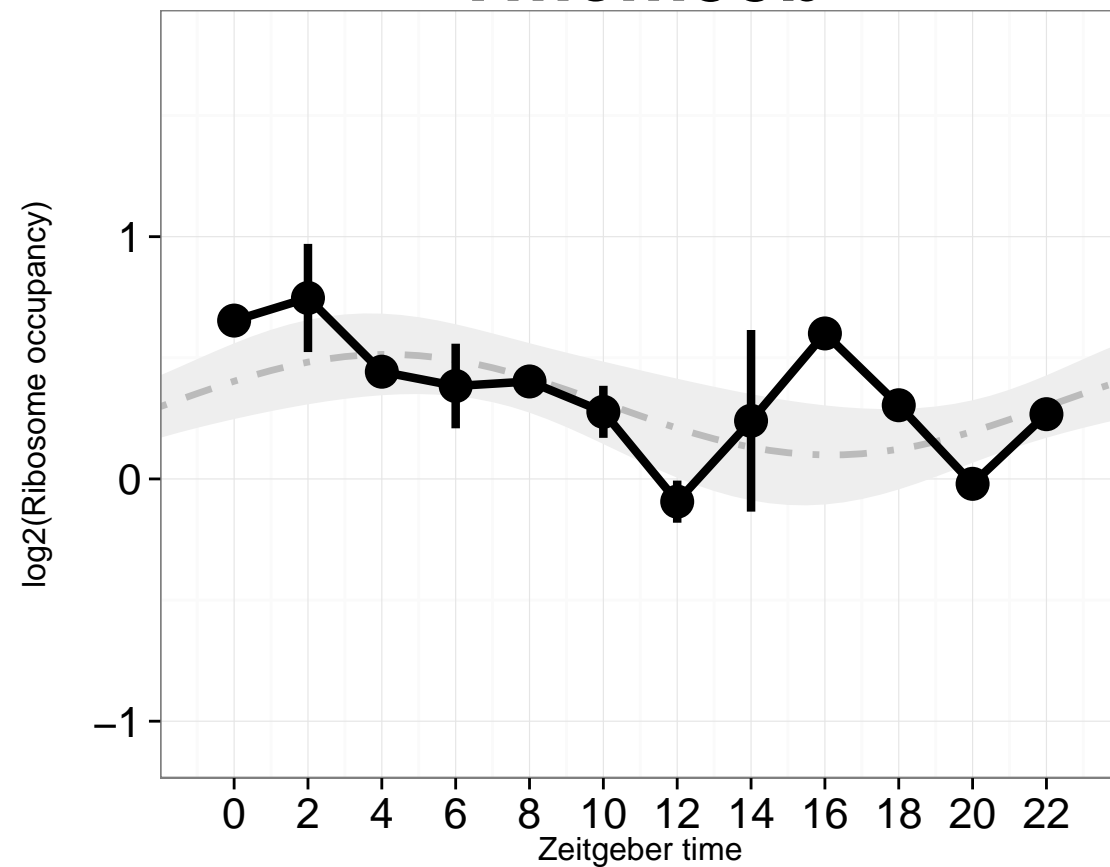

Supplement: SuppDataset_1.zip [file Tmem55b_set_A.pdf › Supplemental Dataset 1/A-mRNA_nonrhyth_translation_nonrhyth/Tmem55b_set_A.pdf]

# Tmem56

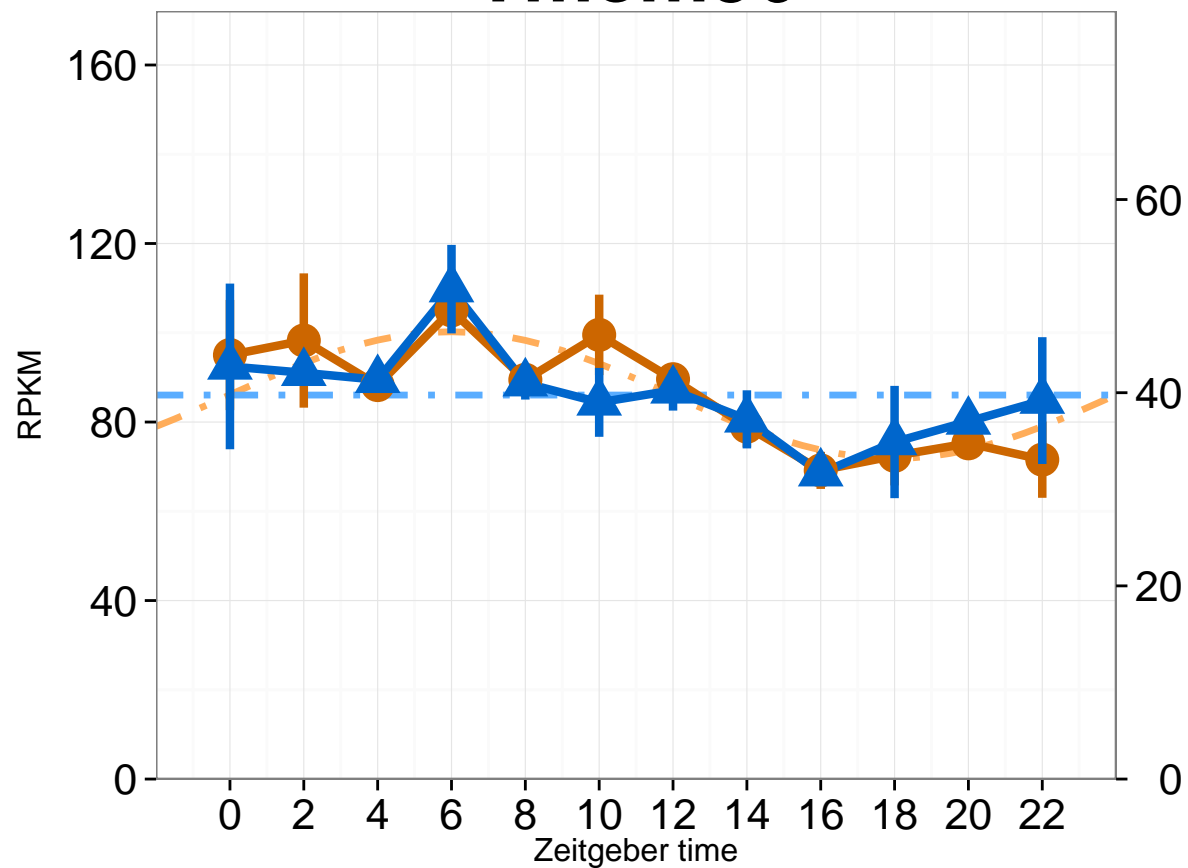

# Tmem56

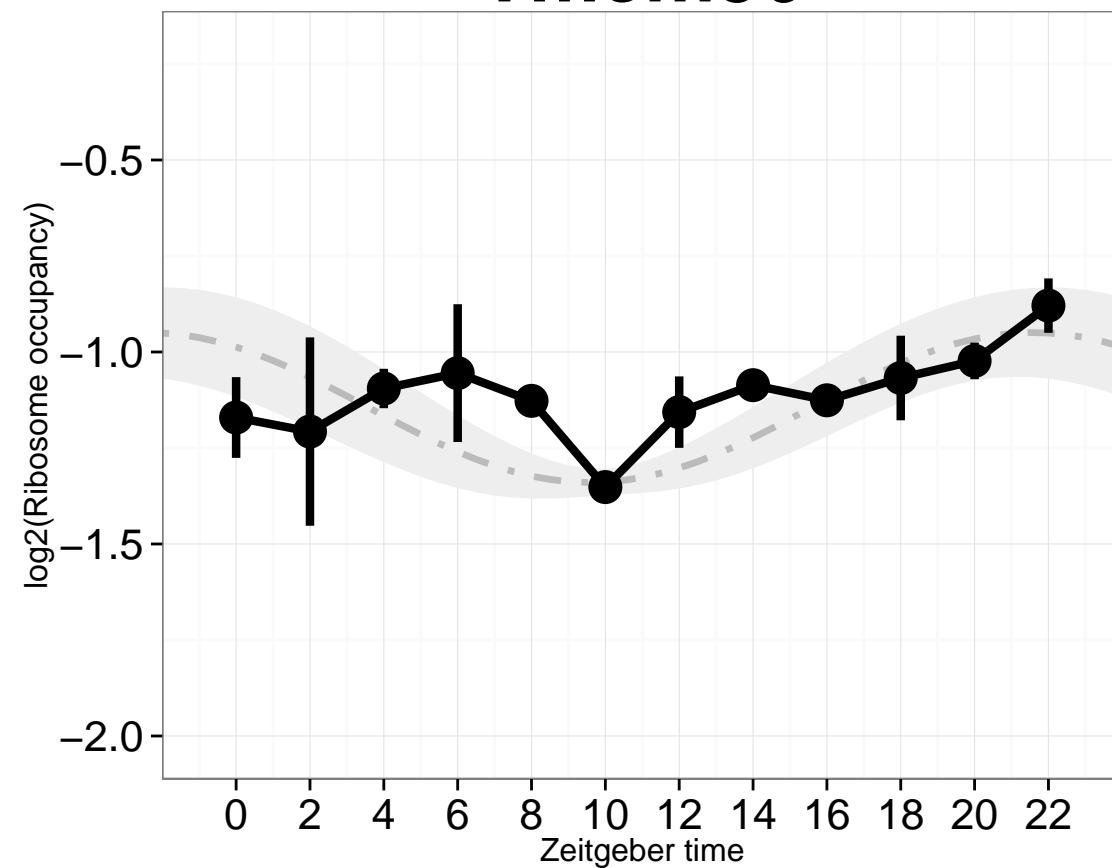

Supplement: SuppDataset_1.zip [file Tmem56_set_A.pdf › Supplemental Dataset 1/A-mRNA_nonrhyth_translation_nonrhyth/Tmem56_set_A.pdf]

# Tmem59

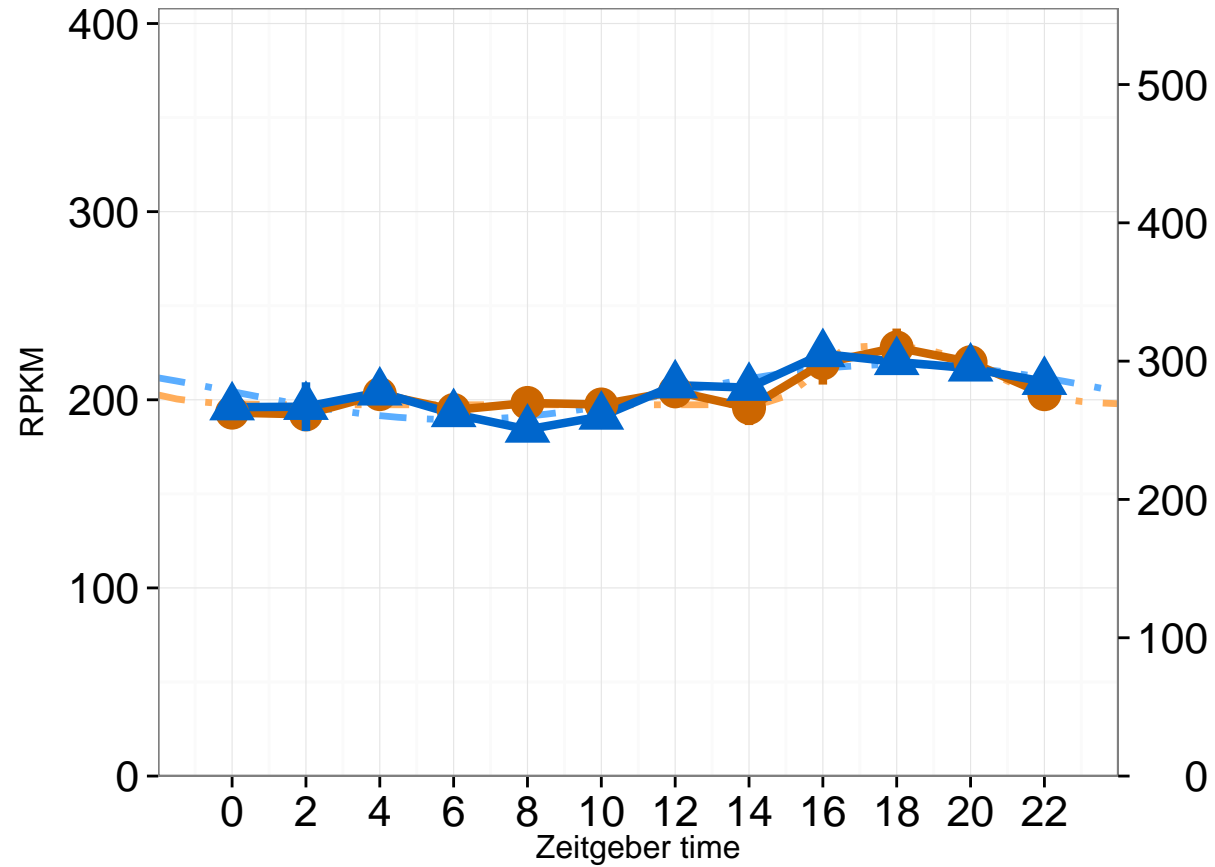

# Tmem59

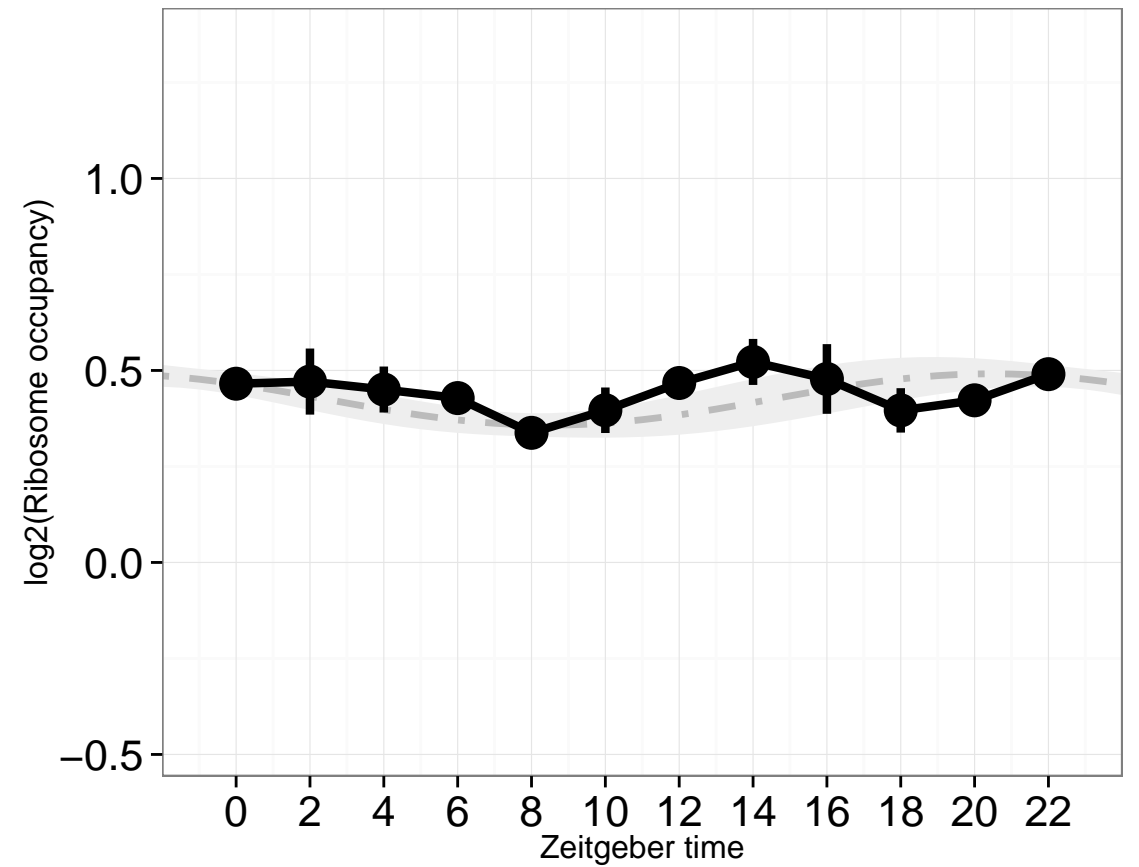

Supplement: SuppDataset_1.zip [file Tmem59_set_A.pdf › Supplemental Dataset 1/A-mRNA_nonrhyth_translation_nonrhyth/Tmem59_set_A.pdf]

# Tmem5

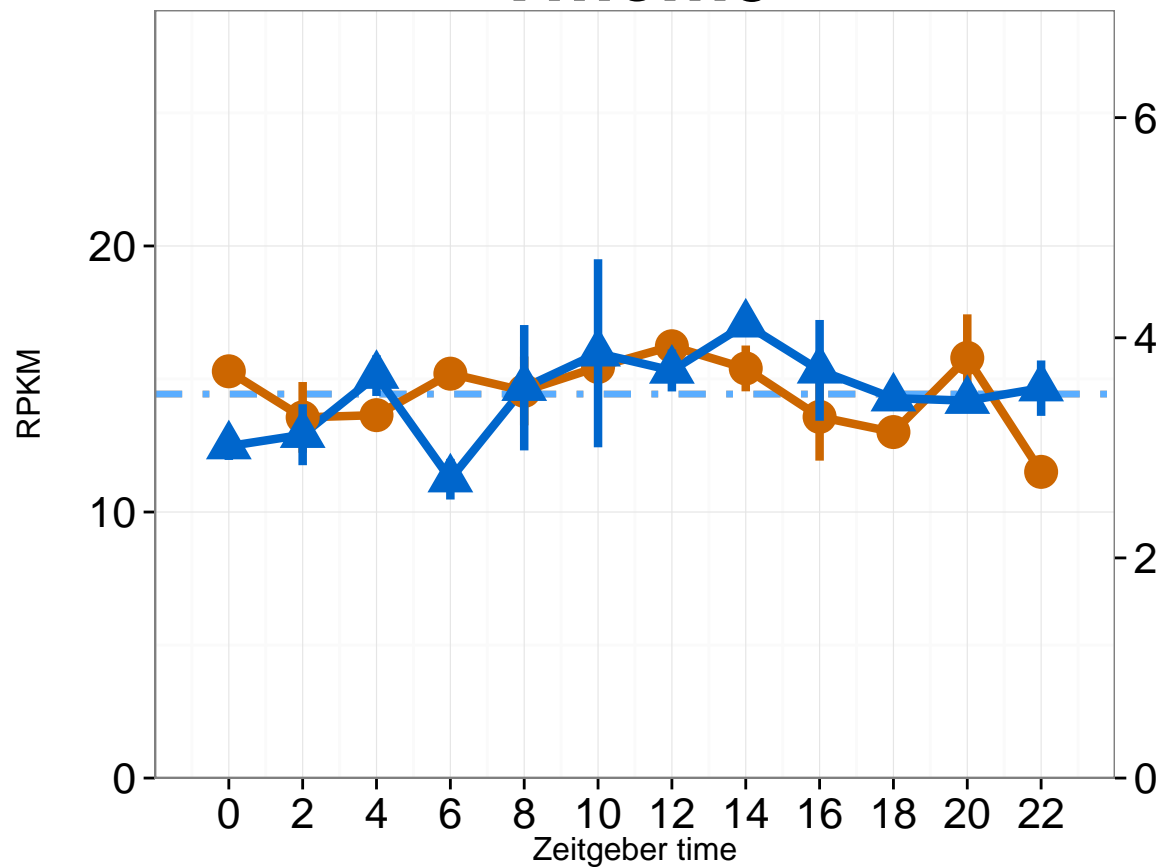

# Tmem5

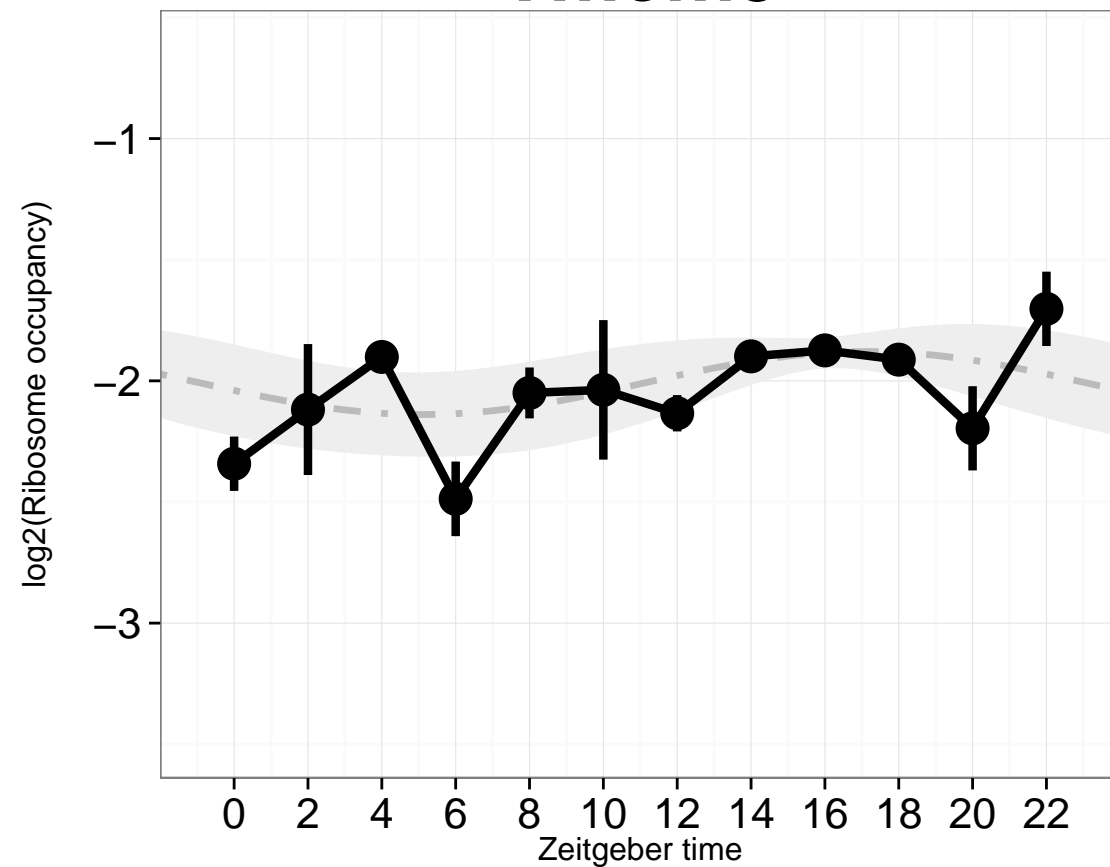

Supplement: SuppDataset_1.zip [file Tmem5_set_A.pdf › Supplemental Dataset 1/A-mRNA_nonrhyth_translation_nonrhyth/Tmem5_set_A.pdf]

## Tmem62

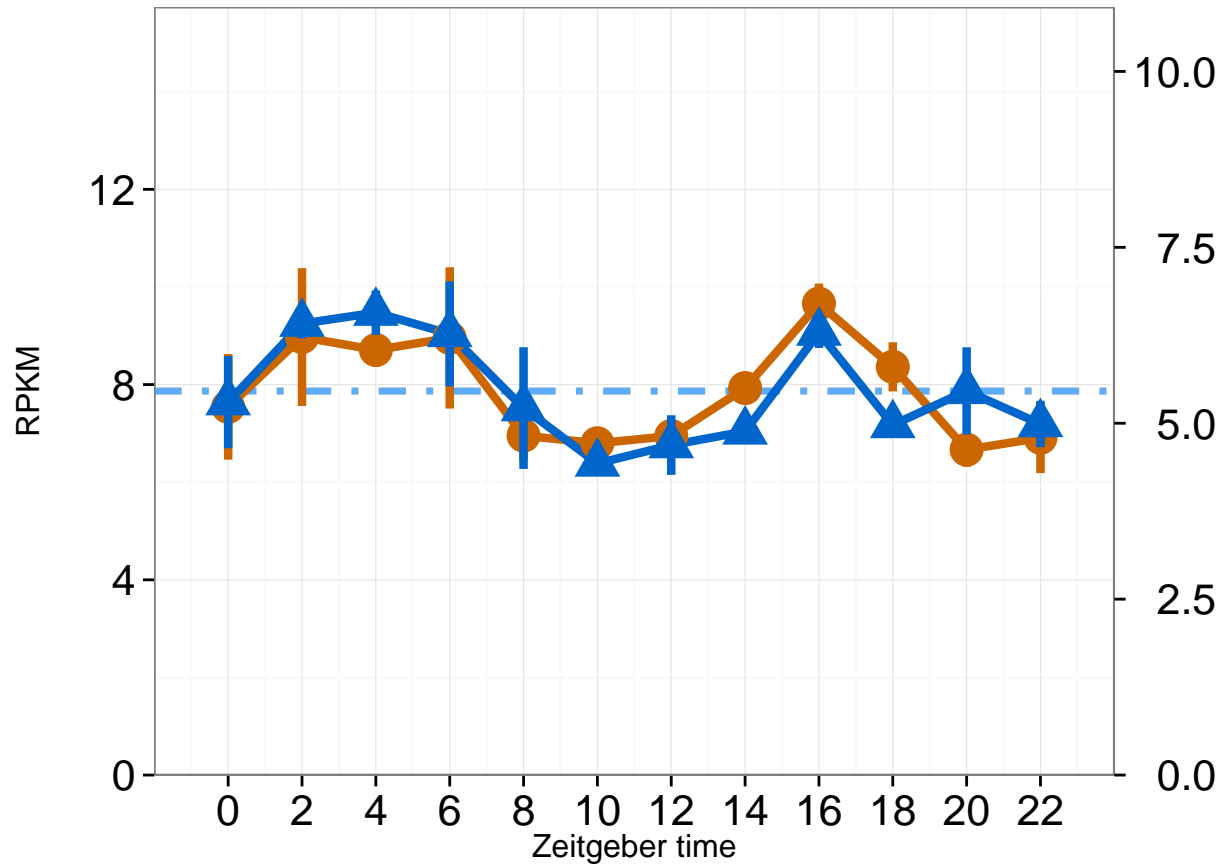

## Tmem62

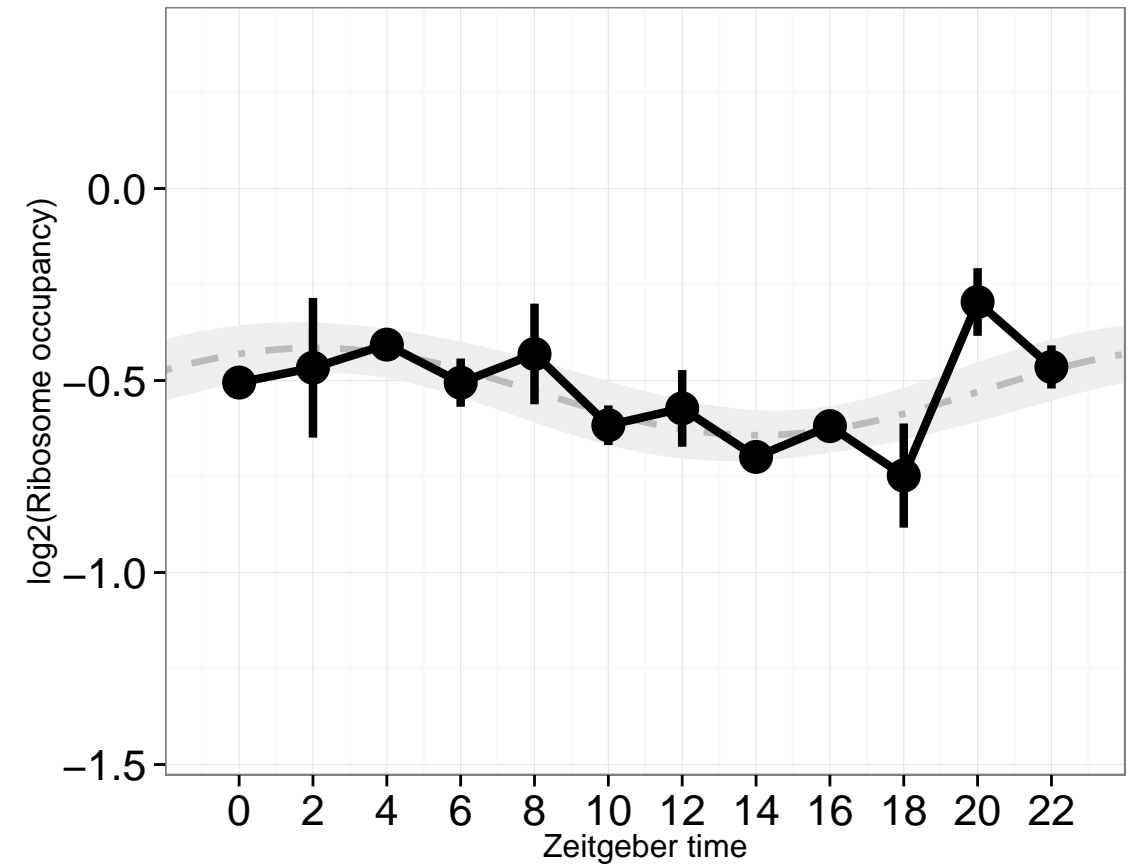

Supplement: SuppDataset_1.zip [file Tmem62_set_A.pdf › Supplemental Dataset 1/A-mRNA_nonrhyth_translation_nonrhyth/Tmem62_set_A.pdf]

# Tmem63a

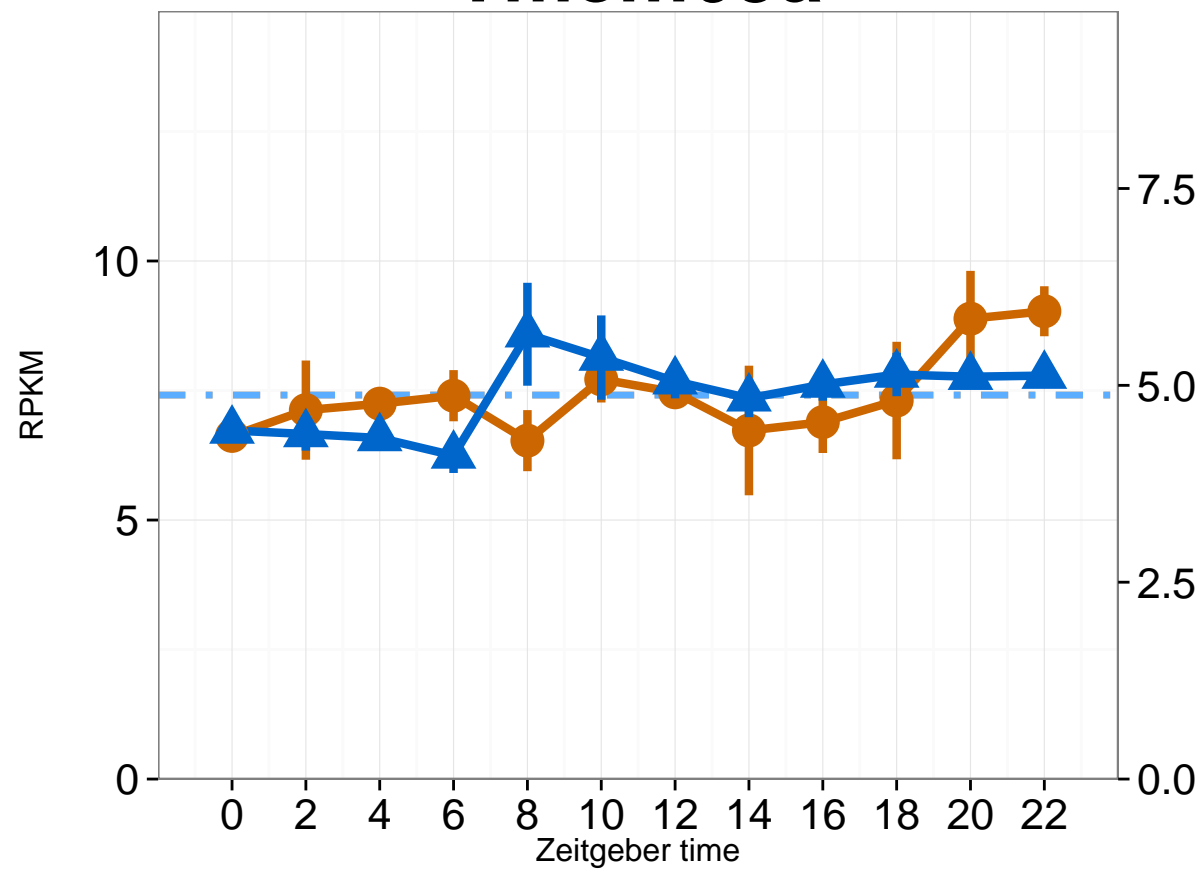

# Tmem63a

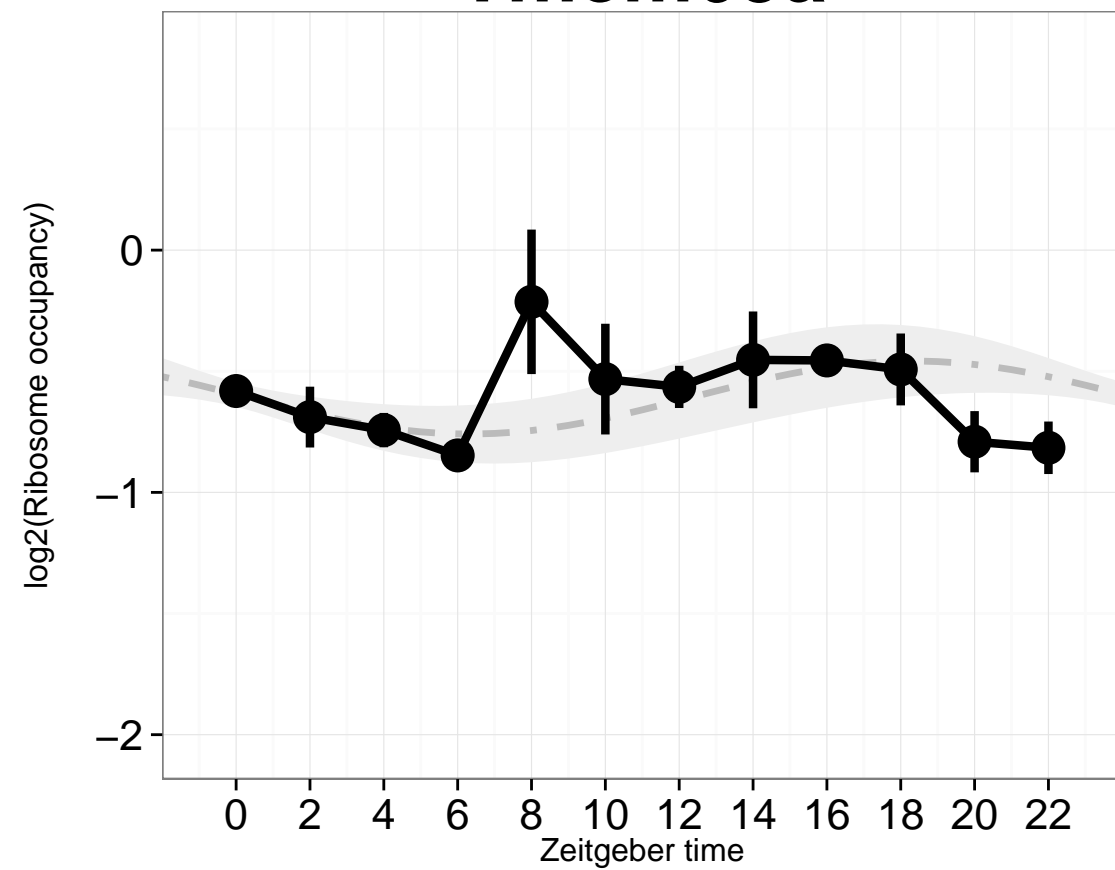

Supplement: SuppDataset_1.zip [file Tmem63a_set_A.pdf › Supplemental Dataset 1/A-mRNA_nonrhyth_translation_nonrhyth/Tmem63a_set_A.pdf]

# Tmem63b

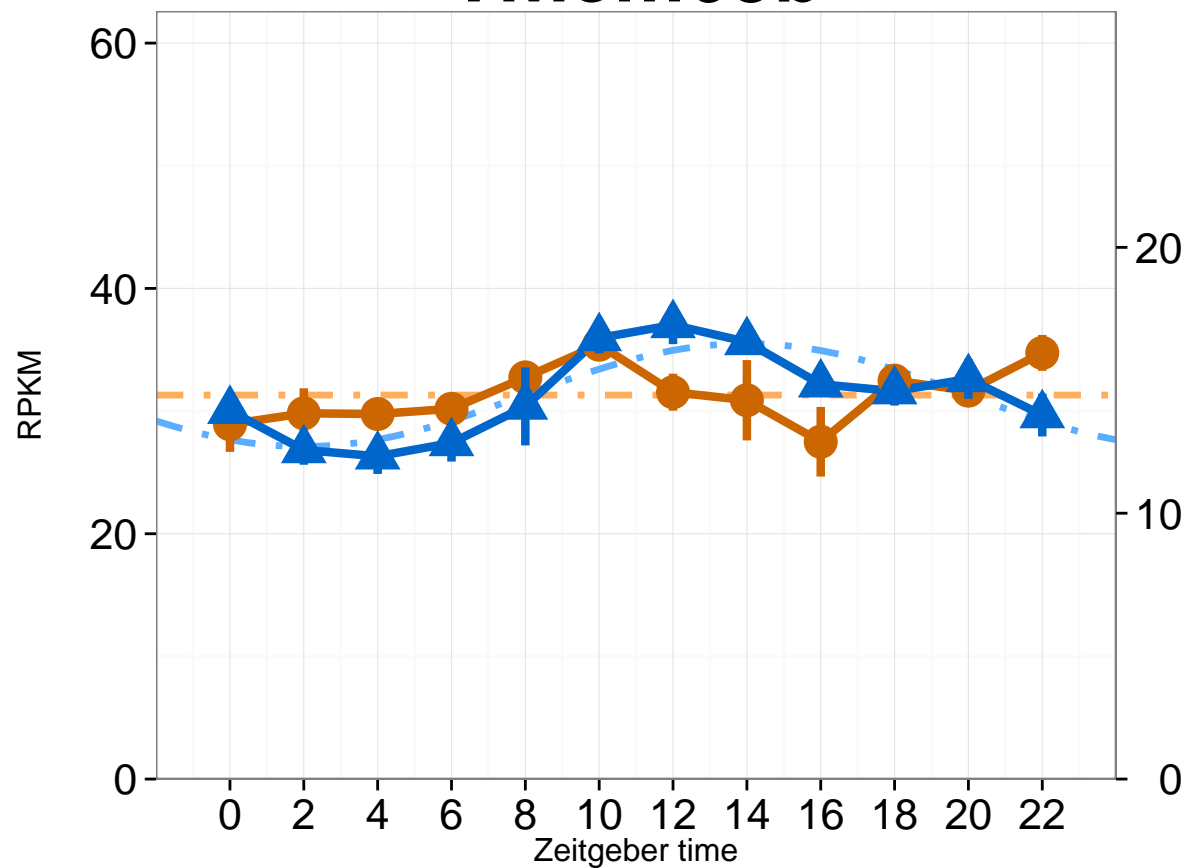

# Tmem63b

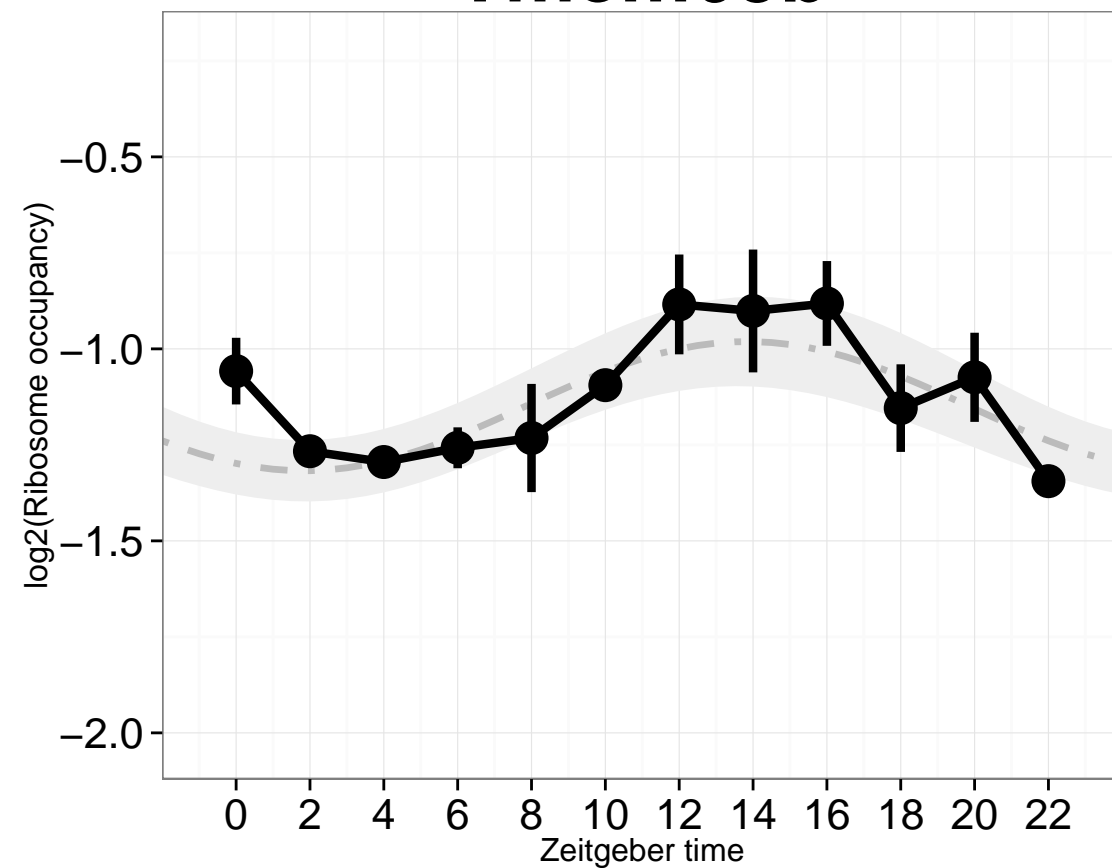

Supplement: SuppDataset_1.zip [file Tmem63b_set_A.pdf › Supplemental Dataset 1/A-mRNA_nonrhyth_translation_nonrhyth/Tmem63b_set_A.pdf]

**Tmem65**

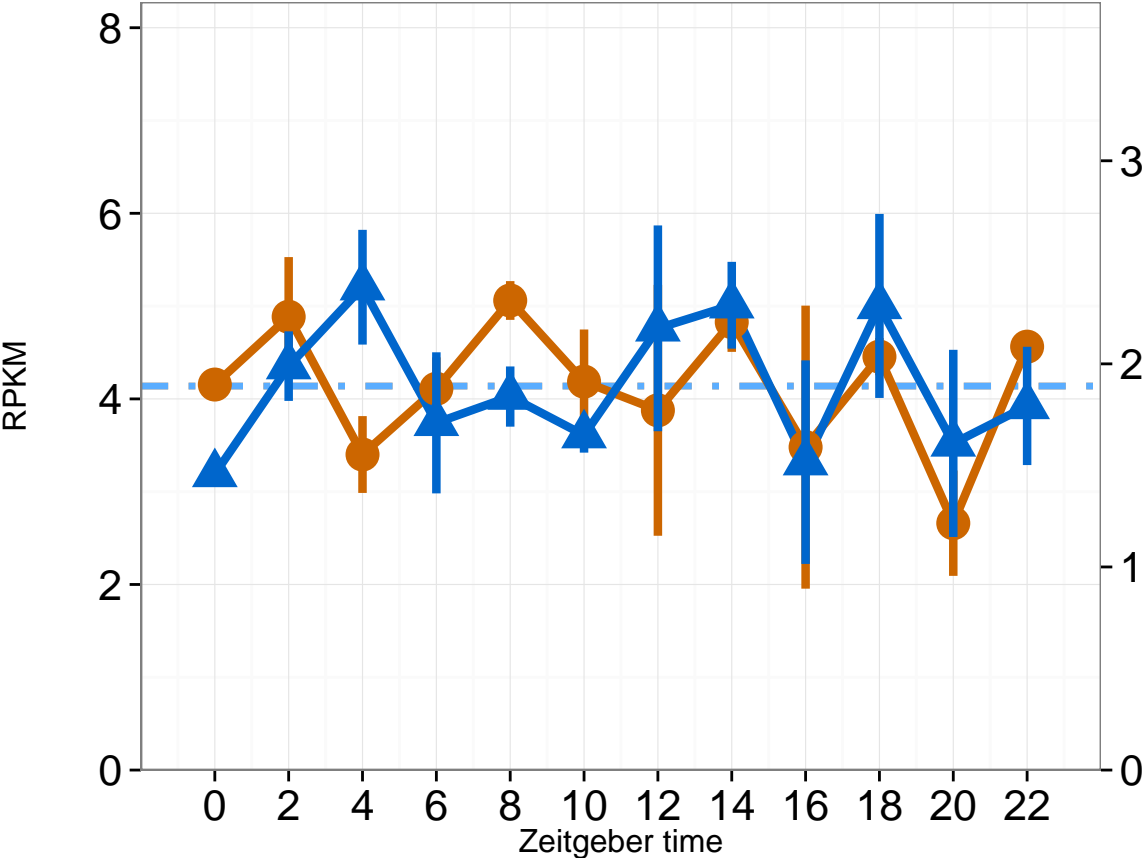

**Tmem65**

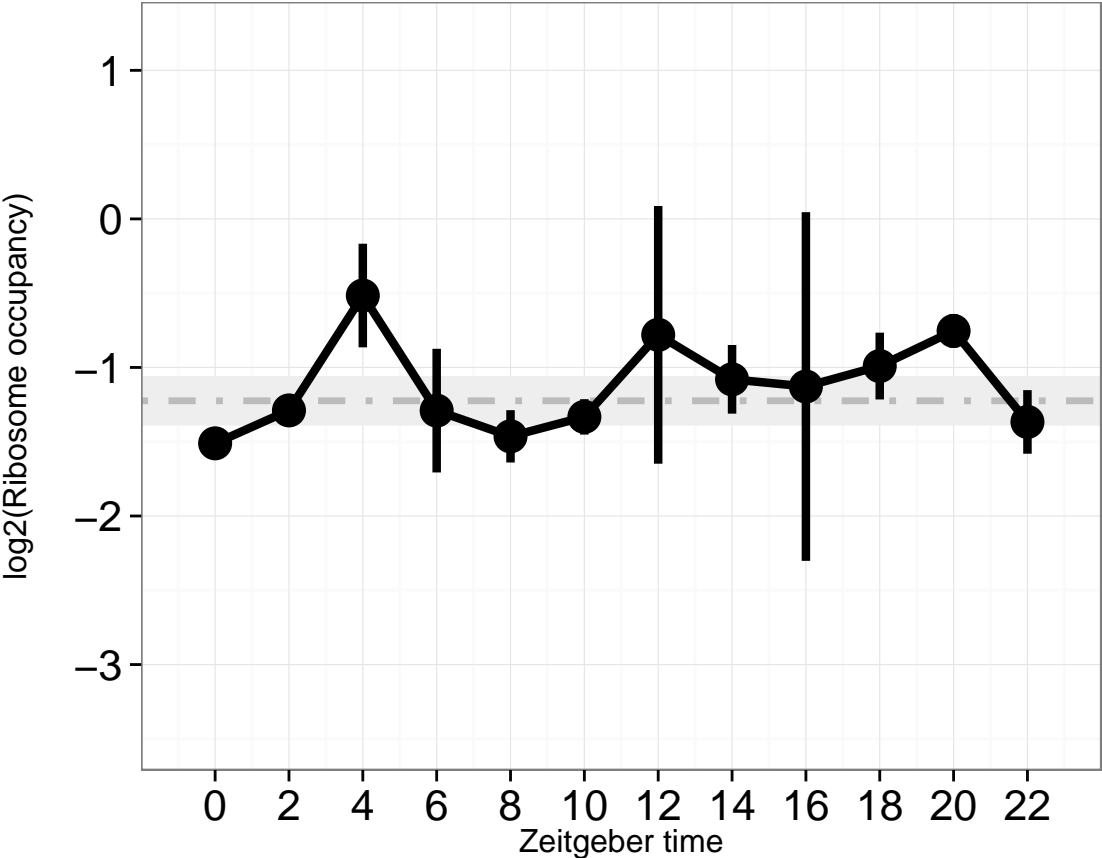

Supplement: SuppDataset_1.zip [file Tmem65_set_A.pdf › Supplemental Dataset 1/A-mRNA_nonrhyth_translation_nonrhyth/Tmem65_set_A.pdf]

# Tmem66

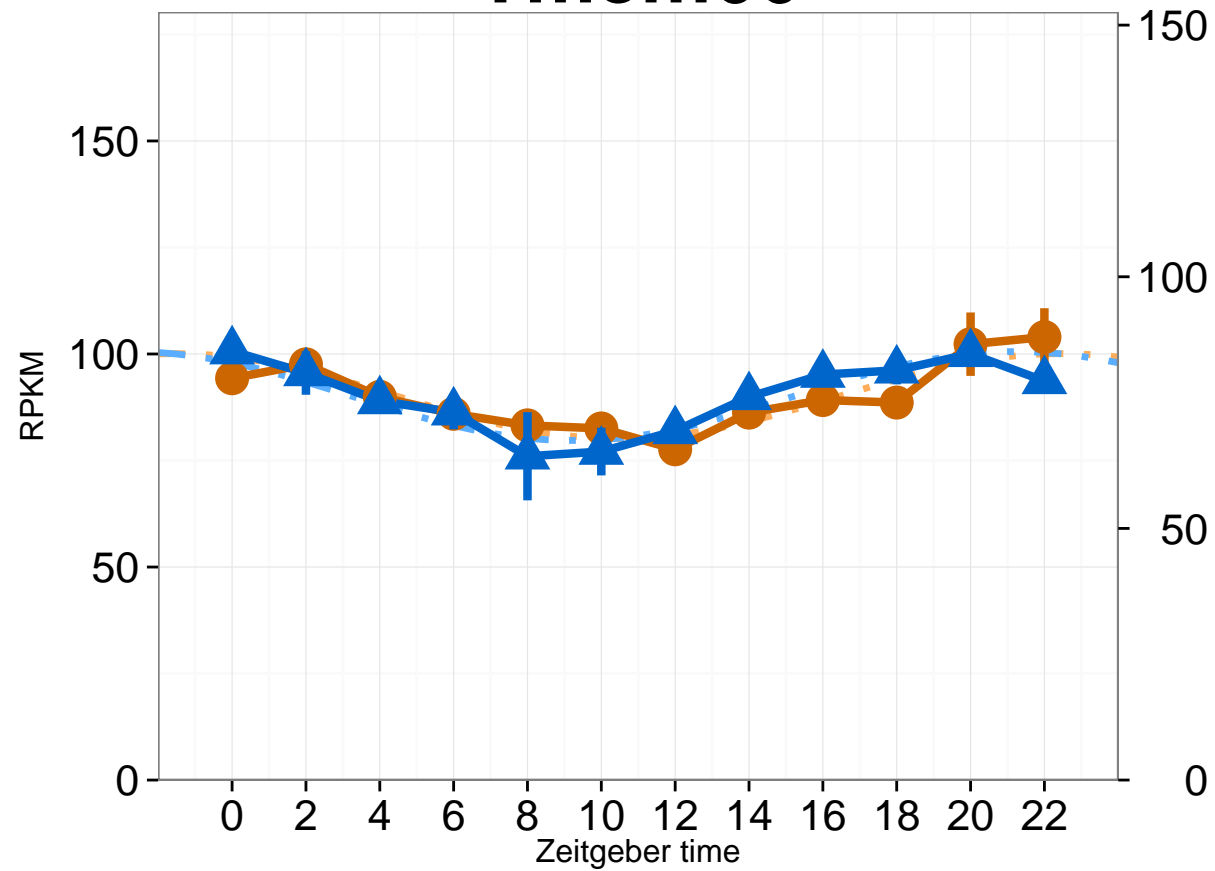

# Tmem66

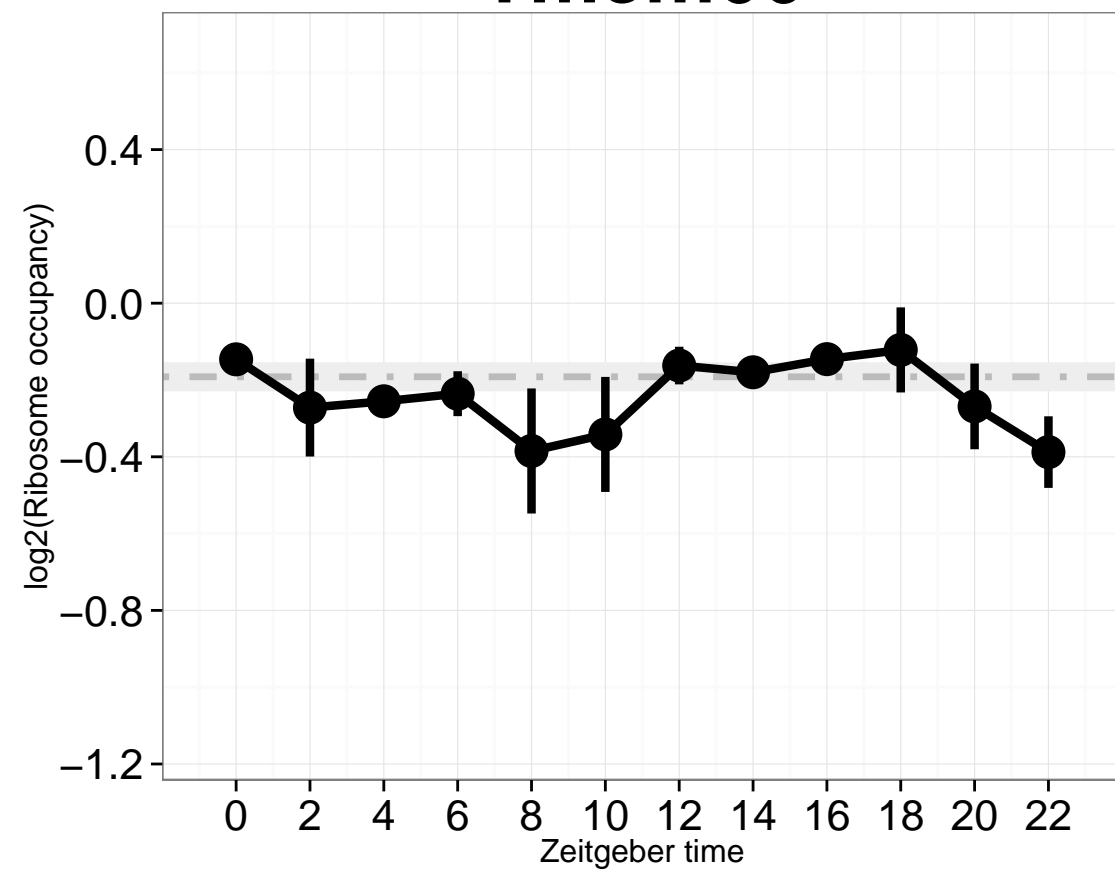

Supplement: SuppDataset_1.zip [file Tmem66_set_A.pdf › Supplemental Dataset 1/A-mRNA_nonrhyth_translation_nonrhyth/Tmem66_set_A.pdf]

## Tmem70

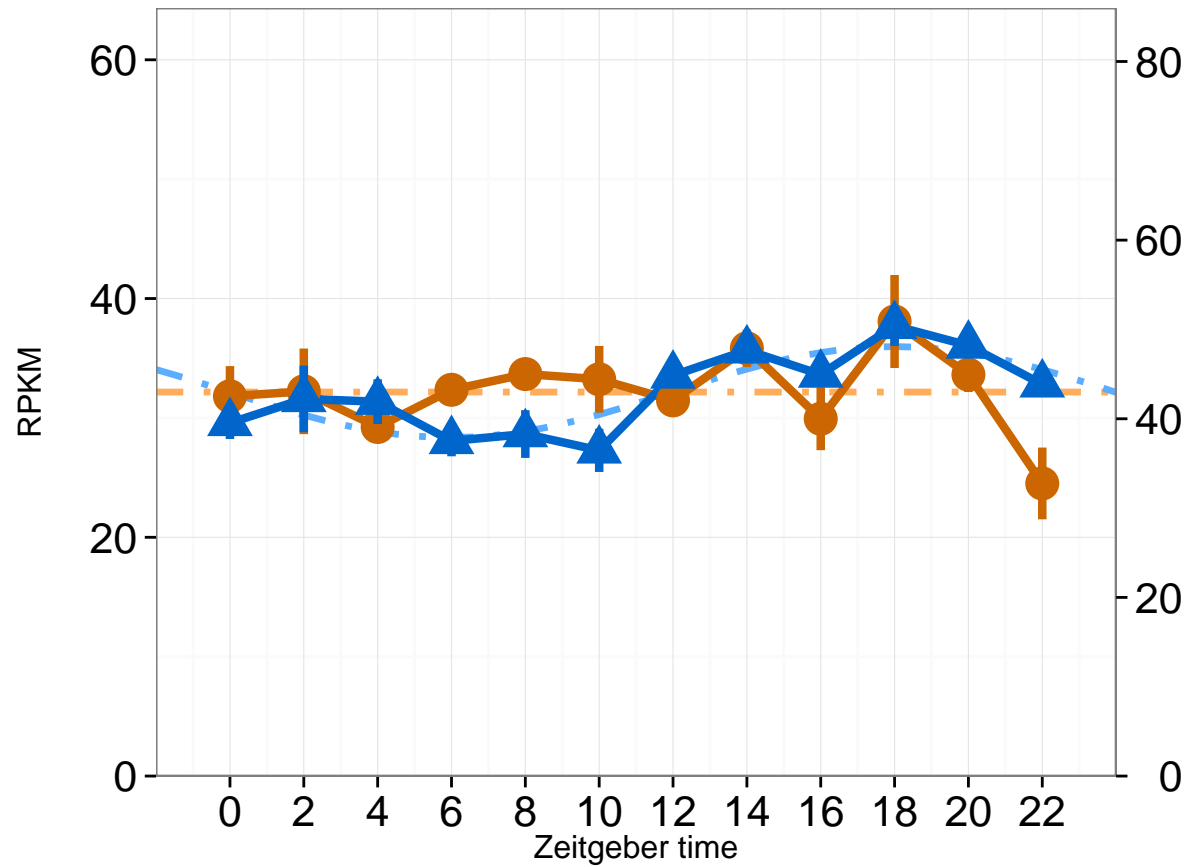

## Tmem70

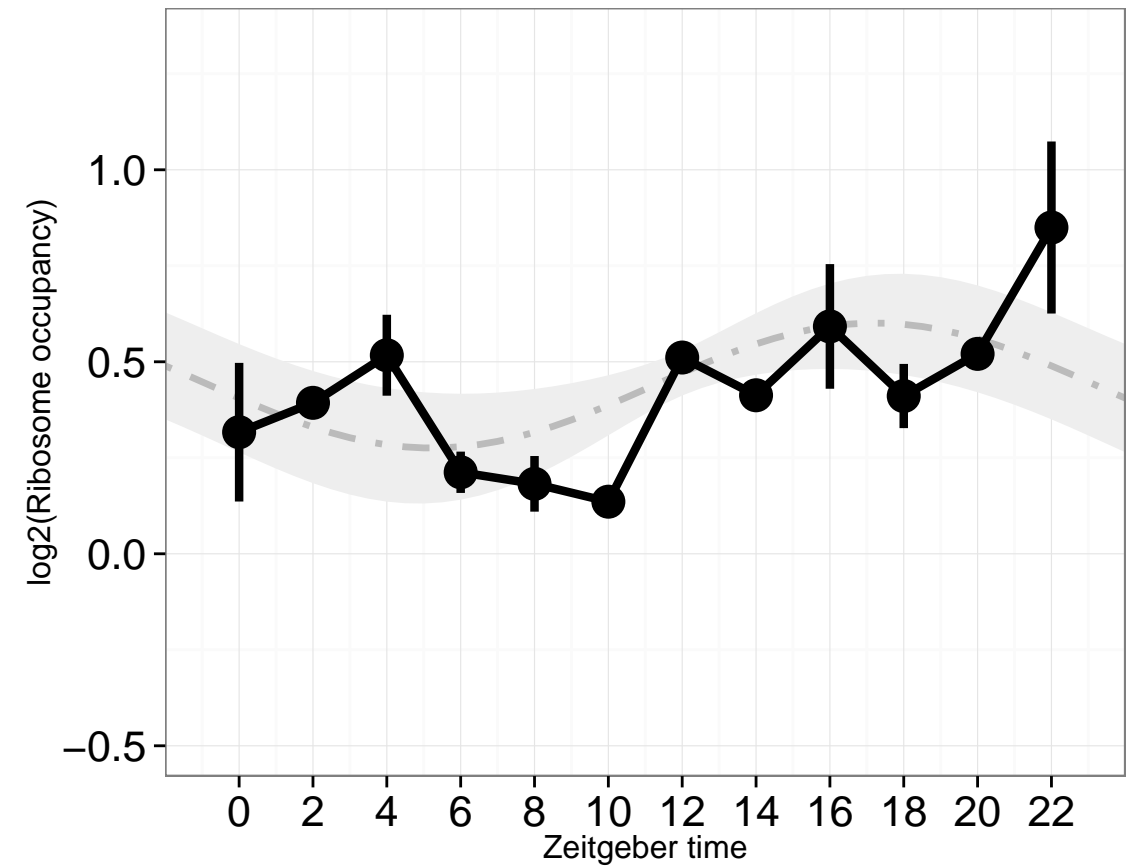

Supplement: SuppDataset_1.zip [file Tmem70_set_A.pdf › Supplemental Dataset 1/A-mRNA_nonrhyth_translation_nonrhyth/Tmem70_set_A.pdf]

**Tmem71 TR**

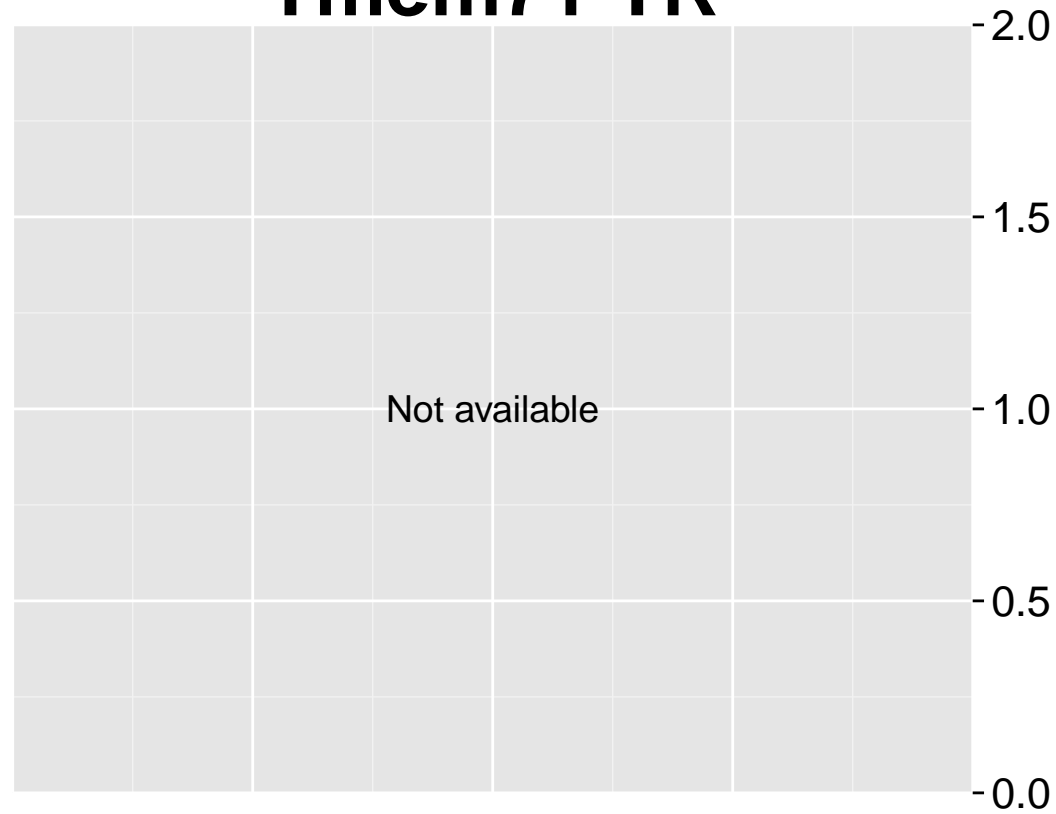

**Tmem71 log2(Ribosome occupanc**

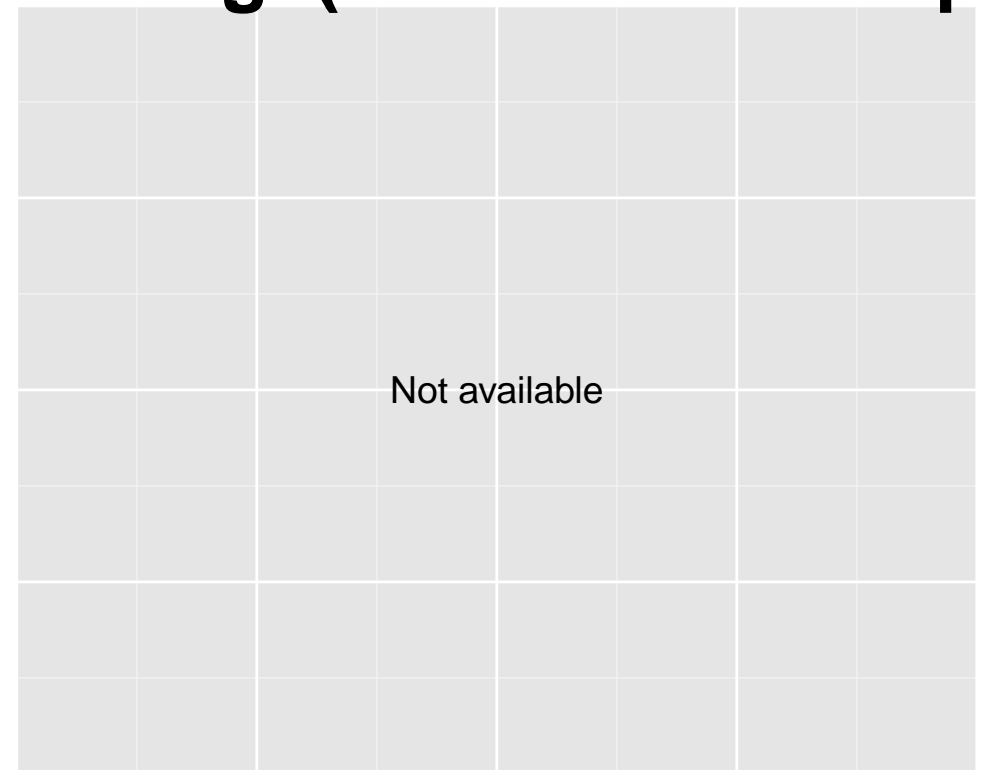

Supplement: SuppDataset_1.zip [file Tmem71_set_A.pdf › Supplemental Dataset 1/A-mRNA_nonrhyth_translation_nonrhyth/Tmem71_set_A.pdf]

## Tmem79

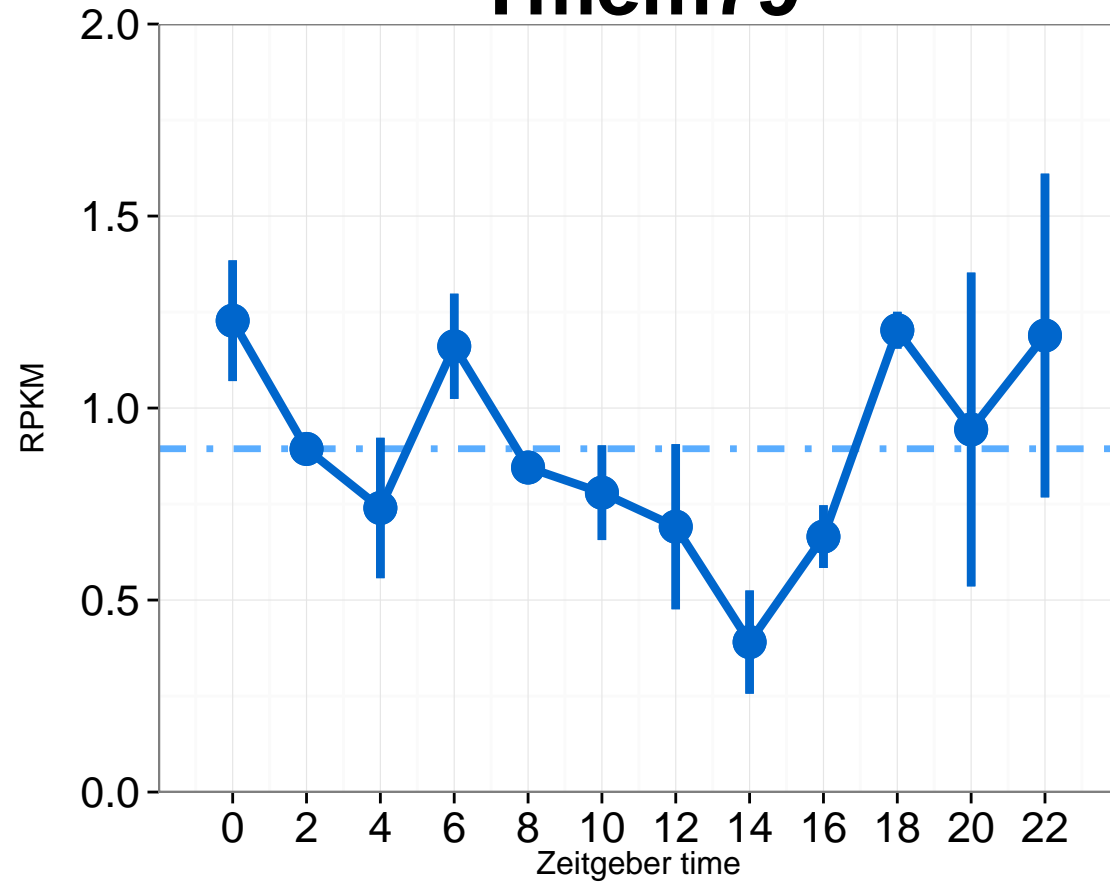

## Tmem79 log2(Ribosome occupanc

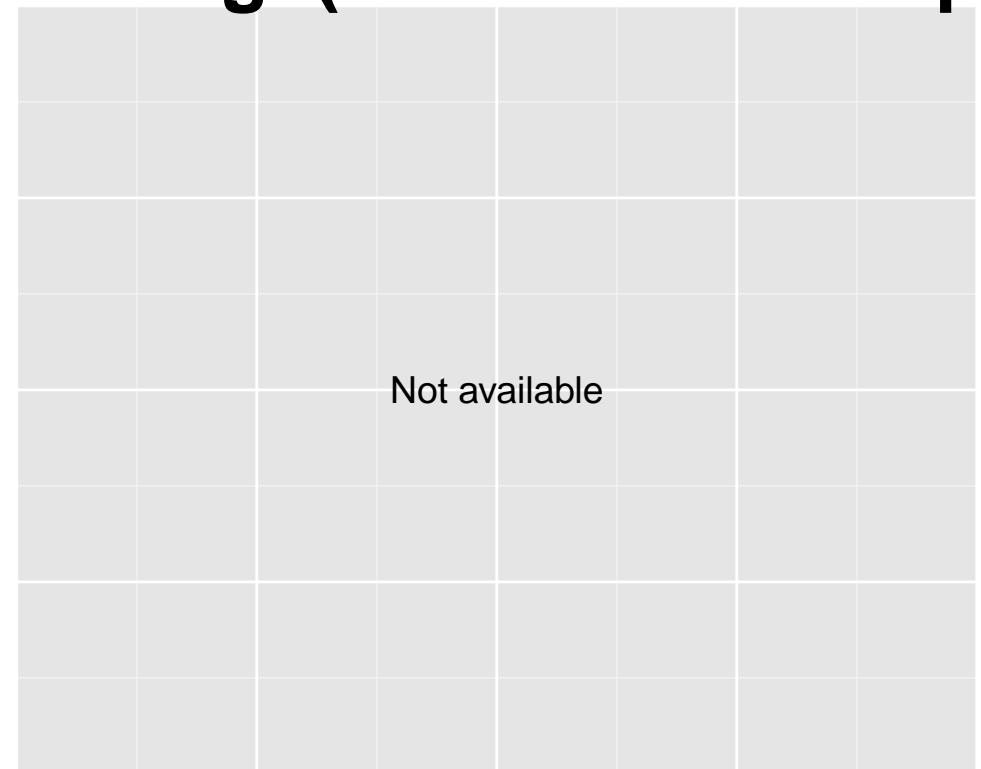

Supplement: SuppDataset_1.zip [file Tmem79_set_A.pdf › Supplemental Dataset 1/A-mRNA_nonrhyth_translation_nonrhyth/Tmem79_set_A.pdf]

## Tmem81

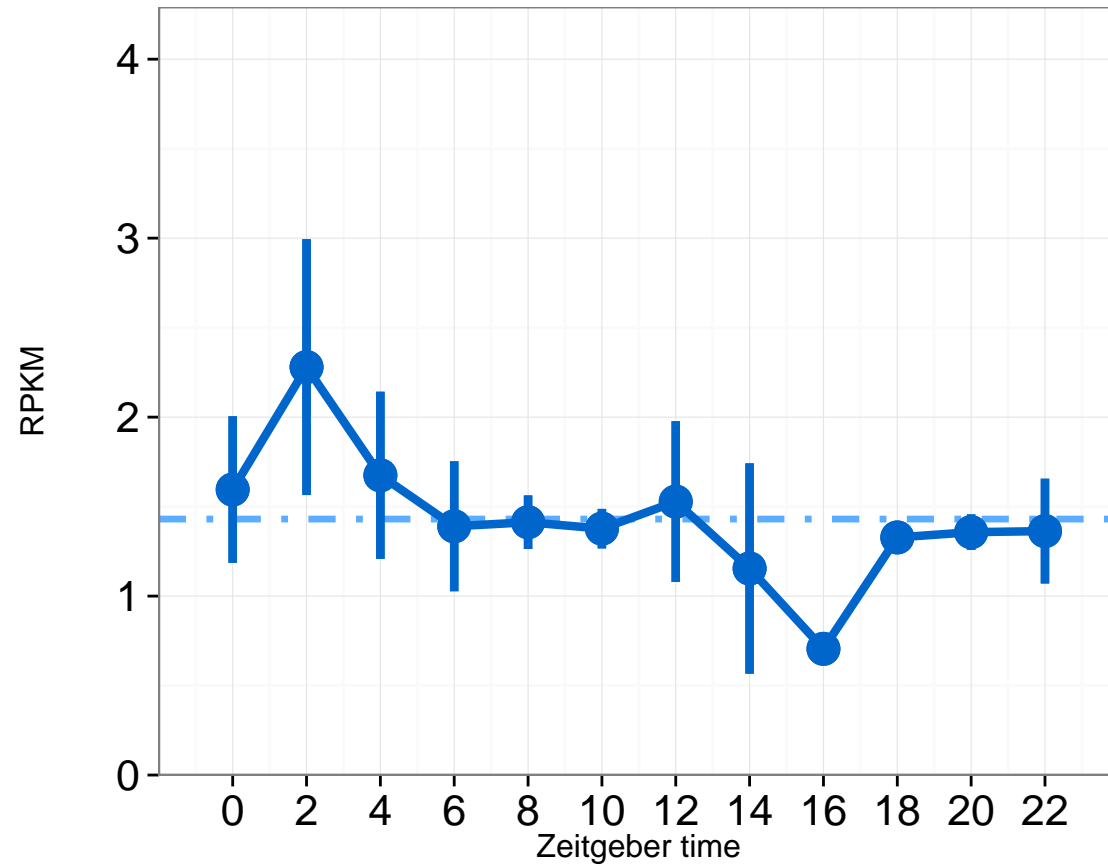

## Tmem81 log2(Ribosome occupanc

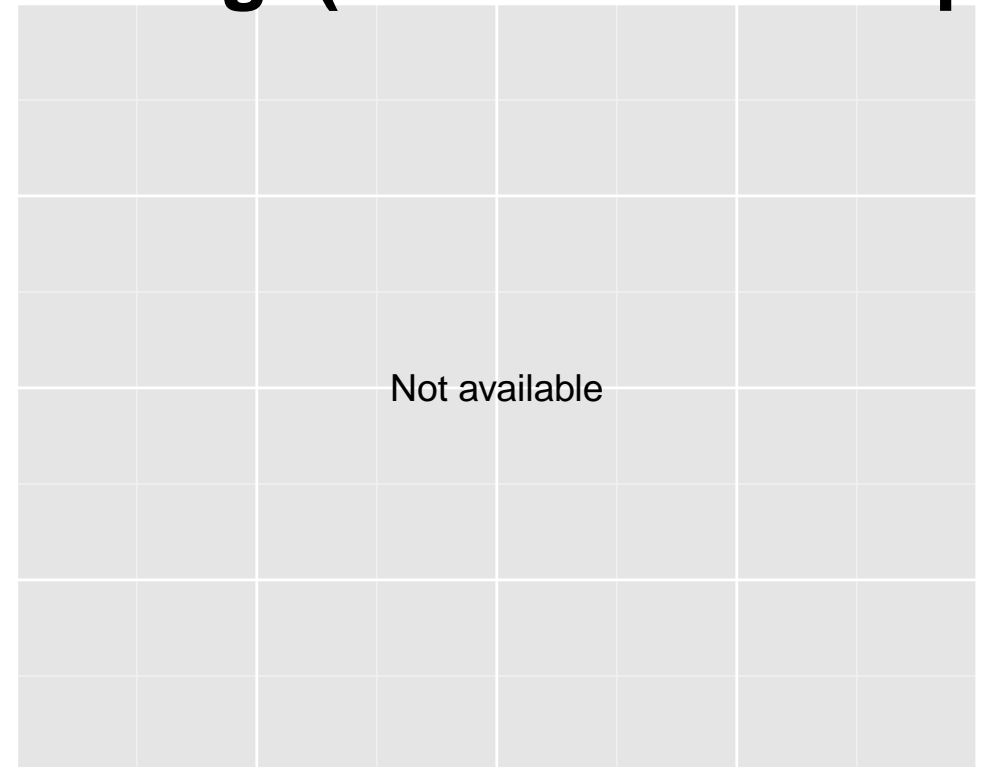

Supplement: SuppDataset_1.zip [file Tmem81_set_A.pdf › Supplemental Dataset 1/A-mRNA_nonrhyth_translation_nonrhyth/Tmem81_set_A.pdf]

## Tmem82

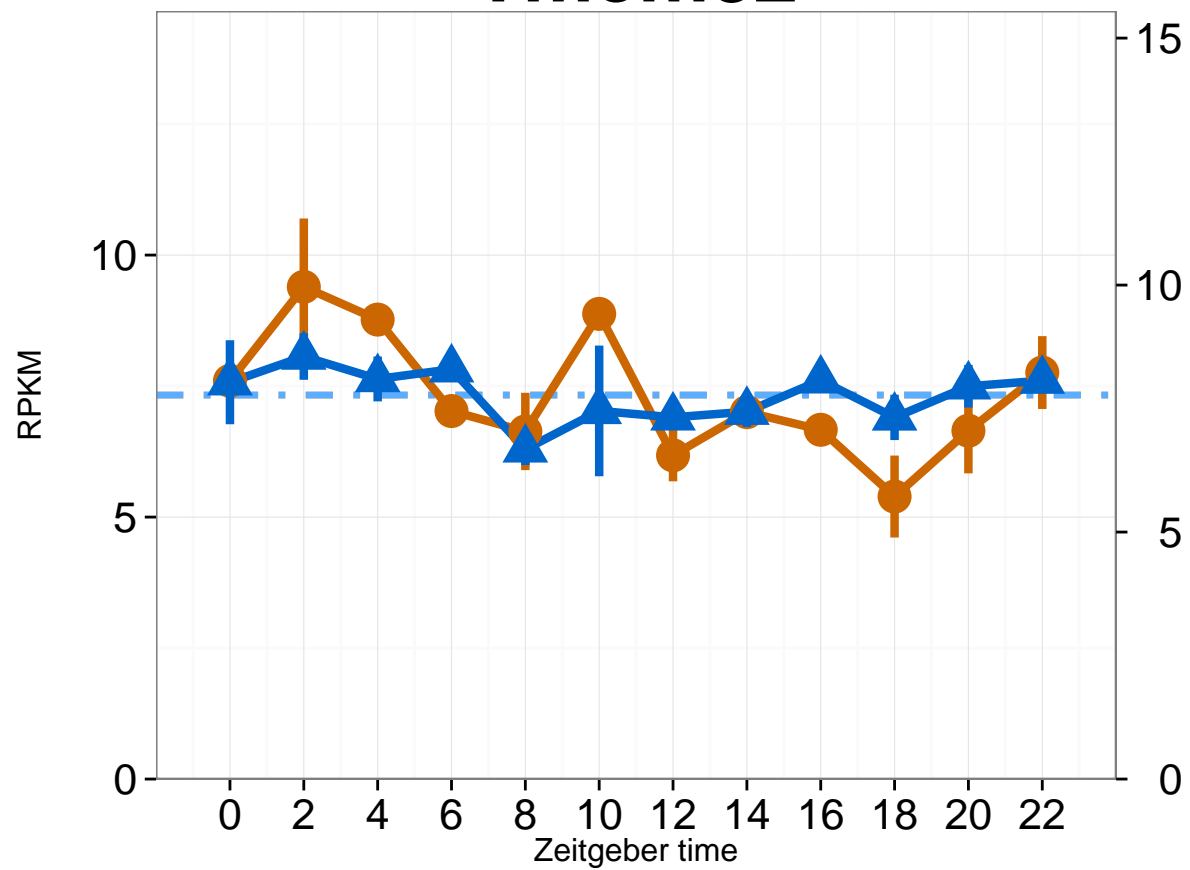

## Tmem82

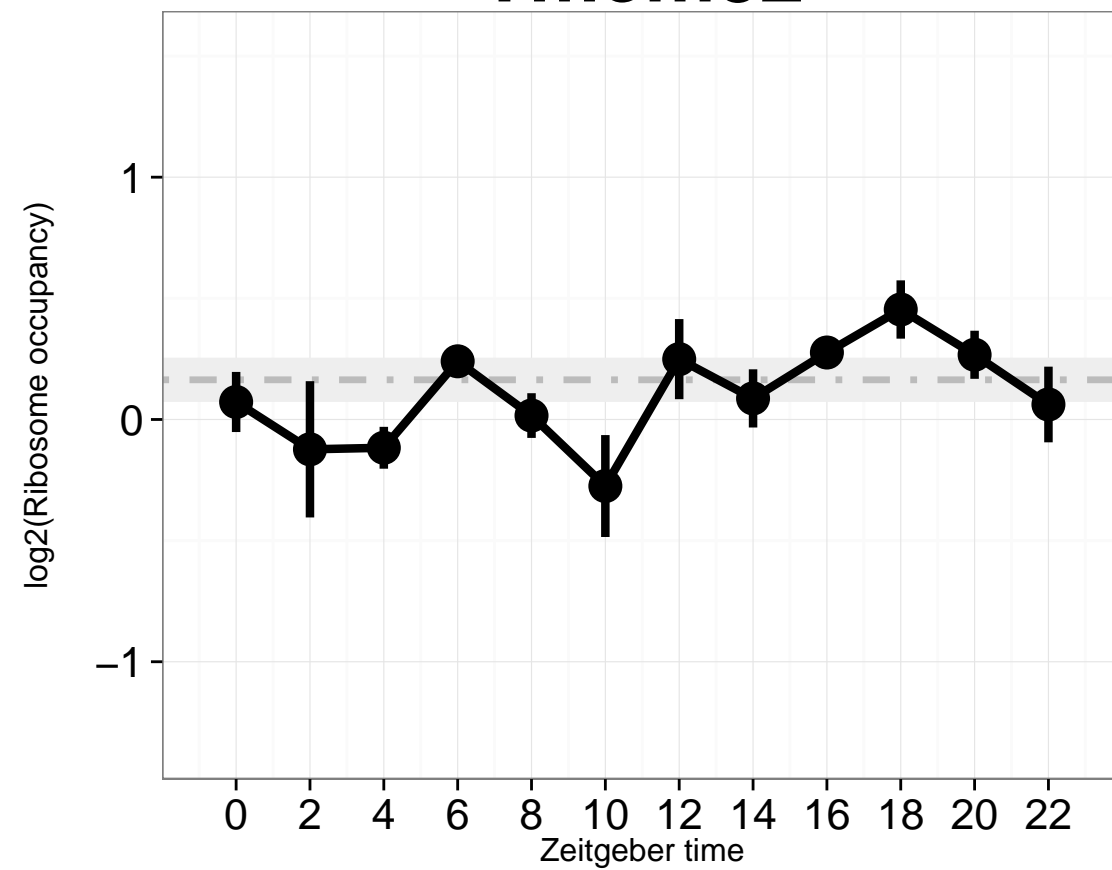

Supplement: SuppDataset_1.zip [file Tmem82_set_A.pdf › Supplemental Dataset 1/A-mRNA_nonrhyth_translation_nonrhyth/Tmem82_set_A.pdf]

# Tmem86b

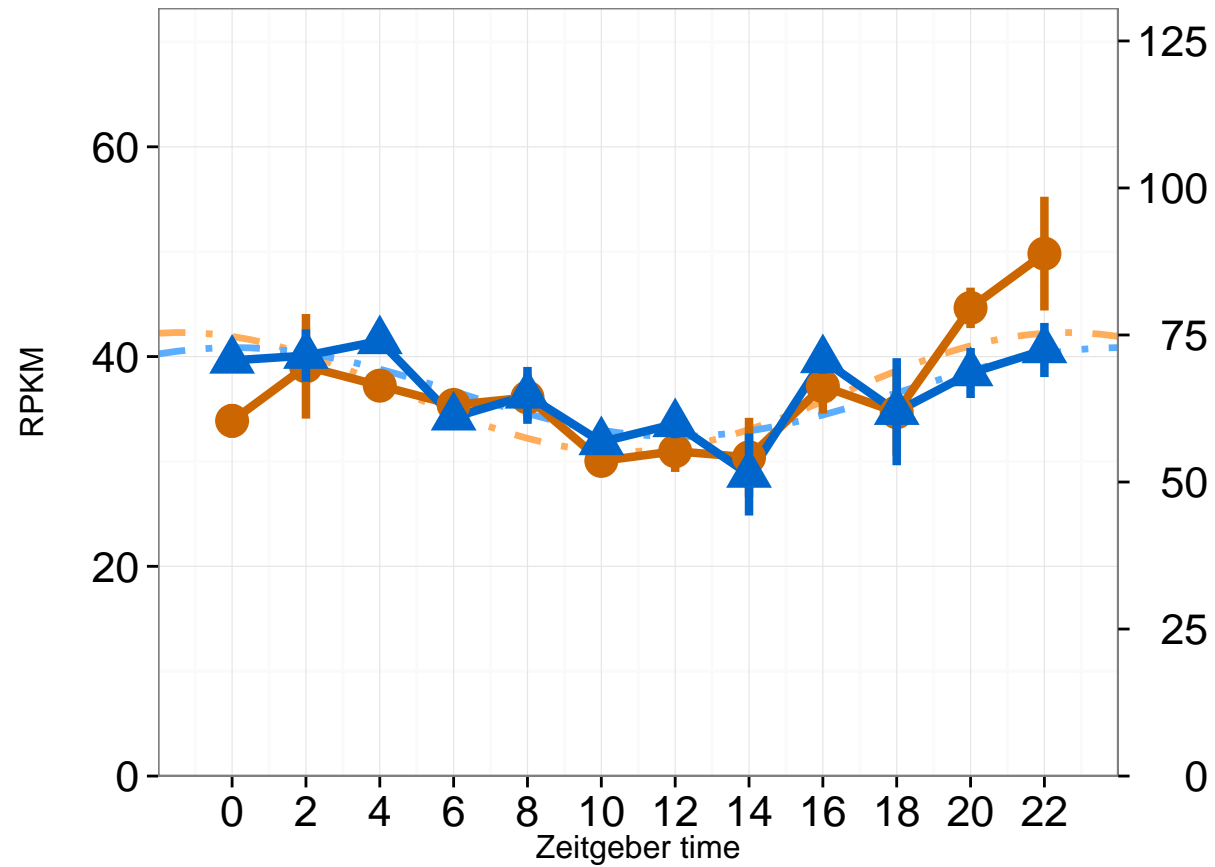

# Tmem86b

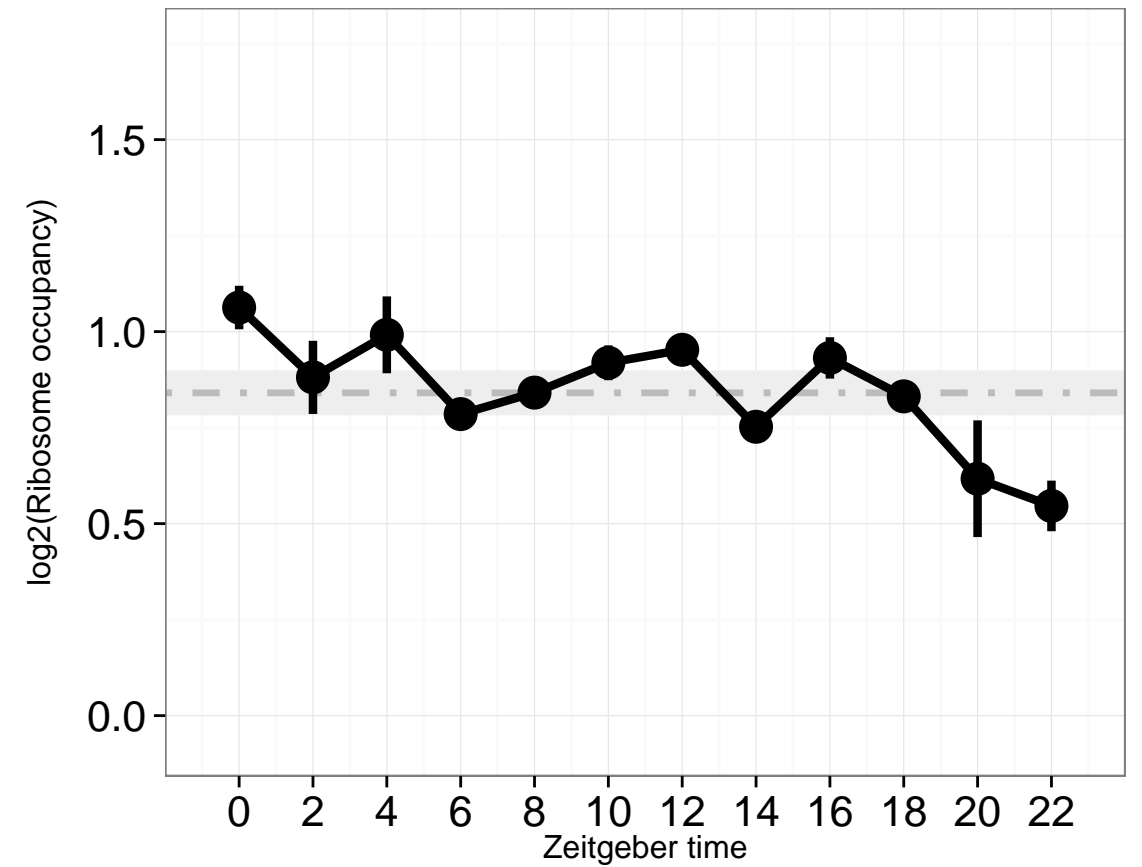

Supplement: SuppDataset_1.zip [file Tmem86b_set_A.pdf › Supplemental Dataset 1/A-mRNA_nonrhyth_translation_nonrhyth/Tmem86b_set_A.pdf]

# Tmem87a

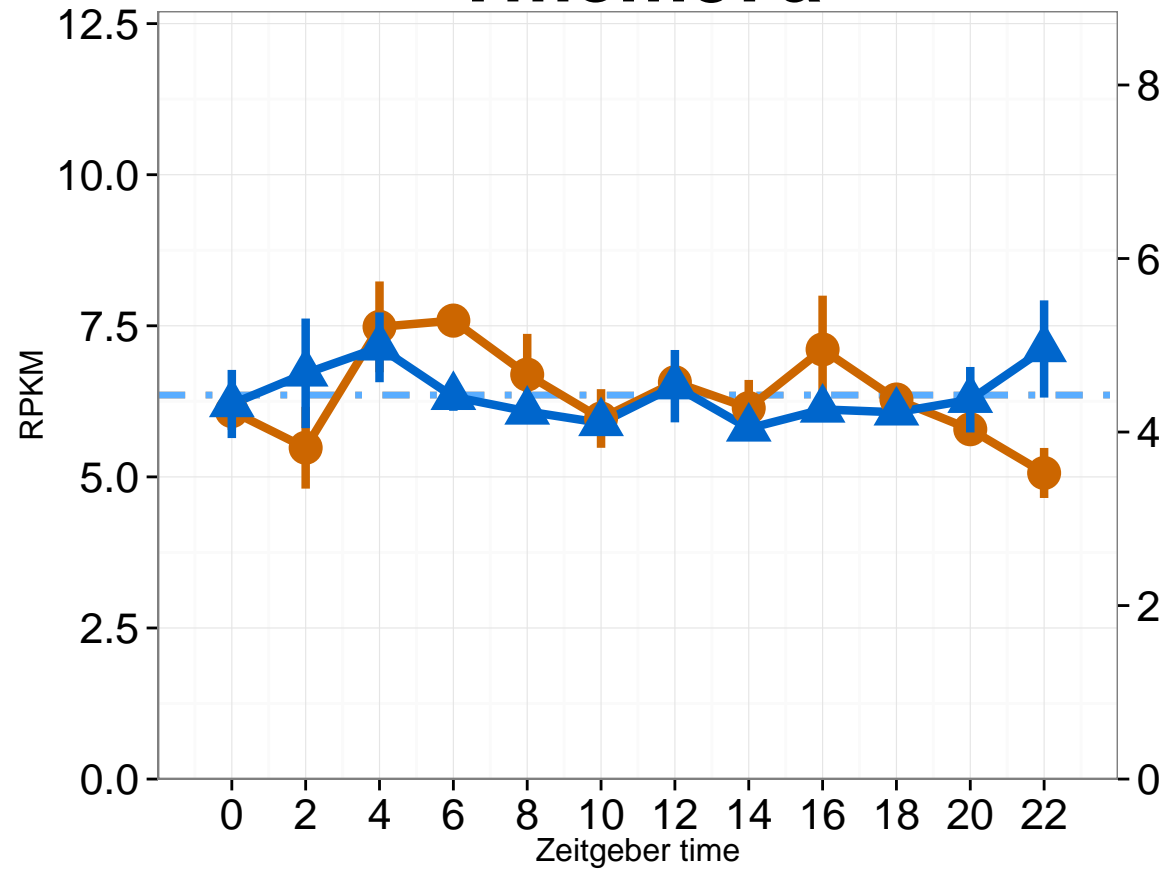

# Tmem87a

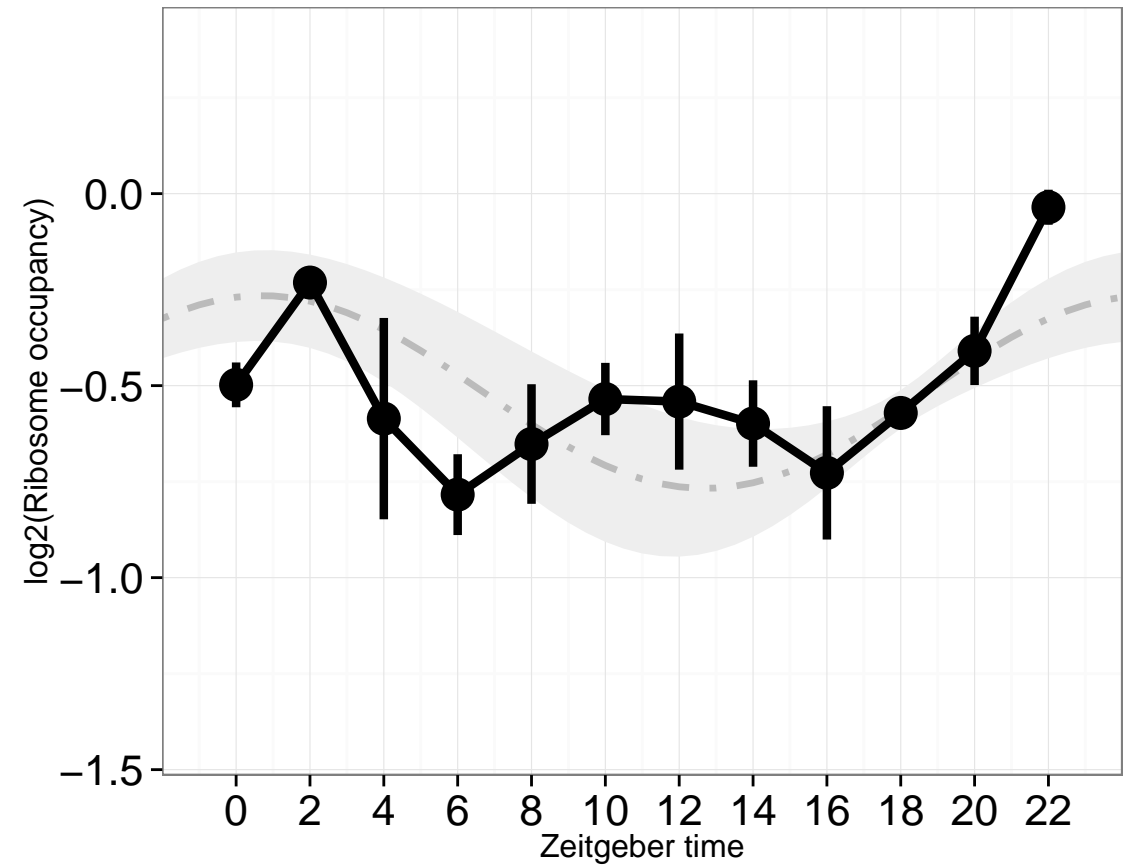

Supplement: SuppDataset_1.zip [file Tmem87a_set_A.pdf › Supplemental Dataset 1/A-mRNA_nonrhyth_translation_nonrhyth/Tmem87a_set_A.pdf]

# Tmem88

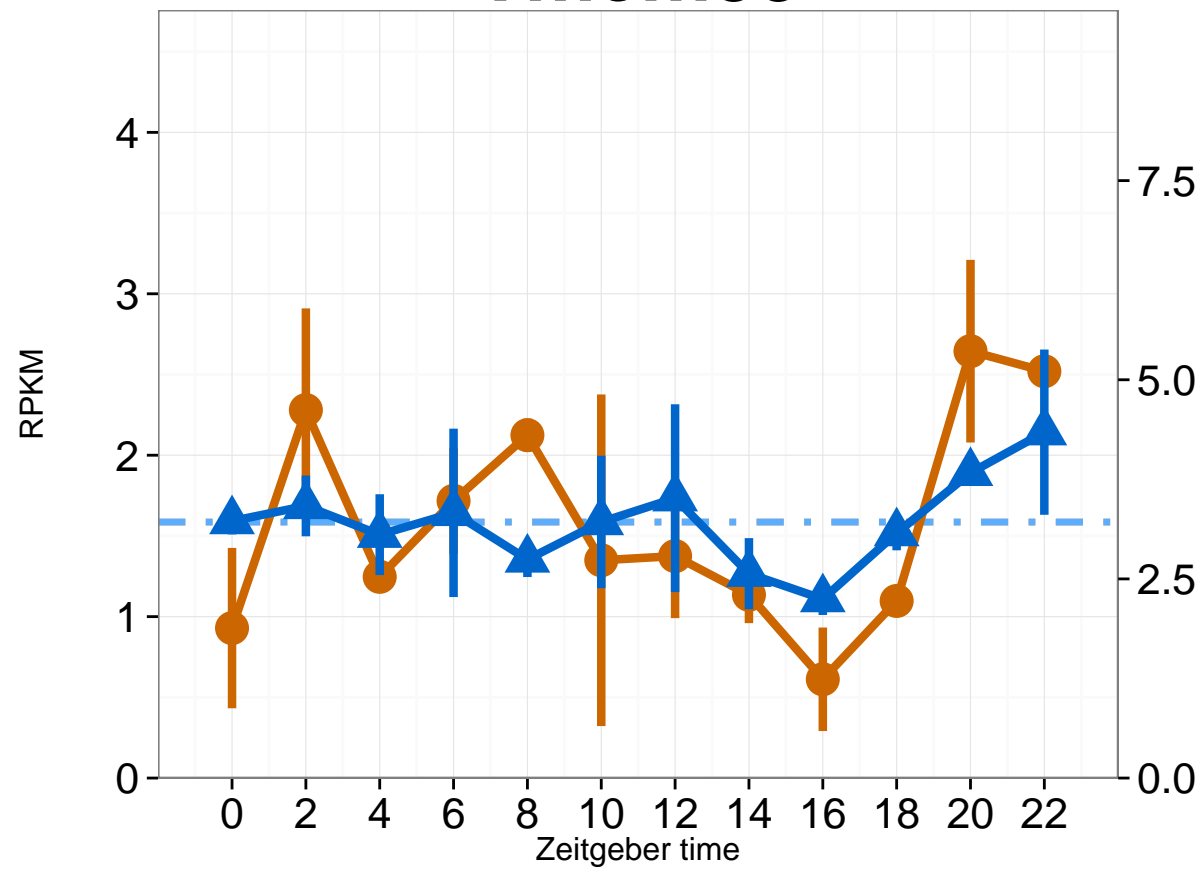

# Tmem88

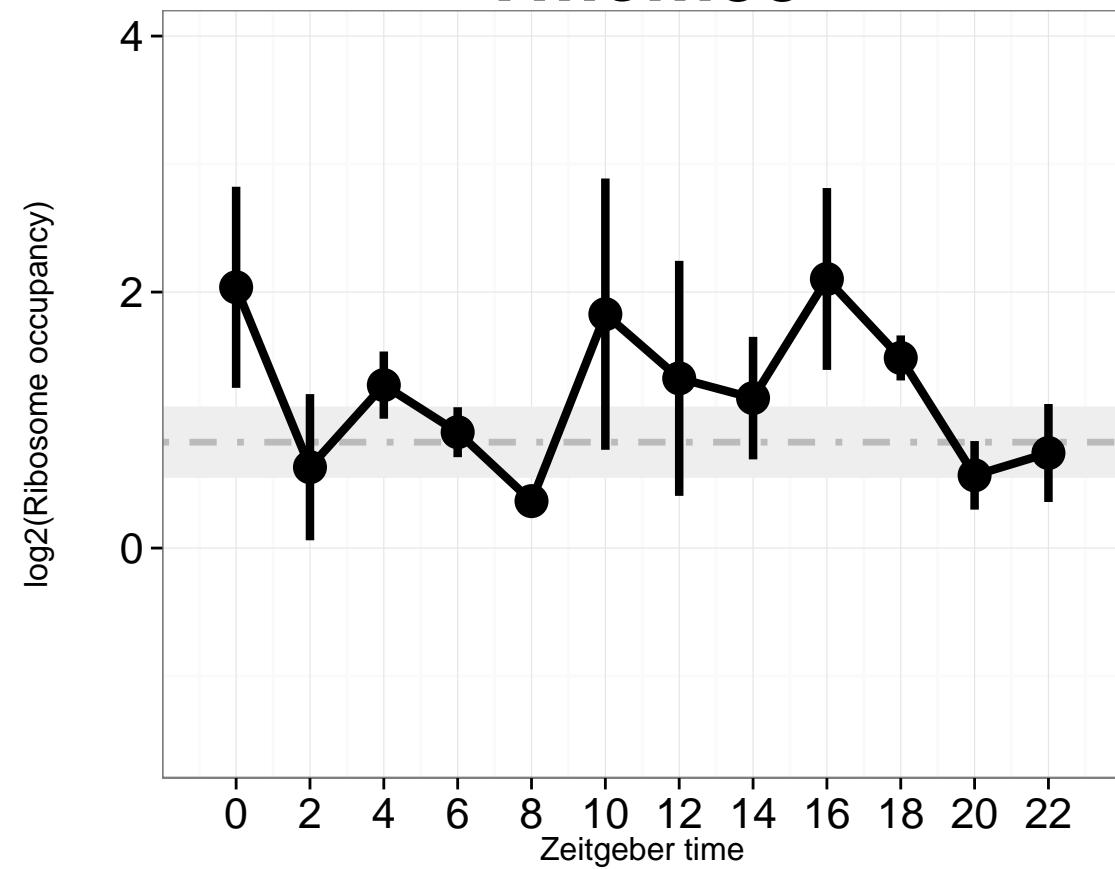

Supplement: SuppDataset_1.zip [file Tmem88_set_A.pdf › Supplemental Dataset 1/A-mRNA_nonrhyth_translation_nonrhyth/Tmem88_set_A.pdf]

# Tmem8

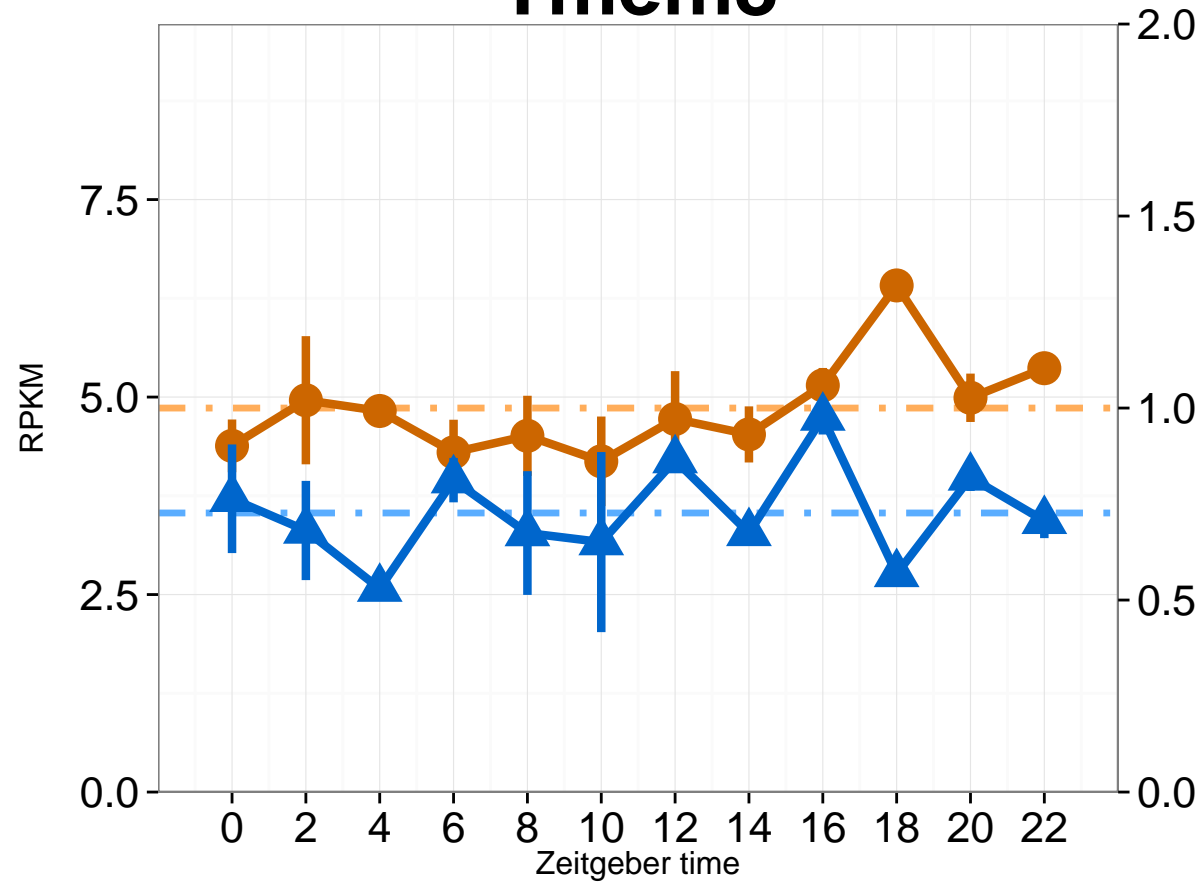

# Tmem8

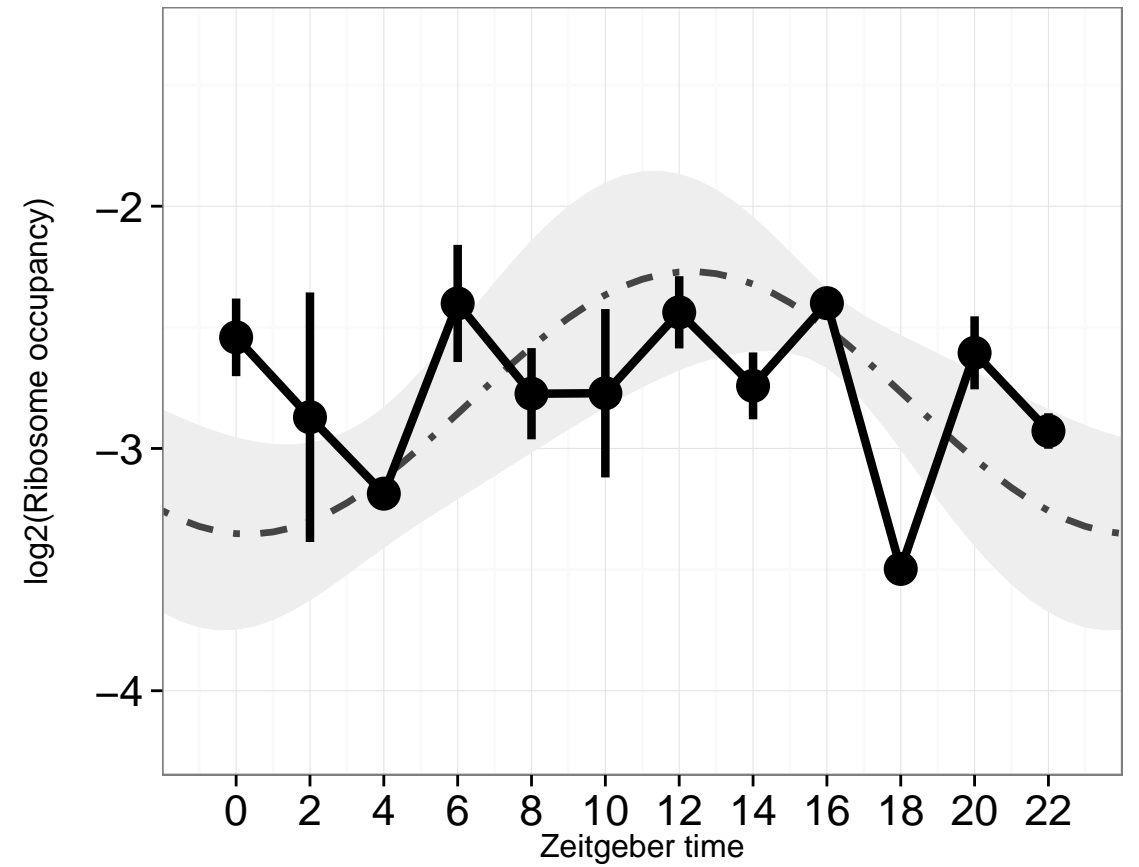

Supplement: SuppDataset_1.zip [file Tmem8_set_A.pdf › Supplemental Dataset 1/A-mRNA_nonrhyth_translation_nonrhyth/Tmem8_set_A.pdf]

# Tmem9b

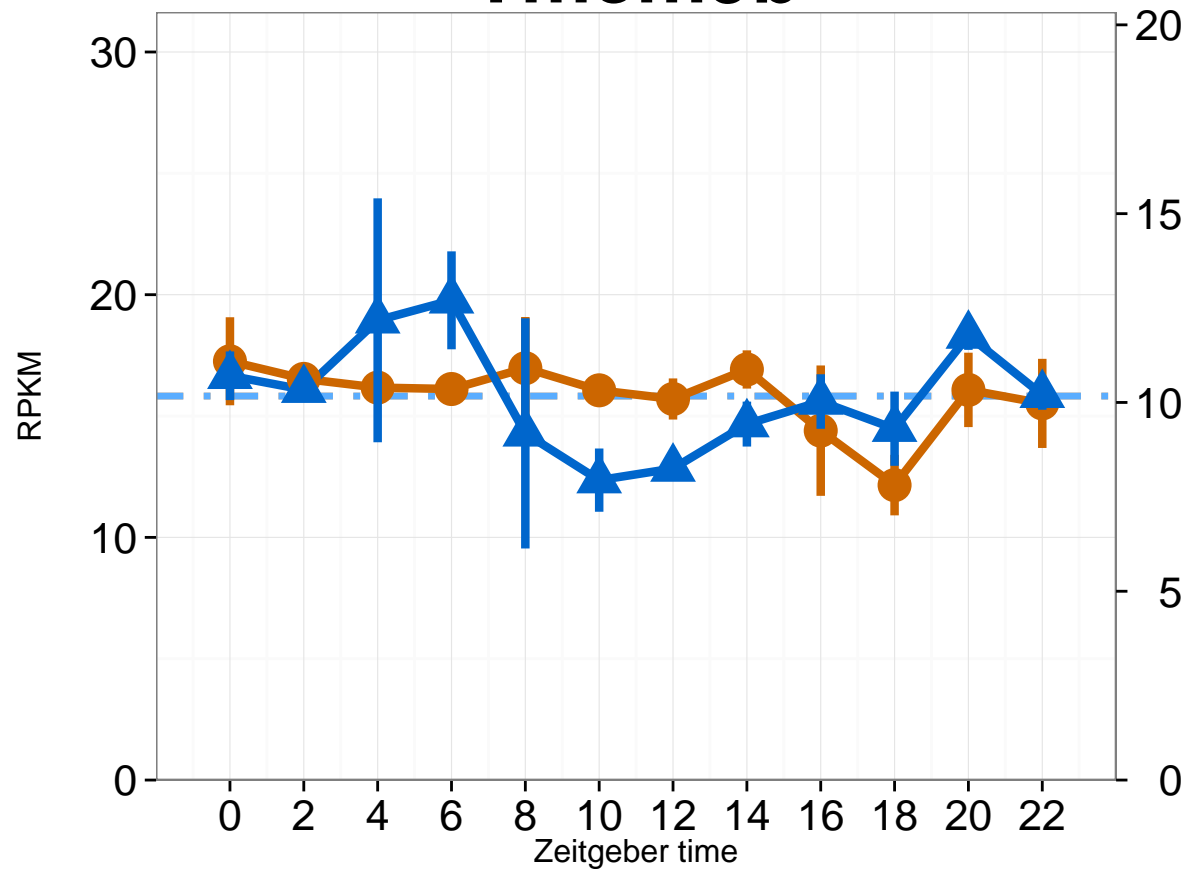

# Tmem9b

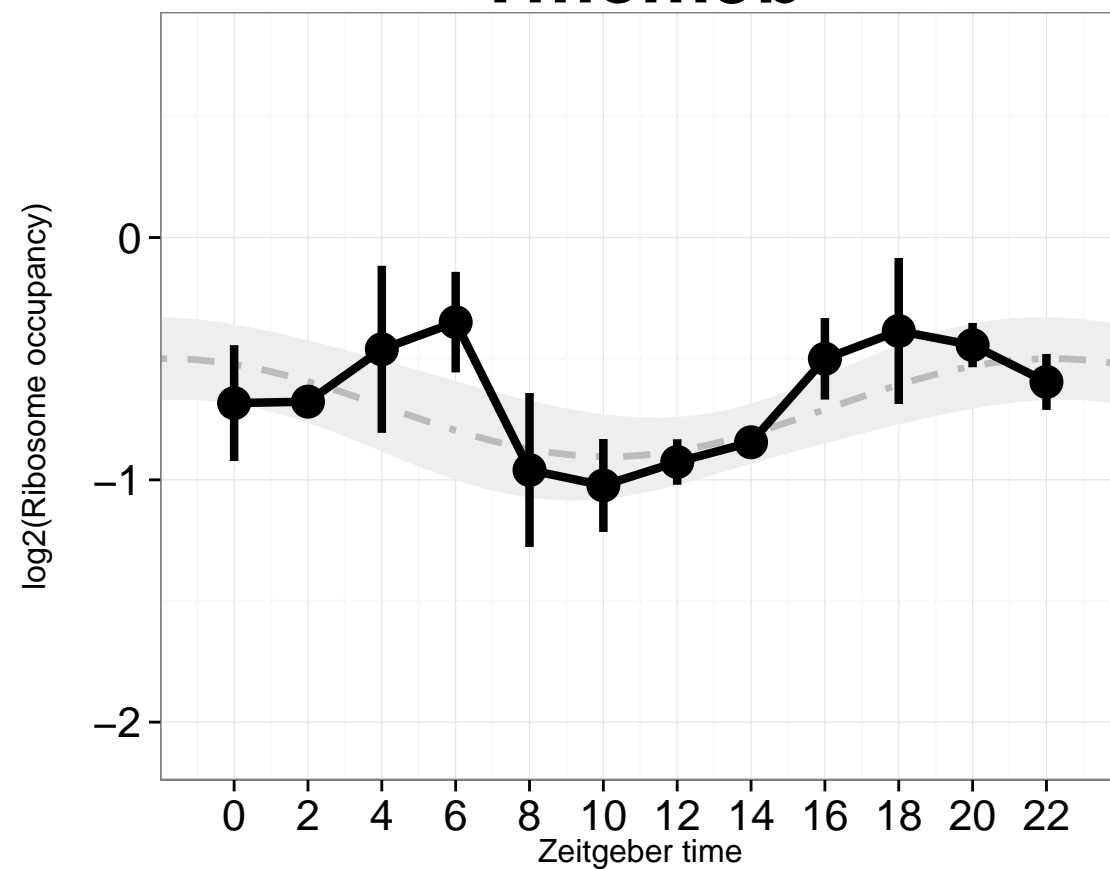

Supplement: SuppDataset_1.zip [file Tmem9b_set_A.pdf › Supplemental Dataset 1/A-mRNA_nonrhyth_translation_nonrhyth/Tmem9b_set_A.pdf]

# Tmf1

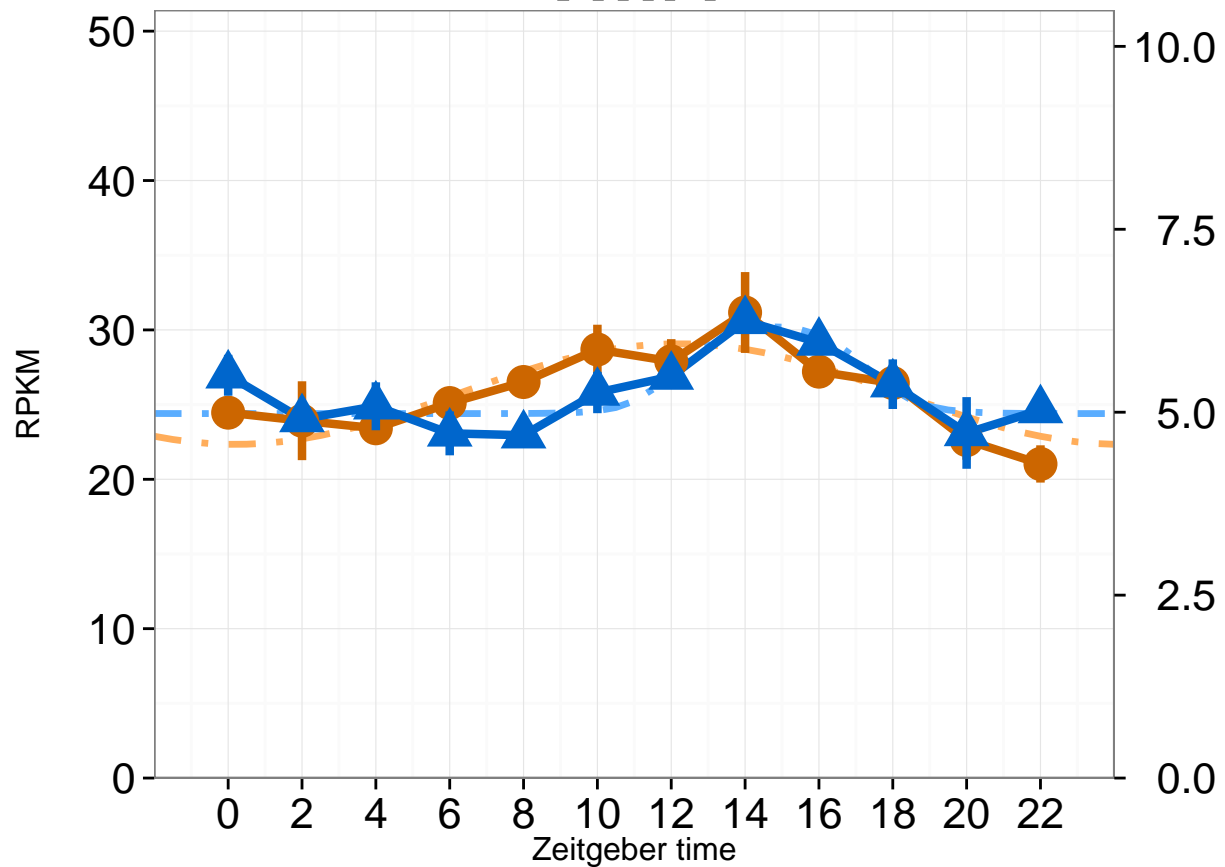

# Tmf1

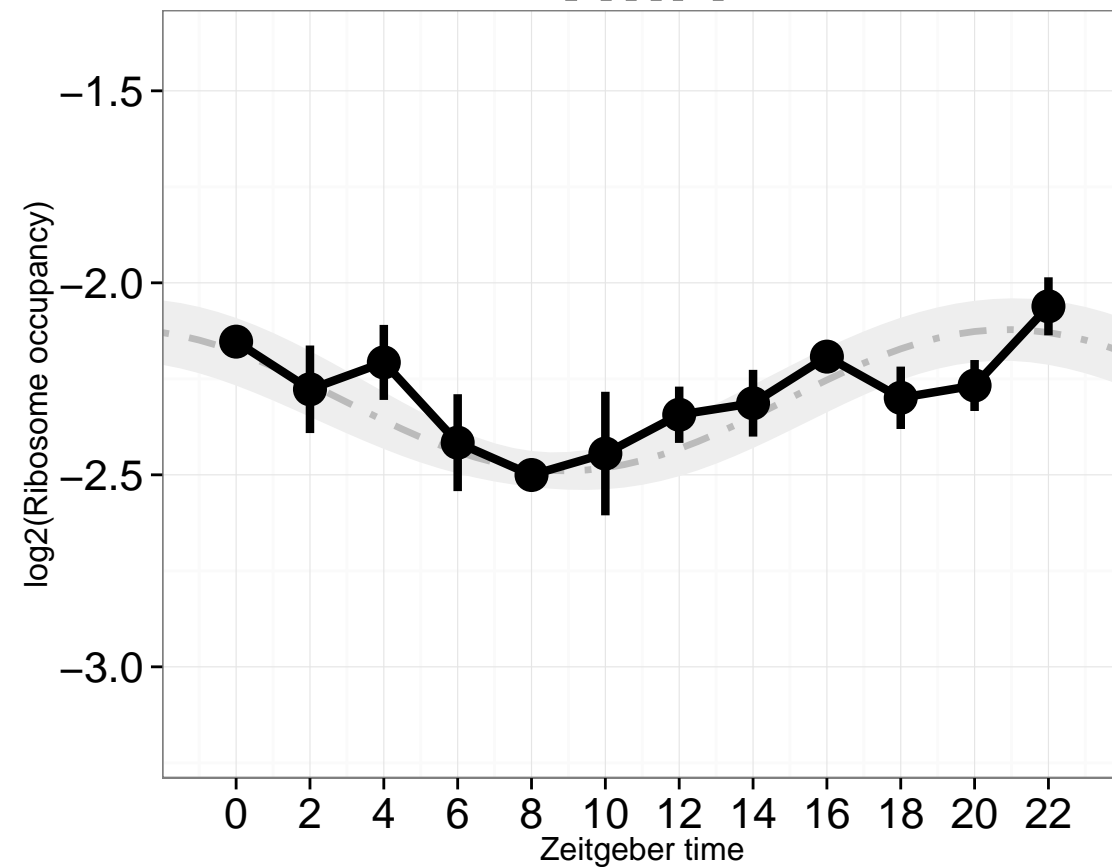

Supplement: SuppDataset_1.zip [file Tmf1_set_A.pdf › Supplemental Dataset 1/A-mRNA_nonrhyth_translation_nonrhyth/Tmf1_set_A.pdf]

## Tmod3

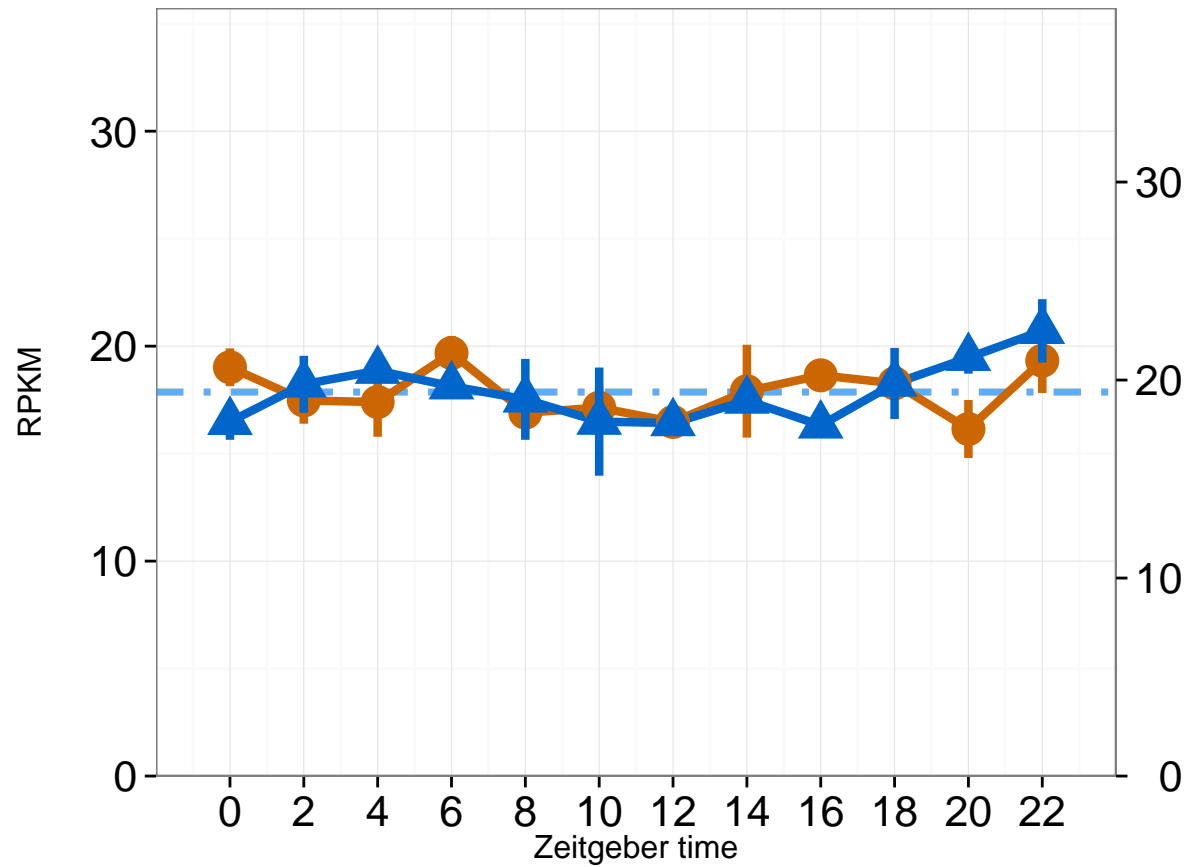

## Tmod3

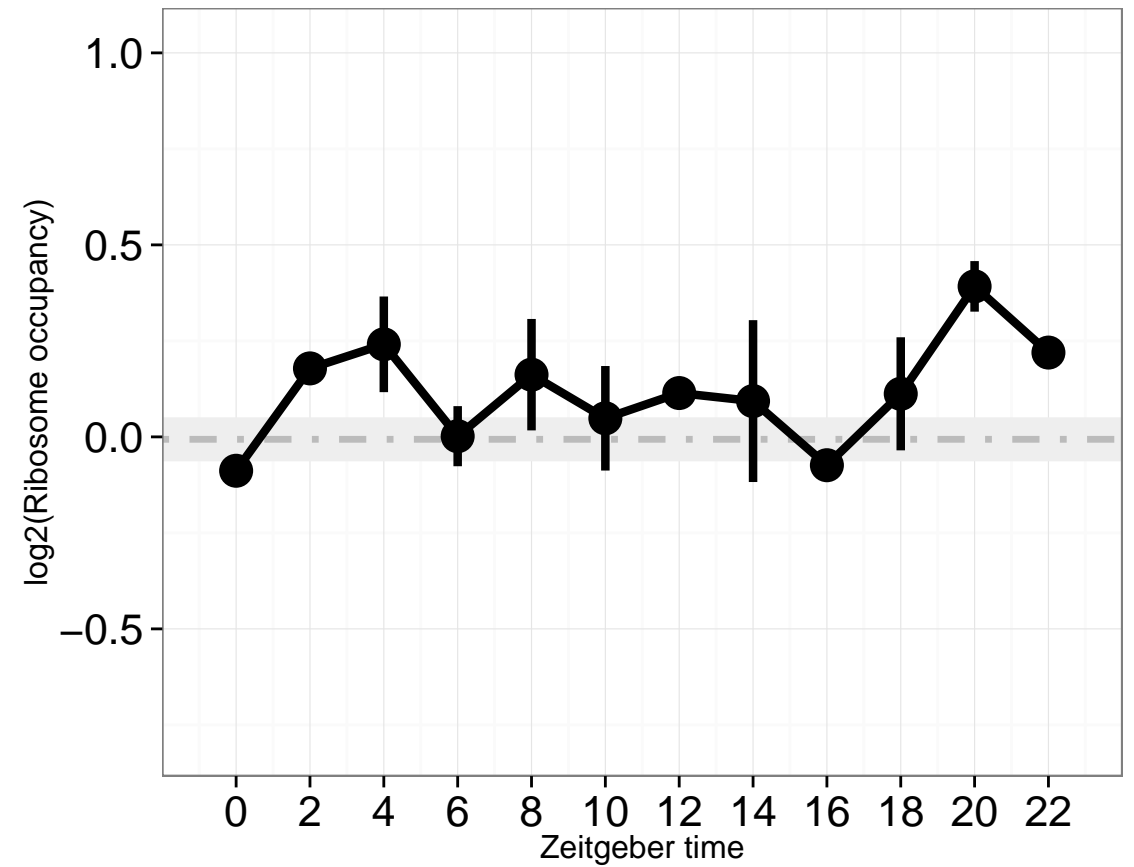

Supplement: SuppDataset_1.zip [file Tmod3_set_A.pdf › Supplemental Dataset 1/A-mRNA_nonrhyth_translation_nonrhyth/Tmod3_set_A.pdf]

## Tmpo

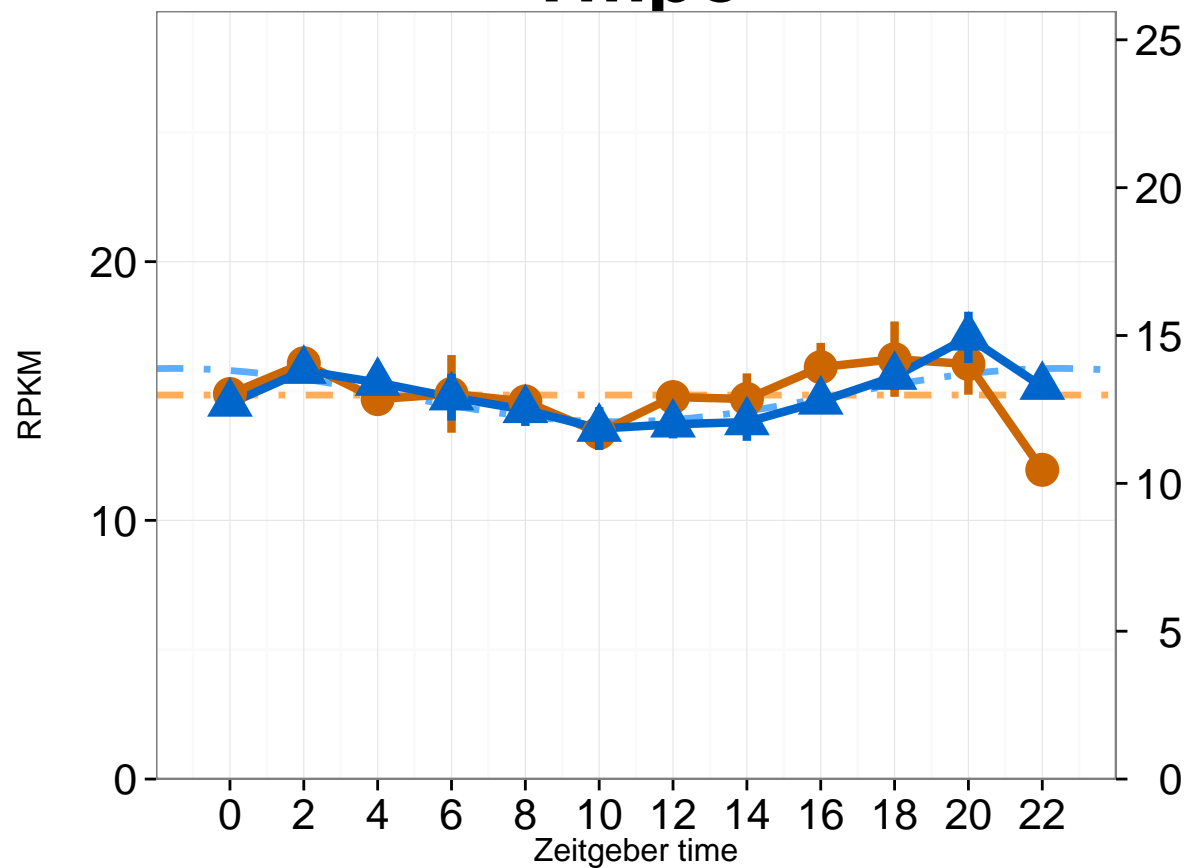

## Tmpo

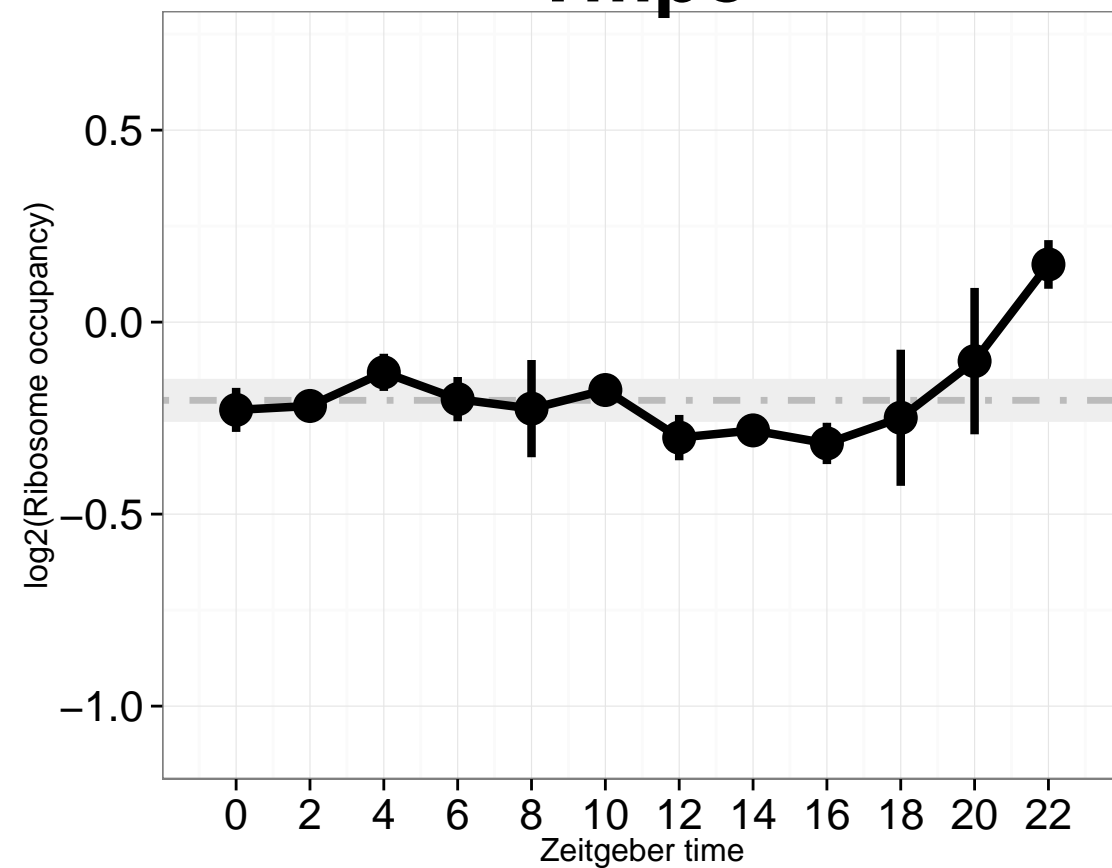

Supplement: SuppDataset_1.zip [file Tmpo_set_A.pdf › Supplemental Dataset 1/A-mRNA_nonrhyth_translation_nonrhyth/Tmpo_set_A.pdf]

## Tmppe

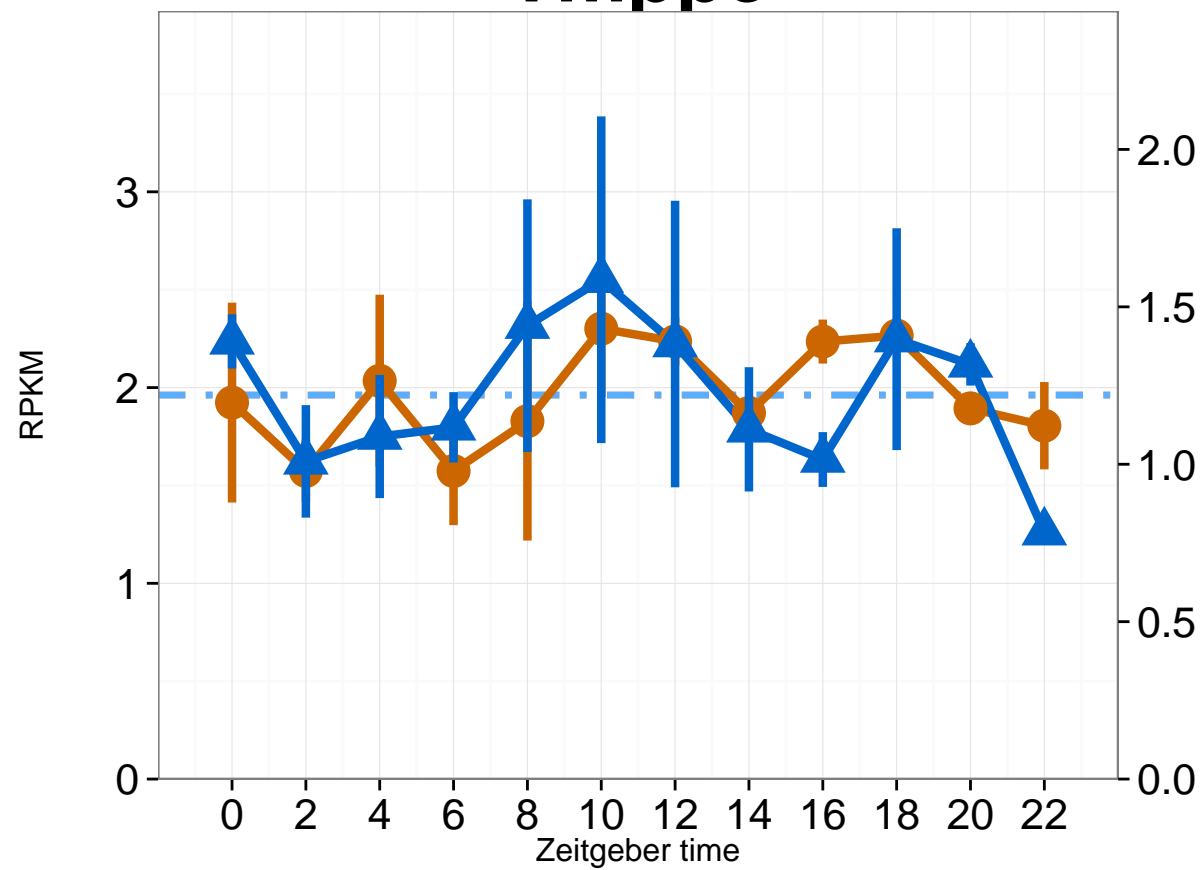

## Tmppe

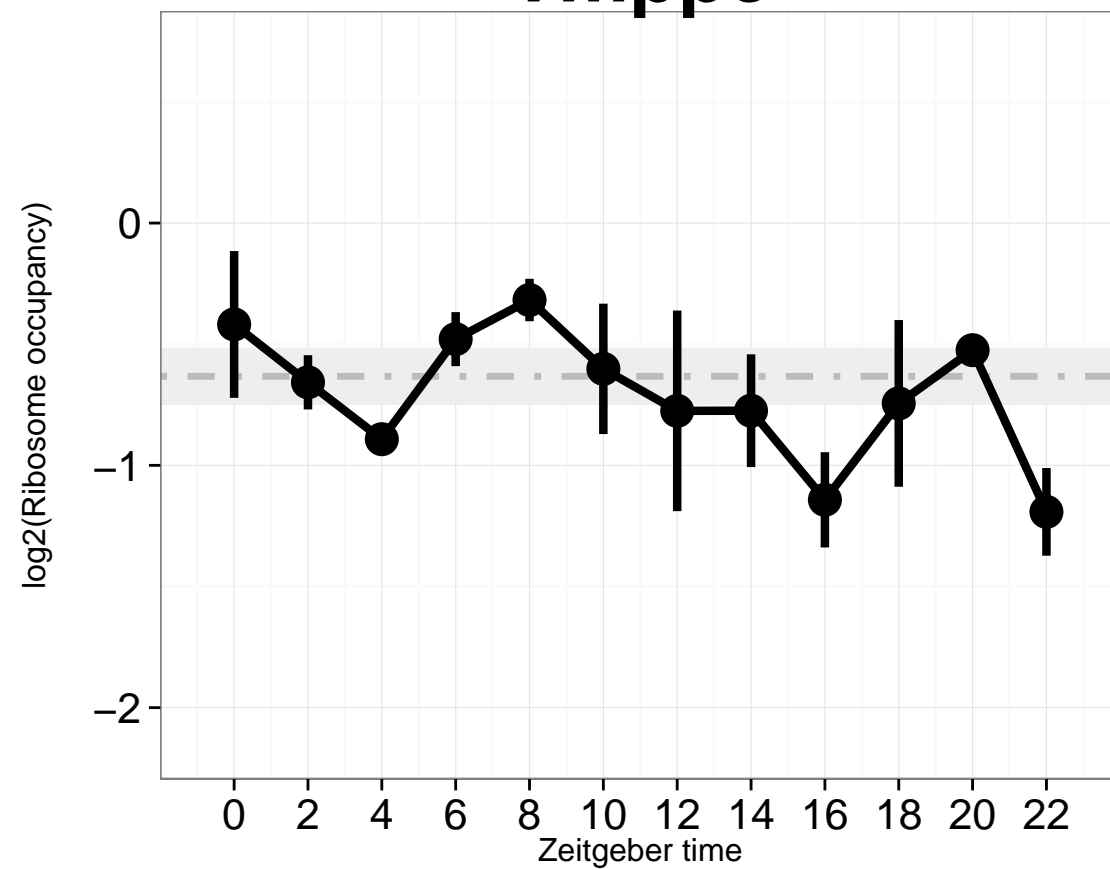

Supplement: SuppDataset_1.zip [file Tmppe_set_A.pdf › Supplemental Dataset 1/A-mRNA_nonrhyth_translation_nonrhyth/Tmppe_set_A.pdf]

## Tmprss2

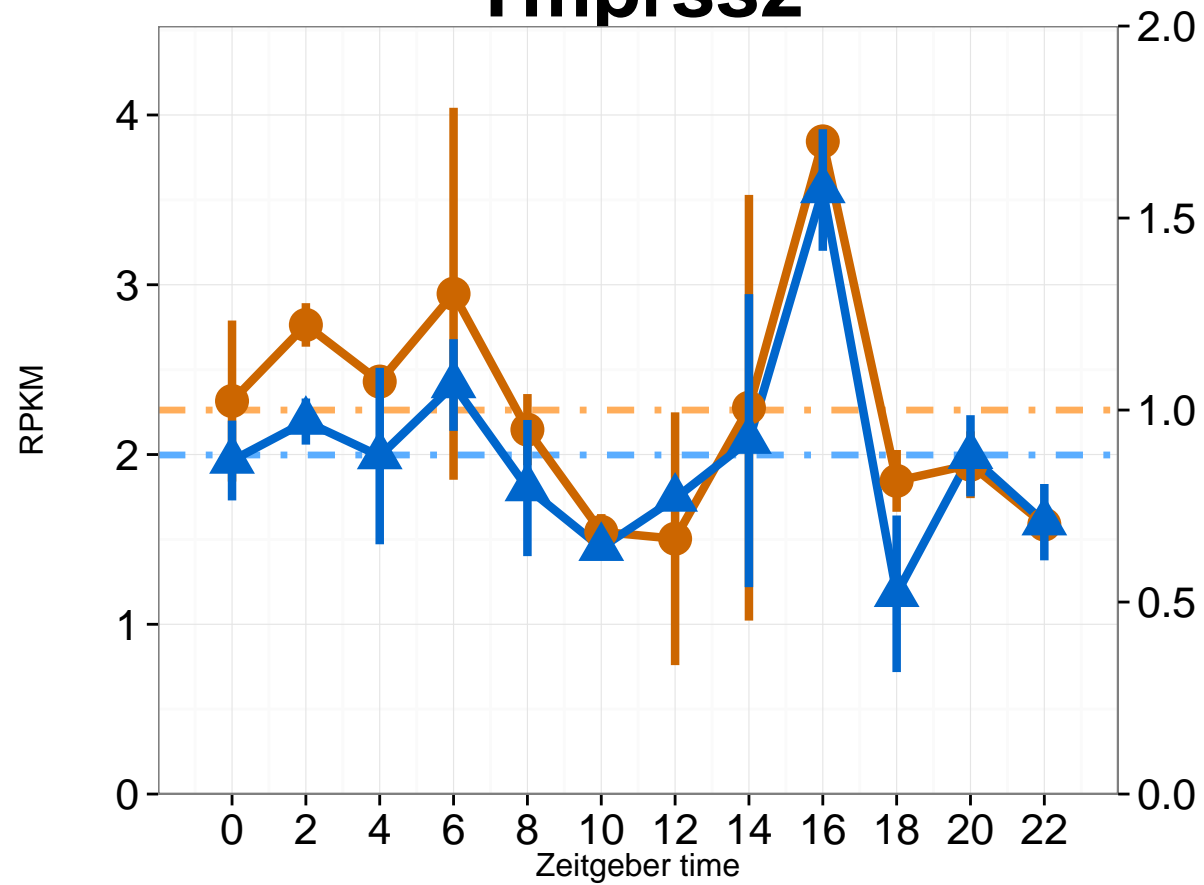

## Tmprss2

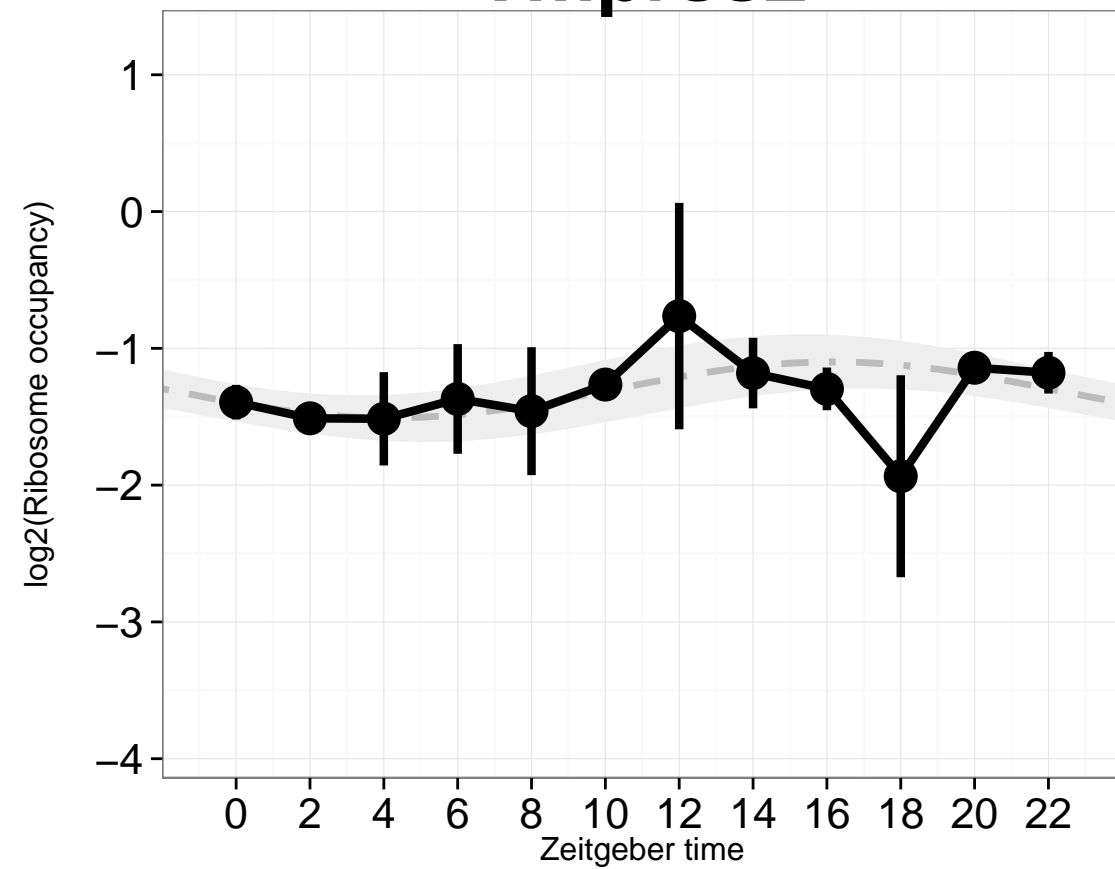

Supplement: SuppDataset_1.zip [file Tmprss2_set_A.pdf › Supplemental Dataset 1/A-mRNA_nonrhyth_translation_nonrhyth/Tmprss2_set_A.pdf]

# Tmprss6

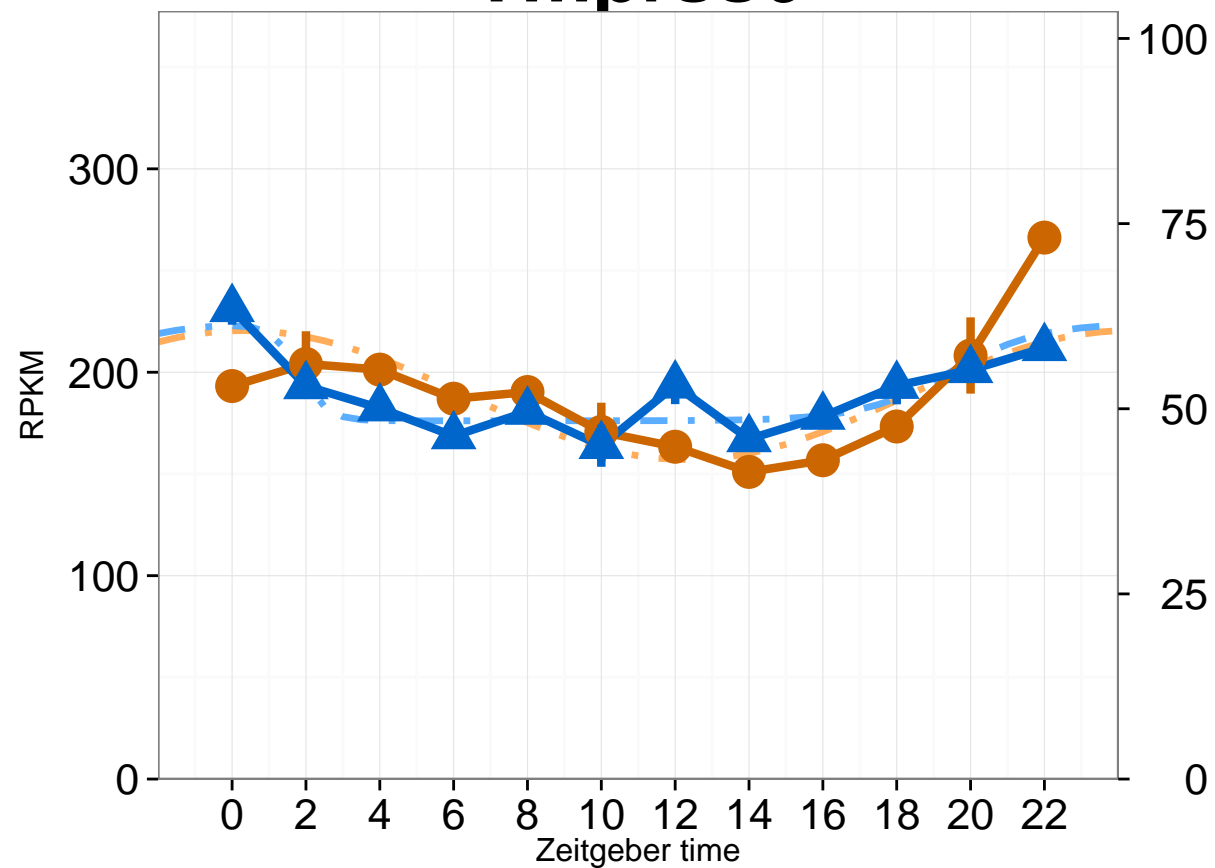

# Tmprss6

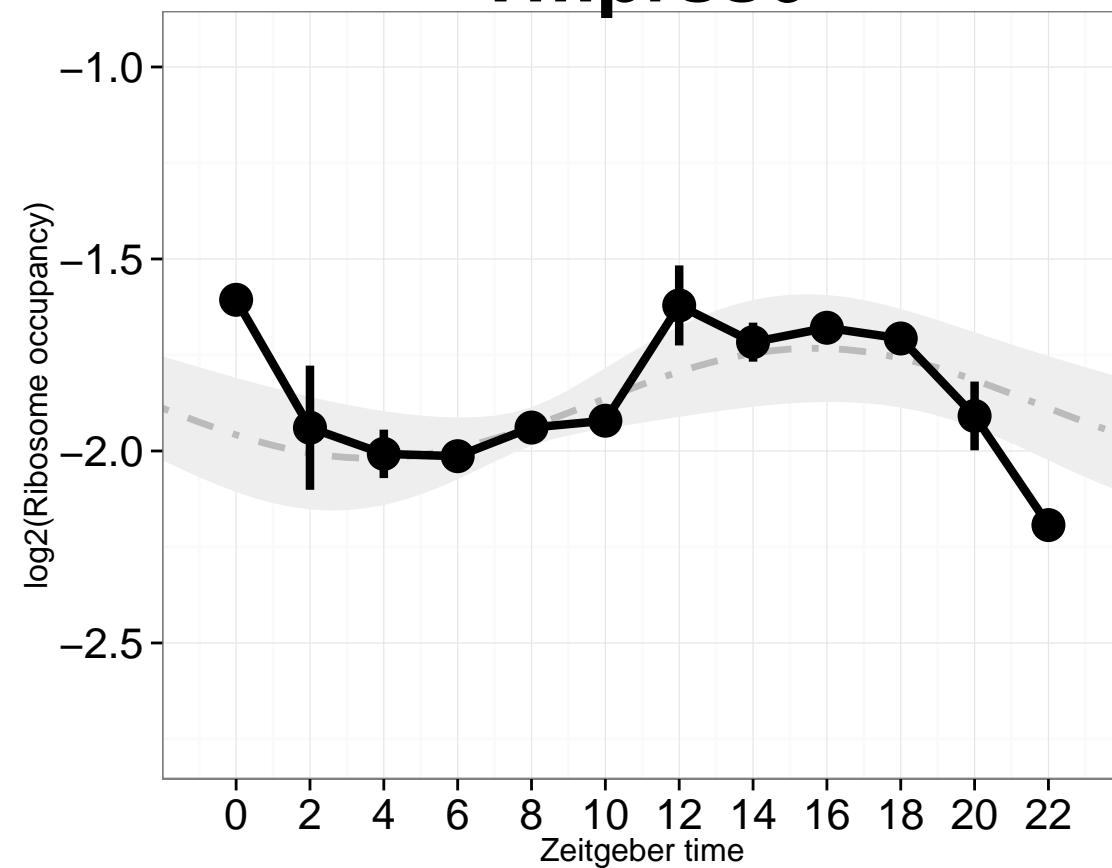

Supplement: SuppDataset_1.zip [file Tmprss6_set_A.pdf › Supplemental Dataset 1/A-mRNA_nonrhyth_translation_nonrhyth/Tmprss6_set_A.pdf]

# Tmsb10

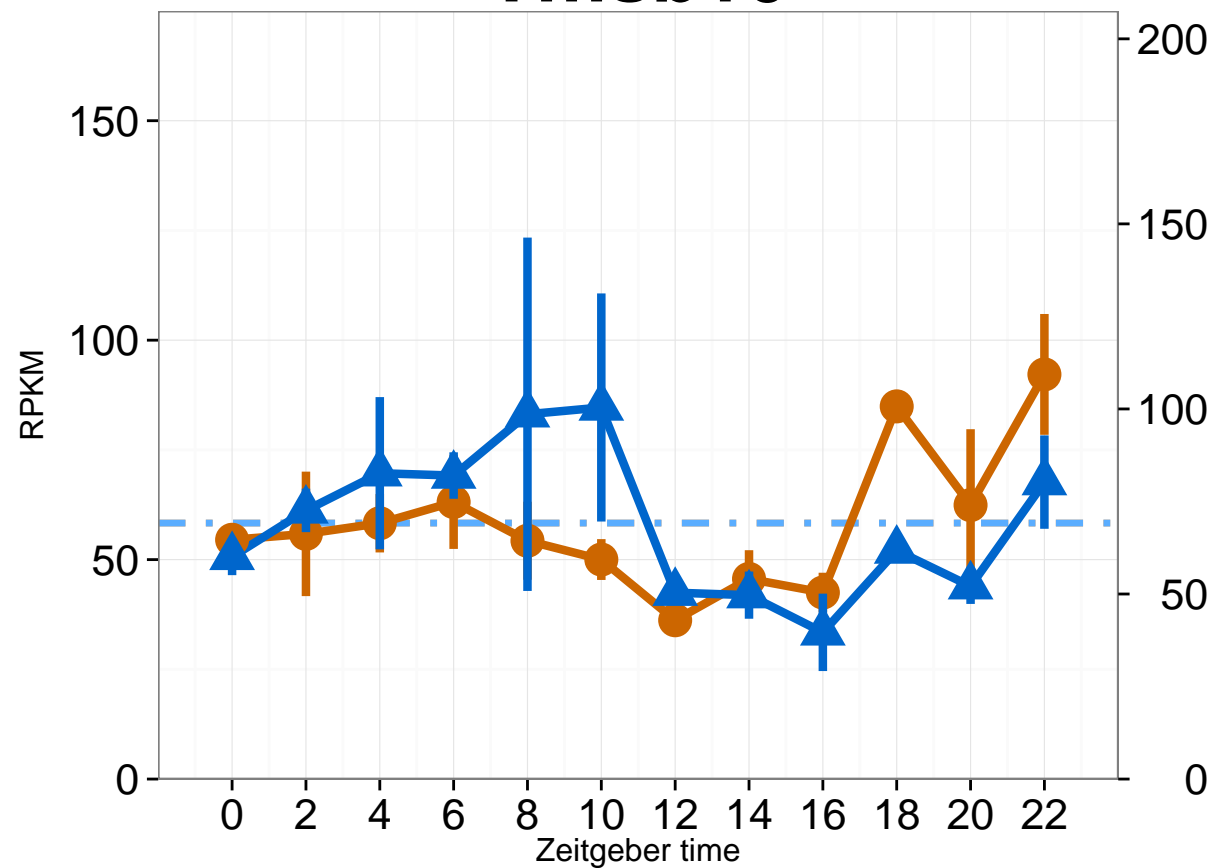

# Tmsb10

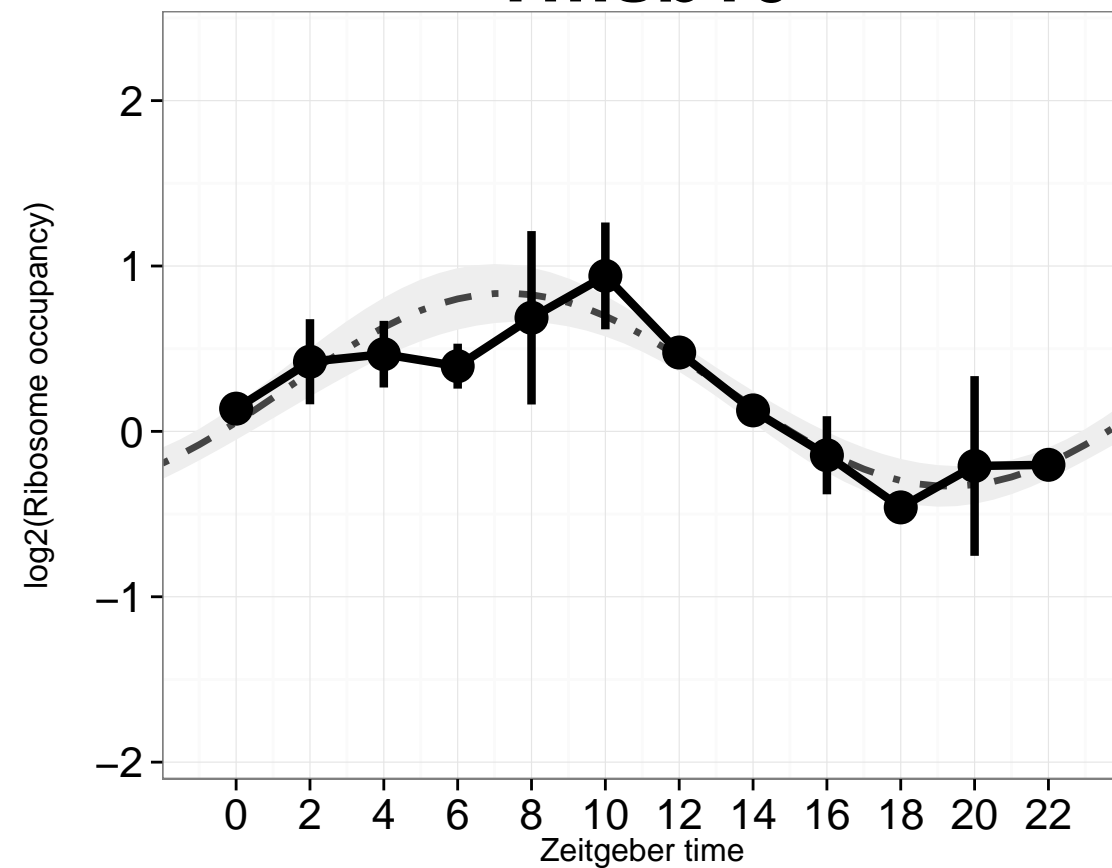

Supplement: SuppDataset_1.zip [file Tmsb10_set_A.pdf › Supplemental Dataset 1/A-mRNA_nonrhyth_translation_nonrhyth/Tmsb10_set_A.pdf]

**Tmsb15b1 TR**

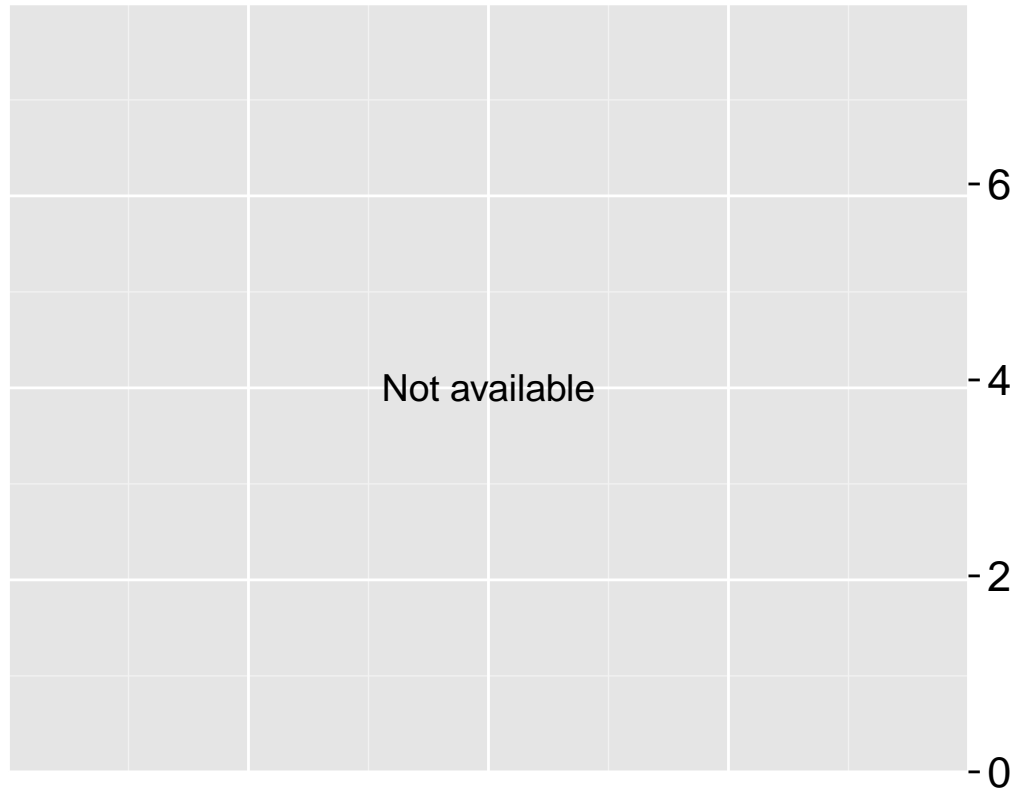

**Tmsb15b1 log2(Ribosome occupan**

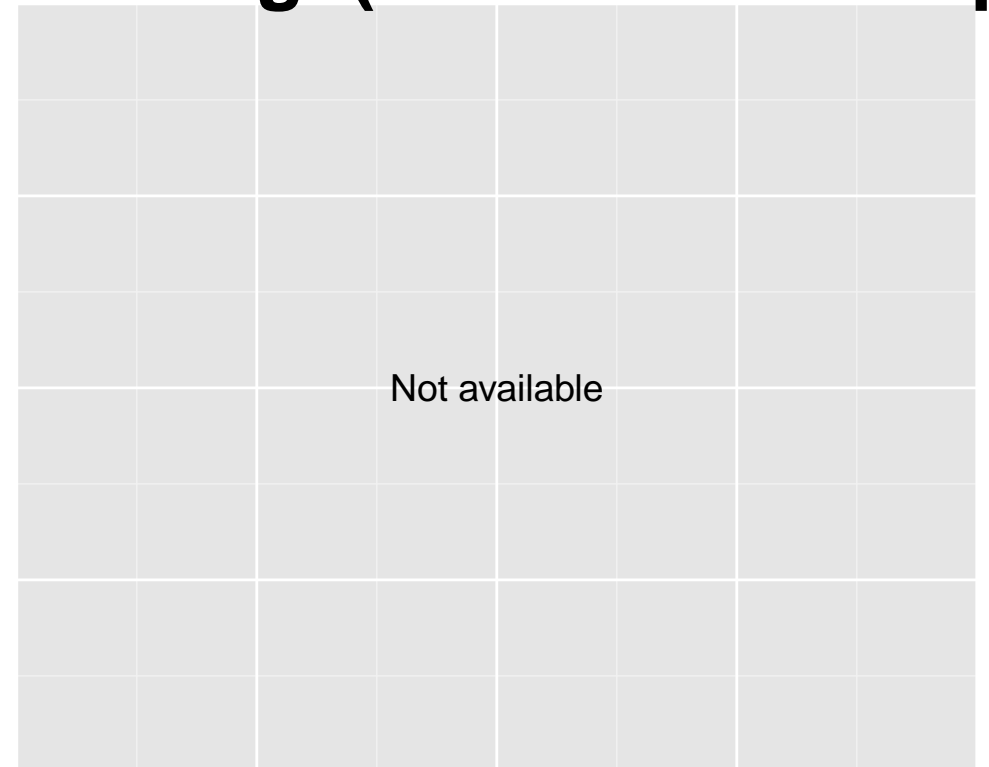

Supplement: SuppDataset_1.zip [file Tmsb15b1_set_A.pdf › Supplemental Dataset 1/A-mRNA_nonrhyth_translation_nonrhyth/Tmsb15b1_set_A.pdf]

## Tmtc1

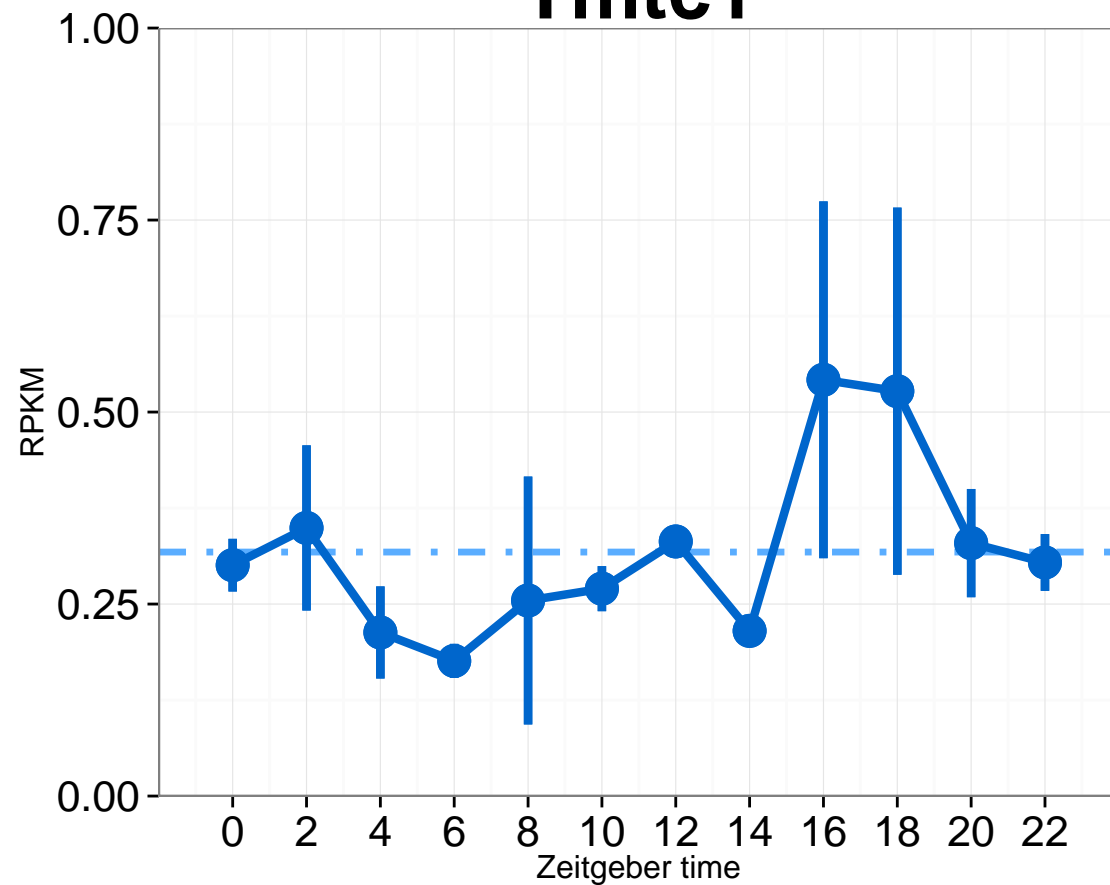

## Tmtc1 log2(Ribosome occupancy

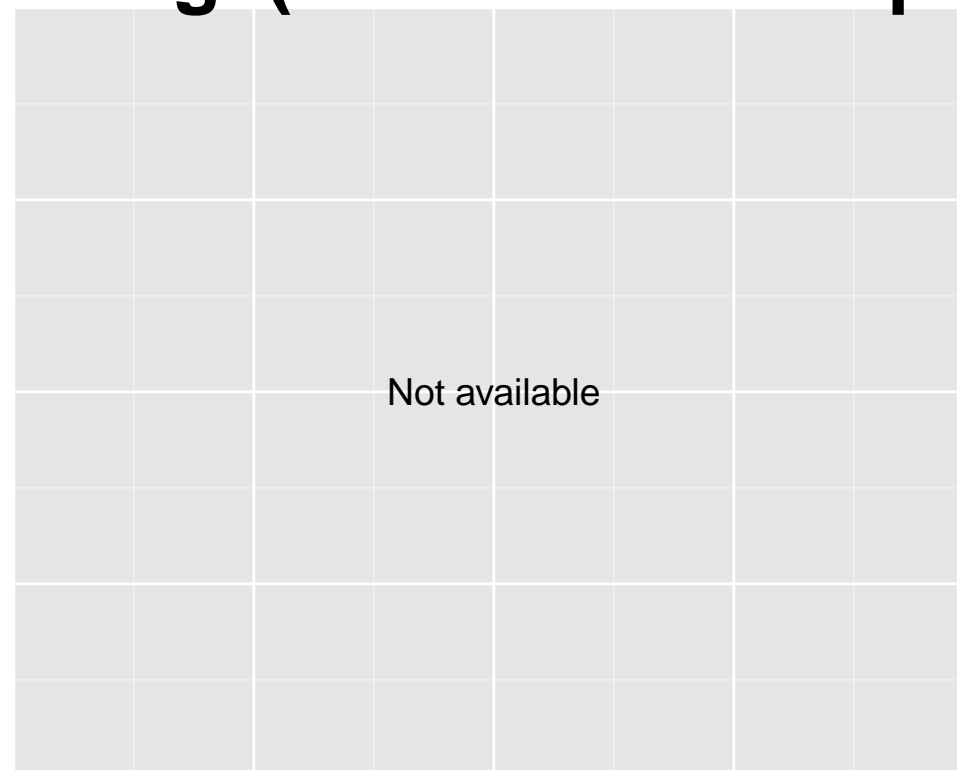

Supplement: SuppDataset_1.zip [file Tmtc1_set_A.pdf › Supplemental Dataset 1/A-mRNA_nonrhyth_translation_nonrhyth/Tmtc1_set_A.pdf]

# Tmtc3

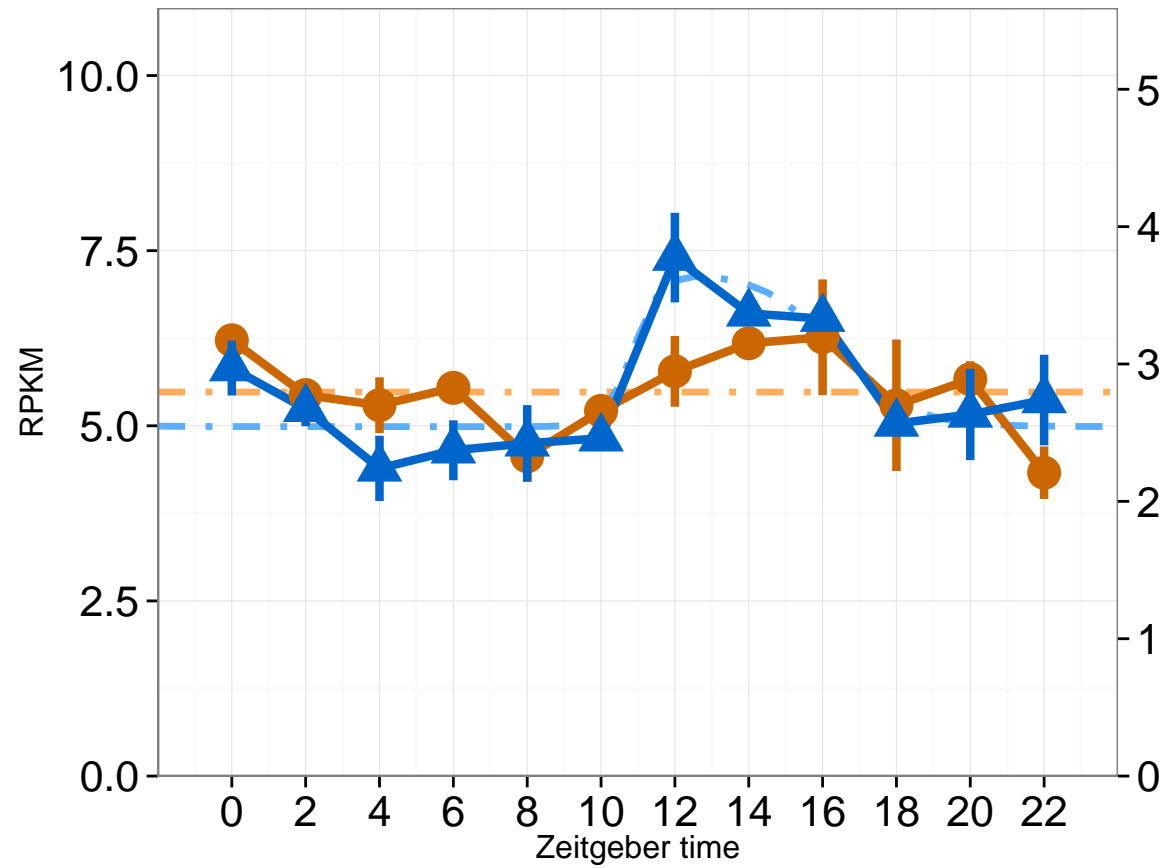

# Tmtc3

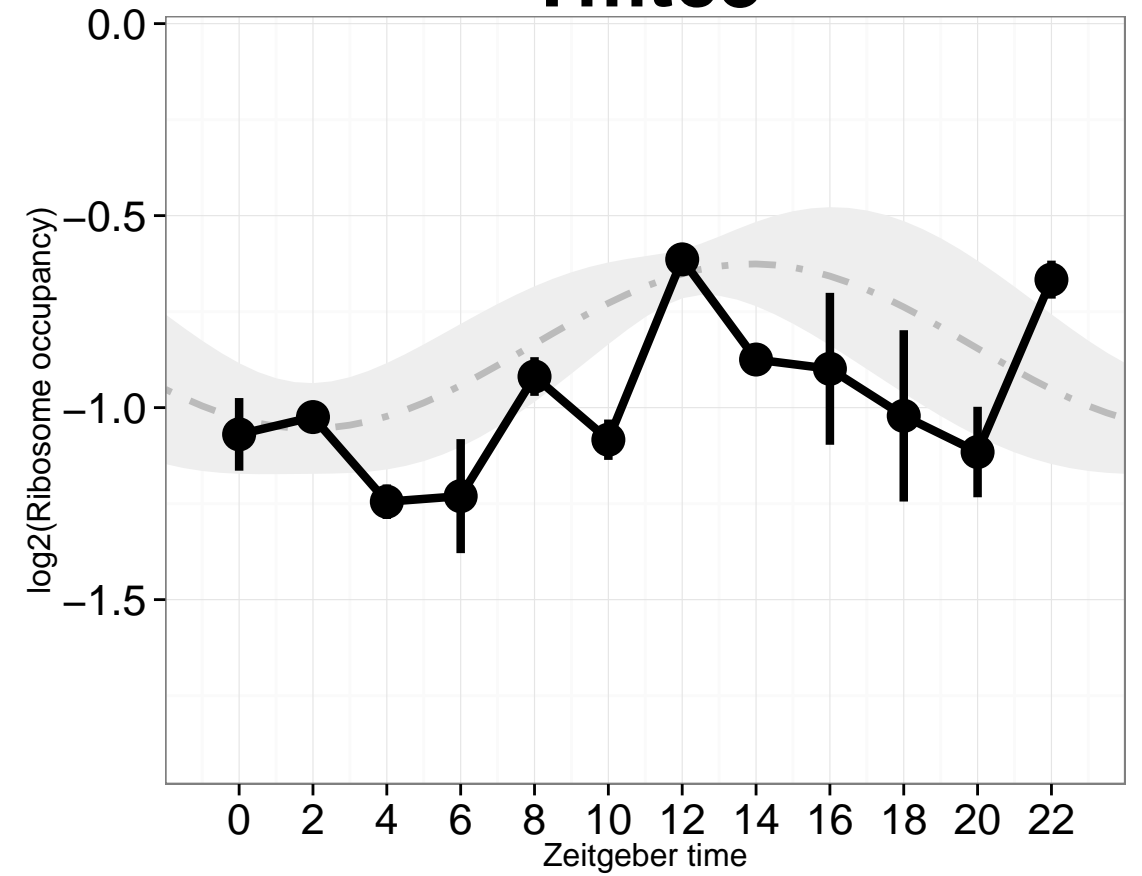

Supplement: SuppDataset_1.zip [file Tmtc3_set_A.pdf › Supplemental Dataset 1/A-mRNA_nonrhyth_translation_nonrhyth/Tmtc3_set_A.pdf]

# Tmub2

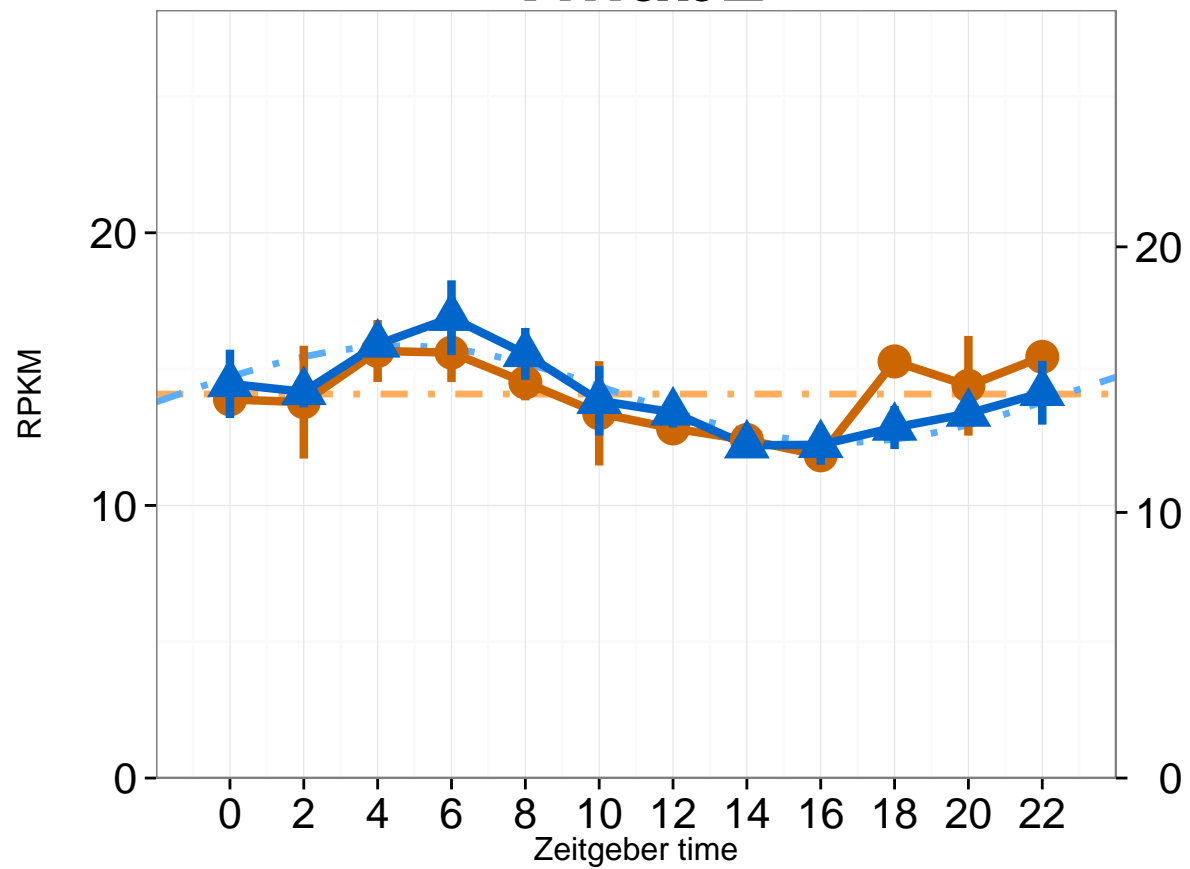

# Tmub2

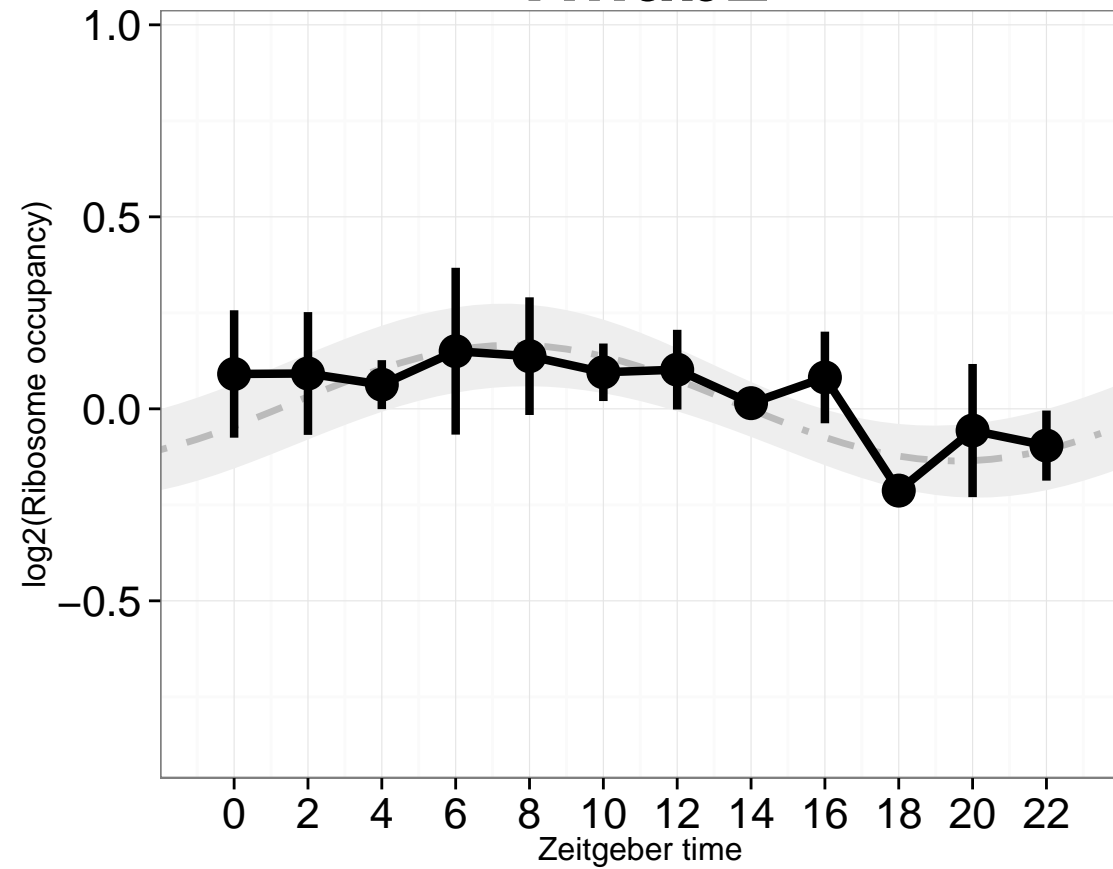

Supplement: SuppDataset_1.zip [file Tmub2_set_A.pdf › Supplemental Dataset 1/A-mRNA_nonrhyth_translation_nonrhyth/Tmub2_set_A.pdf]

# Tmx1

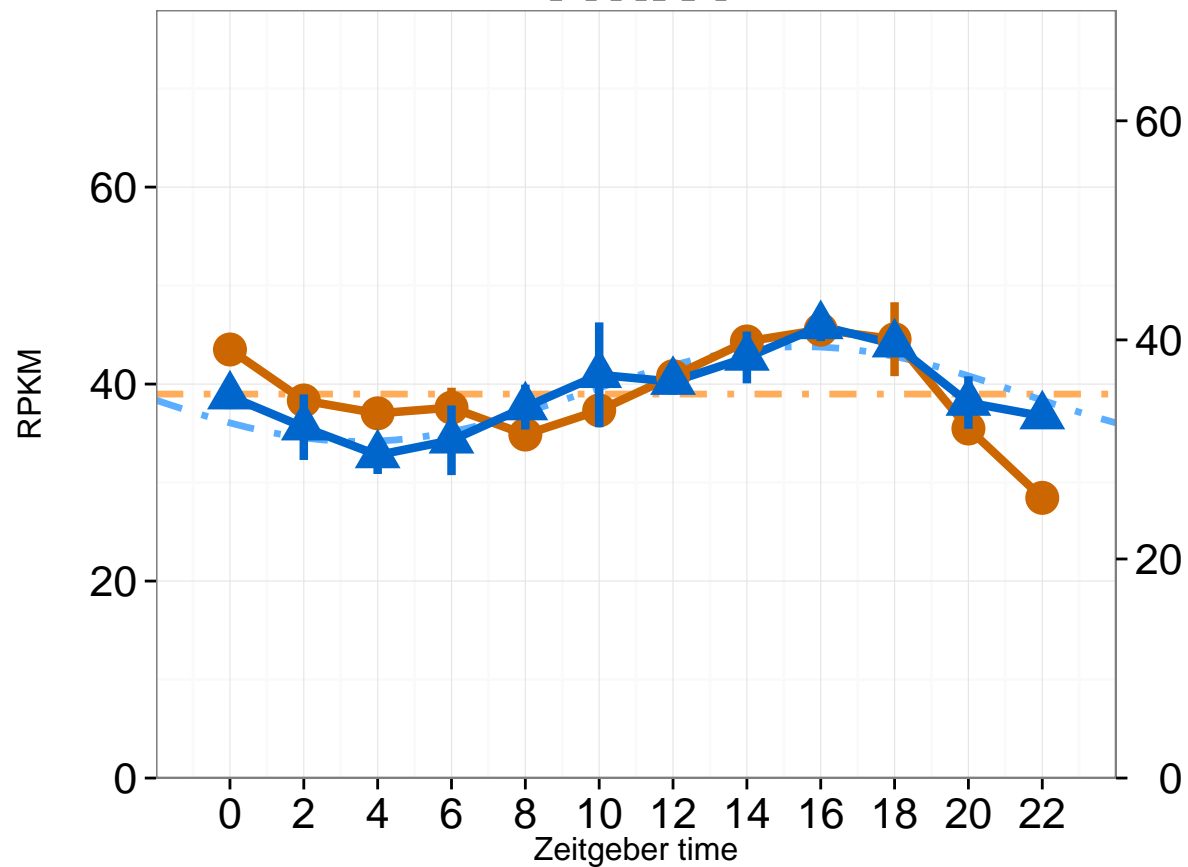

# Tmx1

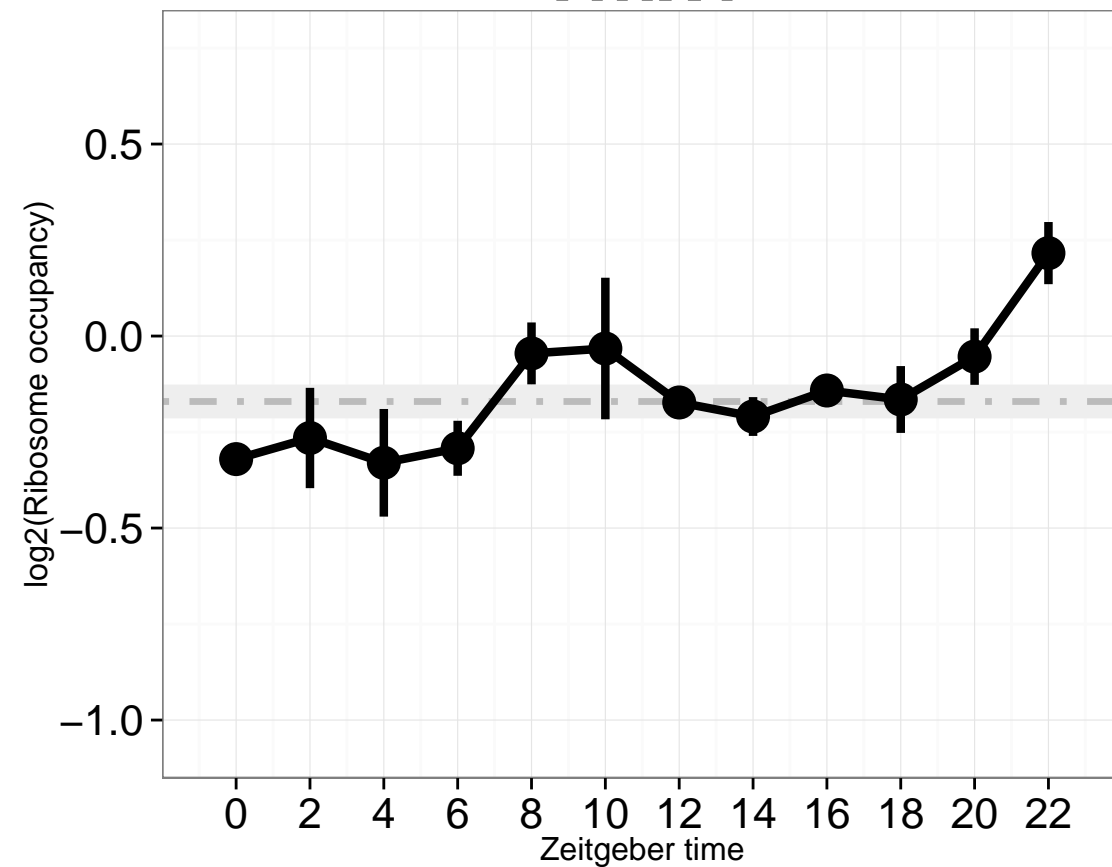

Supplement: SuppDataset_1.zip [file Tmx1_set_A.pdf › Supplemental Dataset 1/A-mRNA_nonrhyth_translation_nonrhyth/Tmx1_set_A.pdf]

## Tmx2

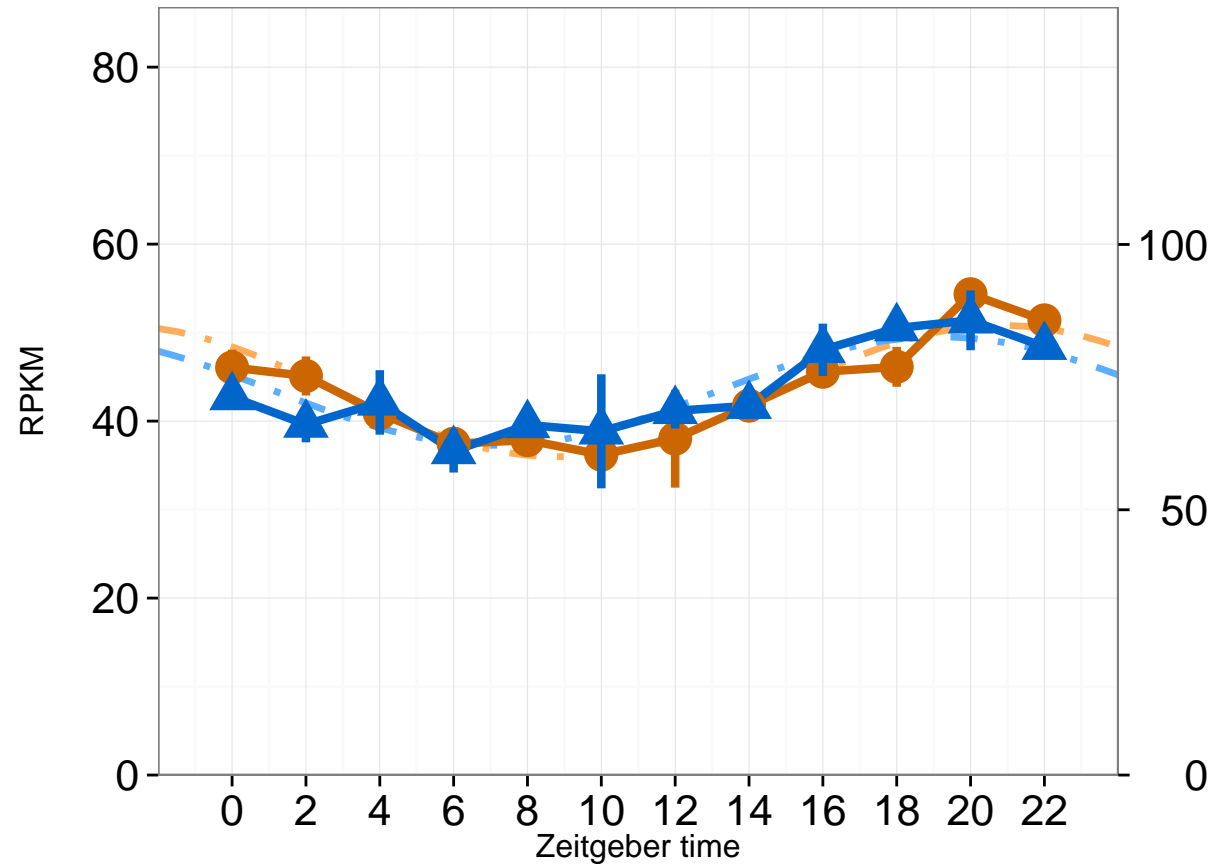

## Tmx2

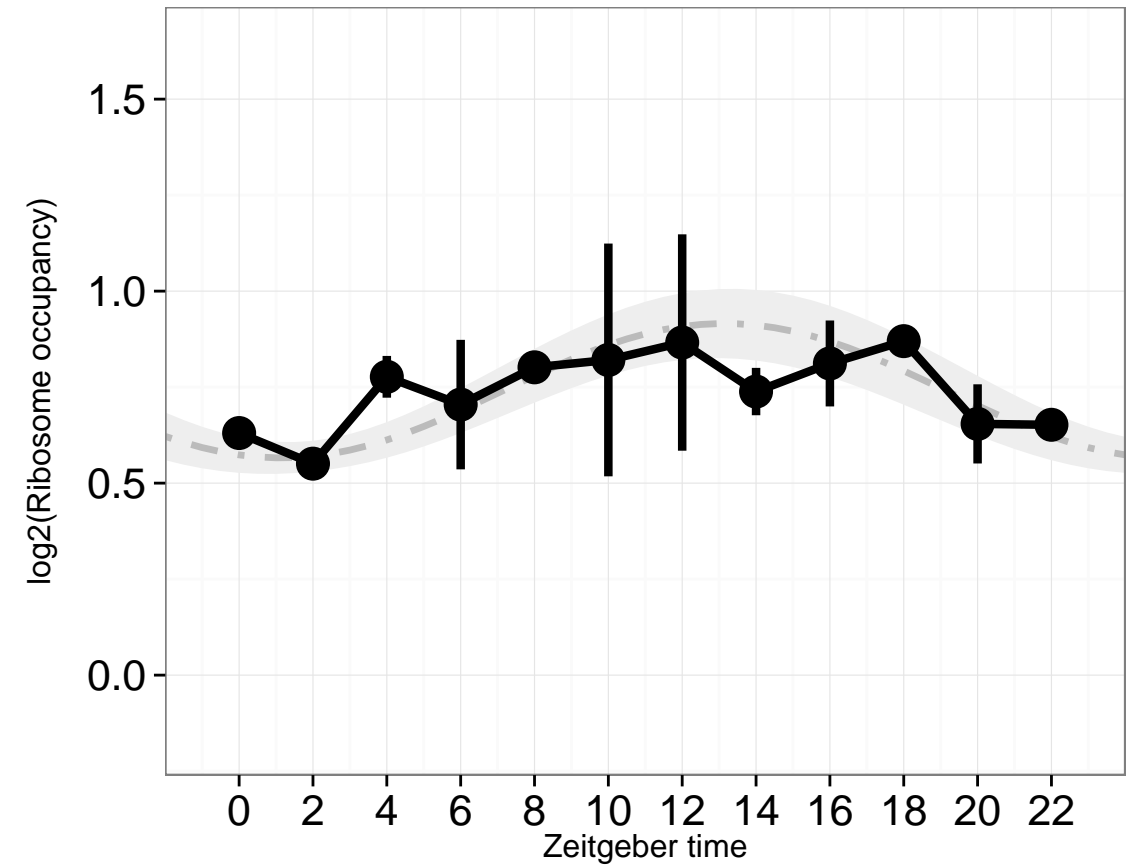

Supplement: SuppDataset_1.zip [file Tmx2_set_A.pdf › Supplemental Dataset 1/A-mRNA_nonrhyth_translation_nonrhyth/Tmx2_set_A.pdf]

## Tmx3

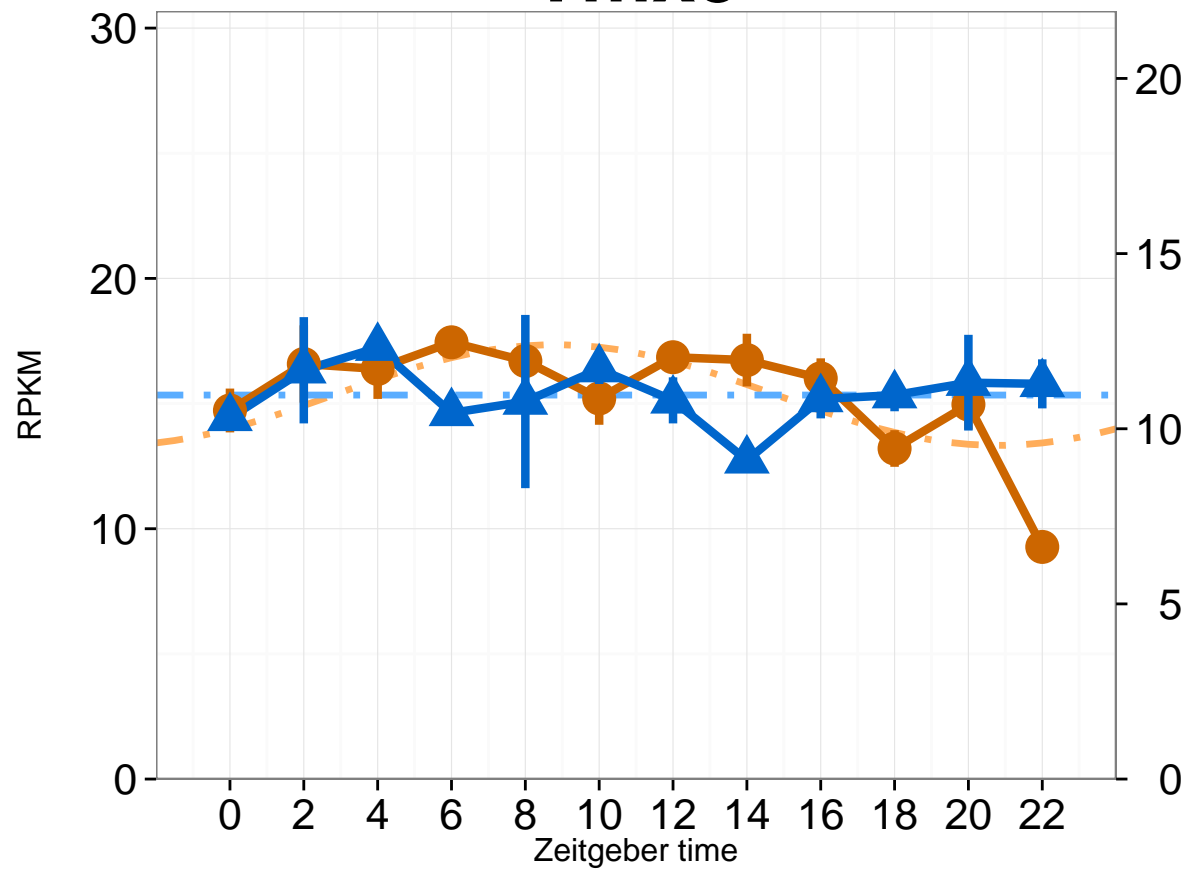

## Tmx3

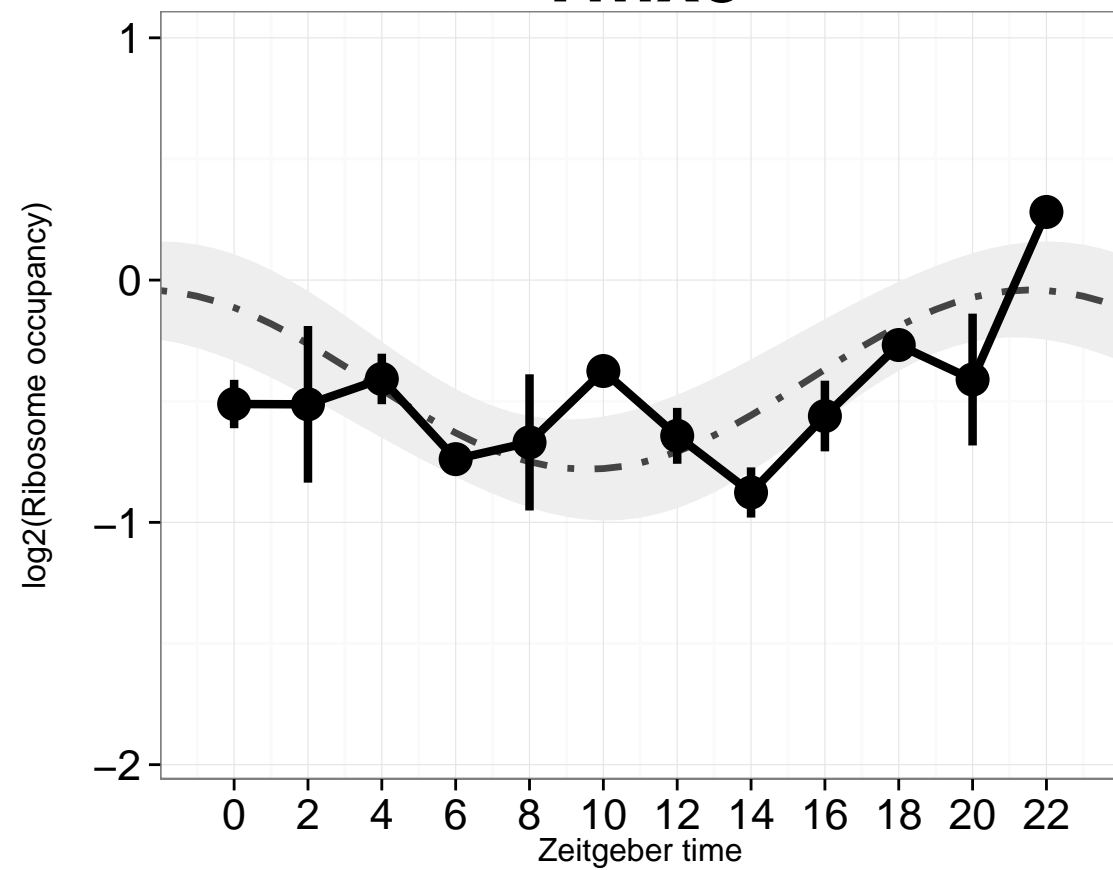

Supplement: SuppDataset_1.zip [file Tmx3_set_A.pdf › Supplemental Dataset 1/A-mRNA_nonrhyth_translation_nonrhyth/Tmx3_set_A.pdf]

# Tmx4

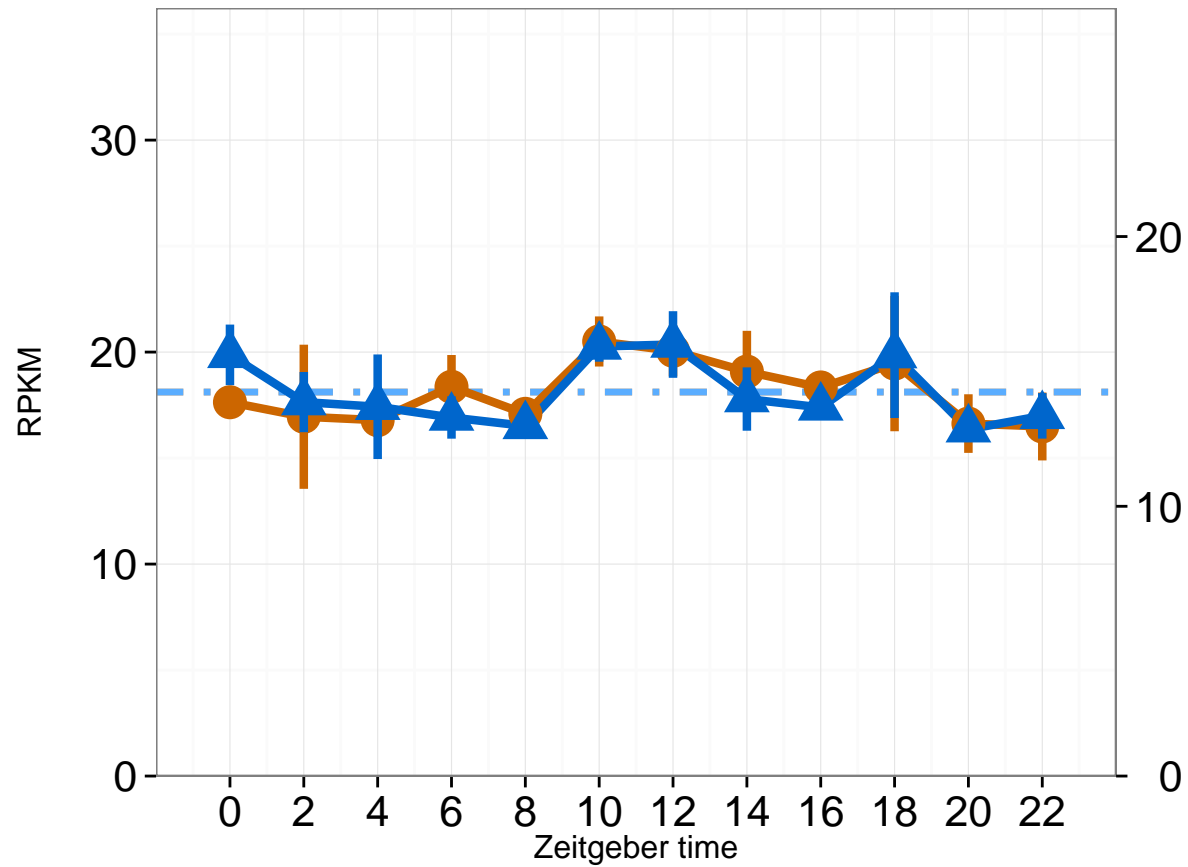

# Tmx4

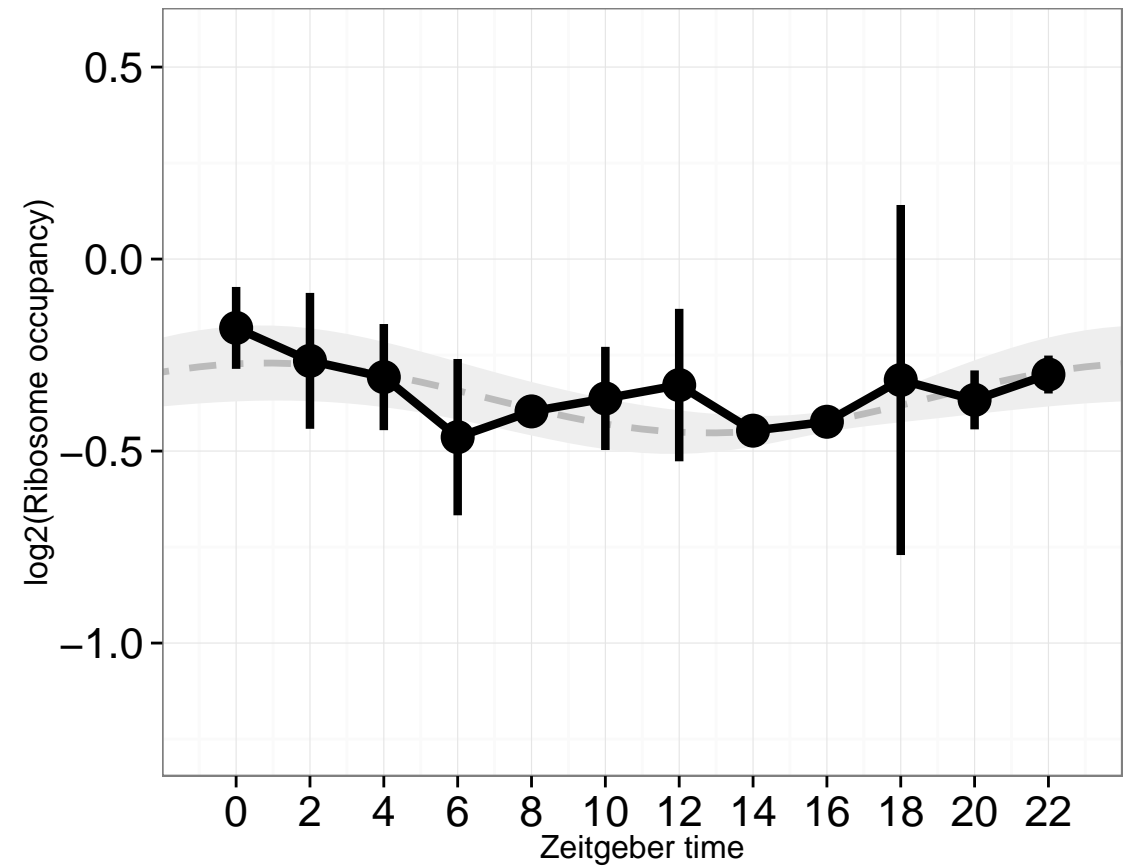

Supplement: SuppDataset_1.zip [file Tmx4_set_A.pdf › Supplemental Dataset 1/A-mRNA_nonrhyth_translation_nonrhyth/Tmx4_set_A.pdf]

## Tnc

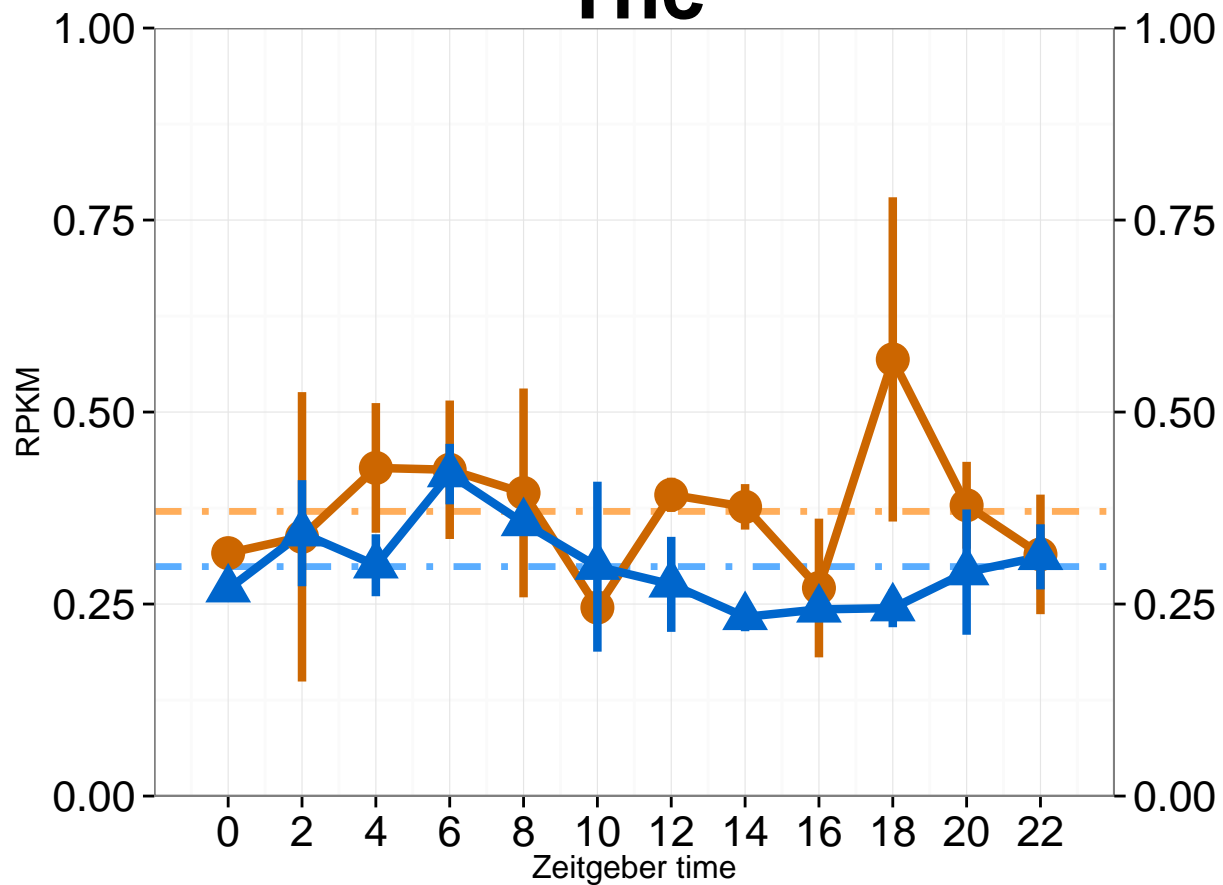

## Tnc

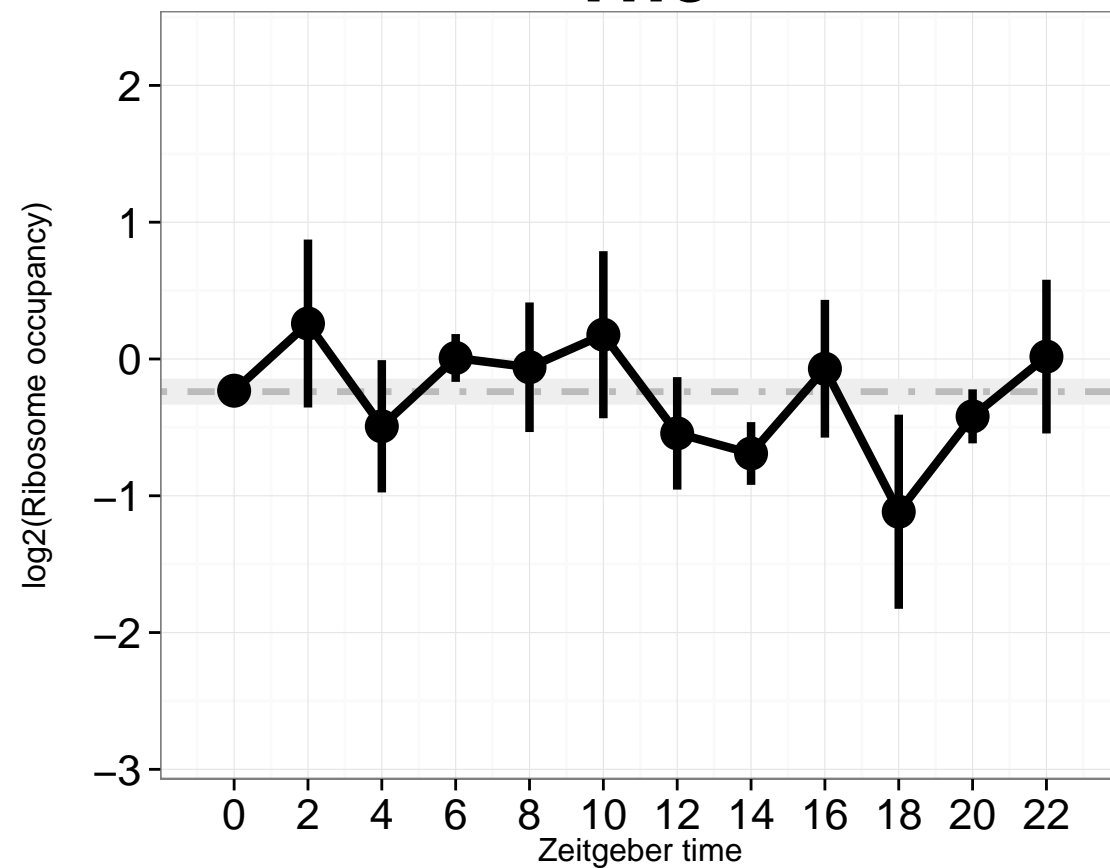

Supplement: SuppDataset_1.zip [file Tnc_set_A.pdf › Supplemental Dataset 1/A-mRNA_nonrhyth_translation_nonrhyth/Tnc_set_A.pdf]

## Tnfaip1

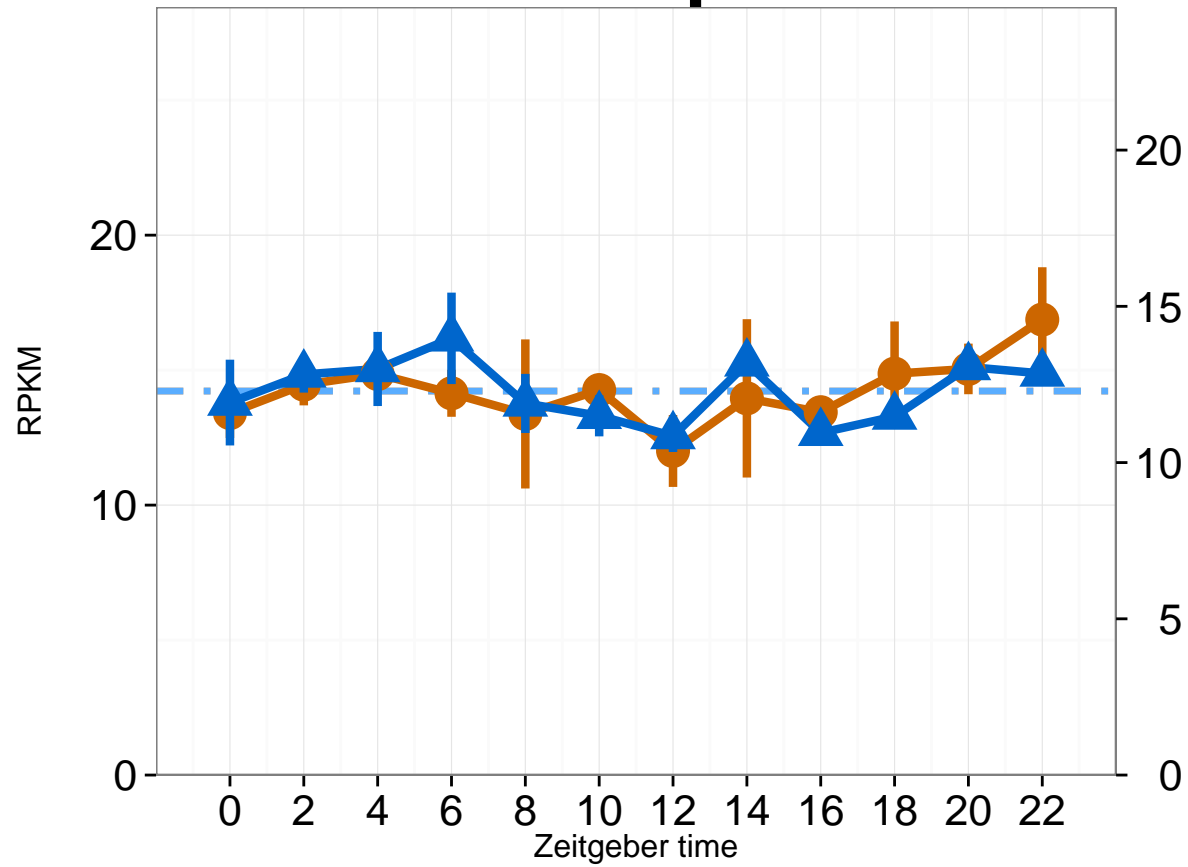

## Tnfaip1

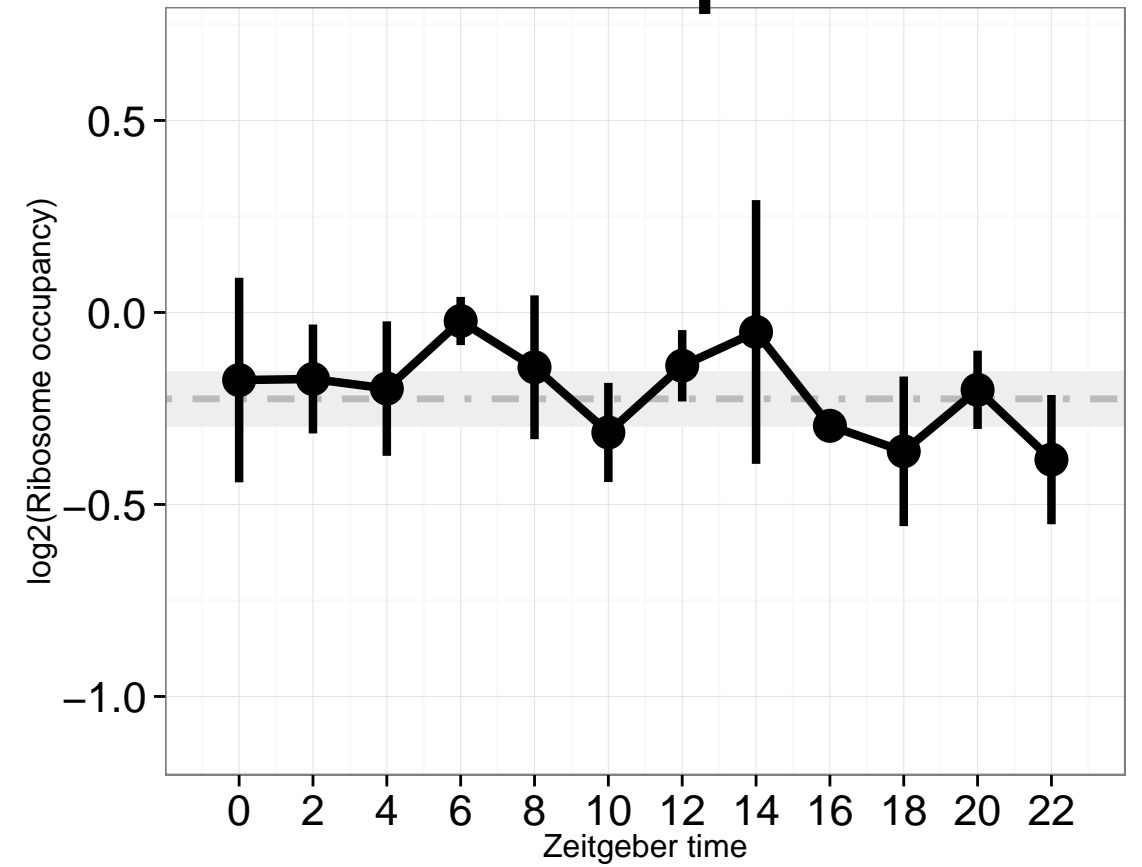

Supplement: SuppDataset_1.zip [file Tnfaip1_set_A.pdf › Supplemental Dataset 1/A-mRNA_nonrhyth_translation_nonrhyth/Tnfaip1_set_A.pdf]

## Tnfaip3

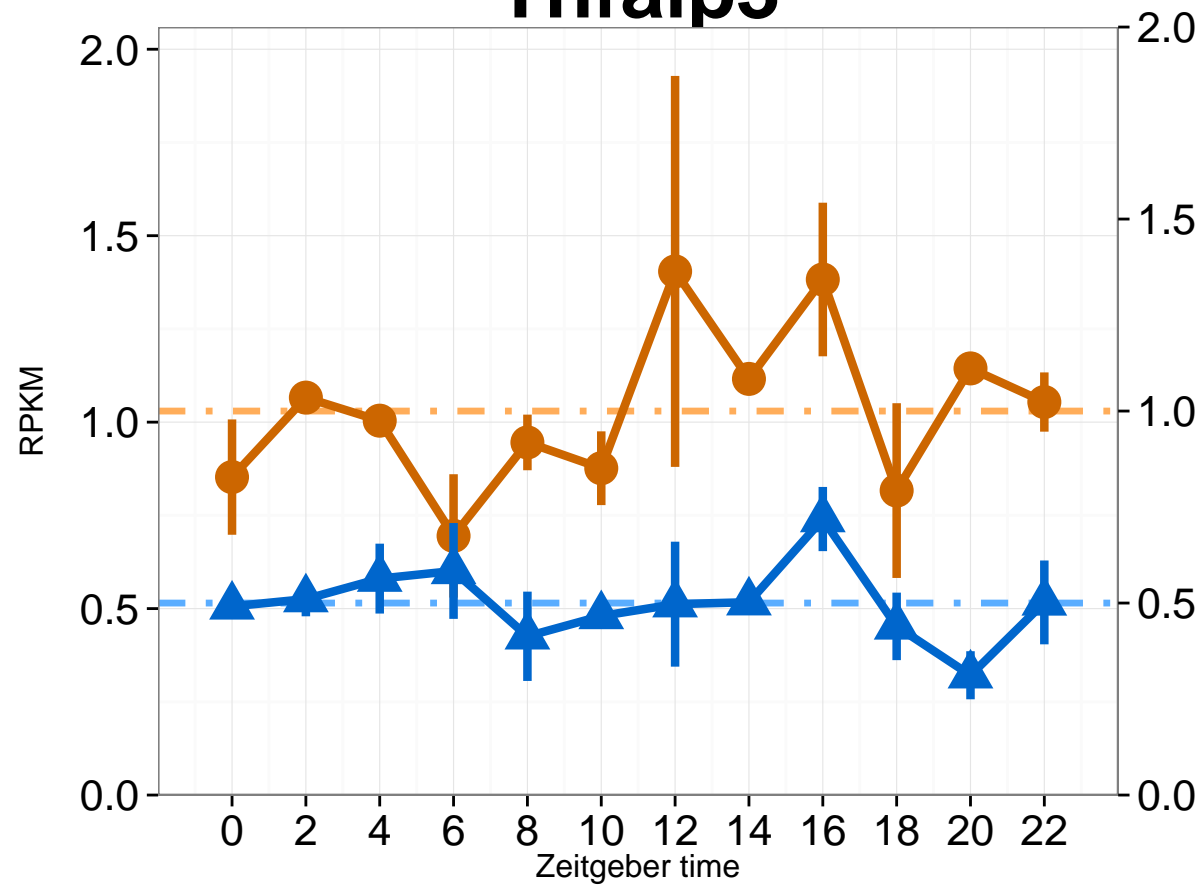

## Tnfaip3

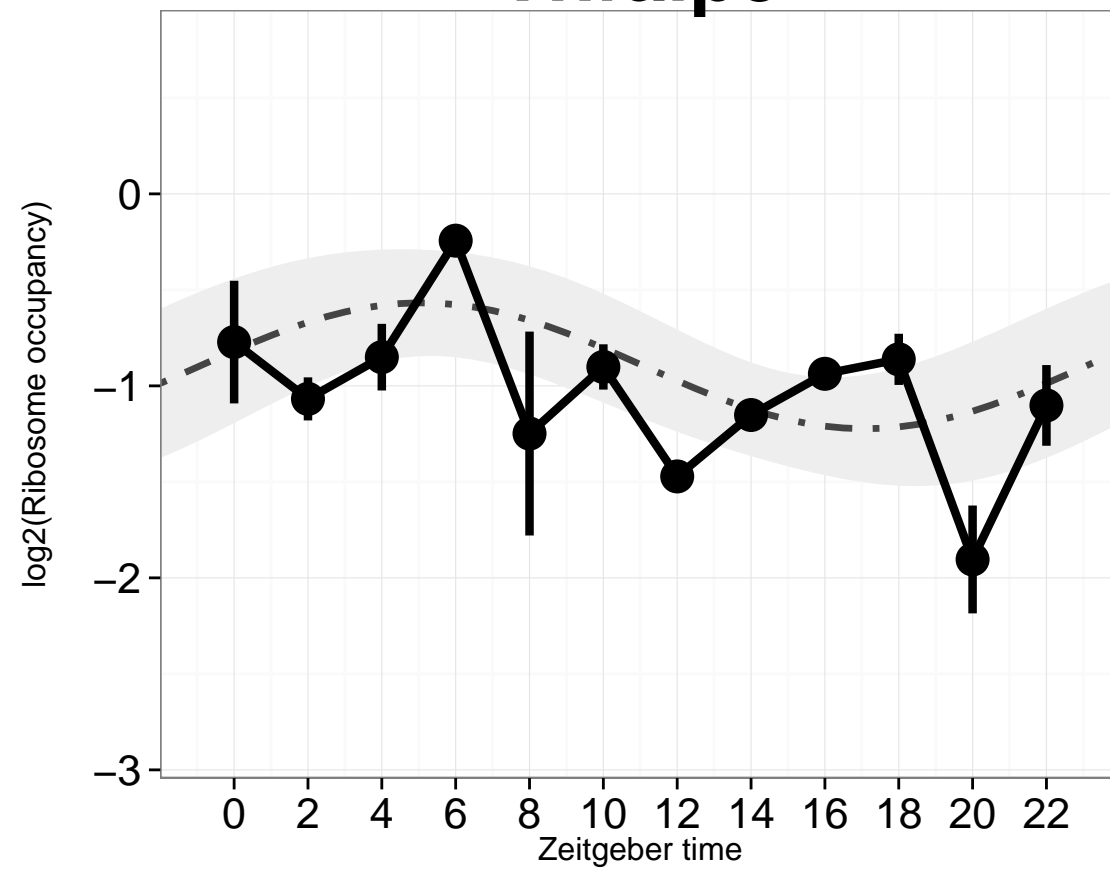

Supplement: SuppDataset_1.zip [file Tnfaip3_set_A.pdf › Supplemental Dataset 1/A-mRNA_nonrhyth_translation_nonrhyth/Tnfaip3_set_A.pdf]

# Tnfaip8

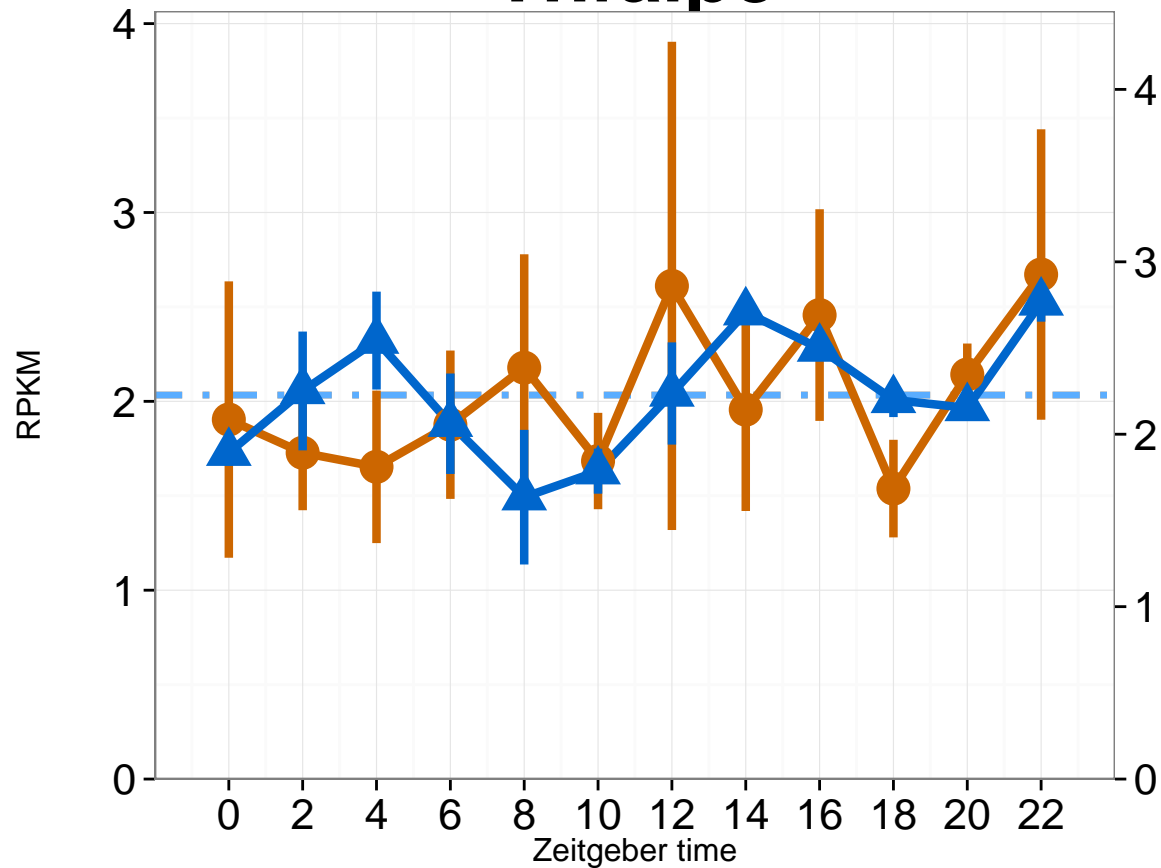

# Tnfaip8

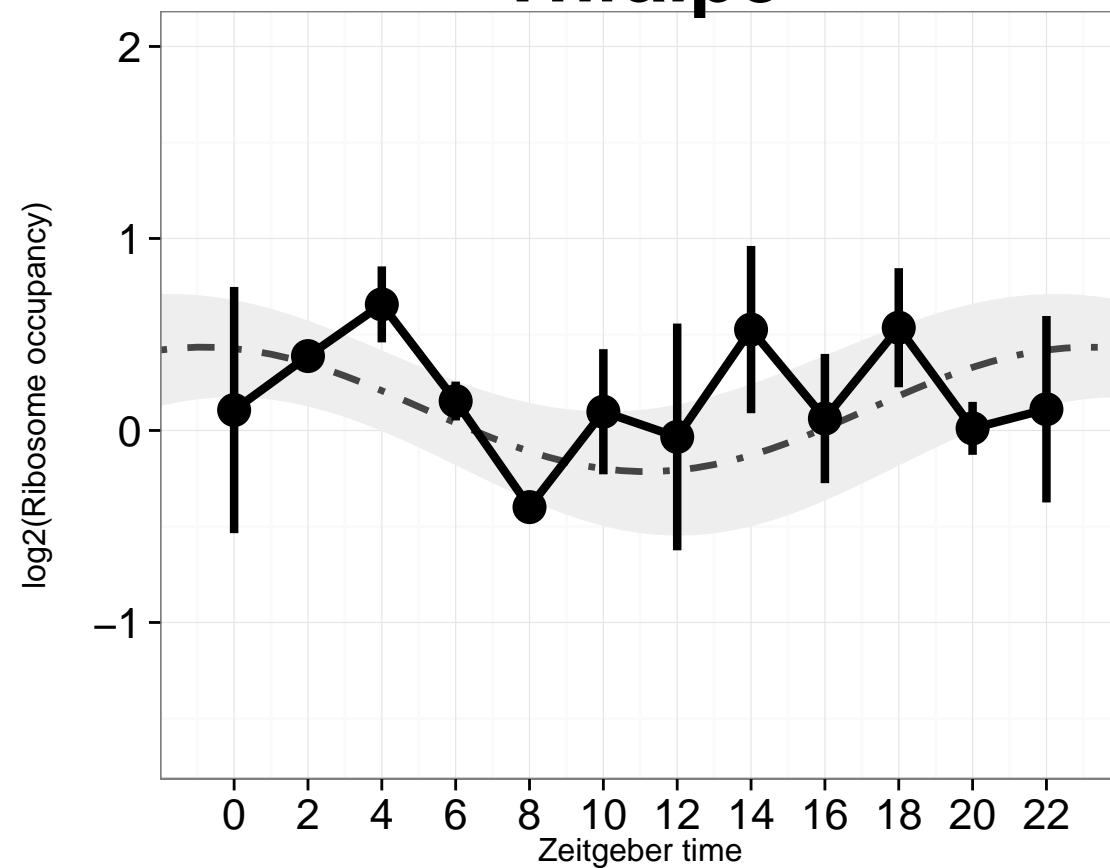

Supplement: SuppDataset_1.zip [file Tnfaip8_set_A.pdf › Supplemental Dataset 1/A-mRNA_nonrhyth_translation_nonrhyth/Tnfaip8_set_A.pdf]

# Tnfaip8l2

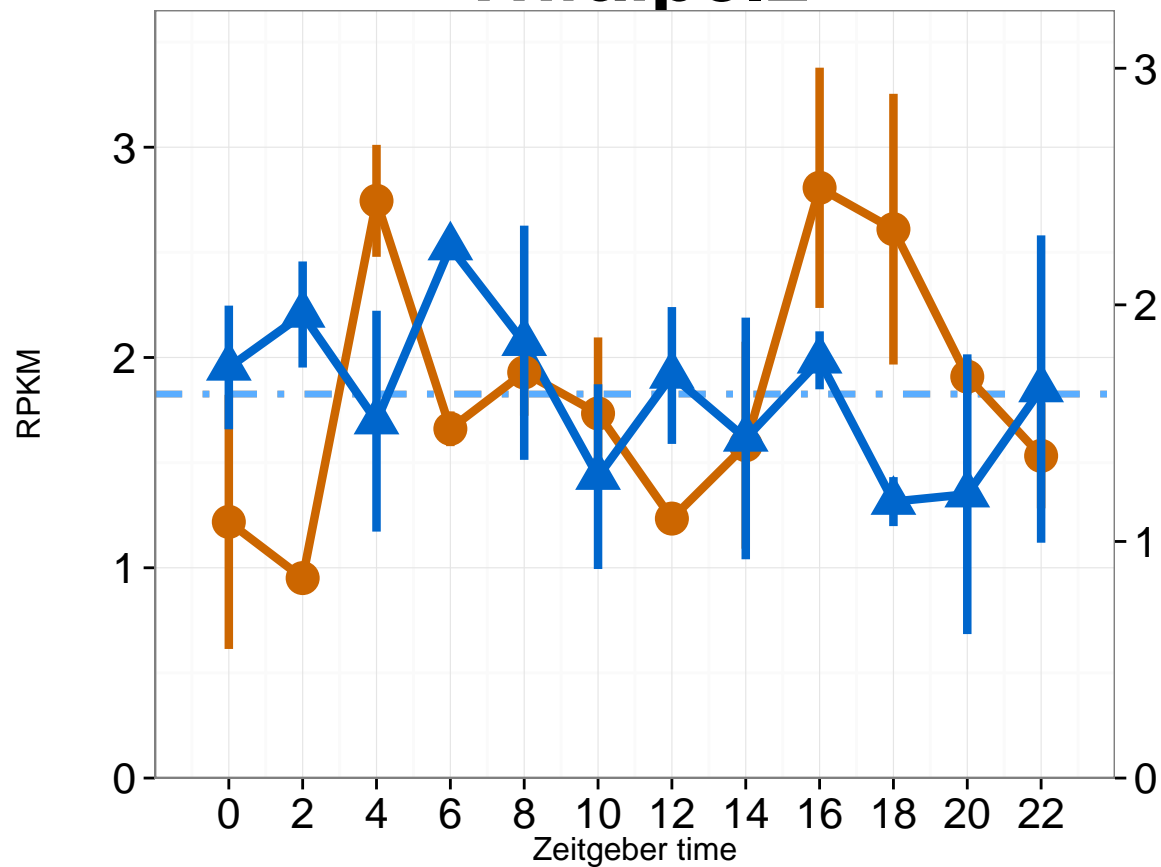

# Tnfaip8l2

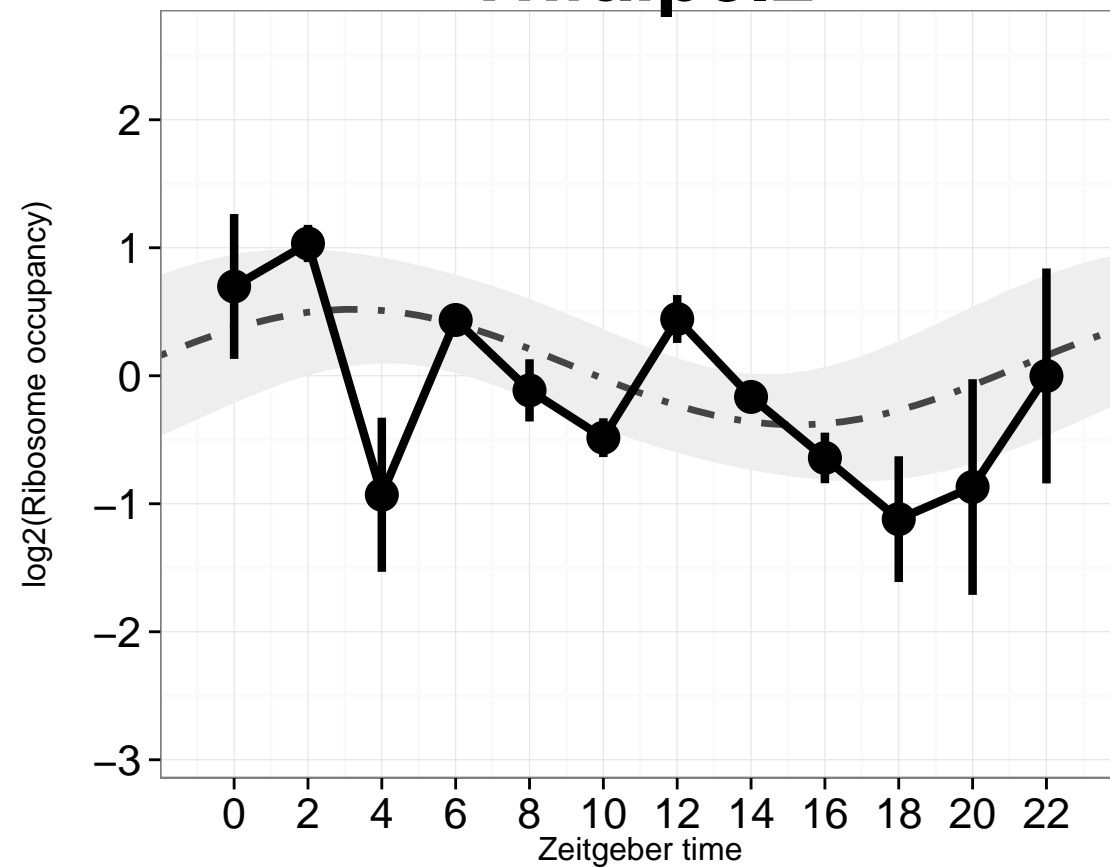

Supplement: SuppDataset_1.zip [file Tnfaip8l2_set_A.pdf › Supplemental Dataset 1/A-mRNA_nonrhyth_translation_nonrhyth/Tnfaip8l2_set_A.pdf]

# Tnfrsf11a

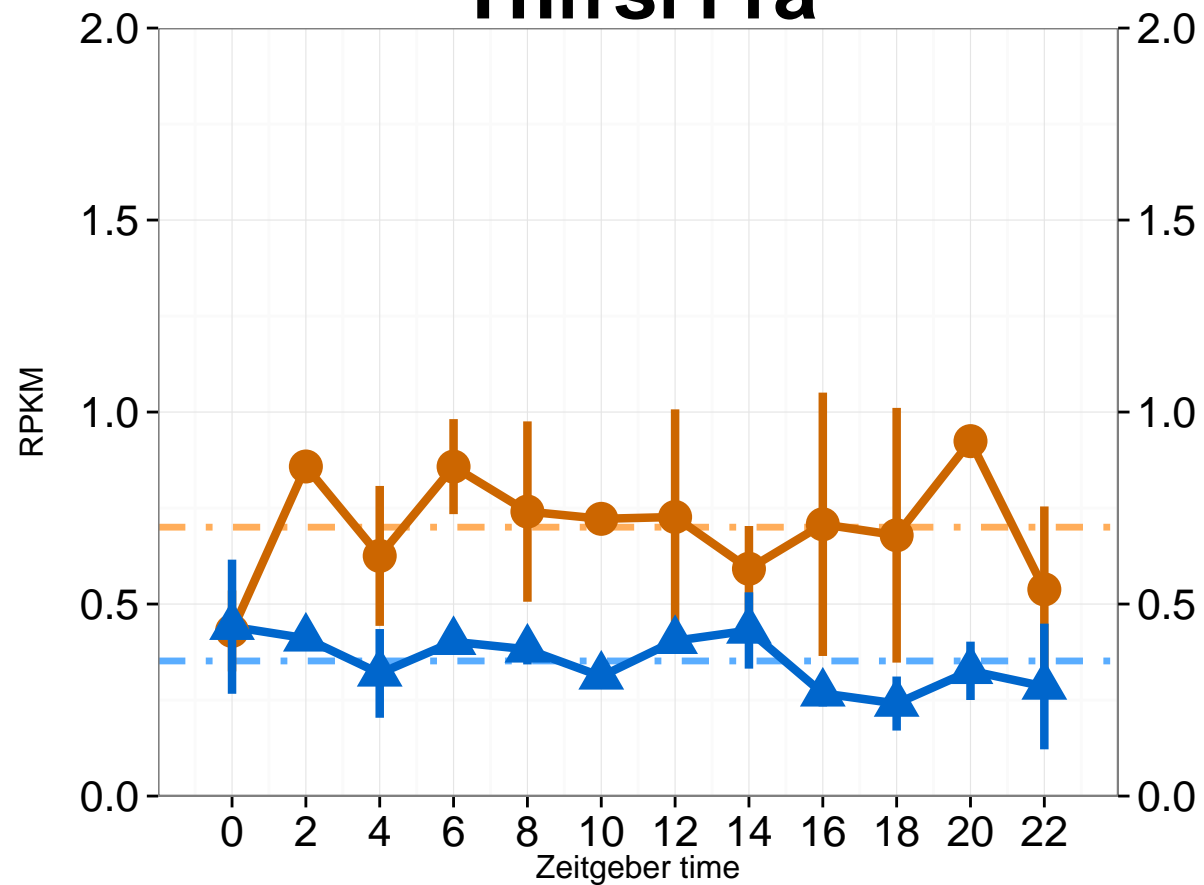

# Tnfrsf11a

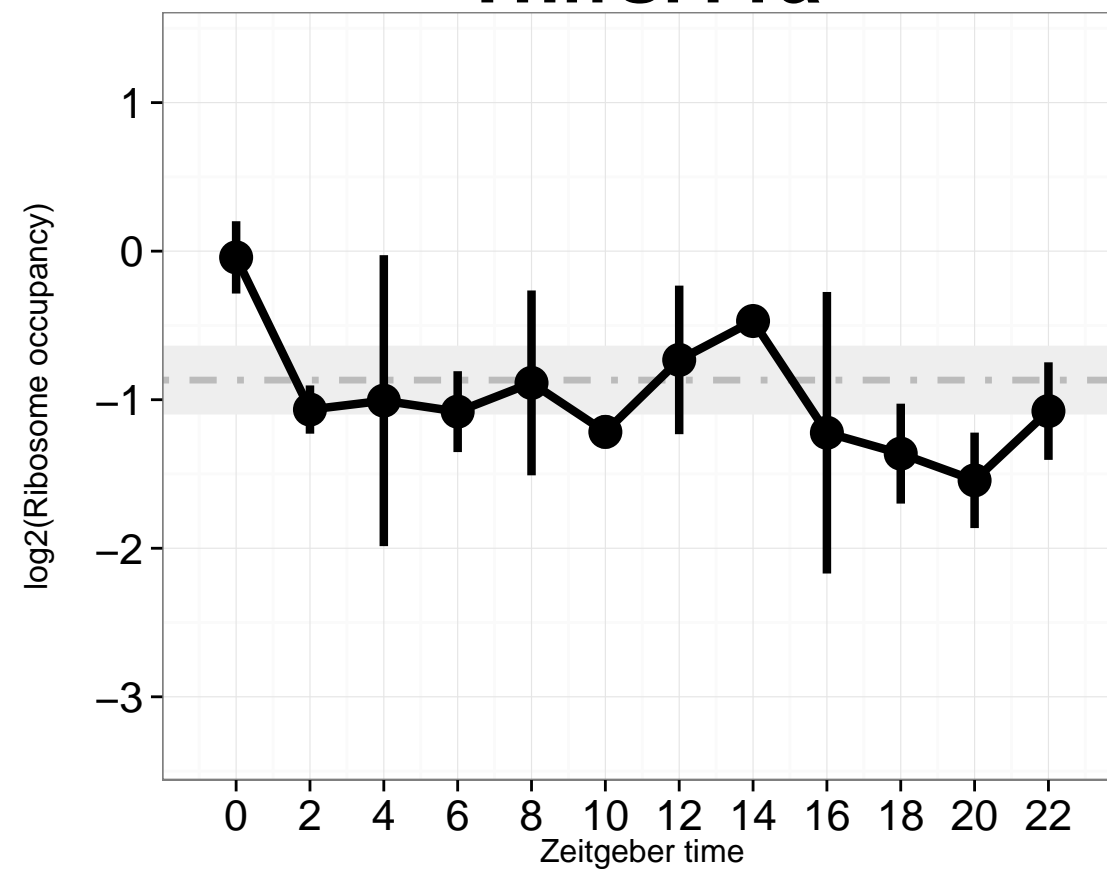

Supplement: SuppDataset_1.zip [file Tnfrsf11a_set_A.pdf › Supplemental Dataset 1/A-mRNA_nonrhyth_translation_nonrhyth/Tnfrsf11a_set_A.pdf]

# Tnfrsf12a

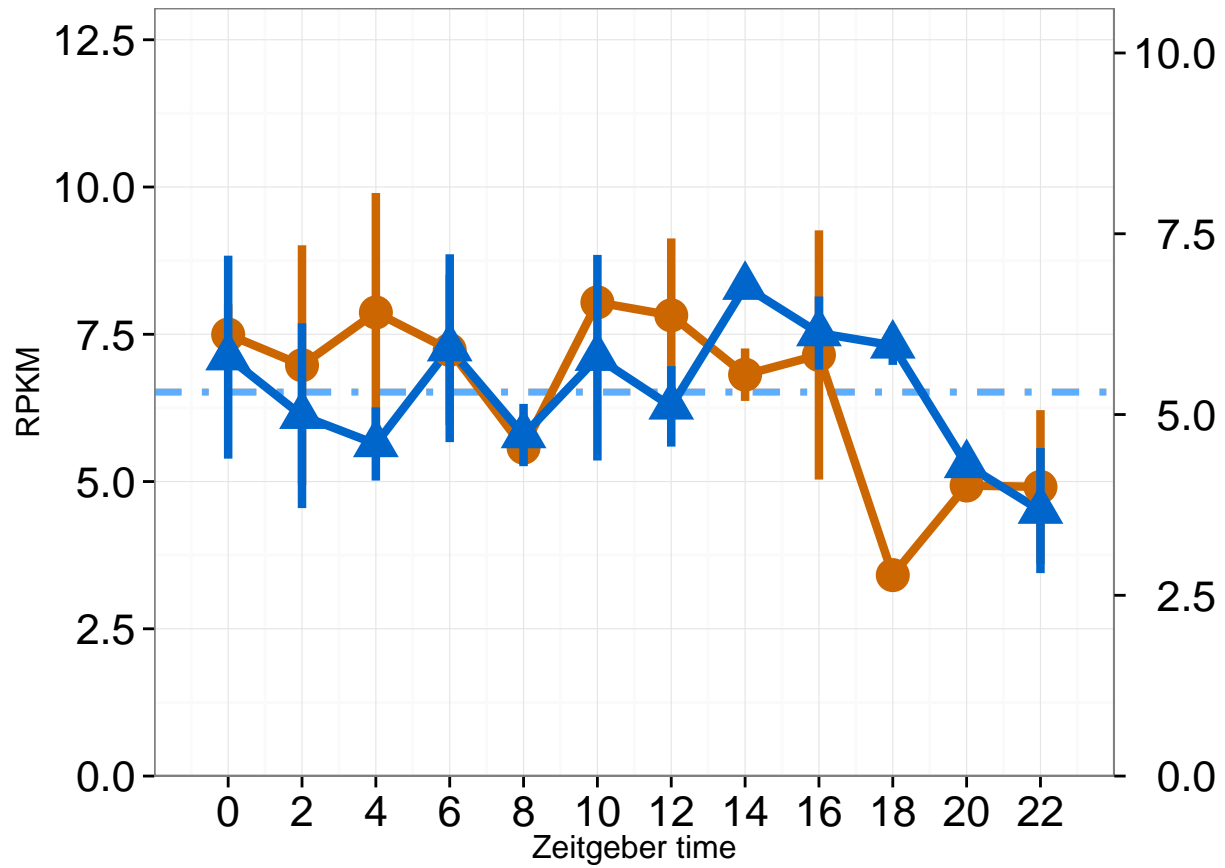

# Tnfrsf12a

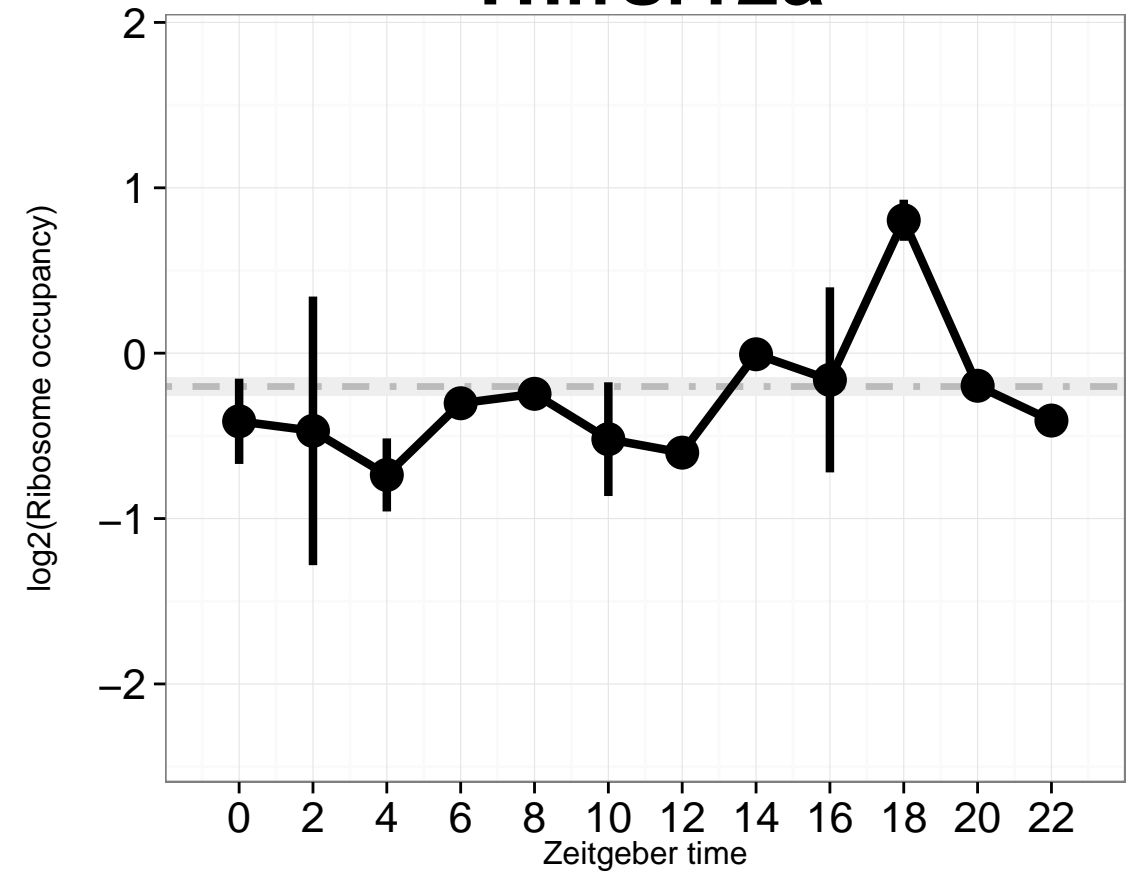

Supplement: SuppDataset_1.zip [file Tnfrsf12a_set_A.pdf › Supplemental Dataset 1/A-mRNA_nonrhyth_translation_nonrhyth/Tnfrsf12a_set_A.pdf]

## Tnfrsf14

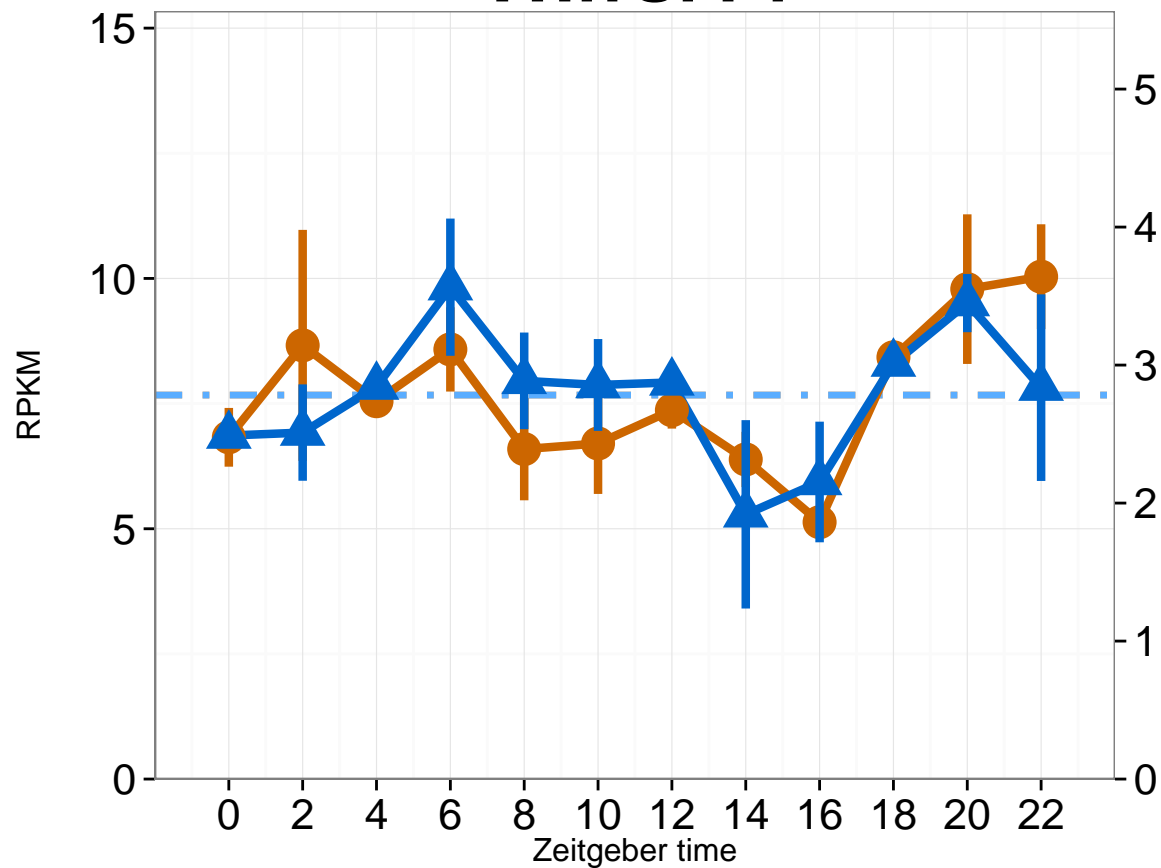

## Tnfrsf14

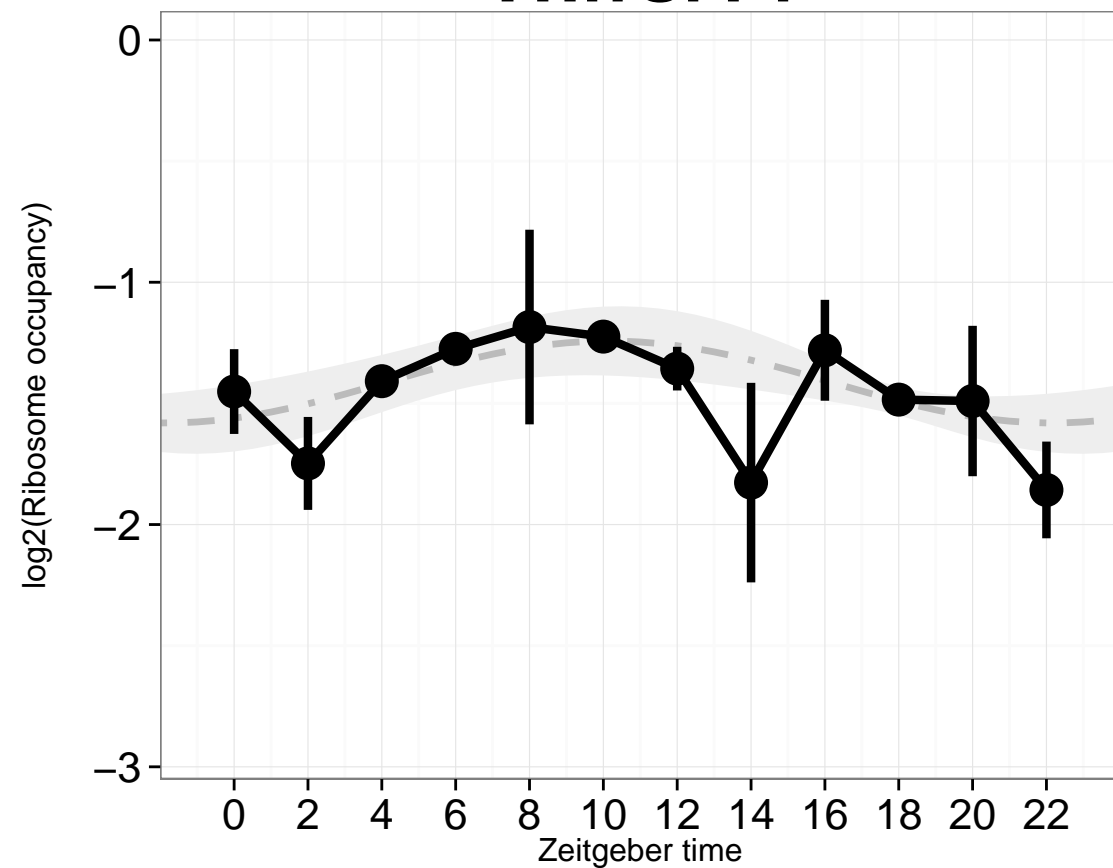

Supplement: SuppDataset_1.zip [file Tnfrsf14_set_A.pdf › Supplemental Dataset 1/A-mRNA_nonrhyth_translation_nonrhyth/Tnfrsf14_set_A.pdf]

## Tnfrsf1a

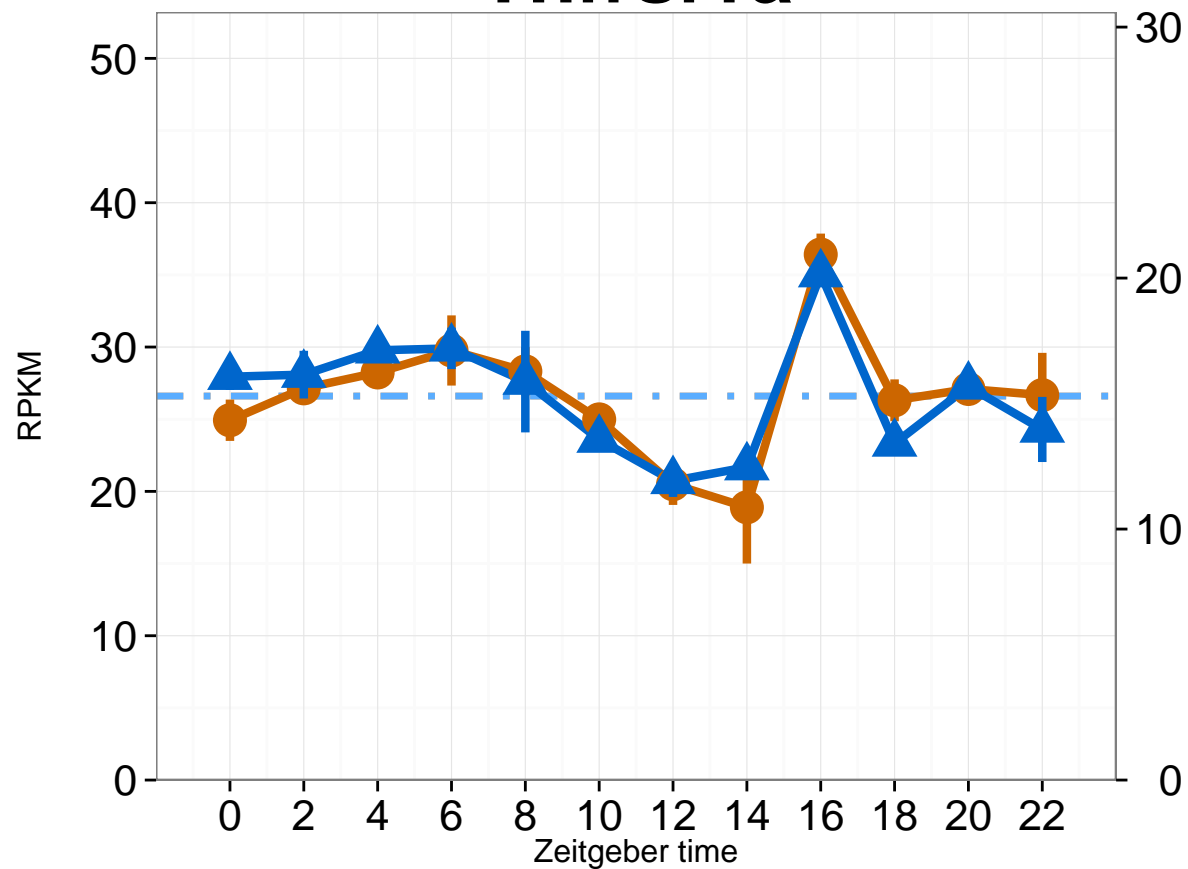

## Tnfrsf1a

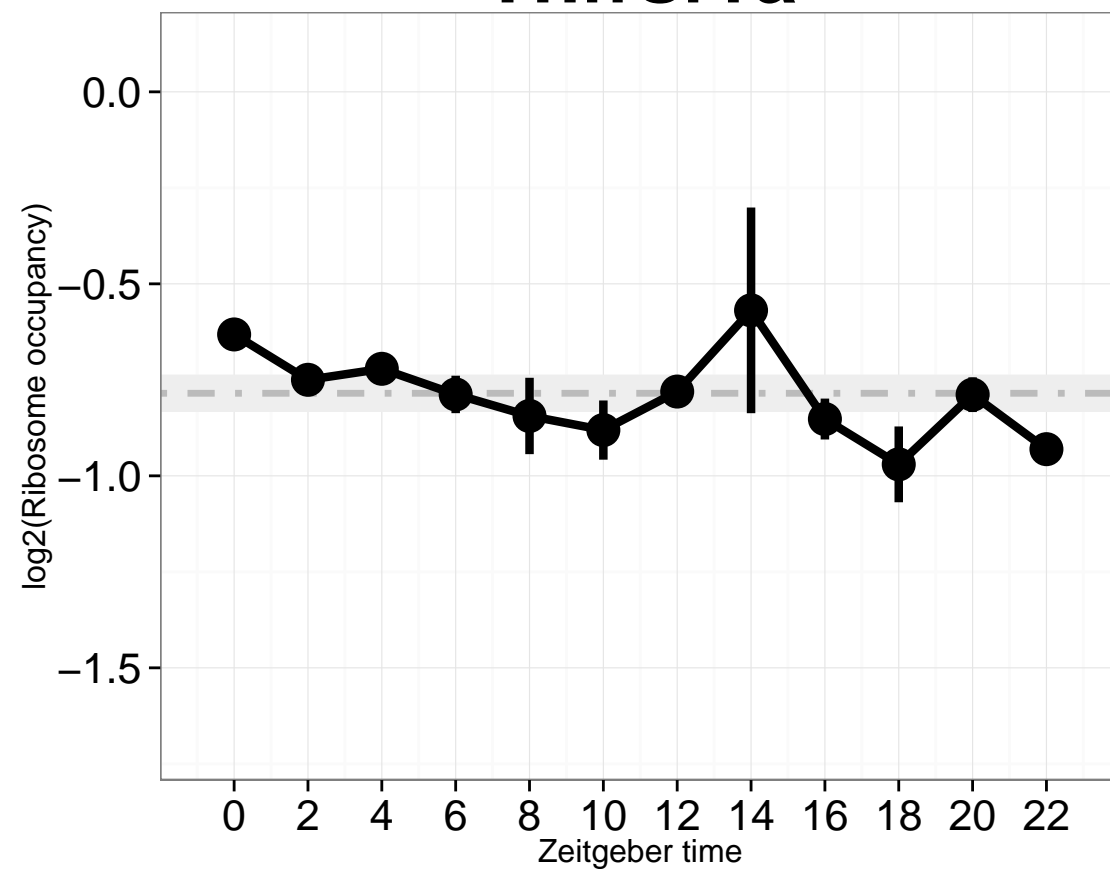

Supplement: SuppDataset_1.zip [file Tnfrsf1a_set_A.pdf › Supplemental Dataset 1/A-mRNA_nonrhyth_translation_nonrhyth/Tnfrsf1a_set_A.pdf]

# Tnfrsf1b

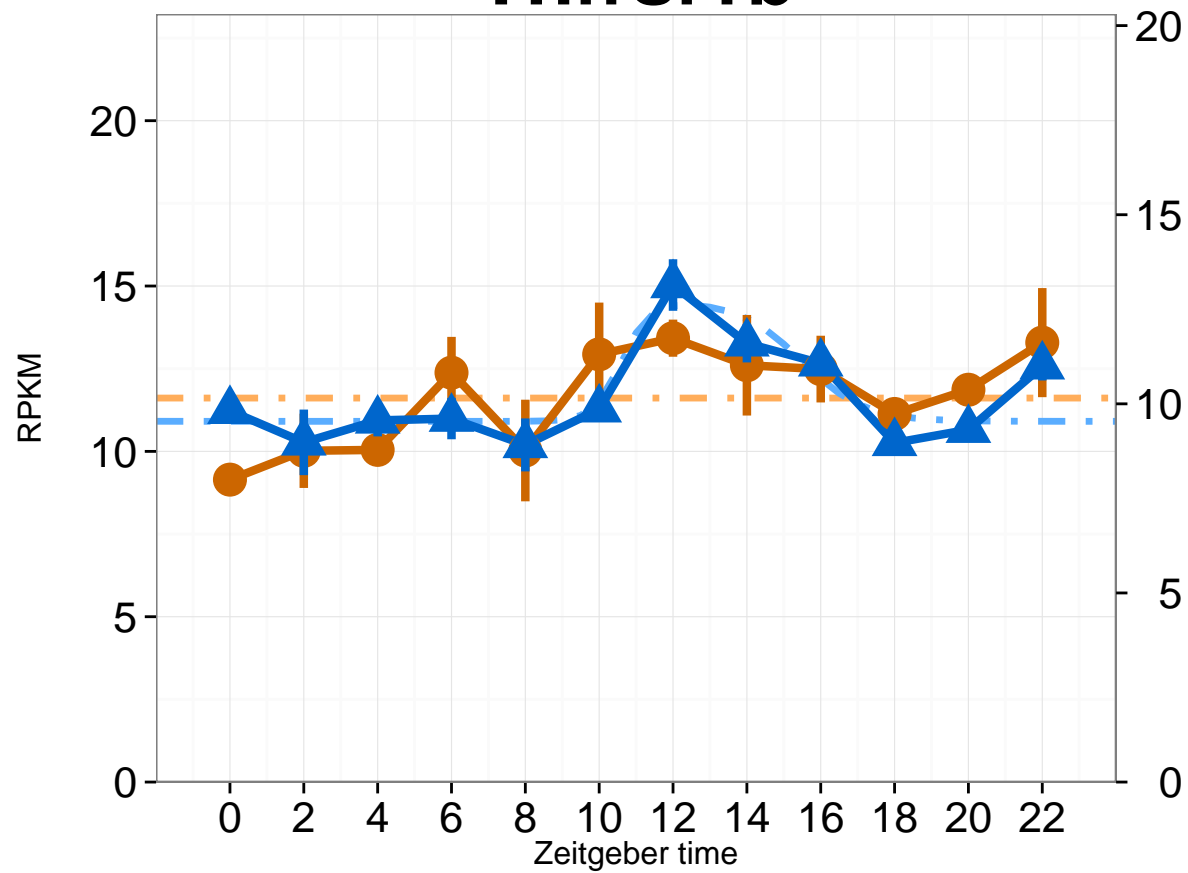

# Tnfrsf1b

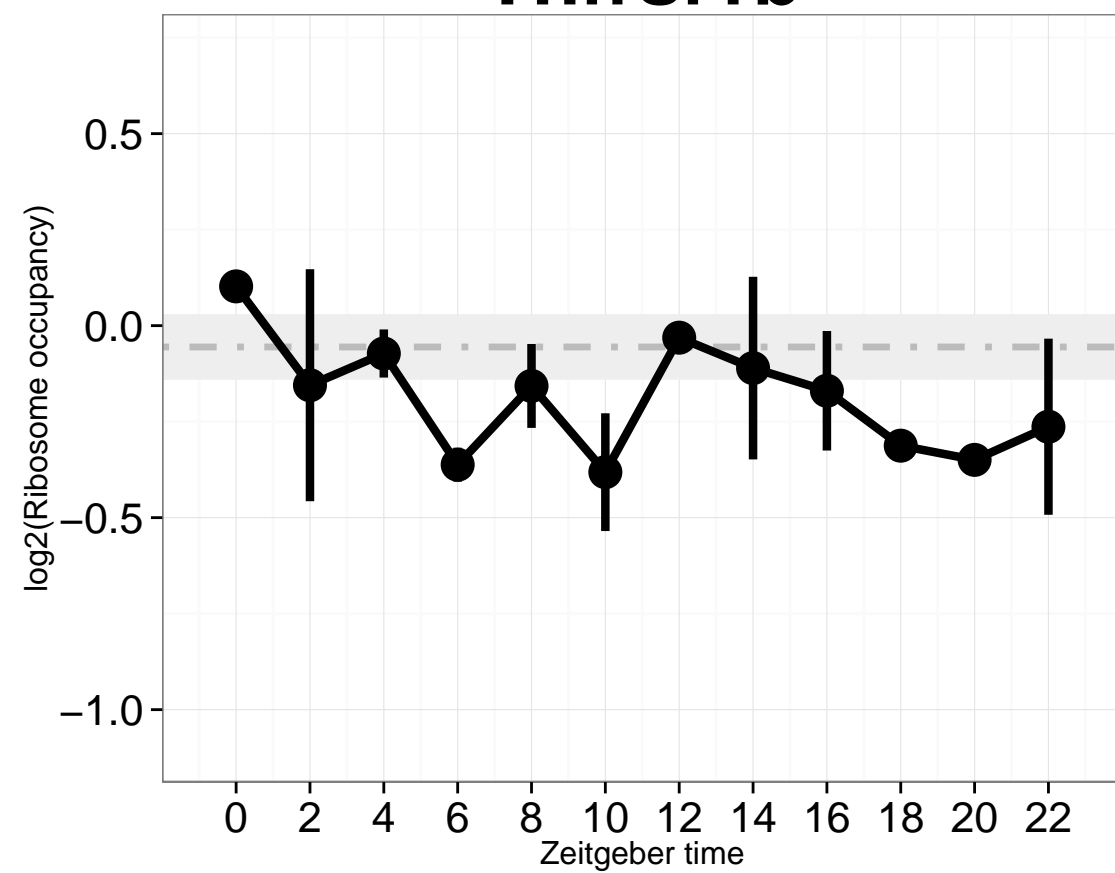

Supplement: SuppDataset_1.zip [file Tnfrsf1b_set_A.pdf › Supplemental Dataset 1/A-mRNA_nonrhyth_translation_nonrhyth/Tnfrsf1b_set_A.pdf]

# Tnfrsf21

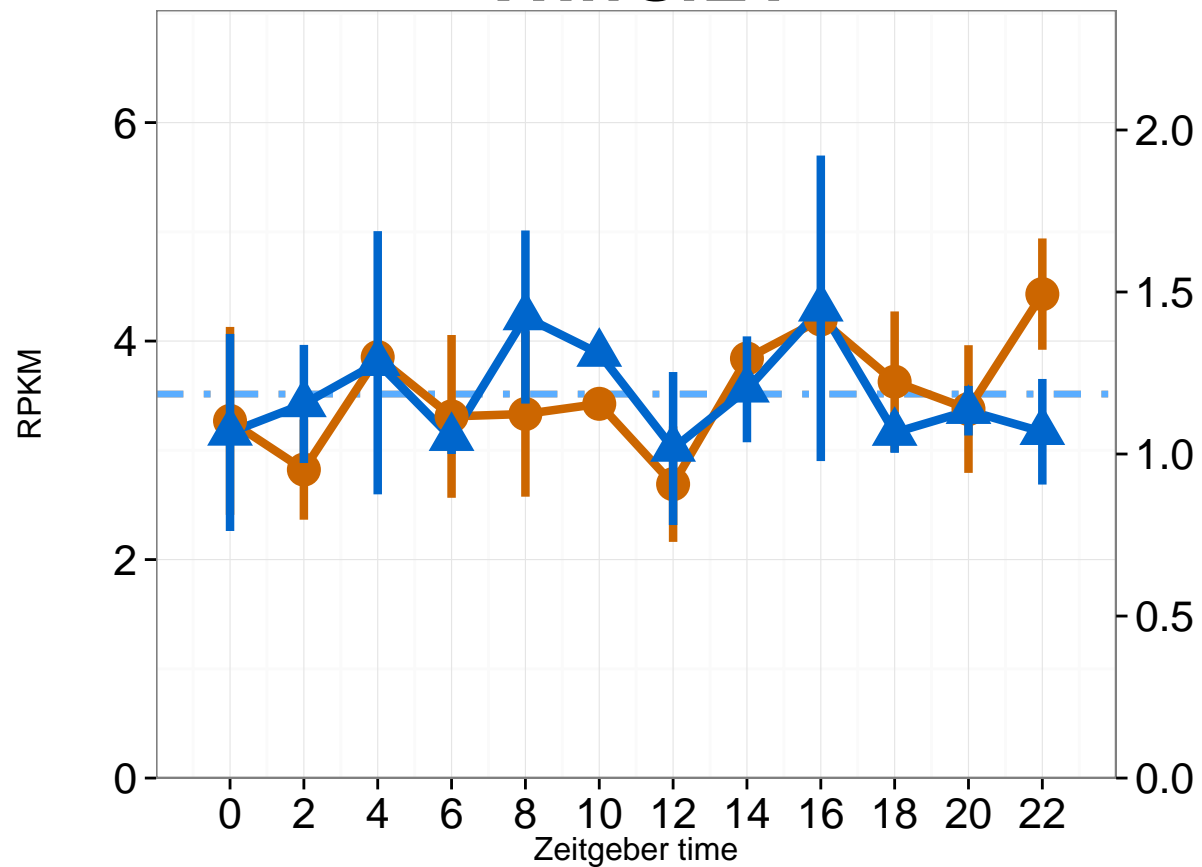

# Tnfrsf21

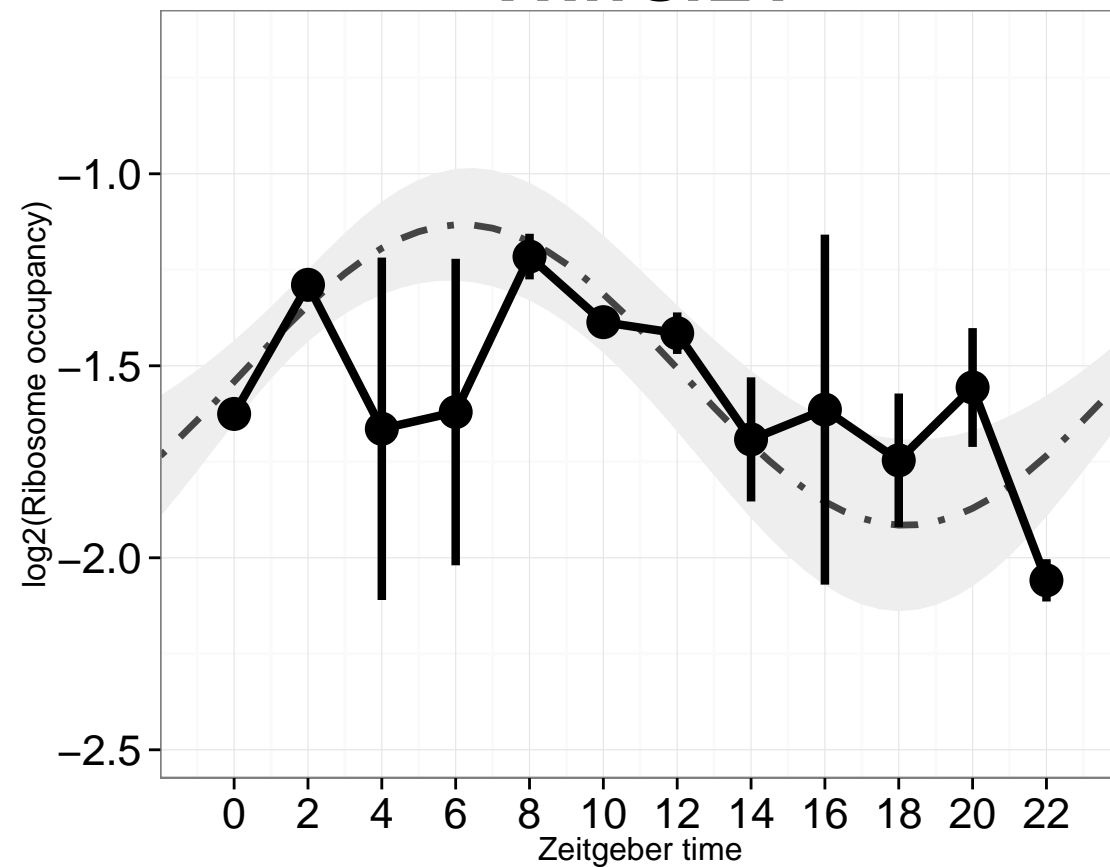

Supplement: SuppDataset_1.zip [file Tnfrsf21_set_A.pdf › Supplemental Dataset 1/A-mRNA_nonrhyth_translation_nonrhyth/Tnfrsf21_set_A.pdf]

## Tnfrsf22

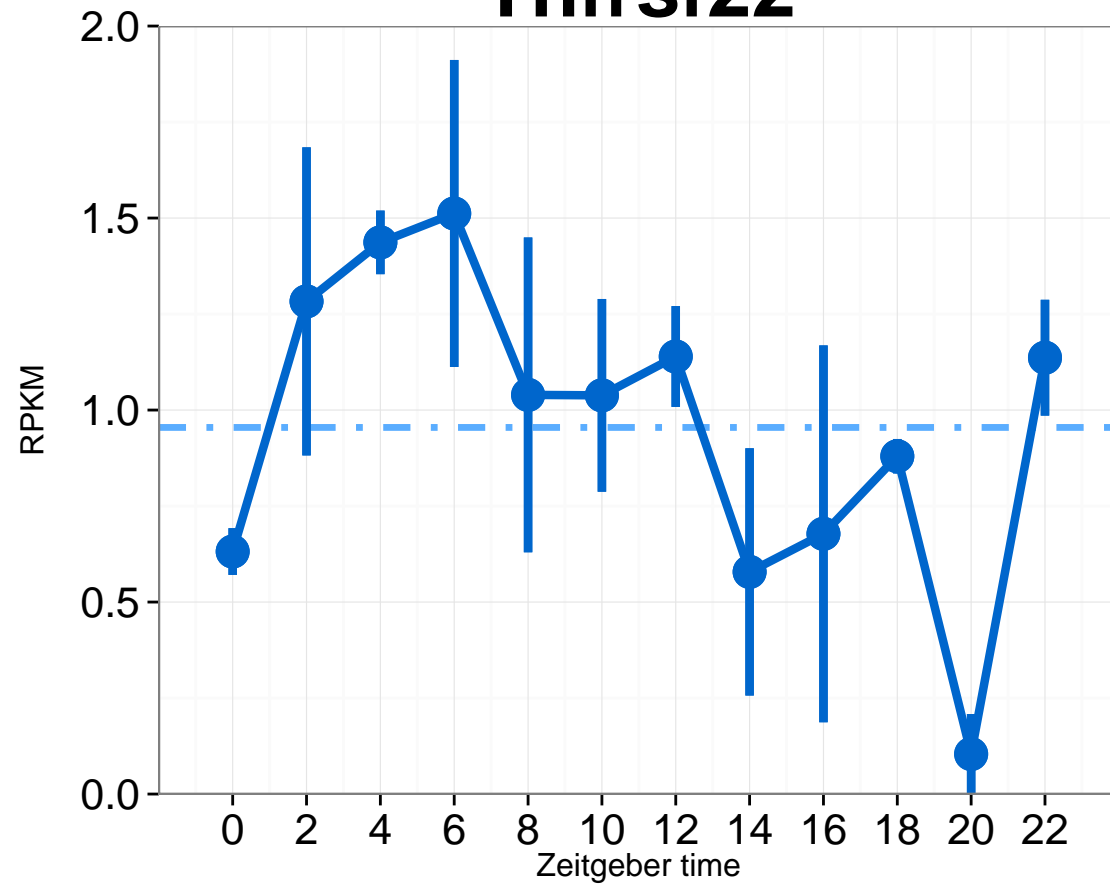

## Tnfrsf22 log2(Ribosome occupanc

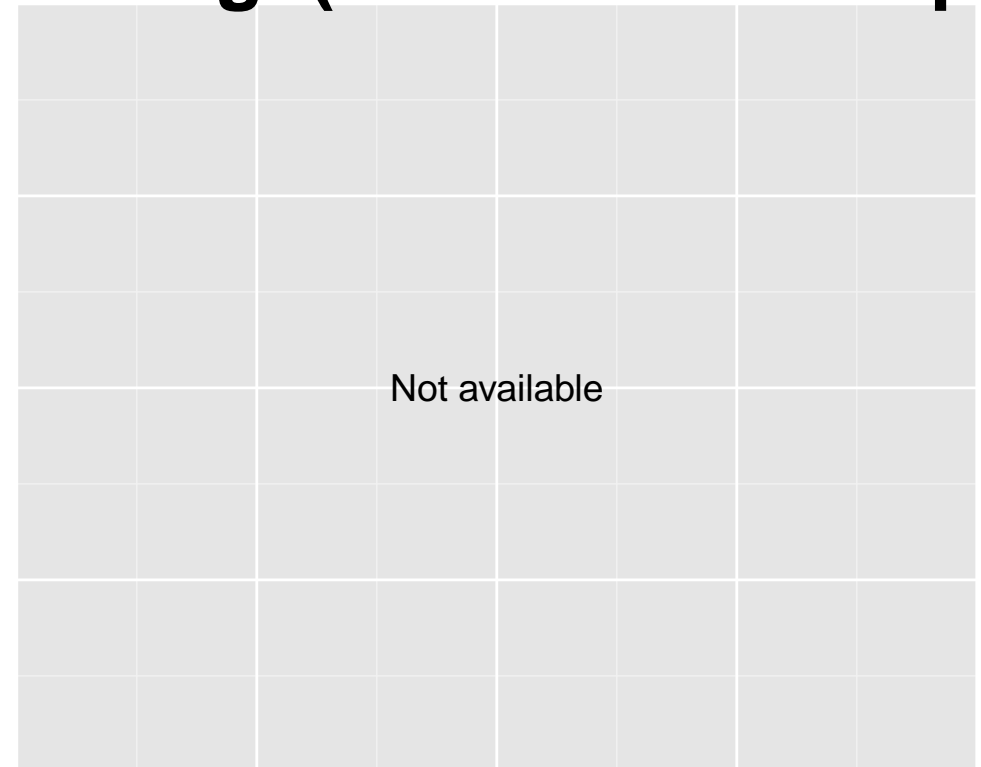

Supplement: SuppDataset_1.zip [file Tnfrsf22_set_A.pdf › Supplemental Dataset 1/A-mRNA_nonrhyth_translation_nonrhyth/Tnfrsf22_set_A.pdf]

## Tnfsf10

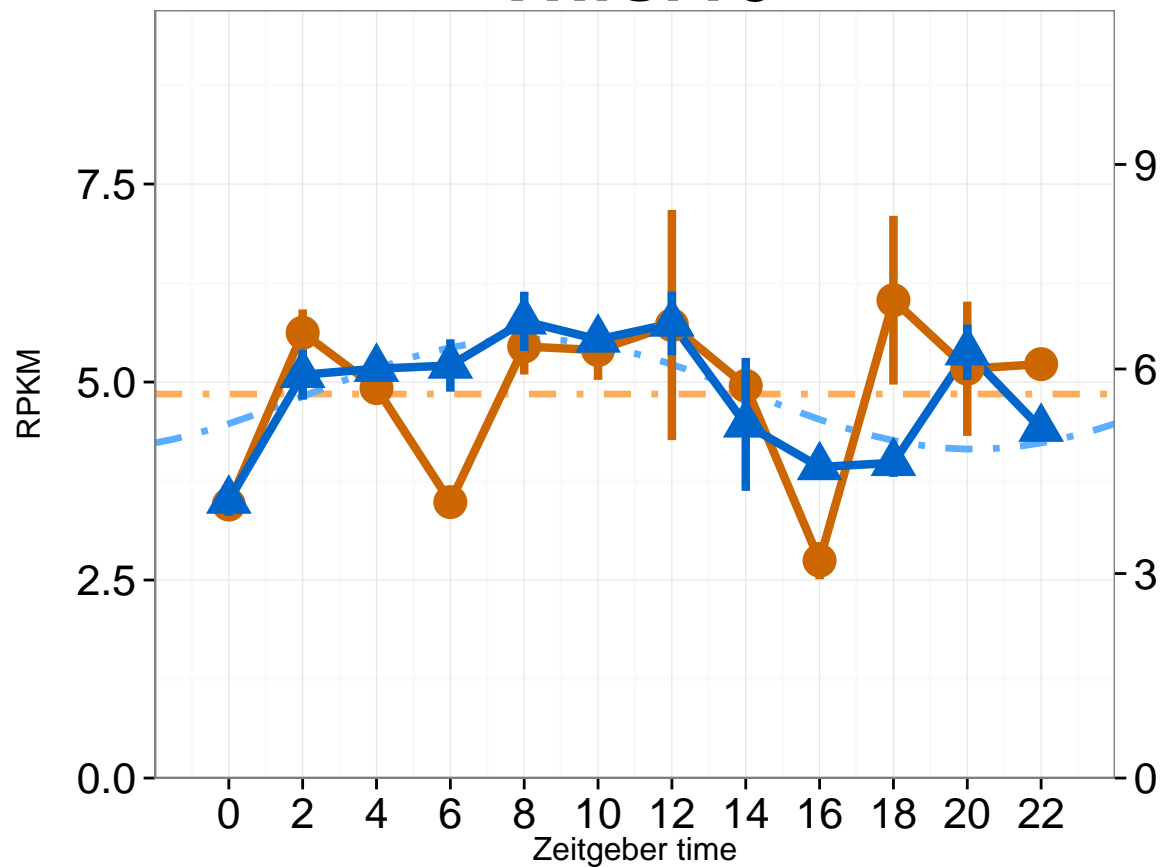

## Tnfsf10

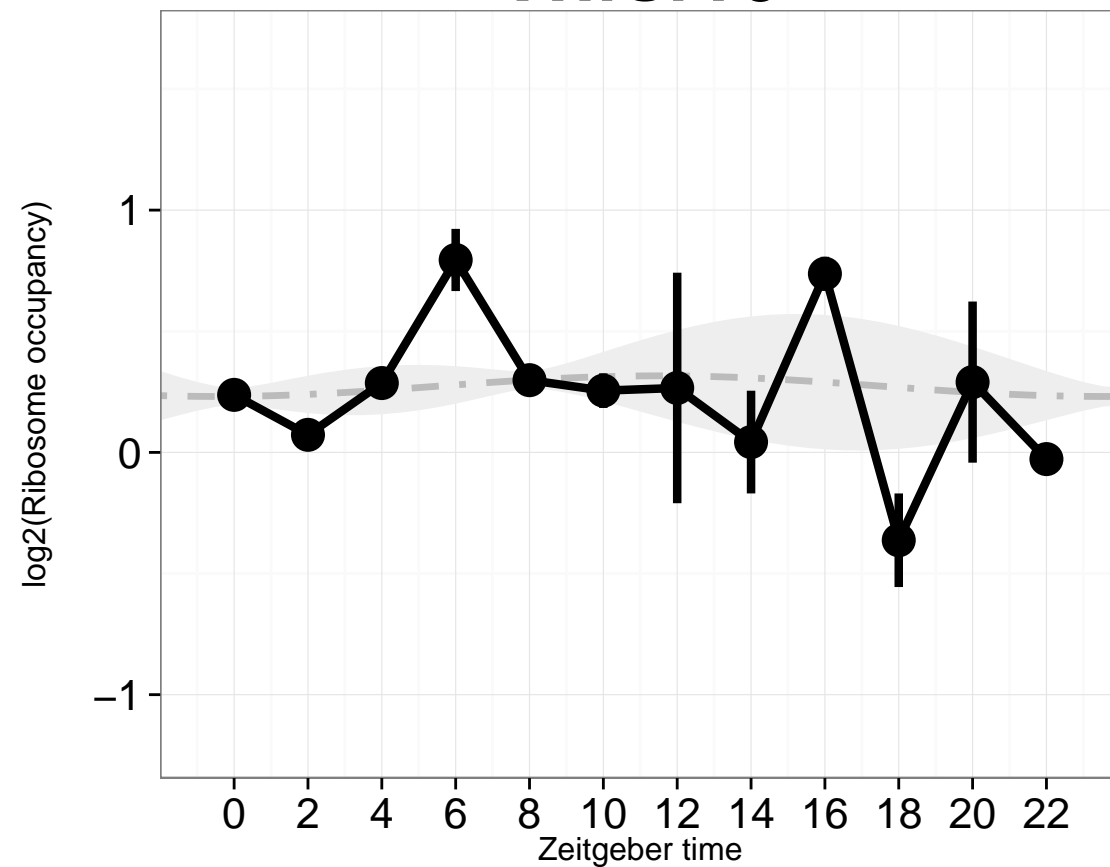

Supplement: SuppDataset_1.zip [file Tnfsf10_set_A.pdf › Supplemental Dataset 1/A-mRNA_nonrhyth_translation_nonrhyth/Tnfsf10_set_A.pdf]

## Tnfsf12

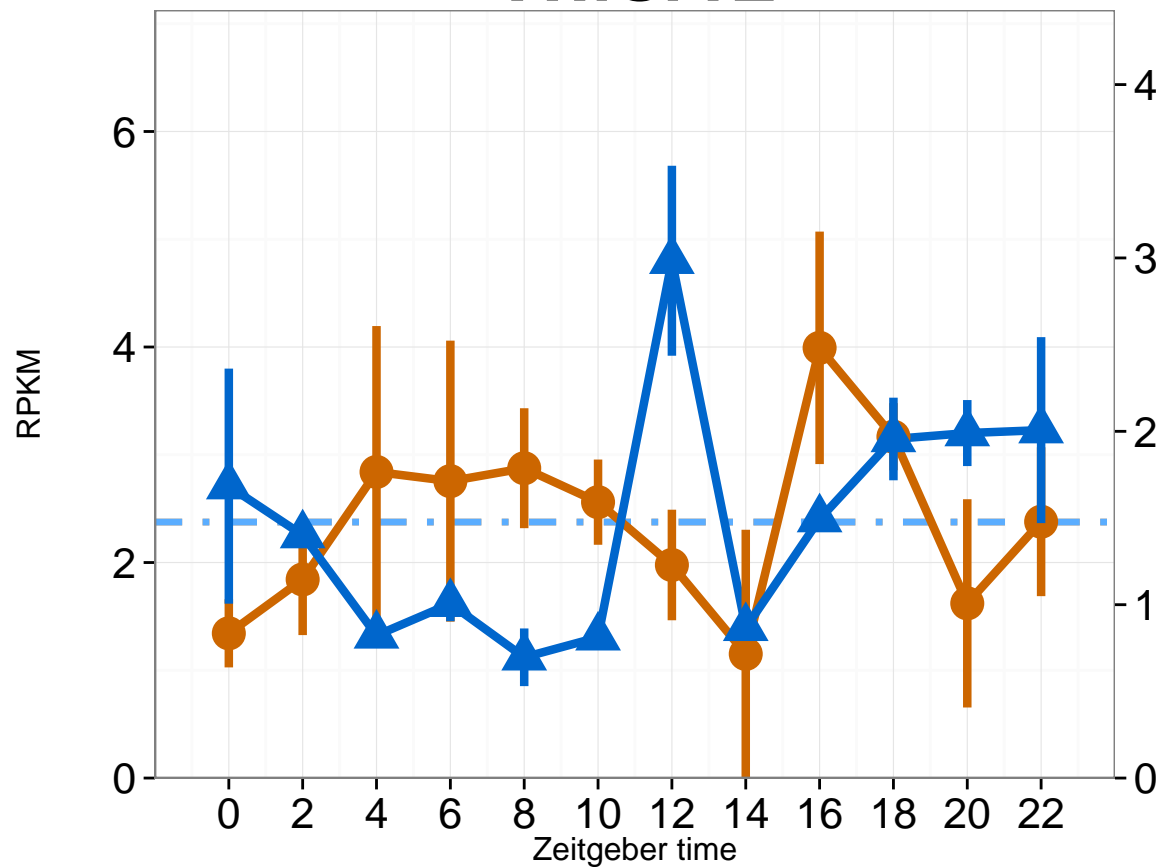

## Tnfsf12

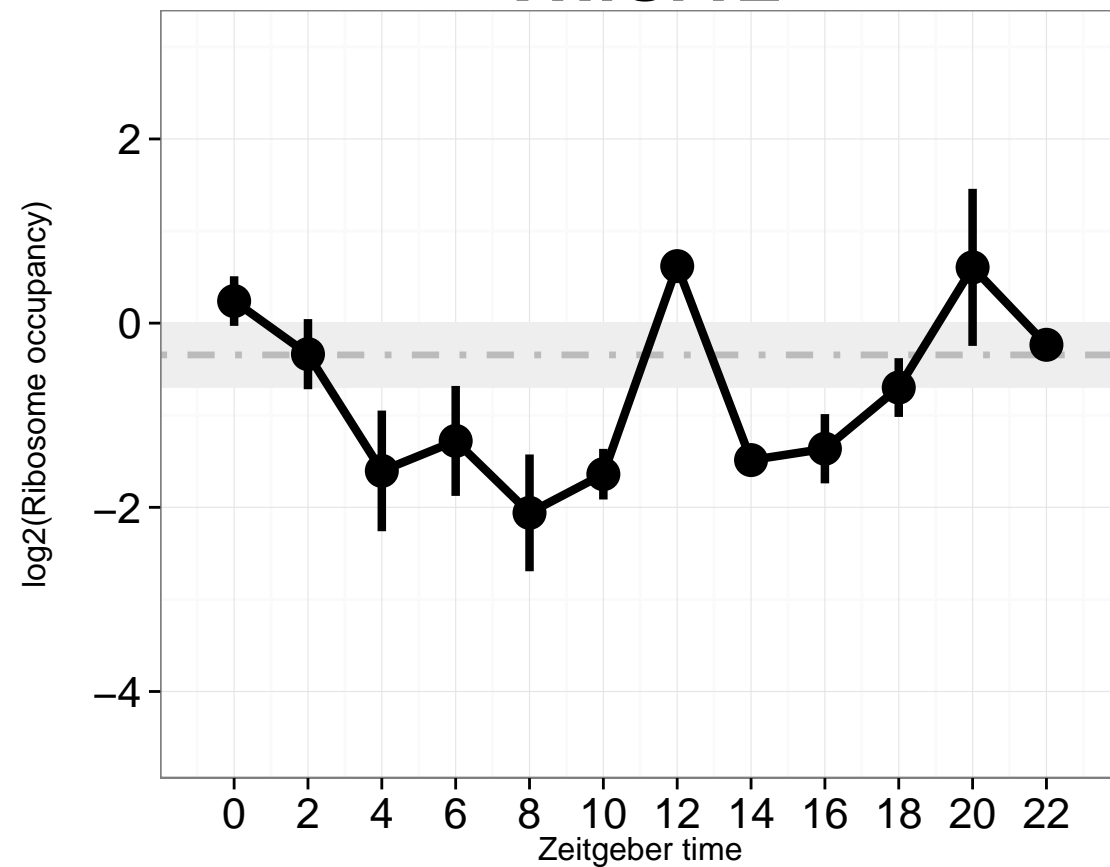

Supplement: SuppDataset_1.zip [file Tnfsf12_set_A.pdf › Supplemental Dataset 1/A-mRNA_nonrhyth_translation_nonrhyth/Tnfsf12_set_A.pdf]

# Tnfsf13

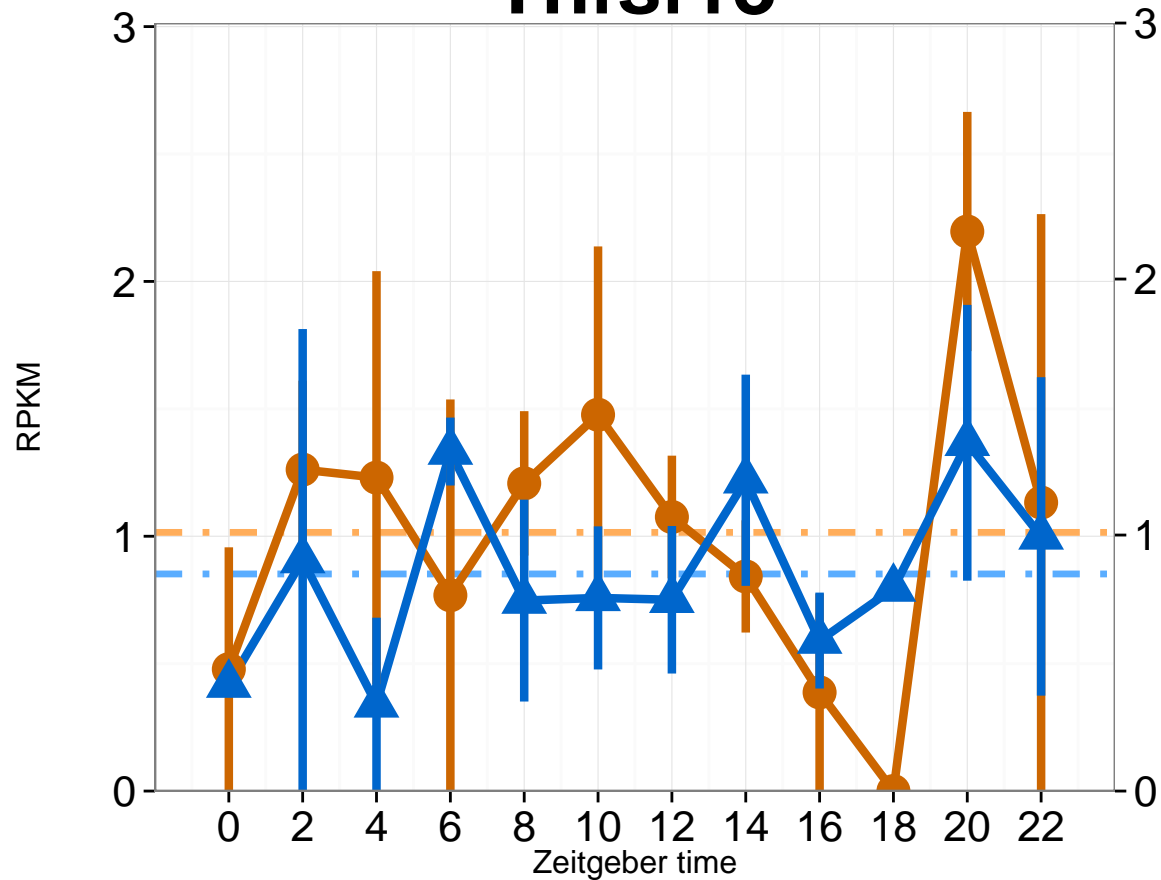

# Tnfsf13

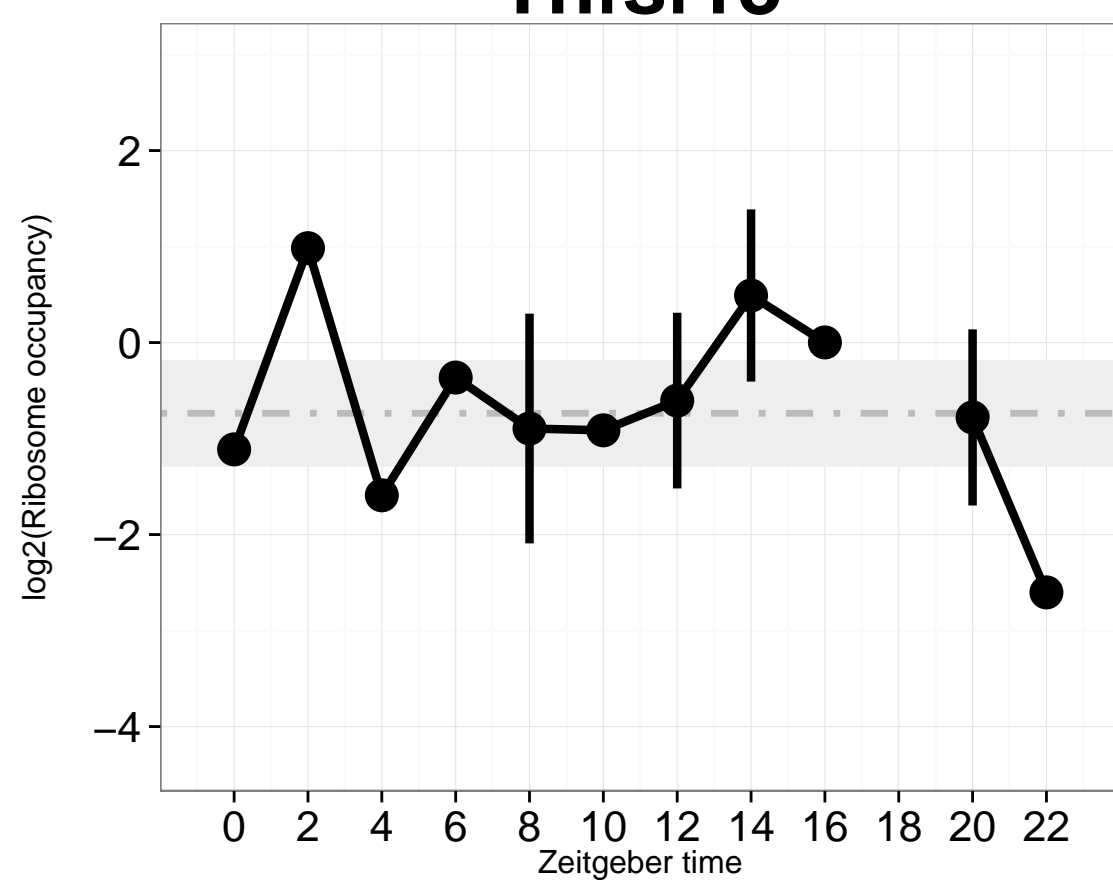

Supplement: SuppDataset_1.zip [file Tnfsf13_set_A.pdf › Supplemental Dataset 1/A-mRNA_nonrhyth_translation_nonrhyth/Tnfsf13_set_A.pdf]

## Tnks2

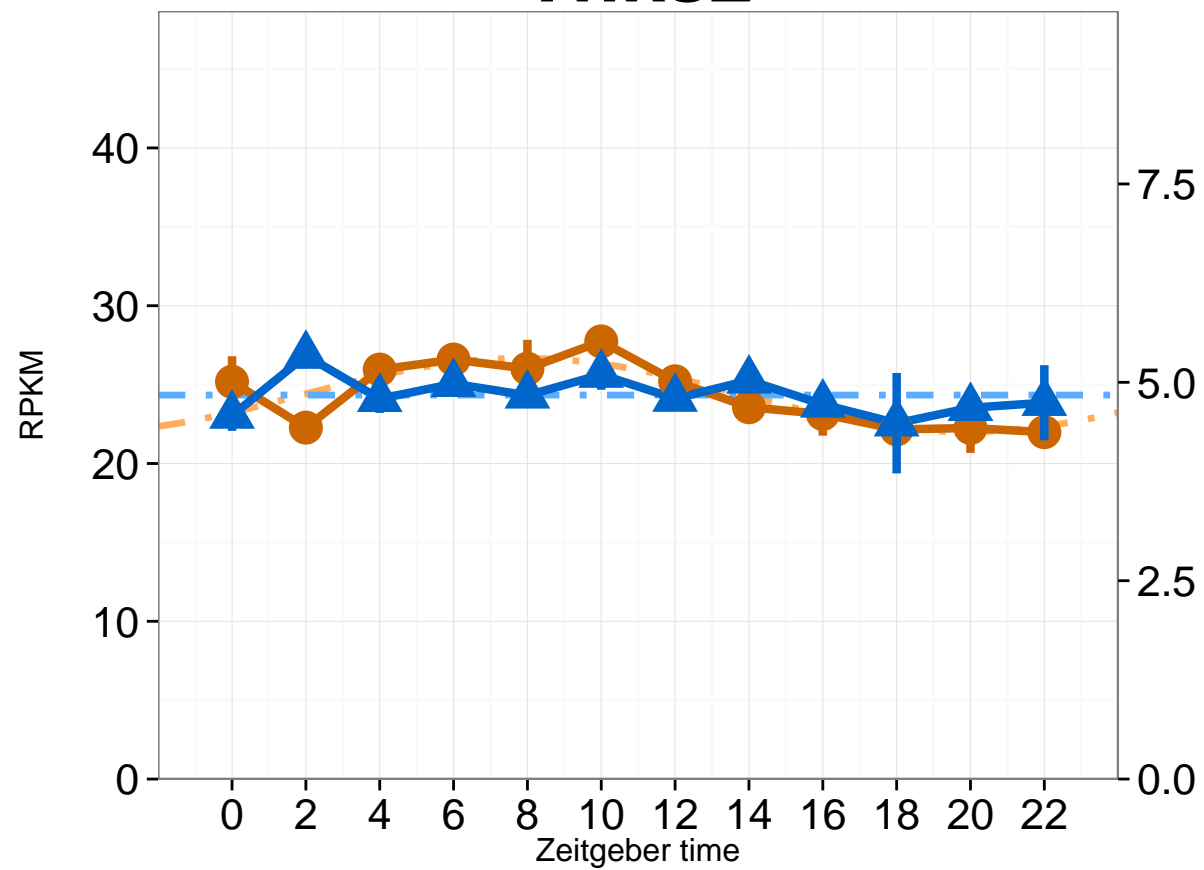

## Tnks2

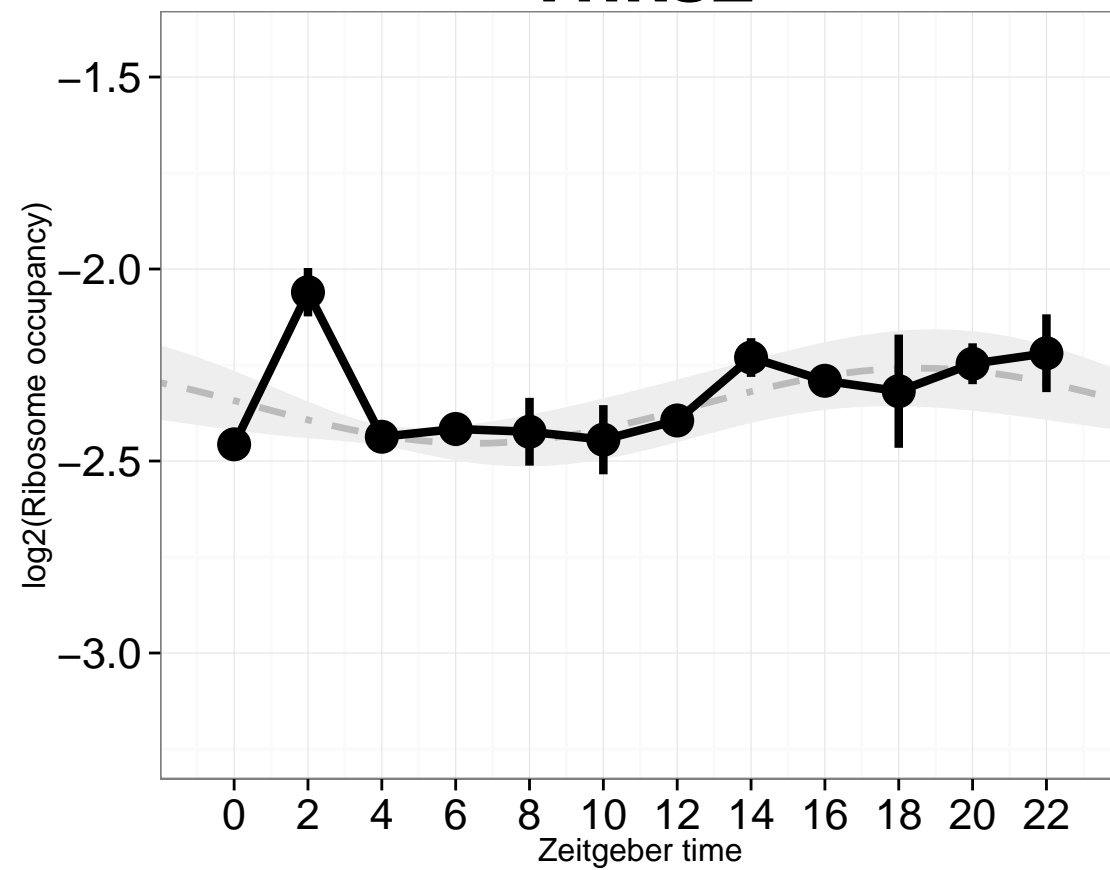

Supplement: SuppDataset_1.zip [file Tnks2_set_A.pdf › Supplemental Dataset 1/A-mRNA_nonrhyth_translation_nonrhyth/Tnks2_set_A.pdf]

## Tnks

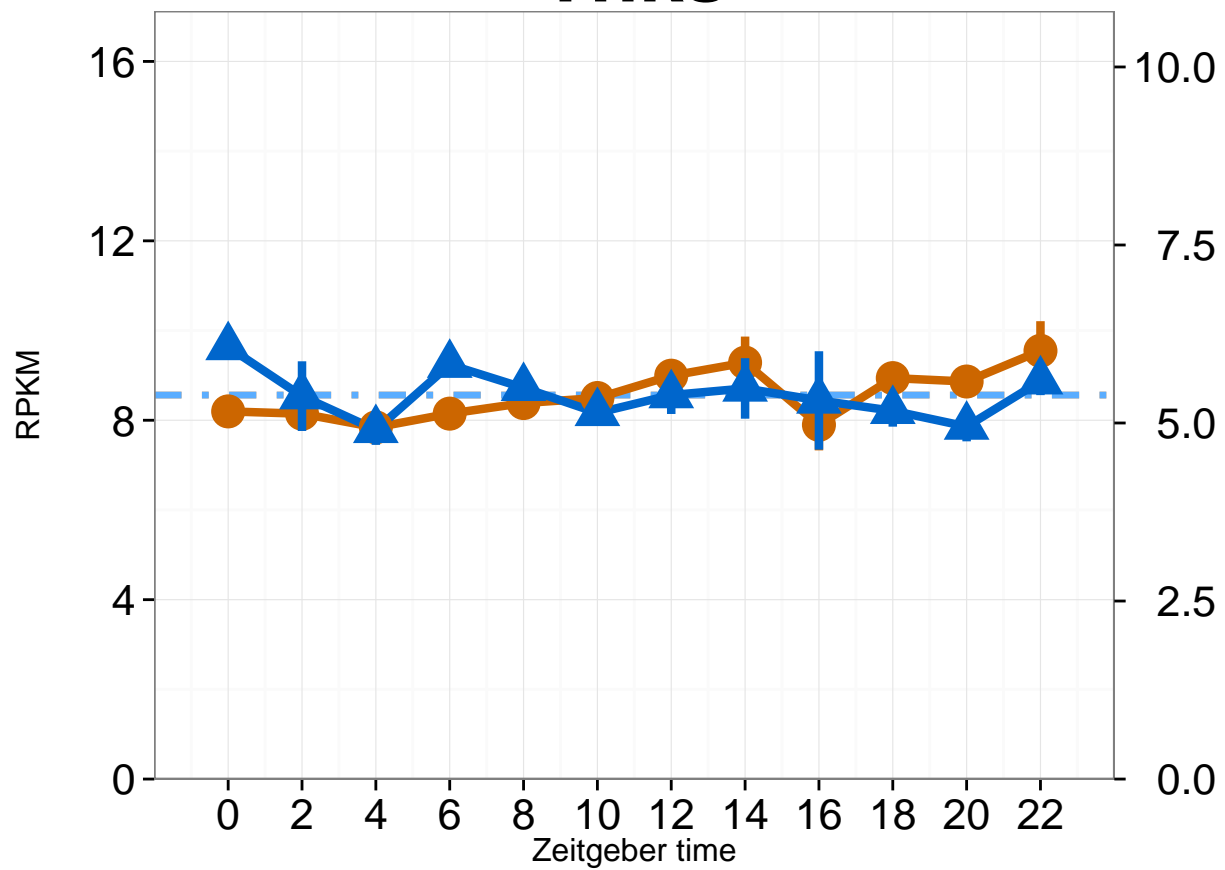

## Tnks

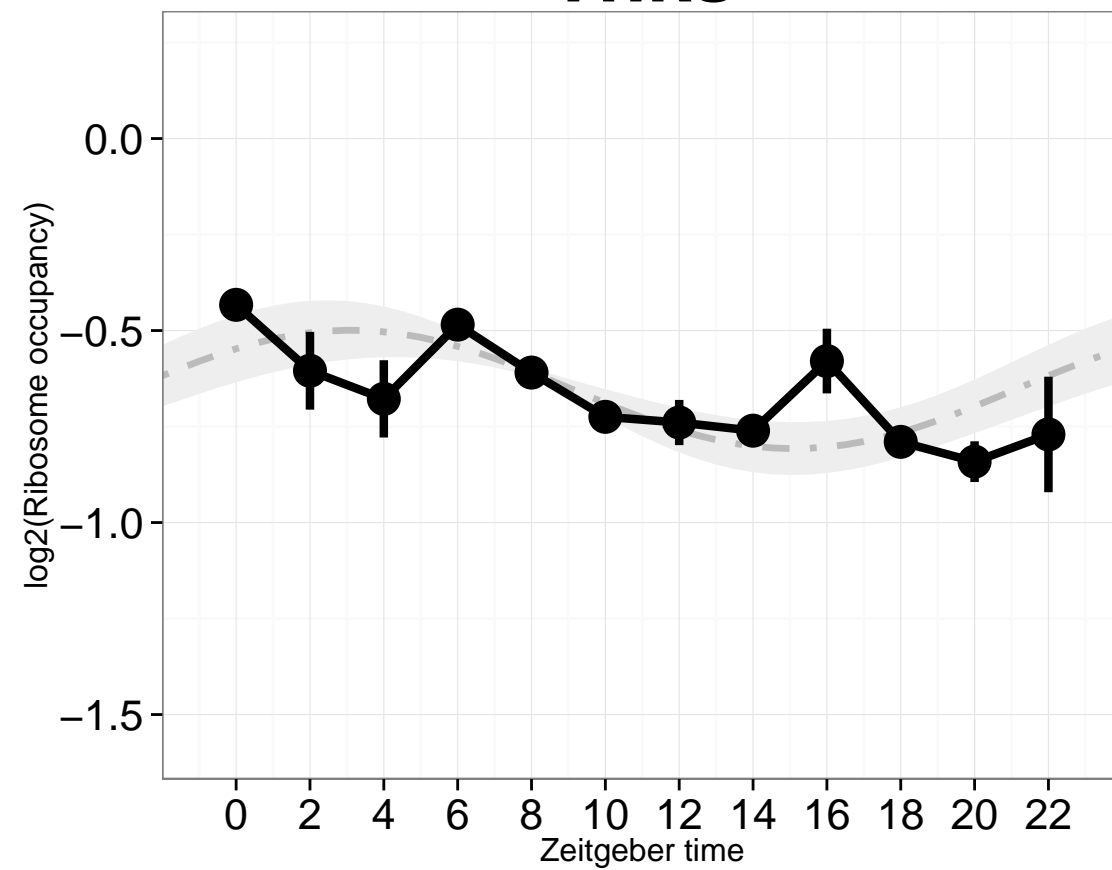

Supplement: SuppDataset_1.zip [file Tnks_set_A.pdf › Supplemental Dataset 1/A-mRNA_nonrhyth_translation_nonrhyth/Tnks_set_A.pdf]

# Tnnt1

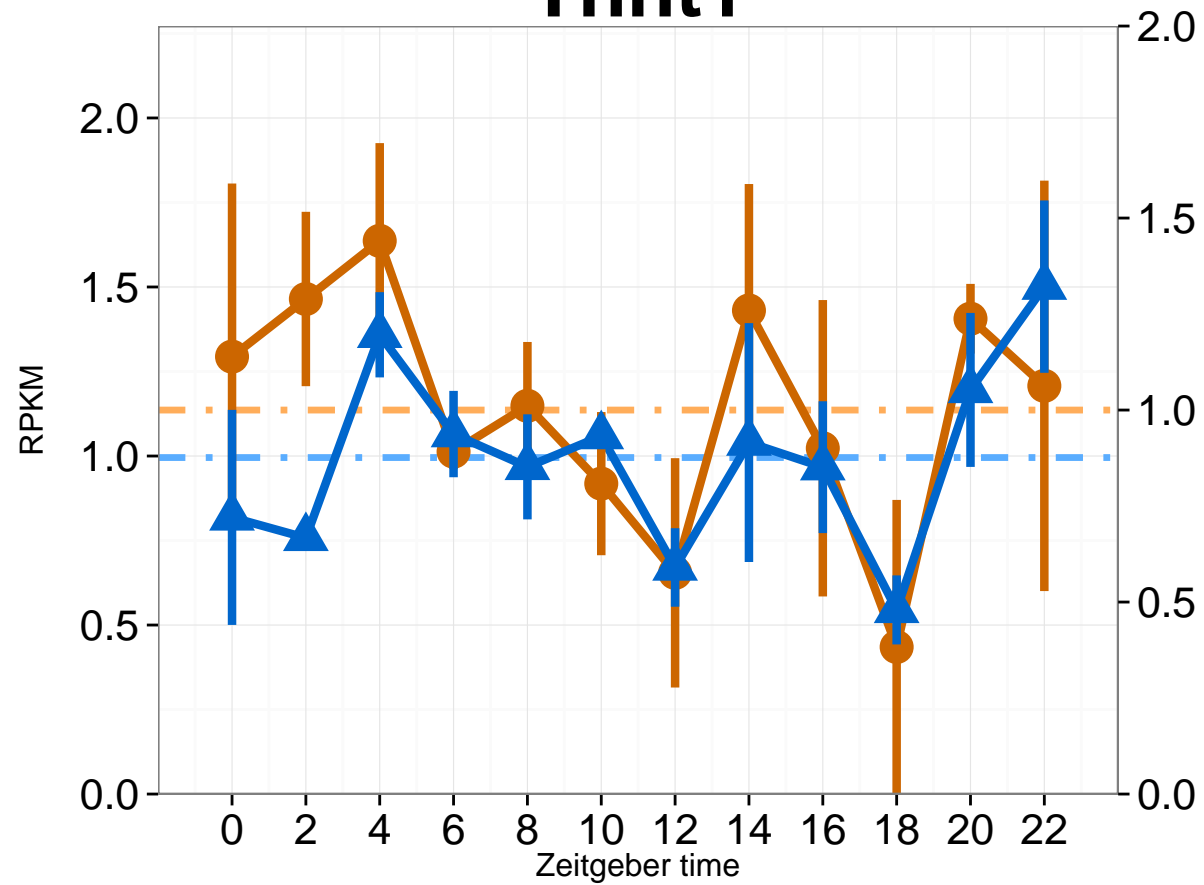

# Tnnt1

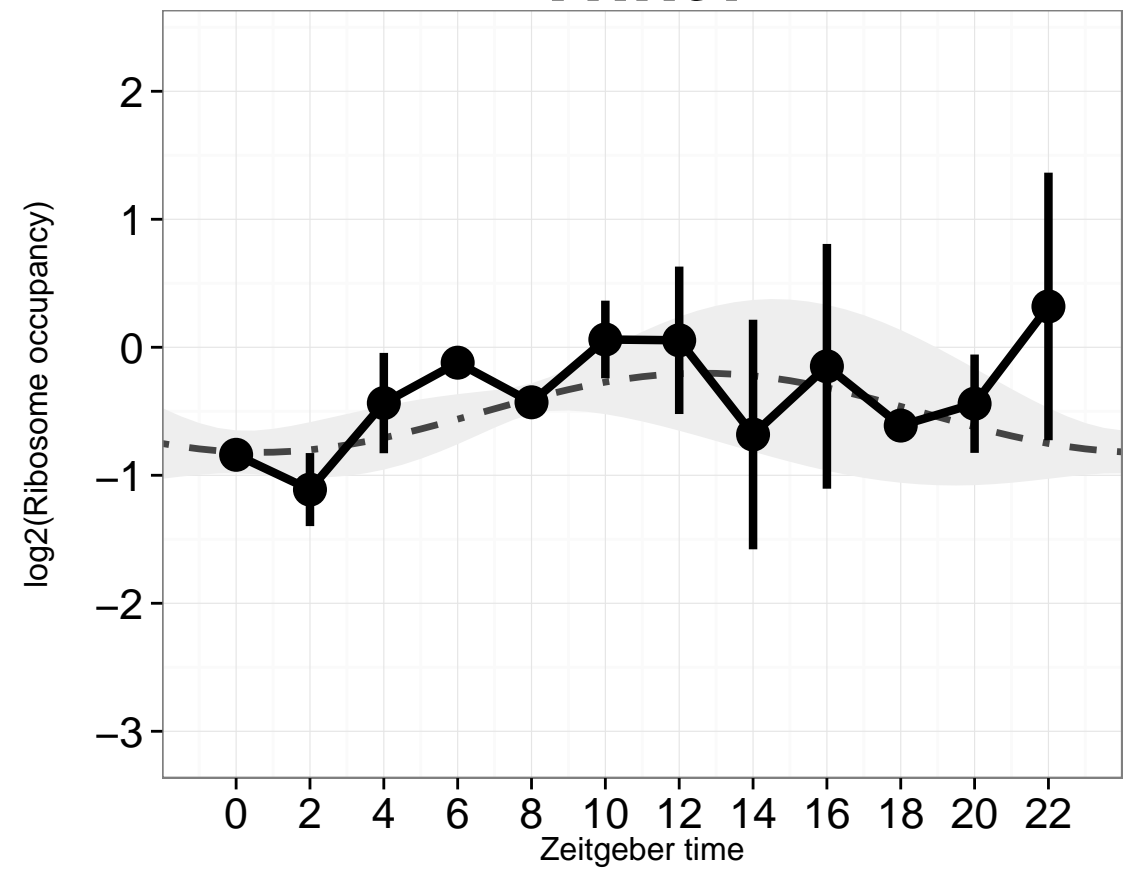

Supplement: SuppDataset_1.zip [file Tnnt1_set_A.pdf › Supplemental Dataset 1/A-mRNA_nonrhyth_translation_nonrhyth/Tnnt1_set_A.pdf]

# Tnpo1

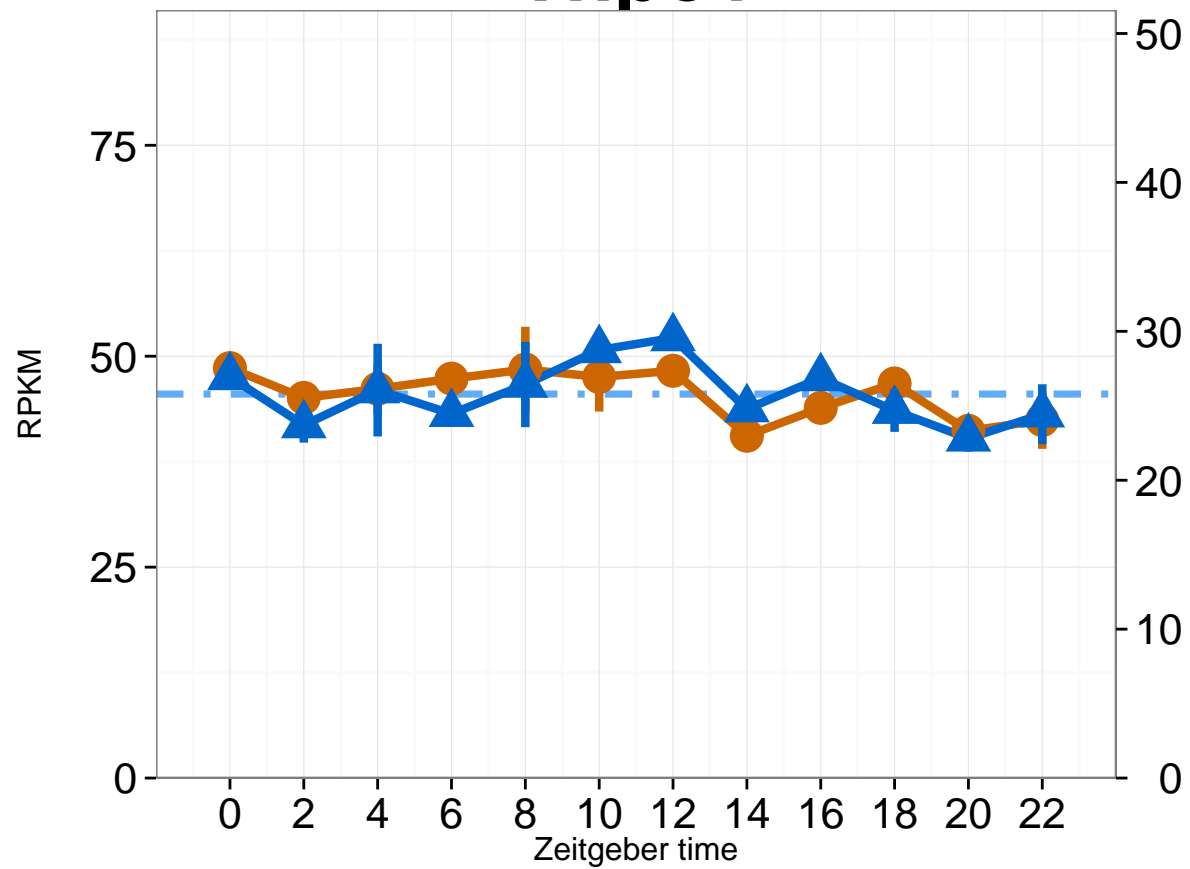

# Tnpo1

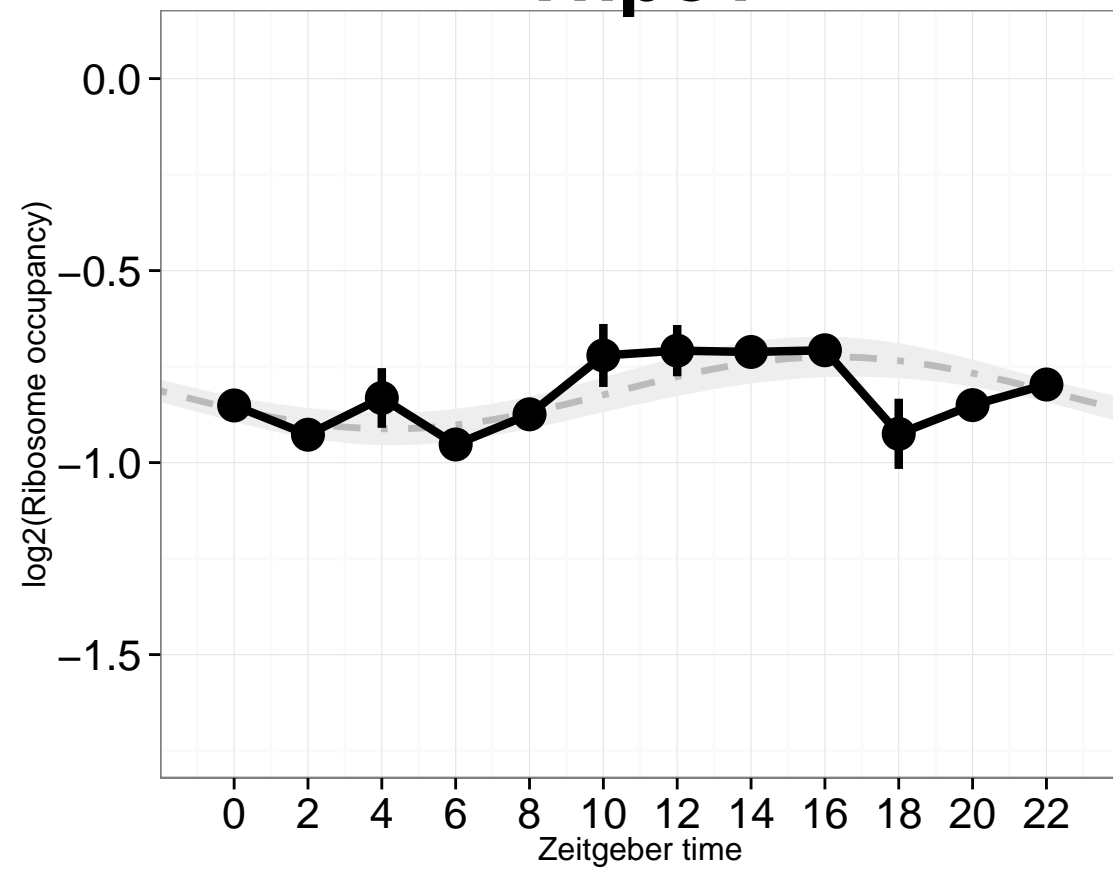

Supplement: SuppDataset_1.zip [file Tnpo1_set_A.pdf › Supplemental Dataset 1/A-mRNA_nonrhyth_translation_nonrhyth/Tnpo1_set_A.pdf]

# Tnpo2

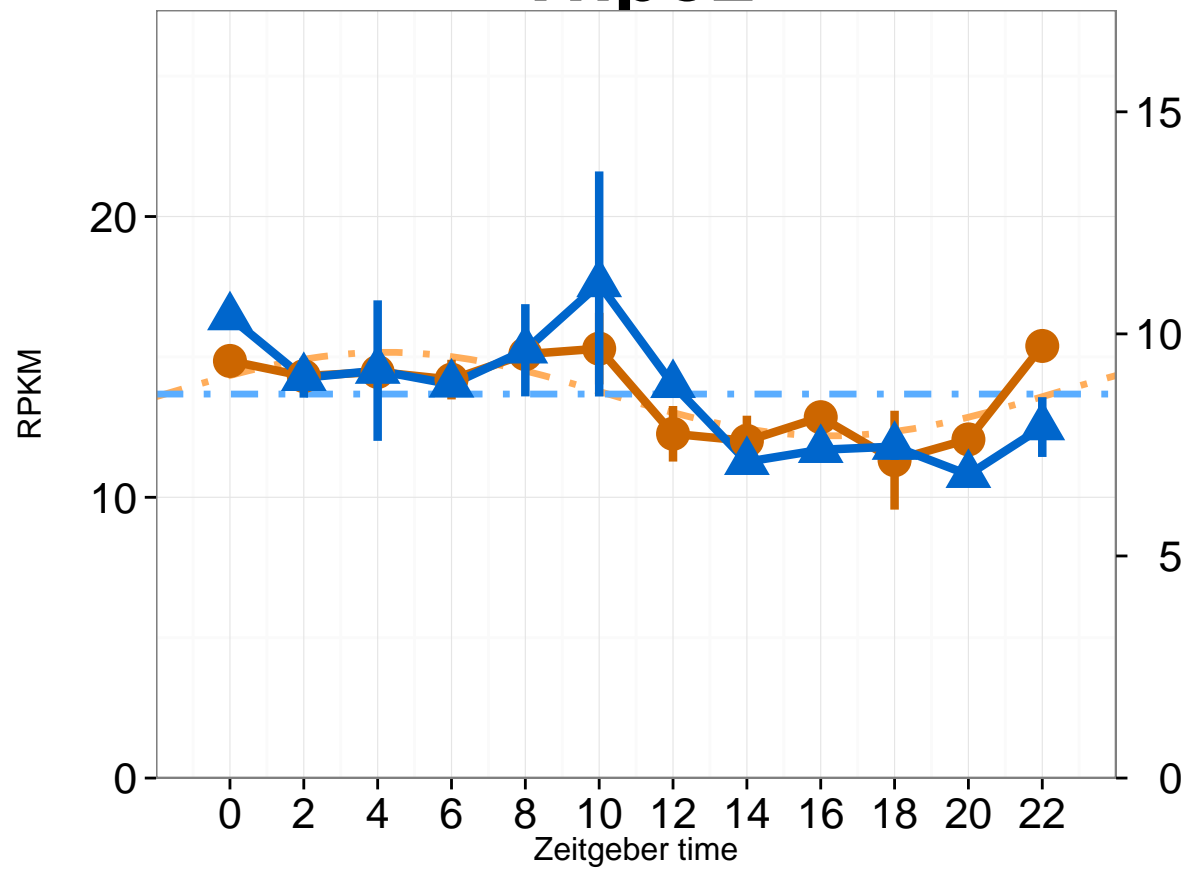

# Tnpo2

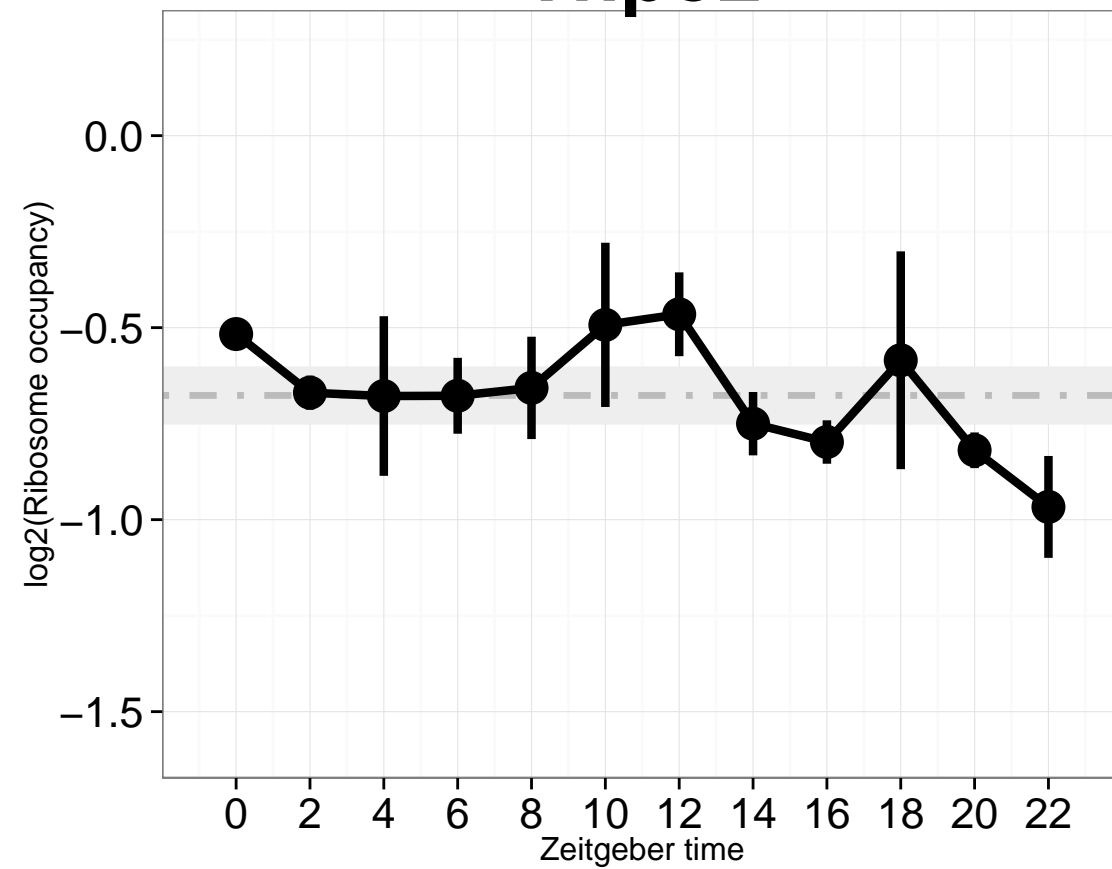

Supplement: SuppDataset_1.zip [file Tnpo2_set_A.pdf › Supplemental Dataset 1/A-mRNA_nonrhyth_translation_nonrhyth/Tnpo2_set_A.pdf]

# Tnpo3

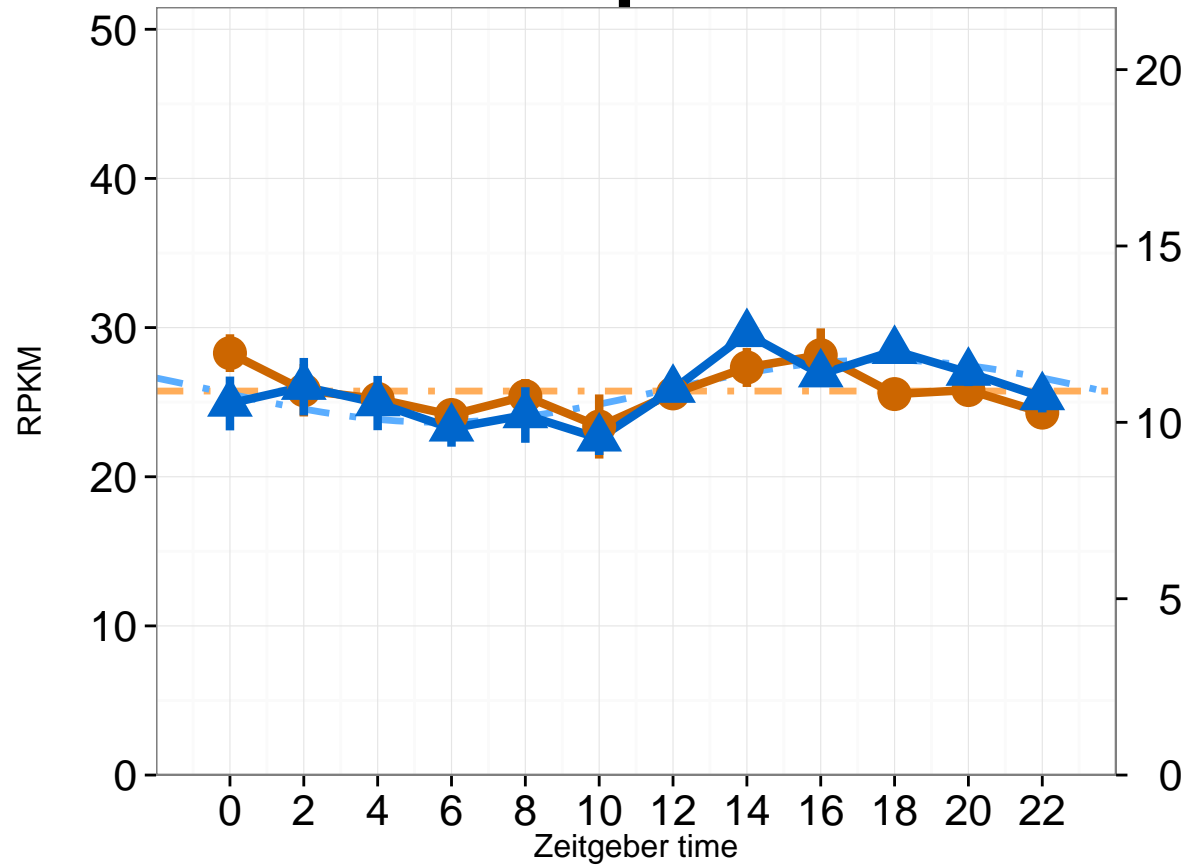

# Tnpo3

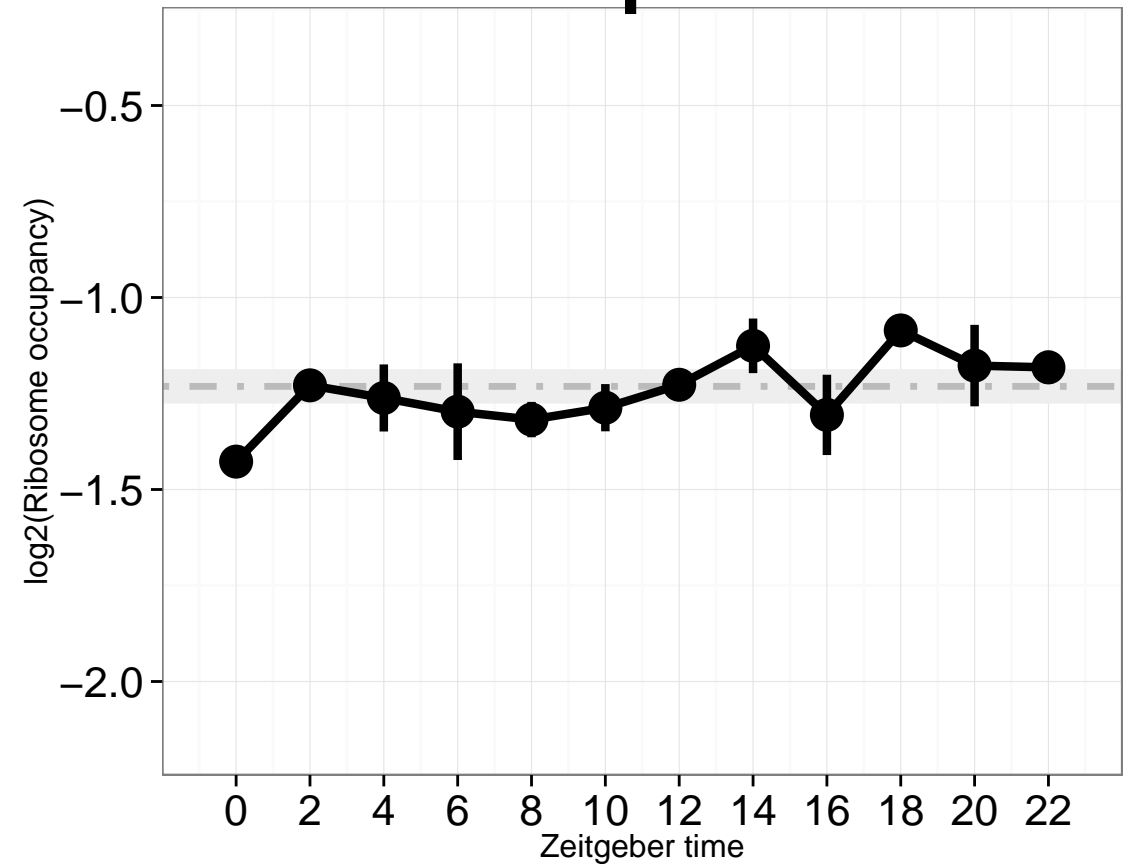

Supplement: SuppDataset_1.zip [file Tnpo3_set_A.pdf › Supplemental Dataset 1/A-mRNA_nonrhyth_translation_nonrhyth/Tnpo3_set_A.pdf]

# Tnrc18

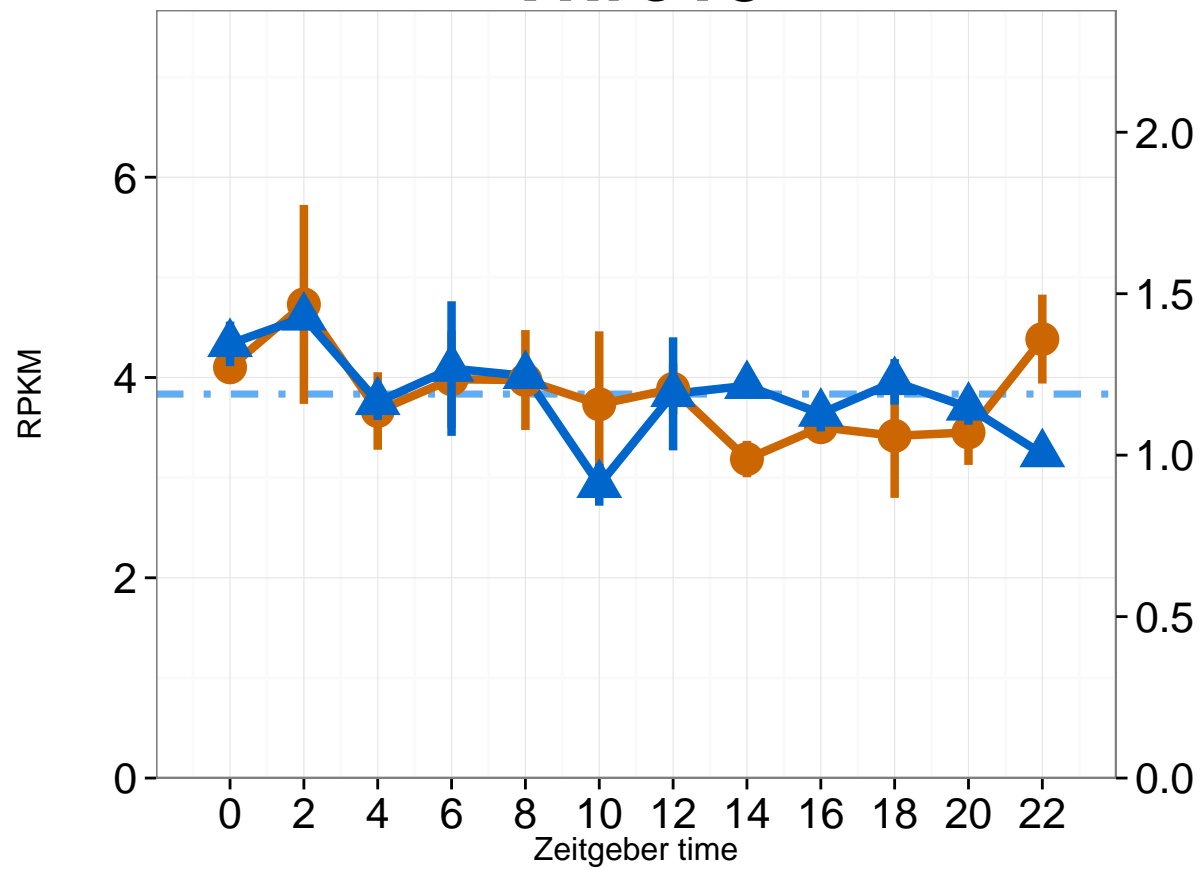

# Tnrc18

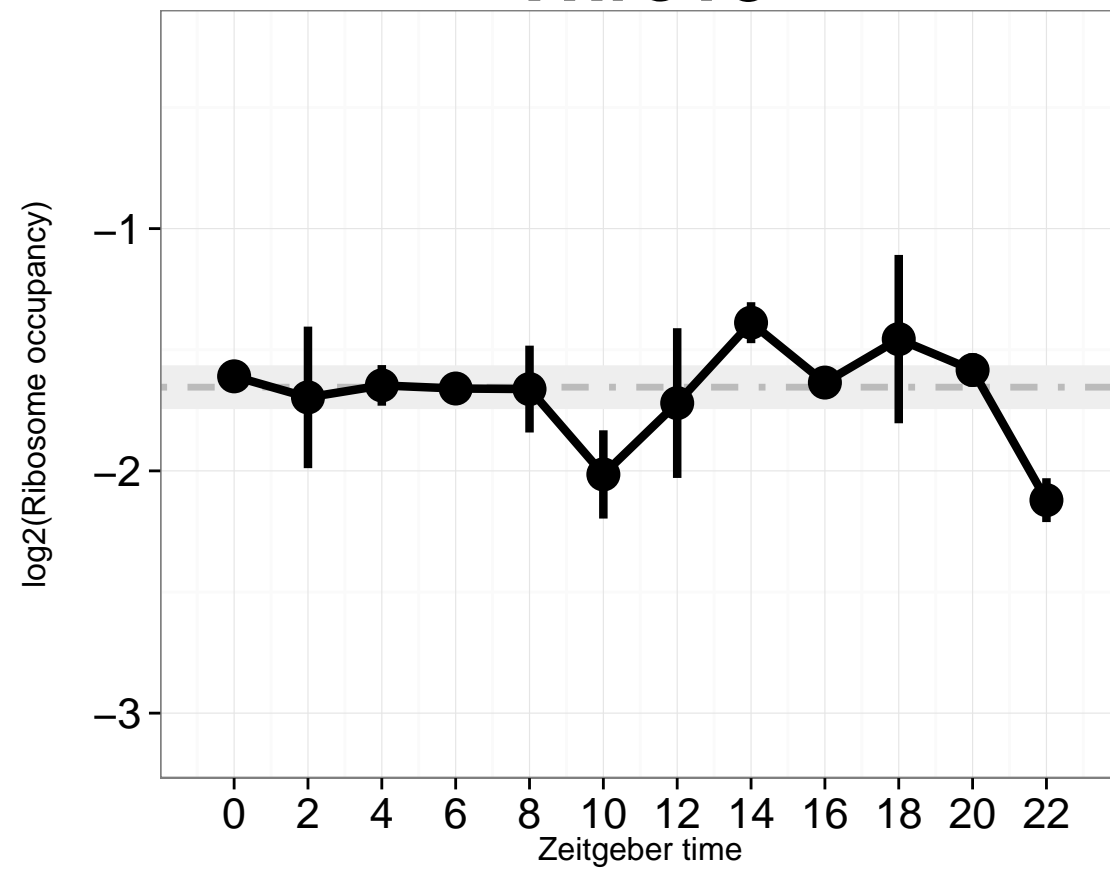

Supplement: SuppDataset_1.zip [file Tnrc18_set_A.pdf › Supplemental Dataset 1/A-mRNA_nonrhyth_translation_nonrhyth/Tnrc18_set_A.pdf]

# Tnrc6a

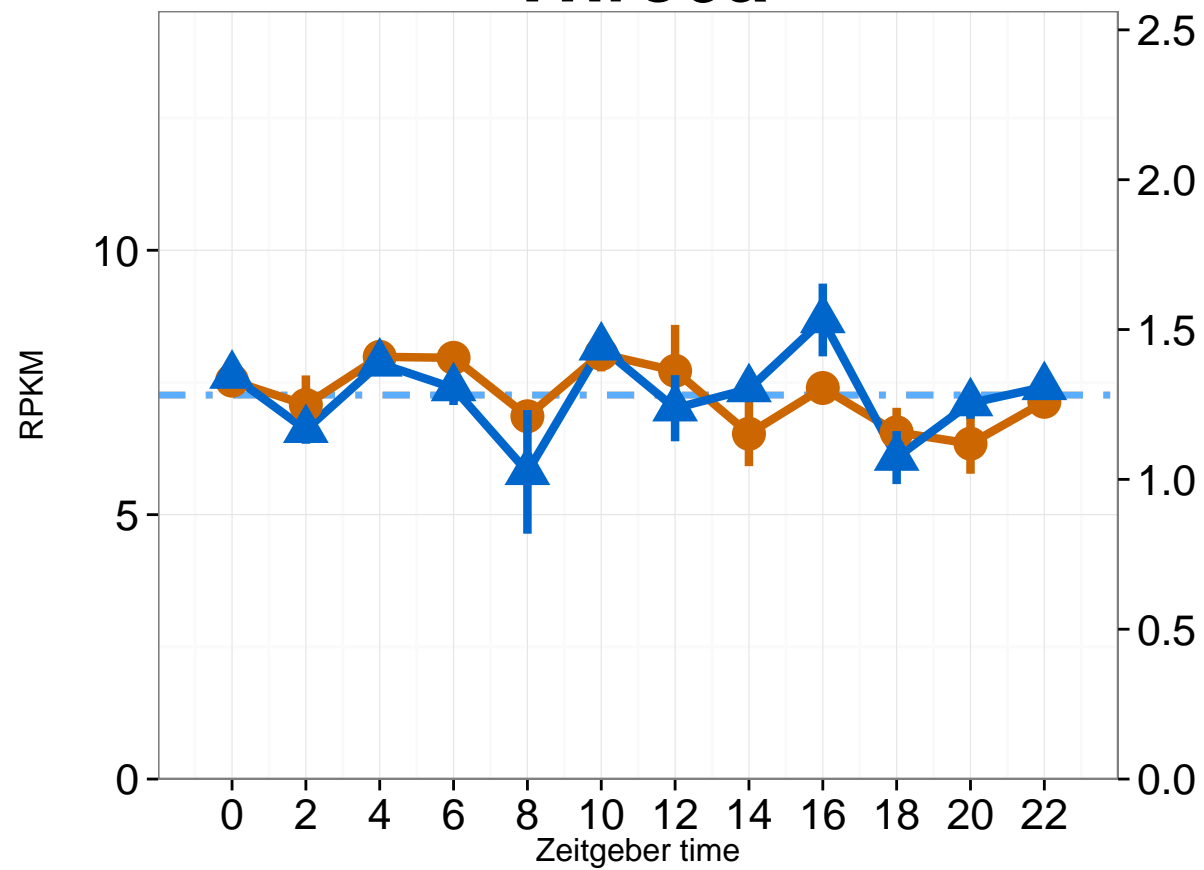

# Tnrc6a

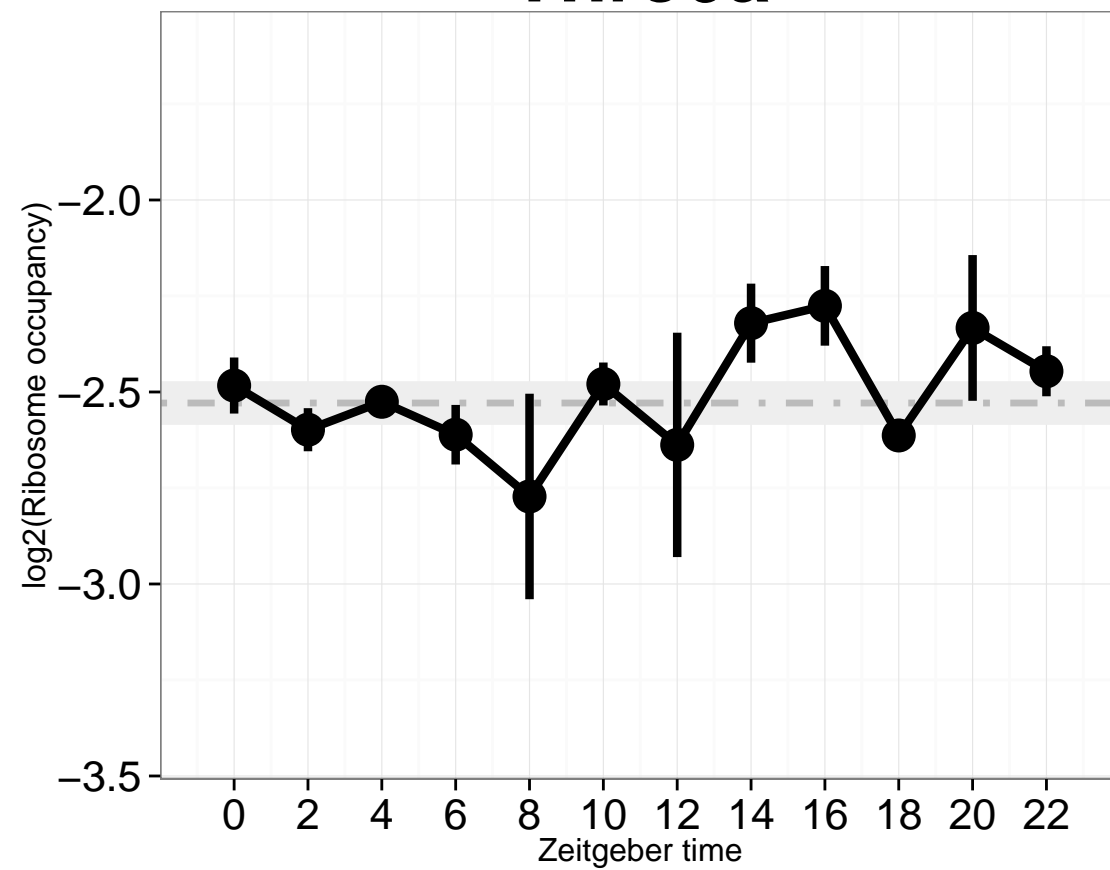

Supplement: SuppDataset_1.zip [file Tnrc6a_set_A.pdf › Supplemental Dataset 1/A-mRNA_nonrhyth_translation_nonrhyth/Tnrc6a_set_A.pdf]

# Tnrc6b

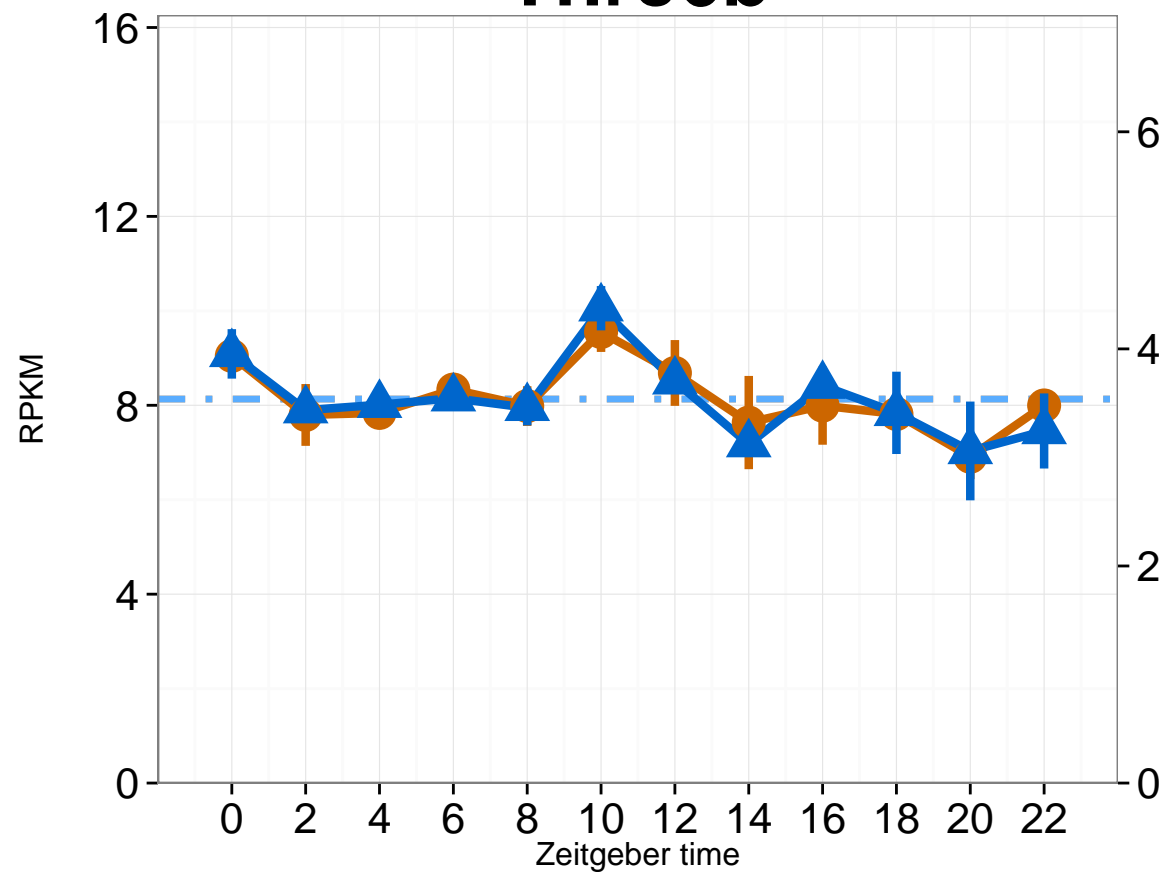

# Tnrc6b

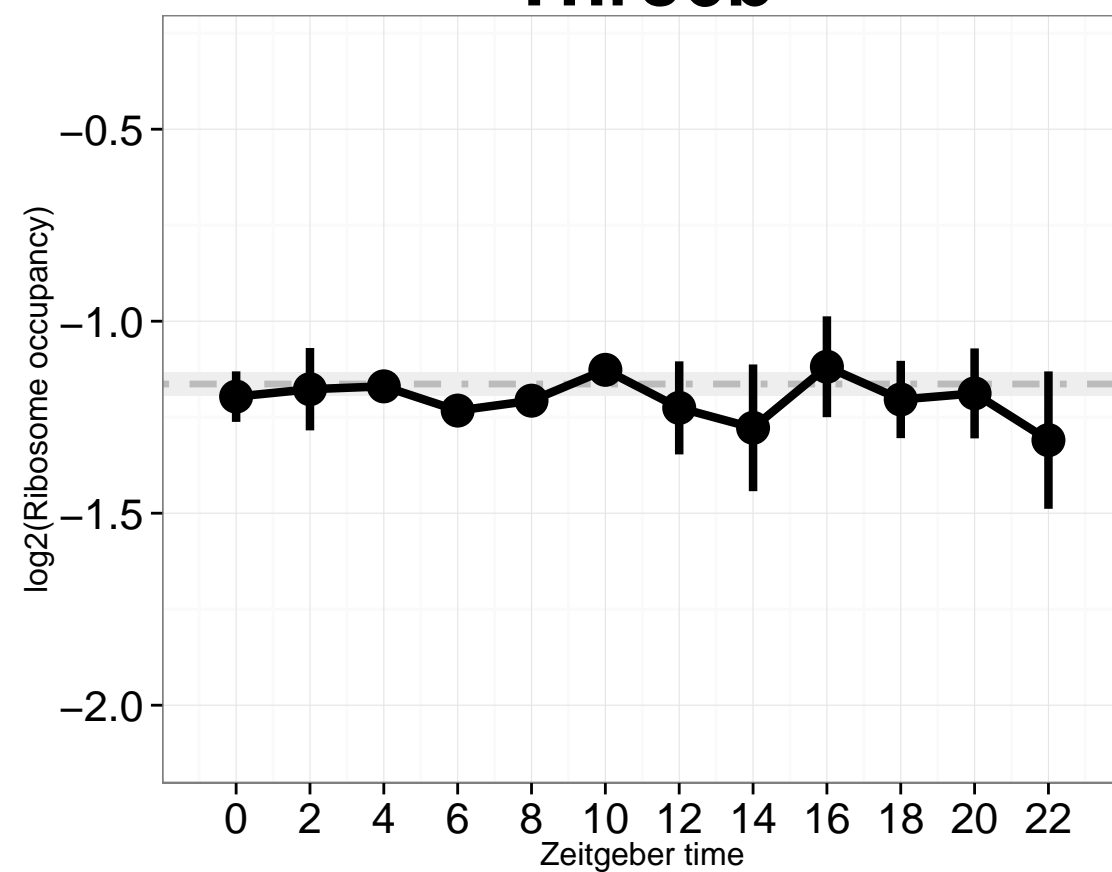

Supplement: SuppDataset_1.zip [file Tnrc6b_set_A.pdf › Supplemental Dataset 1/A-mRNA_nonrhyth_translation_nonrhyth/Tnrc6b_set_A.pdf]

# Tnrc6c

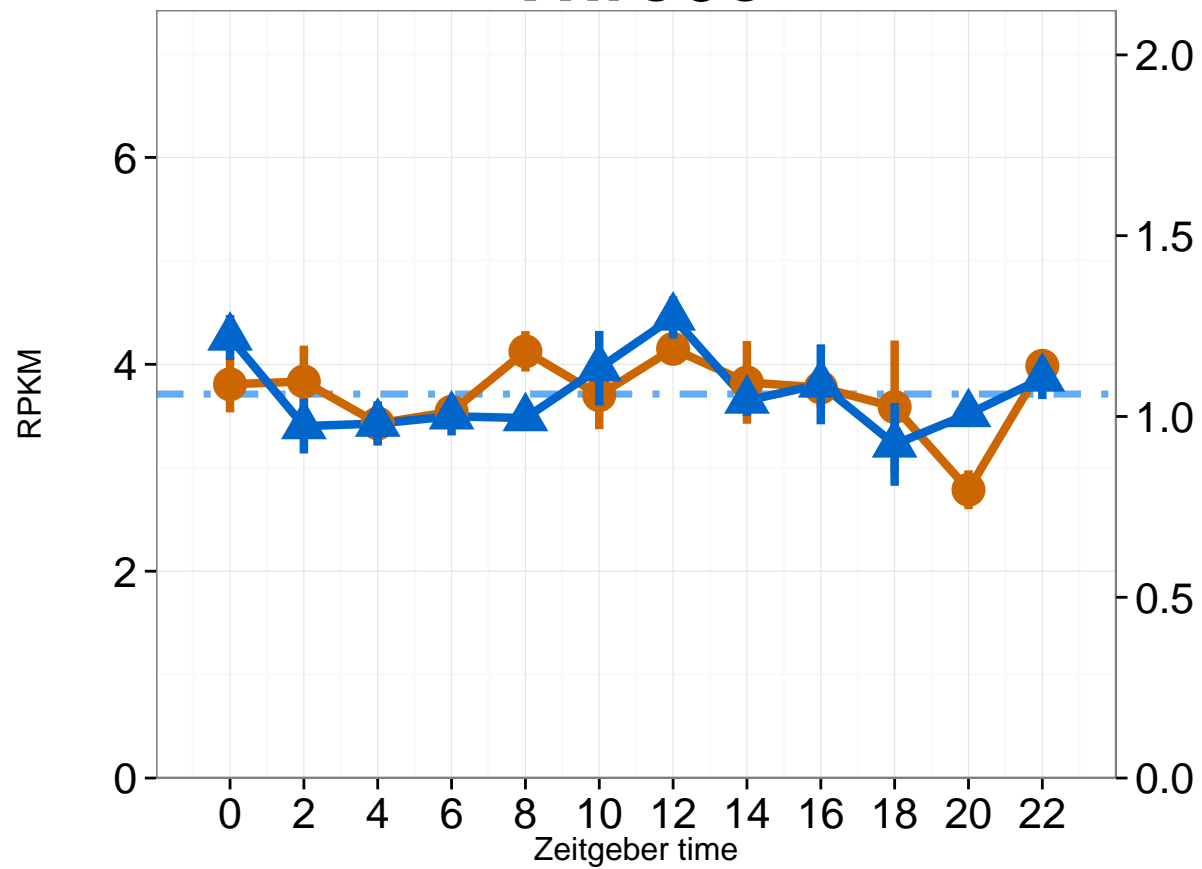

# Tnrc6c

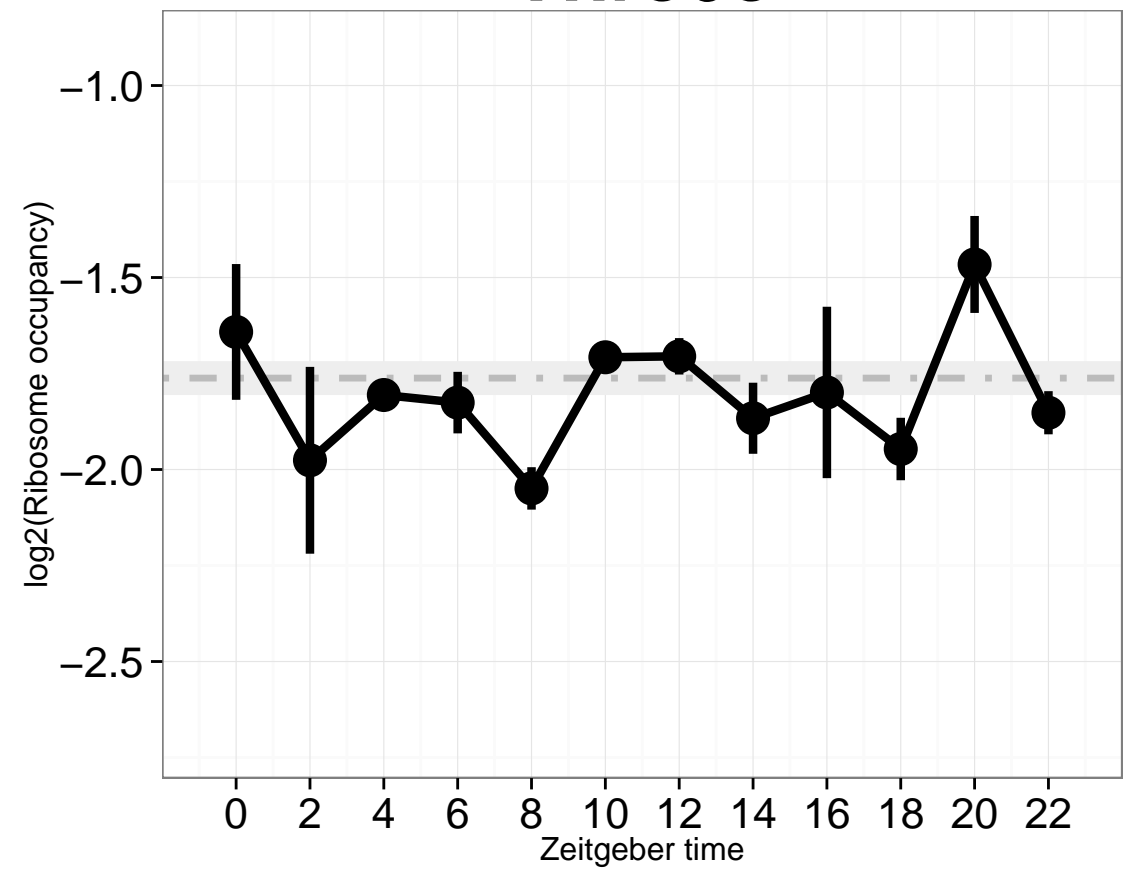

Supplement: SuppDataset_1.zip [file Tnrc6c_set_A.pdf › Supplemental Dataset 1/A-mRNA_nonrhyth_translation_nonrhyth/Tnrc6c_set_A.pdf]

## Tns1

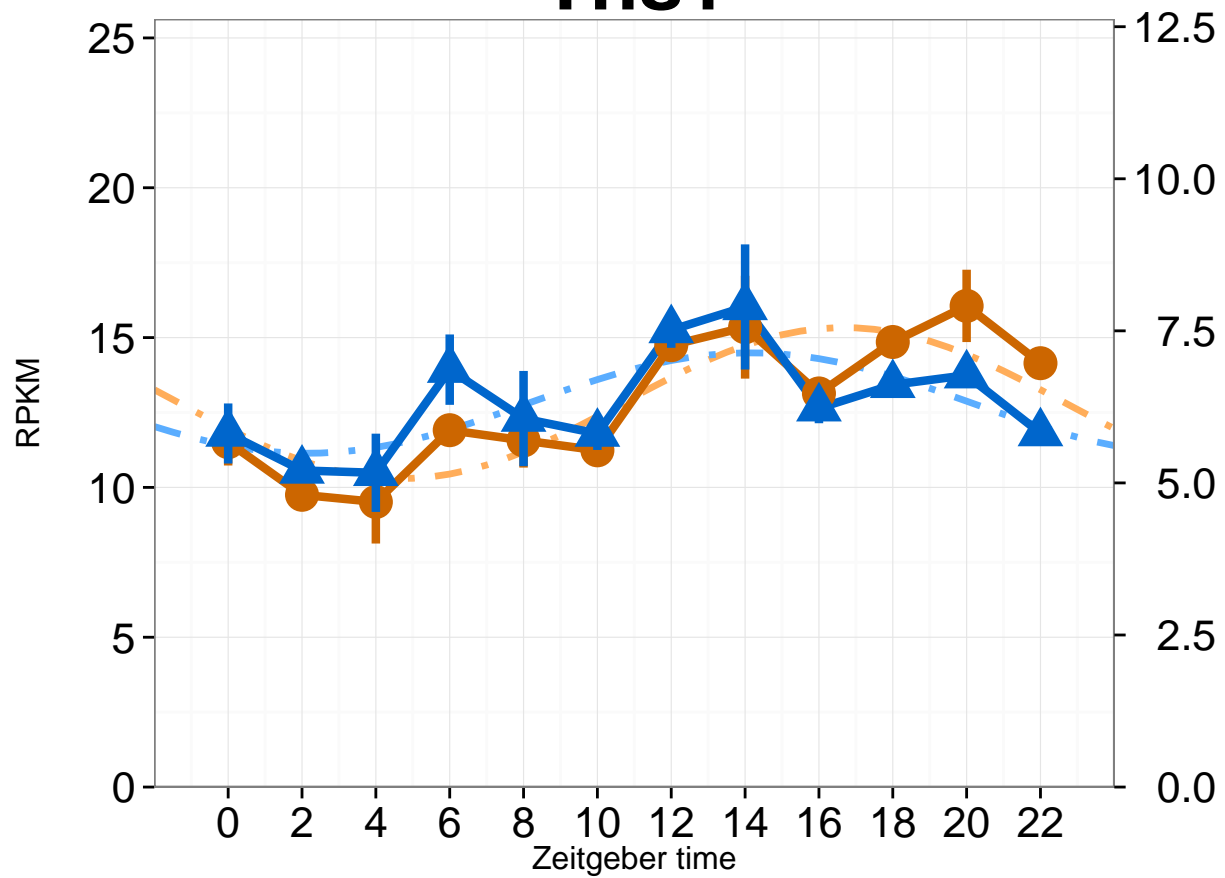

## Tns1

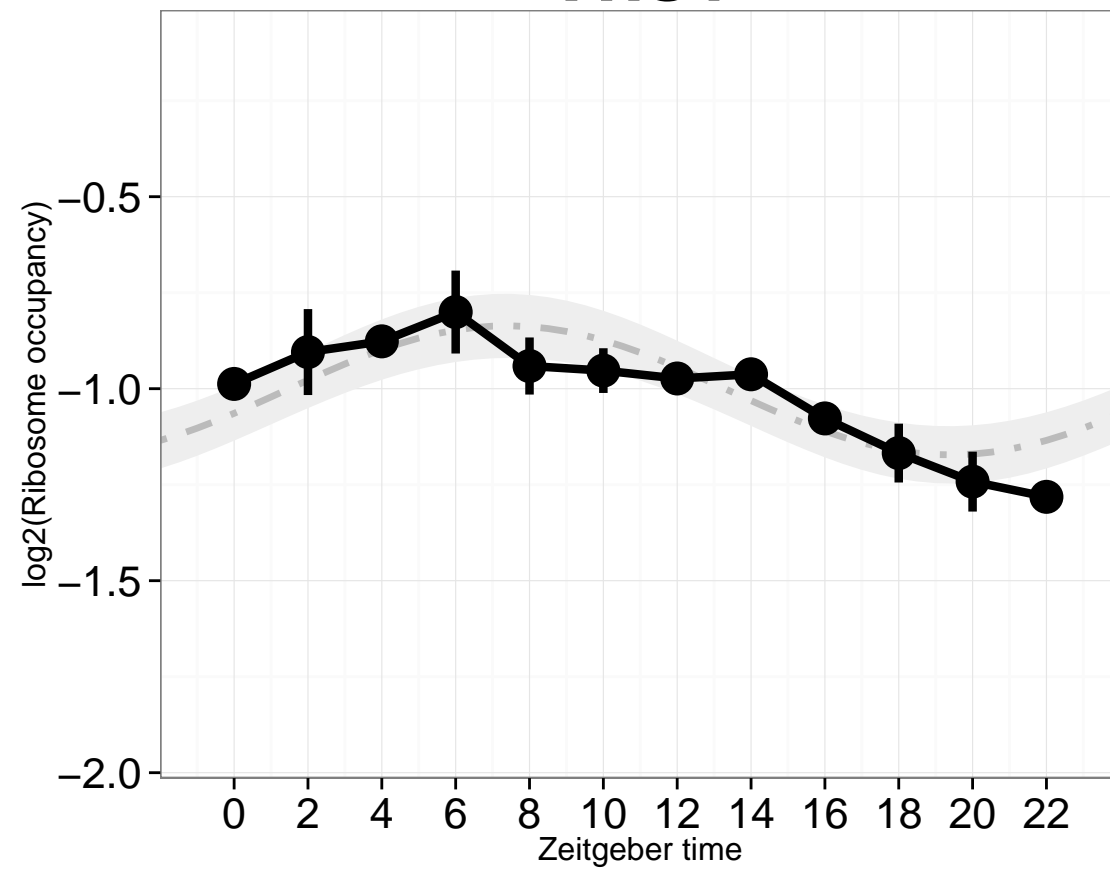

Supplement: SuppDataset_1.zip [file Tns1_set_A.pdf › Supplemental Dataset 1/A-mRNA_nonrhyth_translation_nonrhyth/Tns1_set_A.pdf]

## Tns3

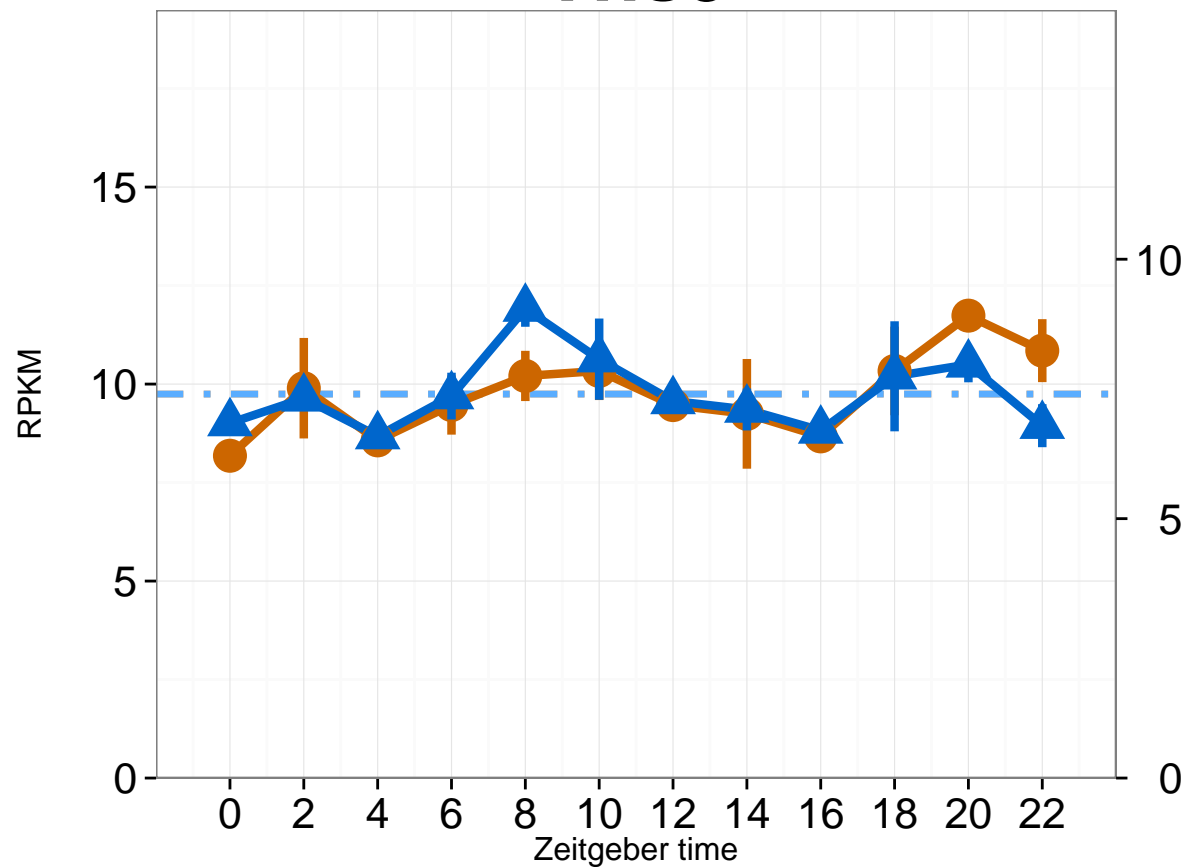

## Tns3

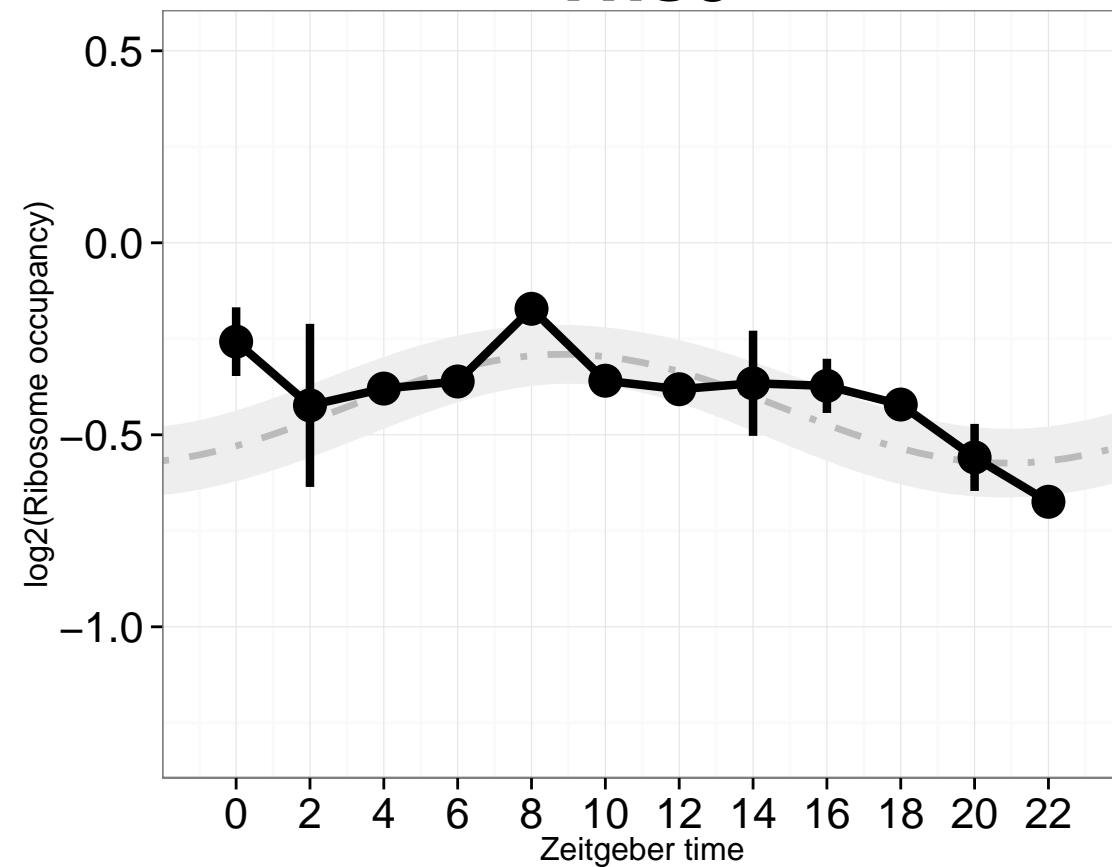

Supplement: SuppDataset_1.zip [file Tns3_set_A.pdf › Supplemental Dataset 1/A-mRNA_nonrhyth_translation_nonrhyth/Tns3_set_A.pdf]

## Tnxb

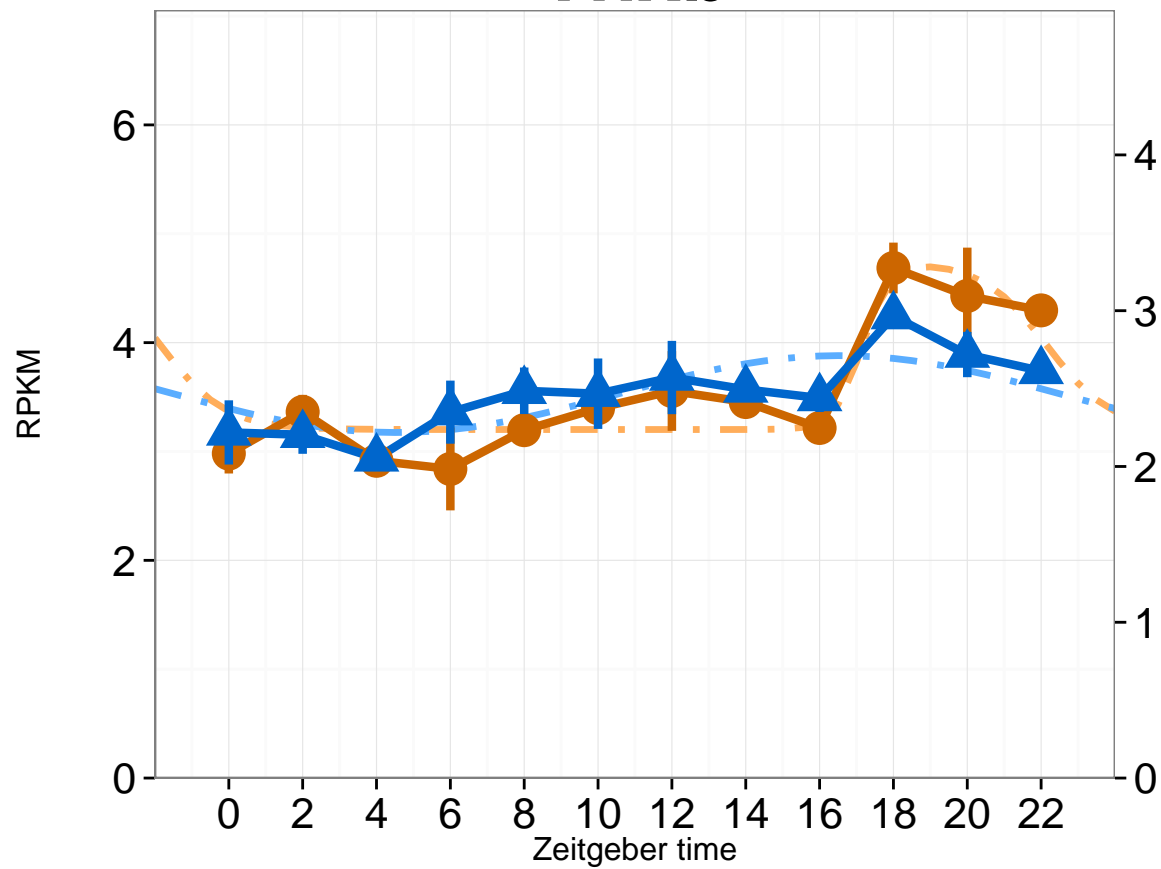

## Tnxb

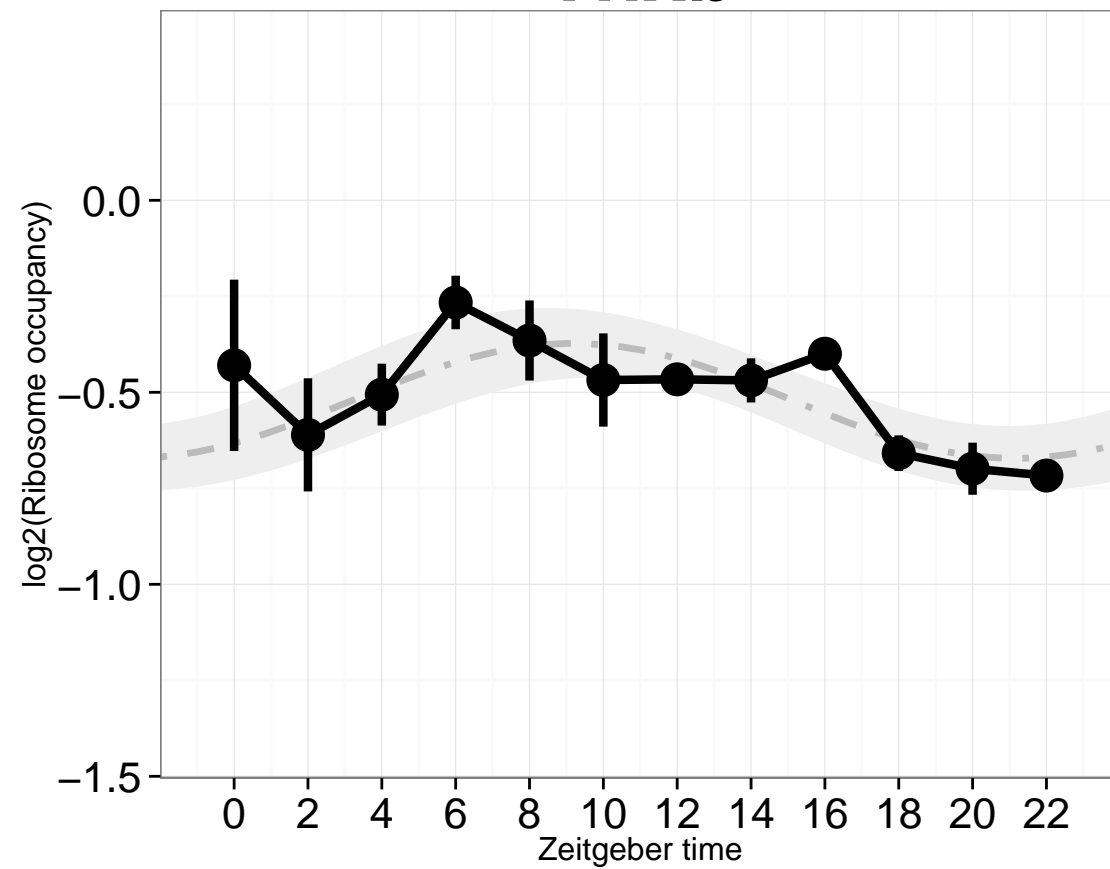

Supplement: SuppDataset_1.zip [file Tnxb_set_A.pdf › Supplemental Dataset 1/A-mRNA_nonrhyth_translation_nonrhyth/Tnxb_set_A.pdf]

## Tob1

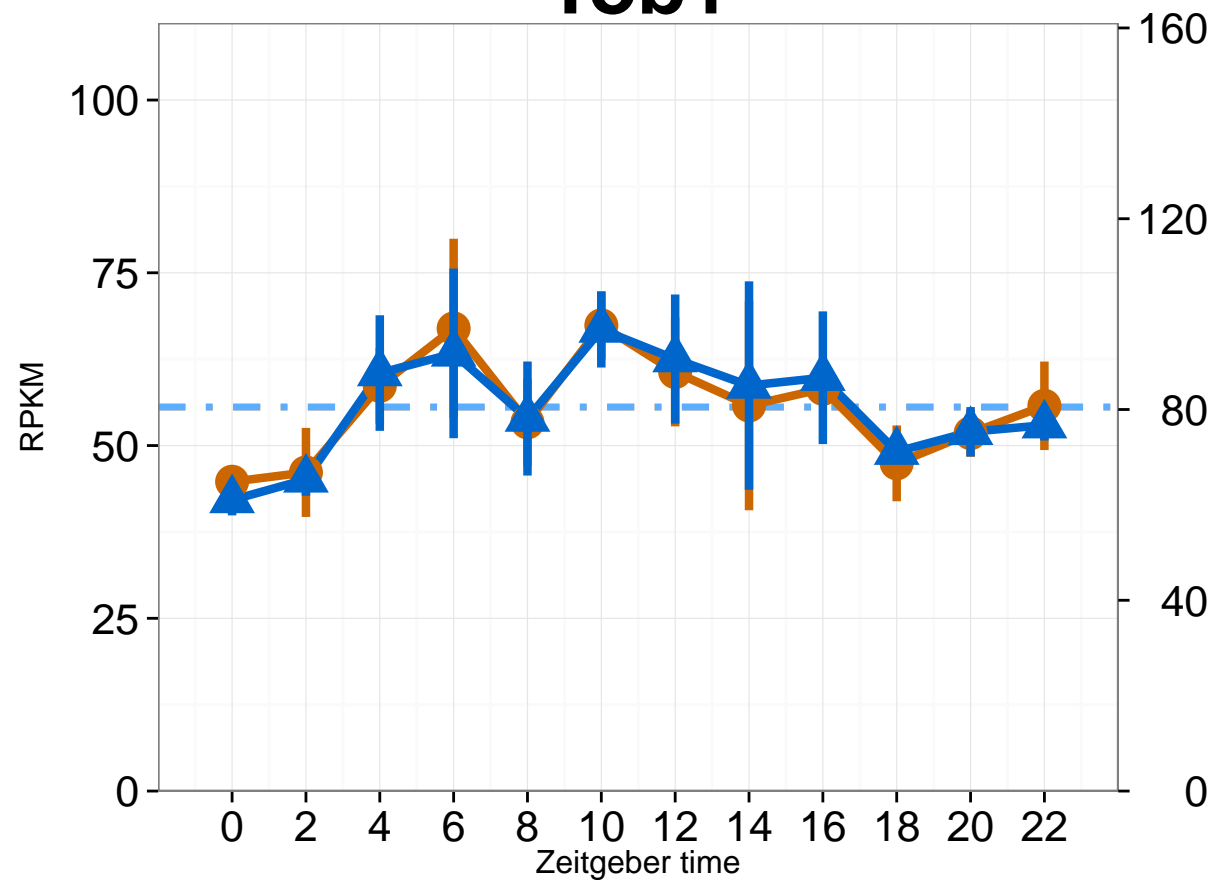

## Tob1

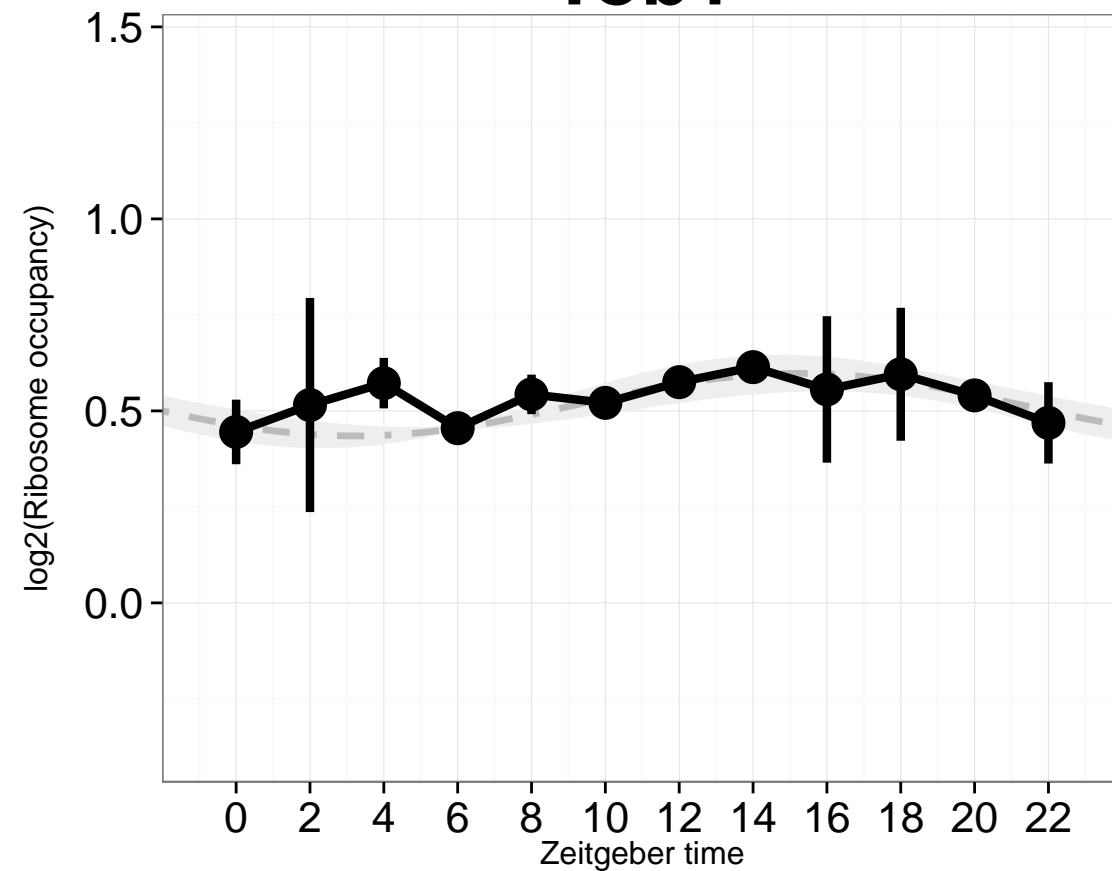

Supplement: SuppDataset_1.zip [file Tob1_set_A.pdf › Supplemental Dataset 1/A-mRNA_nonrhyth_translation_nonrhyth/Tob1_set_A.pdf]

# Toe1

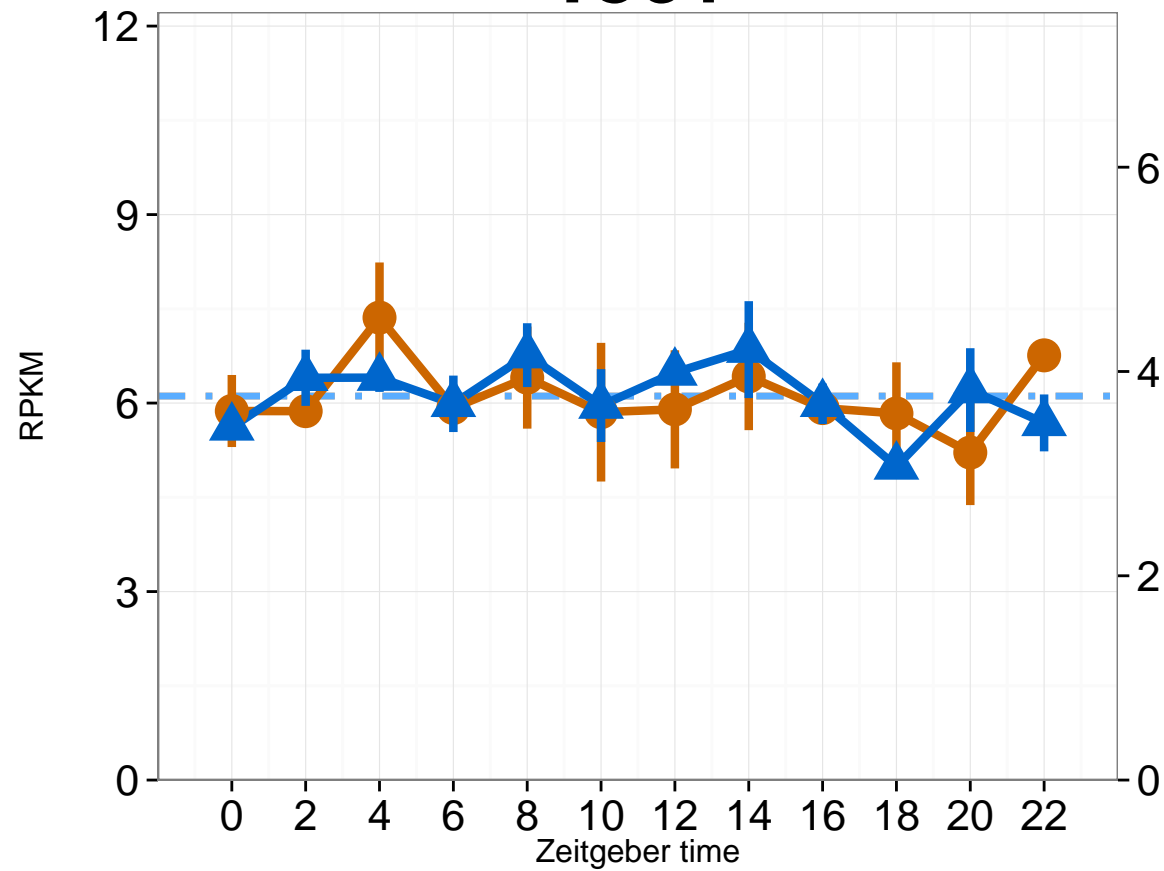

# Toe1

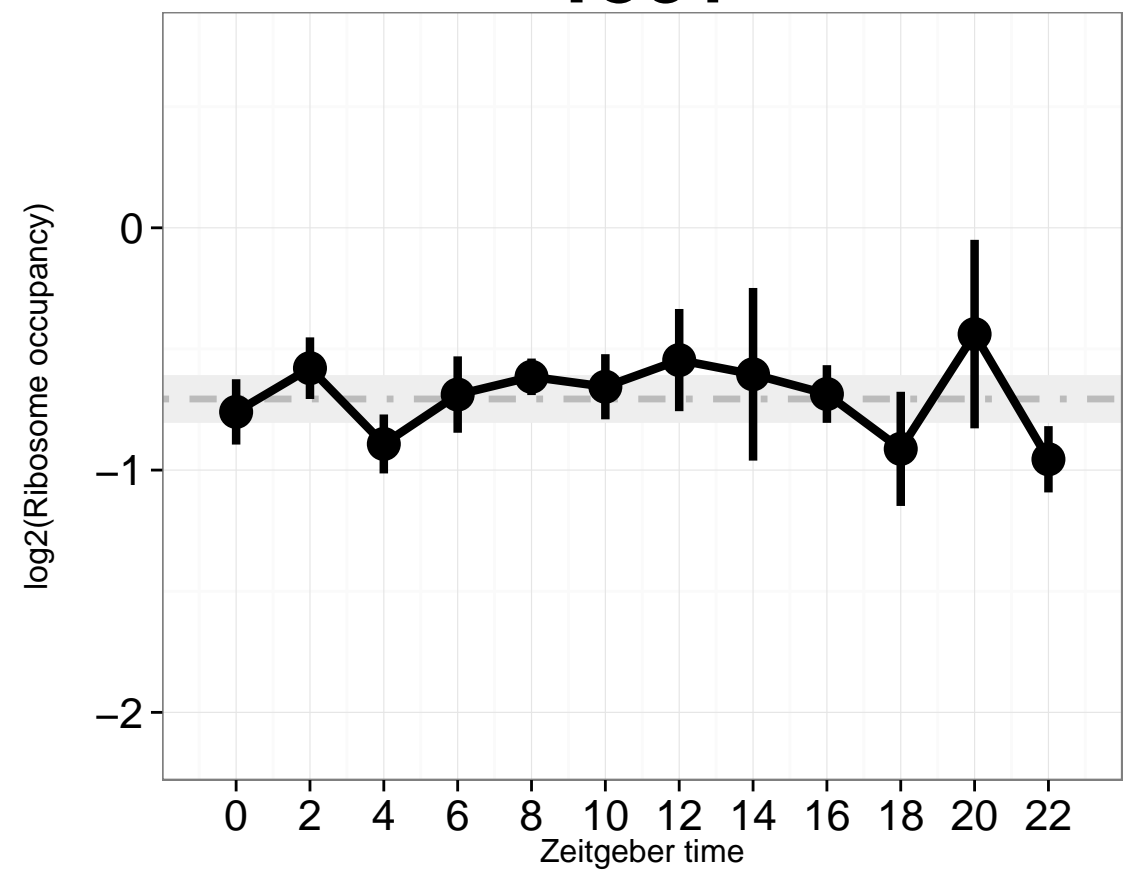

Supplement: SuppDataset_1.zip [file Toe1_set_A.pdf › Supplemental Dataset 1/A-mRNA_nonrhyth_translation_nonrhyth/Toe1_set_A.pdf]

## Tollip

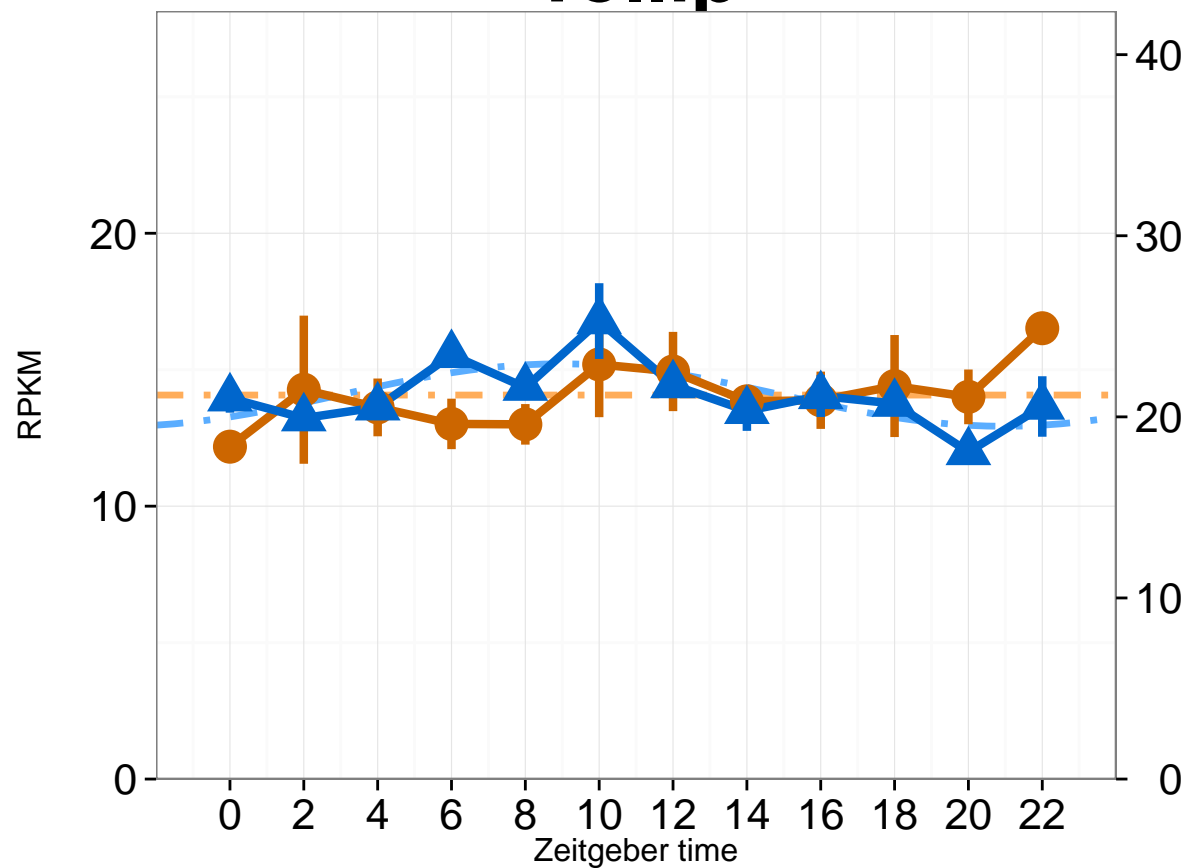

## Tollip

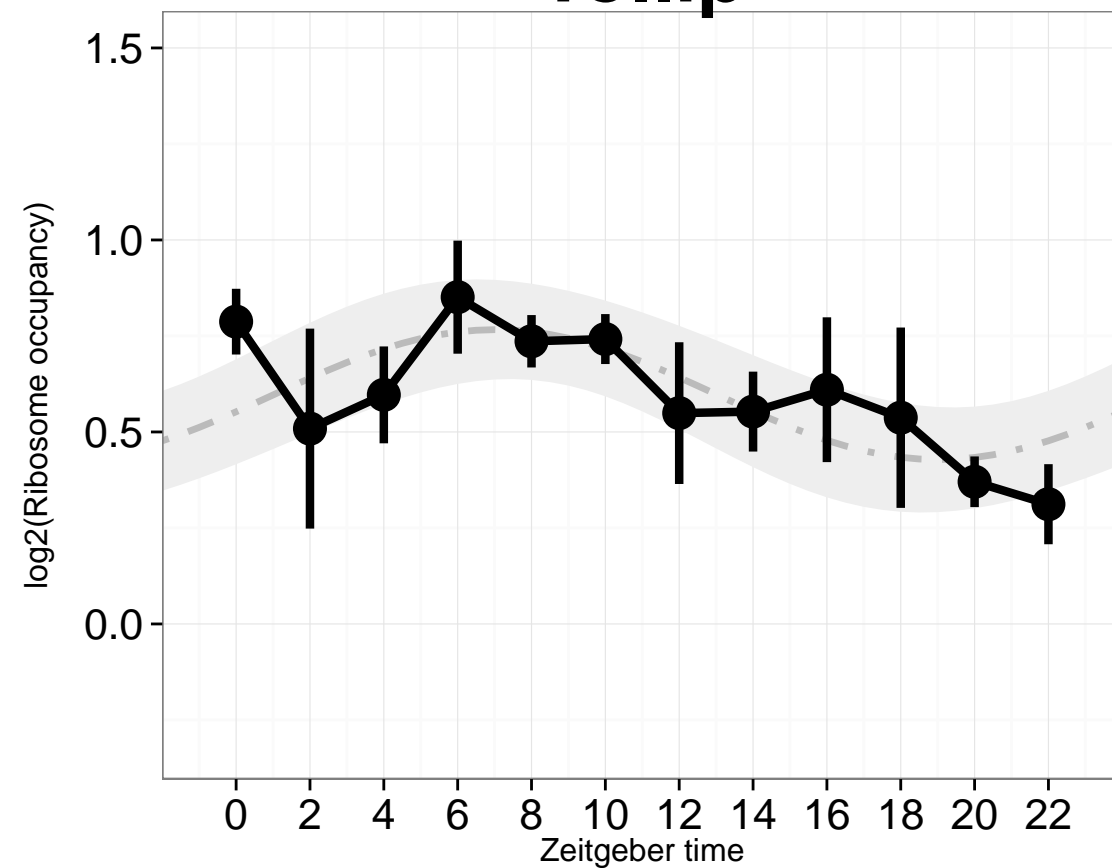

Supplement: SuppDataset_1.zip [file Tollip_set_A.pdf › Supplemental Dataset 1/A-mRNA_nonrhyth_translation_nonrhyth/Tollip_set_A.pdf]

# Tom1

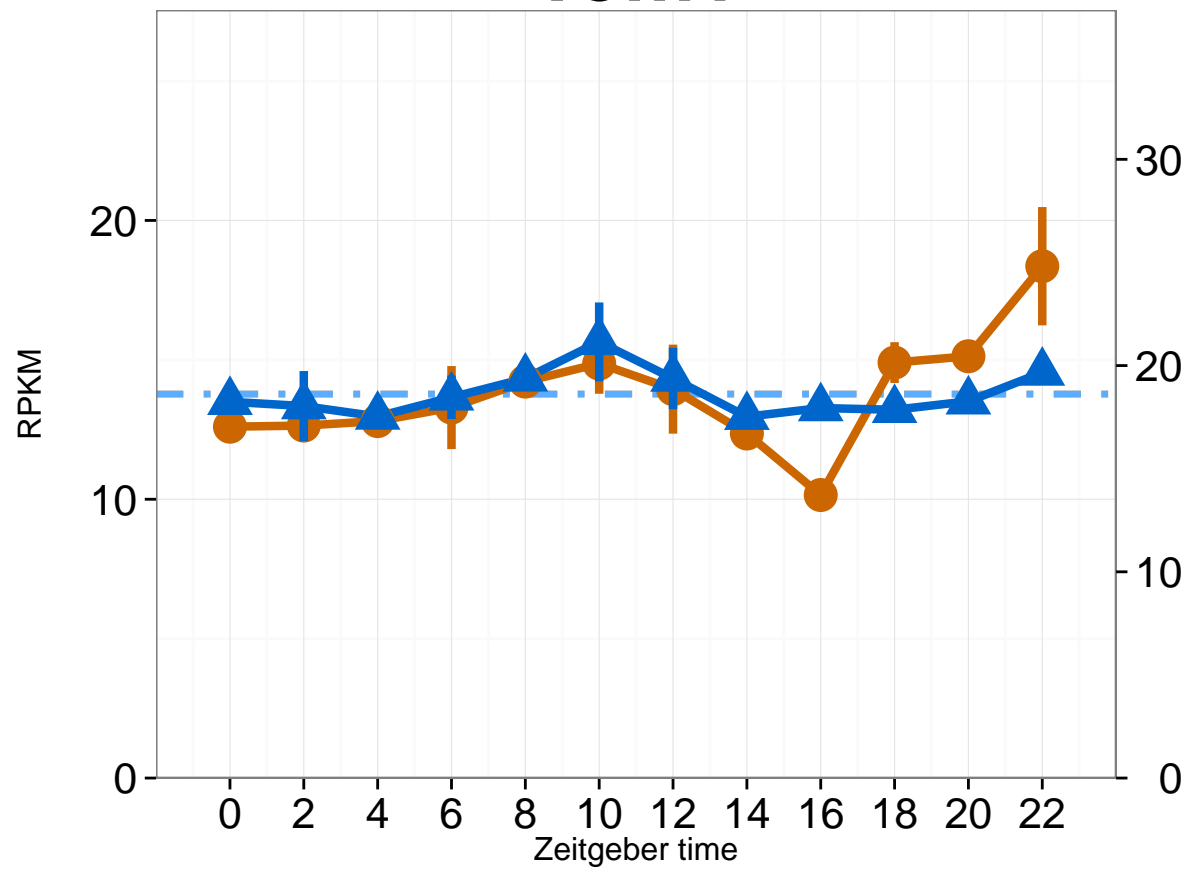

# Tom1

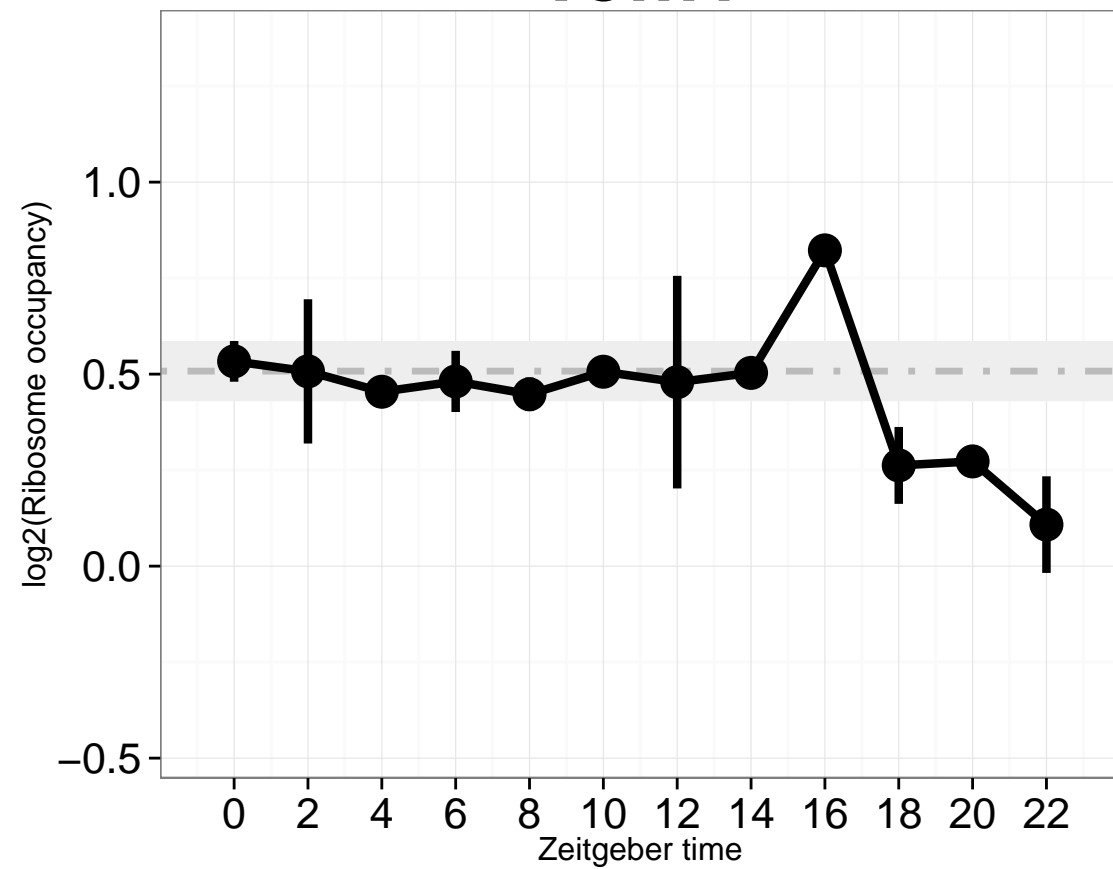

Supplement: SuppDataset_1.zip [file Tom1_set_A.pdf › Supplemental Dataset 1/A-mRNA_nonrhyth_translation_nonrhyth/Tom1_set_A.pdf]

# Tom1l1

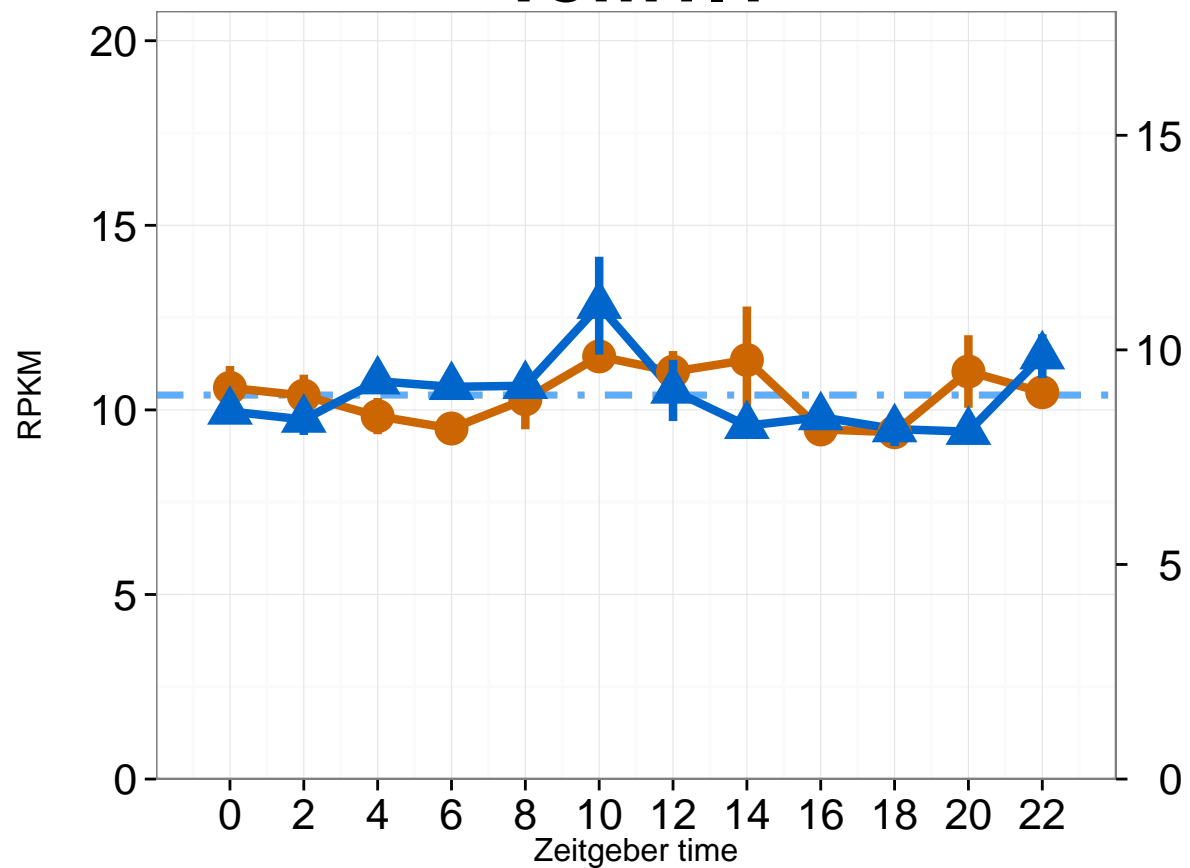

# Tom1l1

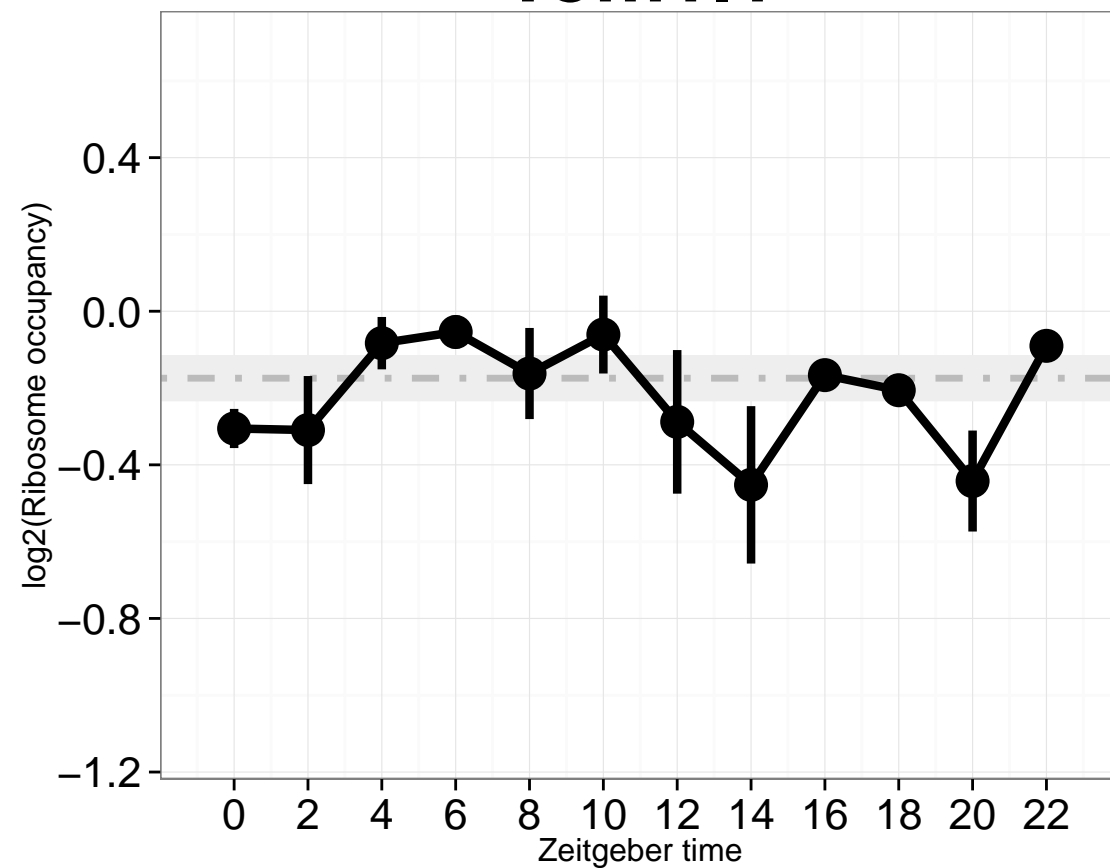

Supplement: SuppDataset_1.zip [file Tom1l1_set_A.pdf › Supplemental Dataset 1/A-mRNA_nonrhyth_translation_nonrhyth/Tom1l1_set_A.pdf]

# Tomm22

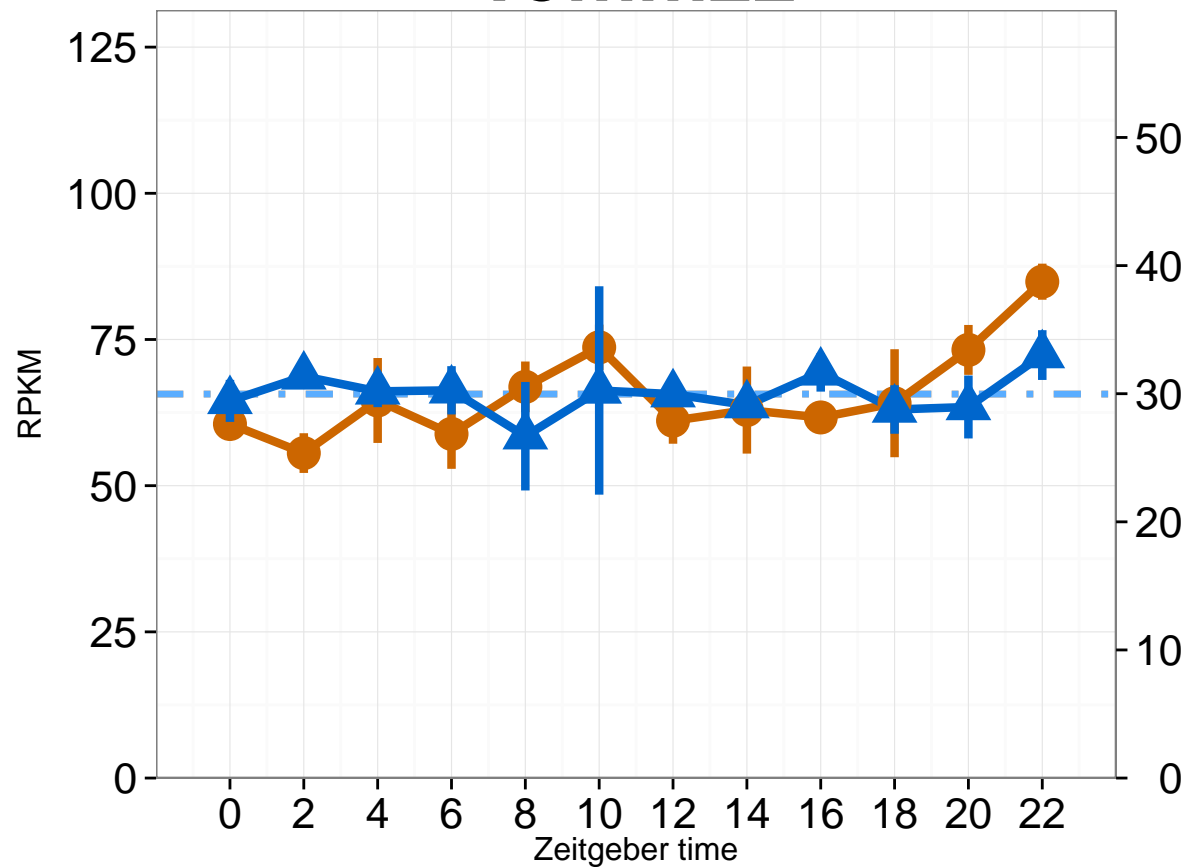

# Tomm22

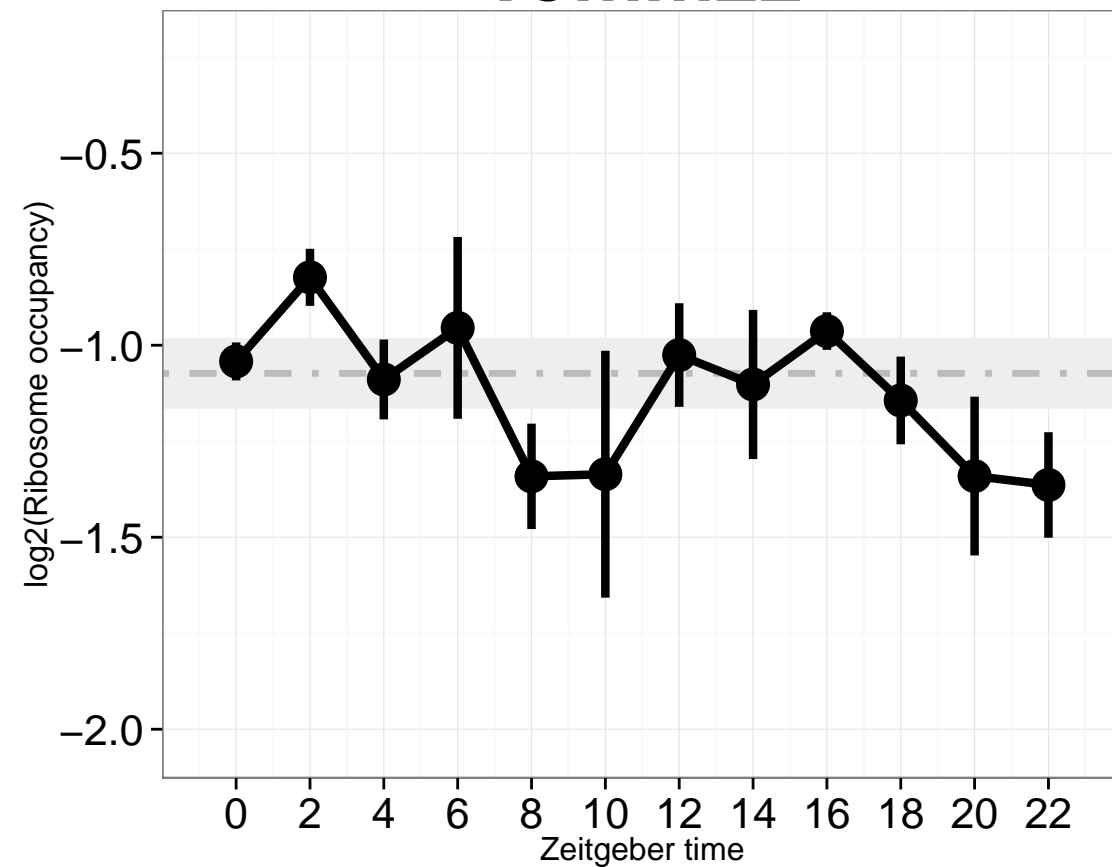

Supplement: SuppDataset_1.zip [file Tomm22_set_A.pdf › Supplemental Dataset 1/A-mRNA_nonrhyth_translation_nonrhyth/Tomm22_set_A.pdf]

## Tomm34

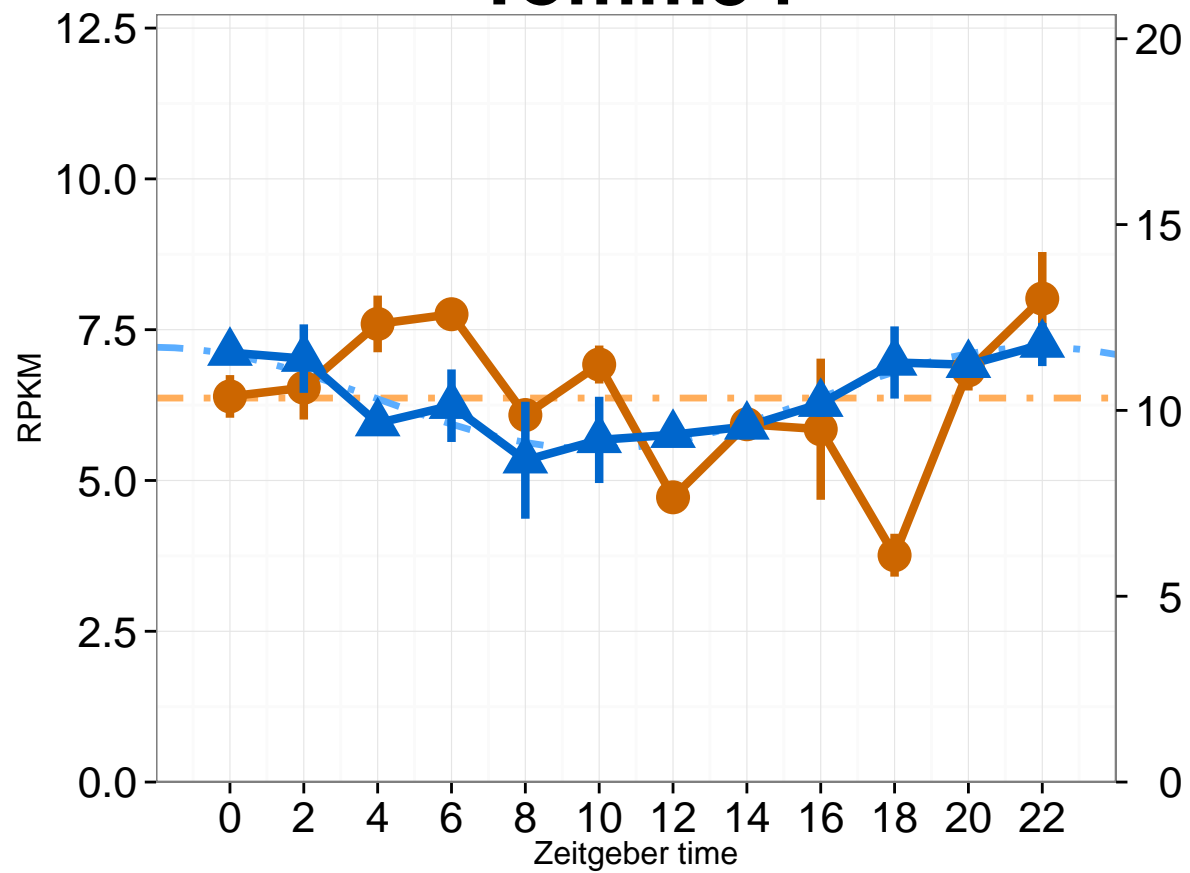

## Tomm34

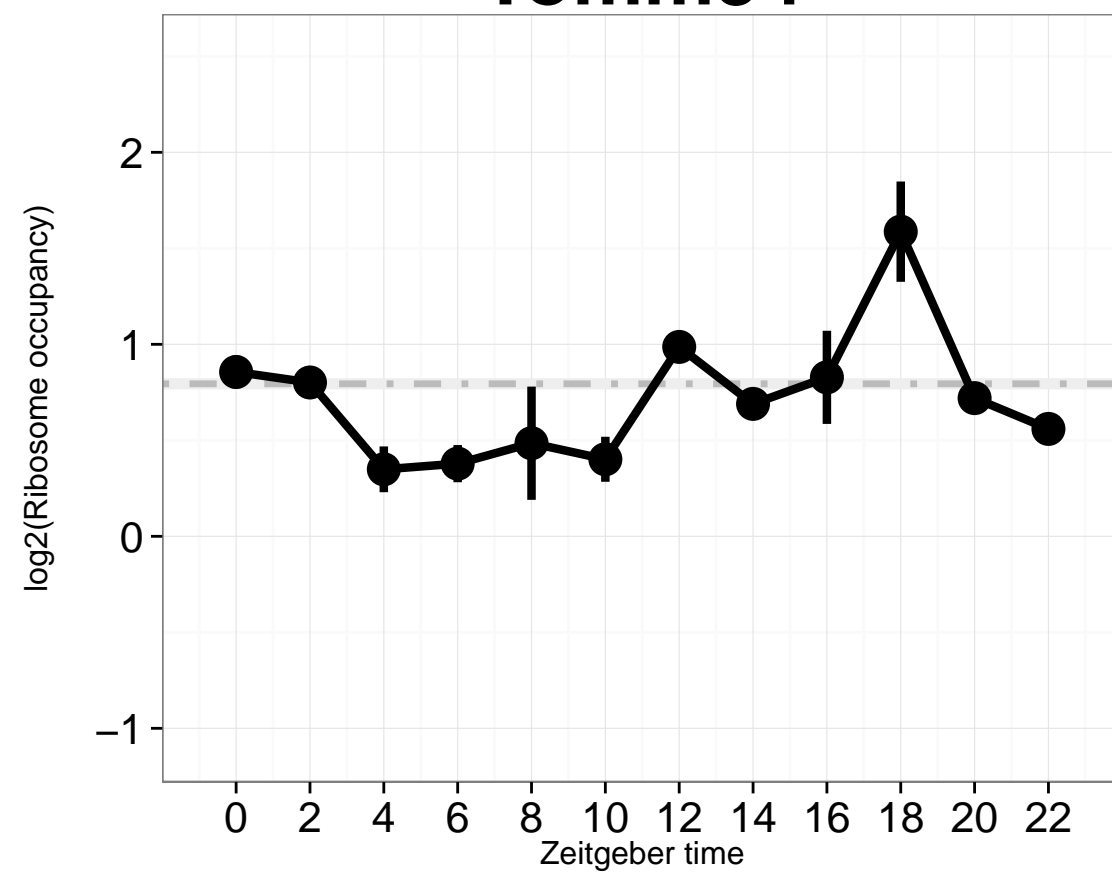

Supplement: SuppDataset_1.zip [file Tomm34_set_A.pdf › Supplemental Dataset 1/A-mRNA_nonrhyth_translation_nonrhyth/Tomm34_set_A.pdf]

## Tomm40

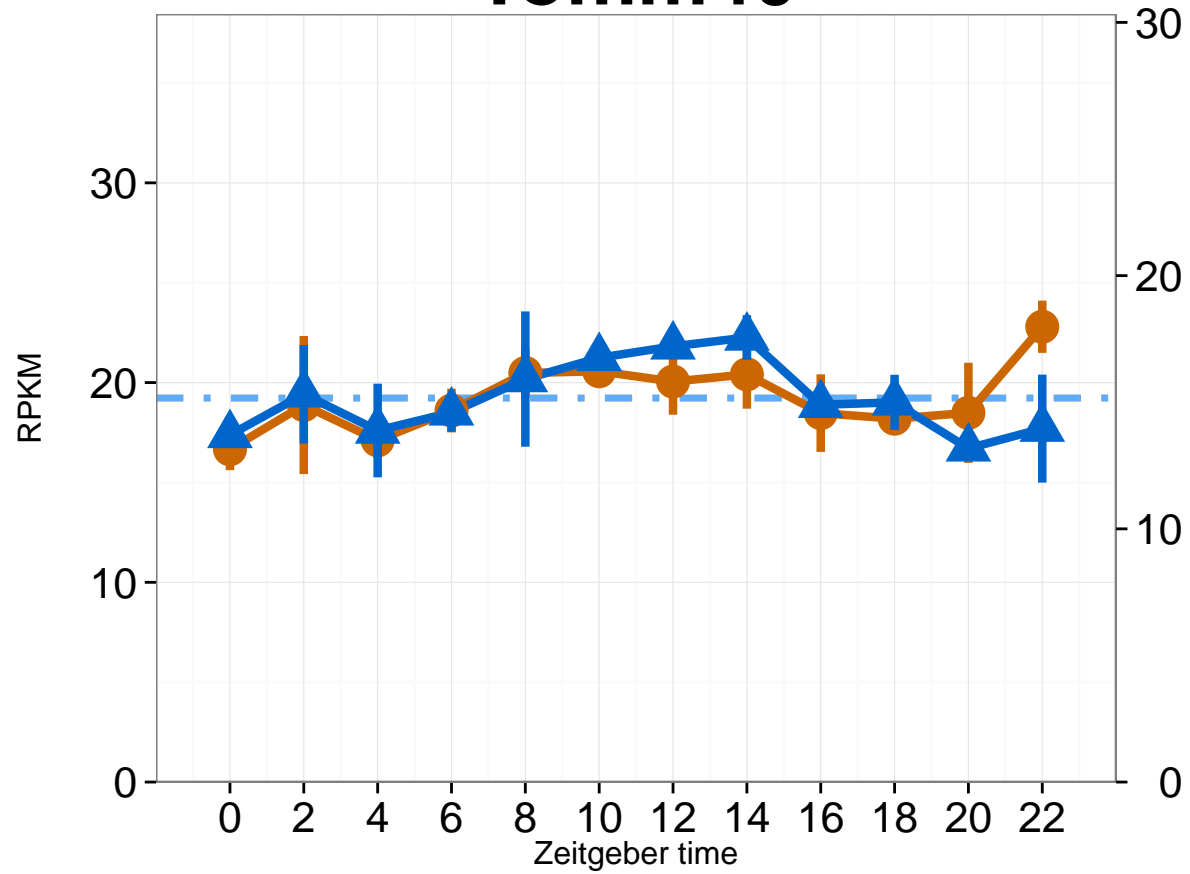

## Tomm40

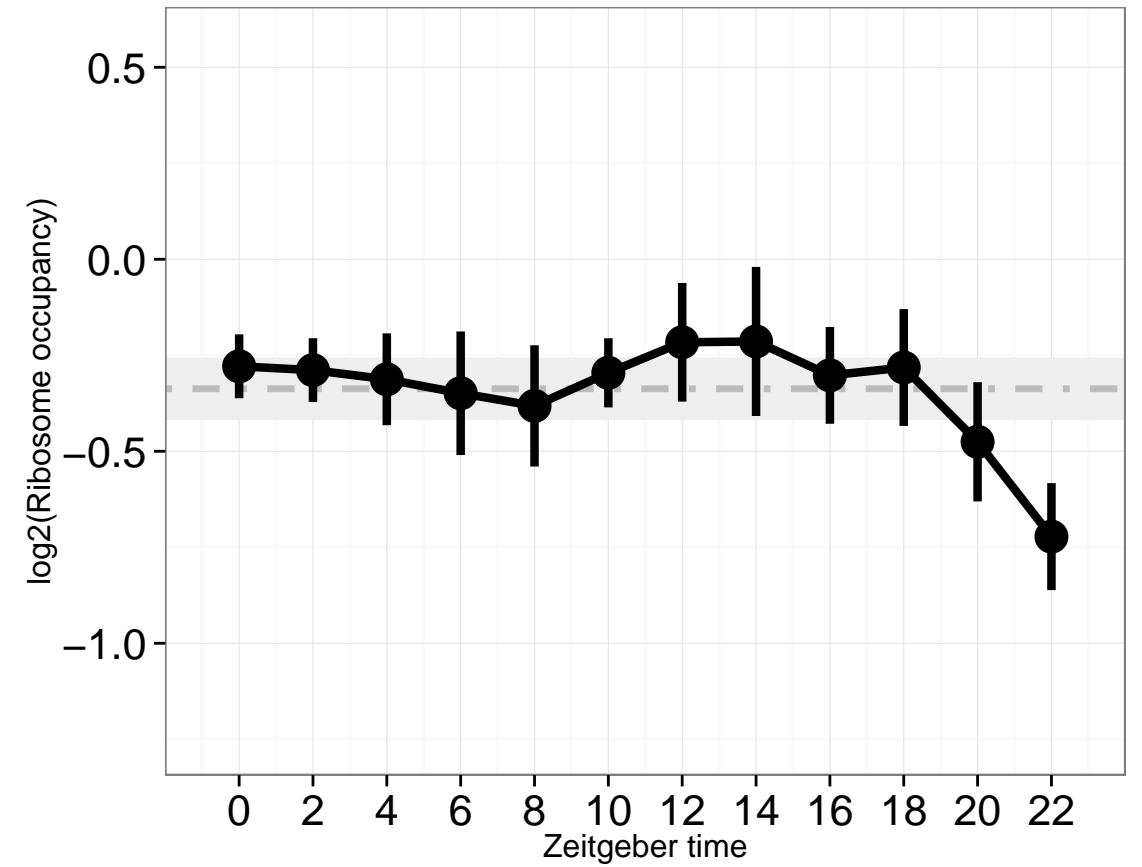

Supplement: SuppDataset_1.zip [file Tomm40_set_A.pdf › Supplemental Dataset 1/A-mRNA_nonrhyth_translation_nonrhyth/Tomm40_set_A.pdf]
