# Supplementary figures and images for: Ribosome profiling reveals the rhythmic liver translatome and circadian clock regulation by upstream open reading frames (part 77 of 113)
Source: HighWire-hosted journal article supplement (doi:10.1101/gr.195404.115), 2015-10-20

## Tomm5

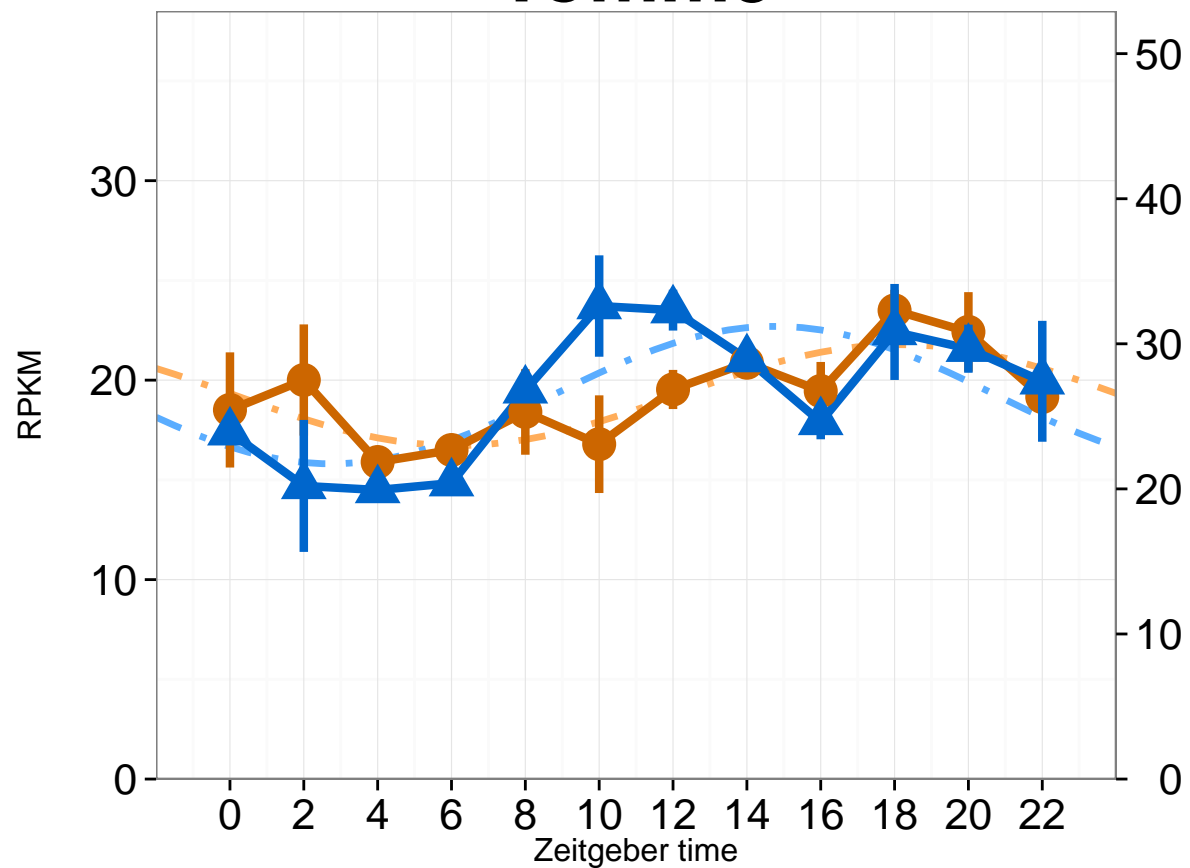

## Tomm5

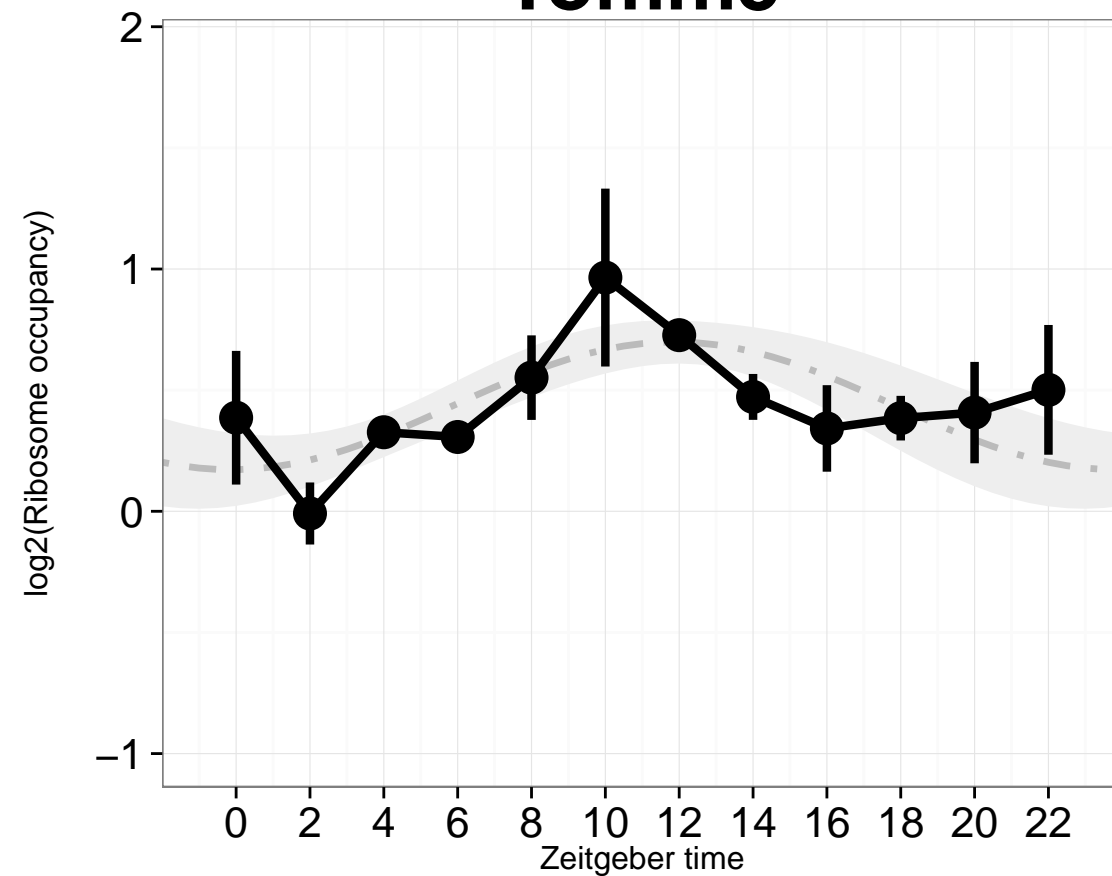

Supplement: SuppDataset_1.zip [file Tomm5_set_A.pdf › Supplemental Dataset 1/A-mRNA_nonrhyth_translation_nonrhyth/Tomm5_set_A.pdf]

# Tomm70a

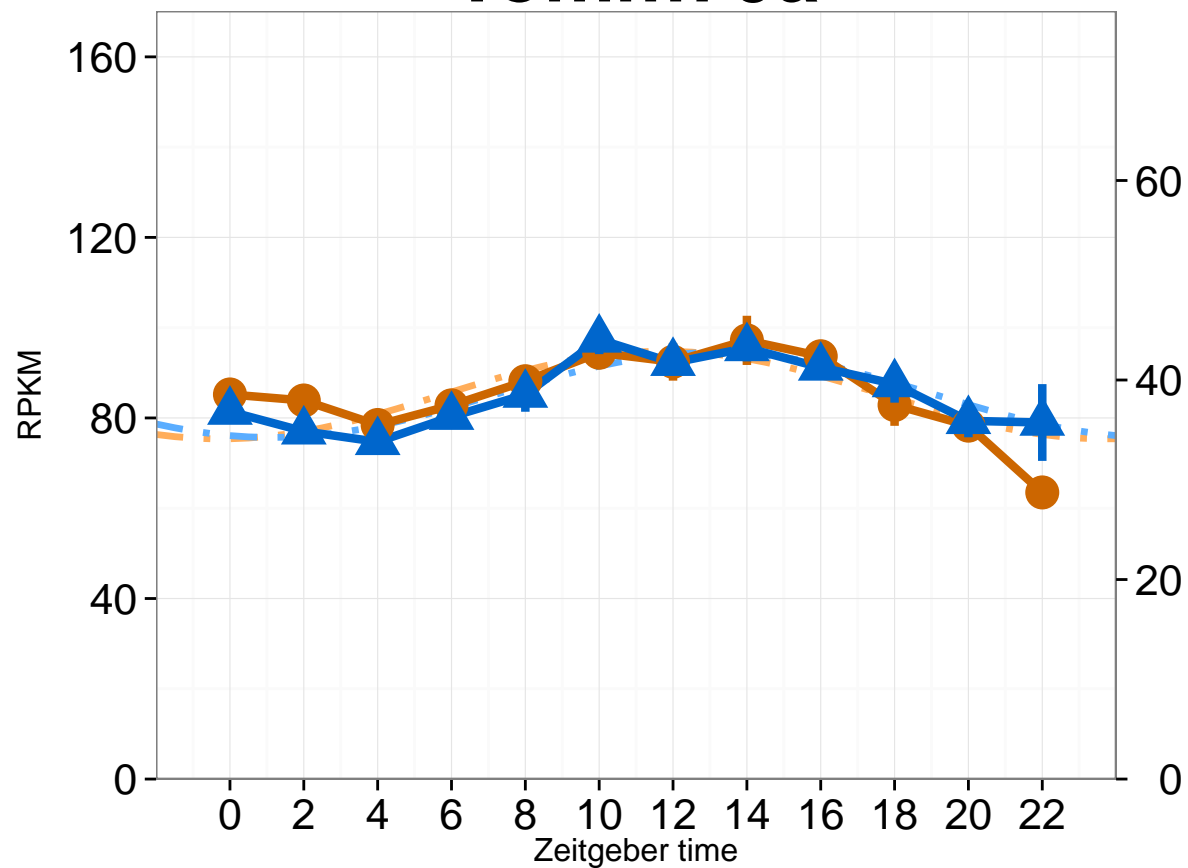

# Tomm70a

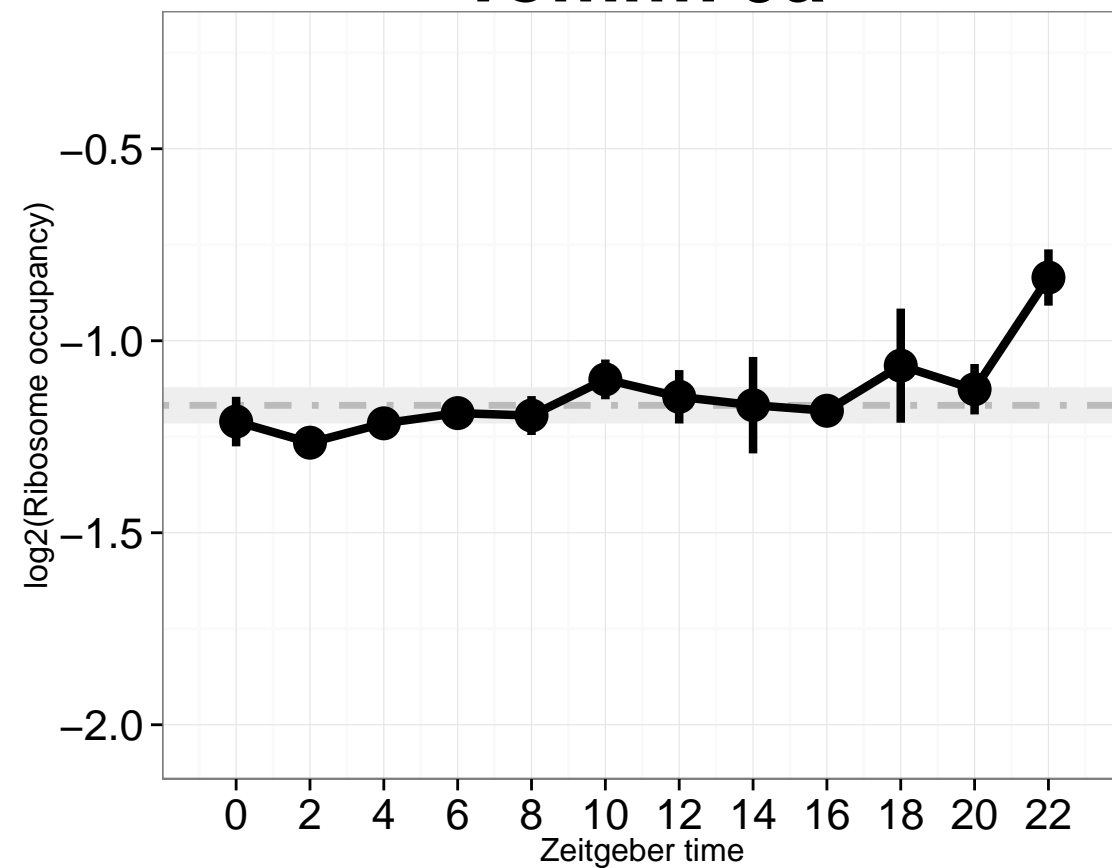

Supplement: SuppDataset_1.zip [file Tomm70a_set_A.pdf › Supplemental Dataset 1/A-mRNA_nonrhyth_translation_nonrhyth/Tomm70a_set_A.pdf]

# Tomm7

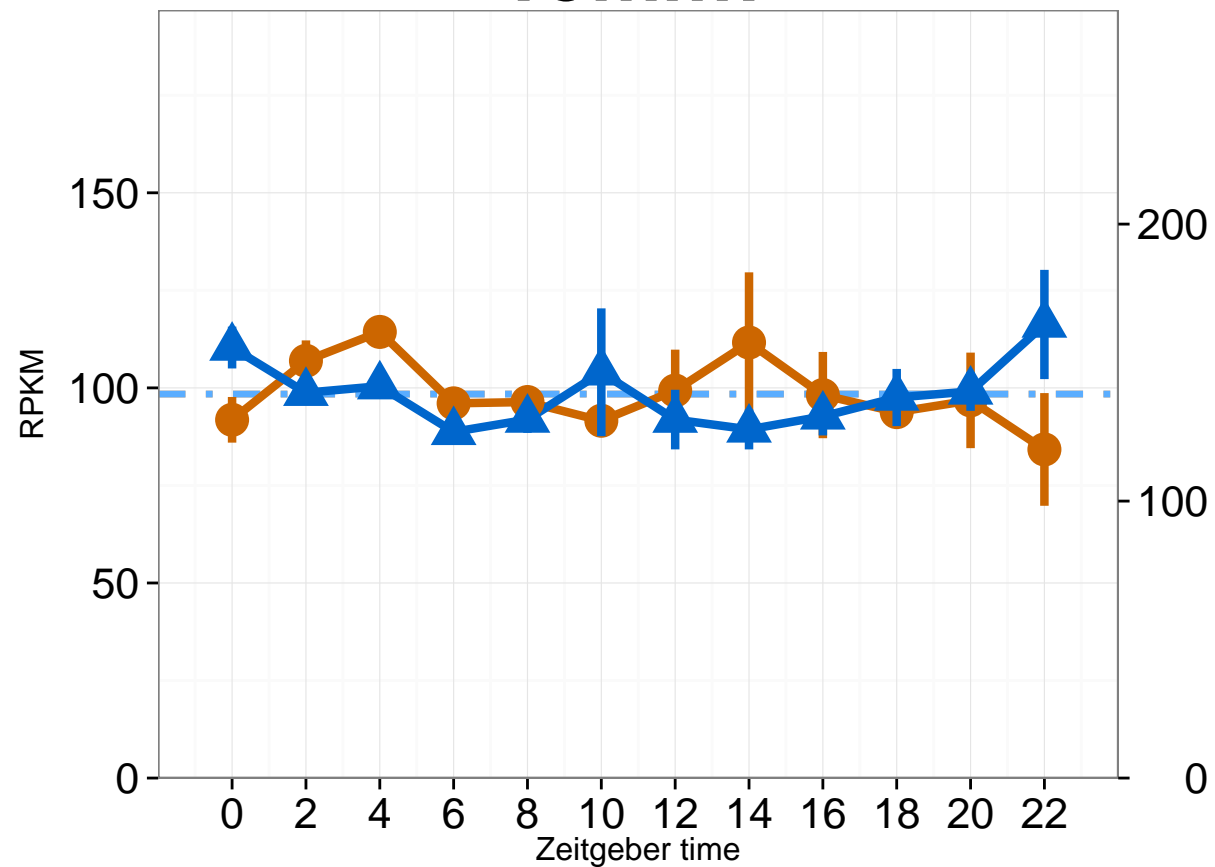

# Tomm7

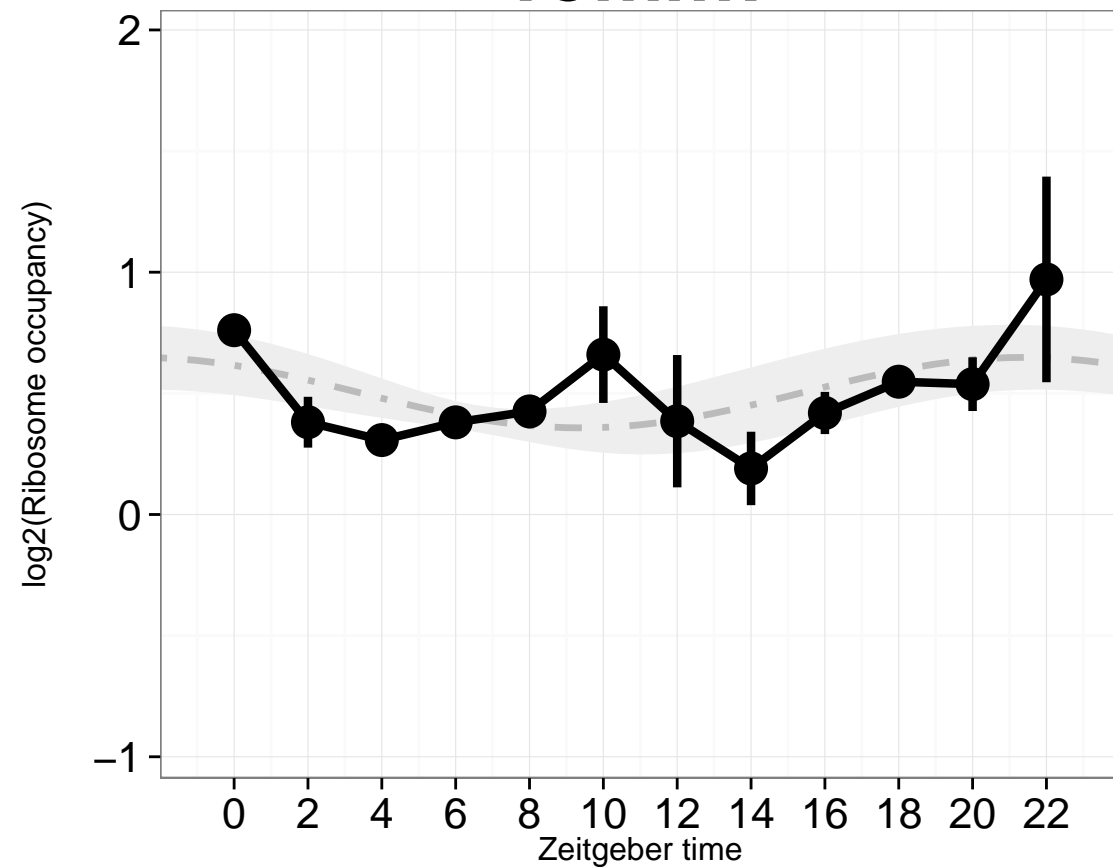

Supplement: SuppDataset_1.zip [file Tomm7_set_A.pdf › Supplemental Dataset 1/A-mRNA_nonrhyth_translation_nonrhyth/Tomm7_set_A.pdf]

# Top1mt

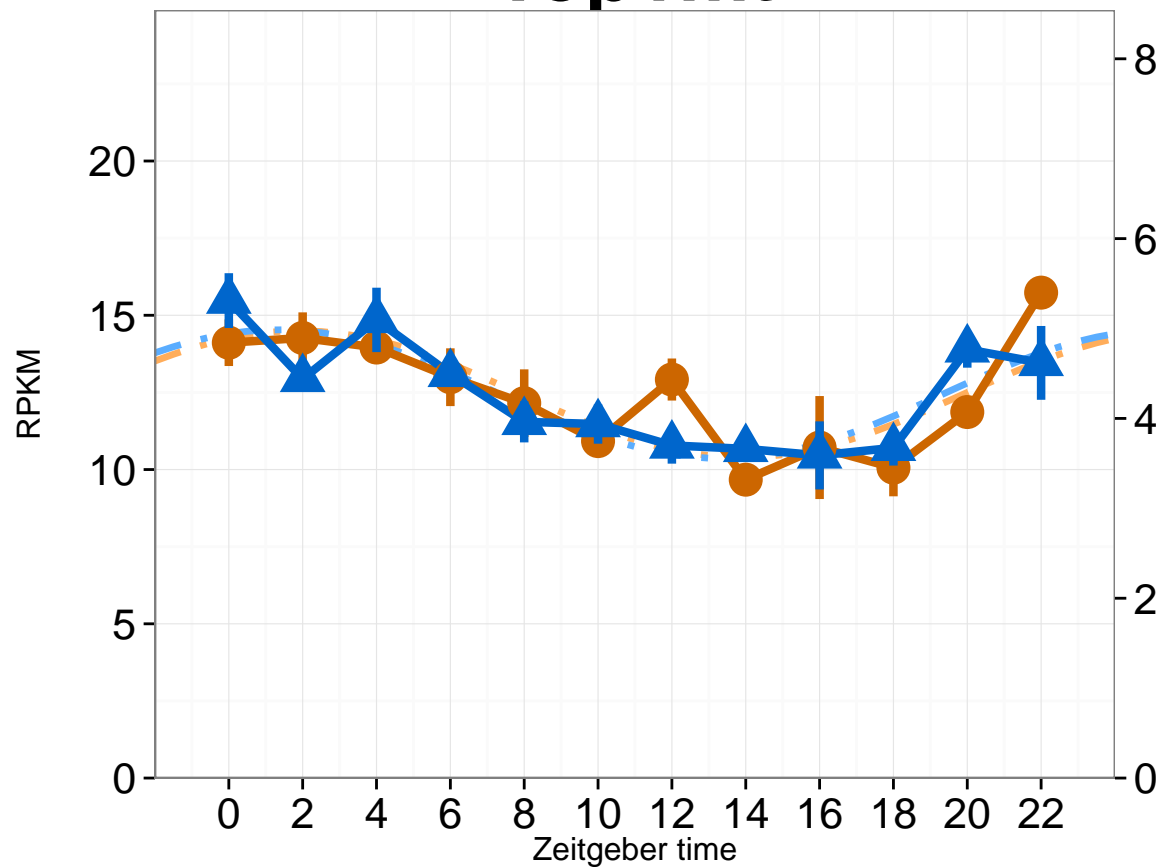

# Top1mt

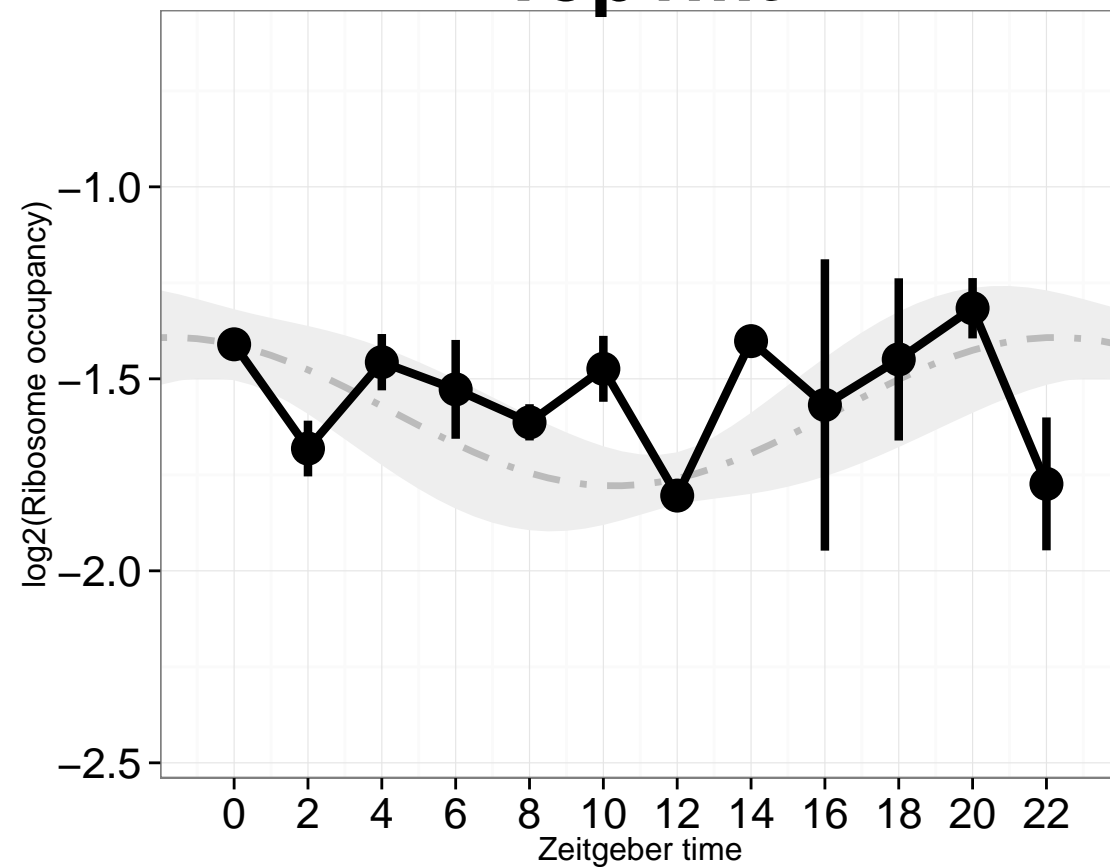

Supplement: SuppDataset_1.zip [file Top1mt_set_A.pdf › Supplemental Dataset 1/A-mRNA_nonrhyth_translation_nonrhyth/Top1mt_set_A.pdf]

# Top2a

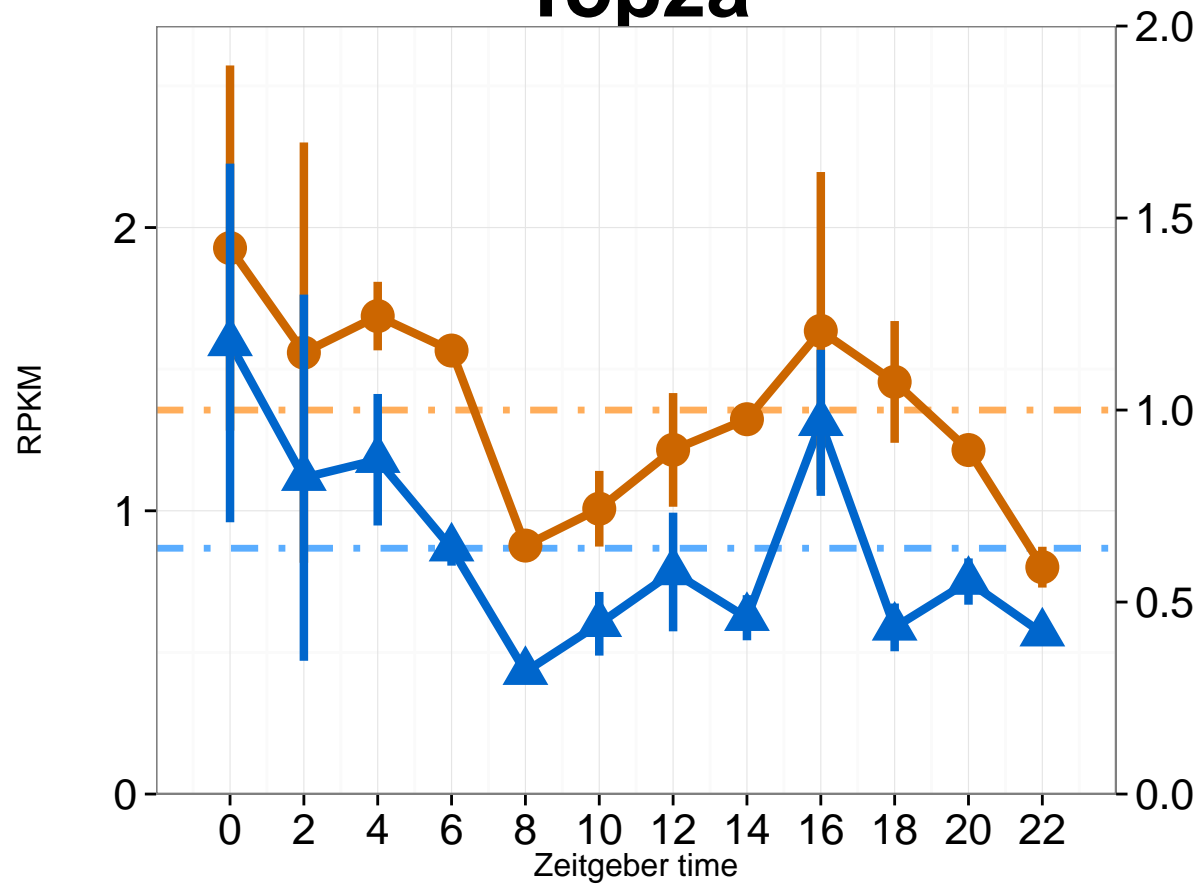

# Top2a

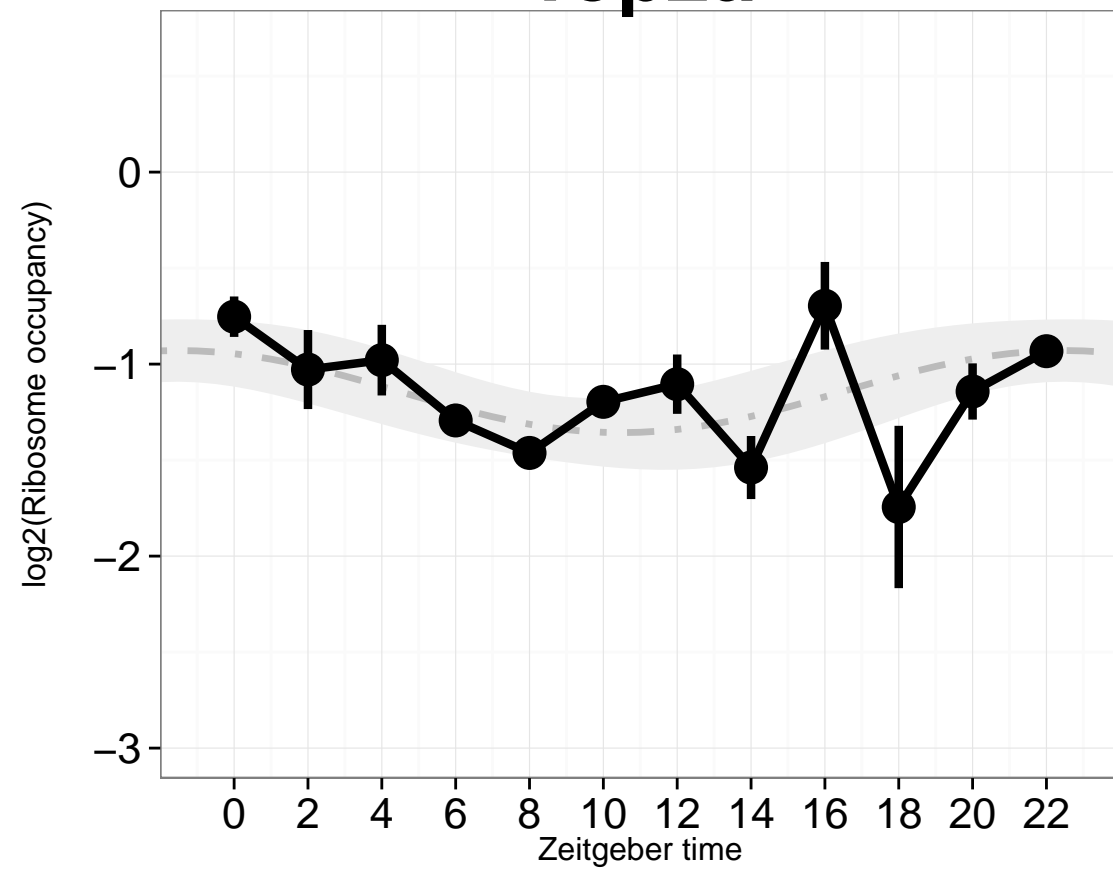

Supplement: SuppDataset_1.zip [file Top2a_set_A.pdf › Supplemental Dataset 1/A-mRNA_nonrhyth_translation_nonrhyth/Top2a_set_A.pdf]

# Top2b

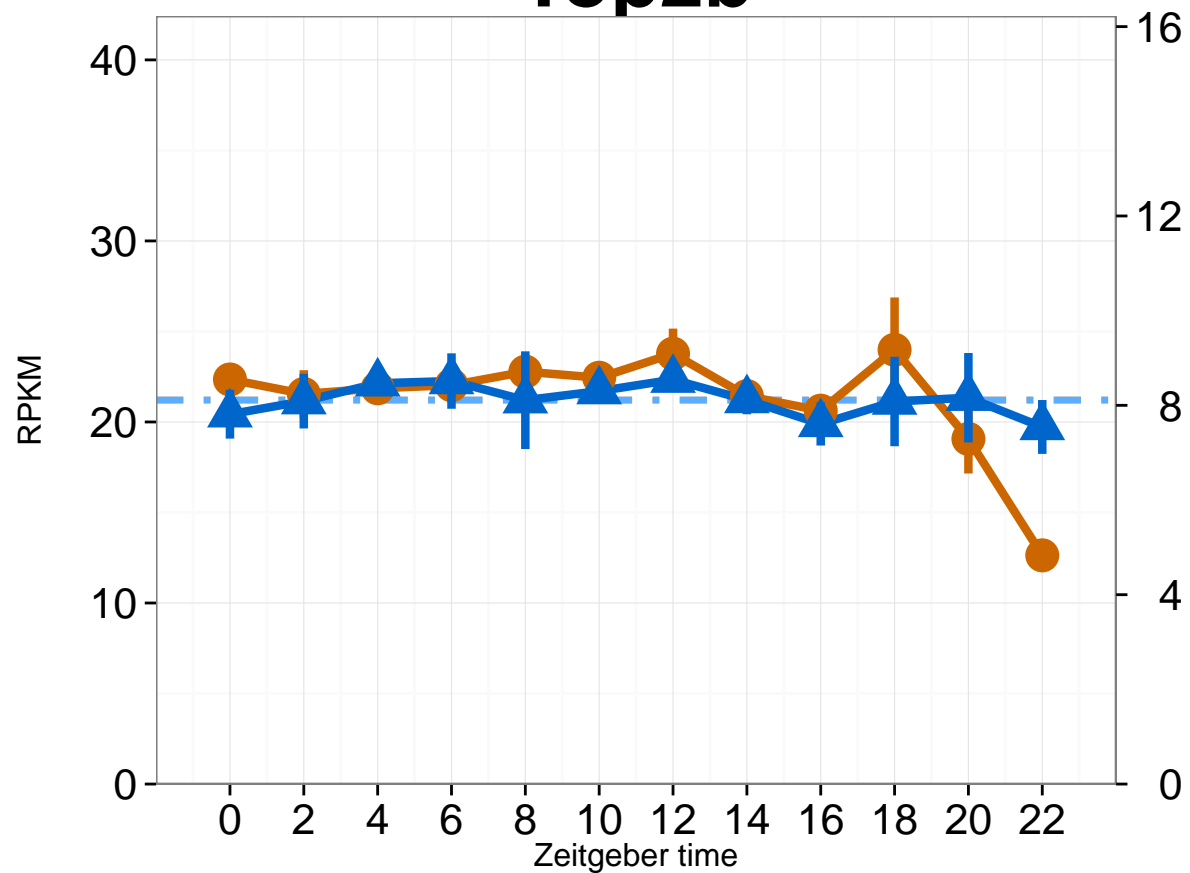

# Top2b

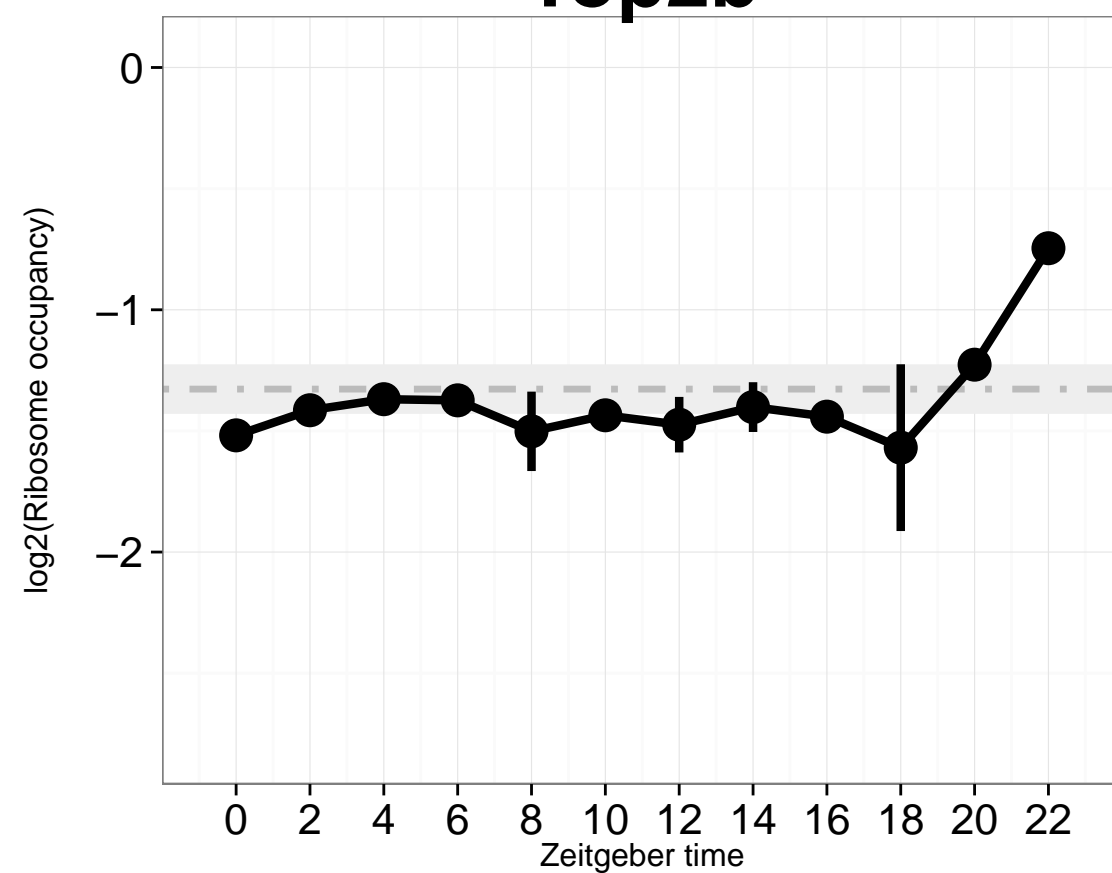

Supplement: SuppDataset_1.zip [file Top2b_set_A.pdf › Supplemental Dataset 1/A-mRNA_nonrhyth_translation_nonrhyth/Top2b_set_A.pdf]

# Top3a

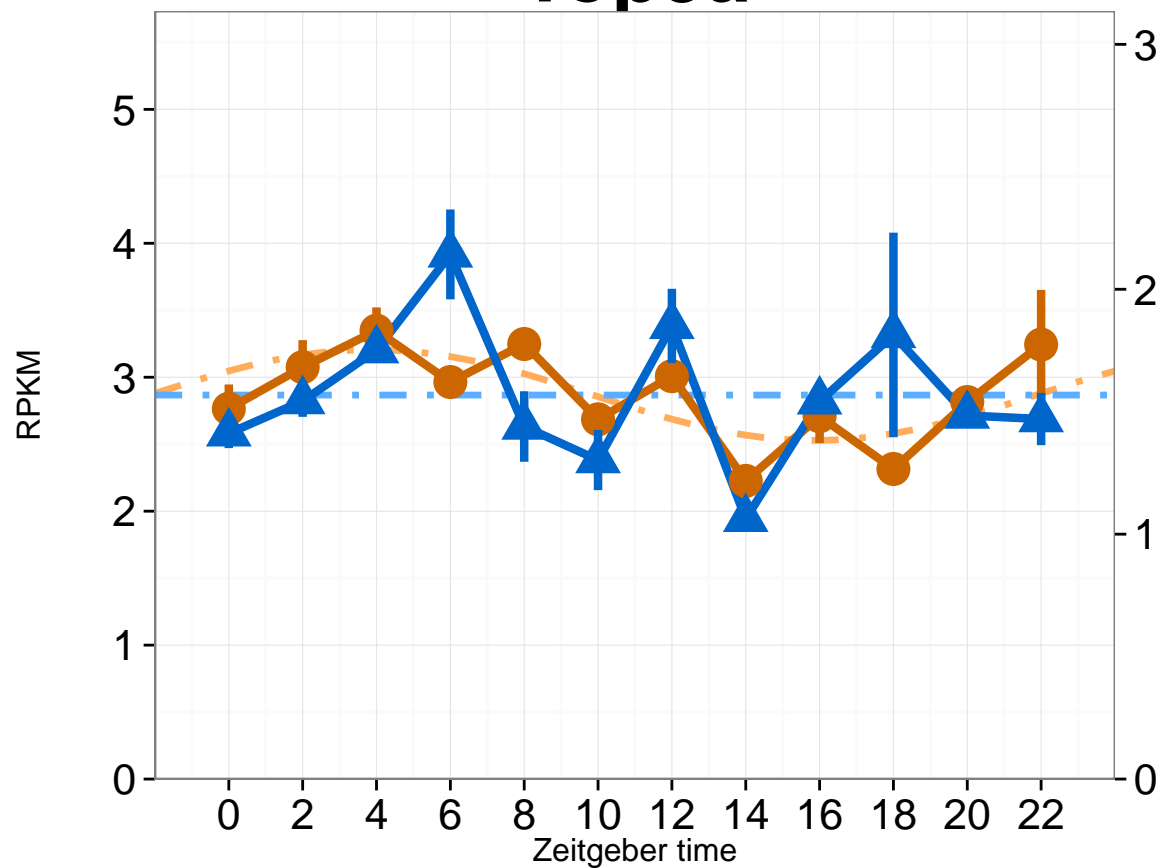

# Top3a

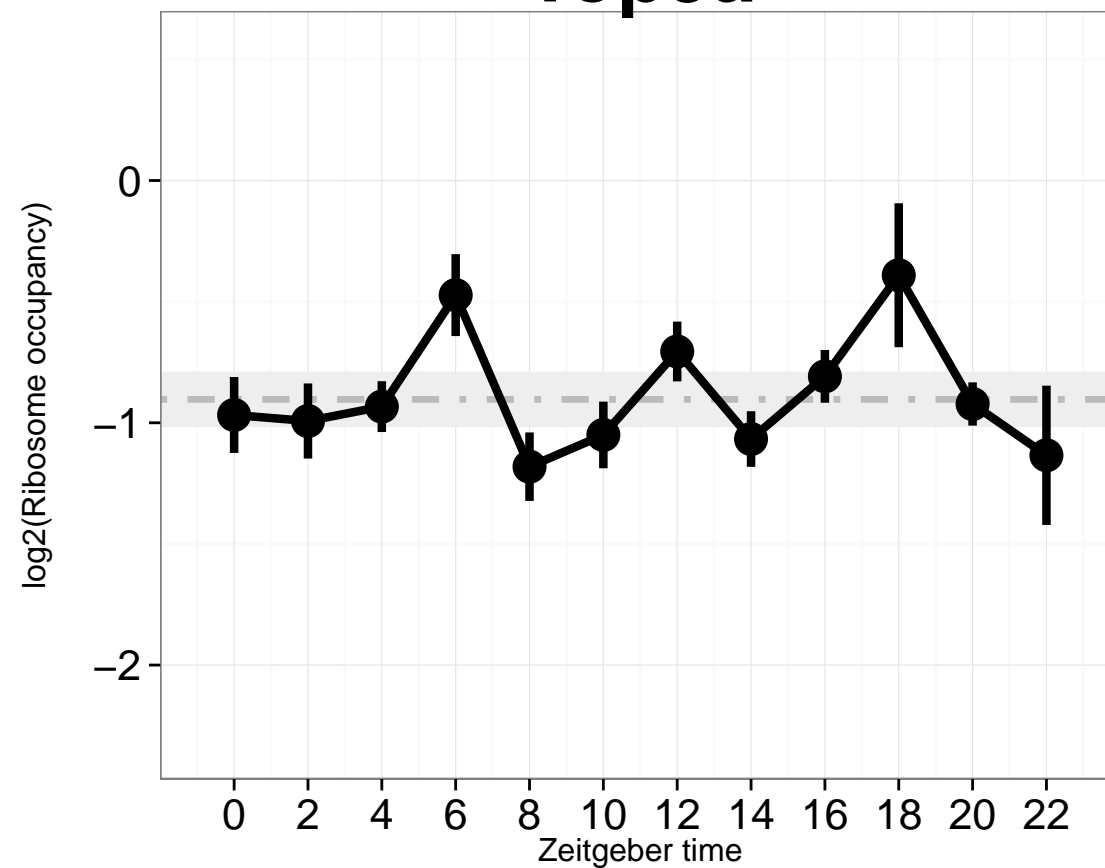

Supplement: SuppDataset_1.zip [file Top3a_set_A.pdf › Supplemental Dataset 1/A-mRNA_nonrhyth_translation_nonrhyth/Top3a_set_A.pdf]

# Top3b

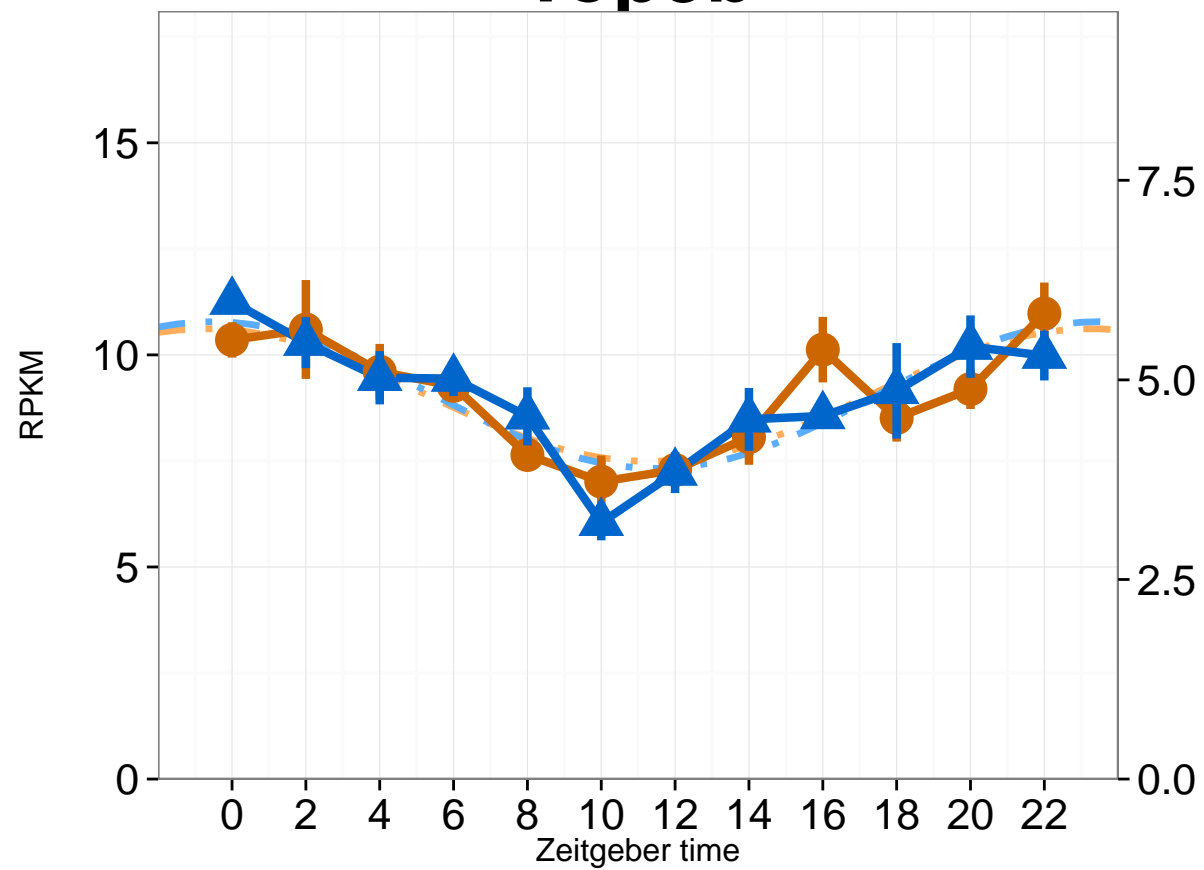

# Top3b

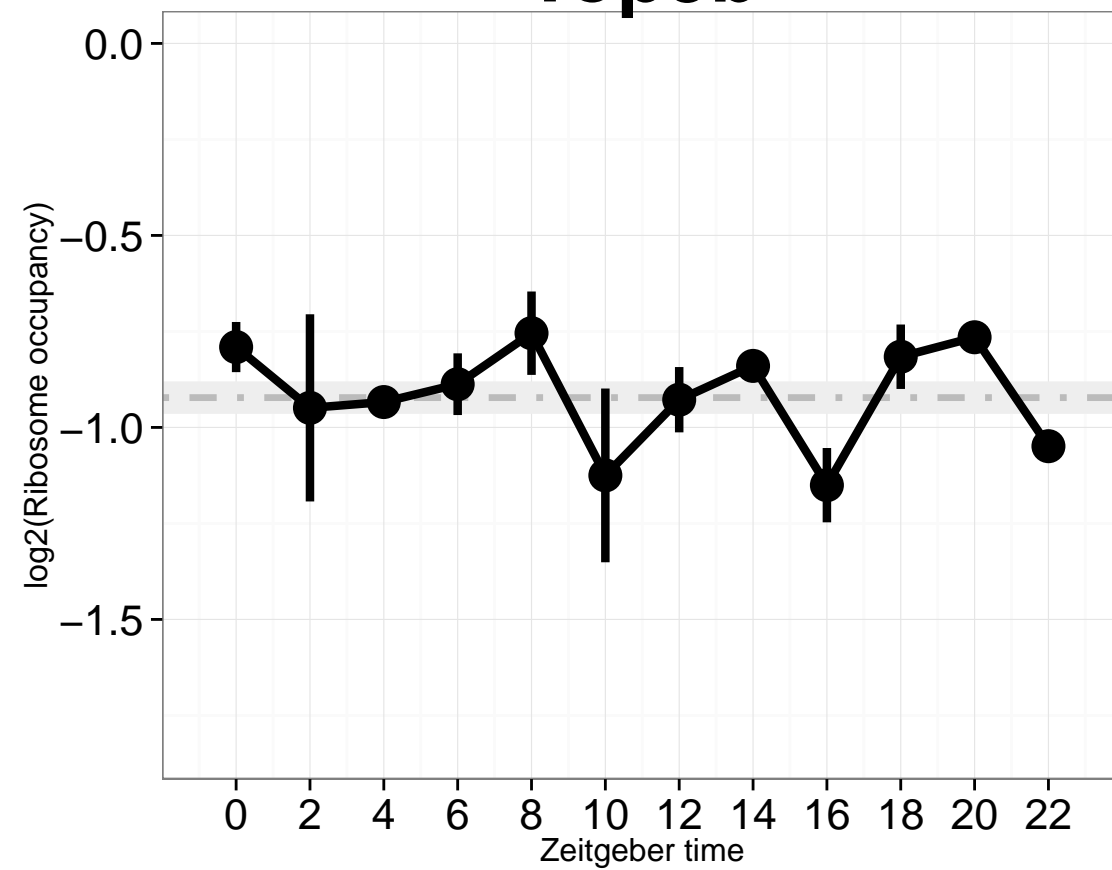

Supplement: SuppDataset_1.zip [file Top3b_set_A.pdf › Supplemental Dataset 1/A-mRNA_nonrhyth_translation_nonrhyth/Top3b_set_A.pdf]

# Topbp1

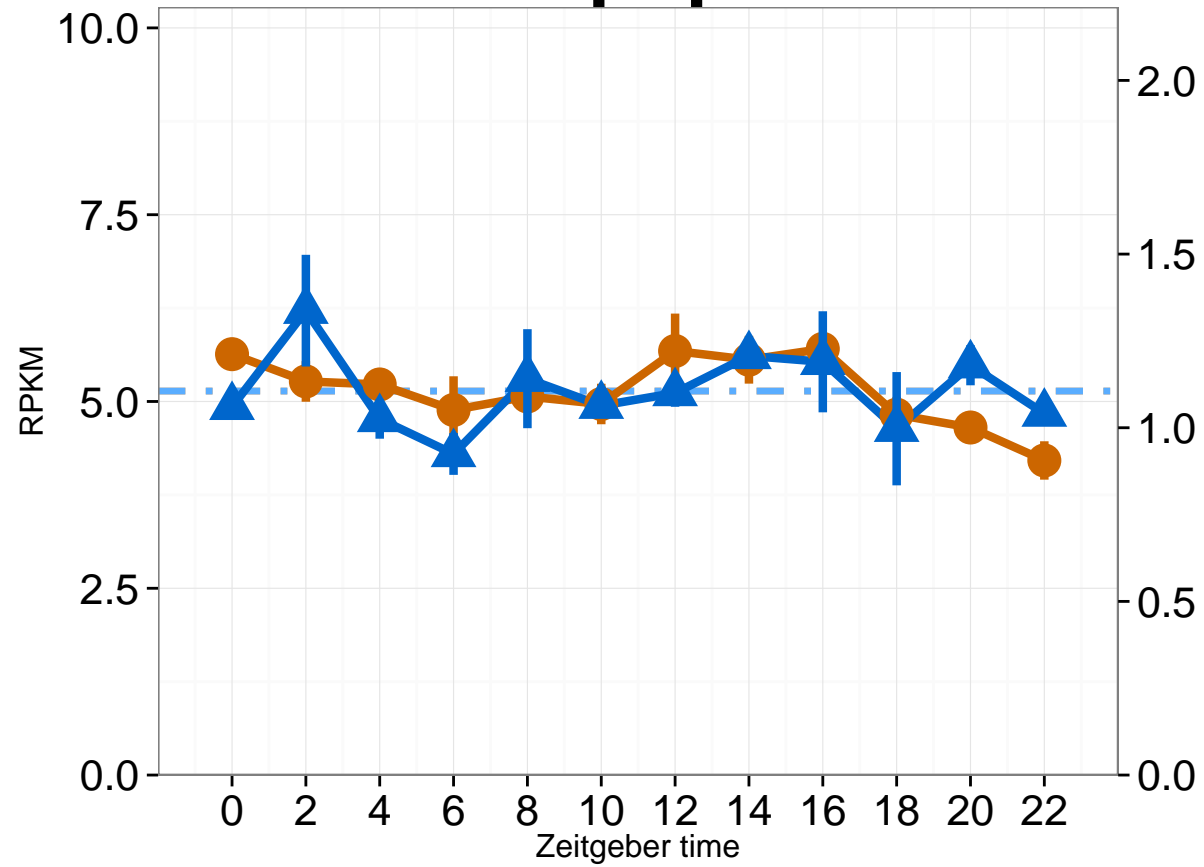

# Topbp1

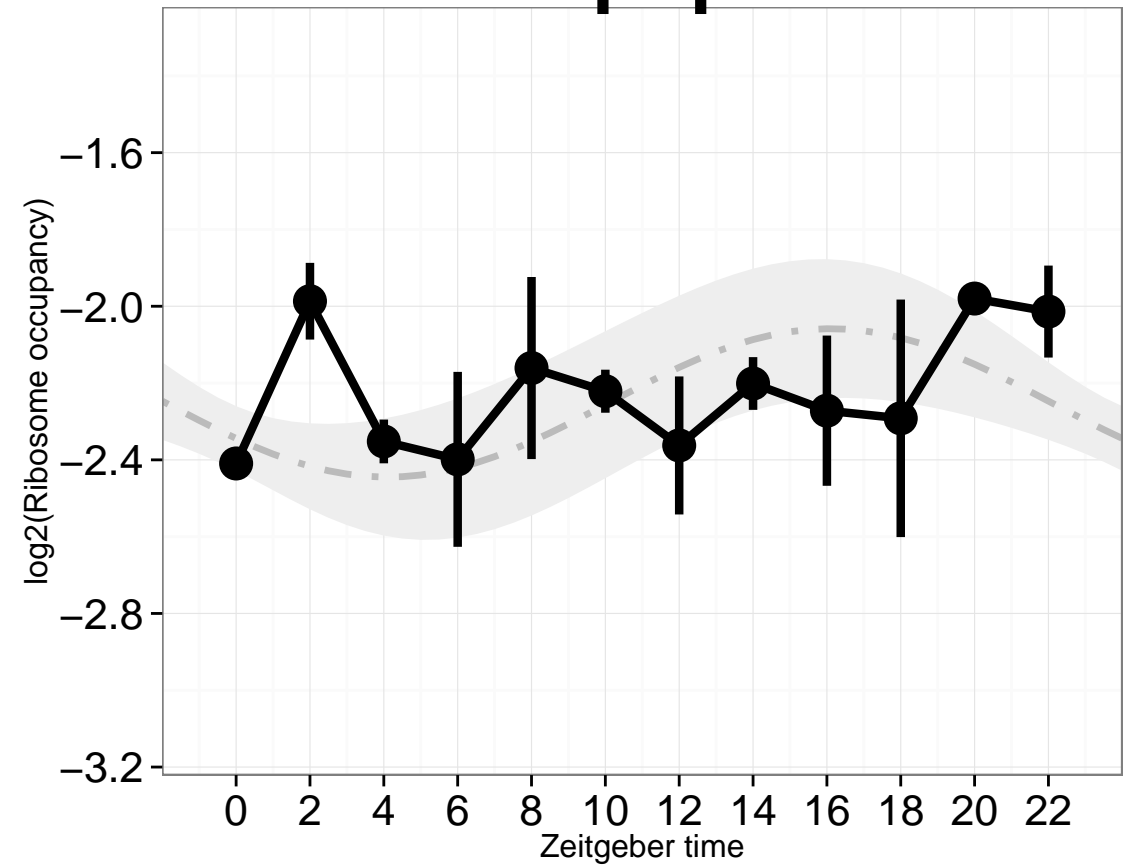

Supplement: SuppDataset_1.zip [file Topbp1_set_A.pdf › Supplemental Dataset 1/A-mRNA_nonrhyth_translation_nonrhyth/Topbp1_set_A.pdf]

## Topors

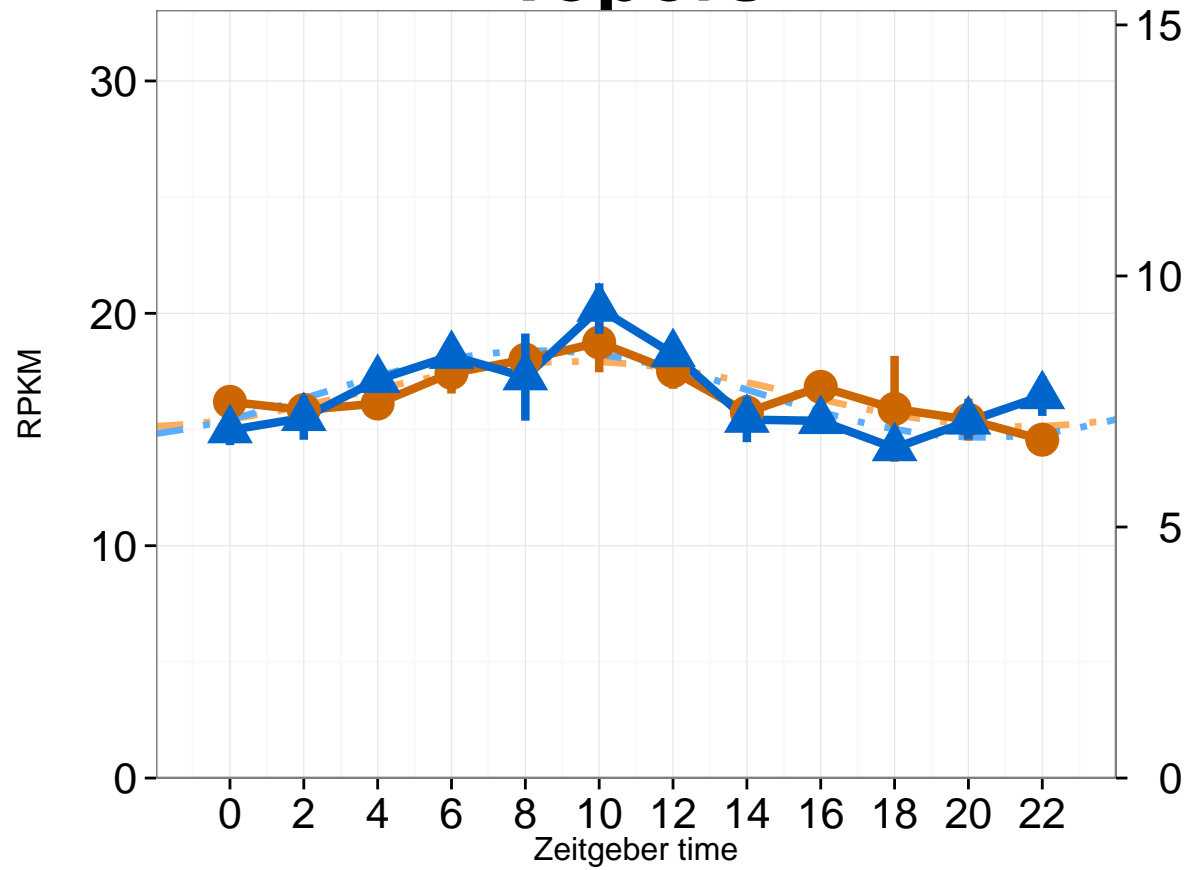

## Topors

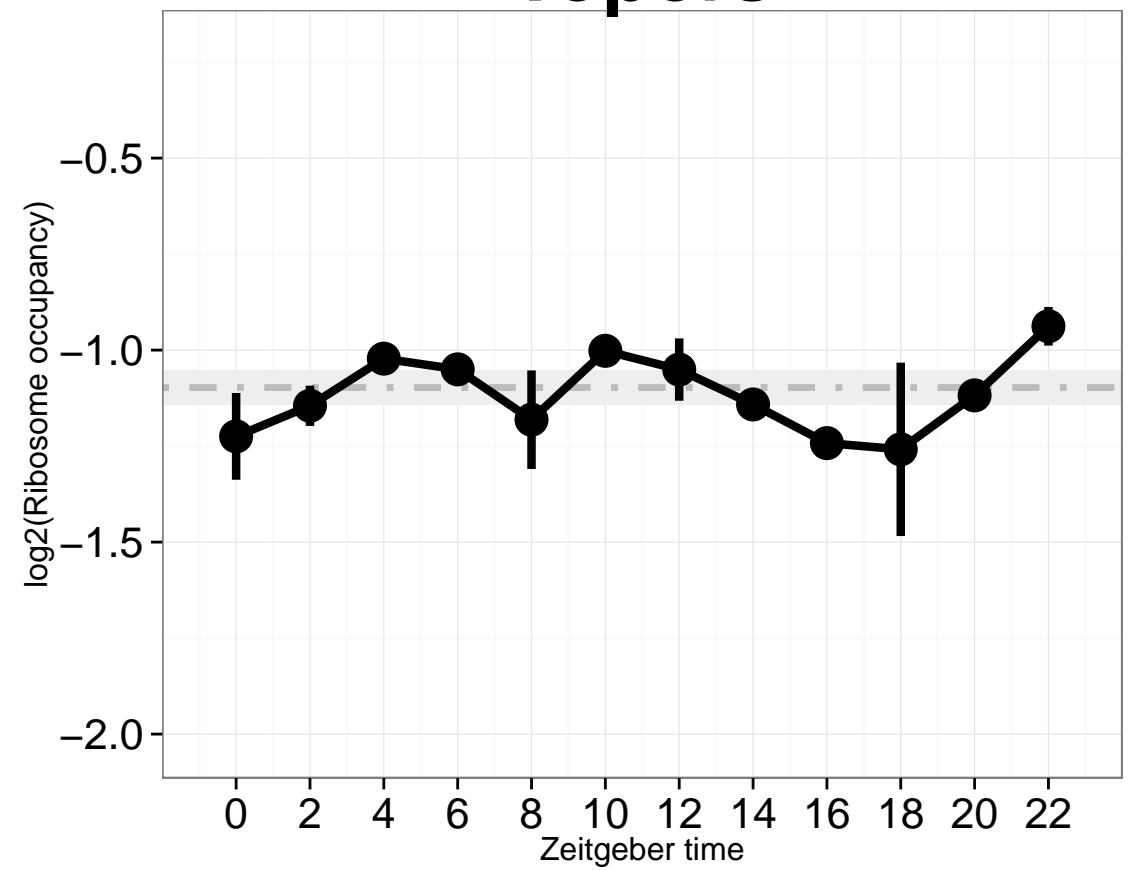

Supplement: SuppDataset_1.zip [file Topors_set_A.pdf › Supplemental Dataset 1/A-mRNA_nonrhyth_translation_nonrhyth/Topors_set_A.pdf]

## Tor1a

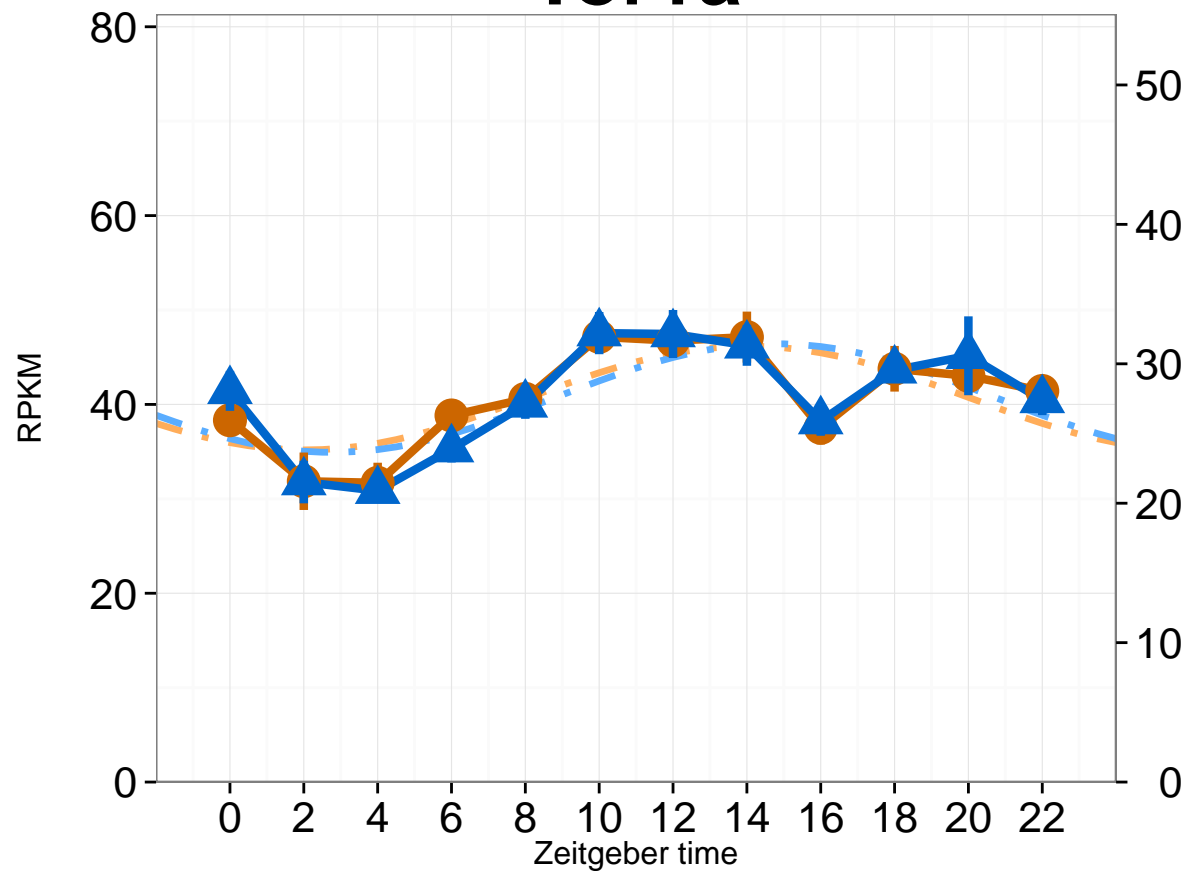

## Tor1a

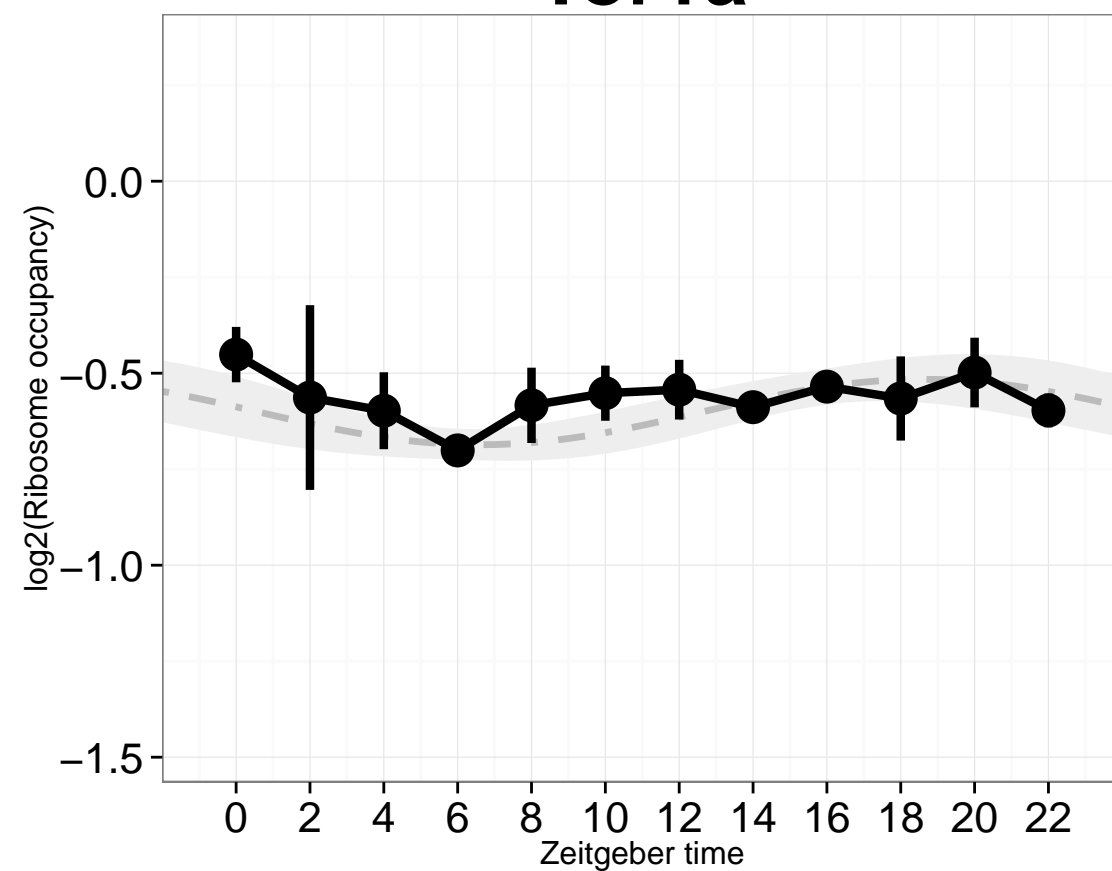

Supplement: SuppDataset_1.zip [file Tor1a_set_A.pdf › Supplemental Dataset 1/A-mRNA_nonrhyth_translation_nonrhyth/Tor1a_set_A.pdf]

# Tor1aip1

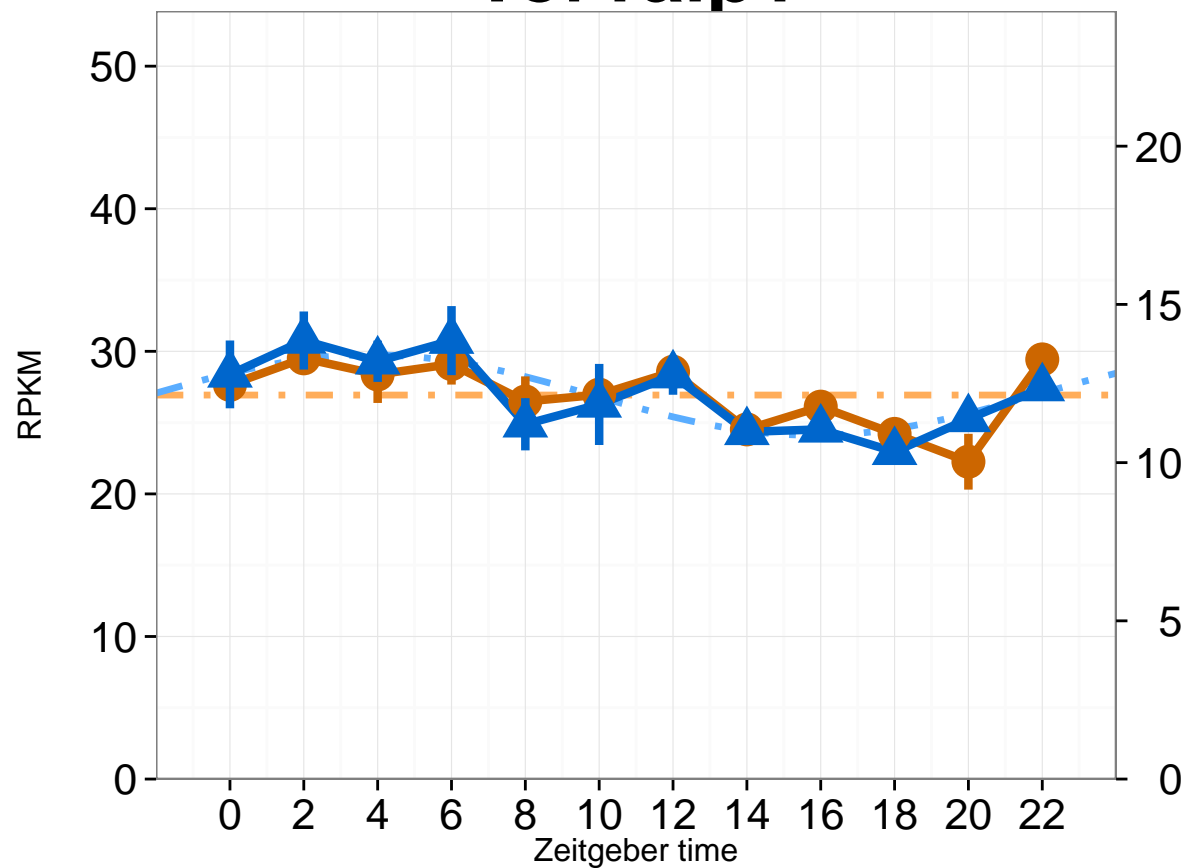

# Tor1aip1

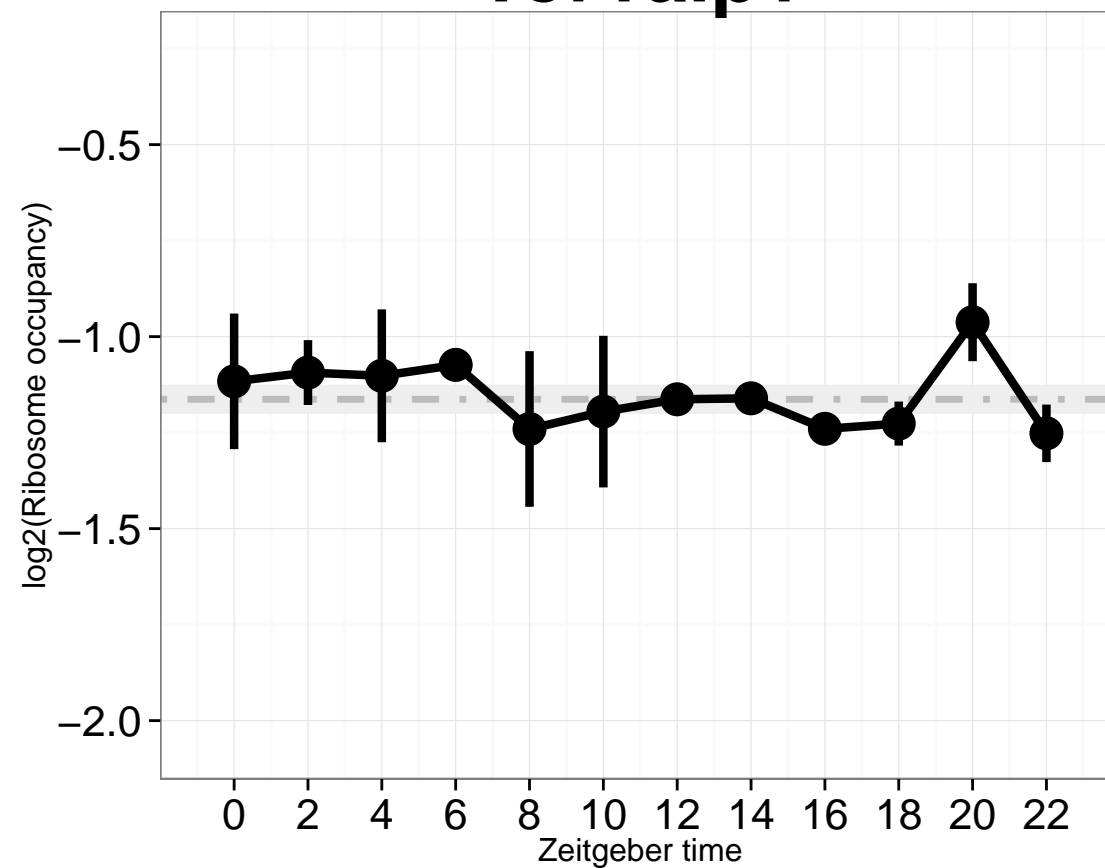

Supplement: SuppDataset_1.zip [file Tor1aip1_set_A.pdf › Supplemental Dataset 1/A-mRNA_nonrhyth_translation_nonrhyth/Tor1aip1_set_A.pdf]

# Tor1aip2

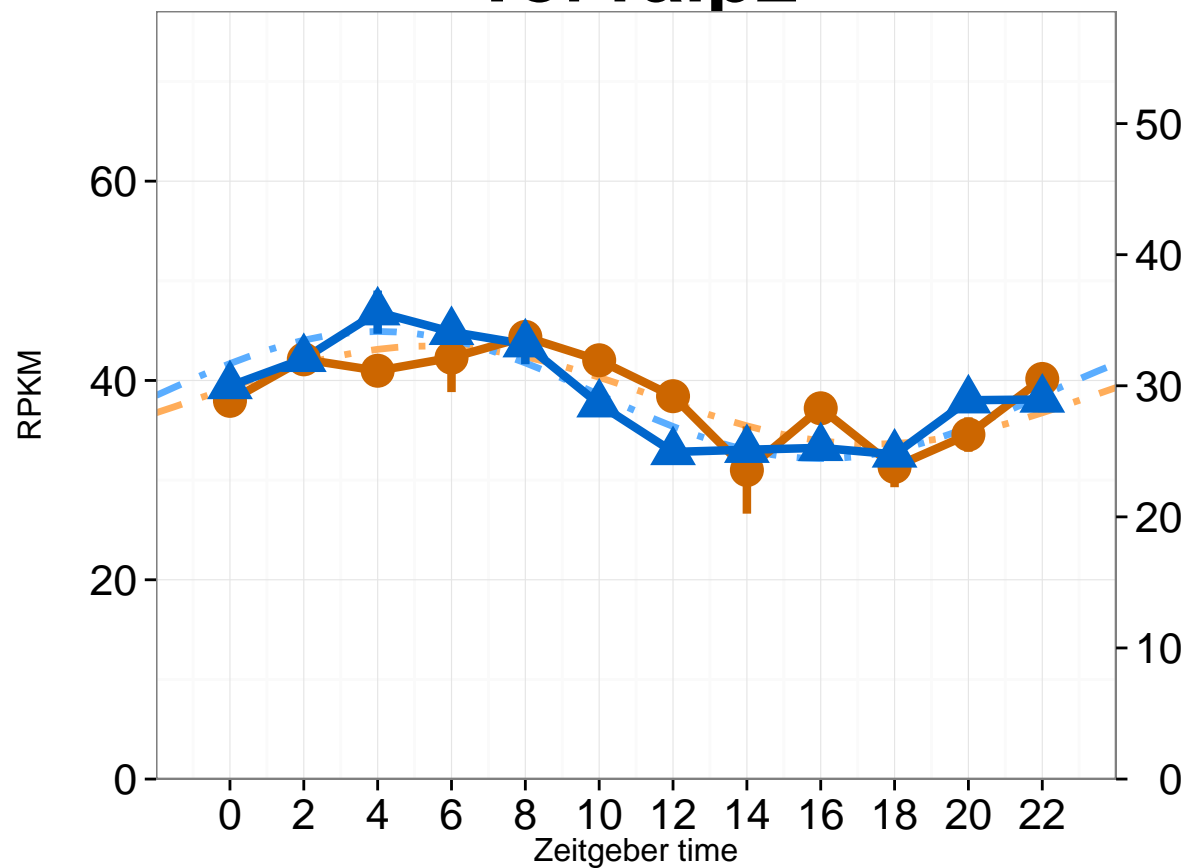

# Tor1aip2

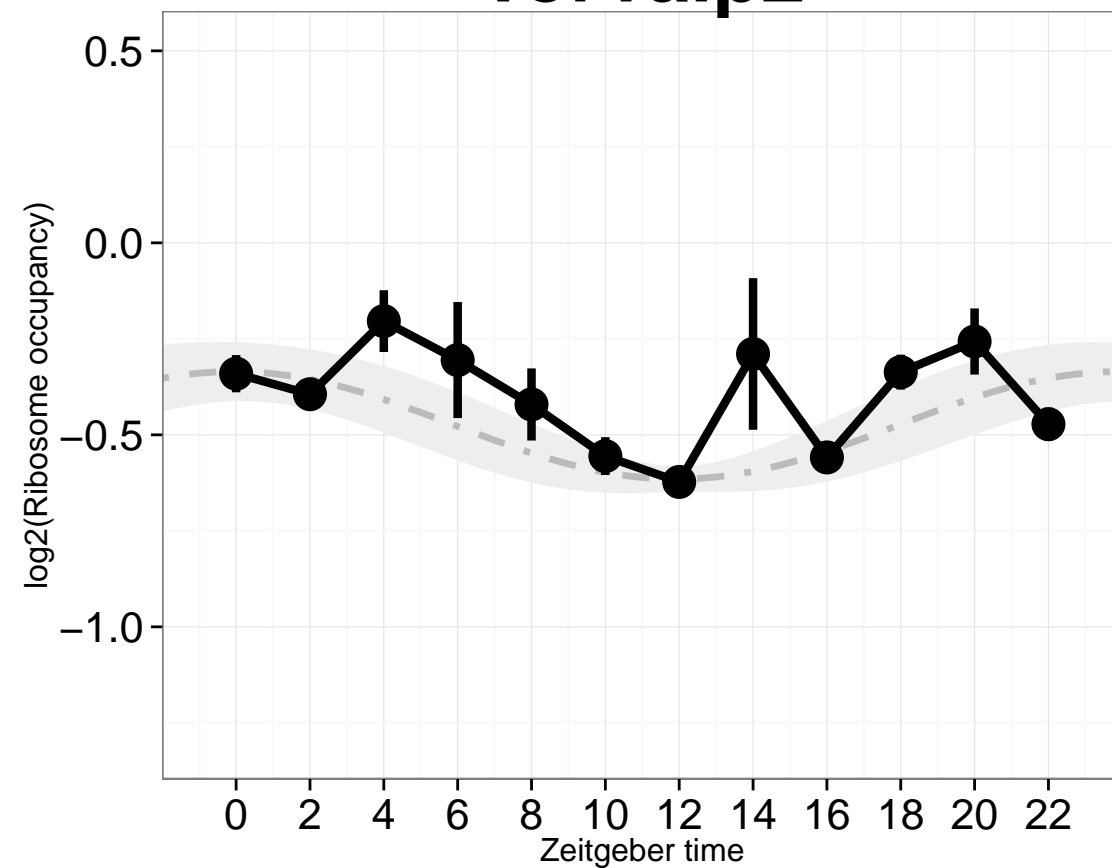

Supplement: SuppDataset_1.zip [file Tor1aip2_set_A.pdf › Supplemental Dataset 1/A-mRNA_nonrhyth_translation_nonrhyth/Tor1aip2_set_A.pdf]

# Tor1b

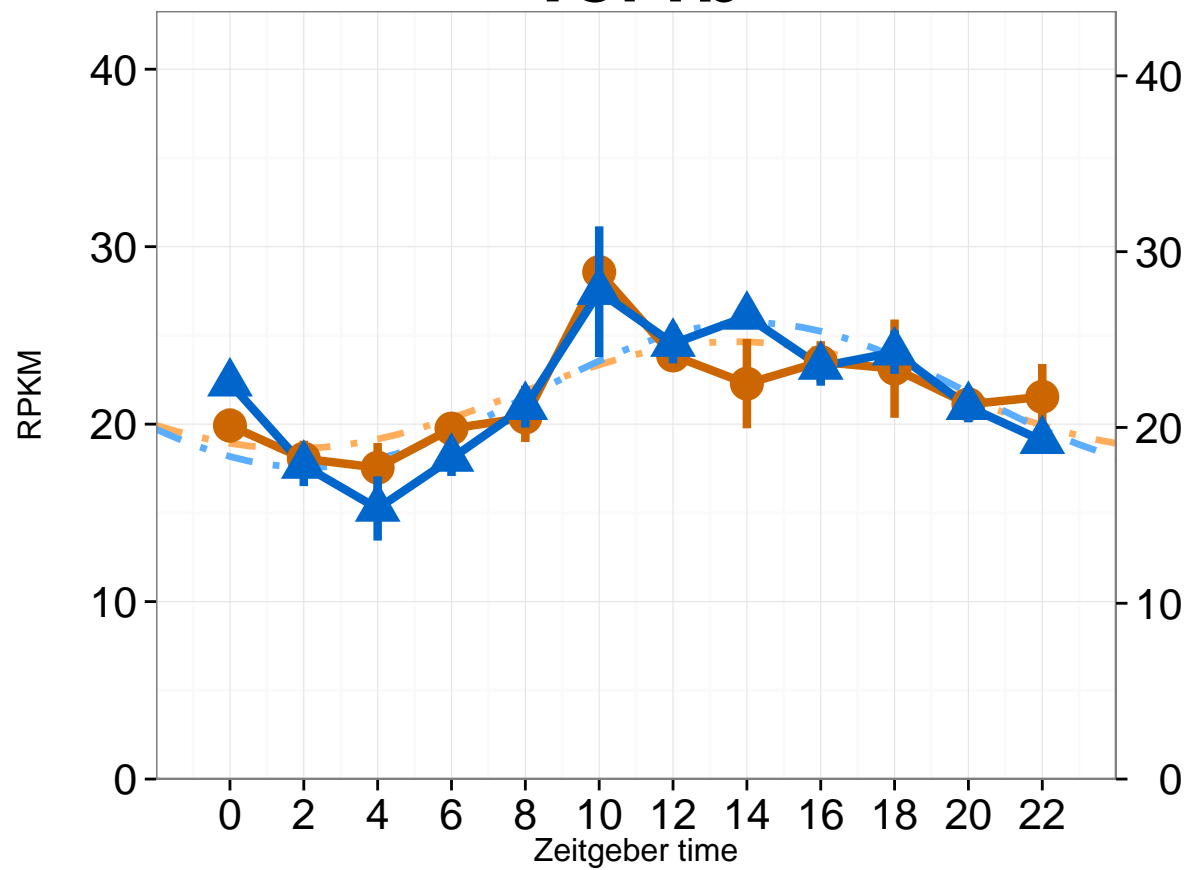

# Tor1b

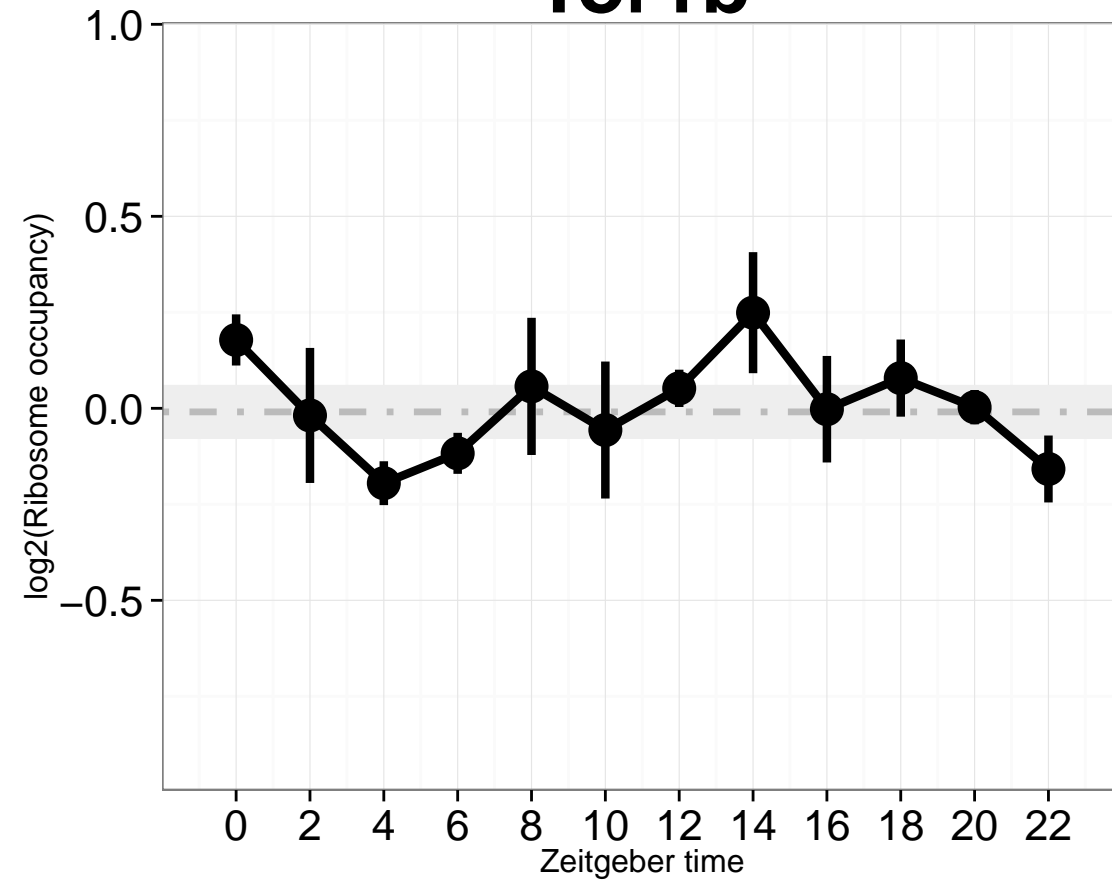

Supplement: SuppDataset_1.zip [file Tor1b_set_A.pdf › Supplemental Dataset 1/A-mRNA_nonrhyth_translation_nonrhyth/Tor1b_set_A.pdf]

# Tor2a

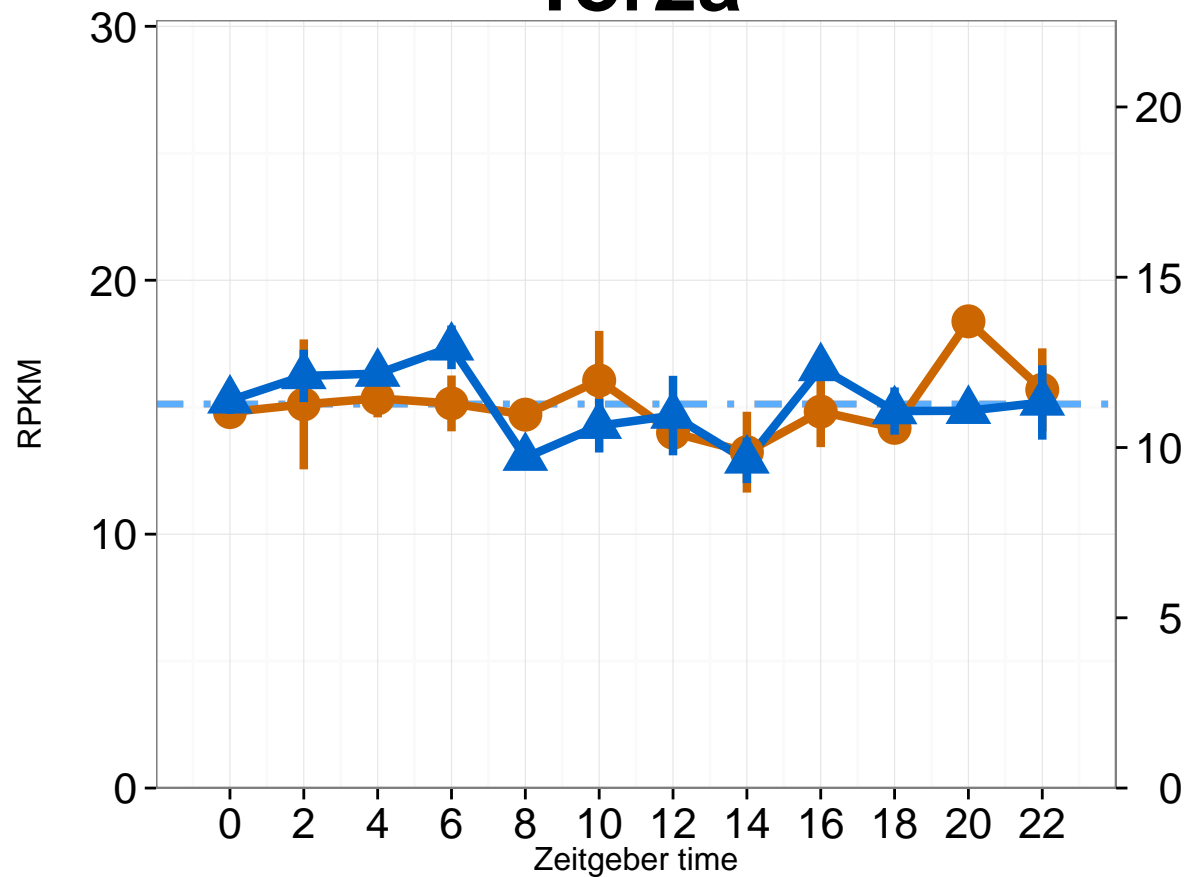

# Tor2a

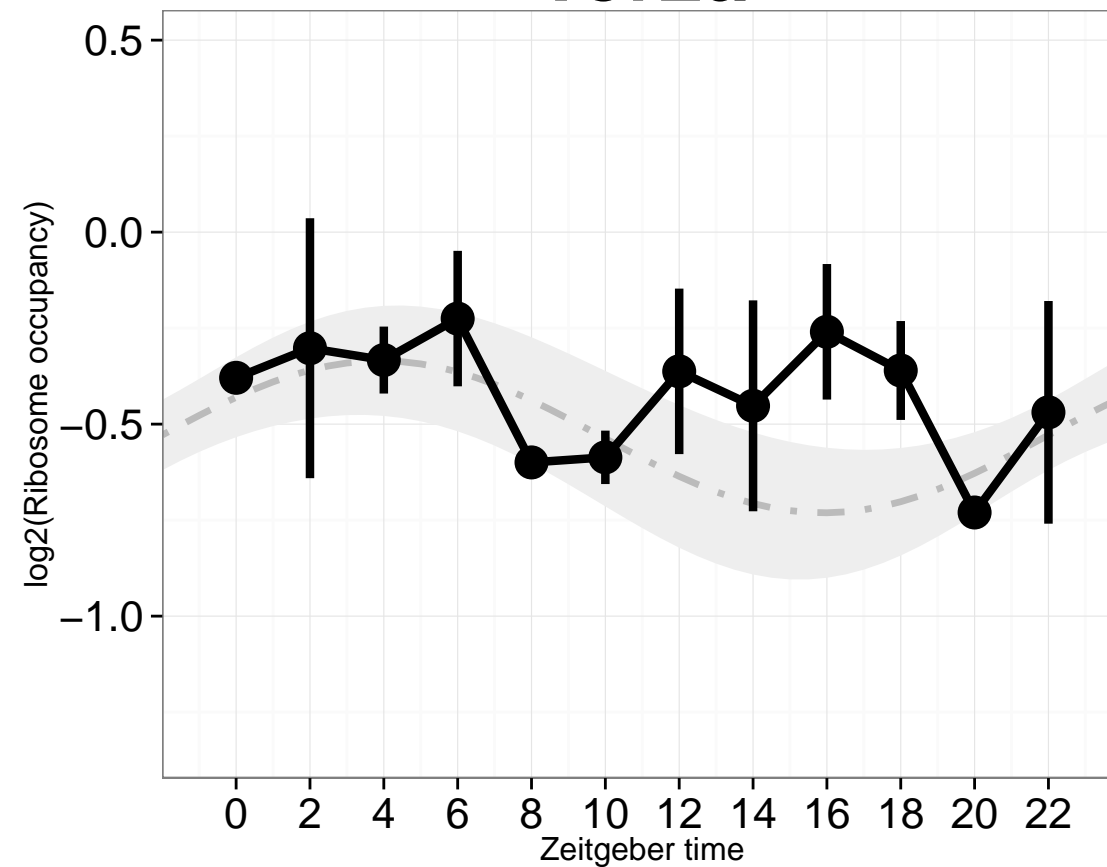

Supplement: SuppDataset_1.zip [file Tor2a_set_A.pdf › Supplemental Dataset 1/A-mRNA_nonrhyth_translation_nonrhyth/Tor2a_set_A.pdf]

## Tox4

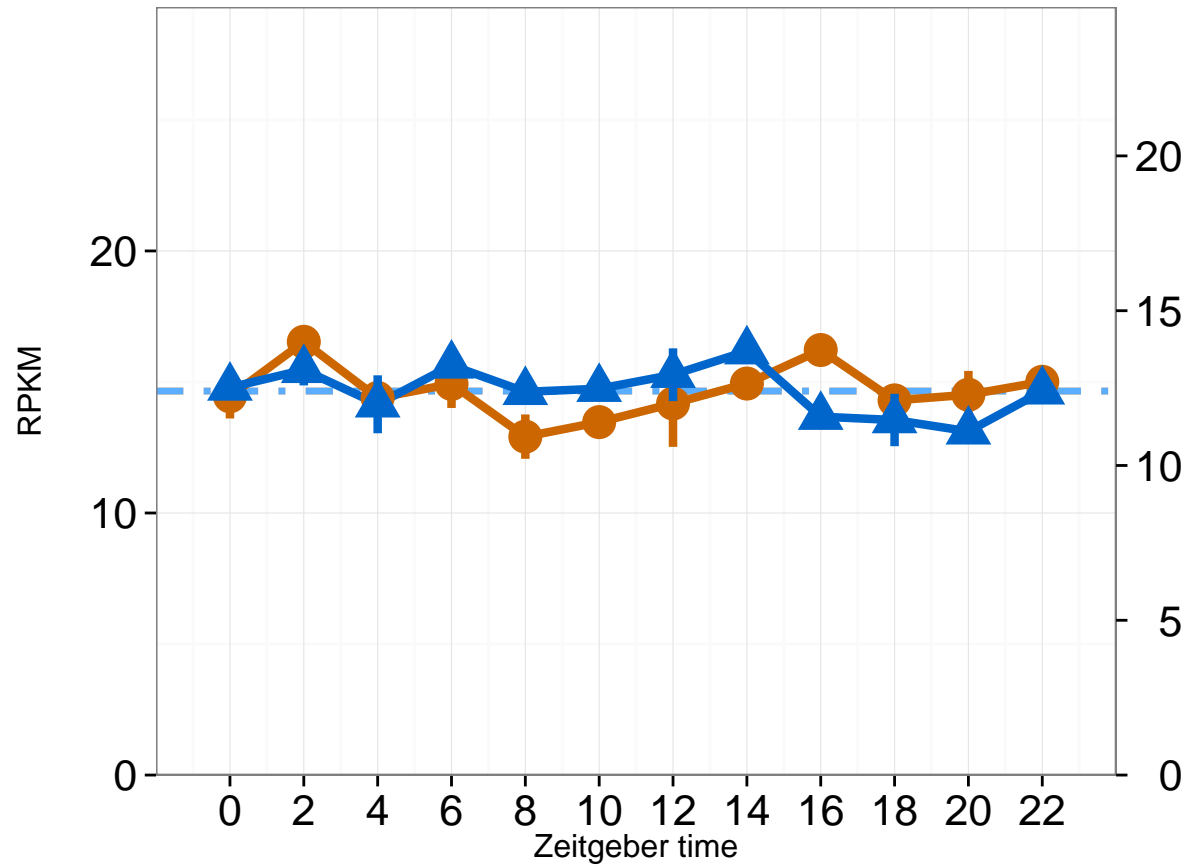

## Tox4

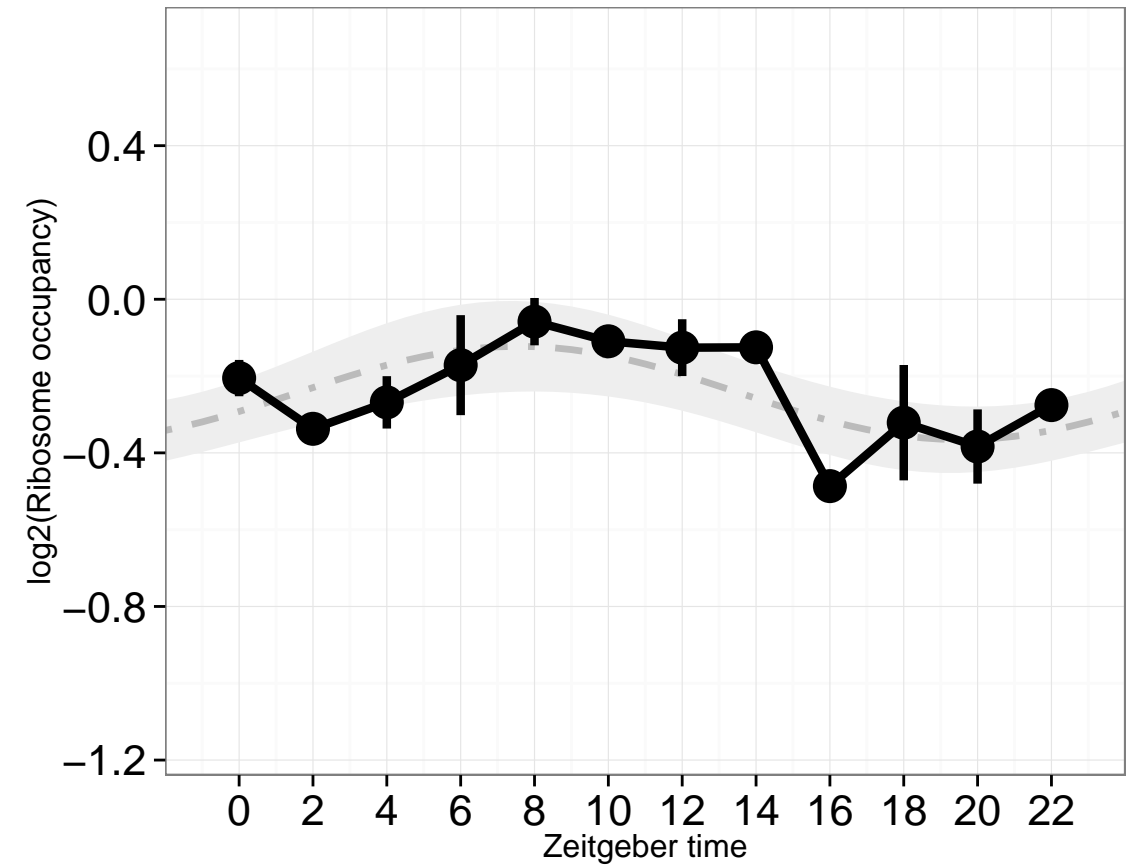

Supplement: SuppDataset_1.zip [file Tox4_set_A.pdf › Supplemental Dataset 1/A-mRNA_nonrhyth_translation_nonrhyth/Tox4_set_A.pdf]

# Tpcn1

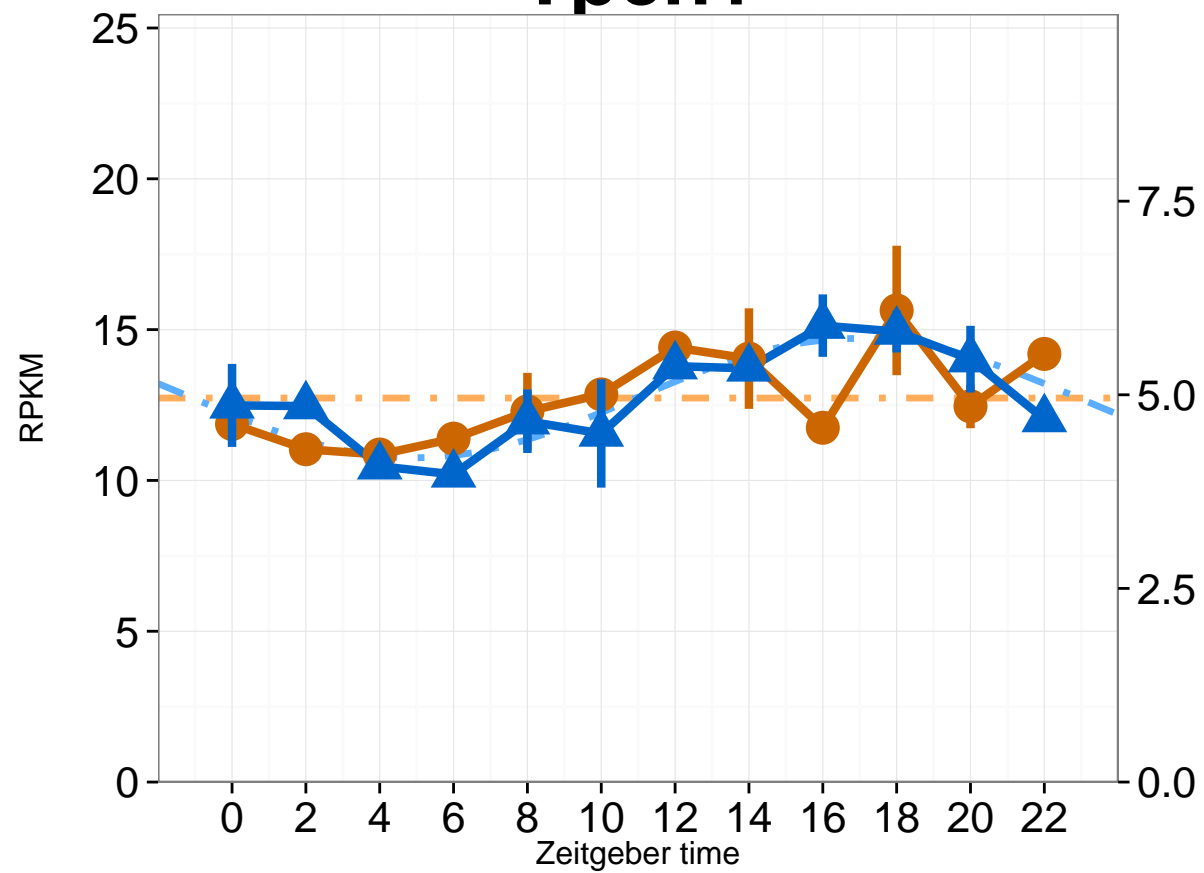

# Tpcn1

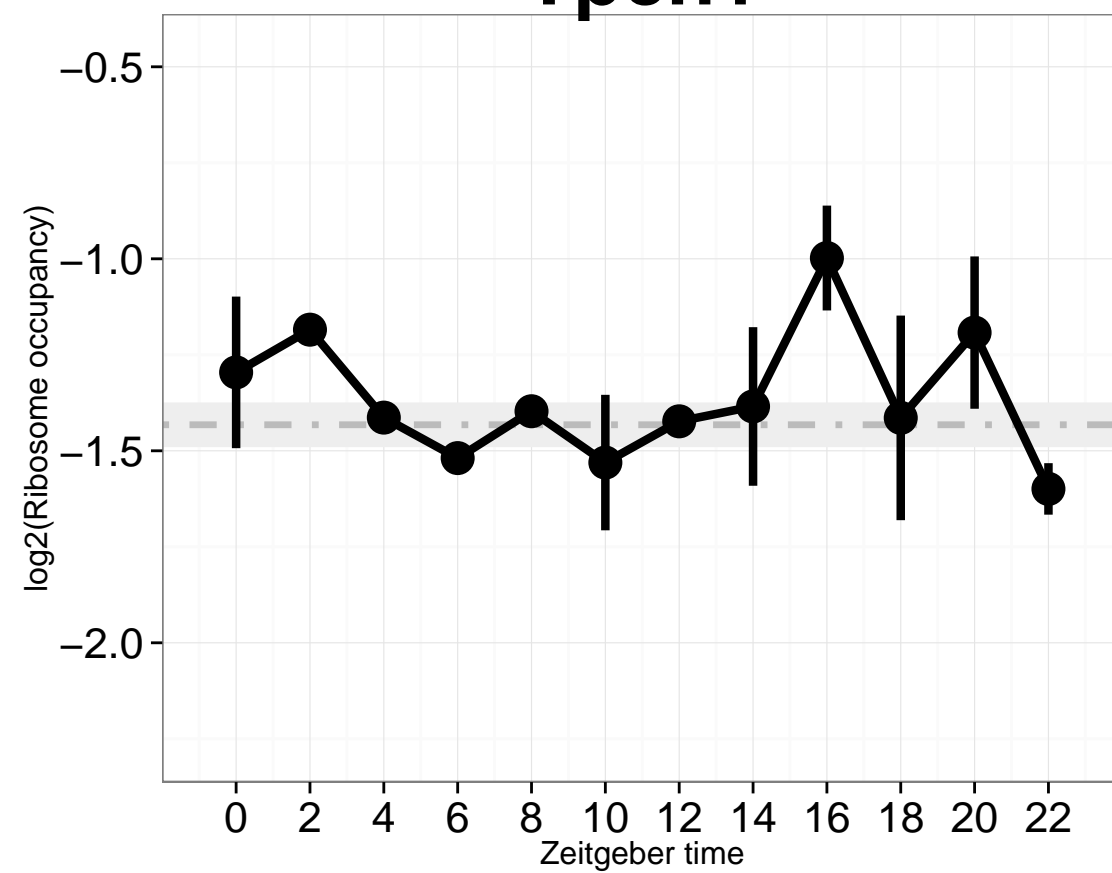

Supplement: SuppDataset_1.zip [file Tpcn1_set_A.pdf › Supplemental Dataset 1/A-mRNA_nonrhyth_translation_nonrhyth/Tpcn1_set_A.pdf]

# Tpcn2

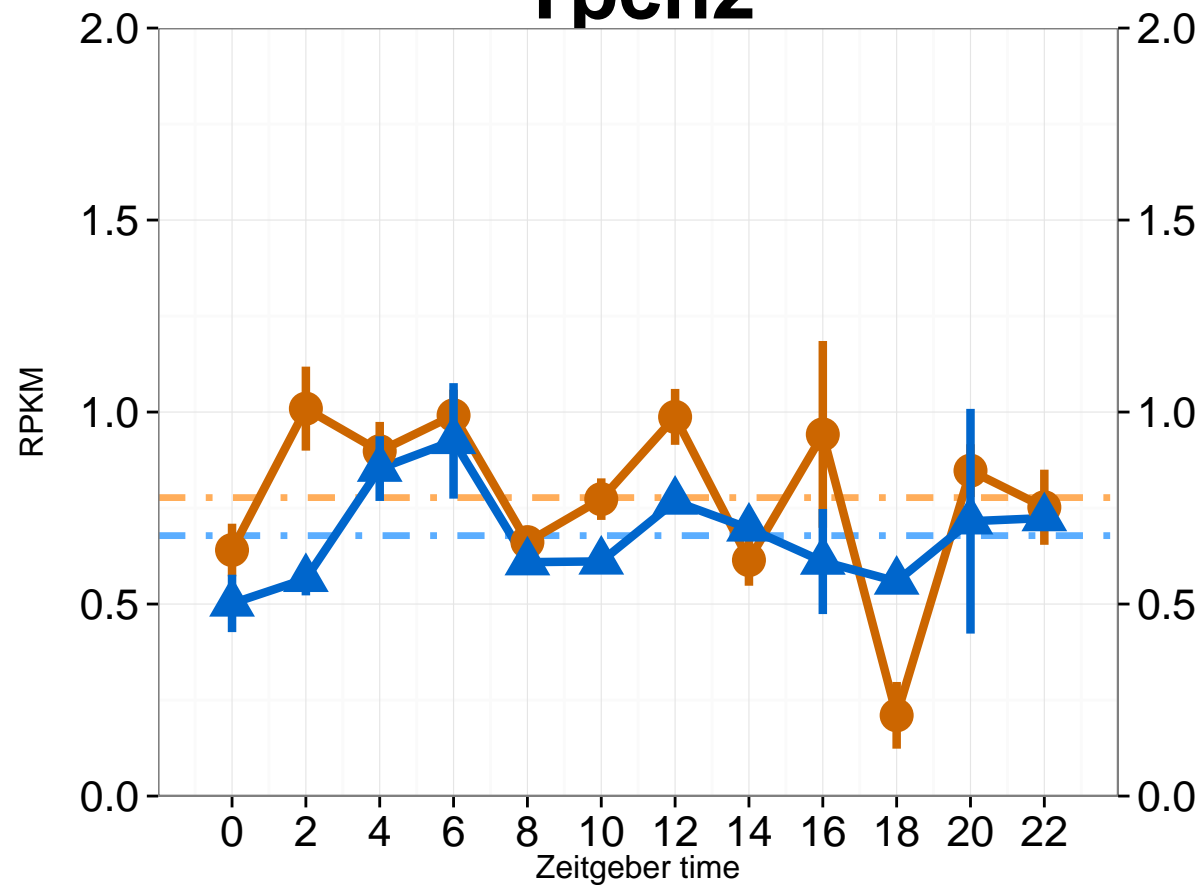

# Tpcn2

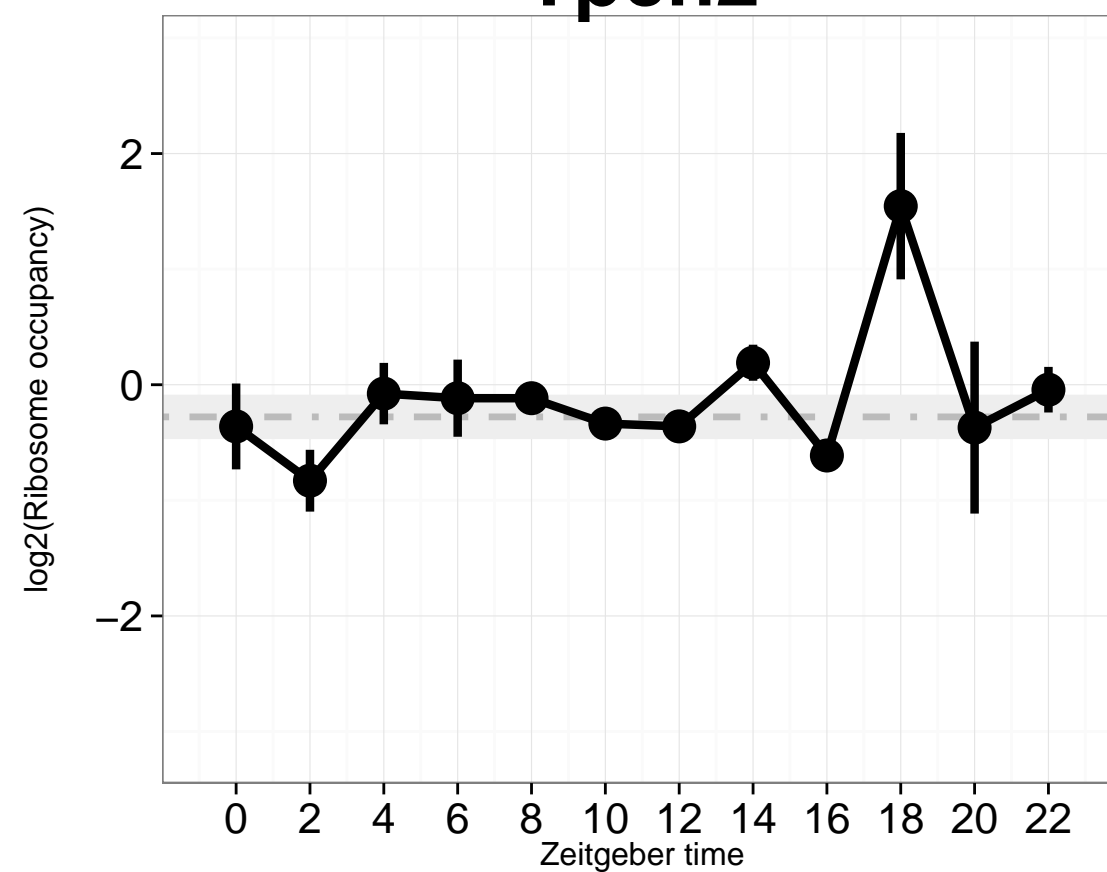

Supplement: SuppDataset_1.zip [file Tpcn2_set_A.pdf › Supplemental Dataset 1/A-mRNA_nonrhyth_translation_nonrhyth/Tpcn2_set_A.pdf]

## Tpd52

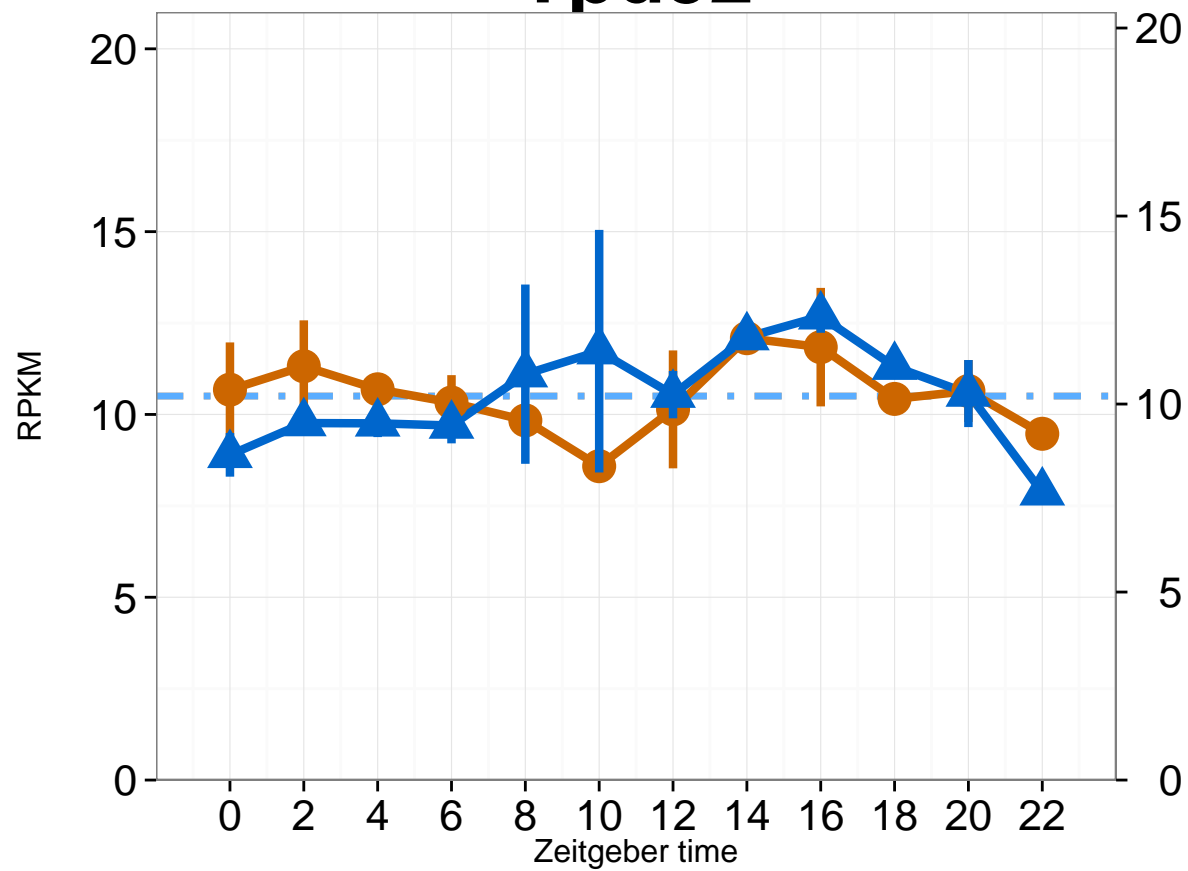

## Tpd52

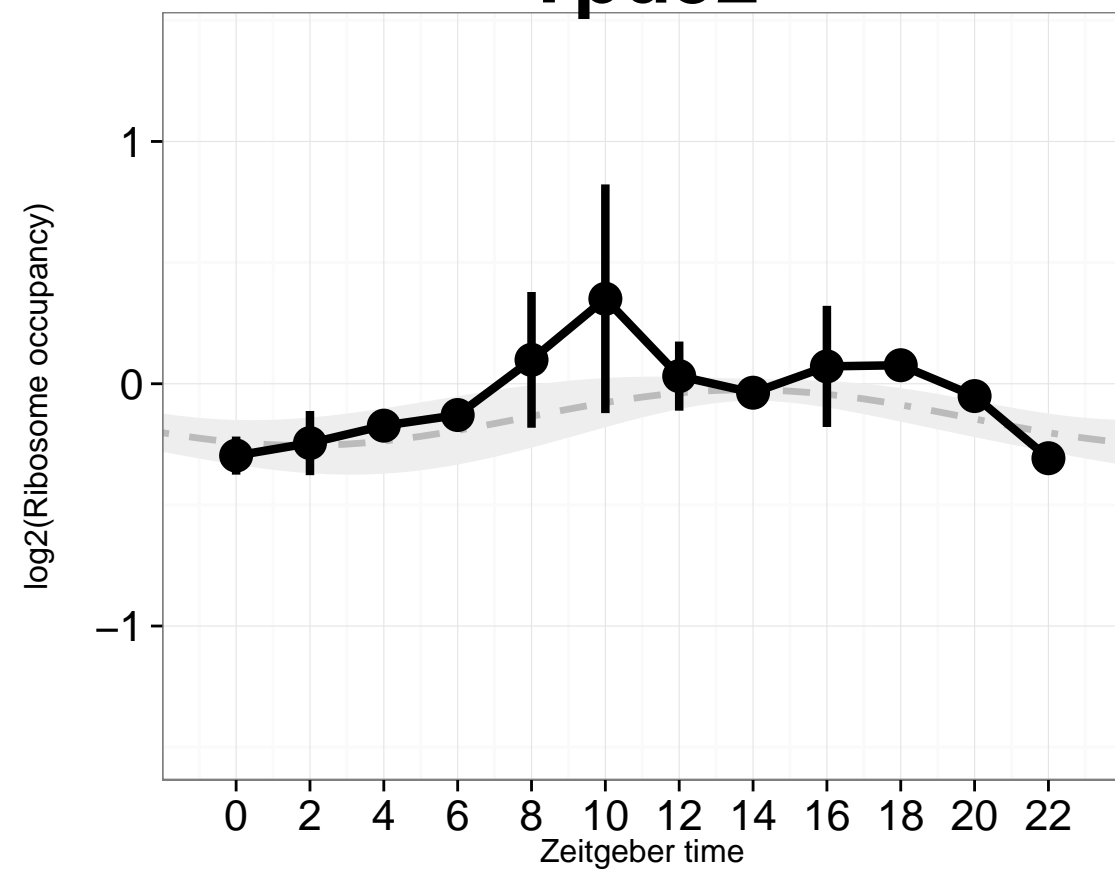

Supplement: SuppDataset_1.zip [file Tpd52_set_A.pdf › Supplemental Dataset 1/A-mRNA_nonrhyth_translation_nonrhyth/Tpd52_set_A.pdf]

# Tpd52l1

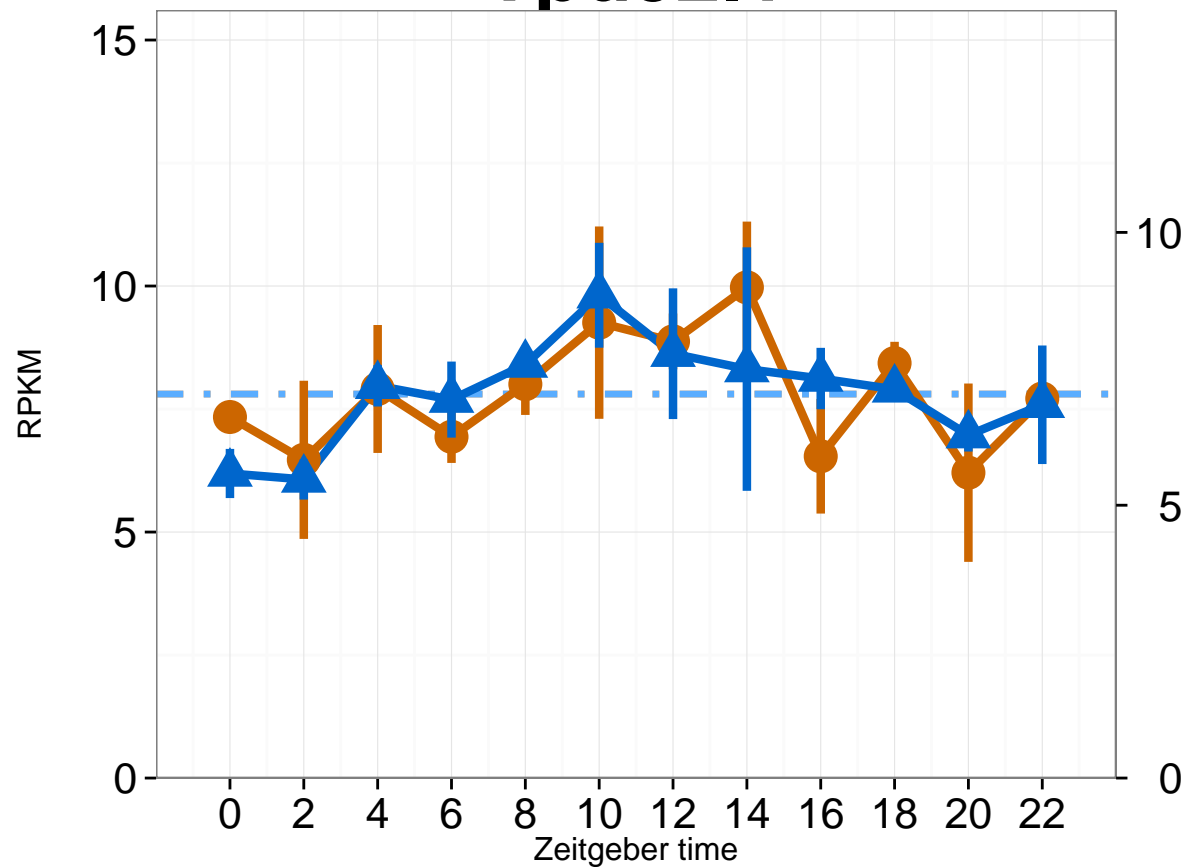

# Tpd52l1

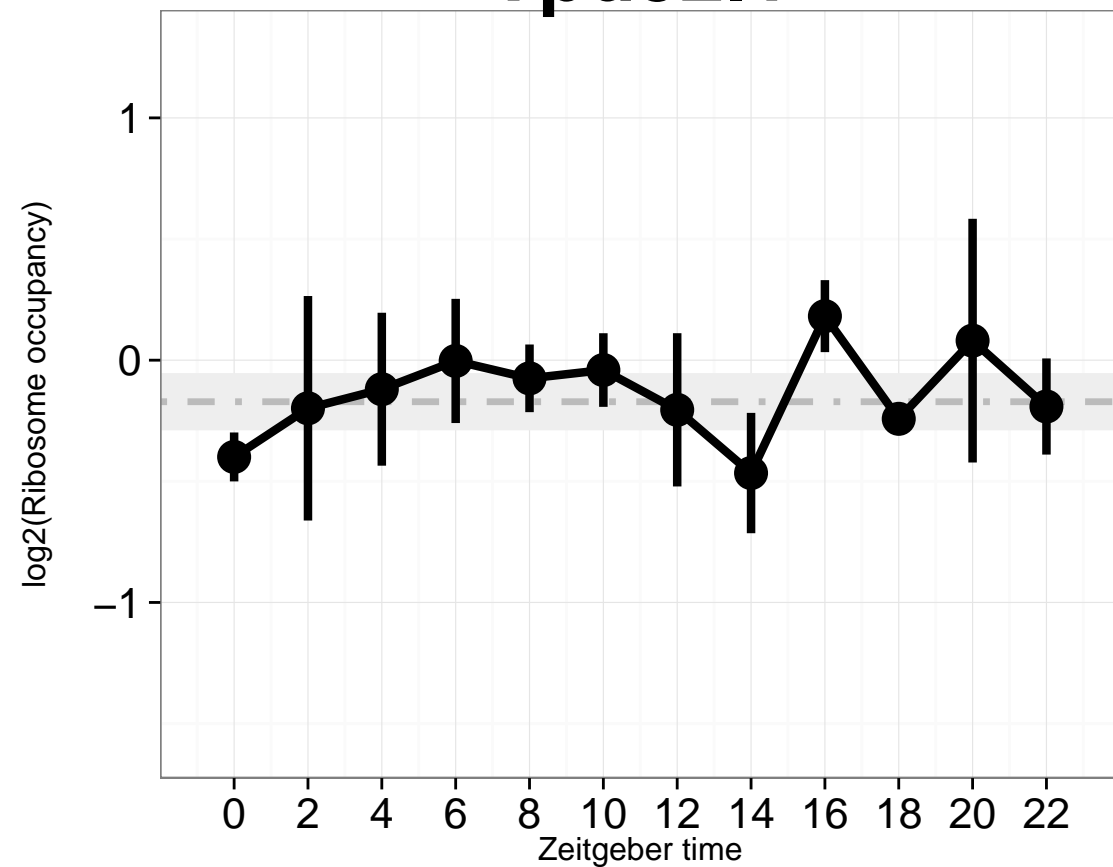

Supplement: SuppDataset_1.zip [file Tpd52l1_set_A.pdf › Supplemental Dataset 1/A-mRNA_nonrhyth_translation_nonrhyth/Tpd52l1_set_A.pdf]

**Tpd52l2**

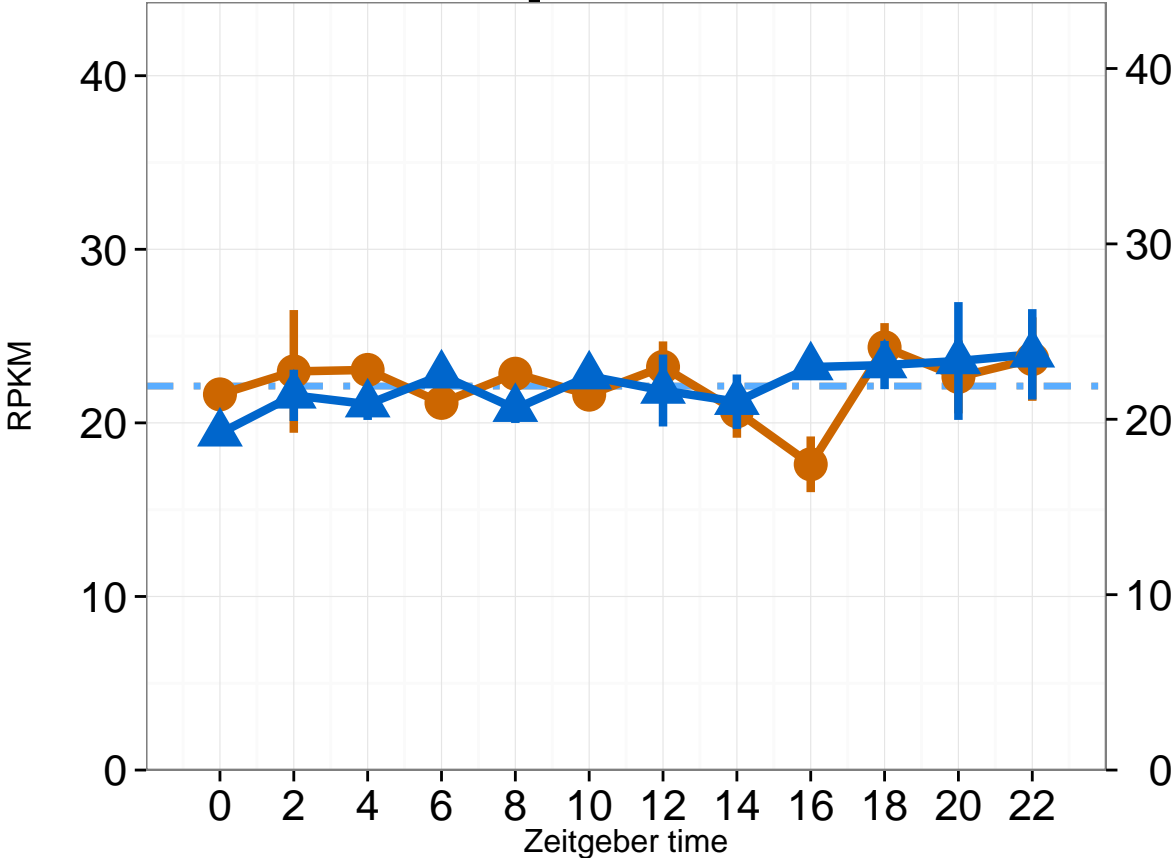

**Tpd52l2**

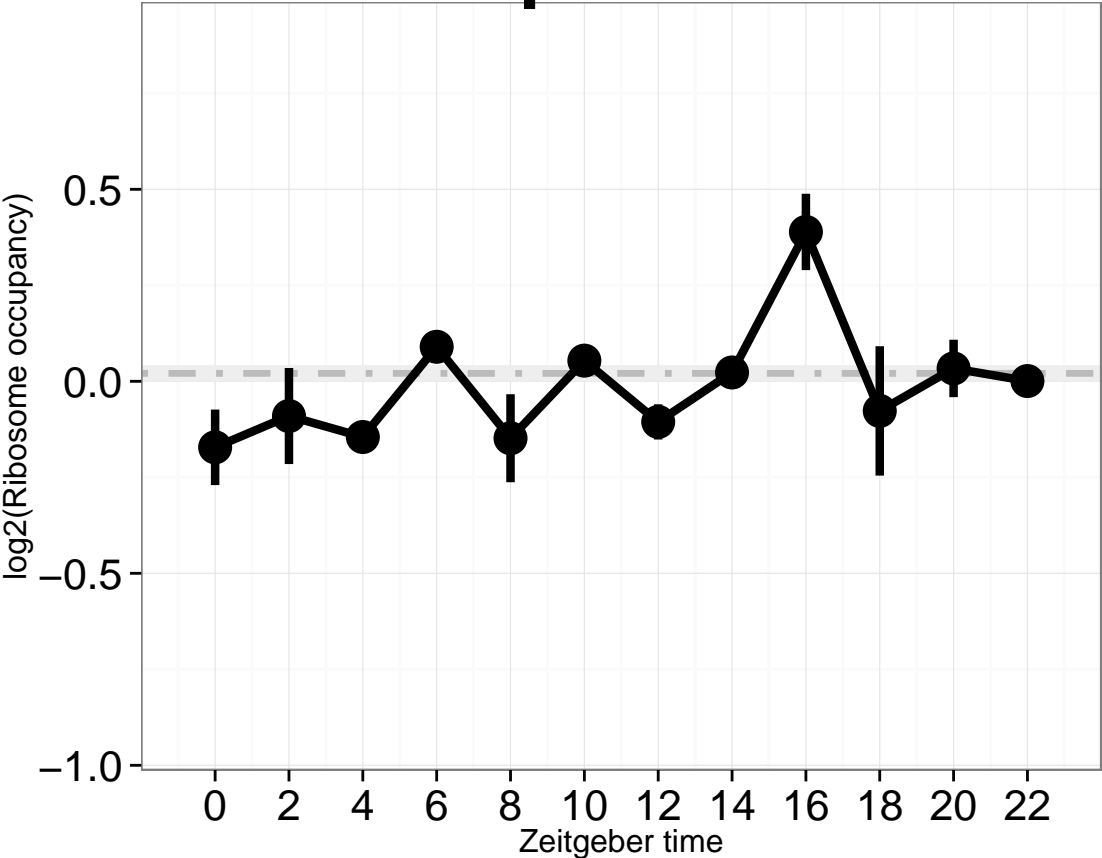

Supplement: SuppDataset_1.zip [file Tpd52l2_set_A.pdf › Supplemental Dataset 1/A-mRNA_nonrhyth_translation_nonrhyth/Tpd52l2_set_A.pdf]

# Tpgs1

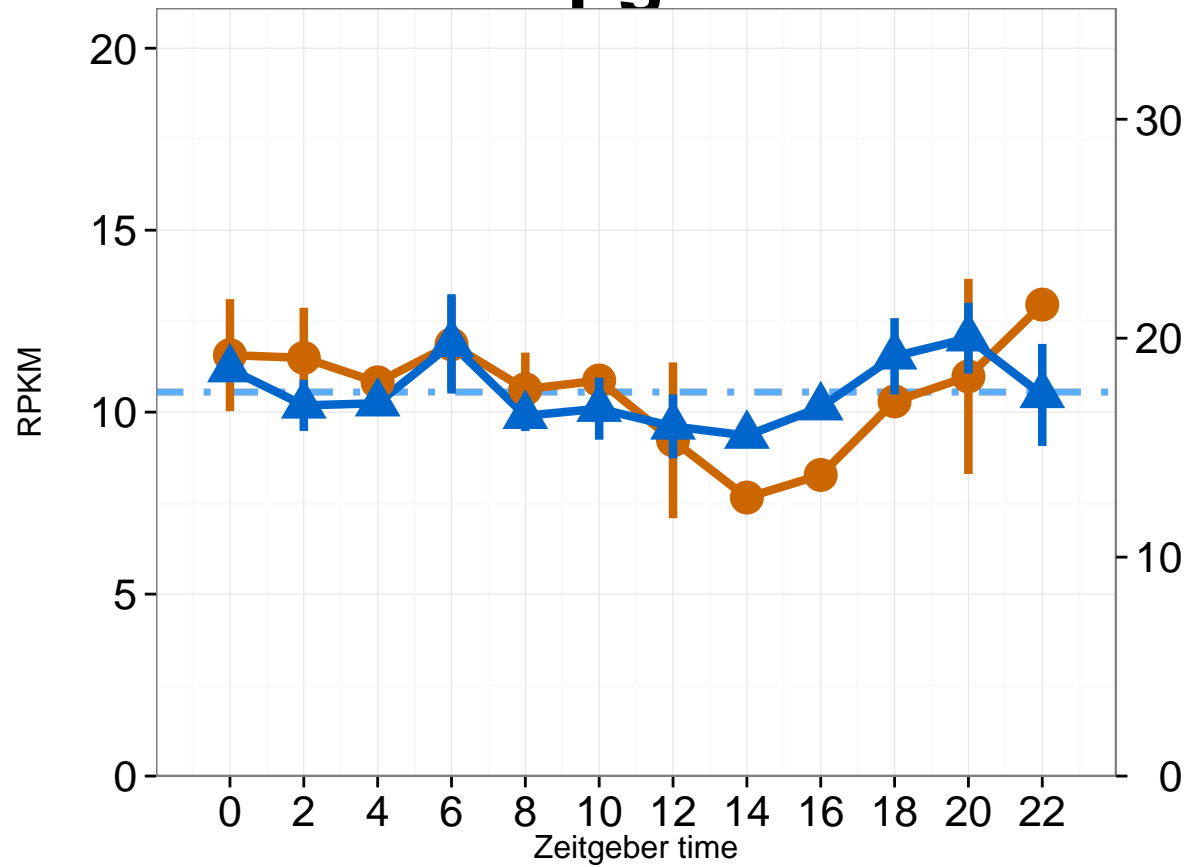

# Tpgs1

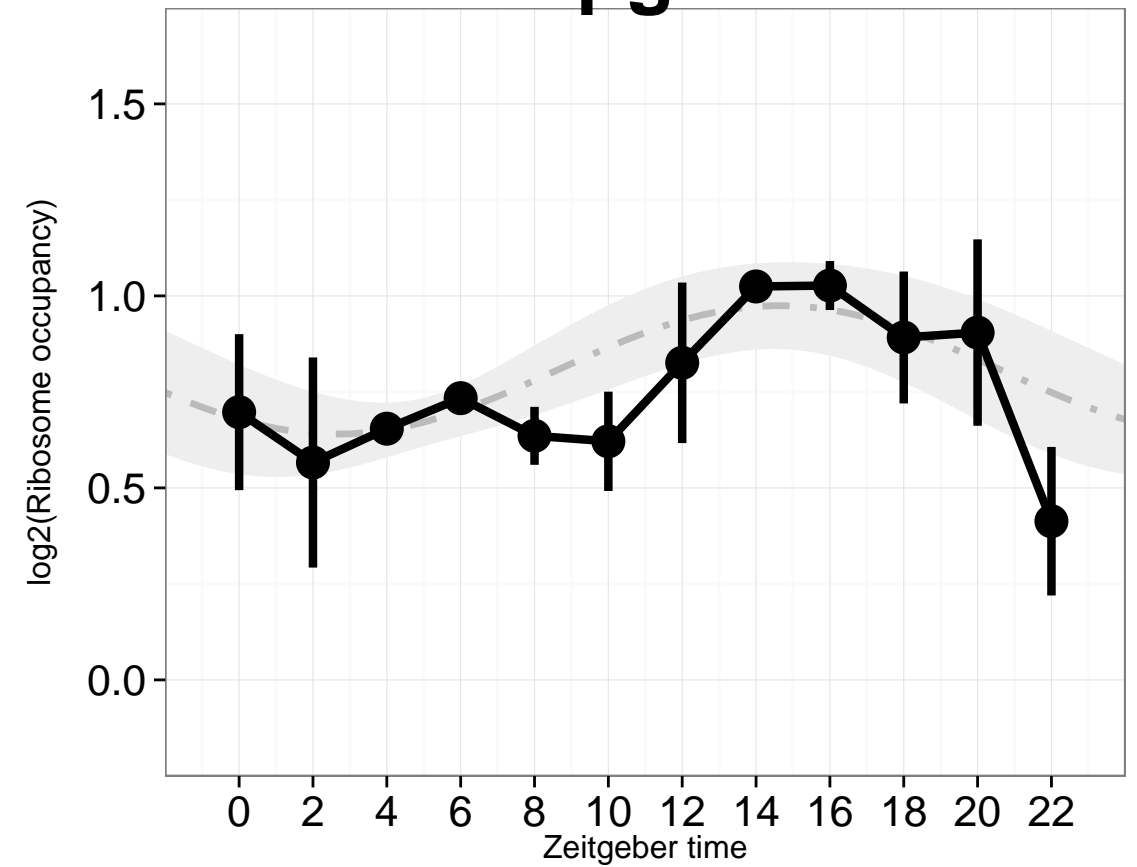

Supplement: SuppDataset_1.zip [file Tpgs1_set_A.pdf › Supplemental Dataset 1/A-mRNA_nonrhyth_translation_nonrhyth/Tpgs1_set_A.pdf]

## Tpi1

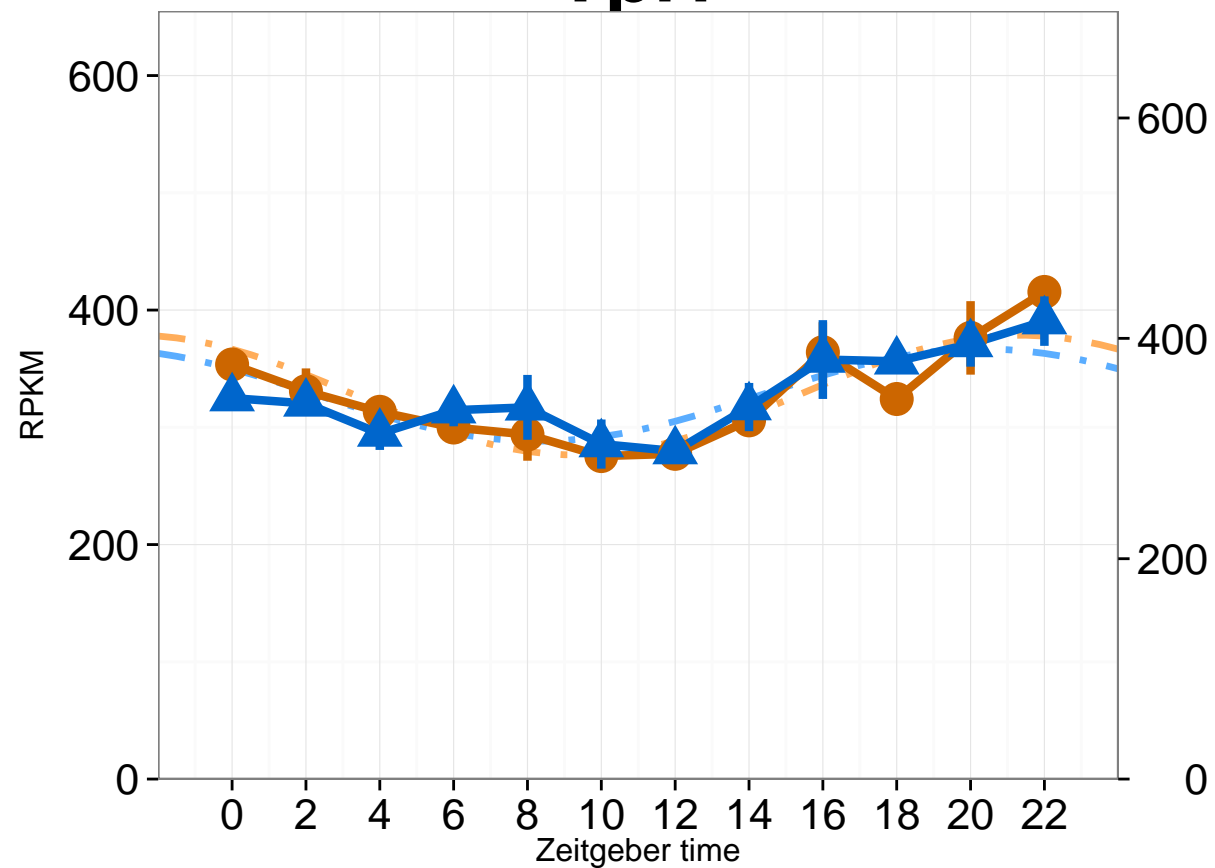

## Tpi1

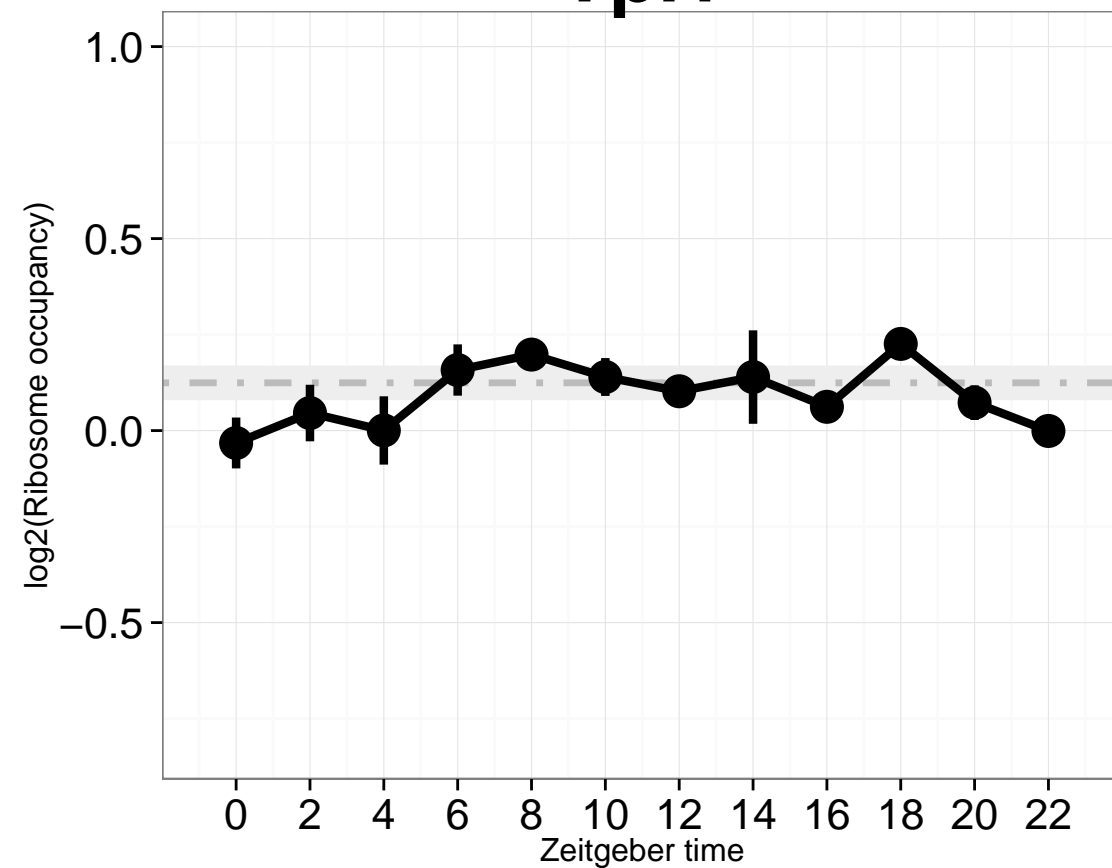

Supplement: SuppDataset_1.zip [file Tpi1_set_A.pdf › Supplemental Dataset 1/A-mRNA_nonrhyth_translation_nonrhyth/Tpi1_set_A.pdf]

# Tpk1

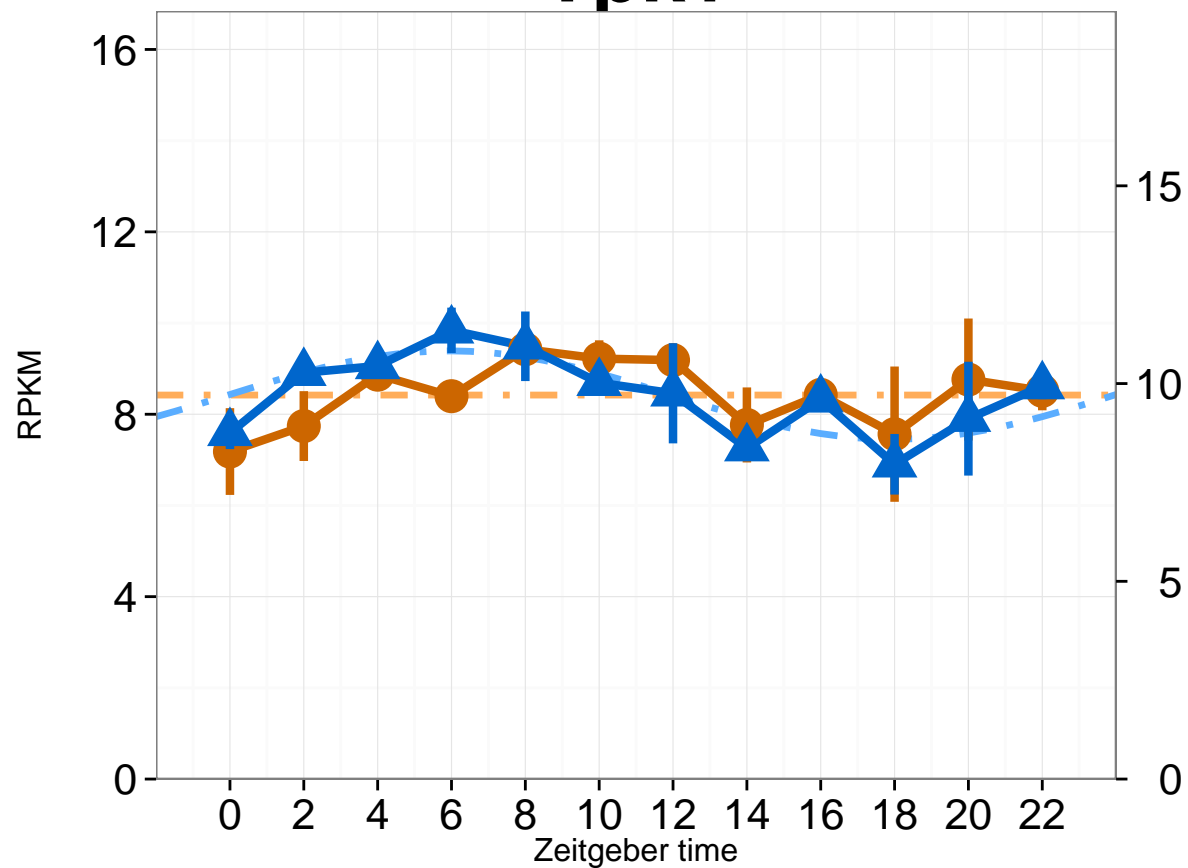

# Tpk1

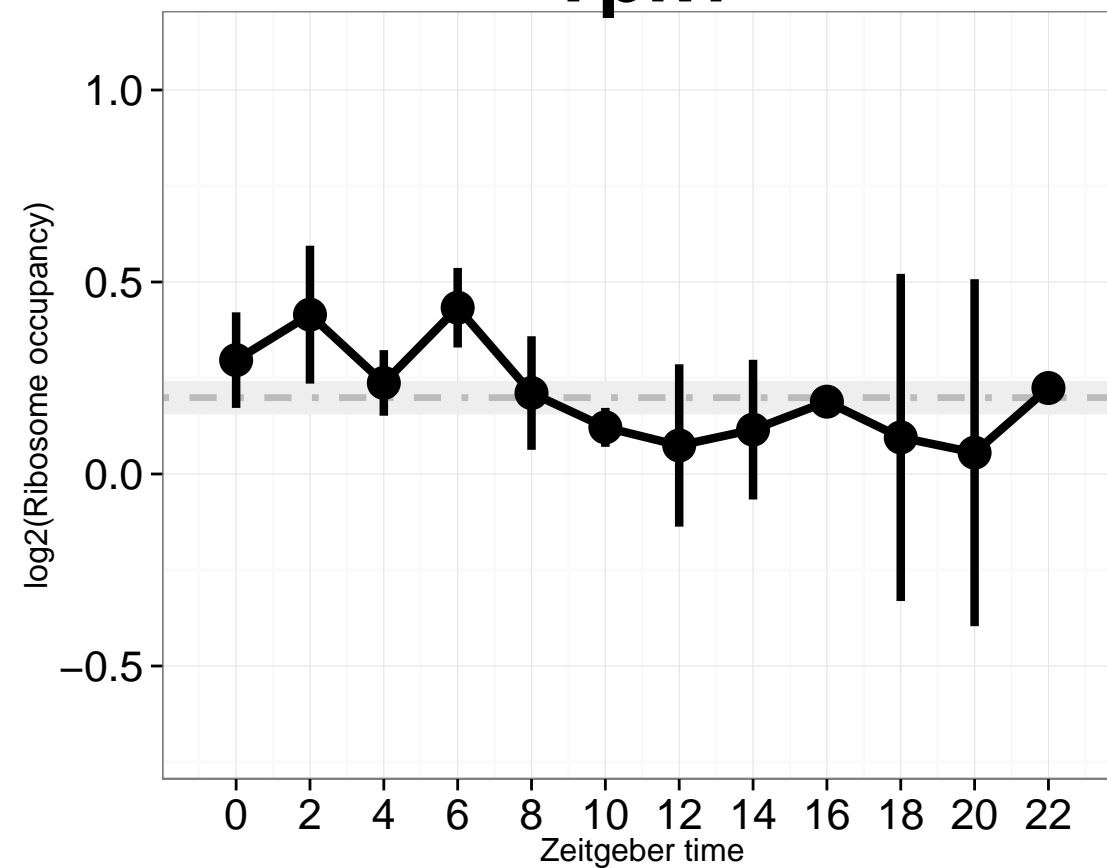

Supplement: SuppDataset_1.zip [file Tpk1_set_A.pdf › Supplemental Dataset 1/A-mRNA_nonrhyth_translation_nonrhyth/Tpk1_set_A.pdf]

# Tpm1

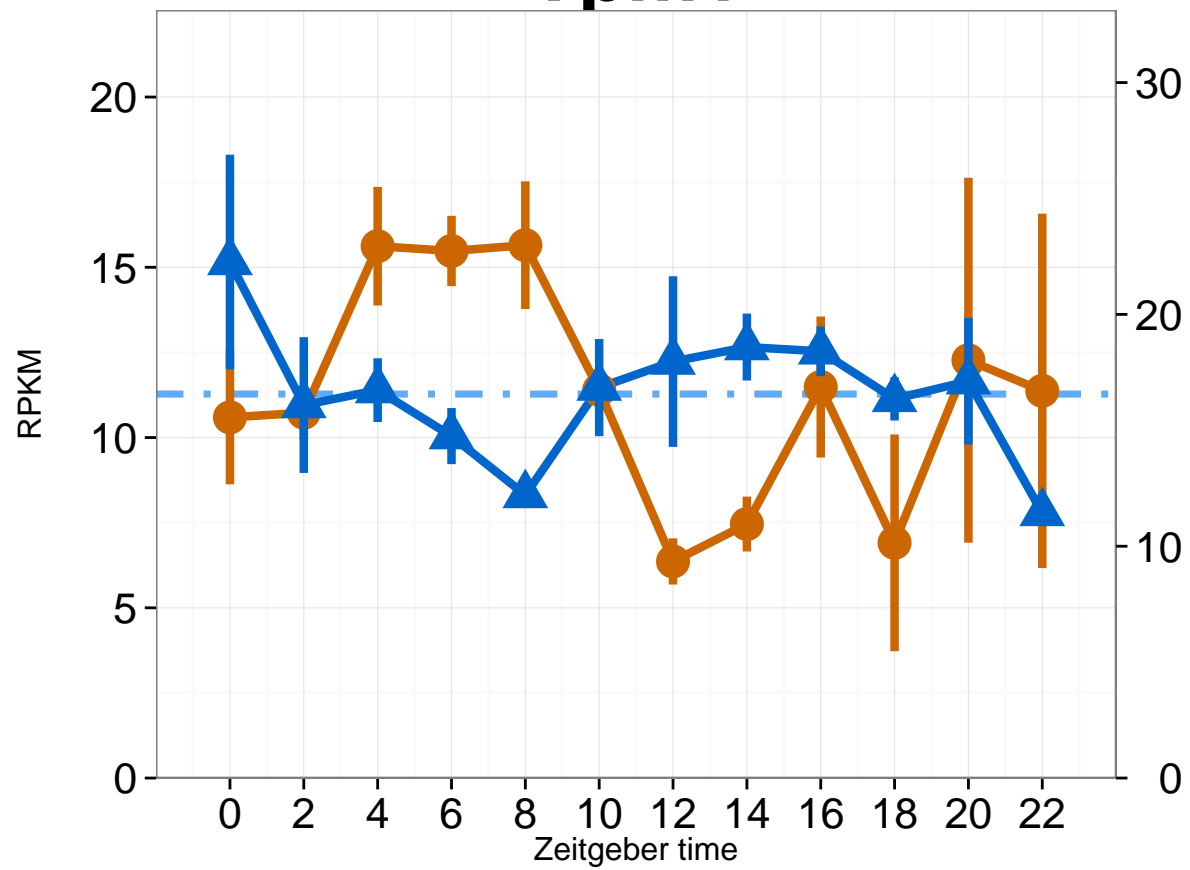

# Tpm1

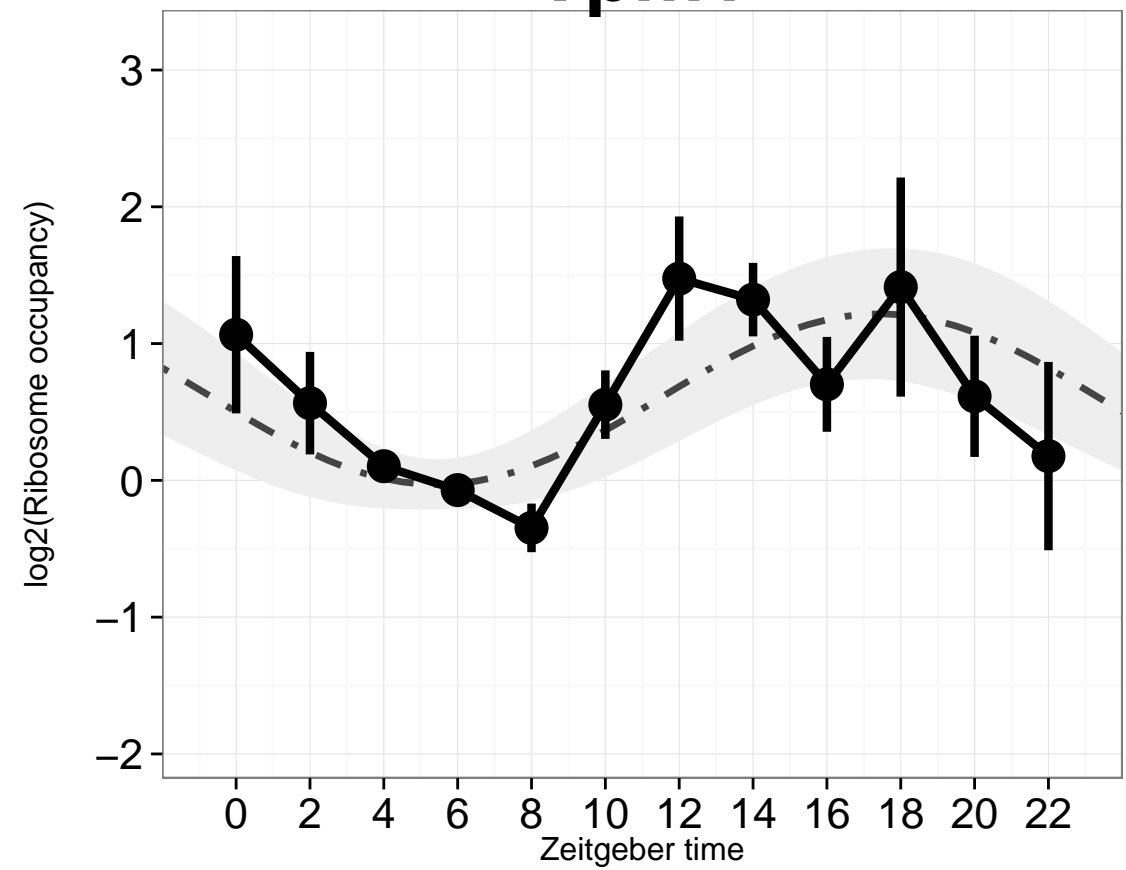

Supplement: SuppDataset_1.zip [file Tpm1_set_A.pdf › Supplemental Dataset 1/A-mRNA_nonrhyth_translation_nonrhyth/Tpm1_set_A.pdf]

# Tpm2

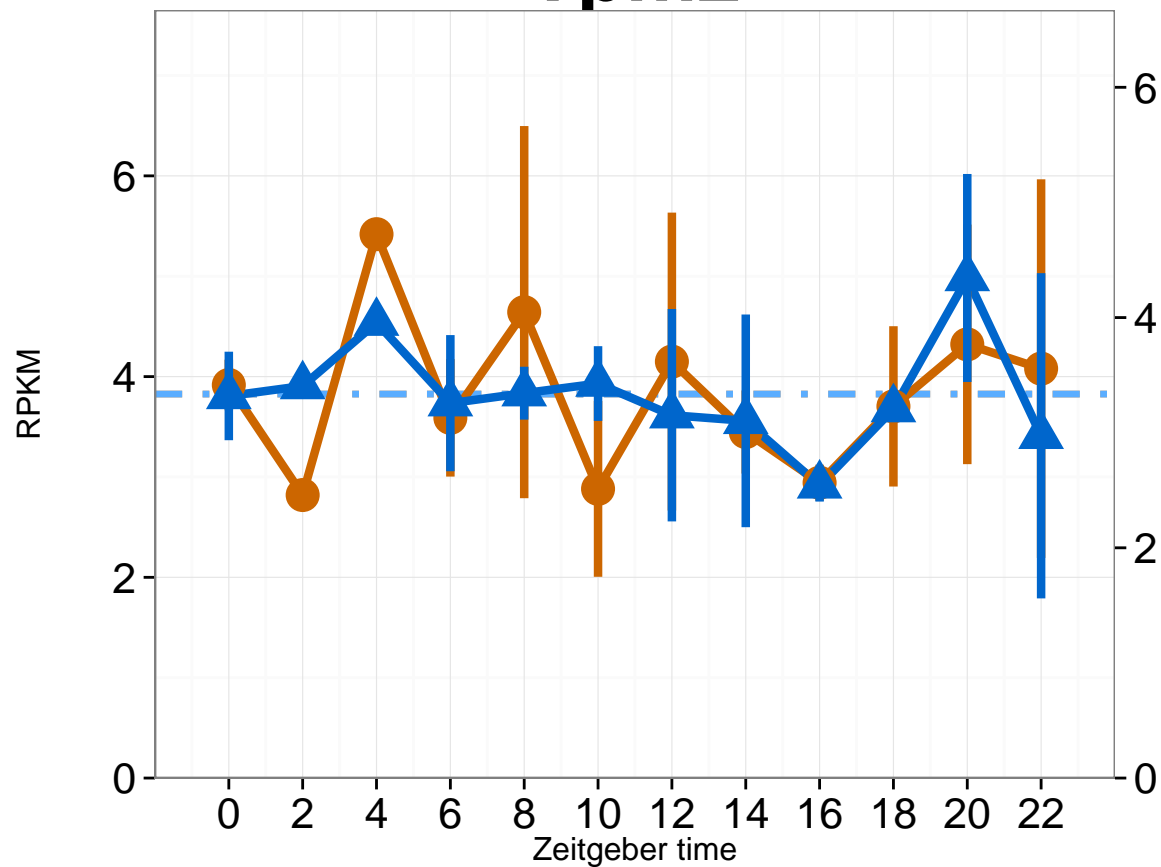

# Tpm2

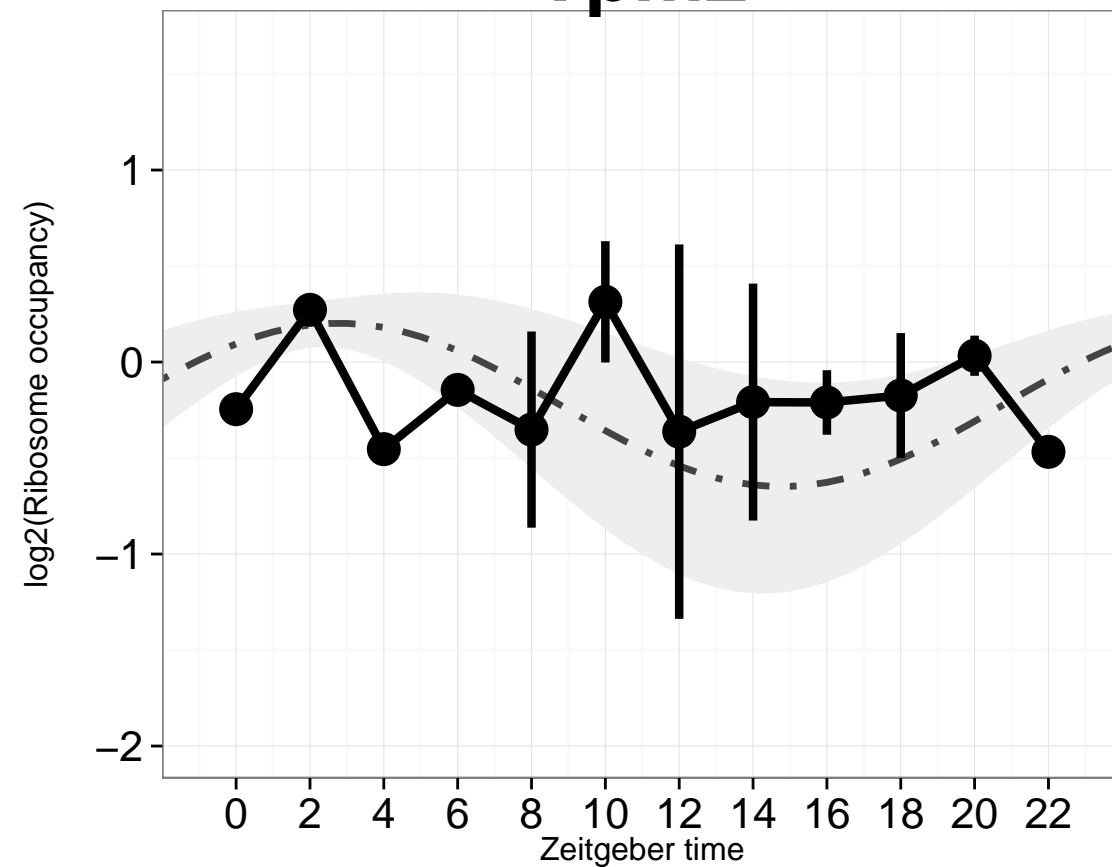

Supplement: SuppDataset_1.zip [file Tpm2_set_A.pdf › Supplemental Dataset 1/A-mRNA_nonrhyth_translation_nonrhyth/Tpm2_set_A.pdf]

# Tpm3

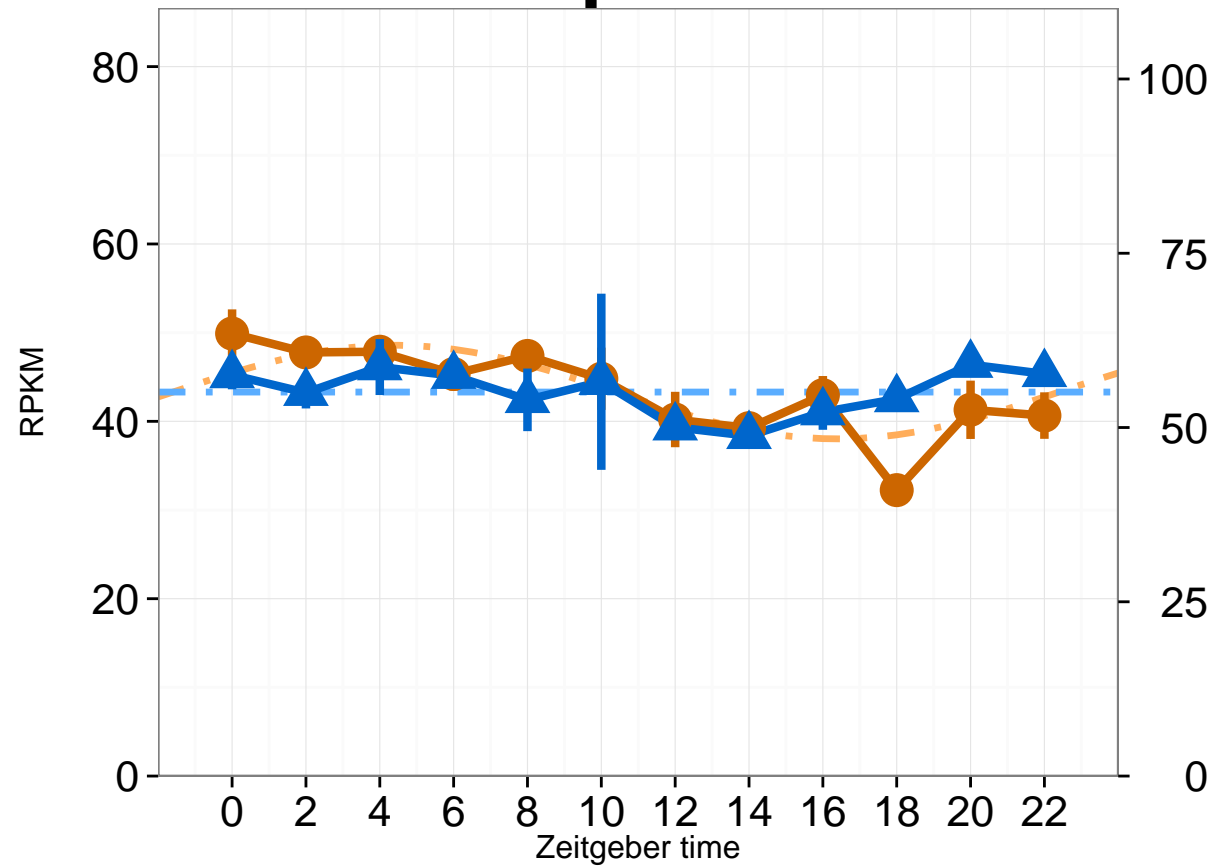

# Tpm3

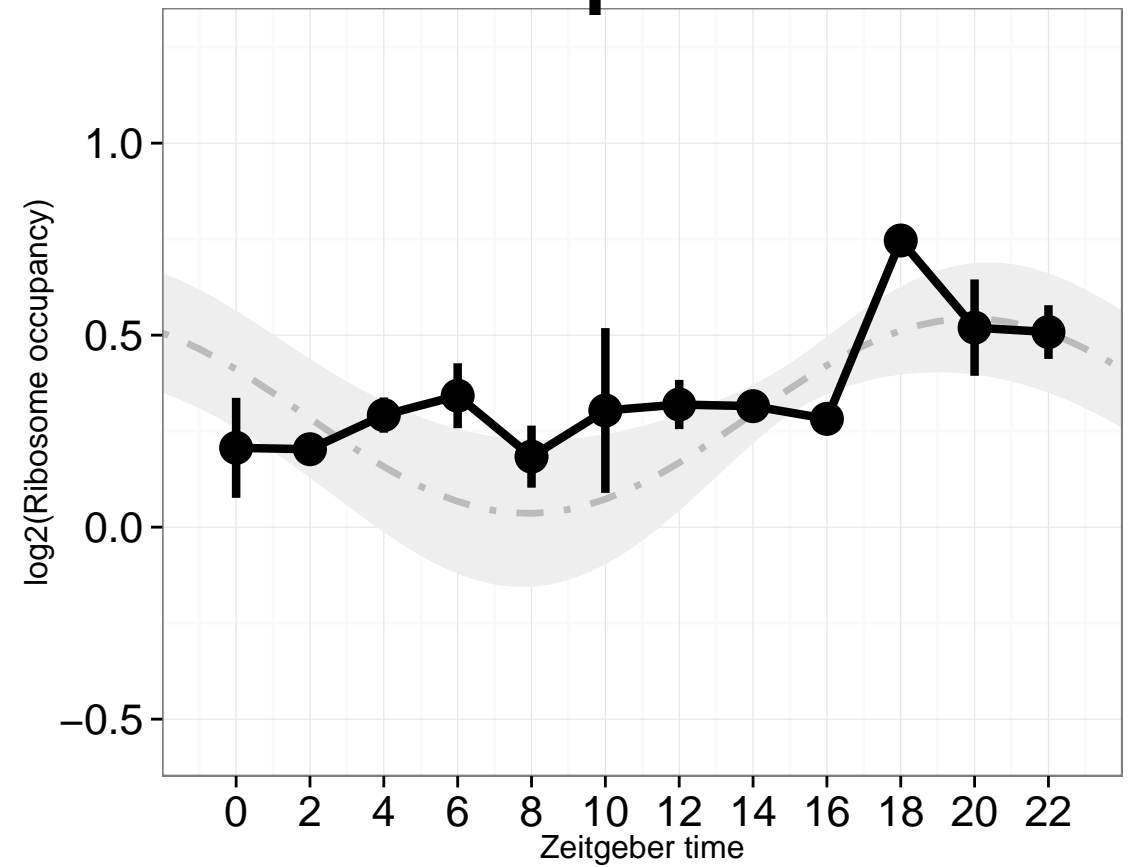

Supplement: SuppDataset_1.zip [file Tpm3_set_A.pdf › Supplemental Dataset 1/A-mRNA_nonrhyth_translation_nonrhyth/Tpm3_set_A.pdf]

# Tpm4

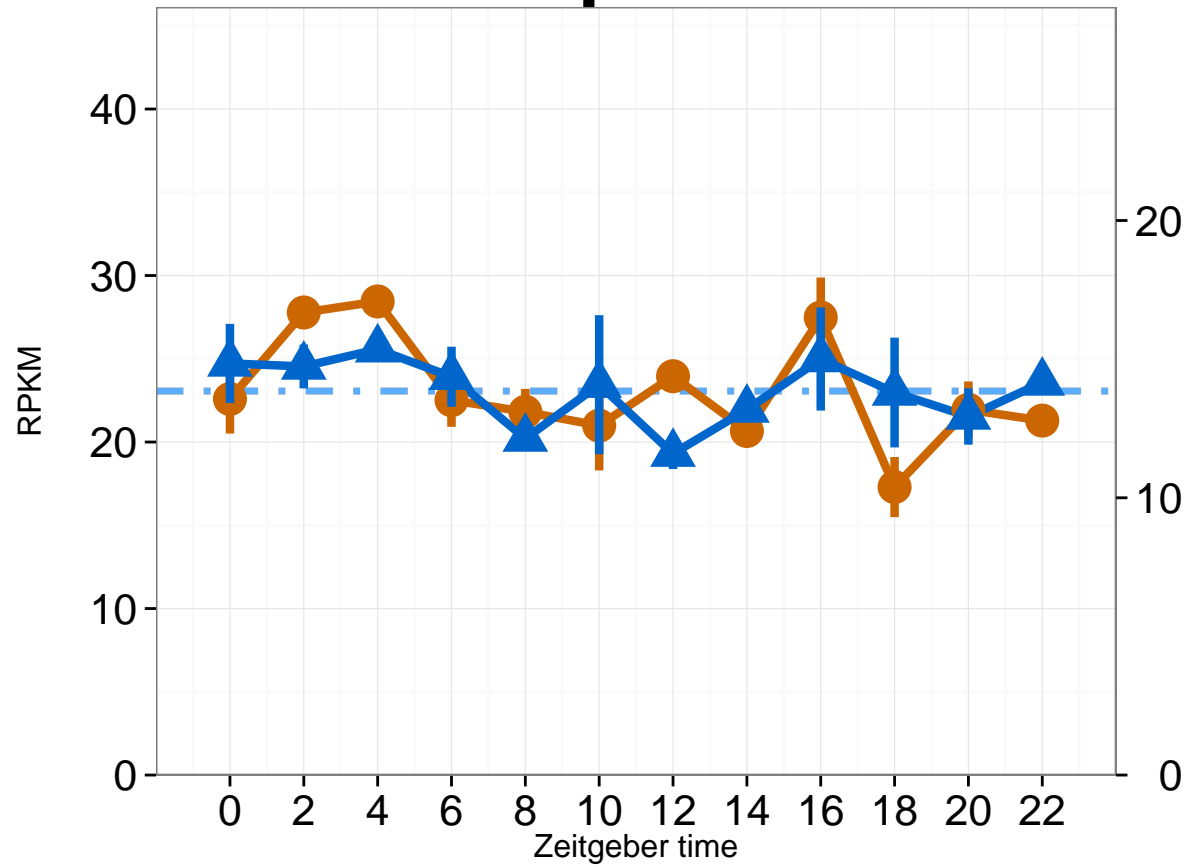

# Tpm4

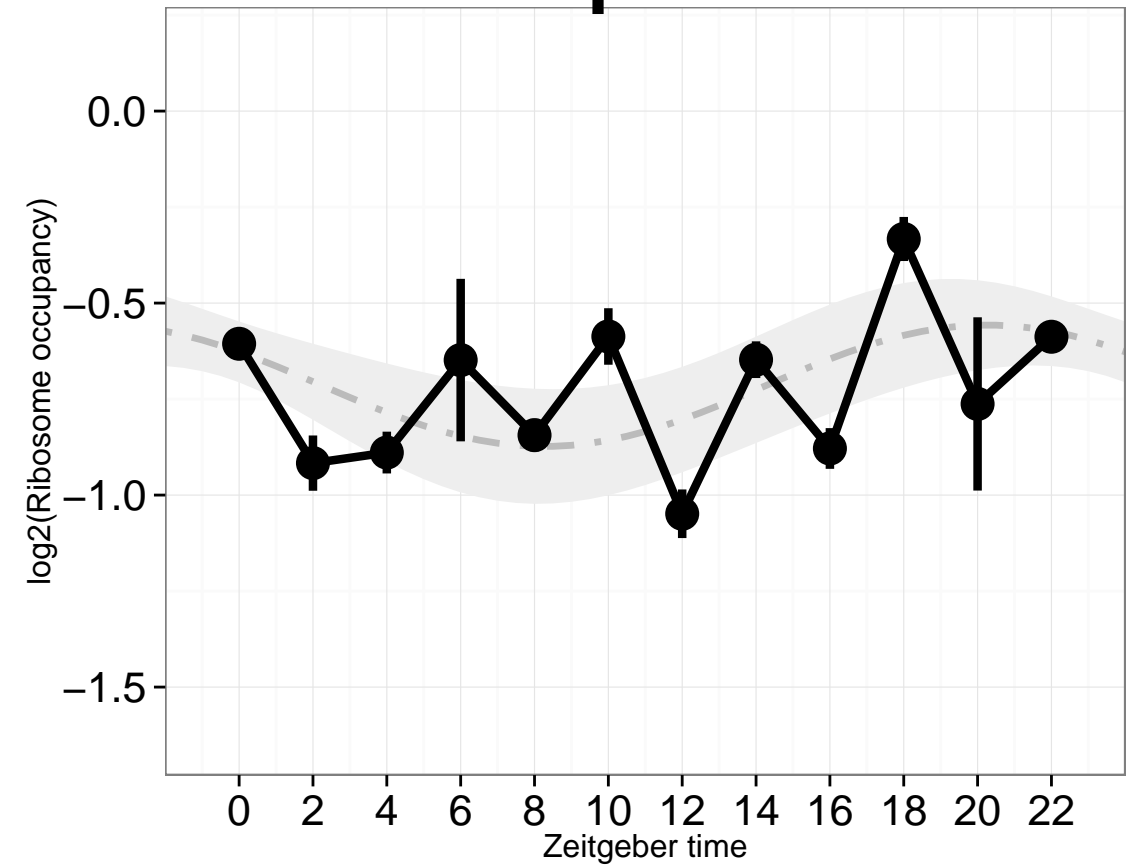

Supplement: SuppDataset_1.zip [file Tpm4_set_A.pdf › Supplemental Dataset 1/A-mRNA_nonrhyth_translation_nonrhyth/Tpm4_set_A.pdf]

## Tpmt

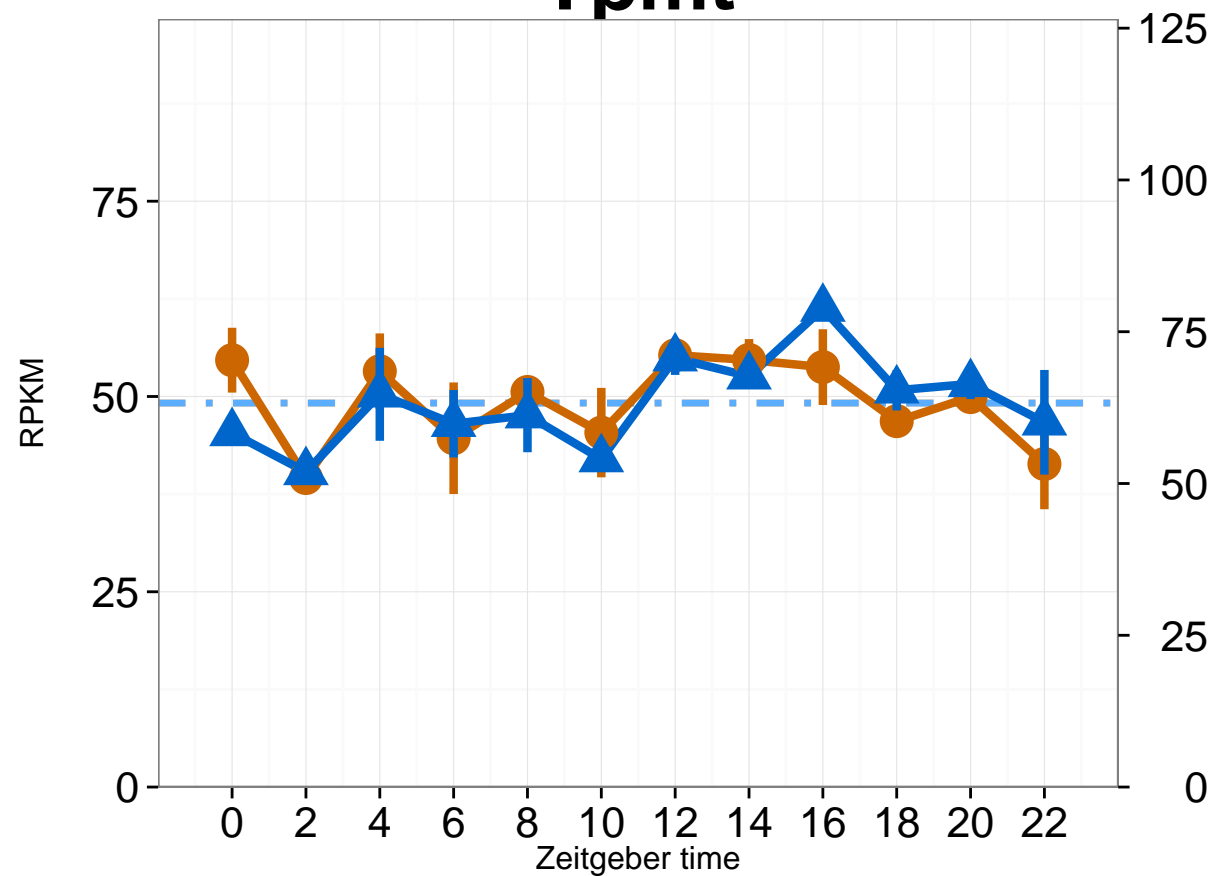

## Tpmt

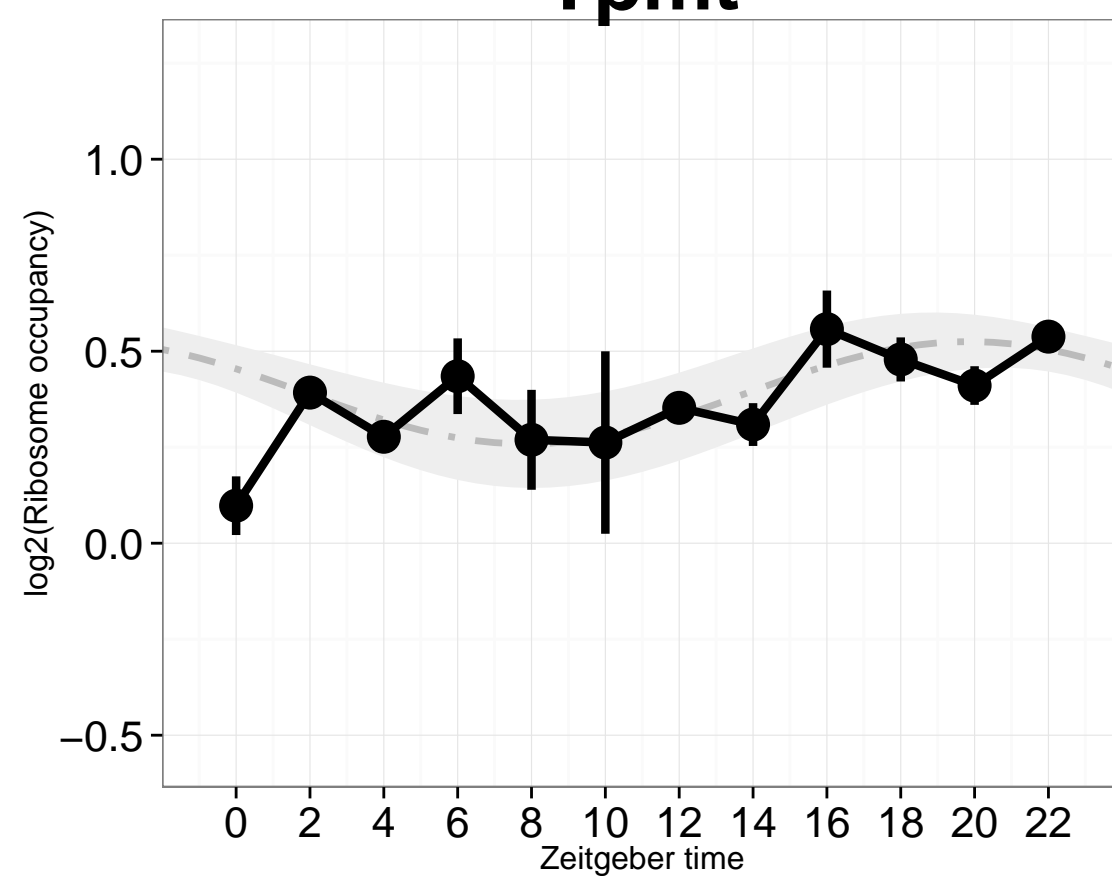

Supplement: SuppDataset_1.zip [file Tpmt_set_A.pdf › Supplemental Dataset 1/A-mRNA_nonrhyth_translation_nonrhyth/Tpmt_set_A.pdf]

# Tpp1

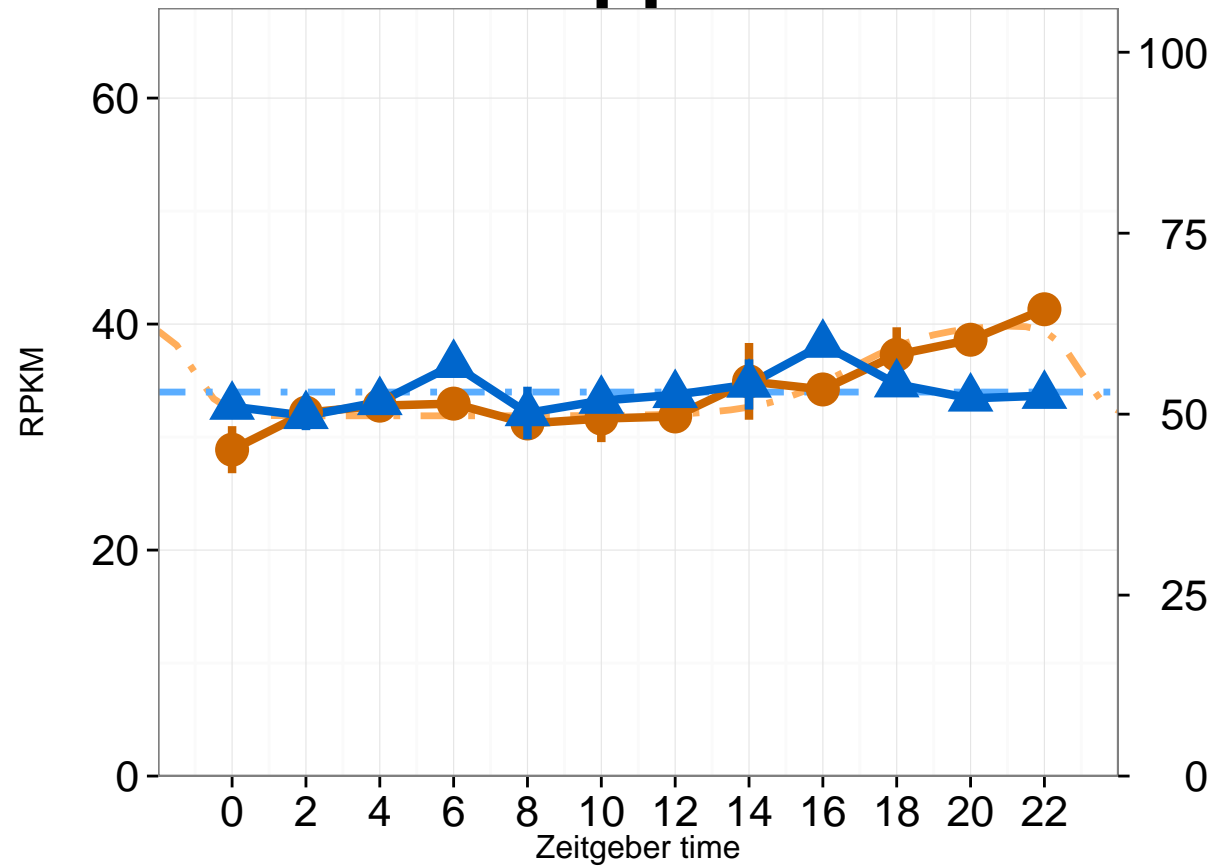

# Tpp1

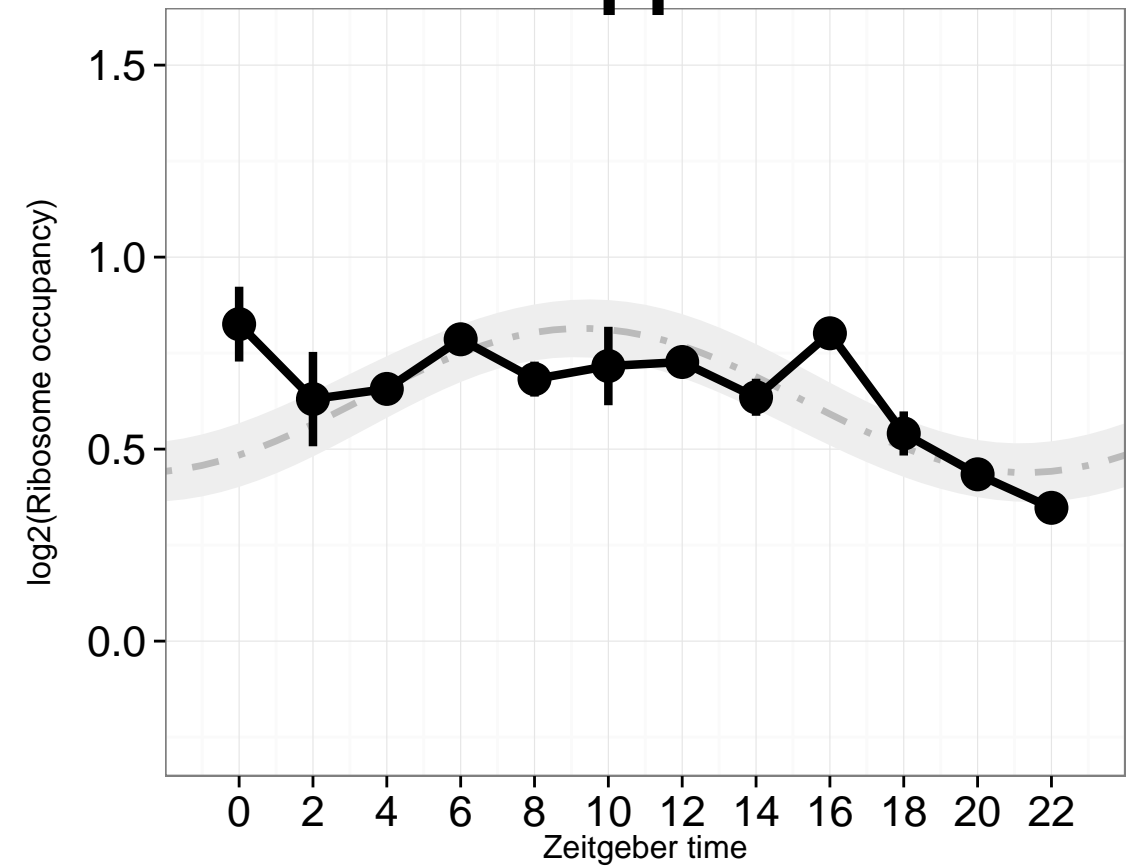

Supplement: SuppDataset_1.zip [file Tpp1_set_A.pdf › Supplemental Dataset 1/A-mRNA_nonrhyth_translation_nonrhyth/Tpp1_set_A.pdf]

# Tpp2

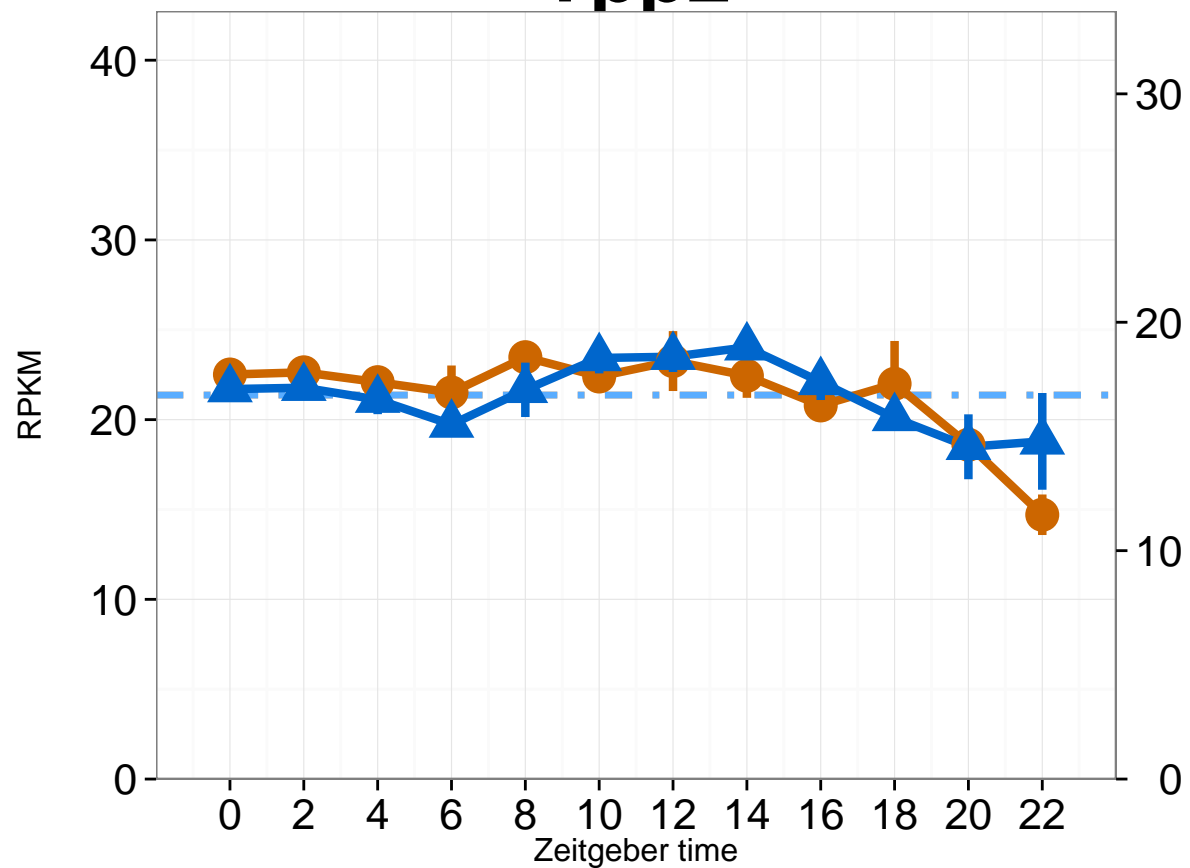

# Tpp2

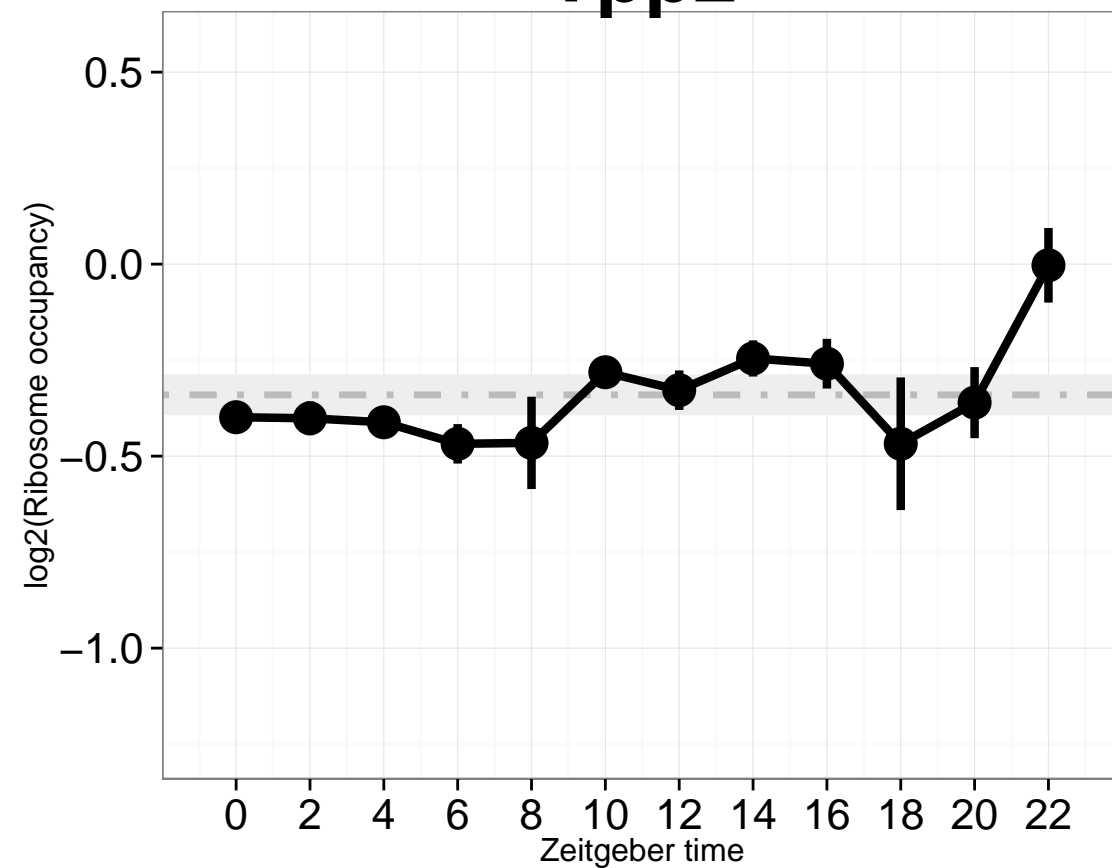

Supplement: SuppDataset_1.zip [file Tpp2_set_A.pdf › Supplemental Dataset 1/A-mRNA_nonrhyth_translation_nonrhyth/Tpp2_set_A.pdf]

# Tpr

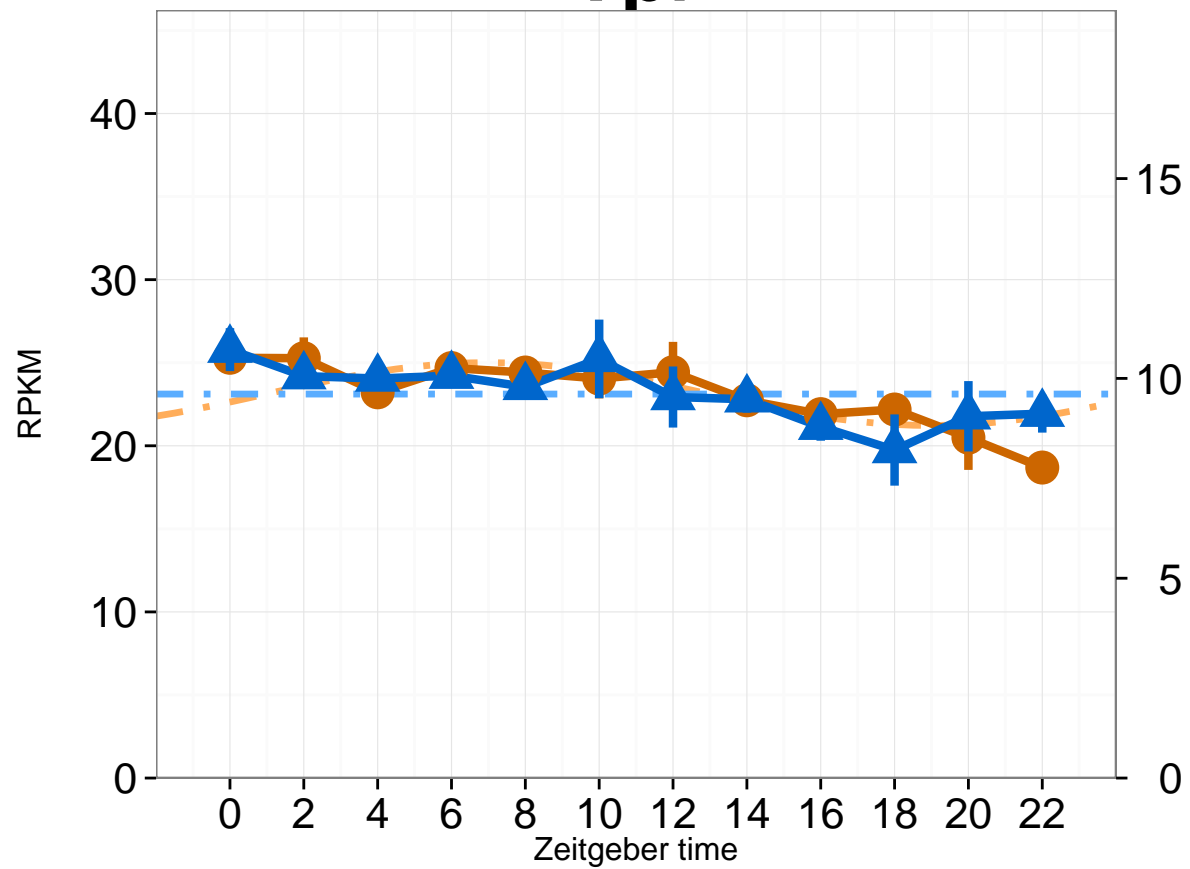

# Tpr

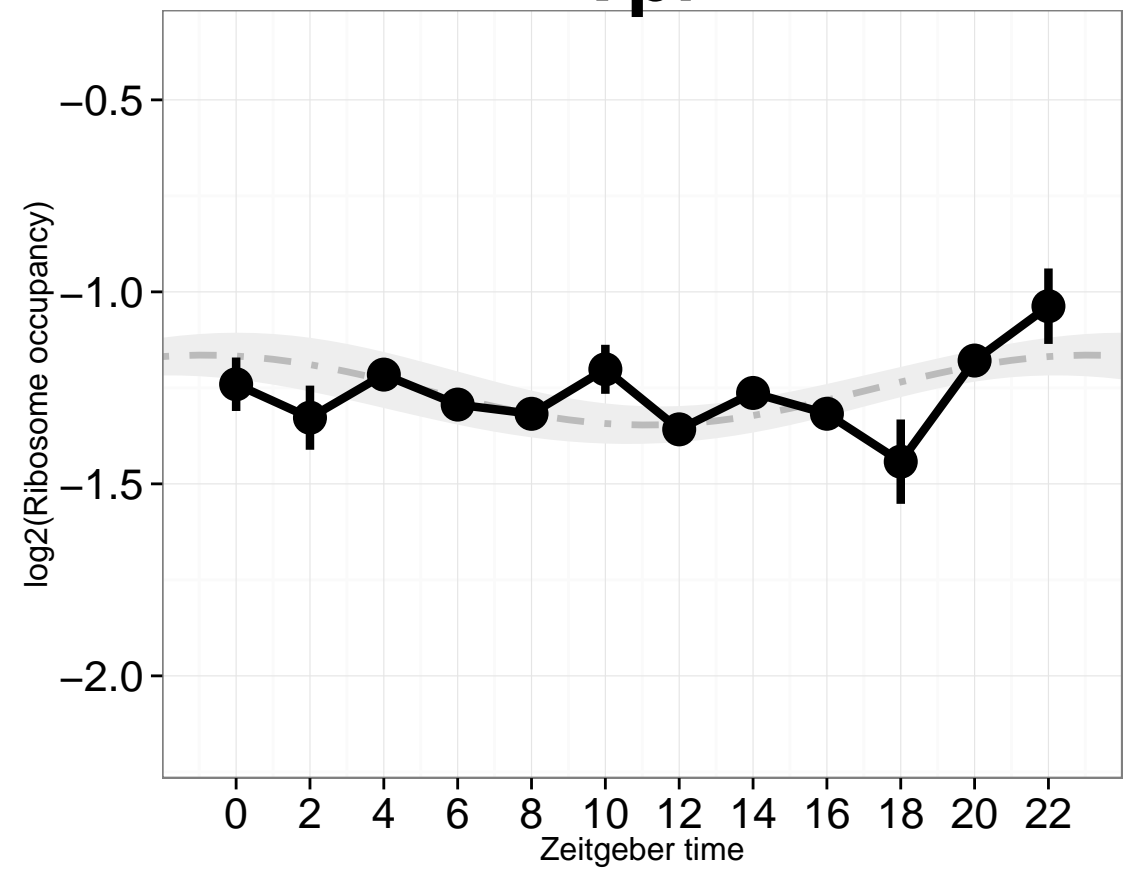

Supplement: SuppDataset_1.zip [file Tpr_set_A.pdf › Supplemental Dataset 1/A-mRNA_nonrhyth_translation_nonrhyth/Tpr_set_A.pdf]

## Tprgl

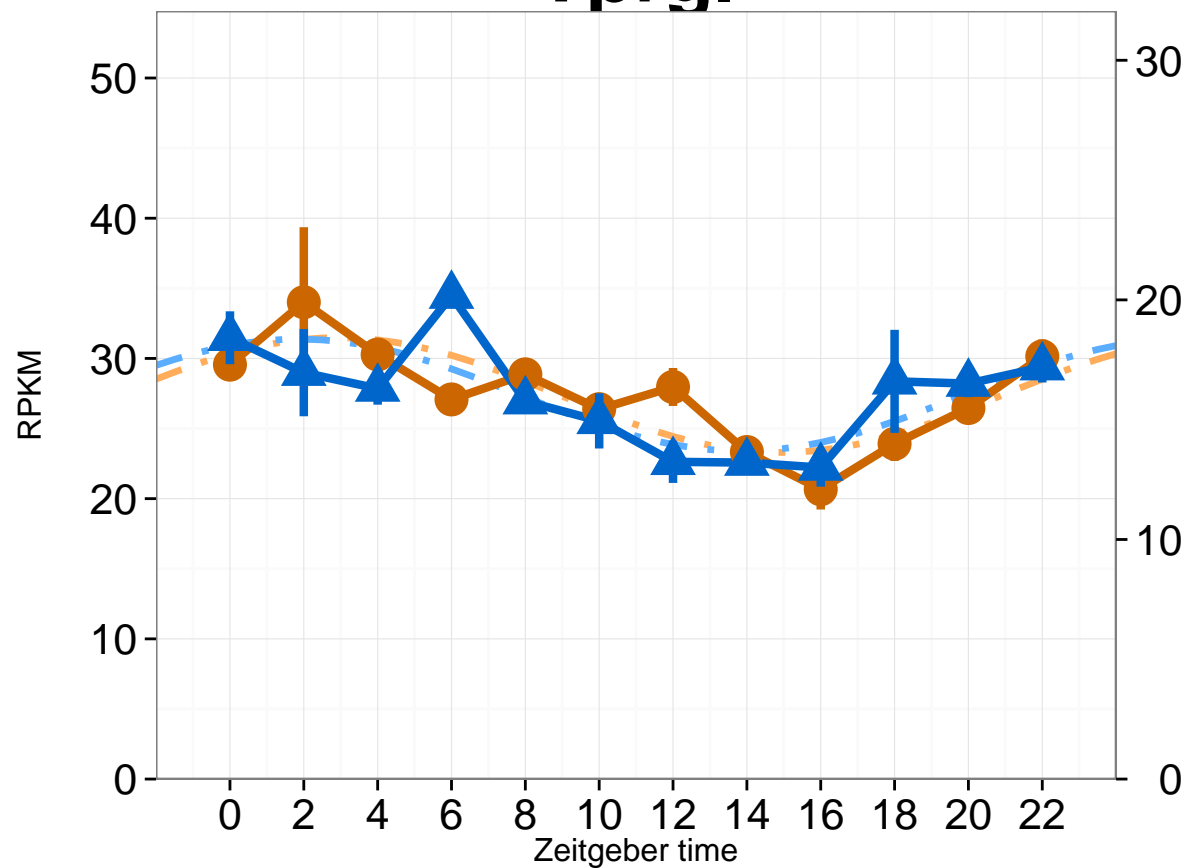

## Tprgl

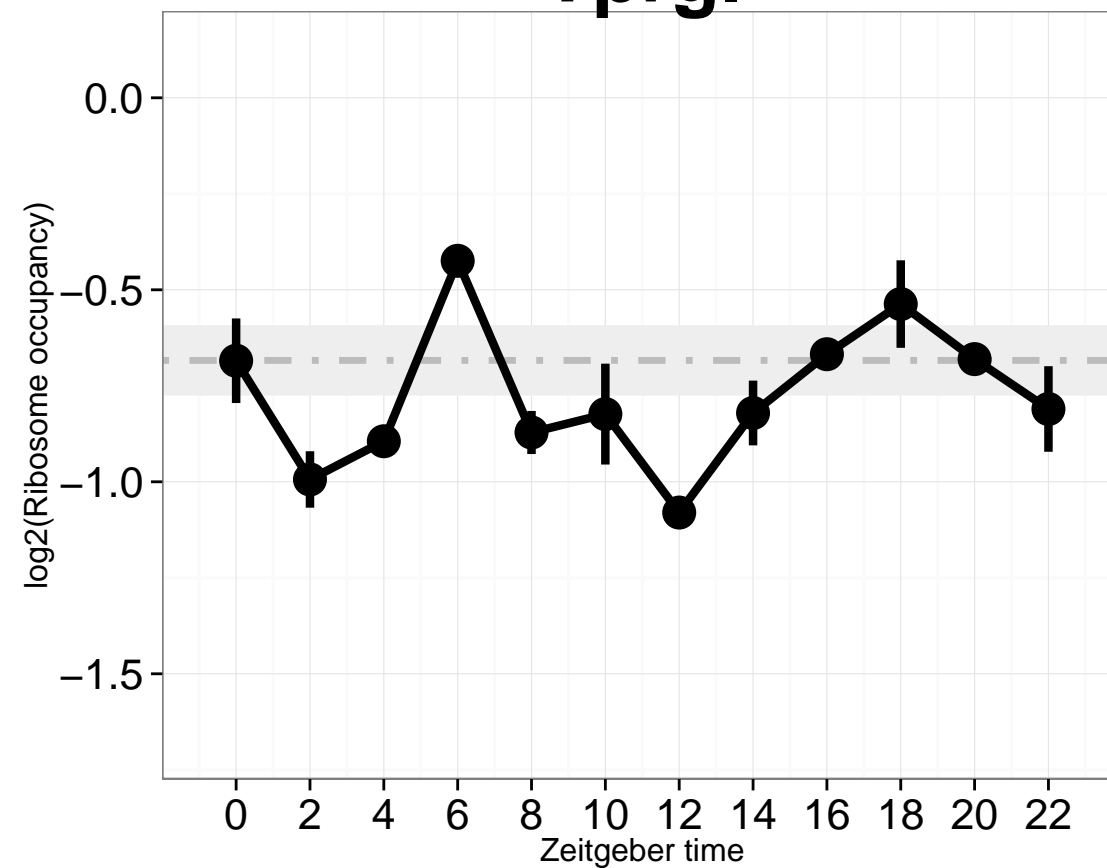

Supplement: SuppDataset_1.zip [file Tprgl_set_A.pdf › Supplemental Dataset 1/A-mRNA_nonrhyth_translation_nonrhyth/Tprgl_set_A.pdf]

## Tprkb

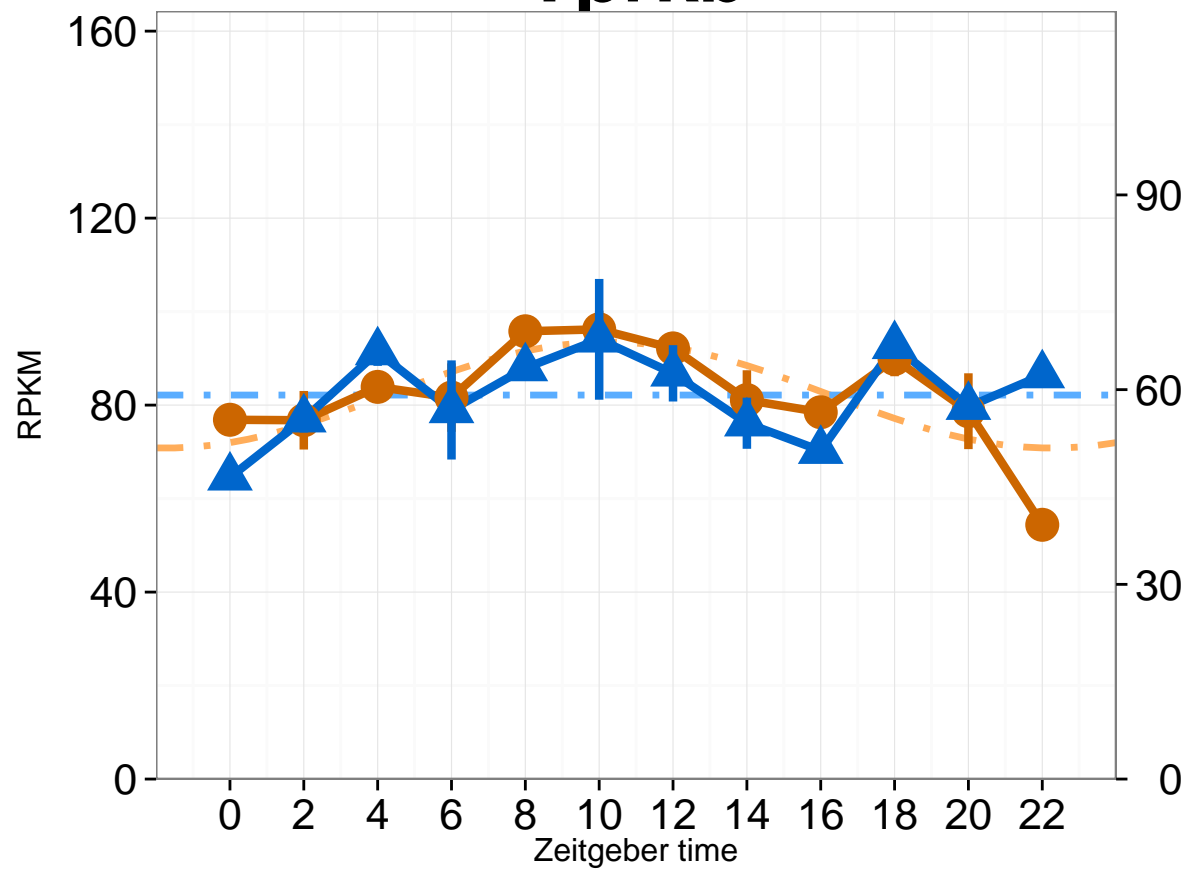

## Tprkb

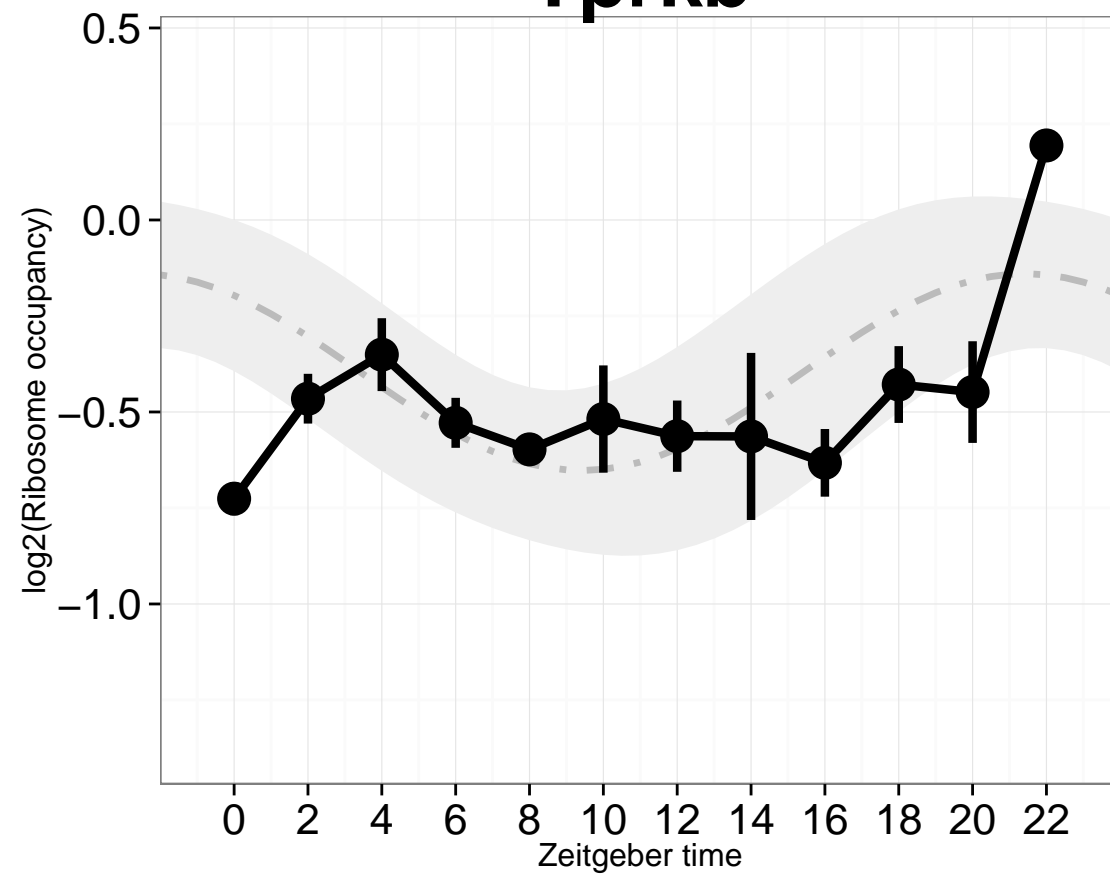

Supplement: SuppDataset_1.zip [file Tprkb_set_A.pdf › Supplemental Dataset 1/A-mRNA_nonrhyth_translation_nonrhyth/Tprkb_set_A.pdf]

## Tprn

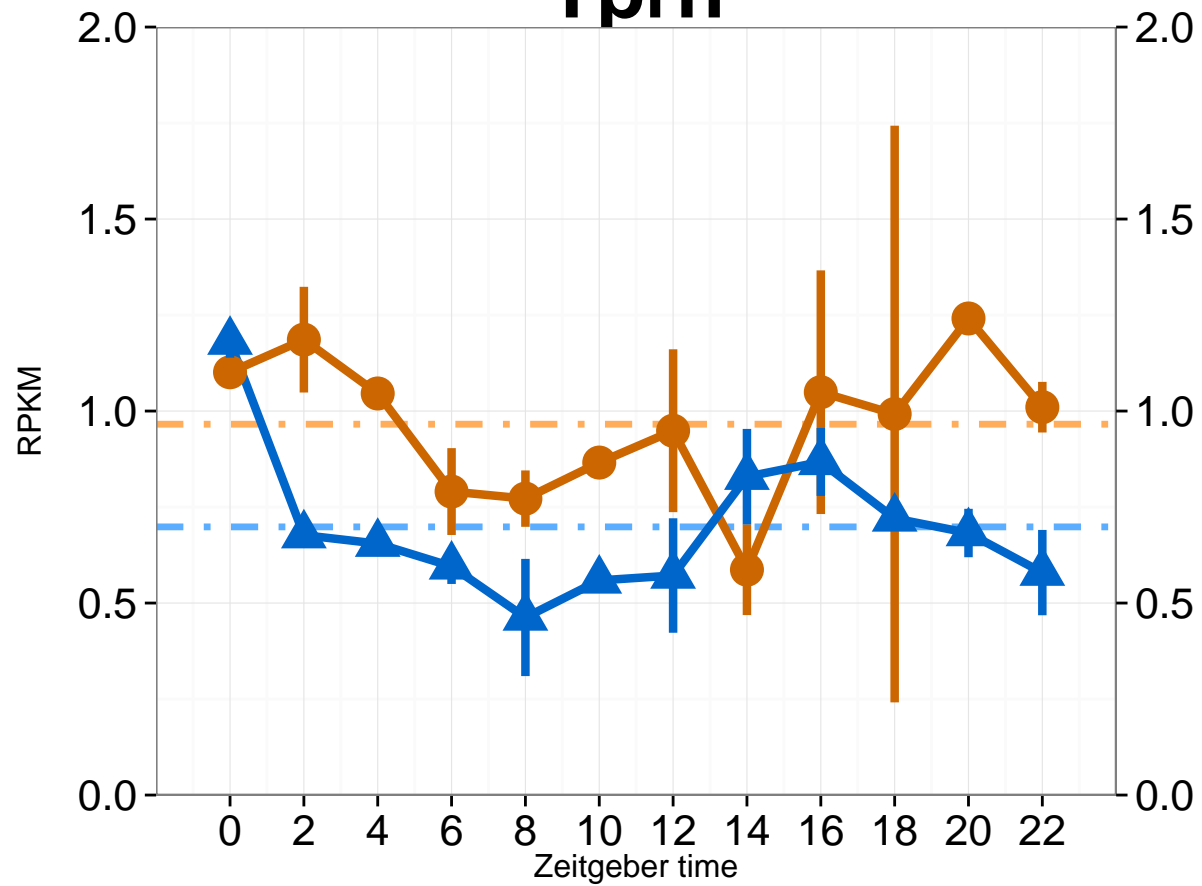

## Tprn

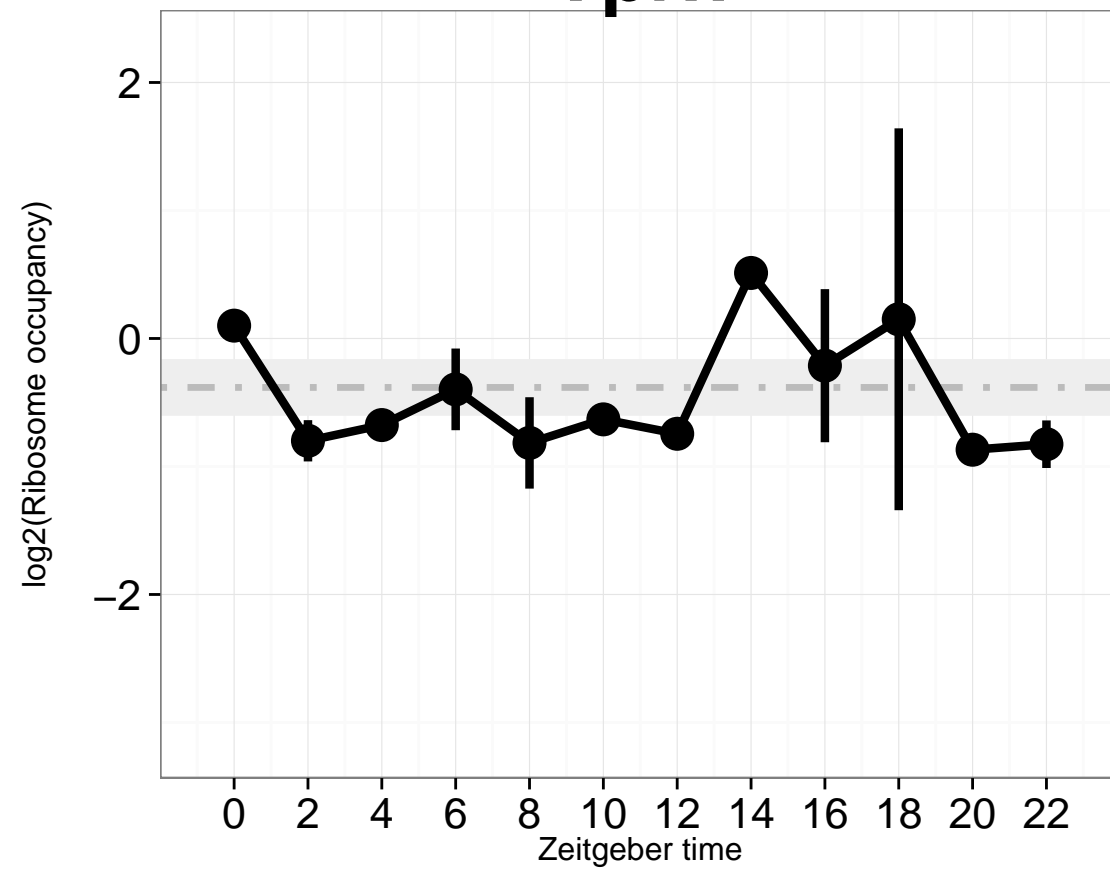

Supplement: SuppDataset_1.zip [file Tprn_set_A.pdf › Supplemental Dataset 1/A-mRNA_nonrhyth_translation_nonrhyth/Tprn_set_A.pdf]

## Tpx2

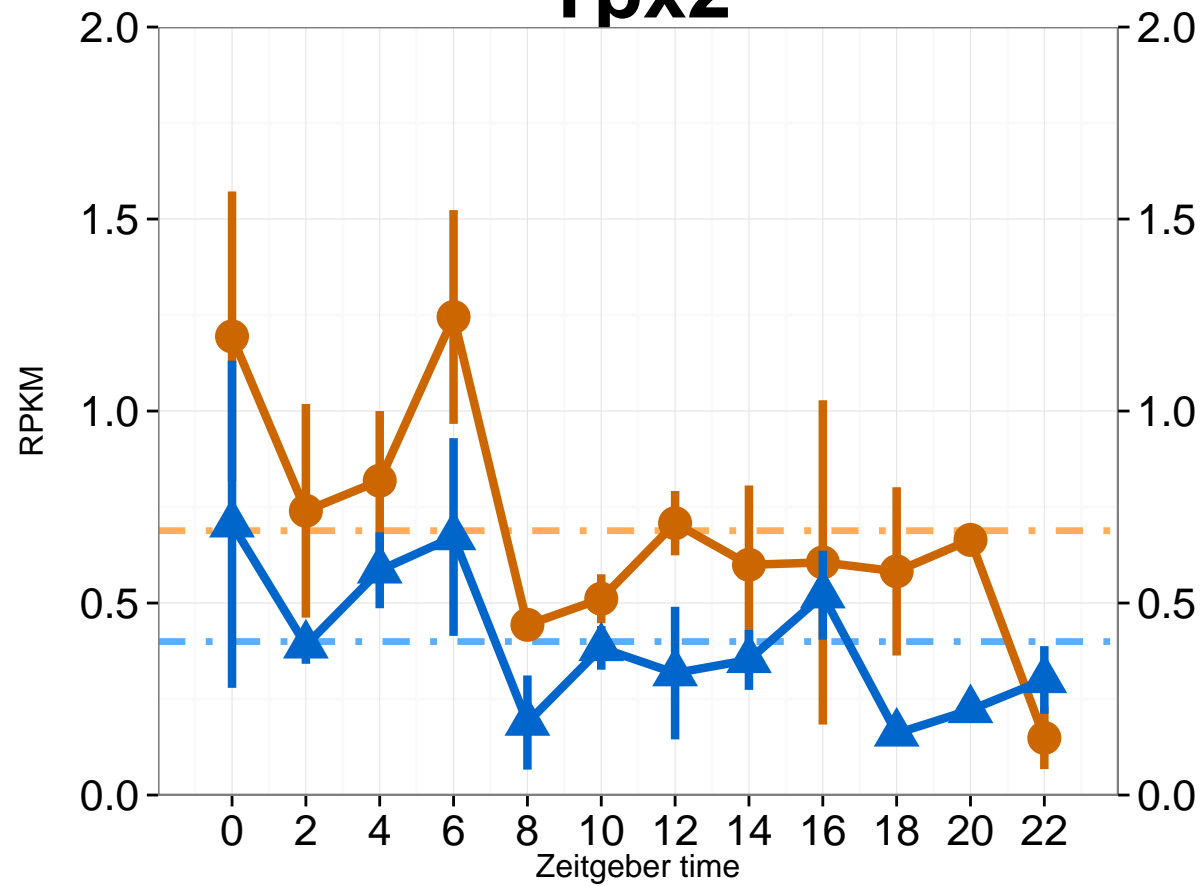

## Tpx2

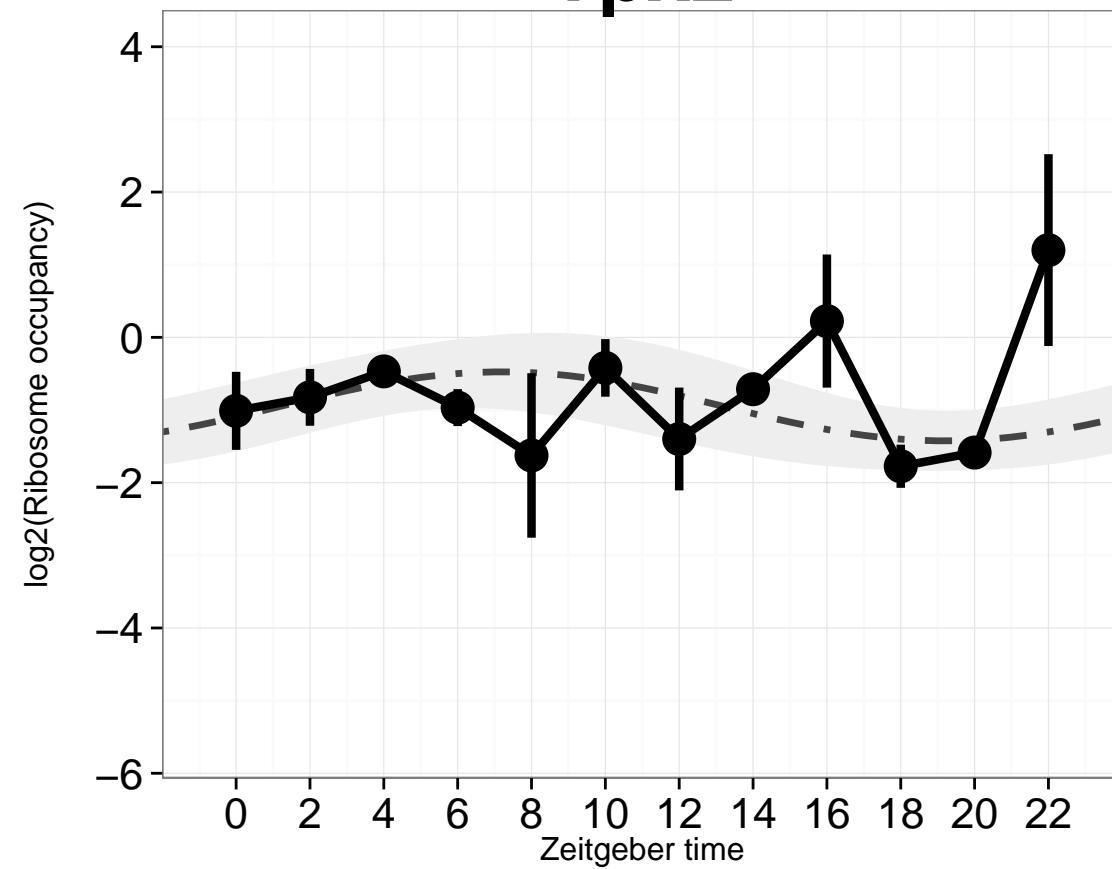

Supplement: SuppDataset_1.zip [file Tpx2_set_A.pdf › Supplemental Dataset 1/A-mRNA_nonrhyth_translation_nonrhyth/Tpx2_set_A.pdf]

# Trabd

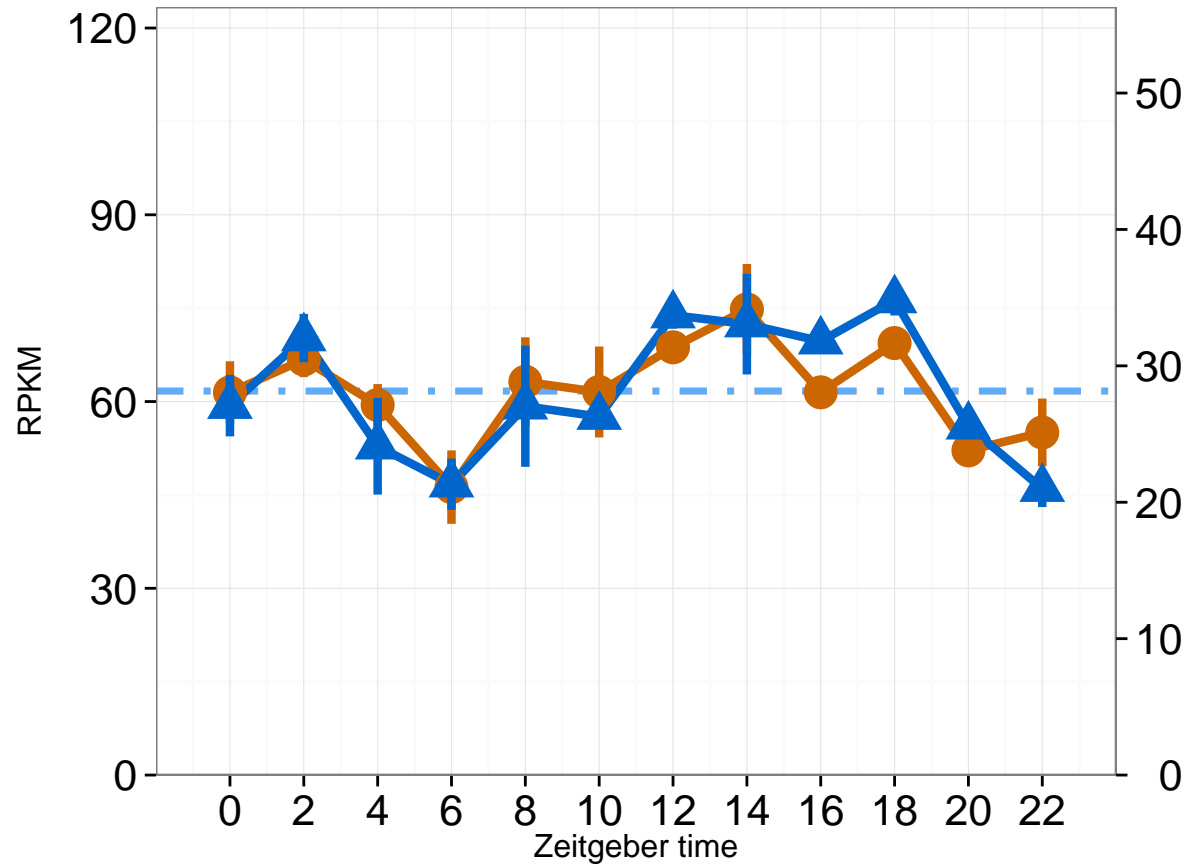

# Trabd

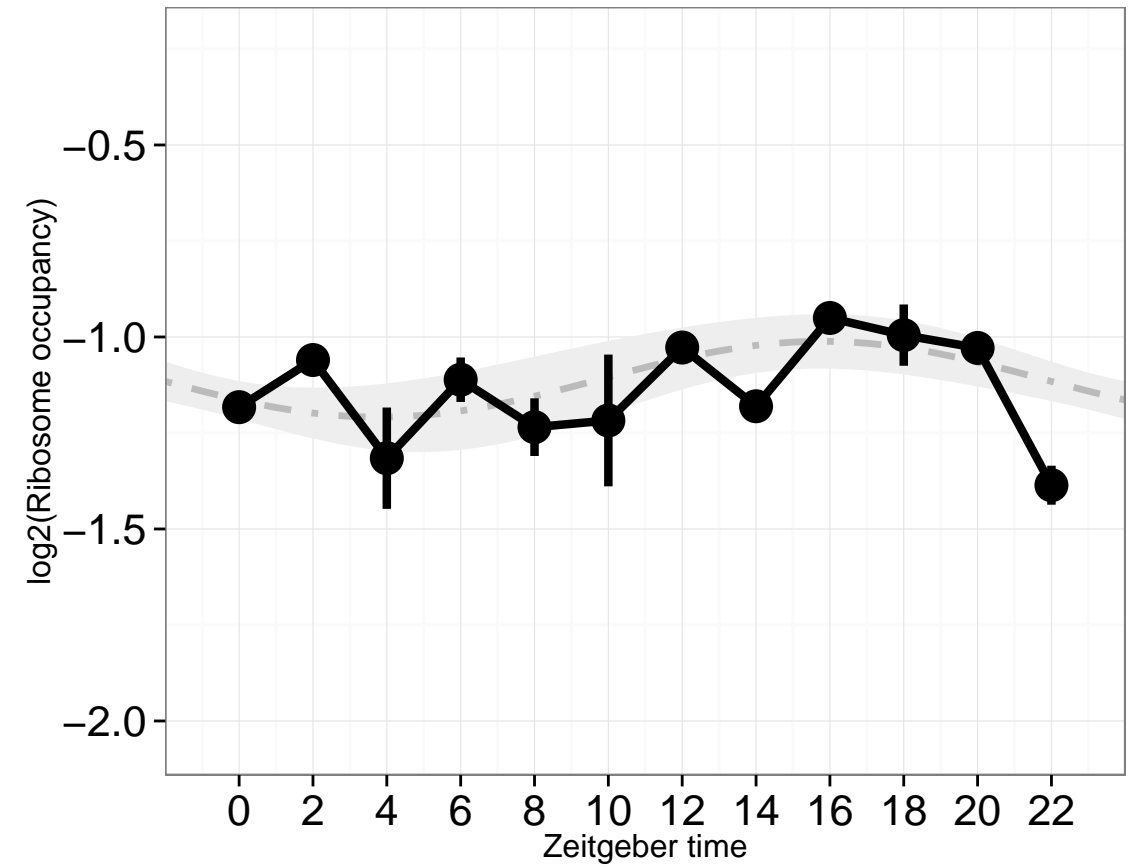

Supplement: SuppDataset_1.zip [file Trabd_set_A.pdf › Supplemental Dataset 1/A-mRNA_nonrhyth_translation_nonrhyth/Trabd_set_A.pdf]

## Tradd

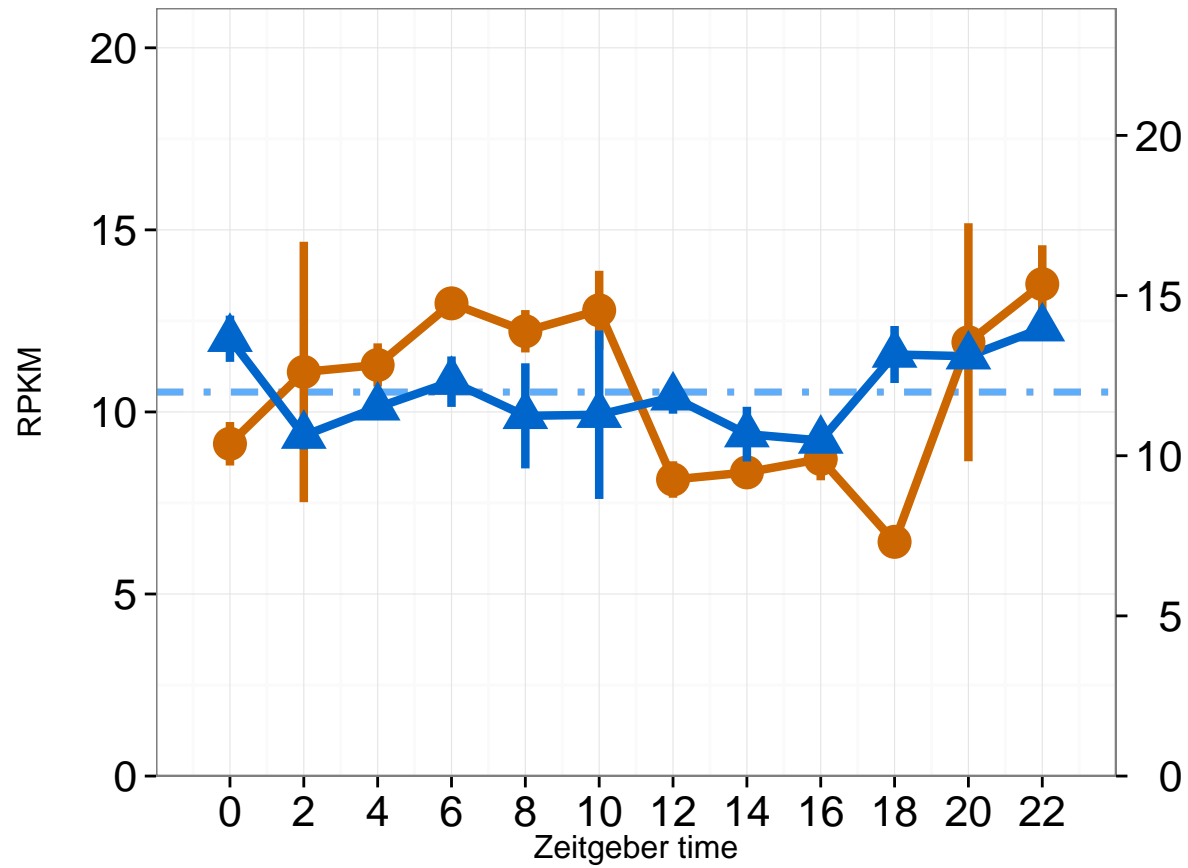

## Tradd

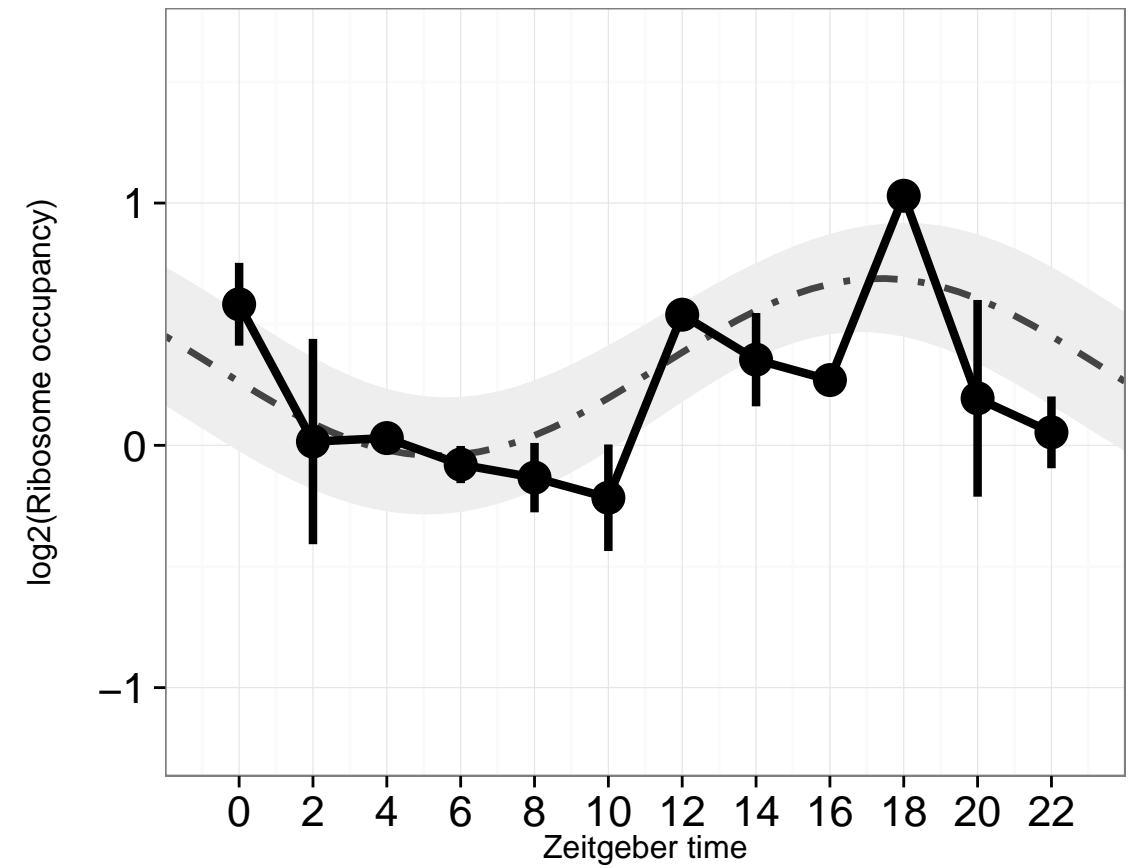

Supplement: SuppDataset_1.zip [file Tradd_set_A.pdf › Supplemental Dataset 1/A-mRNA_nonrhyth_translation_nonrhyth/Tradd_set_A.pdf]

## Traf2

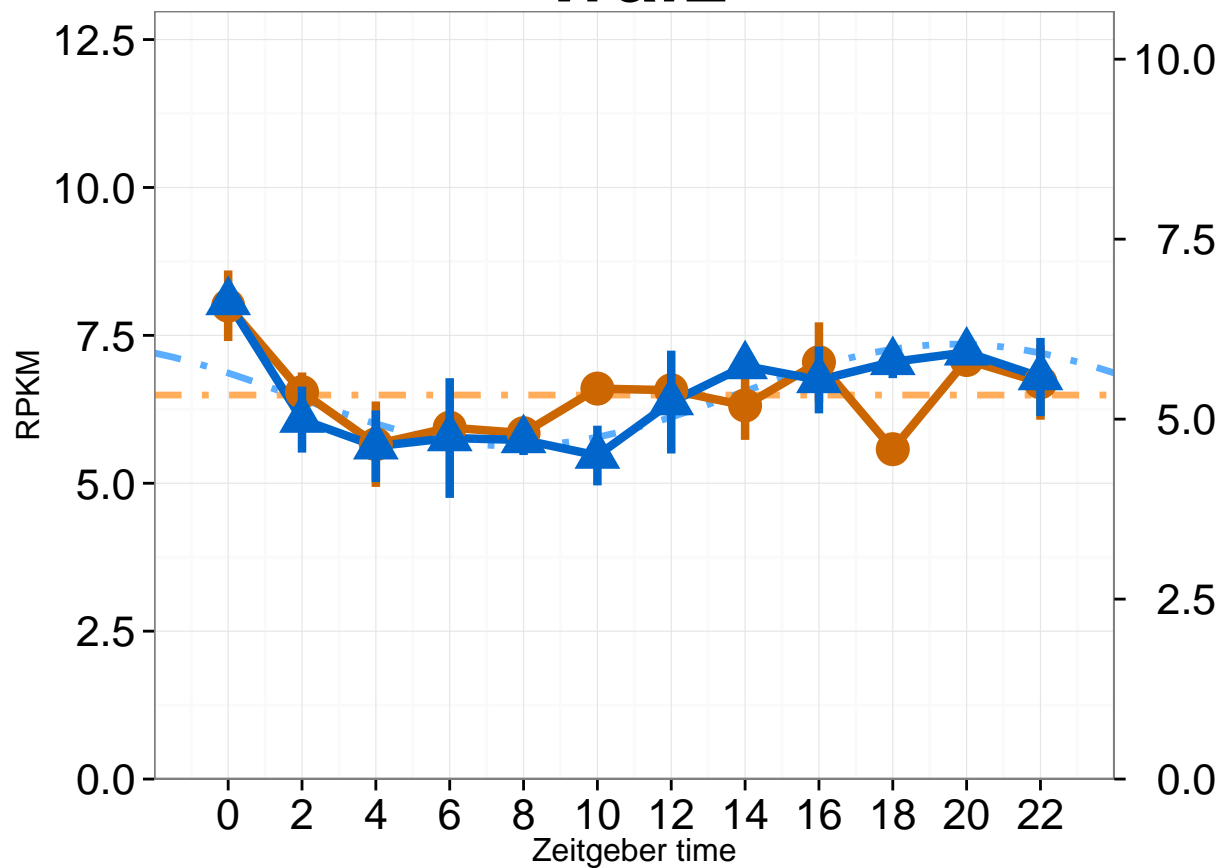

## Traf2

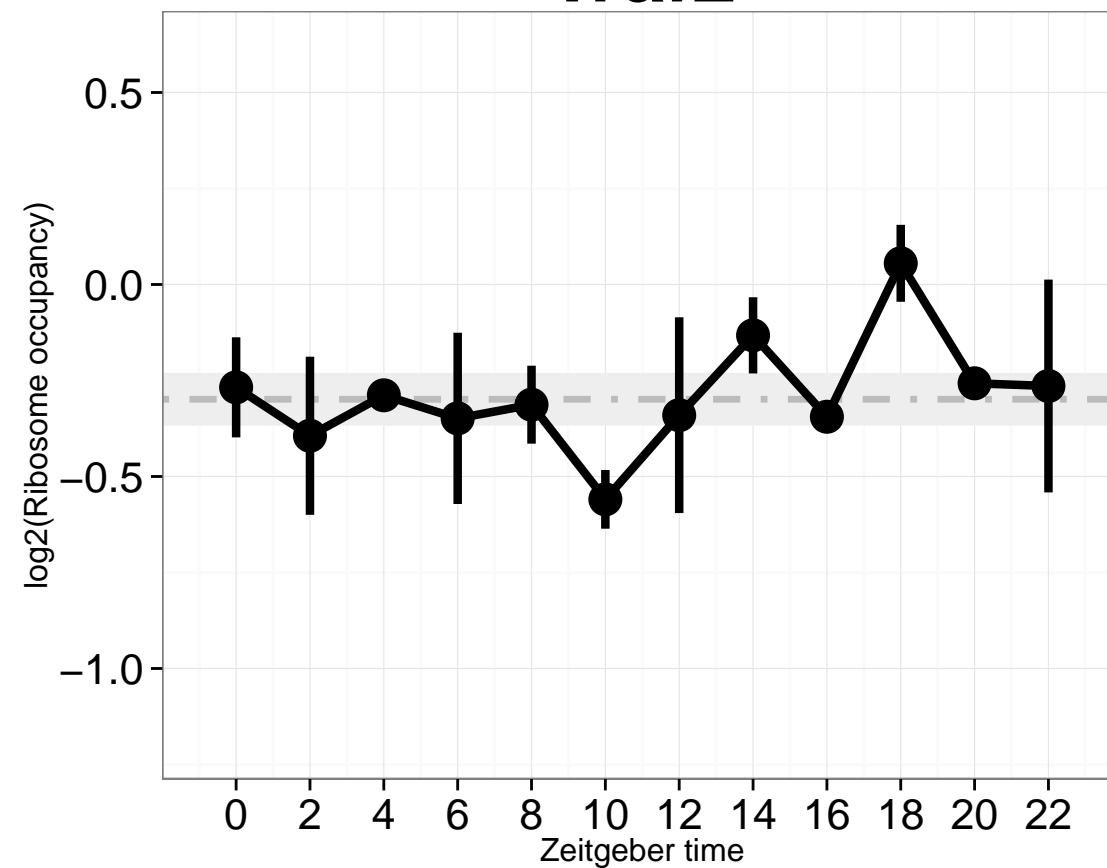

Supplement: SuppDataset_1.zip [file Traf2_set_A.pdf › Supplemental Dataset 1/A-mRNA_nonrhyth_translation_nonrhyth/Traf2_set_A.pdf]

# Traf3

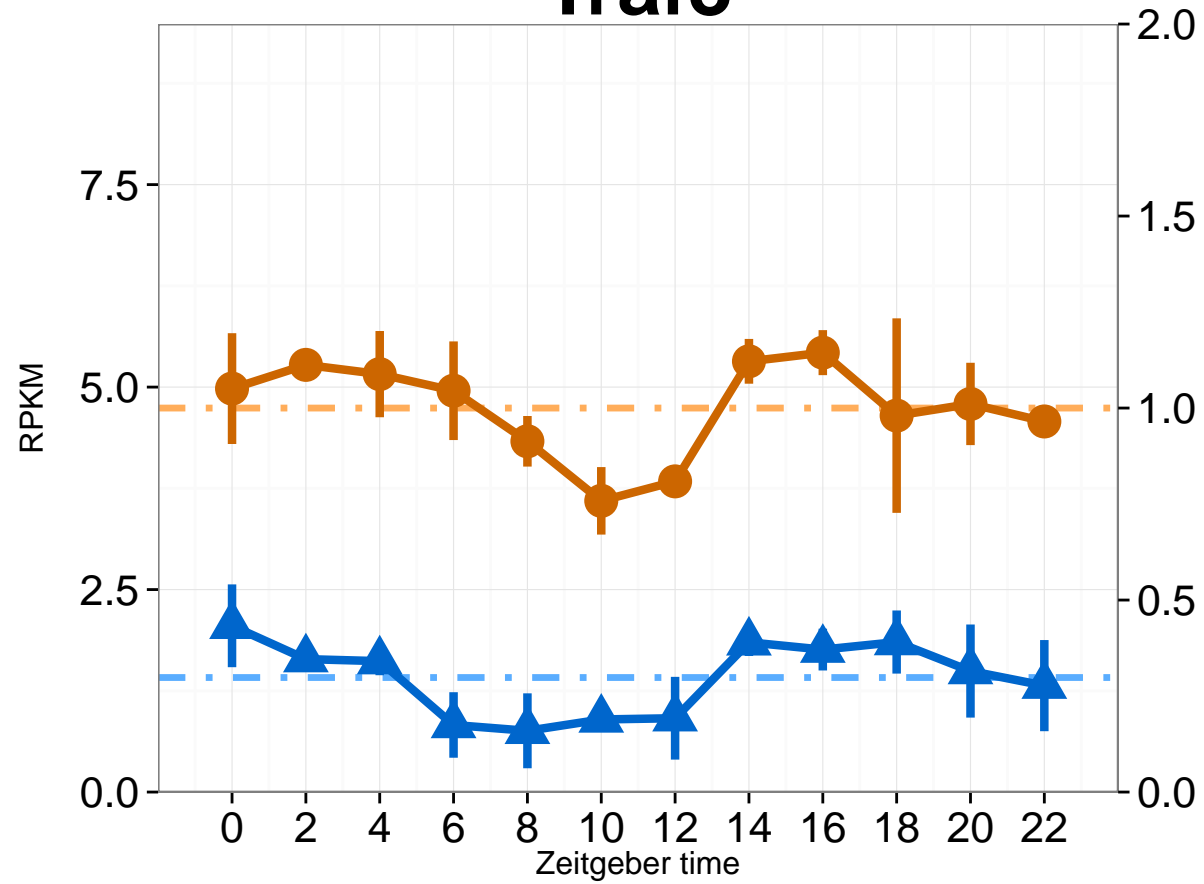

# Traf3

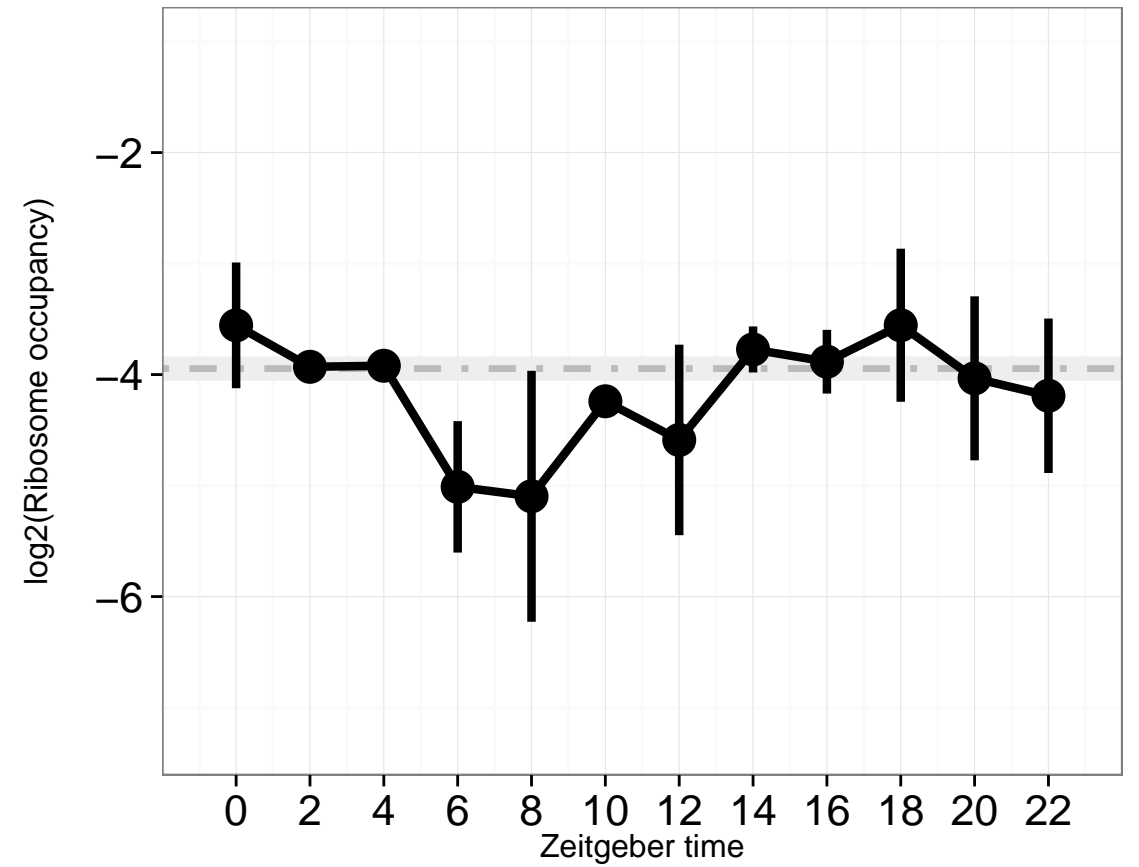

Supplement: SuppDataset_1.zip [file Traf3_set_A.pdf › Supplemental Dataset 1/A-mRNA_nonrhyth_translation_nonrhyth/Traf3_set_A.pdf]

# Traf3ip1

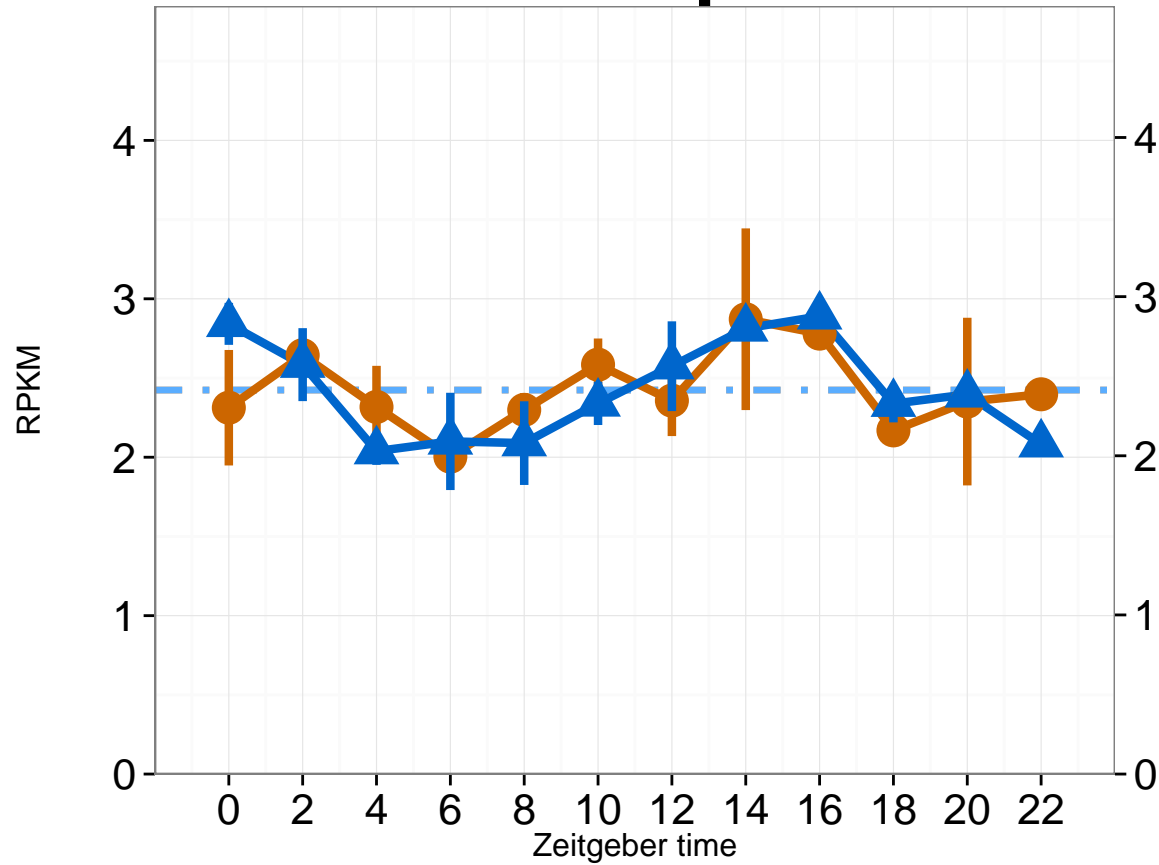

# Traf3ip1

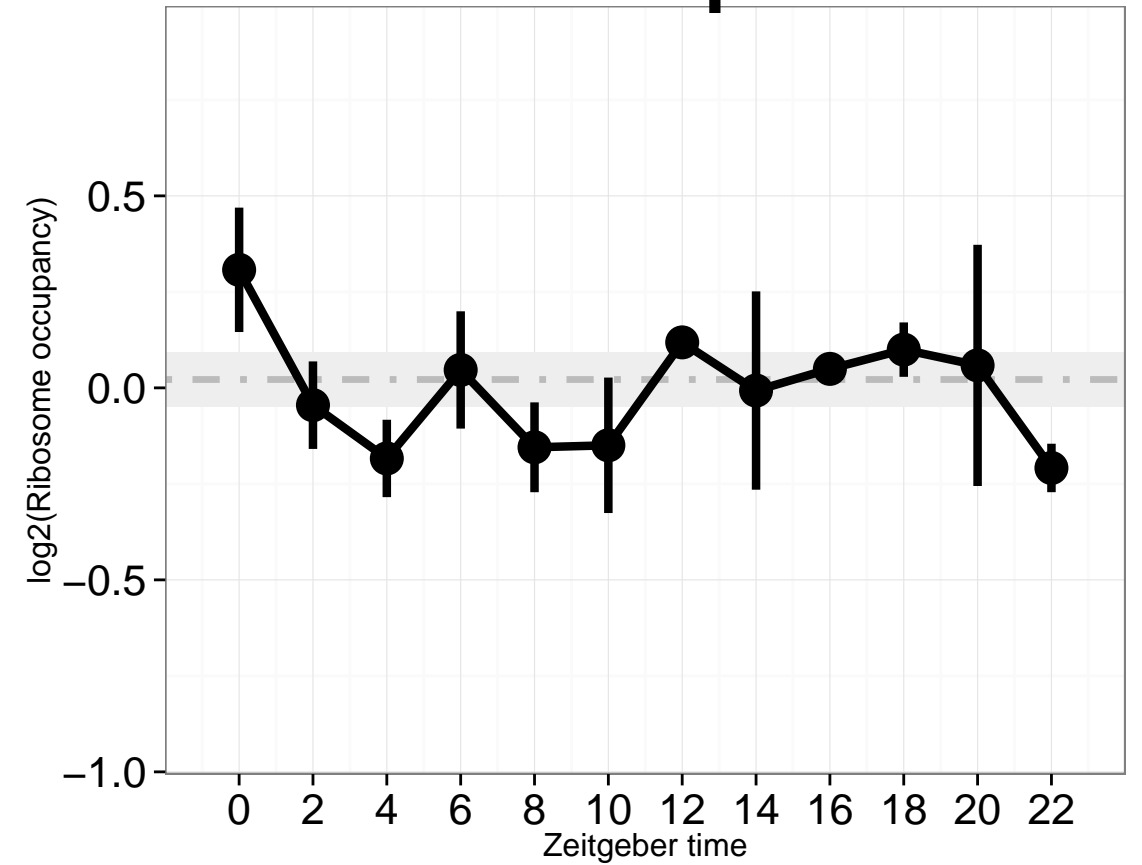

Supplement: SuppDataset_1.zip [file Traf3ip1_set_A.pdf › Supplemental Dataset 1/A-mRNA_nonrhyth_translation_nonrhyth/Traf3ip1_set_A.pdf]

## Traf4

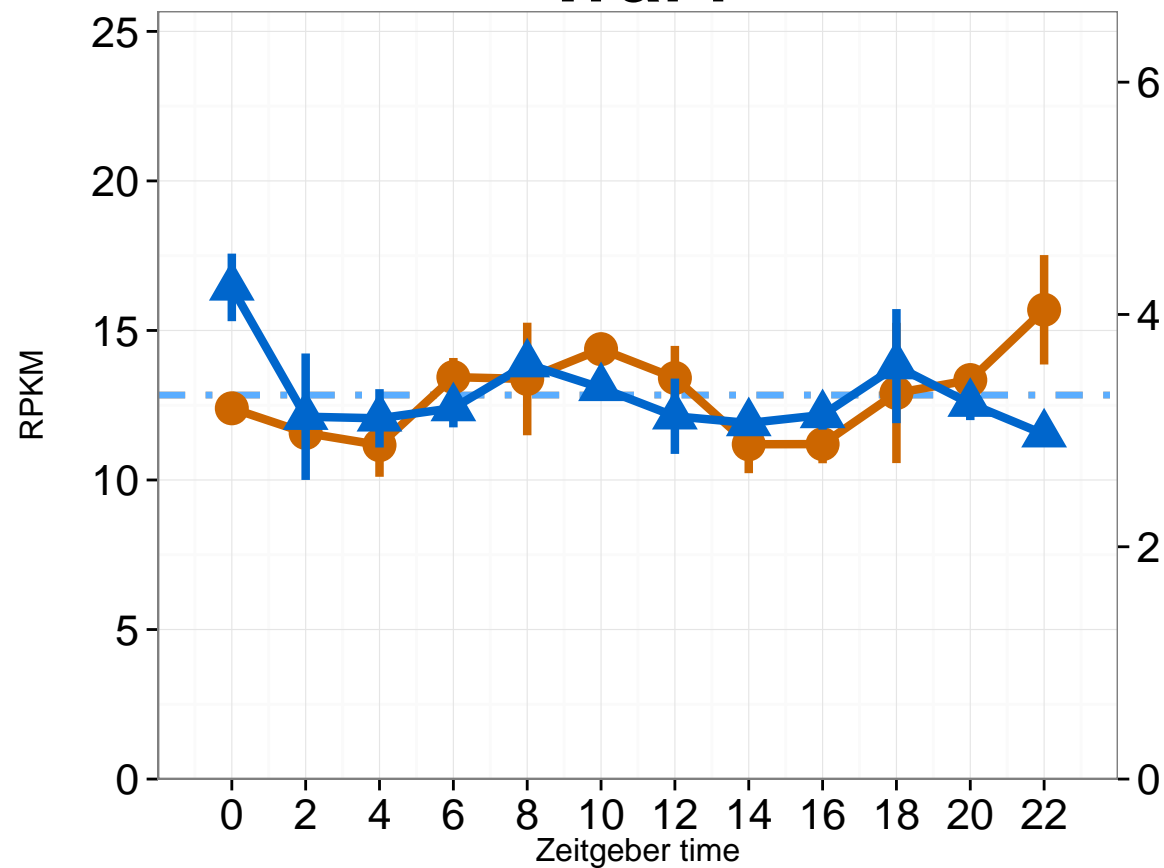

## Traf4

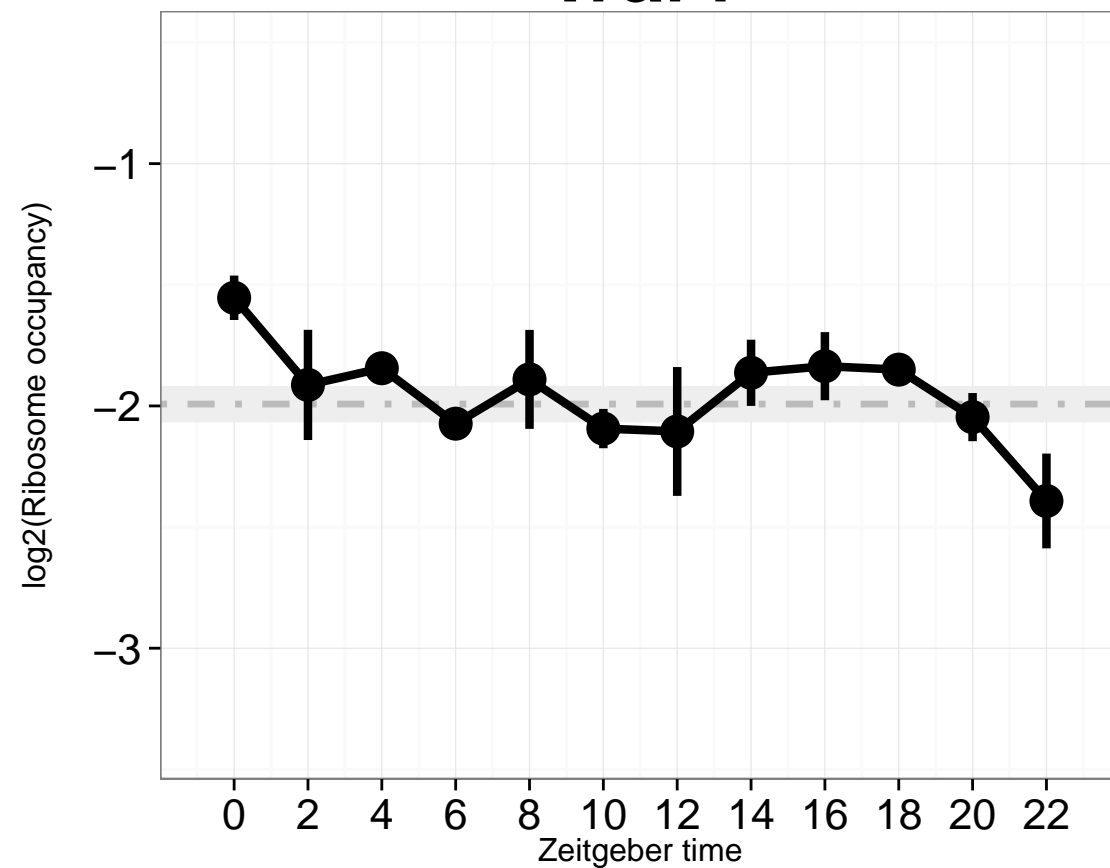

Supplement: SuppDataset_1.zip [file Traf4_set_A.pdf › Supplemental Dataset 1/A-mRNA_nonrhyth_translation_nonrhyth/Traf4_set_A.pdf]

# Traf5

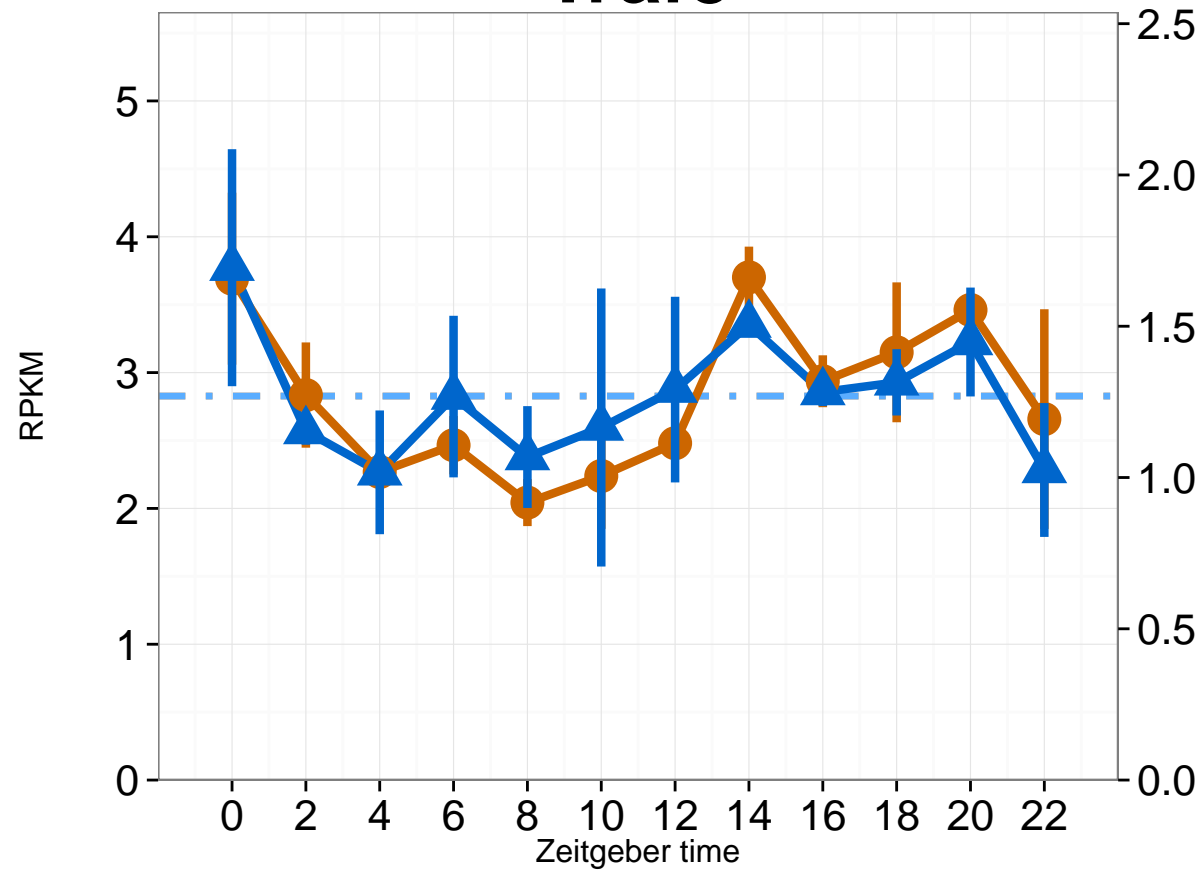

# Traf5

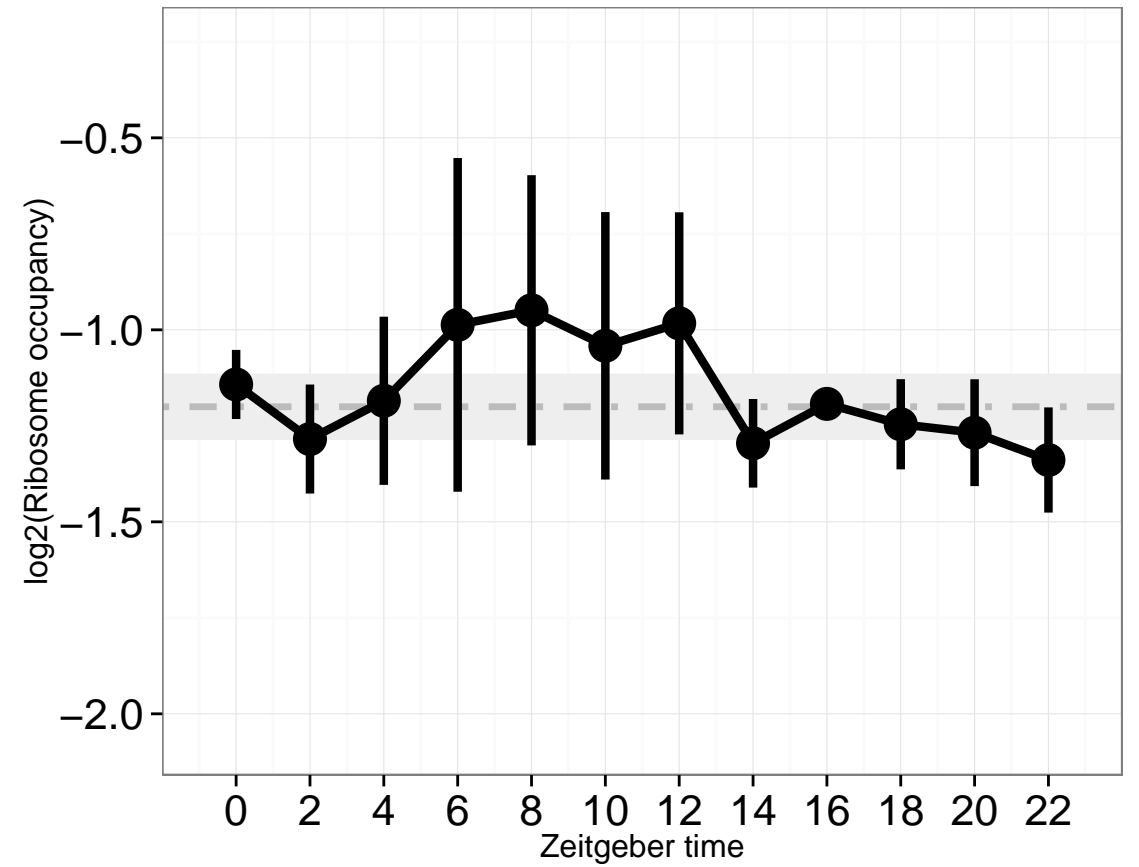

Supplement: SuppDataset_1.zip [file Traf5_set_A.pdf › Supplemental Dataset 1/A-mRNA_nonrhyth_translation_nonrhyth/Traf5_set_A.pdf]

# Traf6

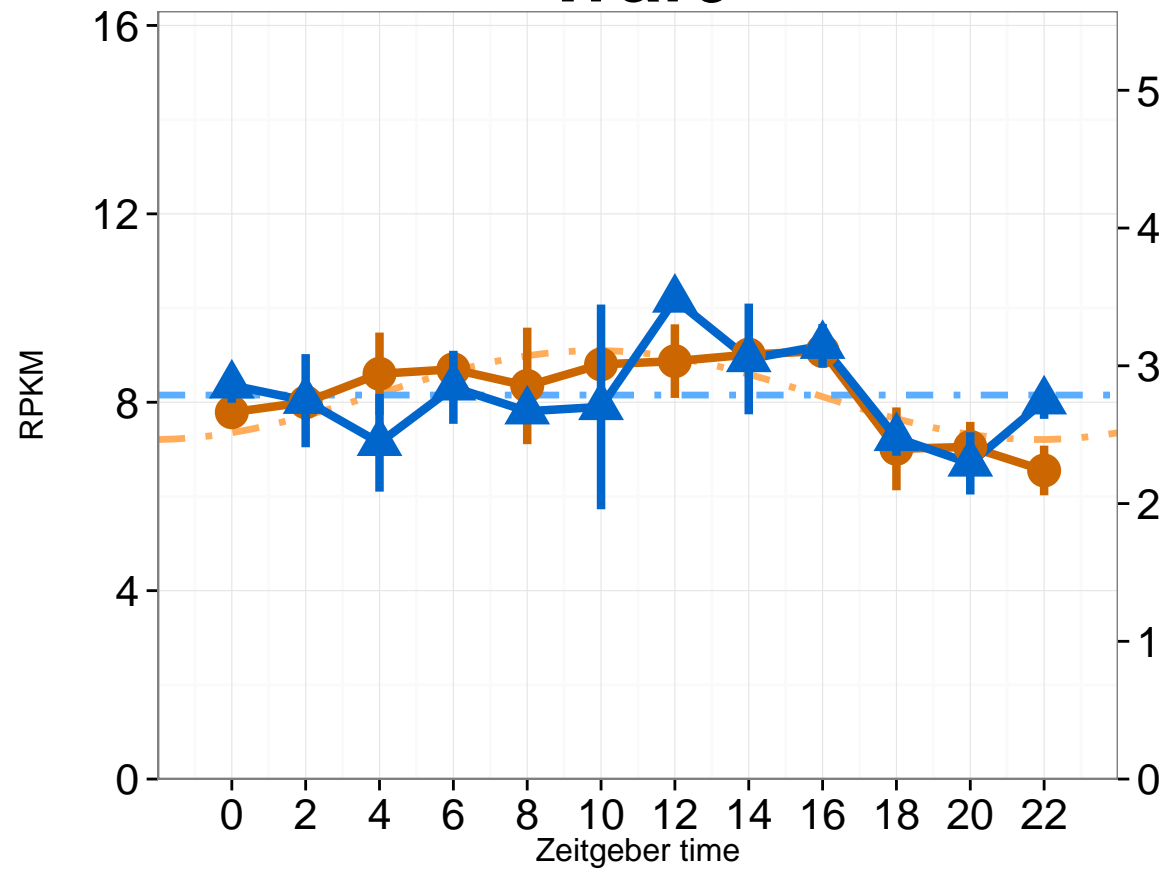

# Traf6

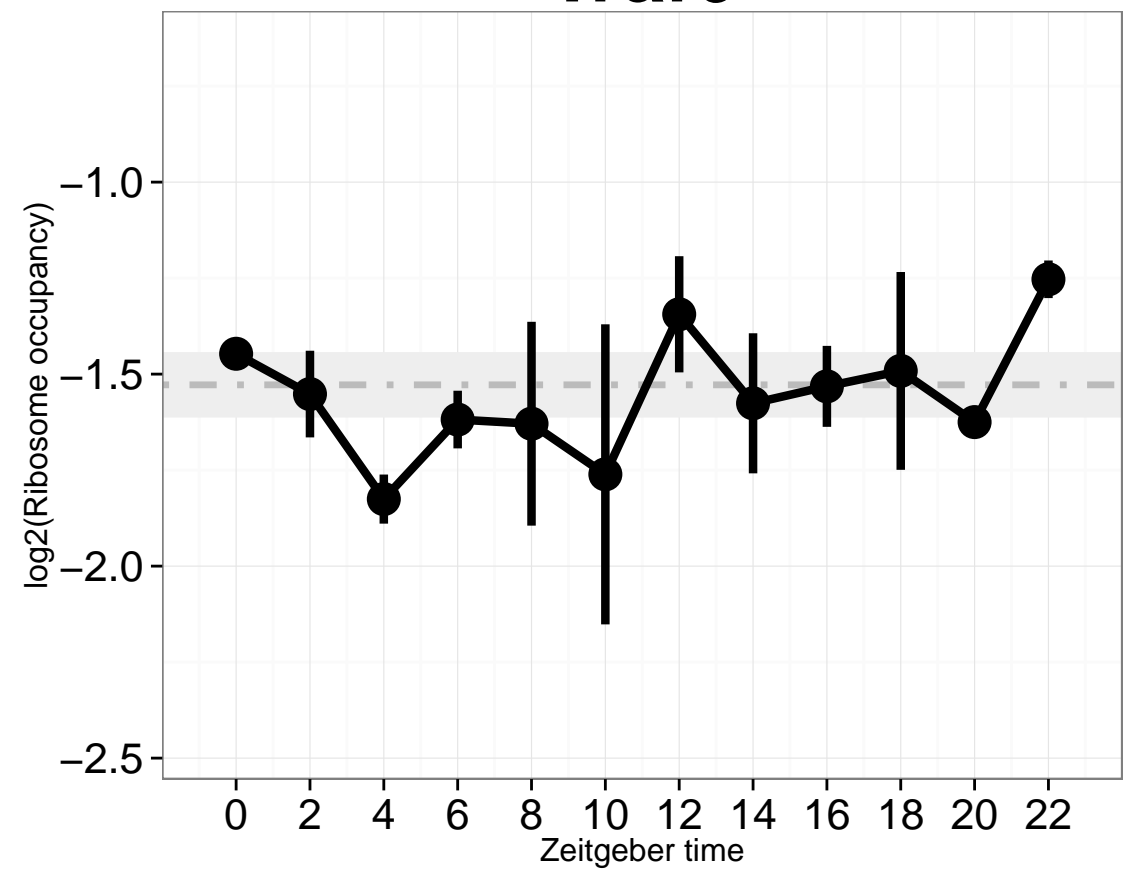

Supplement: SuppDataset_1.zip [file Traf6_set_A.pdf › Supplemental Dataset 1/A-mRNA_nonrhyth_translation_nonrhyth/Traf6_set_A.pdf]

# Traf7

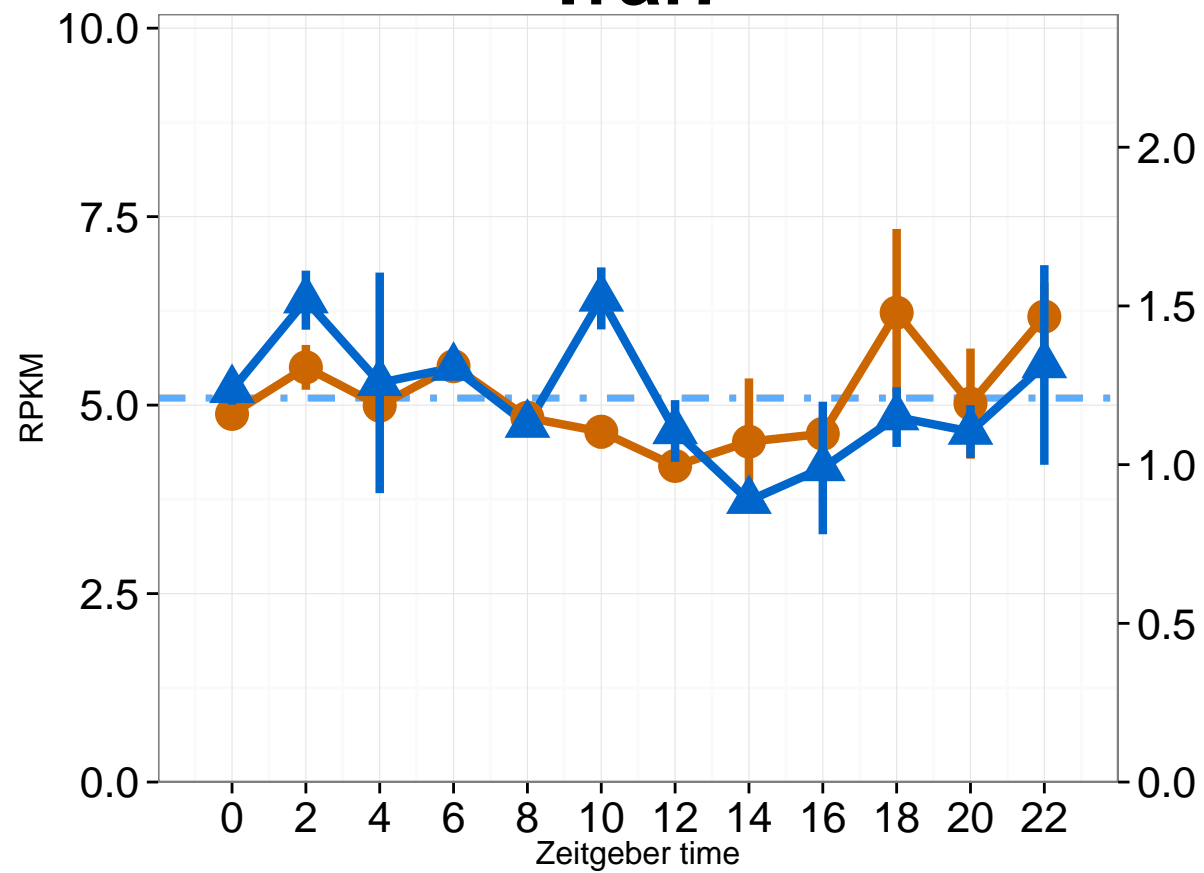

# Traf7

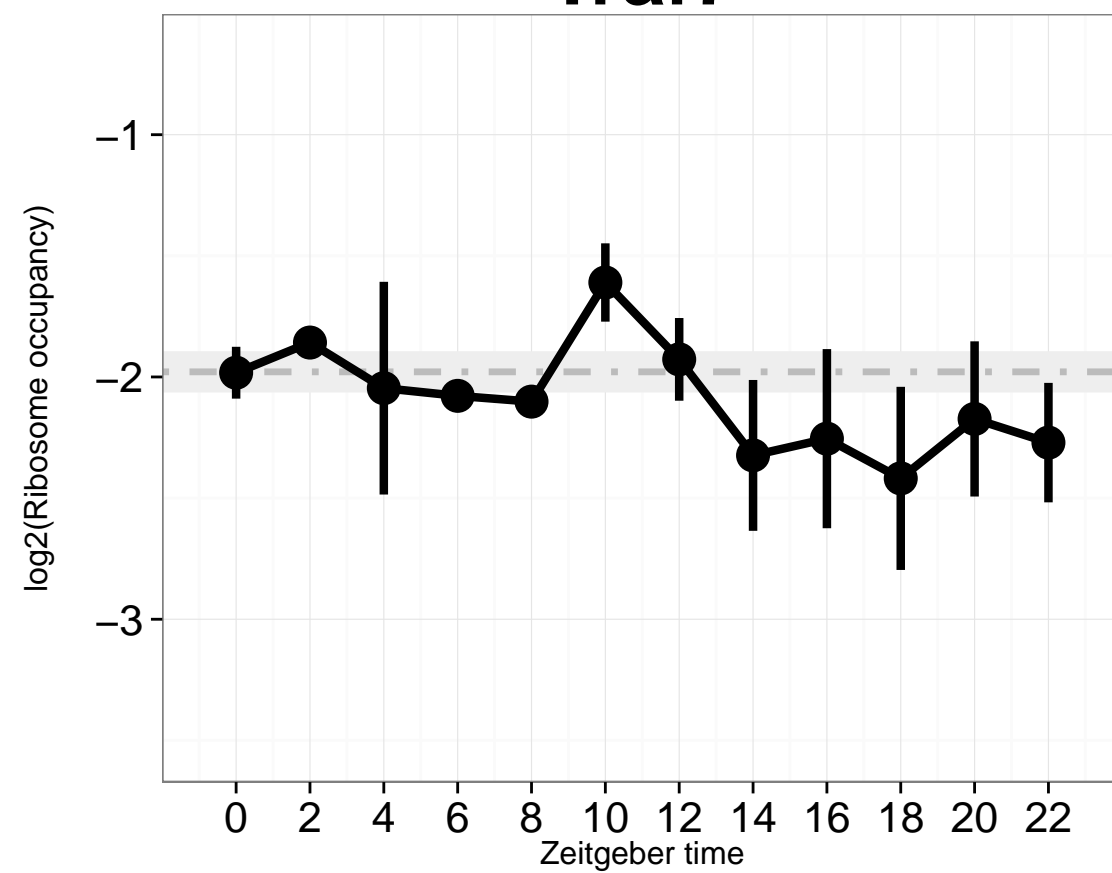

Supplement: SuppDataset_1.zip [file Traf7_set_A.pdf › Supplemental Dataset 1/A-mRNA_nonrhyth_translation_nonrhyth/Traf7_set_A.pdf]

# Trafd1

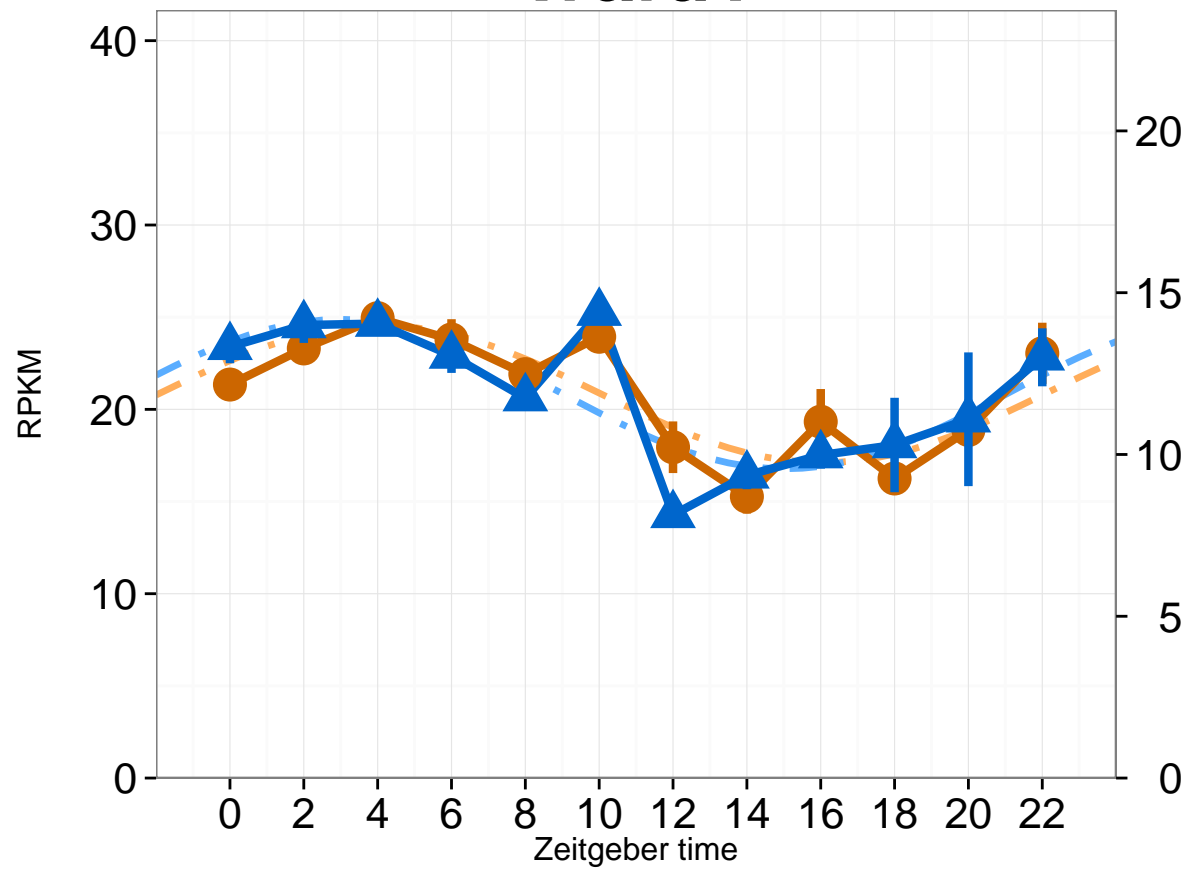

# Trafd1

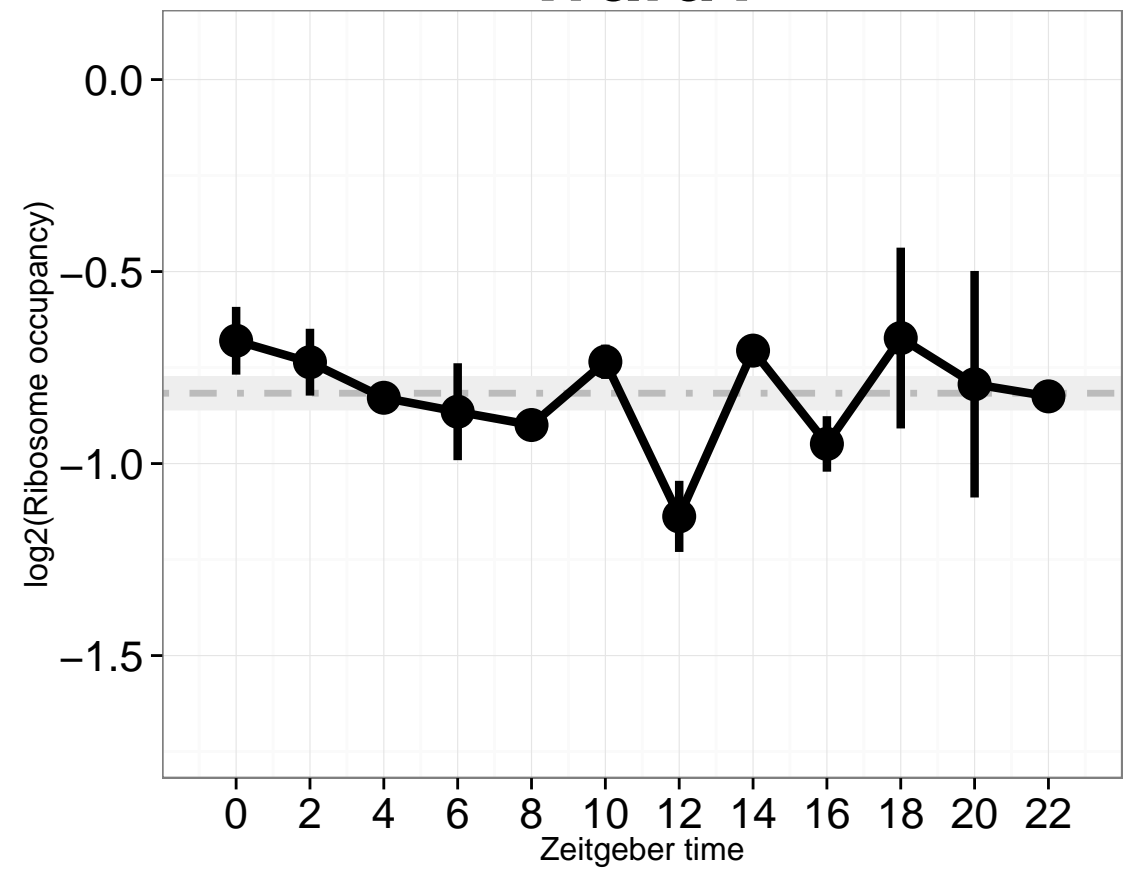

Supplement: SuppDataset_1.zip [file Trafd1_set_A.pdf › Supplemental Dataset 1/A-mRNA_nonrhyth_translation_nonrhyth/Trafd1_set_A.pdf]

# Trak2

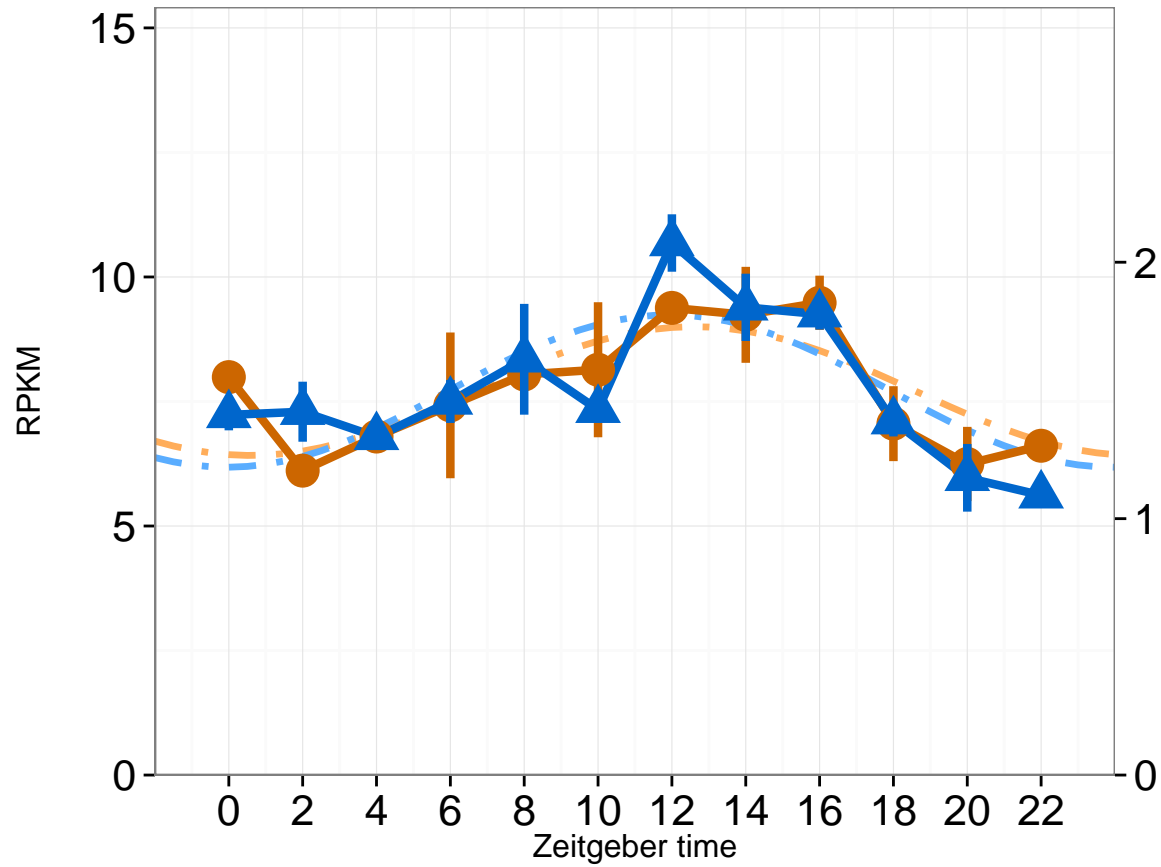

# Trak2

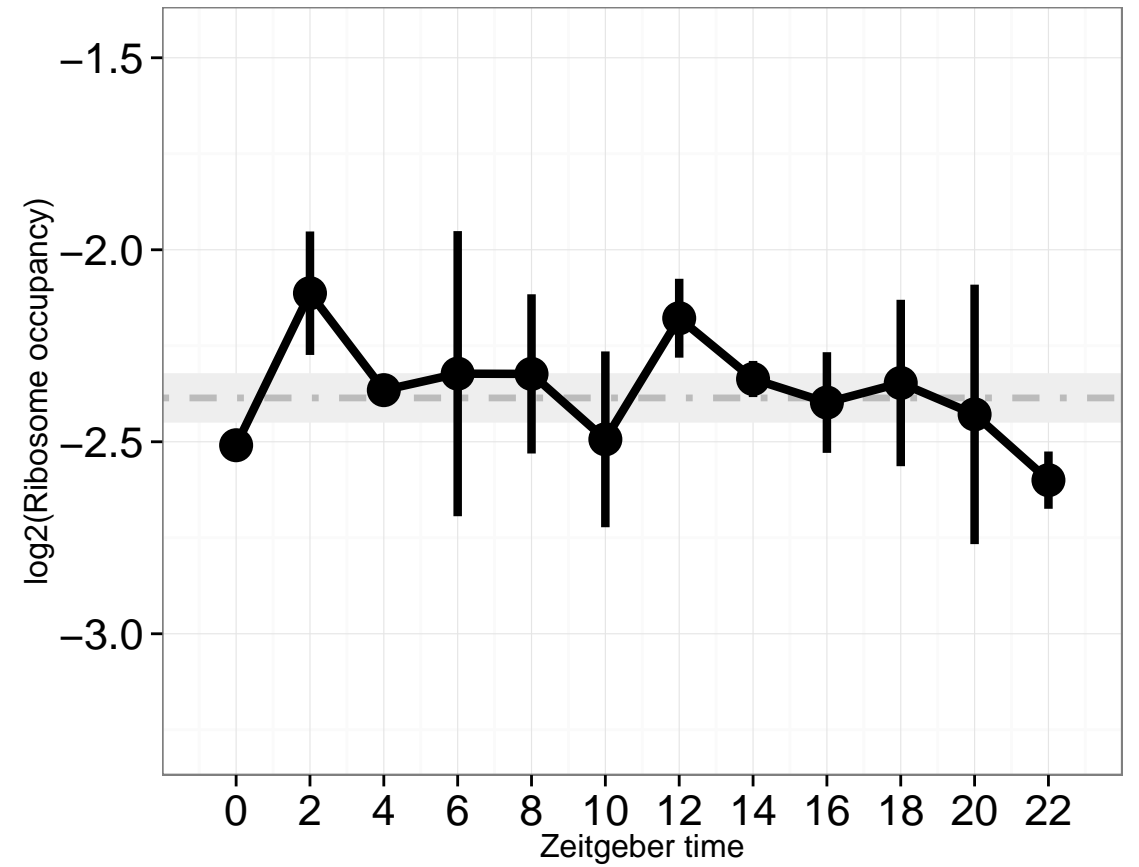

Supplement: SuppDataset_1.zip [file Trak2_set_A.pdf › Supplemental Dataset 1/A-mRNA_nonrhyth_translation_nonrhyth/Trak2_set_A.pdf]

# Tram1

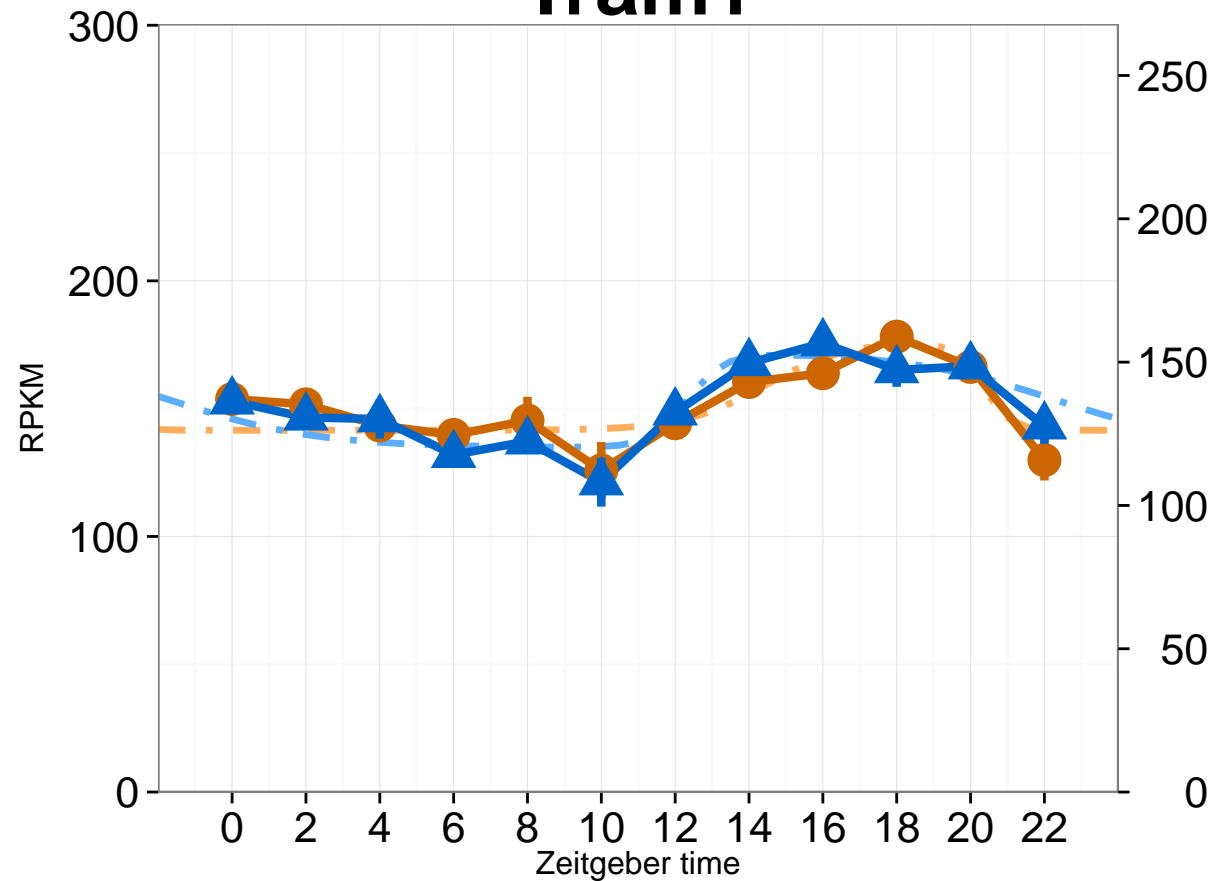

# Tram1

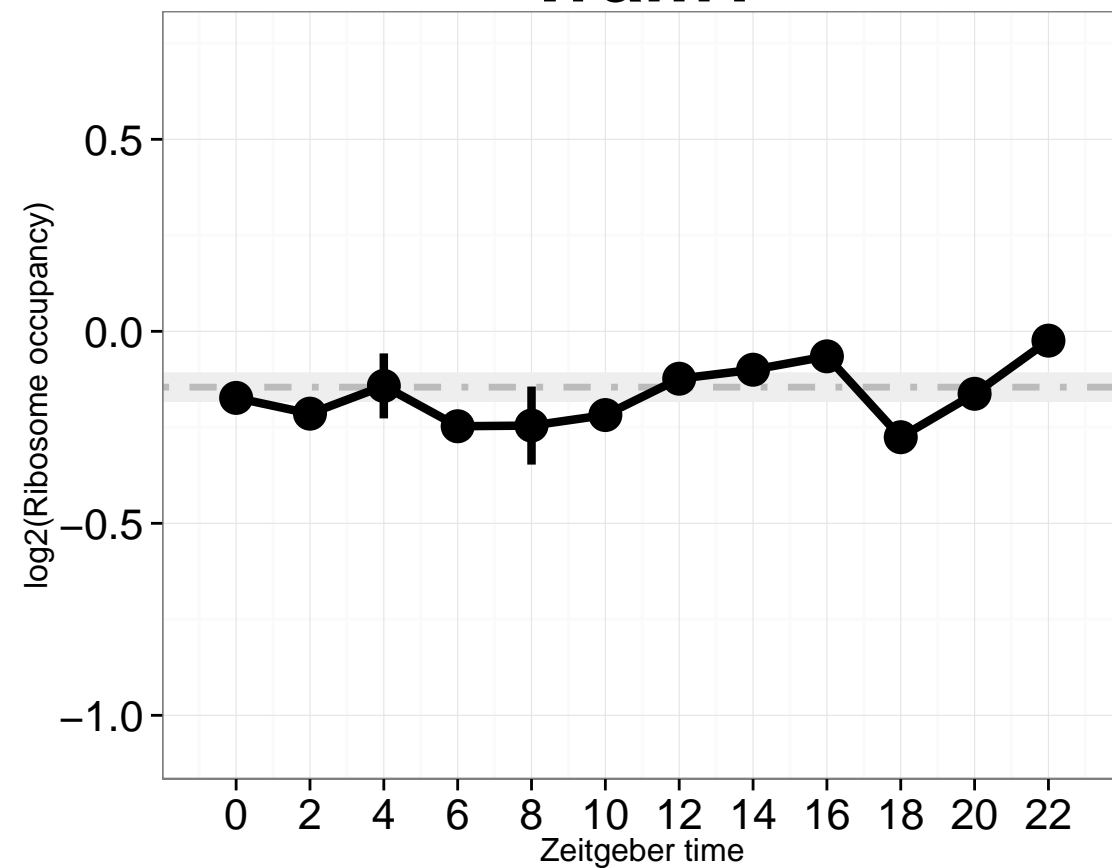

Supplement: SuppDataset_1.zip [file Tram1_set_A.pdf › Supplemental Dataset 1/A-mRNA_nonrhyth_translation_nonrhyth/Tram1_set_A.pdf]

# Tram2

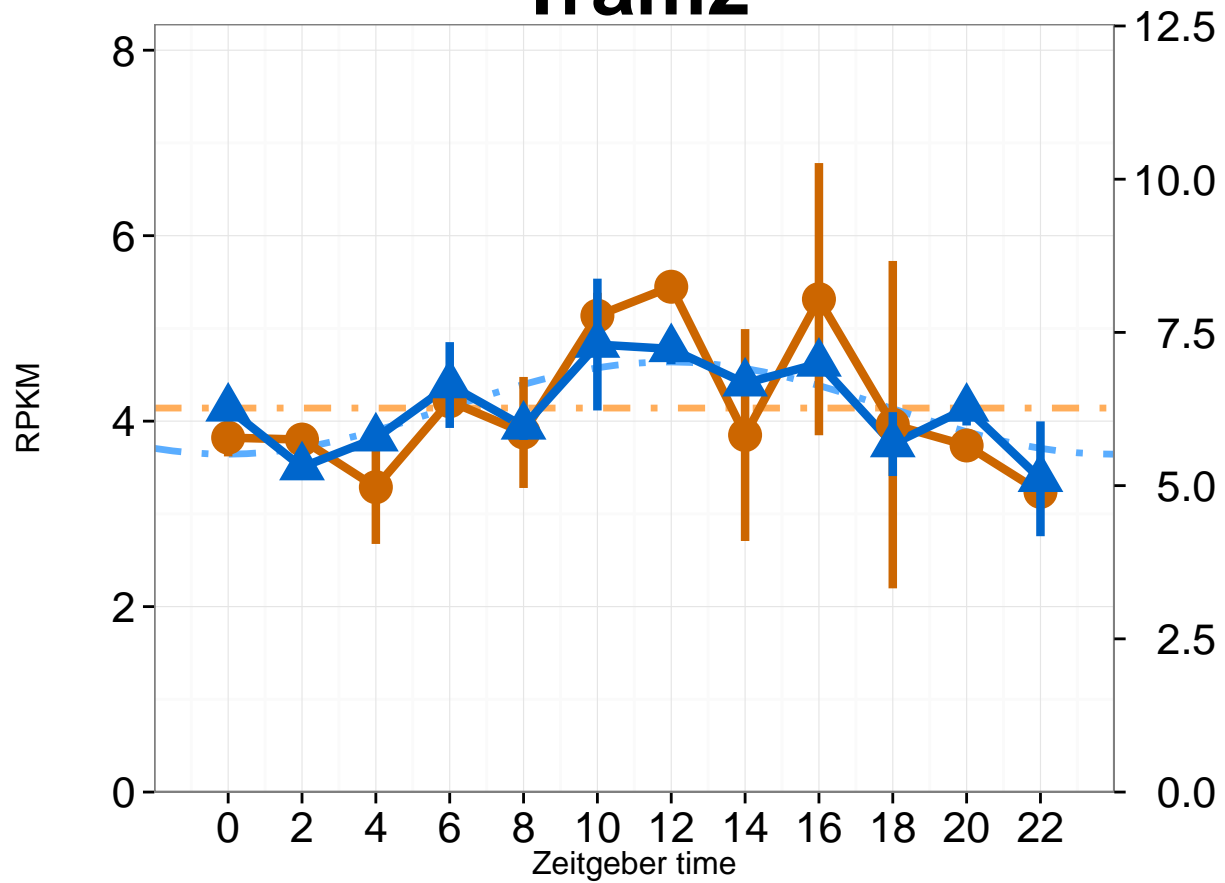

# Tram2

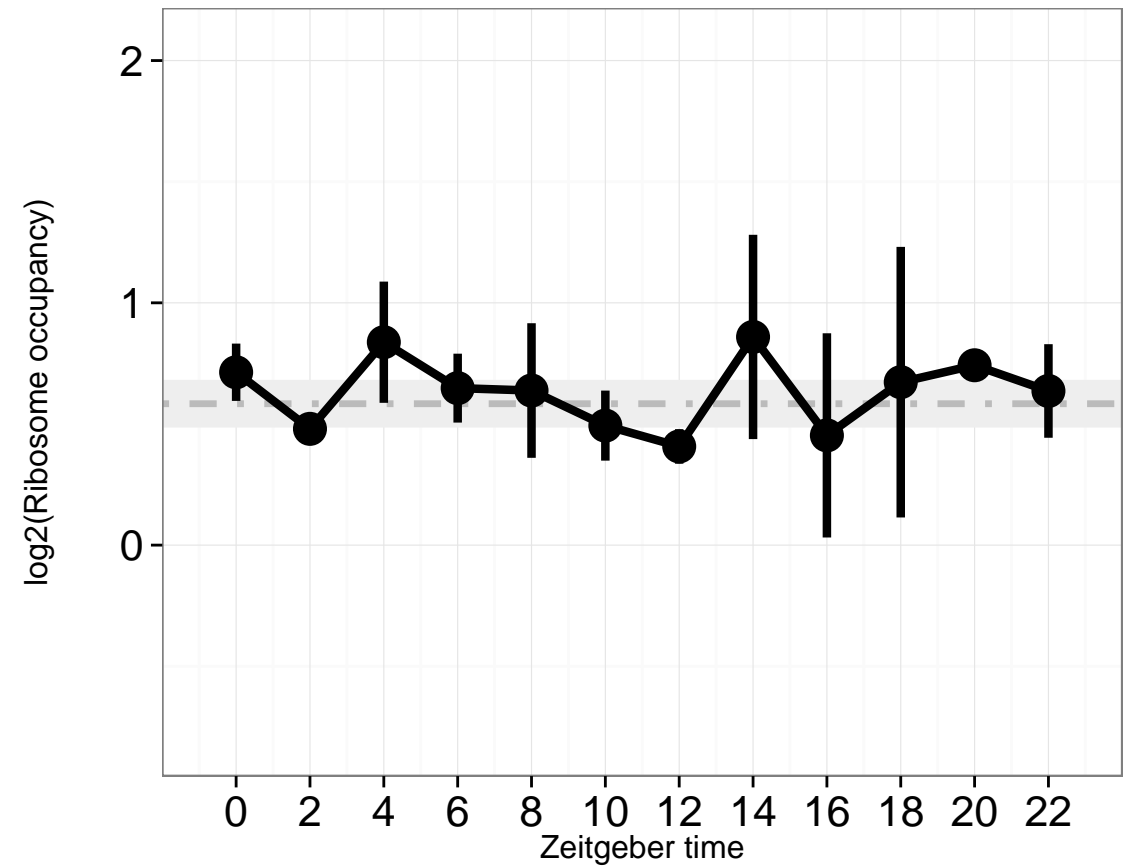

Supplement: SuppDataset_1.zip [file Tram2_set_A.pdf › Supplemental Dataset 1/A-mRNA_nonrhyth_translation_nonrhyth/Tram2_set_A.pdf]

# Trap1

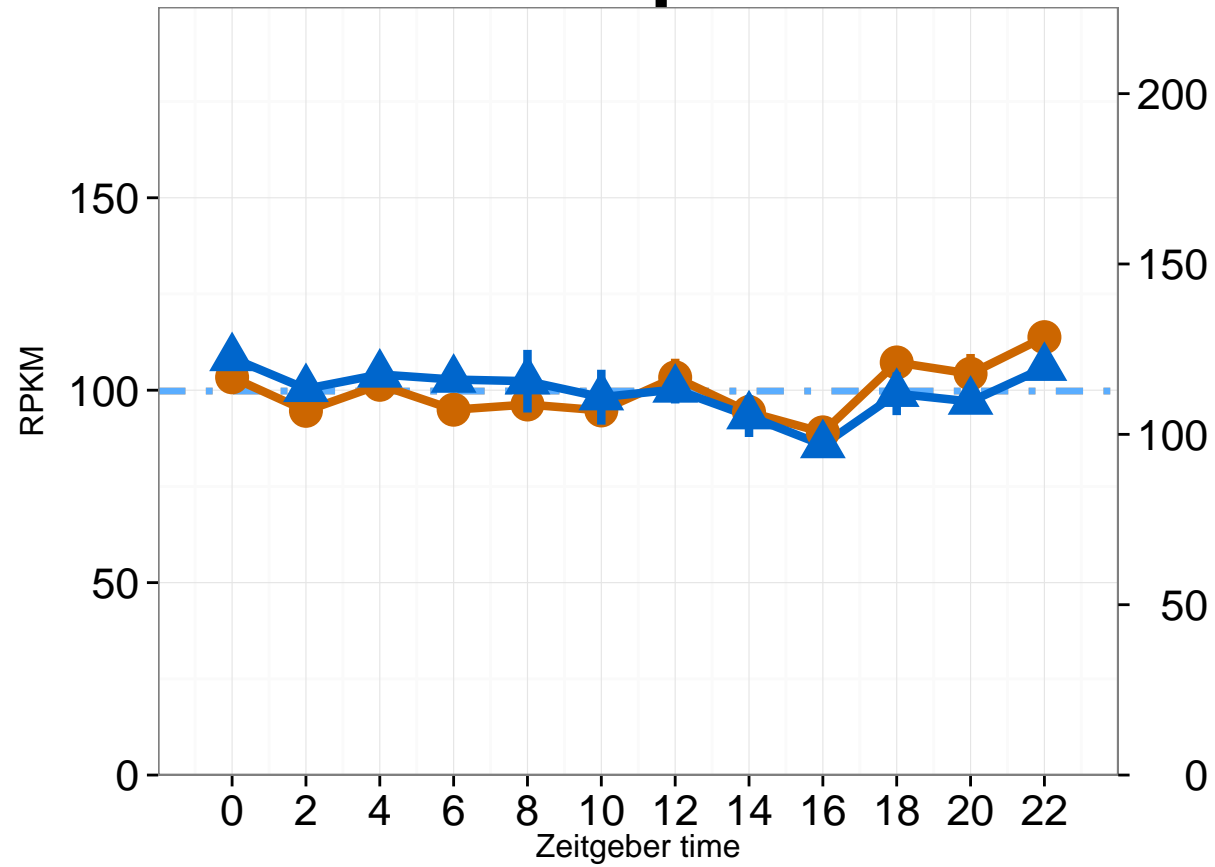

# Trap1

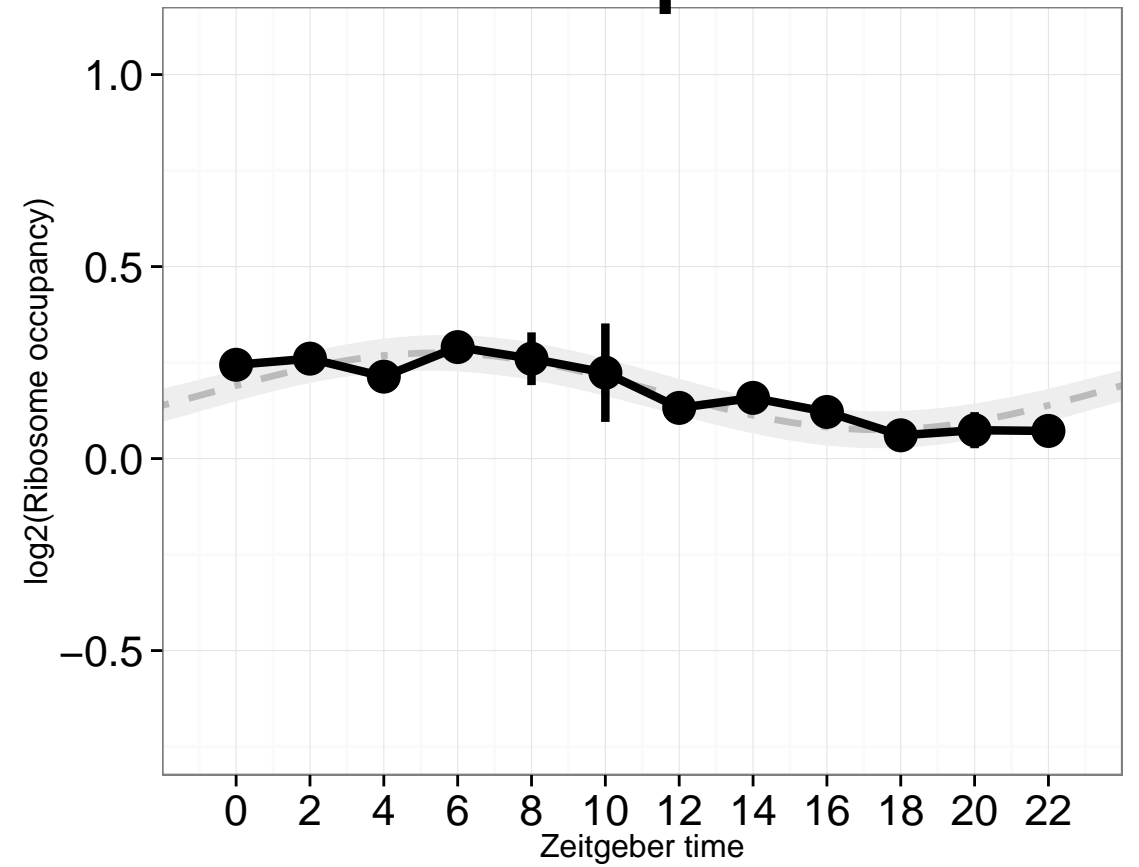

Supplement: SuppDataset_1.zip [file Trap1_set_A.pdf › Supplemental Dataset 1/A-mRNA_nonrhyth_translation_nonrhyth/Trap1_set_A.pdf]

# Trappc10

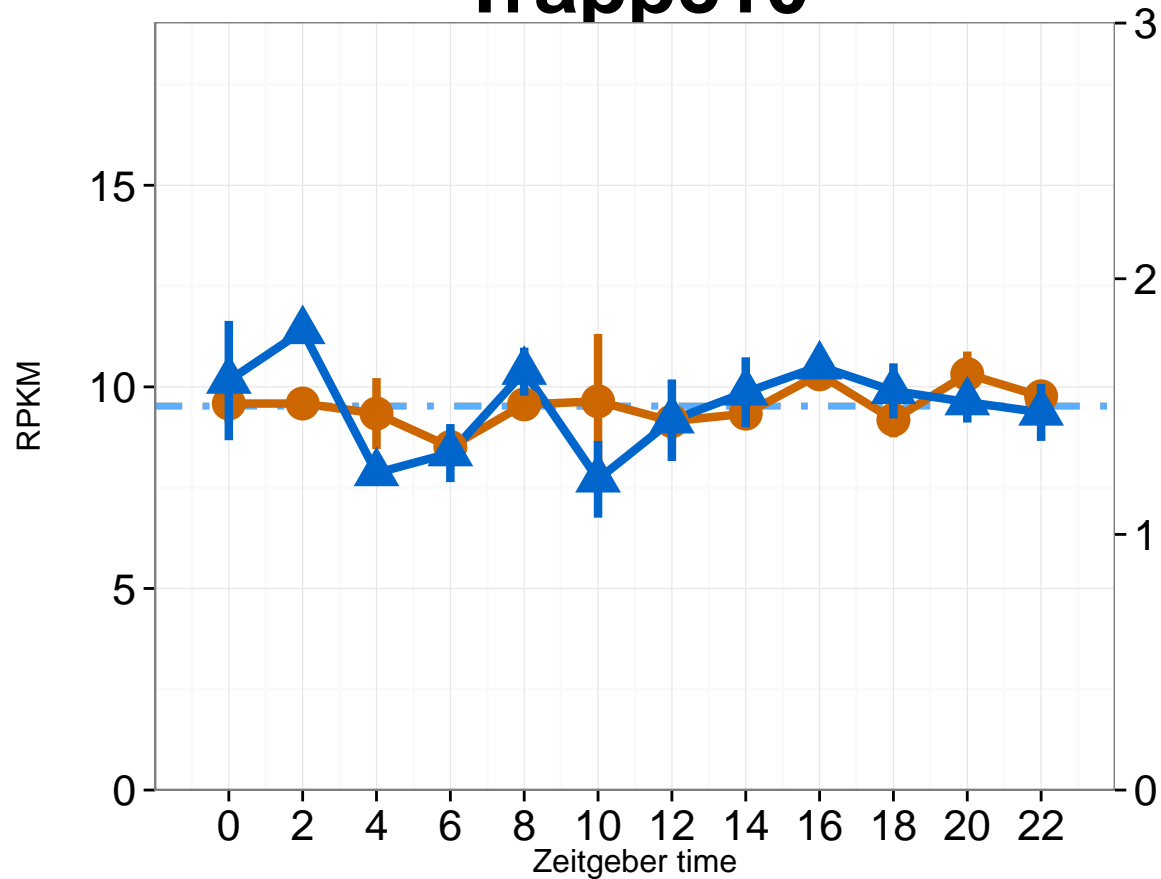

# Trappc10

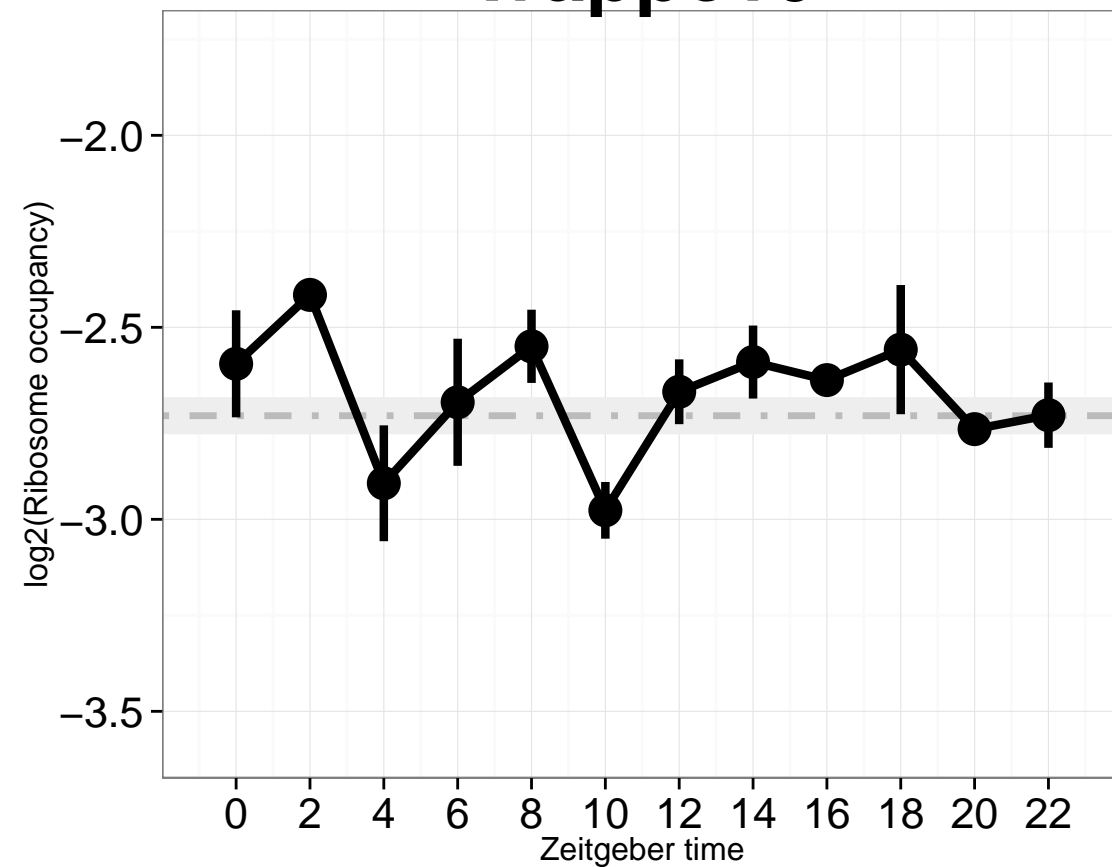

Supplement: SuppDataset_1.zip [file Trappc10_set_A.pdf › Supplemental Dataset 1/A-mRNA_nonrhyth_translation_nonrhyth/Trappc10_set_A.pdf]

# Trappc11

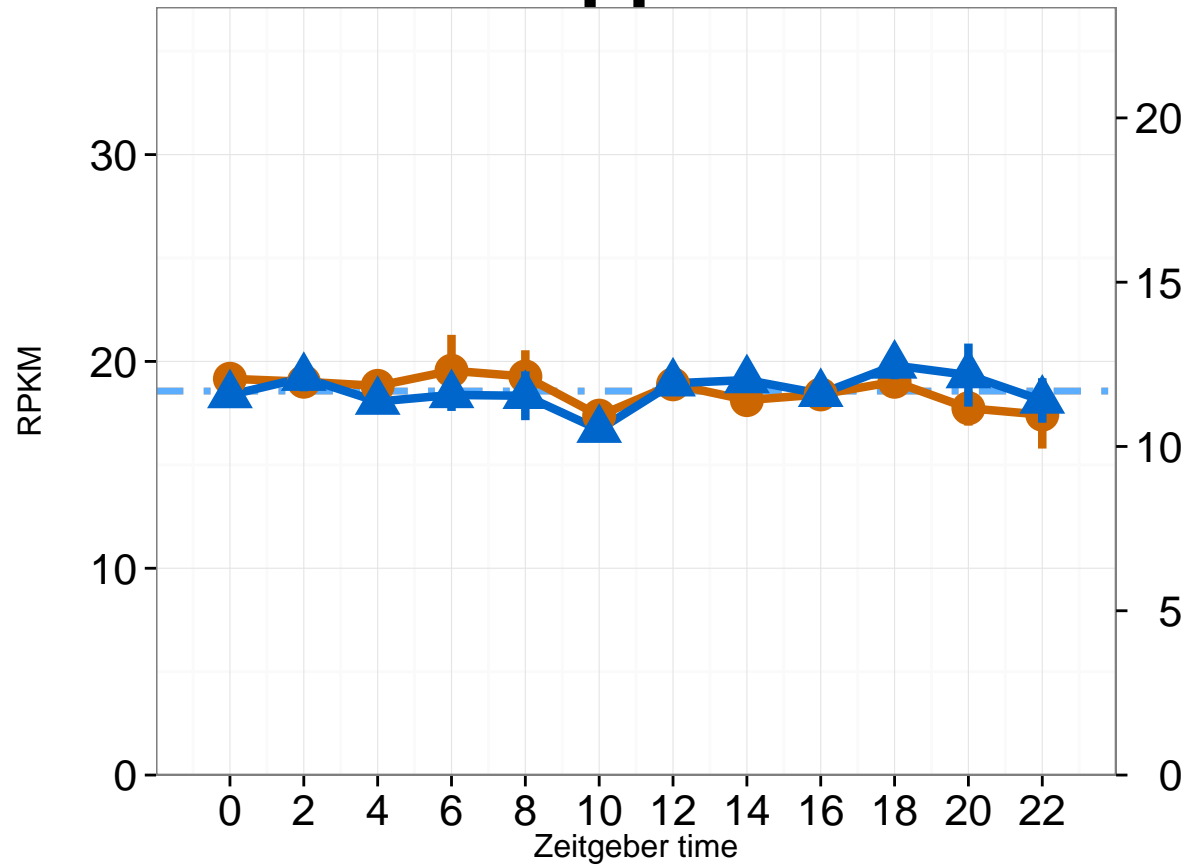

# Trappc11

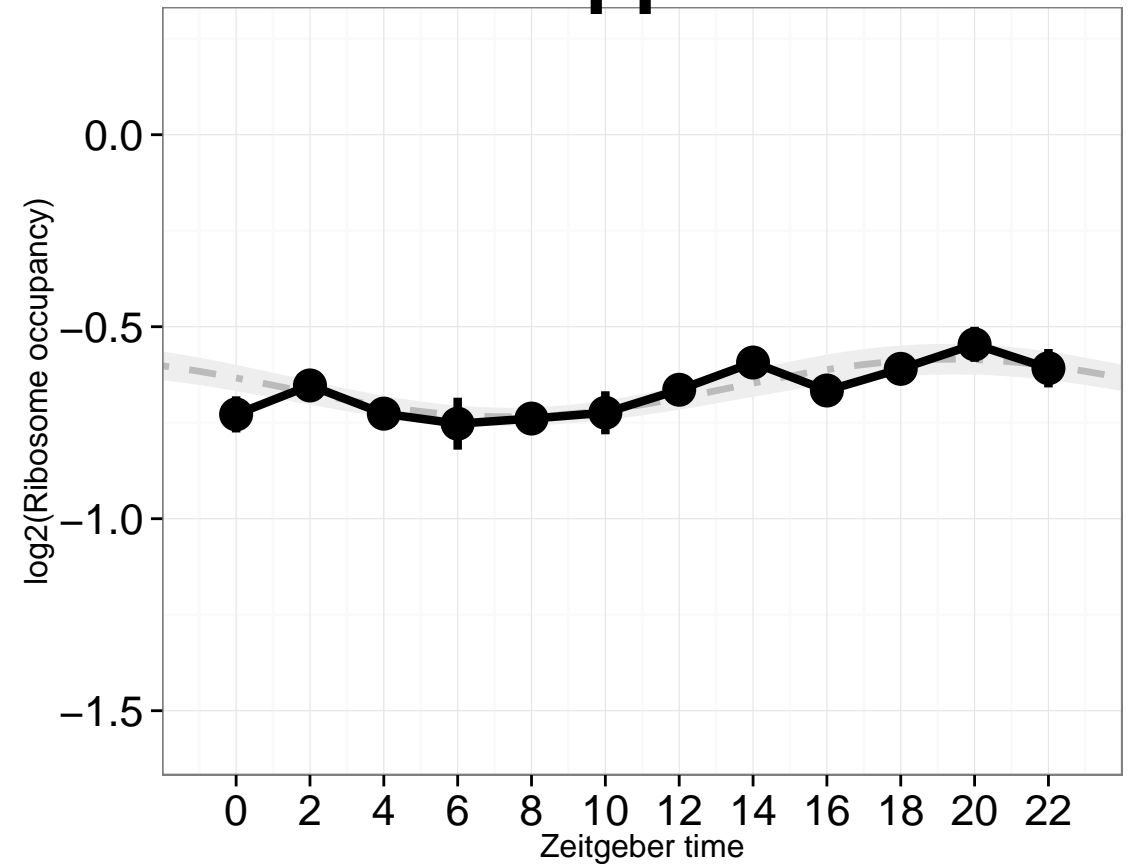

Supplement: SuppDataset_1.zip [file Trappc11_set_A.pdf › Supplemental Dataset 1/A-mRNA_nonrhyth_translation_nonrhyth/Trappc11_set_A.pdf]

# Trappc12

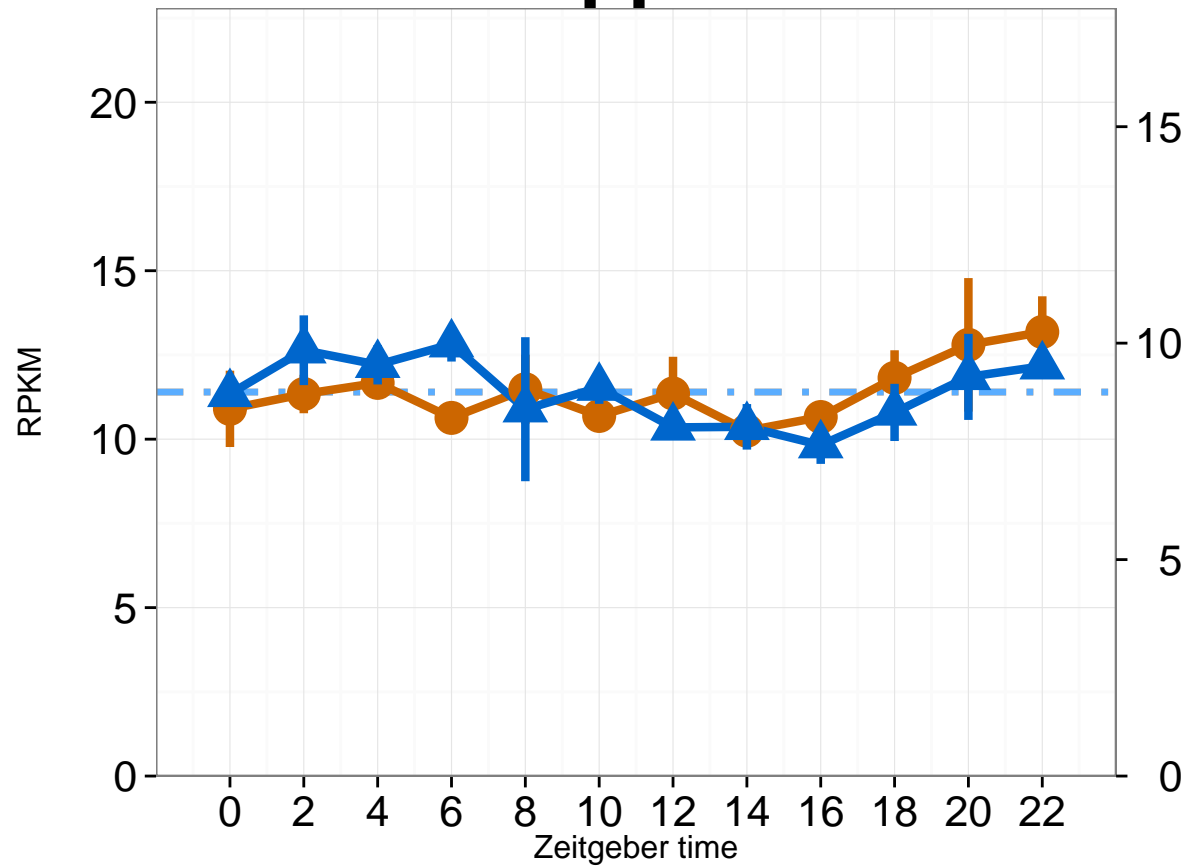

# Trappc12

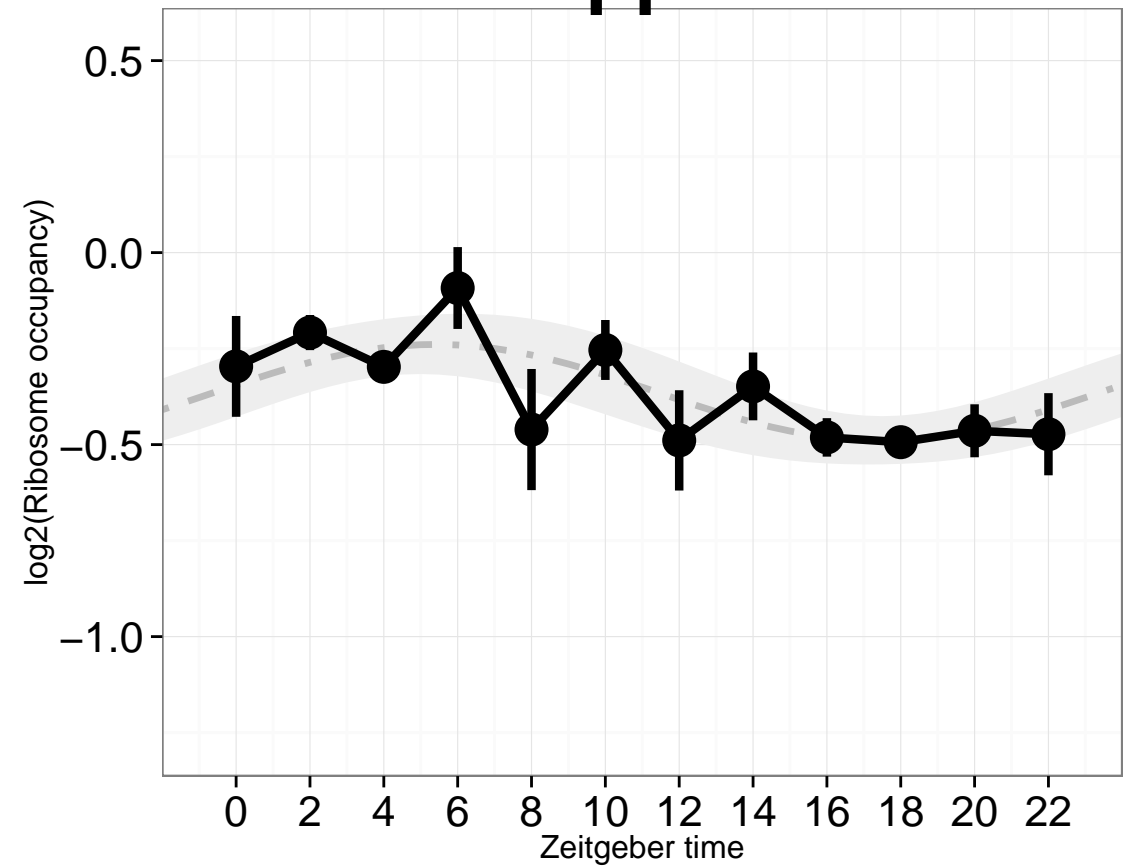

Supplement: SuppDataset_1.zip [file Trappc12_set_A.pdf › Supplemental Dataset 1/A-mRNA_nonrhyth_translation_nonrhyth/Trappc12_set_A.pdf]

# Trappc13

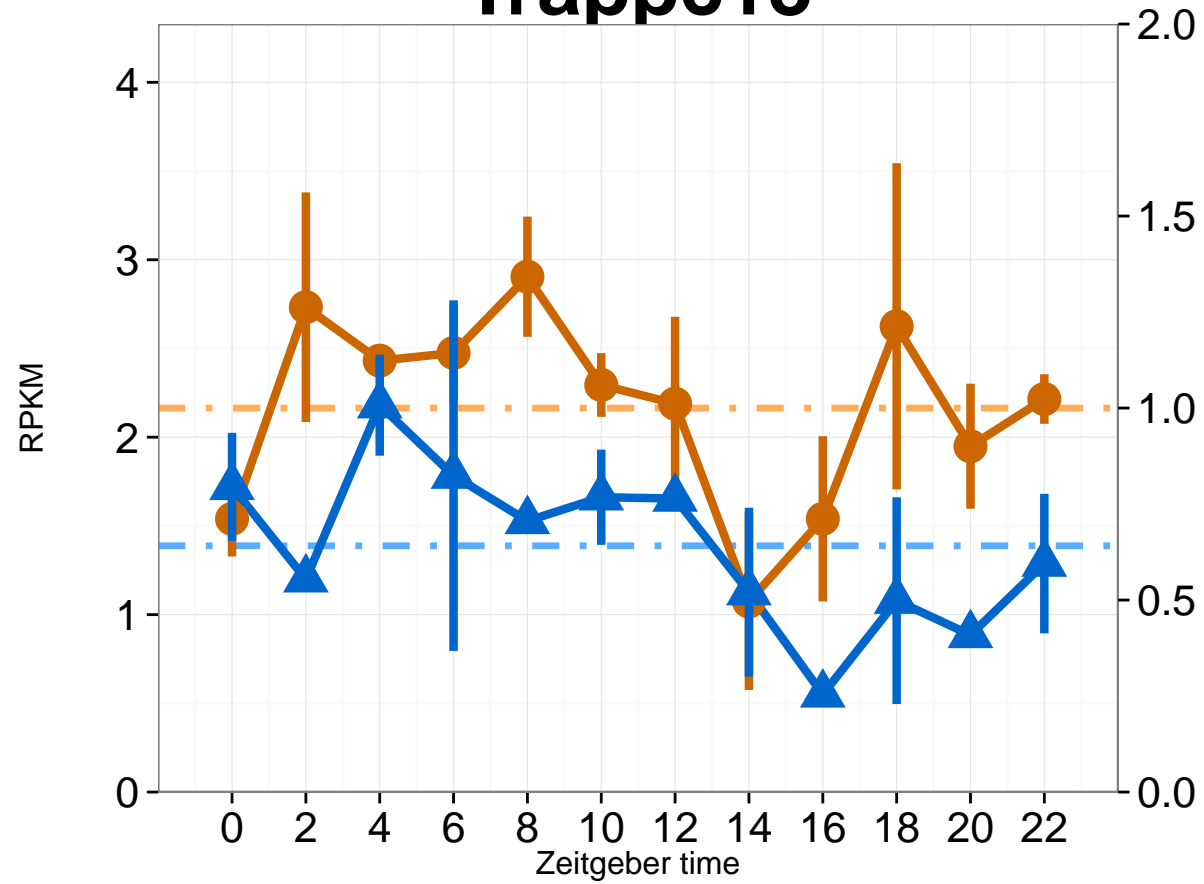

# Trappc13

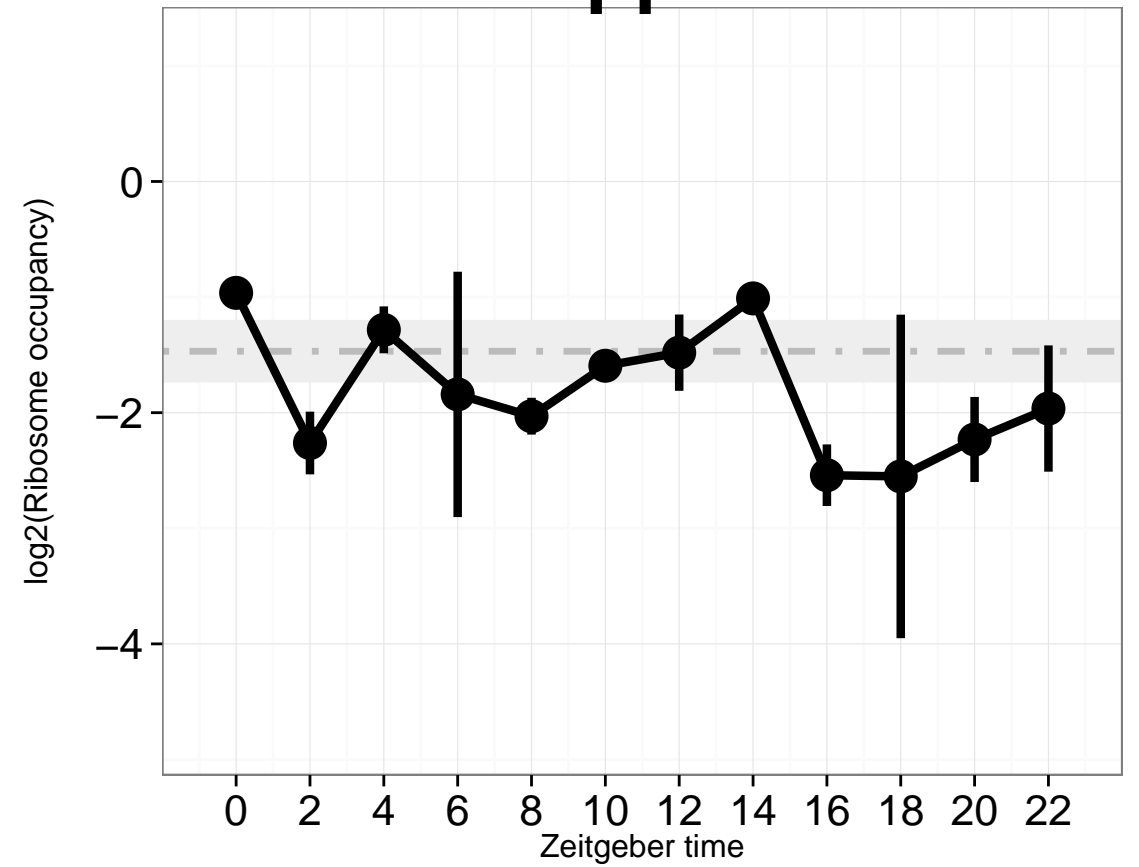

Supplement: SuppDataset_1.zip [file Trappc13_set_A.pdf › Supplemental Dataset 1/A-mRNA_nonrhyth_translation_nonrhyth/Trappc13_set_A.pdf]

# Trappc1

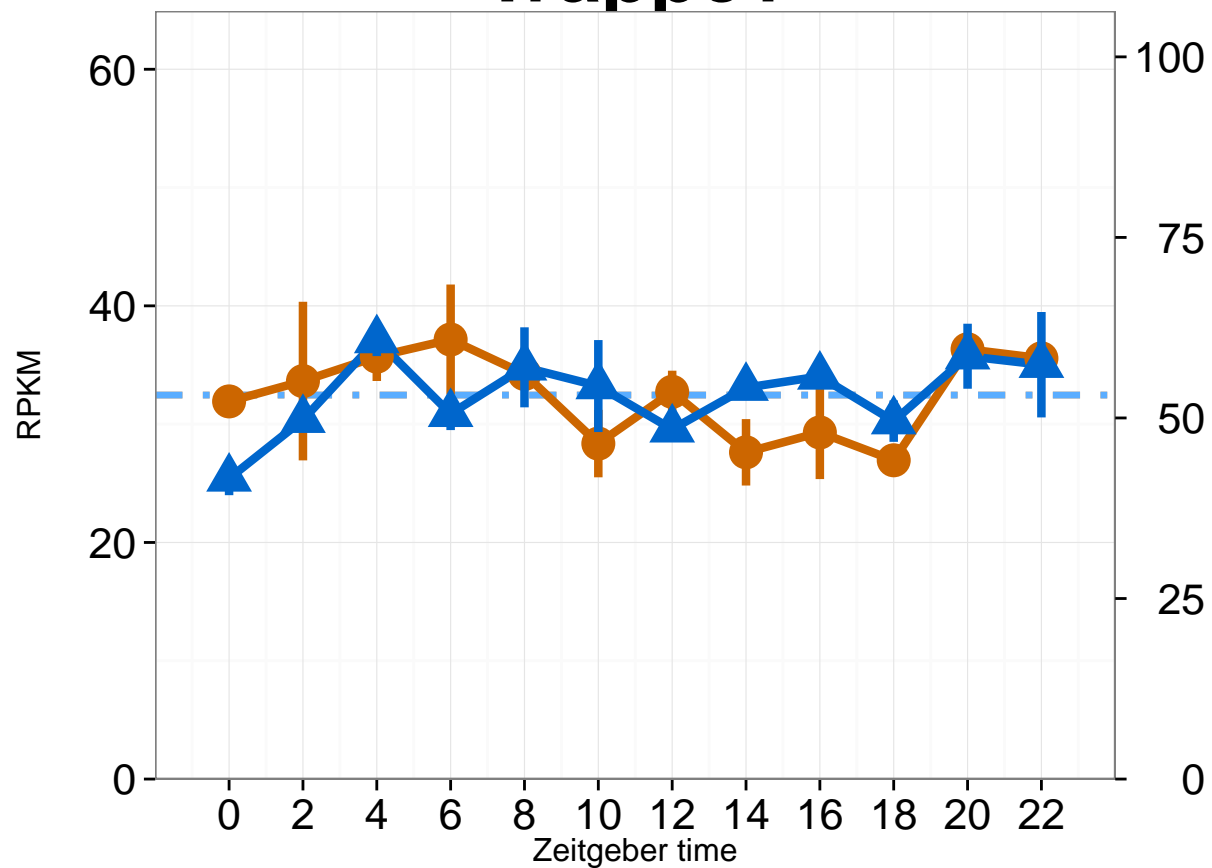

# Trappc1

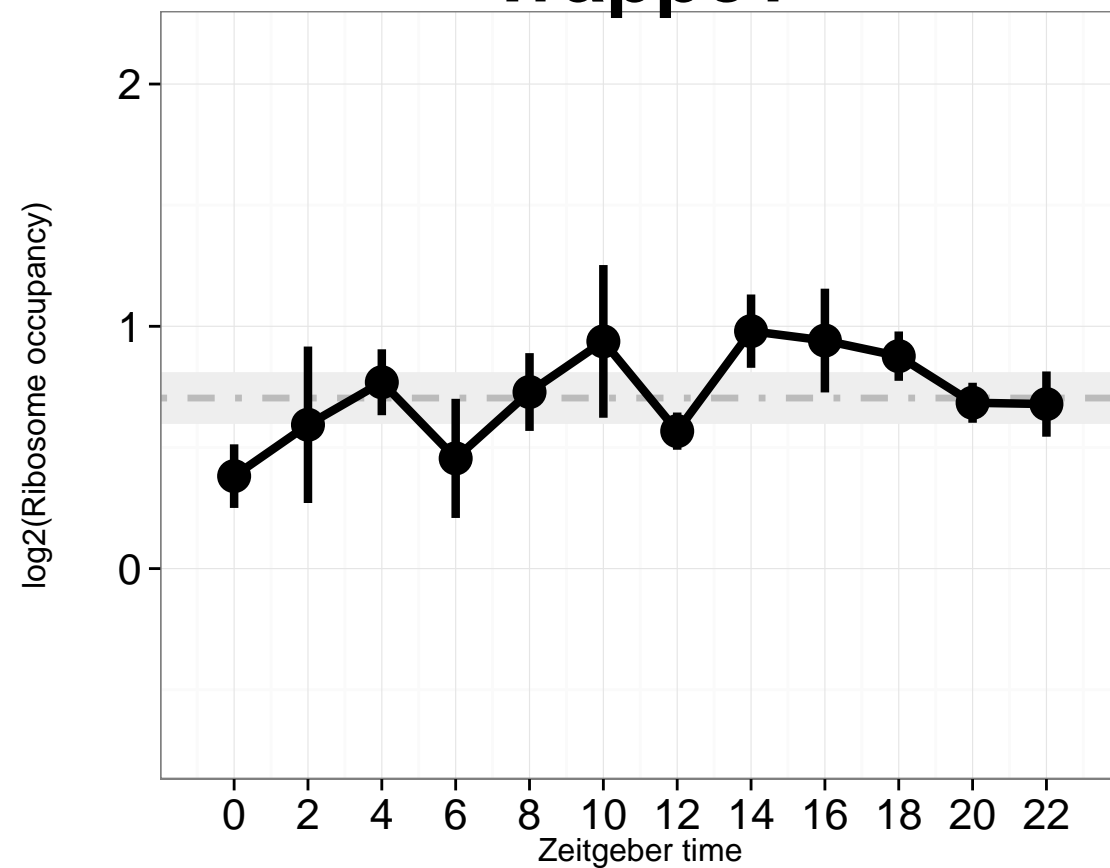

Supplement: SuppDataset_1.zip [file Trappc1_set_A.pdf › Supplemental Dataset 1/A-mRNA_nonrhyth_translation_nonrhyth/Trappc1_set_A.pdf]

# Trappc2

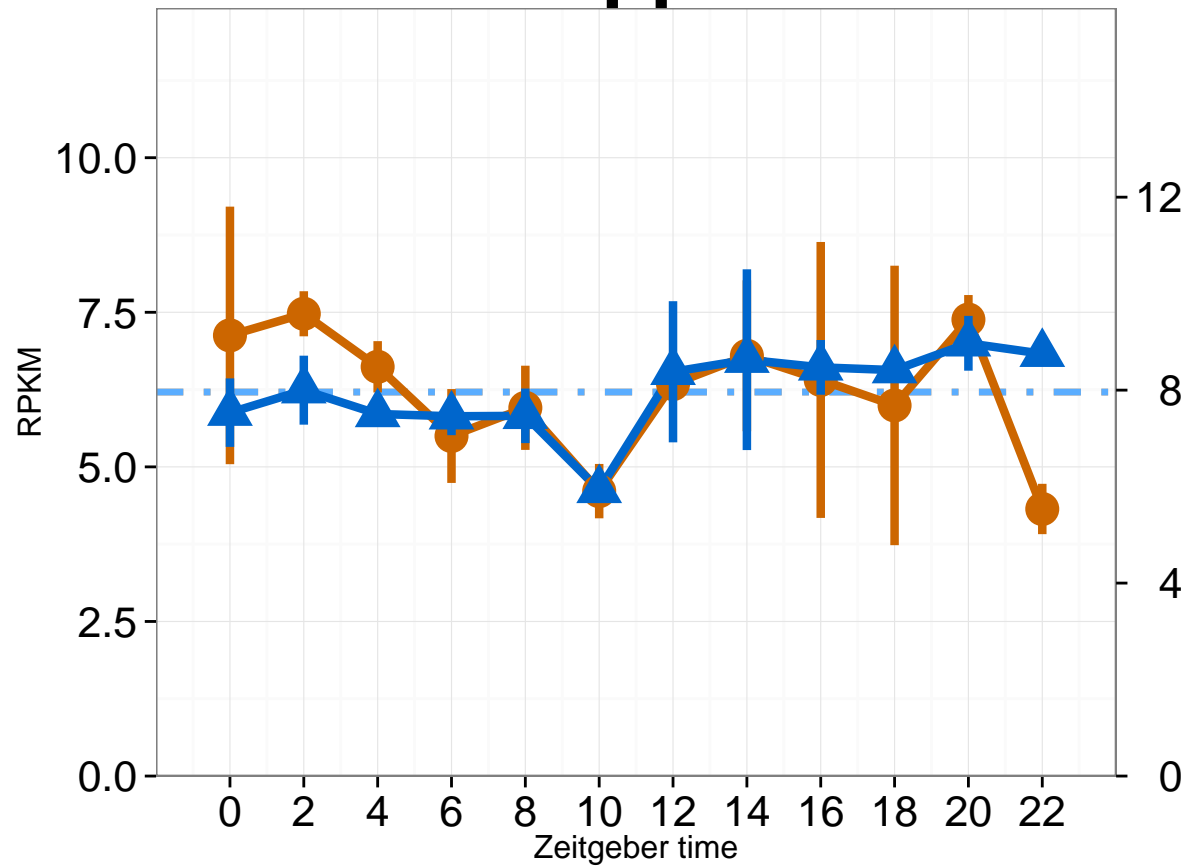

# Trappc2

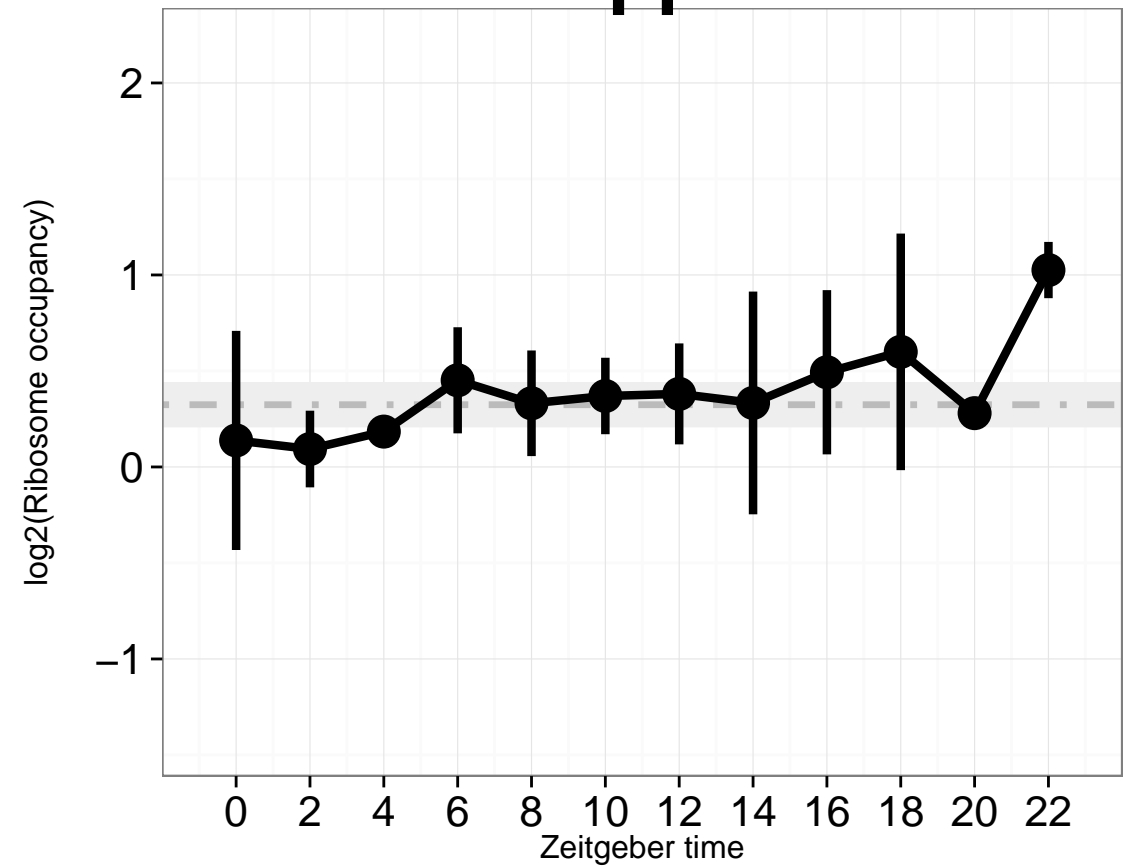

Supplement: SuppDataset_1.zip [file Trappc2_set_A.pdf › Supplemental Dataset 1/A-mRNA_nonrhyth_translation_nonrhyth/Trappc2_set_A.pdf]

# Trappc3

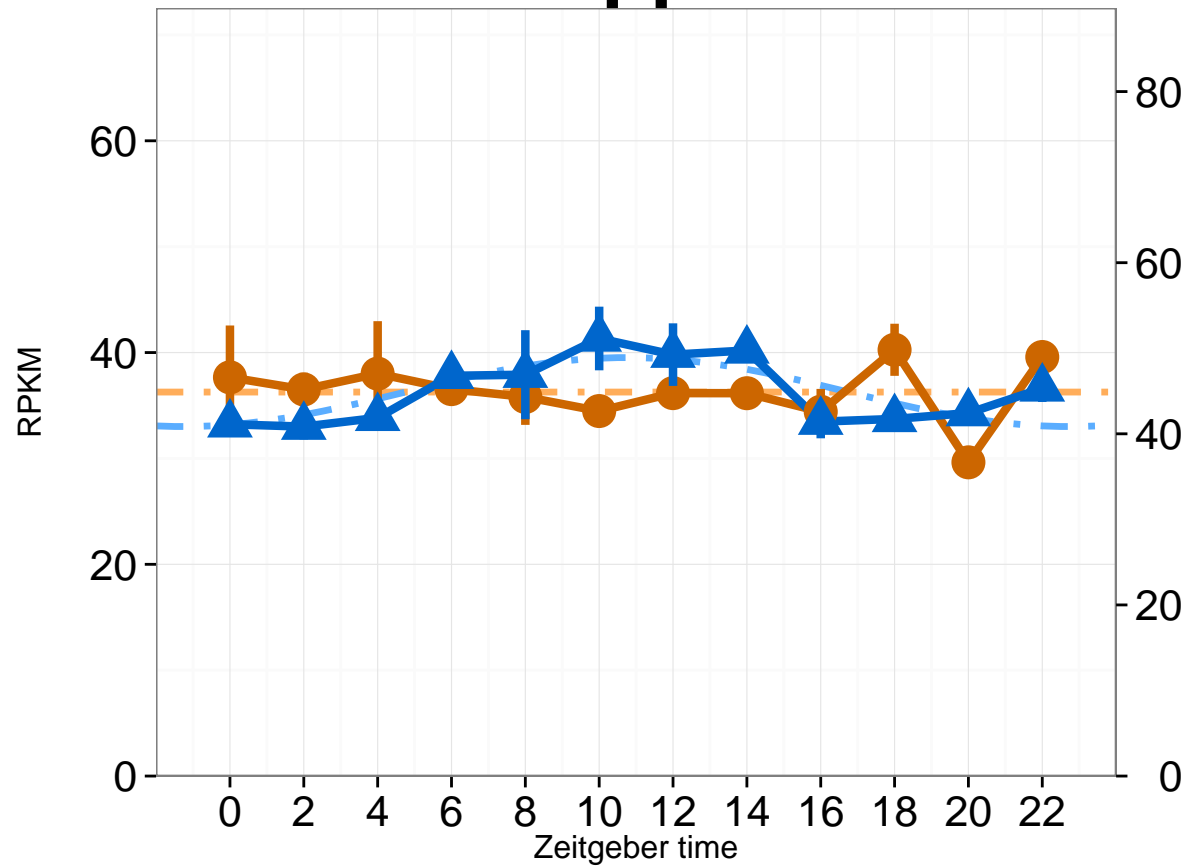

# Trappc3

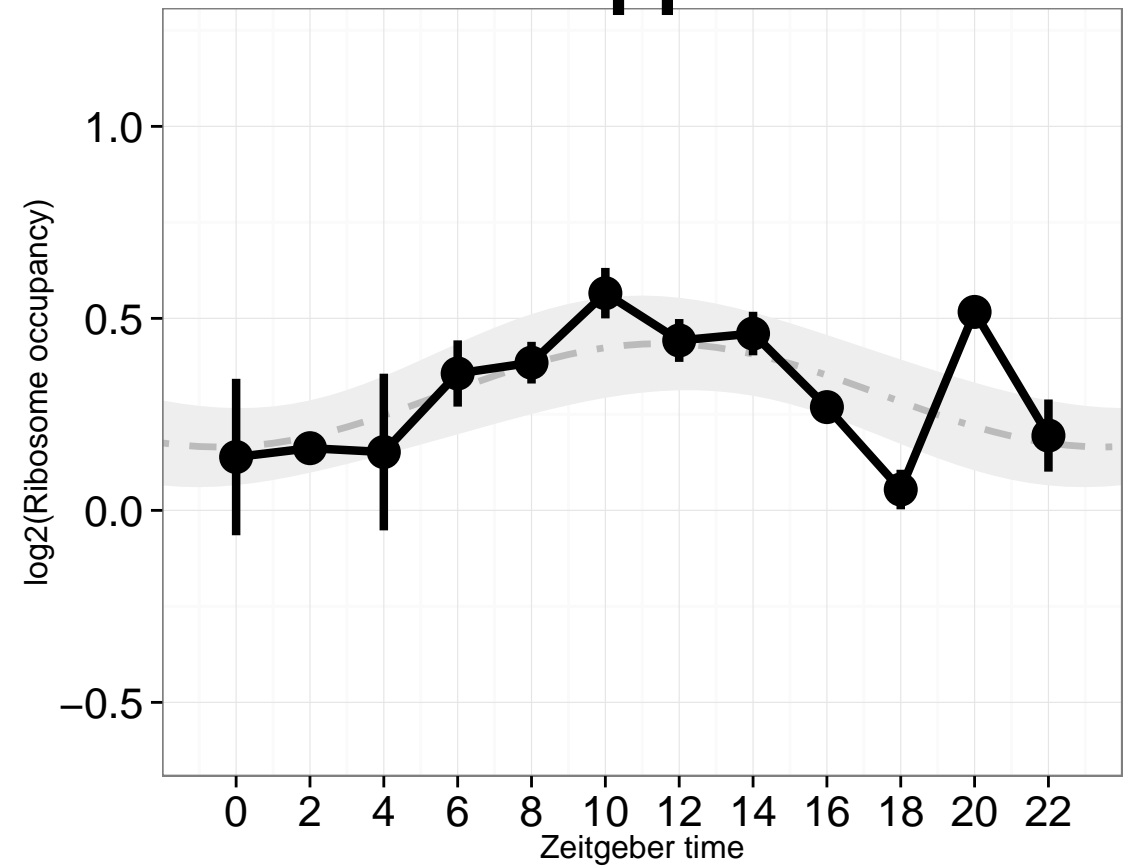

Supplement: SuppDataset_1.zip [file Trappc3_set_A.pdf › Supplemental Dataset 1/A-mRNA_nonrhyth_translation_nonrhyth/Trappc3_set_A.pdf]

# Trappc4

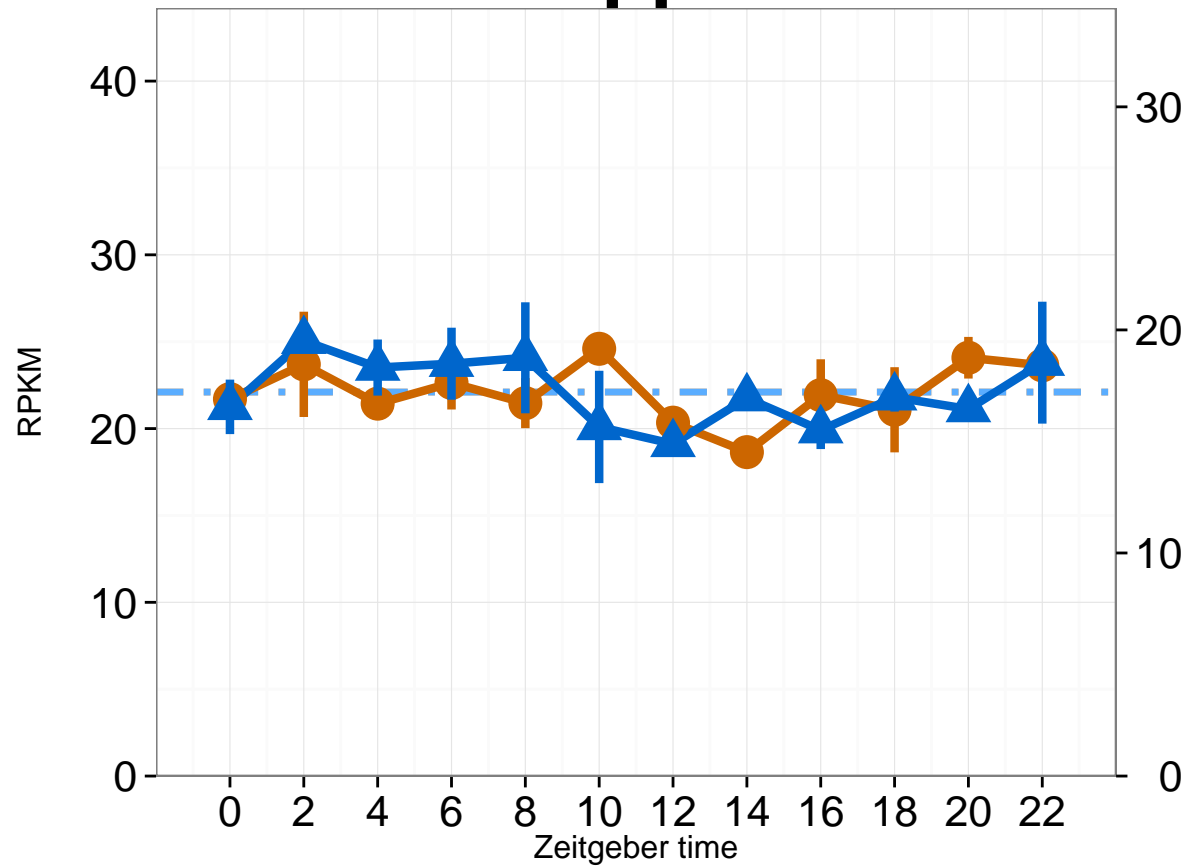

# Trappc4

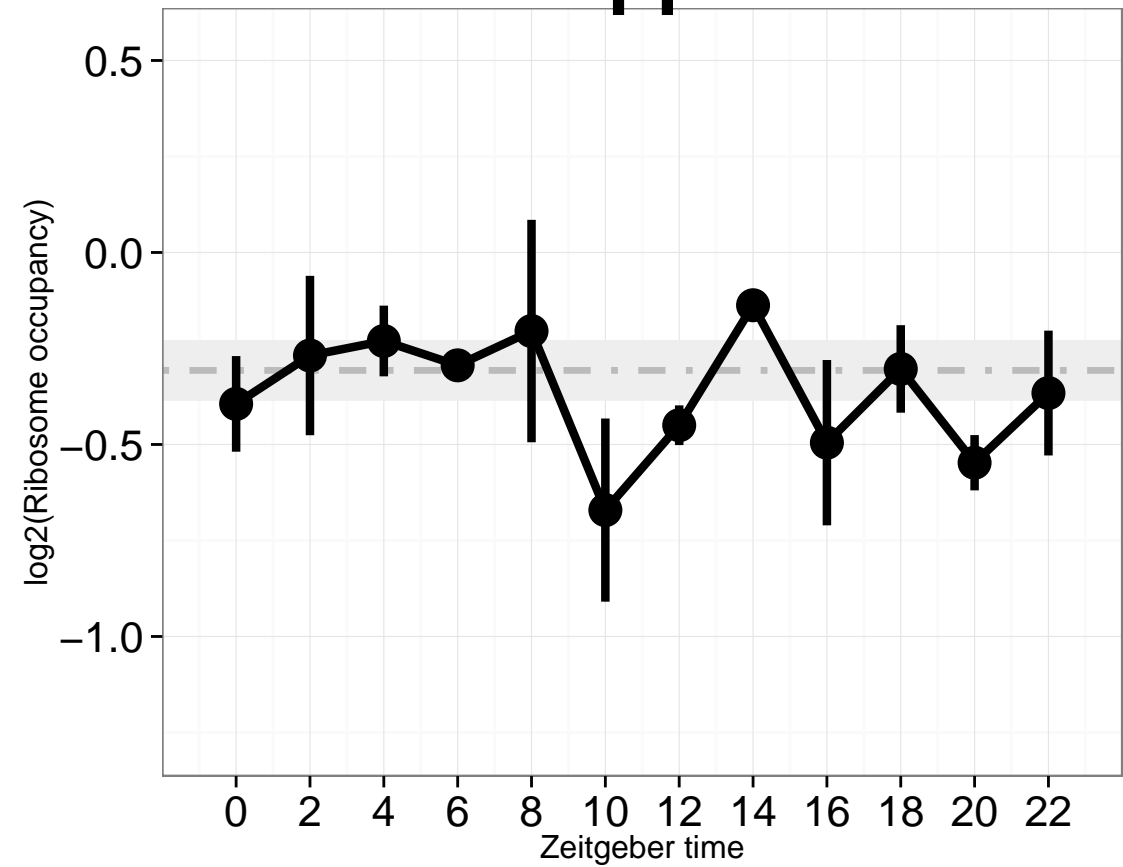

Supplement: SuppDataset_1.zip [file Trappc4_set_A.pdf › Supplemental Dataset 1/A-mRNA_nonrhyth_translation_nonrhyth/Trappc4_set_A.pdf]

# Trappc5

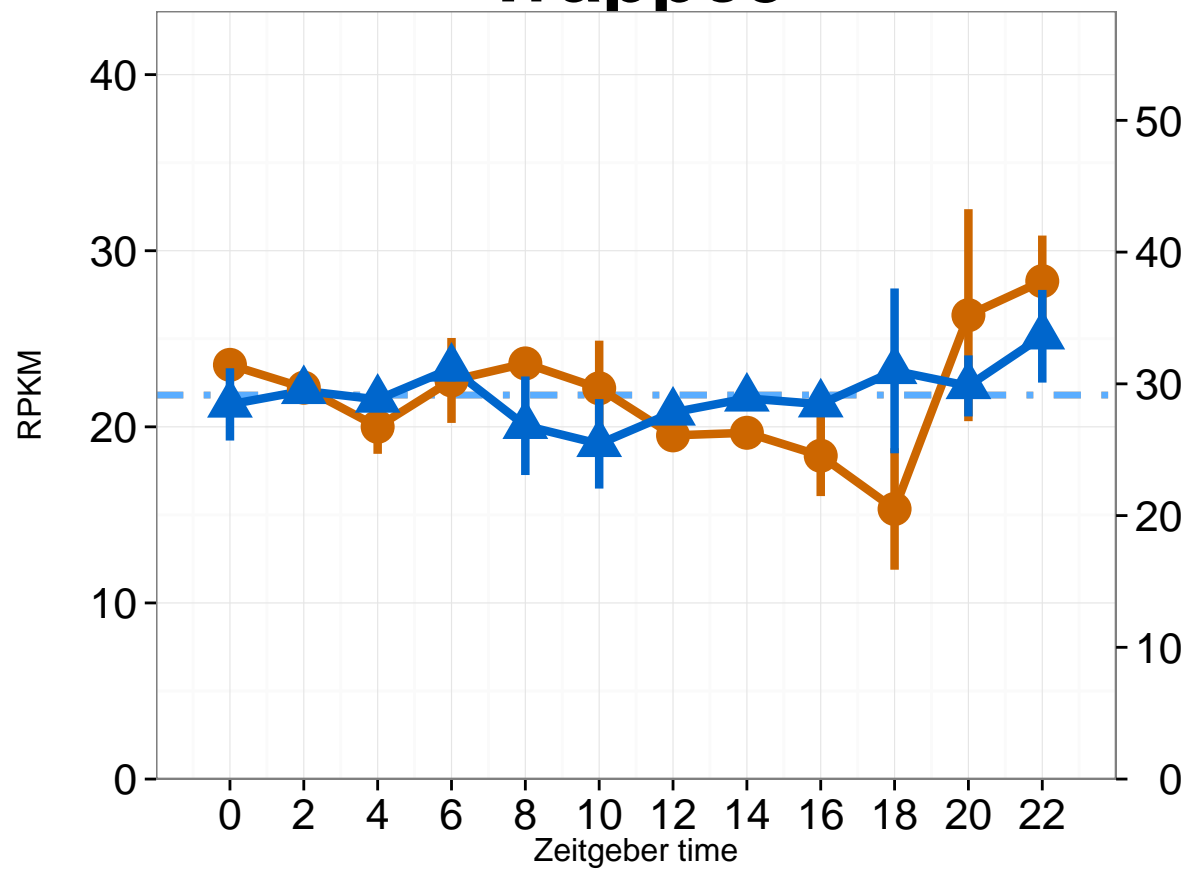

# Trappc5

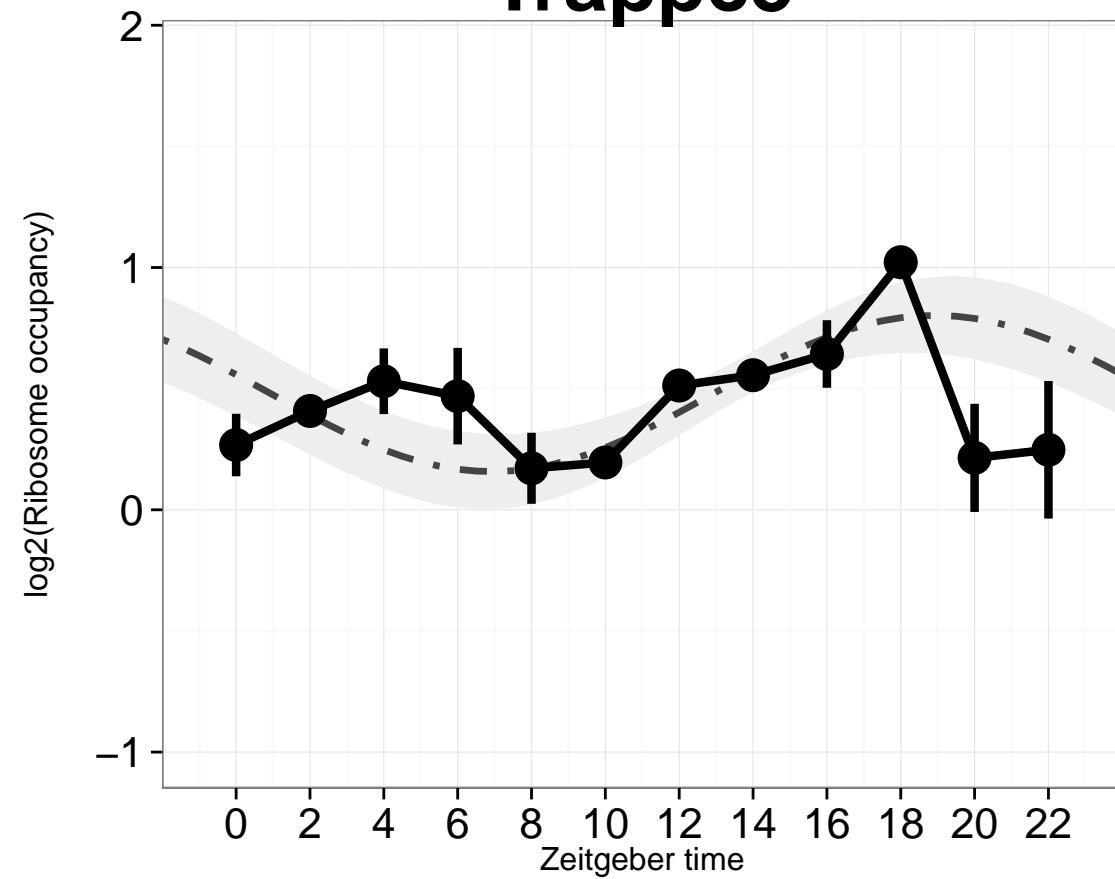

Supplement: SuppDataset_1.zip [file Trappc5_set_A.pdf › Supplemental Dataset 1/A-mRNA_nonrhyth_translation_nonrhyth/Trappc5_set_A.pdf]

# Trappc6a

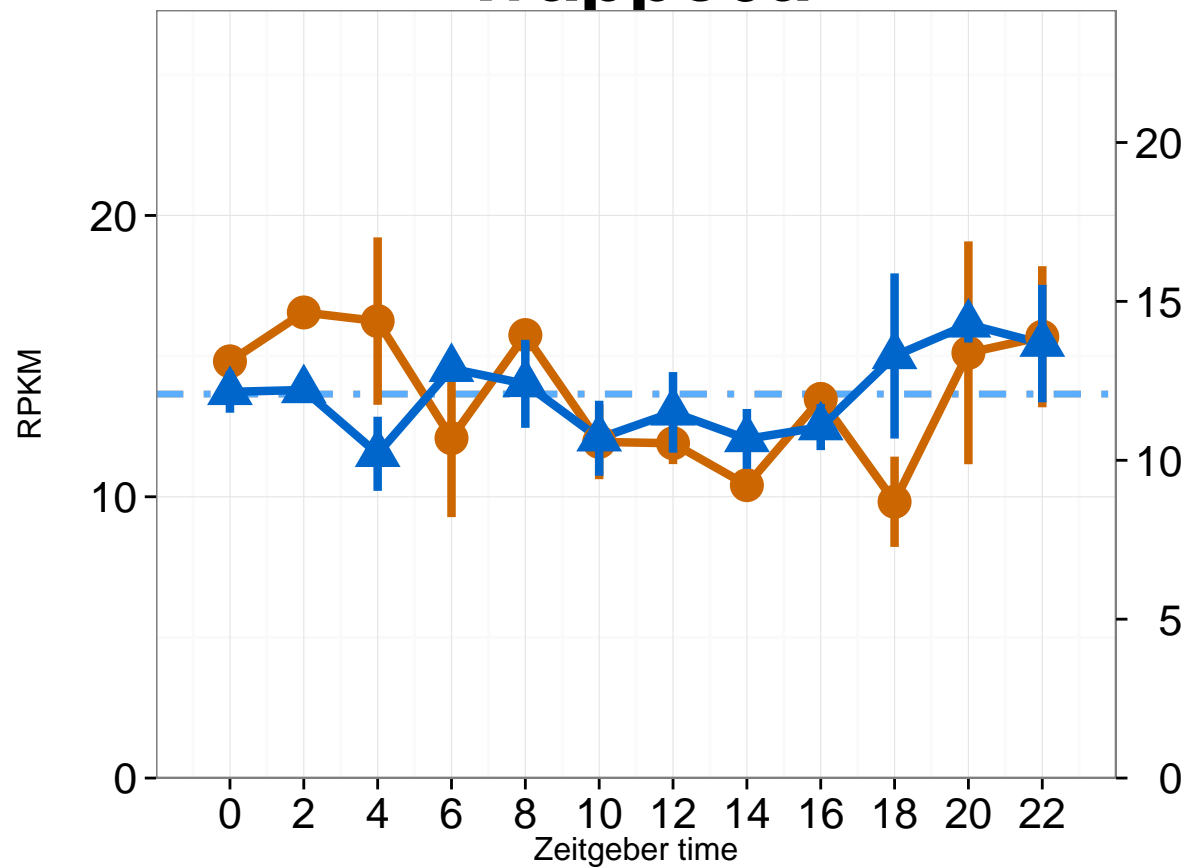

# Trappc6a

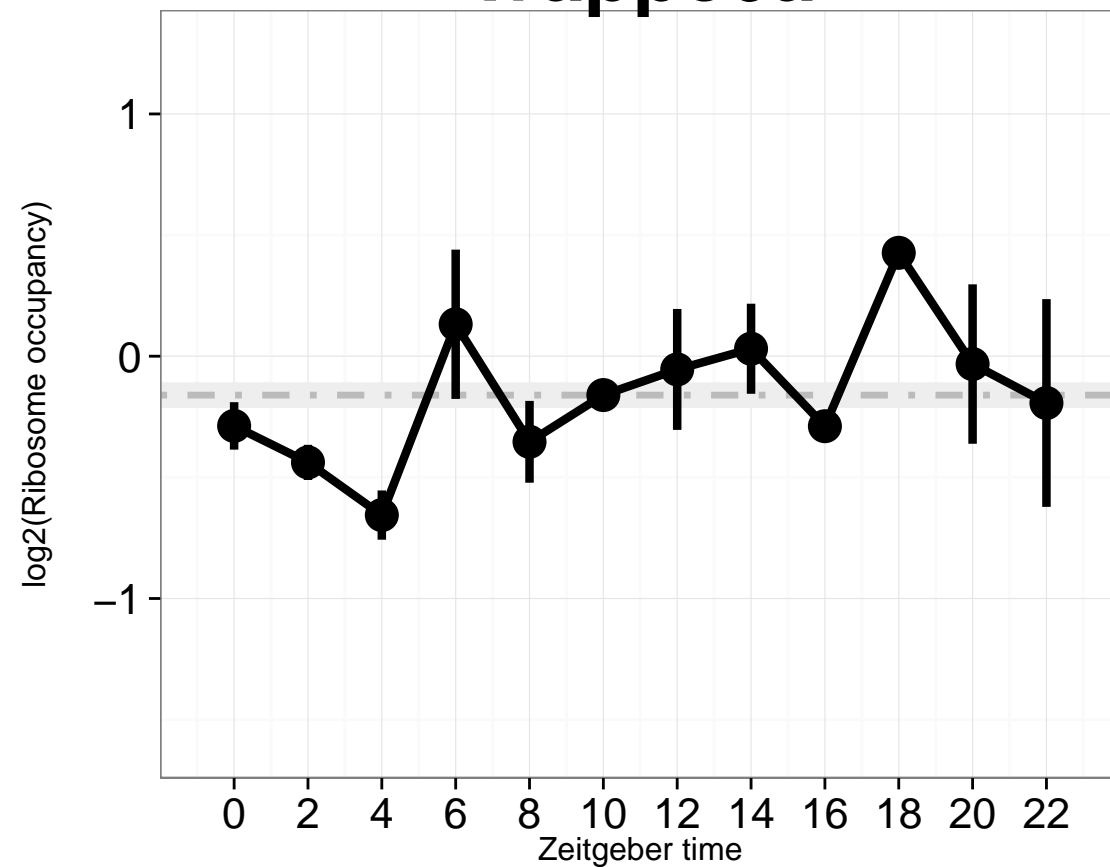

Supplement: SuppDataset_1.zip [file Trappc6a_set_A.pdf › Supplemental Dataset 1/A-mRNA_nonrhyth_translation_nonrhyth/Trappc6a_set_A.pdf]

# Trappc6b

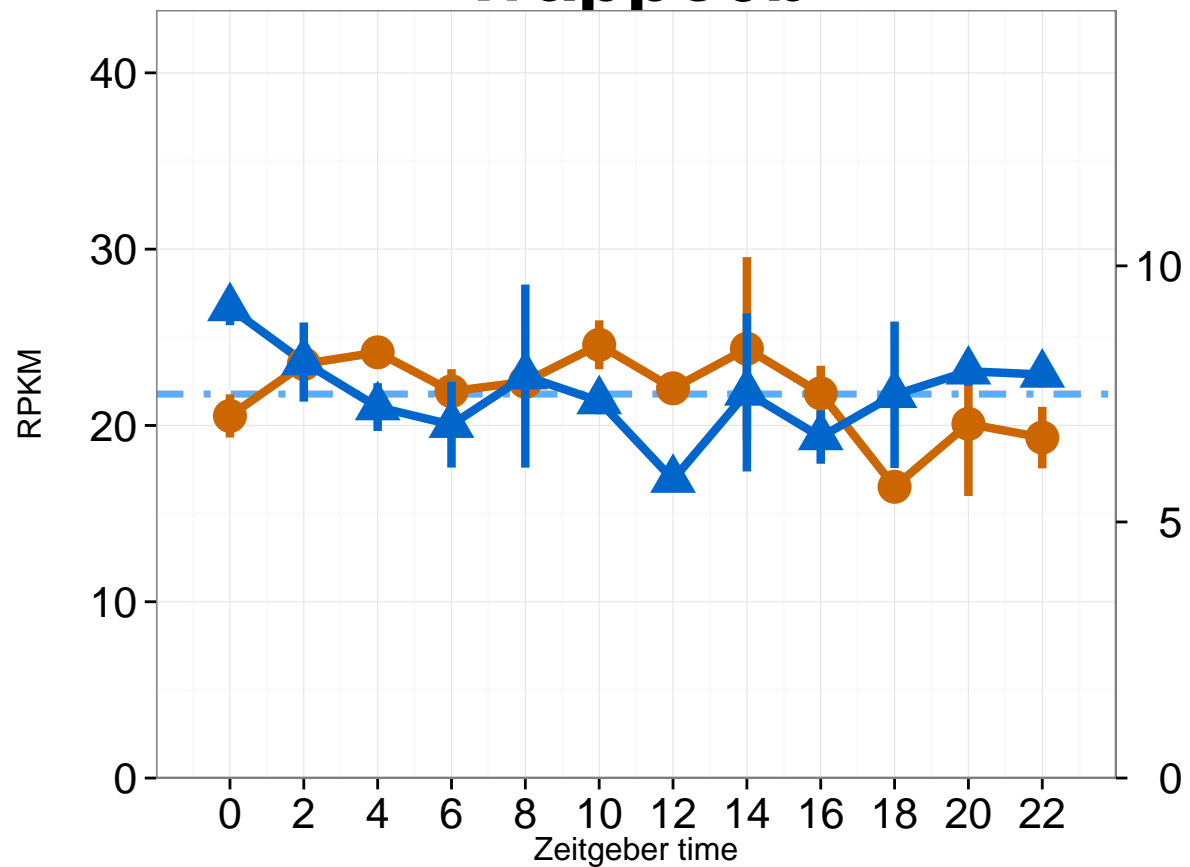

# Trappc6b

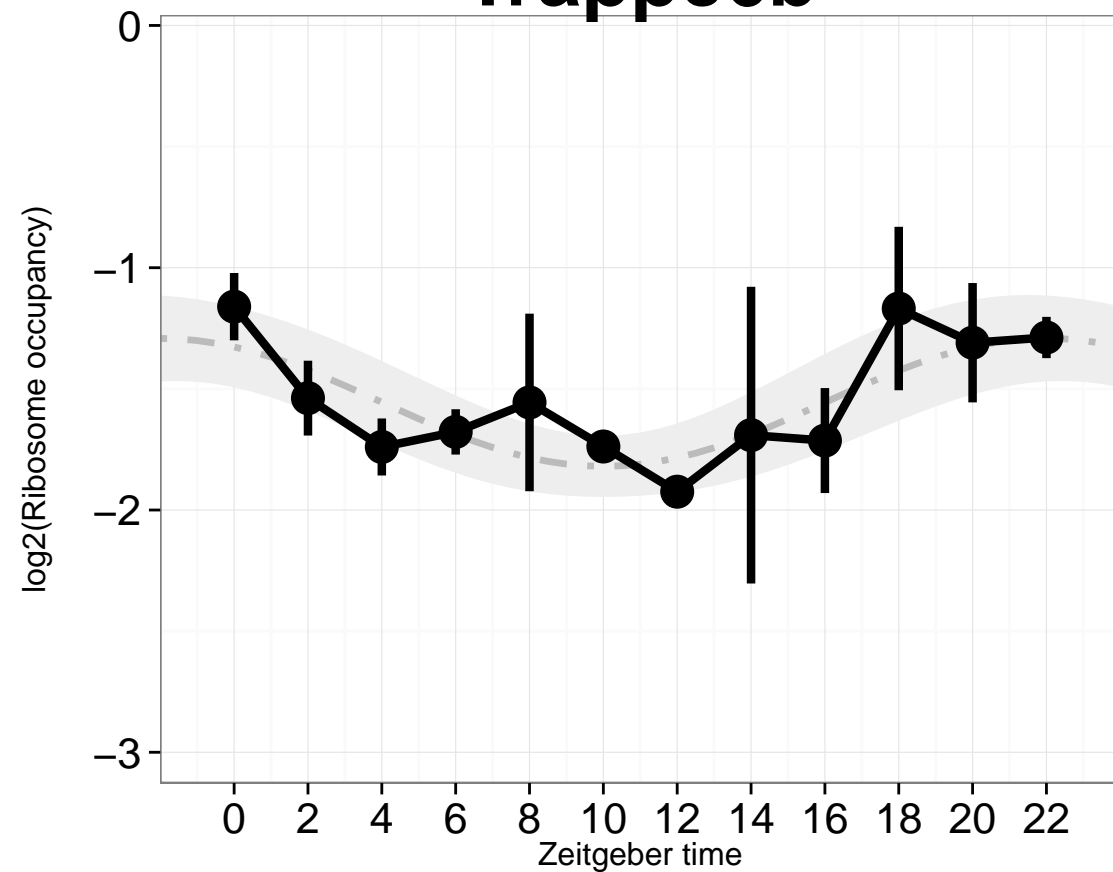

Supplement: SuppDataset_1.zip [file Trappc6b_set_A.pdf › Supplemental Dataset 1/A-mRNA_nonrhyth_translation_nonrhyth/Trappc6b_set_A.pdf]

# Trappc8

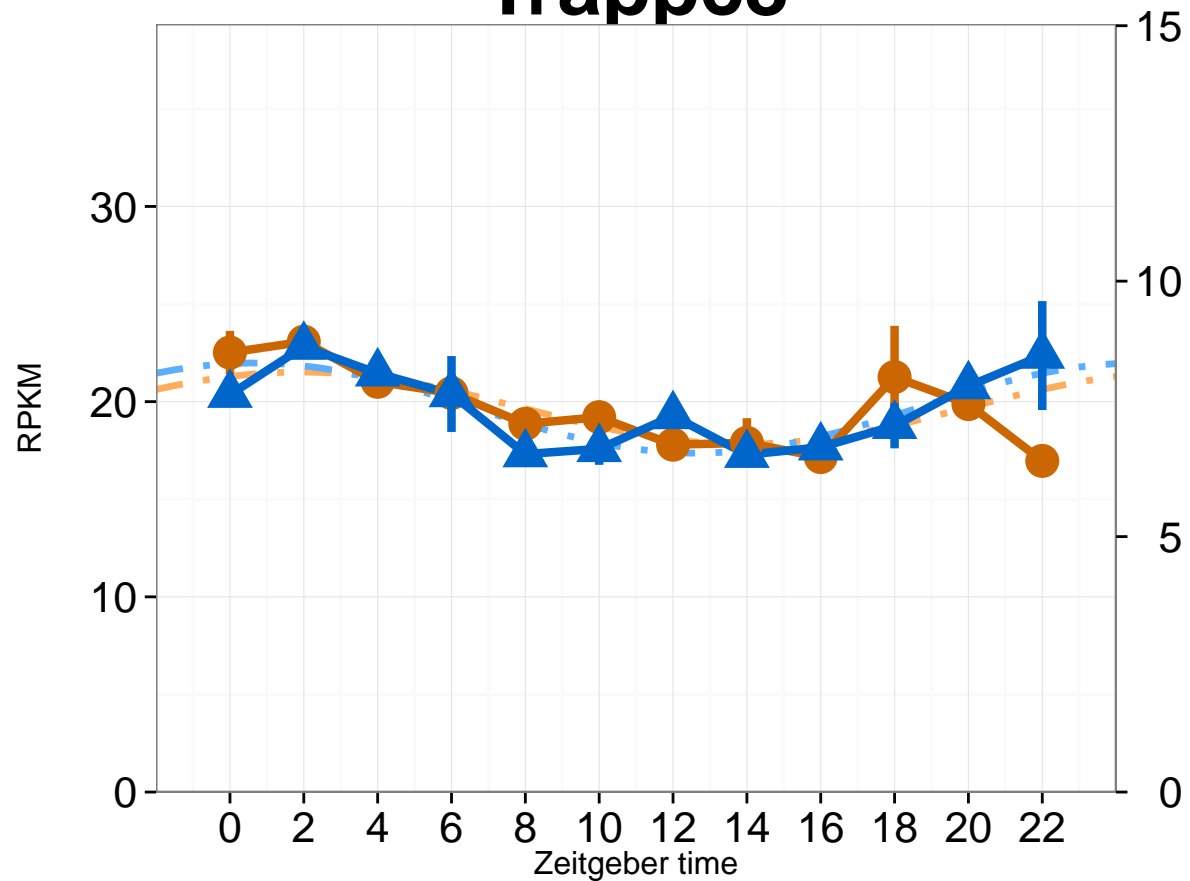

# Trappc8

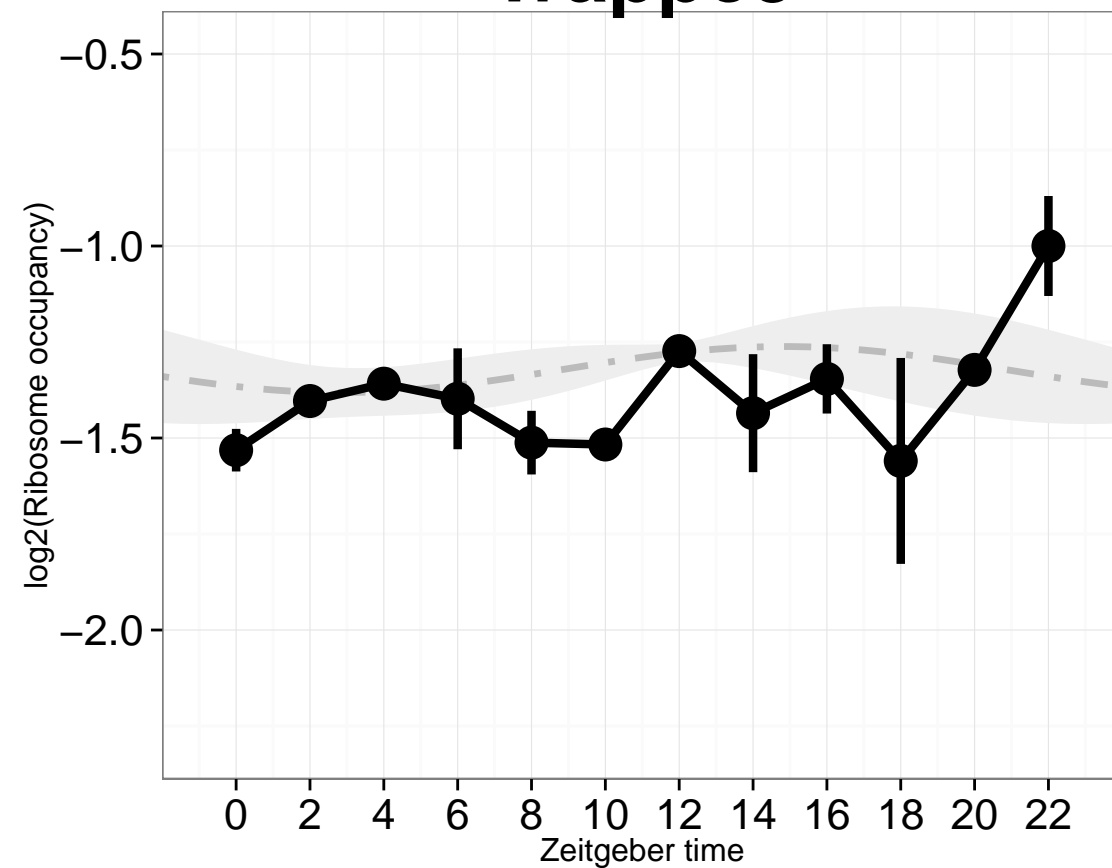

Supplement: SuppDataset_1.zip [file Trappc8_set_A.pdf › Supplemental Dataset 1/A-mRNA_nonrhyth_translation_nonrhyth/Trappc8_set_A.pdf]

# Trappc9

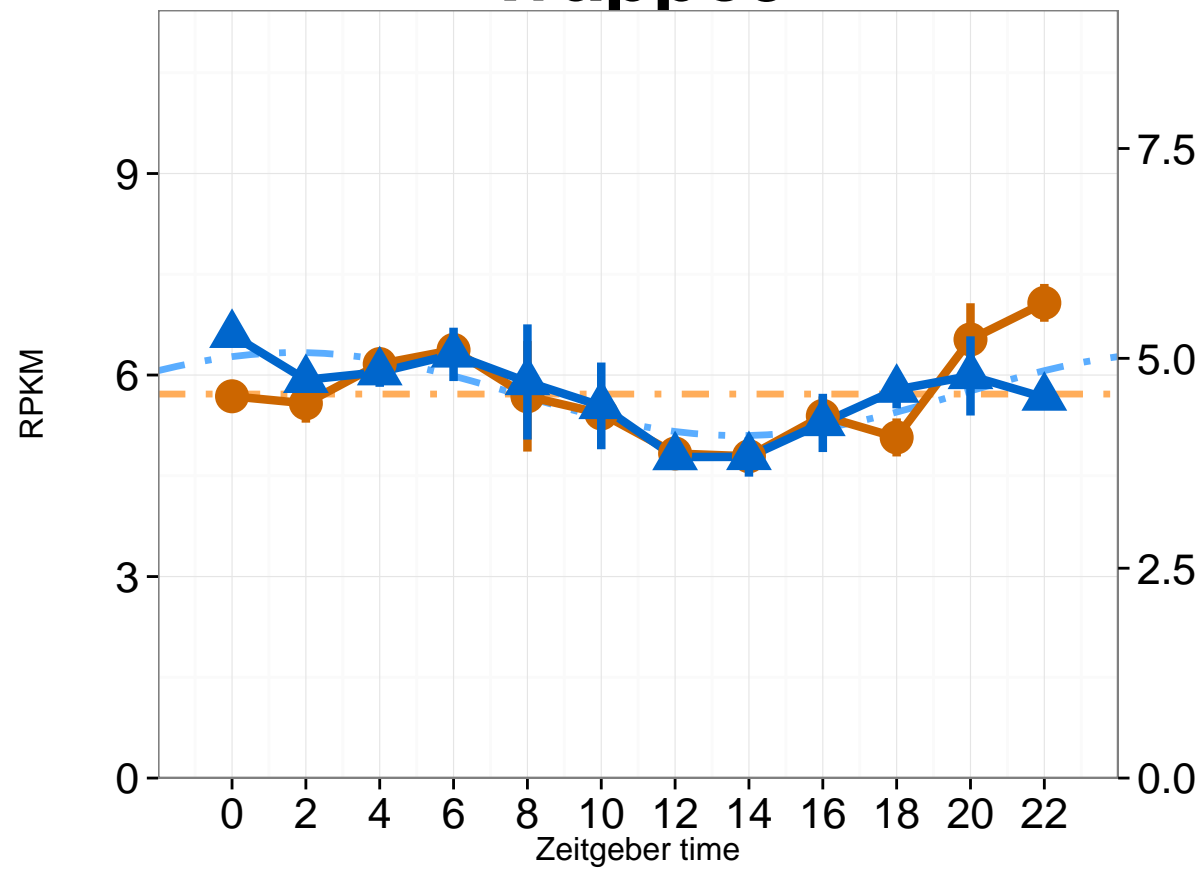

# Trappc9

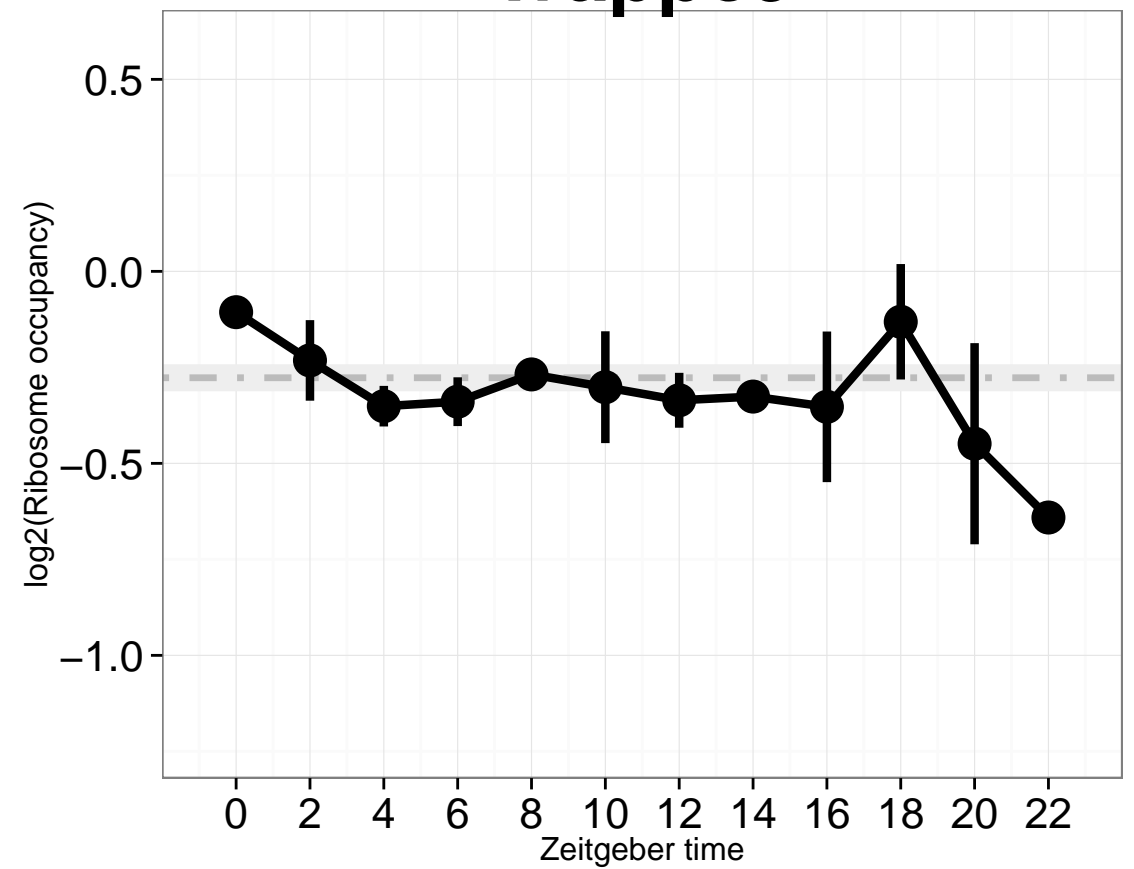

Supplement: SuppDataset_1.zip [file Trappc9_set_A.pdf › Supplemental Dataset 1/A-mRNA_nonrhyth_translation_nonrhyth/Trappc9_set_A.pdf]

# Trdmt1

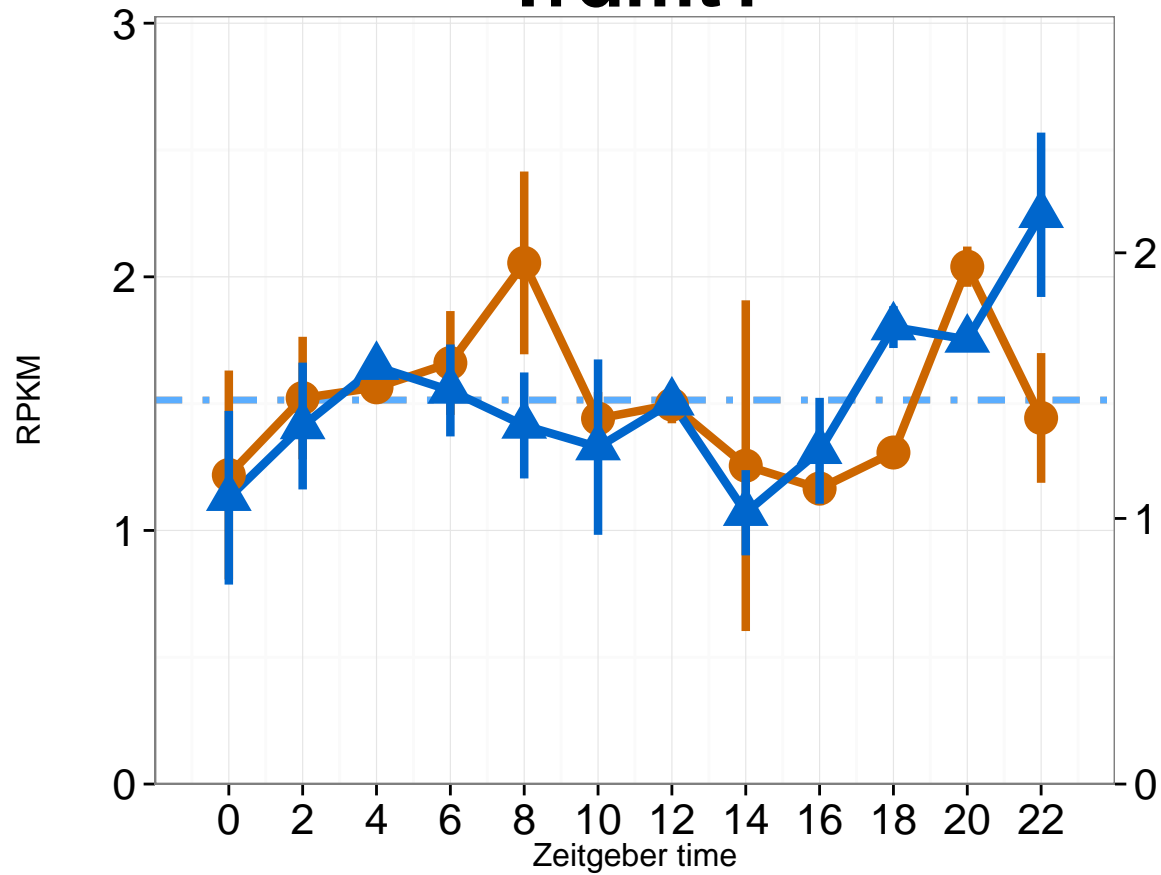

# Trdmt1

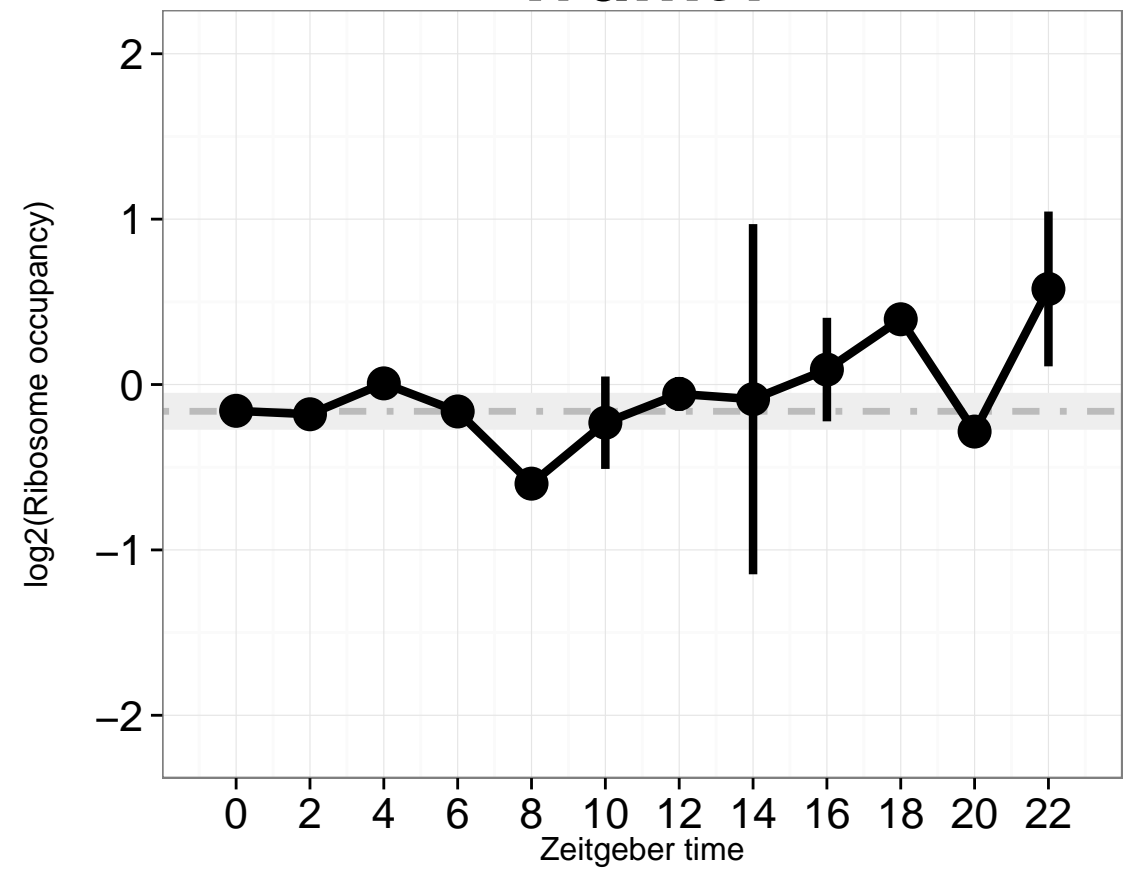

Supplement: SuppDataset_1.zip [file Trdmt1_set_A.pdf › Supplemental Dataset 1/A-mRNA_nonrhyth_translation_nonrhyth/Trdmt1_set_A.pdf]

## Trem14

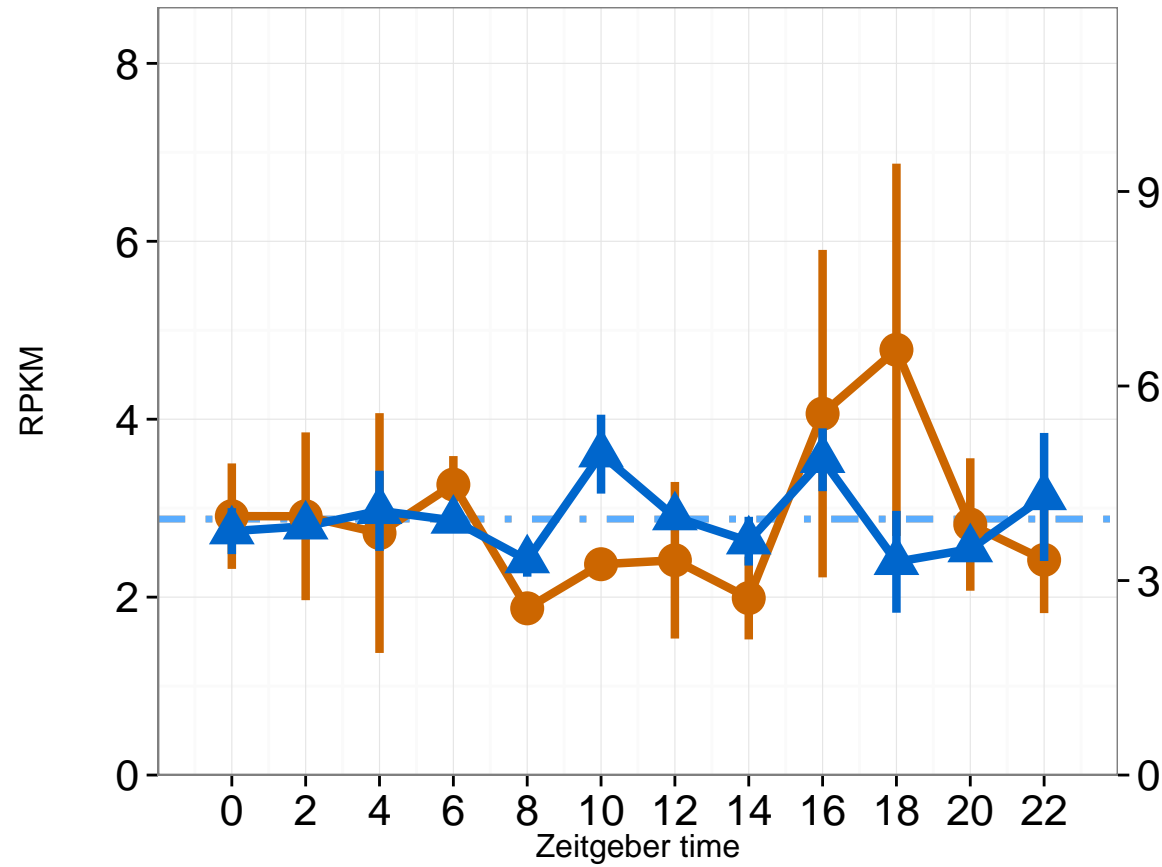

## Trem14

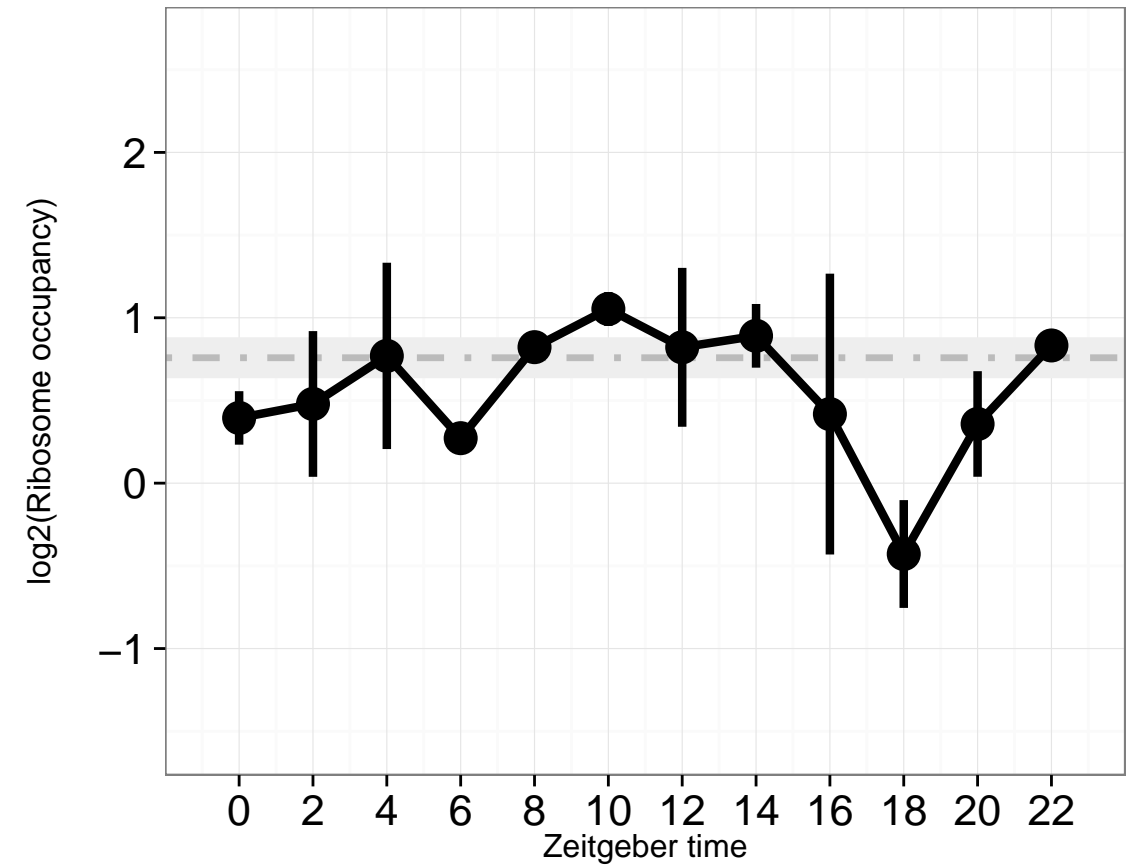

Supplement: SuppDataset_1.zip [file Treml4_set_A.pdf › Supplemental Dataset 1/A-mRNA_nonrhyth_translation_nonrhyth/Treml4_set_A.pdf]

## Trhde

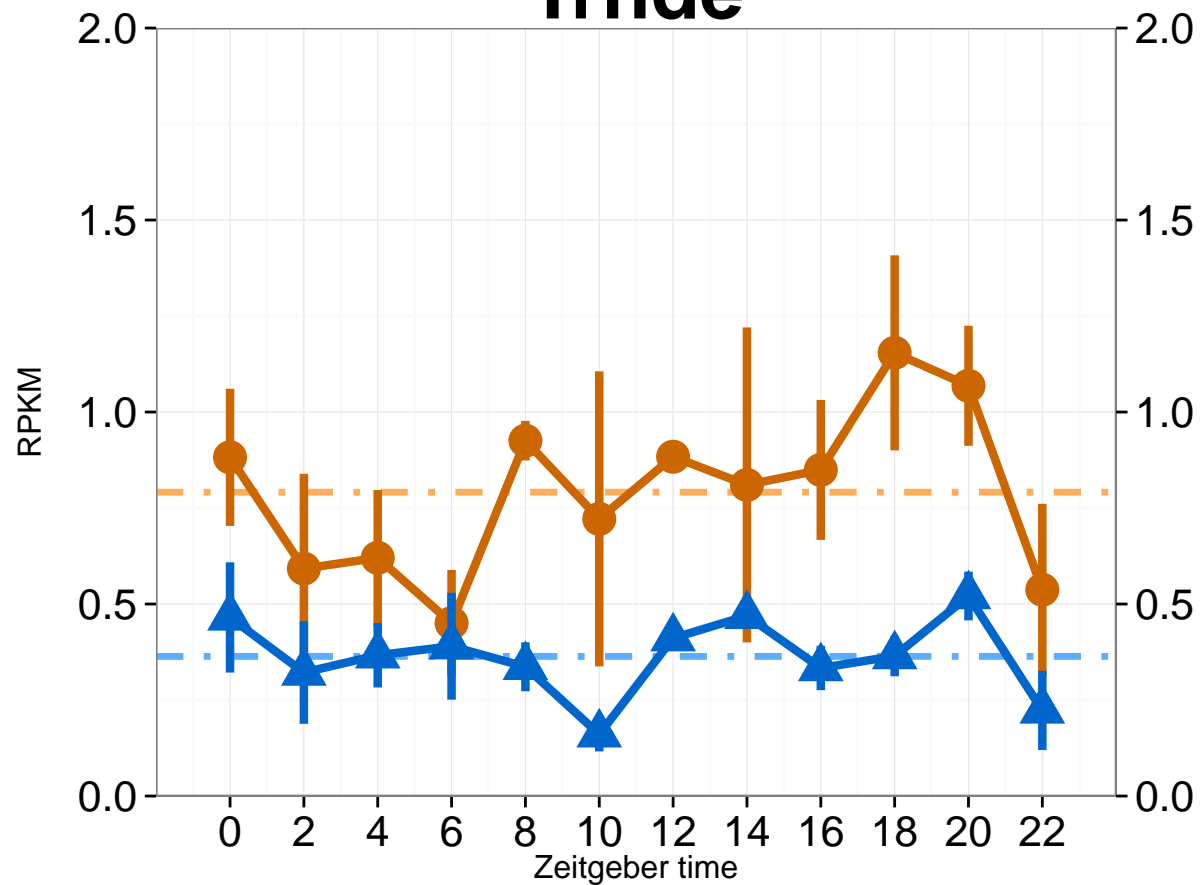

## Trhde

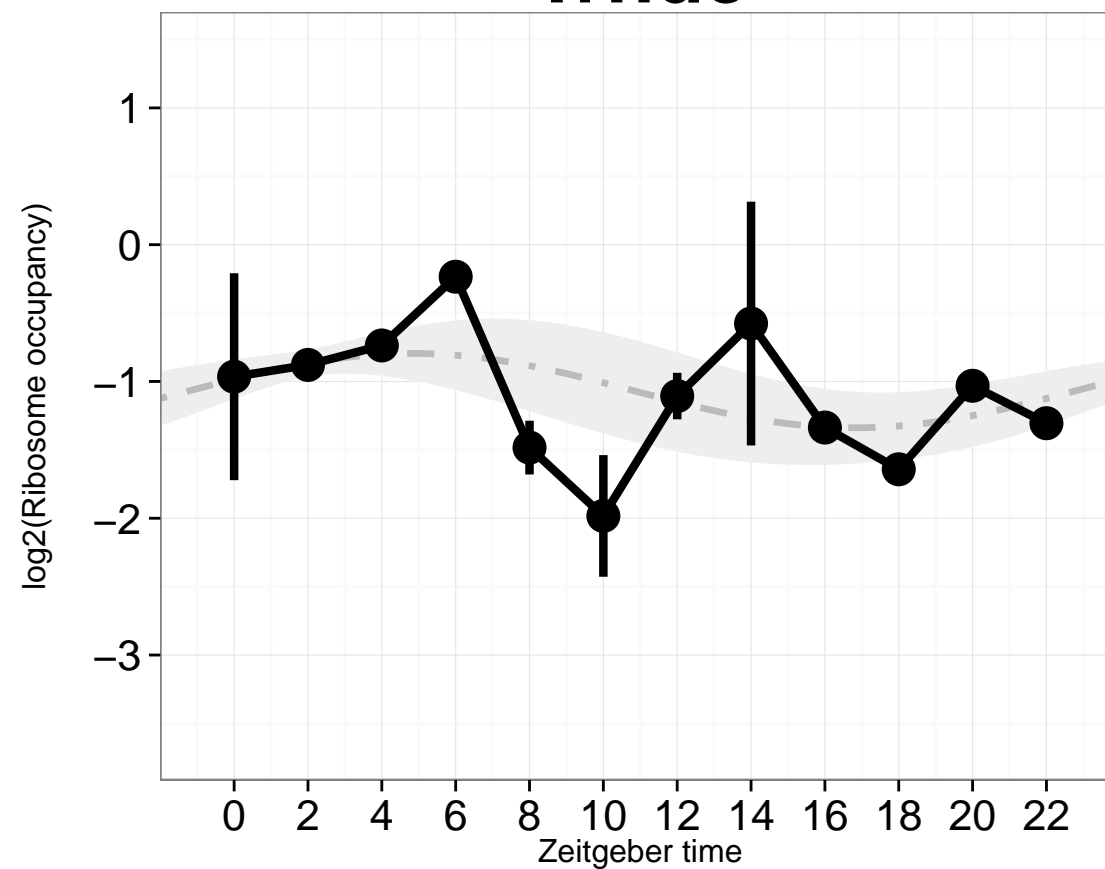

Supplement: SuppDataset_1.zip [file Trhde_set_A.pdf › Supplemental Dataset 1/A-mRNA_nonrhyth_translation_nonrhyth/Trhde_set_A.pdf]

# Triap1

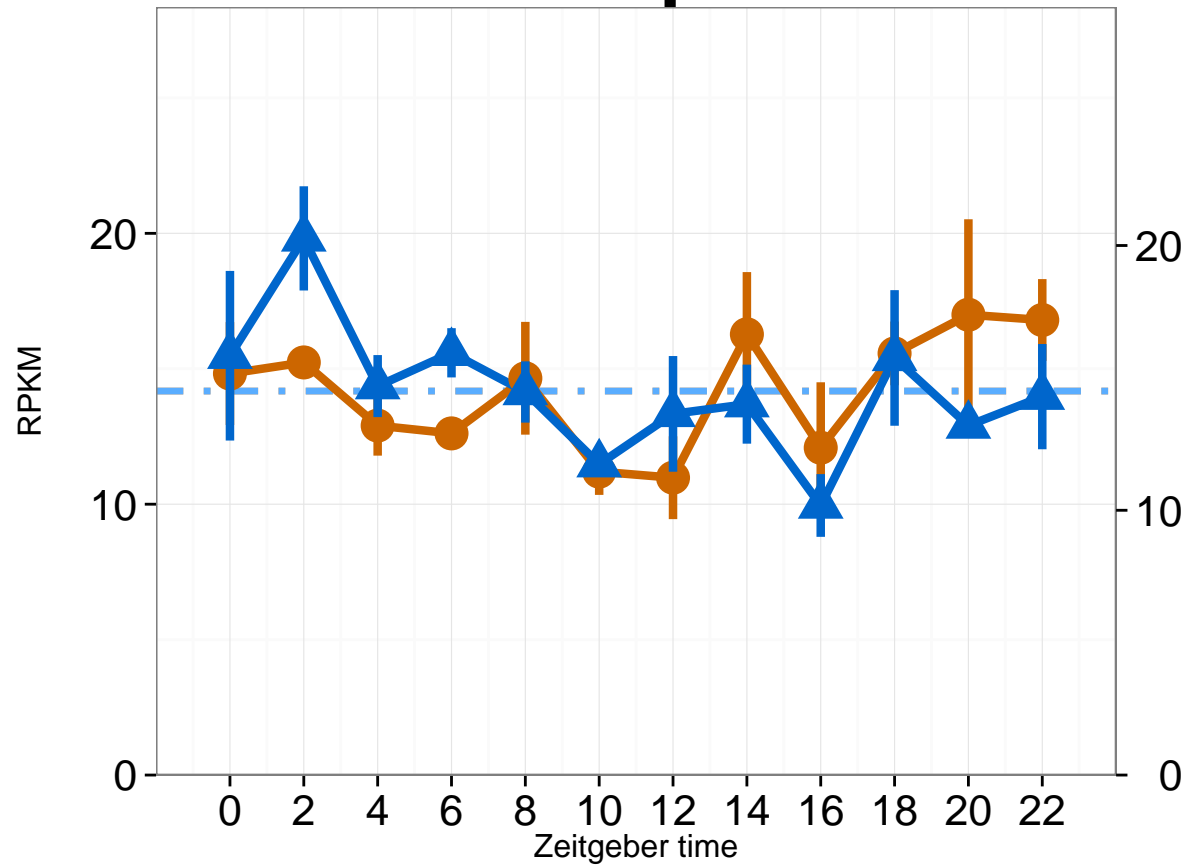

# Triap1

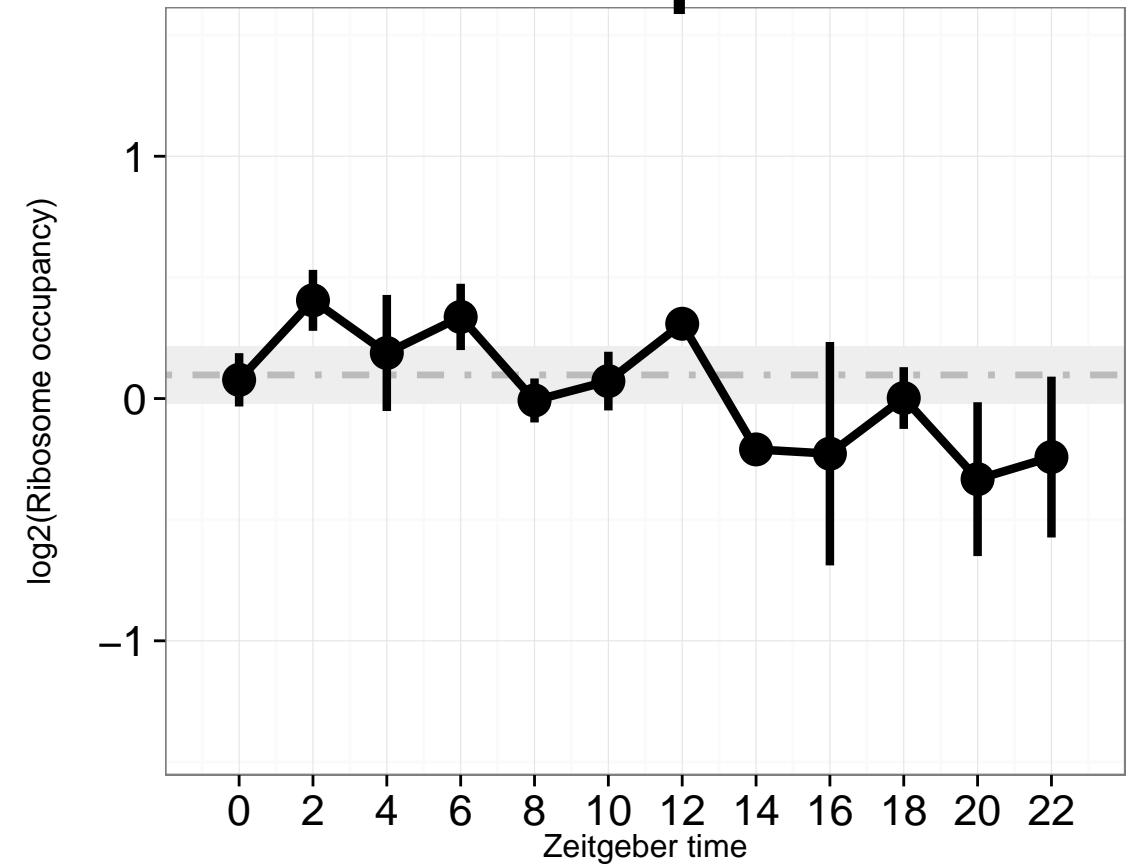

Supplement: SuppDataset_1.zip [file Triap1_set_A.pdf › Supplemental Dataset 1/A-mRNA_nonrhyth_translation_nonrhyth/Triap1_set_A.pdf]

## Trib1

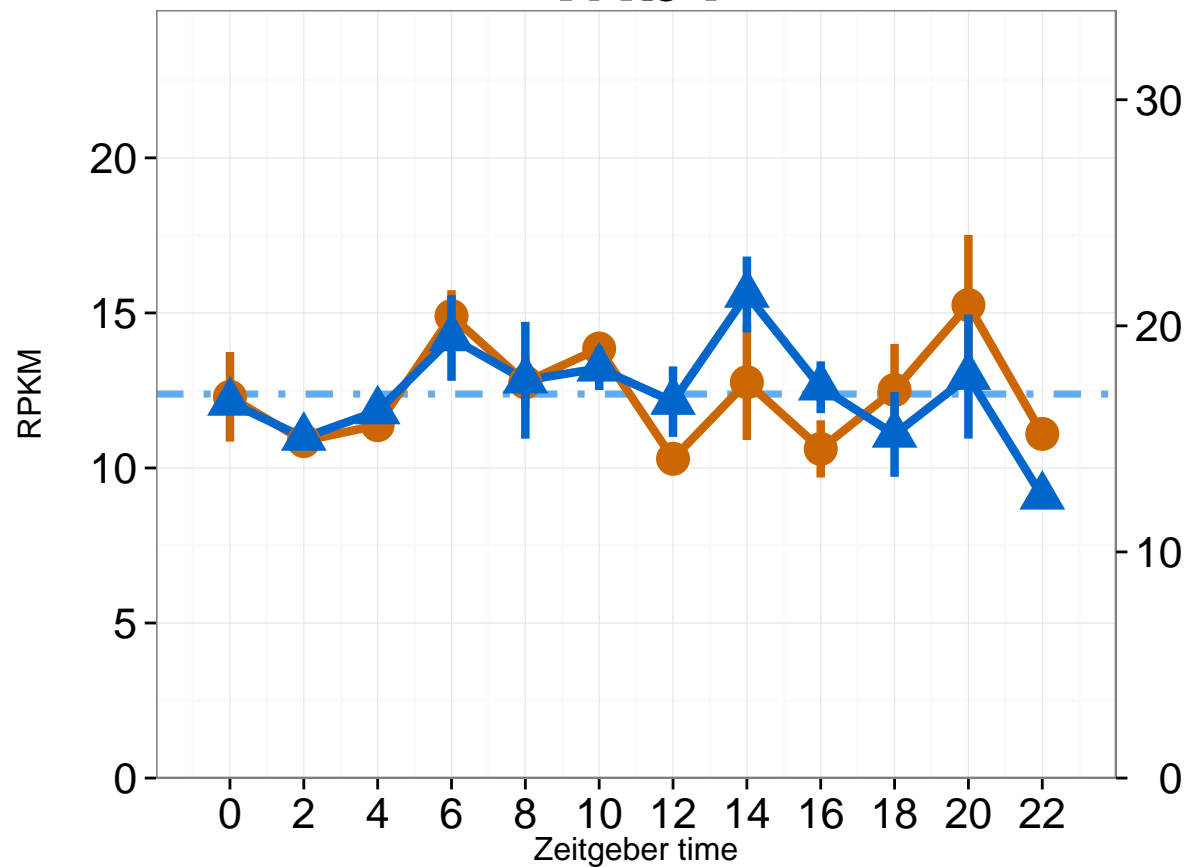

## Trib1

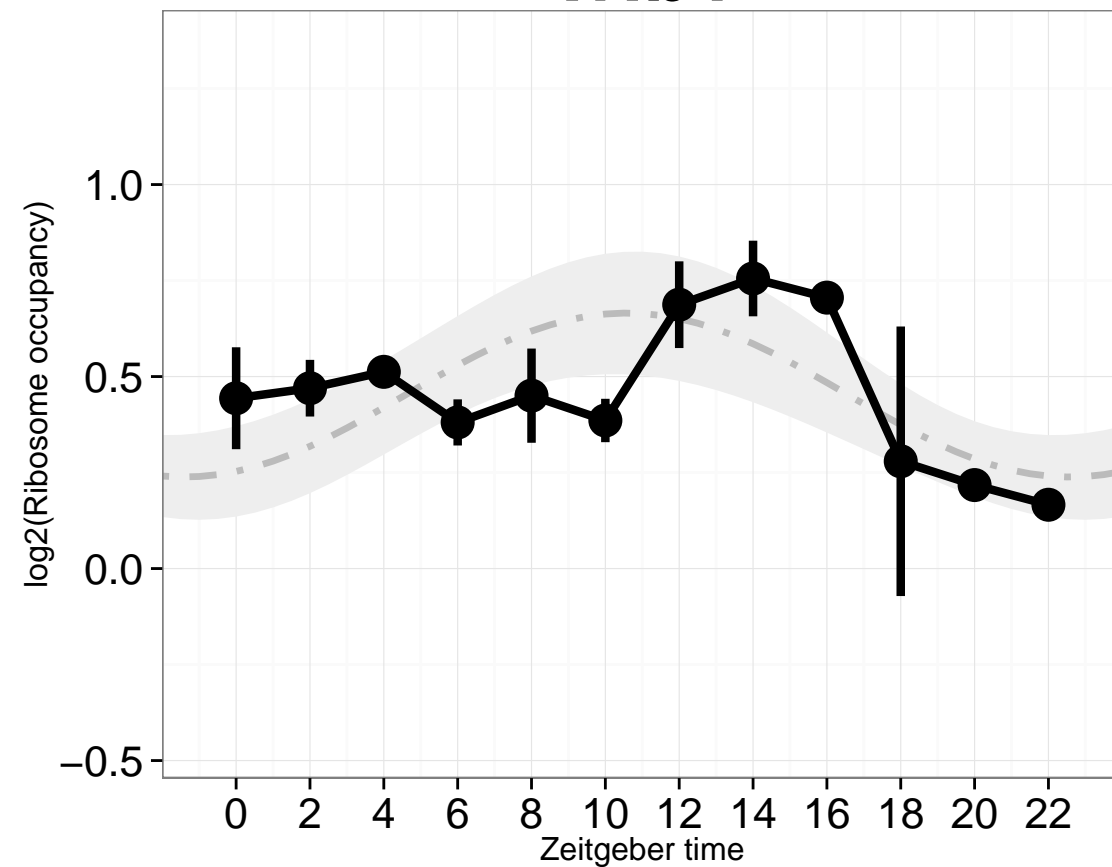

Supplement: SuppDataset_1.zip [file Trib1_set_A.pdf › Supplemental Dataset 1/A-mRNA_nonrhyth_translation_nonrhyth/Trib1_set_A.pdf]

## Trib2

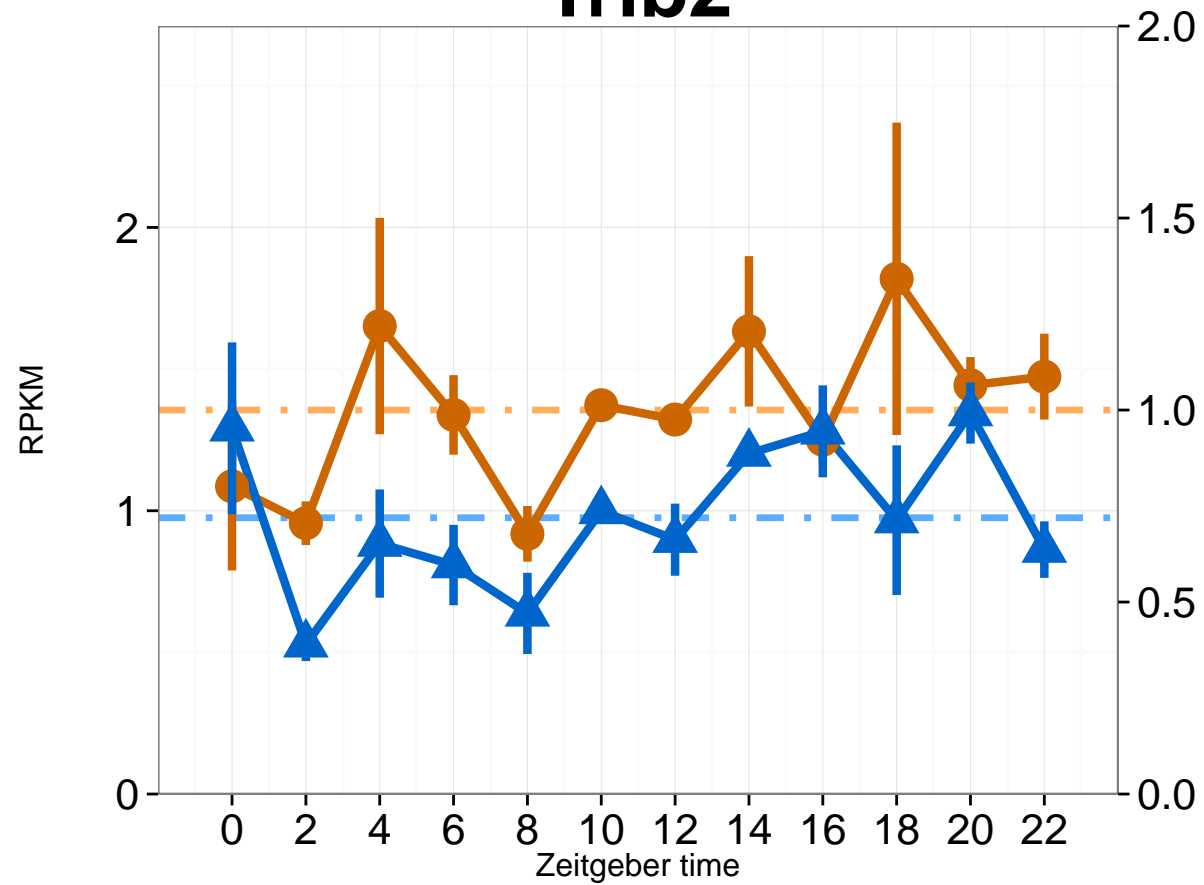

## Trib2

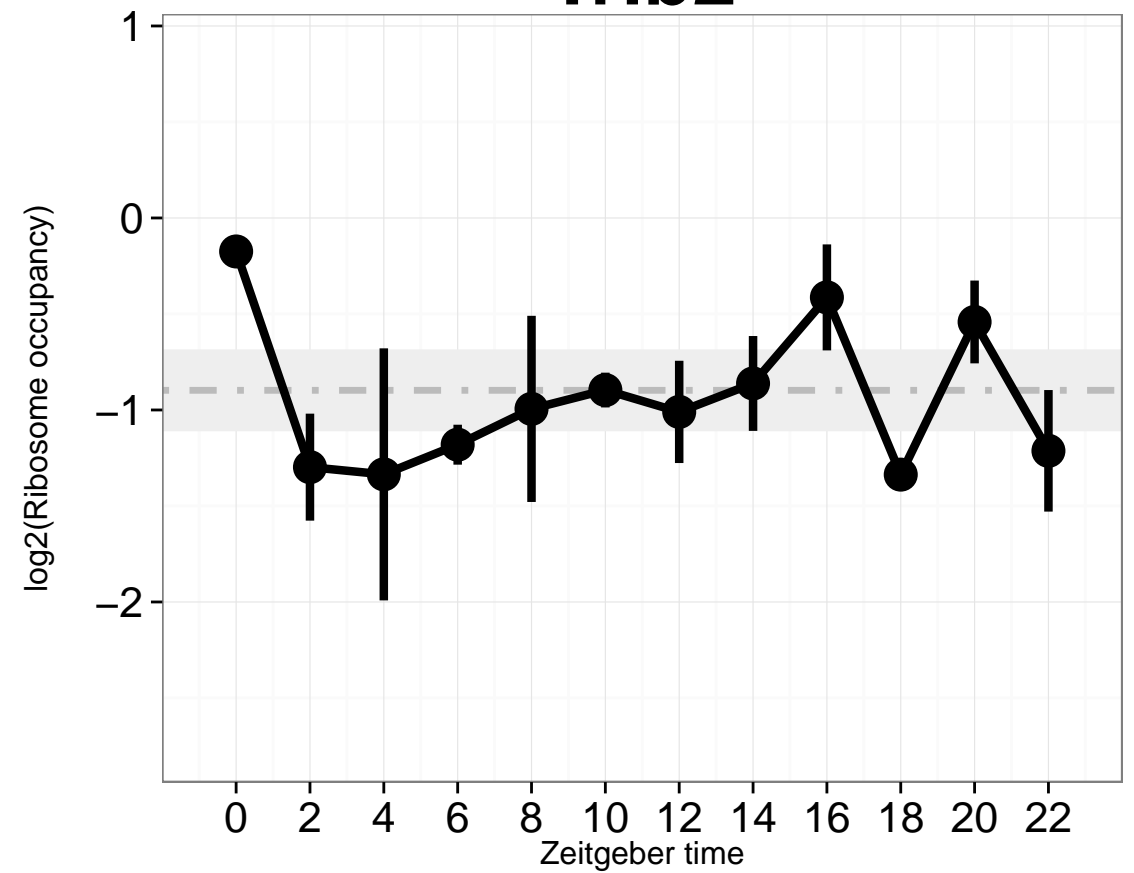

Supplement: SuppDataset_1.zip [file Trib2_set_A.pdf › Supplemental Dataset 1/A-mRNA_nonrhyth_translation_nonrhyth/Trib2_set_A.pdf]

# Trim11

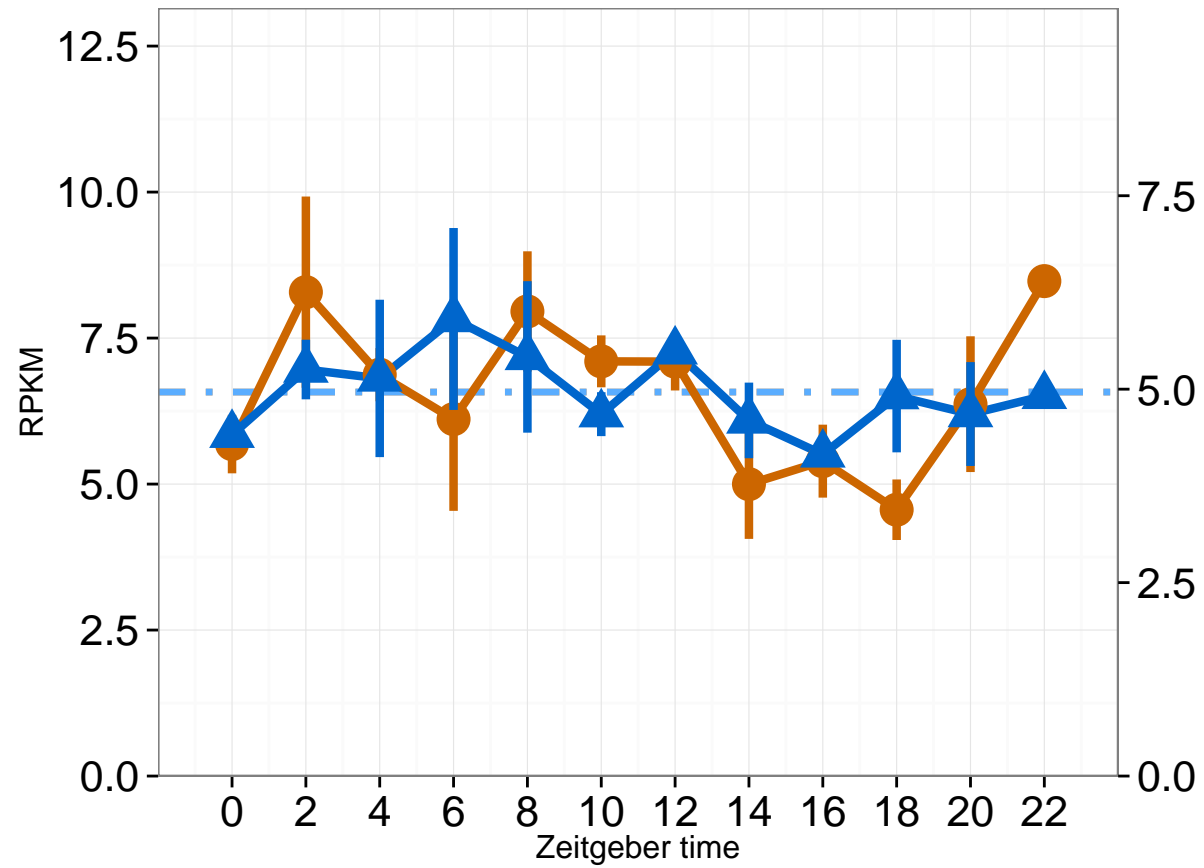

# Trim11

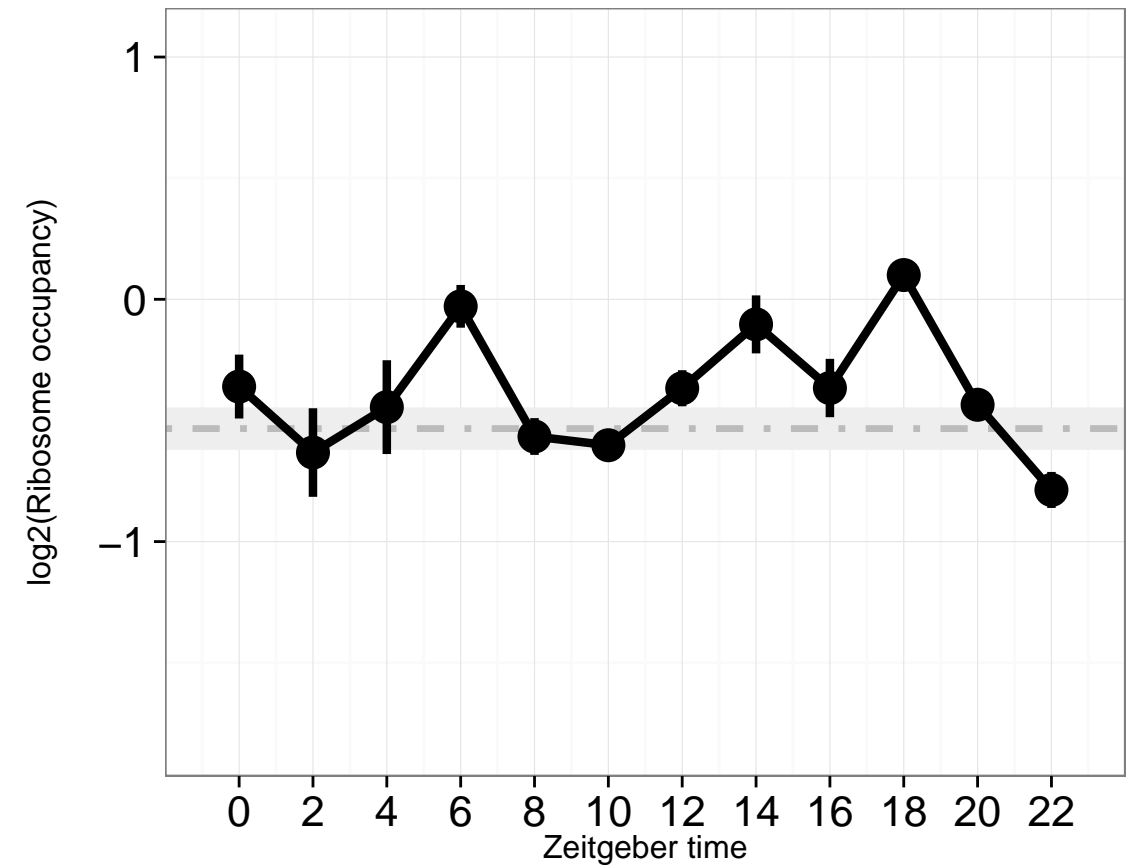

Supplement: SuppDataset_1.zip [file Trim11_set_A.pdf › Supplemental Dataset 1/A-mRNA_nonrhyth_translation_nonrhyth/Trim11_set_A.pdf]

# Trim23

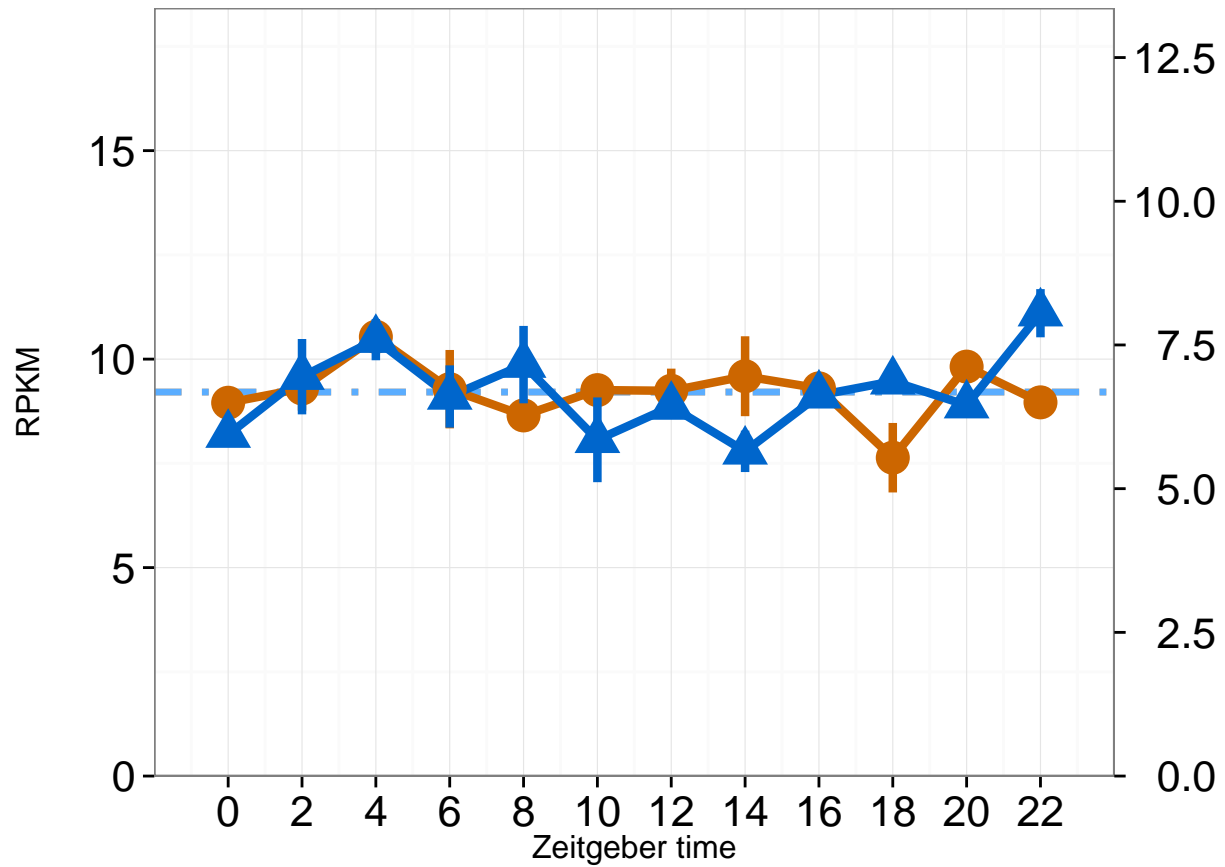

# Trim23

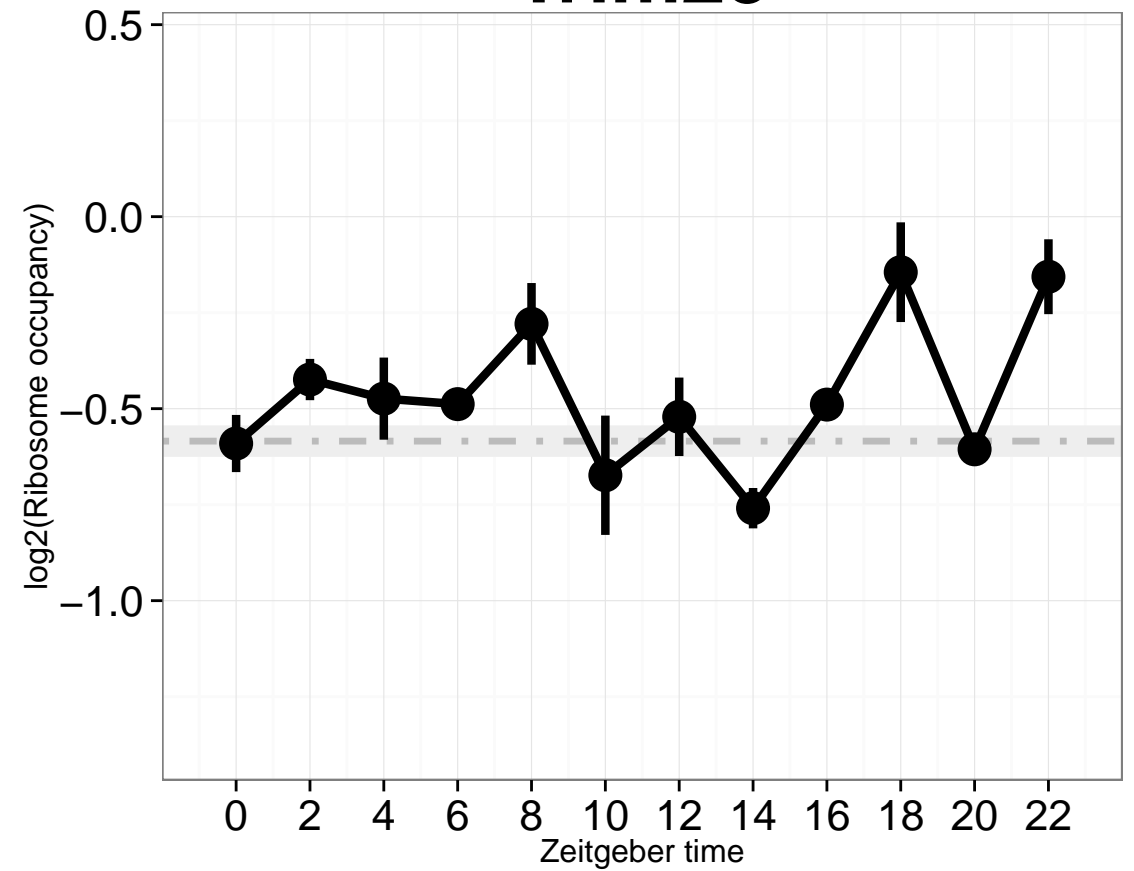

Supplement: SuppDataset_1.zip [file Trim23_set_A.pdf › Supplemental Dataset 1/A-mRNA_nonrhyth_translation_nonrhyth/Trim23_set_A.pdf]

# Trim25

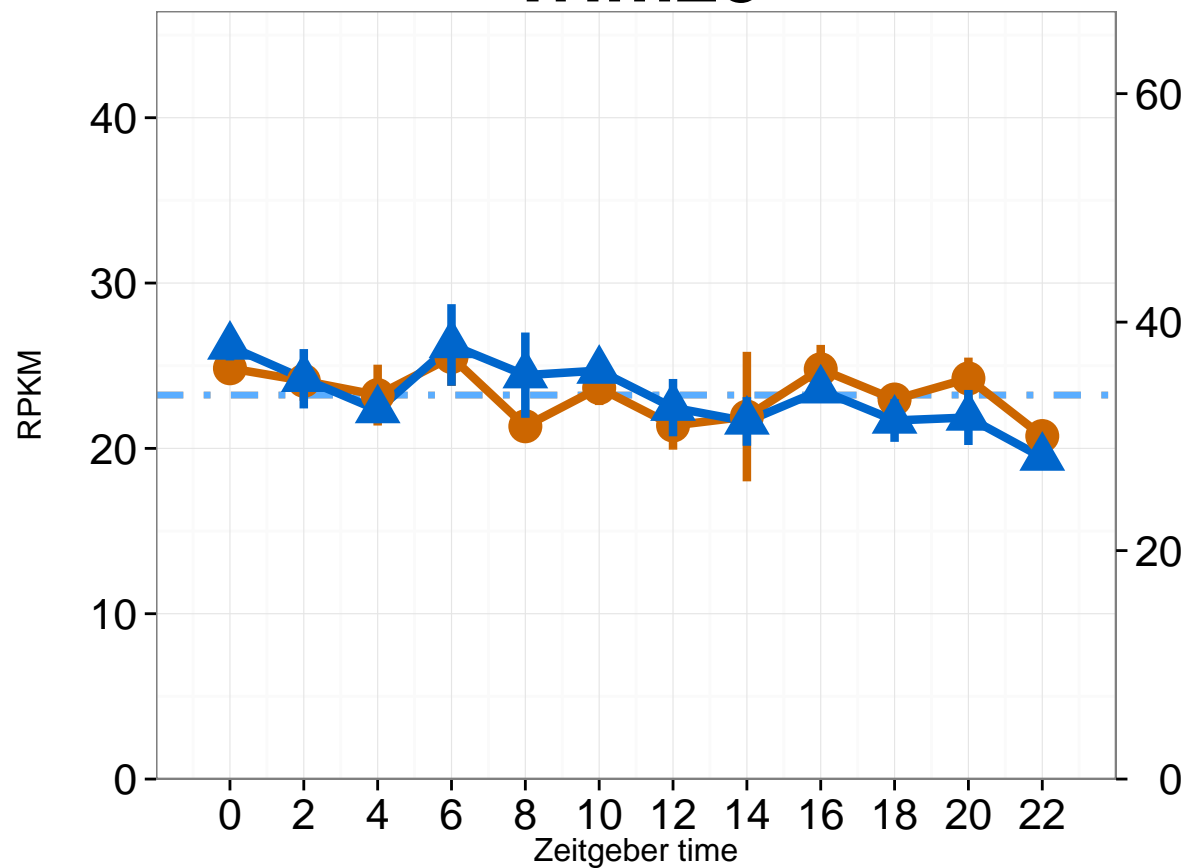

# Trim25

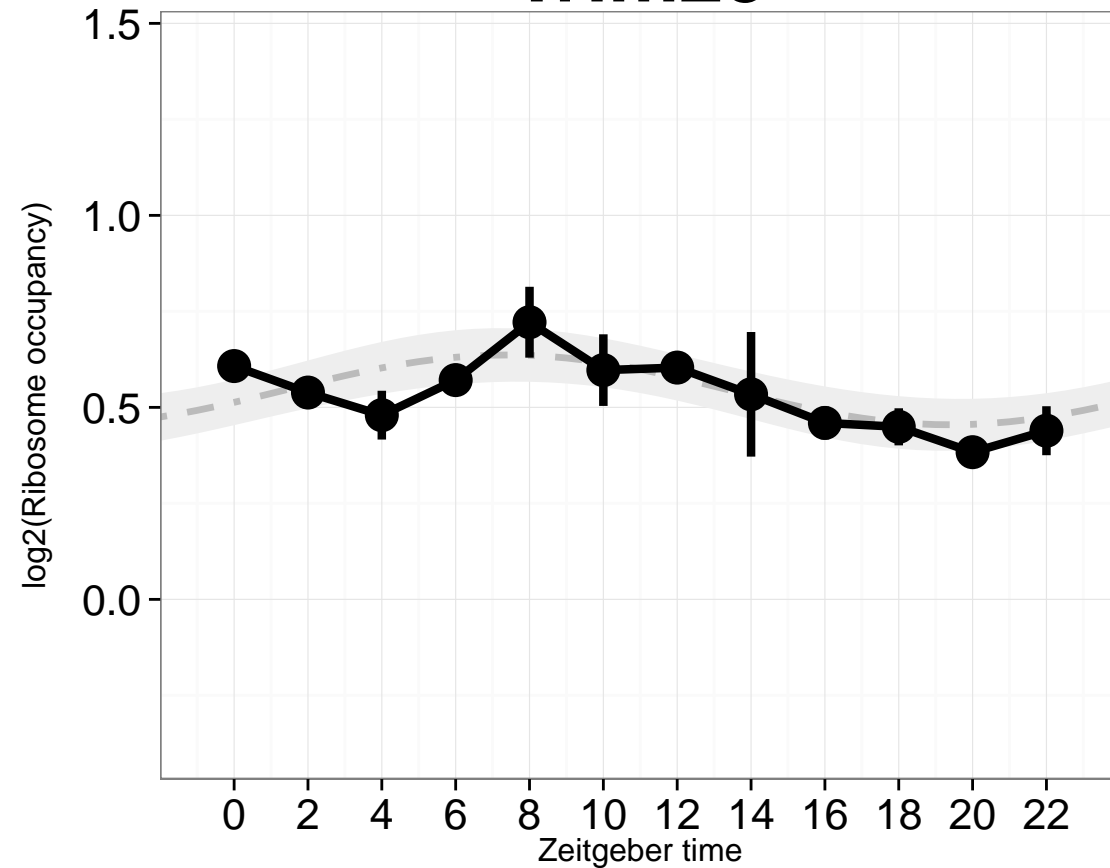

Supplement: SuppDataset_1.zip [file Trim25_set_A.pdf › Supplemental Dataset 1/A-mRNA_nonrhyth_translation_nonrhyth/Trim25_set_A.pdf]

# Trim26

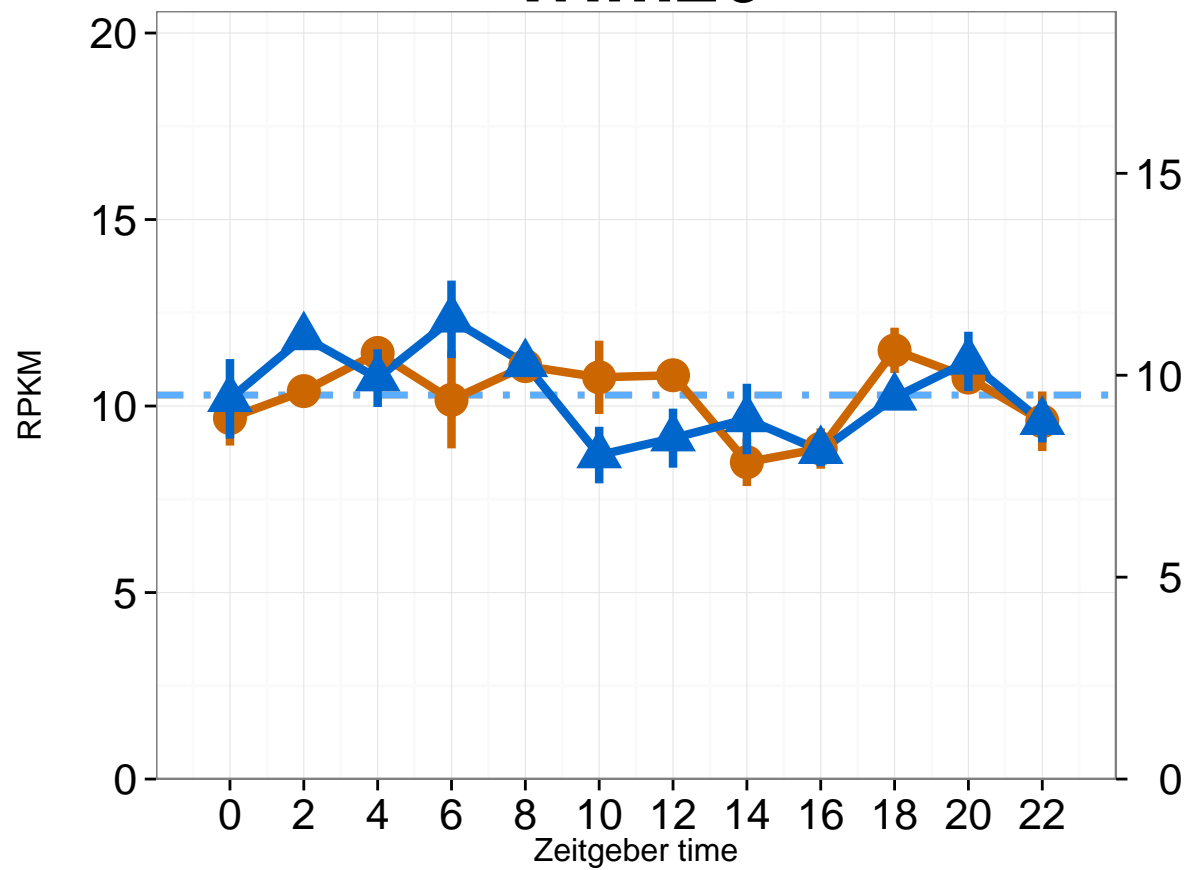

# Trim26

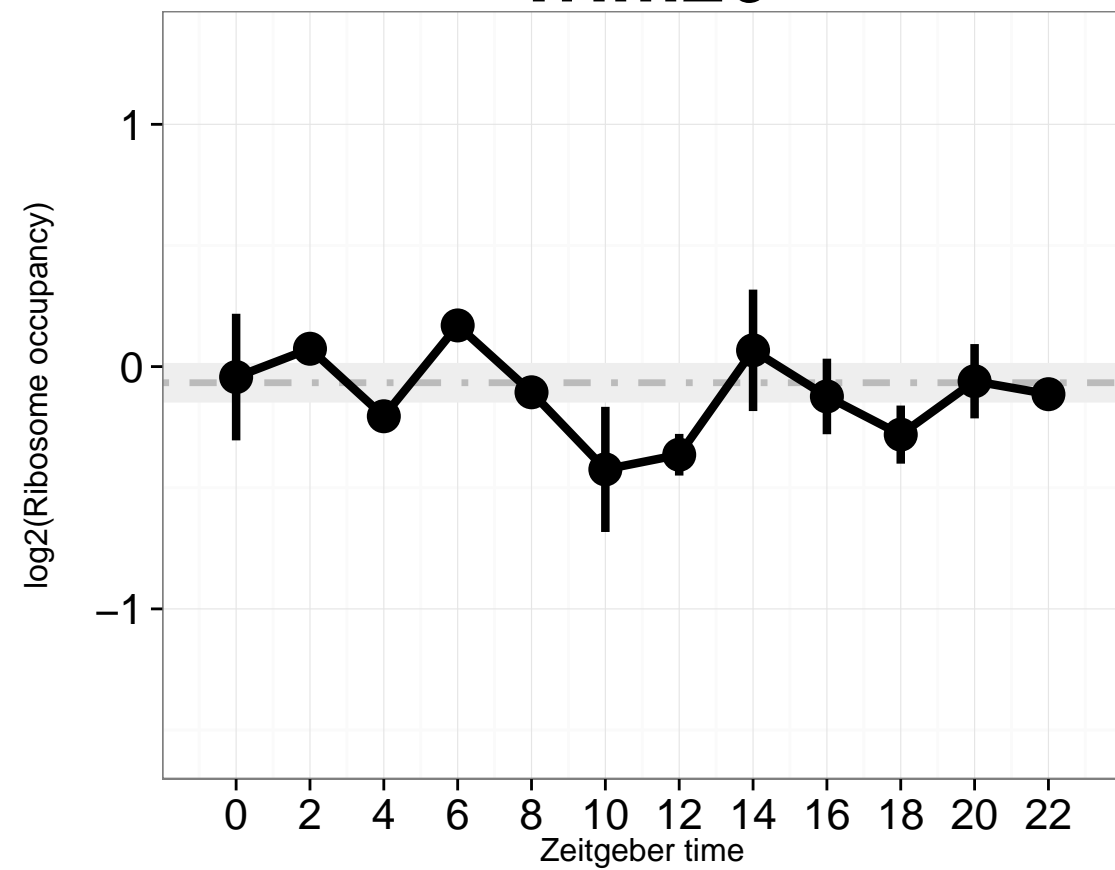

Supplement: SuppDataset_1.zip [file Trim26_set_A.pdf › Supplemental Dataset 1/A-mRNA_nonrhyth_translation_nonrhyth/Trim26_set_A.pdf]

# Trim27

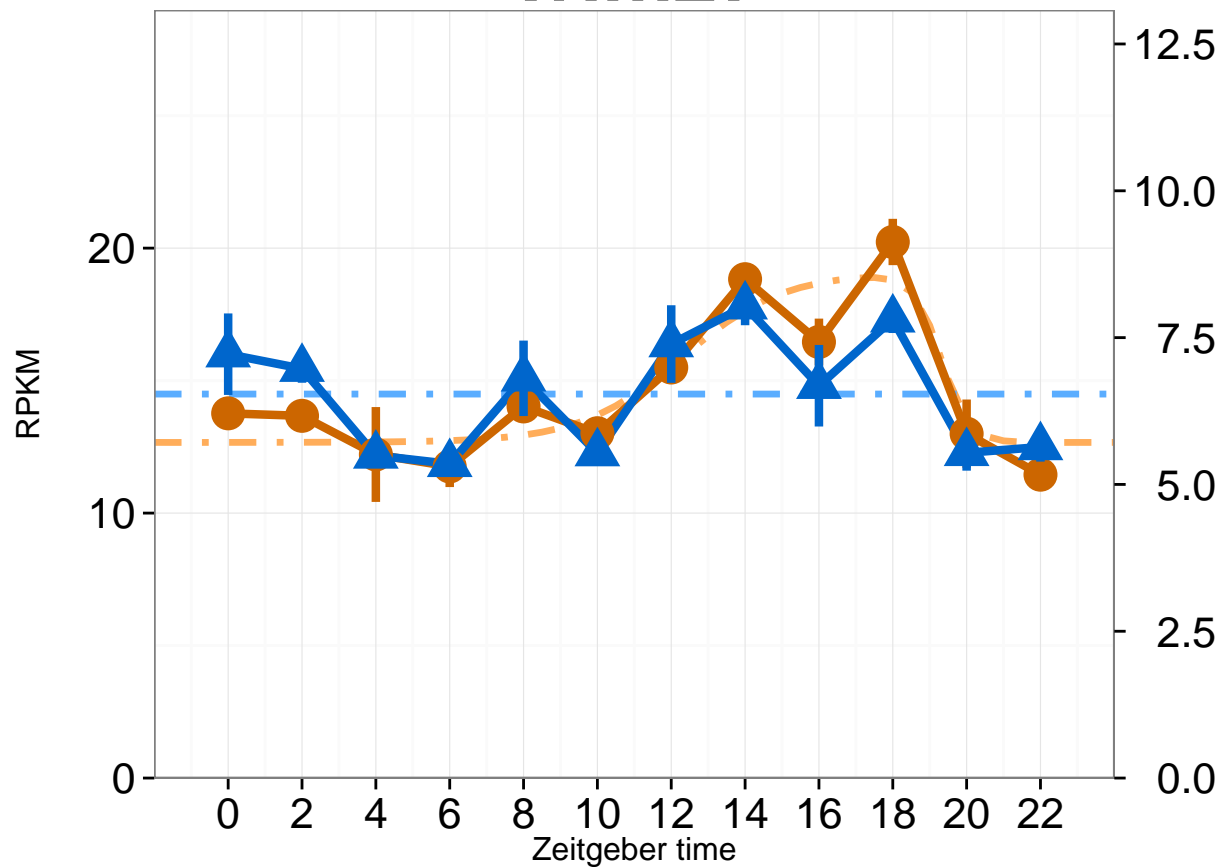

# Trim27

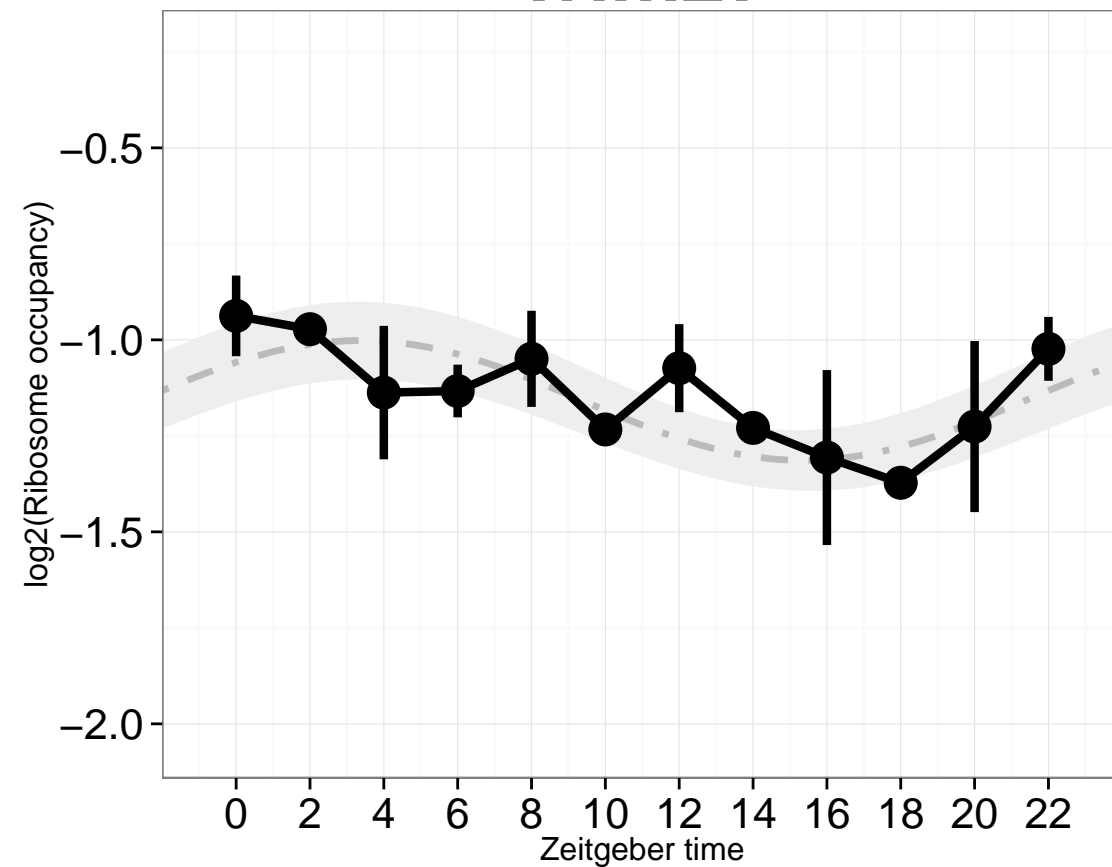

Supplement: SuppDataset_1.zip [file Trim27_set_A.pdf › Supplemental Dataset 1/A-mRNA_nonrhyth_translation_nonrhyth/Trim27_set_A.pdf]

# Trim28

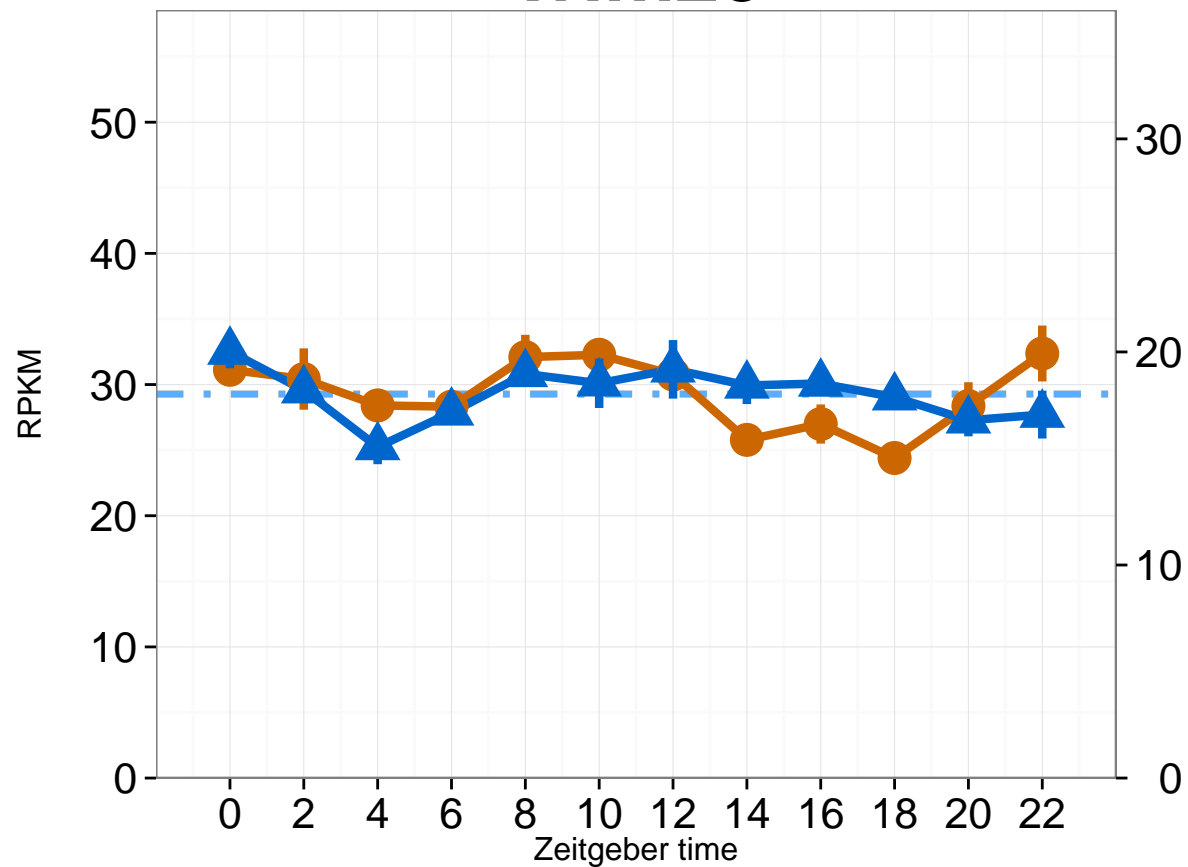

# Trim28

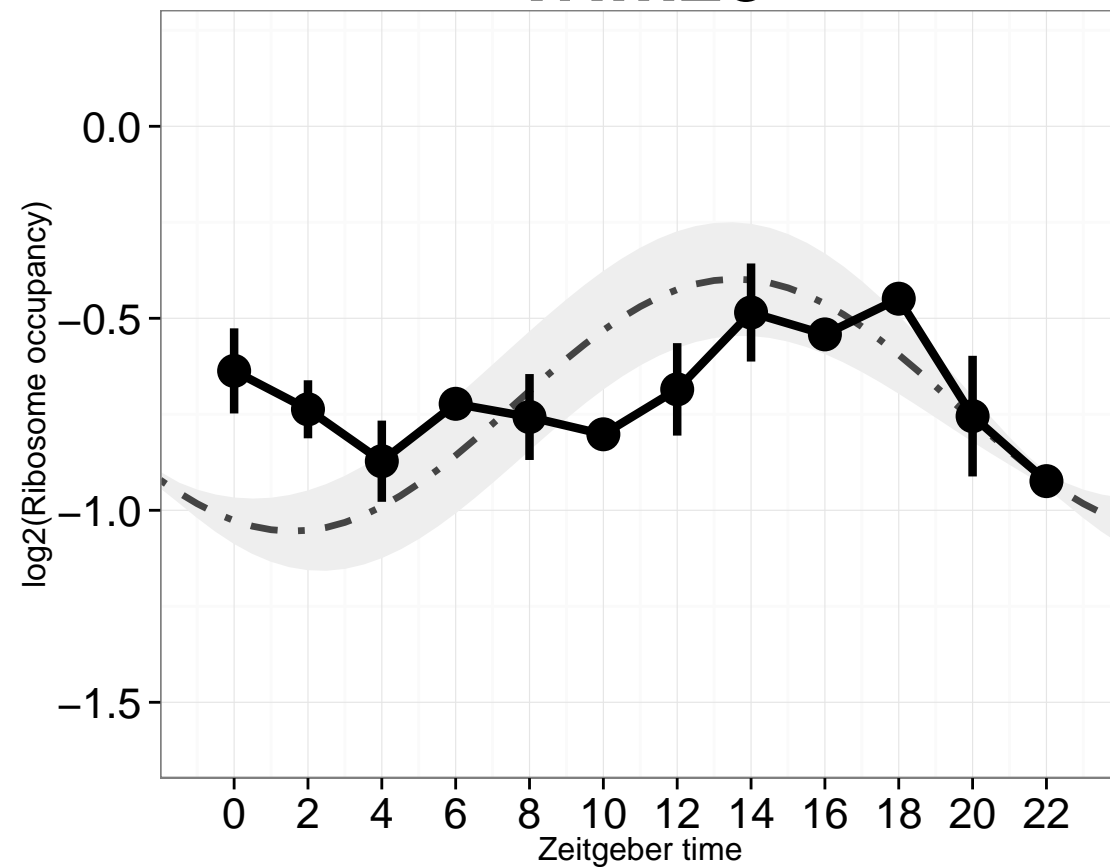

Supplement: SuppDataset_1.zip [file Trim28_set_A.pdf › Supplemental Dataset 1/A-mRNA_nonrhyth_translation_nonrhyth/Trim28_set_A.pdf]

# Trim30a

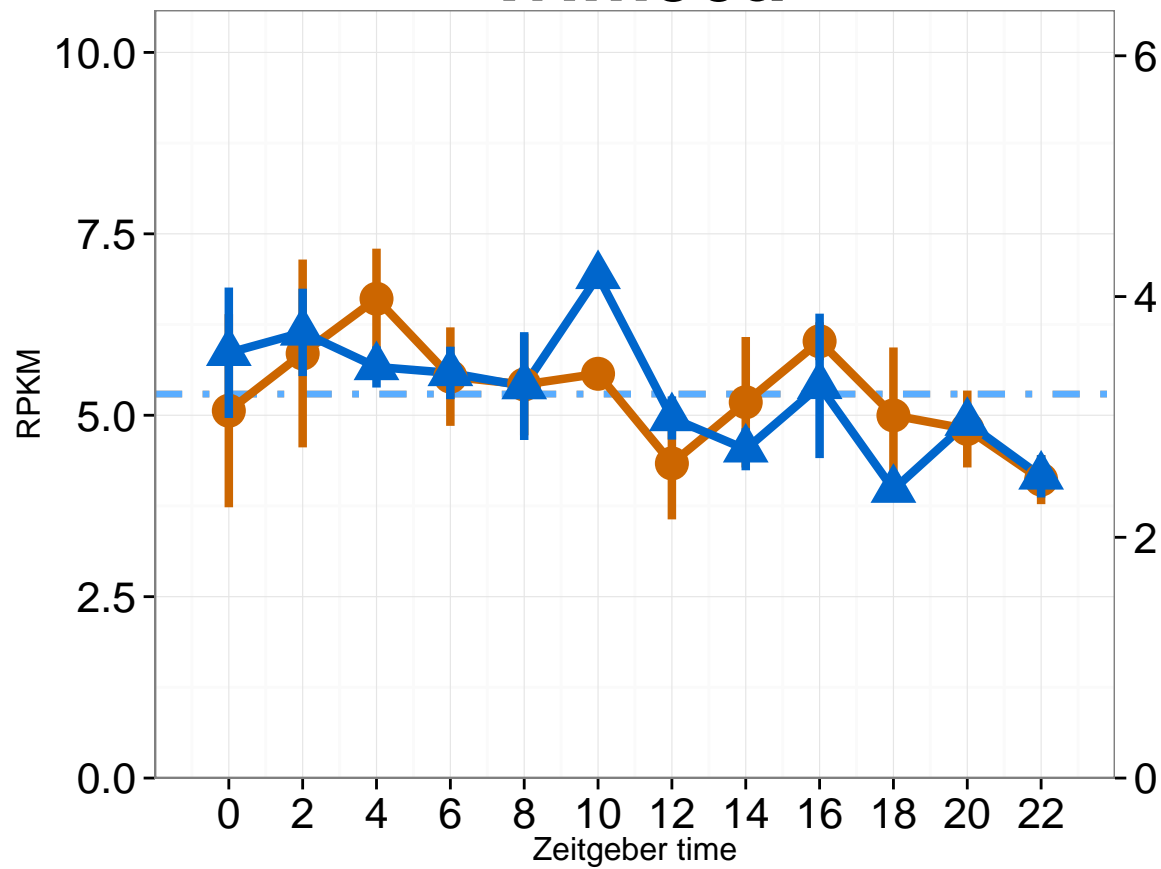

# Trim30a

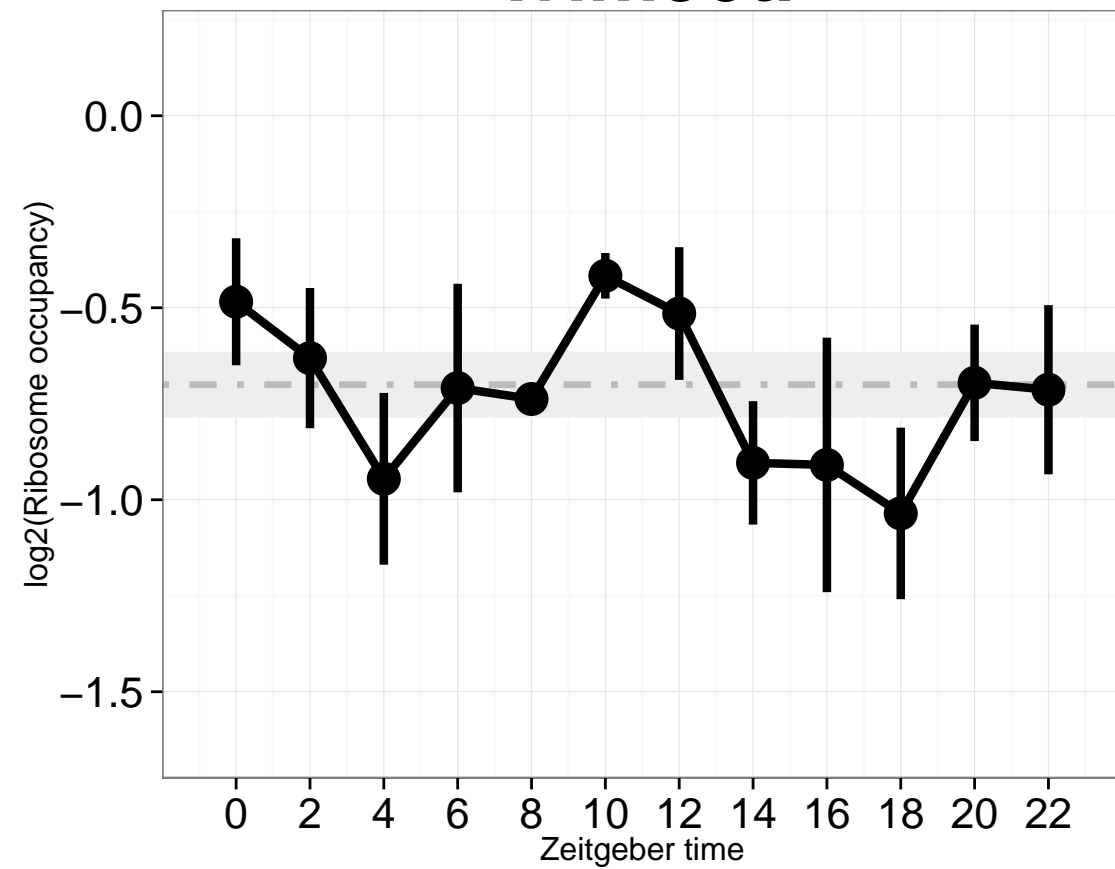

Supplement: SuppDataset_1.zip [file Trim30a_set_A.pdf › Supplemental Dataset 1/A-mRNA_nonrhyth_translation_nonrhyth/Trim30a_set_A.pdf]

# Trim30d

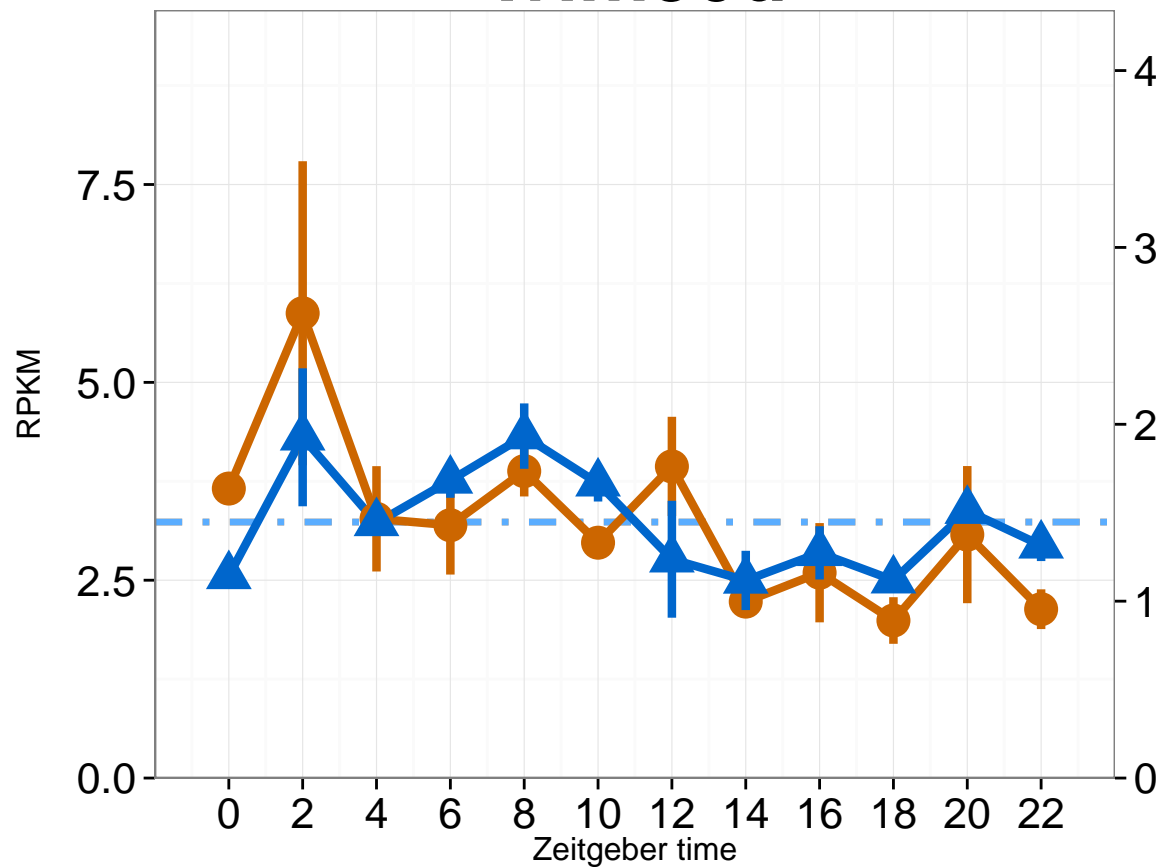

# Trim30d

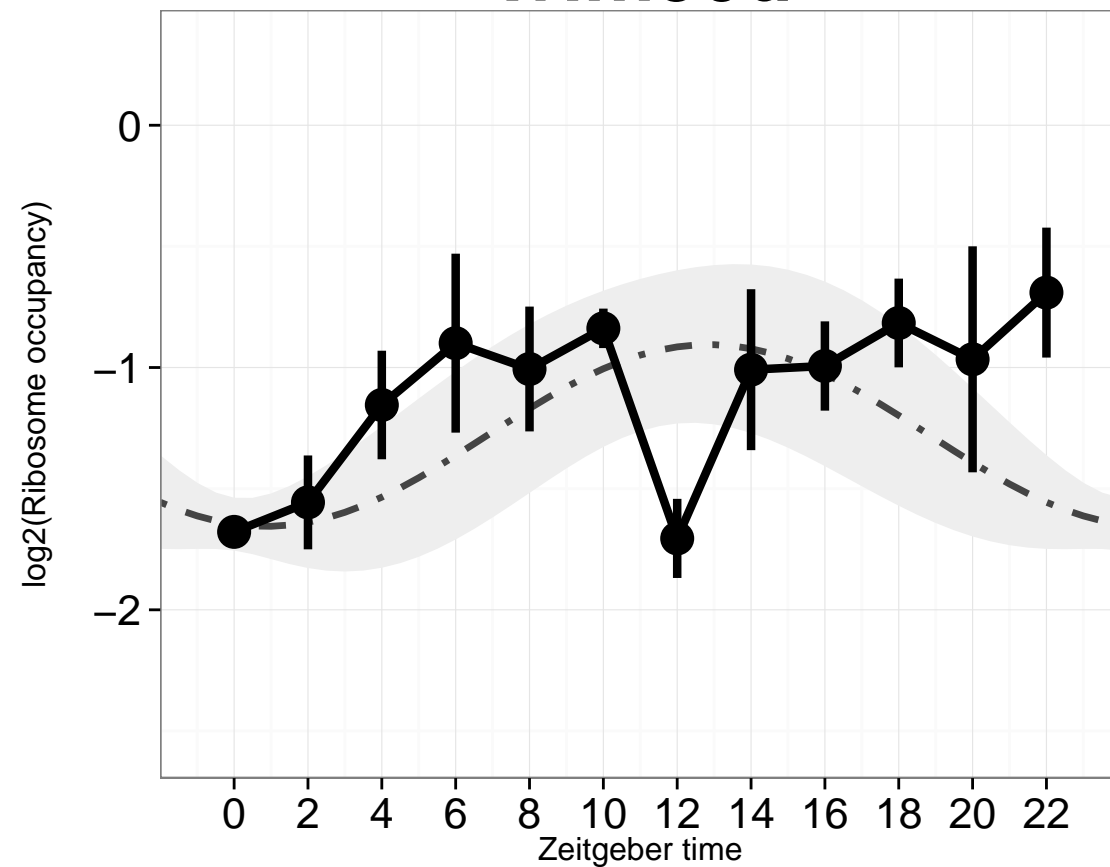

Supplement: SuppDataset_1.zip [file Trim30d_set_A.pdf › Supplemental Dataset 1/A-mRNA_nonrhyth_translation_nonrhyth/Trim30d_set_A.pdf]

## Trim32

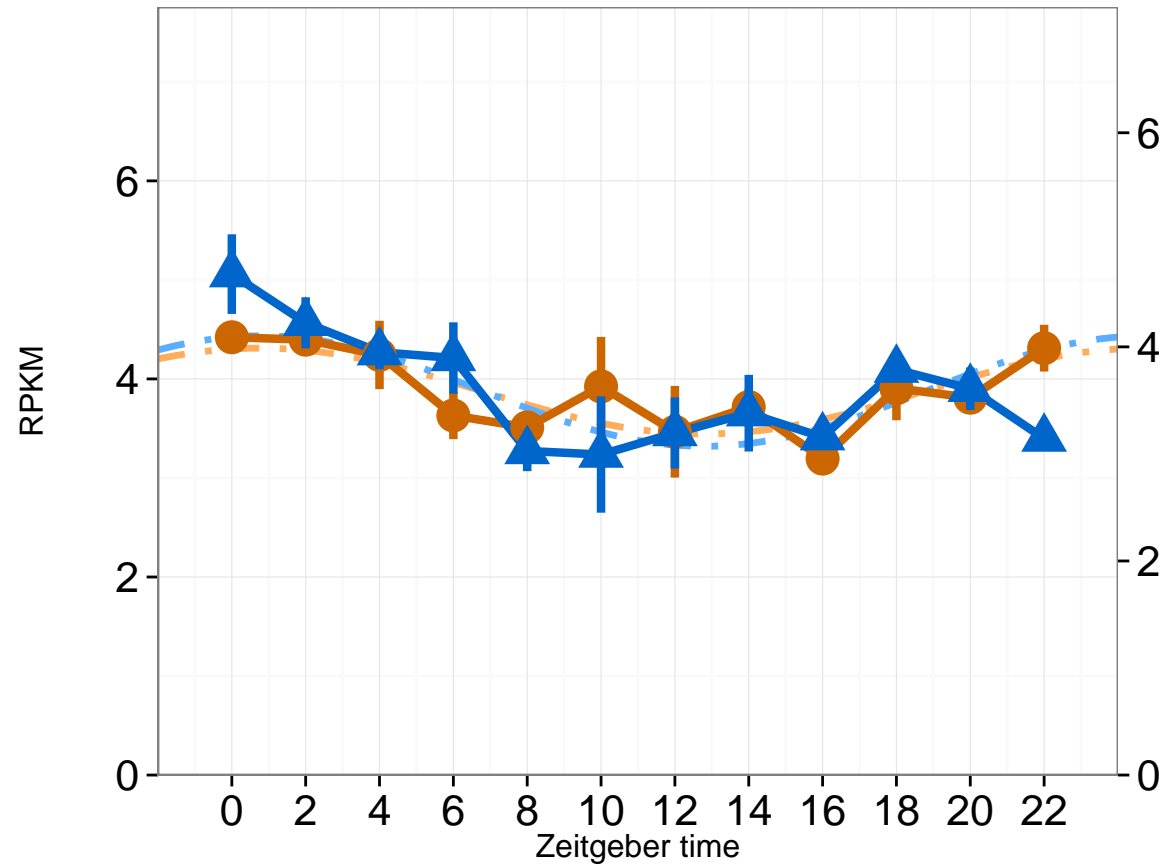

## Trim32

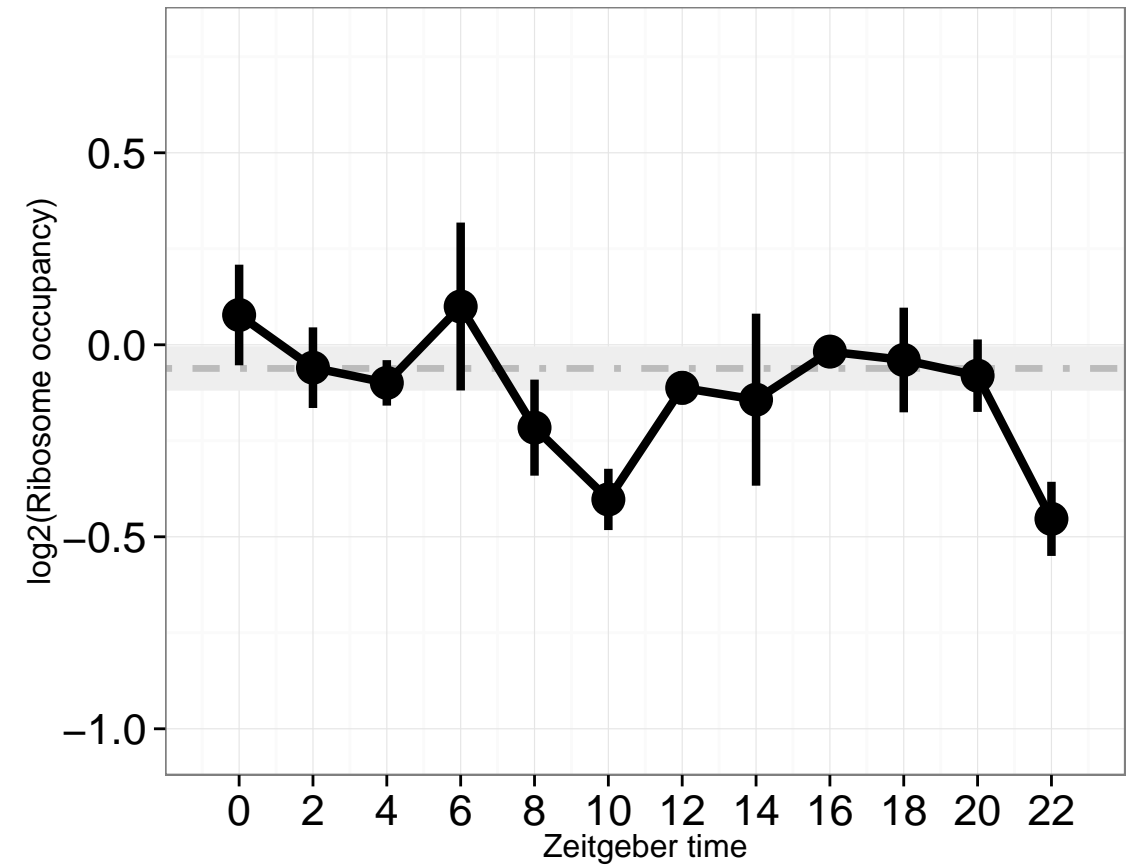

Supplement: SuppDataset_1.zip [file Trim32_set_A.pdf › Supplemental Dataset 1/A-mRNA_nonrhyth_translation_nonrhyth/Trim32_set_A.pdf]

# Trim33

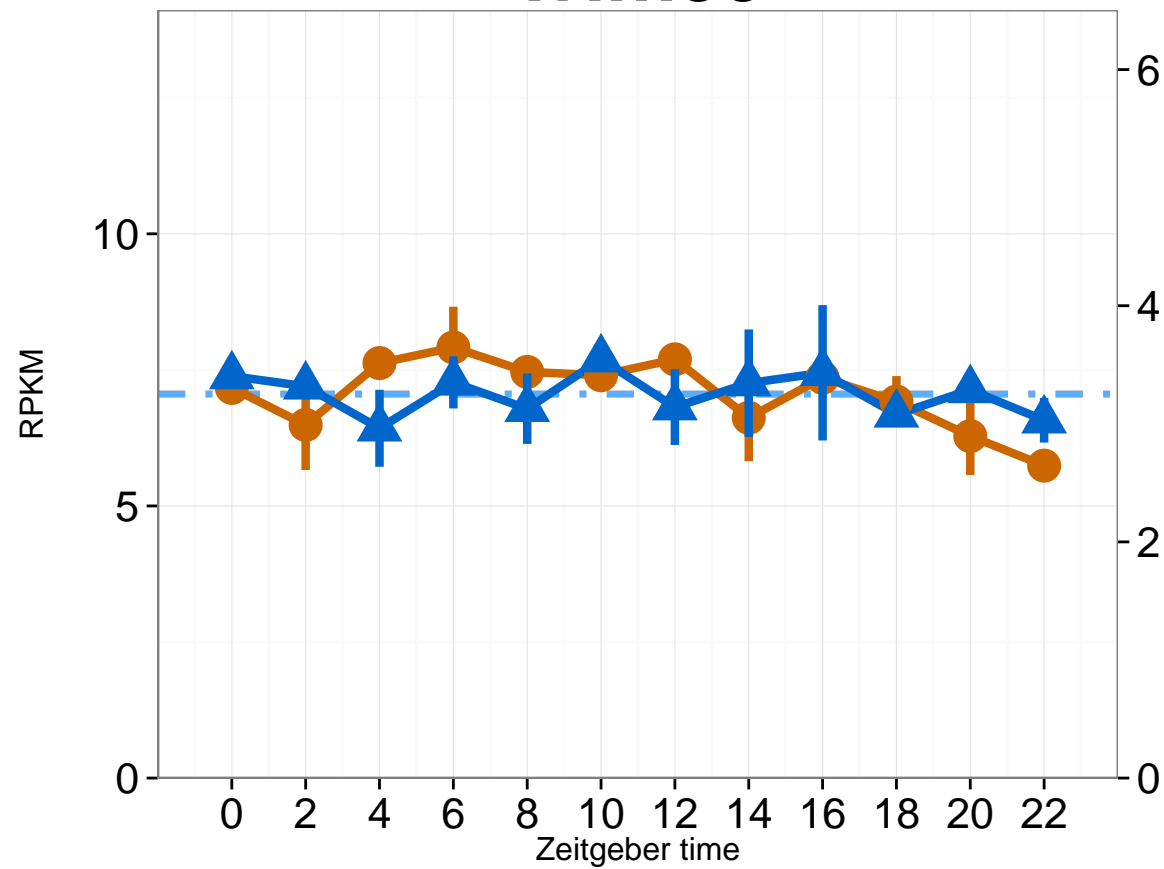

# Trim33

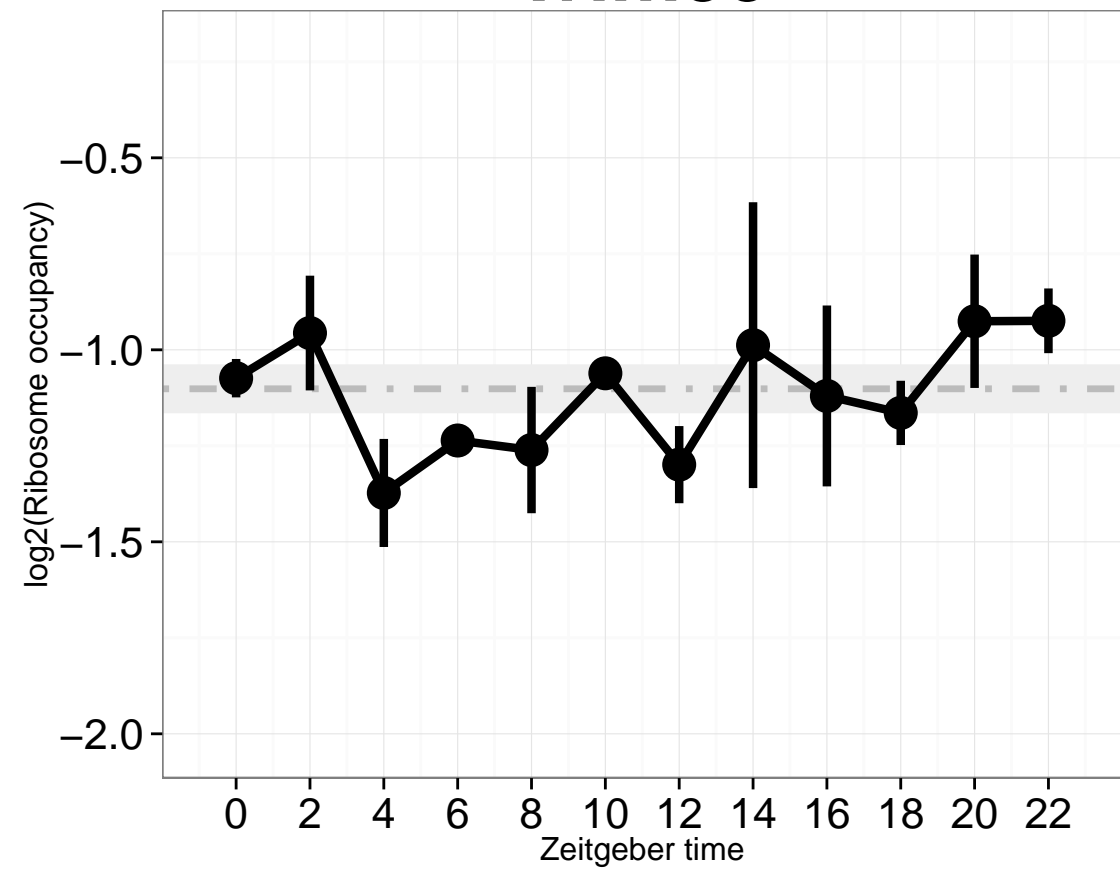

Supplement: SuppDataset_1.zip [file Trim33_set_A.pdf › Supplemental Dataset 1/A-mRNA_nonrhyth_translation_nonrhyth/Trim33_set_A.pdf]

# Trim35

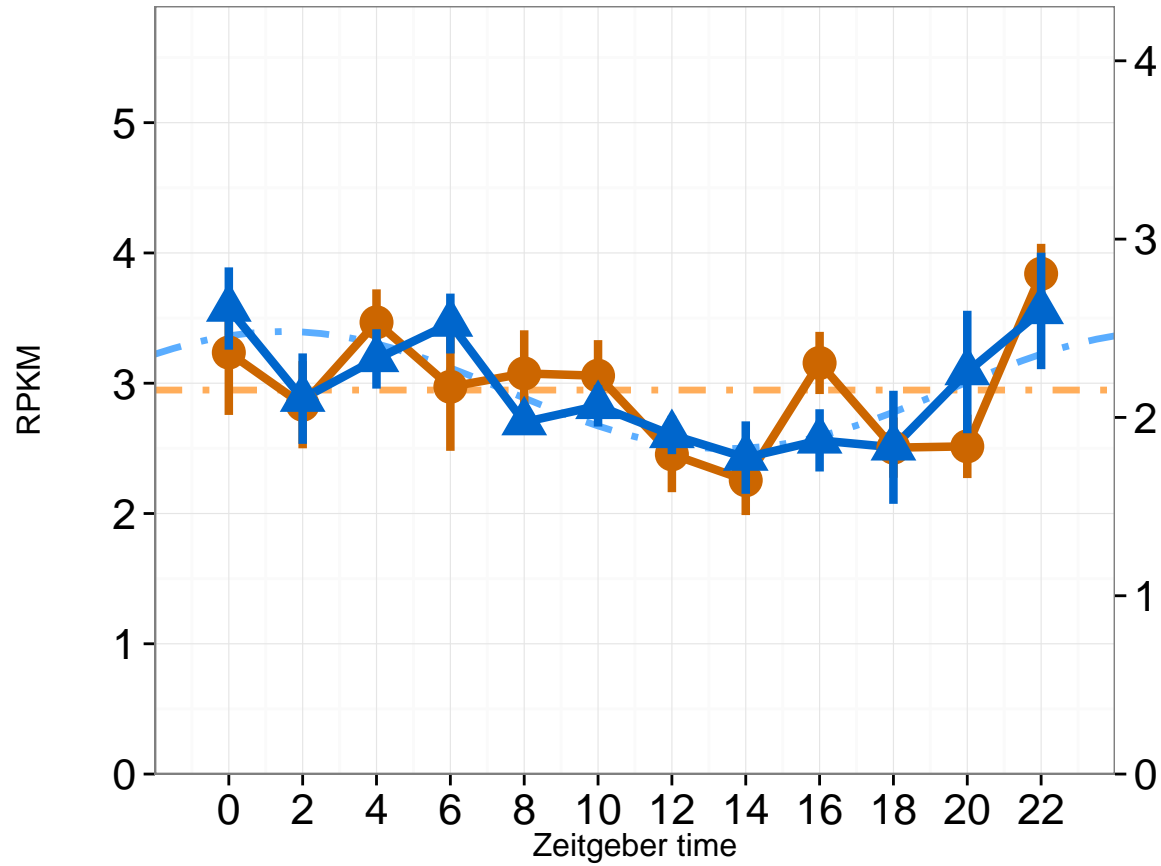

# Trim35

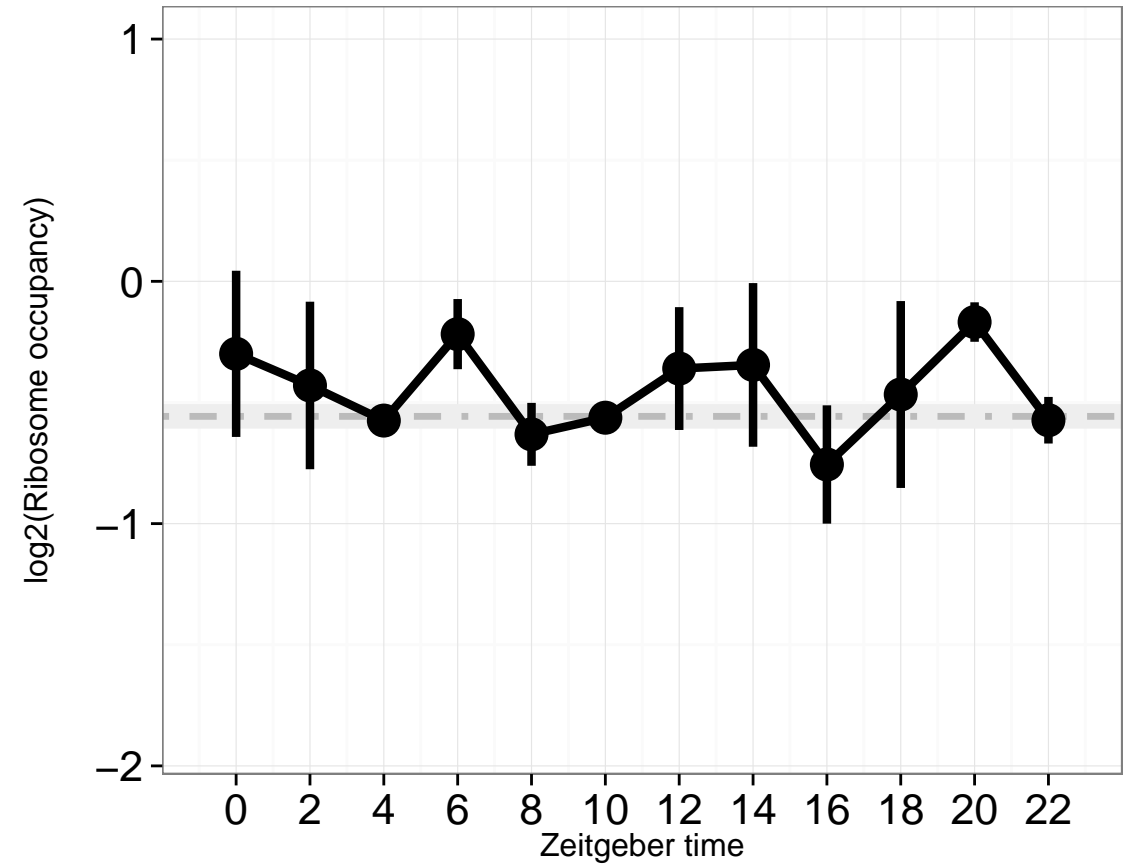

Supplement: SuppDataset_1.zip [file Trim35_set_A.pdf › Supplemental Dataset 1/A-mRNA_nonrhyth_translation_nonrhyth/Trim35_set_A.pdf]

# Trim37

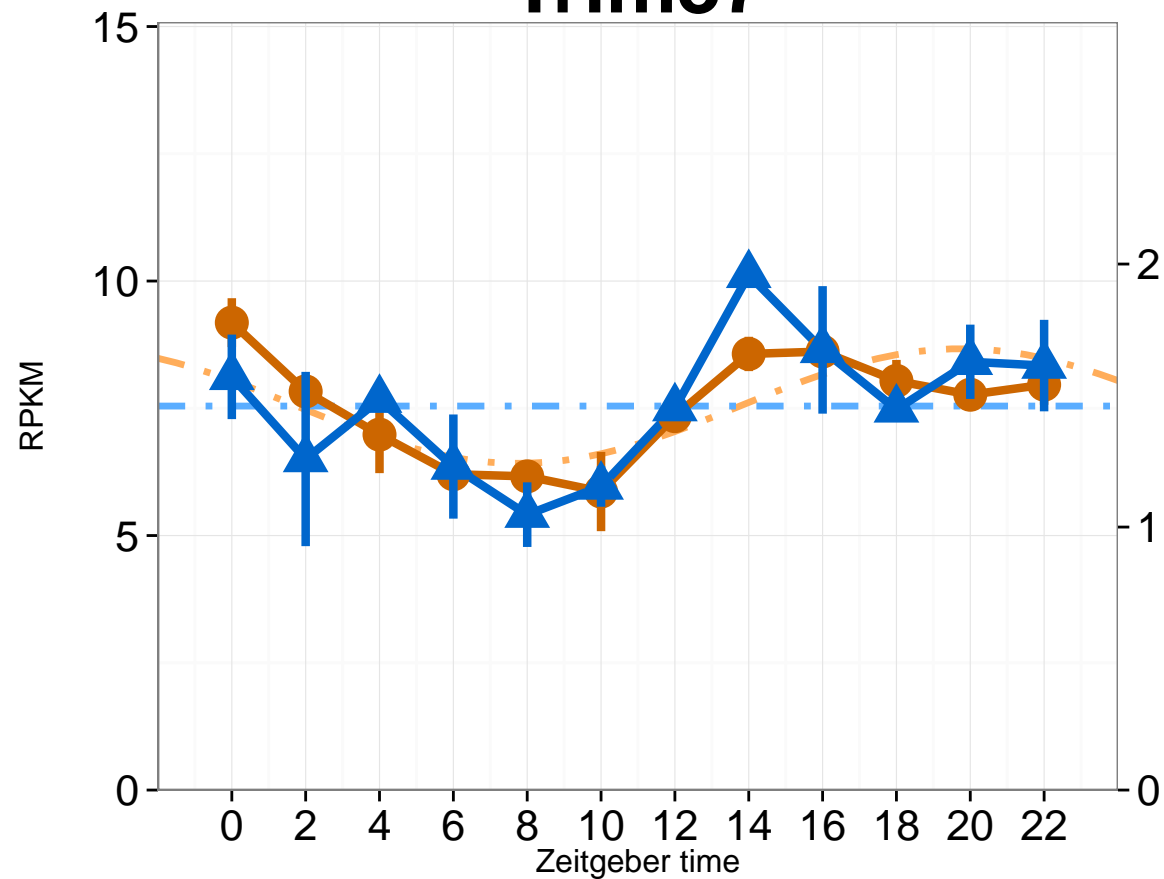

# Trim37

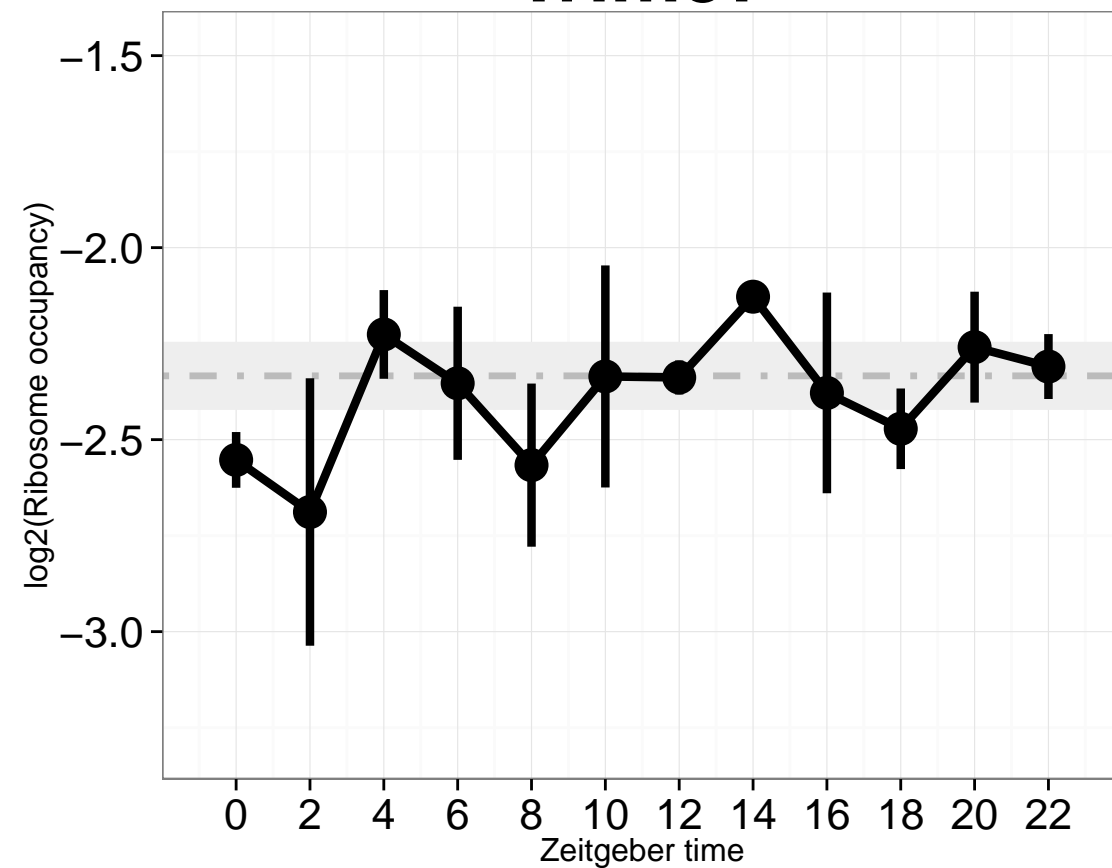

Supplement: SuppDataset_1.zip [file Trim37_set_A.pdf › Supplemental Dataset 1/A-mRNA_nonrhyth_translation_nonrhyth/Trim37_set_A.pdf]

# Trim39

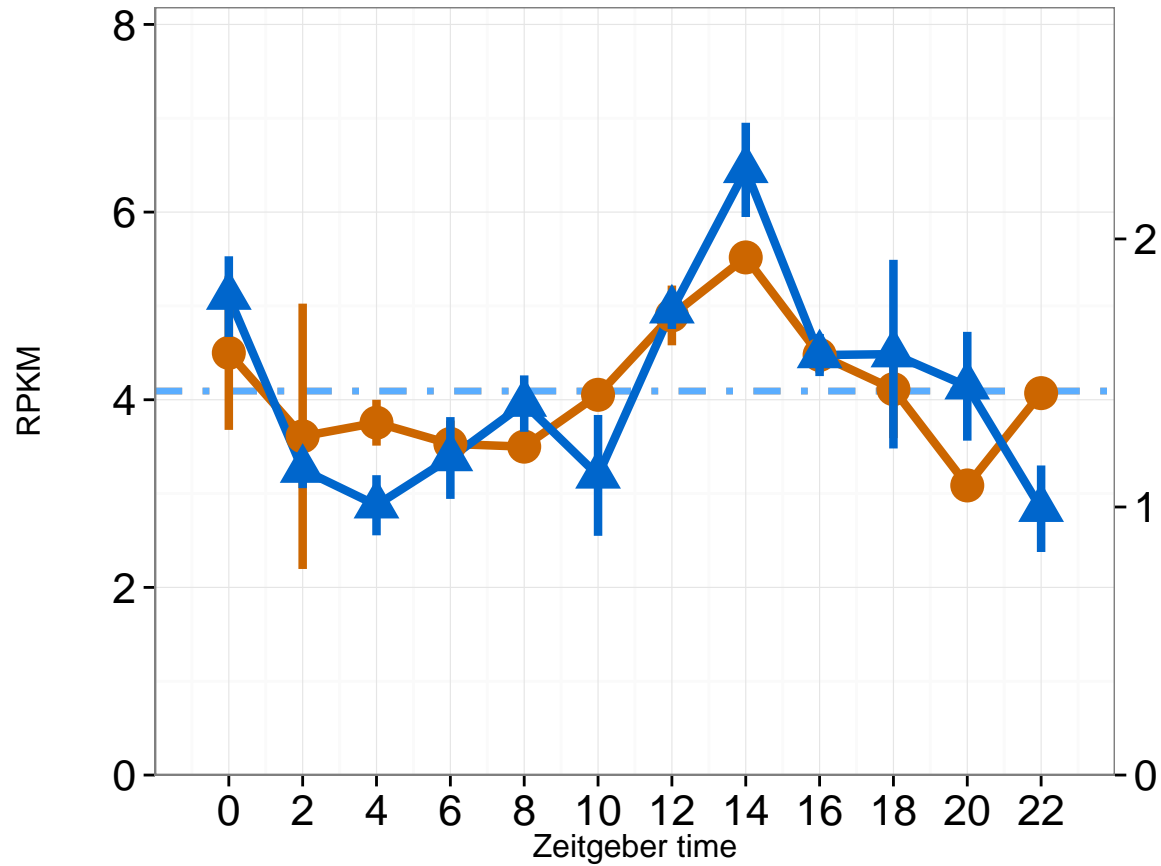

# Trim39

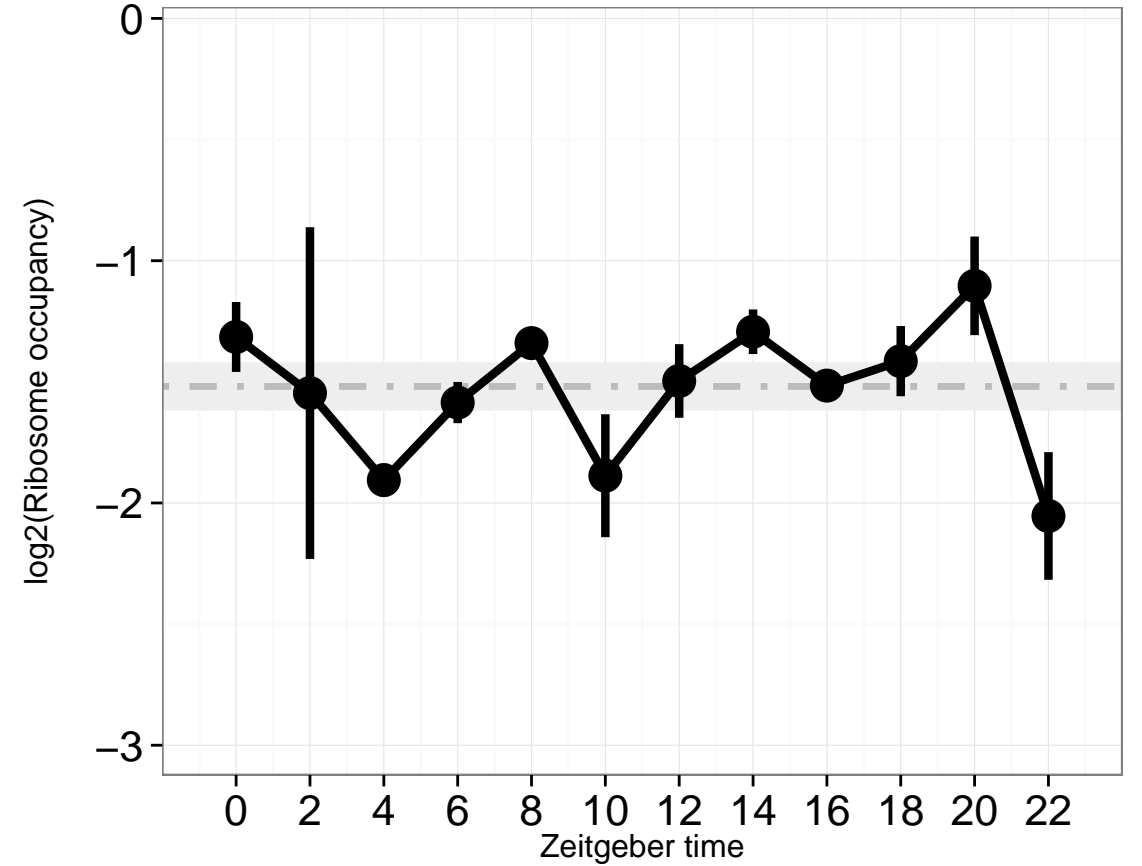

Supplement: SuppDataset_1.zip [file Trim39_set_A.pdf › Supplemental Dataset 1/A-mRNA_nonrhyth_translation_nonrhyth/Trim39_set_A.pdf]

# Trim3

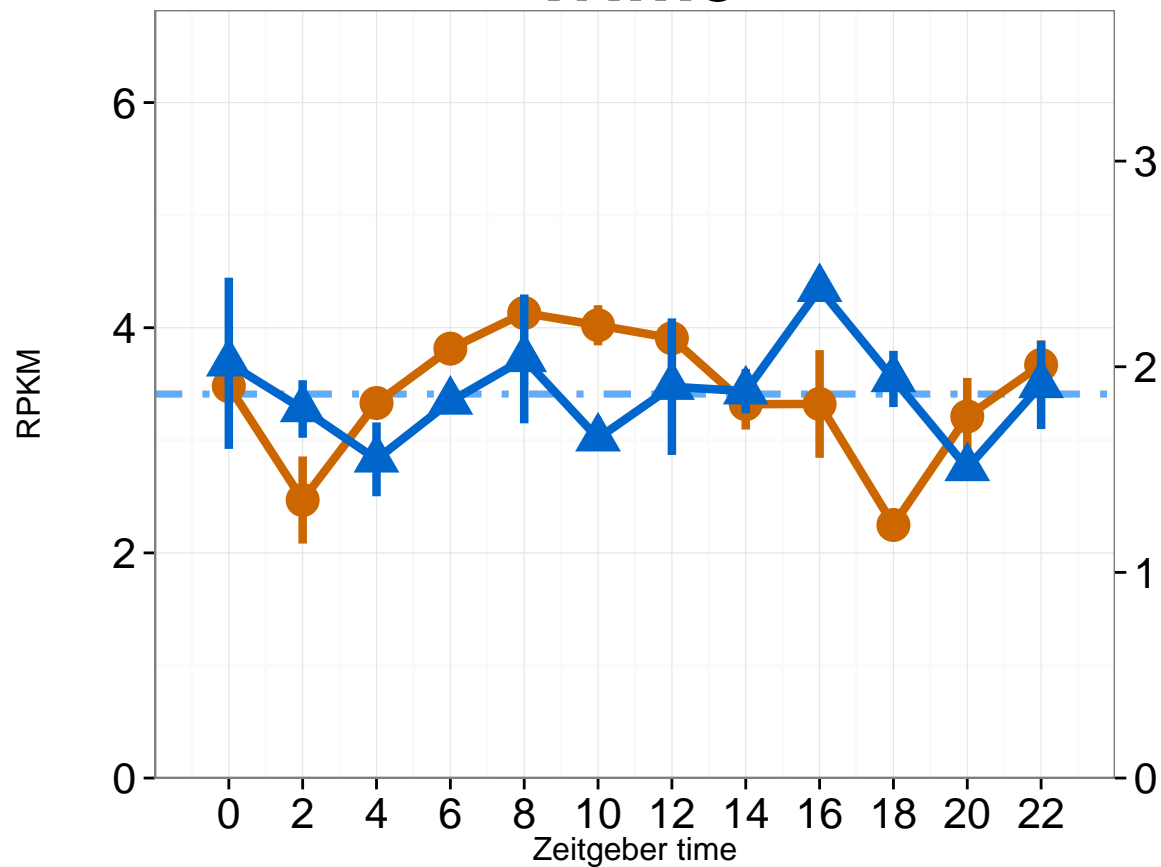

# Trim3

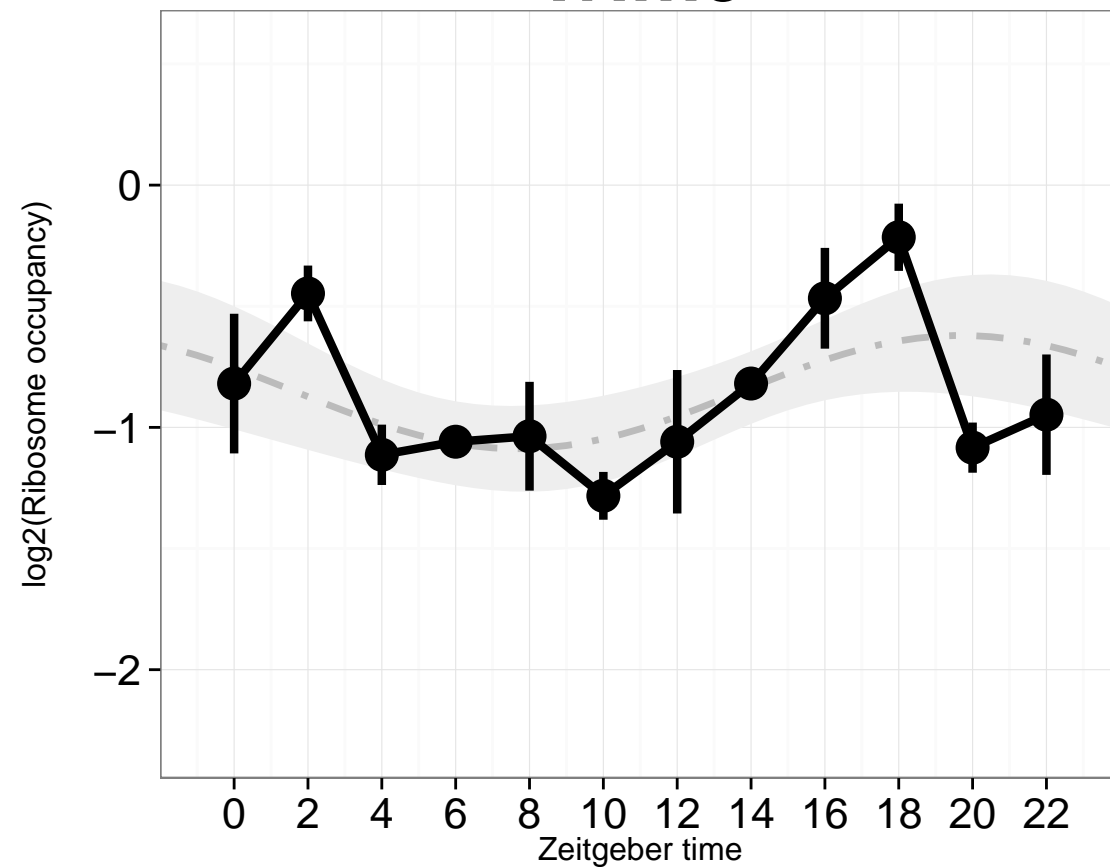

Supplement: SuppDataset_1.zip [file Trim3_set_A.pdf › Supplemental Dataset 1/A-mRNA_nonrhyth_translation_nonrhyth/Trim3_set_A.pdf]

# Trim47

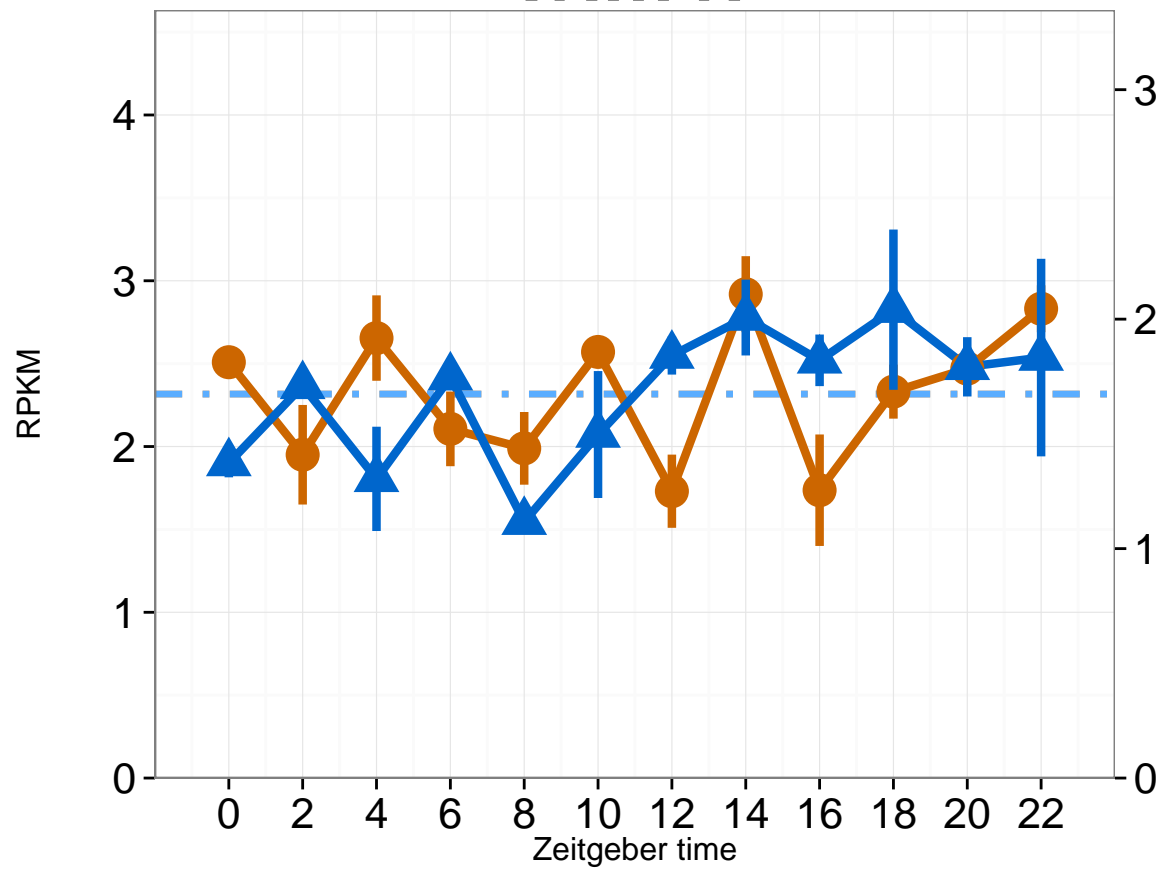

# Trim47

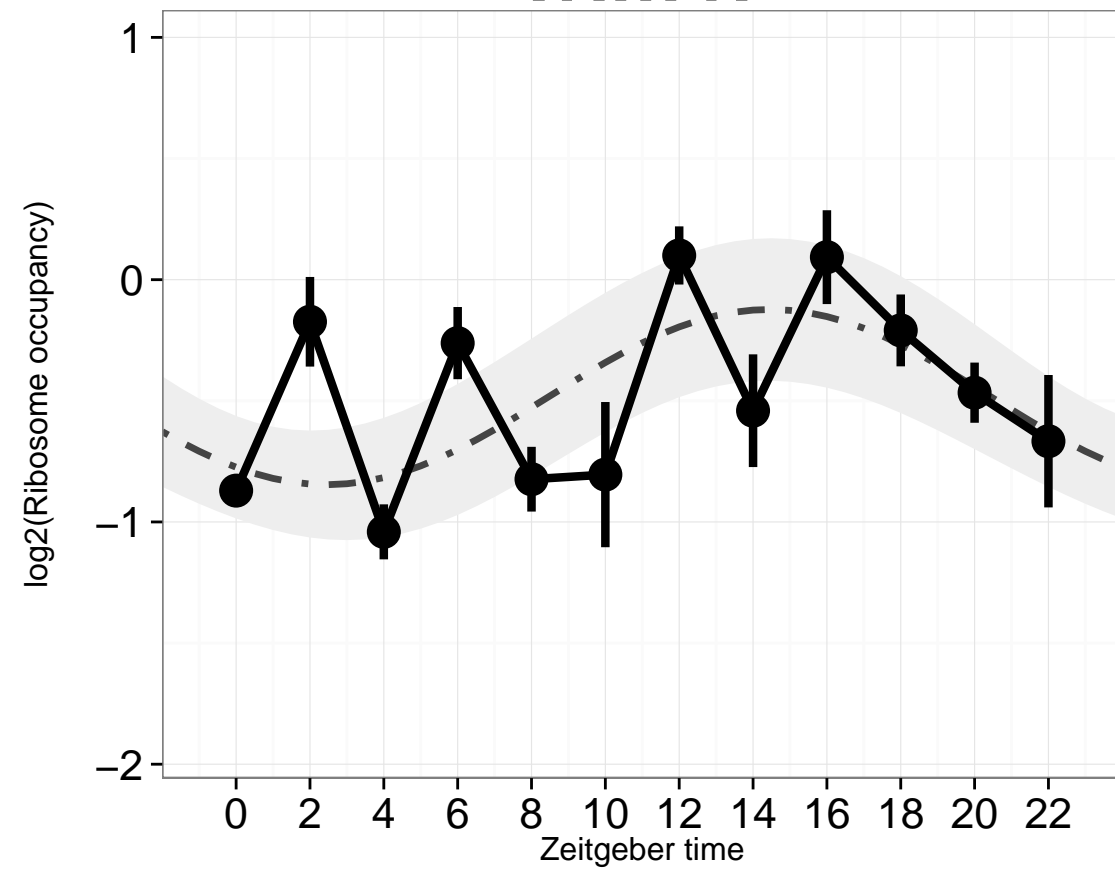

Supplement: SuppDataset_1.zip [file Trim47_set_A.pdf › Supplemental Dataset 1/A-mRNA_nonrhyth_translation_nonrhyth/Trim47_set_A.pdf]

## Trim5

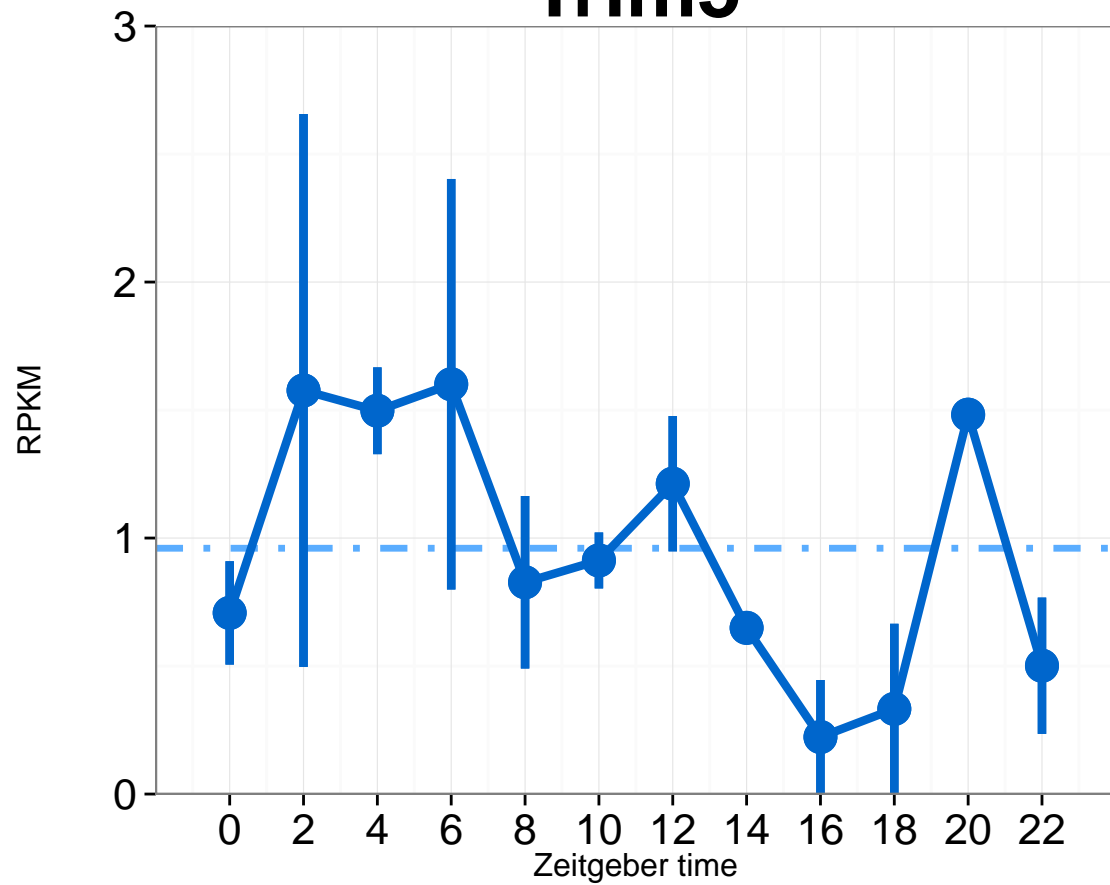

## Trim5 log2(Ribosome occupancy)

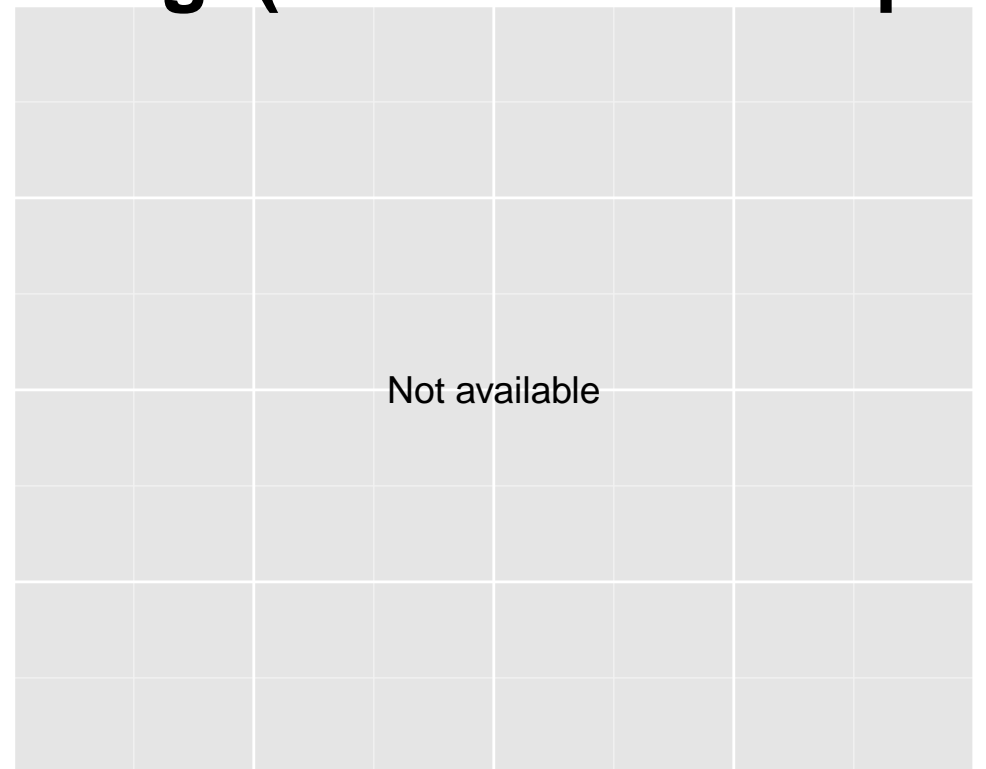

Supplement: SuppDataset_1.zip [file Trim5_set_A.pdf › Supplemental Dataset 1/A-mRNA_nonrhyth_translation_nonrhyth/Trim5_set_A.pdf]

## Trim8

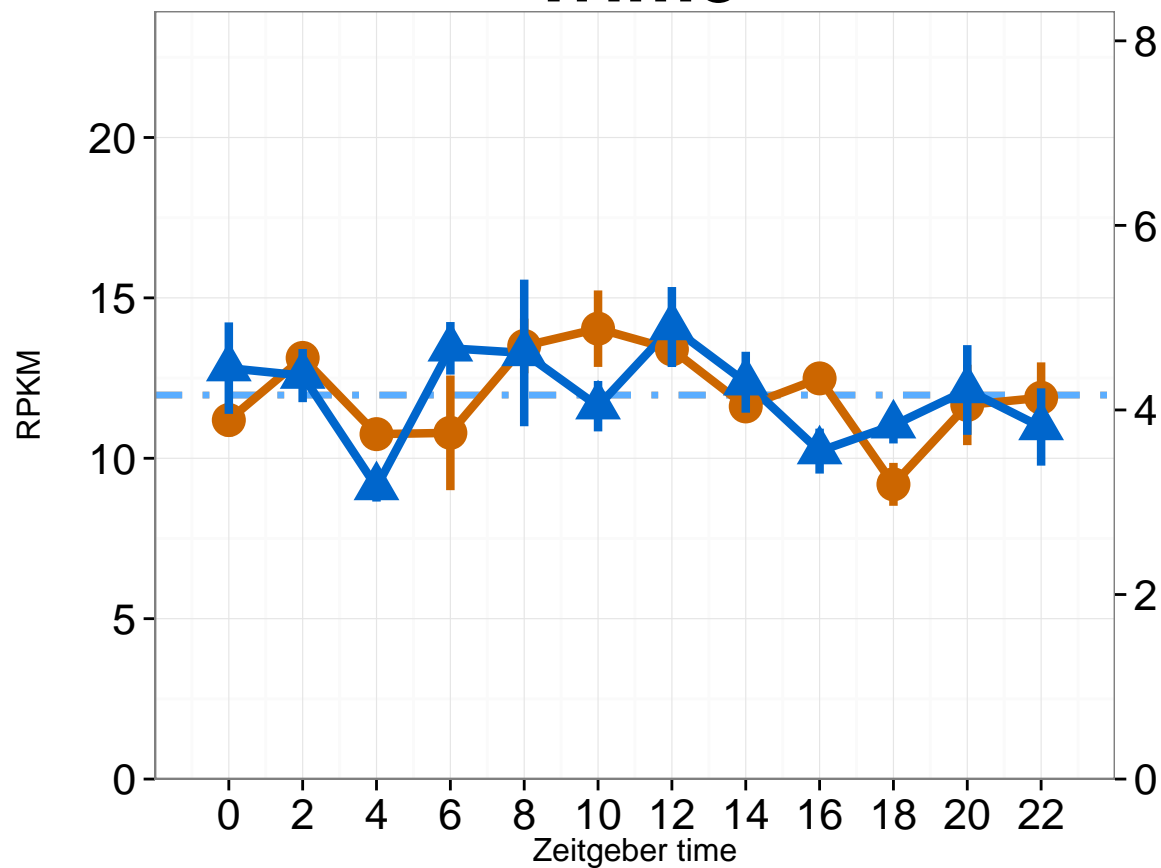

## Trim8

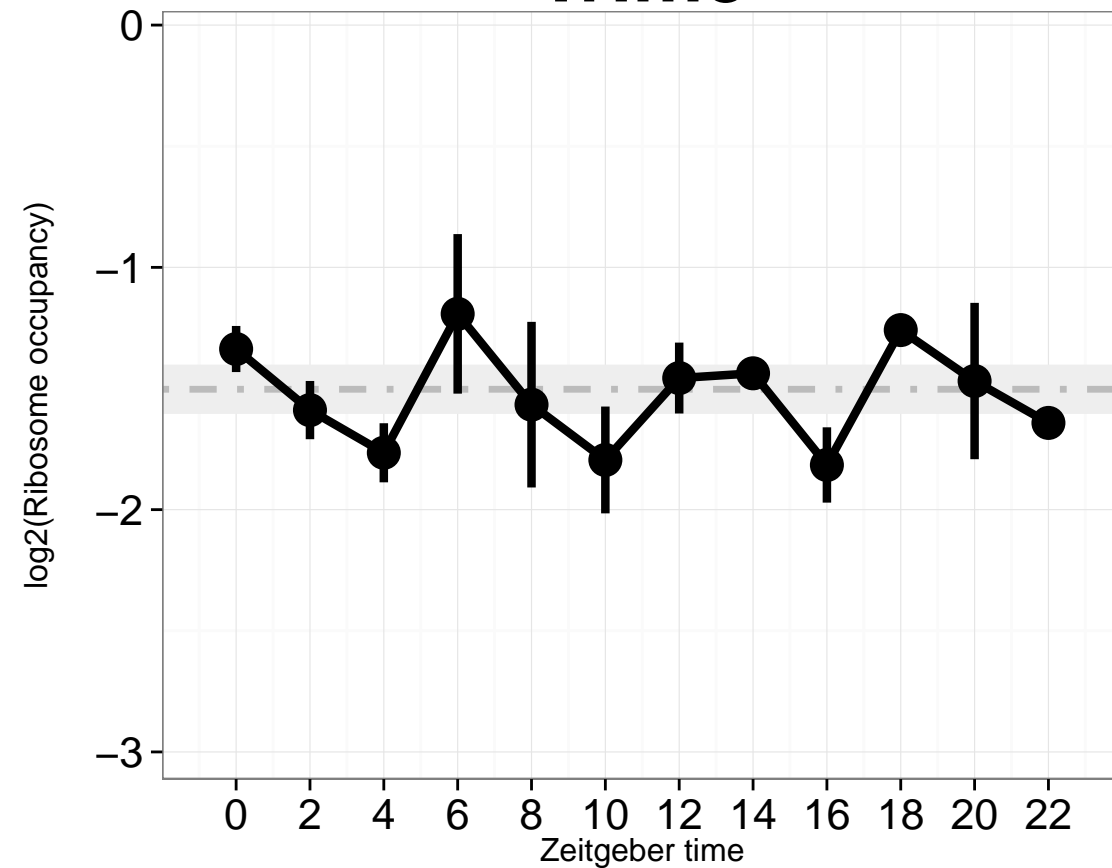

Supplement: SuppDataset_1.zip [file Trim8_set_A.pdf › Supplemental Dataset 1/A-mRNA_nonrhyth_translation_nonrhyth/Trim8_set_A.pdf]

## Trio

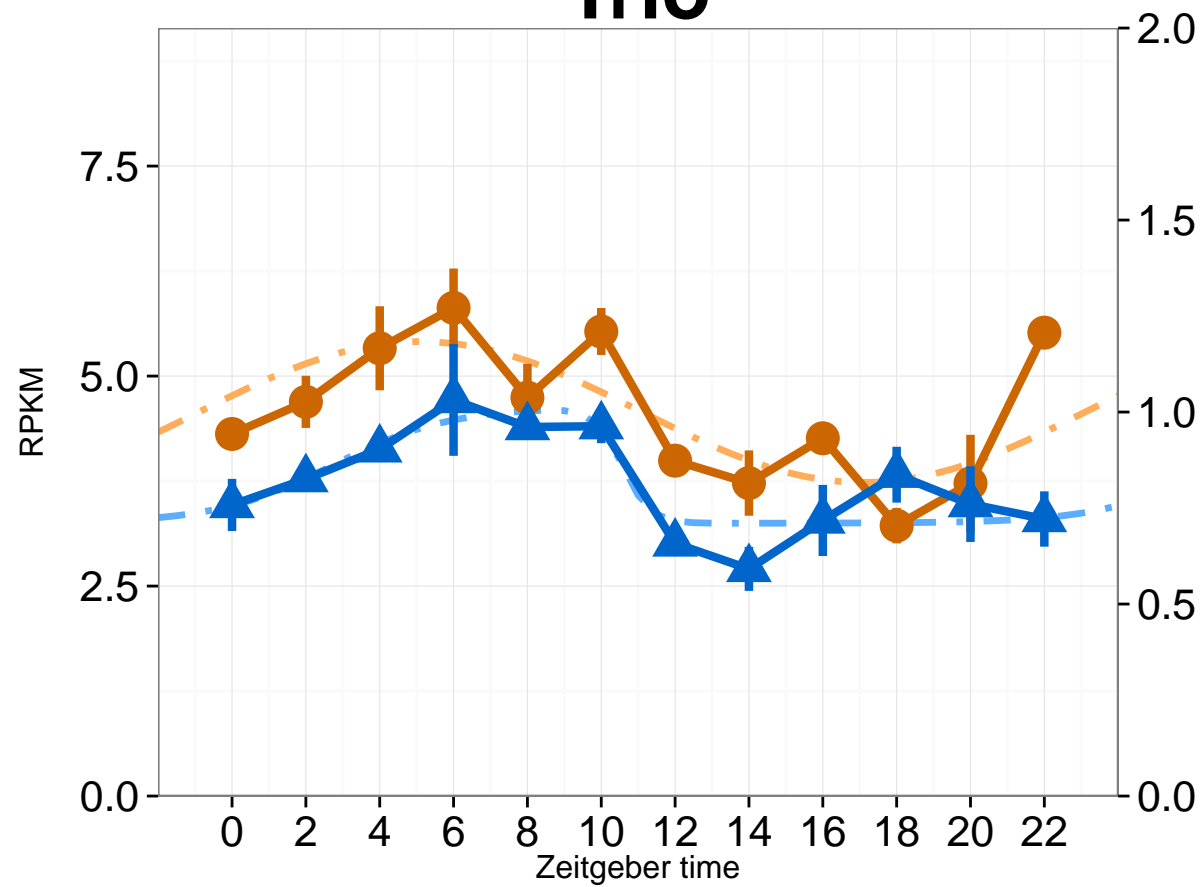

## Trio

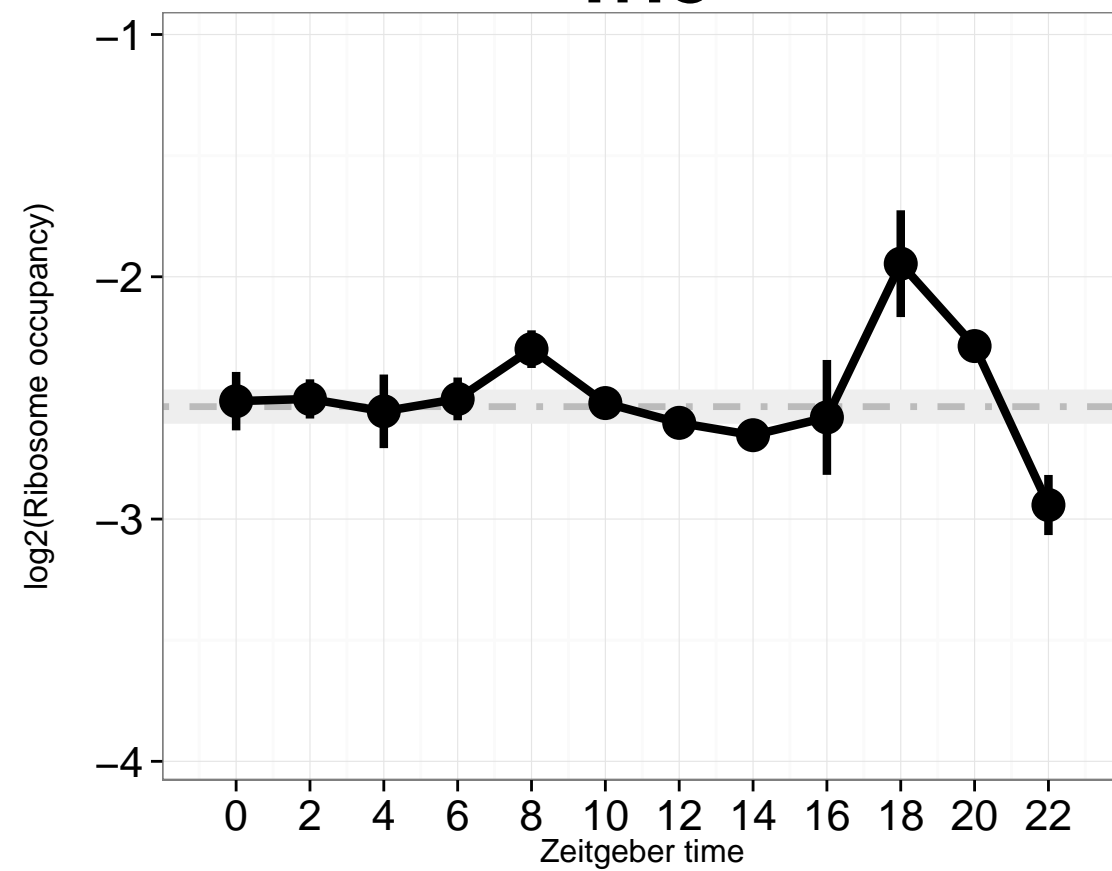

Supplement: SuppDataset_1.zip [file Trio_set_A.pdf › Supplemental Dataset 1/A-mRNA_nonrhyth_translation_nonrhyth/Trio_set_A.pdf]

## Triobp

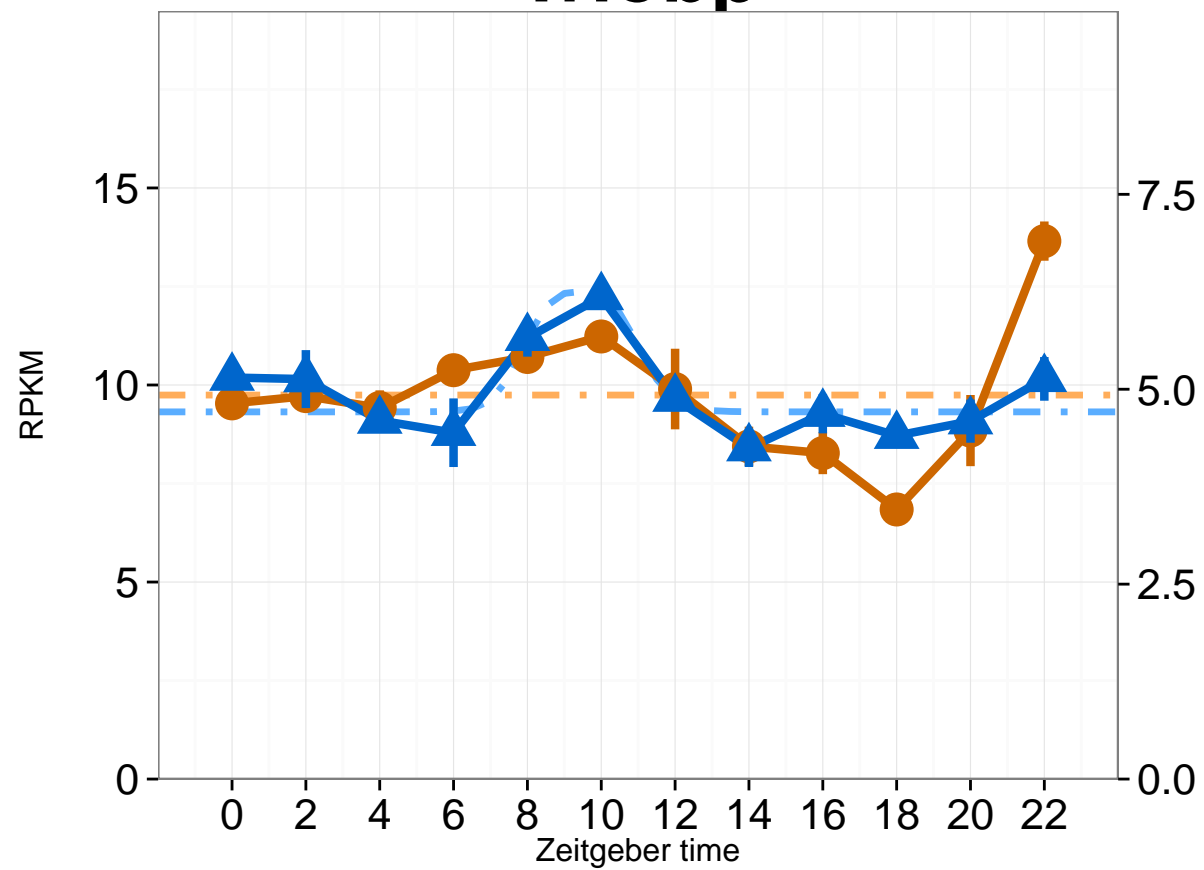

## Triobp

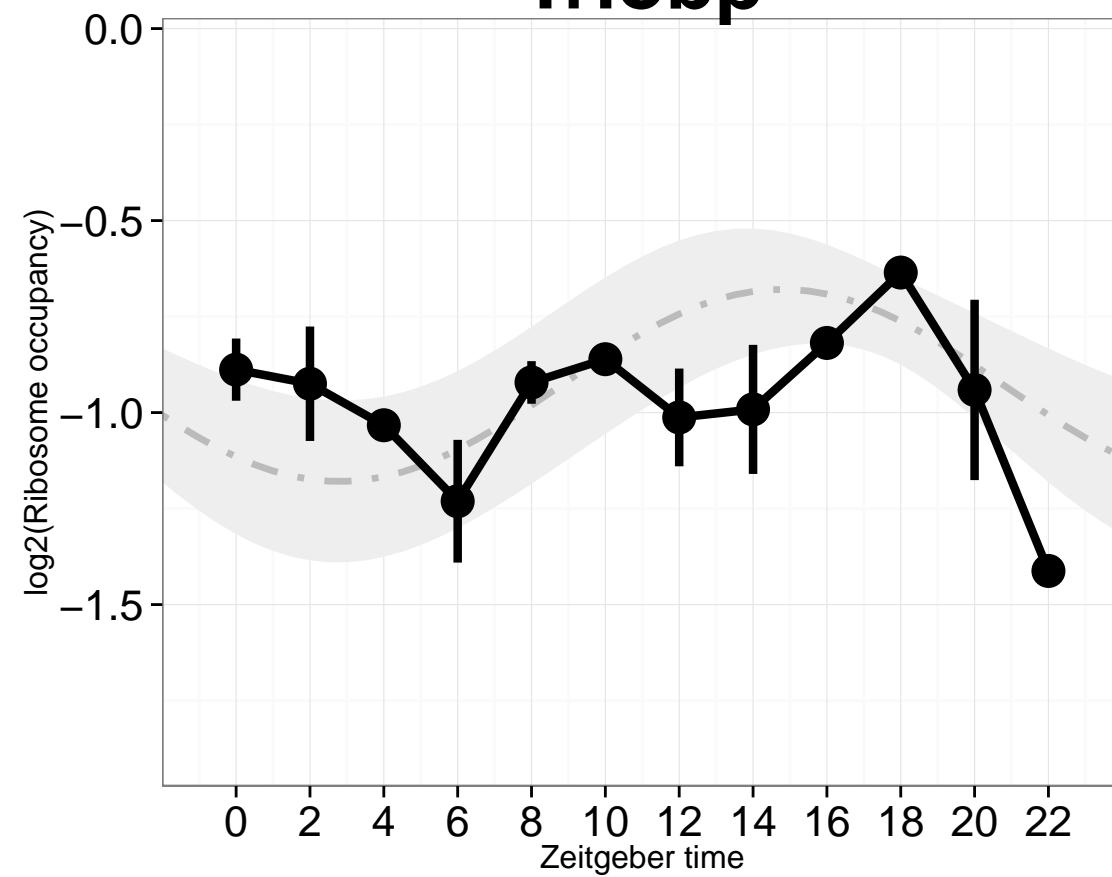

Supplement: SuppDataset_1.zip [file Triobp_set_A.pdf › Supplemental Dataset 1/A-mRNA_nonrhyth_translation_nonrhyth/Triobp_set_A.pdf]

# Trip10

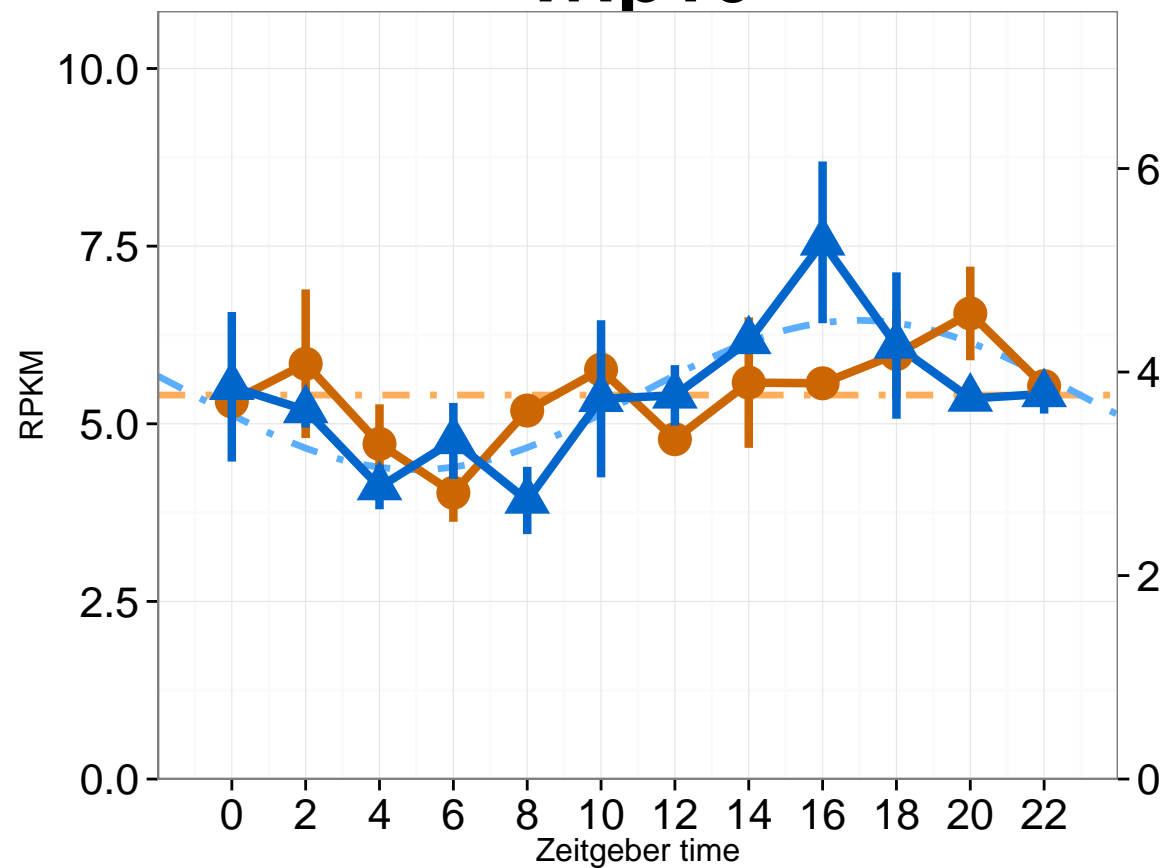

# Trip10

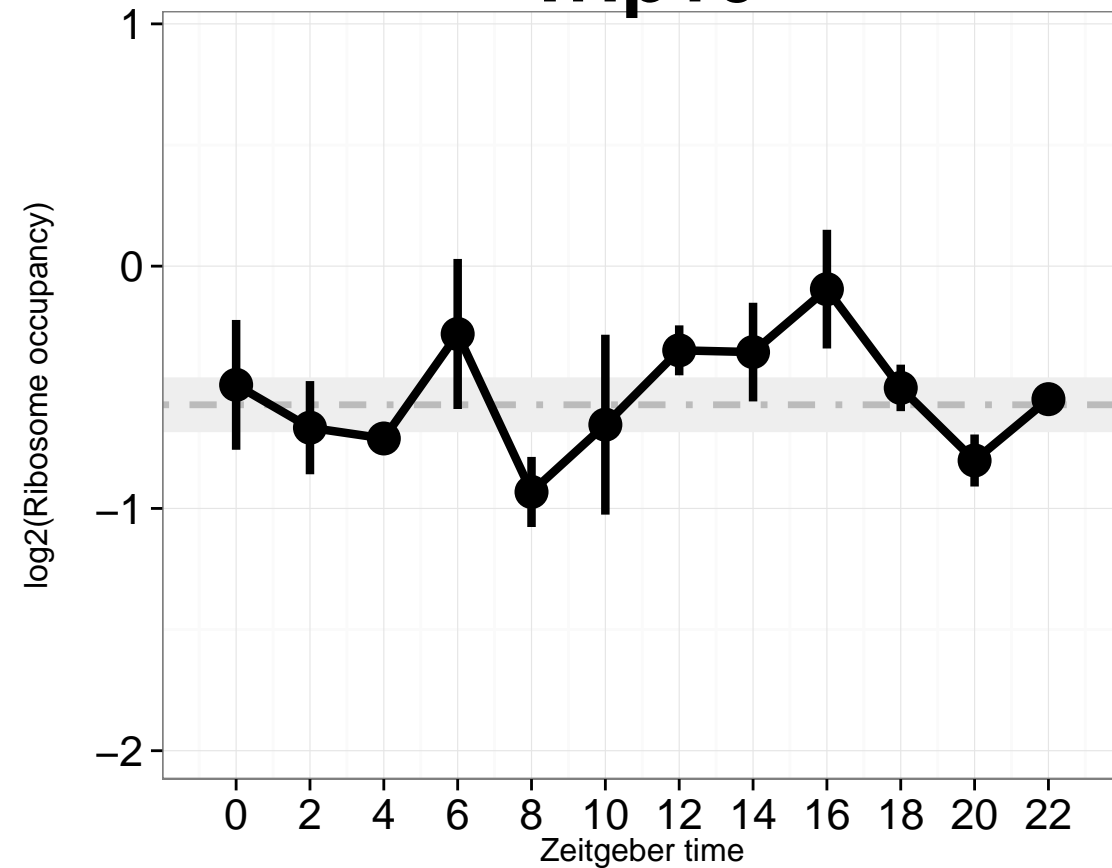

Supplement: SuppDataset_1.zip [file Trip10_set_A.pdf › Supplemental Dataset 1/A-mRNA_nonrhyth_translation_nonrhyth/Trip10_set_A.pdf]

# Trip11

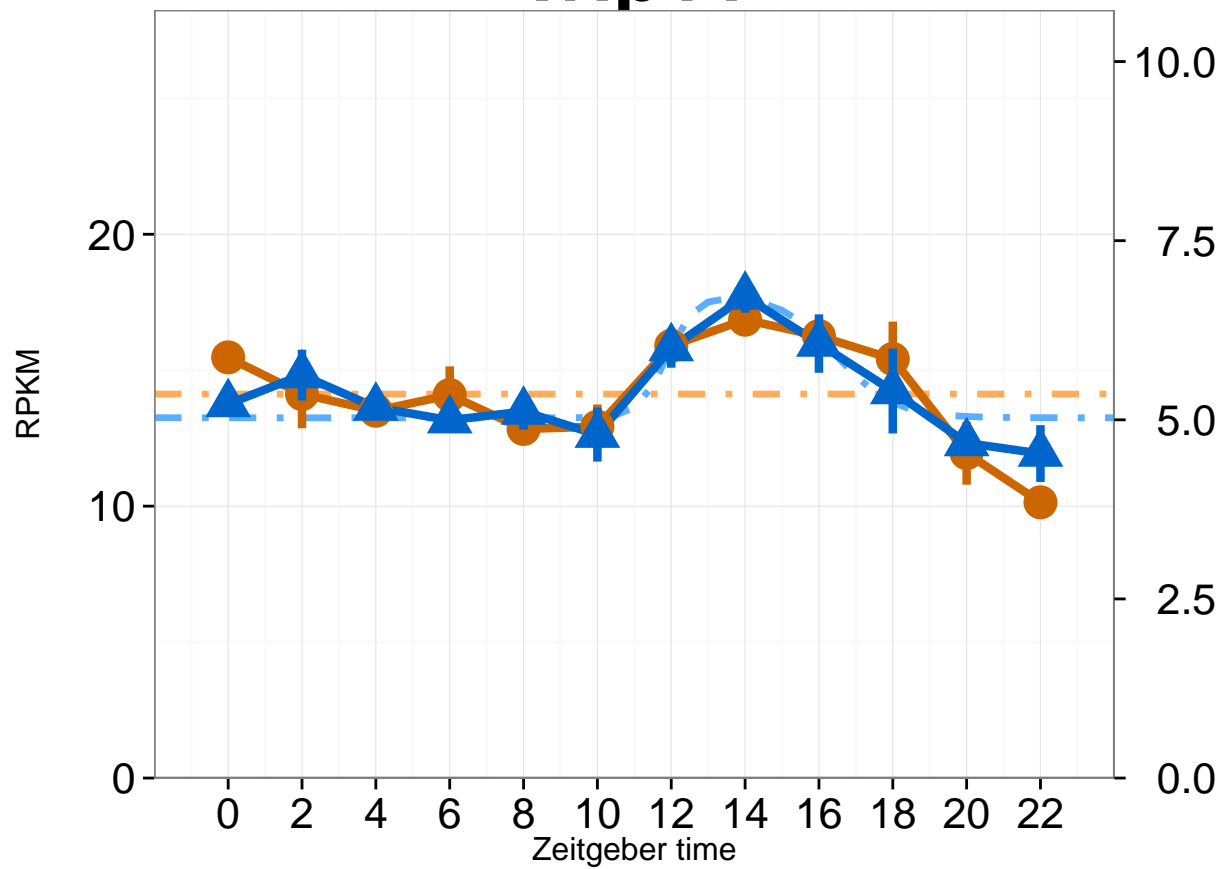

# Trip11

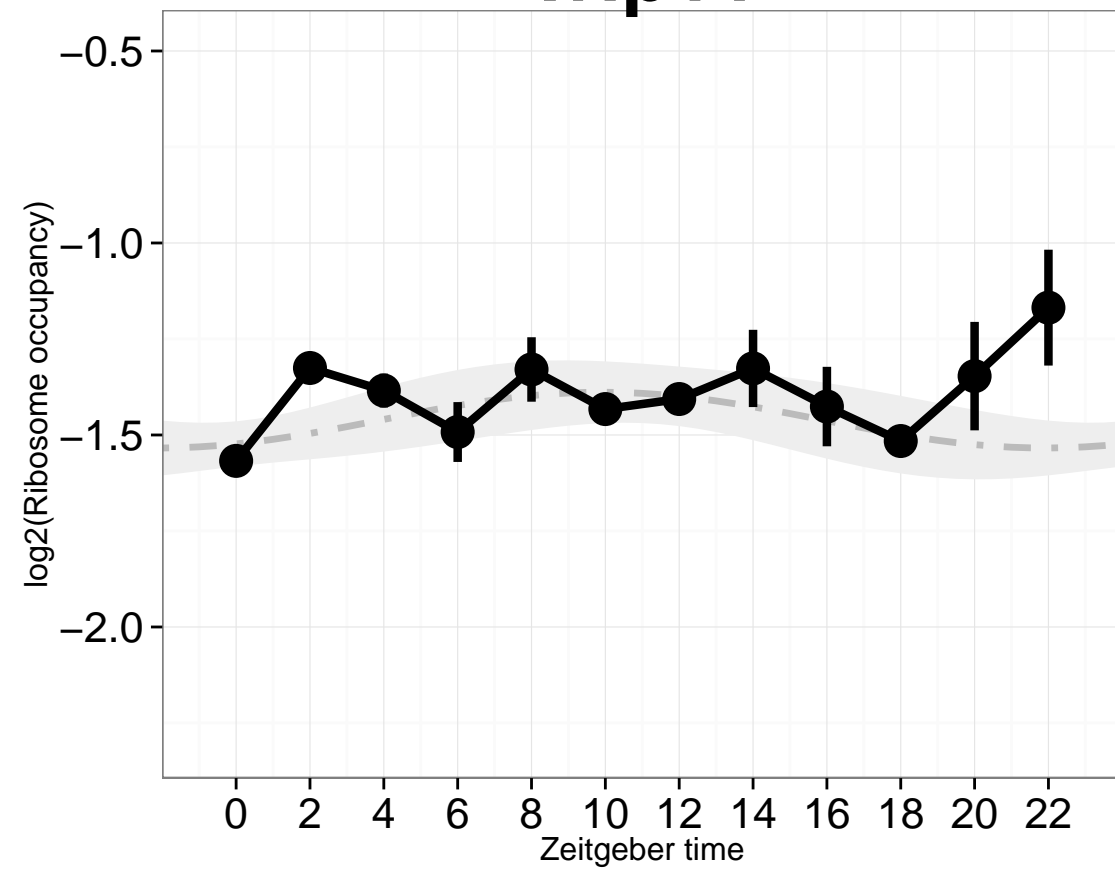

Supplement: SuppDataset_1.zip [file Trip11_set_A.pdf › Supplemental Dataset 1/A-mRNA_nonrhyth_translation_nonrhyth/Trip11_set_A.pdf]

# Trip12

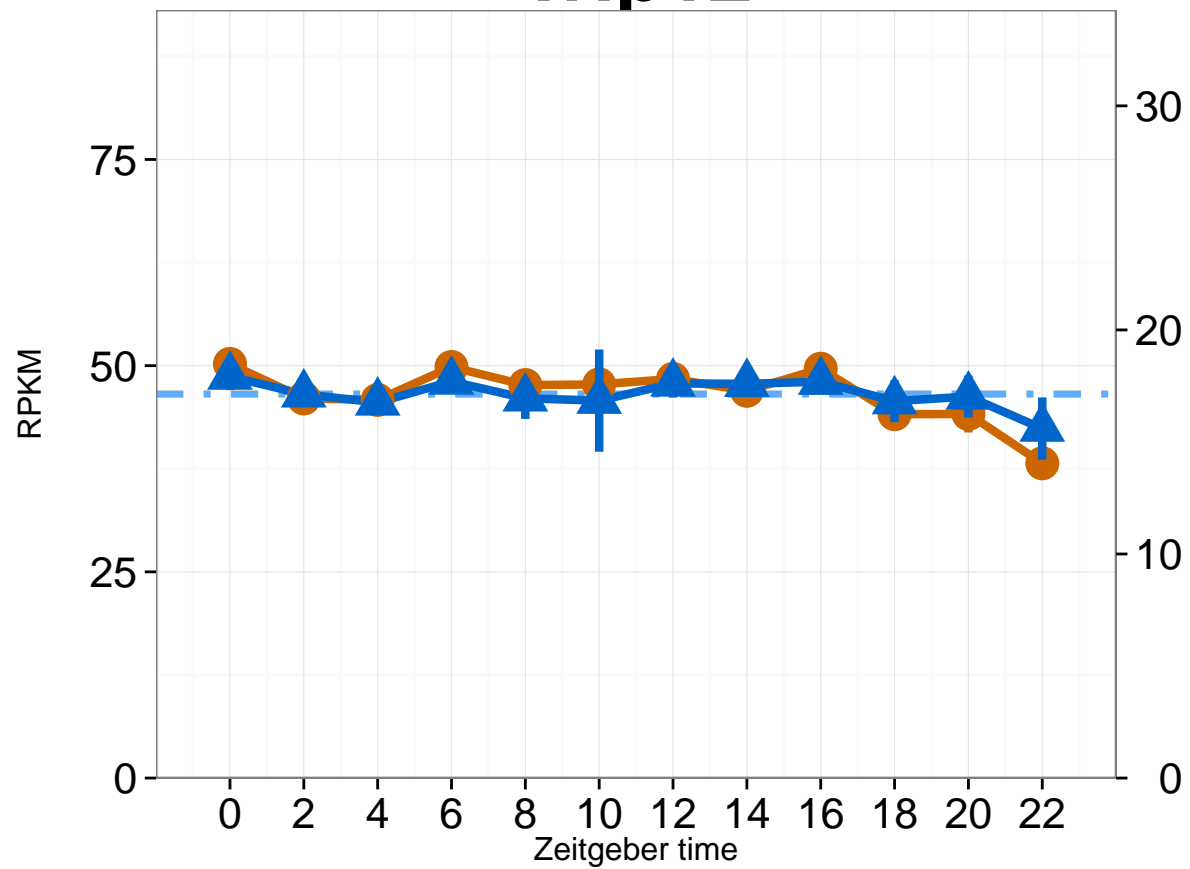

# Trip12

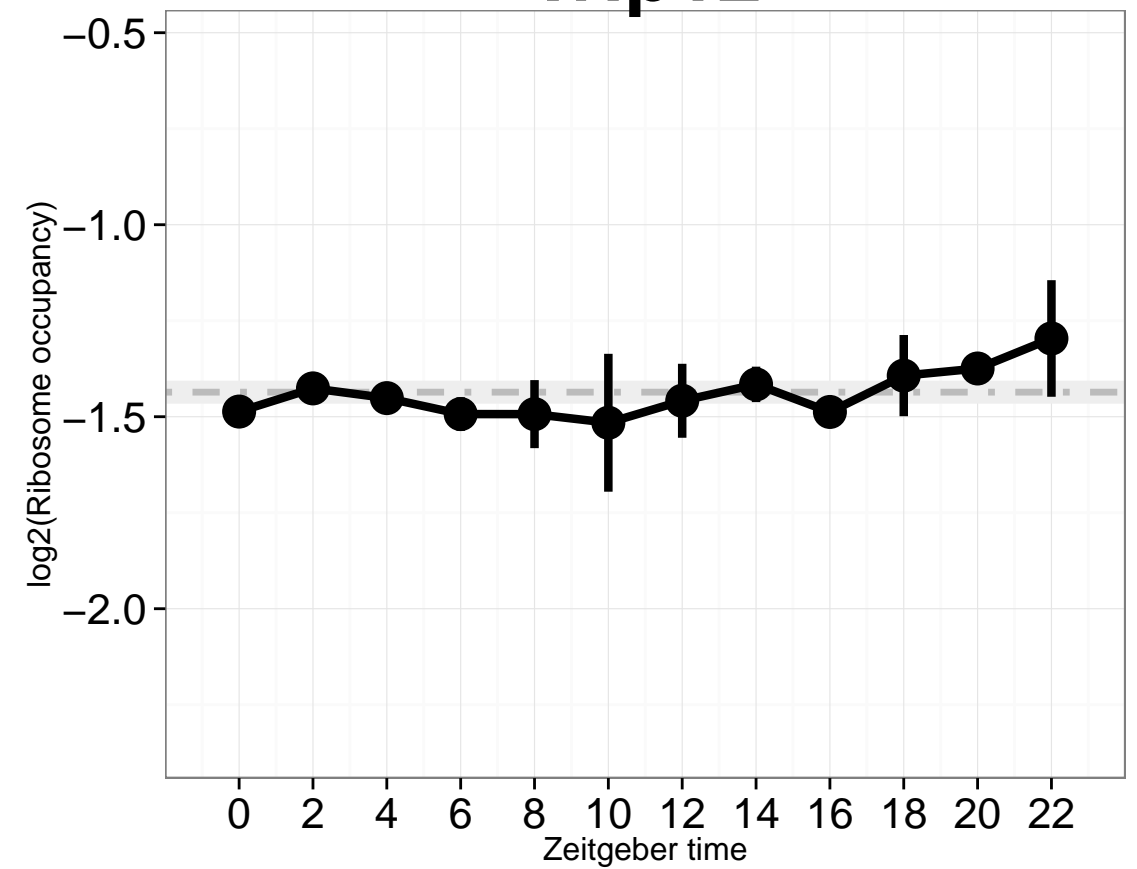

Supplement: SuppDataset_1.zip [file Trip12_set_A.pdf › Supplemental Dataset 1/A-mRNA_nonrhyth_translation_nonrhyth/Trip12_set_A.pdf]

# Trip13

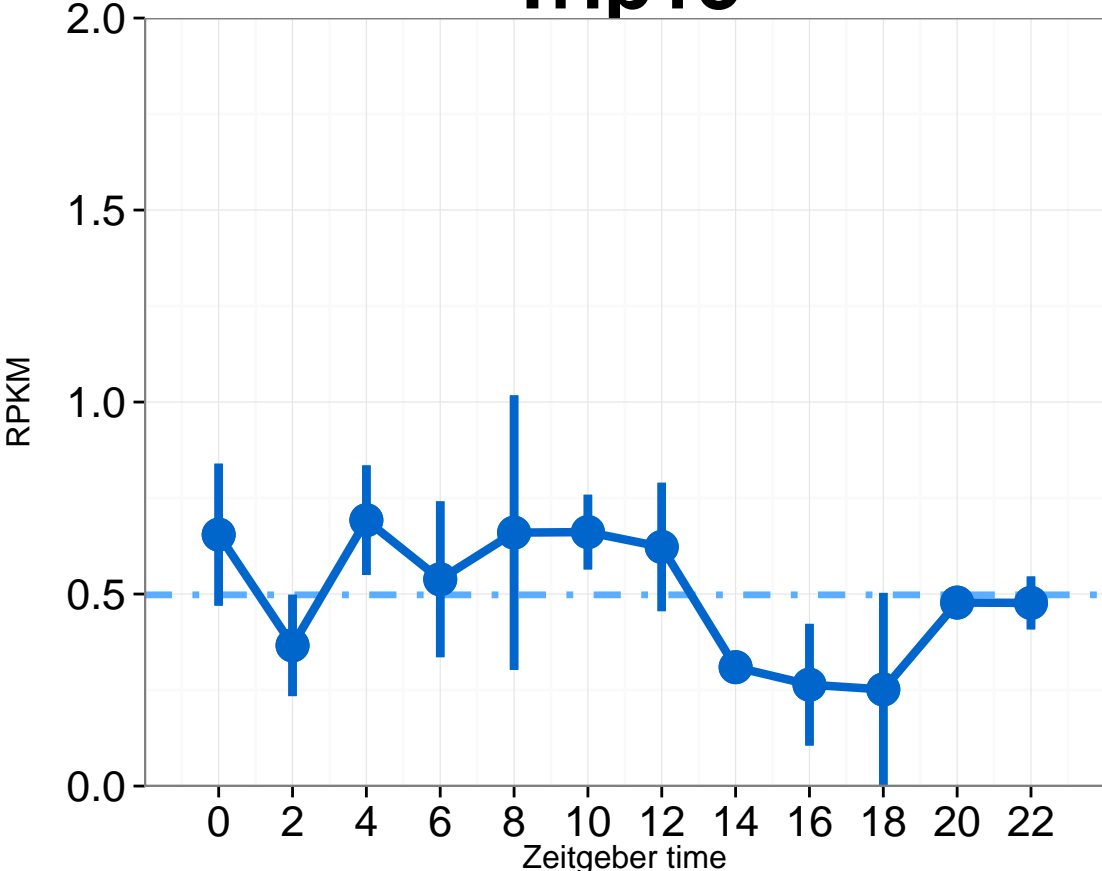

# Trip13 log2(Ribosome occupancy

Supplement: SuppDataset_1.zip [file Trip13_set_A.pdf › Supplemental Dataset 1/A-mRNA_nonrhyth_translation_nonrhyth/Trip13_set_A.pdf]

# Trip4

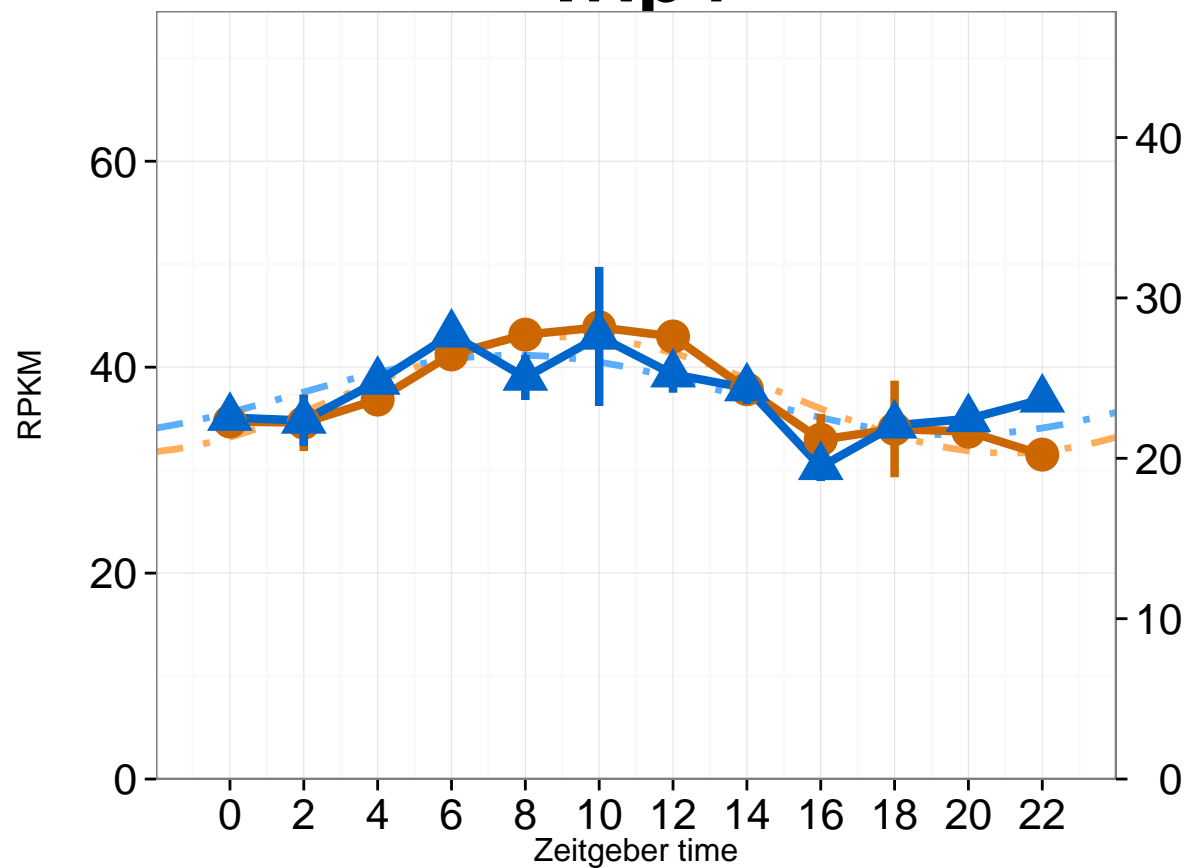

# Trip4

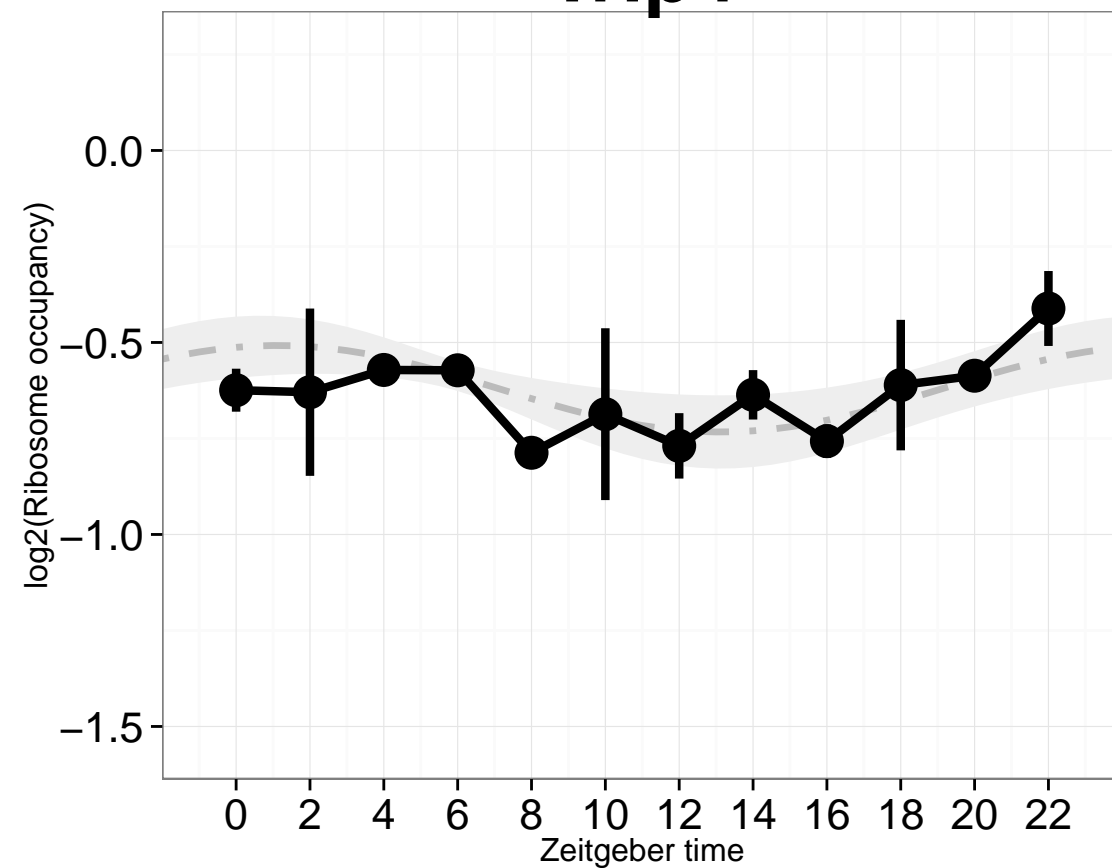

Supplement: SuppDataset_1.zip [file Trip4_set_A.pdf › Supplemental Dataset 1/A-mRNA_nonrhyth_translation_nonrhyth/Trip4_set_A.pdf]

# Trip6

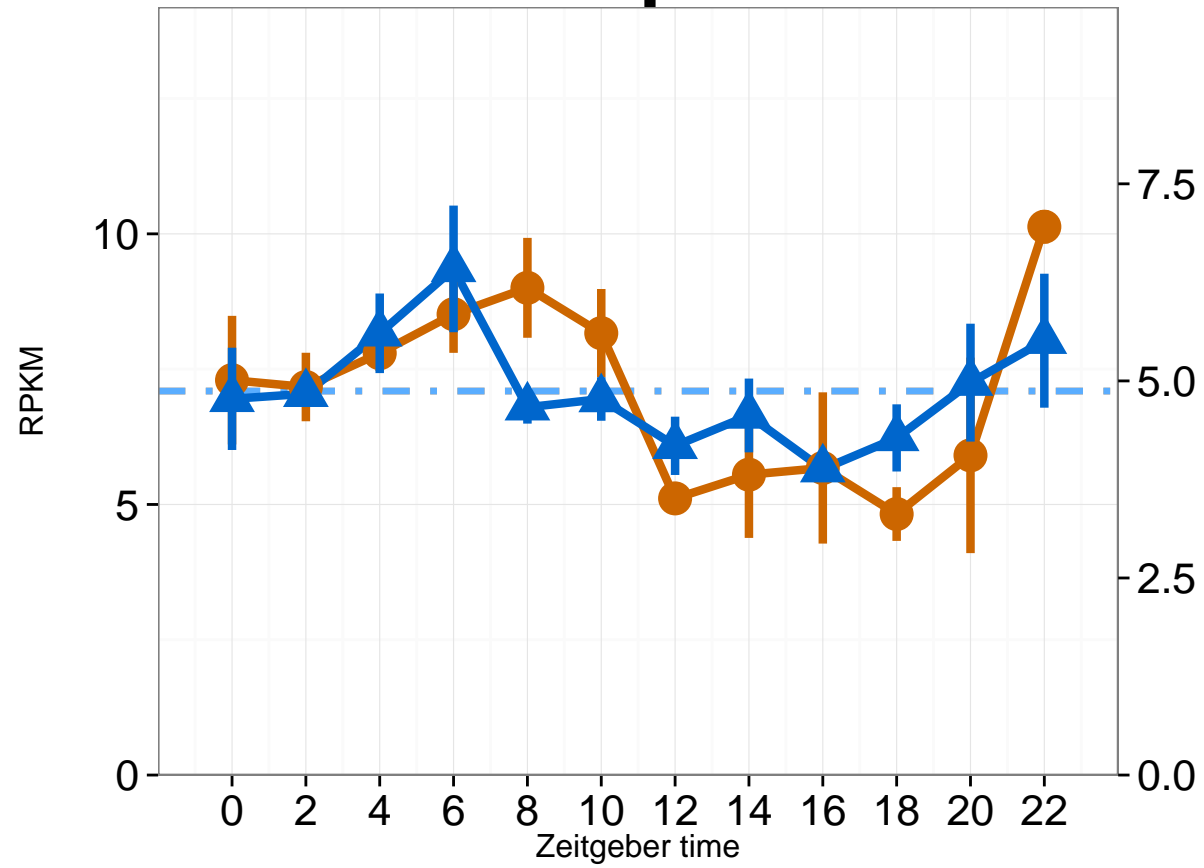

# Trip6

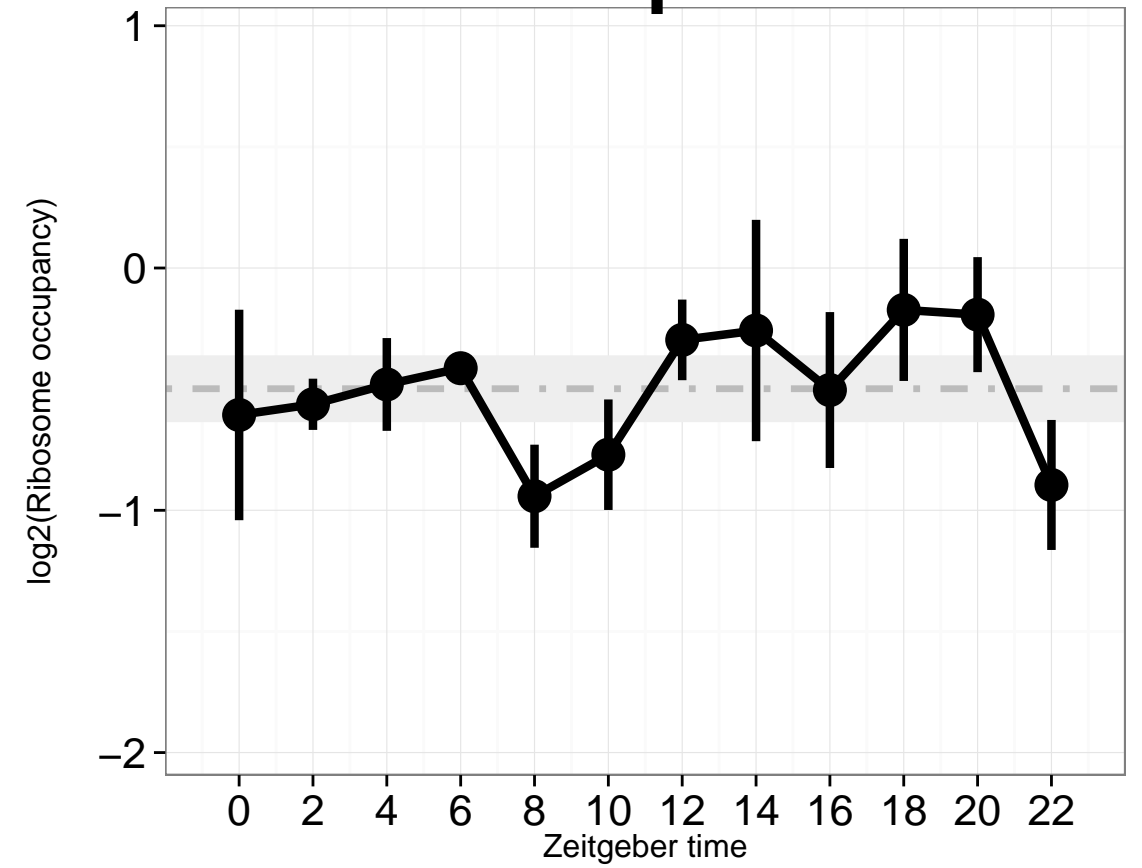

Supplement: SuppDataset_1.zip [file Trip6_set_A.pdf › Supplemental Dataset 1/A-mRNA_nonrhyth_translation_nonrhyth/Trip6_set_A.pdf]

# Trit1

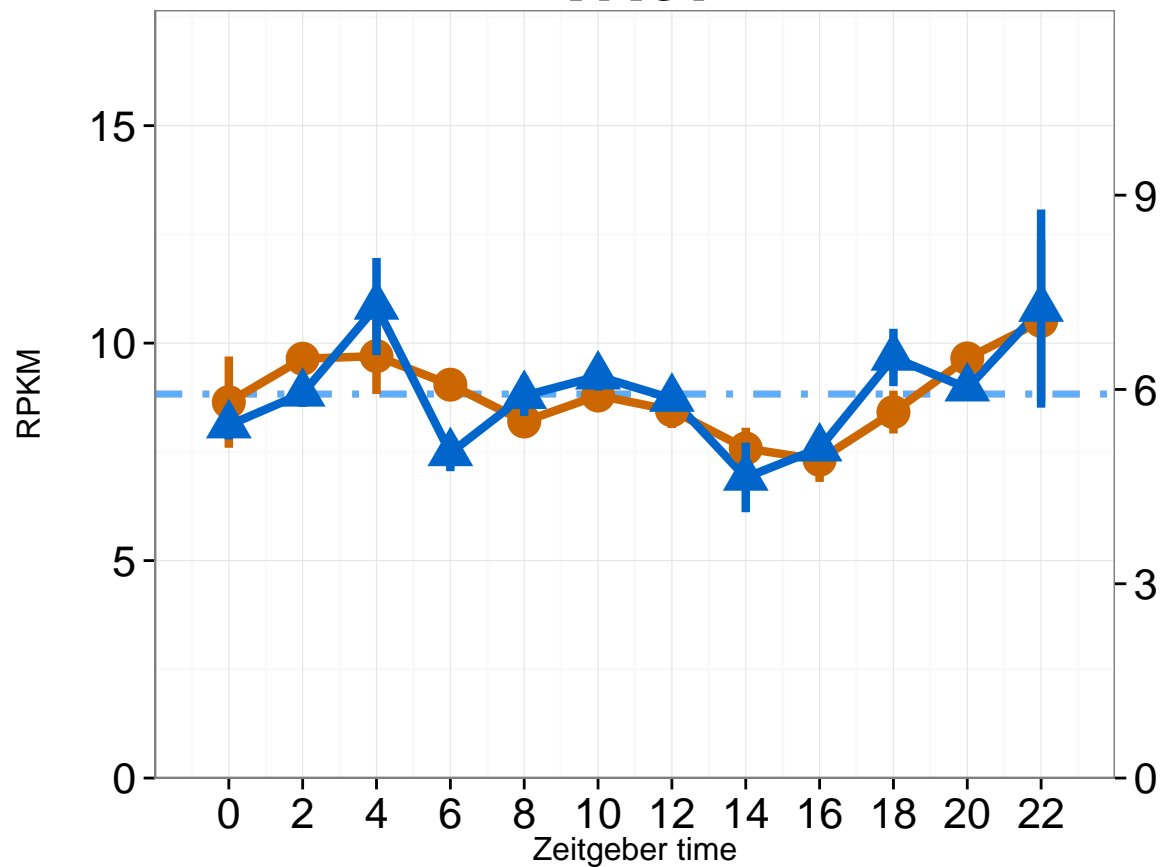

# Trit1

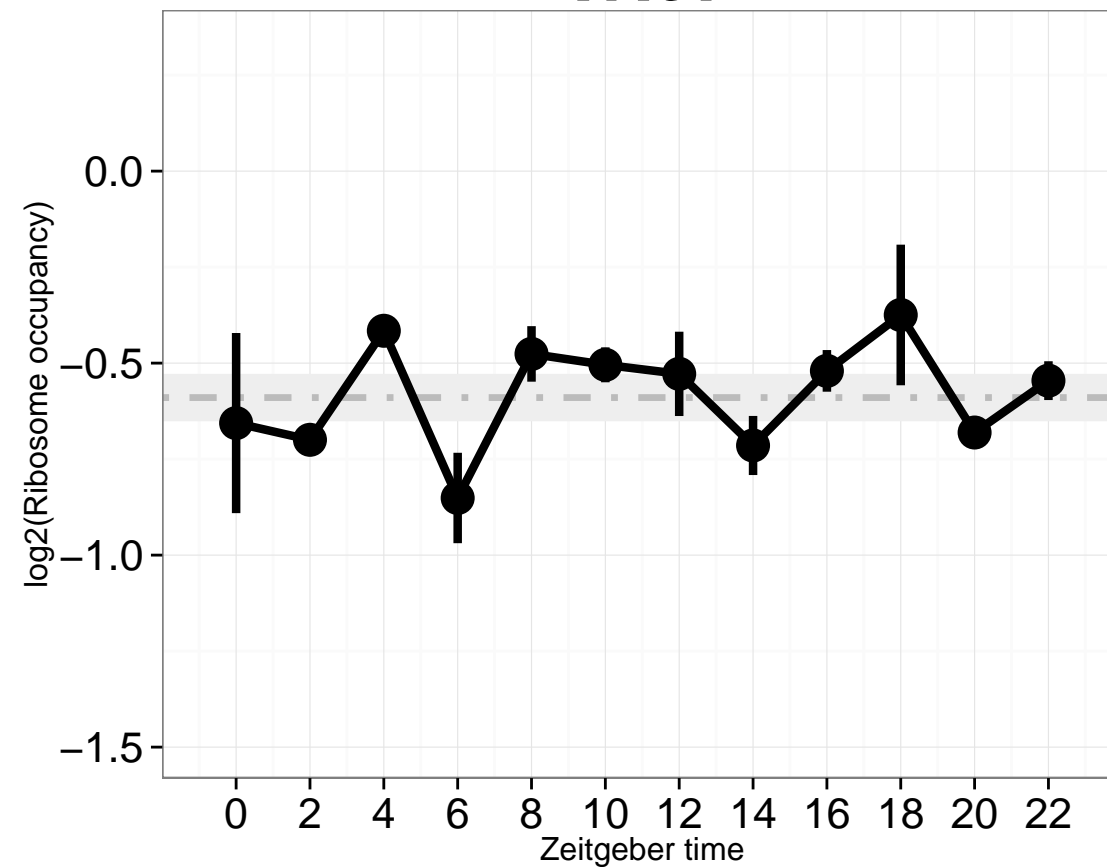

Supplement: SuppDataset_1.zip [file Trit1_set_A.pdf › Supplemental Dataset 1/A-mRNA_nonrhyth_translation_nonrhyth/Trit1_set_A.pdf]

# Trmt10b

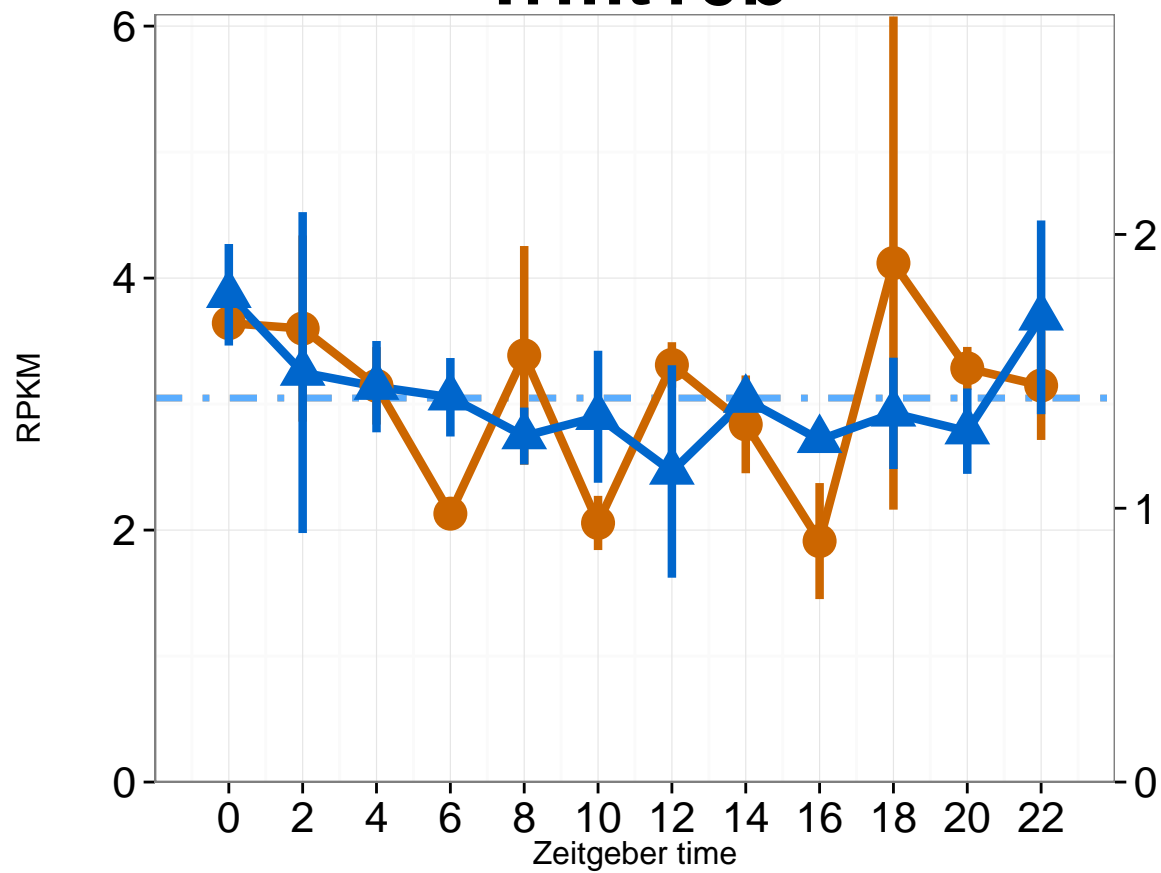

# Trmt10b

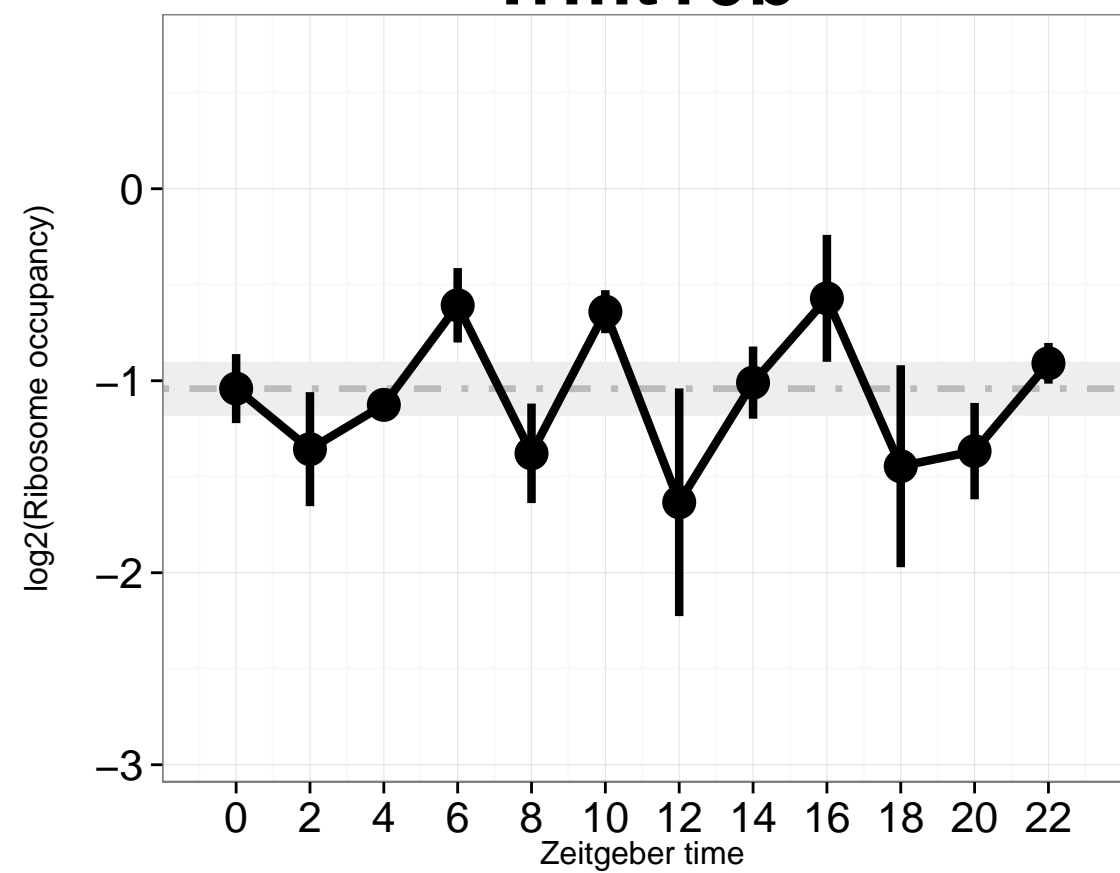

Supplement: SuppDataset_1.zip [file Trmt10b_set_A.pdf › Supplemental Dataset 1/A-mRNA_nonrhyth_translation_nonrhyth/Trmt10b_set_A.pdf]

Trmt10c

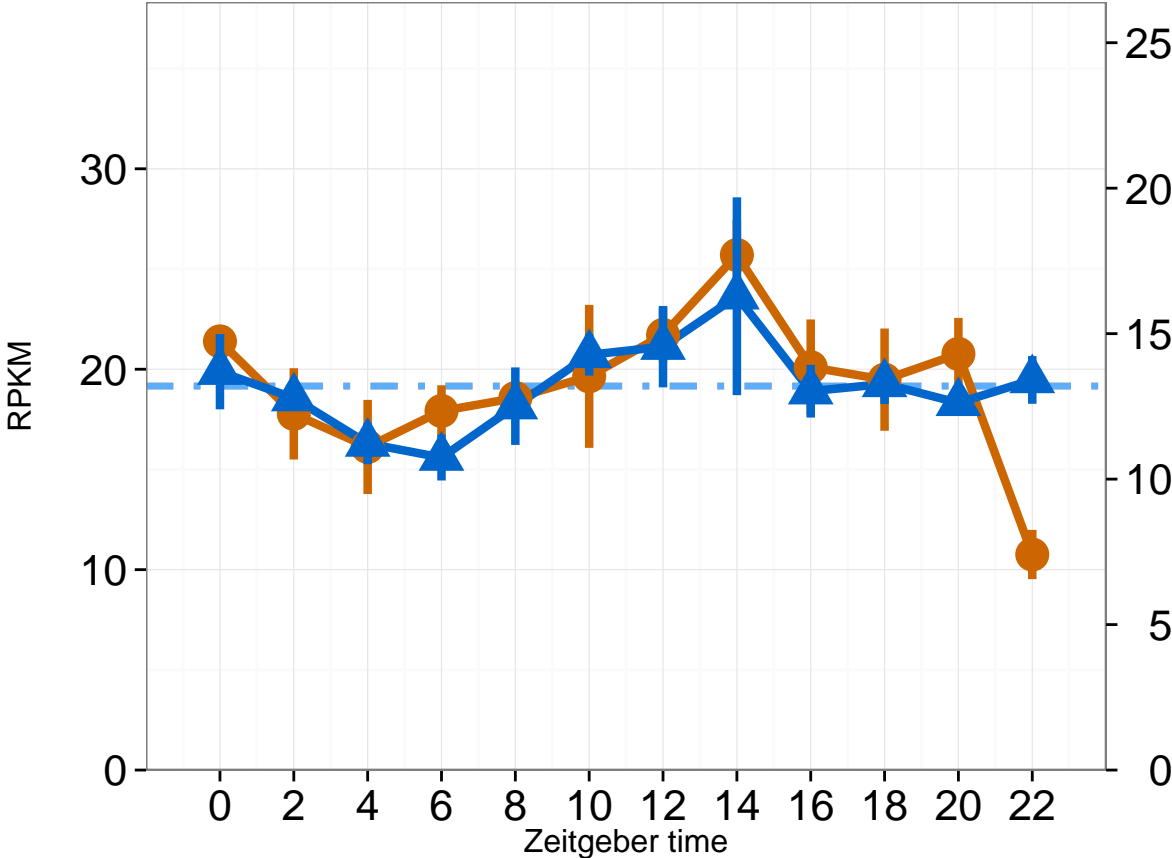

Trmt10c

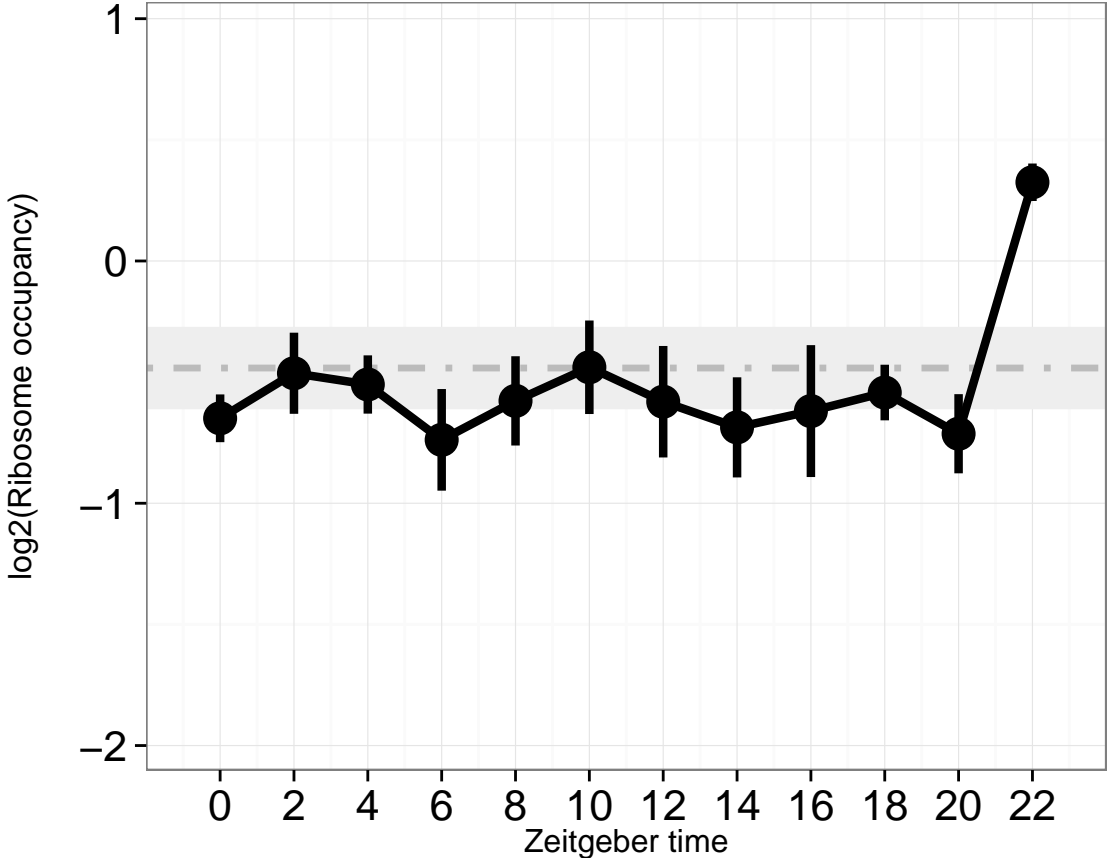

Supplement: SuppDataset_1.zip [file Trmt10c_set_A.pdf › Supplemental Dataset 1/A-mRNA_nonrhyth_translation_nonrhyth/Trmt10c_set_A.pdf]

# Trmt112

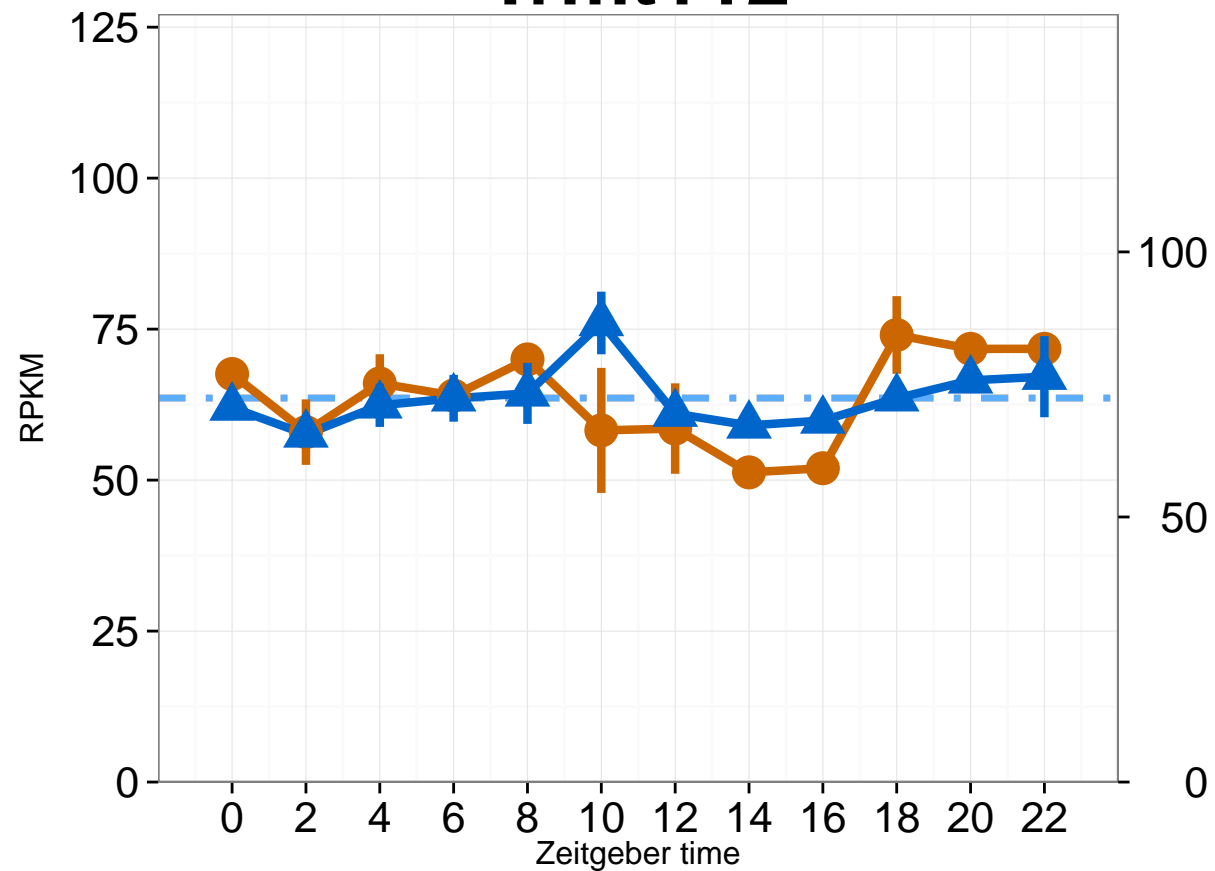

# Trmt112

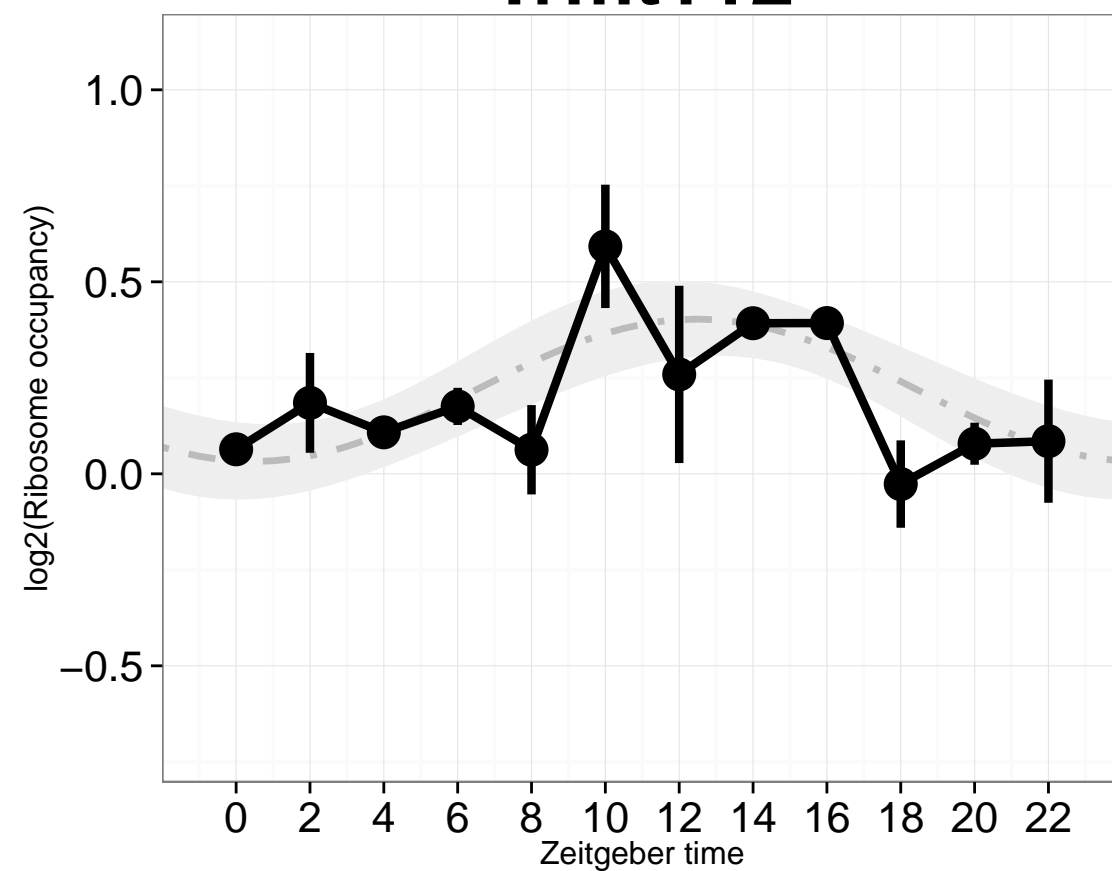

Supplement: SuppDataset_1.zip [file Trmt112_set_A.pdf › Supplemental Dataset 1/A-mRNA_nonrhyth_translation_nonrhyth/Trmt112_set_A.pdf]

# Trmt11

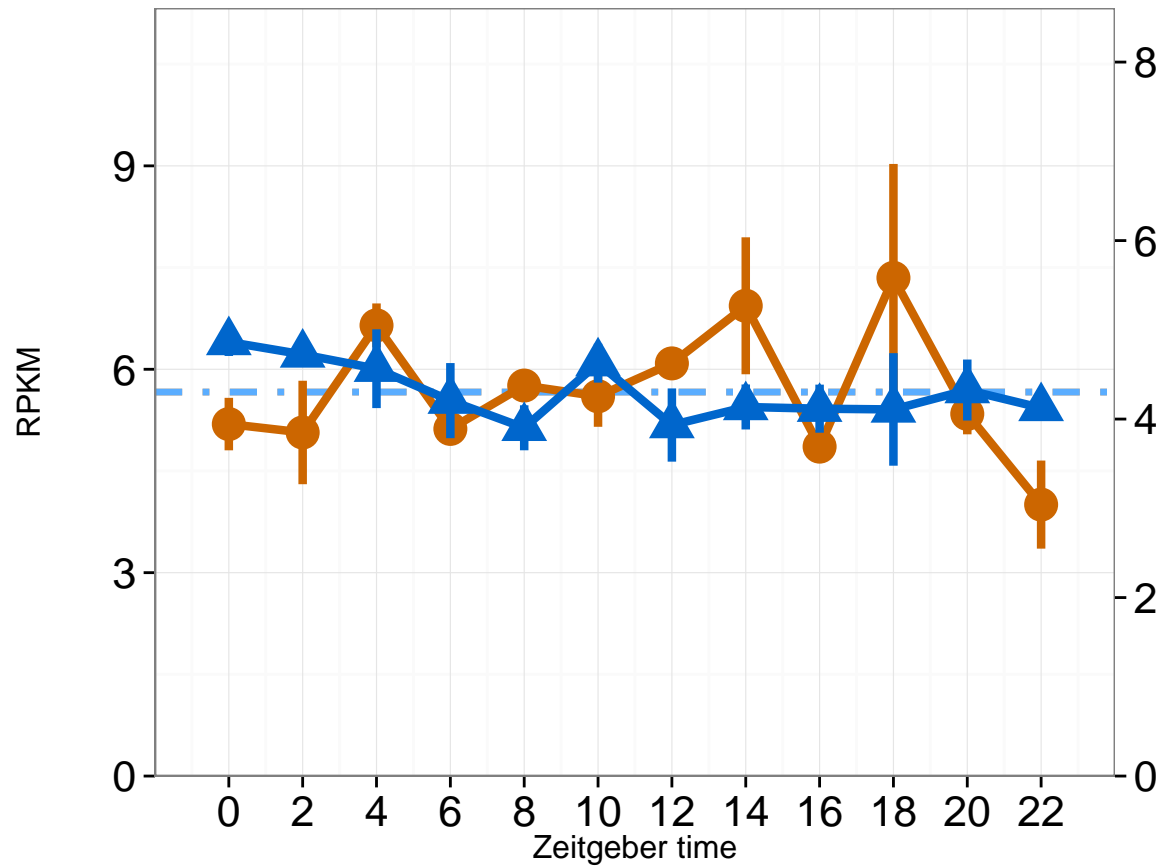

# Trmt11

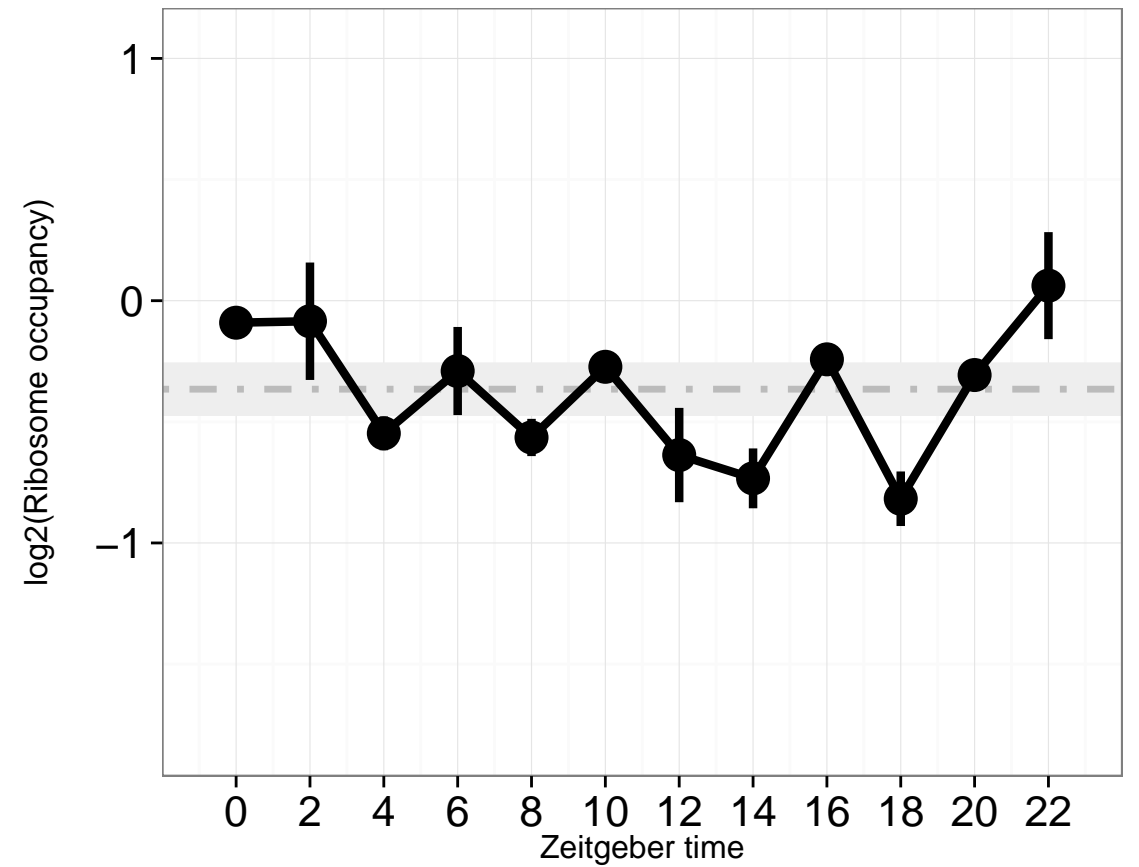

Supplement: SuppDataset_1.zip [file Trmt11_set_A.pdf › Supplemental Dataset 1/A-mRNA_nonrhyth_translation_nonrhyth/Trmt11_set_A.pdf]

# Trmt12

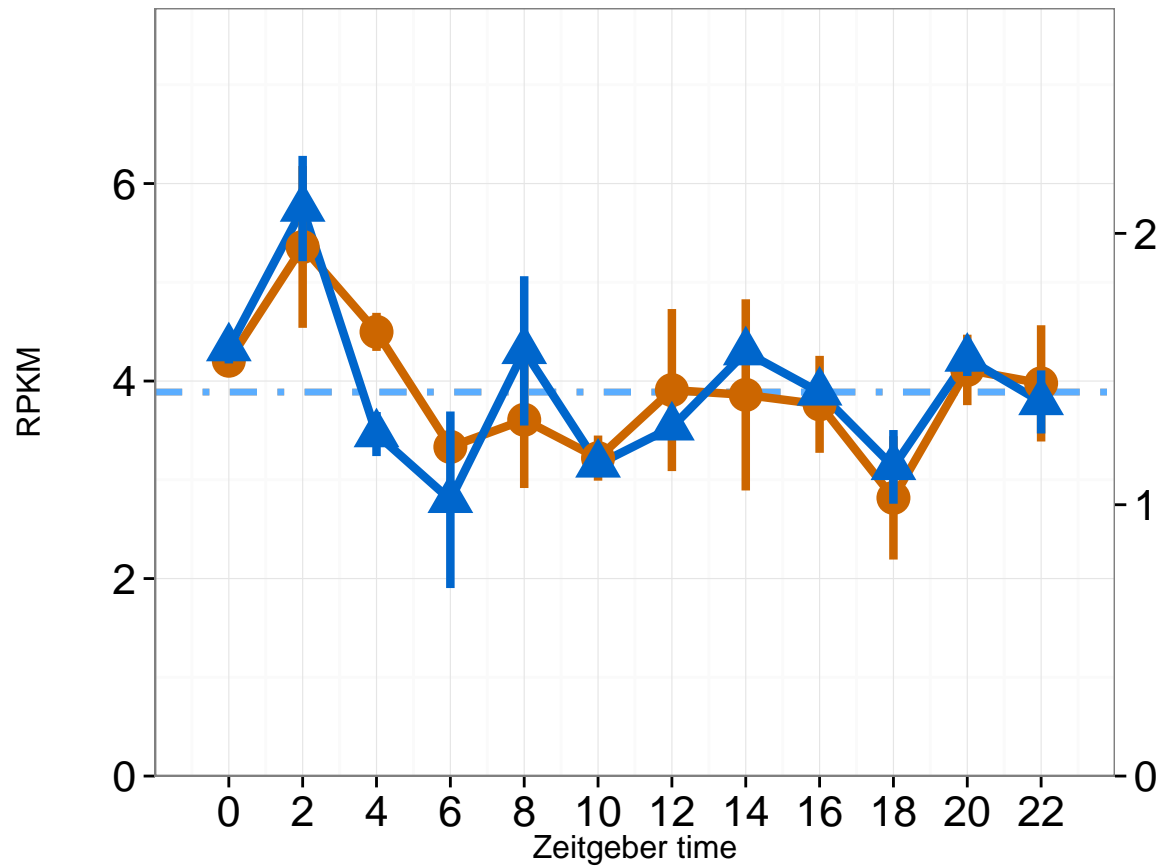

# Trmt12

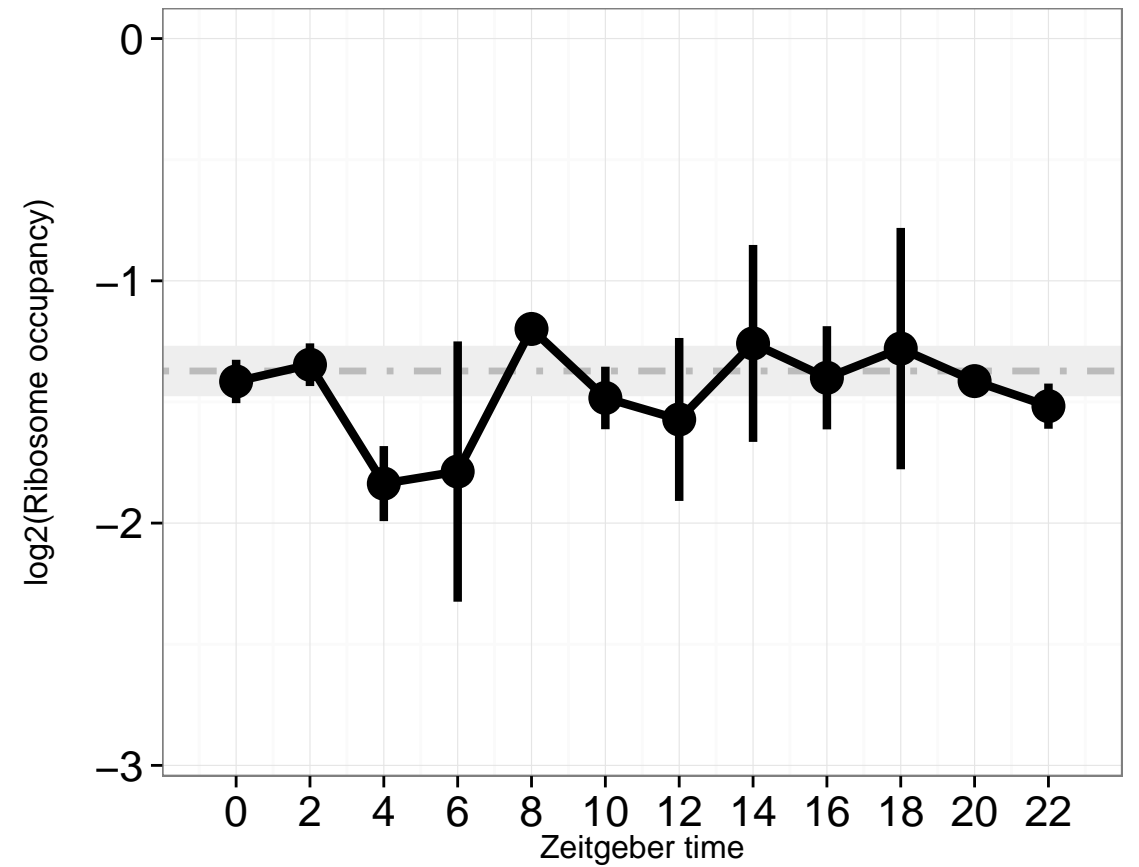

Supplement: SuppDataset_1.zip [file Trmt12_set_A.pdf › Supplemental Dataset 1/A-mRNA_nonrhyth_translation_nonrhyth/Trmt12_set_A.pdf]
