# Supplementary figures and images for: Ribosome profiling reveals the rhythmic liver translatome and circadian clock regulation by upstream open reading frames (part 101 of 113)
Source: HighWire-hosted journal article supplement (doi:10.1101/gr.195404.115), 2015-10-20

# Tomm20

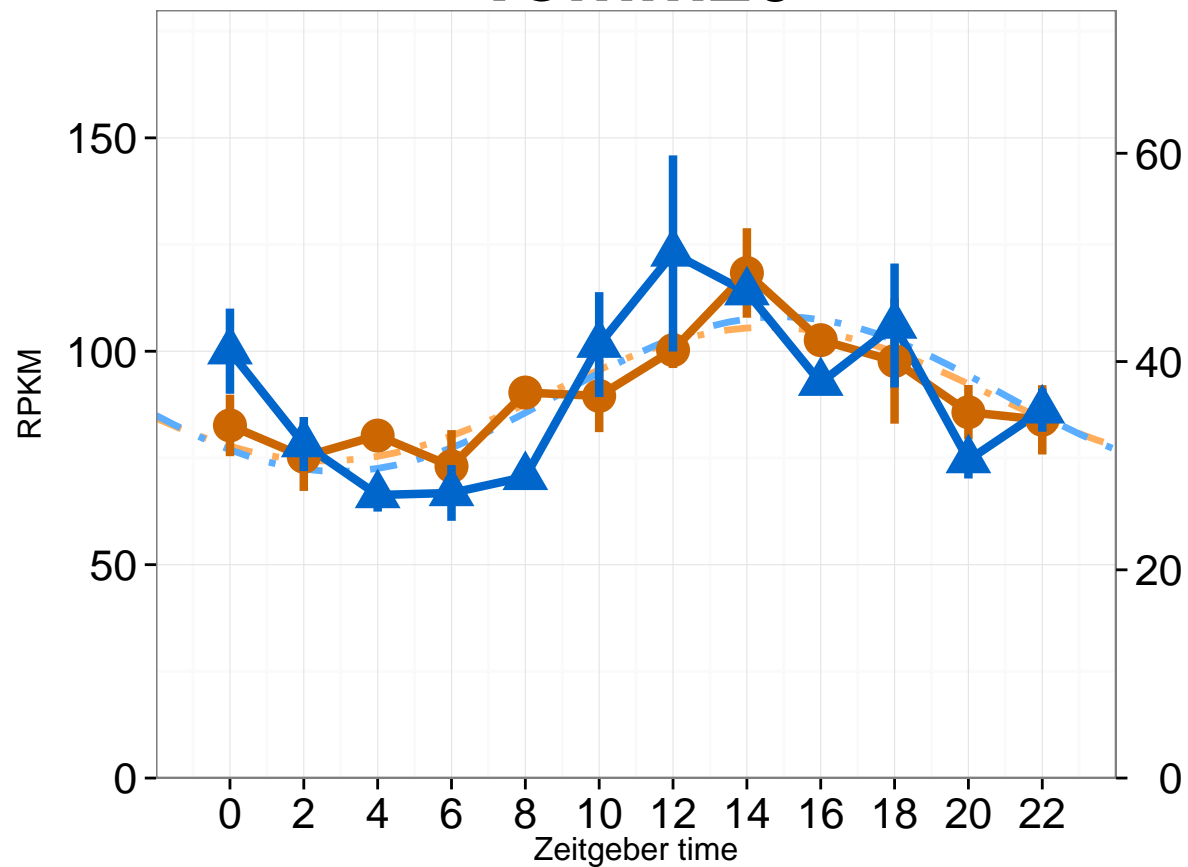

# Tomm20

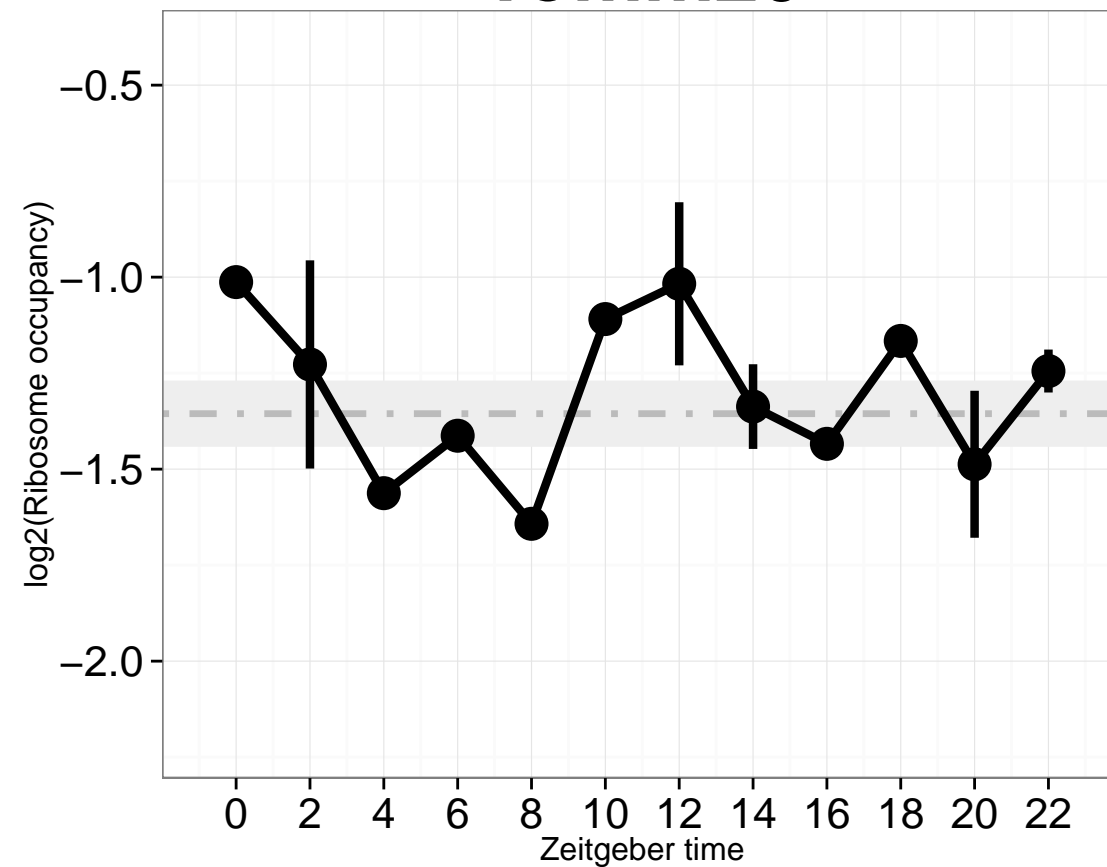

Supplement: SuppDataset_1.zip [file Tomm20_set_C.pdf › Supplemental Dataset 1/C-mRNA_nonrhythm_translation_rhyth/Tomm20_set_C.pdf]

# Top1

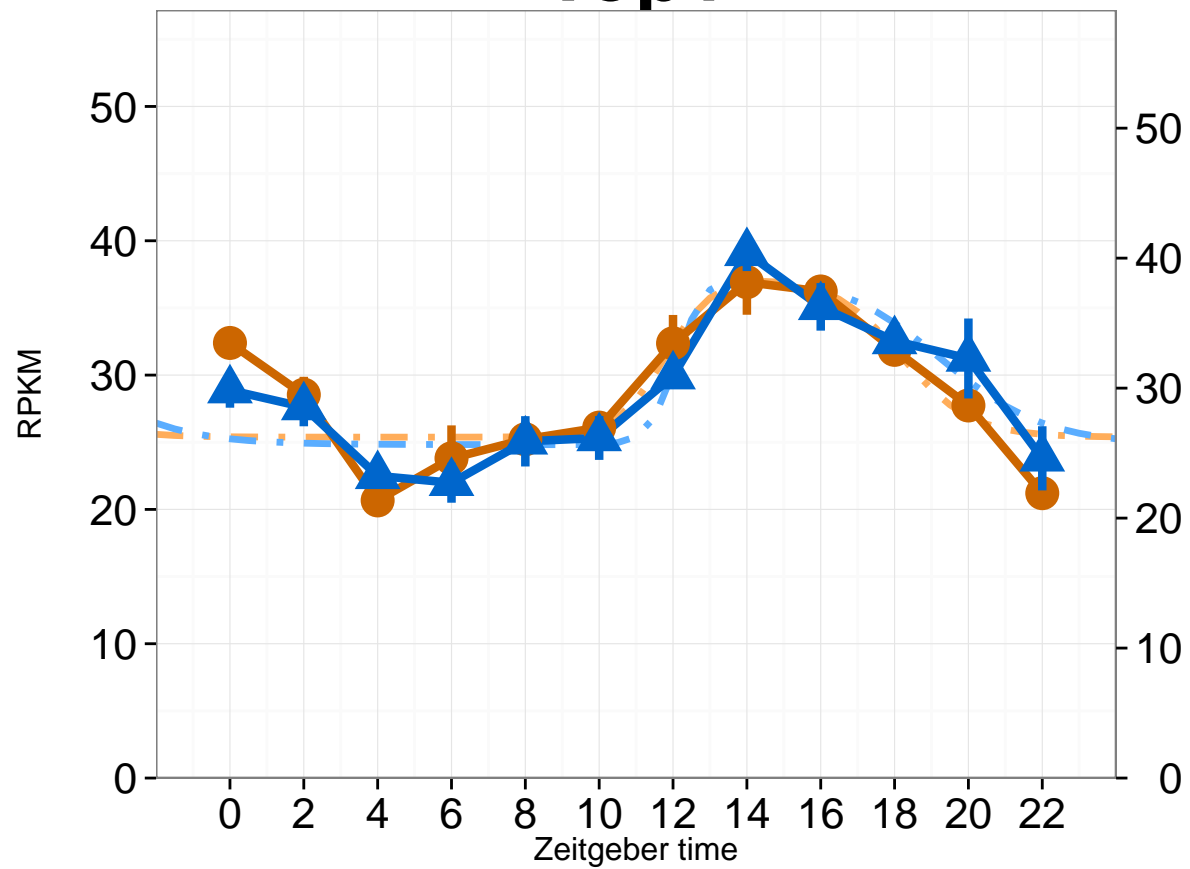

# Top1

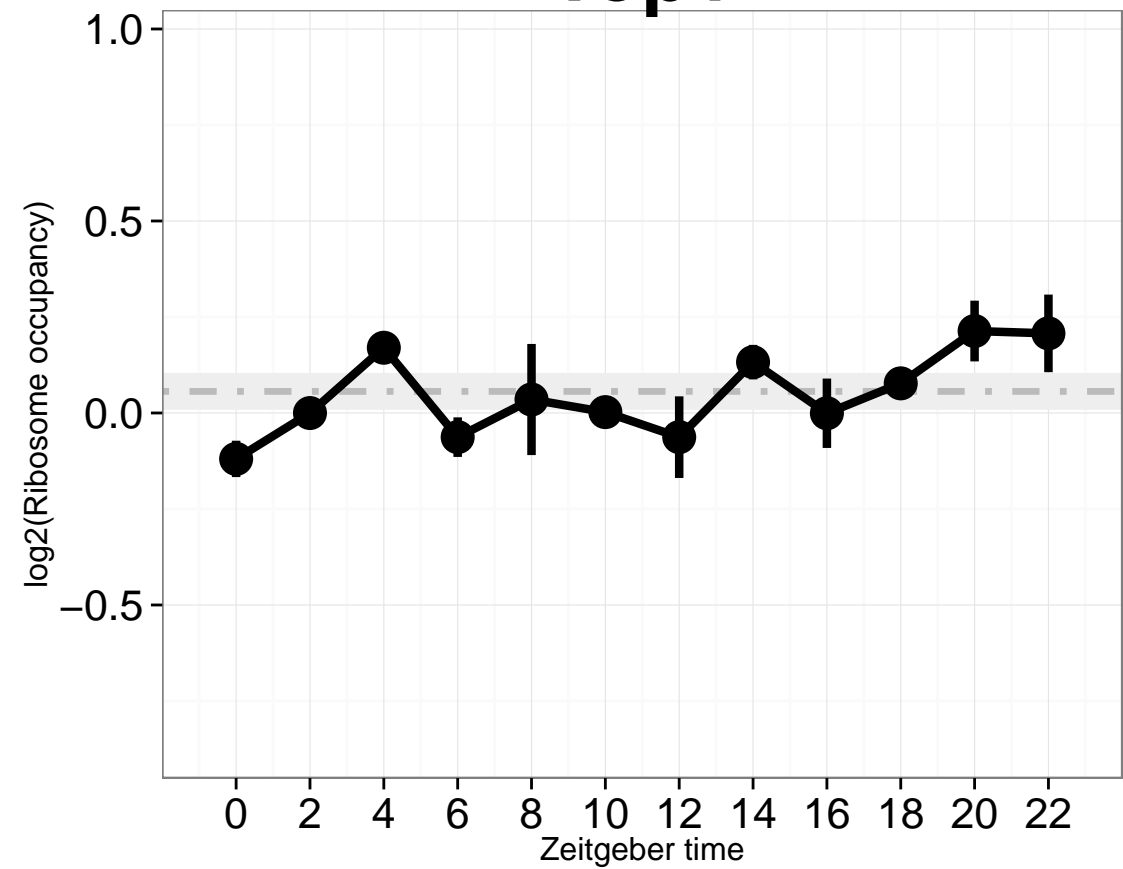

Supplement: SuppDataset_1.zip [file Top1_set_C.pdf › Supplemental Dataset 1/C-mRNA_nonrhythm_translation_rhyth/Top1_set_C.pdf]

# Tpst1

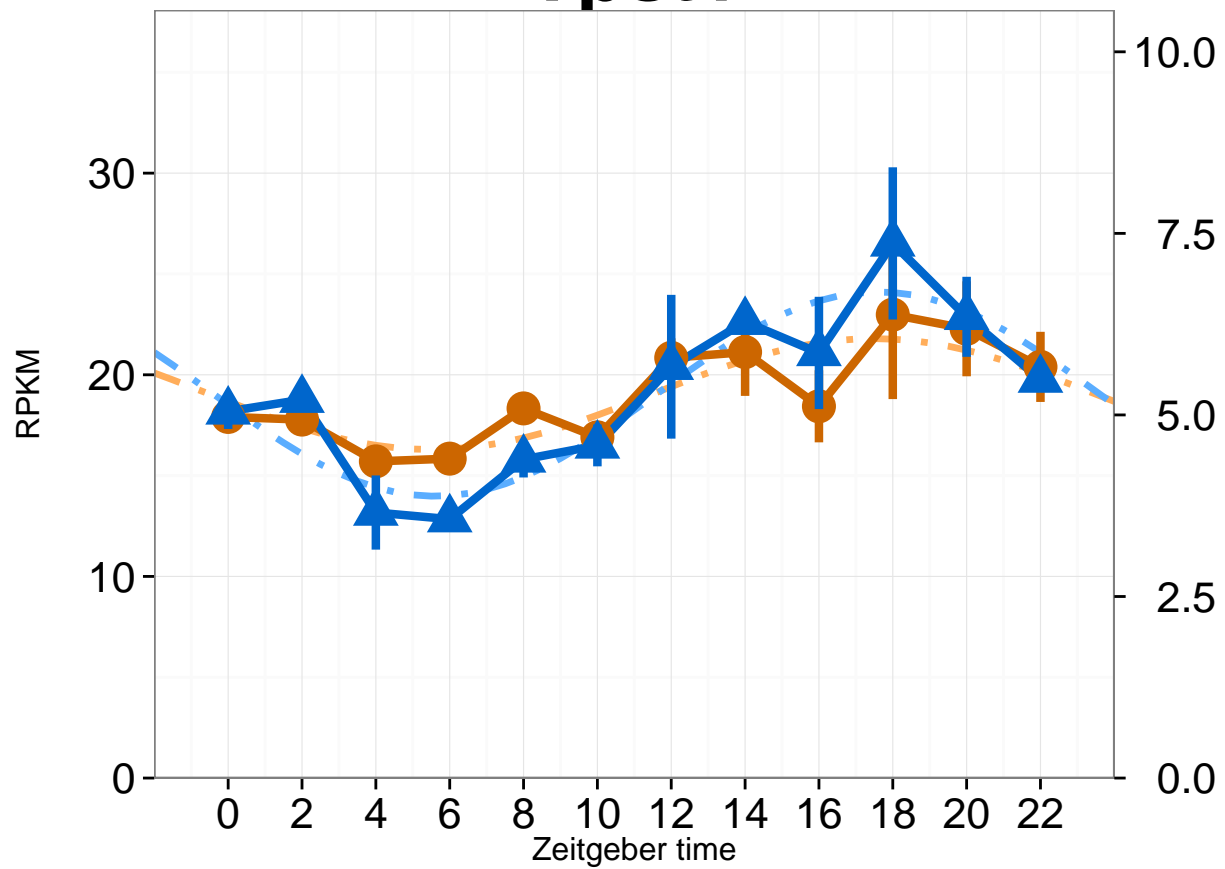

# Tpst1

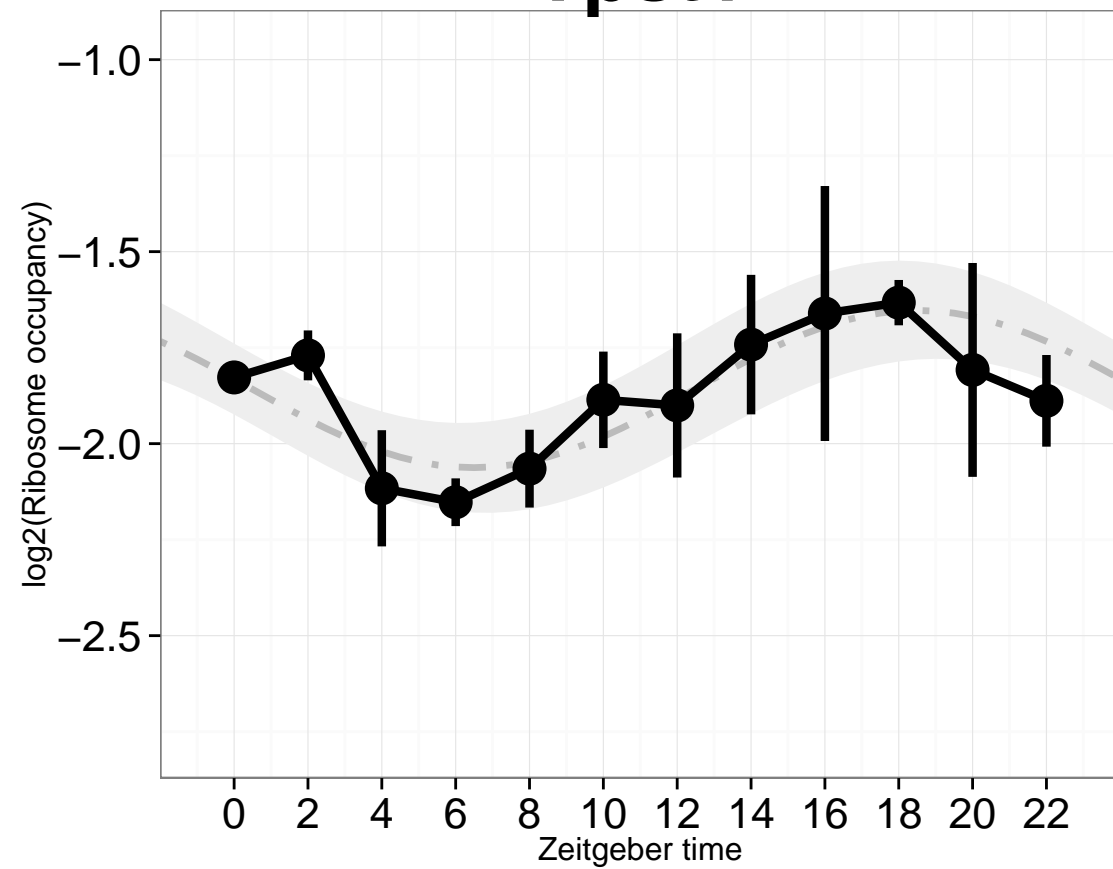

Supplement: SuppDataset_1.zip [file Tpst1_set_C.pdf › Supplemental Dataset 1/C-mRNA_nonrhythm_translation_rhyth/Tpst1_set_C.pdf]

# Tpt1

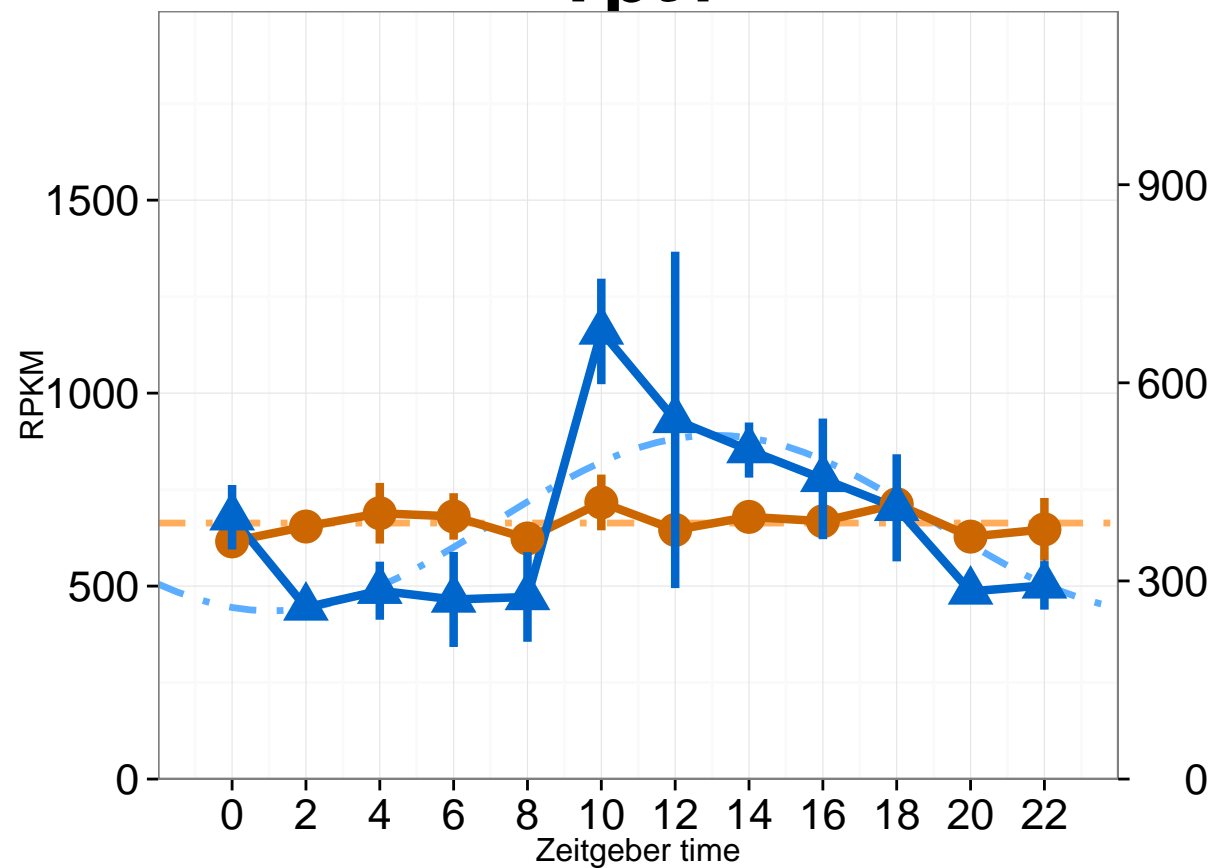

# Tpt1

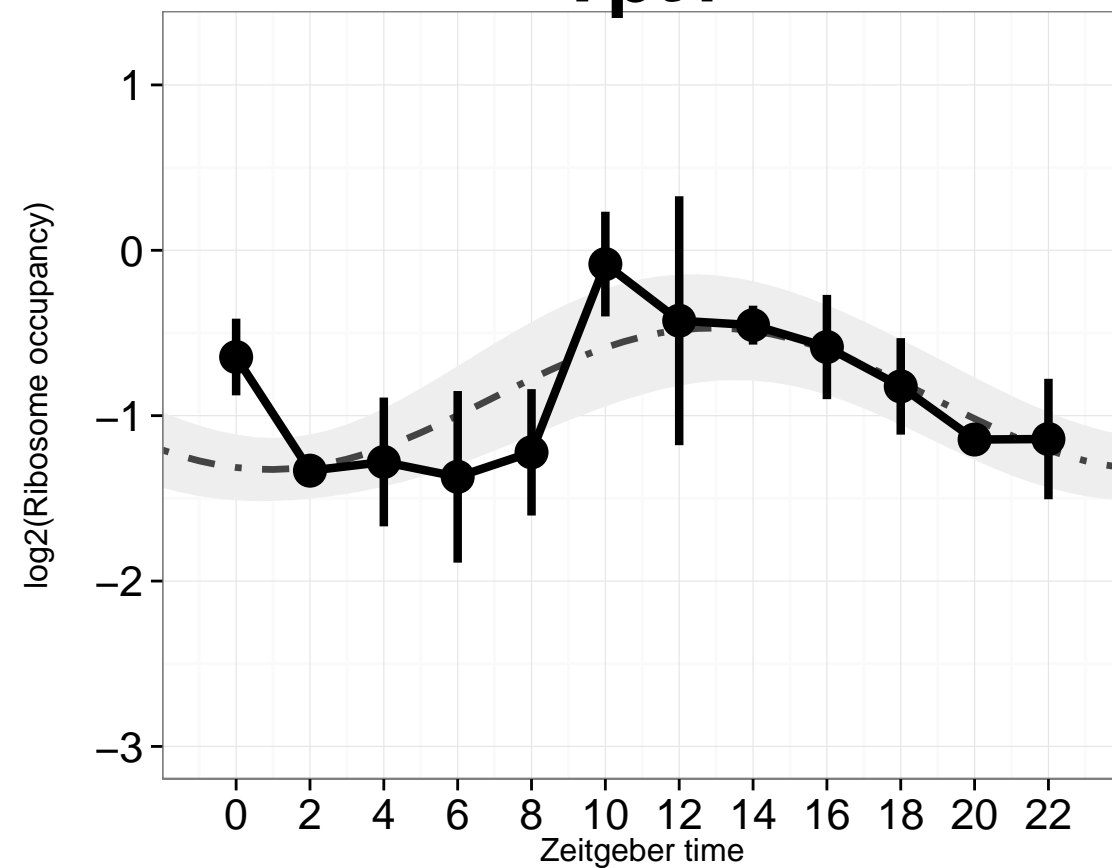

Supplement: SuppDataset_1.zip [file Tpt1_set_C.pdf › Supplemental Dataset 1/C-mRNA_nonrhythm_translation_rhyth/Tpt1_set_C.pdf]

# Trak1

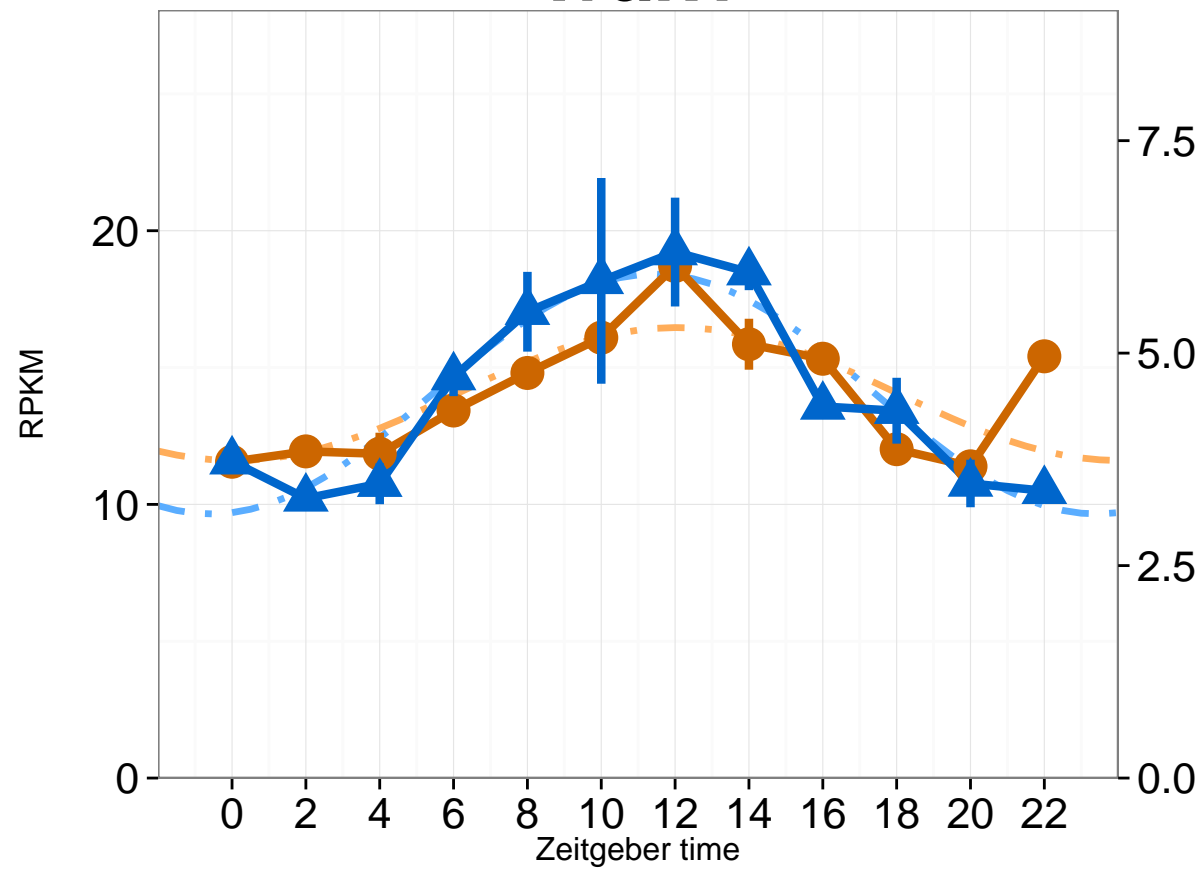

# Trak1

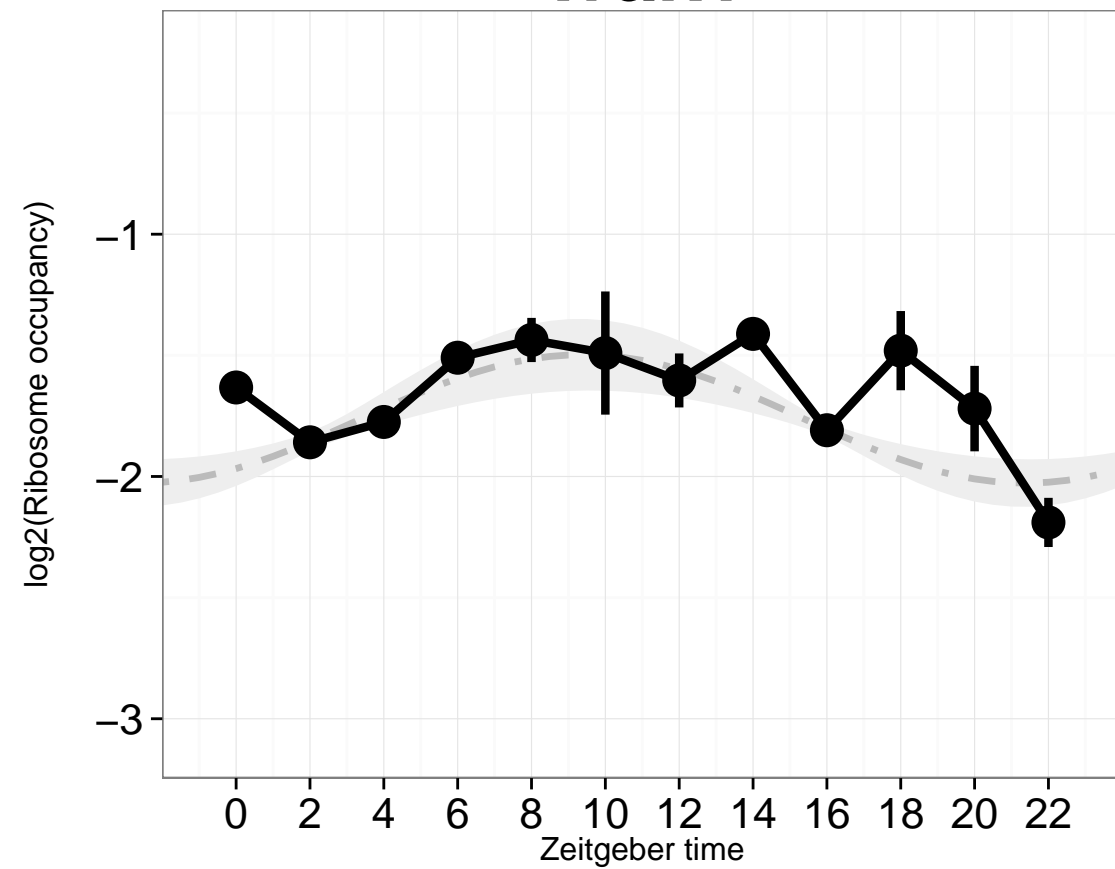

Supplement: SuppDataset_1.zip [file Trak1_set_C.pdf › Supplemental Dataset 1/C-mRNA_nonrhythm_translation_rhyth/Trak1_set_C.pdf]

## Treh

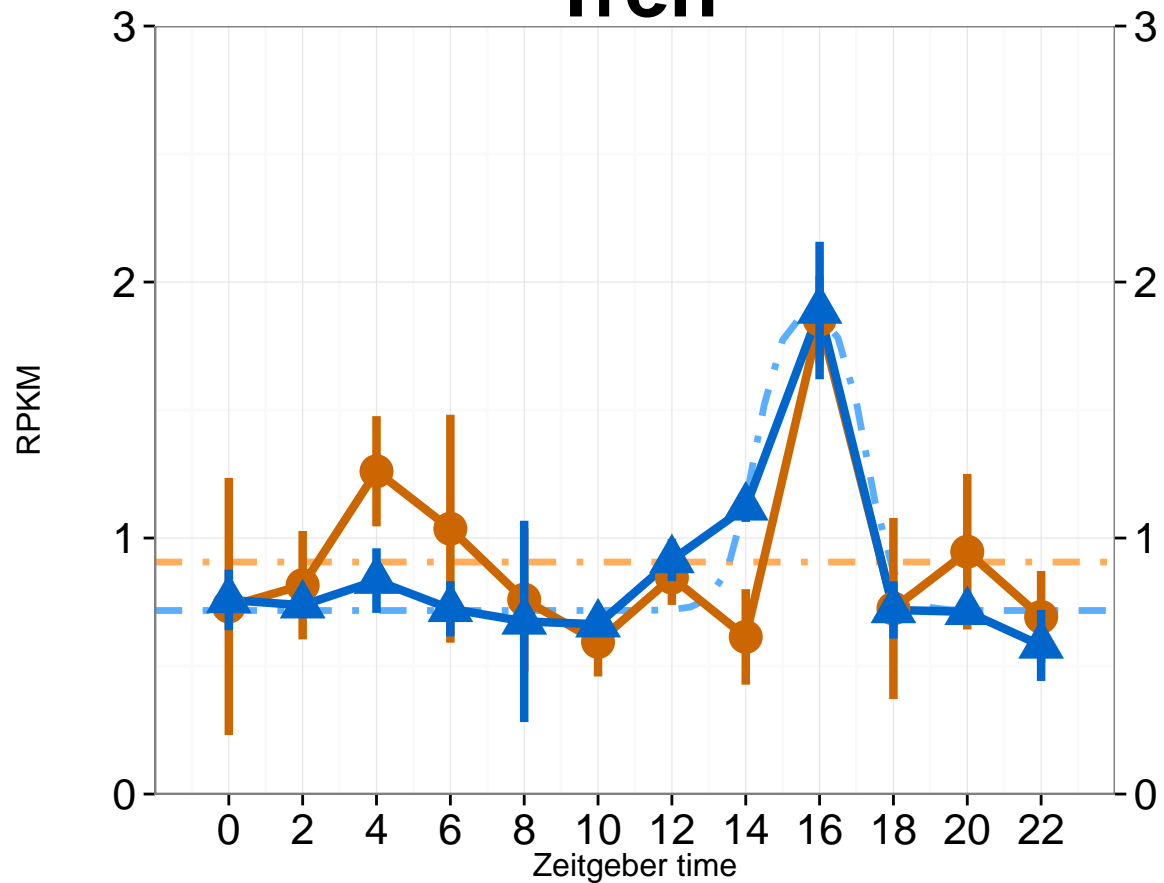

## Treh

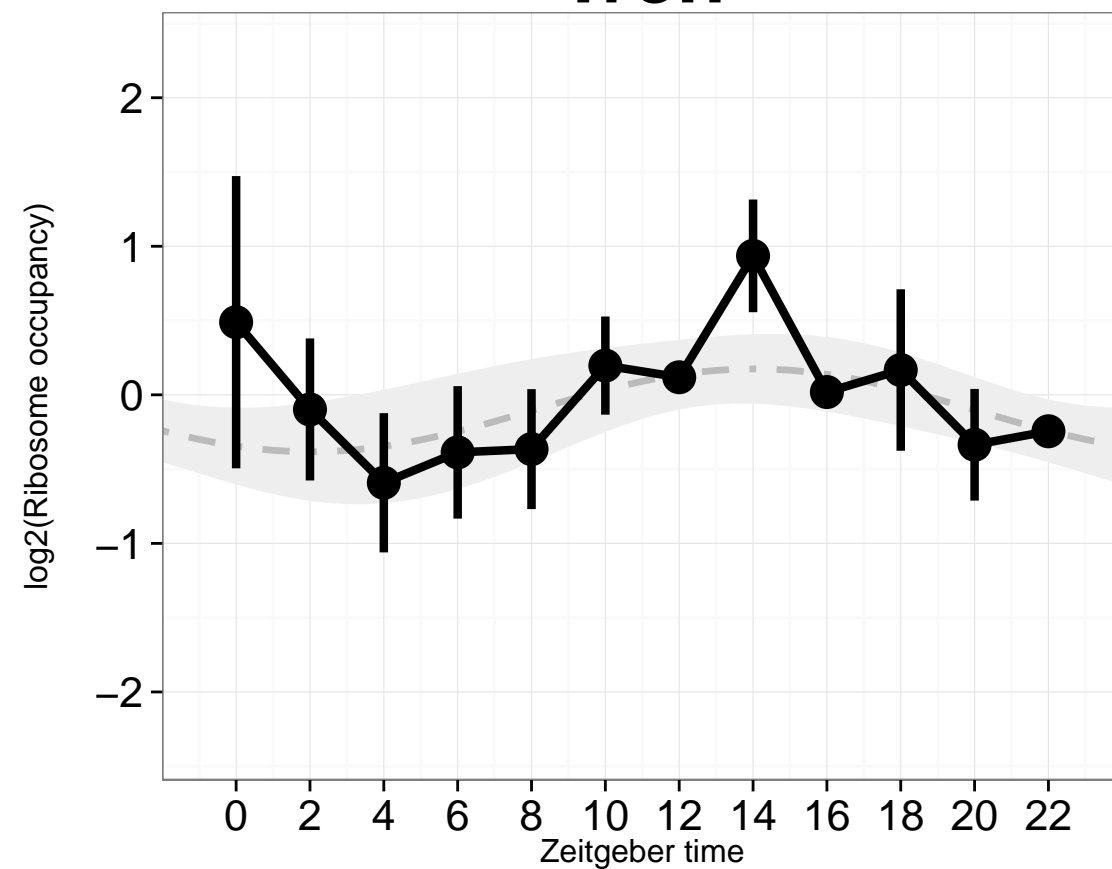

Supplement: SuppDataset_1.zip [file Treh_set_C.pdf › Supplemental Dataset 1/C-mRNA_nonrhythm_translation_rhyth/Treh_set_C.pdf]

# Trim21

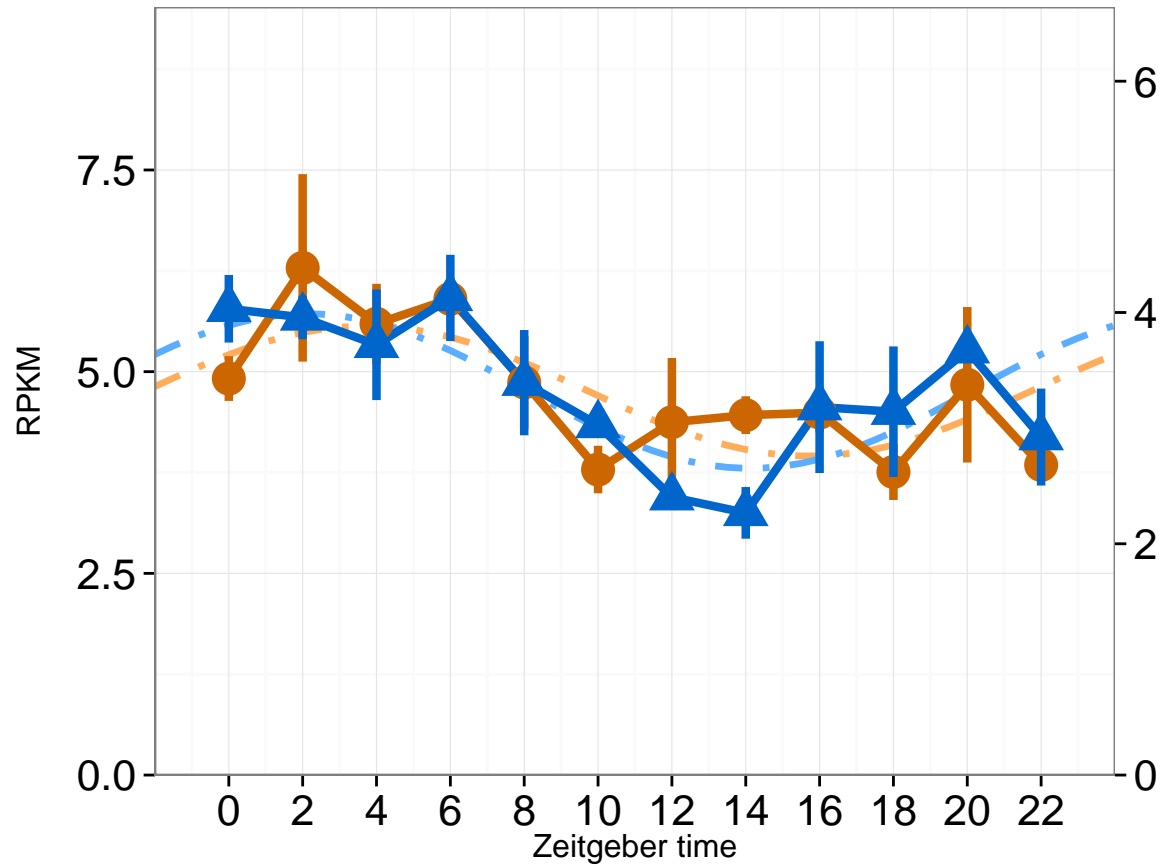

# Trim21

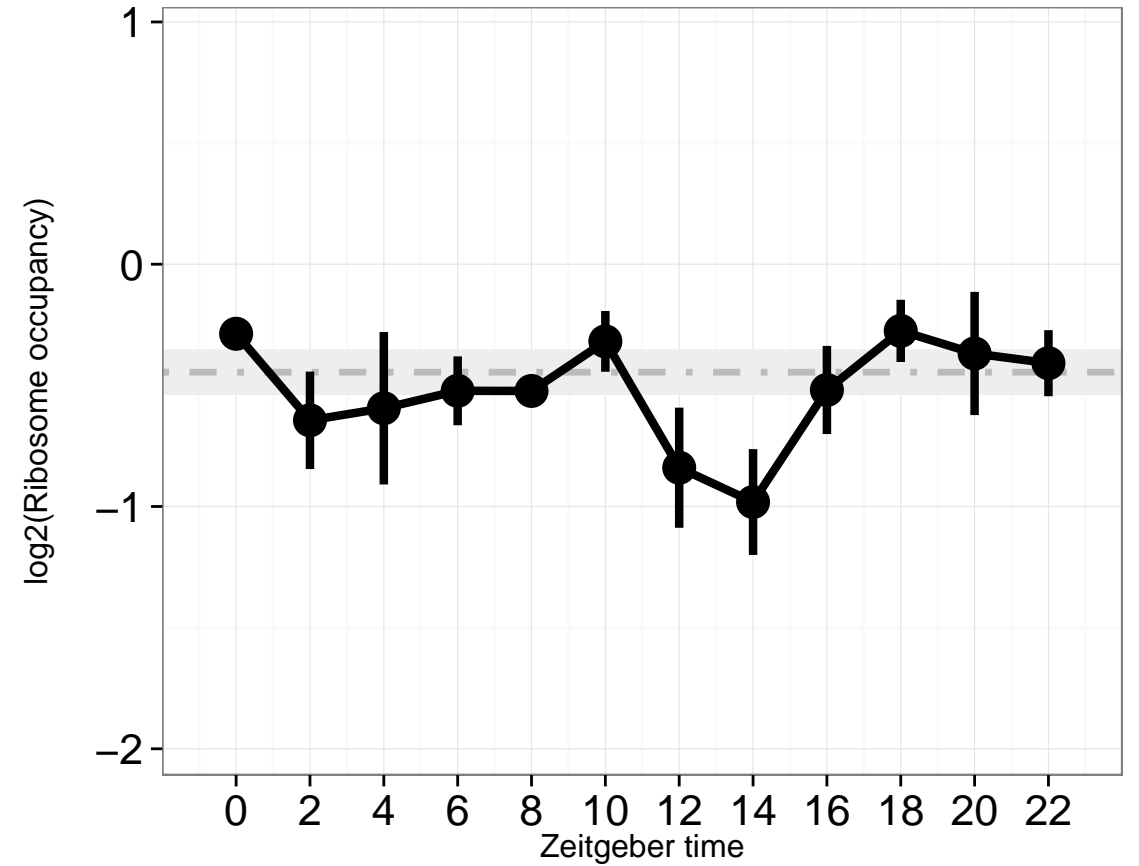

Supplement: SuppDataset_1.zip [file Trim21_set_C.pdf › Supplemental Dataset 1/C-mRNA_nonrhythm_translation_rhyth/Trim21_set_C.pdf]

# Trim34a

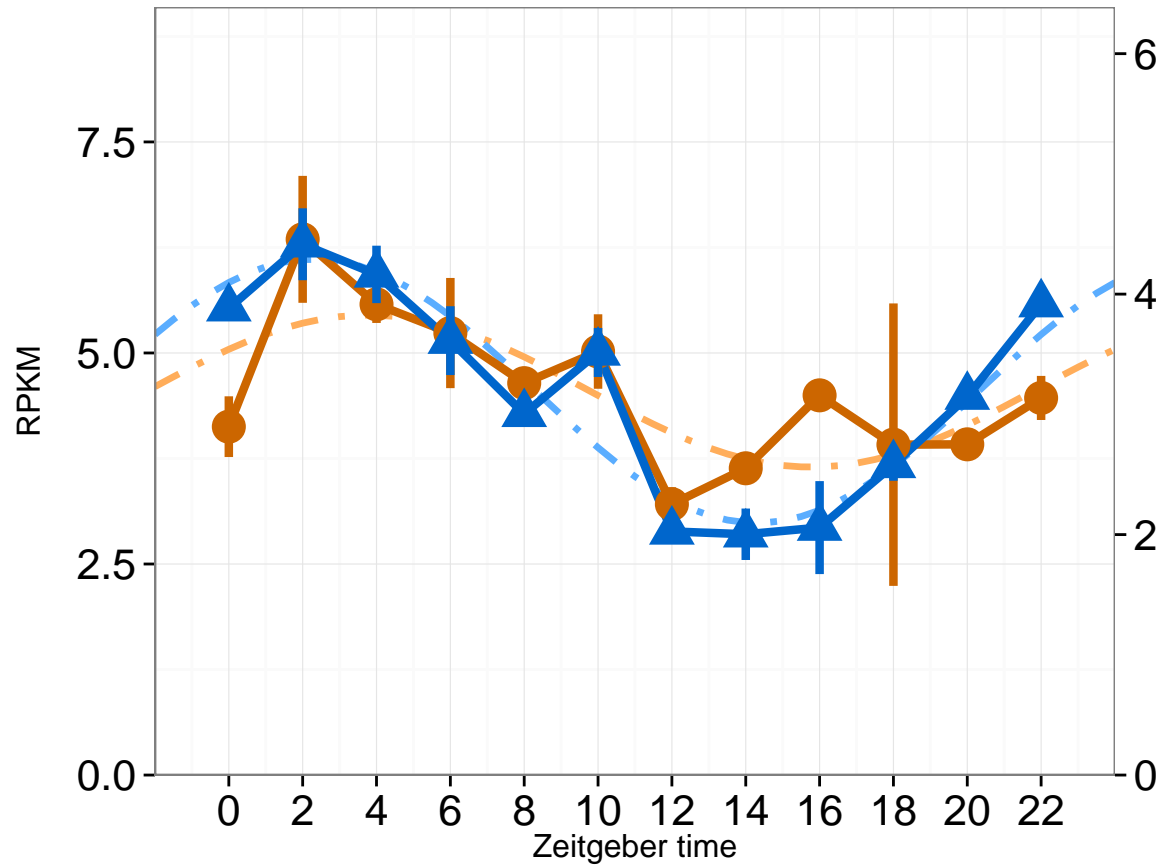

# Trim34a

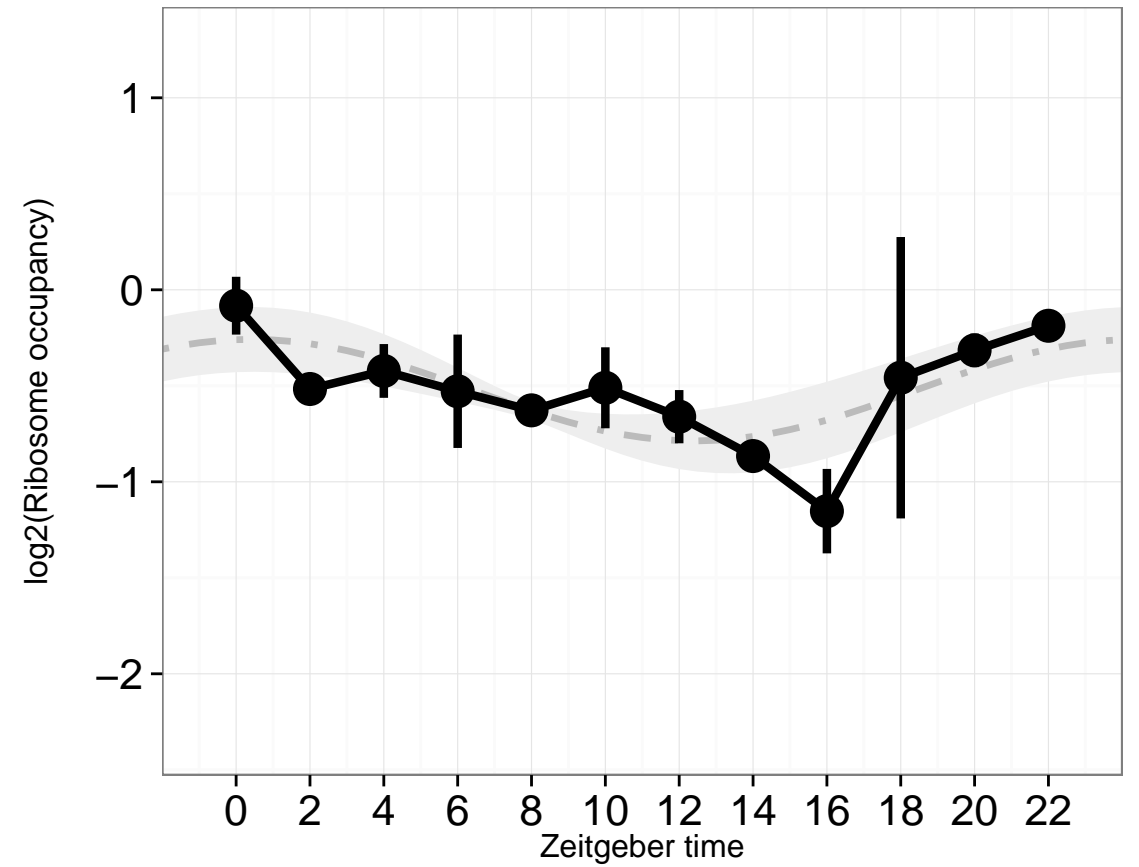

Supplement: SuppDataset_1.zip [file Trim34a_set_C.pdf › Supplemental Dataset 1/C-mRNA_nonrhythm_translation_rhyth/Trim34a_set_C.pdf]

# Trim41

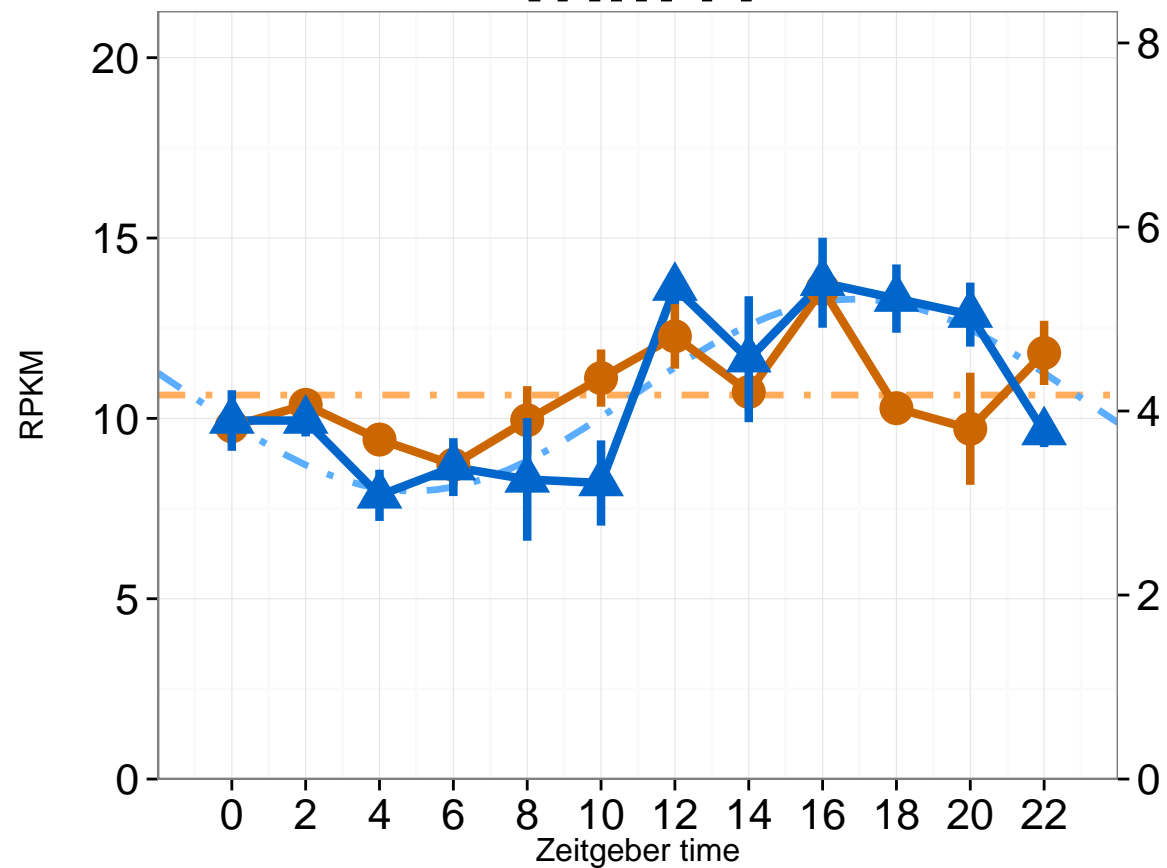

# Trim41

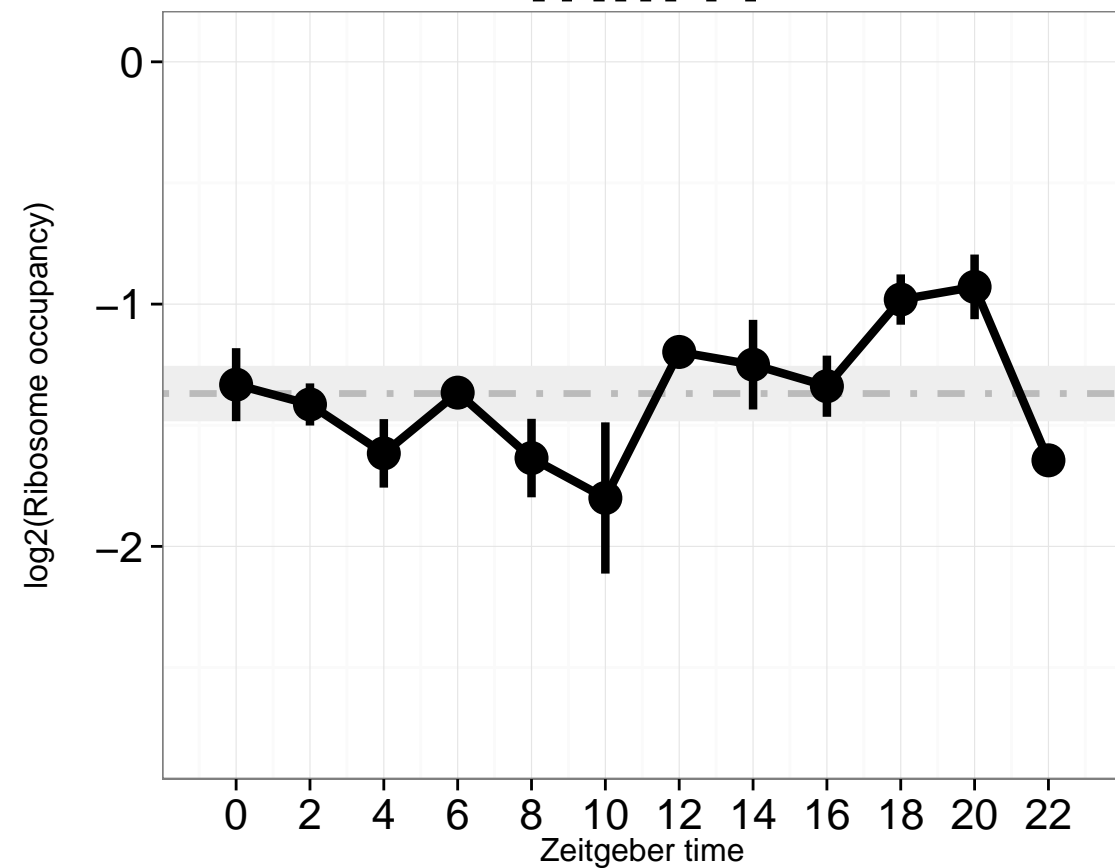

Supplement: SuppDataset_1.zip [file Trim41_set_C.pdf › Supplemental Dataset 1/C-mRNA_nonrhythm_translation_rhyth/Trim41_set_C.pdf]

# Trim7

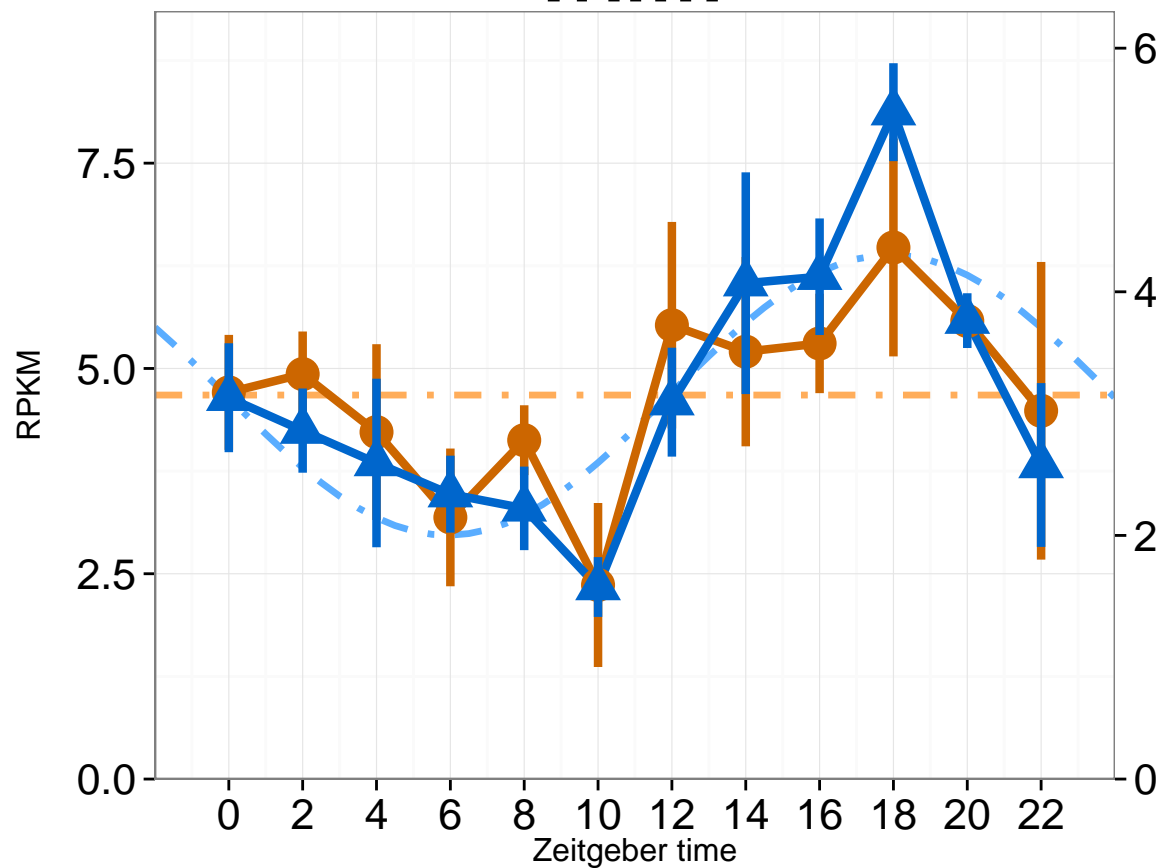

# Trim7

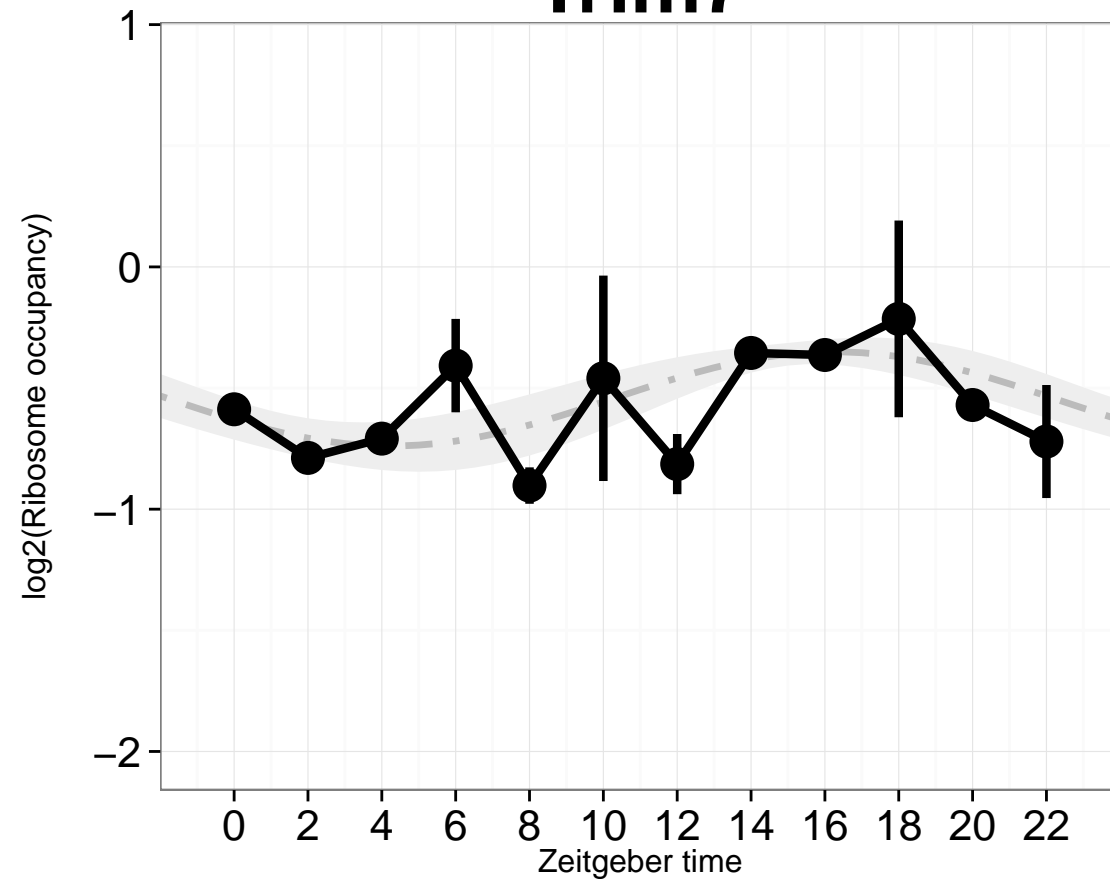

Supplement: SuppDataset_1.zip [file Trim7_set_C.pdf › Supplemental Dataset 1/C-mRNA_nonrhythm_translation_rhyth/Trim7_set_C.pdf]

# Trmt10a

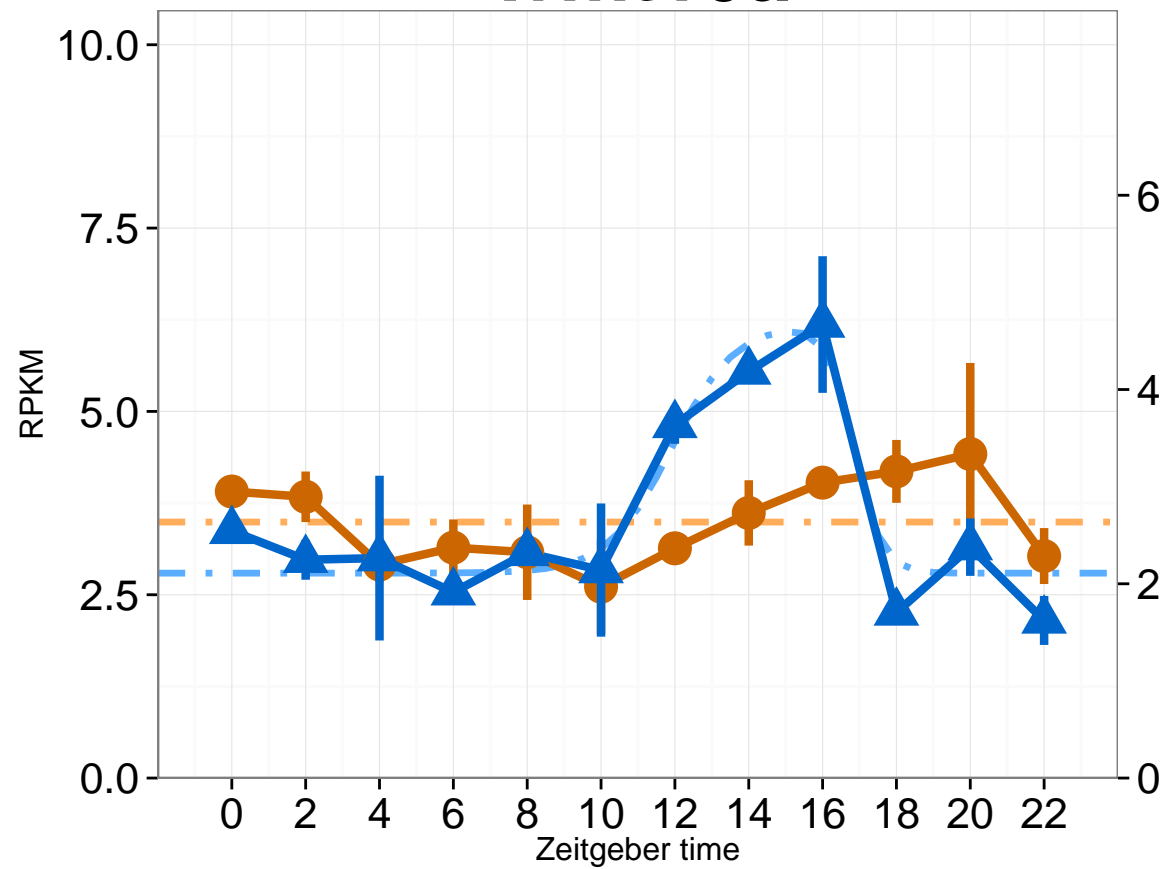

# Trmt10a

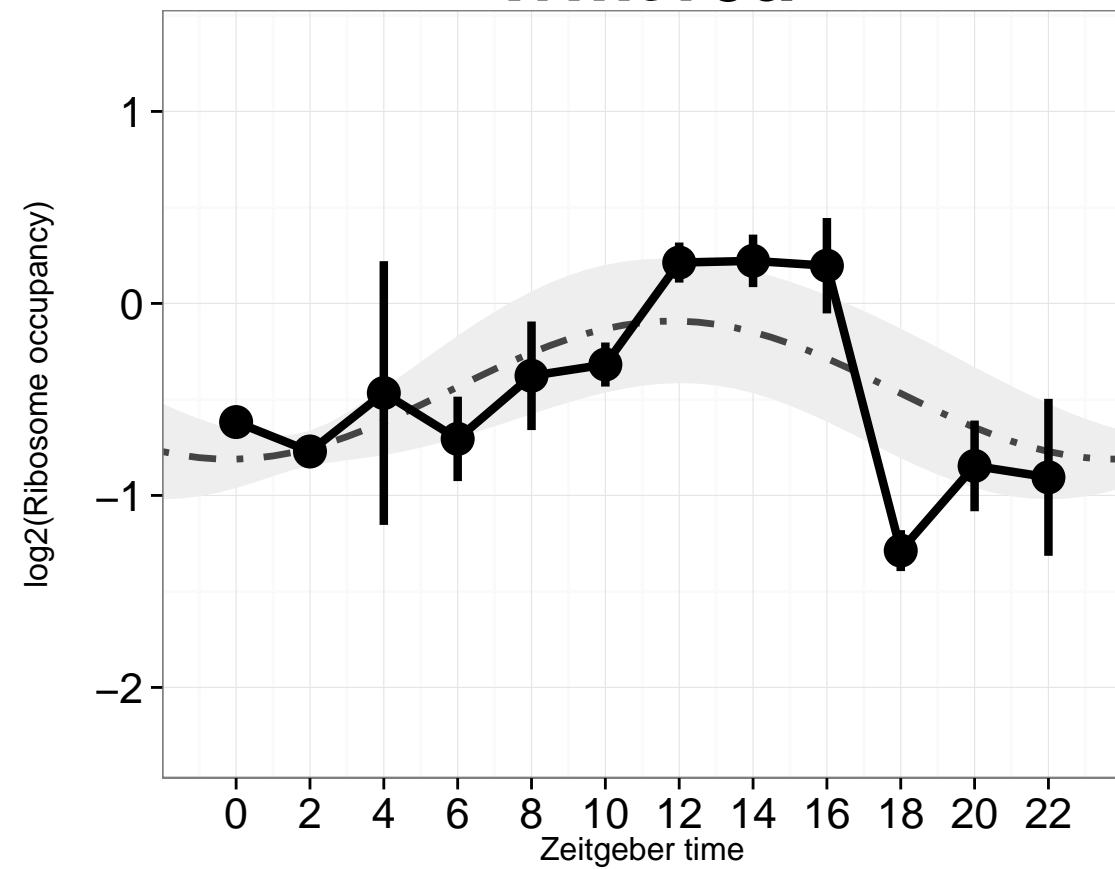

Supplement: SuppDataset_1.zip [file Trmt10a_set_C.pdf › Supplemental Dataset 1/C-mRNA_nonrhythm_translation_rhyth/Trmt10a_set_C.pdf]

# Trmt1l

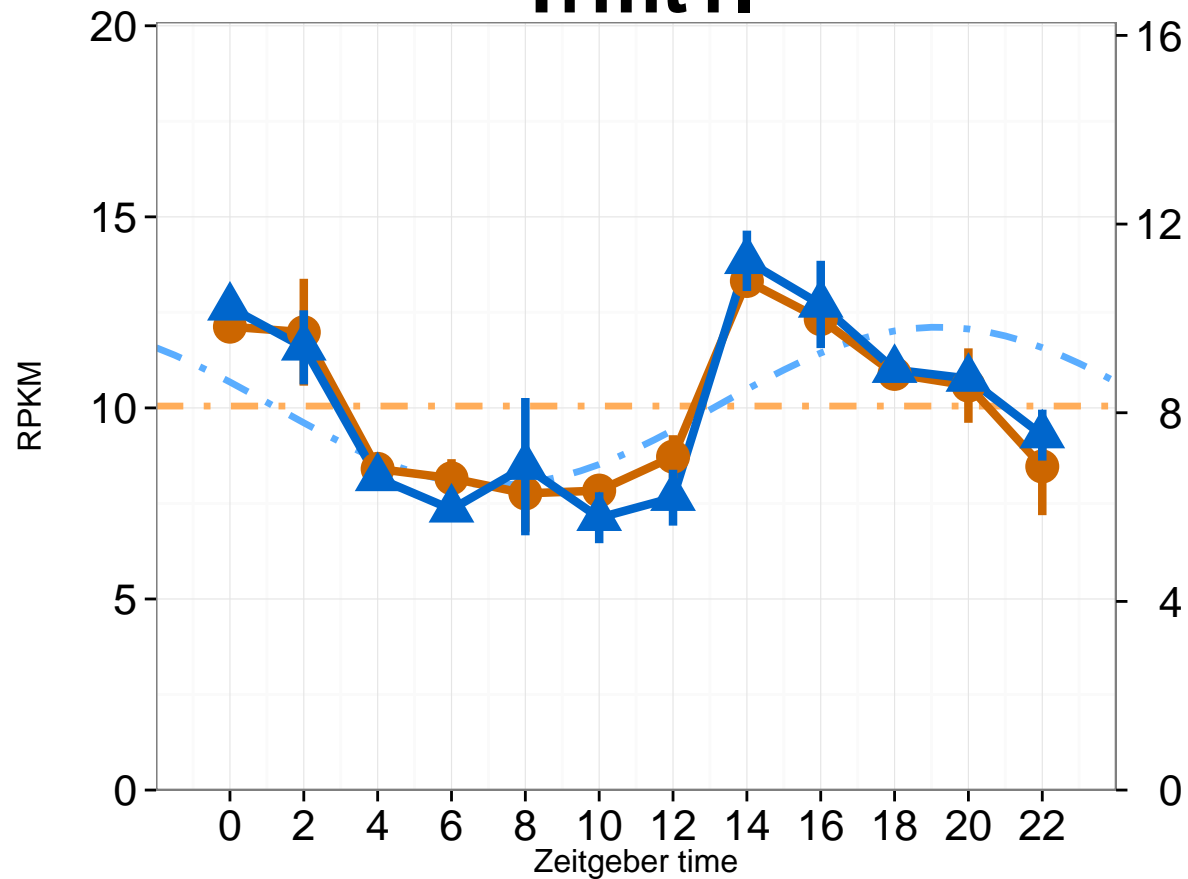

# Trmt1l

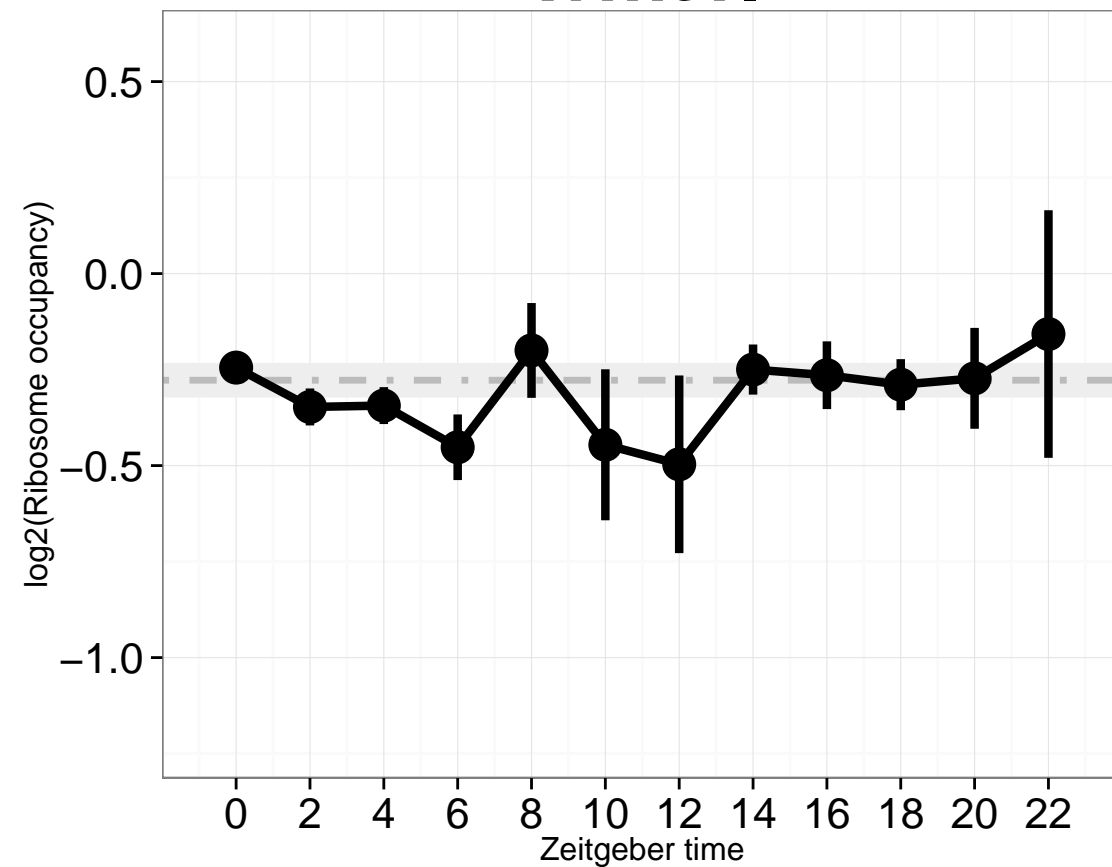

Supplement: SuppDataset_1.zip [file Trmt1l_set_C.pdf › Supplemental Dataset 1/C-mRNA_nonrhythm_translation_rhyth/Trmt1l_set_C.pdf]

# Trmt61a

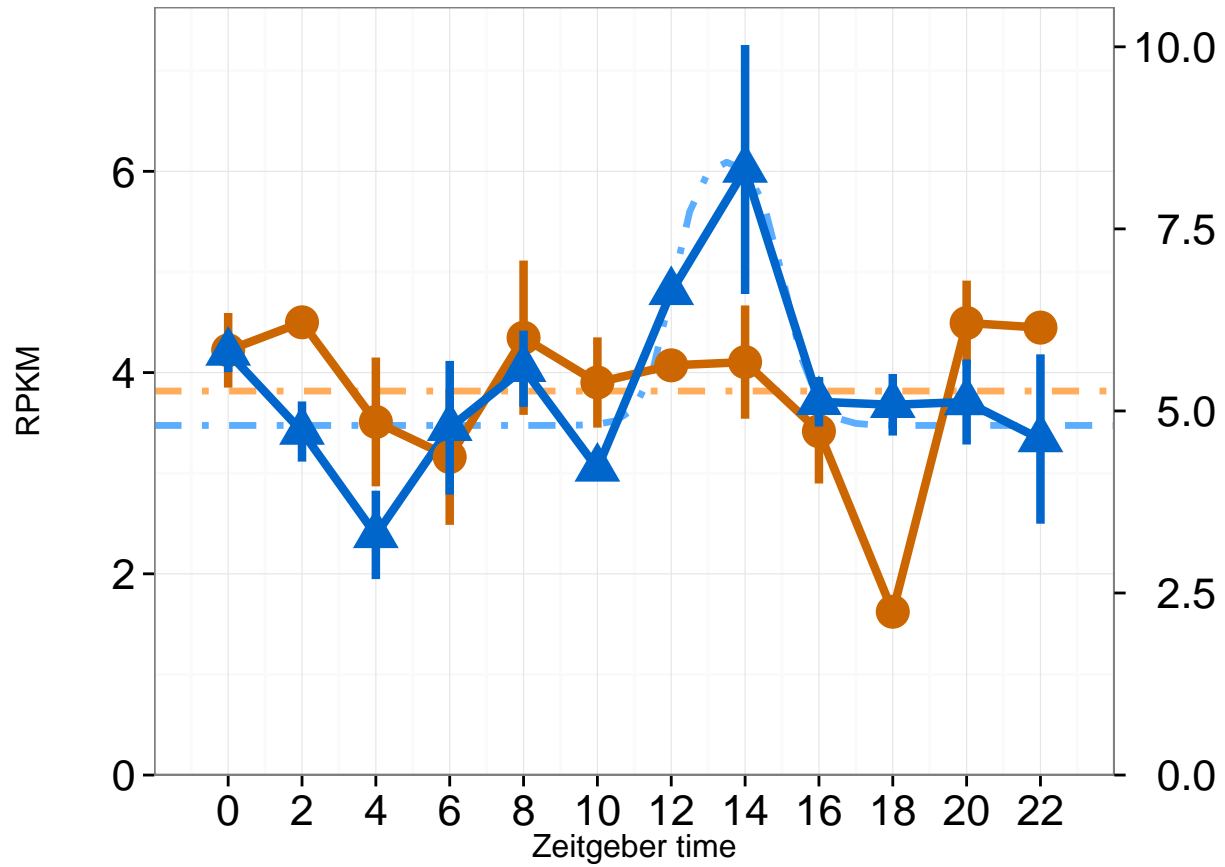

# Trmt61a

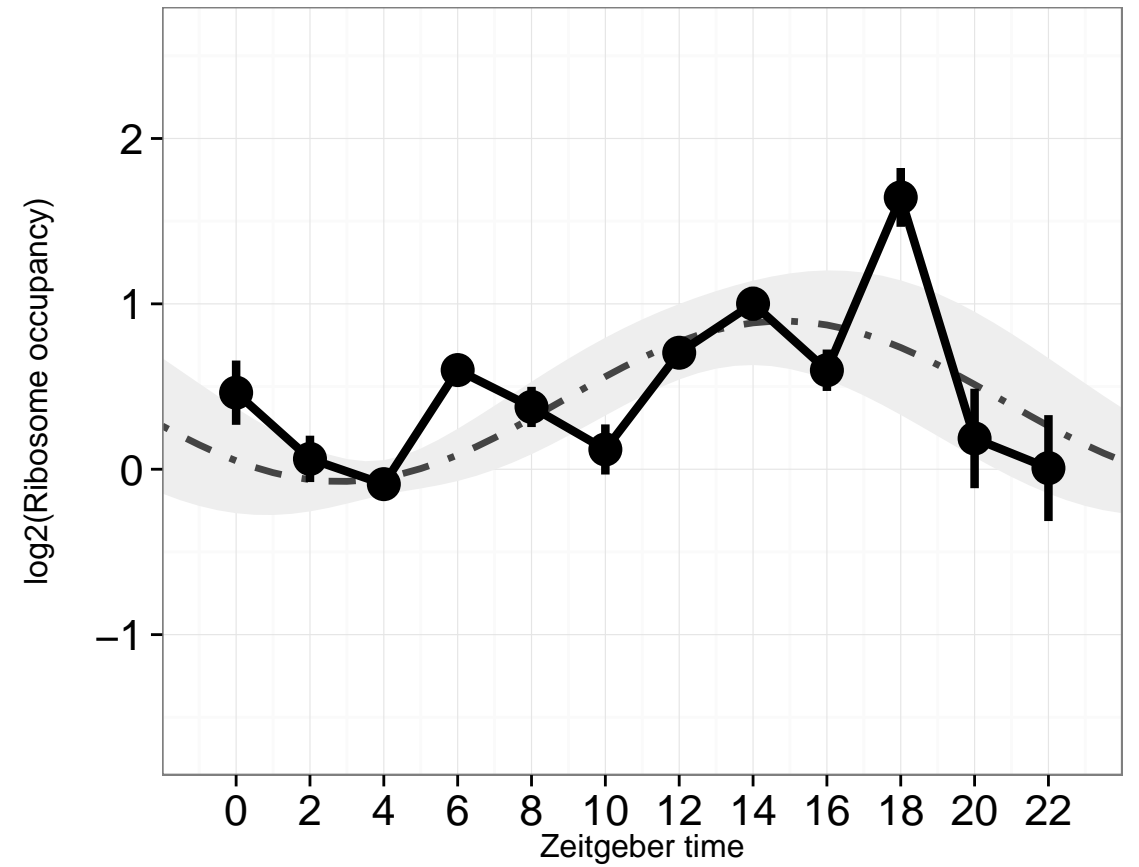

Supplement: SuppDataset_1.zip [file Trmt61a_set_C.pdf › Supplemental Dataset 1/C-mRNA_nonrhythm_translation_rhyth/Trmt61a_set_C.pdf]

# Tshz2

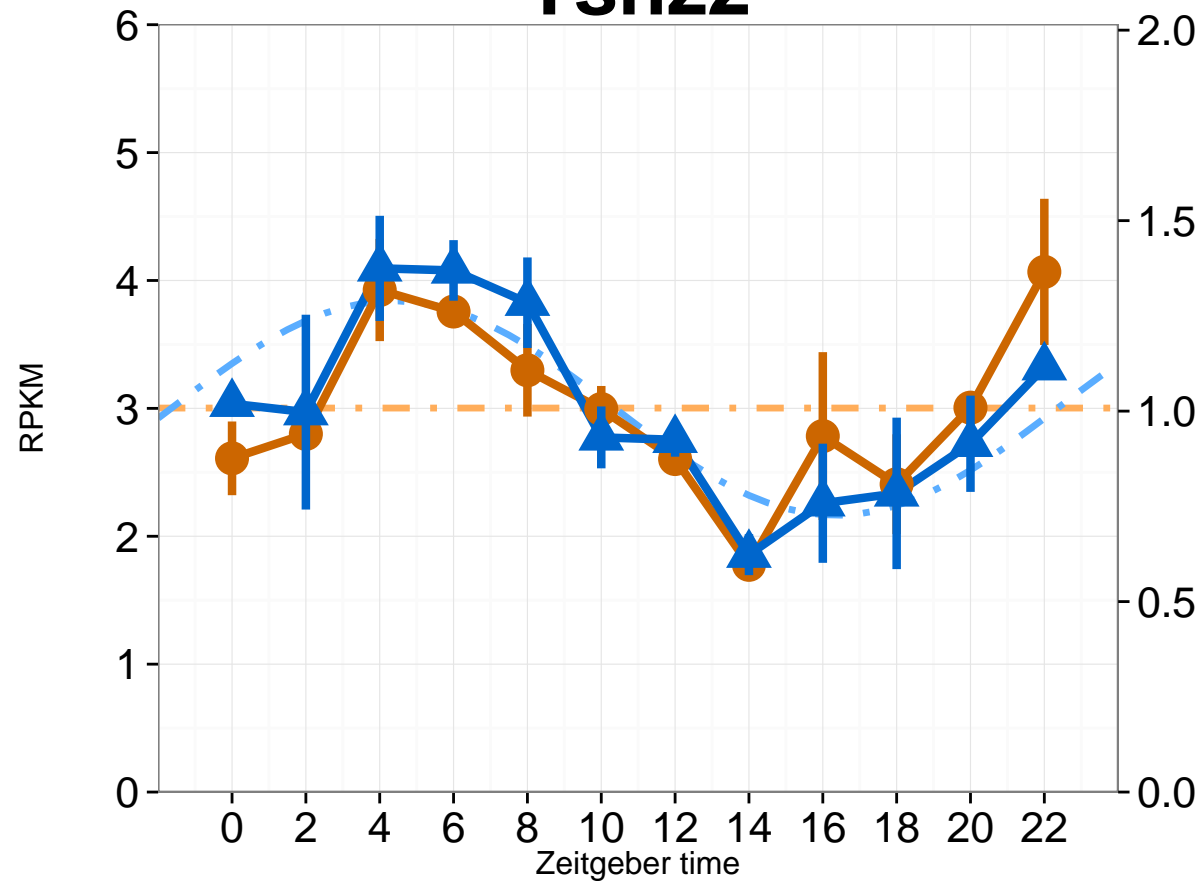

# Tshz2

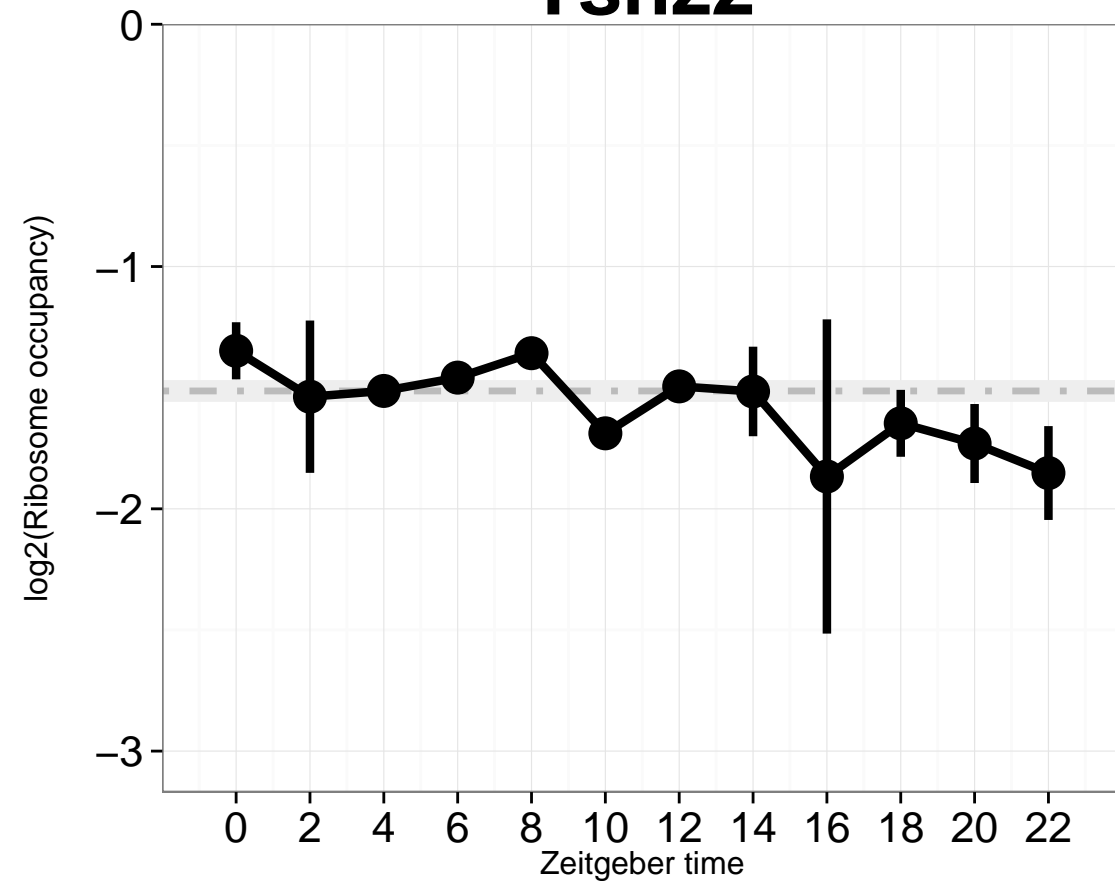

Supplement: SuppDataset_1.zip [file Tshz2_set_C.pdf › Supplemental Dataset 1/C-mRNA_nonrhythm_translation_rhyth/Tshz2_set_C.pdf]

# Tspan12

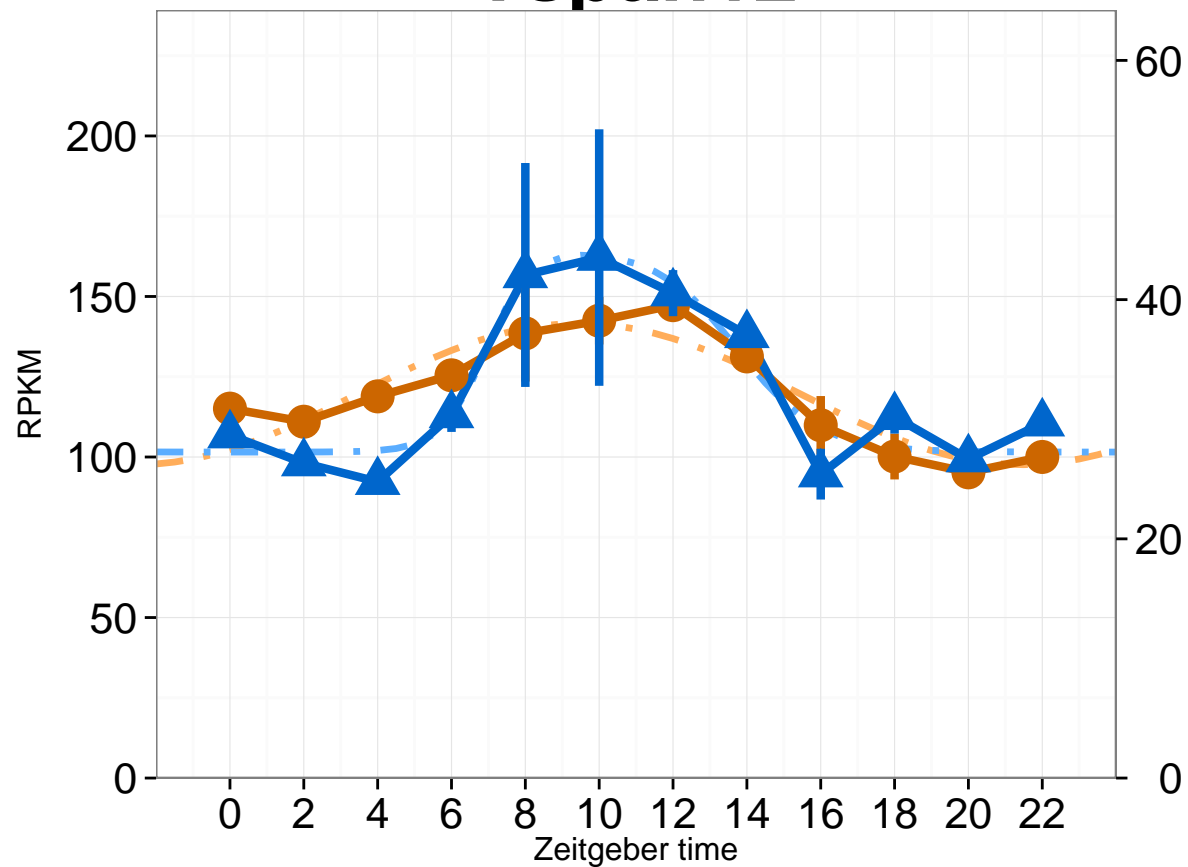

# Tspan12

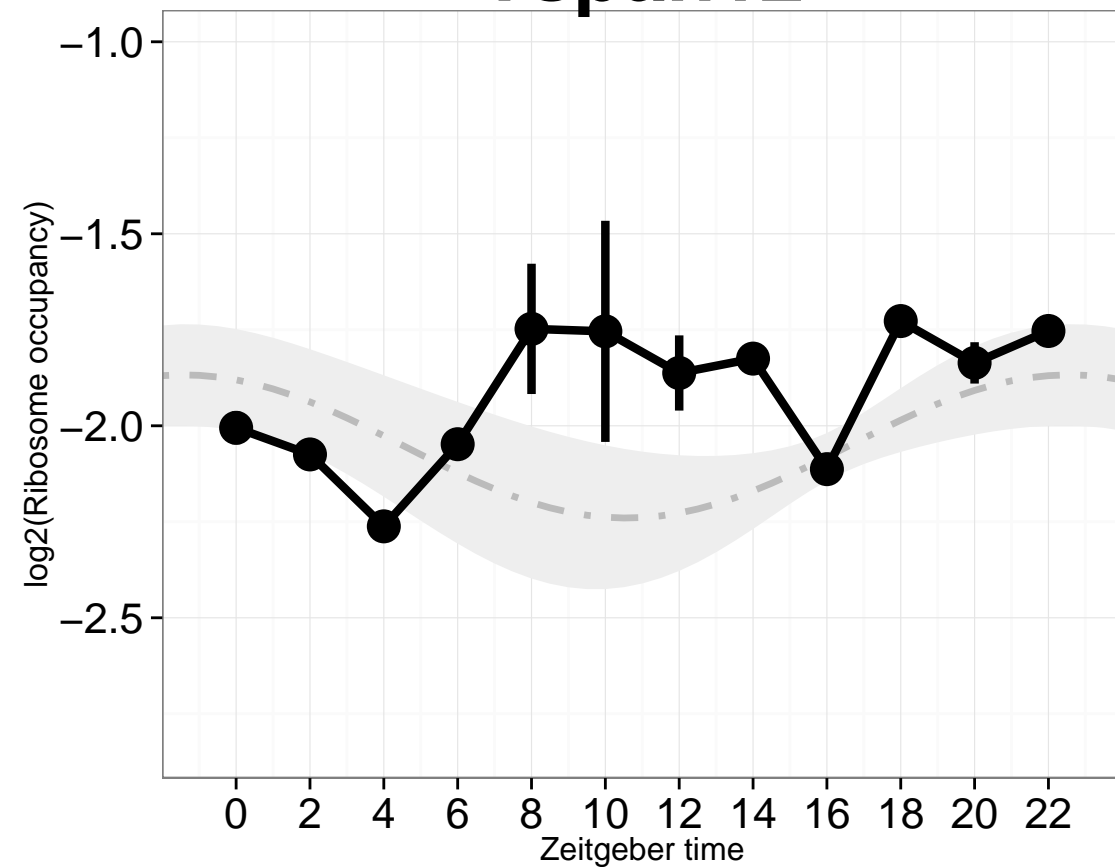

Supplement: SuppDataset_1.zip [file Tspan12_set_C.pdf › Supplemental Dataset 1/C-mRNA_nonrhythm_translation_rhyth/Tspan12_set_C.pdf]

# Tspan18

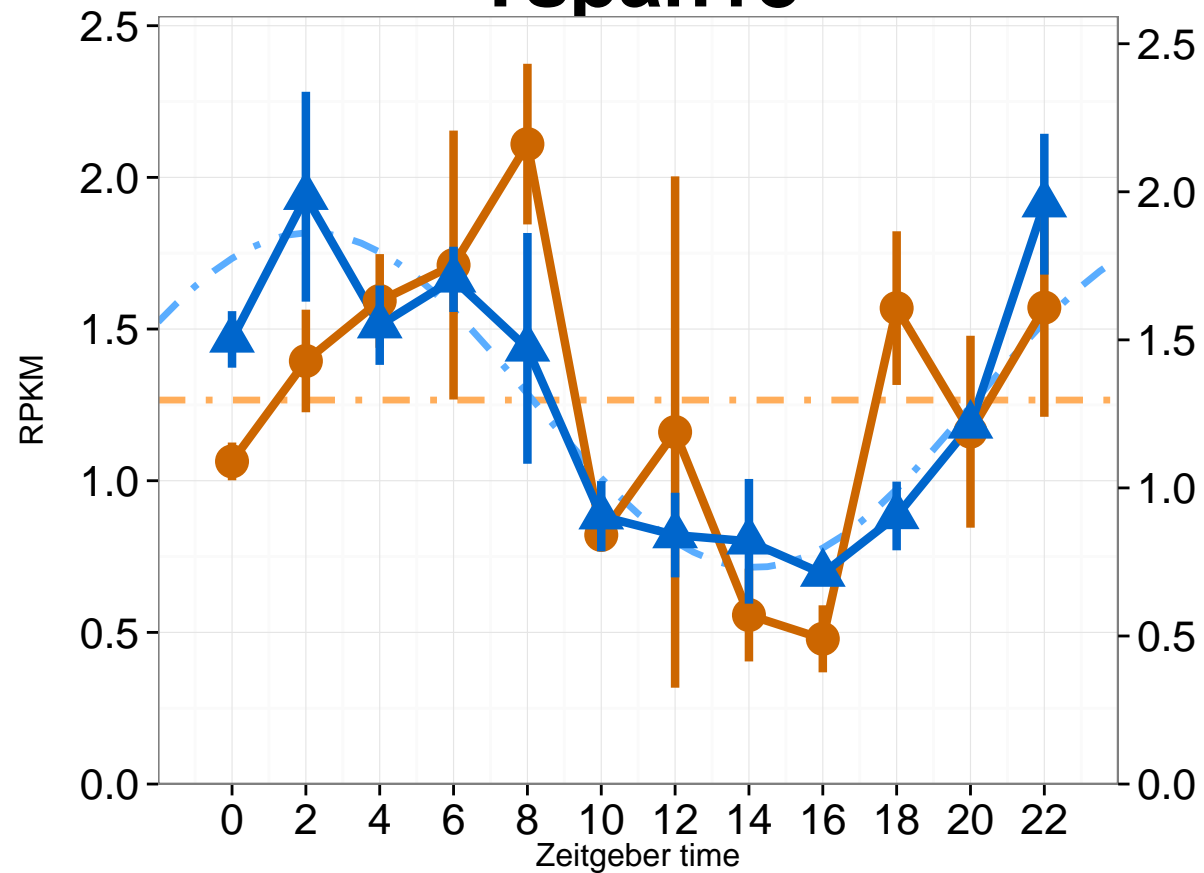

# Tspan18

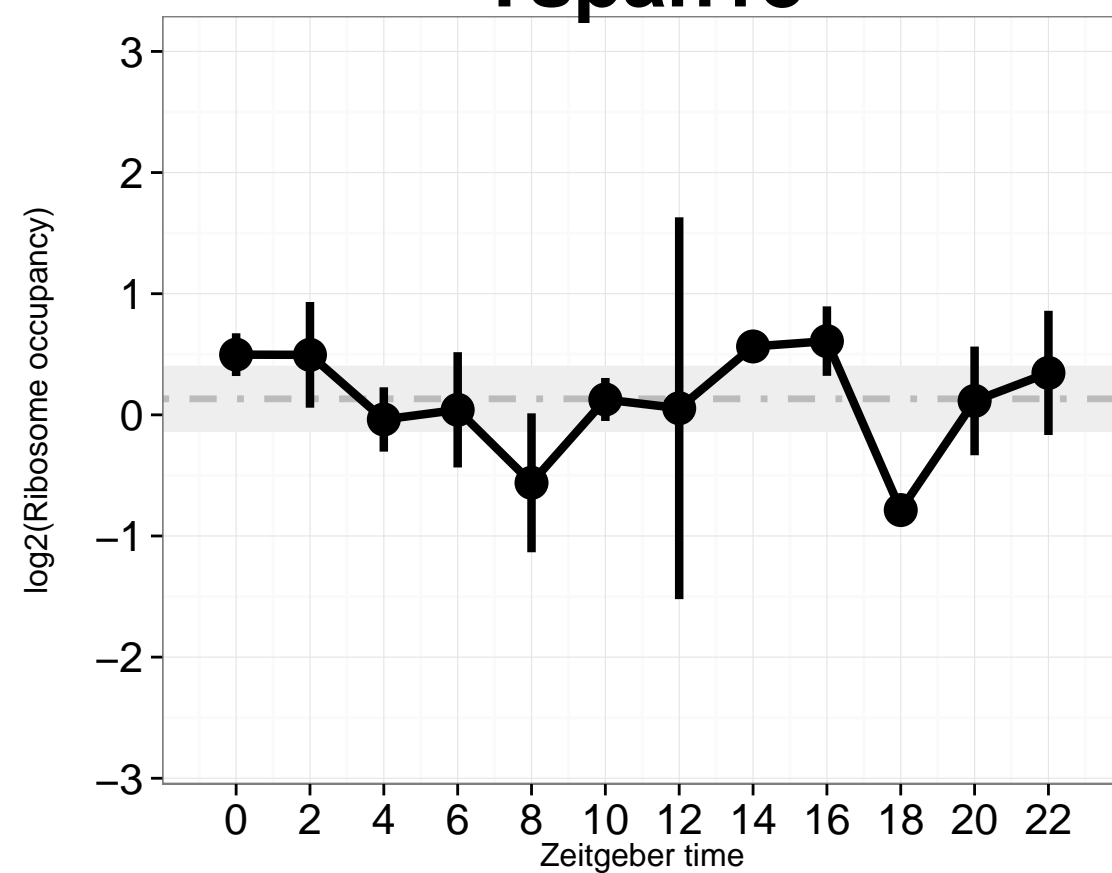

Supplement: SuppDataset_1.zip [file Tspan18_set_C.pdf › Supplemental Dataset 1/C-mRNA_nonrhythm_translation_rhyth/Tspan18_set_C.pdf]

## Tspyl2

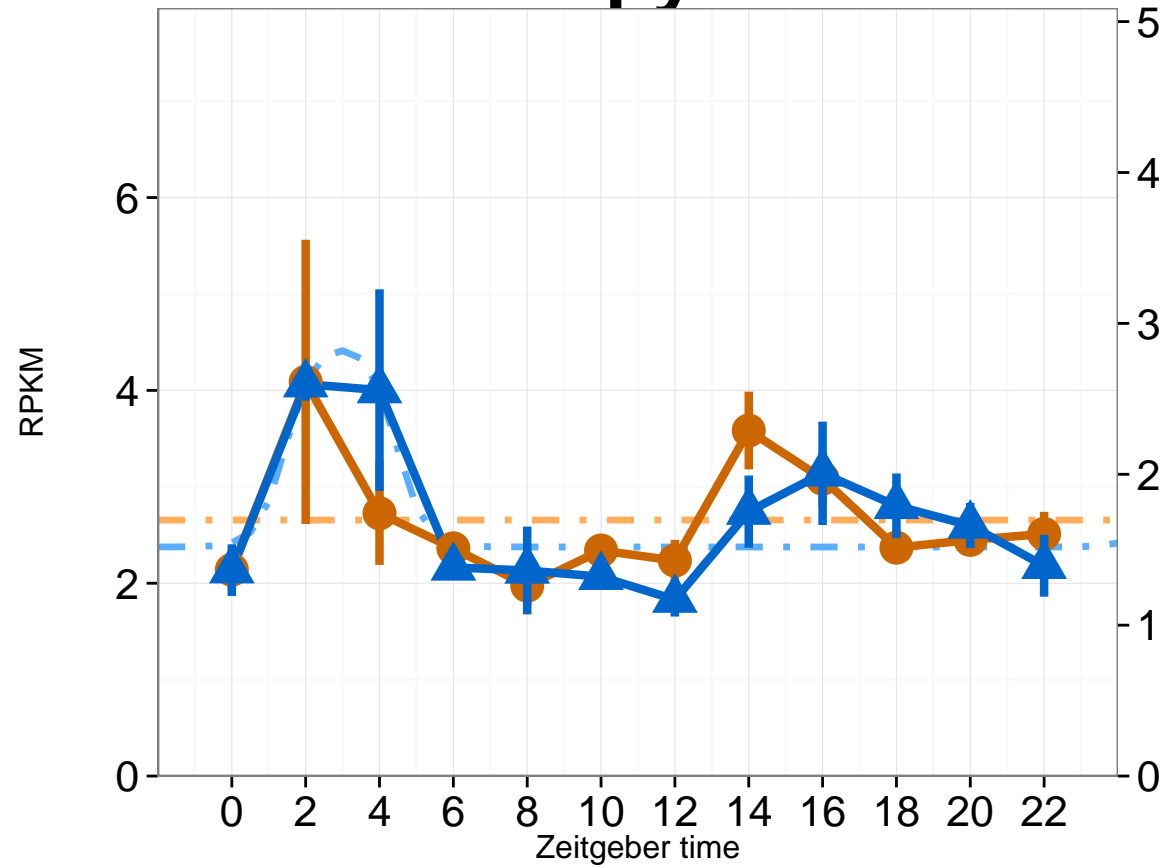

## Tspyl2

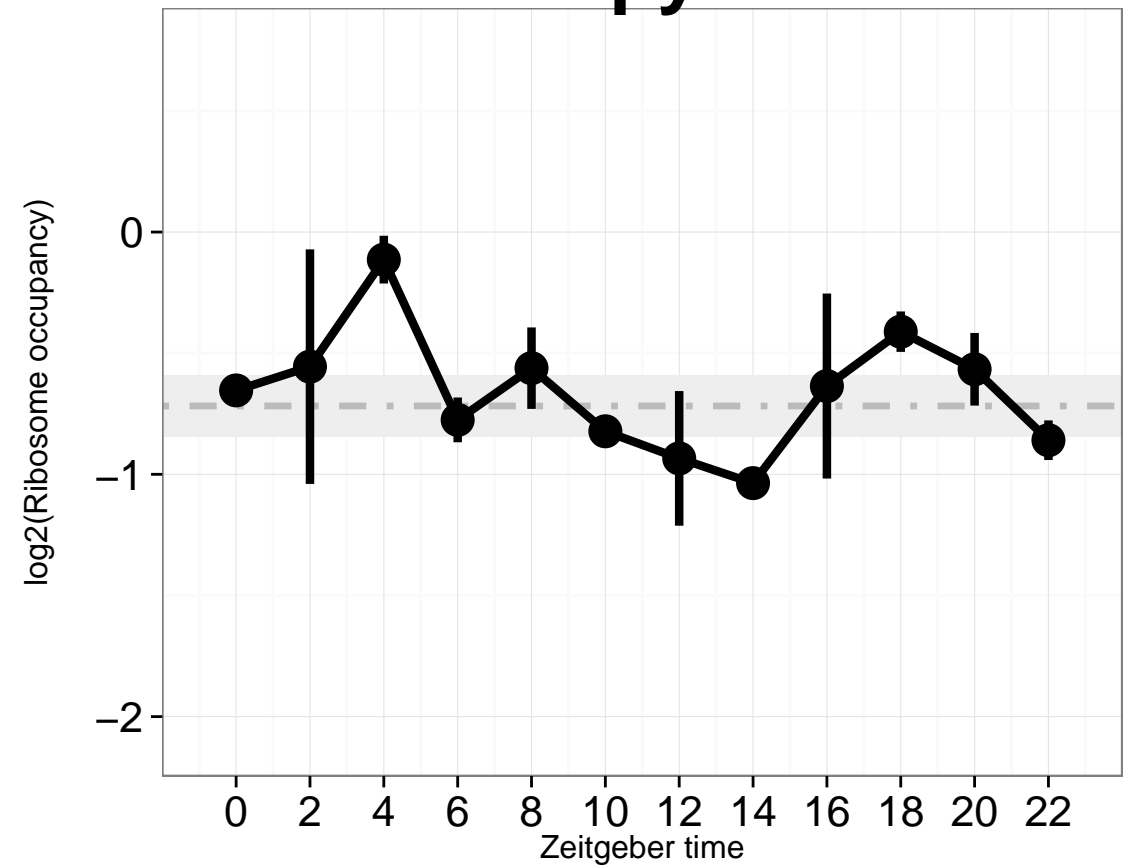

Supplement: SuppDataset_1.zip [file Tspyl2_set_C.pdf › Supplemental Dataset 1/C-mRNA_nonrhythm_translation_rhyth/Tspyl2_set_C.pdf]

## Tssc4

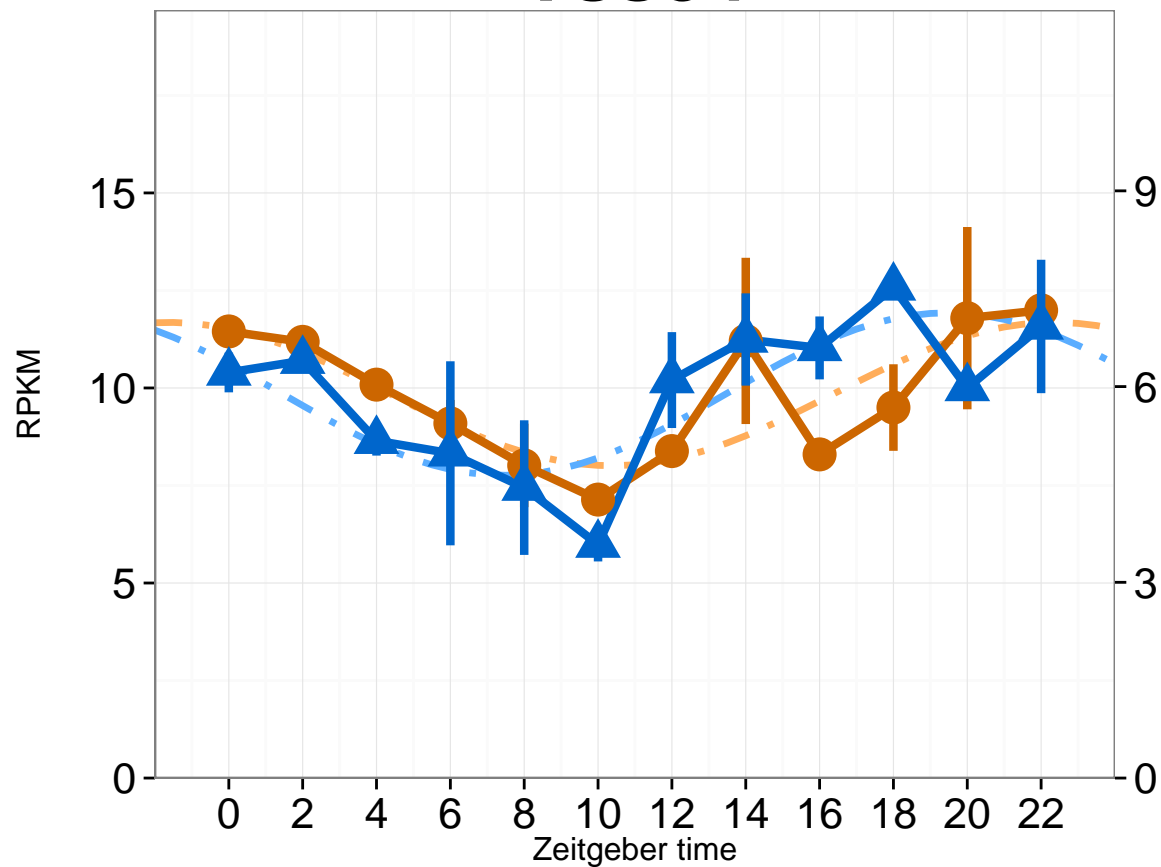

## Tssc4

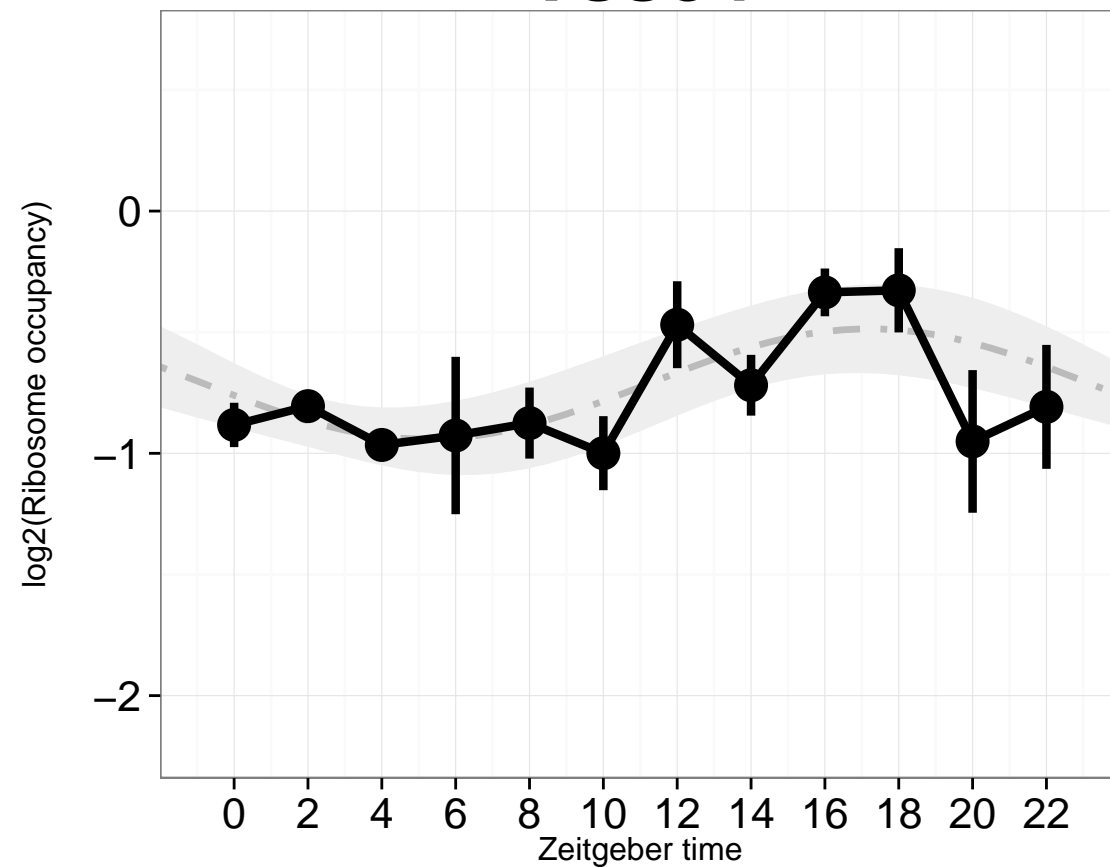

Supplement: SuppDataset_1.zip [file Tssc4_set_C.pdf › Supplemental Dataset 1/C-mRNA_nonrhythm_translation_rhyth/Tssc4_set_C.pdf]

# Ttc21b

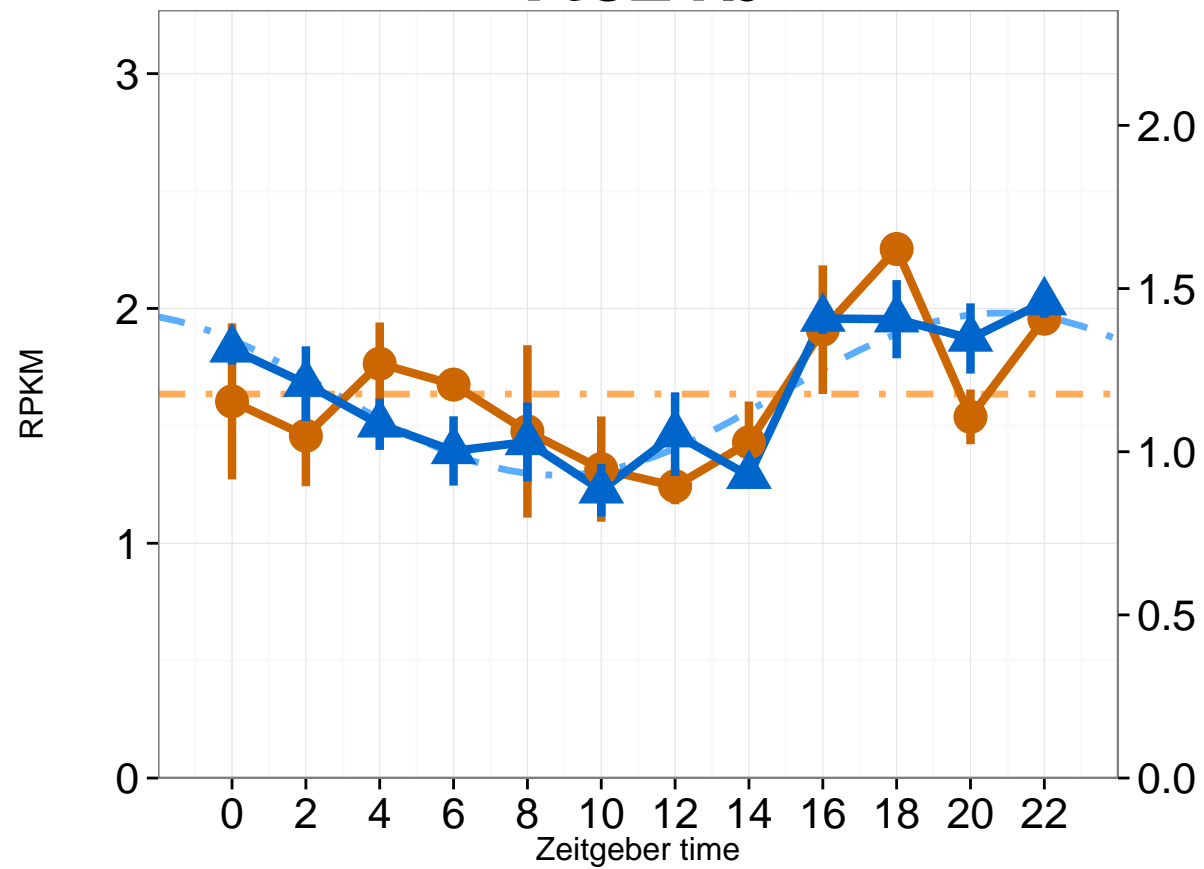

# Ttc21b

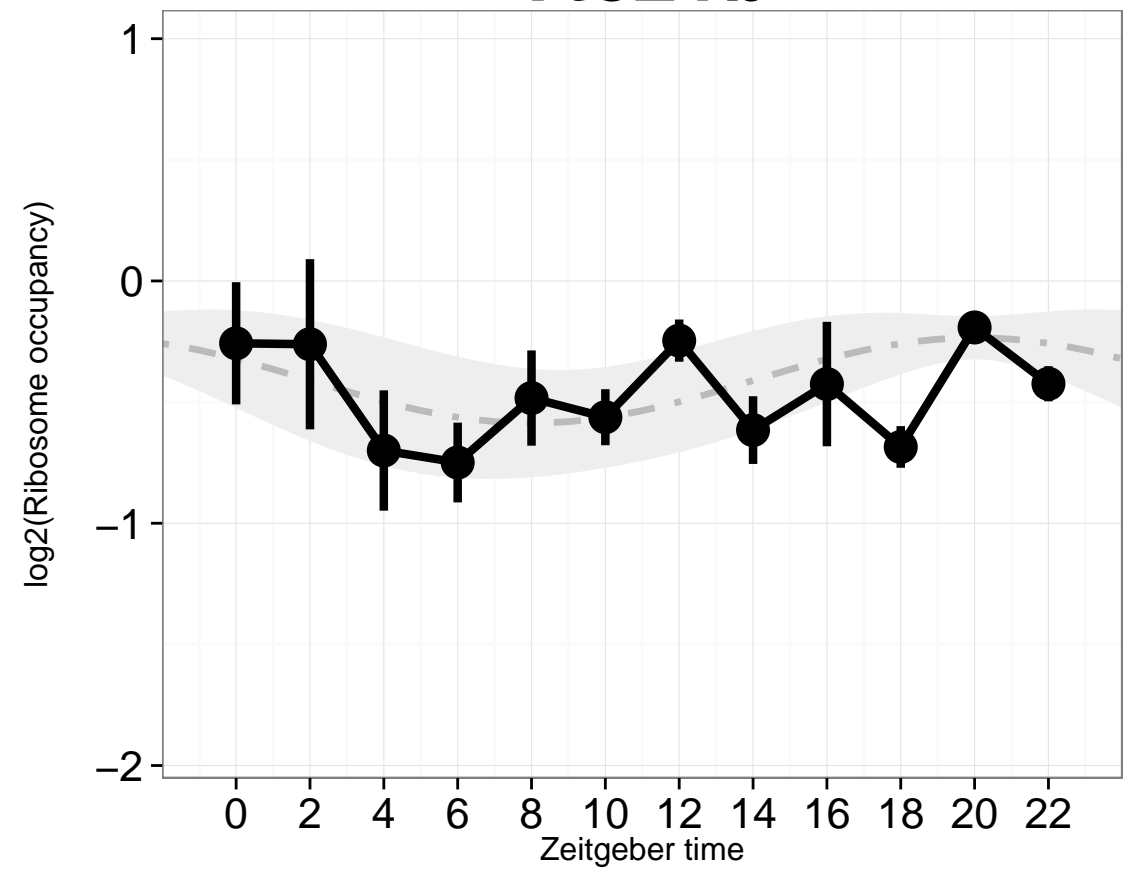

Supplement: SuppDataset_1.zip [file Ttc21b_set_C.pdf › Supplemental Dataset 1/C-mRNA_nonrhythm_translation_rhyth/Ttc21b_set_C.pdf]

## Ttc5

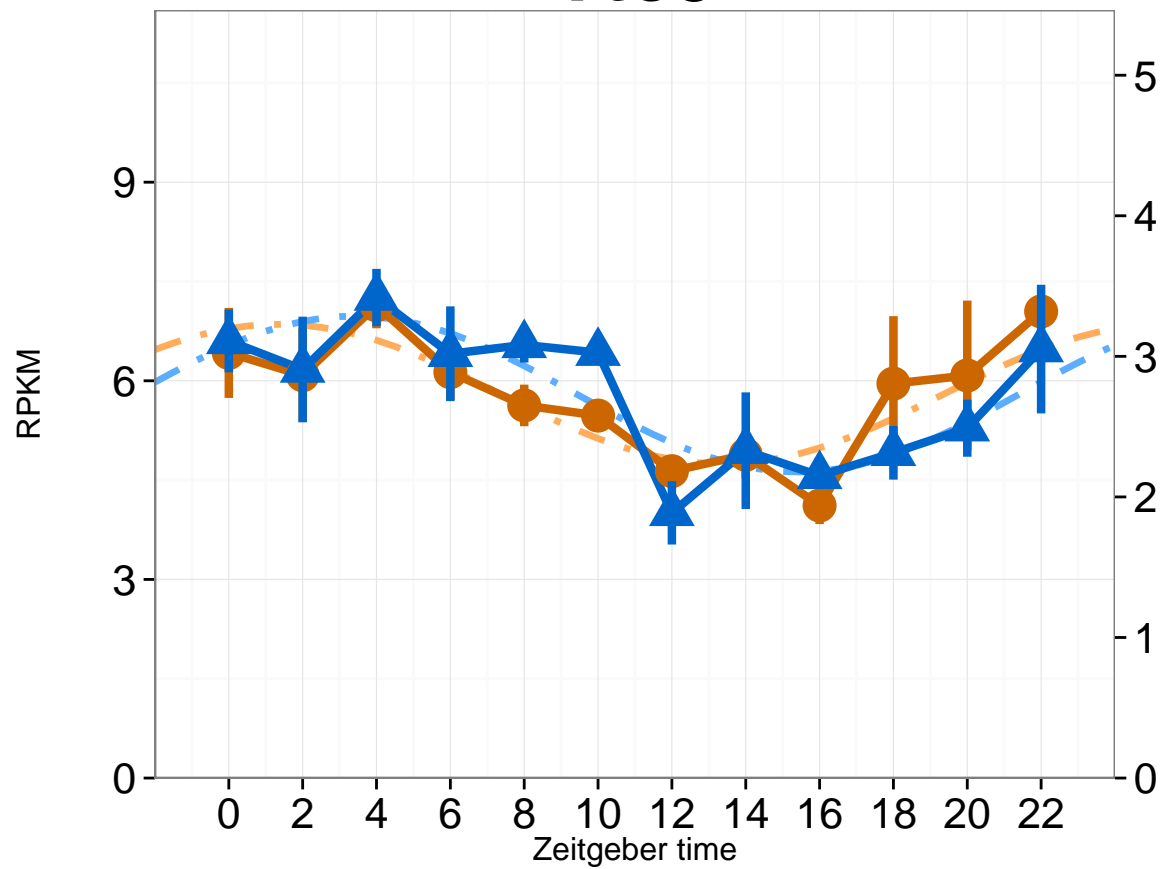

## Ttc5

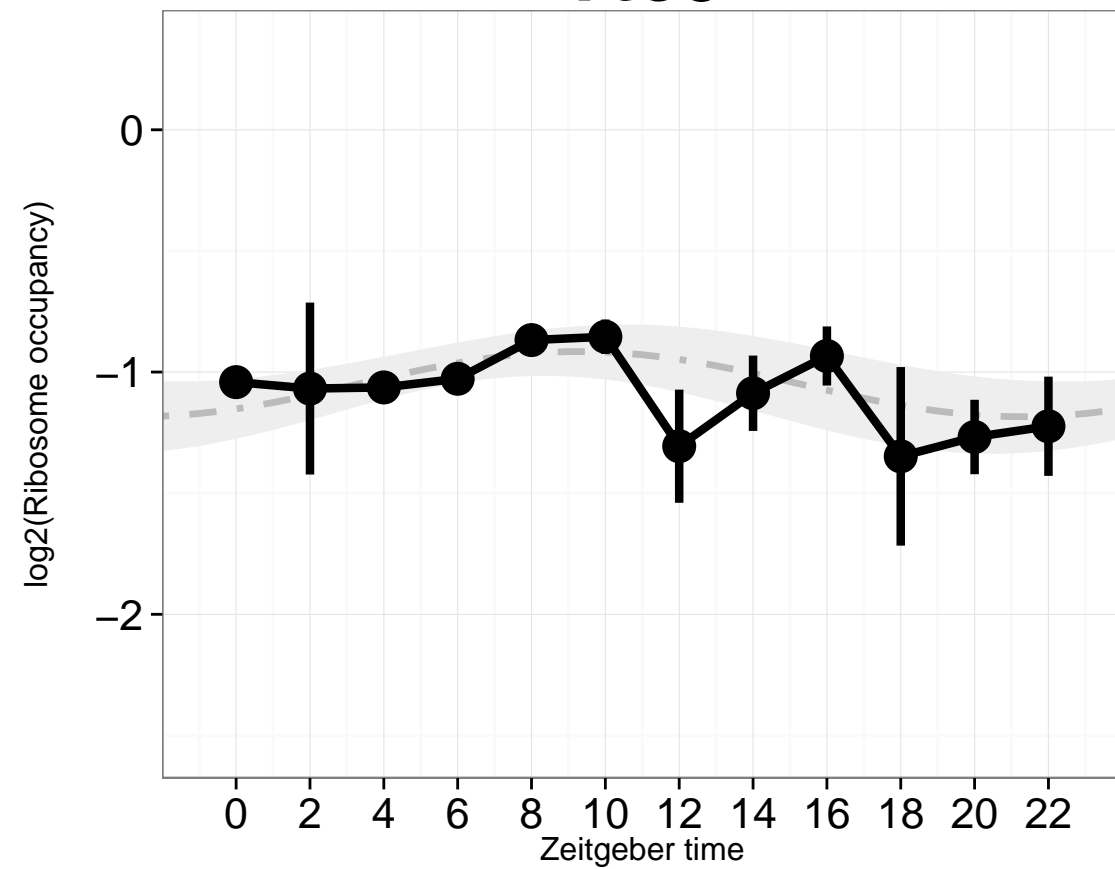

Supplement: SuppDataset_1.zip [file Ttc5_set_C.pdf › Supplemental Dataset 1/C-mRNA_nonrhythm_translation_rhyth/Ttc5_set_C.pdf]

## Ttc7

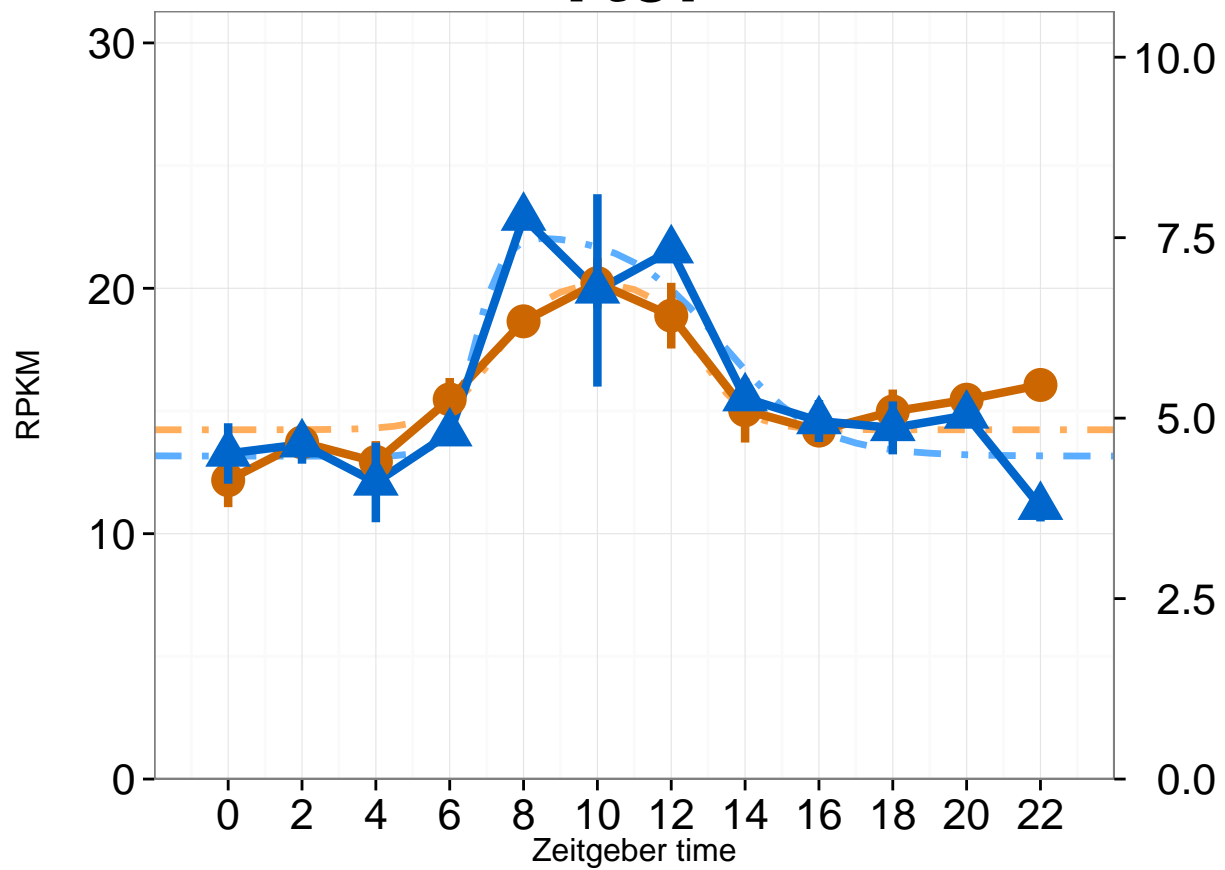

## Ttc7

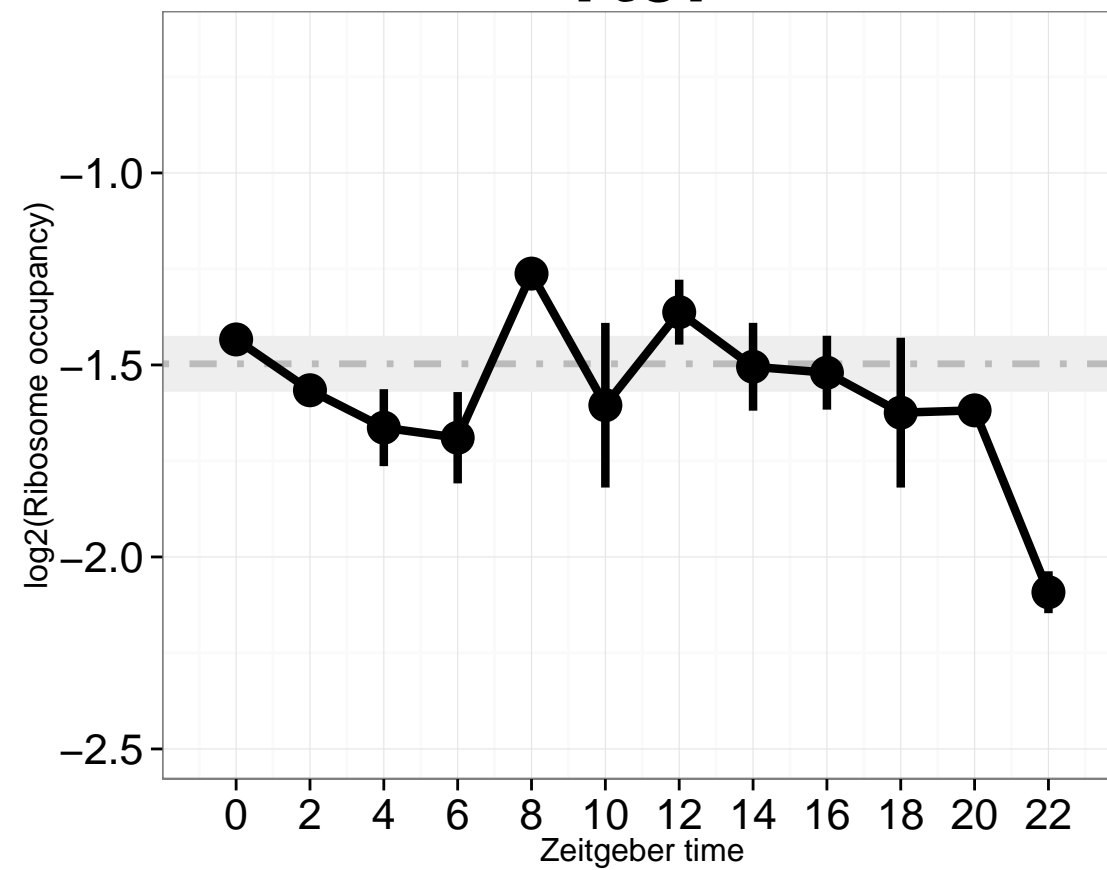

Supplement: SuppDataset_1.zip [file Ttc7_set_C.pdf › Supplemental Dataset 1/C-mRNA_nonrhythm_translation_rhyth/Ttc7_set_C.pdf]

## TtII4

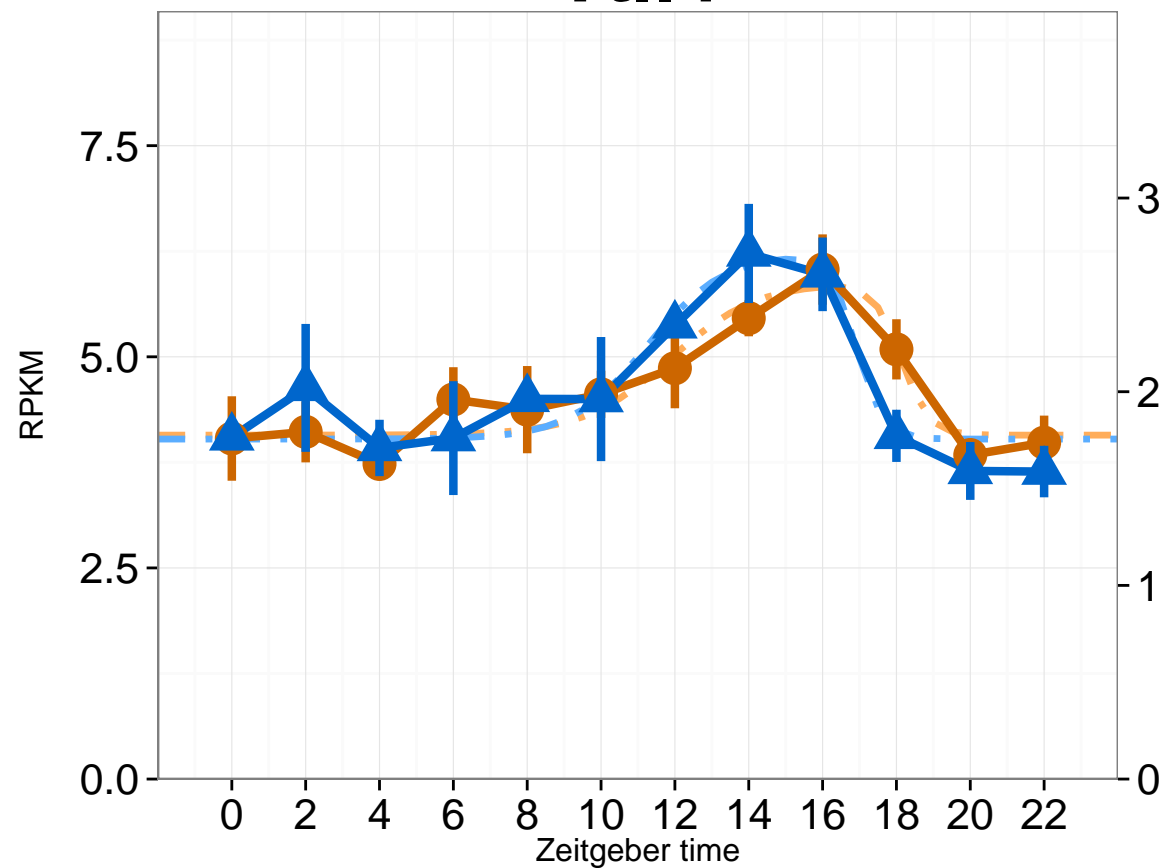

## TtII4

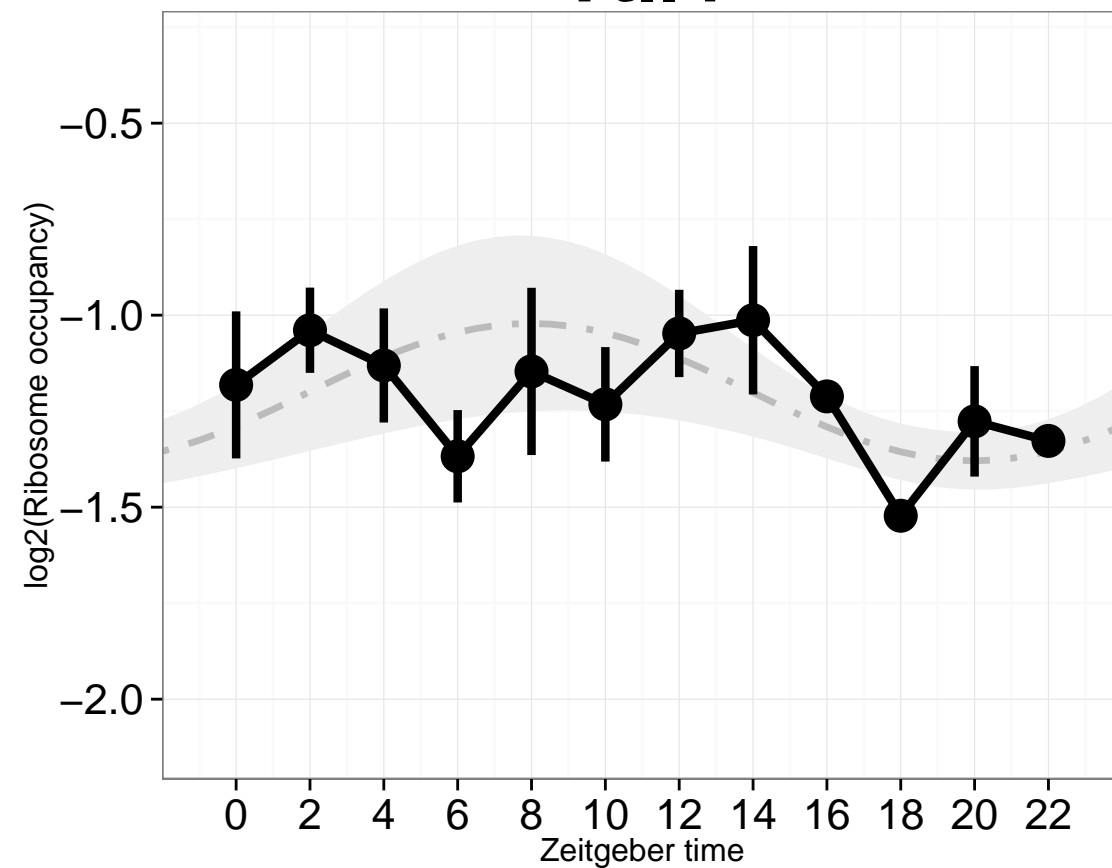

Supplement: SuppDataset_1.zip [file Ttll4_set_C.pdf › Supplemental Dataset 1/C-mRNA_nonrhythm_translation_rhyth/Ttll4_set_C.pdf]

# Ttpal

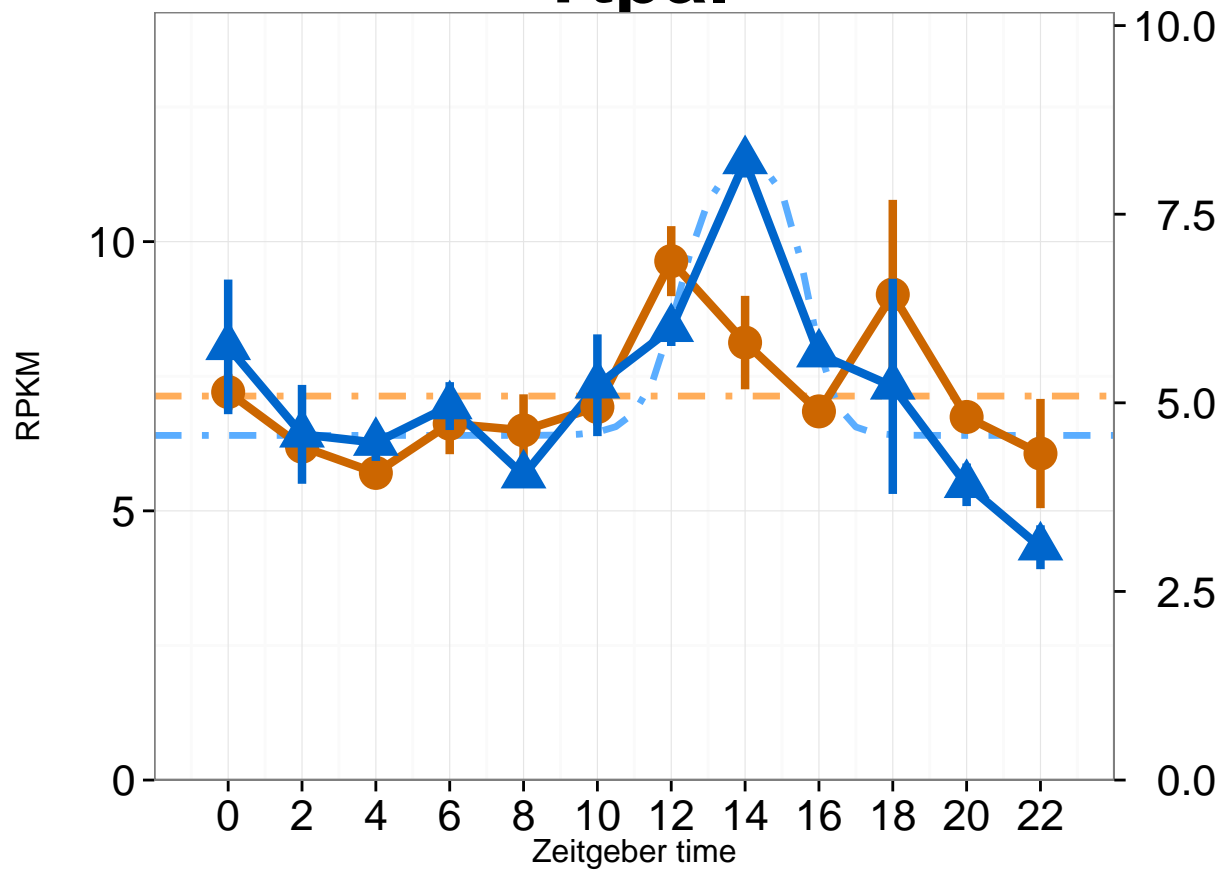

# Ttpal

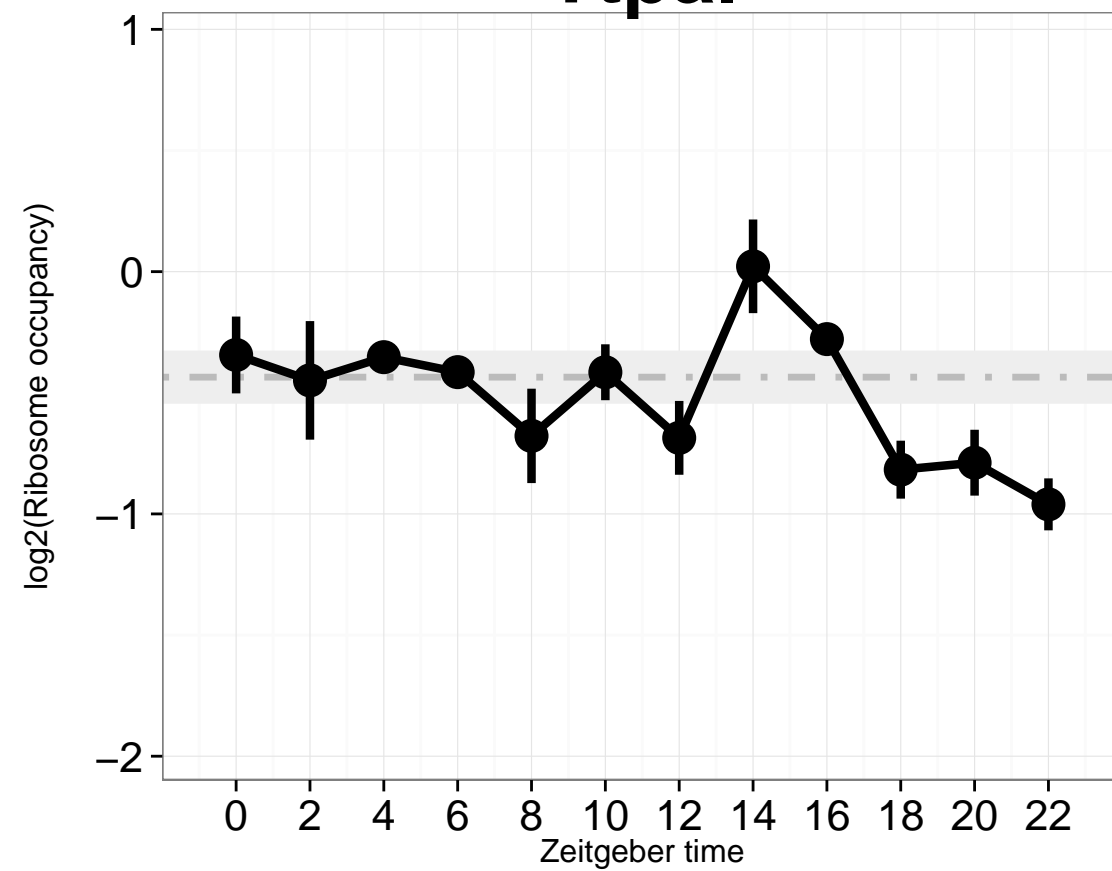

Supplement: SuppDataset_1.zip [file Ttpal_set_C.pdf › Supplemental Dataset 1/C-mRNA_nonrhythm_translation_rhyth/Ttpal_set_C.pdf]

# Tuba1a

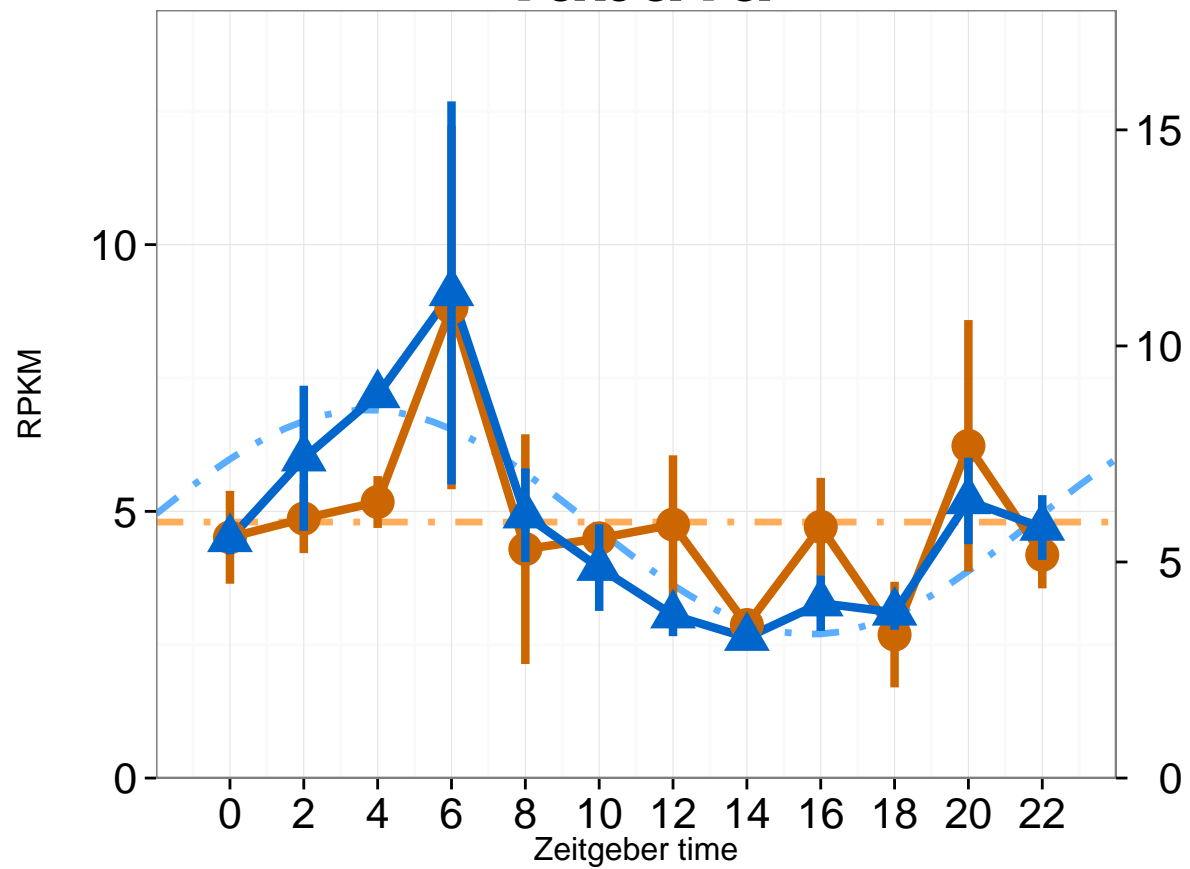

# Tuba1a

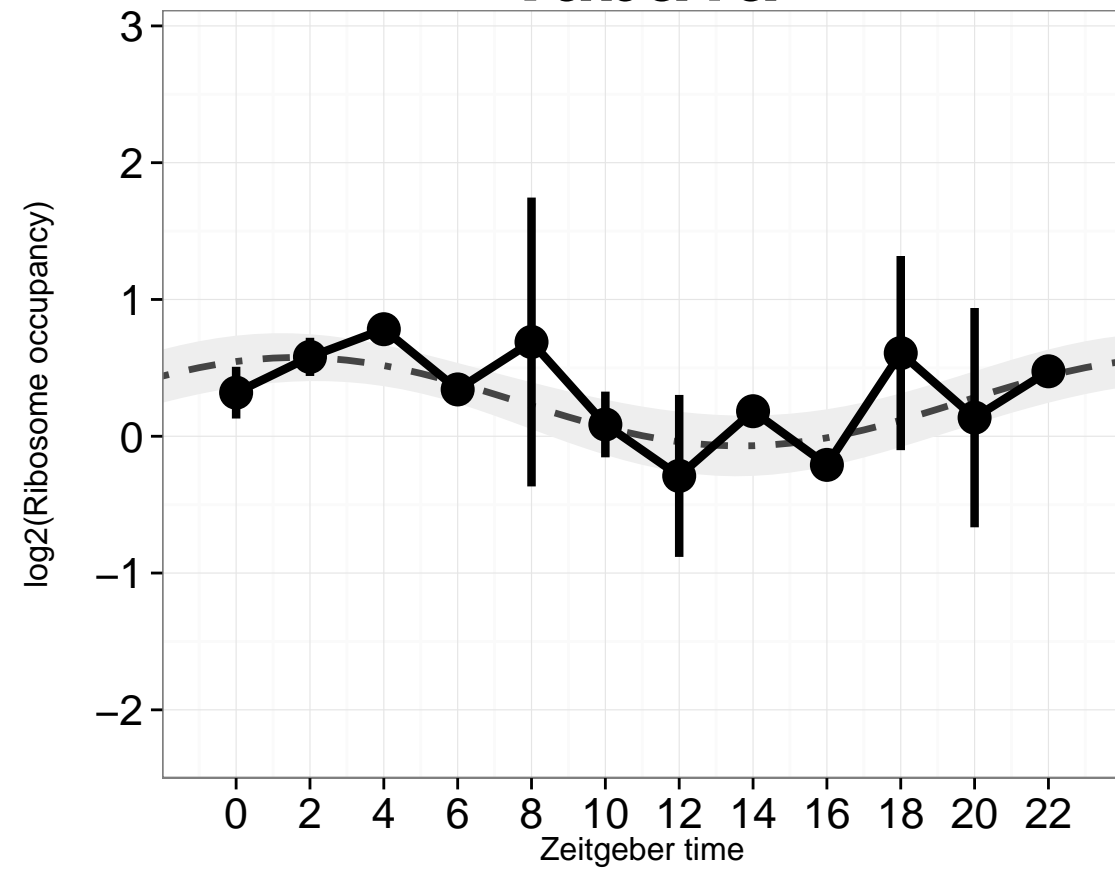

Supplement: SuppDataset_1.zip [file Tuba1a_set_C.pdf › Supplemental Dataset 1/C-mRNA_nonrhythm_translation_rhyth/Tuba1a_set_C.pdf]

**Txndc11**

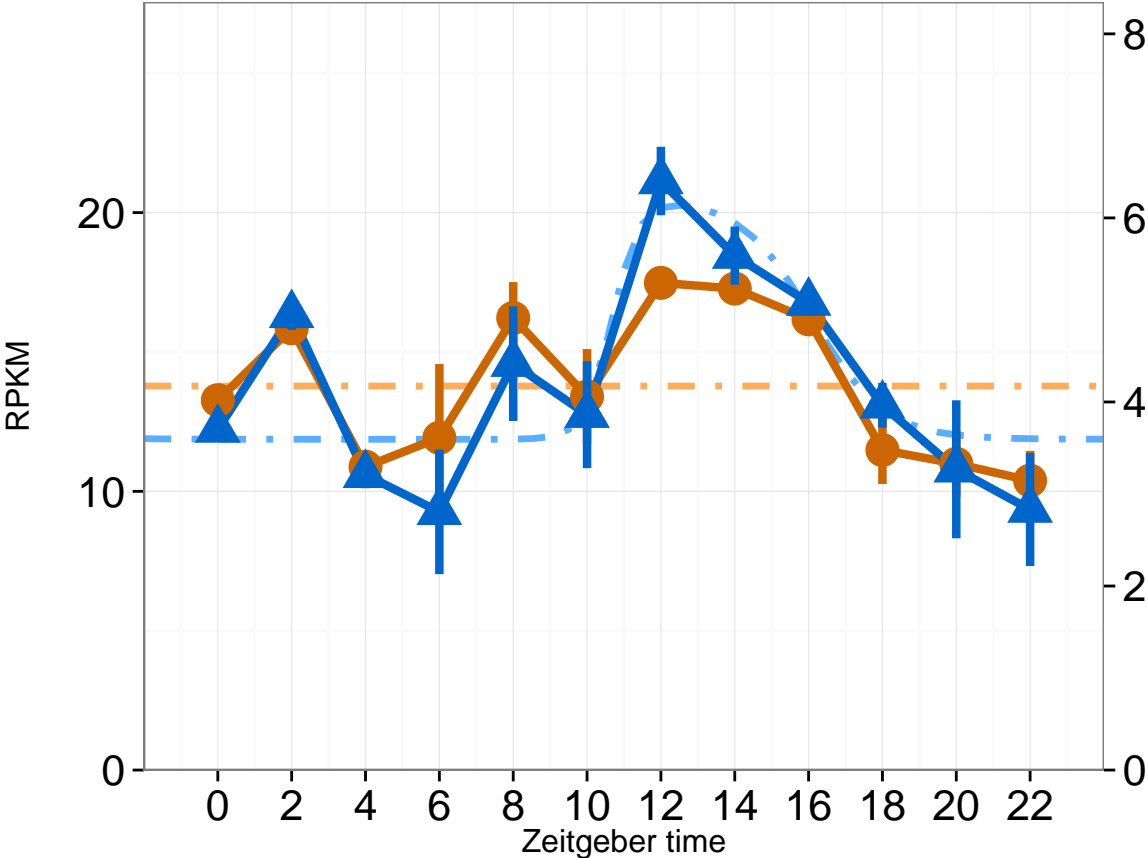

**Txndc11**

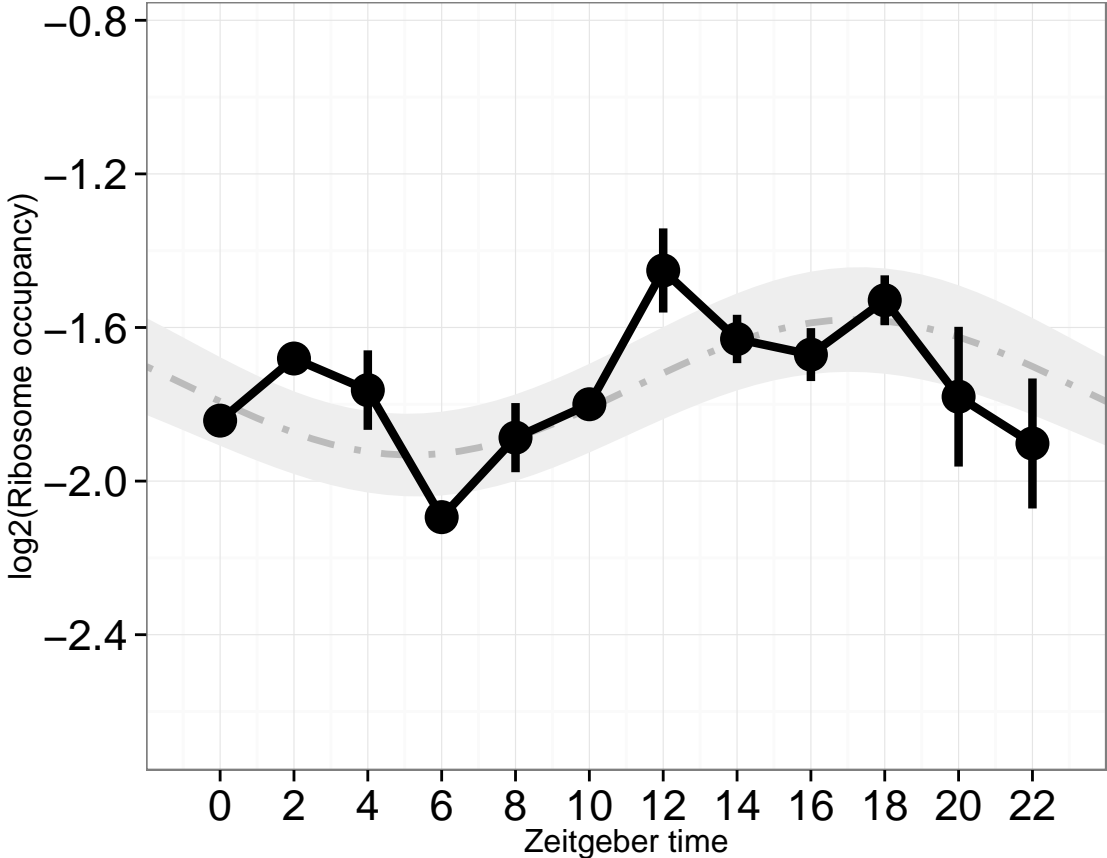

Supplement: SuppDataset_1.zip [file Txndc11_set_C.pdf › Supplemental Dataset 1/C-mRNA_nonrhythm_translation_rhyth/Txndc11_set_C.pdf]

## Uald2

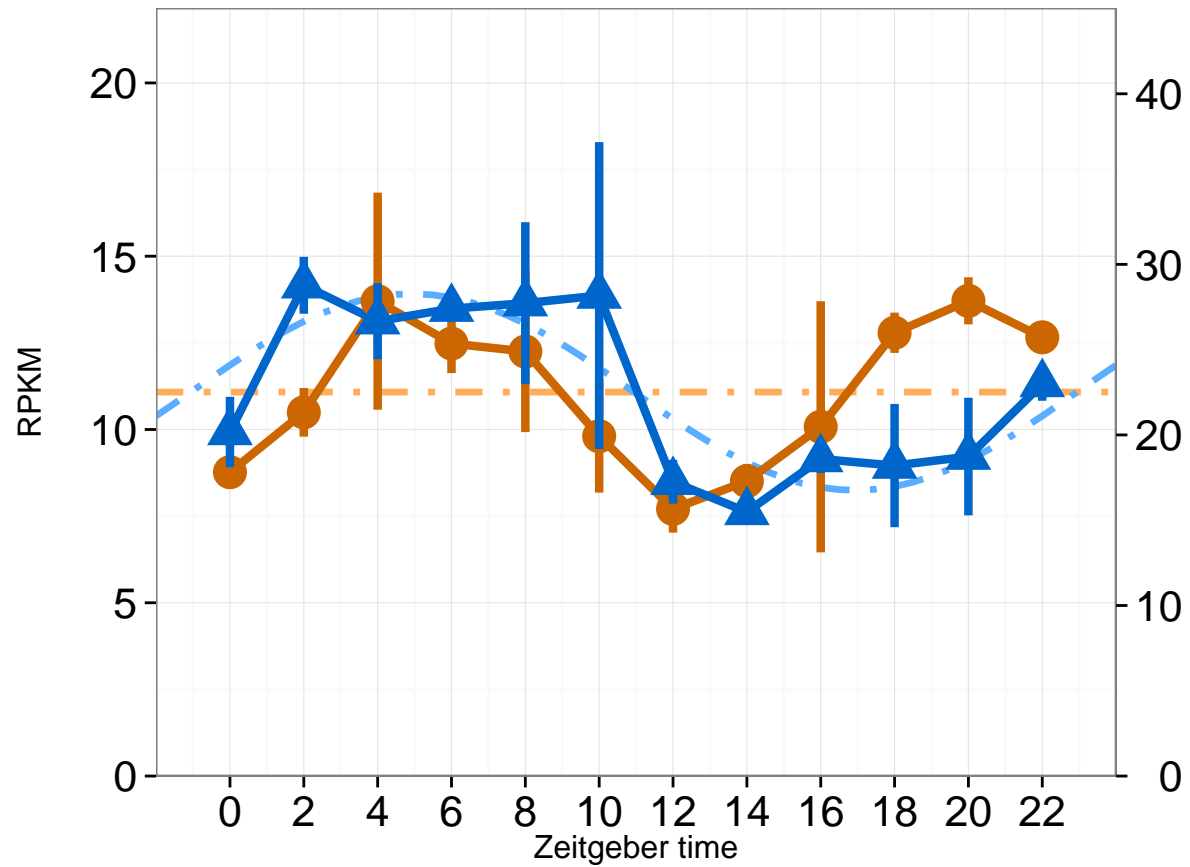

## Uald2

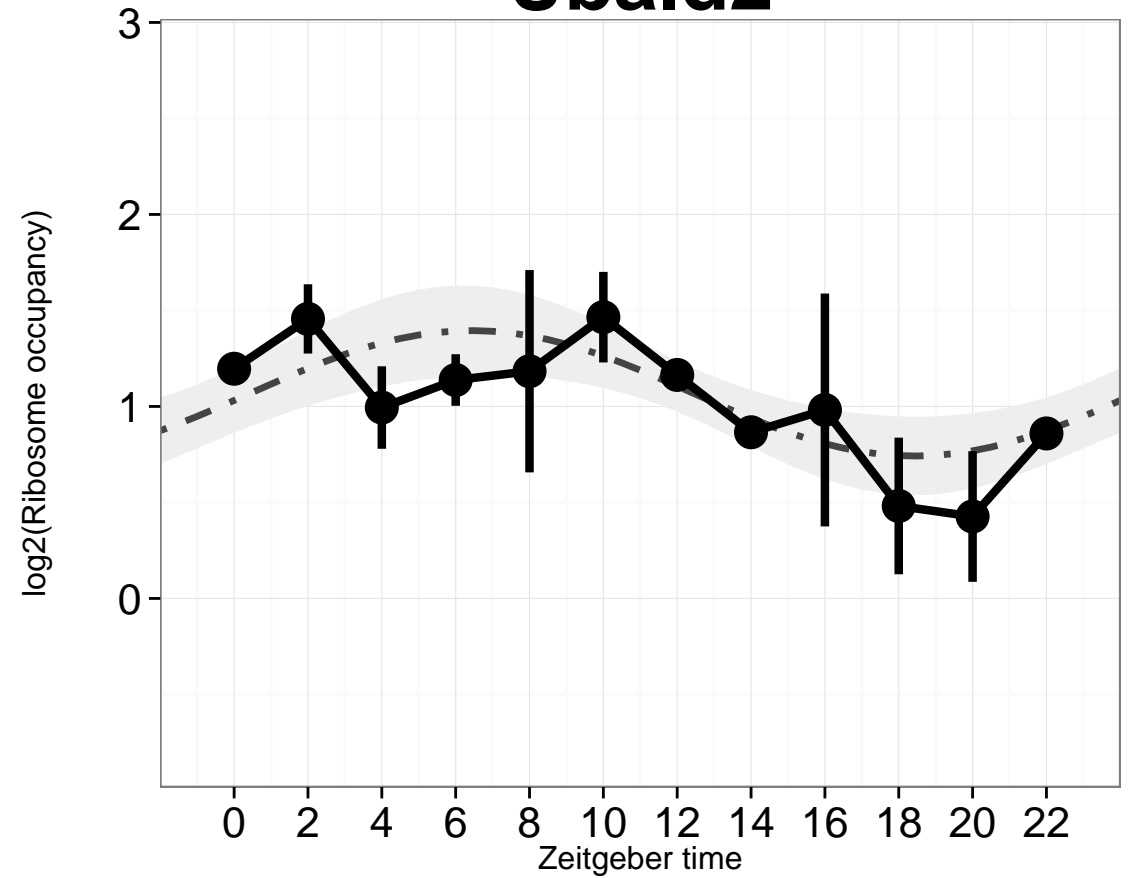

Supplement: SuppDataset_1.zip [file Ubald2_set_C.pdf › Supplemental Dataset 1/C-mRNA_nonrhythm_translation_rhyth/Ubald2_set_C.pdf]

## Ube2g2

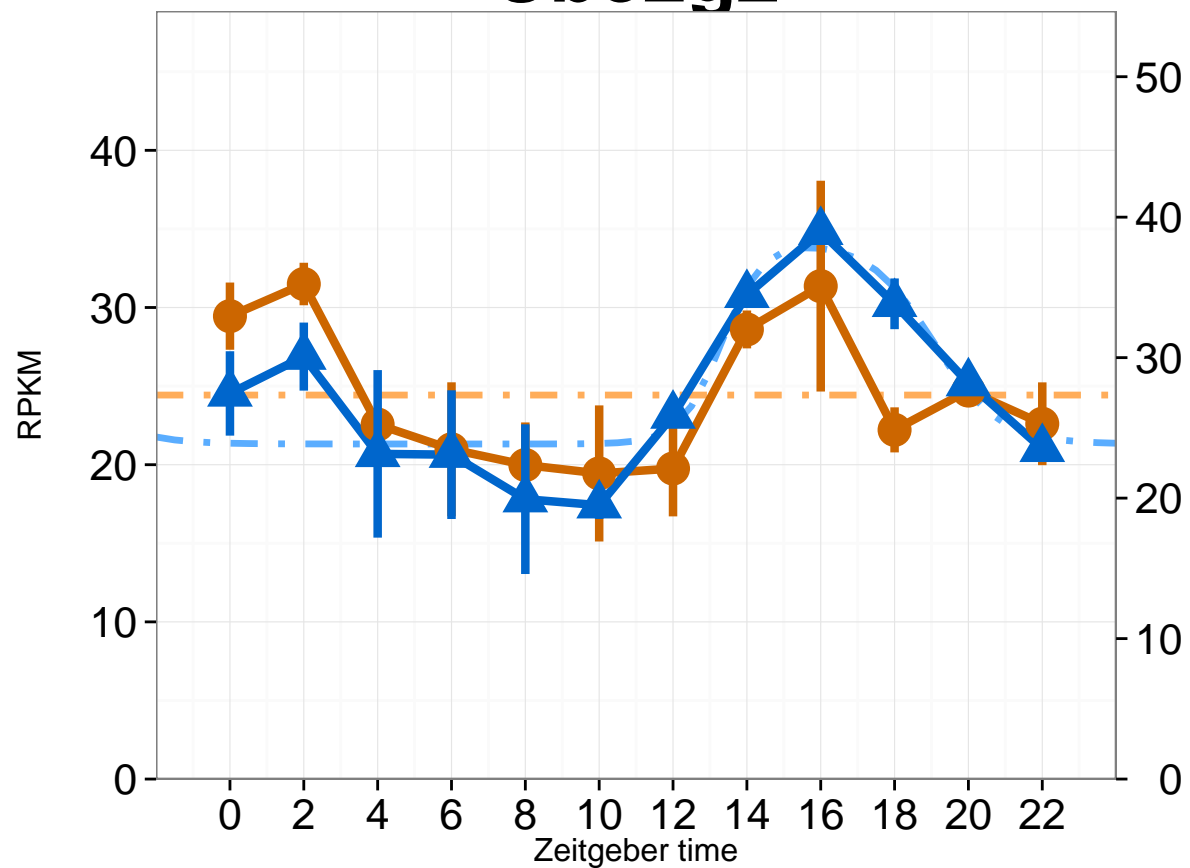

## Ube2g2

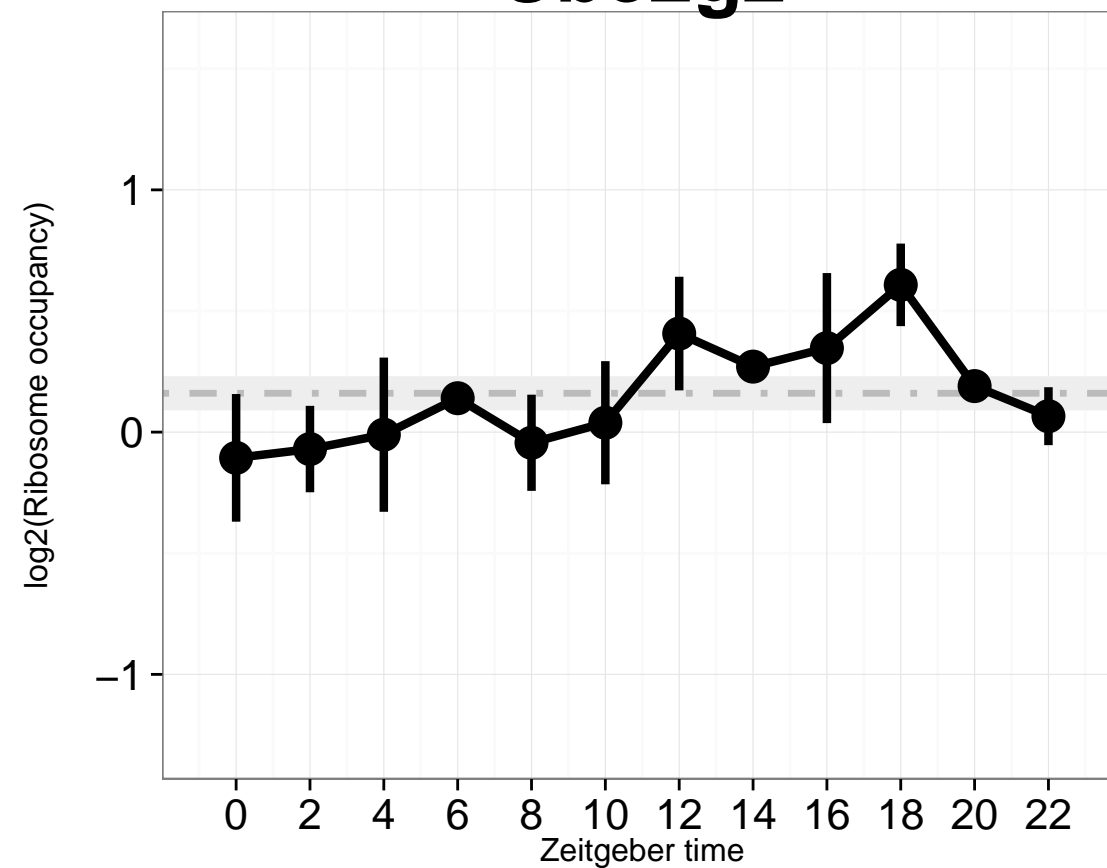

Supplement: SuppDataset_1.zip [file Ube2g2_set_C.pdf › Supplemental Dataset 1/C-mRNA_nonrhythm_translation_rhyth/Ube2g2_set_C.pdf]

## Ubr2

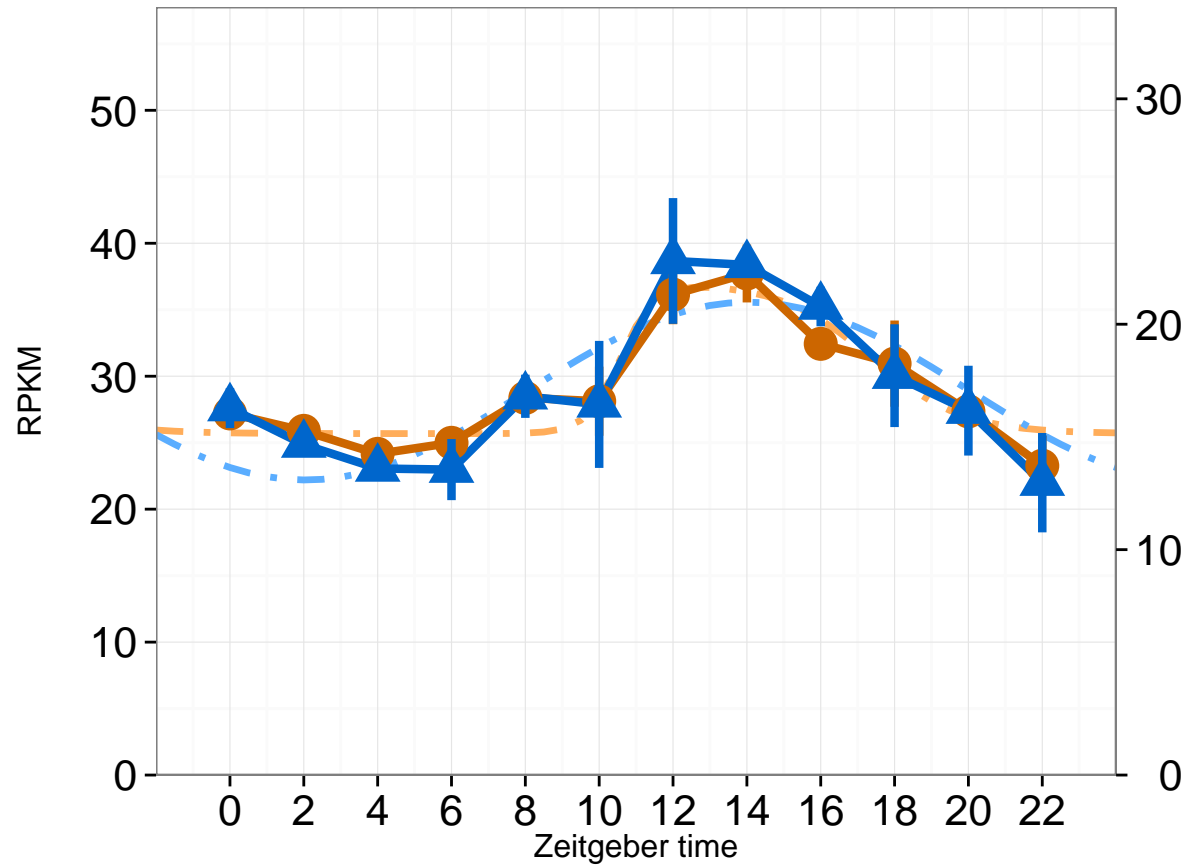

## Ubr2

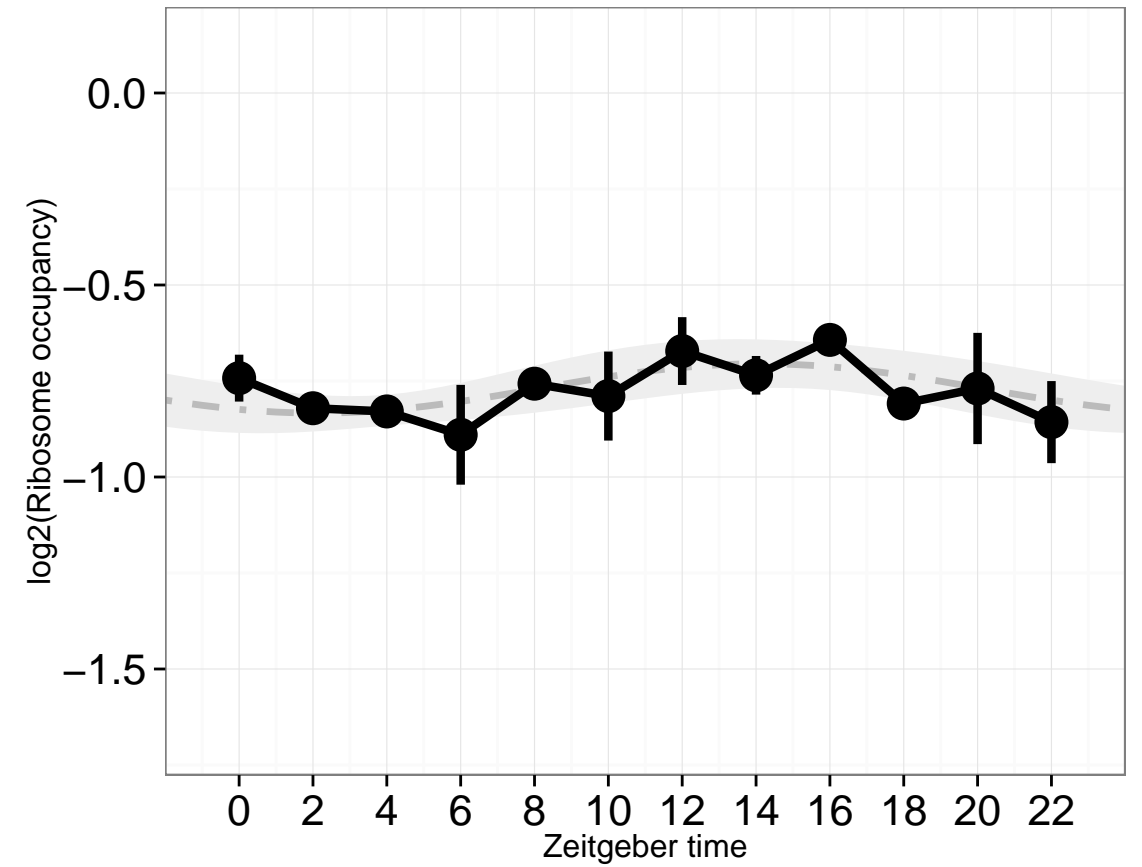

Supplement: SuppDataset_1.zip [file Ubr2_set_C.pdf › Supplemental Dataset 1/C-mRNA_nonrhythm_translation_rhyth/Ubr2_set_C.pdf]

# Ugt2b34

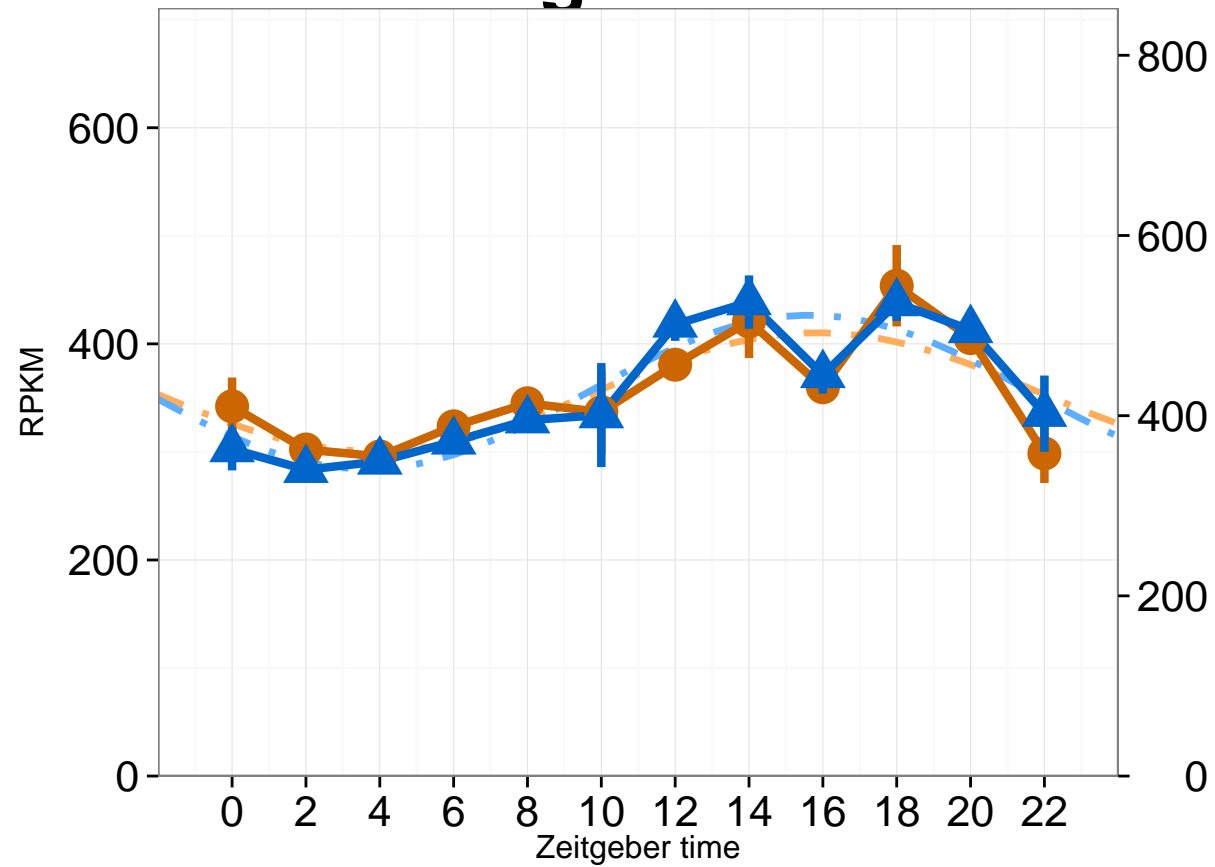

# Ugt2b34

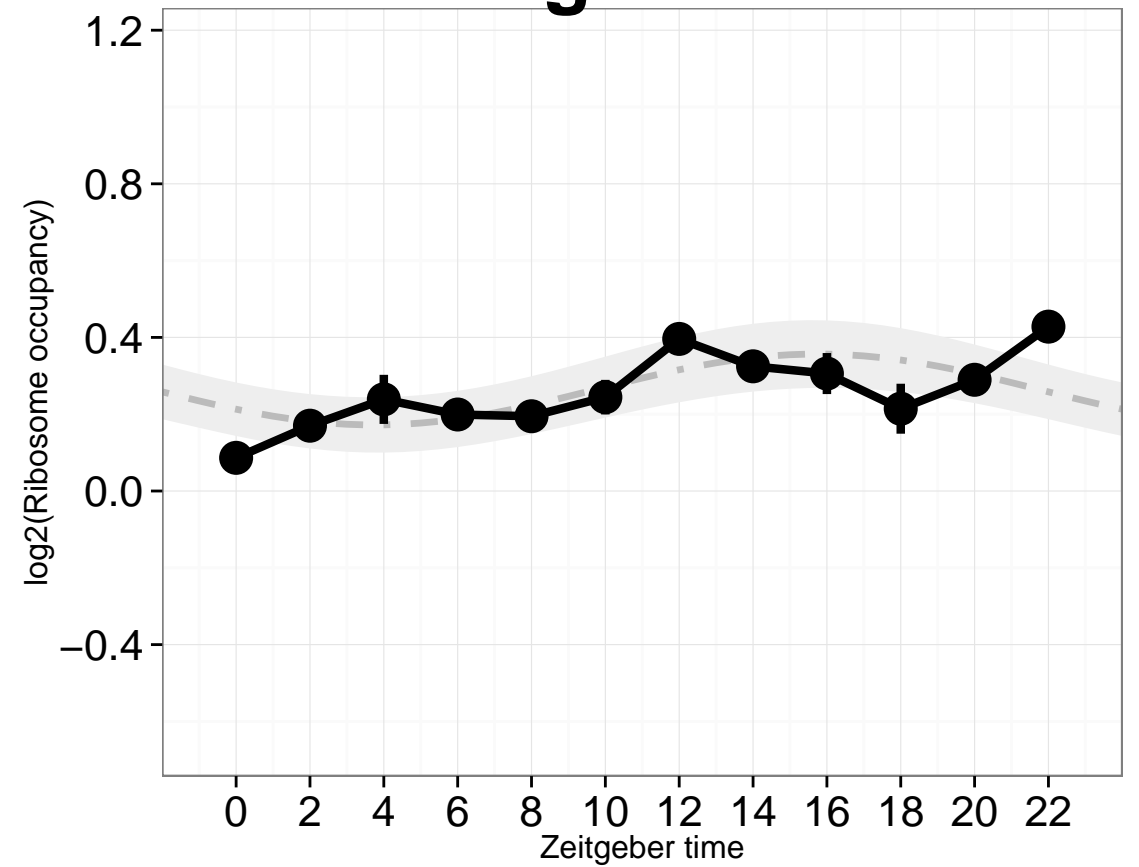

Supplement: SuppDataset_1.zip [file Ugt2b34_set_C.pdf › Supplemental Dataset 1/C-mRNA_nonrhythm_translation_rhyth/Ugt2b34_set_C.pdf]

# Utp18

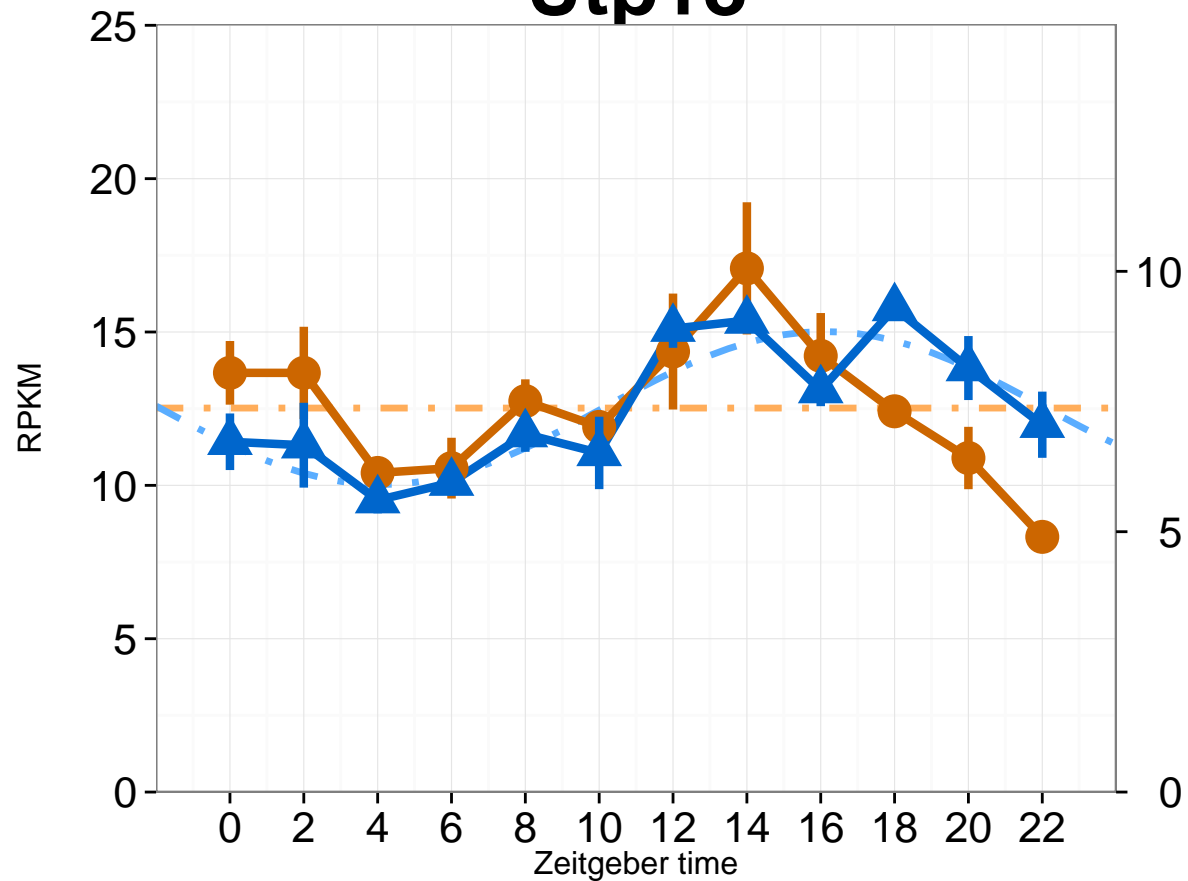

# Utp18

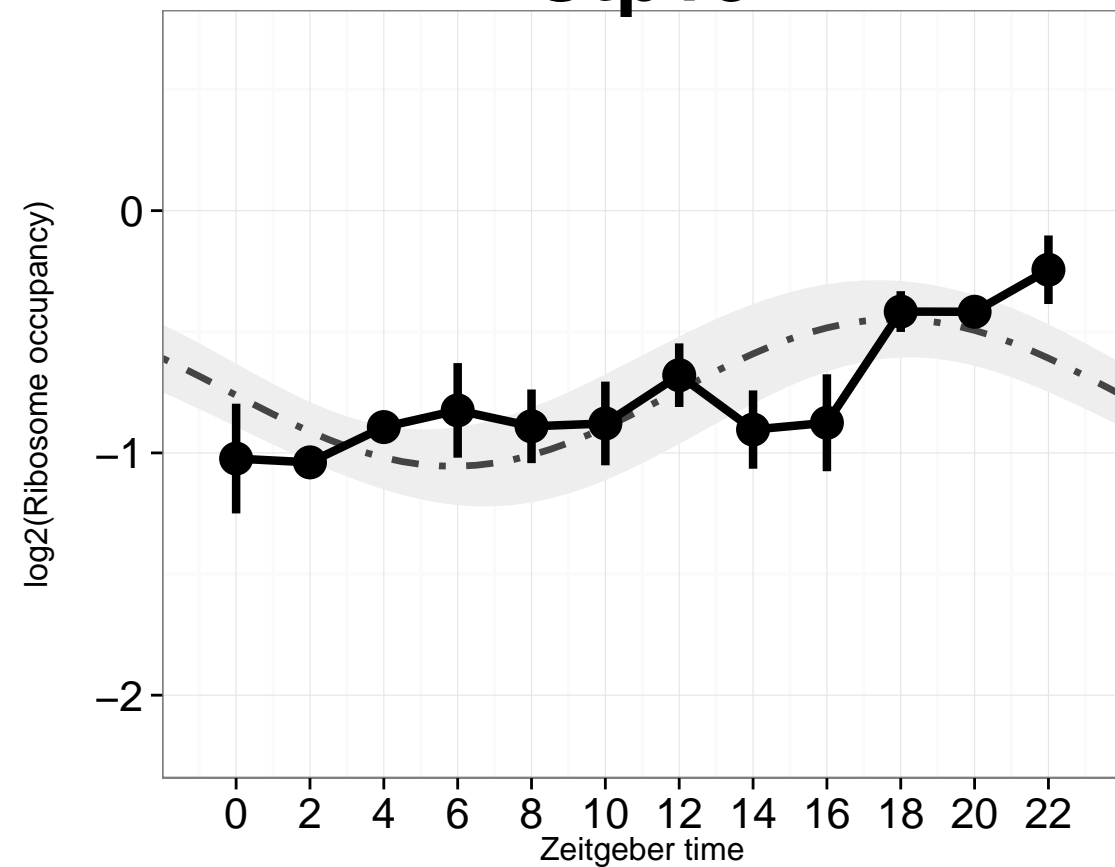

Supplement: SuppDataset_1.zip [file Utp18_set_C.pdf › Supplemental Dataset 1/C-mRNA_nonrhythm_translation_rhyth/Utp18_set_C.pdf]

## Utrn

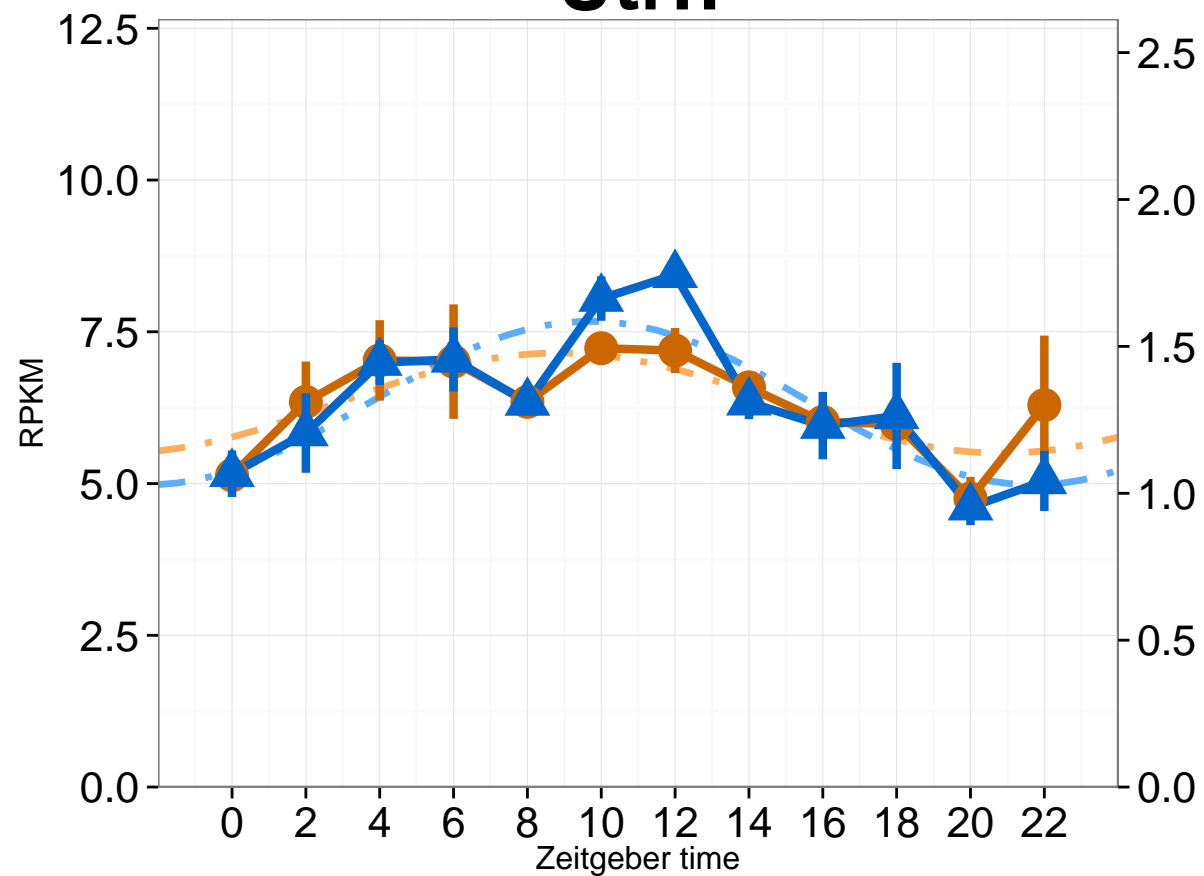

## Utrn

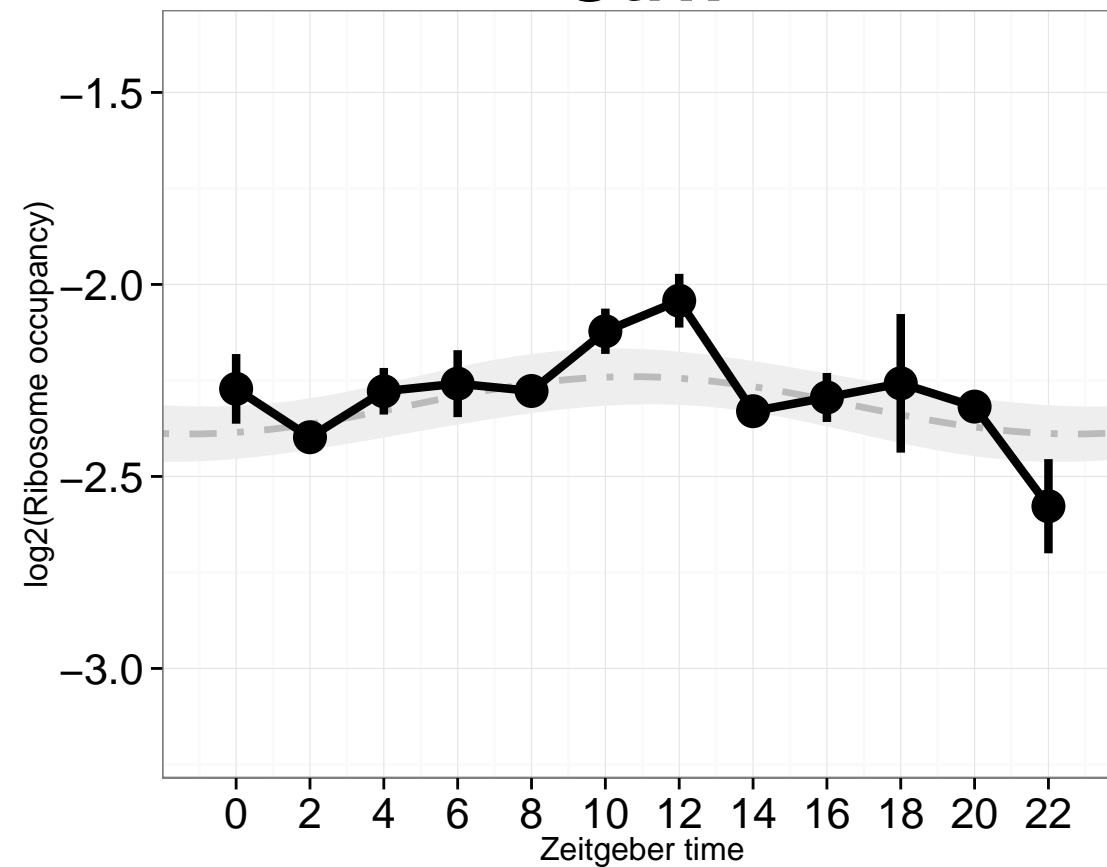

Supplement: SuppDataset_1.zip [file Utrn_set_C.pdf › Supplemental Dataset 1/C-mRNA_nonrhythm_translation_rhyth/Utrn_set_C.pdf]

## Vasn

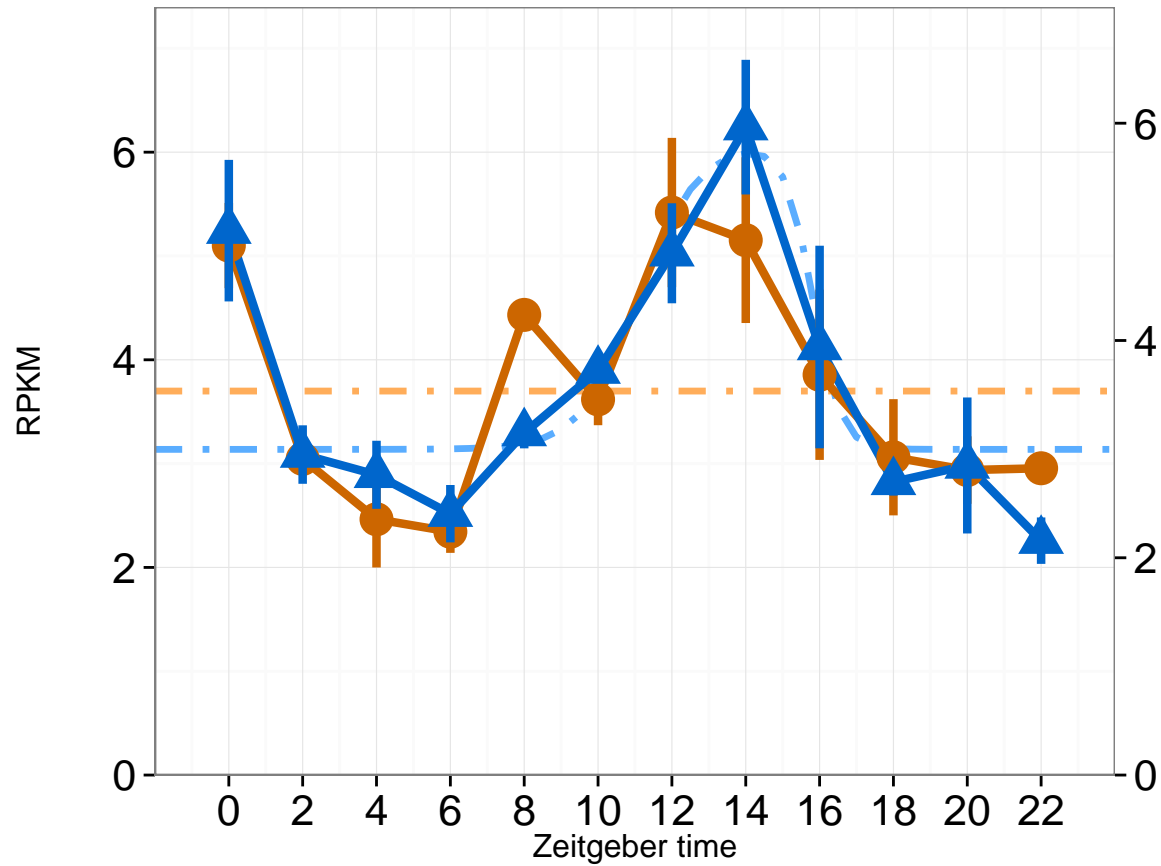

## Vasn

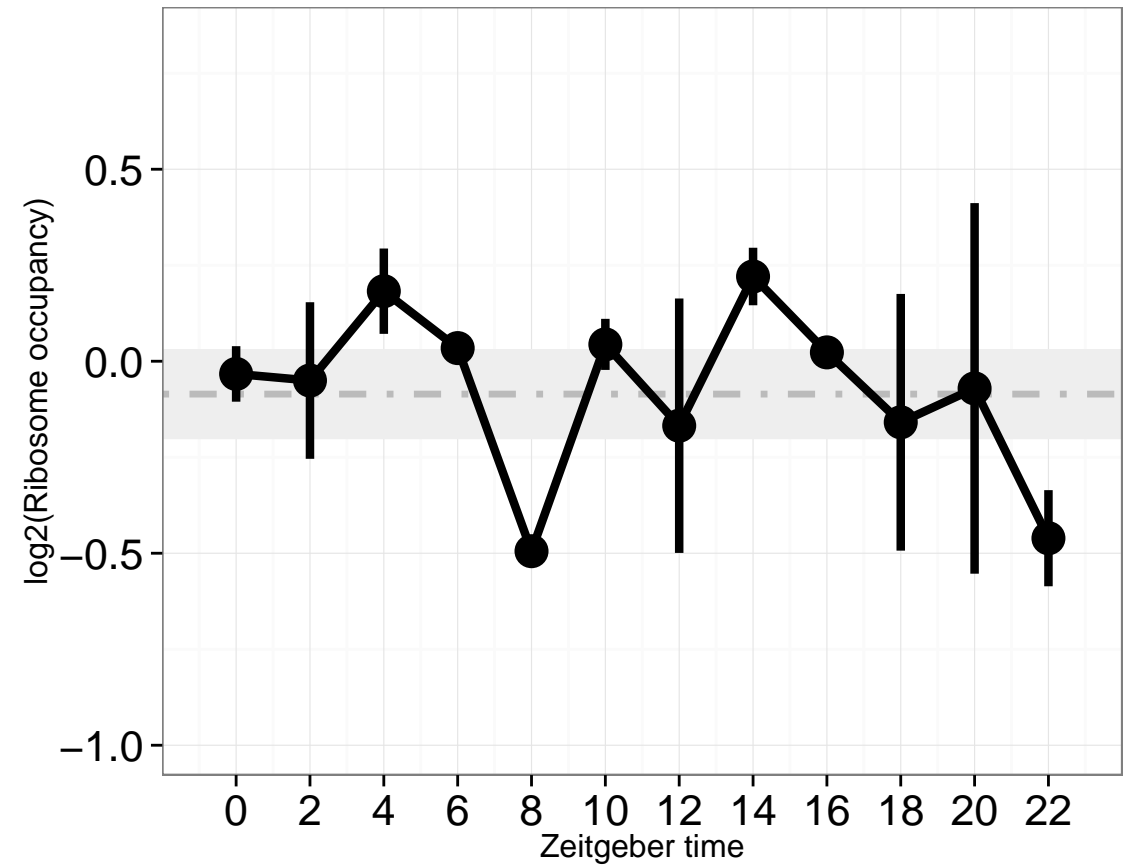

Supplement: SuppDataset_1.zip [file Vasn_set_C.pdf › Supplemental Dataset 1/C-mRNA_nonrhythm_translation_rhyth/Vasn_set_C.pdf]

## Wdr12

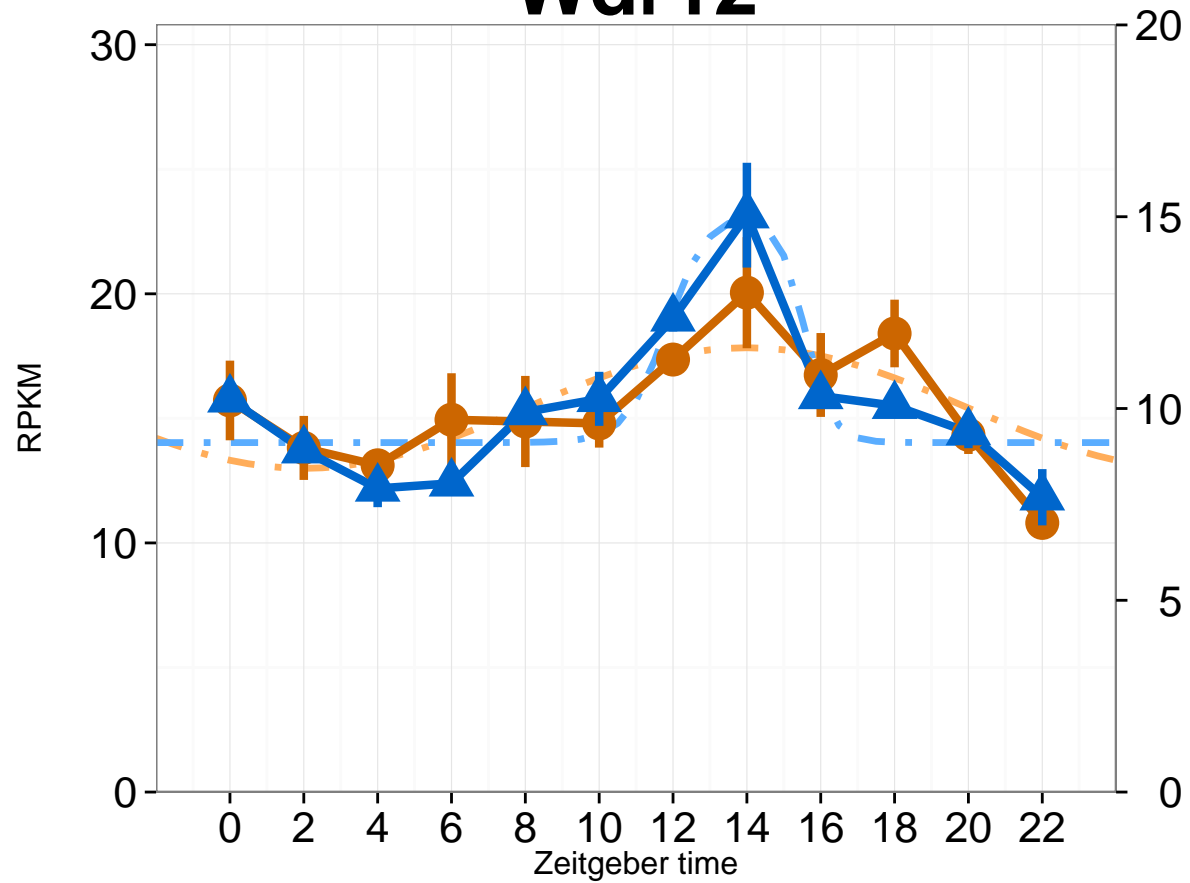

## Wdr12

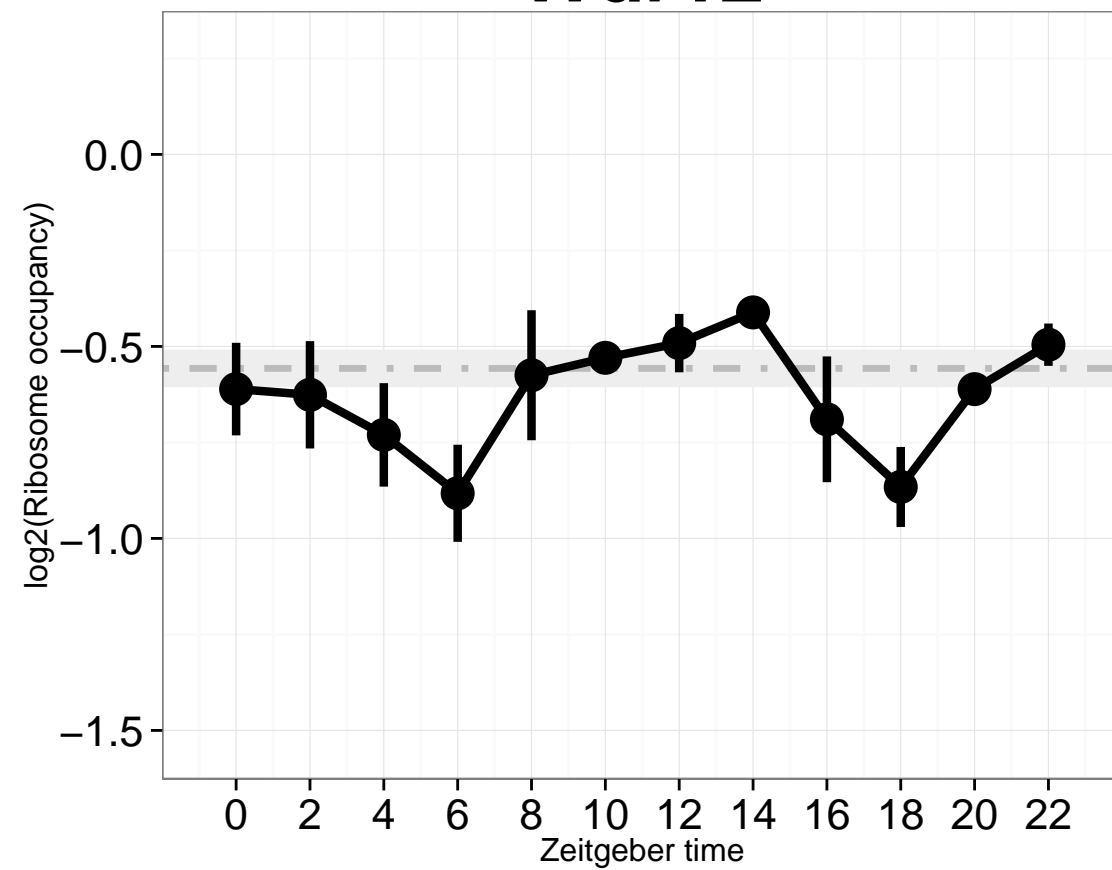

Supplement: SuppDataset_1.zip [file Wdr12_set_C.pdf › Supplemental Dataset 1/C-mRNA_nonrhythm_translation_rhyth/Wdr12_set_C.pdf]

# Wdr45b

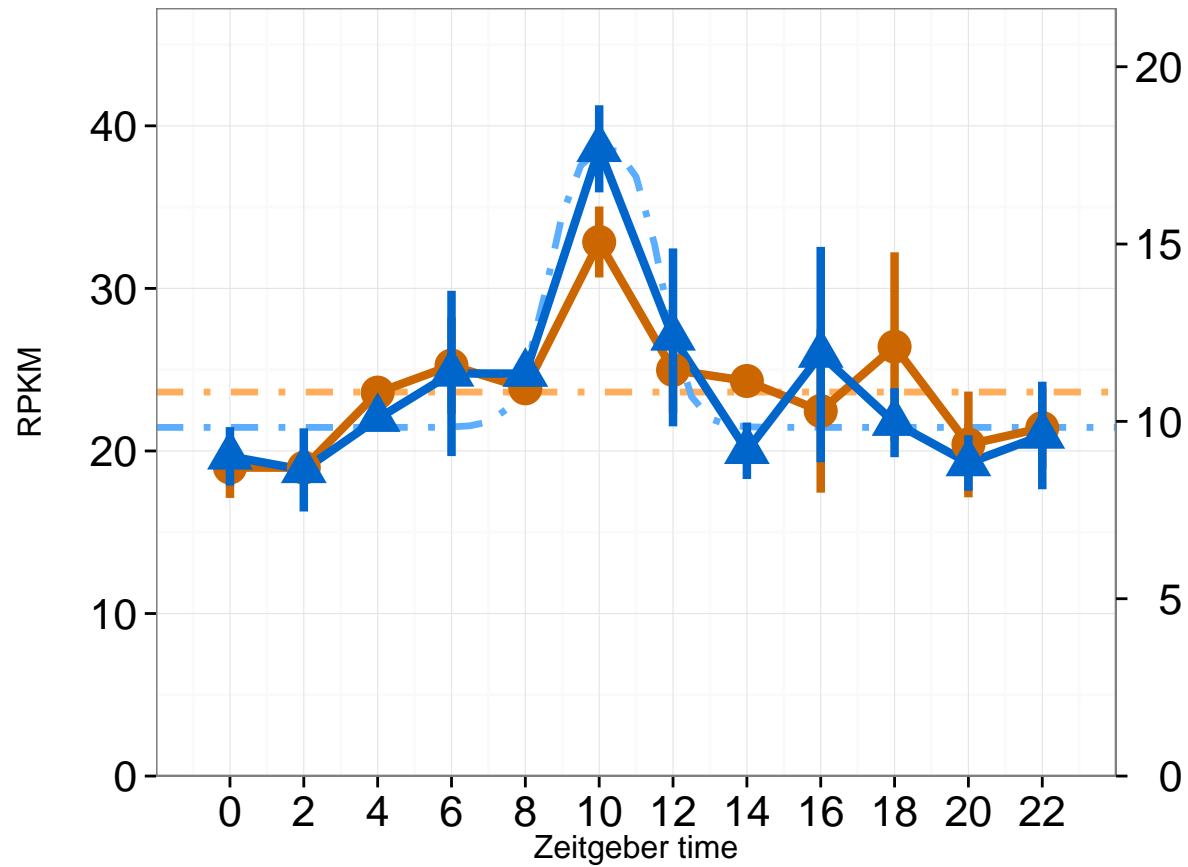

# Wdr45b

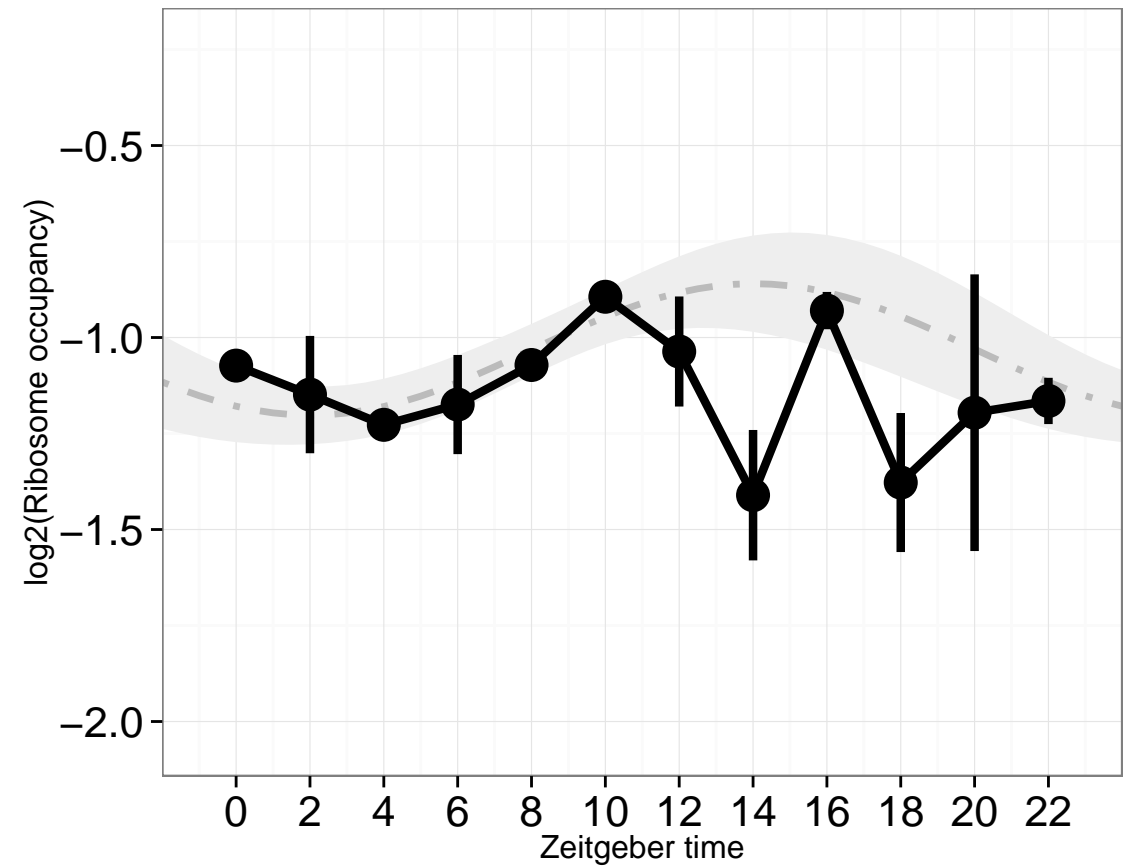

Supplement: SuppDataset_1.zip [file Wdr45b_set_C.pdf › Supplemental Dataset 1/C-mRNA_nonrhythm_translation_rhyth/Wdr45b_set_C.pdf]

**Wdr54 TR**

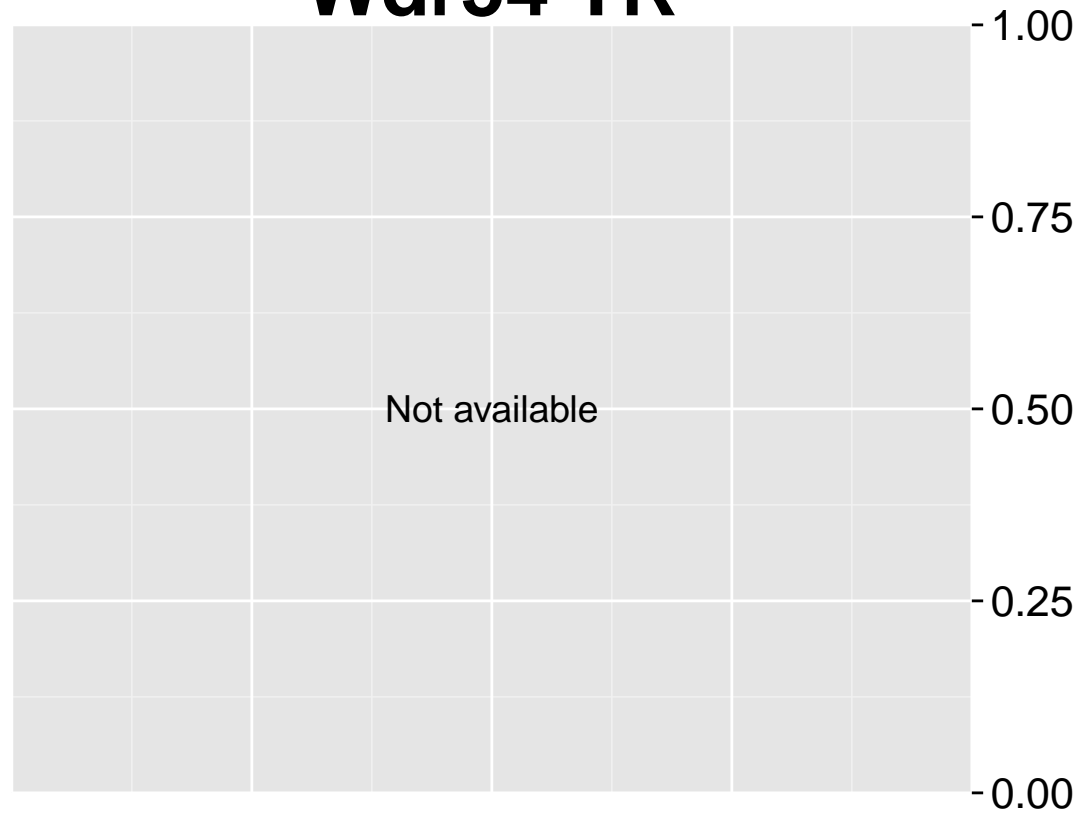

**Wdr54 log2(Ribosome occupancy**

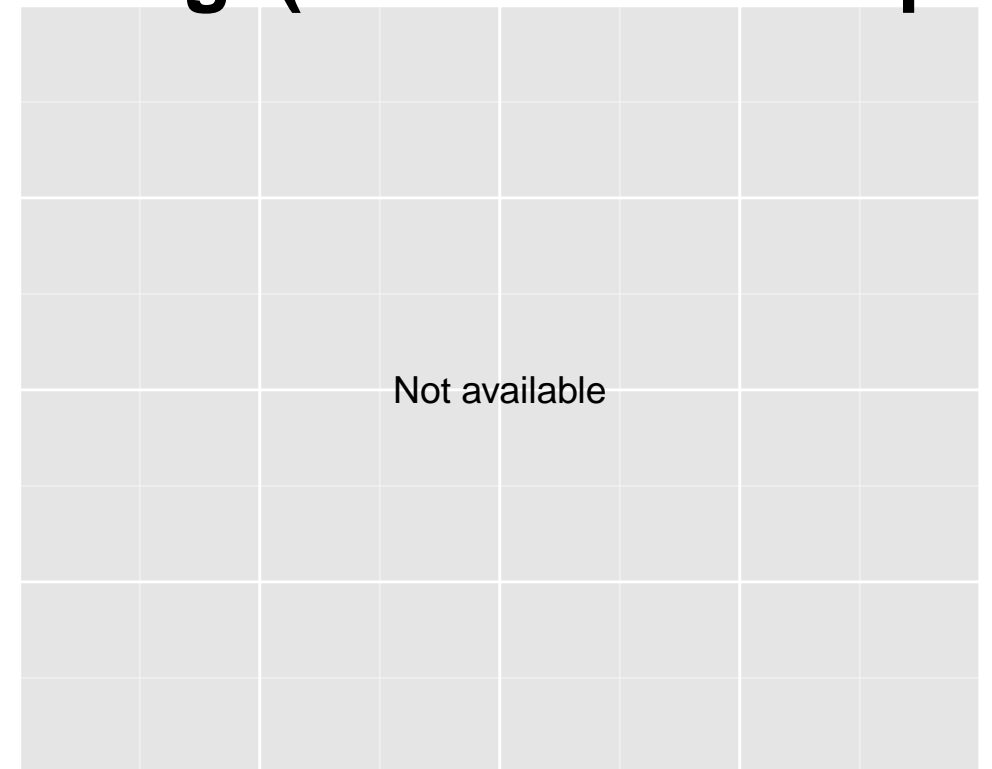

Supplement: SuppDataset_1.zip [file Wdr54_set_C.pdf › Supplemental Dataset 1/C-mRNA_nonrhythm_translation_rhyth/Wdr54_set_C.pdf]

## Wdr90

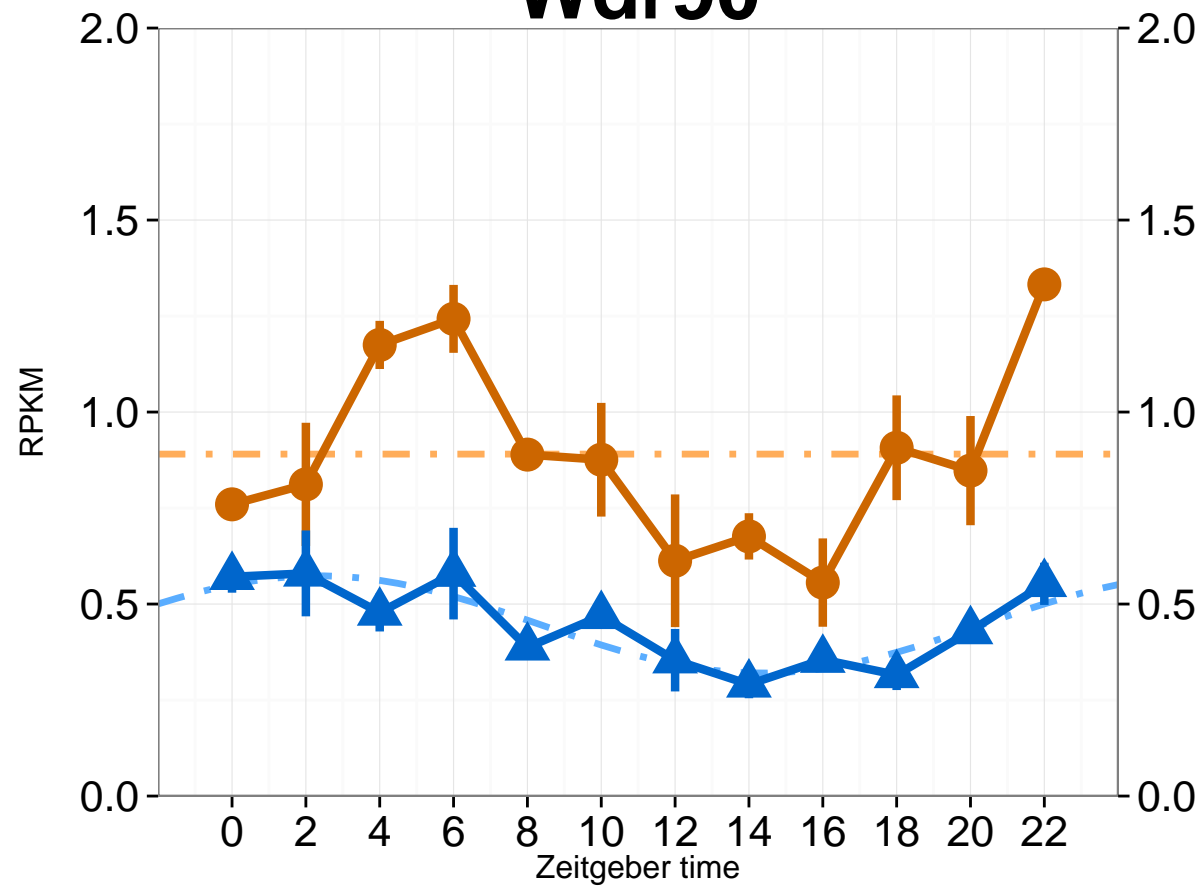

## Wdr90

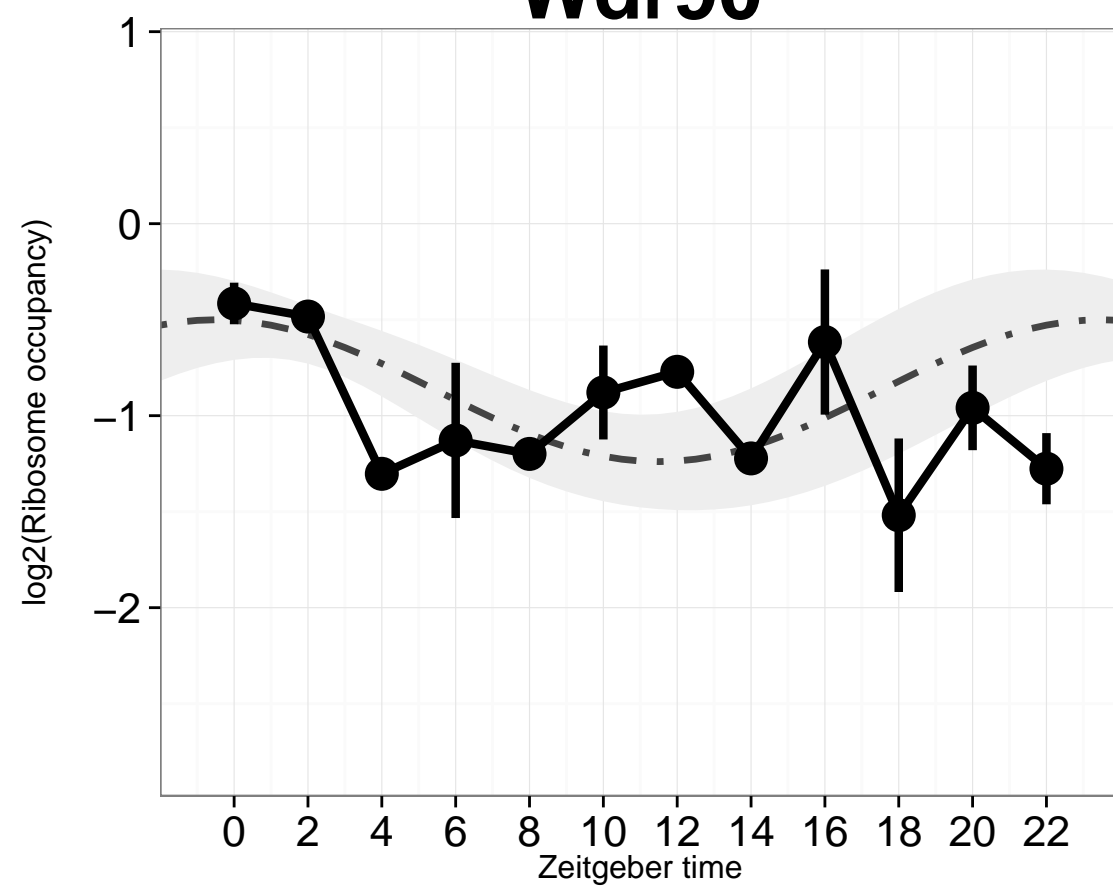

Supplement: SuppDataset_1.zip [file Wdr90_set_C.pdf › Supplemental Dataset 1/C-mRNA_nonrhythm_translation_rhyth/Wdr90_set_C.pdf]

# Wdtdc1

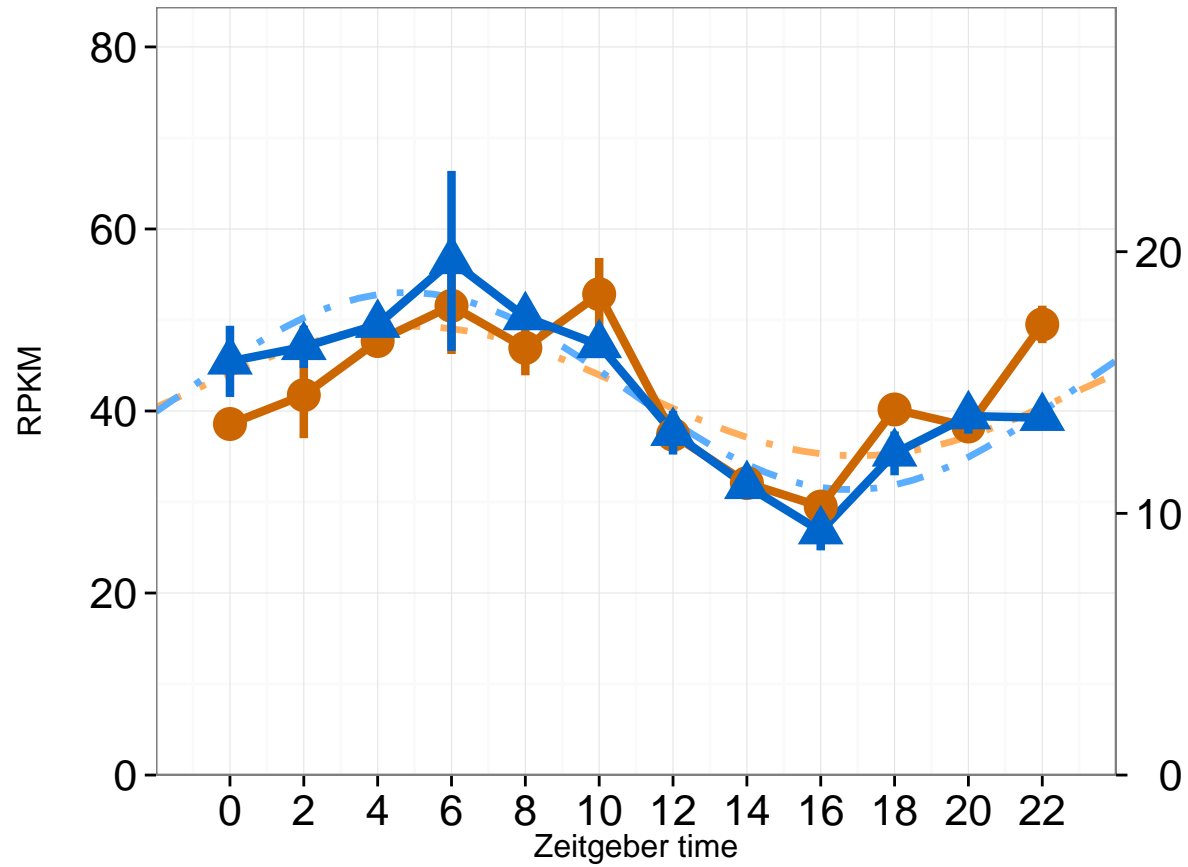

# Wdtdc1

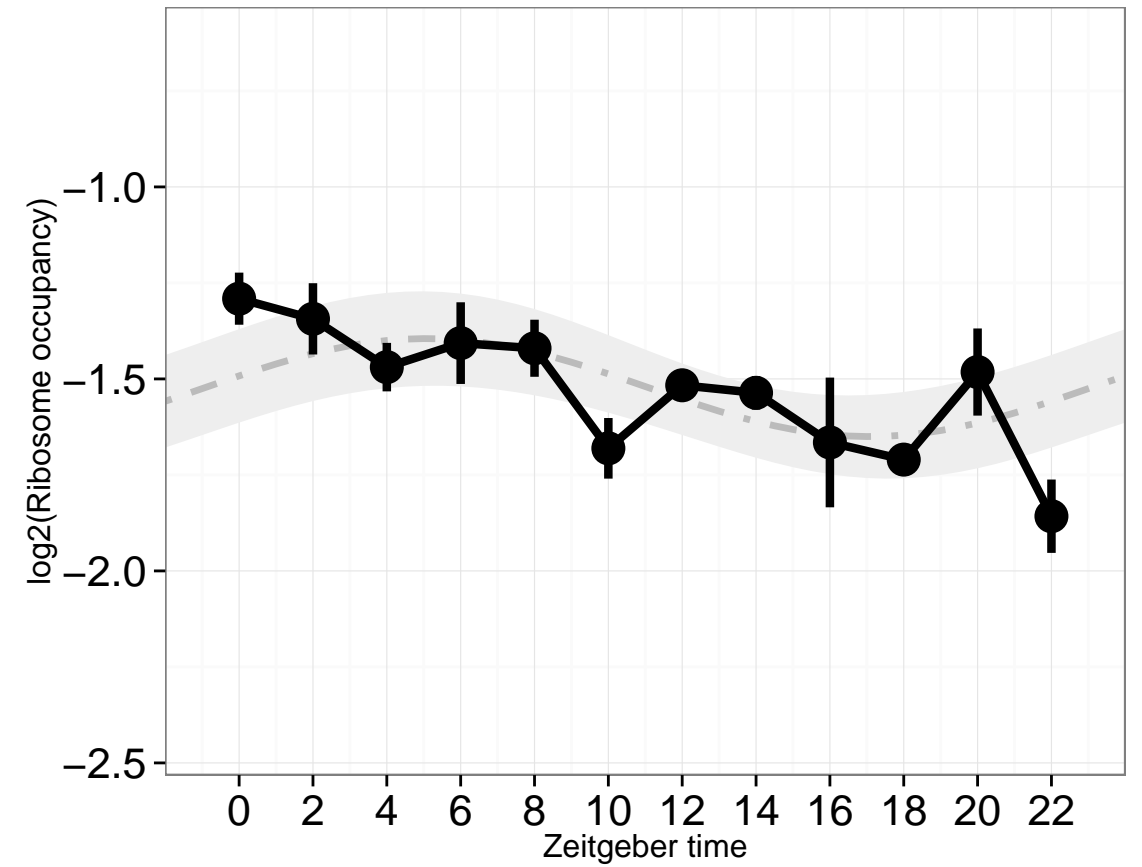

Supplement: SuppDataset_1.zip [file Wdtc1_set_C.pdf › Supplemental Dataset 1/C-mRNA_nonrhythm_translation_rhyth/Wdtc1_set_C.pdf]

## Wipf3

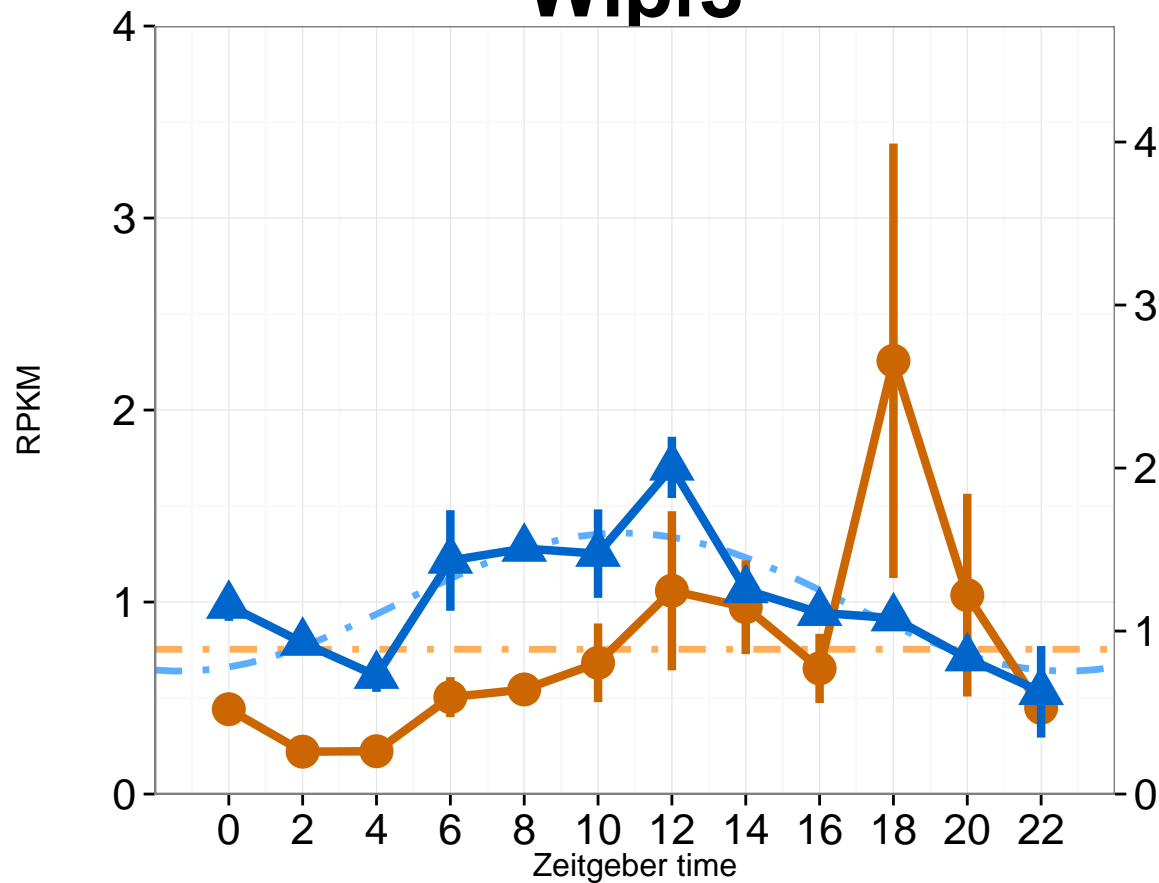

## Wipf3

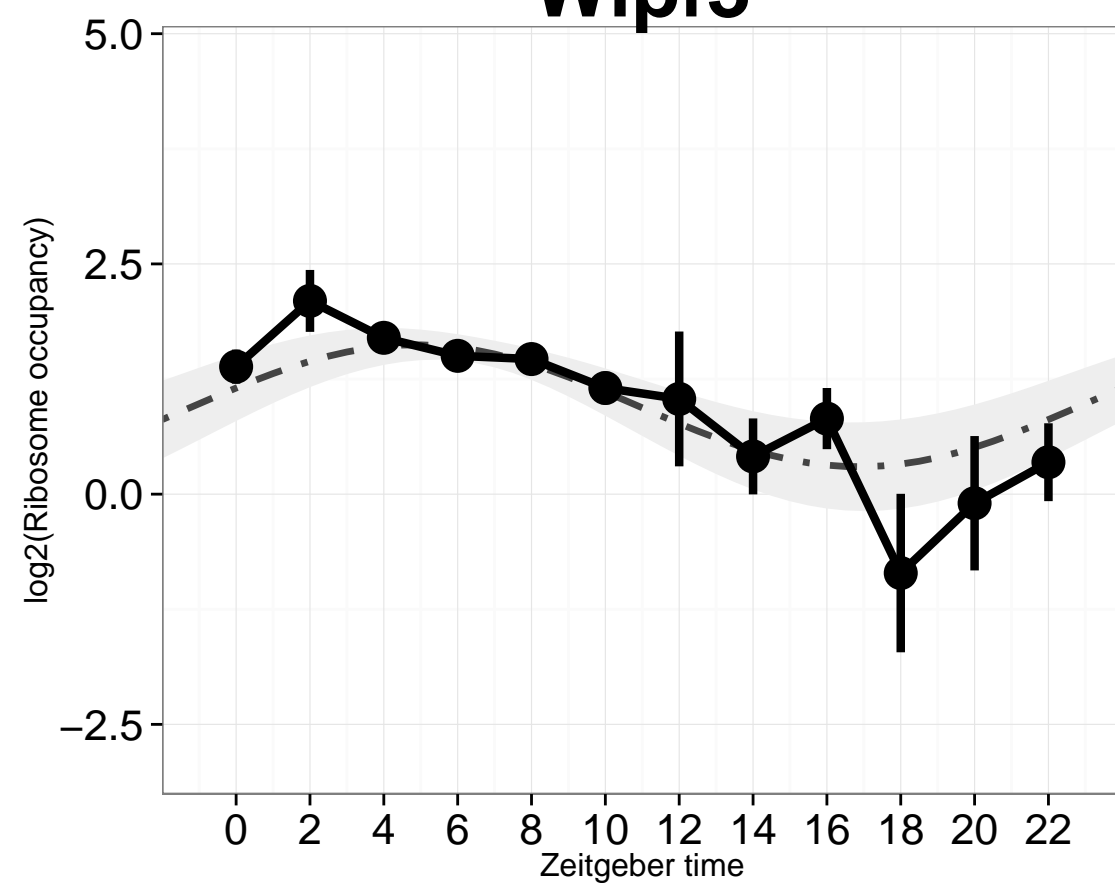

Supplement: SuppDataset_1.zip [file Wipf3_set_C.pdf › Supplemental Dataset 1/C-mRNA_nonrhythm_translation_rhyth/Wipf3_set_C.pdf]

## Xkr9

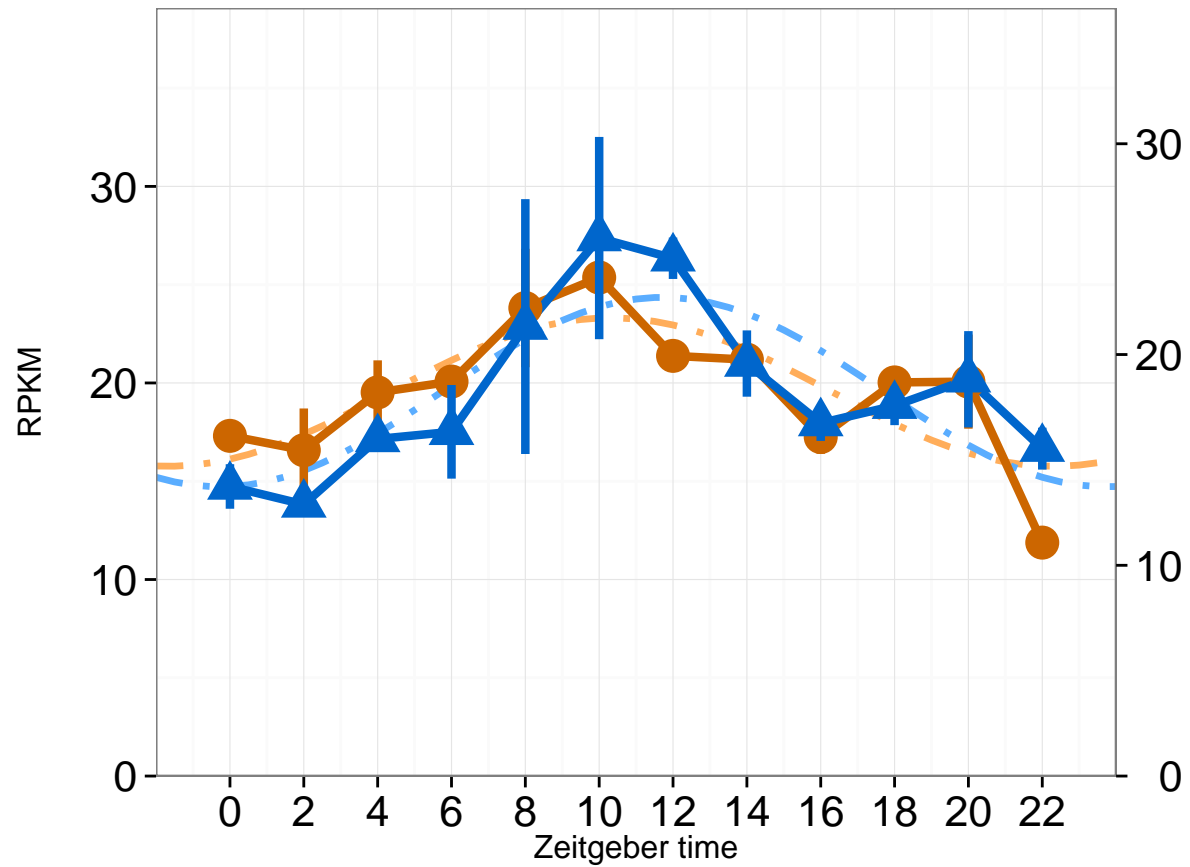

## Xkr9

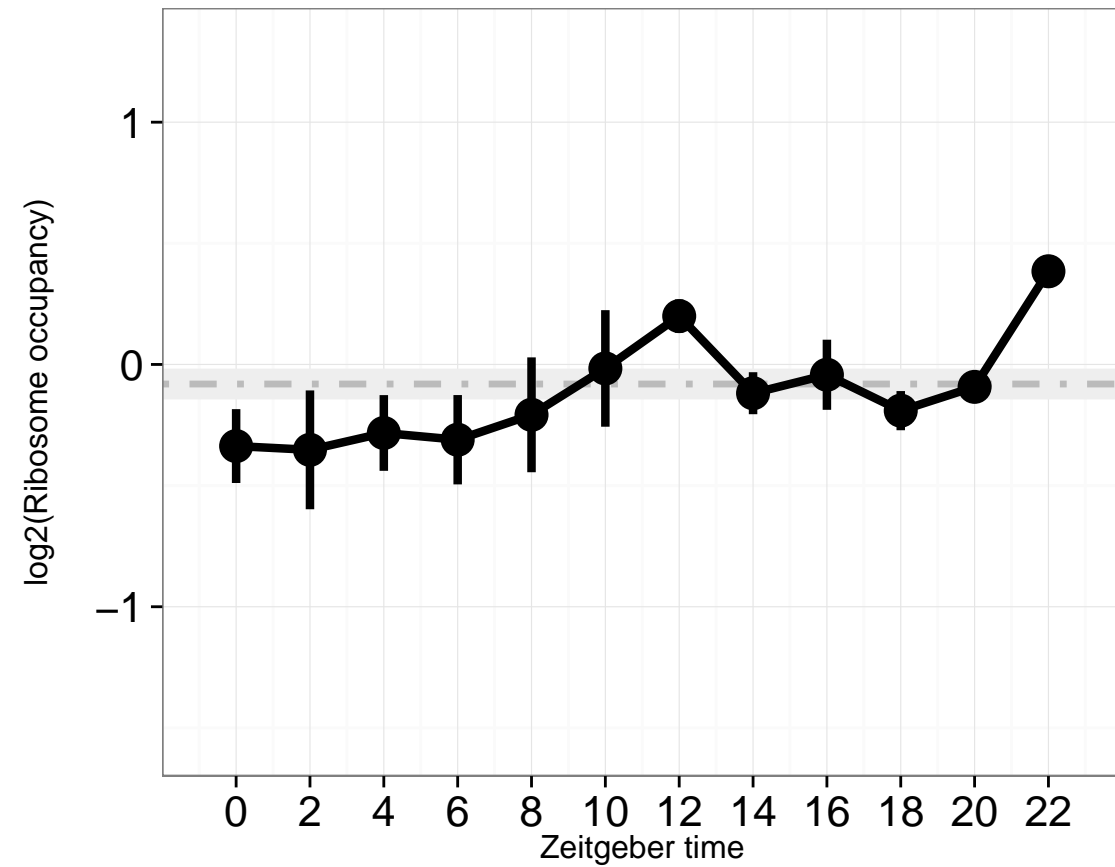

Supplement: SuppDataset_1.zip [file Xkr9_set_C.pdf › Supplemental Dataset 1/C-mRNA_nonrhythm_translation_rhyth/Xkr9_set_C.pdf]

## Ybx3

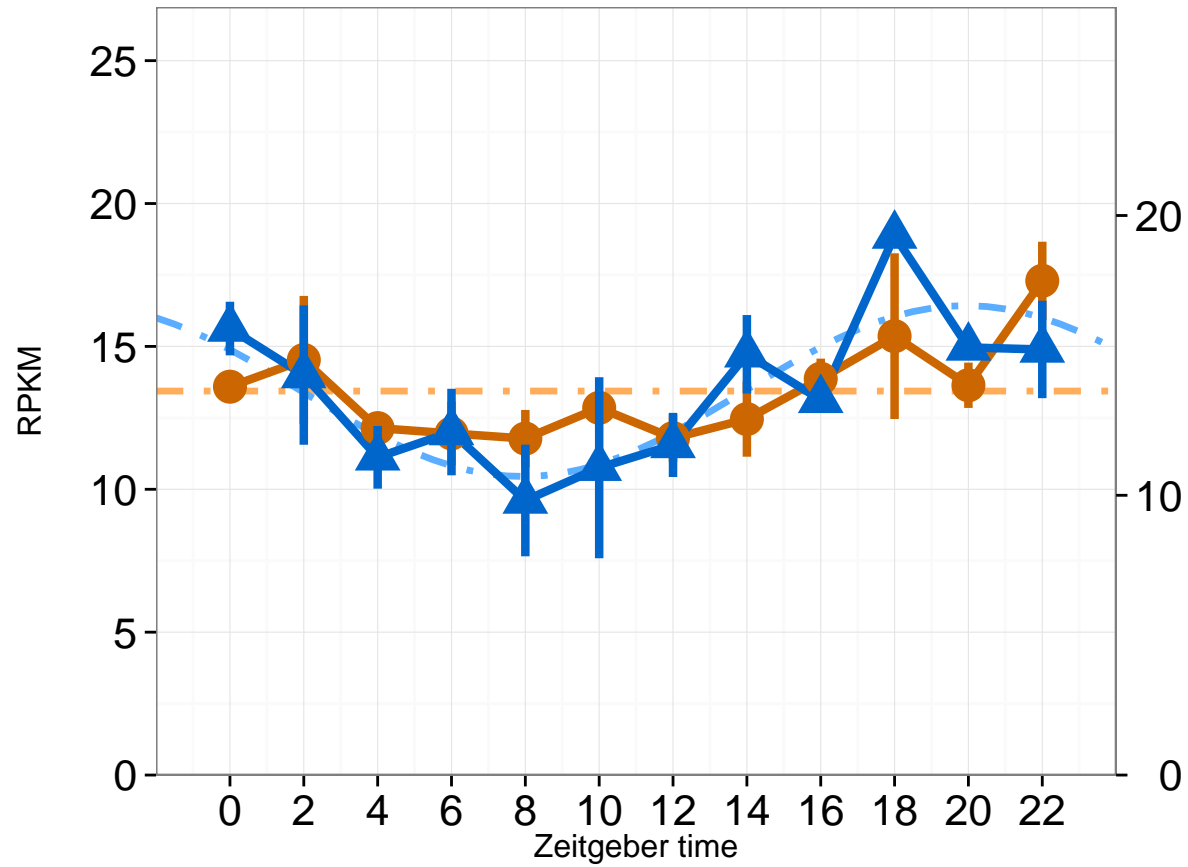

## Ybx3

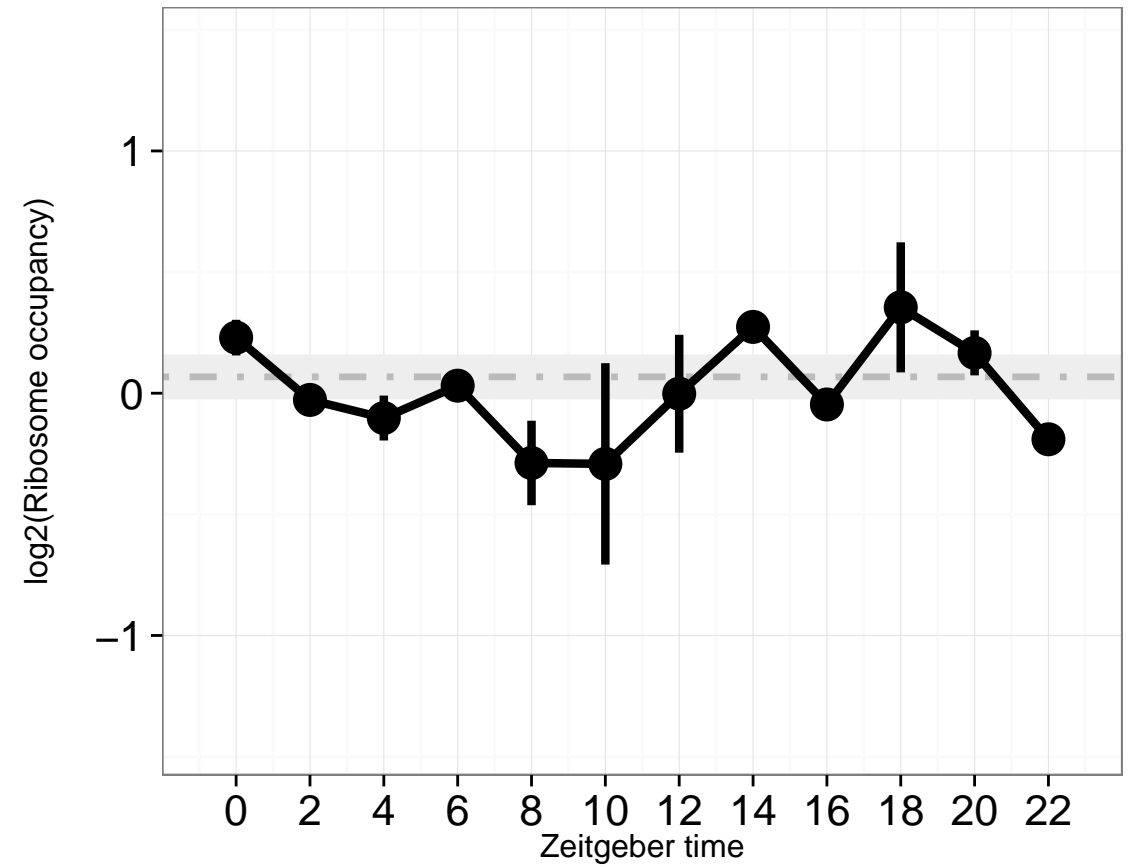

Supplement: SuppDataset_1.zip [file Ybx3_set_C.pdf › Supplemental Dataset 1/C-mRNA_nonrhythm_translation_rhyth/Ybx3_set_C.pdf]

## Zbp1

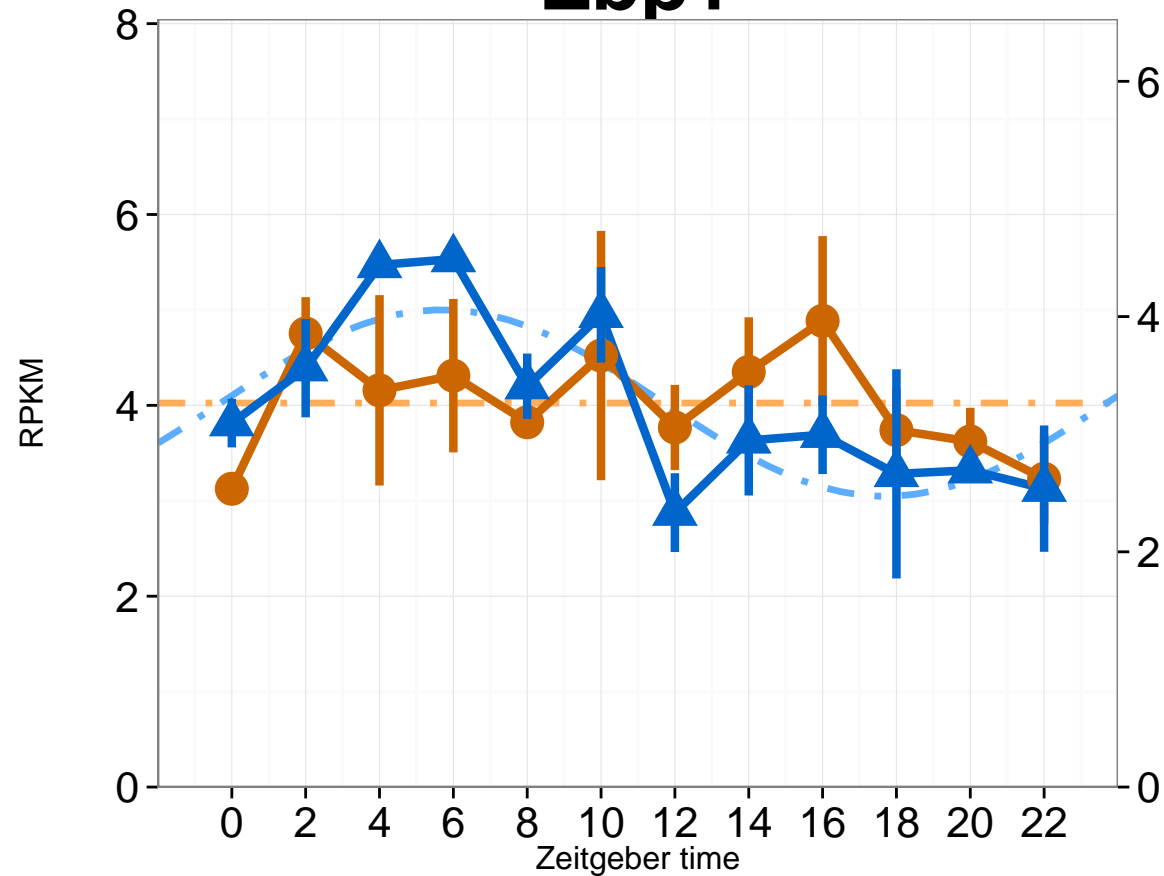

## Zbp1

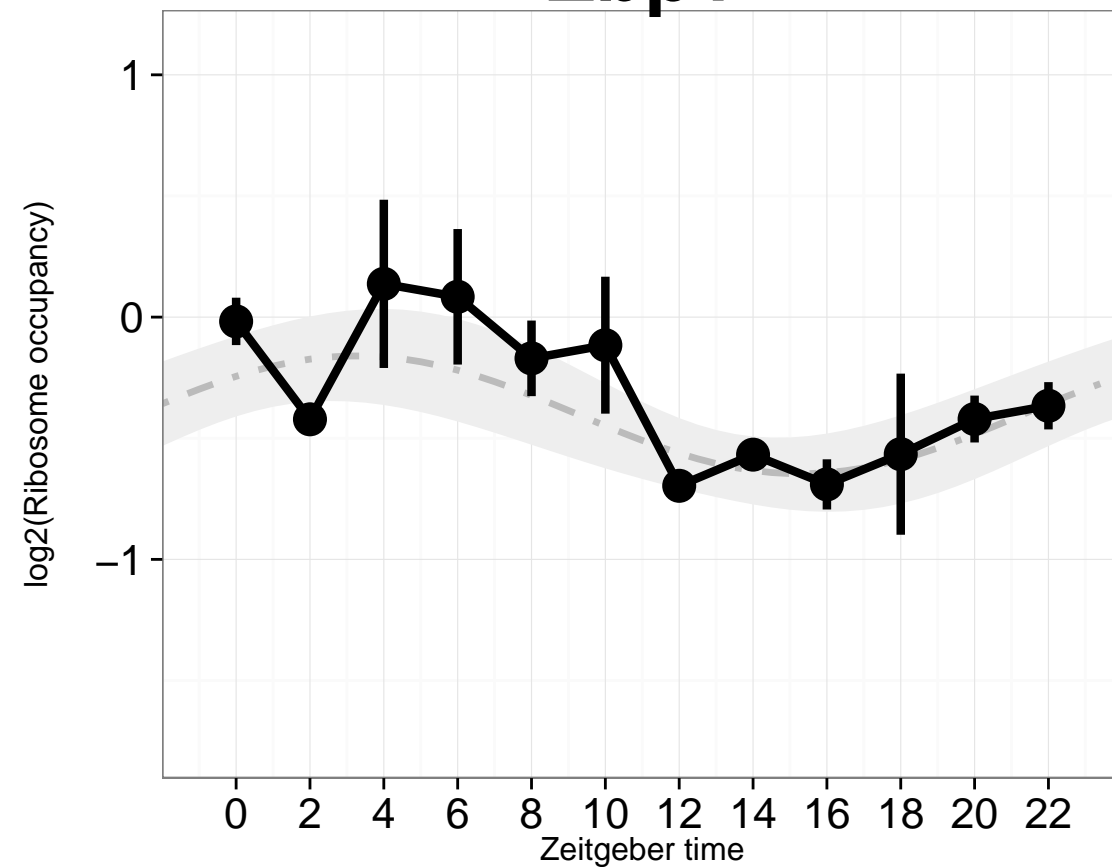

Supplement: SuppDataset_1.zip [file Zbp1_set_C.pdf › Supplemental Dataset 1/C-mRNA_nonrhythm_translation_rhyth/Zbp1_set_C.pdf]

## Zc3hav1

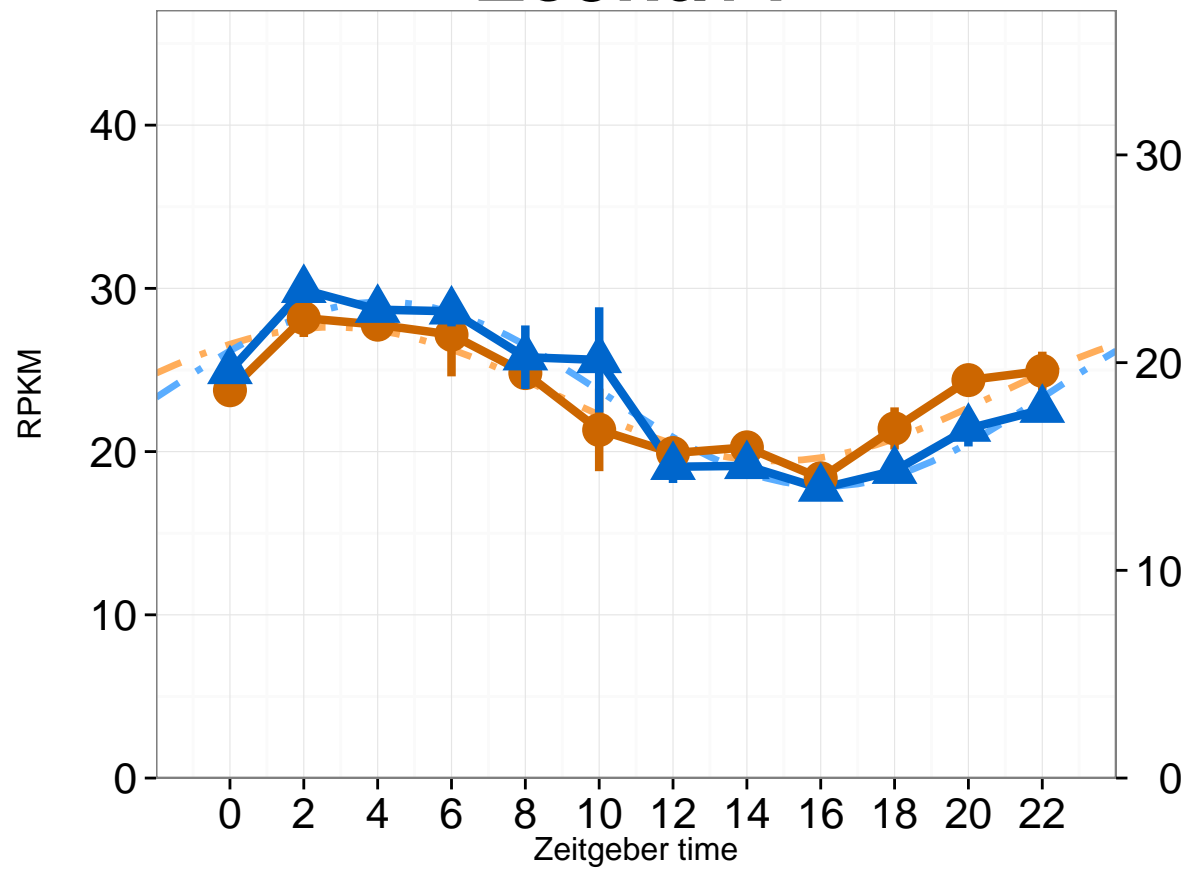

## Zc3hav1

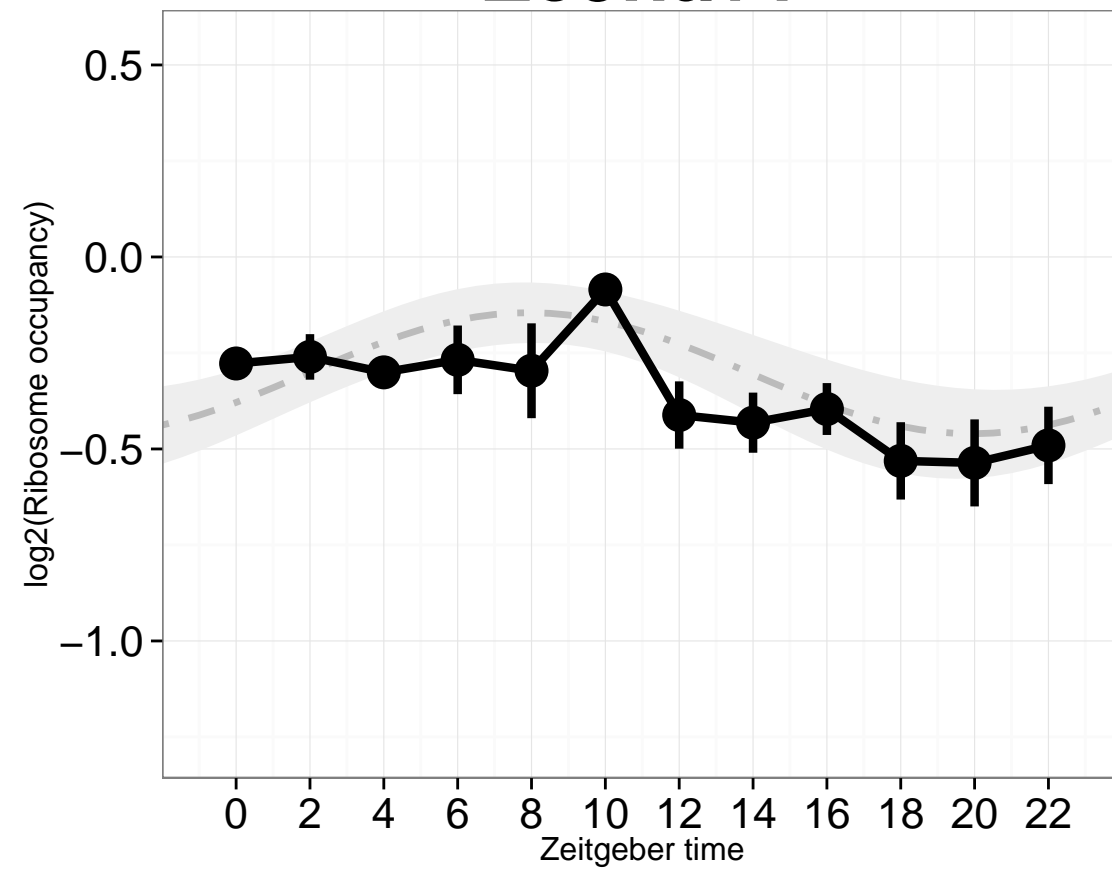

Supplement: SuppDataset_1.zip [file Zc3hav1_set_C.pdf › Supplemental Dataset 1/C-mRNA_nonrhythm_translation_rhyth/Zc3hav1_set_C.pdf]

## Zc4h2 TR

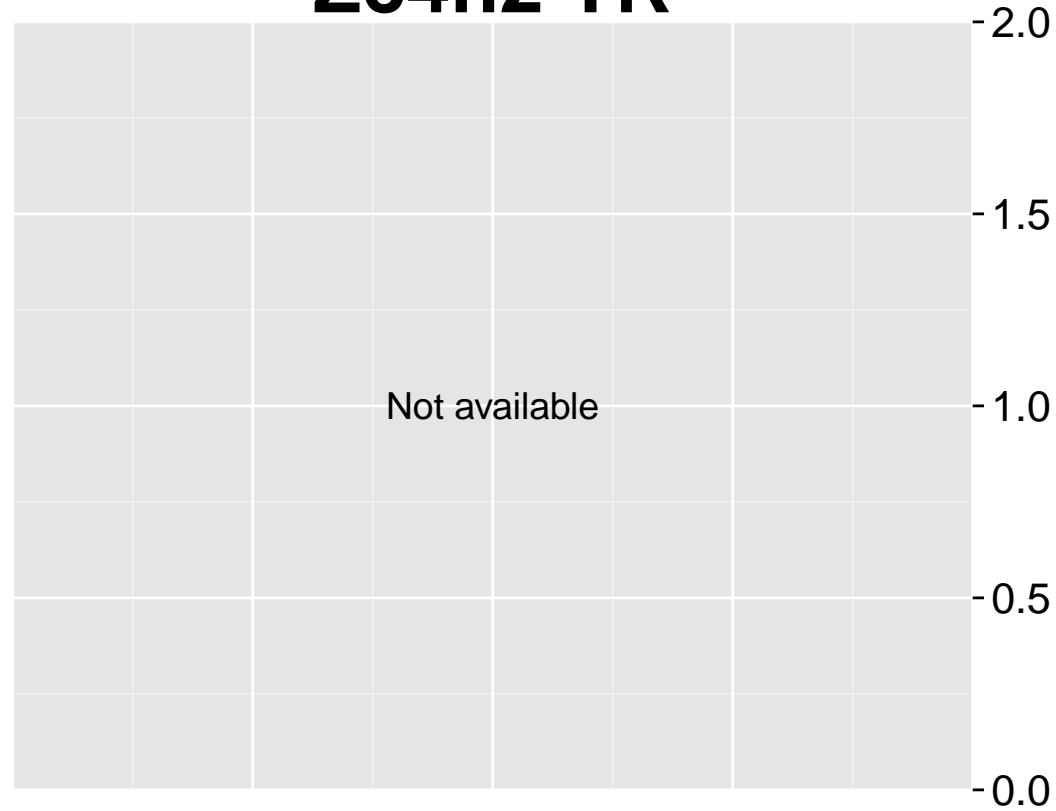

## Zc4h2 log2(Ribosome occupancy

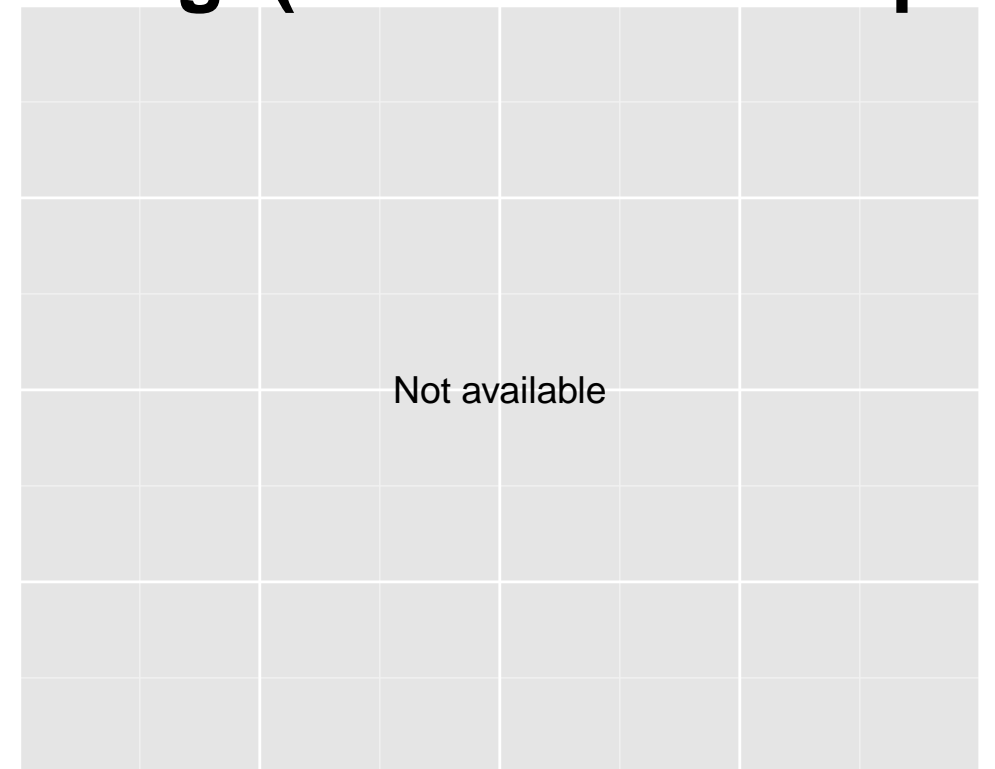

Supplement: SuppDataset_1.zip [file Zc4h2_set_C.pdf › Supplemental Dataset 1/C-mRNA_nonrhythm_translation_rhyth/Zc4h2_set_C.pdf]

# Zcwpw1

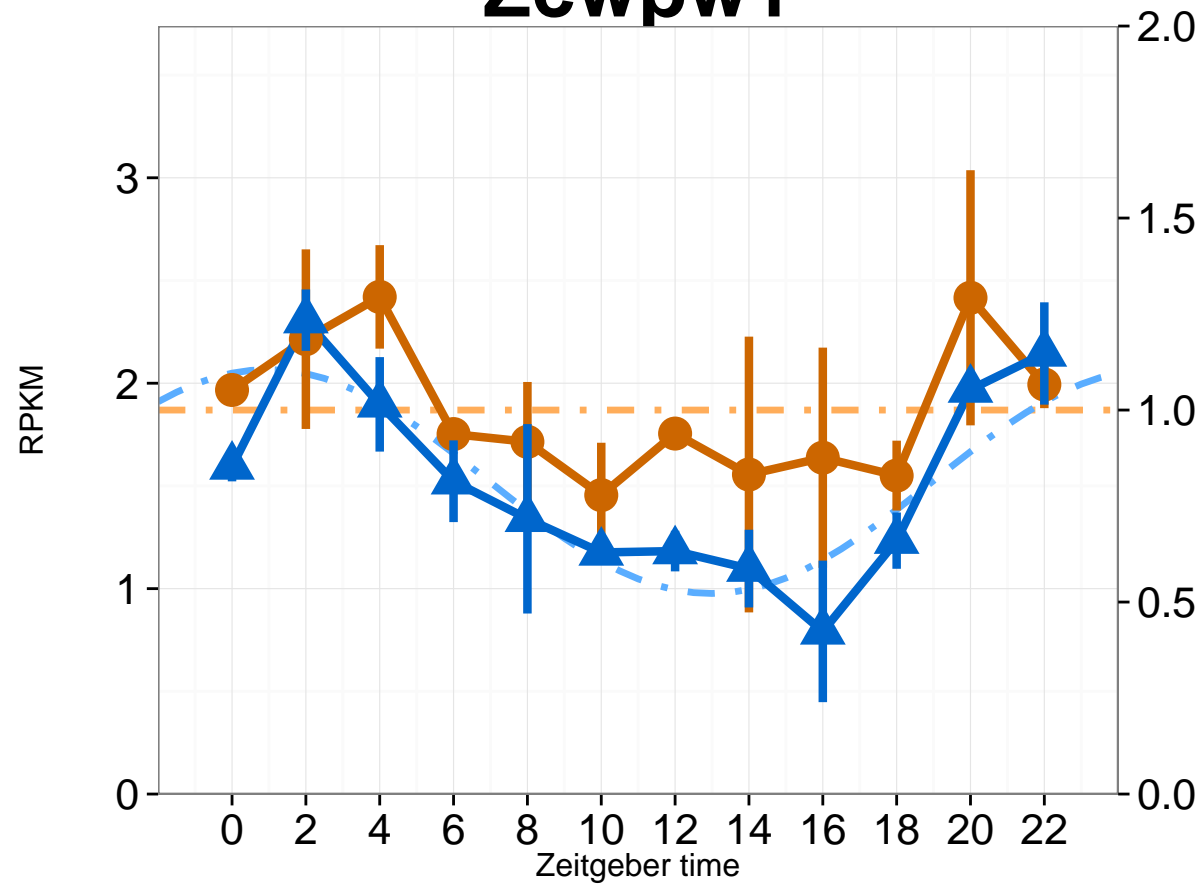

# Zcwpw1

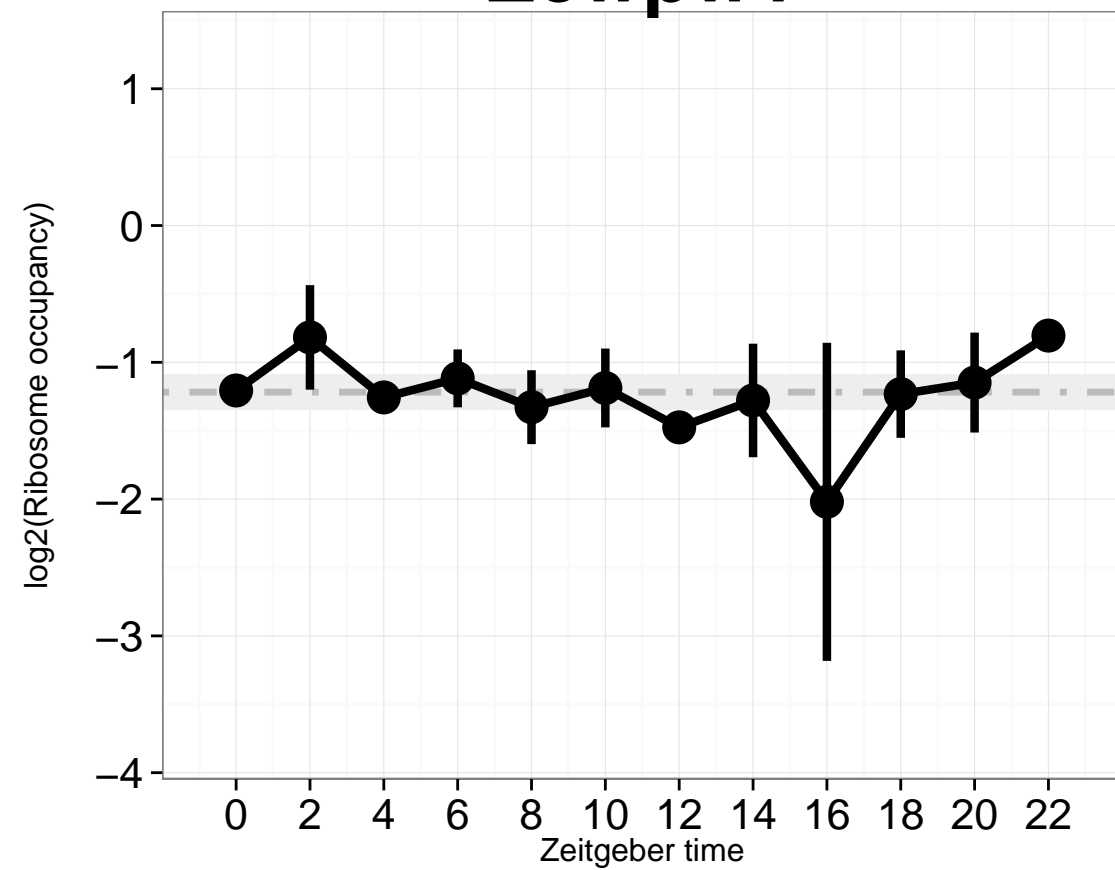

Supplement: SuppDataset_1.zip [file Zcwpw1_set_C.pdf › Supplemental Dataset 1/C-mRNA_nonrhythm_translation_rhyth/Zcwpw1_set_C.pdf]

# Zdhhc8

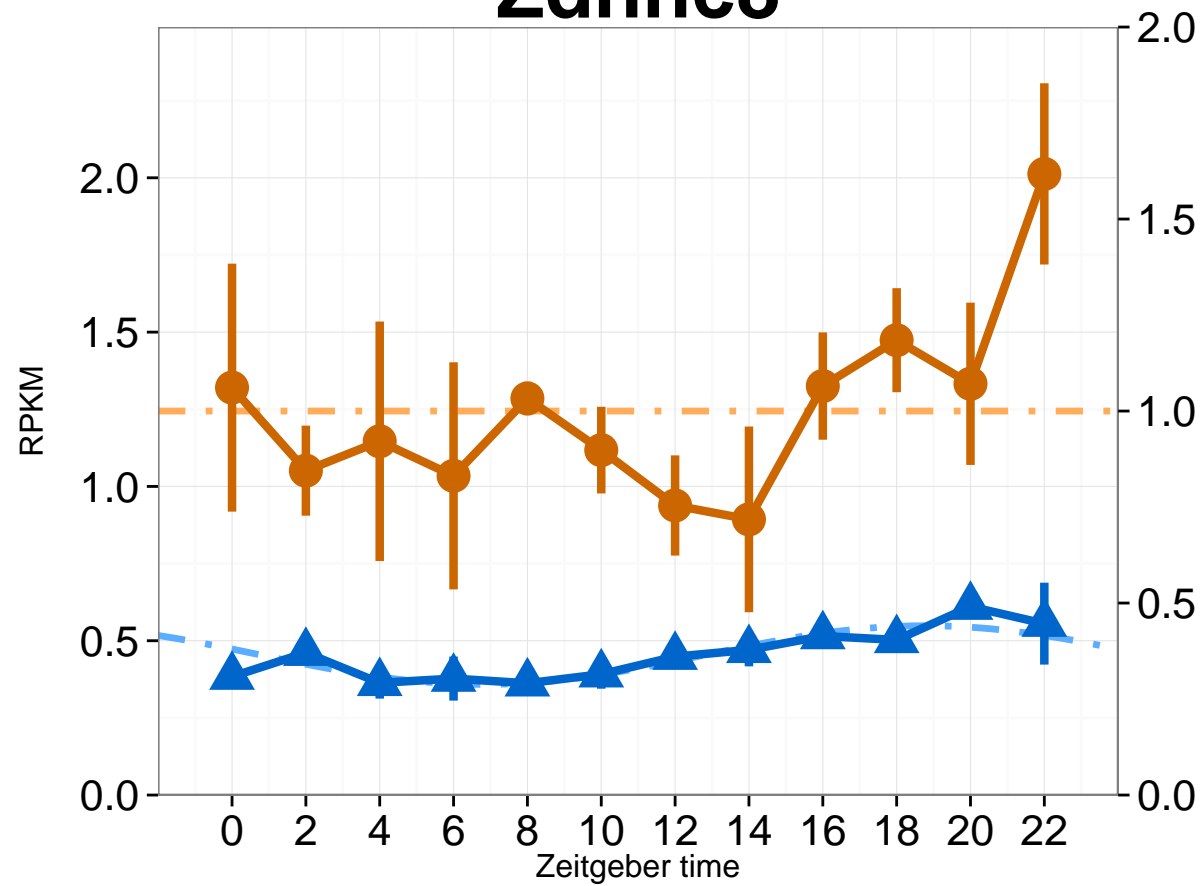

# Zdhhc8

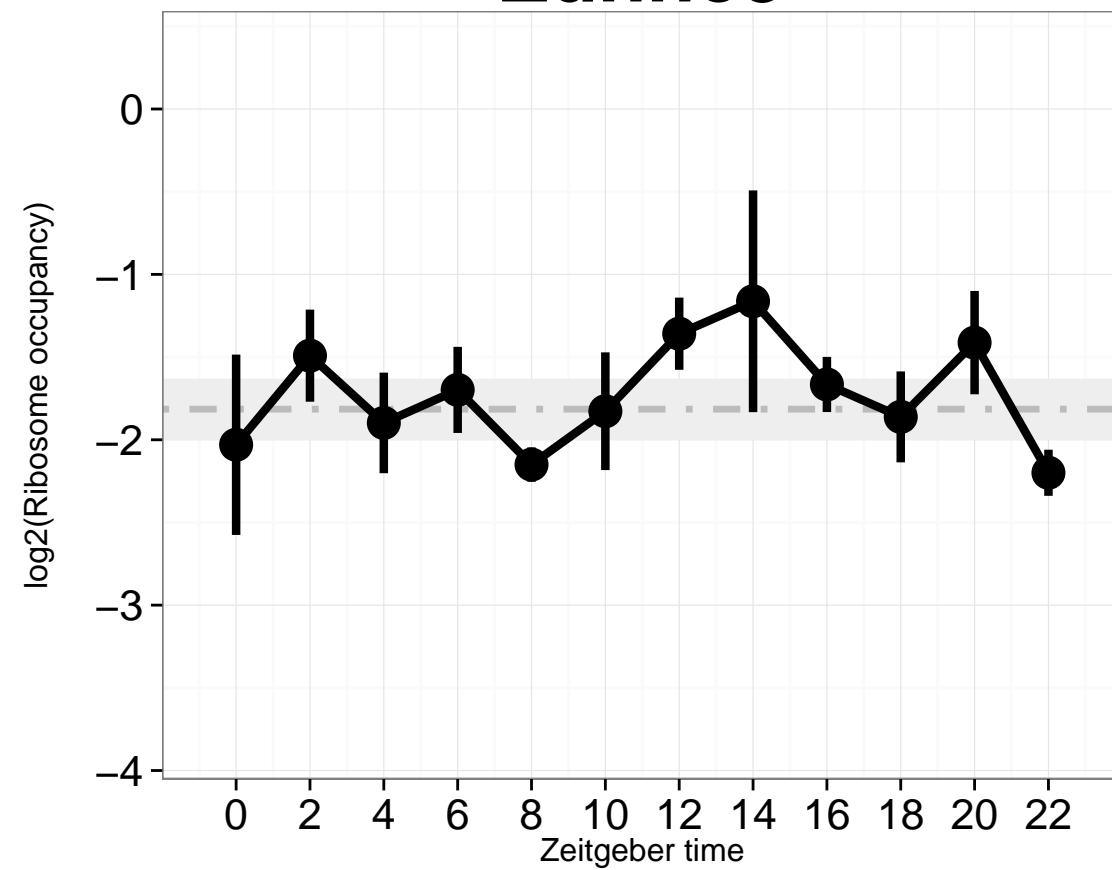

Supplement: SuppDataset_1.zip [file Zdhhc8_set_C.pdf › Supplemental Dataset 1/C-mRNA_nonrhythm_translation_rhyth/Zdhhc8_set_C.pdf]

# Zfp101

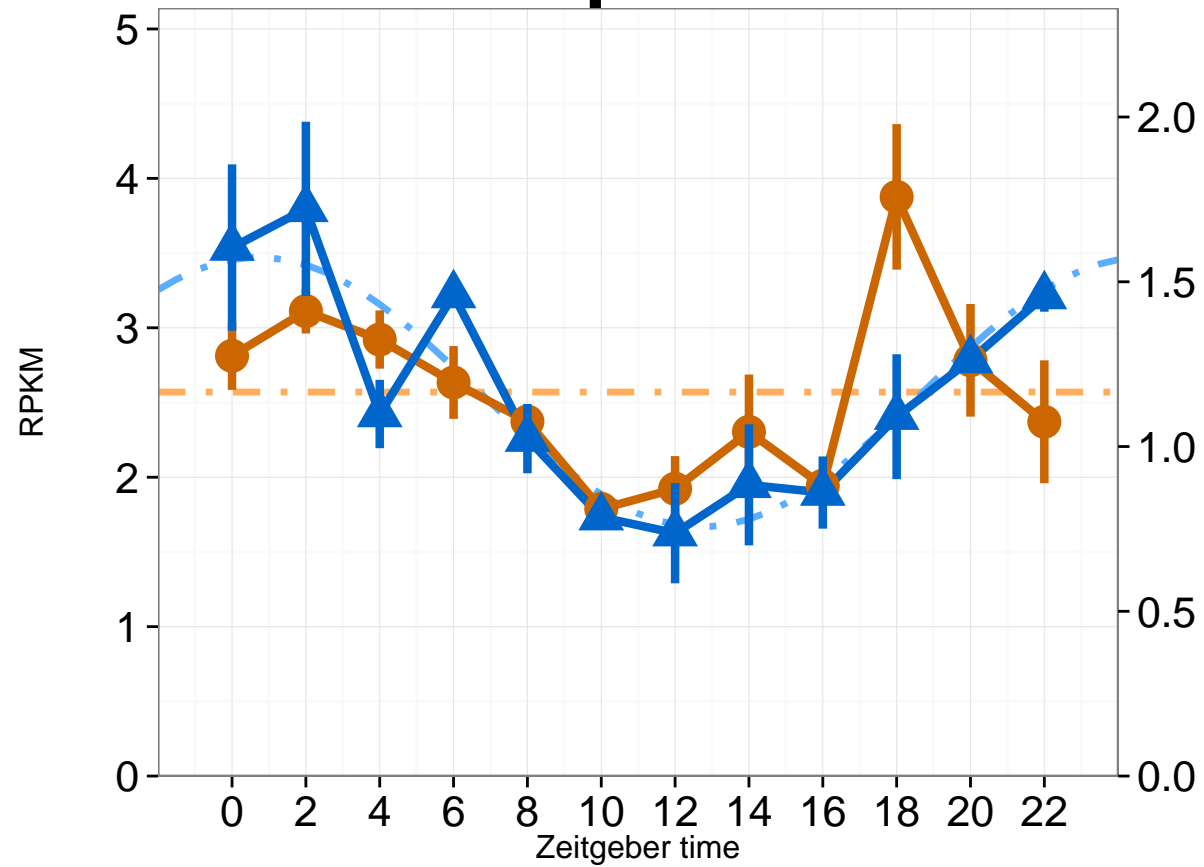

# Zfp101

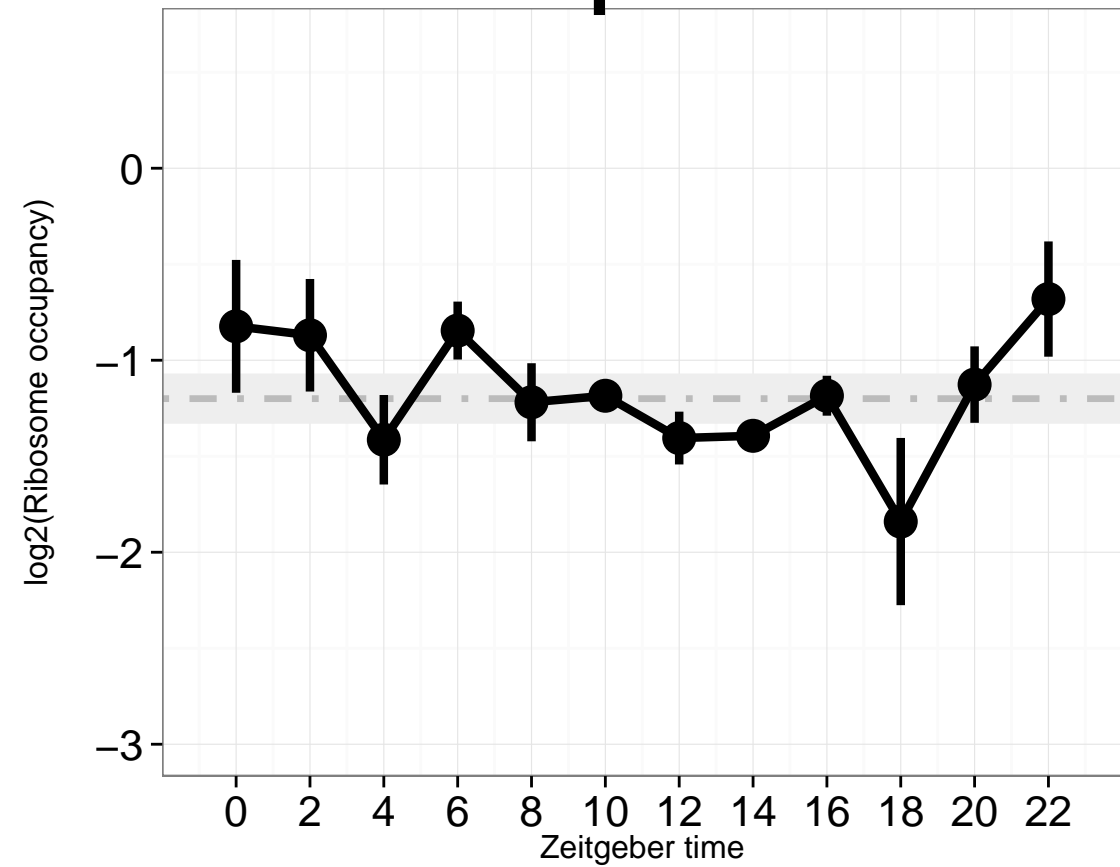

Supplement: SuppDataset_1.zip [file Zfp101_set_C.pdf › Supplemental Dataset 1/C-mRNA_nonrhythm_translation_rhyth/Zfp101_set_C.pdf]

# Zfp131

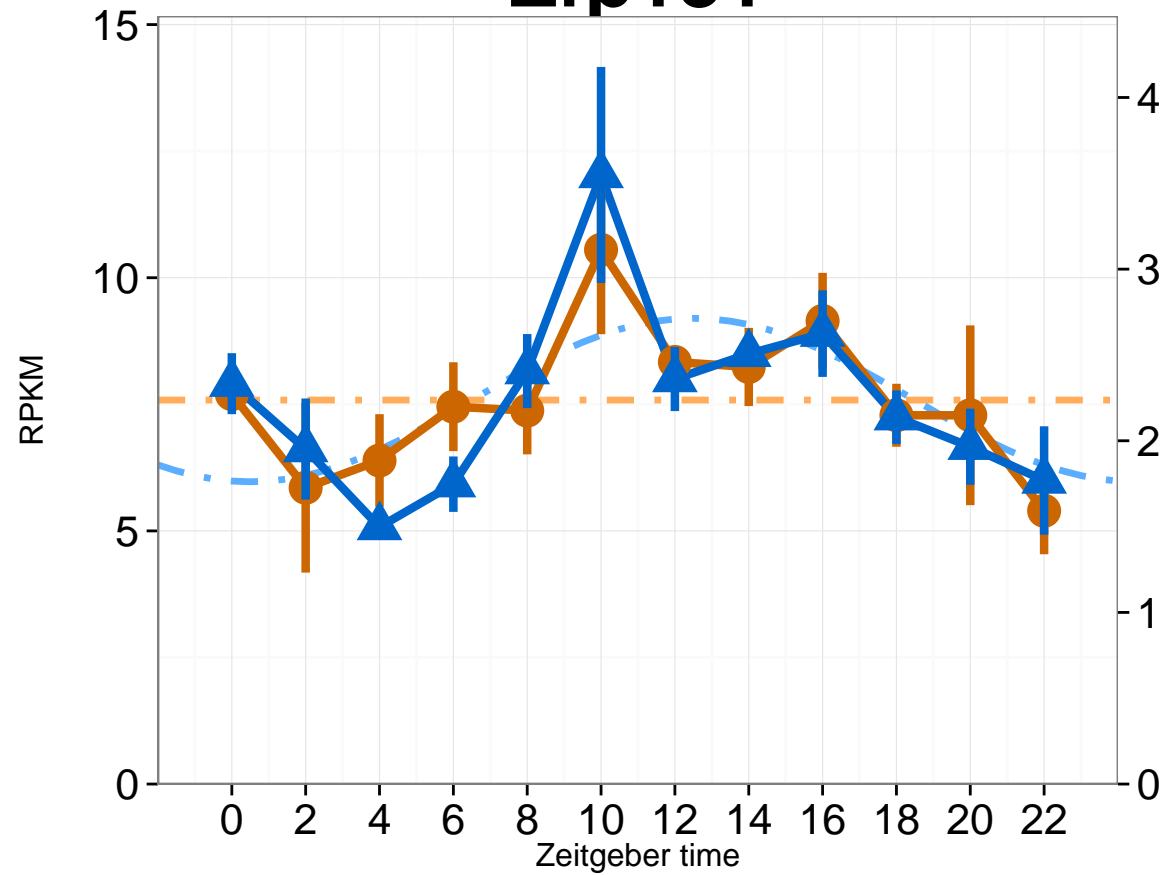

# Zfp131

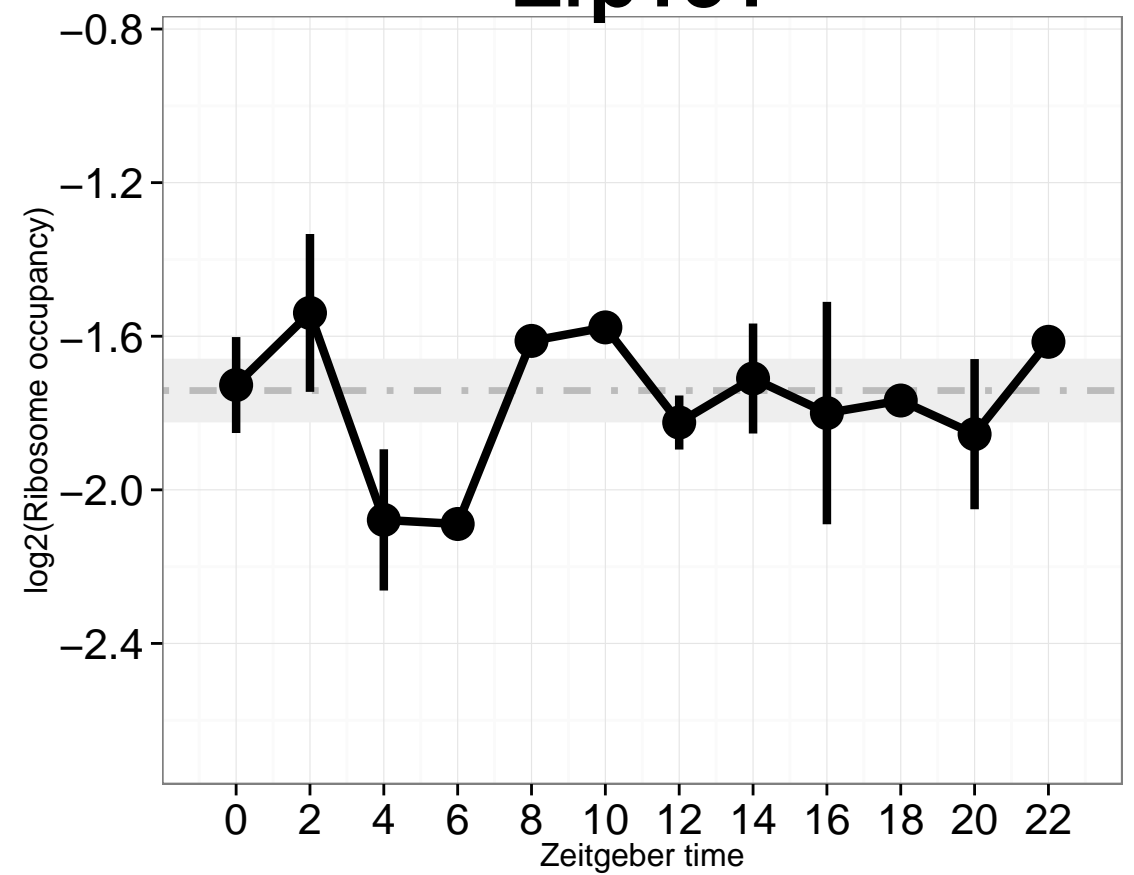

Supplement: SuppDataset_1.zip [file Zfp131_set_C.pdf › Supplemental Dataset 1/C-mRNA_nonrhythm_translation_rhyth/Zfp131_set_C.pdf]

# Zfp26

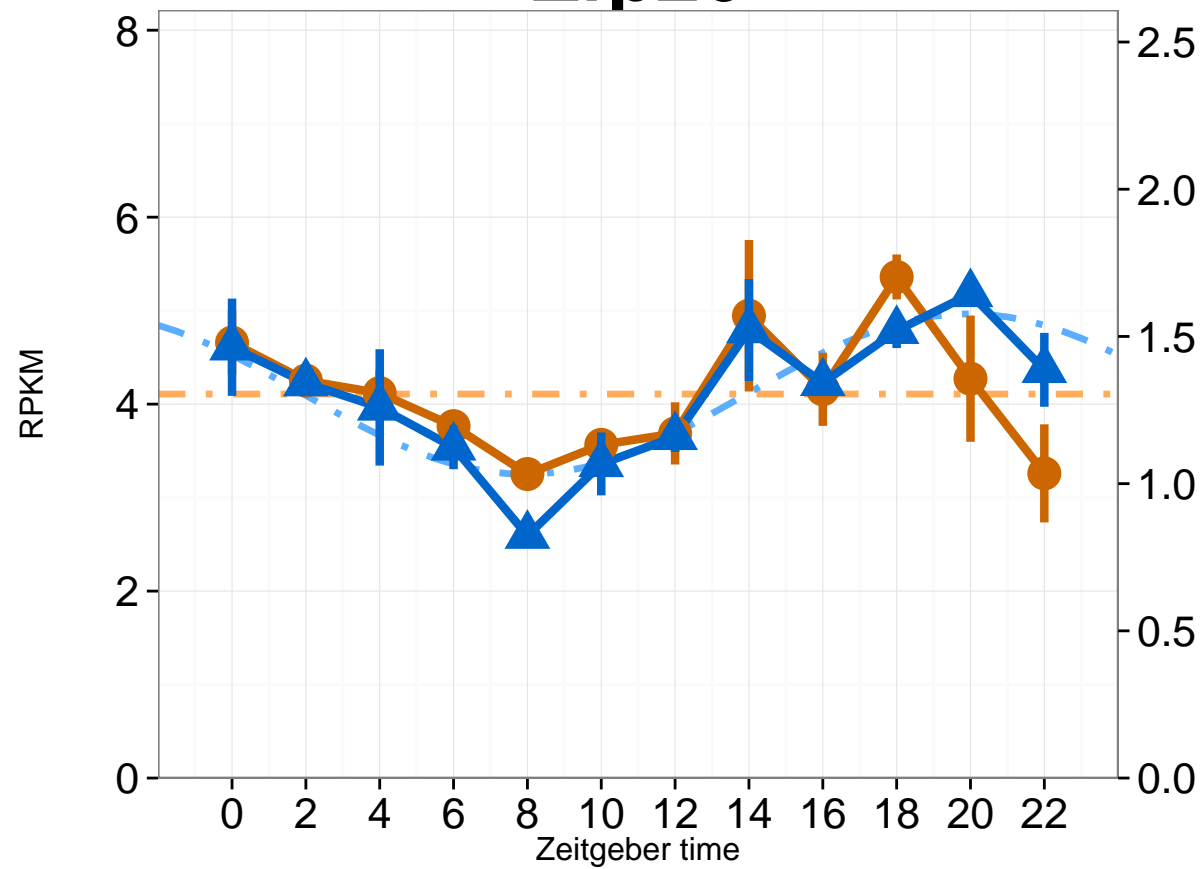

# Zfp26

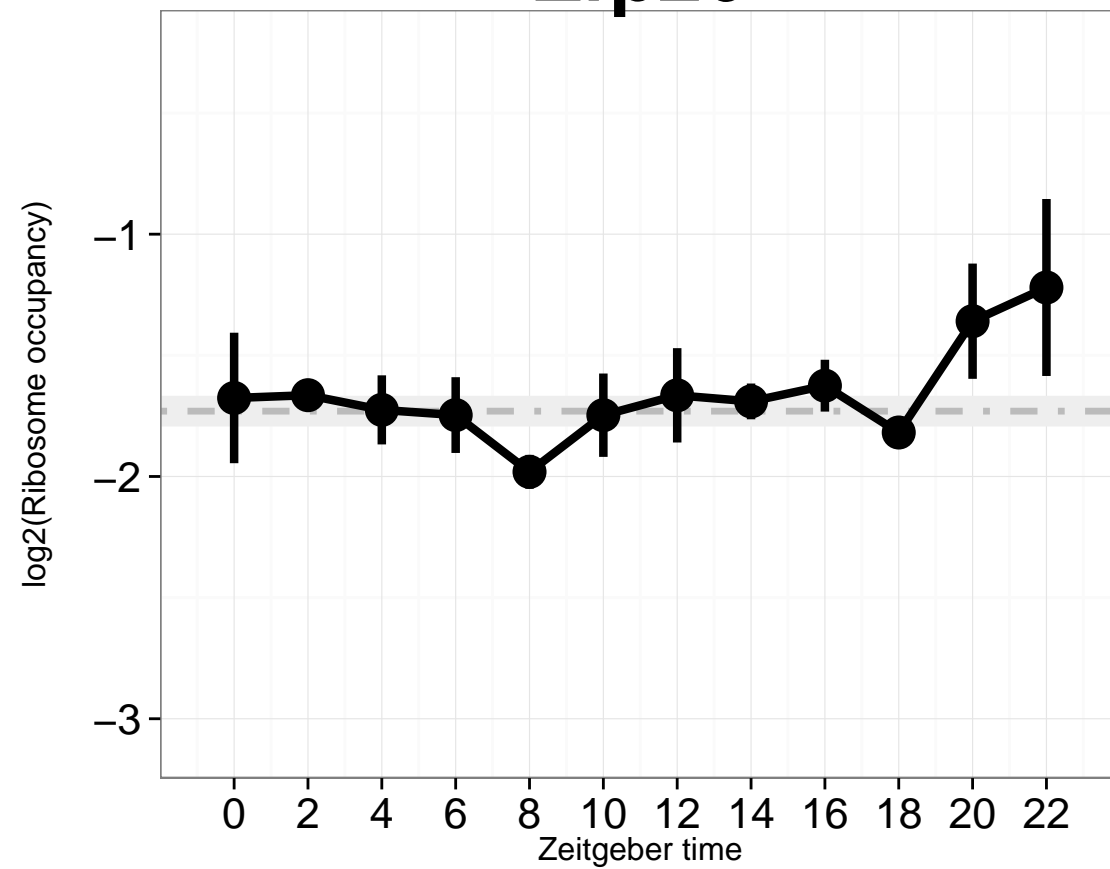

Supplement: SuppDataset_1.zip [file Zfp26_set_C.pdf › Supplemental Dataset 1/C-mRNA_nonrhythm_translation_rhyth/Zfp26_set_C.pdf]

# Zfp326

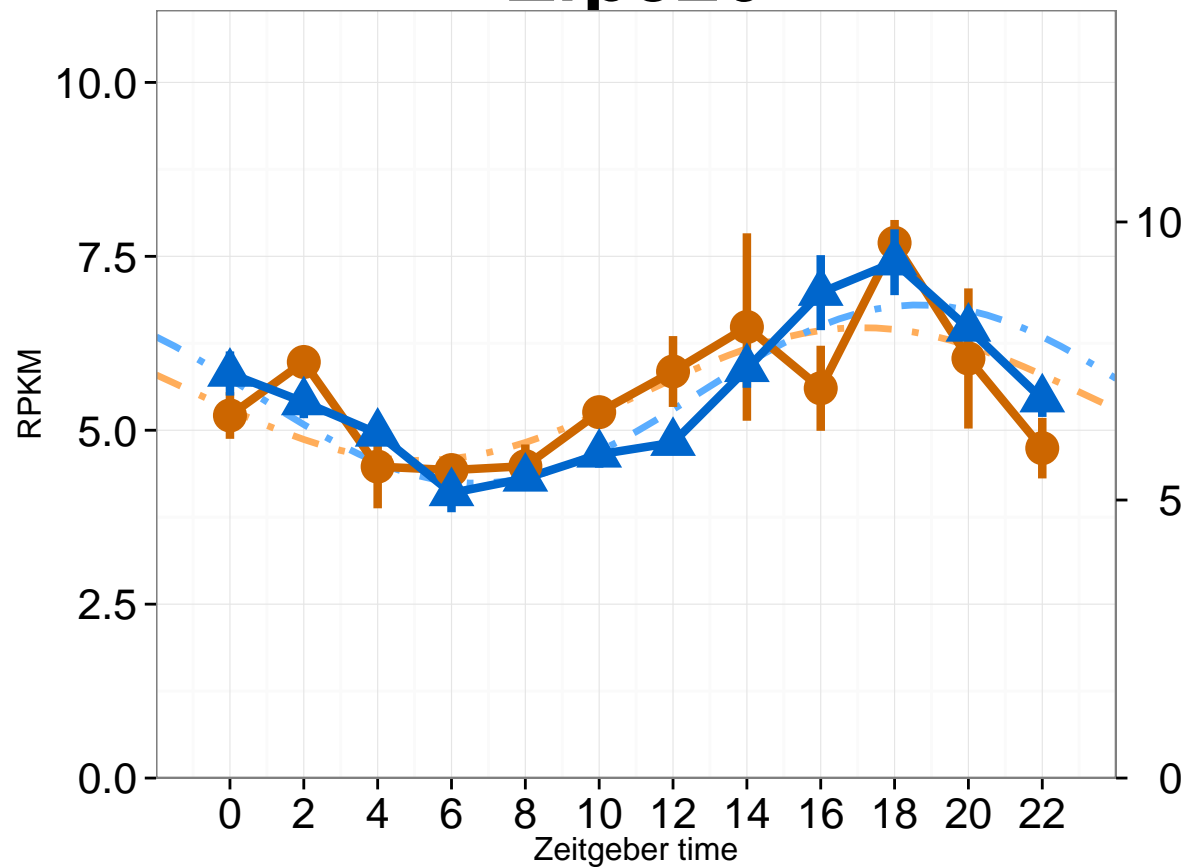

# Zfp326

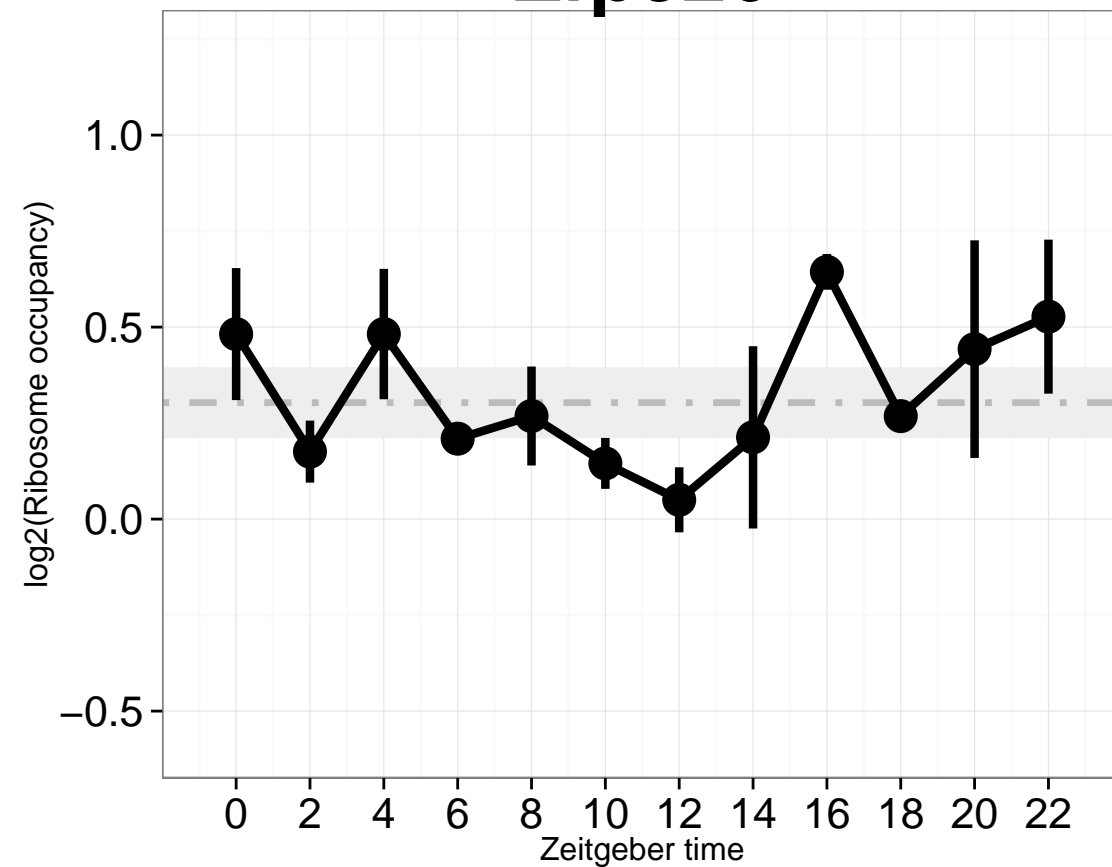

Supplement: SuppDataset_1.zip [file Zfp326_set_C.pdf › Supplemental Dataset 1/C-mRNA_nonrhythm_translation_rhyth/Zfp326_set_C.pdf]

# Zfp329

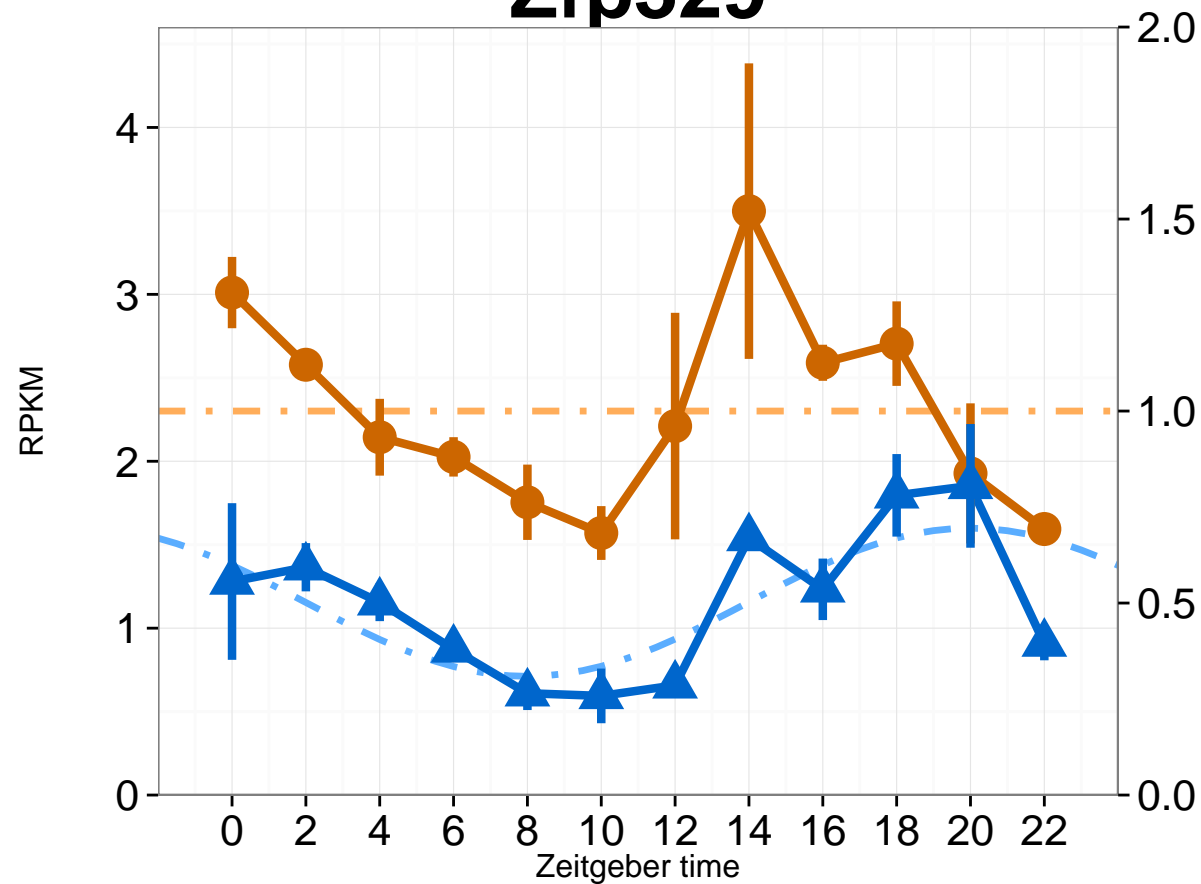

# Zfp329

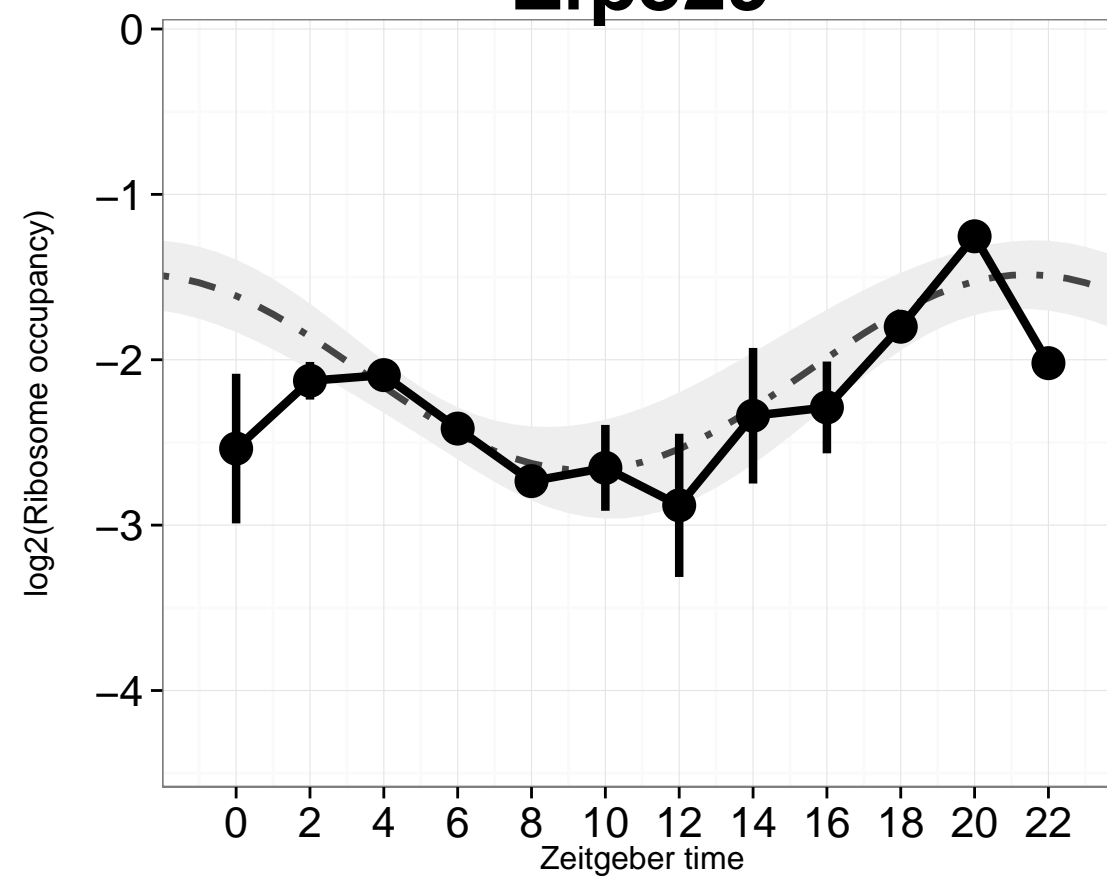

Supplement: SuppDataset_1.zip [file Zfp329_set_C.pdf › Supplemental Dataset 1/C-mRNA_nonrhythm_translation_rhyth/Zfp329_set_C.pdf]

# Zfp334

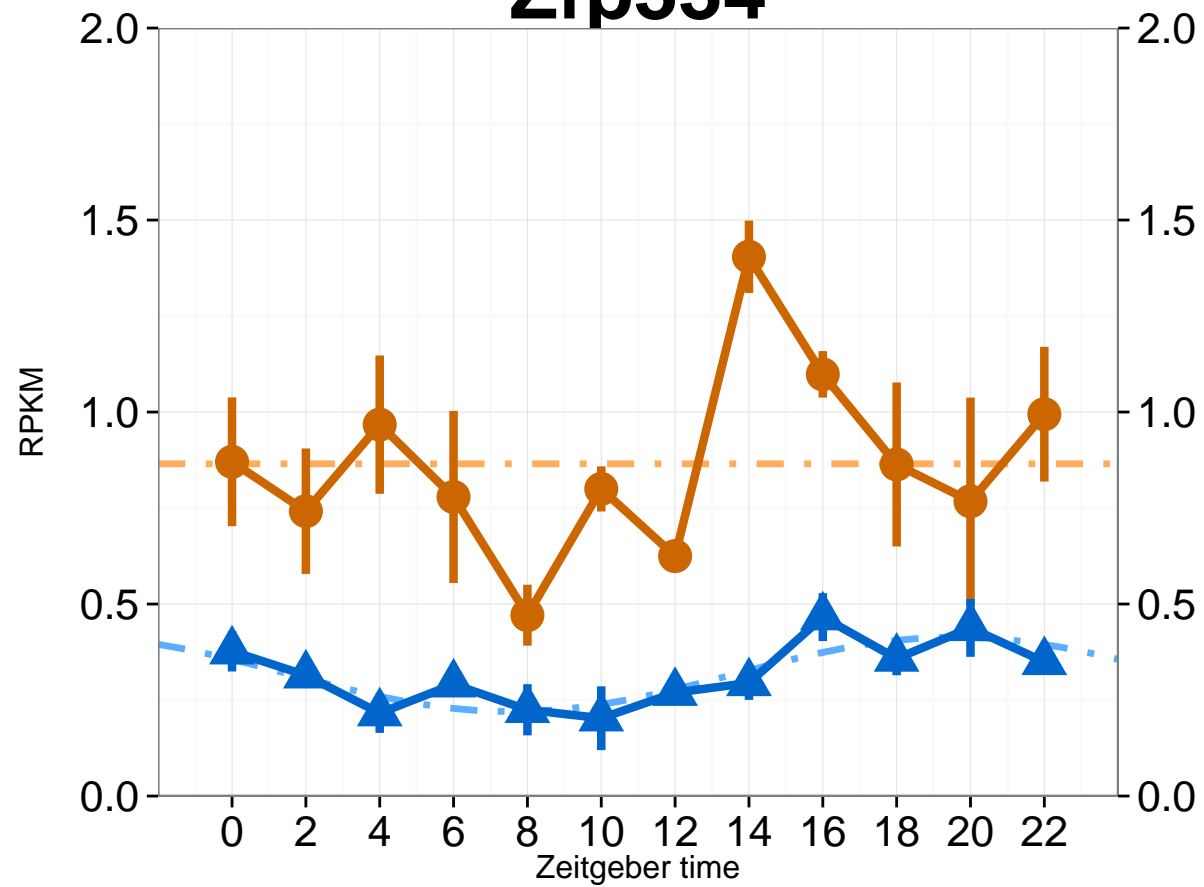

# Zfp334

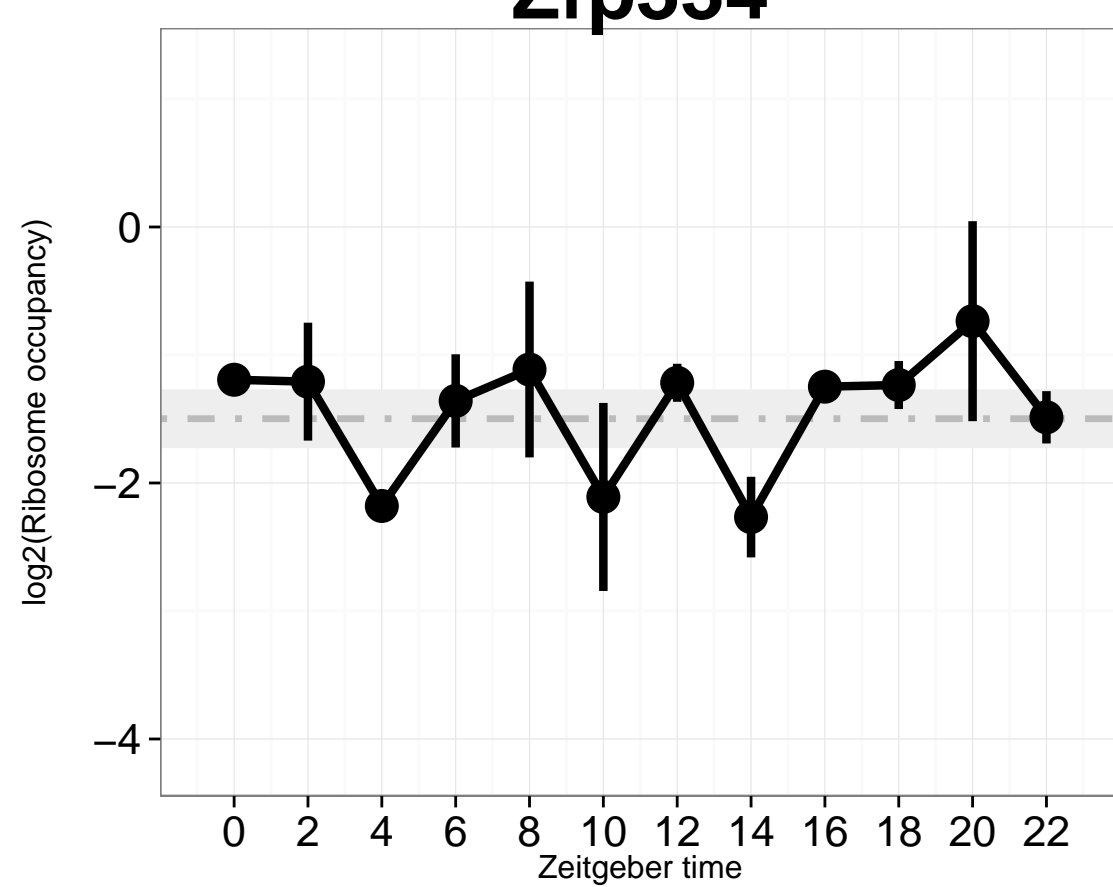

Supplement: SuppDataset_1.zip [file Zfp334_set_C.pdf › Supplemental Dataset 1/C-mRNA_nonrhythm_translation_rhyth/Zfp334_set_C.pdf]

# Zfp354a

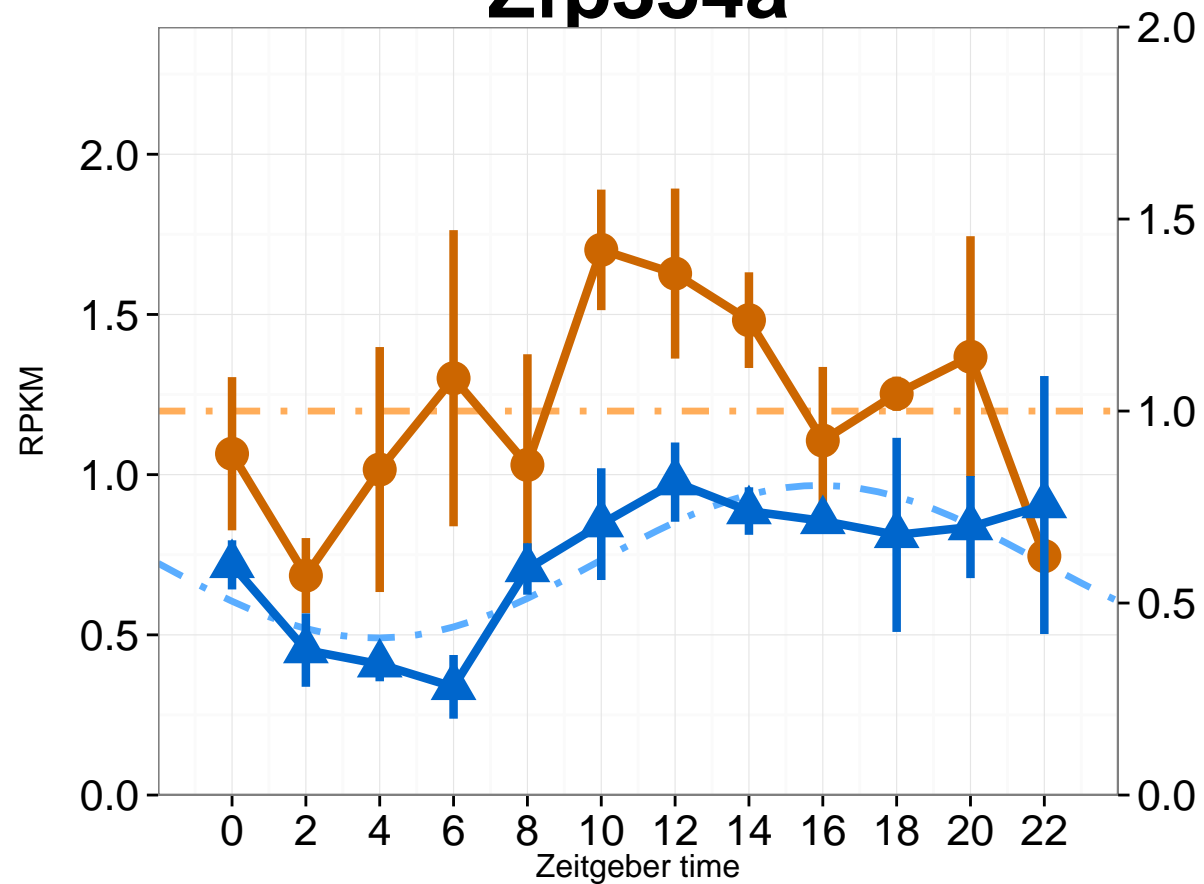

# Zfp354a

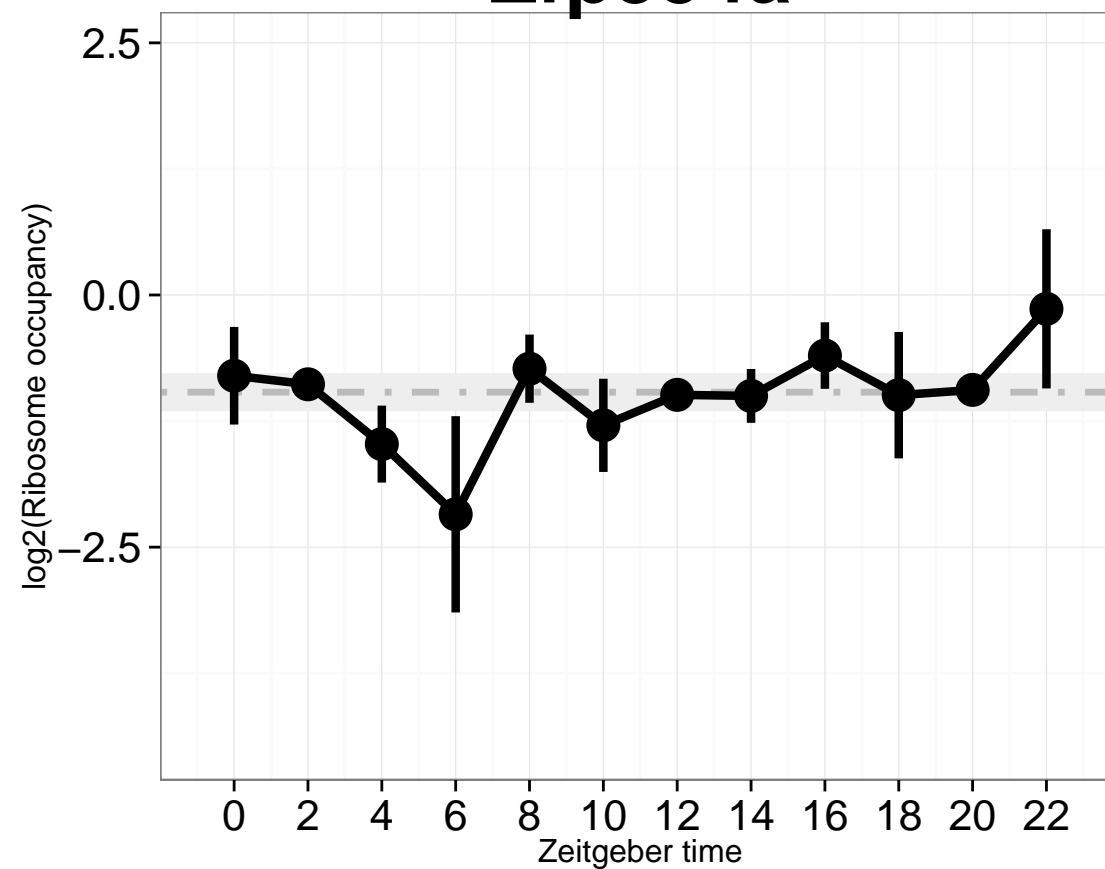

Supplement: SuppDataset_1.zip [file Zfp354a_set_C.pdf › Supplemental Dataset 1/C-mRNA_nonrhythm_translation_rhyth/Zfp354a_set_C.pdf]

# Zfp385a

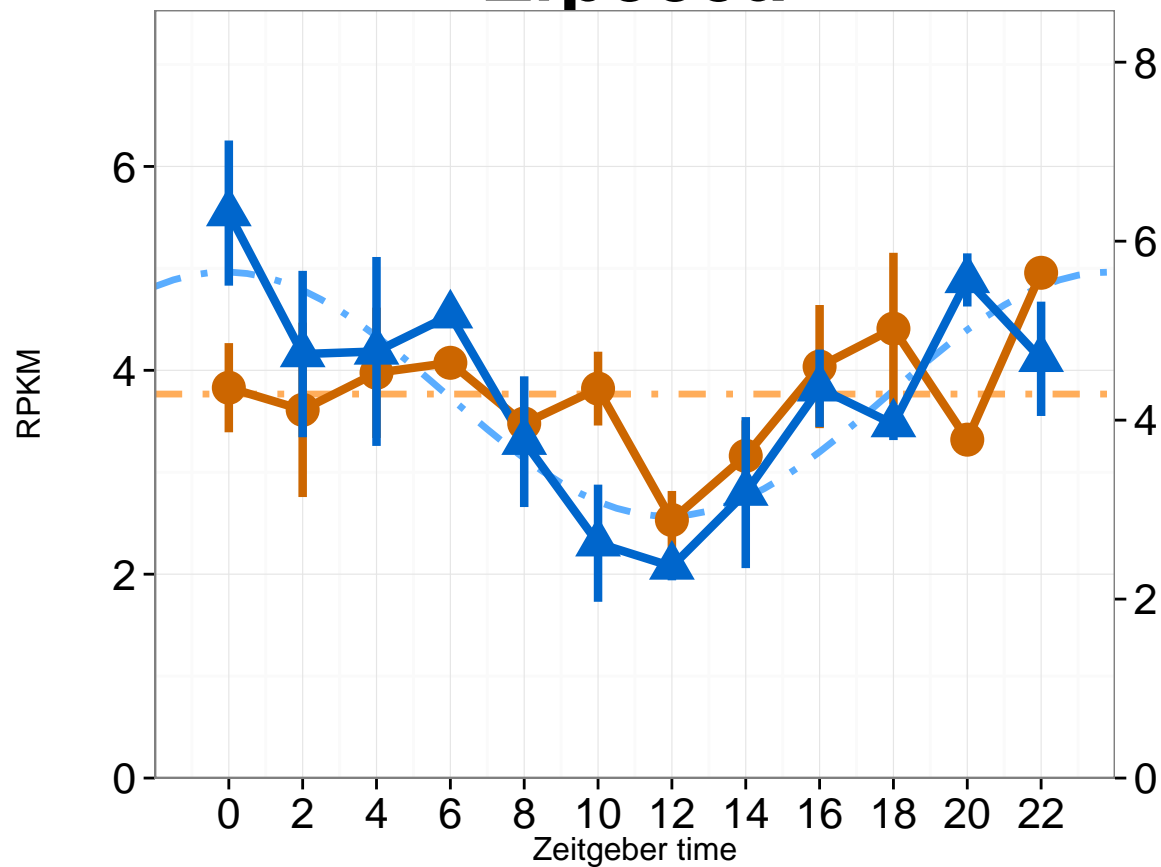

# Zfp385a

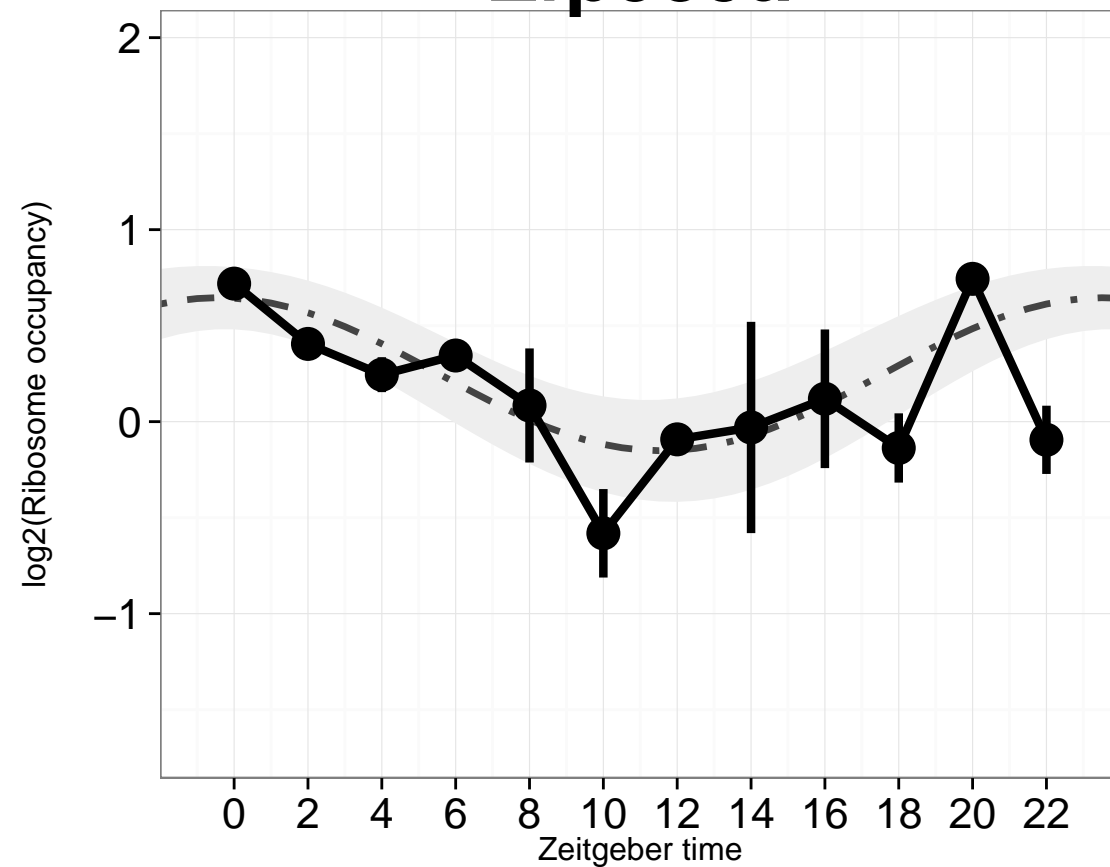

Supplement: SuppDataset_1.zip [file Zfp385a_set_C.pdf › Supplemental Dataset 1/C-mRNA_nonrhythm_translation_rhyth/Zfp385a_set_C.pdf]

# Zfp385b

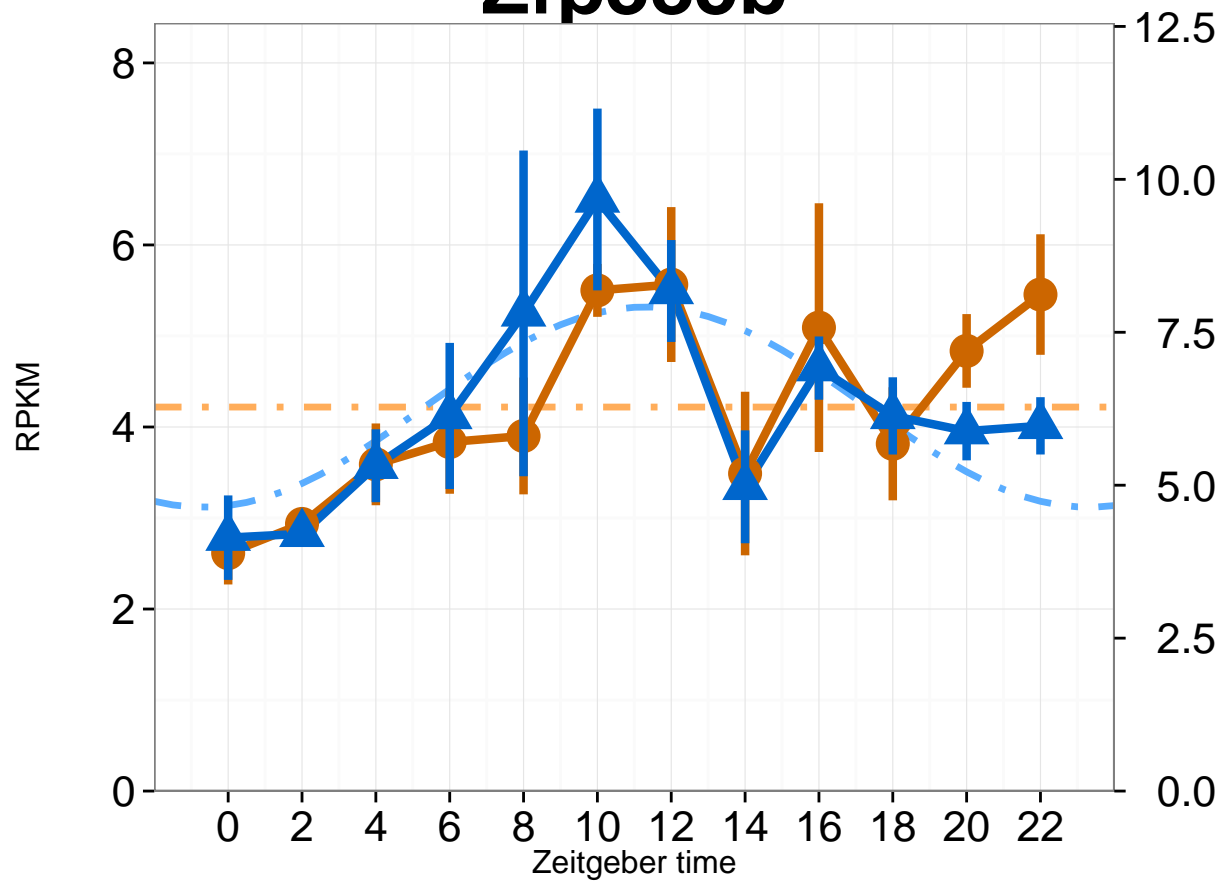

# Zfp385b

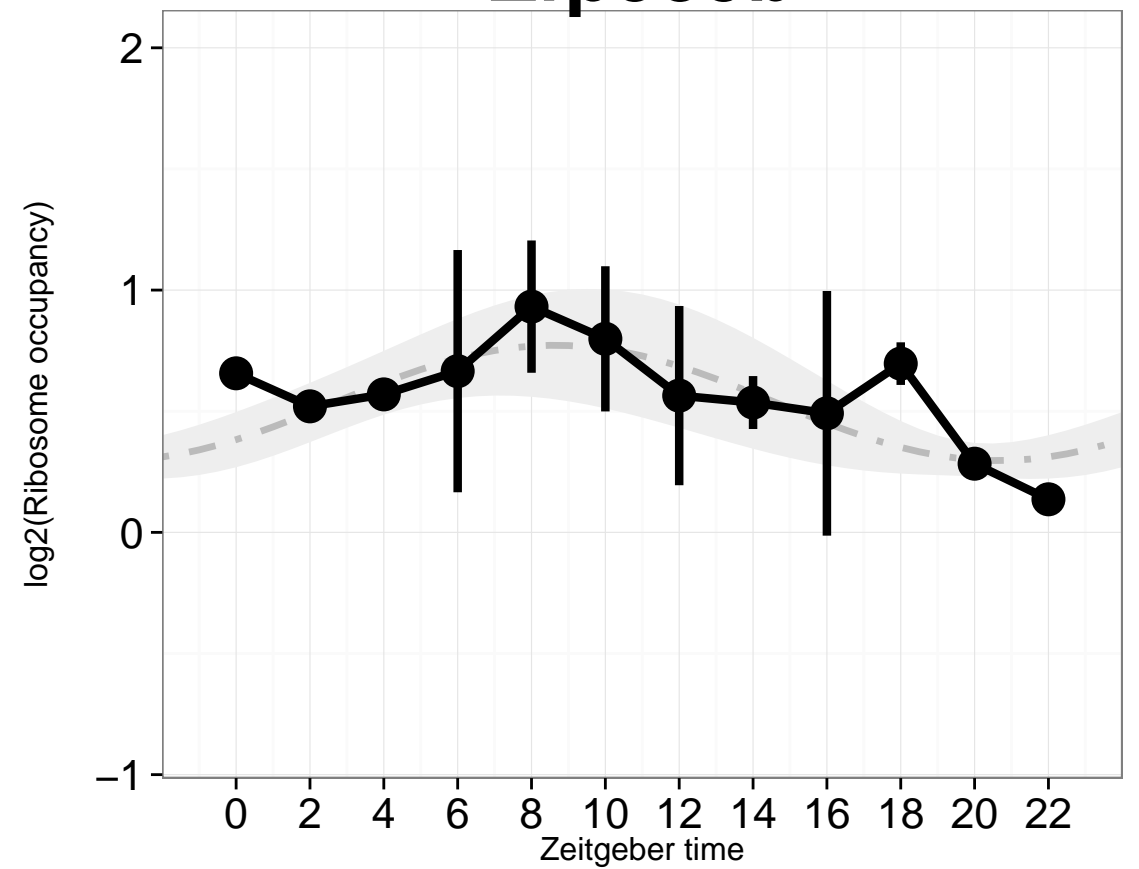

Supplement: SuppDataset_1.zip [file Zfp385b_set_C.pdf › Supplemental Dataset 1/C-mRNA_nonrhythm_translation_rhyth/Zfp385b_set_C.pdf]

# Zfp386

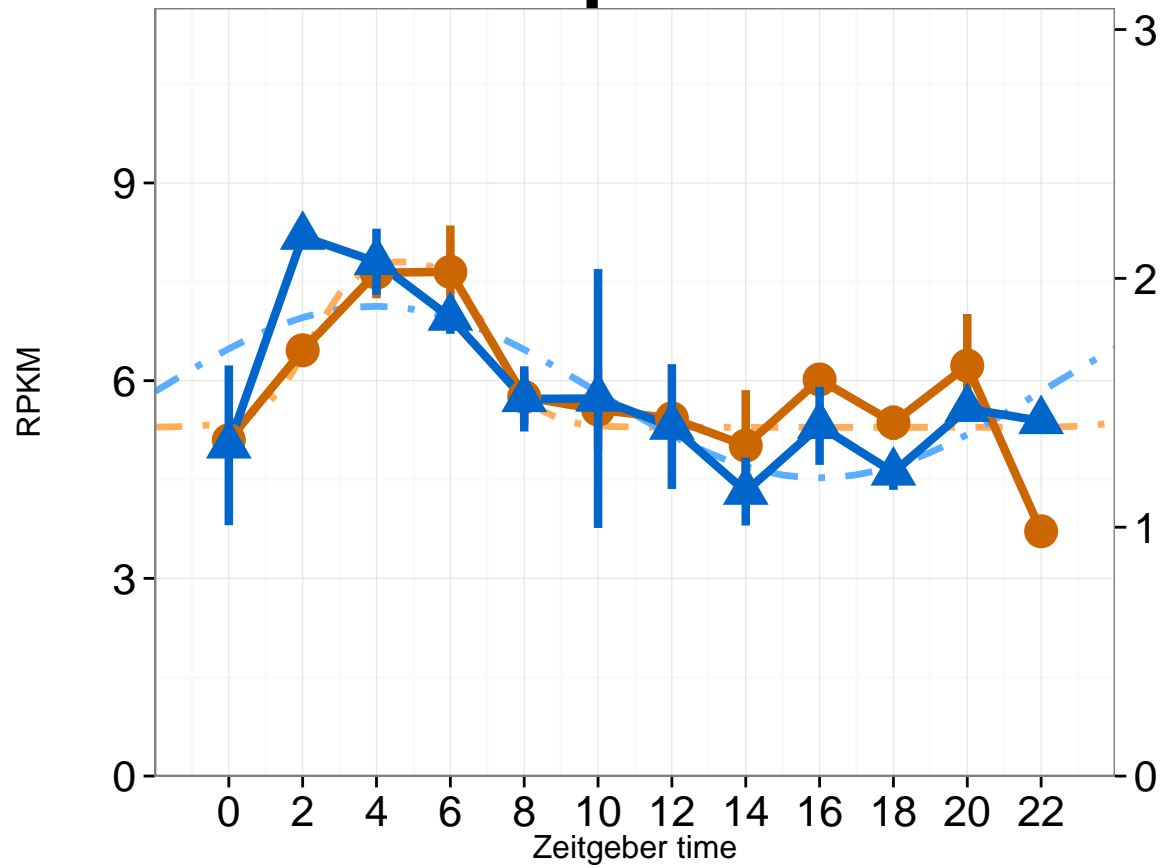

# Zfp386

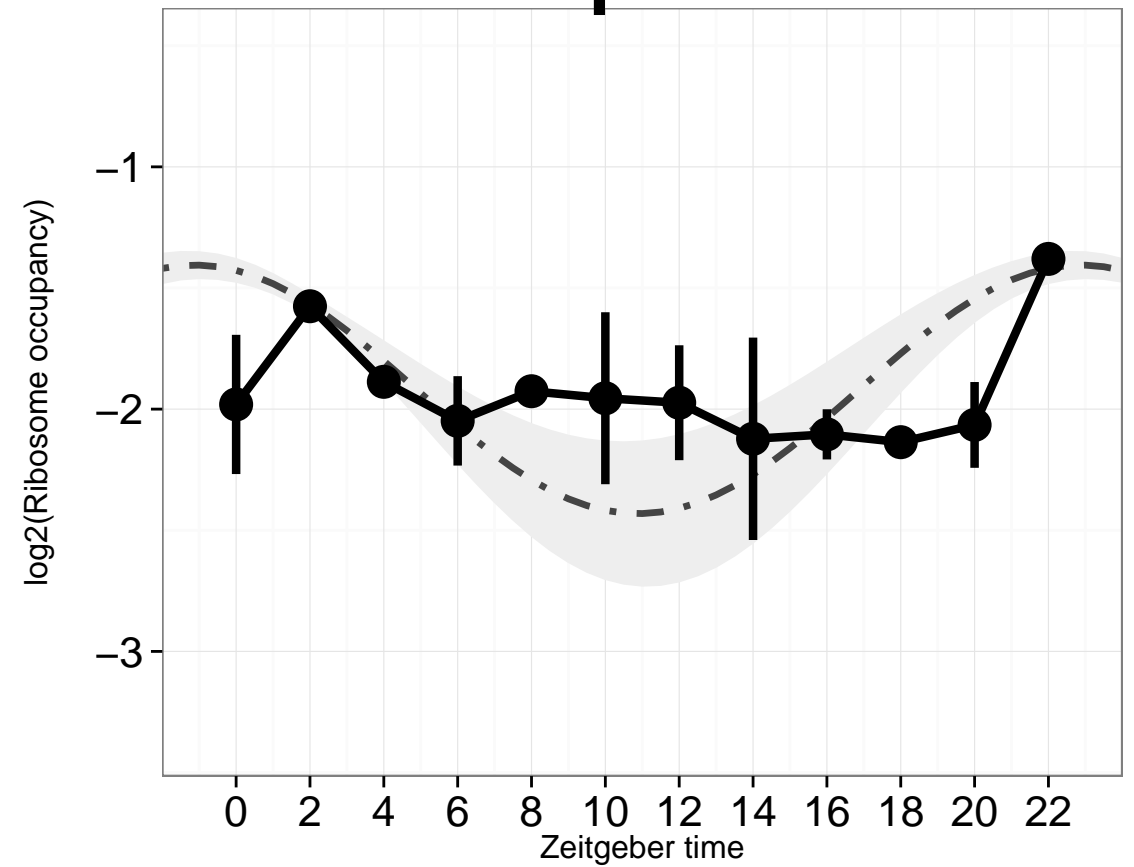

Supplement: SuppDataset_1.zip [file Zfp386_set_C.pdf › Supplemental Dataset 1/C-mRNA_nonrhythm_translation_rhyth/Zfp386_set_C.pdf]

# Zfp422

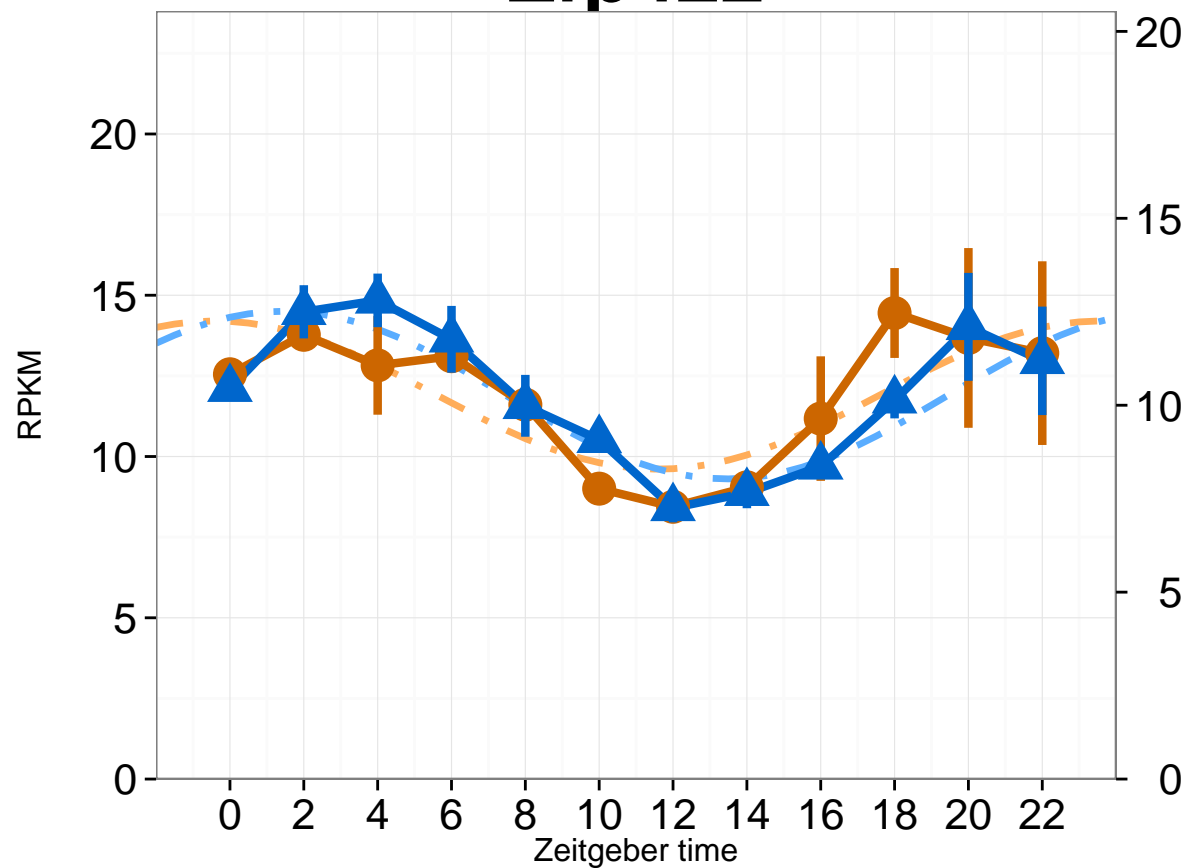

# Zfp422

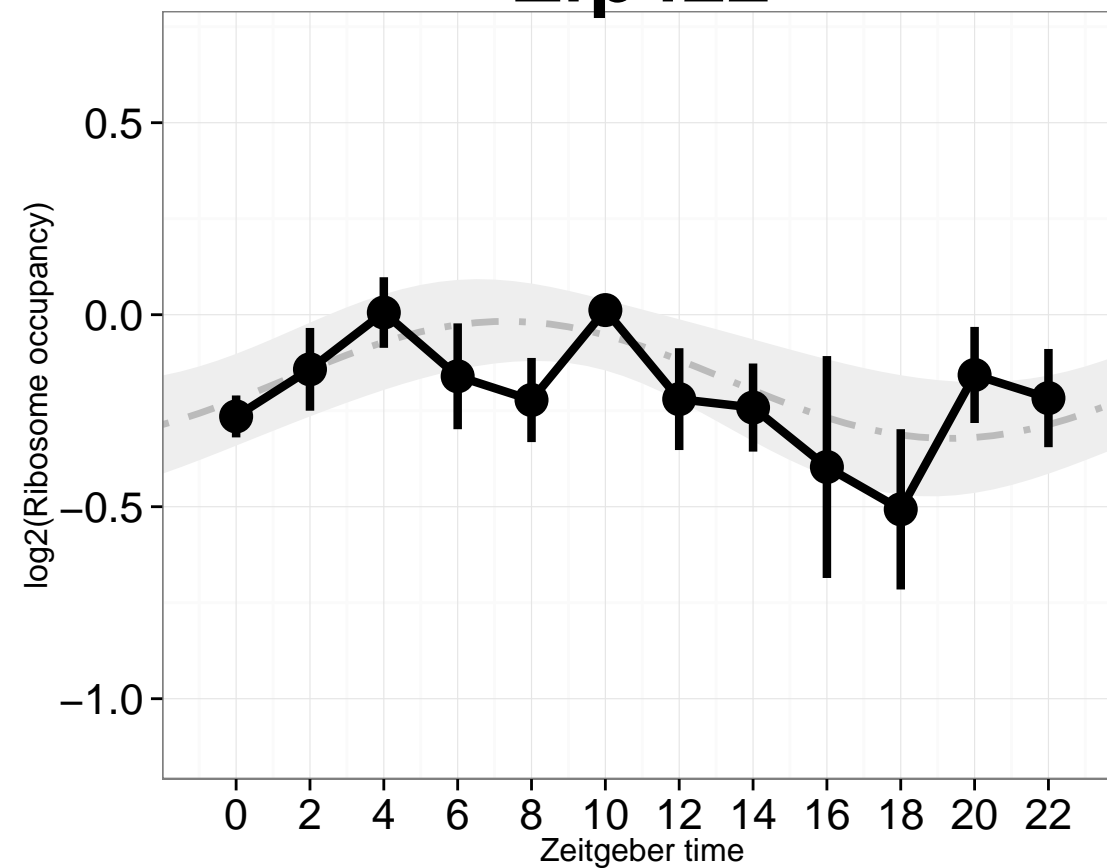

Supplement: SuppDataset_1.zip [file Zfp422_set_C.pdf › Supplemental Dataset 1/C-mRNA_nonrhythm_translation_rhyth/Zfp422_set_C.pdf]

# Zfp428

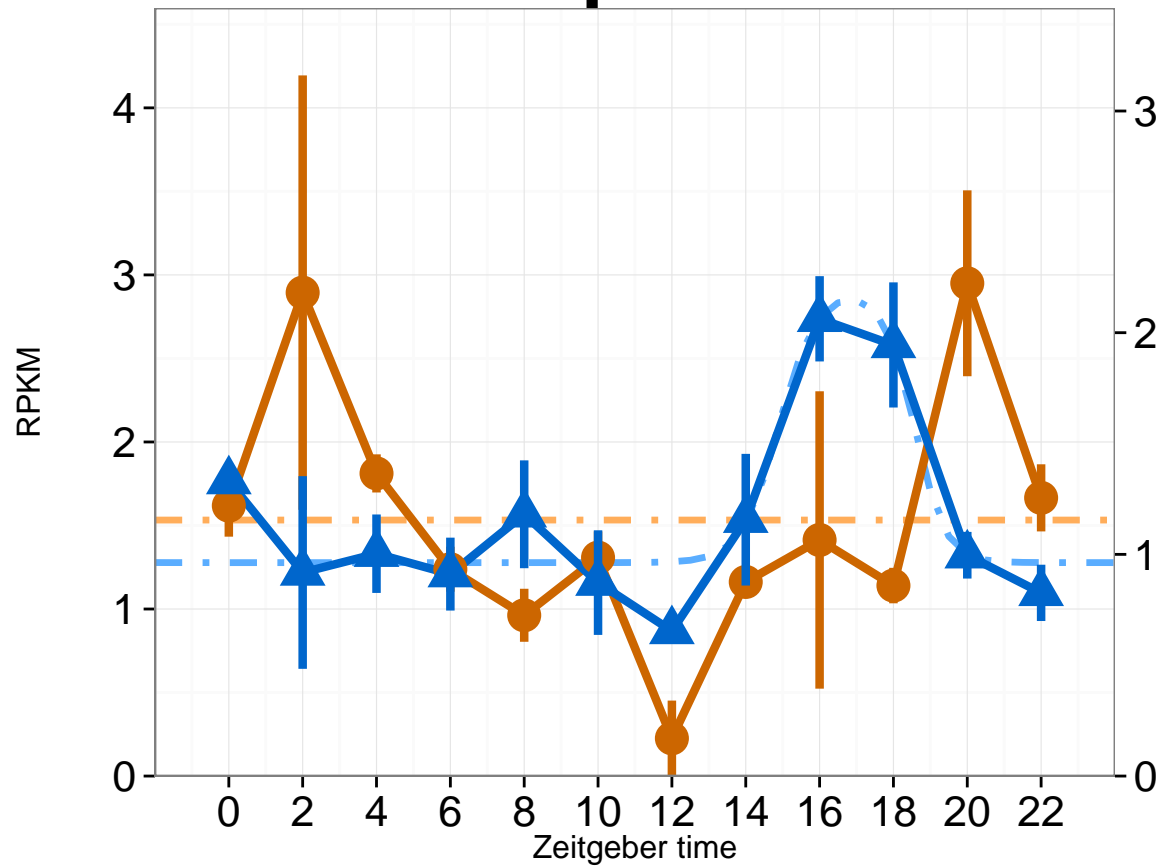

# Zfp428

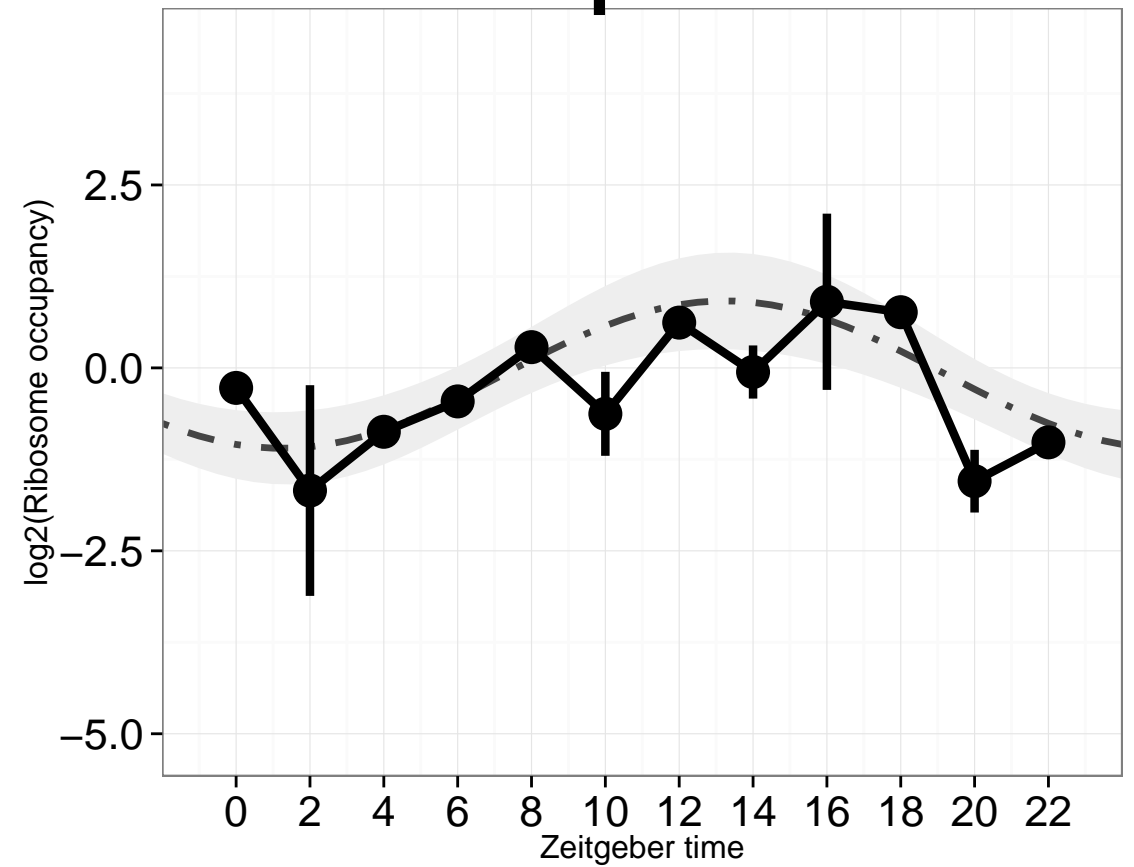

Supplement: SuppDataset_1.zip [file Zfp428_set_C.pdf › Supplemental Dataset 1/C-mRNA_nonrhythm_translation_rhyth/Zfp428_set_C.pdf]

# Zfp493

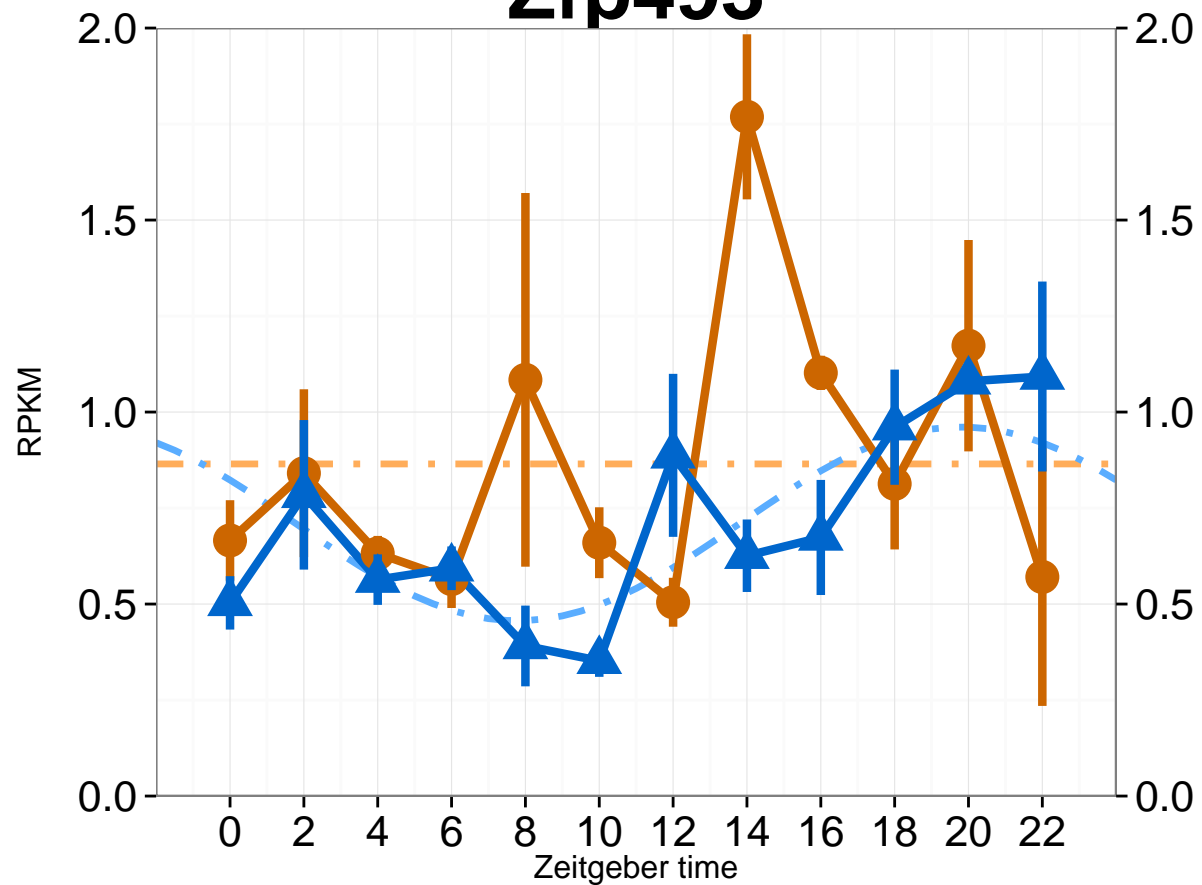

# Zfp493

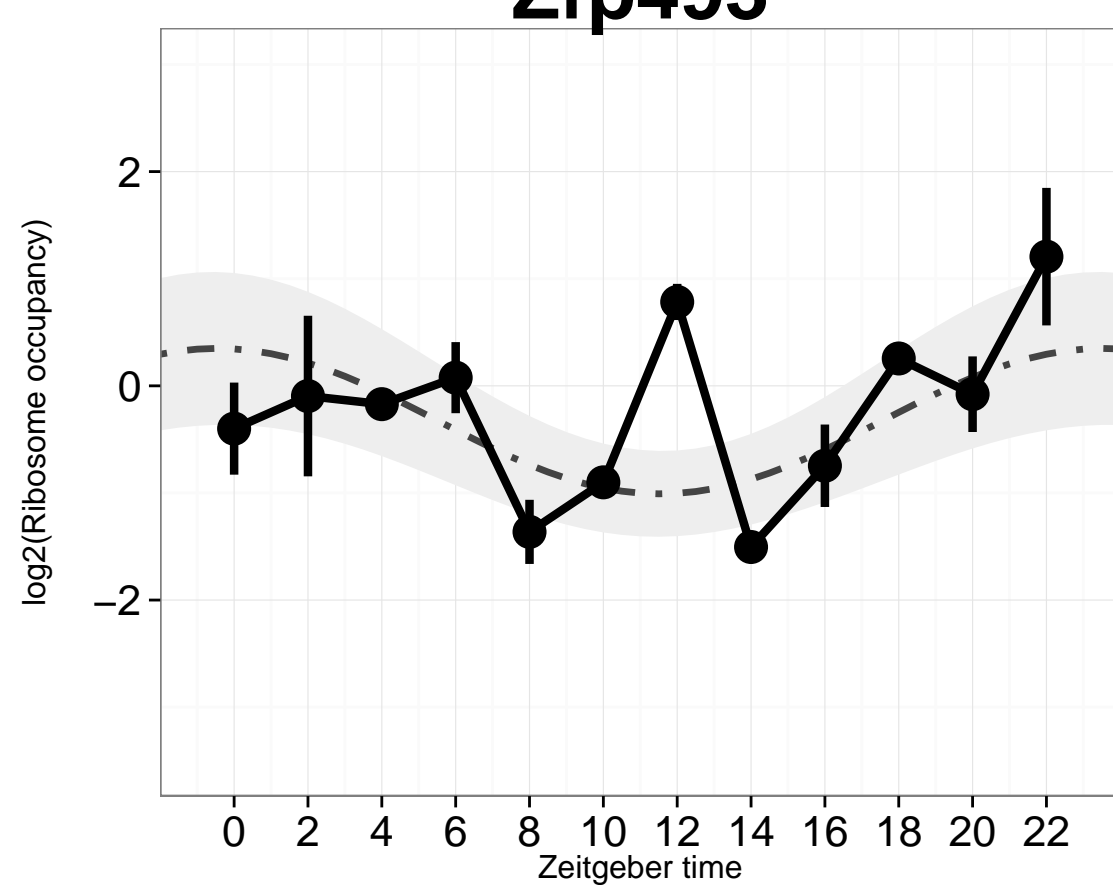

Supplement: SuppDataset_1.zip [file Zfp493_set_C.pdf › Supplemental Dataset 1/C-mRNA_nonrhythm_translation_rhyth/Zfp493_set_C.pdf]

# Zfp512

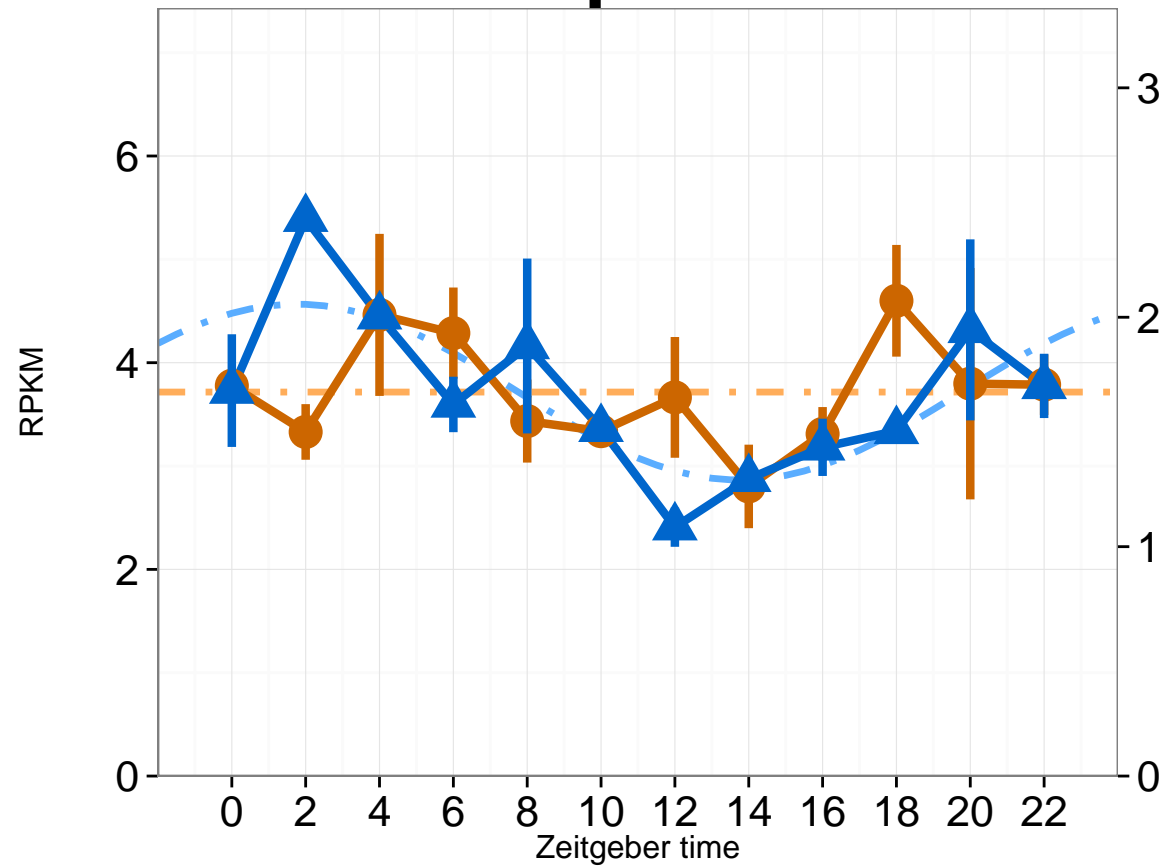

# Zfp512

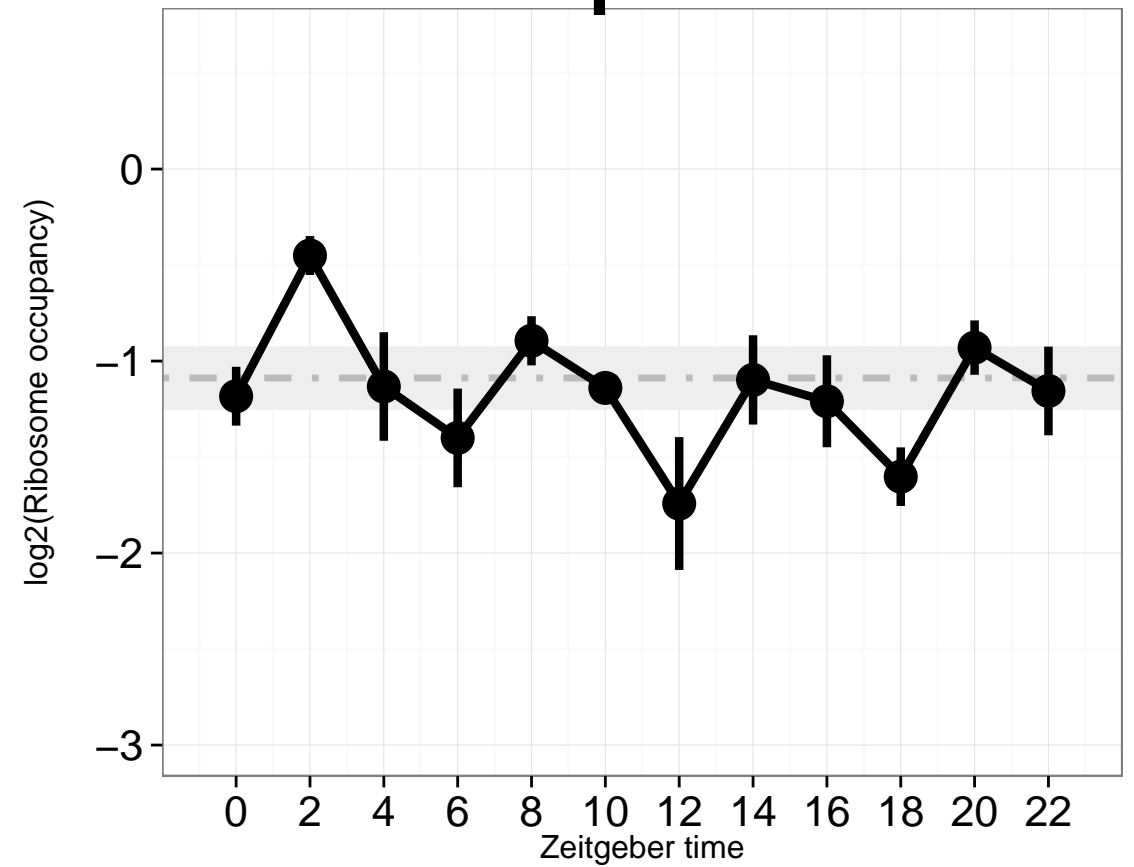

Supplement: SuppDataset_1.zip [file Zfp512_set_C.pdf › Supplemental Dataset 1/C-mRNA_nonrhythm_translation_rhyth/Zfp512_set_C.pdf]

# Zfp53

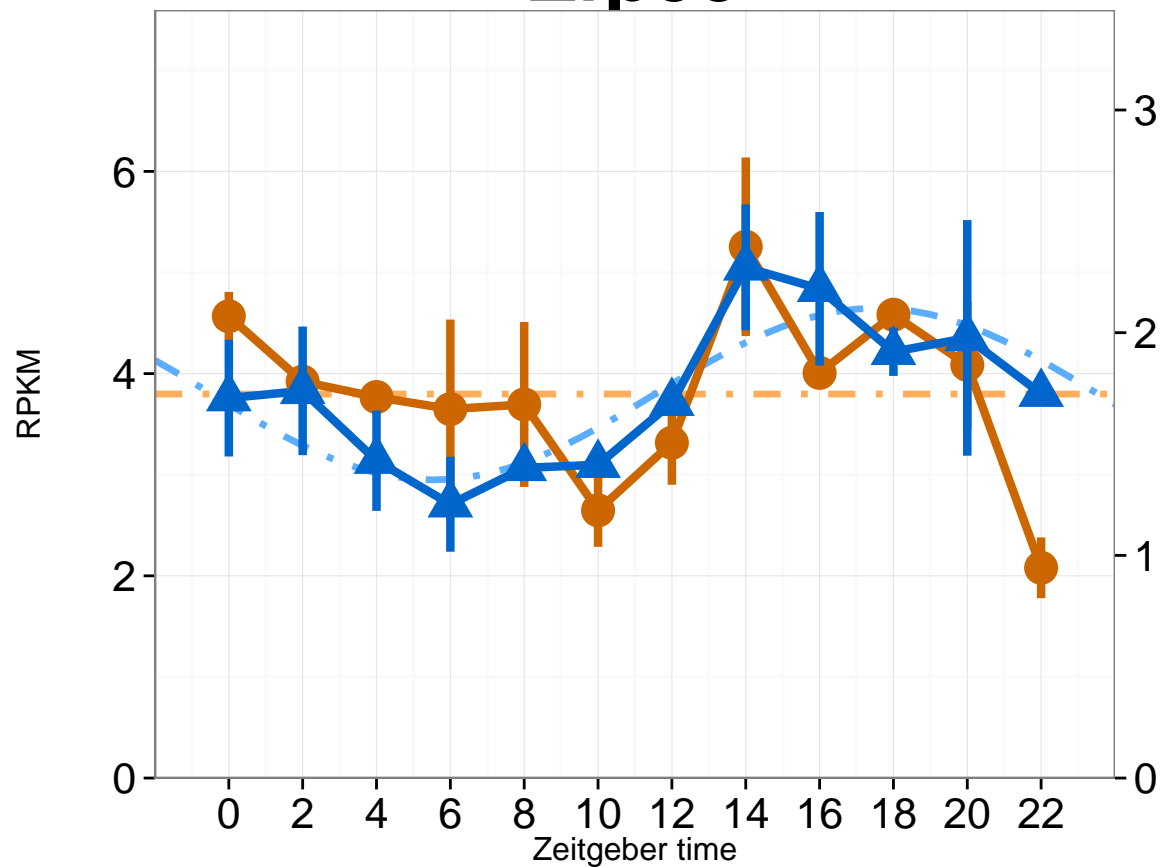

# Zfp53

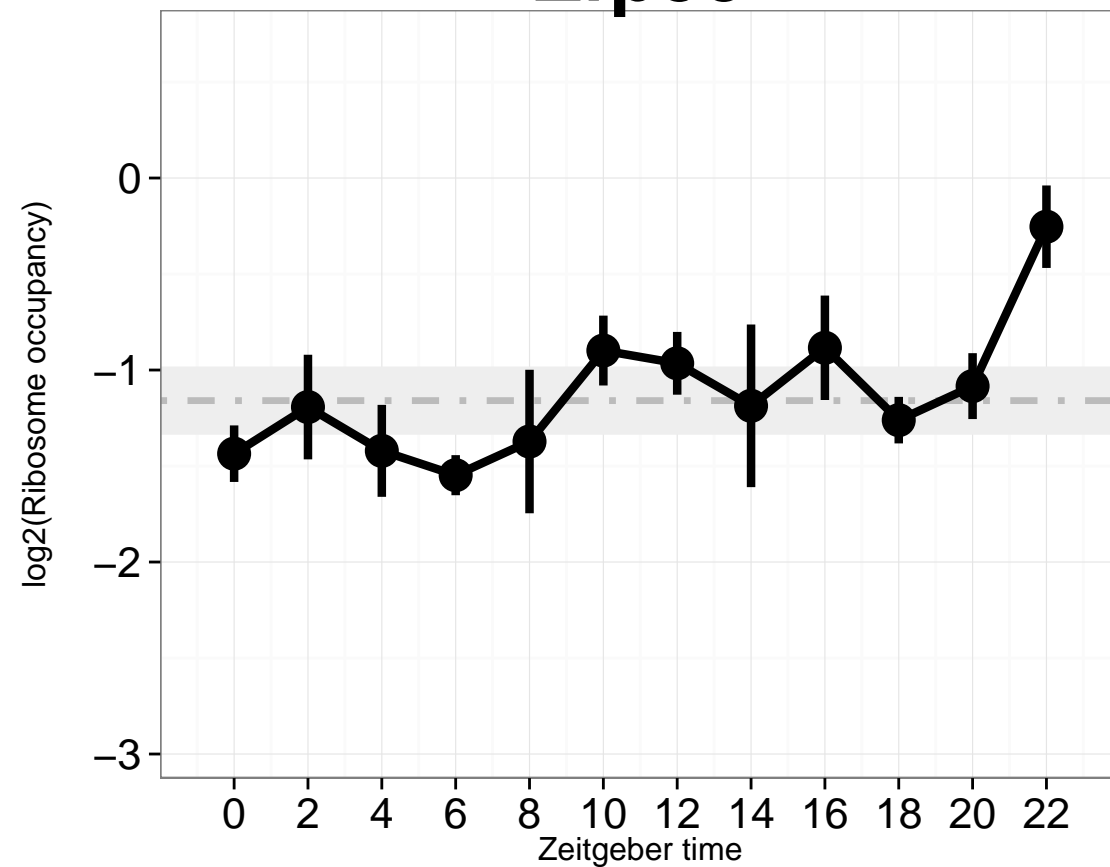

Supplement: SuppDataset_1.zip [file Zfp53_set_C.pdf › Supplemental Dataset 1/C-mRNA_nonrhythm_translation_rhyth/Zfp53_set_C.pdf]

# Zfp54

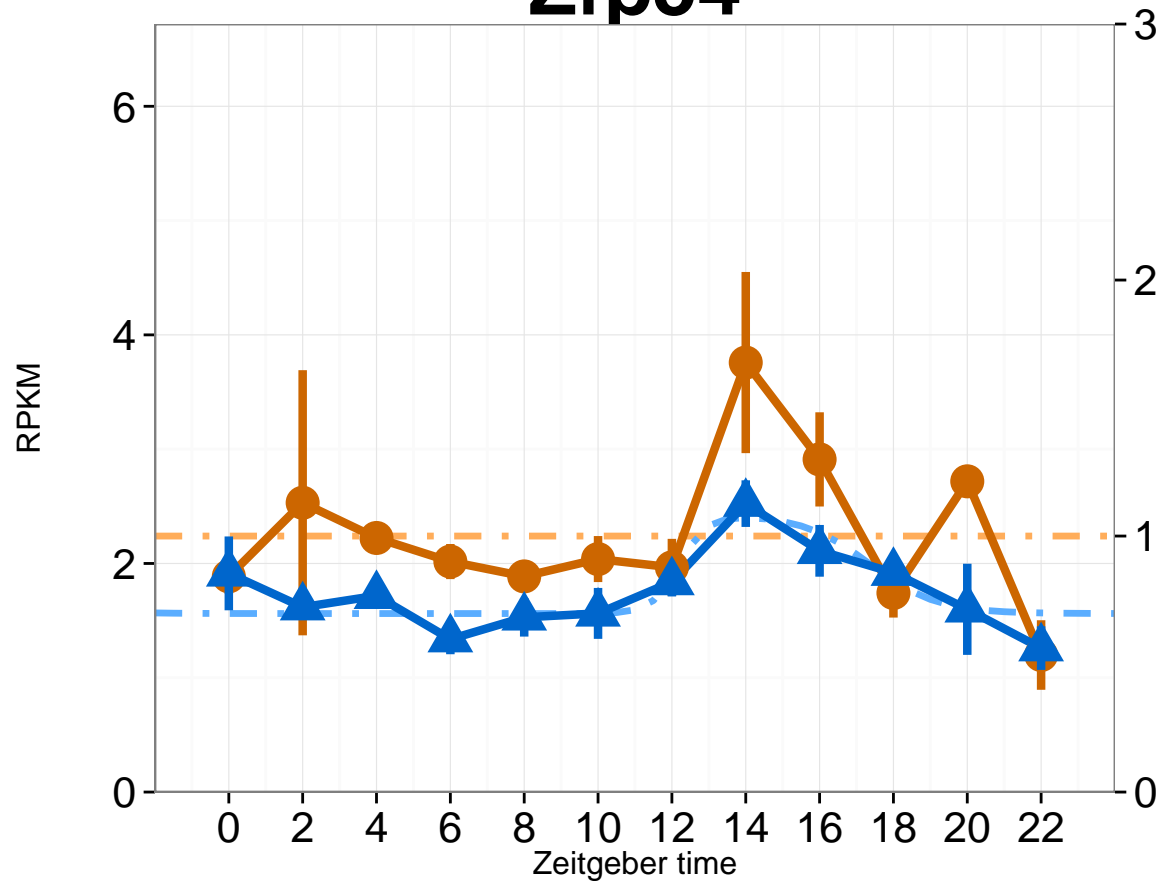

# Zfp54

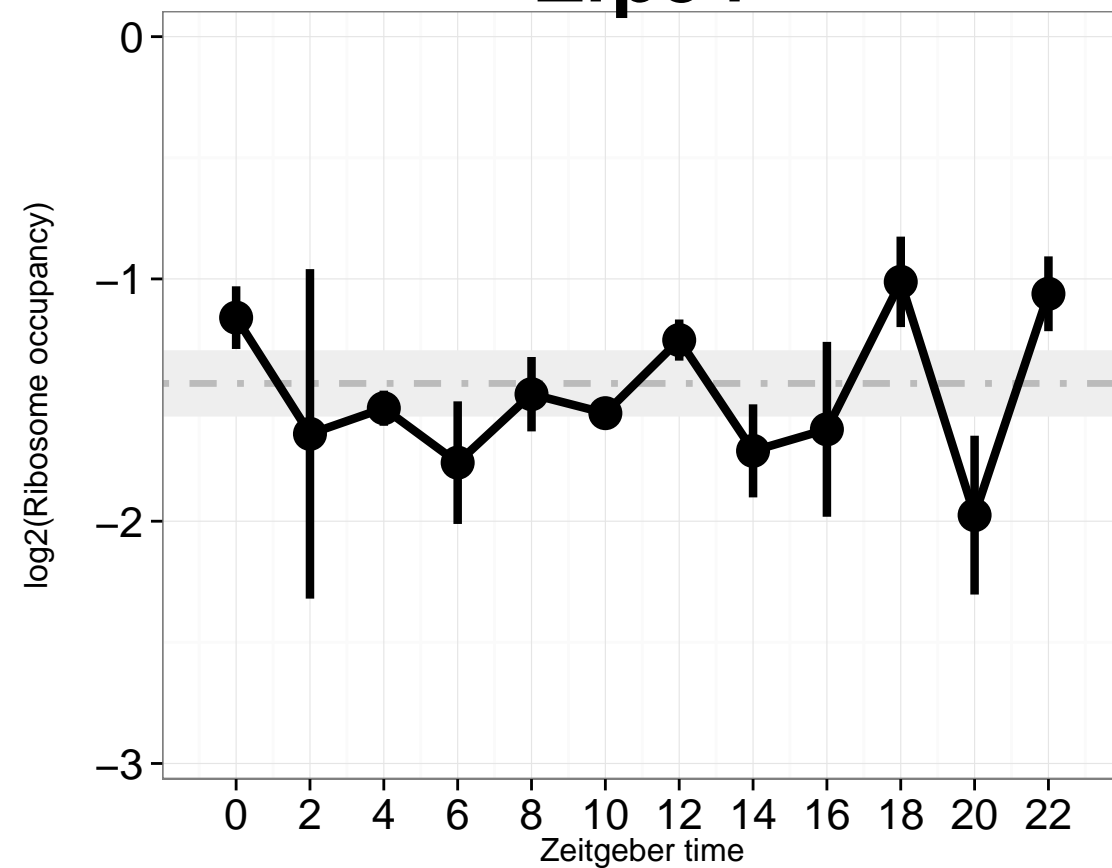

Supplement: SuppDataset_1.zip [file Zfp54_set_C.pdf › Supplemental Dataset 1/C-mRNA_nonrhythm_translation_rhyth/Zfp54_set_C.pdf]

# Zfp629

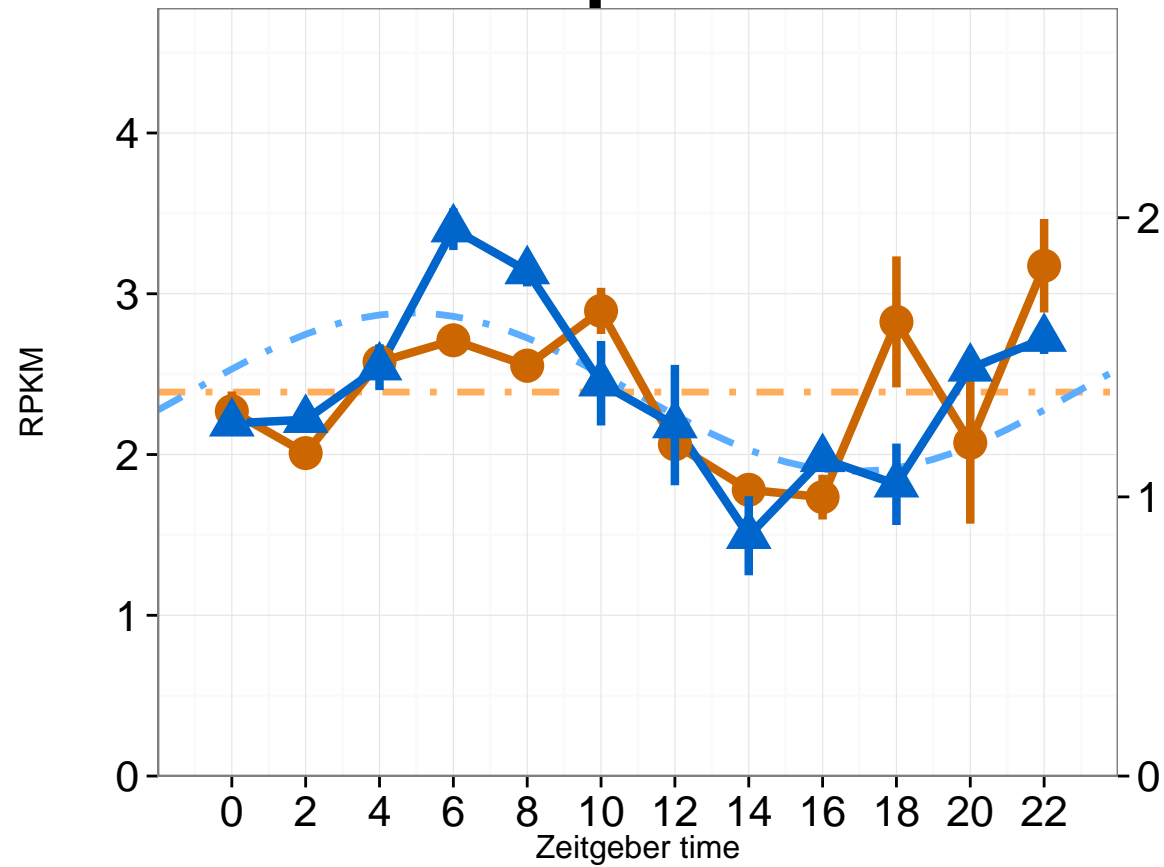

# Zfp629

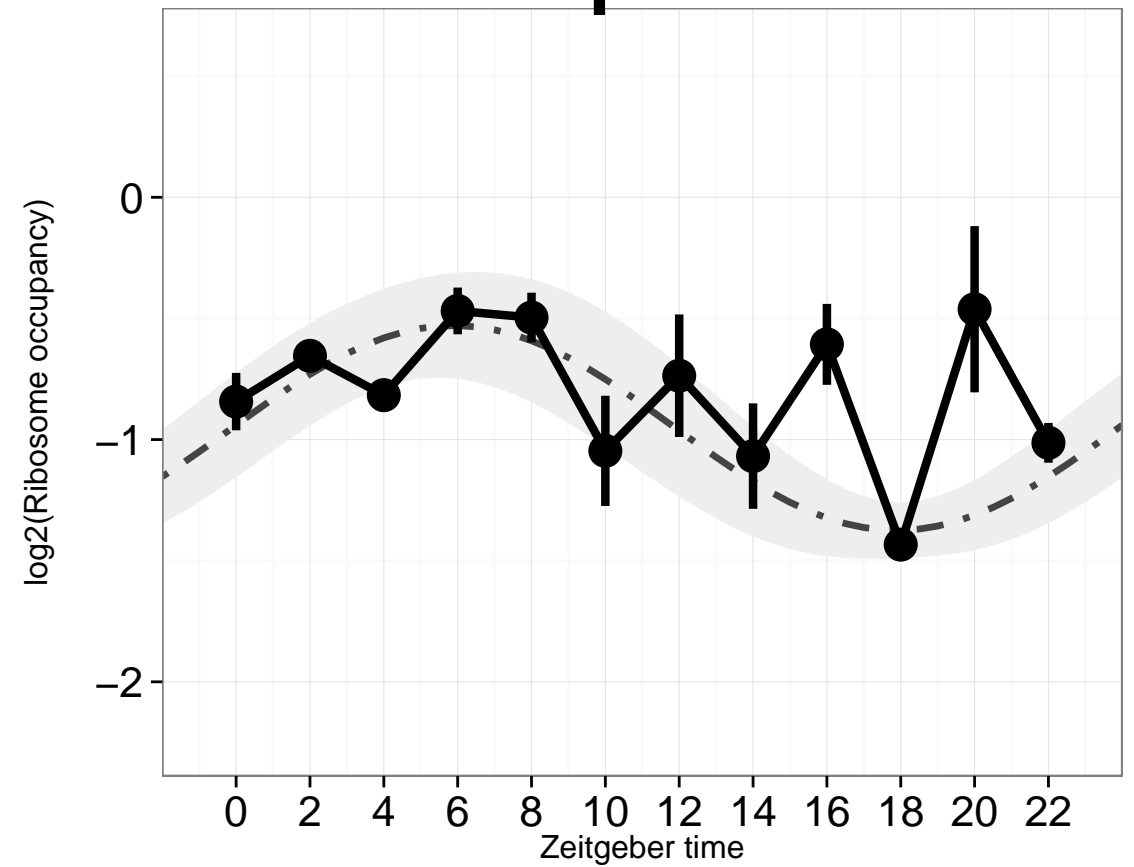

Supplement: SuppDataset_1.zip [file Zfp629_set_C.pdf › Supplemental Dataset 1/C-mRNA_nonrhythm_translation_rhyth/Zfp629_set_C.pdf]

# Zfp661

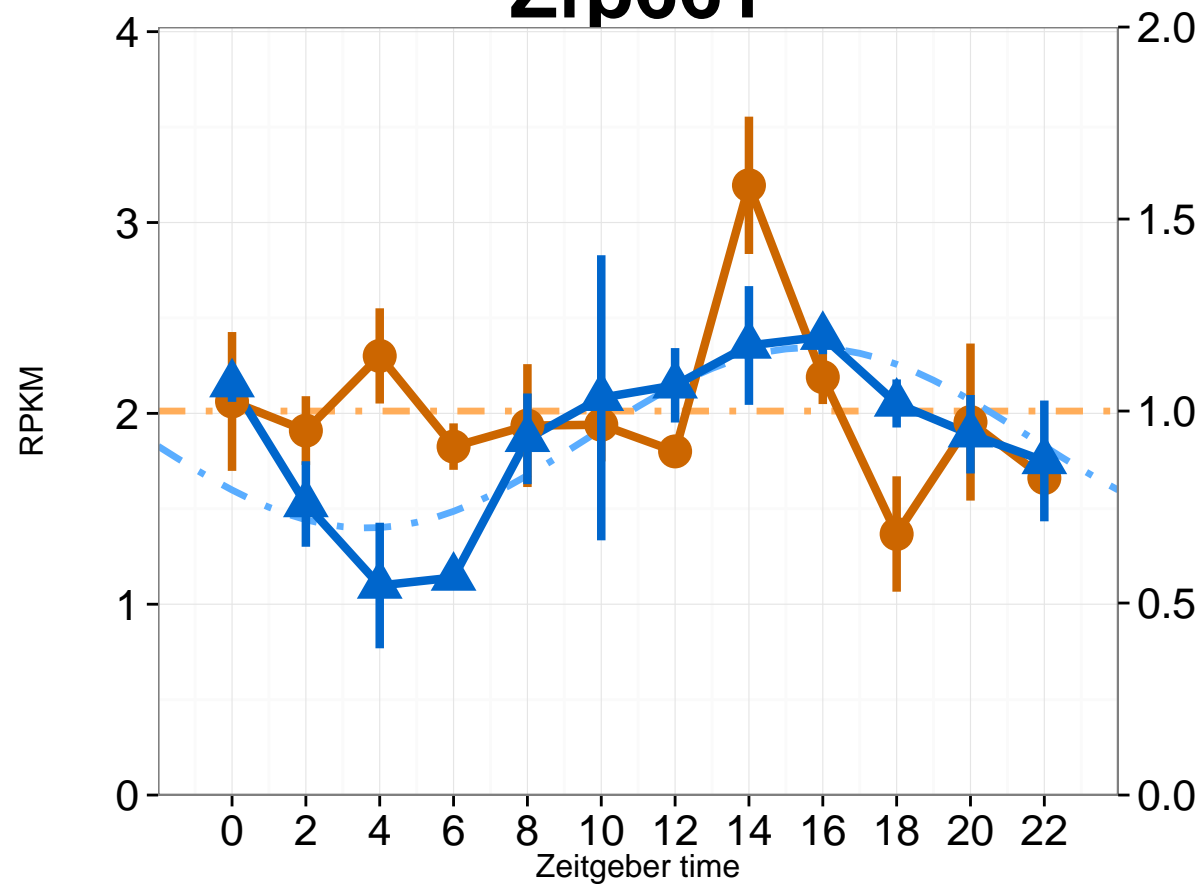

# Zfp661

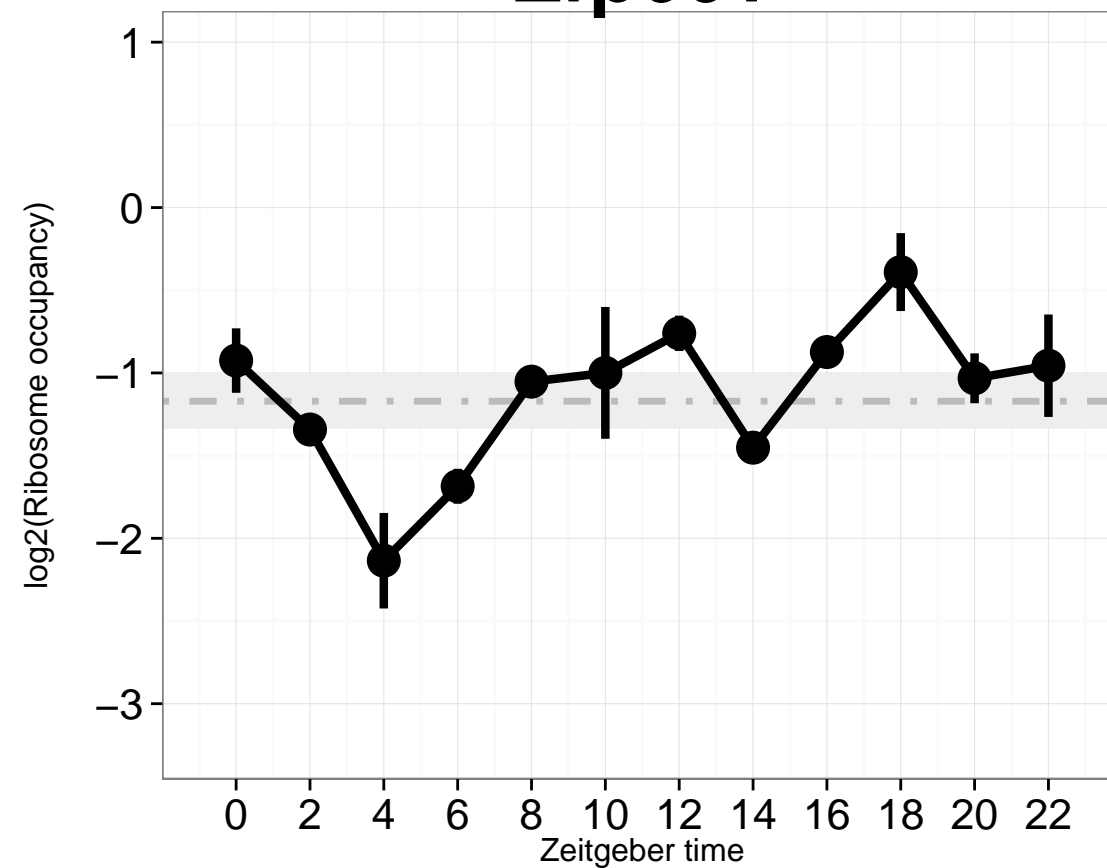

Supplement: SuppDataset_1.zip [file Zfp661_set_C.pdf › Supplemental Dataset 1/C-mRNA_nonrhythm_translation_rhyth/Zfp661_set_C.pdf]

# Zfp692

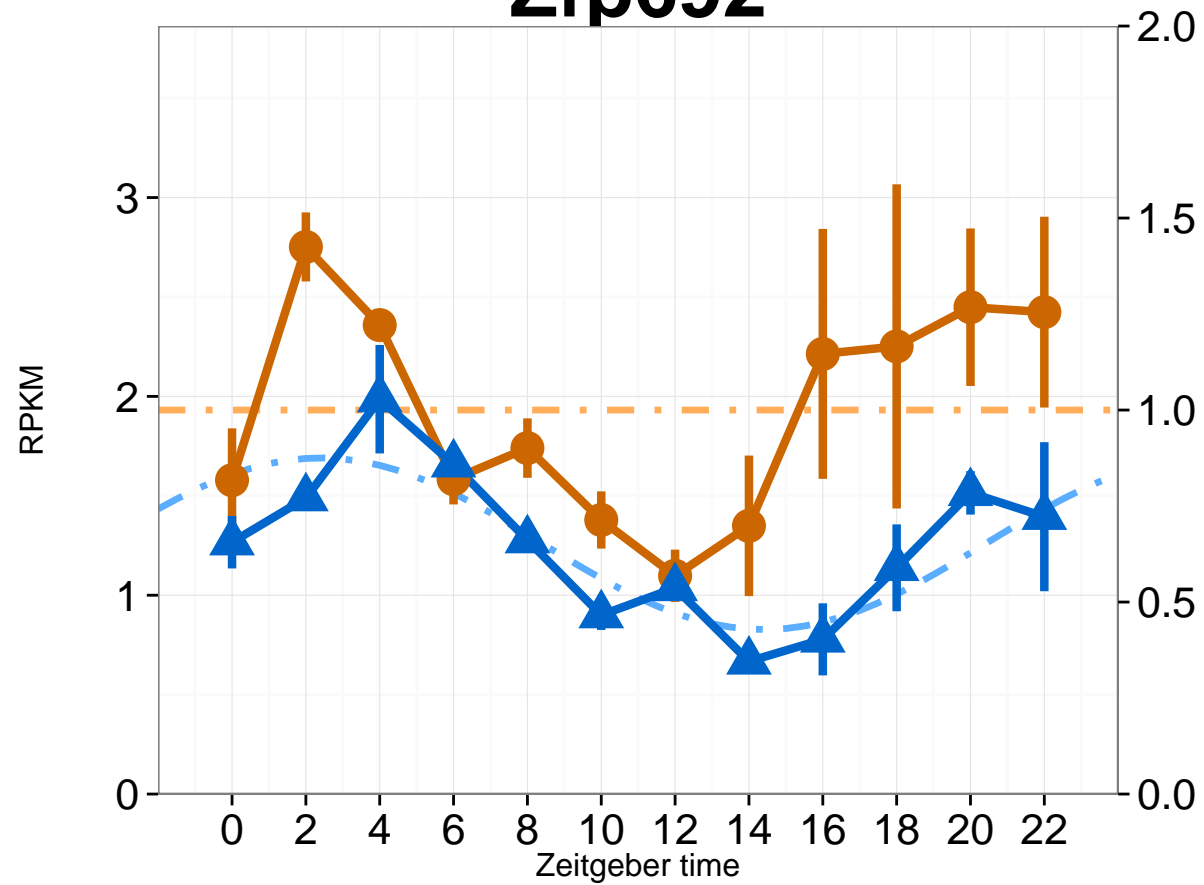

# Zfp692

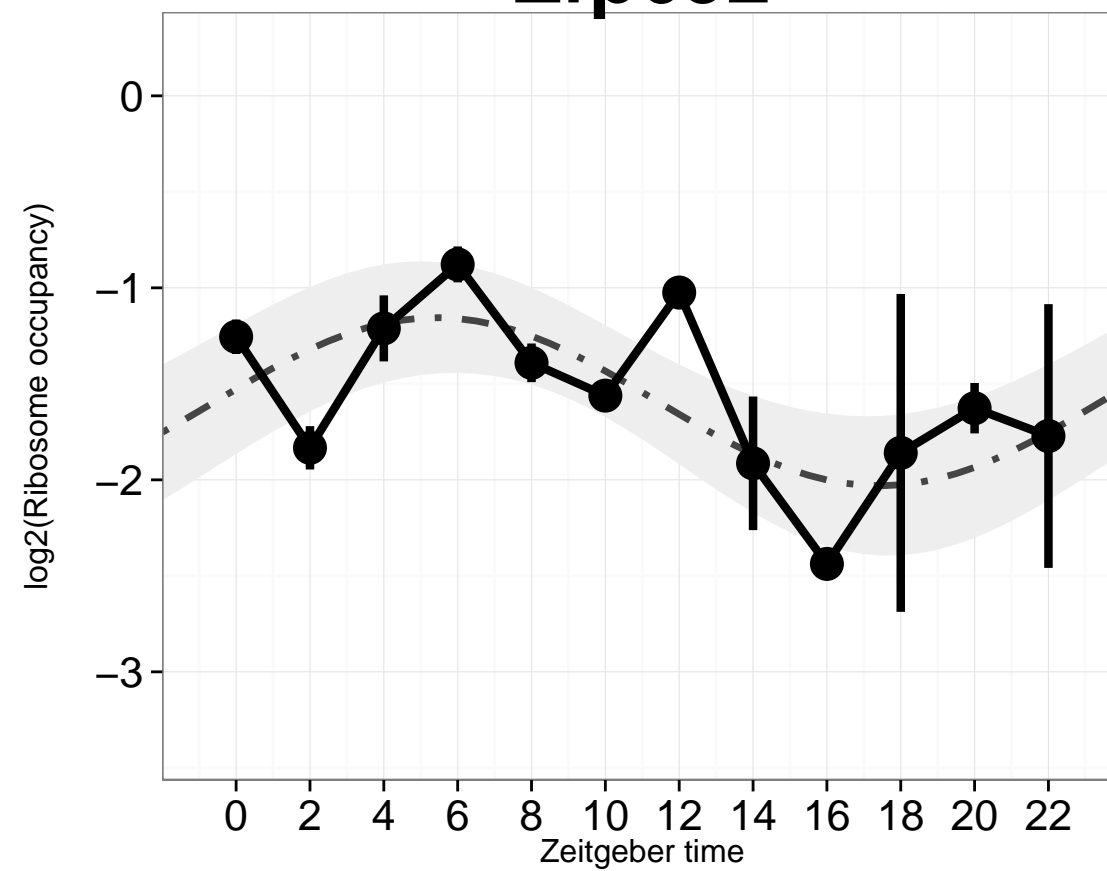

Supplement: SuppDataset_1.zip [file Zfp692_set_C.pdf › Supplemental Dataset 1/C-mRNA_nonrhythm_translation_rhyth/Zfp692_set_C.pdf]

# Zfp74

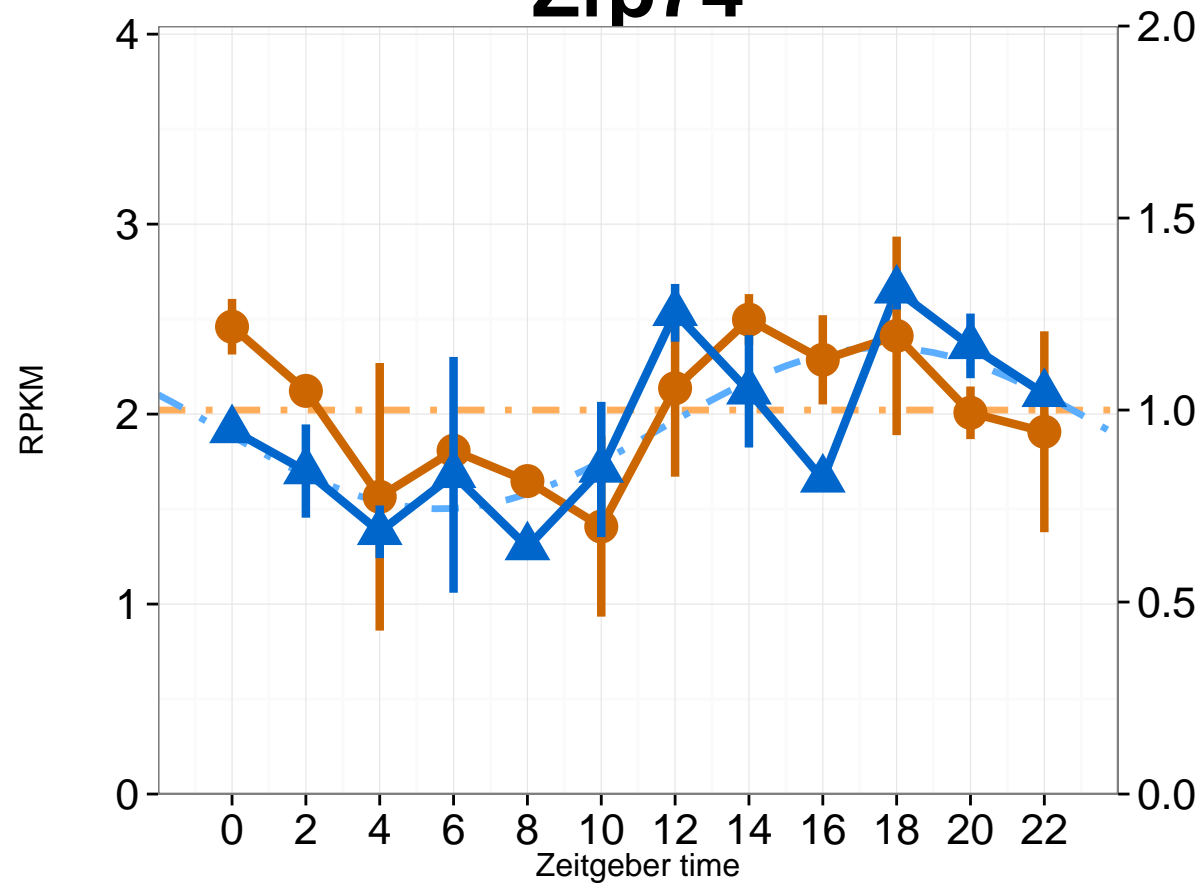

# Zfp74

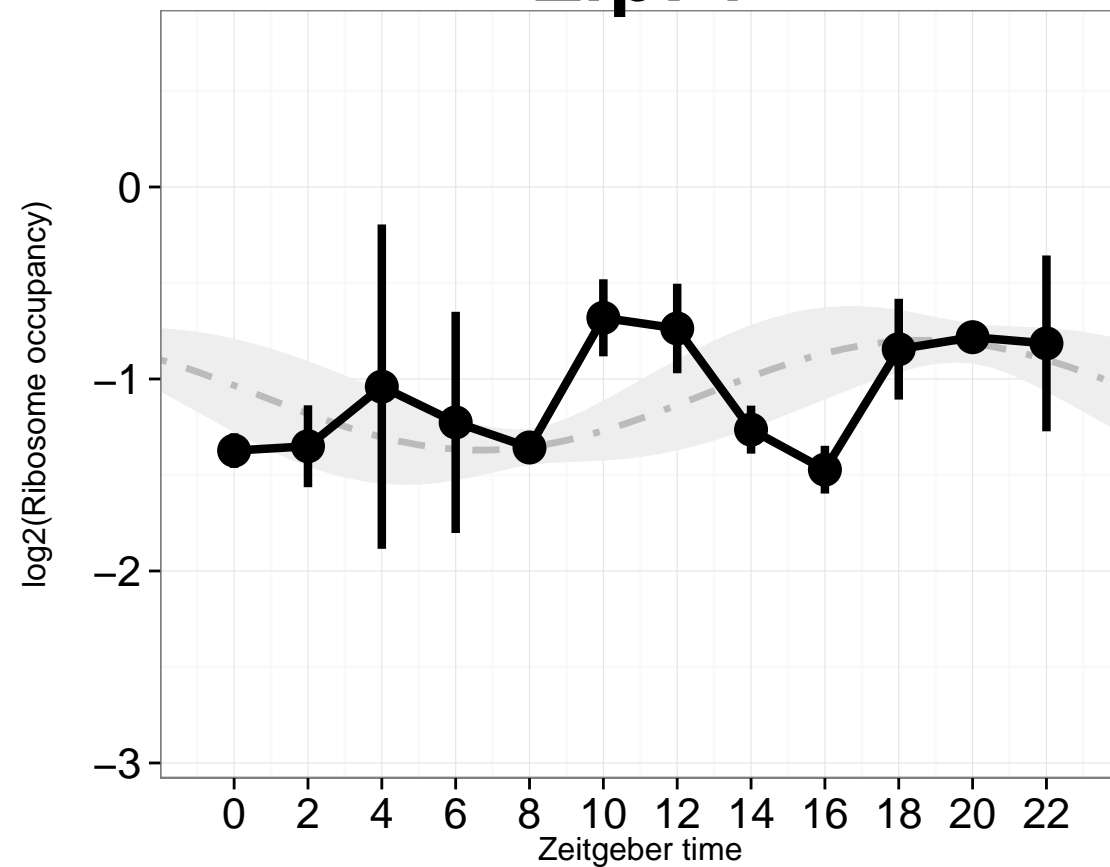

Supplement: SuppDataset_1.zip [file Zfp74_set_C.pdf › Supplemental Dataset 1/C-mRNA_nonrhythm_translation_rhyth/Zfp74_set_C.pdf]

# Zfr

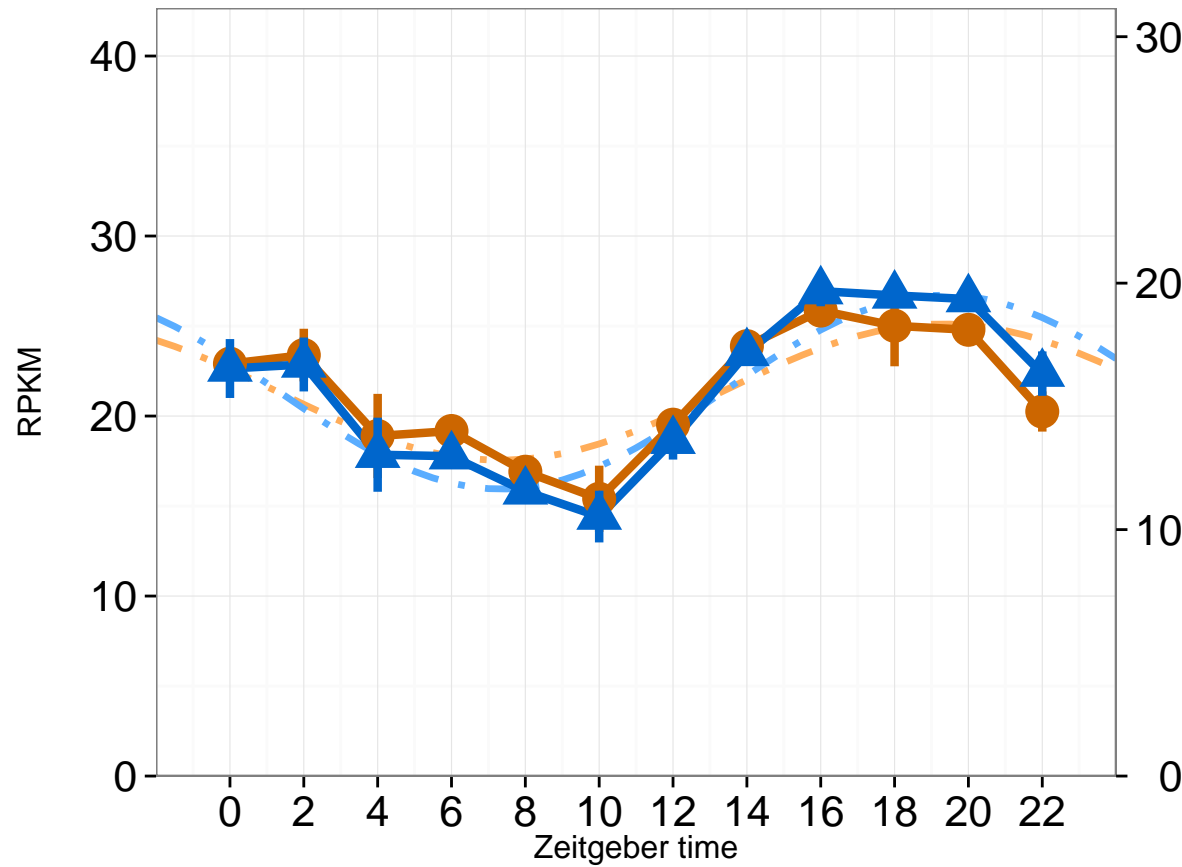

# Zfr

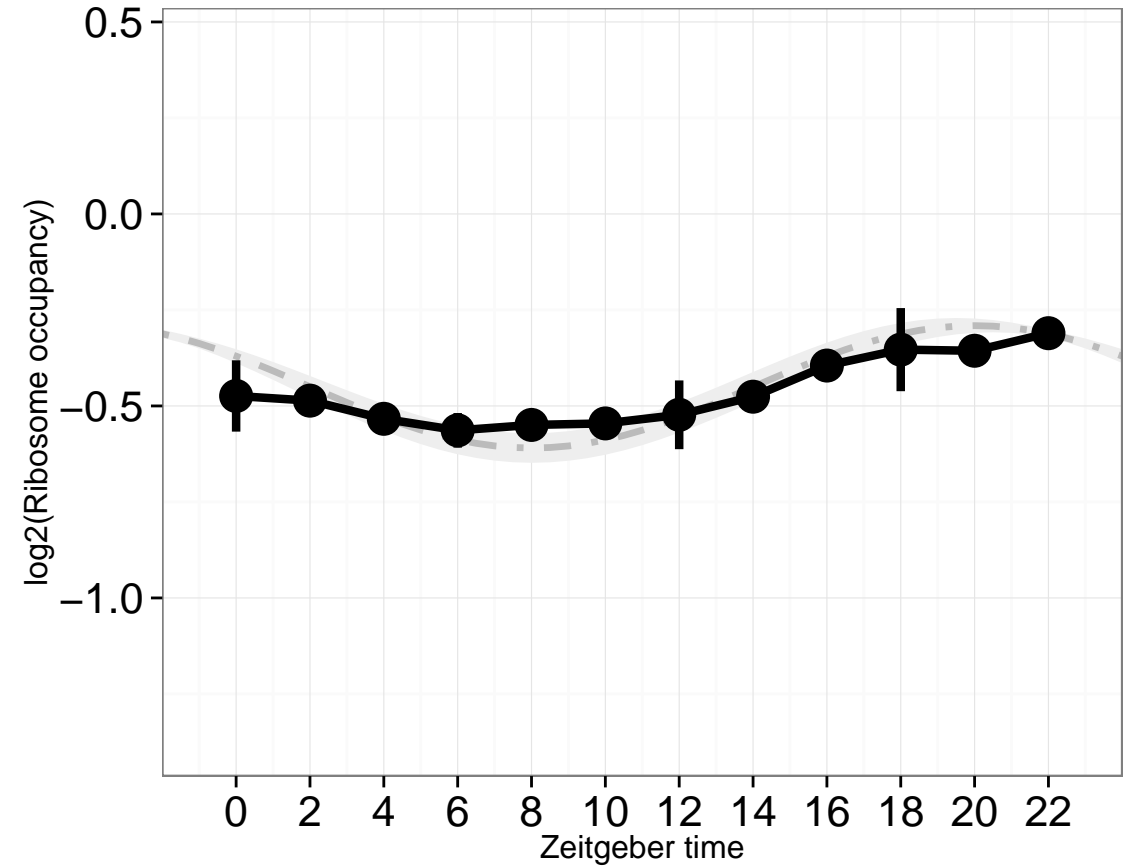

Supplement: SuppDataset_1.zip [file Zfr_set_C.pdf › Supplemental Dataset 1/C-mRNA_nonrhythm_translation_rhyth/Zfr_set_C.pdf]

## Zkscan3

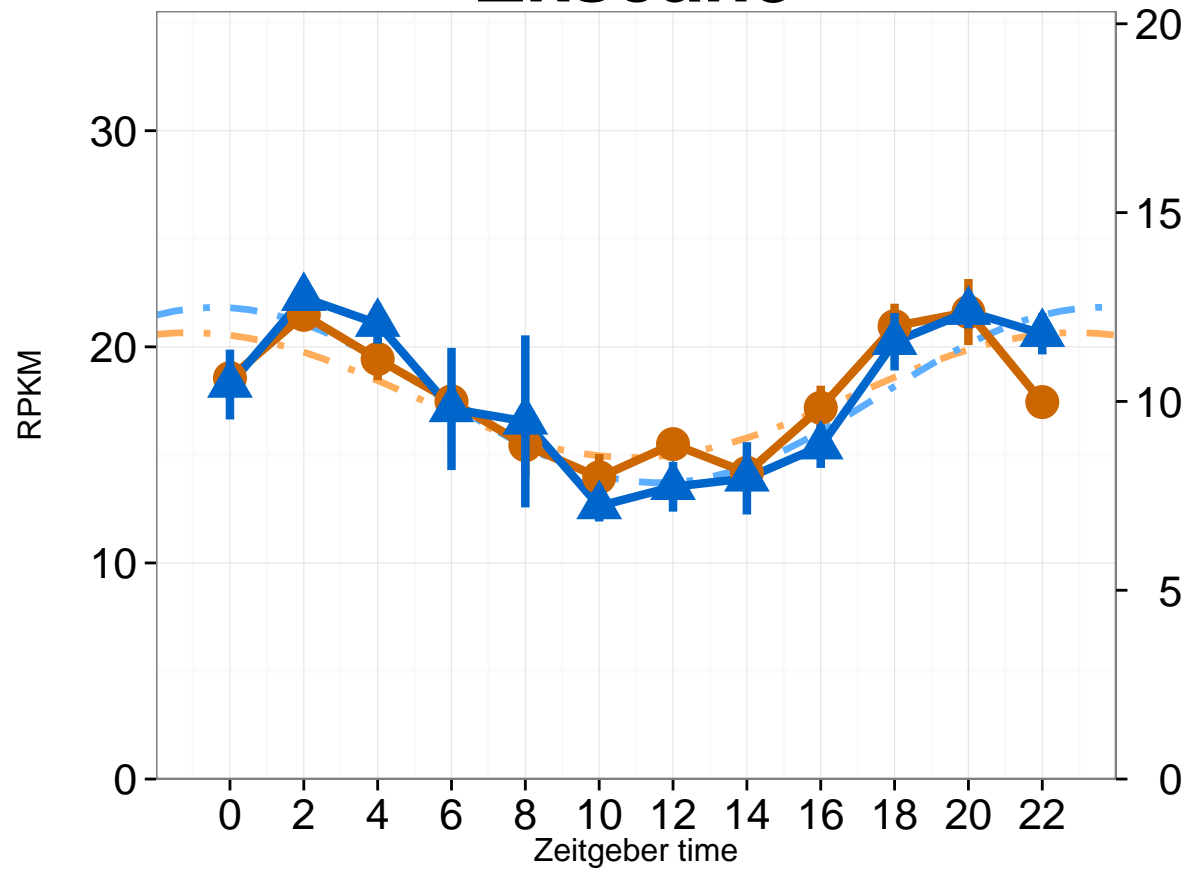

## Zkscan3

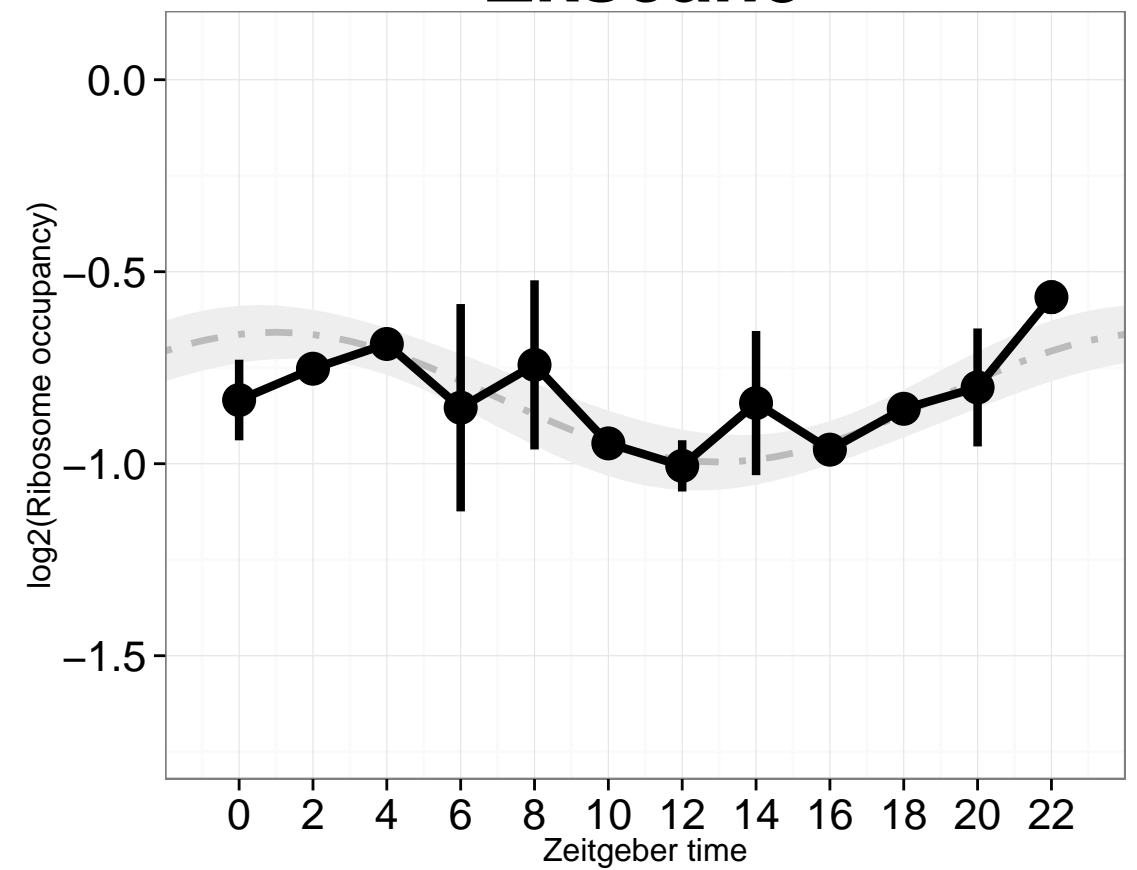

Supplement: SuppDataset_1.zip [file Zkscan3_set_C.pdf › Supplemental Dataset 1/C-mRNA_nonrhythm_translation_rhyth/Zkscan3_set_C.pdf]

# I7Rn6

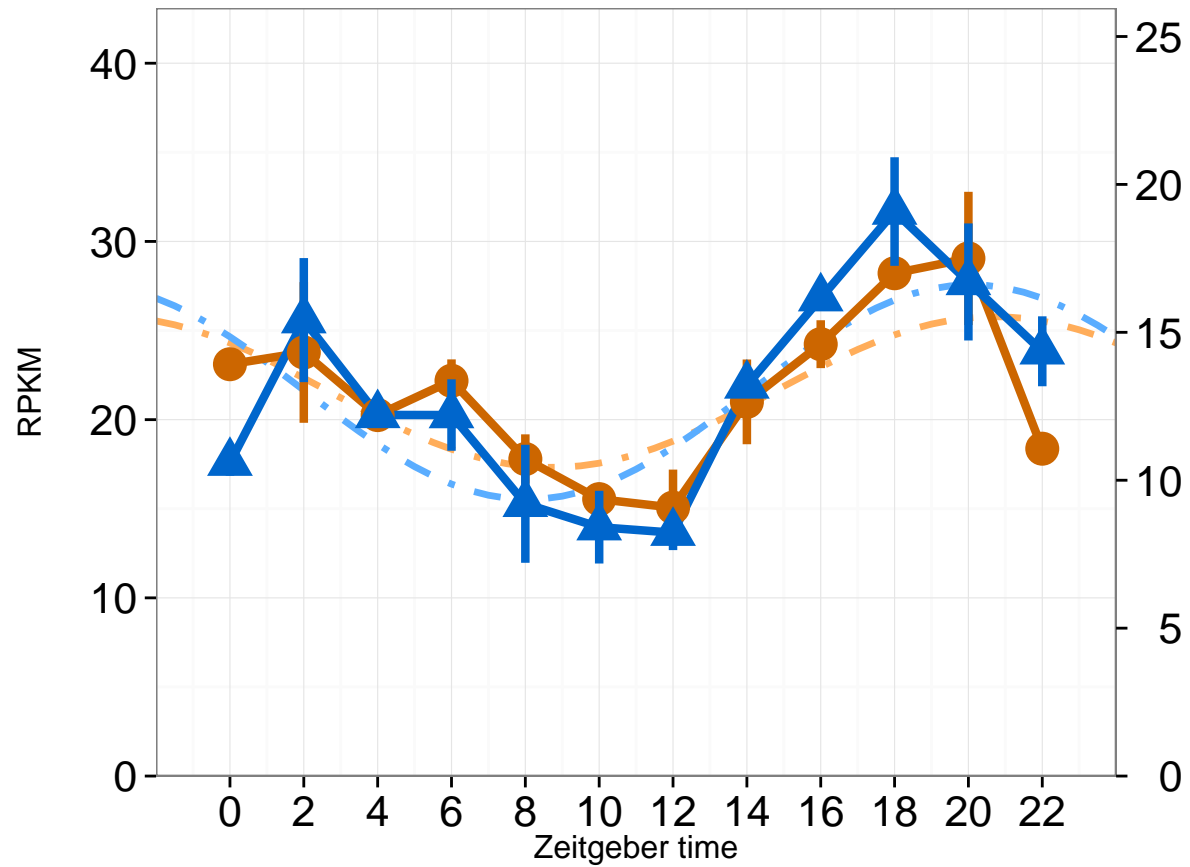

# I7Rn6

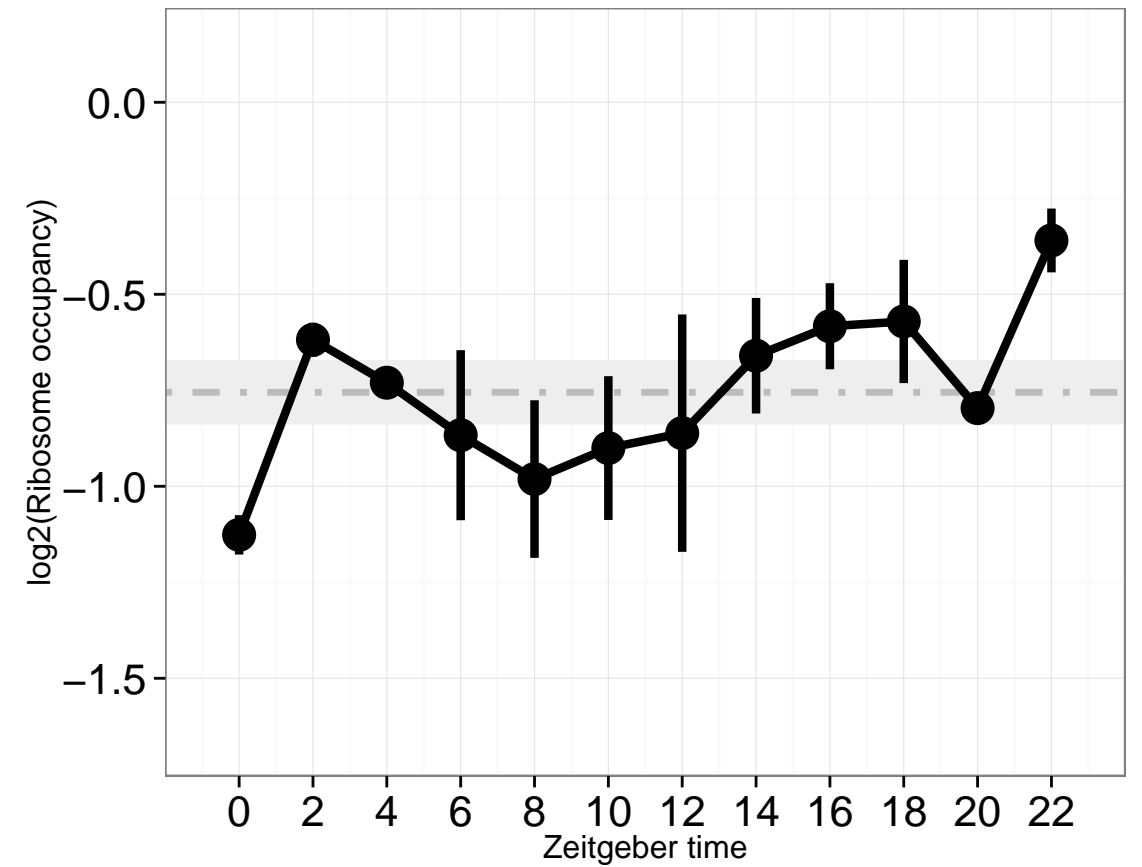

Supplement: SuppDataset_1.zip [file l7Rn6_set_C.pdf › Supplemental Dataset 1/C-mRNA_nonrhythm_translation_rhyth/l7Rn6_set_C.pdf]

**mt-Atp6**

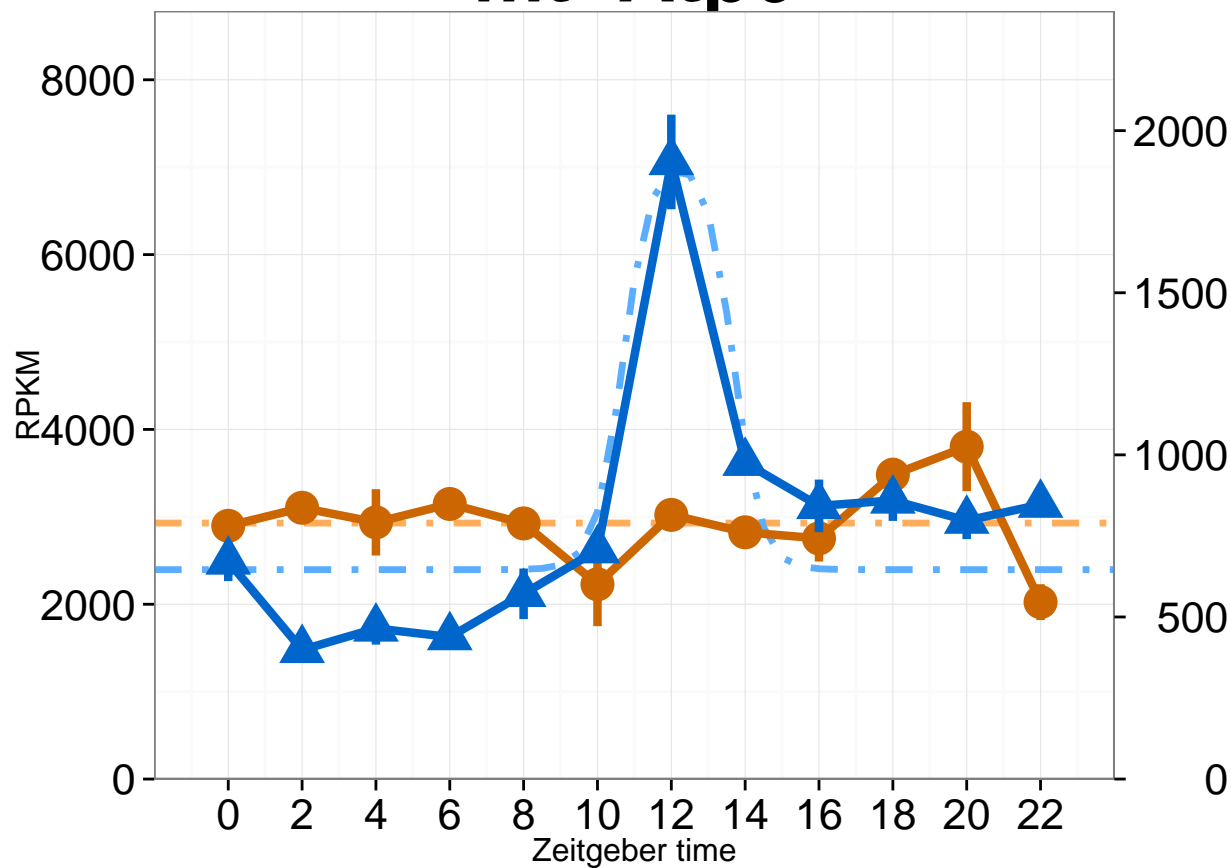

**mt-Atp6**

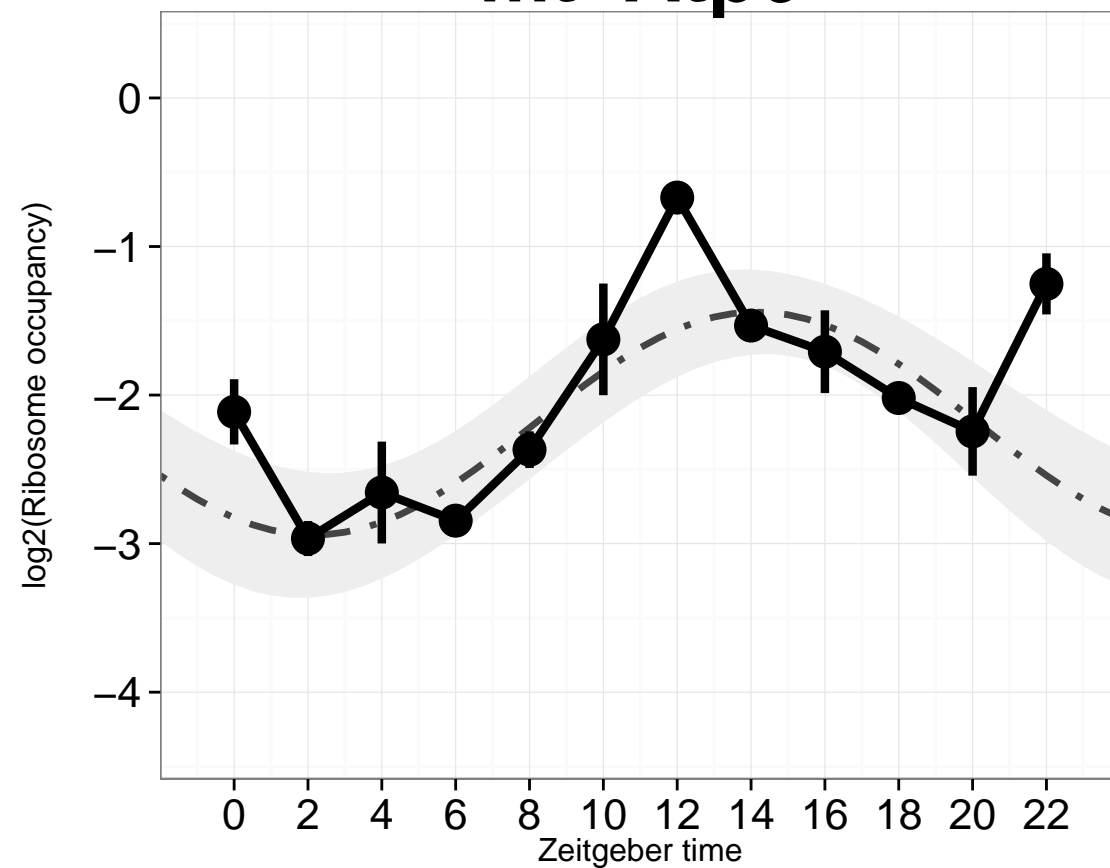

Supplement: SuppDataset_1.zip [file mt-Atp6_set_C.pdf › Supplemental Dataset 1/C-mRNA_nonrhythm_translation_rhyth/mt-Atp6_set_C.pdf]

# mt-Co1

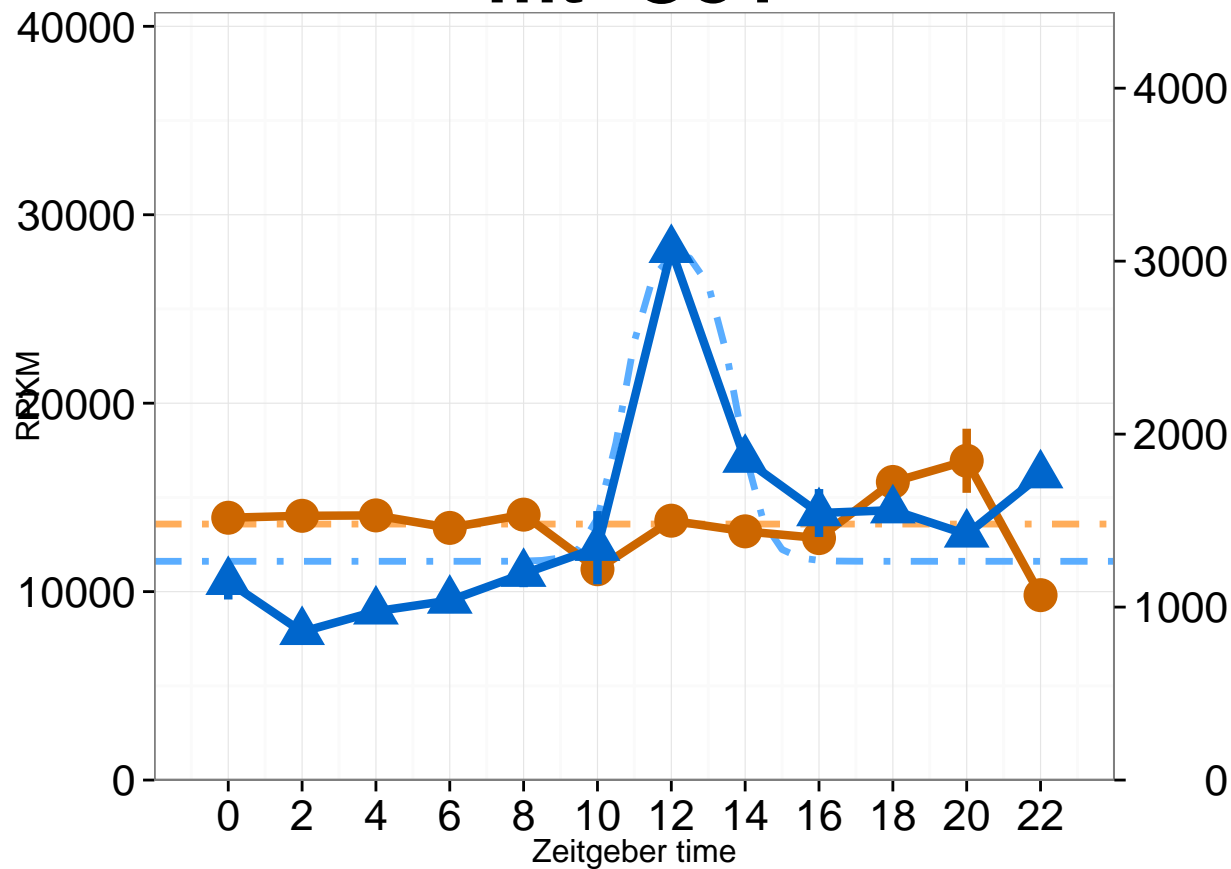

# mt-Co1

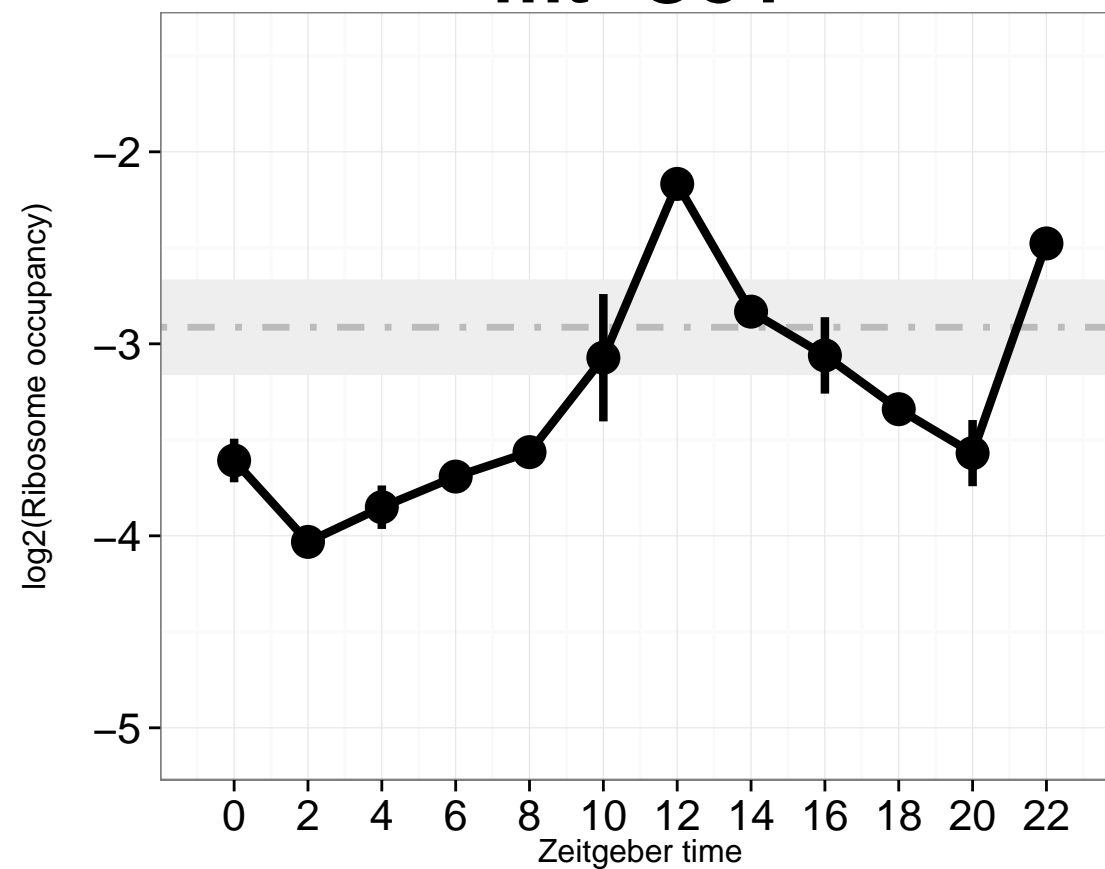

Supplement: SuppDataset_1.zip [file mt-Co1_set_C.pdf › Supplemental Dataset 1/C-mRNA_nonrhythm_translation_rhyth/mt-Co1_set_C.pdf]

**mt-Co2**

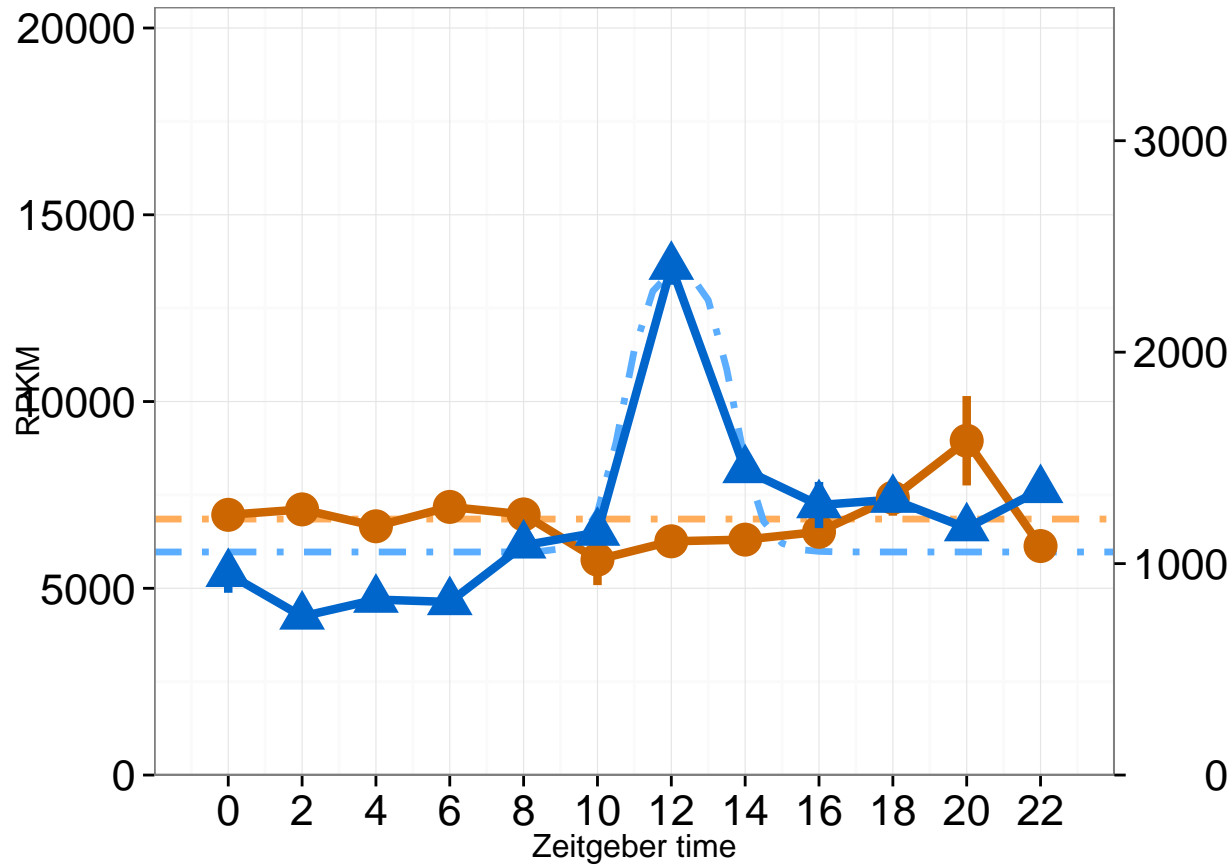

**mt-Co2**

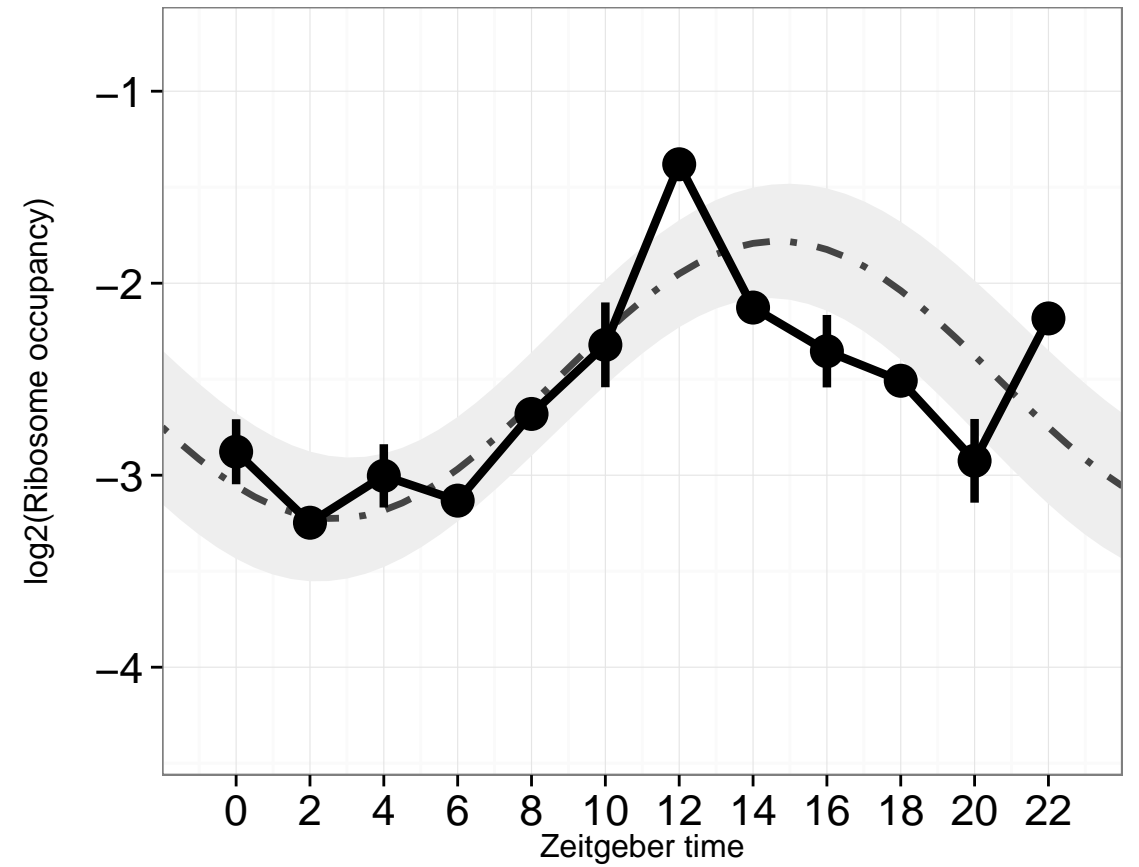

Supplement: SuppDataset_1.zip [file mt-Co2_set_C.pdf › Supplemental Dataset 1/C-mRNA_nonrhythm_translation_rhyth/mt-Co2_set_C.pdf]

# mt-Co3

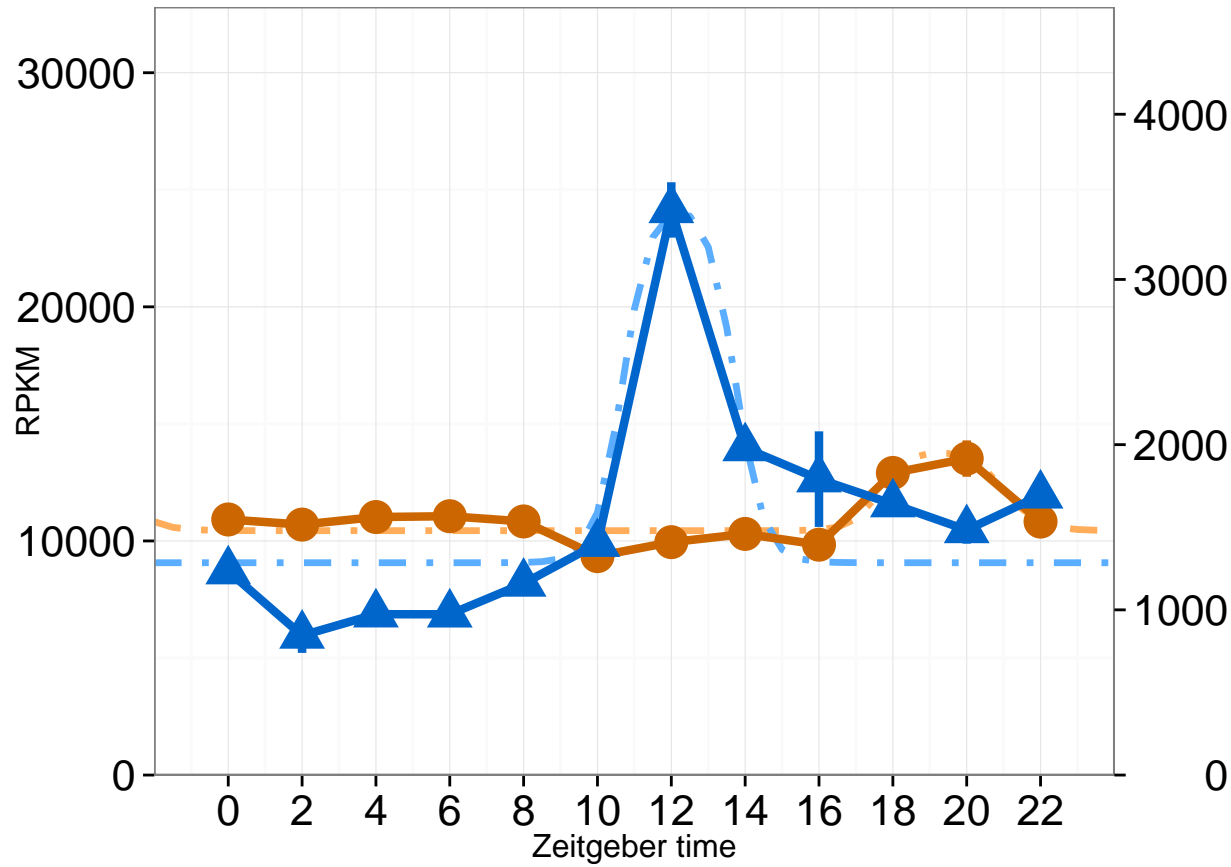

# mt-Co3

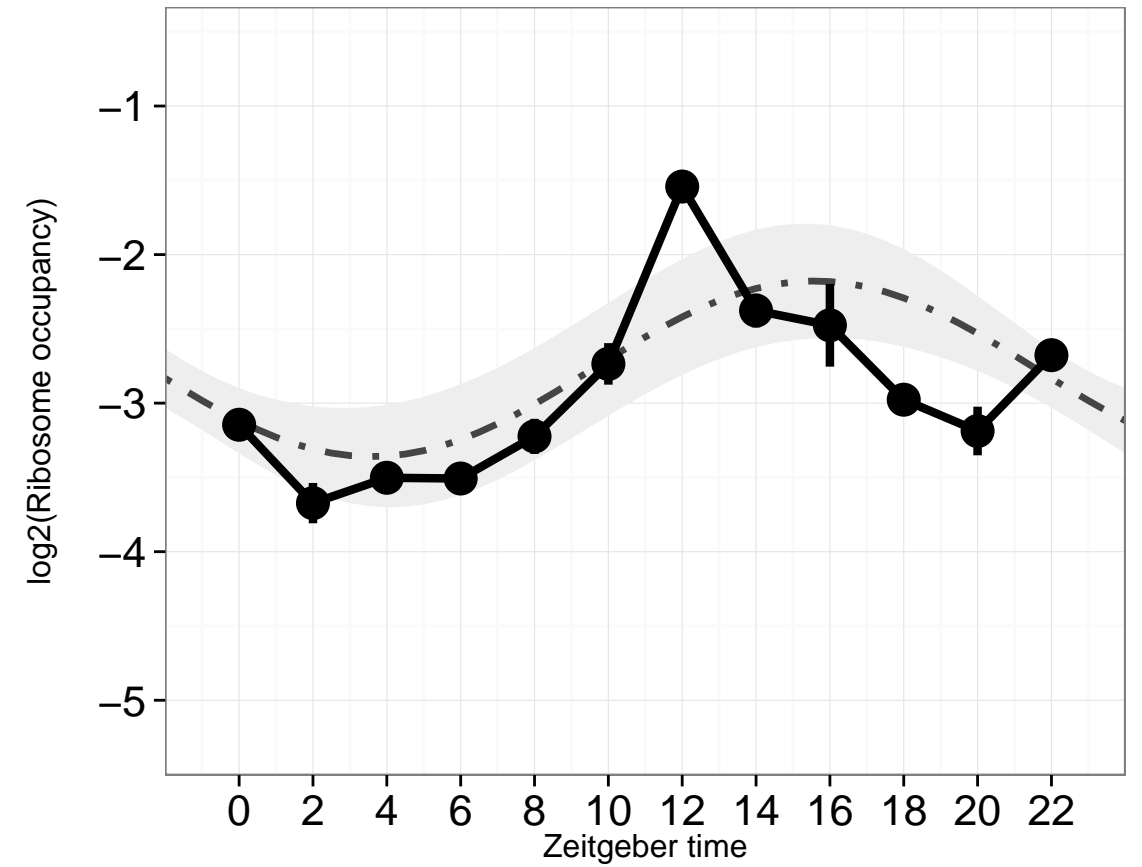

Supplement: SuppDataset_1.zip [file mt-Co3_set_C.pdf › Supplemental Dataset 1/C-mRNA_nonrhythm_translation_rhyth/mt-Co3_set_C.pdf]

mt-Nd1

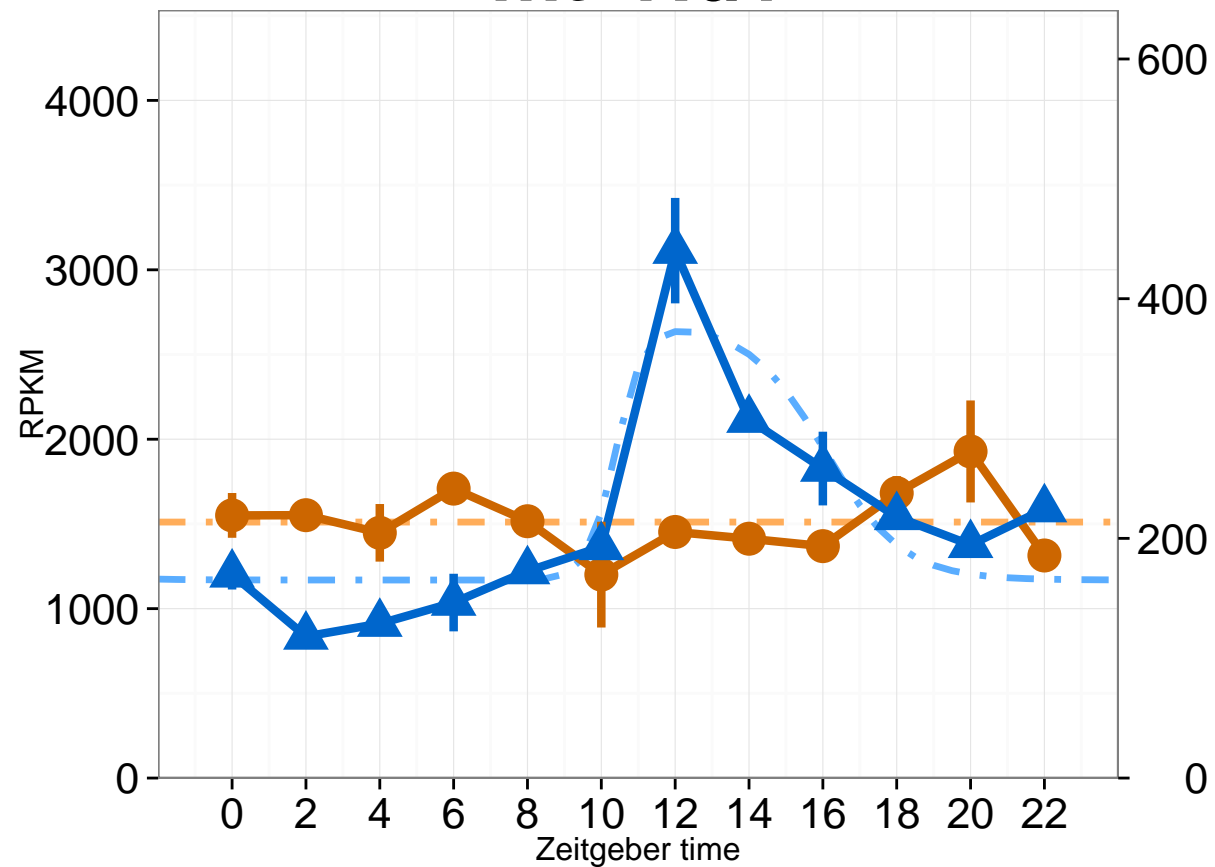

mt-Nd1

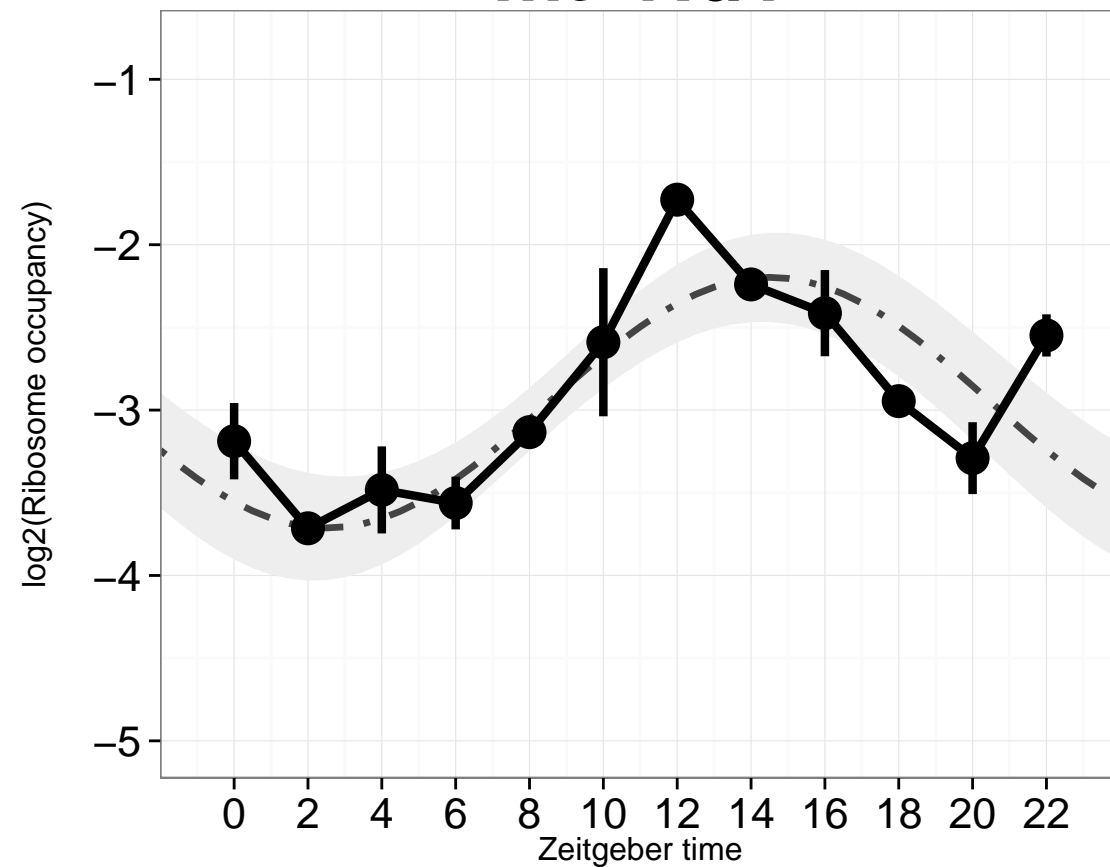

Supplement: SuppDataset_1.zip [file mt-Nd1_set_C.pdf › Supplemental Dataset 1/C-mRNA_nonrhythm_translation_rhyth/mt-Nd1_set_C.pdf]

**mt-Nd2**

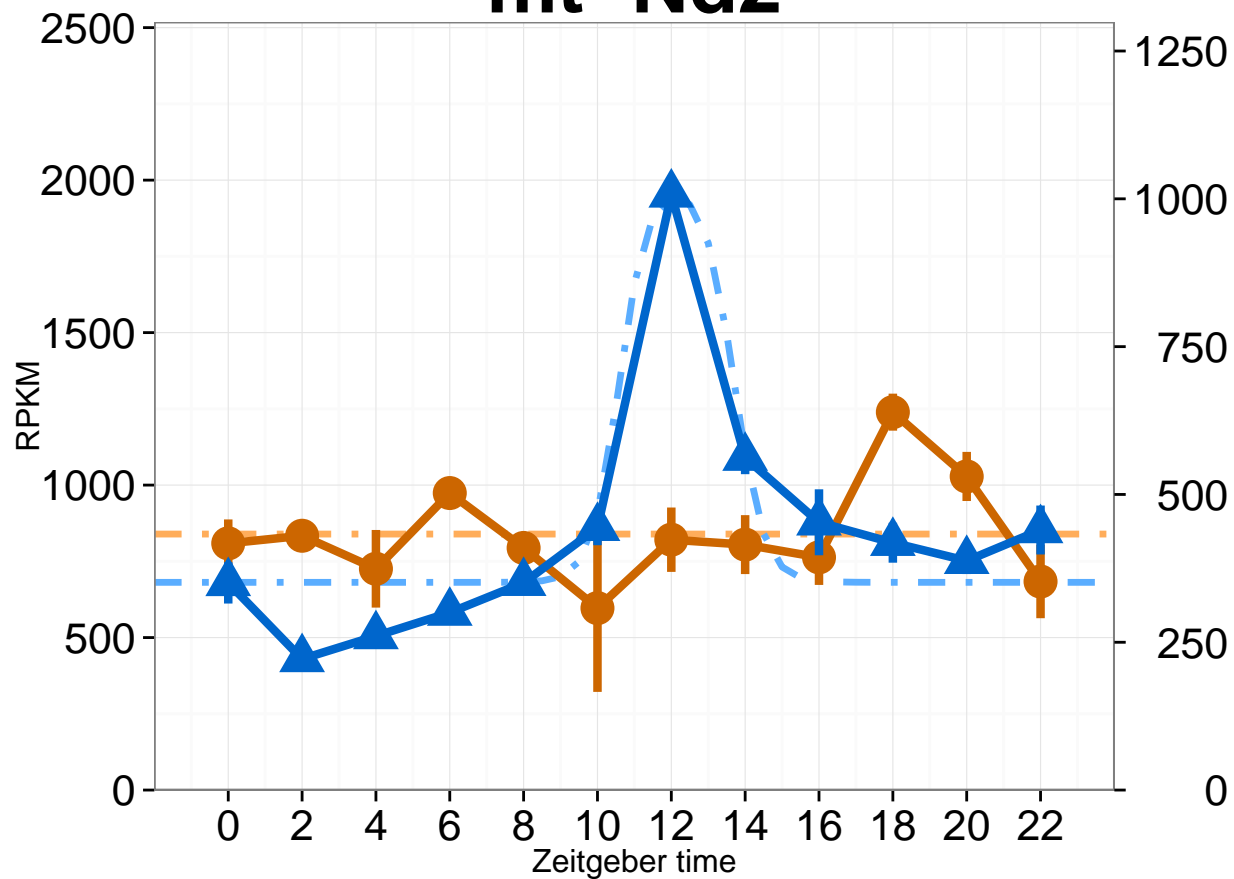

**mt-Nd2**

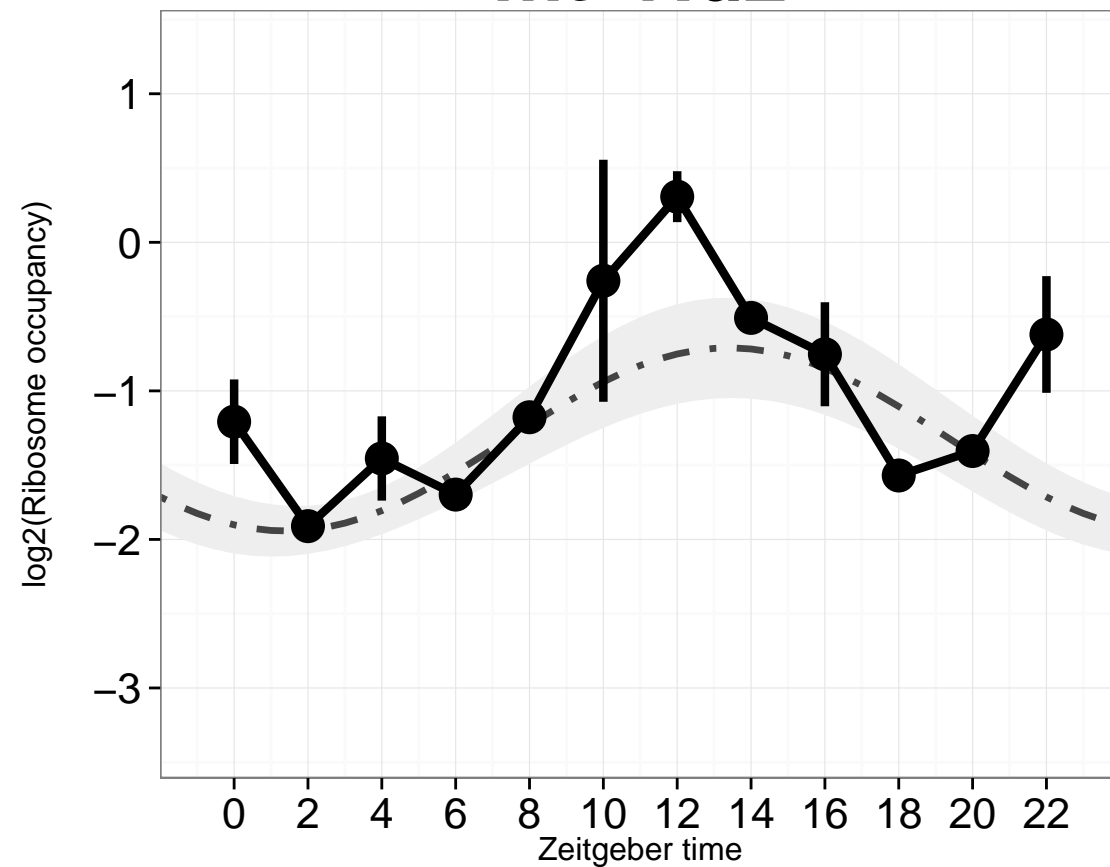

Supplement: SuppDataset_1.zip [file mt-Nd2_set_C.pdf › Supplemental Dataset 1/C-mRNA_nonrhythm_translation_rhyth/mt-Nd2_set_C.pdf]

**mt-Nd3**

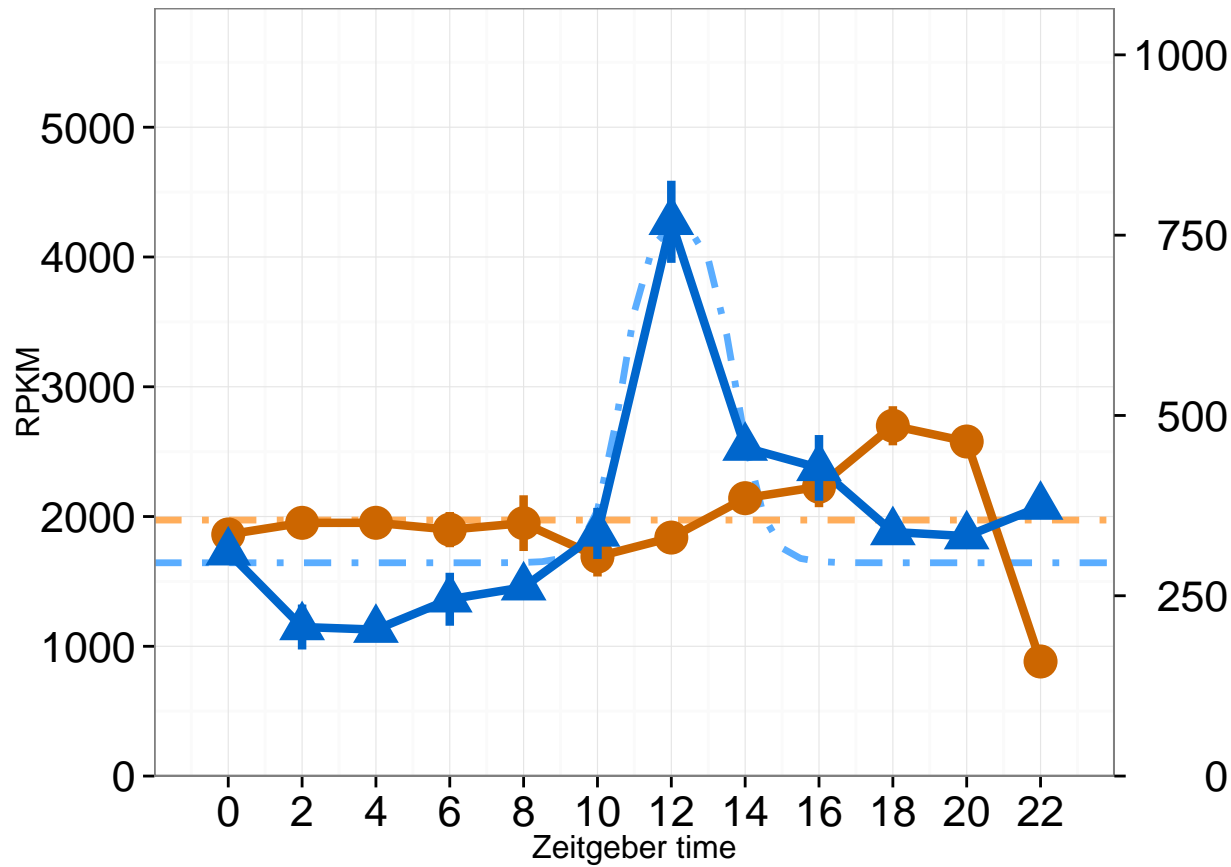

**mt-Nd3**

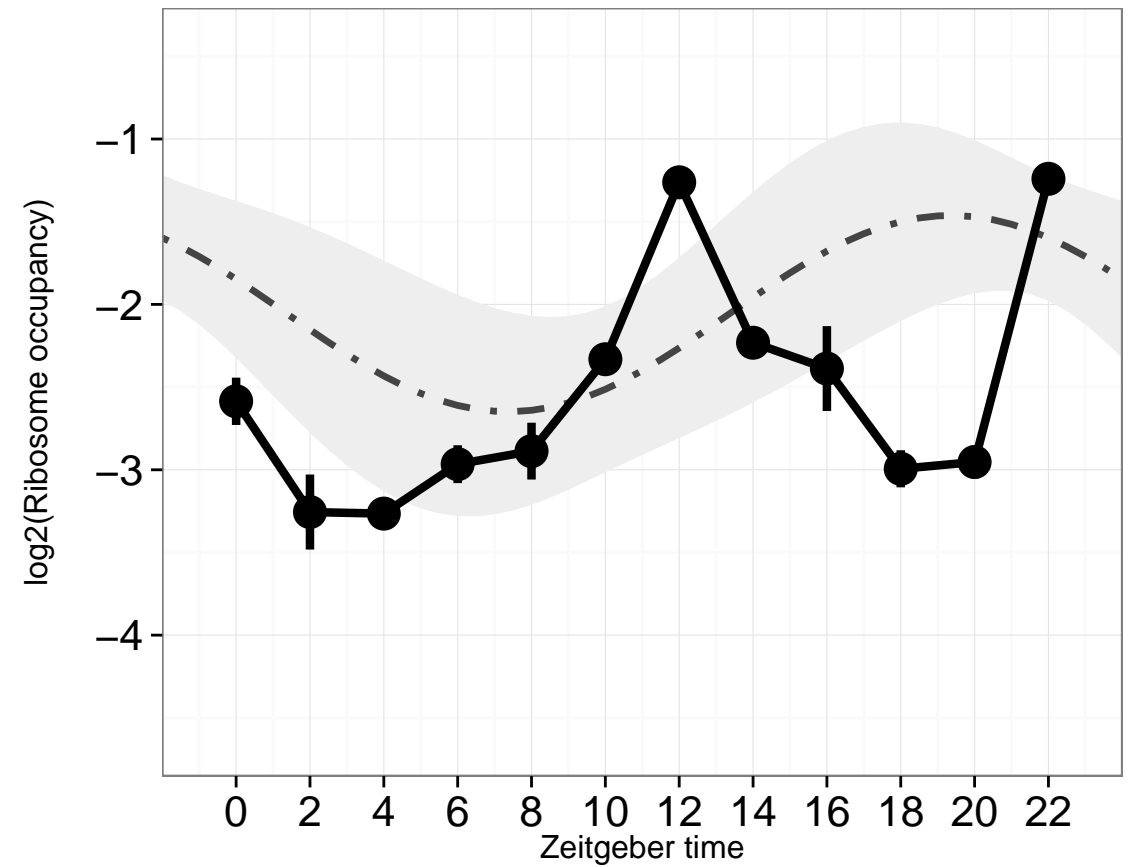

Supplement: SuppDataset_1.zip [file mt-Nd3_set_C.pdf › Supplemental Dataset 1/C-mRNA_nonrhythm_translation_rhyth/mt-Nd3_set_C.pdf]

mt-Nd4

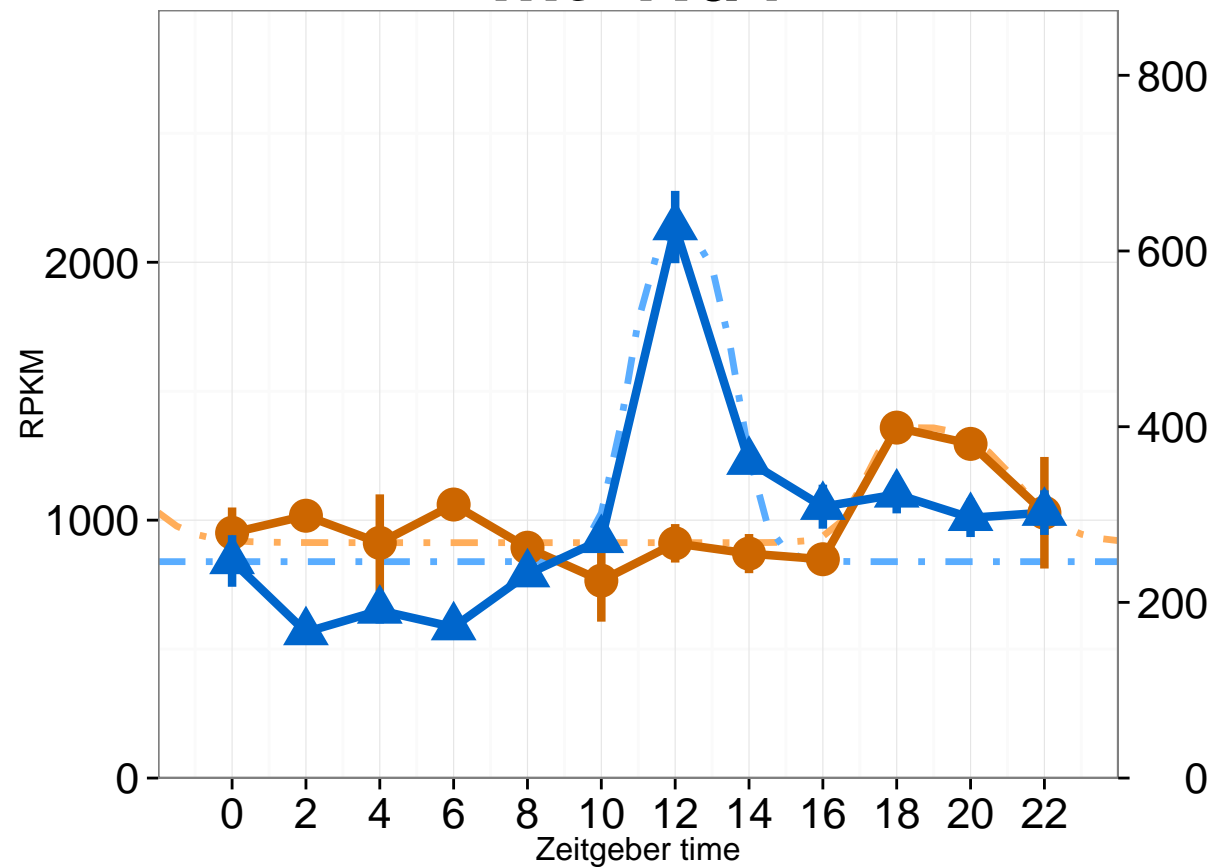

mt-Nd4

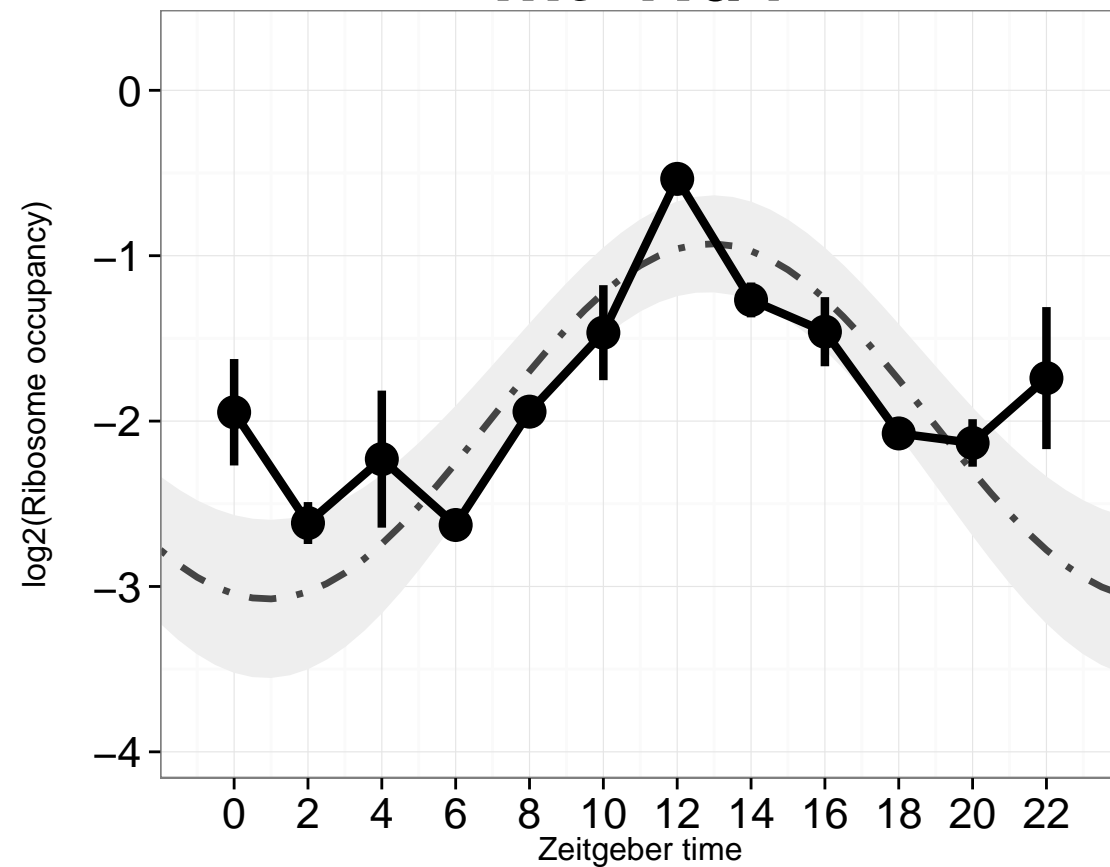

Supplement: SuppDataset_1.zip [file mt-Nd4_set_C.pdf › Supplemental Dataset 1/C-mRNA_nonrhythm_translation_rhyth/mt-Nd4_set_C.pdf]

**mt-Nd6**

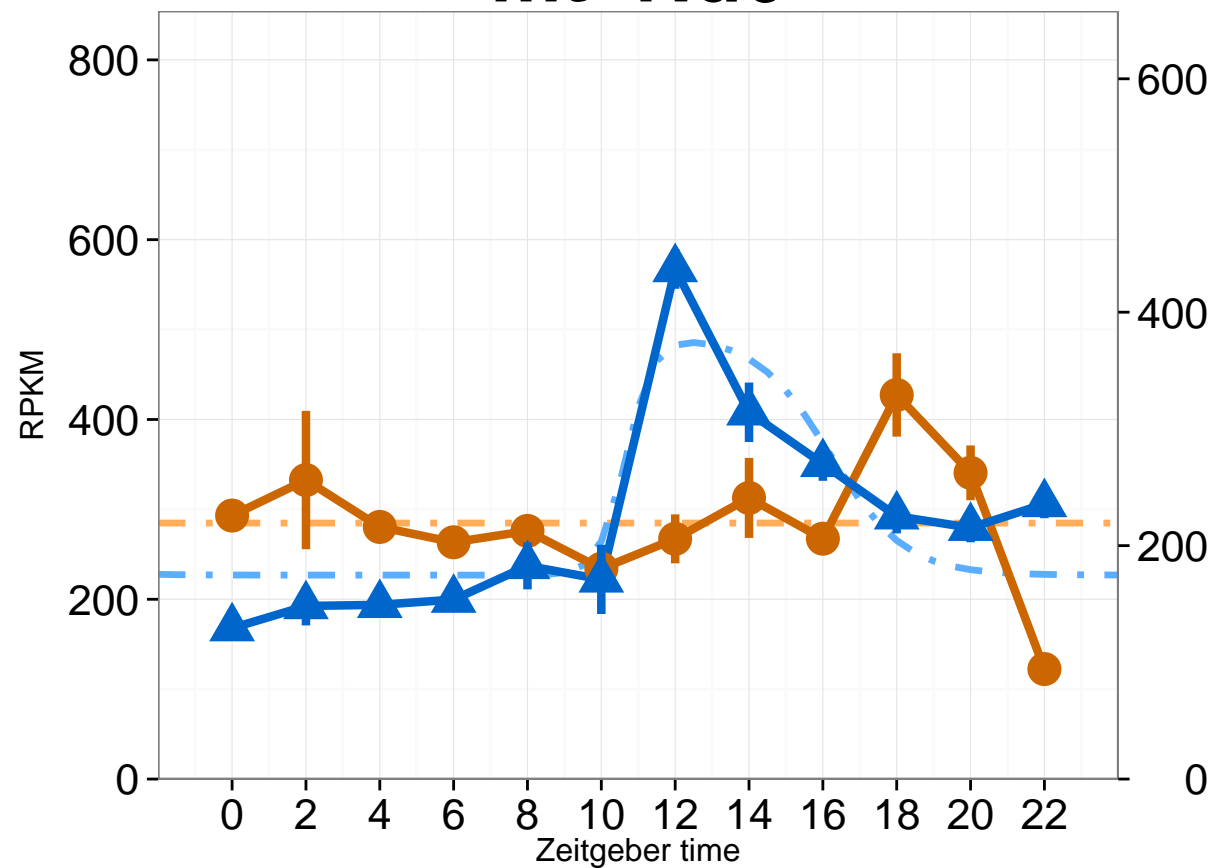

**mt-Nd6**

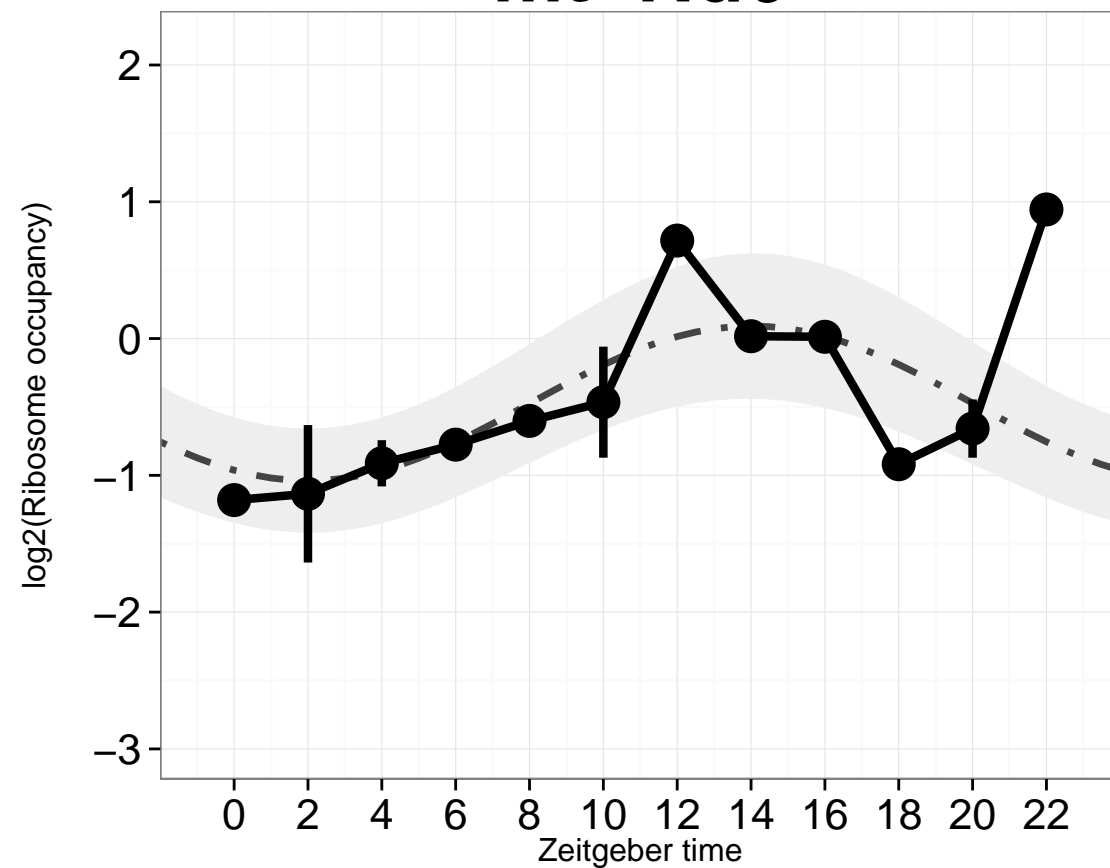

Supplement: SuppDataset_1.zip [file mt-Nd6_set_C.pdf › Supplemental Dataset 1/C-mRNA_nonrhythm_translation_rhyth/mt-Nd6_set_C.pdf]

**0610030E20Rik**

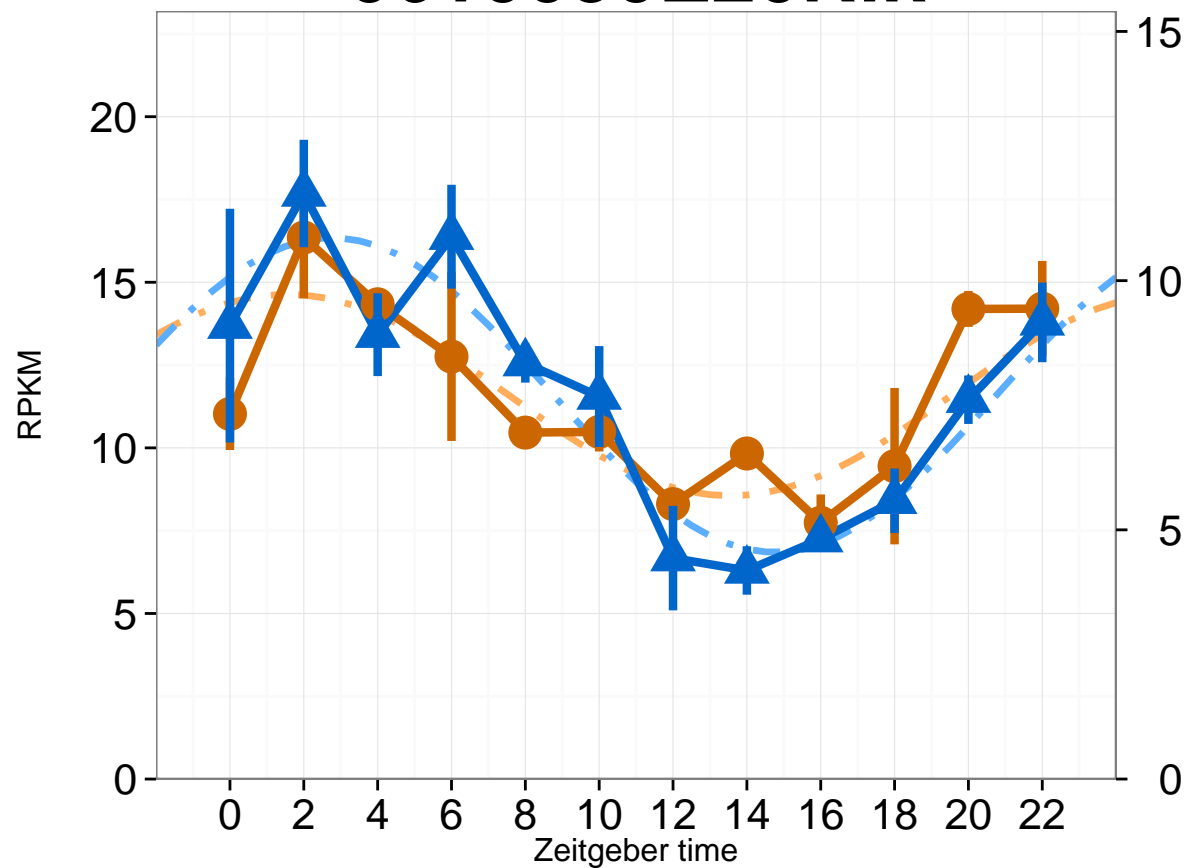

**0610030E20Rik**

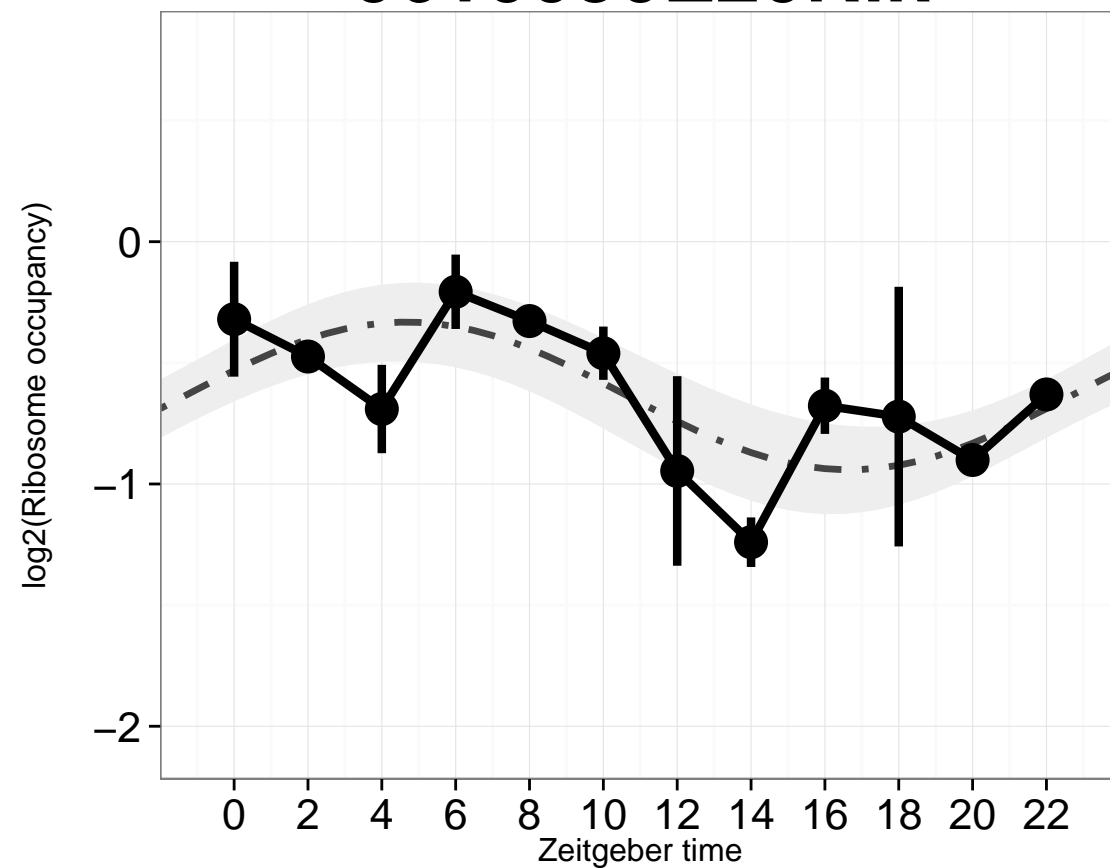

Supplement: SuppDataset_1.zip [file 0610030E20Rik_set_D.pdf › Supplemental Dataset 1/D-mRNA_rhythm_translation_rhyth/0610030E20Rik_set_D.pdf]

# 1110059E24Rik

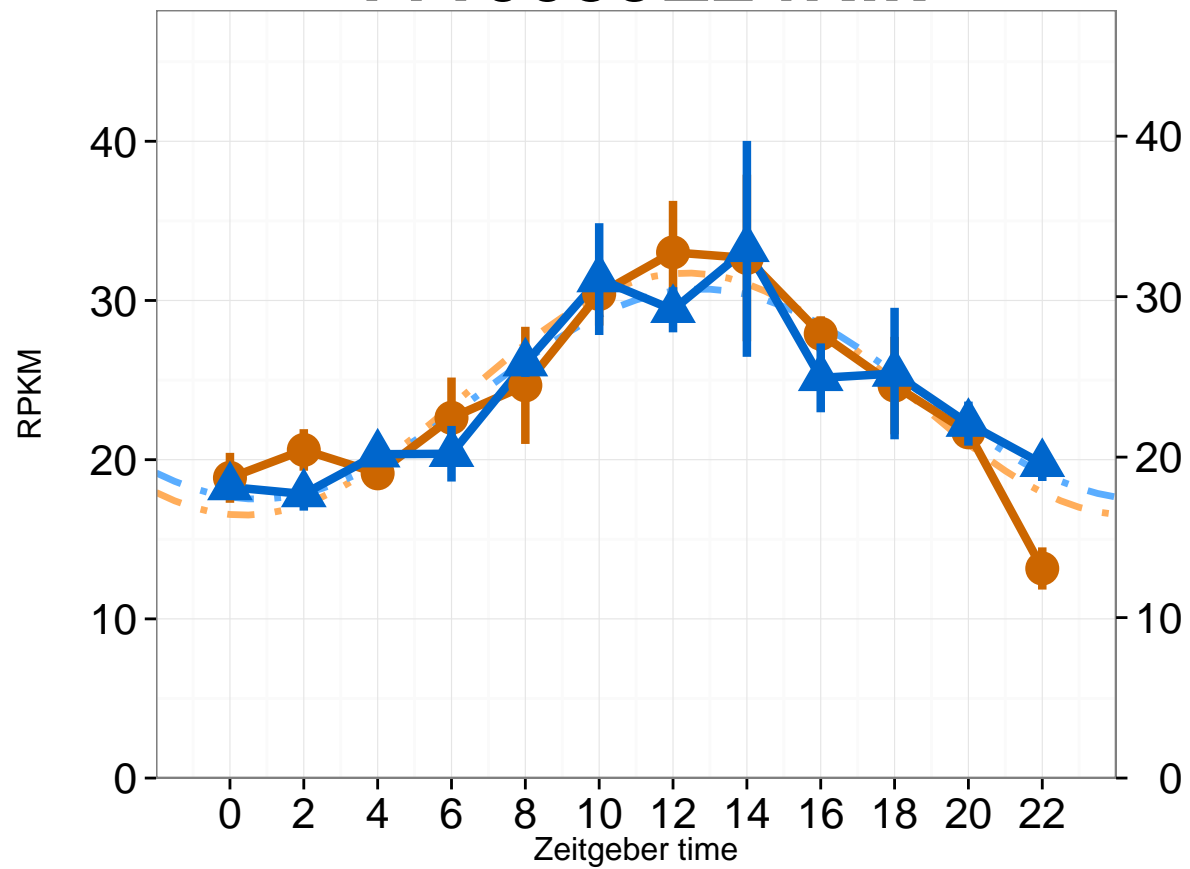

# 1110059E24Rik

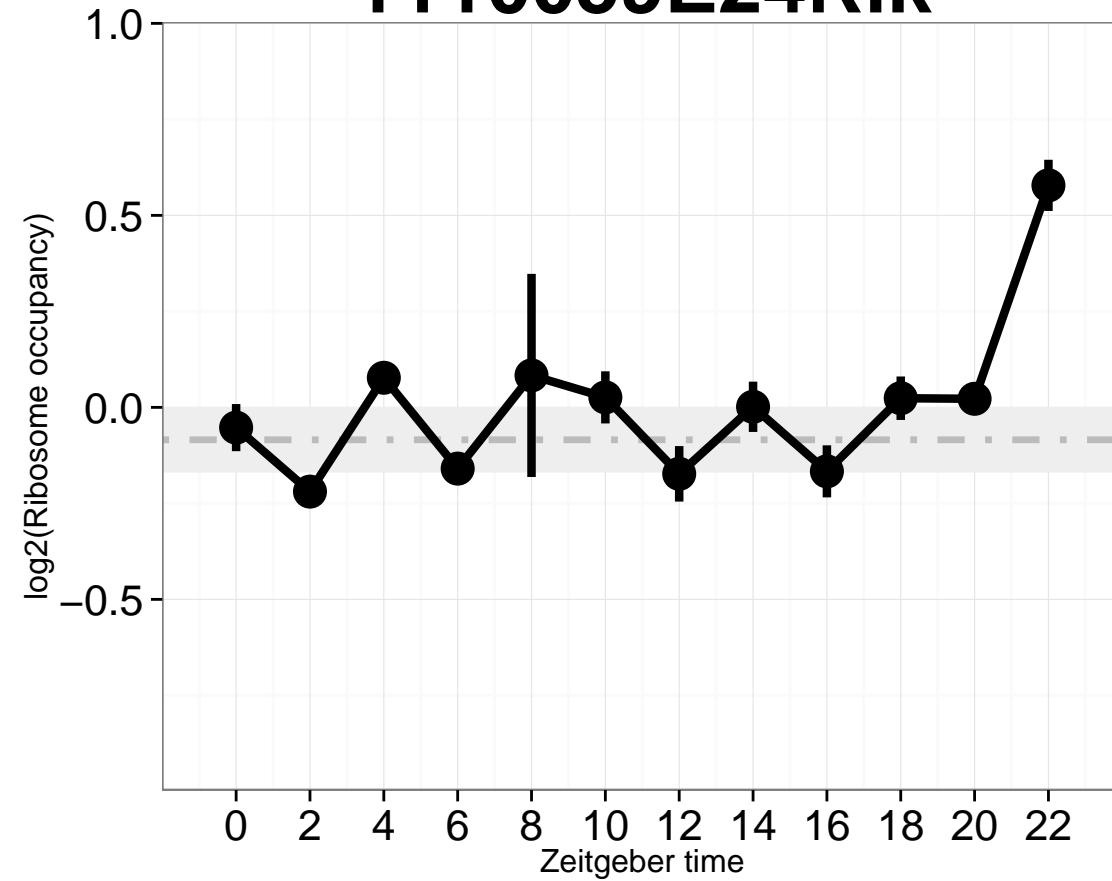

Supplement: SuppDataset_1.zip [file 1110059E24Rik_set_D.pdf › Supplemental Dataset 1/D-mRNA_rhythm_translation_rhyth/1110059E24Rik_set_D.pdf]

# 1300002K09Rik

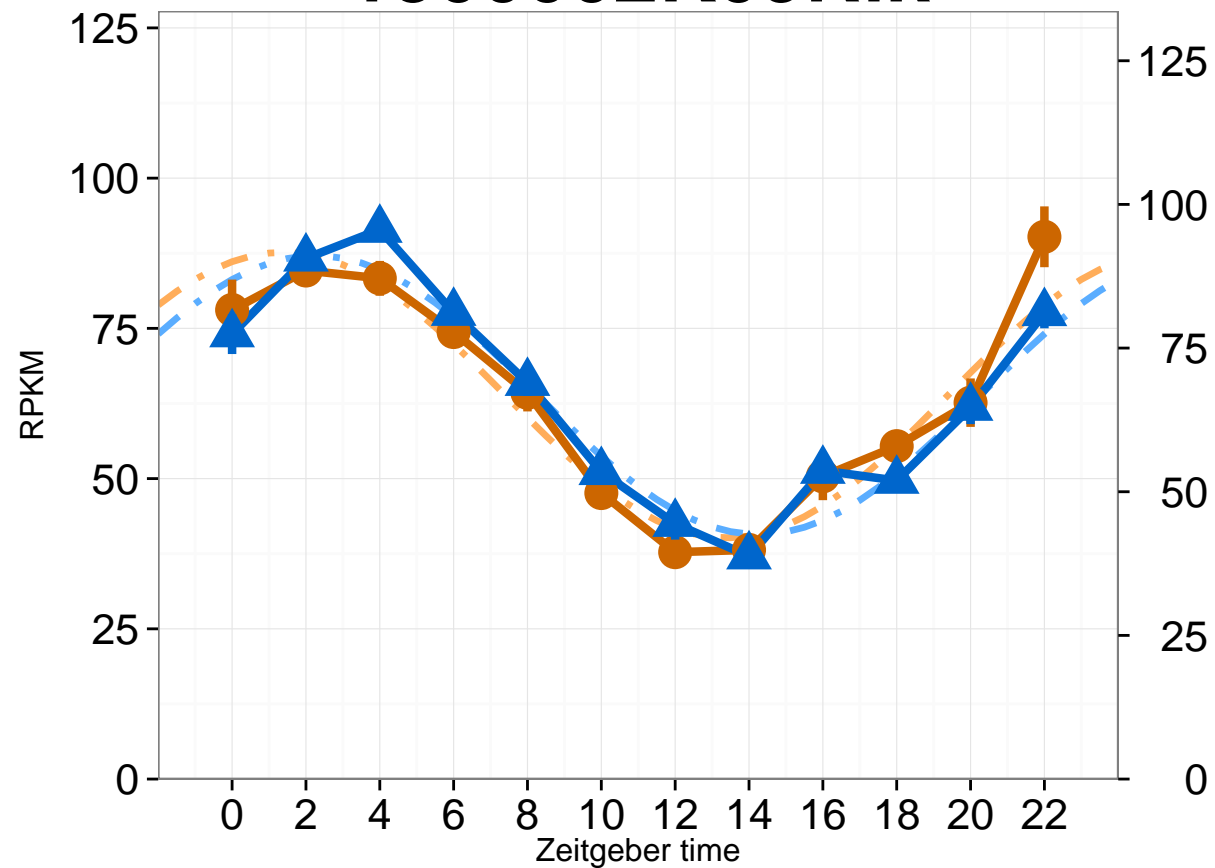

# 1300002K09Rik

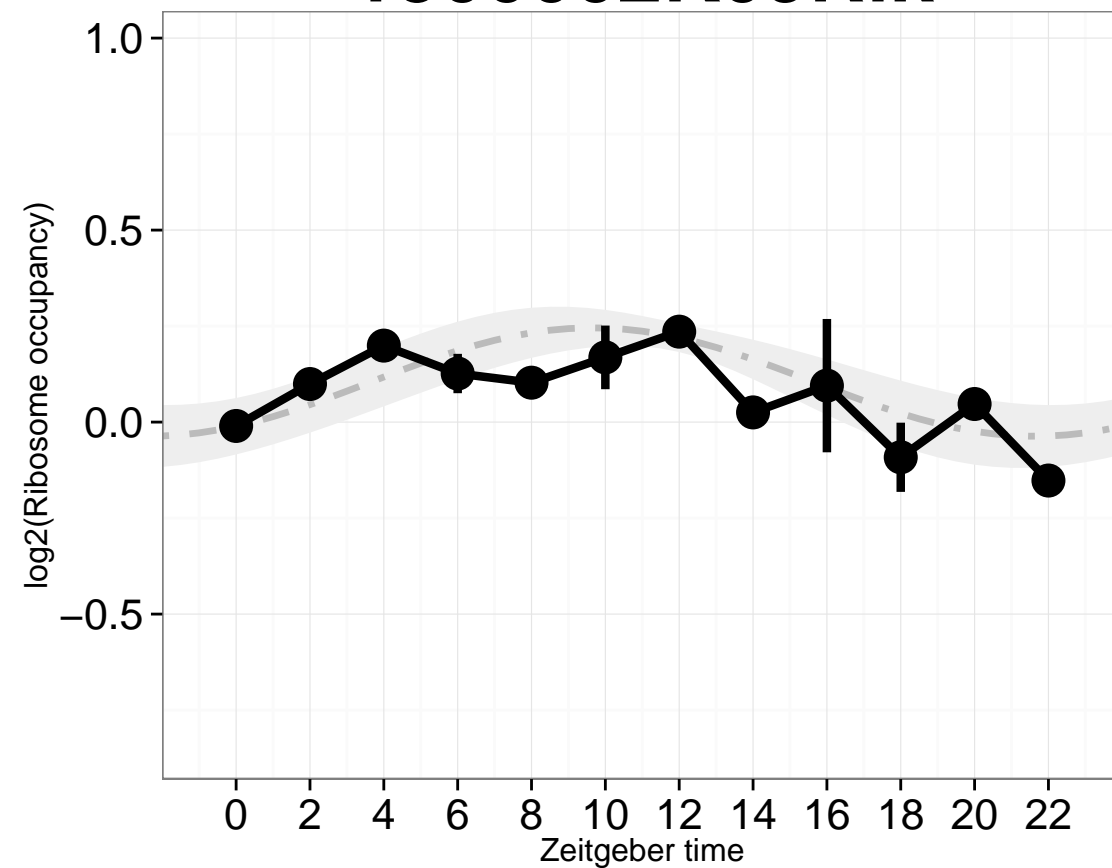

Supplement: SuppDataset_1.zip [file 1300002K09Rik_set_D.pdf › Supplemental Dataset 1/D-mRNA_rhythm_translation_rhyth/1300002K09Rik_set_D.pdf]

# 1600002H07Rik

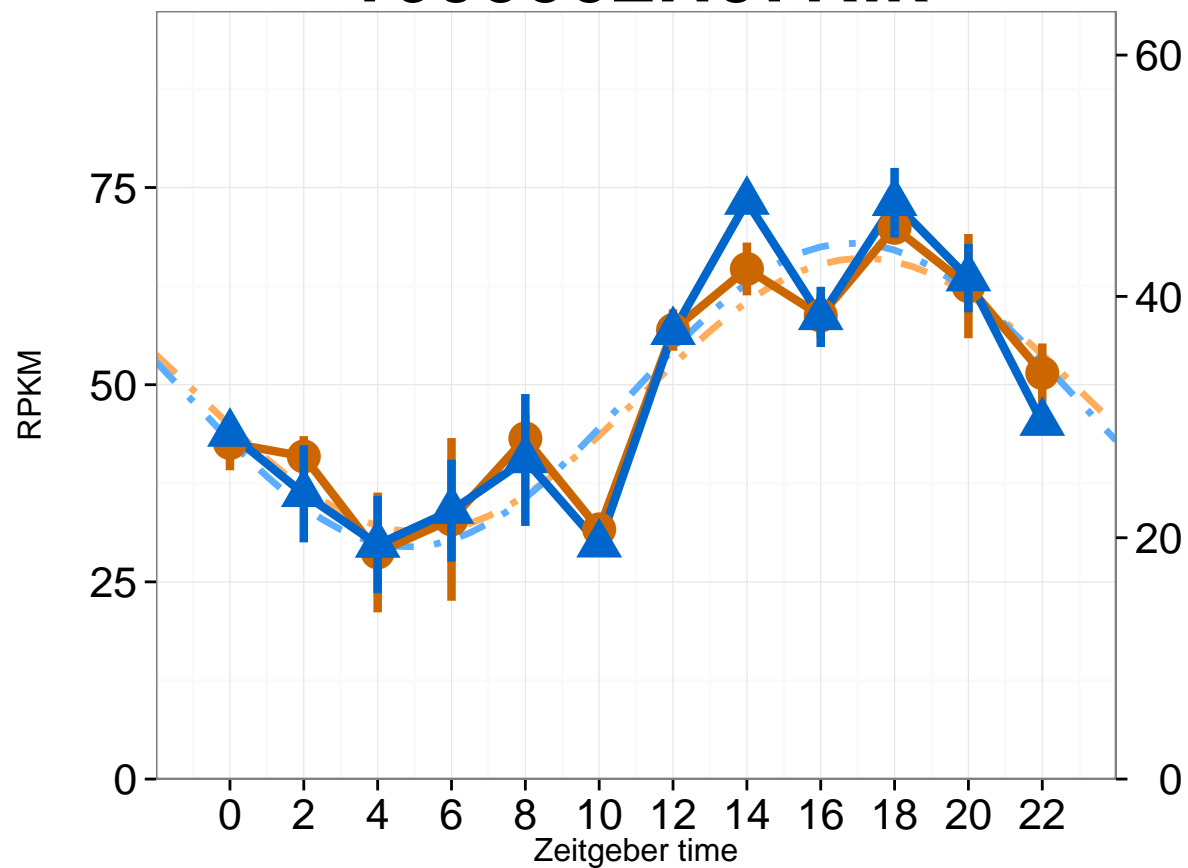

# 1600002H07Rik

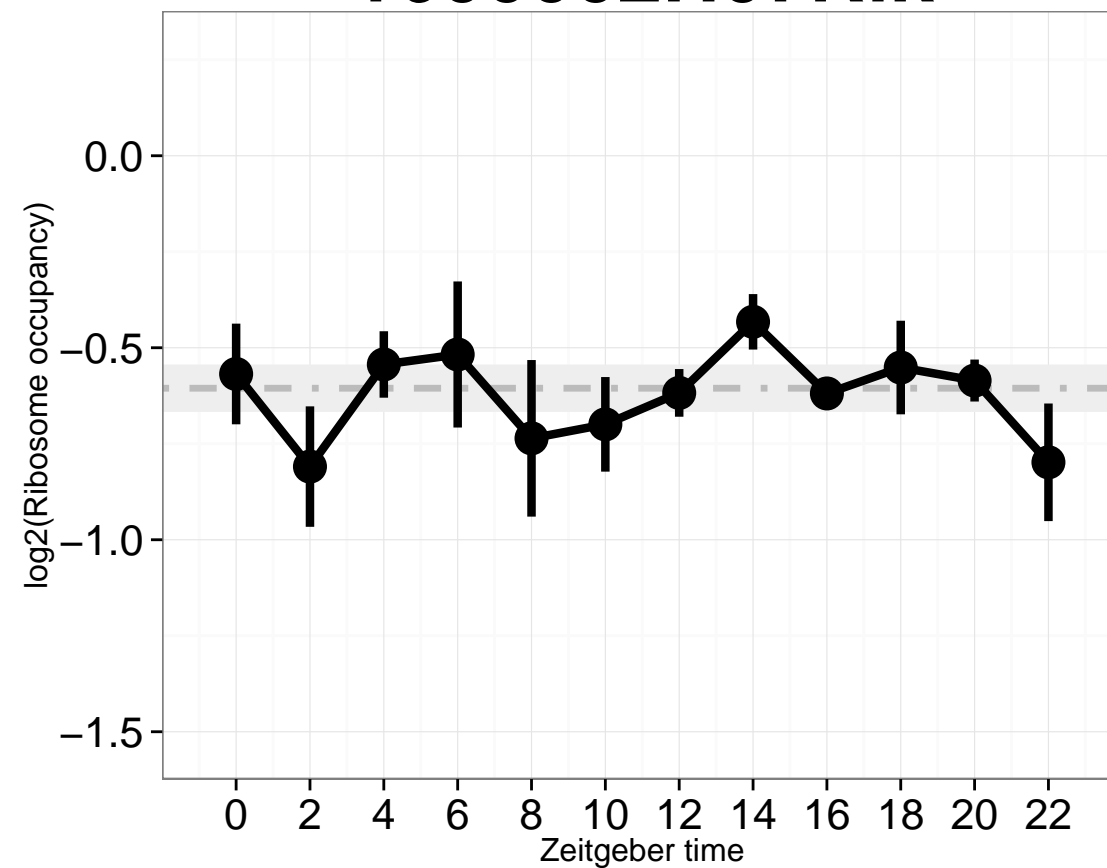

Supplement: SuppDataset_1.zip [file 1600002H07Rik_set_D.pdf › Supplemental Dataset 1/D-mRNA_rhythm_translation_rhyth/1600002H07Rik_set_D.pdf]

**1700017B05Rik**

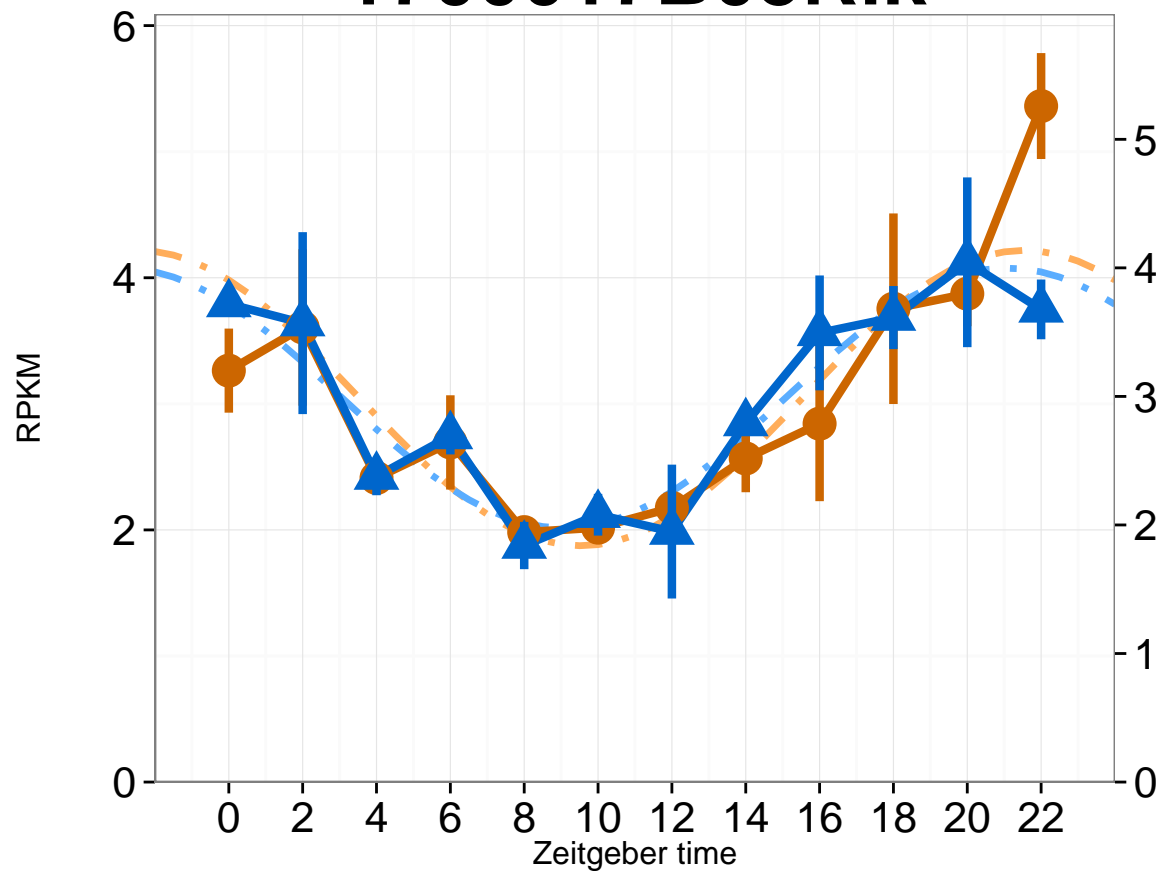

**1700017B05Rik**

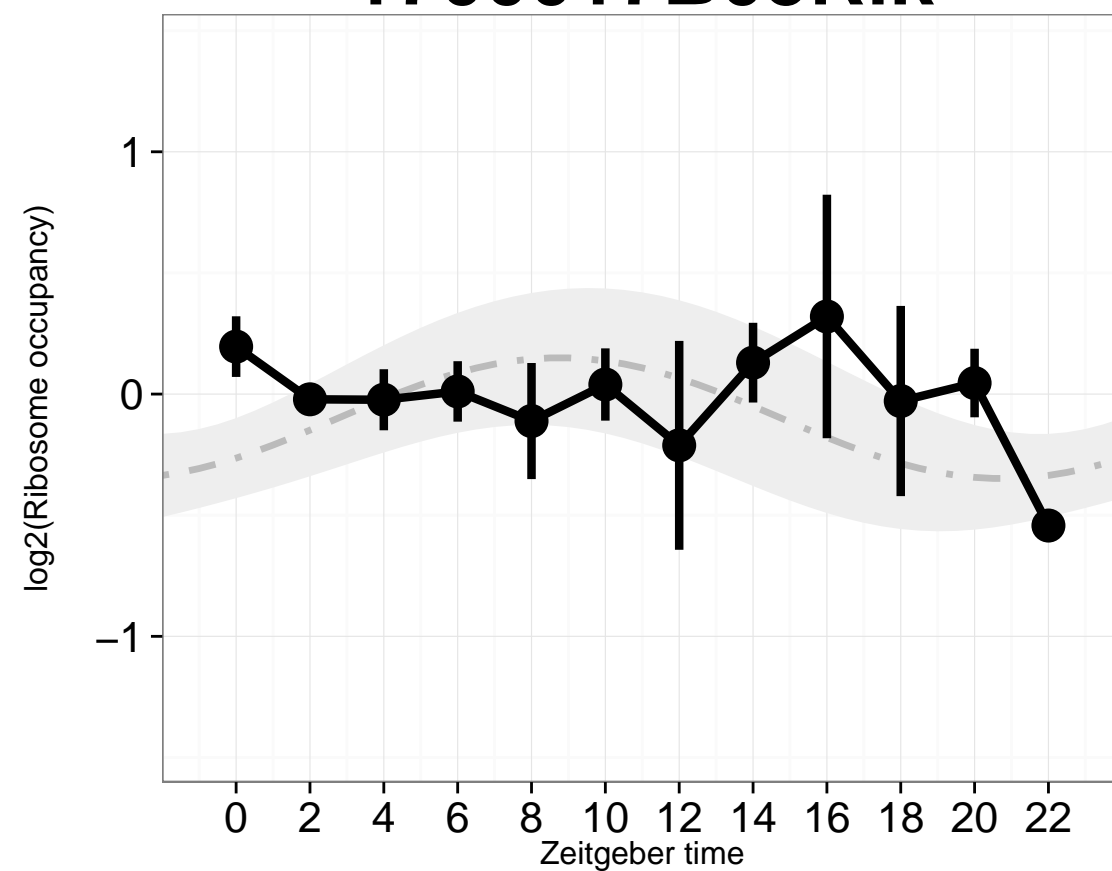

Supplement: SuppDataset_1.zip [file 1700017B05Rik_set_D.pdf › Supplemental Dataset 1/D-mRNA_rhythm_translation_rhyth/1700017B05Rik_set_D.pdf]

# 1810055G02Rik

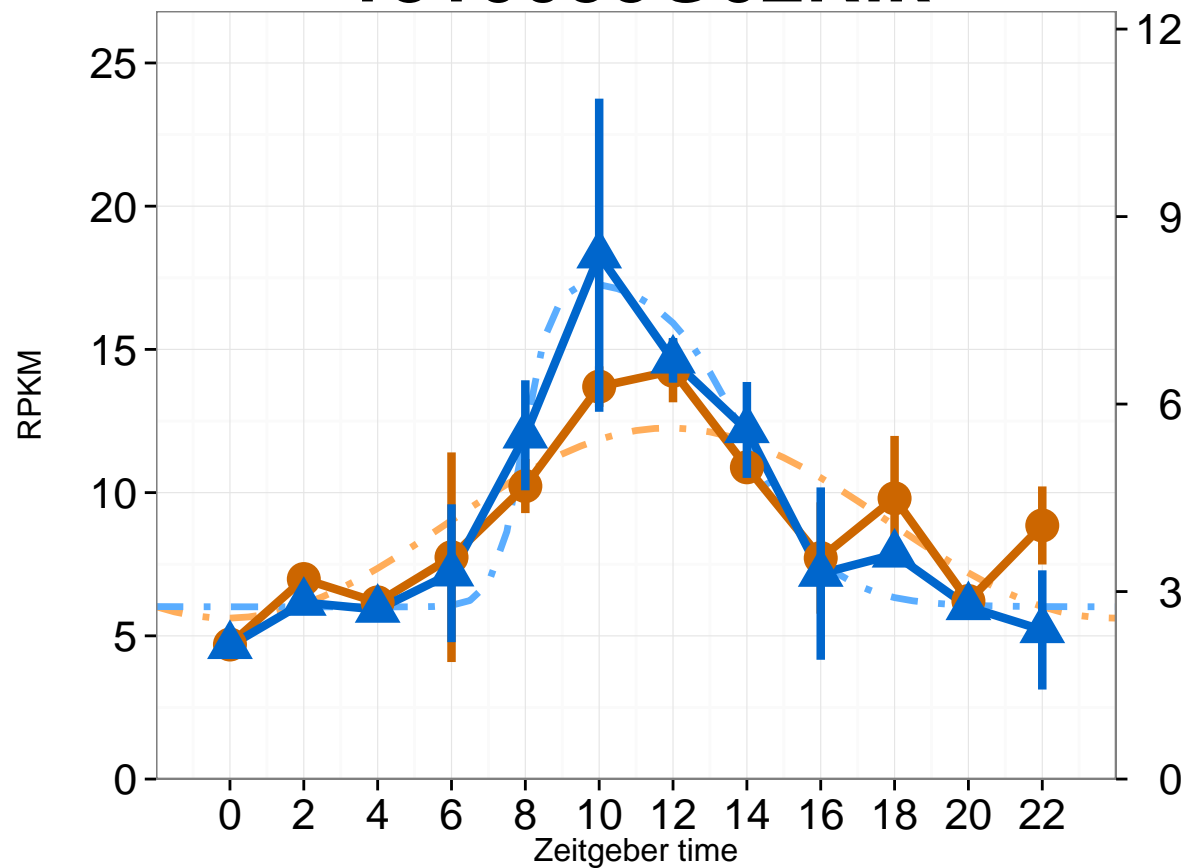

# 1810055G02Rik

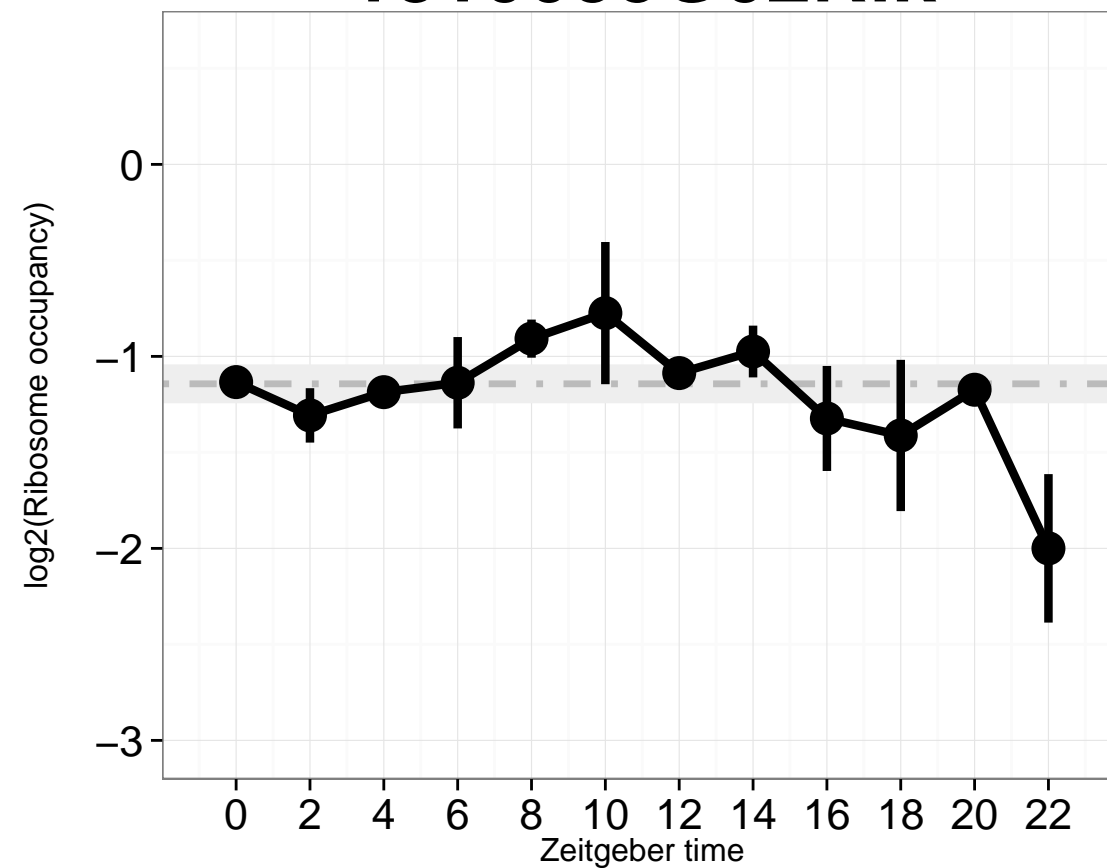

Supplement: SuppDataset_1.zip [file 1810055G02Rik_set_D.pdf › Supplemental Dataset 1/D-mRNA_rhythm_translation_rhyth/1810055G02Rik_set_D.pdf]

## 2210408I21Rik

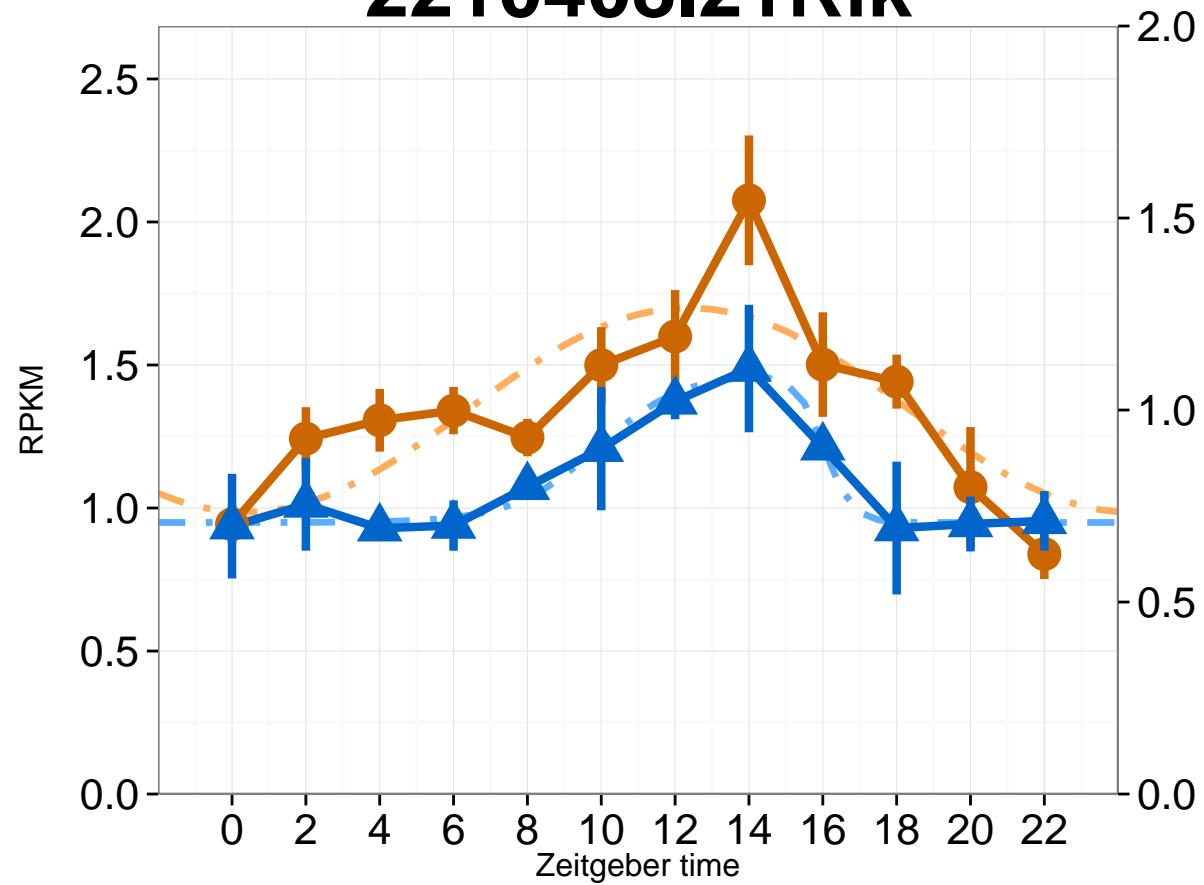

## 2210408I21Rik

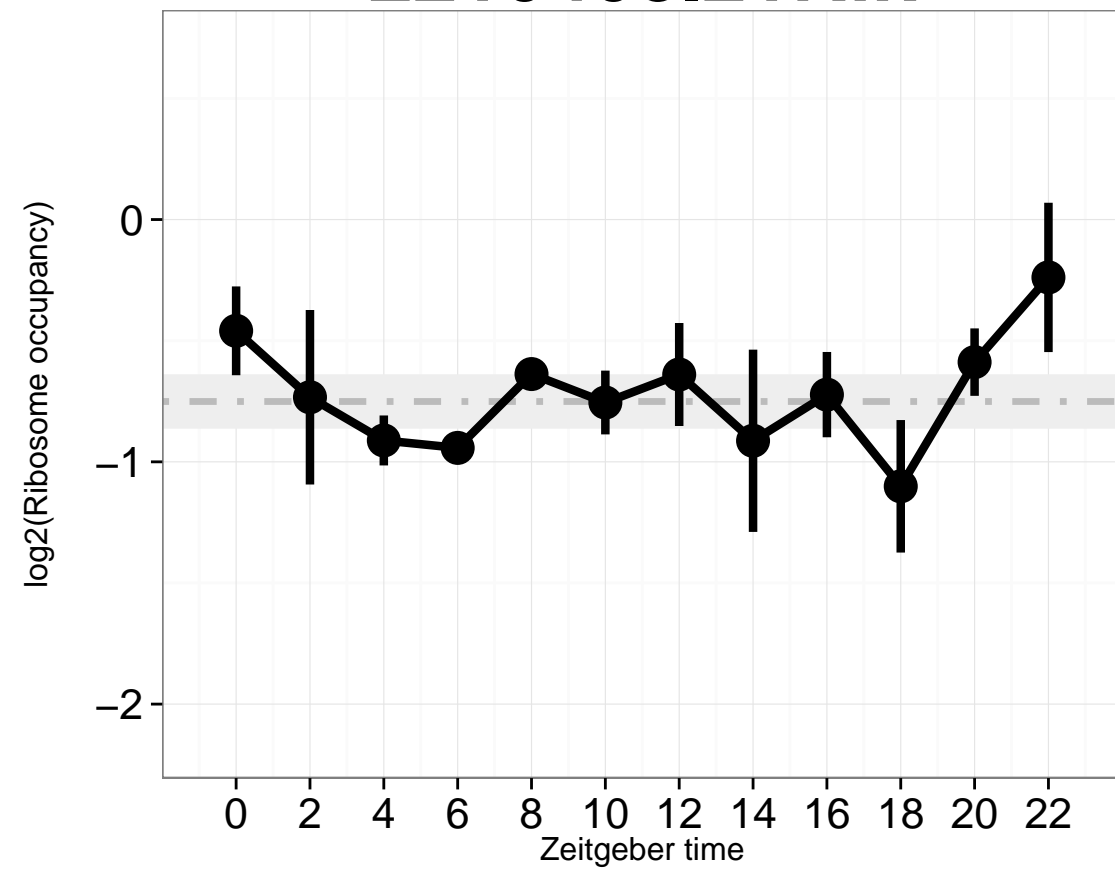

Supplement: SuppDataset_1.zip [file 2210408I21Rik_set_D.pdf › Supplemental Dataset 1/D-mRNA_rhythm_translation_rhyth/2210408I21Rik_set_D.pdf]

**2610528J11Rik**

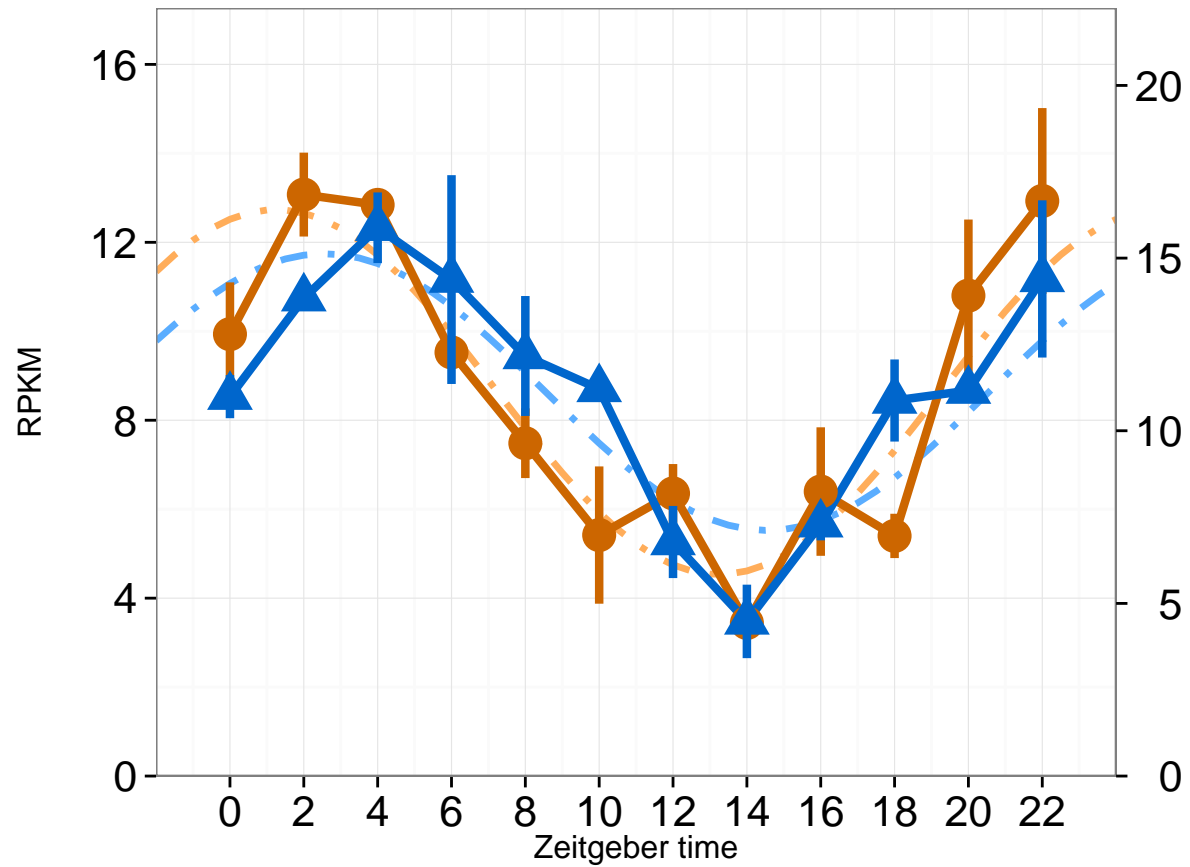

**2610528J11Rik**

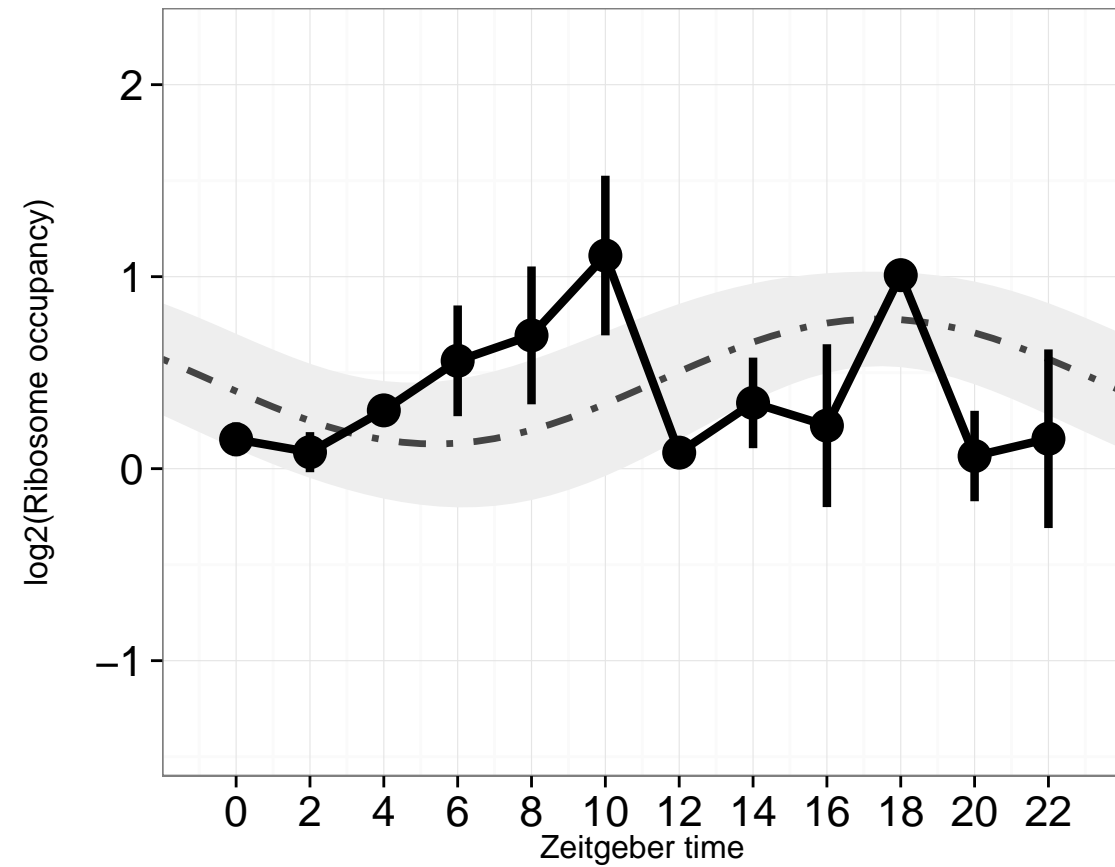

Supplement: SuppDataset_1.zip [file 2610528J11Rik_set_D.pdf › Supplemental Dataset 1/D-mRNA_rhythm_translation_rhyth/2610528J11Rik_set_D.pdf]

## 2700050L05Rik

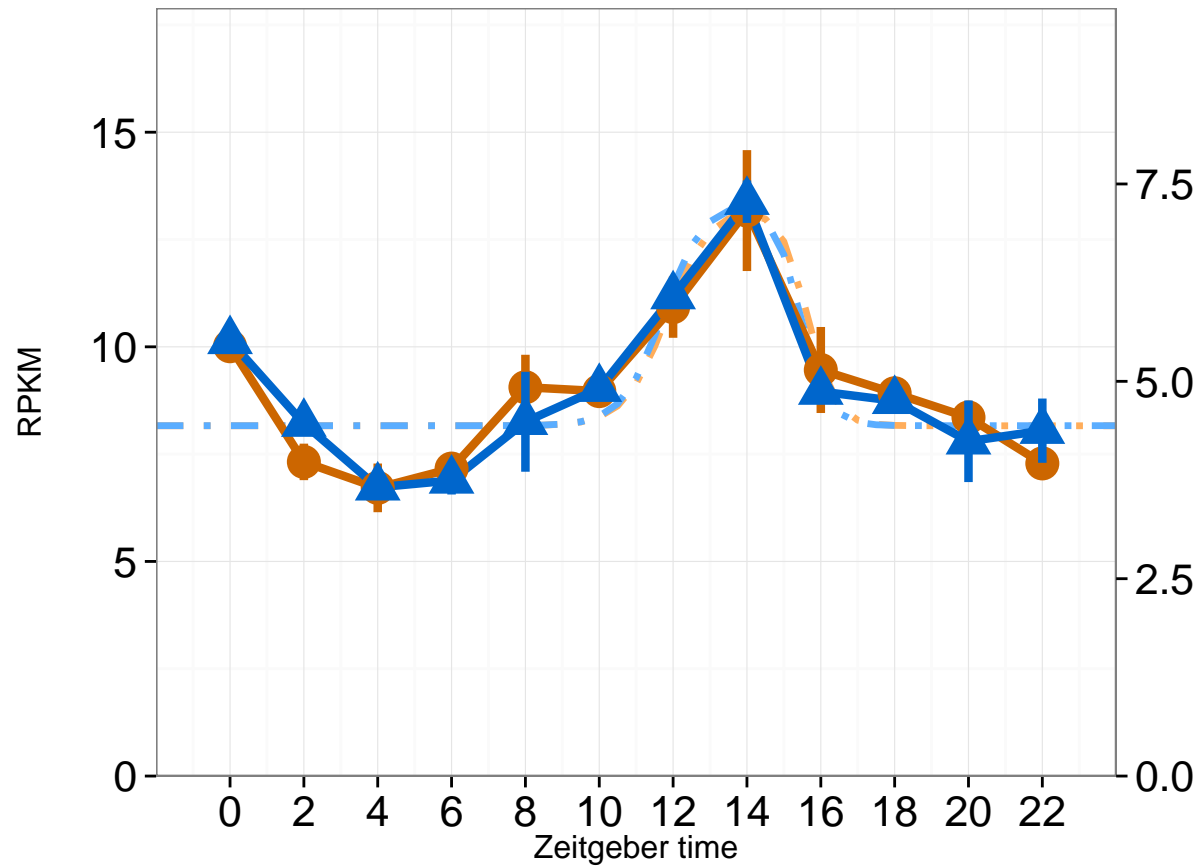

## 2700050L05Rik

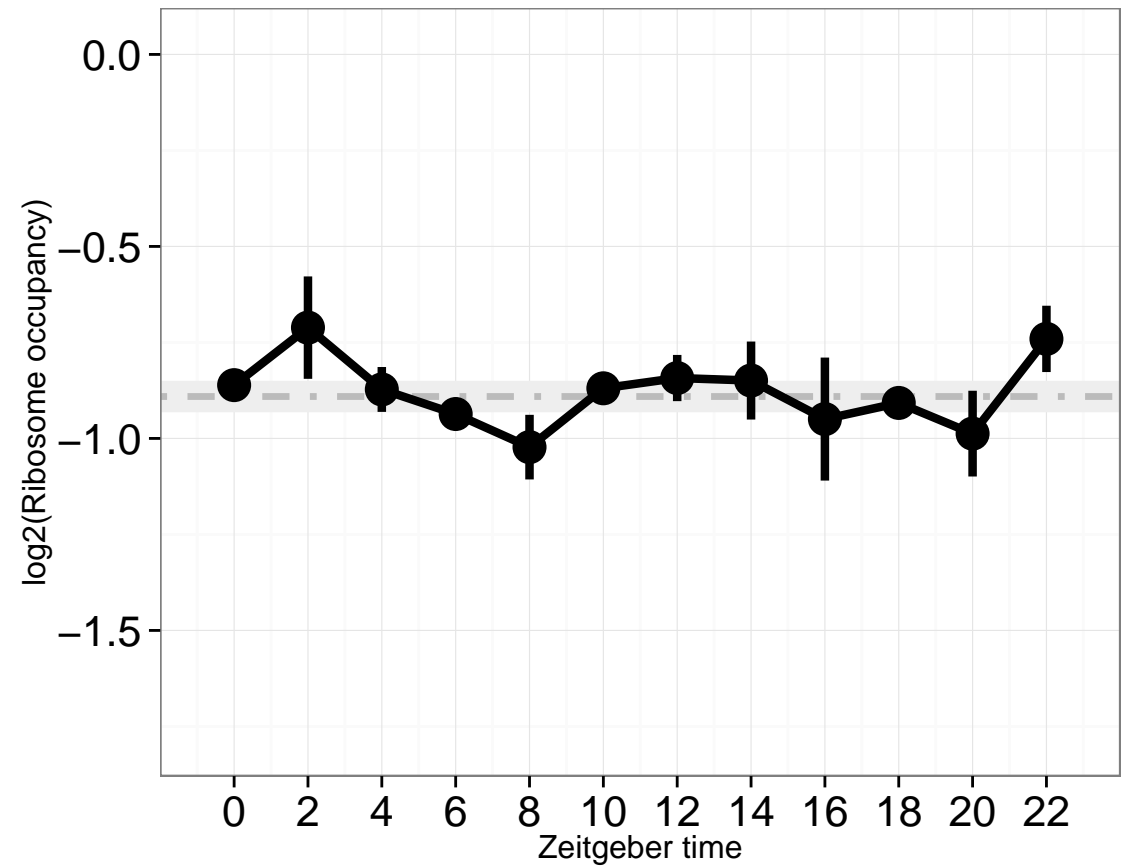

Supplement: SuppDataset_1.zip [file 2700050L05Rik_set_D.pdf › Supplemental Dataset 1/D-mRNA_rhythm_translation_rhyth/2700050L05Rik_set_D.pdf]

3010026O09Rik

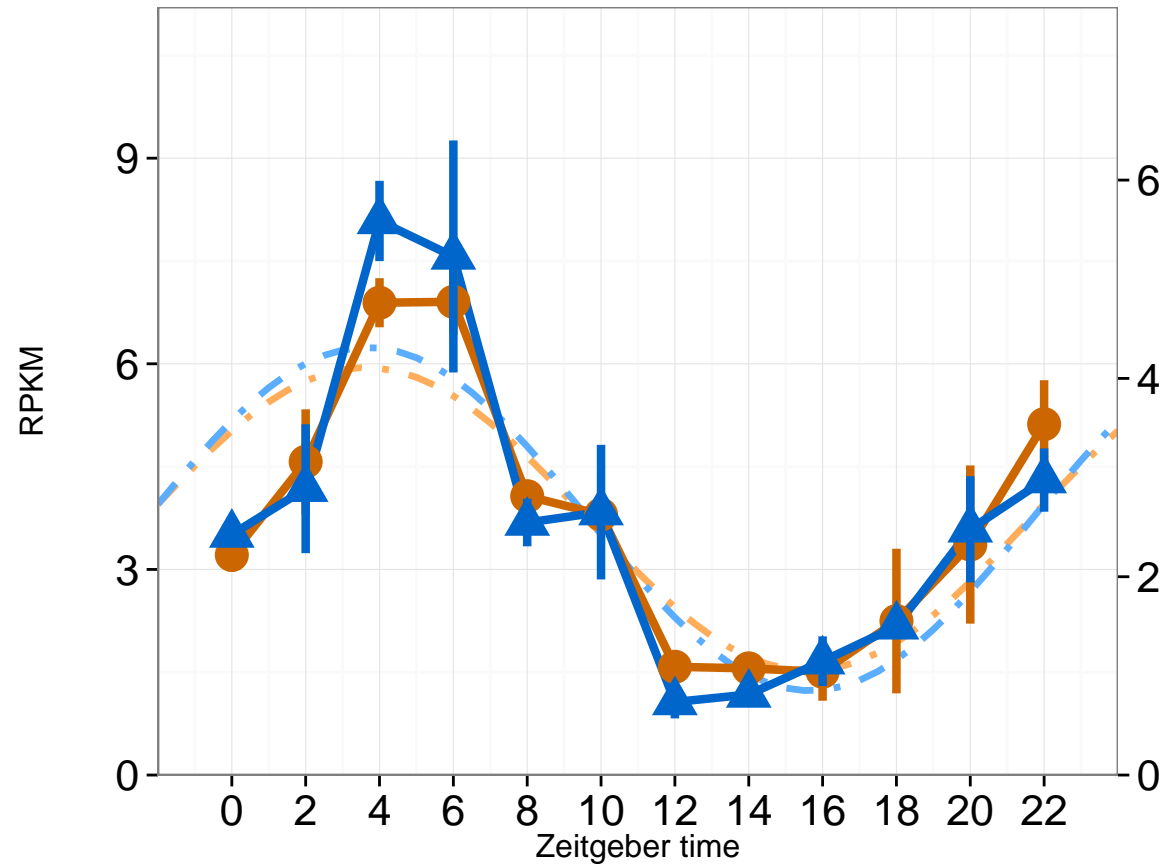

3010026O09Rik

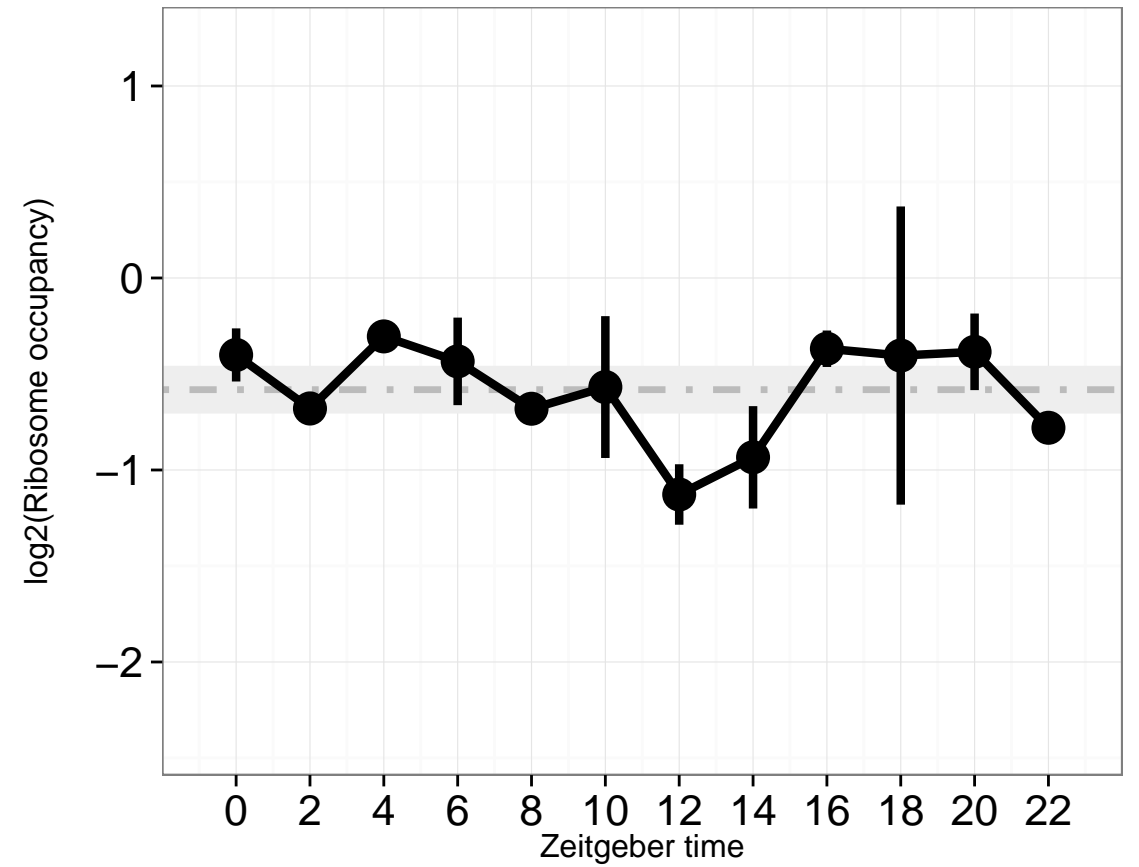

Supplement: SuppDataset_1.zip [file 3010026O09Rik_set_D.pdf › Supplemental Dataset 1/D-mRNA_rhythm_translation_rhyth/3010026O09Rik_set_D.pdf]

# 3110001I22Rik

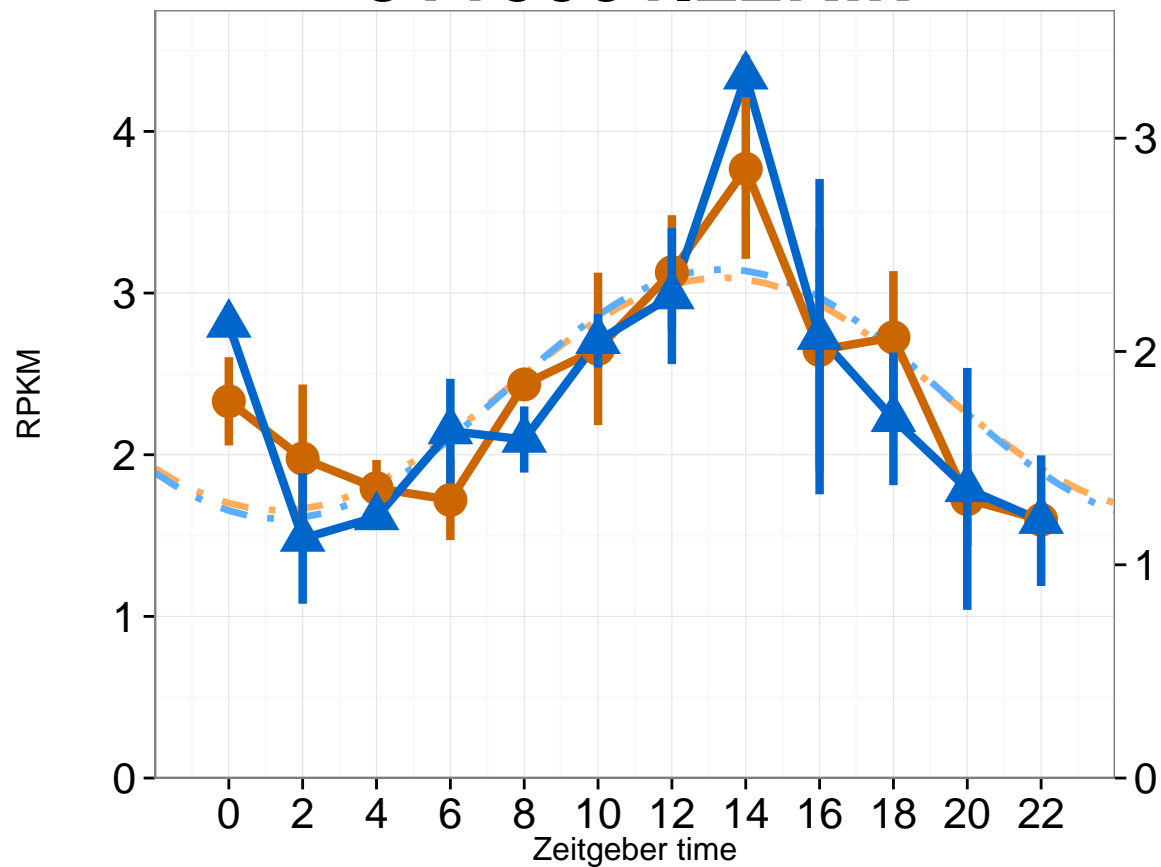

# 3110001I22Rik

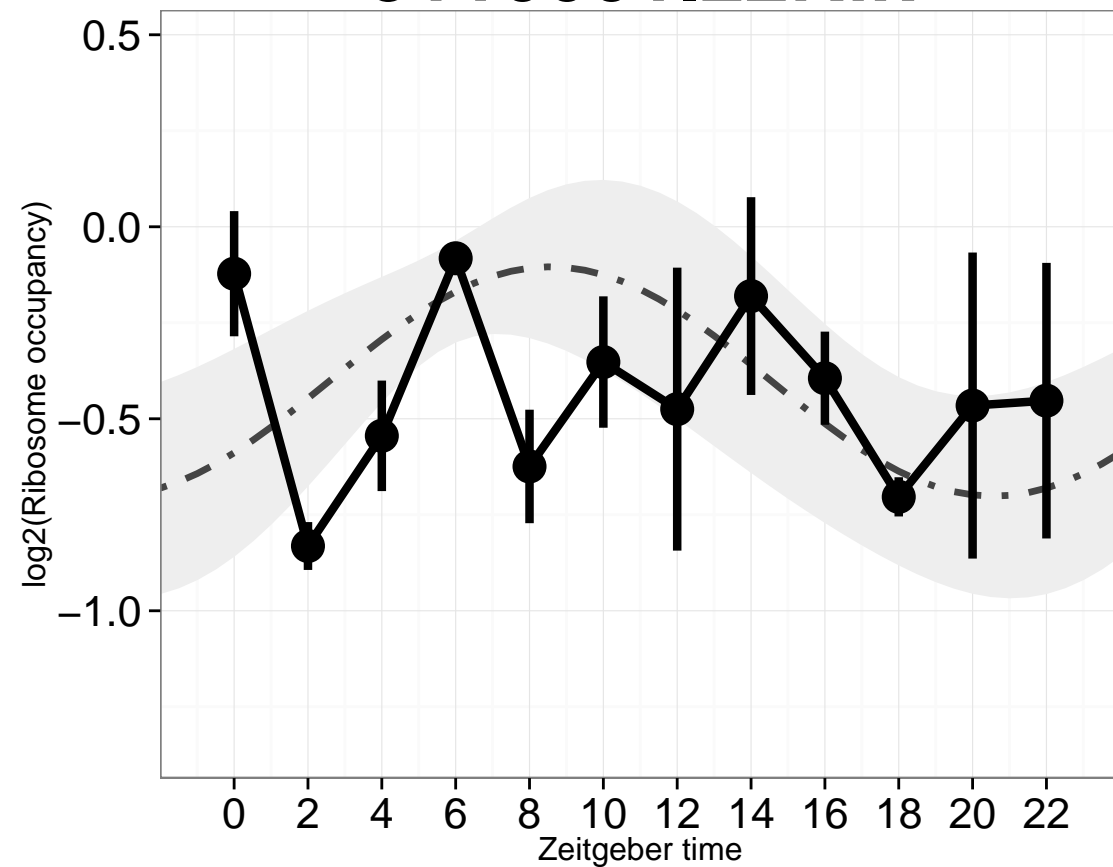

Supplement: SuppDataset_1.zip [file 3110001I22Rik_set_D.pdf › Supplemental Dataset 1/D-mRNA_rhythm_translation_rhyth/3110001I22Rik_set_D.pdf]

# 3110052M02Rik

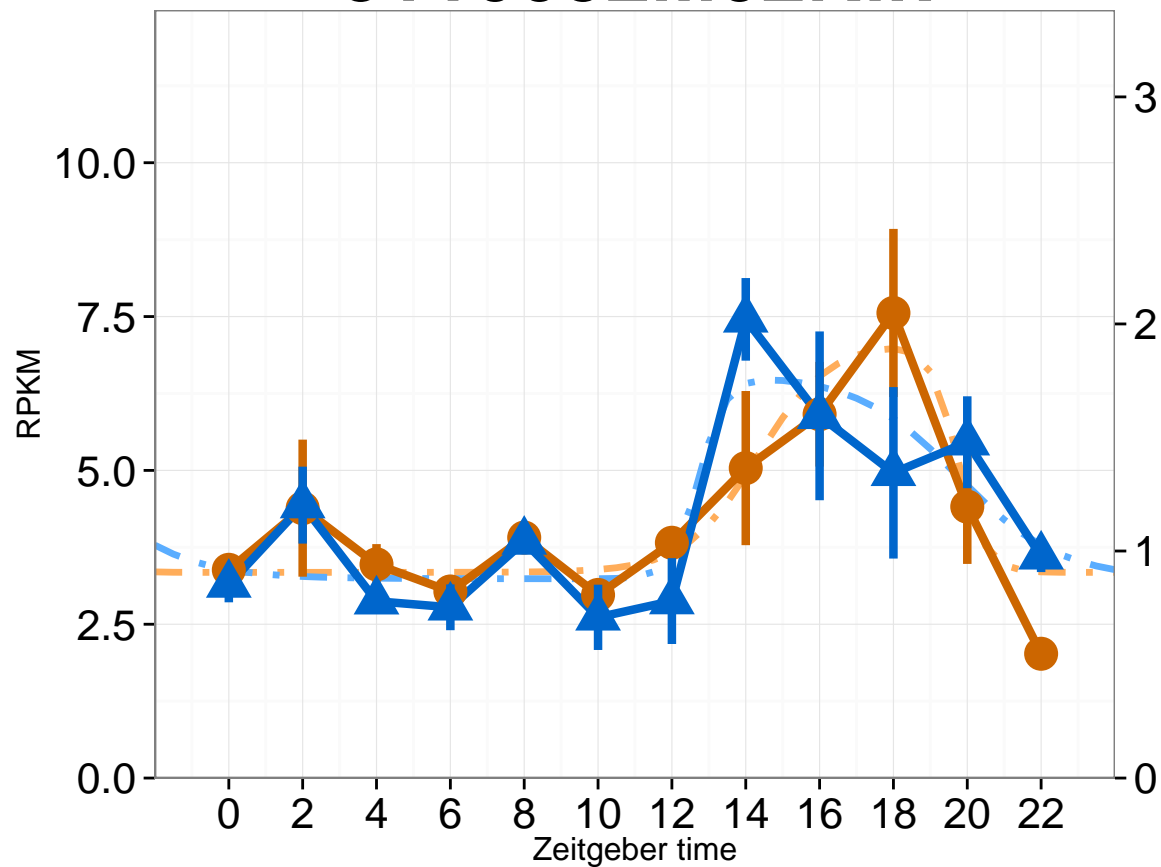

# 3110052M02Rik

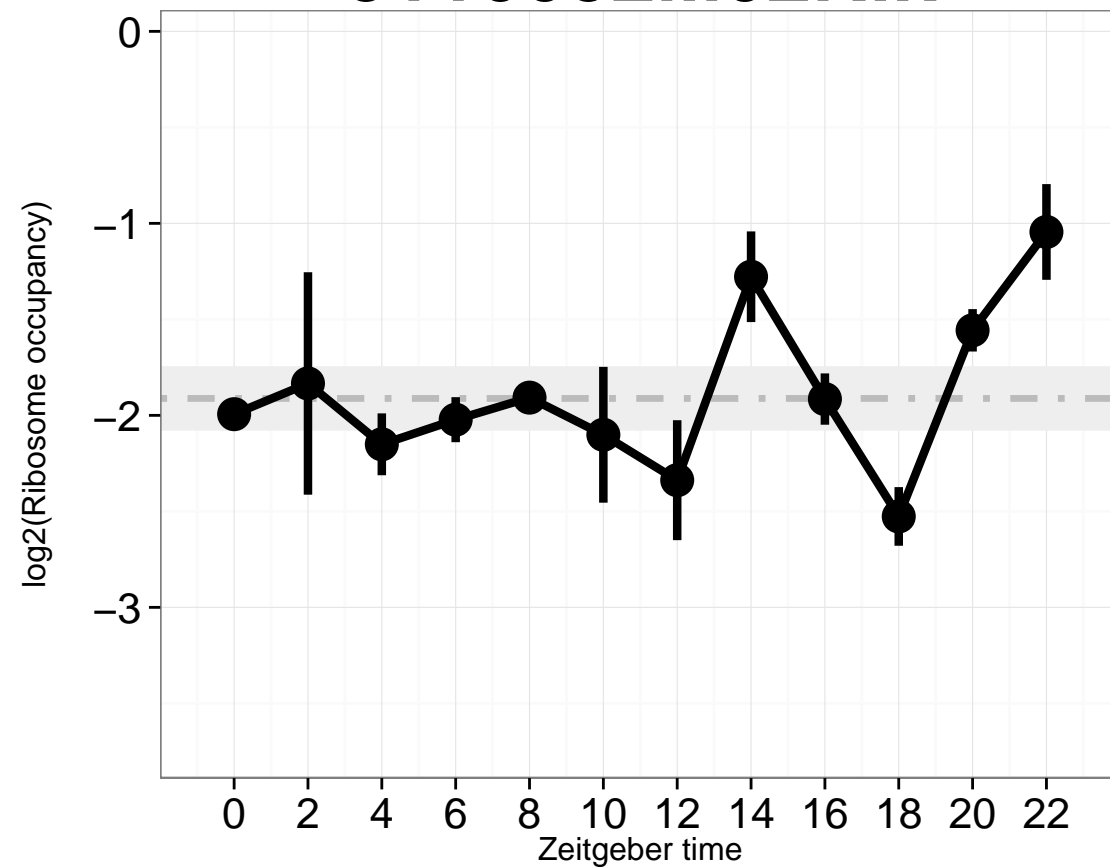

Supplement: SuppDataset_1.zip [file 3110052M02Rik_set_D.pdf › Supplemental Dataset 1/D-mRNA_rhythm_translation_rhyth/3110052M02Rik_set_D.pdf]

**3110082I17Rik**

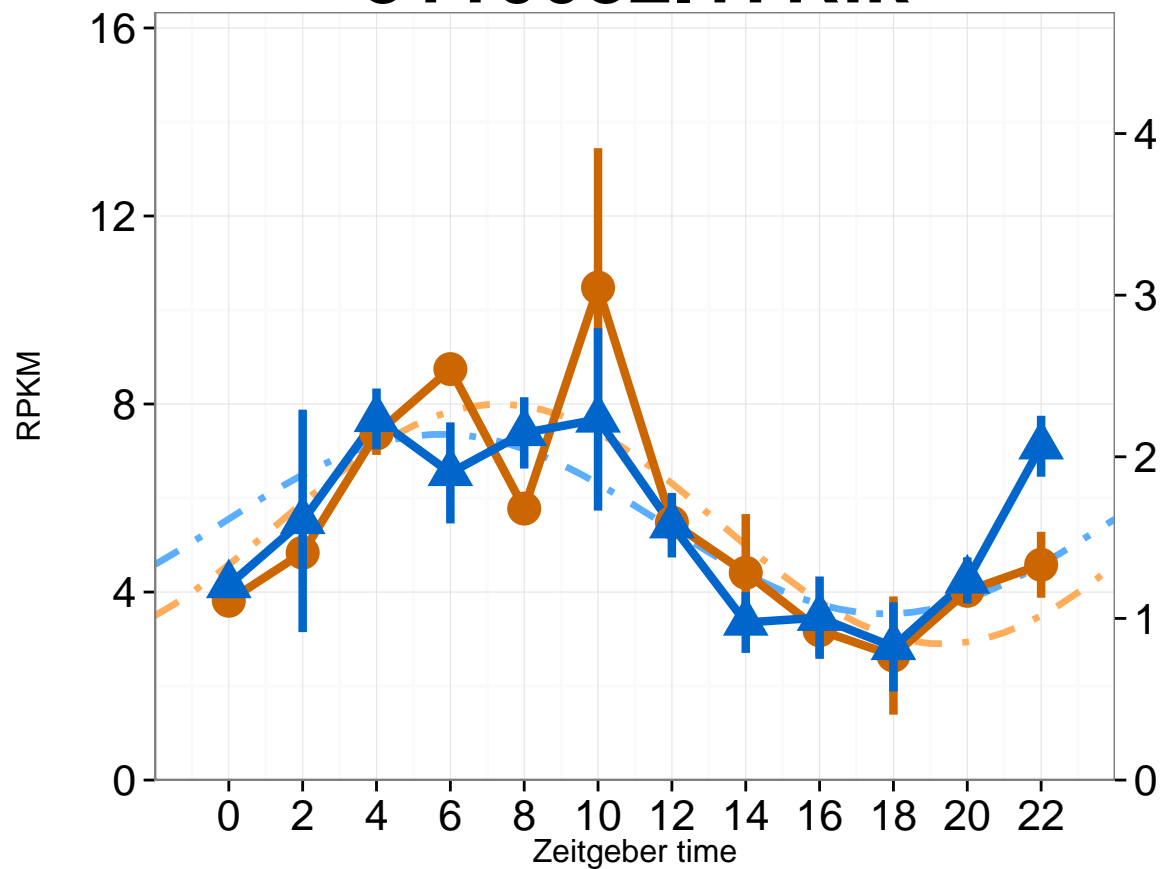

**3110082I17Rik**

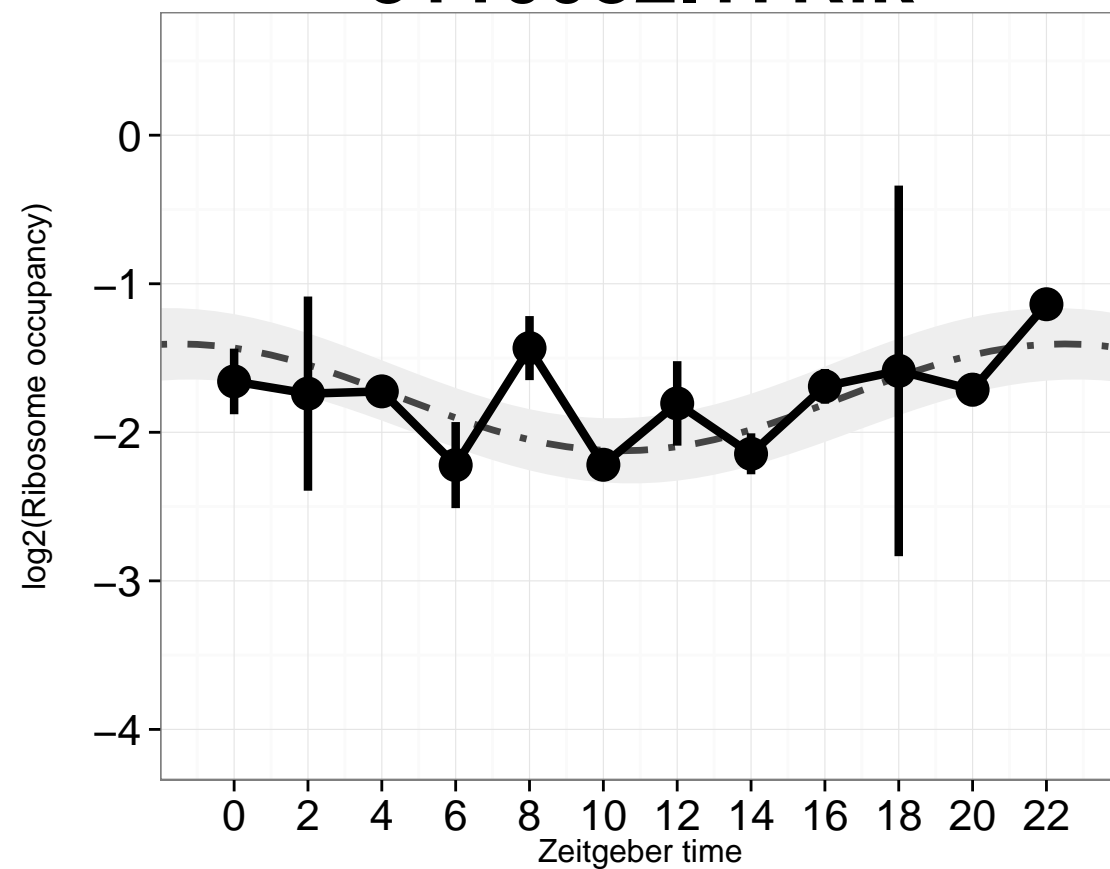

Supplement: SuppDataset_1.zip [file 3110082I17Rik_set_D.pdf › Supplemental Dataset 1/D-mRNA_rhythm_translation_rhyth/3110082I17Rik_set_D.pdf]

## 4833439L19Rik

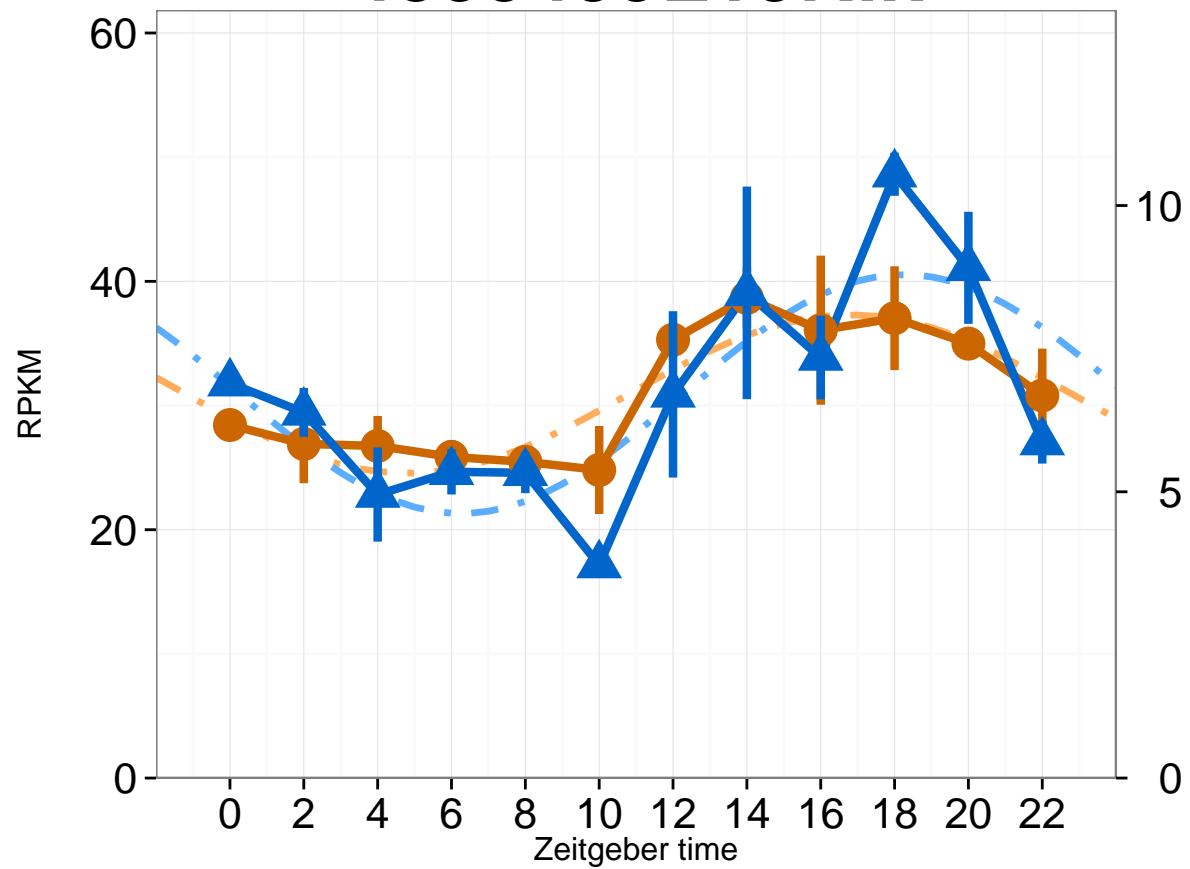

## 4833439L19Rik

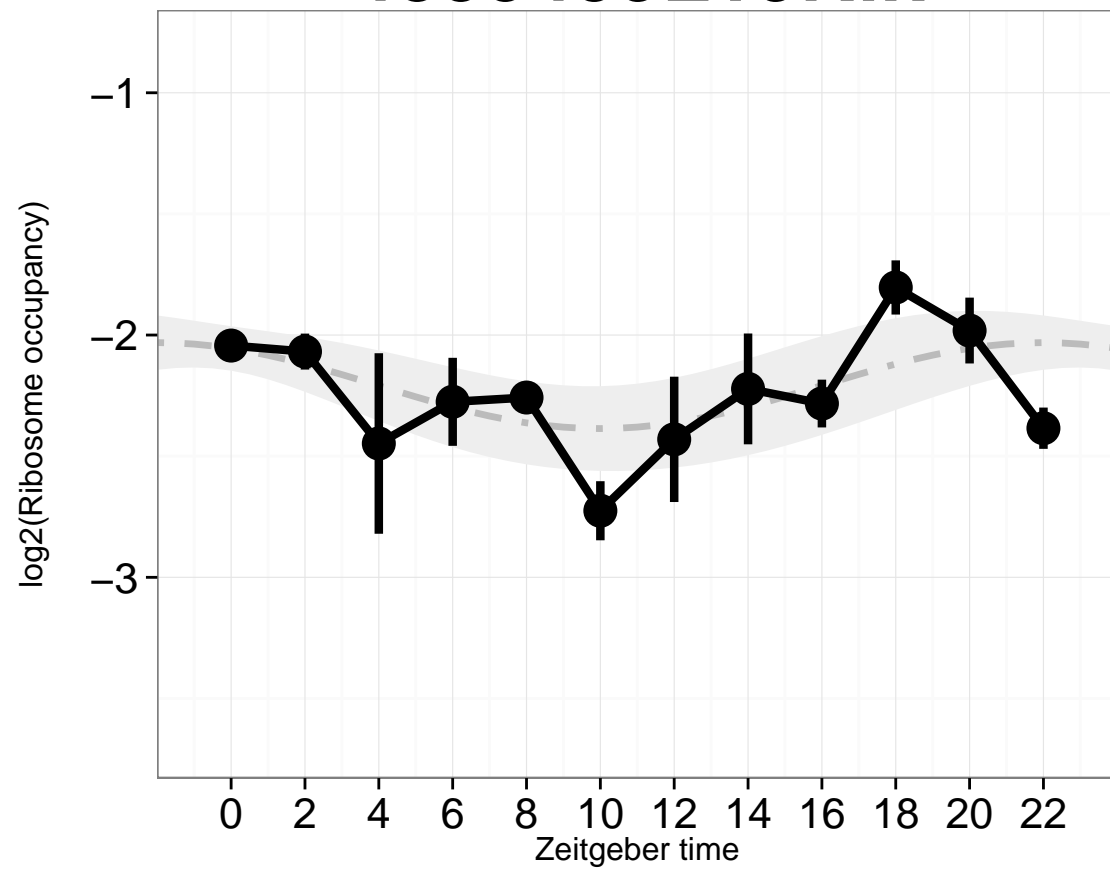

Supplement: SuppDataset_1.zip [file 4833439L19Rik_set_D.pdf › Supplemental Dataset 1/D-mRNA_rhythm_translation_rhyth/4833439L19Rik_set_D.pdf]

## 4931414P19Rik

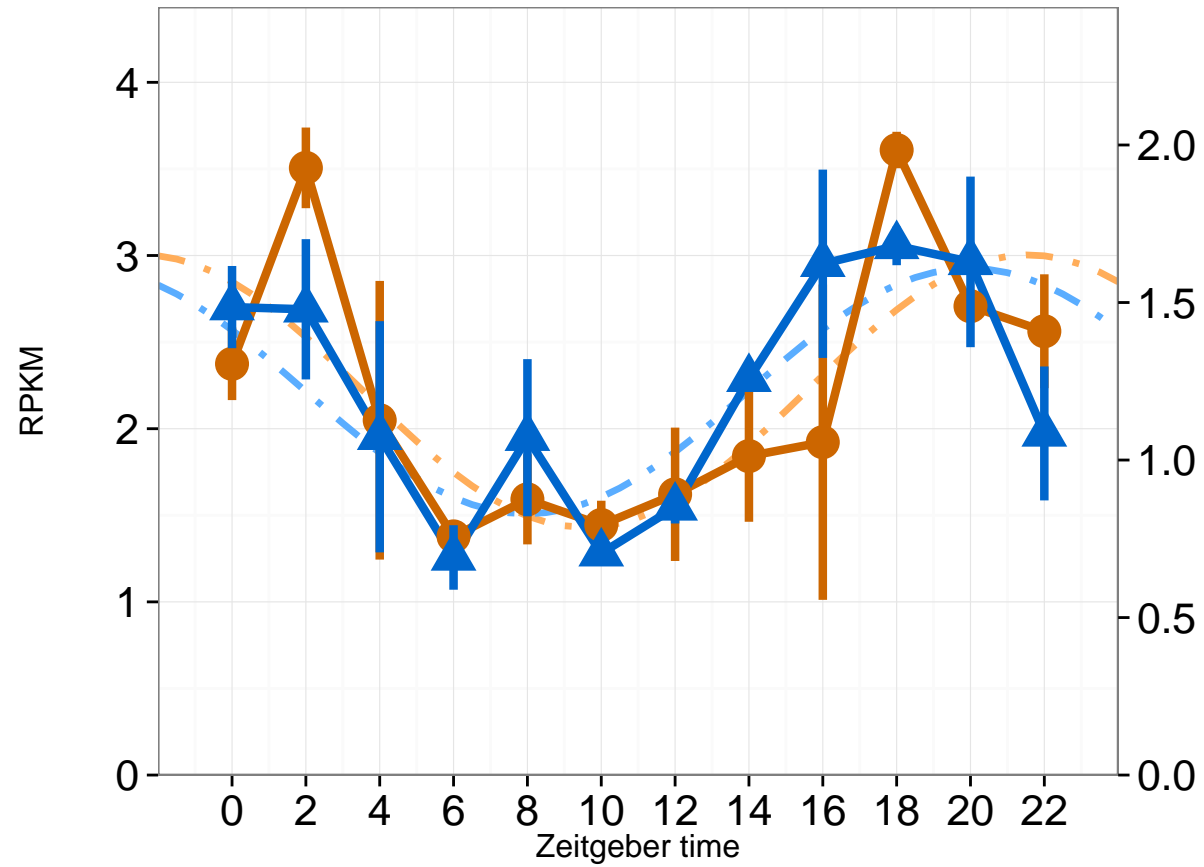

## 4931414P19Rik

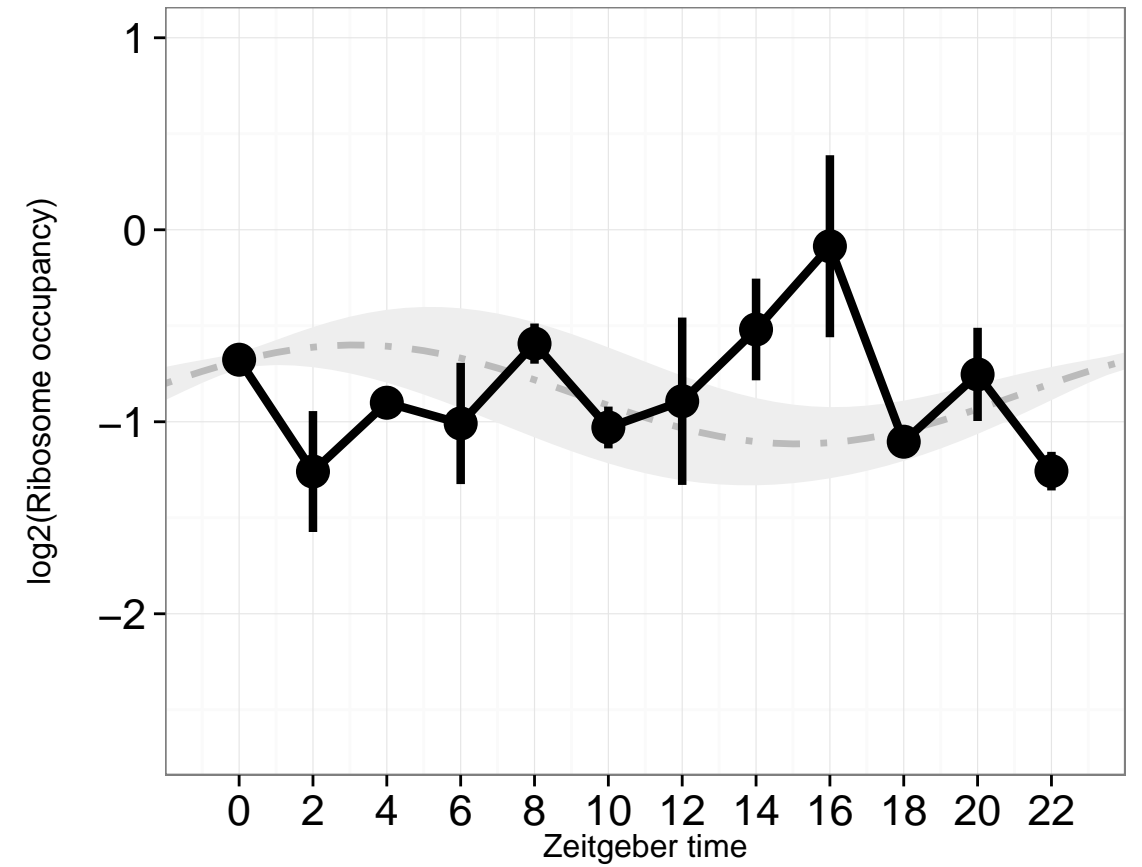

Supplement: SuppDataset_1.zip [file 4931414P19Rik_set_D.pdf › Supplemental Dataset 1/D-mRNA_rhythm_translation_rhyth/4931414P19Rik_set_D.pdf]

## 4932438A13Rik

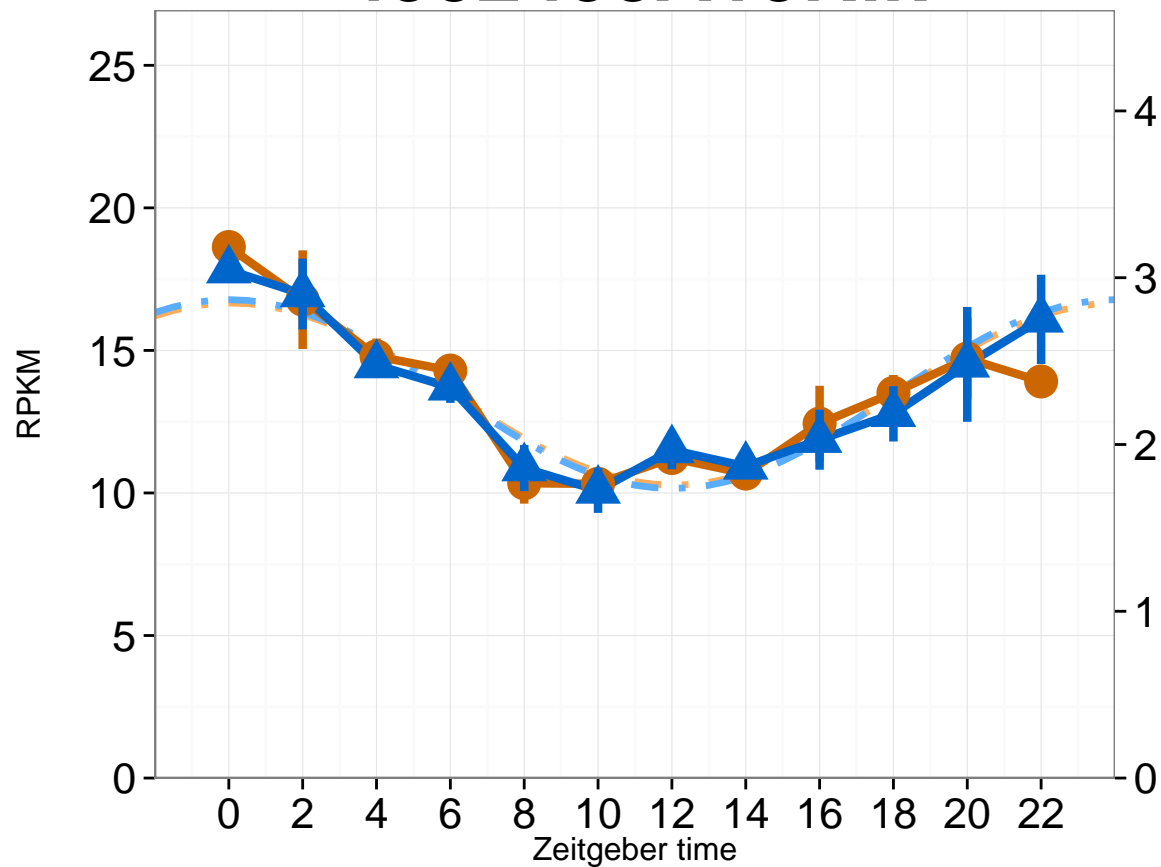

## 4932438A13Rik

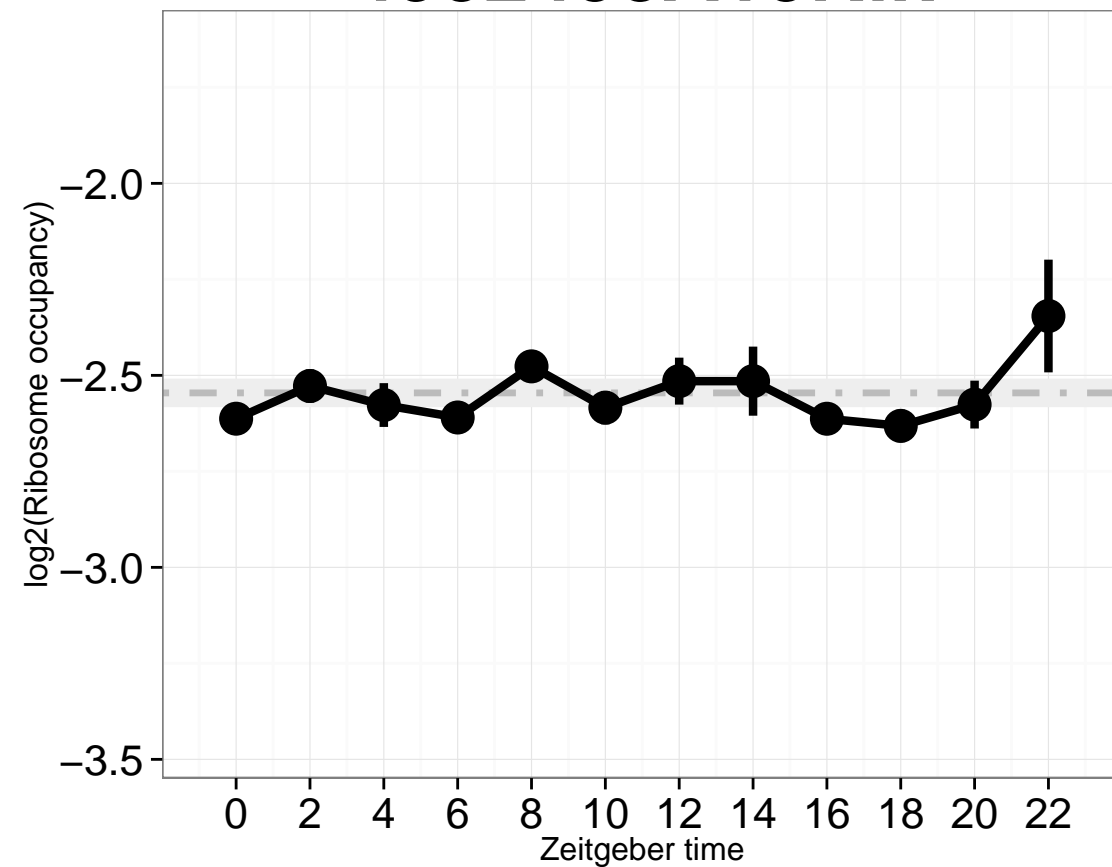

Supplement: SuppDataset_1.zip [file 4932438A13Rik_set_D.pdf › Supplemental Dataset 1/D-mRNA_rhythm_translation_rhyth/4932438A13Rik_set_D.pdf]

# 4933422H20Rik

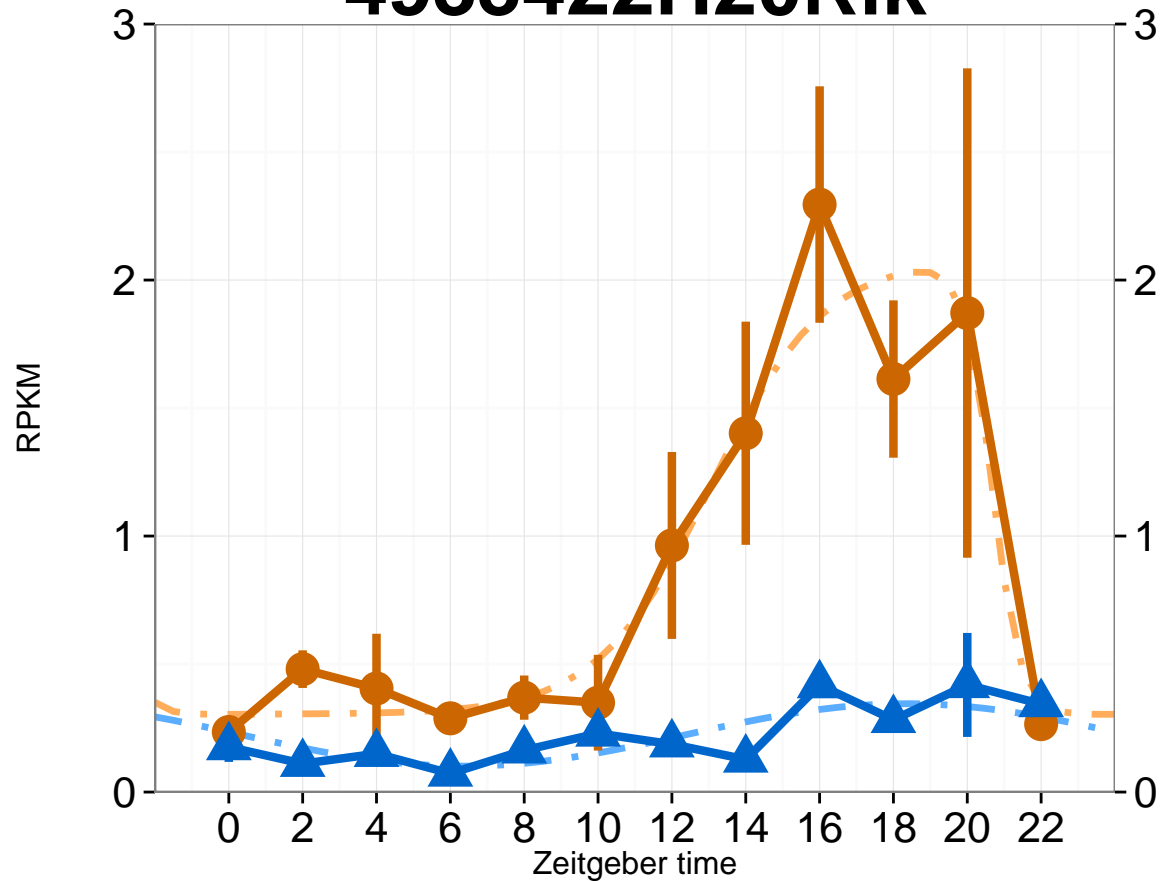

# 4933422H20Rik

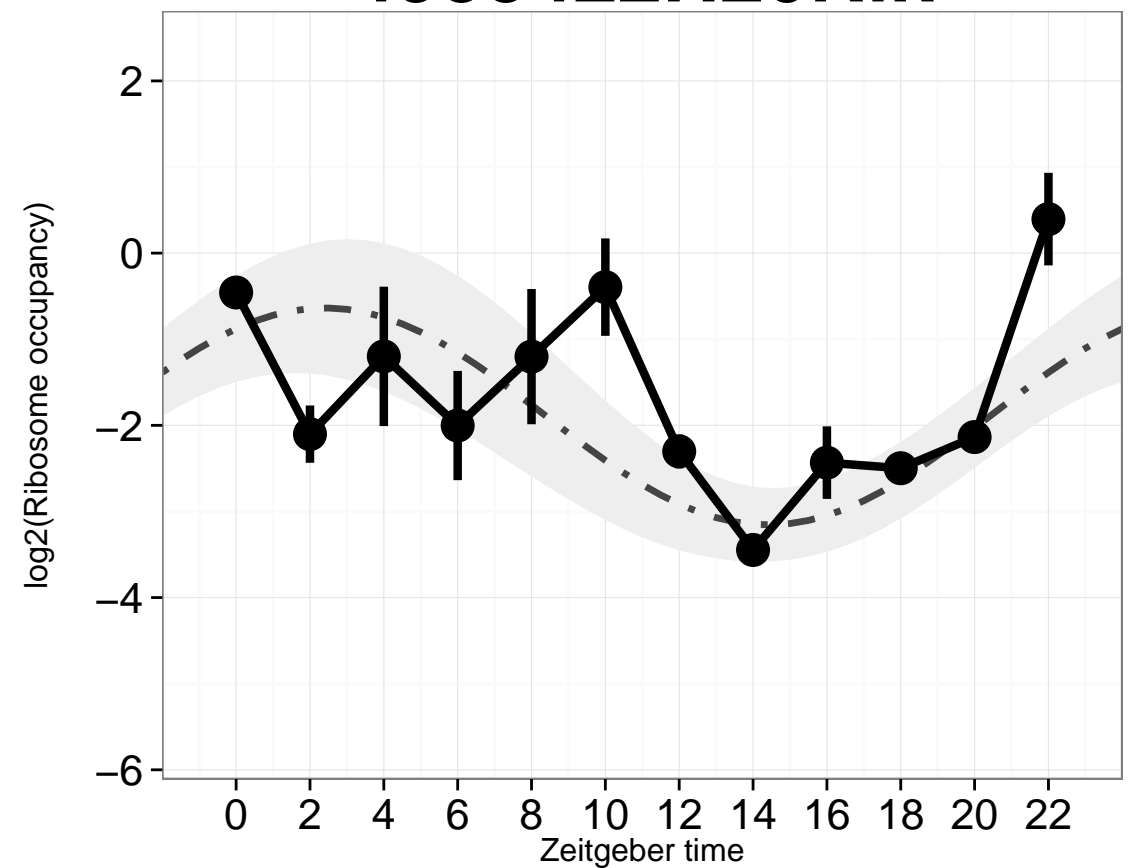

Supplement: SuppDataset_1.zip [file 4933422H20Rik_set_D.pdf › Supplemental Dataset 1/D-mRNA_rhythm_translation_rhyth/4933422H20Rik_set_D.pdf]

# 6430573F11Rik

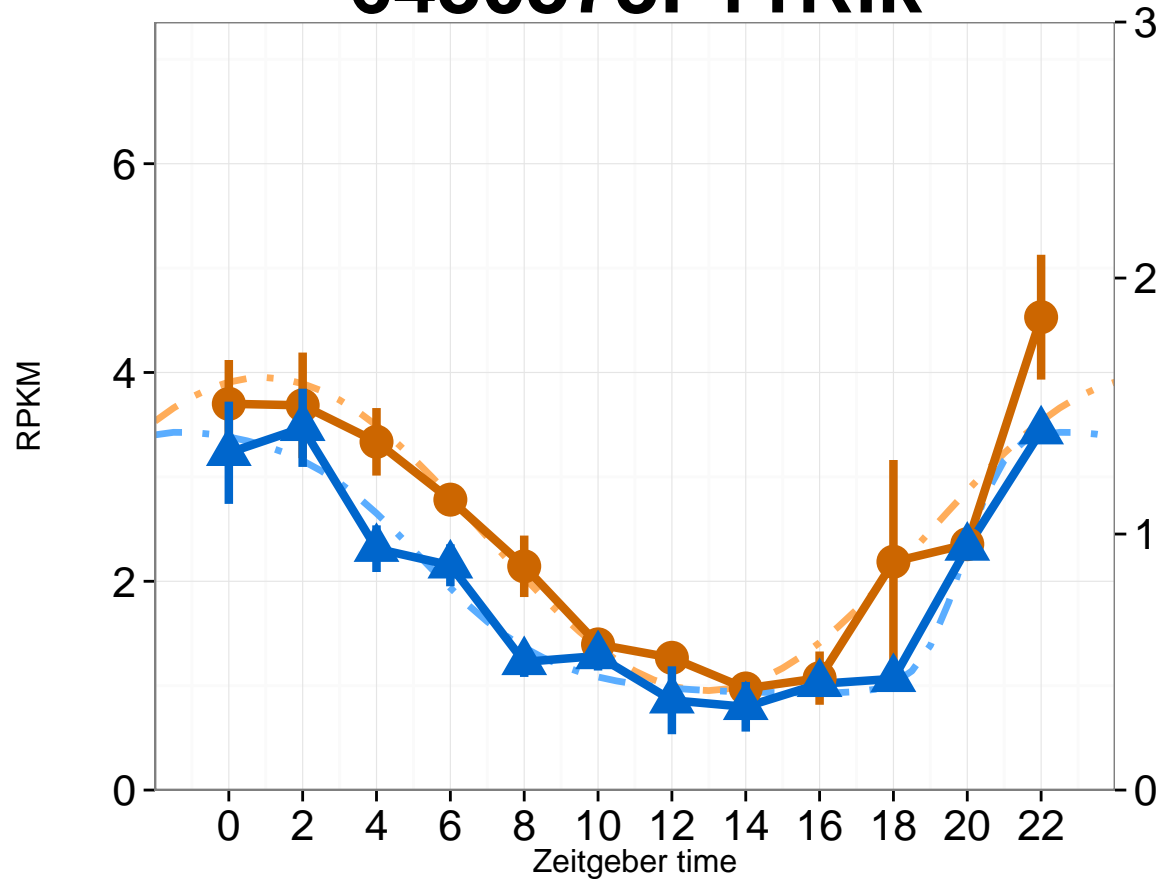

# 6430573F11Rik

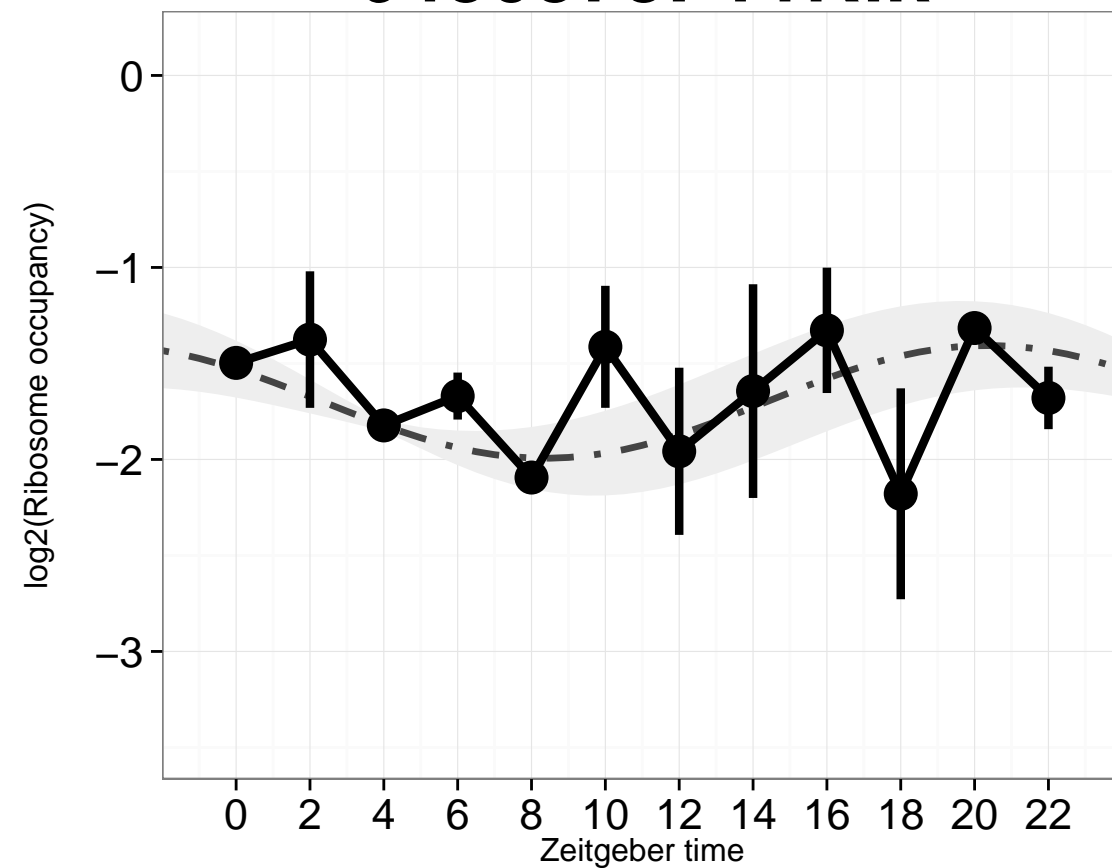

Supplement: SuppDataset_1.zip [file 6430573F11Rik_set_D.pdf › Supplemental Dataset 1/D-mRNA_rhythm_translation_rhyth/6430573F11Rik_set_D.pdf]

**8430419L09Rik**

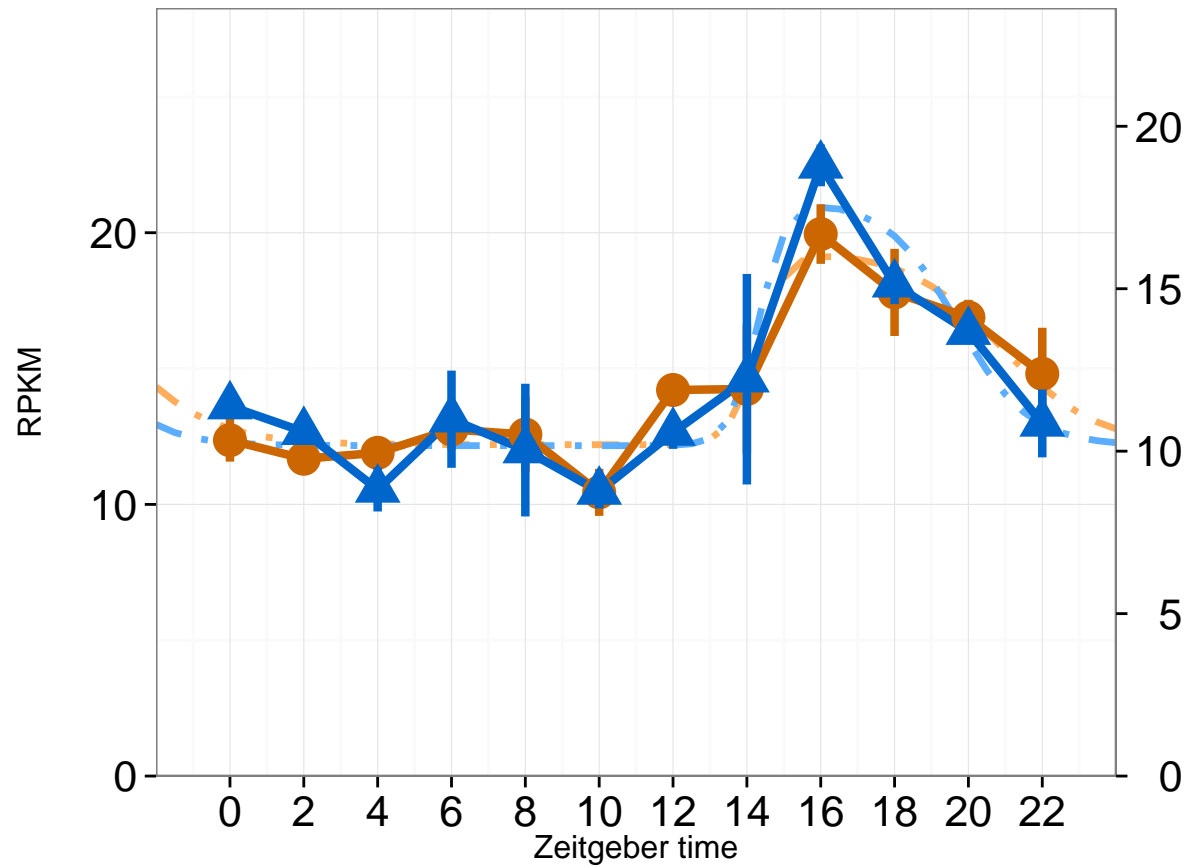

**8430419L09Rik**

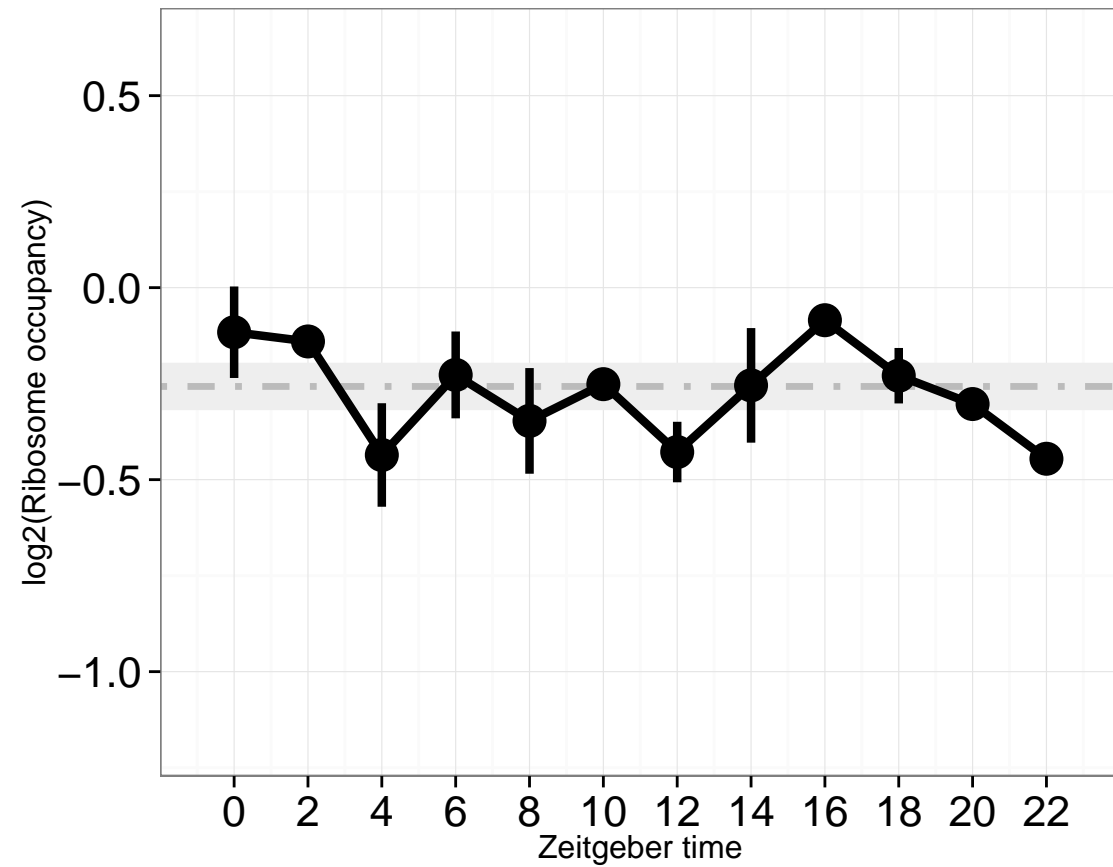

Supplement: SuppDataset_1.zip [file 8430419L09Rik_set_D.pdf › Supplemental Dataset 1/D-mRNA_rhythm_translation_rhyth/8430419L09Rik_set_D.pdf]

## 9430023L20Rik

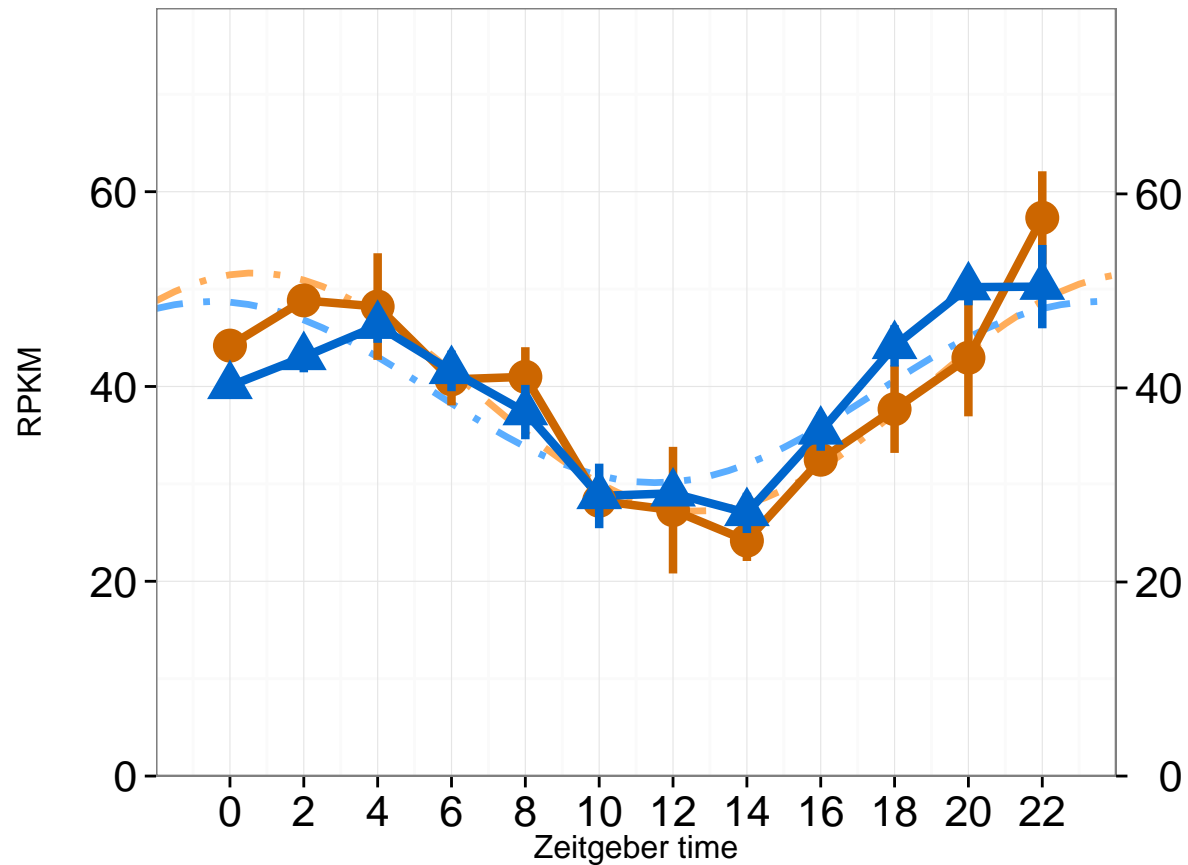

## 9430023L20Rik

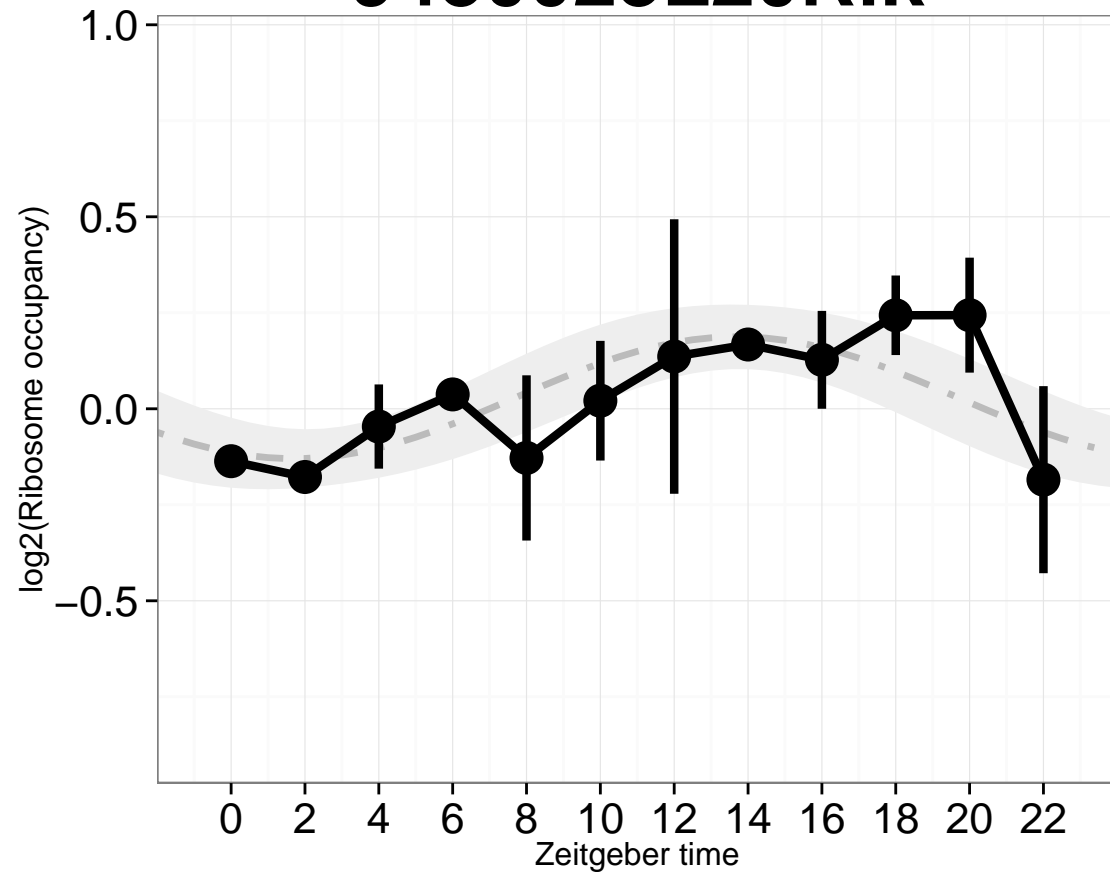

Supplement: SuppDataset_1.zip [file 9430023L20Rik_set_D.pdf › Supplemental Dataset 1/D-mRNA_rhythm_translation_rhyth/9430023L20Rik_set_D.pdf]

# 9630033F20Rik

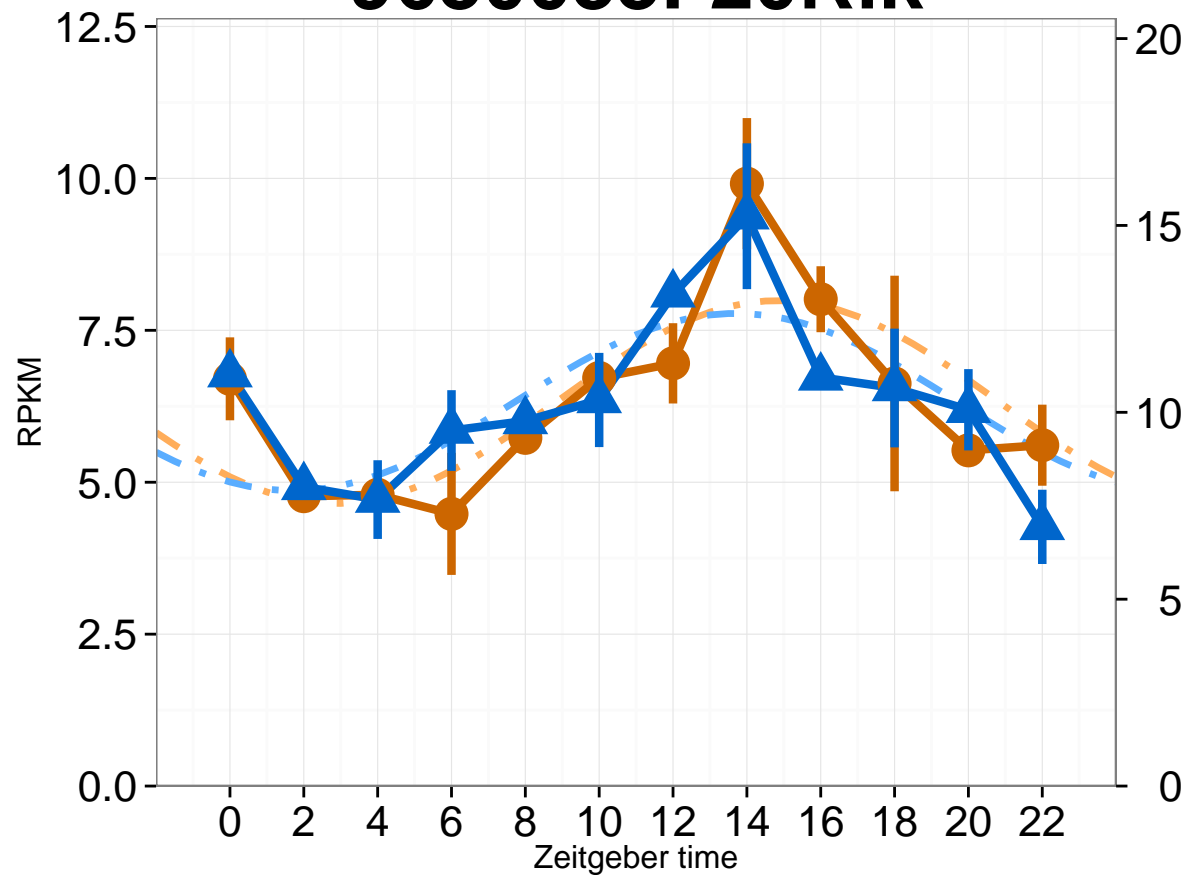

# 9630033F20Rik

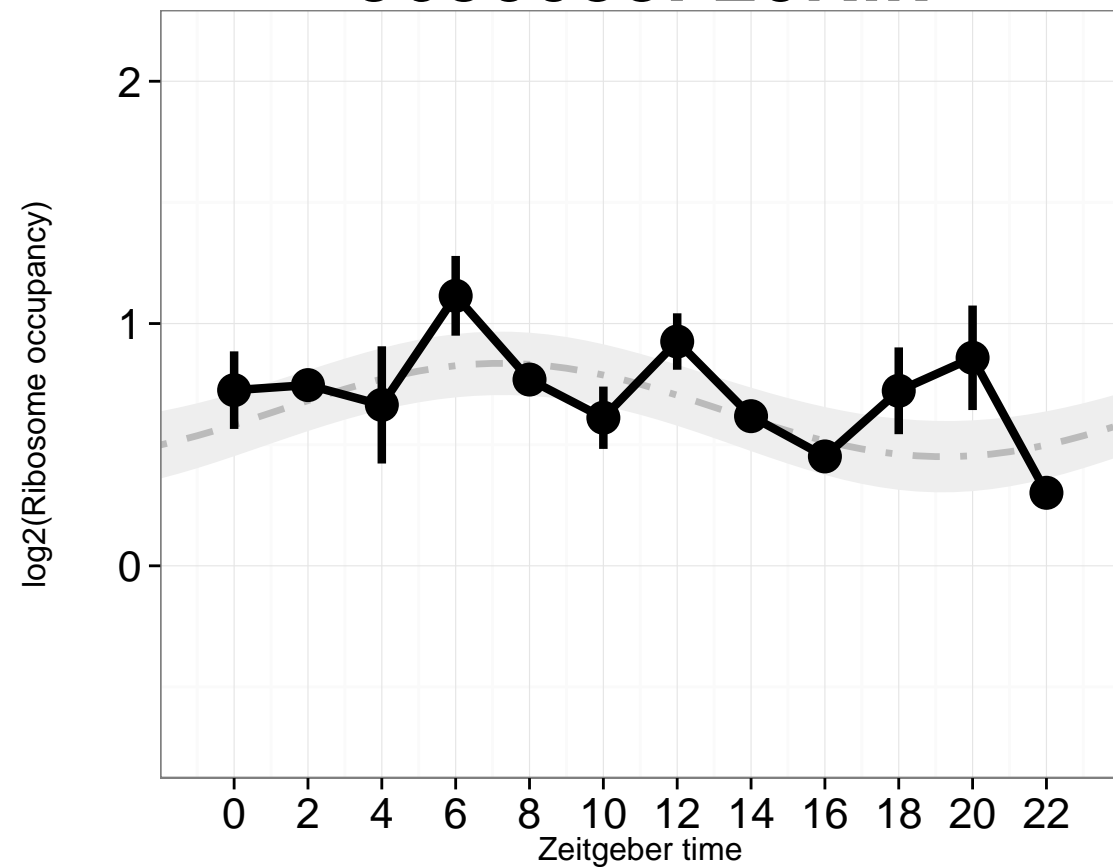

Supplement: SuppDataset_1.zip [file 9630033F20Rik_set_D.pdf › Supplemental Dataset 1/D-mRNA_rhythm_translation_rhyth/9630033F20Rik_set_D.pdf]

## A230050P20Rik

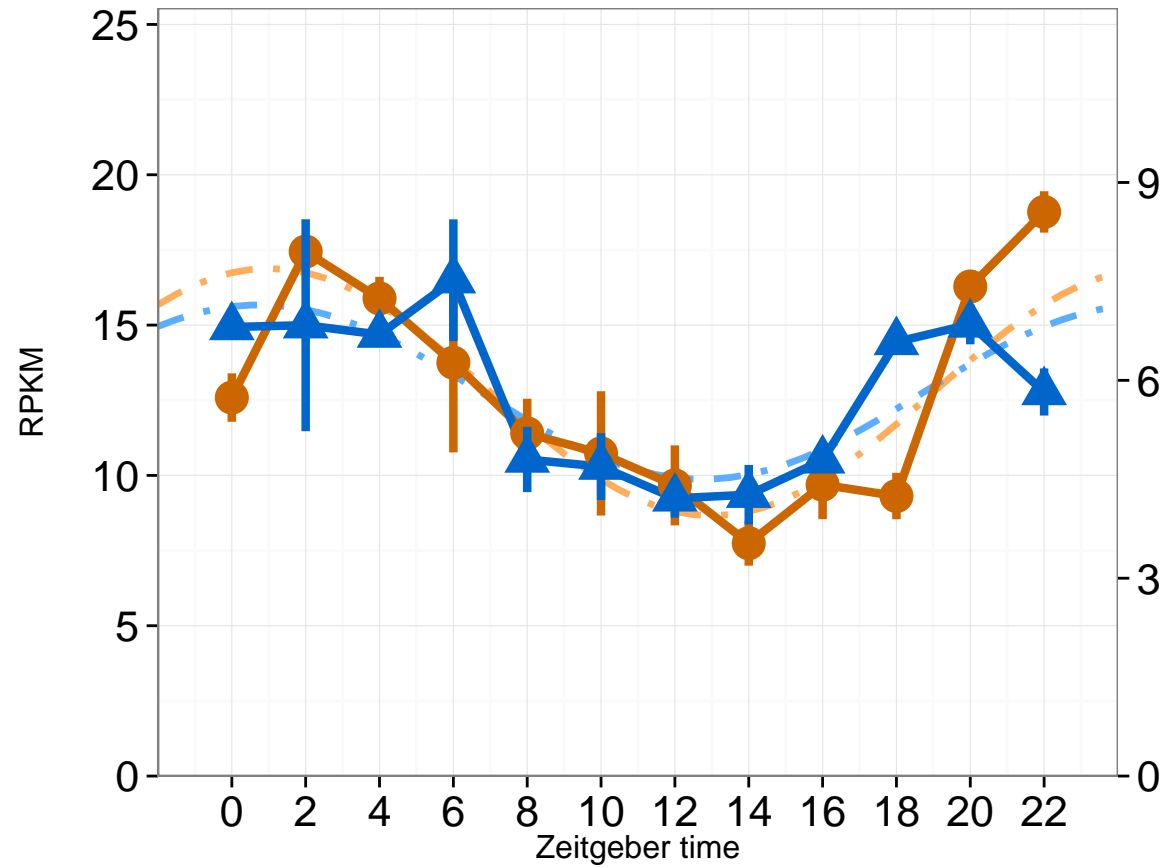

## A230050P20Rik

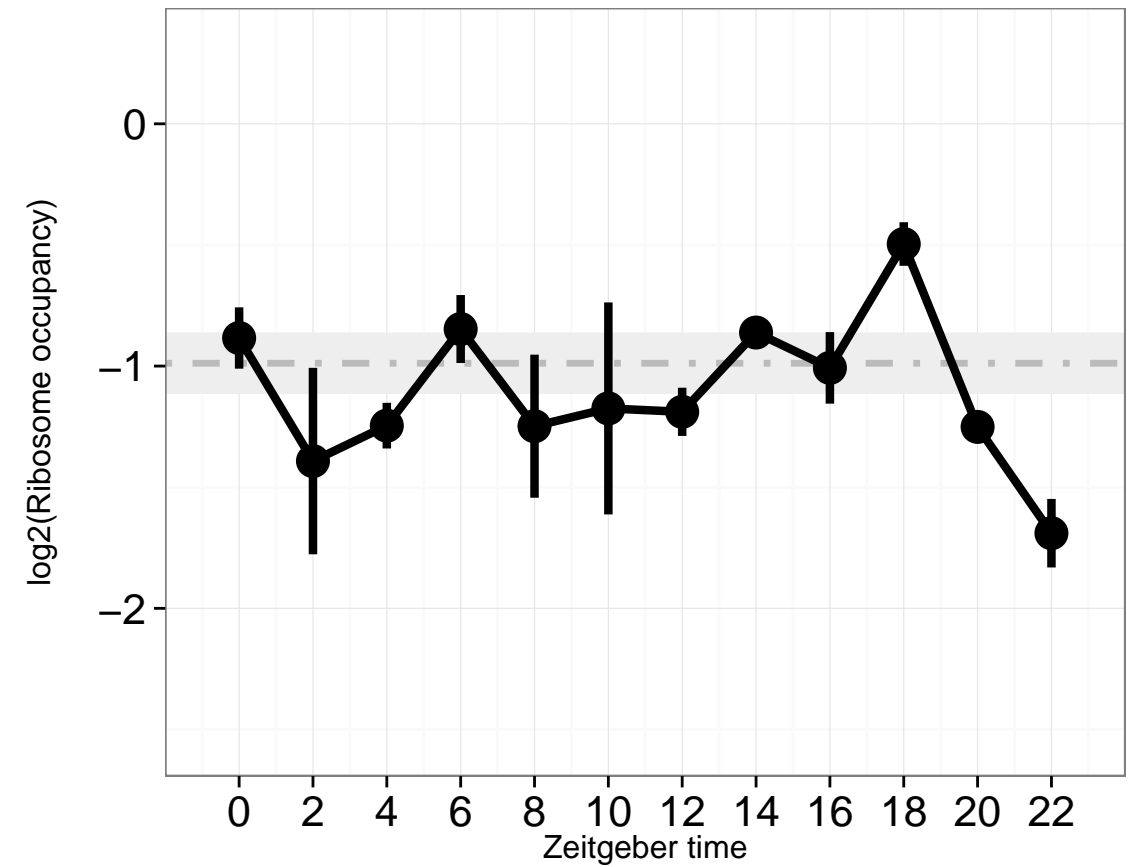

Supplement: SuppDataset_1.zip [file A230050P20Rik_set_D.pdf › Supplemental Dataset 1/D-mRNA_rhythm_translation_rhyth/A230050P20Rik_set_D.pdf]

## AA986860

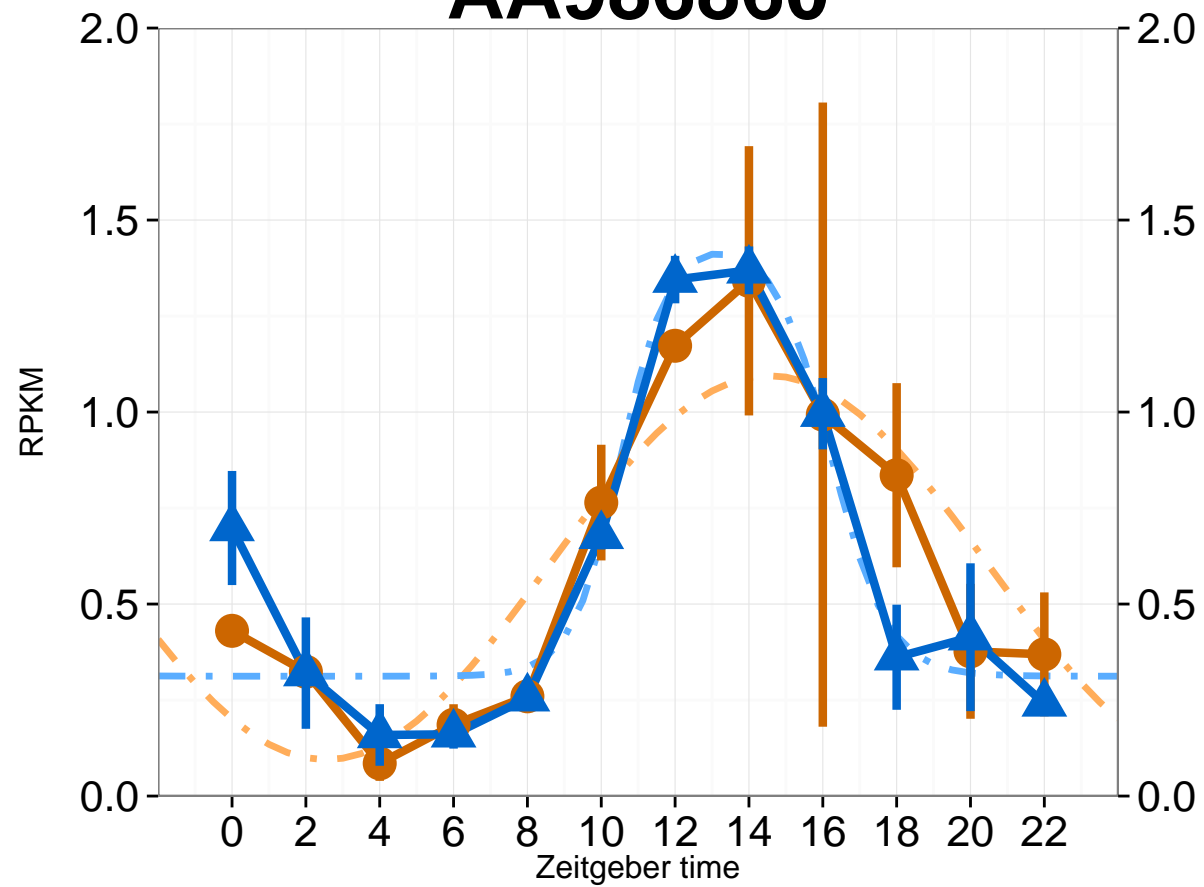

## AA986860

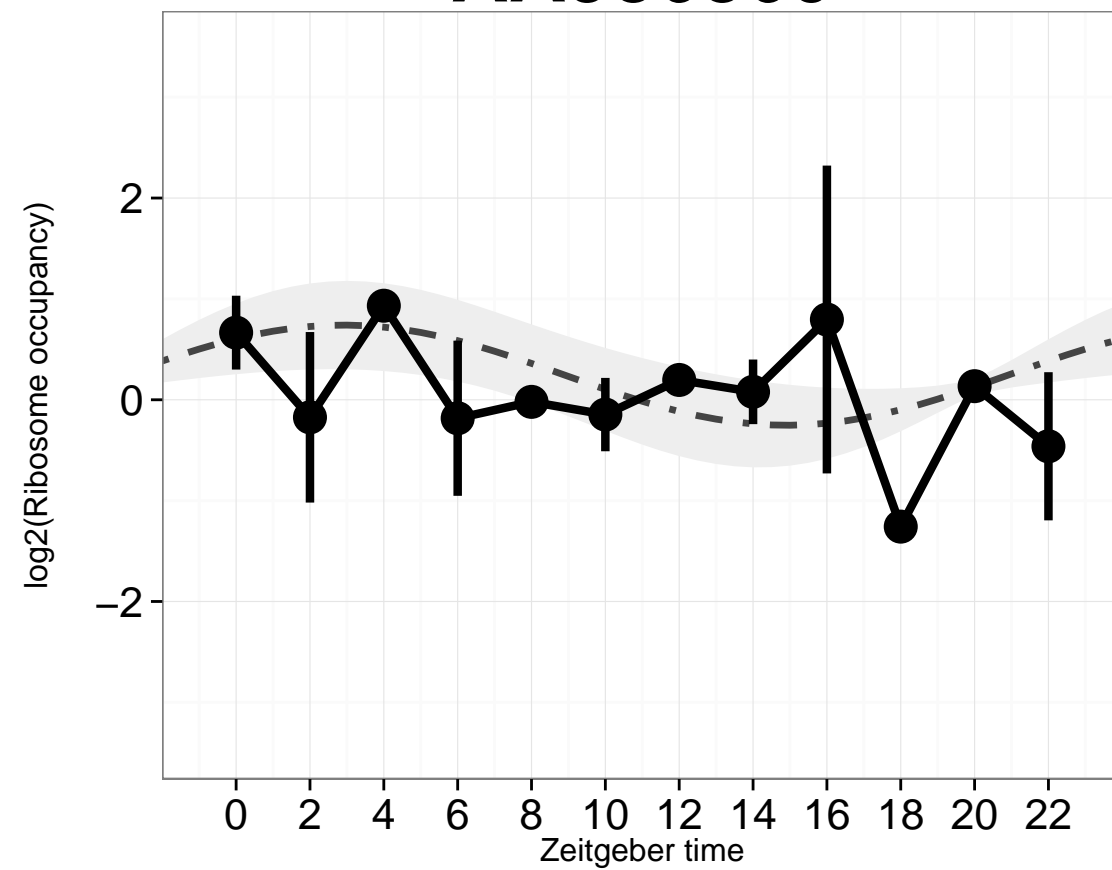

Supplement: SuppDataset_1.zip [file AA986860_set_D.pdf › Supplemental Dataset 1/D-mRNA_rhythm_translation_rhyth/AA986860_set_D.pdf]
