# Supplementary figures and images for: Ribosome profiling reveals the rhythmic liver translatome and circadian clock regulation by upstream open reading frames (part 94 of 113)
Source: HighWire-hosted journal article supplement (doi:10.1101/gr.195404.115), 2015-10-20

## Tor4a

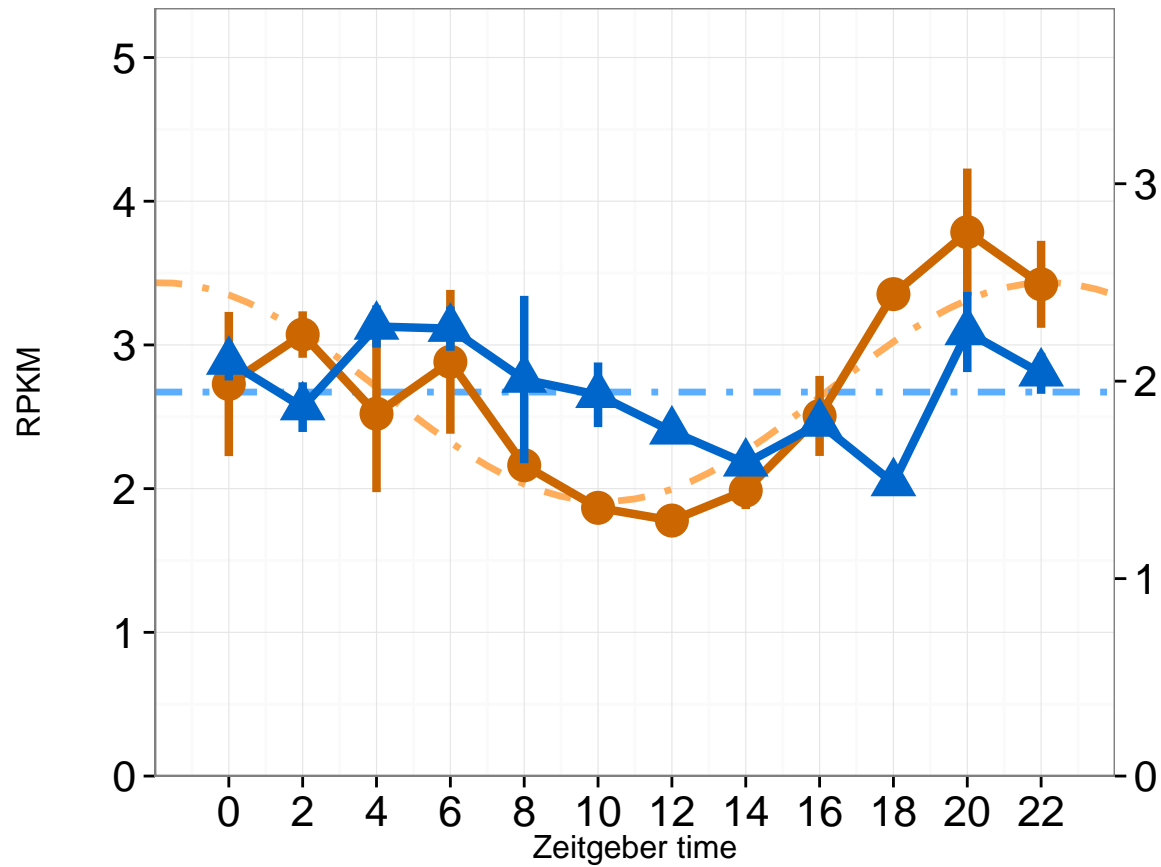

## Tor4a

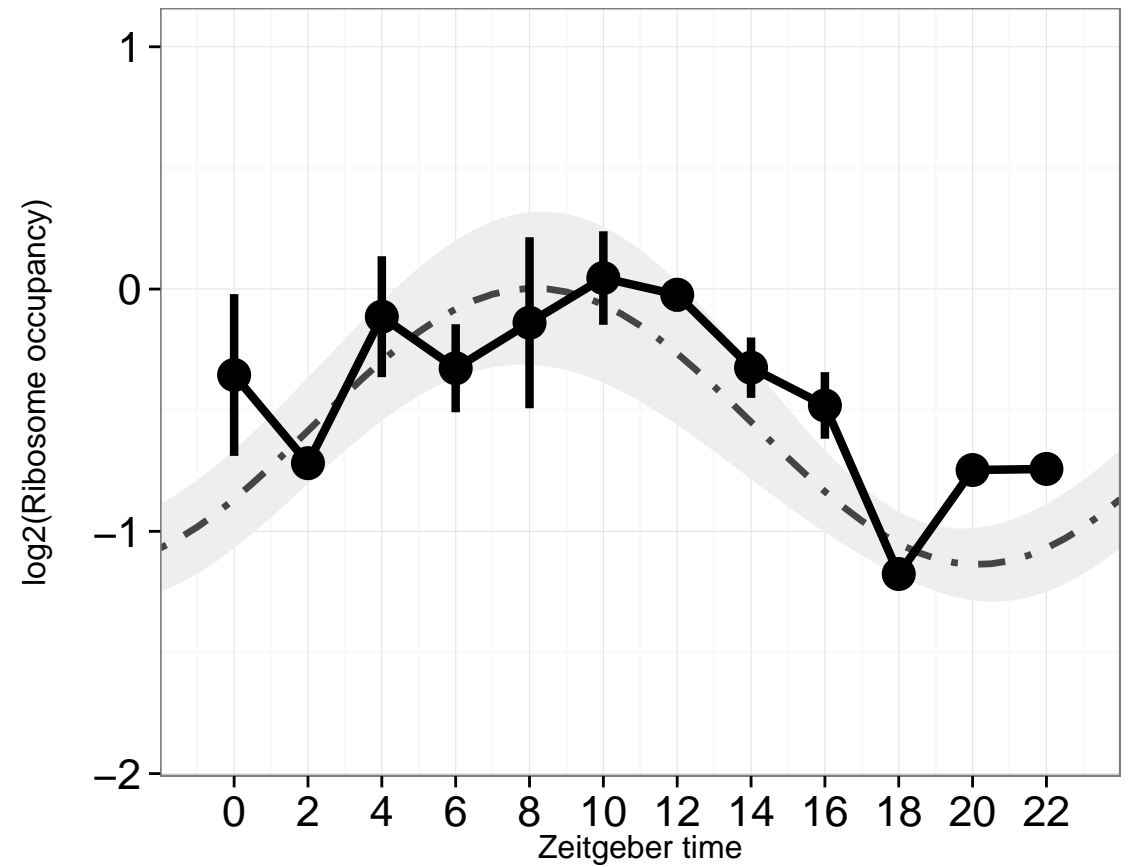

Supplement: SuppDataset_1.zip [file Tor4a_set_B.pdf › Supplemental Dataset 1/B-mRNA_rhythm_translation_nonrhyth/Tor4a_set_B.pdf]

# Tpgs2

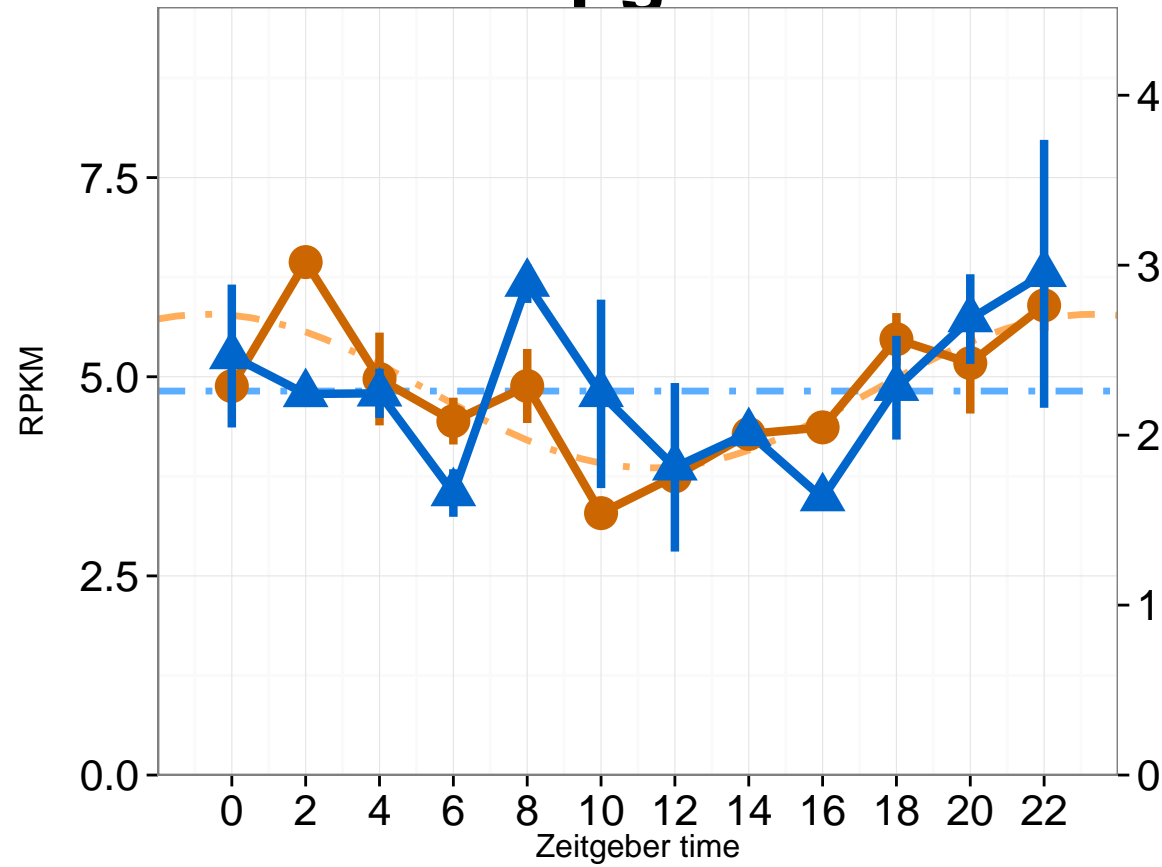

# Tpgs2

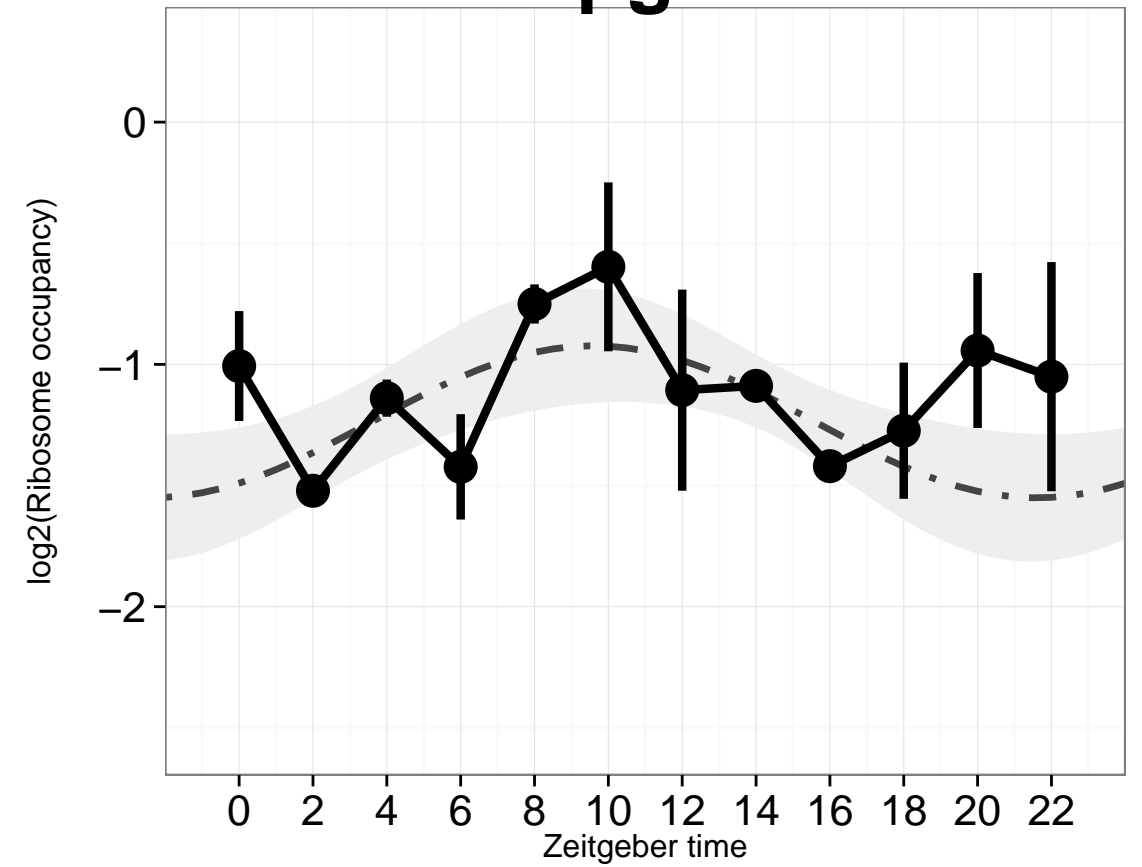

Supplement: SuppDataset_1.zip [file Tpgs2_set_B.pdf › Supplemental Dataset 1/B-mRNA_rhythm_translation_nonrhyth/Tpgs2_set_B.pdf]

## Tpra1

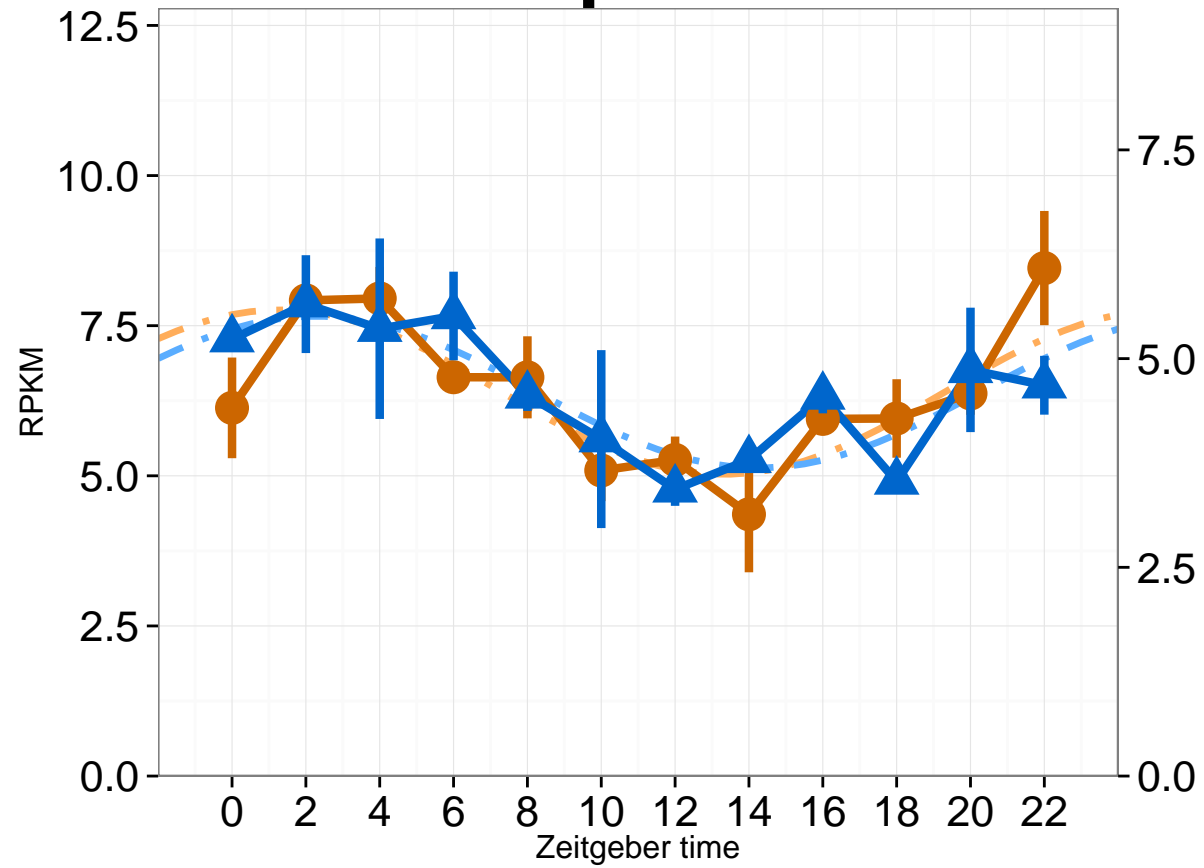

## Tpra1

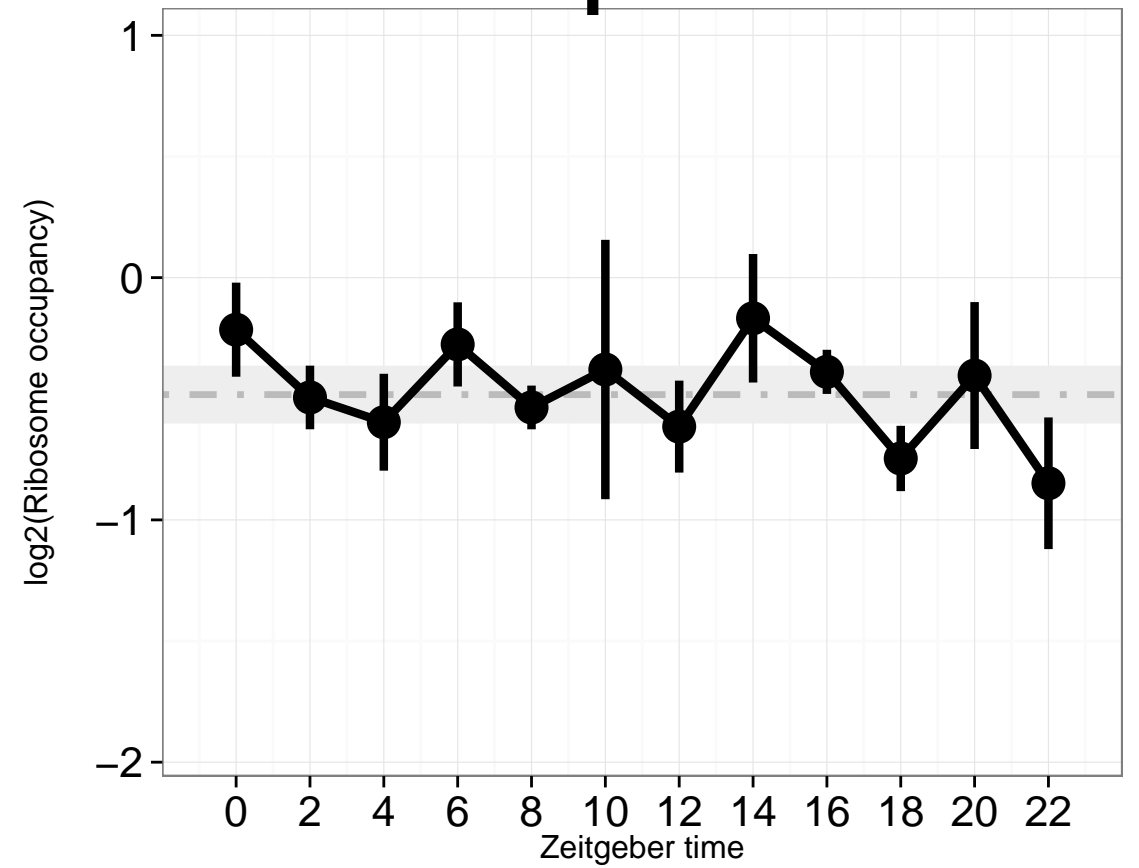

Supplement: SuppDataset_1.zip [file Tpra1_set_B.pdf › Supplemental Dataset 1/B-mRNA_rhythm_translation_nonrhyth/Tpra1_set_B.pdf]

# Trim12a

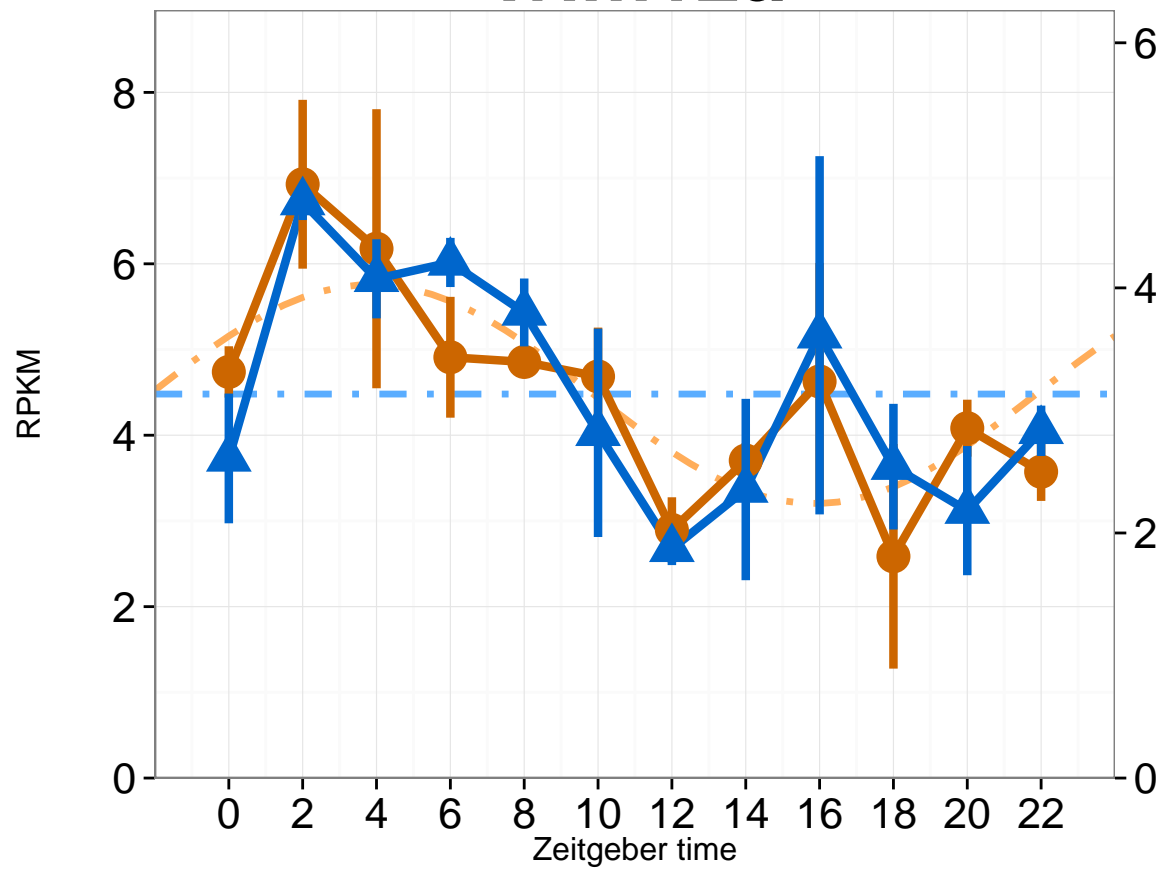

# Trim12a

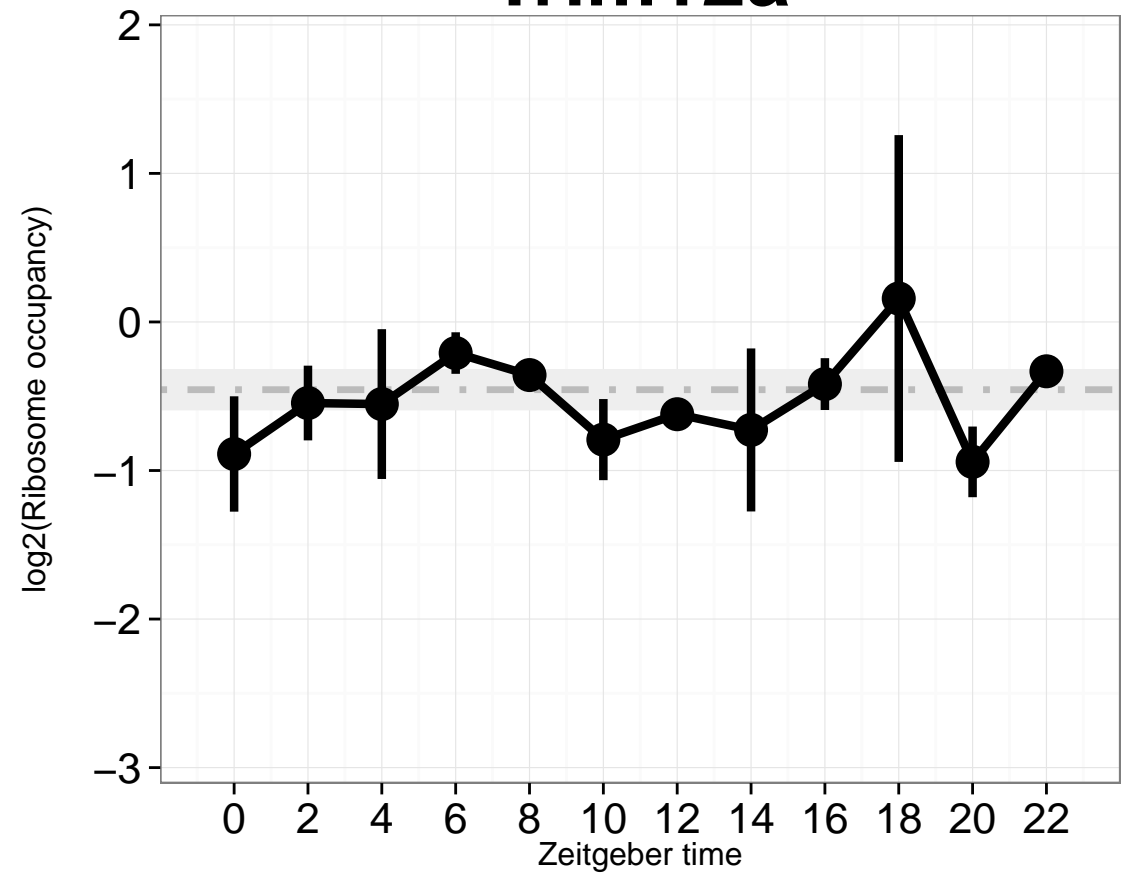

Supplement: SuppDataset_1.zip [file Trim12a_set_B.pdf › Supplemental Dataset 1/B-mRNA_rhythm_translation_nonrhyth/Trim12a_set_B.pdf]

# Trim13

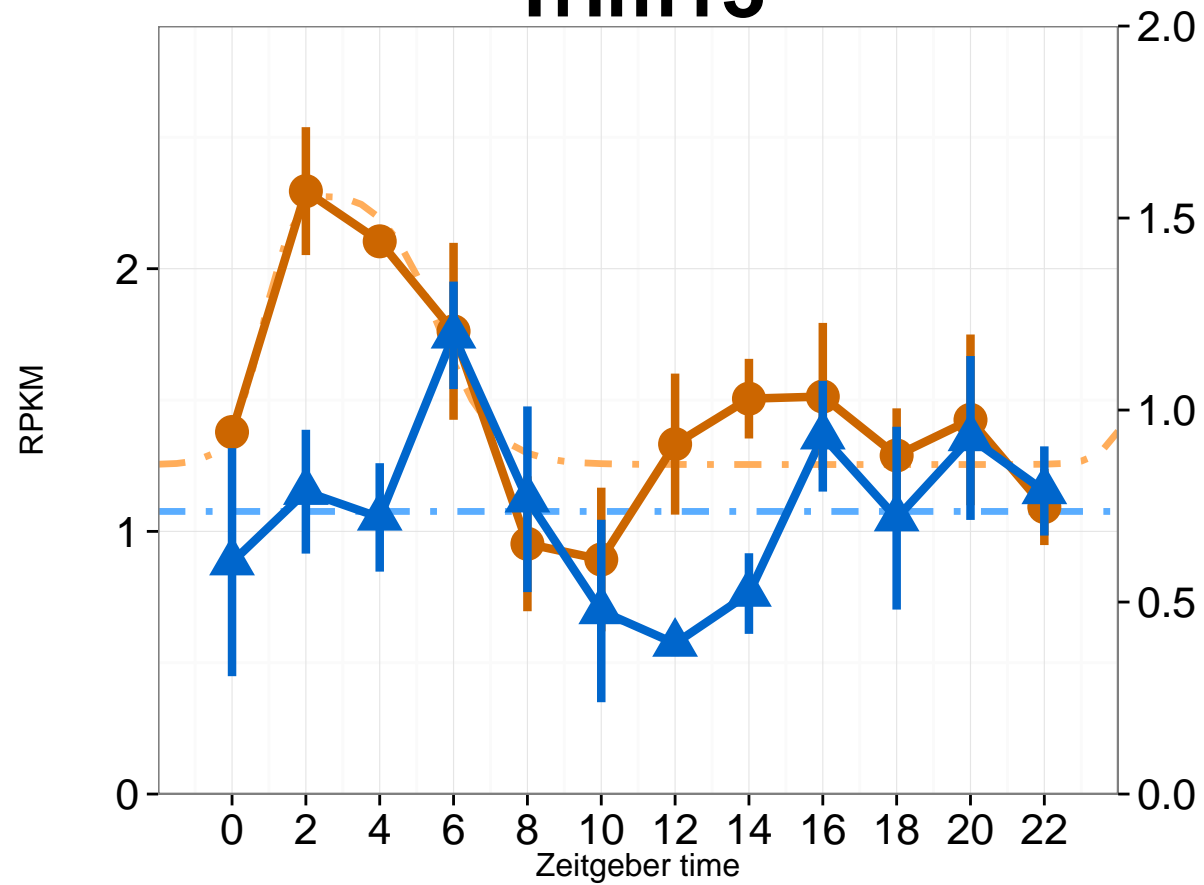

# Trim13

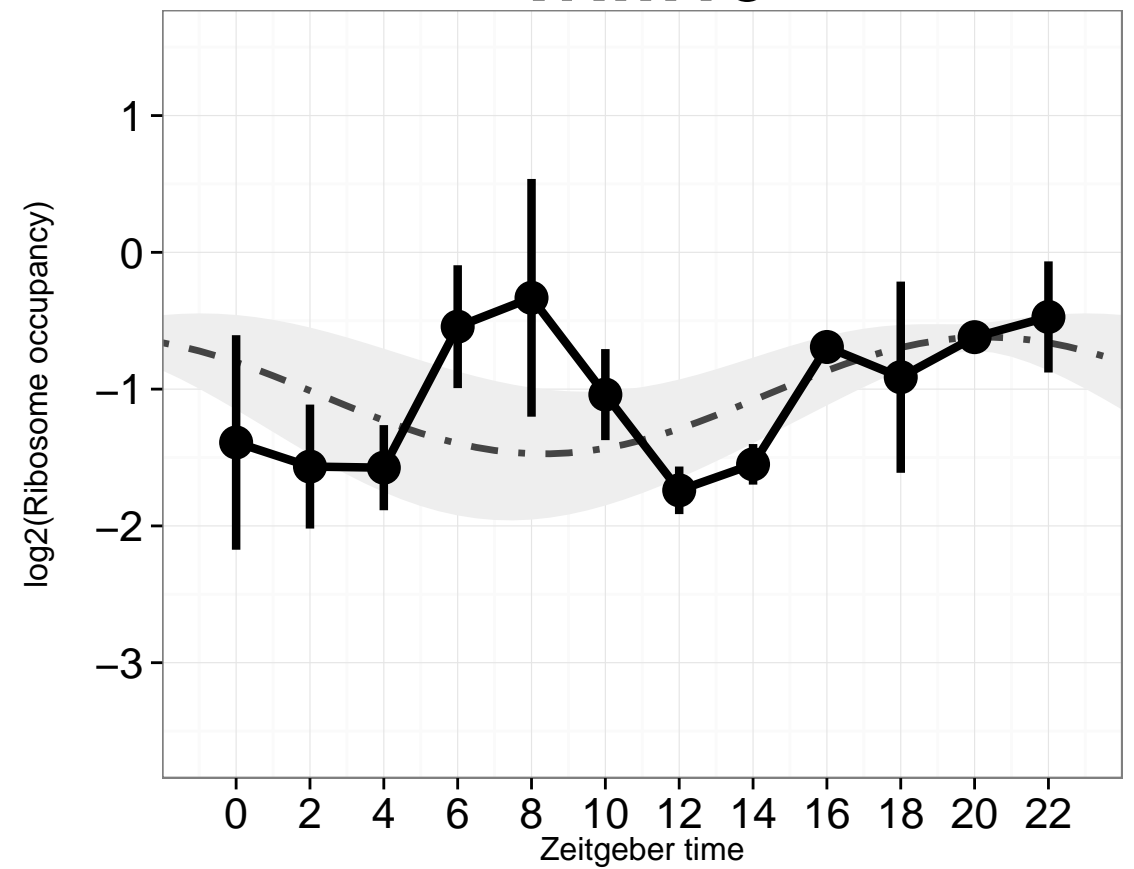

Supplement: SuppDataset_1.zip [file Trim13_set_B.pdf › Supplemental Dataset 1/B-mRNA_rhythm_translation_nonrhyth/Trim13_set_B.pdf]

# Trim44

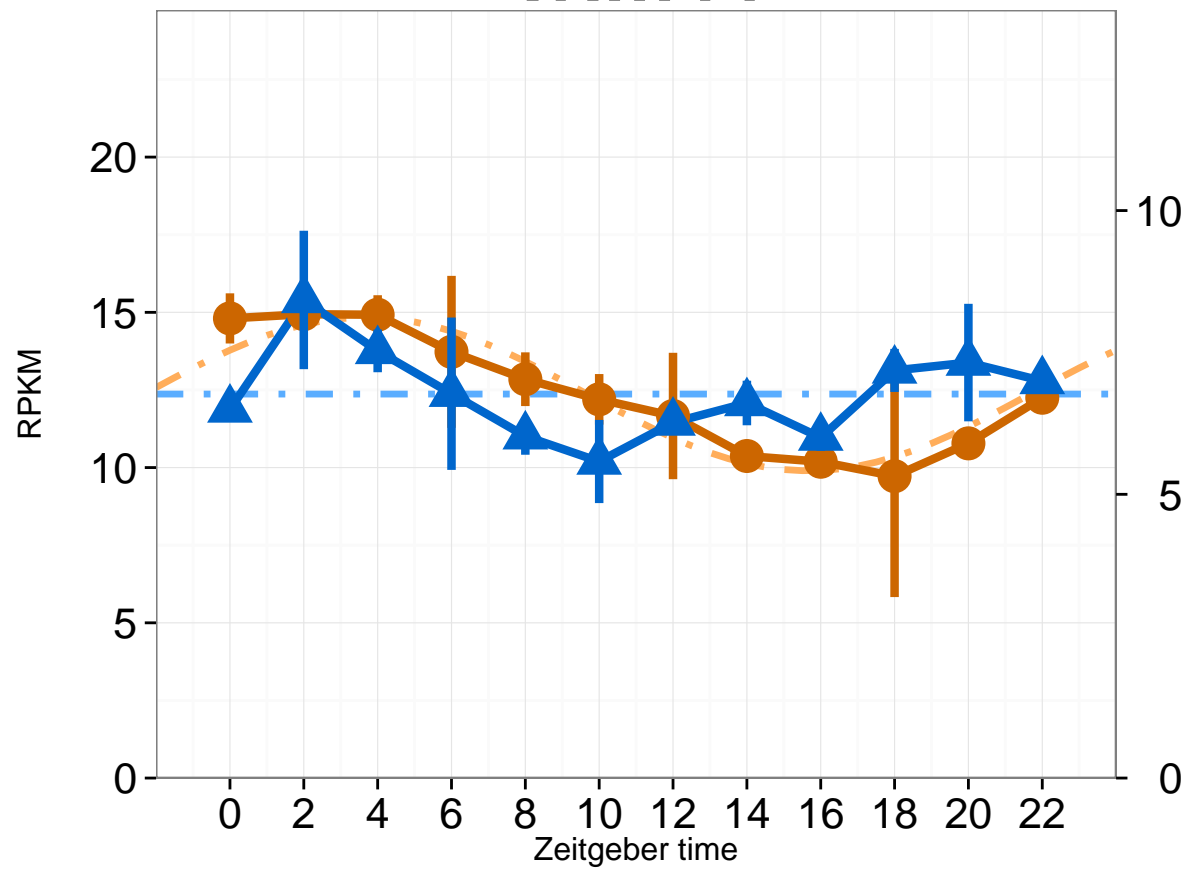

# Trim44

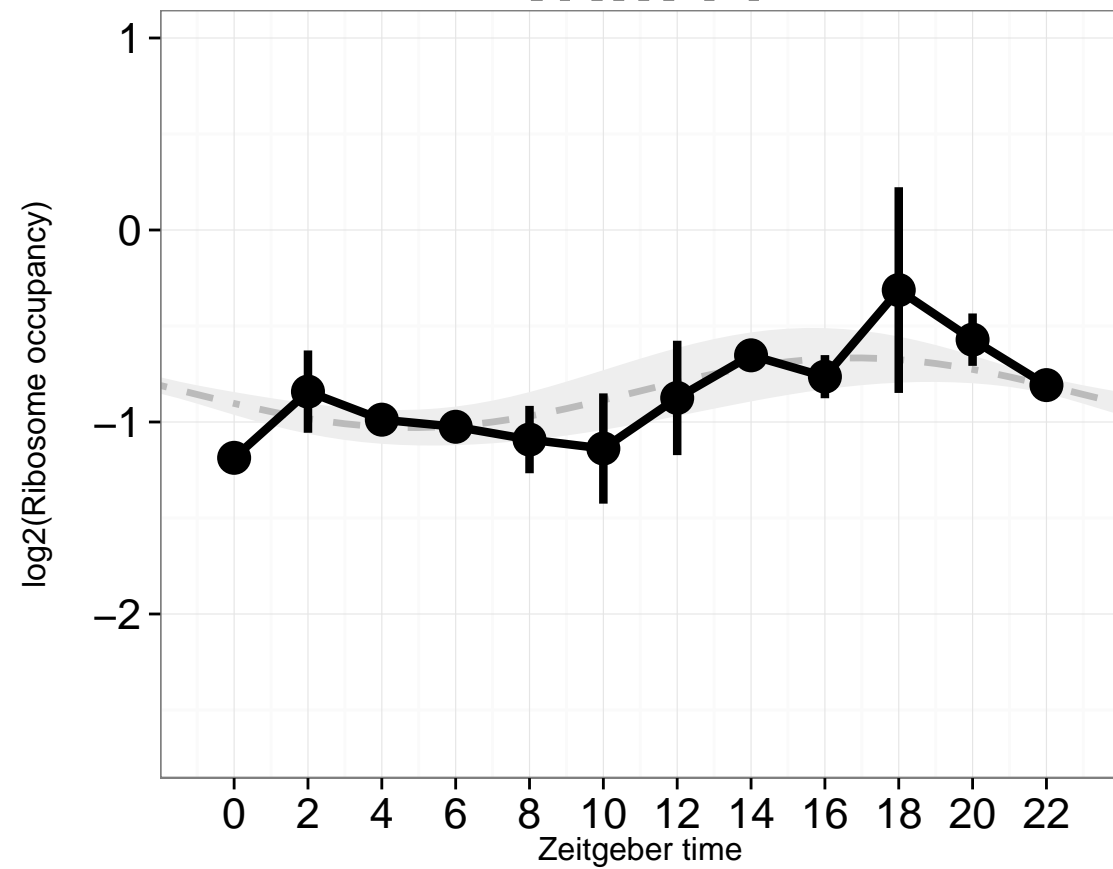

Supplement: SuppDataset_1.zip [file Trim44_set_B.pdf › Supplemental Dataset 1/B-mRNA_rhythm_translation_nonrhyth/Trim44_set_B.pdf]

# Trim56

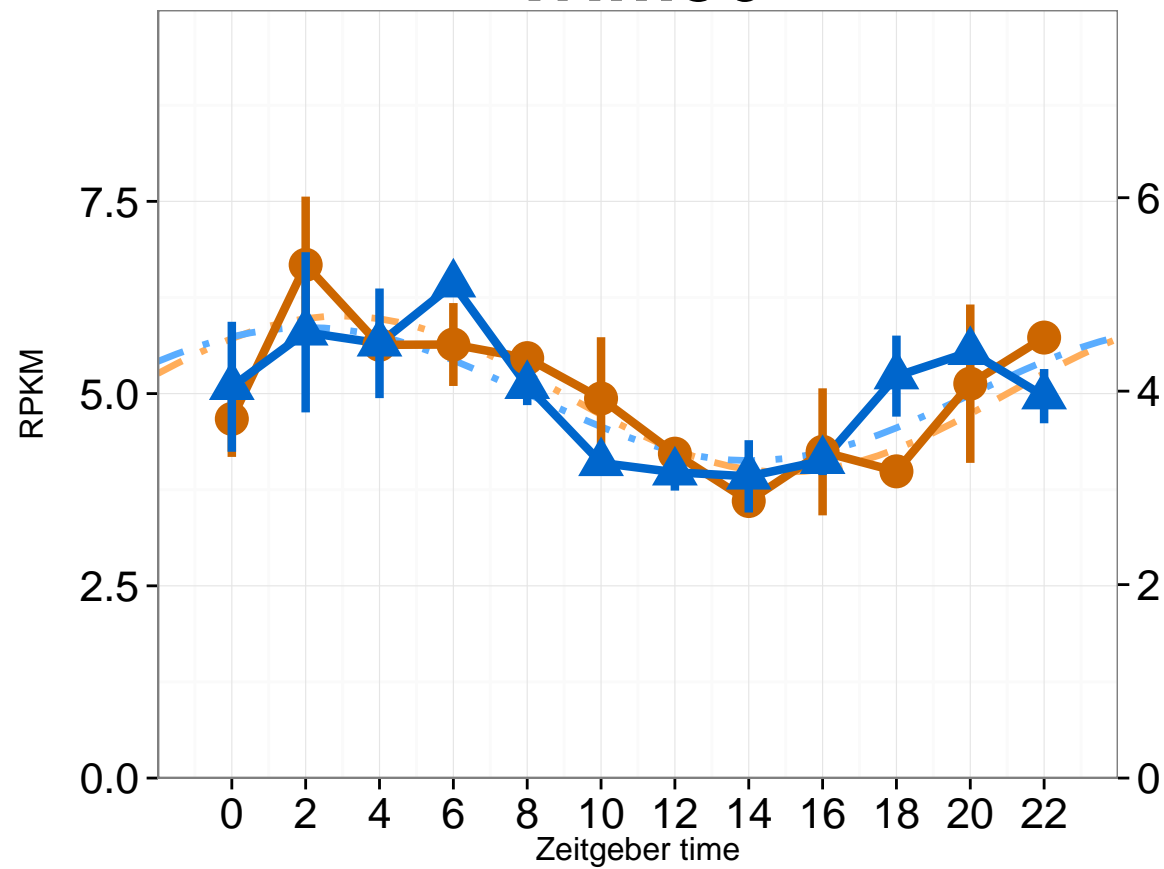

# Trim56

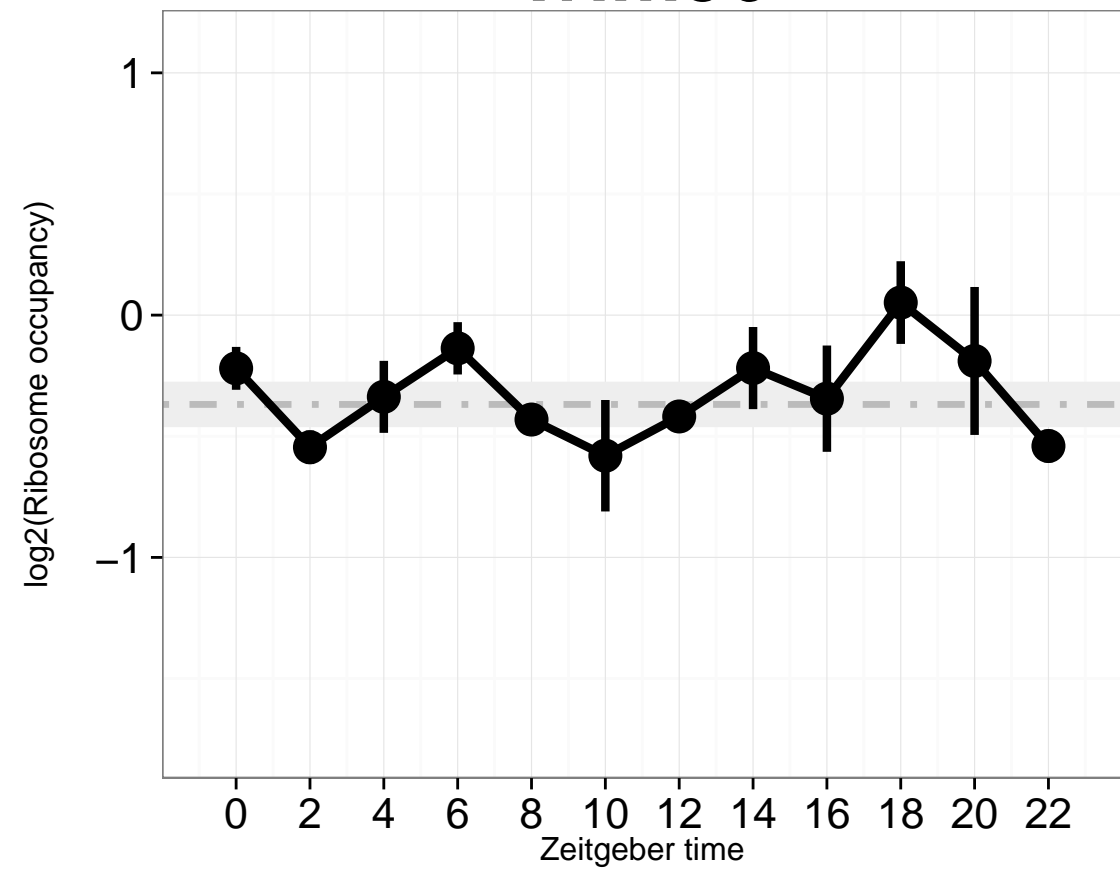

Supplement: SuppDataset_1.zip [file Trim56_set_B.pdf › Supplemental Dataset 1/B-mRNA_rhythm_translation_nonrhyth/Trim56_set_B.pdf]

# Trove2

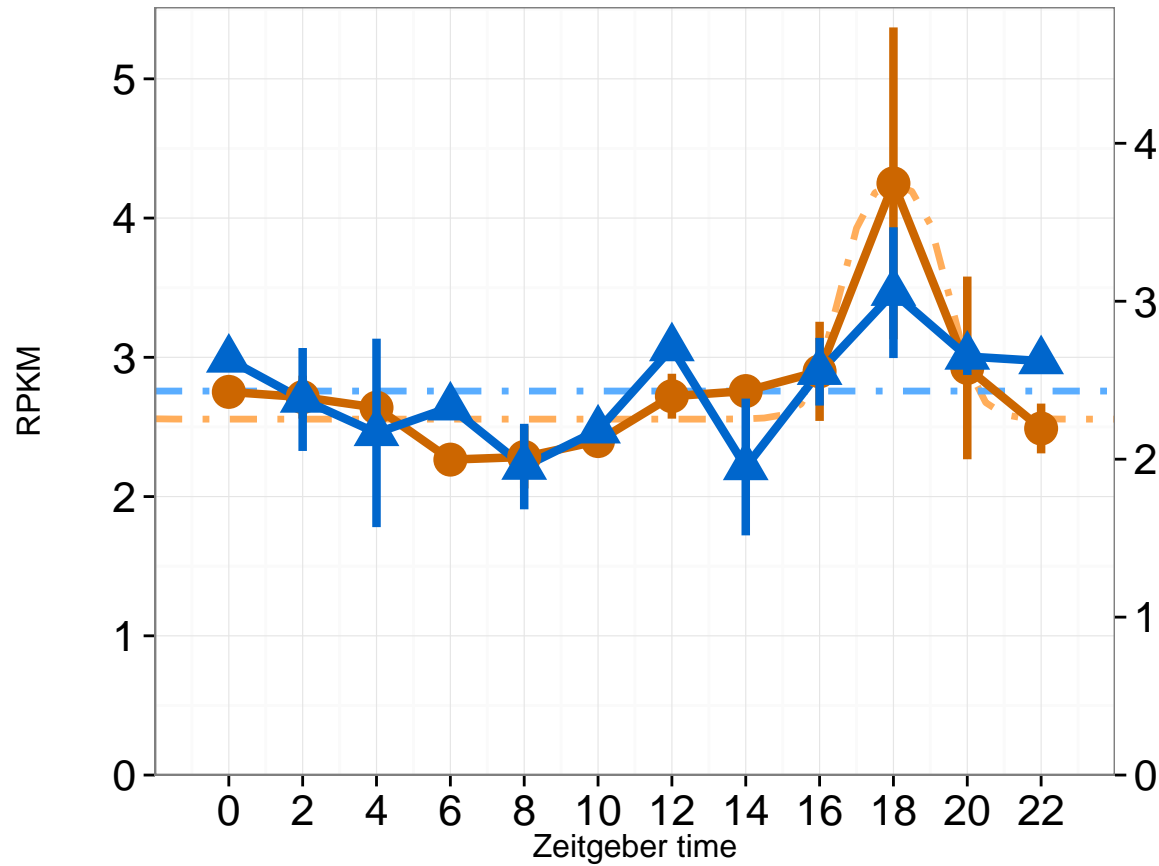

# Trove2

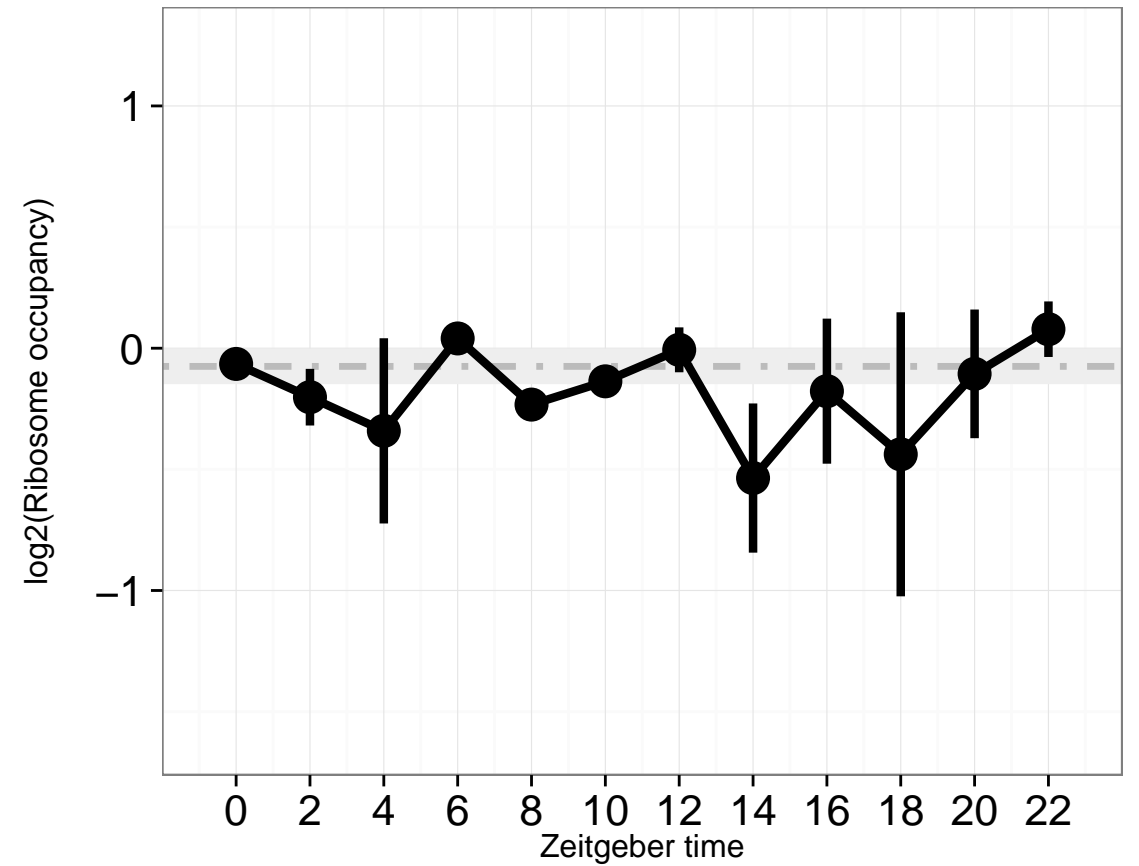

Supplement: SuppDataset_1.zip [file Trove2_set_B.pdf › Supplemental Dataset 1/B-mRNA_rhythm_translation_nonrhyth/Trove2_set_B.pdf]

# Trpm7

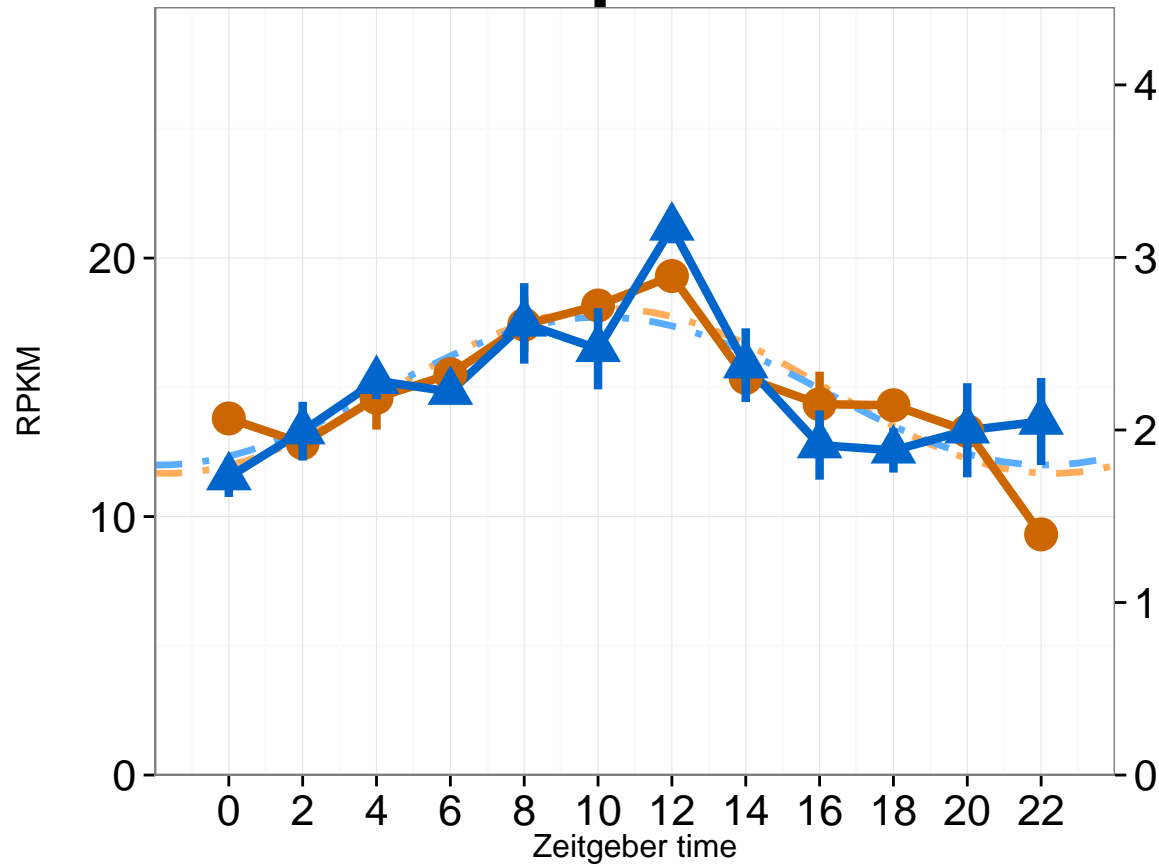

# Trpm7

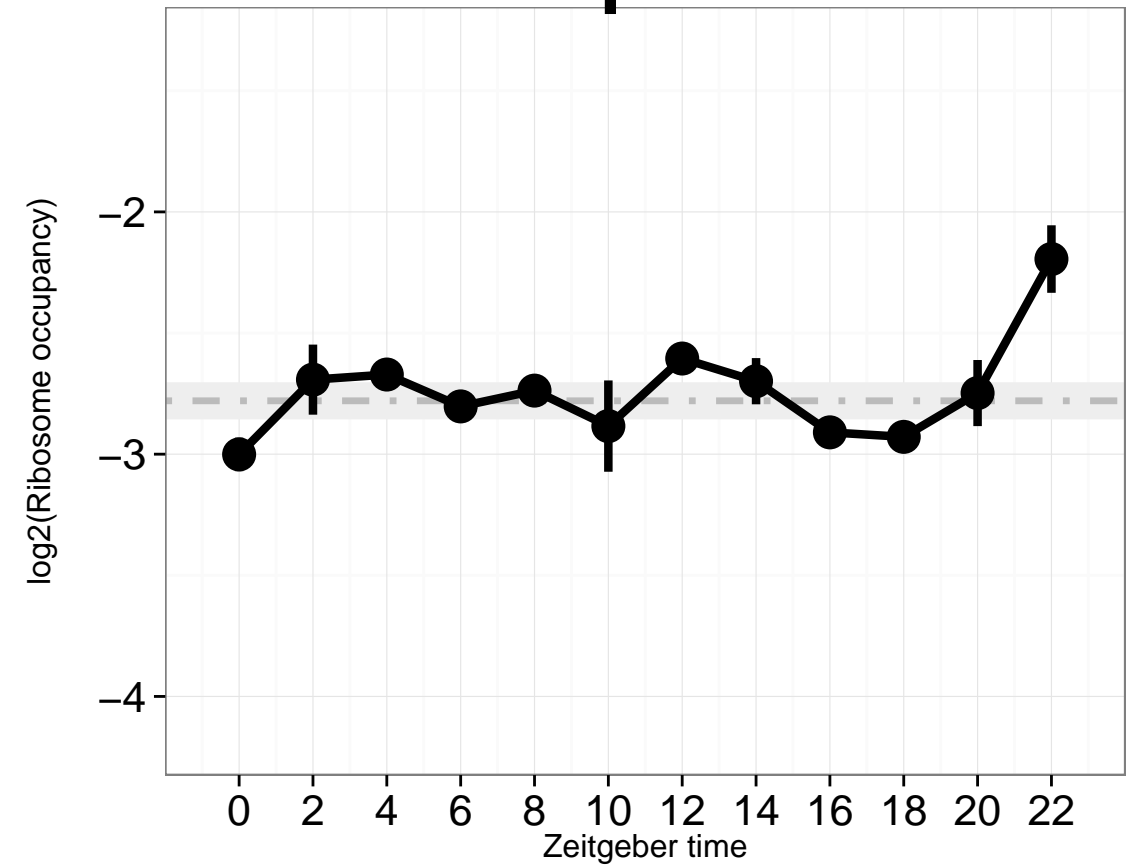

Supplement: SuppDataset_1.zip [file Trpm7_set_B.pdf › Supplemental Dataset 1/B-mRNA_rhythm_translation_nonrhyth/Trpm7_set_B.pdf]

# Trps1

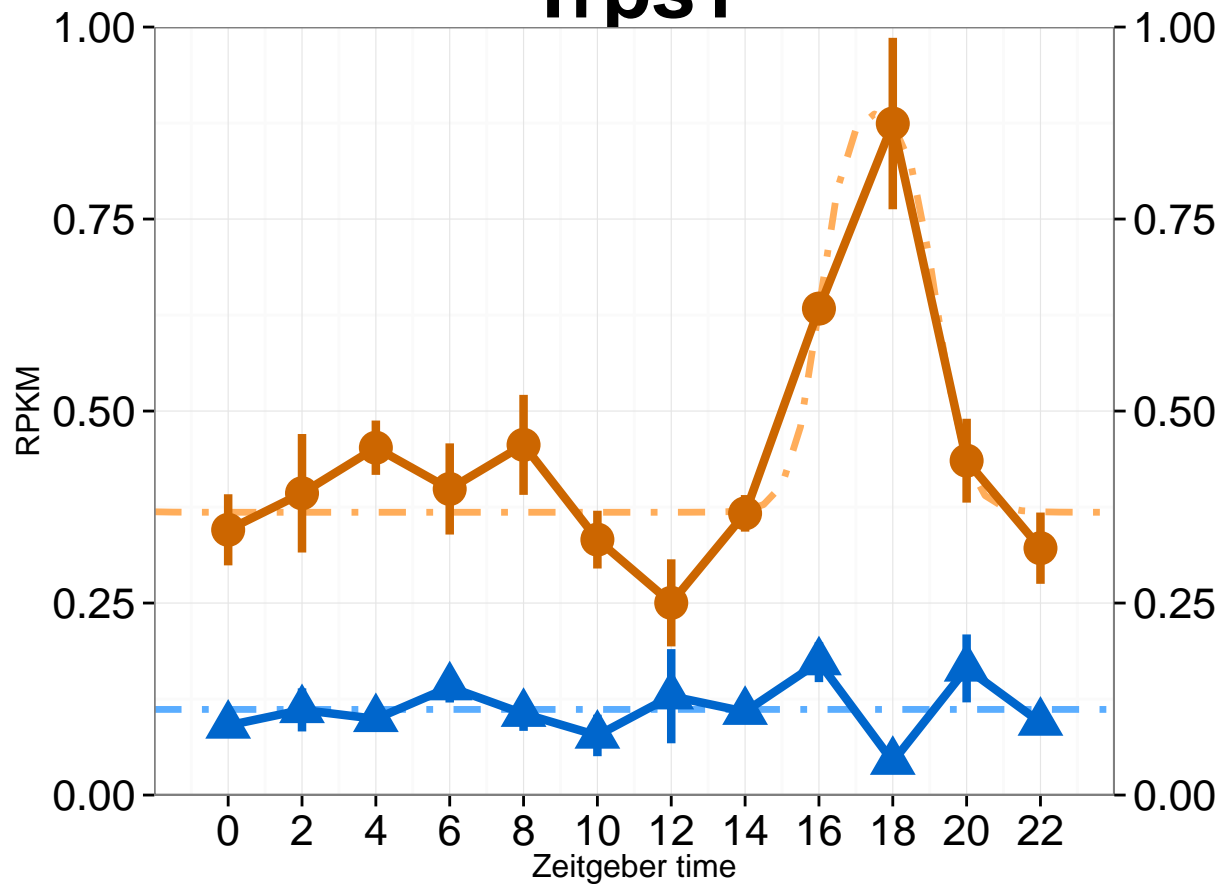

# Trps1

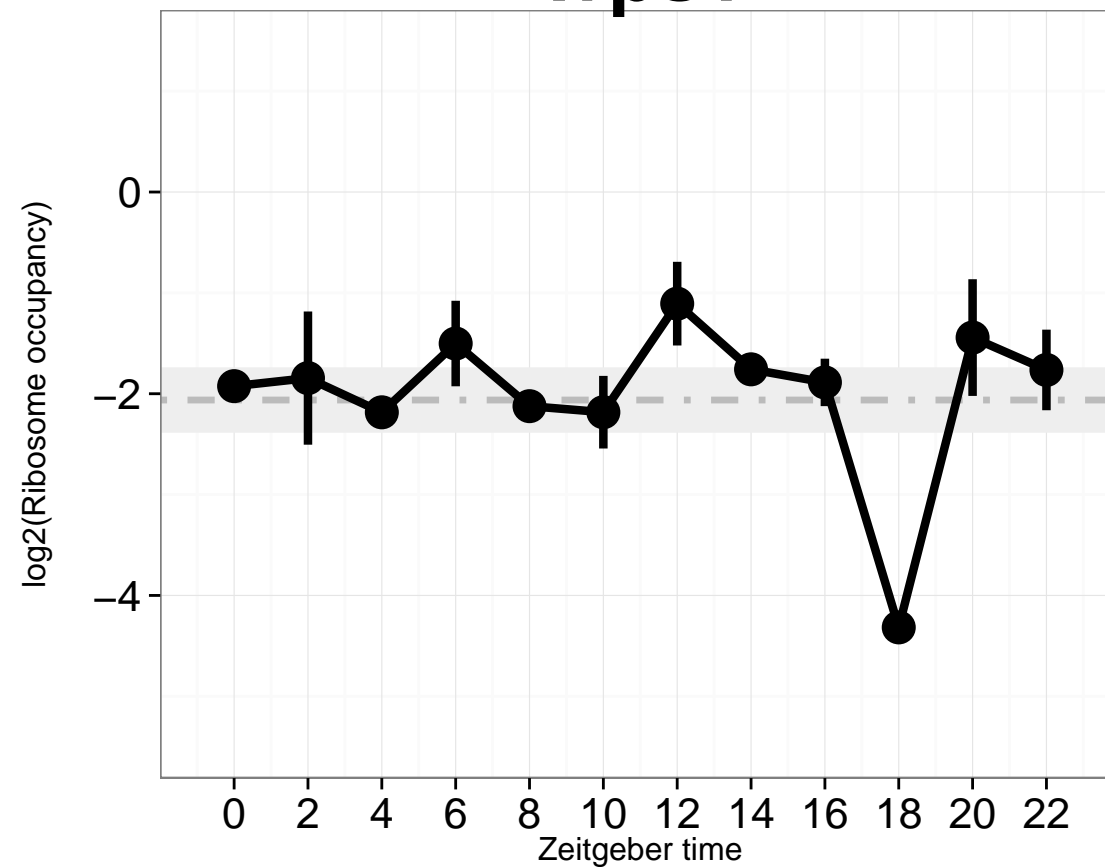

Supplement: SuppDataset_1.zip [file Trps1_set_B.pdf › Supplemental Dataset 1/B-mRNA_rhythm_translation_nonrhyth/Trps1_set_B.pdf]

## Tshz3

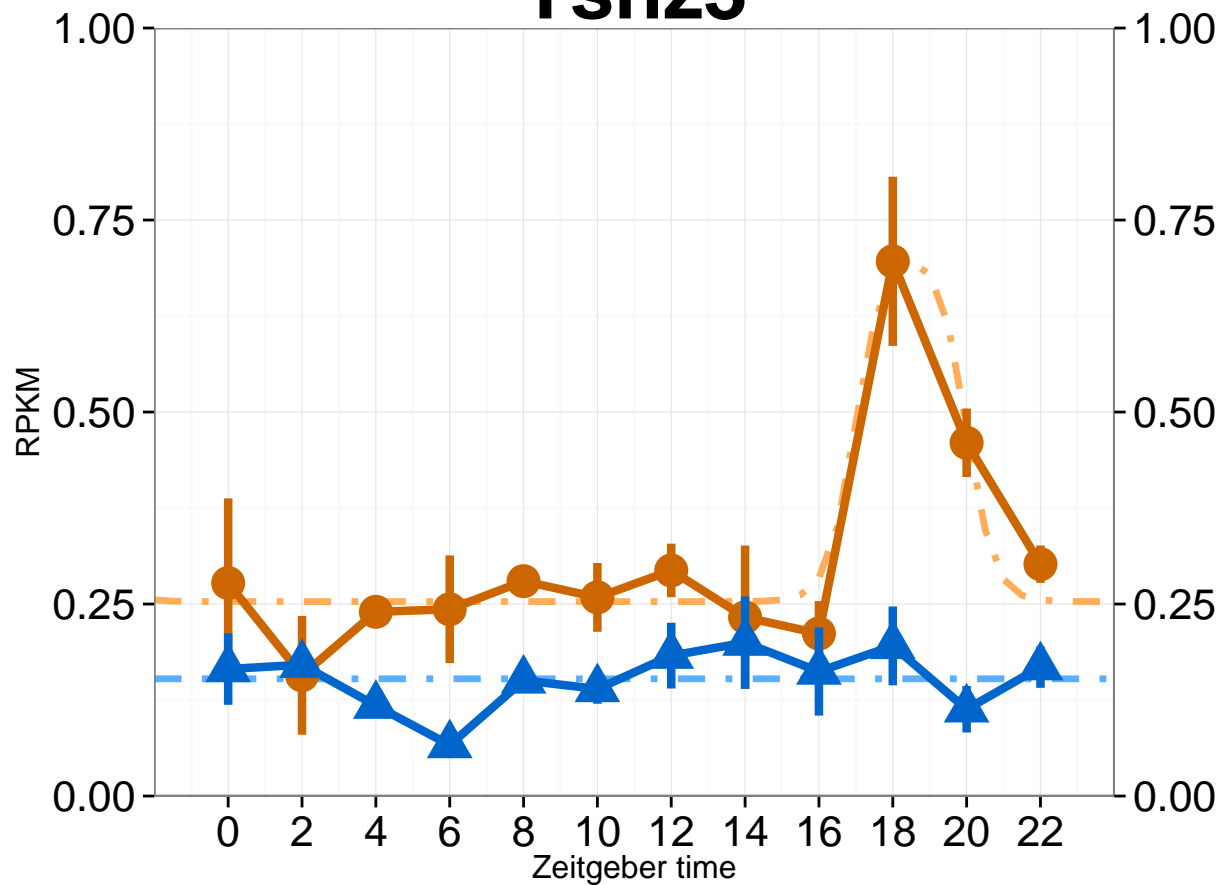

## Tshz3

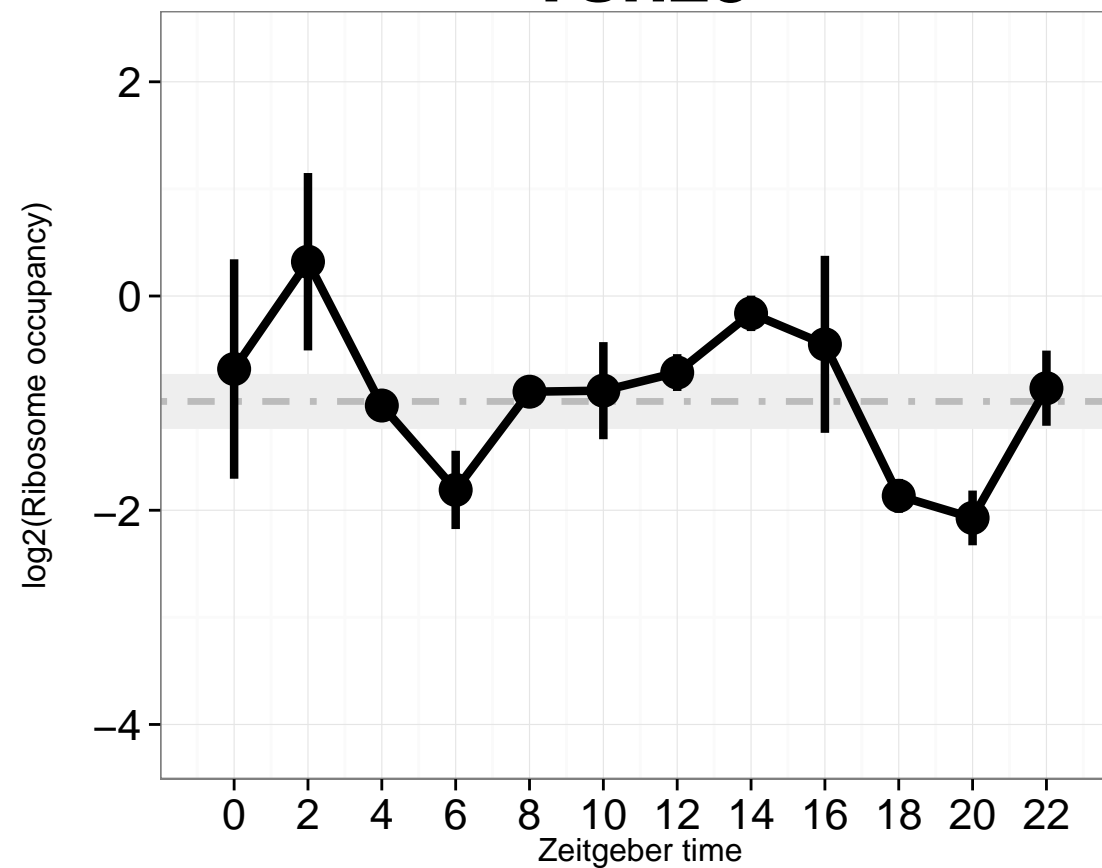

Supplement: SuppDataset_1.zip [file Tshz3_set_B.pdf › Supplemental Dataset 1/B-mRNA_rhythm_translation_nonrhyth/Tshz3_set_B.pdf]

## Tspan2

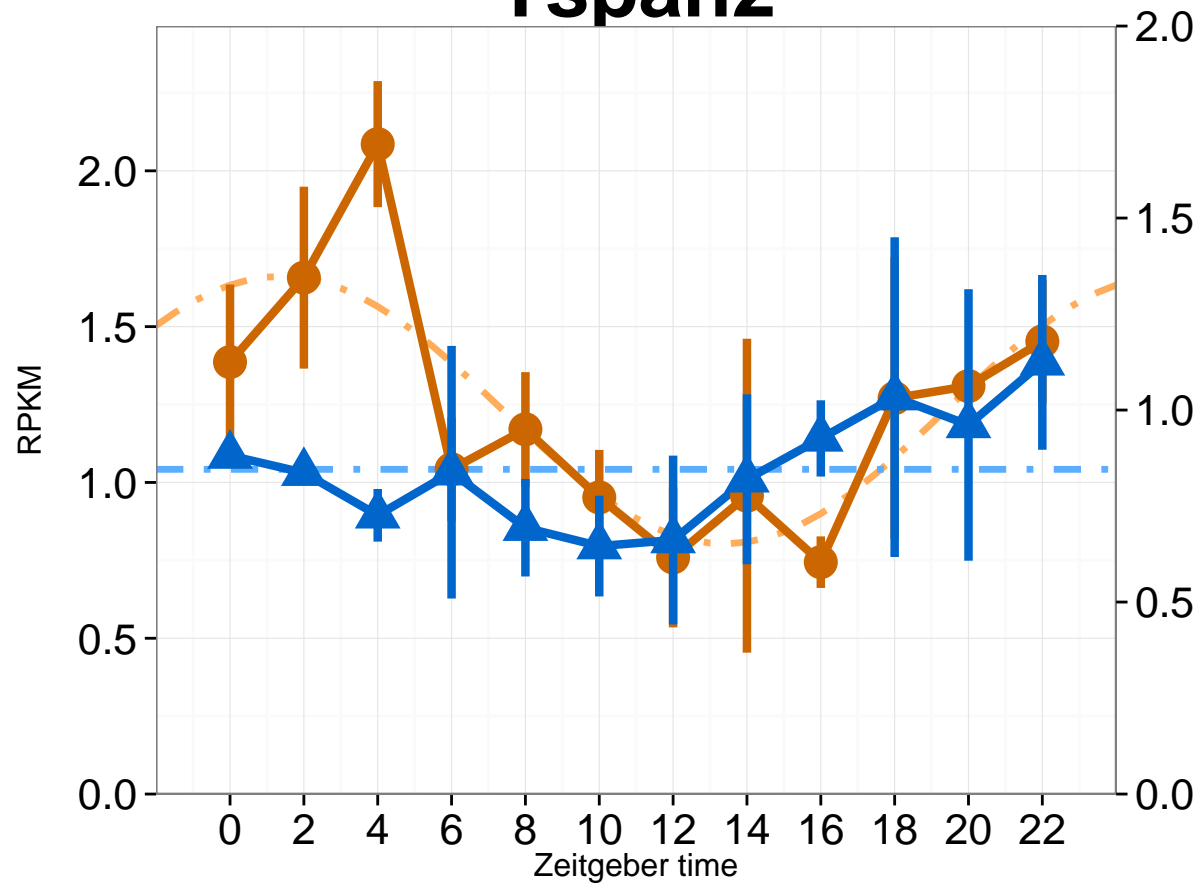

## Tspan2

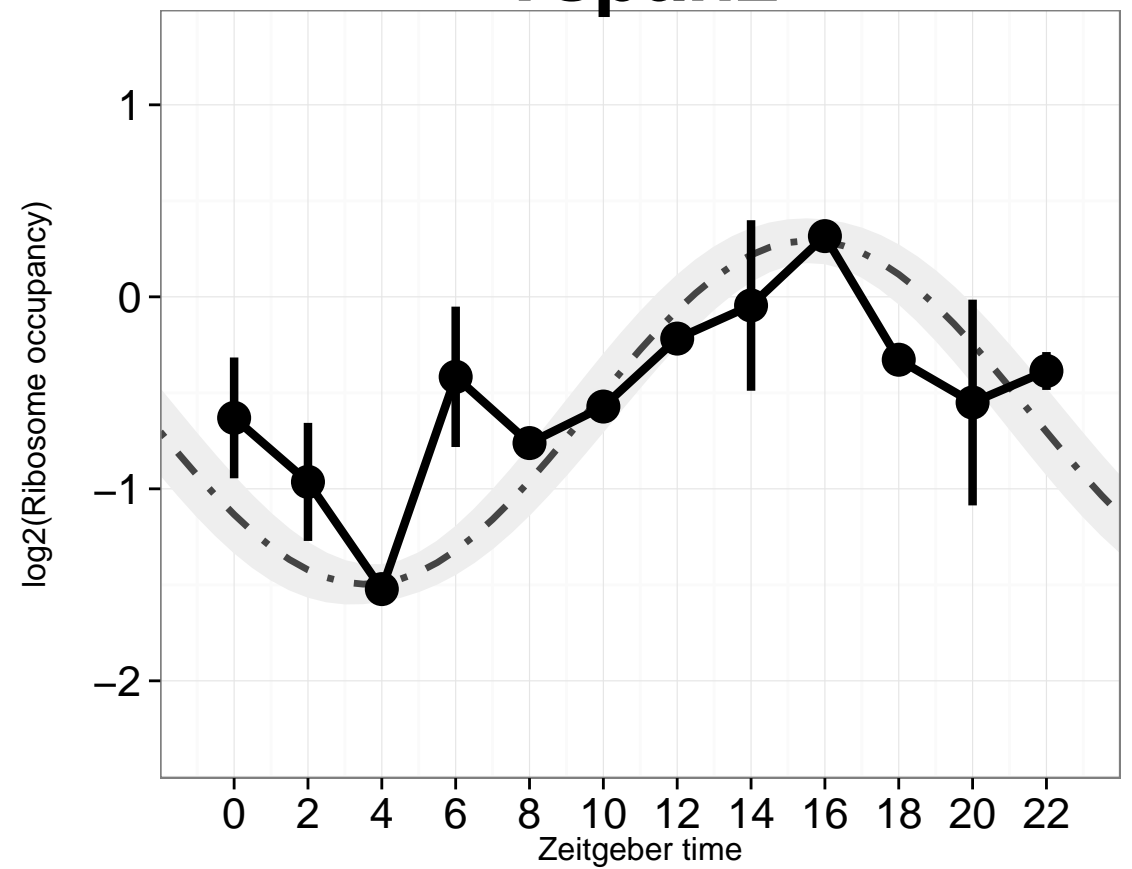

Supplement: SuppDataset_1.zip [file Tspan2_set_B.pdf › Supplemental Dataset 1/B-mRNA_rhythm_translation_nonrhyth/Tspan2_set_B.pdf]

# TtI

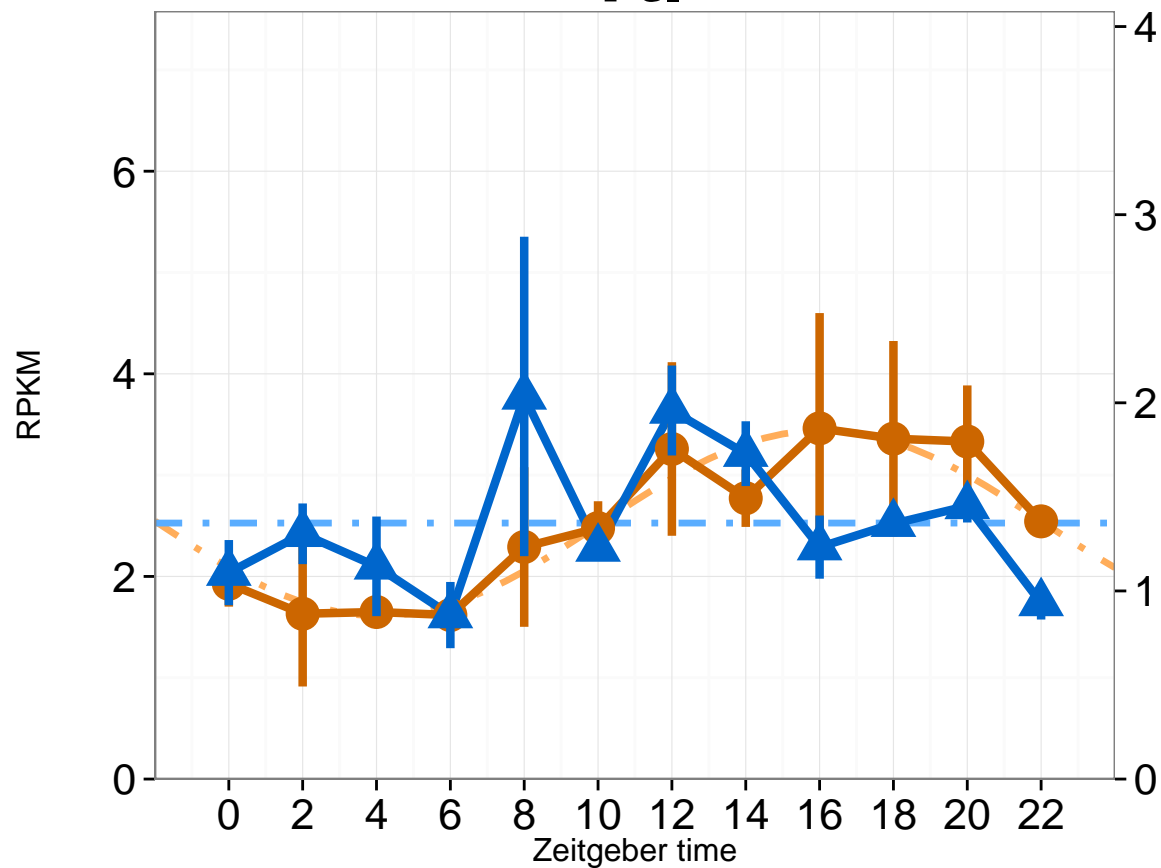

# TtI

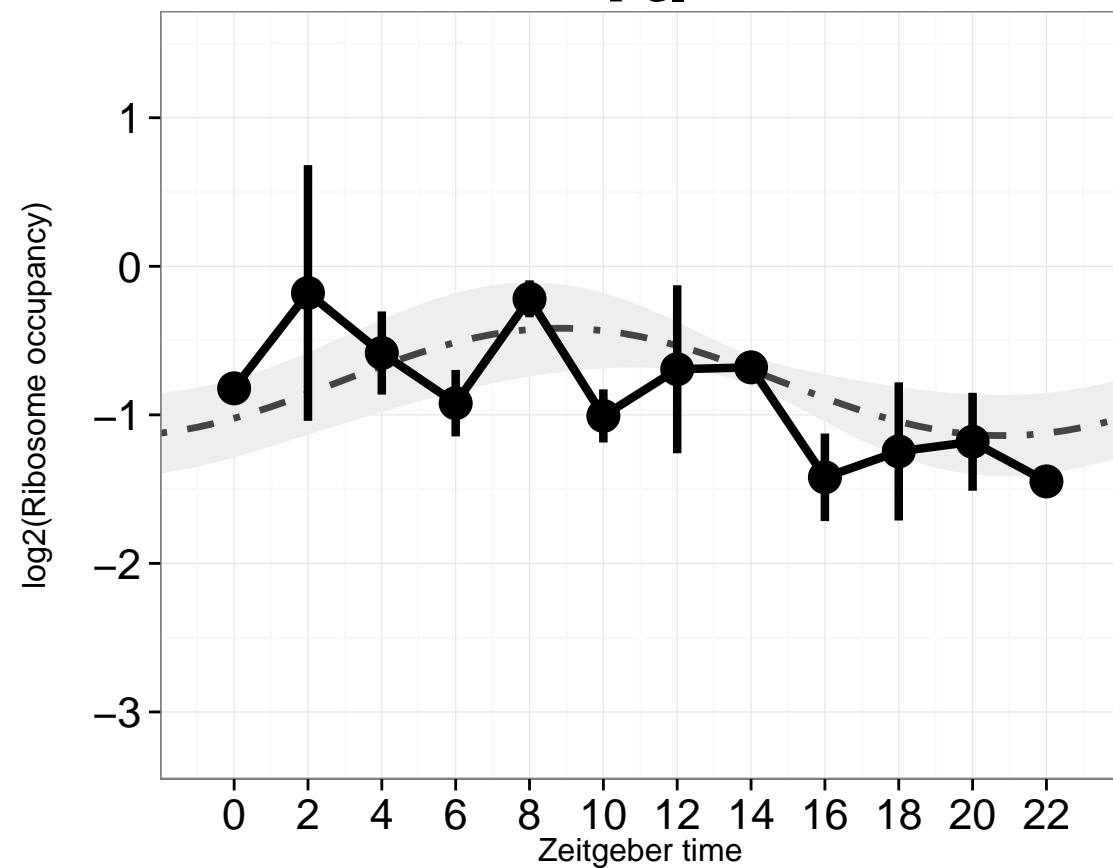

Supplement: SuppDataset_1.zip [file Ttl_set_B.pdf › Supplemental Dataset 1/B-mRNA_rhythm_translation_nonrhyth/Ttl_set_B.pdf]

## TtII12

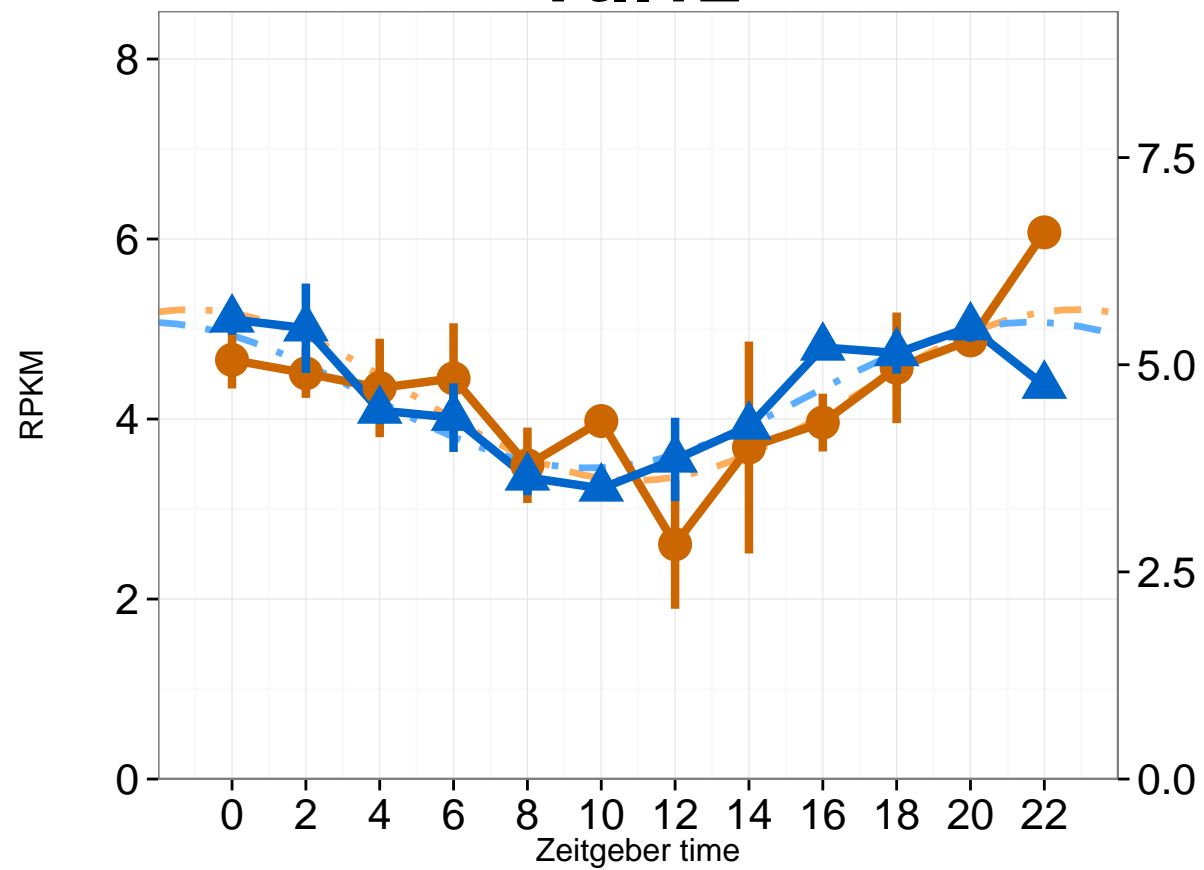

## TtII12

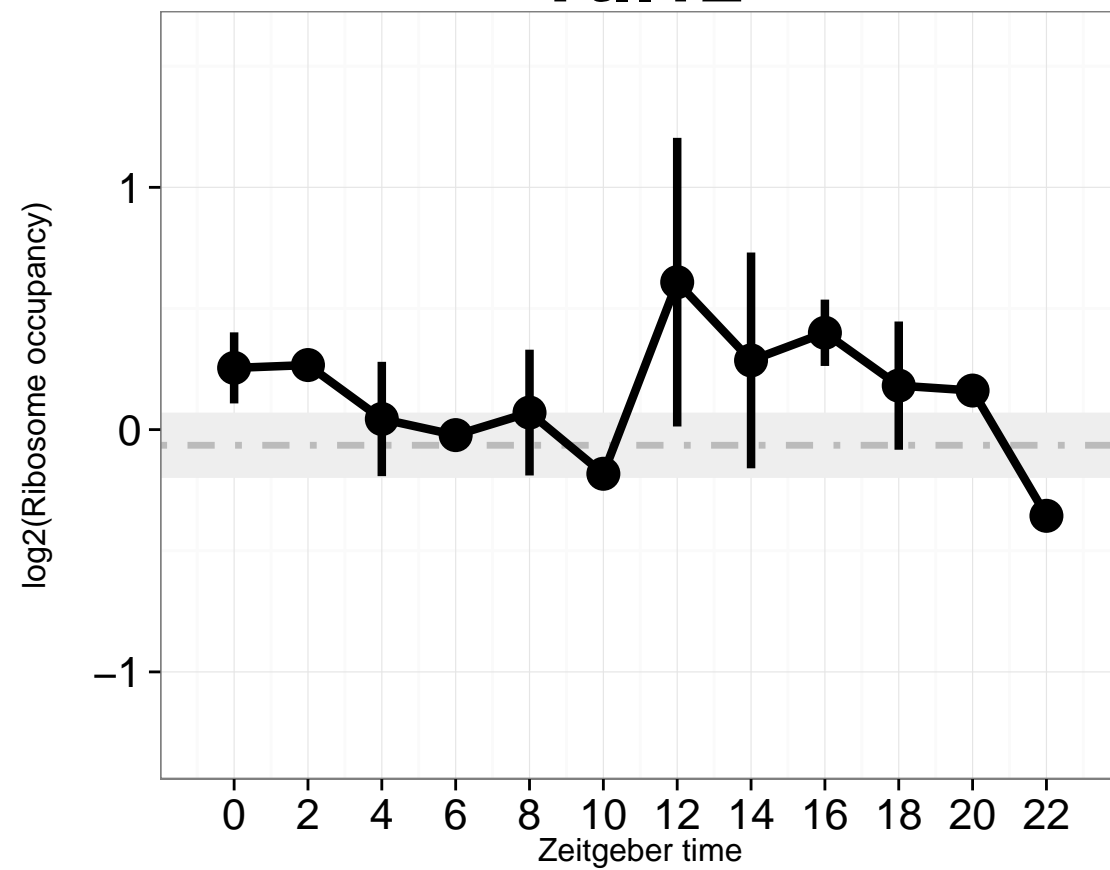

Supplement: SuppDataset_1.zip [file Ttll12_set_B.pdf › Supplemental Dataset 1/B-mRNA_rhythm_translation_nonrhyth/Ttll12_set_B.pdf]

# Tubb5

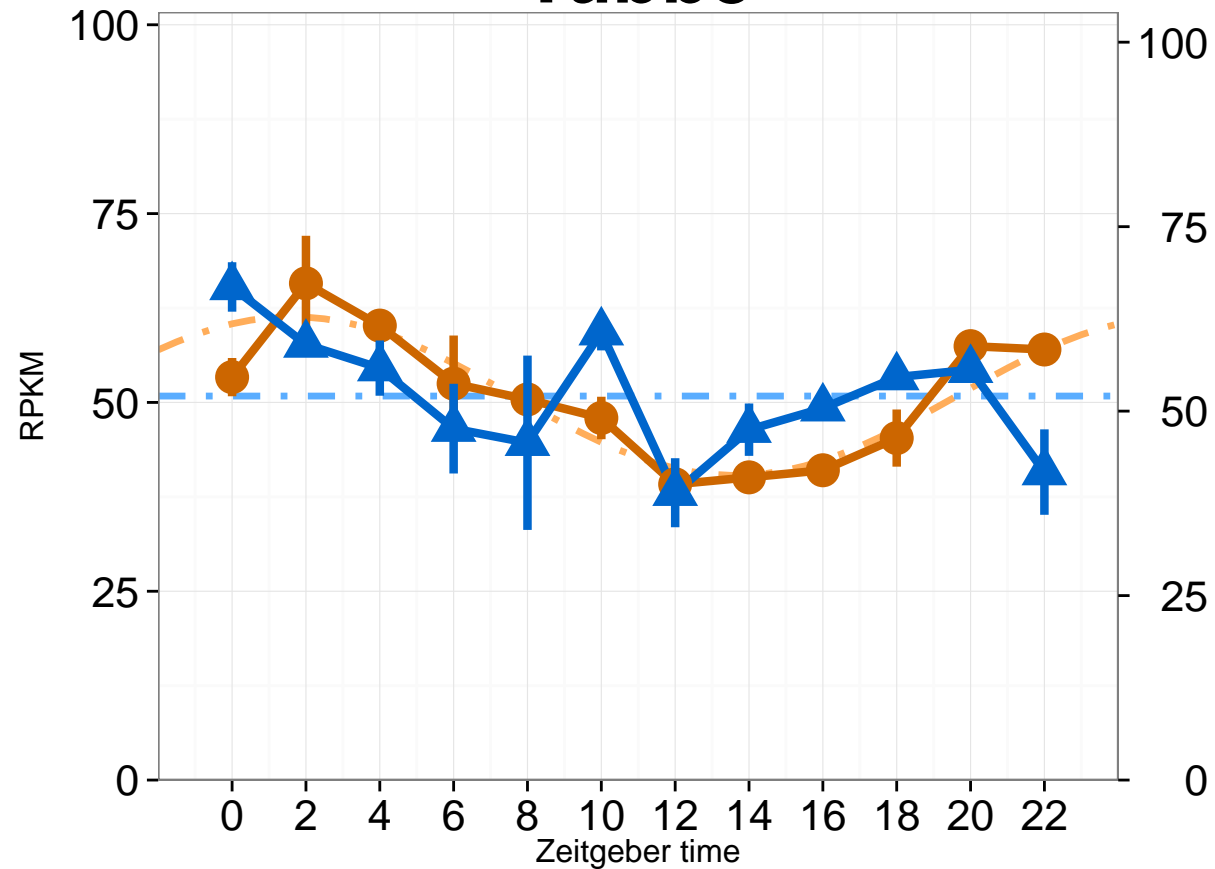

# Tubb5

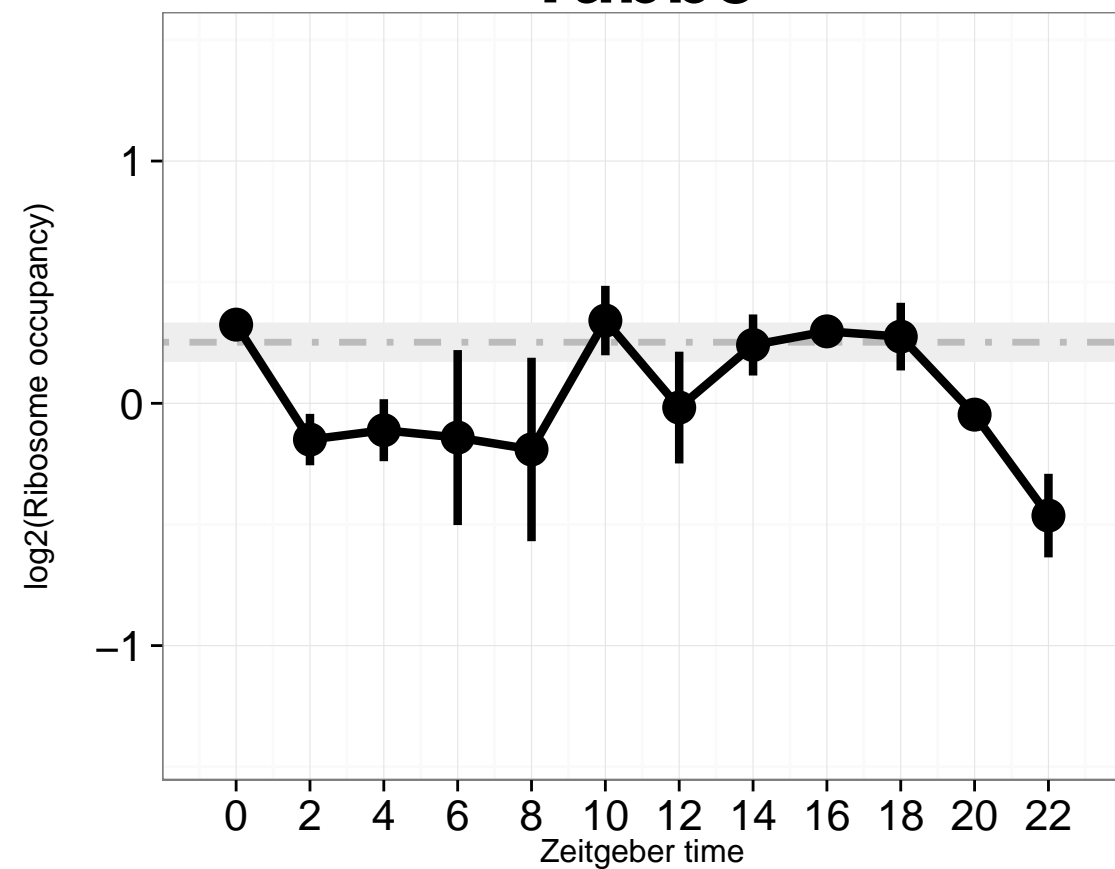

Supplement: SuppDataset_1.zip [file Tubb5_set_B.pdf › Supplemental Dataset 1/B-mRNA_rhythm_translation_nonrhyth/Tubb5_set_B.pdf]

# Tubb6

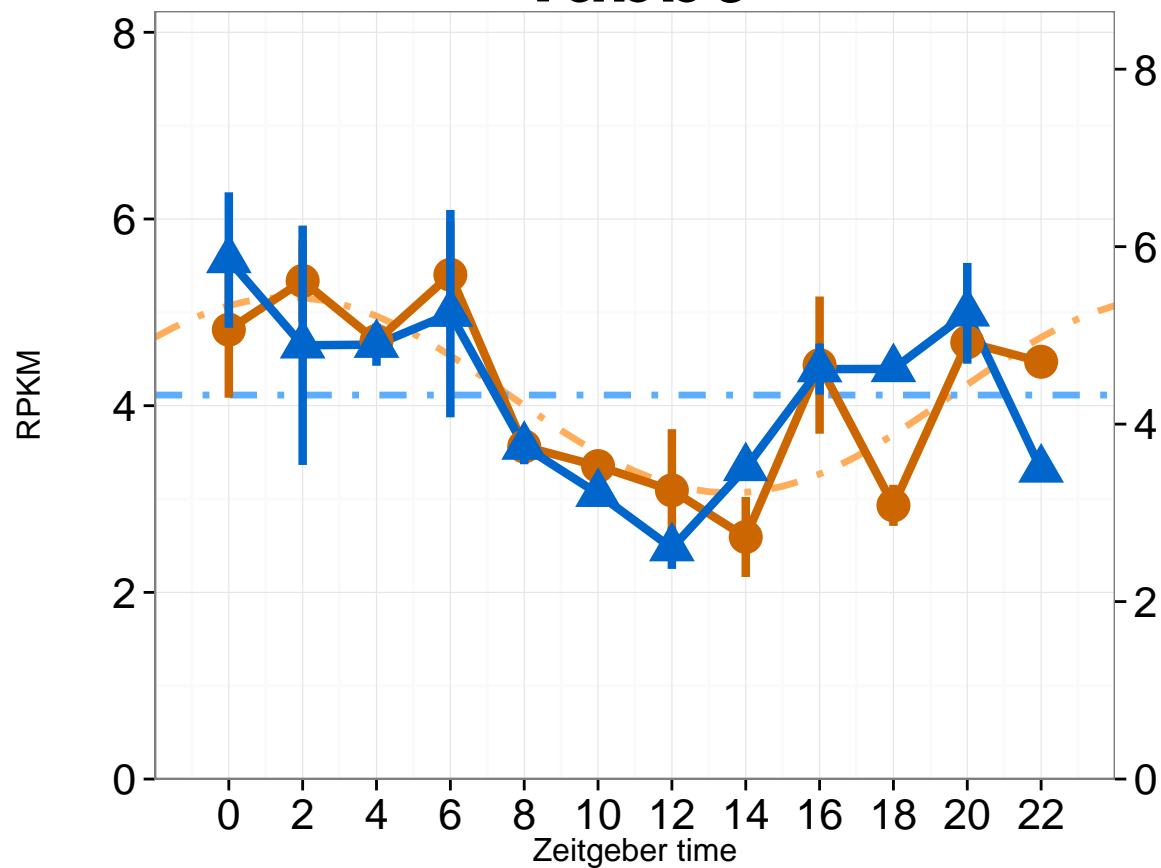

# Tubb6

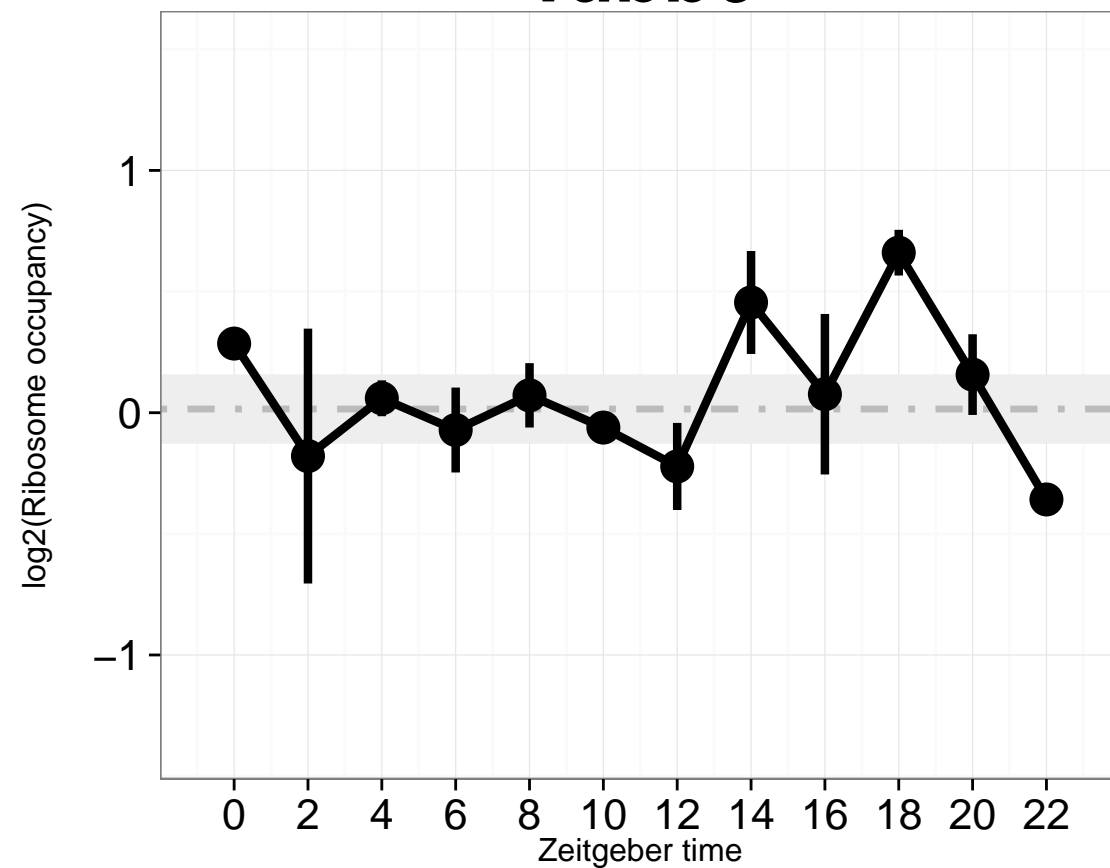

Supplement: SuppDataset_1.zip [file Tubb6_set_B.pdf › Supplemental Dataset 1/B-mRNA_rhythm_translation_nonrhyth/Tubb6_set_B.pdf]

# Tubd1

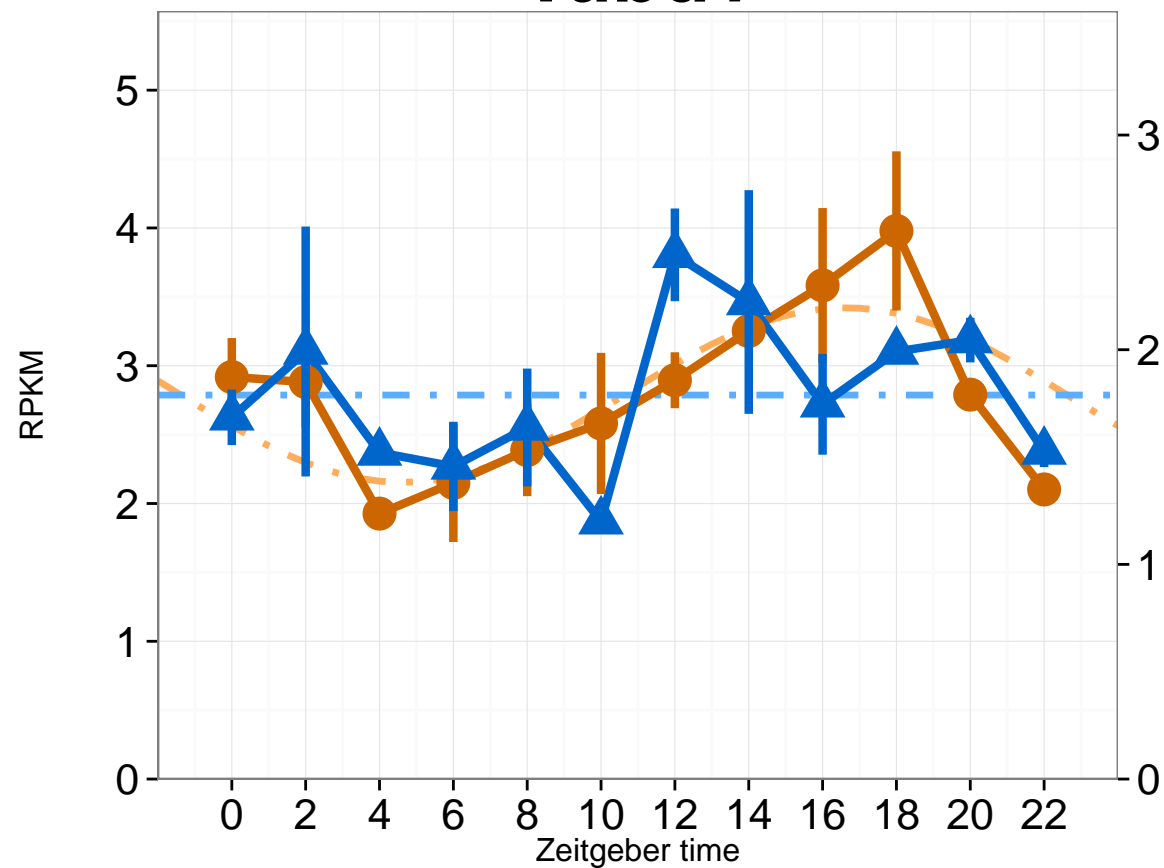

# Tubd1

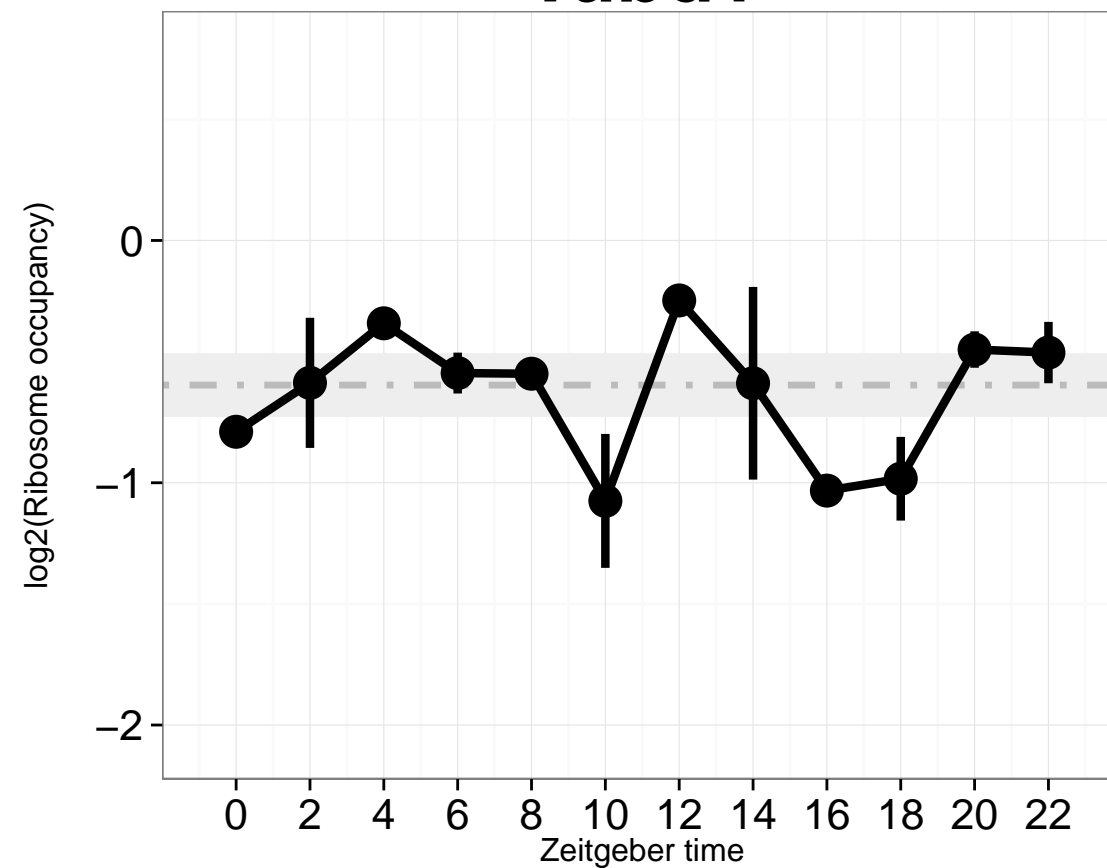

Supplement: SuppDataset_1.zip [file Tubd1_set_B.pdf › Supplemental Dataset 1/B-mRNA_rhythm_translation_nonrhyth/Tubd1_set_B.pdf]

# Tubg1

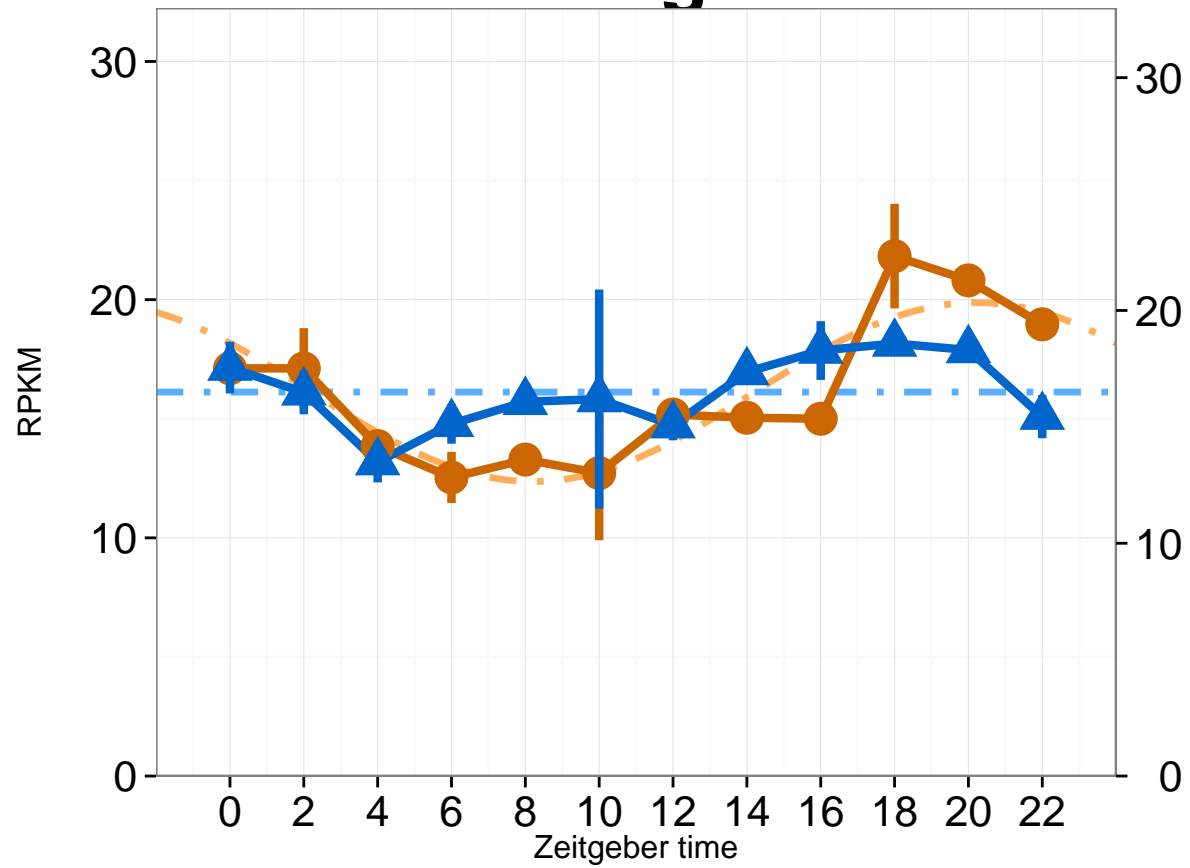

# Tubg1

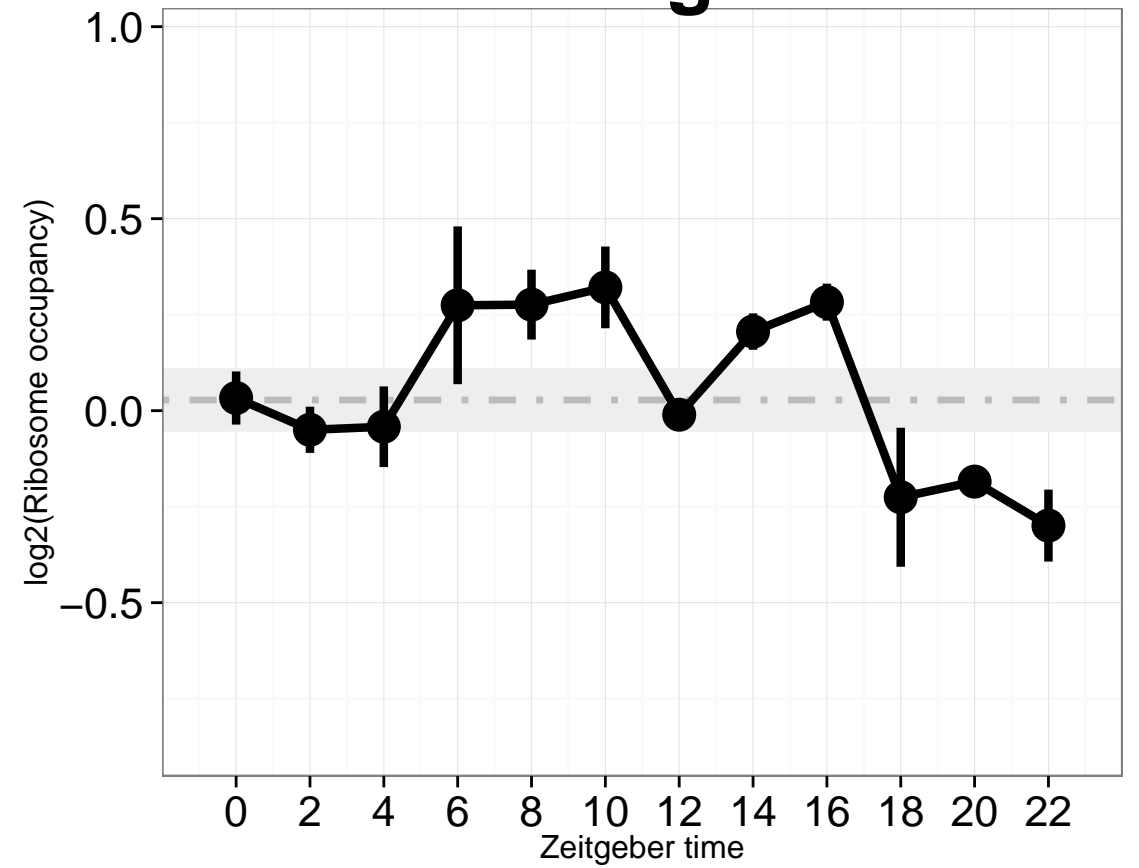

Supplement: SuppDataset_1.zip [file Tubg1_set_B.pdf › Supplemental Dataset 1/B-mRNA_rhythm_translation_nonrhyth/Tubg1_set_B.pdf]

## Txn2

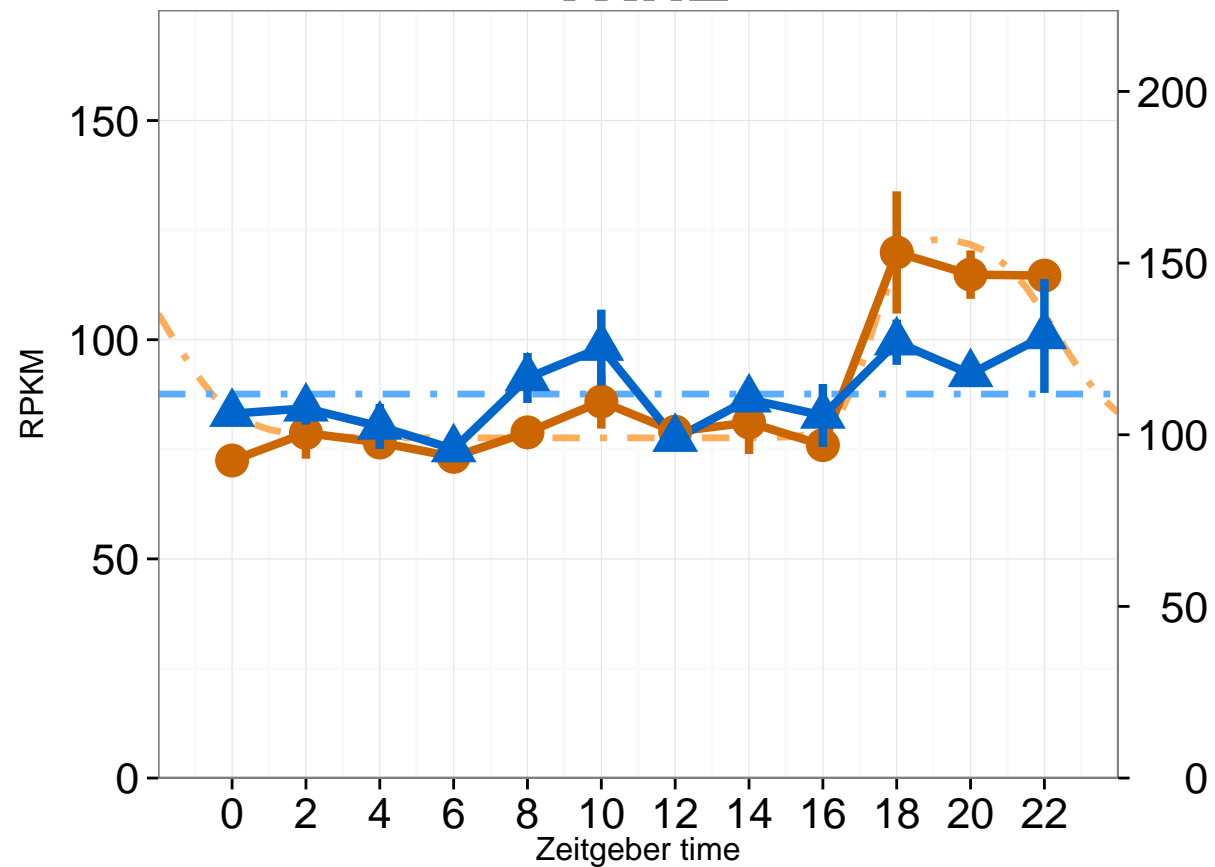

## Txn2

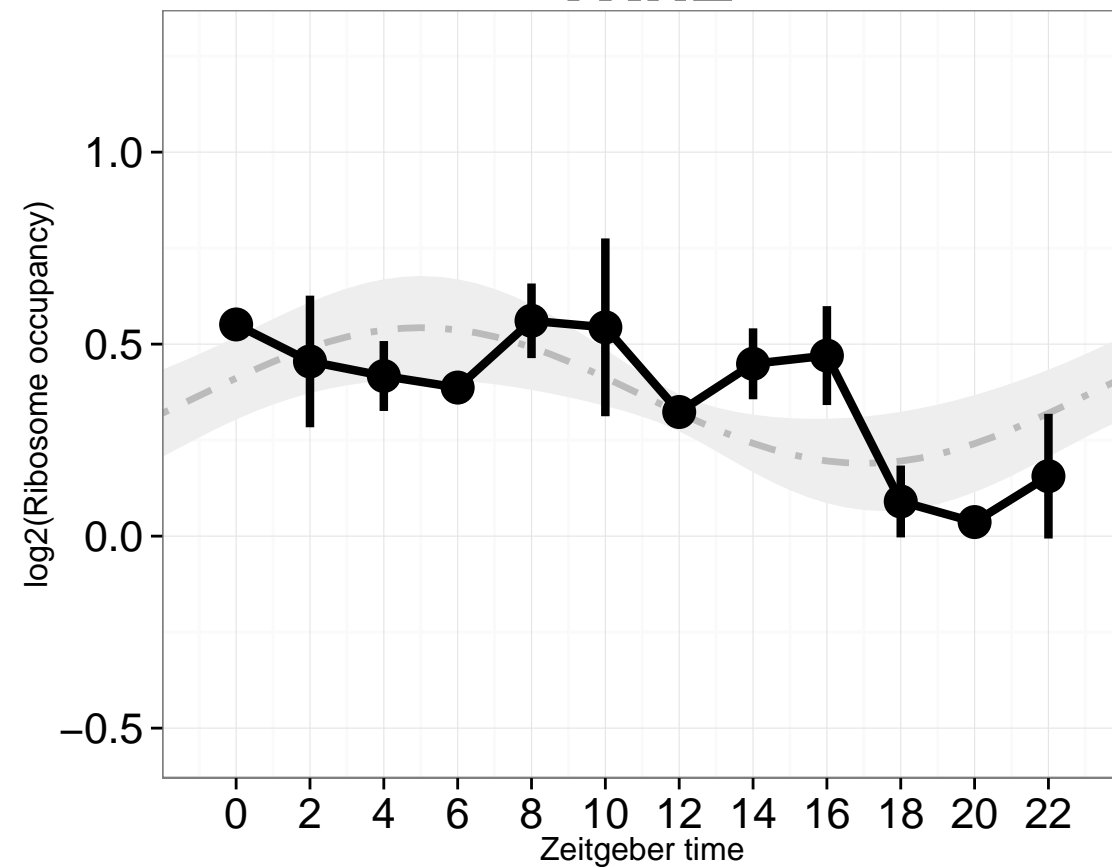

Supplement: SuppDataset_1.zip [file Txn2_set_B.pdf › Supplemental Dataset 1/B-mRNA_rhythm_translation_nonrhyth/Txn2_set_B.pdf]

## Tyk2

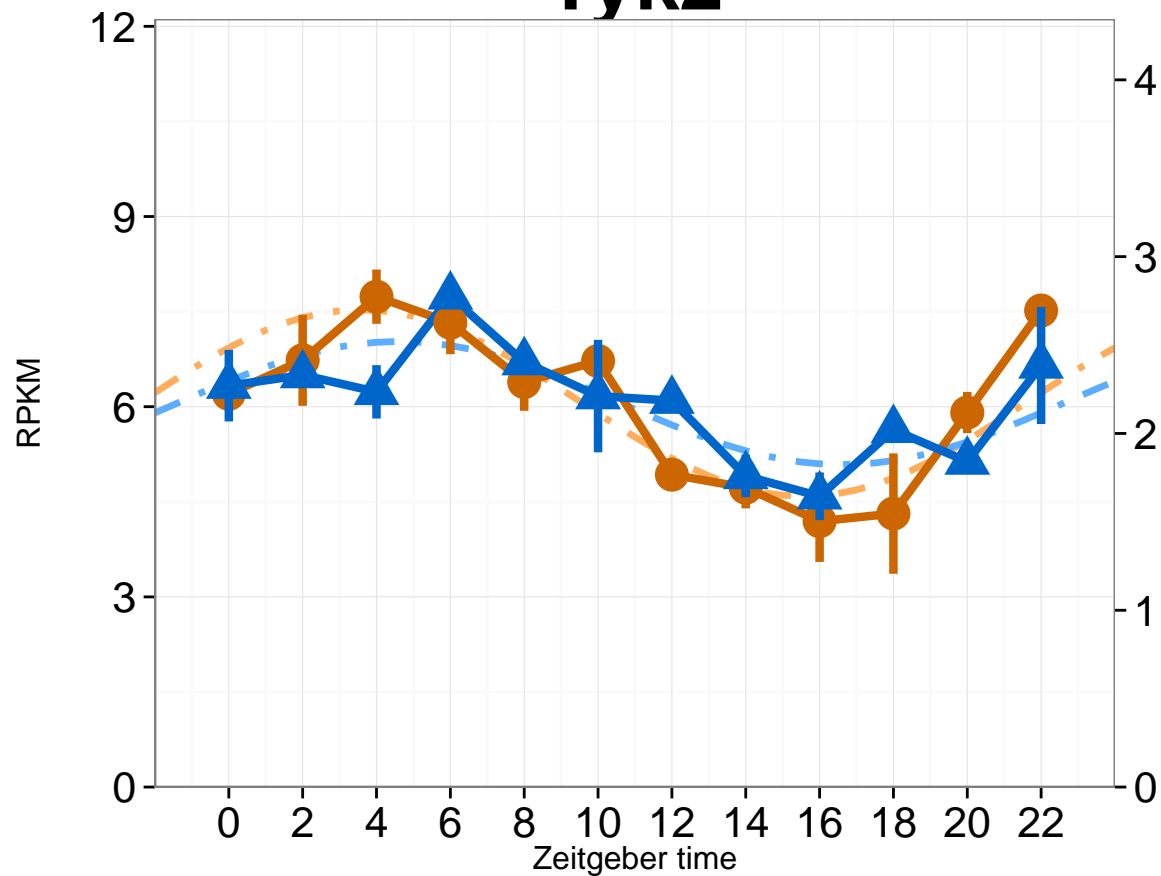

## Tyk2

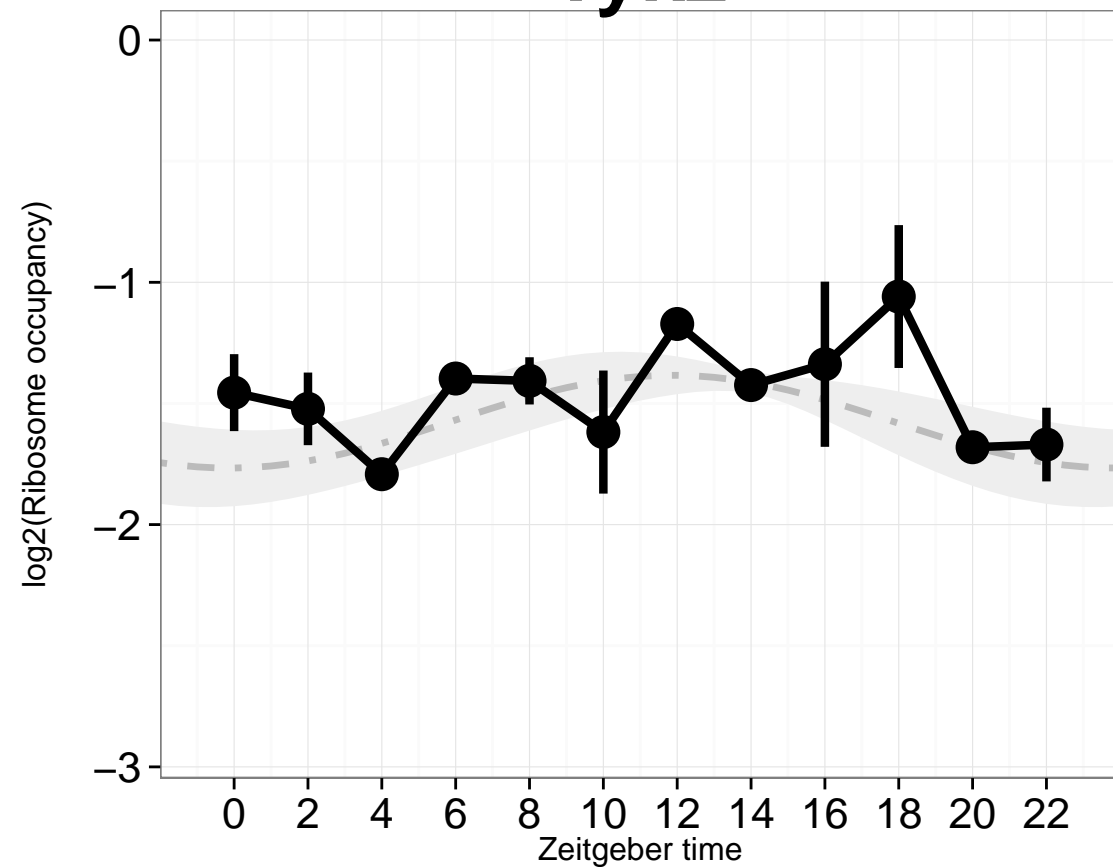

Supplement: SuppDataset_1.zip [file Tyk2_set_B.pdf › Supplemental Dataset 1/B-mRNA_rhythm_translation_nonrhyth/Tyk2_set_B.pdf]

# Uba6

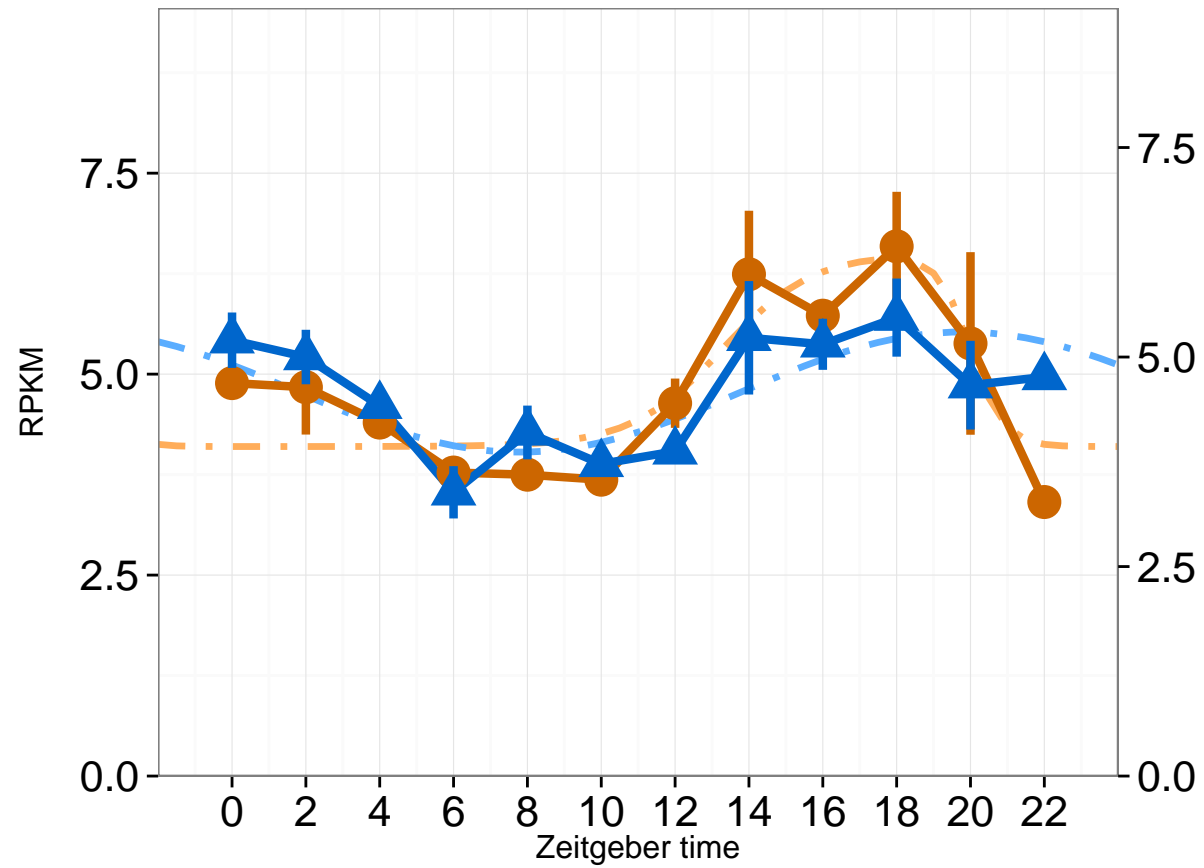

# Uba6

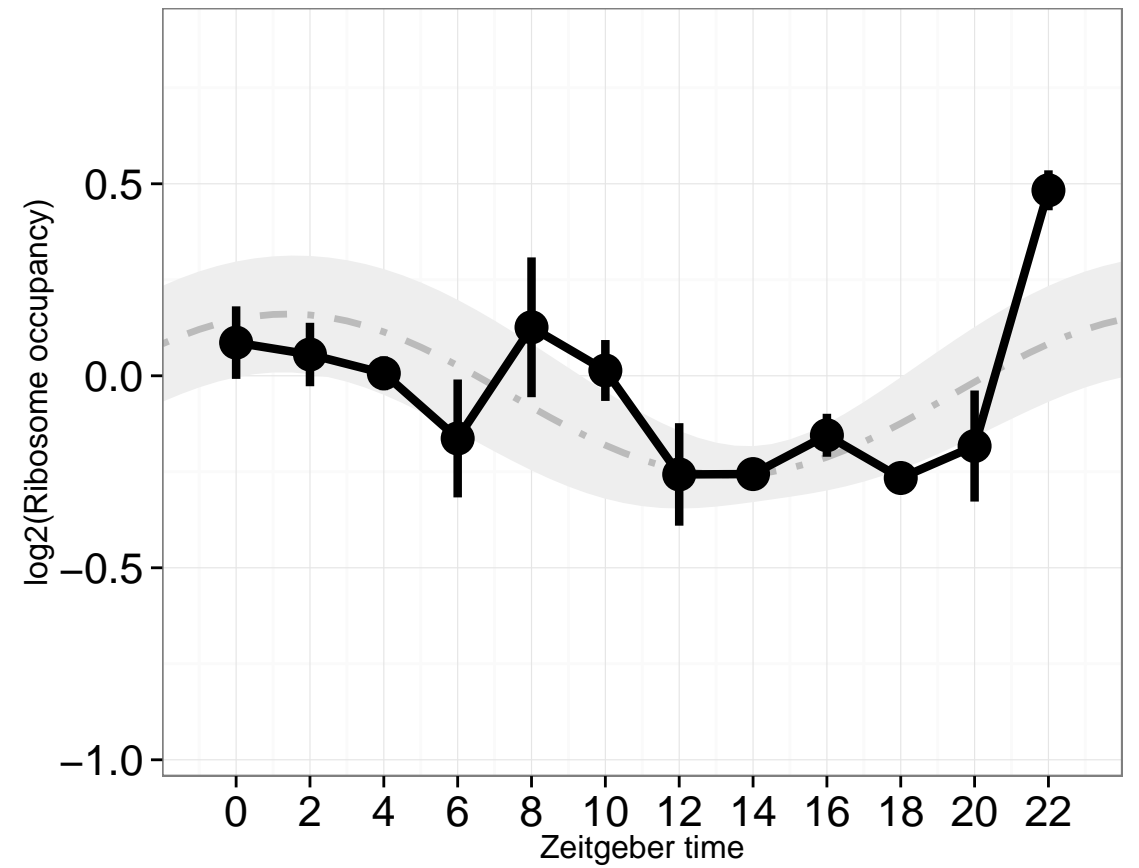

Supplement: SuppDataset_1.zip [file Uba6_set_B.pdf › Supplemental Dataset 1/B-mRNA_rhythm_translation_nonrhyth/Uba6_set_B.pdf]

## Ubc

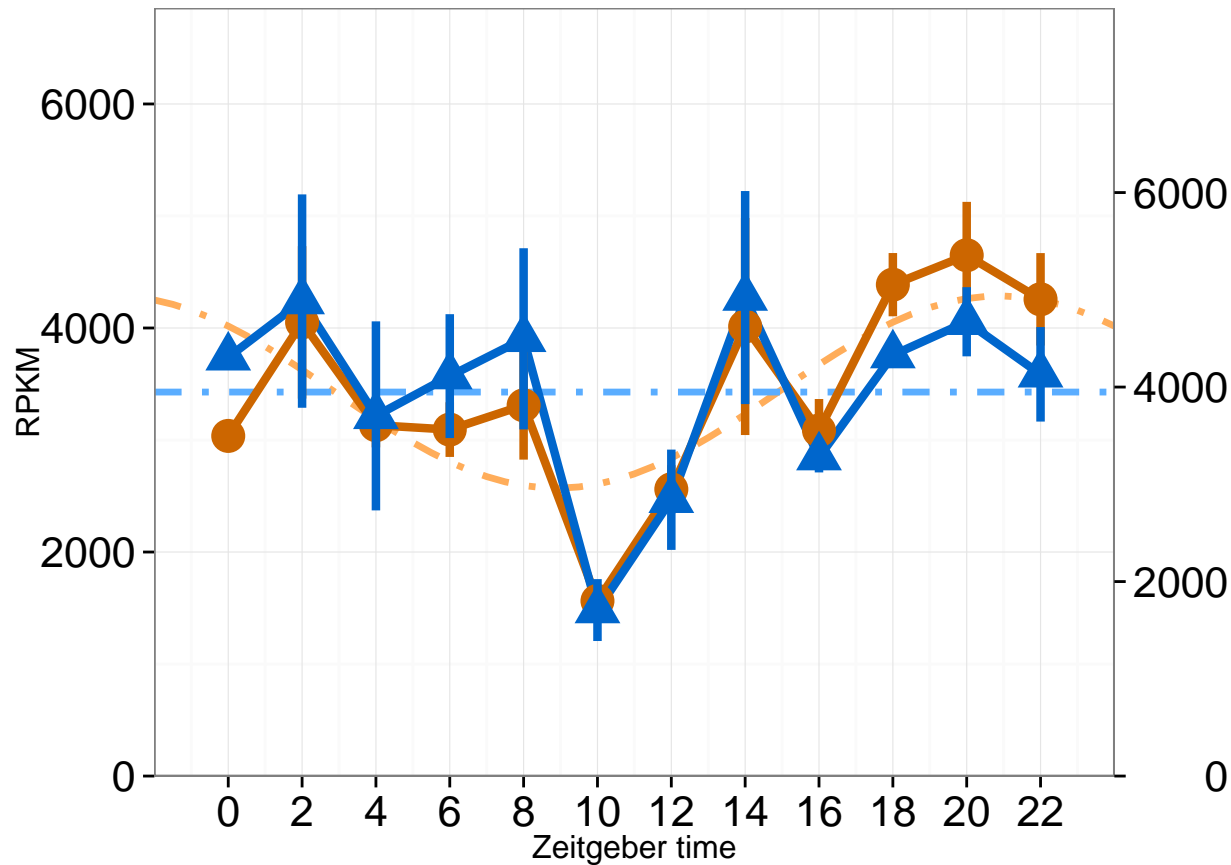

## Ubc

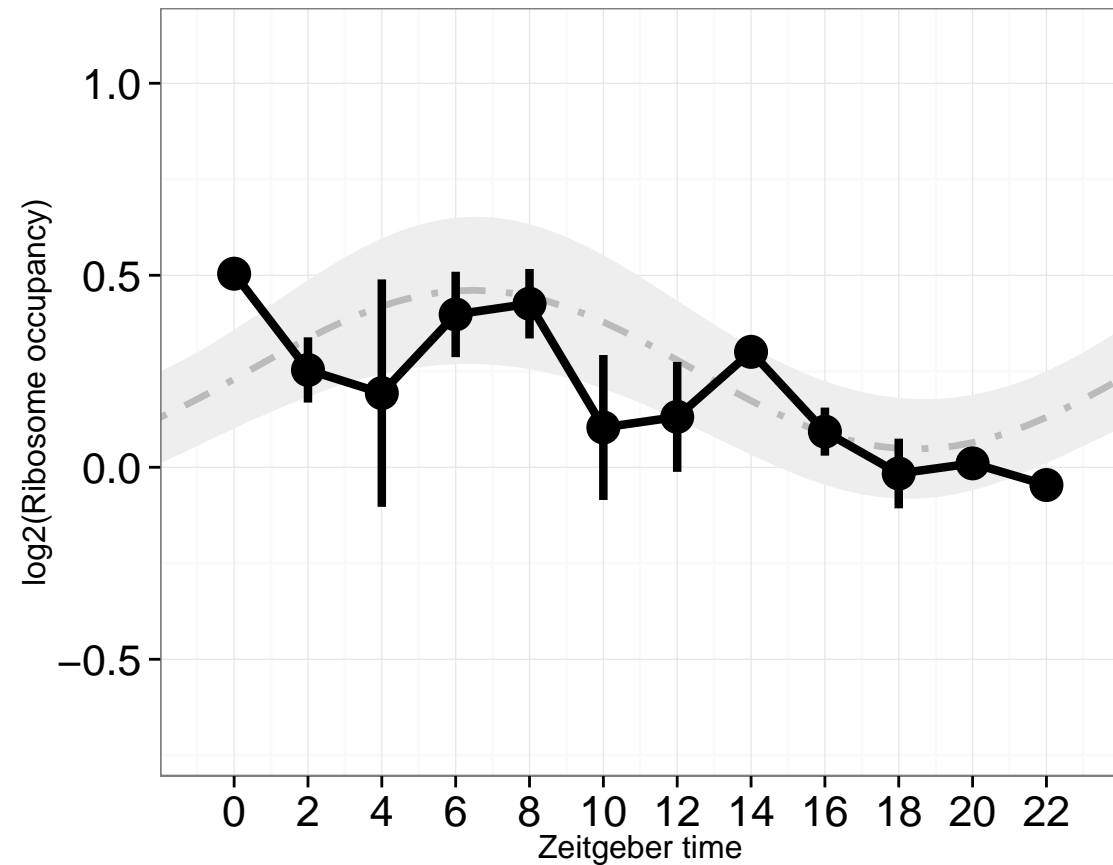

Supplement: SuppDataset_1.zip [file Ubc_set_B.pdf › Supplemental Dataset 1/B-mRNA_rhythm_translation_nonrhyth/Ubc_set_B.pdf]

## Ube2e1

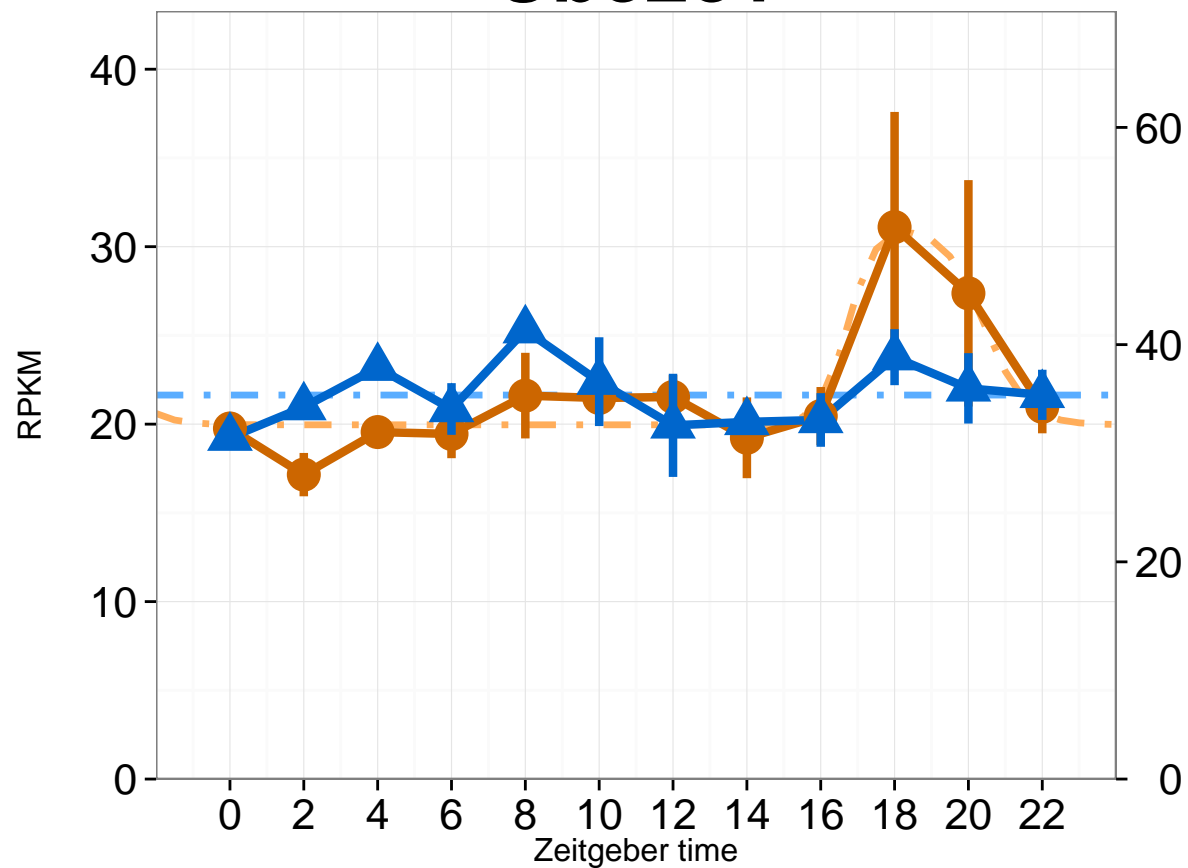

## Ube2e1

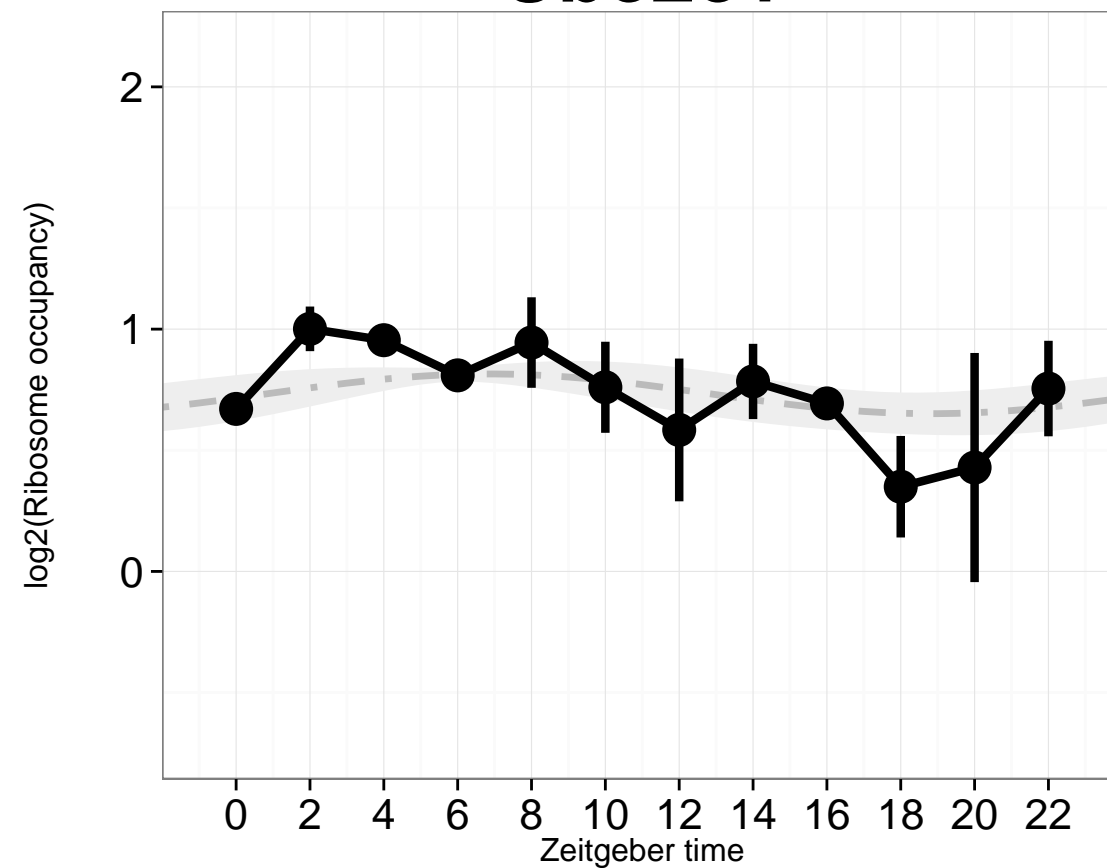

Supplement: SuppDataset_1.zip [file Ube2e1_set_B.pdf › Supplemental Dataset 1/B-mRNA_rhythm_translation_nonrhyth/Ube2e1_set_B.pdf]

## Ubqln4

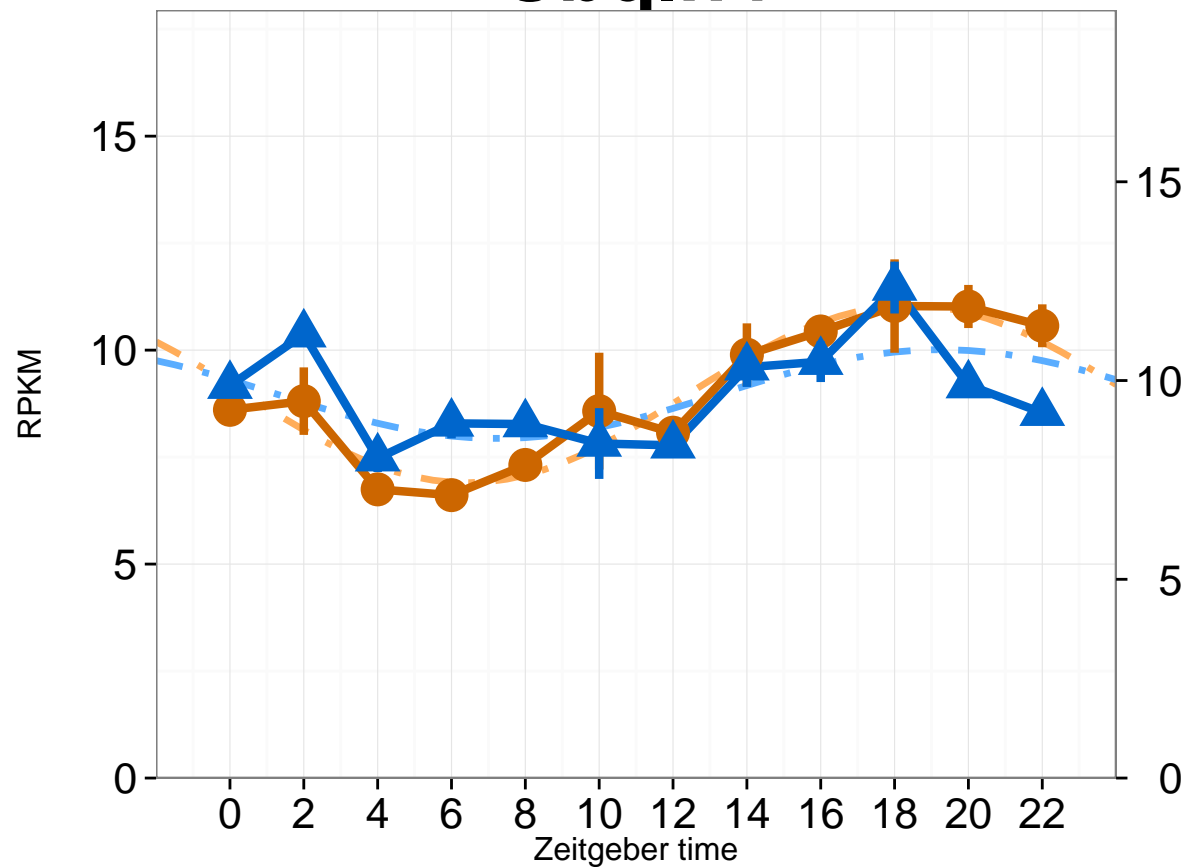

## Ubqln4

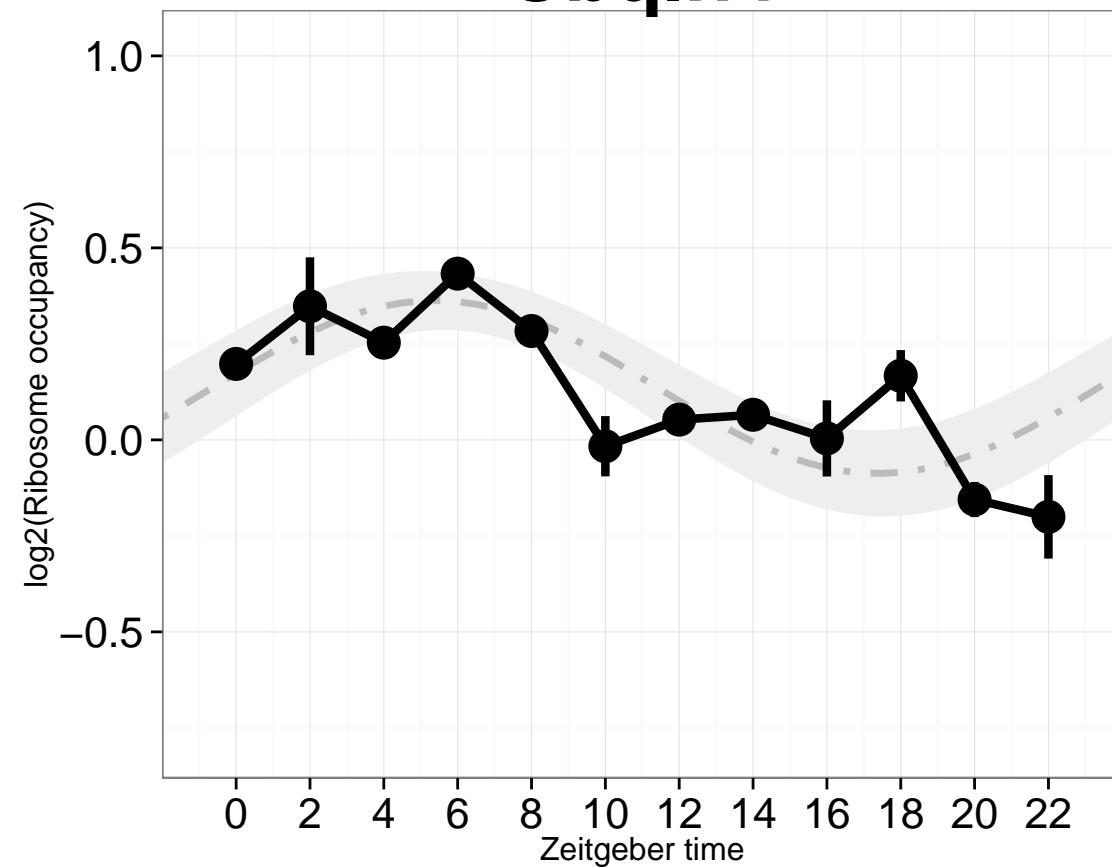

Supplement: SuppDataset_1.zip [file Ubqln4_set_B.pdf › Supplemental Dataset 1/B-mRNA_rhythm_translation_nonrhyth/Ubqln4_set_B.pdf]

# Ugt1a7c

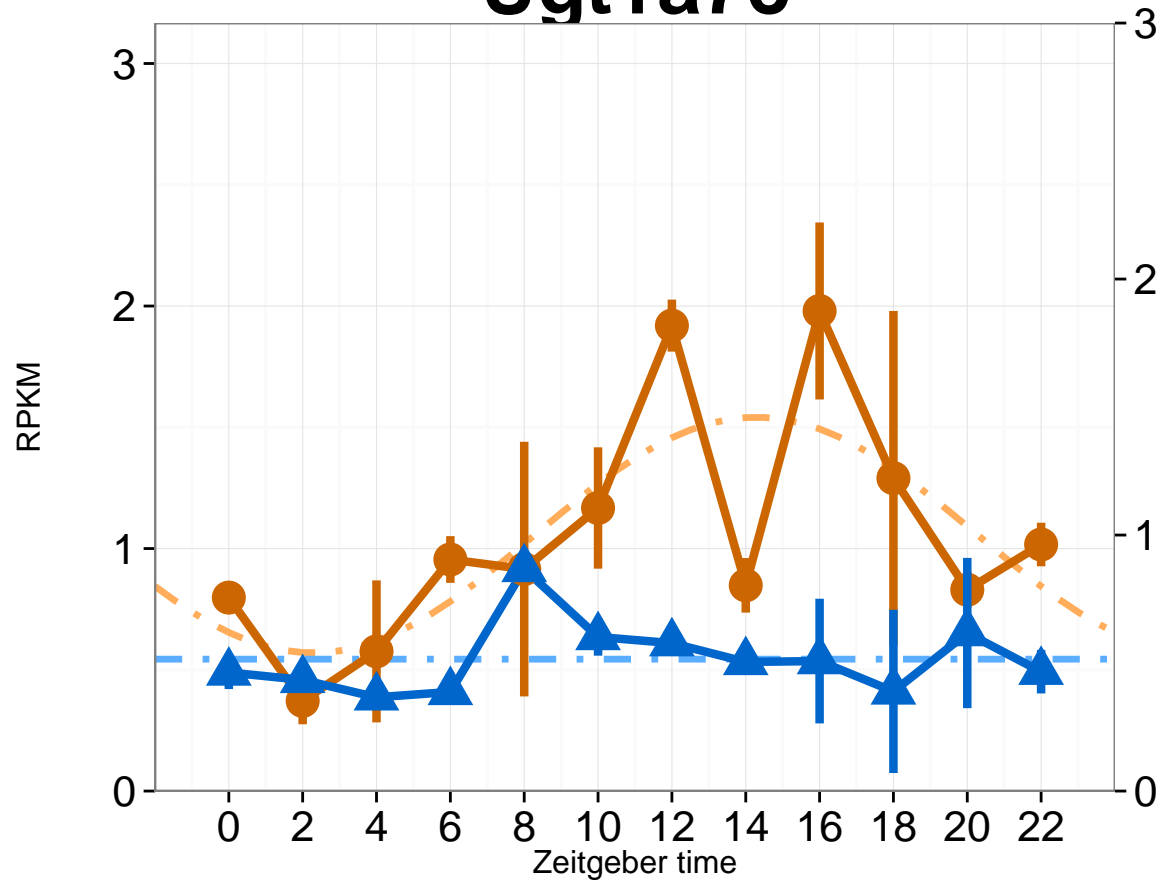

# Ugt1a7c

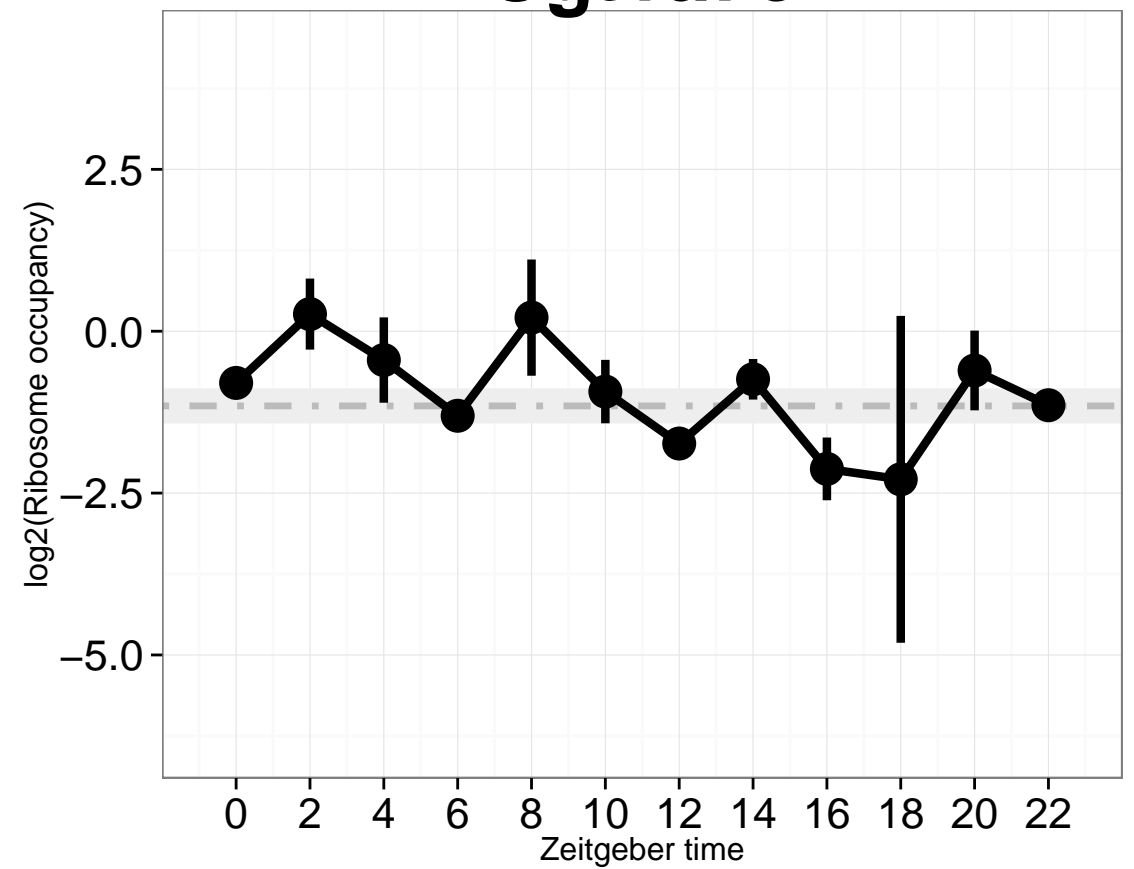

Supplement: SuppDataset_1.zip [file Ugt1a7c_set_B.pdf › Supplemental Dataset 1/B-mRNA_rhythm_translation_nonrhyth/Ugt1a7c_set_B.pdf]

# Uqcc1

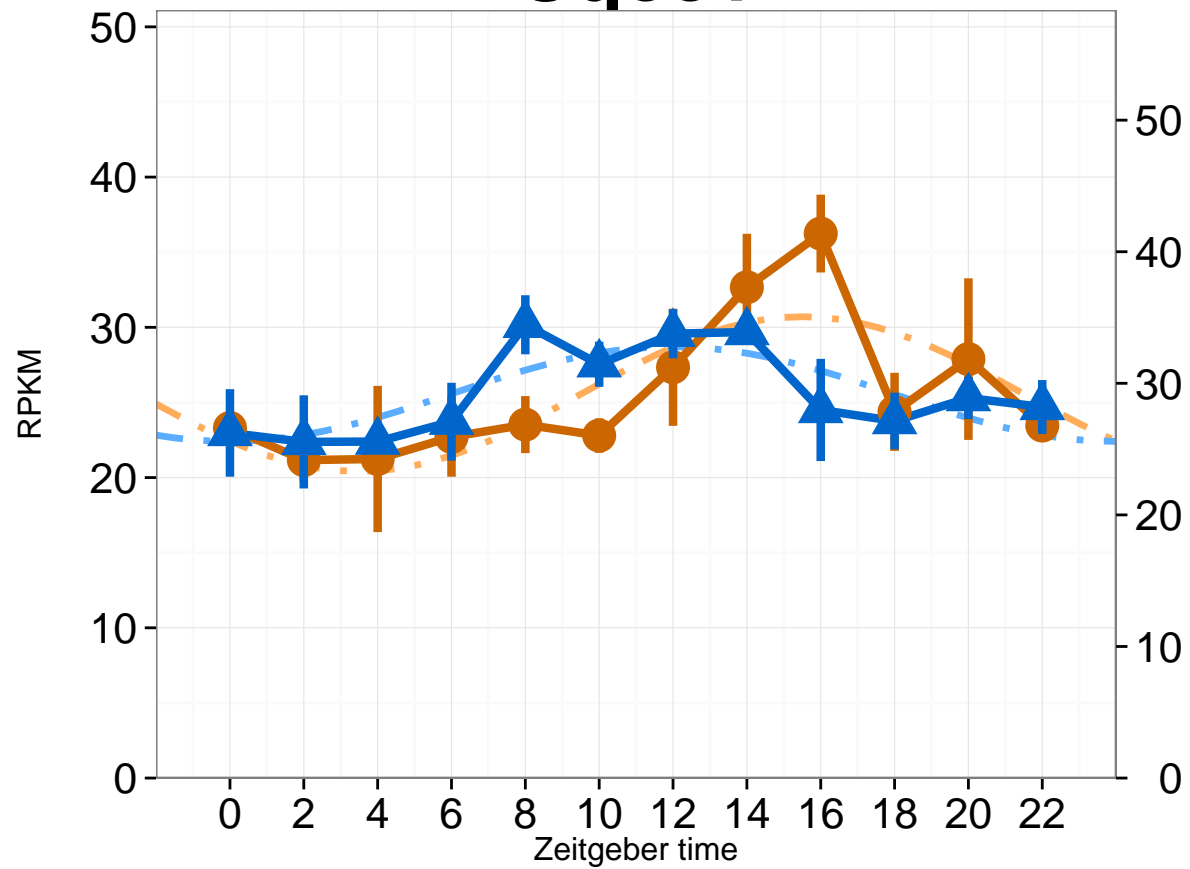

# Uqcc1

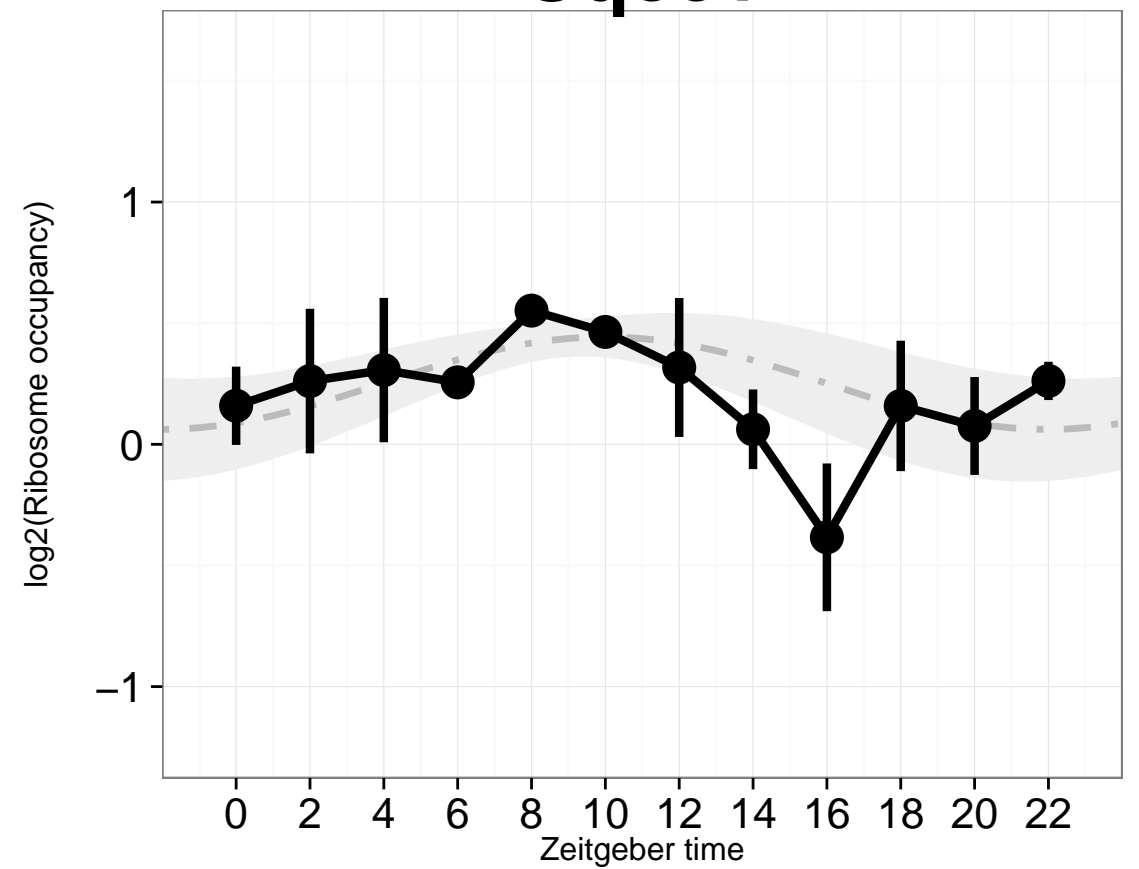

Supplement: SuppDataset_1.zip [file Uqcc1_set_B.pdf › Supplemental Dataset 1/B-mRNA_rhythm_translation_nonrhyth/Uqcc1_set_B.pdf]

# Uqcr10

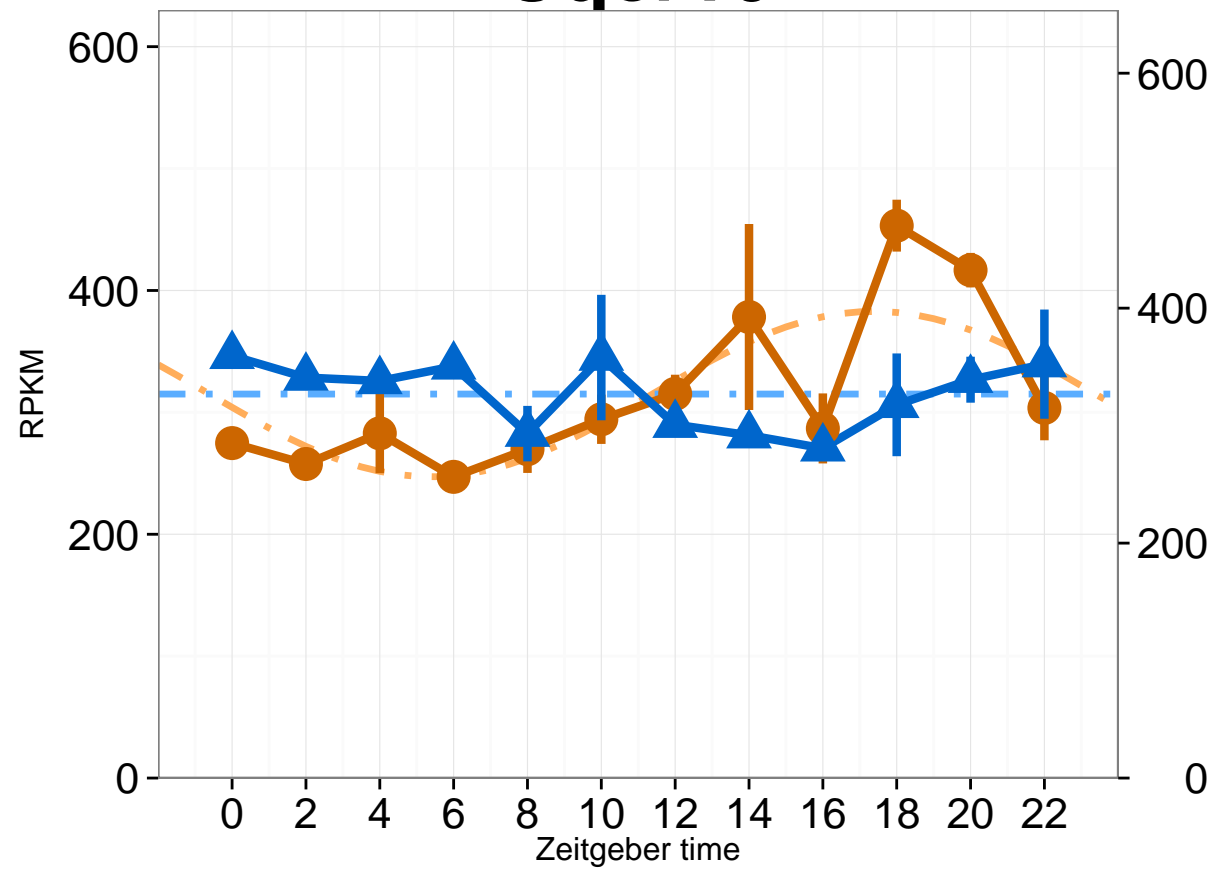

# Uqcr10

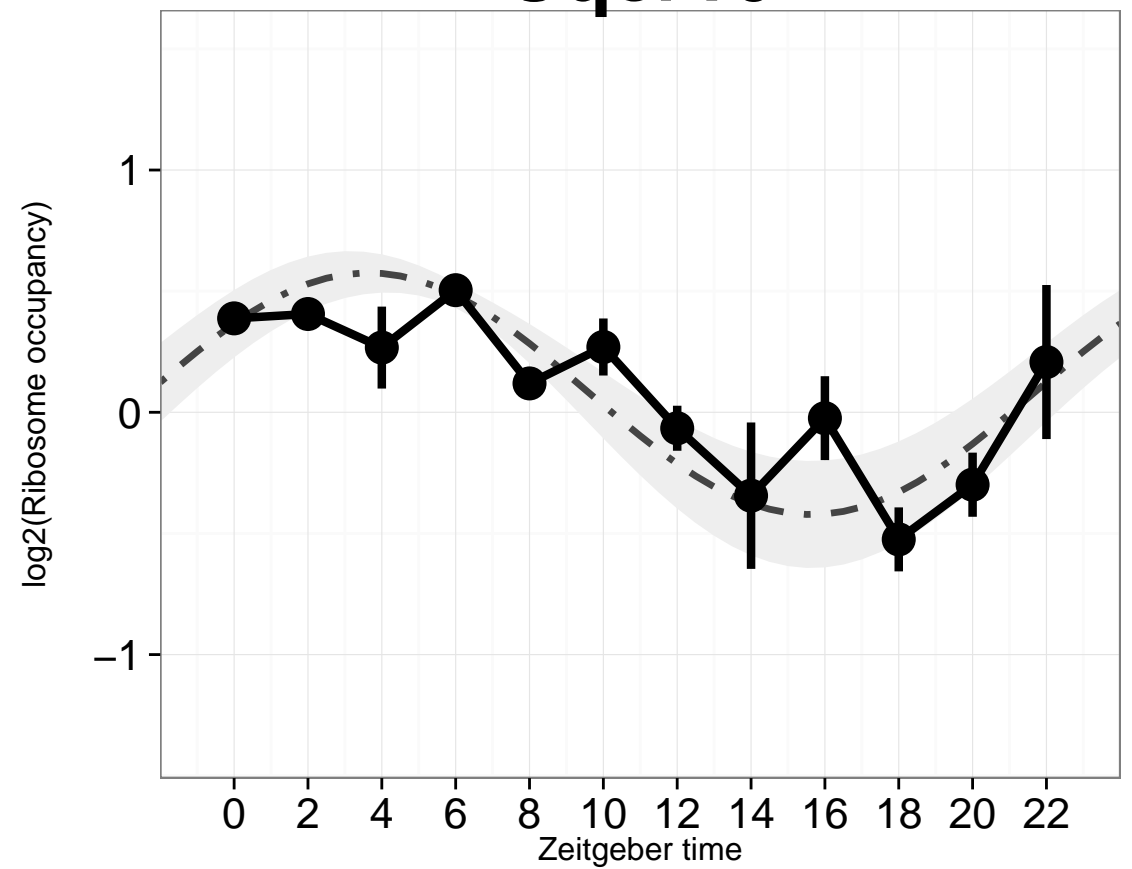

Supplement: SuppDataset_1.zip [file Uqcr10_set_B.pdf › Supplemental Dataset 1/B-mRNA_rhythm_translation_nonrhyth/Uqcr10_set_B.pdf]

## Usb1

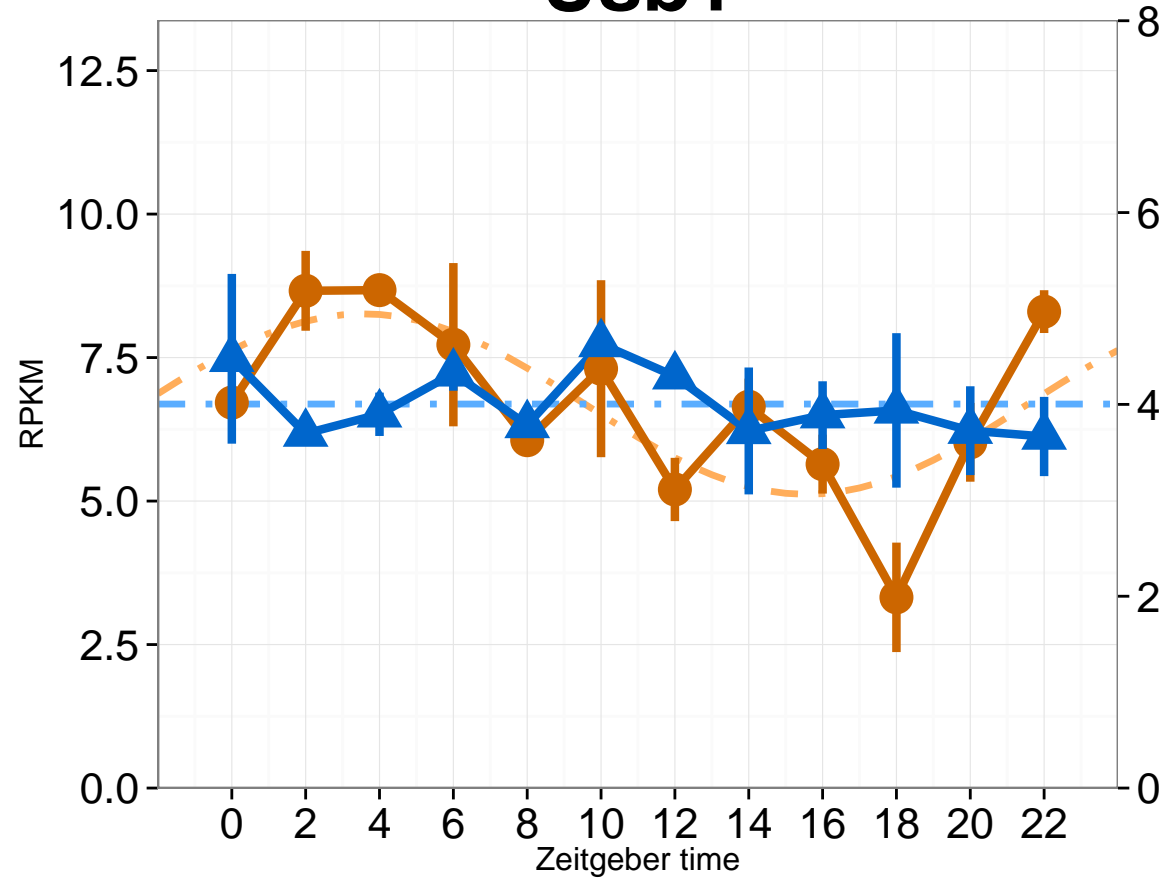

## Usb1

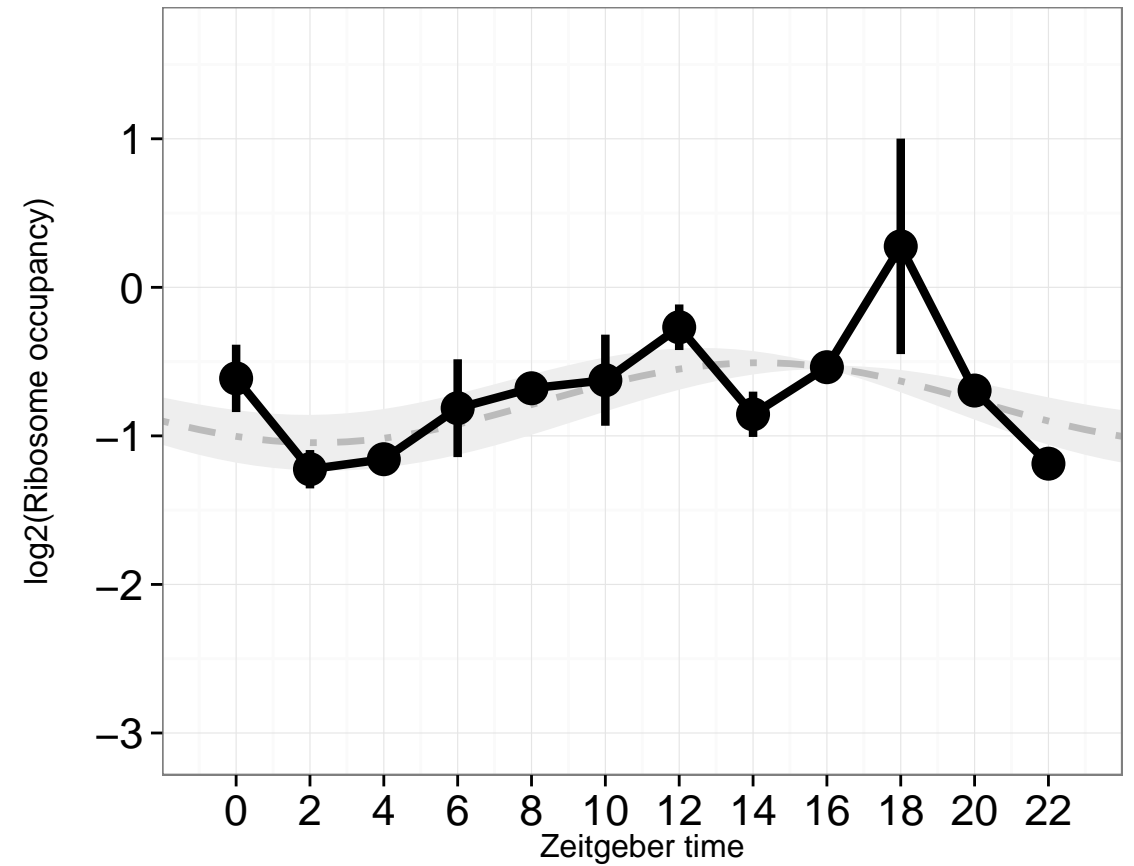

Supplement: SuppDataset_1.zip [file Usb1_set_B.pdf › Supplemental Dataset 1/B-mRNA_rhythm_translation_nonrhyth/Usb1_set_B.pdf]

## Usmg5

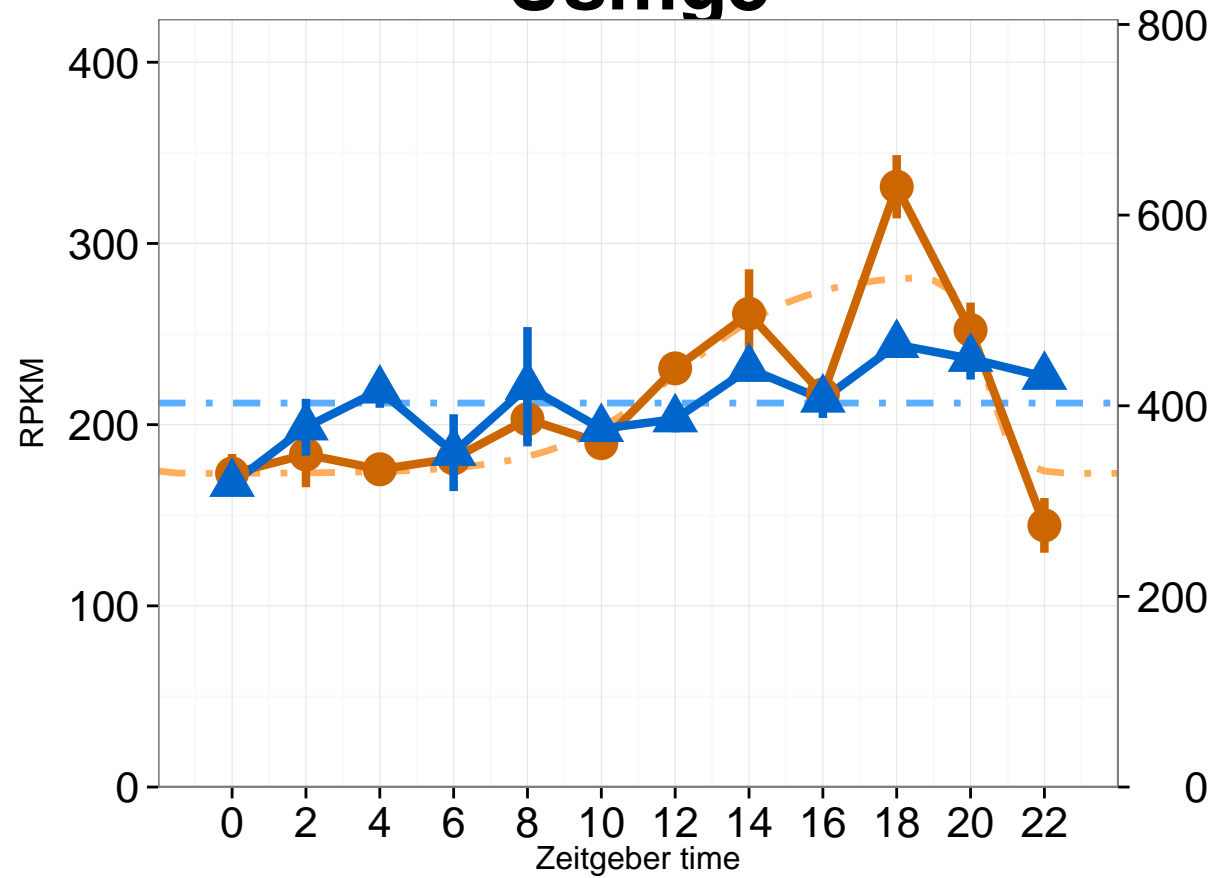

## Usmg5

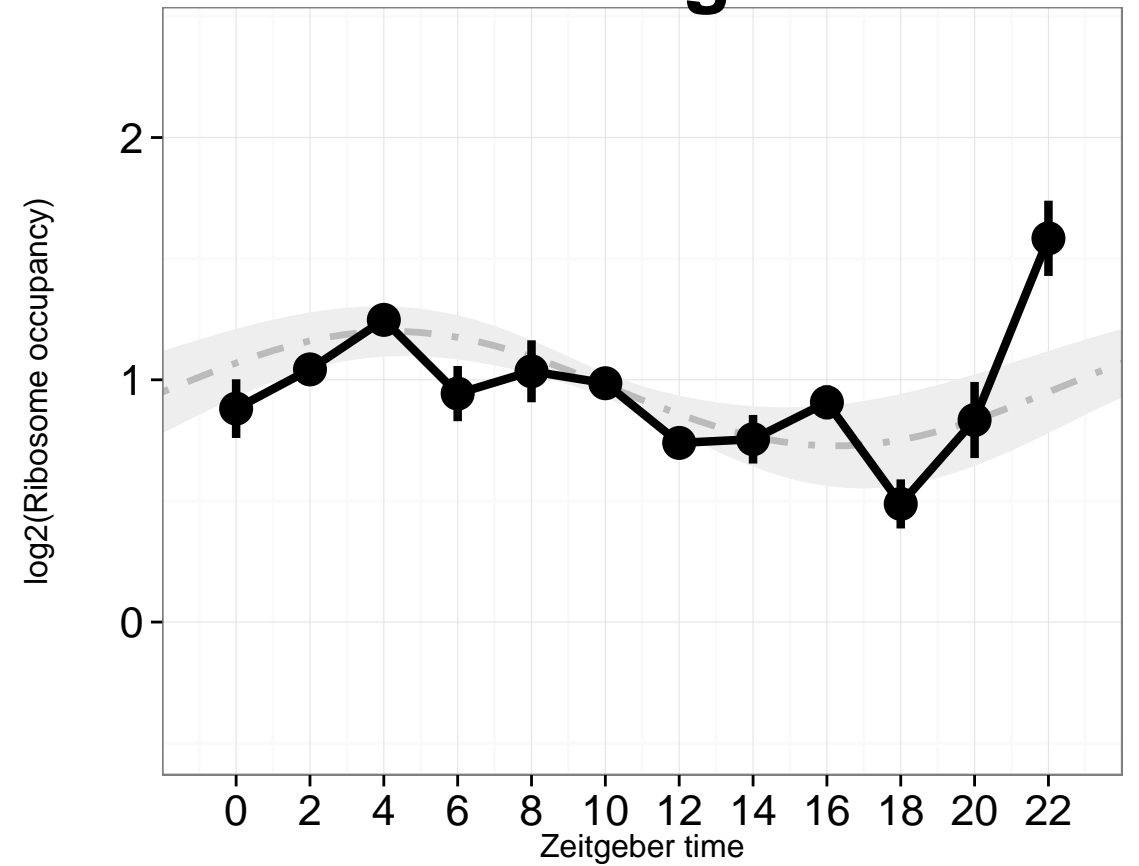

Supplement: SuppDataset_1.zip [file Usmg5_set_B.pdf › Supplemental Dataset 1/B-mRNA_rhythm_translation_nonrhyth/Usmg5_set_B.pdf]

# Usp16

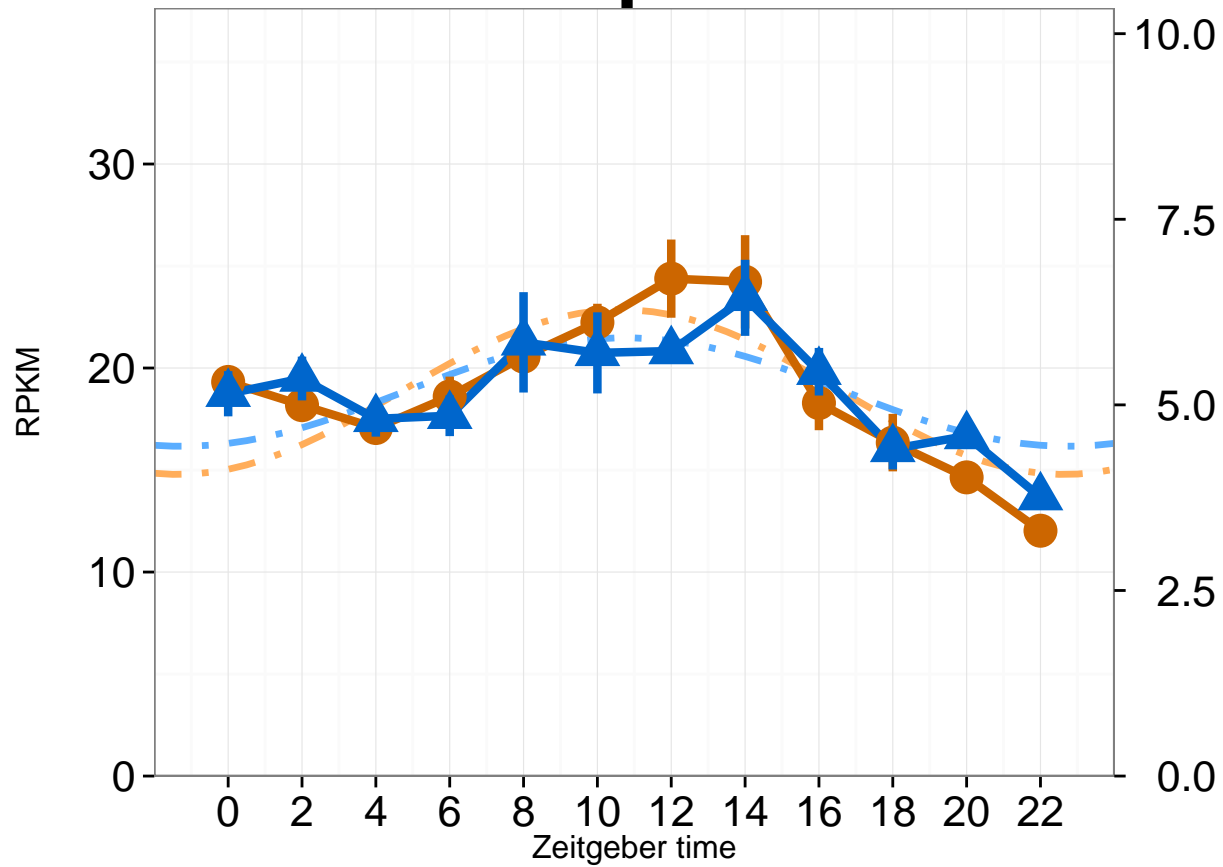

# Usp16

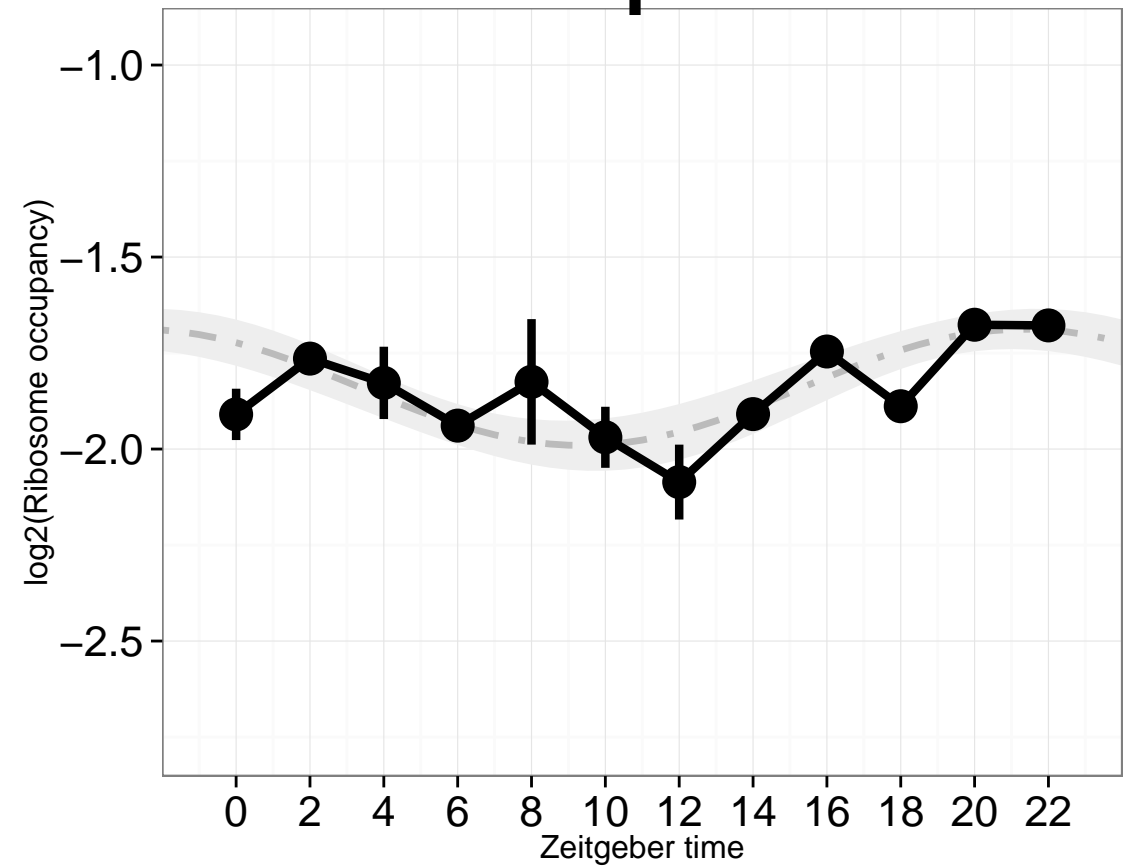

Supplement: SuppDataset_1.zip [file Usp16_set_B.pdf › Supplemental Dataset 1/B-mRNA_rhythm_translation_nonrhyth/Usp16_set_B.pdf]

## Usp45

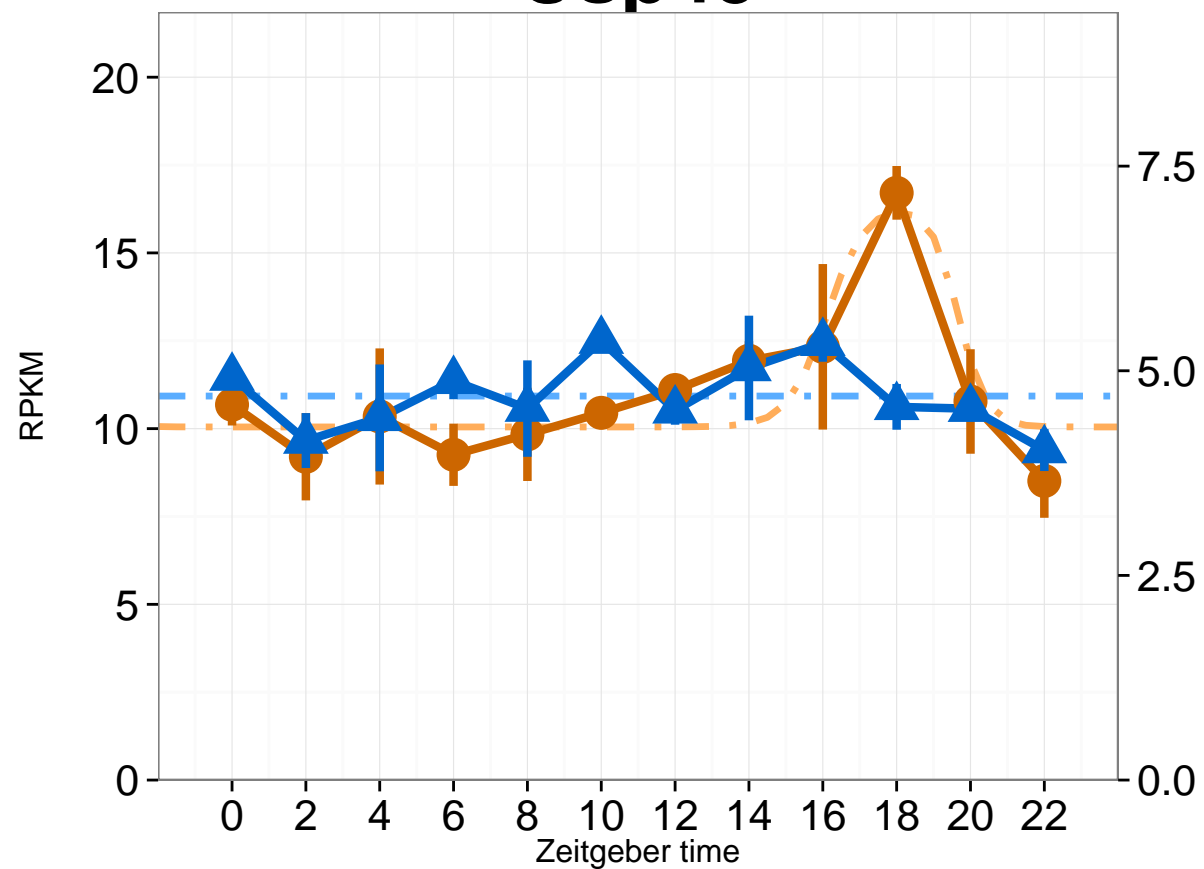

## Usp45

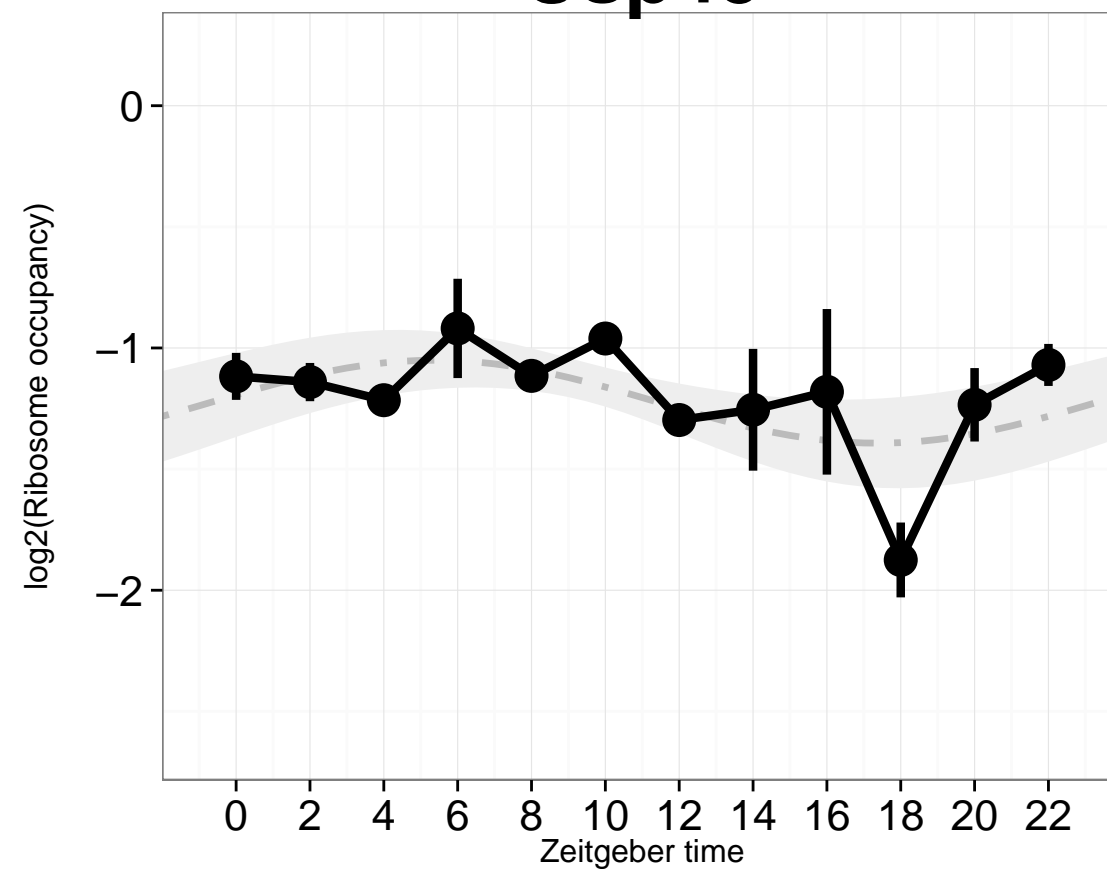

Supplement: SuppDataset_1.zip [file Usp45_set_B.pdf › Supplemental Dataset 1/B-mRNA_rhythm_translation_nonrhyth/Usp45_set_B.pdf]

# Vill

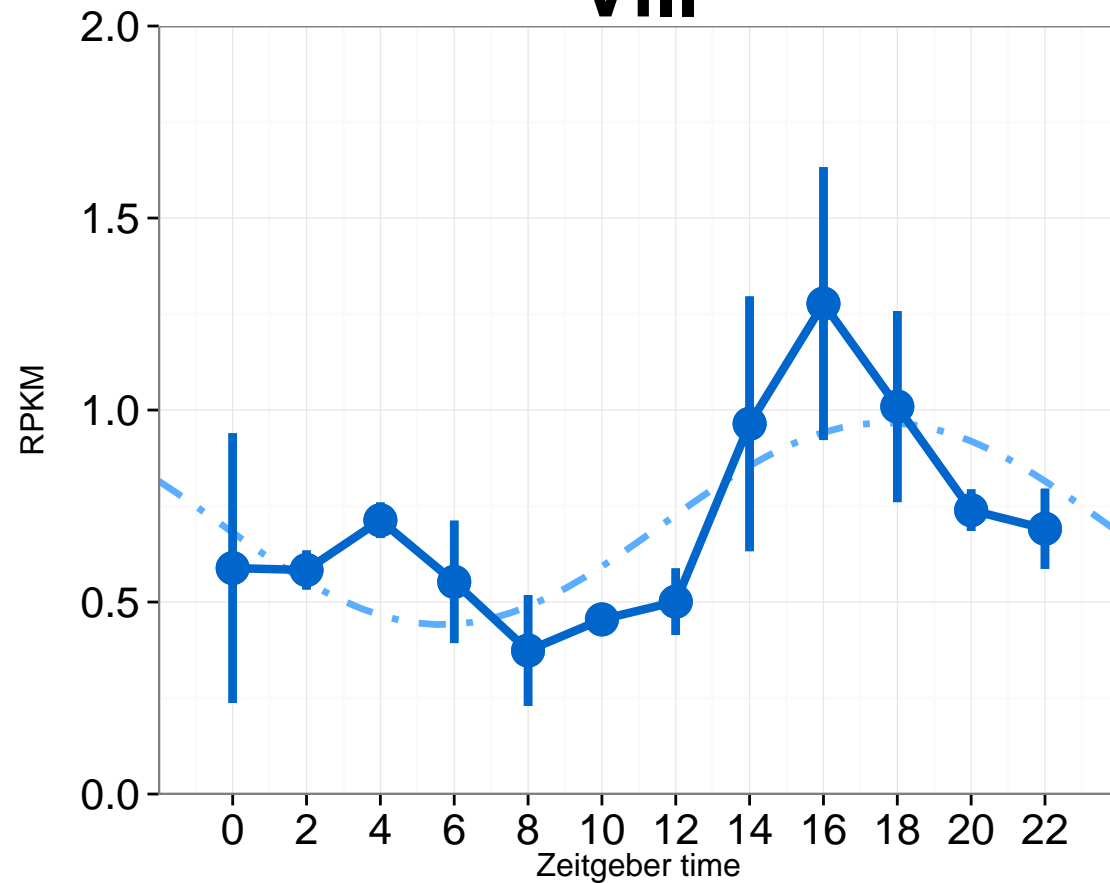

# Vill log2(Ribosome occupancy)

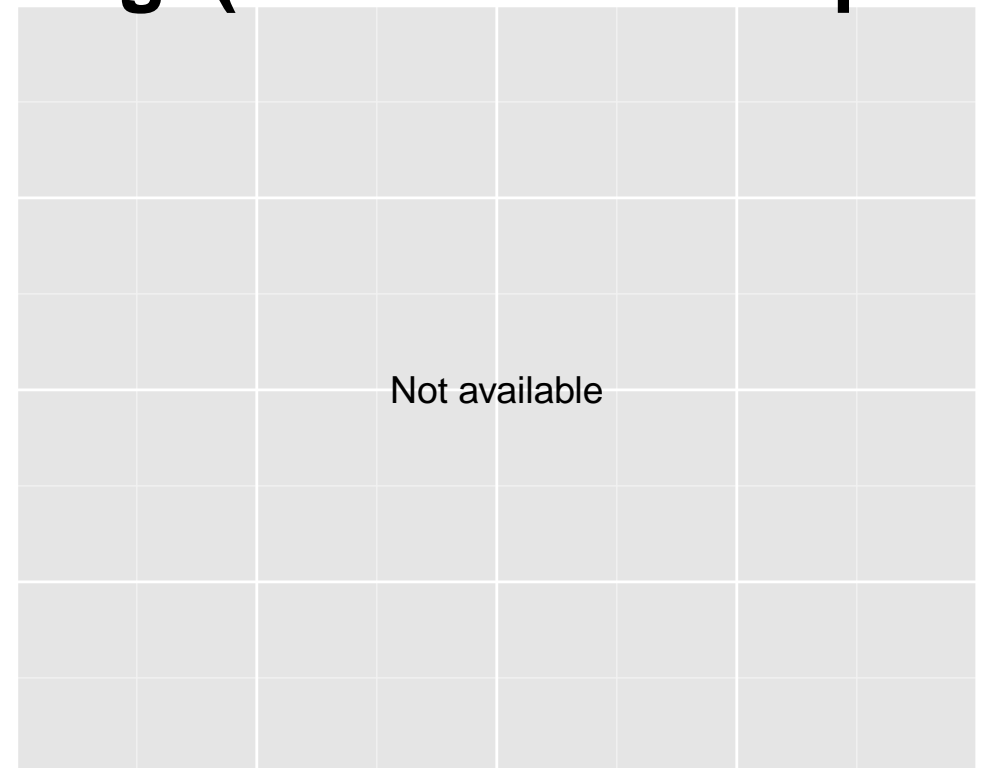

Supplement: SuppDataset_1.zip [file Vill_set_B.pdf › Supplemental Dataset 1/B-mRNA_rhythm_translation_nonrhyth/Vill_set_B.pdf]

## Vipr1

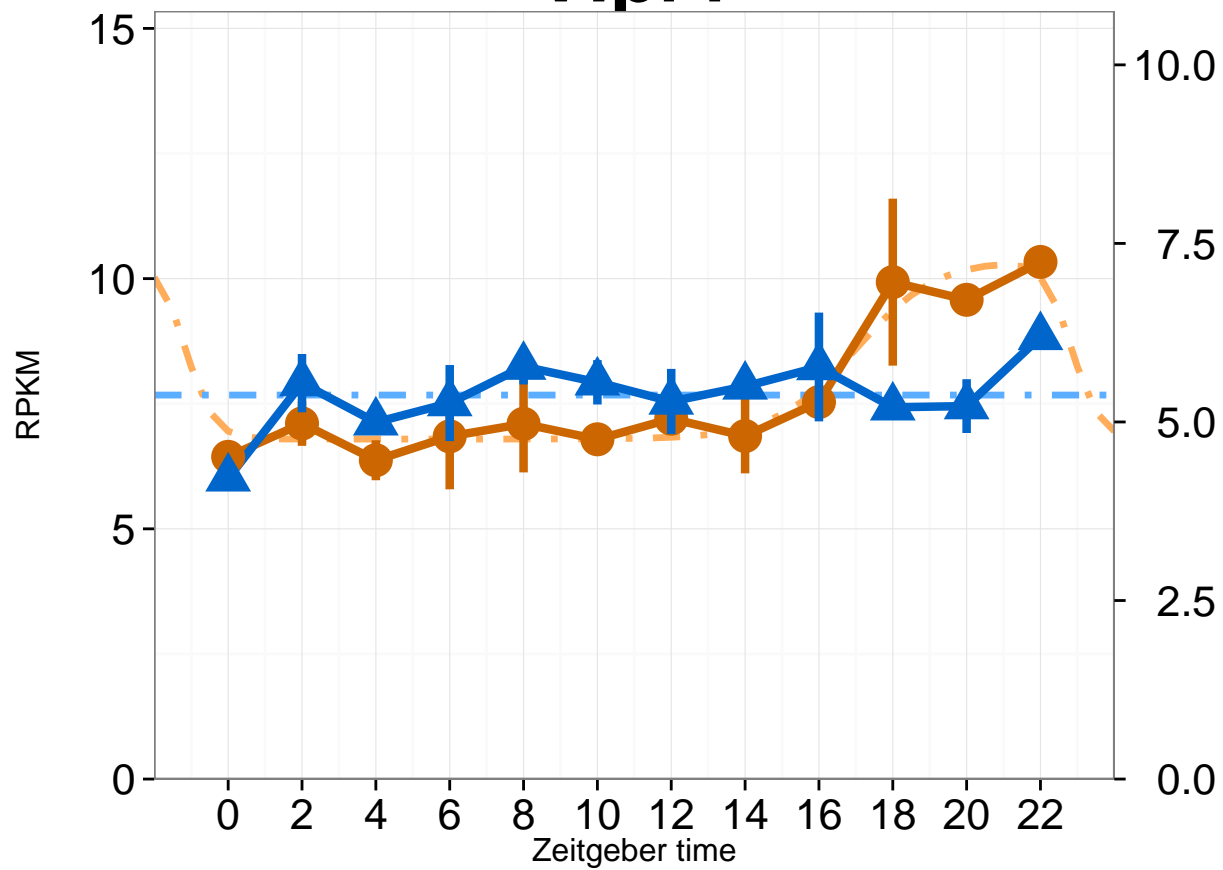

## Vipr1

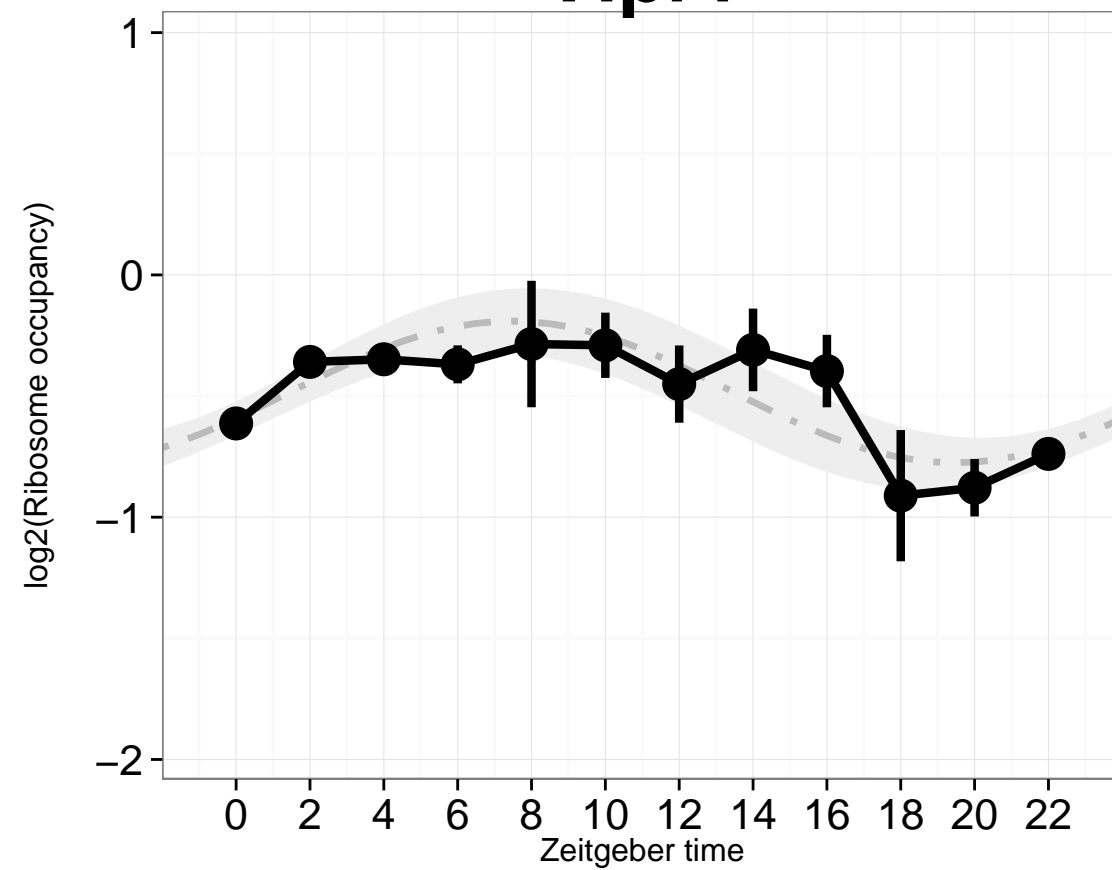

Supplement: SuppDataset_1.zip [file Vipr1_set_B.pdf › Supplemental Dataset 1/B-mRNA_rhythm_translation_nonrhyth/Vipr1_set_B.pdf]

## Vkorc1

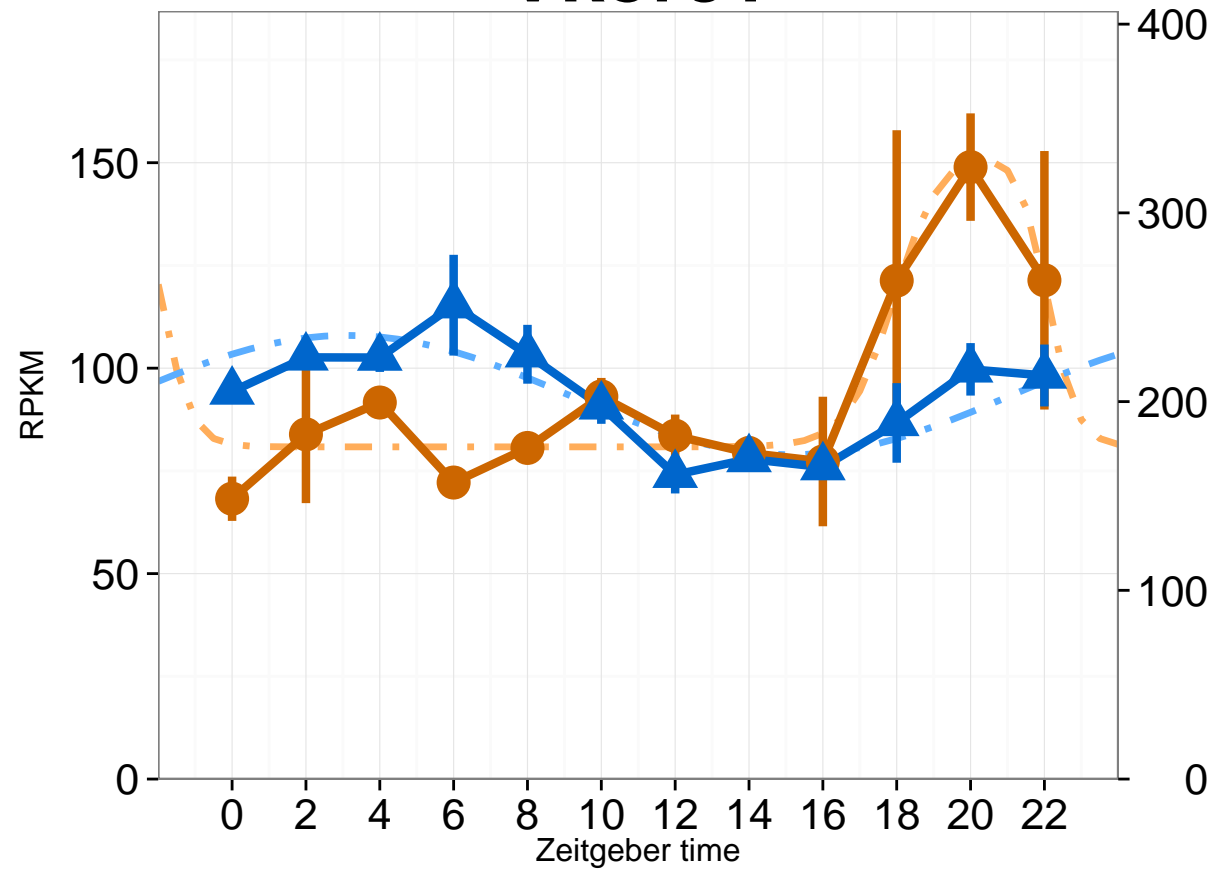

## Vkorc1

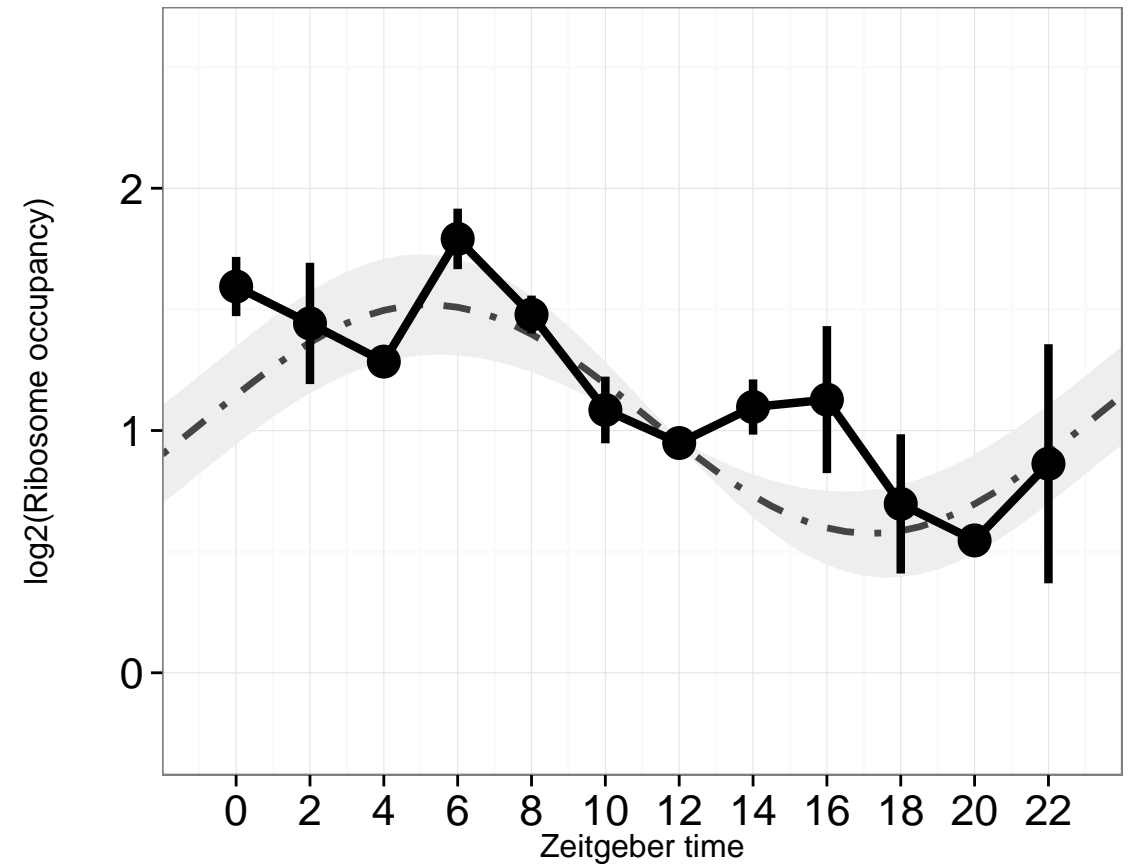

Supplement: SuppDataset_1.zip [file Vkorc1_set_B.pdf › Supplemental Dataset 1/B-mRNA_rhythm_translation_nonrhyth/Vkorc1_set_B.pdf]

## Vmo1

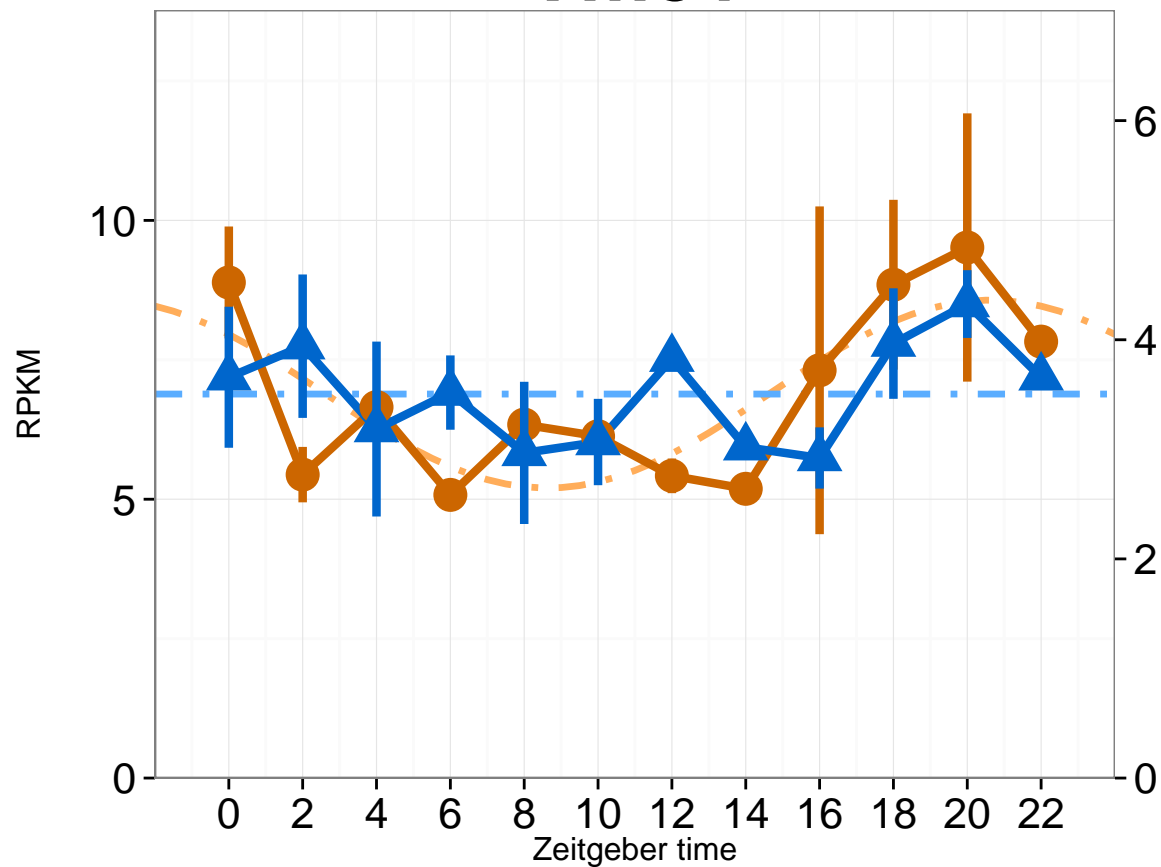

## Vmo1

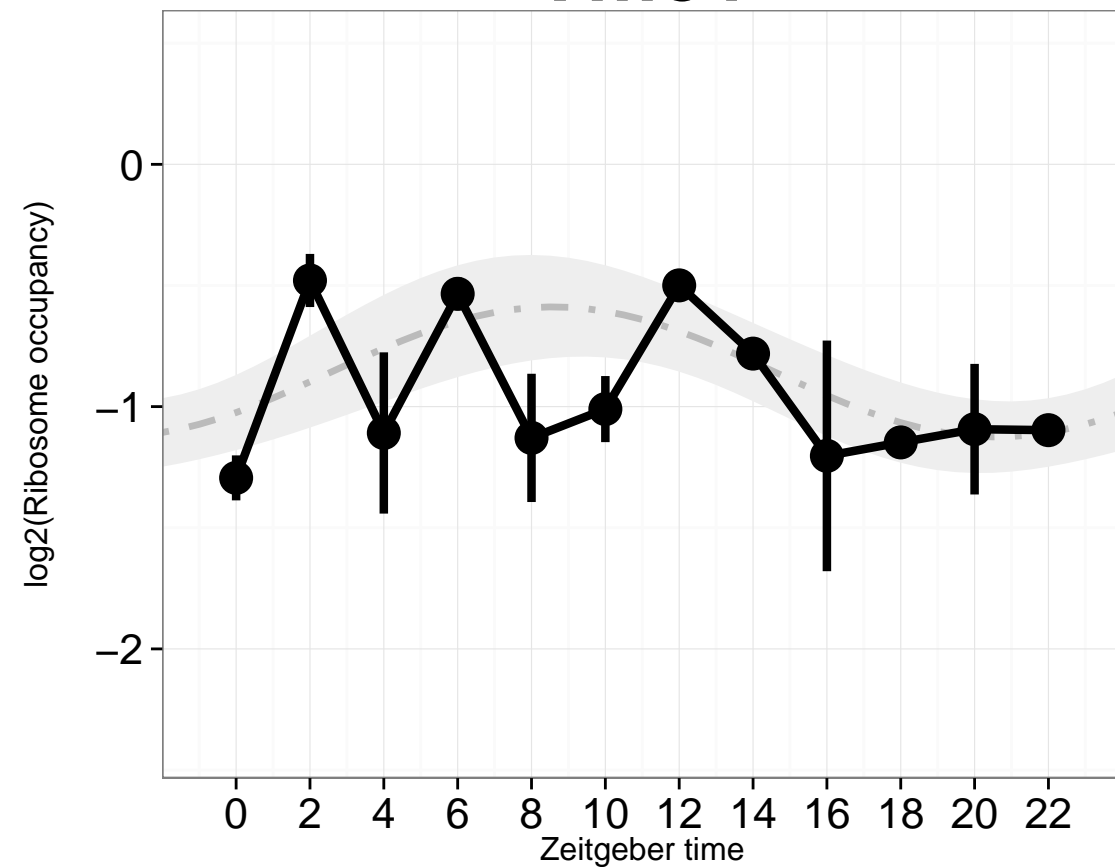

Supplement: SuppDataset_1.zip [file Vmo1_set_B.pdf › Supplemental Dataset 1/B-mRNA_rhythm_translation_nonrhyth/Vmo1_set_B.pdf]

## Wbp2

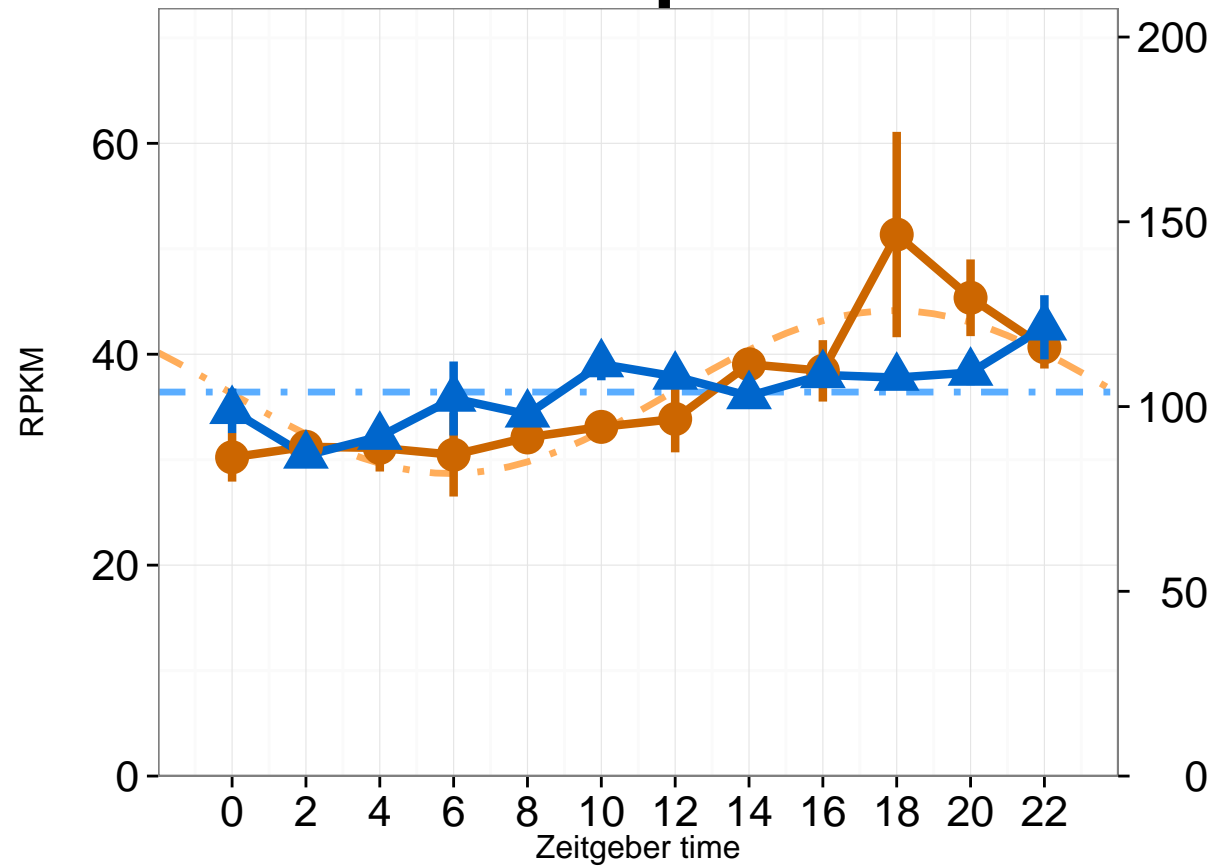

## Wbp2

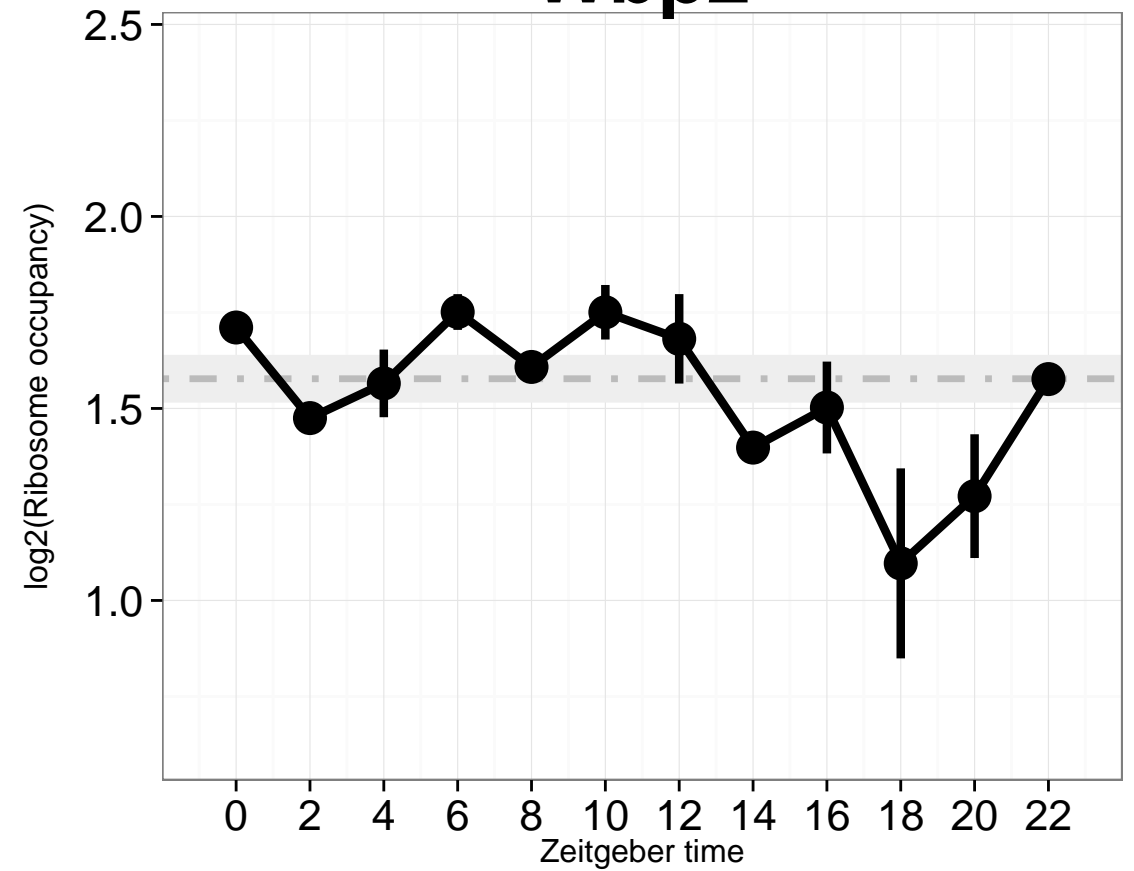

Supplement: SuppDataset_1.zip [file Wbp2_set_B.pdf › Supplemental Dataset 1/B-mRNA_rhythm_translation_nonrhyth/Wbp2_set_B.pdf]

# Wbscr22

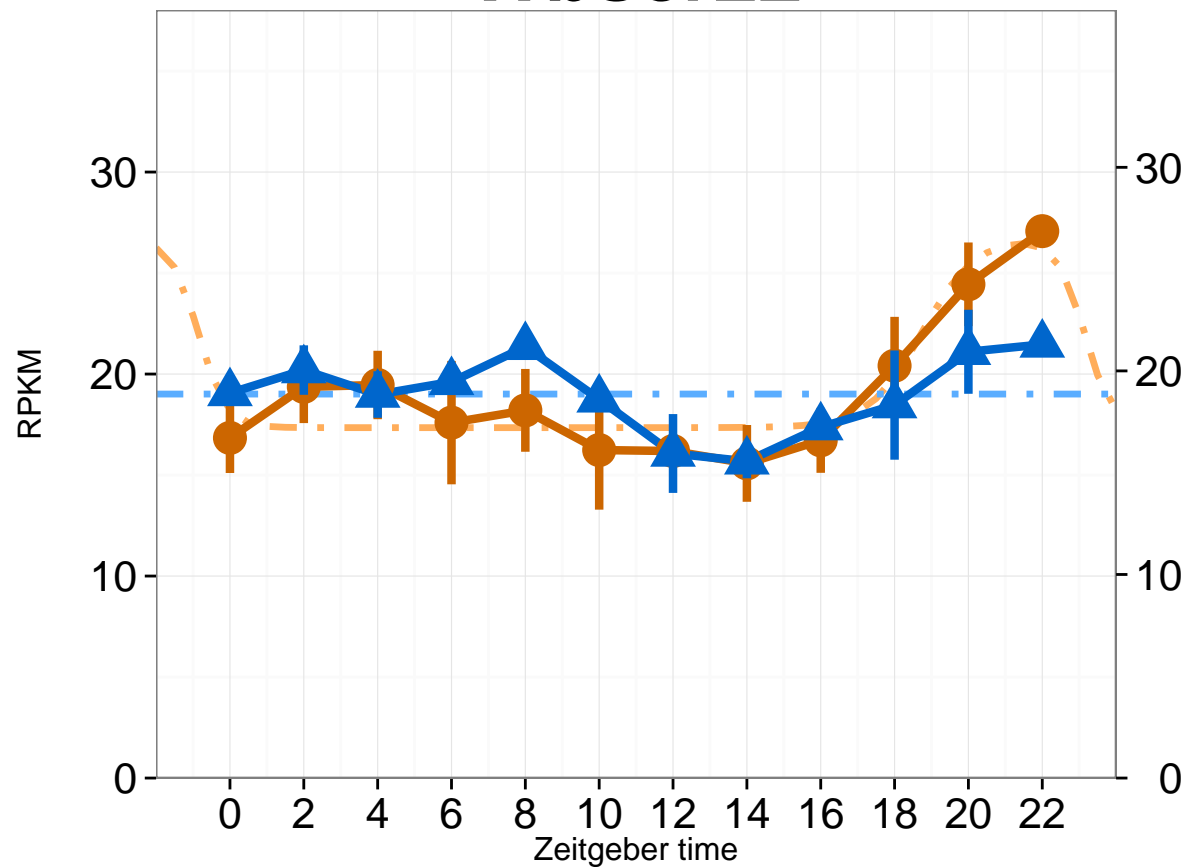

# Wbscr22

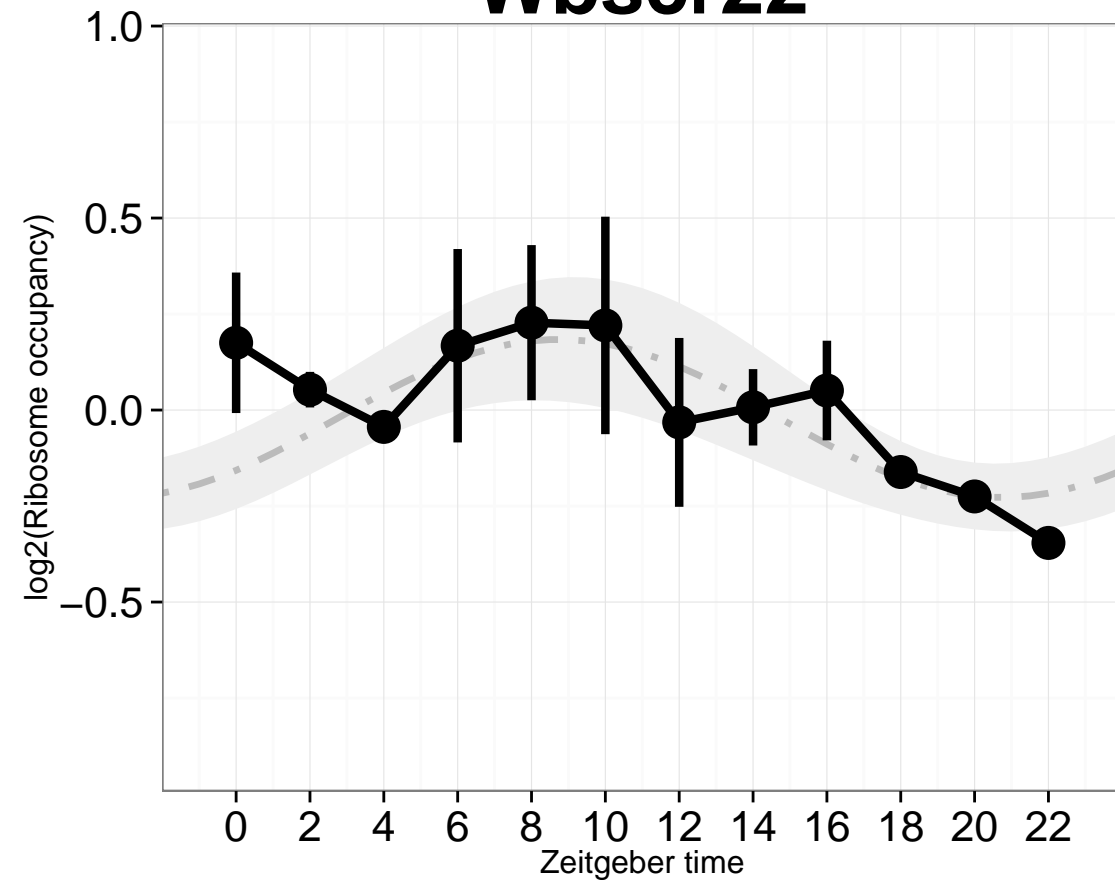

Supplement: SuppDataset_1.zip [file Wbscr22_set_B.pdf › Supplemental Dataset 1/B-mRNA_rhythm_translation_nonrhyth/Wbscr22_set_B.pdf]

# Wdhd1

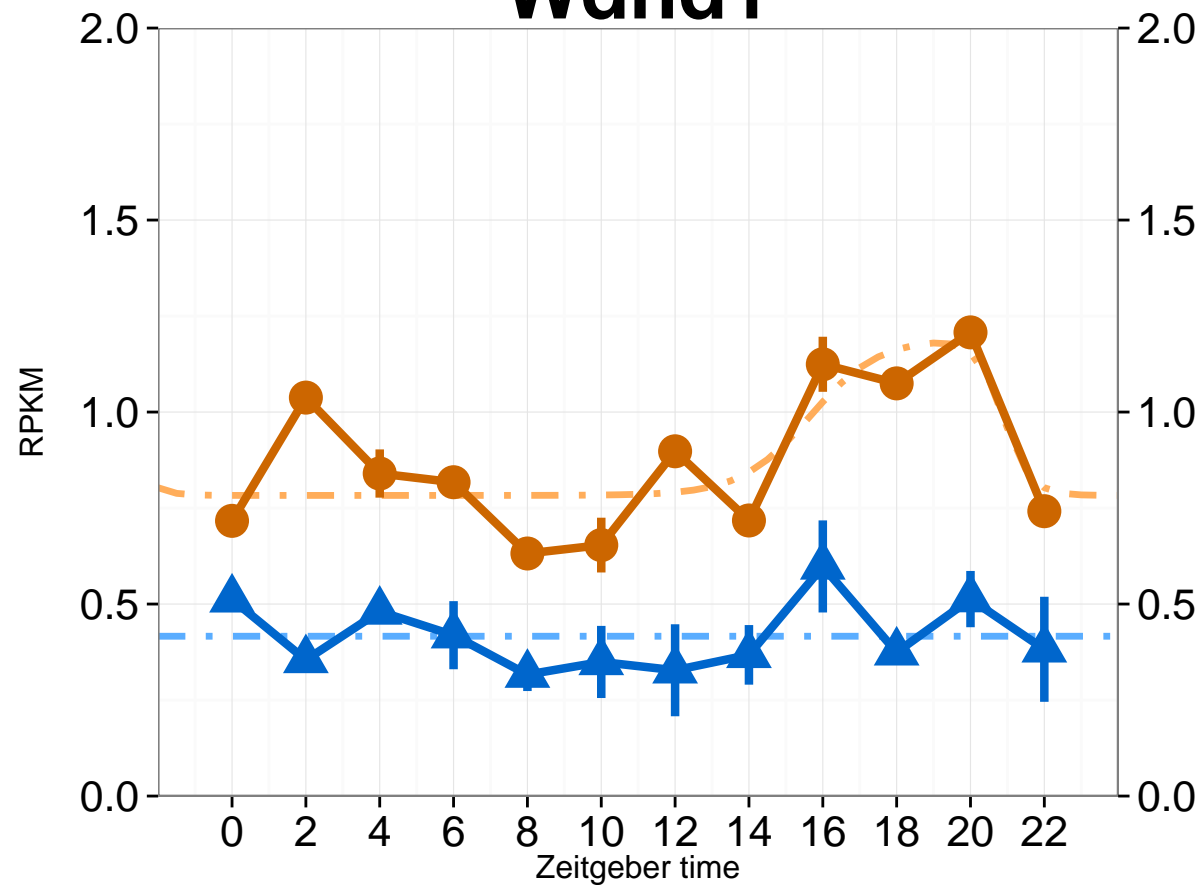

# Wdhd1

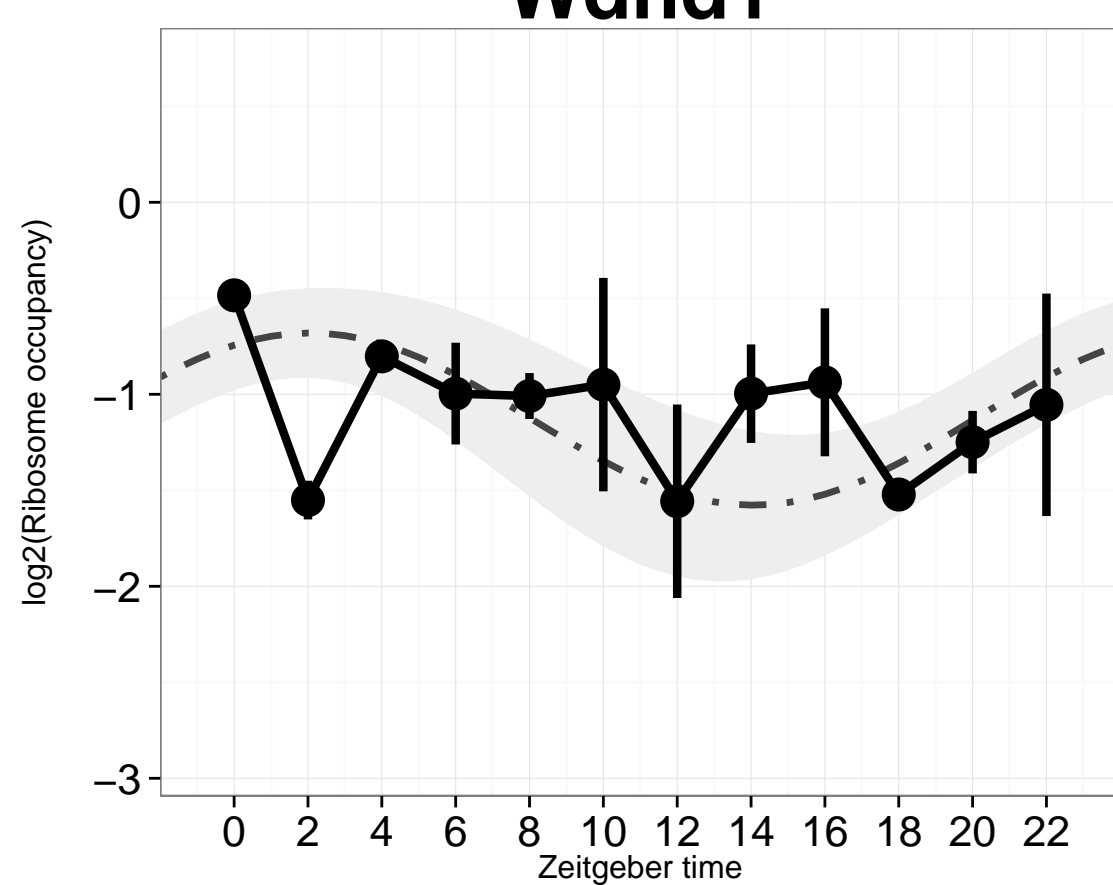

Supplement: SuppDataset_1.zip [file Wdhd1_set_B.pdf › Supplemental Dataset 1/B-mRNA_rhythm_translation_nonrhyth/Wdhd1_set_B.pdf]

## Wdr41

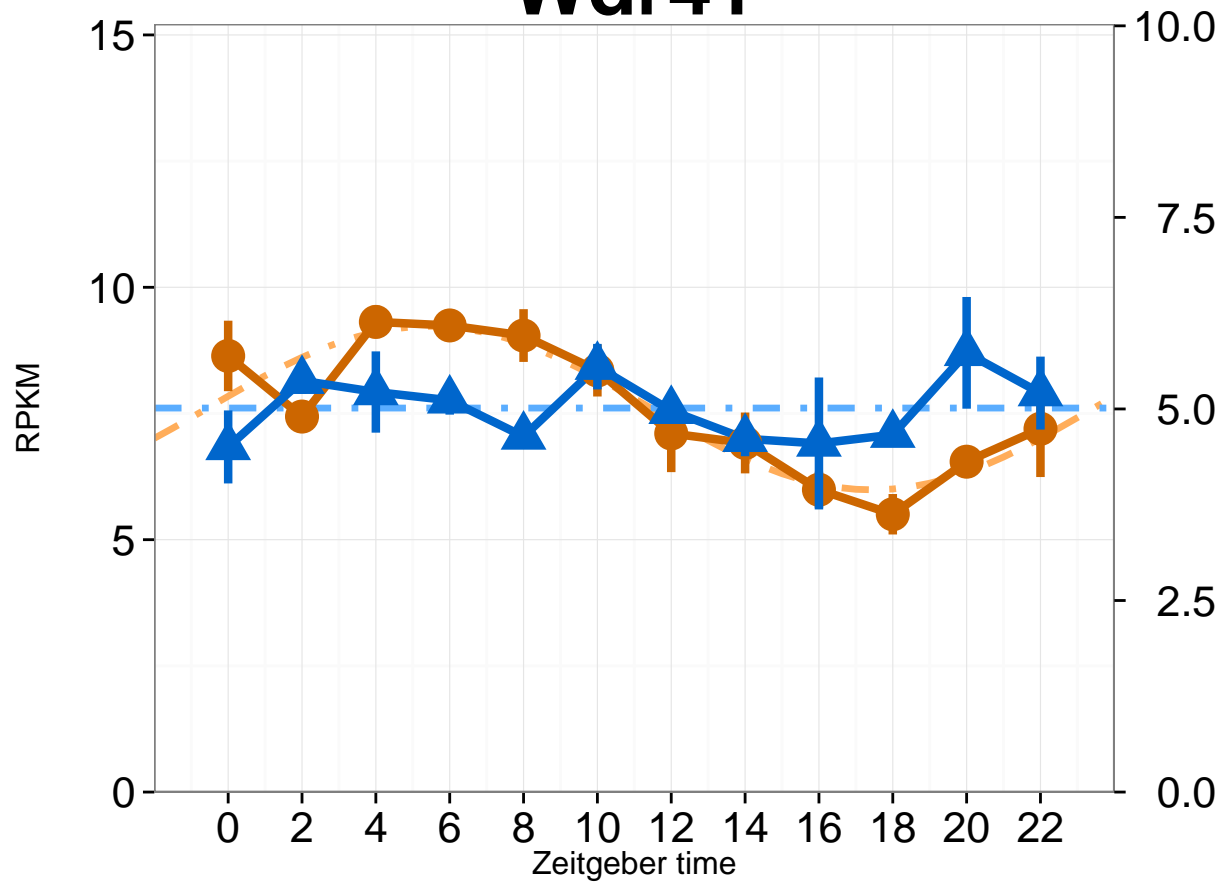

## Wdr41

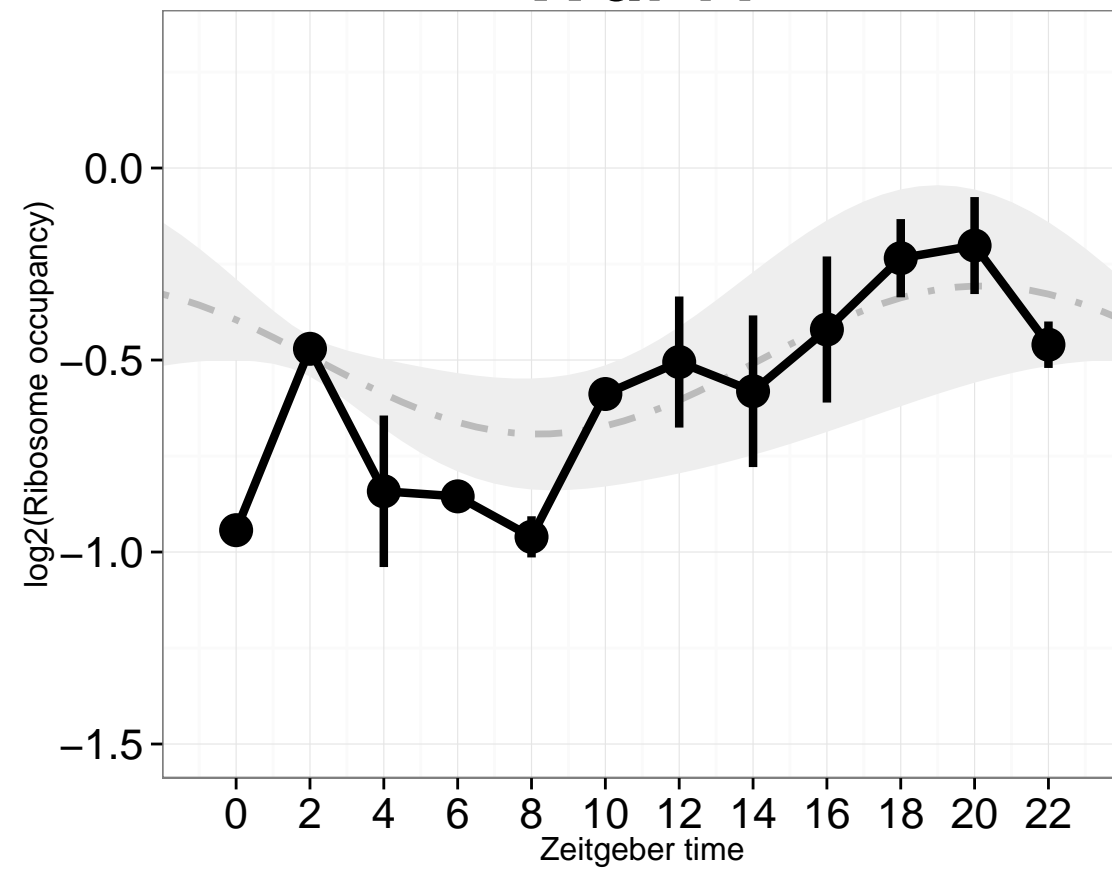

Supplement: SuppDataset_1.zip [file Wdr41_set_B.pdf › Supplemental Dataset 1/B-mRNA_rhythm_translation_nonrhyth/Wdr41_set_B.pdf]

# Wdr5b

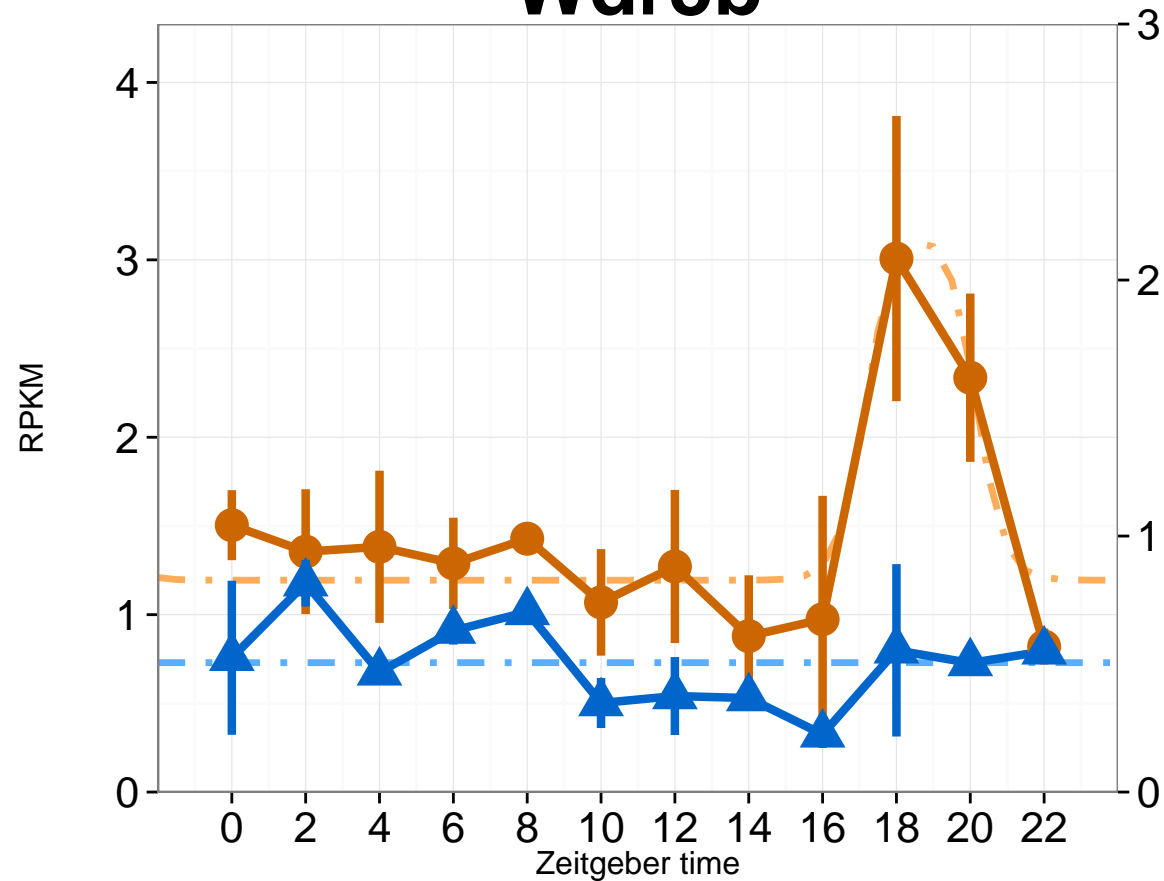

# Wdr5b

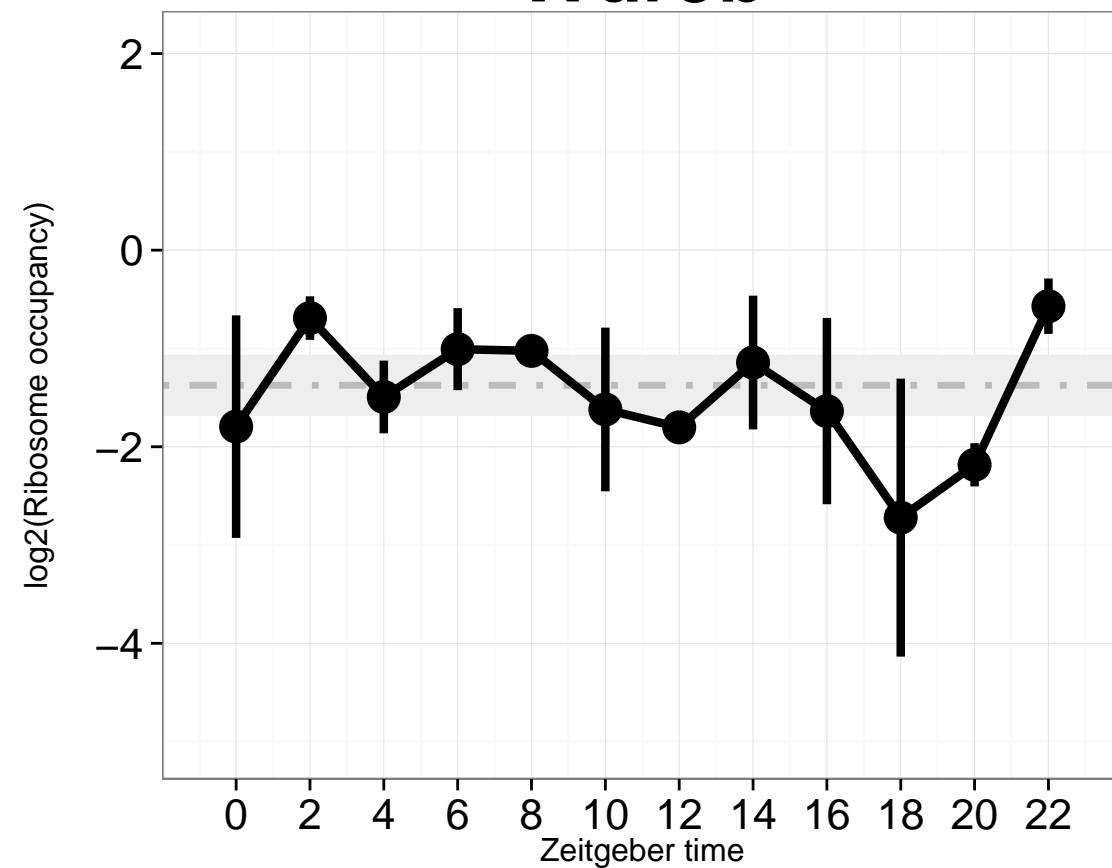

Supplement: SuppDataset_1.zip [file Wdr5b_set_B.pdf › Supplemental Dataset 1/B-mRNA_rhythm_translation_nonrhyth/Wdr5b_set_B.pdf]

# Wfdc17

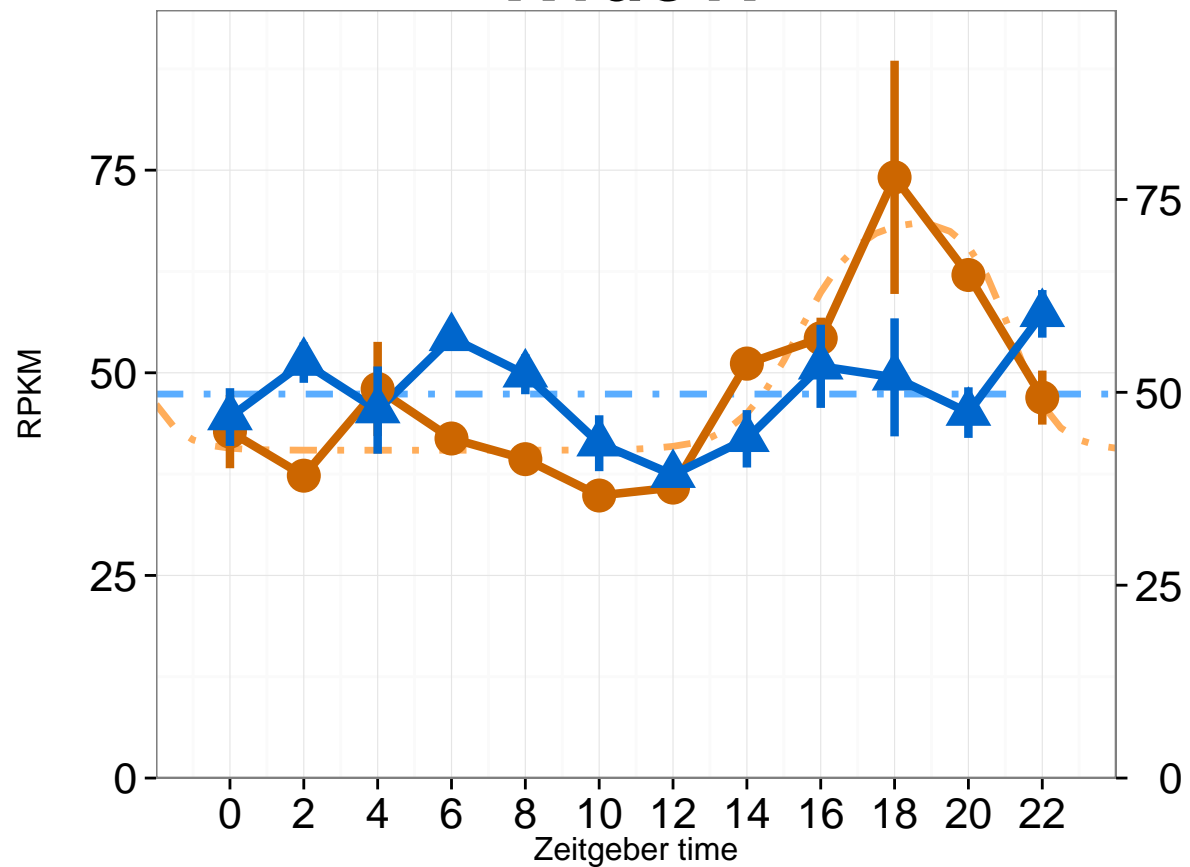

# Wfdc17

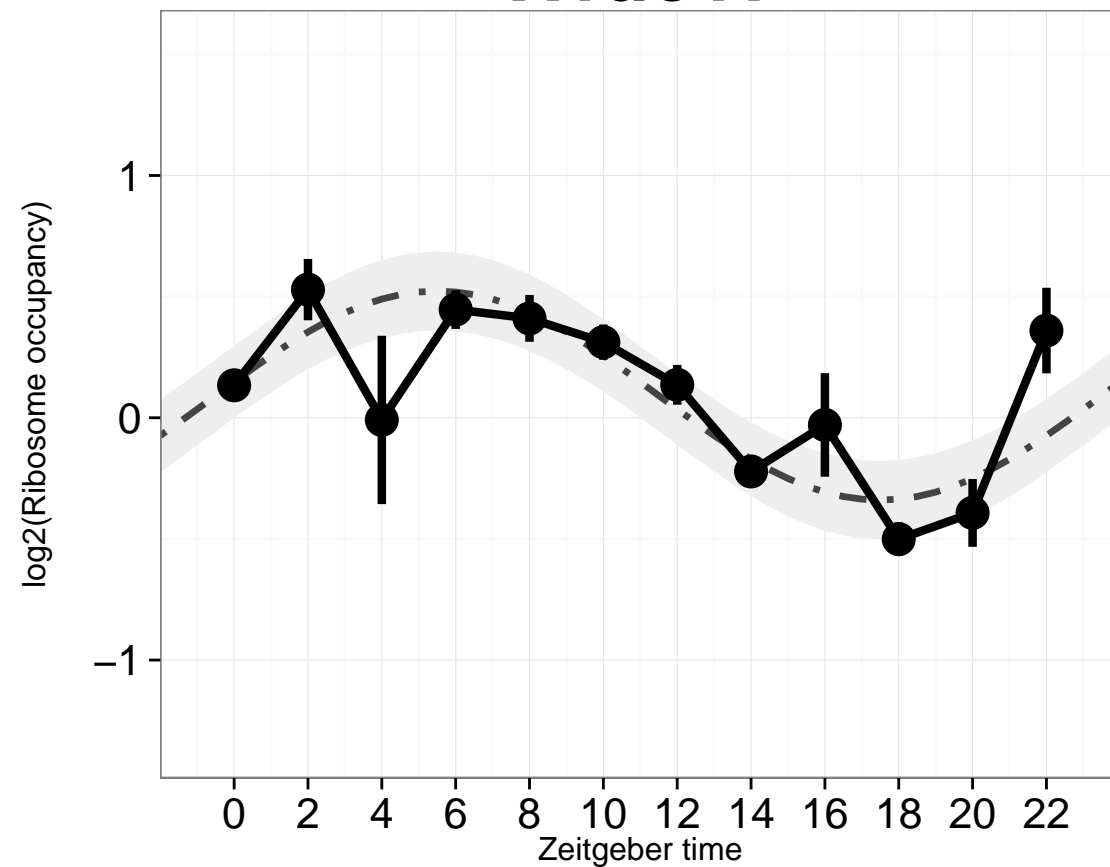

Supplement: SuppDataset_1.zip [file Wfdc17_set_B.pdf › Supplemental Dataset 1/B-mRNA_rhythm_translation_nonrhyth/Wfdc17_set_B.pdf]

# Wfdc2

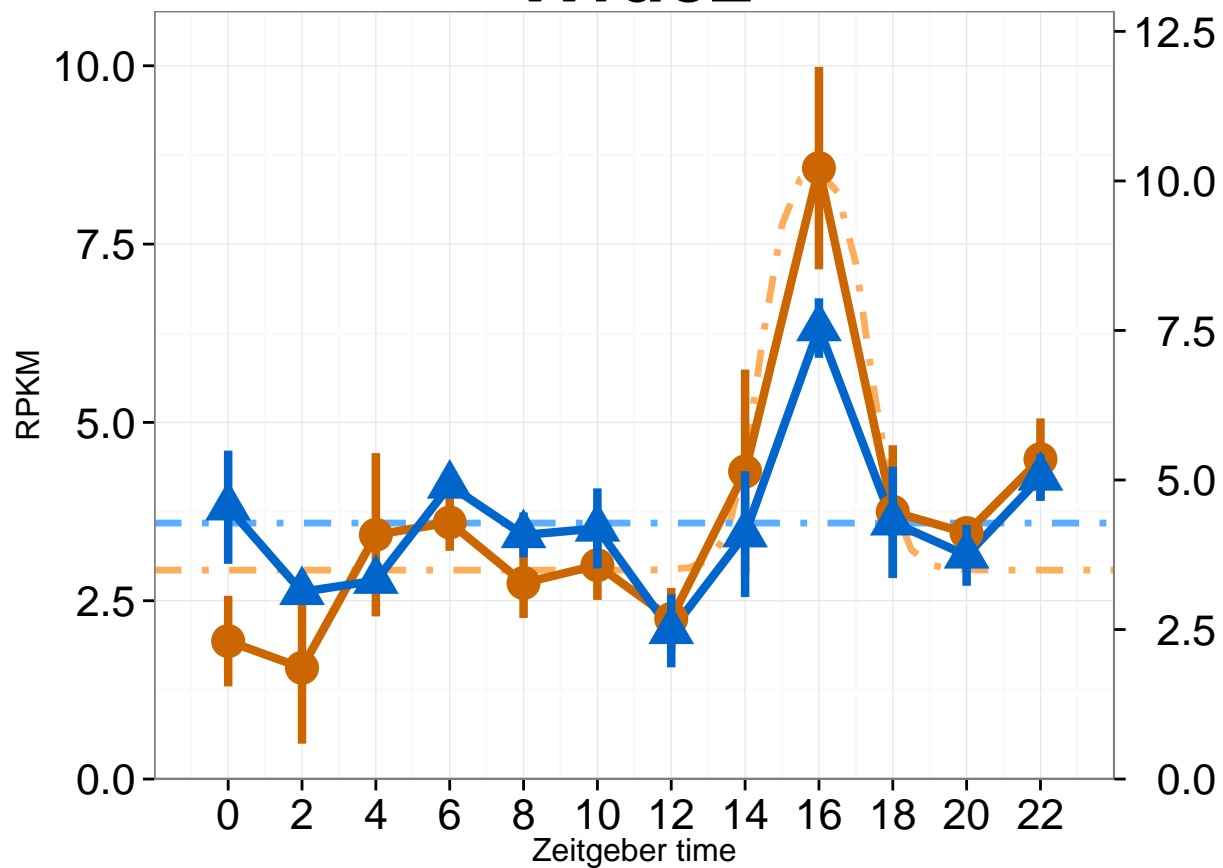

# Wfdc2

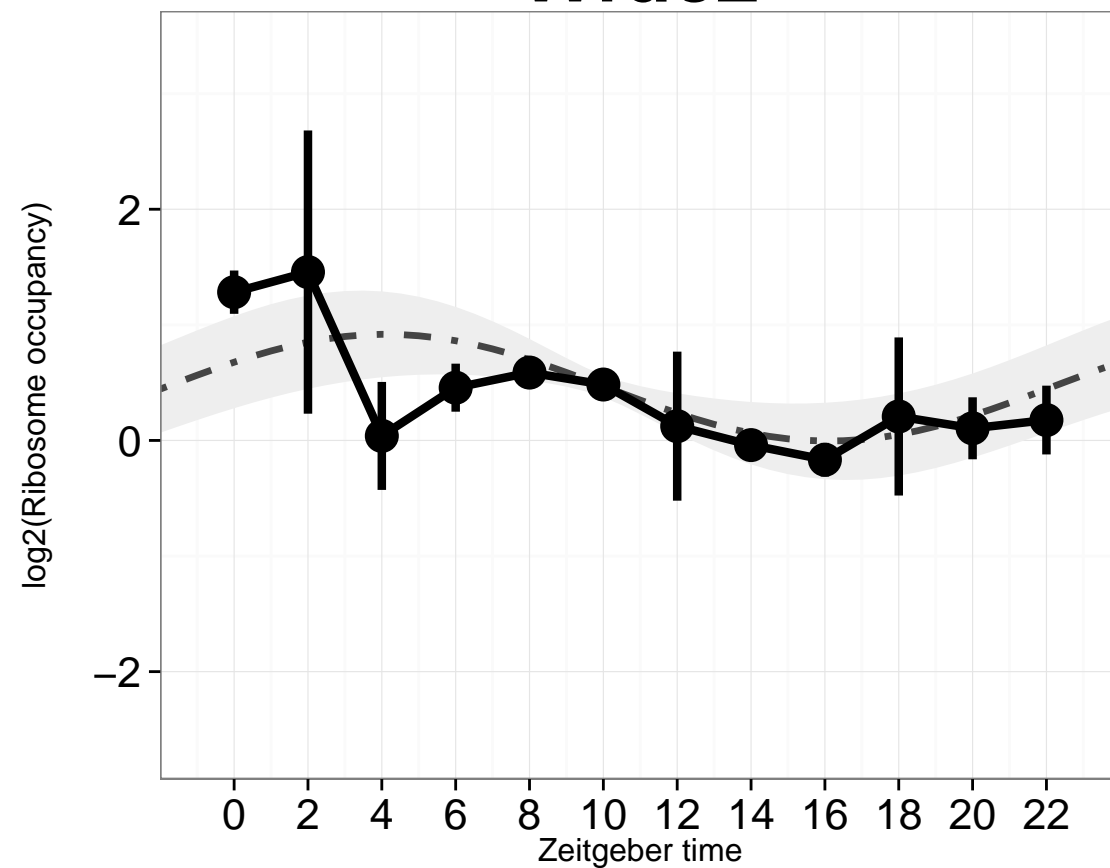

Supplement: SuppDataset_1.zip [file Wfdc2_set_B.pdf › Supplemental Dataset 1/B-mRNA_rhythm_translation_nonrhyth/Wfdc2_set_B.pdf]

## Wisp1

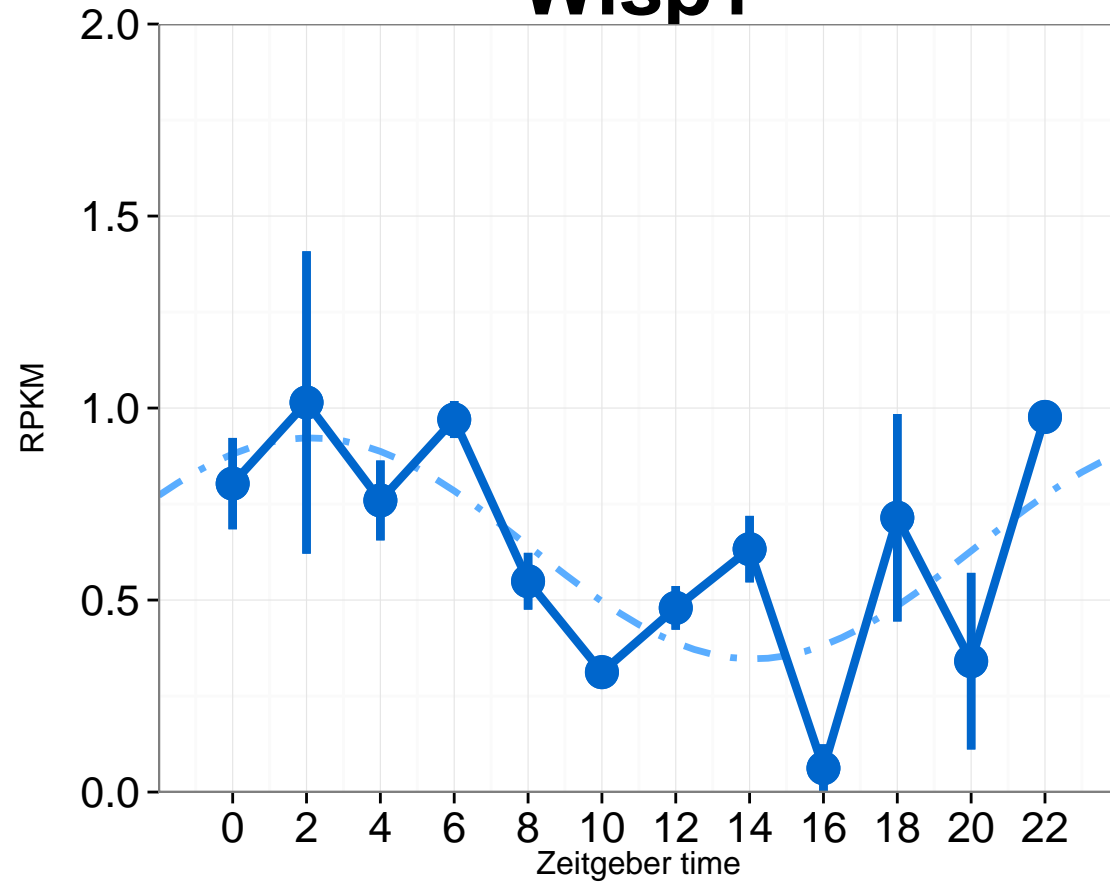

## Wisp1 log2(Ribosome occupancy

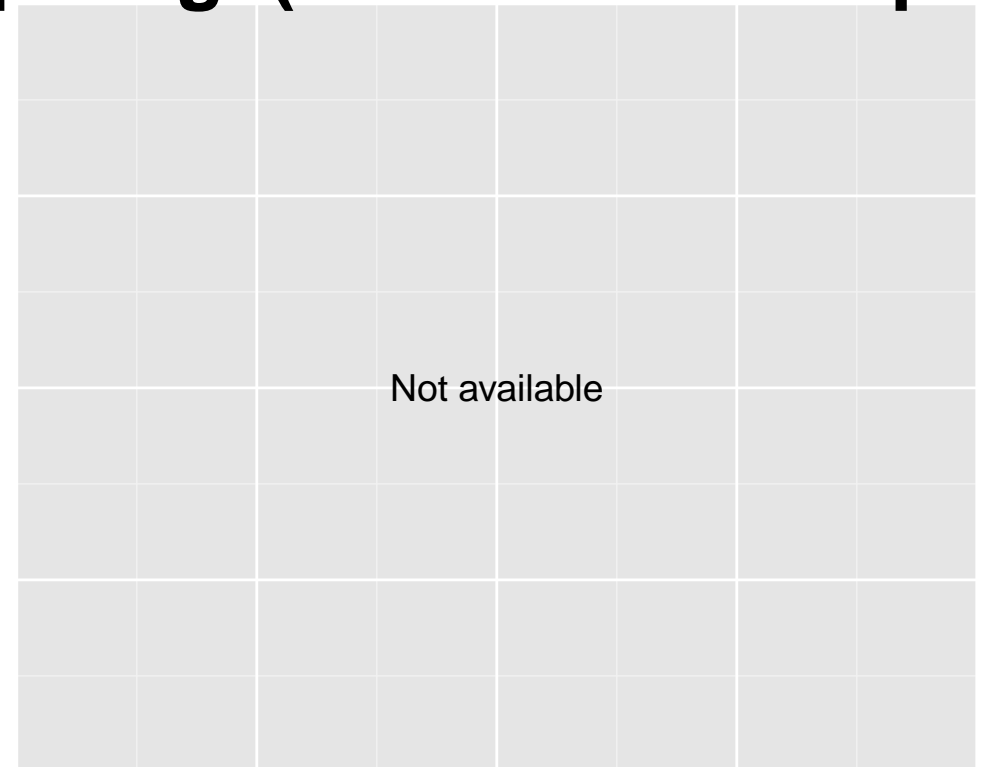

Supplement: SuppDataset_1.zip [file Wisp1_set_B.pdf › Supplemental Dataset 1/B-mRNA_rhythm_translation_nonrhyth/Wisp1_set_B.pdf]

# Wsb1

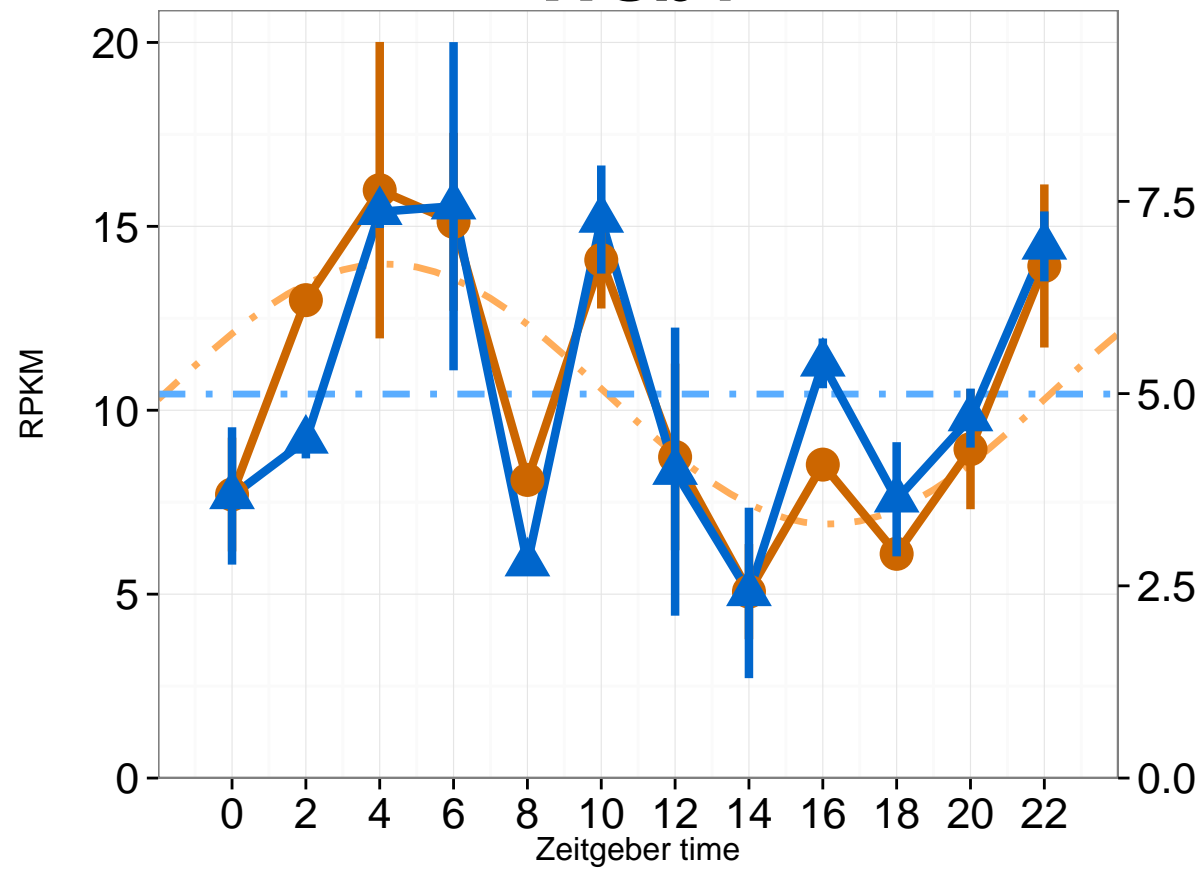

# Wsb1

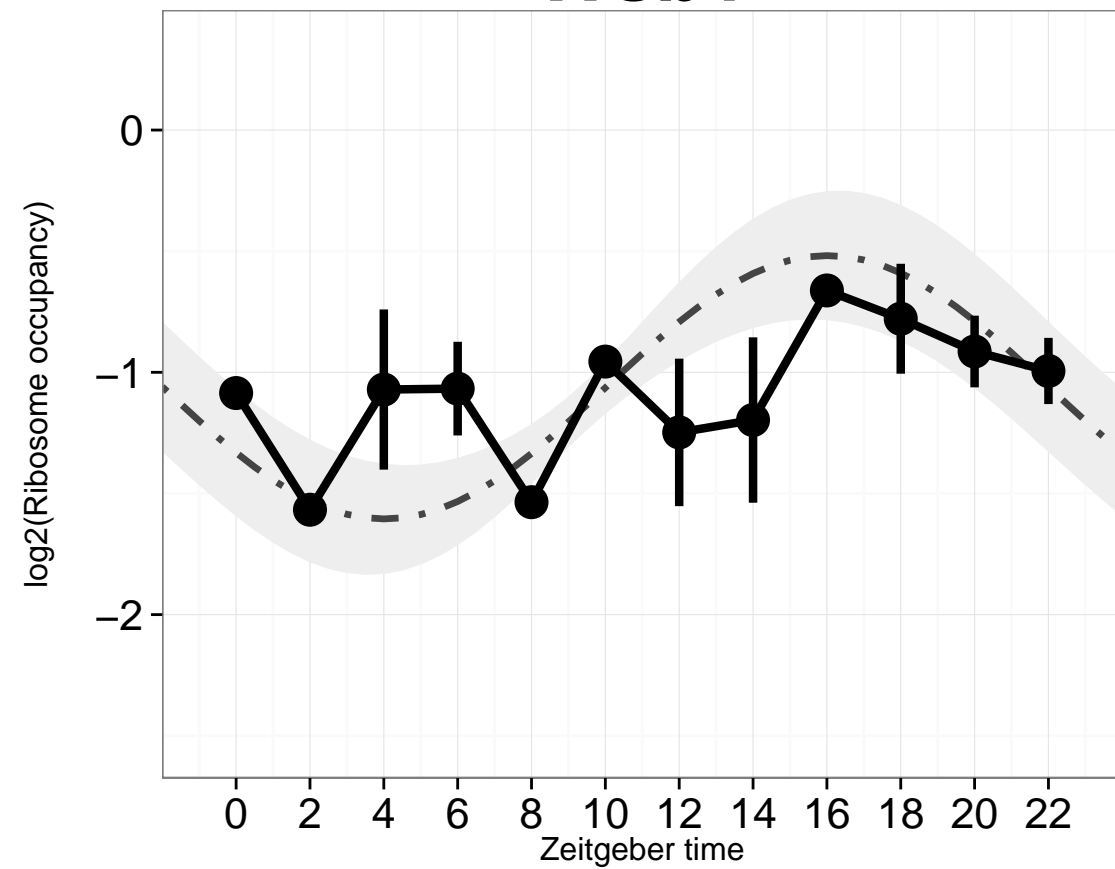

Supplement: SuppDataset_1.zip [file Wsb1_set_B.pdf › Supplemental Dataset 1/B-mRNA_rhythm_translation_nonrhyth/Wsb1_set_B.pdf]

## Xkr8

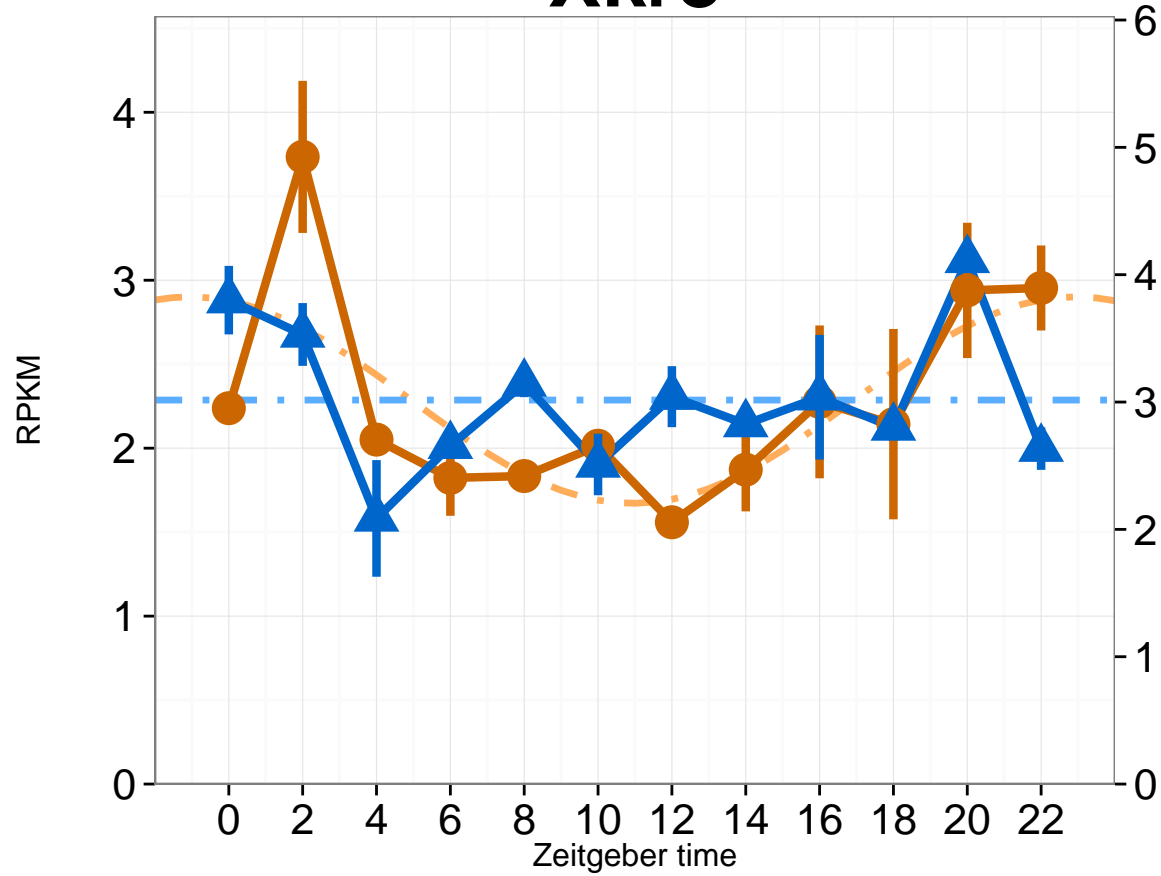

## Xkr8

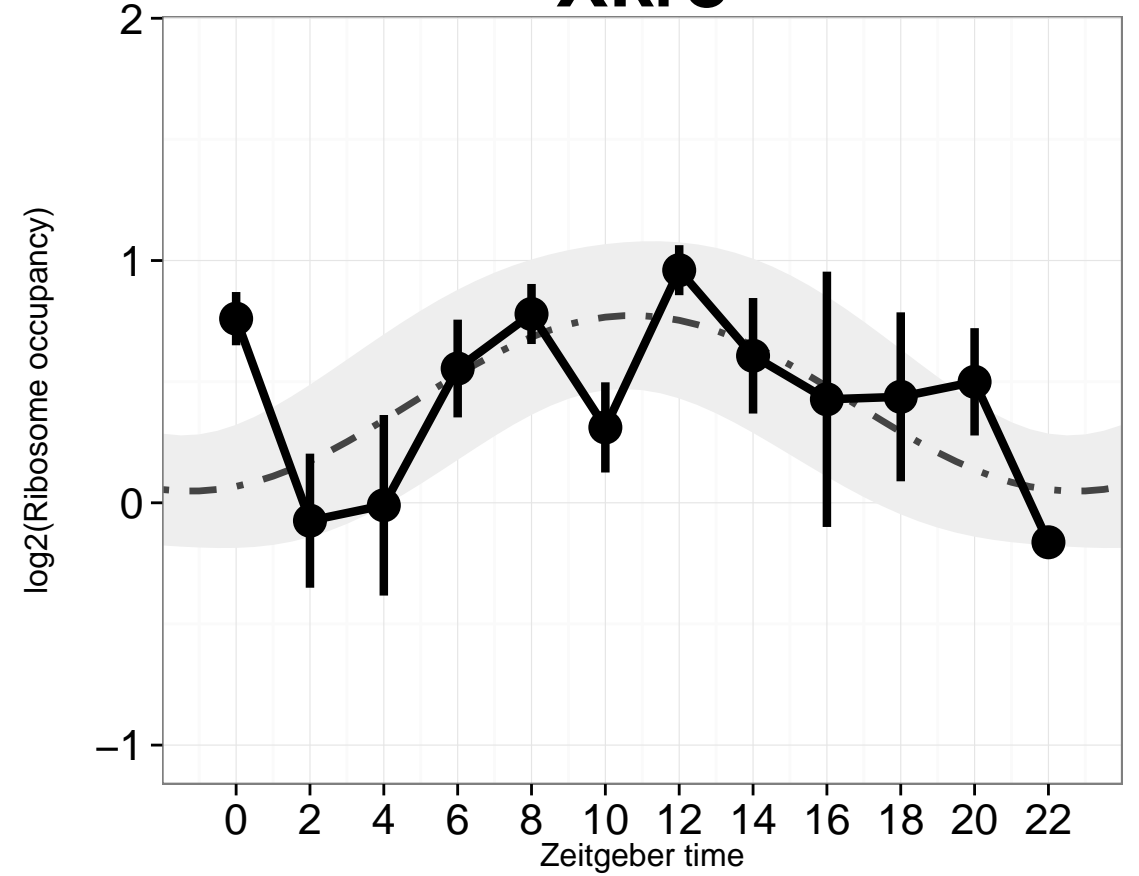

Supplement: SuppDataset_1.zip [file Xkr8_set_B.pdf › Supplemental Dataset 1/B-mRNA_rhythm_translation_nonrhyth/Xkr8_set_B.pdf]

## Xlr3a

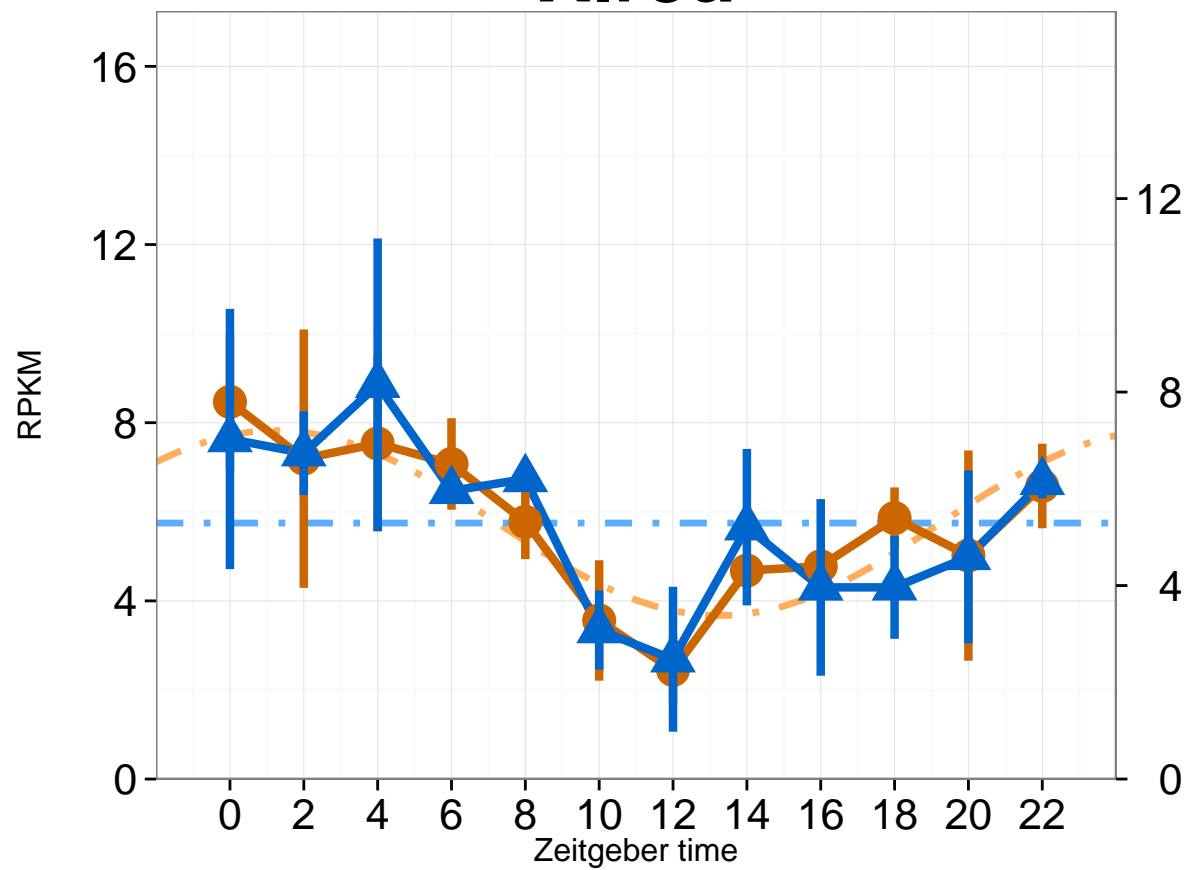

## Xlr3a

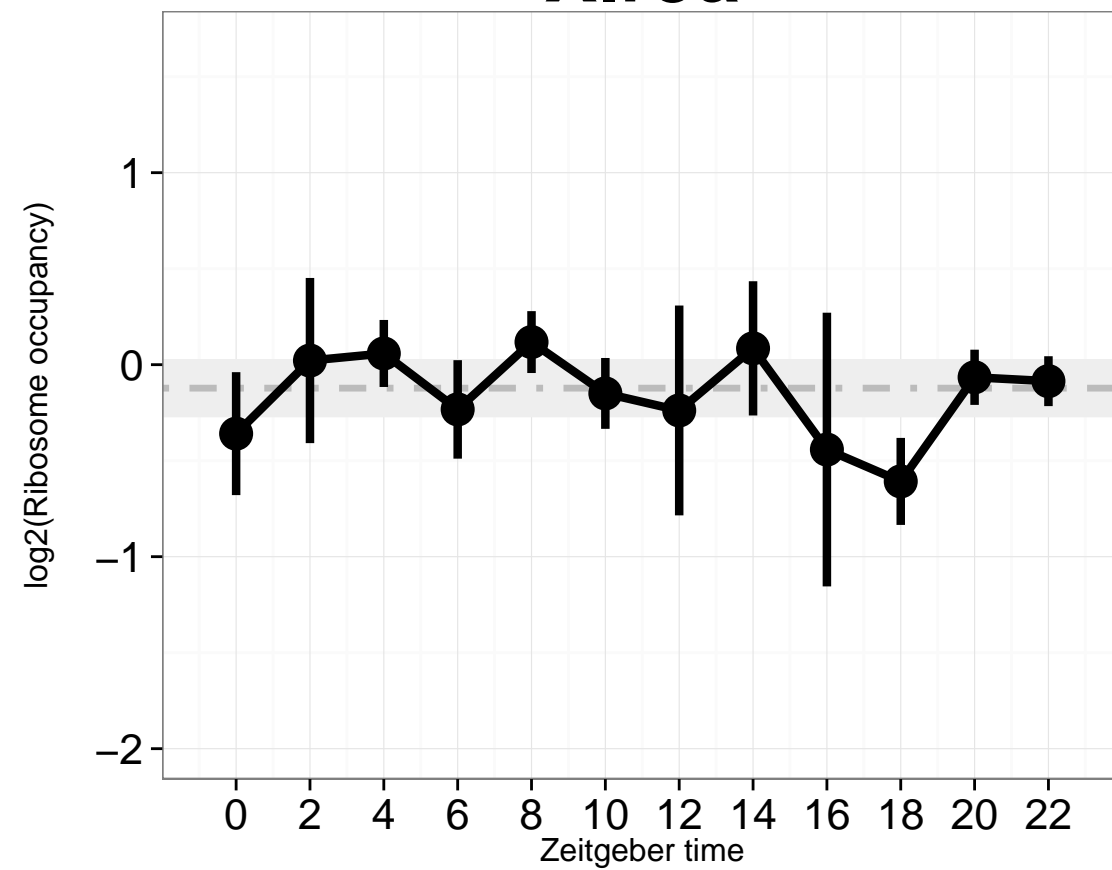

Supplement: SuppDataset_1.zip [file Xlr3a_set_B.pdf › Supplemental Dataset 1/B-mRNA_rhythm_translation_nonrhyth/Xlr3a_set_B.pdf]

## Xrcc1

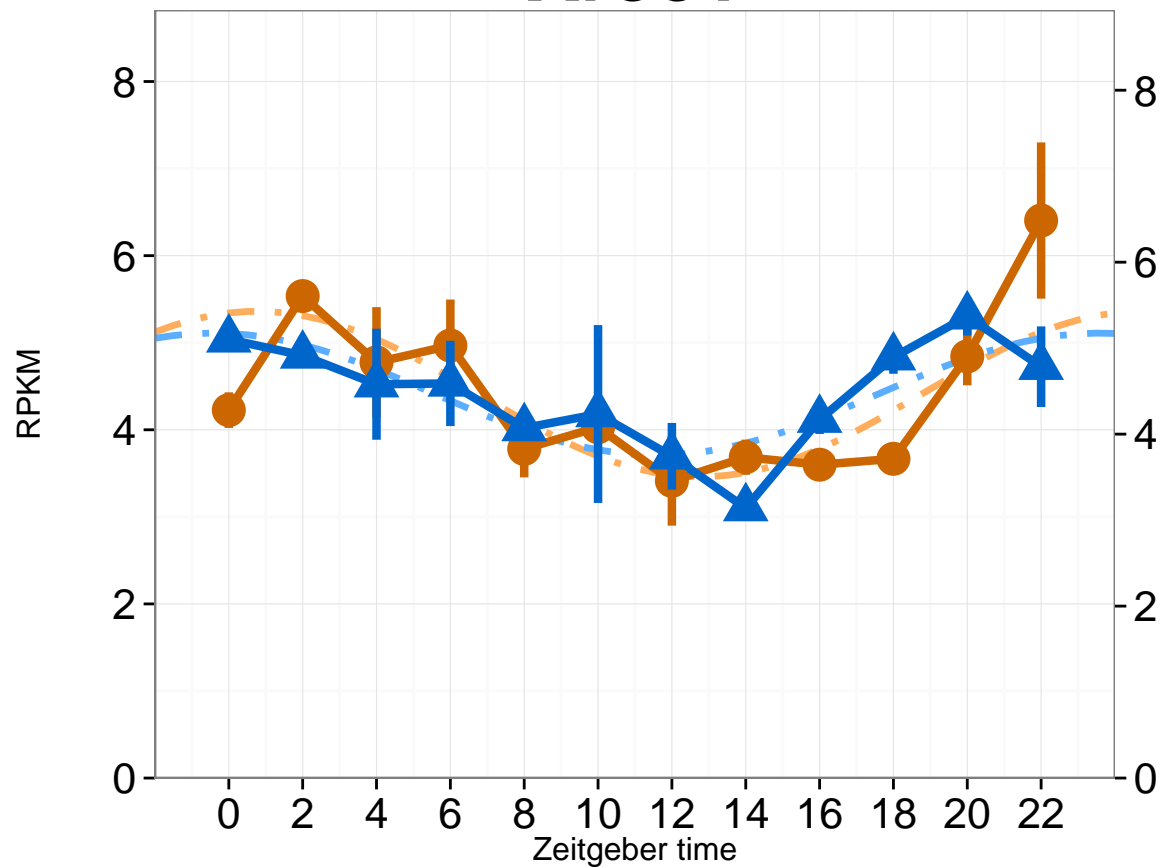

## Xrcc1

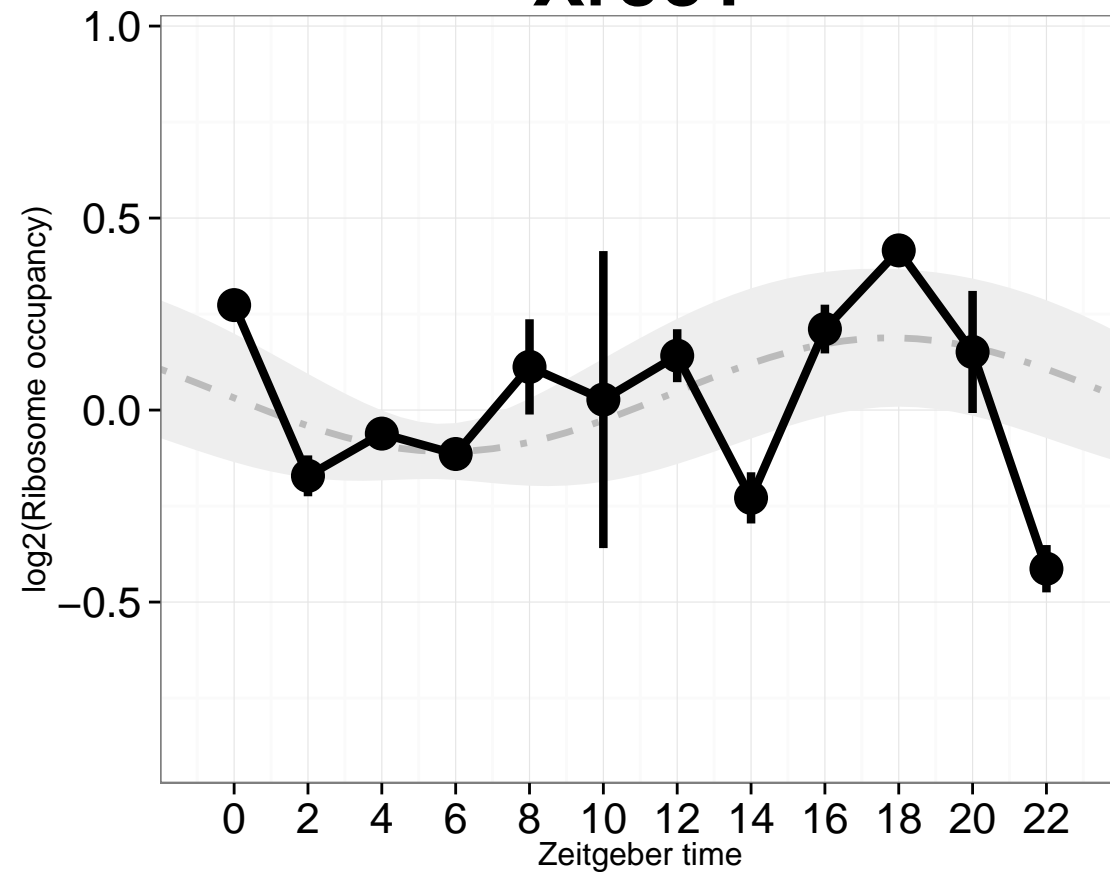

Supplement: SuppDataset_1.zip [file Xrcc1_set_B.pdf › Supplemental Dataset 1/B-mRNA_rhythm_translation_nonrhyth/Xrcc1_set_B.pdf]

# Xrcc6bp1

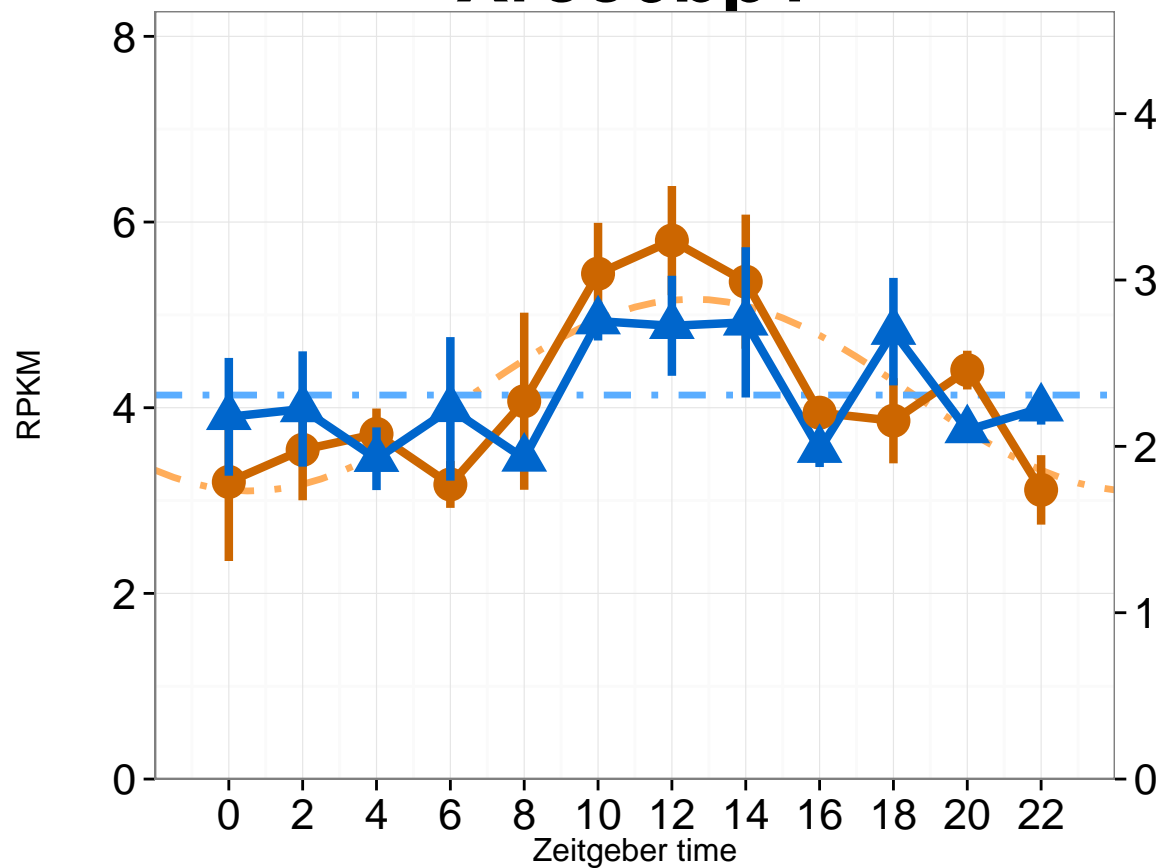

# Xrcc6bp1

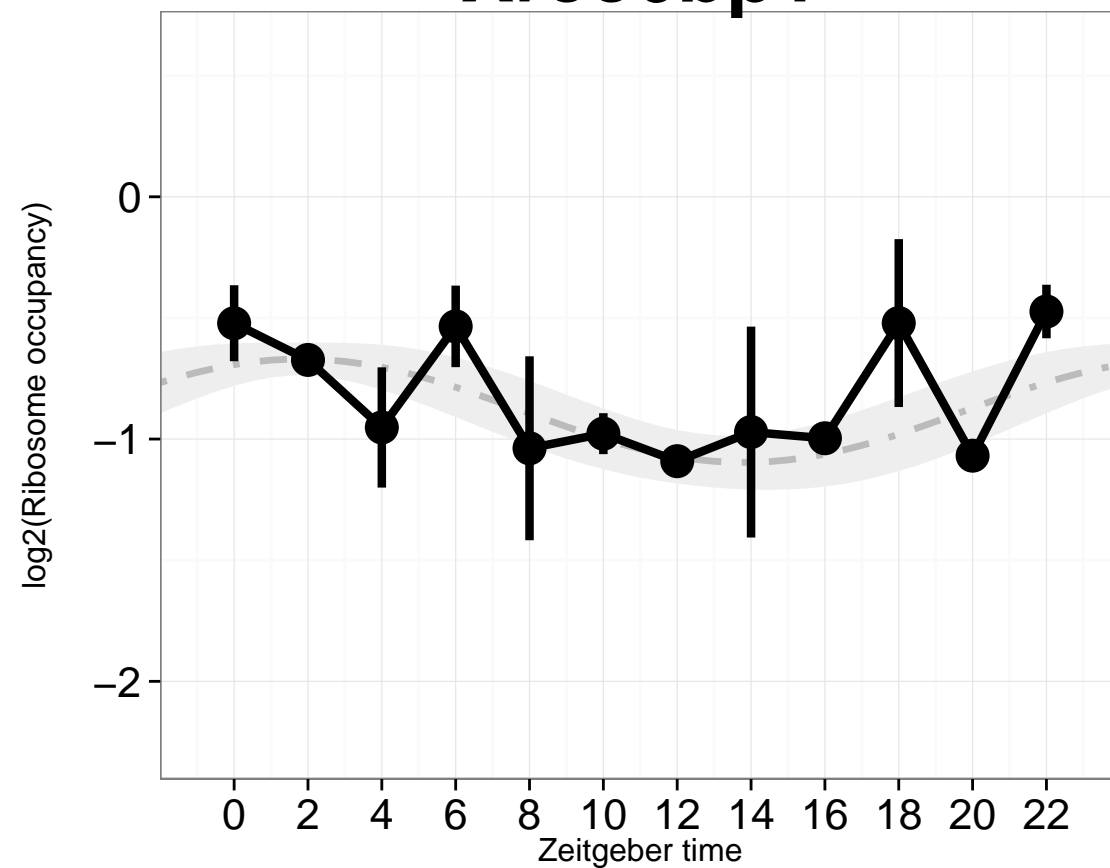

Supplement: SuppDataset_1.zip [file Xrcc6bp1_set_B.pdf › Supplemental Dataset 1/B-mRNA_rhythm_translation_nonrhyth/Xrcc6bp1_set_B.pdf]

# Ypel3

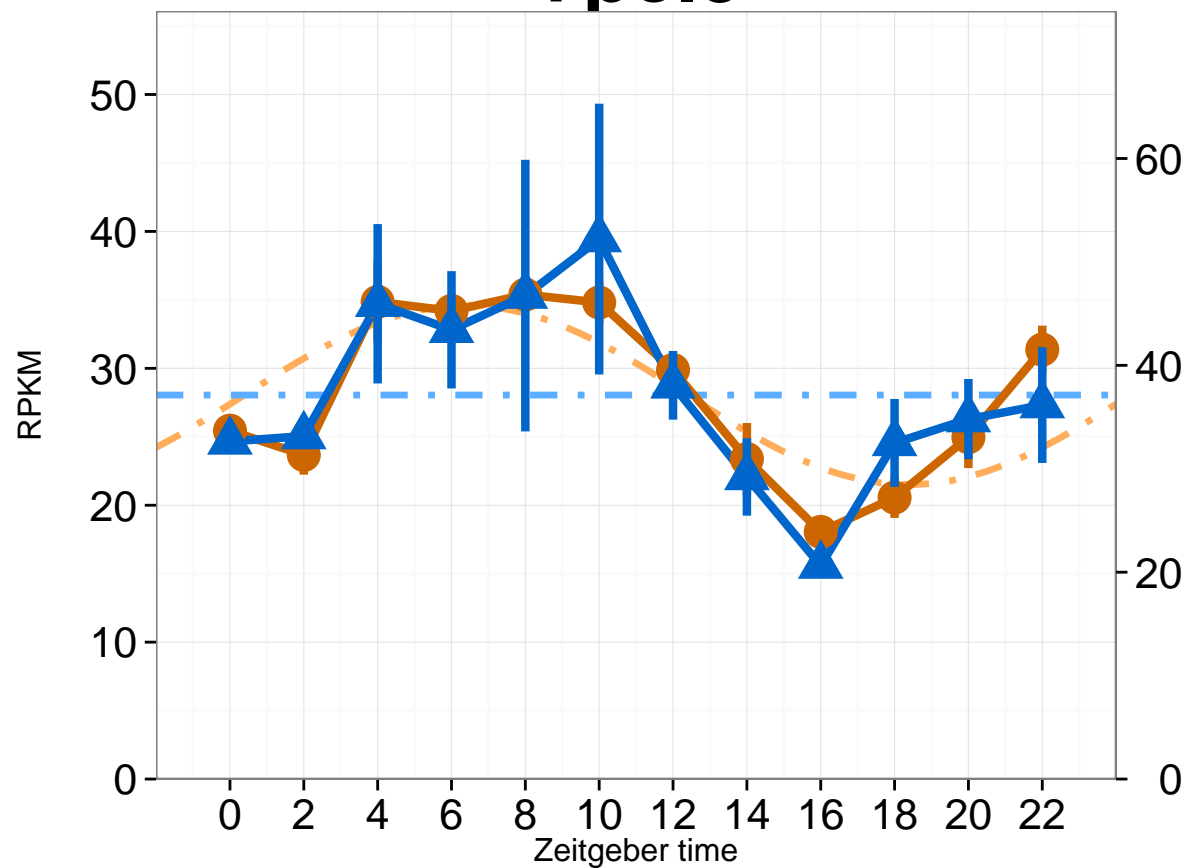

# Ypel3

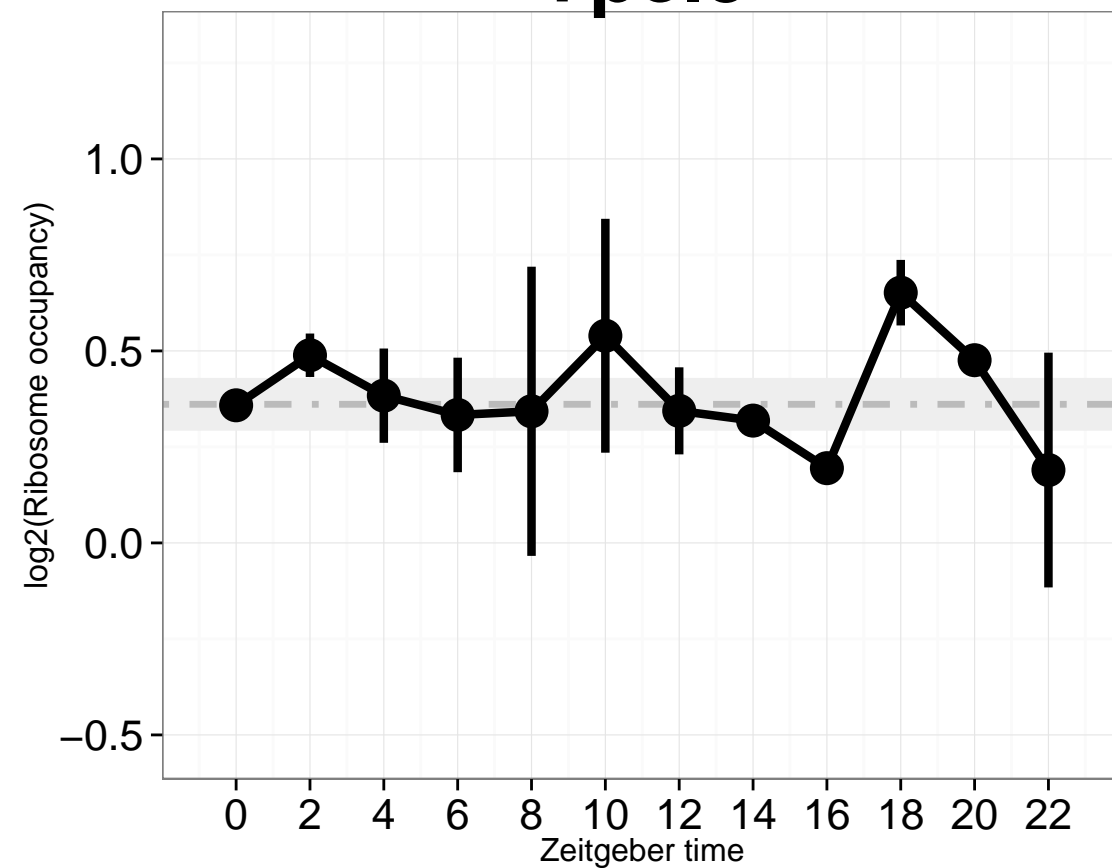

Supplement: SuppDataset_1.zip [file Ypel3_set_B.pdf › Supplemental Dataset 1/B-mRNA_rhythm_translation_nonrhyth/Ypel3_set_B.pdf]

# Zbtb22

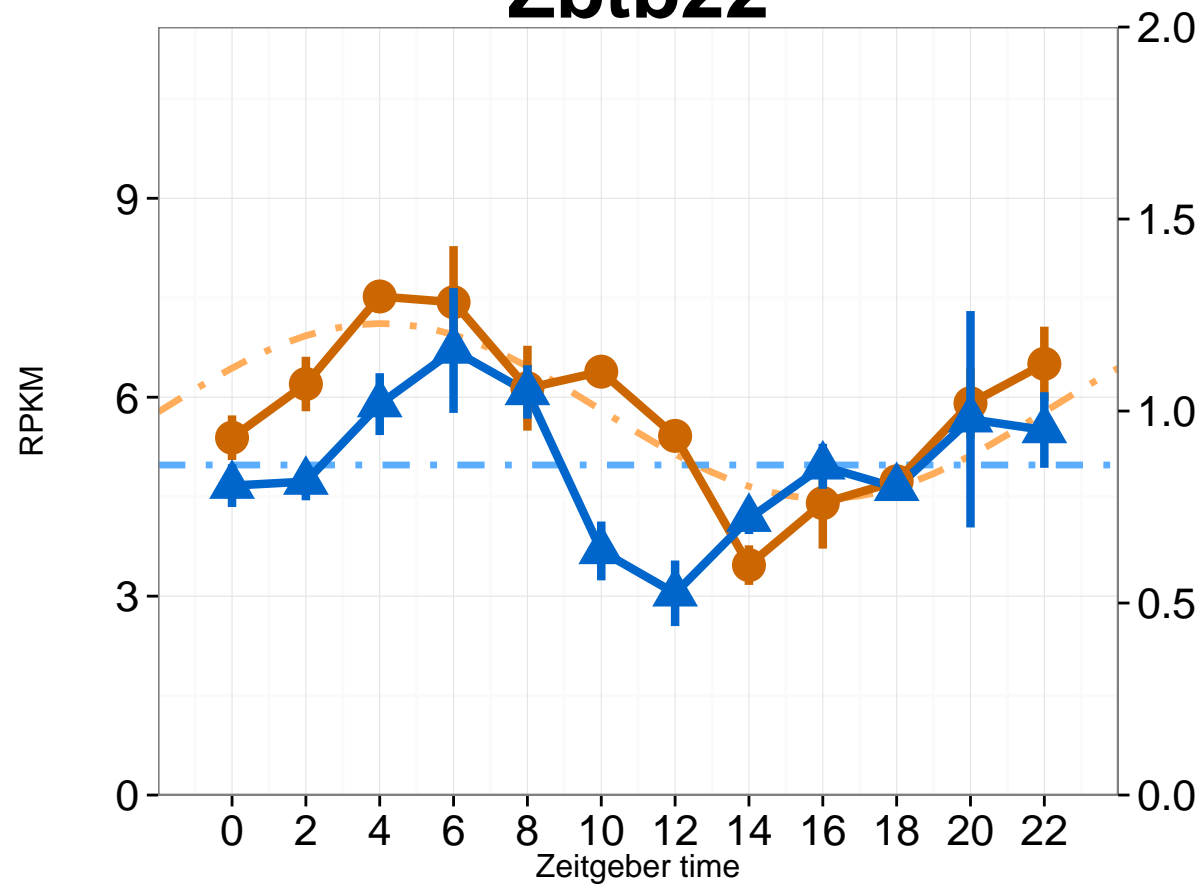

# Zbtb22

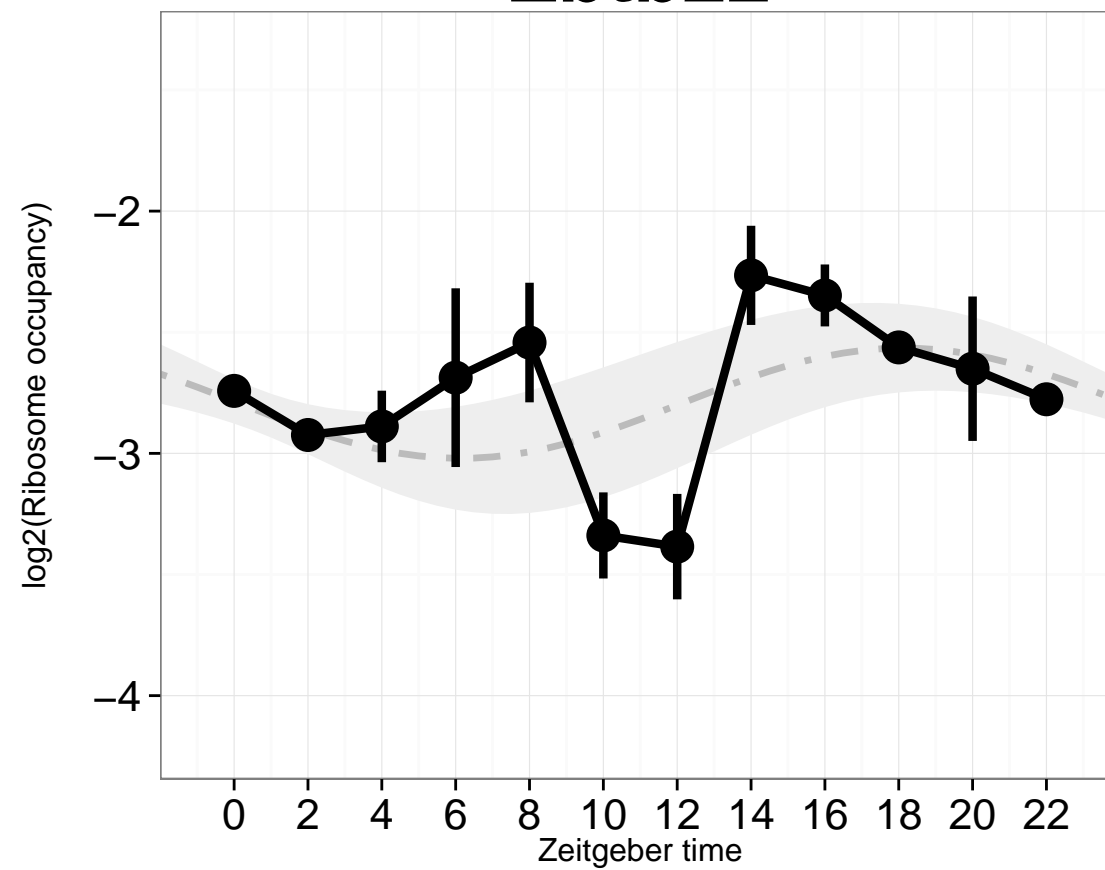

Supplement: SuppDataset_1.zip [file Zbtb22_set_B.pdf › Supplemental Dataset 1/B-mRNA_rhythm_translation_nonrhyth/Zbtb22_set_B.pdf]

# Zbtb45

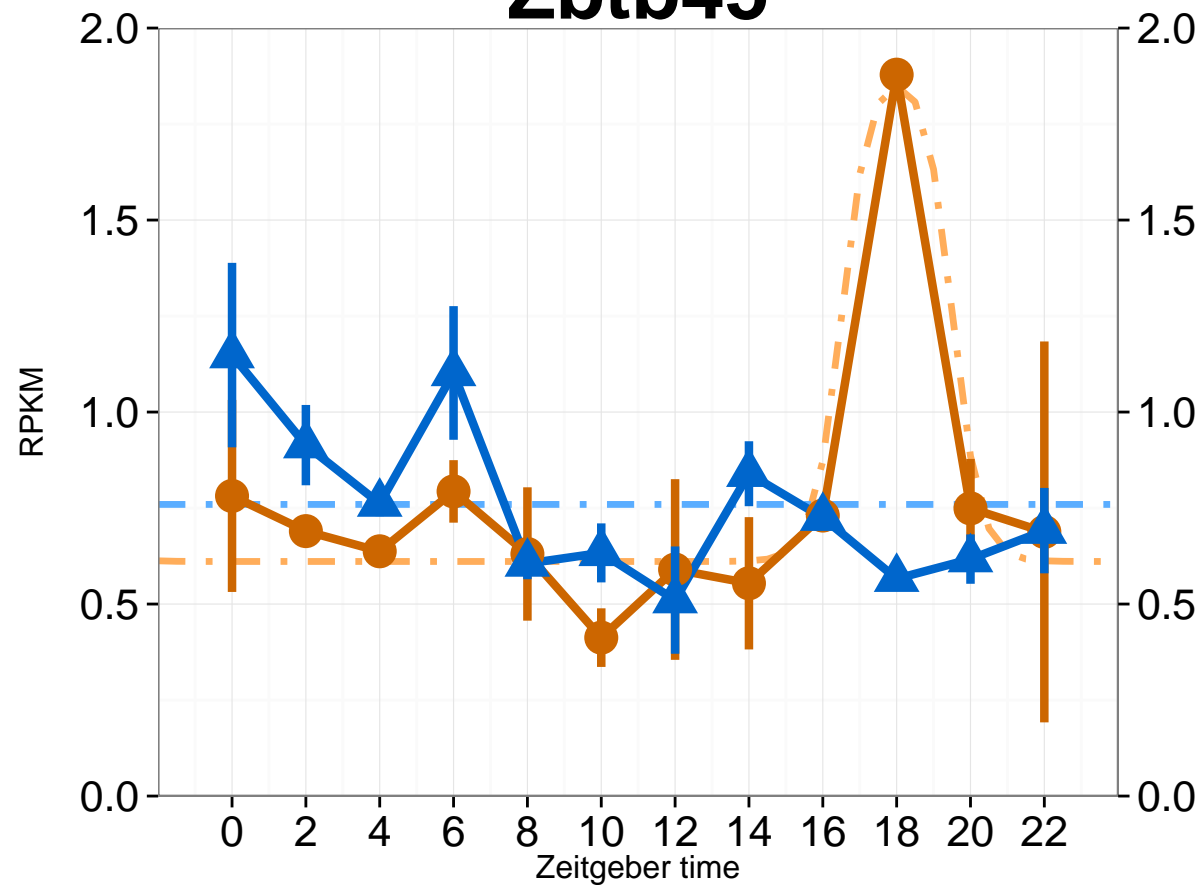

# Zbtb45

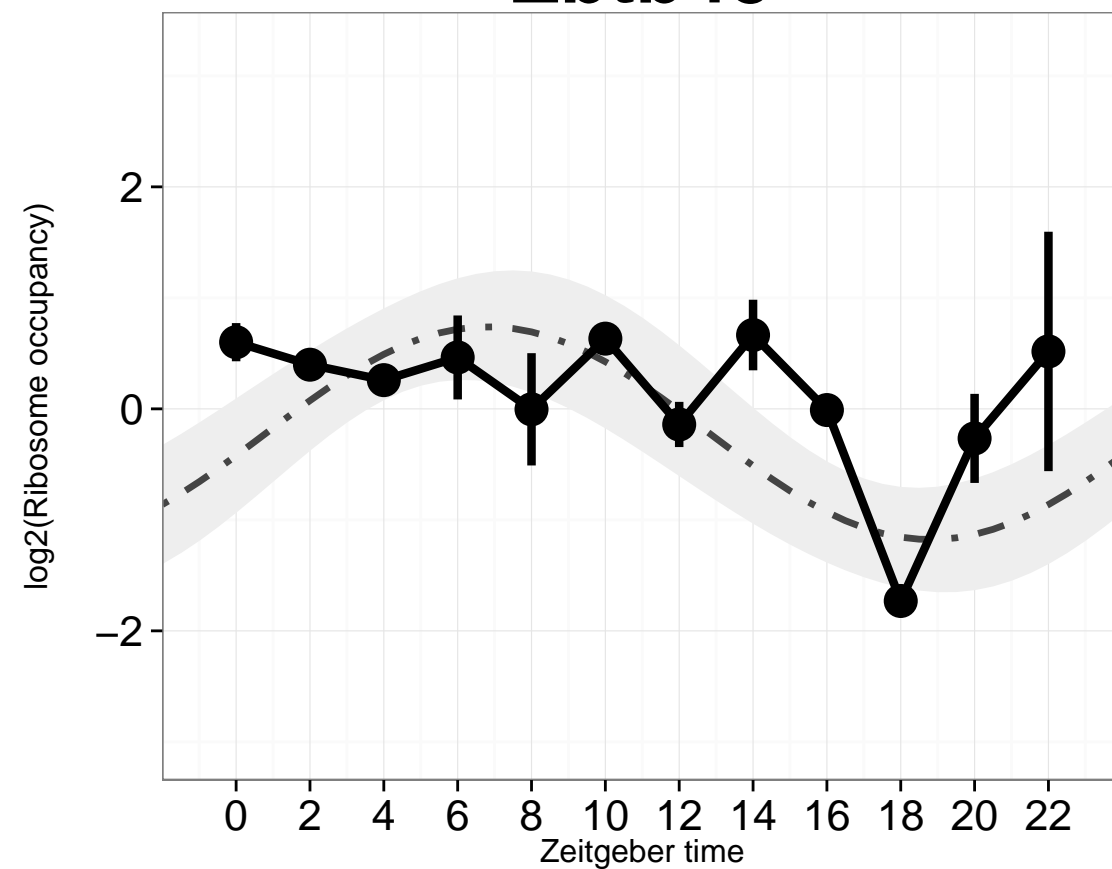

Supplement: SuppDataset_1.zip [file Zbtb45_set_B.pdf › Supplemental Dataset 1/B-mRNA_rhythm_translation_nonrhyth/Zbtb45_set_B.pdf]

# Zdhhc14

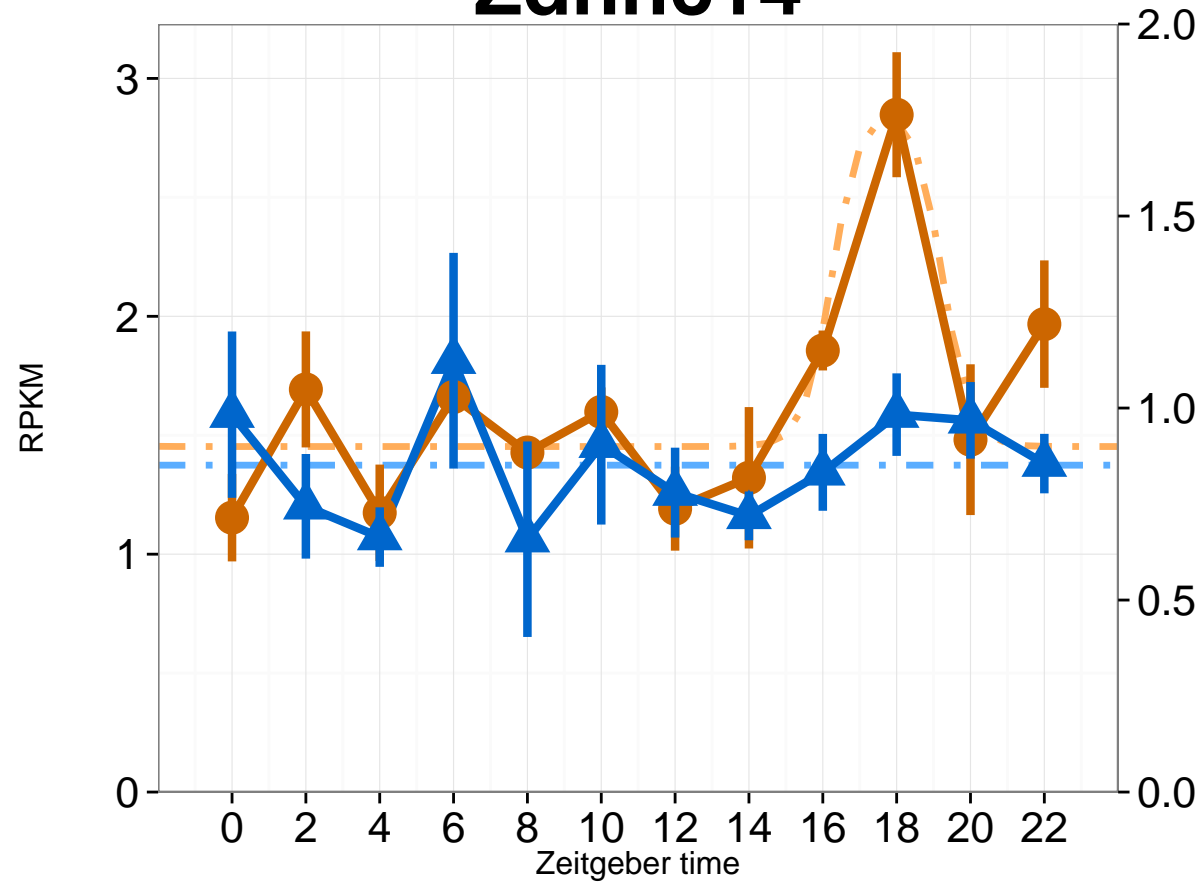

# Zdhhc14

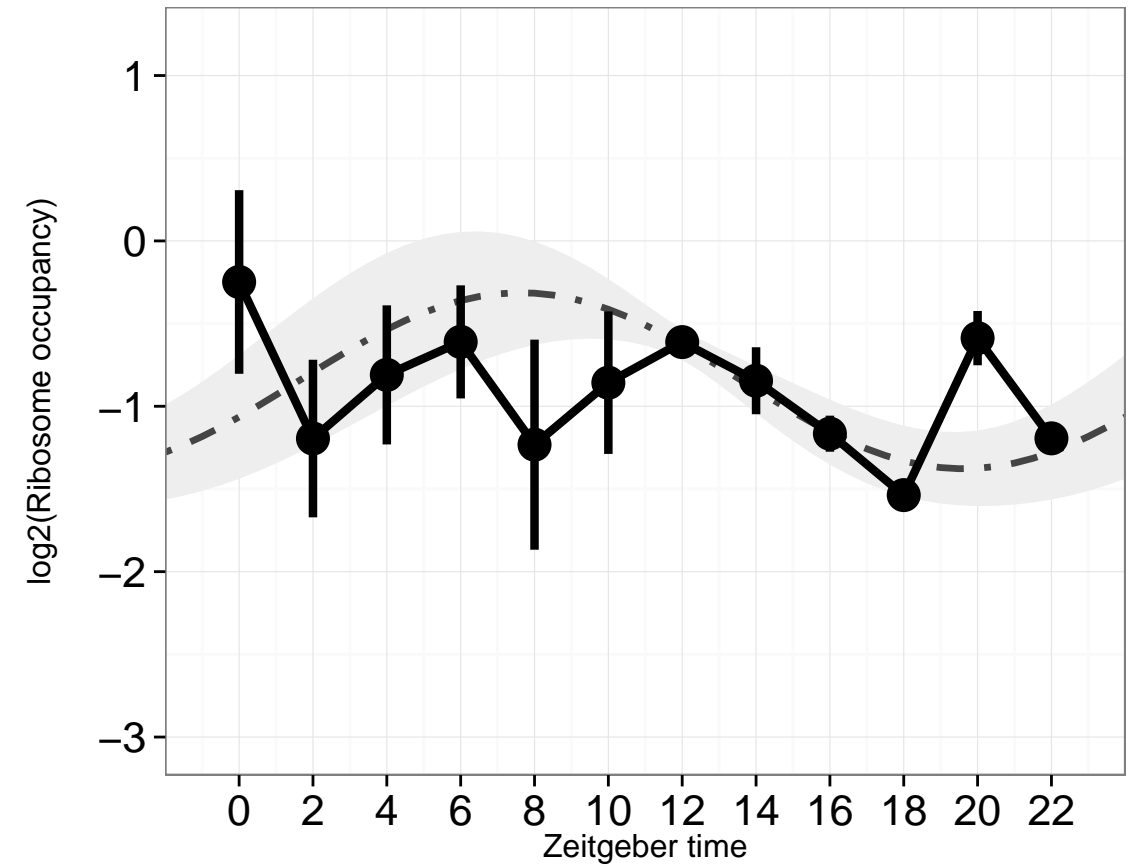

Supplement: SuppDataset_1.zip [file Zdhhc14_set_B.pdf › Supplemental Dataset 1/B-mRNA_rhythm_translation_nonrhyth/Zdhhc14_set_B.pdf]

## Zfat

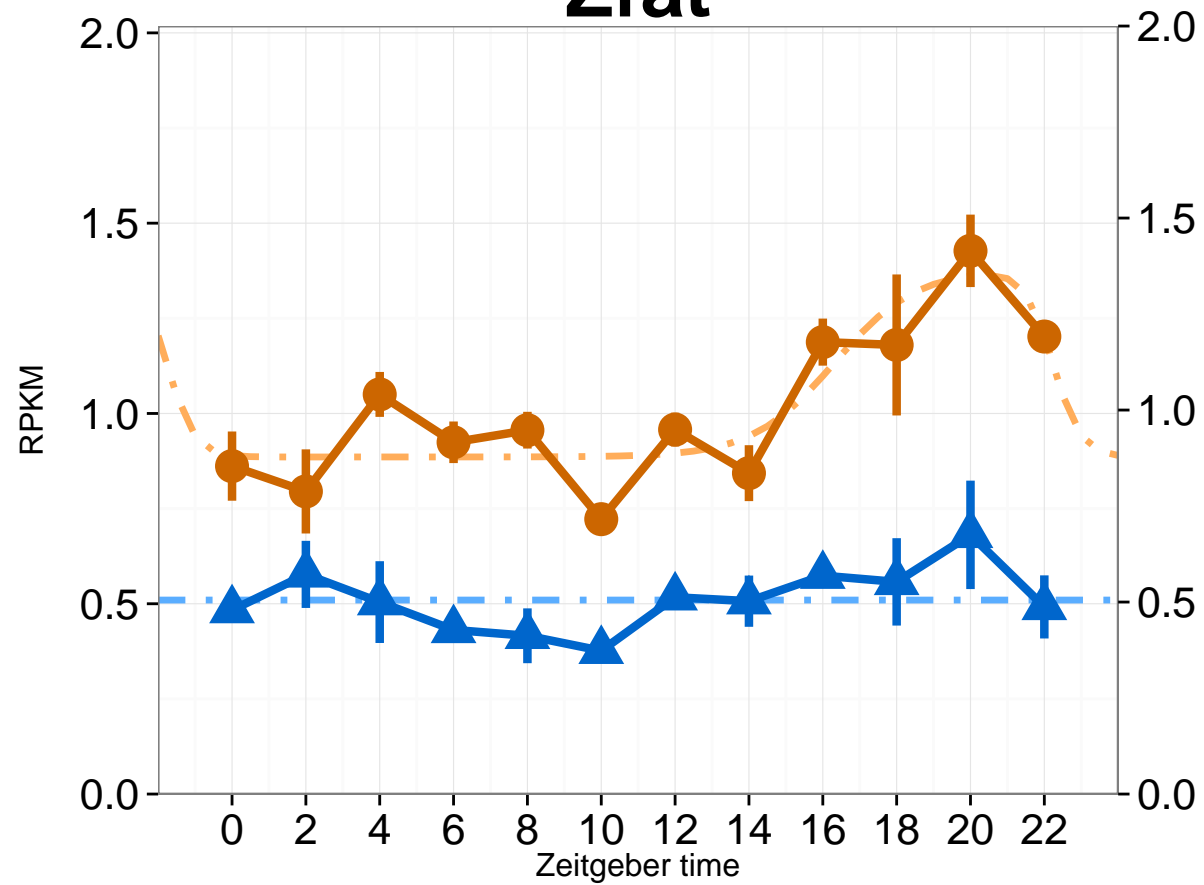

## Zfat

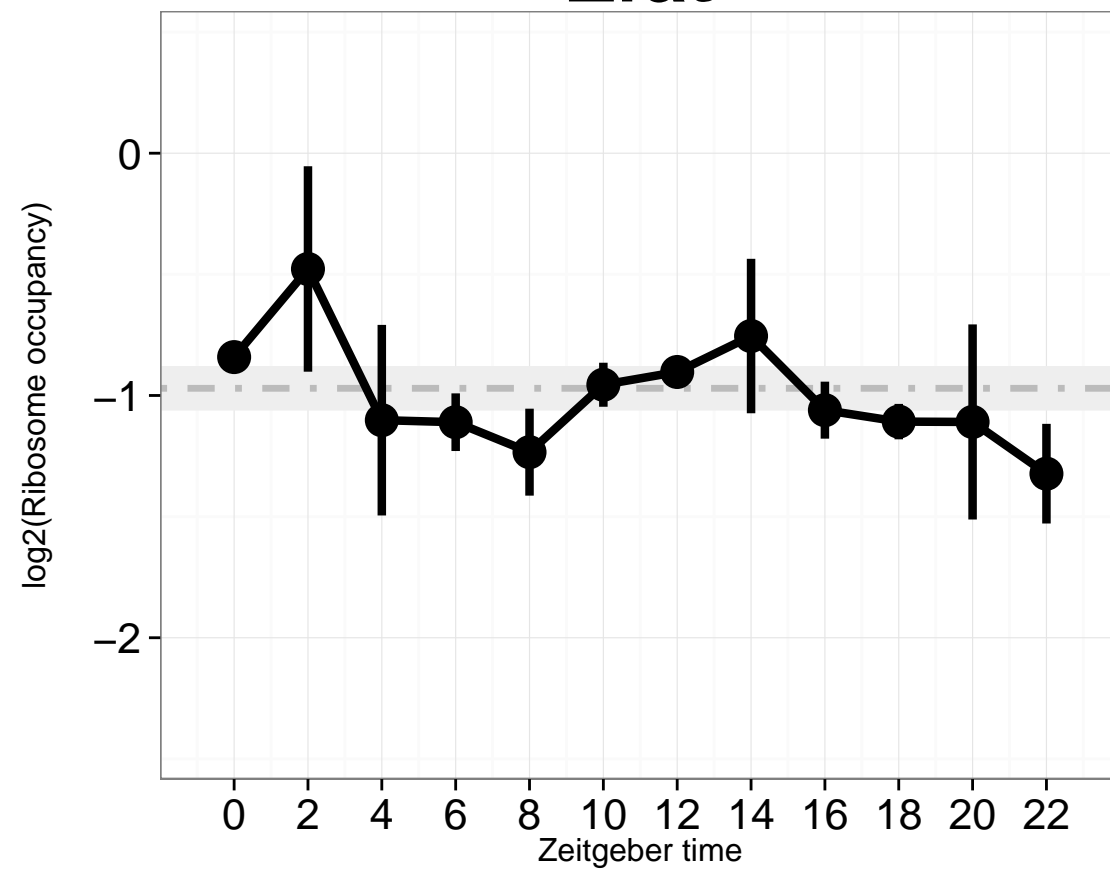

Supplement: SuppDataset_1.zip [file Zfat_set_B.pdf › Supplemental Dataset 1/B-mRNA_rhythm_translation_nonrhyth/Zfat_set_B.pdf]

# Zfp109

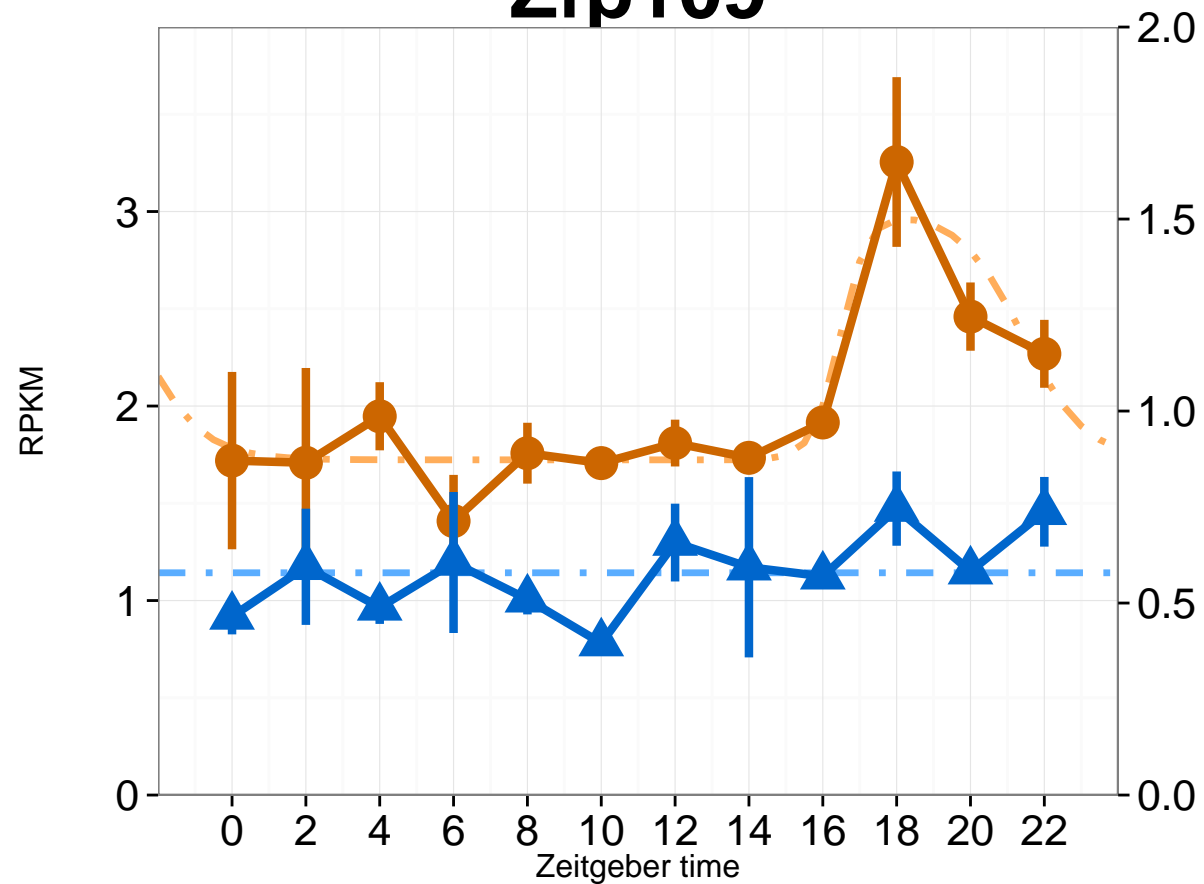

# Zfp109

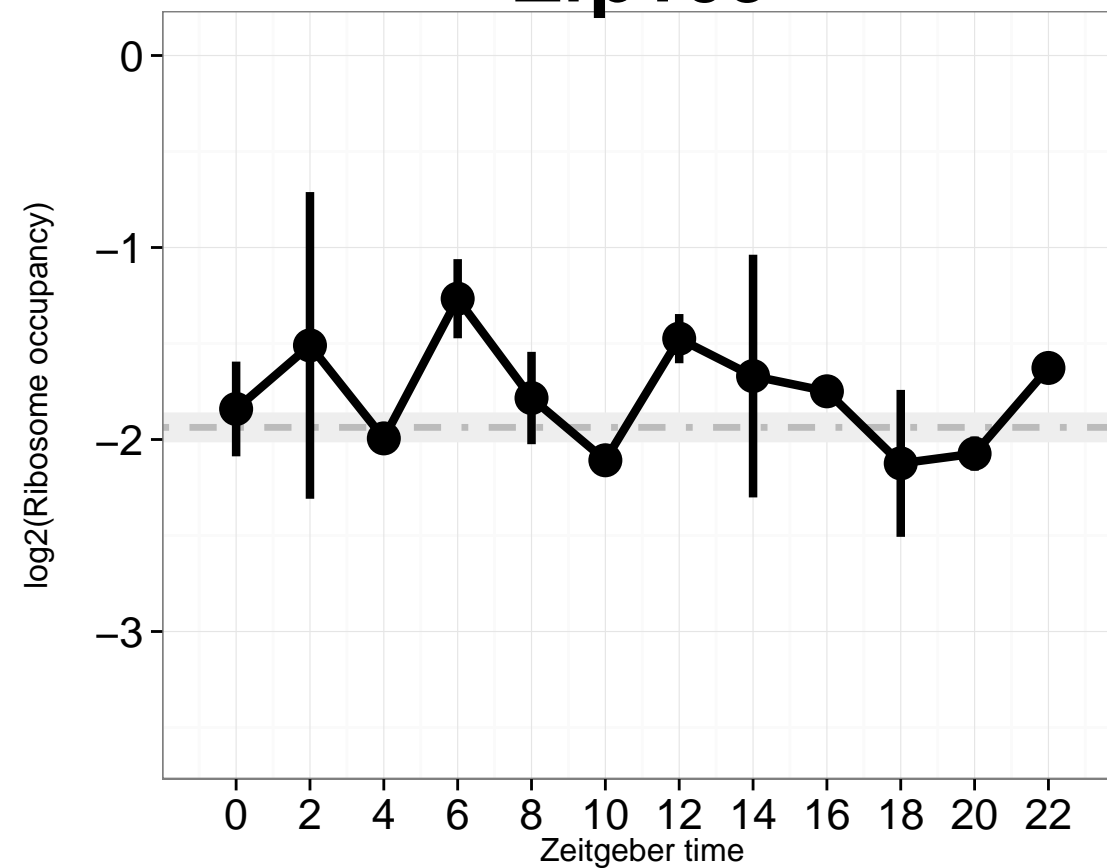

Supplement: SuppDataset_1.zip [file Zfp109_set_B.pdf › Supplemental Dataset 1/B-mRNA_rhythm_translation_nonrhyth/Zfp109_set_B.pdf]

# Zfp354b

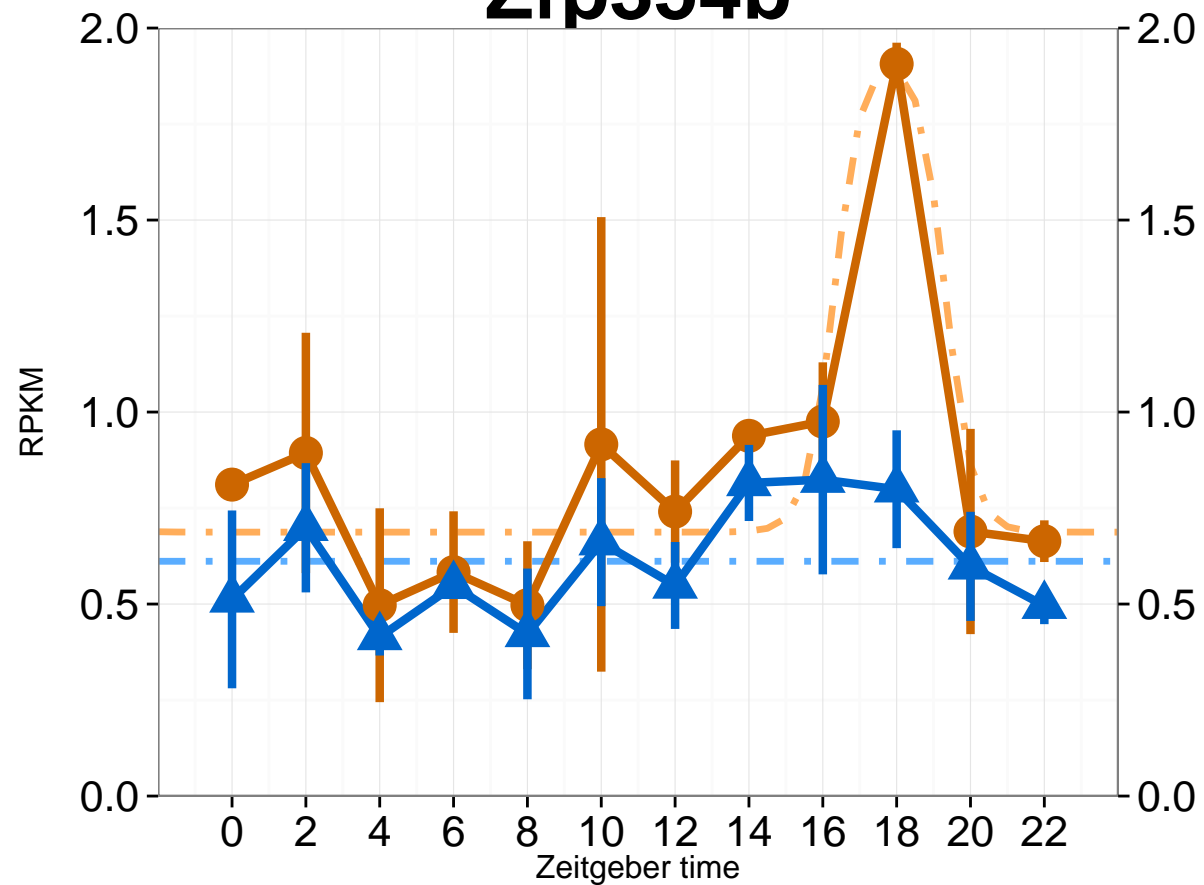

# Zfp354b

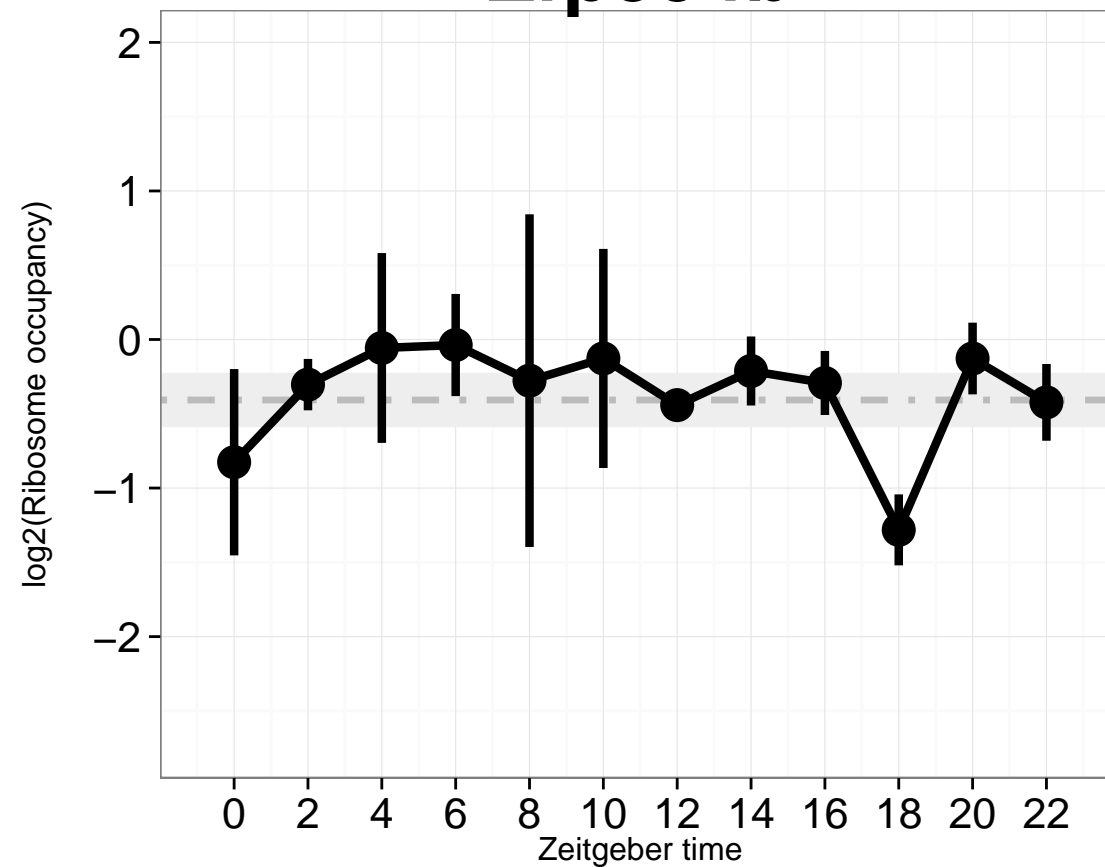

Supplement: SuppDataset_1.zip [file Zfp354b_set_B.pdf › Supplemental Dataset 1/B-mRNA_rhythm_translation_nonrhyth/Zfp354b_set_B.pdf]

# Zfp444

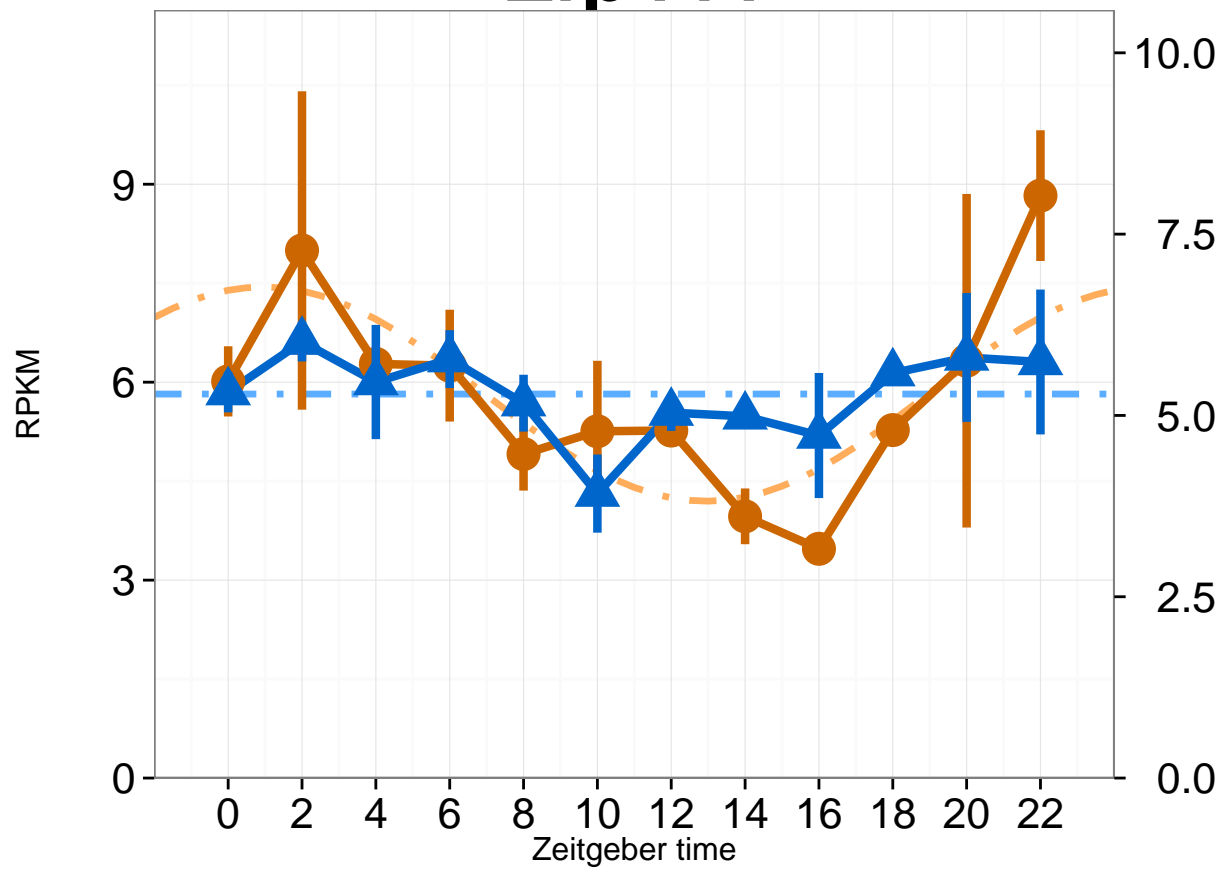

# Zfp444

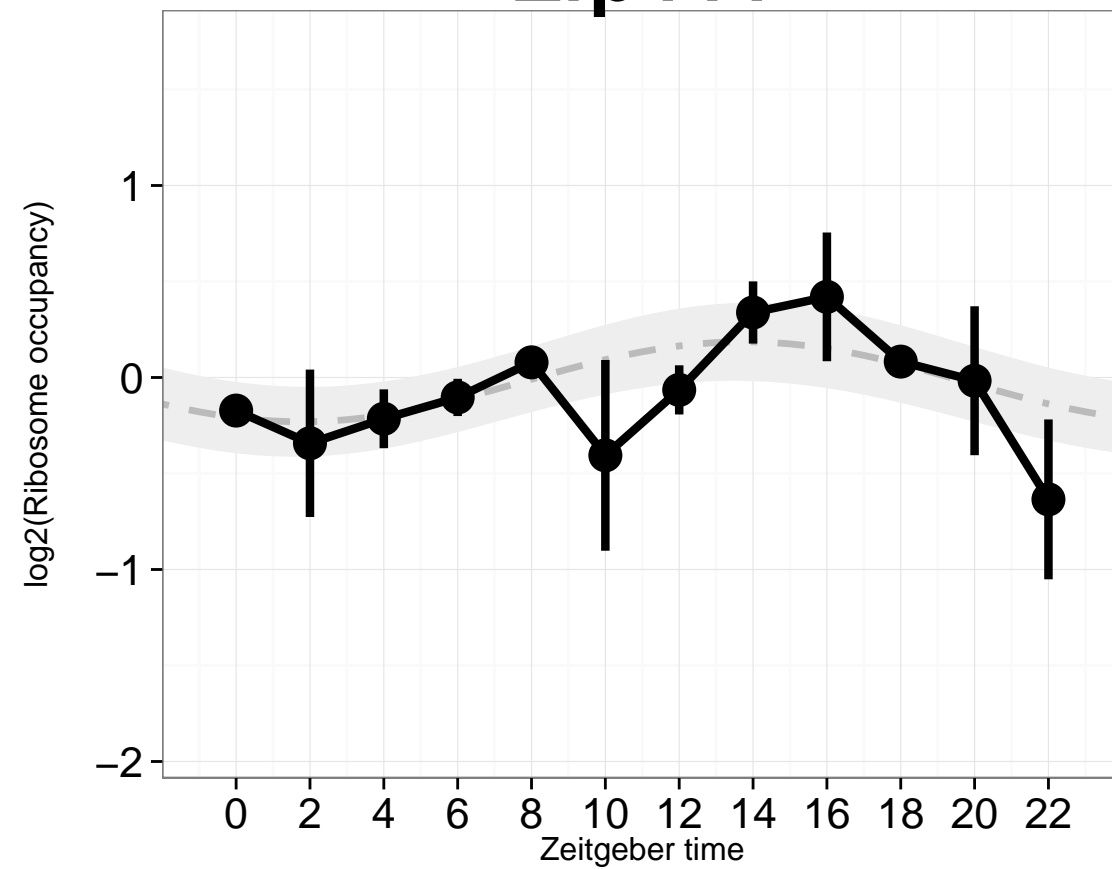

Supplement: SuppDataset_1.zip [file Zfp444_set_B.pdf › Supplemental Dataset 1/B-mRNA_rhythm_translation_nonrhyth/Zfp444_set_B.pdf]

## Zfp454

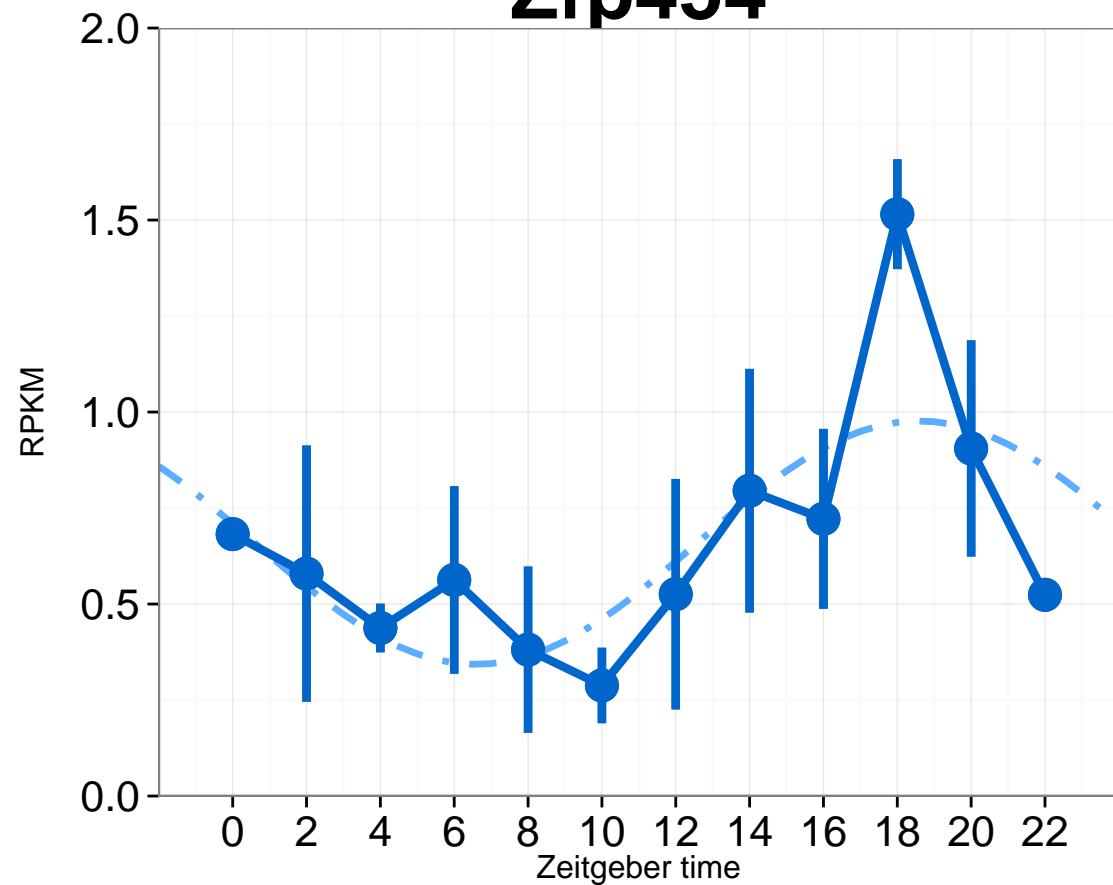

## Zfp454 log2(Ribosome occupancy

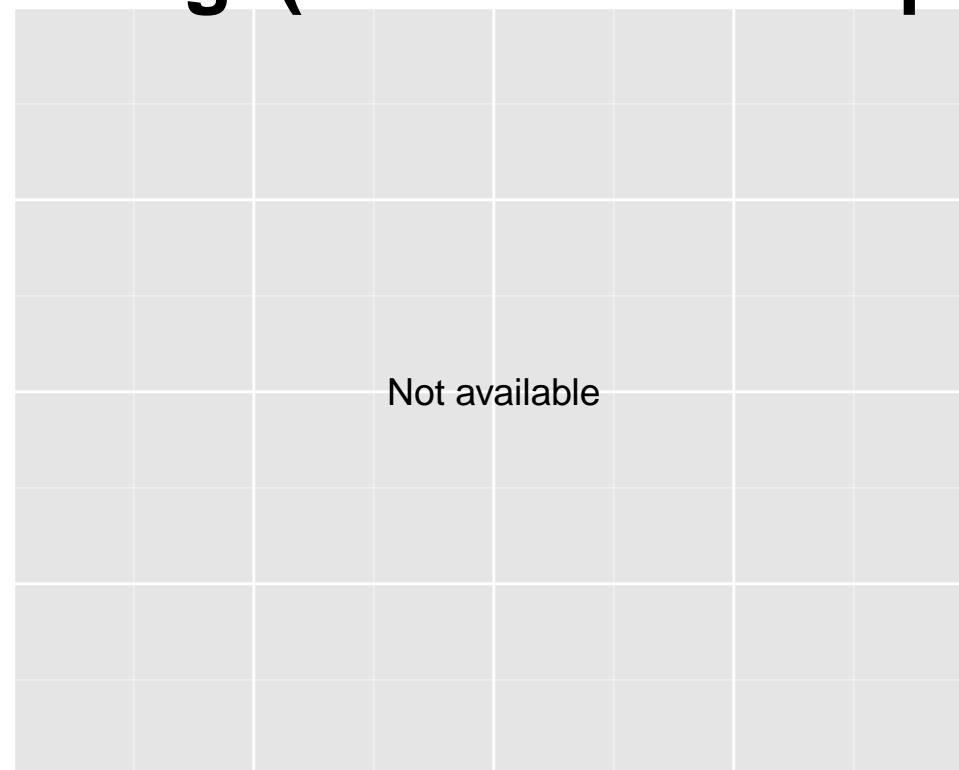

Supplement: SuppDataset_1.zip [file Zfp454_set_B.pdf › Supplemental Dataset 1/B-mRNA_rhythm_translation_nonrhyth/Zfp454_set_B.pdf]

# Zfp654

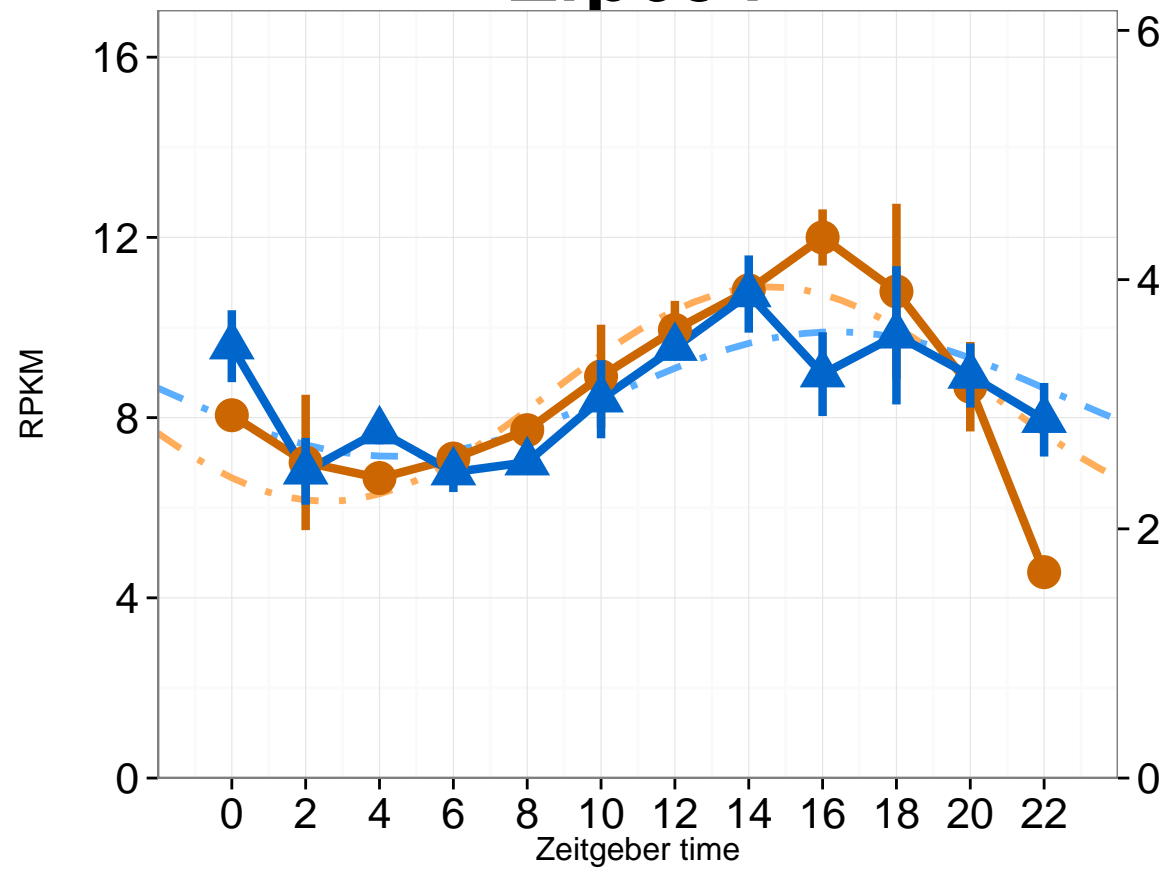

# Zfp654

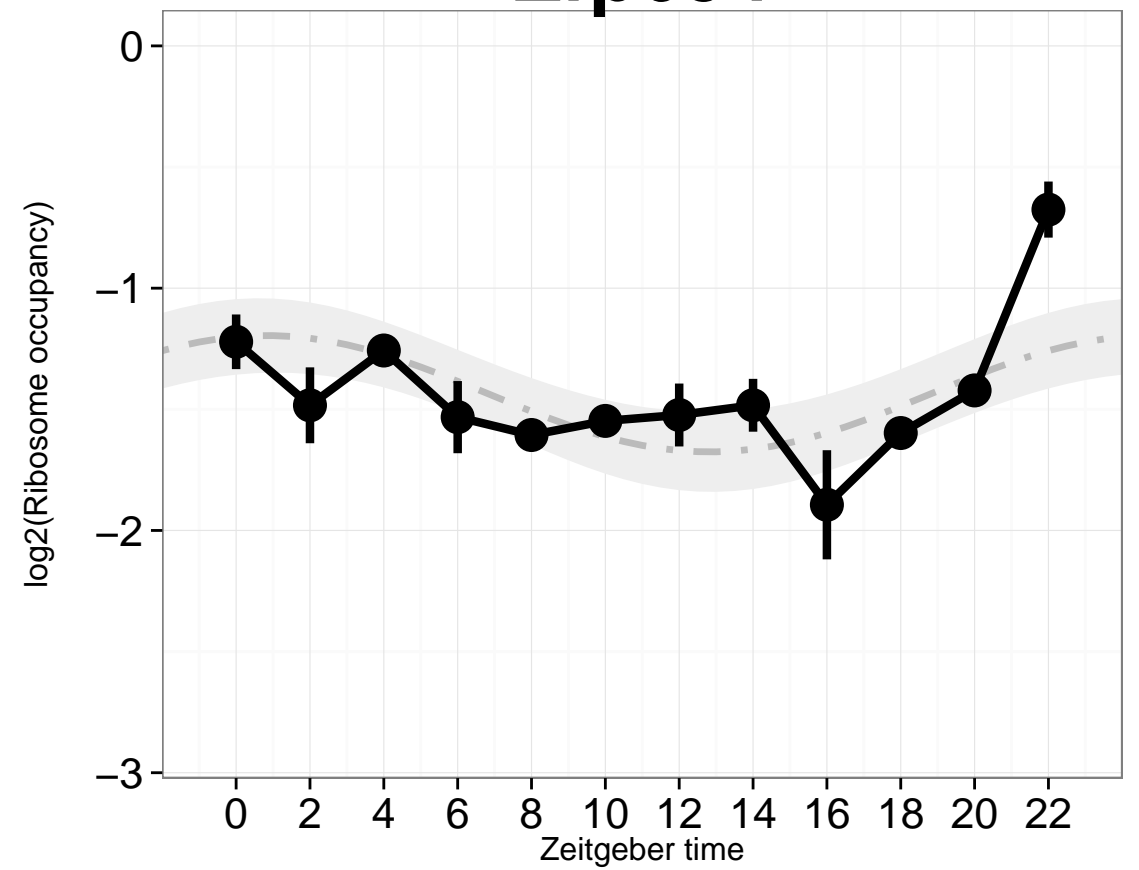

Supplement: SuppDataset_1.zip [file Zfp654_set_B.pdf › Supplemental Dataset 1/B-mRNA_rhythm_translation_nonrhyth/Zfp654_set_B.pdf]

# Zfp706

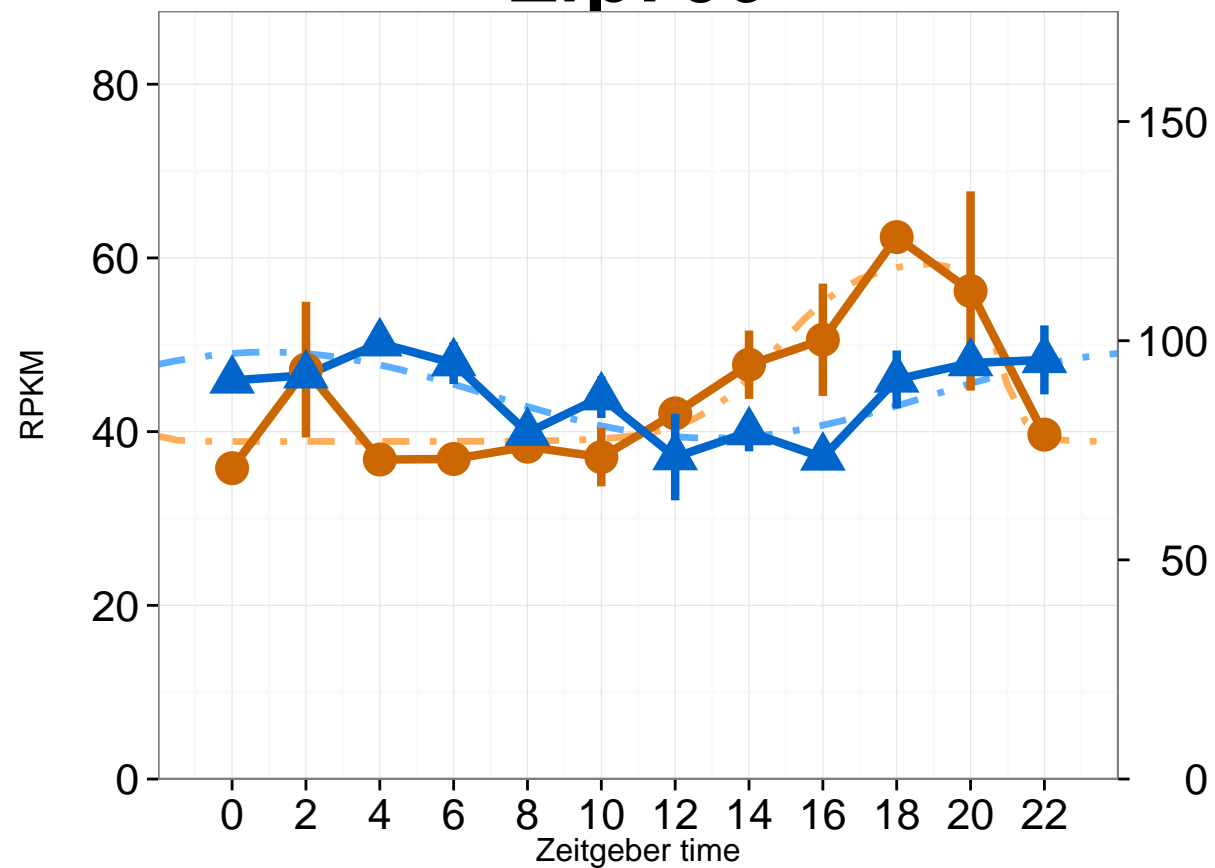

# Zfp706

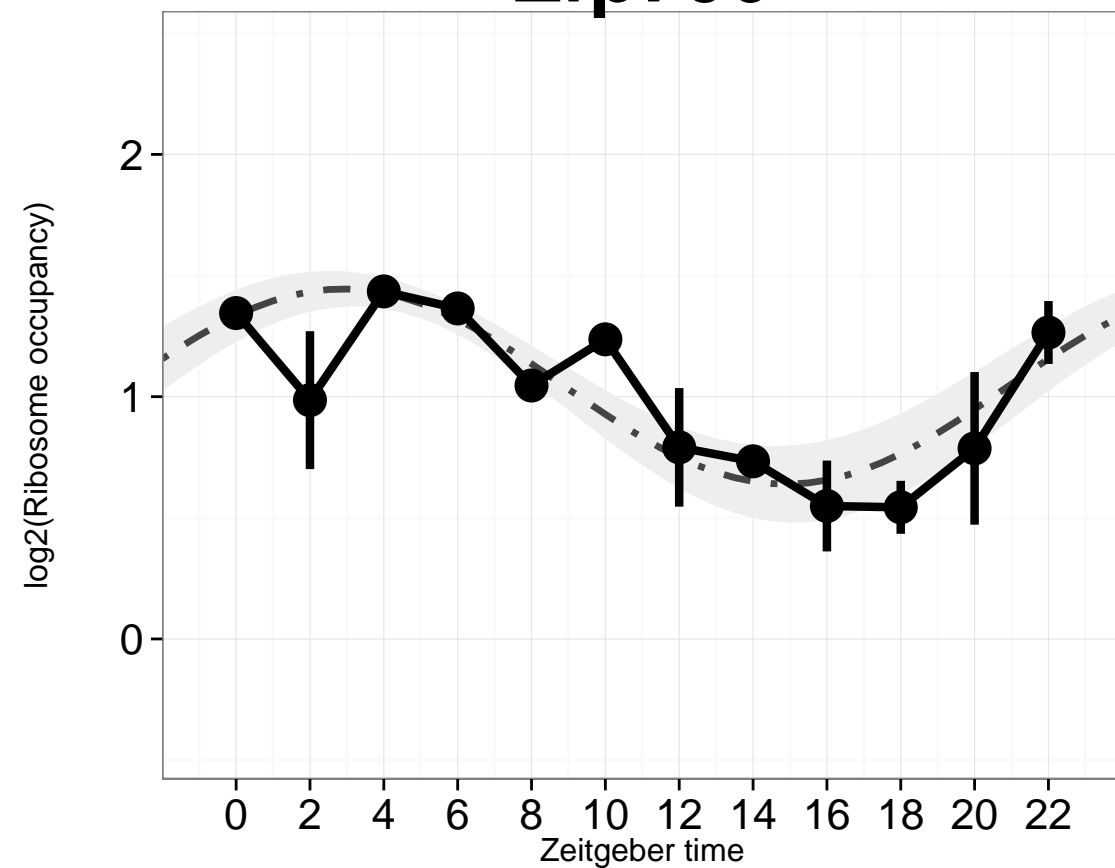

Supplement: SuppDataset_1.zip [file Zfp706_set_B.pdf › Supplemental Dataset 1/B-mRNA_rhythm_translation_nonrhyth/Zfp706_set_B.pdf]

# Zfp78

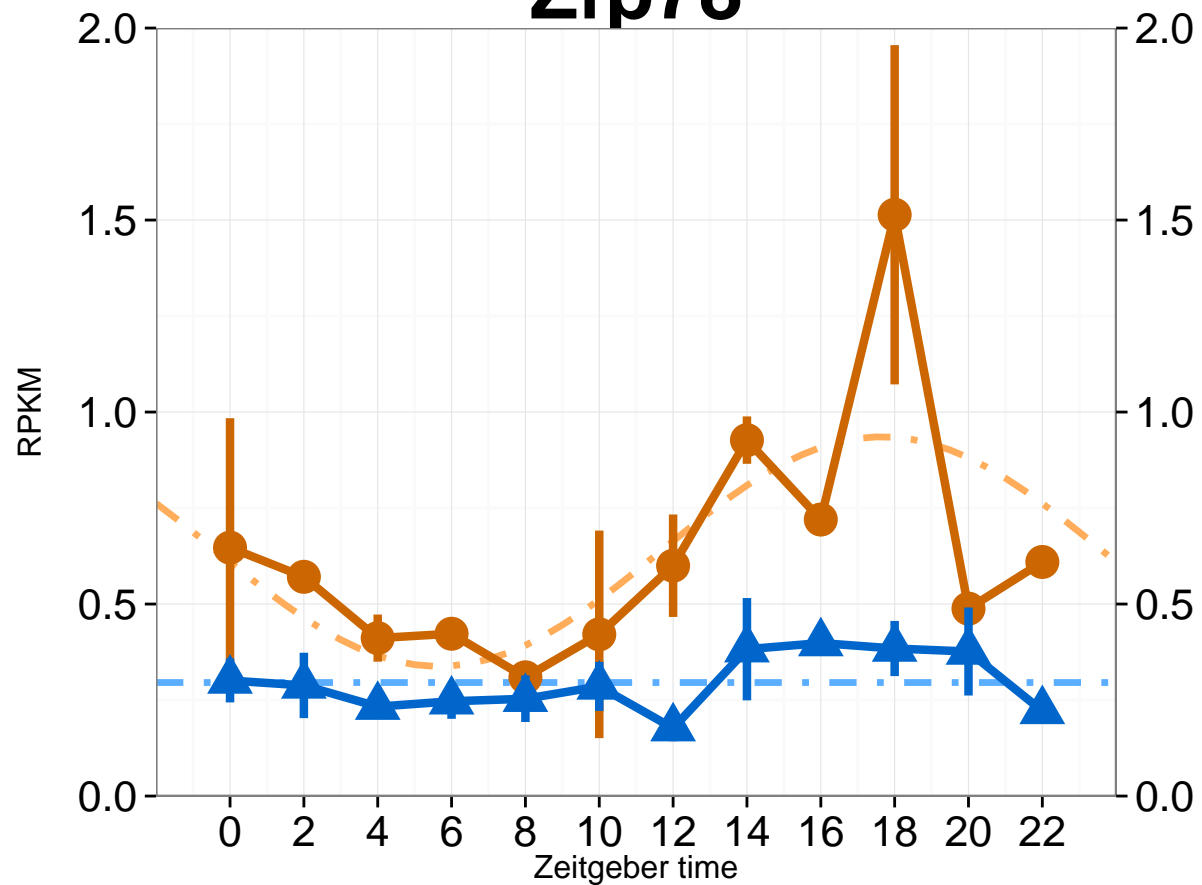

# Zfp78

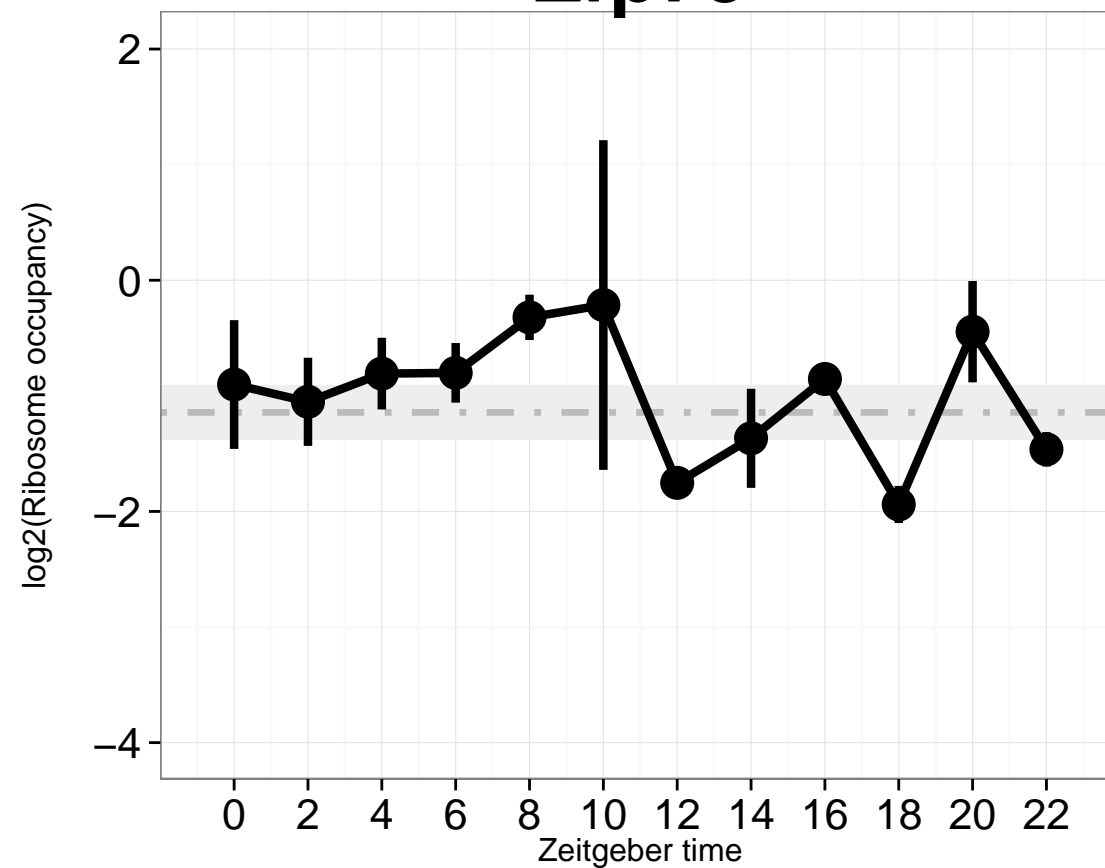

Supplement: SuppDataset_1.zip [file Zfp78_set_B.pdf › Supplemental Dataset 1/B-mRNA_rhythm_translation_nonrhyth/Zfp78_set_B.pdf]

## Zfp872

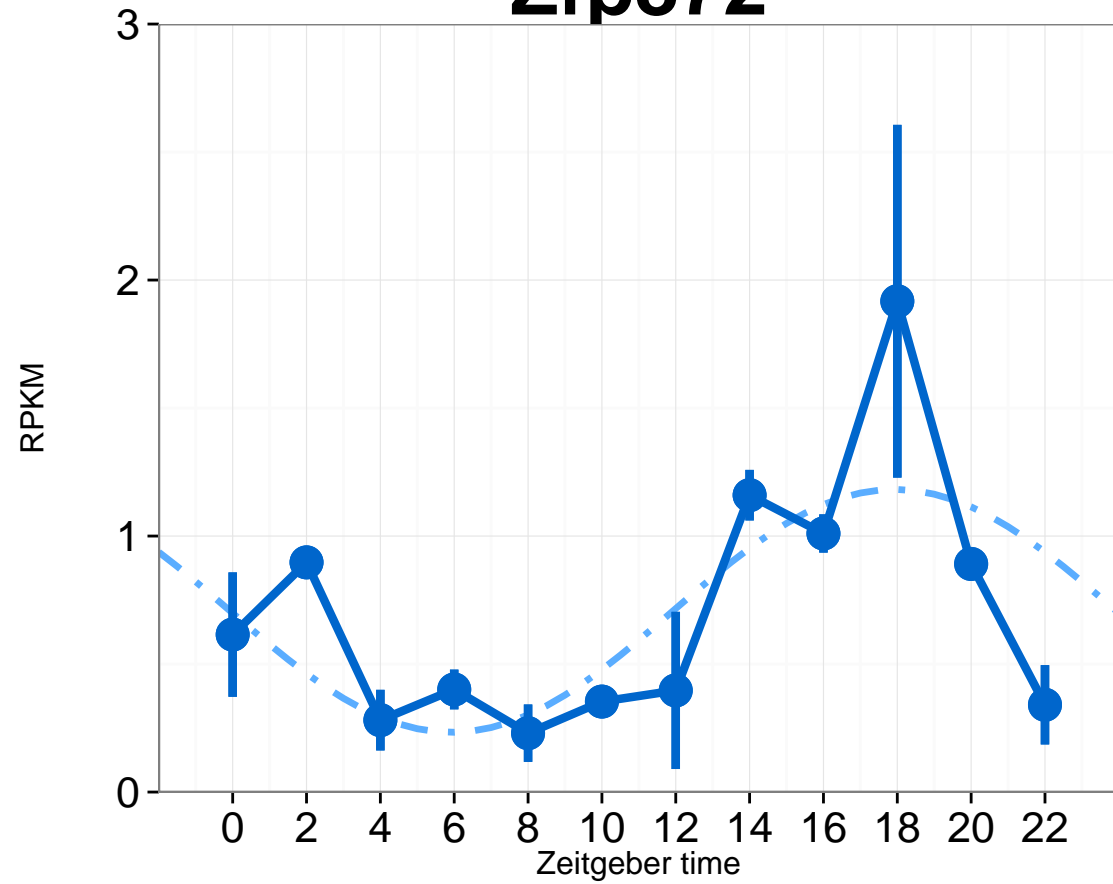

## Zfp872 log2(Ribosome occupancy

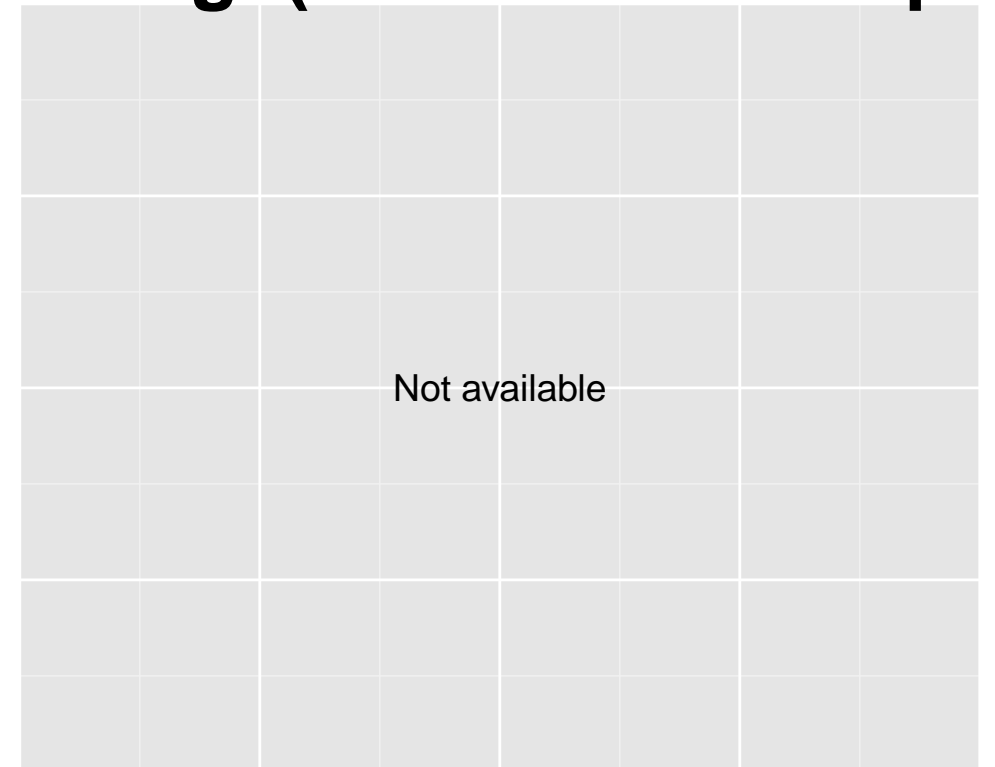

Supplement: SuppDataset_1.zip [file Zfp872_set_B.pdf › Supplemental Dataset 1/B-mRNA_rhythm_translation_nonrhyth/Zfp872_set_B.pdf]

# Zfp874b

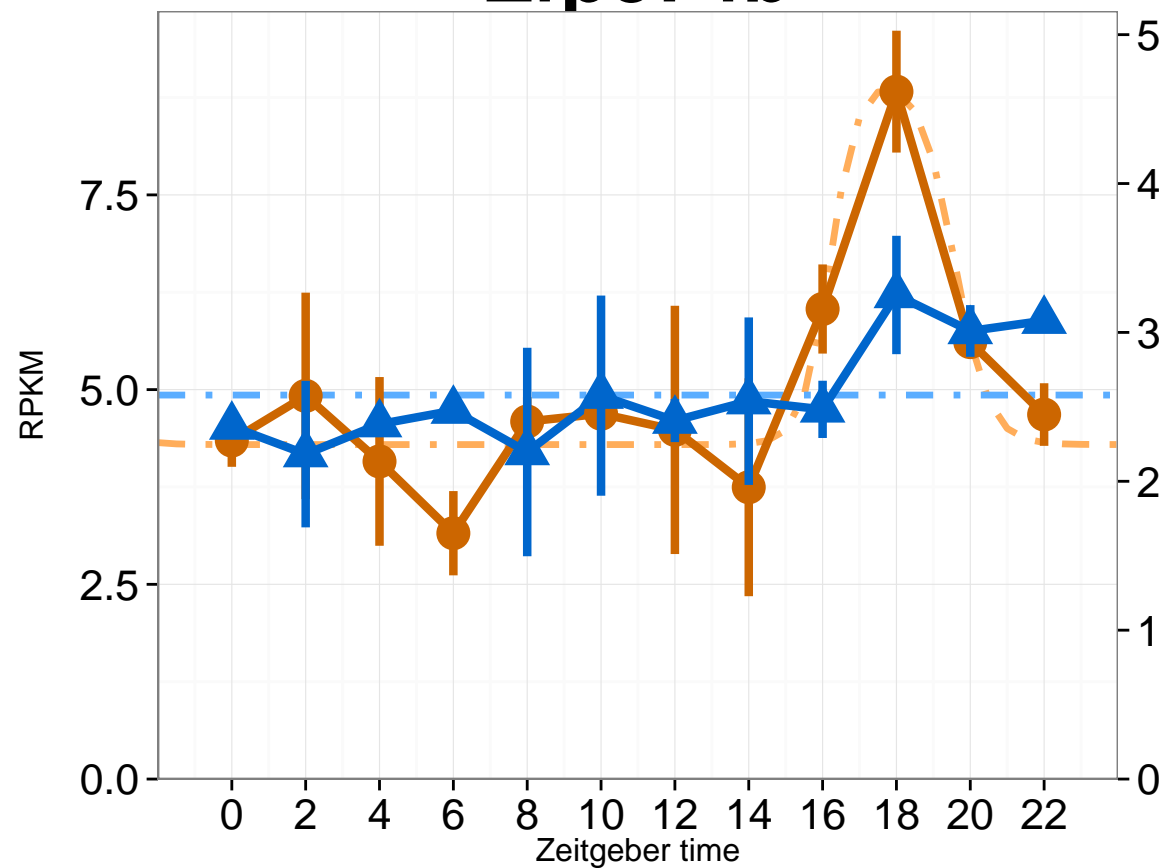

# Zfp874b

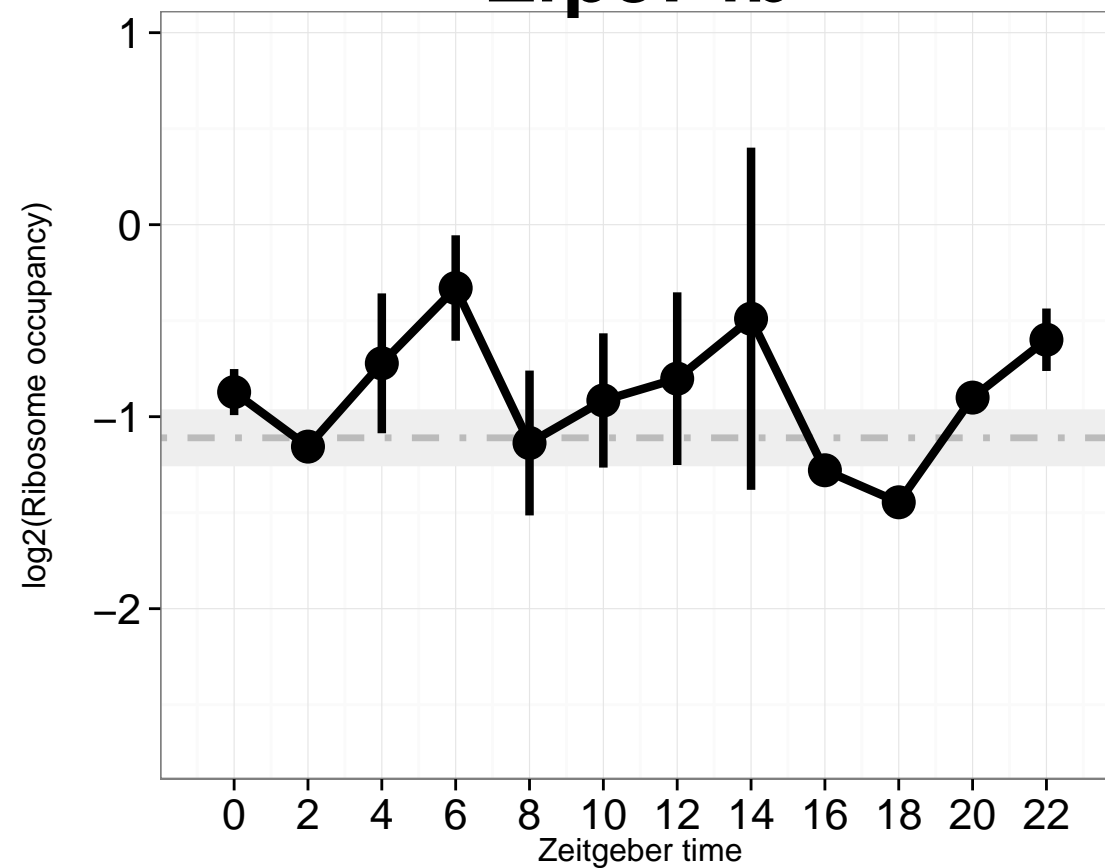

Supplement: SuppDataset_1.zip [file Zfp874b_set_B.pdf › Supplemental Dataset 1/B-mRNA_rhythm_translation_nonrhyth/Zfp874b_set_B.pdf]

# Zfp930

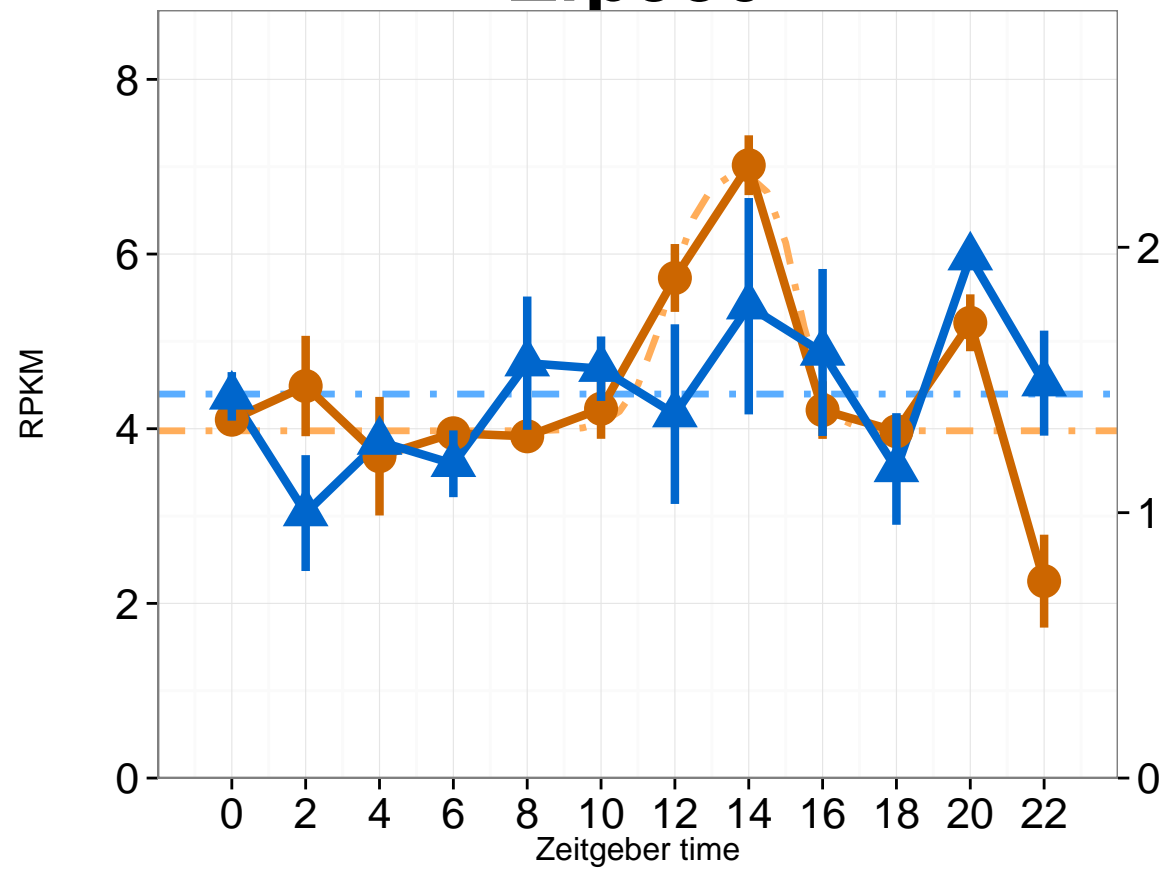

# Zfp930

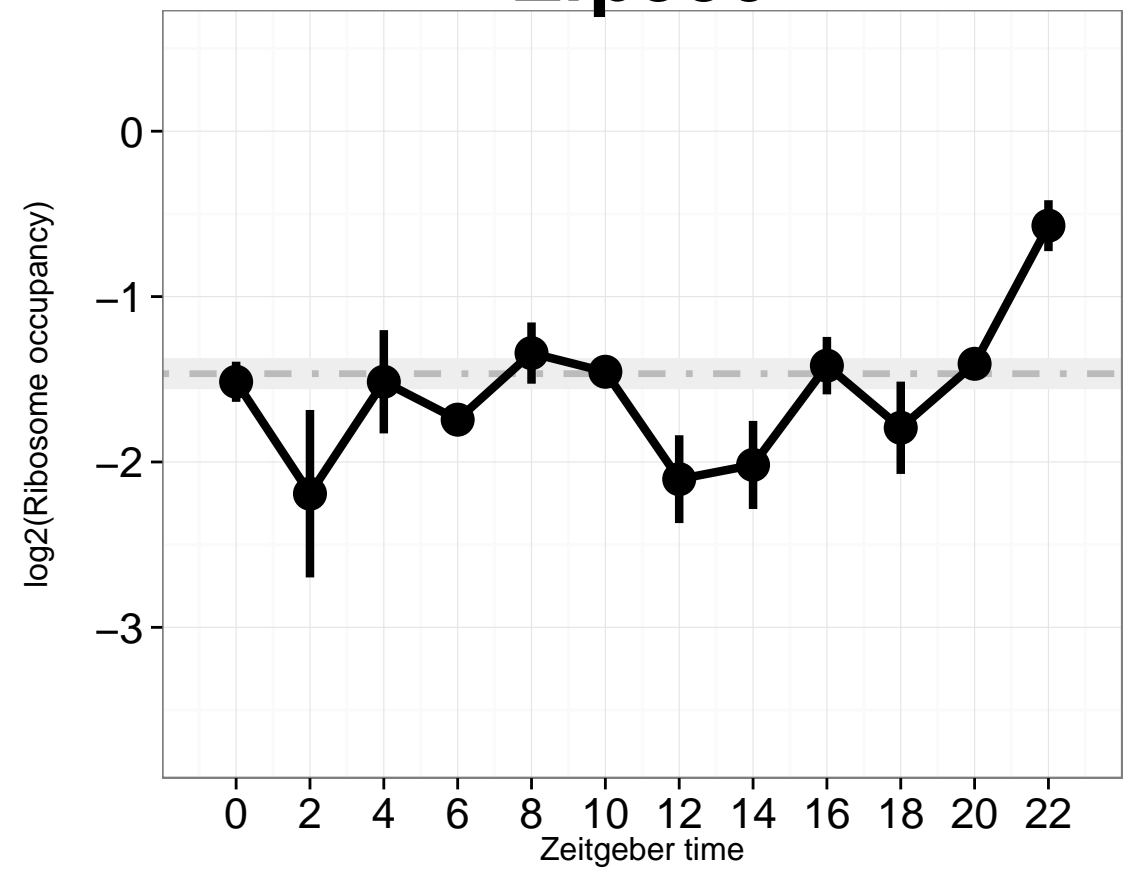

Supplement: SuppDataset_1.zip [file Zfp930_set_B.pdf › Supplemental Dataset 1/B-mRNA_rhythm_translation_nonrhyth/Zfp930_set_B.pdf]

## Zfp940

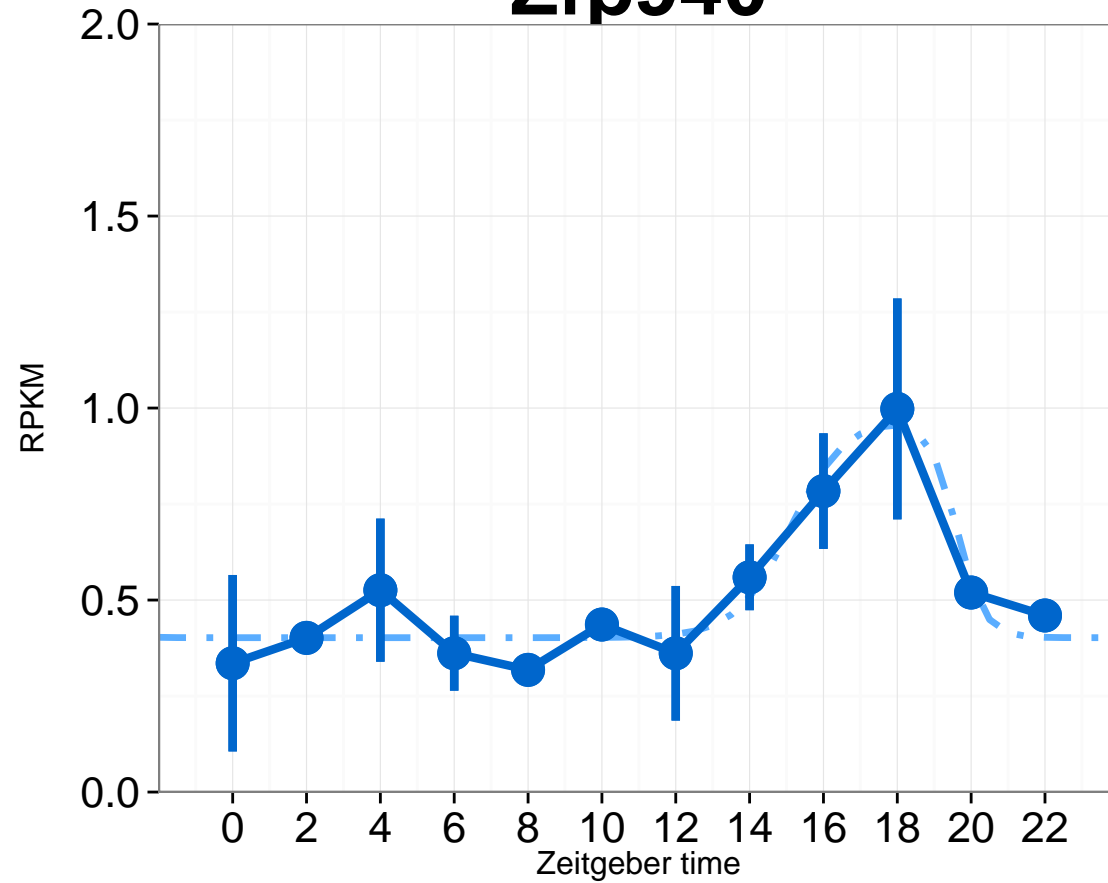

## Zfp940 log2(Ribosome occupancy



Supplement: SuppDataset_1.zip [file Zfp940_set_B.pdf › Supplemental Dataset 1/B-mRNA_rhythm_translation_nonrhyth/Zfp940_set_B.pdf]

## Zfp941

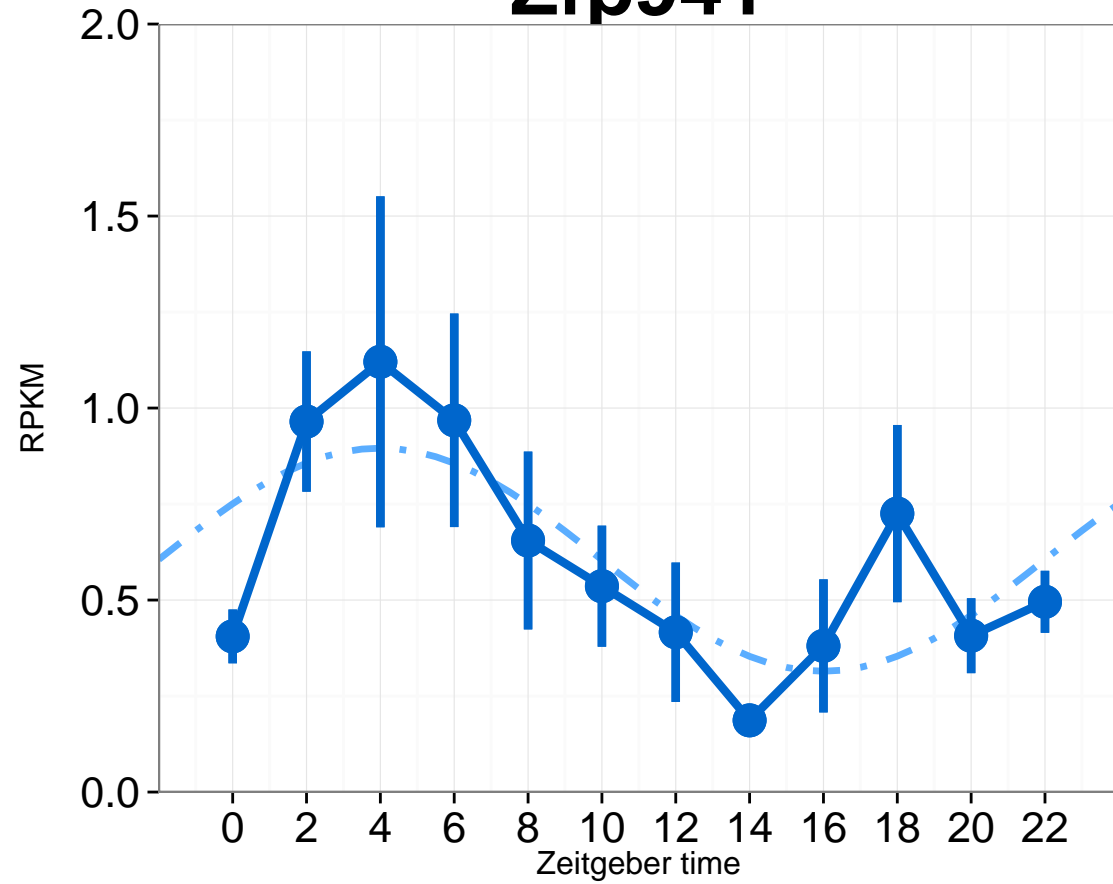

## Zfp941 log2(Ribosome occupancy

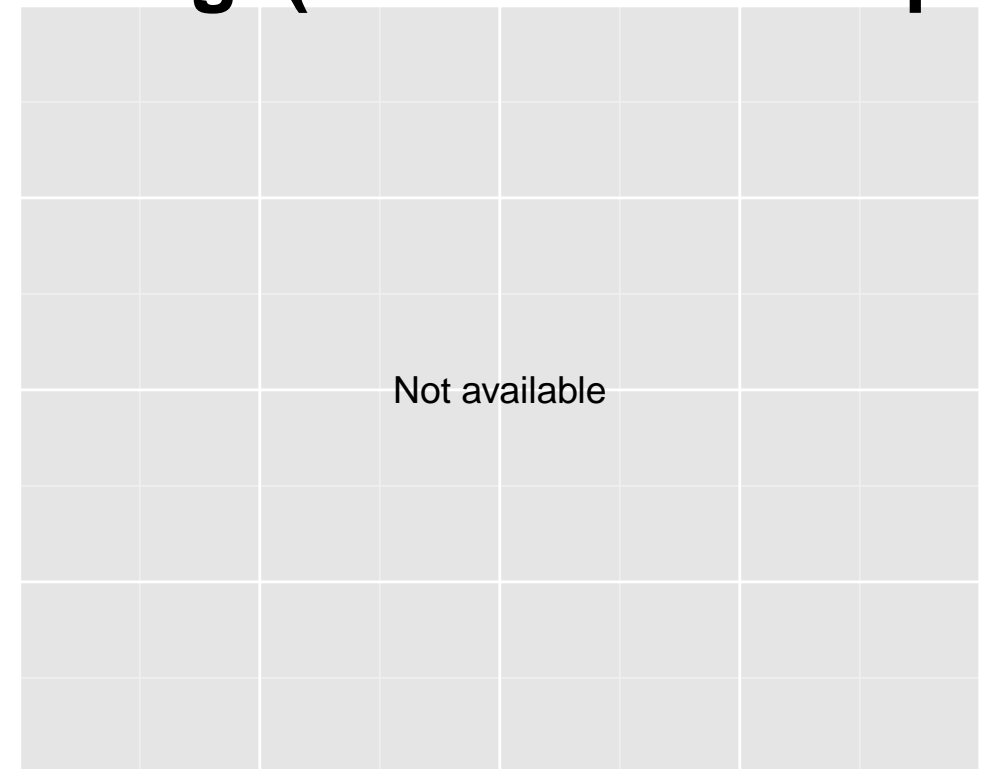

Supplement: SuppDataset_1.zip [file Zfp941_set_B.pdf › Supplemental Dataset 1/B-mRNA_rhythm_translation_nonrhyth/Zfp941_set_B.pdf]

# Zfp948

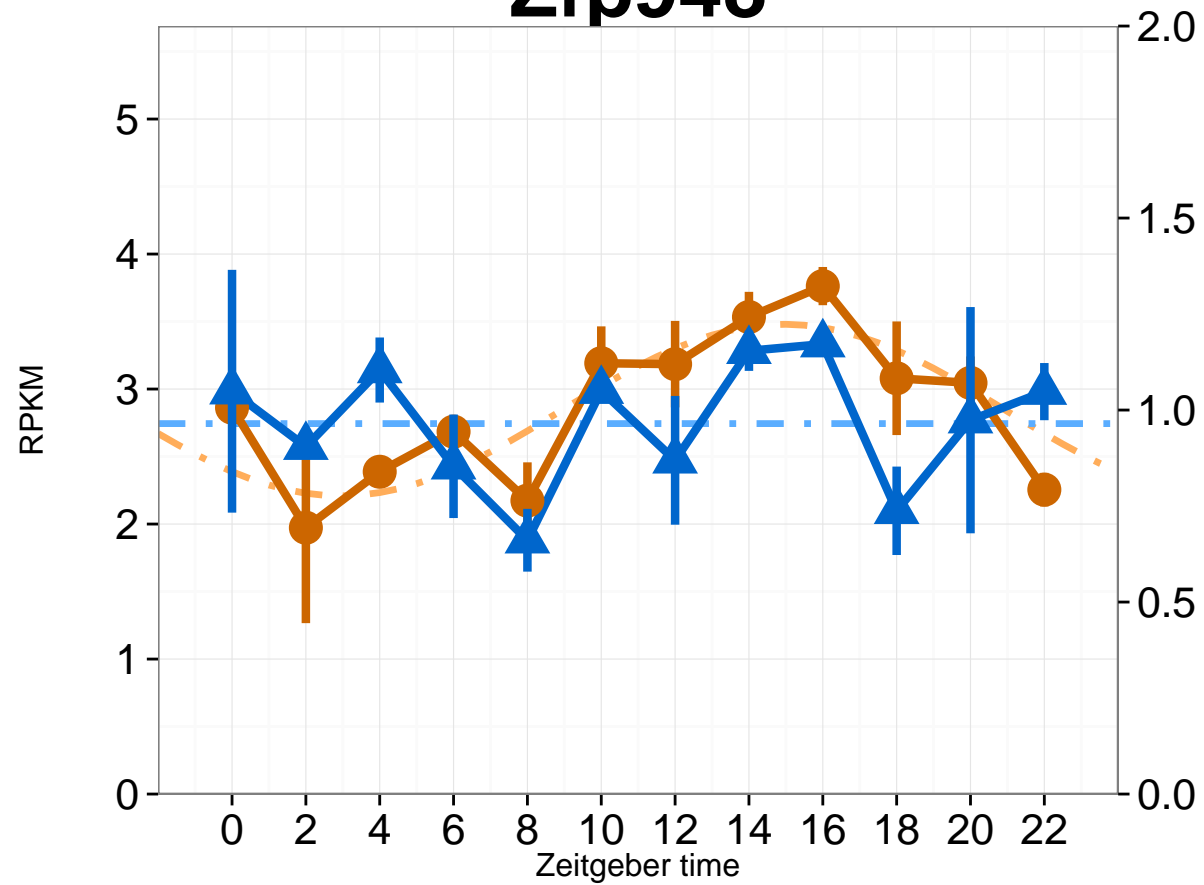

# Zfp948

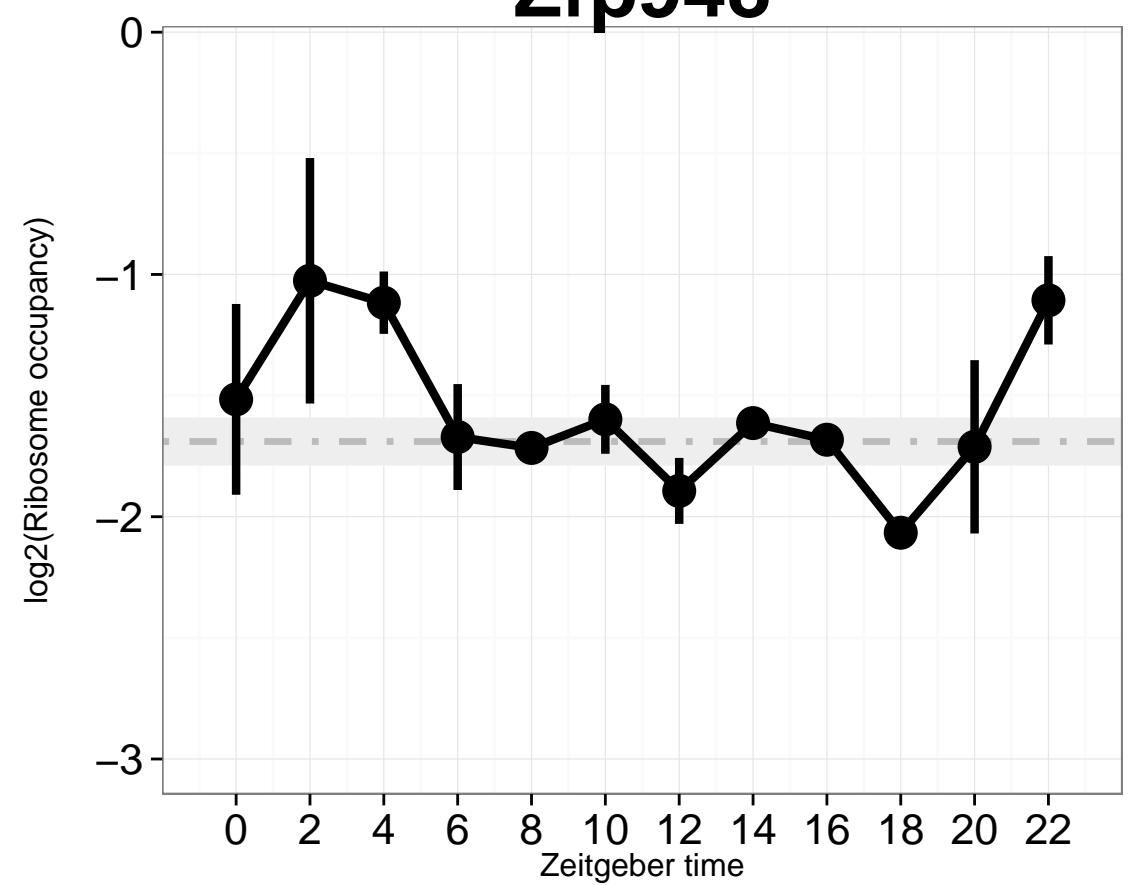

Supplement: SuppDataset_1.zip [file Zfp948_set_B.pdf › Supplemental Dataset 1/B-mRNA_rhythm_translation_nonrhyth/Zfp948_set_B.pdf]

# Zfp954

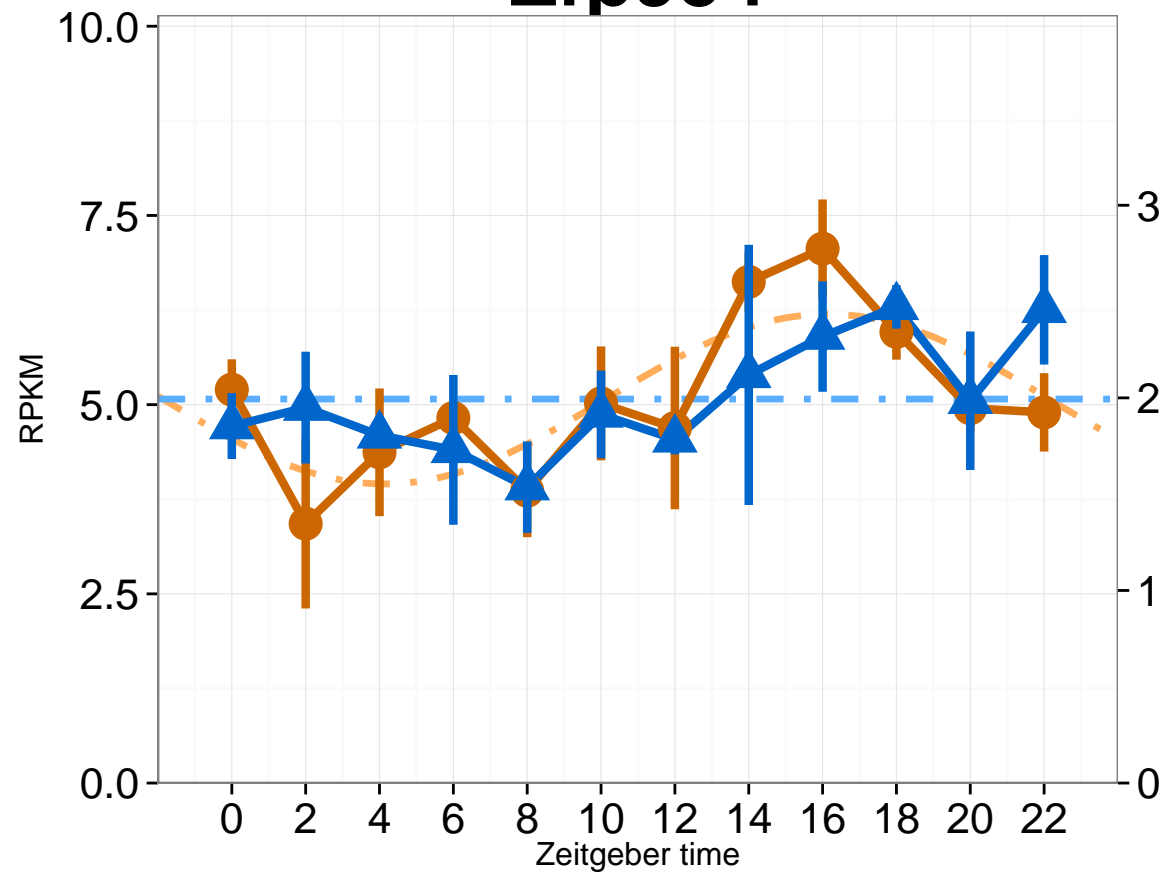

# Zfp954

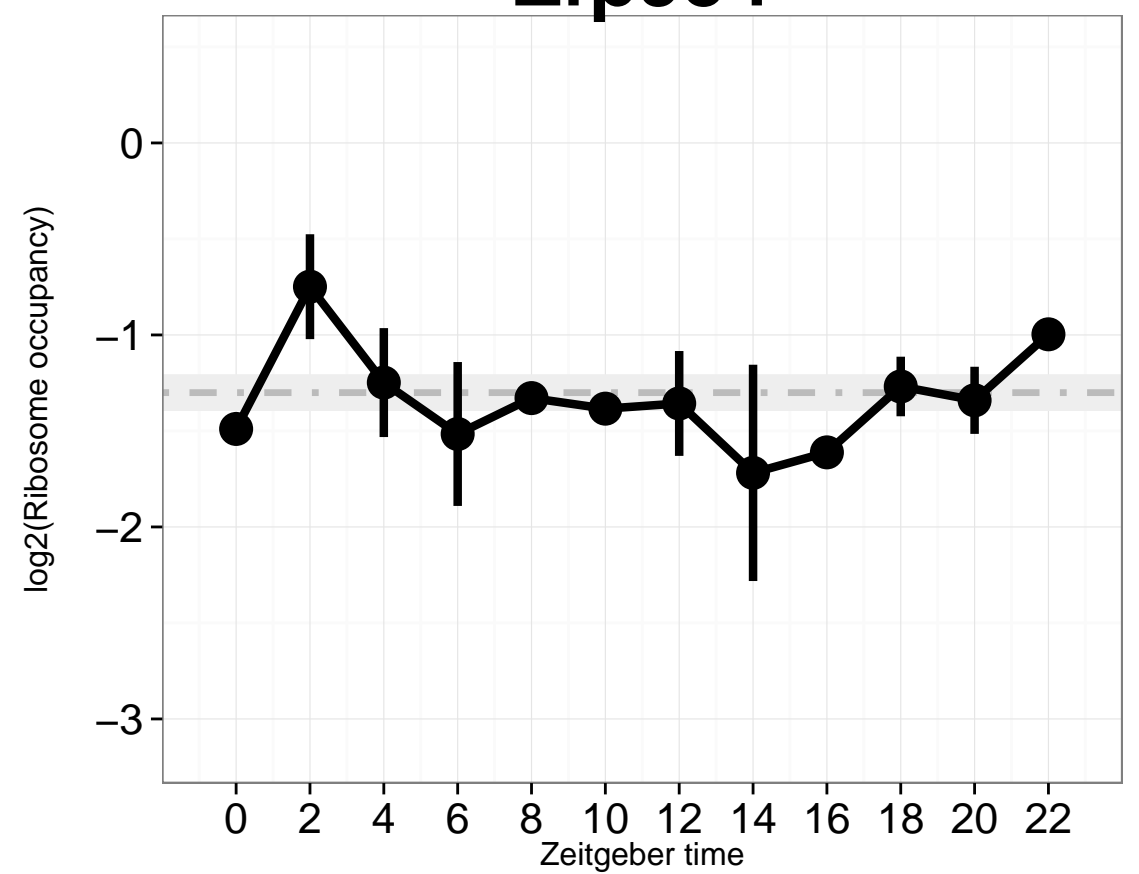

Supplement: SuppDataset_1.zip [file Zfp954_set_B.pdf › Supplemental Dataset 1/B-mRNA_rhythm_translation_nonrhyth/Zfp954_set_B.pdf]

# Zfyve27

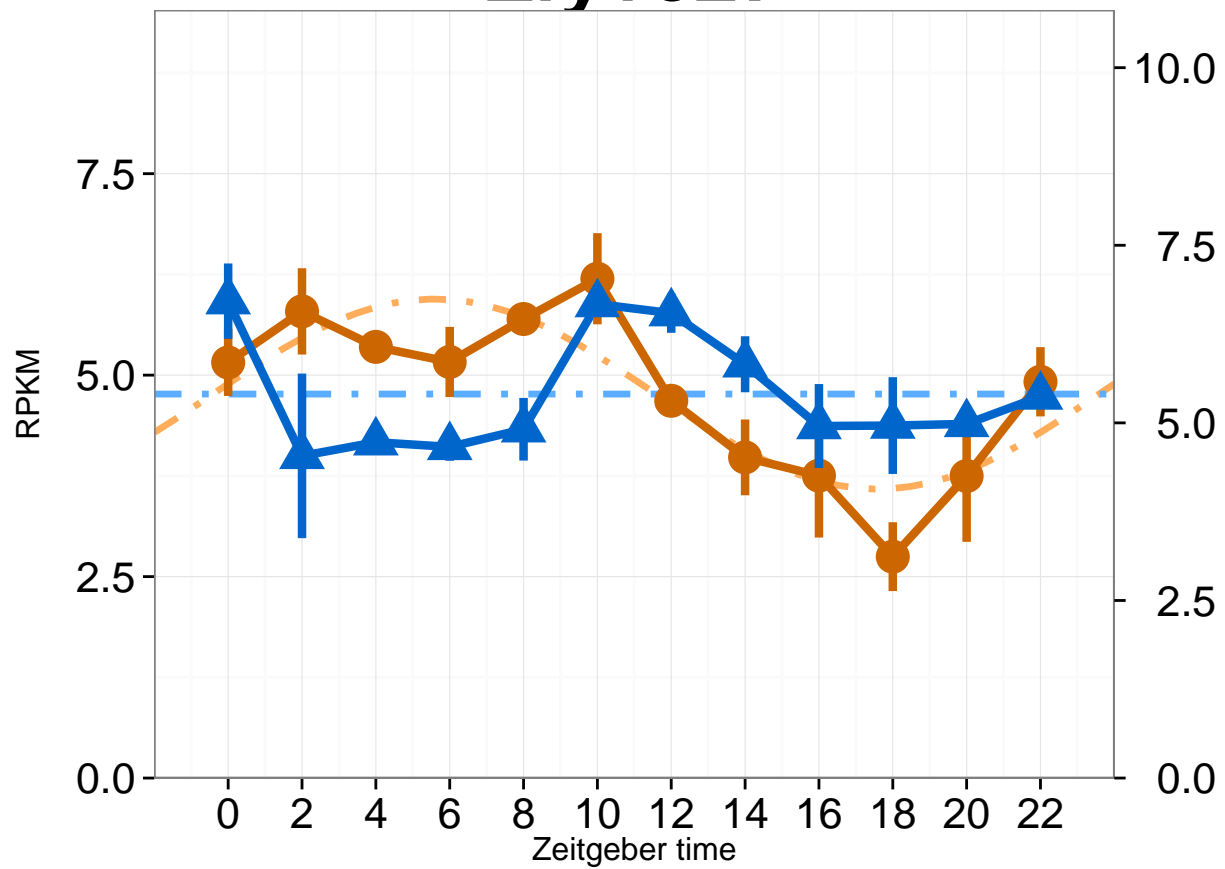

# Zfyve27

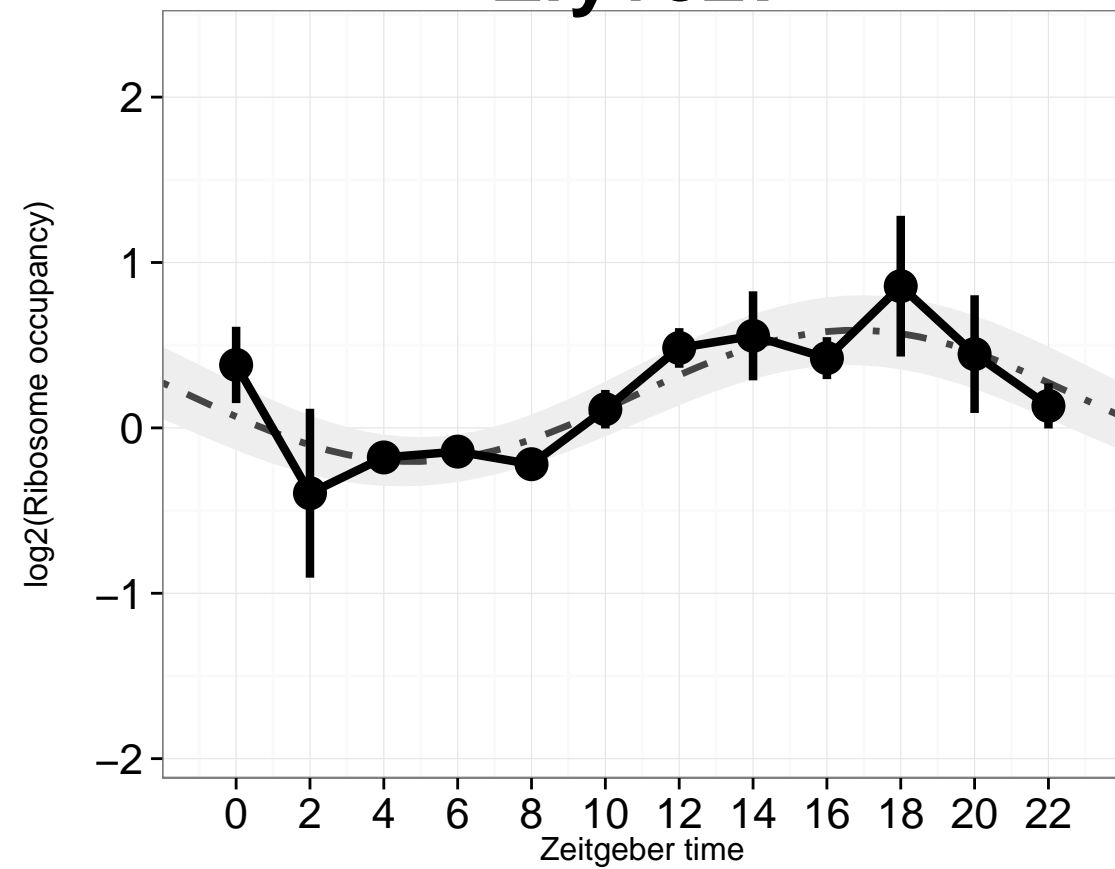

Supplement: SuppDataset_1.zip [file Zfyve27_set_B.pdf › Supplemental Dataset 1/B-mRNA_rhythm_translation_nonrhyth/Zfyve27_set_B.pdf]

## Zkscan1

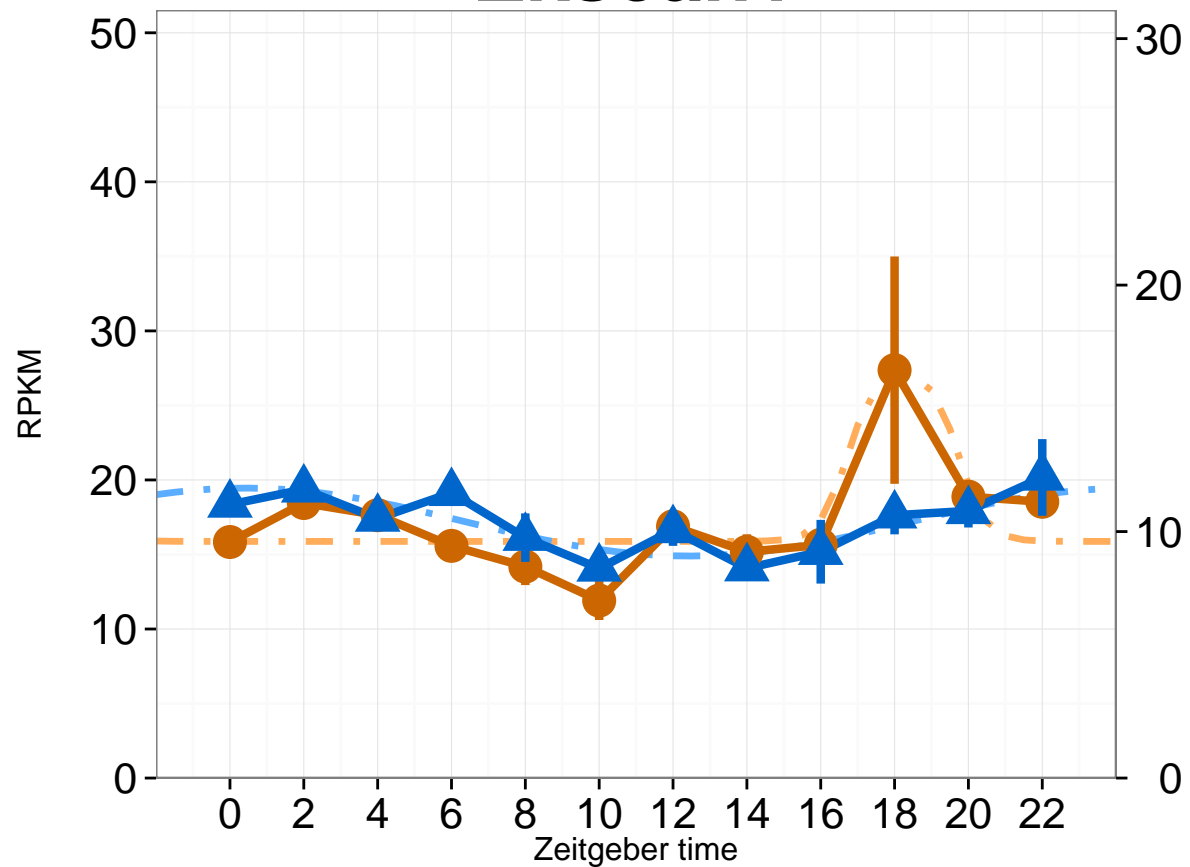

## Zkscan1

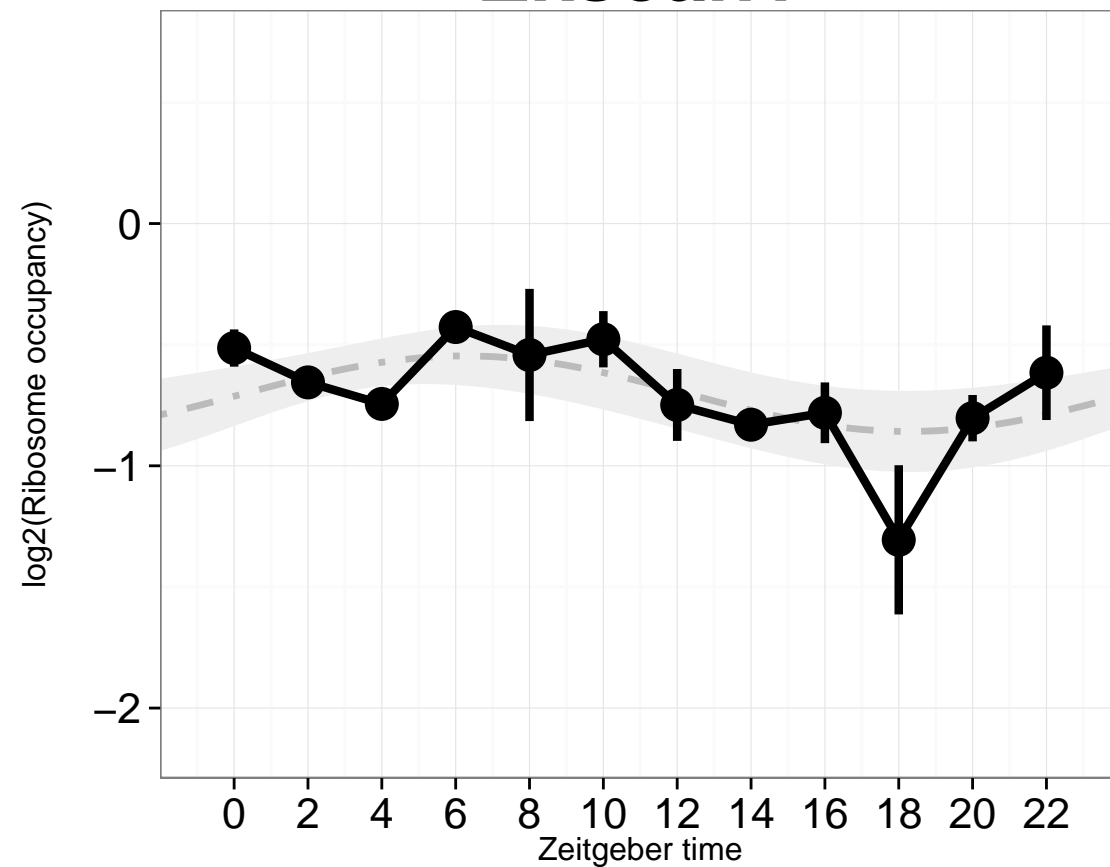

Supplement: SuppDataset_1.zip [file Zkscan1_set_B.pdf › Supplemental Dataset 1/B-mRNA_rhythm_translation_nonrhyth/Zkscan1_set_B.pdf]

## Zmiz1

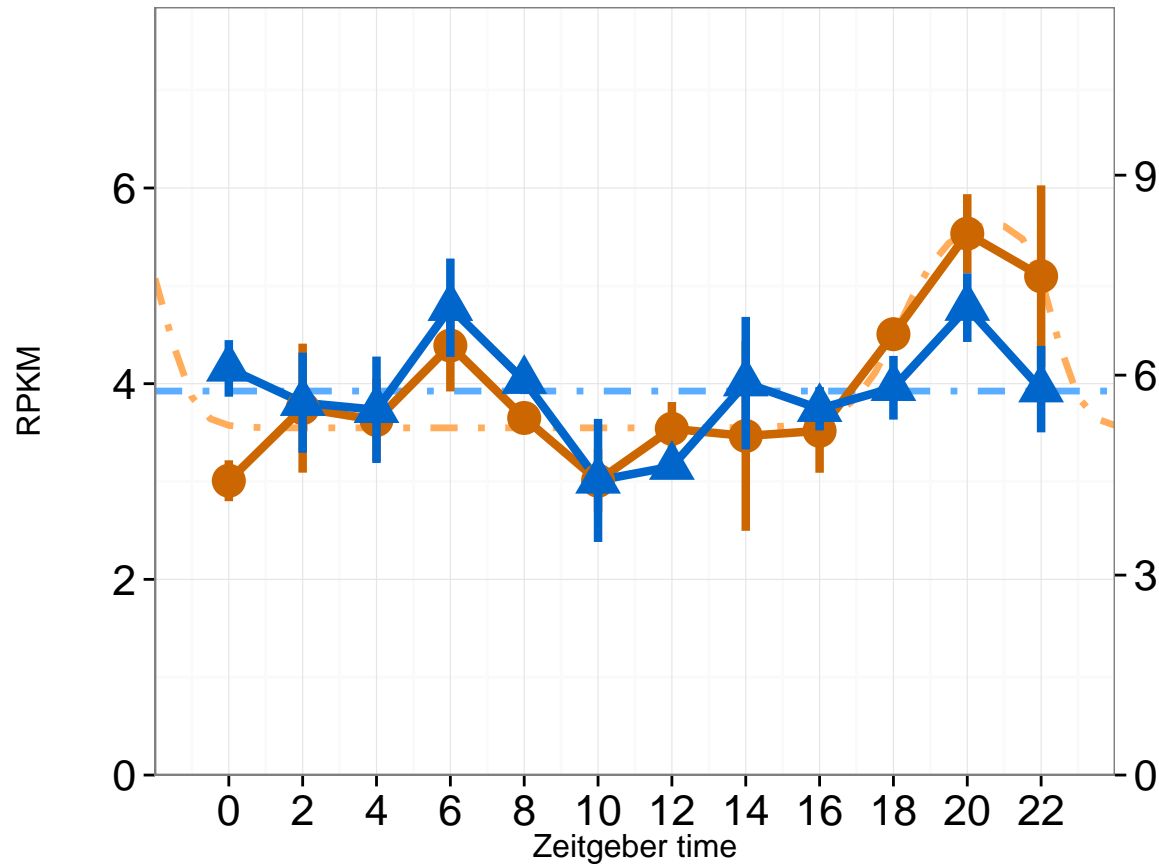

## Zmiz1

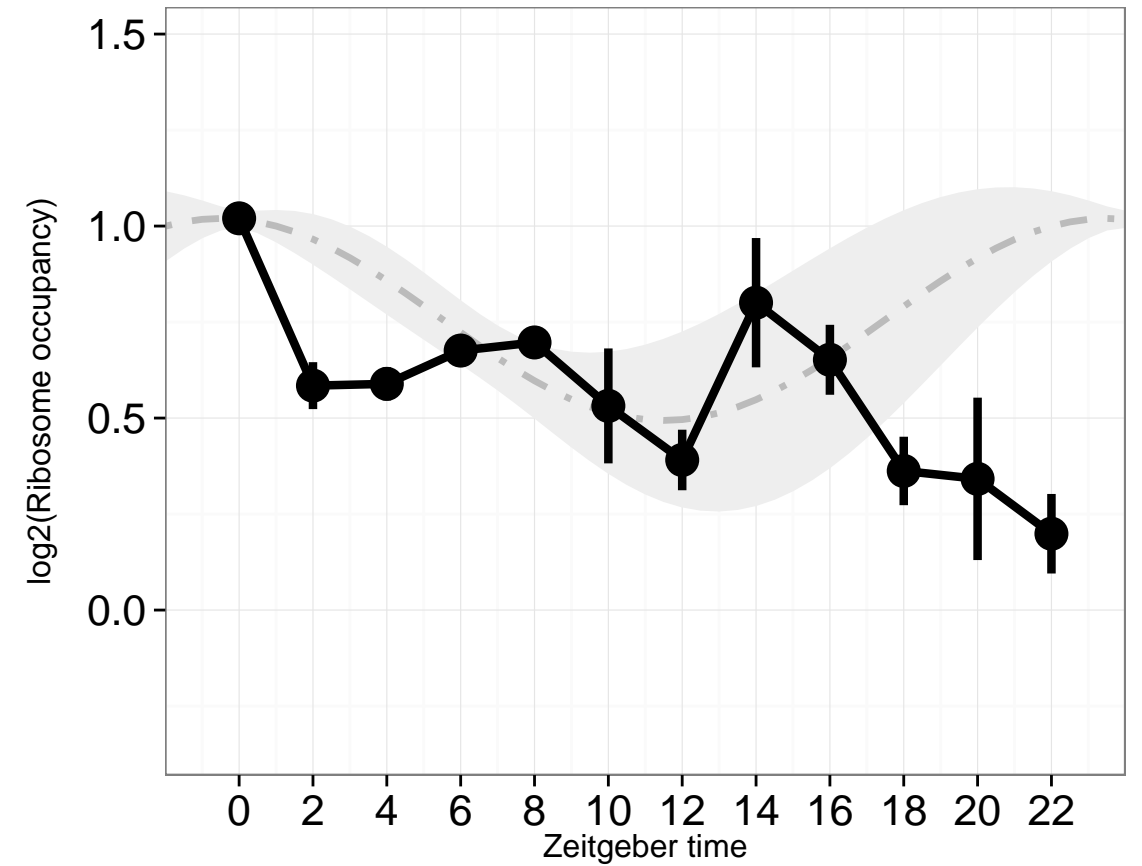

Supplement: SuppDataset_1.zip [file Zmiz1_set_B.pdf › Supplemental Dataset 1/B-mRNA_rhythm_translation_nonrhyth/Zmiz1_set_B.pdf]

# Znrf3

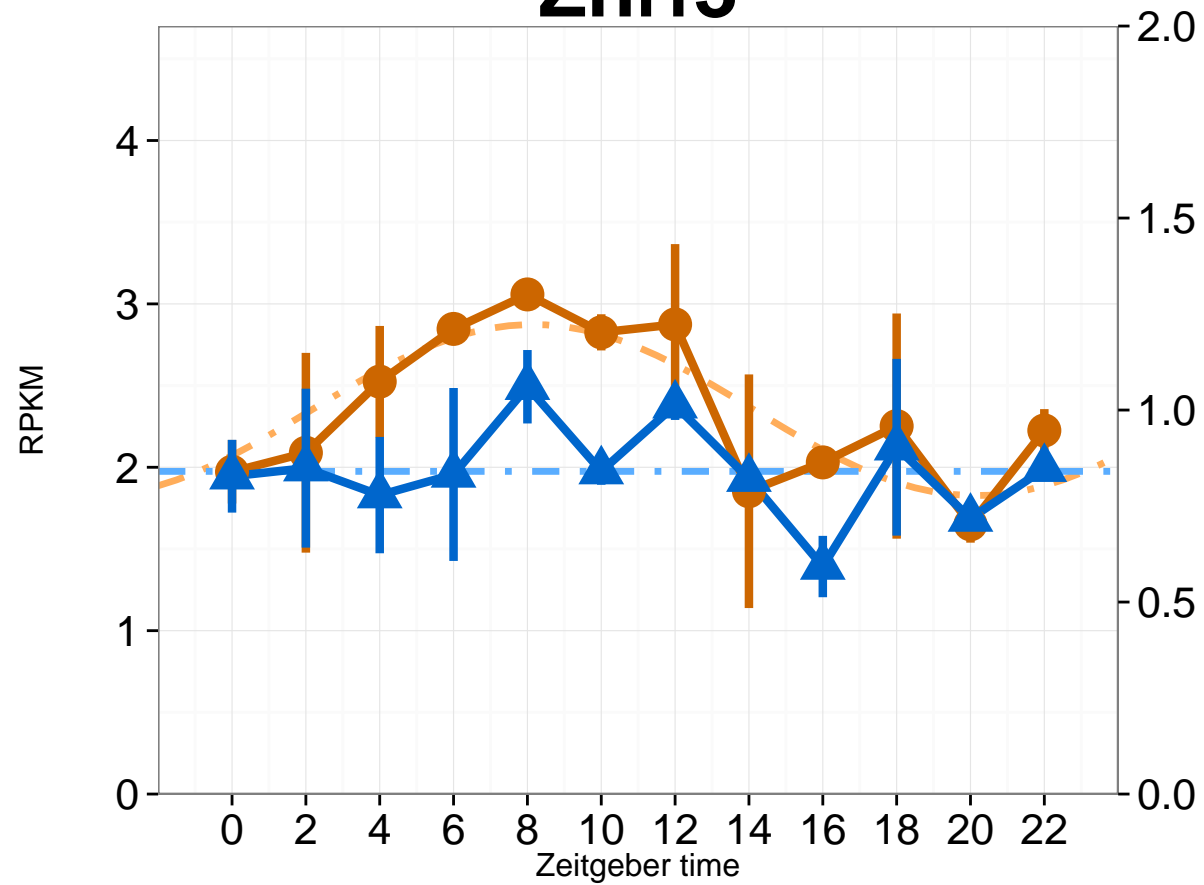

# Znrf3

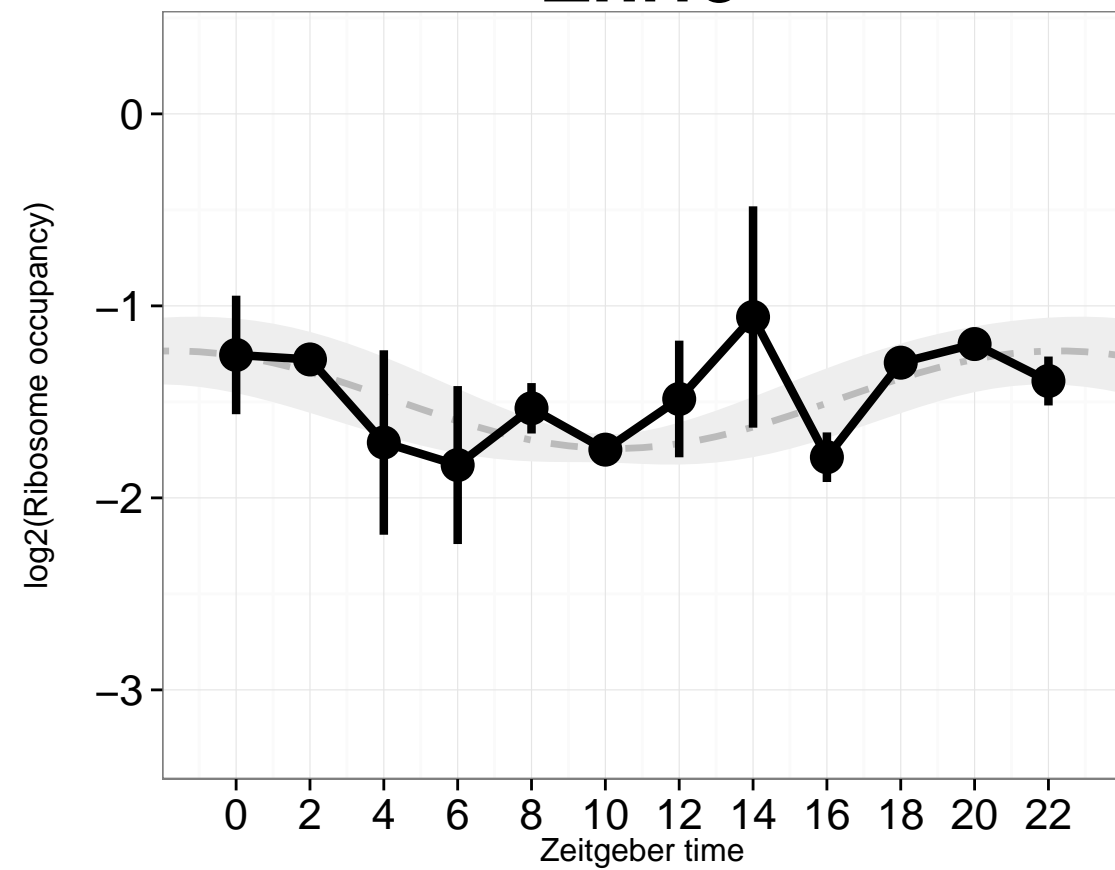

Supplement: SuppDataset_1.zip [file Znrf3_set_B.pdf › Supplemental Dataset 1/B-mRNA_rhythm_translation_nonrhyth/Znrf3_set_B.pdf]

# Zswim3

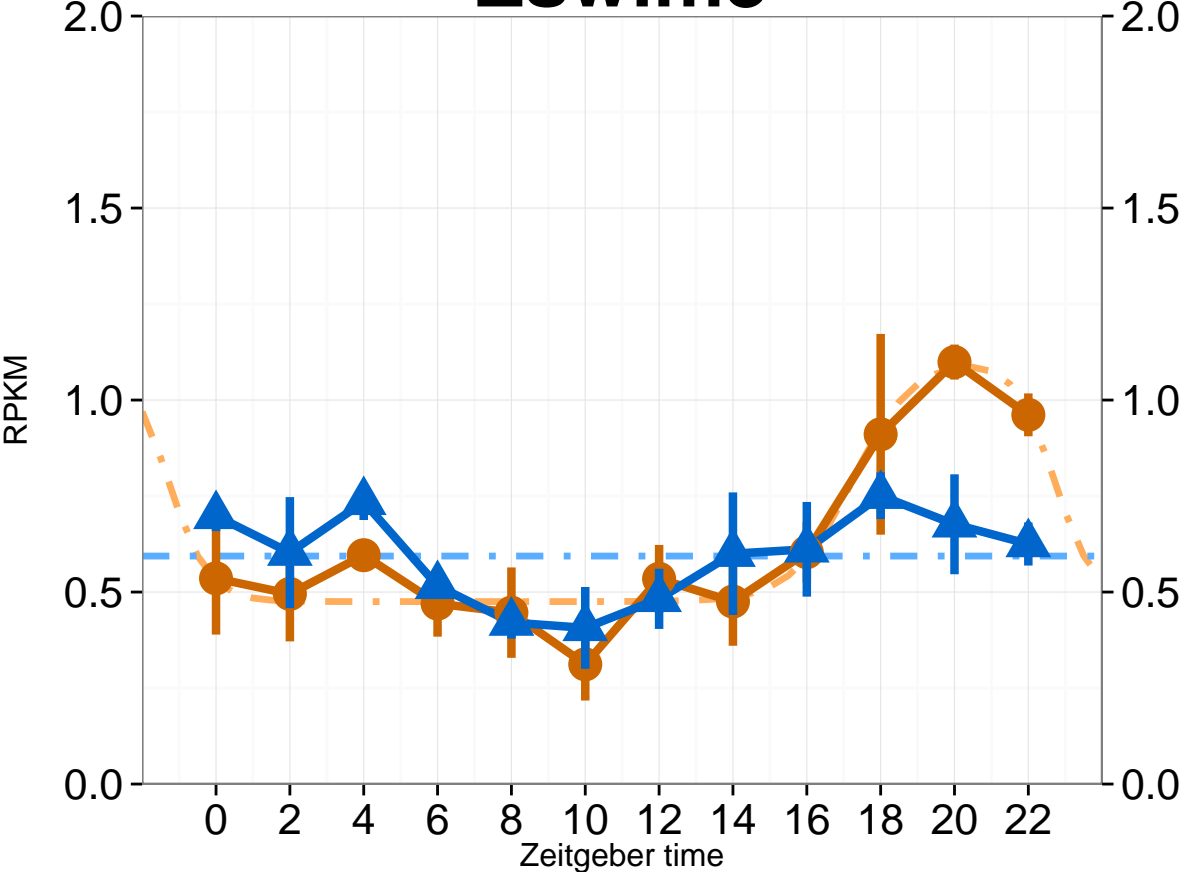

# Zswim3

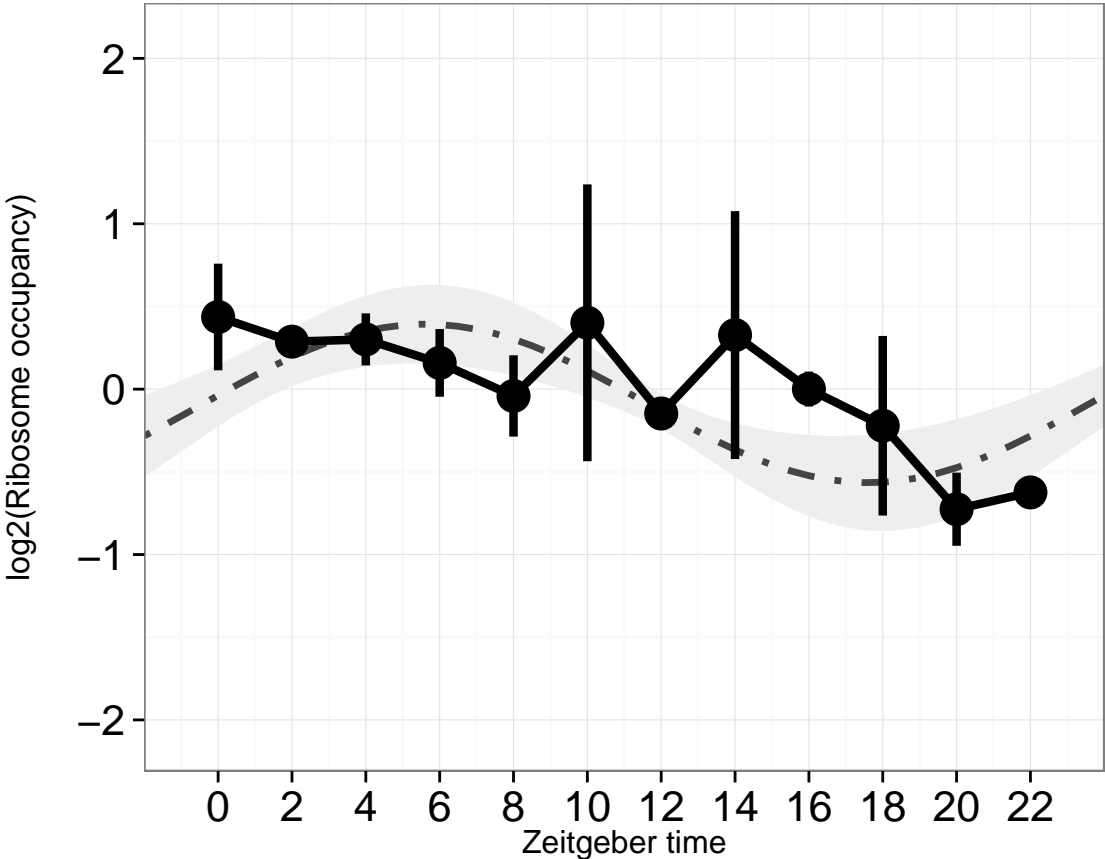

Supplement: SuppDataset_1.zip [file Zswim3_set_B.pdf › Supplemental Dataset 1/B-mRNA_rhythm_translation_nonrhyth/Zswim3_set_B.pdf]

# Zswim4

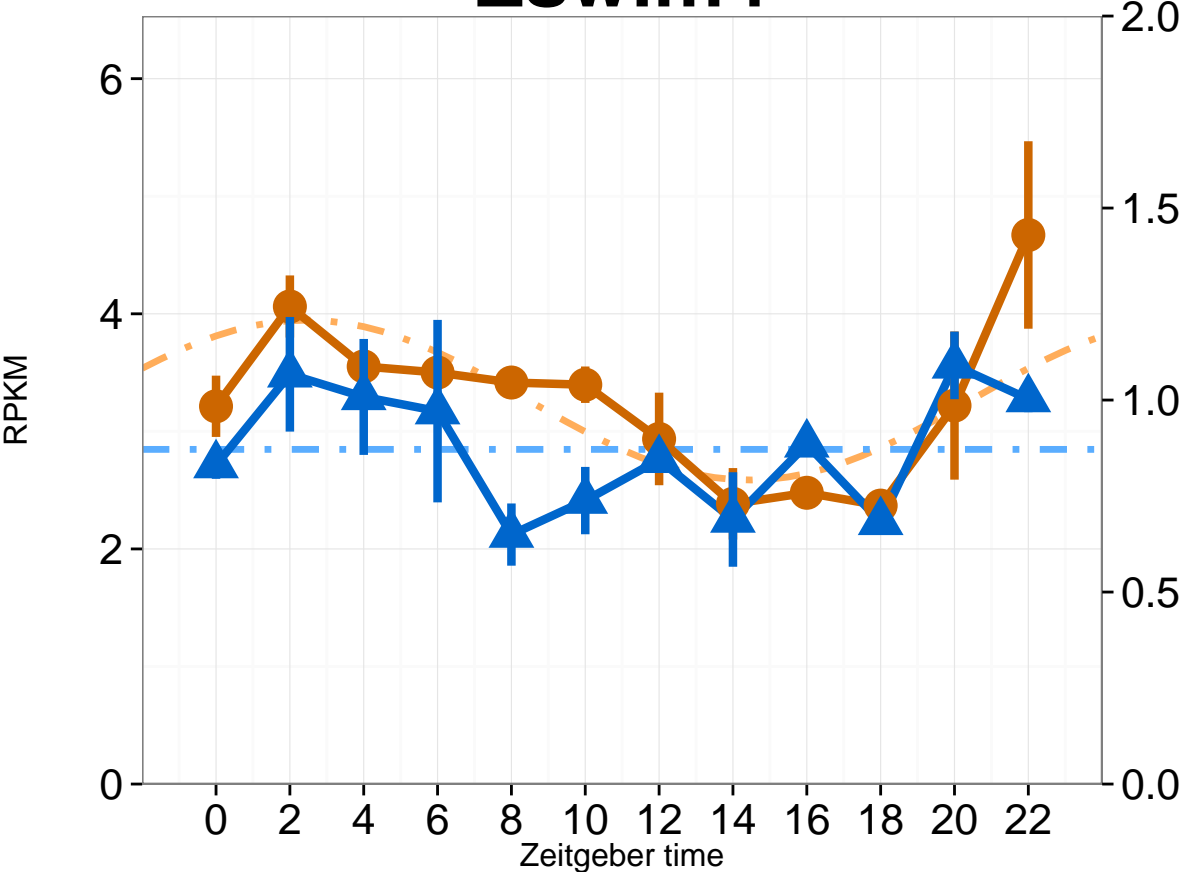

# Zswim4

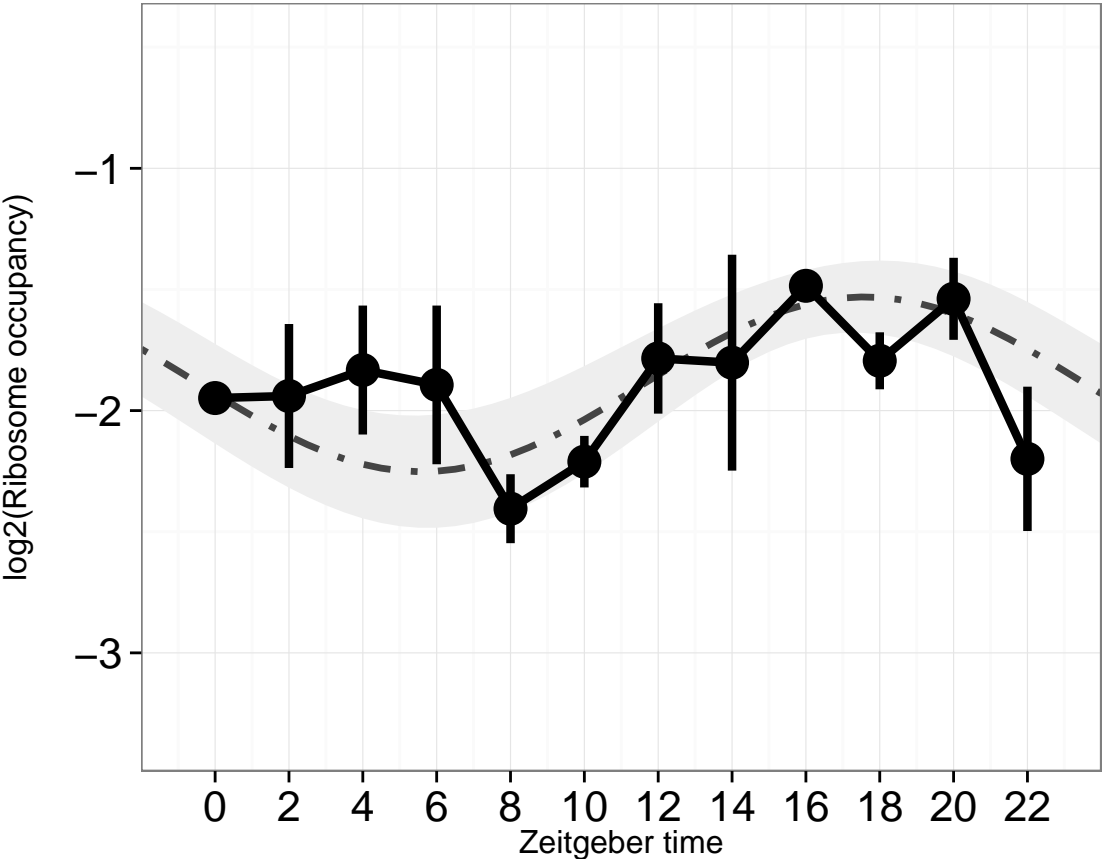

Supplement: SuppDataset_1.zip [file Zswim4_set_B.pdf › Supplemental Dataset 1/B-mRNA_rhythm_translation_nonrhyth/Zswim4_set_B.pdf]

# 1190002N15Rik

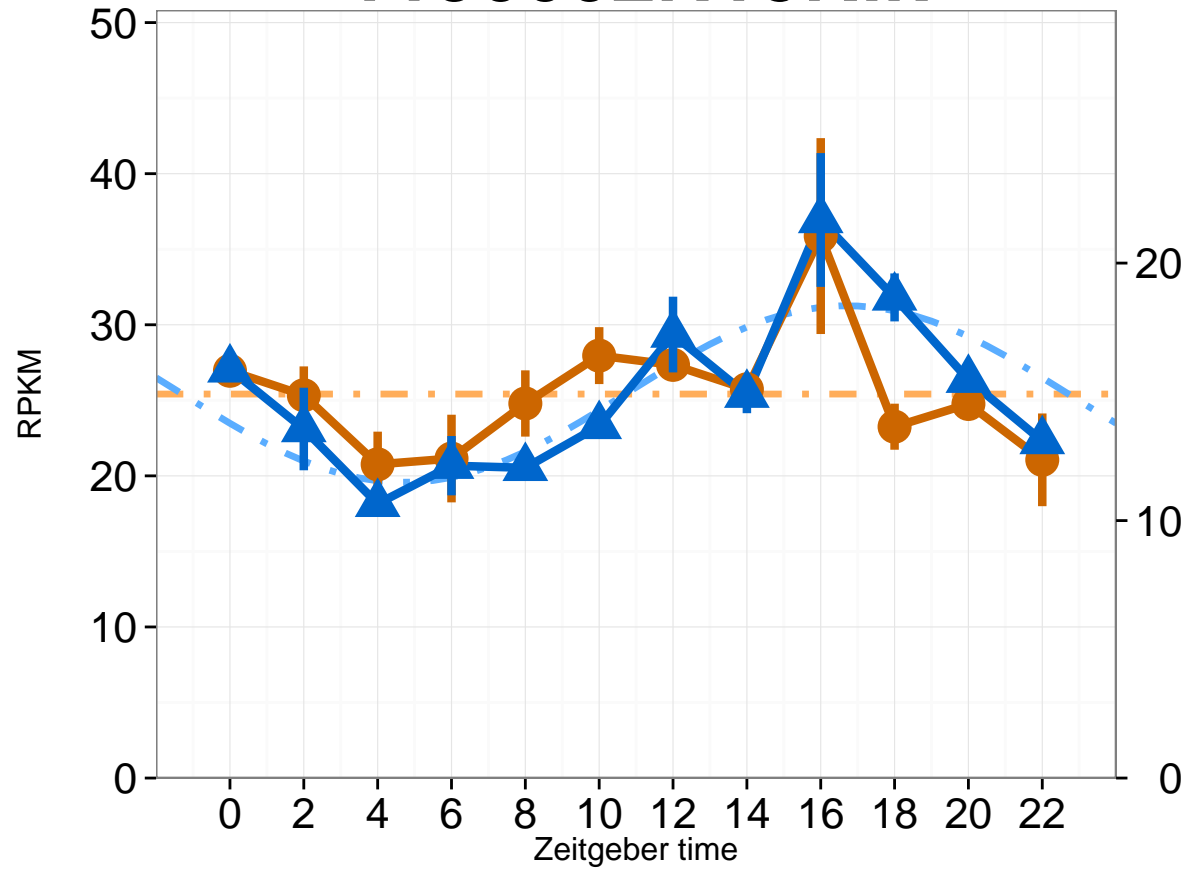

# 1190002N15Rik

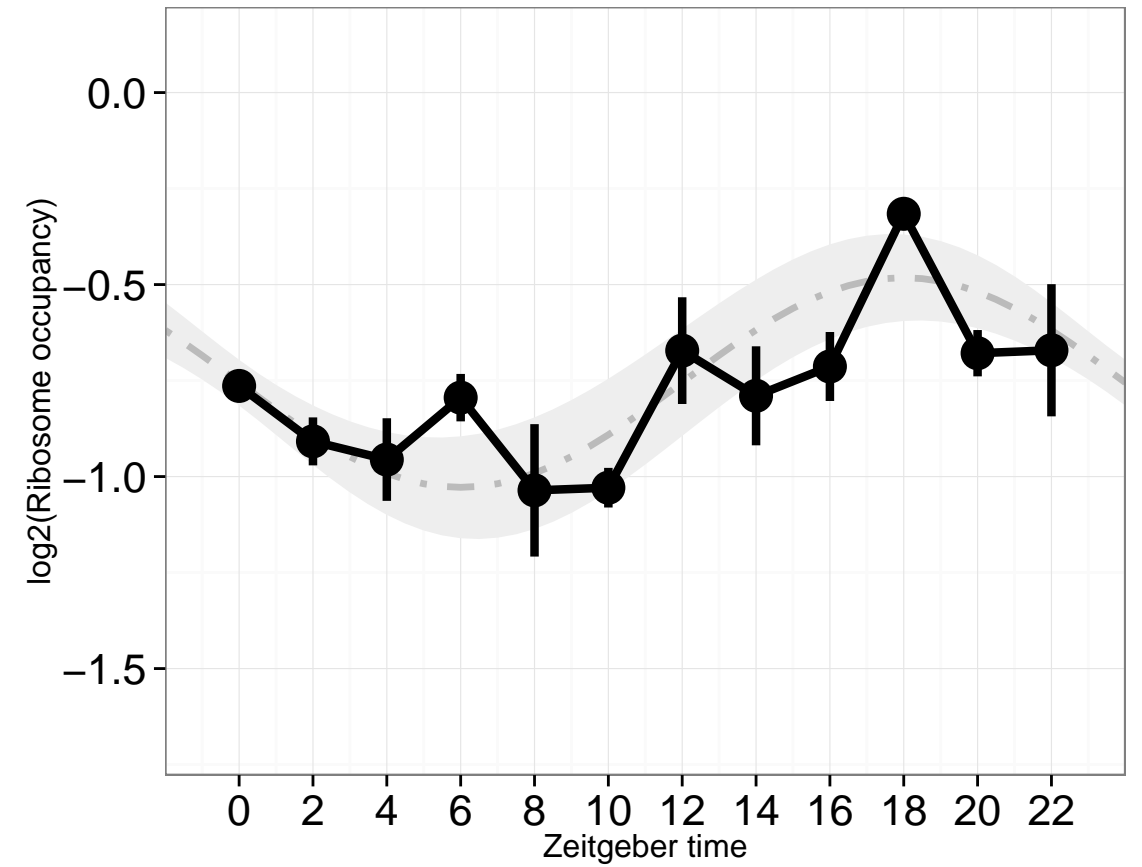

Supplement: SuppDataset_1.zip [file 1190002N15Rik_set_C.pdf › Supplemental Dataset 1/C-mRNA_nonrhythm_translation_rhyth/1190002N15Rik_set_C.pdf]

# 1700019G17Rik

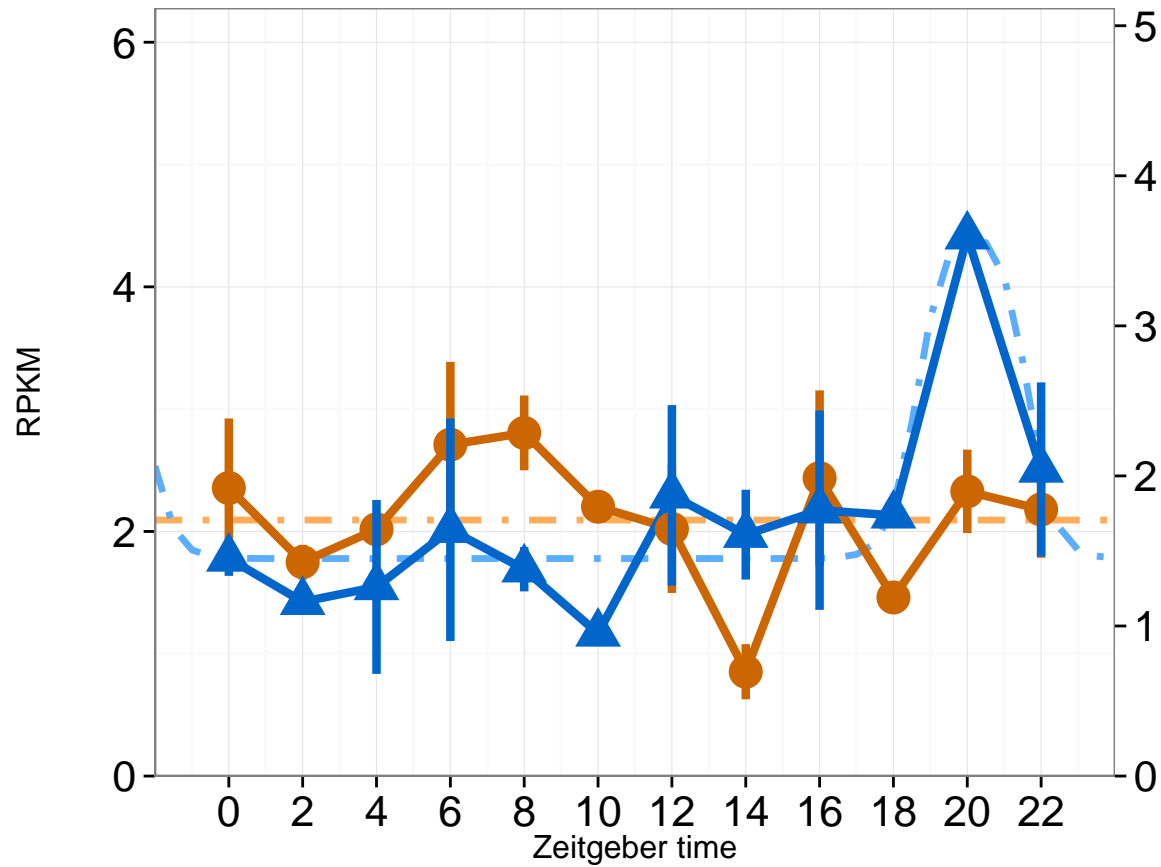

# 1700019G17Rik

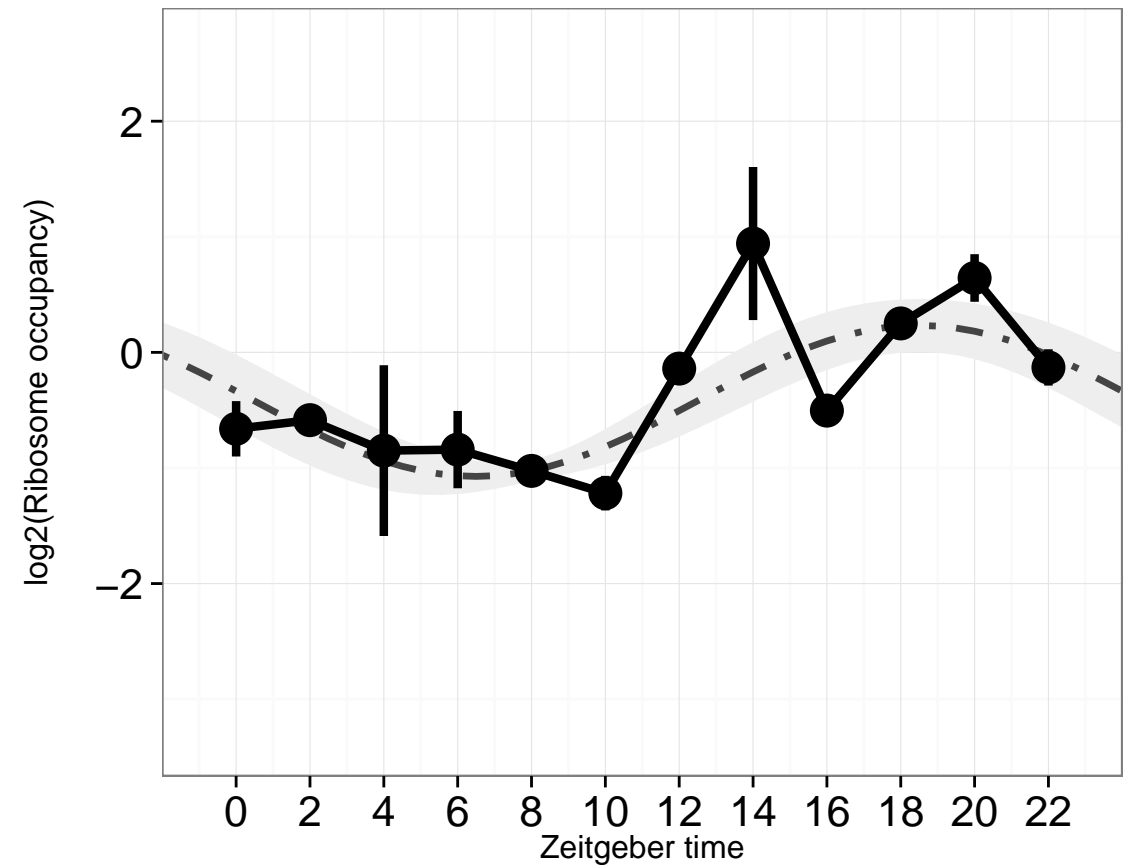

Supplement: SuppDataset_1.zip [file 1700019G17Rik_set_C.pdf › Supplemental Dataset 1/C-mRNA_nonrhythm_translation_rhyth/1700019G17Rik_set_C.pdf]

# 1700040L02Rik

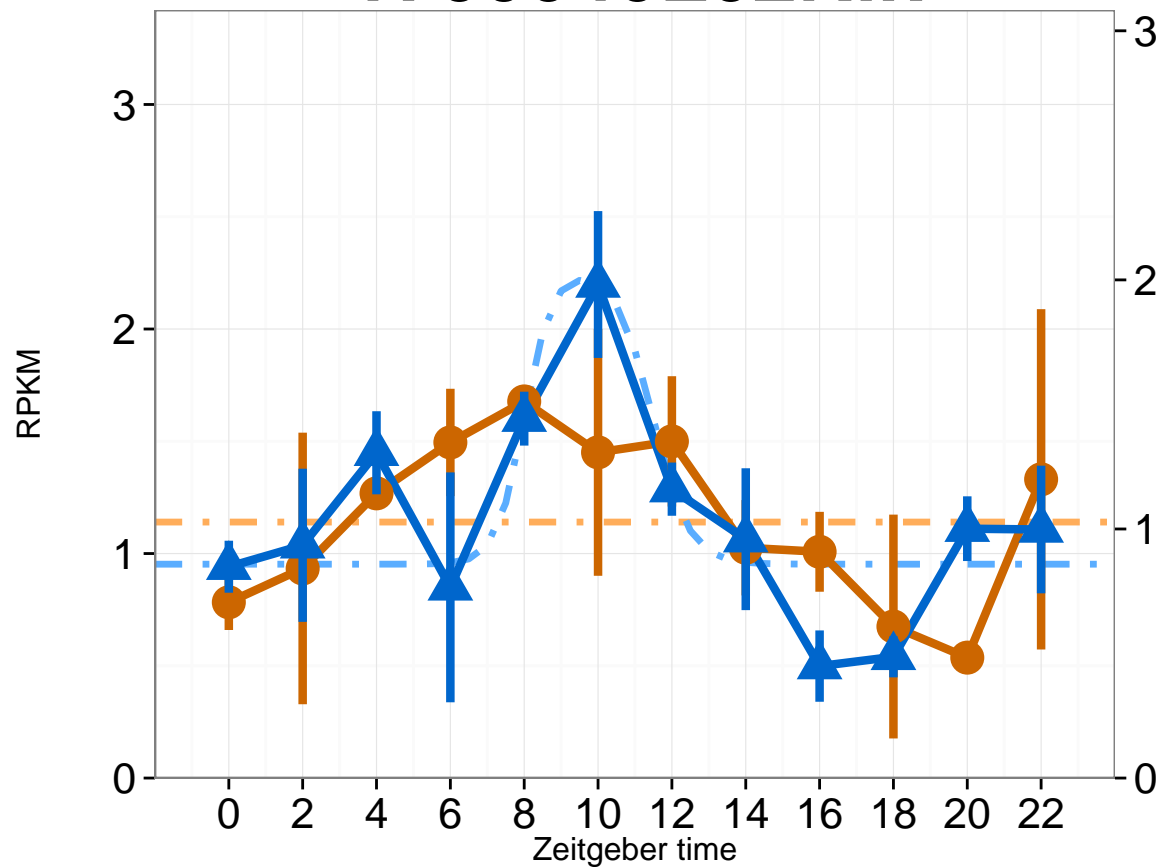

# 1700040L02Rik

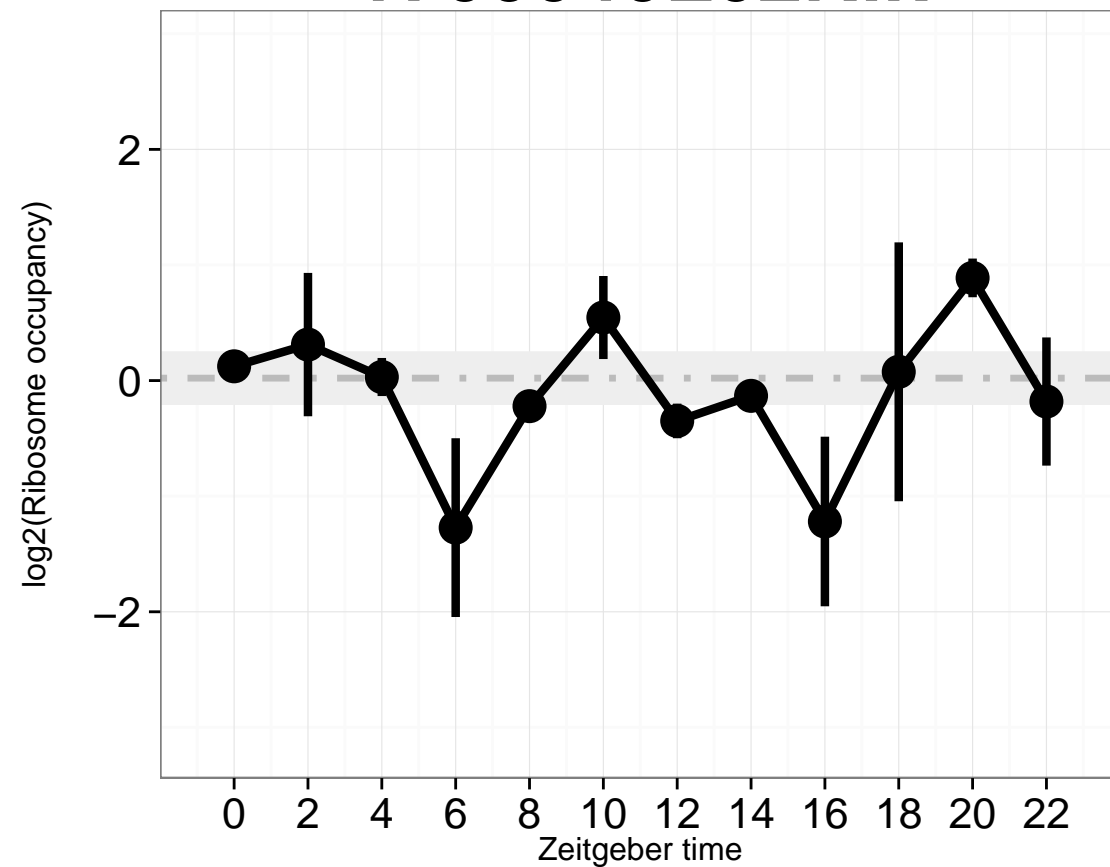

Supplement: SuppDataset_1.zip [file 1700040L02Rik_set_C.pdf › Supplemental Dataset 1/C-mRNA_nonrhythm_translation_rhyth/1700040L02Rik_set_C.pdf]

# 2510002D24Rik

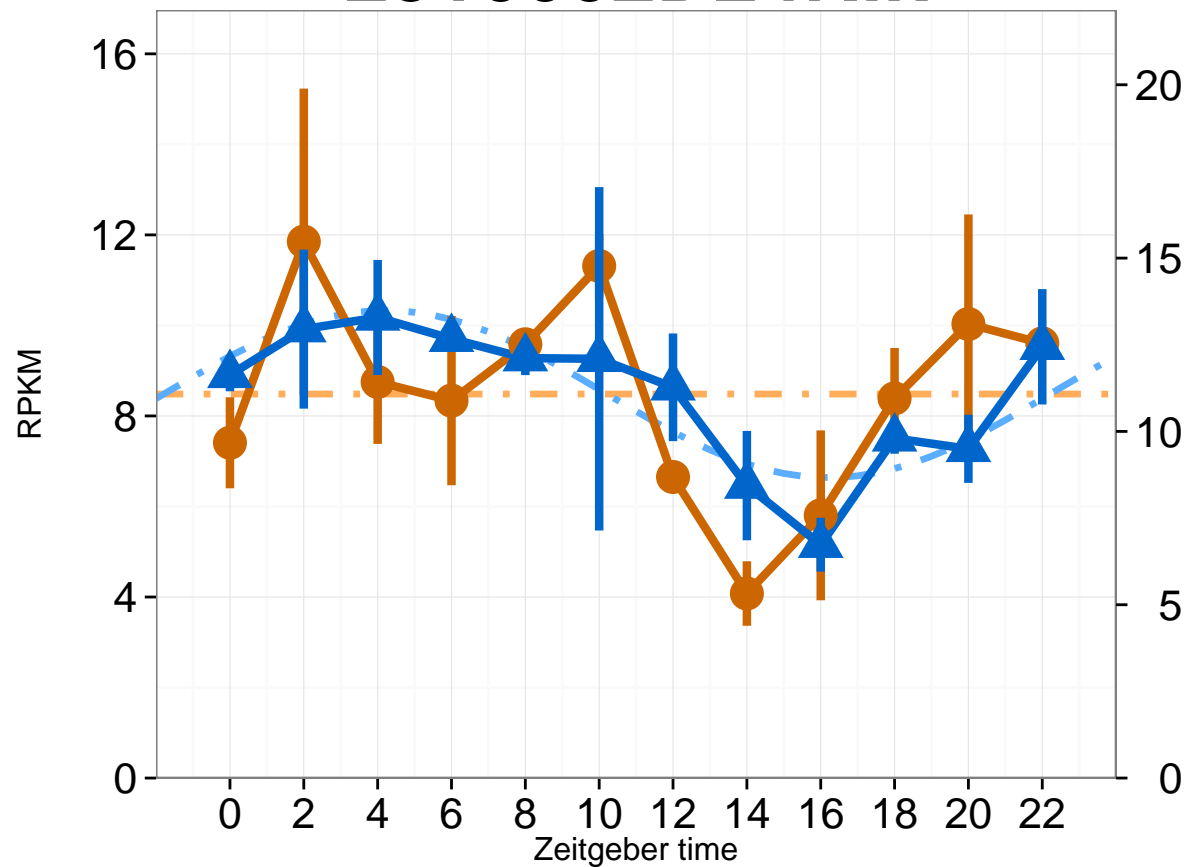

# 2510002D24Rik

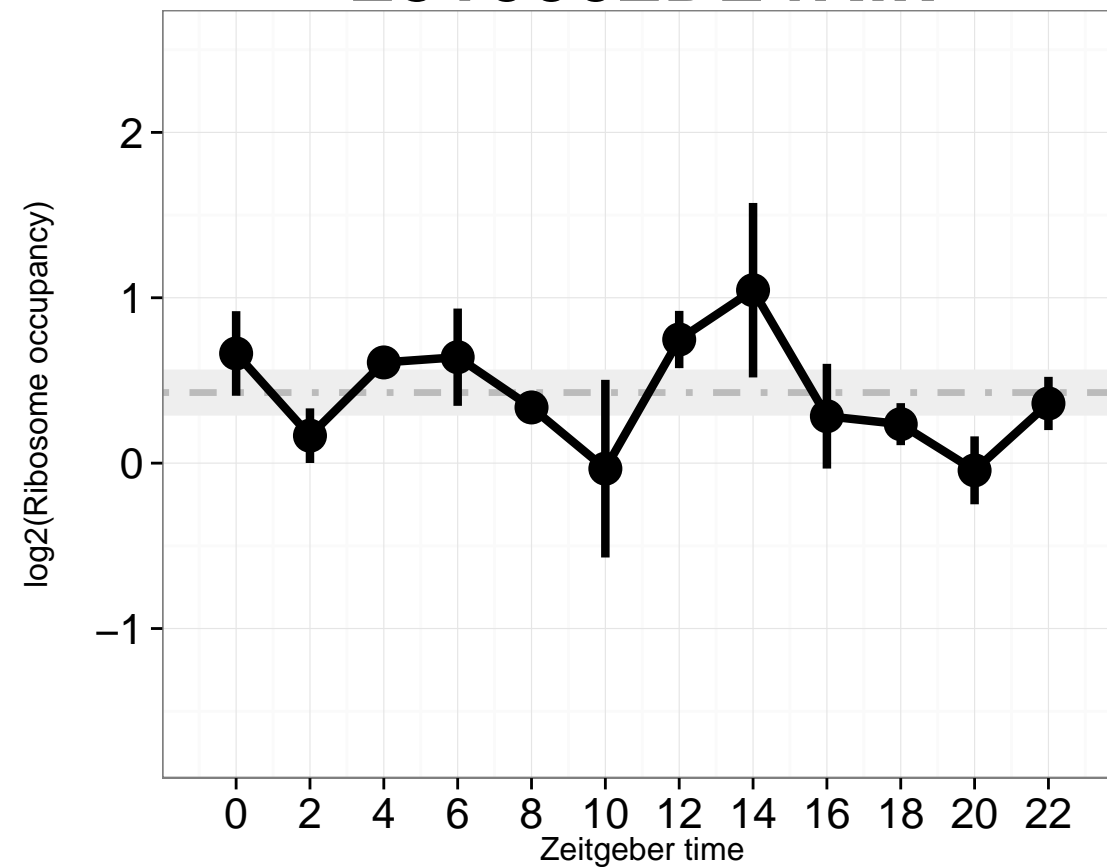

Supplement: SuppDataset_1.zip [file 2510002D24Rik_set_C.pdf › Supplemental Dataset 1/C-mRNA_nonrhythm_translation_rhyth/2510002D24Rik_set_C.pdf]

# 4632428N05Rik

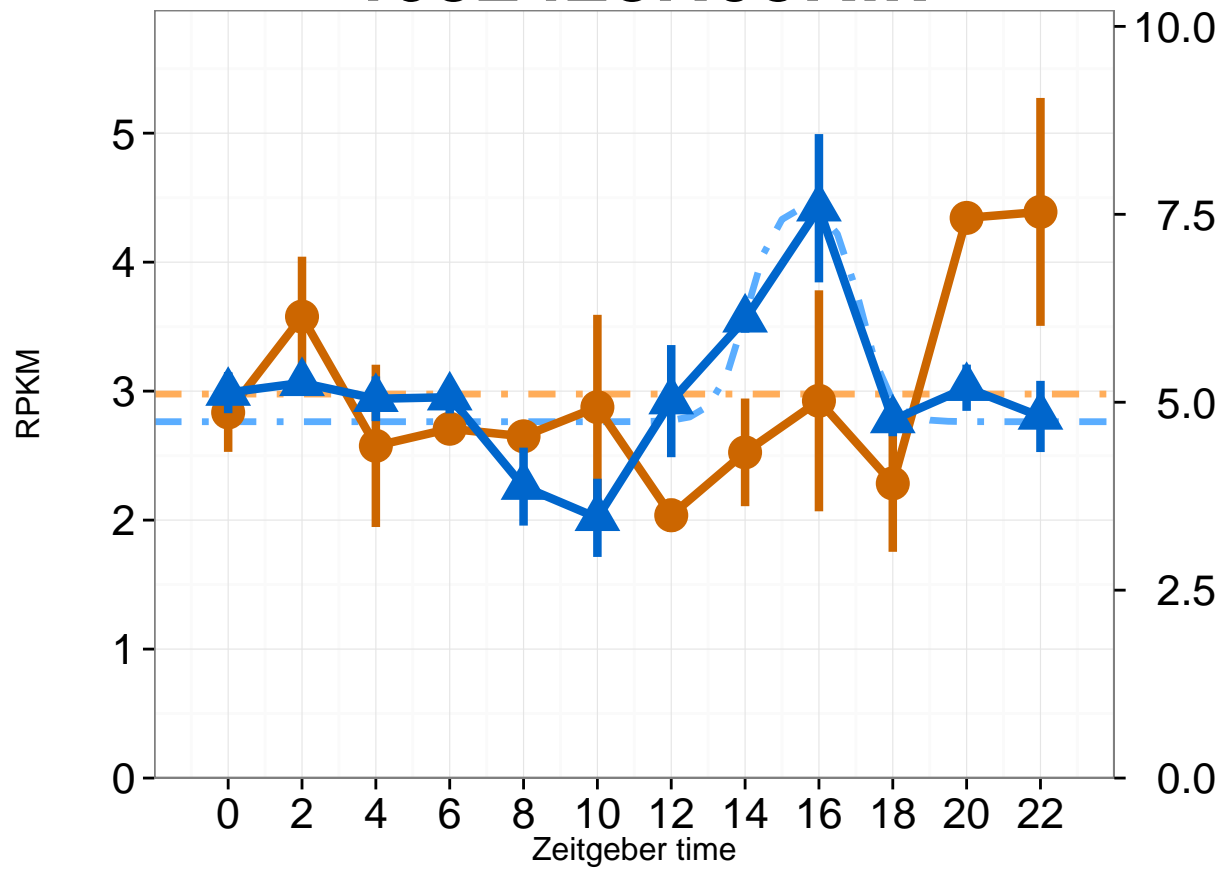

# 4632428N05Rik

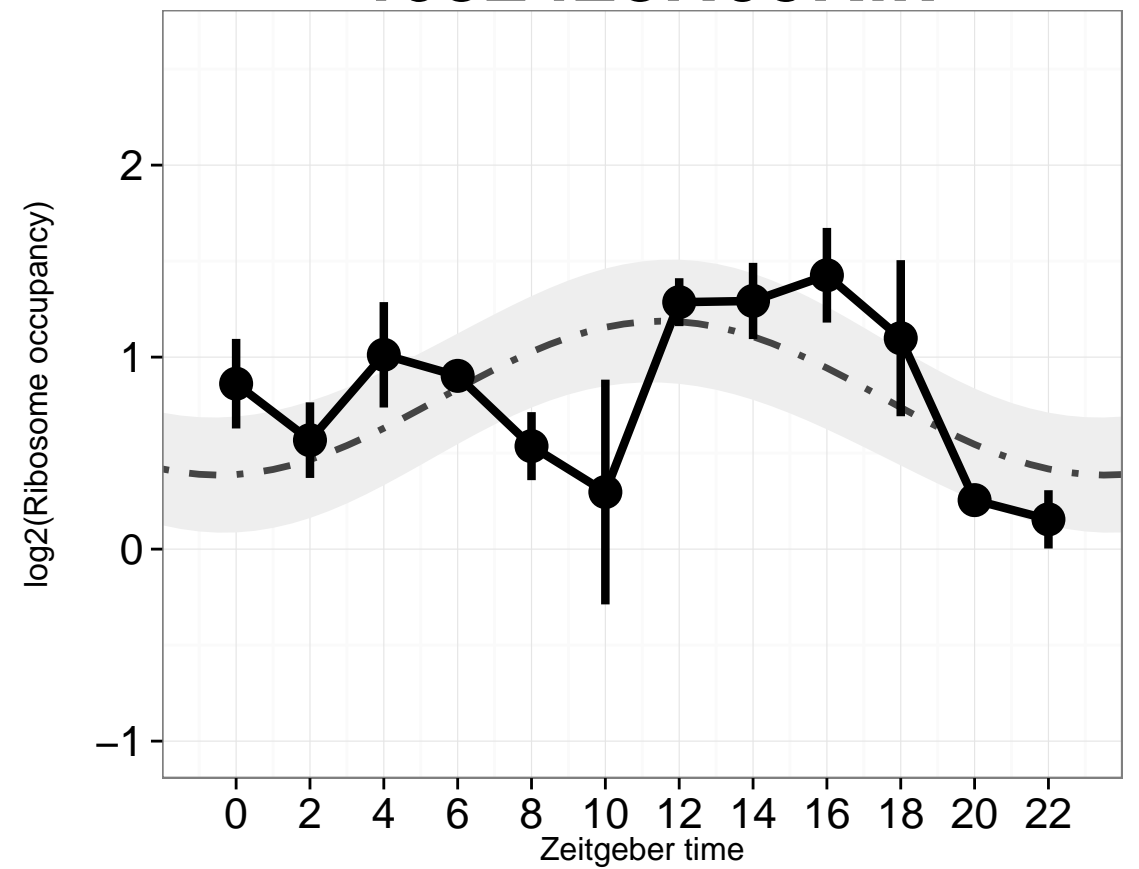

Supplement: SuppDataset_1.zip [file 4632428N05Rik_set_C.pdf › Supplemental Dataset 1/C-mRNA_nonrhythm_translation_rhyth/4632428N05Rik_set_C.pdf]

# 4732465J04Rik

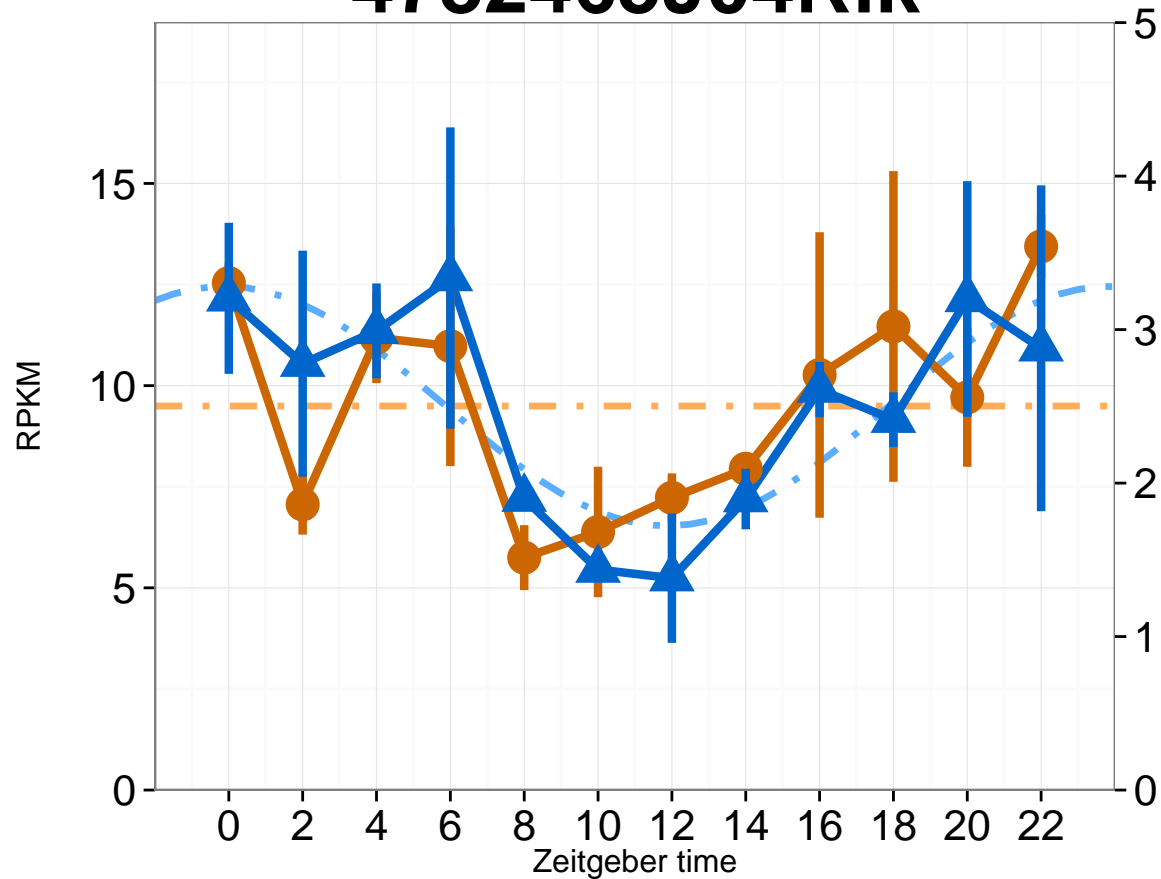

# 4732465J04Rik

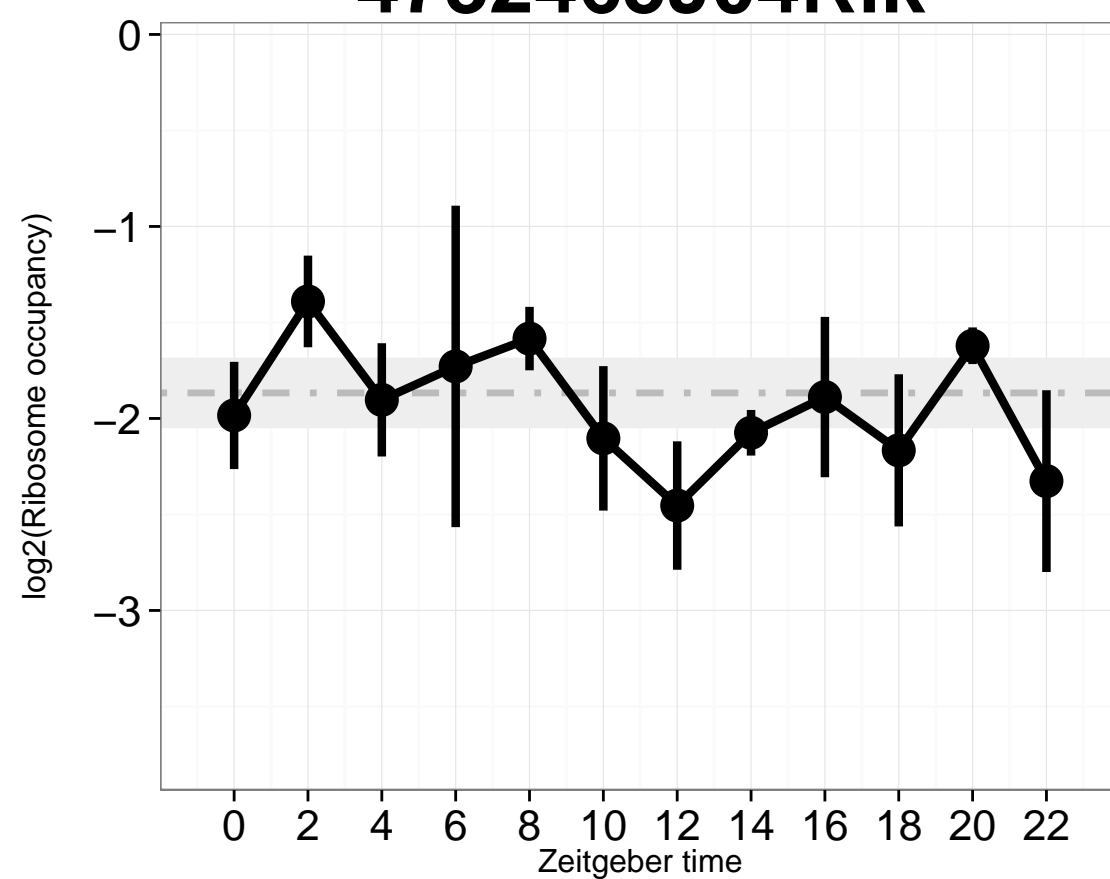

Supplement: SuppDataset_1.zip [file 4732465J04Rik_set_C.pdf › Supplemental Dataset 1/C-mRNA_nonrhythm_translation_rhyth/4732465J04Rik_set_C.pdf]

# 4930430F08Rik

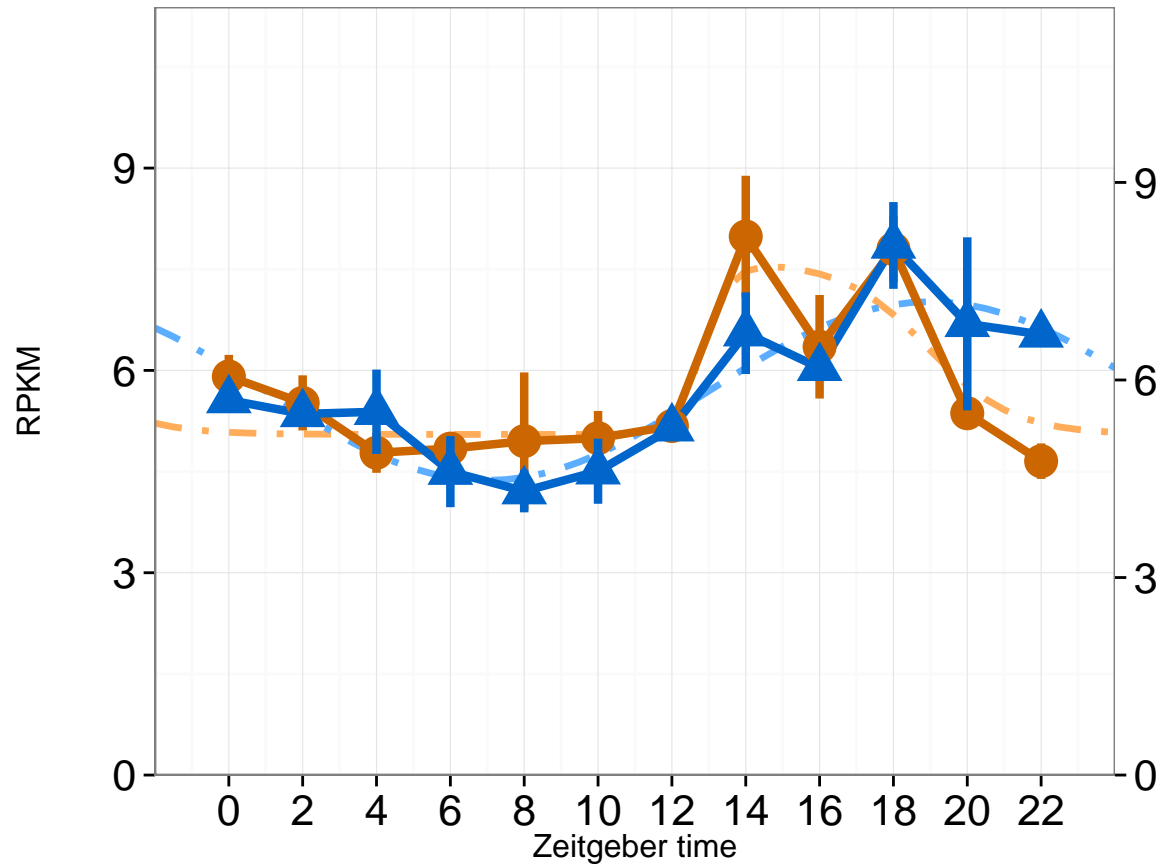

# 4930430F08Rik

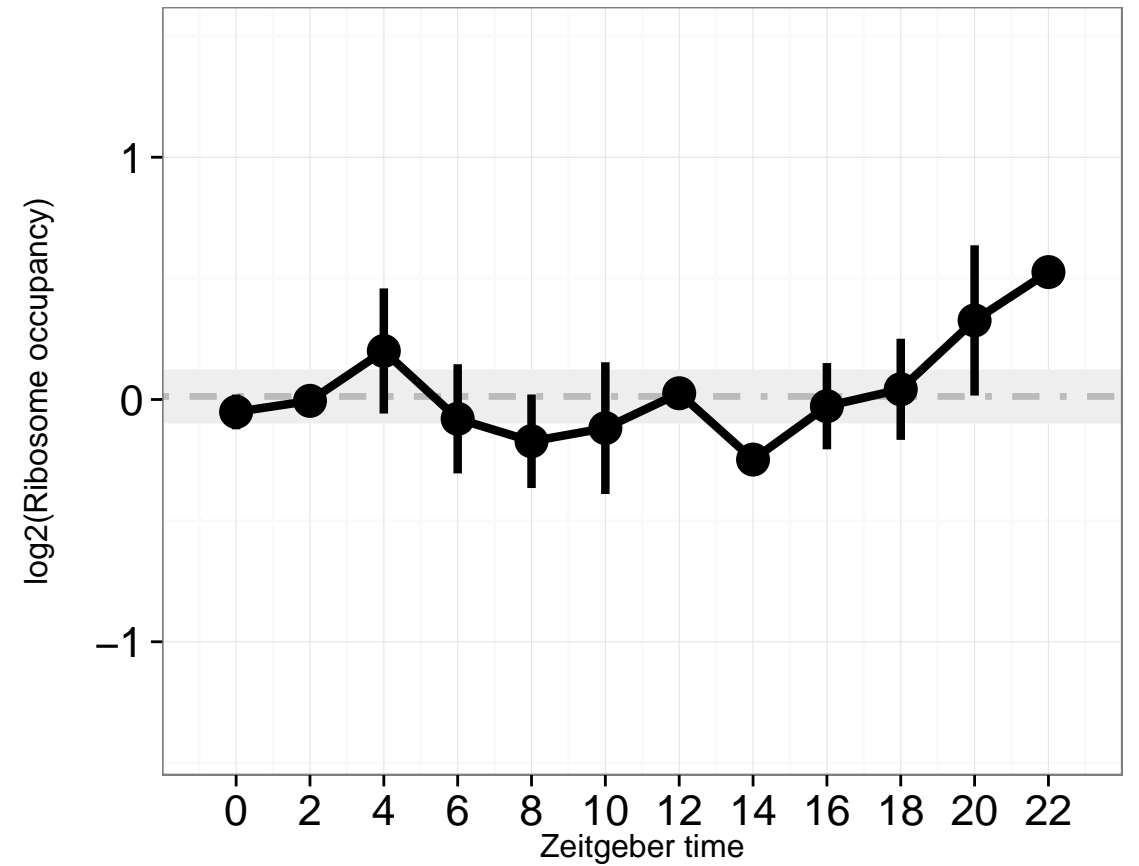

Supplement: SuppDataset_1.zip [file 4930430F08Rik_set_C.pdf › Supplemental Dataset 1/C-mRNA_nonrhythm_translation_rhyth/4930430F08Rik_set_C.pdf]

# 4933426M11Rik

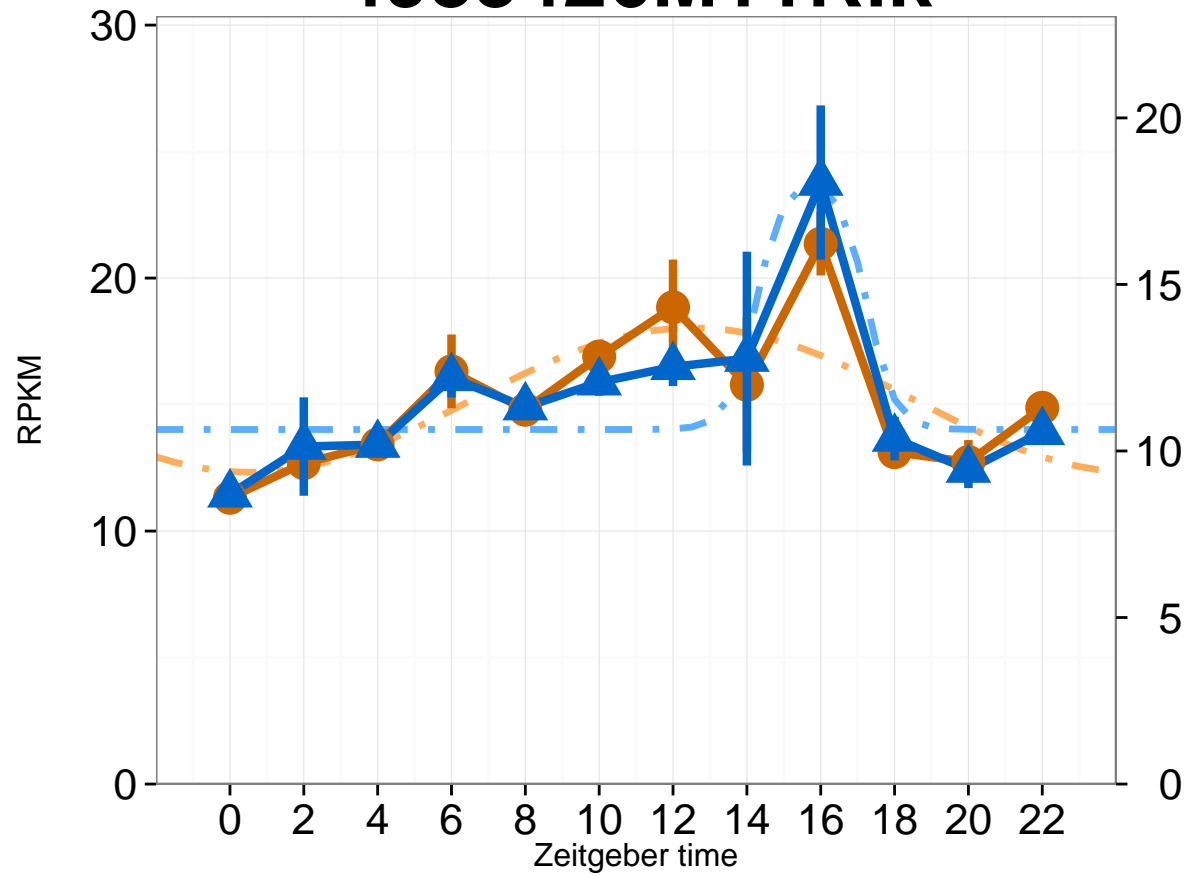

# 4933426M11Rik

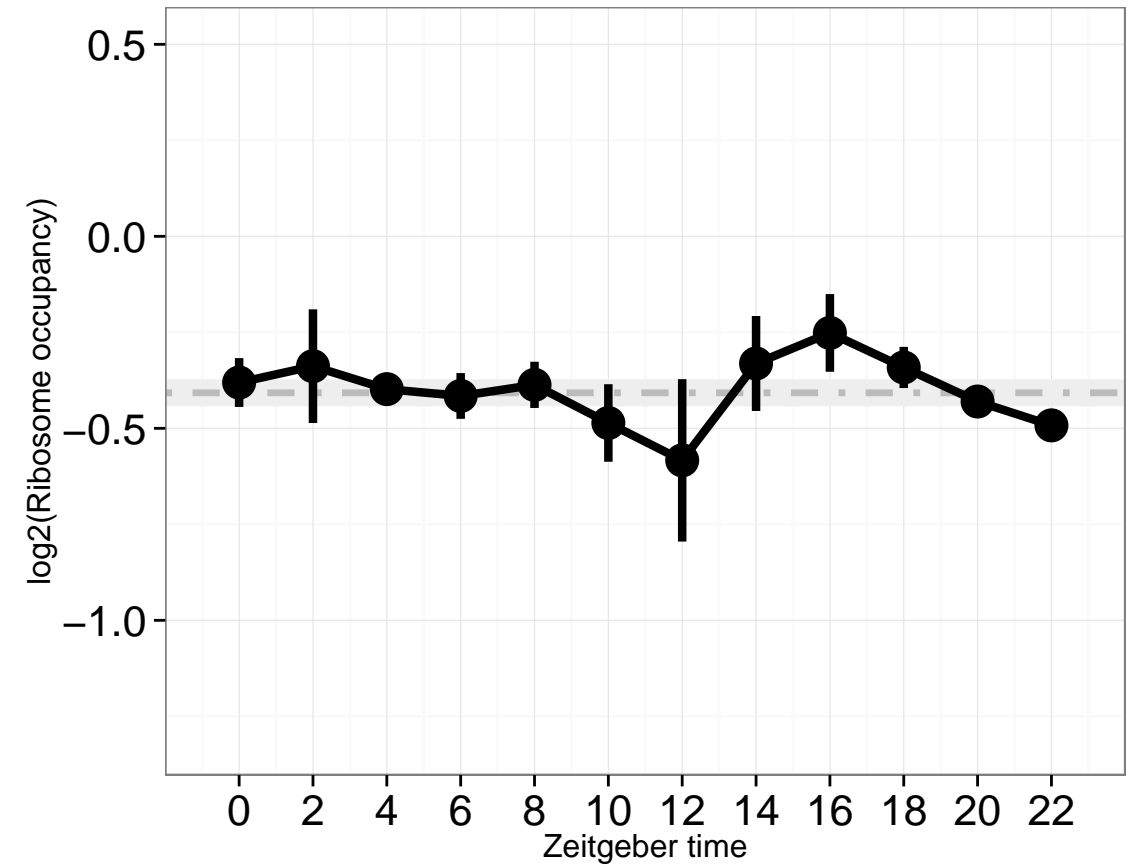

Supplement: SuppDataset_1.zip [file 4933426M11Rik_set_C.pdf › Supplemental Dataset 1/C-mRNA_nonrhythm_translation_rhyth/4933426M11Rik_set_C.pdf]

# 5031439G07Rik

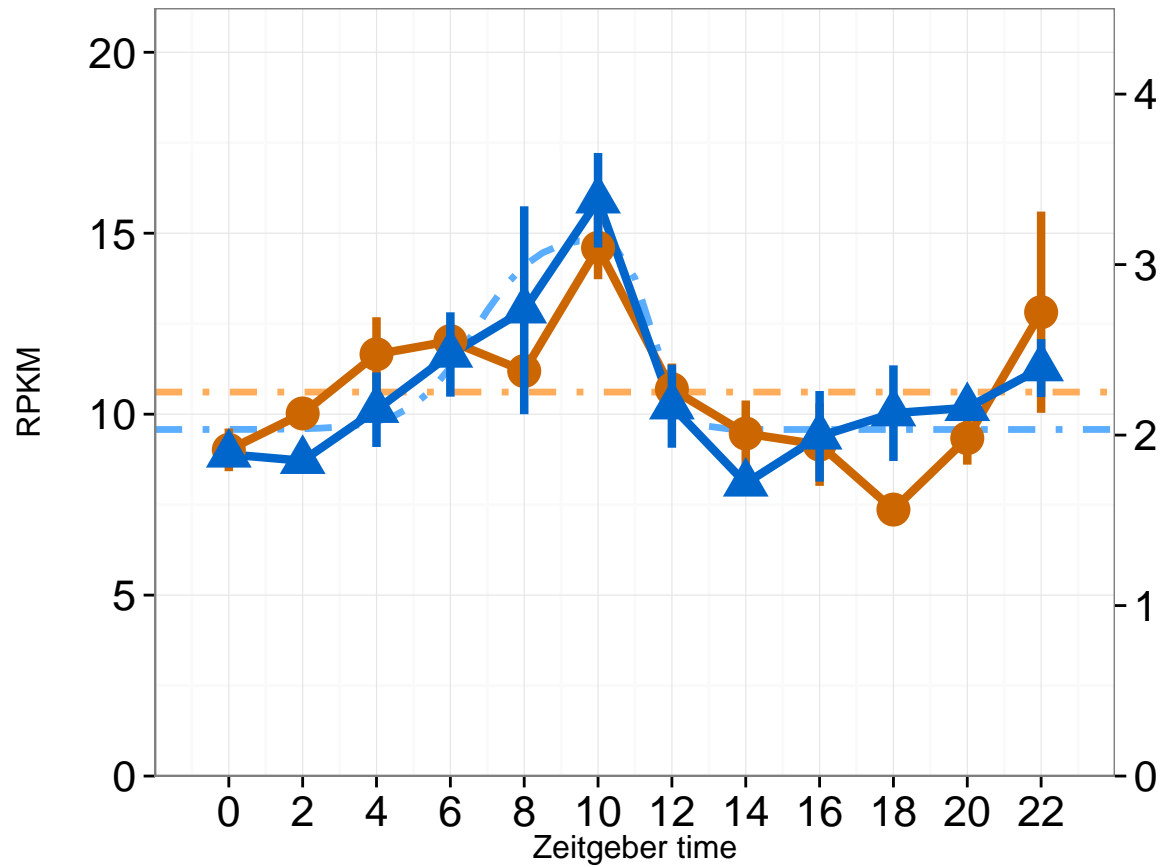

# 5031439G07Rik

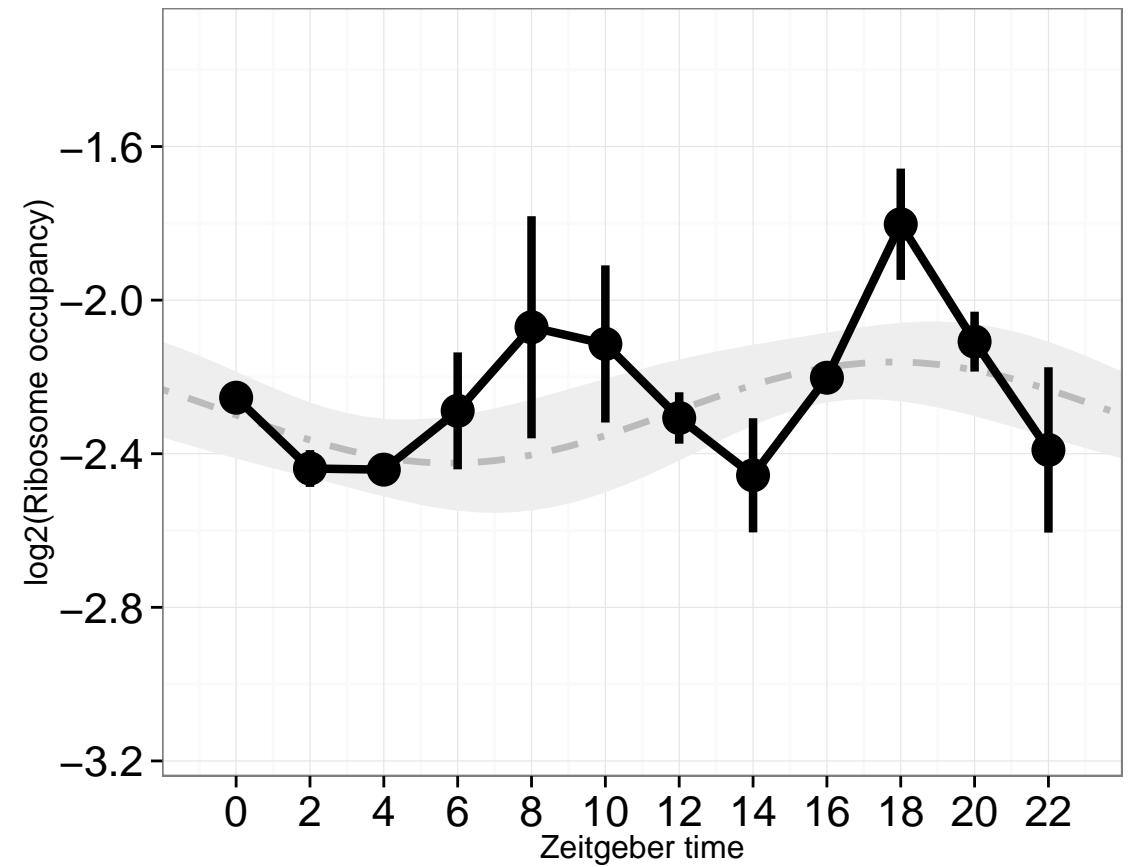

Supplement: SuppDataset_1.zip [file 5031439G07Rik_set_C.pdf › Supplemental Dataset 1/C-mRNA_nonrhythm_translation_rhyth/5031439G07Rik_set_C.pdf]

9030619P08Rik TR

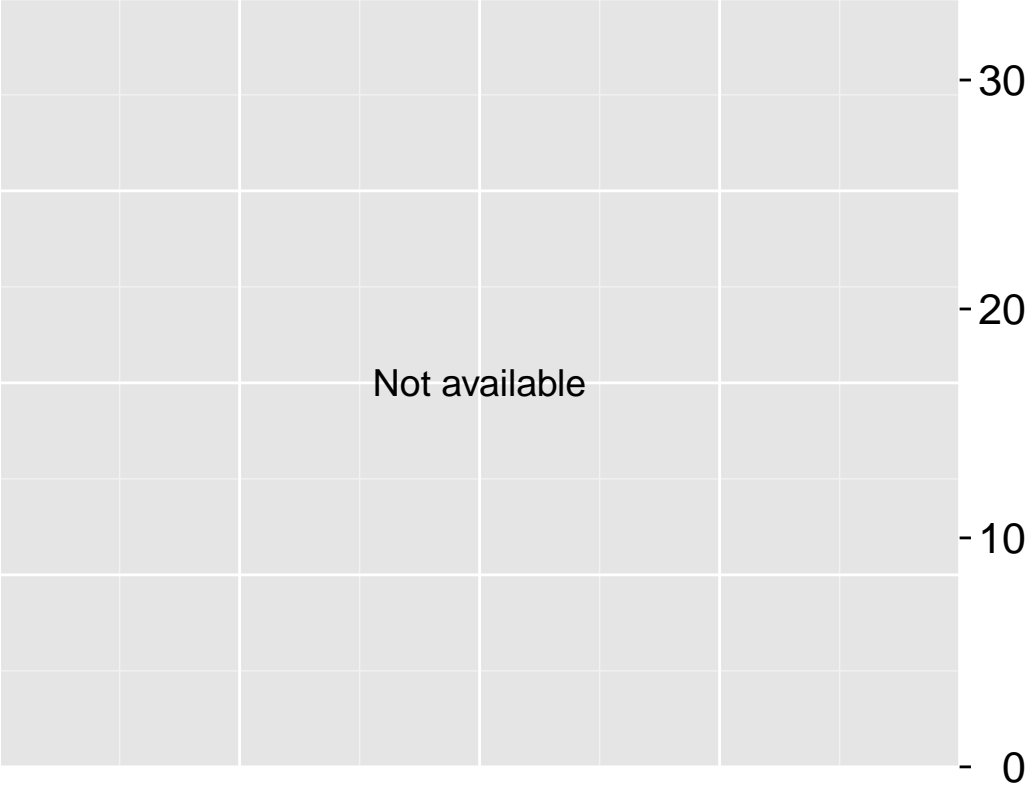

9030619P08Rik log2(Ribosome occup

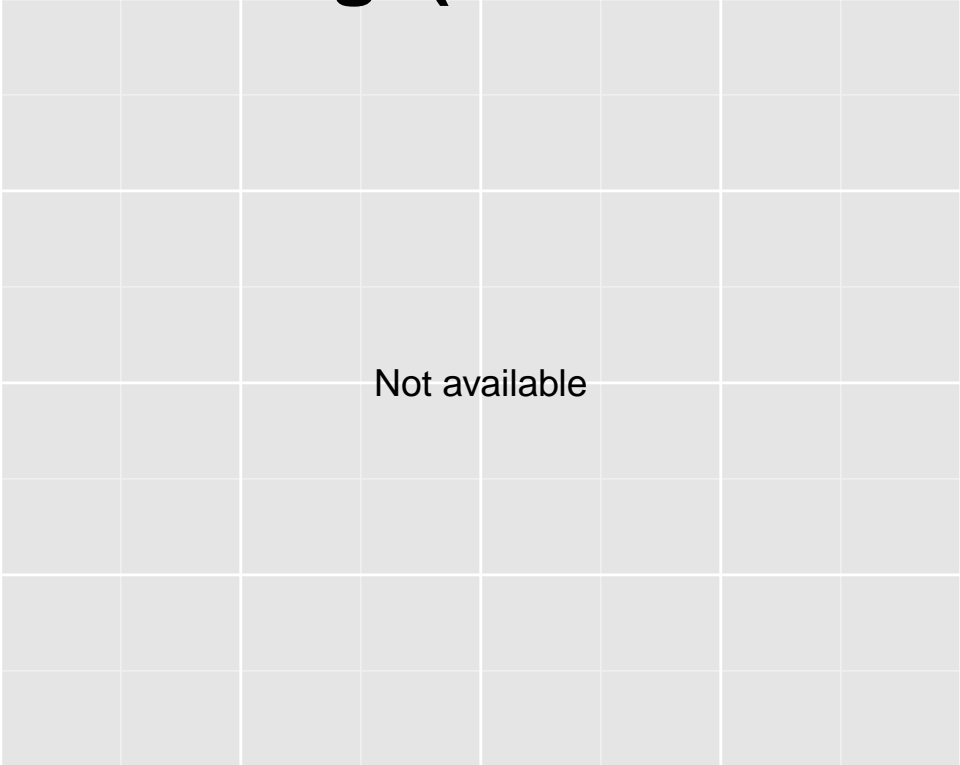

Supplement: SuppDataset_1.zip [file 9030619P08Rik_set_C.pdf › Supplemental Dataset 1/C-mRNA_nonrhythm_translation_rhyth/9030619P08Rik_set_C.pdf]

# A2m

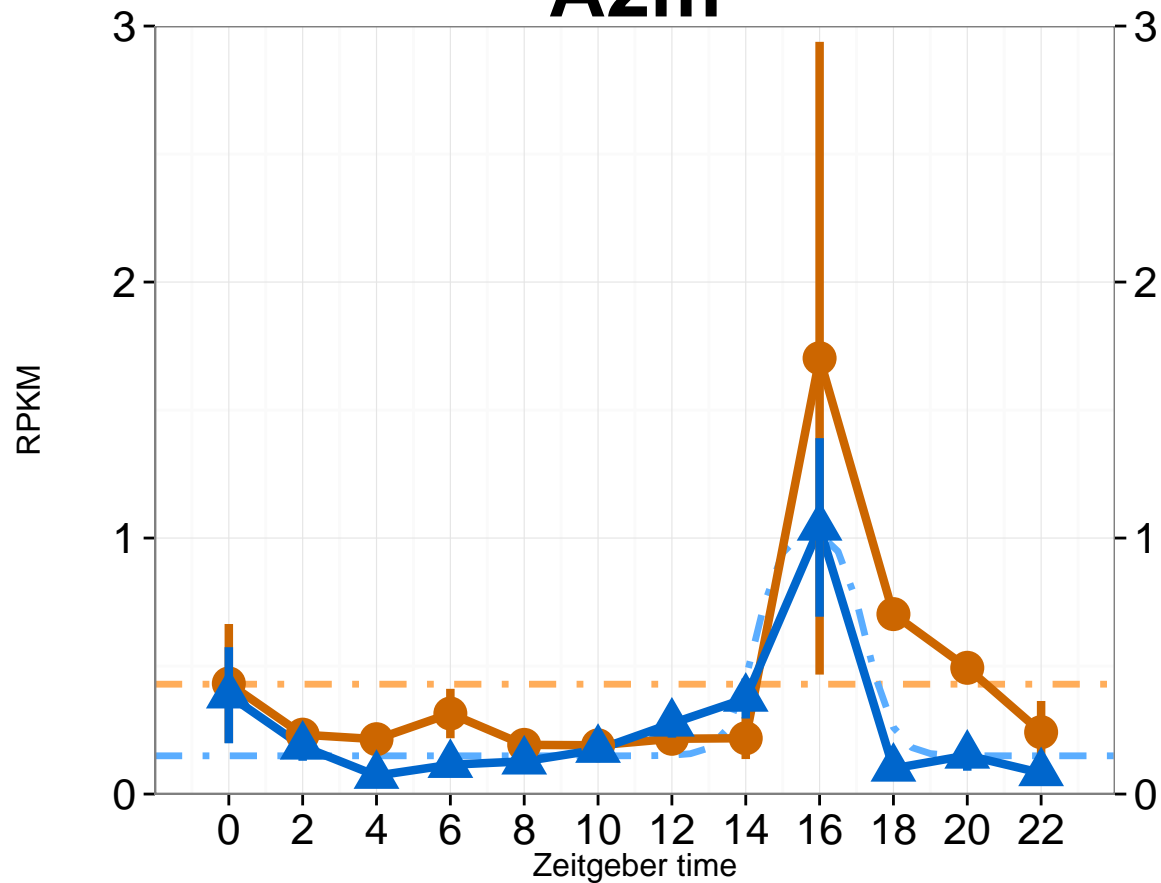

# A2m

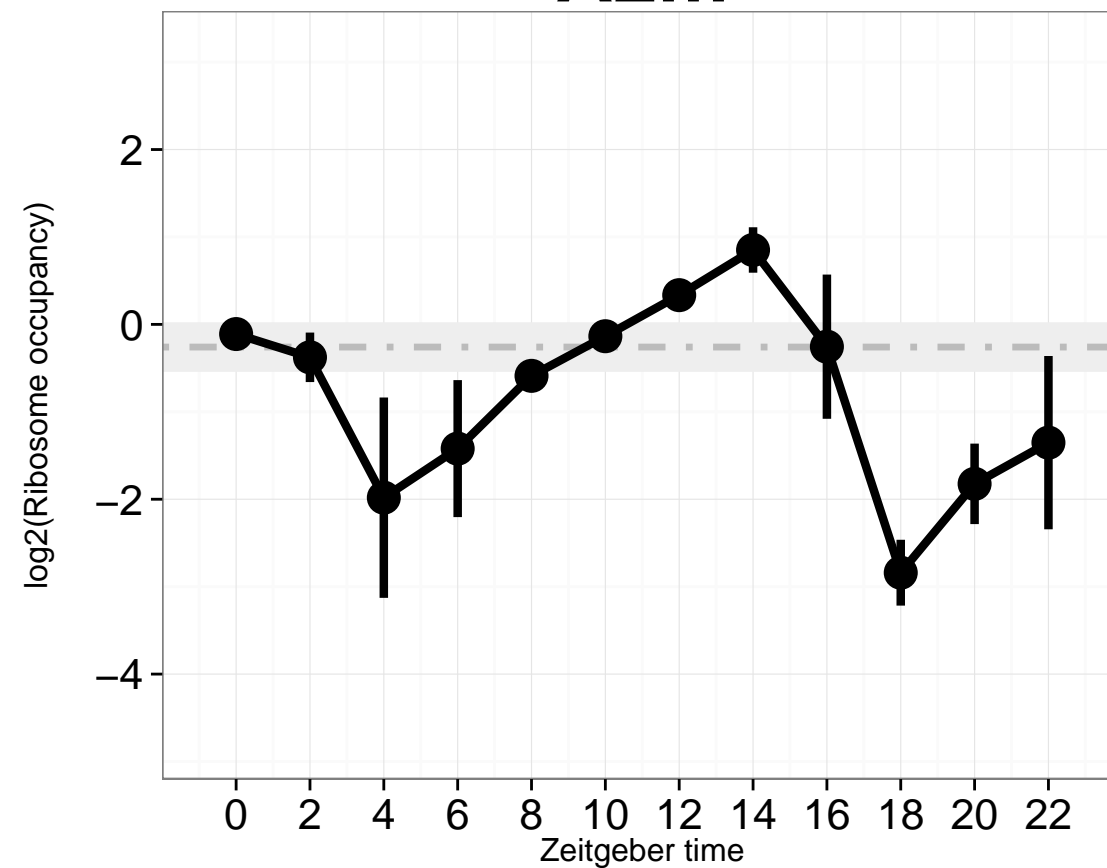

Supplement: SuppDataset_1.zip [file A2m_set_C.pdf › Supplemental Dataset 1/C-mRNA_nonrhythm_translation_rhyth/A2m_set_C.pdf]

# AW011738

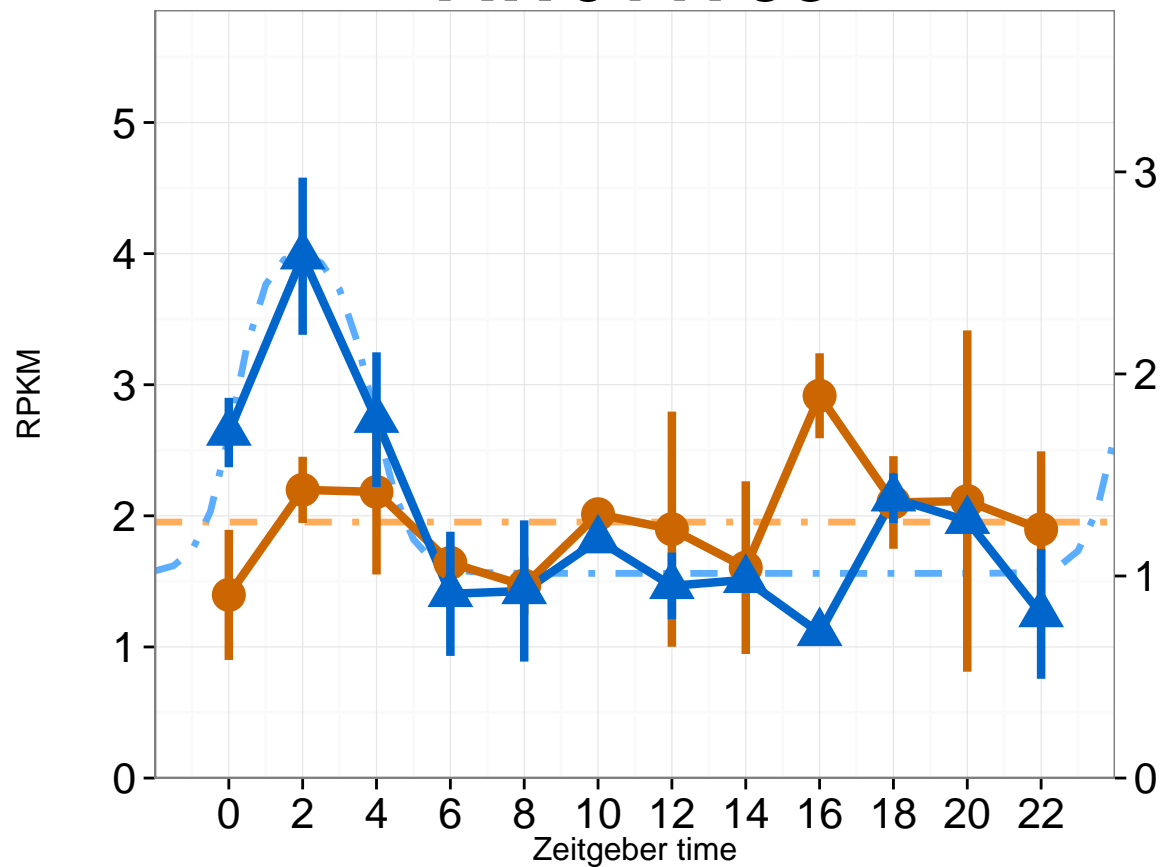

# AW011738

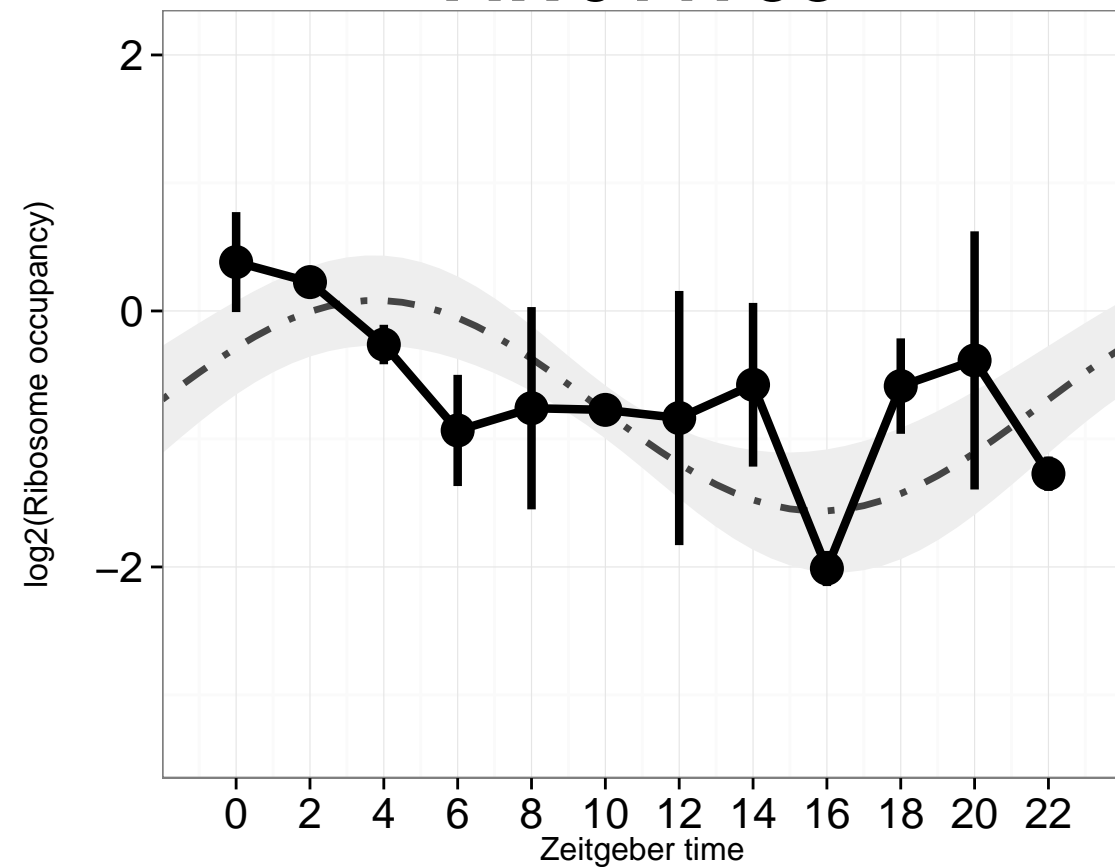

Supplement: SuppDataset_1.zip [file AW011738_set_C.pdf › Supplemental Dataset 1/C-mRNA_nonrhythm_translation_rhyth/AW011738_set_C.pdf]

## Abcb4

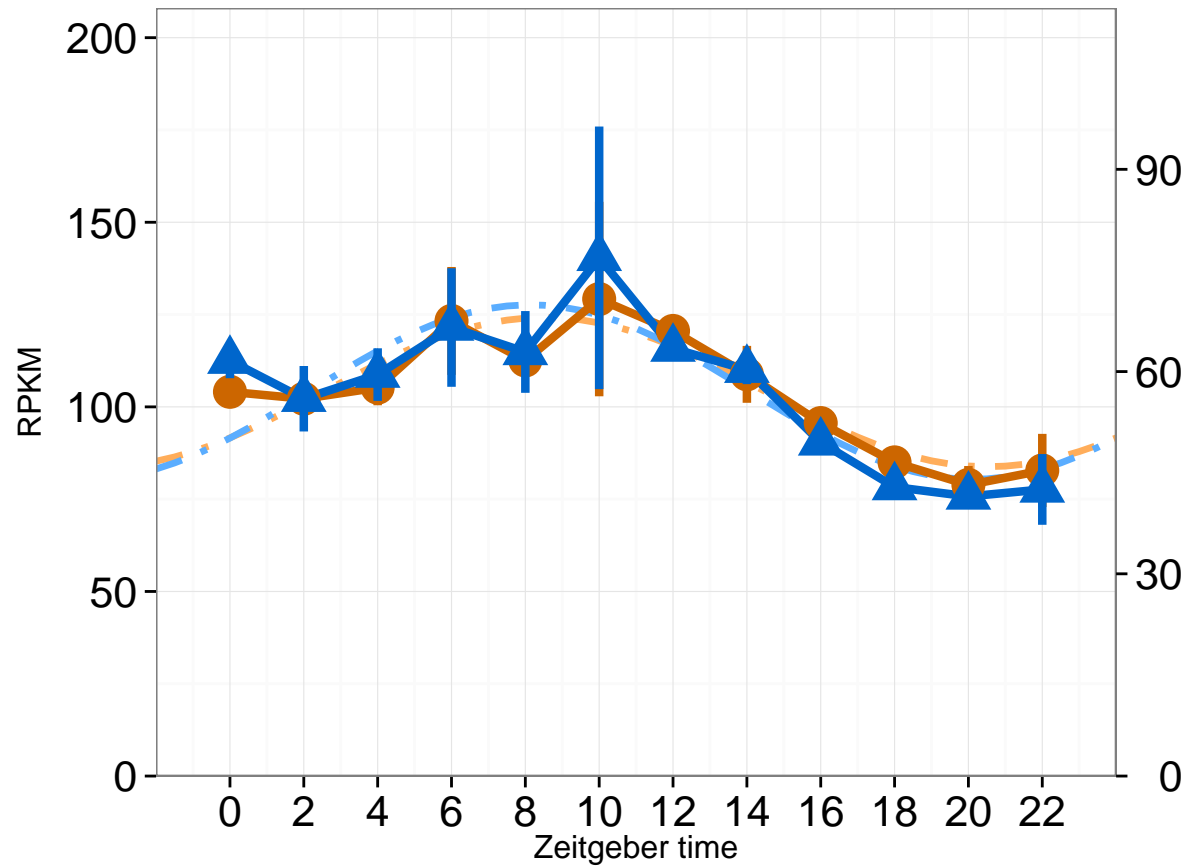

## Abcb4

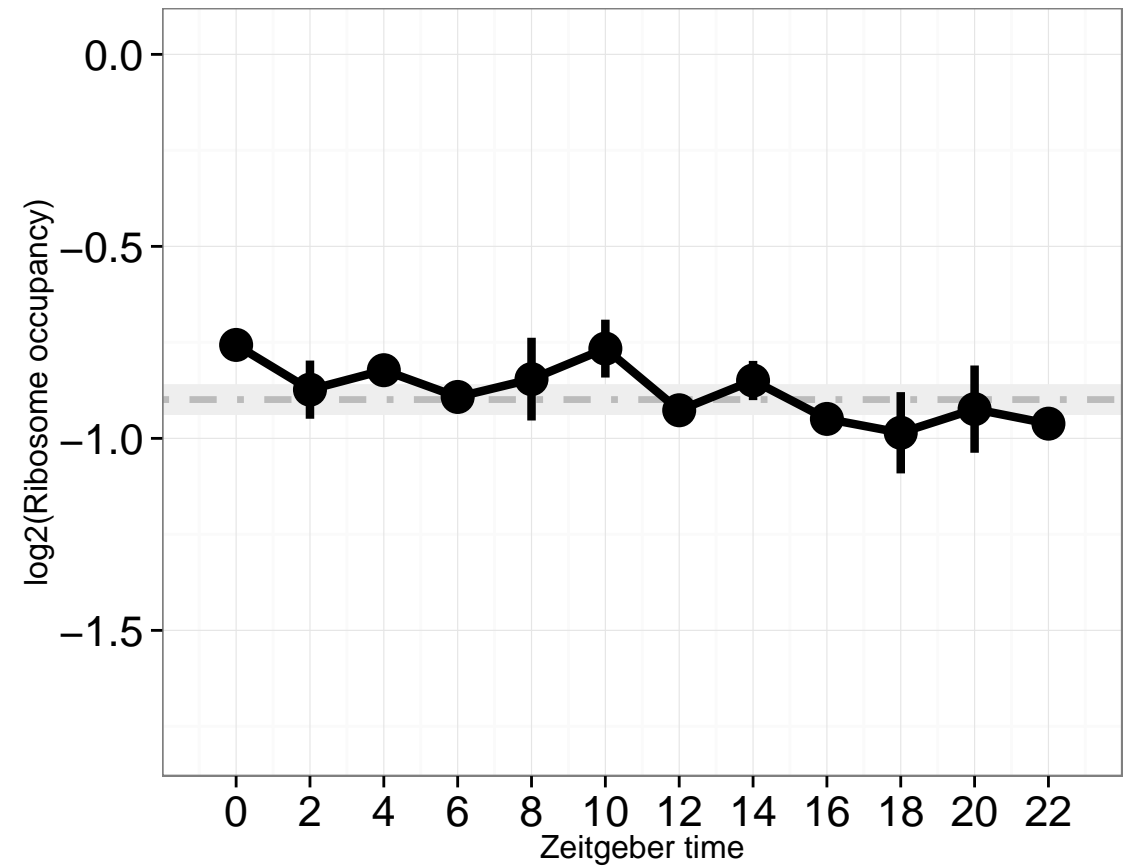

Supplement: SuppDataset_1.zip [file Abcb4_set_C.pdf › Supplemental Dataset 1/C-mRNA_nonrhythm_translation_rhyth/Abcb4_set_C.pdf]

# Acaa1a

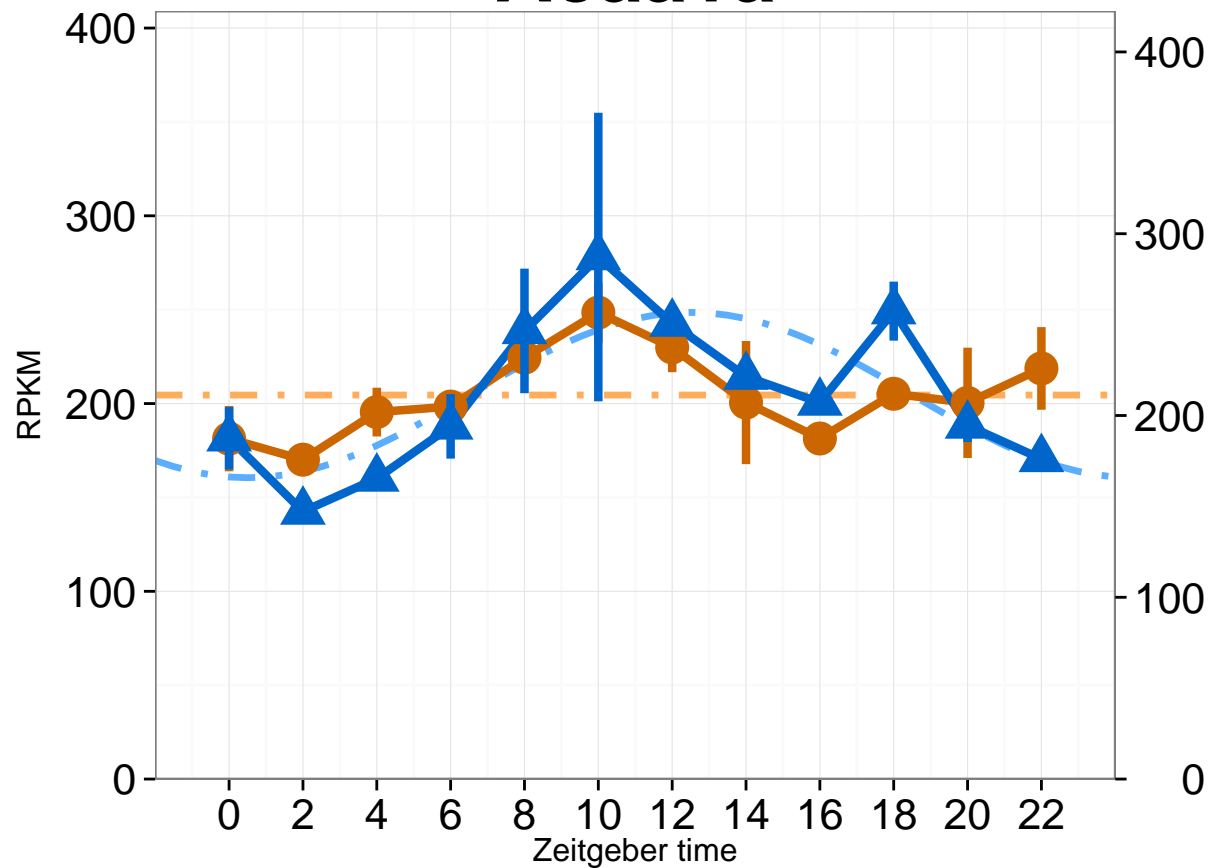

# Acaa1a

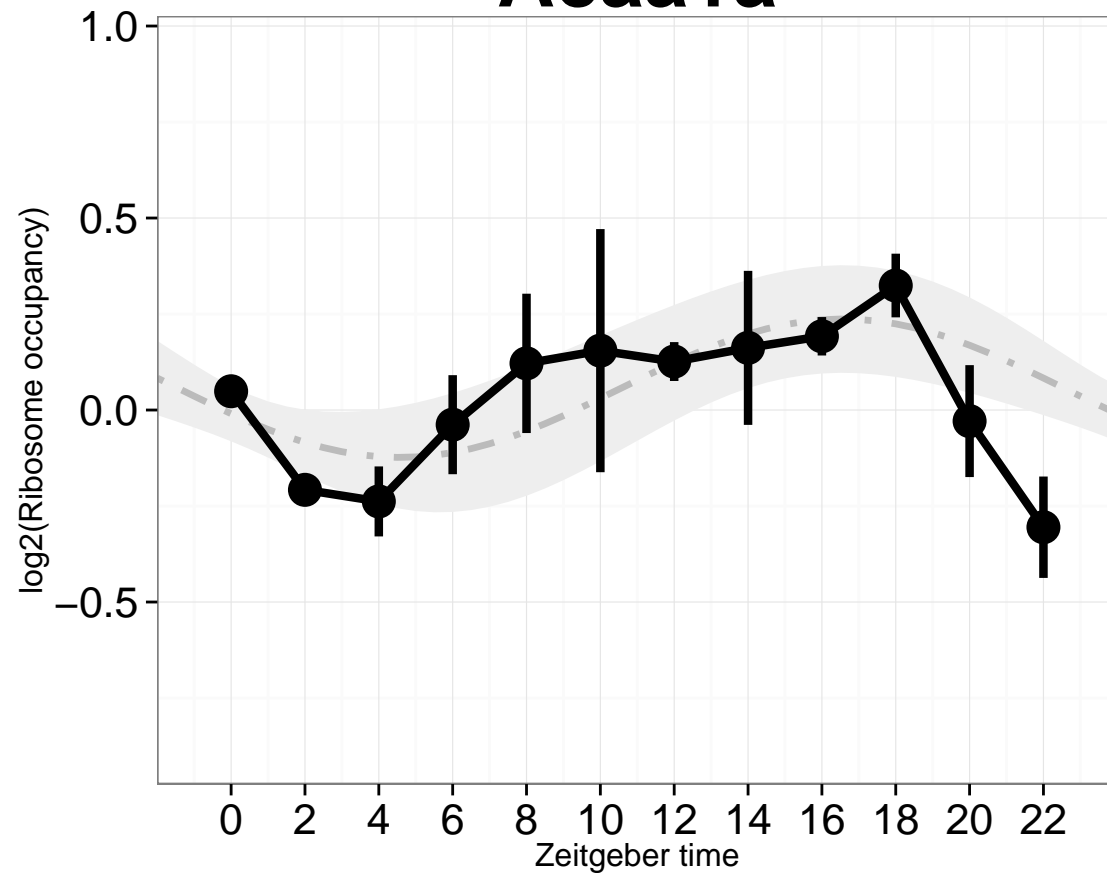

Supplement: SuppDataset_1.zip [file Acaa1a_set_C.pdf › Supplemental Dataset 1/C-mRNA_nonrhythm_translation_rhyth/Acaa1a_set_C.pdf]

# Acbd4

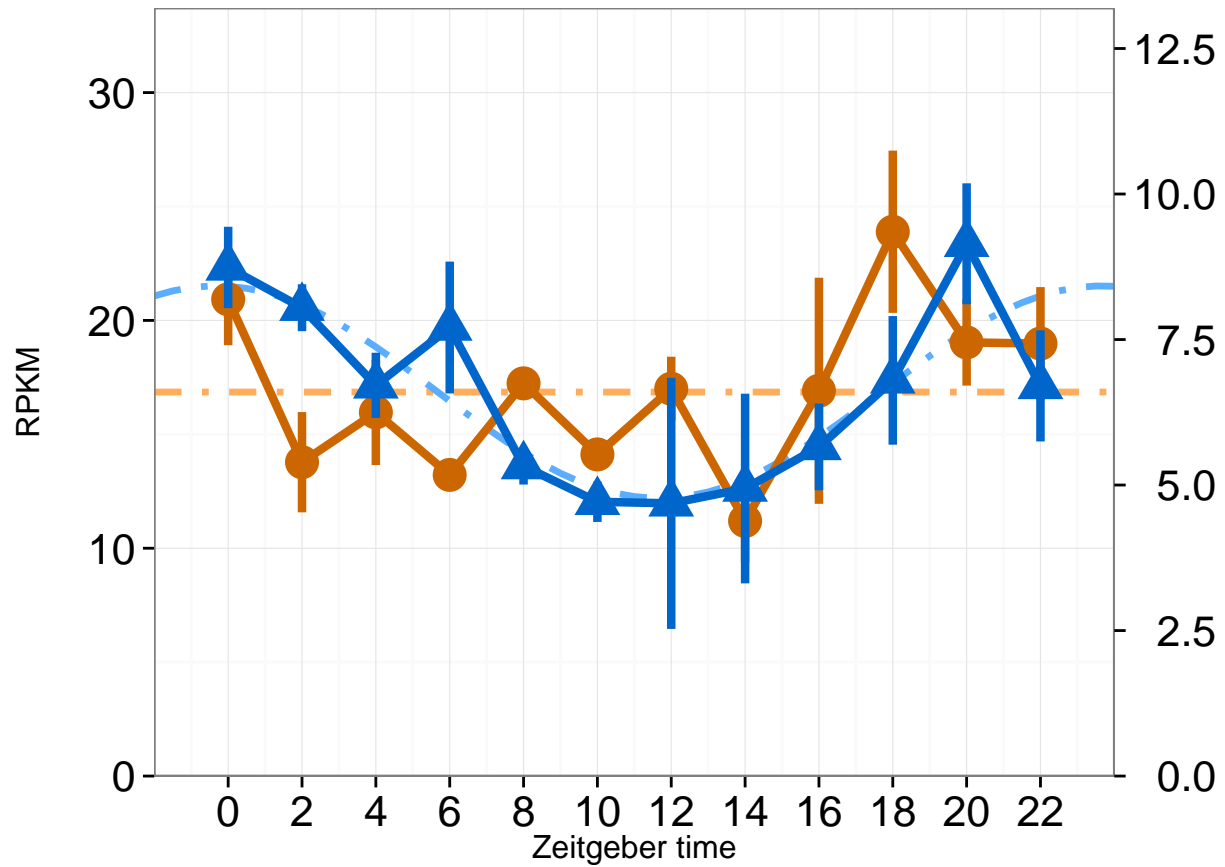

# Acbd4

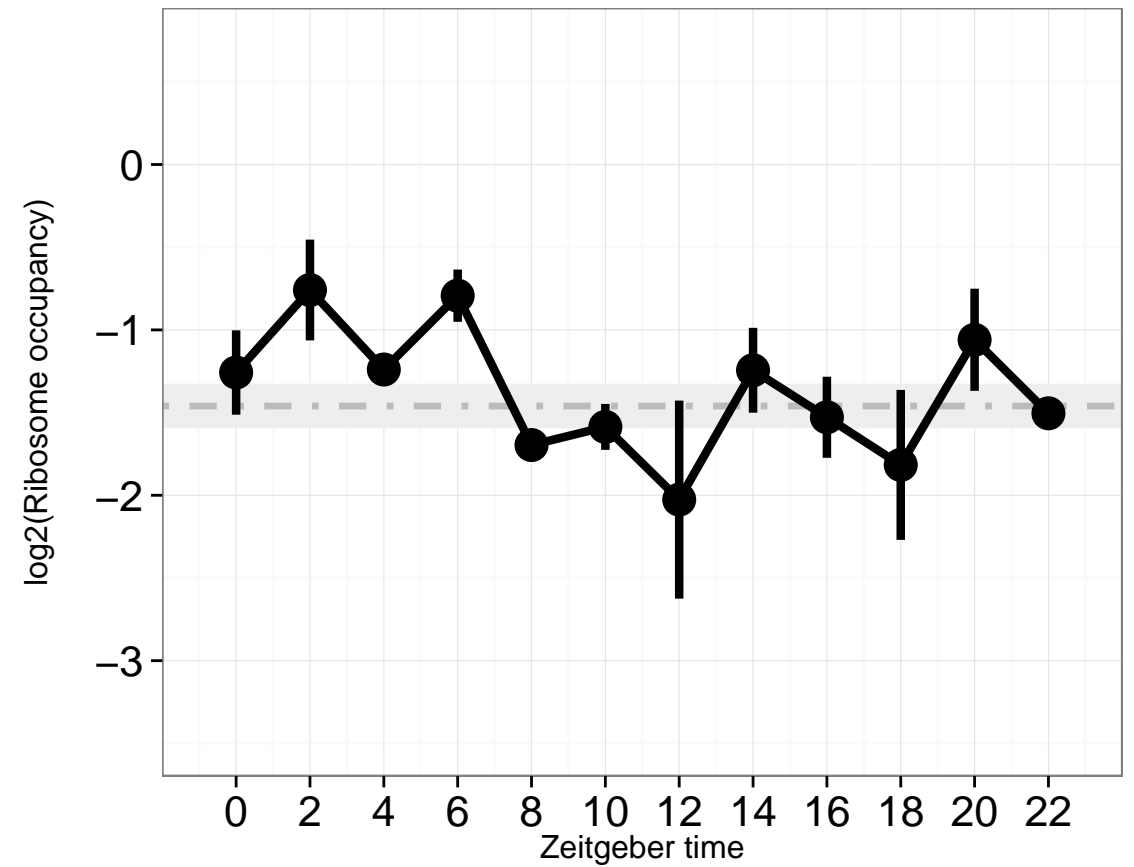

Supplement: SuppDataset_1.zip [file Acbd4_set_C.pdf › Supplemental Dataset 1/C-mRNA_nonrhythm_translation_rhyth/Acbd4_set_C.pdf]

## Accs

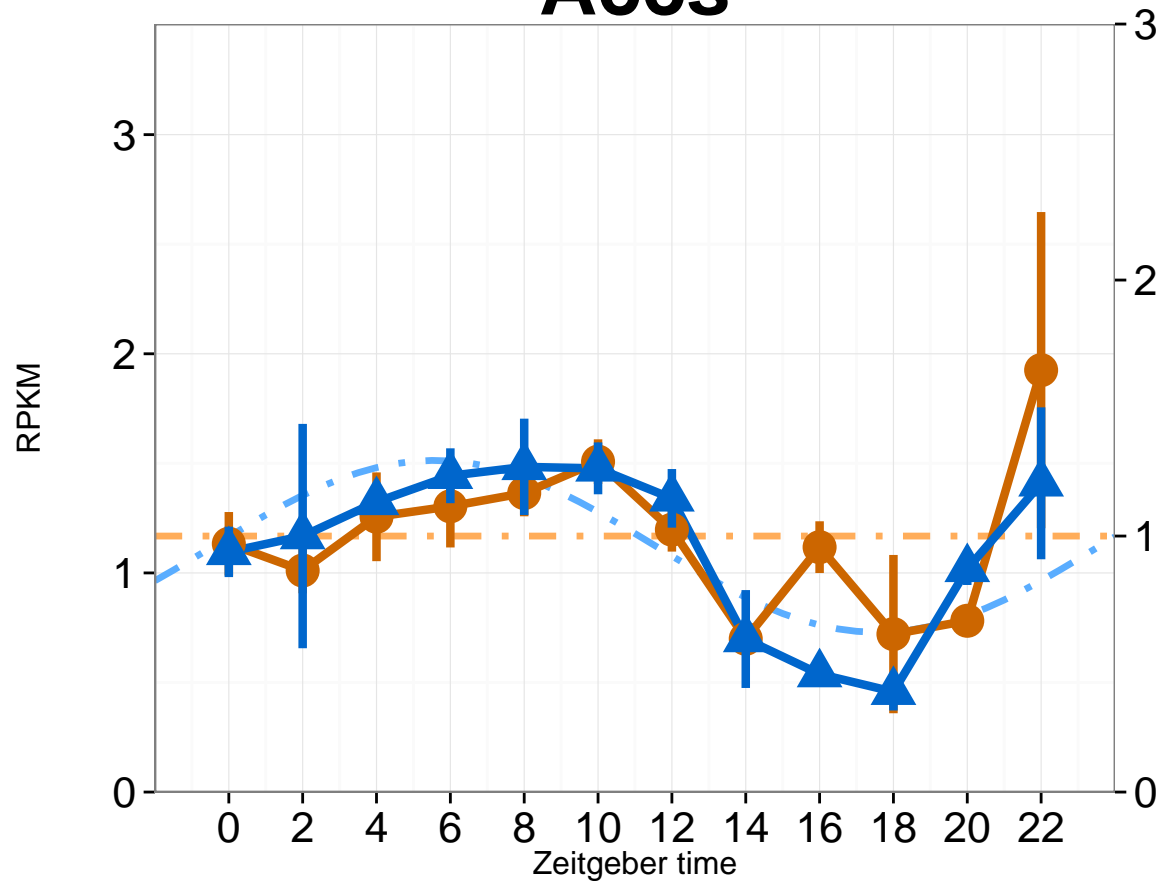

## Accs

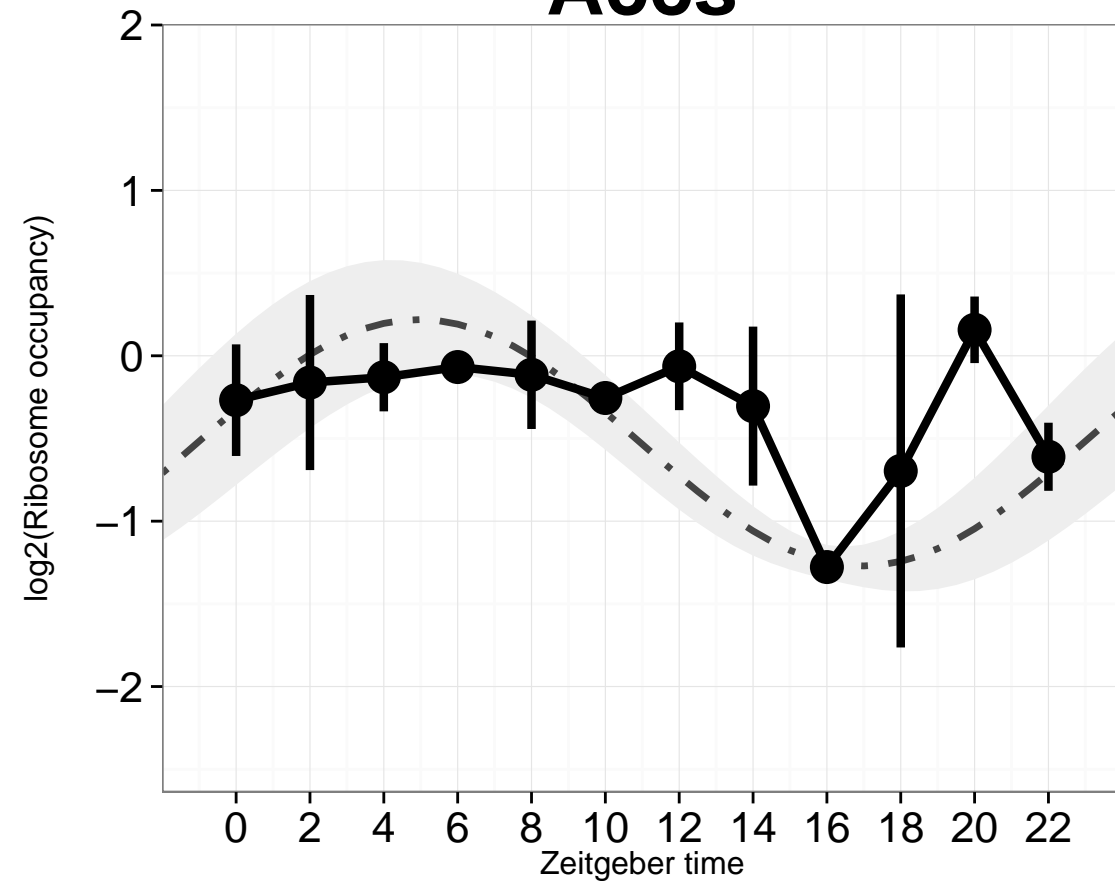

Supplement: SuppDataset_1.zip [file Accs_set_C.pdf › Supplemental Dataset 1/C-mRNA_nonrhythm_translation_rhyth/Accs_set_C.pdf]

## Ace

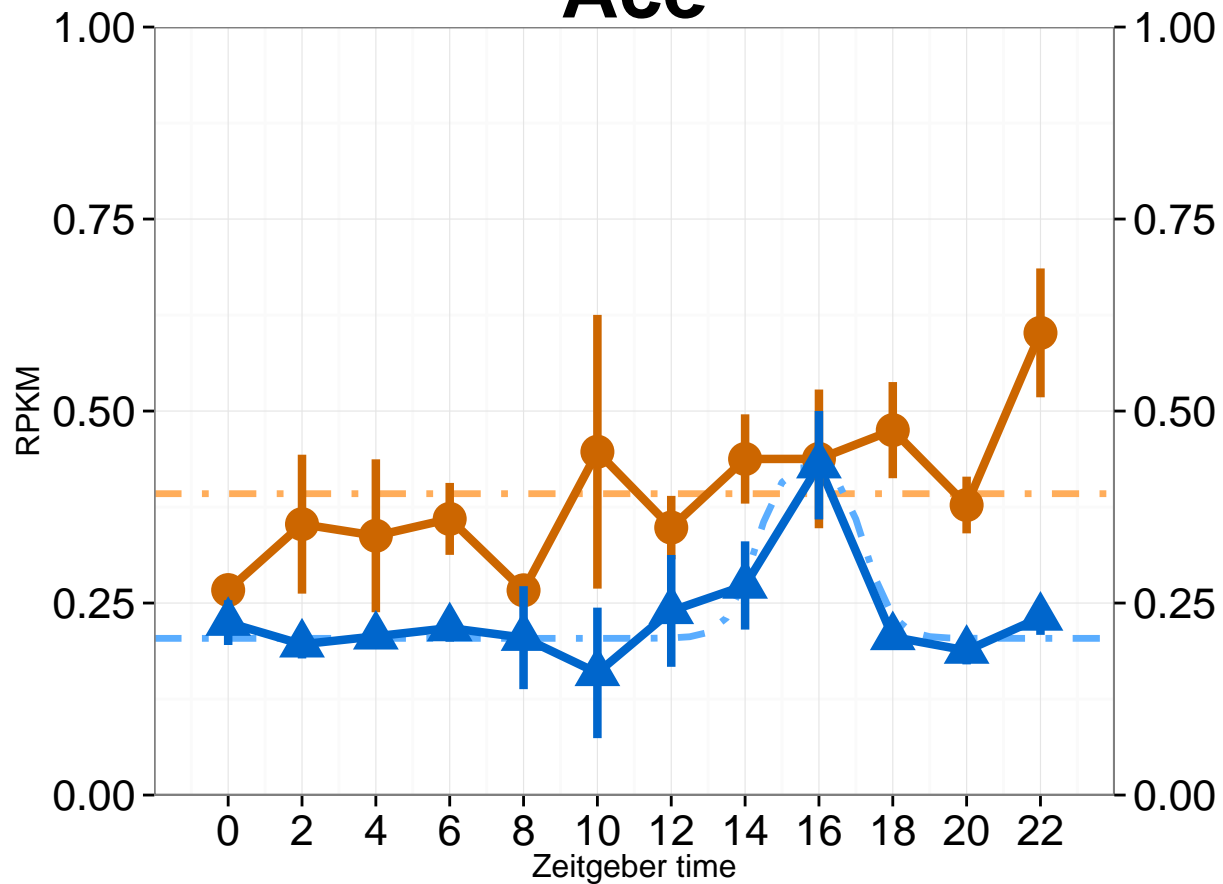

## Ace

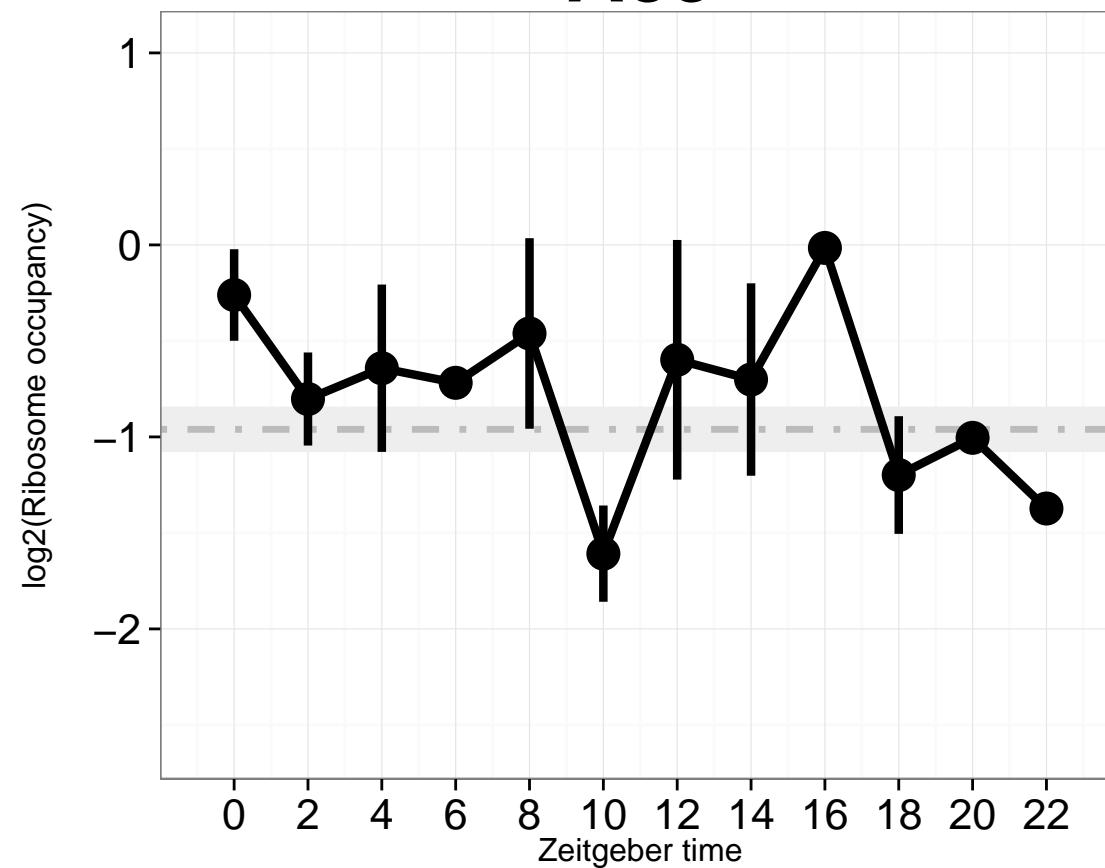

Supplement: SuppDataset_1.zip [file Ace_set_C.pdf › Supplemental Dataset 1/C-mRNA_nonrhythm_translation_rhyth/Ace_set_C.pdf]

# Acot11

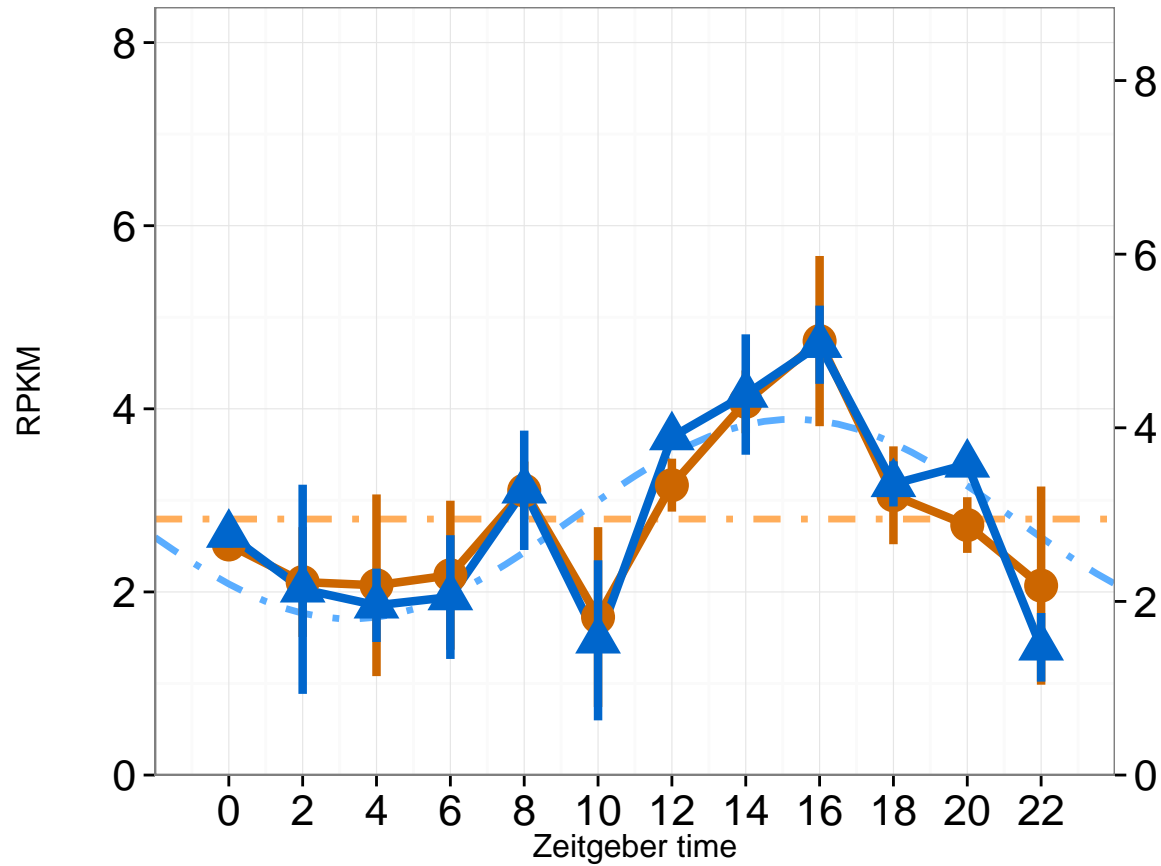

# Acot11

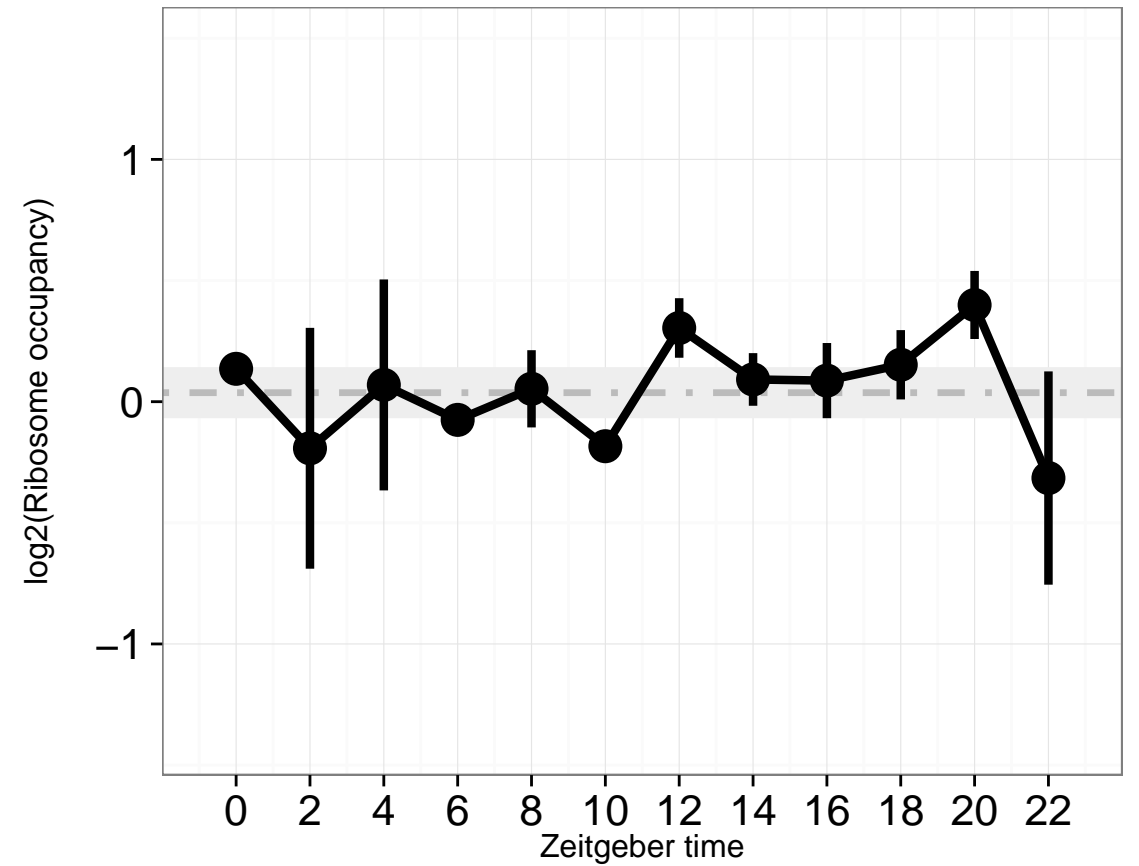

Supplement: SuppDataset_1.zip [file Acot11_set_C.pdf › Supplemental Dataset 1/C-mRNA_nonrhythm_translation_rhyth/Acot11_set_C.pdf]

## Acot12

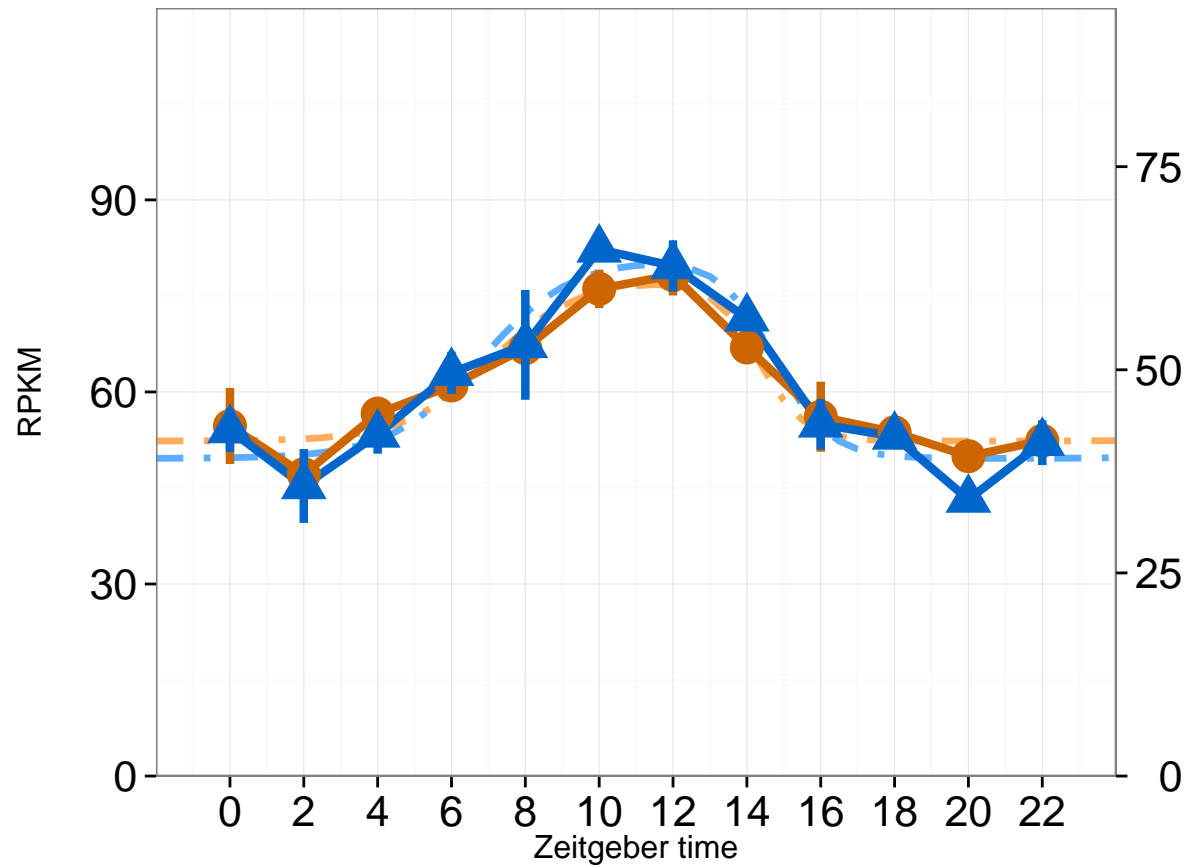

## Acot12

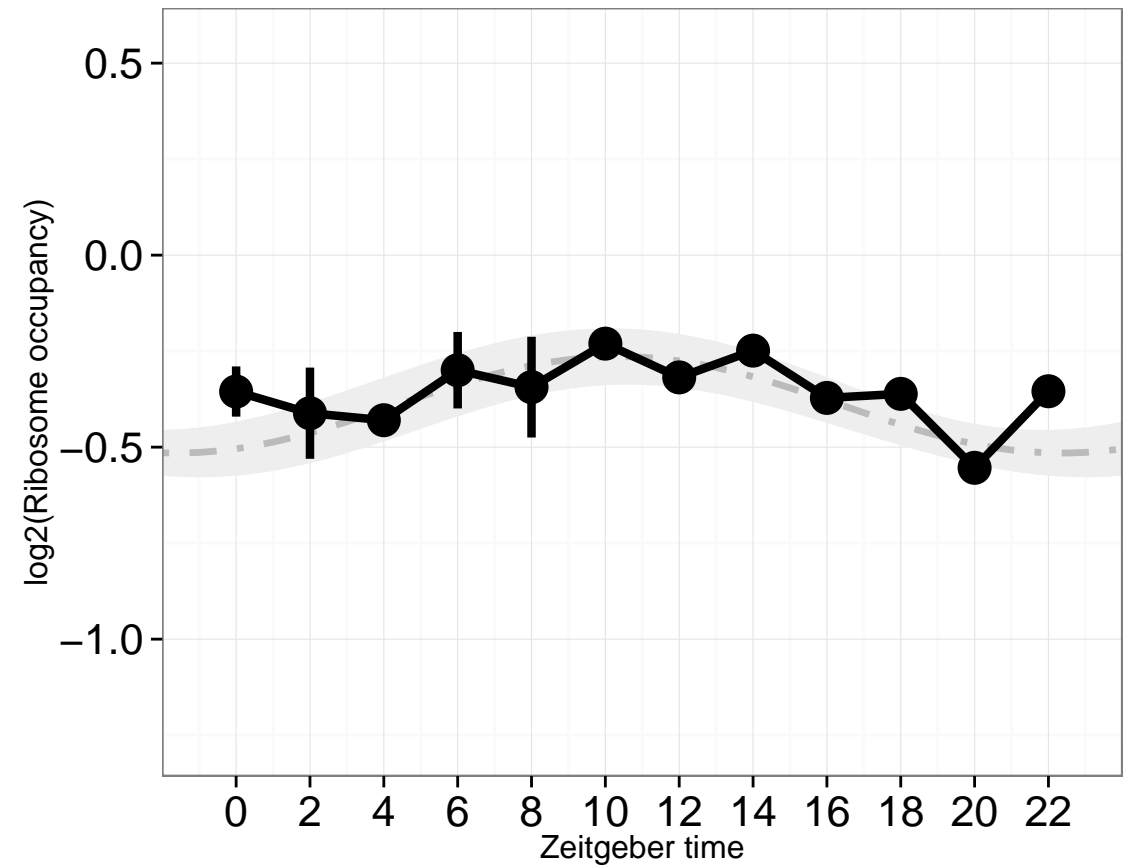

Supplement: SuppDataset_1.zip [file Acot12_set_C.pdf › Supplemental Dataset 1/C-mRNA_nonrhythm_translation_rhyth/Acot12_set_C.pdf]

# Acyp2

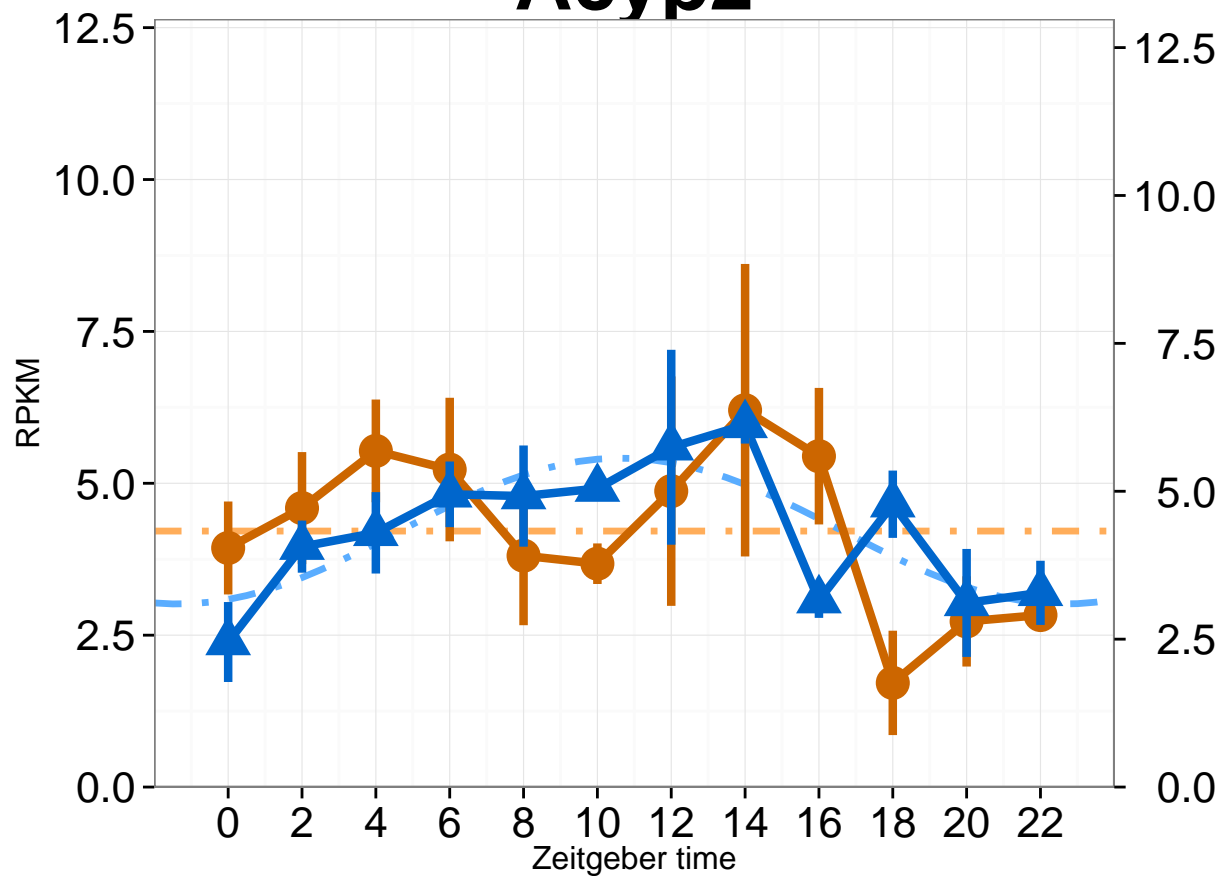

# Acyp2

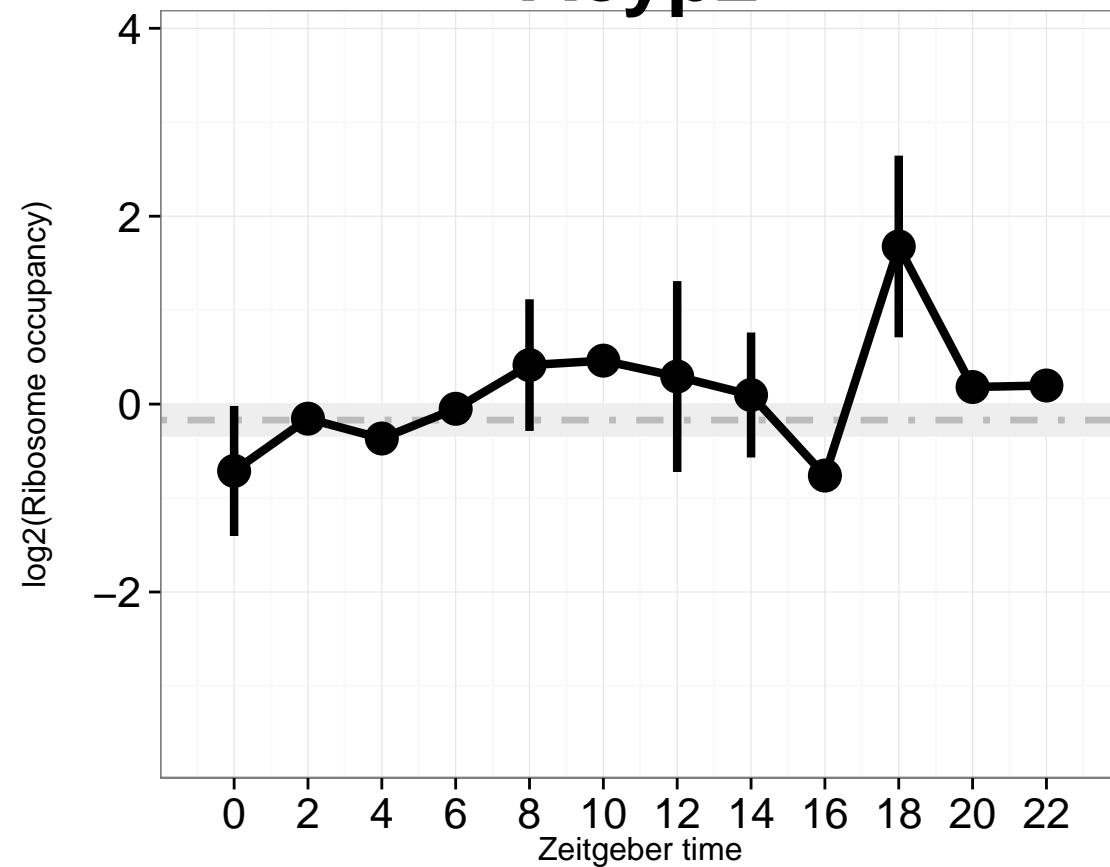

Supplement: SuppDataset_1.zip [file Acyp2_set_C.pdf › Supplemental Dataset 1/C-mRNA_nonrhythm_translation_rhyth/Acyp2_set_C.pdf]

# Adam23

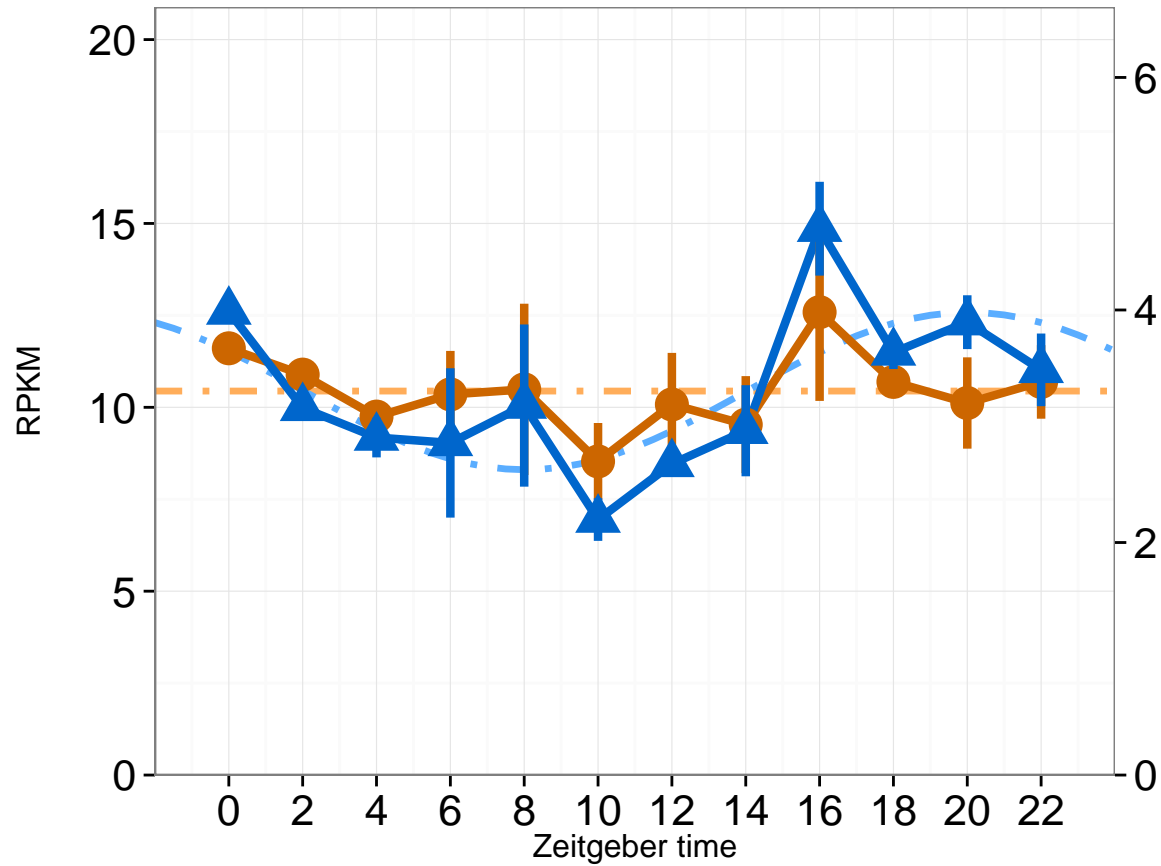

# Adam23

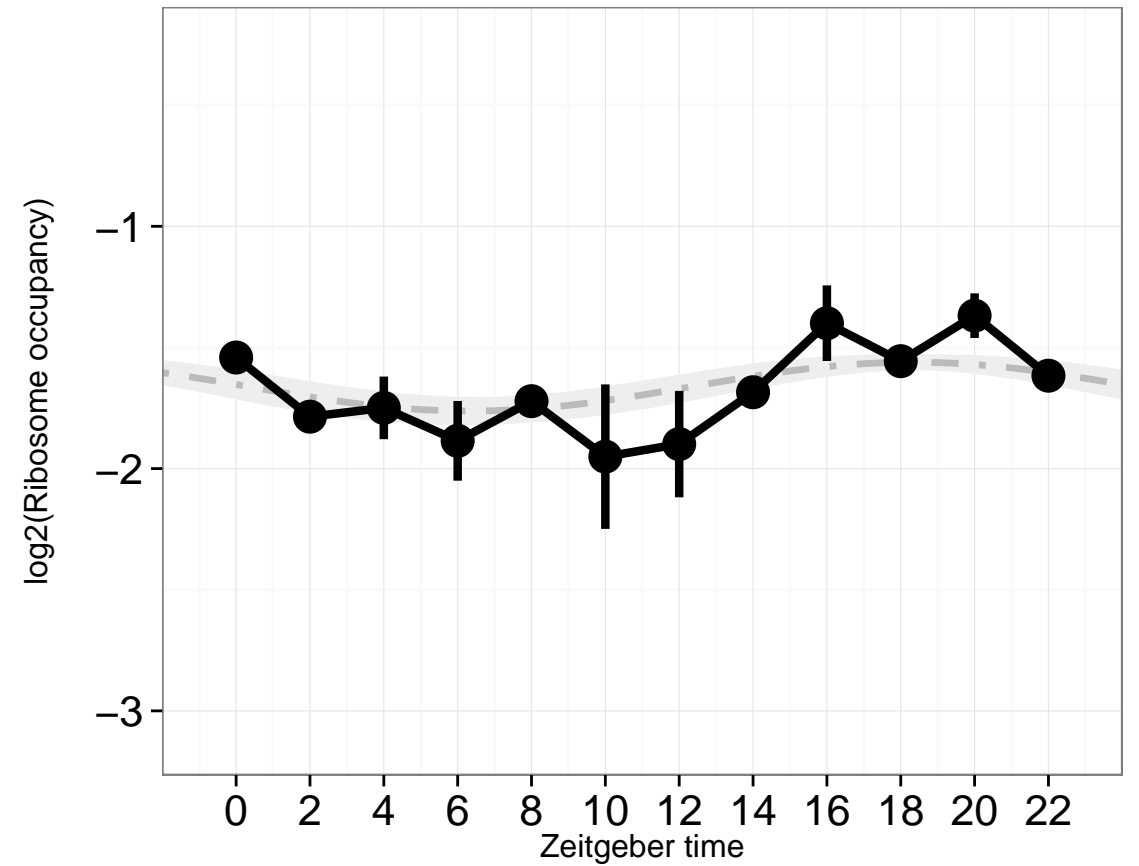

Supplement: SuppDataset_1.zip [file Adam23_set_C.pdf › Supplemental Dataset 1/C-mRNA_nonrhythm_translation_rhyth/Adam23_set_C.pdf]

# Adamts1

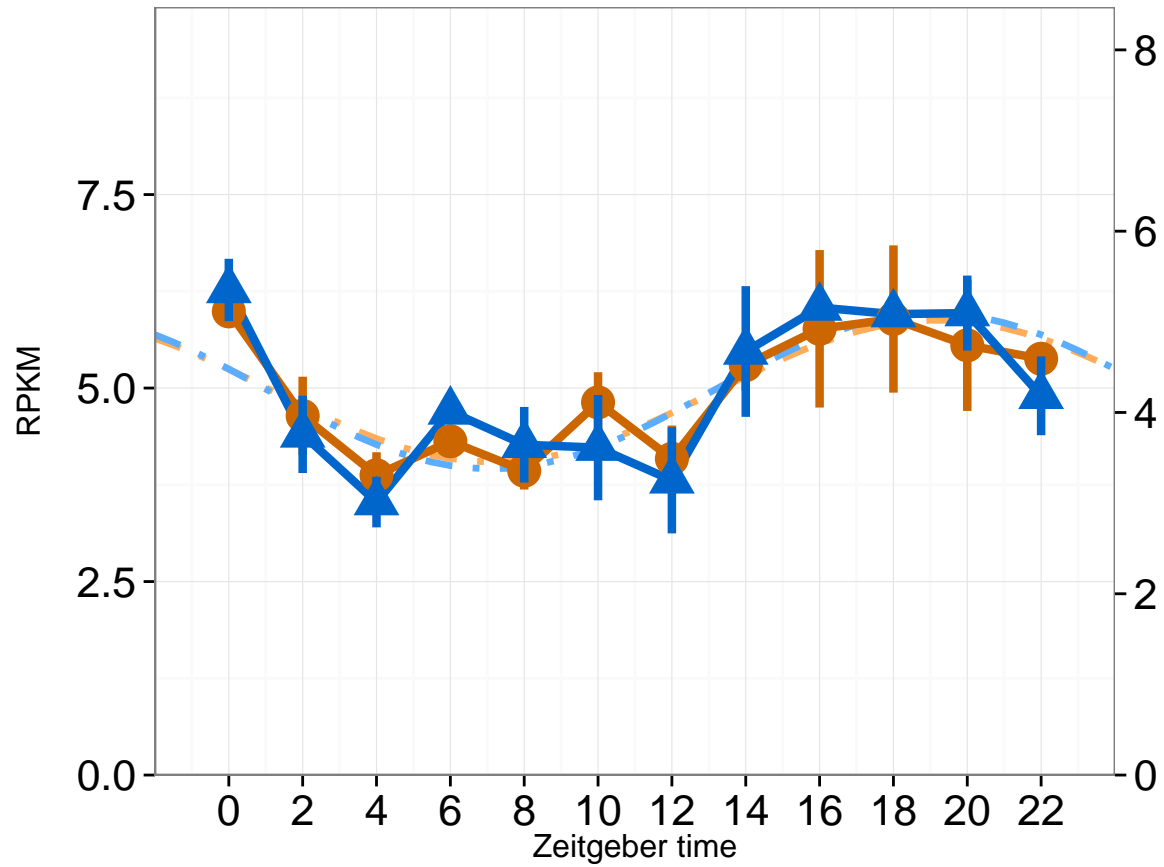

# Adamts1

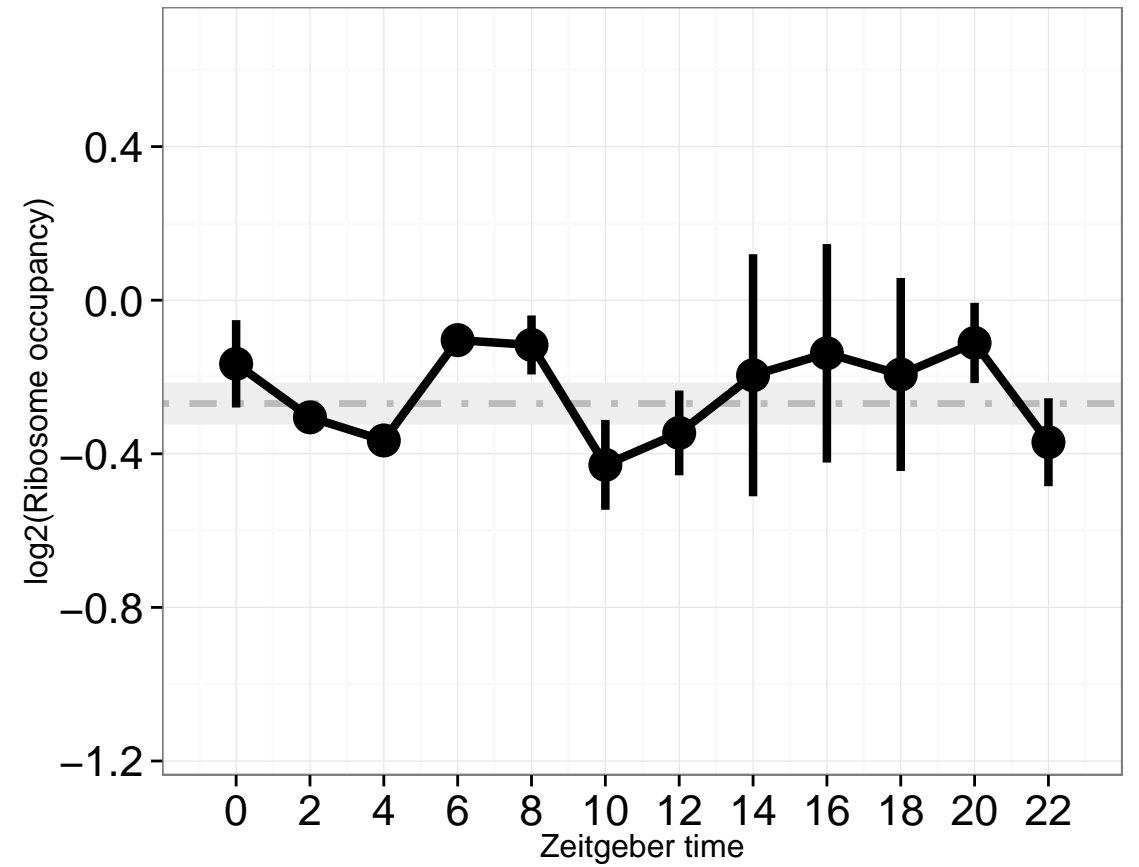

Supplement: SuppDataset_1.zip [file Adamts1_set_C.pdf › Supplemental Dataset 1/C-mRNA_nonrhythm_translation_rhyth/Adamts1_set_C.pdf]

# Adh6-ps1

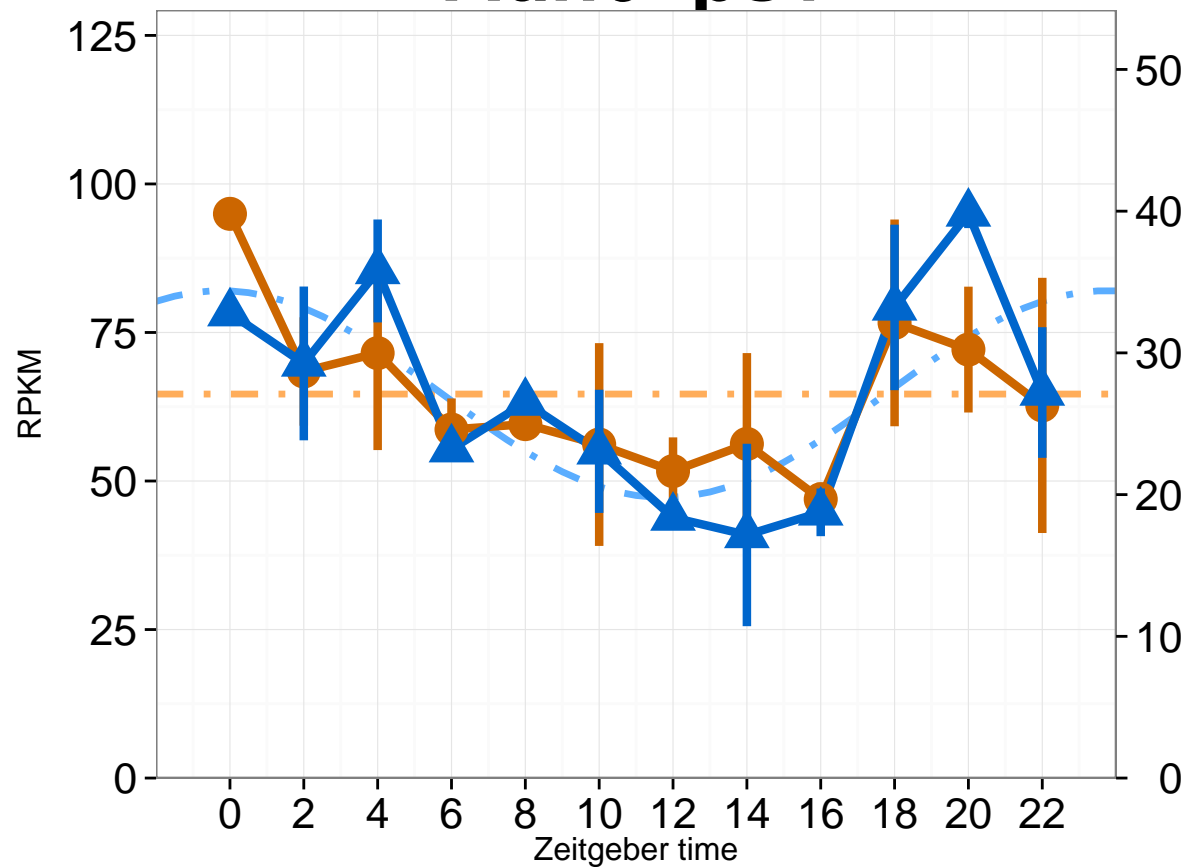

# Adh6-ps1

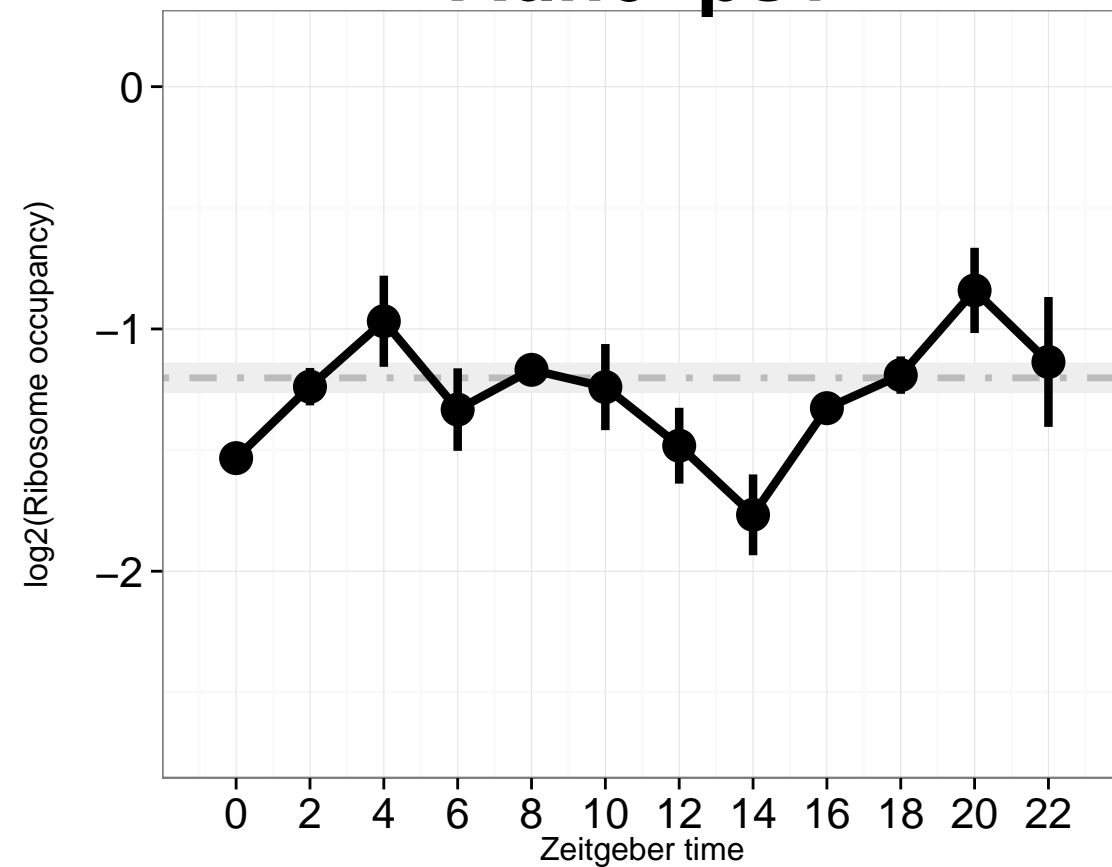

Supplement: SuppDataset_1.zip [file Adh6-ps1_set_C.pdf › Supplemental Dataset 1/C-mRNA_nonrhythm_translation_rhyth/Adh6-ps1_set_C.pdf]

## Adora1

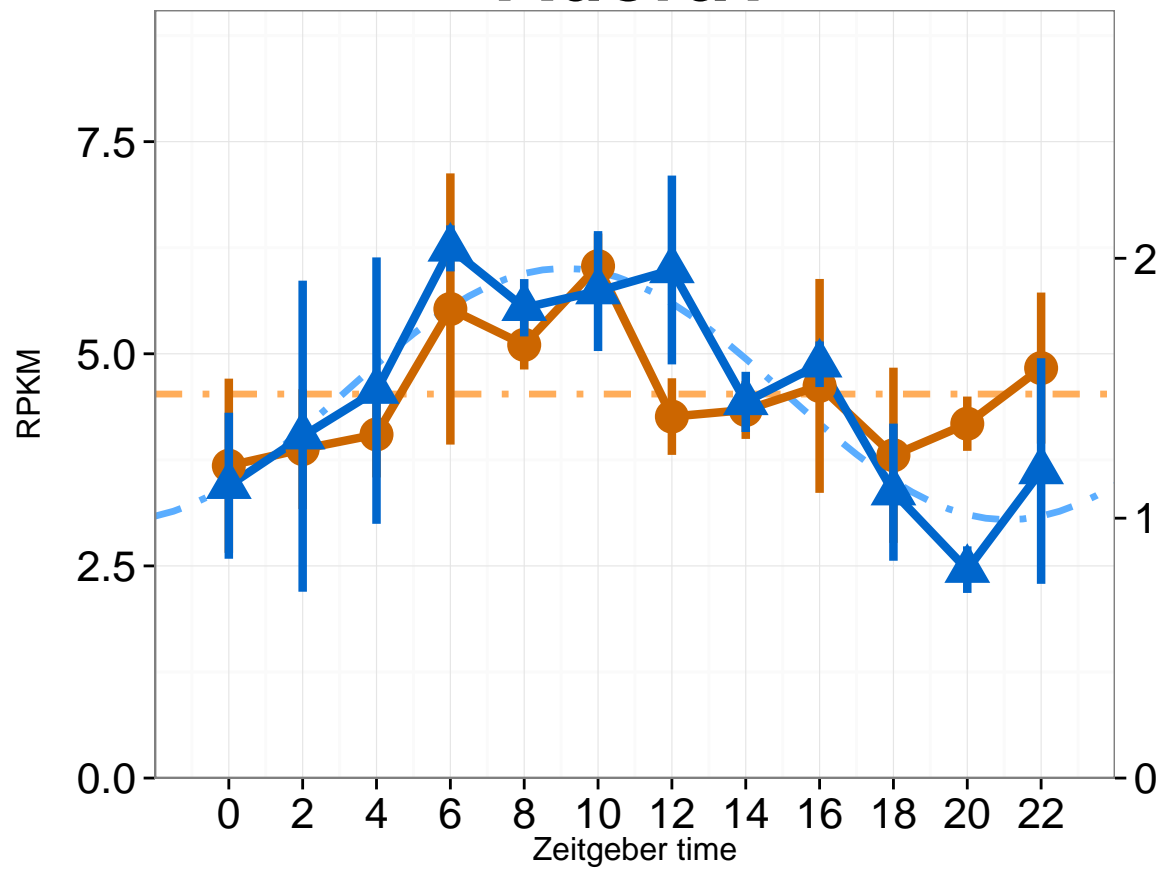

## Adora1

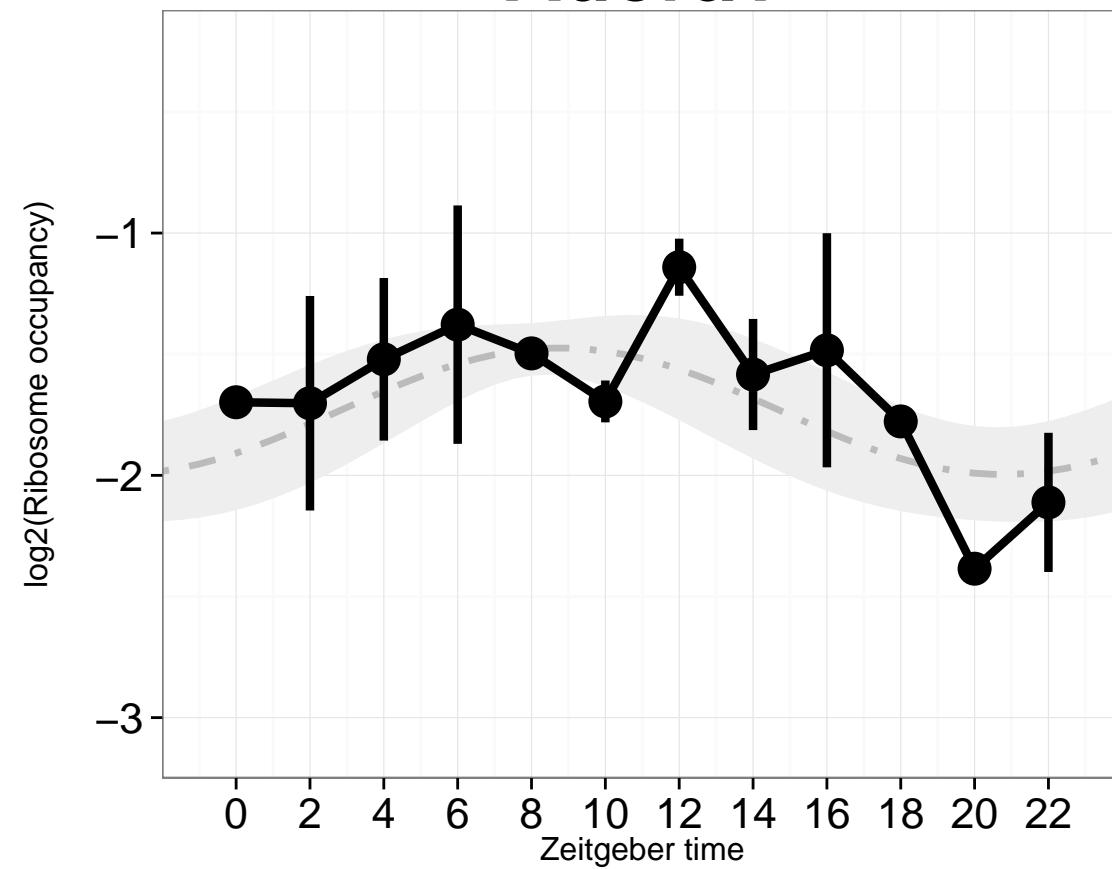

Supplement: SuppDataset_1.zip [file Adora1_set_C.pdf › Supplemental Dataset 1/C-mRNA_nonrhythm_translation_rhyth/Adora1_set_C.pdf]

## Afap1

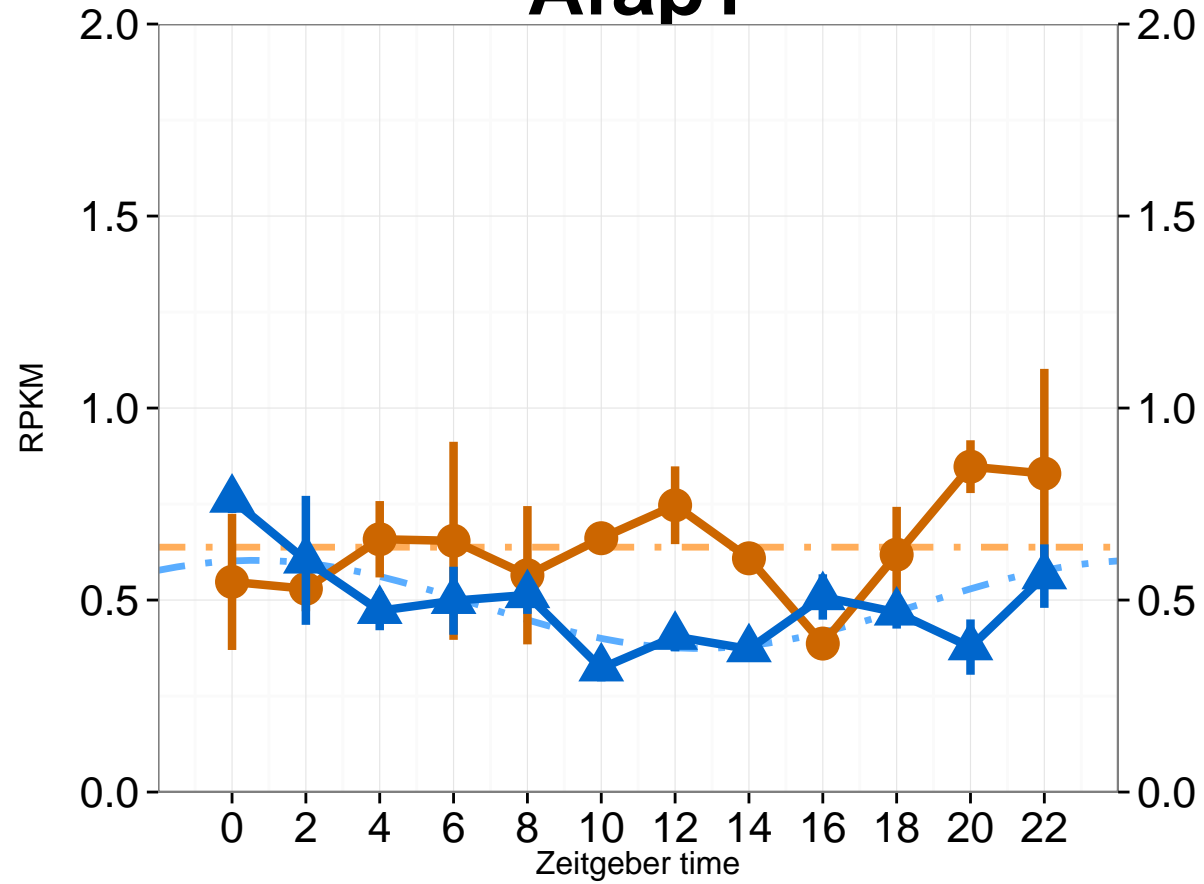

## Afap1

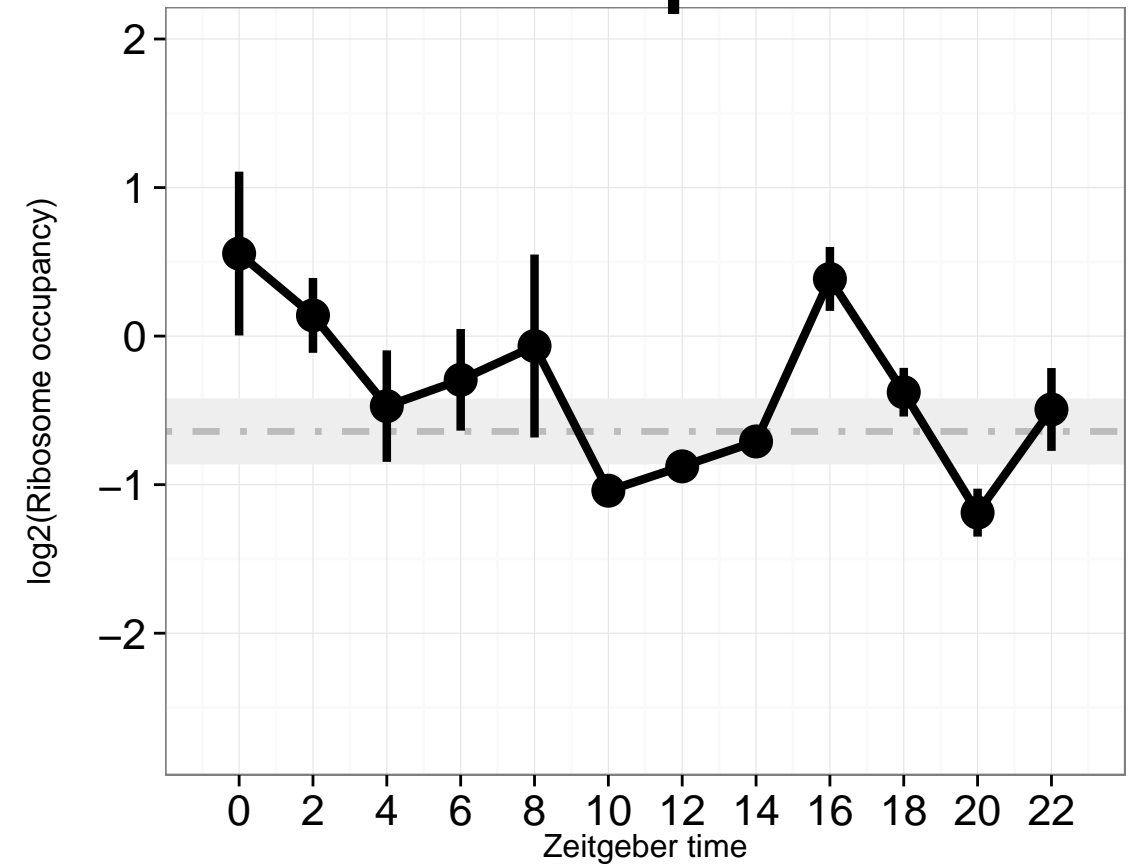

Supplement: SuppDataset_1.zip [file Afap1_set_C.pdf › Supplemental Dataset 1/C-mRNA_nonrhythm_translation_rhyth/Afap1_set_C.pdf]

# Afap1l2

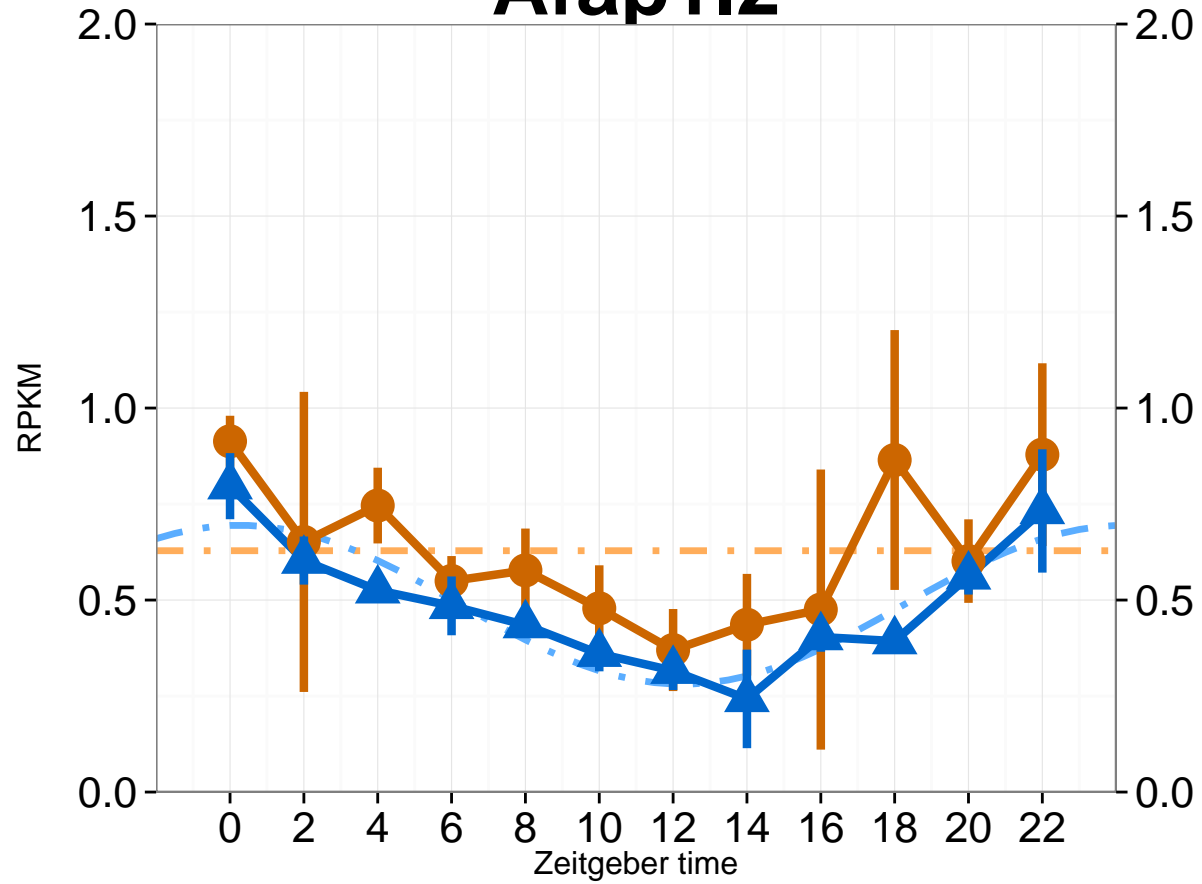

# Afap1l2

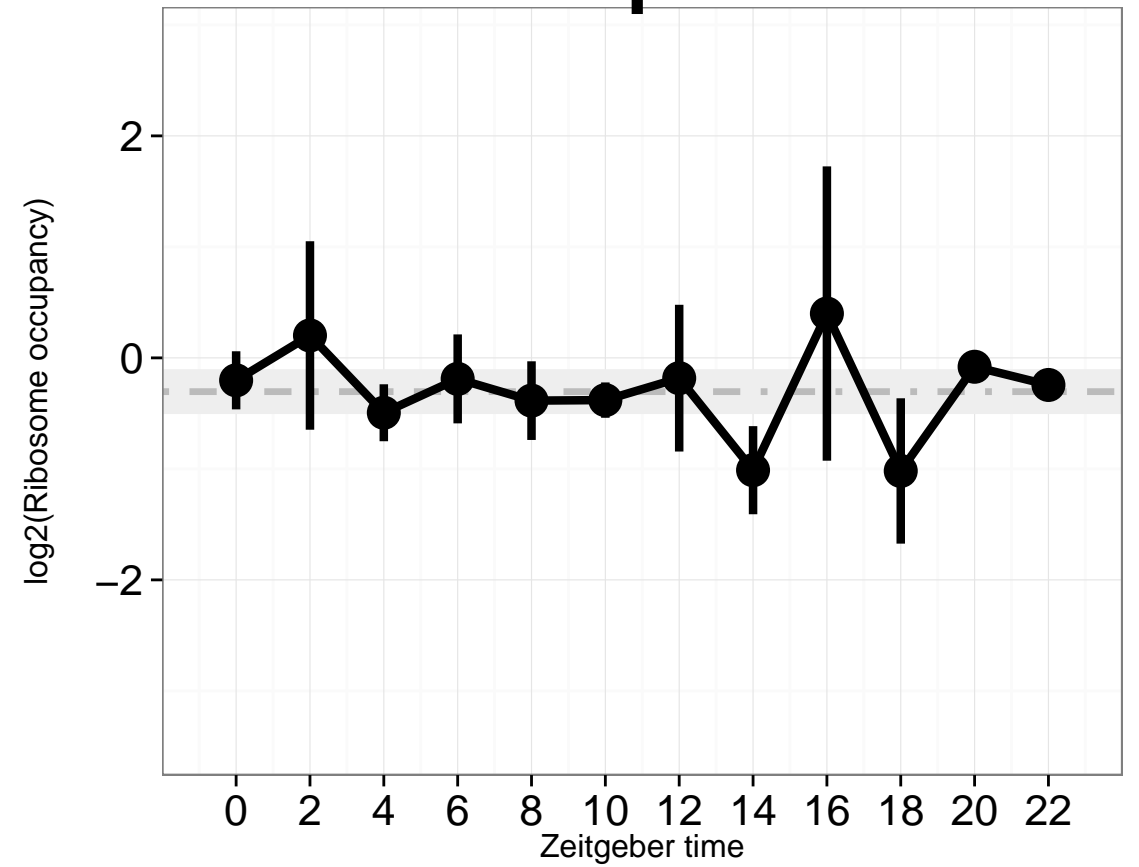

Supplement: SuppDataset_1.zip [file Afap1l2_set_C.pdf › Supplemental Dataset 1/C-mRNA_nonrhythm_translation_rhyth/Afap1l2_set_C.pdf]

## Ago3

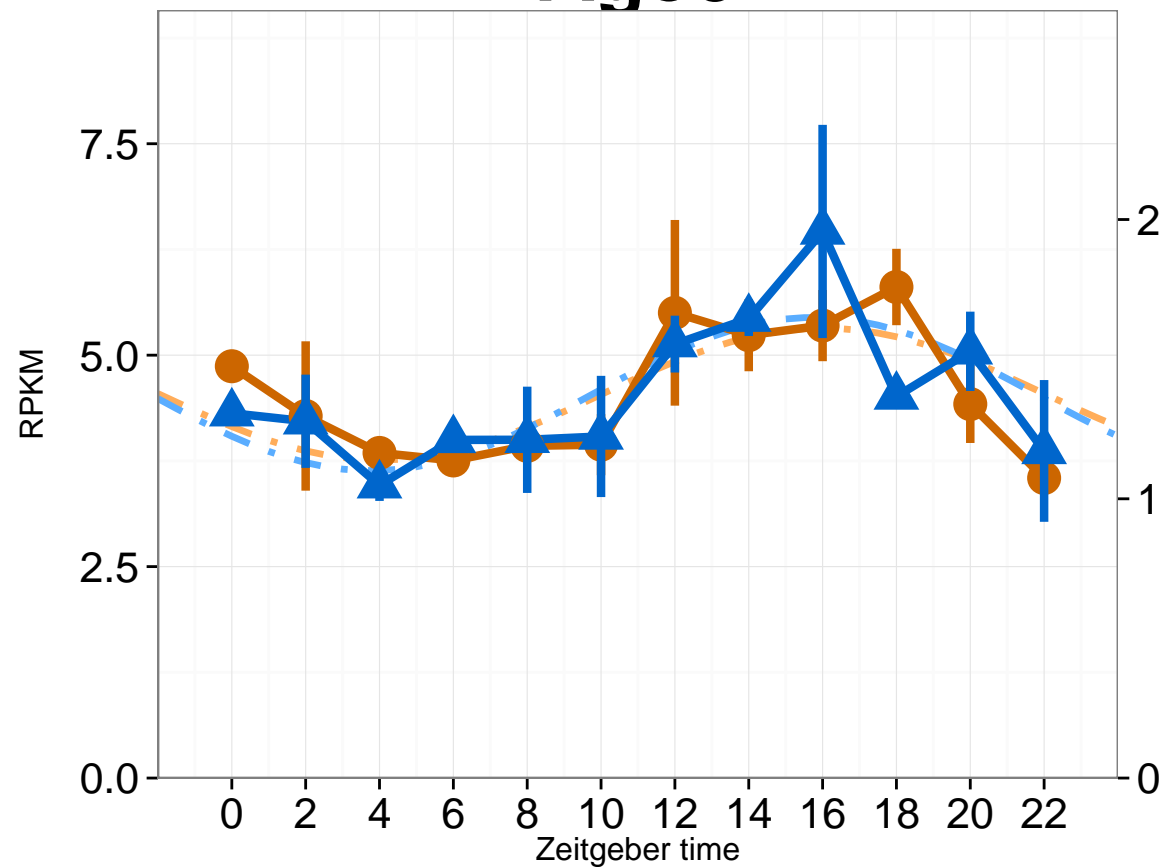

## Ago3

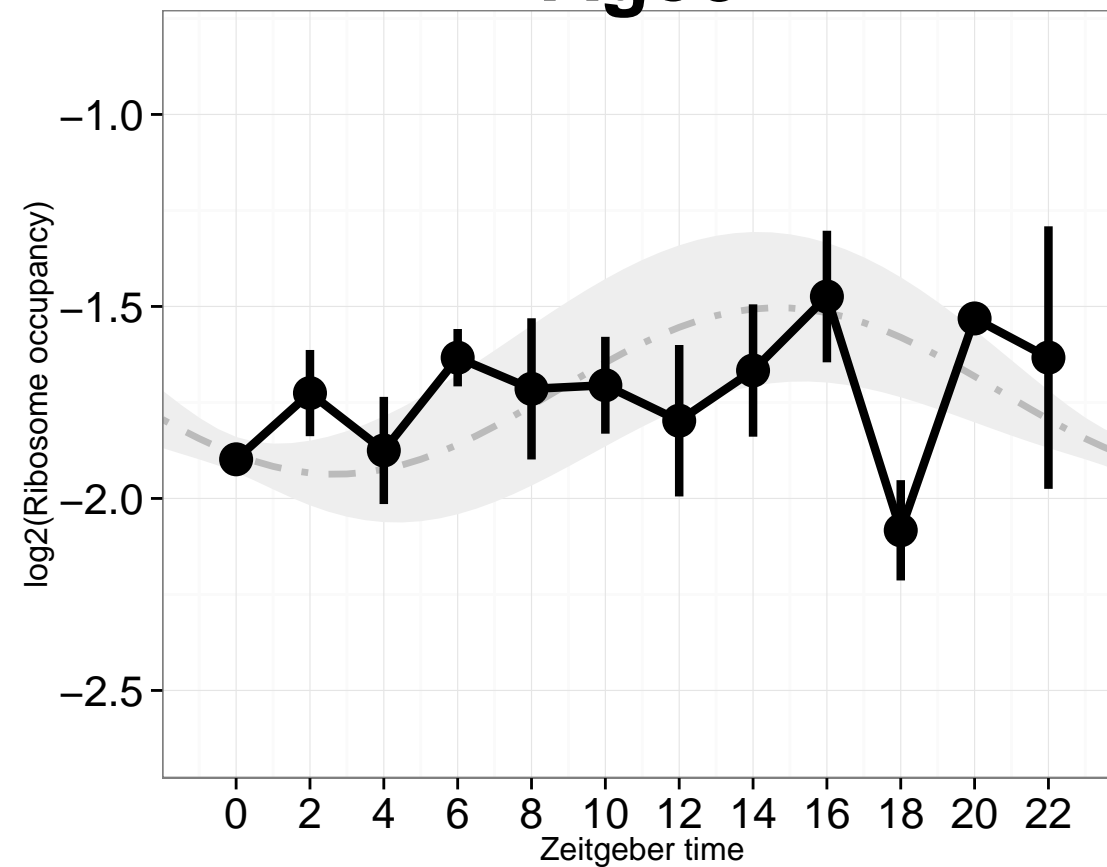

Supplement: SuppDataset_1.zip [file Ago3_set_C.pdf › Supplemental Dataset 1/C-mRNA_nonrhythm_translation_rhyth/Ago3_set_C.pdf]
