# Supplementary figures and images for: Ribosome profiling reveals the rhythmic liver translatome and circadian clock regulation by upstream open reading frames (part 78 of 113)
Source: HighWire-hosted journal article supplement (doi:10.1101/gr.195404.115), 2015-10-20

# Trmt13

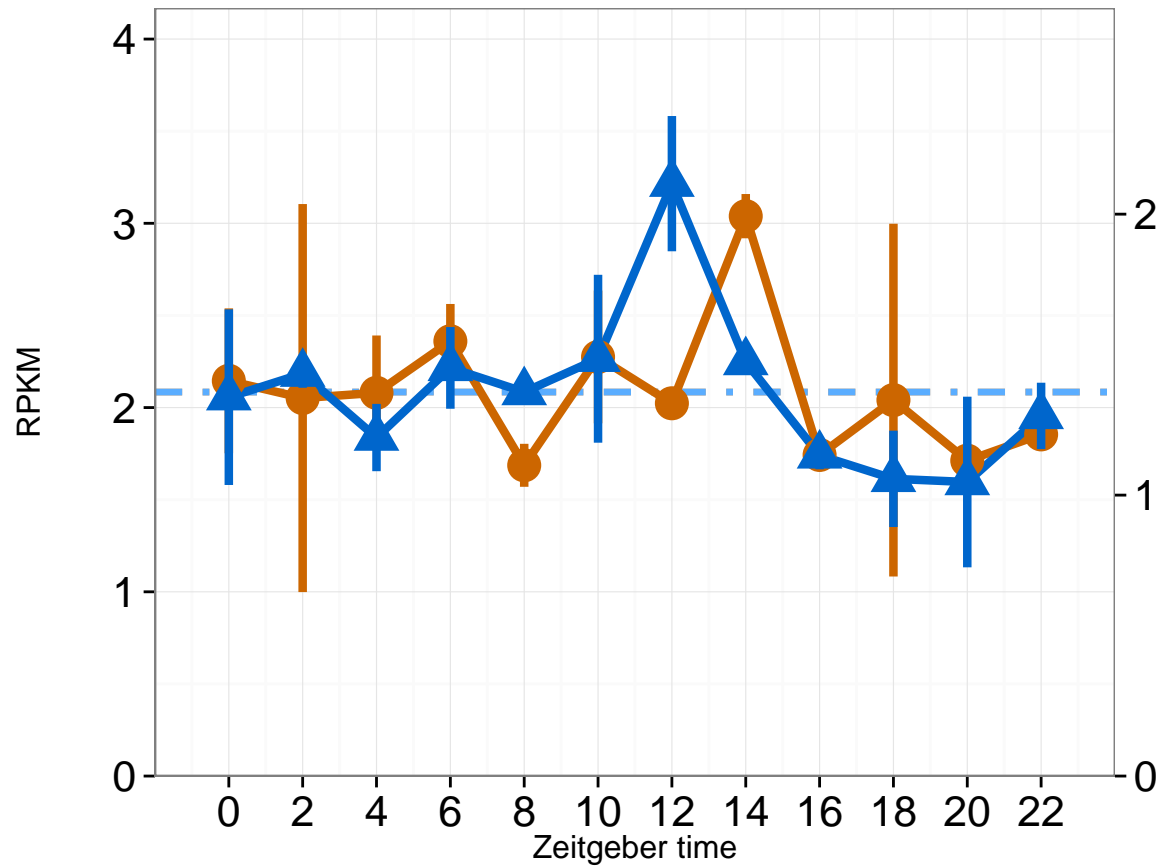

# Trmt13

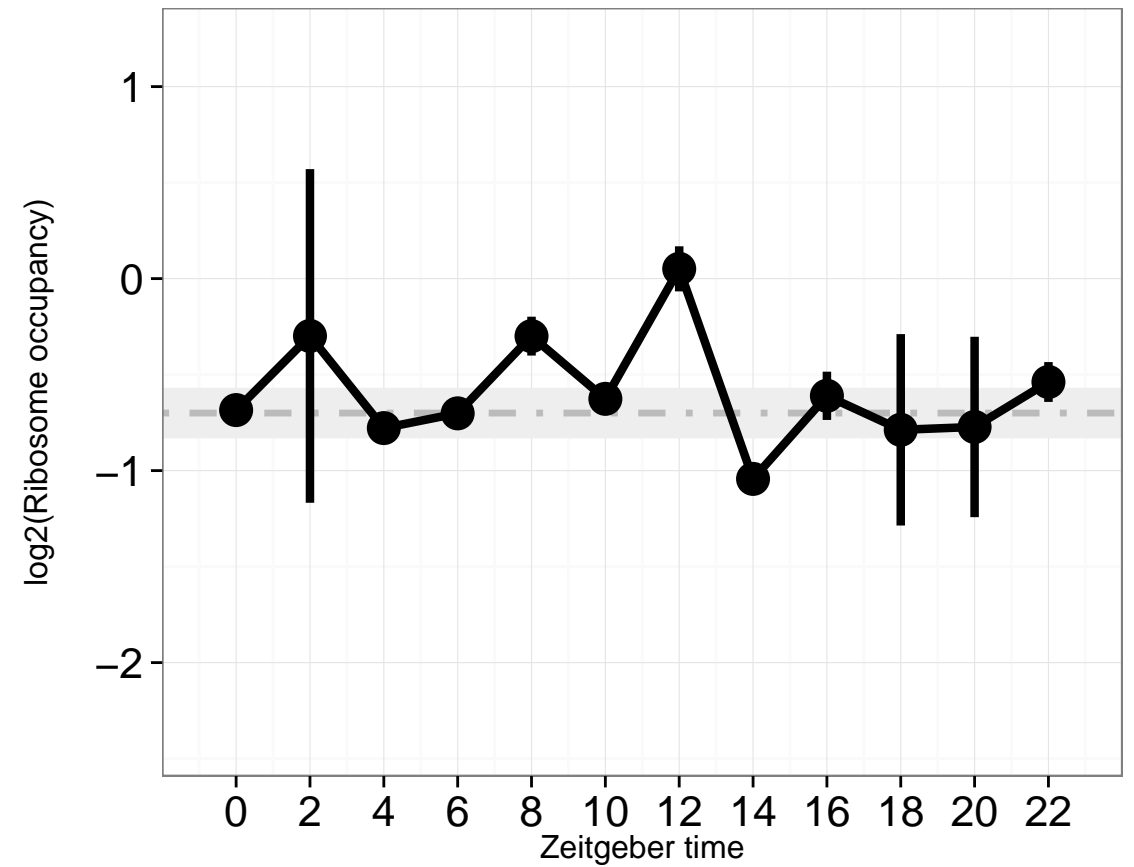

Supplement: SuppDataset_1.zip [file Trmt13_set_A.pdf › Supplemental Dataset 1/A-mRNA_nonrhyth_translation_nonrhyth/Trmt13_set_A.pdf]

# Trmt1

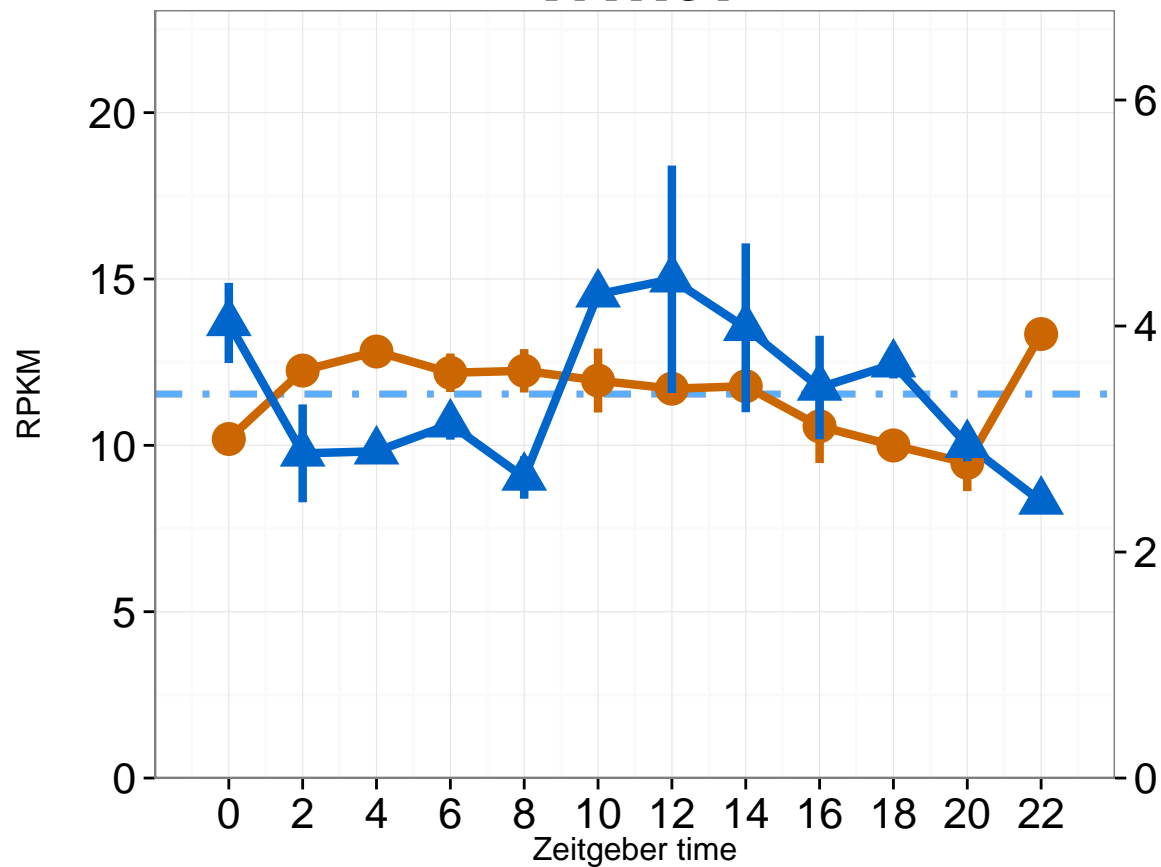

# Trmt1

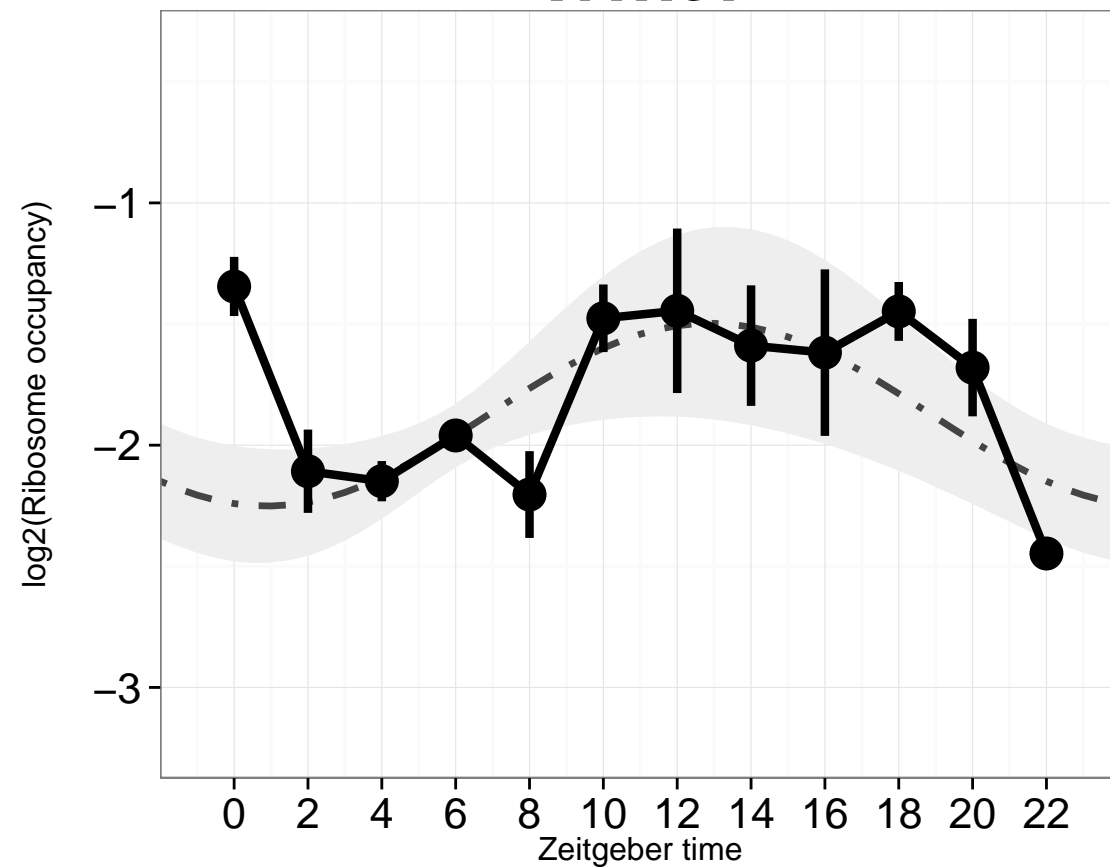

Supplement: SuppDataset_1.zip [file Trmt1_set_A.pdf › Supplemental Dataset 1/A-mRNA_nonrhyth_translation_nonrhyth/Trmt1_set_A.pdf]

# Trmt2b

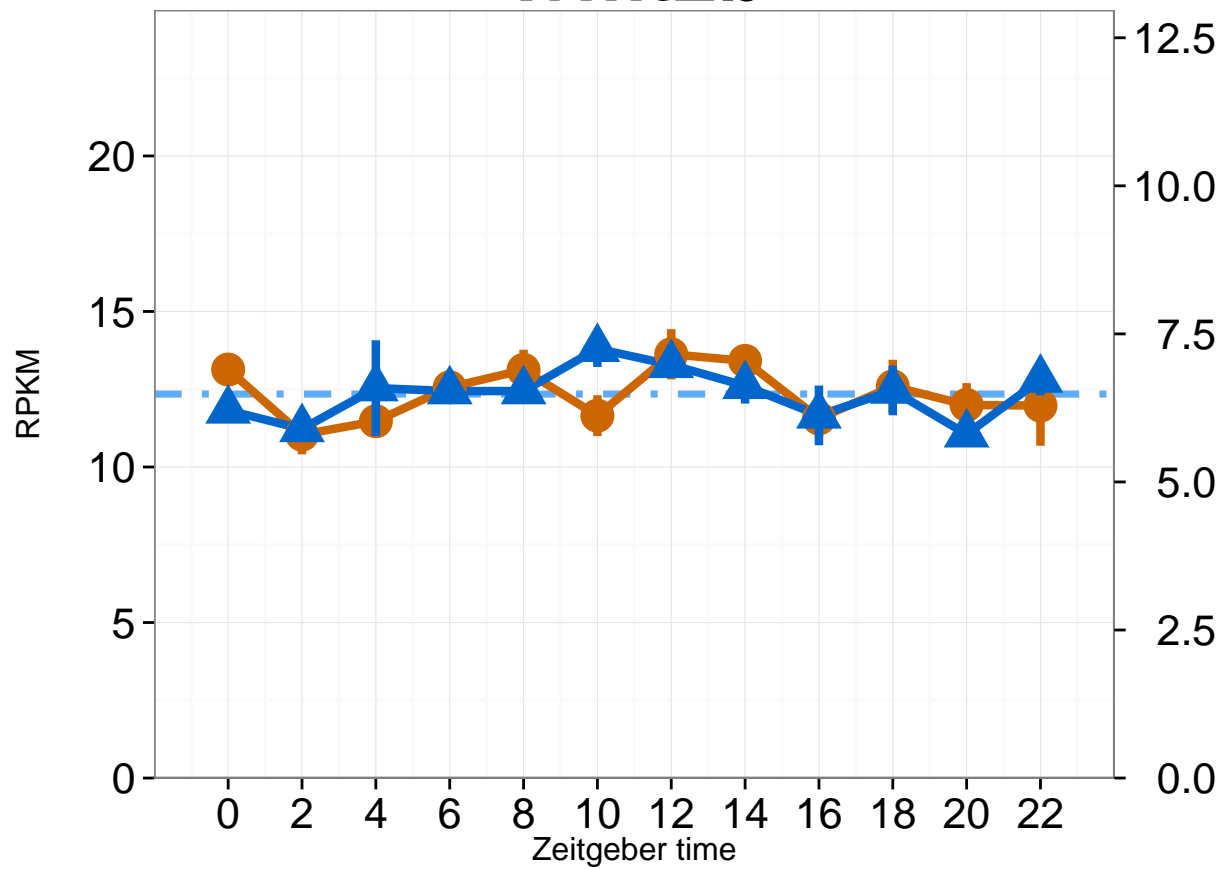

# Trmt2b

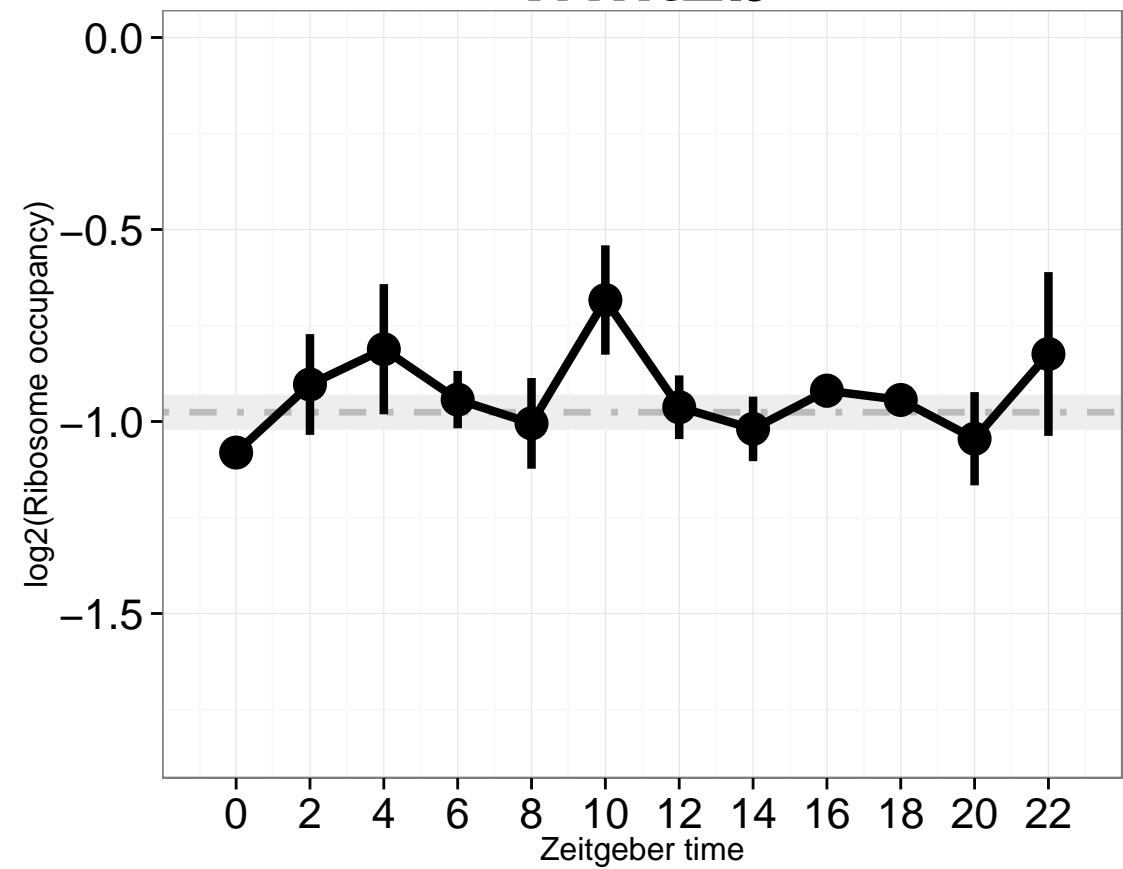

Supplement: SuppDataset_1.zip [file Trmt2b_set_A.pdf › Supplemental Dataset 1/A-mRNA_nonrhyth_translation_nonrhyth/Trmt2b_set_A.pdf]

# Trmt44

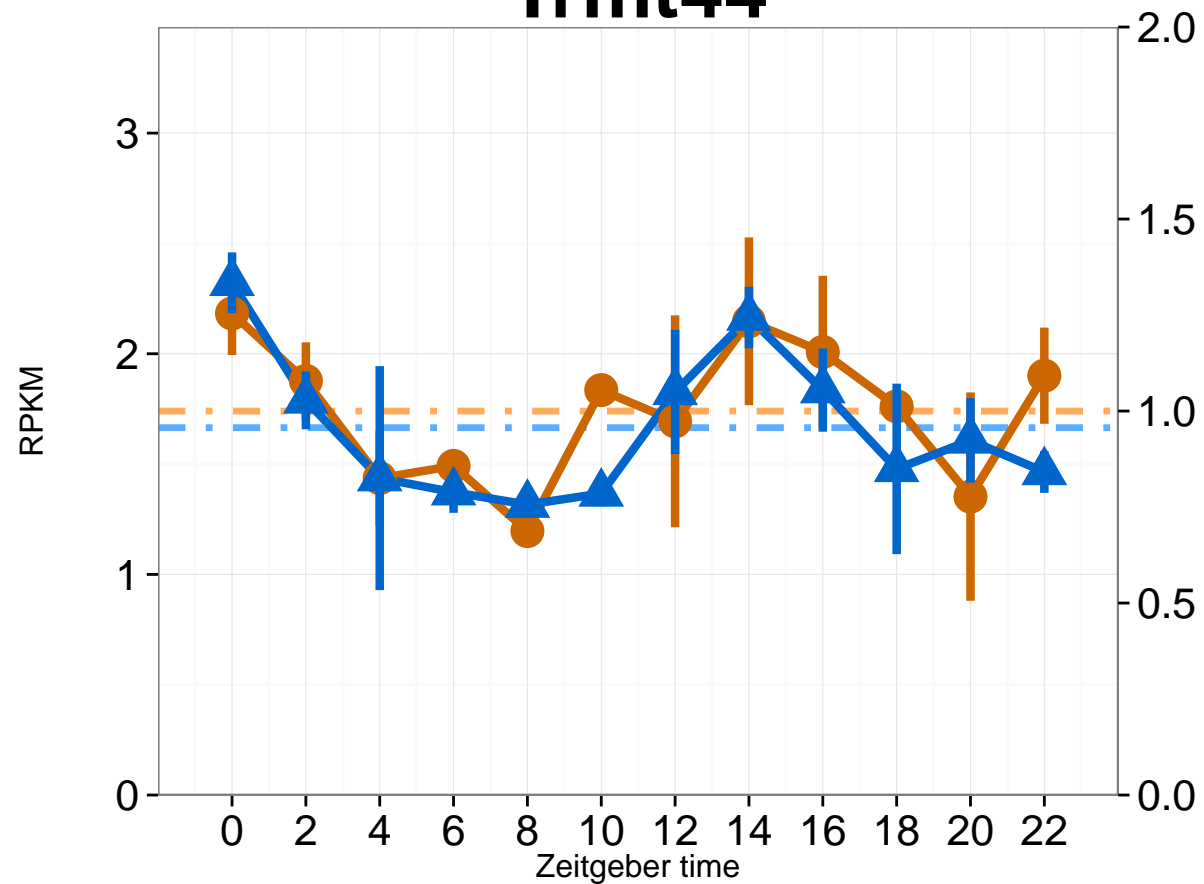

# Trmt44

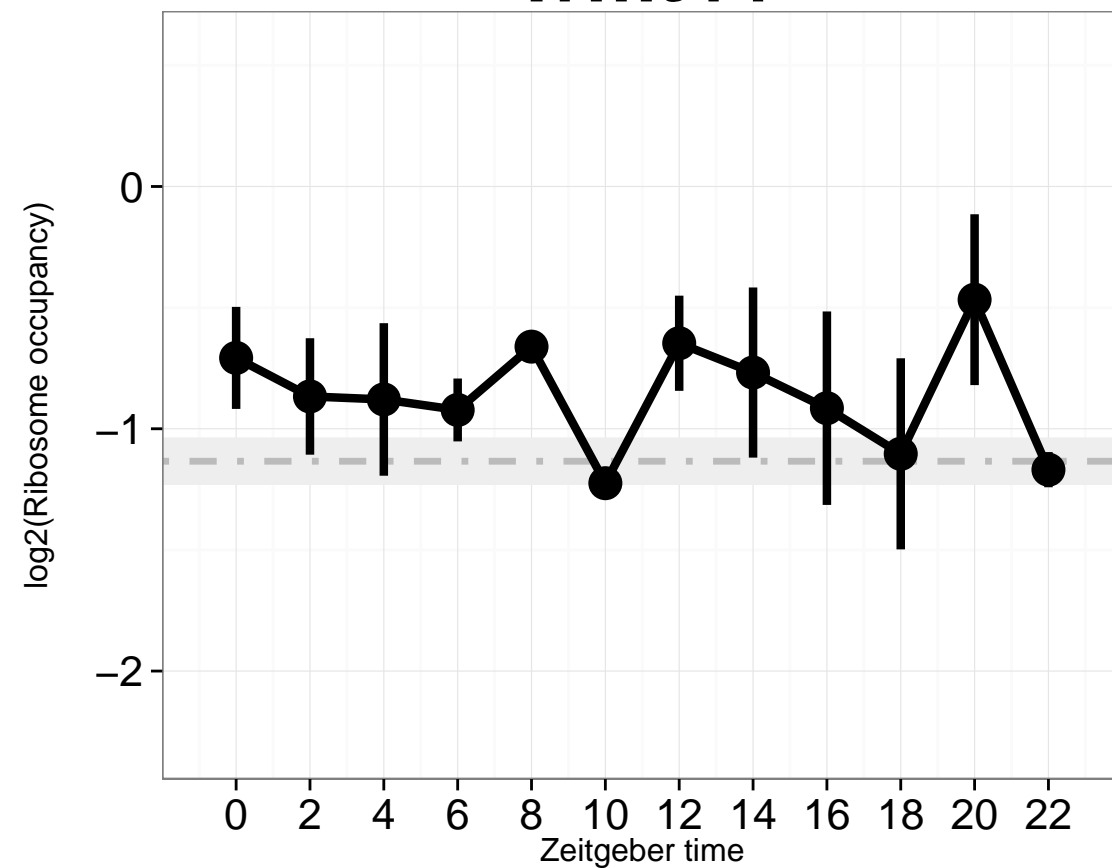

Supplement: SuppDataset_1.zip [file Trmt44_set_A.pdf › Supplemental Dataset 1/A-mRNA_nonrhyth_translation_nonrhyth/Trmt44_set_A.pdf]

# Trmt5

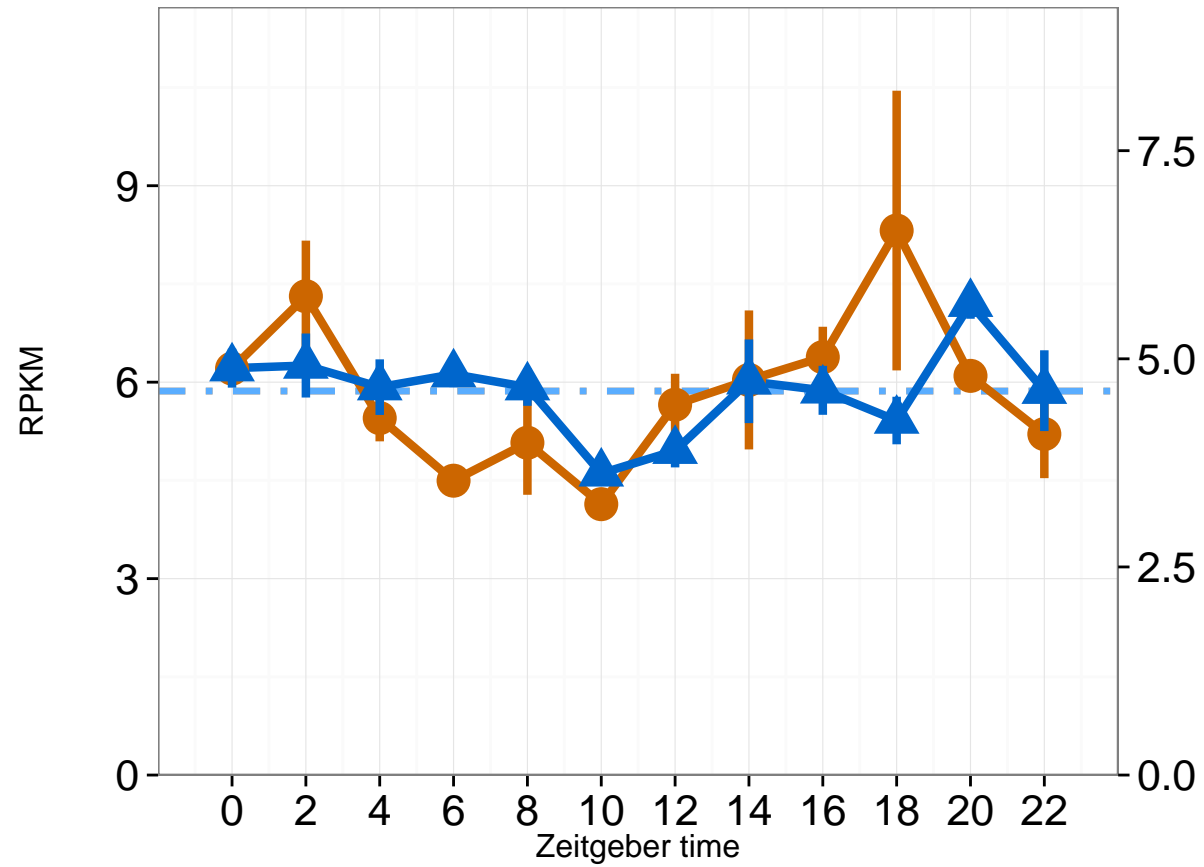

# Trmt5

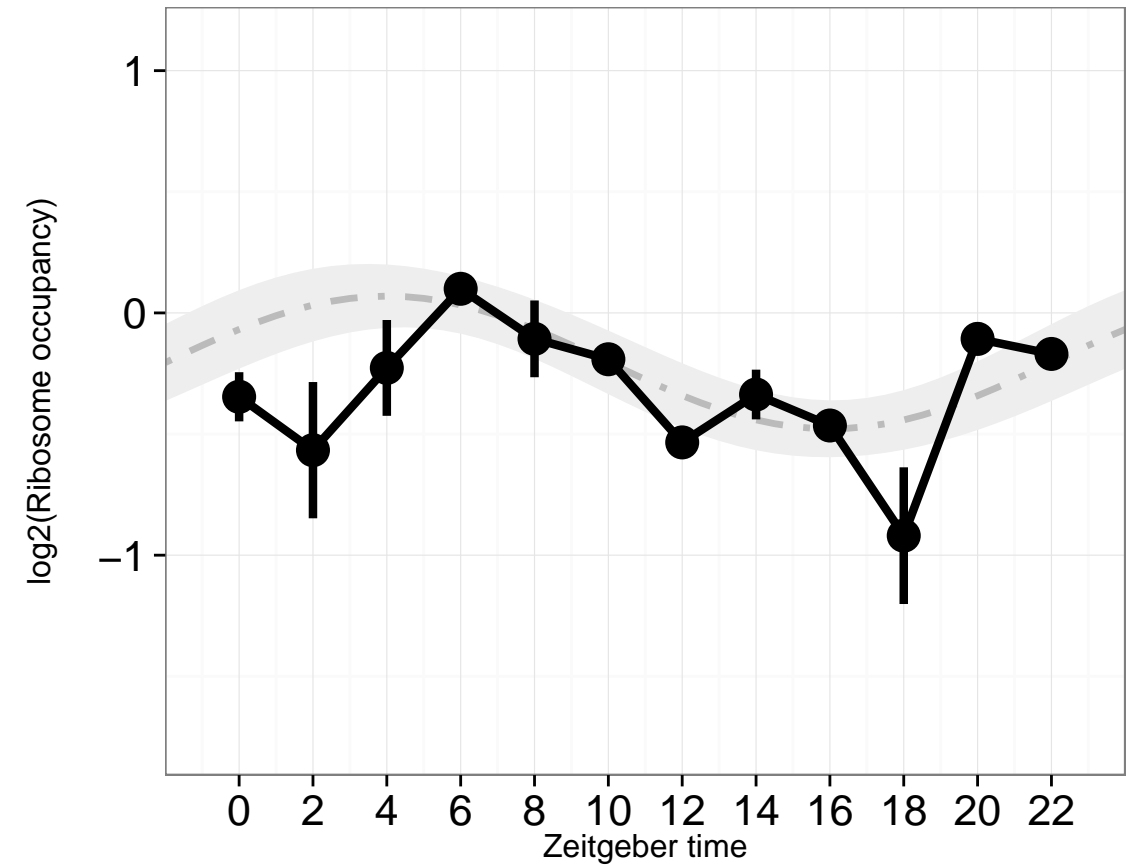

Supplement: SuppDataset_1.zip [file Trmt5_set_A.pdf › Supplemental Dataset 1/A-mRNA_nonrhyth_translation_nonrhyth/Trmt5_set_A.pdf]

## Trmt6

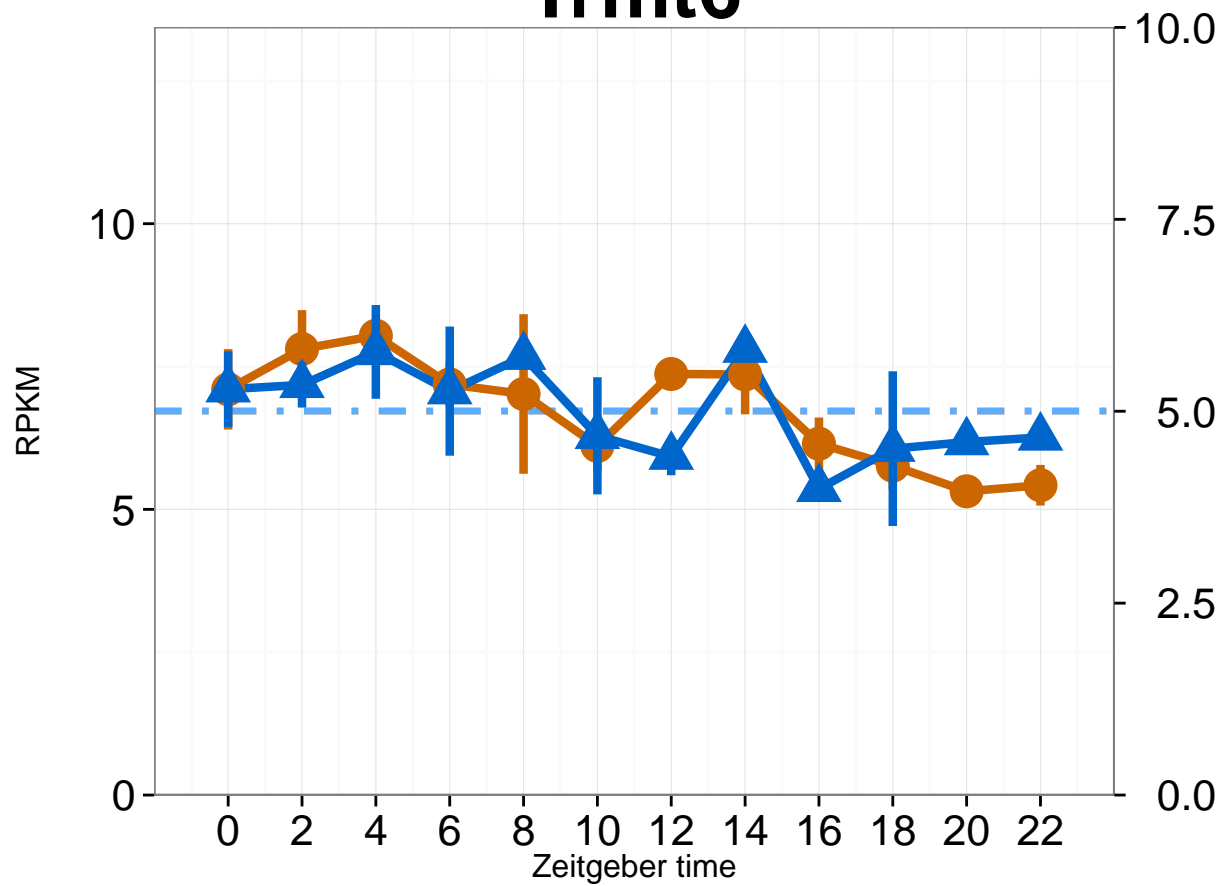

## Trmt6

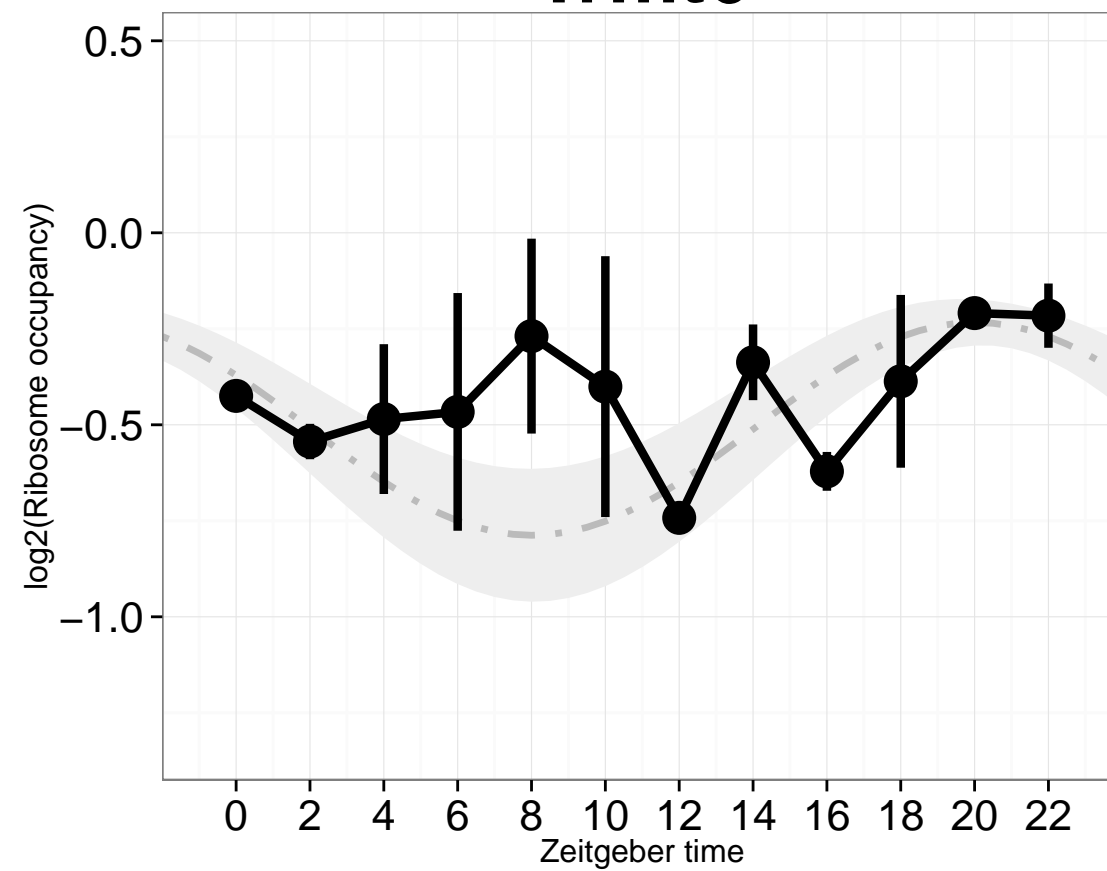

Supplement: SuppDataset_1.zip [file Trmt6_set_A.pdf › Supplemental Dataset 1/A-mRNA_nonrhyth_translation_nonrhyth/Trmt6_set_A.pdf]

## Trmu

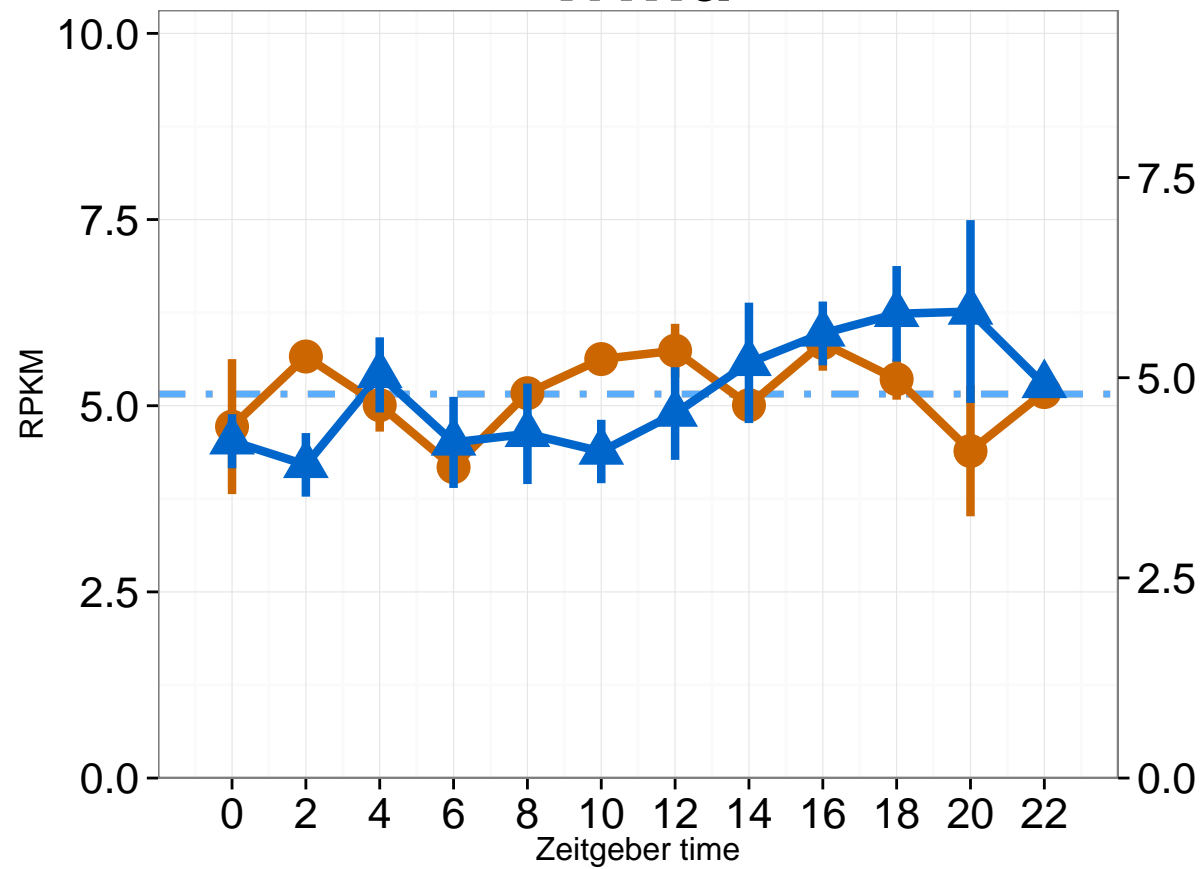

## Trmu

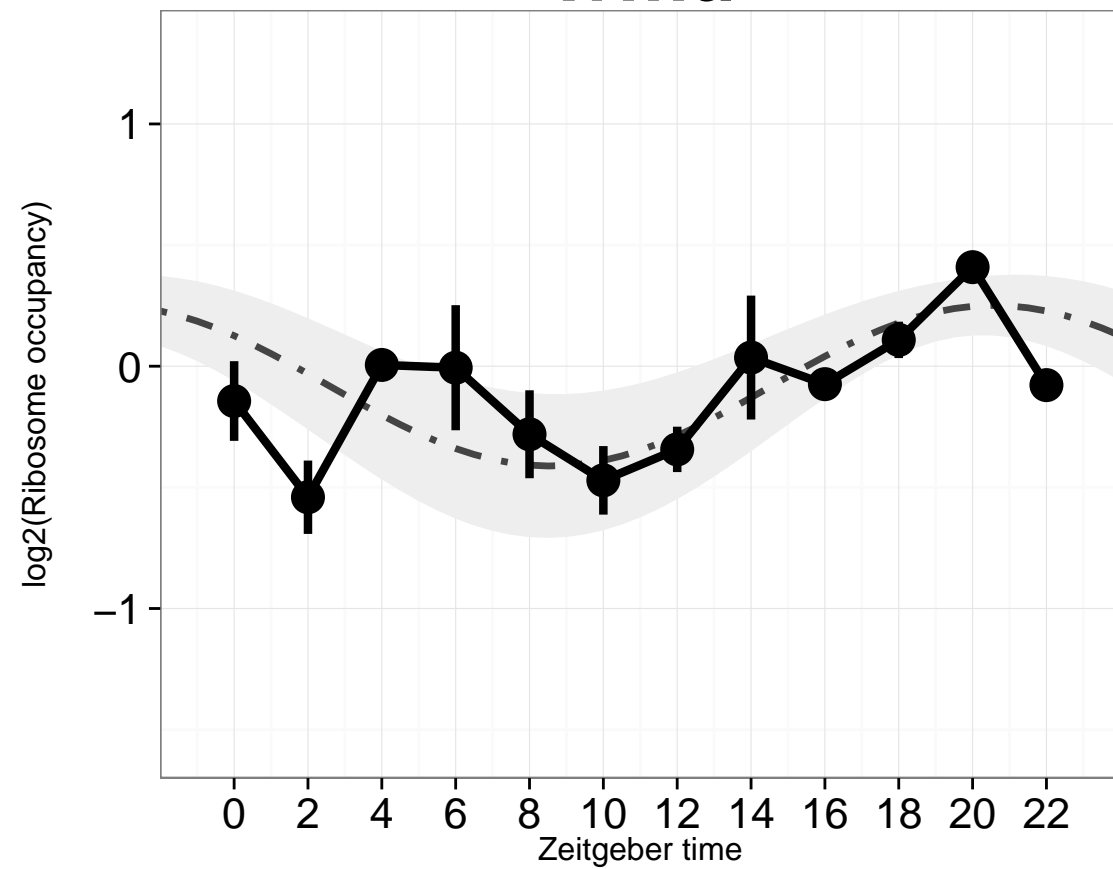

Supplement: SuppDataset_1.zip [file Trmu_set_A.pdf › Supplemental Dataset 1/A-mRNA_nonrhyth_translation_nonrhyth/Trmu_set_A.pdf]

# Trnau1ap

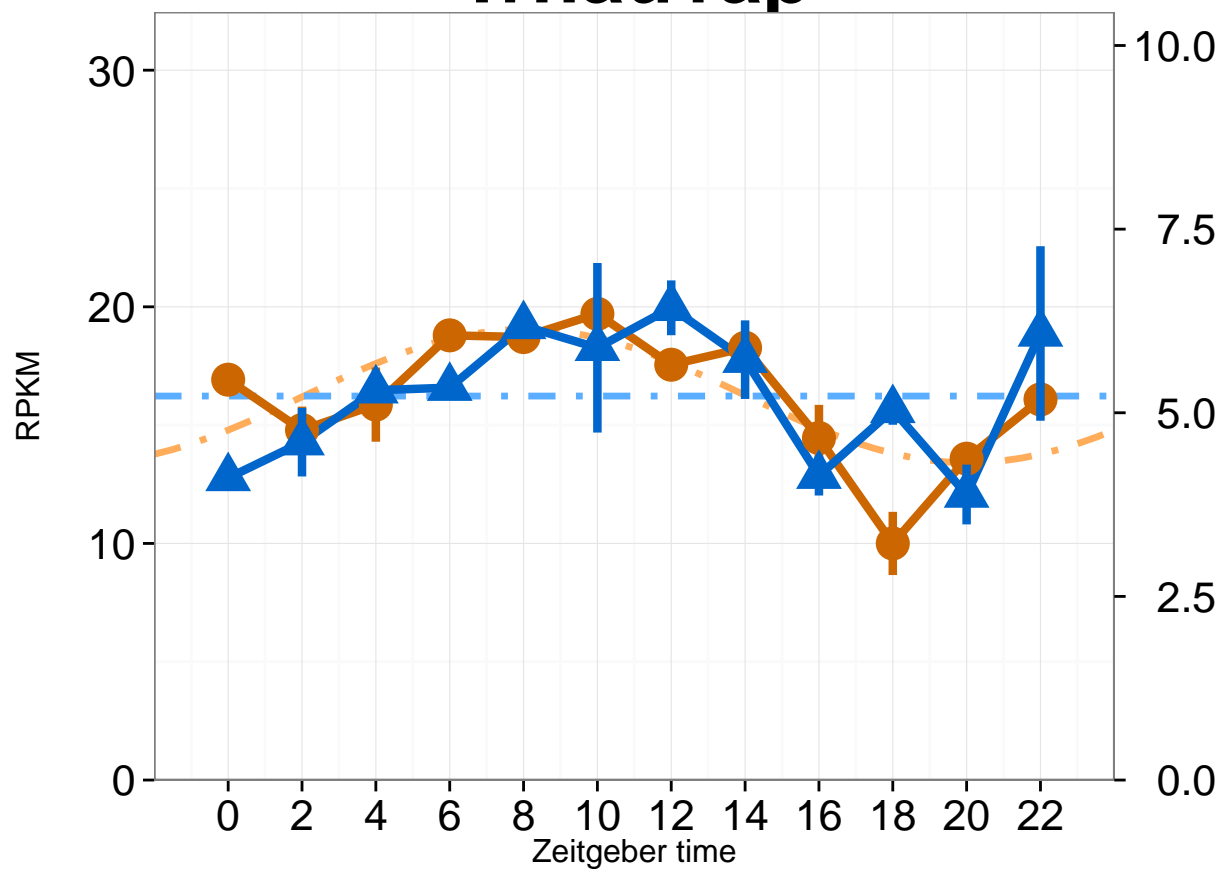

# Trnau1ap

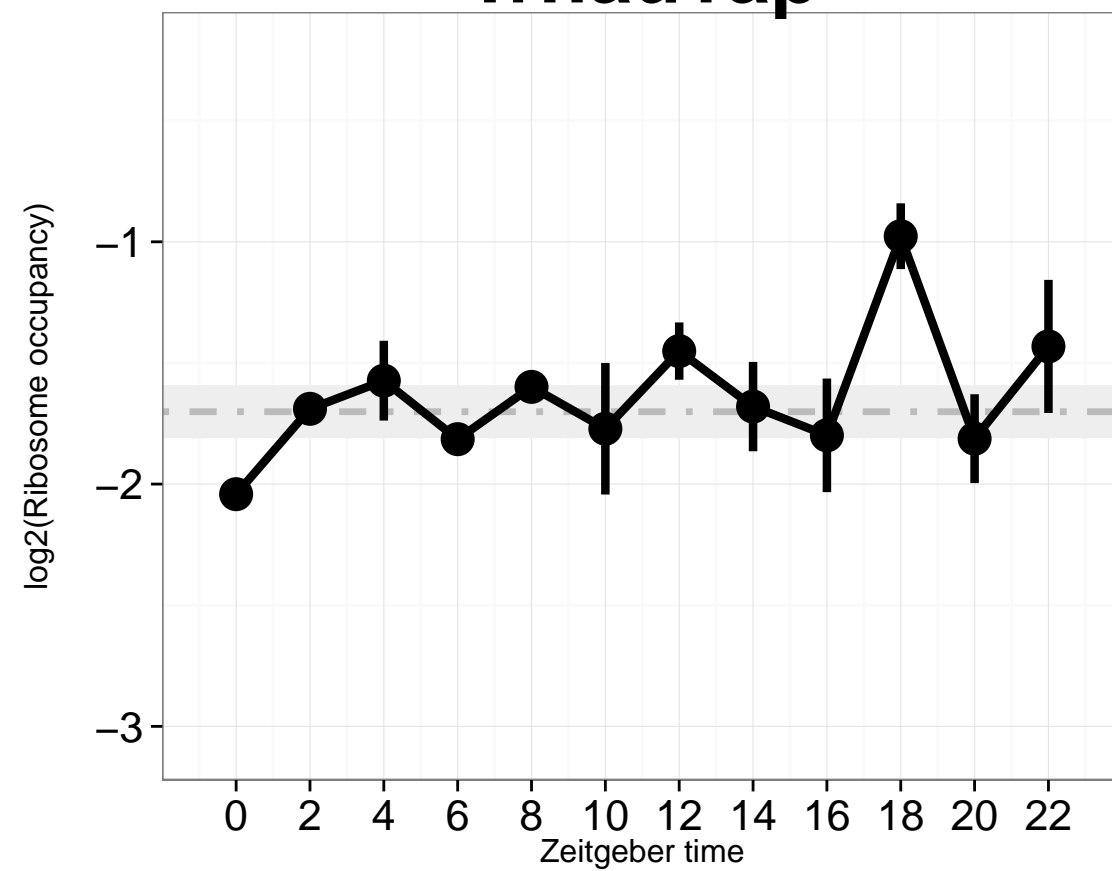

Supplement: SuppDataset_1.zip [file Trnau1ap_set_A.pdf › Supplemental Dataset 1/A-mRNA_nonrhyth_translation_nonrhyth/Trnau1ap_set_A.pdf]

# Trnt1

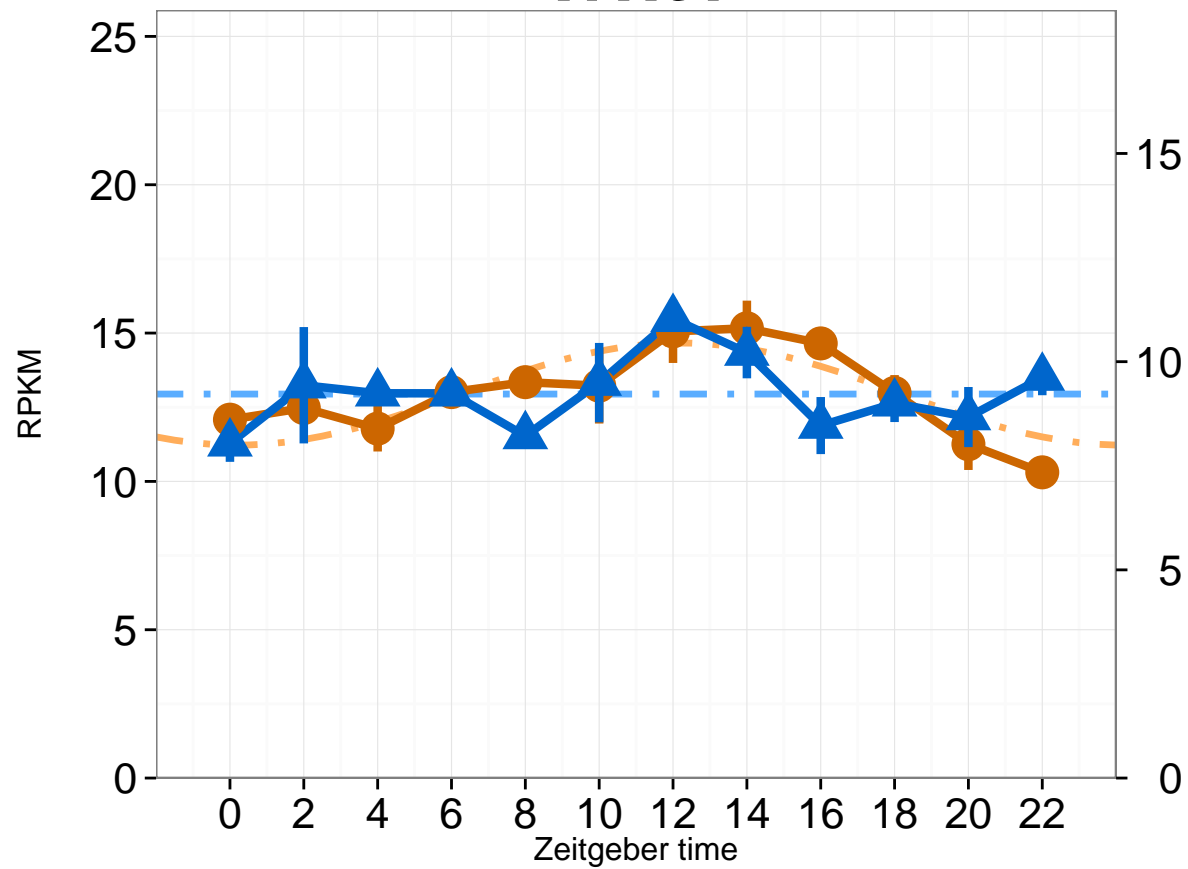

# Trnt1

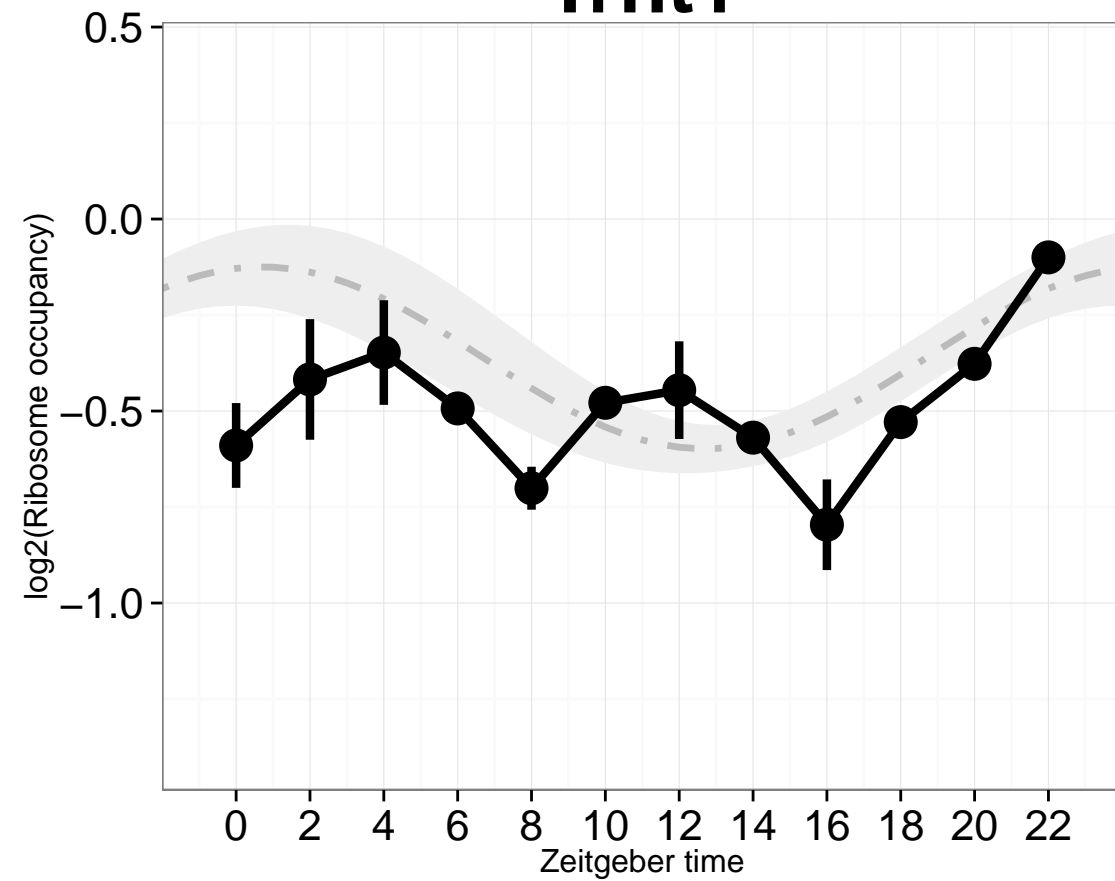

Supplement: SuppDataset_1.zip [file Trnt1_set_A.pdf › Supplemental Dataset 1/A-mRNA_nonrhyth_translation_nonrhyth/Trnt1_set_A.pdf]

## Trp53

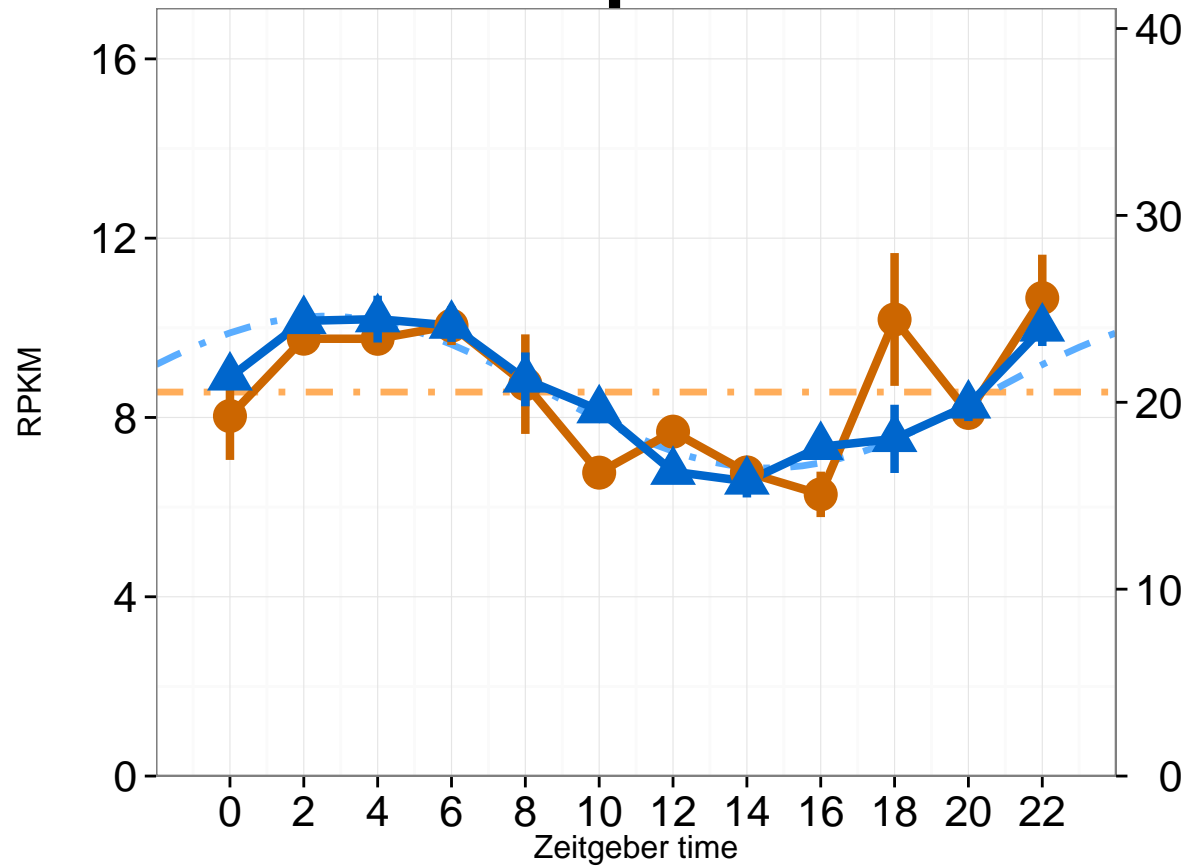

## Trp53

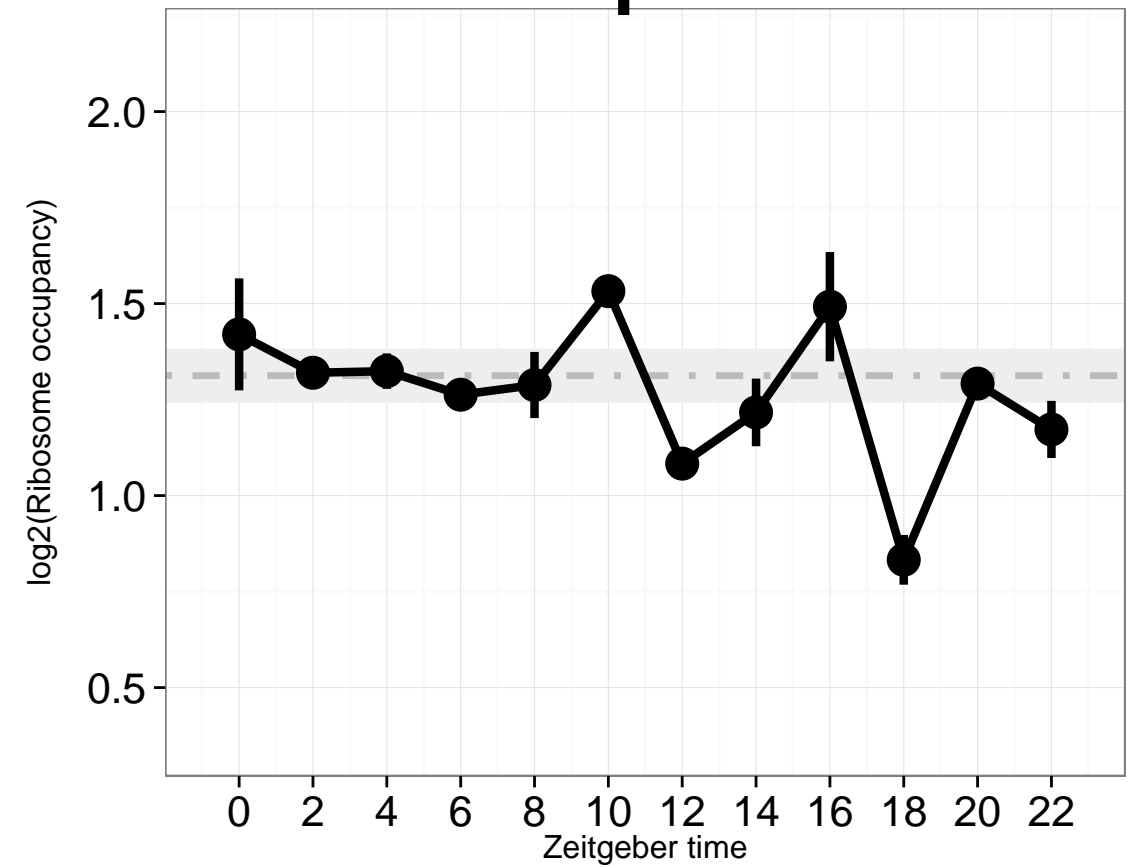

Supplement: SuppDataset_1.zip [file Trp53_set_A.pdf › Supplemental Dataset 1/A-mRNA_nonrhyth_translation_nonrhyth/Trp53_set_A.pdf]

# Trp53bp1

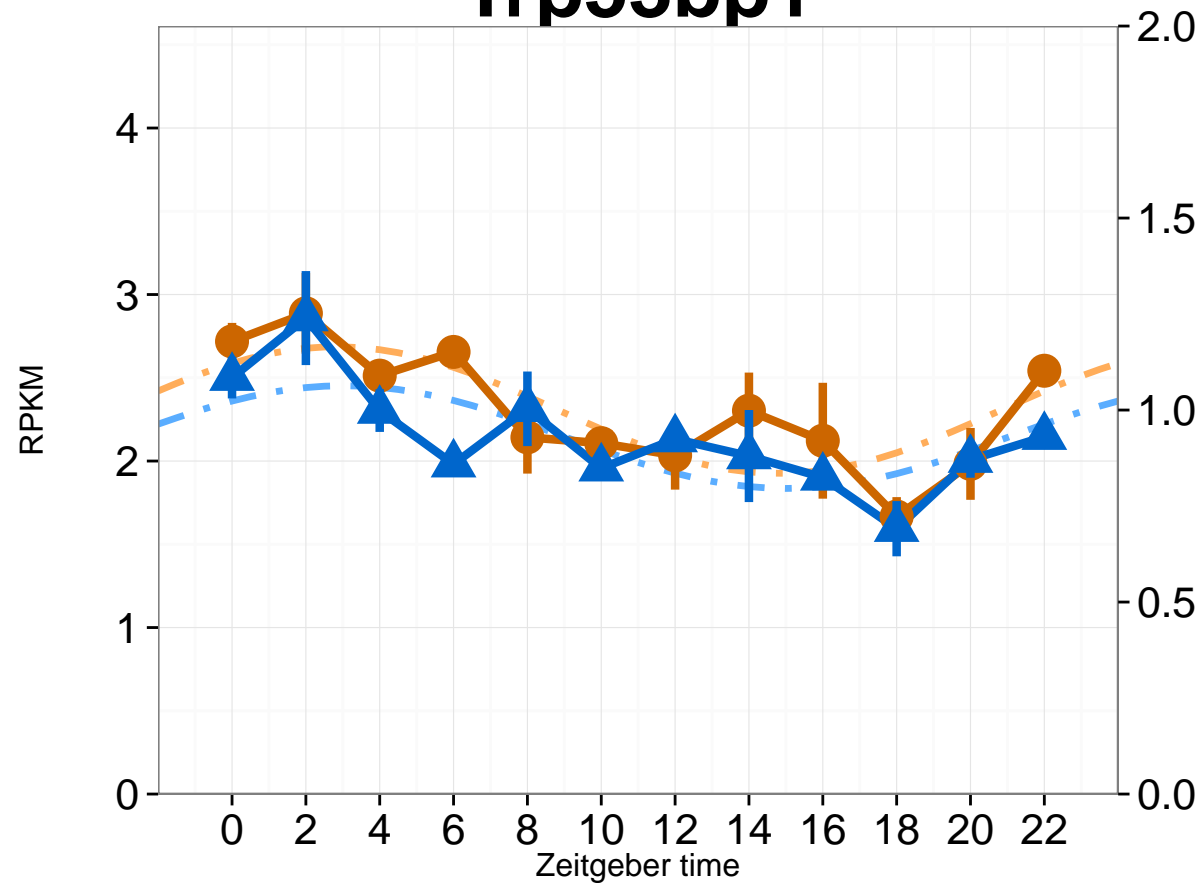

# Trp53bp1

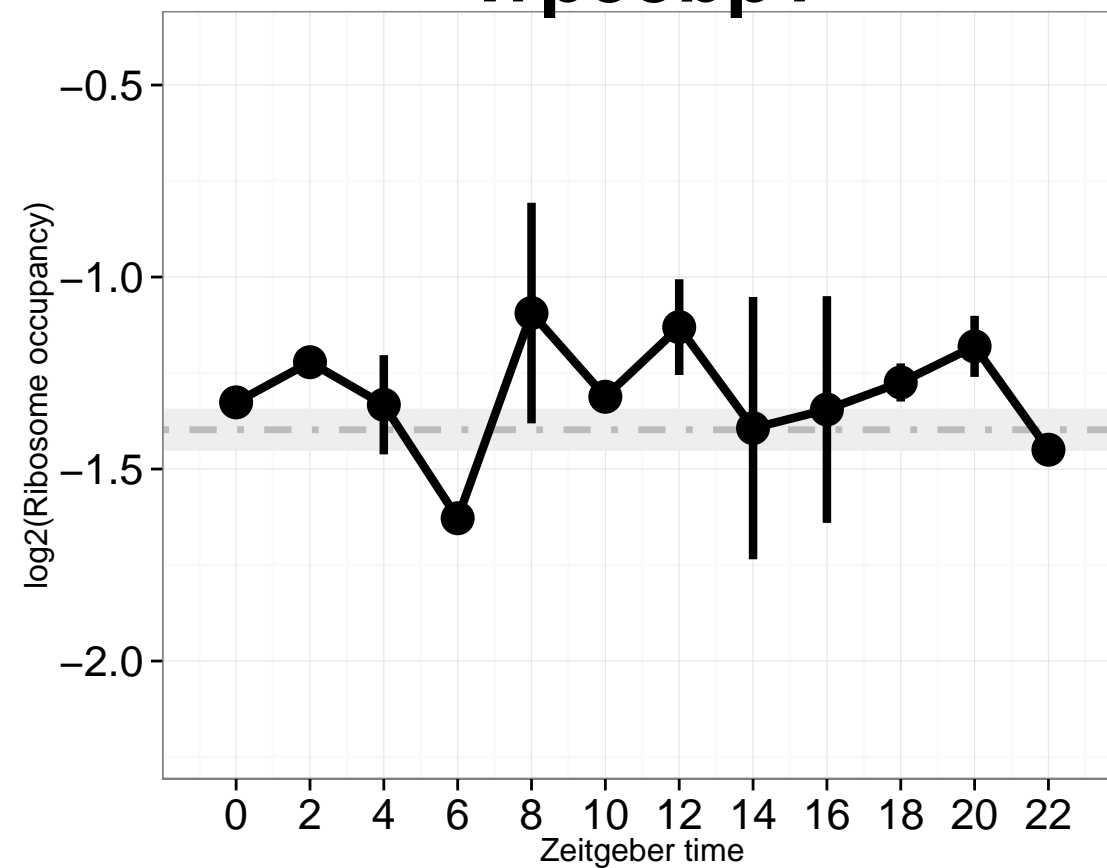

Supplement: SuppDataset_1.zip [file Trp53bp1_set_A.pdf › Supplemental Dataset 1/A-mRNA_nonrhyth_translation_nonrhyth/Trp53bp1_set_A.pdf]

# Trp53bp2

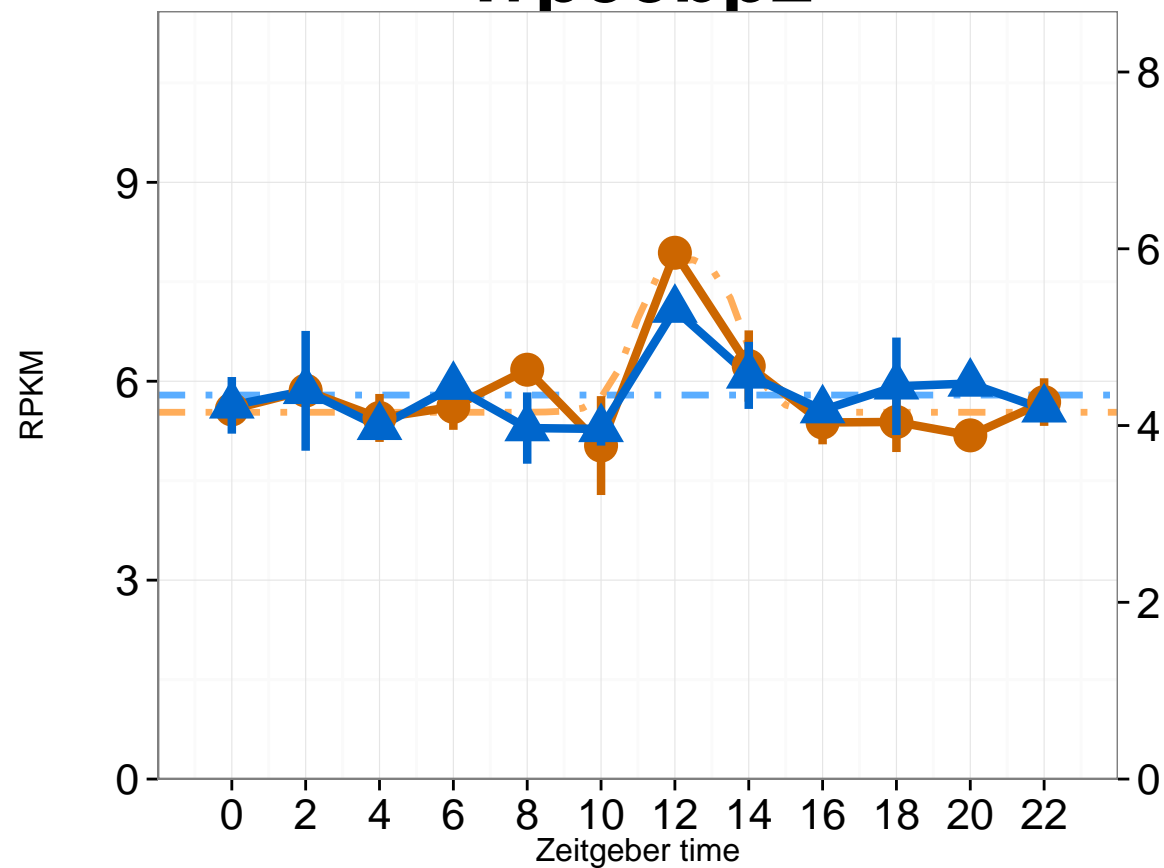

# Trp53bp2

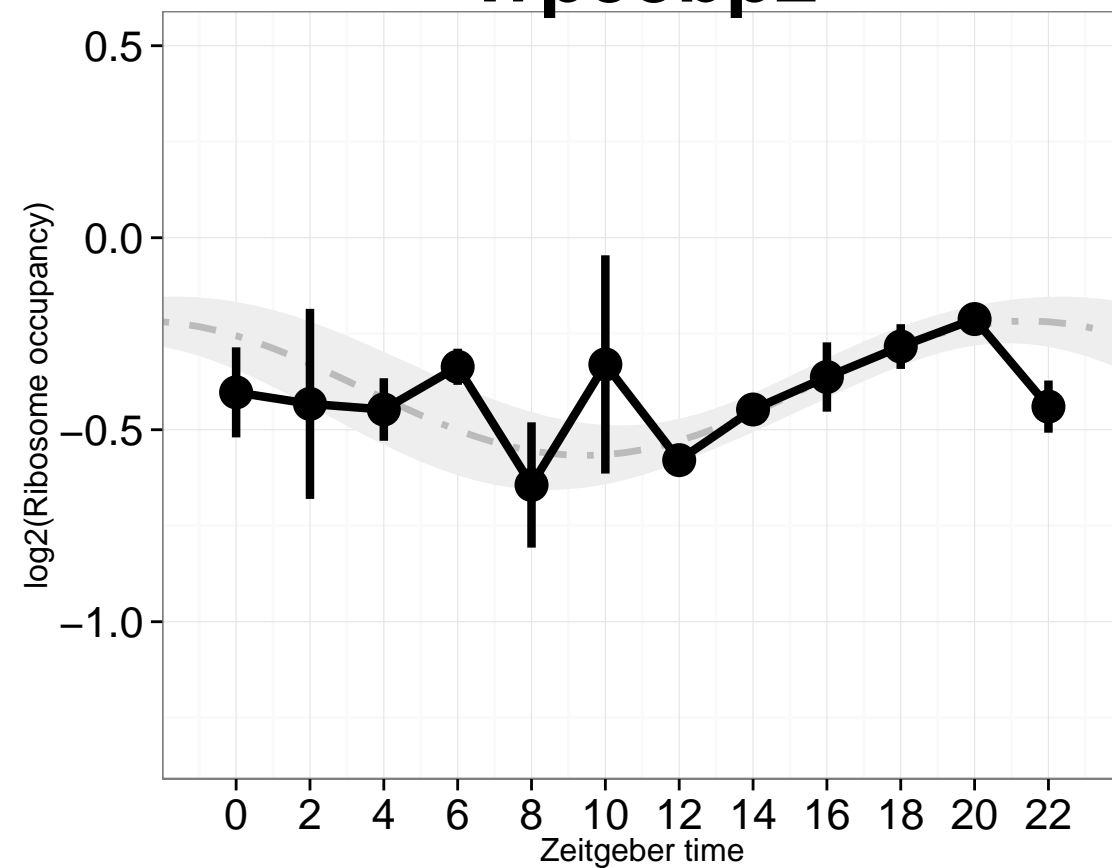

Supplement: SuppDataset_1.zip [file Trp53bp2_set_A.pdf › Supplemental Dataset 1/A-mRNA_nonrhyth_translation_nonrhyth/Trp53bp2_set_A.pdf]

# Trp53i13

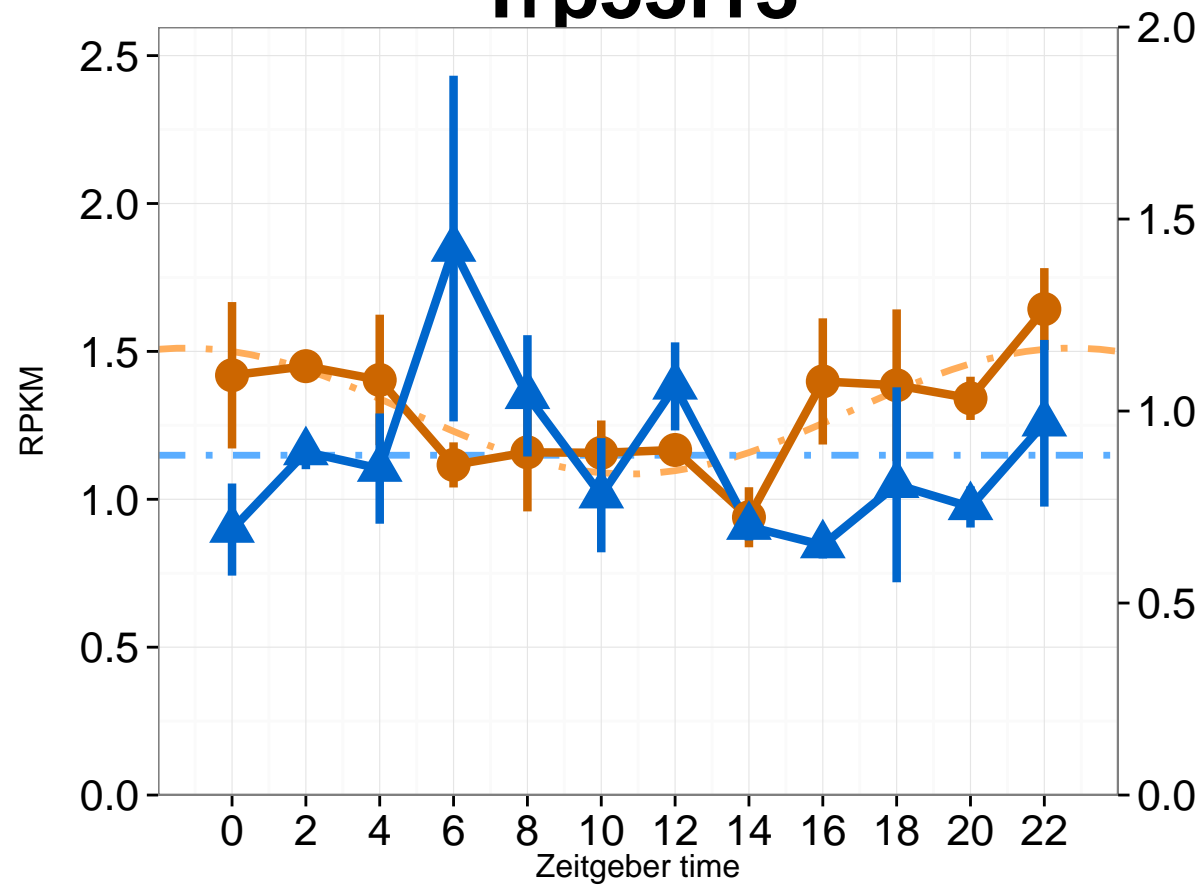

# Trp53i13

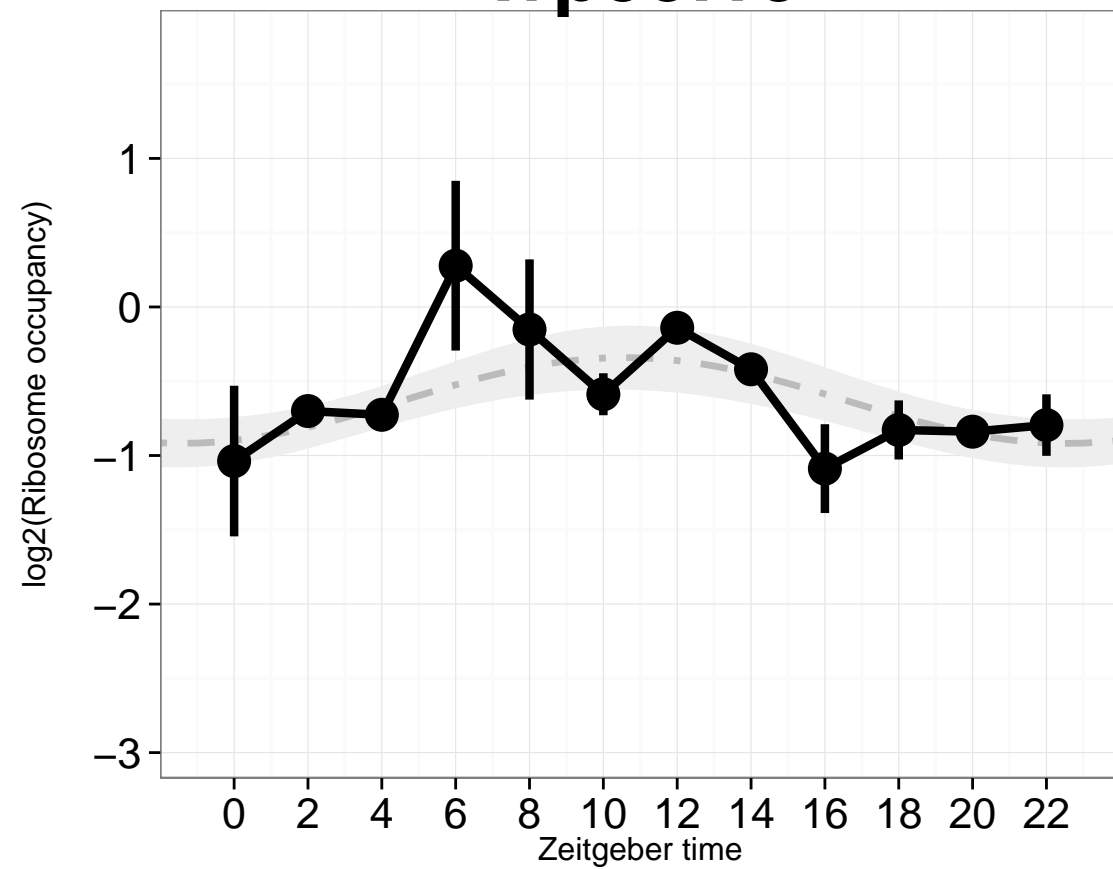

Supplement: SuppDataset_1.zip [file Trp53i13_set_A.pdf › Supplemental Dataset 1/A-mRNA_nonrhyth_translation_nonrhyth/Trp53i13_set_A.pdf]

# Trp53inp1

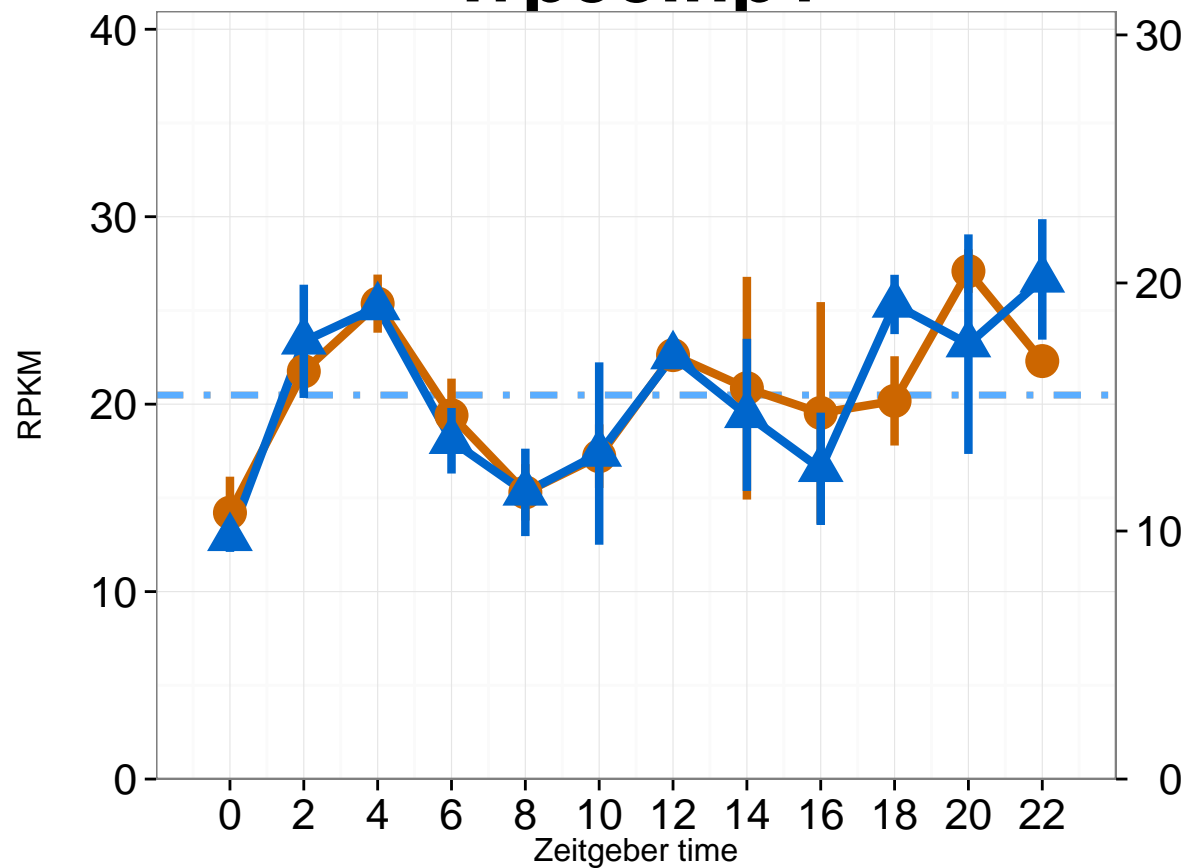

# Trp53inp1

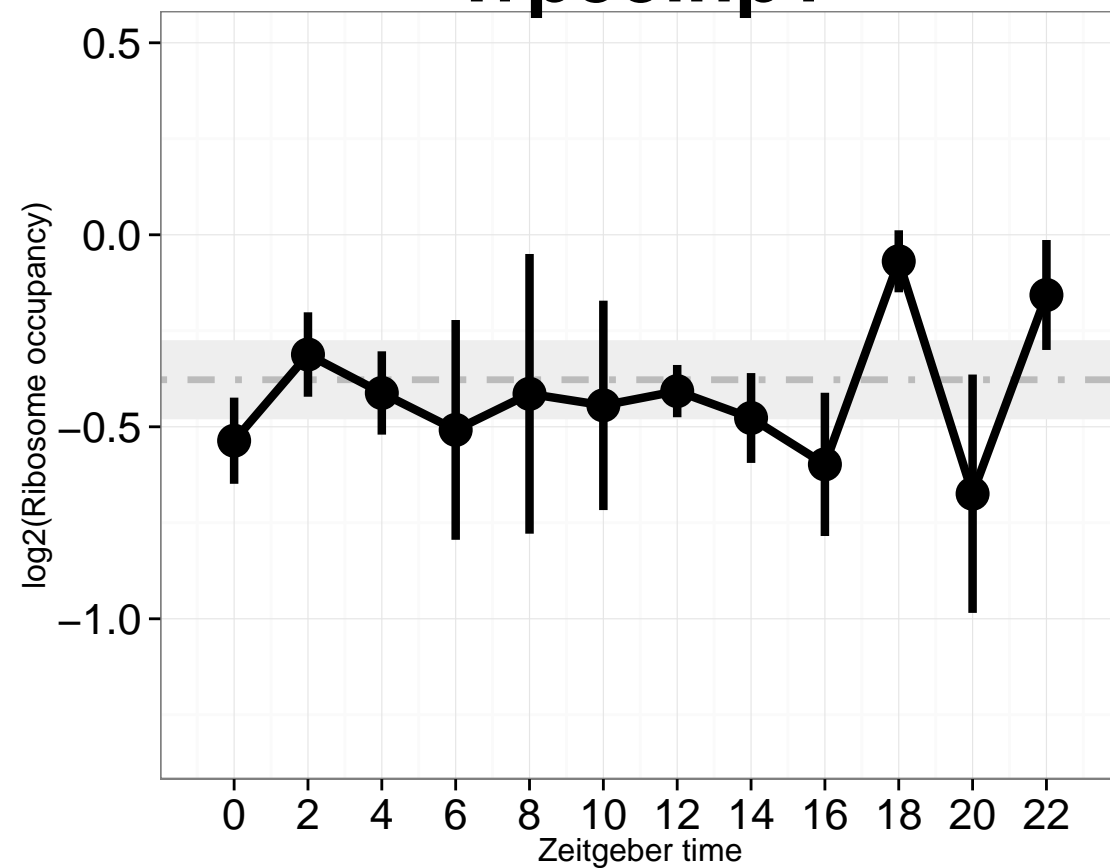

Supplement: SuppDataset_1.zip [file Trp53inp1_set_A.pdf › Supplemental Dataset 1/A-mRNA_nonrhyth_translation_nonrhyth/Trp53inp1_set_A.pdf]

# Trp53rk

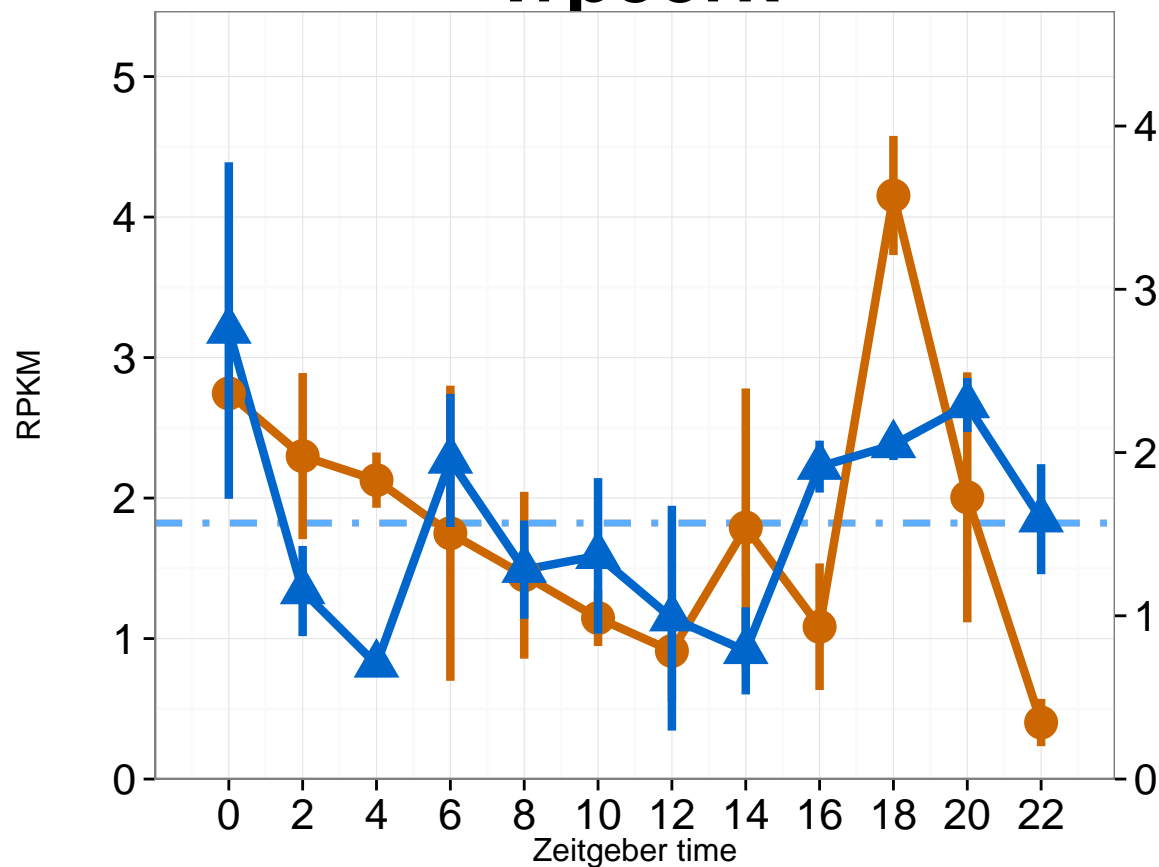

# Trp53rk

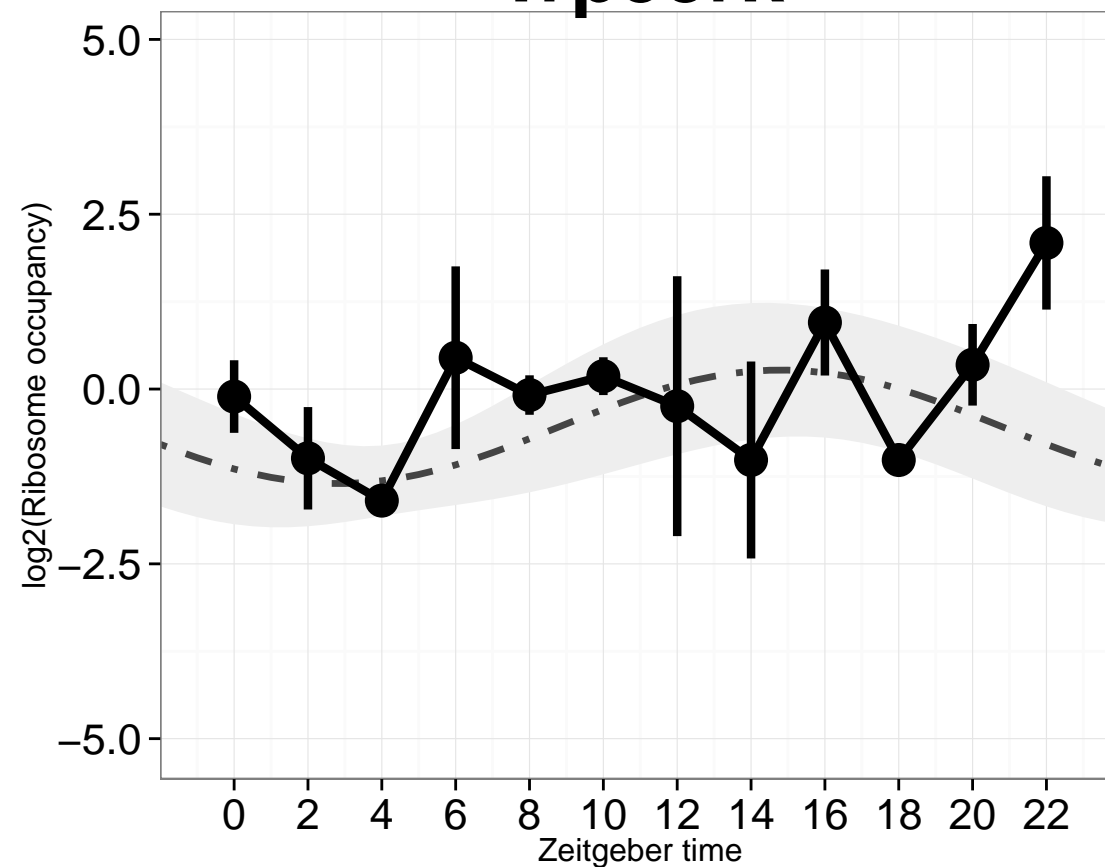

Supplement: SuppDataset_1.zip [file Trp53rk_set_A.pdf › Supplemental Dataset 1/A-mRNA_nonrhyth_translation_nonrhyth/Trp53rk_set_A.pdf]

## Trpc3

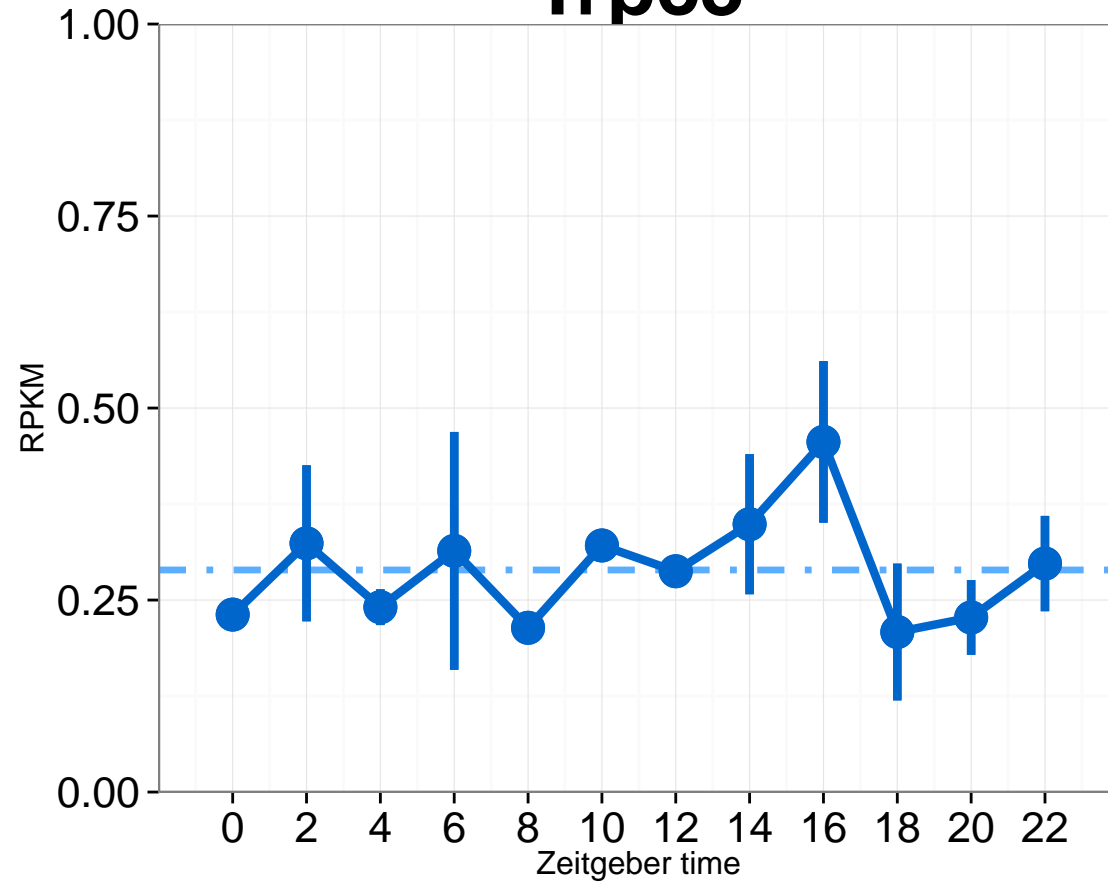

## Trpc3 log2(Ribosome occupancy)

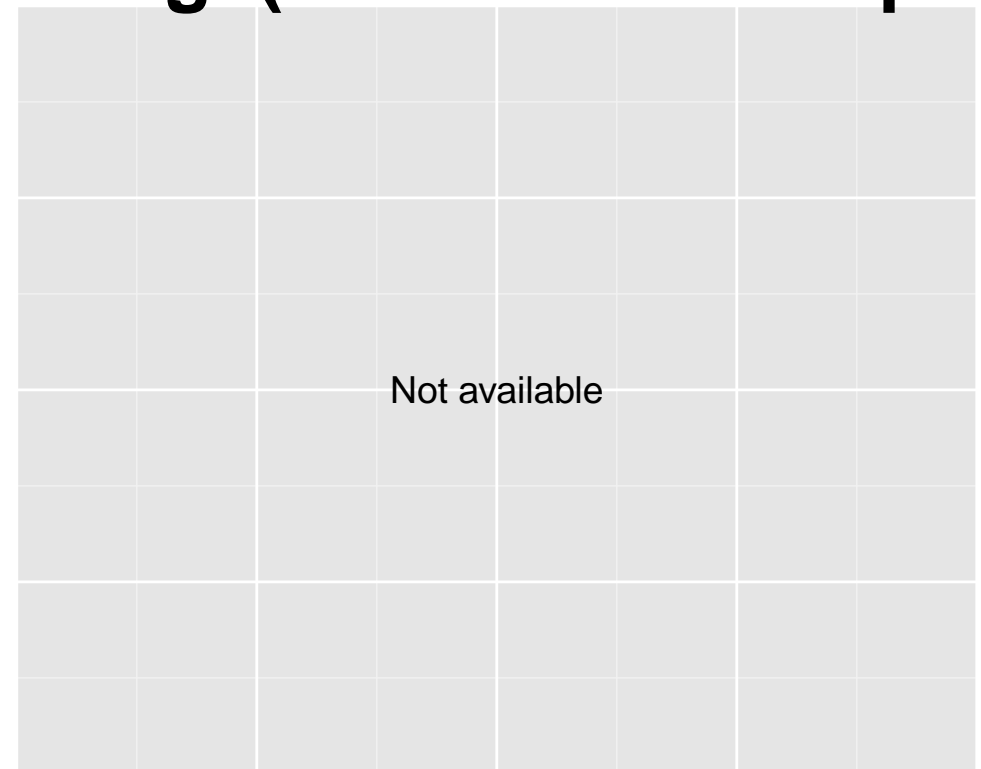

Supplement: SuppDataset_1.zip [file Trpc3_set_A.pdf › Supplemental Dataset 1/A-mRNA_nonrhyth_translation_nonrhyth/Trpc3_set_A.pdf]

# Trpc4ap

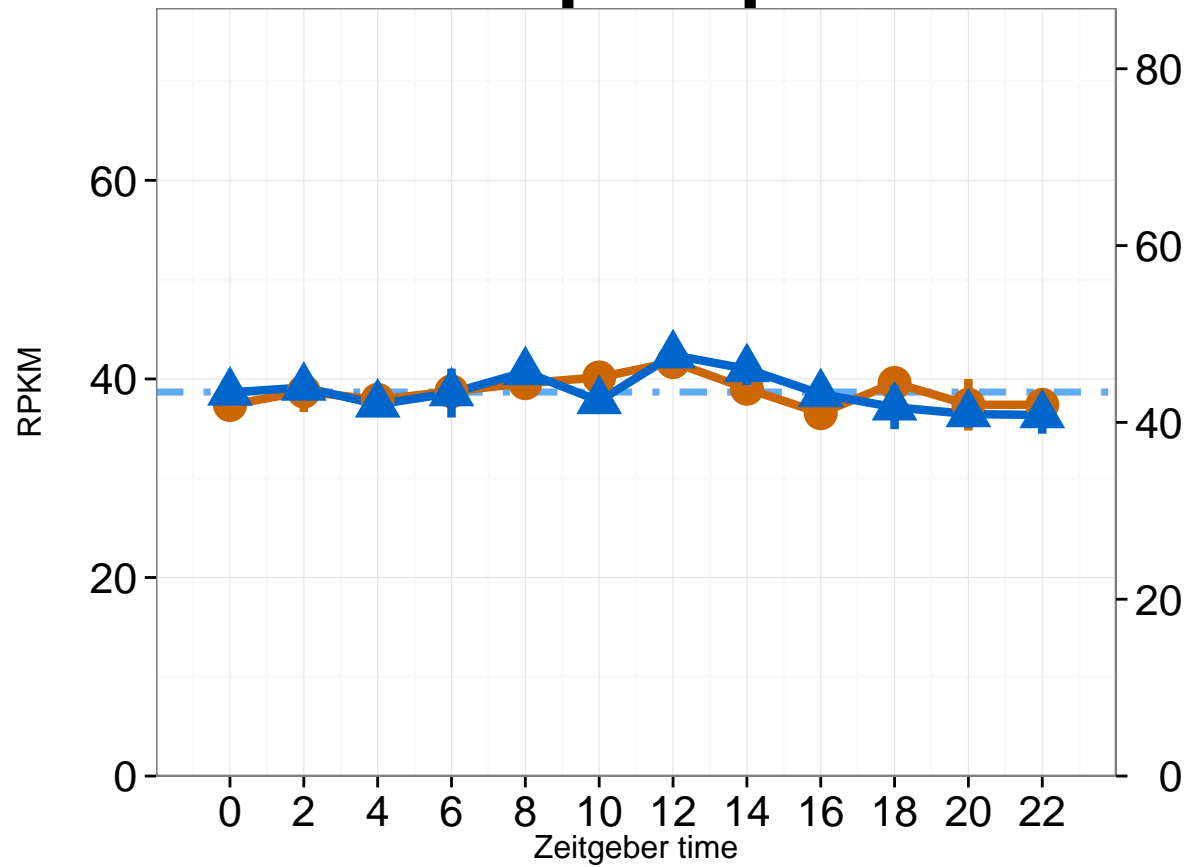

# Trpc4ap

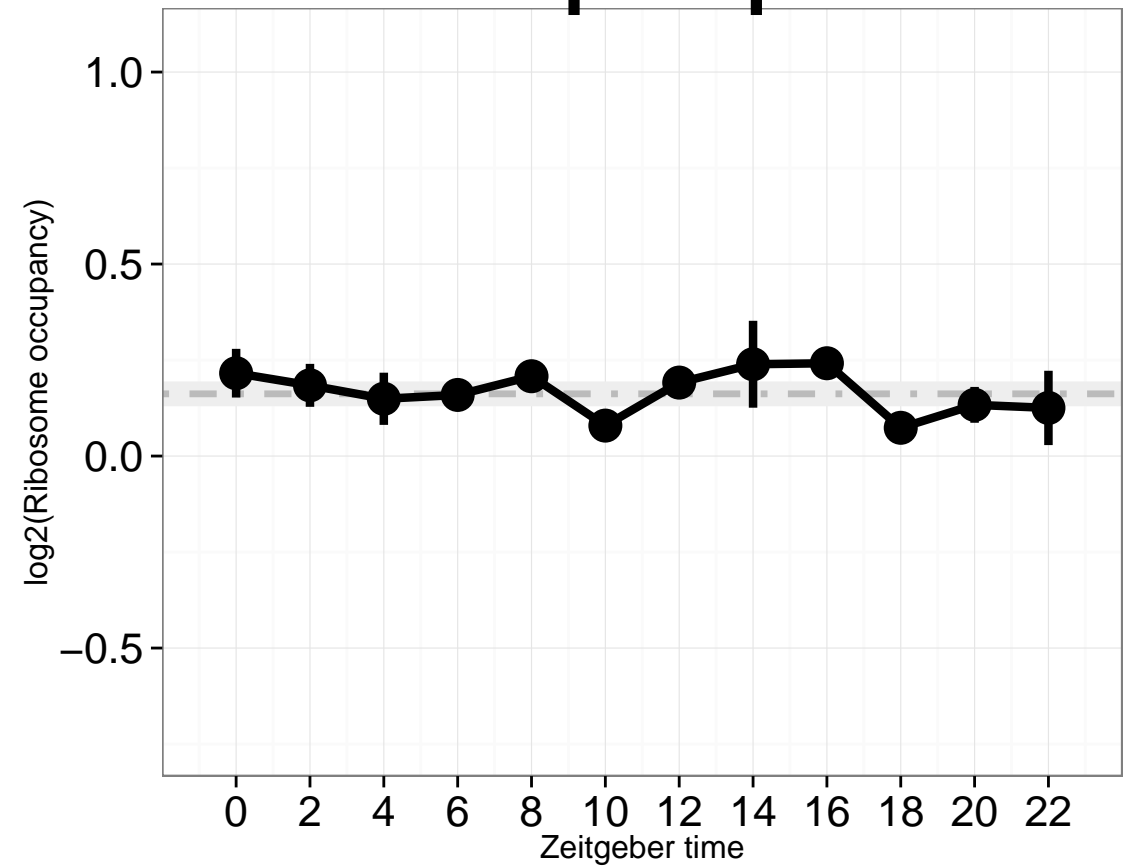

Supplement: SuppDataset_1.zip [file Trpc4ap_set_A.pdf › Supplemental Dataset 1/A-mRNA_nonrhyth_translation_nonrhyth/Trpc4ap_set_A.pdf]

# Trpm2

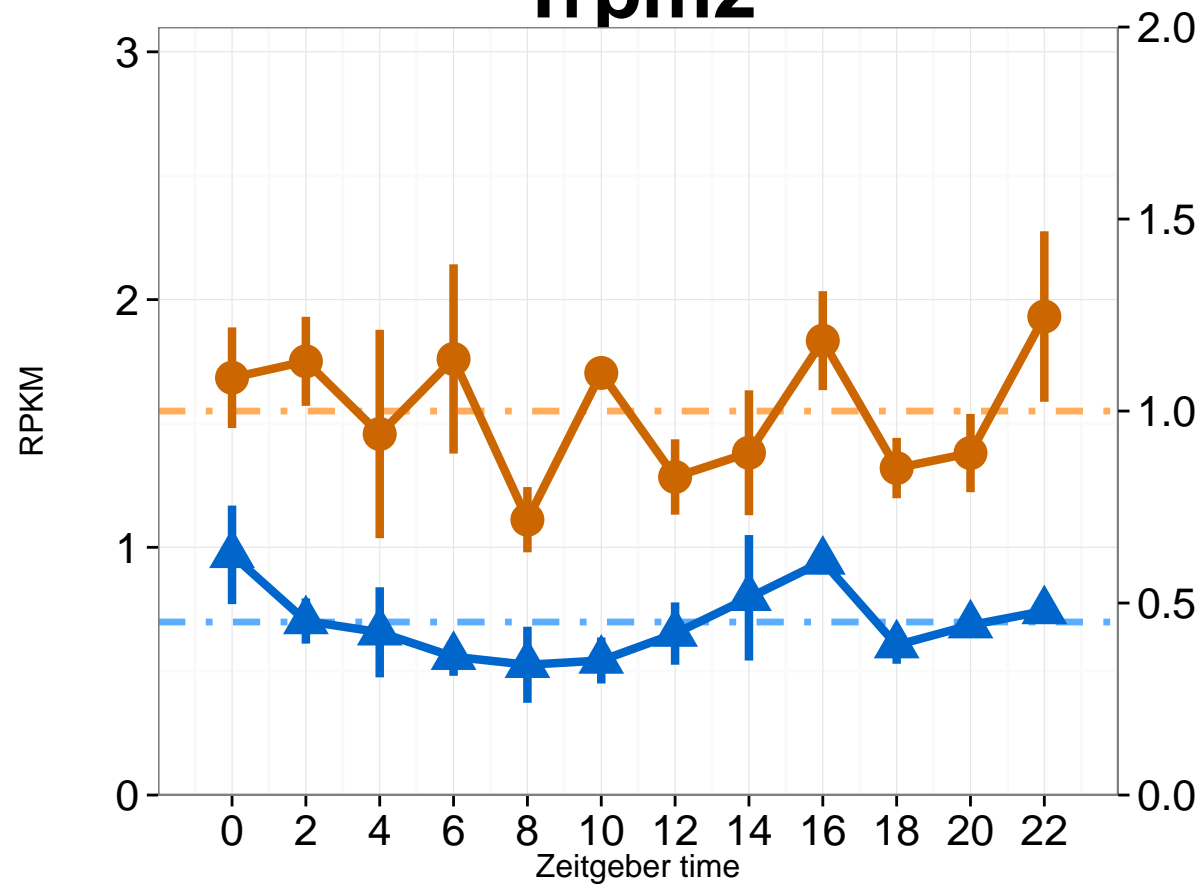

# Trpm2

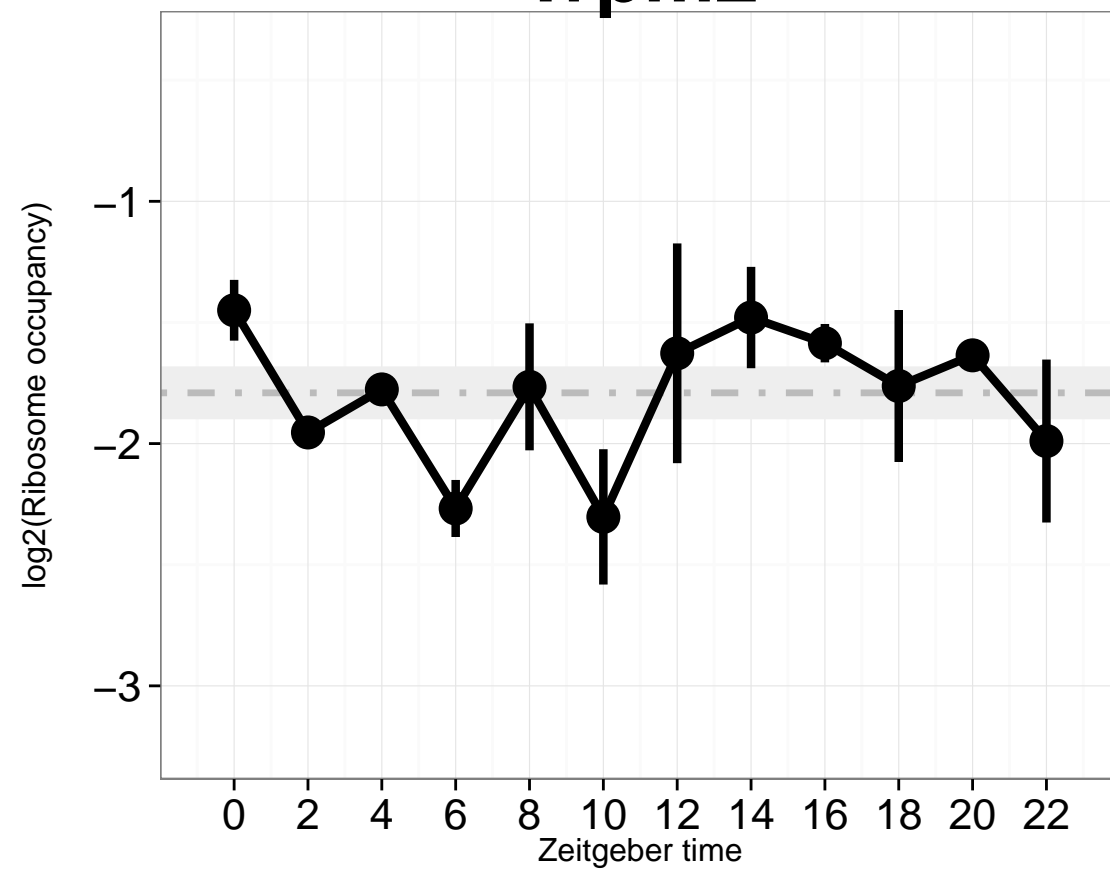

Supplement: SuppDataset_1.zip [file Trpm2_set_A.pdf › Supplemental Dataset 1/A-mRNA_nonrhyth_translation_nonrhyth/Trpm2_set_A.pdf]

# Trpm4

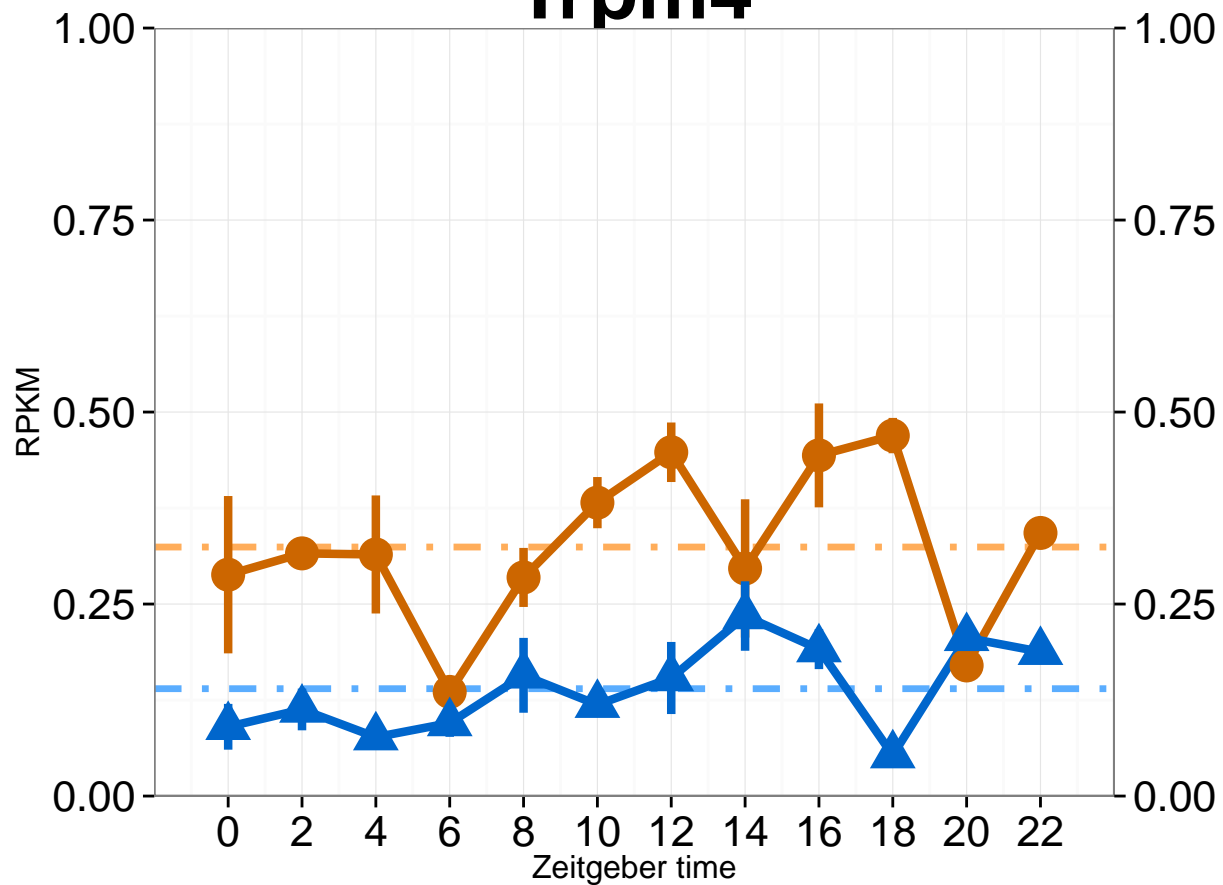

# Trpm4

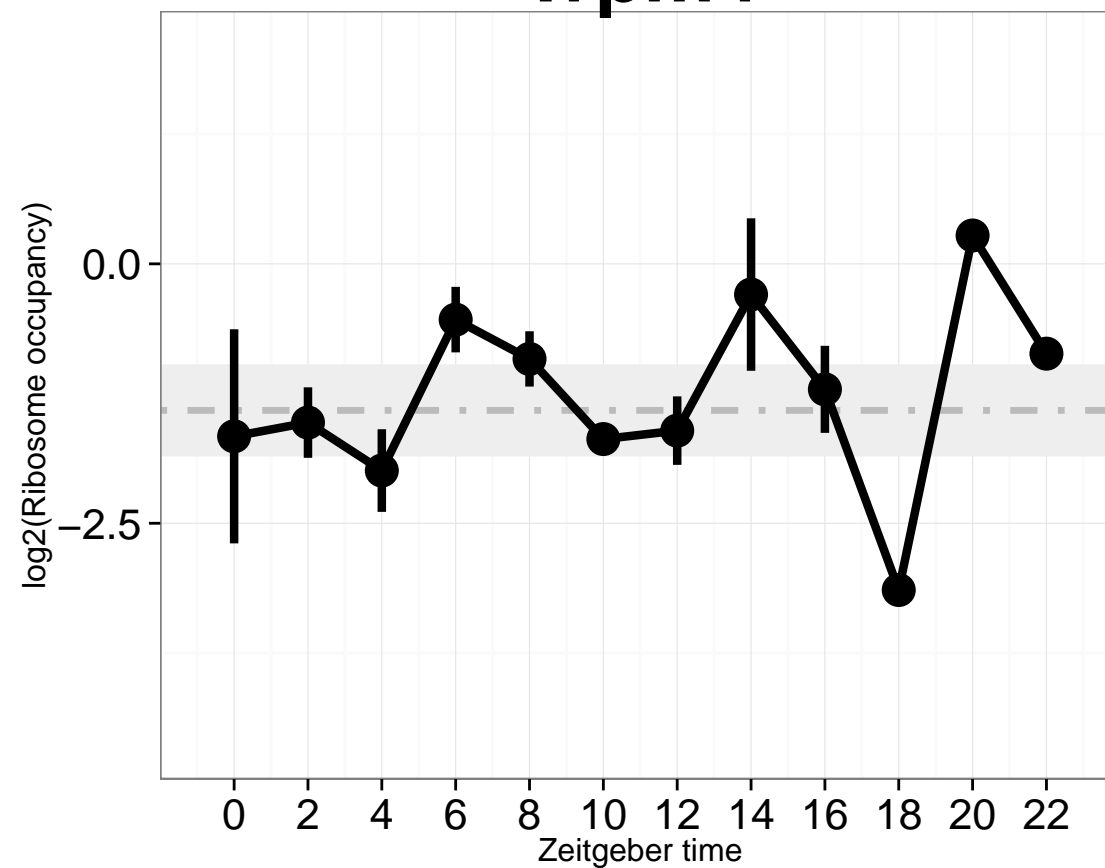

Supplement: SuppDataset_1.zip [file Trpm4_set_A.pdf › Supplemental Dataset 1/A-mRNA_nonrhyth_translation_nonrhyth/Trpm4_set_A.pdf]

# Trpt1

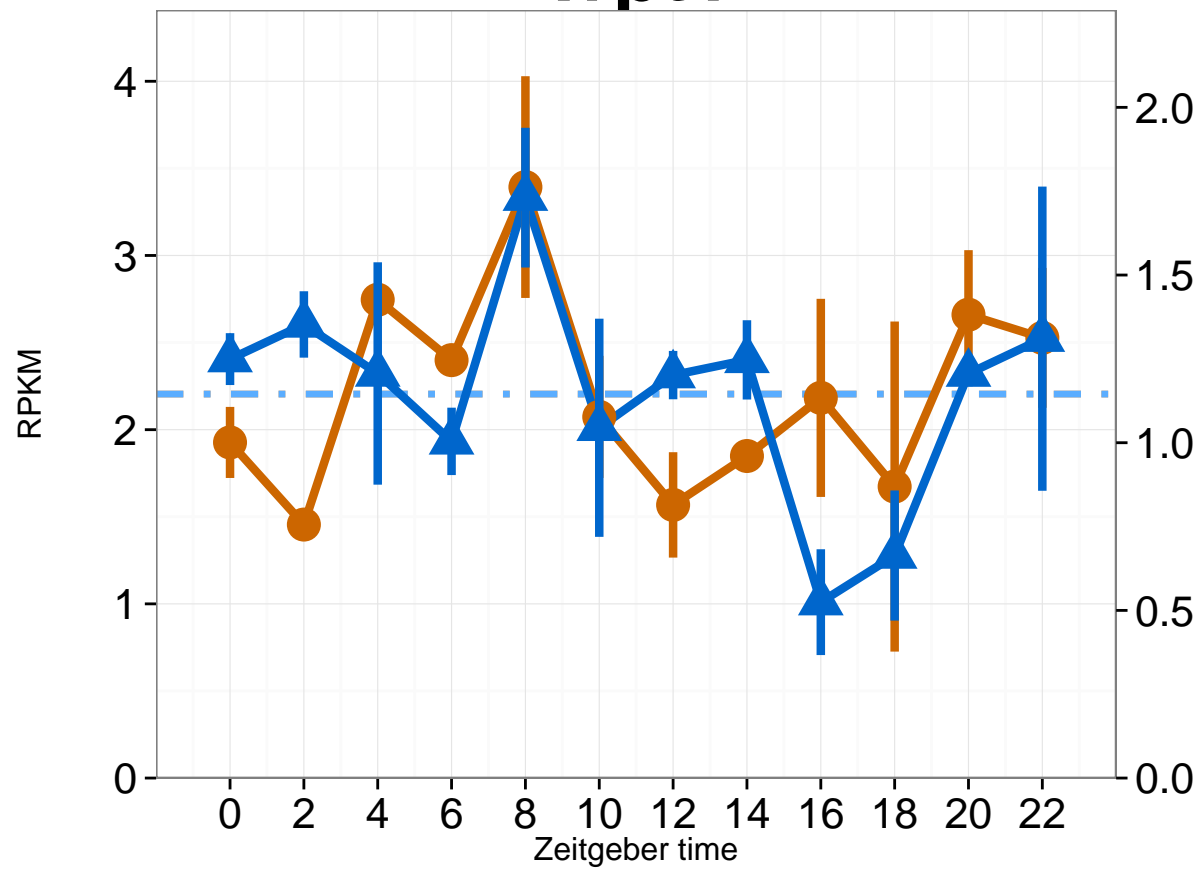

# Trpt1

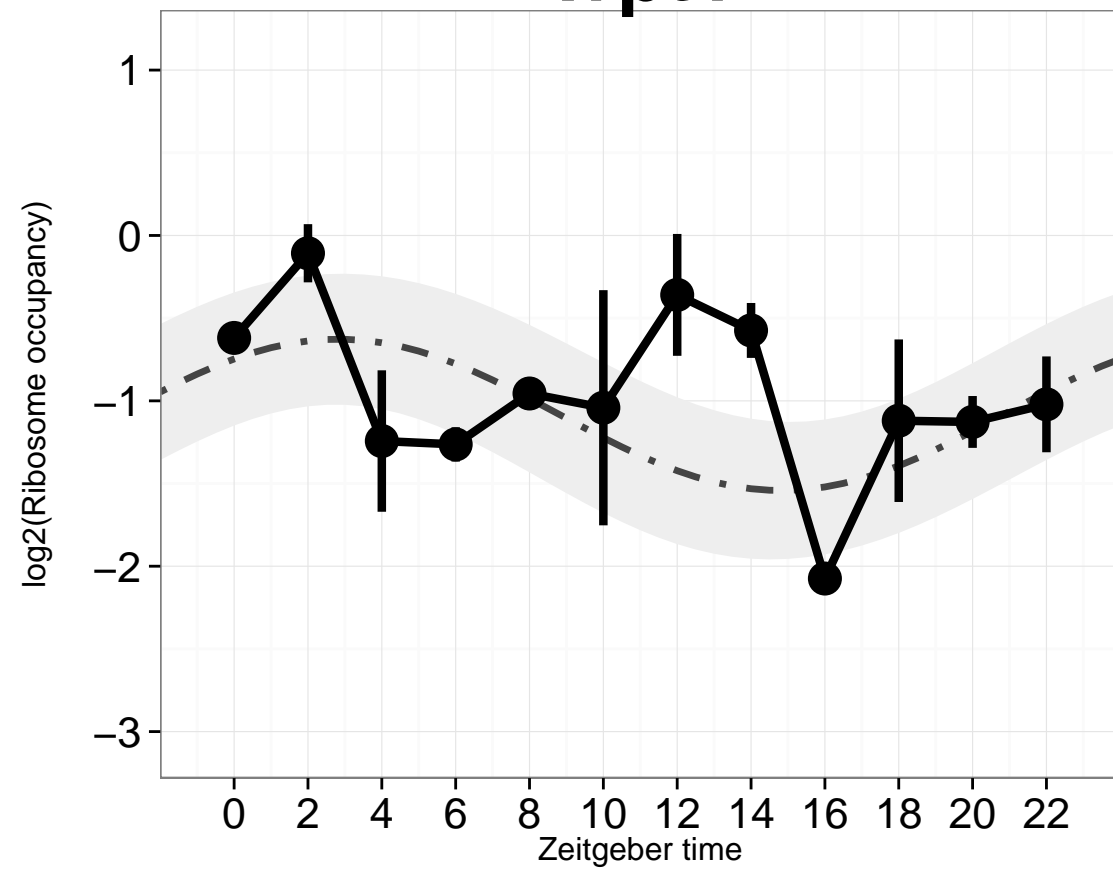

Supplement: SuppDataset_1.zip [file Trpt1_set_A.pdf › Supplemental Dataset 1/A-mRNA_nonrhyth_translation_nonrhyth/Trpt1_set_A.pdf]

# Trpv2

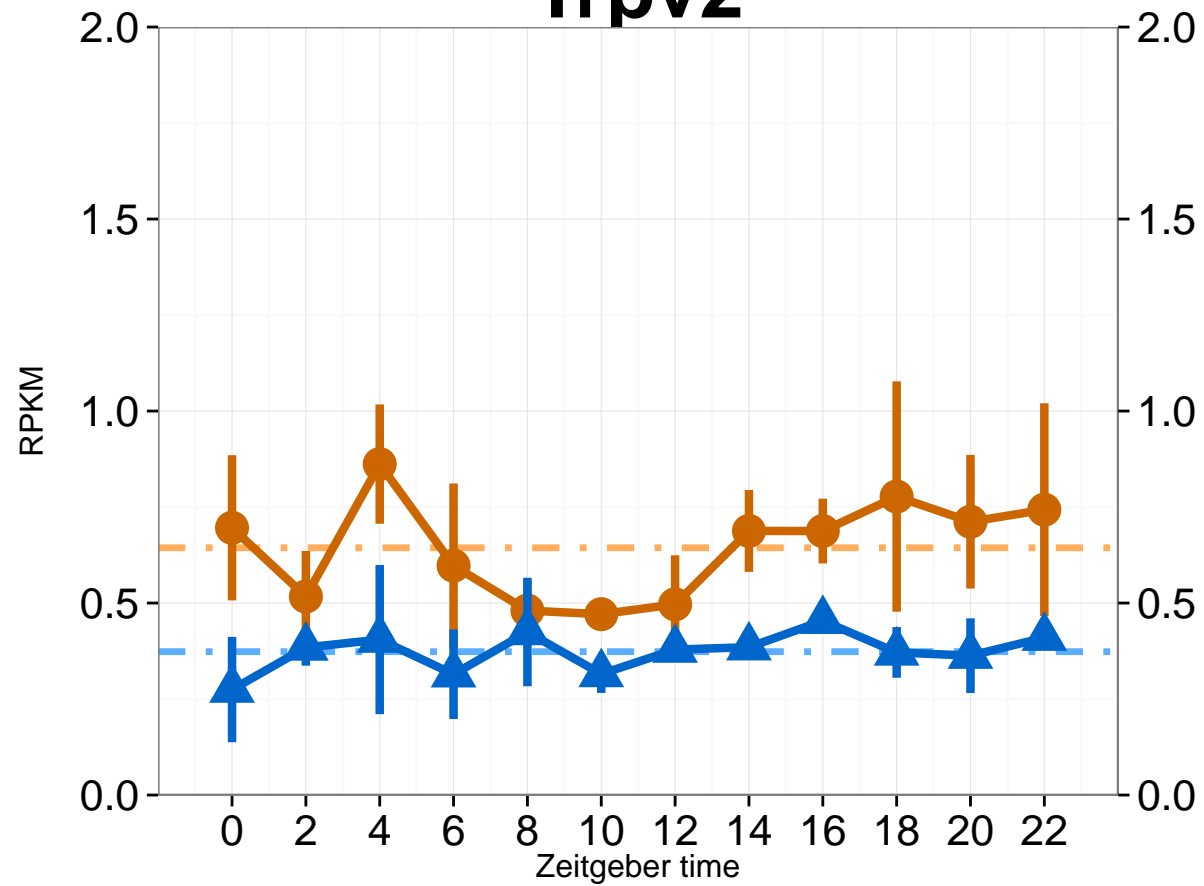

# Trpv2

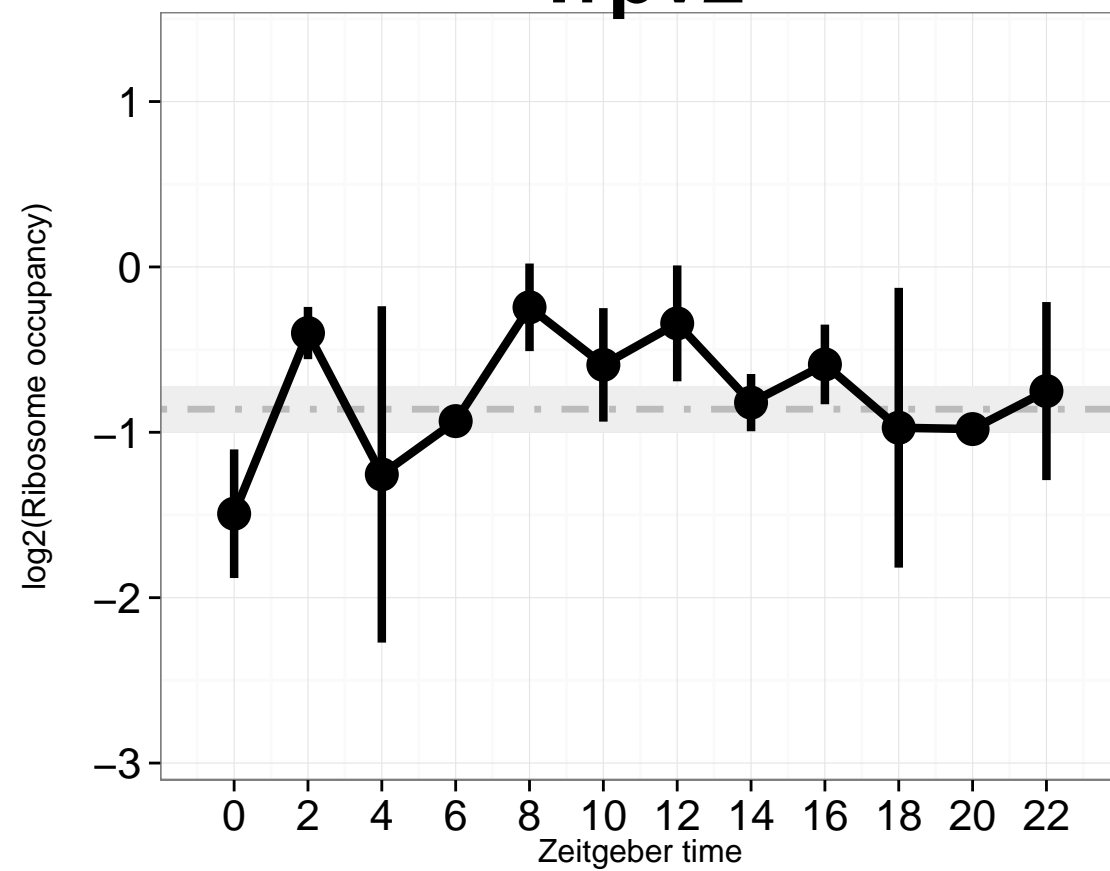

Supplement: SuppDataset_1.zip [file Trpv2_set_A.pdf › Supplemental Dataset 1/A-mRNA_nonrhyth_translation_nonrhyth/Trpv2_set_A.pdf]

# Trrap

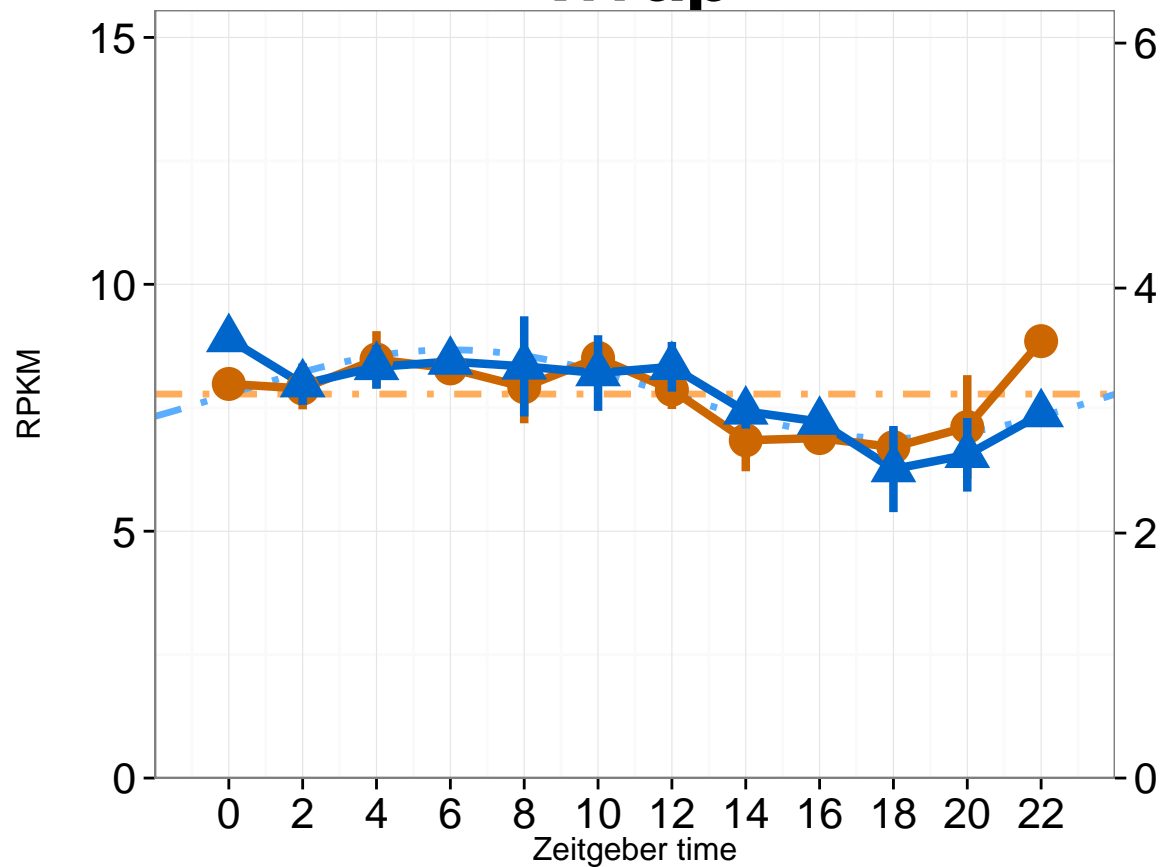

# Trrap

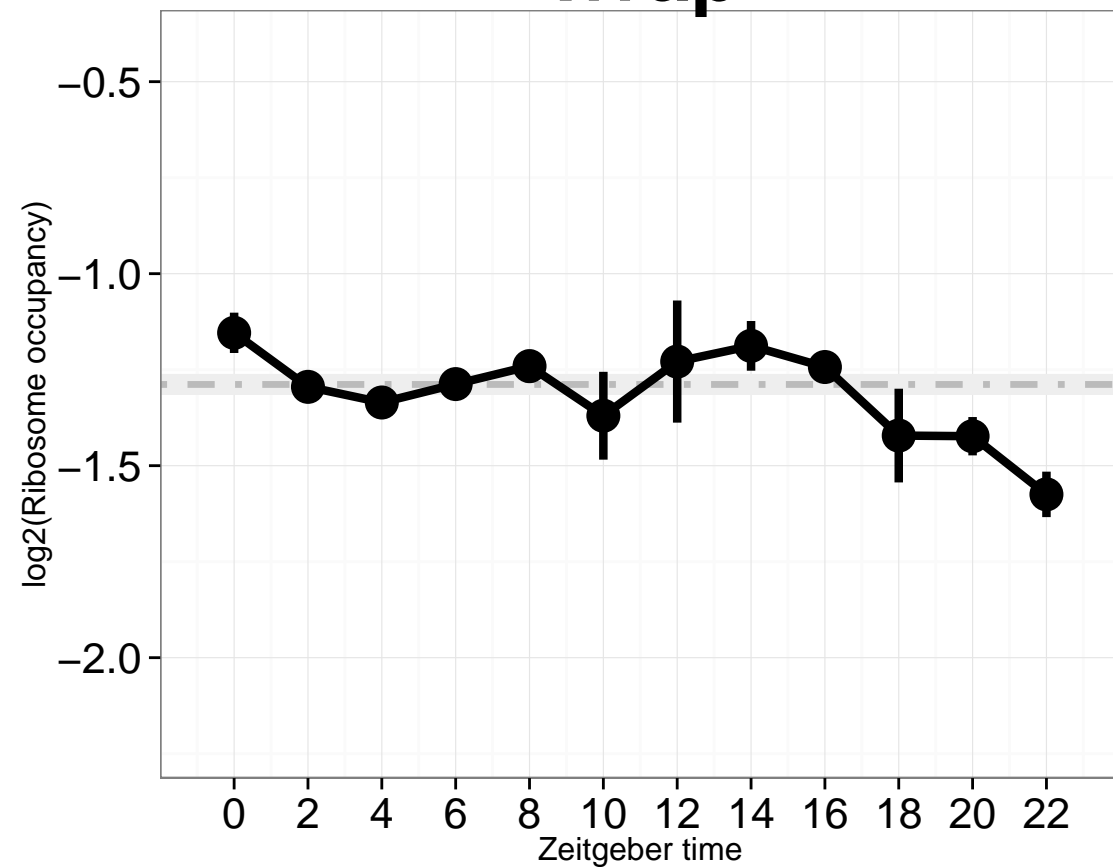

Supplement: SuppDataset_1.zip [file Trrap_set_A.pdf › Supplemental Dataset 1/A-mRNA_nonrhyth_translation_nonrhyth/Trrap_set_A.pdf]

# Trub1

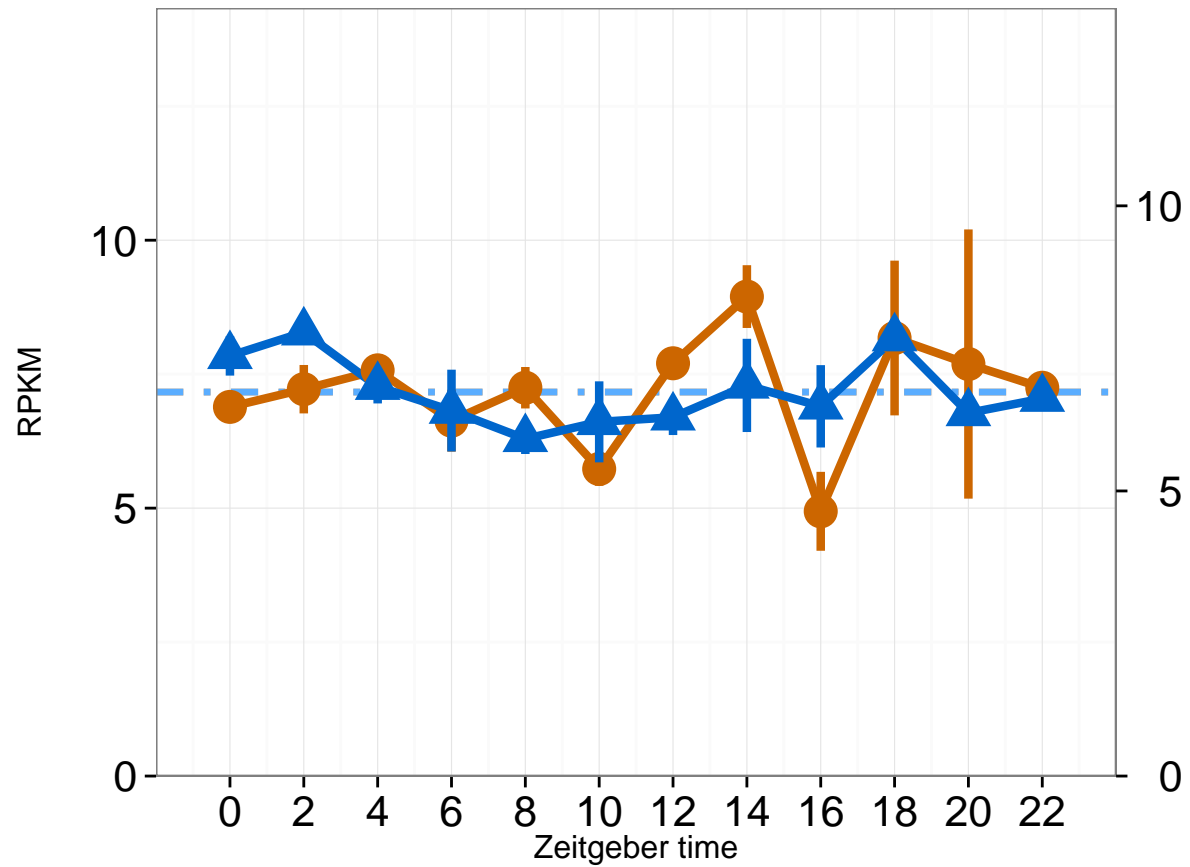

# Trub1

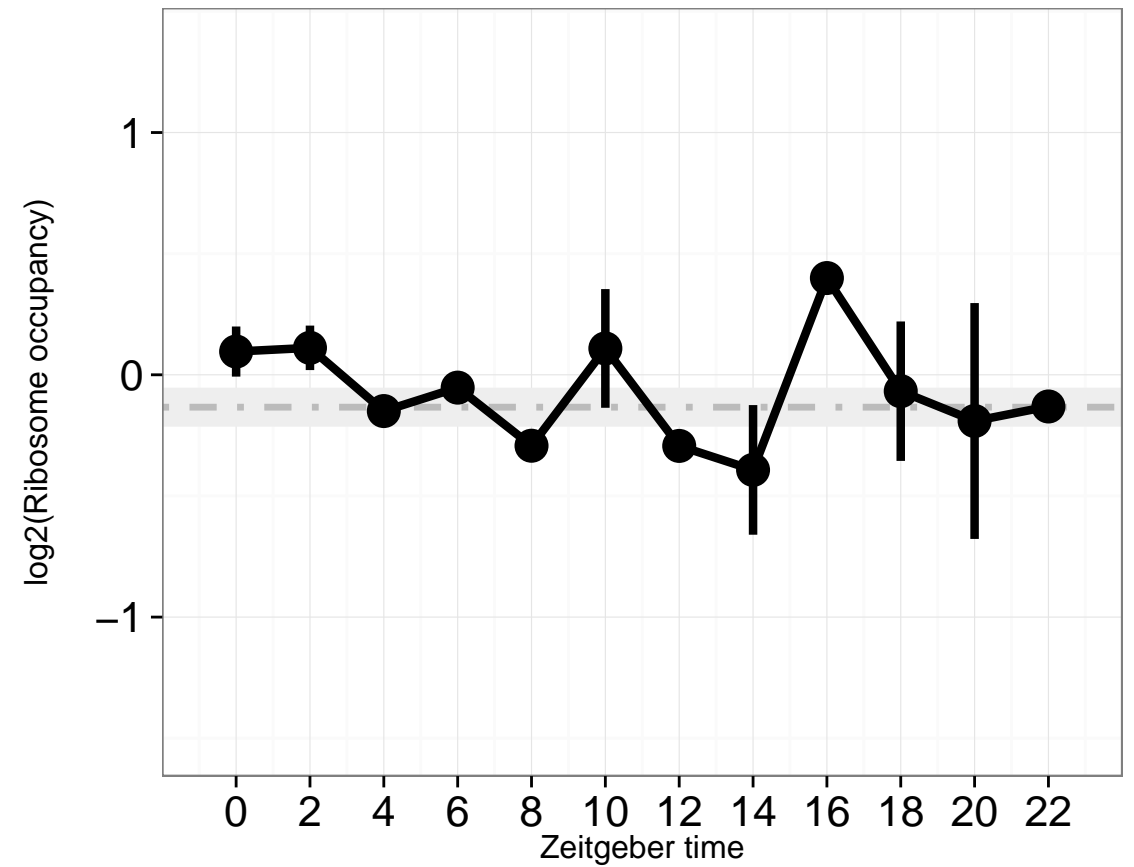

Supplement: SuppDataset_1.zip [file Trub1_set_A.pdf › Supplemental Dataset 1/A-mRNA_nonrhyth_translation_nonrhyth/Trub1_set_A.pdf]

# Trub2

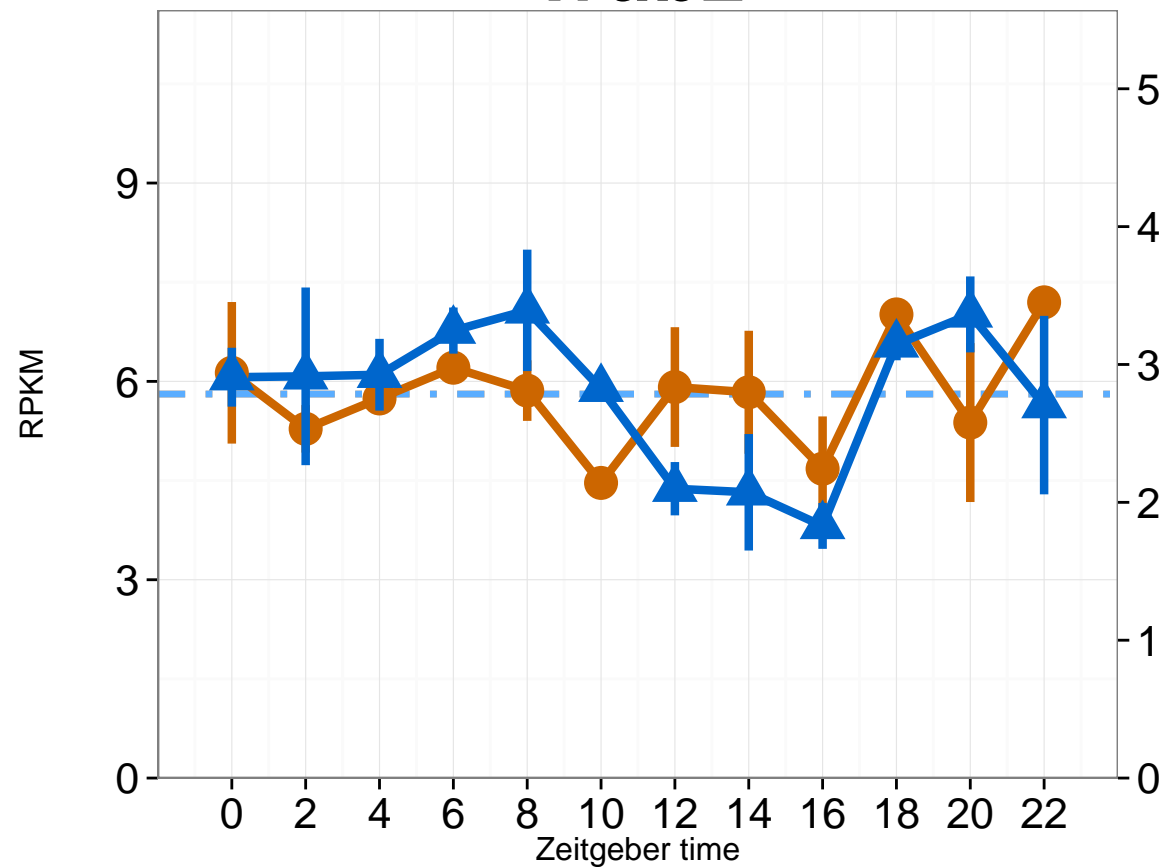

# Trub2

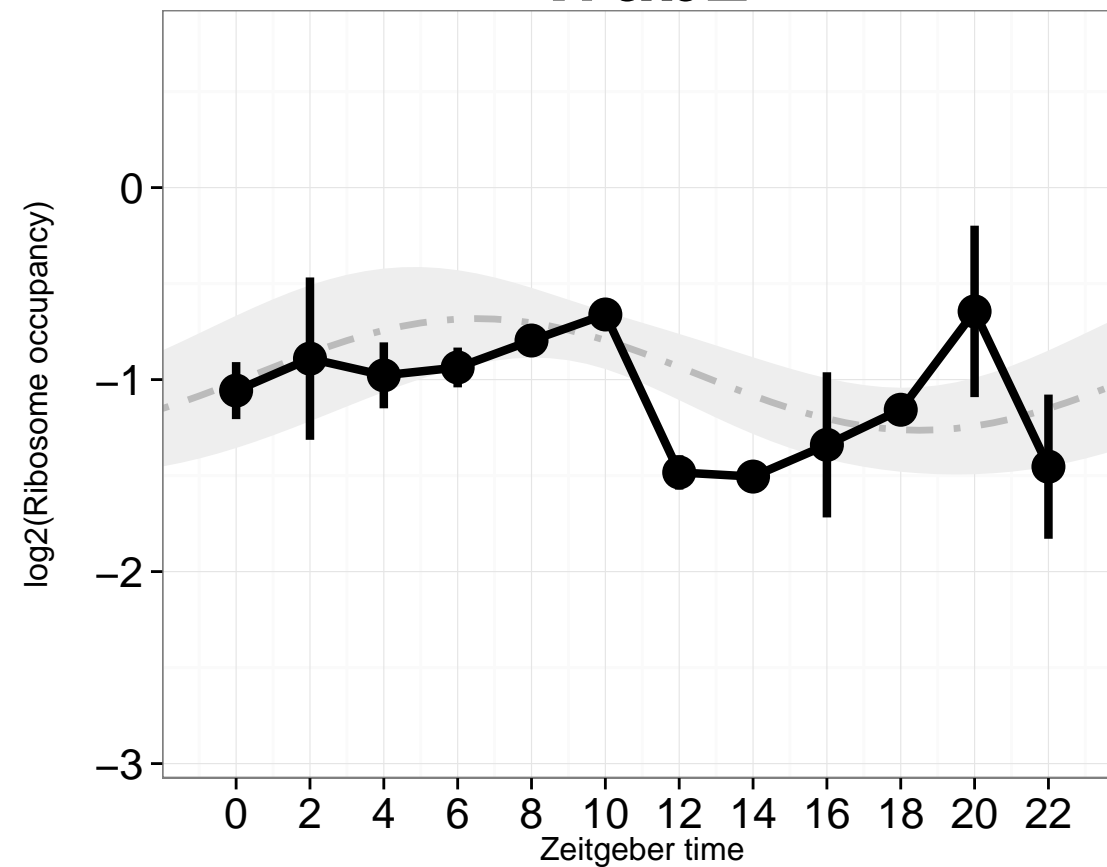

Supplement: SuppDataset_1.zip [file Trub2_set_A.pdf › Supplemental Dataset 1/A-mRNA_nonrhyth_translation_nonrhyth/Trub2_set_A.pdf]

## Tsc1

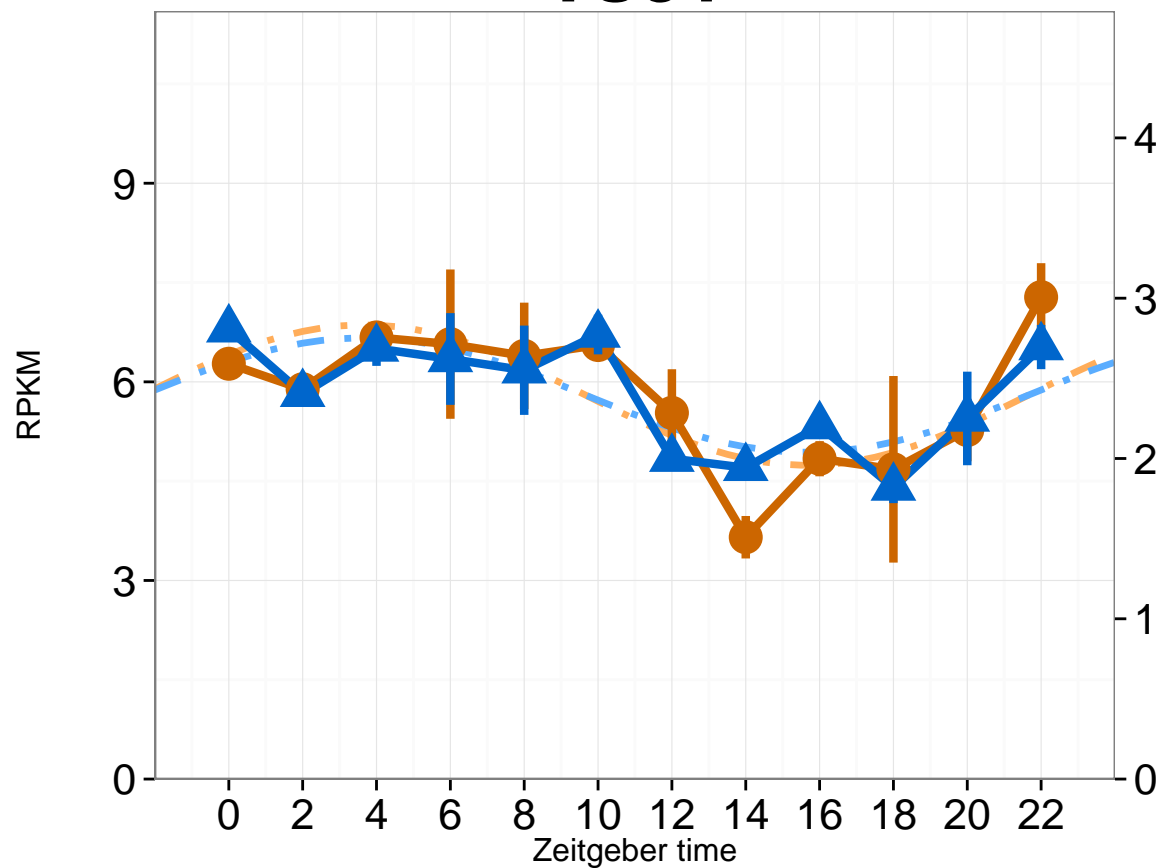

## Tsc1

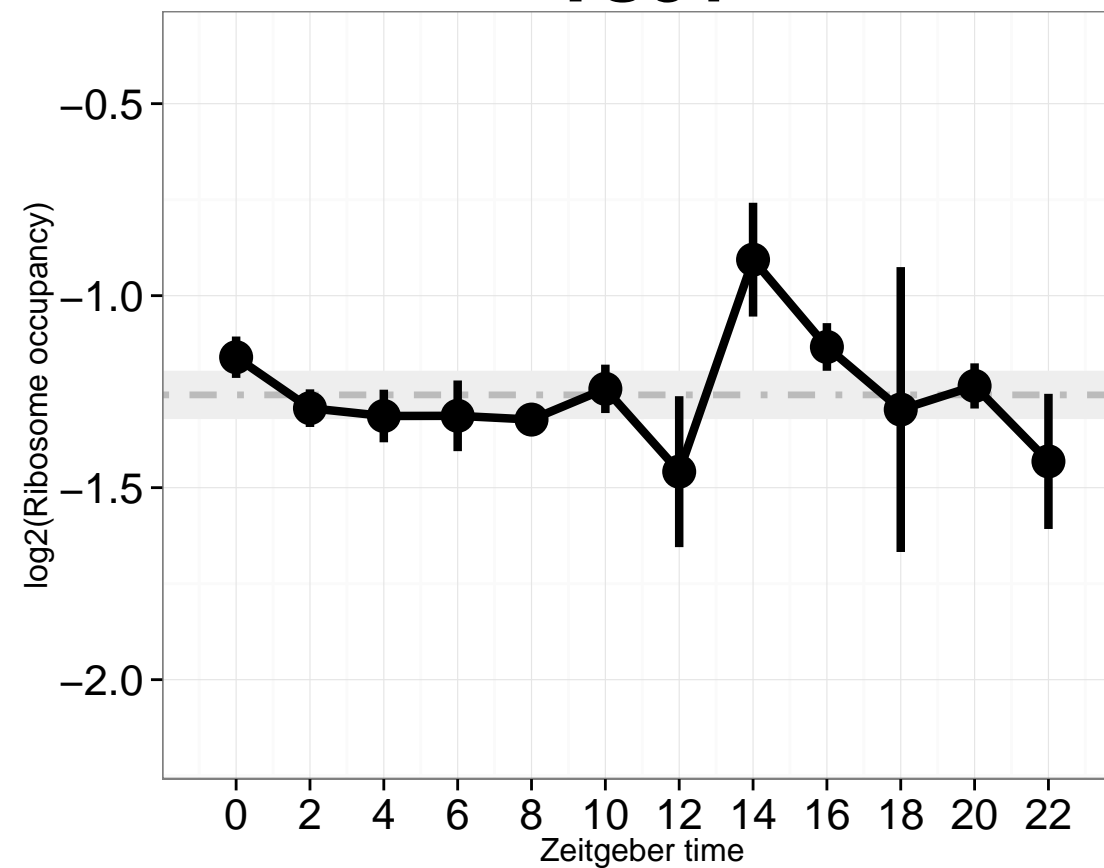

Supplement: SuppDataset_1.zip [file Tsc1_set_A.pdf › Supplemental Dataset 1/A-mRNA_nonrhyth_translation_nonrhyth/Tsc1_set_A.pdf]

# Tsc22d1

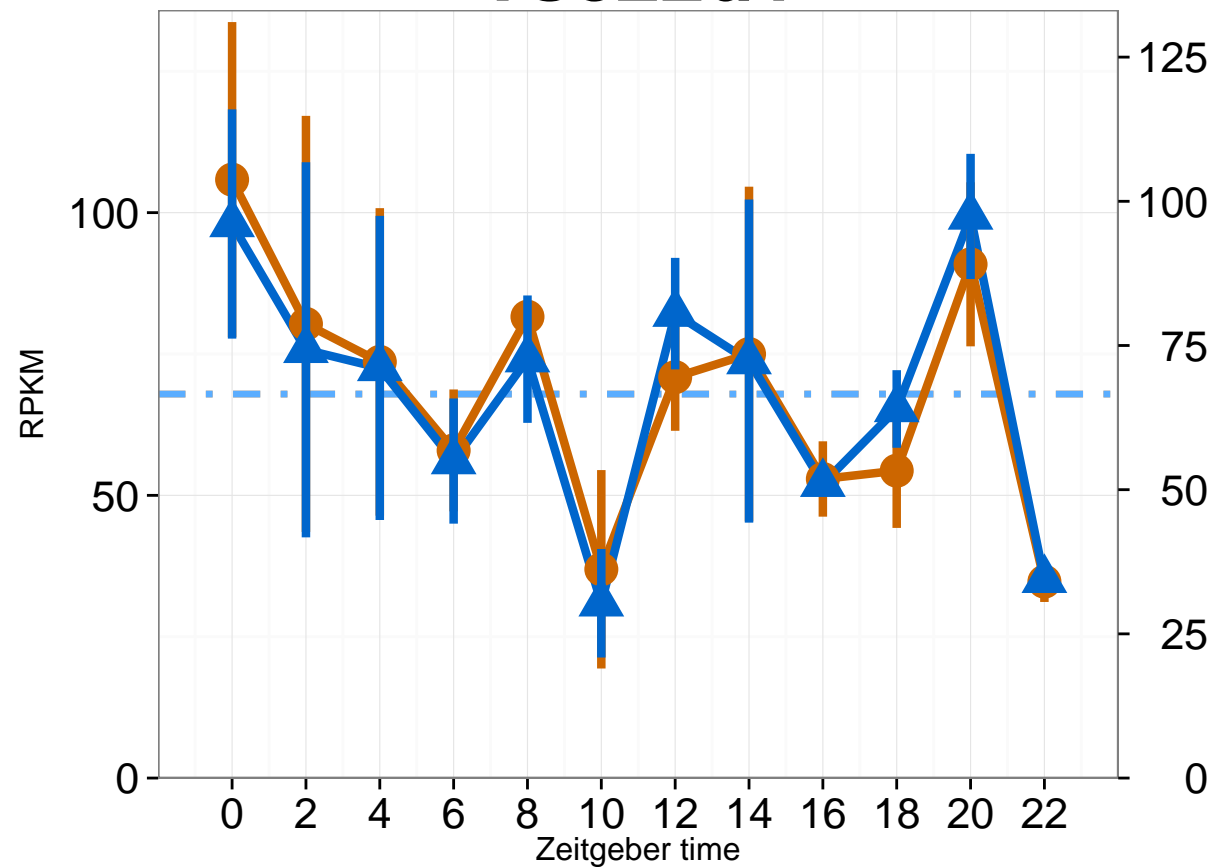

# Tsc22d1

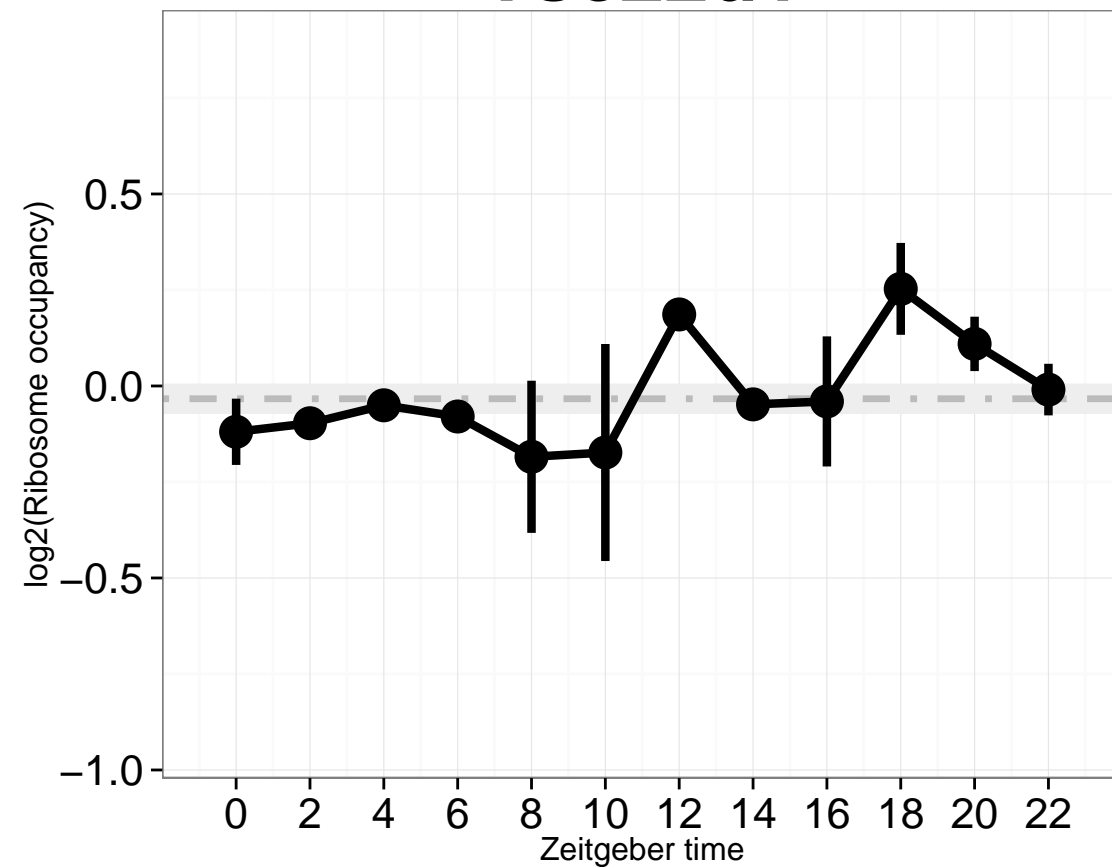

Supplement: SuppDataset_1.zip [file Tsc22d1_set_A.pdf › Supplemental Dataset 1/A-mRNA_nonrhyth_translation_nonrhyth/Tsc22d1_set_A.pdf]

# Tsc22d2

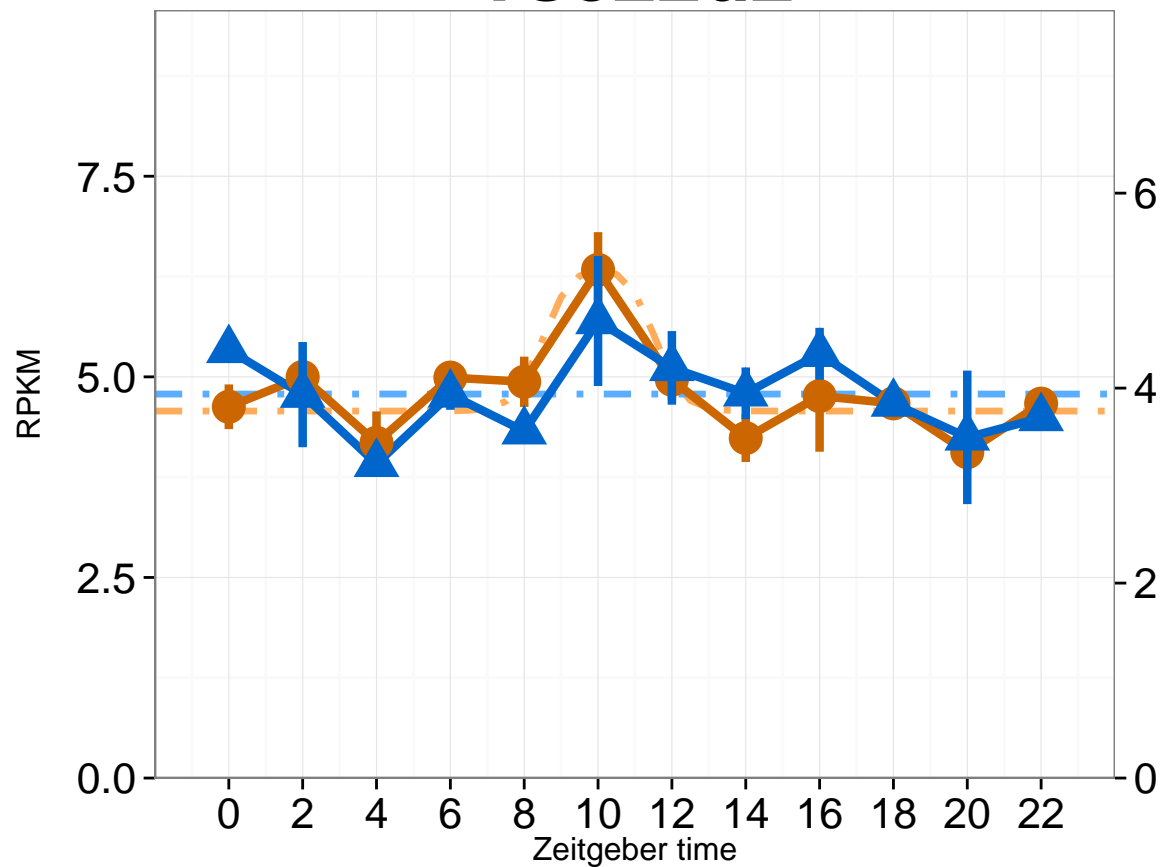

# Tsc22d2

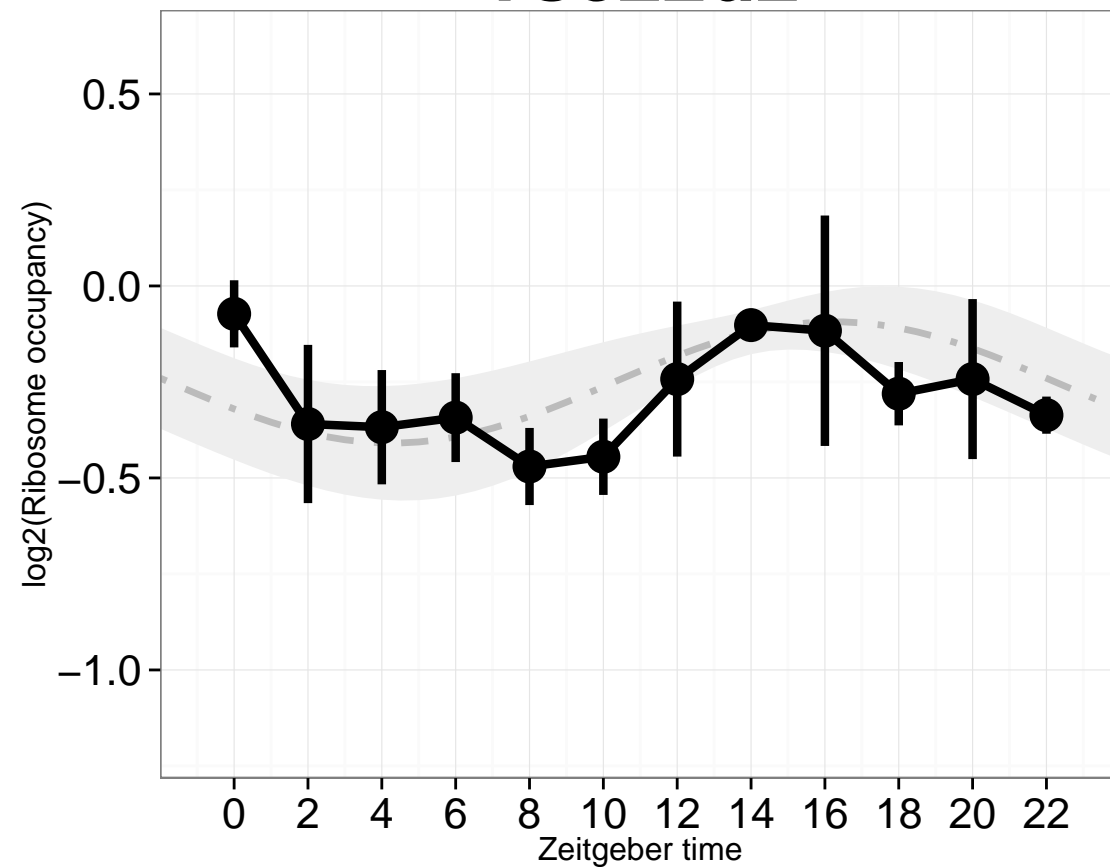

Supplement: SuppDataset_1.zip [file Tsc22d2_set_A.pdf › Supplemental Dataset 1/A-mRNA_nonrhyth_translation_nonrhyth/Tsc22d2_set_A.pdf]

# Tsc22d4

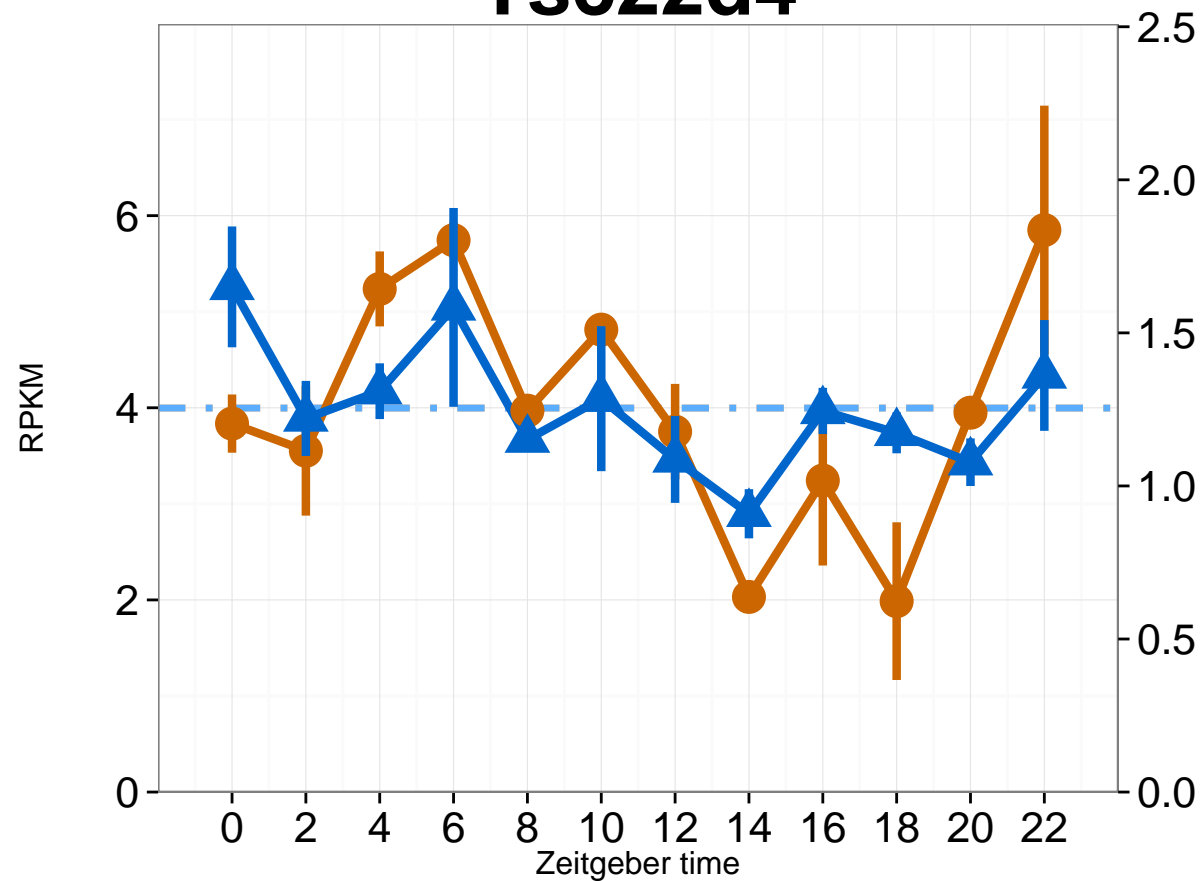

# Tsc22d4

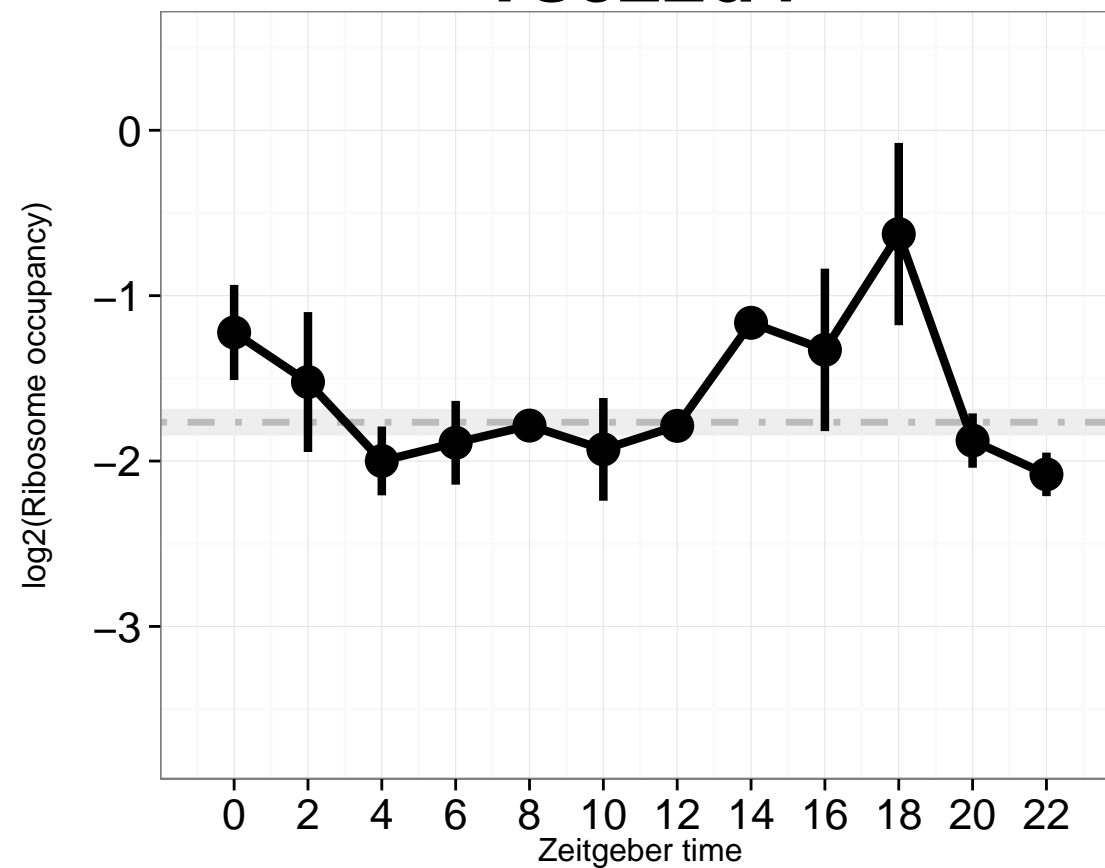

Supplement: SuppDataset_1.zip [file Tsc22d4_set_A.pdf › Supplemental Dataset 1/A-mRNA_nonrhyth_translation_nonrhyth/Tsc22d4_set_A.pdf]

## Tsc2

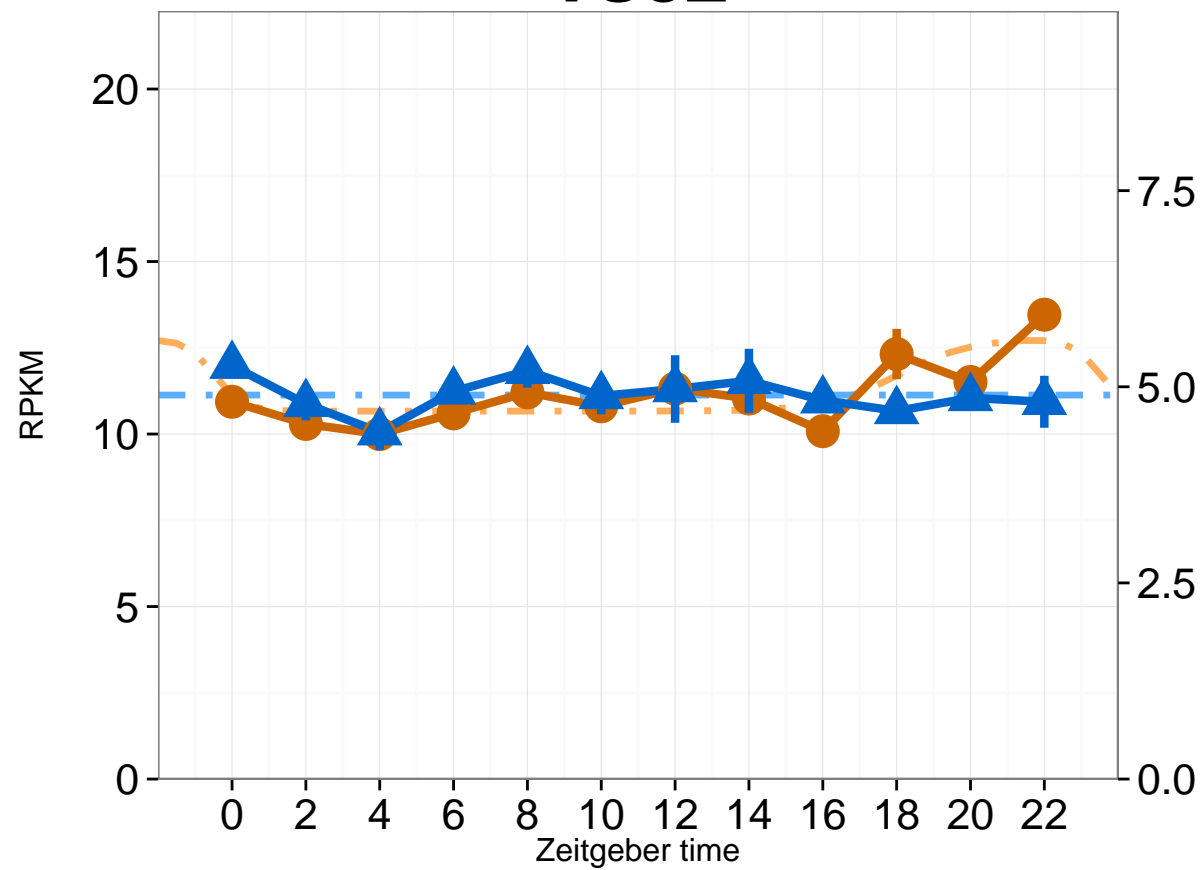

## Tsc2

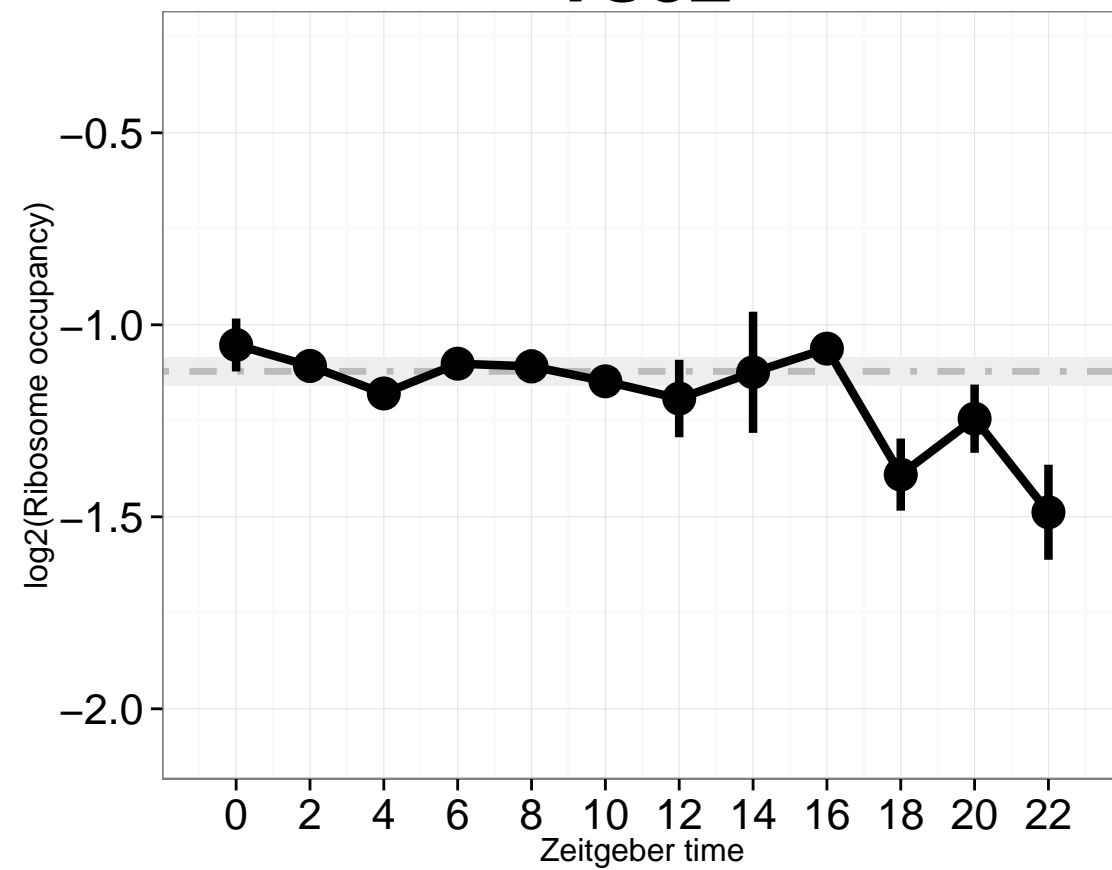

Supplement: SuppDataset_1.zip [file Tsc2_set_A.pdf › Supplemental Dataset 1/A-mRNA_nonrhyth_translation_nonrhyth/Tsc2_set_A.pdf]

# Tsen15

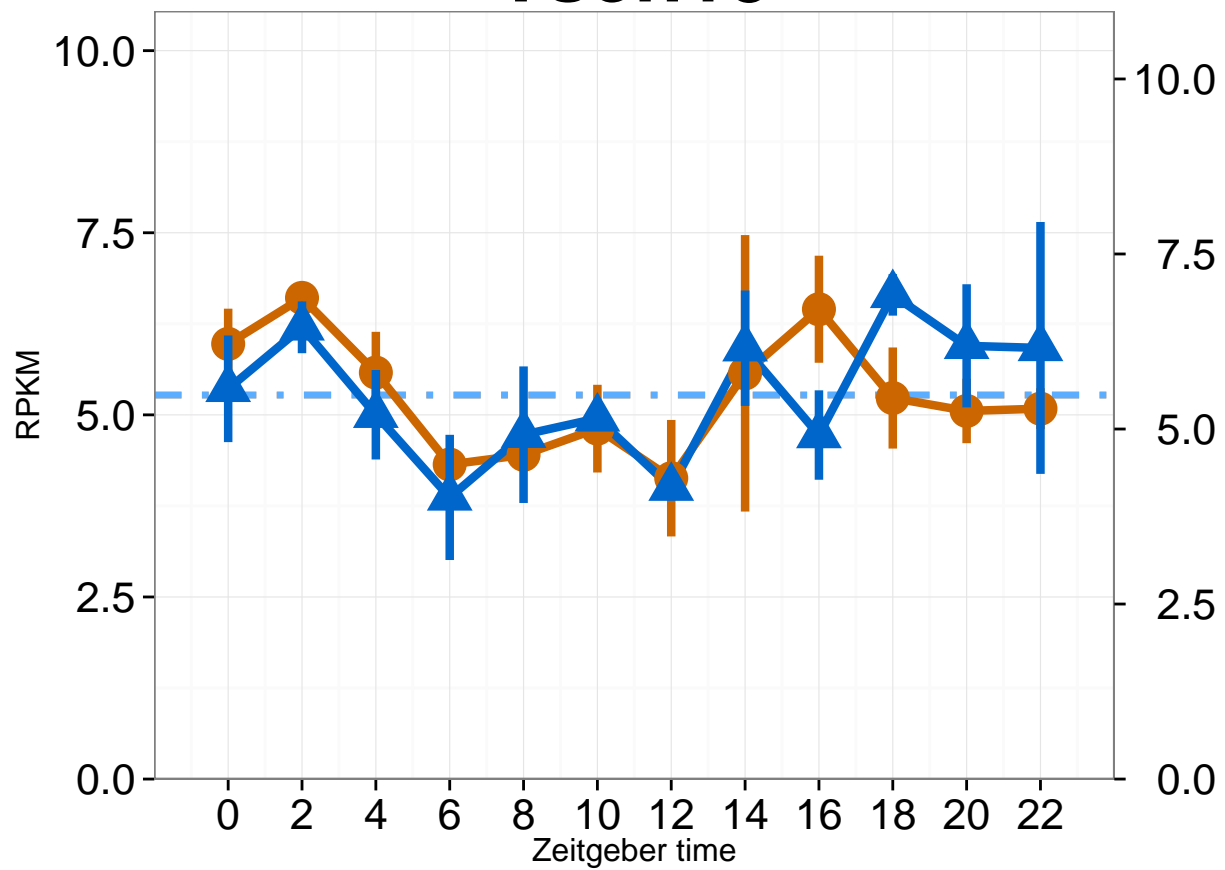

# Tsen15

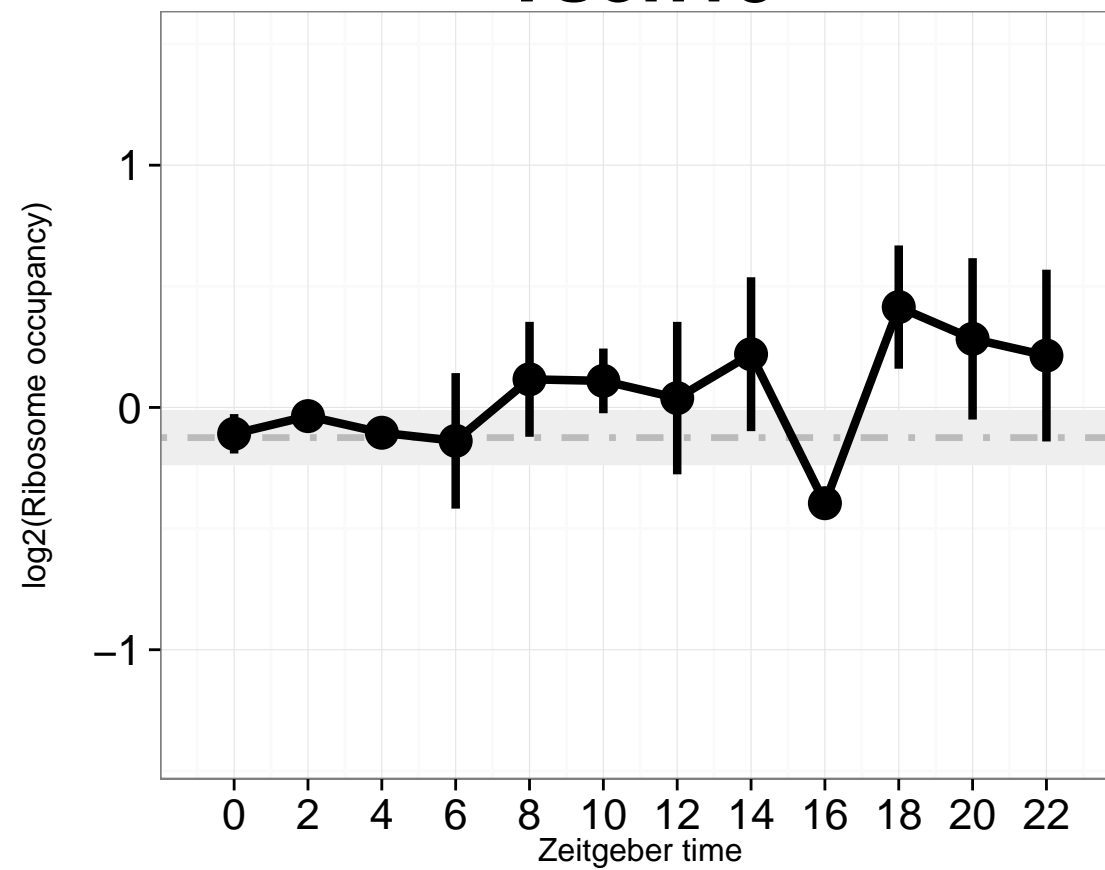

Supplement: SuppDataset_1.zip [file Tsen15_set_A.pdf › Supplemental Dataset 1/A-mRNA_nonrhyth_translation_nonrhyth/Tsen15_set_A.pdf]

## Tsen2

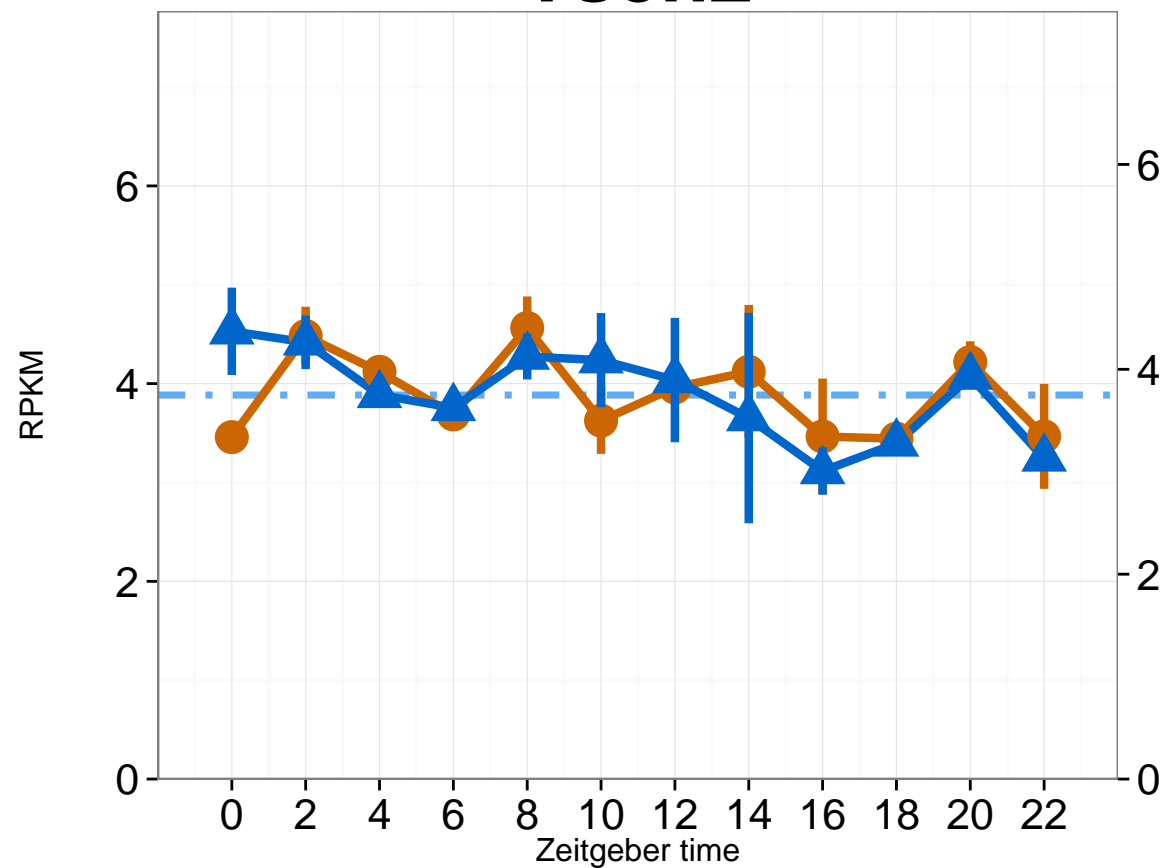

## Tsen2

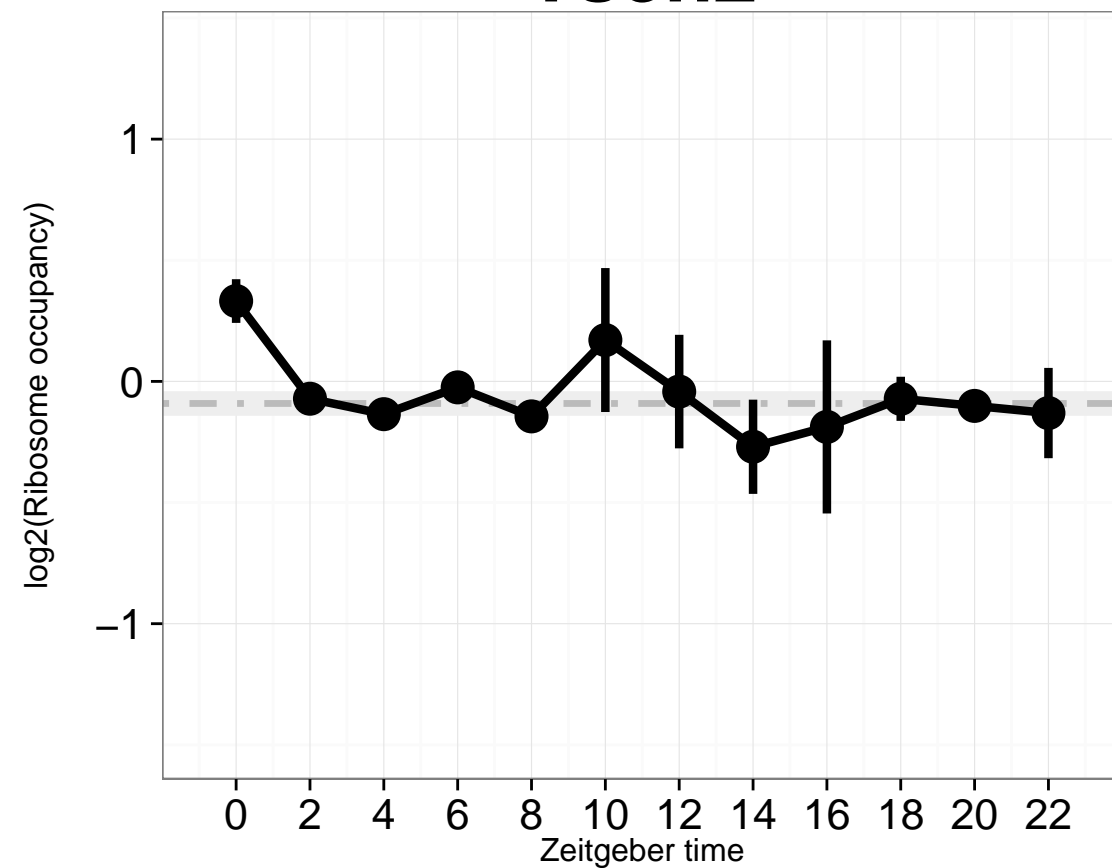

Supplement: SuppDataset_1.zip [file Tsen2_set_A.pdf › Supplemental Dataset 1/A-mRNA_nonrhyth_translation_nonrhyth/Tsen2_set_A.pdf]

## Tsen34

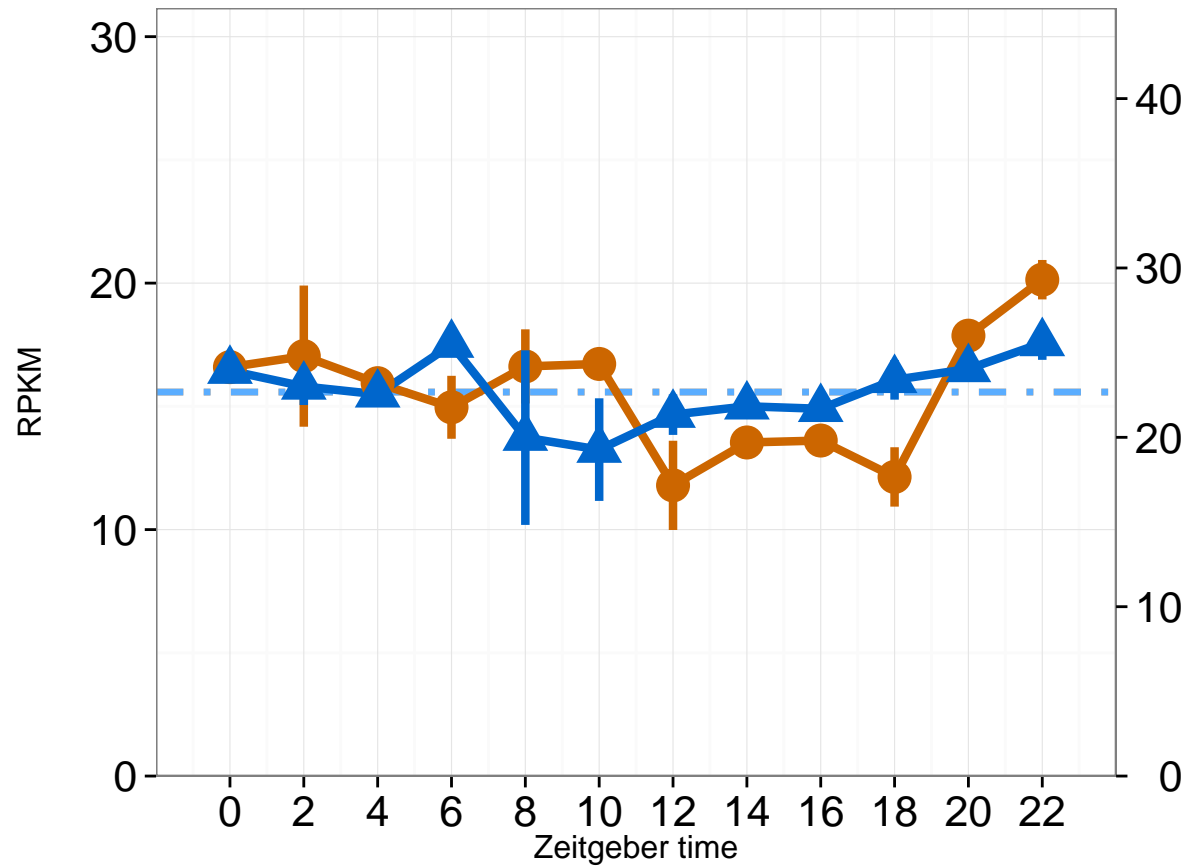

## Tsen34

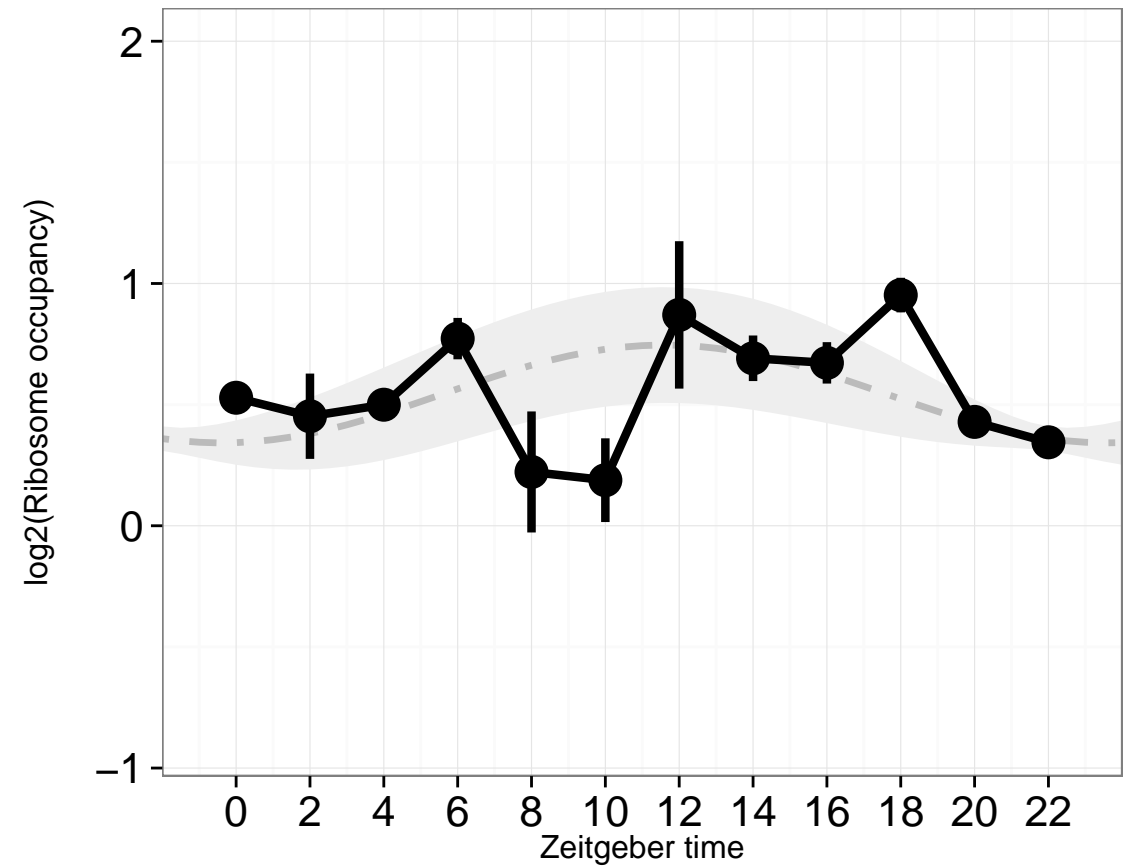

Supplement: SuppDataset_1.zip [file Tsen34_set_A.pdf › Supplemental Dataset 1/A-mRNA_nonrhyth_translation_nonrhyth/Tsen34_set_A.pdf]

## Tsen54

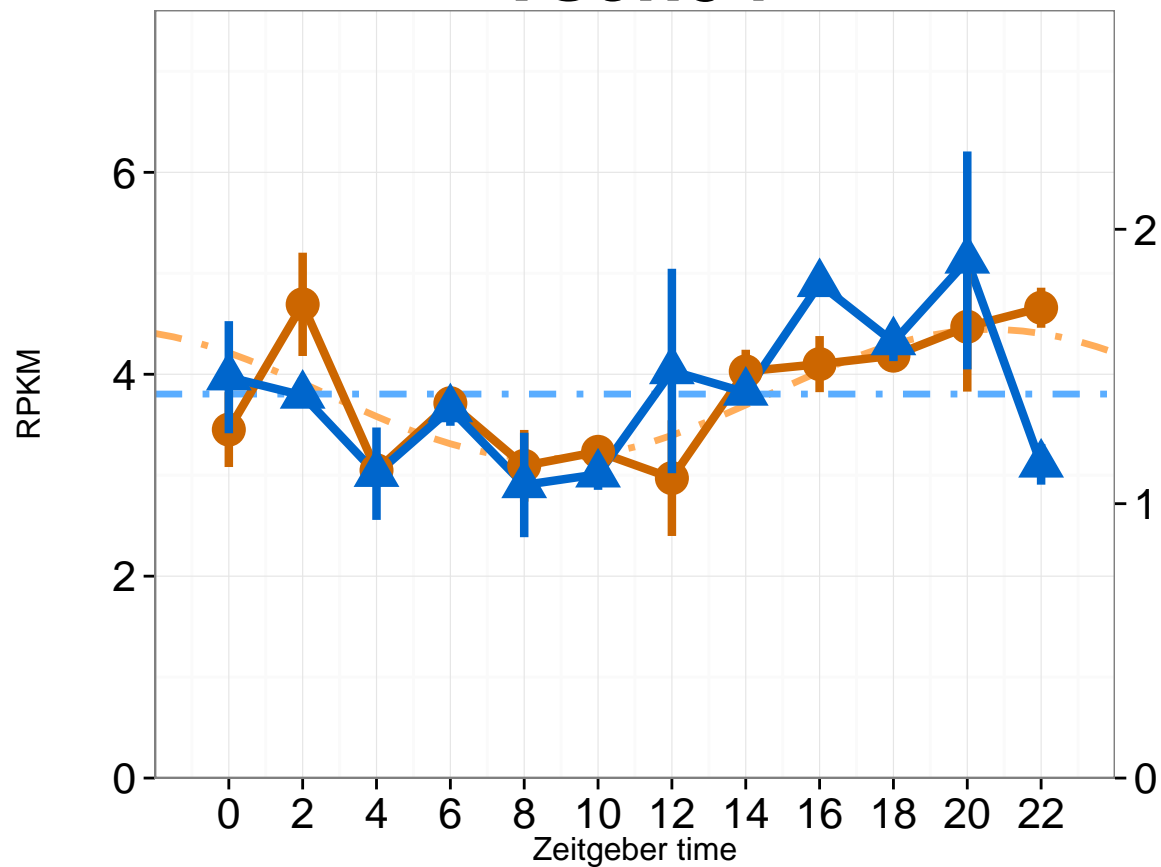

## Tsen54

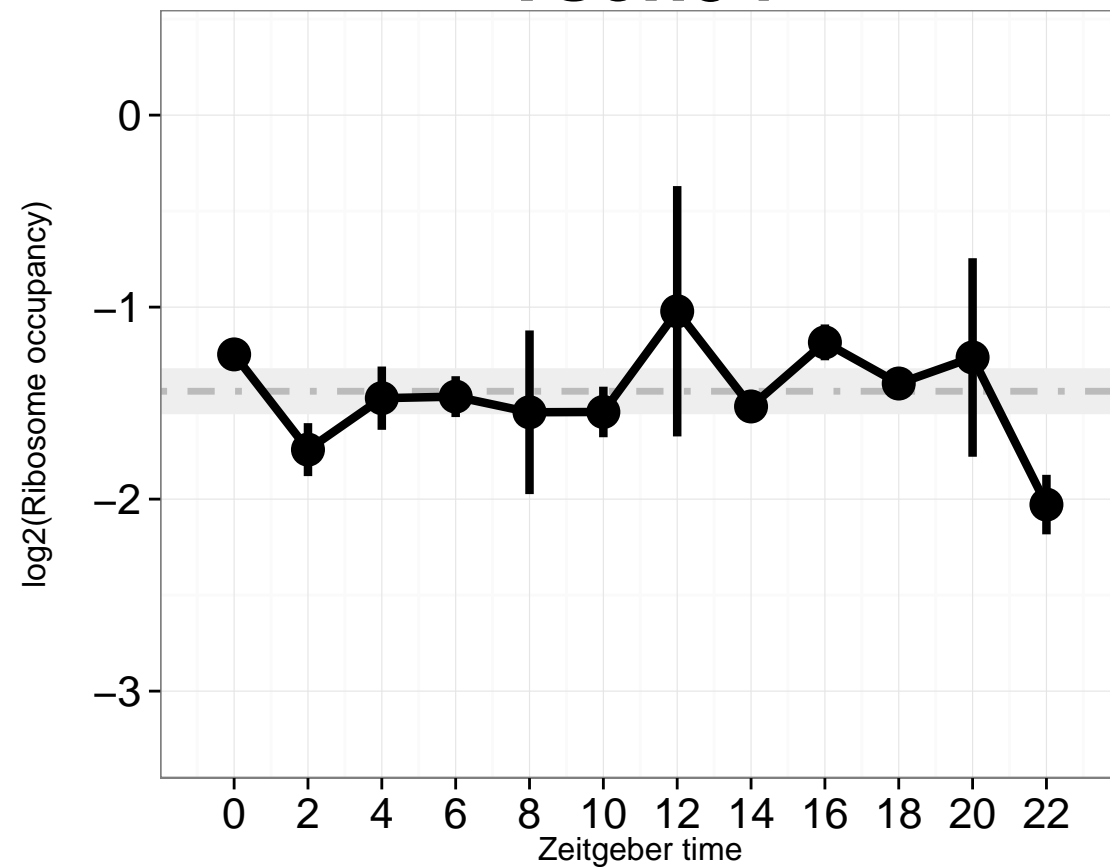

Supplement: SuppDataset_1.zip [file Tsen54_set_A.pdf › Supplemental Dataset 1/A-mRNA_nonrhyth_translation_nonrhyth/Tsen54_set_A.pdf]

## Tsfm

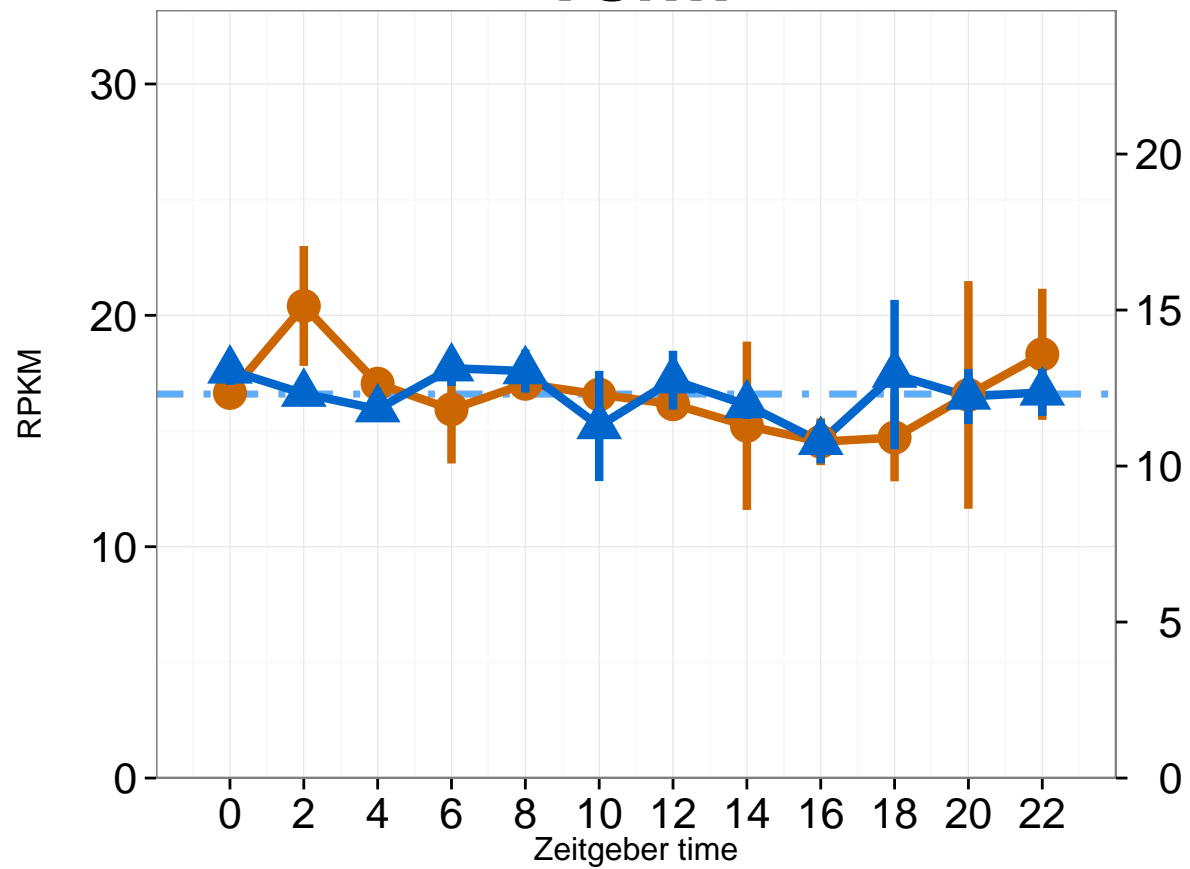

## Tsfm

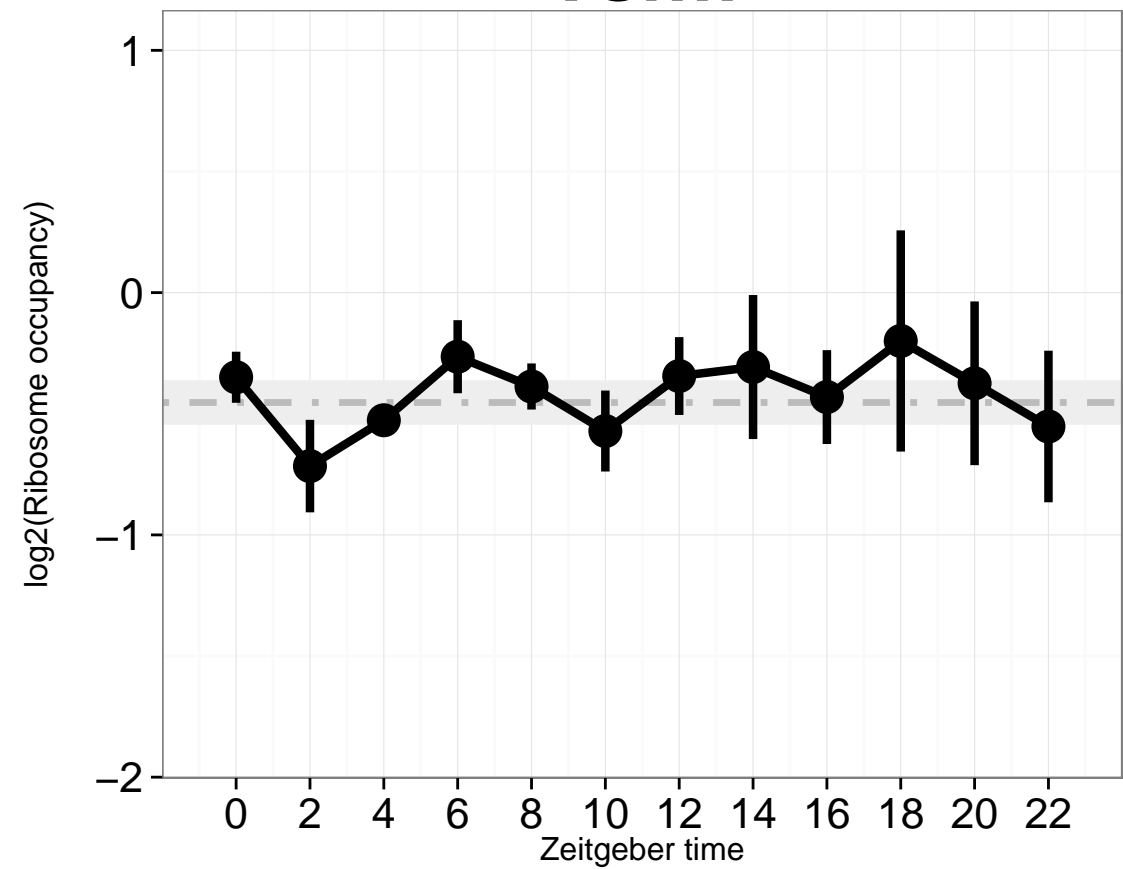

Supplement: SuppDataset_1.zip [file Tsfm_set_A.pdf › Supplemental Dataset 1/A-mRNA_nonrhyth_translation_nonrhyth/Tsfm_set_A.pdf]

# Tsg101

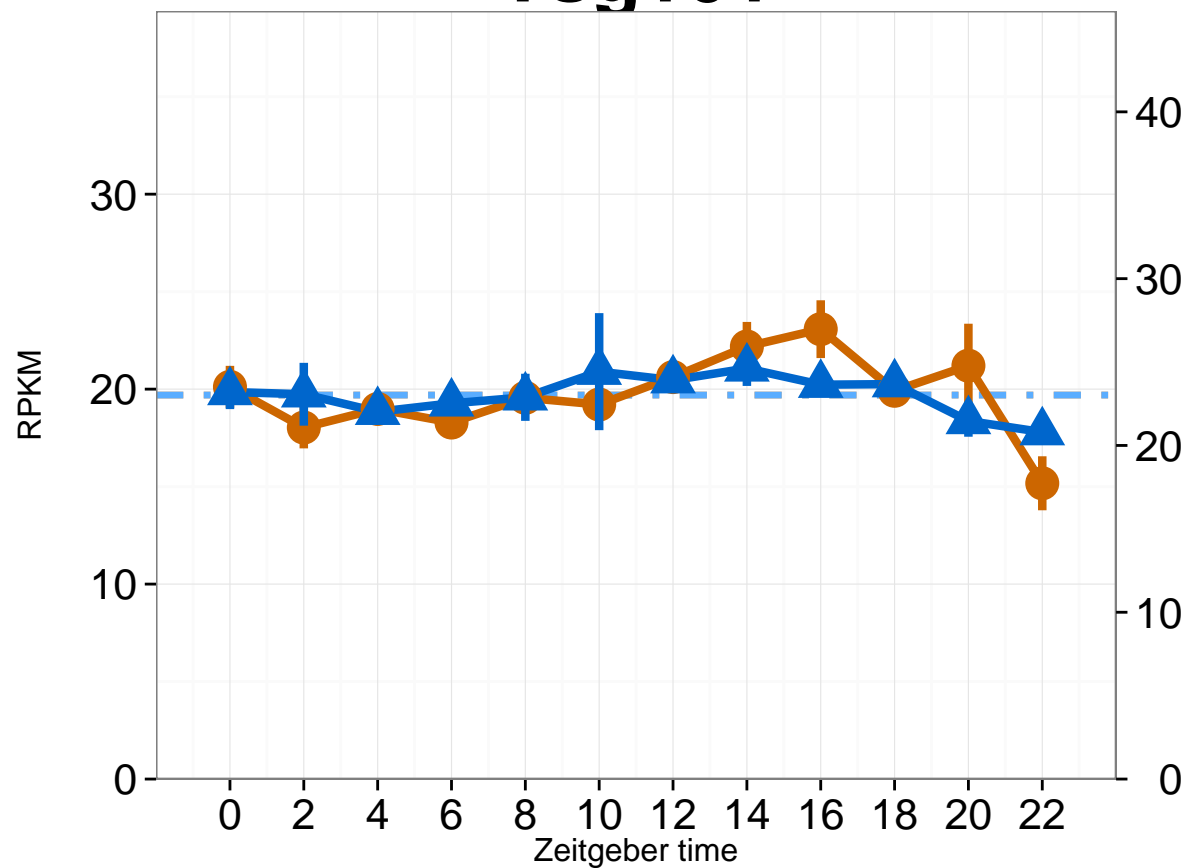

# Tsg101

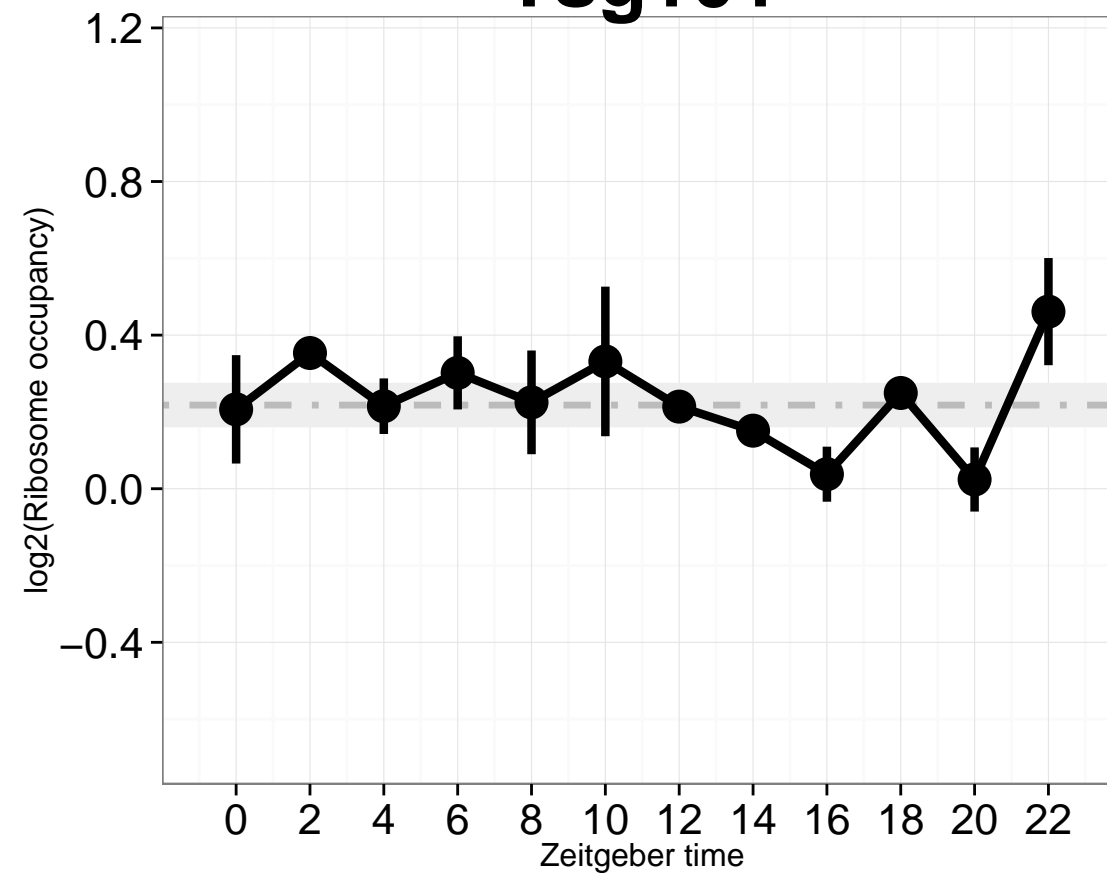

Supplement: SuppDataset_1.zip [file Tsg101_set_A.pdf › Supplemental Dataset 1/A-mRNA_nonrhyth_translation_nonrhyth/Tsg101_set_A.pdf]

# Tsga10

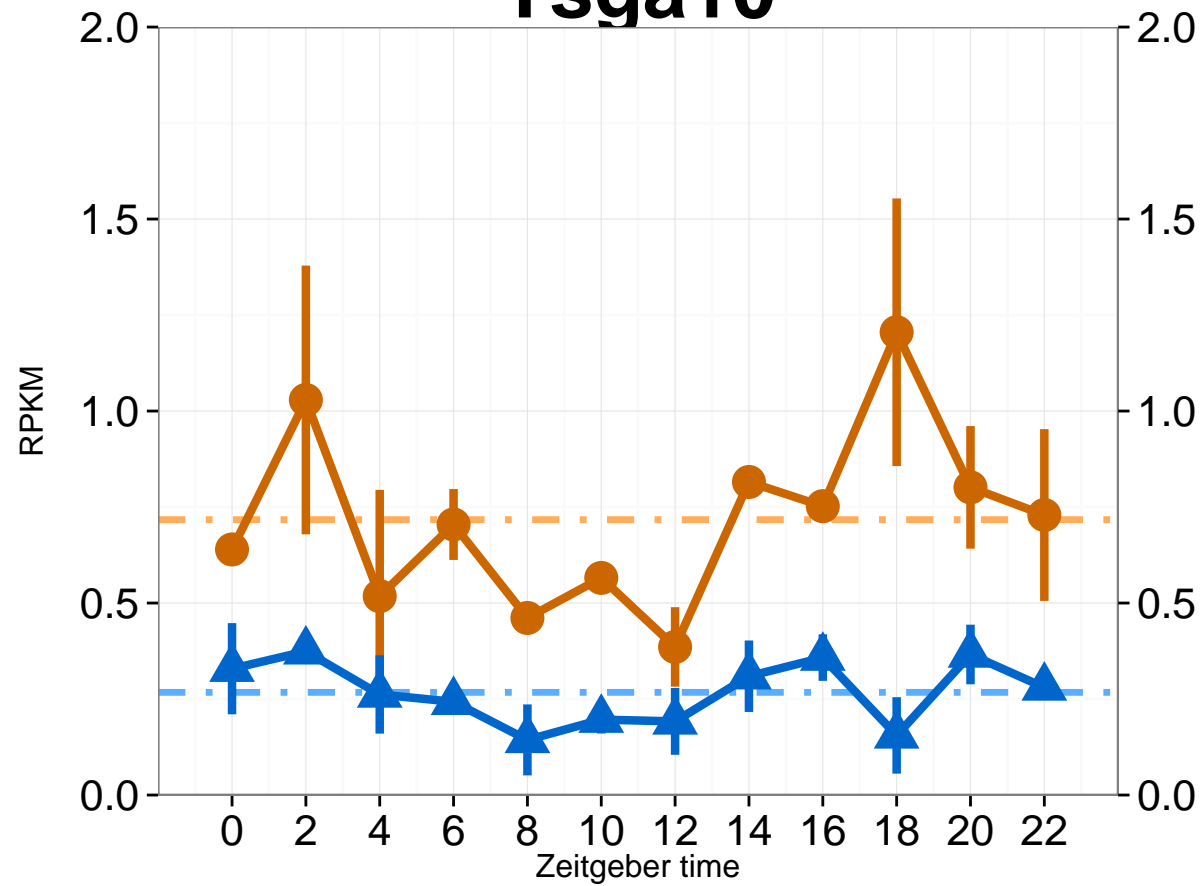

# Tsga10

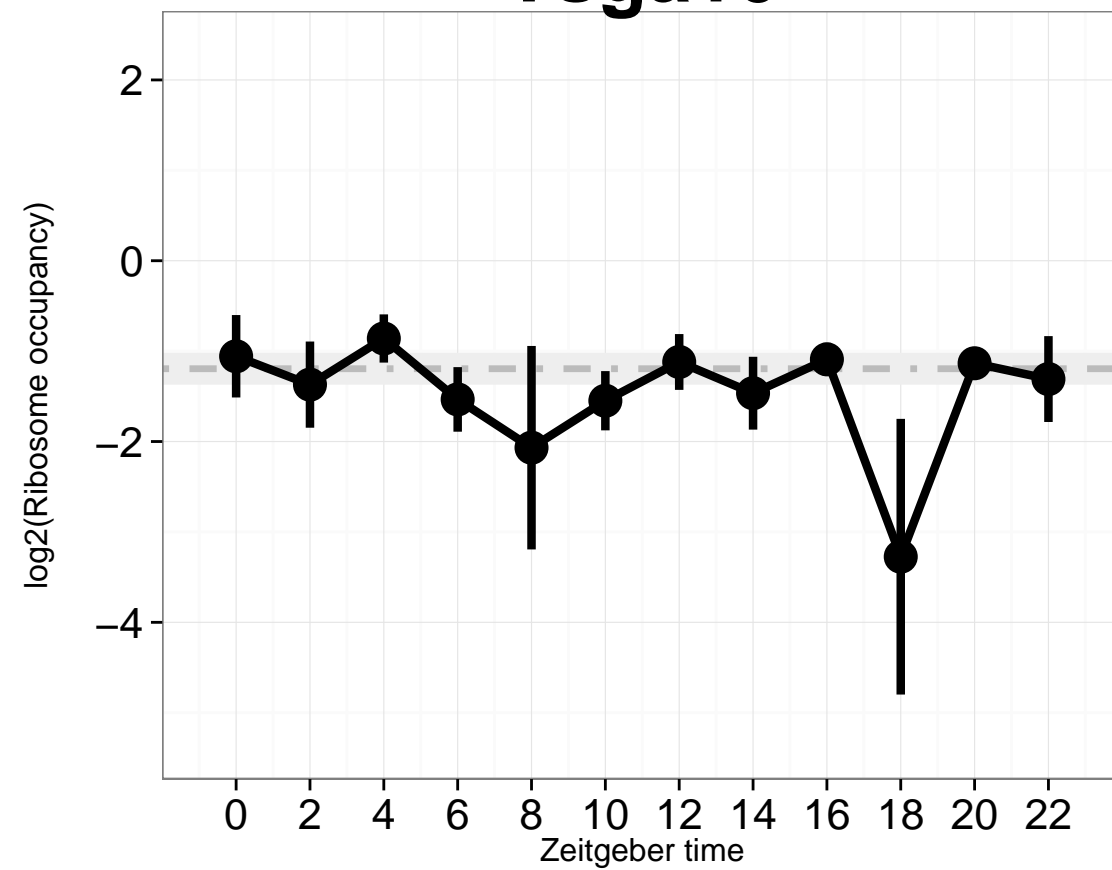

Supplement: SuppDataset_1.zip [file Tsga10_set_A.pdf › Supplemental Dataset 1/A-mRNA_nonrhyth_translation_nonrhyth/Tsga10_set_A.pdf]

## Tshz1

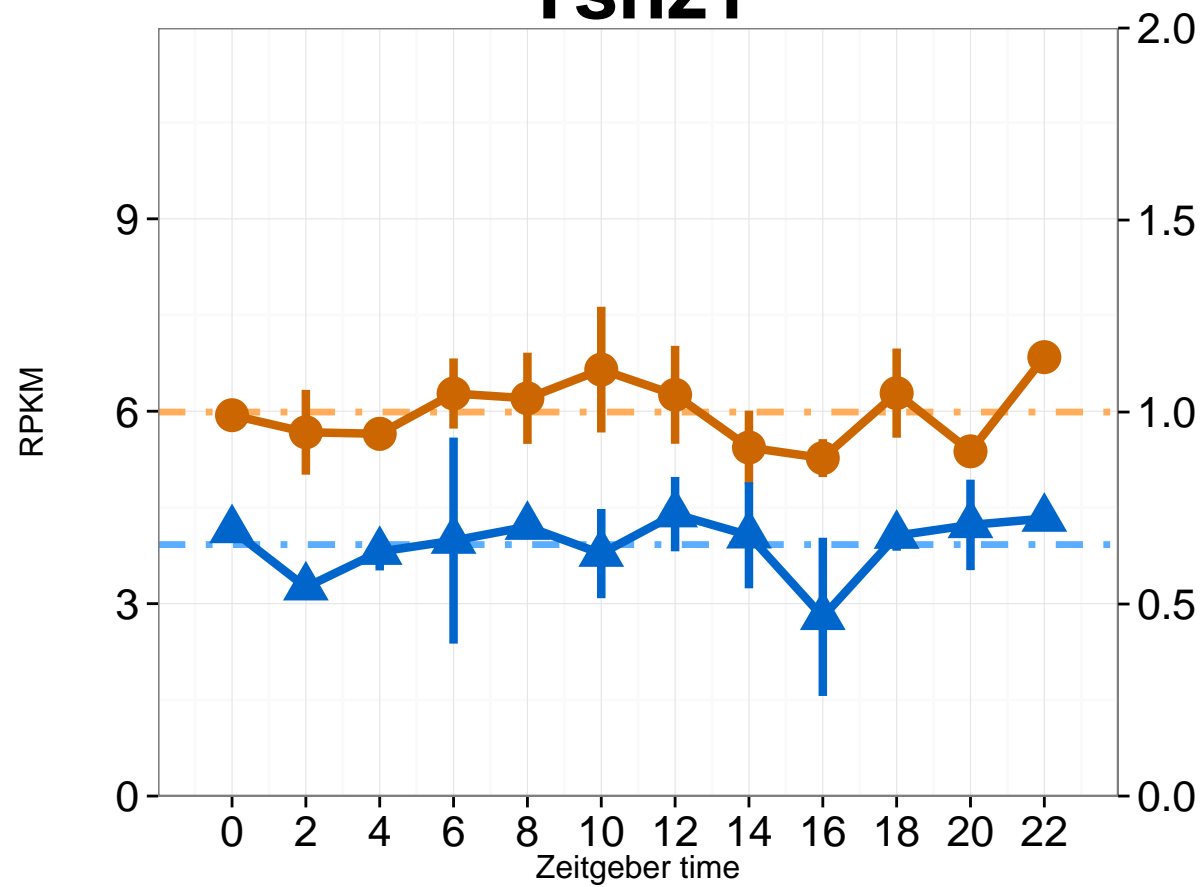

## Tshz1

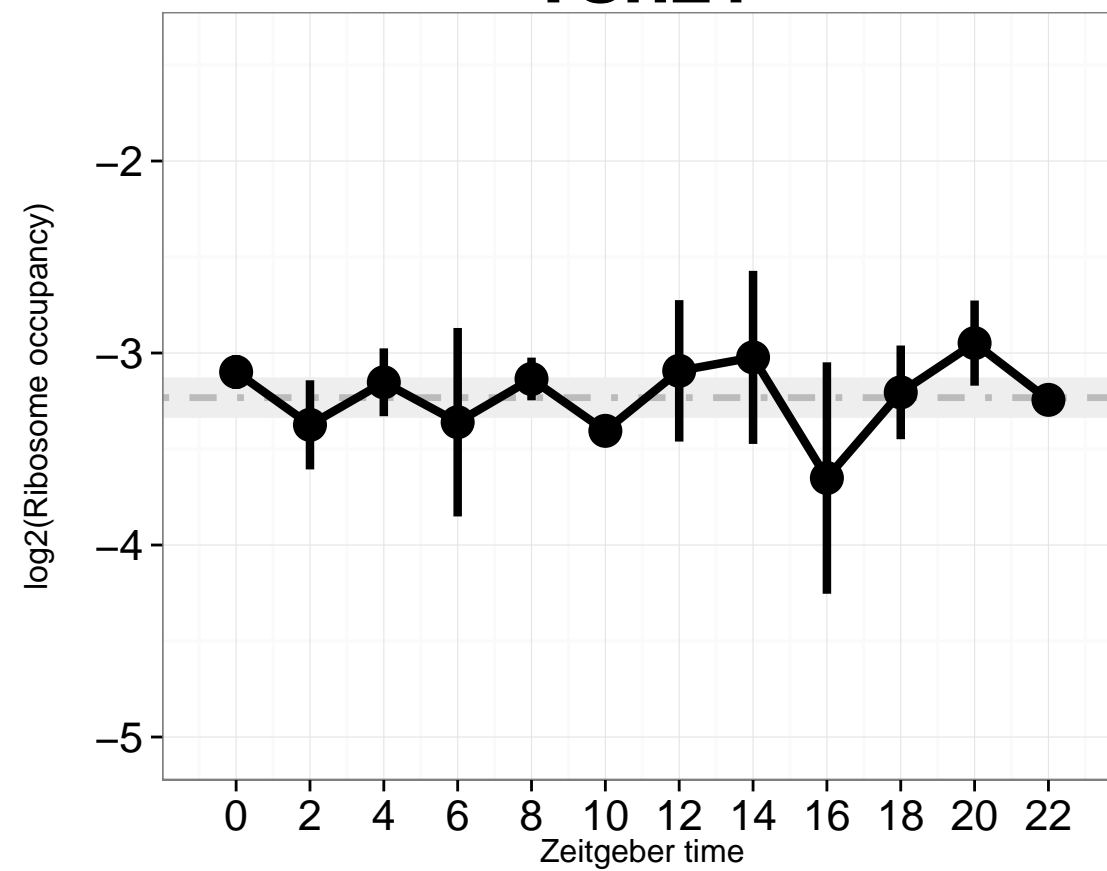

Supplement: SuppDataset_1.zip [file Tshz1_set_A.pdf › Supplemental Dataset 1/A-mRNA_nonrhyth_translation_nonrhyth/Tshz1_set_A.pdf]

# Tsn

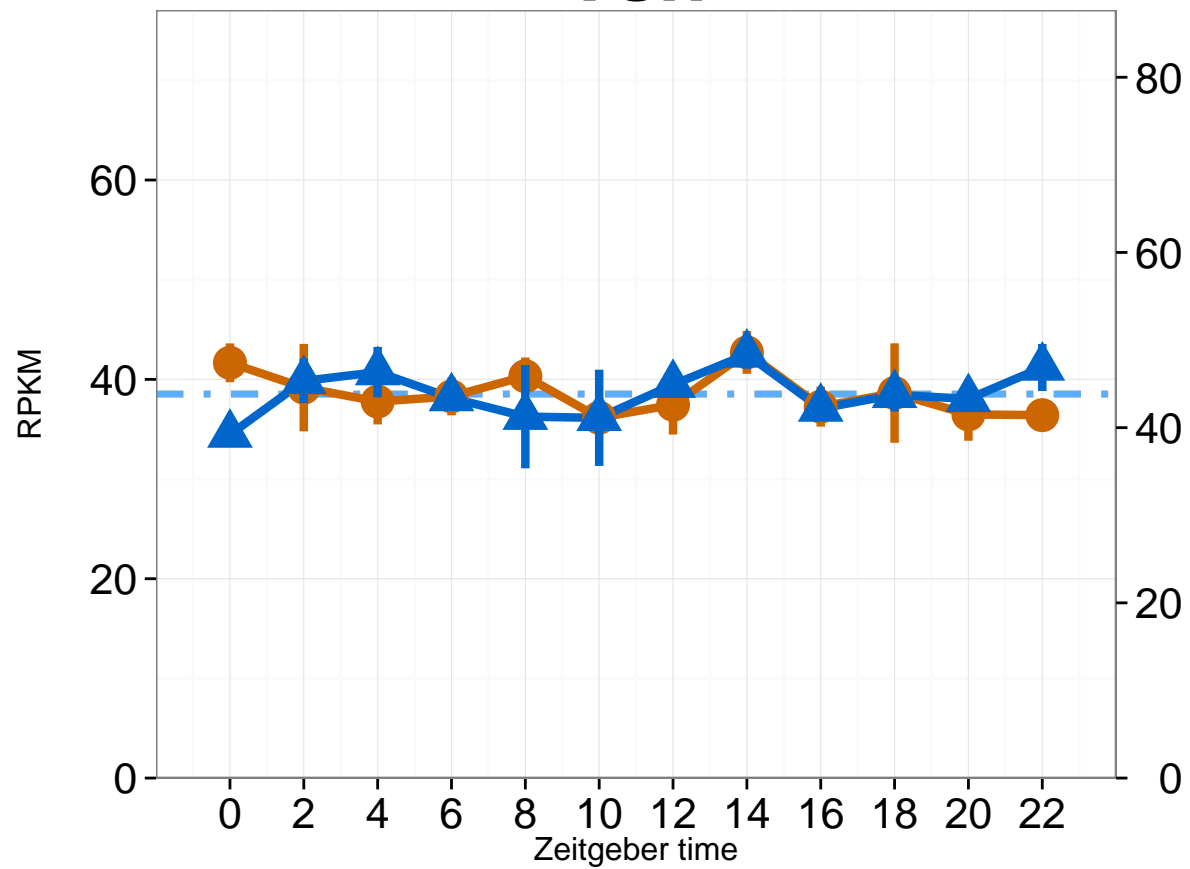

# Tsn

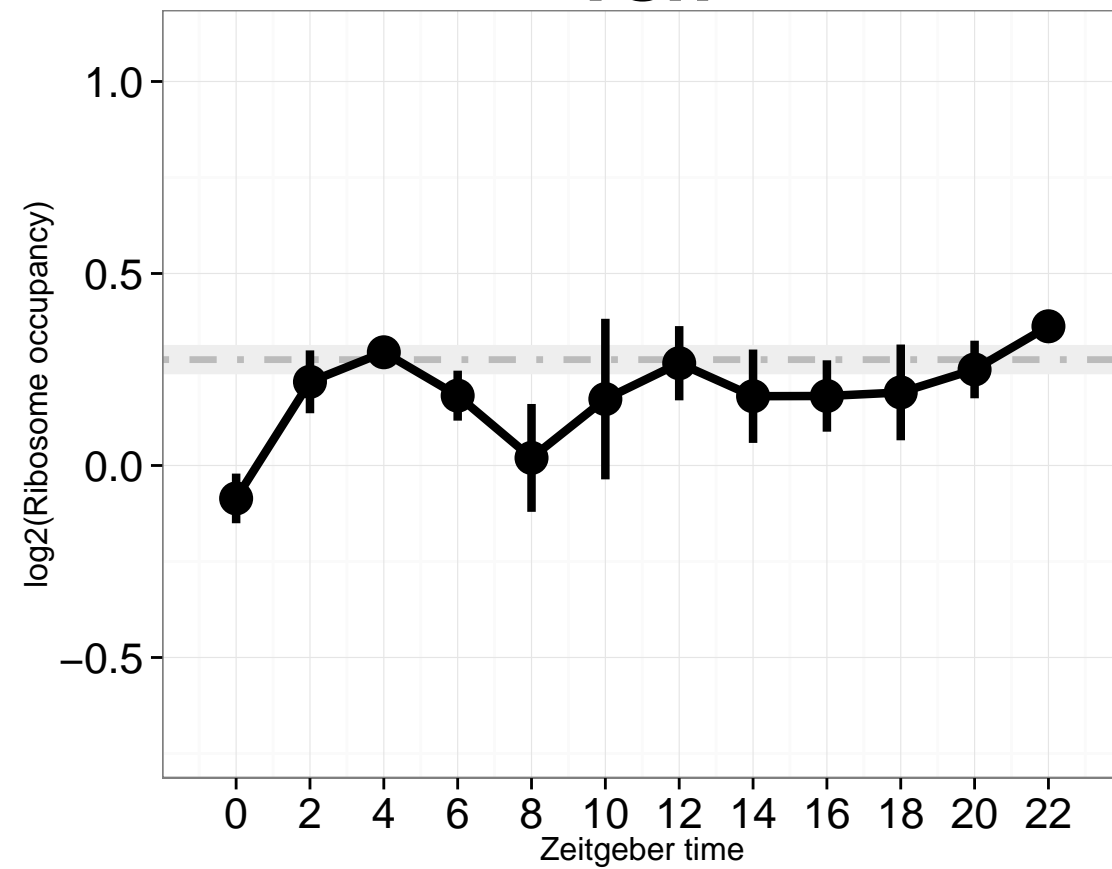

Supplement: SuppDataset_1.zip [file Tsn_set_A.pdf › Supplemental Dataset 1/A-mRNA_nonrhyth_translation_nonrhyth/Tsn_set_A.pdf]

## Tsnax

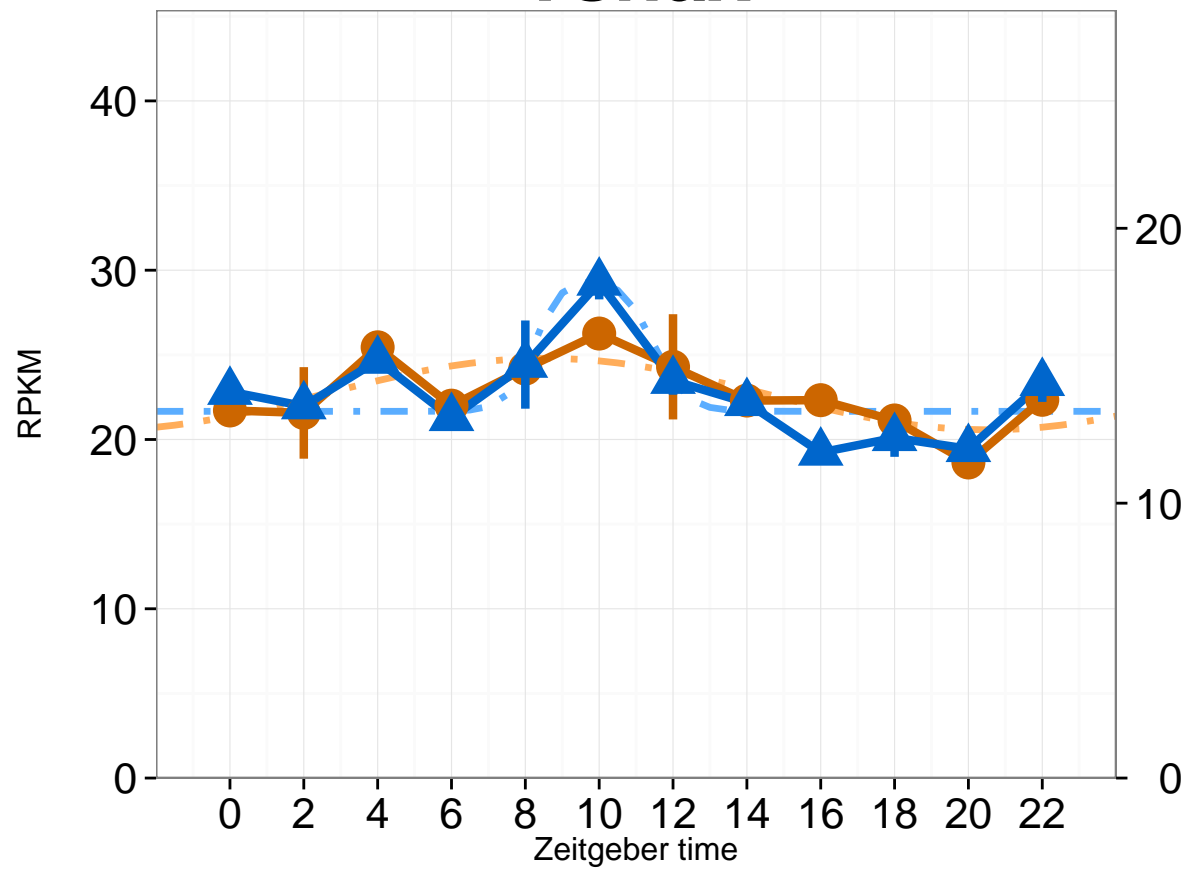

## Tsnax

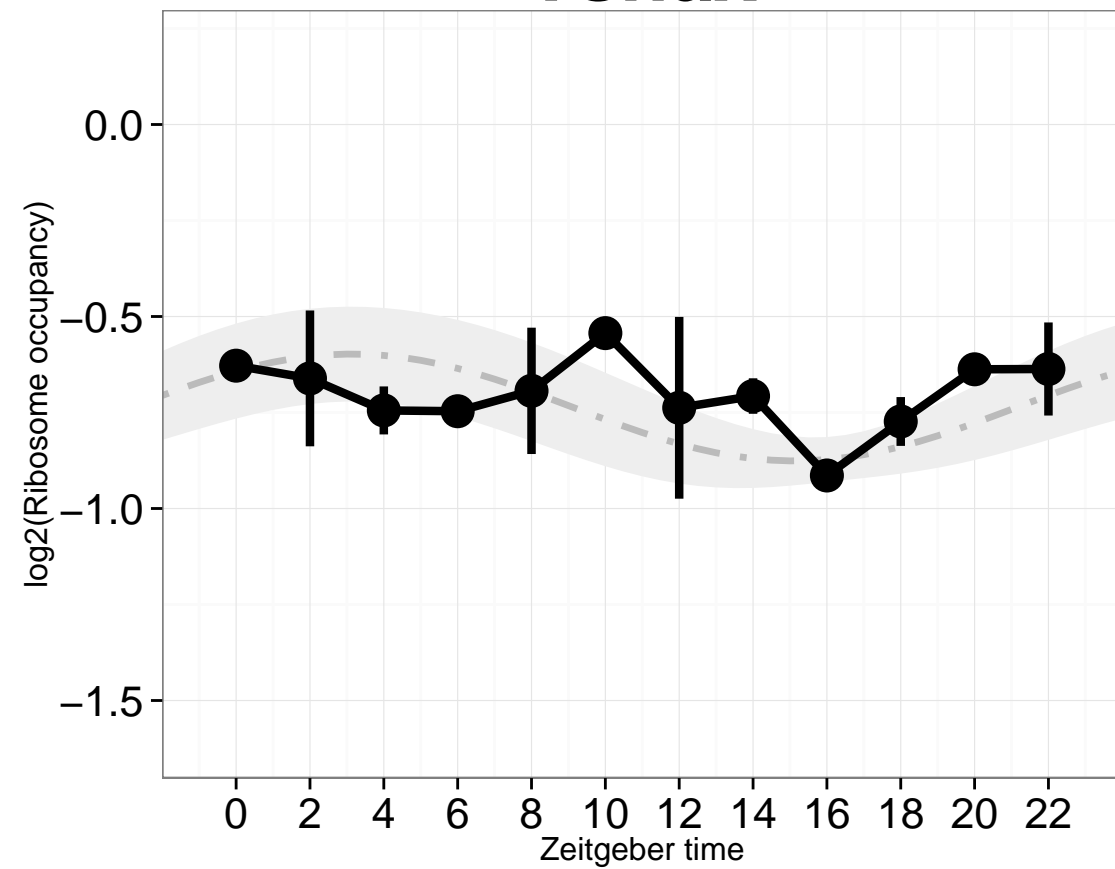

Supplement: SuppDataset_1.zip [file Tsnax_set_A.pdf › Supplemental Dataset 1/A-mRNA_nonrhyth_translation_nonrhyth/Tsnax_set_A.pdf]

# Tspan15

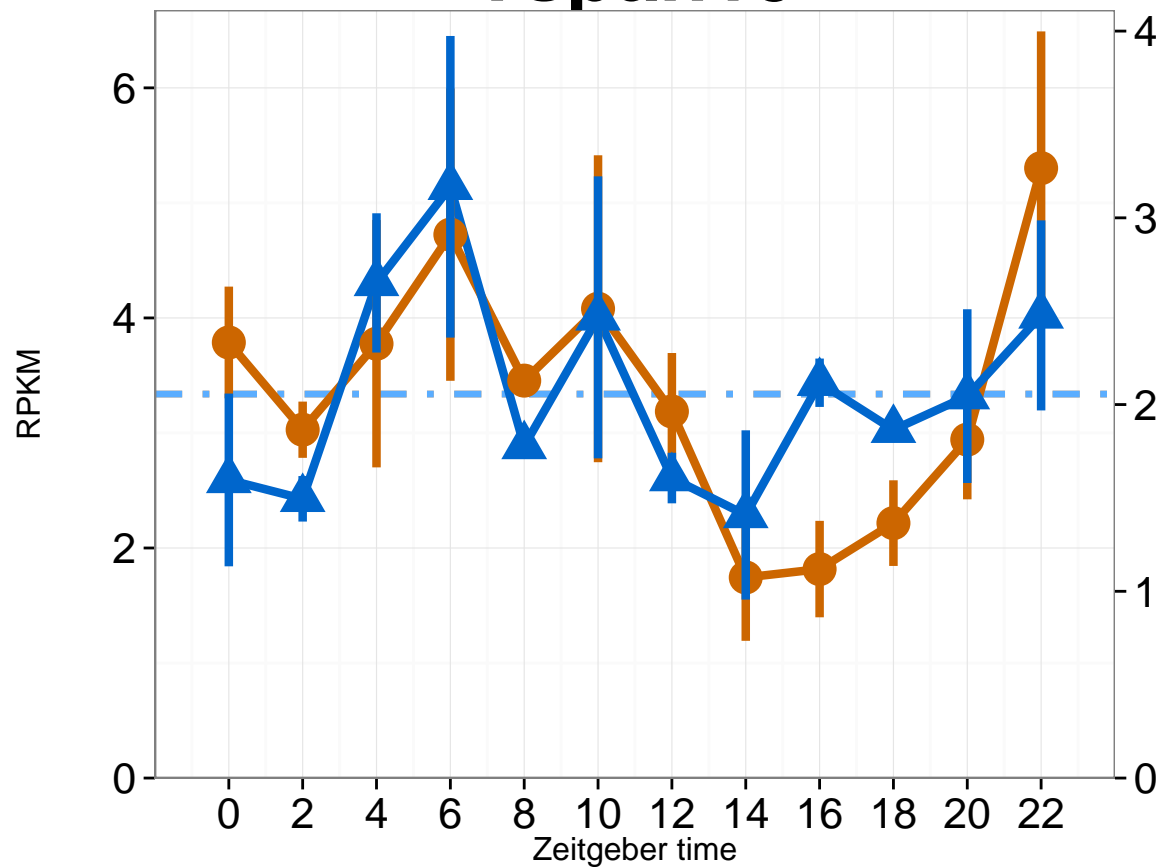

# Tspan15

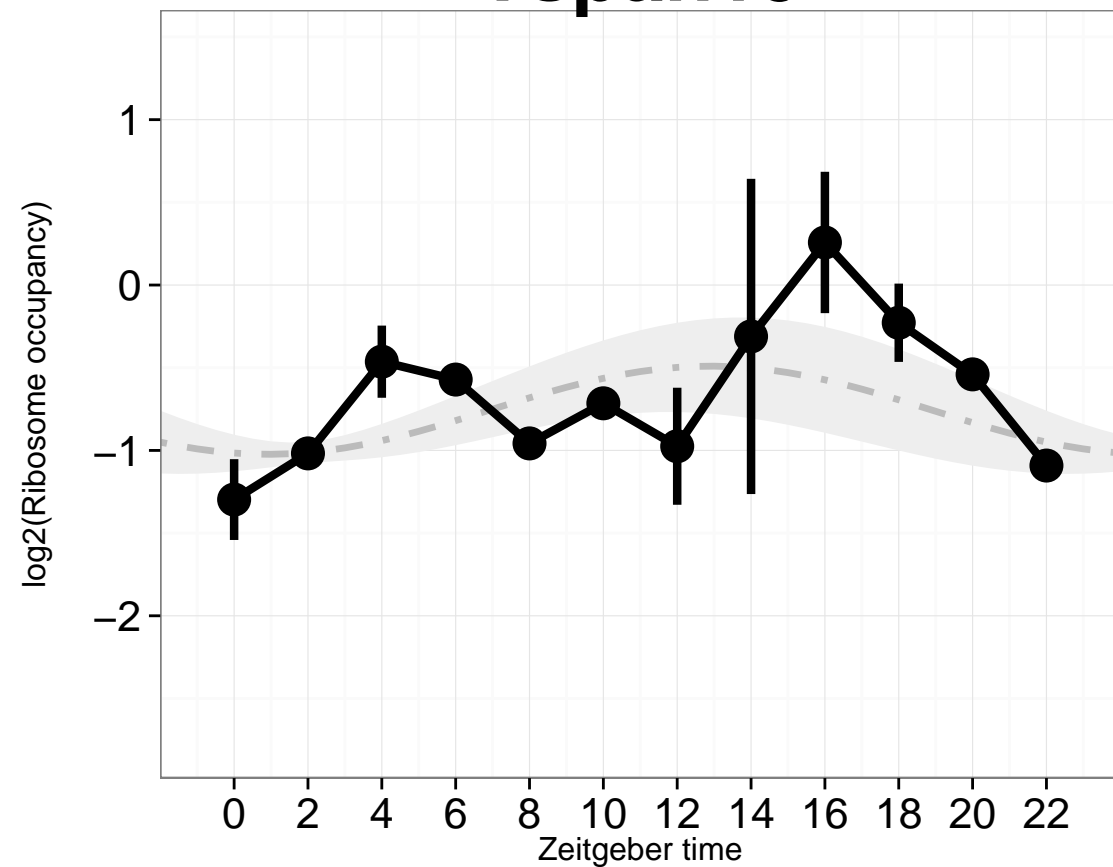

Supplement: SuppDataset_1.zip [file Tspan15_set_A.pdf › Supplemental Dataset 1/A-mRNA_nonrhyth_translation_nonrhyth/Tspan15_set_A.pdf]

## Tspan17

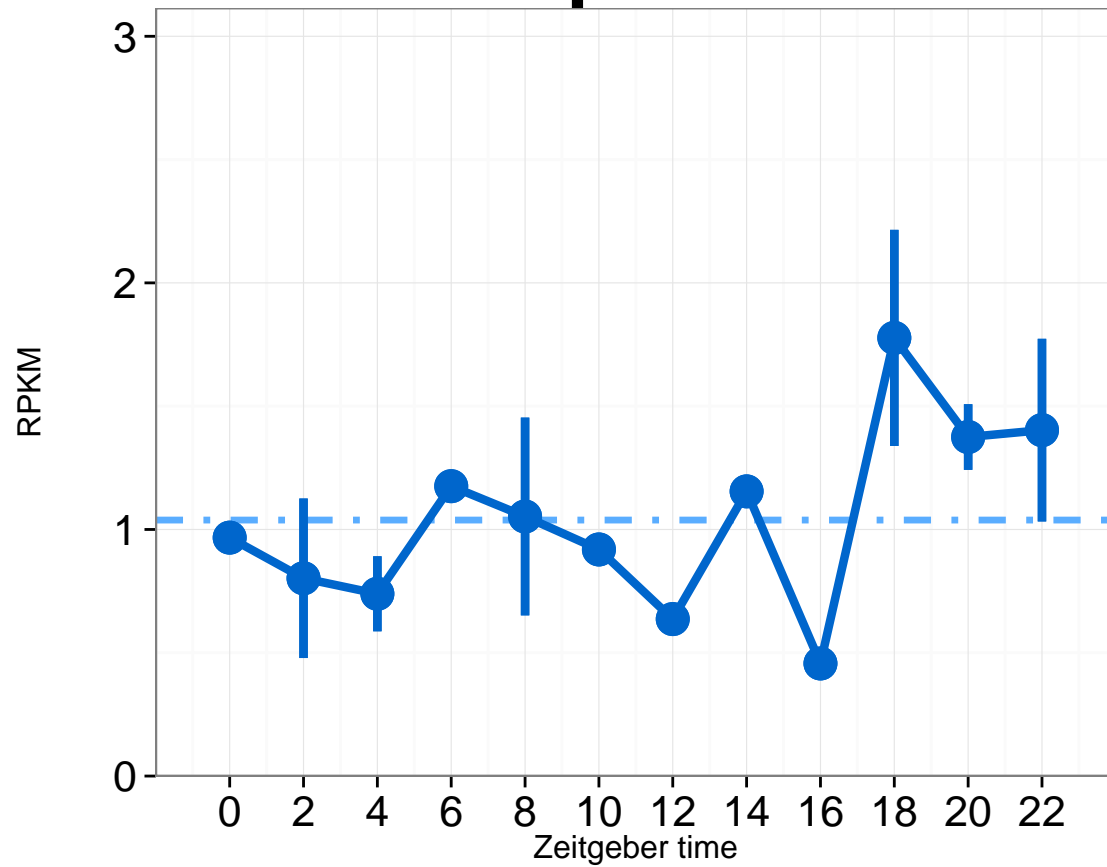

## Tspan17 log2(Ribosome occupanc

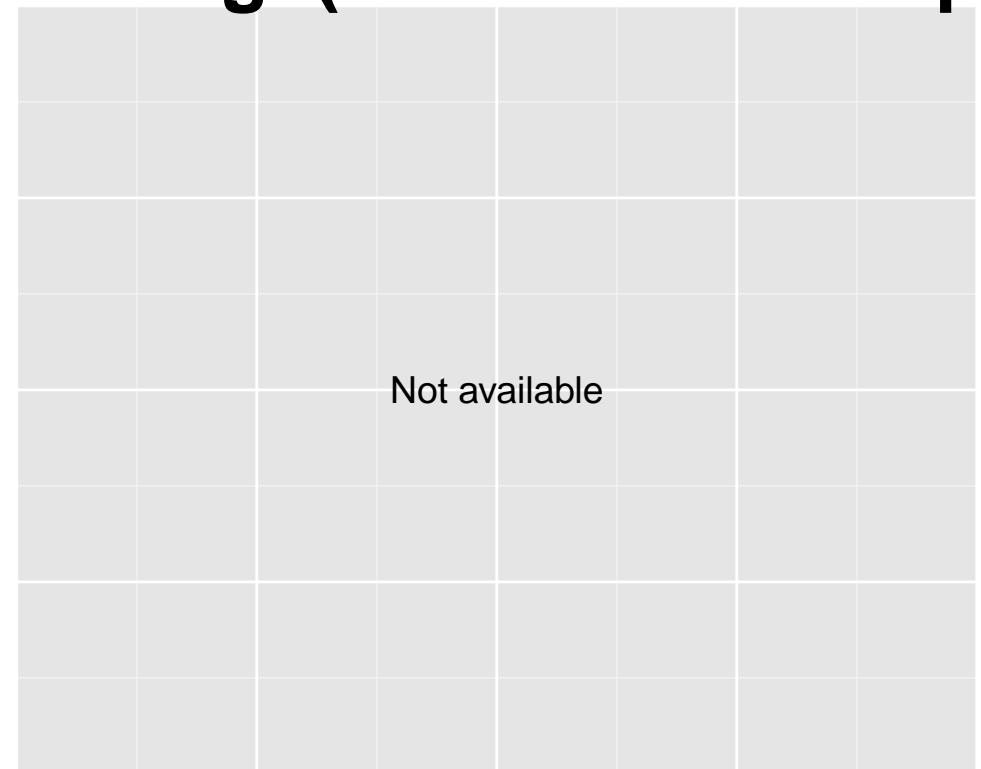

Supplement: SuppDataset_1.zip [file Tspan17_set_A.pdf › Supplemental Dataset 1/A-mRNA_nonrhyth_translation_nonrhyth/Tspan17_set_A.pdf]

# Tspan31

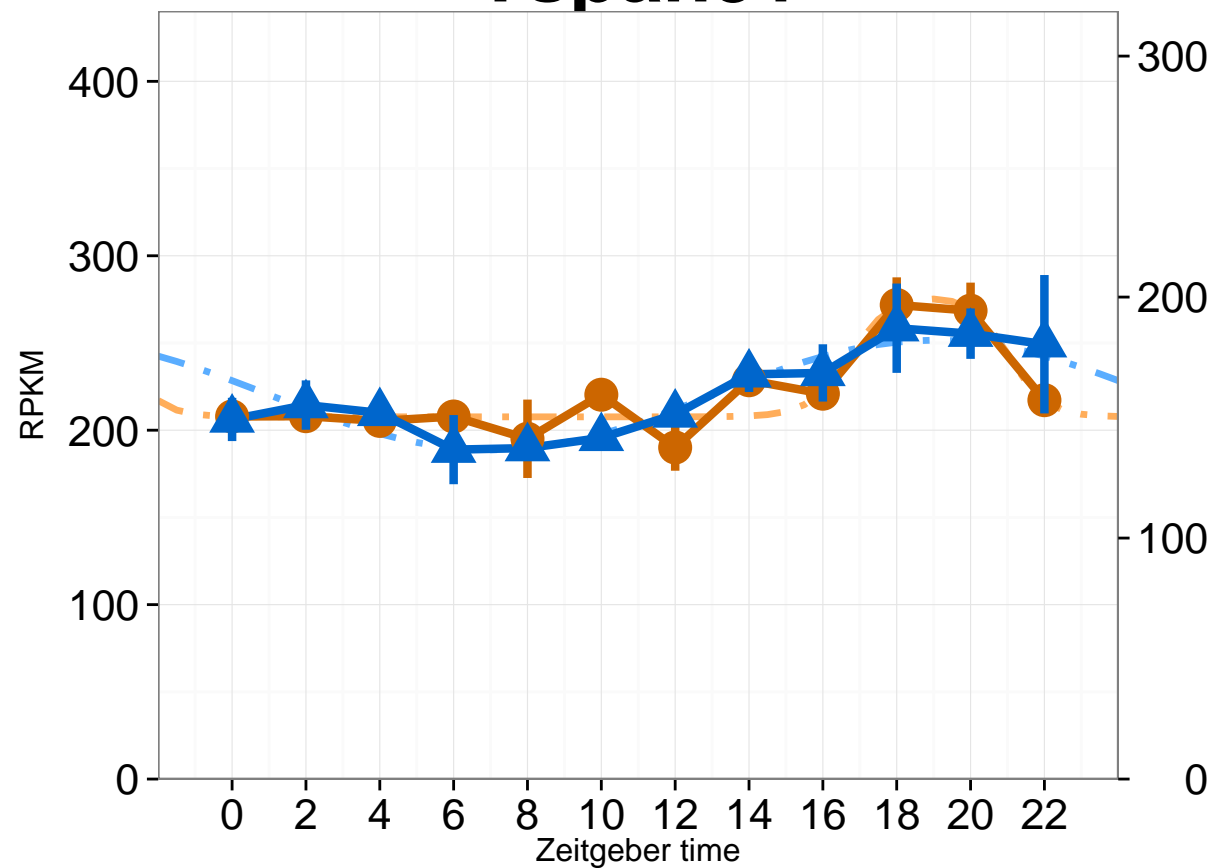

# Tspan31

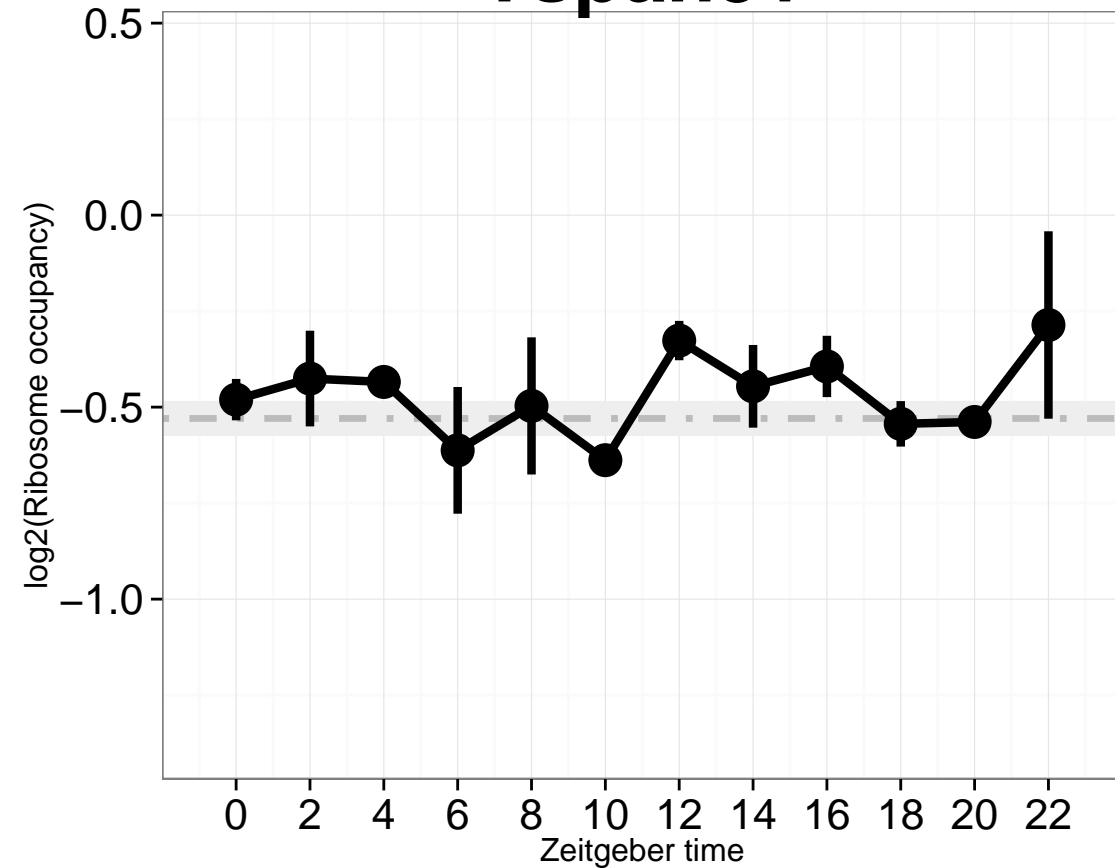

Supplement: SuppDataset_1.zip [file Tspan31_set_A.pdf › Supplemental Dataset 1/A-mRNA_nonrhyth_translation_nonrhyth/Tspan31_set_A.pdf]

## Tspan3

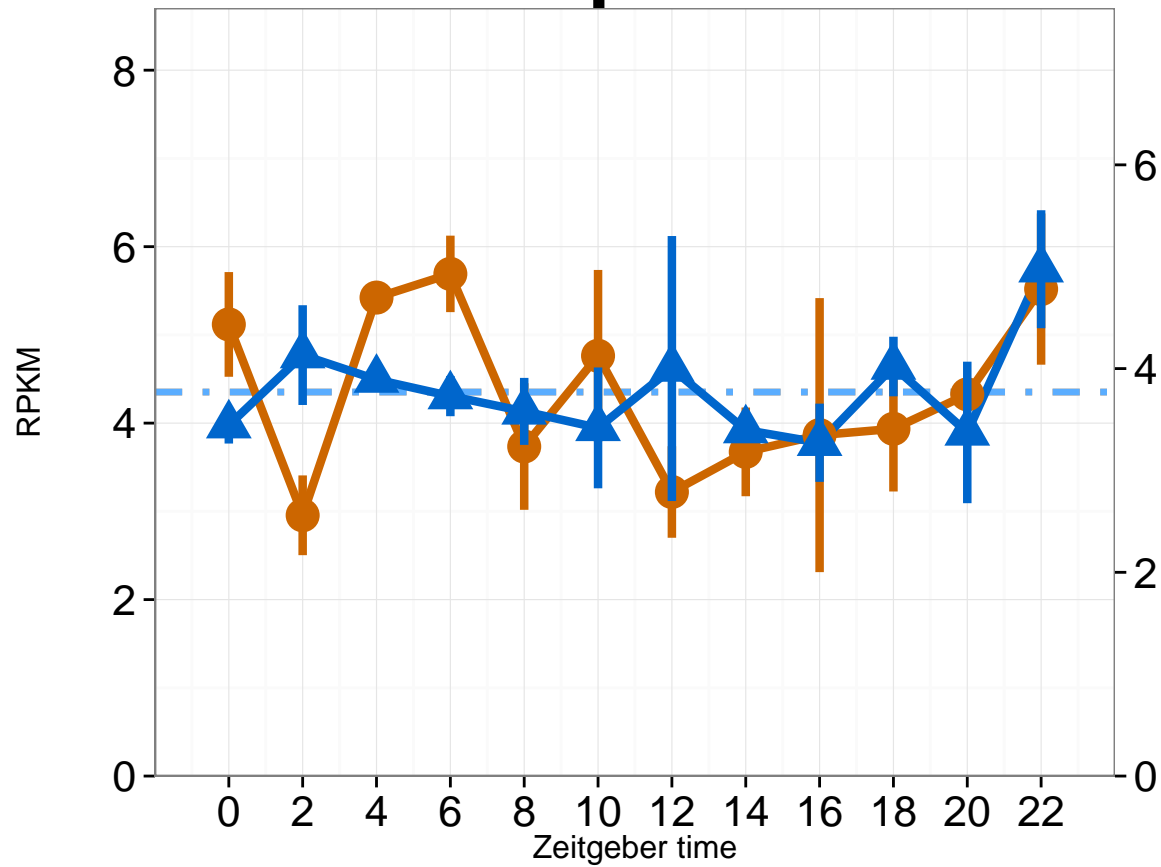

## Tspan3

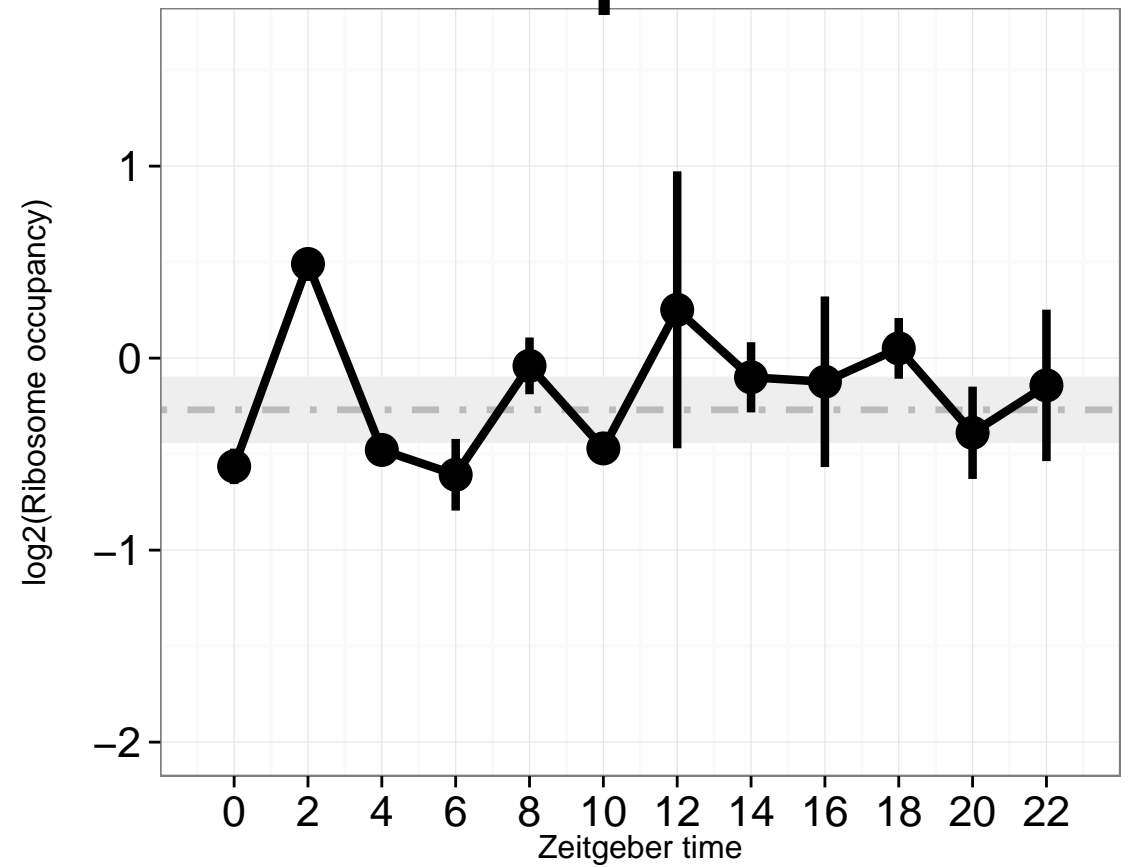

Supplement: SuppDataset_1.zip [file Tspan3_set_A.pdf › Supplemental Dataset 1/A-mRNA_nonrhyth_translation_nonrhyth/Tspan3_set_A.pdf]

# Tspan7

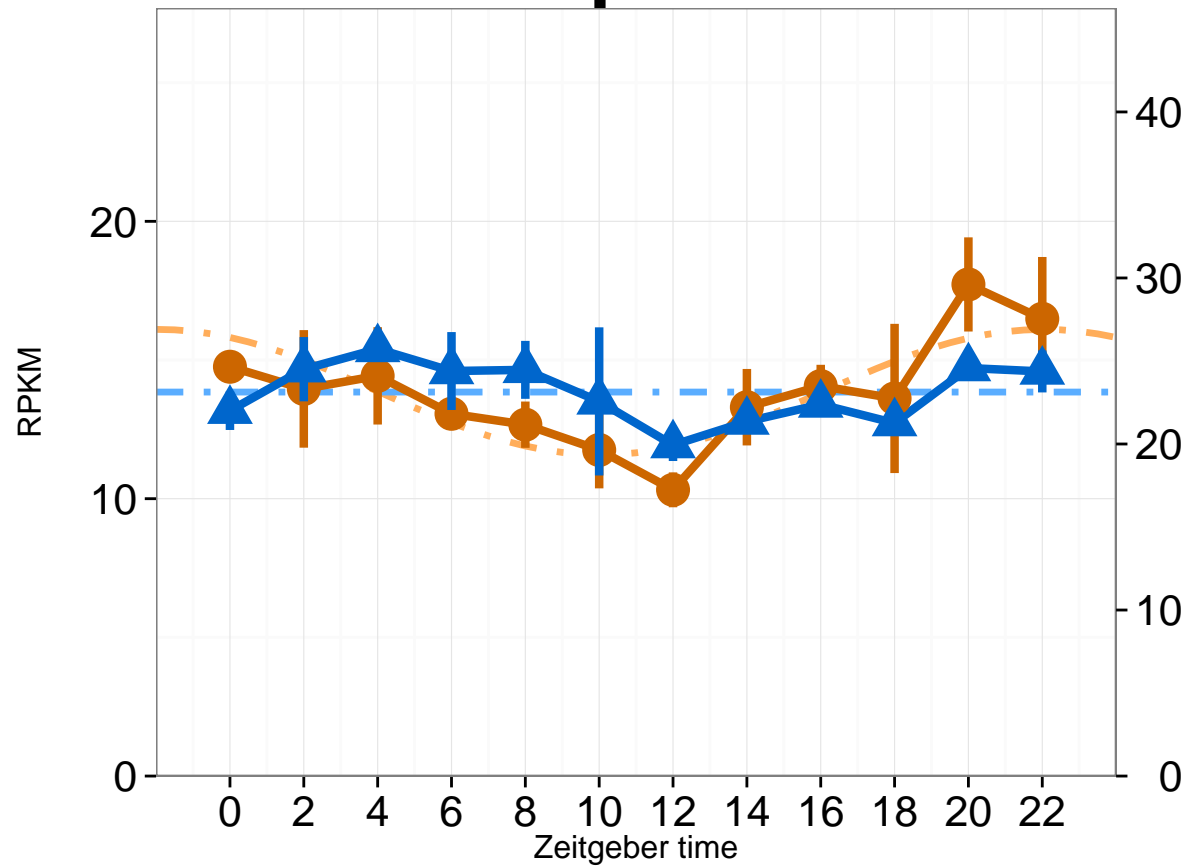

# Tspan7

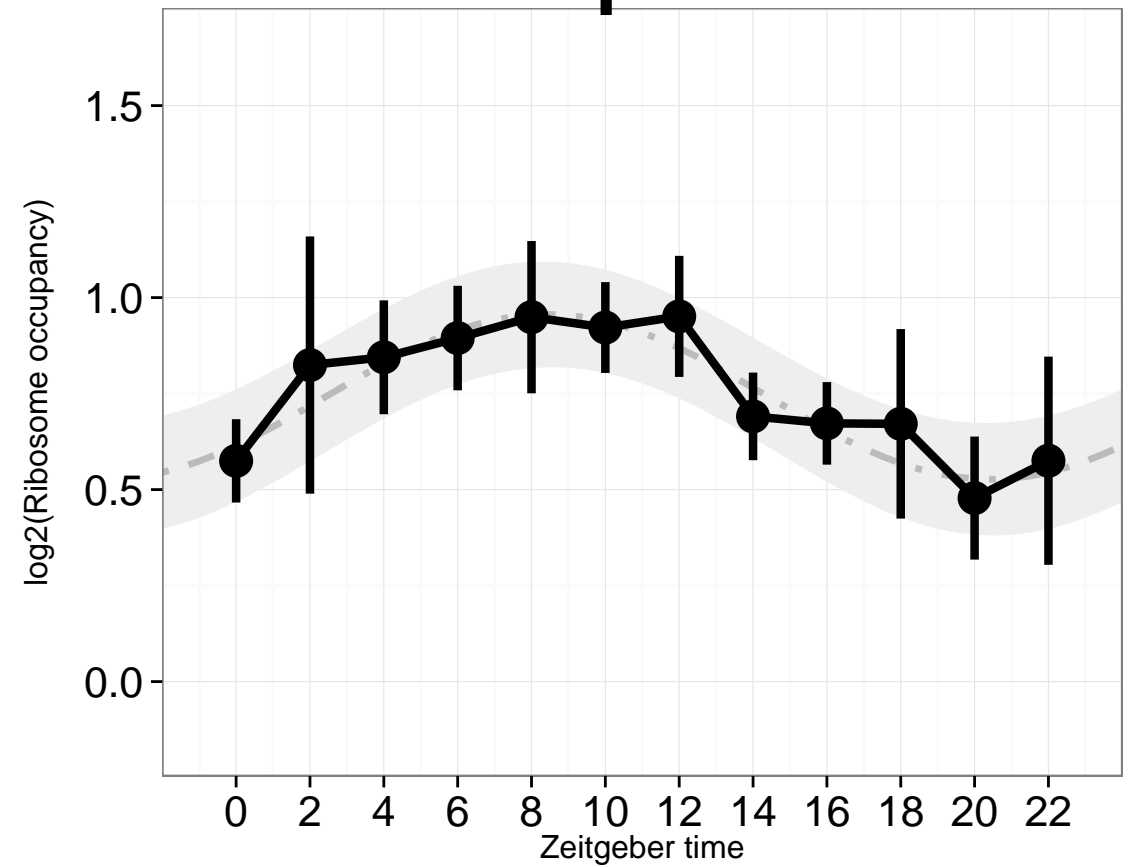

Supplement: SuppDataset_1.zip [file Tspan7_set_A.pdf › Supplemental Dataset 1/A-mRNA_nonrhyth_translation_nonrhyth/Tspan7_set_A.pdf]

**Tspan8 TR**

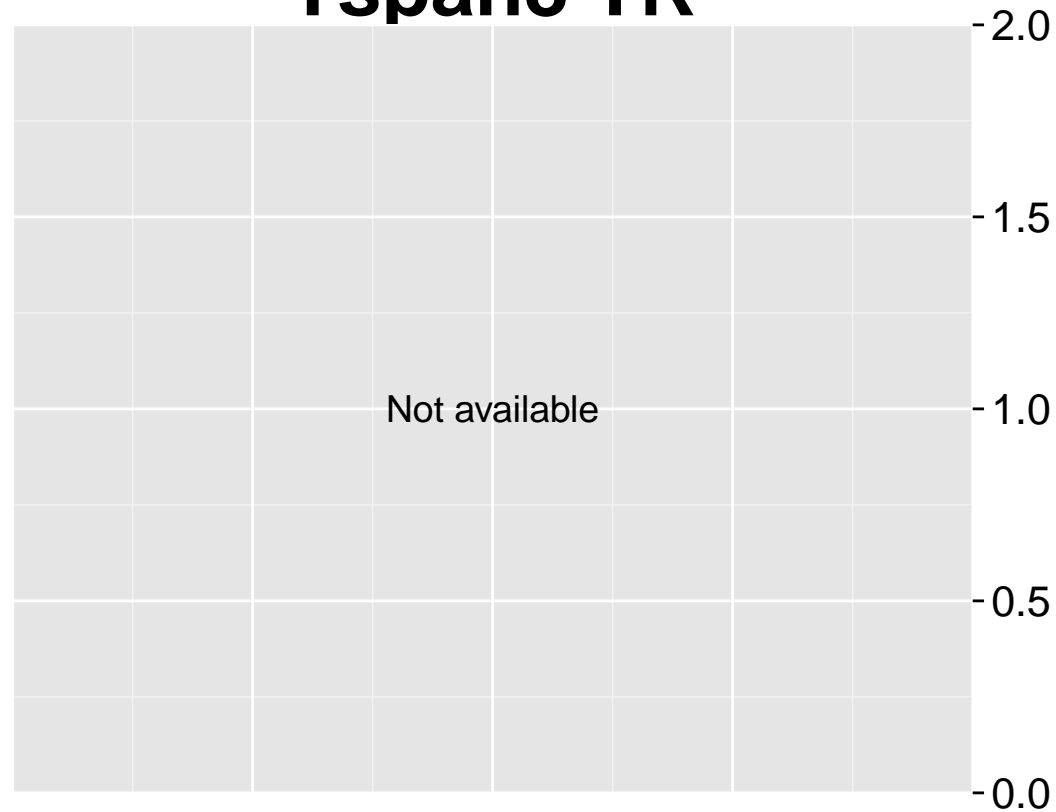

**Tspan8 log2(Ribosome occupancy**

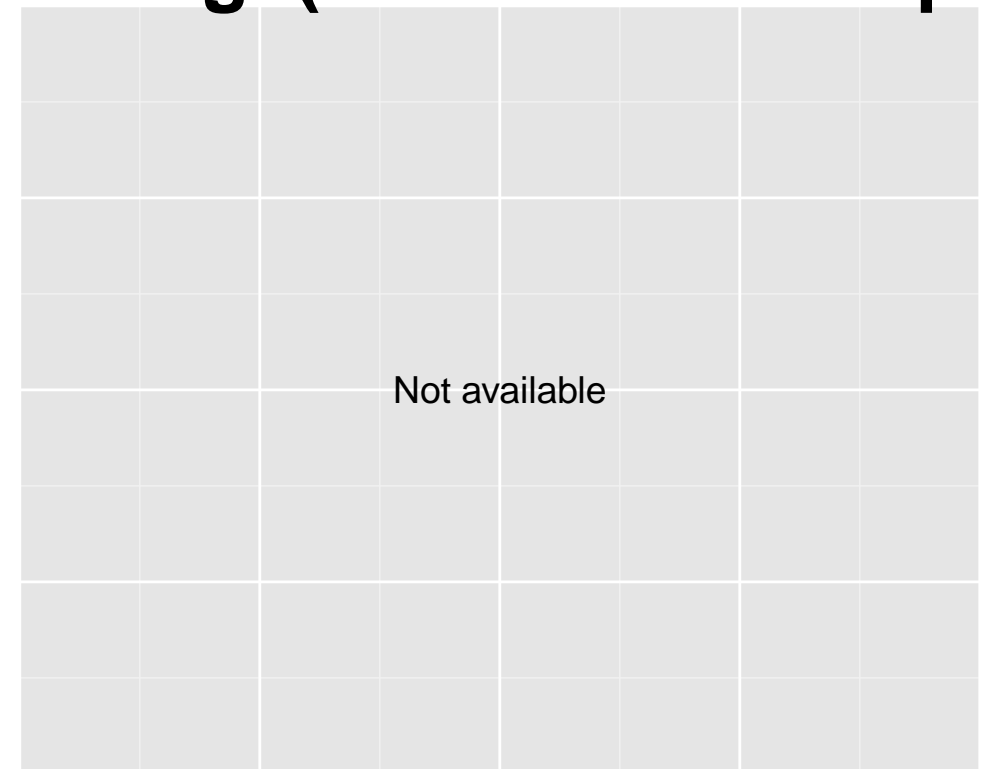

Supplement: SuppDataset_1.zip [file Tspan8_set_A.pdf › Supplemental Dataset 1/A-mRNA_nonrhyth_translation_nonrhyth/Tspan8_set_A.pdf]

## Tspan9

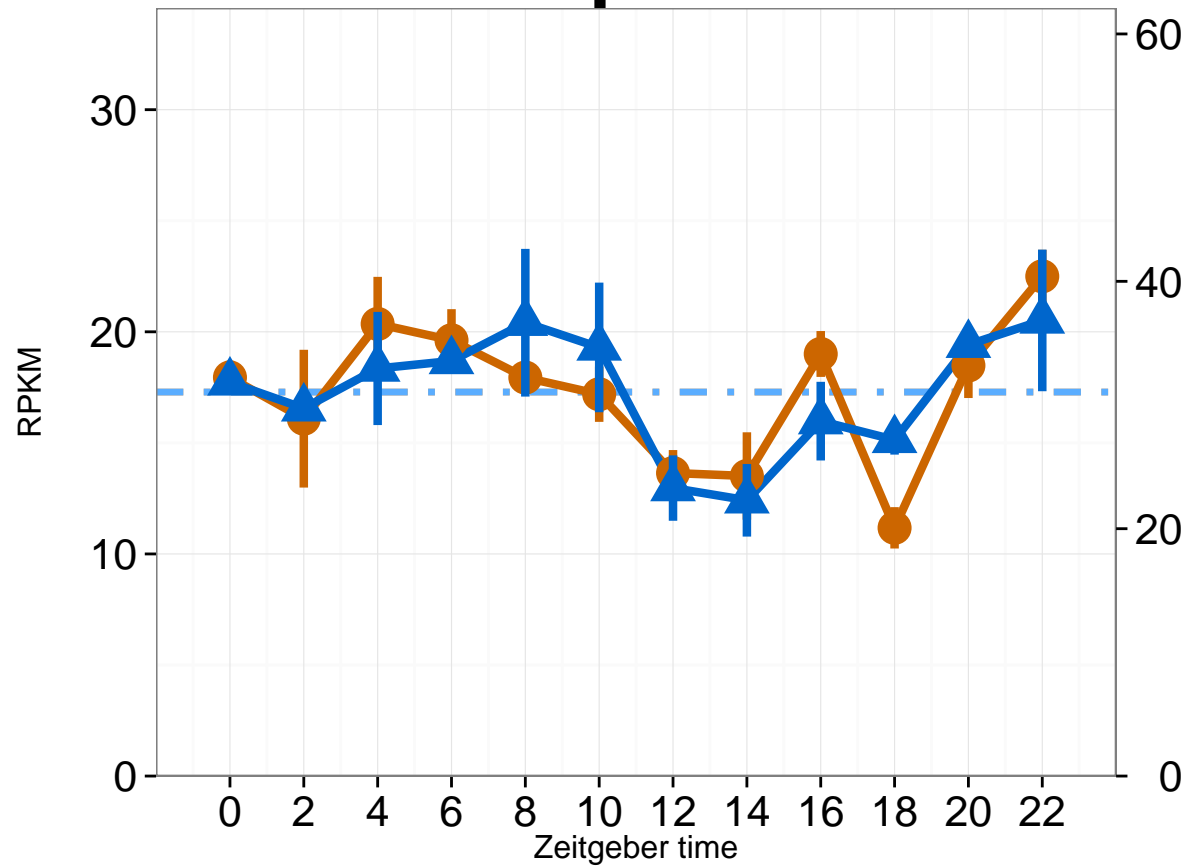

## Tspan9

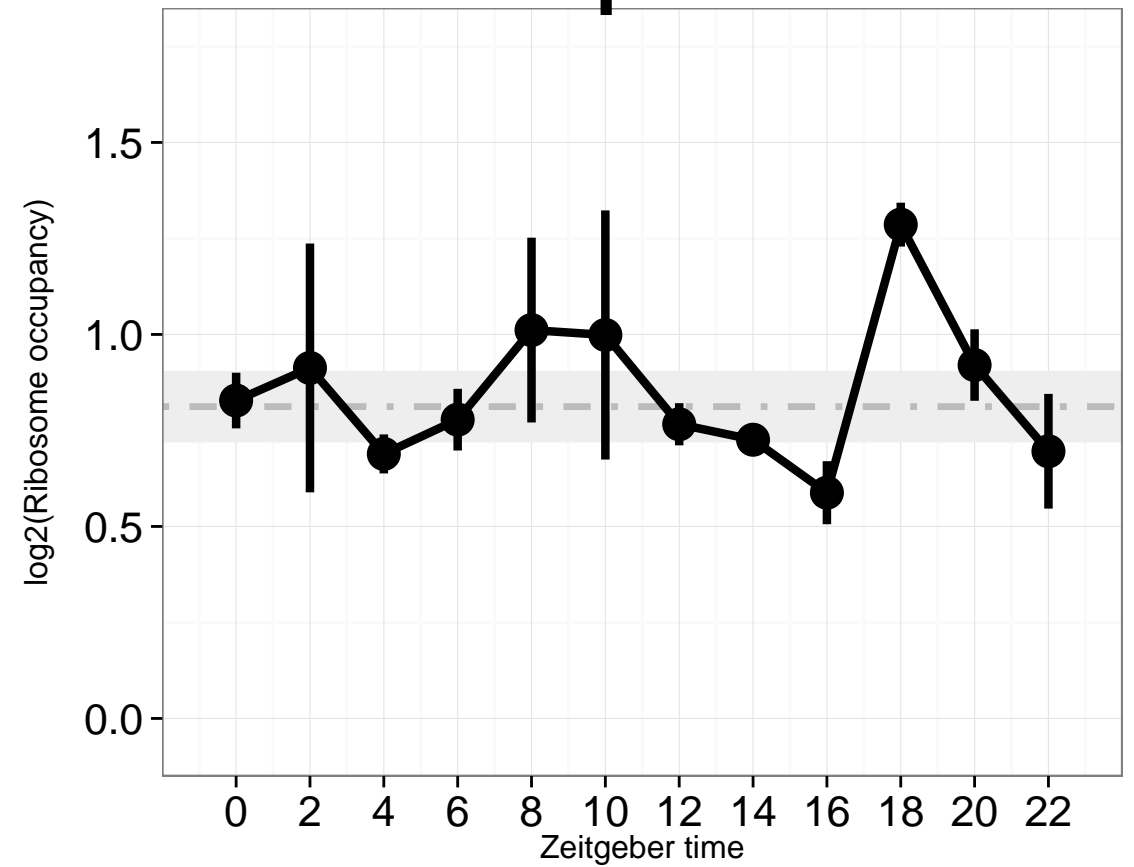

Supplement: SuppDataset_1.zip [file Tspan9_set_A.pdf › Supplemental Dataset 1/A-mRNA_nonrhyth_translation_nonrhyth/Tspan9_set_A.pdf]

## Tspo

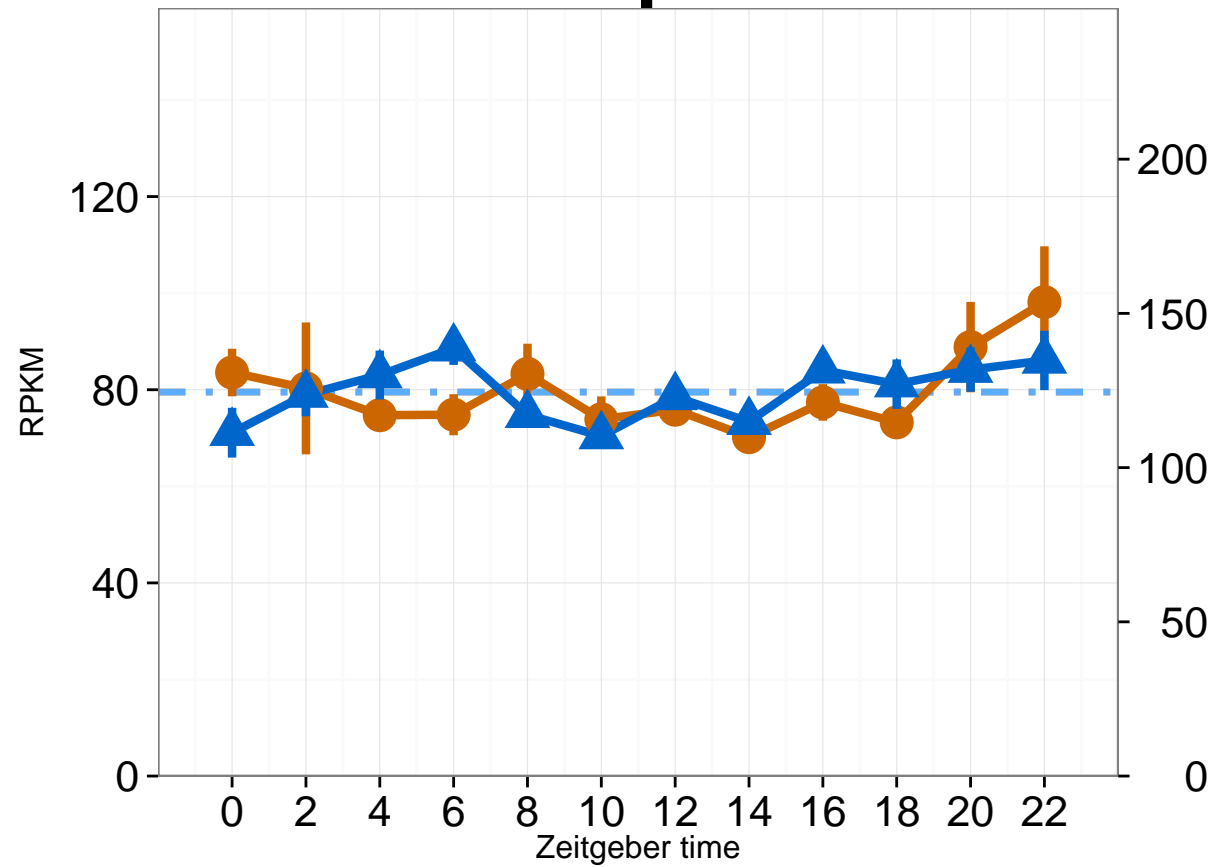

## Tspo

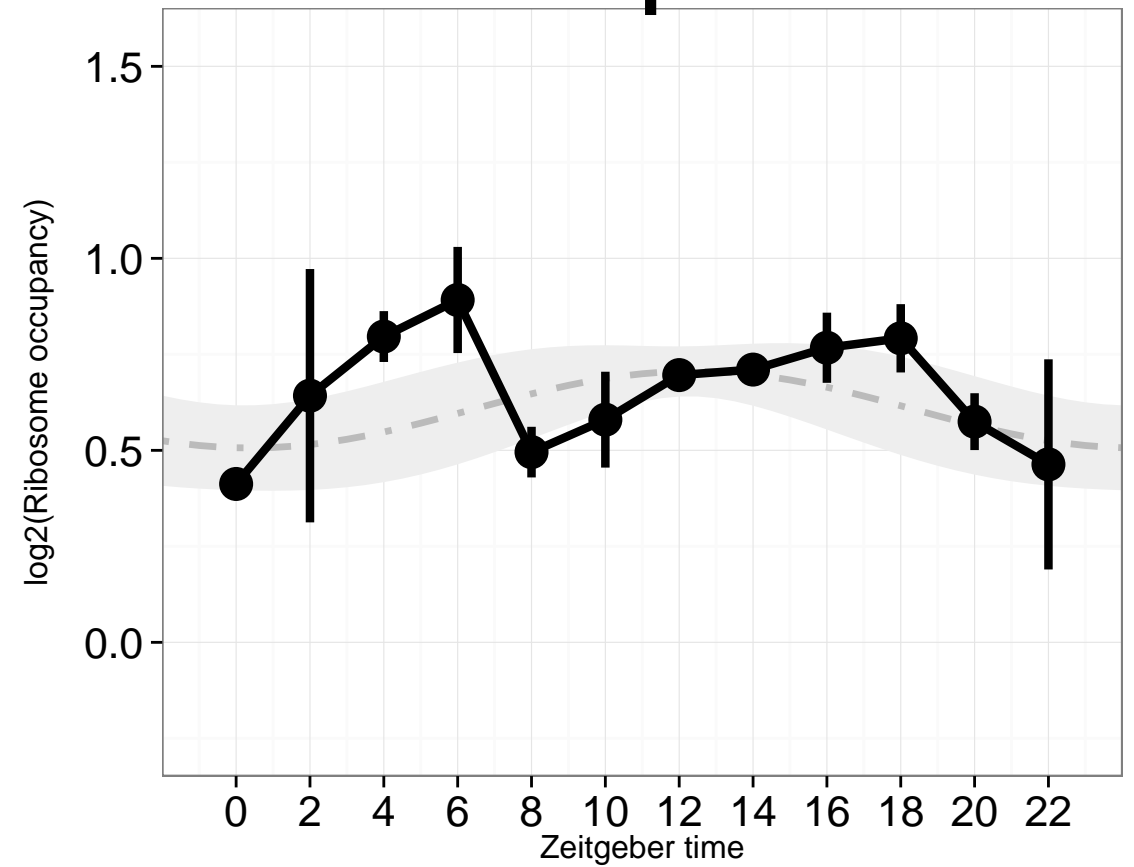

Supplement: SuppDataset_1.zip [file Tspo_set_A.pdf › Supplemental Dataset 1/A-mRNA_nonrhyth_translation_nonrhyth/Tspo_set_A.pdf]

# Tspyl1

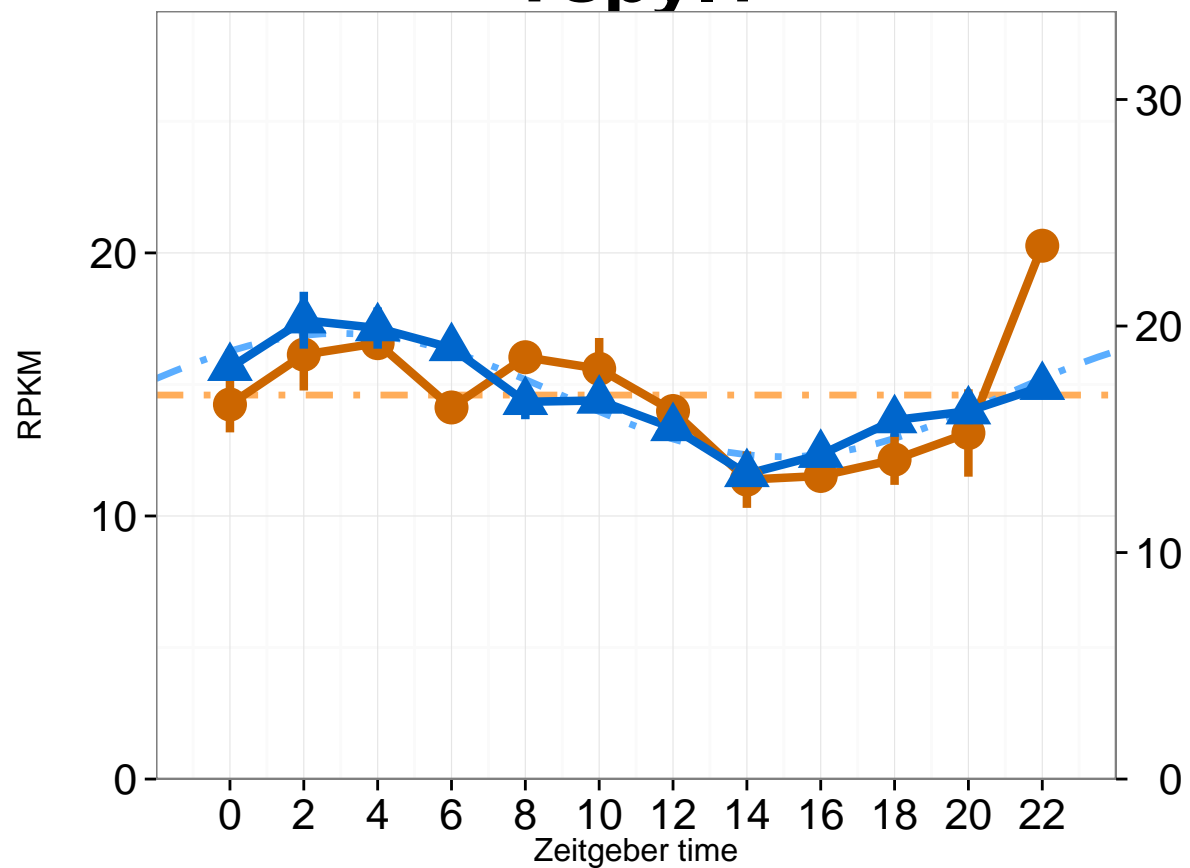

# Tspyl1

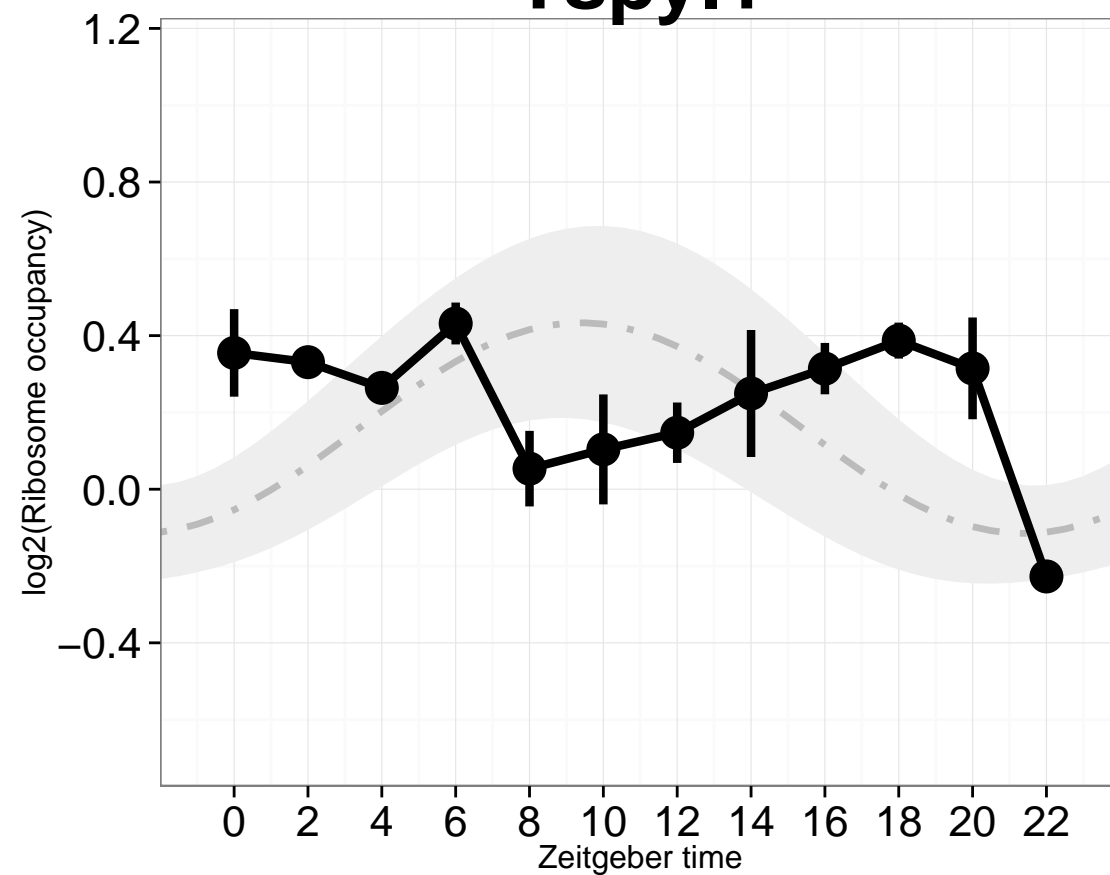

Supplement: SuppDataset_1.zip [file Tspyl1_set_A.pdf › Supplemental Dataset 1/A-mRNA_nonrhyth_translation_nonrhyth/Tspyl1_set_A.pdf]

# Tsr1

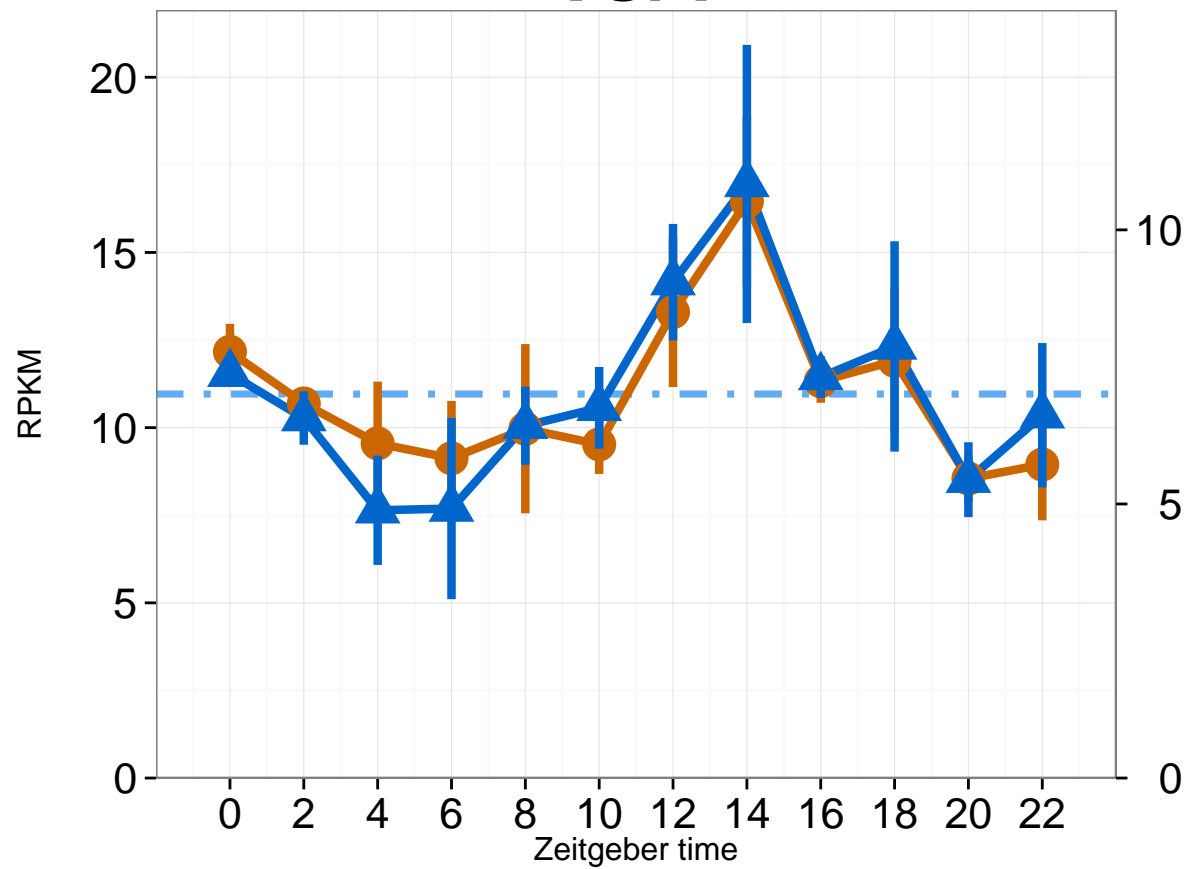

# Tsr1

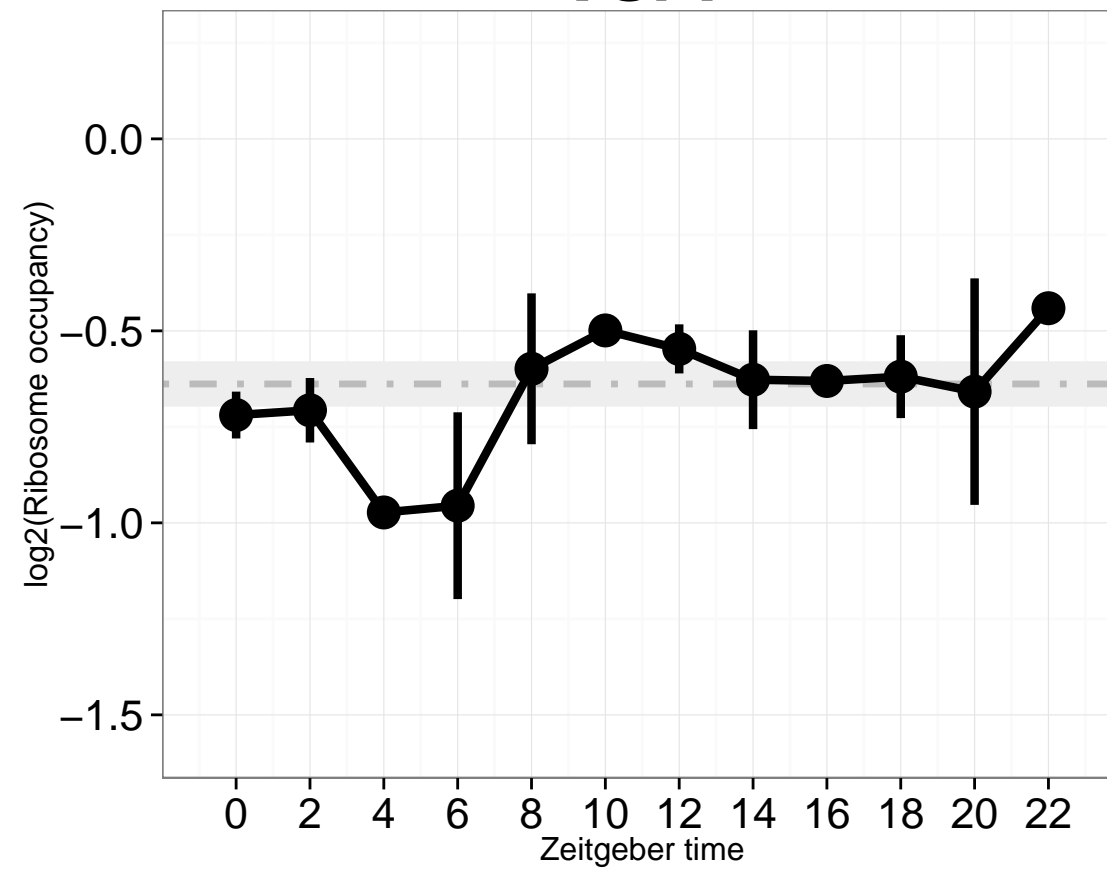

Supplement: SuppDataset_1.zip [file Tsr1_set_A.pdf › Supplemental Dataset 1/A-mRNA_nonrhyth_translation_nonrhyth/Tsr1_set_A.pdf]

## Tsr2

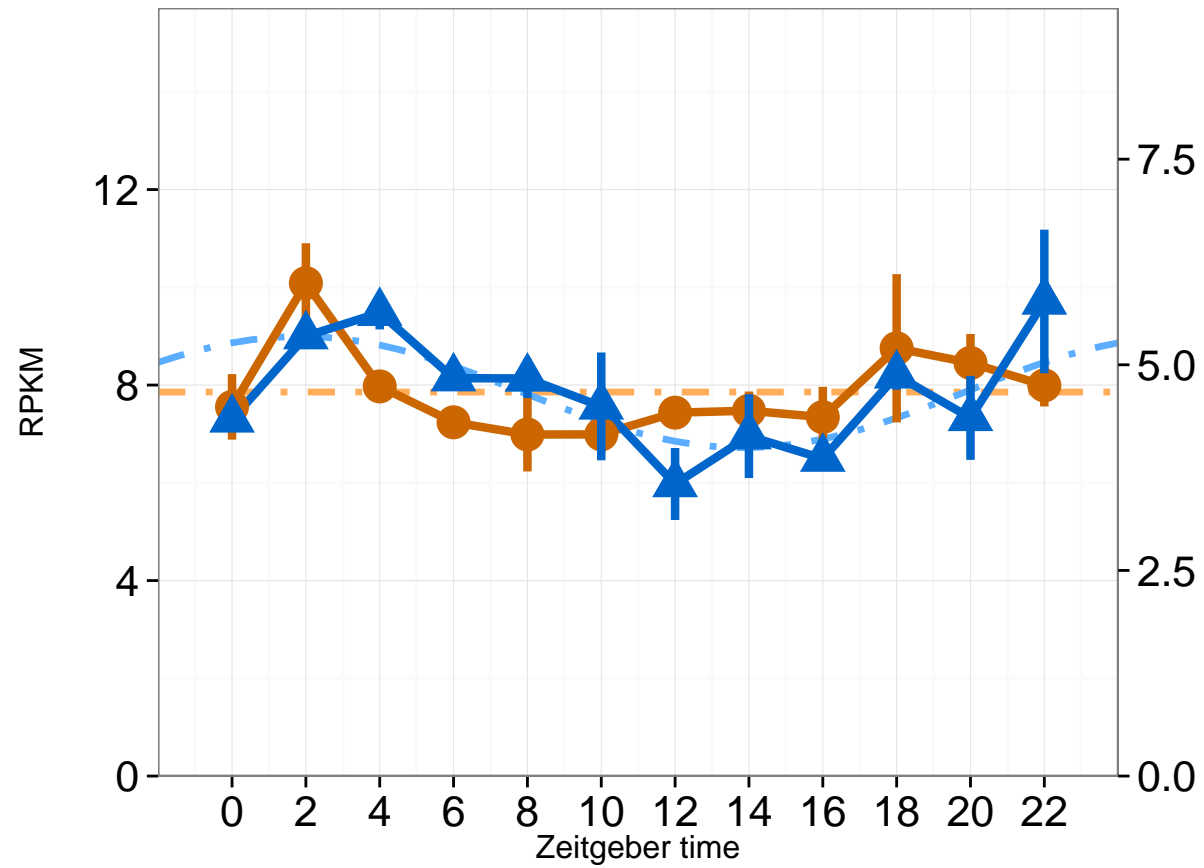

## Tsr2

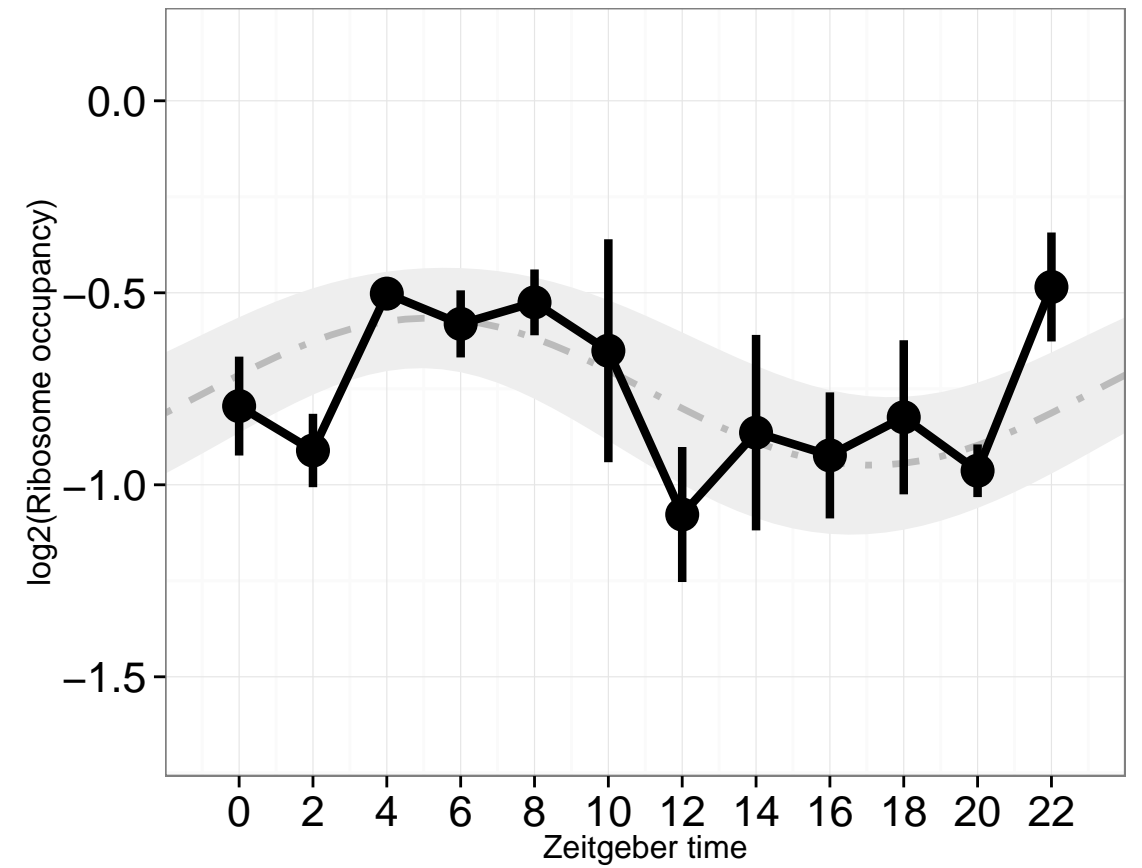

Supplement: SuppDataset_1.zip [file Tsr2_set_A.pdf › Supplemental Dataset 1/A-mRNA_nonrhyth_translation_nonrhyth/Tsr2_set_A.pdf]

## Tsr3

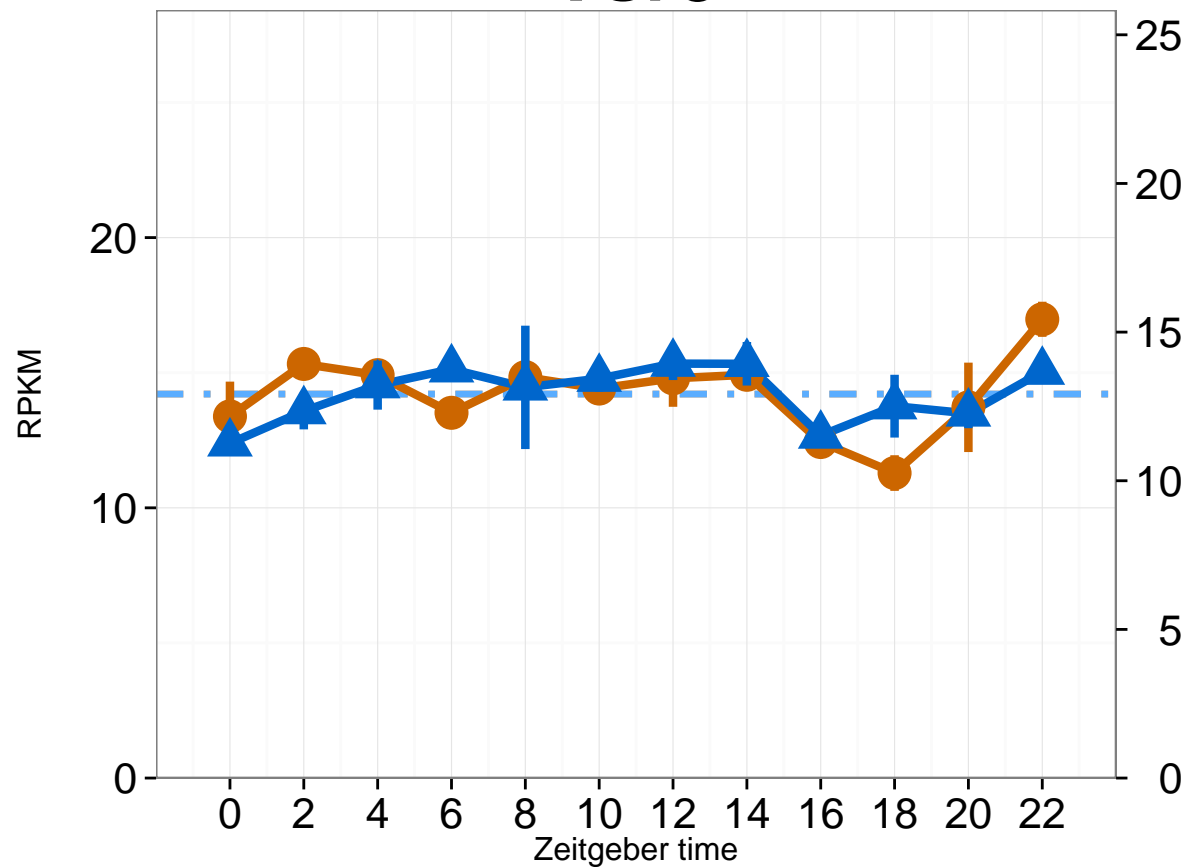

## Tsr3

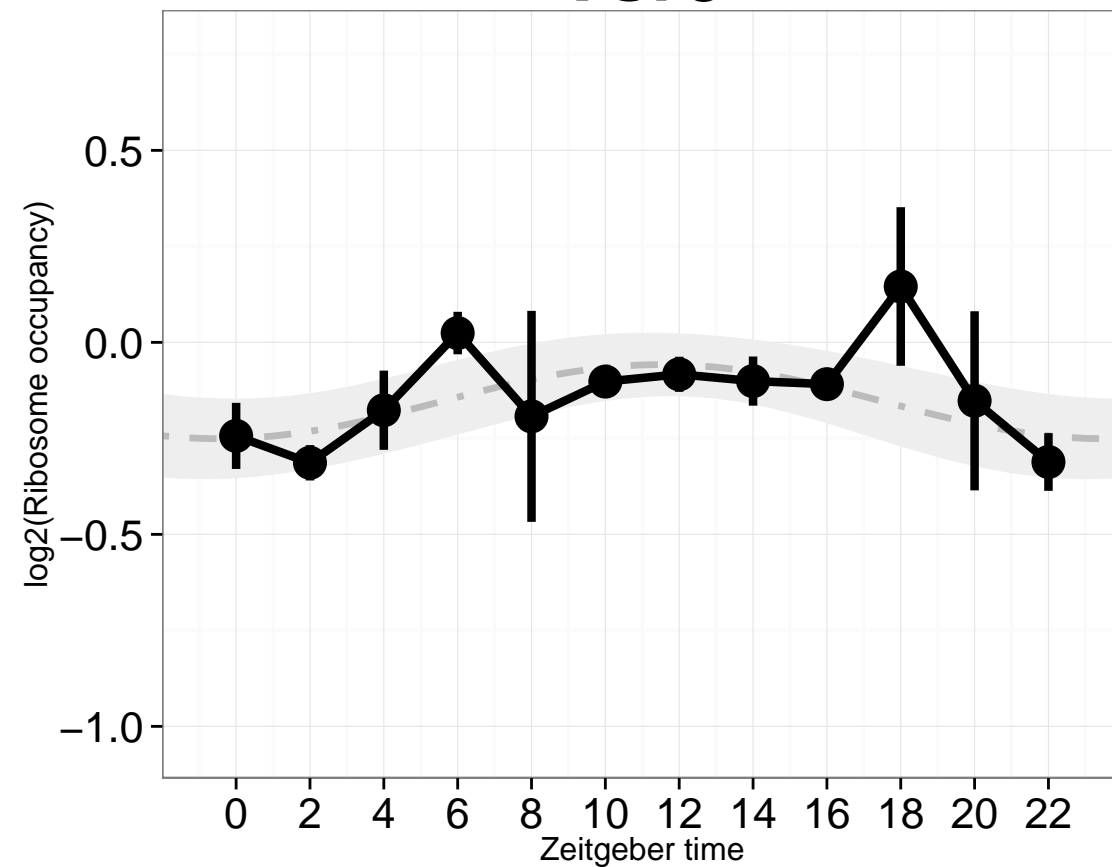

Supplement: SuppDataset_1.zip [file Tsr3_set_A.pdf › Supplemental Dataset 1/A-mRNA_nonrhyth_translation_nonrhyth/Tsr3_set_A.pdf]

# Tst

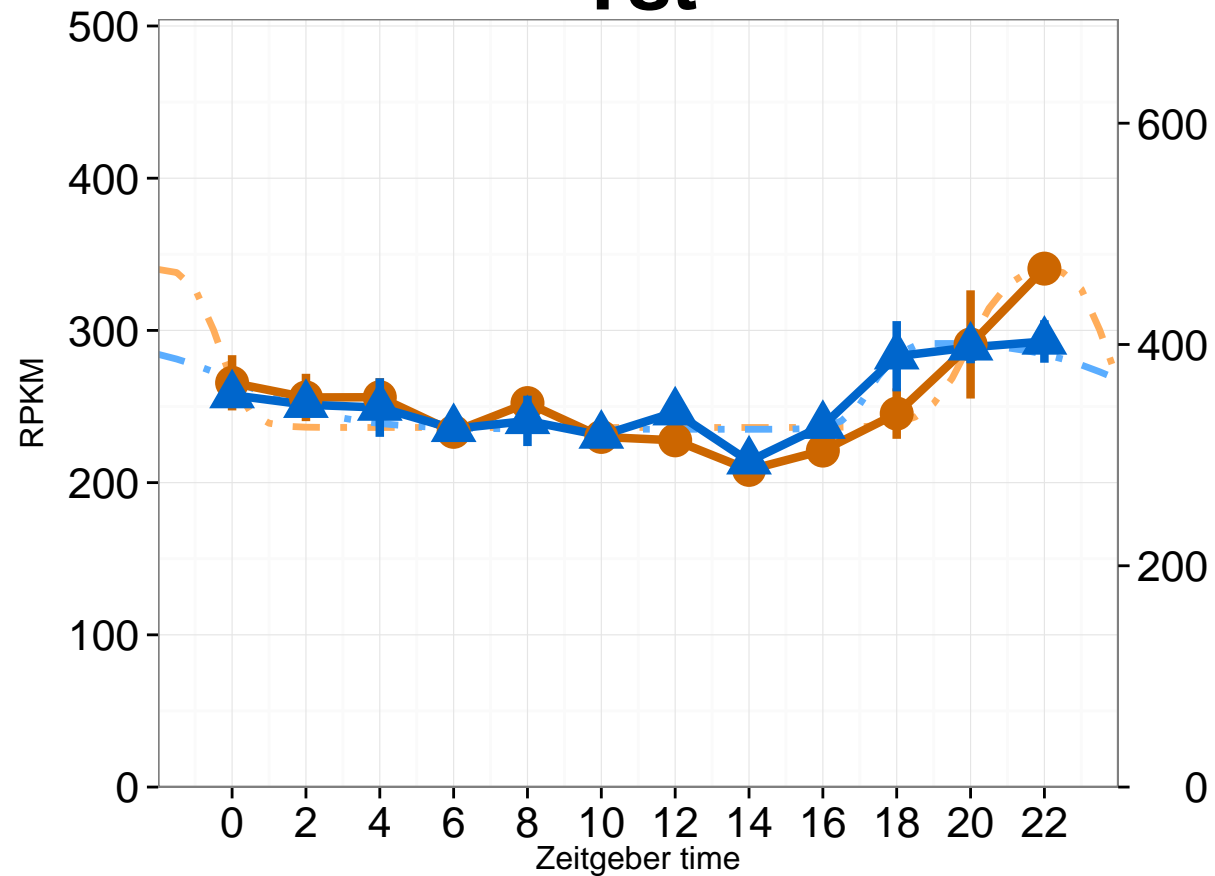

# Tst

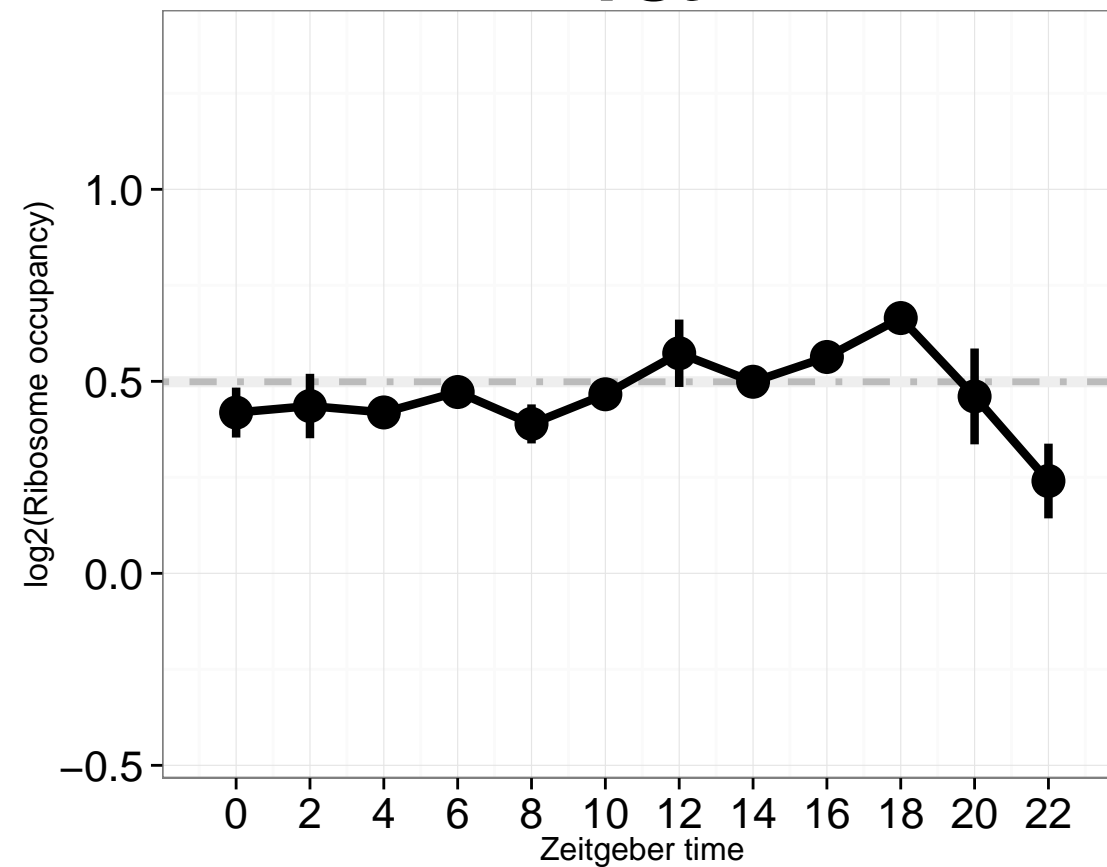

Supplement: SuppDataset_1.zip [file Tst_set_A.pdf › Supplemental Dataset 1/A-mRNA_nonrhyth_translation_nonrhyth/Tst_set_A.pdf]

## Tsta3

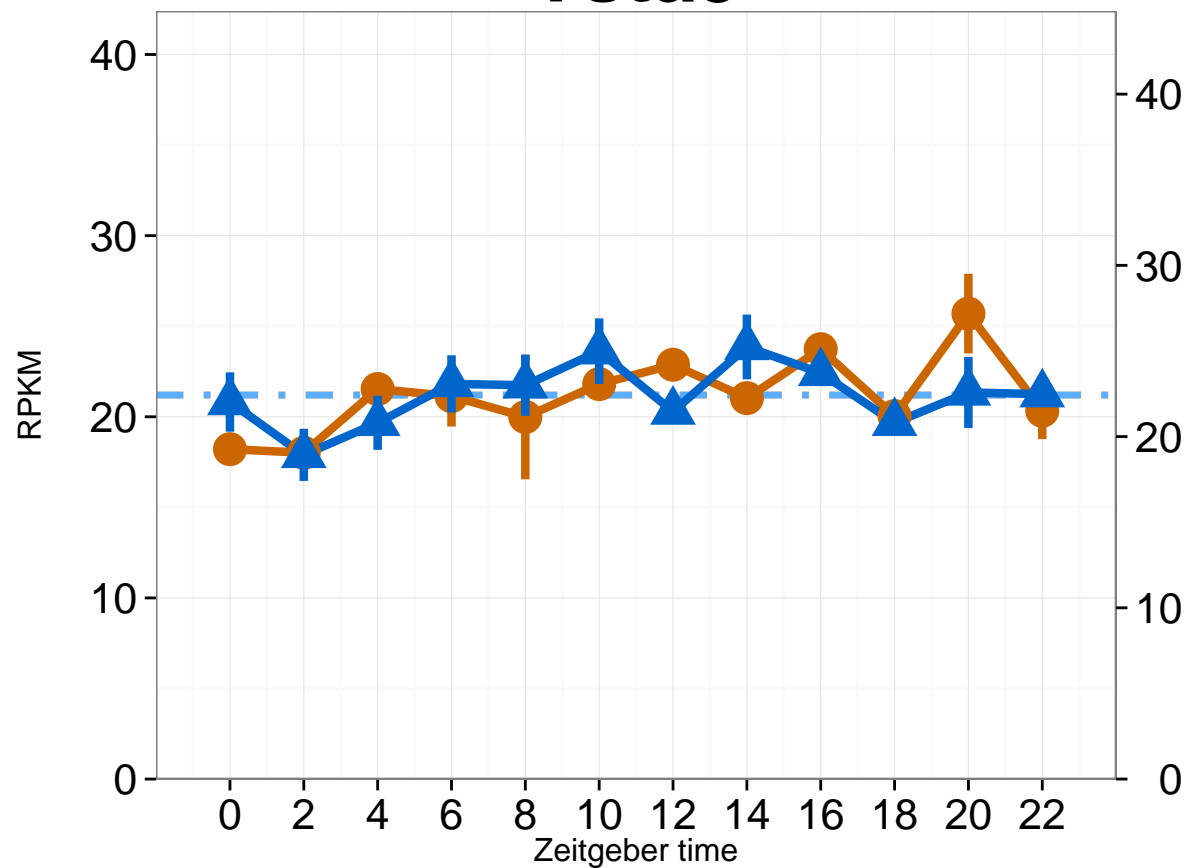

## Tsta3

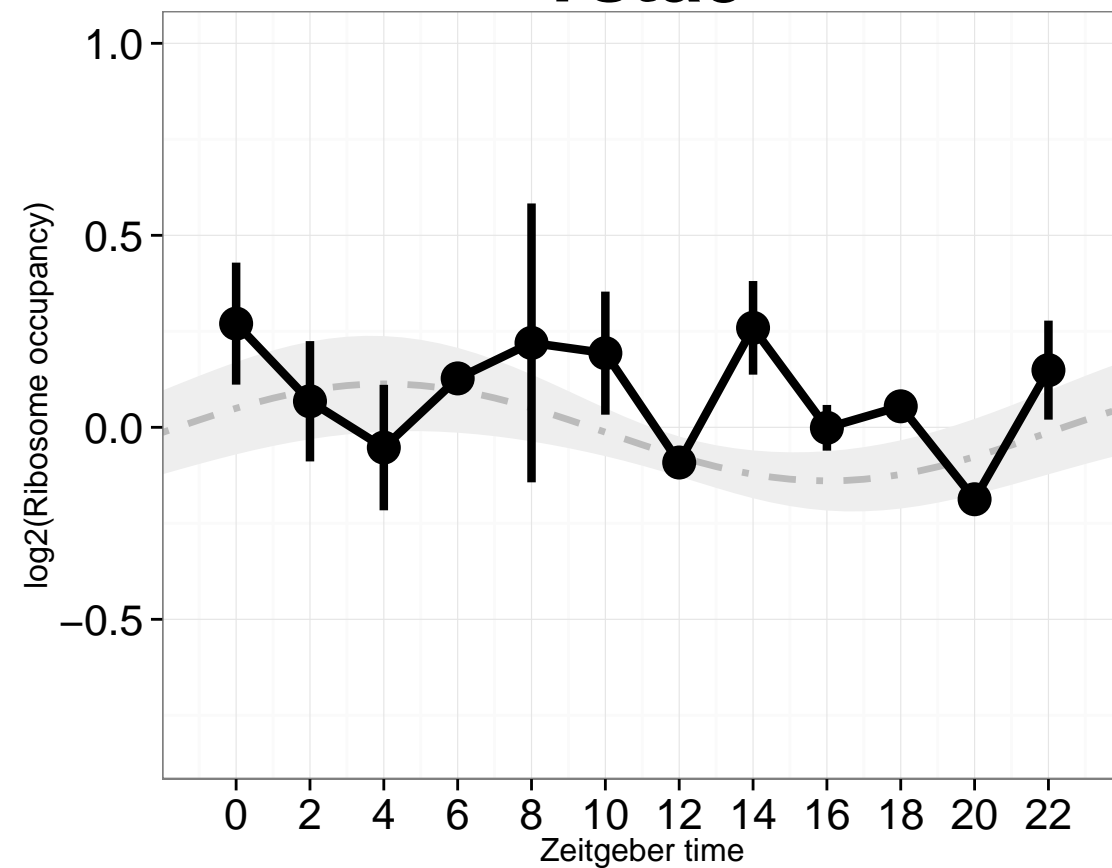

Supplement: SuppDataset_1.zip [file Tsta3_set_A.pdf › Supplemental Dataset 1/A-mRNA_nonrhyth_translation_nonrhyth/Tsta3_set_A.pdf]

# Tstd1

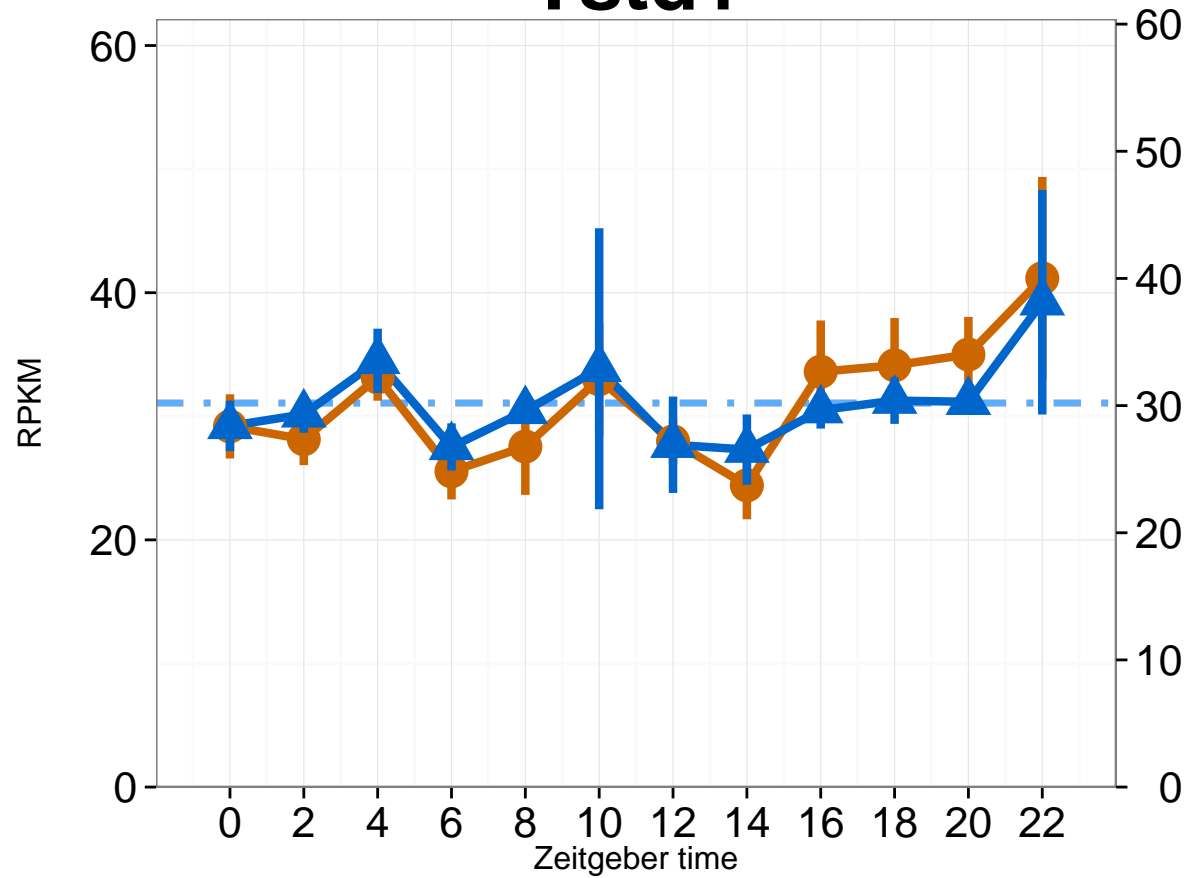

# Tstd1

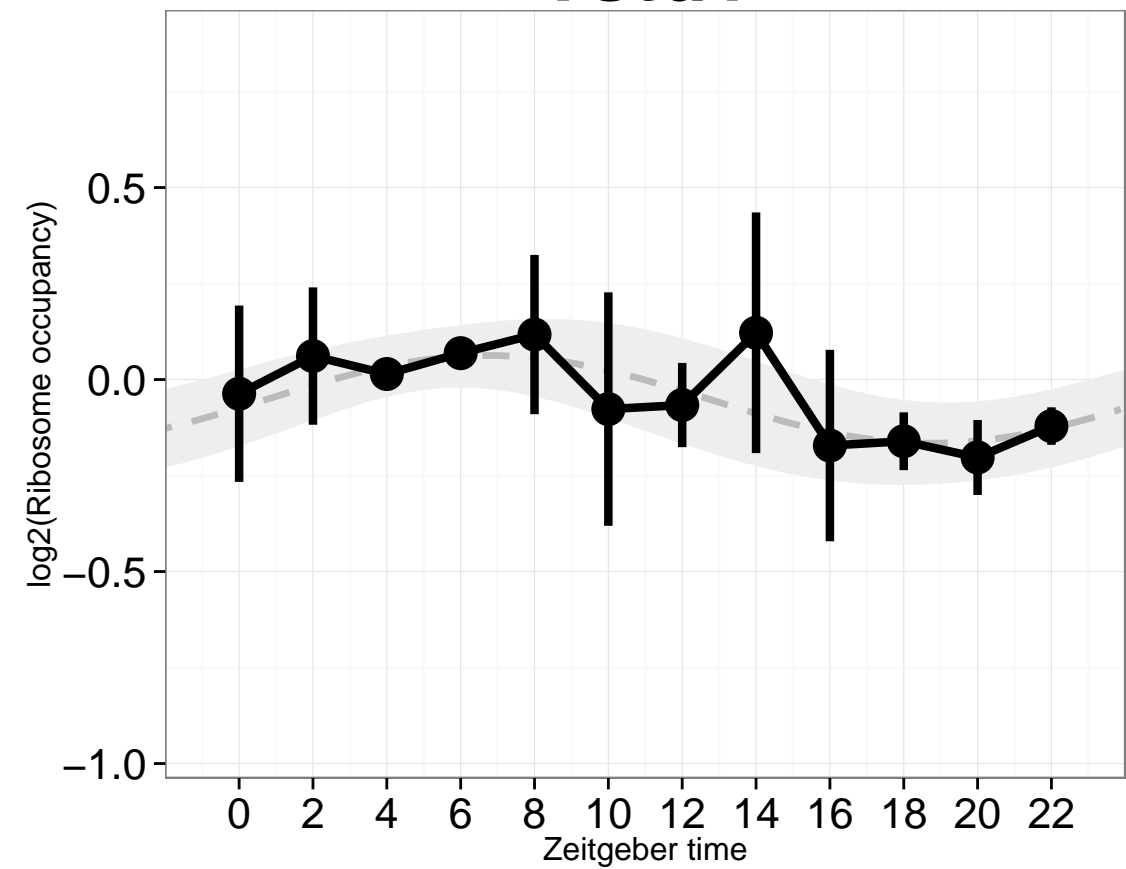

Supplement: SuppDataset_1.zip [file Tstd1_set_A.pdf › Supplemental Dataset 1/A-mRNA_nonrhyth_translation_nonrhyth/Tstd1_set_A.pdf]

## Tstd2

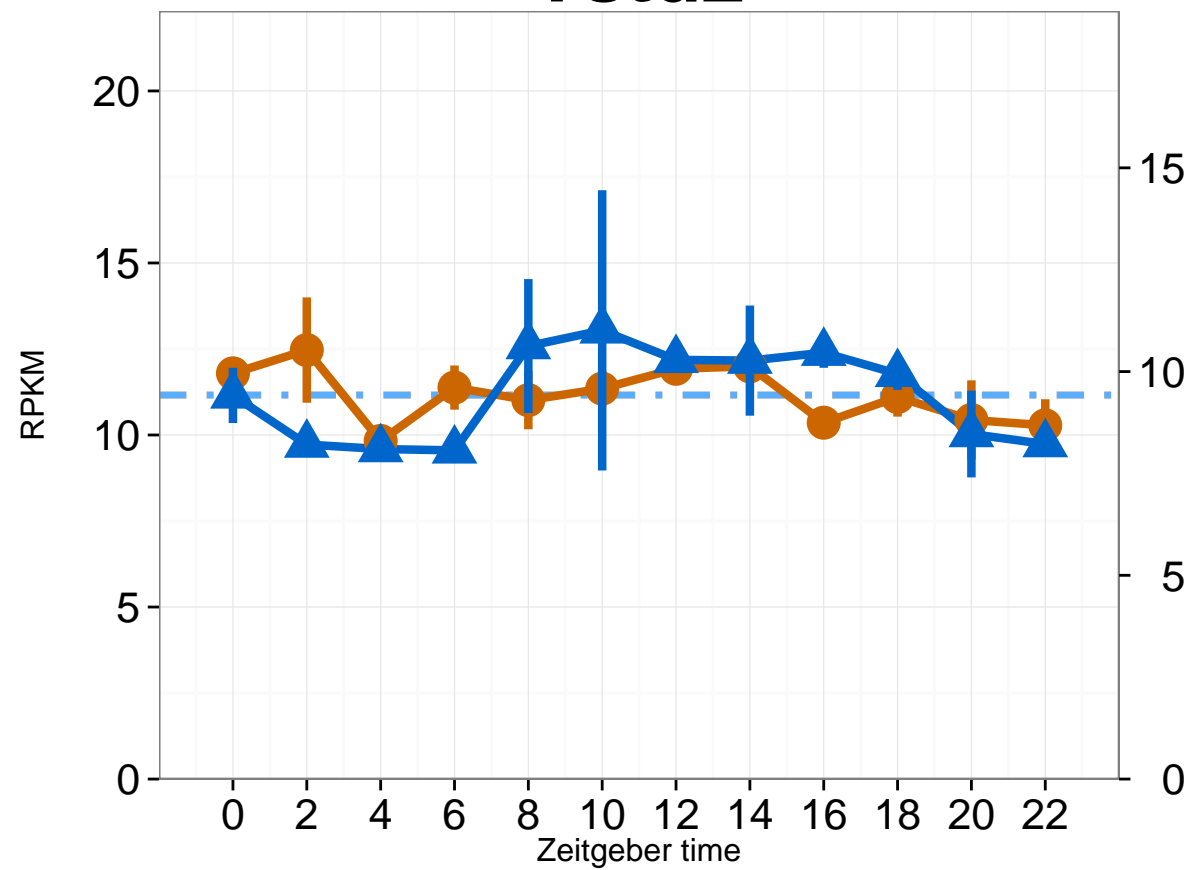

## Tstd2

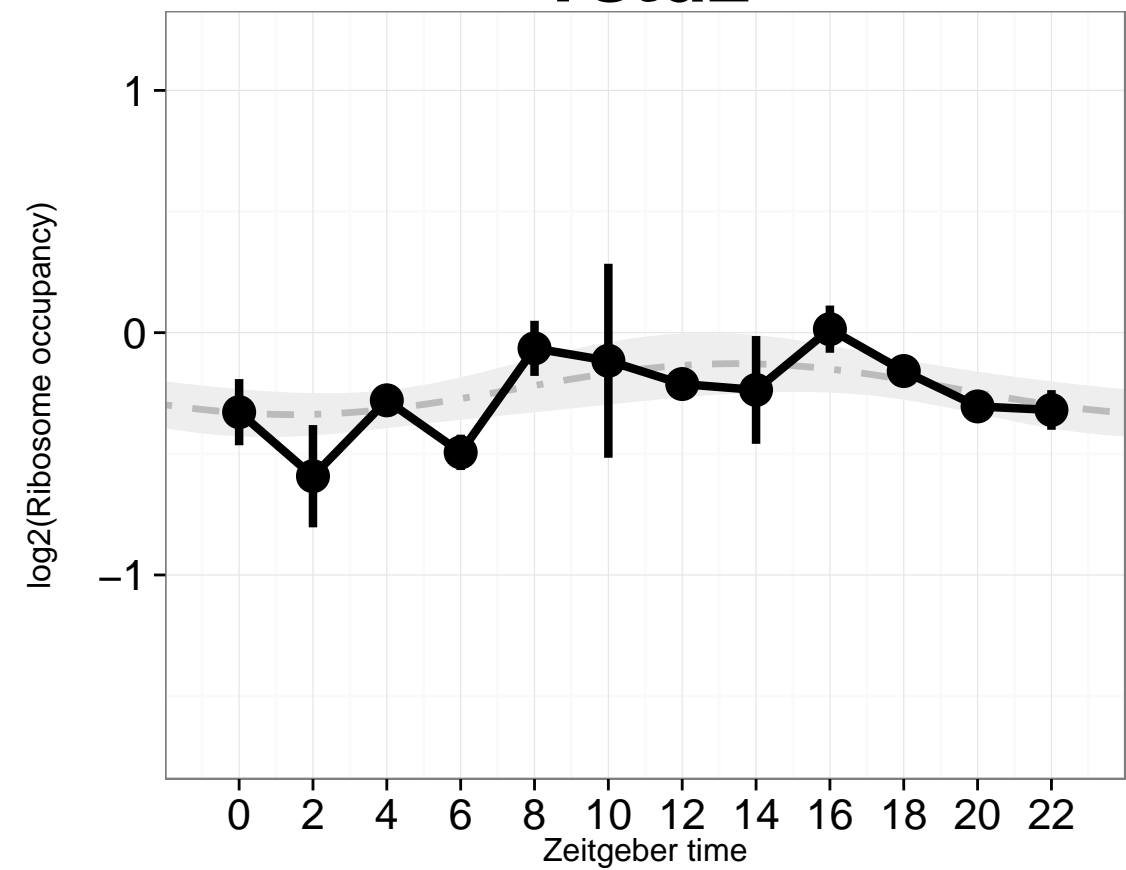

Supplement: SuppDataset_1.zip [file Tstd2_set_A.pdf › Supplemental Dataset 1/A-mRNA_nonrhyth_translation_nonrhyth/Tstd2_set_A.pdf]

## Ttbk2

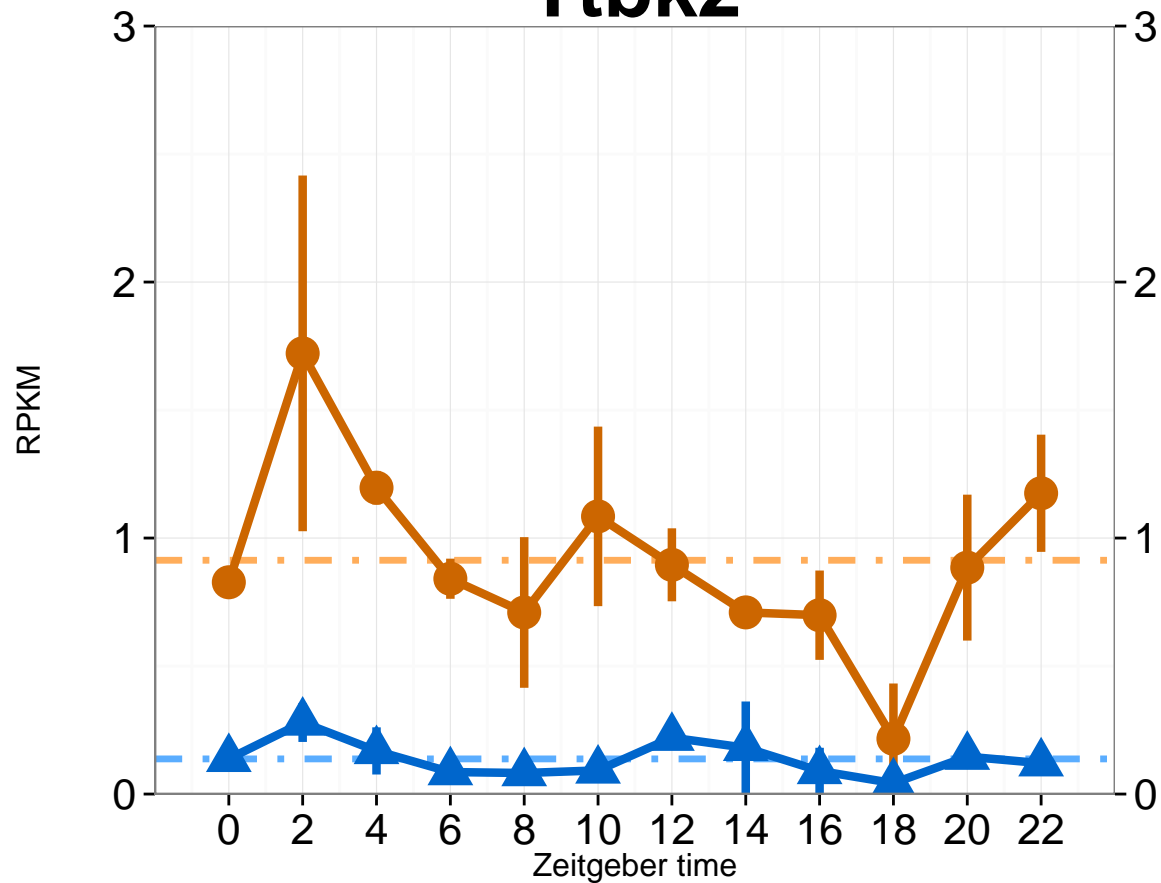

## Ttbk2

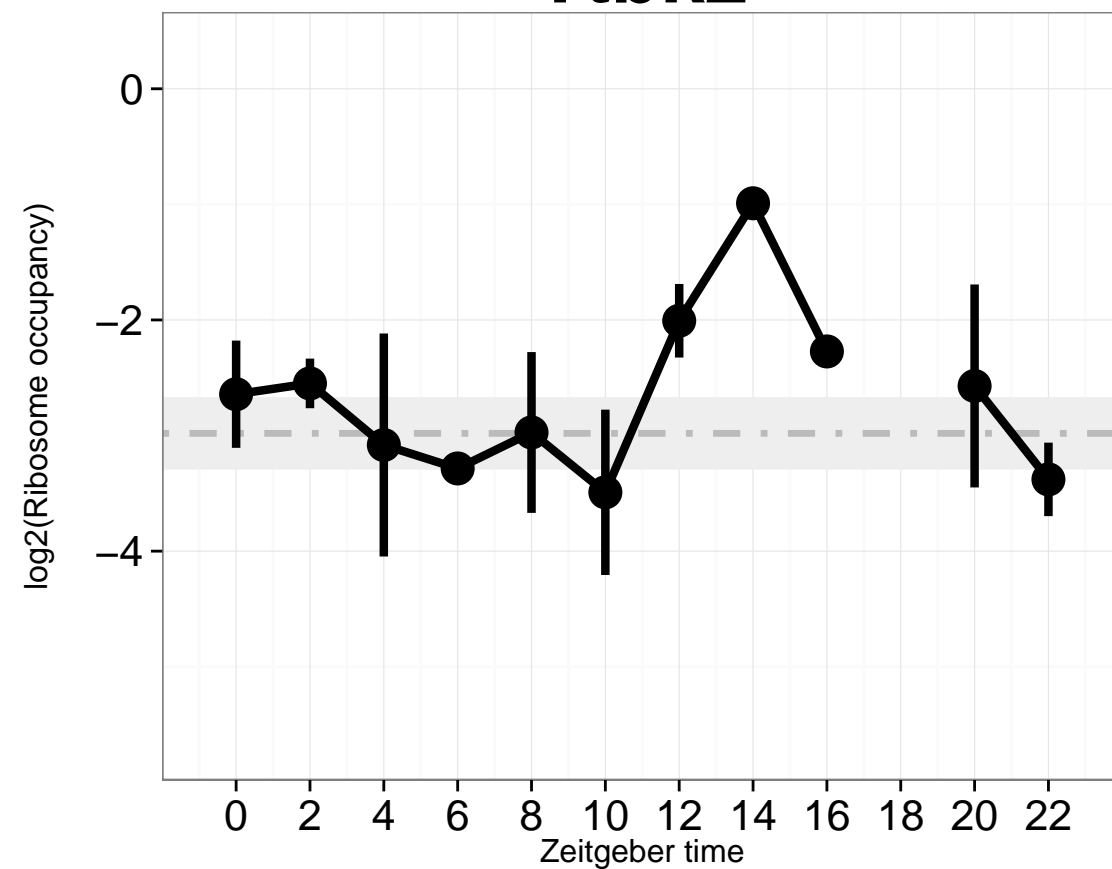

Supplement: SuppDataset_1.zip [file Ttbk2_set_A.pdf › Supplemental Dataset 1/A-mRNA_nonrhyth_translation_nonrhyth/Ttbk2_set_A.pdf]

# Ttc13

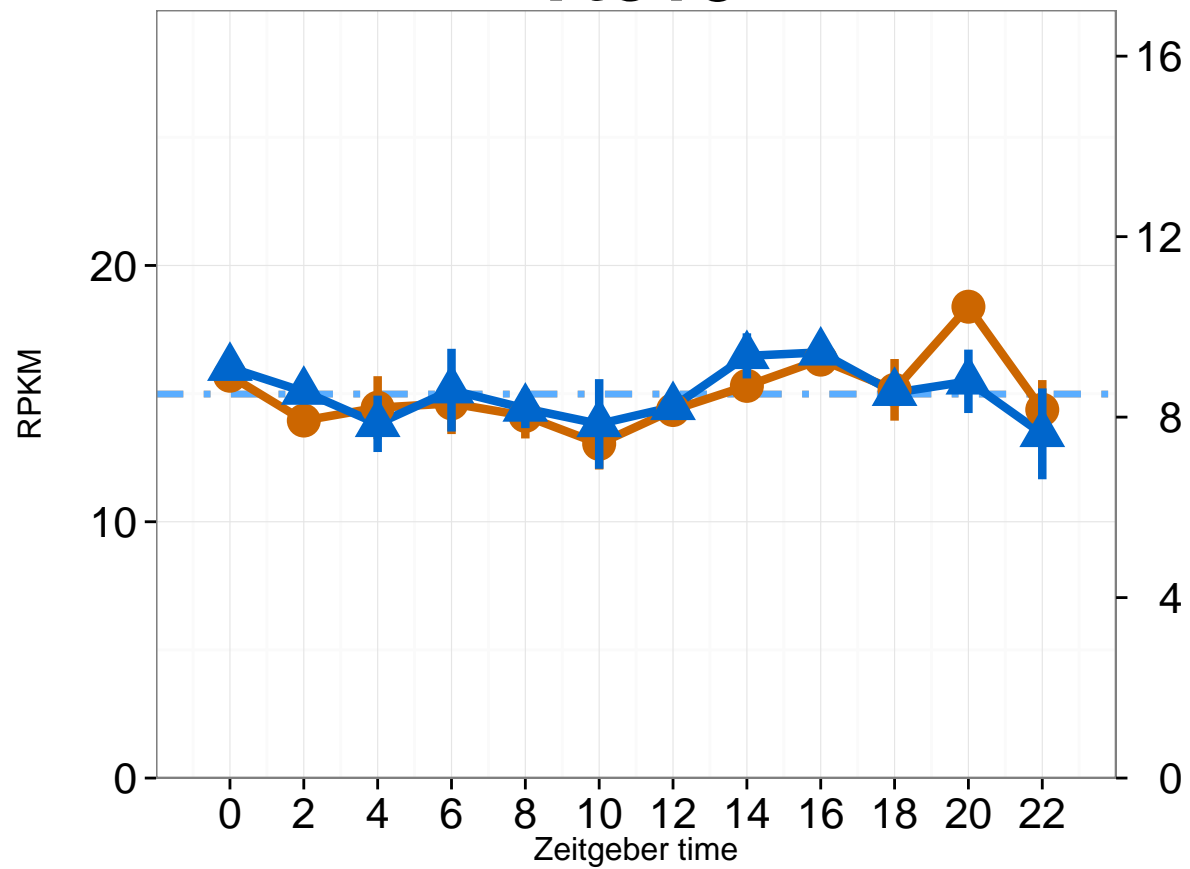

# Ttc13

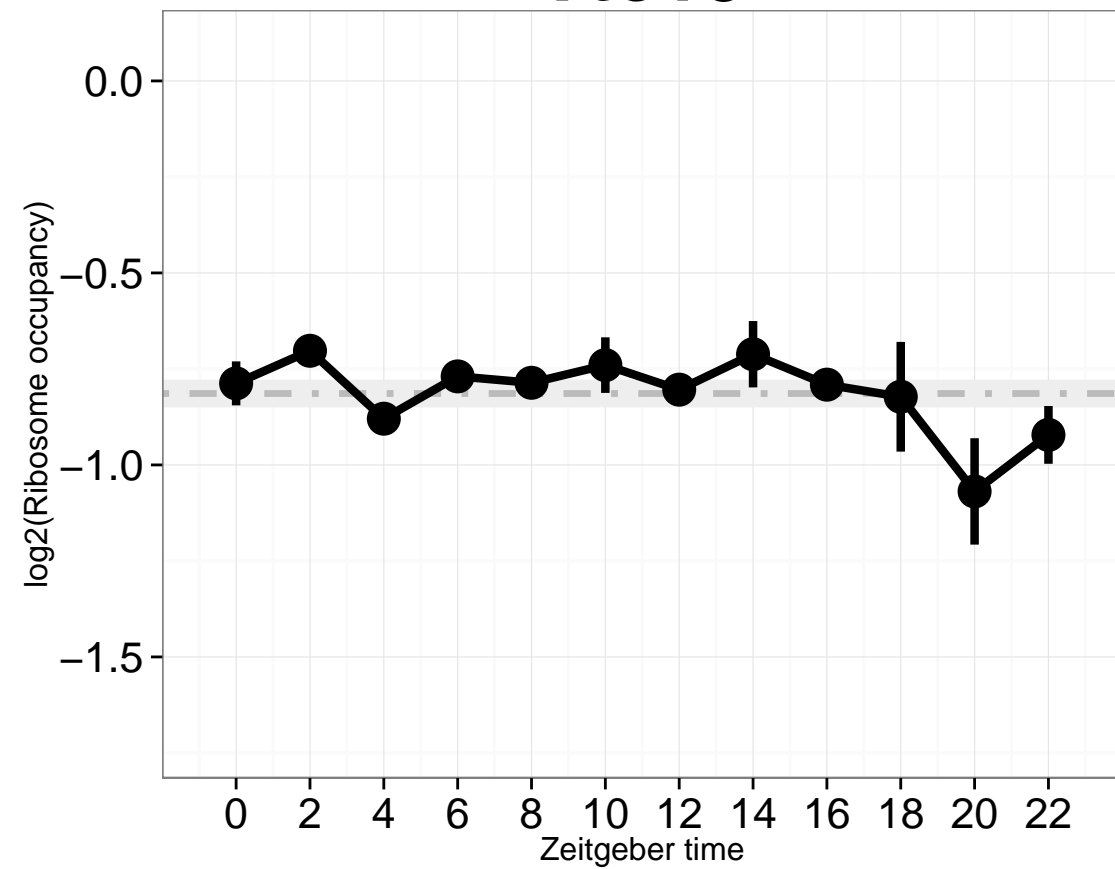

Supplement: SuppDataset_1.zip [file Ttc13_set_A.pdf › Supplemental Dataset 1/A-mRNA_nonrhyth_translation_nonrhyth/Ttc13_set_A.pdf]

## Ttc14

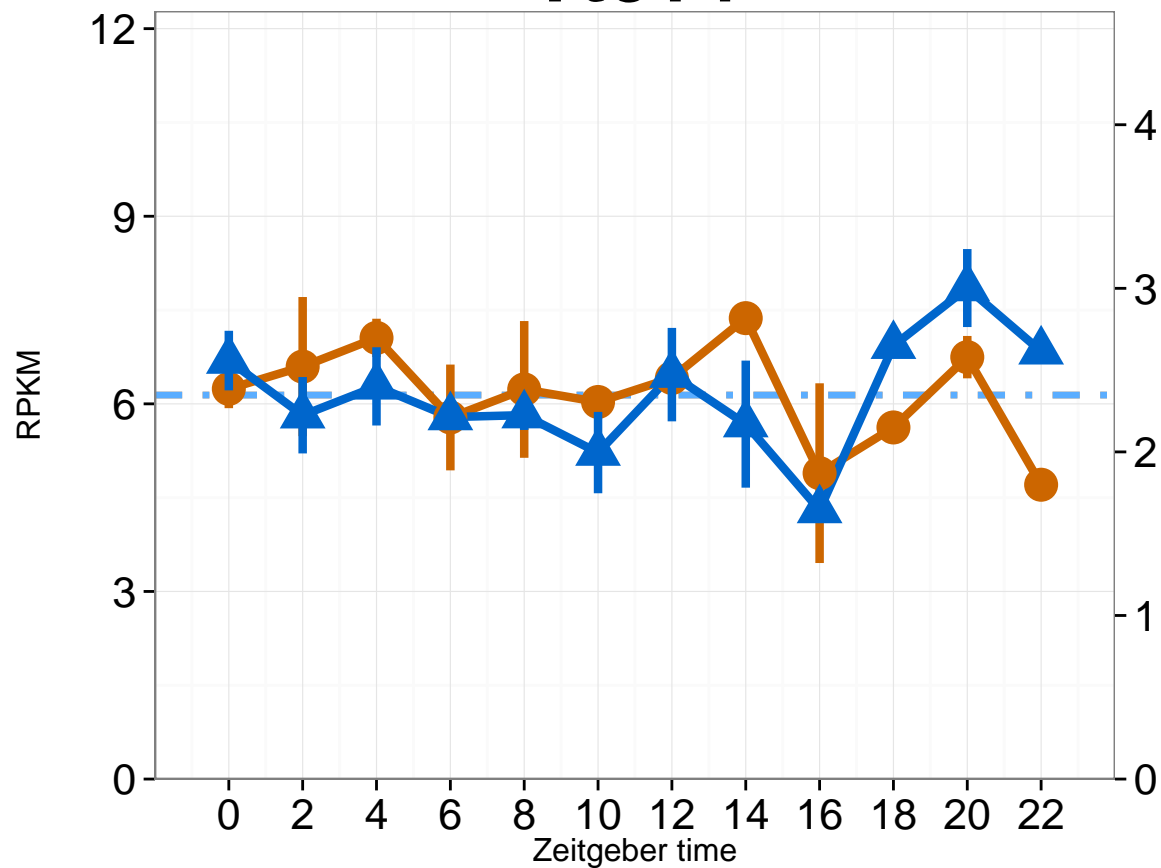

## Ttc14

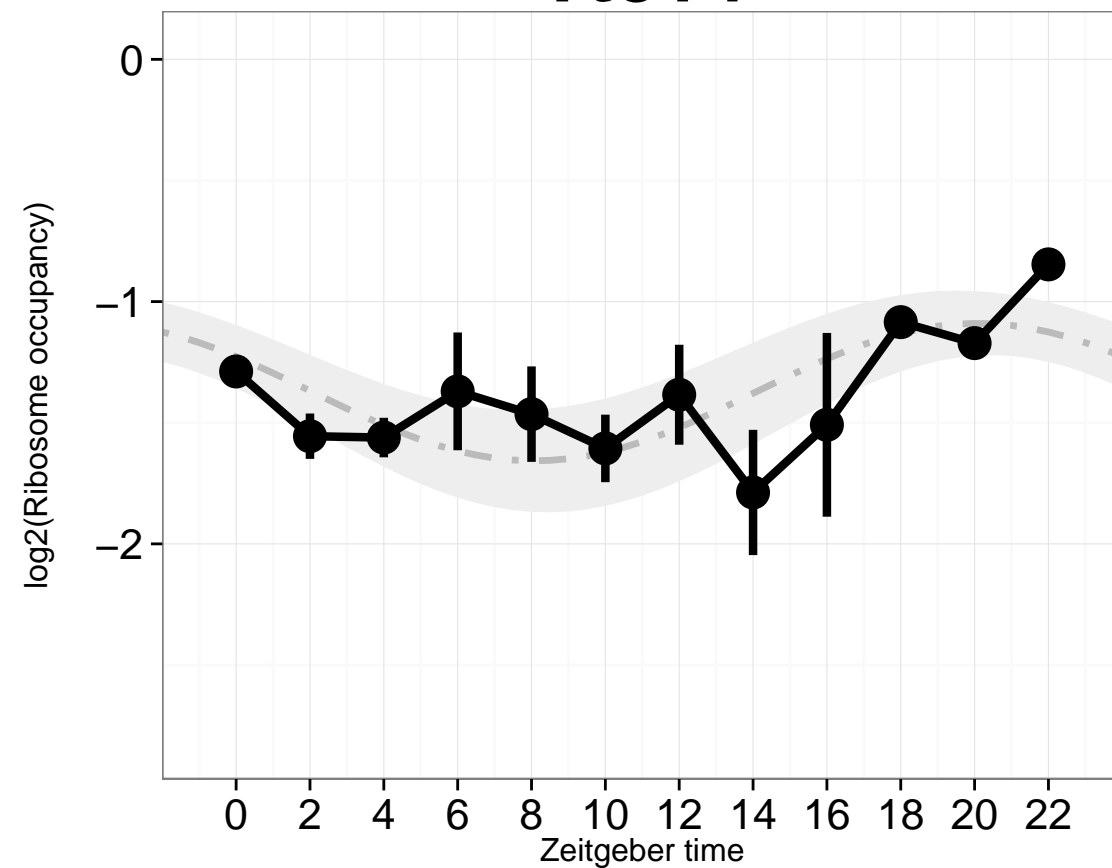

Supplement: SuppDataset_1.zip [file Ttc14_set_A.pdf › Supplemental Dataset 1/A-mRNA_nonrhyth_translation_nonrhyth/Ttc14_set_A.pdf]

## Ttc17

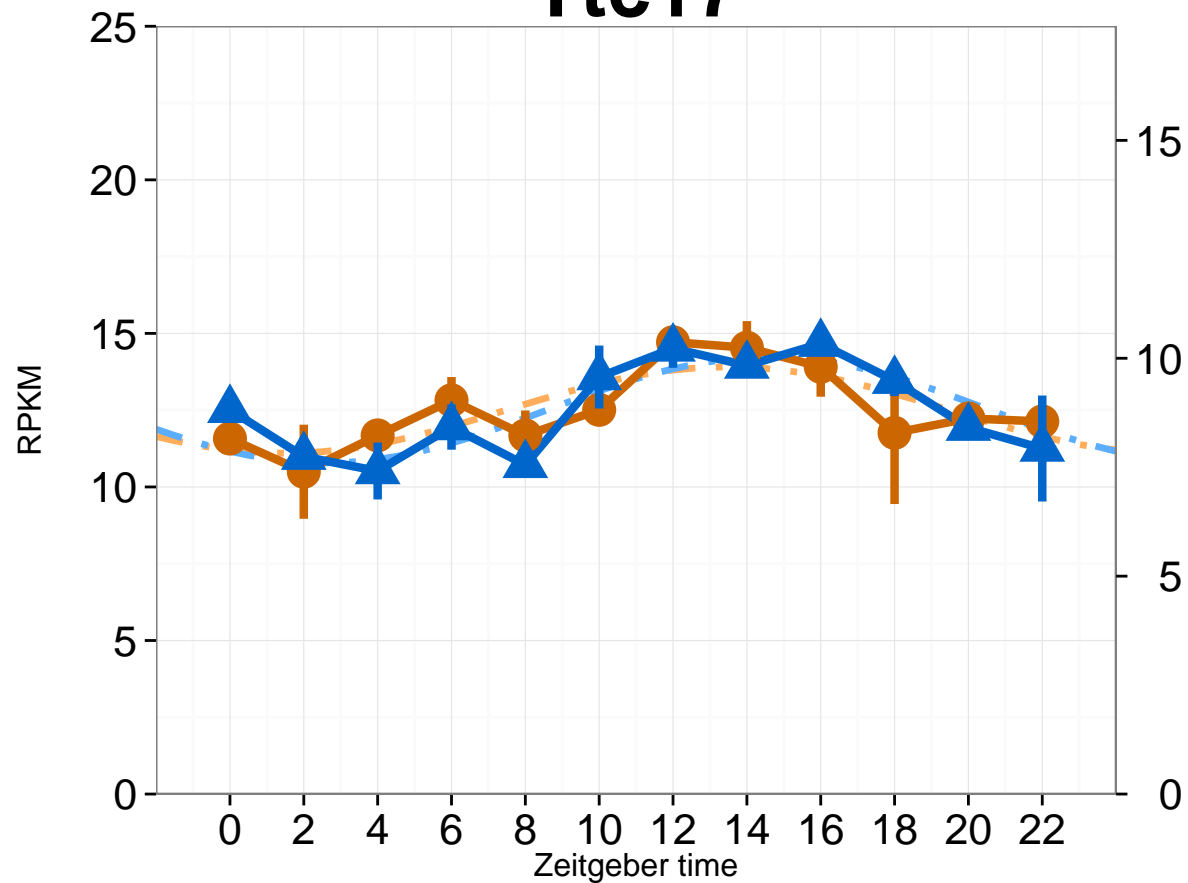

## Ttc17

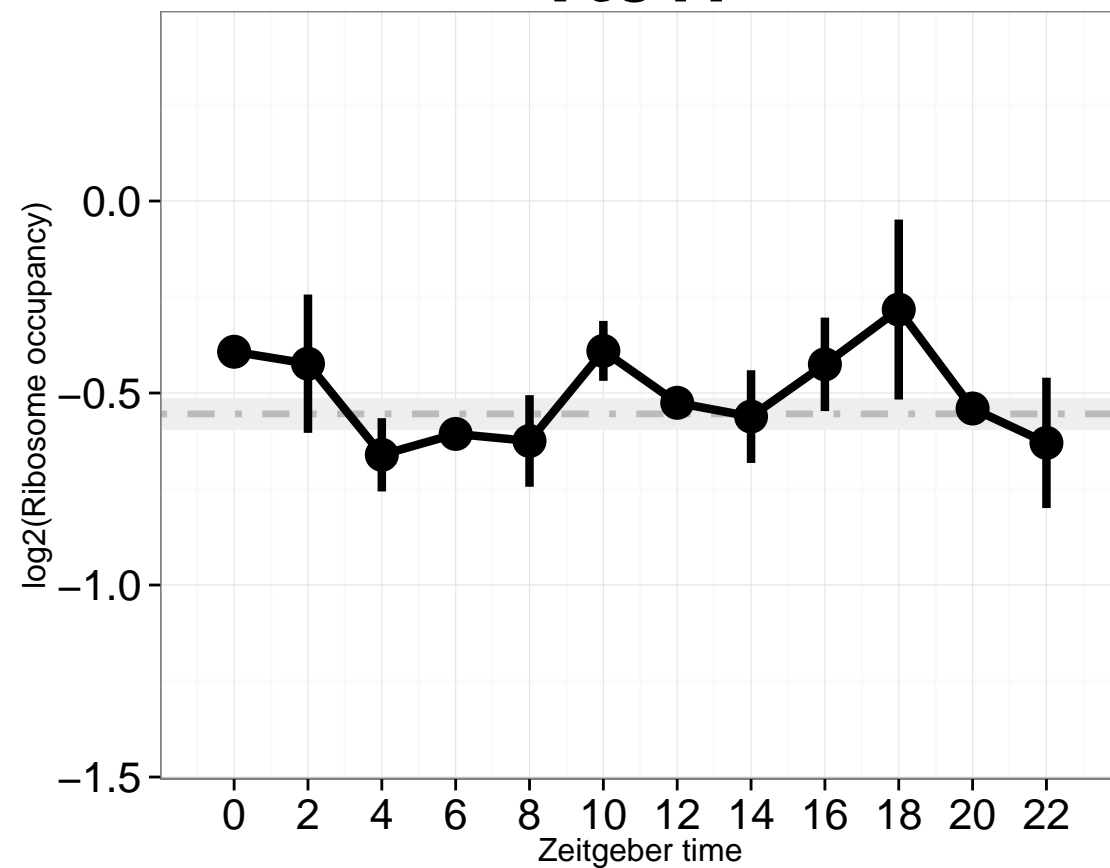

Supplement: SuppDataset_1.zip [file Ttc17_set_A.pdf › Supplemental Dataset 1/A-mRNA_nonrhyth_translation_nonrhyth/Ttc17_set_A.pdf]

## Ttc19

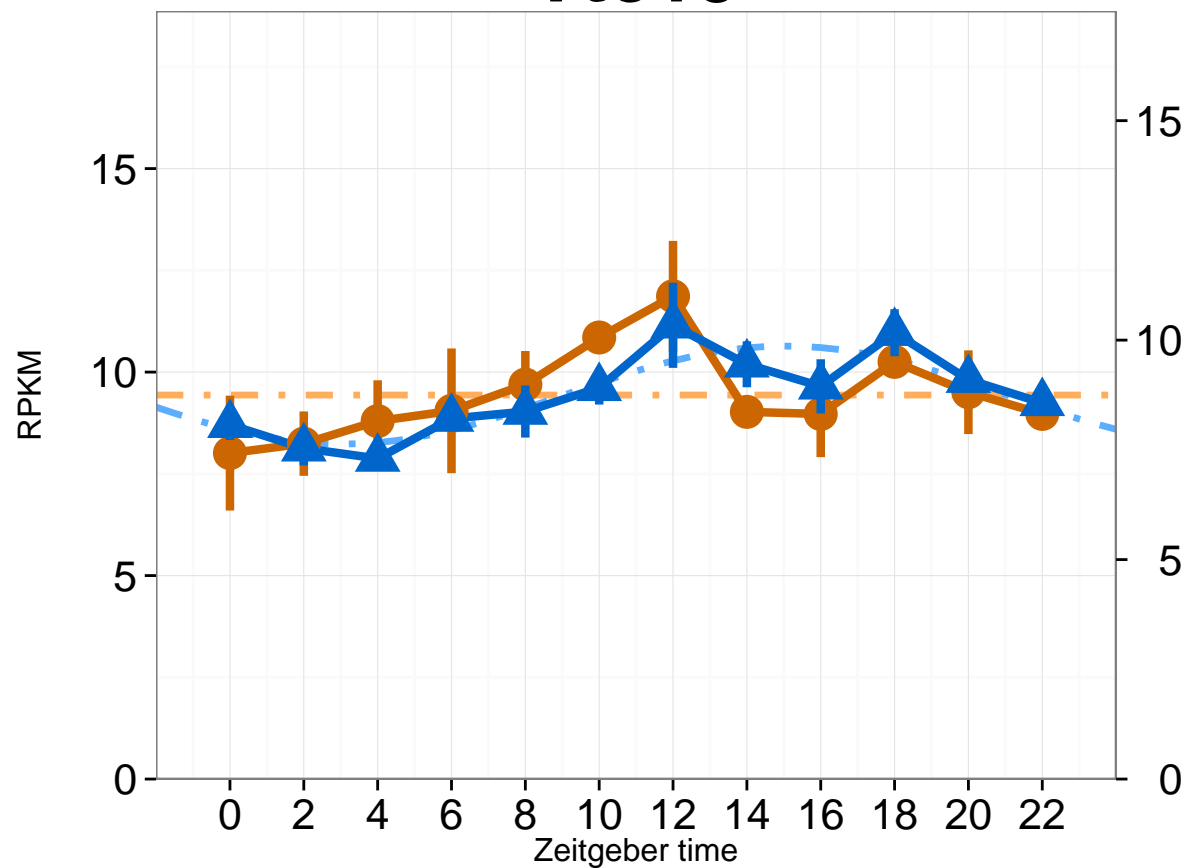

## Ttc19

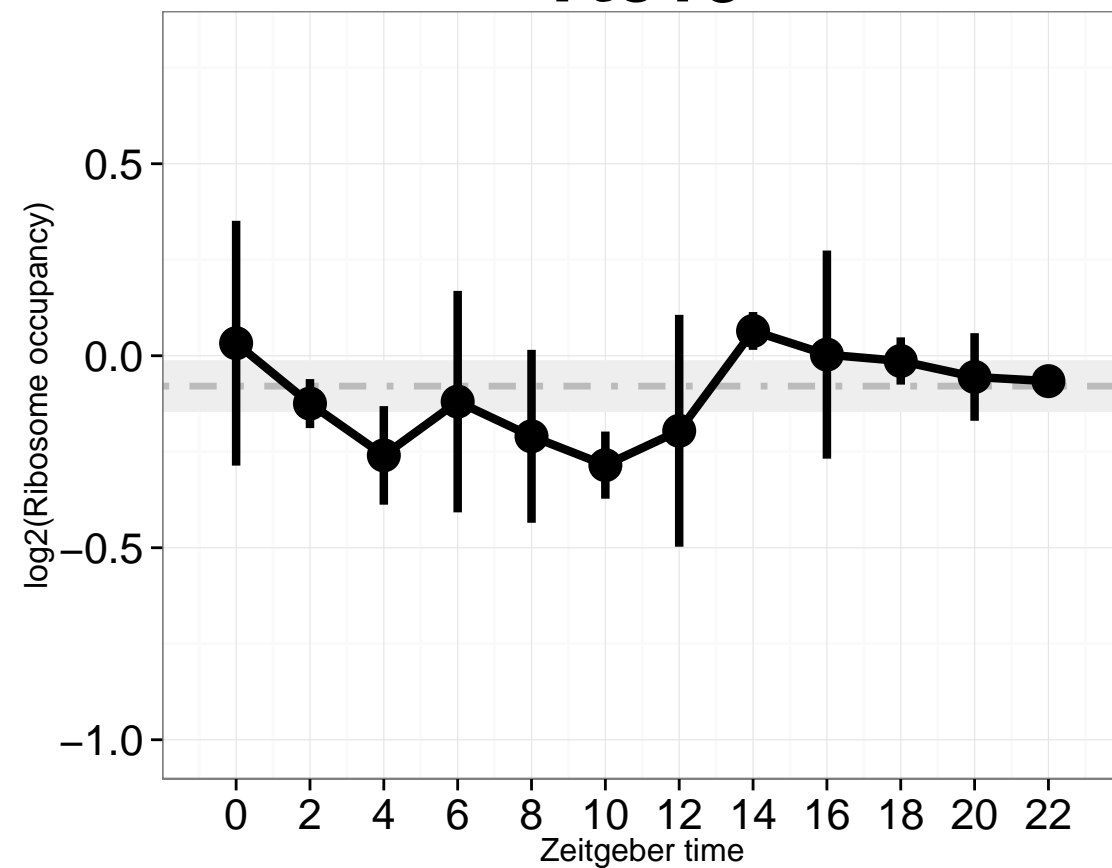

Supplement: SuppDataset_1.zip [file Ttc19_set_A.pdf › Supplemental Dataset 1/A-mRNA_nonrhyth_translation_nonrhyth/Ttc19_set_A.pdf]

# Ttc1

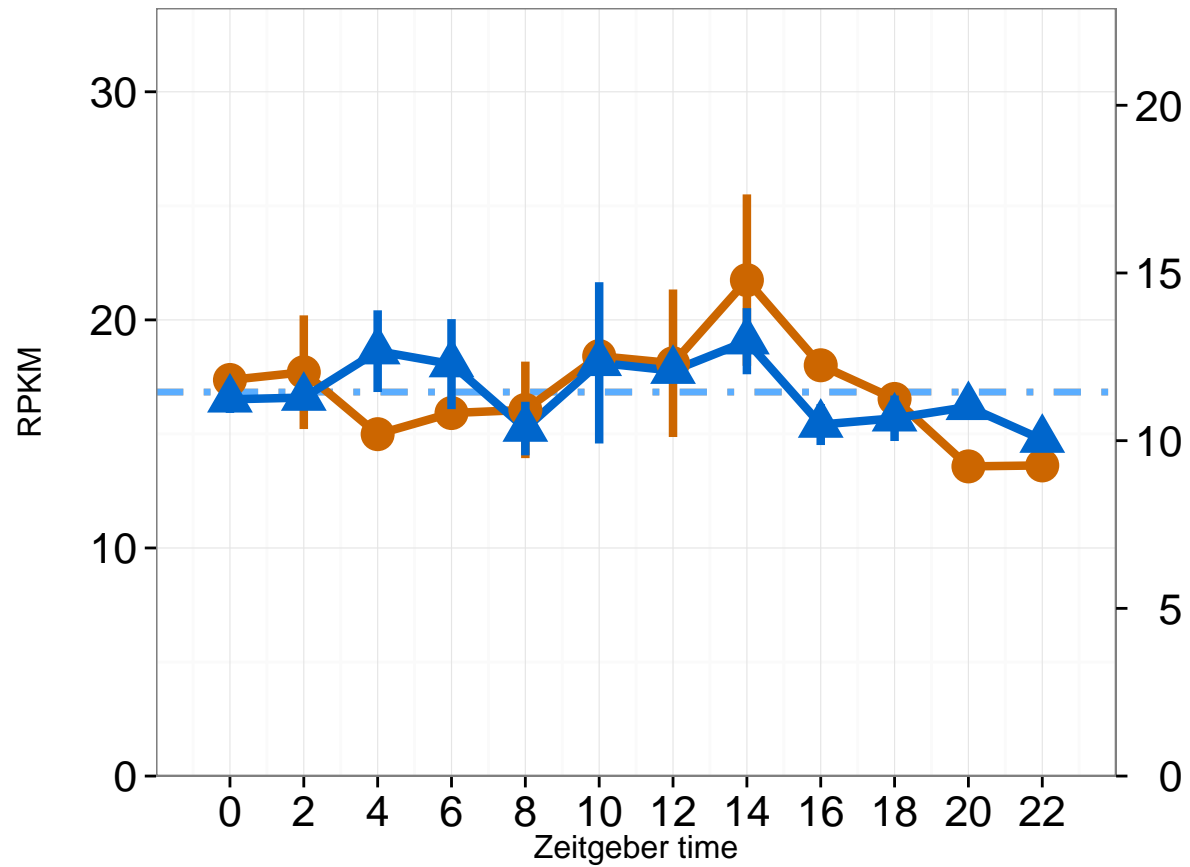

# Ttc1

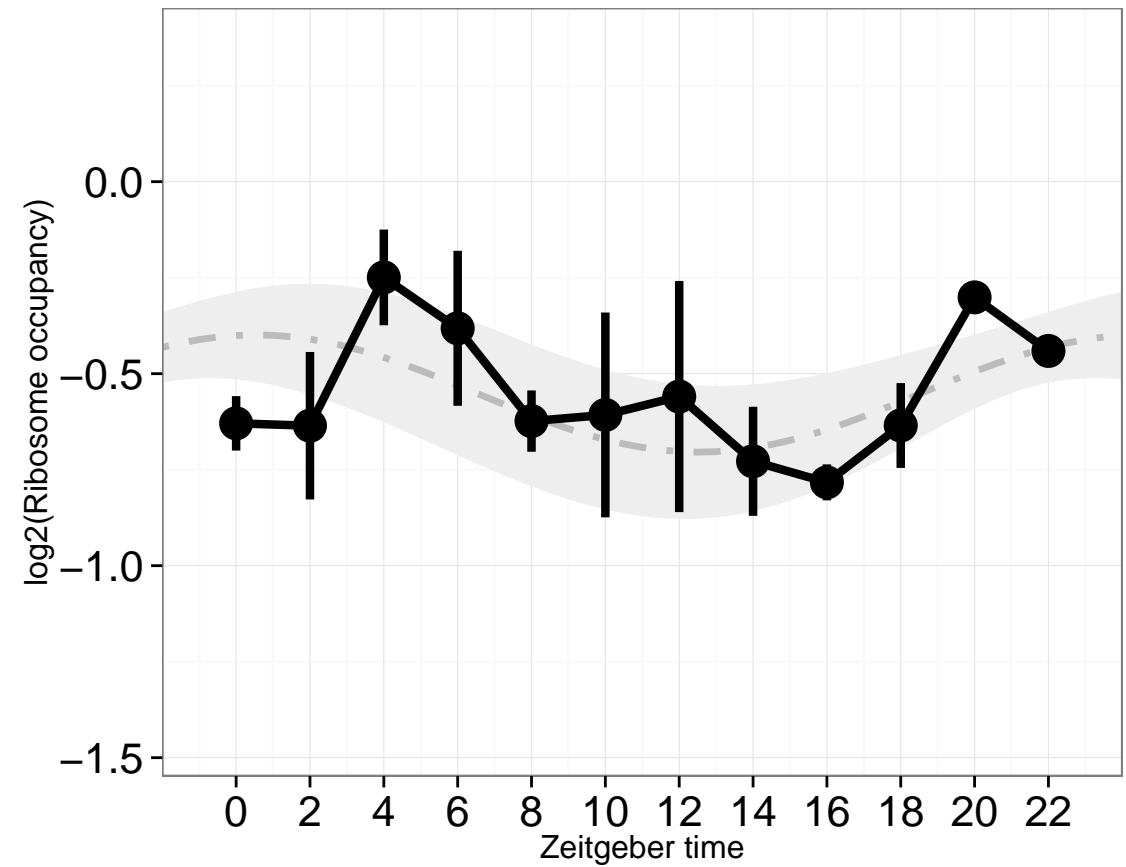

Supplement: SuppDataset_1.zip [file Ttc1_set_A.pdf › Supplemental Dataset 1/A-mRNA_nonrhyth_translation_nonrhyth/Ttc1_set_A.pdf]

## Ttc27

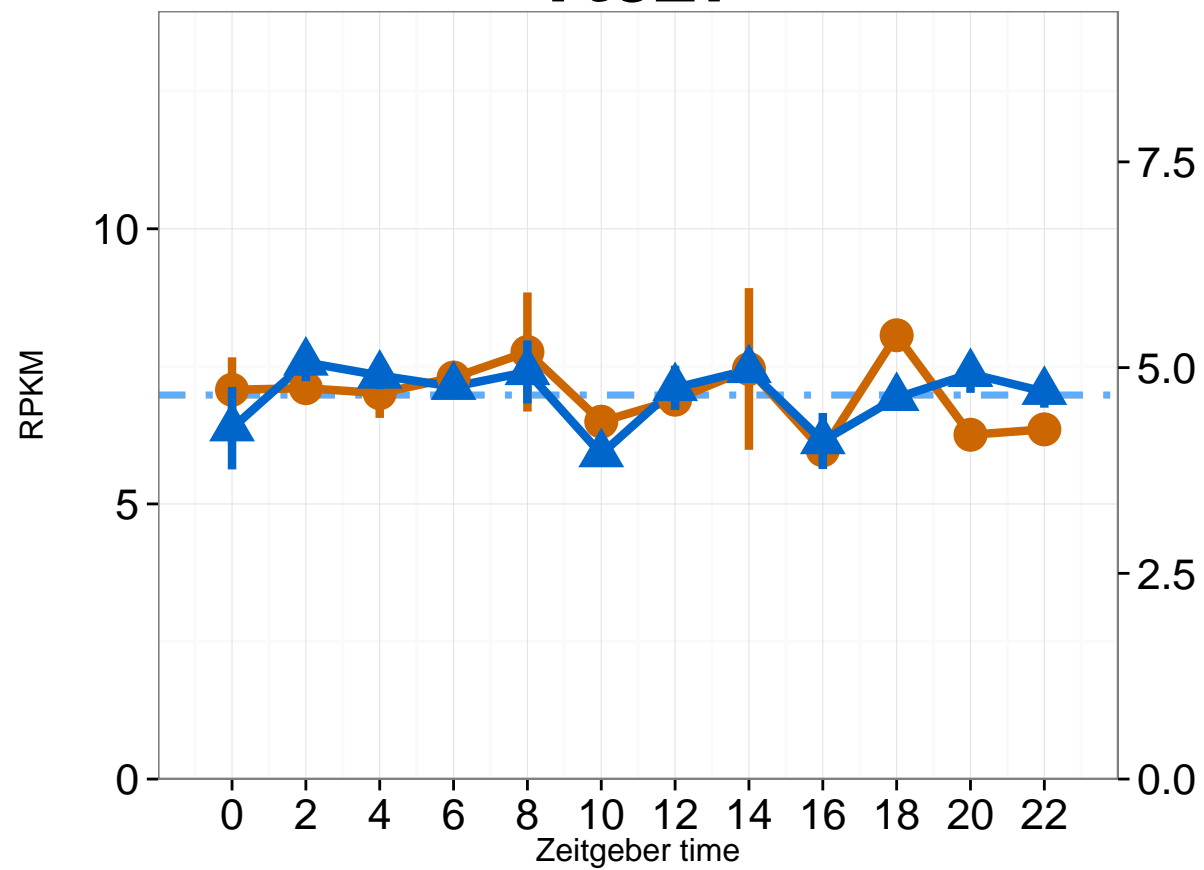

## Ttc27

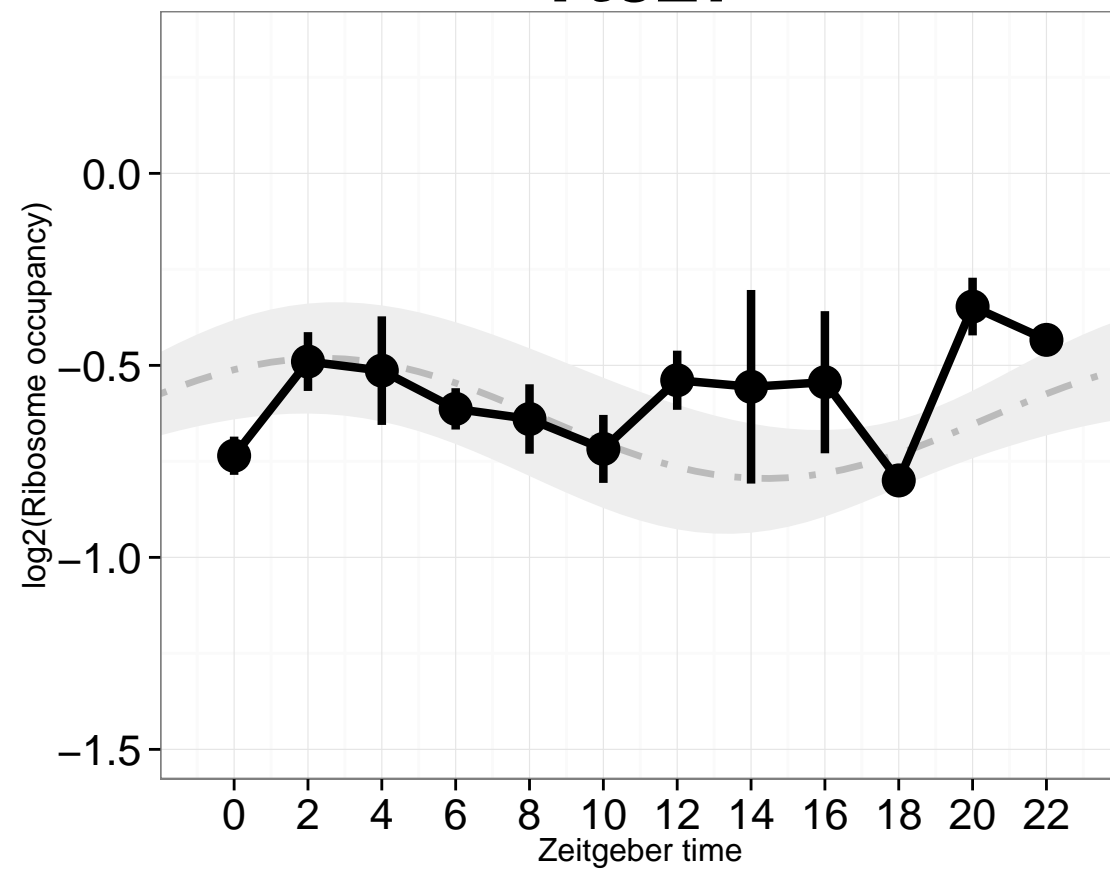

Supplement: SuppDataset_1.zip [file Ttc27_set_A.pdf › Supplemental Dataset 1/A-mRNA_nonrhyth_translation_nonrhyth/Ttc27_set_A.pdf]

## Ttc28

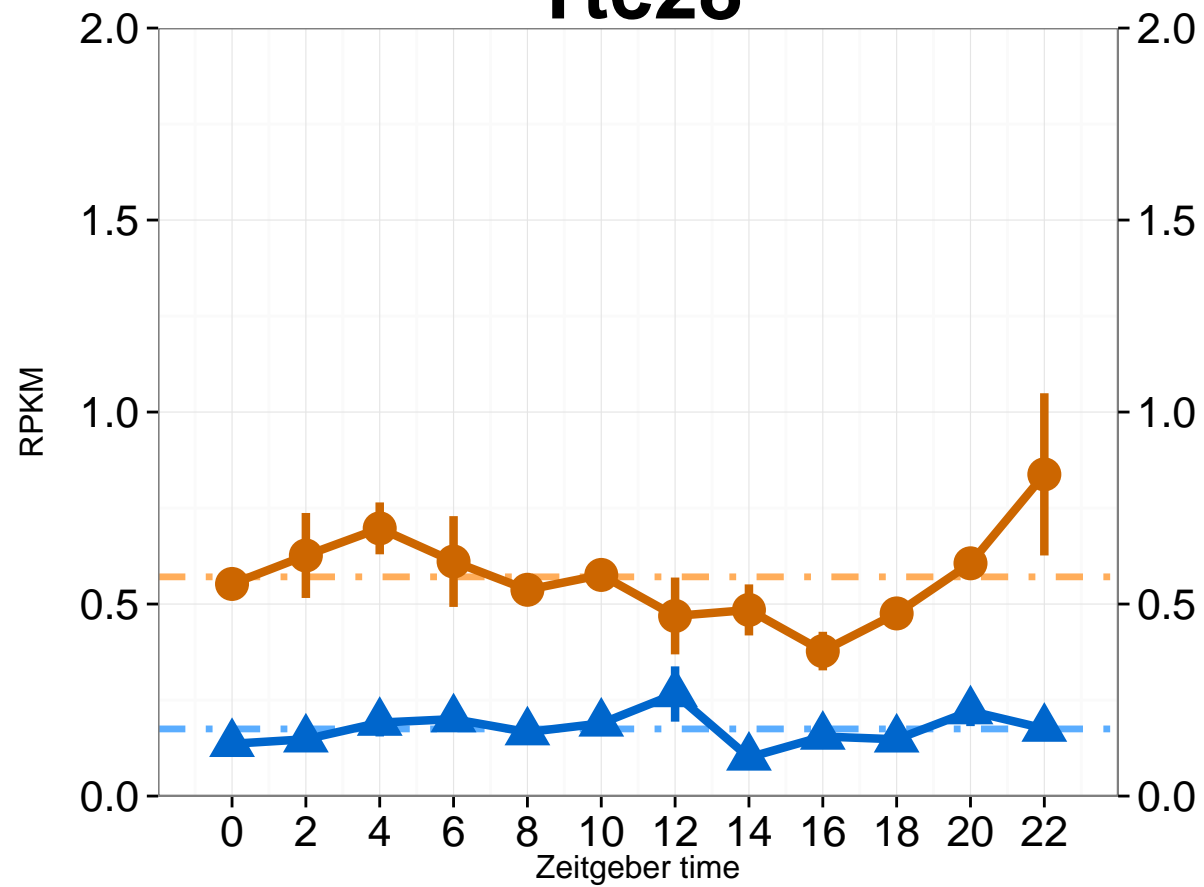

## Ttc28

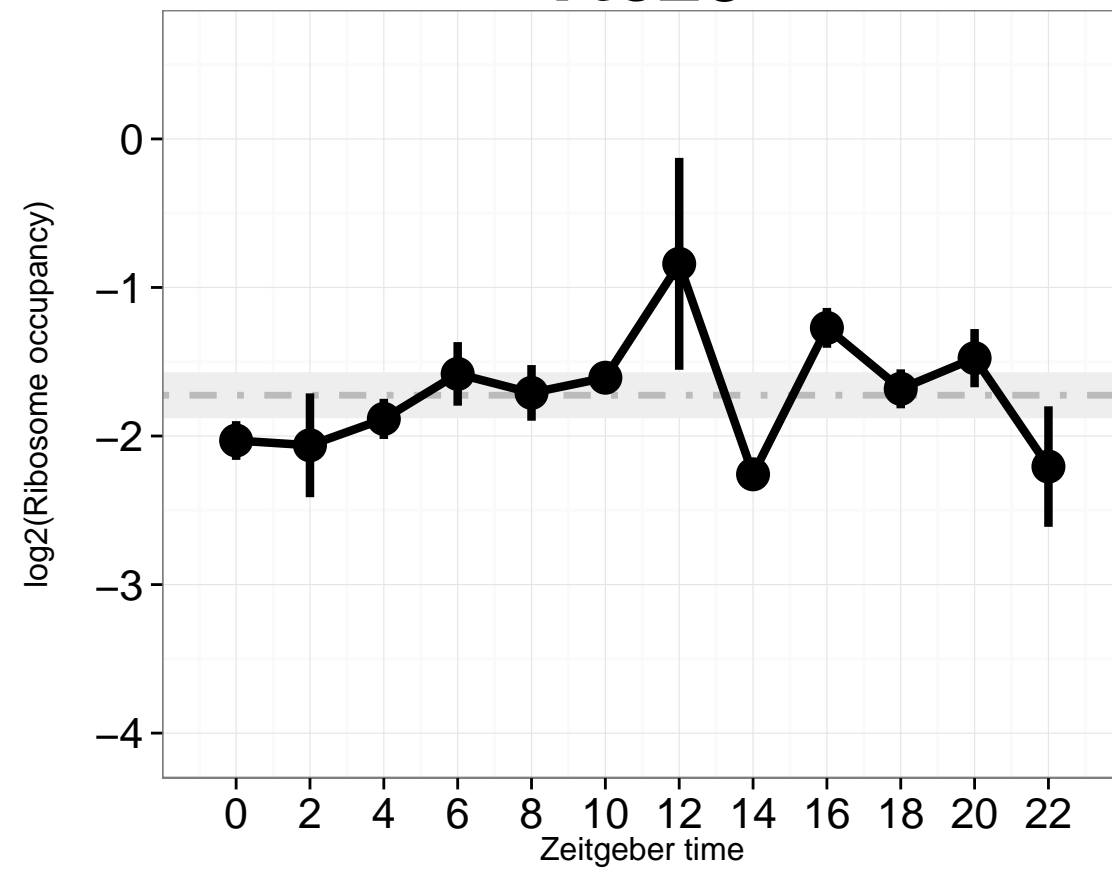

Supplement: SuppDataset_1.zip [file Ttc28_set_A.pdf › Supplemental Dataset 1/A-mRNA_nonrhyth_translation_nonrhyth/Ttc28_set_A.pdf]

# Ttc30a1

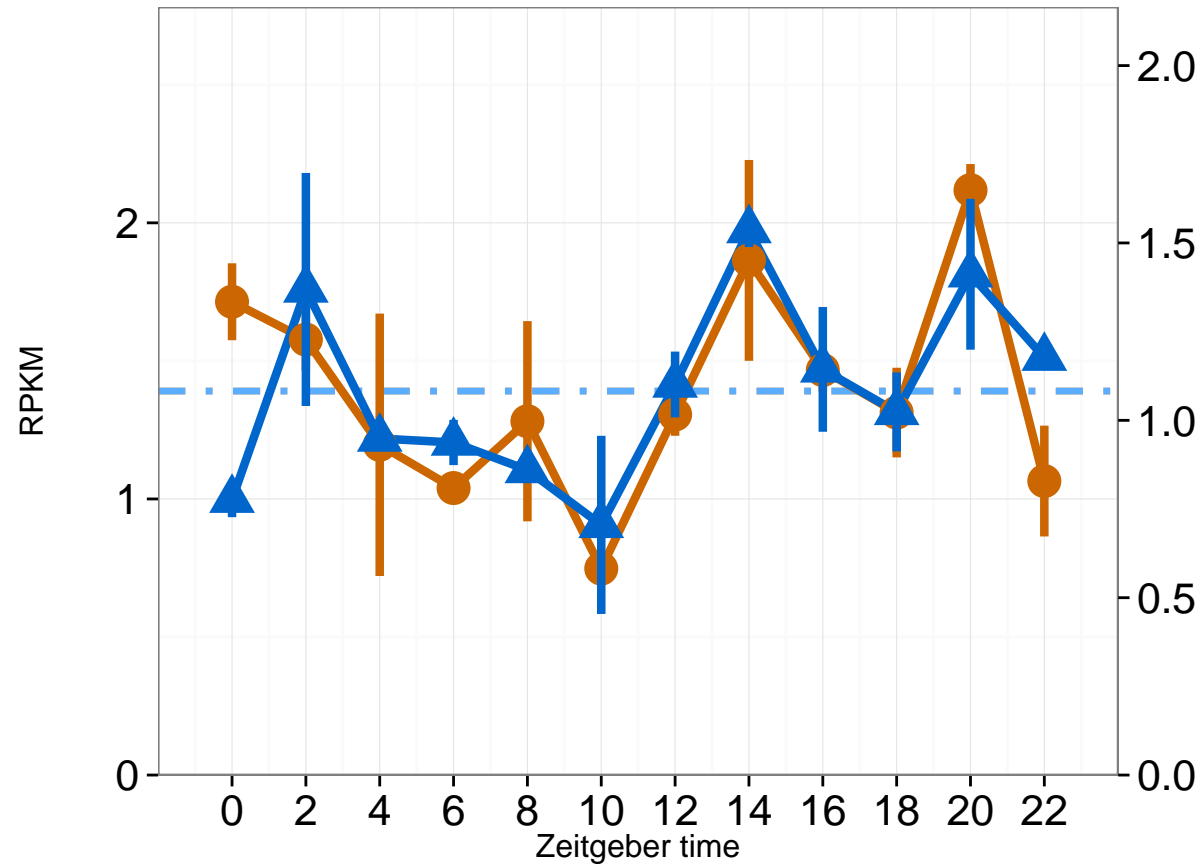

# Ttc30a1

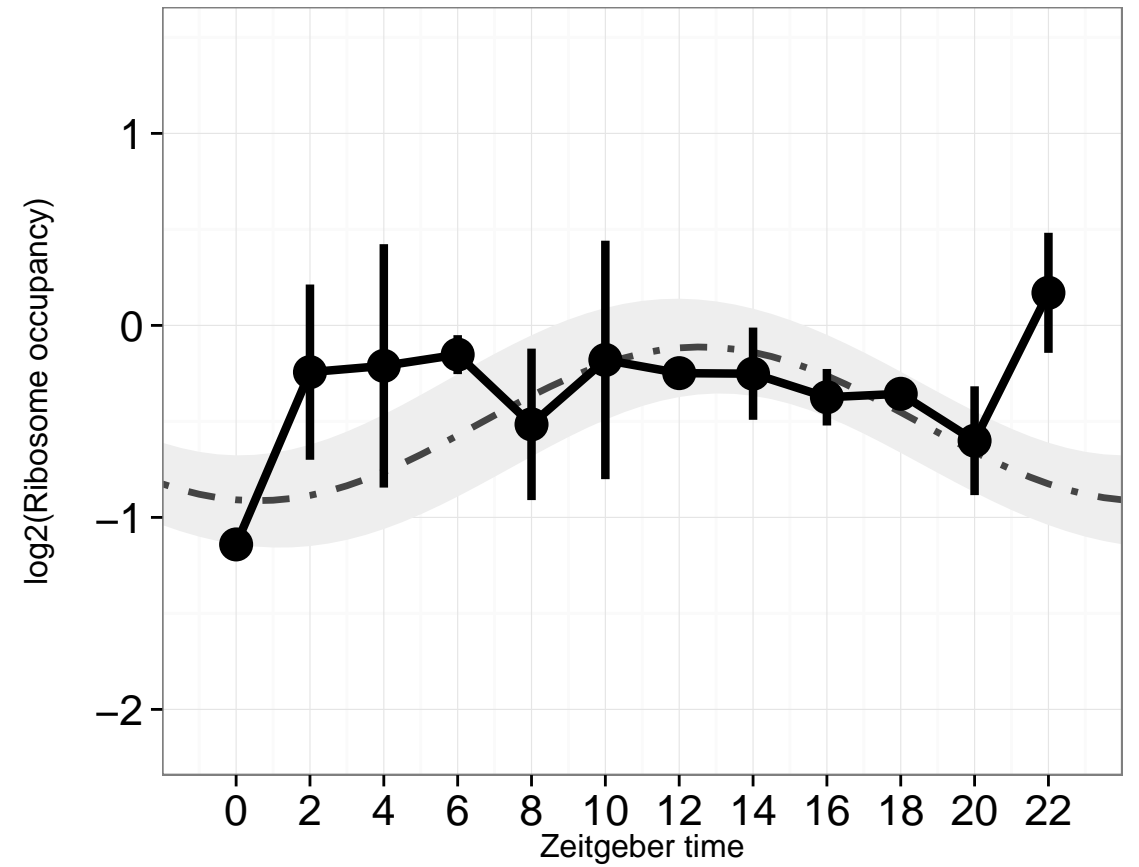

Supplement: SuppDataset_1.zip [file Ttc30a1_set_A.pdf › Supplemental Dataset 1/A-mRNA_nonrhyth_translation_nonrhyth/Ttc30a1_set_A.pdf]

# Ttc30b

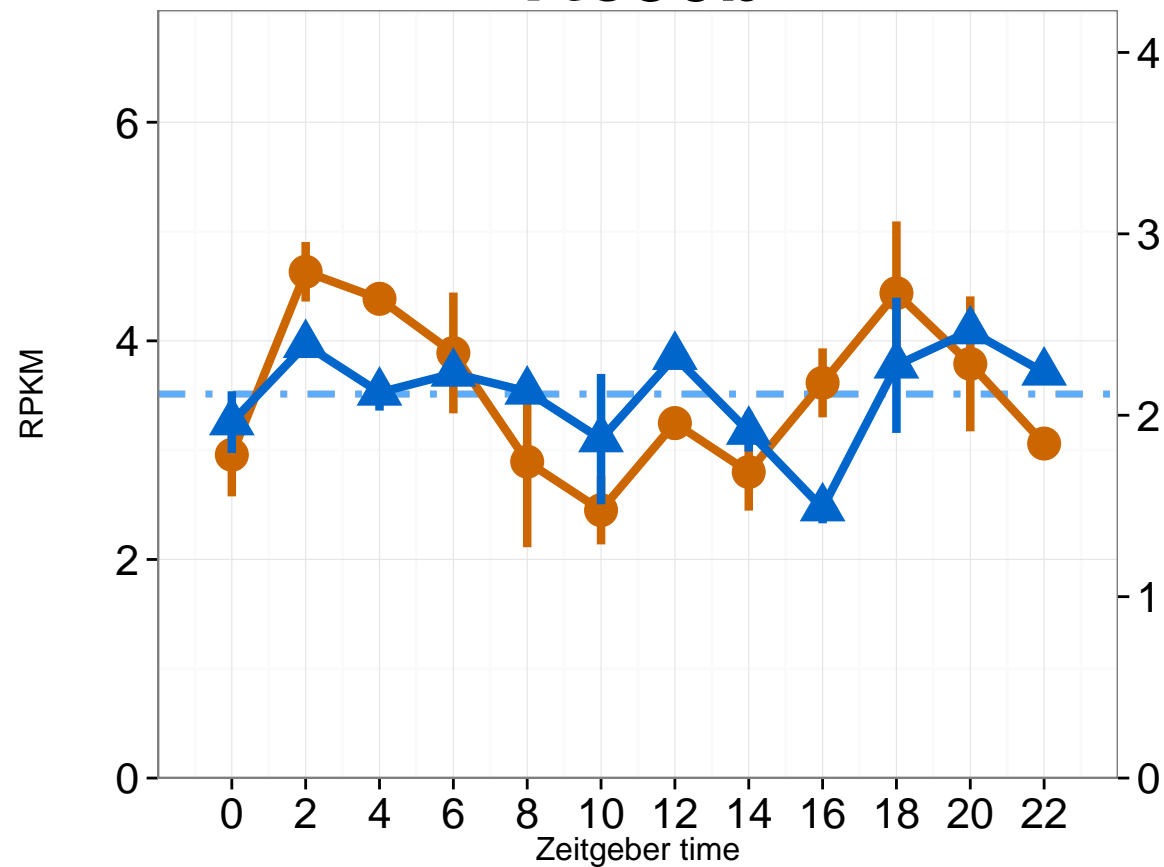

# Ttc30b

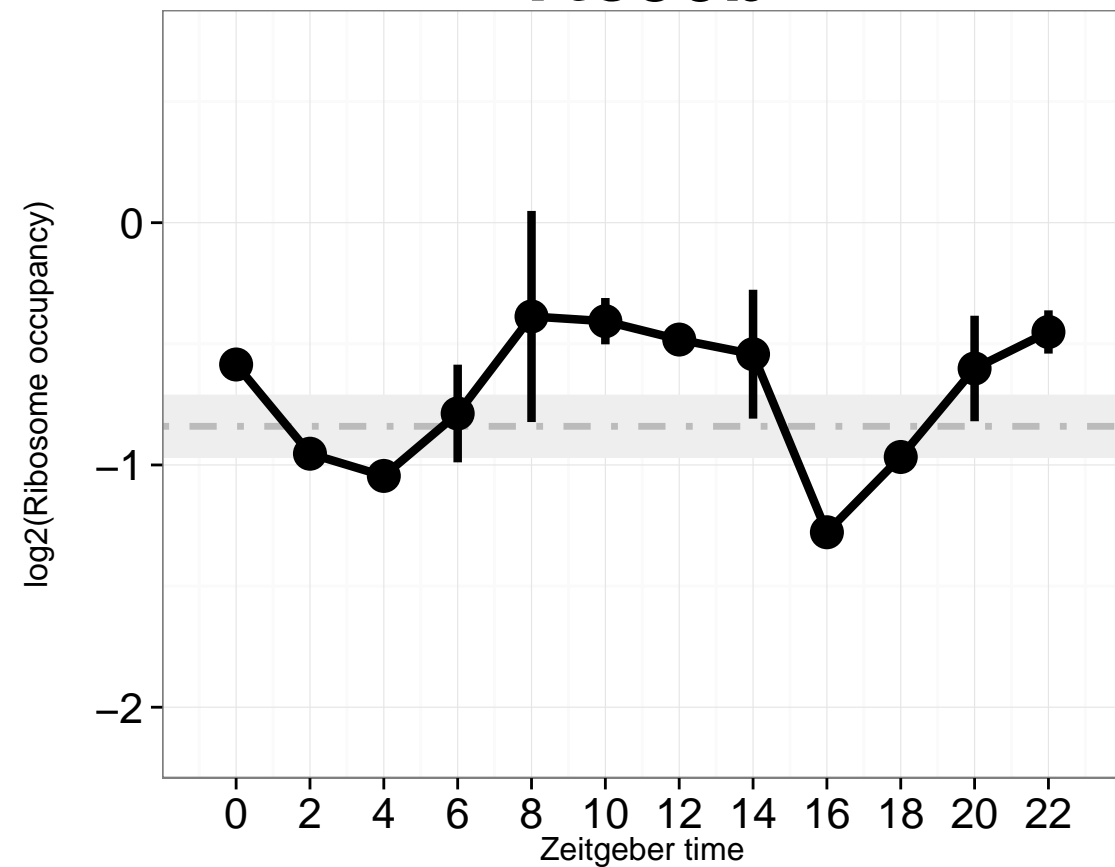

Supplement: SuppDataset_1.zip [file Ttc30b_set_A.pdf › Supplemental Dataset 1/A-mRNA_nonrhyth_translation_nonrhyth/Ttc30b_set_A.pdf]

# Ttc32

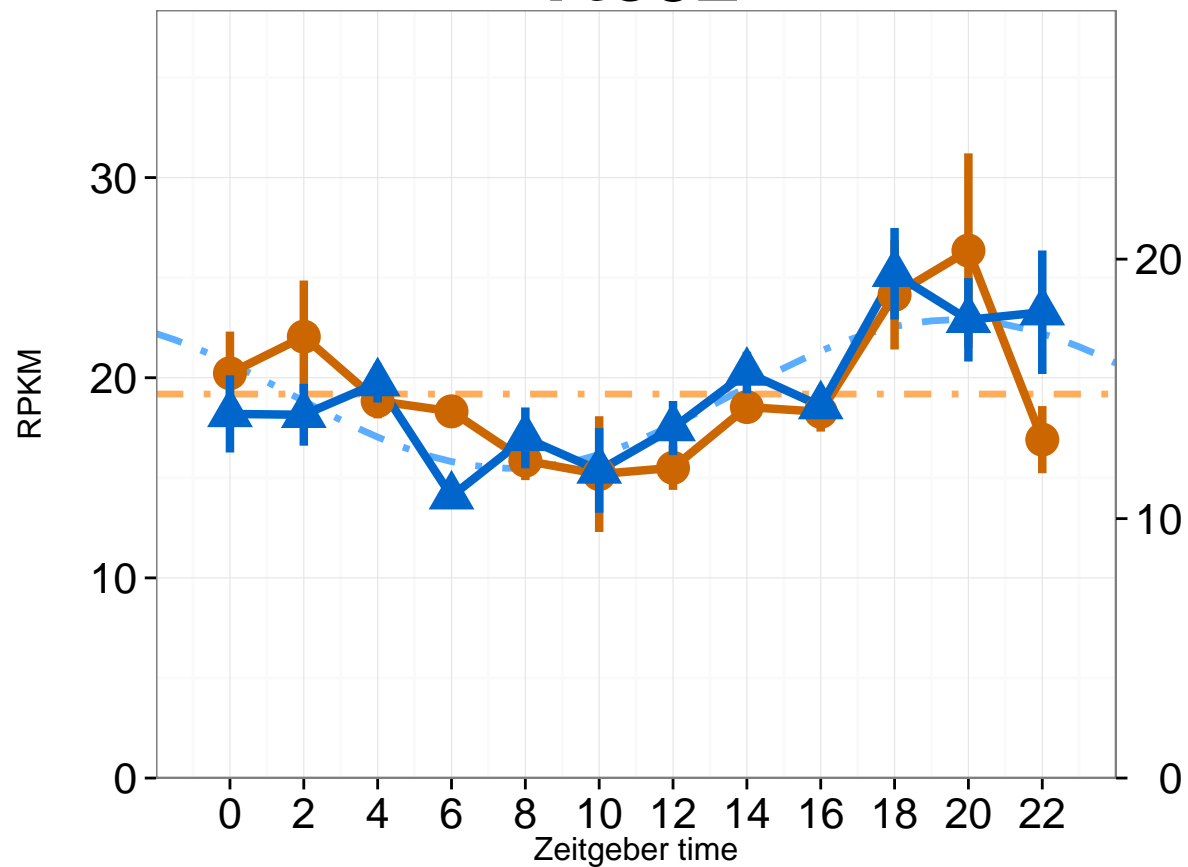

# Ttc32

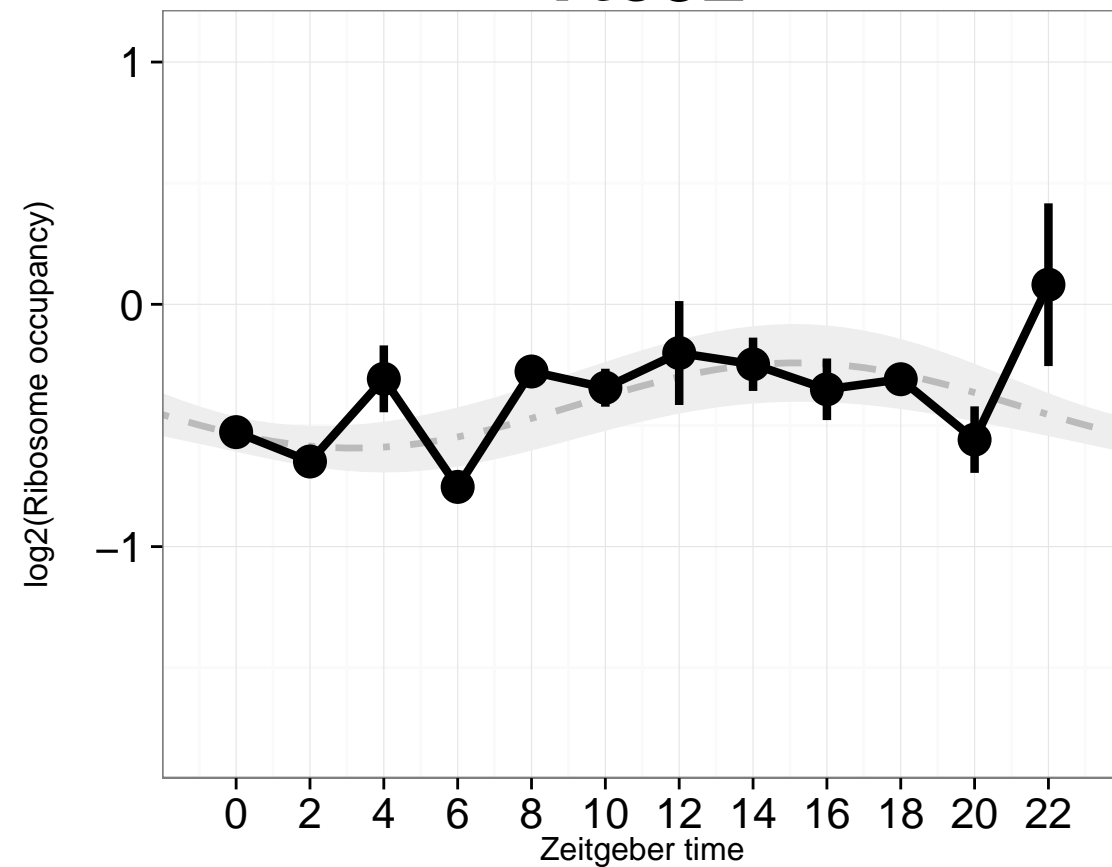

Supplement: SuppDataset_1.zip [file Ttc32_set_A.pdf › Supplemental Dataset 1/A-mRNA_nonrhyth_translation_nonrhyth/Ttc32_set_A.pdf]

## Ttc33

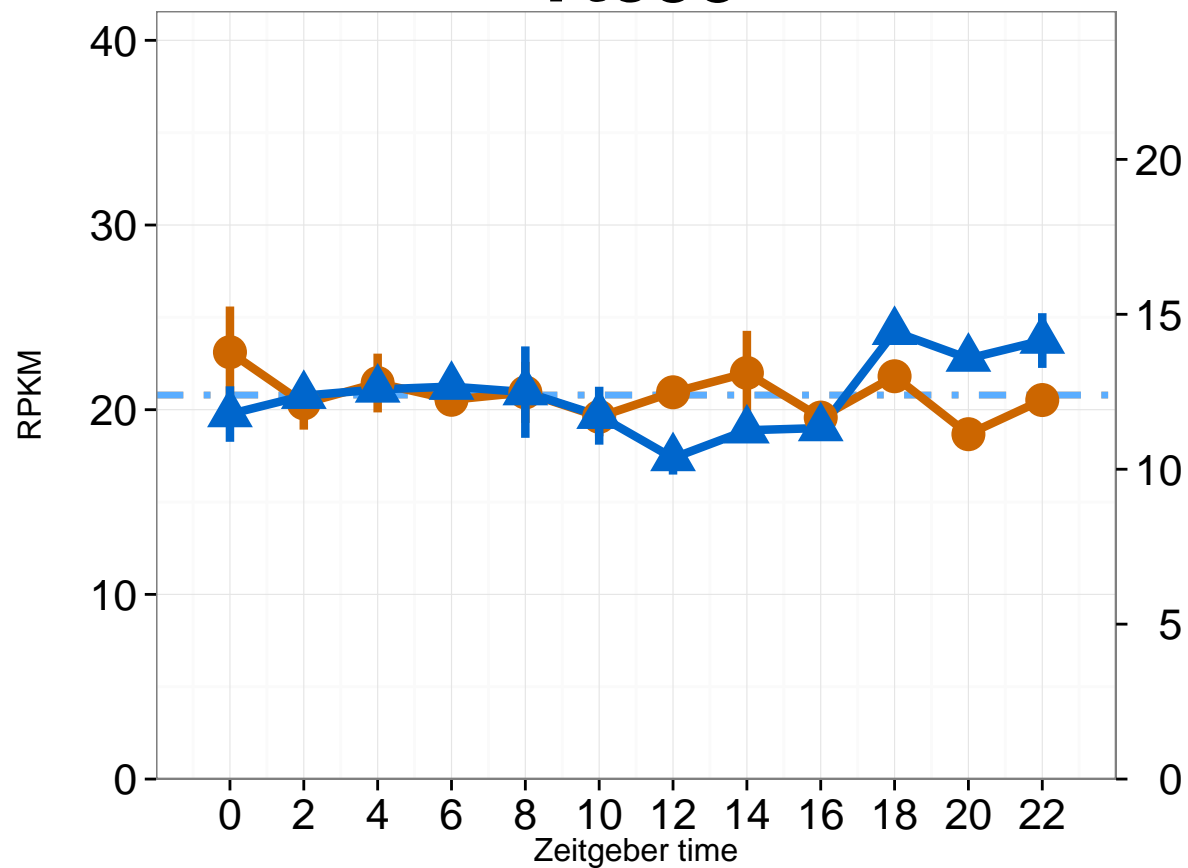

## Ttc33

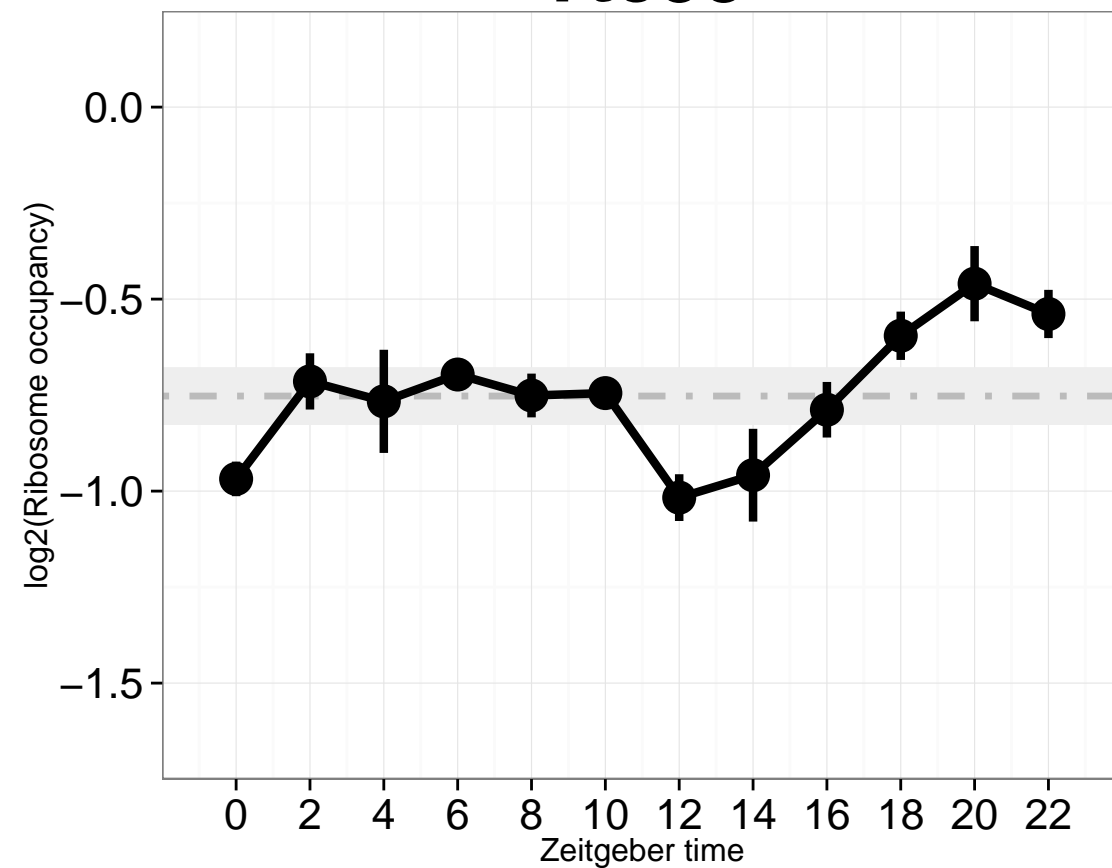

Supplement: SuppDataset_1.zip [file Ttc33_set_A.pdf › Supplemental Dataset 1/A-mRNA_nonrhyth_translation_nonrhyth/Ttc33_set_A.pdf]

## Ttc36

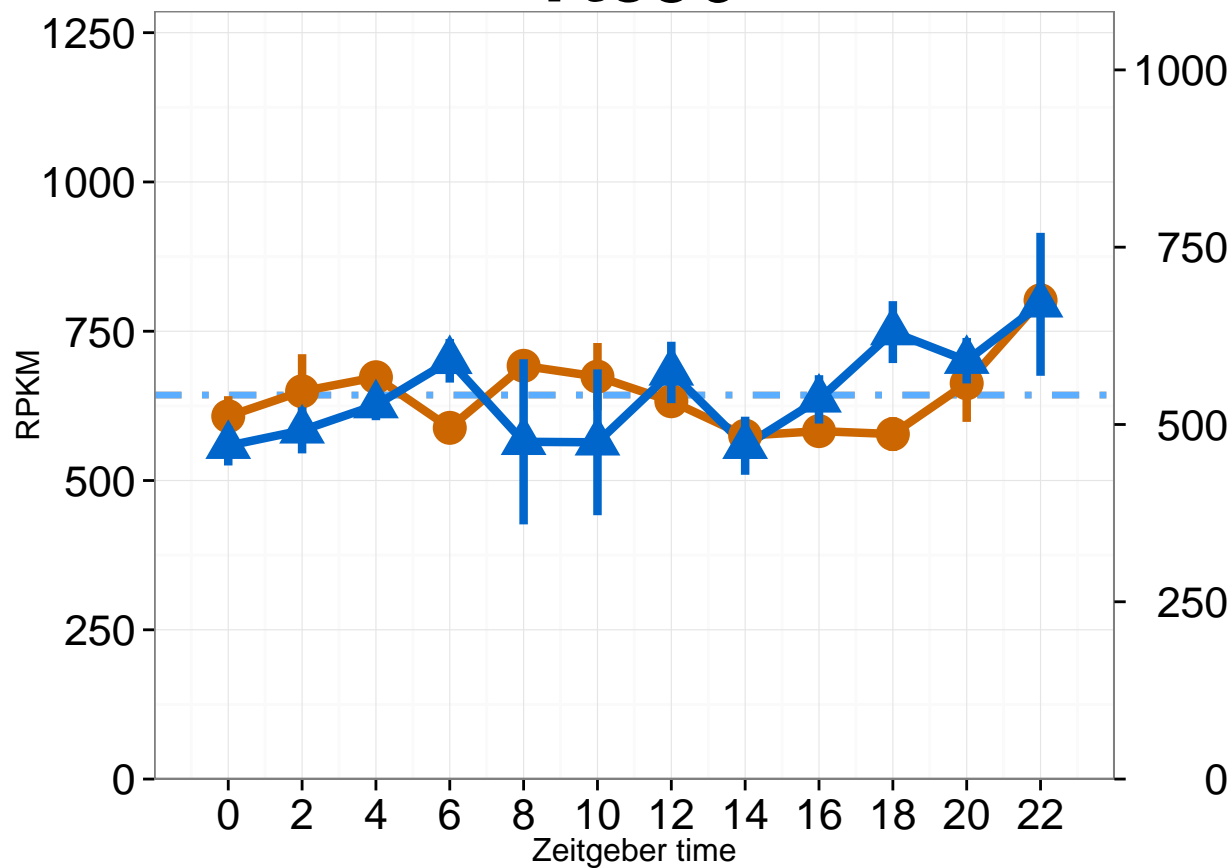

## Ttc36

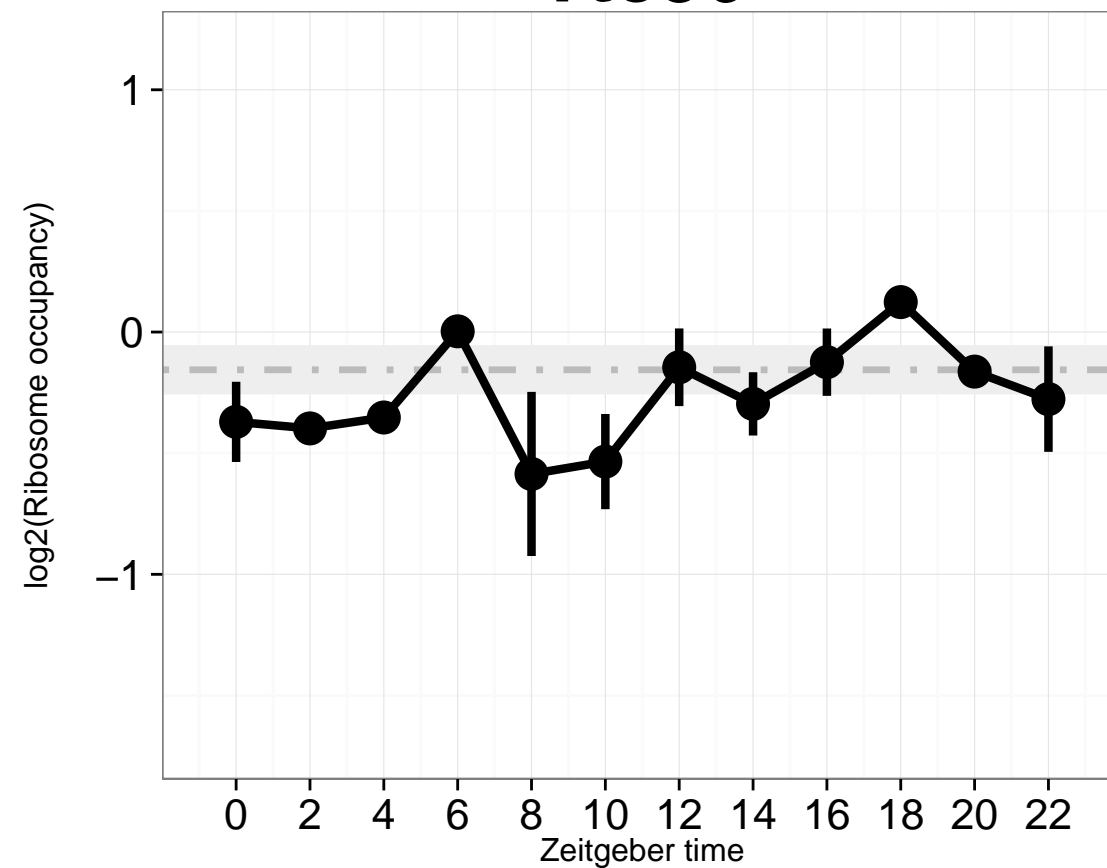

Supplement: SuppDataset_1.zip [file Ttc36_set_A.pdf › Supplemental Dataset 1/A-mRNA_nonrhyth_translation_nonrhyth/Ttc36_set_A.pdf]

## Ttc37

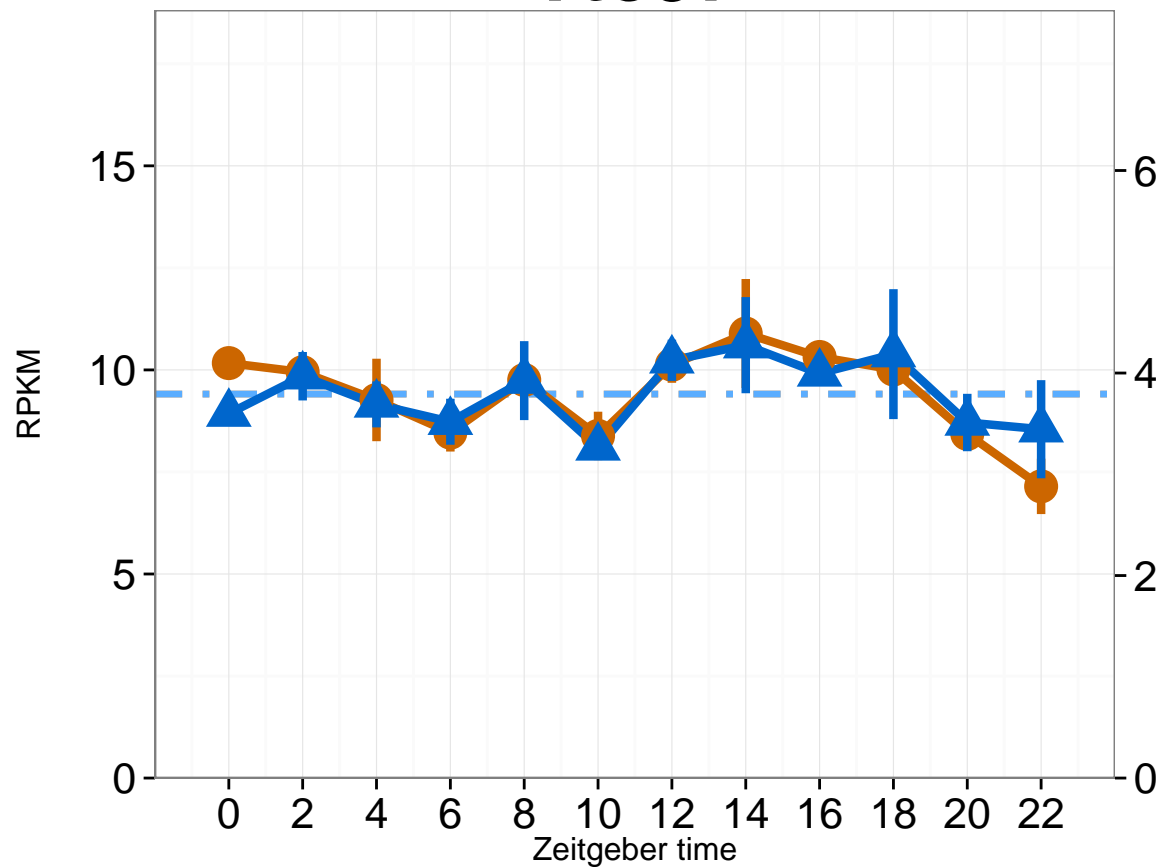

## Ttc37

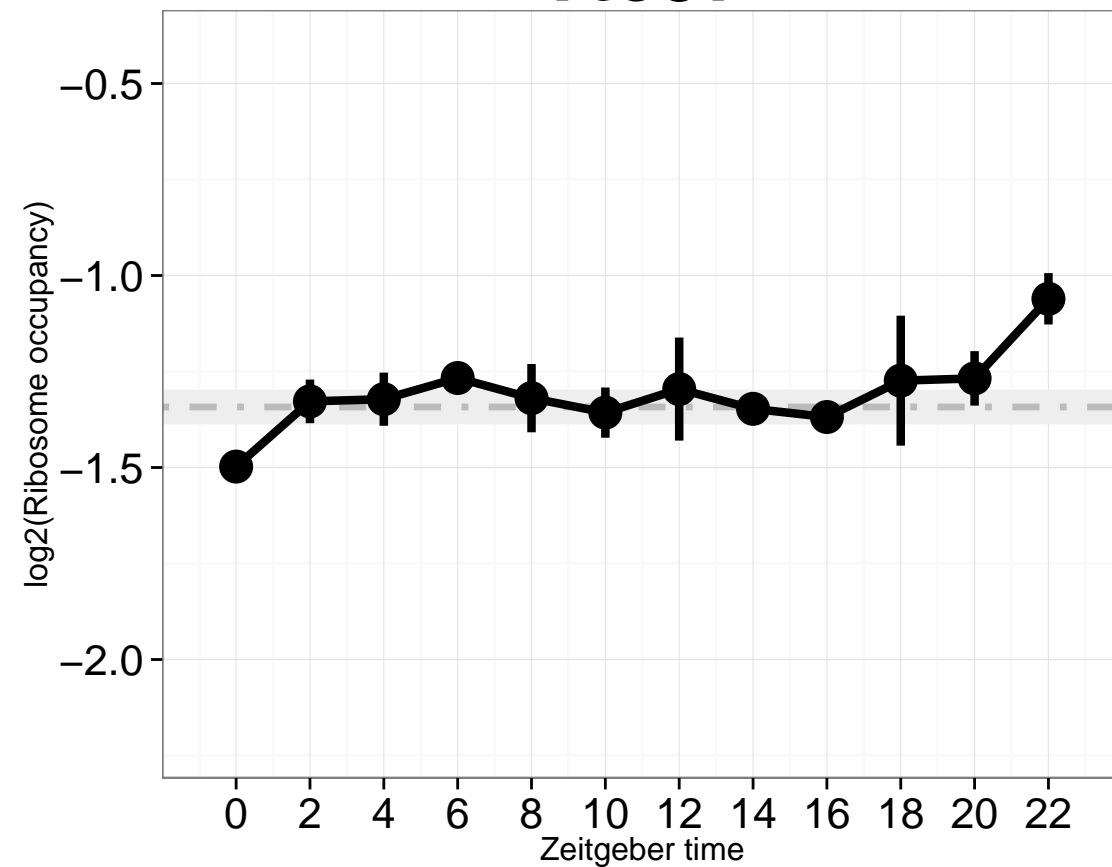

Supplement: SuppDataset_1.zip [file Ttc37_set_A.pdf › Supplemental Dataset 1/A-mRNA_nonrhyth_translation_nonrhyth/Ttc37_set_A.pdf]

# Ttc38

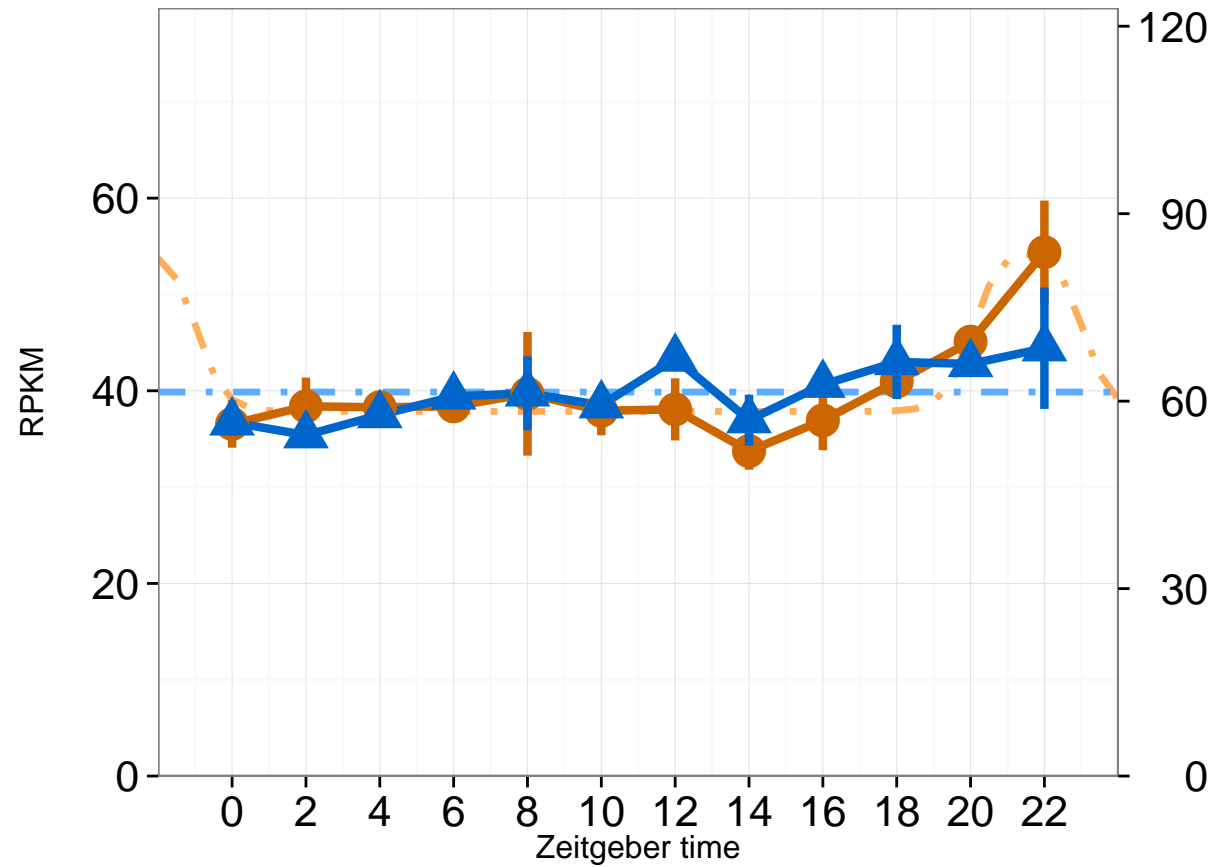

# Ttc38

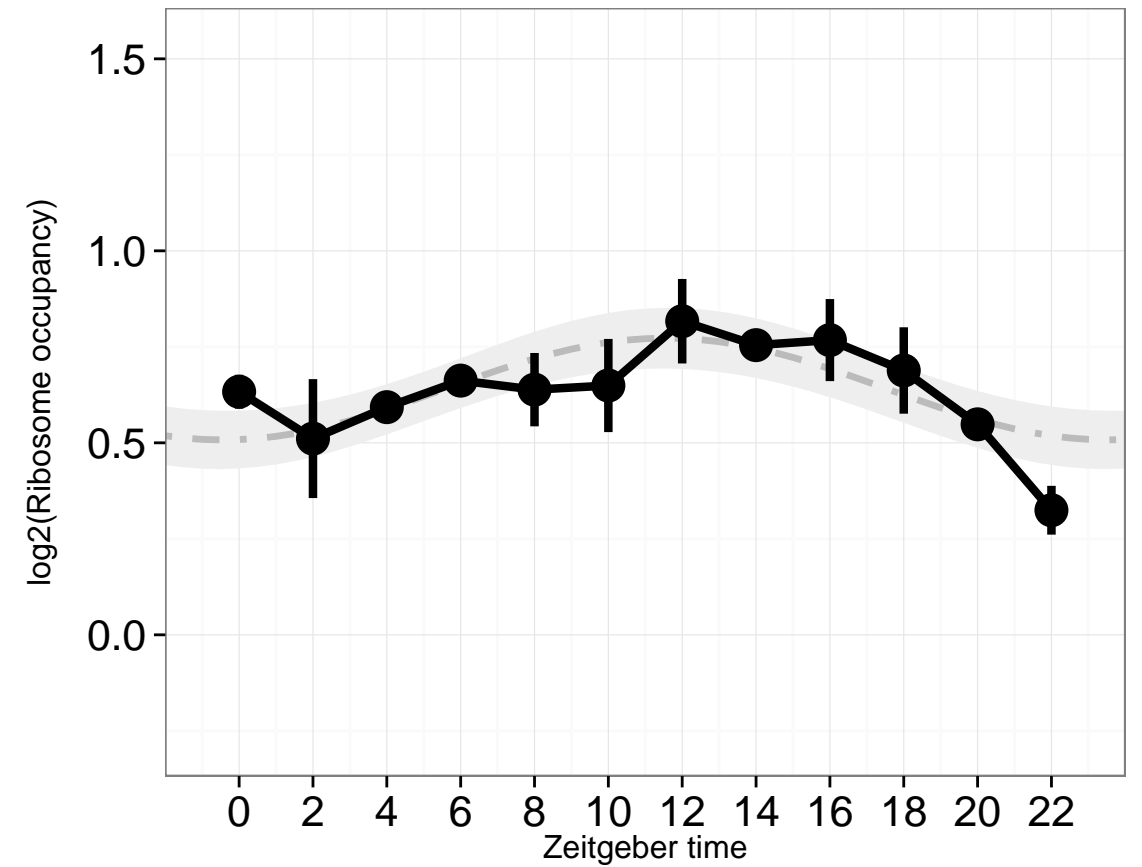

Supplement: SuppDataset_1.zip [file Ttc38_set_A.pdf › Supplemental Dataset 1/A-mRNA_nonrhyth_translation_nonrhyth/Ttc38_set_A.pdf]

# Ttc39c

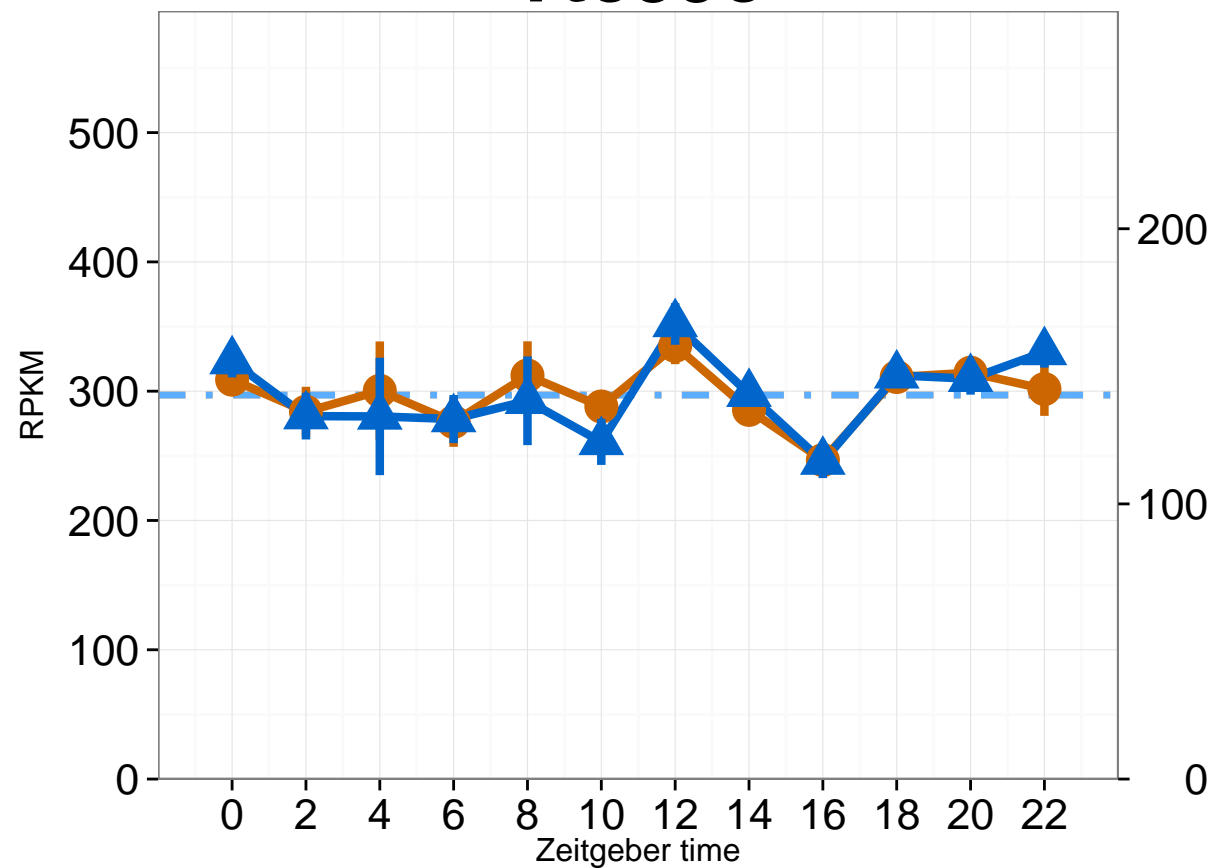

# Ttc39c

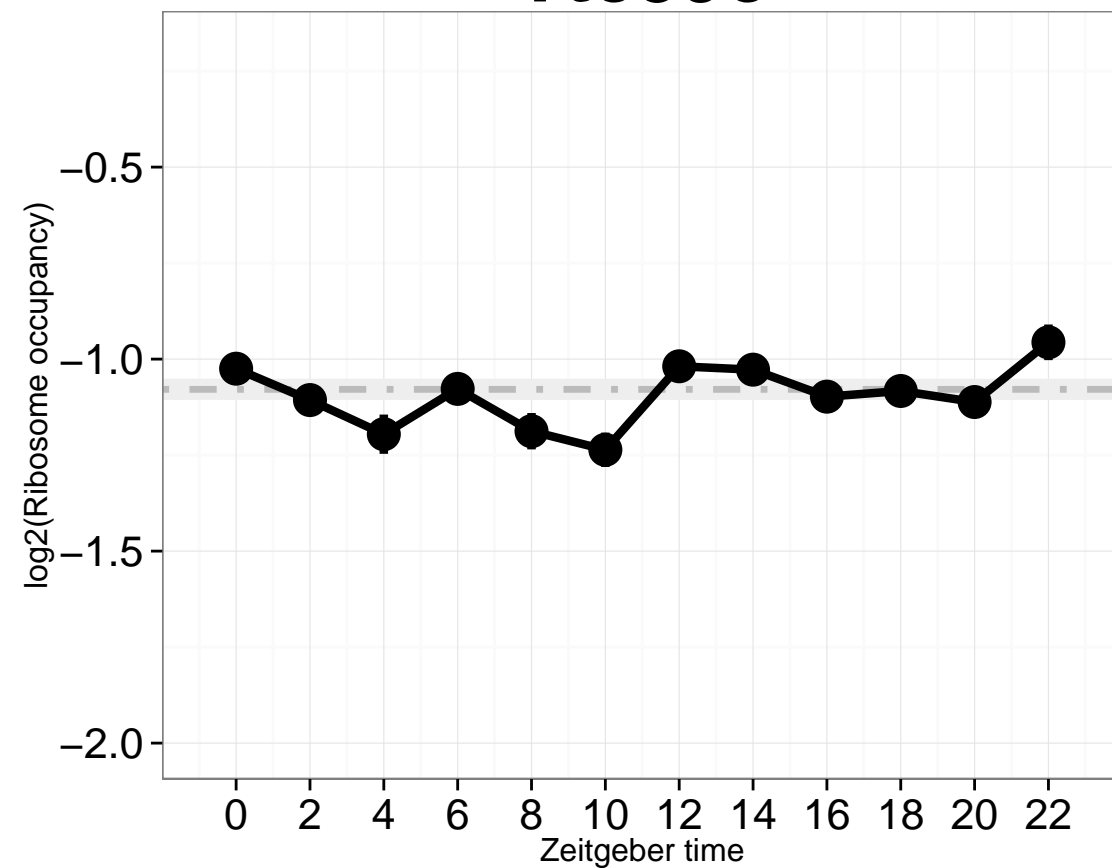

Supplement: SuppDataset_1.zip [file Ttc39c_set_A.pdf › Supplemental Dataset 1/A-mRNA_nonrhyth_translation_nonrhyth/Ttc39c_set_A.pdf]

## Ttc3

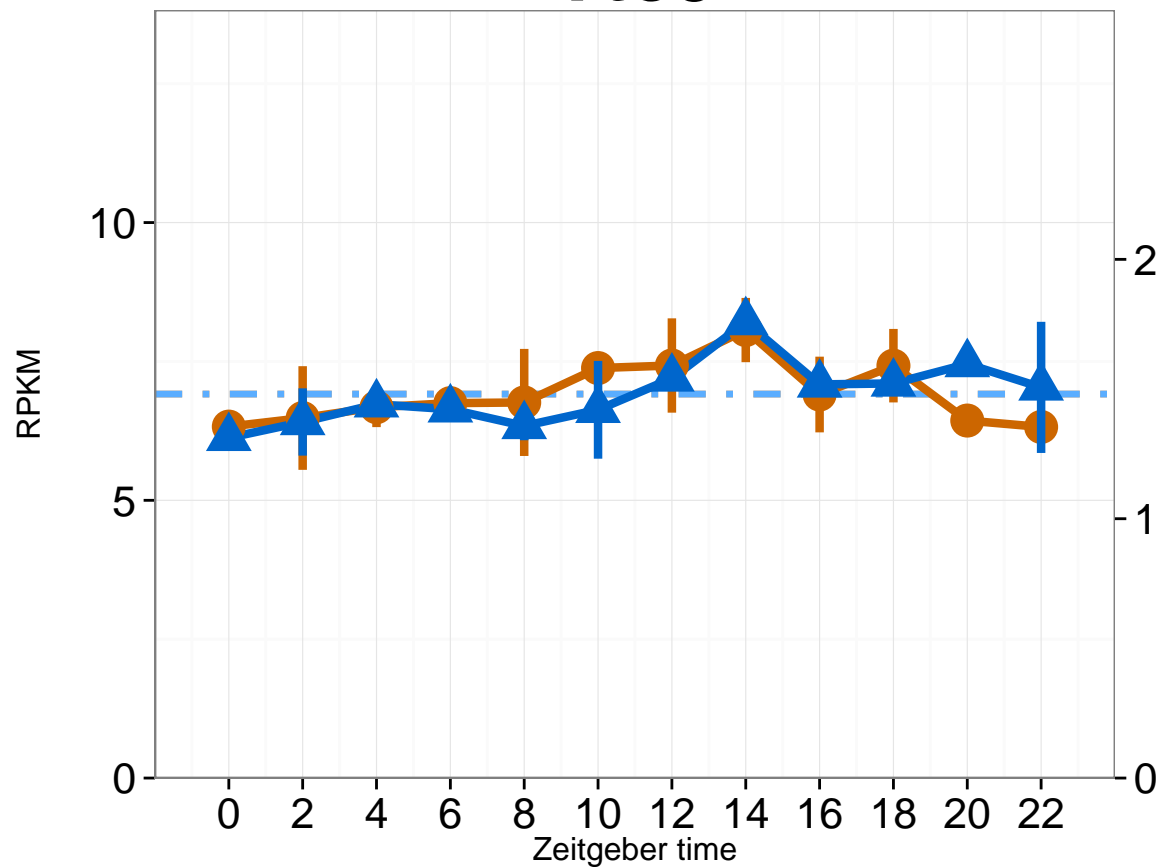

## Ttc3

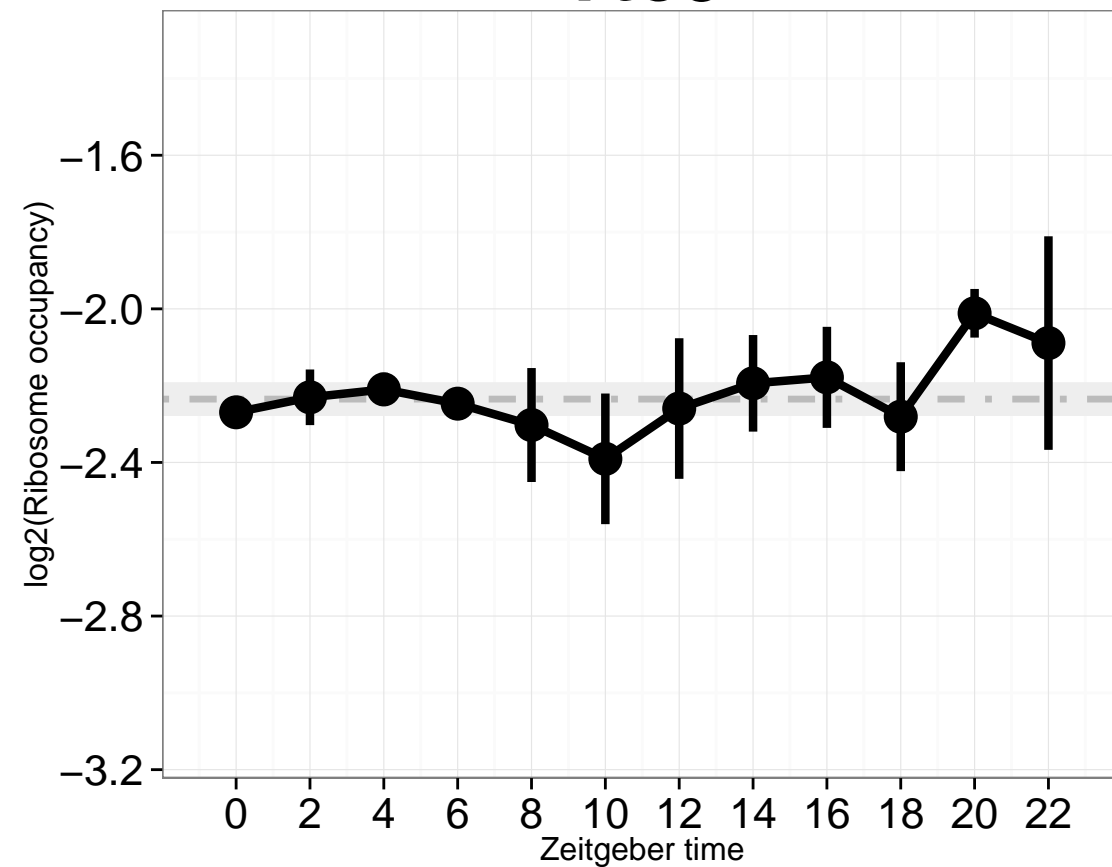

Supplement: SuppDataset_1.zip [file Ttc3_set_A.pdf › Supplemental Dataset 1/A-mRNA_nonrhyth_translation_nonrhyth/Ttc3_set_A.pdf]

## Ttc4

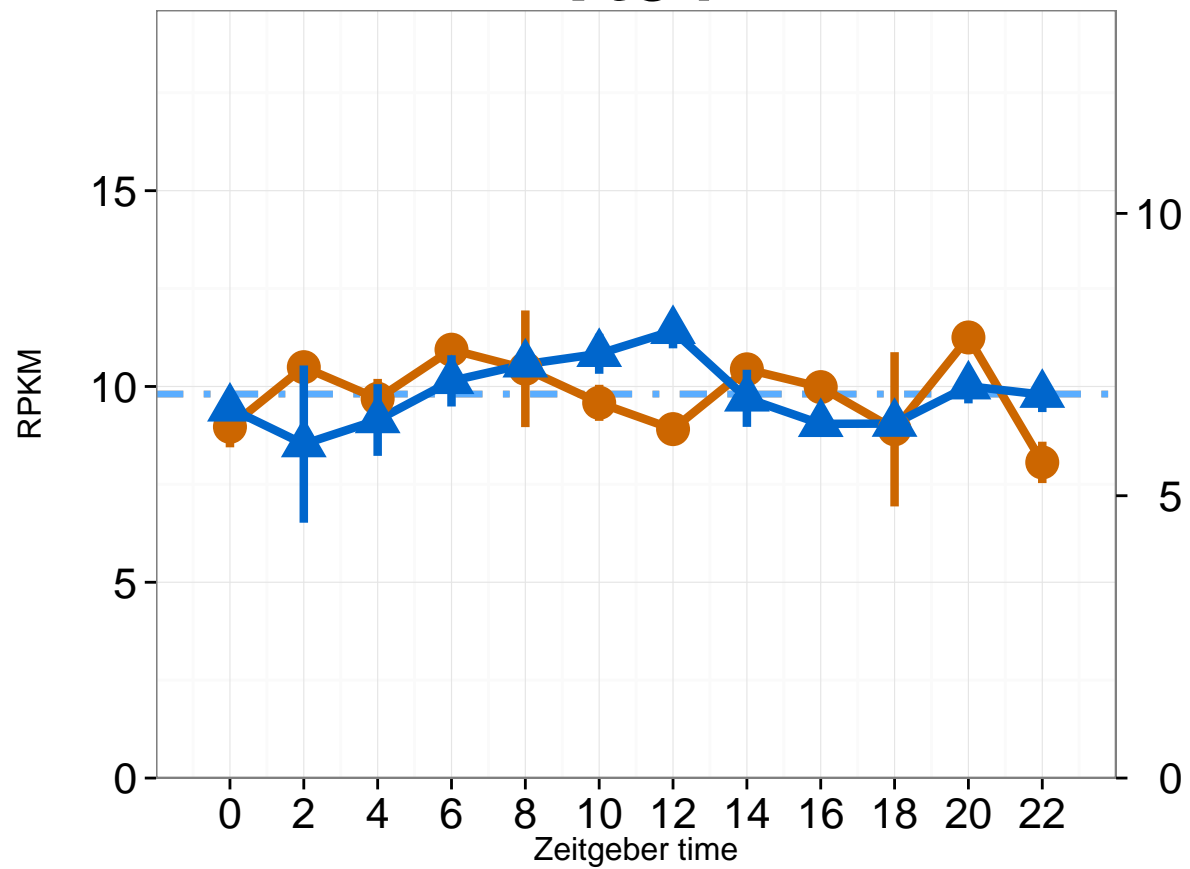

## Ttc4

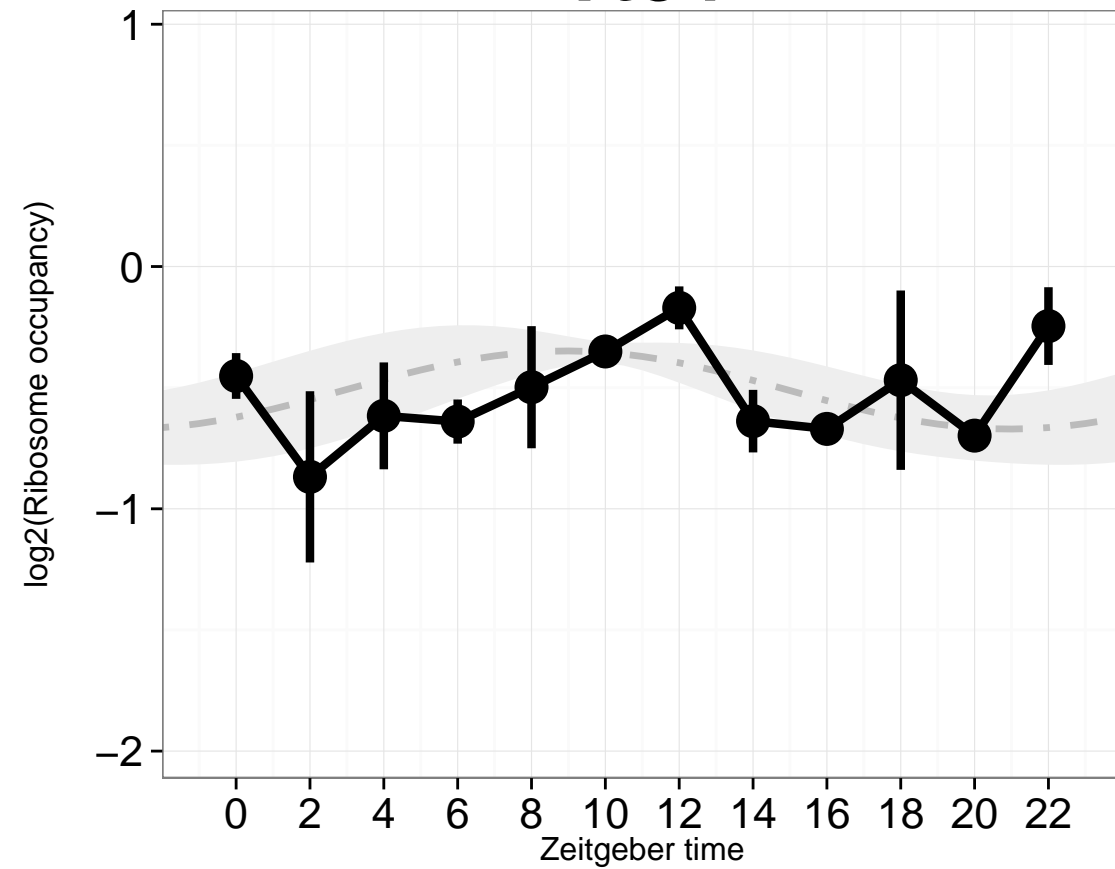

Supplement: SuppDataset_1.zip [file Ttc4_set_A.pdf › Supplemental Dataset 1/A-mRNA_nonrhyth_translation_nonrhyth/Ttc4_set_A.pdf]

# Ttc7b

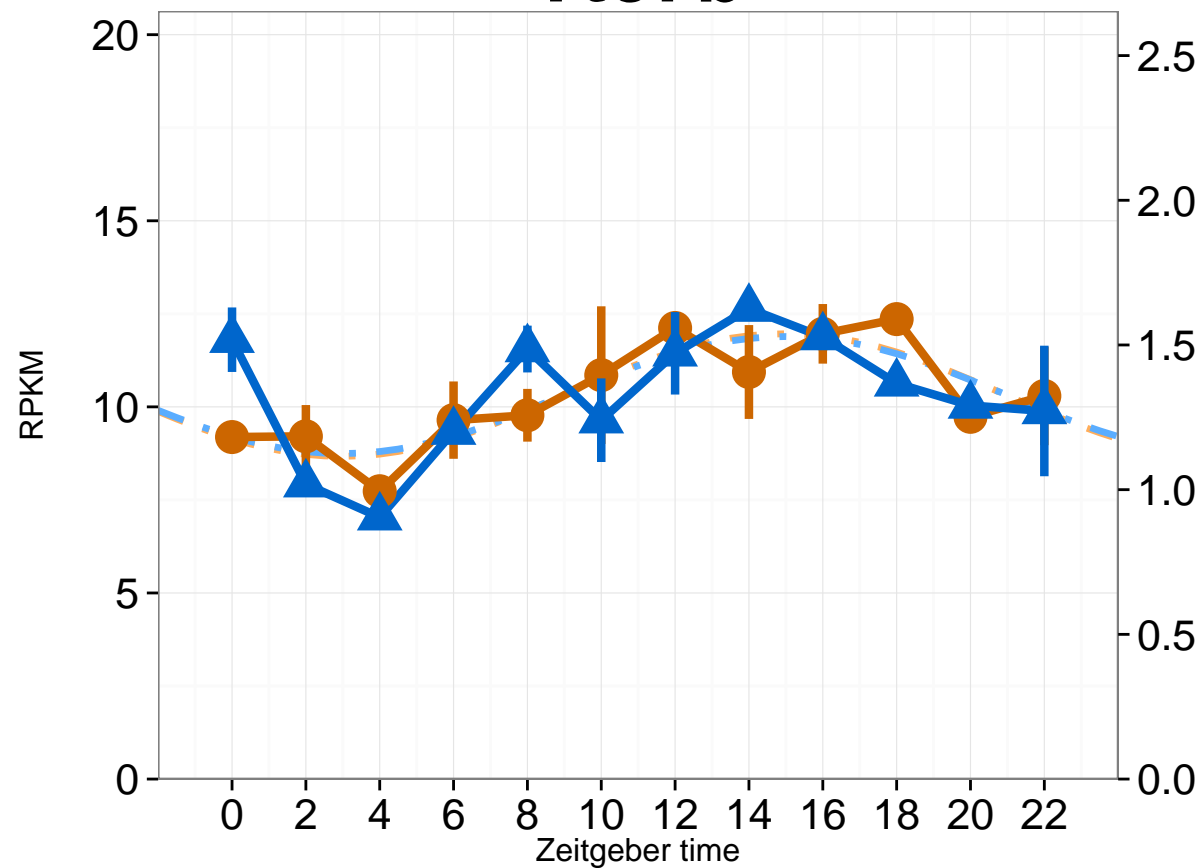

# Ttc7b

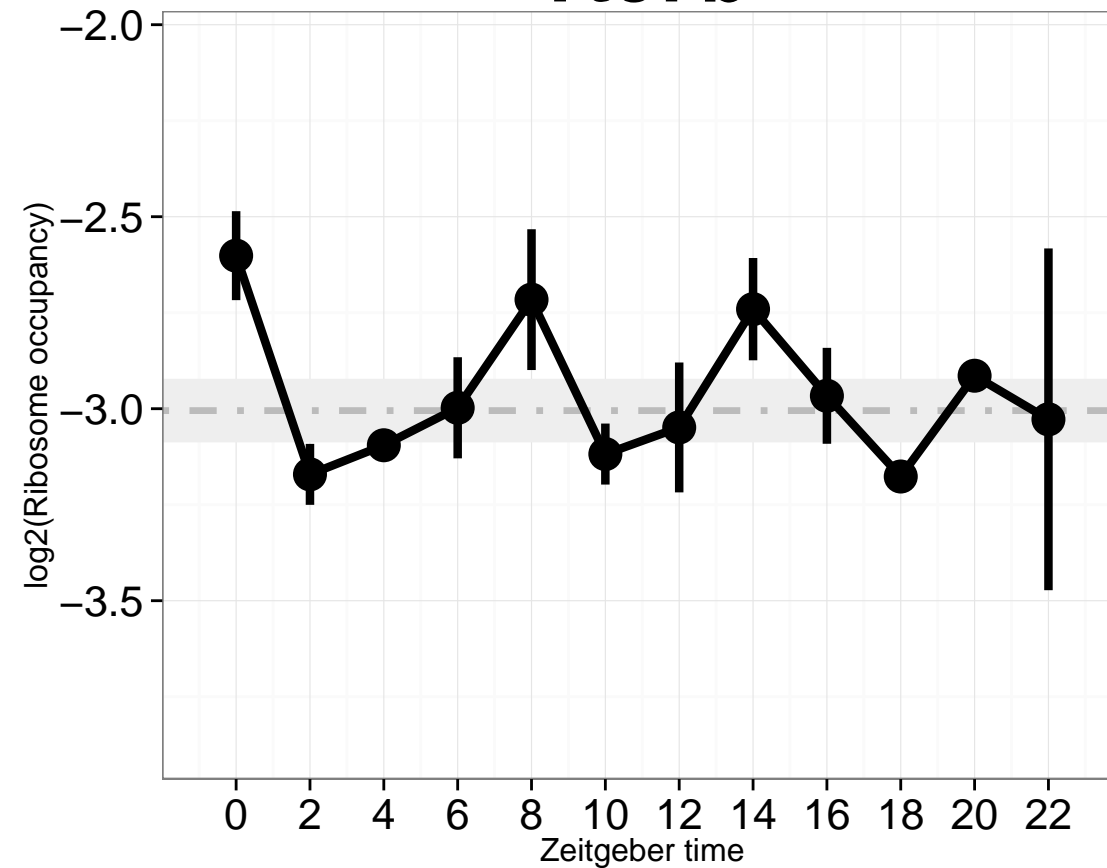

Supplement: SuppDataset_1.zip [file Ttc7b_set_A.pdf › Supplemental Dataset 1/A-mRNA_nonrhyth_translation_nonrhyth/Ttc7b_set_A.pdf]

# Ttc8

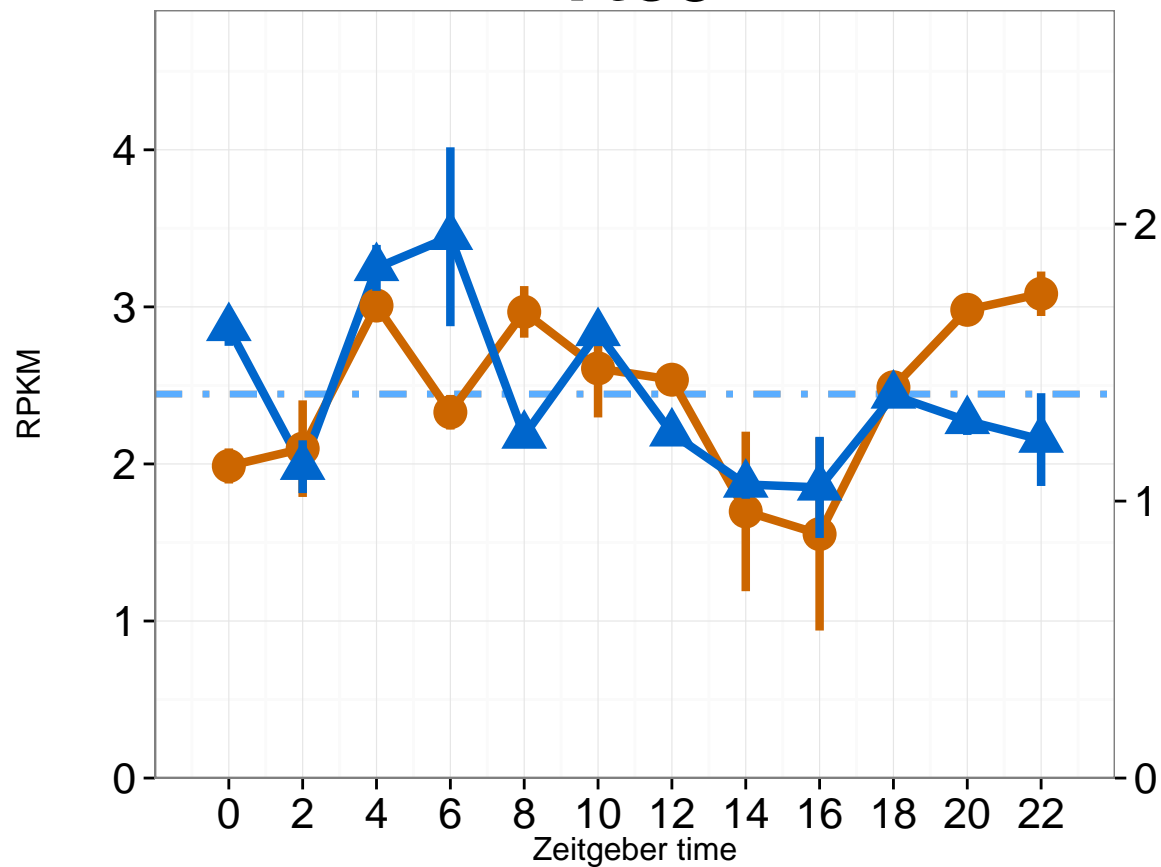

# Ttc8

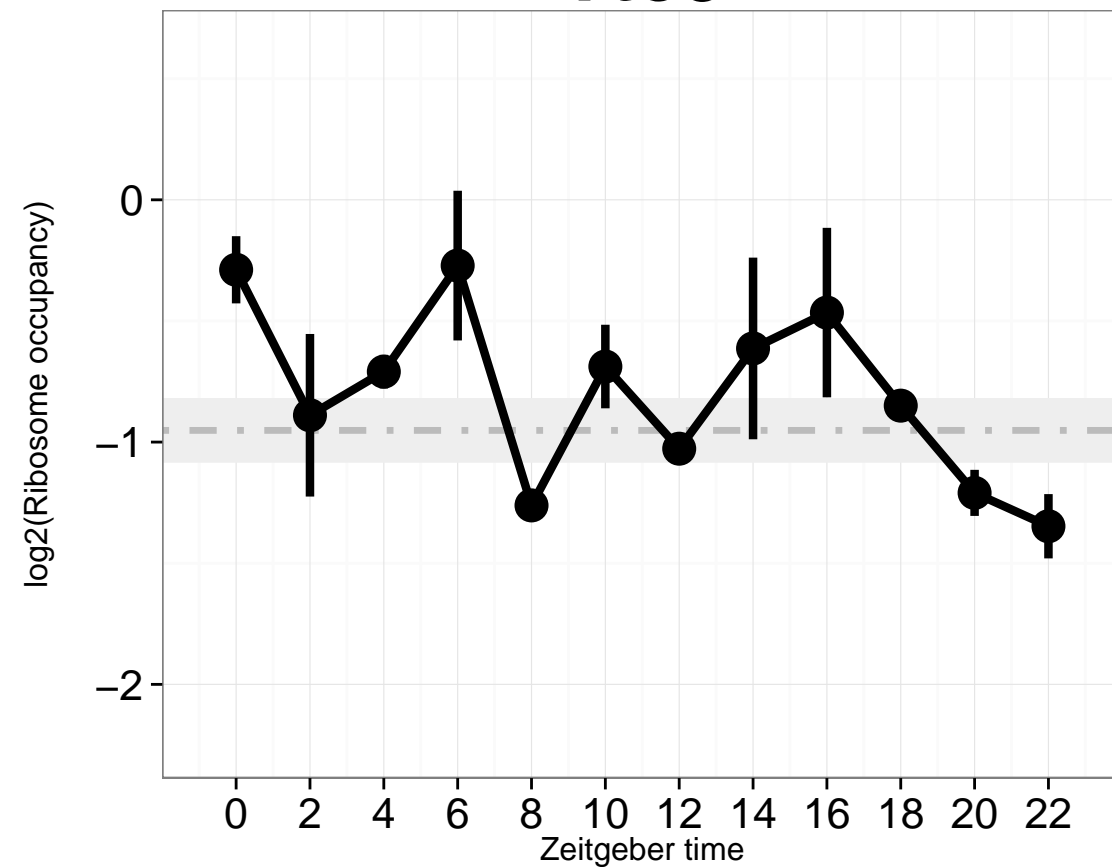

Supplement: SuppDataset_1.zip [file Ttc8_set_A.pdf › Supplemental Dataset 1/A-mRNA_nonrhyth_translation_nonrhyth/Ttc8_set_A.pdf]

# Ttc9c

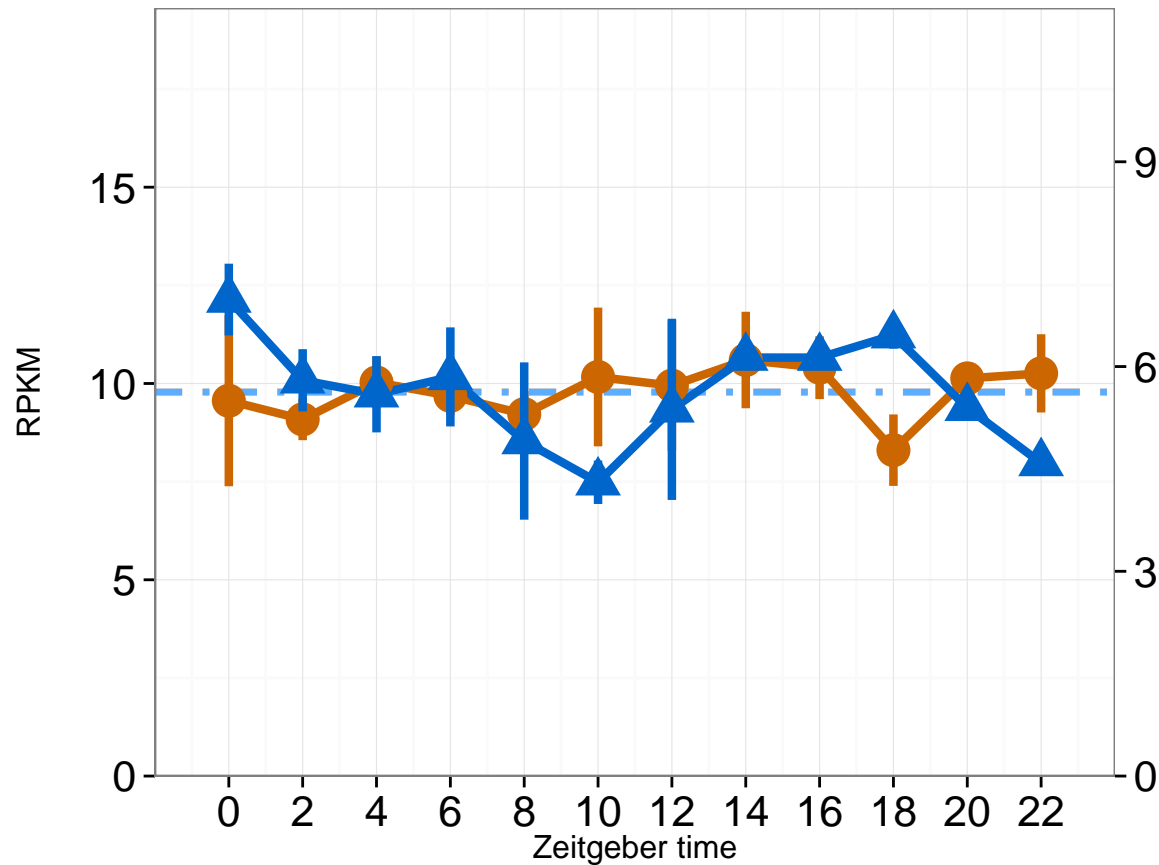

# Ttc9c

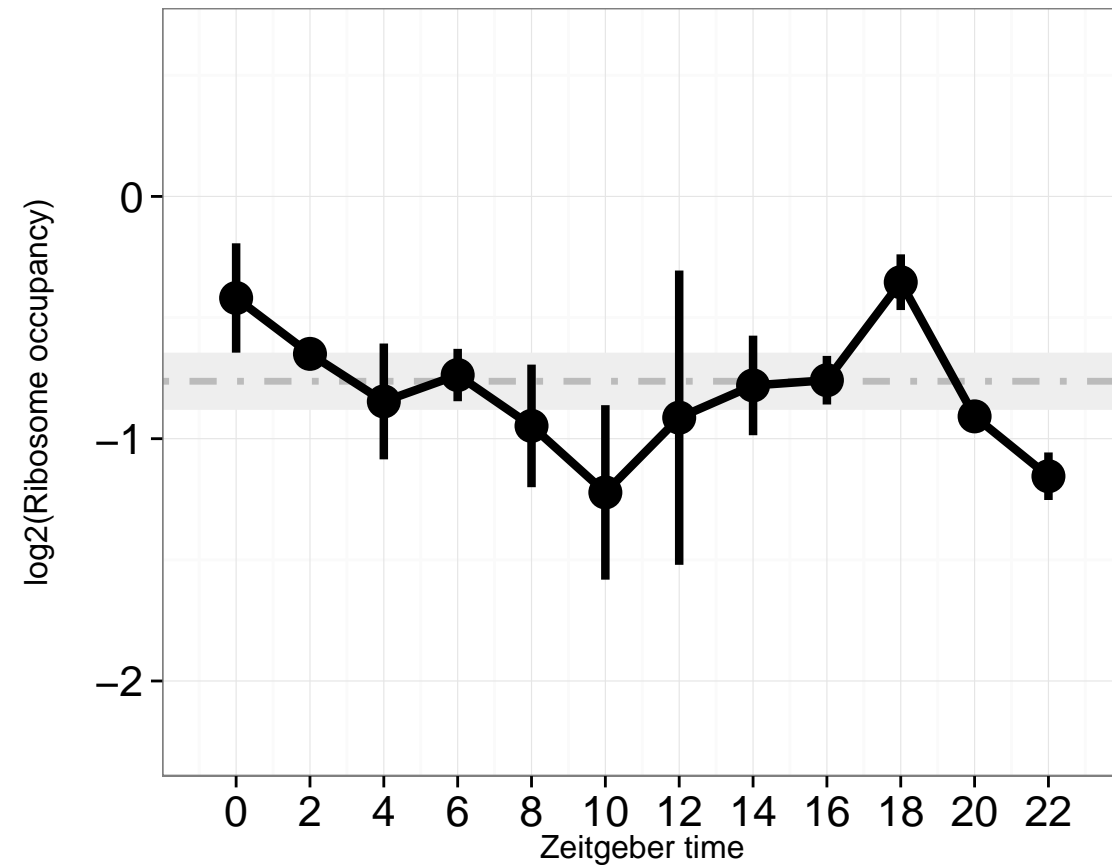

Supplement: SuppDataset_1.zip [file Ttc9c_set_A.pdf › Supplemental Dataset 1/A-mRNA_nonrhyth_translation_nonrhyth/Ttc9c_set_A.pdf]

## Ttf1

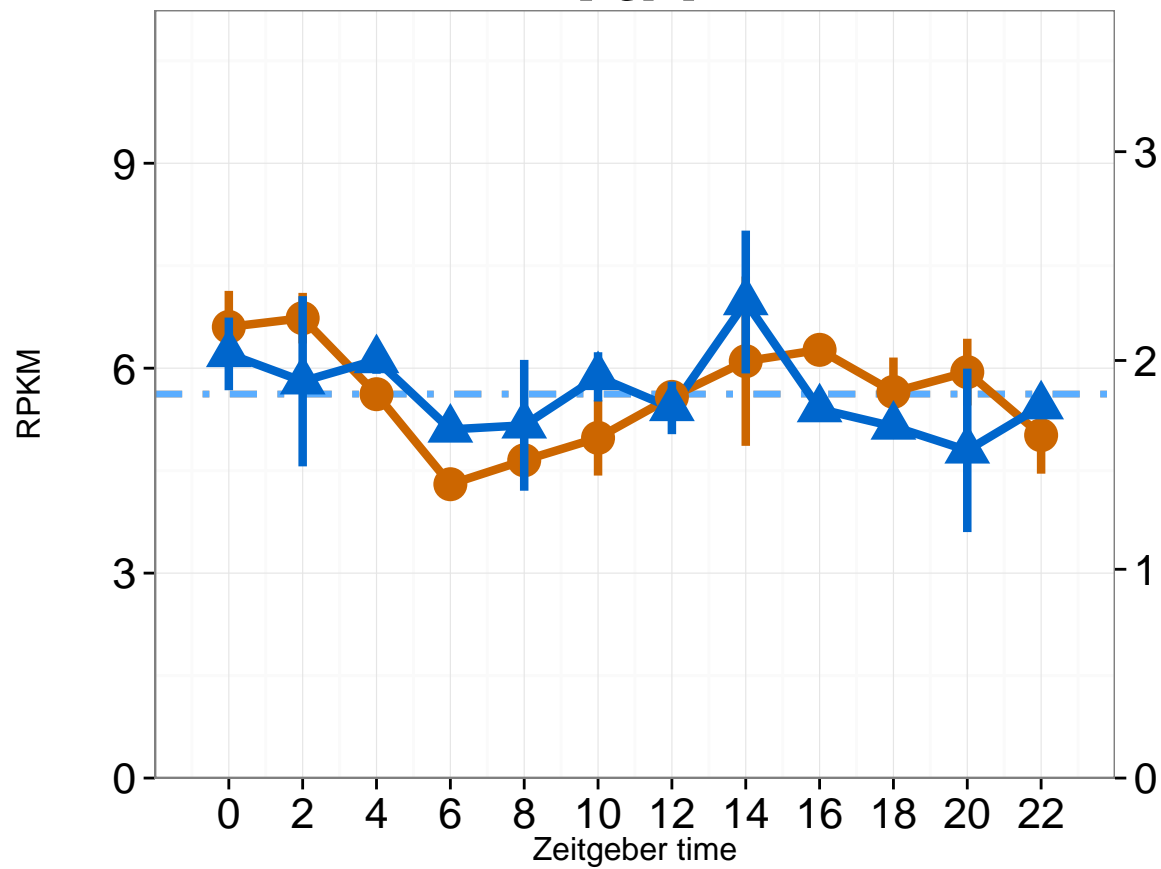

## Ttf1

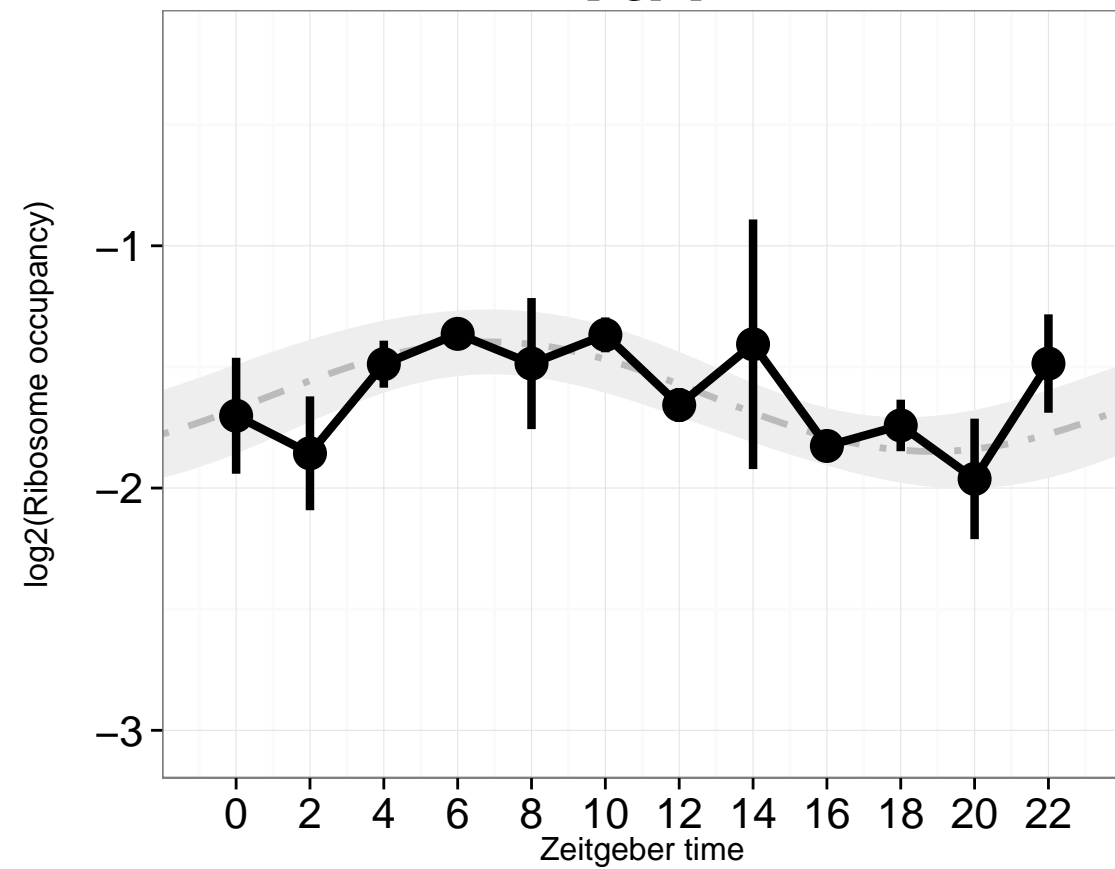

Supplement: SuppDataset_1.zip [file Ttf1_set_A.pdf › Supplemental Dataset 1/A-mRNA_nonrhyth_translation_nonrhyth/Ttf1_set_A.pdf]

## Ttf2

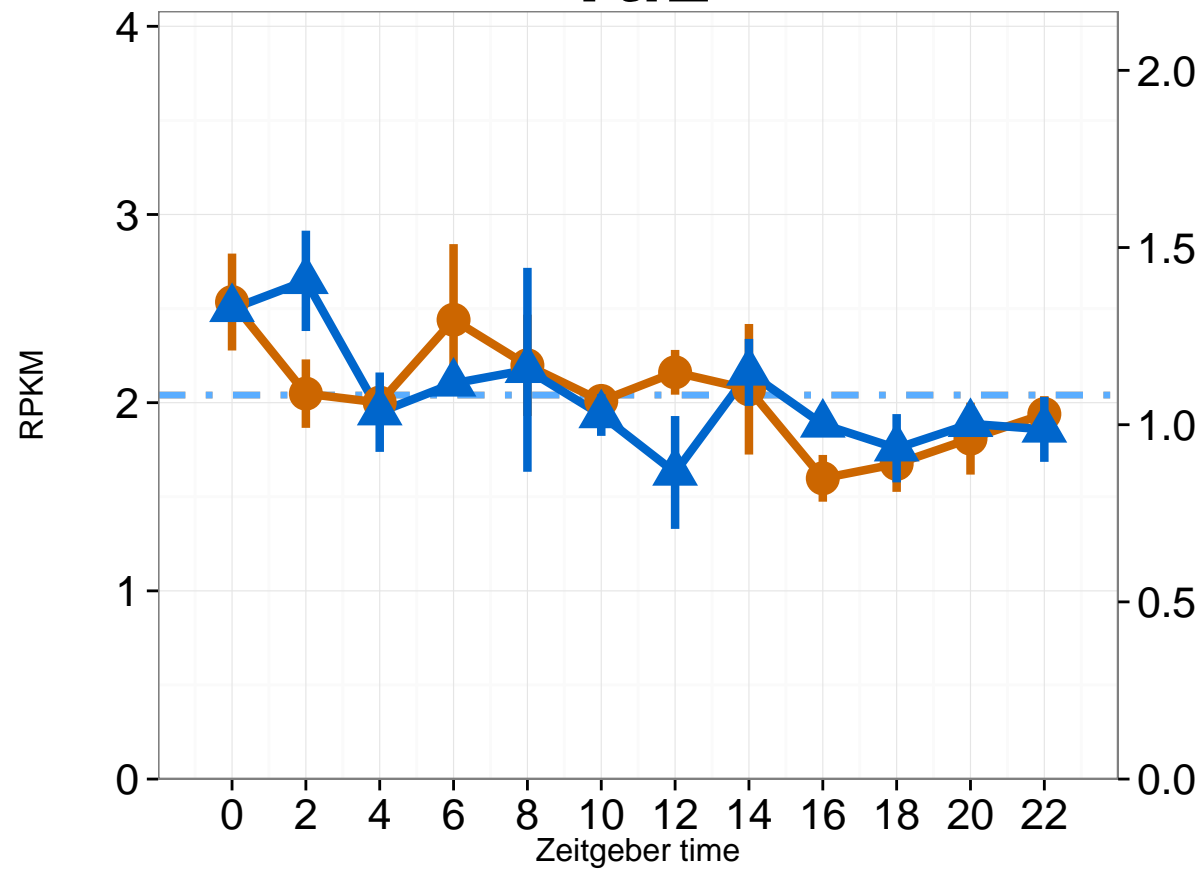

## Ttf2

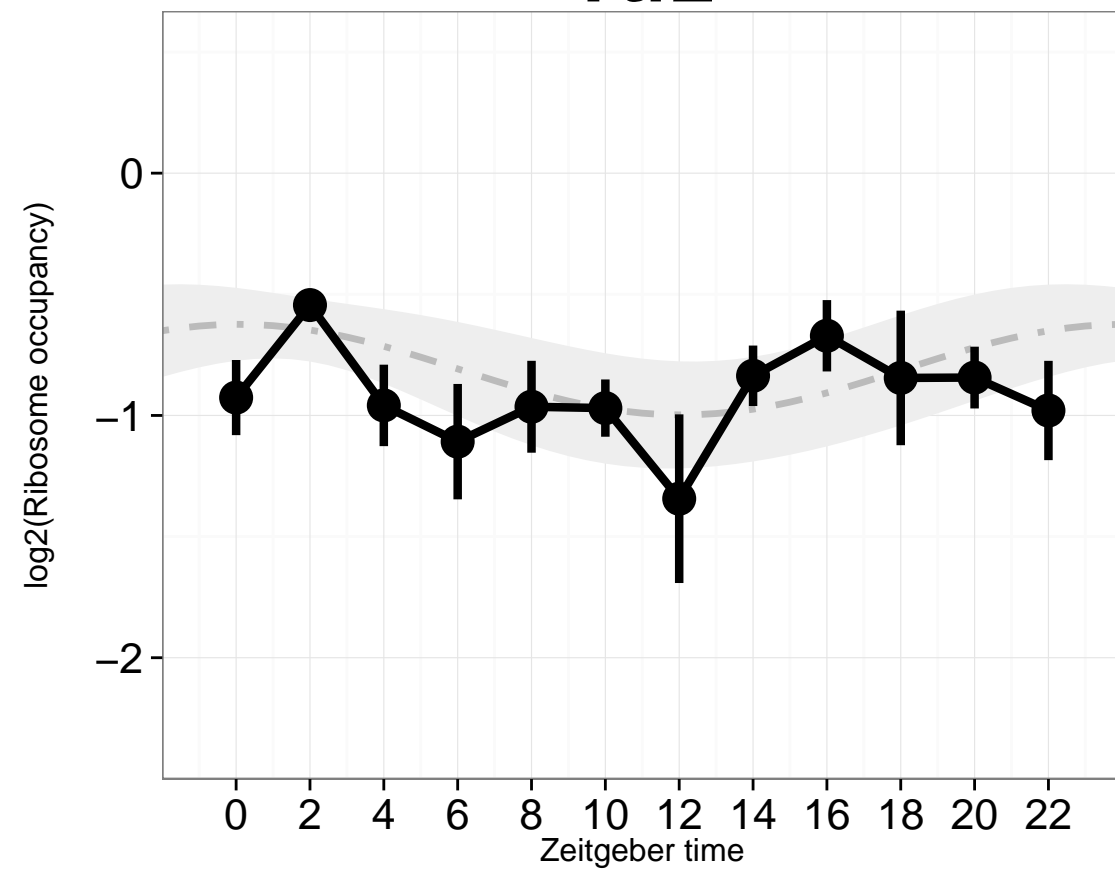

Supplement: SuppDataset_1.zip [file Ttf2_set_A.pdf › Supplemental Dataset 1/A-mRNA_nonrhyth_translation_nonrhyth/Ttf2_set_A.pdf]

## Tti1

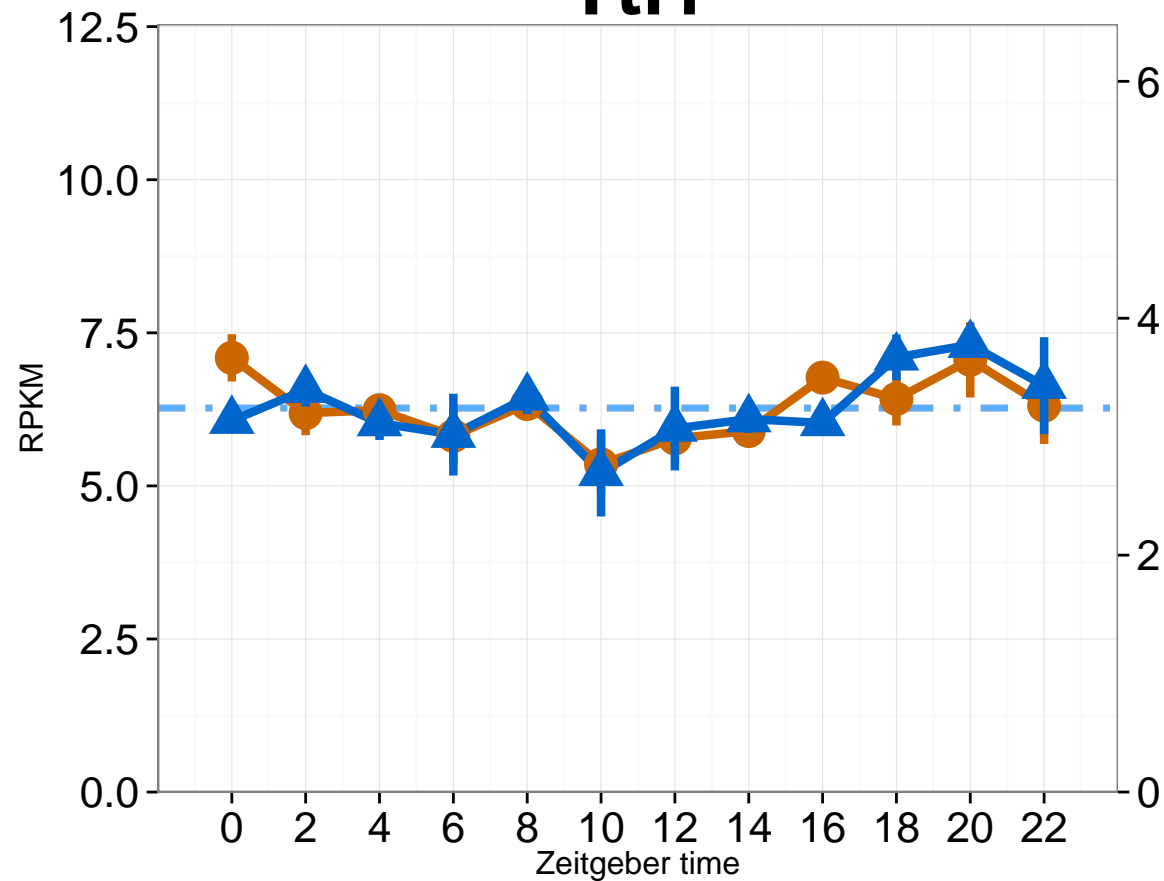

## Tti1

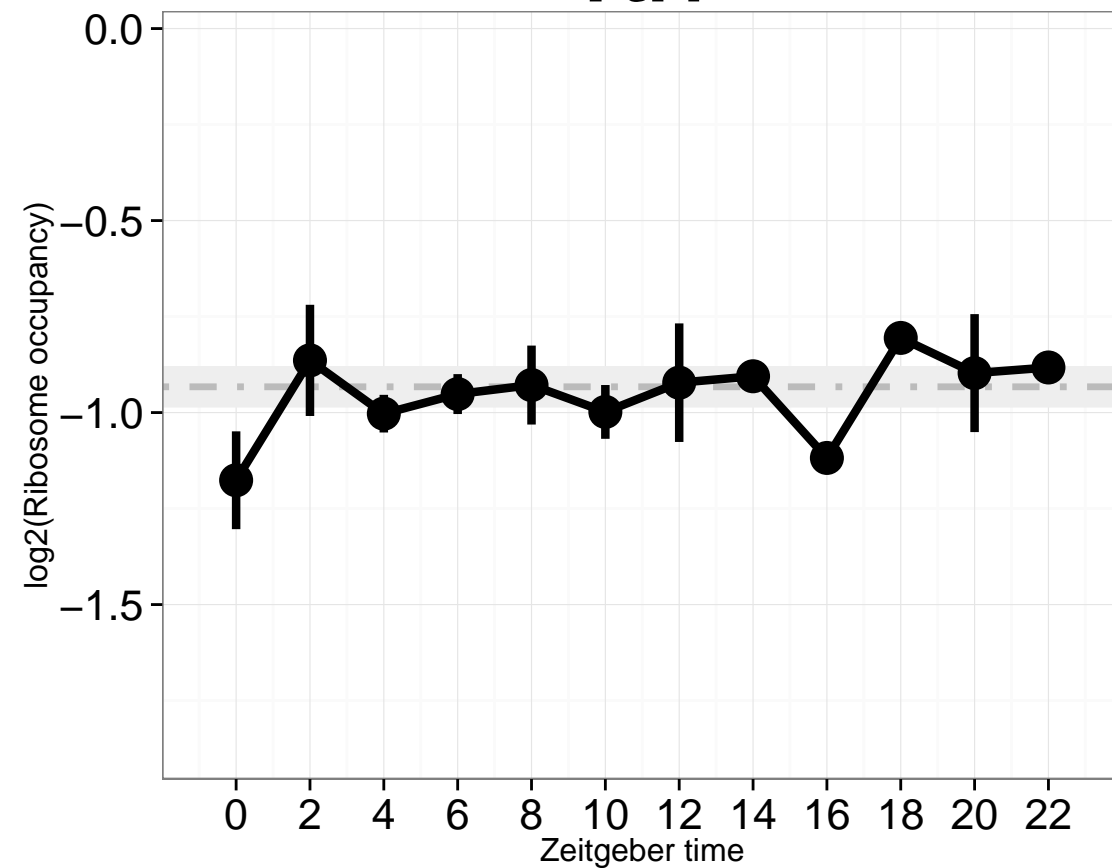

Supplement: SuppDataset_1.zip [file Tti1_set_A.pdf › Supplemental Dataset 1/A-mRNA_nonrhyth_translation_nonrhyth/Tti1_set_A.pdf]

## Tti2

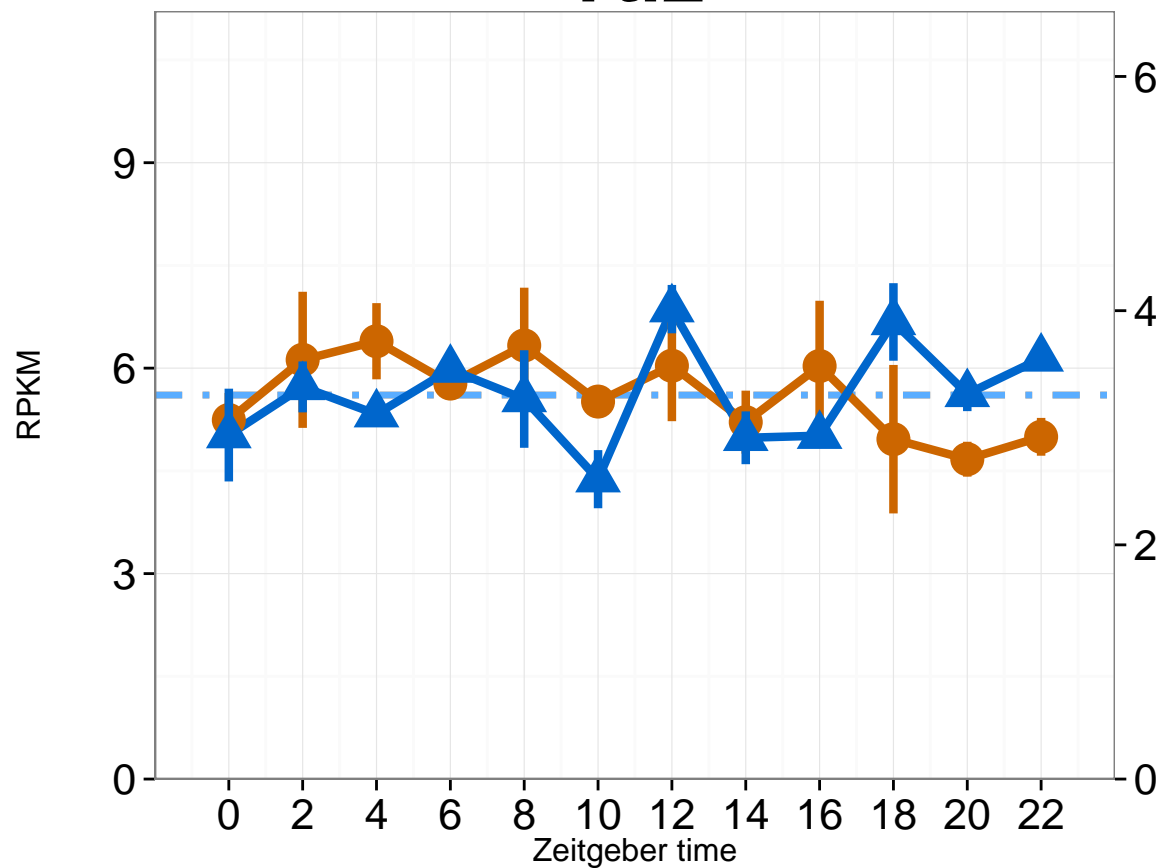

## Tti2

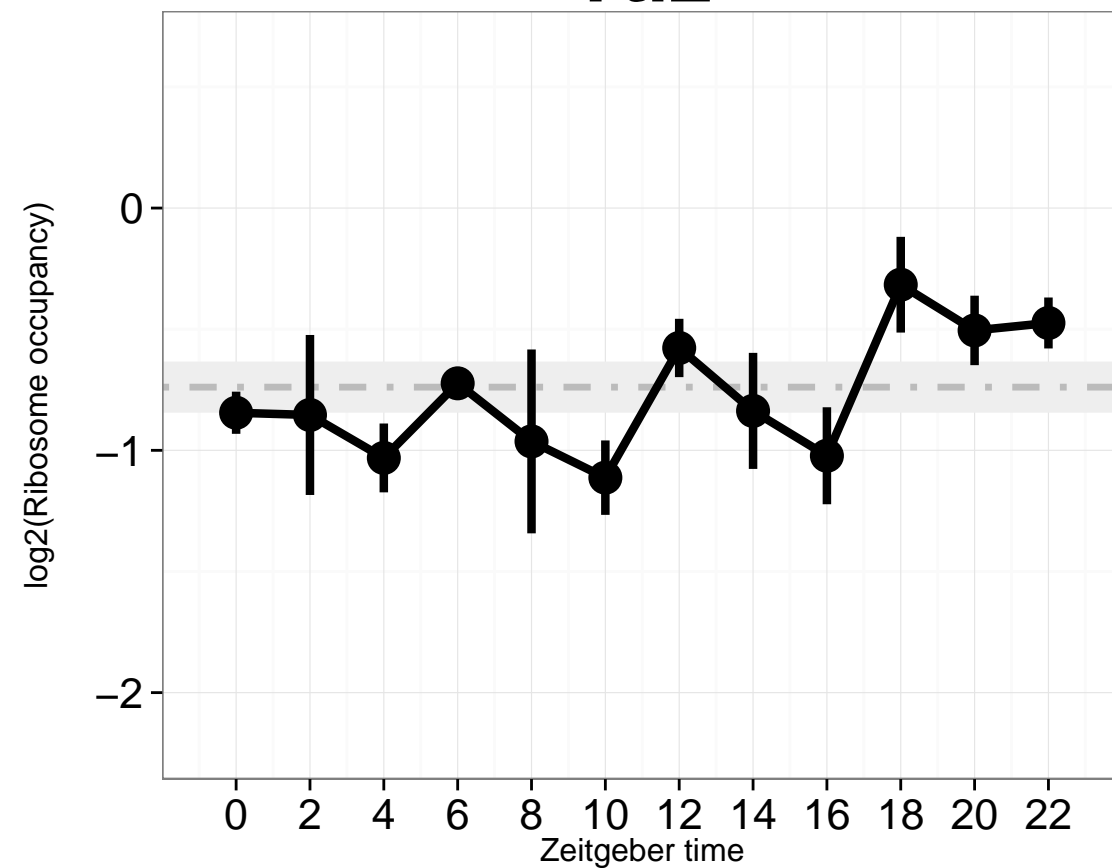

Supplement: SuppDataset_1.zip [file Tti2_set_A.pdf › Supplemental Dataset 1/A-mRNA_nonrhyth_translation_nonrhyth/Tti2_set_A.pdf]

## Ttl1

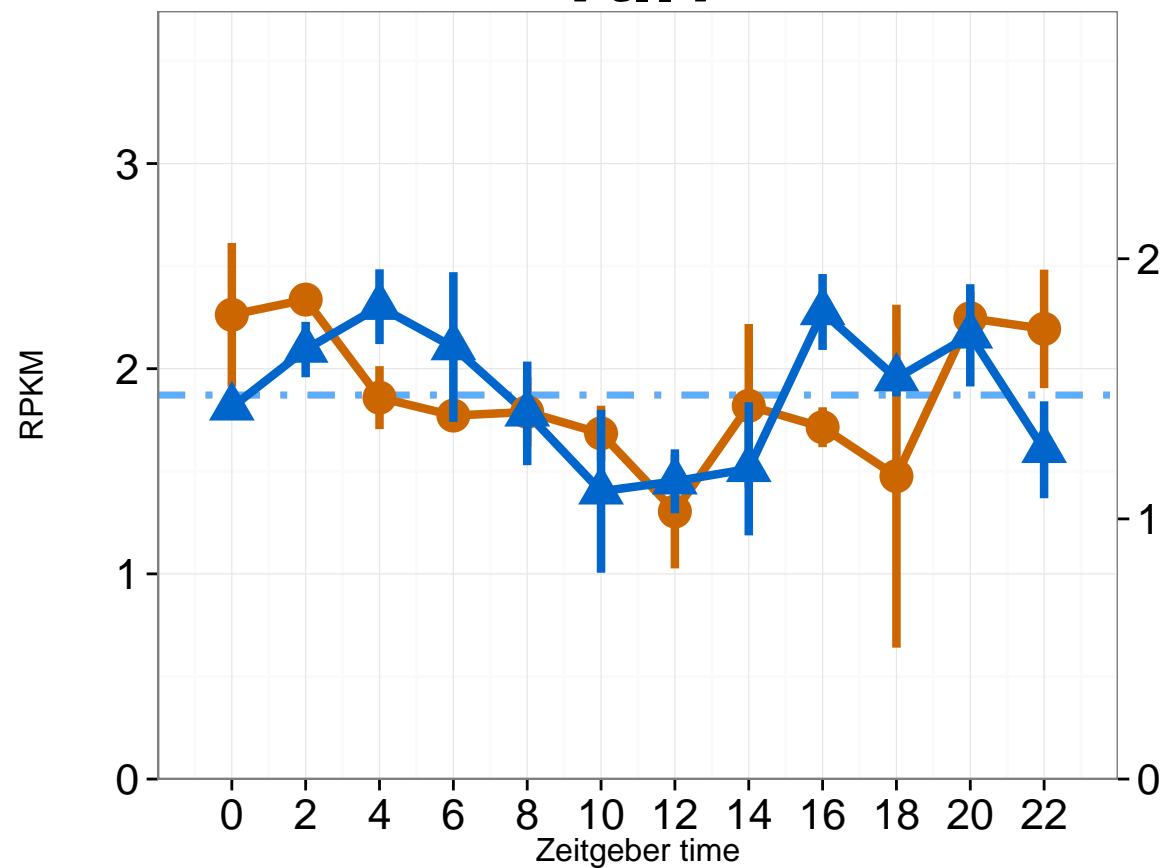

## Ttl1

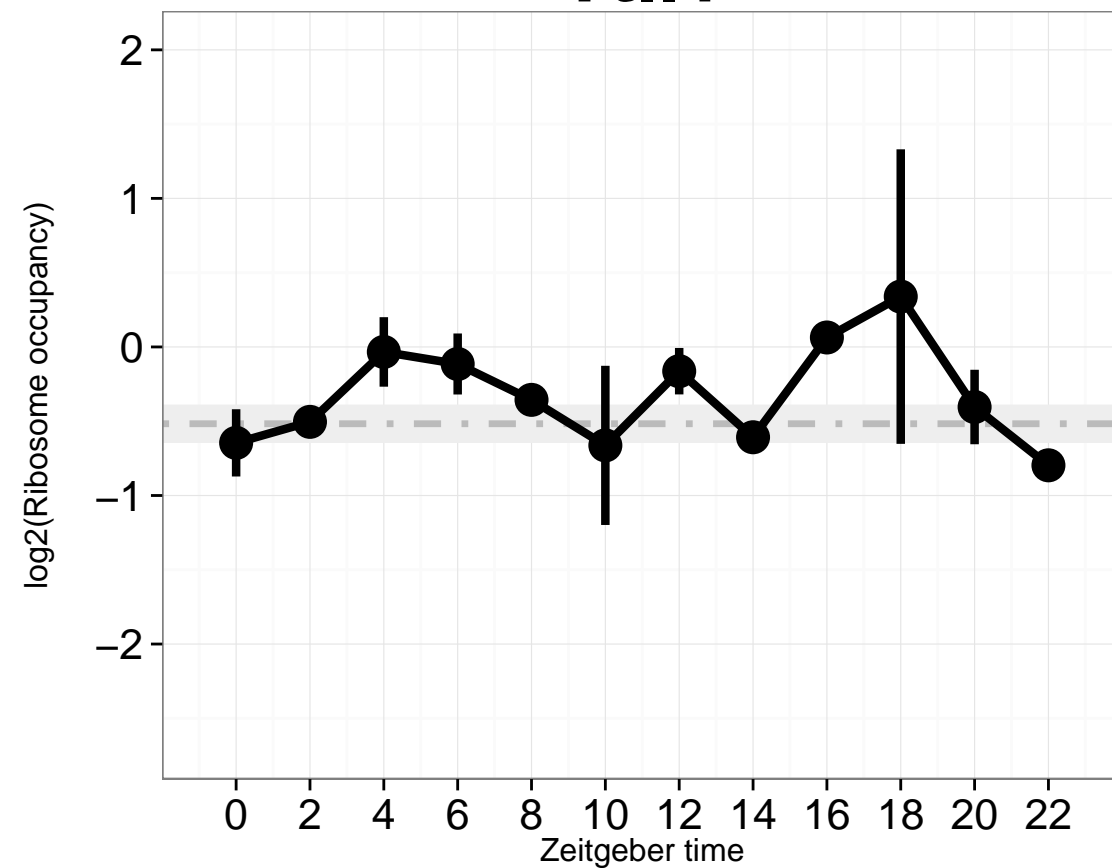

Supplement: SuppDataset_1.zip [file Ttll1_set_A.pdf › Supplemental Dataset 1/A-mRNA_nonrhyth_translation_nonrhyth/Ttll1_set_A.pdf]

## TtII5

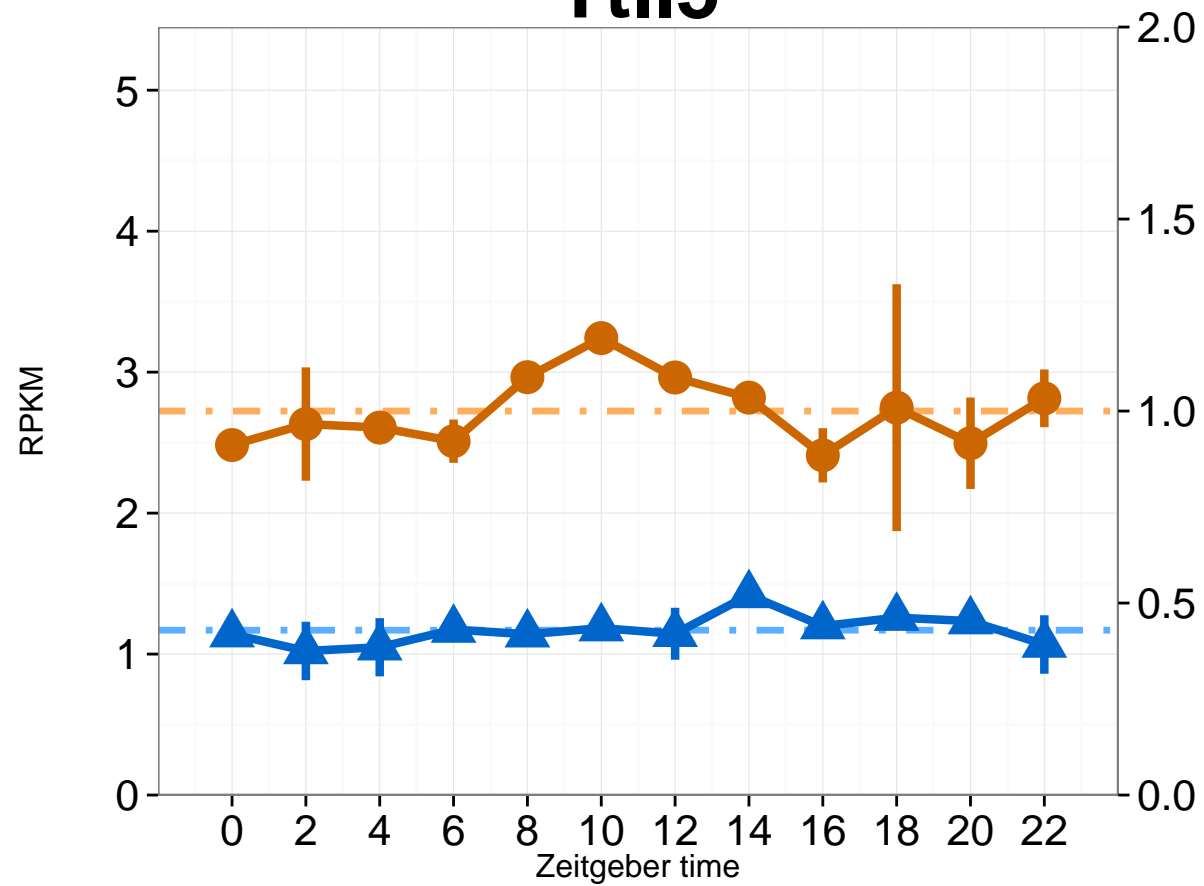

## TtII5

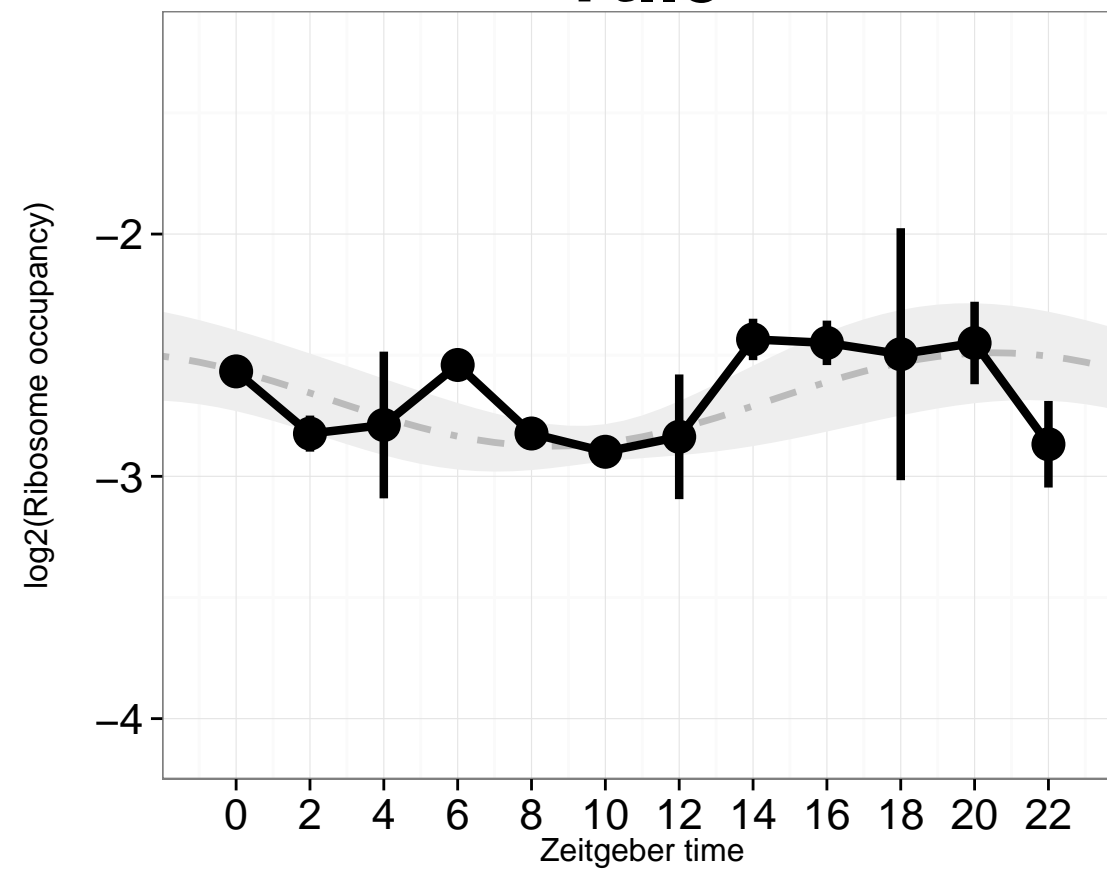

Supplement: SuppDataset_1.zip [file Ttll5_set_A.pdf › Supplemental Dataset 1/A-mRNA_nonrhyth_translation_nonrhyth/Ttll5_set_A.pdf]

## Ttll6

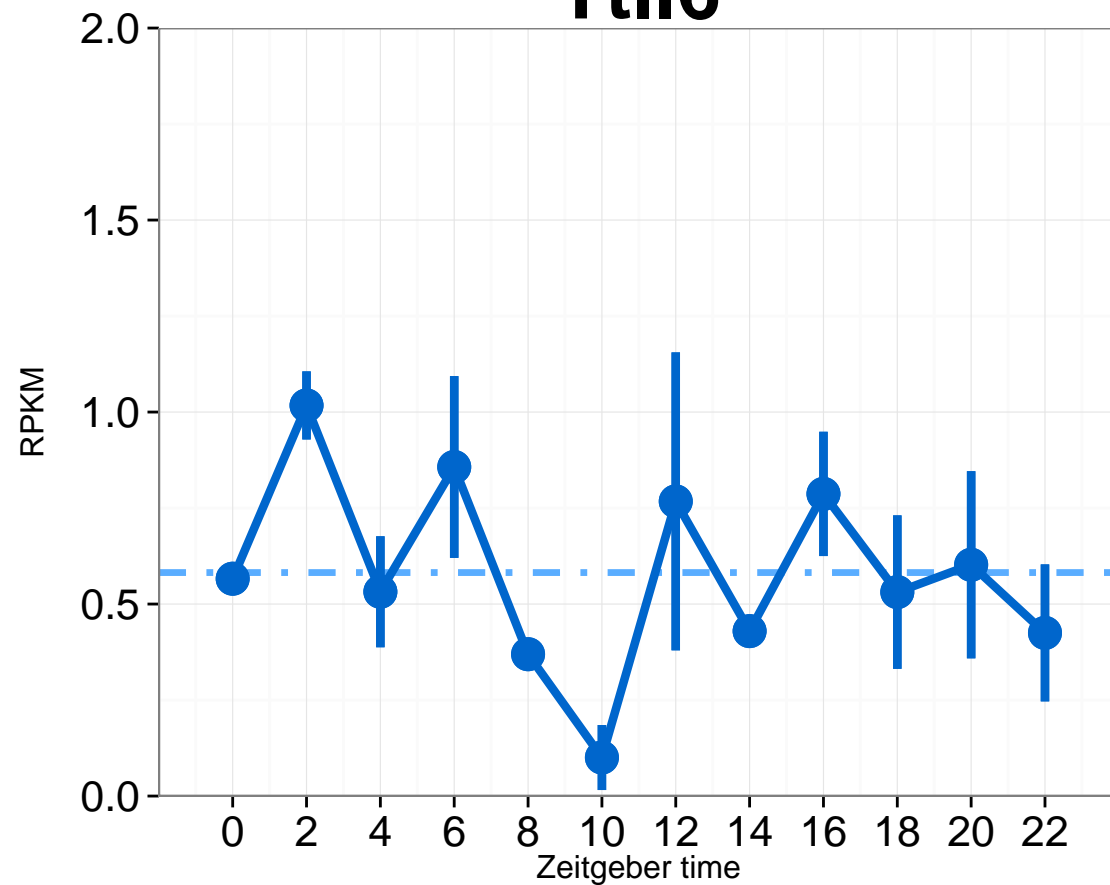

## Ttll6 log2(Ribosome occupancy)

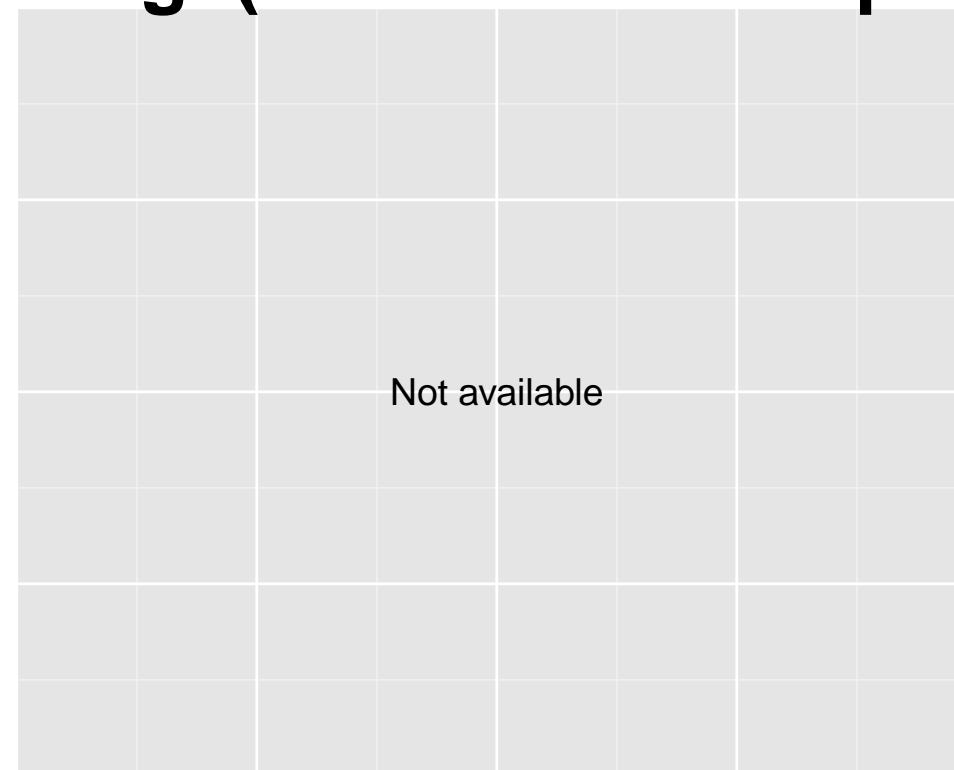

Supplement: SuppDataset_1.zip [file Ttll6_set_A.pdf › Supplemental Dataset 1/A-mRNA_nonrhyth_translation_nonrhyth/Ttll6_set_A.pdf]

## TtII7

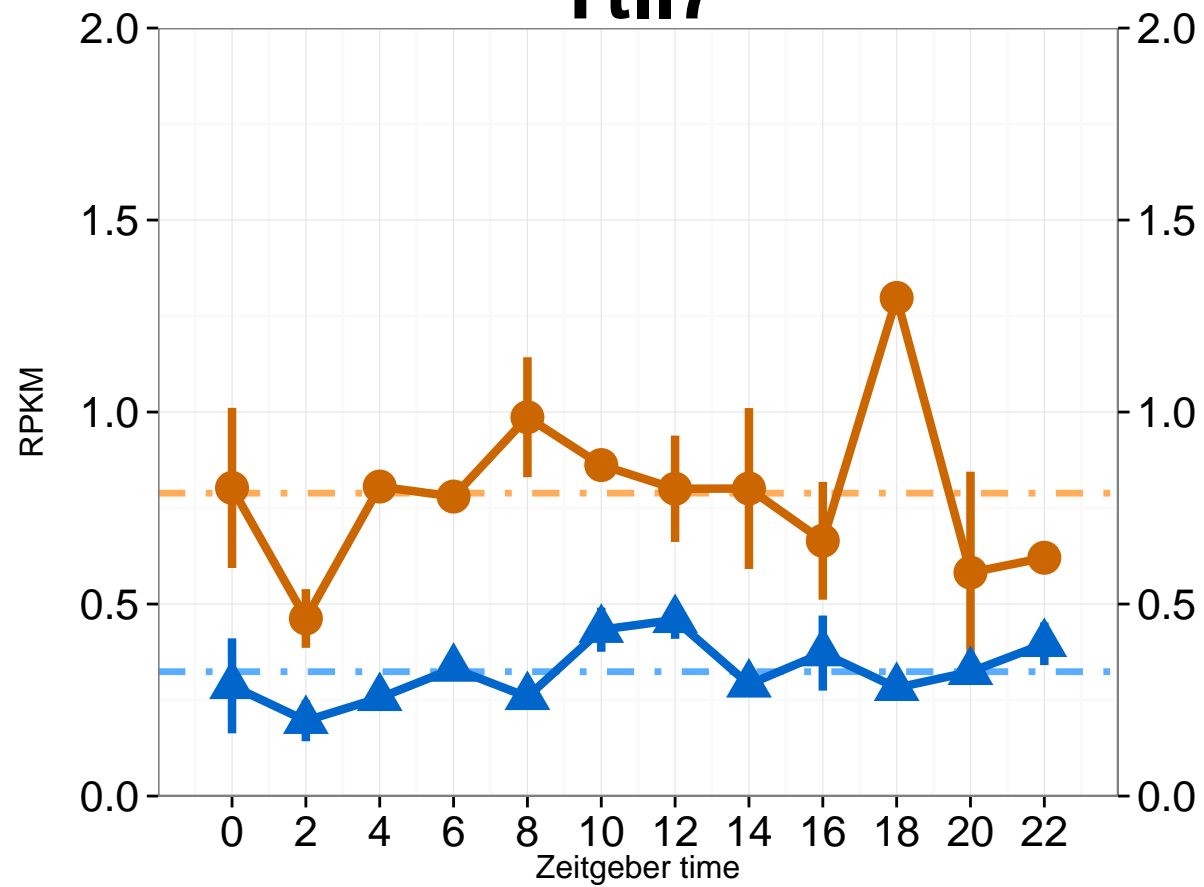

## TtII7

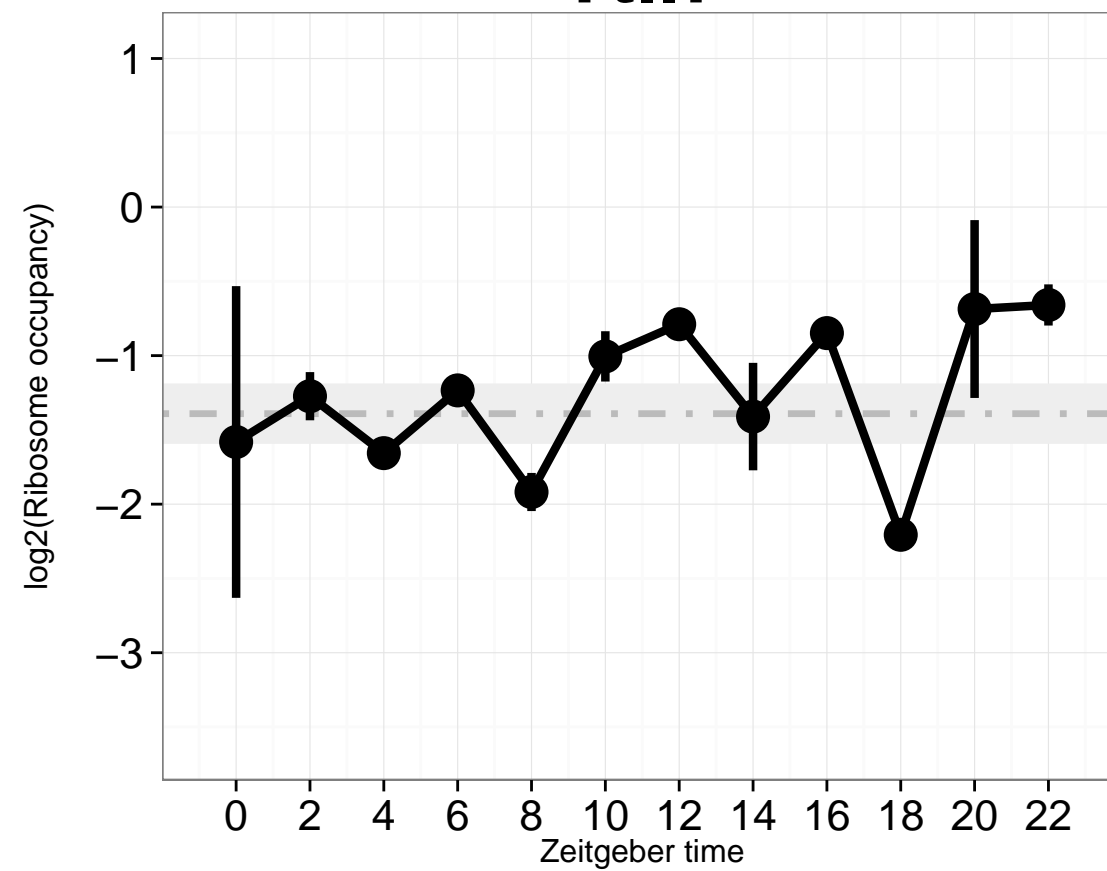

Supplement: SuppDataset_1.zip [file Ttll7_set_A.pdf › Supplemental Dataset 1/A-mRNA_nonrhyth_translation_nonrhyth/Ttll7_set_A.pdf]

# Ttpa

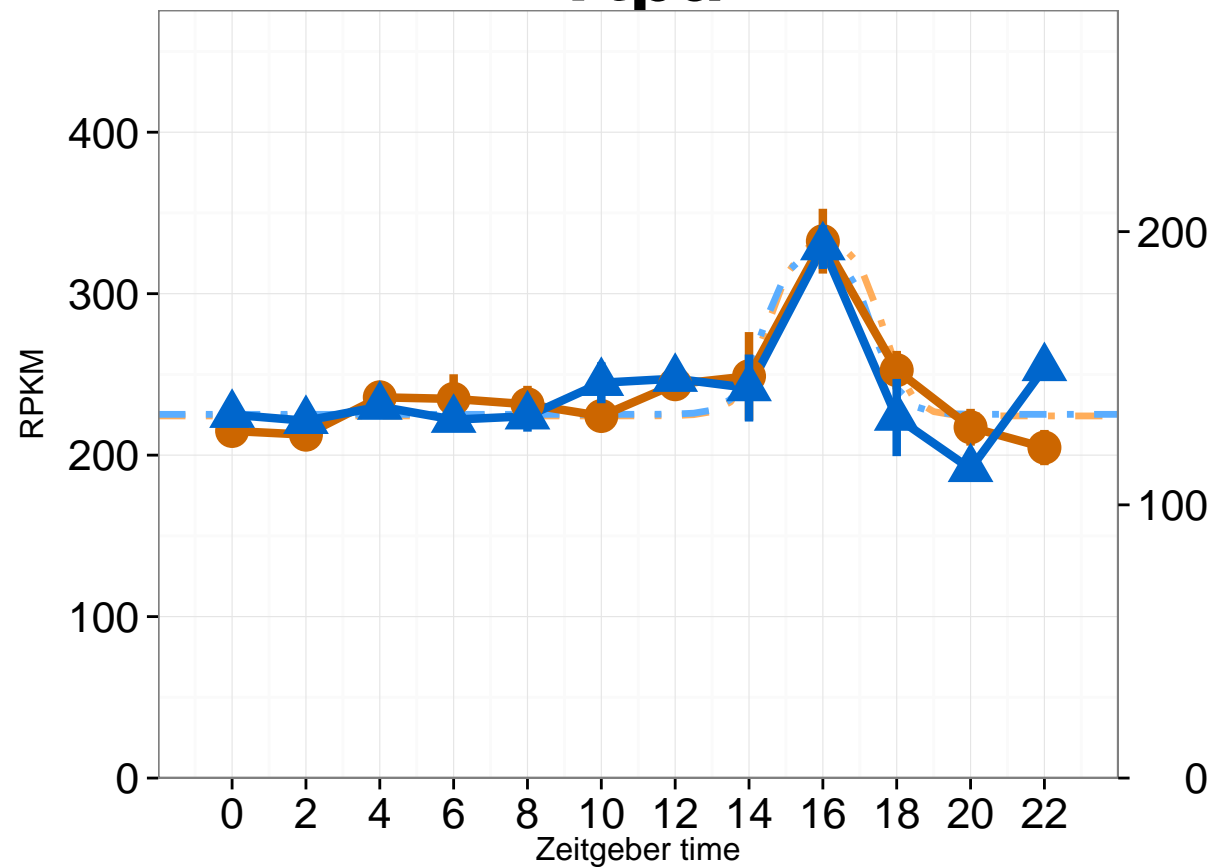

# Ttpa

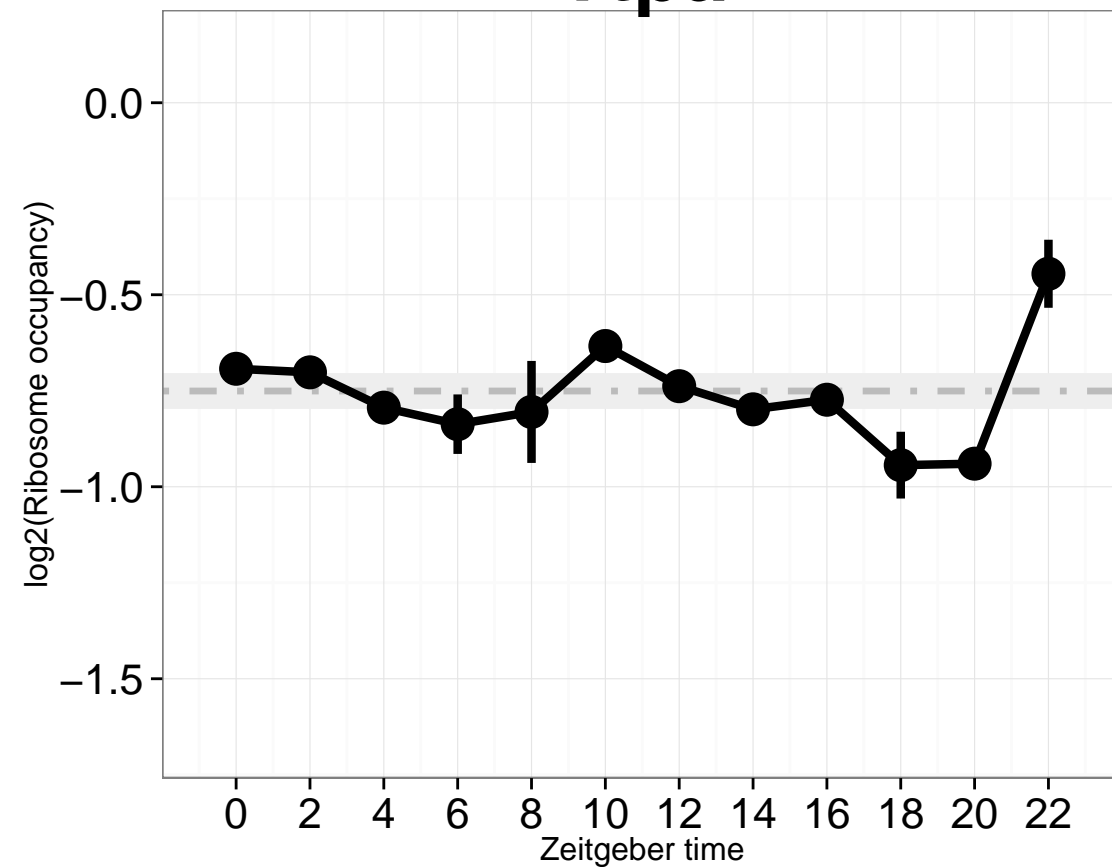

Supplement: SuppDataset_1.zip [file Ttpa_set_A.pdf › Supplemental Dataset 1/A-mRNA_nonrhyth_translation_nonrhyth/Ttpa_set_A.pdf]

**Ttr**

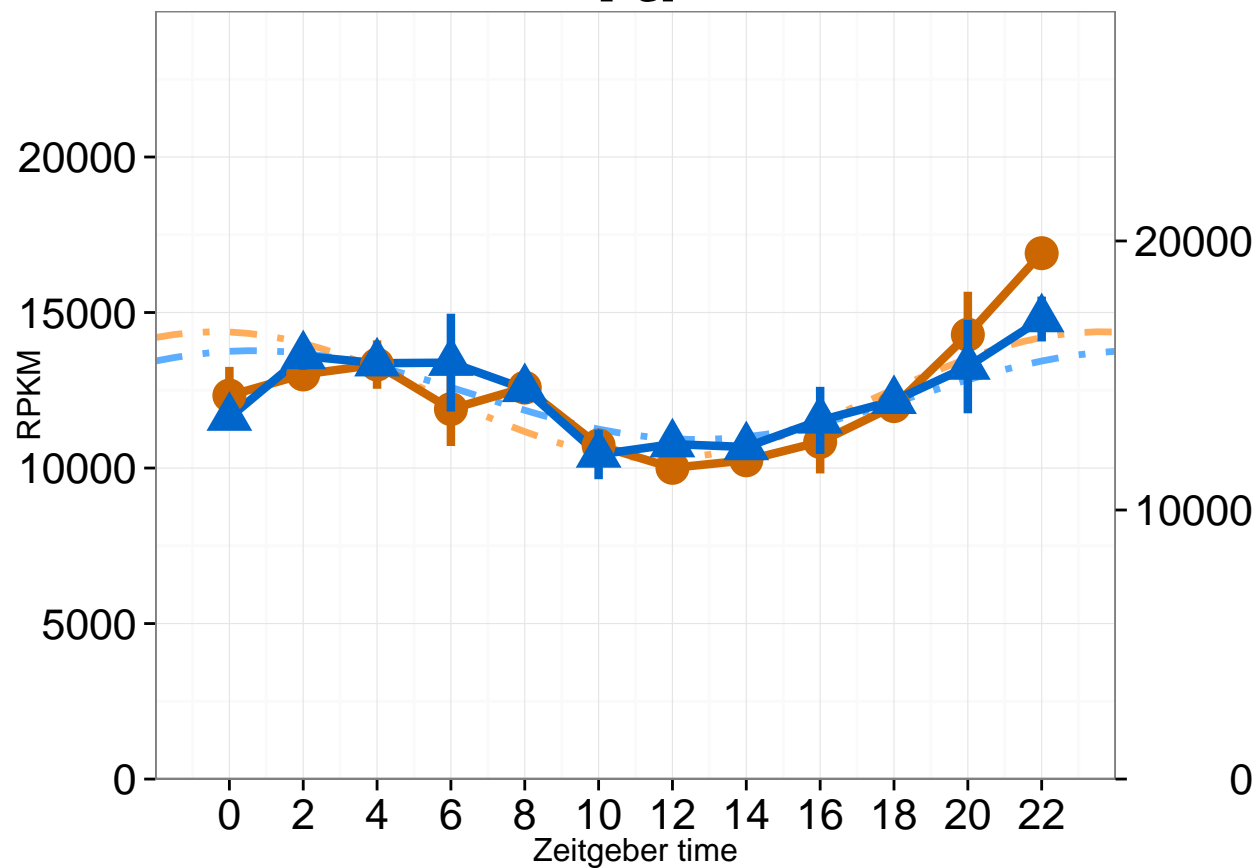

**Ttr**

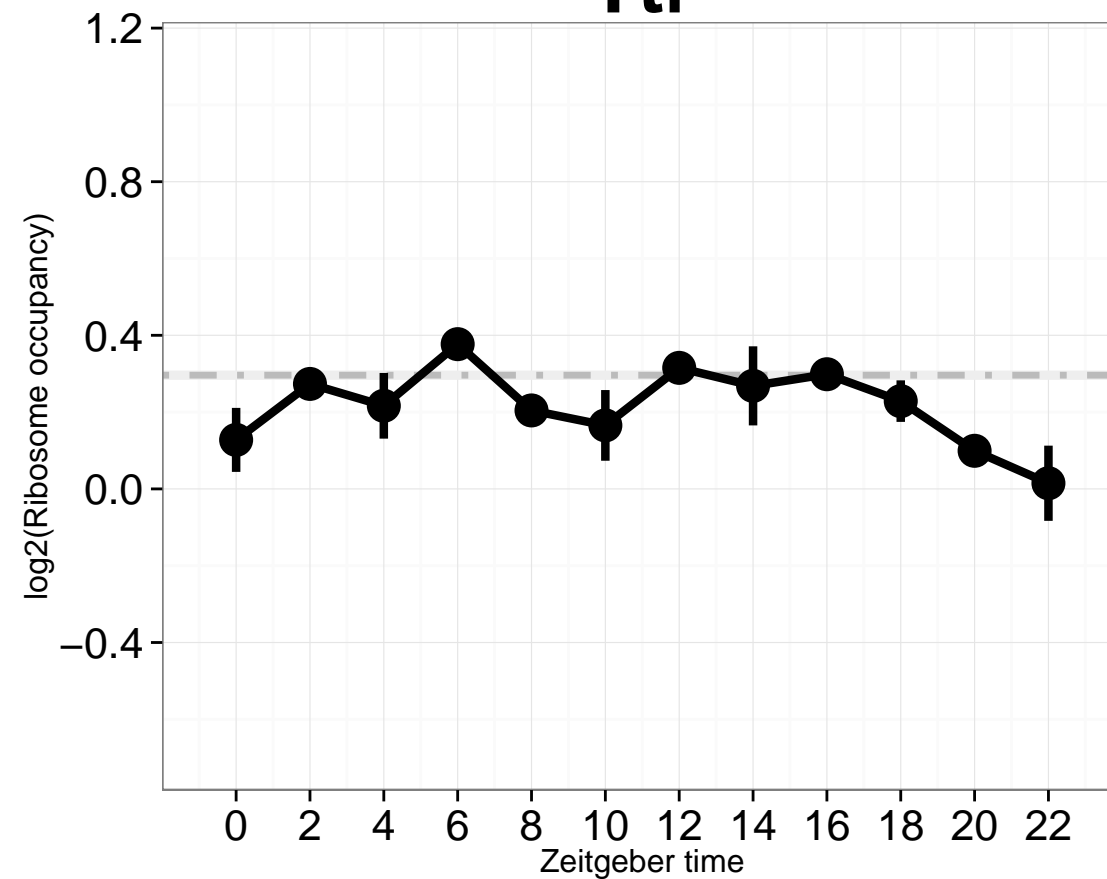

Supplement: SuppDataset_1.zip [file Ttr_set_A.pdf › Supplemental Dataset 1/A-mRNA_nonrhyth_translation_nonrhyth/Ttr_set_A.pdf]

## Ttyh2

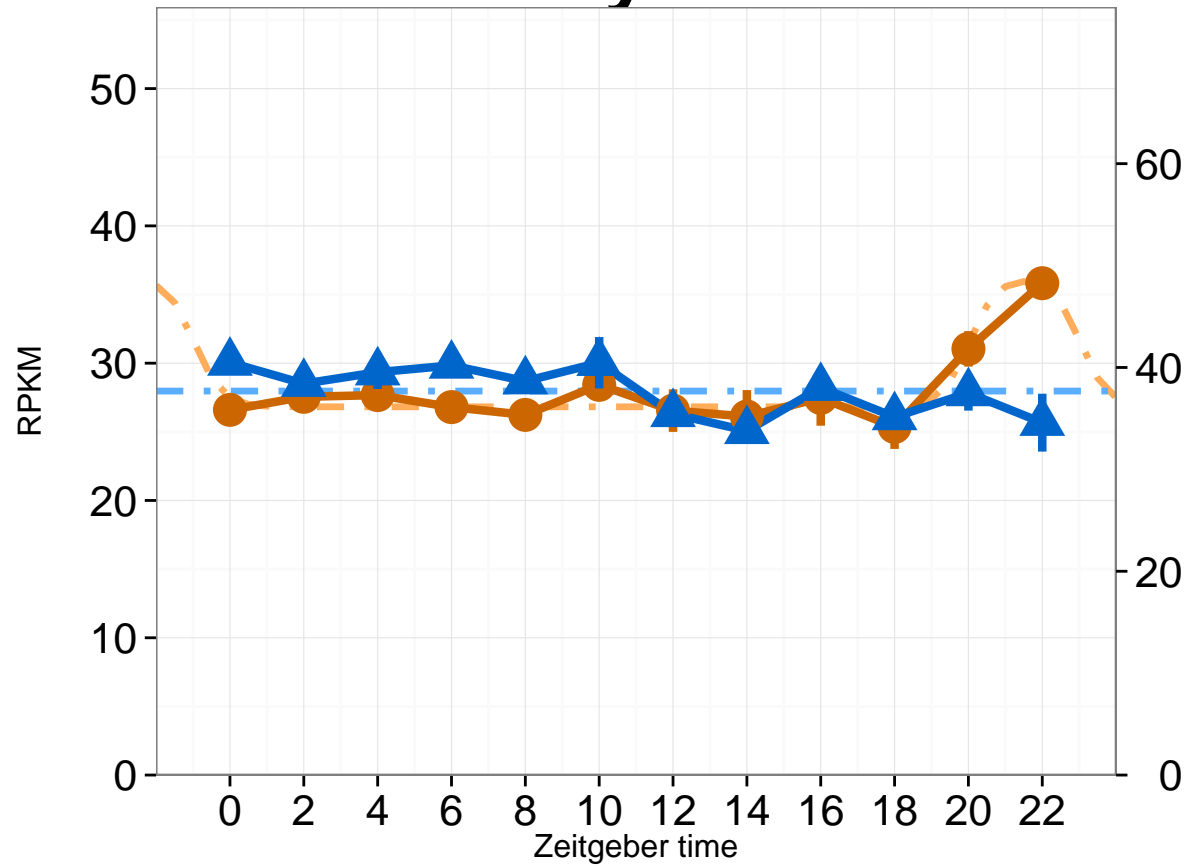

## Ttyh2

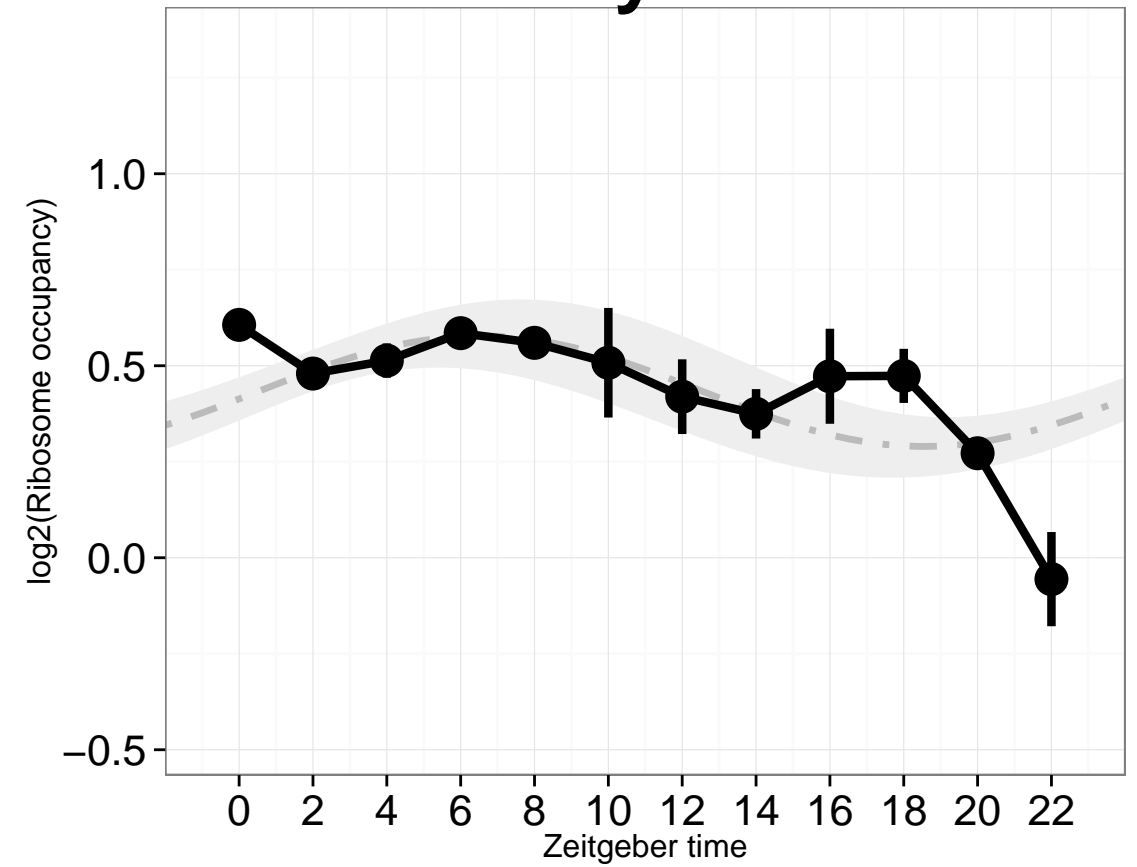

Supplement: SuppDataset_1.zip [file Ttyh2_set_A.pdf › Supplemental Dataset 1/A-mRNA_nonrhyth_translation_nonrhyth/Ttyh2_set_A.pdf]

## Ttyh3

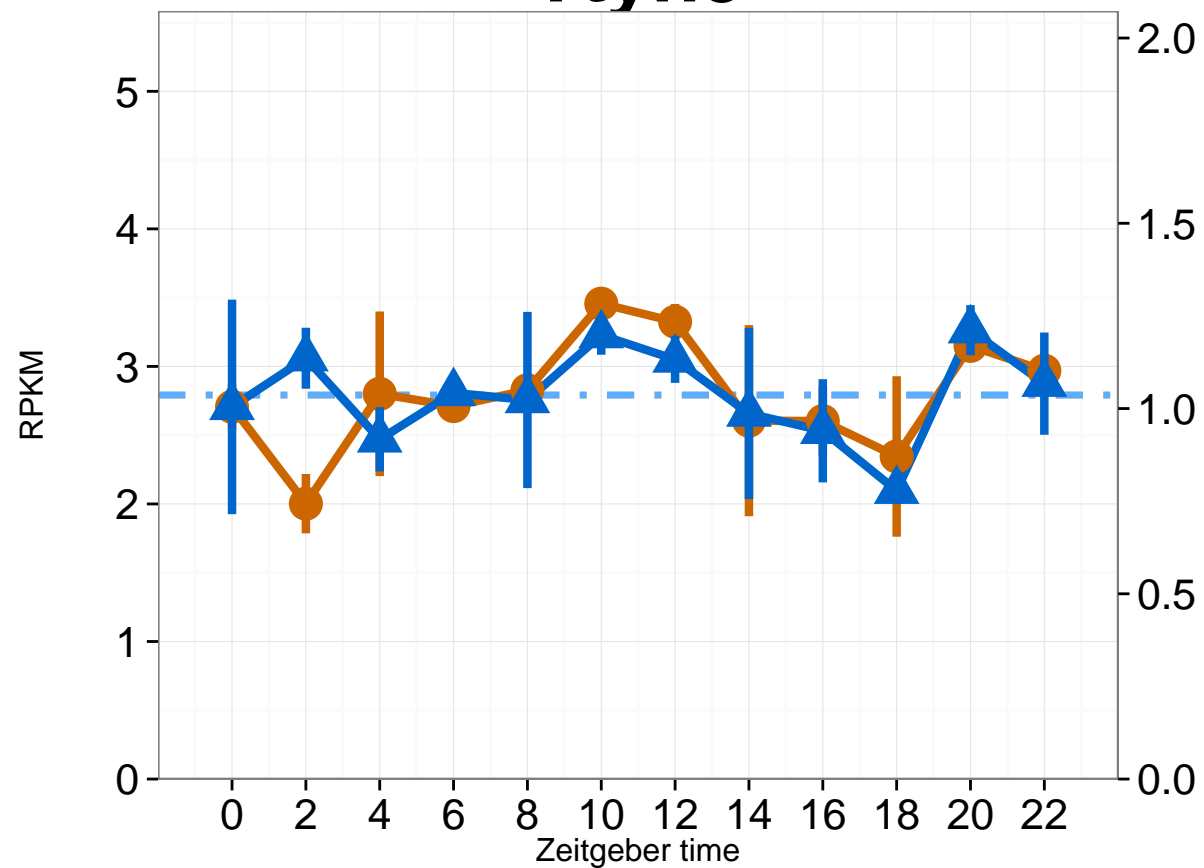

## Ttyh3

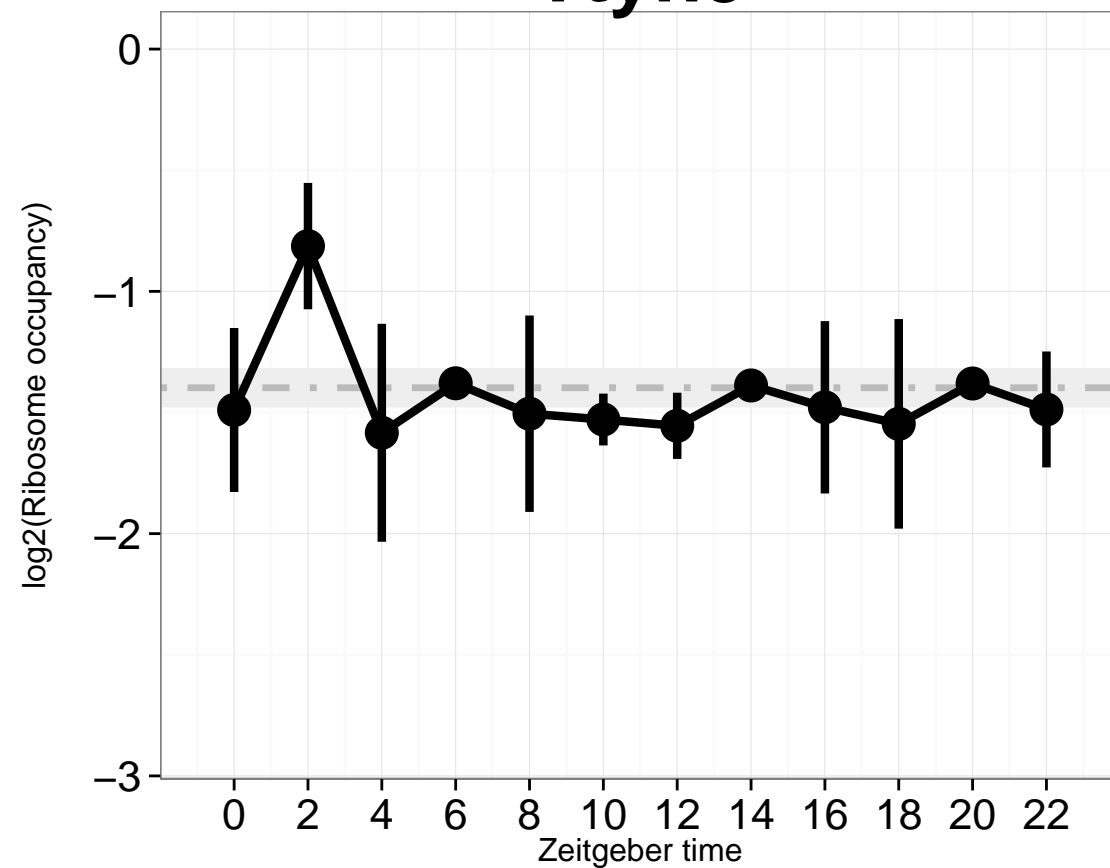

Supplement: SuppDataset_1.zip [file Ttyh3_set_A.pdf › Supplemental Dataset 1/A-mRNA_nonrhyth_translation_nonrhyth/Ttyh3_set_A.pdf]

# Tuba1b

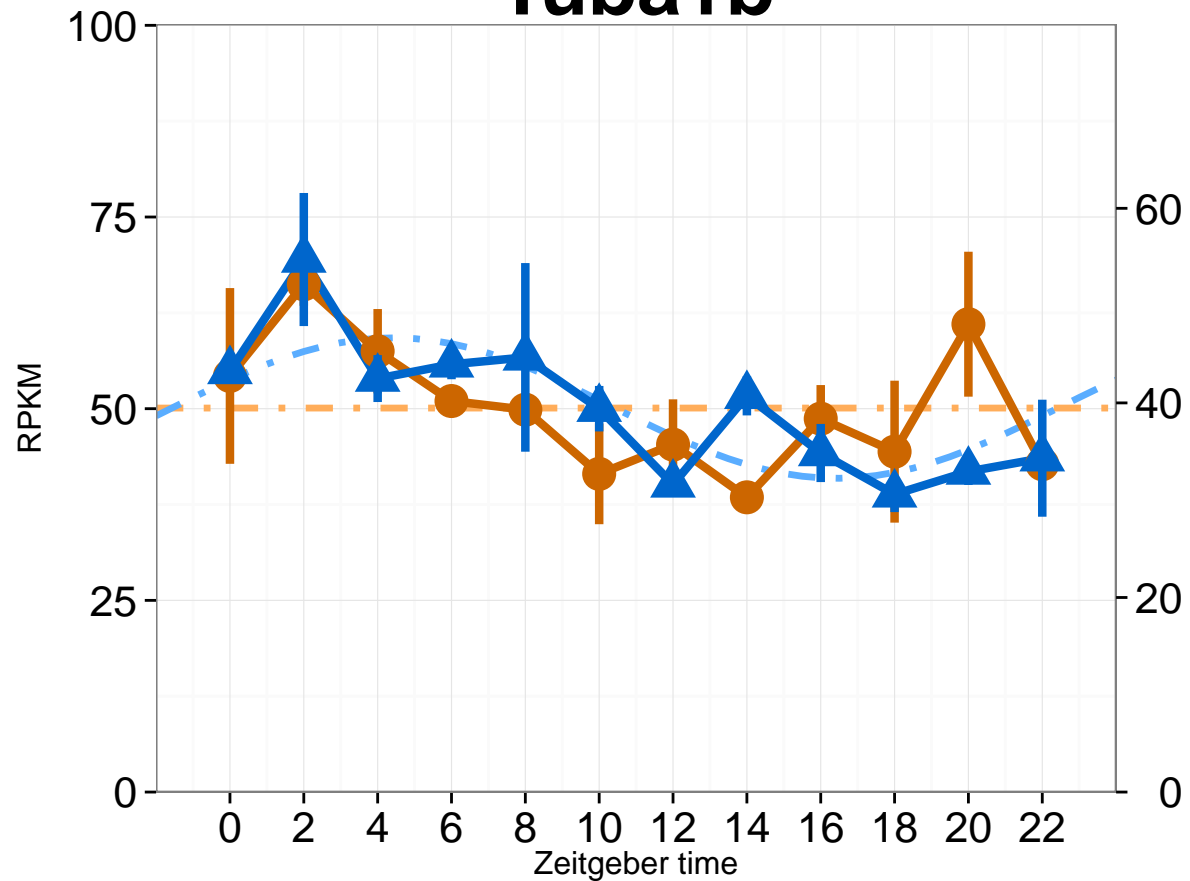

# Tuba1b

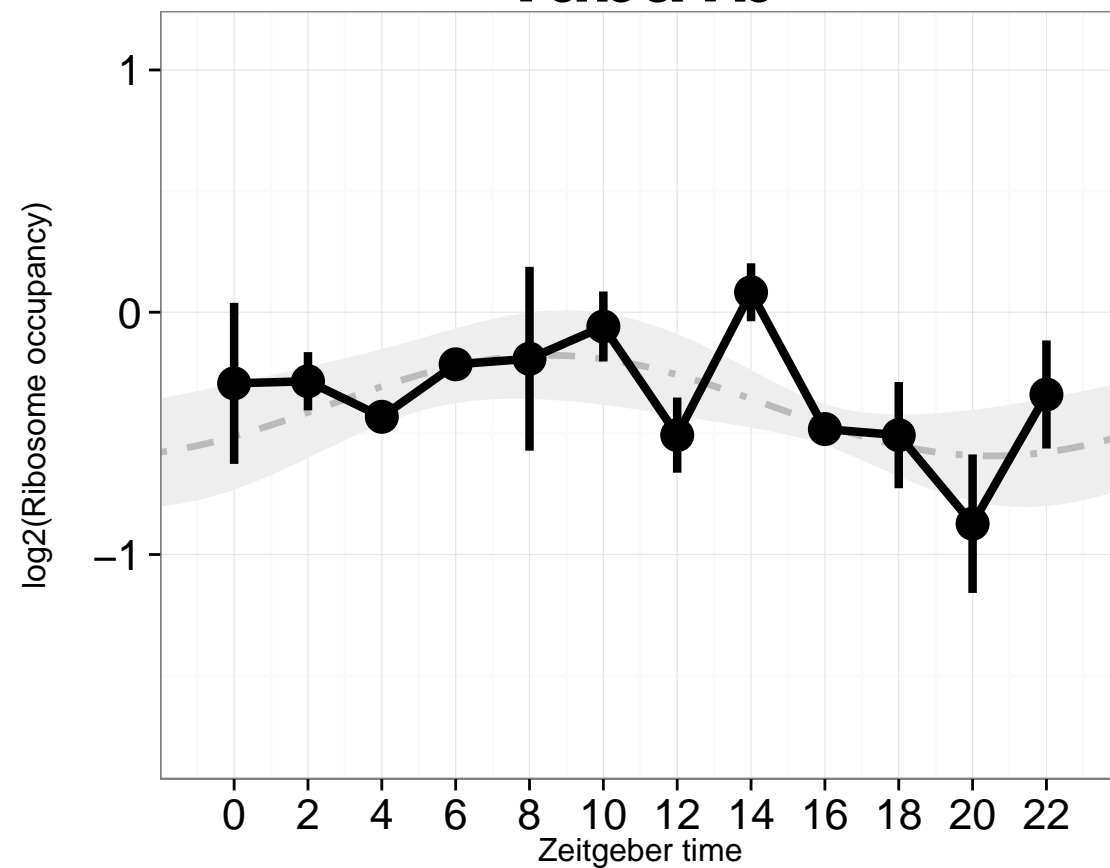

Supplement: SuppDataset_1.zip [file Tuba1b_set_A.pdf › Supplemental Dataset 1/A-mRNA_nonrhyth_translation_nonrhyth/Tuba1b_set_A.pdf]

# Tuba1c

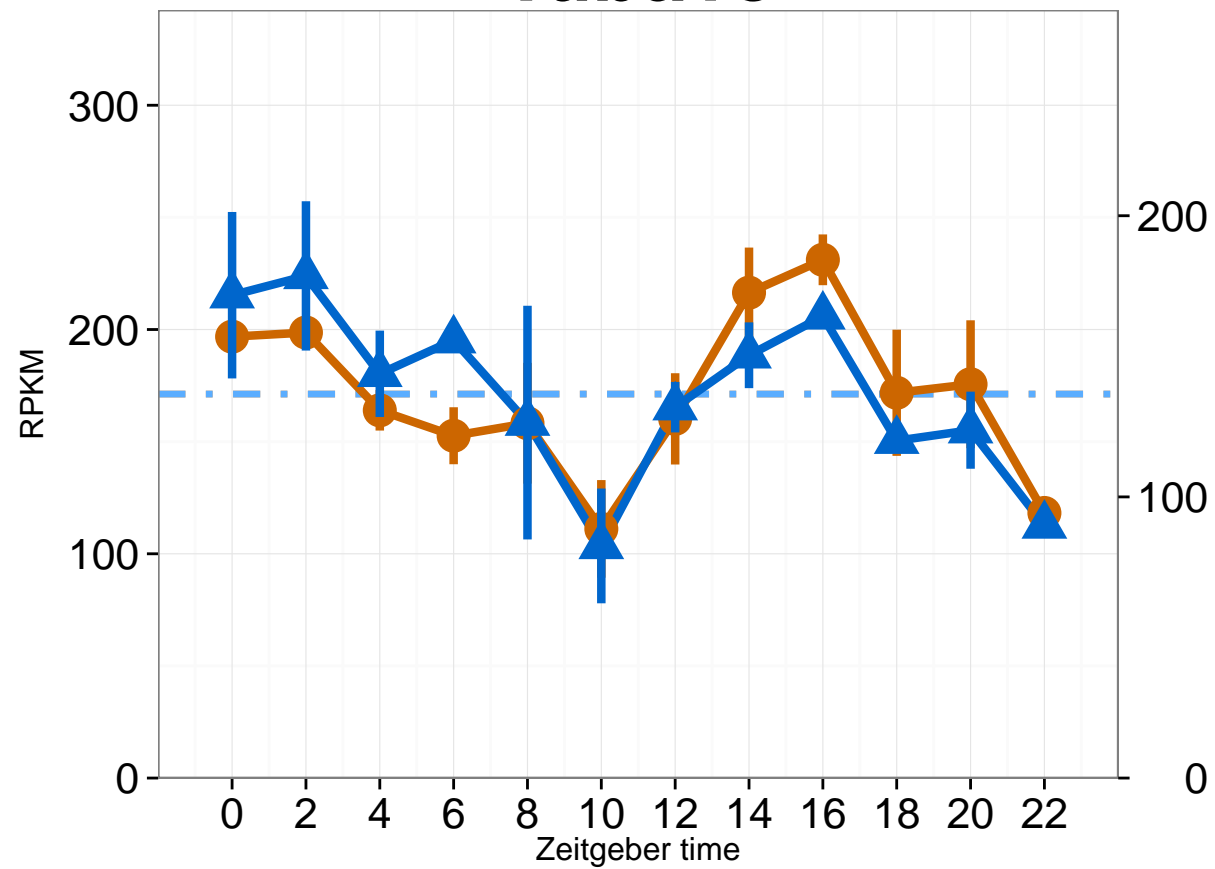

# Tuba1c

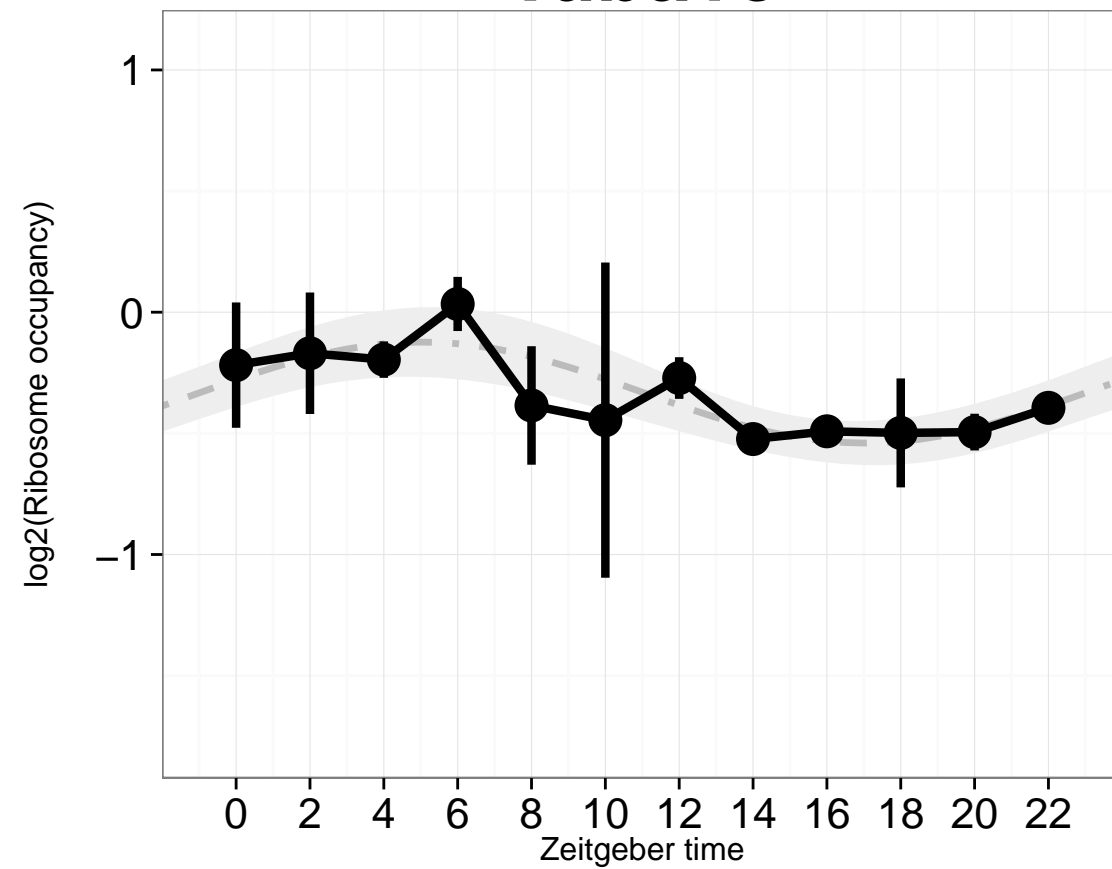

Supplement: SuppDataset_1.zip [file Tuba1c_set_A.pdf › Supplemental Dataset 1/A-mRNA_nonrhyth_translation_nonrhyth/Tuba1c_set_A.pdf]

# Tuba8

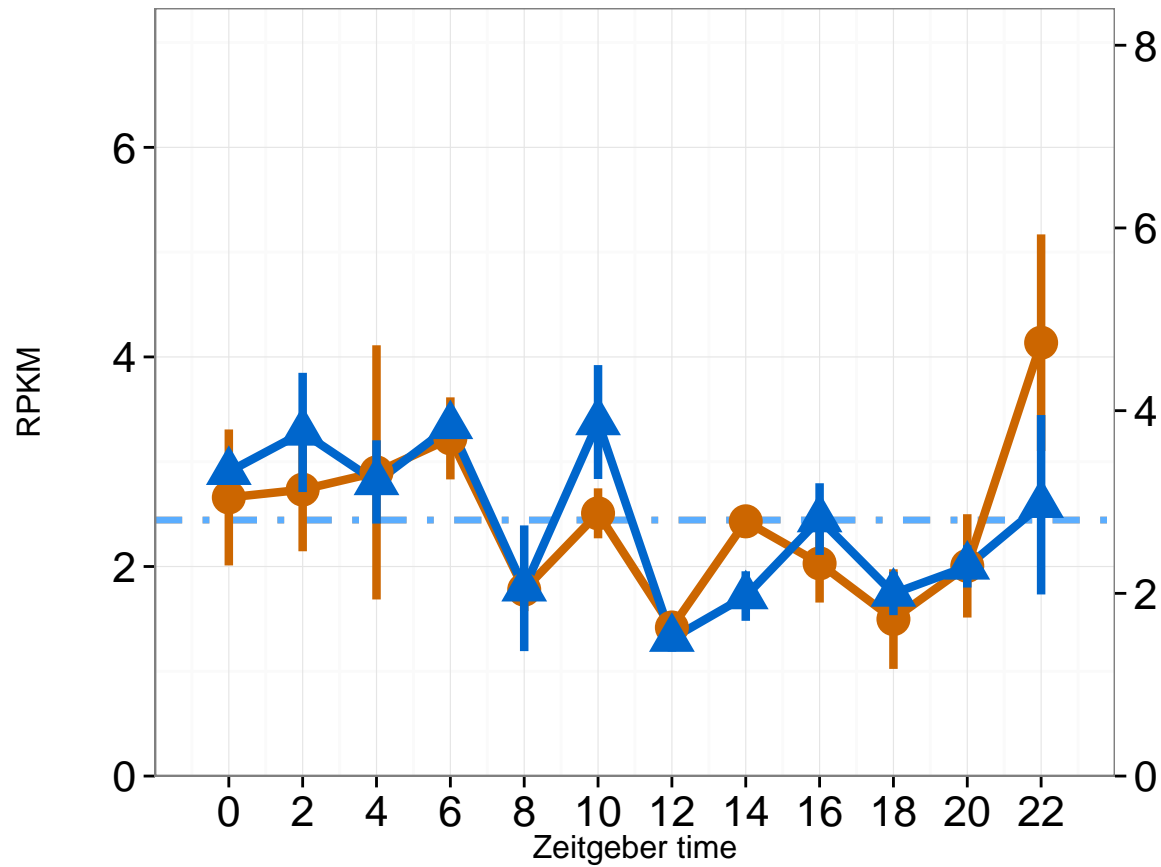

# Tuba8

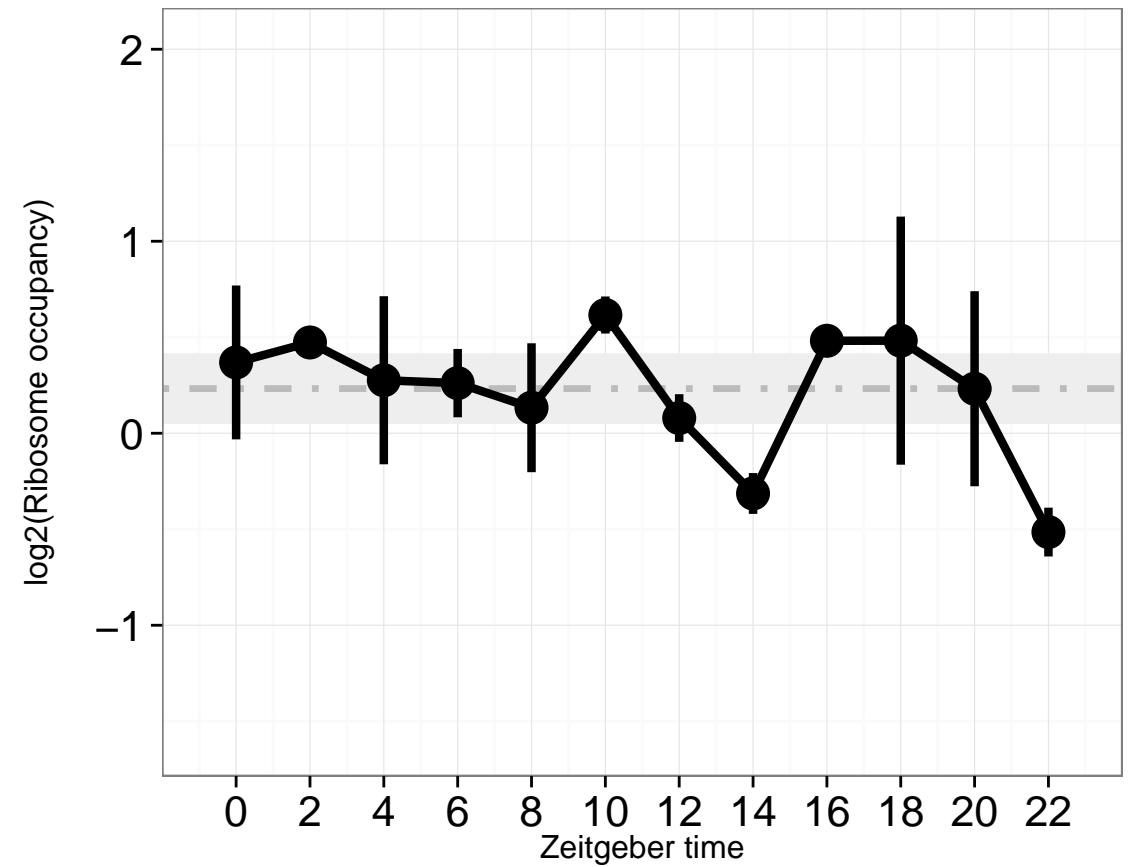

Supplement: SuppDataset_1.zip [file Tuba8_set_A.pdf › Supplemental Dataset 1/A-mRNA_nonrhyth_translation_nonrhyth/Tuba8_set_A.pdf]

# Tube1

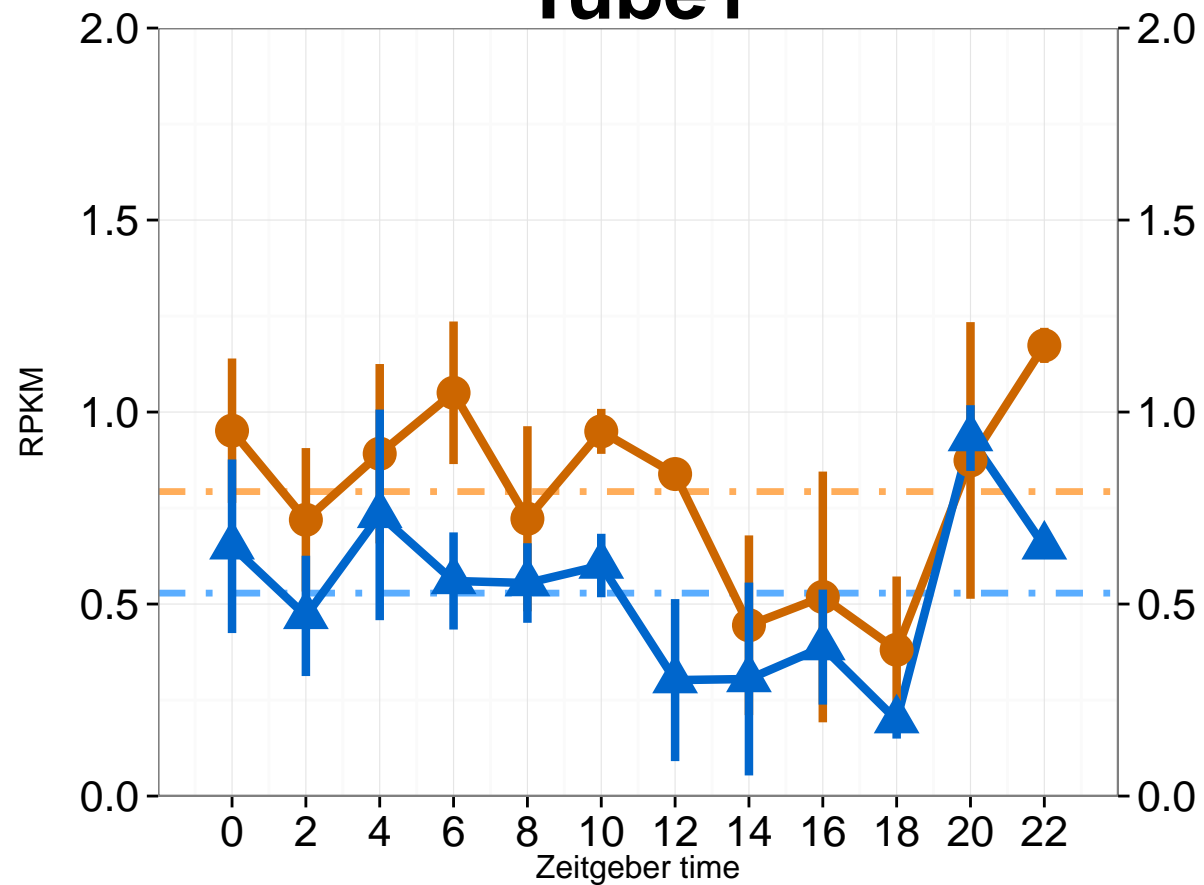

# Tube1

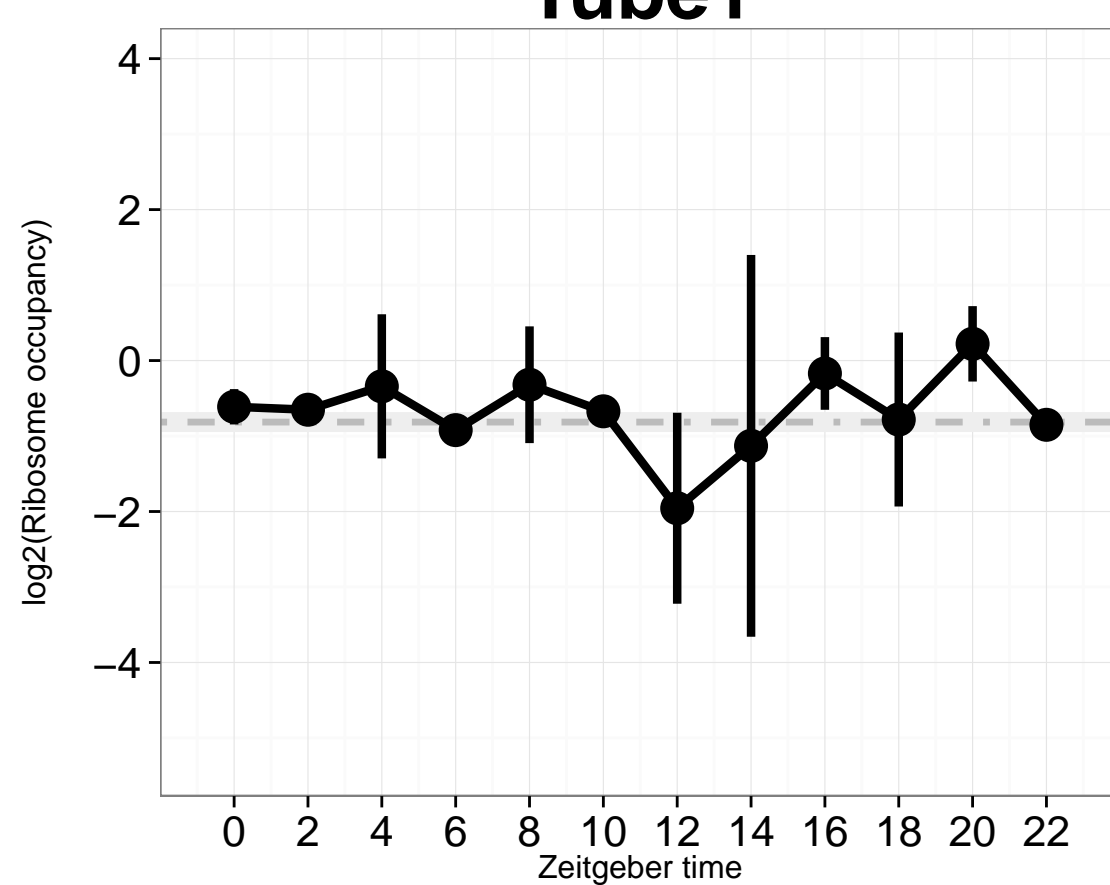

Supplement: SuppDataset_1.zip [file Tube1_set_A.pdf › Supplemental Dataset 1/A-mRNA_nonrhyth_translation_nonrhyth/Tube1_set_A.pdf]

# Tubgcp3

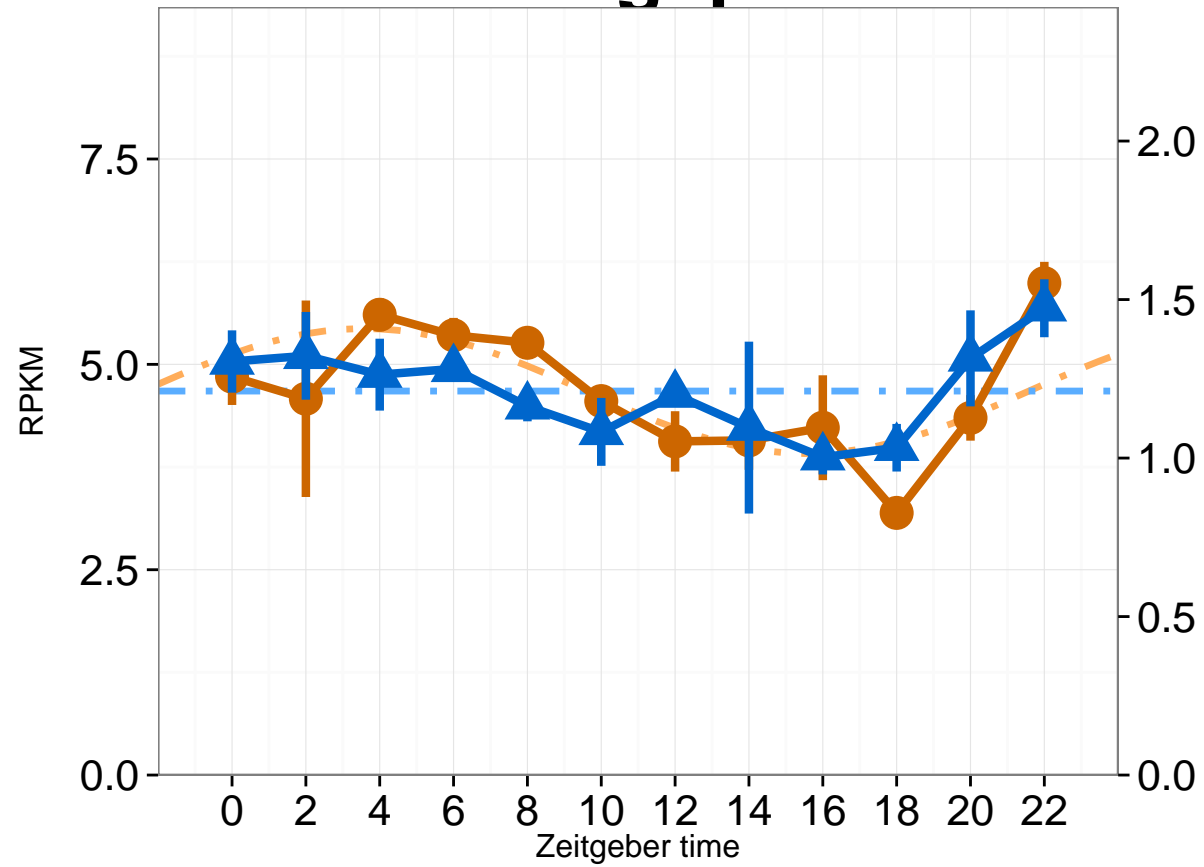

# Tubgcp3

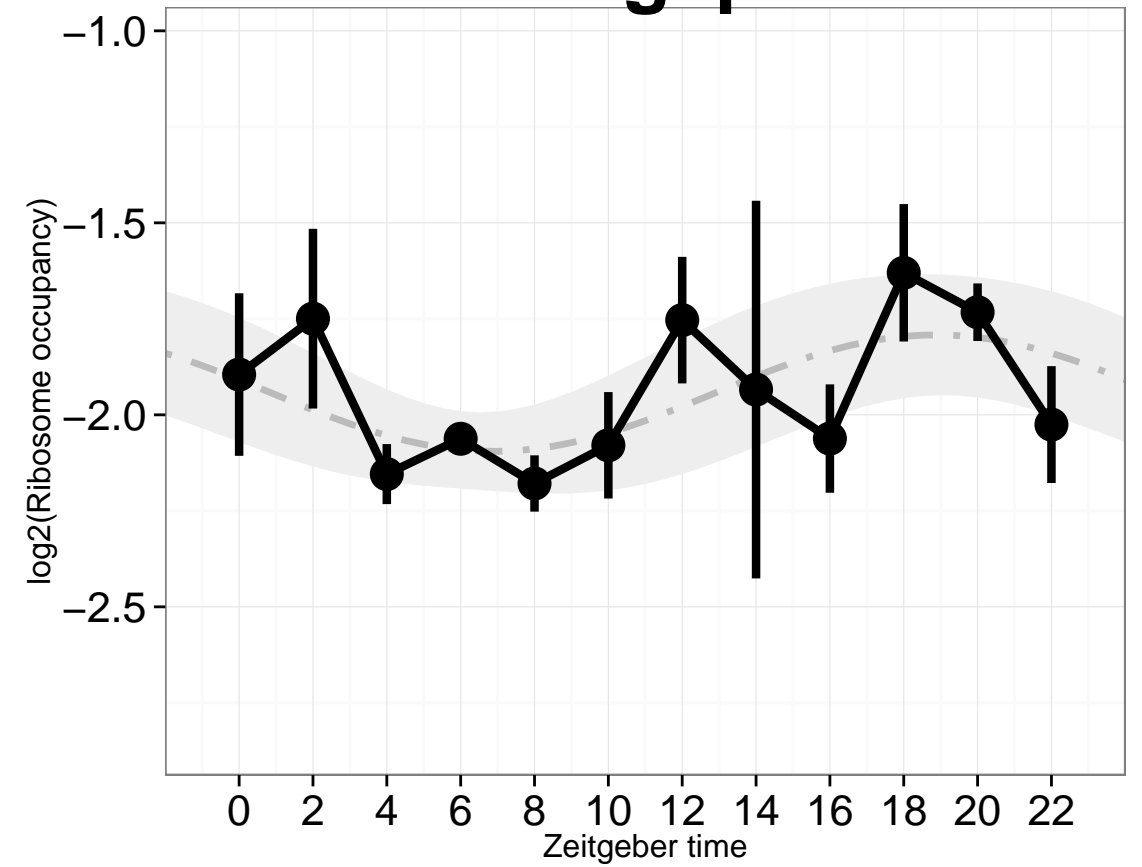

Supplement: SuppDataset_1.zip [file Tubgcp3_set_A.pdf › Supplemental Dataset 1/A-mRNA_nonrhyth_translation_nonrhyth/Tubgcp3_set_A.pdf]

# Tubgcp5

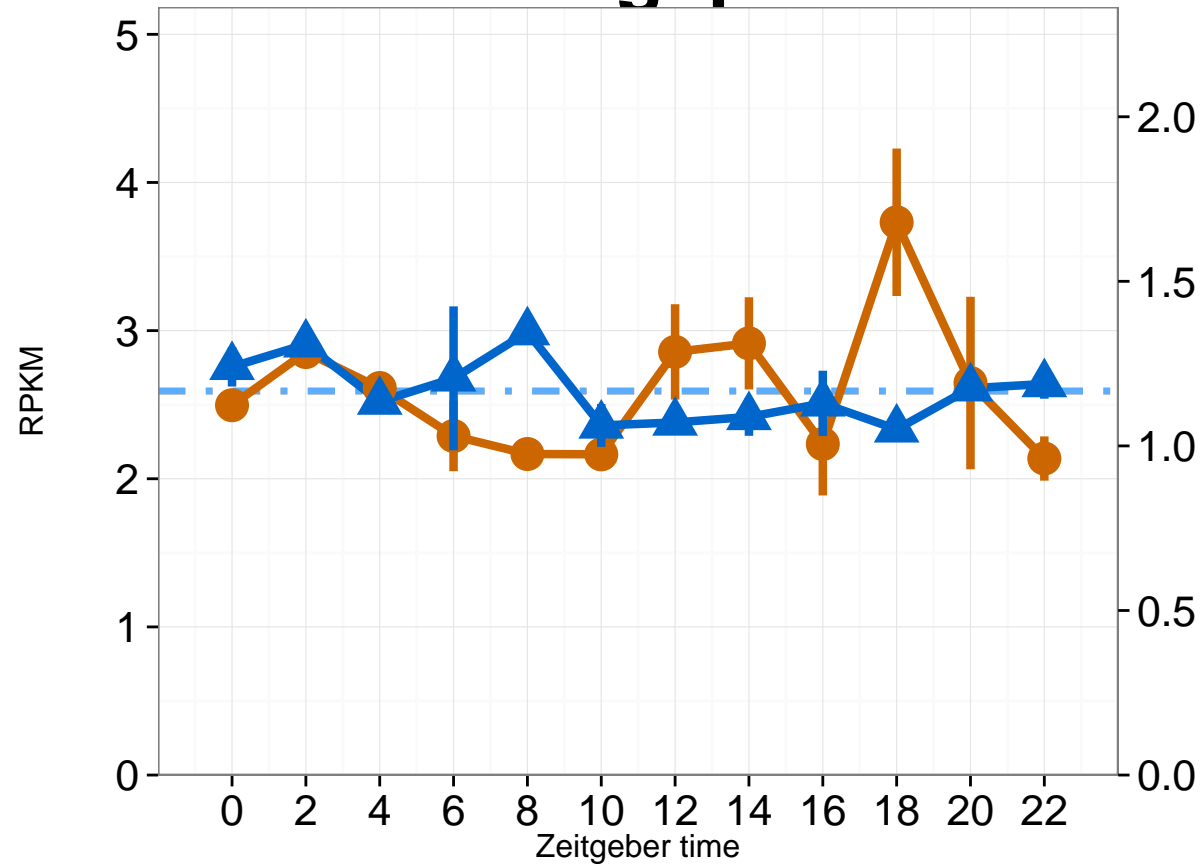

# Tubgcp5

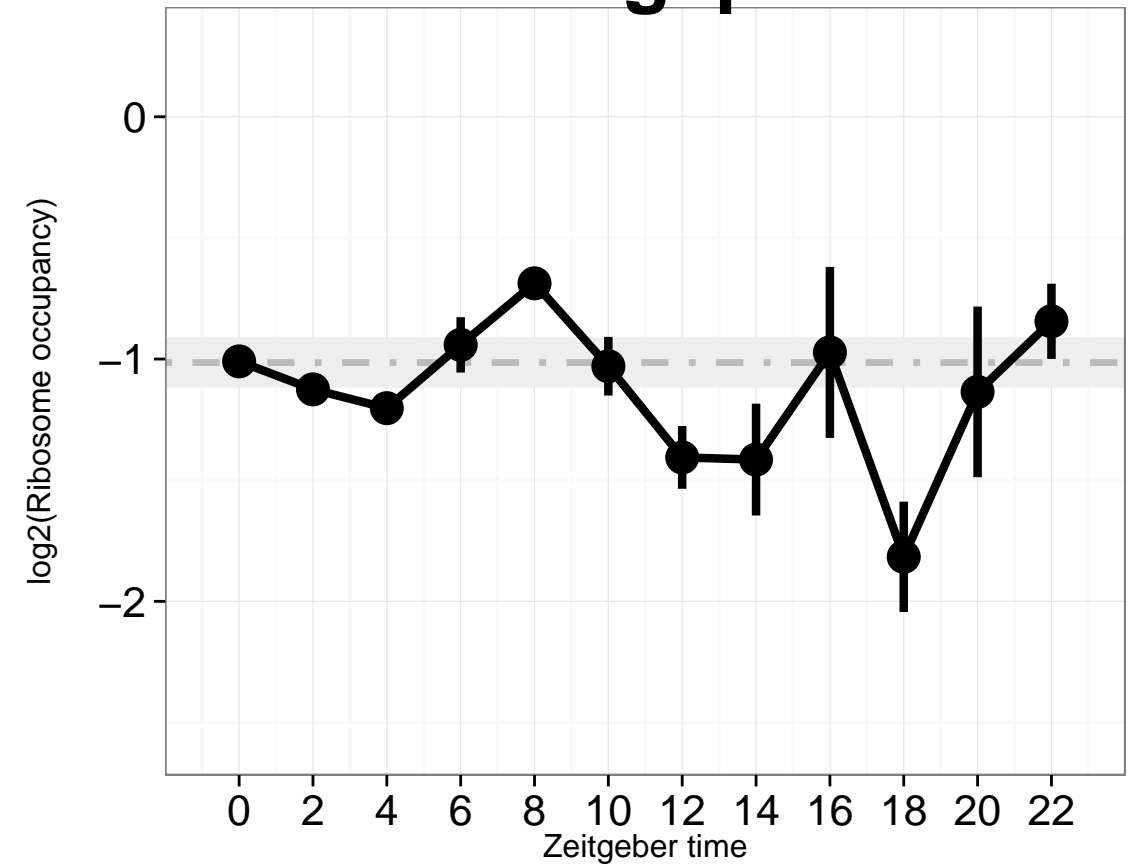

Supplement: SuppDataset_1.zip [file Tubgcp5_set_A.pdf › Supplemental Dataset 1/A-mRNA_nonrhyth_translation_nonrhyth/Tubgcp5_set_A.pdf]

# Tubgcp6

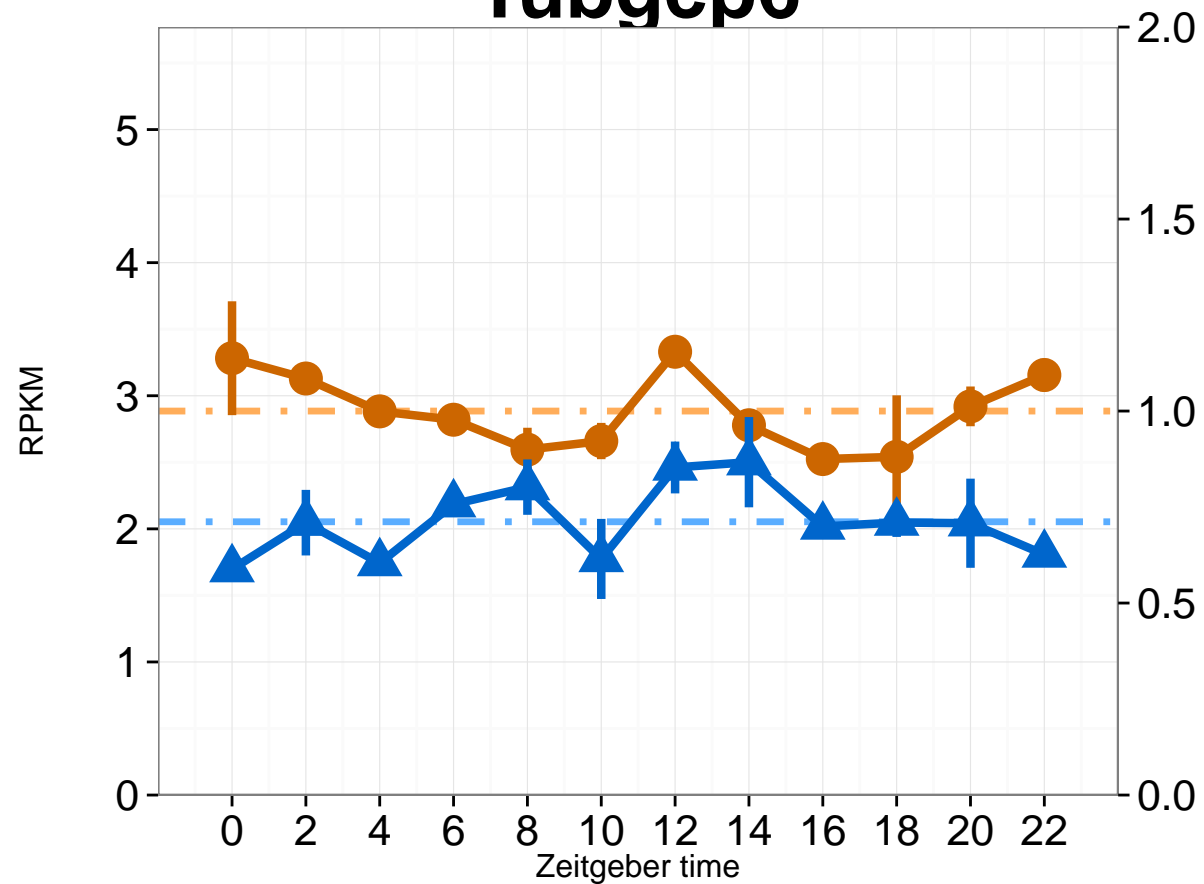

# Tubgcp6

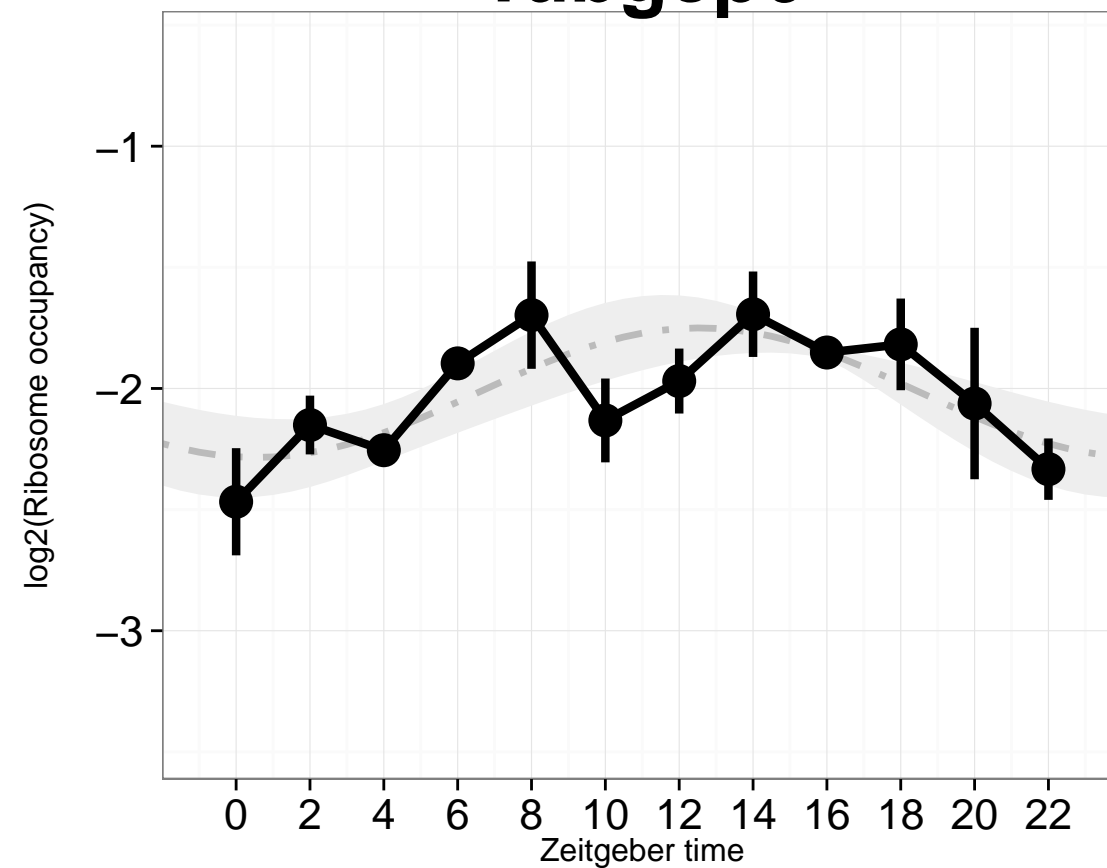

Supplement: SuppDataset_1.zip [file Tubgcp6_set_A.pdf › Supplemental Dataset 1/A-mRNA_nonrhyth_translation_nonrhyth/Tubgcp6_set_A.pdf]

## Tufm

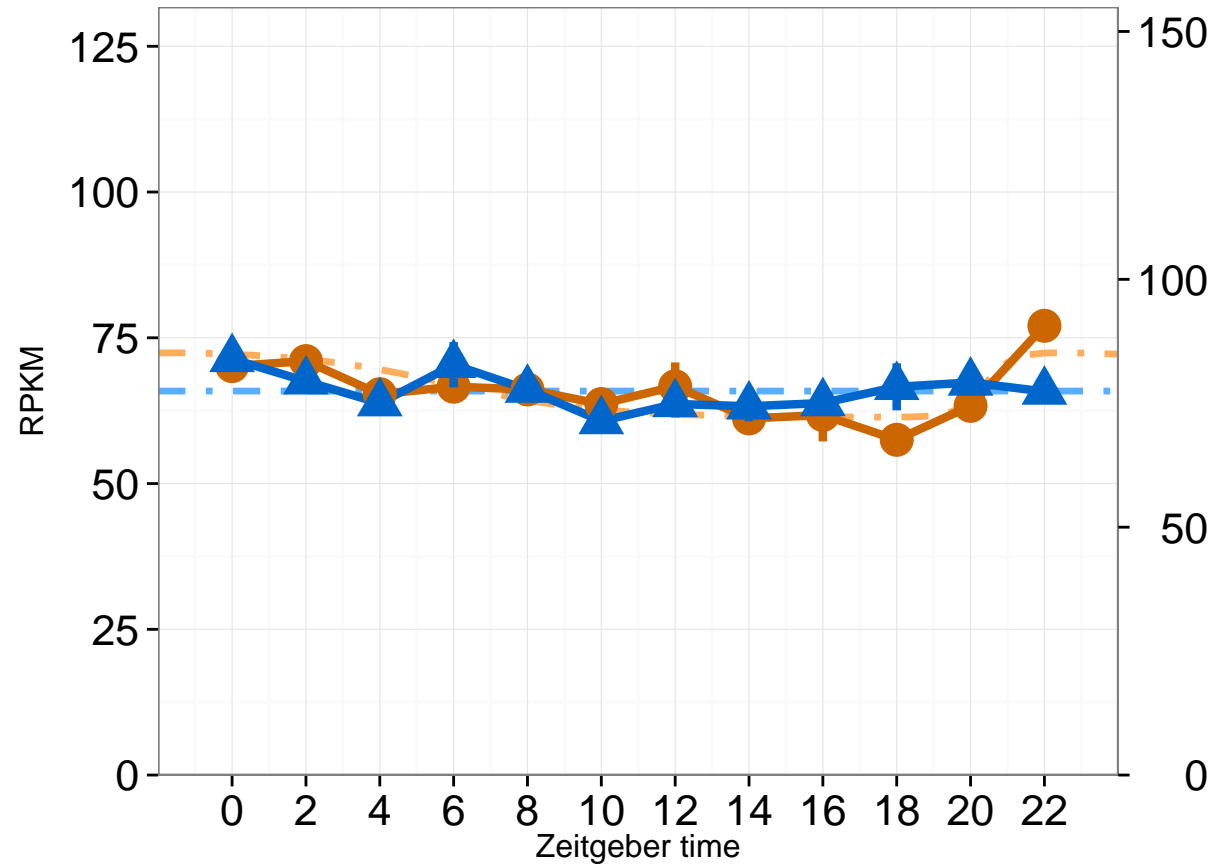

## Tufm

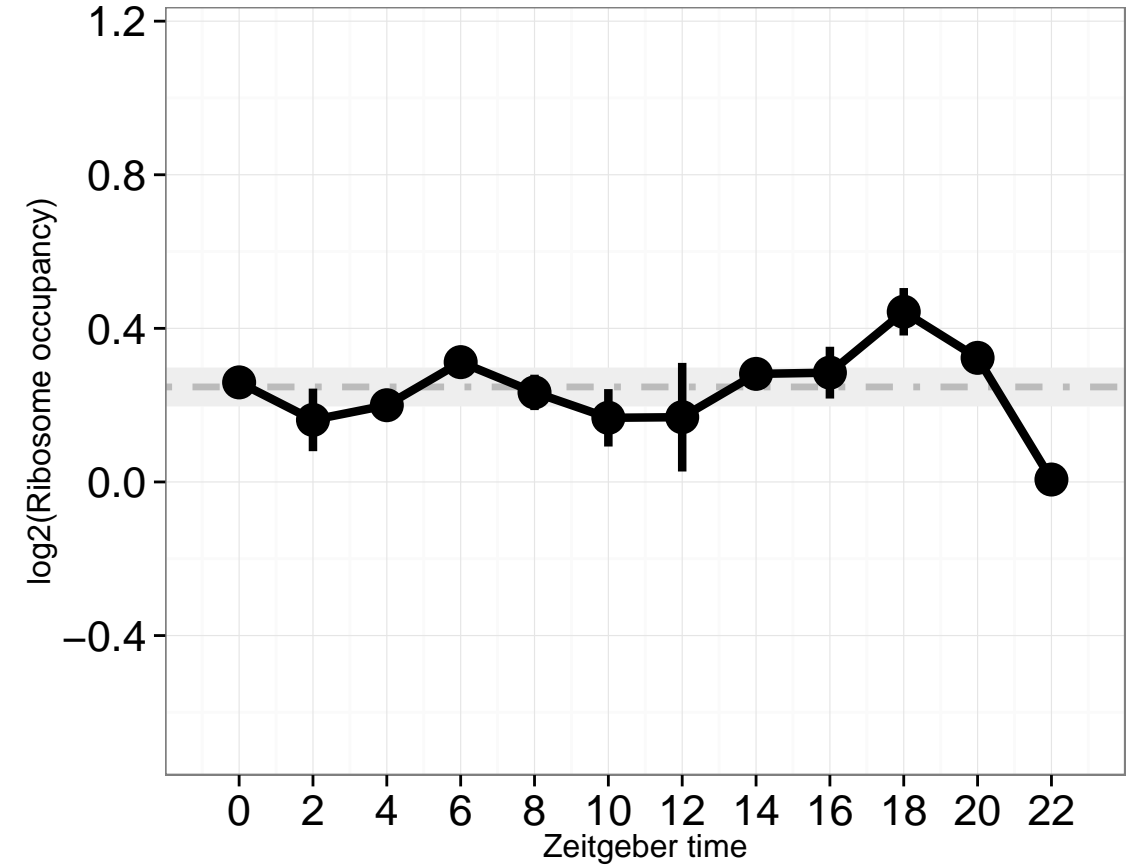

Supplement: SuppDataset_1.zip [file Tufm_set_A.pdf › Supplemental Dataset 1/A-mRNA_nonrhyth_translation_nonrhyth/Tufm_set_A.pdf]

## Tuft1

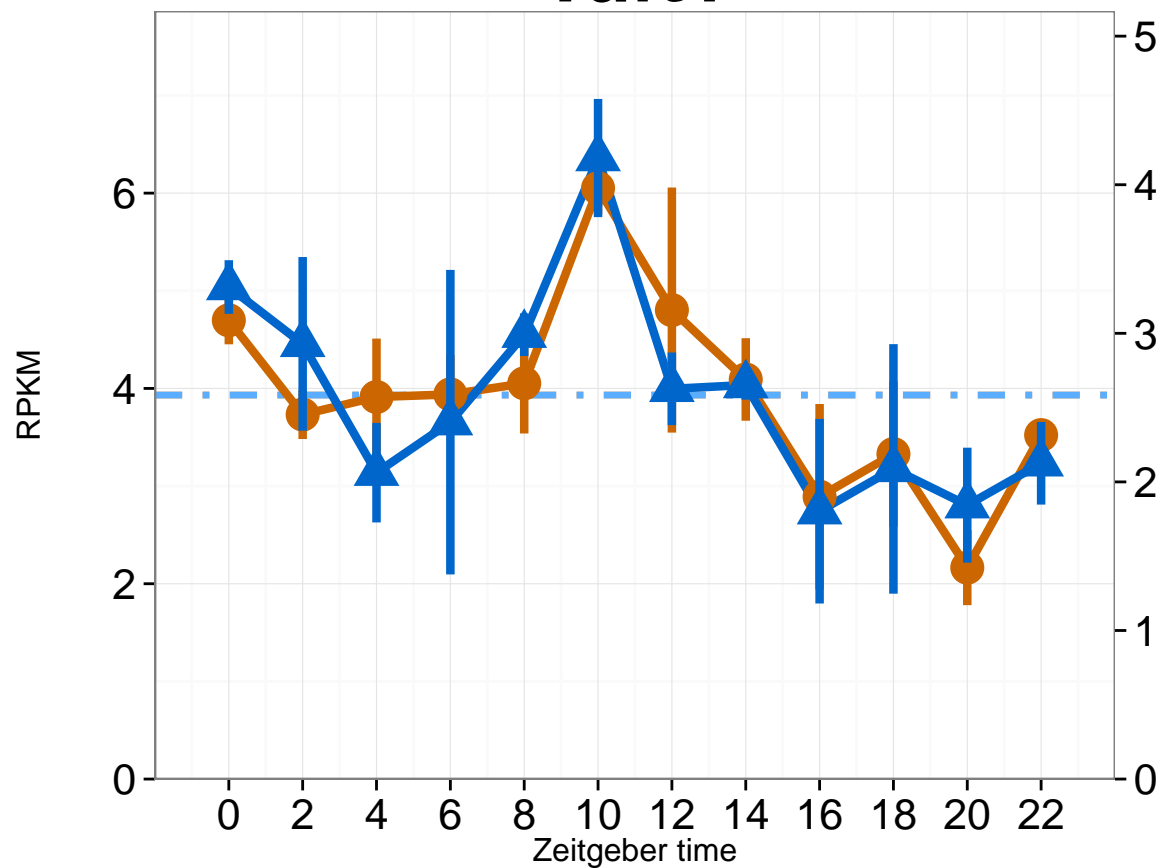

## Tuft1

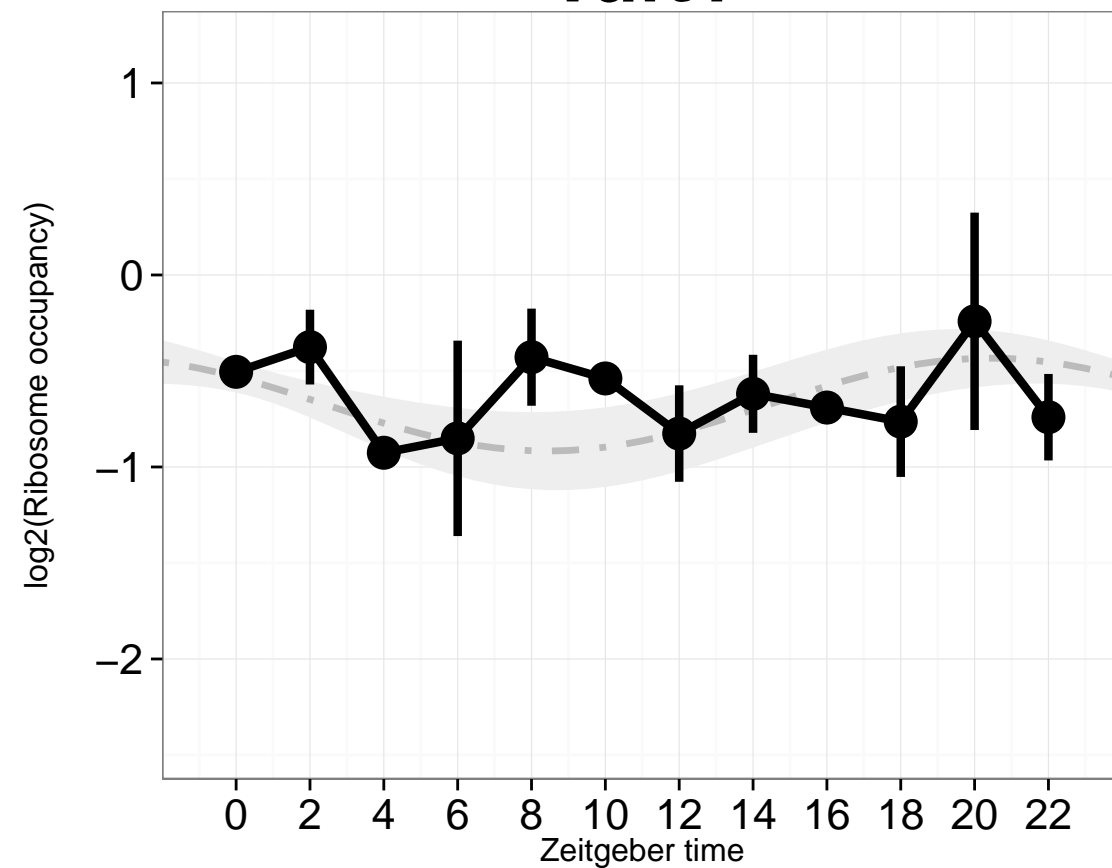

Supplement: SuppDataset_1.zip [file Tuft1_set_A.pdf › Supplemental Dataset 1/A-mRNA_nonrhyth_translation_nonrhyth/Tuft1_set_A.pdf]

# Tulp3

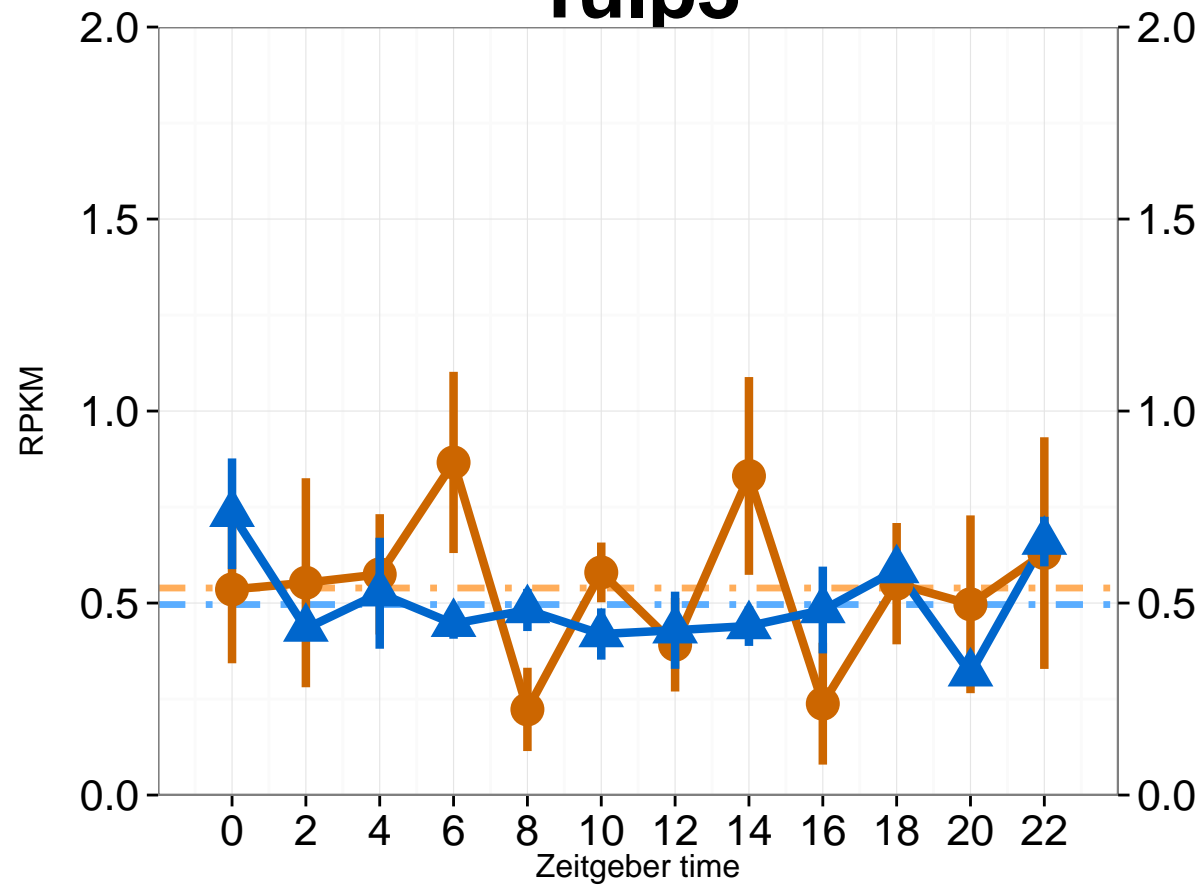

# Tulp3

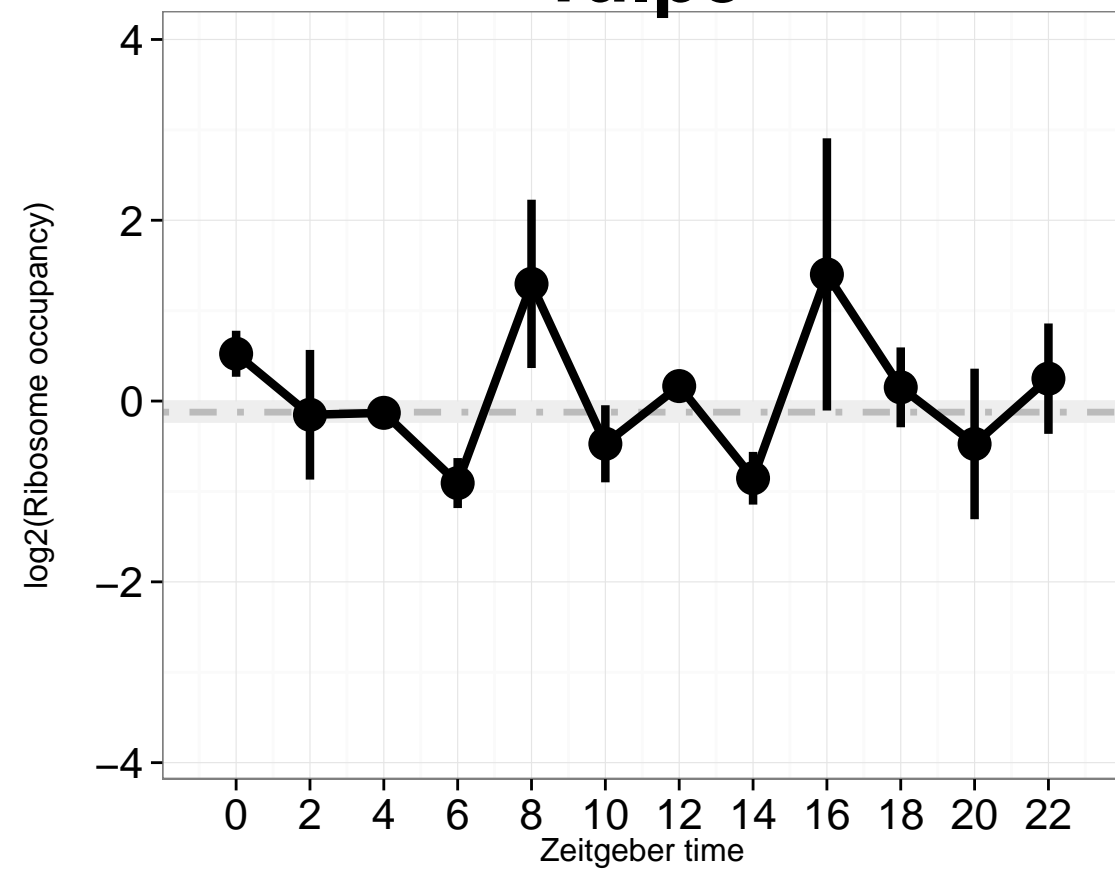

Supplement: SuppDataset_1.zip [file Tulp3_set_A.pdf › Supplemental Dataset 1/A-mRNA_nonrhyth_translation_nonrhyth/Tulp3_set_A.pdf]

## Tulp4

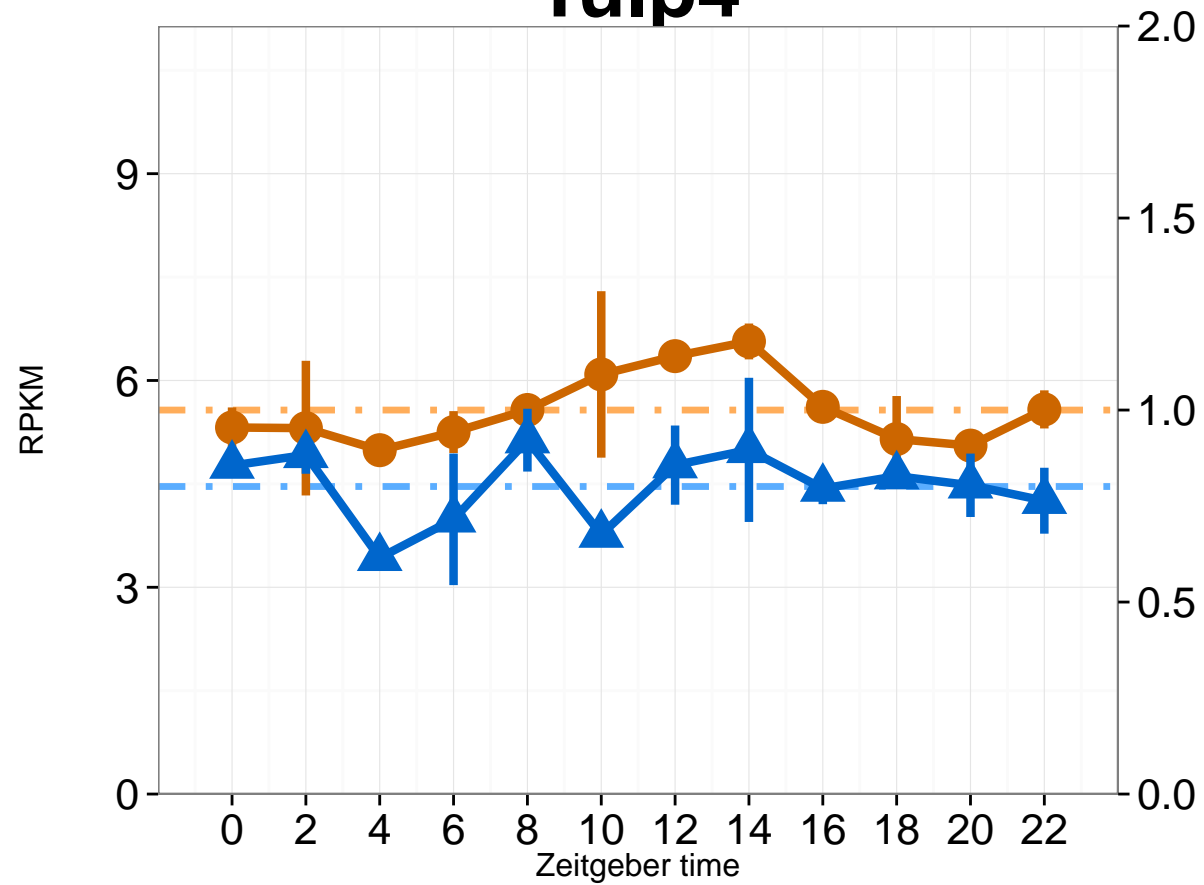

## Tulp4

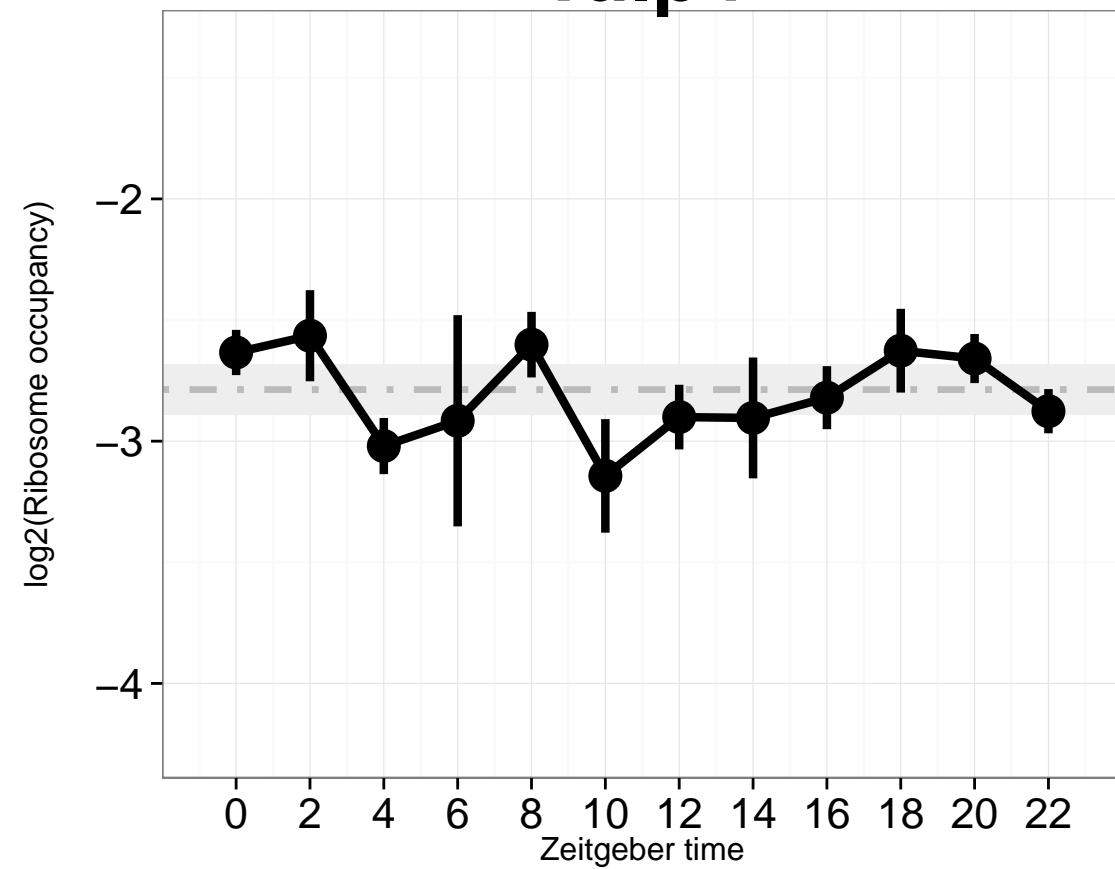

Supplement: SuppDataset_1.zip [file Tulp4_set_A.pdf › Supplemental Dataset 1/A-mRNA_nonrhyth_translation_nonrhyth/Tulp4_set_A.pdf]

## Tusc1

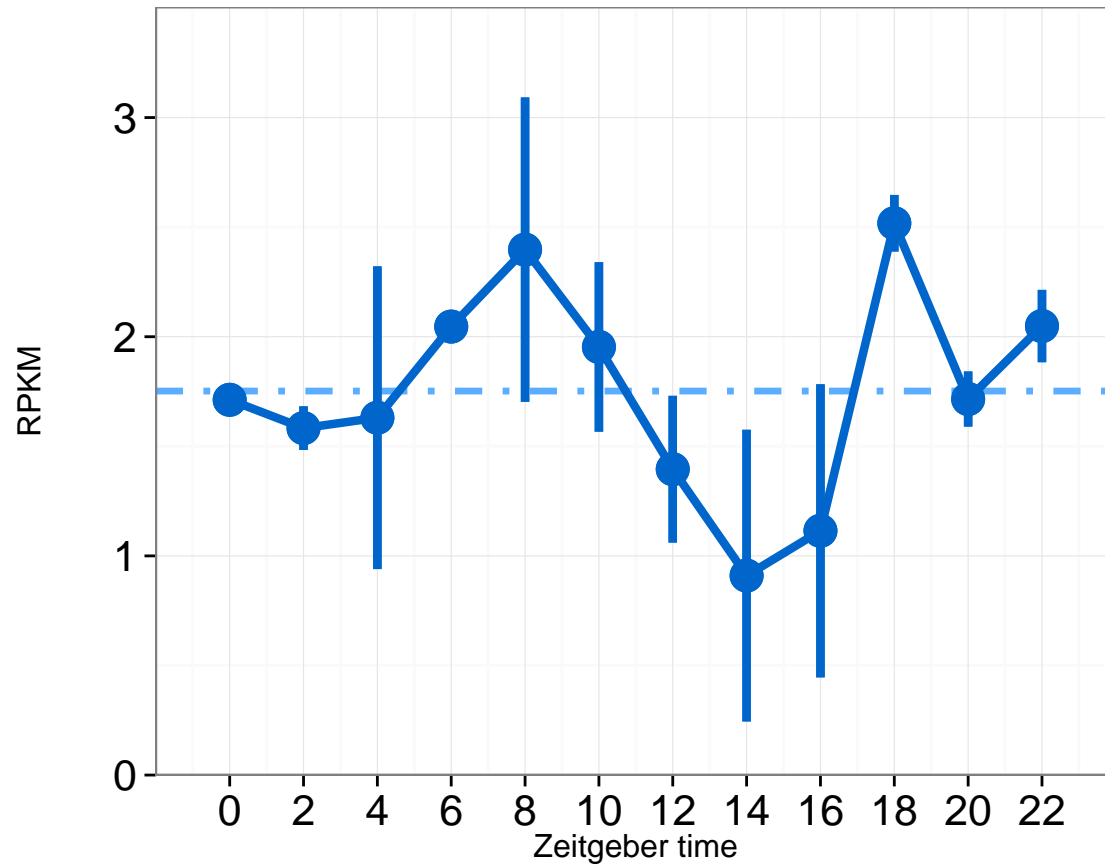

## Tusc1 log2(Ribosome occupancy

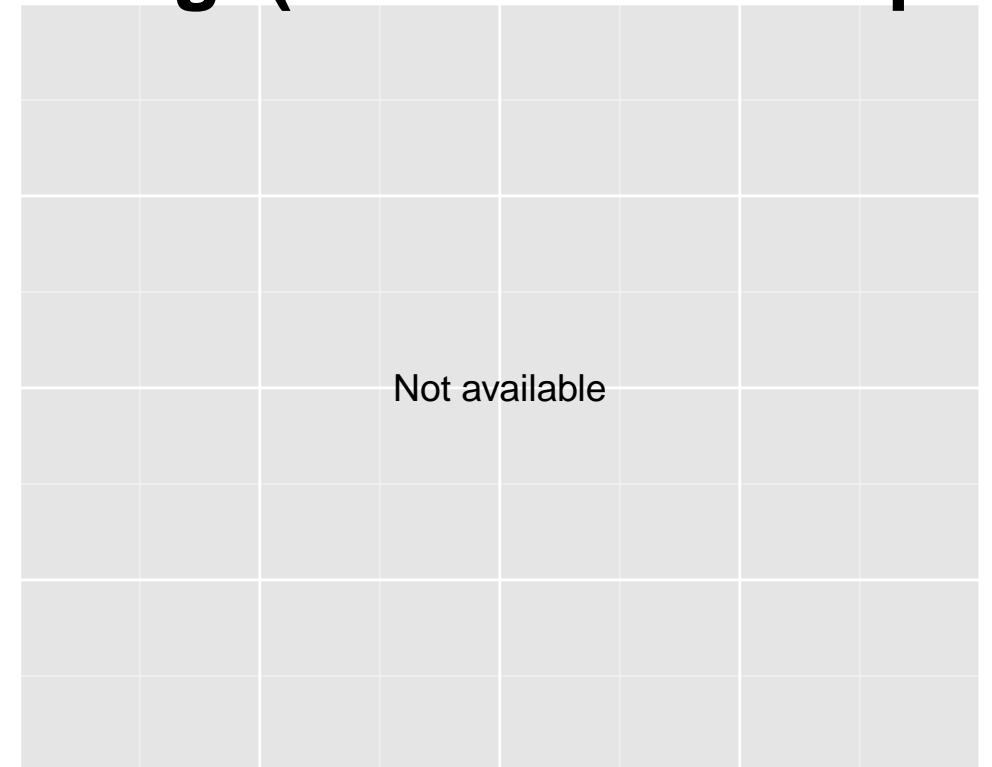

Supplement: SuppDataset_1.zip [file Tusc1_set_A.pdf › Supplemental Dataset 1/A-mRNA_nonrhyth_translation_nonrhyth/Tusc1_set_A.pdf]
