# Supplementary figures and images for: Ribosome profiling reveals the rhythmic liver translatome and circadian clock regulation by upstream open reading frames (part 113 of 113)
Source: HighWire-hosted journal article supplement (doi:10.1101/gr.195404.115), 2015-10-20

# Tubgcp2

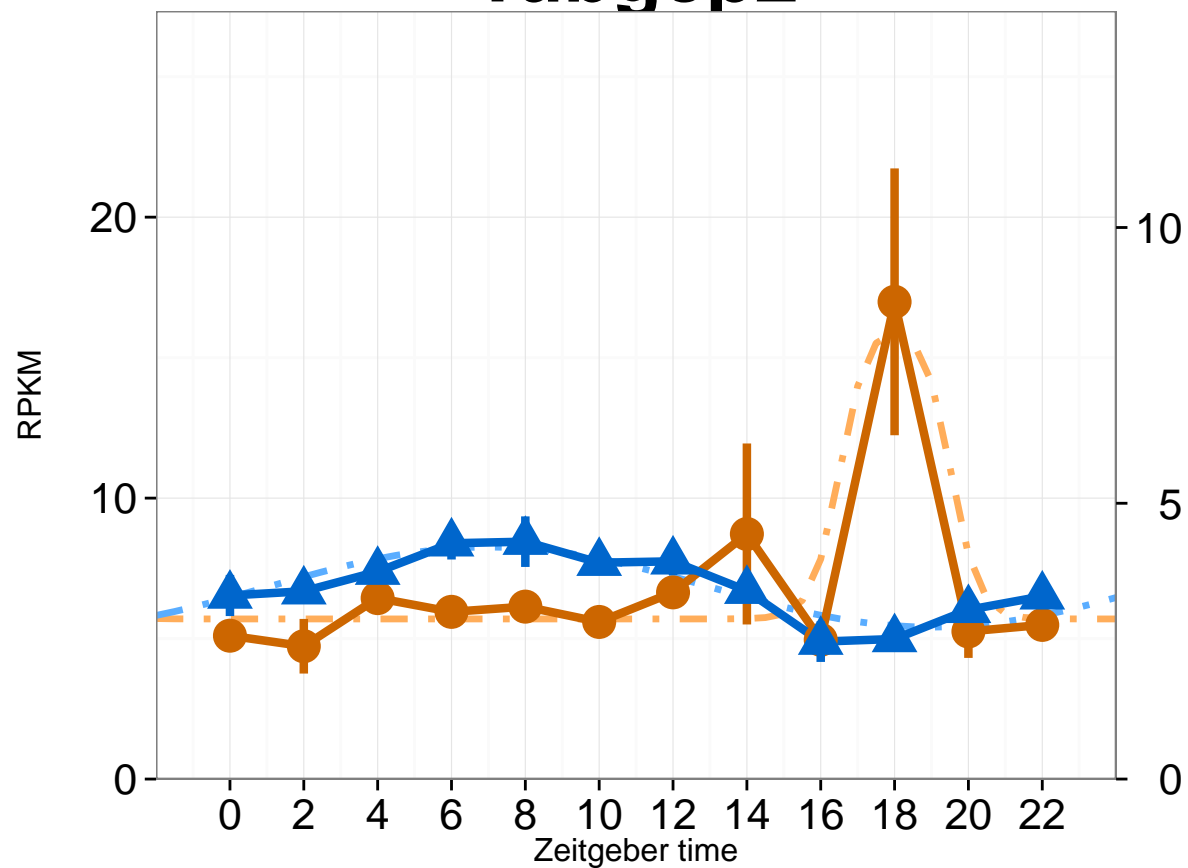

# Tubgcp2

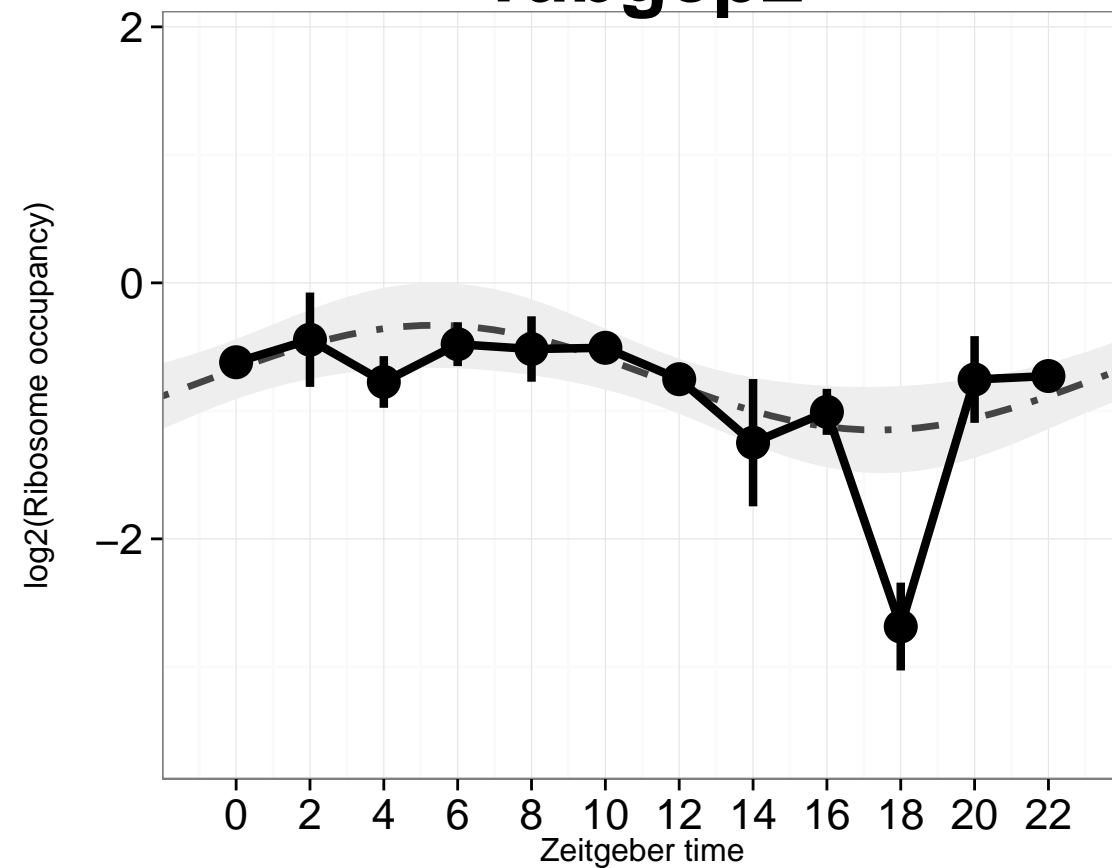

Supplement: SuppDataset_1.zip [file Tubgcp2_set_D.pdf › Supplemental Dataset 1/D-mRNA_rhythm_translation_rhyth/Tubgcp2_set_D.pdf]

# Txn14a

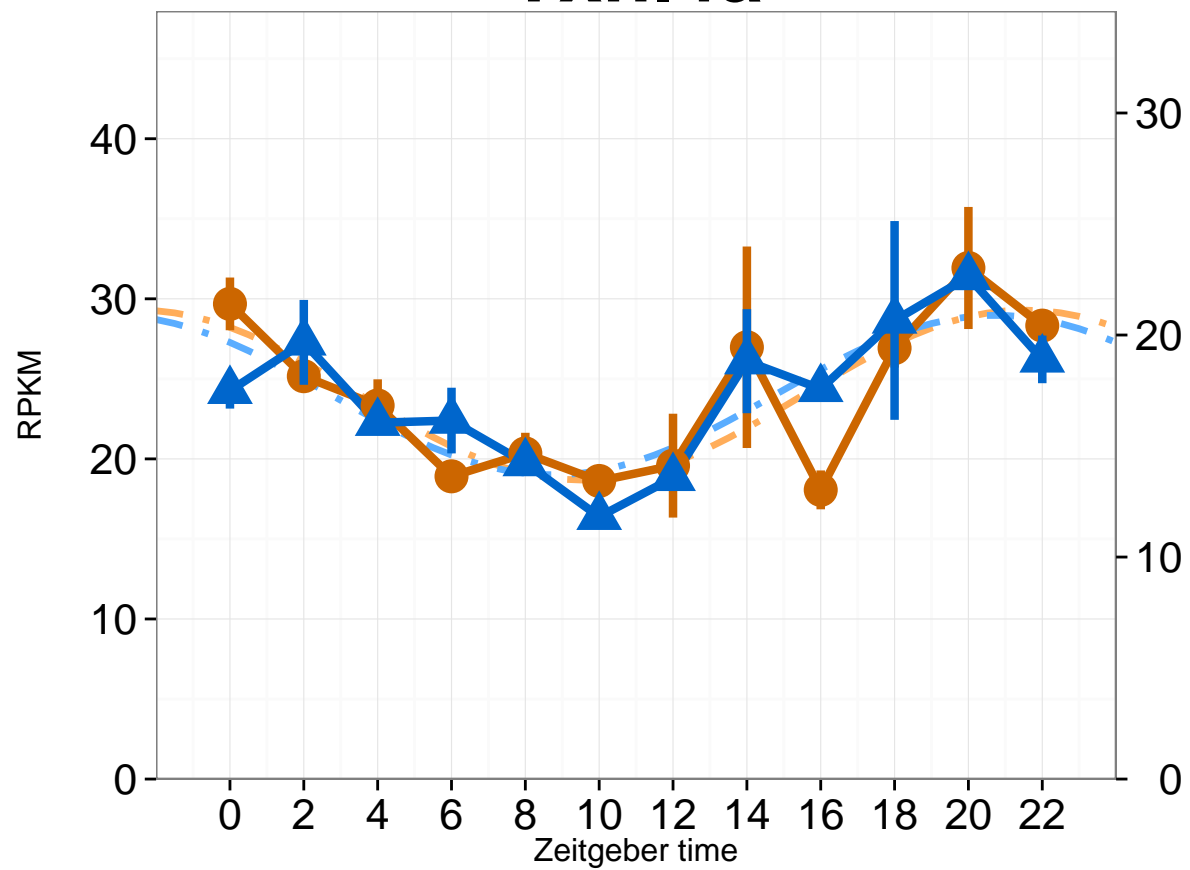

# Txn14a

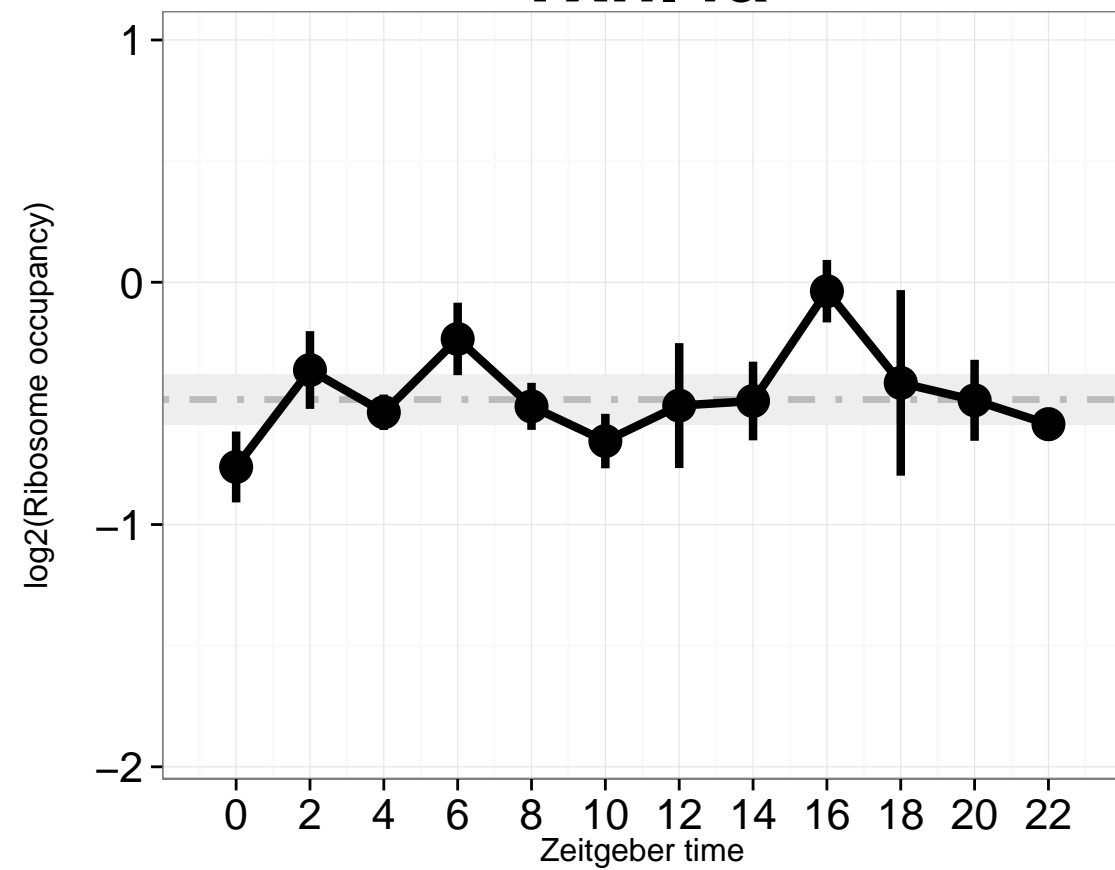

Supplement: SuppDataset_1.zip [file Txnl4a_set_D.pdf › Supplemental Dataset 1/D-mRNA_rhythm_translation_rhyth/Txnl4a_set_D.pdf]

## Txnrd3

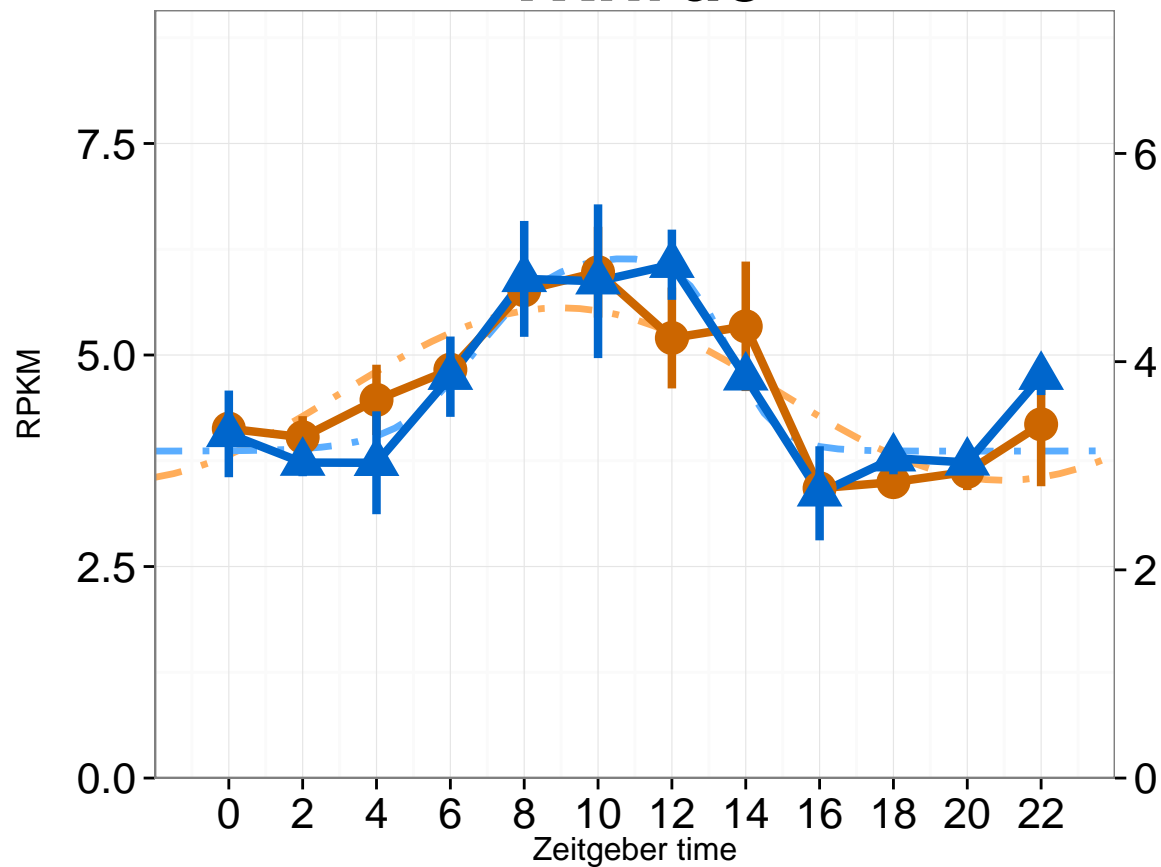

## Txnrd3

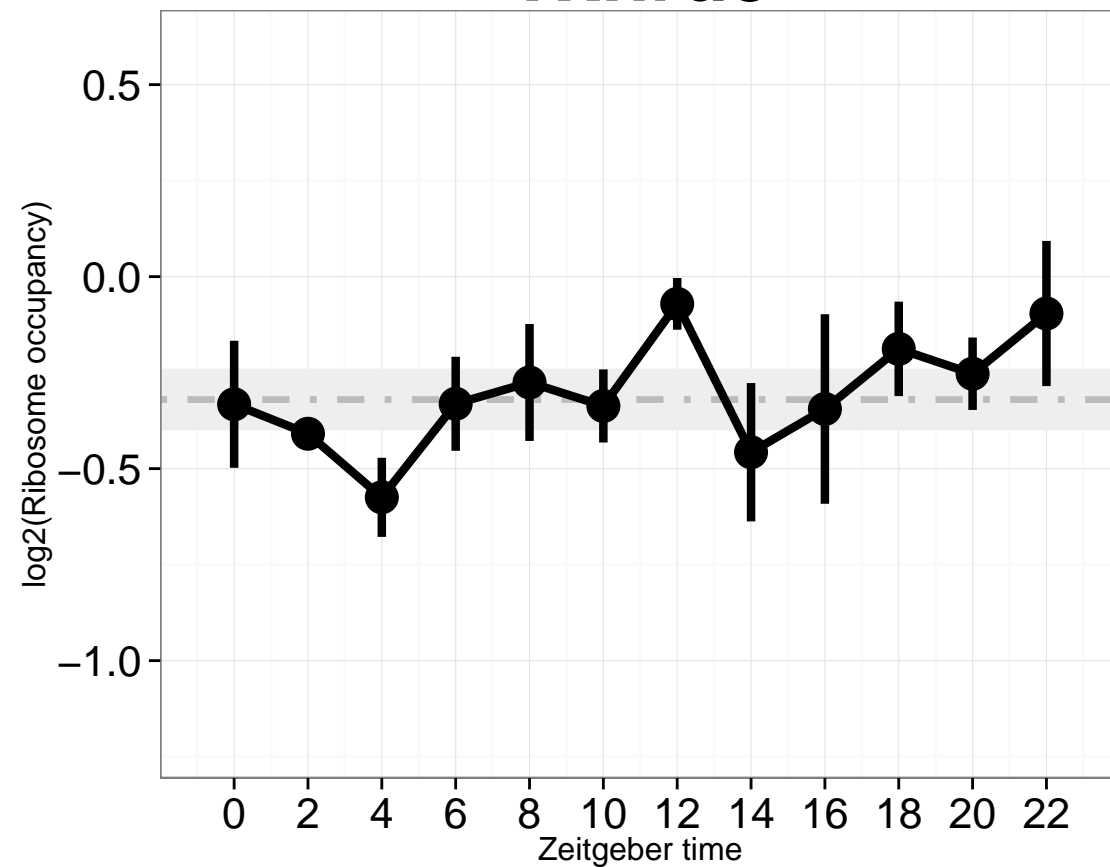

Supplement: SuppDataset_1.zip [file Txnrd3_set_D.pdf › Supplemental Dataset 1/D-mRNA_rhythm_translation_rhyth/Txnrd3_set_D.pdf]

# Tymp

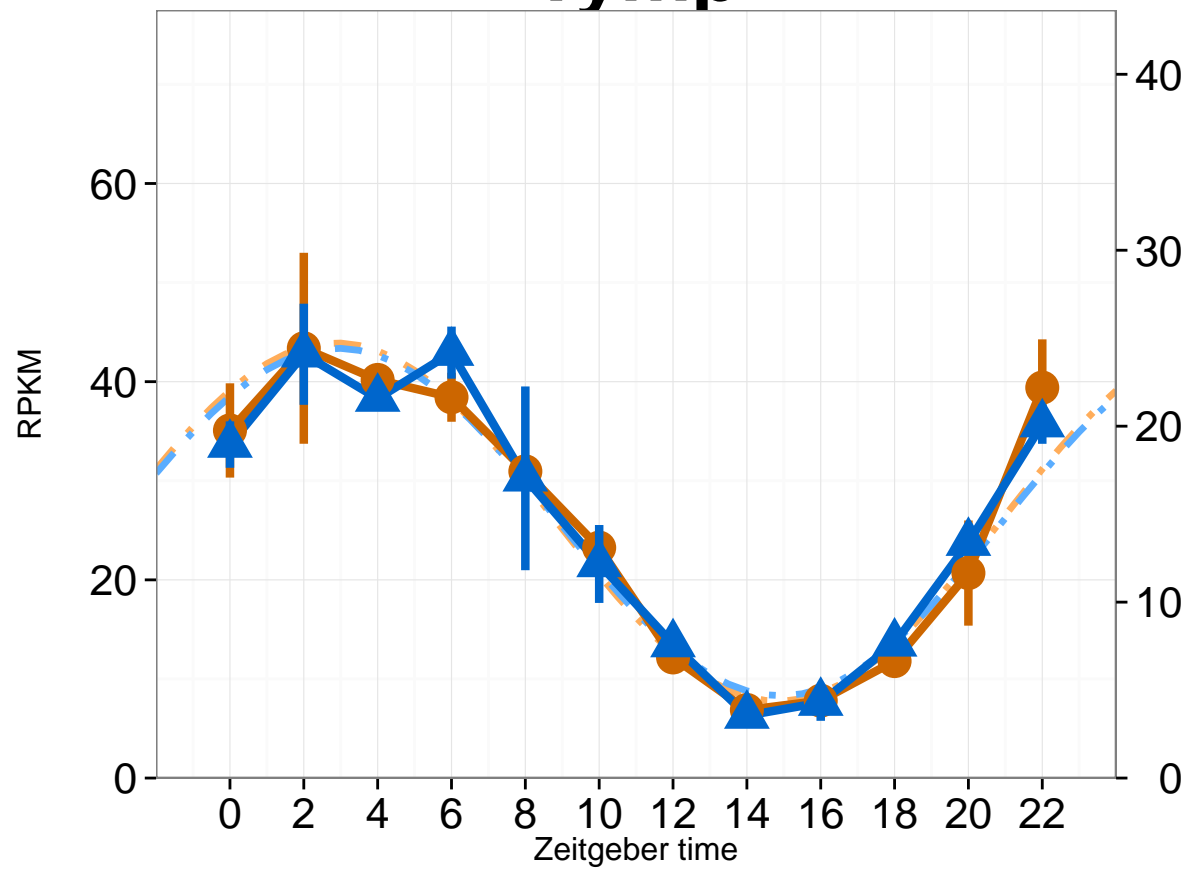

# Tymp

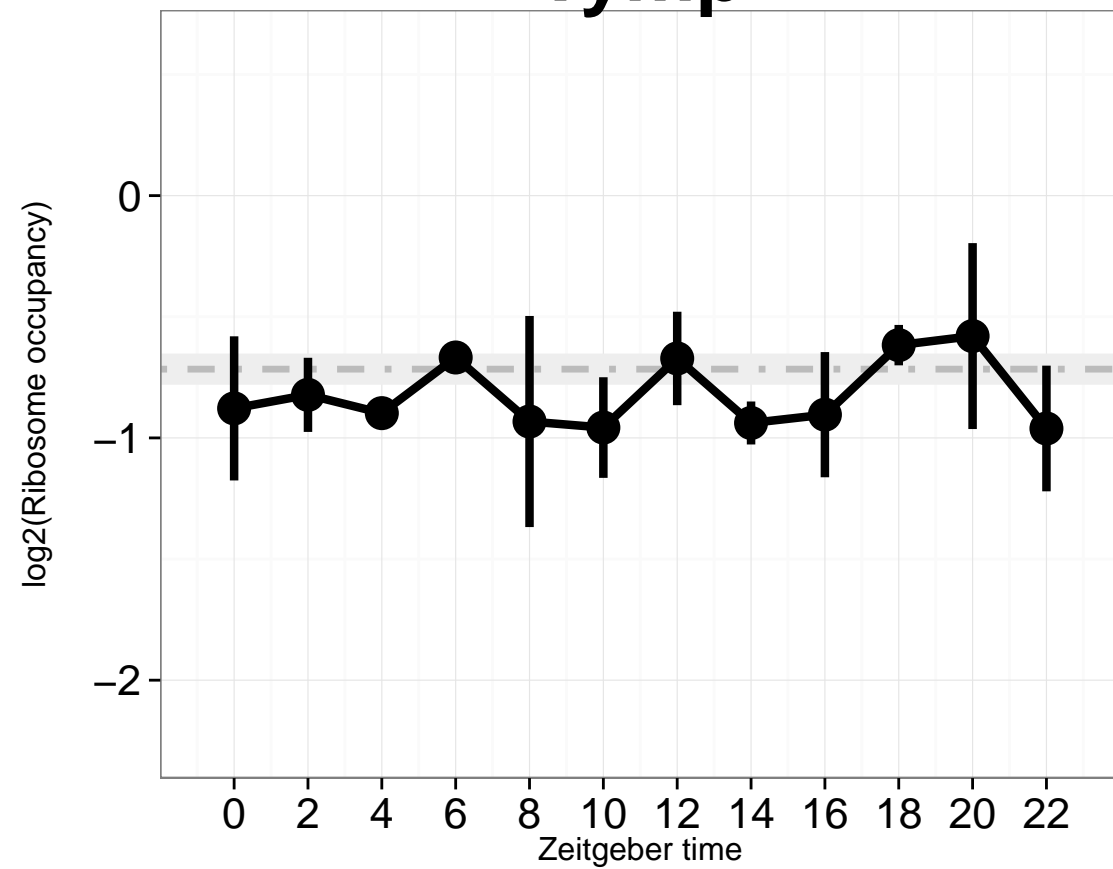

Supplement: SuppDataset_1.zip [file Tymp_set_D.pdf › Supplemental Dataset 1/D-mRNA_rhythm_translation_rhyth/Tymp_set_D.pdf]

# Uap1

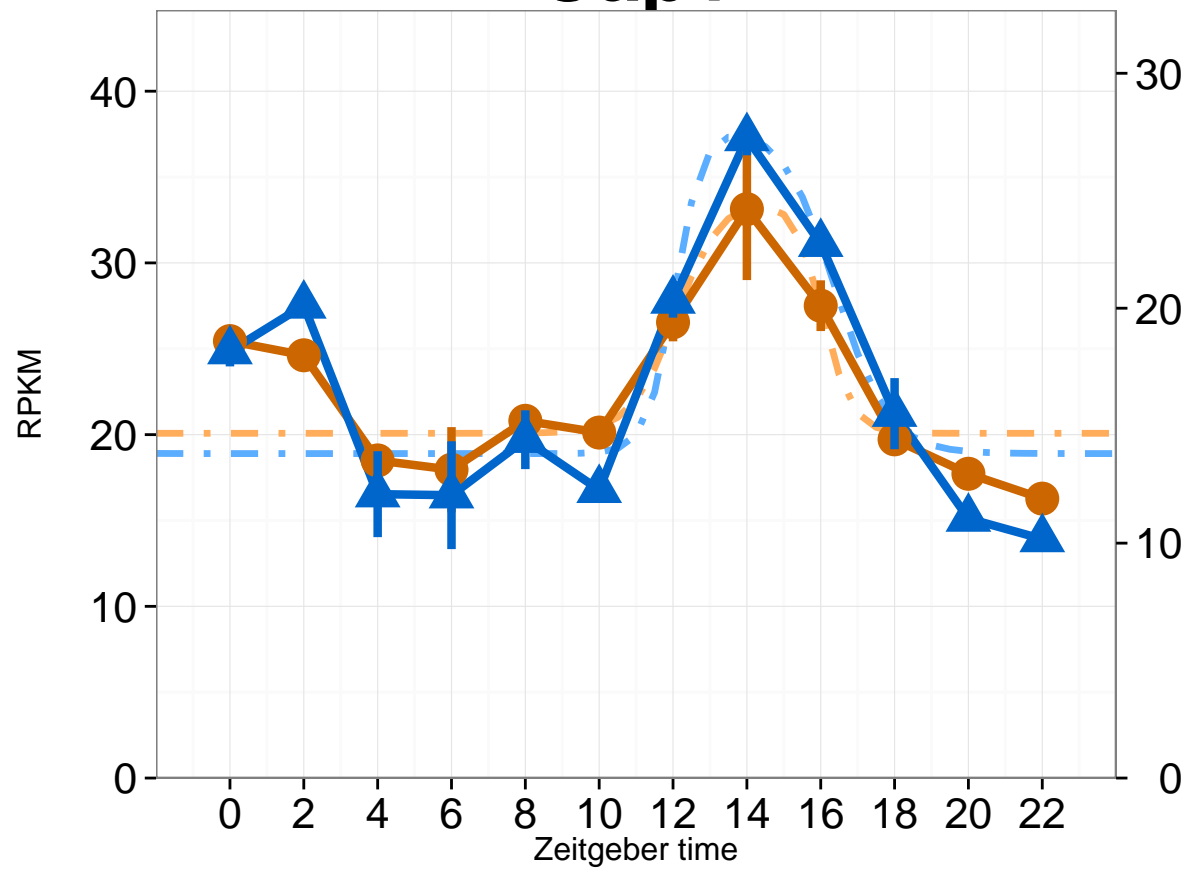

# Uap1

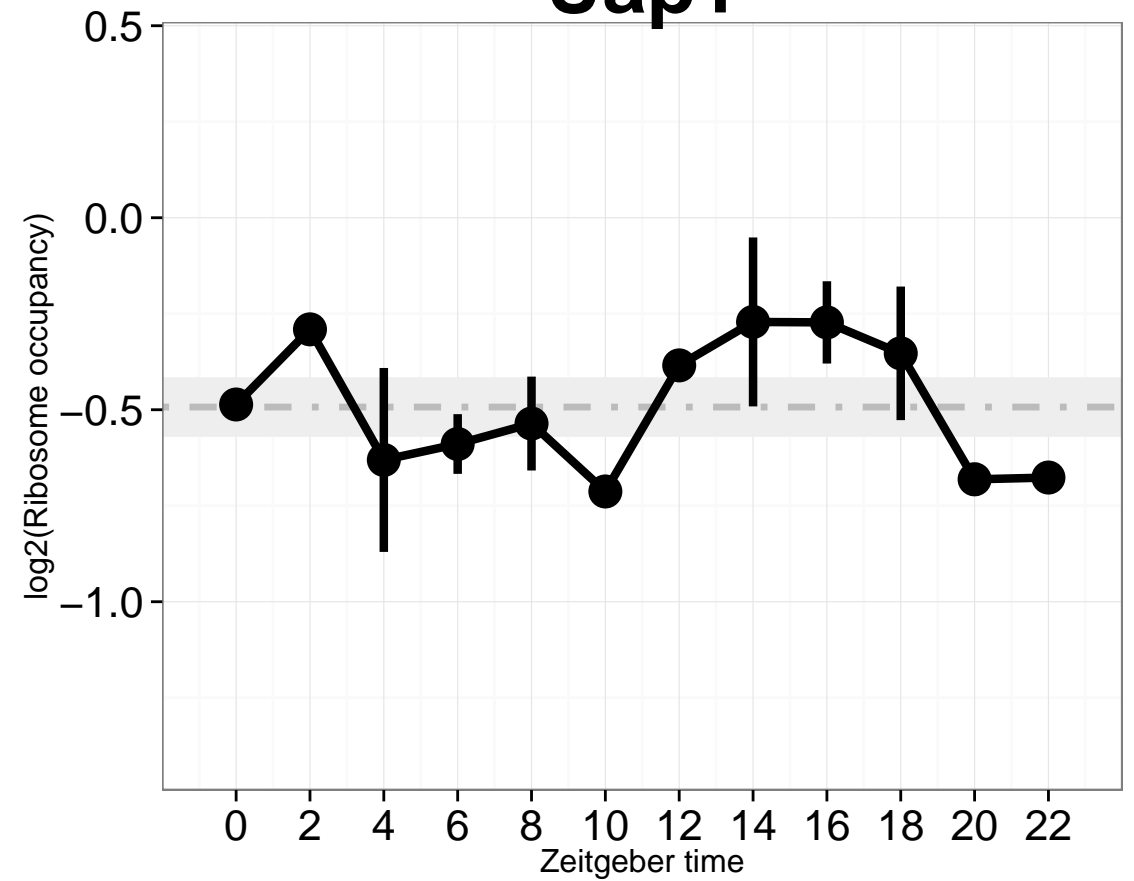

Supplement: SuppDataset_1.zip [file Uap1_set_D.pdf › Supplemental Dataset 1/D-mRNA_rhythm_translation_rhyth/Uap1_set_D.pdf]

## Ubac1

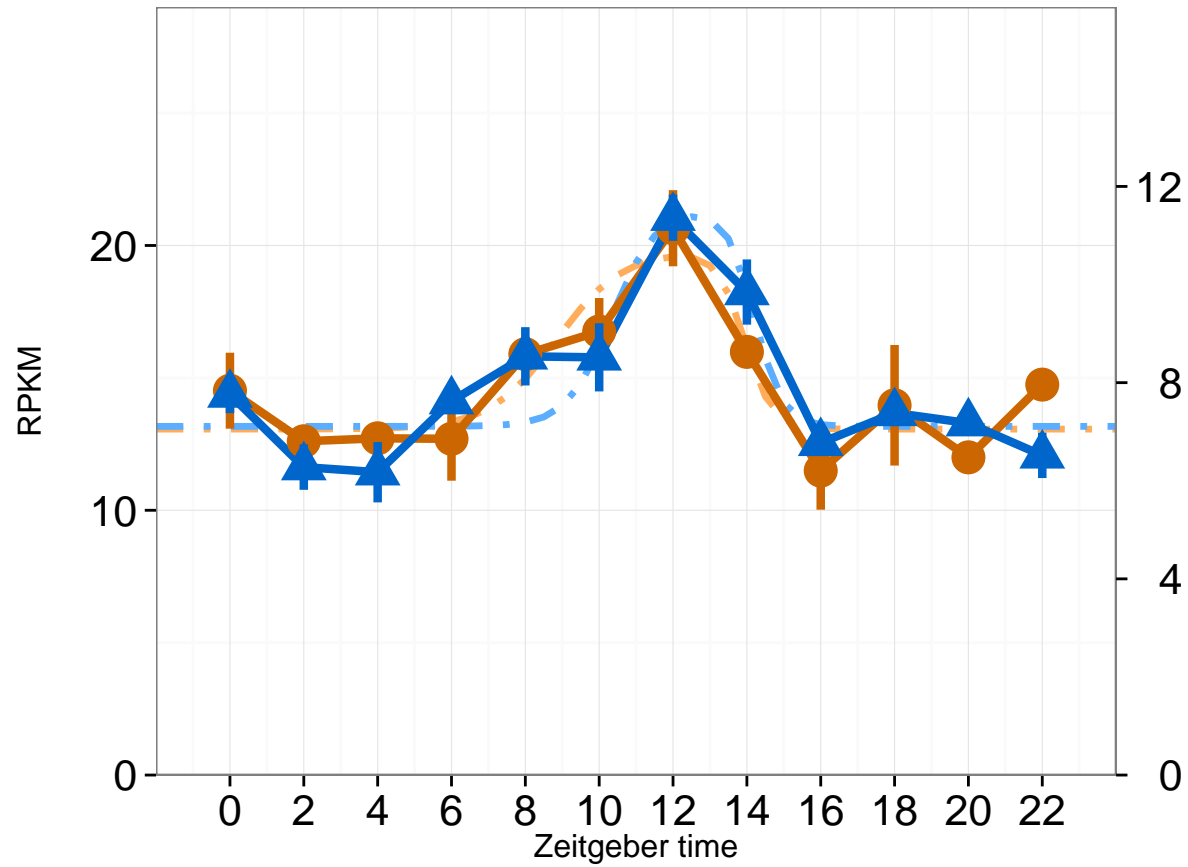

## Ubac1

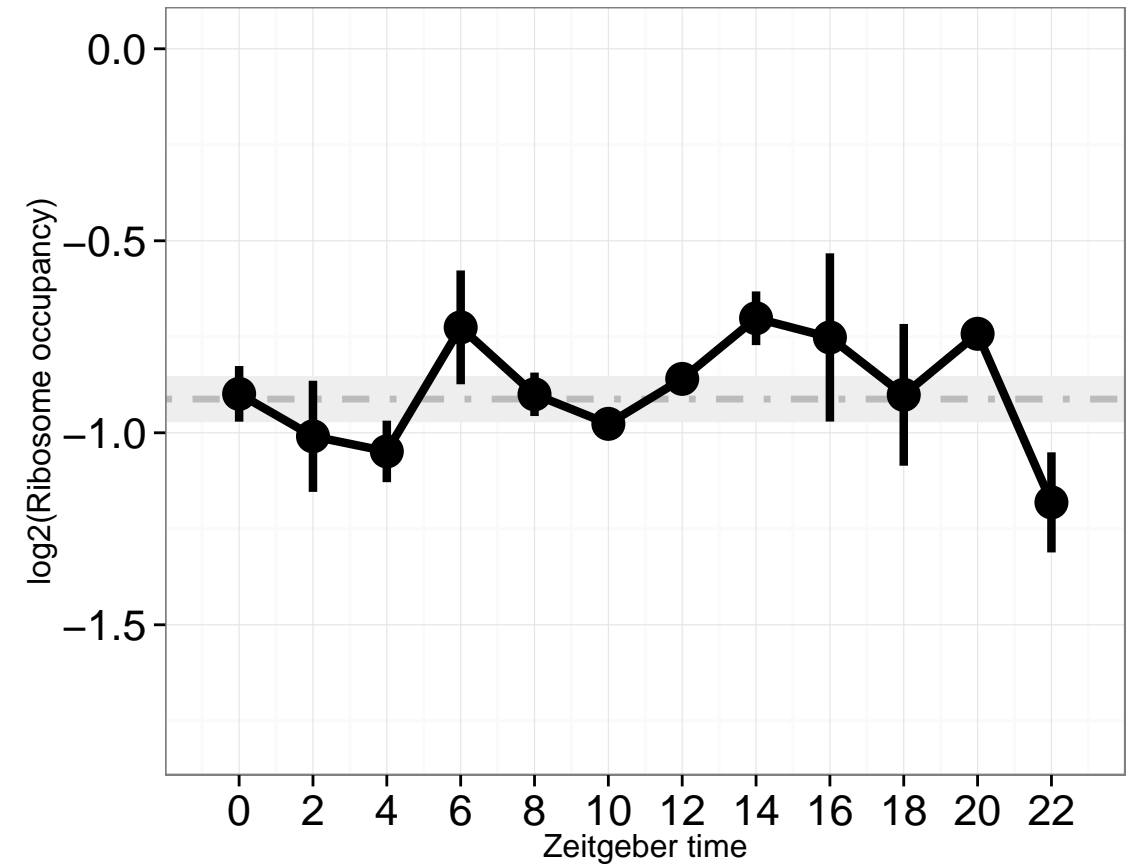

Supplement: SuppDataset_1.zip [file Ubac1_set_D.pdf › Supplemental Dataset 1/D-mRNA_rhythm_translation_rhyth/Ubac1_set_D.pdf]

## Ube2f

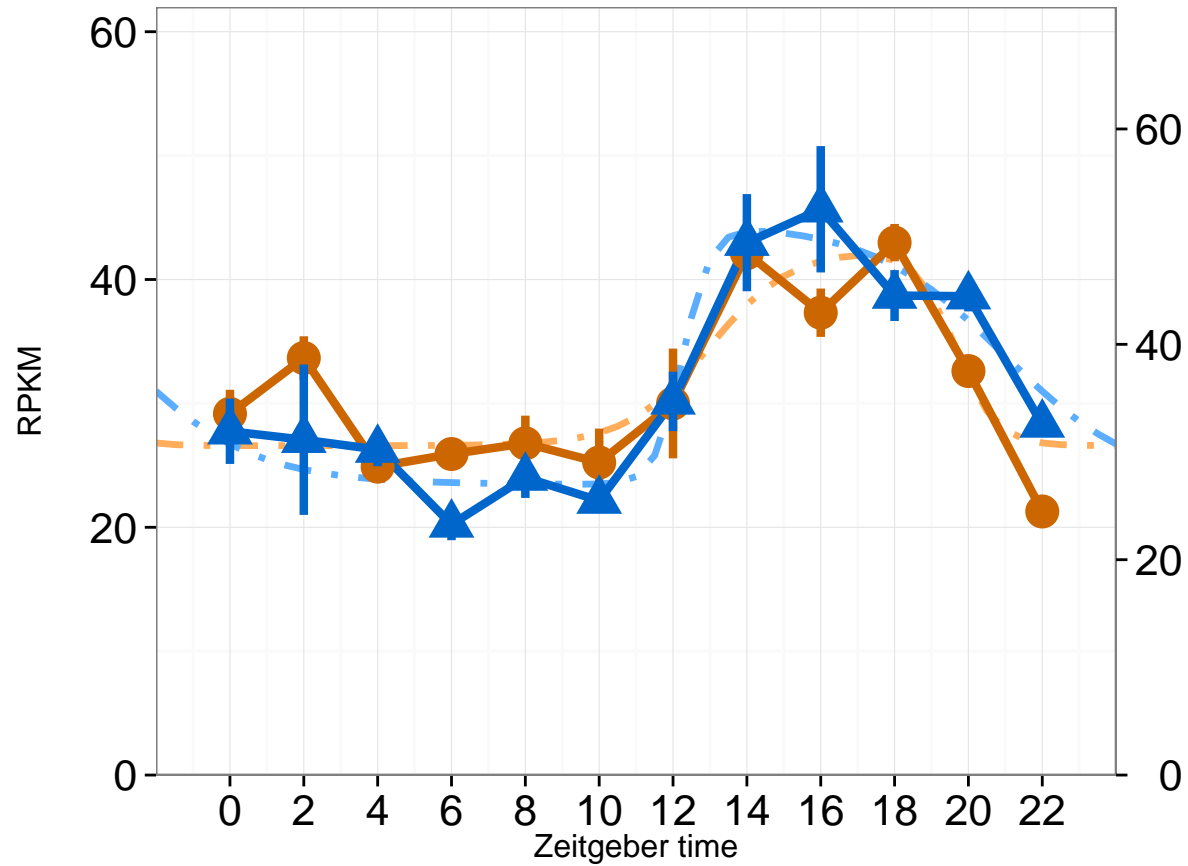

## Ube2f

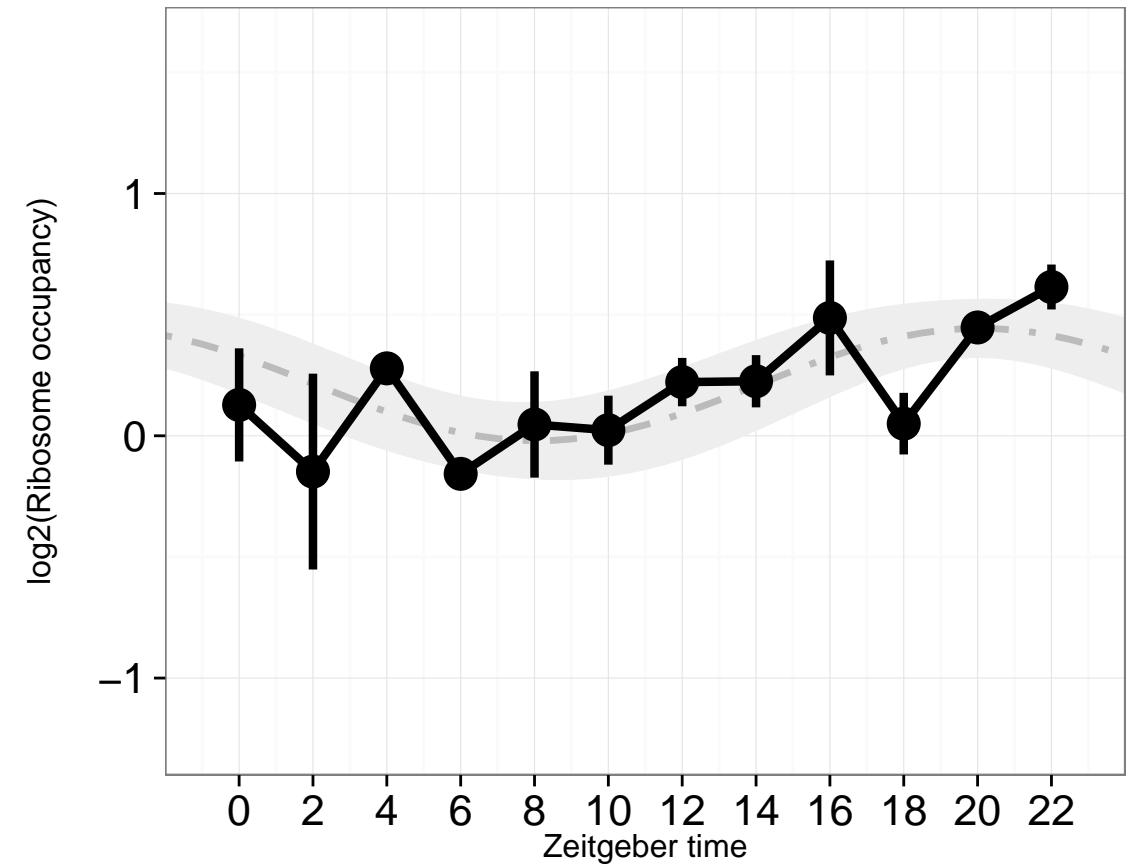

Supplement: SuppDataset_1.zip [file Ube2f_set_D.pdf › Supplemental Dataset 1/D-mRNA_rhythm_translation_rhyth/Ube2f_set_D.pdf]

## Ube2u

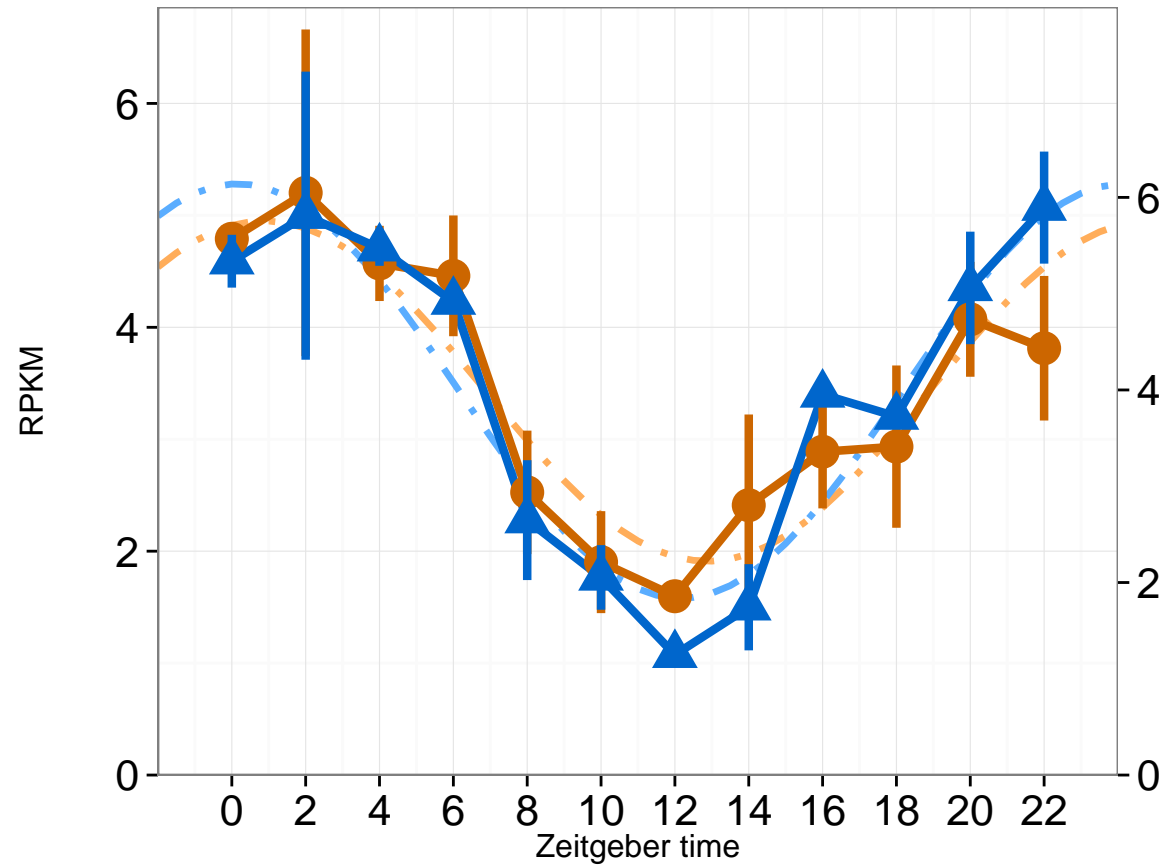

## Ube2u

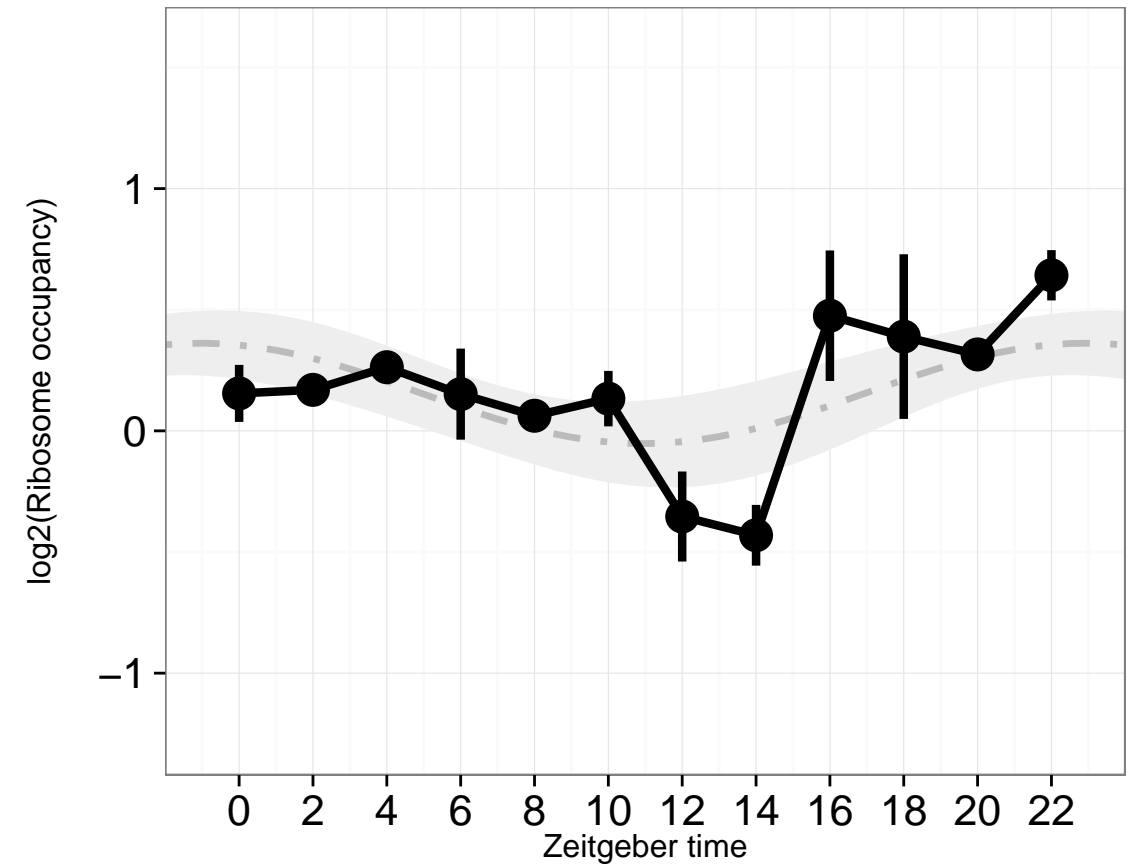

Supplement: SuppDataset_1.zip [file Ube2u_set_D.pdf › Supplemental Dataset 1/D-mRNA_rhythm_translation_rhyth/Ube2u_set_D.pdf]

## Ubxn1

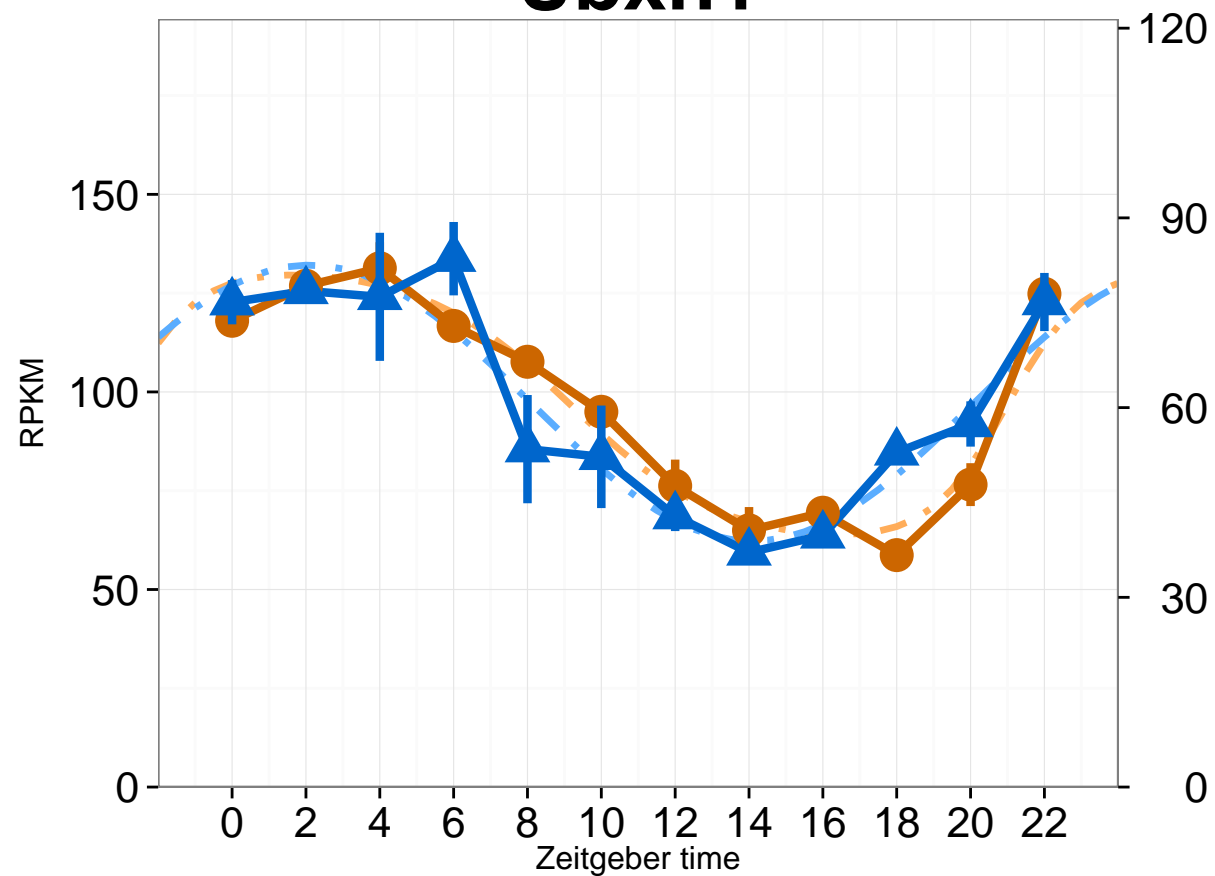

## Ubxn1

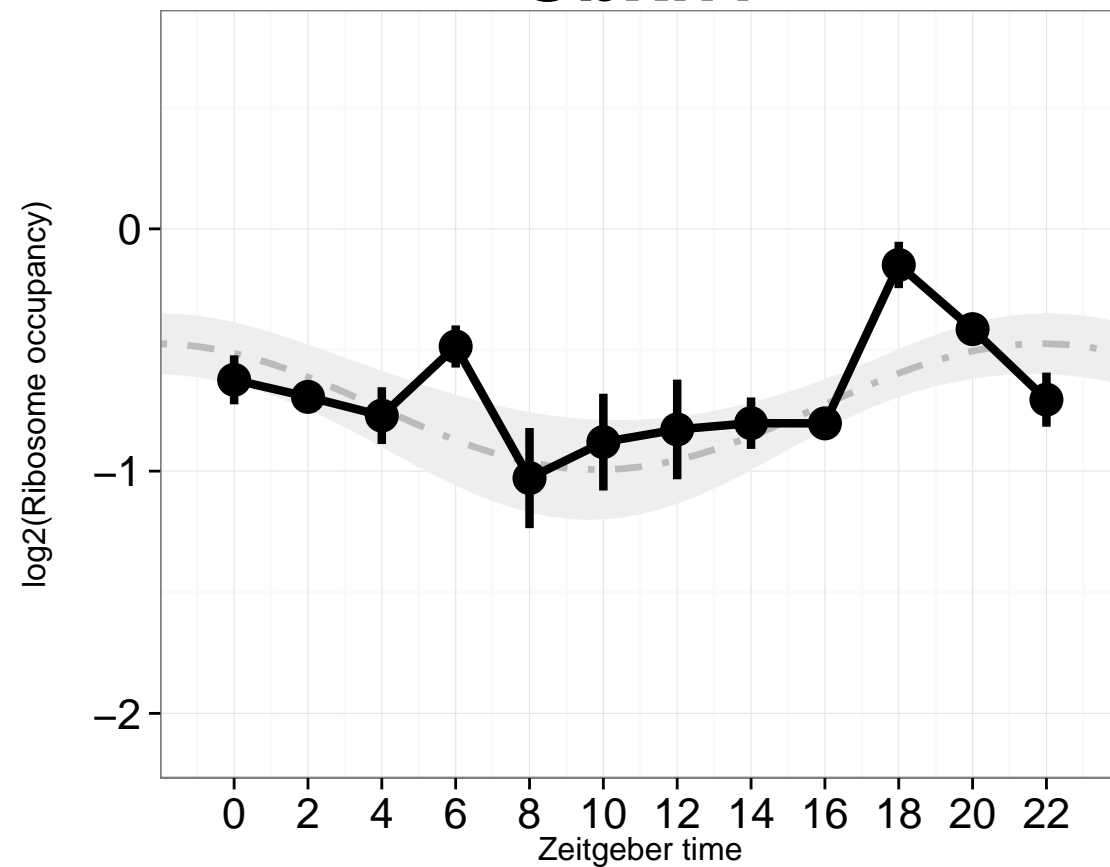

Supplement: SuppDataset_1.zip [file Ubxn1_set_D.pdf › Supplemental Dataset 1/D-mRNA_rhythm_translation_rhyth/Ubxn1_set_D.pdf]

## Ugp2

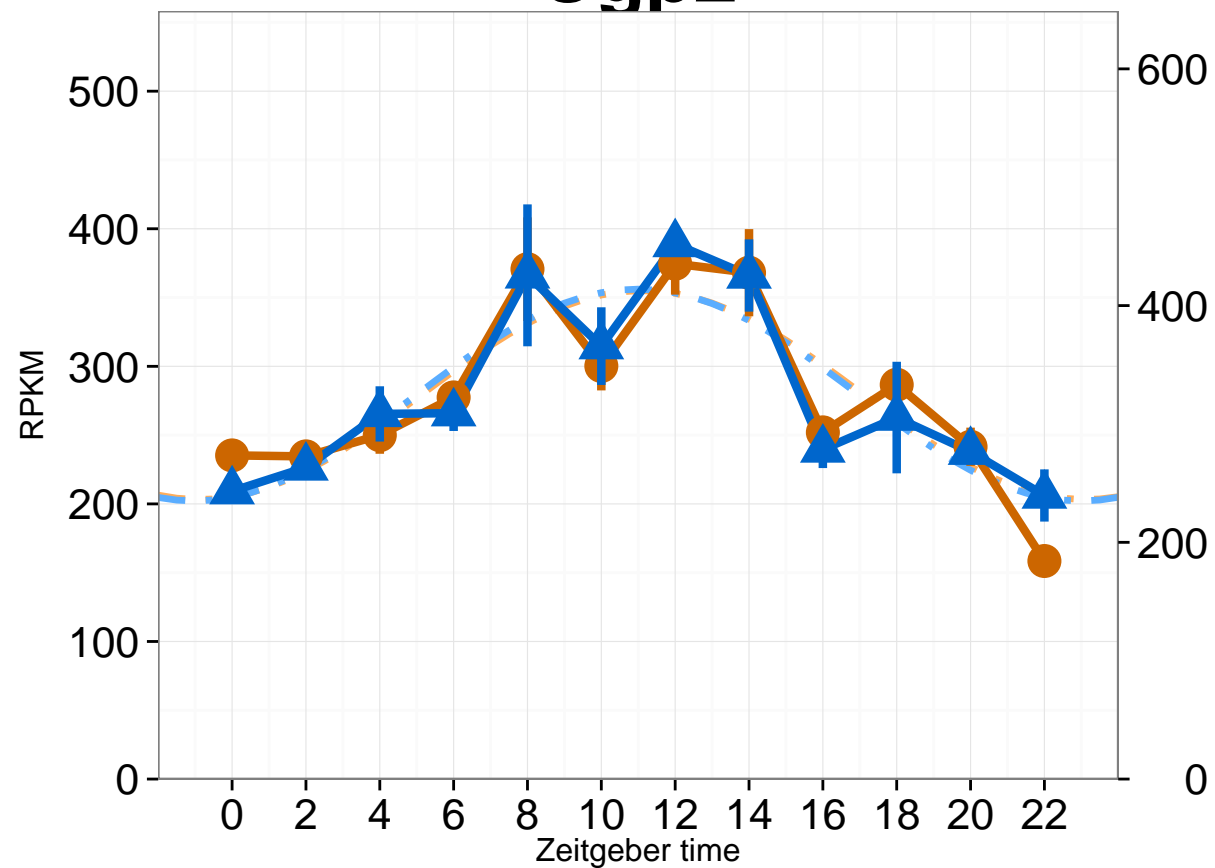

## Ugp2

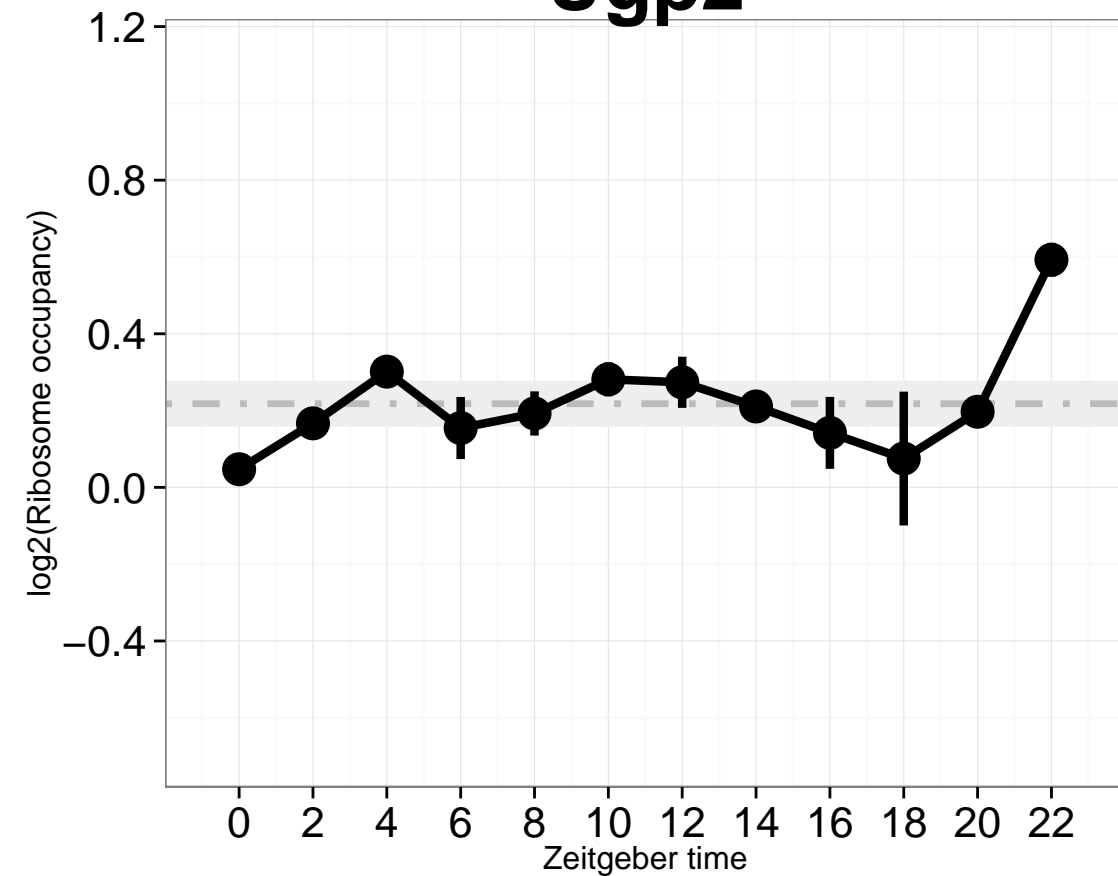

Supplement: SuppDataset_1.zip [file Ugp2_set_D.pdf › Supplemental Dataset 1/D-mRNA_rhythm_translation_rhyth/Ugp2_set_D.pdf]

# Ugt2b35

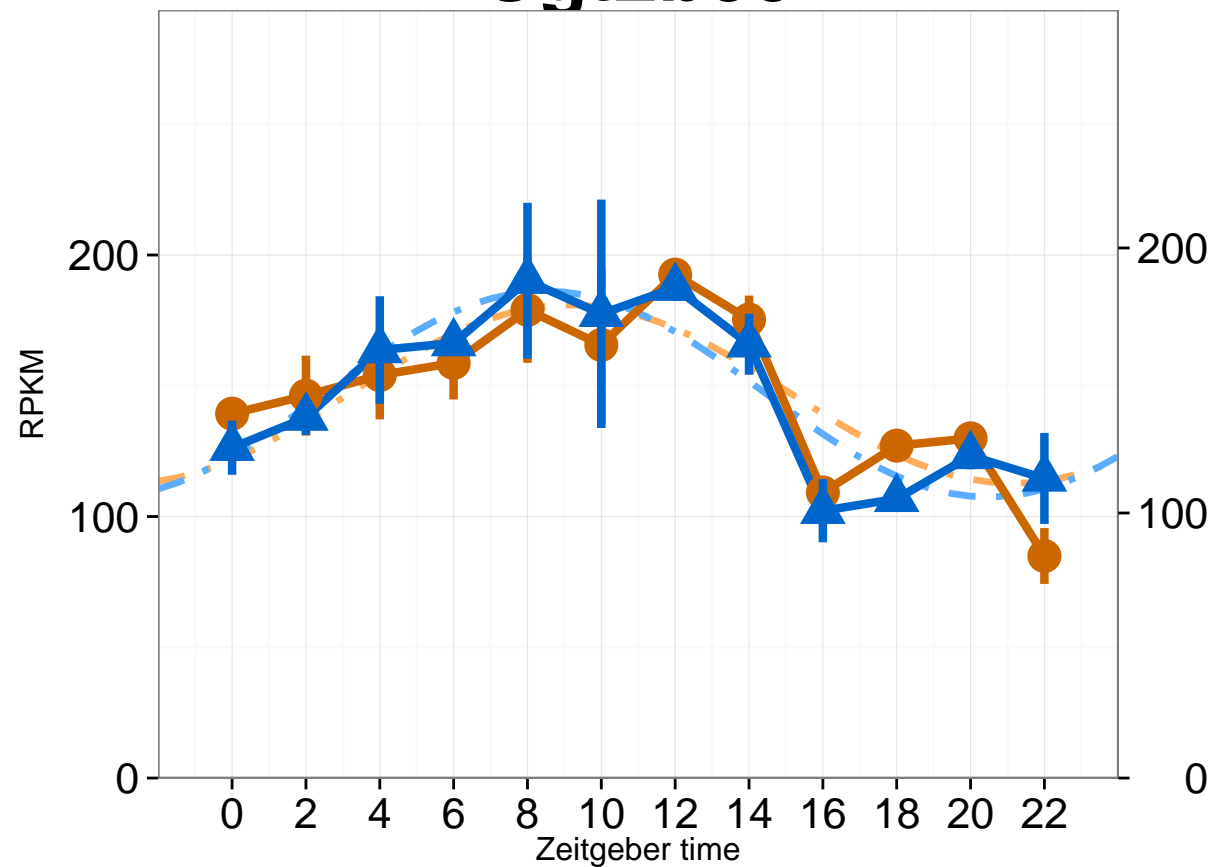

# Ugt2b35

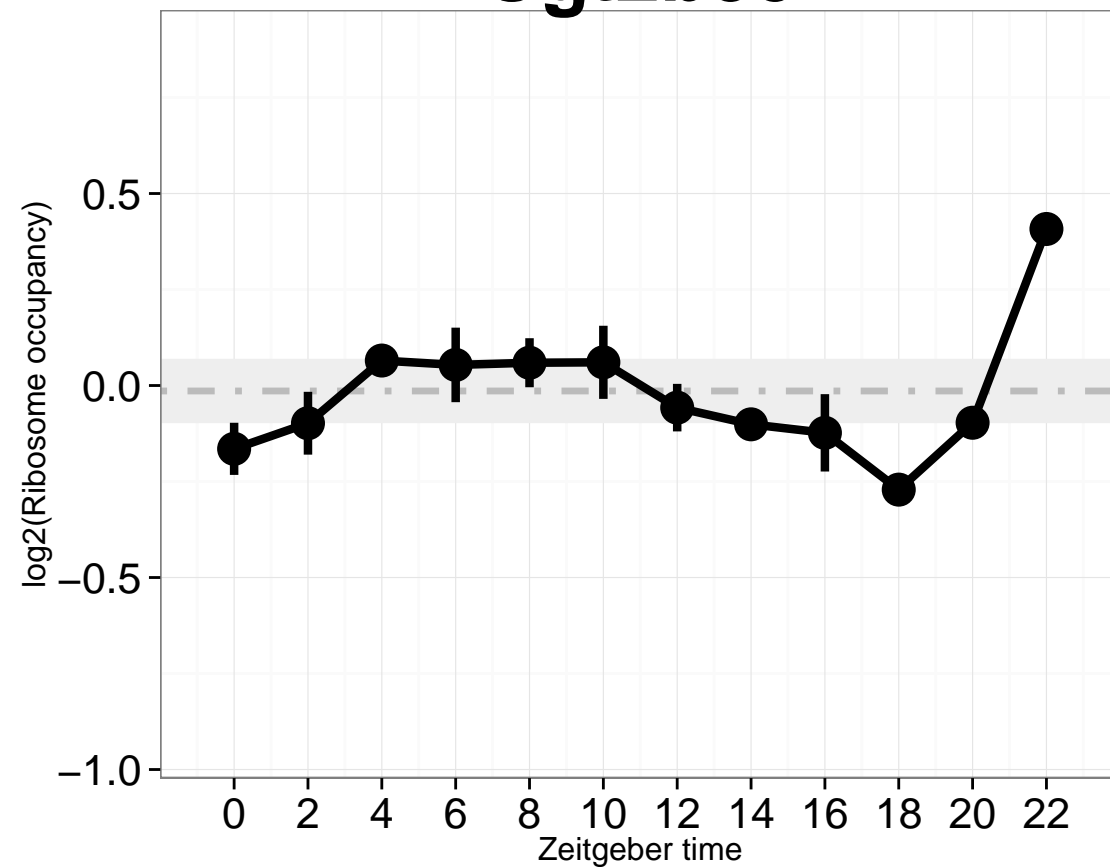

Supplement: SuppDataset_1.zip [file Ugt2b35_set_D.pdf › Supplemental Dataset 1/D-mRNA_rhythm_translation_rhyth/Ugt2b35_set_D.pdf]

## Ulk1

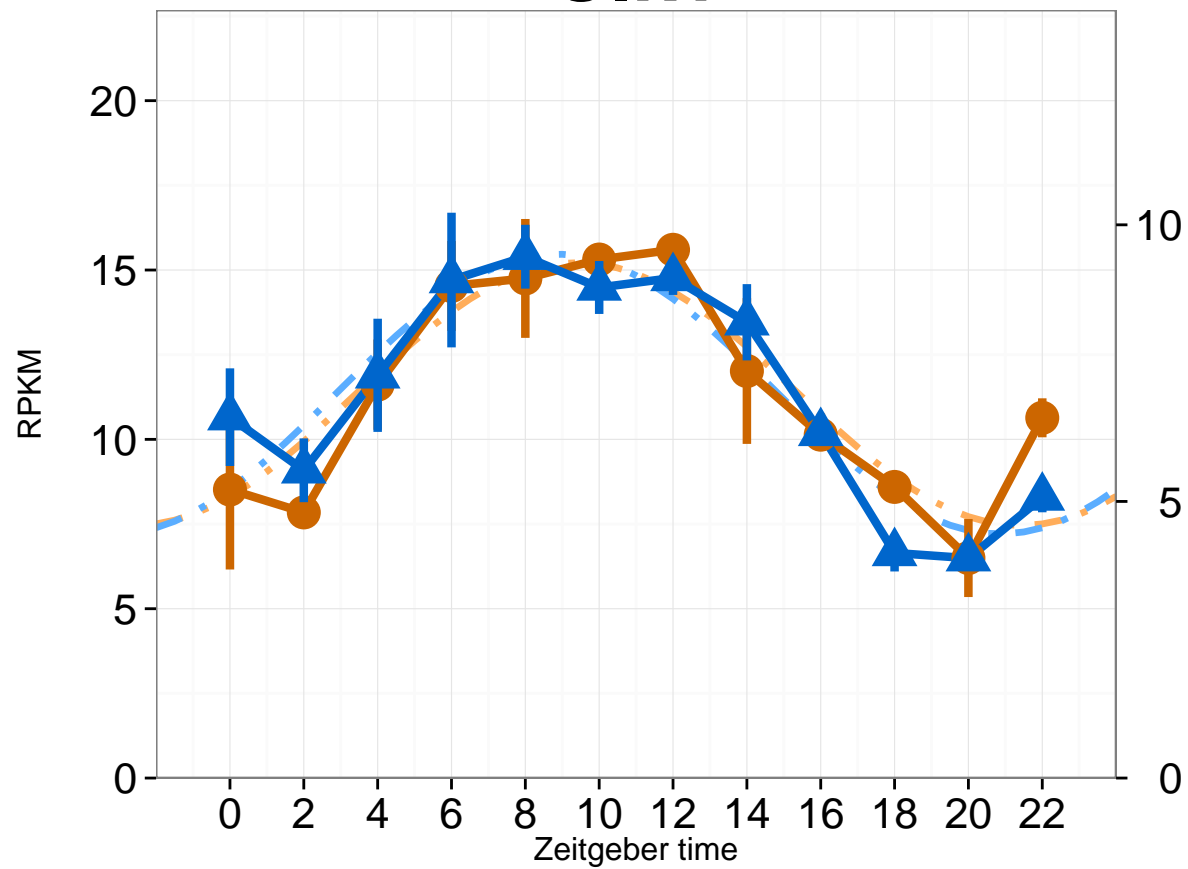

## Ulk1

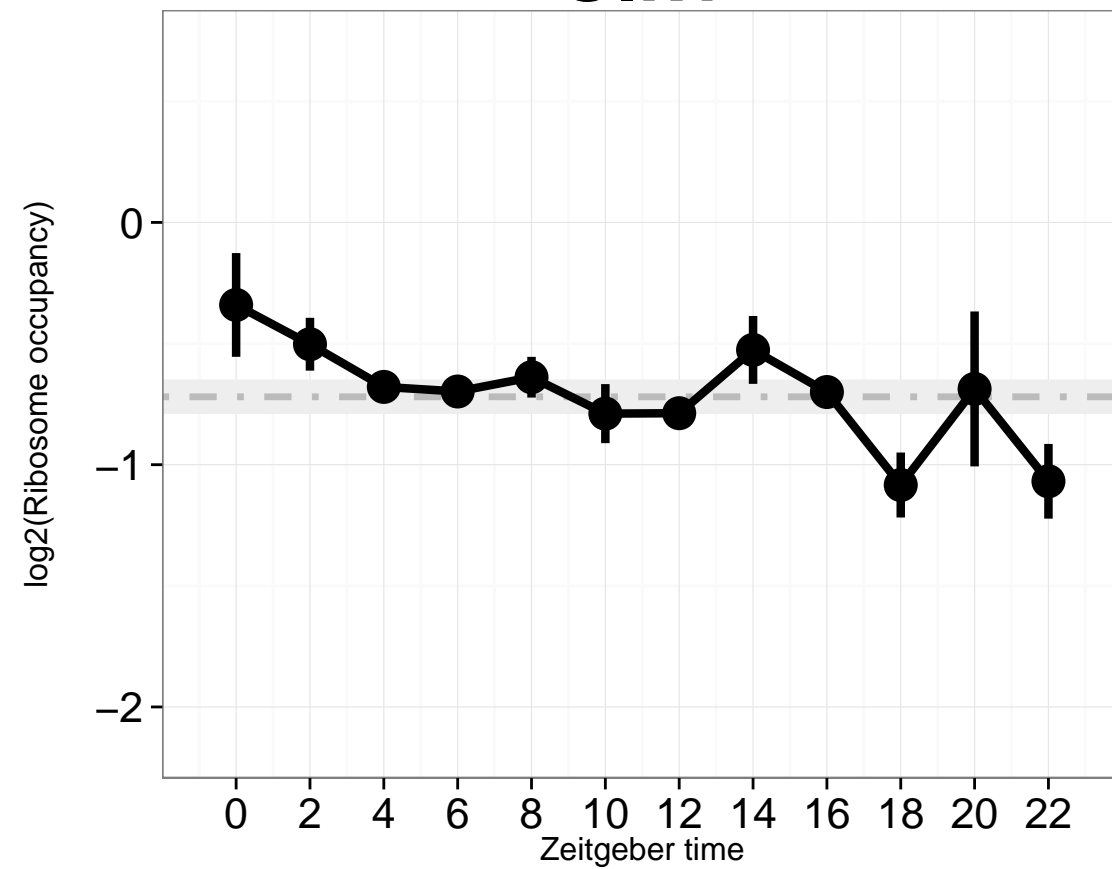

Supplement: SuppDataset_1.zip [file Ulk1_set_D.pdf › Supplemental Dataset 1/D-mRNA_rhythm_translation_rhyth/Ulk1_set_D.pdf]

# Ung

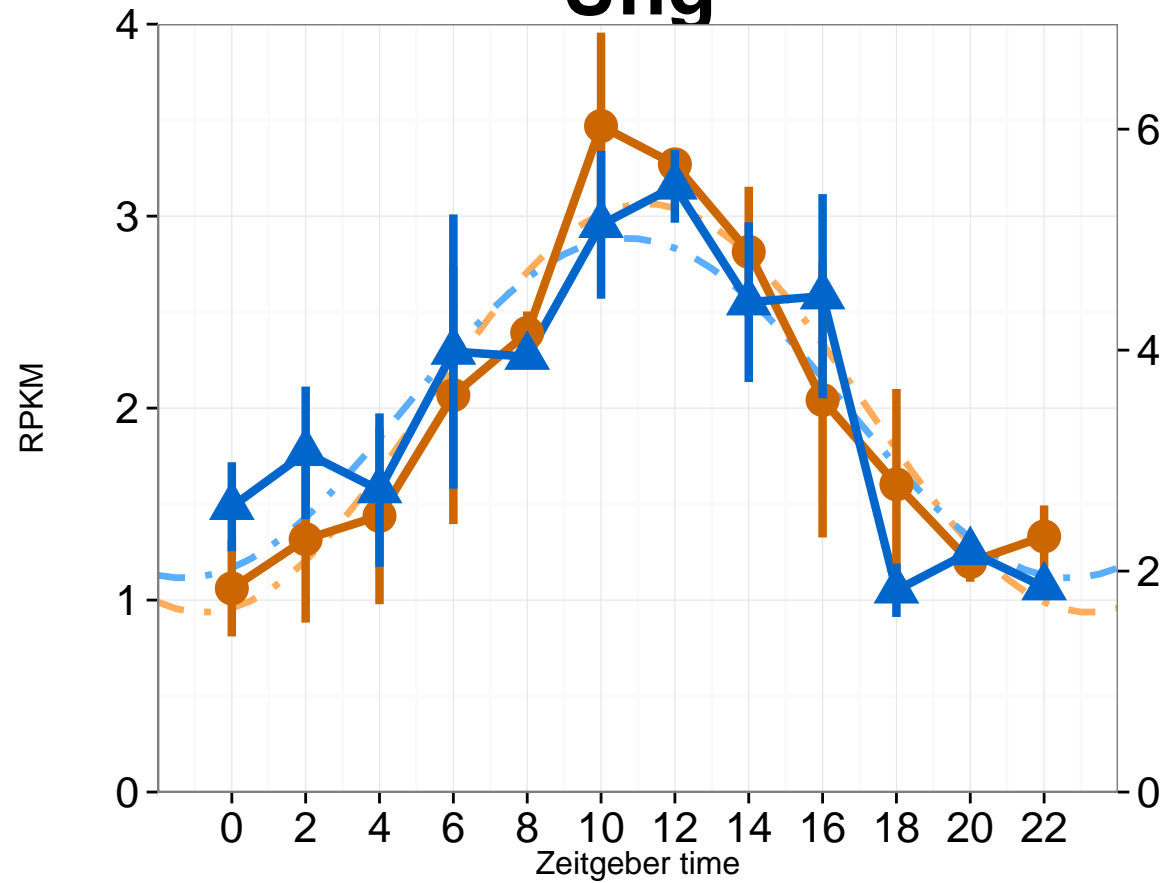

# Ung

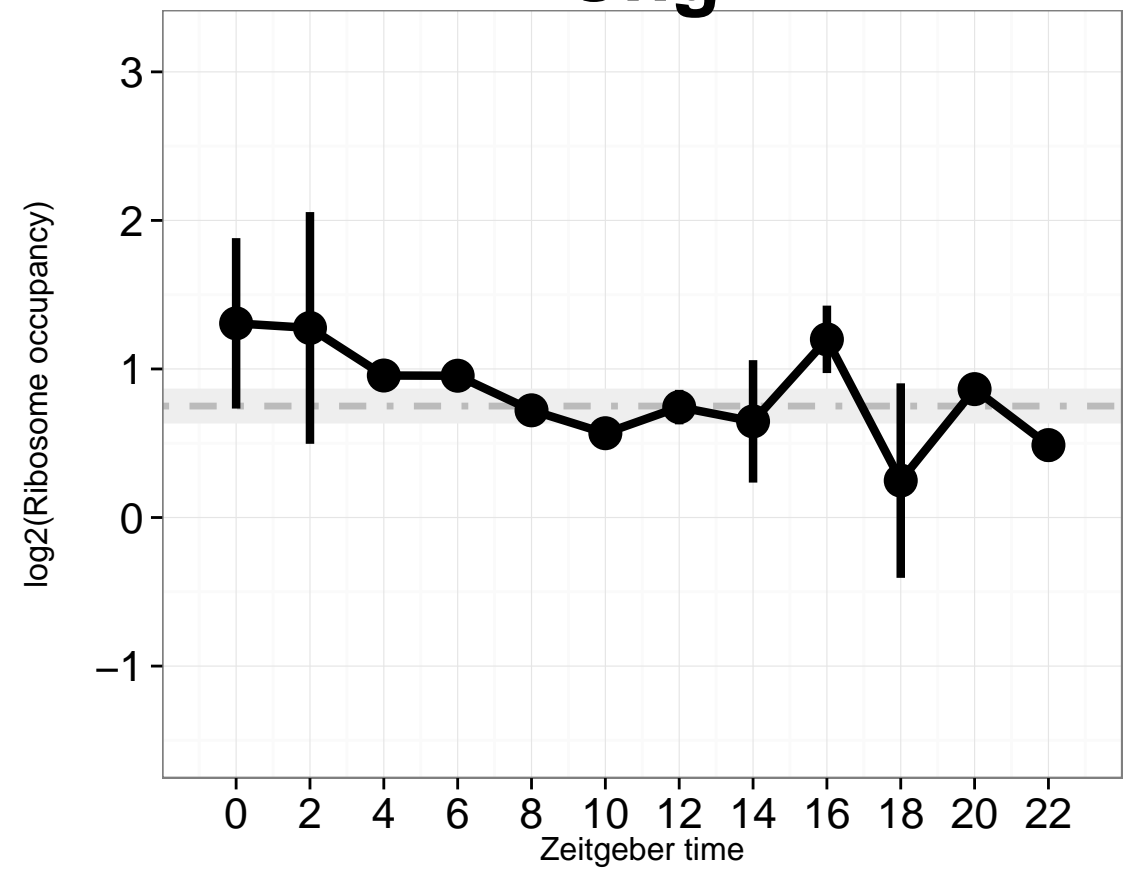

Supplement: SuppDataset_1.zip [file Ung_set_D.pdf › Supplemental Dataset 1/D-mRNA_rhythm_translation_rhyth/Ung_set_D.pdf]

## Uox

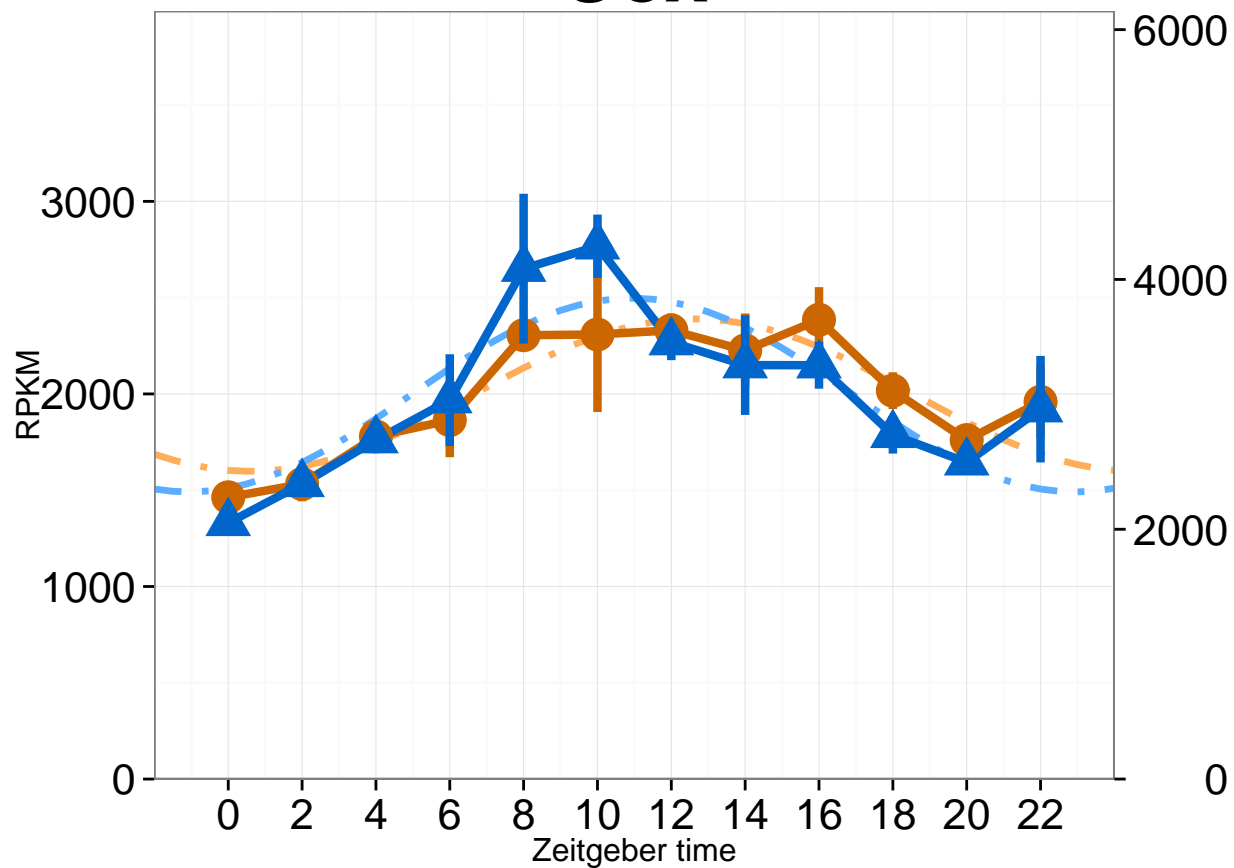

## Uox

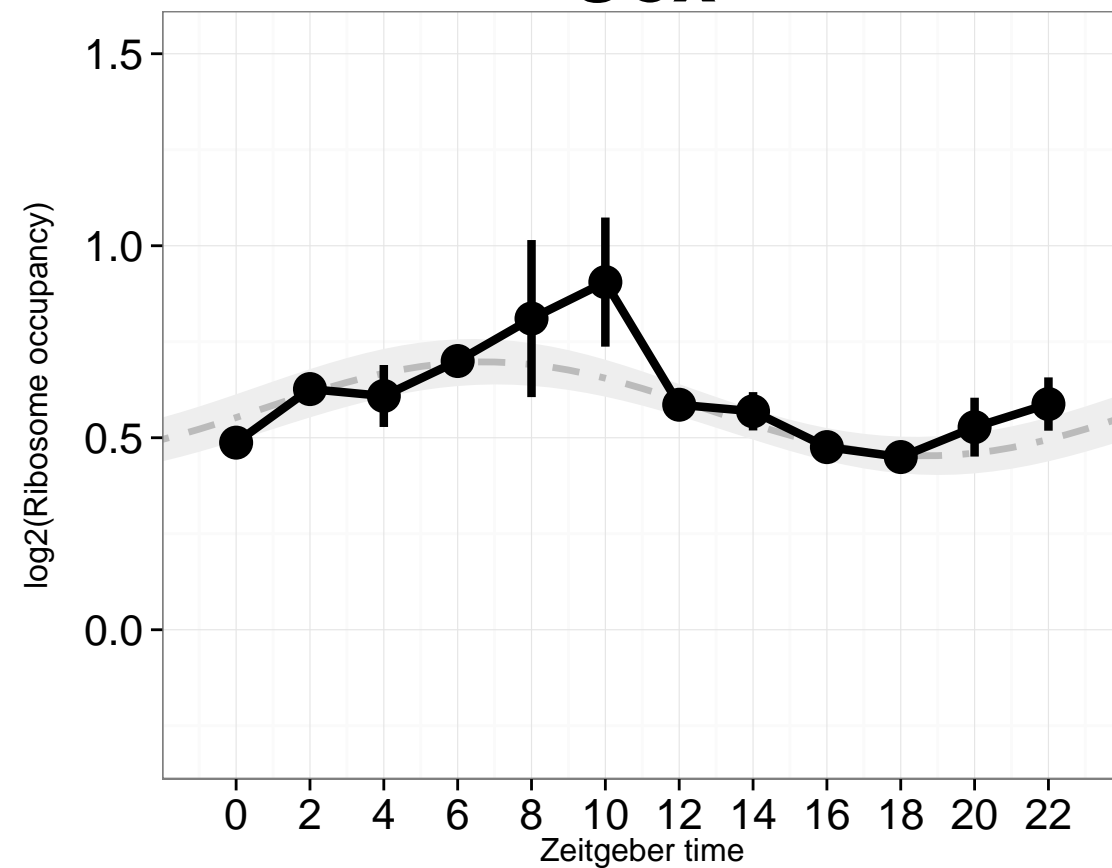

Supplement: SuppDataset_1.zip [file Uox_set_D.pdf › Supplemental Dataset 1/D-mRNA_rhythm_translation_rhyth/Uox_set_D.pdf]

## Upp2

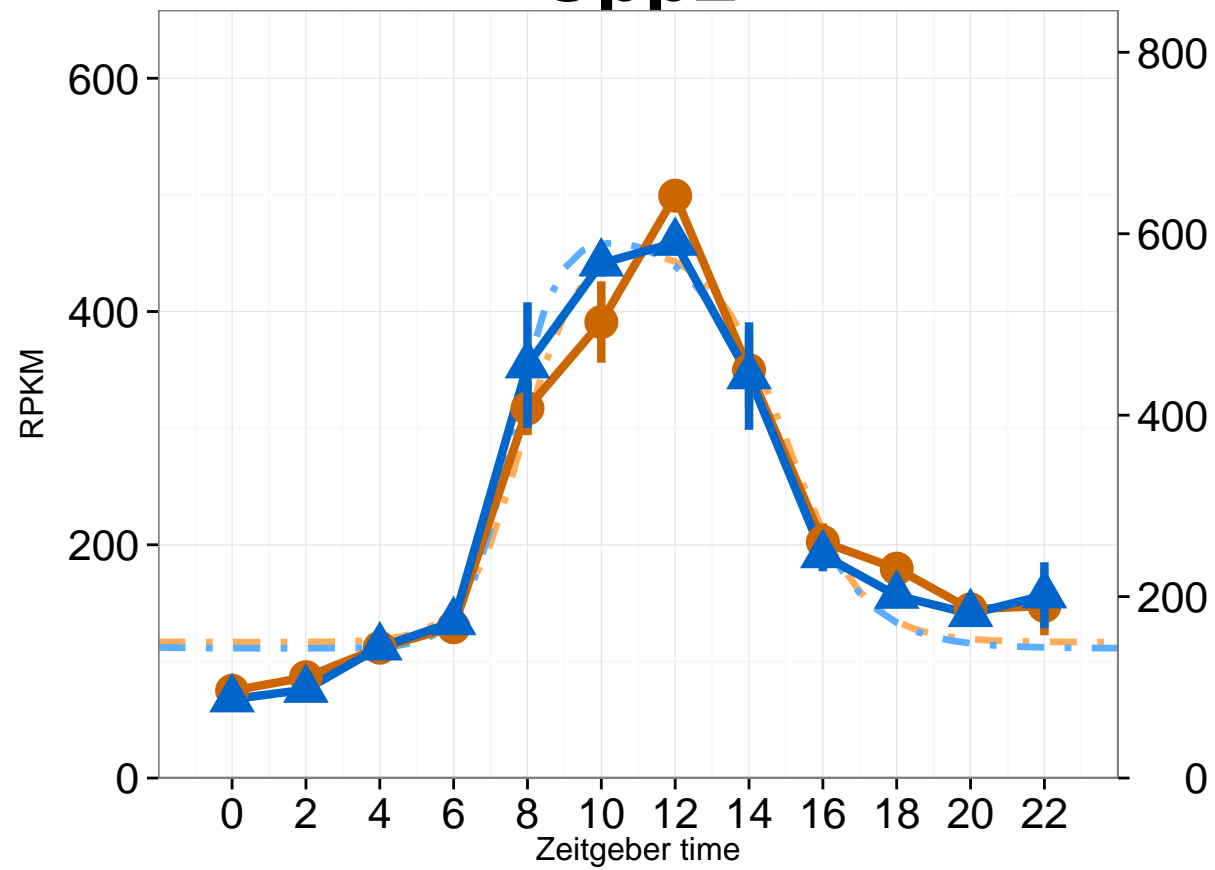

## Upp2

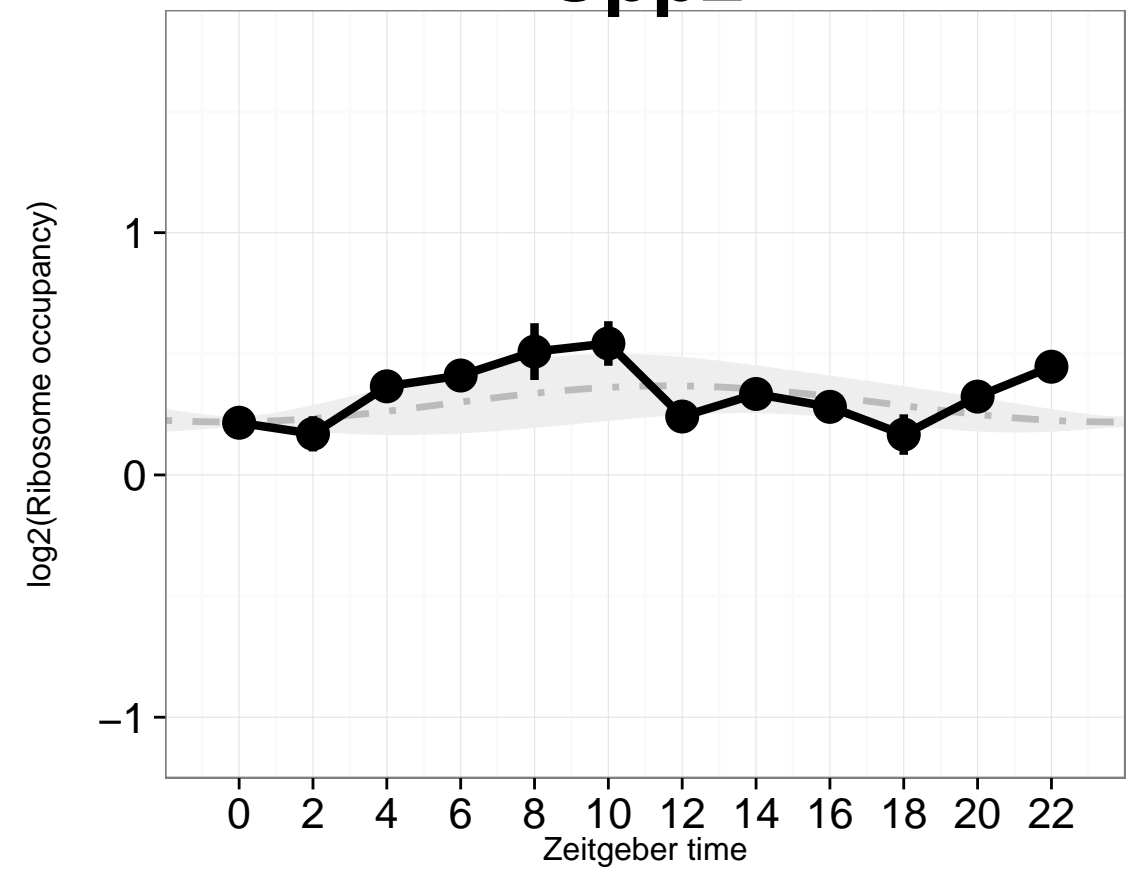

Supplement: SuppDataset_1.zip [file Upp2_set_D.pdf › Supplemental Dataset 1/D-mRNA_rhythm_translation_rhyth/Upp2_set_D.pdf]

## Urad

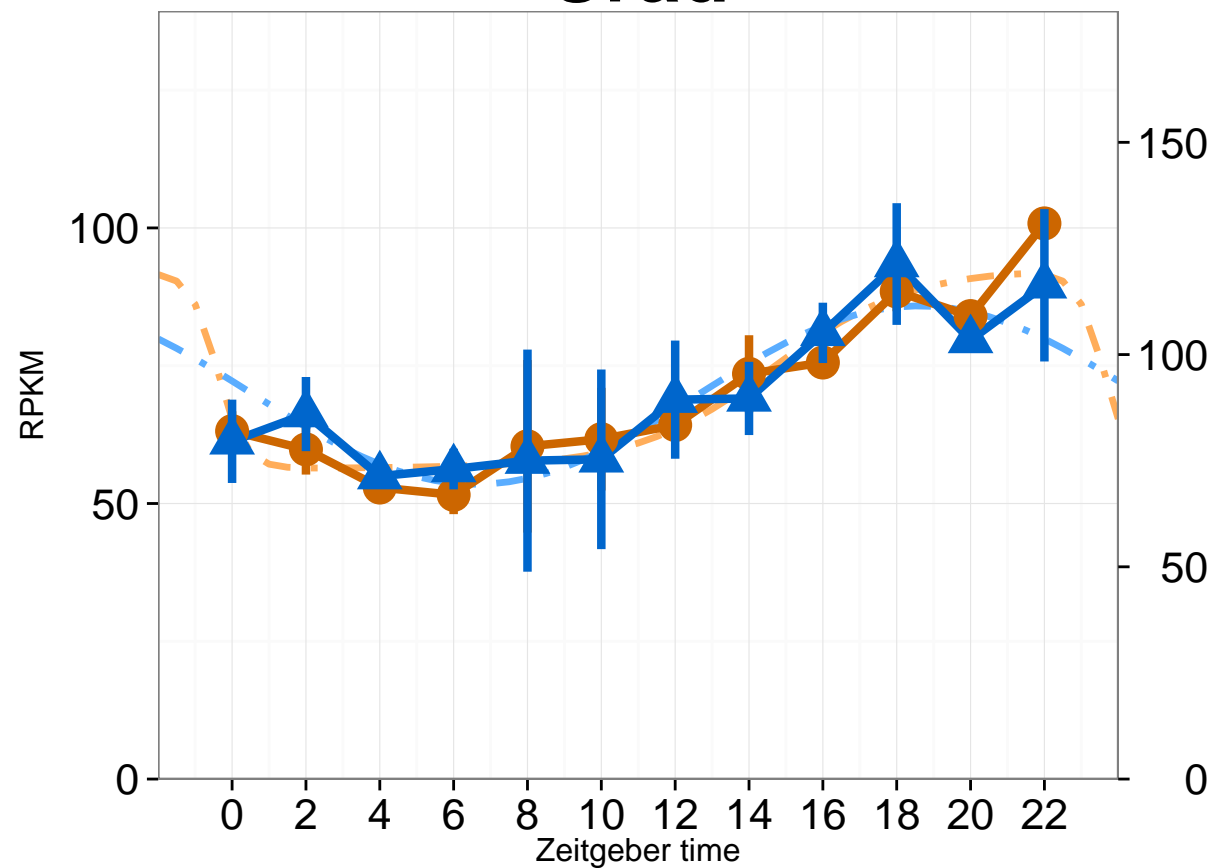

## Urad

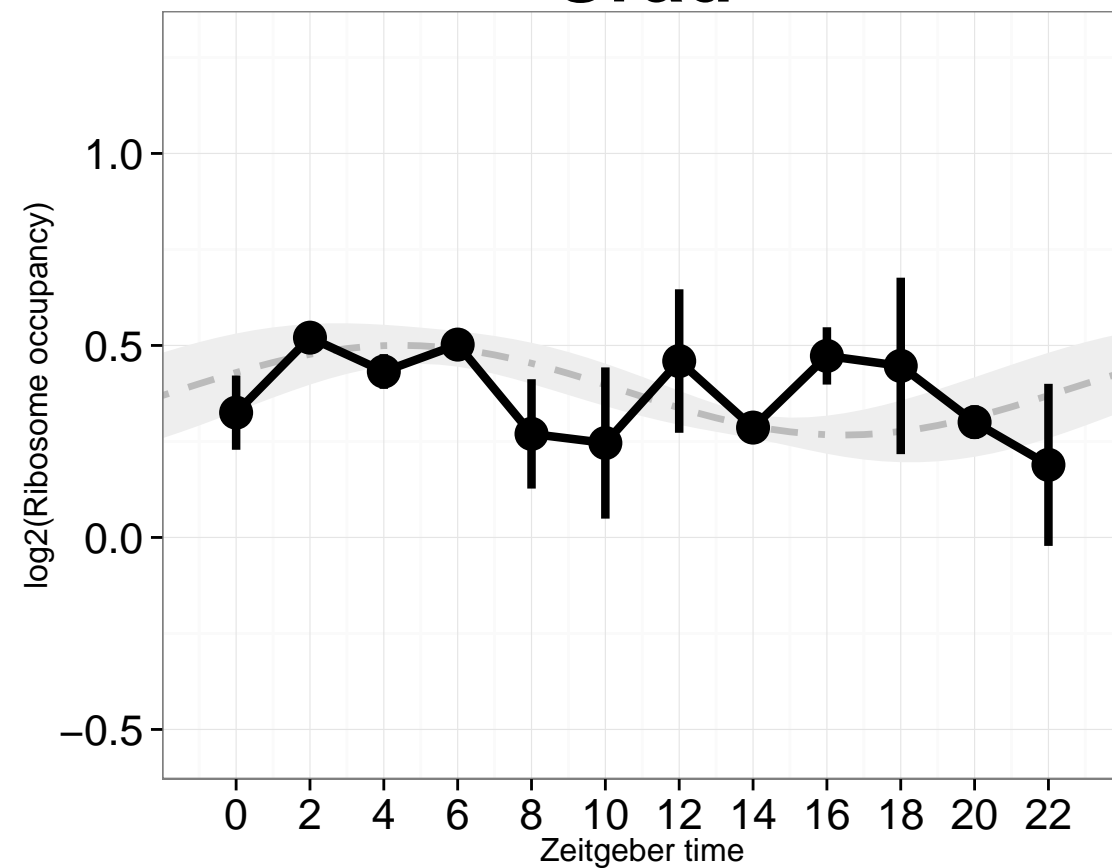

Supplement: SuppDataset_1.zip [file Urad_set_D.pdf › Supplemental Dataset 1/D-mRNA_rhythm_translation_rhyth/Urad_set_D.pdf]

## Uri1

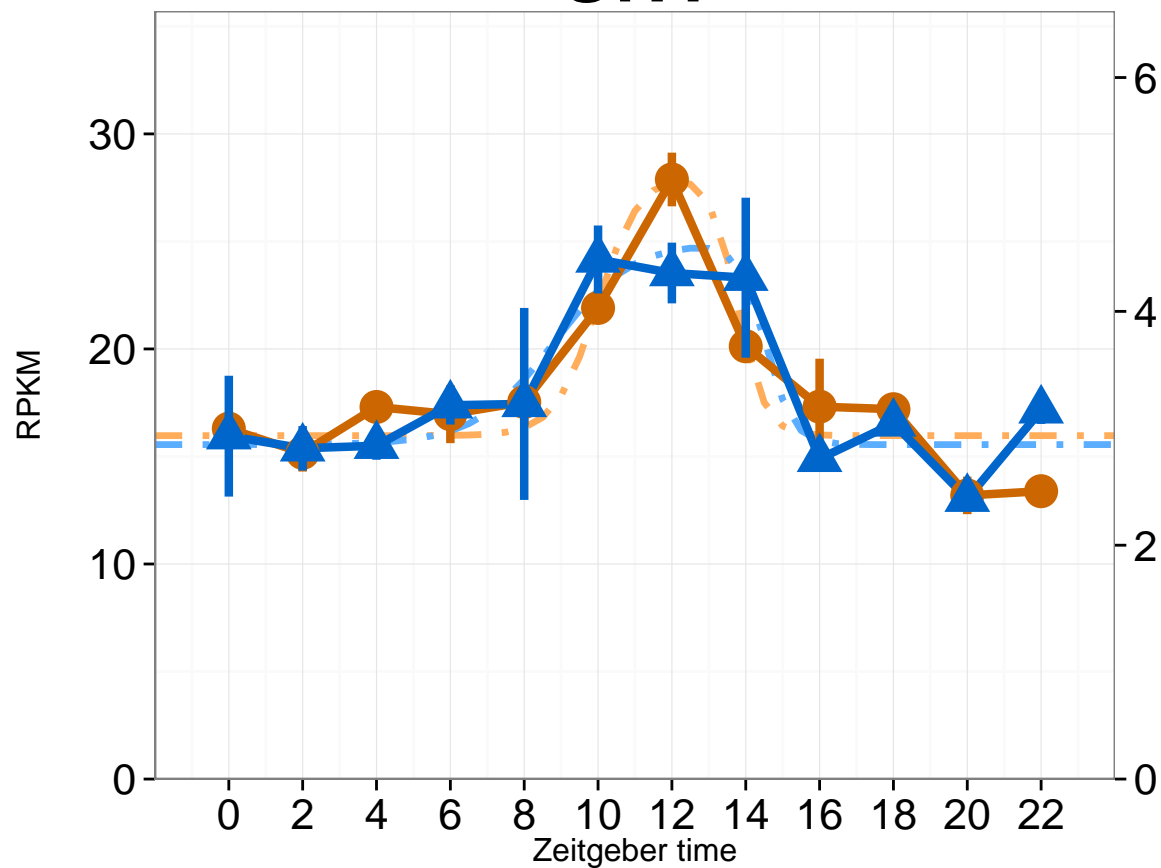

## Uri1

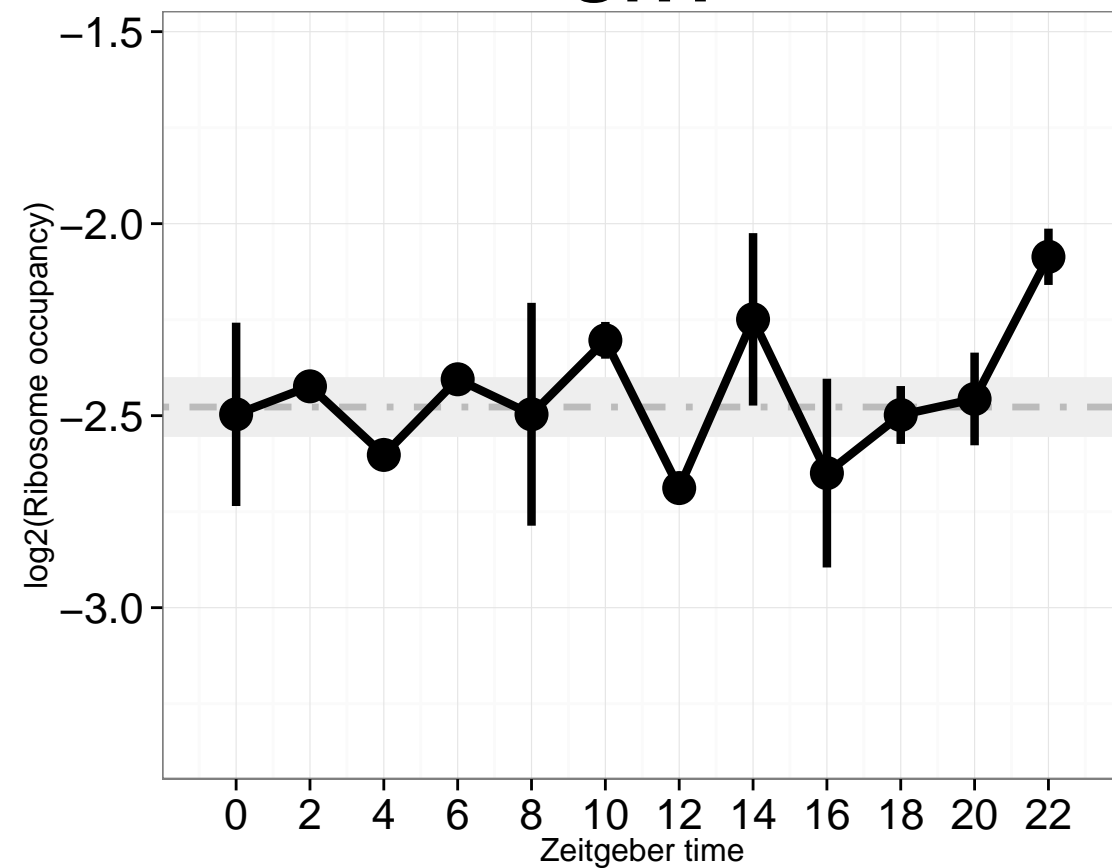

Supplement: SuppDataset_1.zip [file Uri1_set_D.pdf › Supplemental Dataset 1/D-mRNA_rhythm_translation_rhyth/Uri1_set_D.pdf]

# Usp18

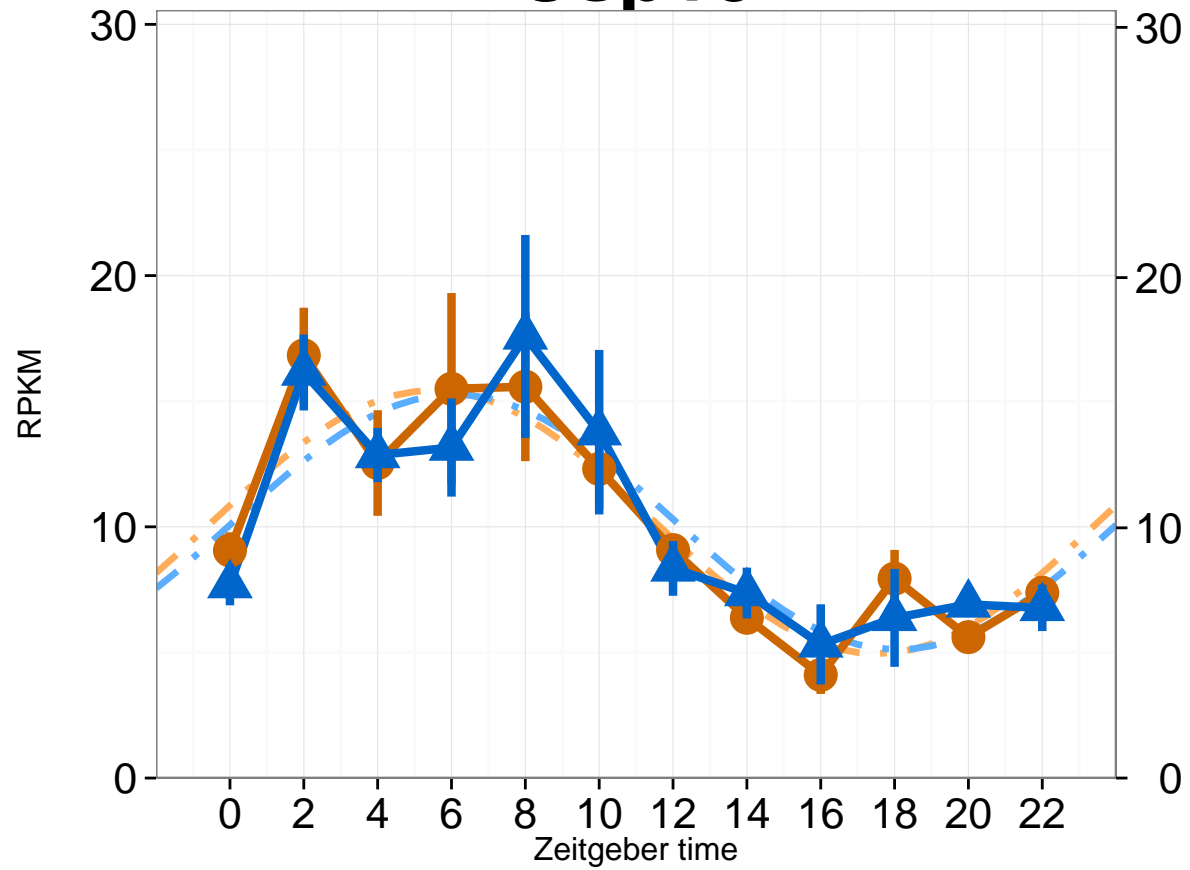

# Usp18

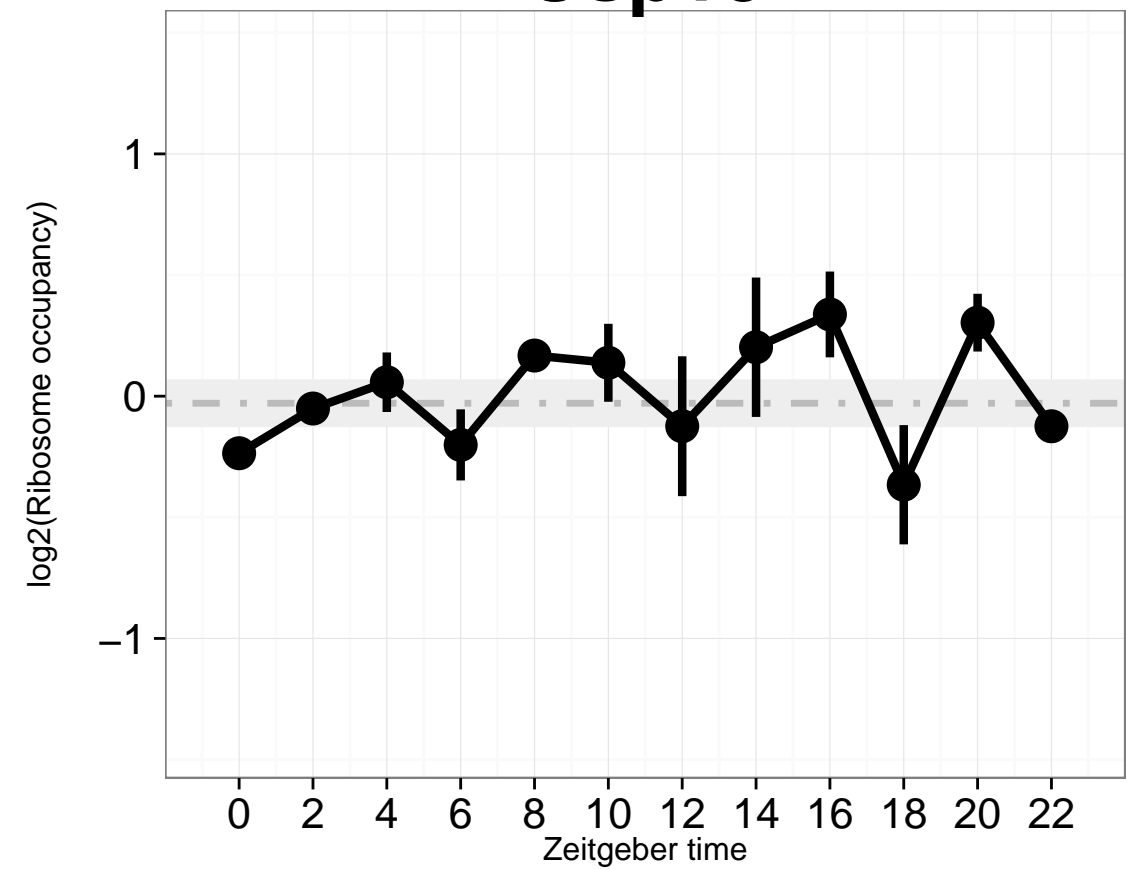

Supplement: SuppDataset_1.zip [file Usp18_set_D.pdf › Supplemental Dataset 1/D-mRNA_rhythm_translation_rhyth/Usp18_set_D.pdf]

## Usp2

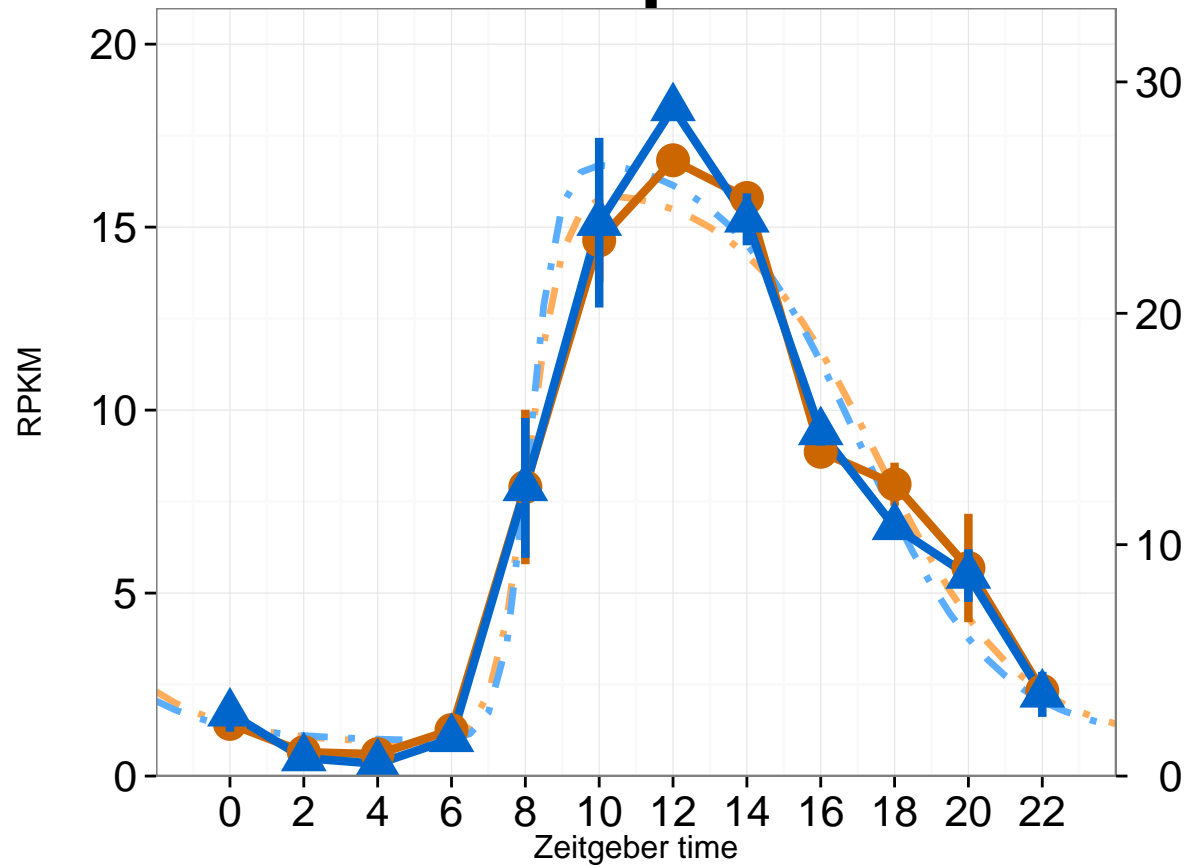

## Usp2

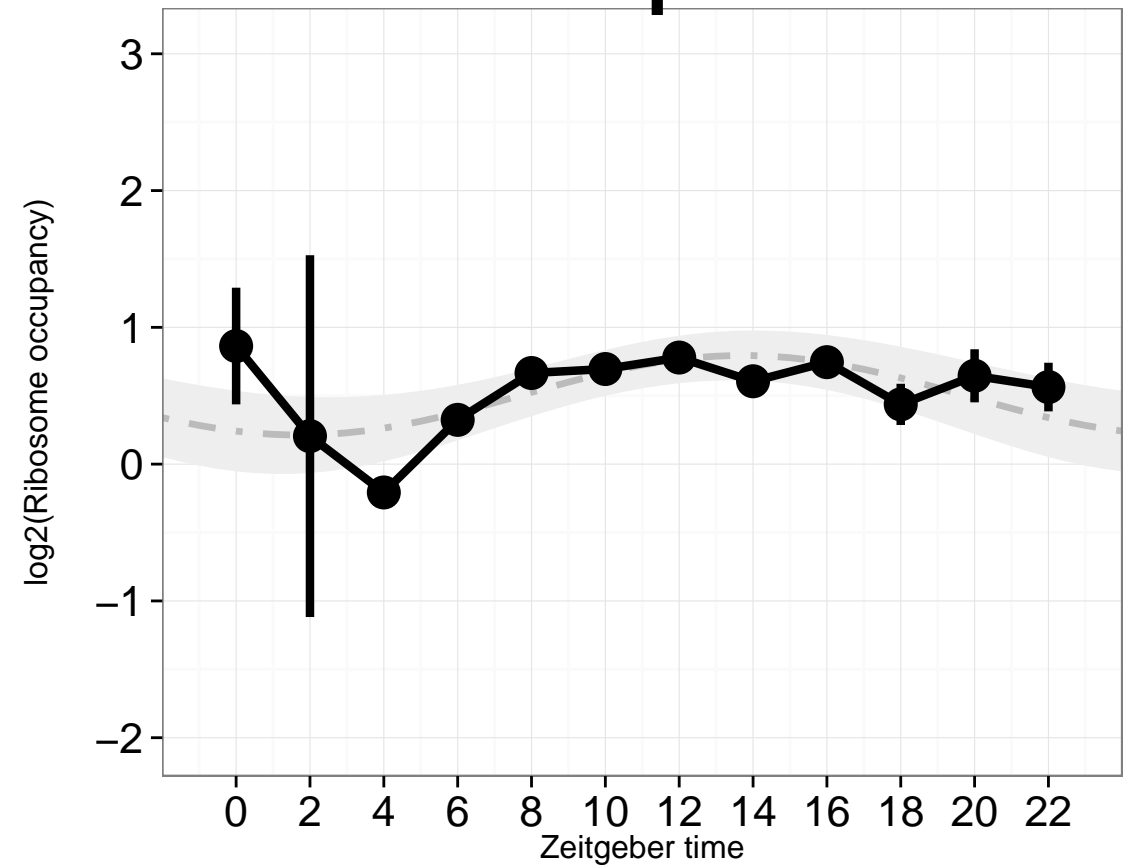

Supplement: SuppDataset_1.zip [file Usp2_set_D.pdf › Supplemental Dataset 1/D-mRNA_rhythm_translation_rhyth/Usp2_set_D.pdf]

# Usp36

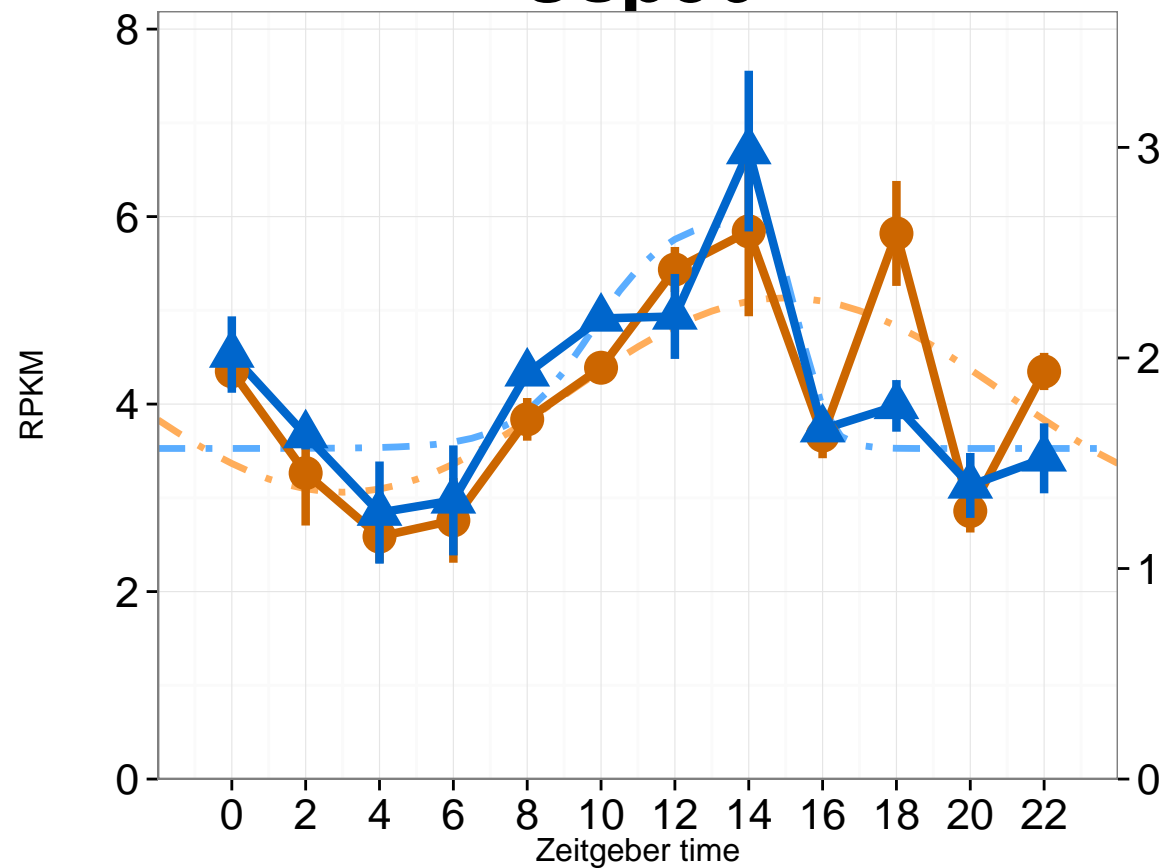

# Usp36

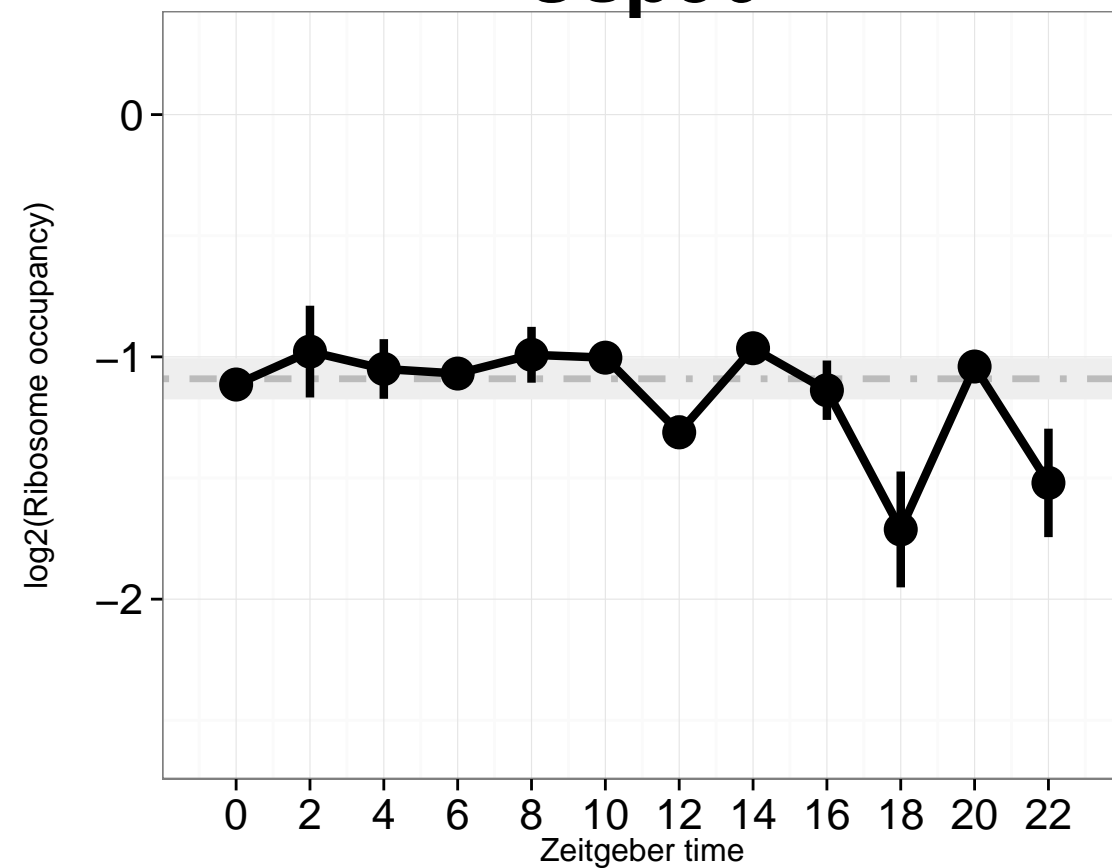

Supplement: SuppDataset_1.zip [file Usp36_set_D.pdf › Supplemental Dataset 1/D-mRNA_rhythm_translation_rhyth/Usp36_set_D.pdf]

# Usp11

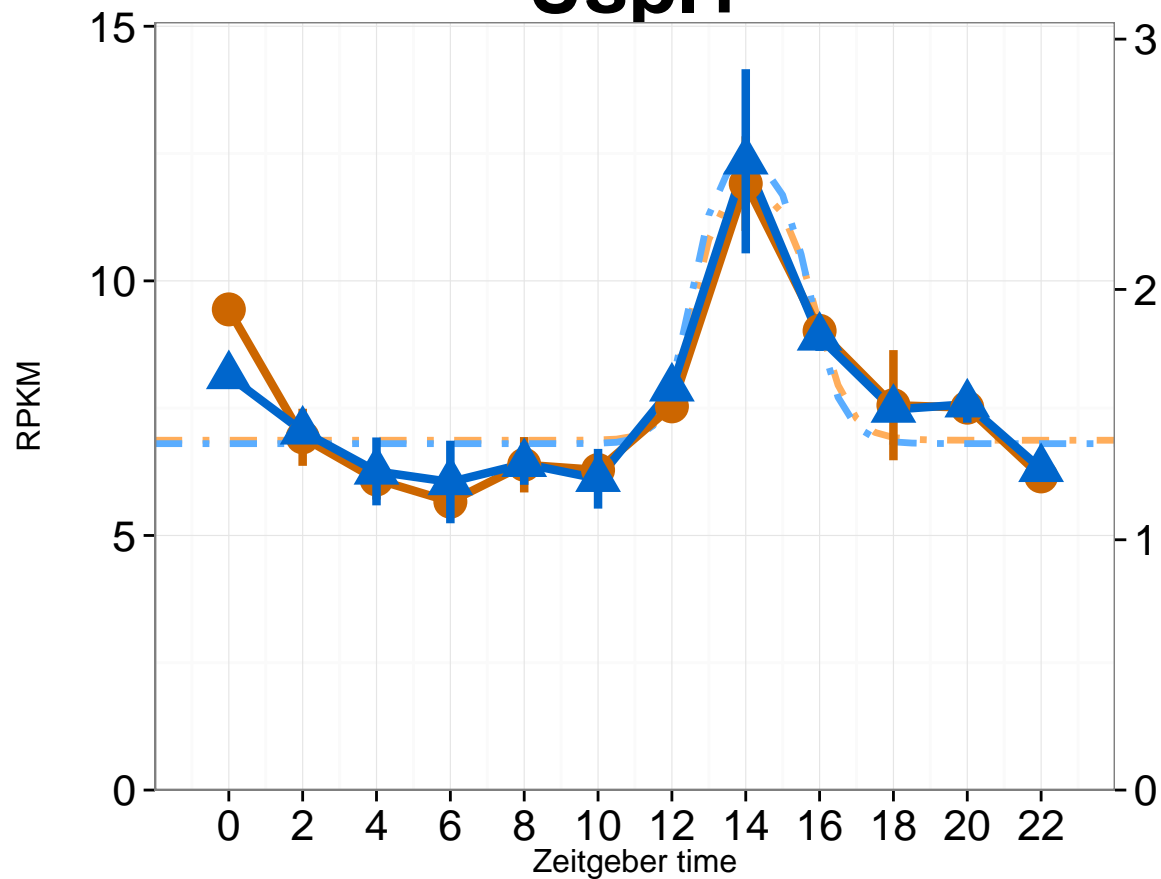

# Usp11

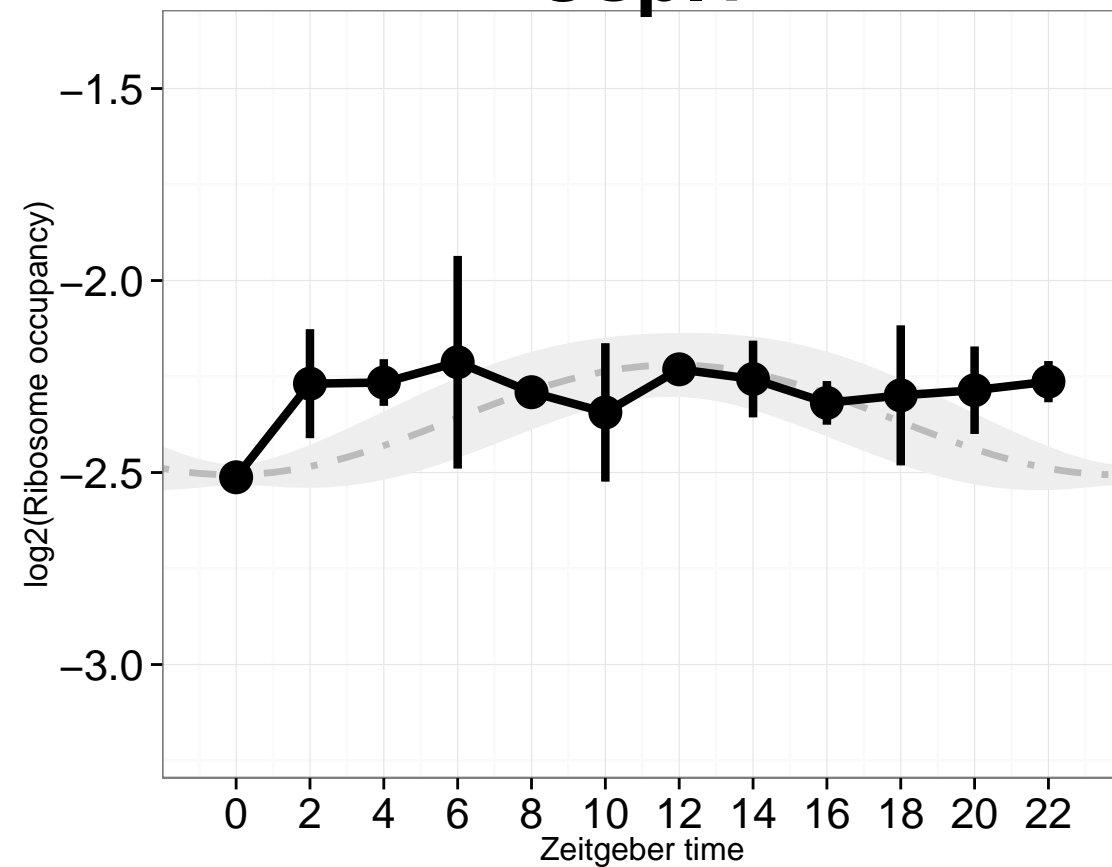

Supplement: SuppDataset_1.zip [file Uspl1_set_D.pdf › Supplemental Dataset 1/D-mRNA_rhythm_translation_rhyth/Uspl1_set_D.pdf]

# Utp14b

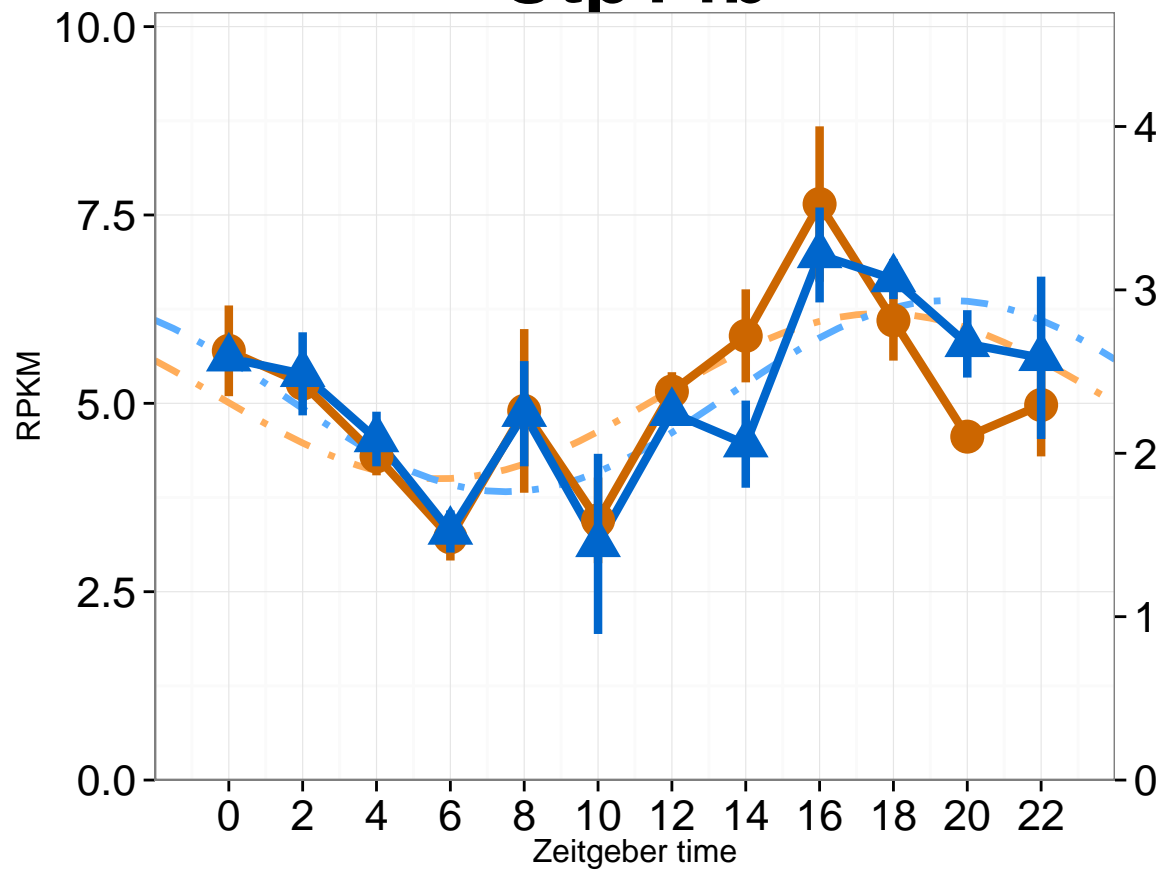

# Utp14b

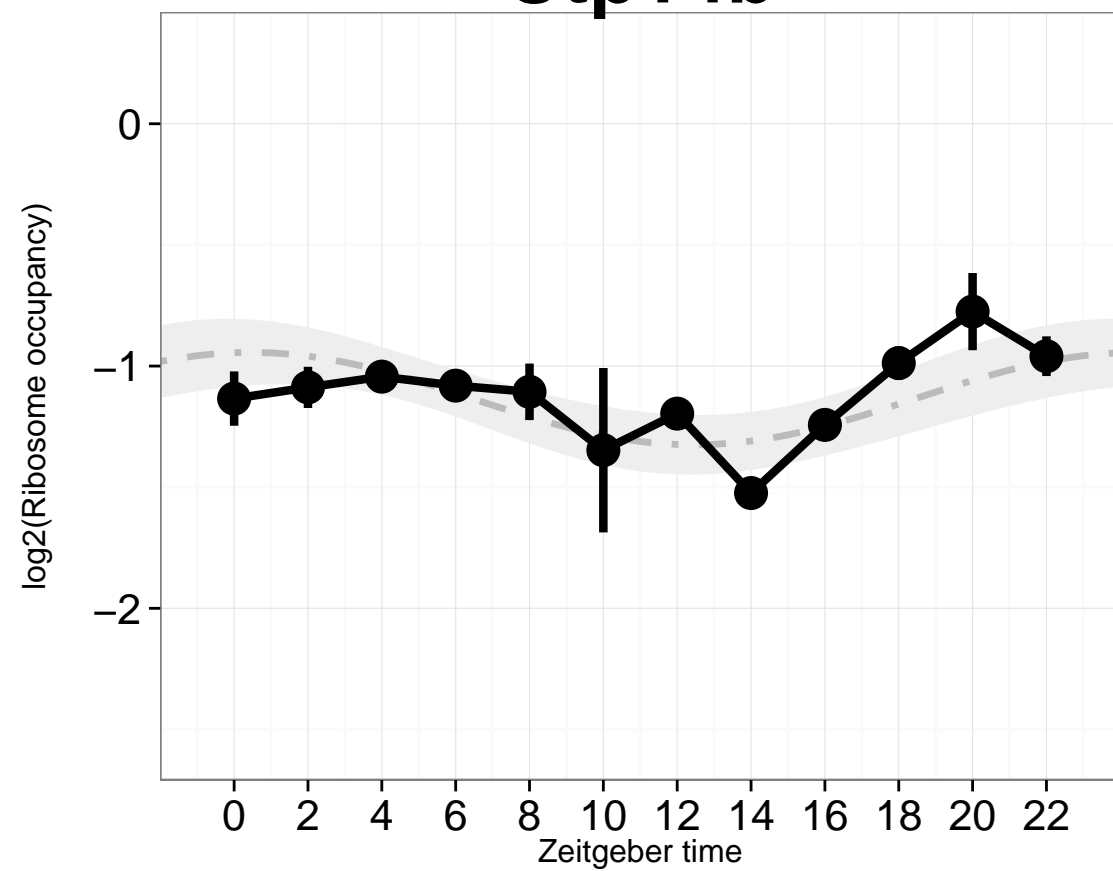

Supplement: SuppDataset_1.zip [file Utp14b_set_D.pdf › Supplemental Dataset 1/D-mRNA_rhythm_translation_rhyth/Utp14b_set_D.pdf]

# Uxs1

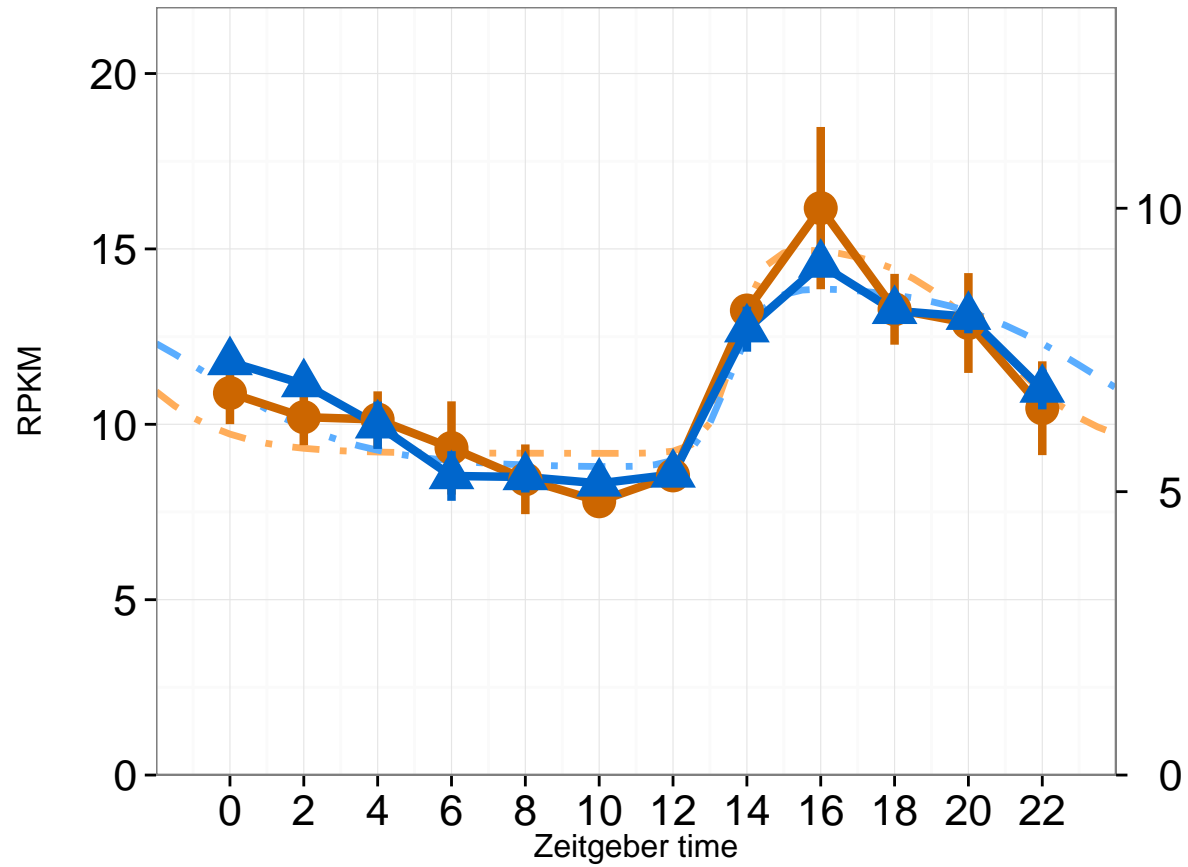

# Uxs1

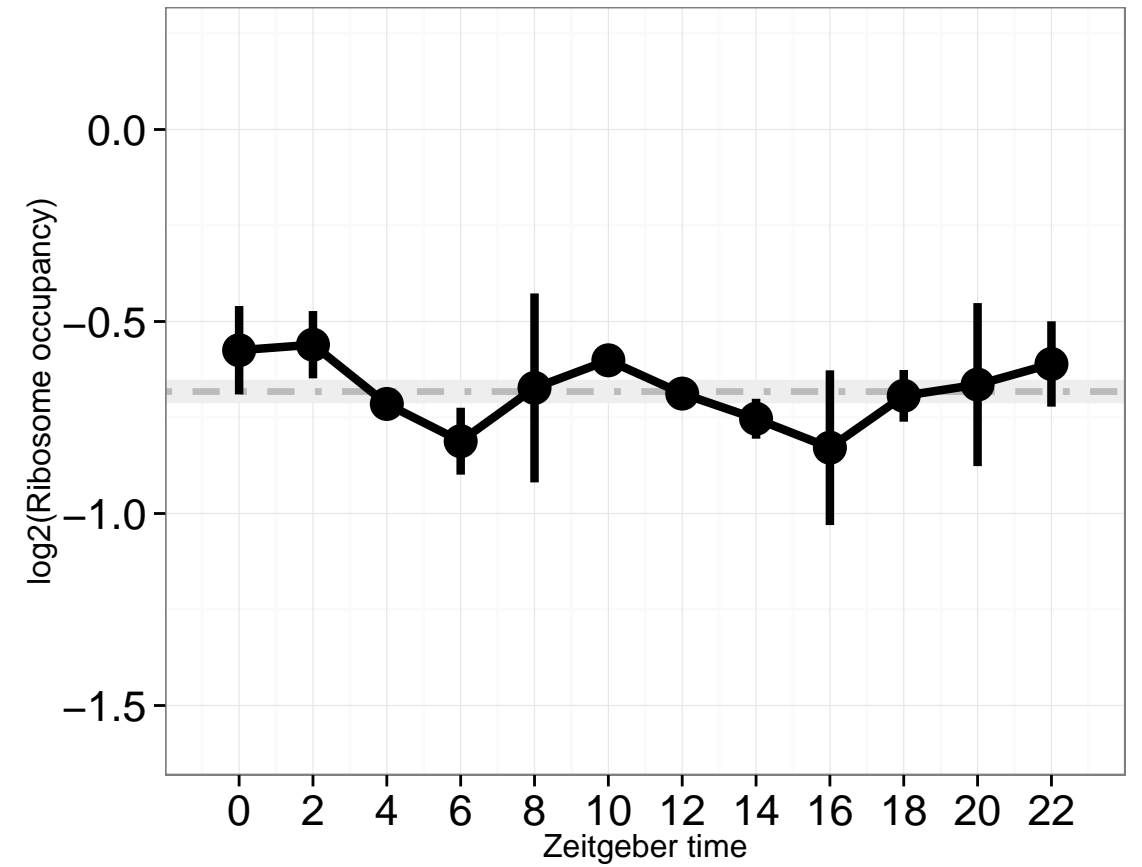

Supplement: SuppDataset_1.zip [file Uxs1_set_D.pdf › Supplemental Dataset 1/D-mRNA_rhythm_translation_rhyth/Uxs1_set_D.pdf]

## Vac14

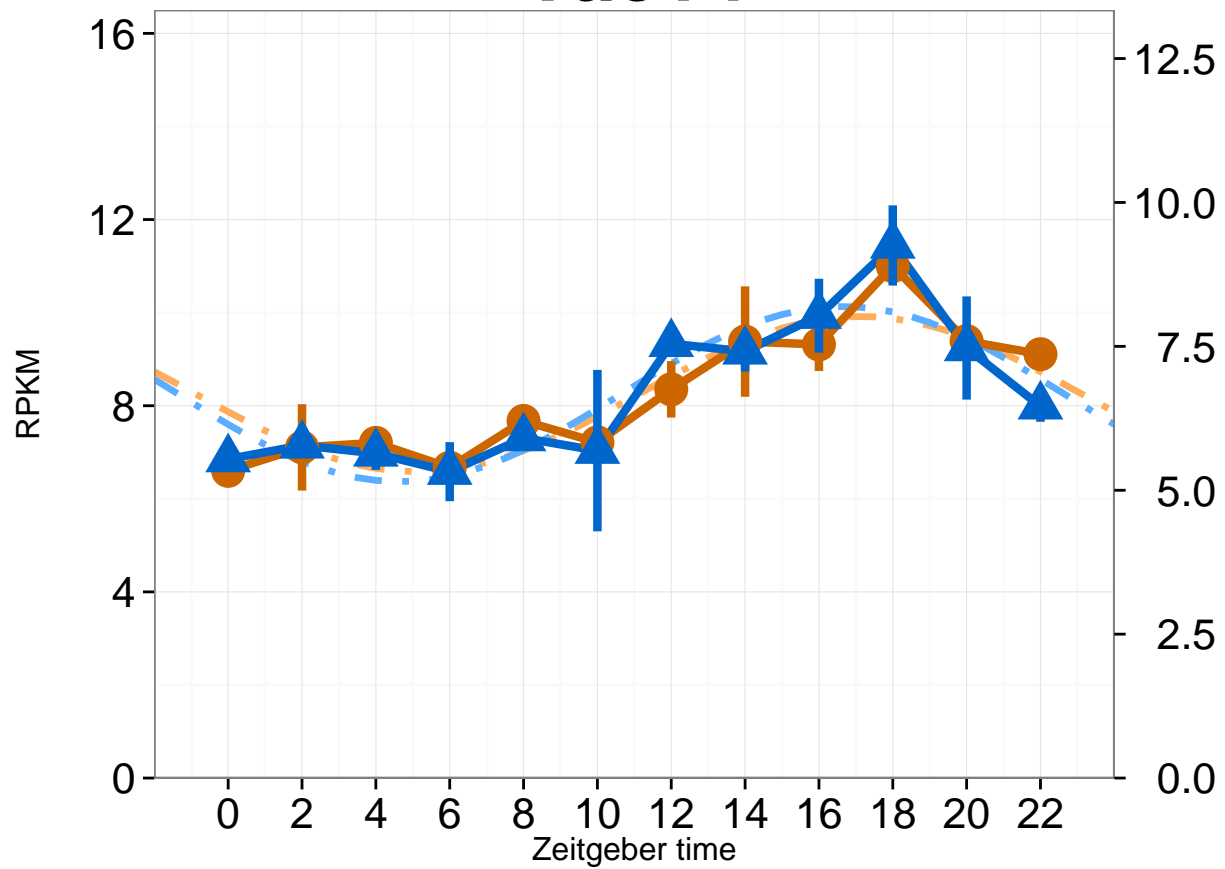

## Vac14

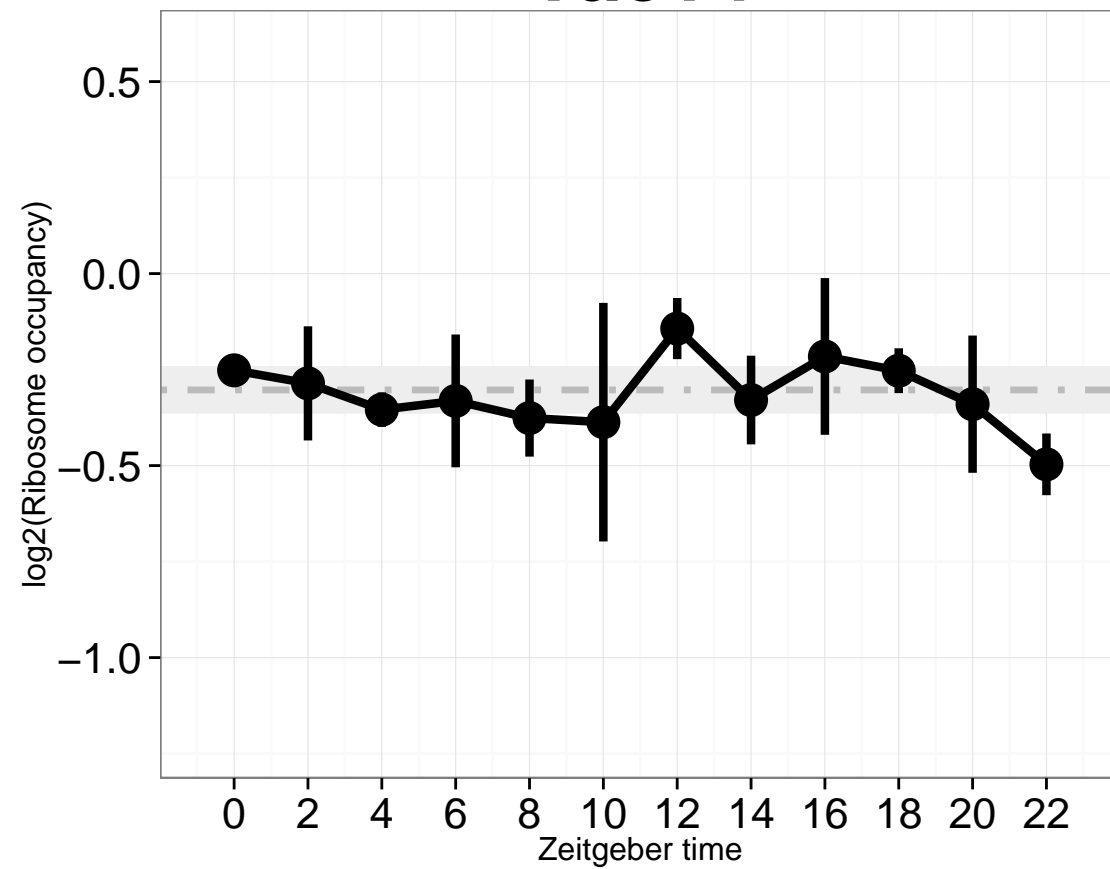

Supplement: SuppDataset_1.zip [file Vac14_set_D.pdf › Supplemental Dataset 1/D-mRNA_rhythm_translation_rhyth/Vac14_set_D.pdf]

## Vcam1

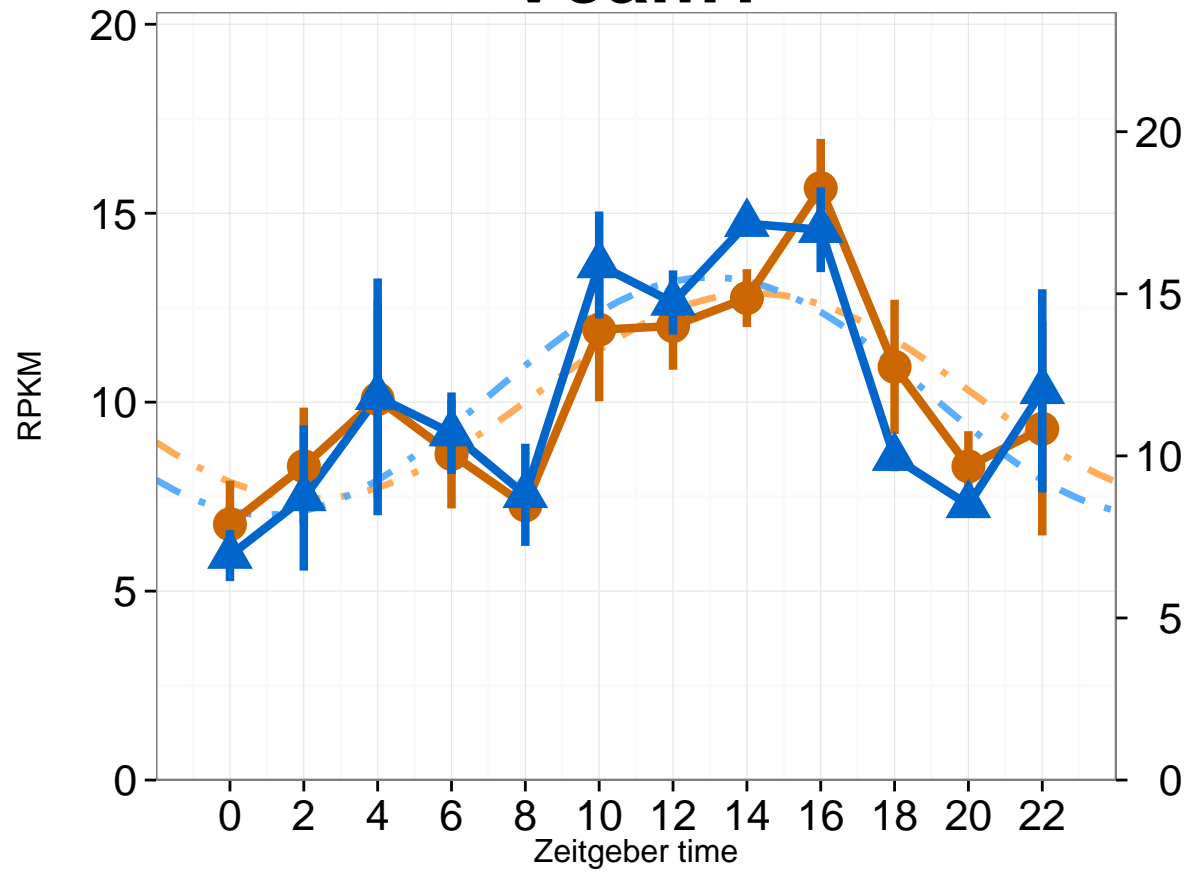

## Vcam1

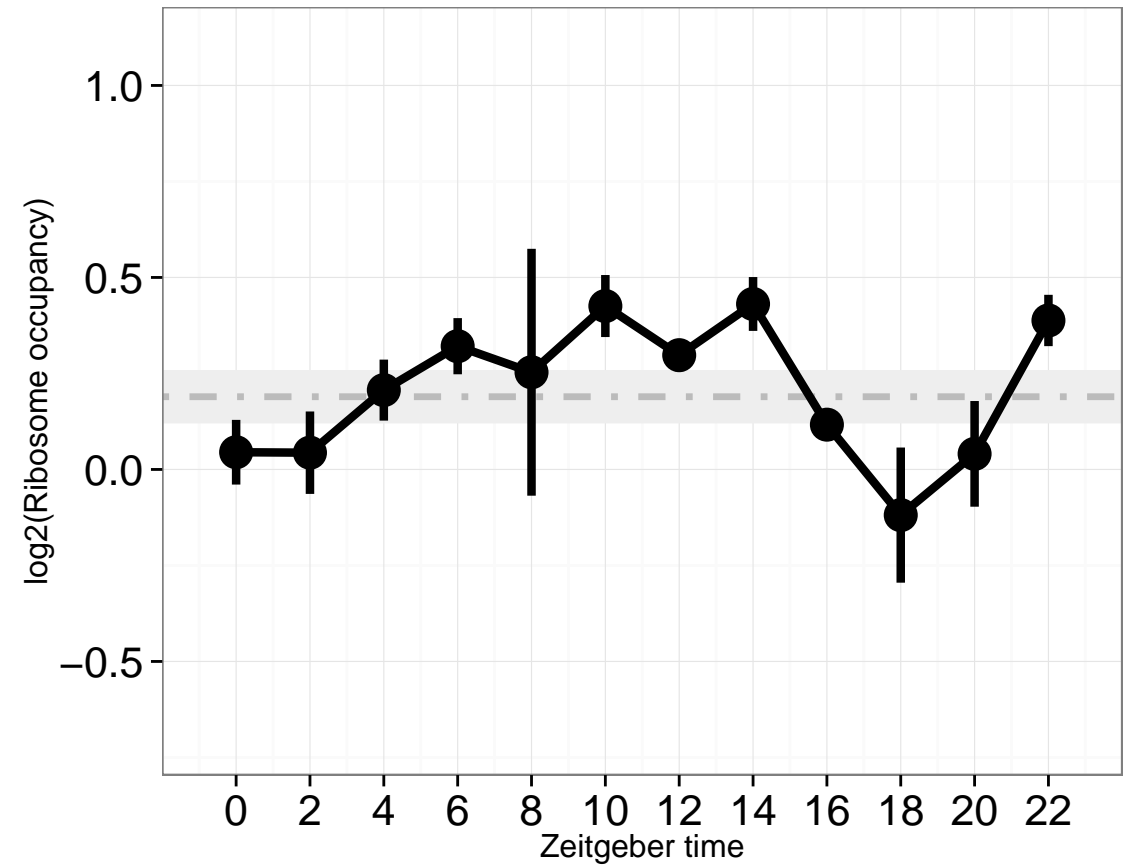

Supplement: SuppDataset_1.zip [file Vcam1_set_D.pdf › Supplemental Dataset 1/D-mRNA_rhythm_translation_rhyth/Vcam1_set_D.pdf]

# Vps13a

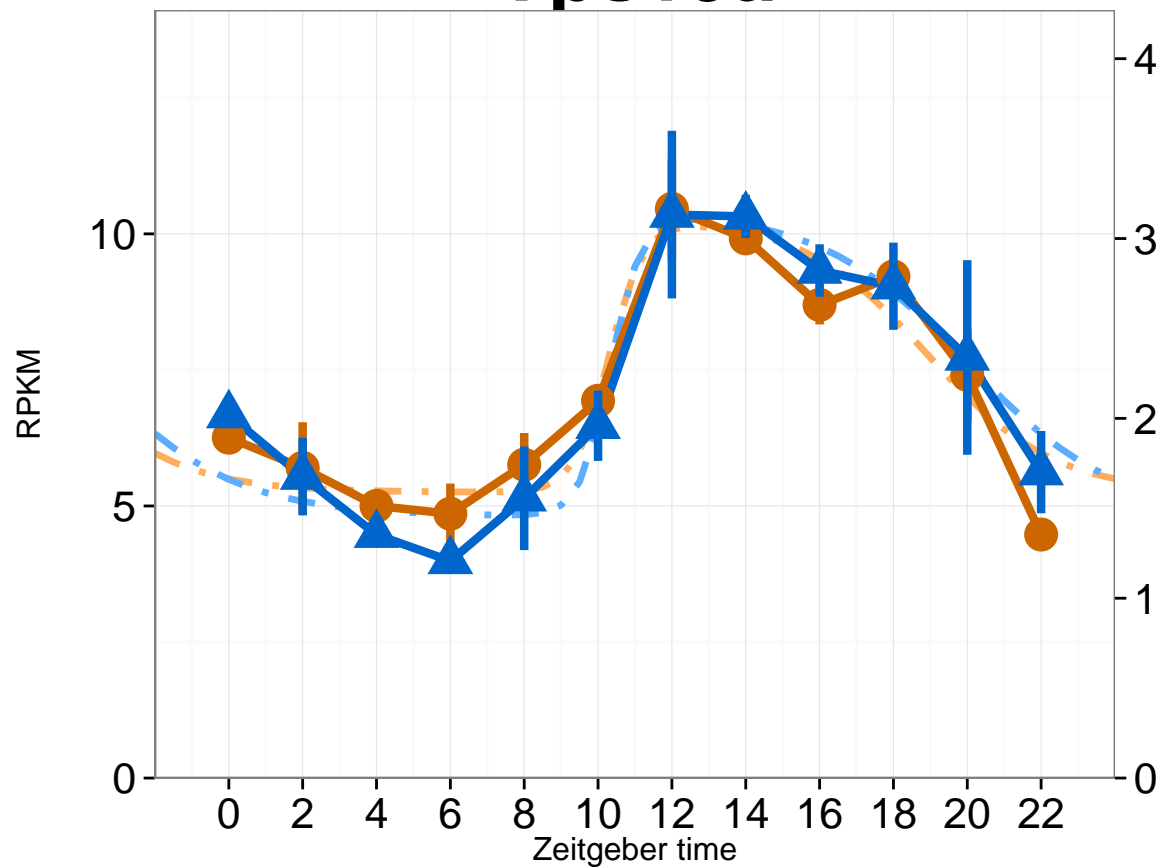

# Vps13a

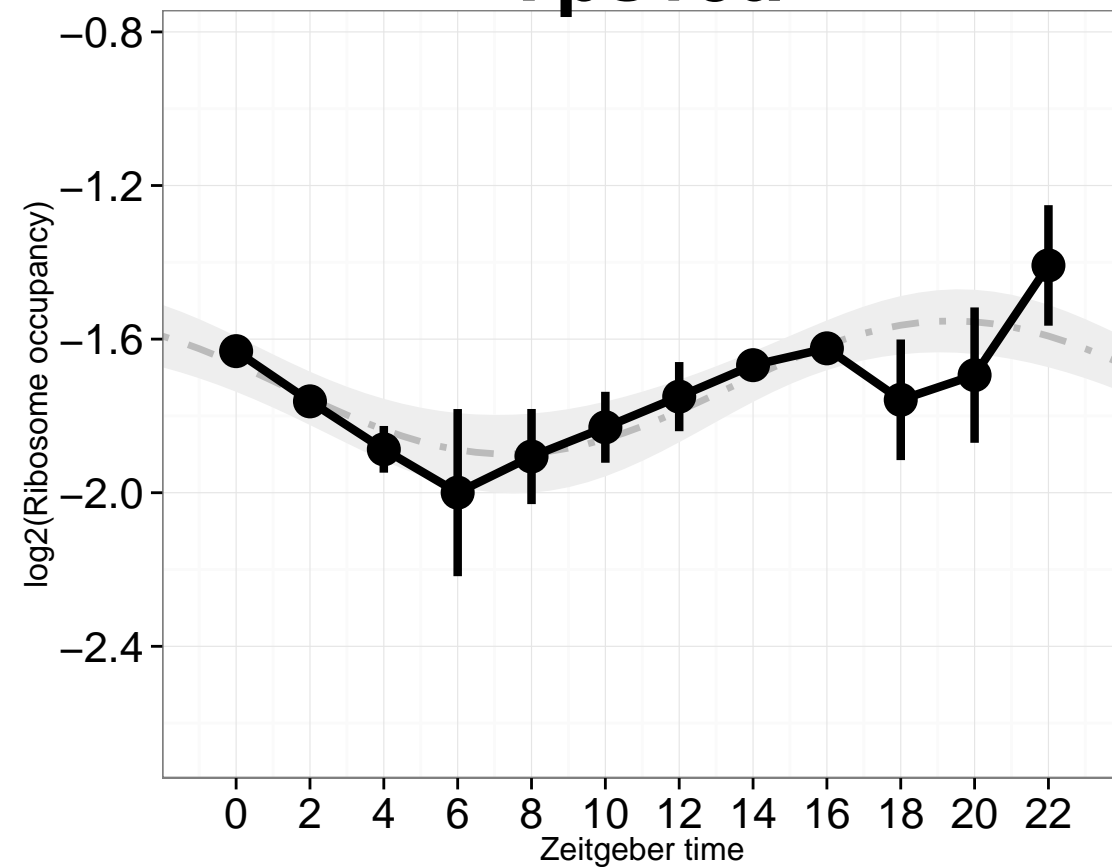

Supplement: SuppDataset_1.zip [file Vps13a_set_D.pdf › Supplemental Dataset 1/D-mRNA_rhythm_translation_rhyth/Vps13a_set_D.pdf]

# Vps37b

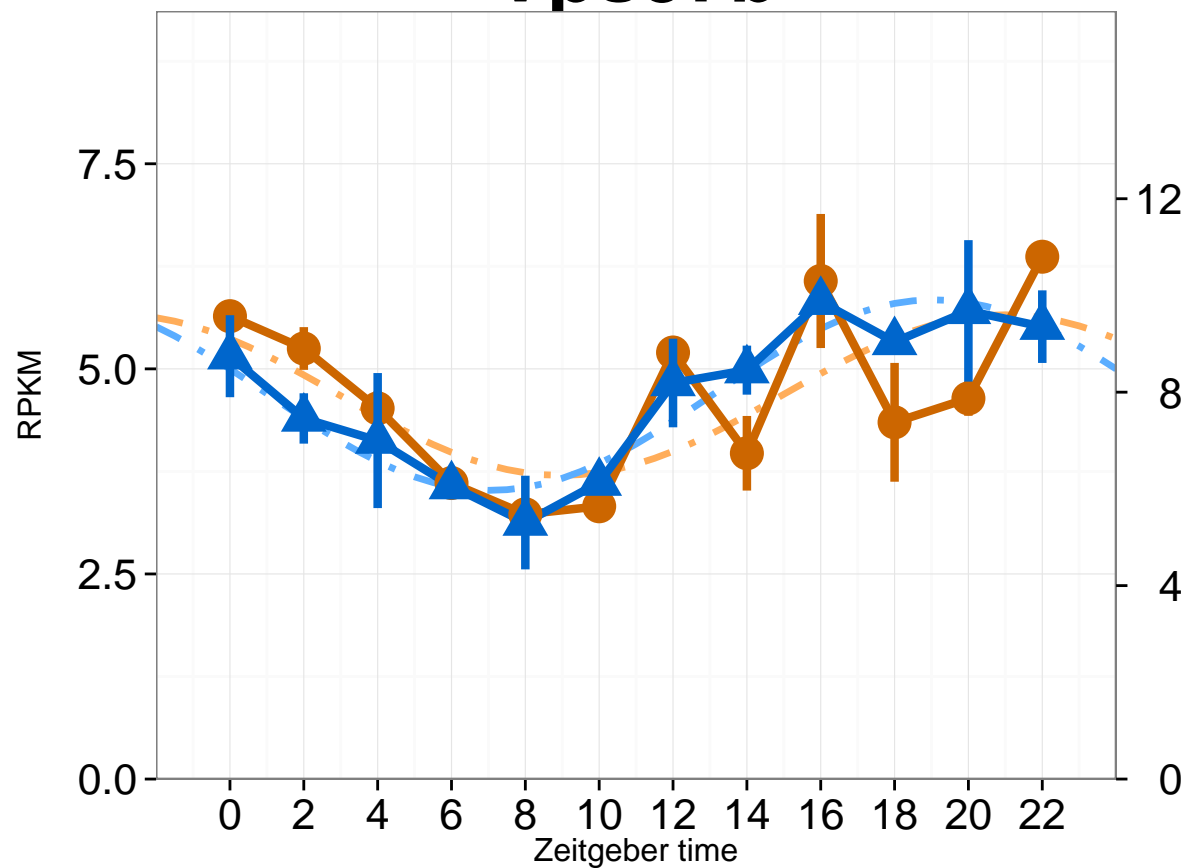

# Vps37b

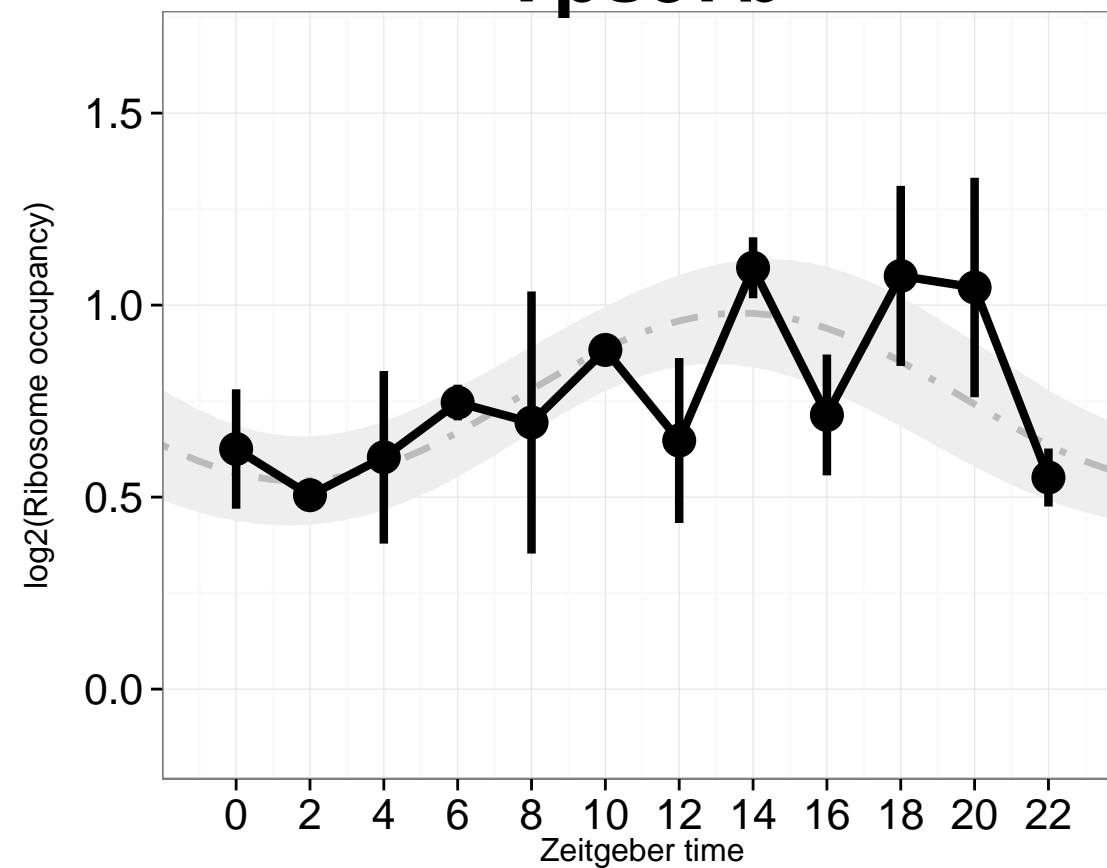

Supplement: SuppDataset_1.zip [file Vps37b_set_D.pdf › Supplemental Dataset 1/D-mRNA_rhythm_translation_rhyth/Vps37b_set_D.pdf]

## Wasf1

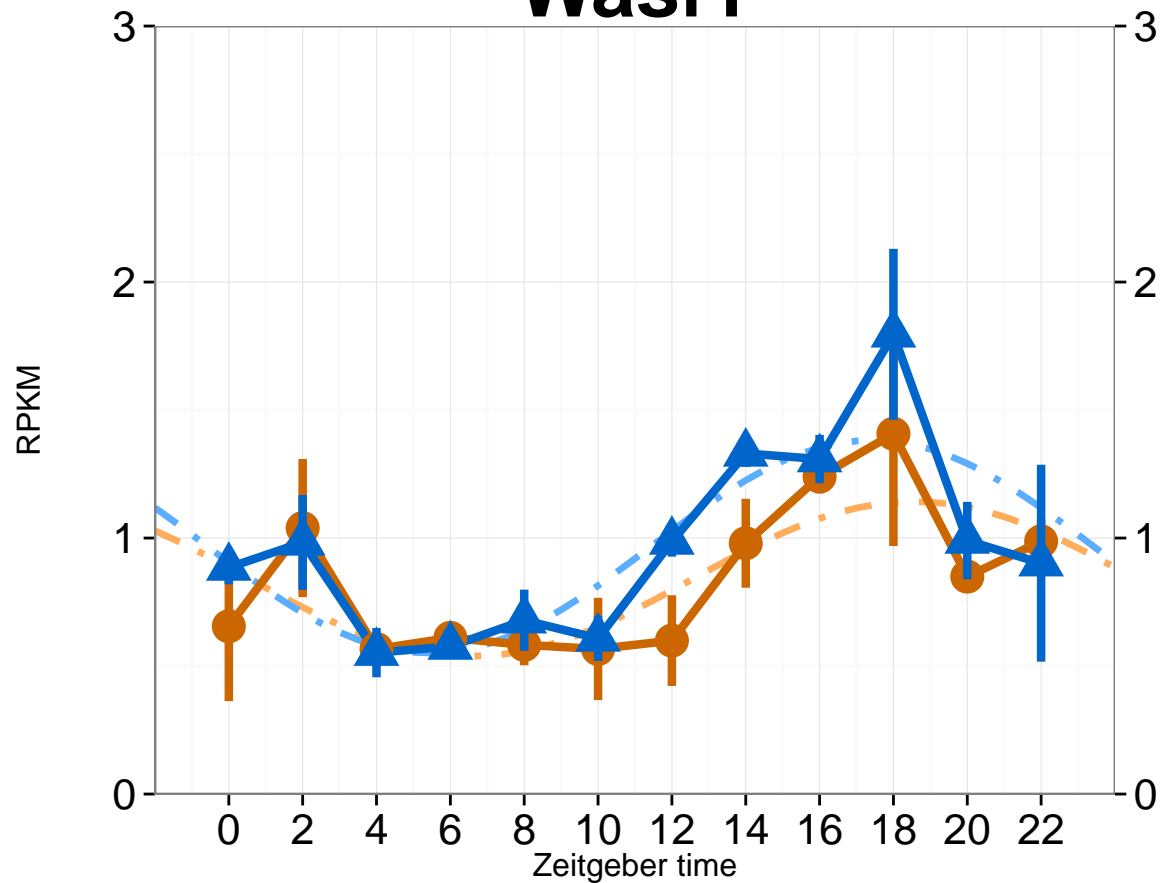

## Wasf1

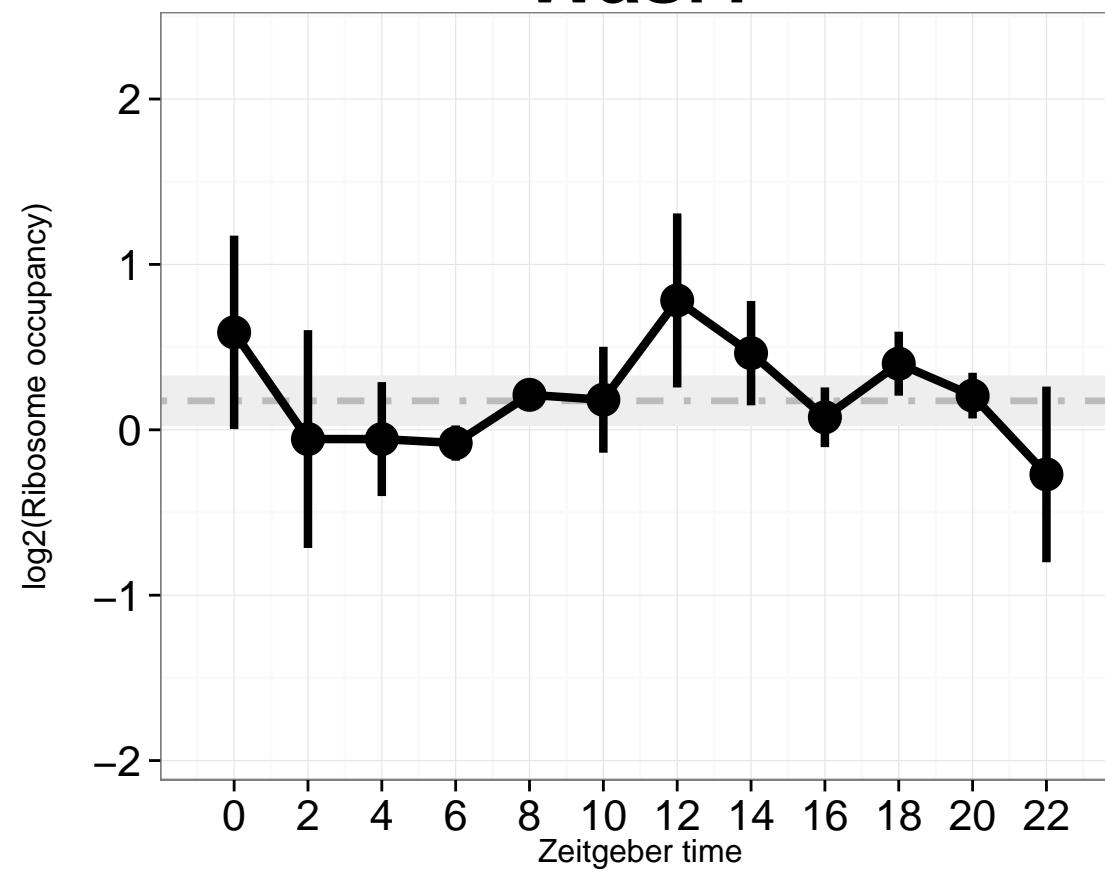

Supplement: SuppDataset_1.zip [file Wasf1_set_D.pdf › Supplemental Dataset 1/D-mRNA_rhythm_translation_rhyth/Wasf1_set_D.pdf]

## Wash

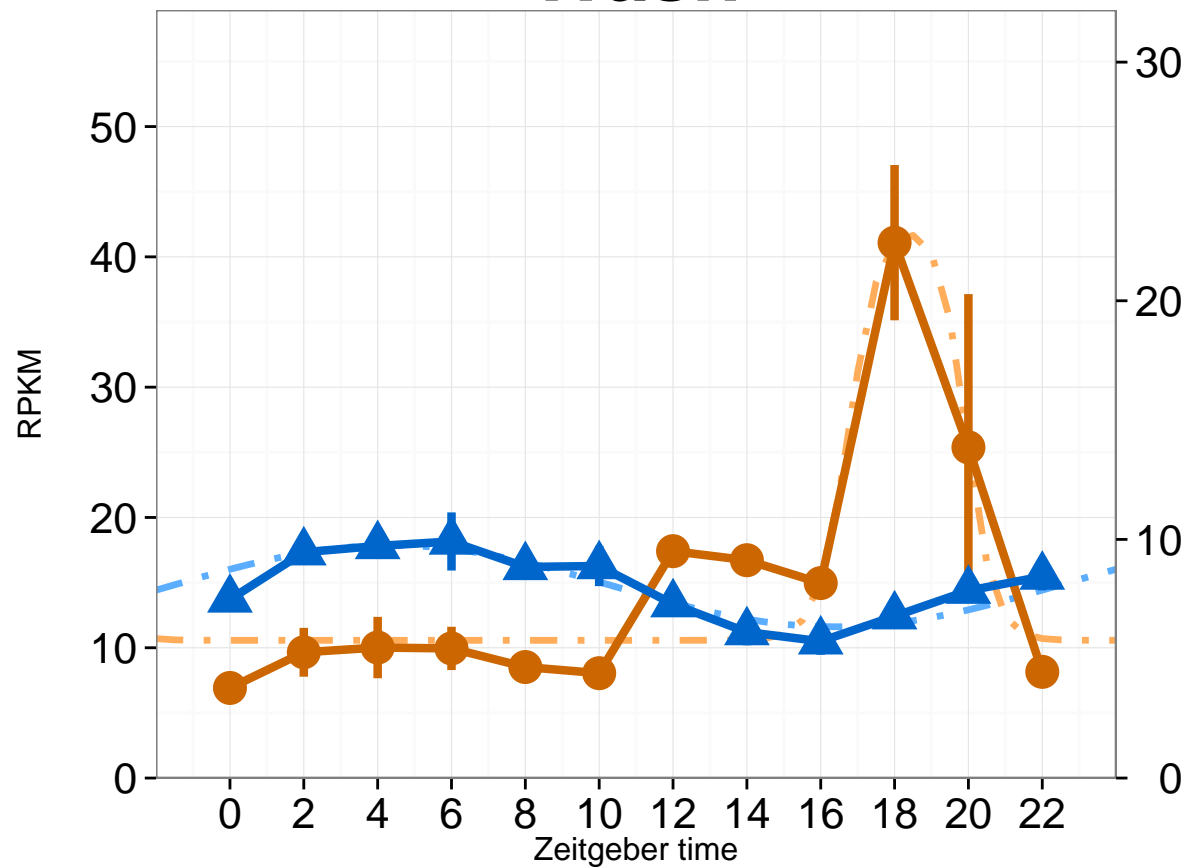

## Wash

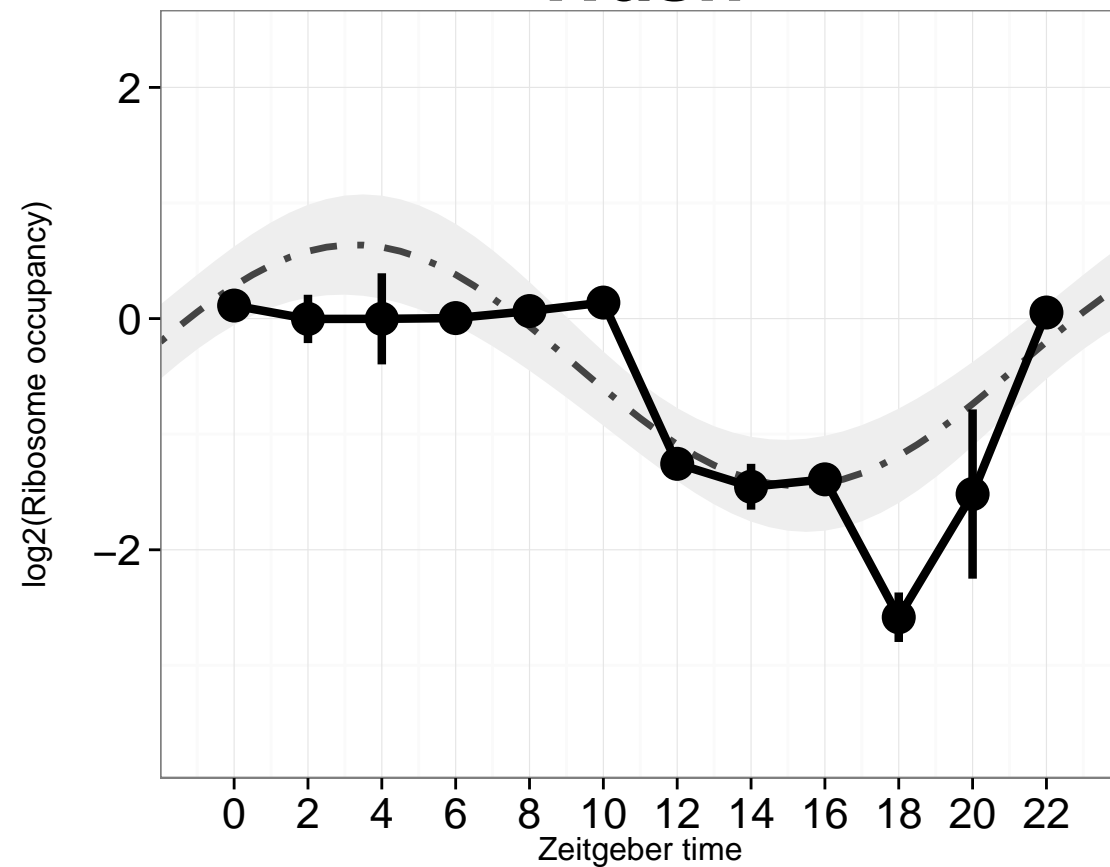

Supplement: SuppDataset_1.zip [file Wash_set_D.pdf › Supplemental Dataset 1/D-mRNA_rhythm_translation_rhyth/Wash_set_D.pdf]

# Wbscr27

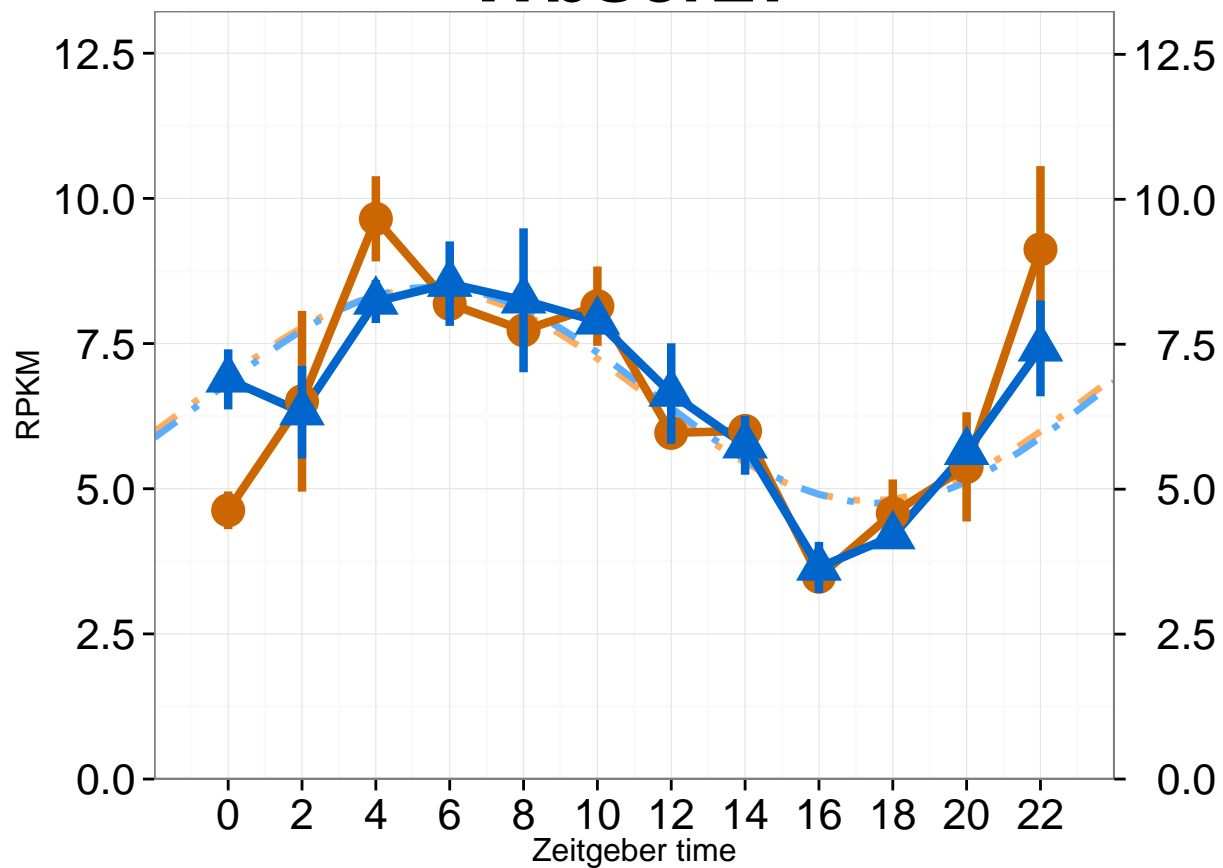

# Wbscr27

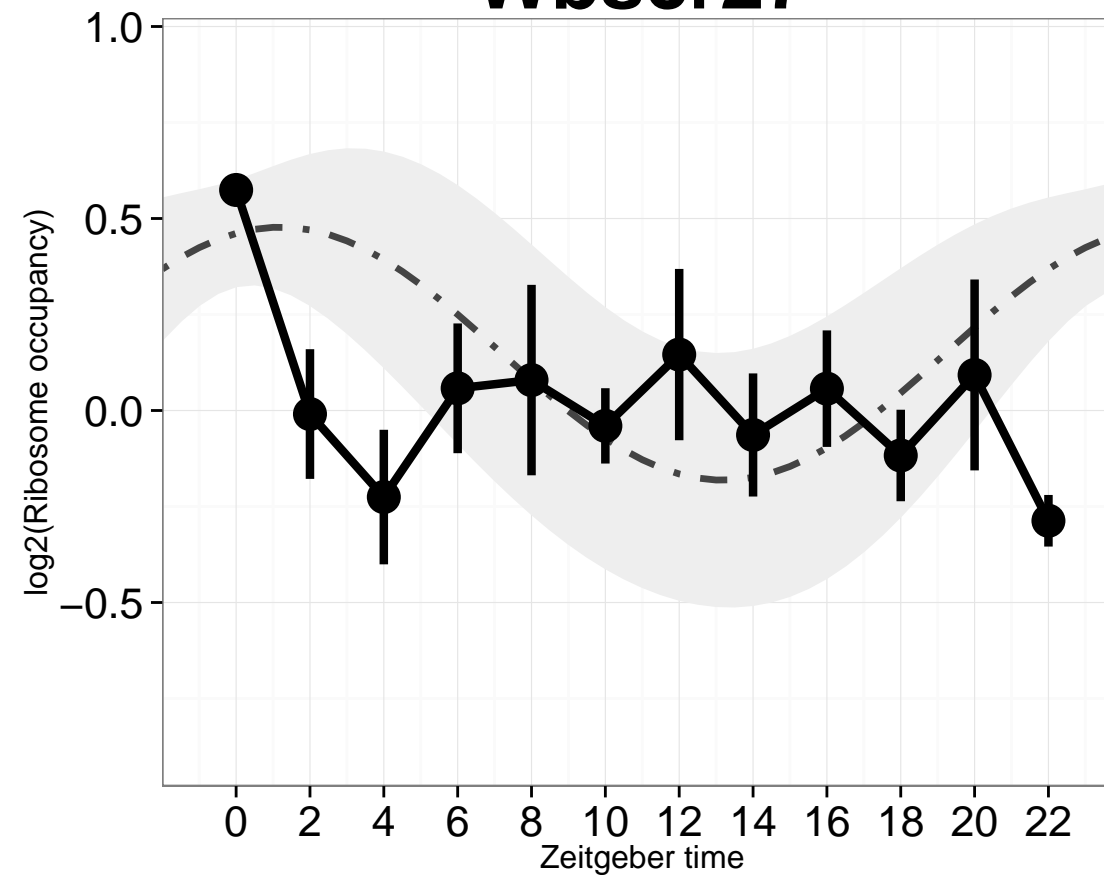

Supplement: SuppDataset_1.zip [file Wbscr27_set_D.pdf › Supplemental Dataset 1/D-mRNA_rhythm_translation_rhyth/Wbscr27_set_D.pdf]

# Wdr19

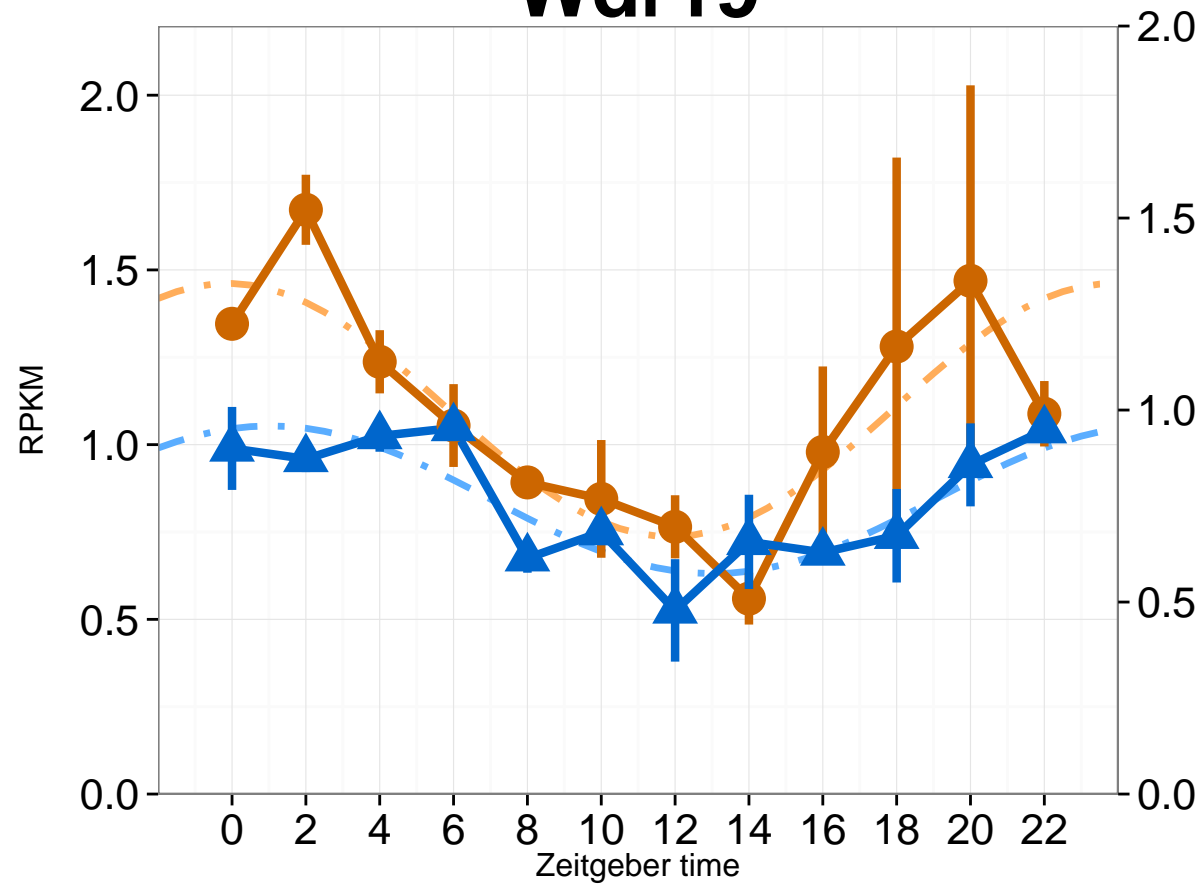

# Wdr19

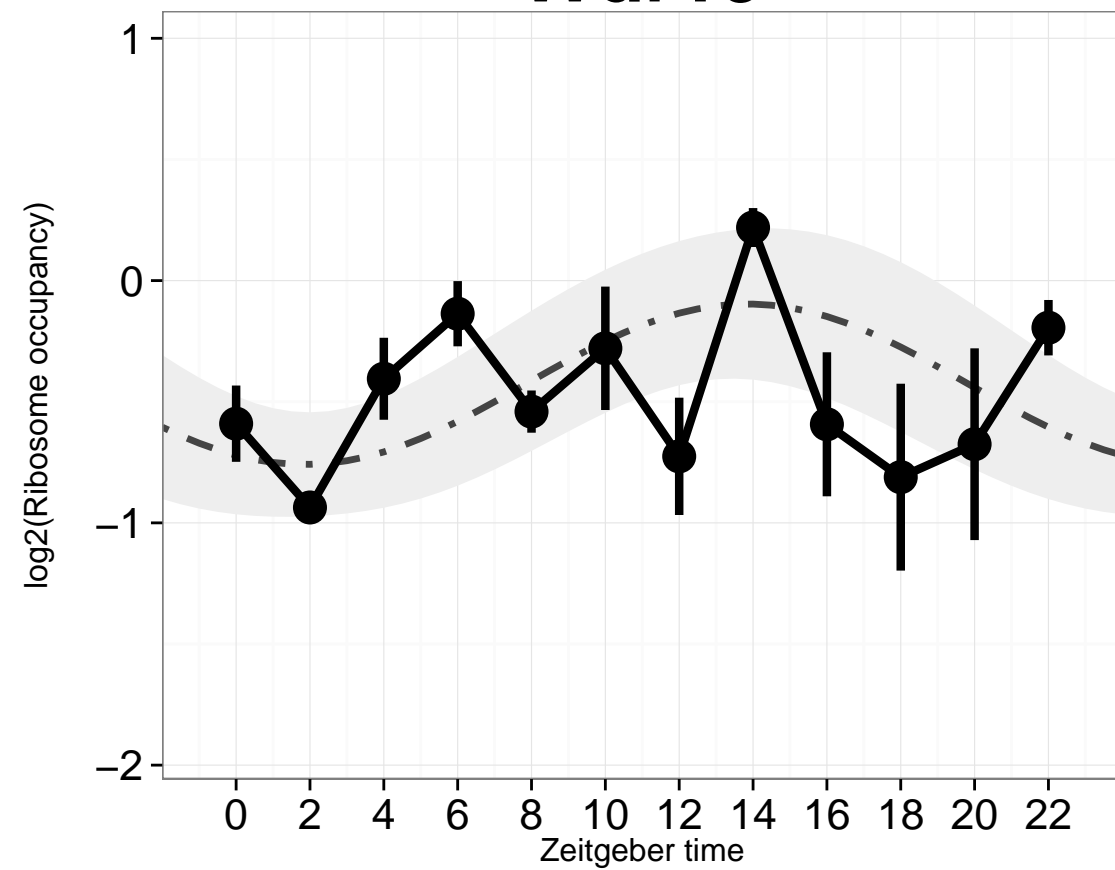

Supplement: SuppDataset_1.zip [file Wdr19_set_D.pdf › Supplemental Dataset 1/D-mRNA_rhythm_translation_rhyth/Wdr19_set_D.pdf]

# Wdr43

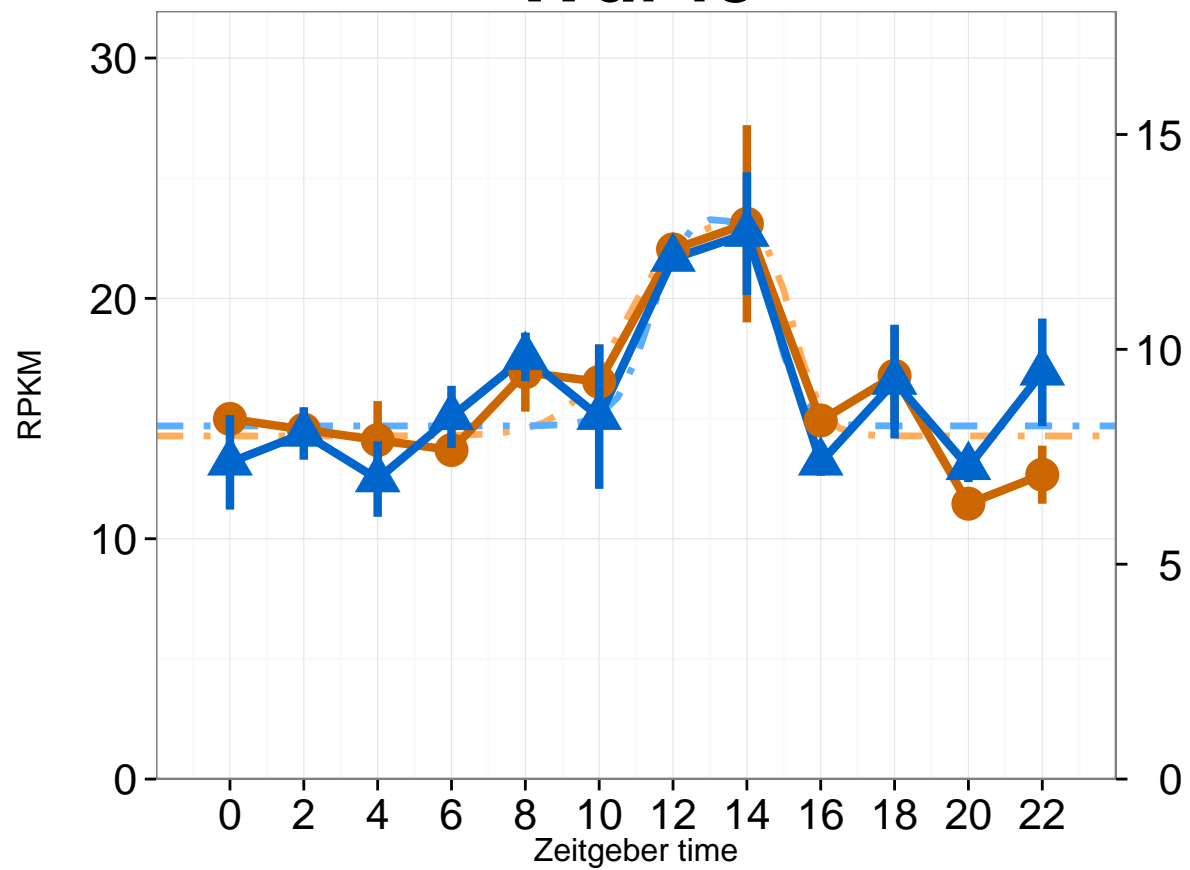

# Wdr43

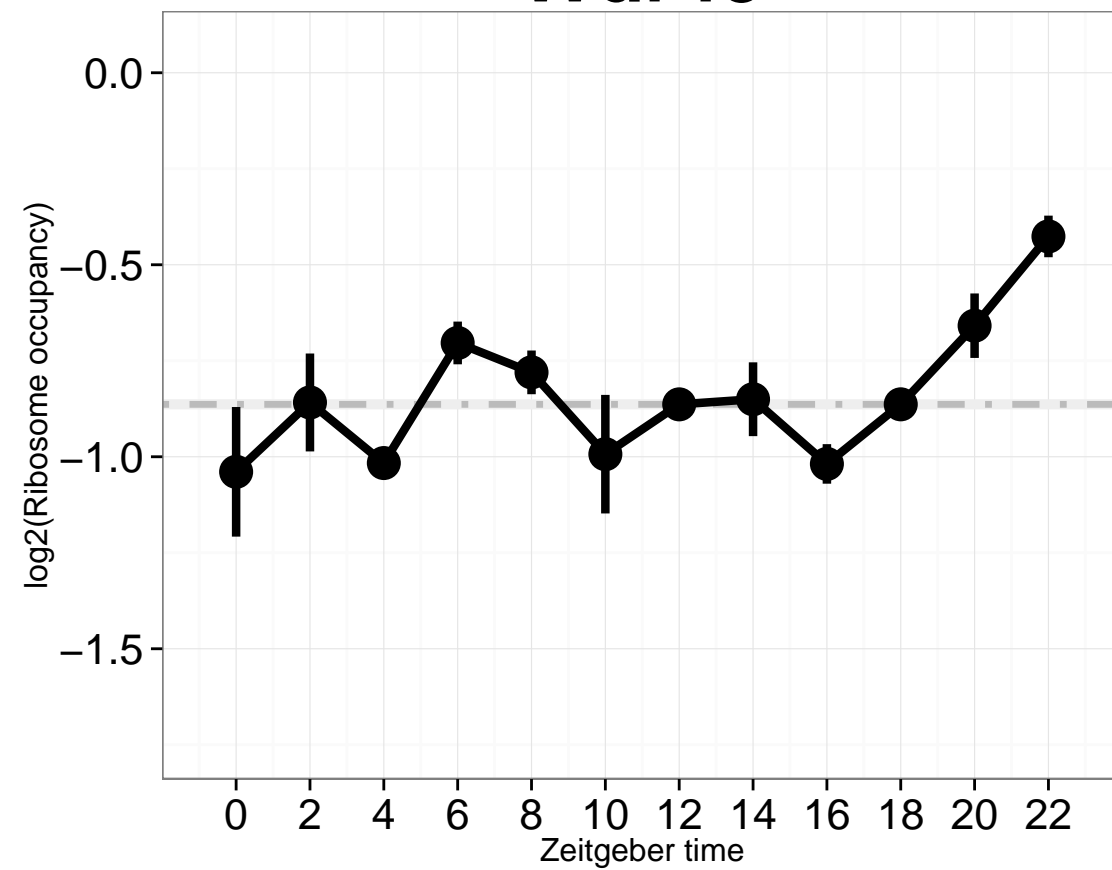

Supplement: SuppDataset_1.zip [file Wdr43_set_D.pdf › Supplemental Dataset 1/D-mRNA_rhythm_translation_rhyth/Wdr43_set_D.pdf]

# Wdr6

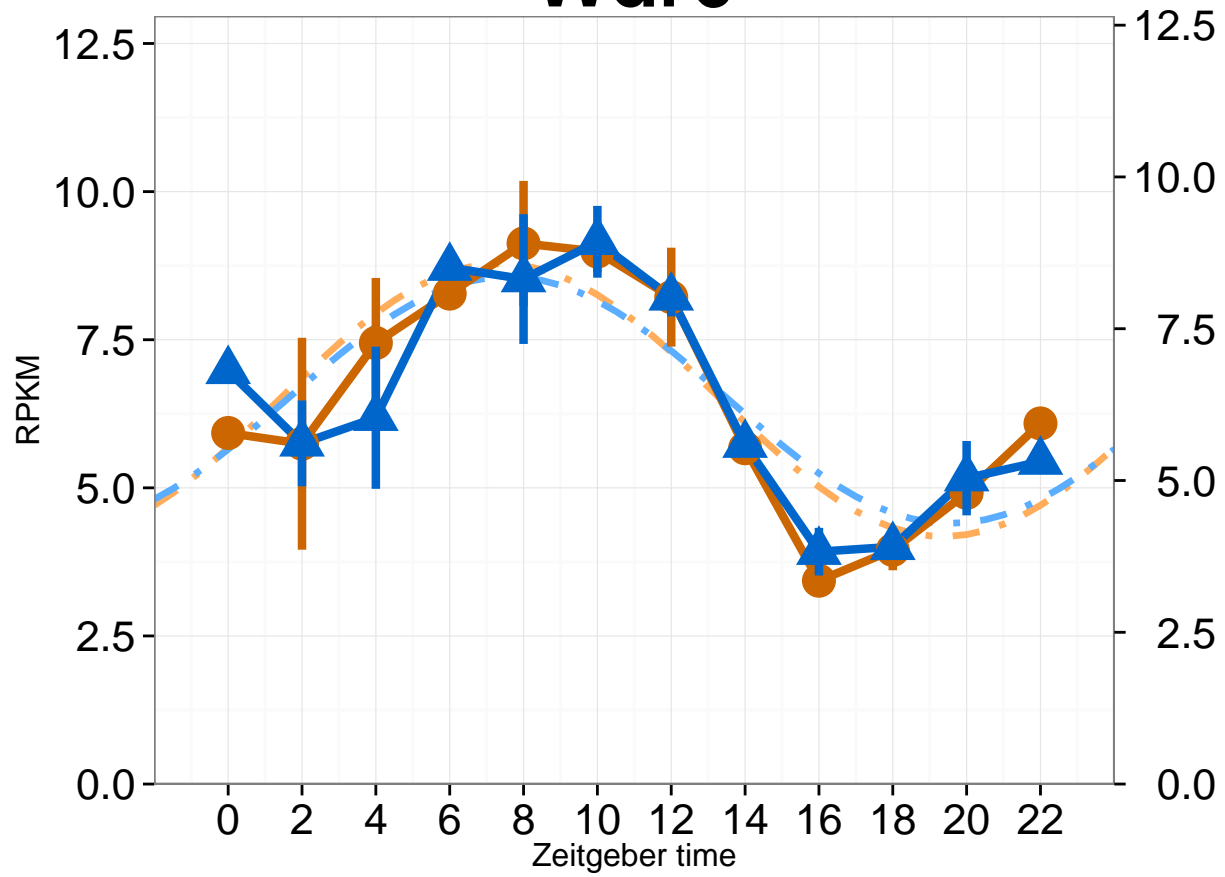

# Wdr6

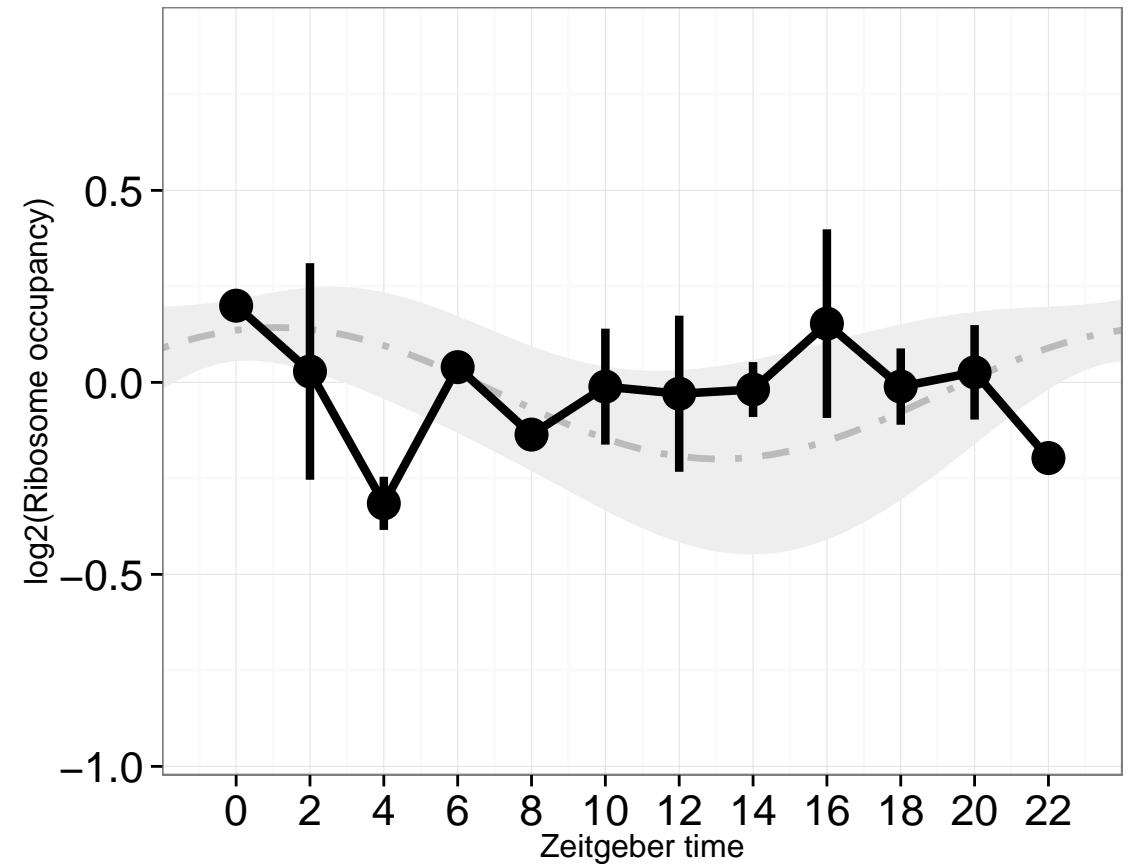

Supplement: SuppDataset_1.zip [file Wdr6_set_D.pdf › Supplemental Dataset 1/D-mRNA_rhythm_translation_rhyth/Wdr6_set_D.pdf]

## Wdr81

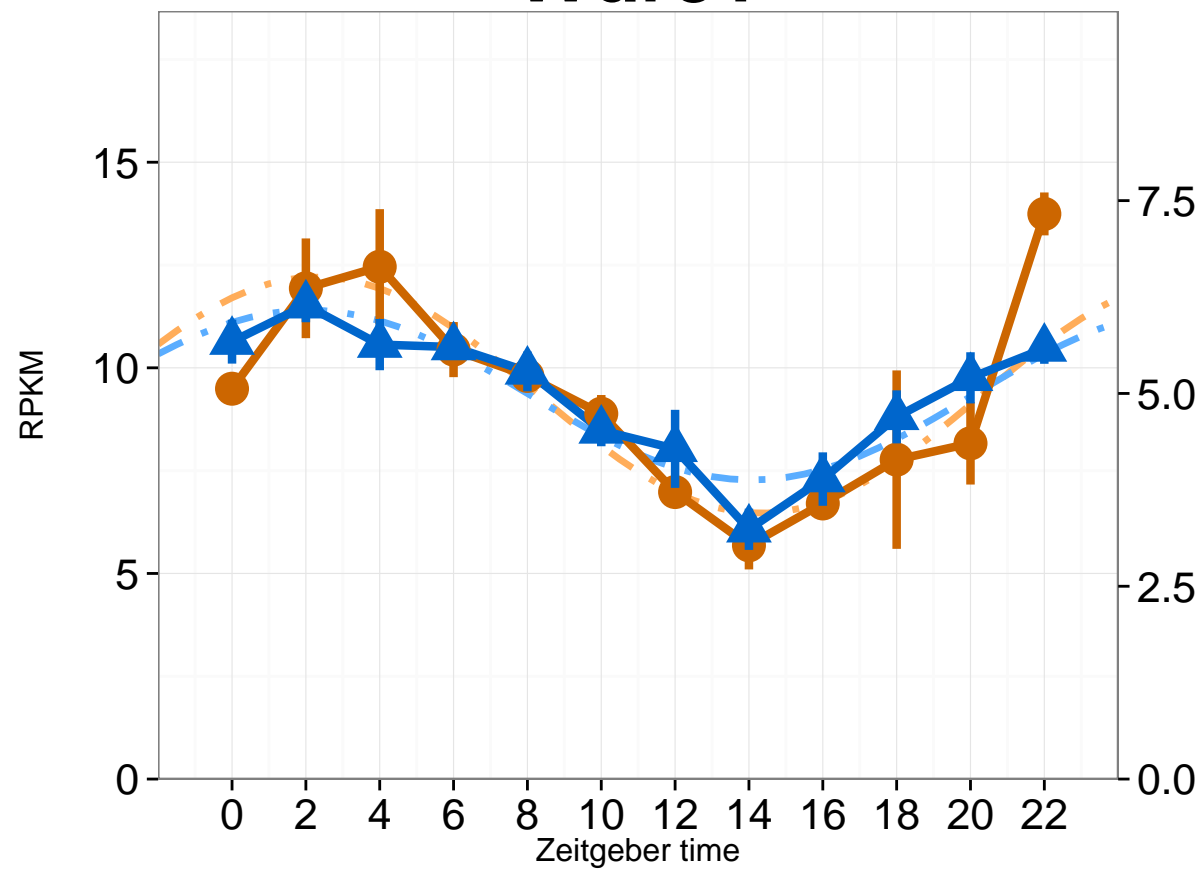

## Wdr81

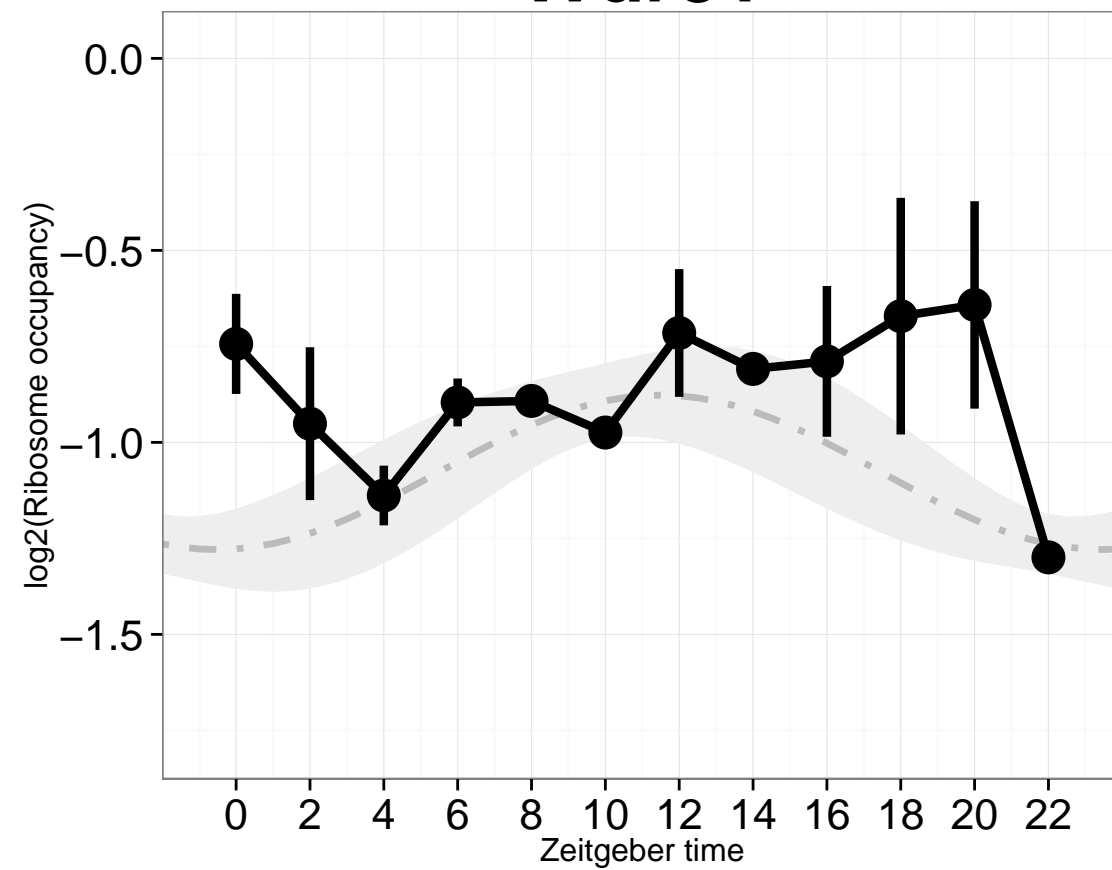

Supplement: SuppDataset_1.zip [file Wdr81_set_D.pdf › Supplemental Dataset 1/D-mRNA_rhythm_translation_rhyth/Wdr81_set_D.pdf]

# Wdr89

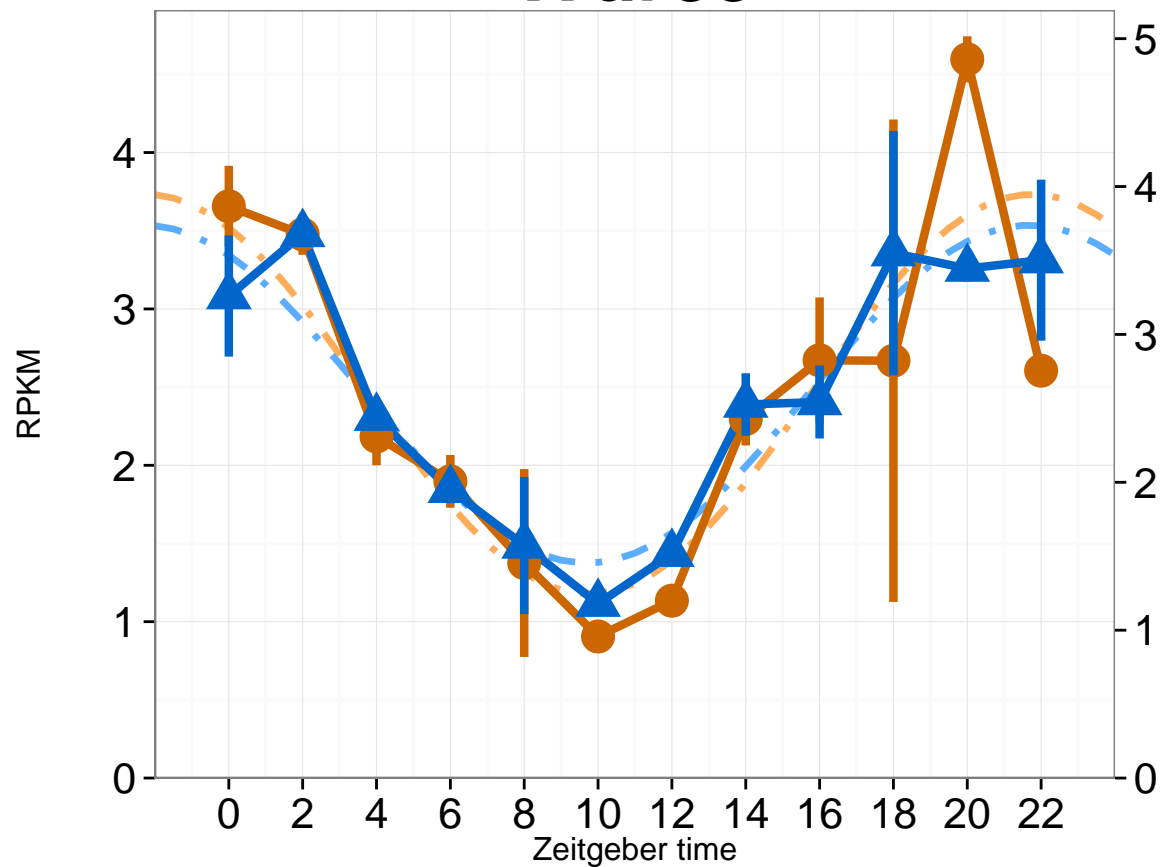

# Wdr89

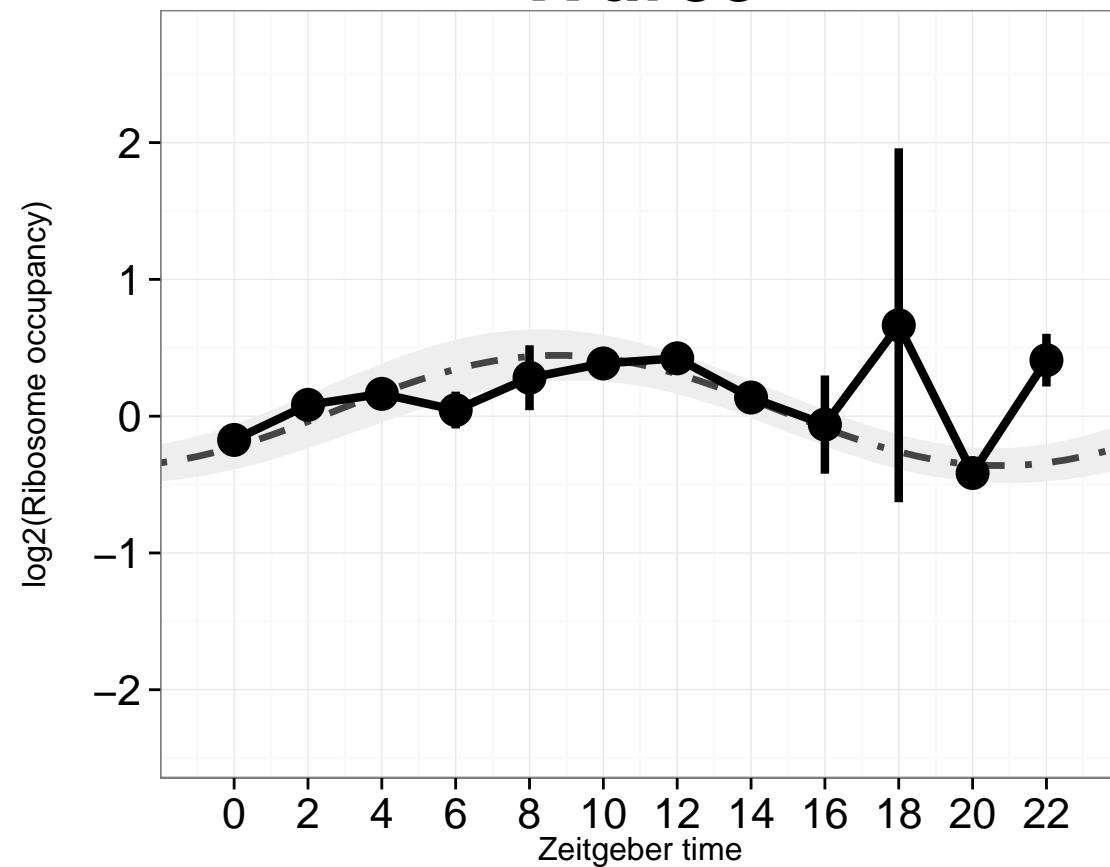

Supplement: SuppDataset_1.zip [file Wdr89_set_D.pdf › Supplemental Dataset 1/D-mRNA_rhythm_translation_rhyth/Wdr89_set_D.pdf]

## Wdr91

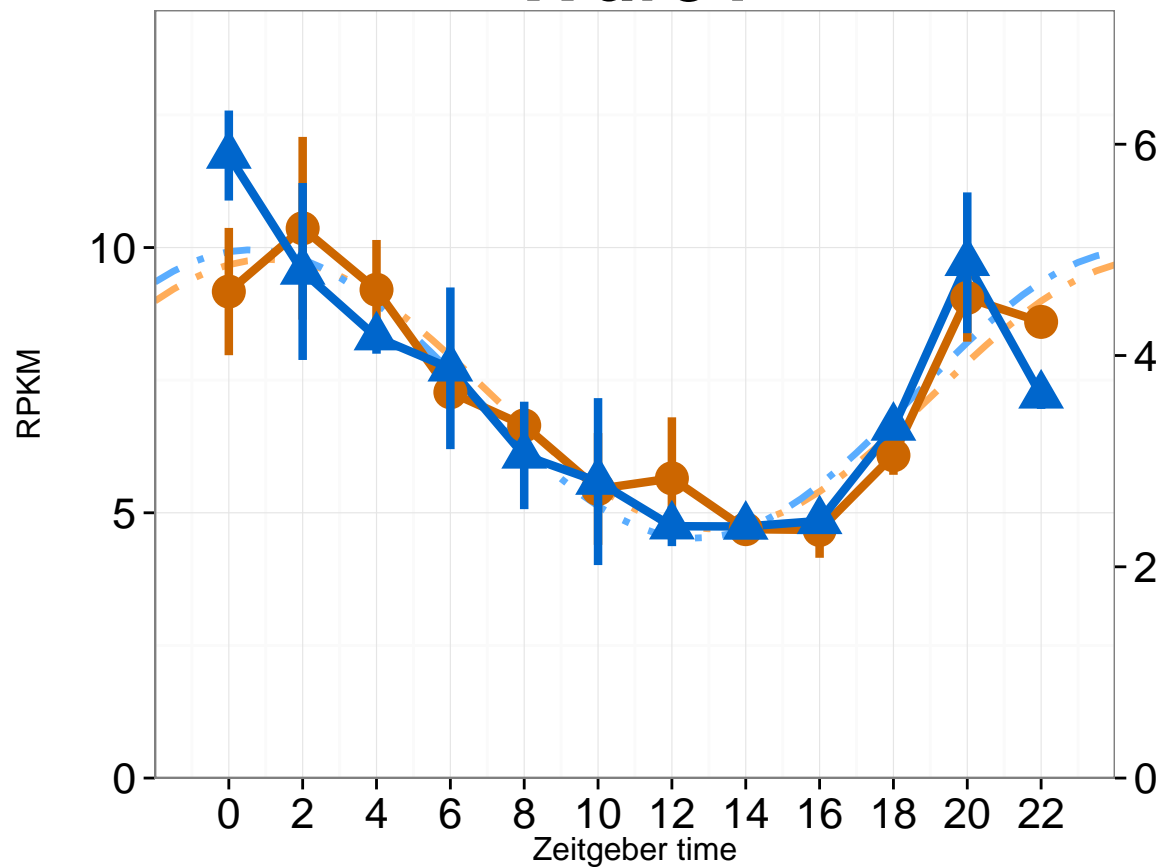

## Wdr91

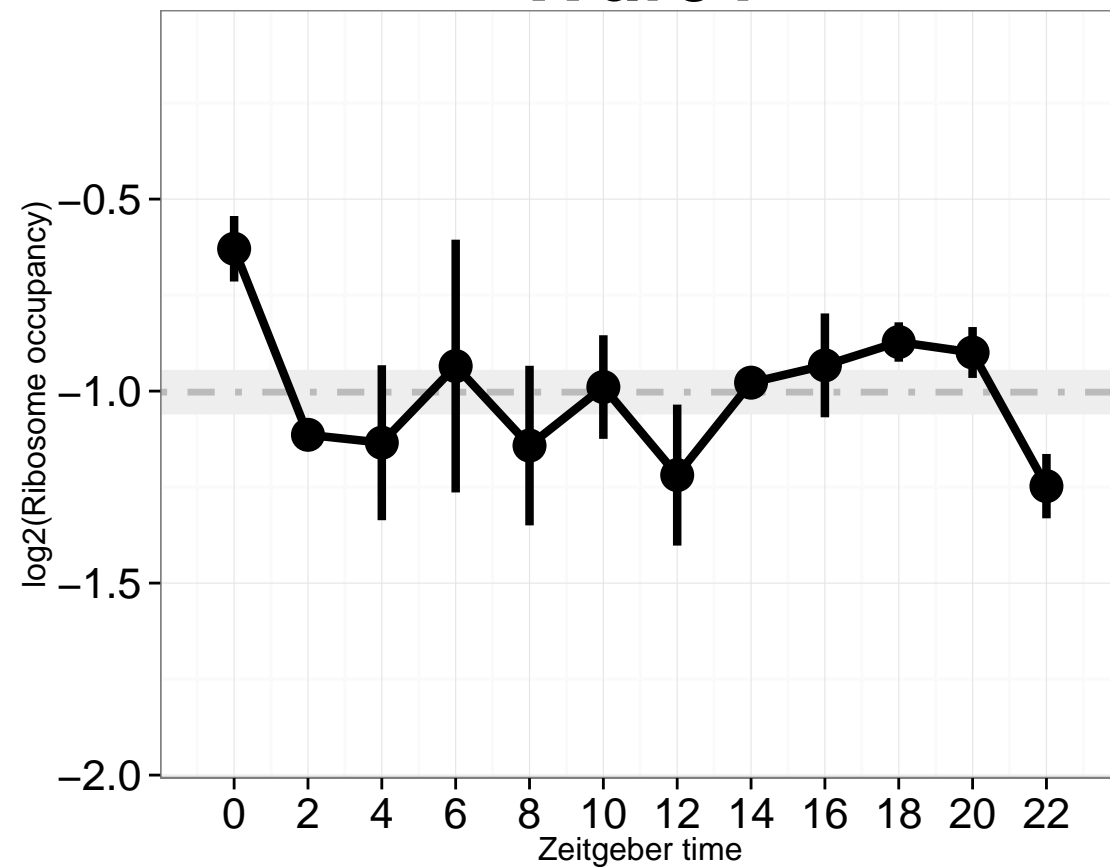

Supplement: SuppDataset_1.zip [file Wdr91_set_D.pdf › Supplemental Dataset 1/D-mRNA_rhythm_translation_rhyth/Wdr91_set_D.pdf]

## Wee1

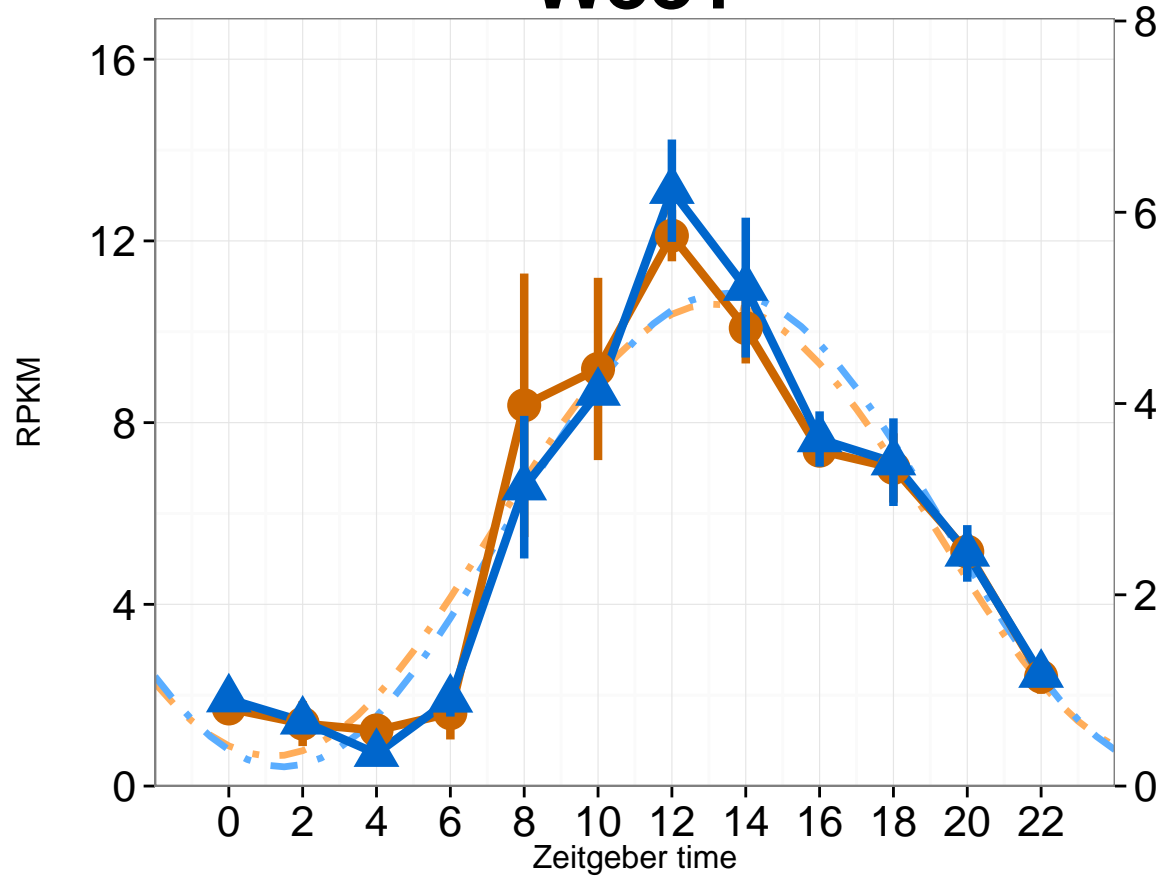

## Wee1

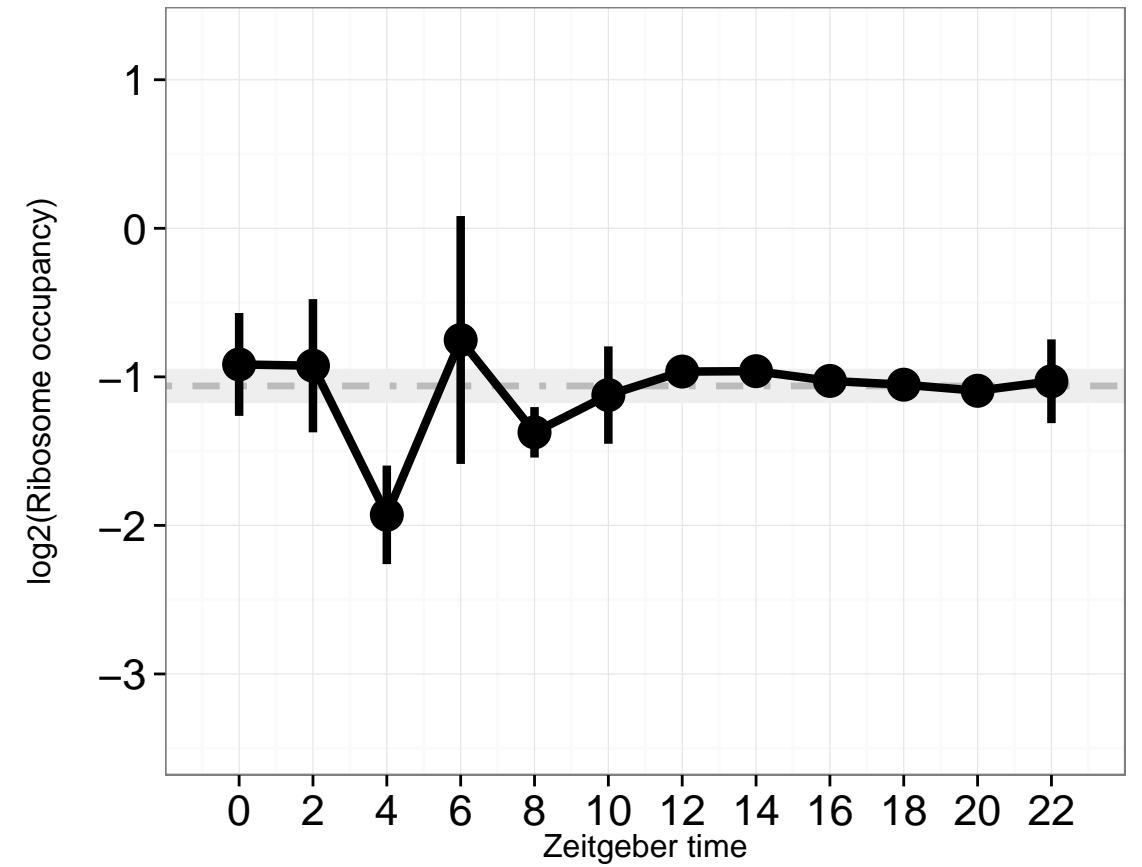

Supplement: SuppDataset_1.zip [file Wee1_set_D.pdf › Supplemental Dataset 1/D-mRNA_rhythm_translation_rhyth/Wee1_set_D.pdf]

# Wnk4

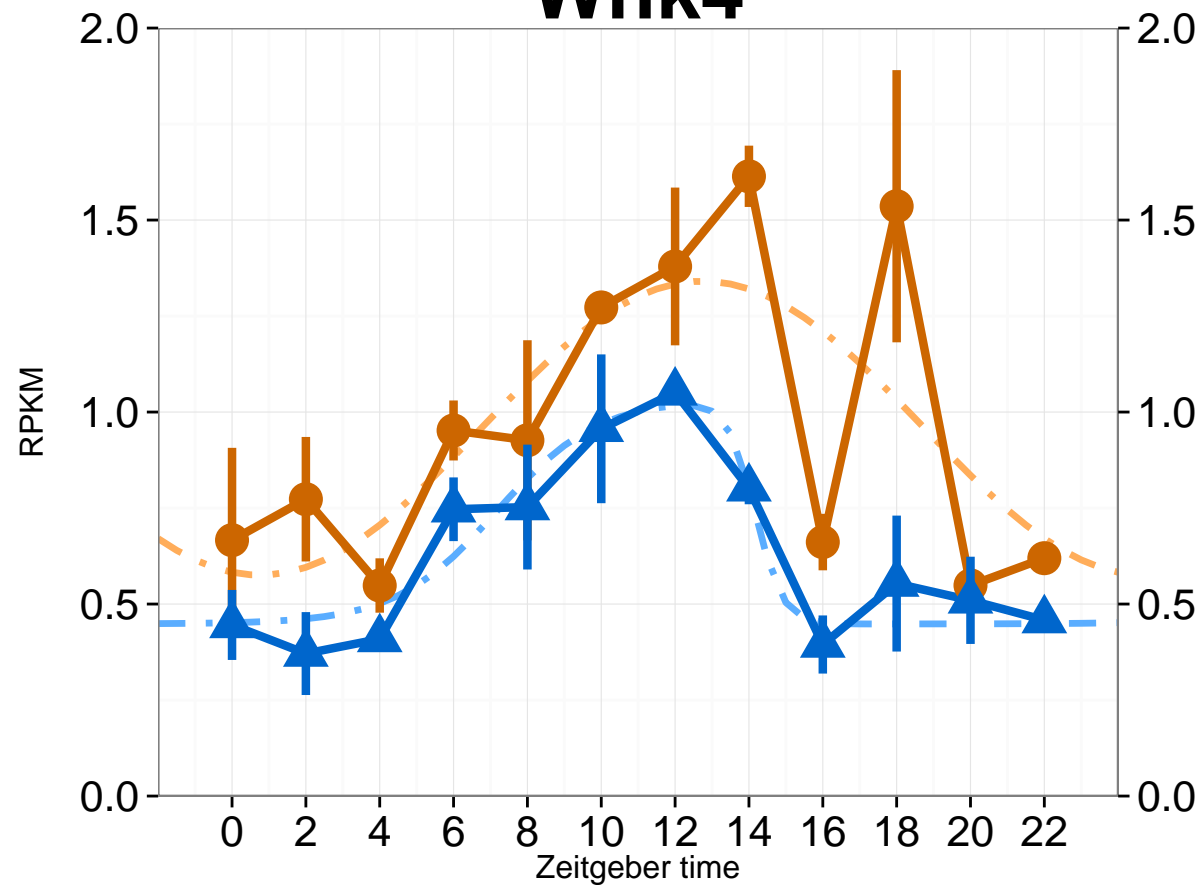

# Wnk4

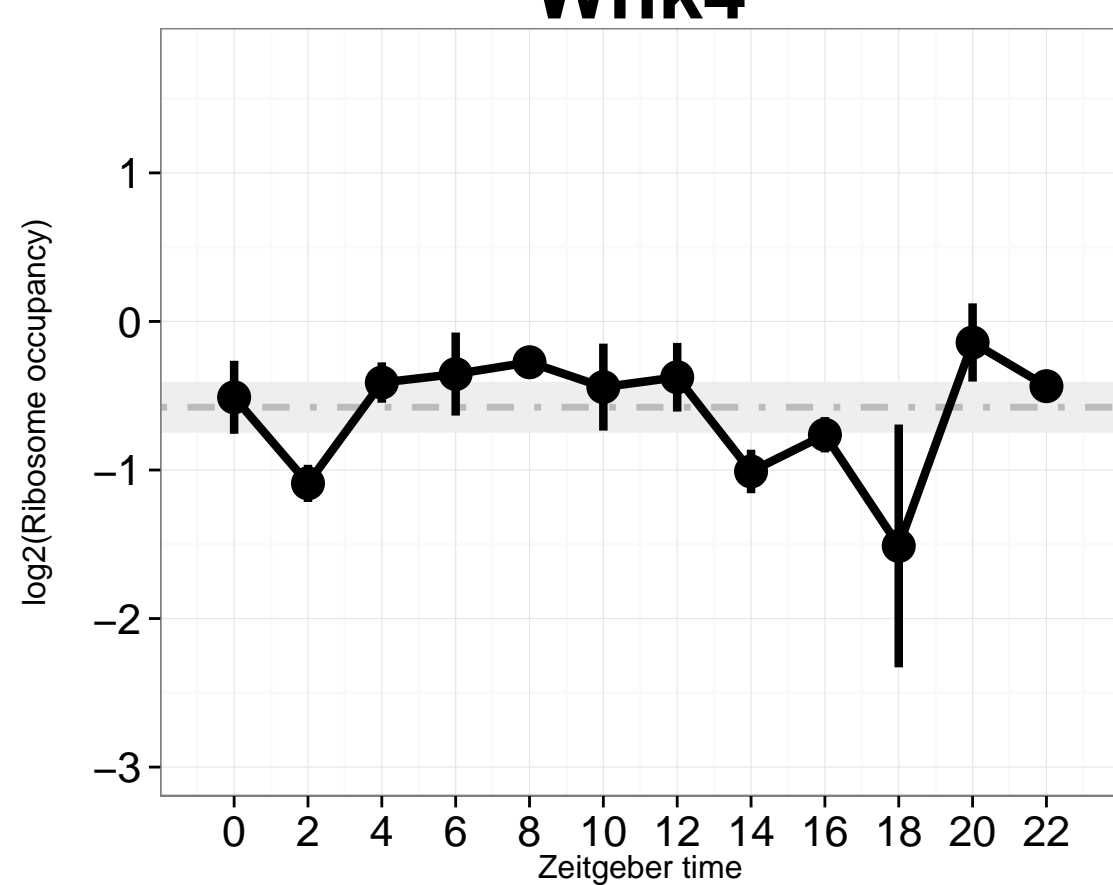

Supplement: SuppDataset_1.zip [file Wnk4_set_D.pdf › Supplemental Dataset 1/D-mRNA_rhythm_translation_rhyth/Wnk4_set_D.pdf]

# Wnt5b

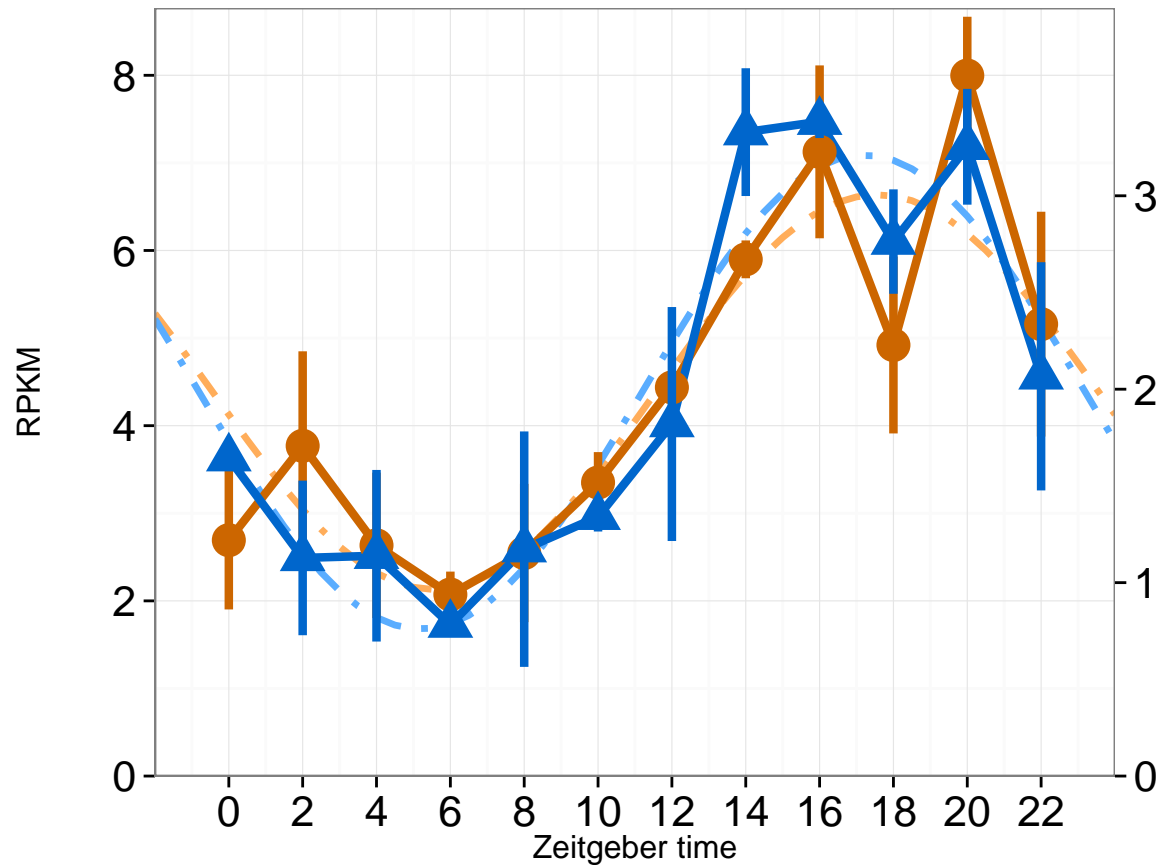

# Wnt5b

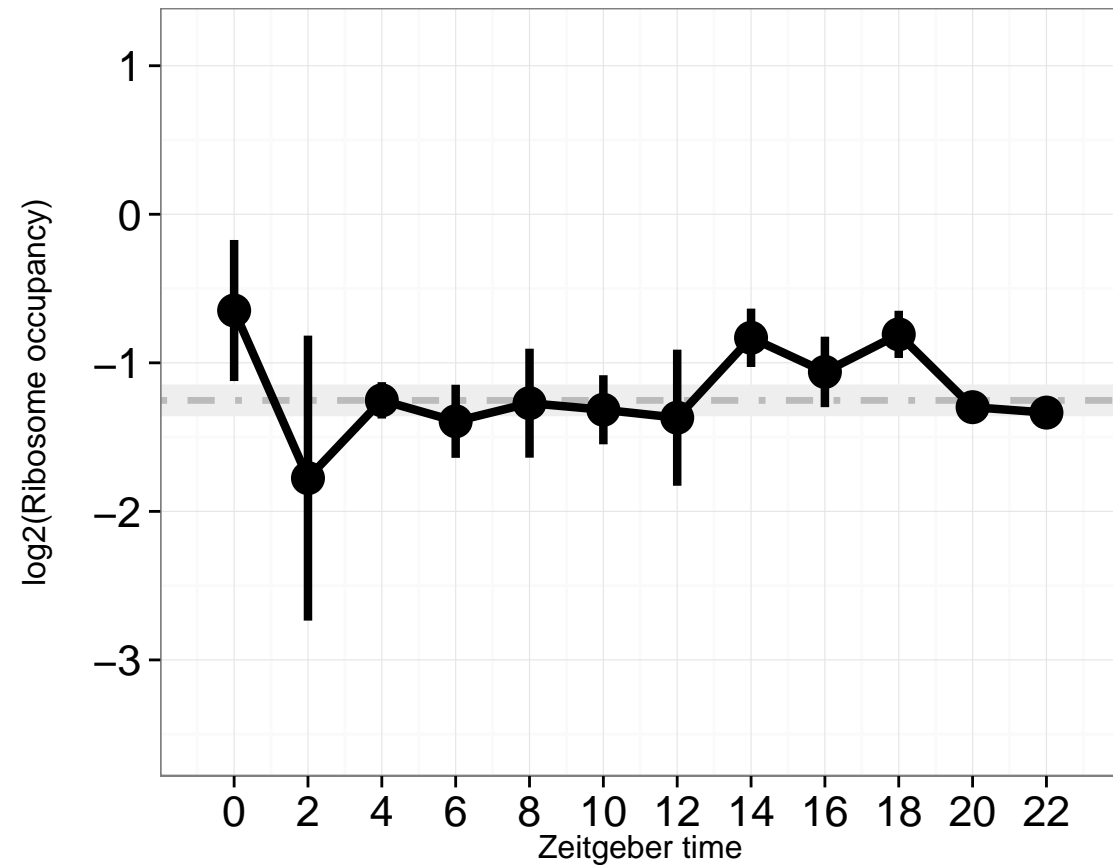

Supplement: SuppDataset_1.zip [file Wnt5b_set_D.pdf › Supplemental Dataset 1/D-mRNA_rhythm_translation_rhyth/Wnt5b_set_D.pdf]

## Wrap73

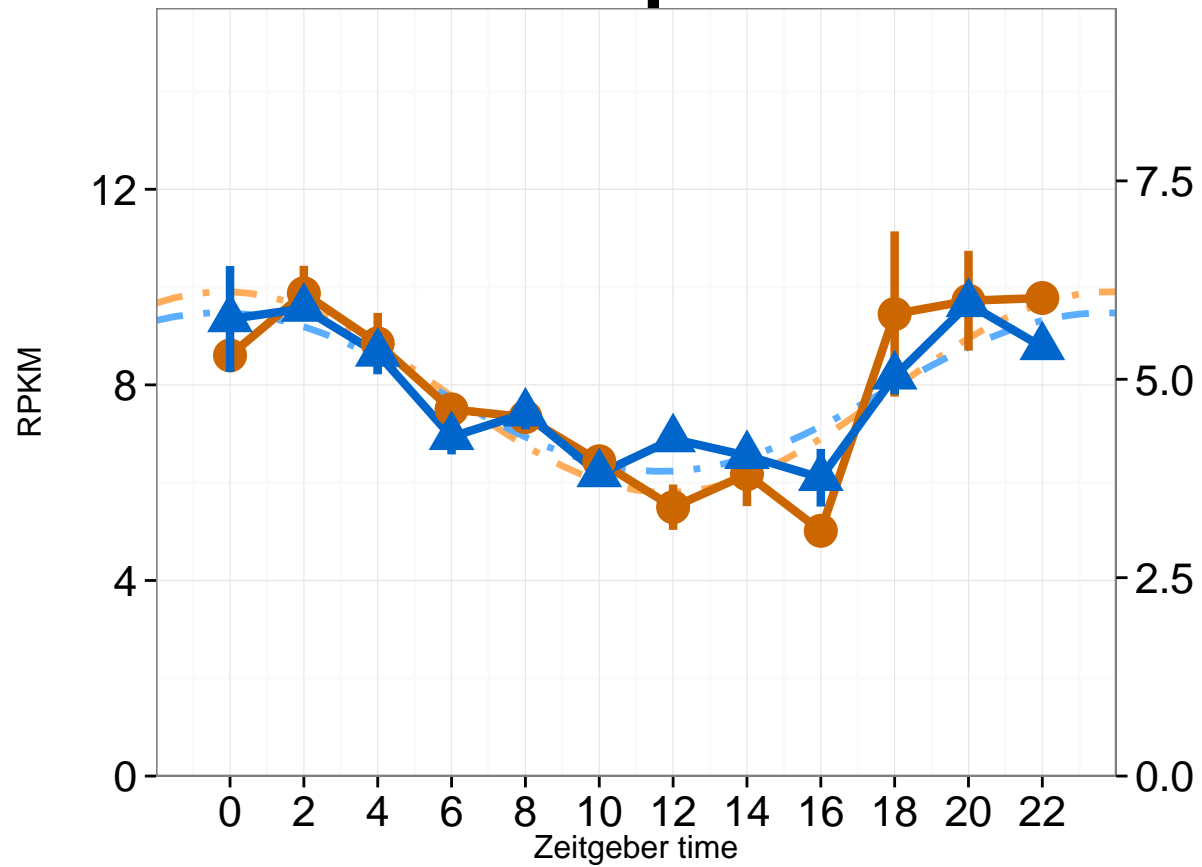

## Wrap73

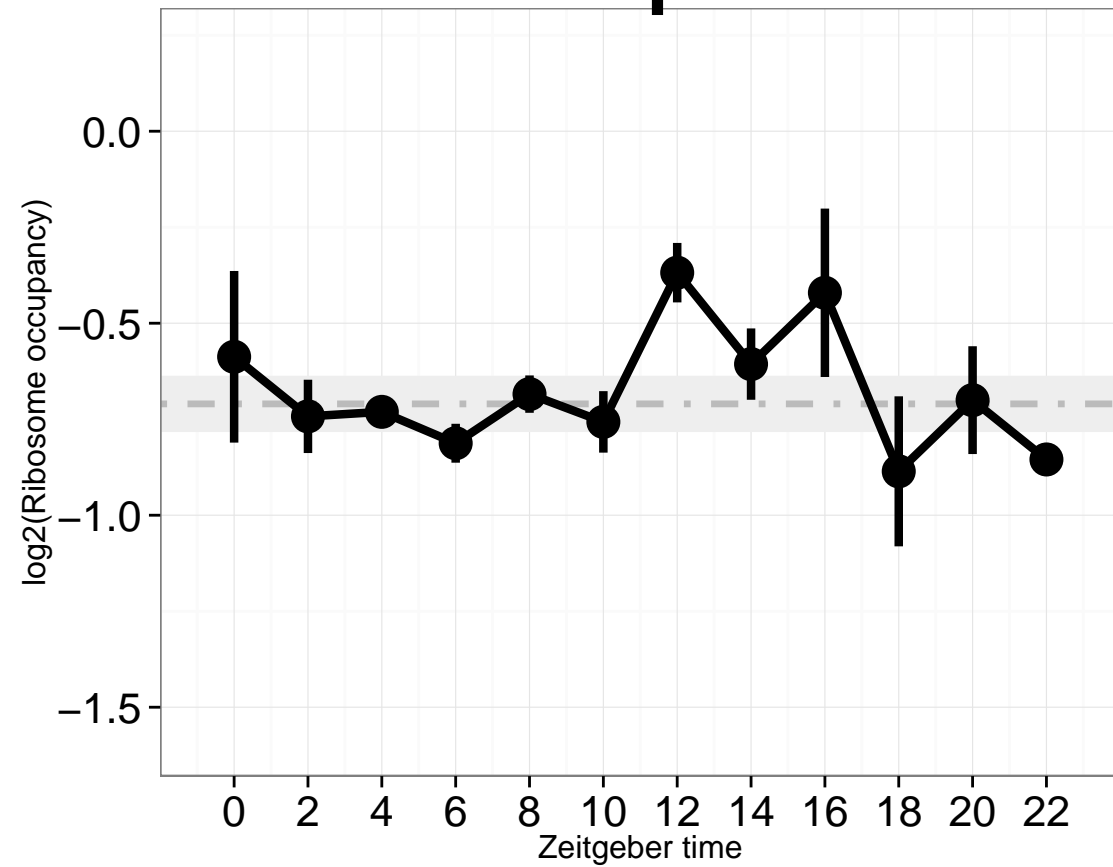

Supplement: SuppDataset_1.zip [file Wrap73_set_D.pdf › Supplemental Dataset 1/D-mRNA_rhythm_translation_rhyth/Wrap73_set_D.pdf]

## Wrnip1

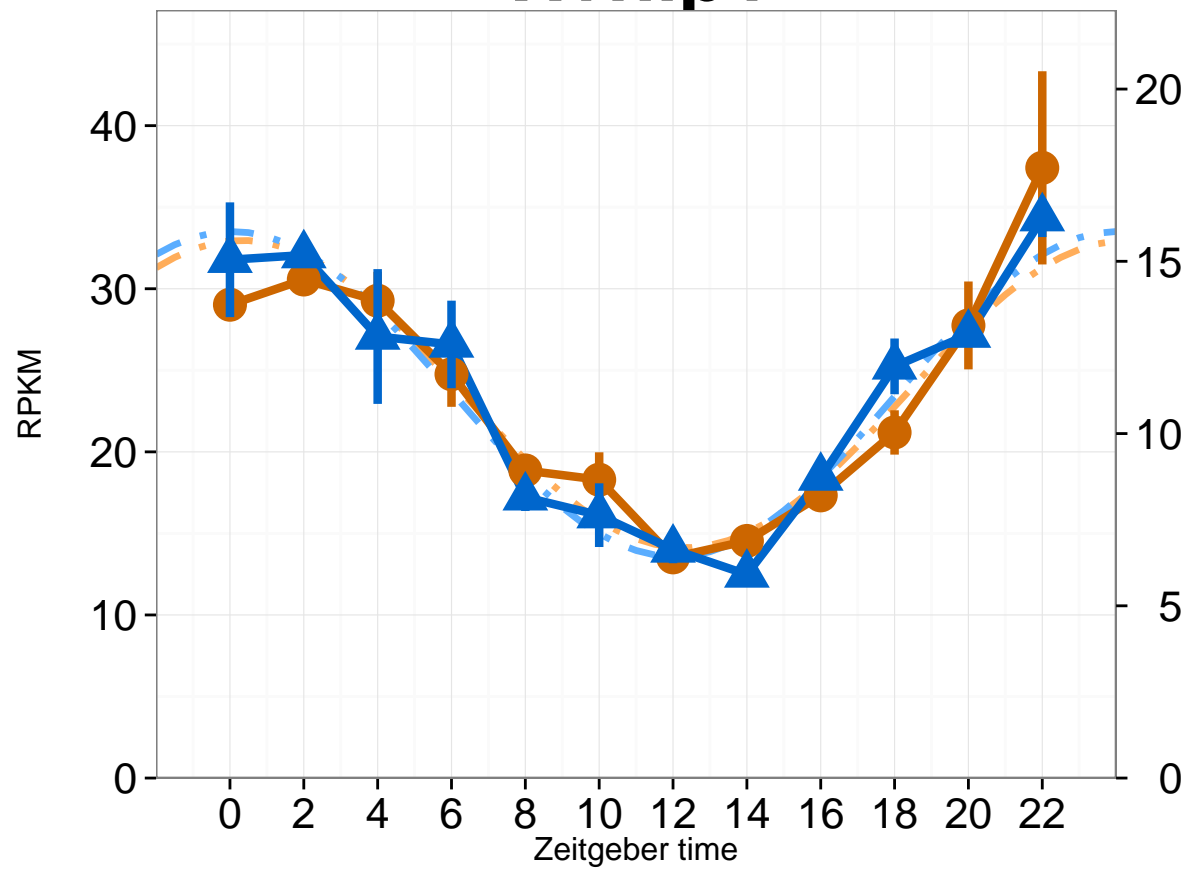

## Wrnip1

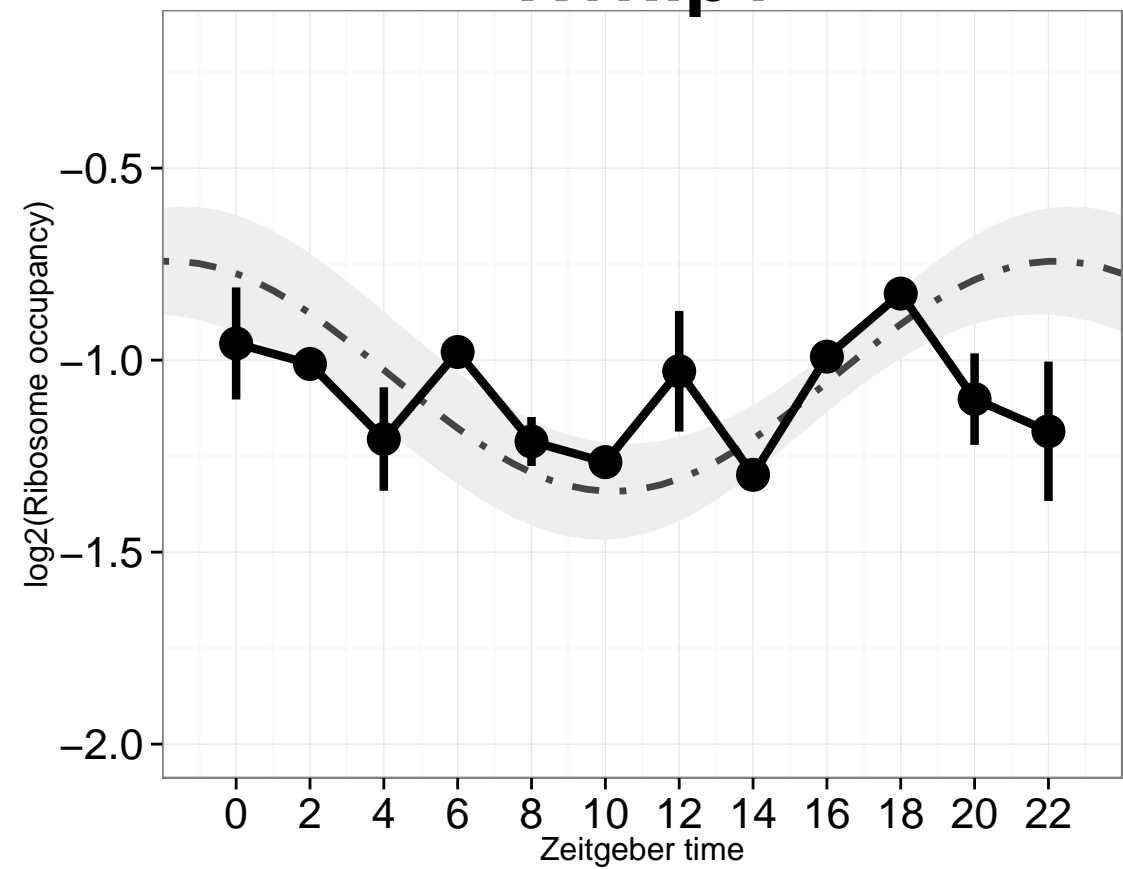

Supplement: SuppDataset_1.zip [file Wrnip1_set_D.pdf › Supplemental Dataset 1/D-mRNA_rhythm_translation_rhyth/Wrnip1_set_D.pdf]

## Xaf1

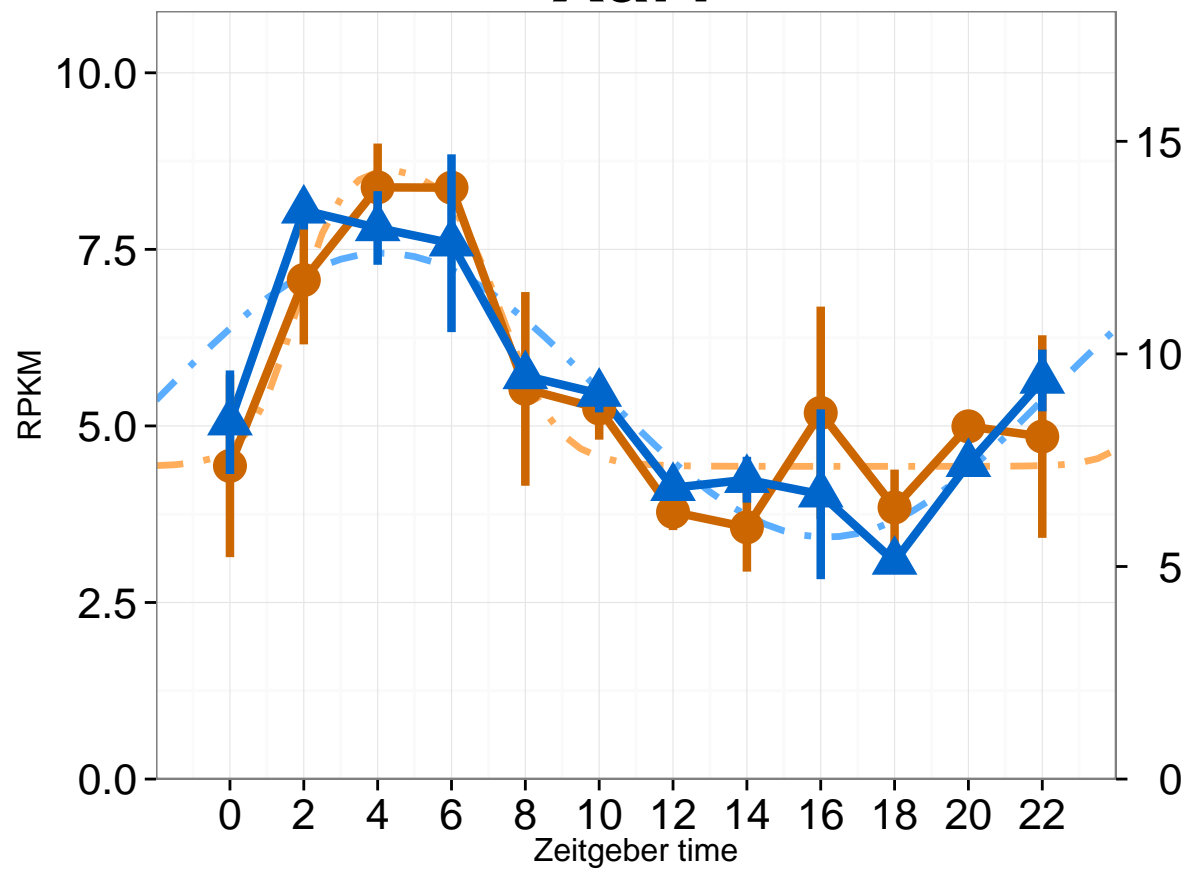

## Xaf1

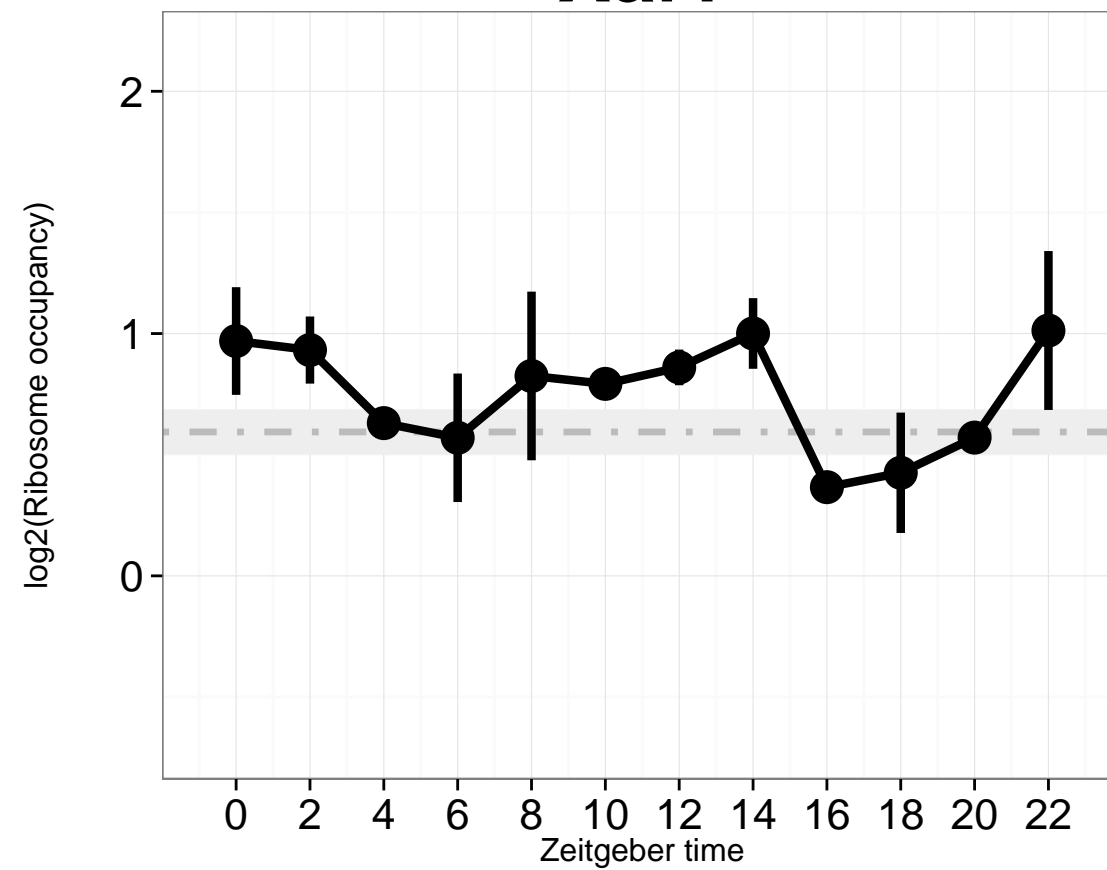

Supplement: SuppDataset_1.zip [file Xaf1_set_D.pdf › Supplemental Dataset 1/D-mRNA_rhythm_translation_rhyth/Xaf1_set_D.pdf]

## Yod1

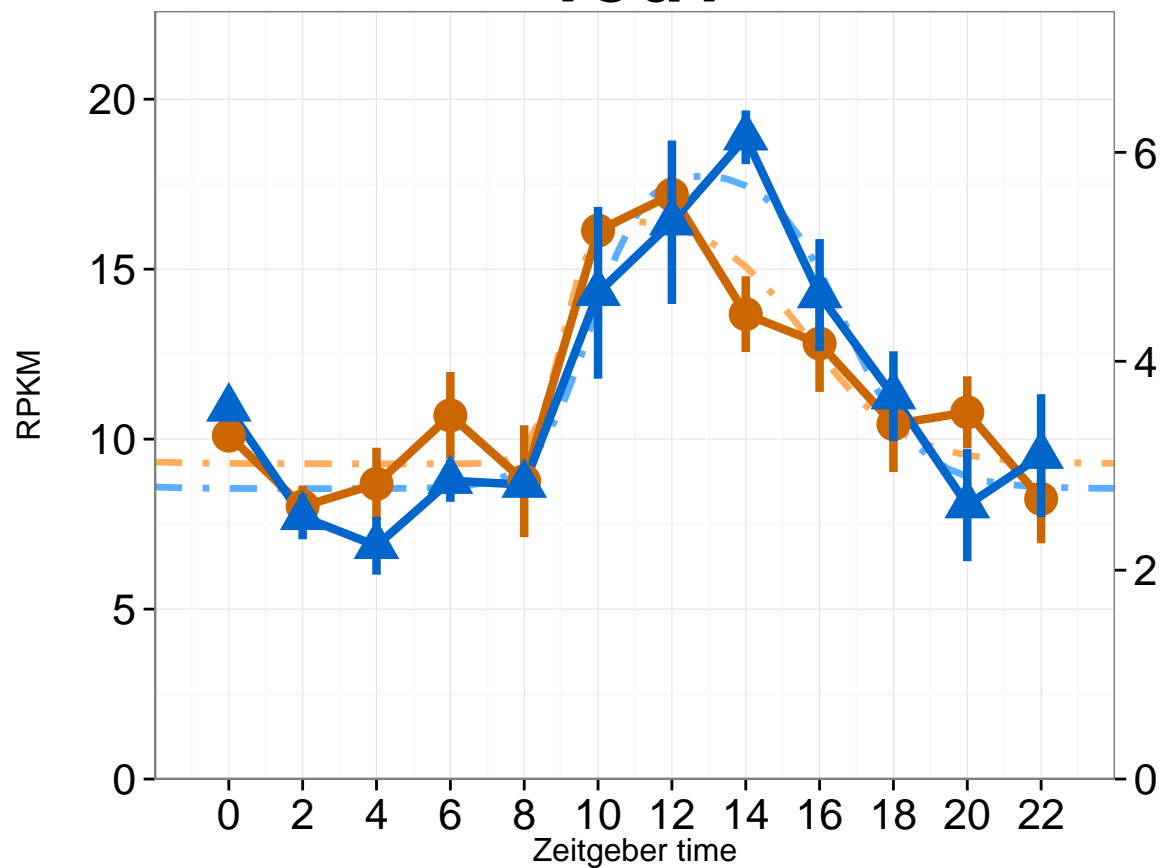

## Yod1

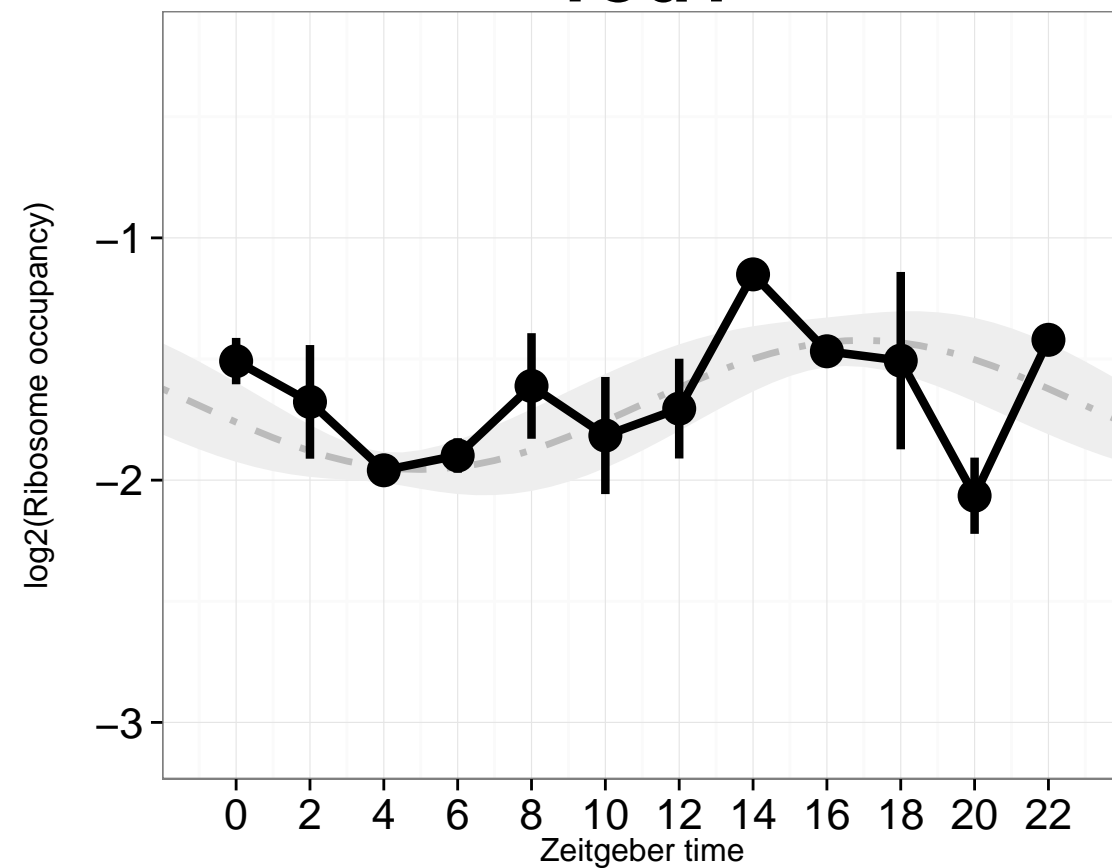

Supplement: SuppDataset_1.zip [file Yod1_set_D.pdf › Supplemental Dataset 1/D-mRNA_rhythm_translation_rhyth/Yod1_set_D.pdf]

## Ypel2

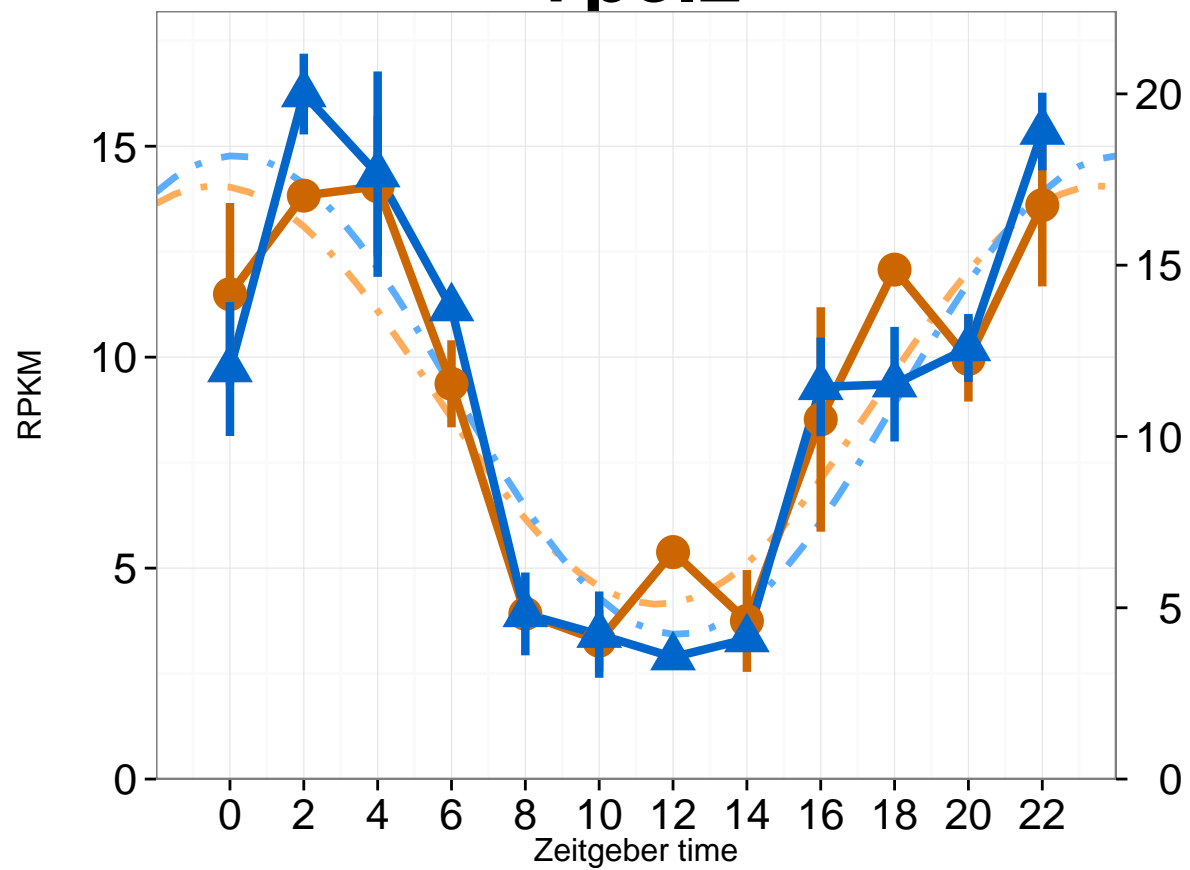

## Ypel2

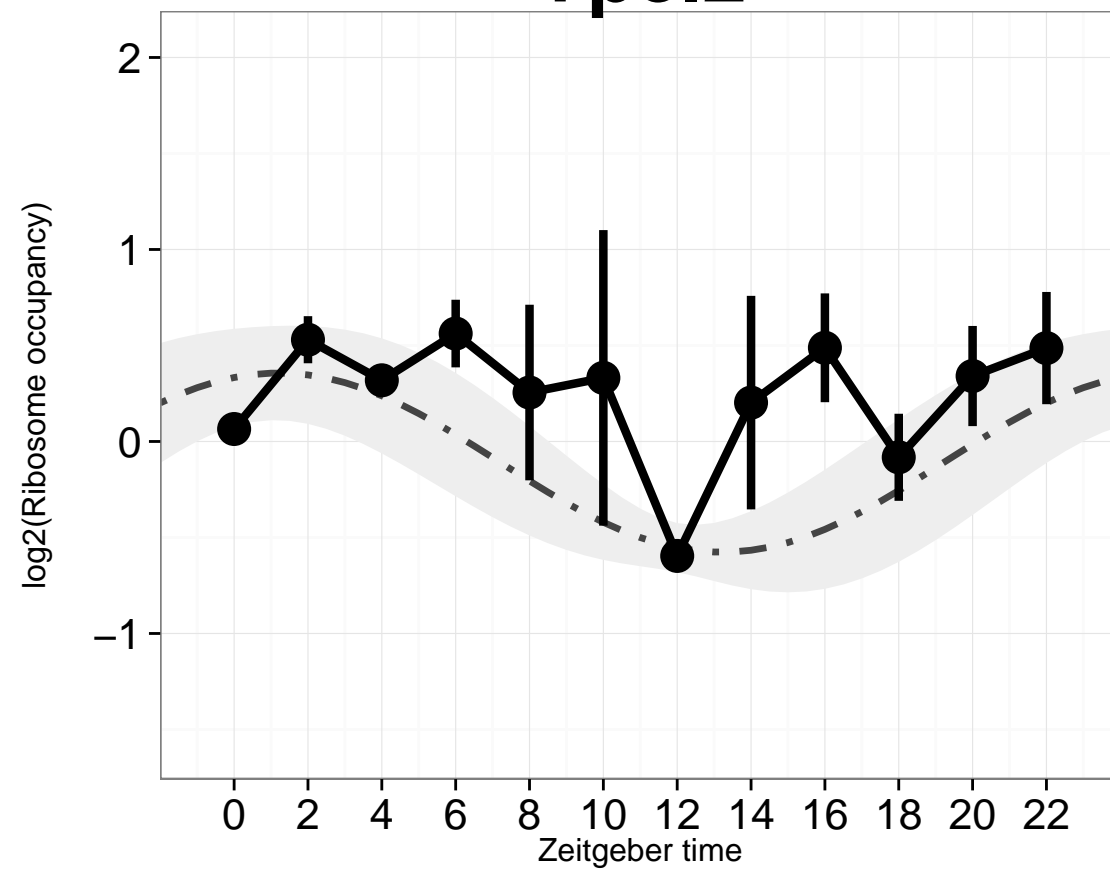

Supplement: SuppDataset_1.zip [file Ypel2_set_D.pdf › Supplemental Dataset 1/D-mRNA_rhythm_translation_rhyth/Ypel2_set_D.pdf]

# Zbtb16

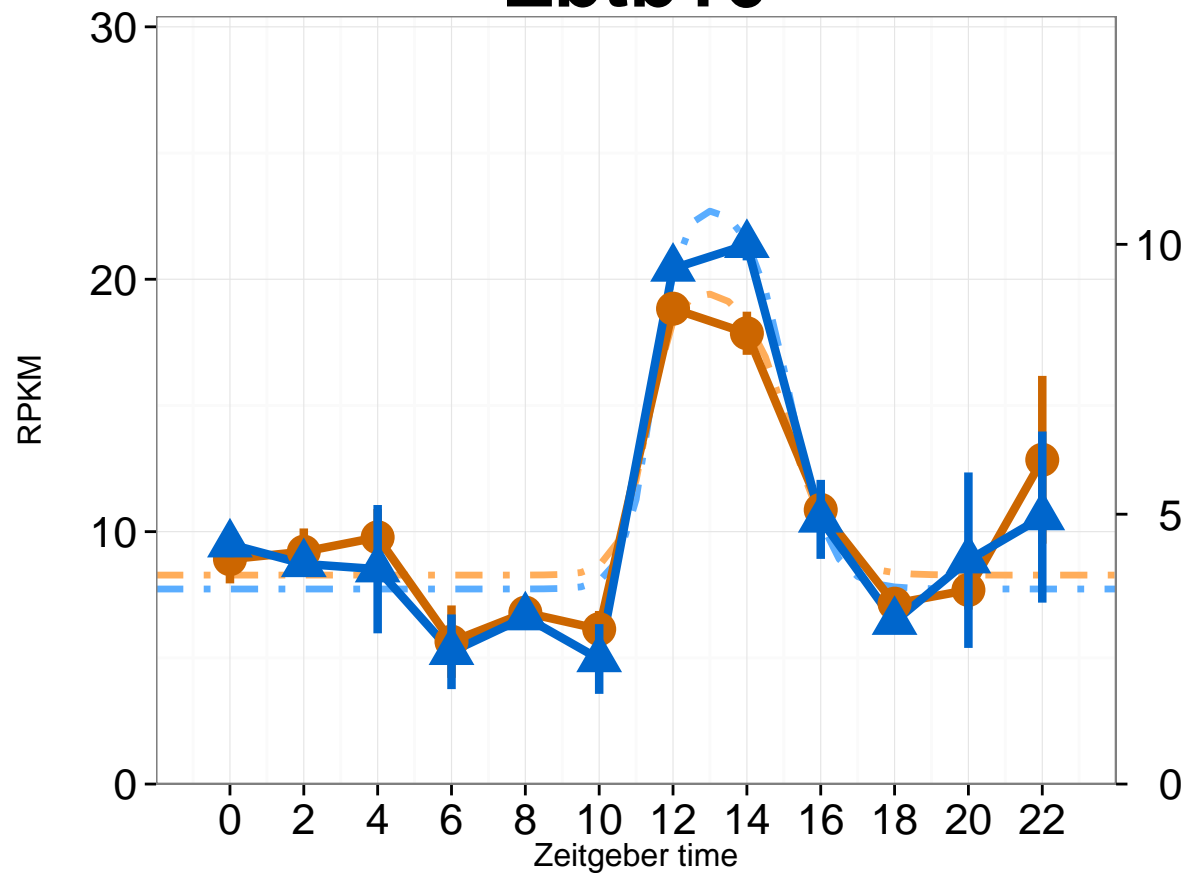

# Zbtb16

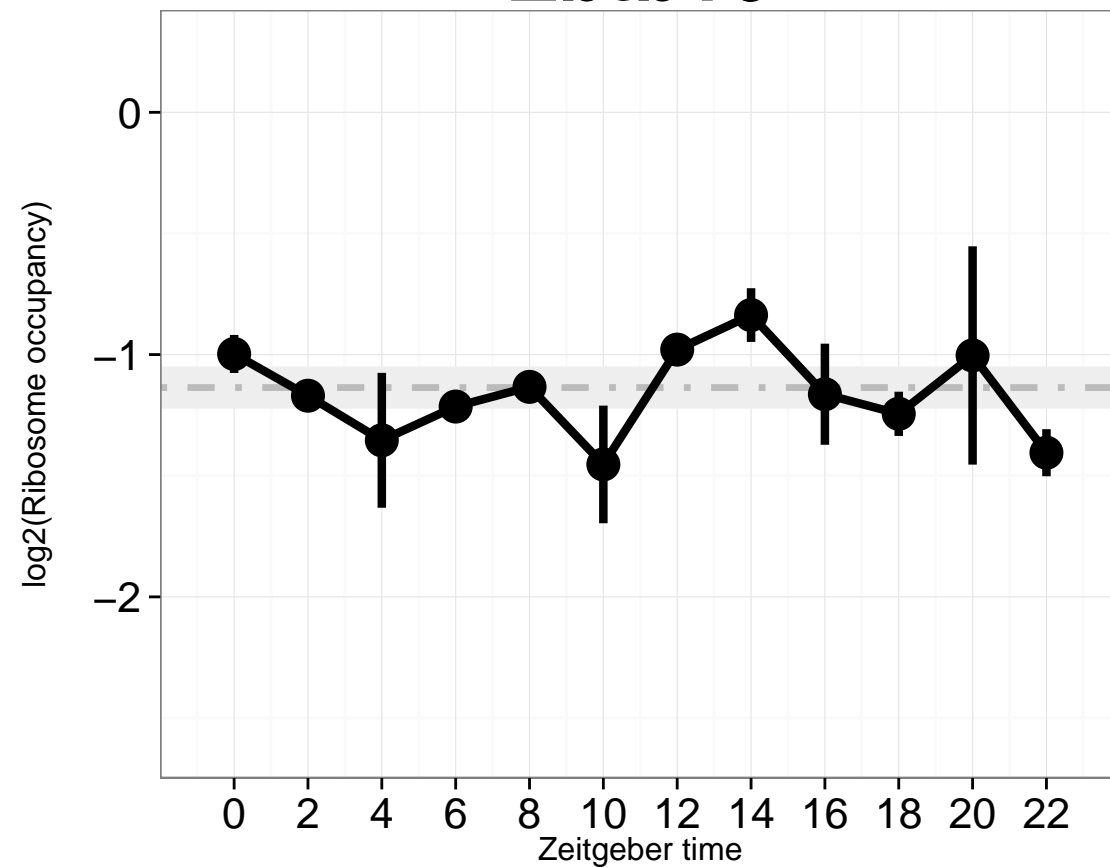

Supplement: SuppDataset_1.zip [file Zbtb16_set_D.pdf › Supplemental Dataset 1/D-mRNA_rhythm_translation_rhyth/Zbtb16_set_D.pdf]

# Zbtb21

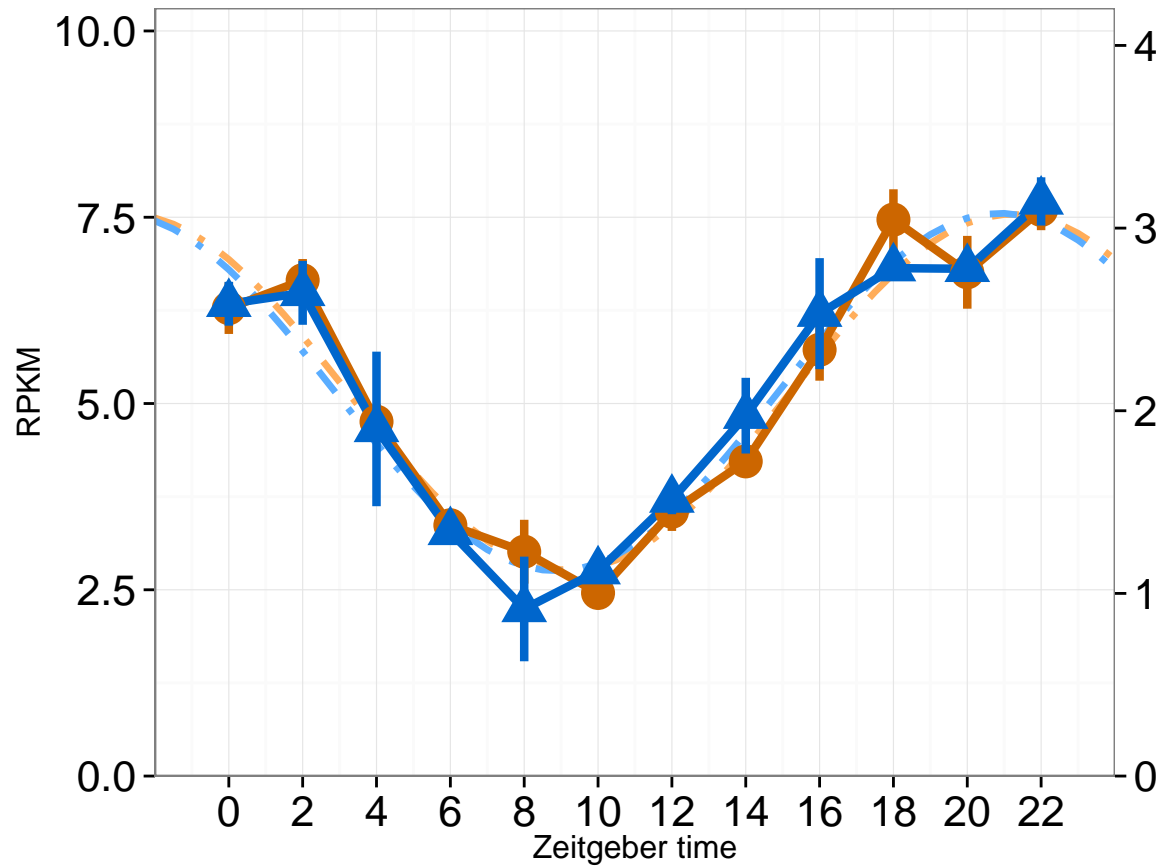

# Zbtb21

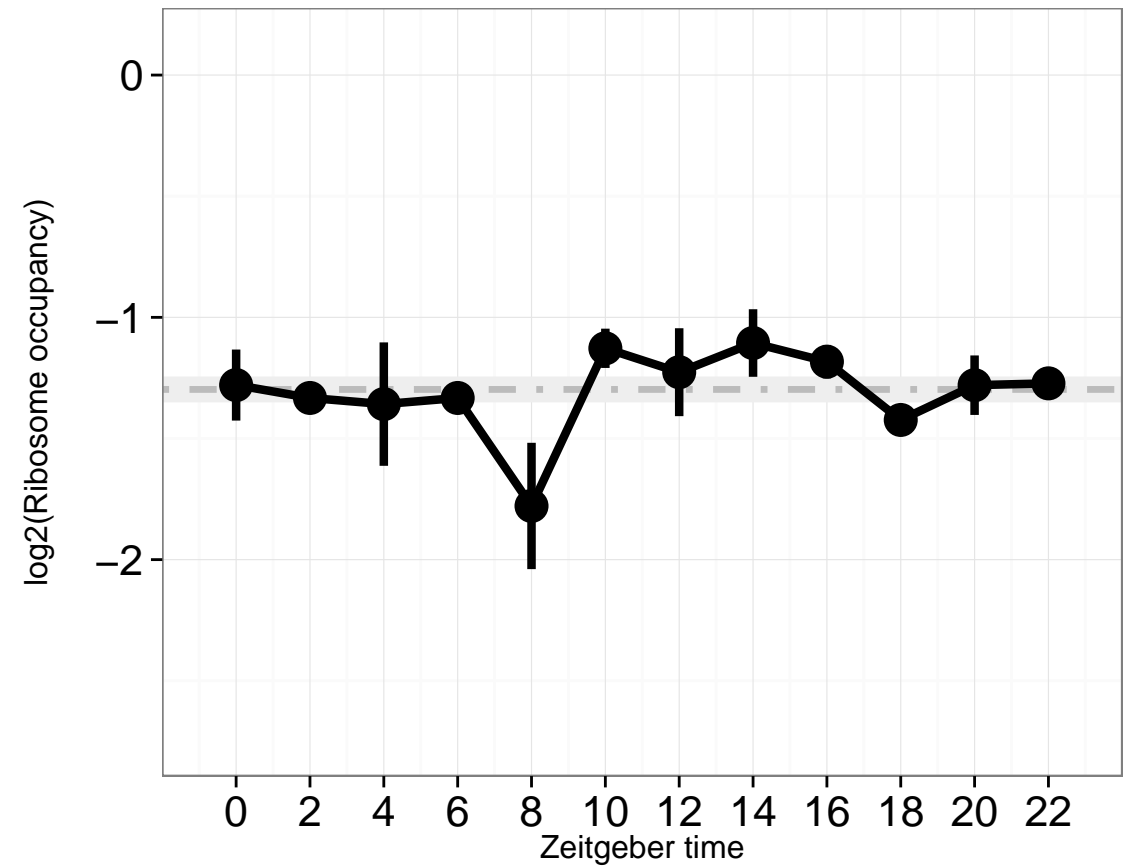

Supplement: SuppDataset_1.zip [file Zbtb21_set_D.pdf › Supplemental Dataset 1/D-mRNA_rhythm_translation_rhyth/Zbtb21_set_D.pdf]

## Zbtb40

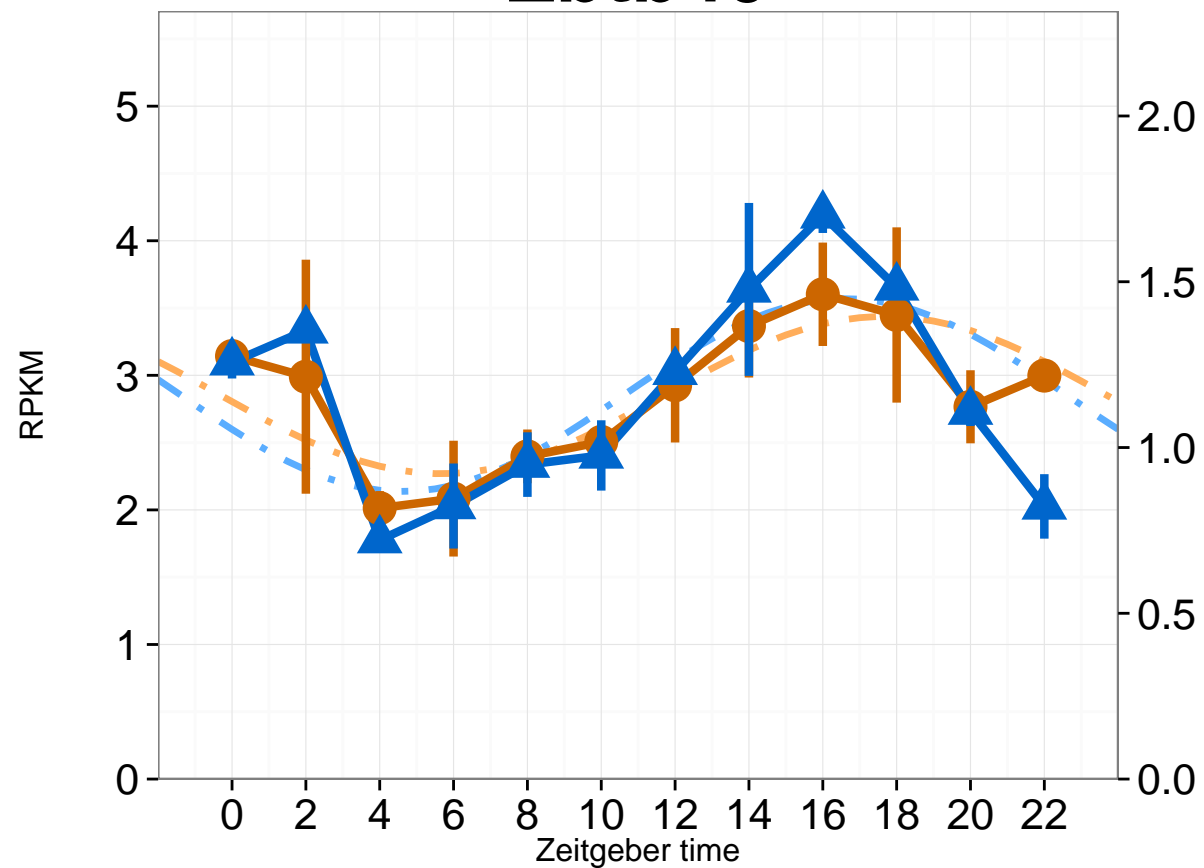

## Zbtb40

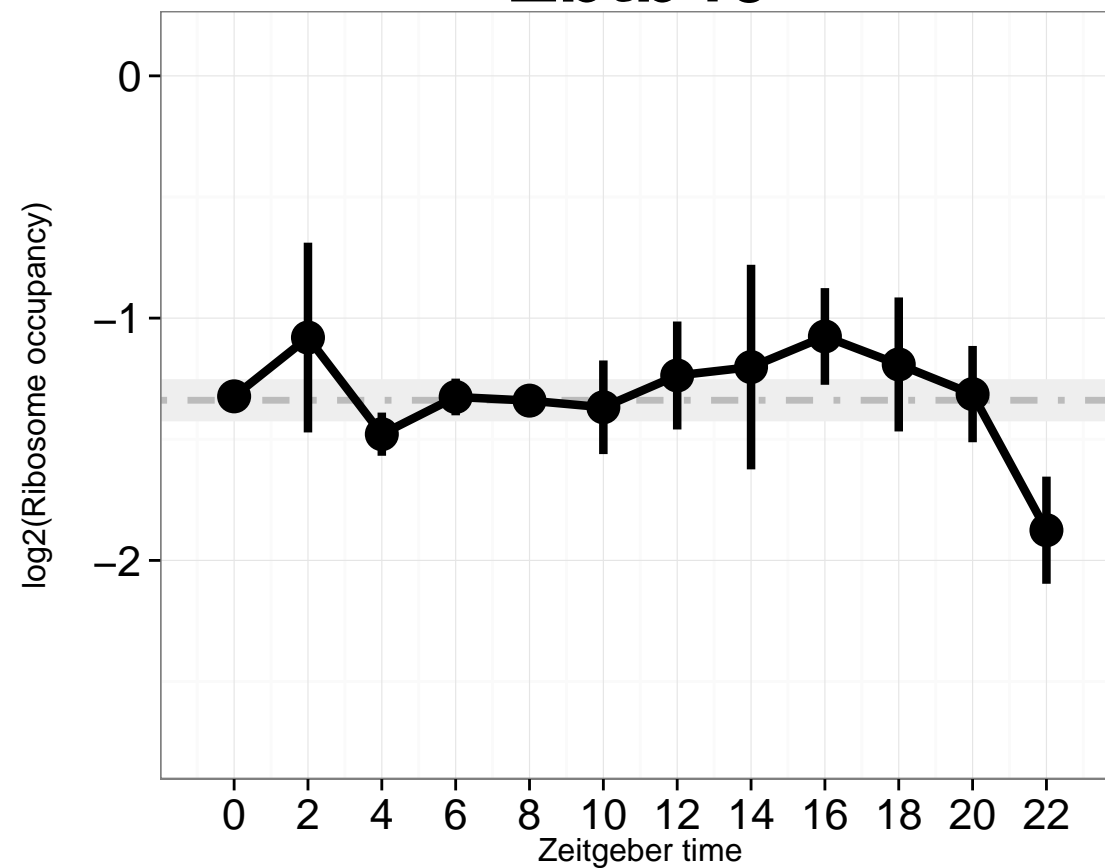

Supplement: SuppDataset_1.zip [file Zbtb40_set_D.pdf › Supplemental Dataset 1/D-mRNA_rhythm_translation_rhyth/Zbtb40_set_D.pdf]

# Zbtb48

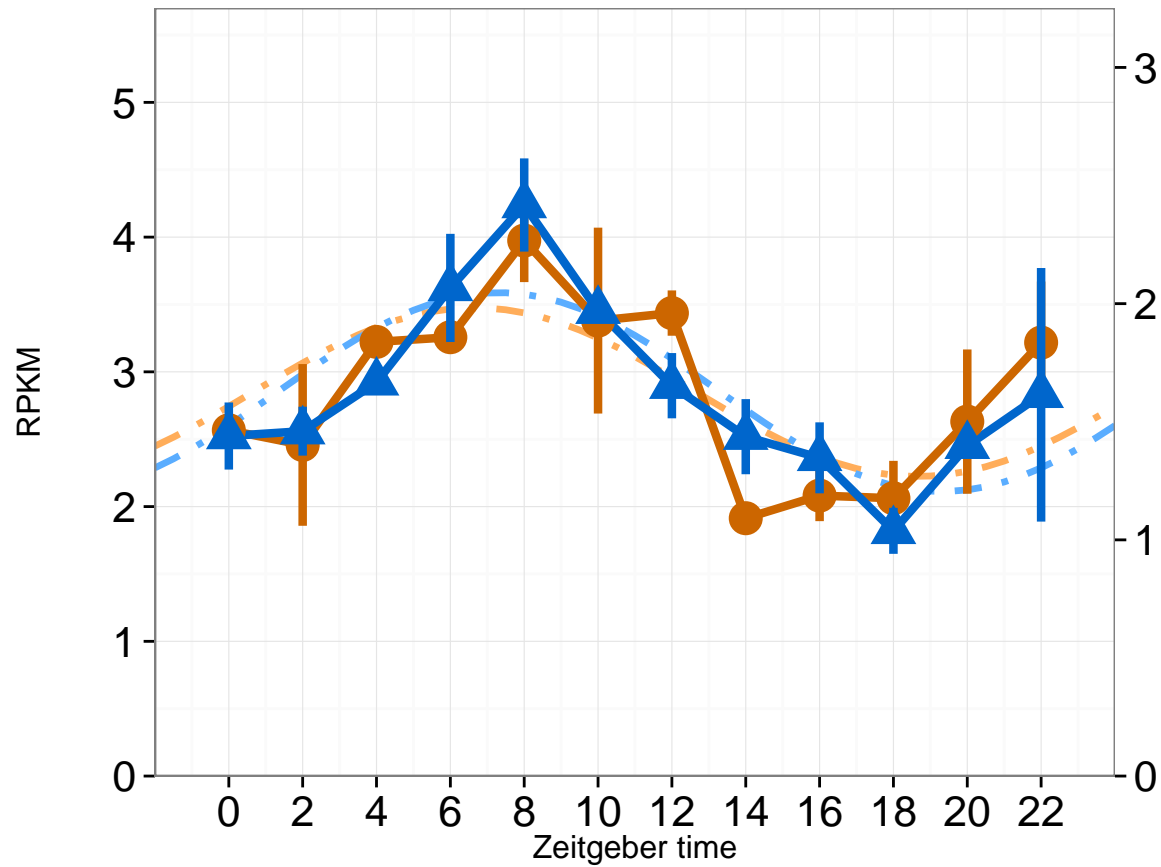

# Zbtb48

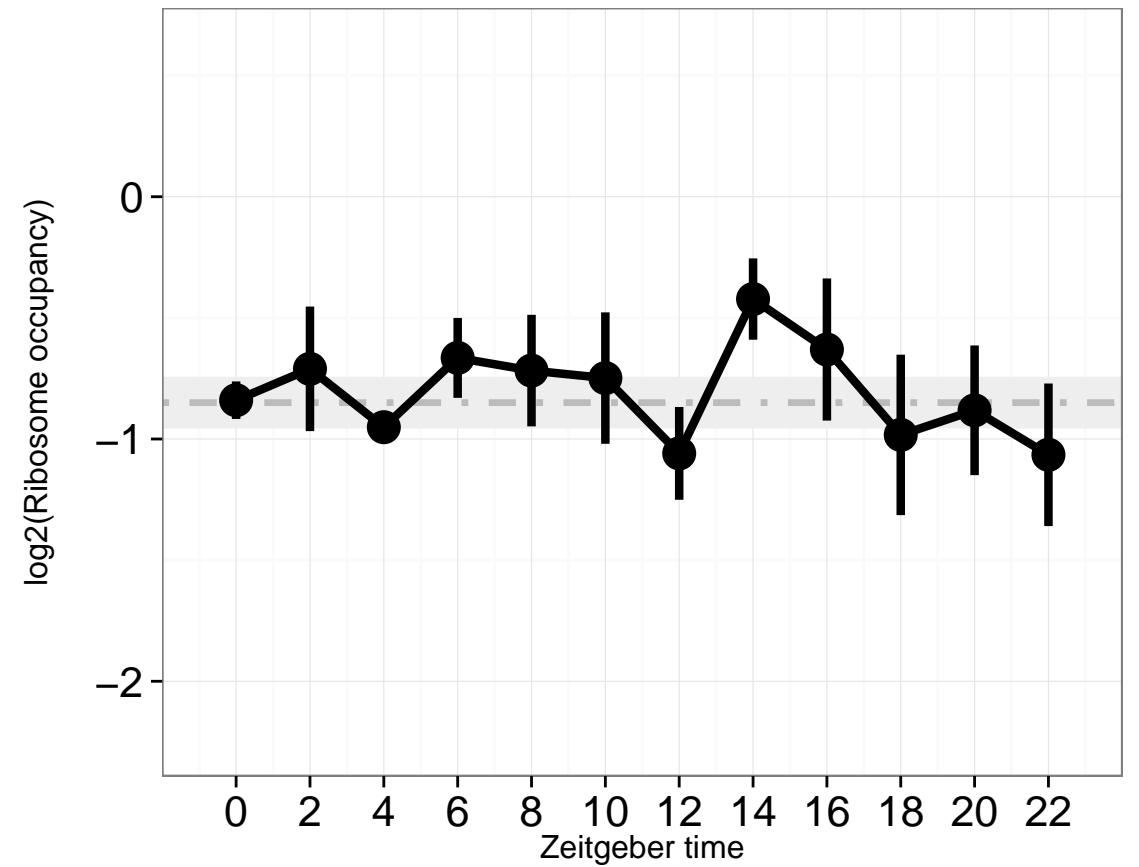

Supplement: SuppDataset_1.zip [file Zbtb48_set_D.pdf › Supplemental Dataset 1/D-mRNA_rhythm_translation_rhyth/Zbtb48_set_D.pdf]

# Zbtb7b

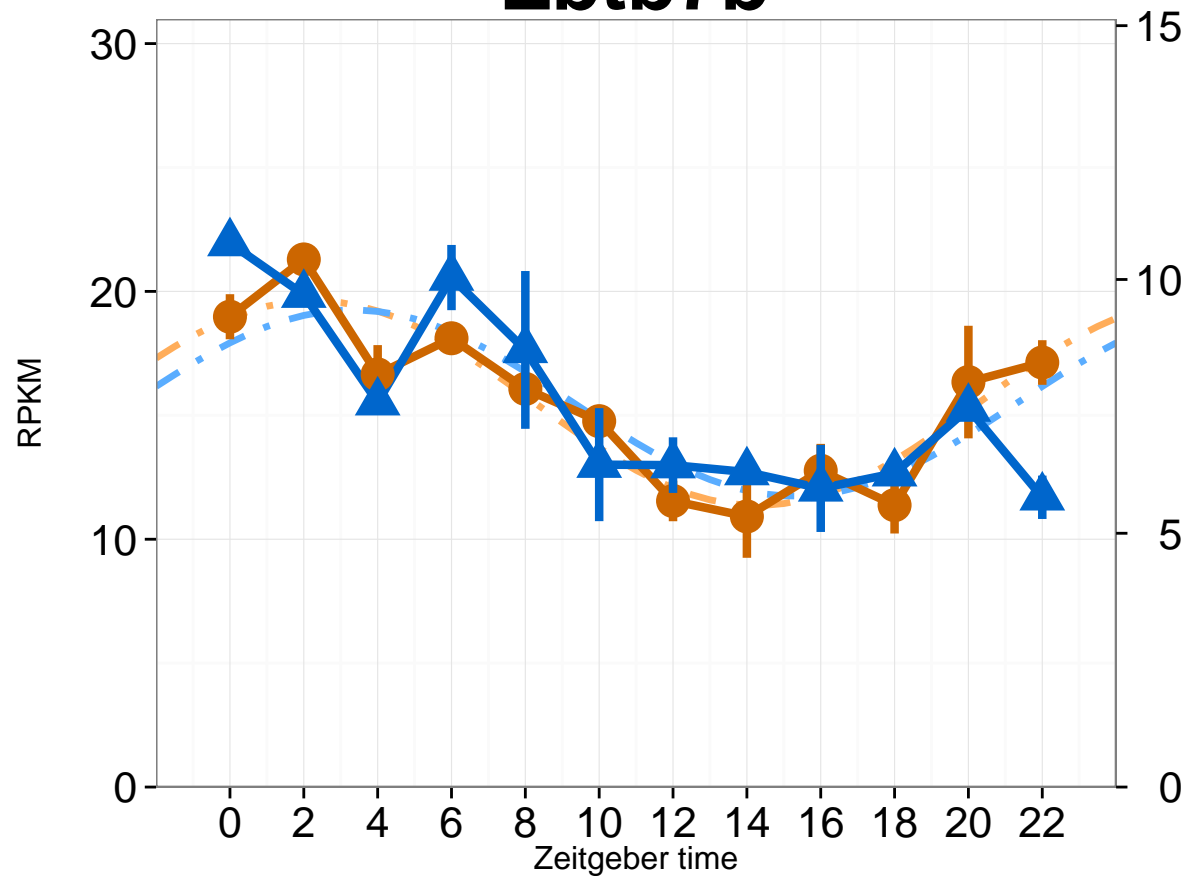

# Zbtb7b

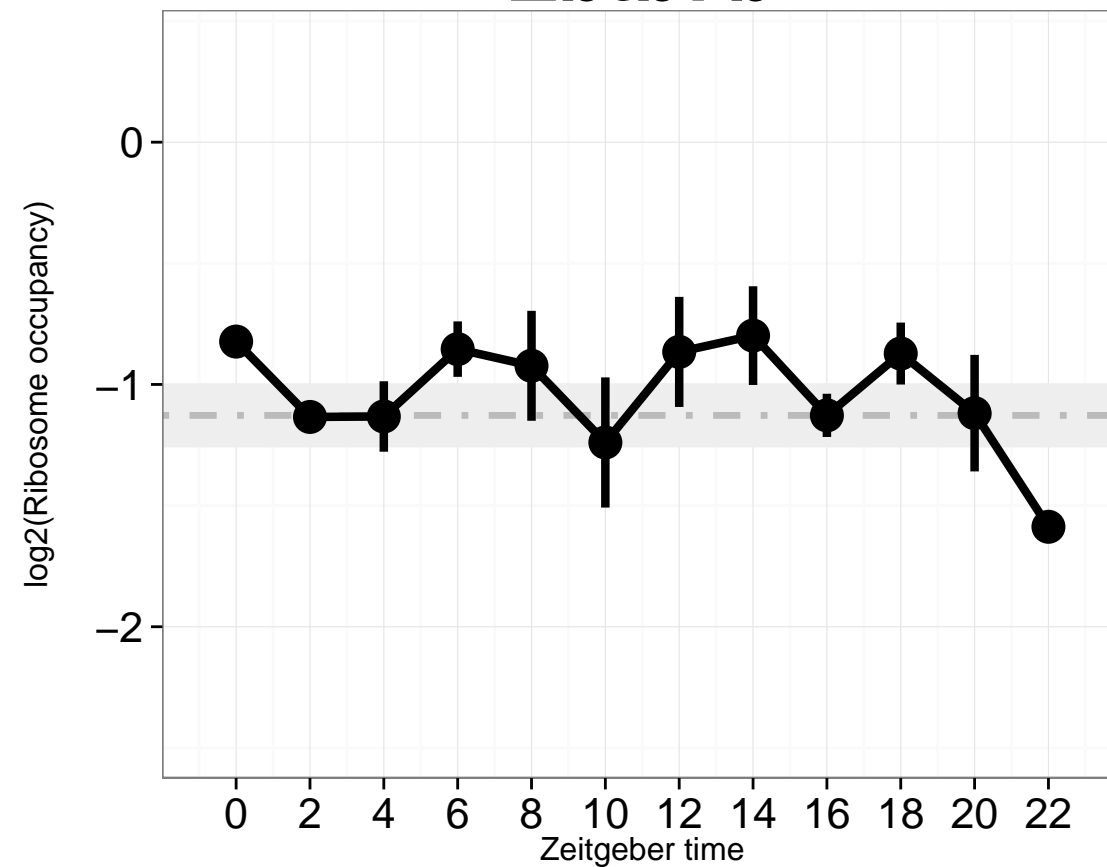

Supplement: SuppDataset_1.zip [file Zbtb7b_set_D.pdf › Supplemental Dataset 1/D-mRNA_rhythm_translation_rhyth/Zbtb7b_set_D.pdf]

## Zc3h12d

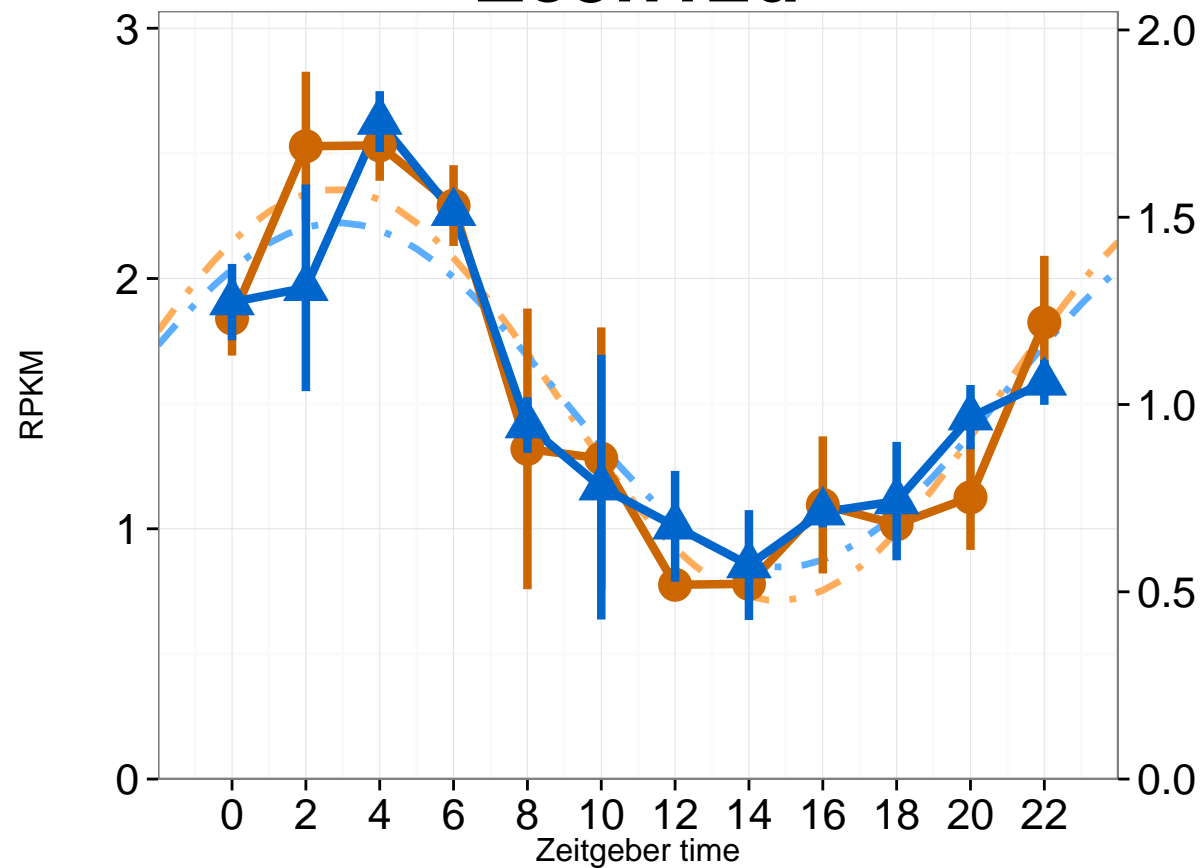

## Zc3h12d

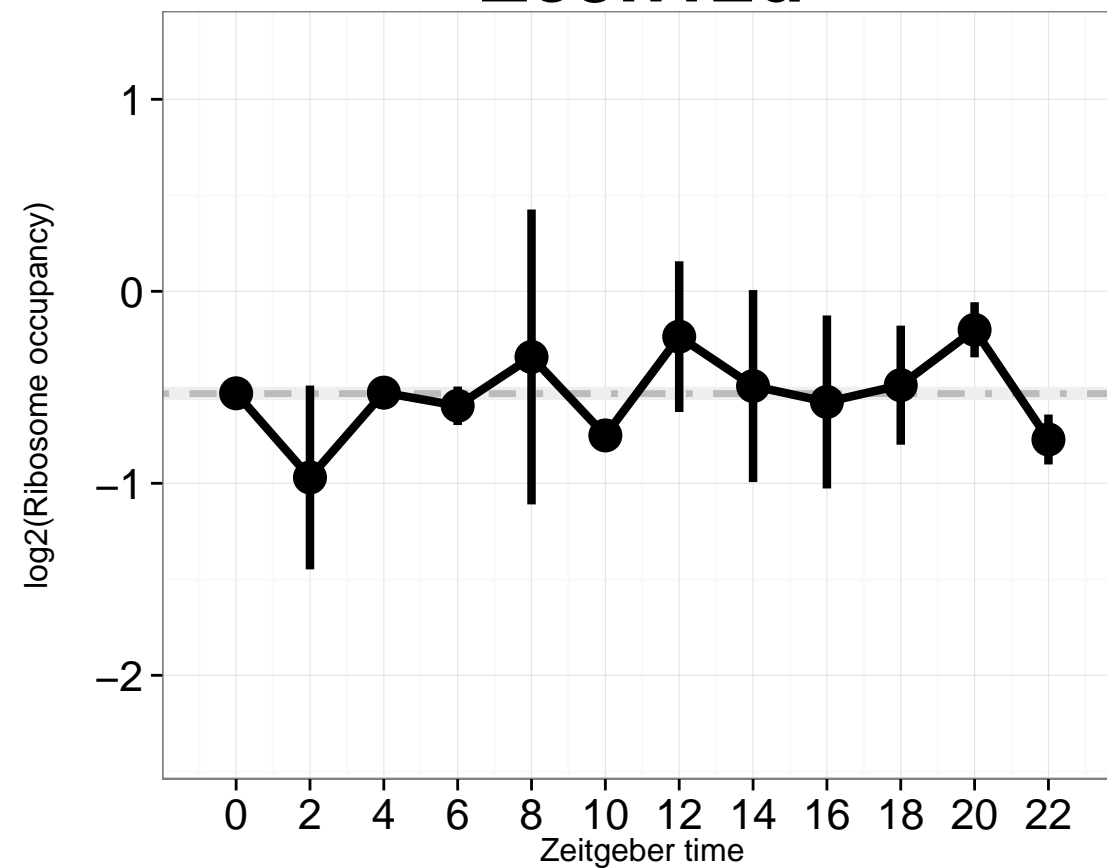

Supplement: SuppDataset_1.zip [file Zc3h12d_set_D.pdf › Supplemental Dataset 1/D-mRNA_rhythm_translation_rhyth/Zc3h12d_set_D.pdf]

# Zc3h8

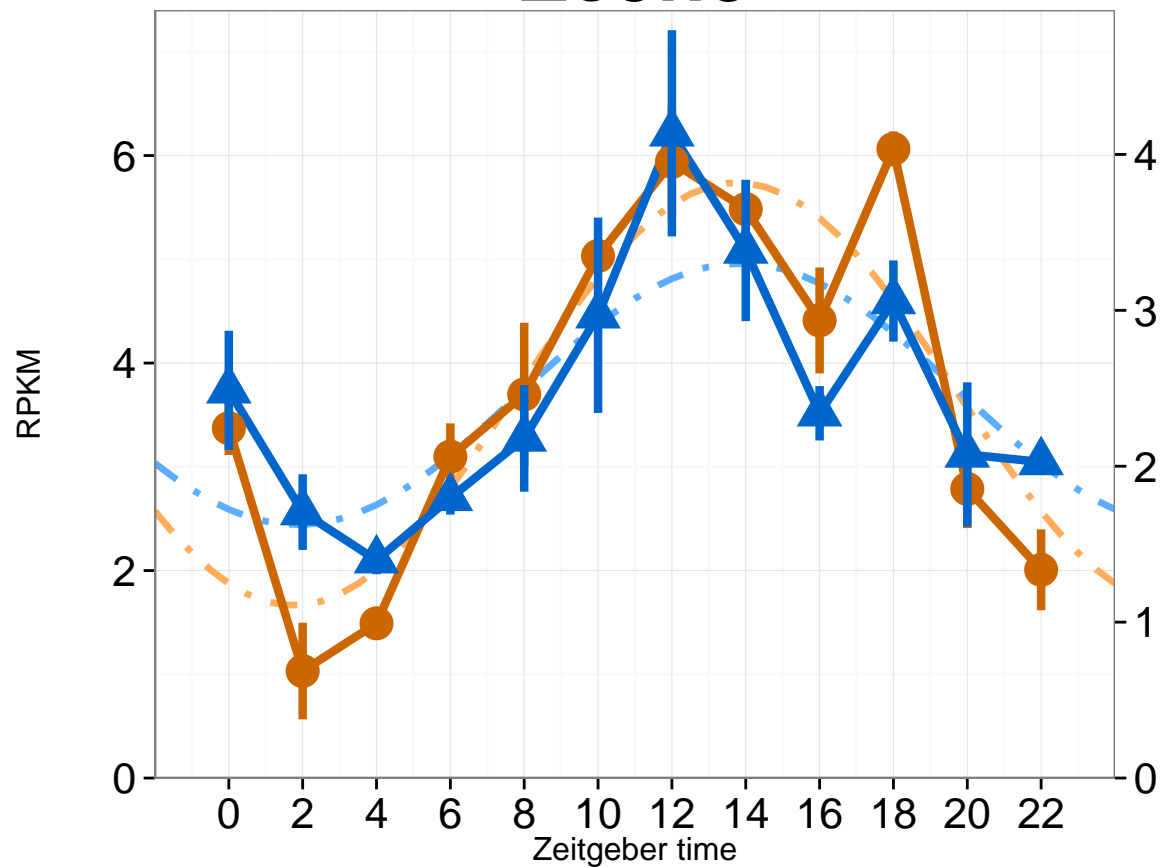

# Zc3h8

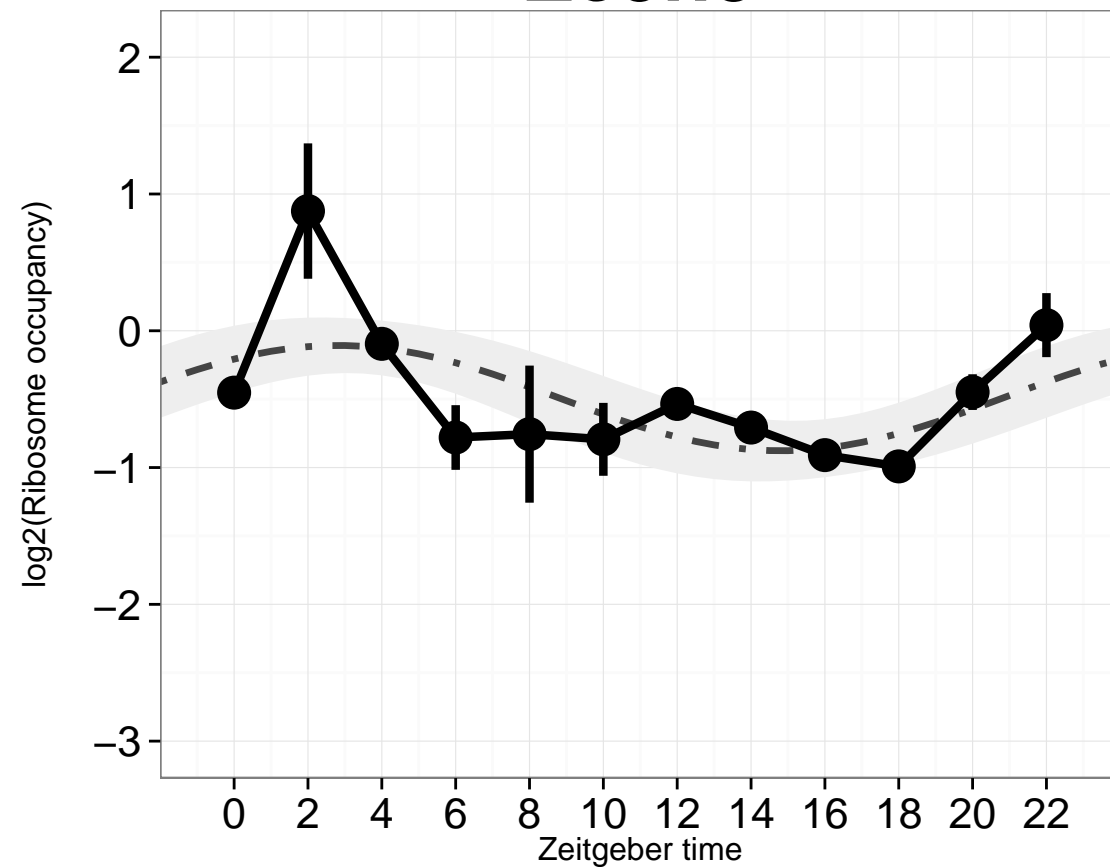

Supplement: SuppDataset_1.zip [file Zc3h8_set_D.pdf › Supplemental Dataset 1/D-mRNA_rhythm_translation_rhyth/Zc3h8_set_D.pdf]

# Zcchc11

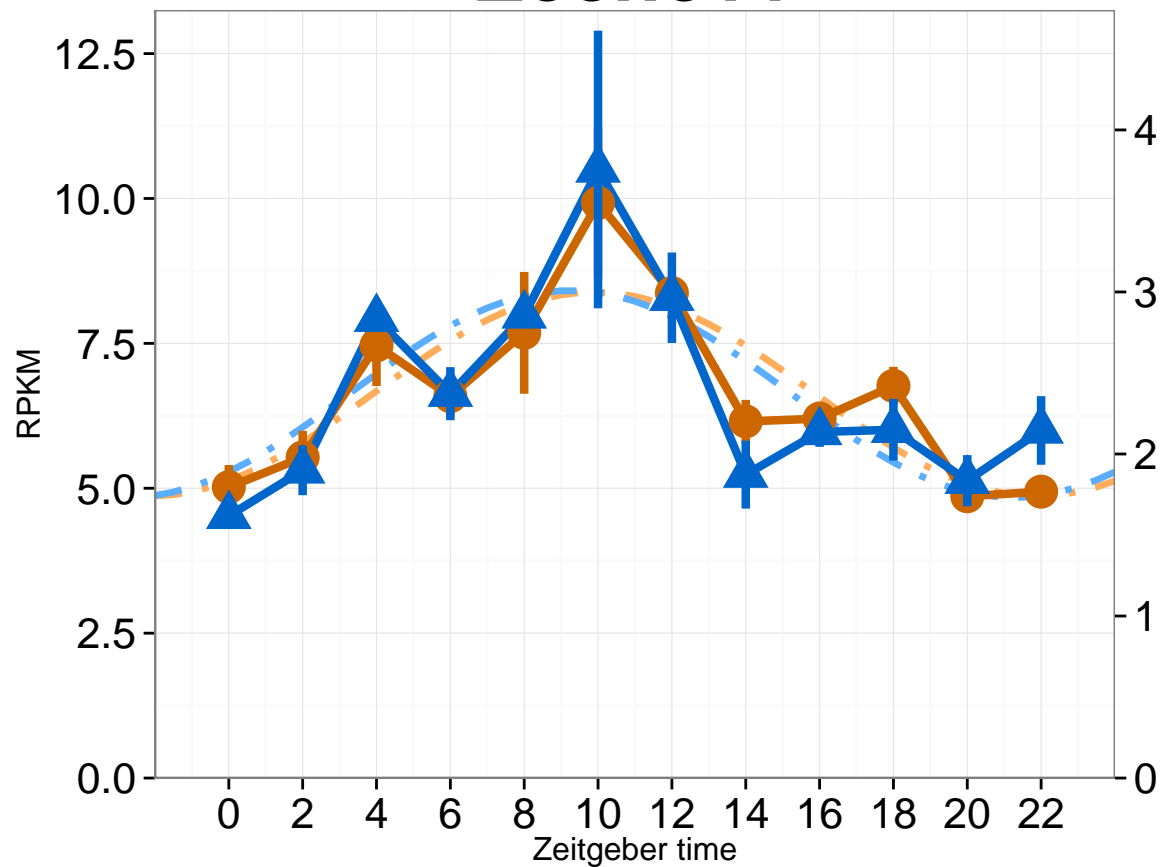

# Zcchc11

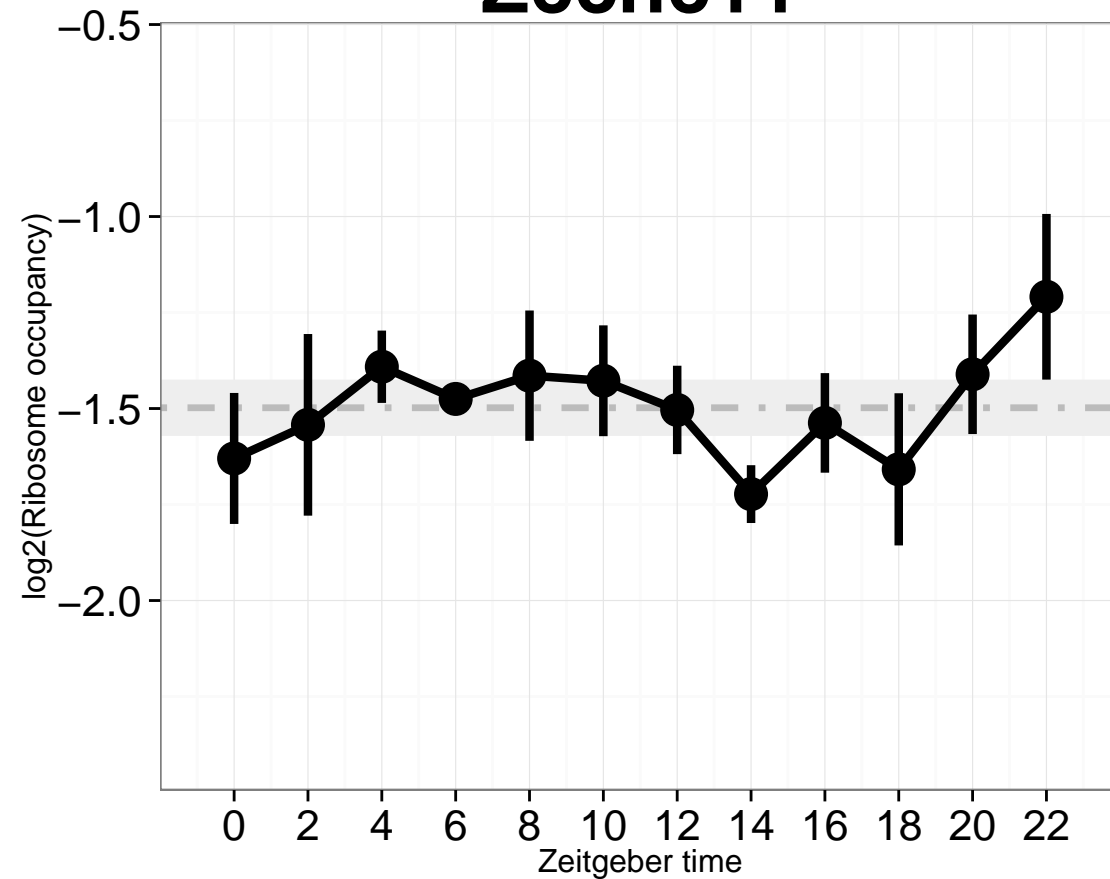

Supplement: SuppDataset_1.zip [file Zcchc11_set_D.pdf › Supplemental Dataset 1/D-mRNA_rhythm_translation_rhyth/Zcchc11_set_D.pdf]

## Zfand4

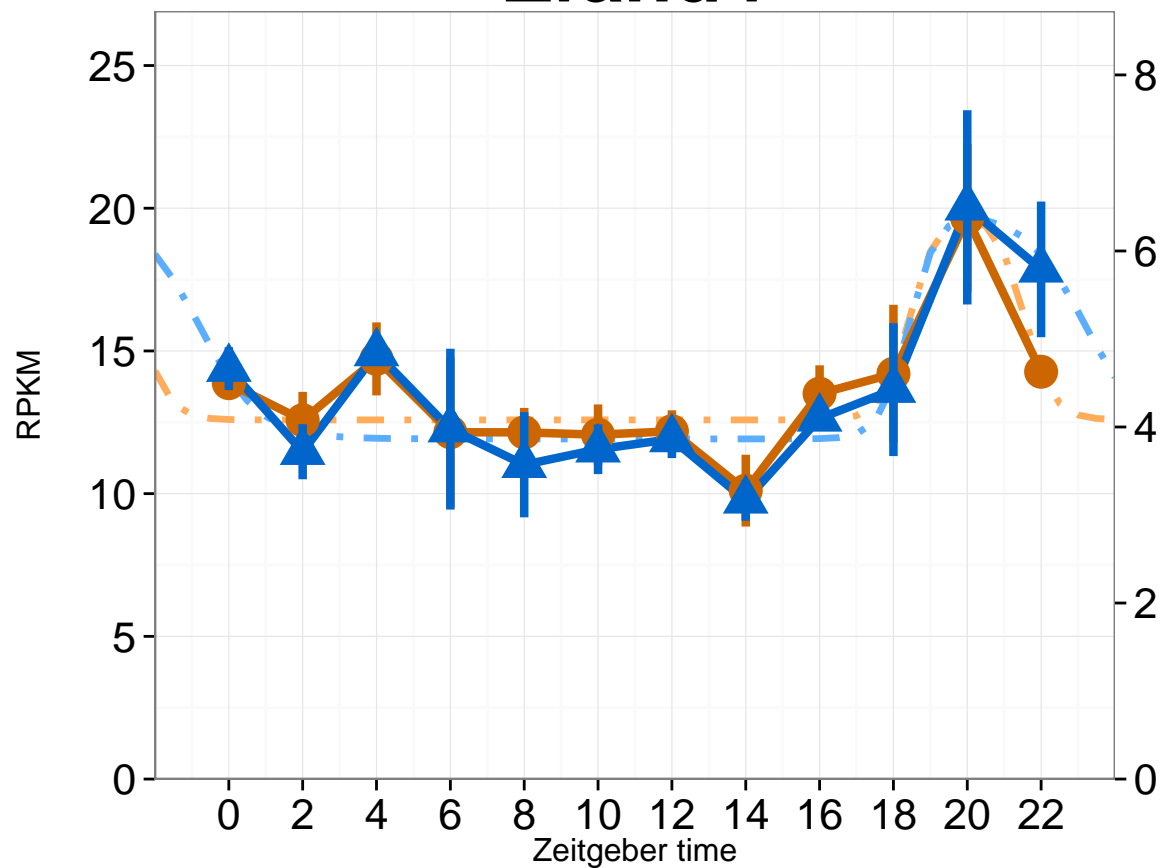

## Zfand4

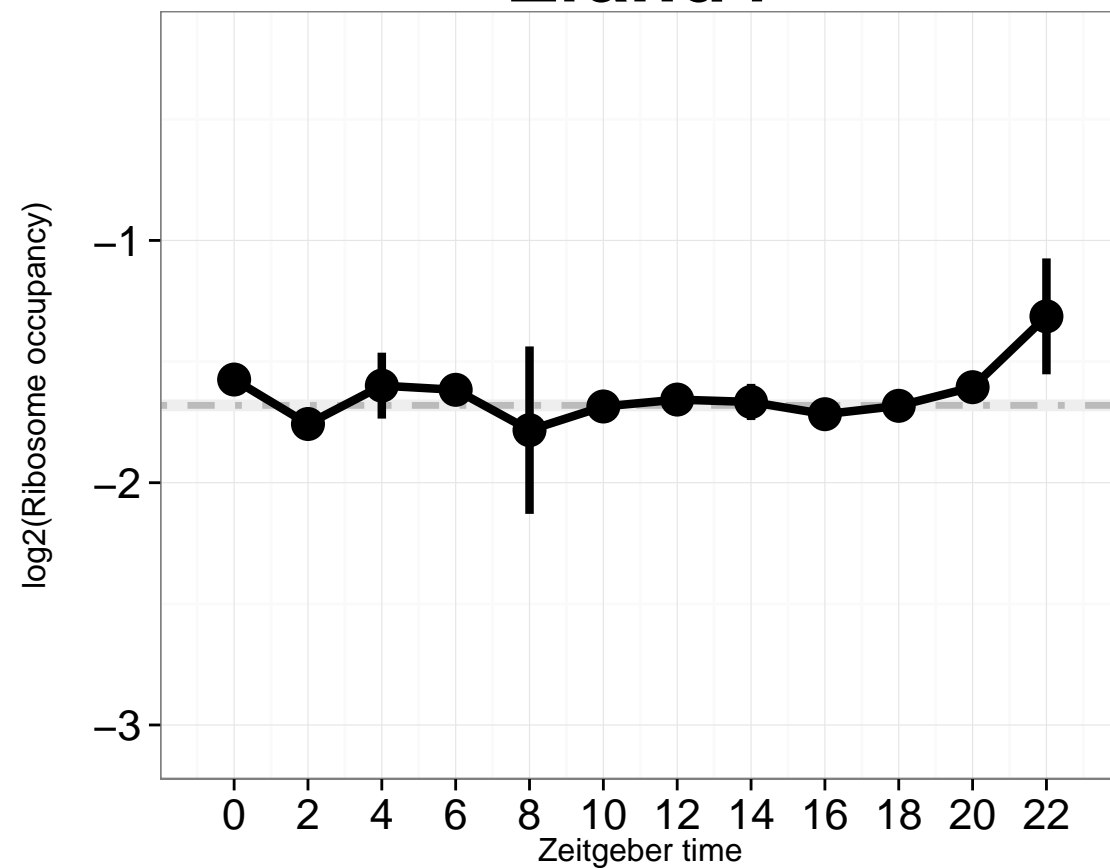

Supplement: SuppDataset_1.zip [file Zfand4_set_D.pdf › Supplemental Dataset 1/D-mRNA_rhythm_translation_rhyth/Zfand4_set_D.pdf]

# Zfp169

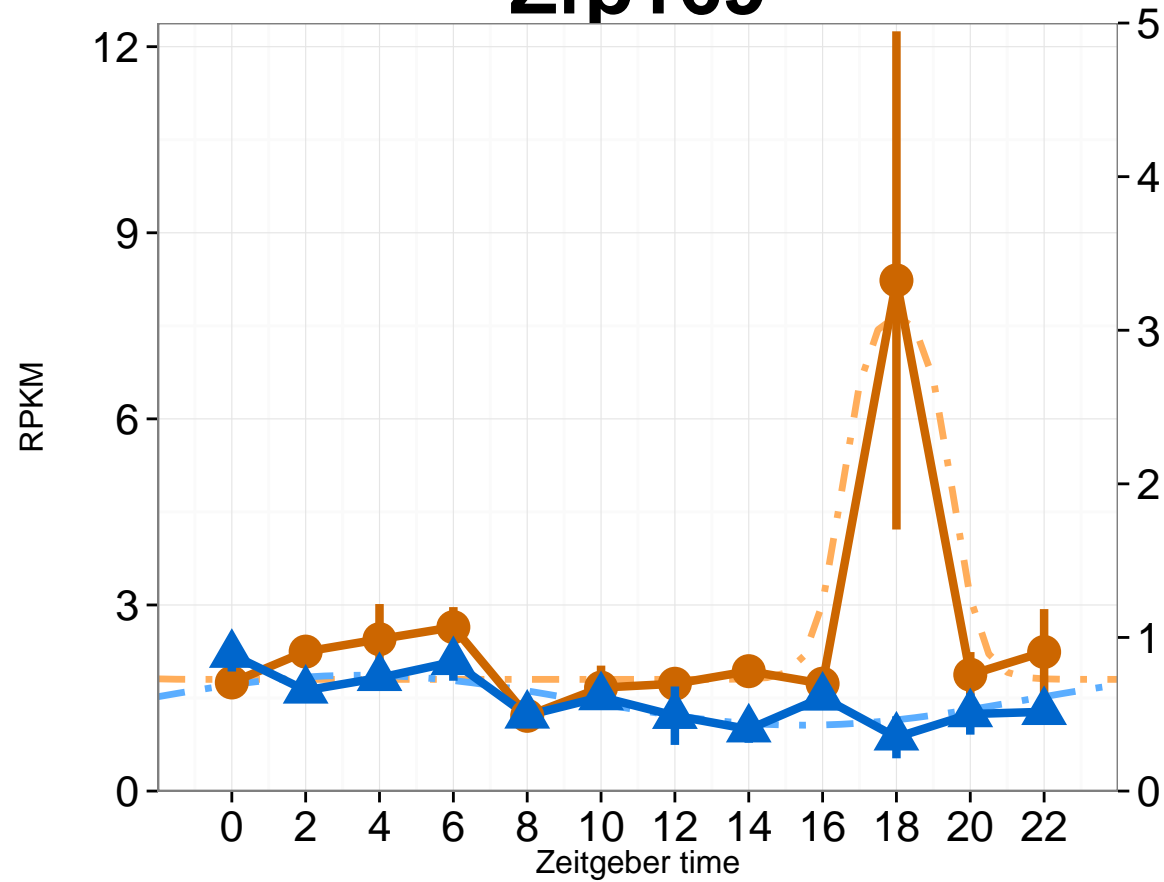

# Zfp169

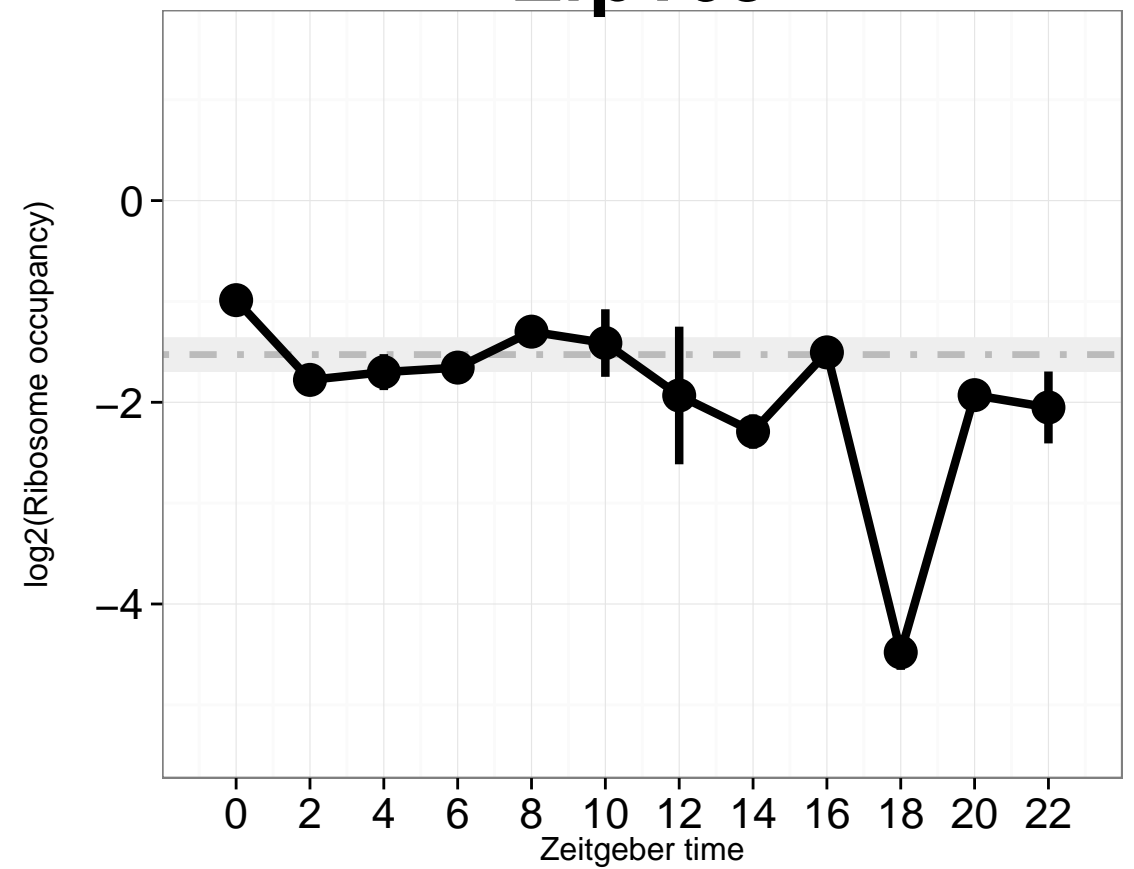

Supplement: SuppDataset_1.zip [file Zfp169_set_D.pdf › Supplemental Dataset 1/D-mRNA_rhythm_translation_rhyth/Zfp169_set_D.pdf]

# Zfp189

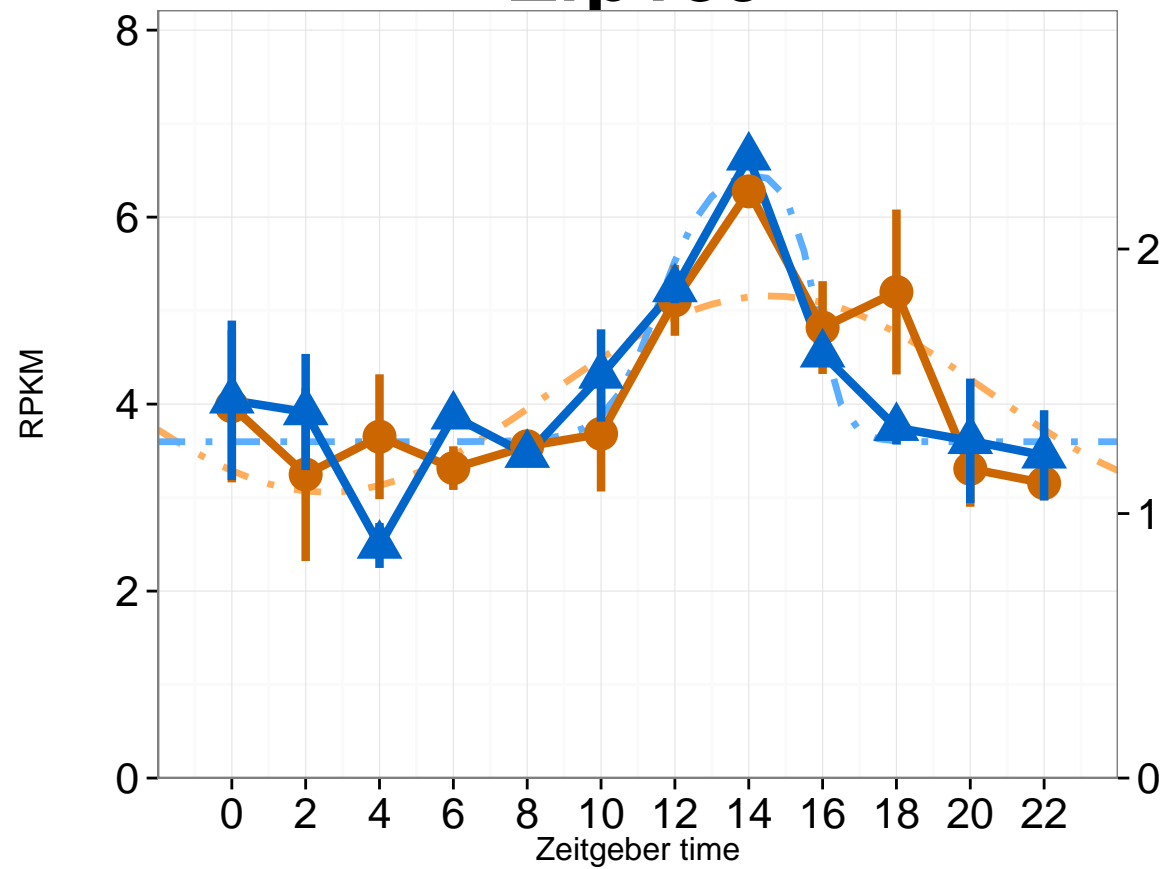

# Zfp189

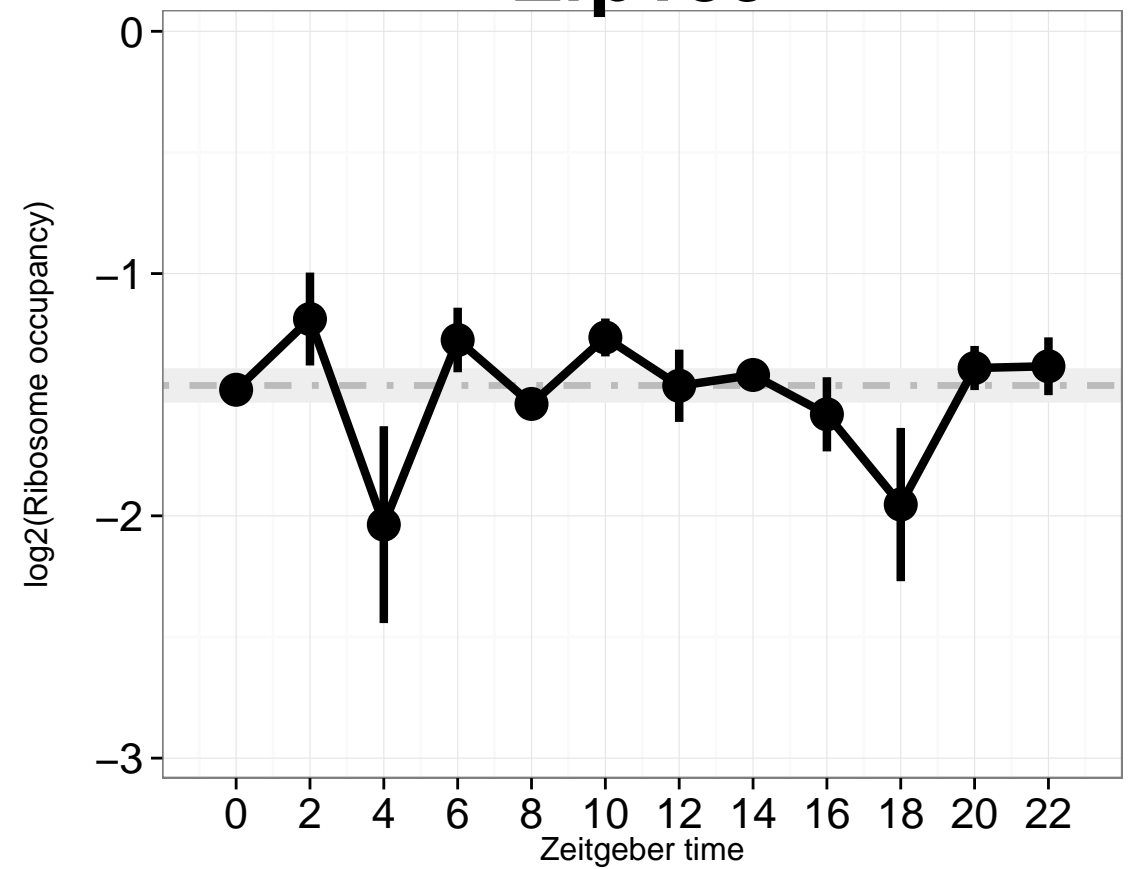

Supplement: SuppDataset_1.zip [file Zfp189_set_D.pdf › Supplemental Dataset 1/D-mRNA_rhythm_translation_rhyth/Zfp189_set_D.pdf]

# Zfp341

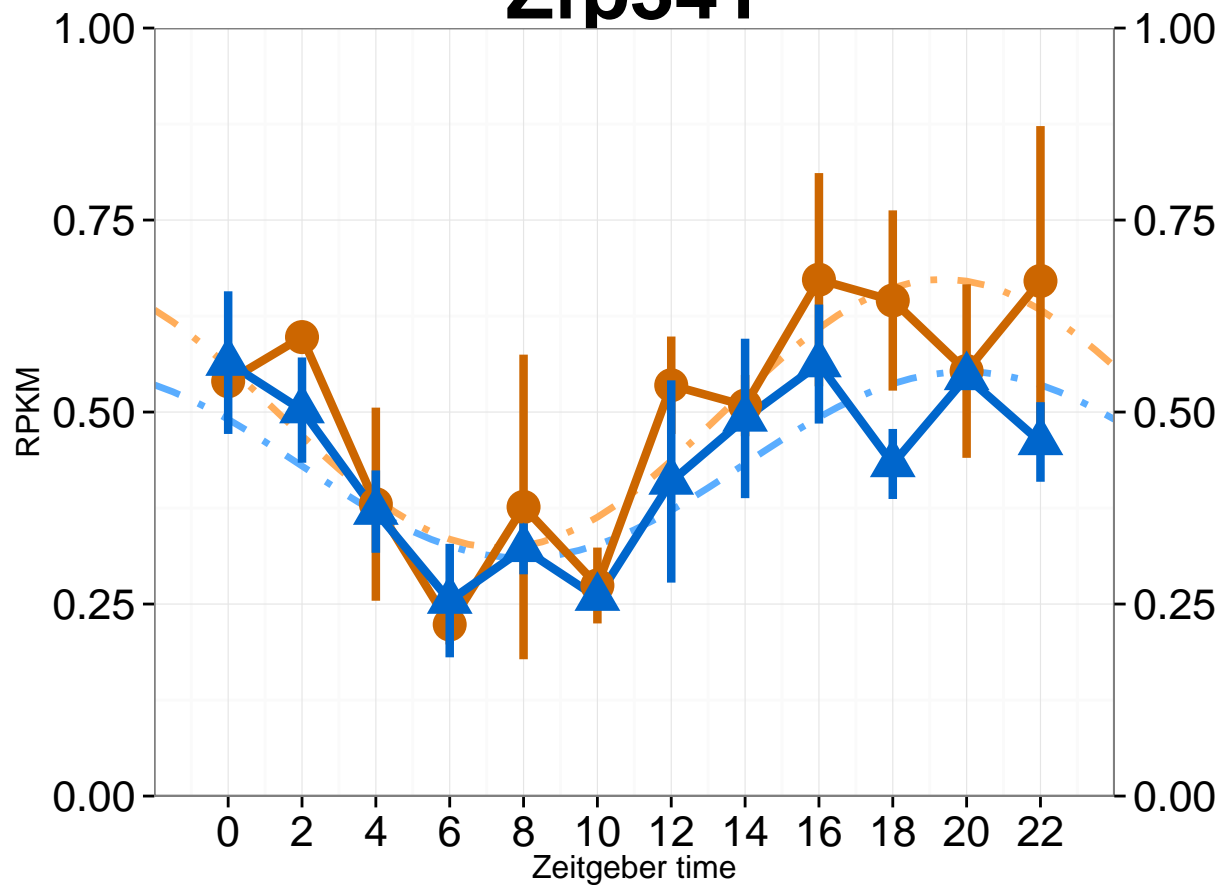

# Zfp341

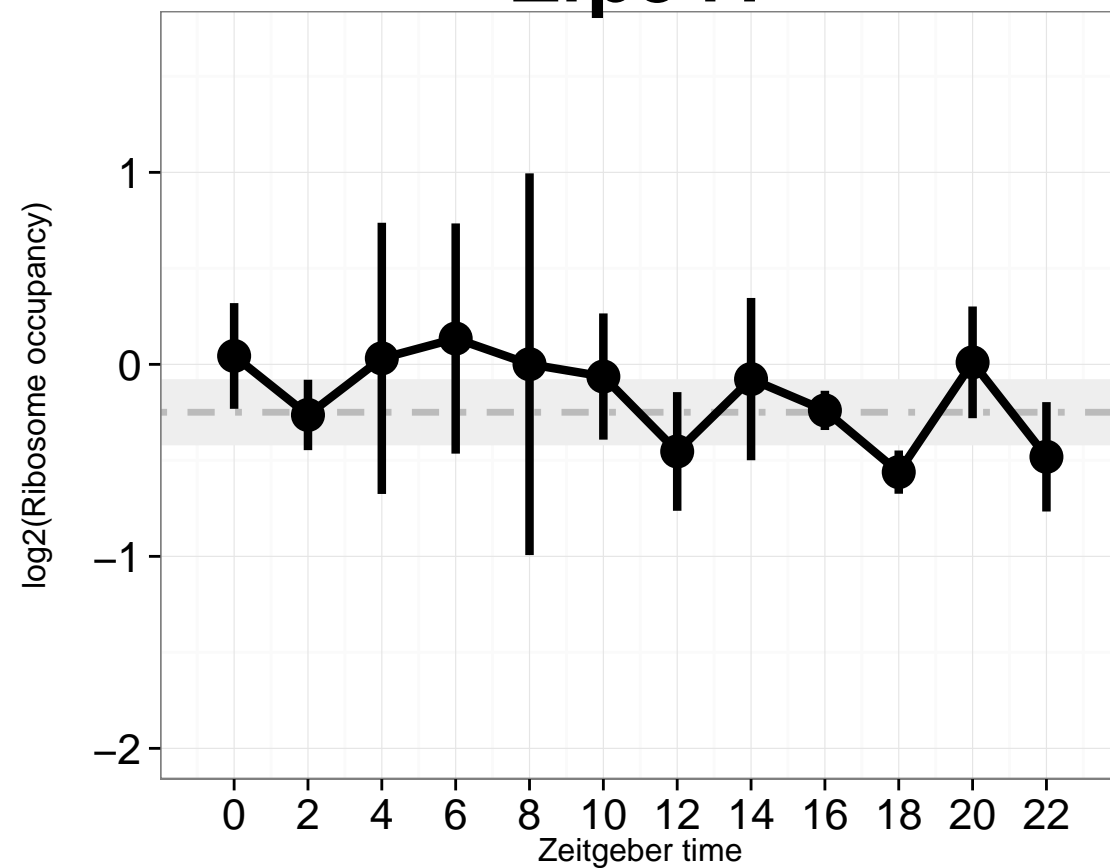

Supplement: SuppDataset_1.zip [file Zfp341_set_D.pdf › Supplemental Dataset 1/D-mRNA_rhythm_translation_rhyth/Zfp341_set_D.pdf]

# Zfp36l1

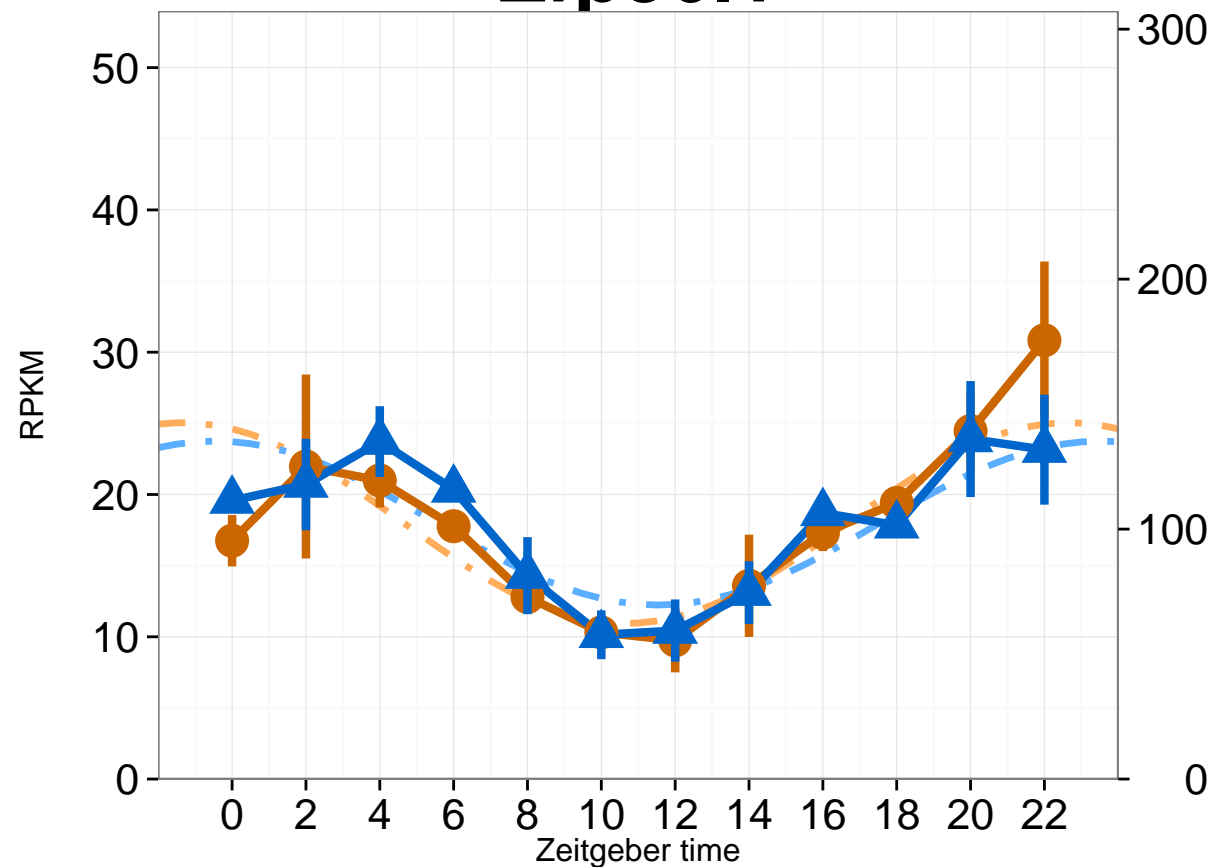

# Zfp36l1

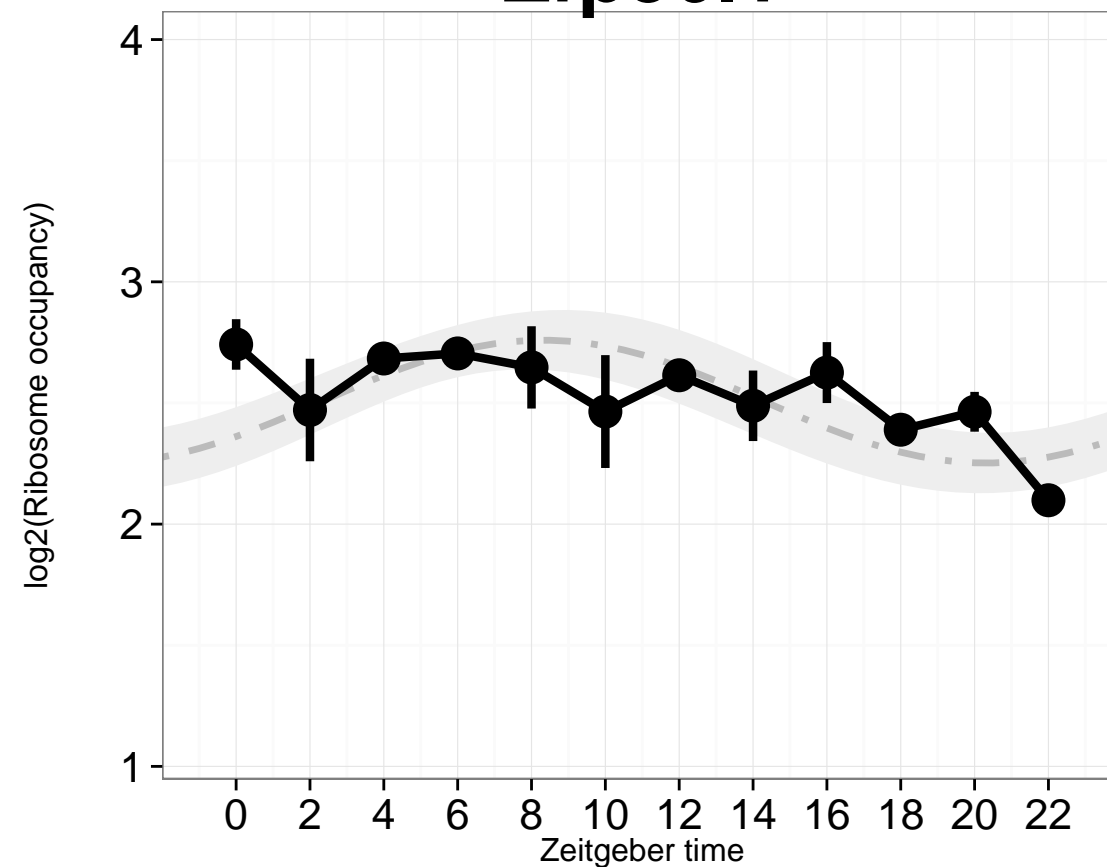

Supplement: SuppDataset_1.zip [file Zfp36l1_set_D.pdf › Supplemental Dataset 1/D-mRNA_rhythm_translation_rhyth/Zfp36l1_set_D.pdf]

# Zfp445

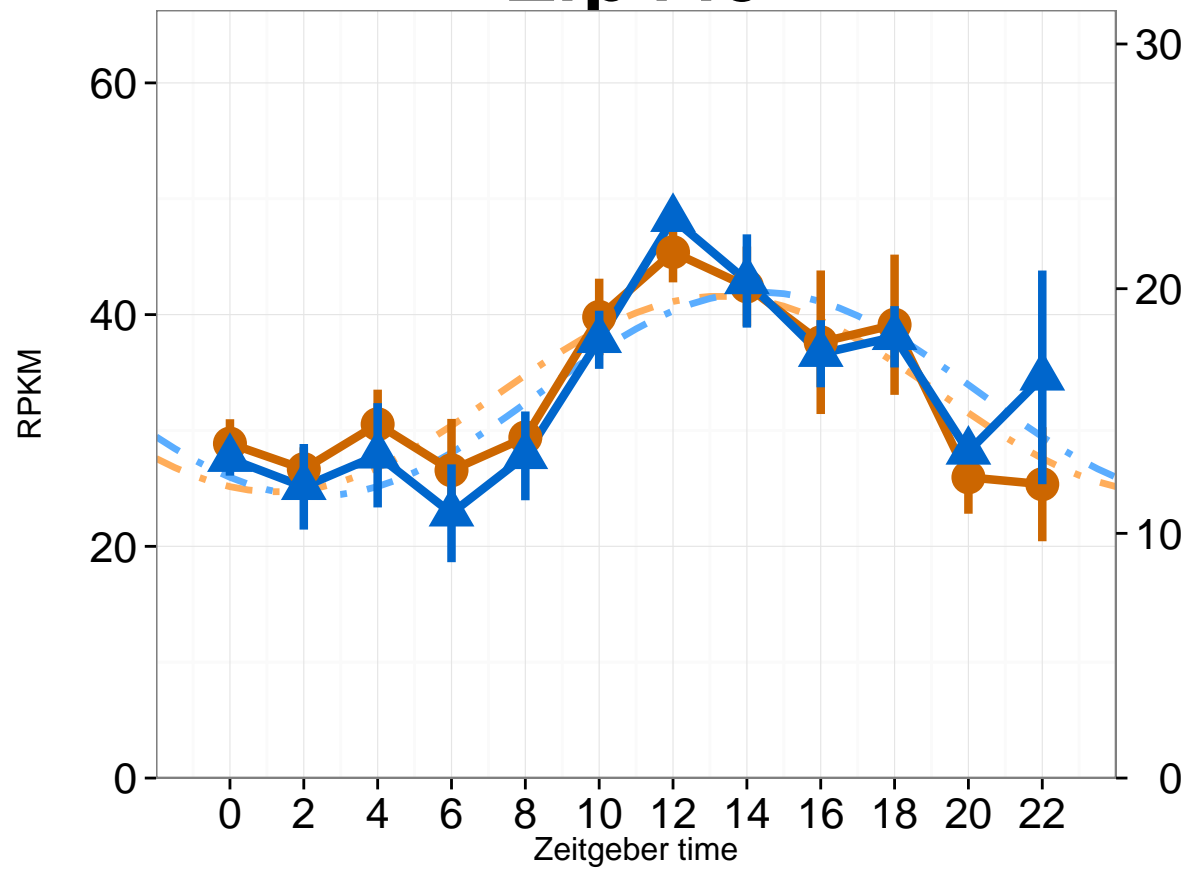

# Zfp445

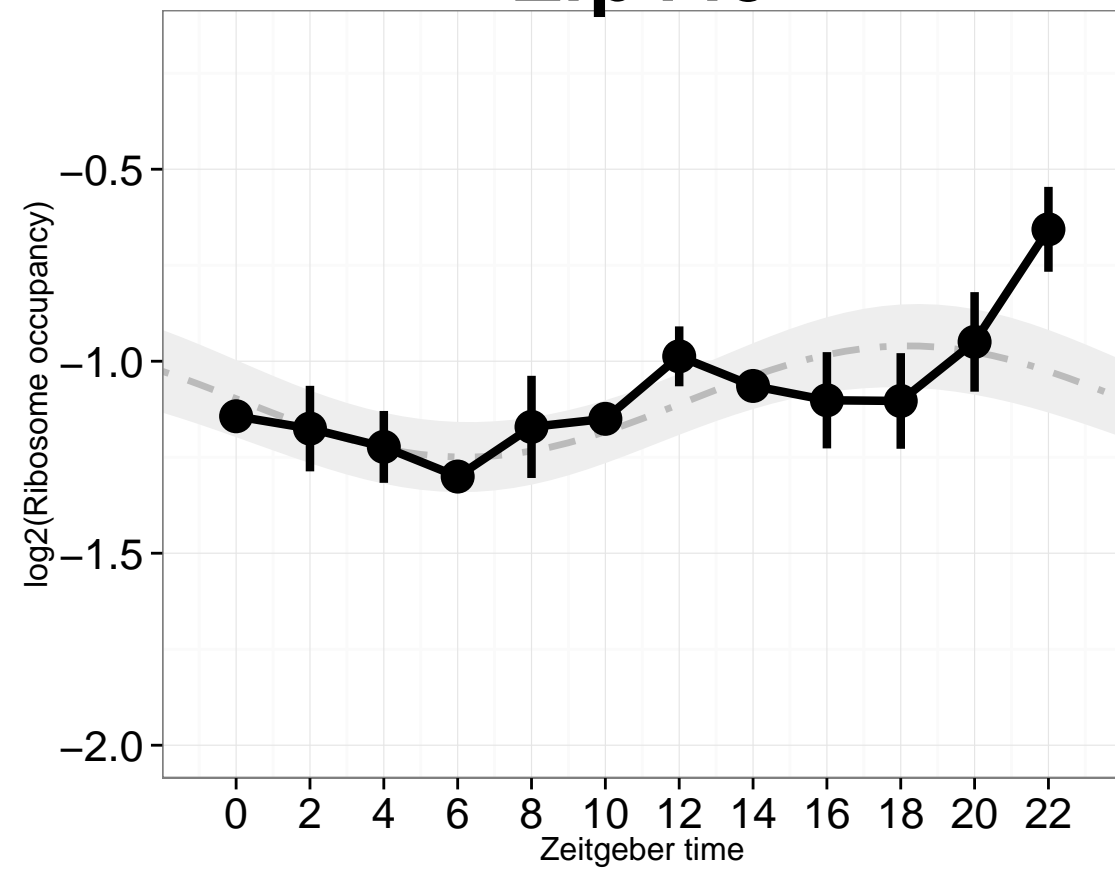

Supplement: SuppDataset_1.zip [file Zfp445_set_D.pdf › Supplemental Dataset 1/D-mRNA_rhythm_translation_rhyth/Zfp445_set_D.pdf]

# Zfp788

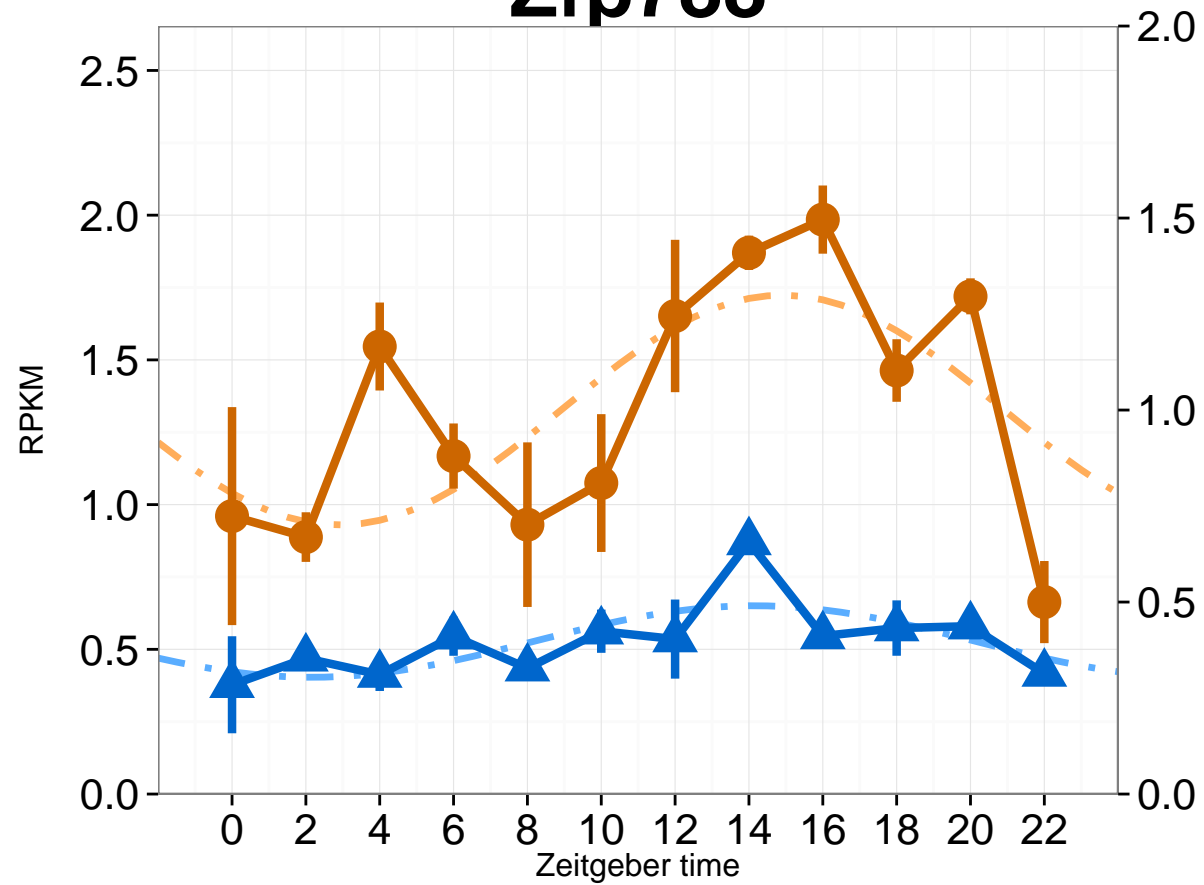

# Zfp788

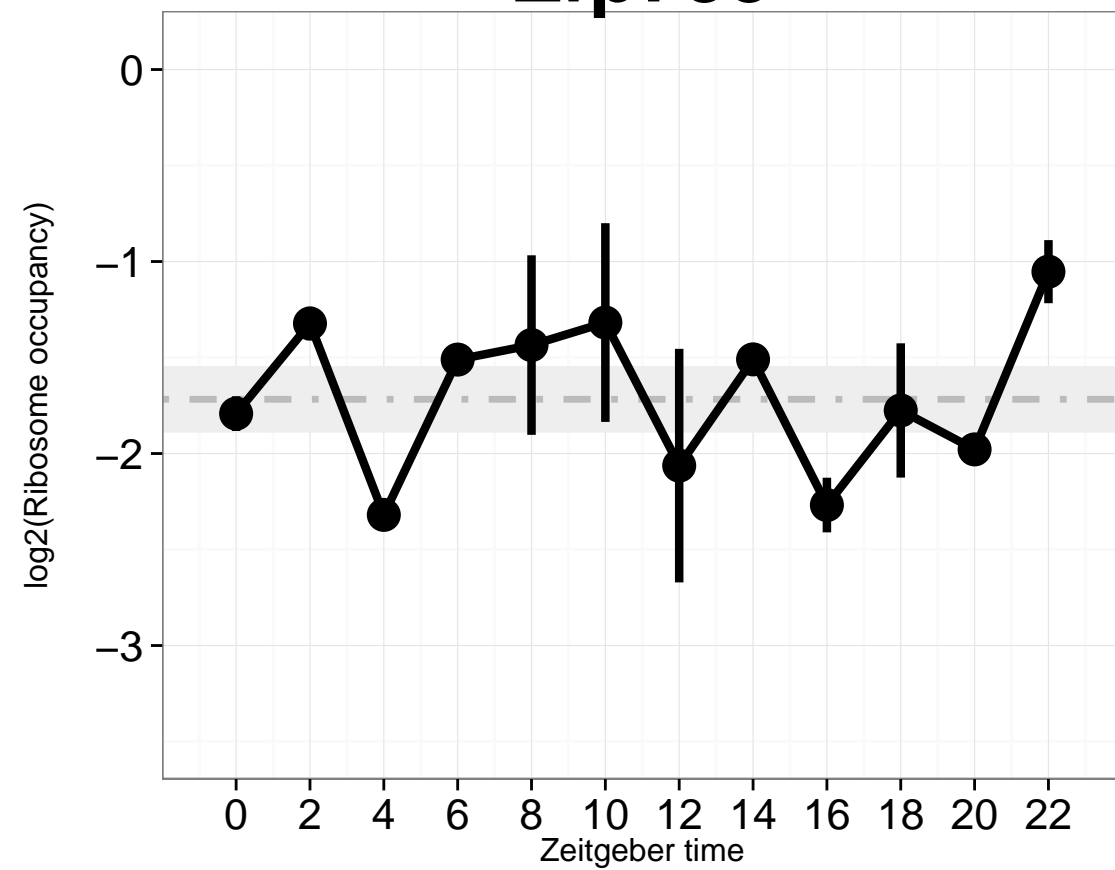

Supplement: SuppDataset_1.zip [file Zfp788_set_D.pdf › Supplemental Dataset 1/D-mRNA_rhythm_translation_rhyth/Zfp788_set_D.pdf]

# Zfp867

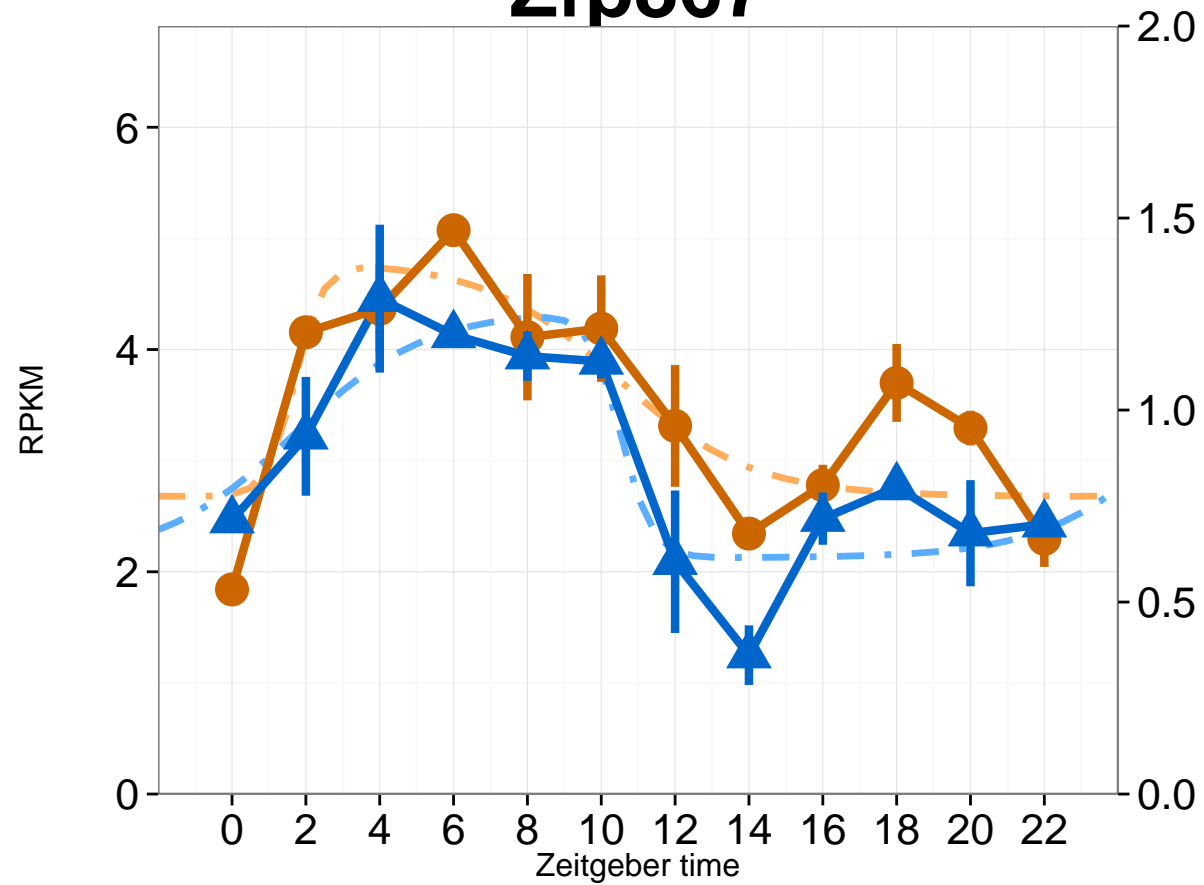

# Zfp867

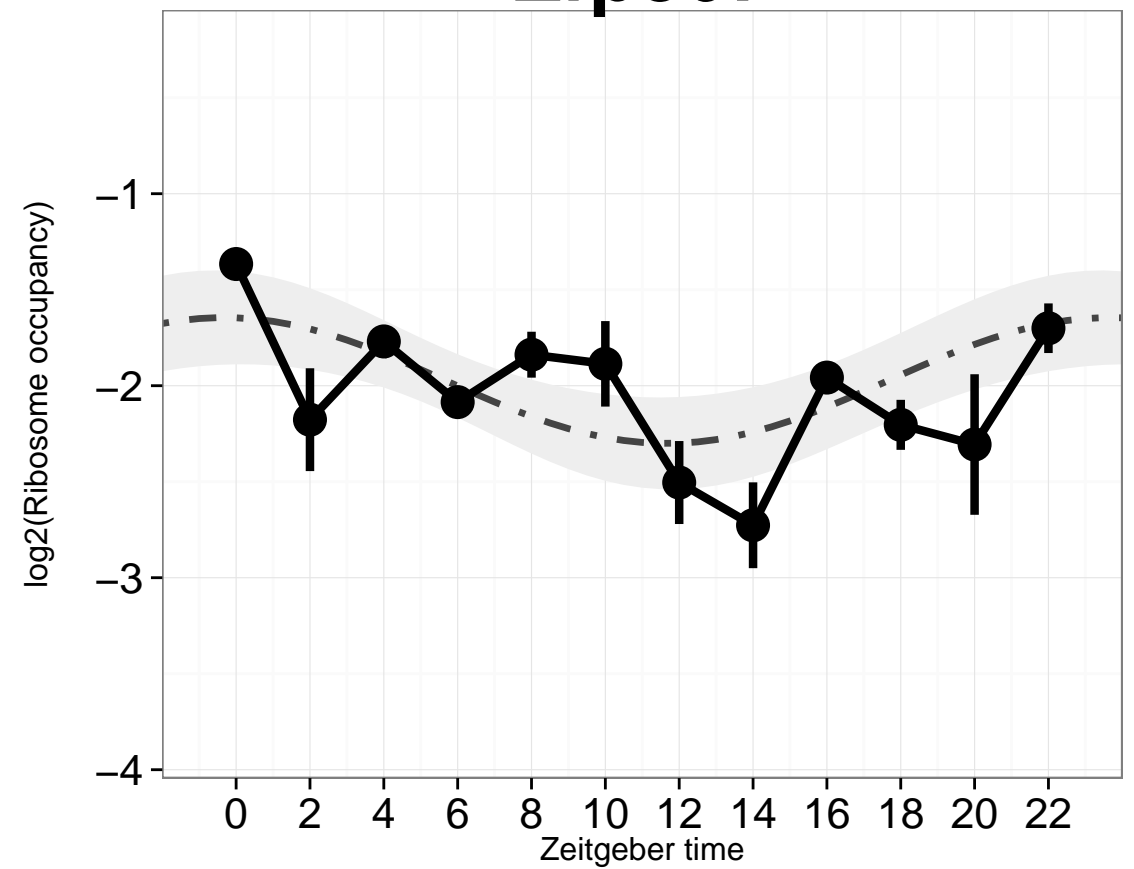

Supplement: SuppDataset_1.zip [file Zfp867_set_D.pdf › Supplemental Dataset 1/D-mRNA_rhythm_translation_rhyth/Zfp867_set_D.pdf]

# Zfp9

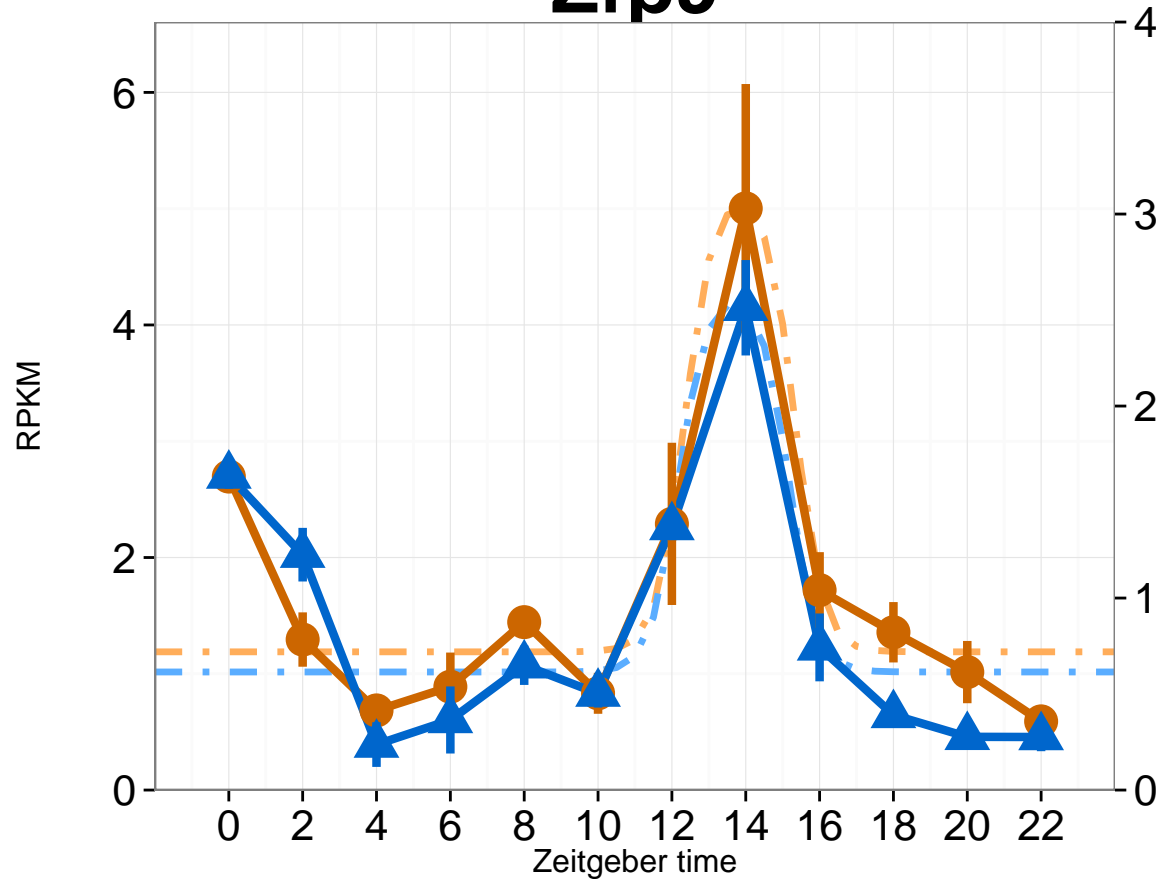

# Zfp9

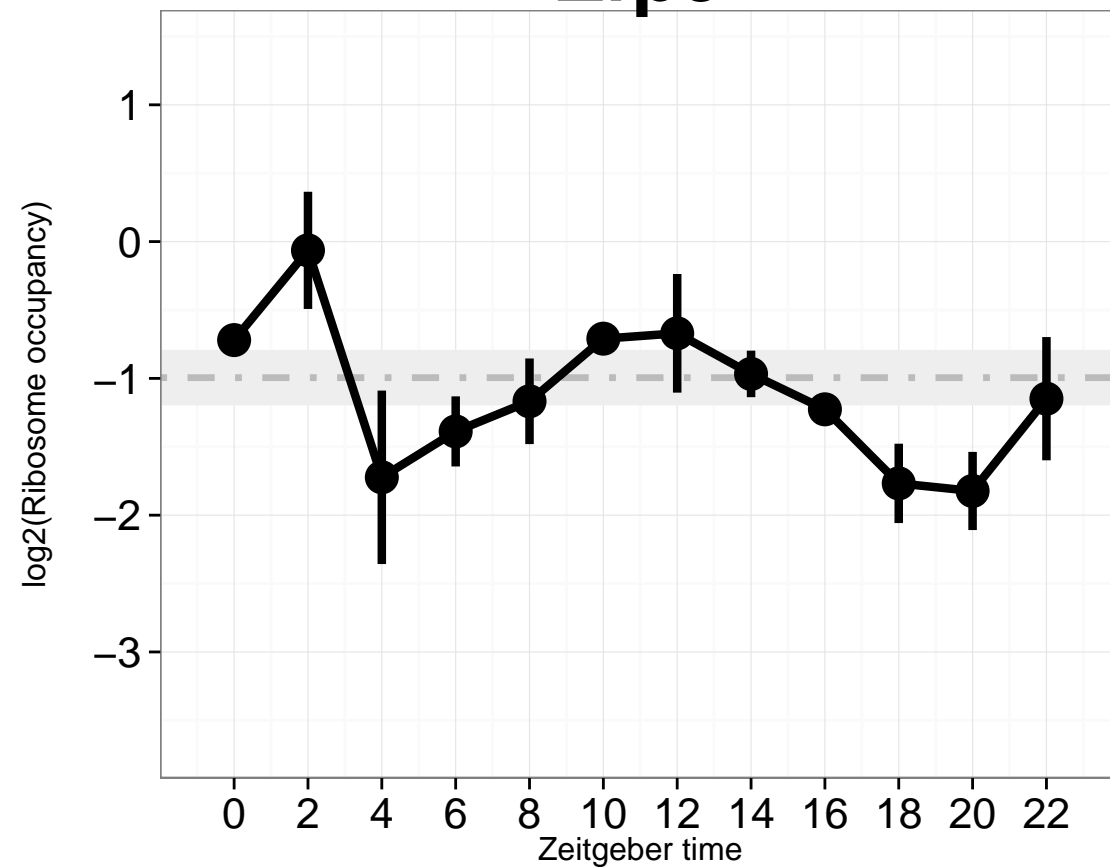

Supplement: SuppDataset_1.zip [file Zfp9_set_D.pdf › Supplemental Dataset 1/D-mRNA_rhythm_translation_rhyth/Zfp9_set_D.pdf]

# Zkscan17

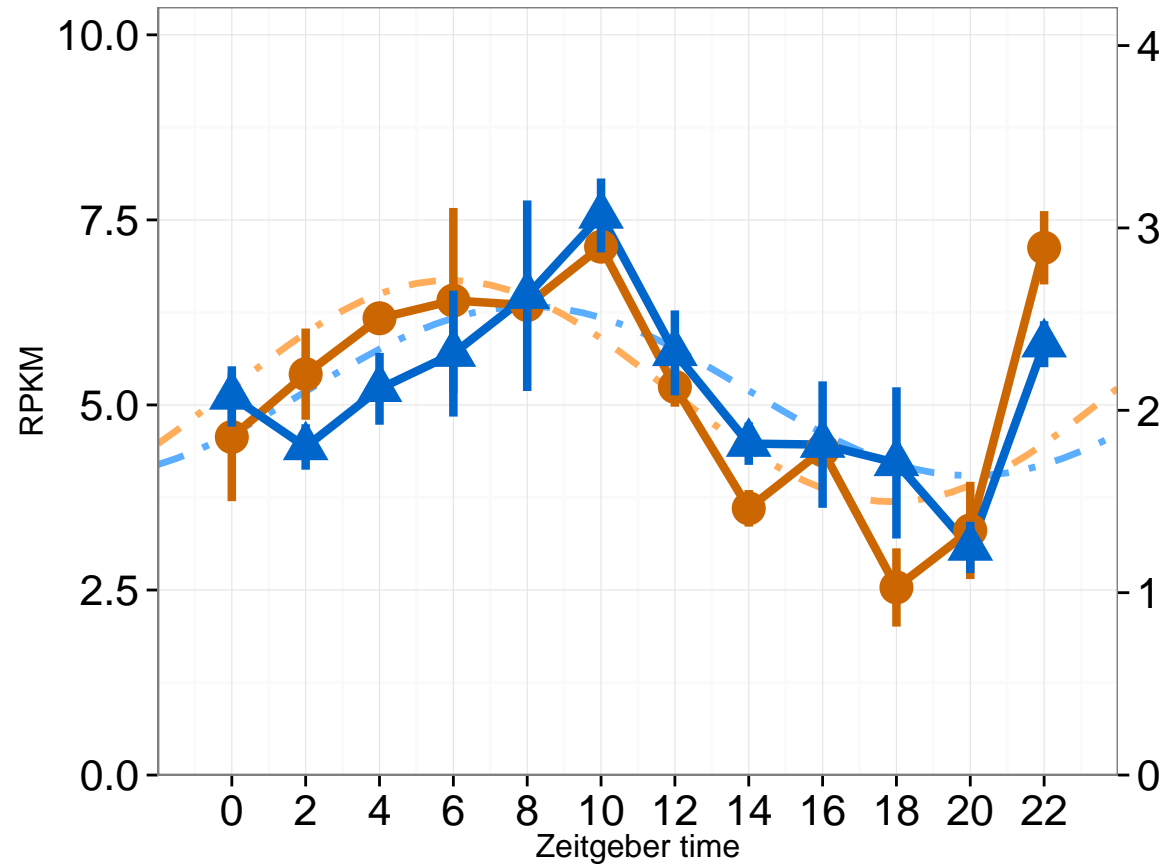

# Zkscan17

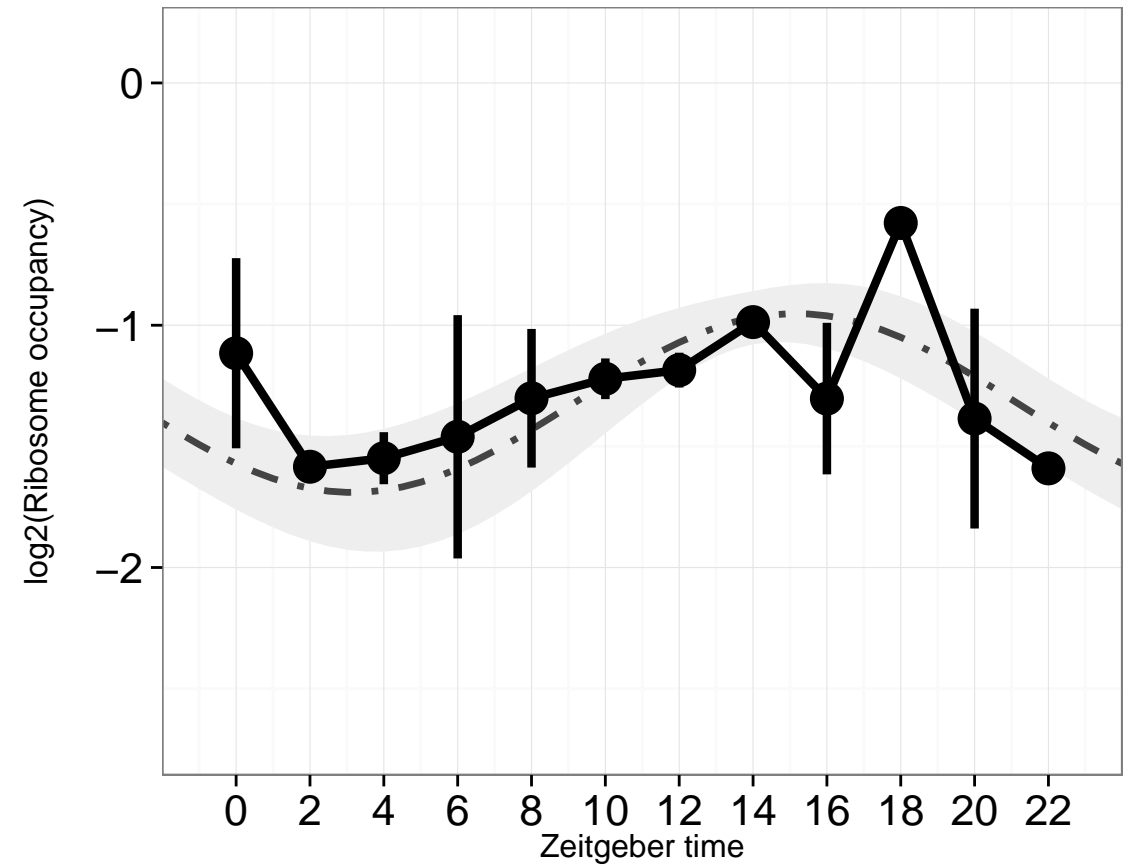

Supplement: SuppDataset_1.zip [file Zkscan17_set_D.pdf › Supplemental Dataset 1/D-mRNA_rhythm_translation_rhyth/Zkscan17_set_D.pdf]

# Zmat1

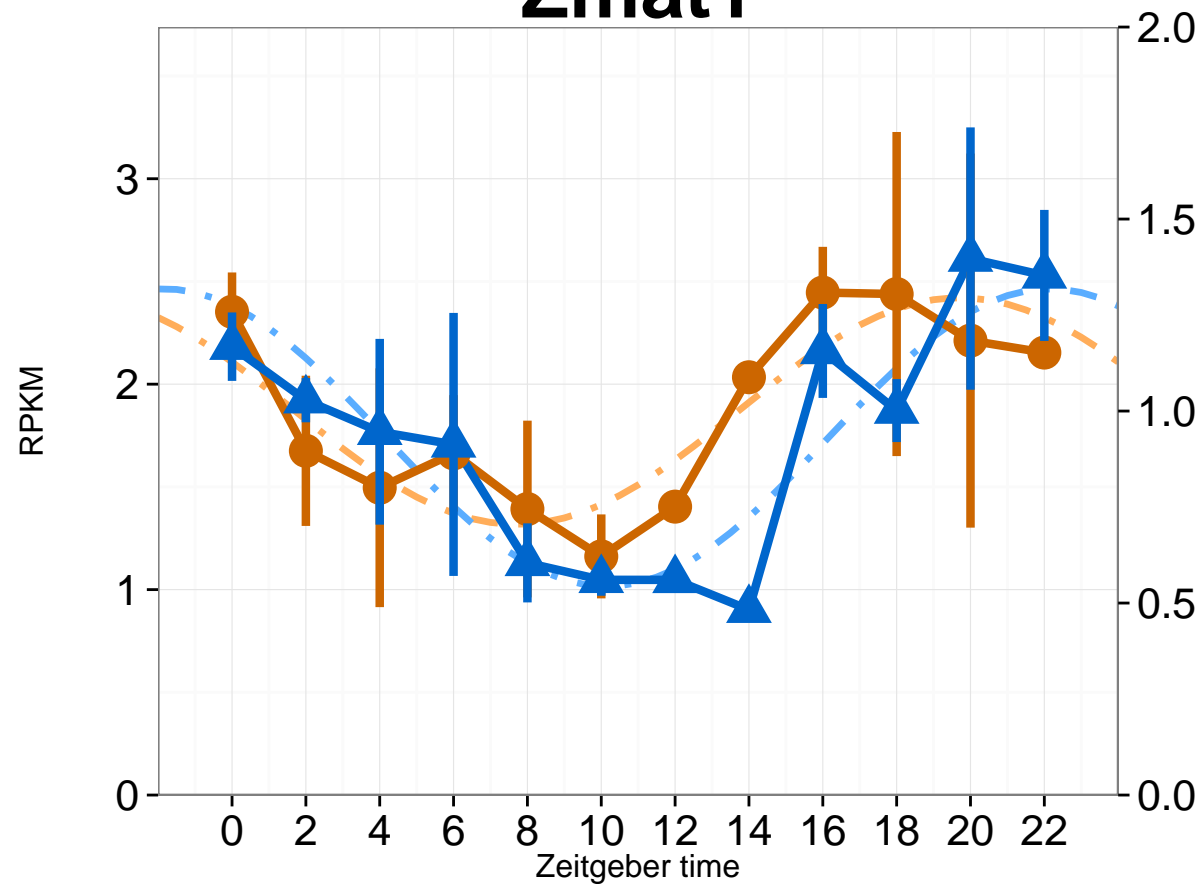

# Zmat1

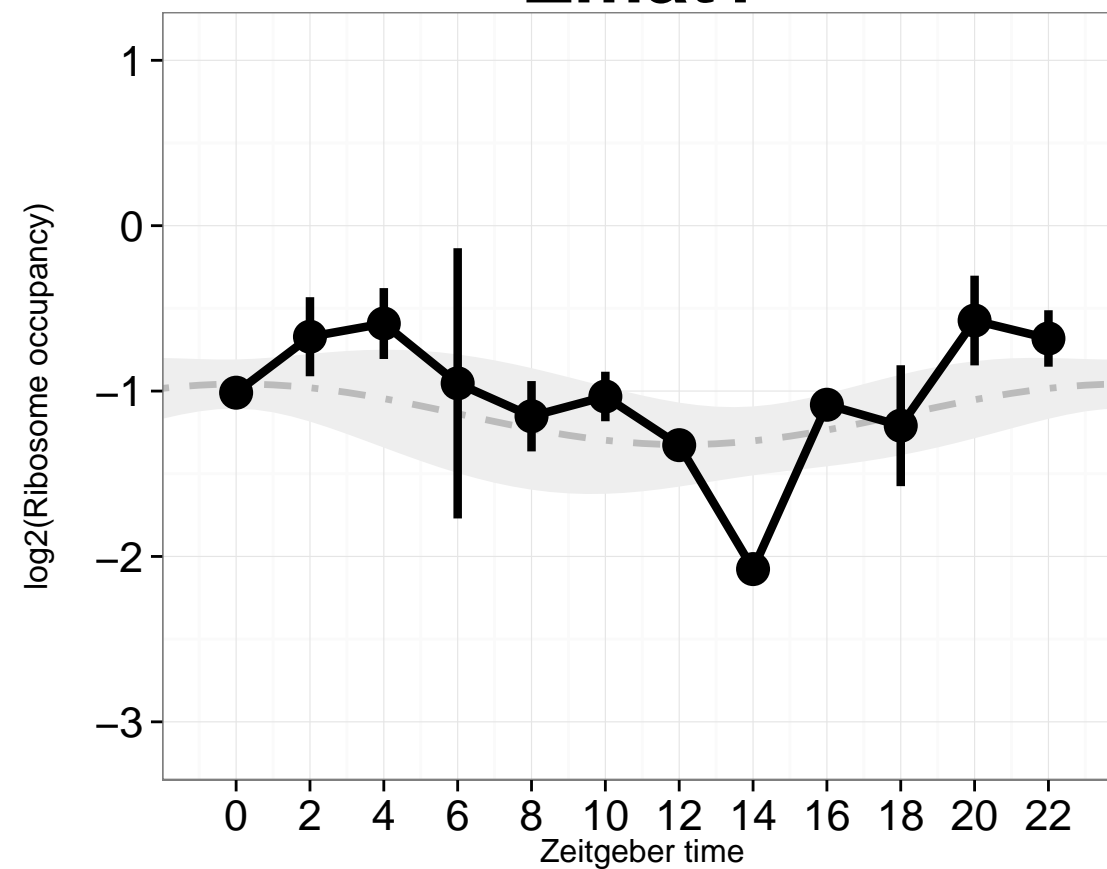

Supplement: SuppDataset_1.zip [file Zmat1_set_D.pdf › Supplemental Dataset 1/D-mRNA_rhythm_translation_rhyth/Zmat1_set_D.pdf]

# Zmym6

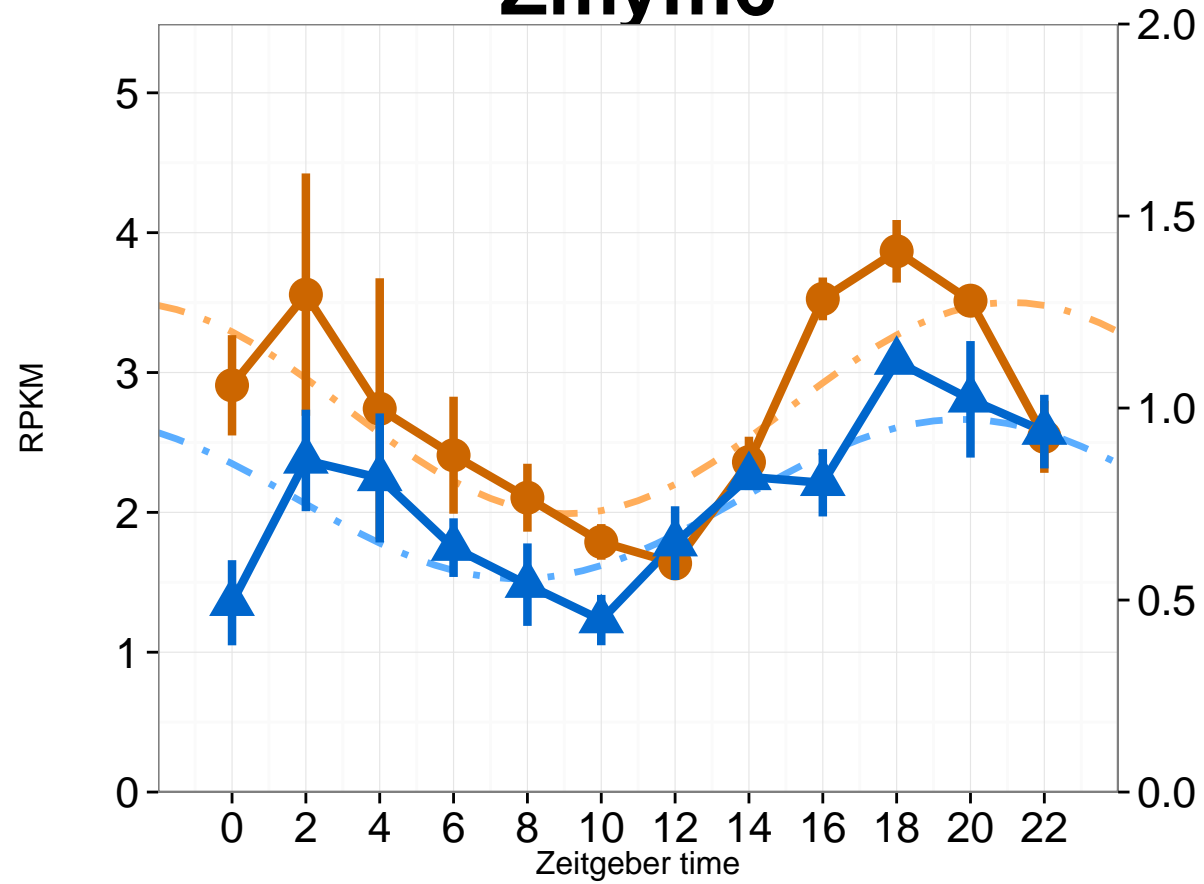

# Zmym6

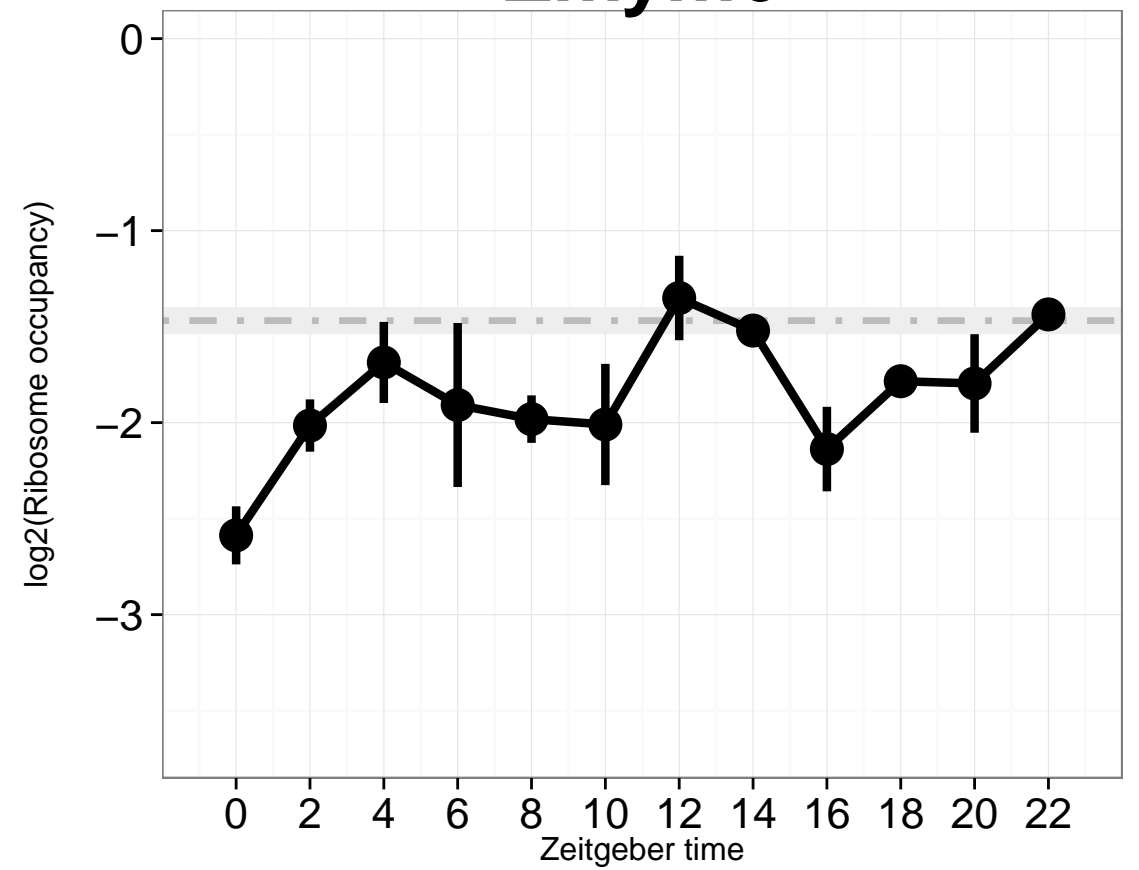

Supplement: SuppDataset_1.zip [file Zmym6_set_D.pdf › Supplemental Dataset 1/D-mRNA_rhythm_translation_rhyth/Zmym6_set_D.pdf]

## Zmynd8

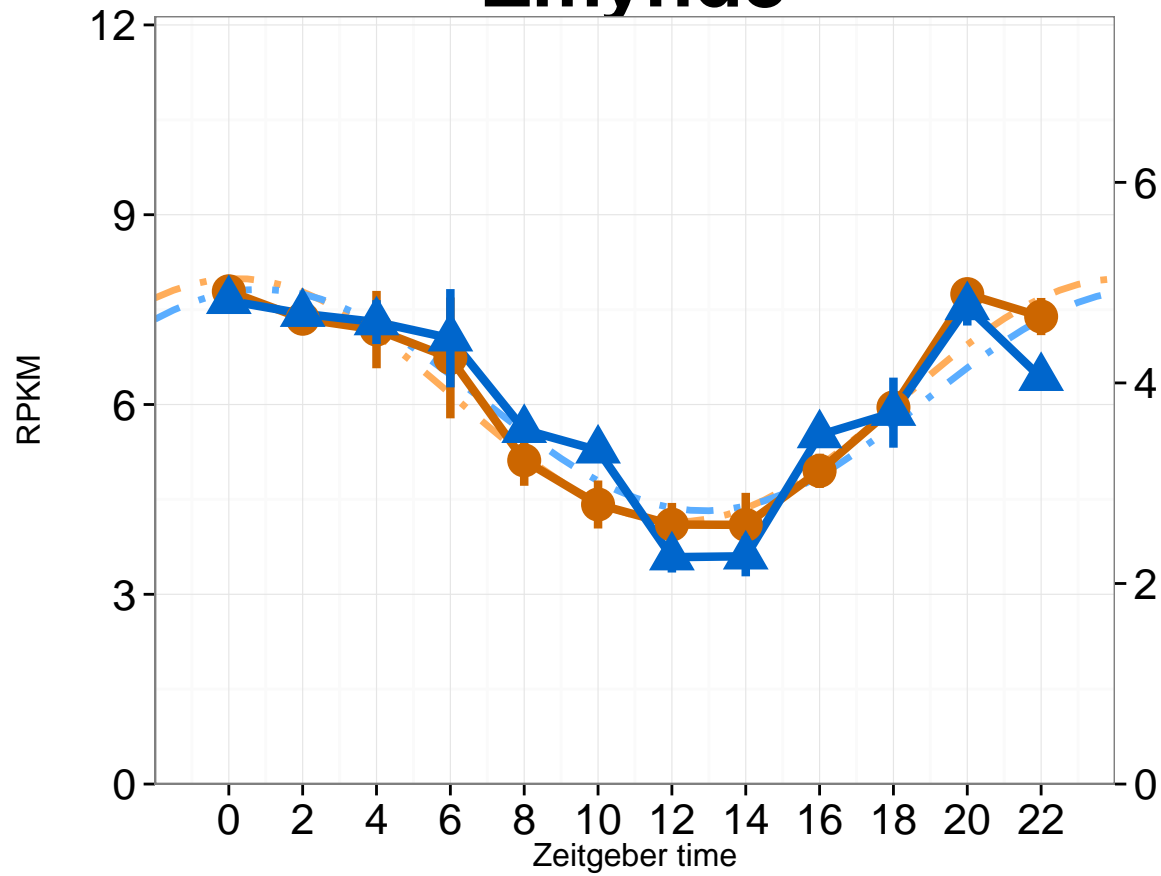

## Zmynd8

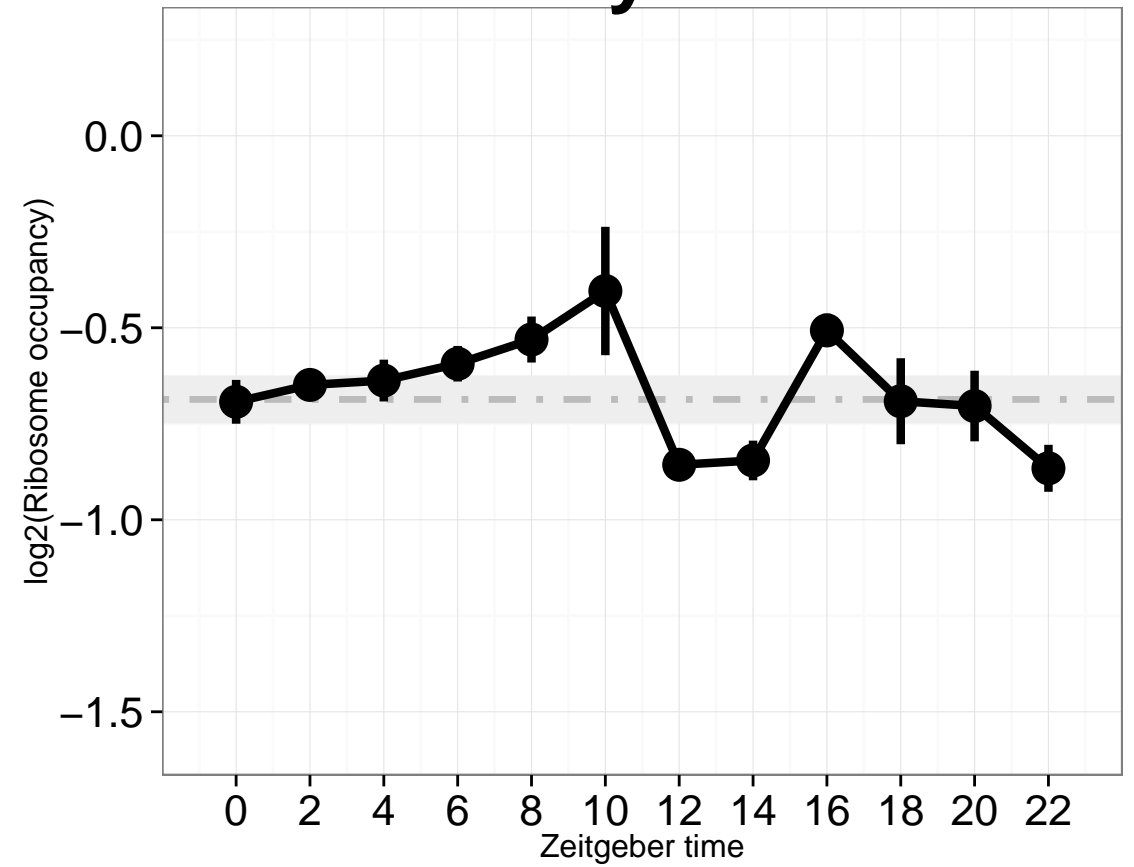

Supplement: SuppDataset_1.zip [file Zmynd8_set_D.pdf › Supplemental Dataset 1/D-mRNA_rhythm_translation_rhyth/Zmynd8_set_D.pdf]

## Zscan20

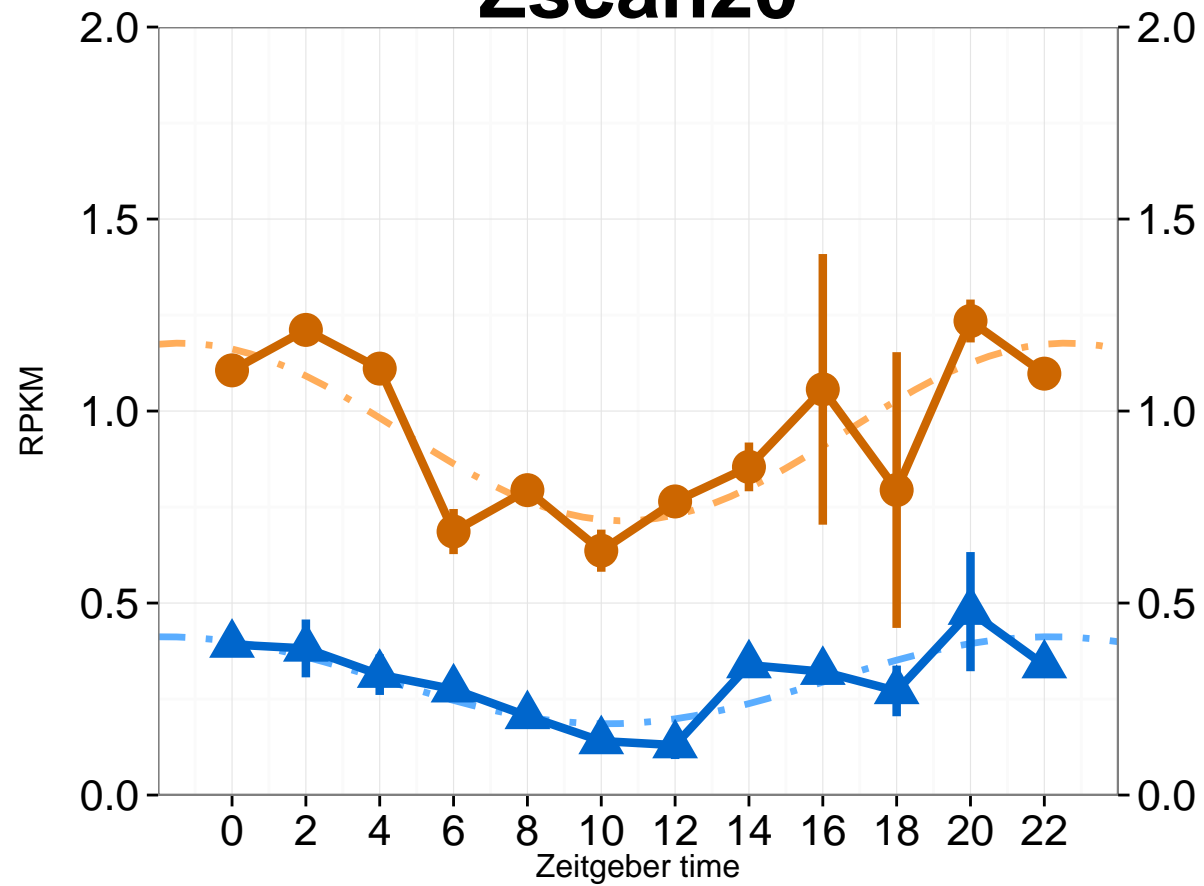

## Zscan20

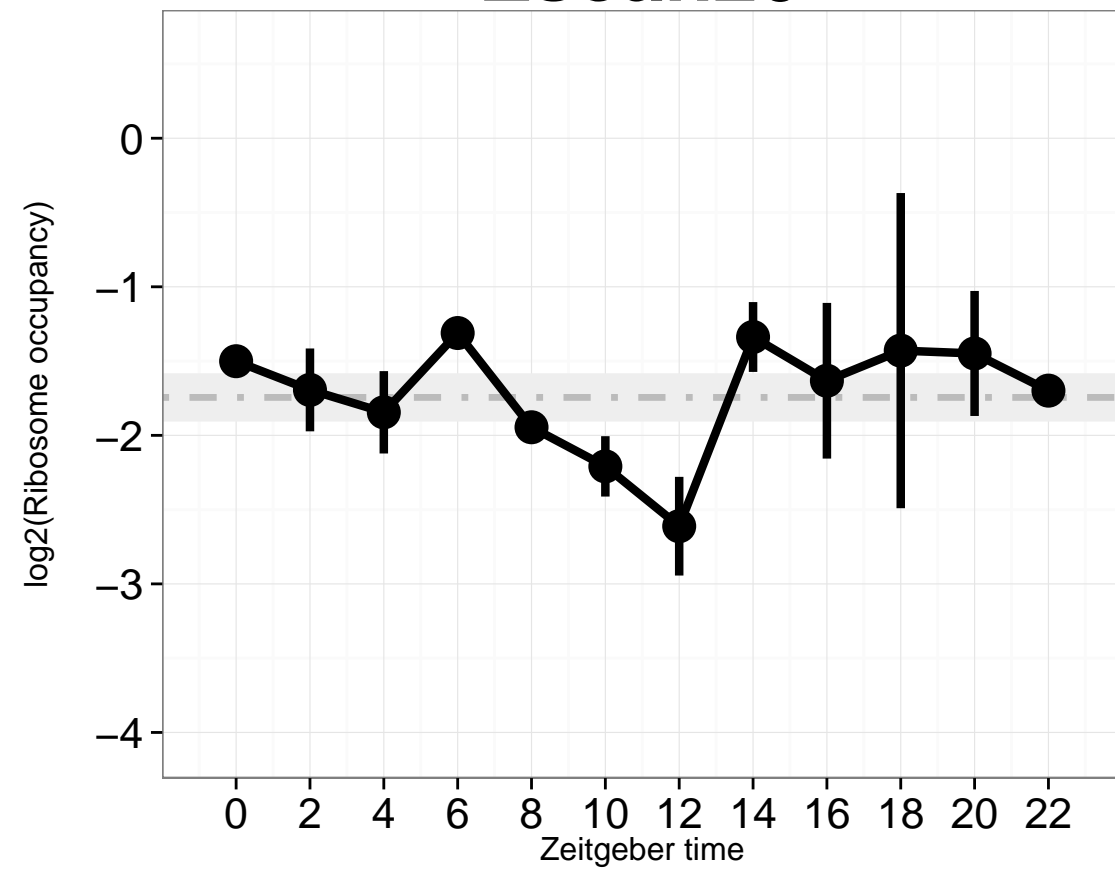

Supplement: SuppDataset_1.zip [file Zscan20_set_D.pdf › Supplemental Dataset 1/D-mRNA_rhythm_translation_rhyth/Zscan20_set_D.pdf]

**mt-Atp8**

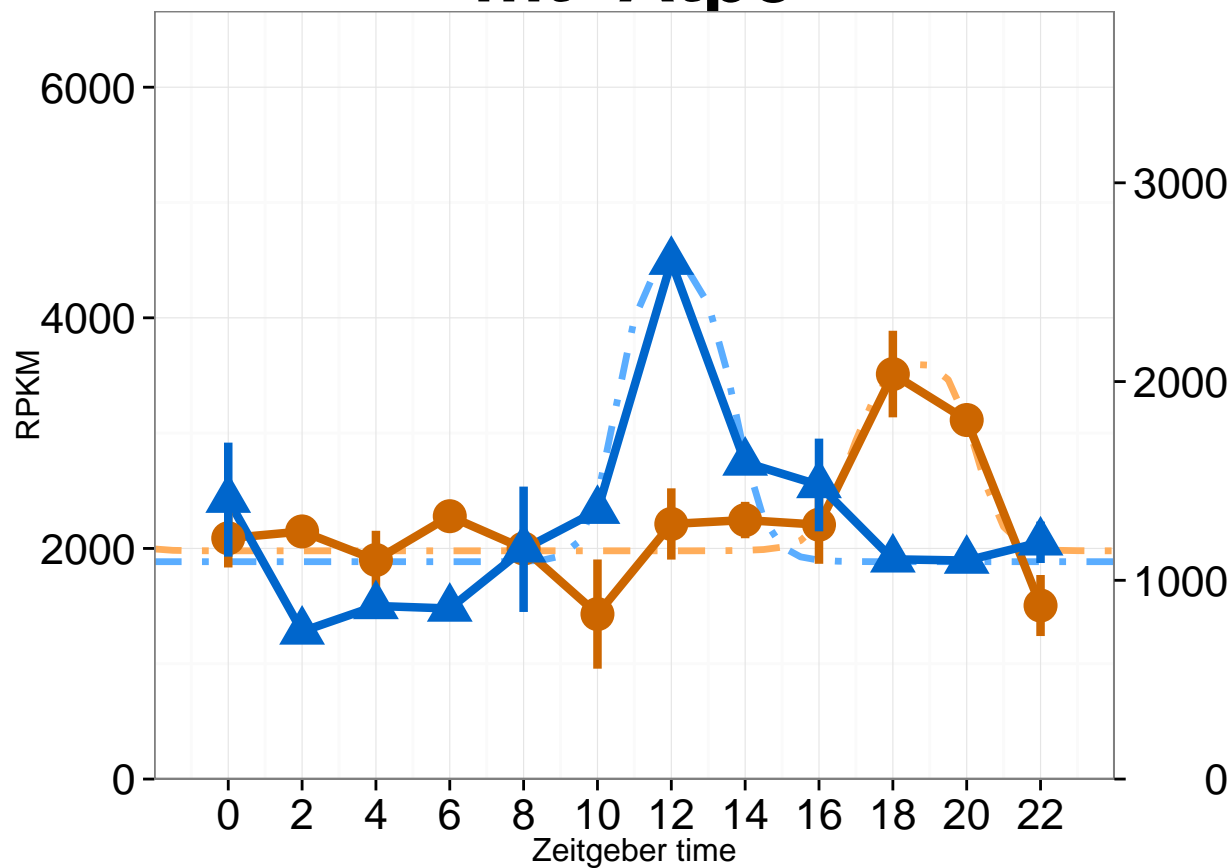

**mt-Atp8**

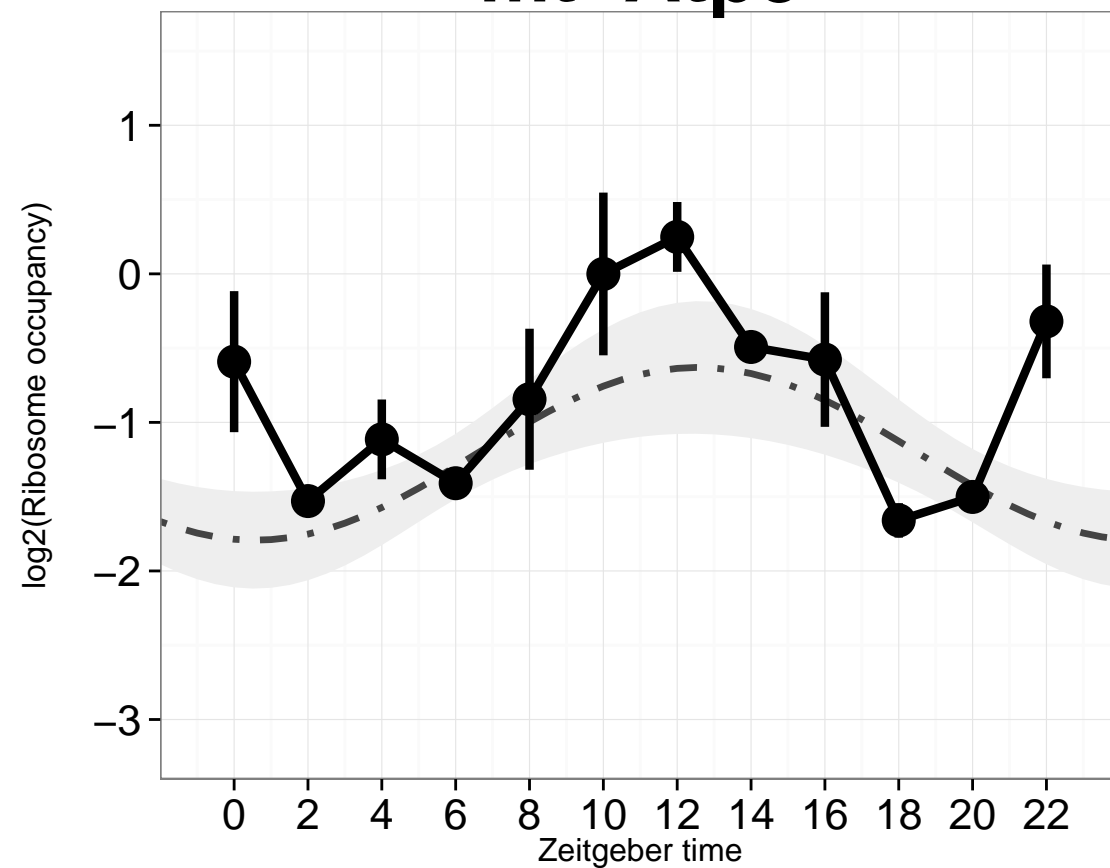

Supplement: SuppDataset_1.zip [file mt-Atp8_set_D.pdf › Supplemental Dataset 1/D-mRNA_rhythm_translation_rhyth/mt-Atp8_set_D.pdf]

mt-Cytb

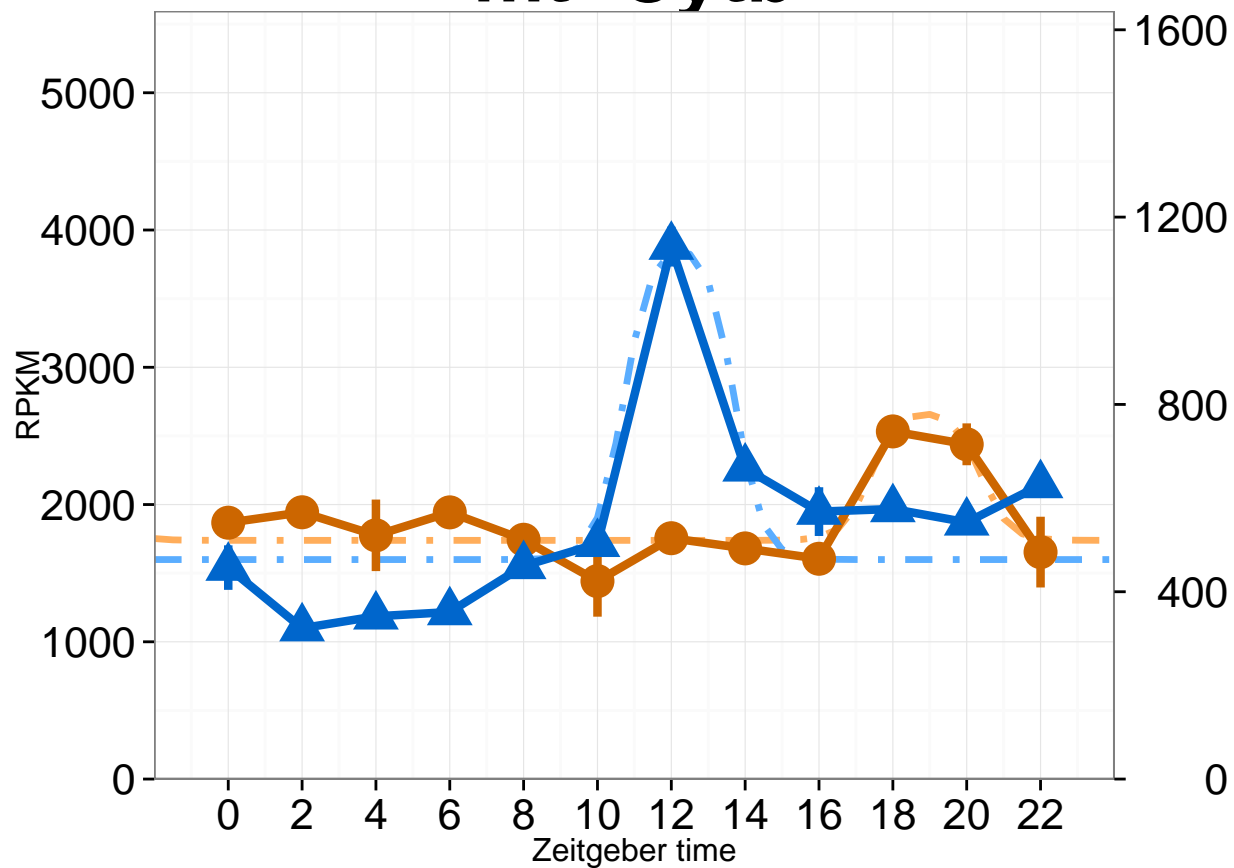

mt-Cytb

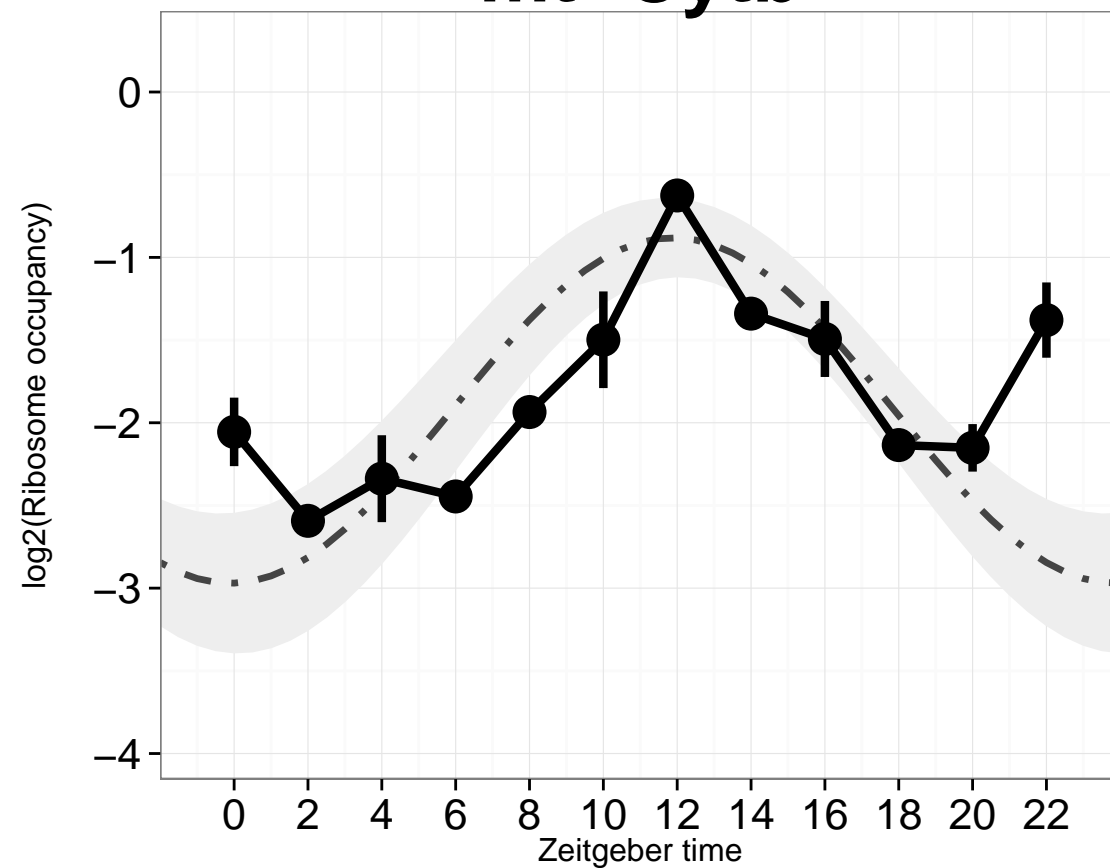

Supplement: SuppDataset_1.zip [file mt-Cytb_set_D.pdf › Supplemental Dataset 1/D-mRNA_rhythm_translation_rhyth/mt-Cytb_set_D.pdf]

mt-Nd5

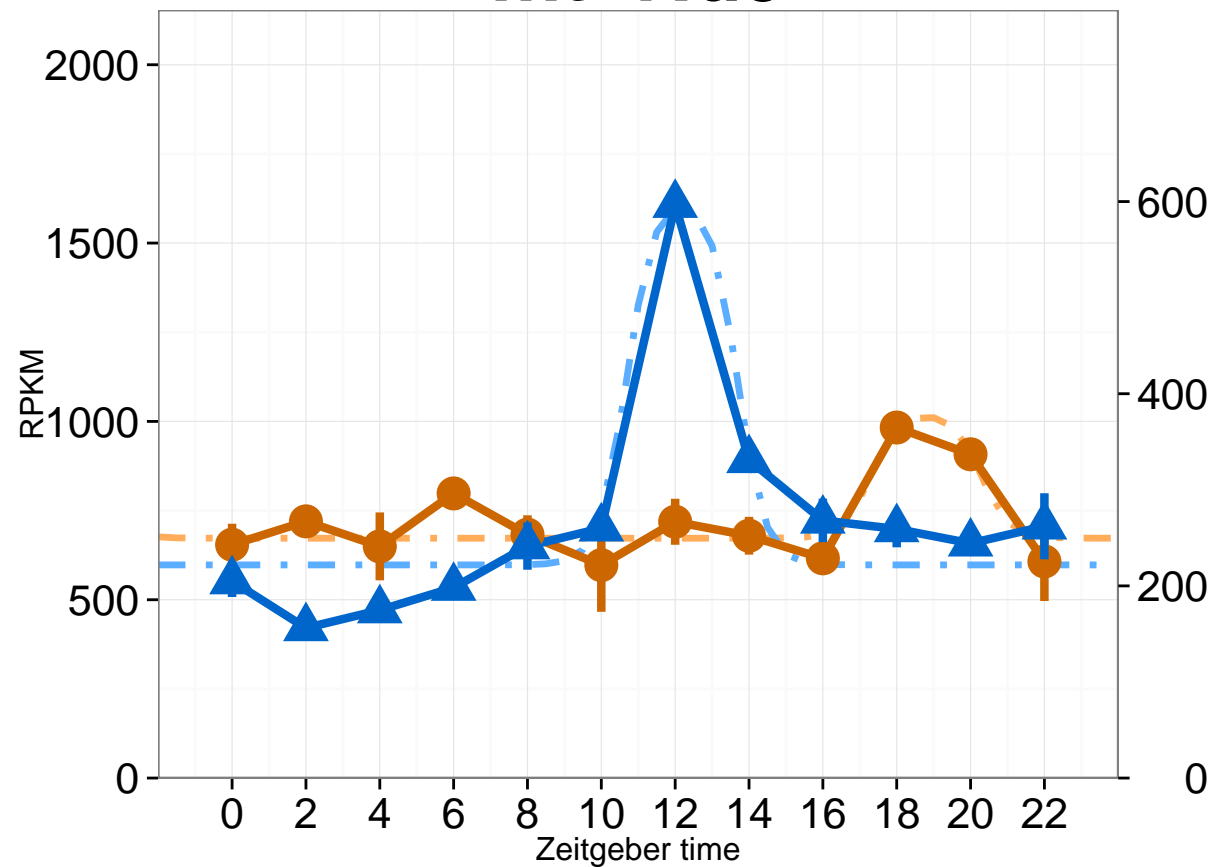

mt-Nd5

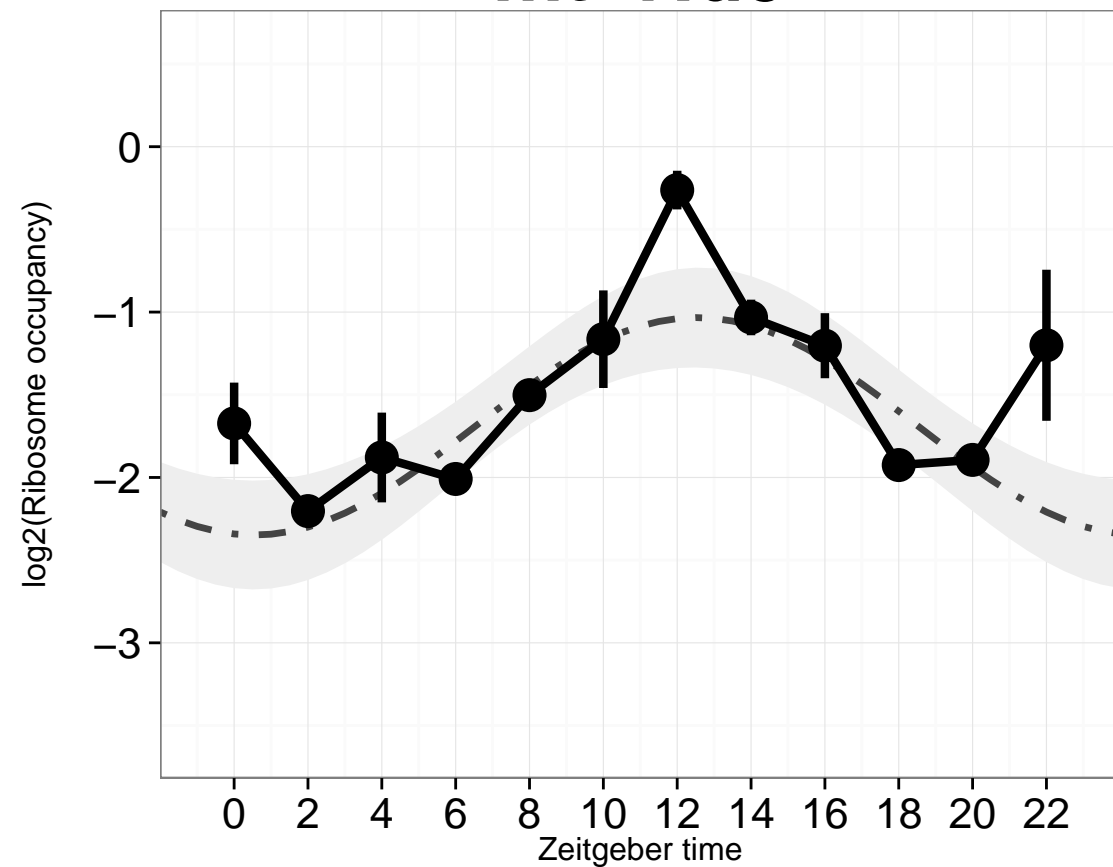

Supplement: SuppDataset_1.zip [file mt-Nd5_set_D.pdf › Supplemental Dataset 1/D-mRNA_rhythm_translation_rhyth/mt-Nd5_set_D.pdf]
