# Supplementary figures and images for: Ribosome profiling reveals the rhythmic liver translatome and circadian clock regulation by upstream open reading frames (part 79 of 113)
Source: HighWire-hosted journal article supplement (doi:10.1101/gr.195404.115), 2015-10-20

## Tusc2

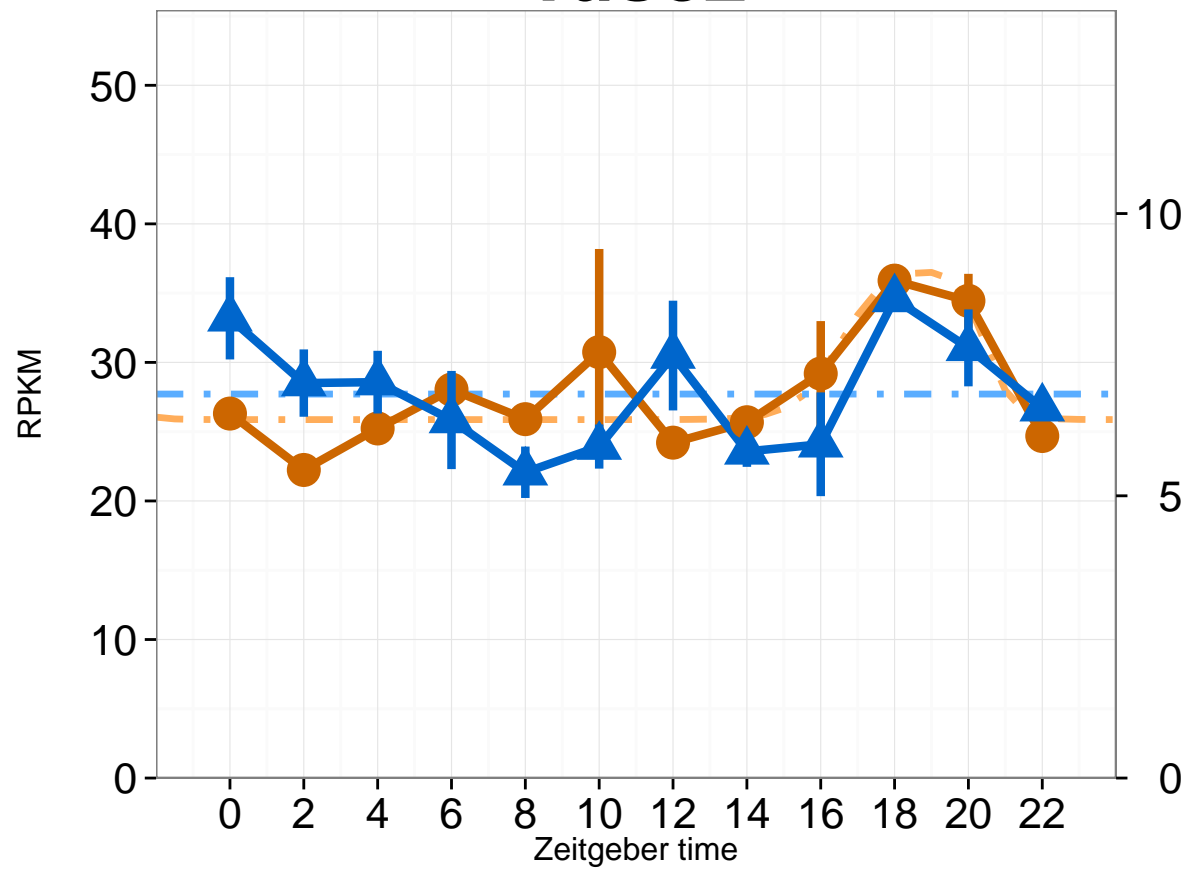

## Tusc2

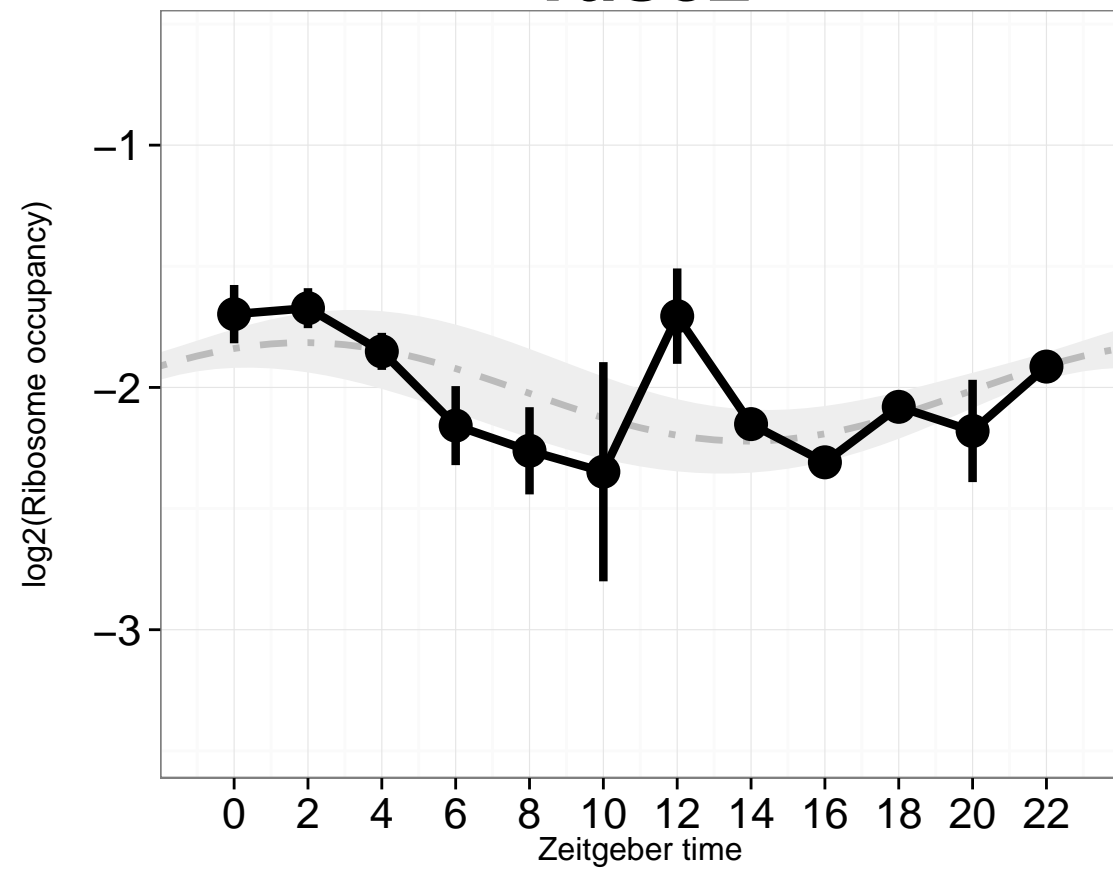

Supplement: SuppDataset_1.zip [file Tusc2_set_A.pdf › Supplemental Dataset 1/A-mRNA_nonrhyth_translation_nonrhyth/Tusc2_set_A.pdf]

## Tusc3

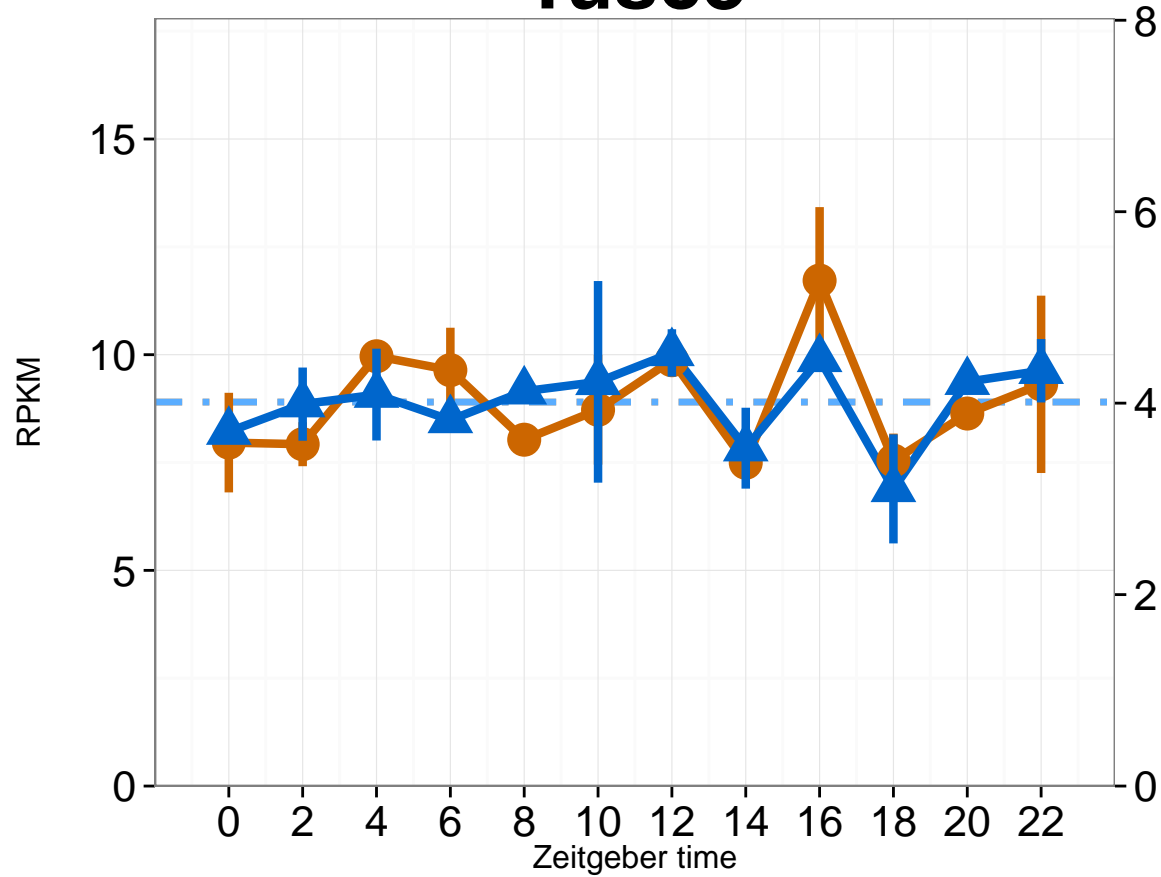

## Tusc3

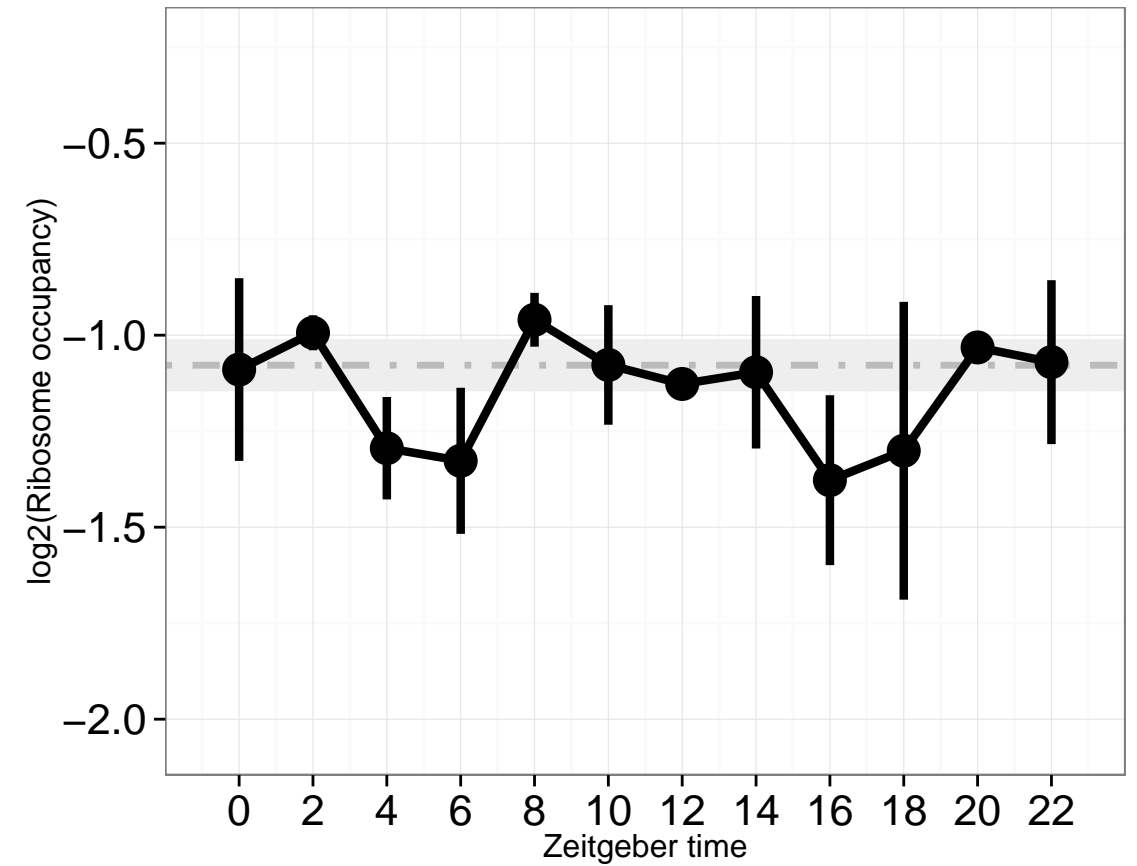

Supplement: SuppDataset_1.zip [file Tusc3_set_A.pdf › Supplemental Dataset 1/A-mRNA_nonrhyth_translation_nonrhyth/Tusc3_set_A.pdf]

# Tut1

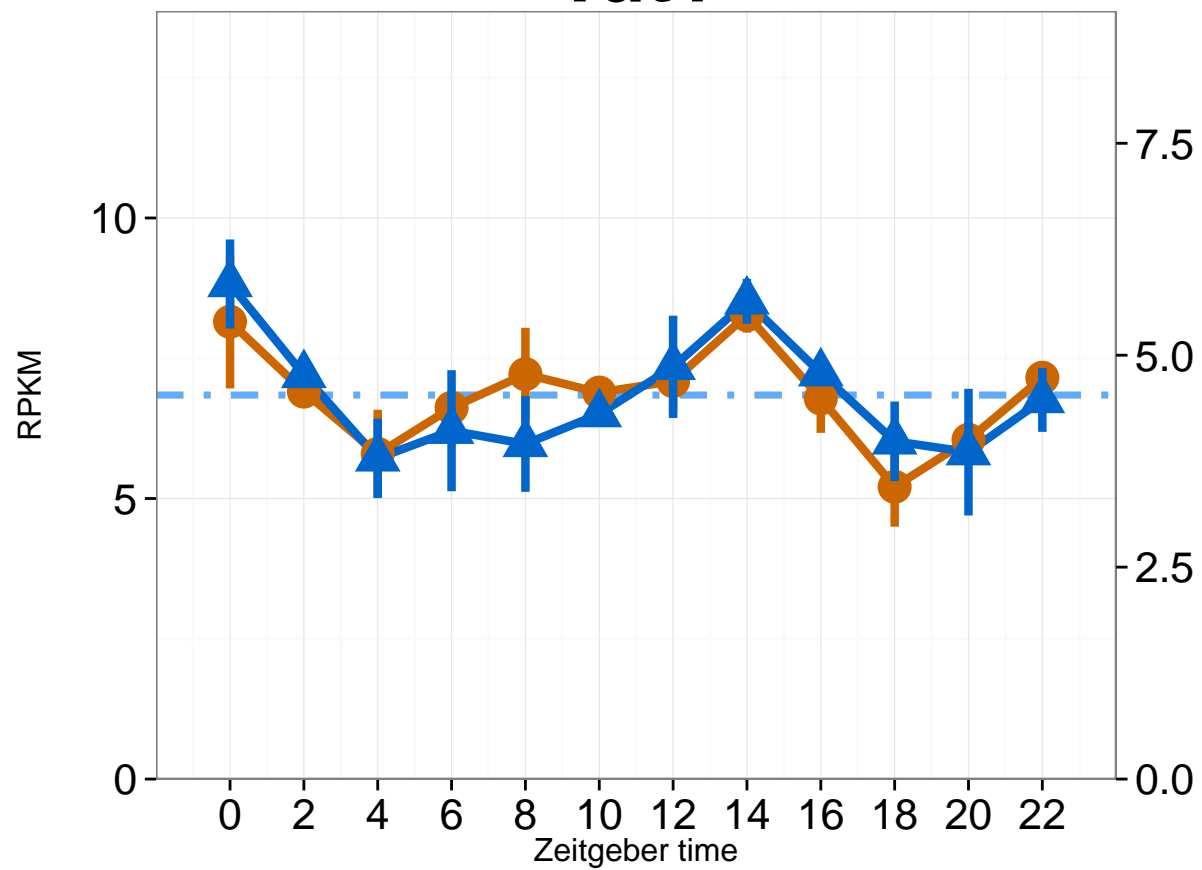

# Tut1

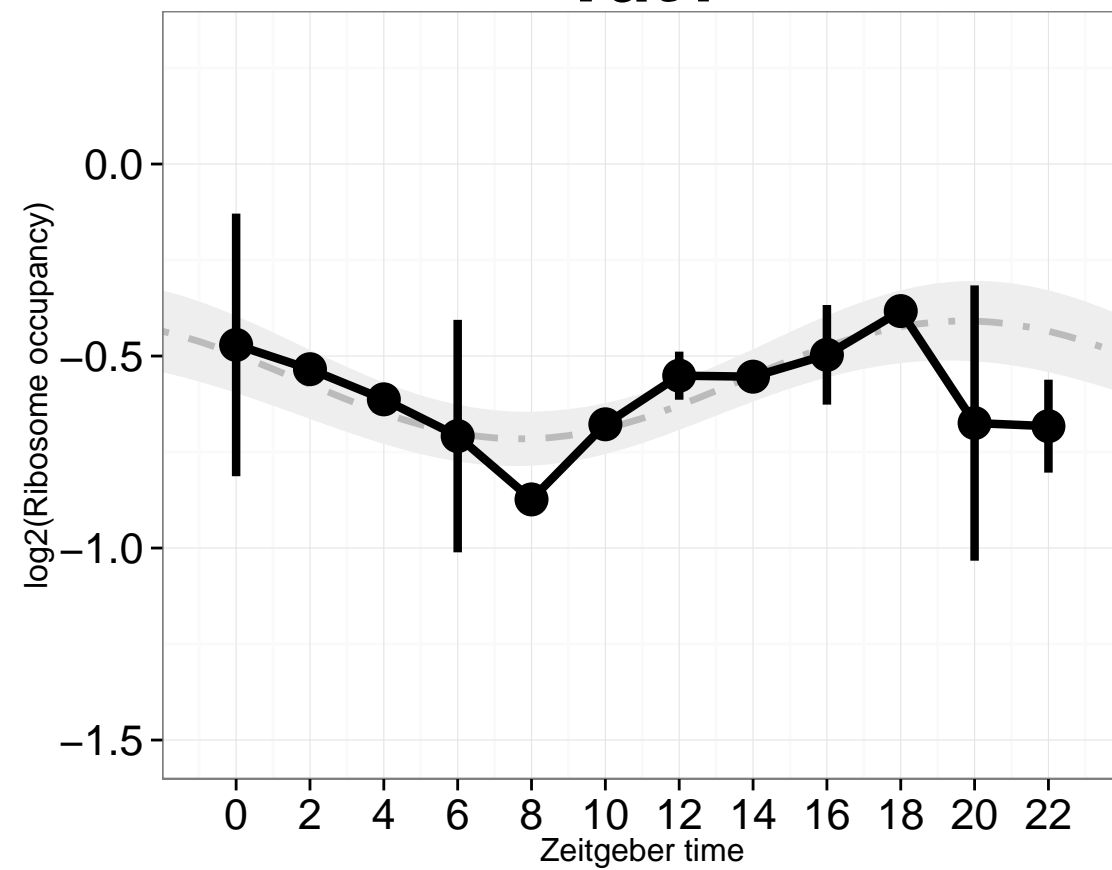

Supplement: SuppDataset_1.zip [file Tut1_set_A.pdf › Supplemental Dataset 1/A-mRNA_nonrhyth_translation_nonrhyth/Tut1_set_A.pdf]

## Tvp23b

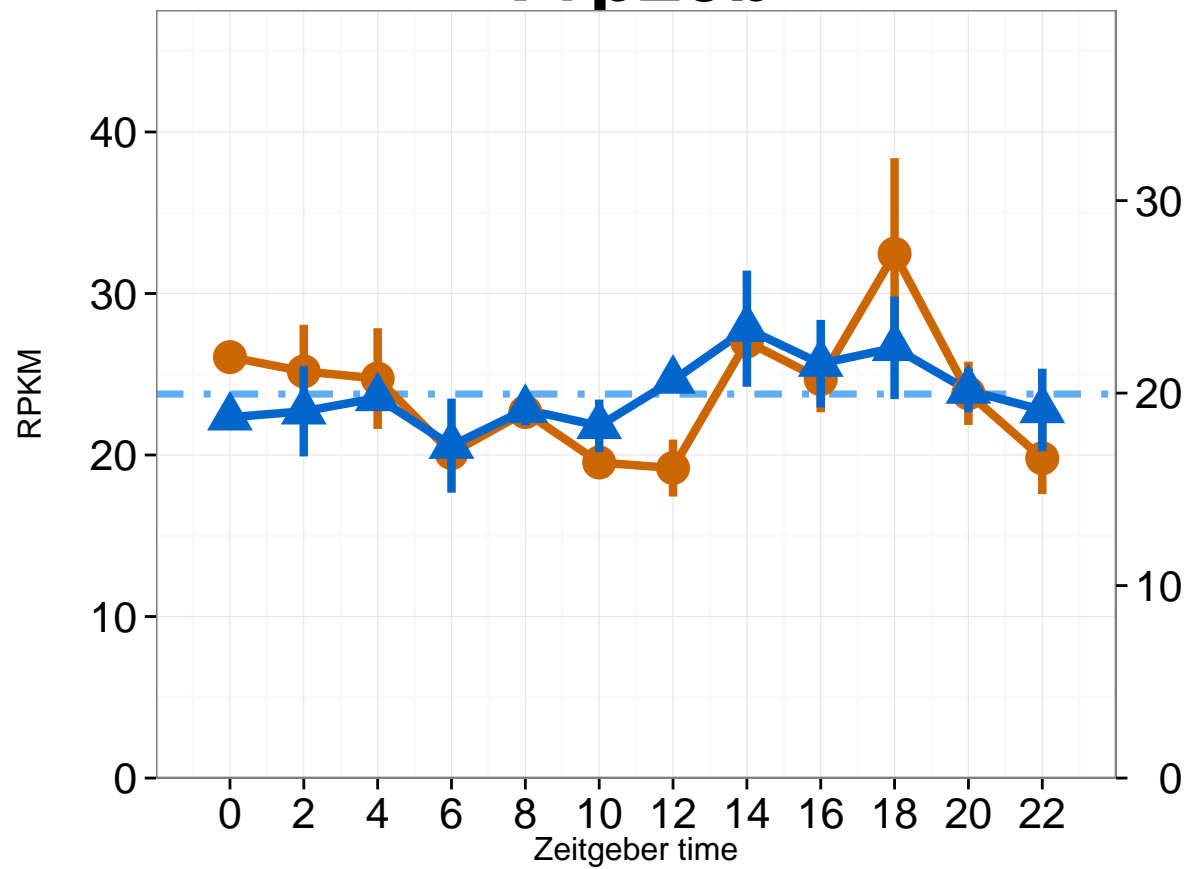

## Tvp23b

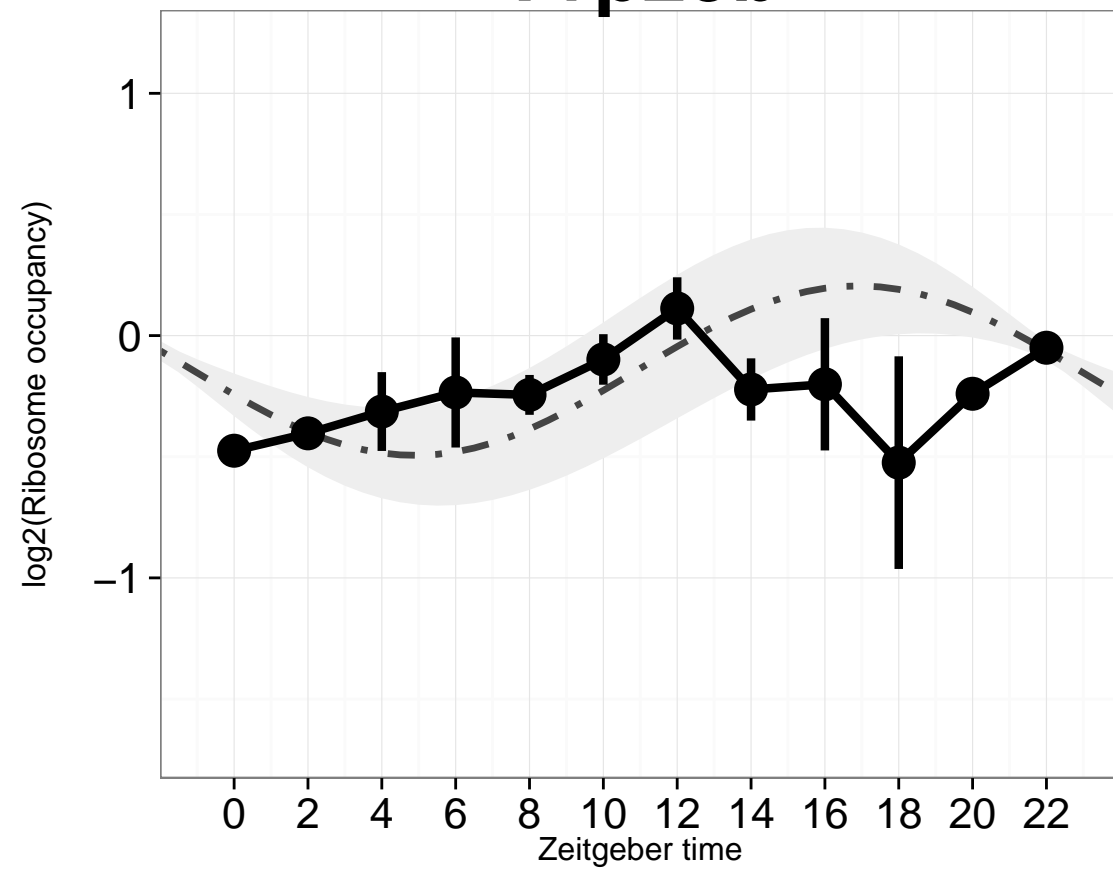

Supplement: SuppDataset_1.zip [file Tvp23b_set_A.pdf › Supplemental Dataset 1/A-mRNA_nonrhyth_translation_nonrhyth/Tvp23b_set_A.pdf]

## Twf1

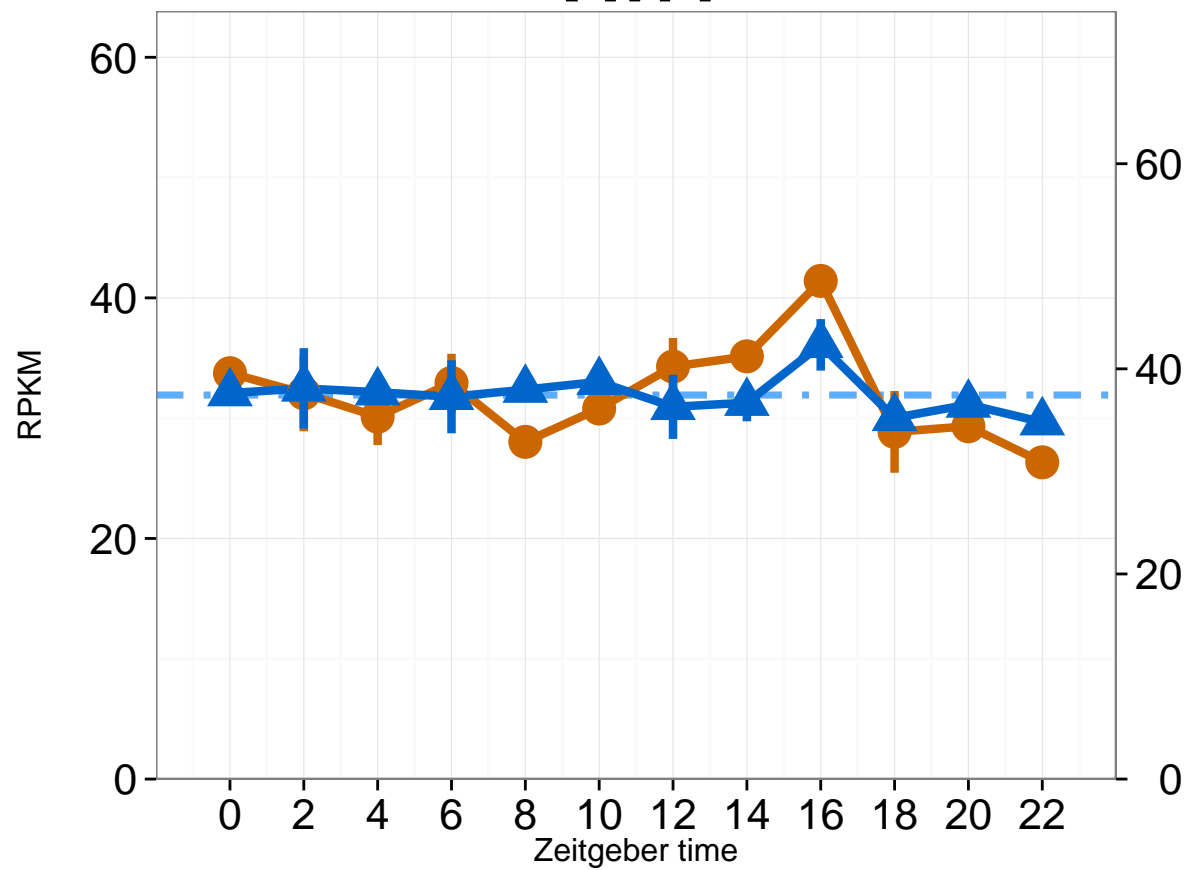

## Twf1

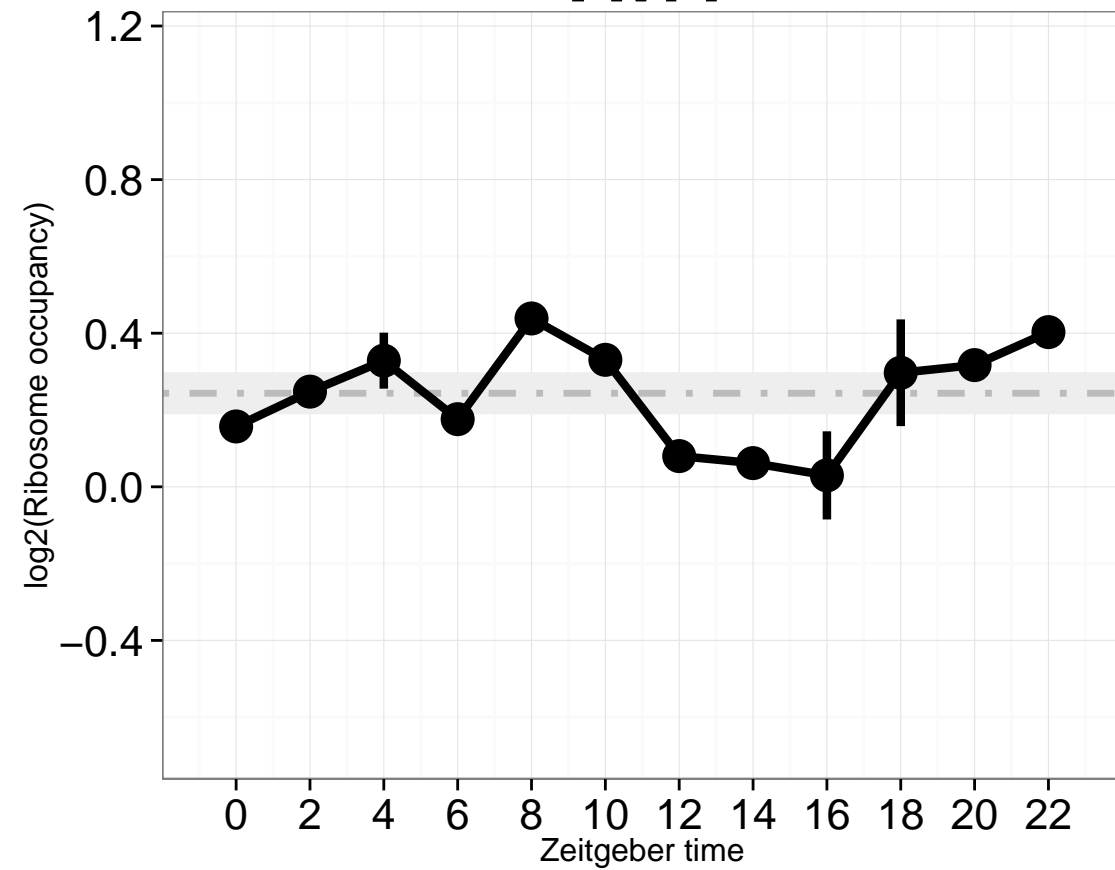

Supplement: SuppDataset_1.zip [file Twf1_set_A.pdf › Supplemental Dataset 1/A-mRNA_nonrhyth_translation_nonrhyth/Twf1_set_A.pdf]

## Twf2

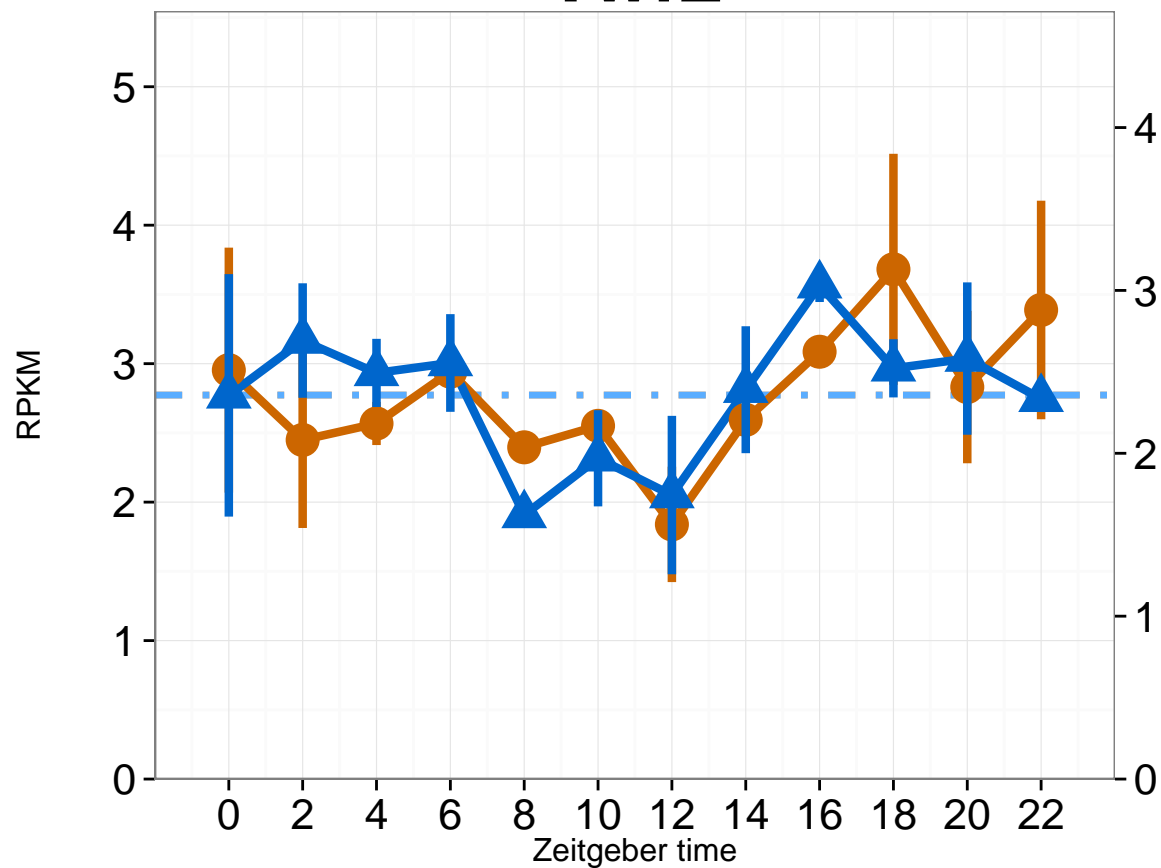

## Twf2

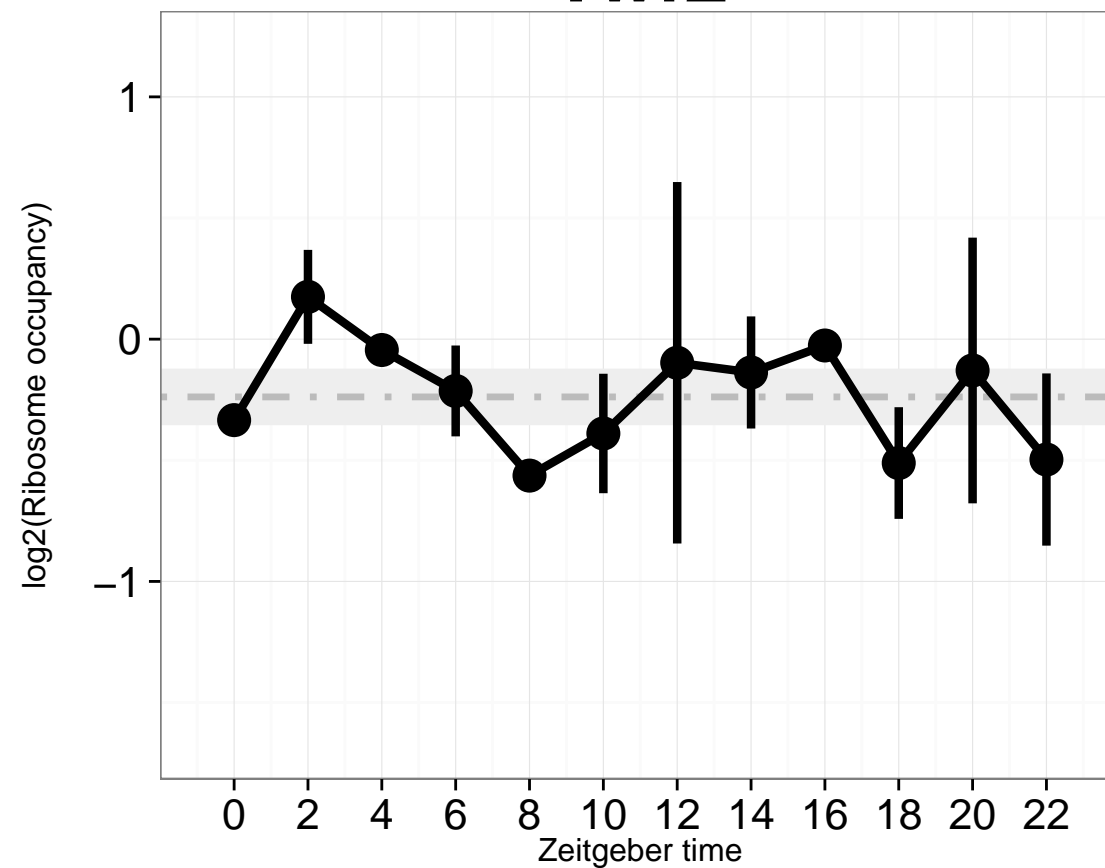

Supplement: SuppDataset_1.zip [file Twf2_set_A.pdf › Supplemental Dataset 1/A-mRNA_nonrhyth_translation_nonrhyth/Twf2_set_A.pdf]

## Twistnb

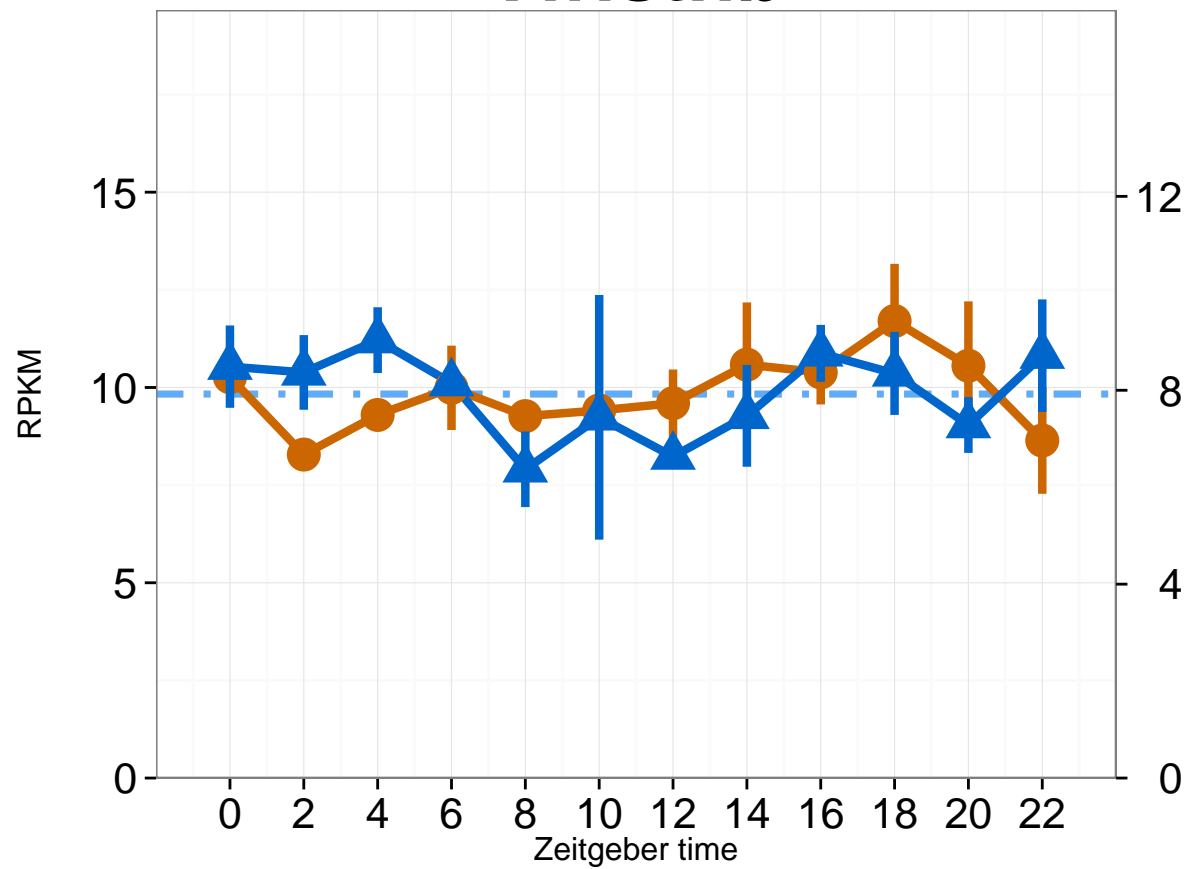

## Twistnb

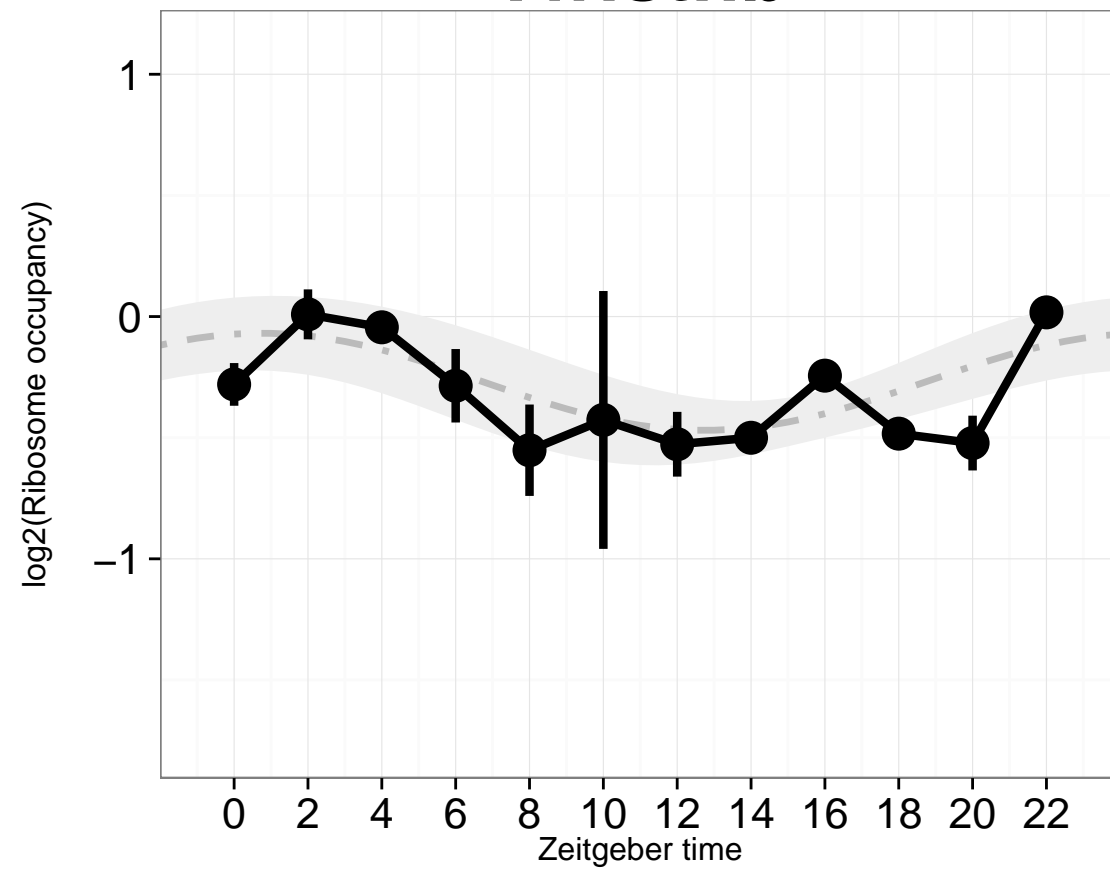

Supplement: SuppDataset_1.zip [file Twistnb_set_A.pdf › Supplemental Dataset 1/A-mRNA_nonrhyth_translation_nonrhyth/Twistnb_set_A.pdf]

# Twsg1

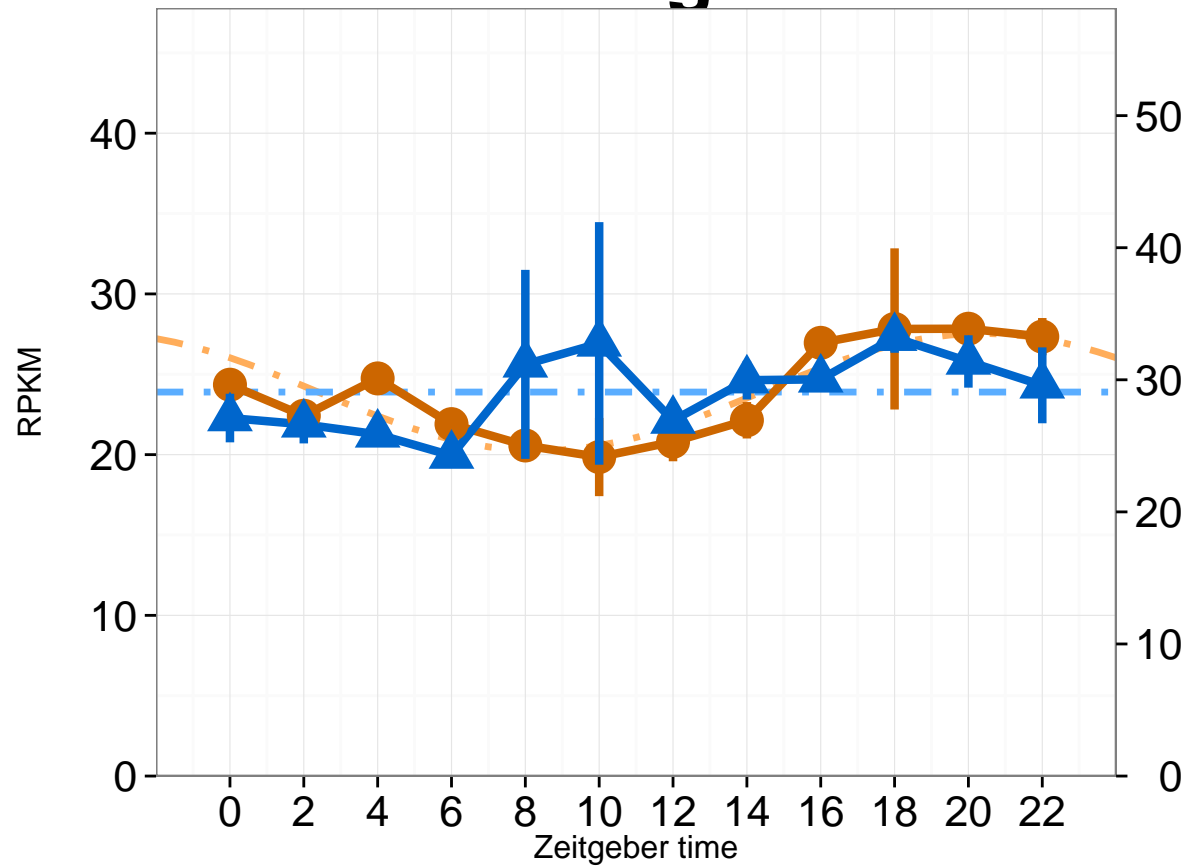

# Twsg1

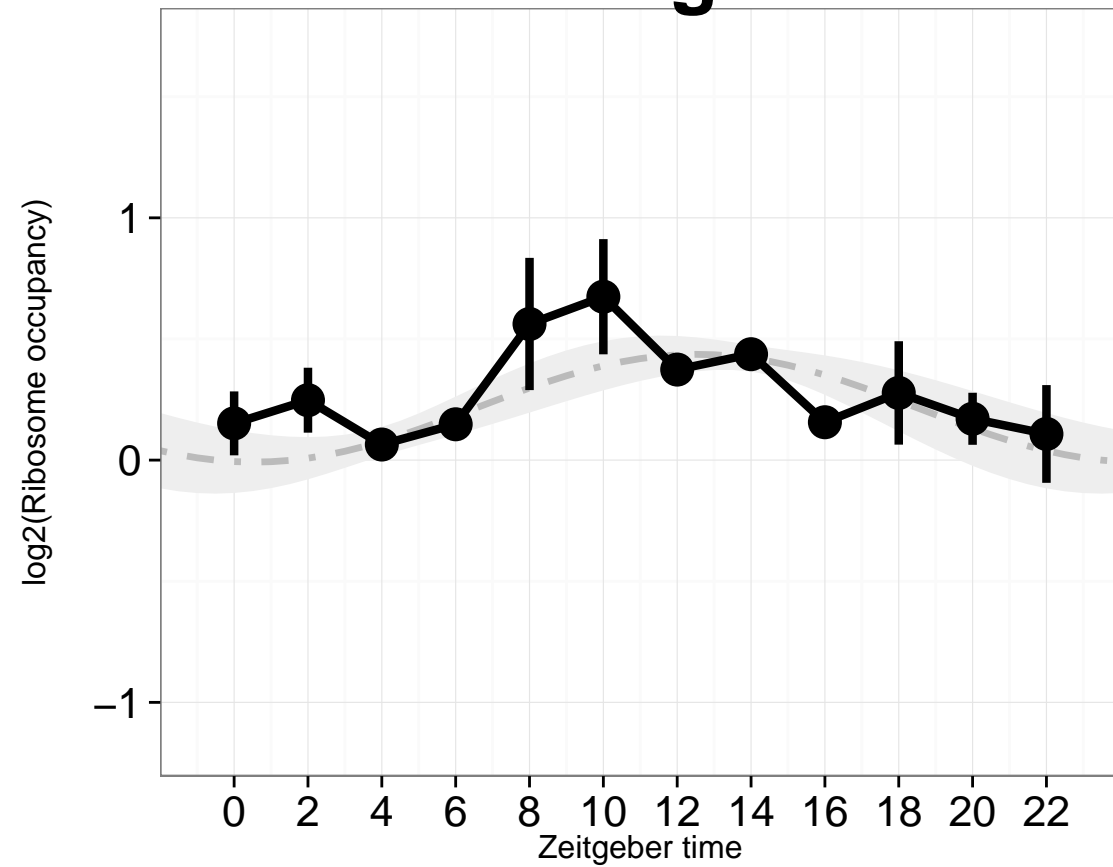

Supplement: SuppDataset_1.zip [file Twsg1_set_A.pdf › Supplemental Dataset 1/A-mRNA_nonrhyth_translation_nonrhyth/Twsg1_set_A.pdf]

## Txlna

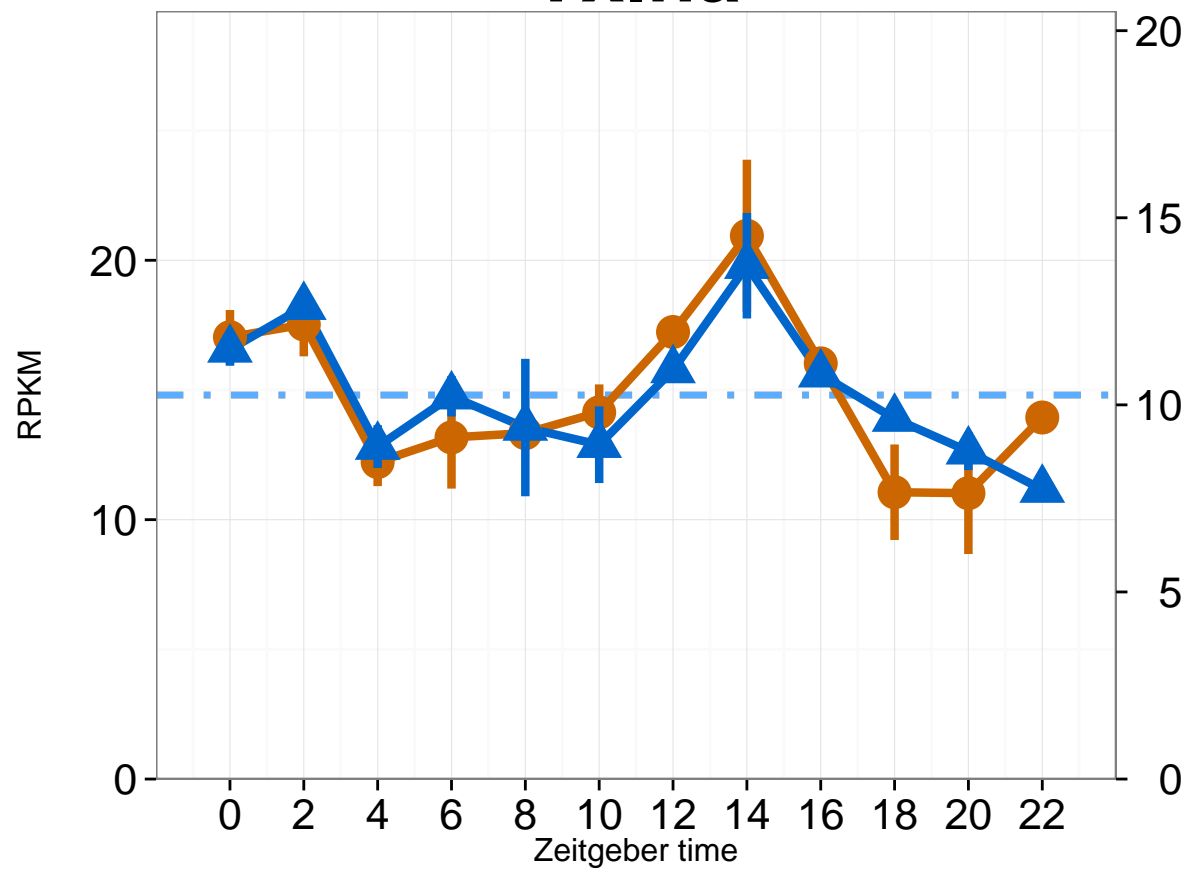

## Txlna

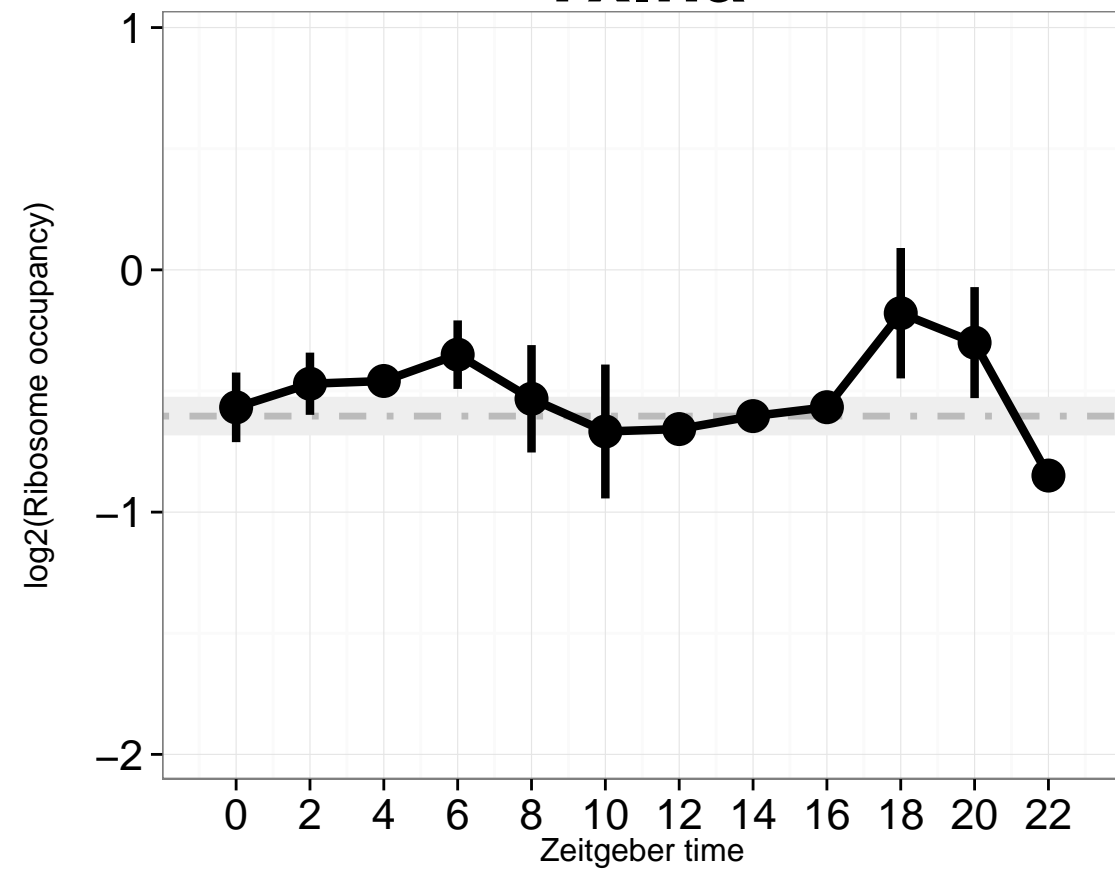

Supplement: SuppDataset_1.zip [file Txlna_set_A.pdf › Supplemental Dataset 1/A-mRNA_nonrhyth_translation_nonrhyth/Txlna_set_A.pdf]

## TxIng

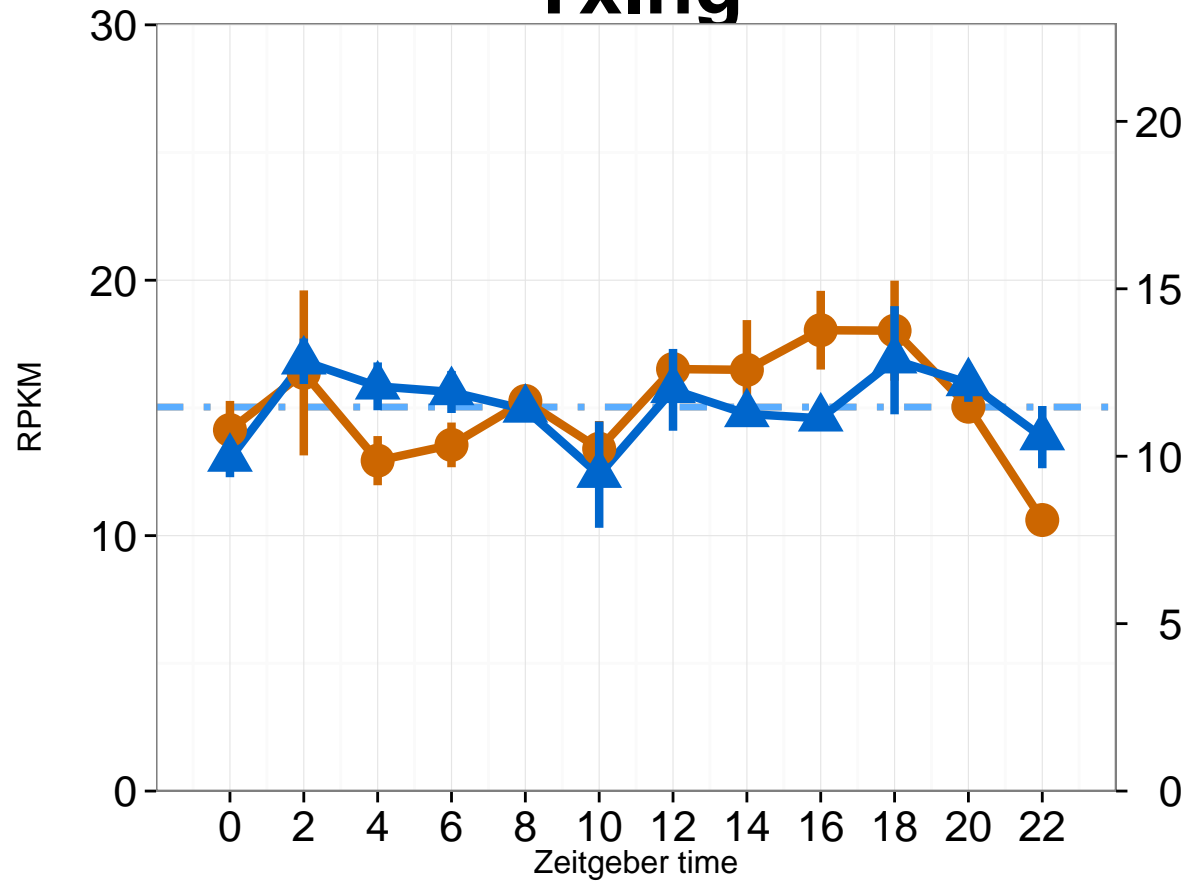

## TxIng

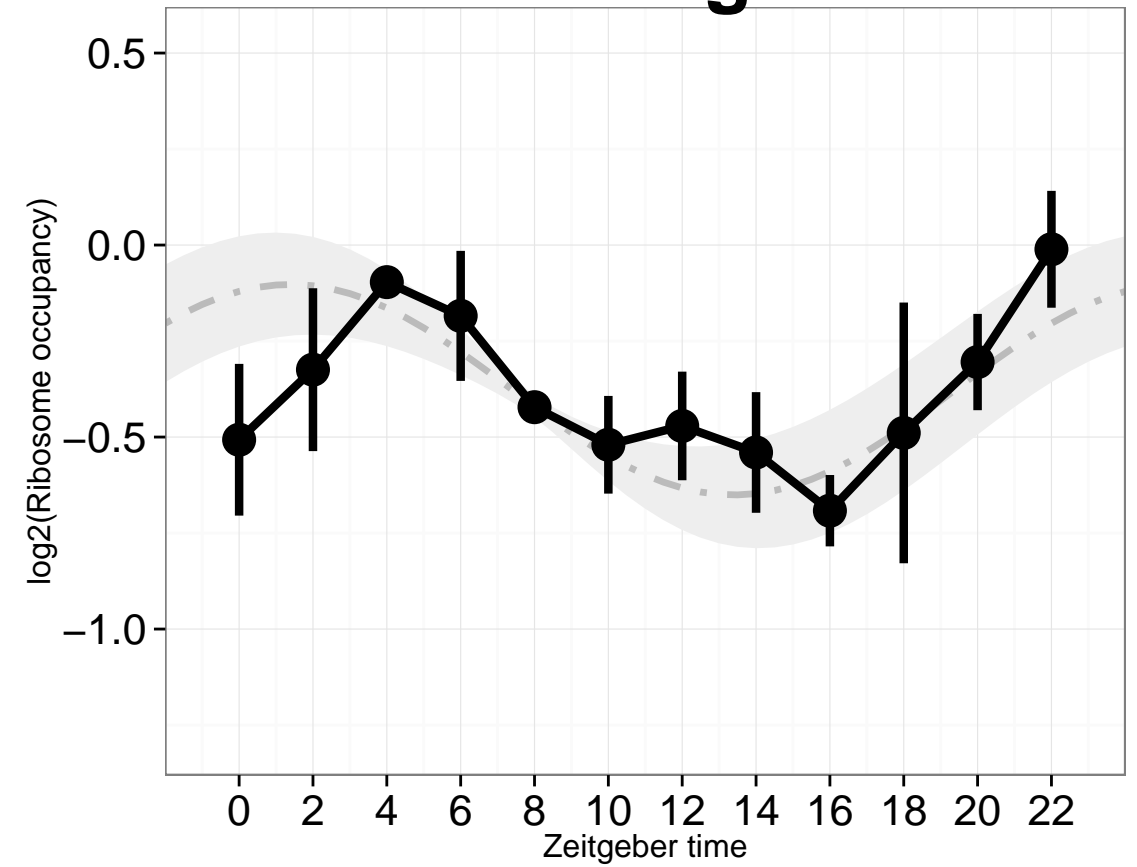

Supplement: SuppDataset_1.zip [file Txlng_set_A.pdf › Supplemental Dataset 1/A-mRNA_nonrhyth_translation_nonrhyth/Txlng_set_A.pdf]

# Txn1

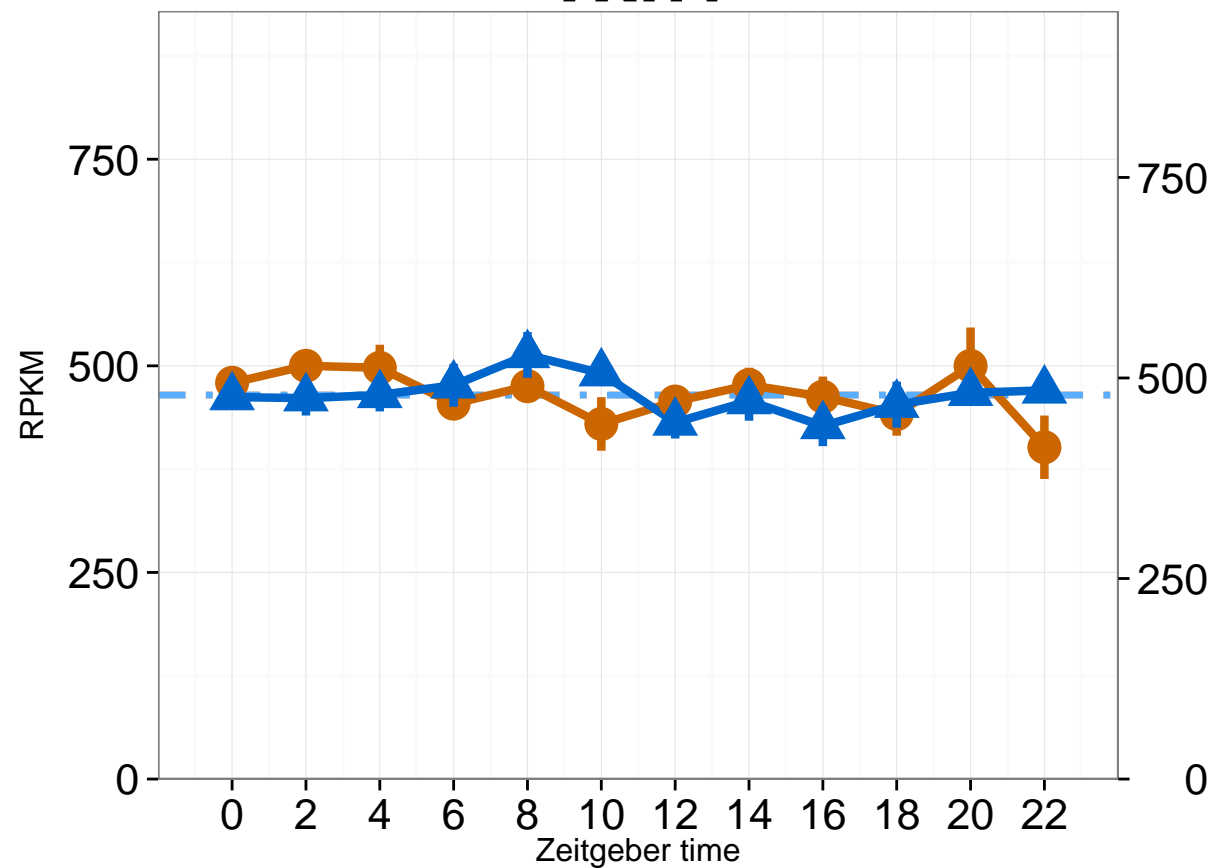

# Txn1

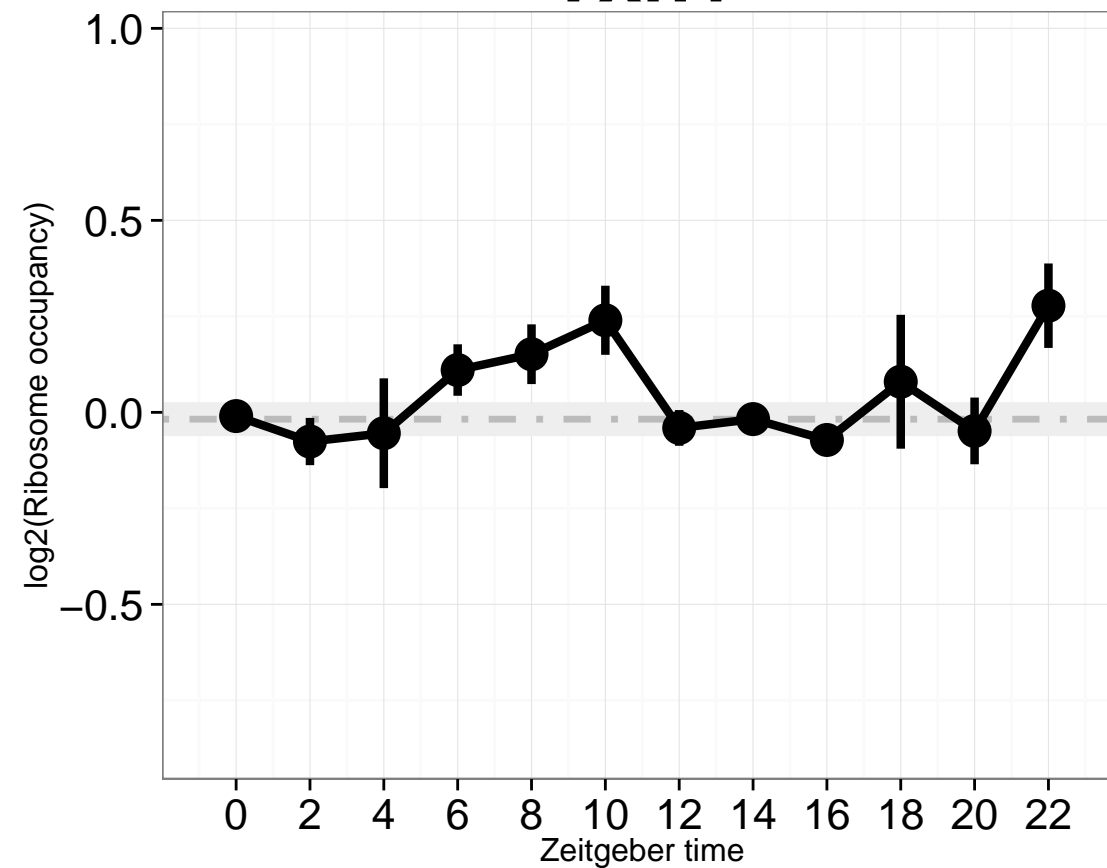

Supplement: SuppDataset_1.zip [file Txn1_set_A.pdf › Supplemental Dataset 1/A-mRNA_nonrhyth_translation_nonrhyth/Txn1_set_A.pdf]

## Txndc12

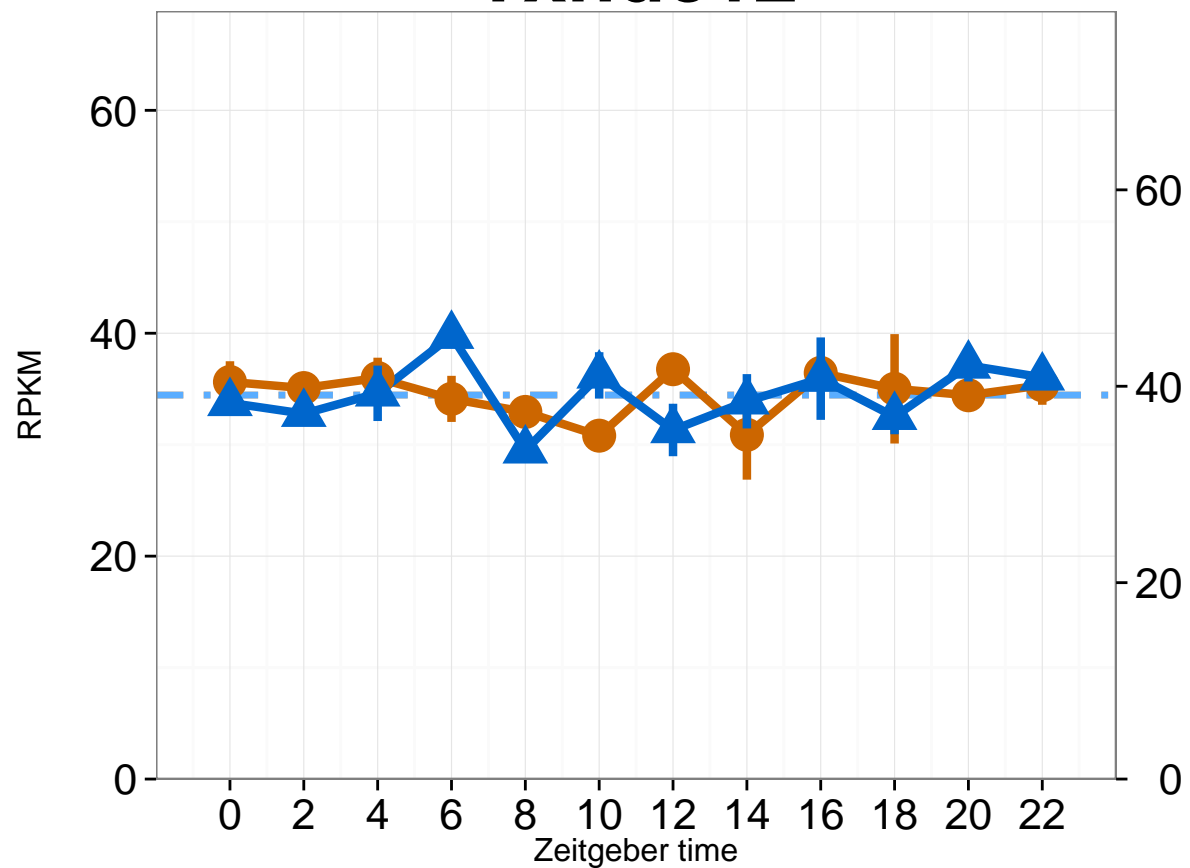

## Txndc12

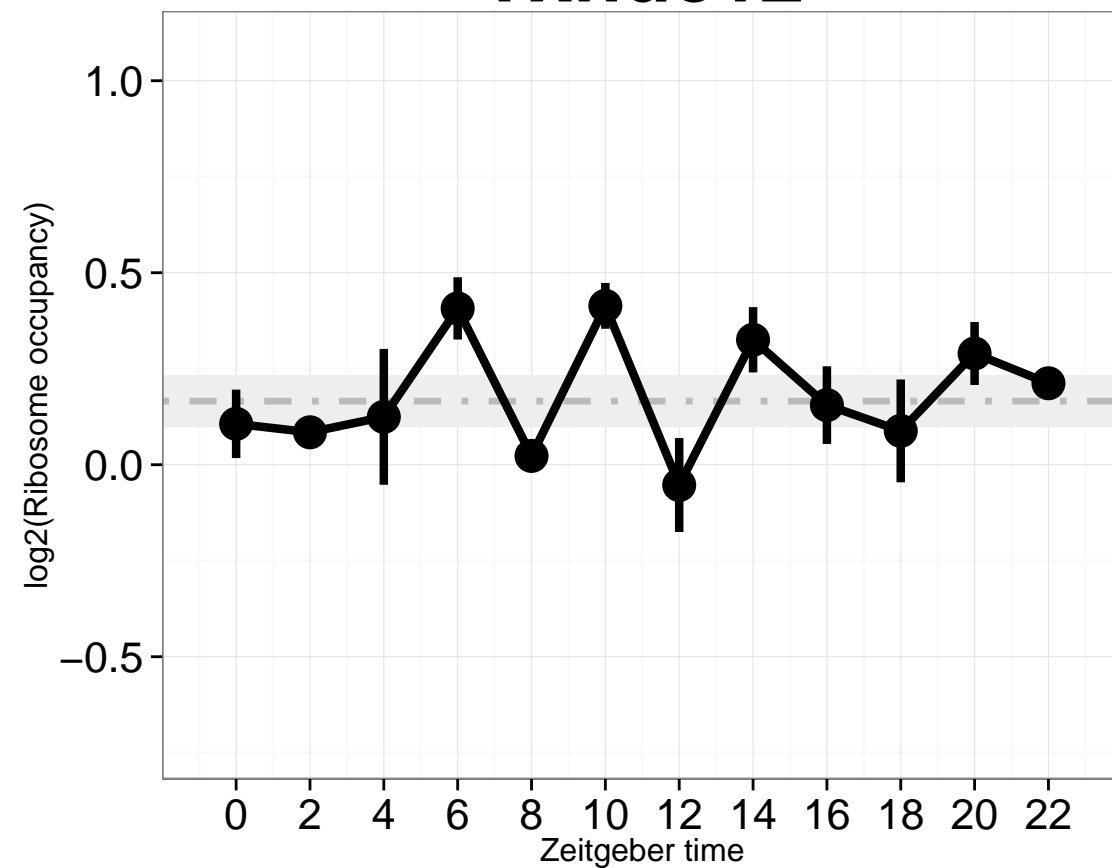

Supplement: SuppDataset_1.zip [file Txndc12_set_A.pdf › Supplemental Dataset 1/A-mRNA_nonrhyth_translation_nonrhyth/Txndc12_set_A.pdf]

## Txndc15

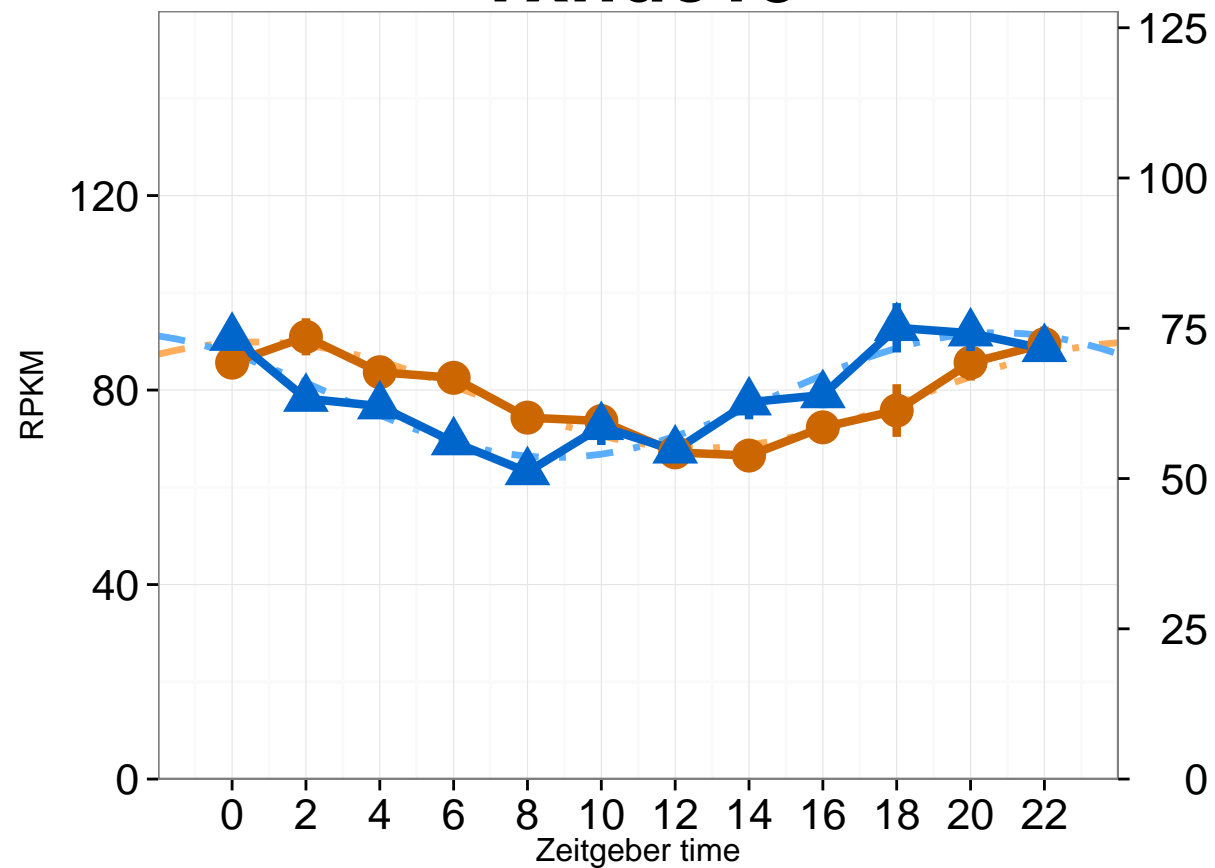

## Txndc15

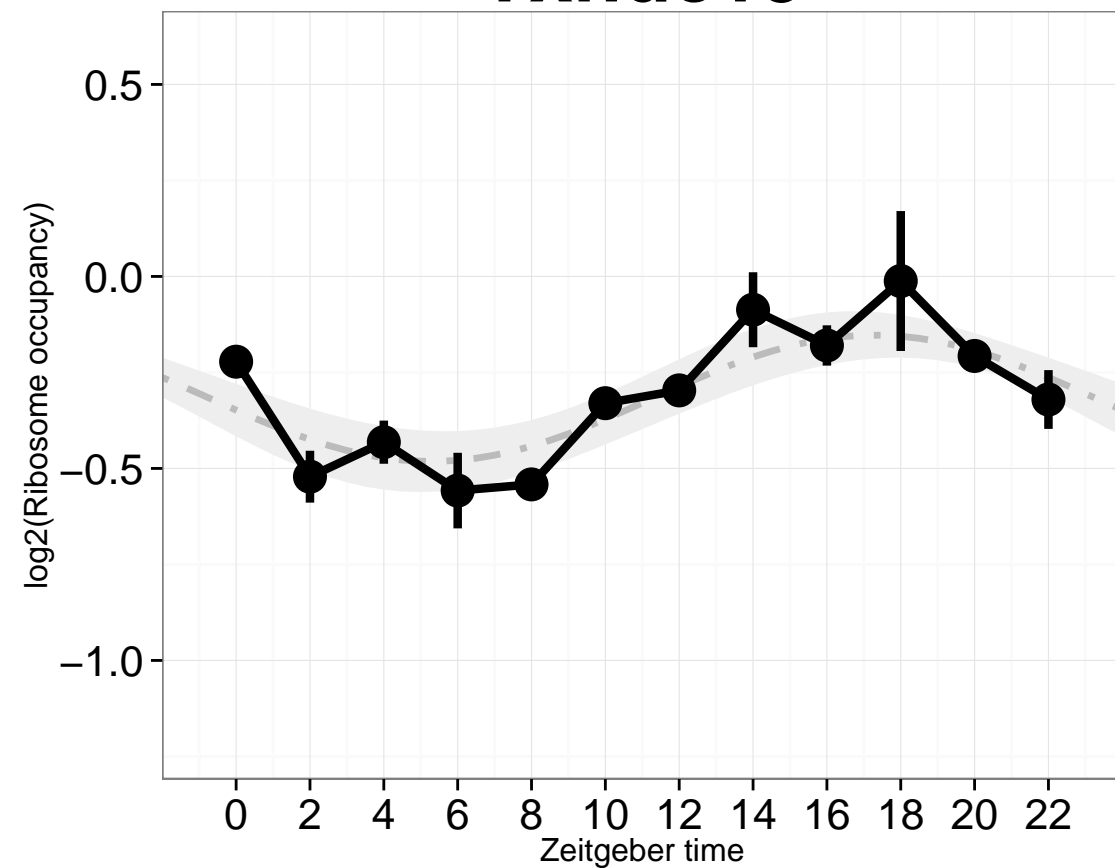

Supplement: SuppDataset_1.zip [file Txndc15_set_A.pdf › Supplemental Dataset 1/A-mRNA_nonrhyth_translation_nonrhyth/Txndc15_set_A.pdf]

# Txndc16

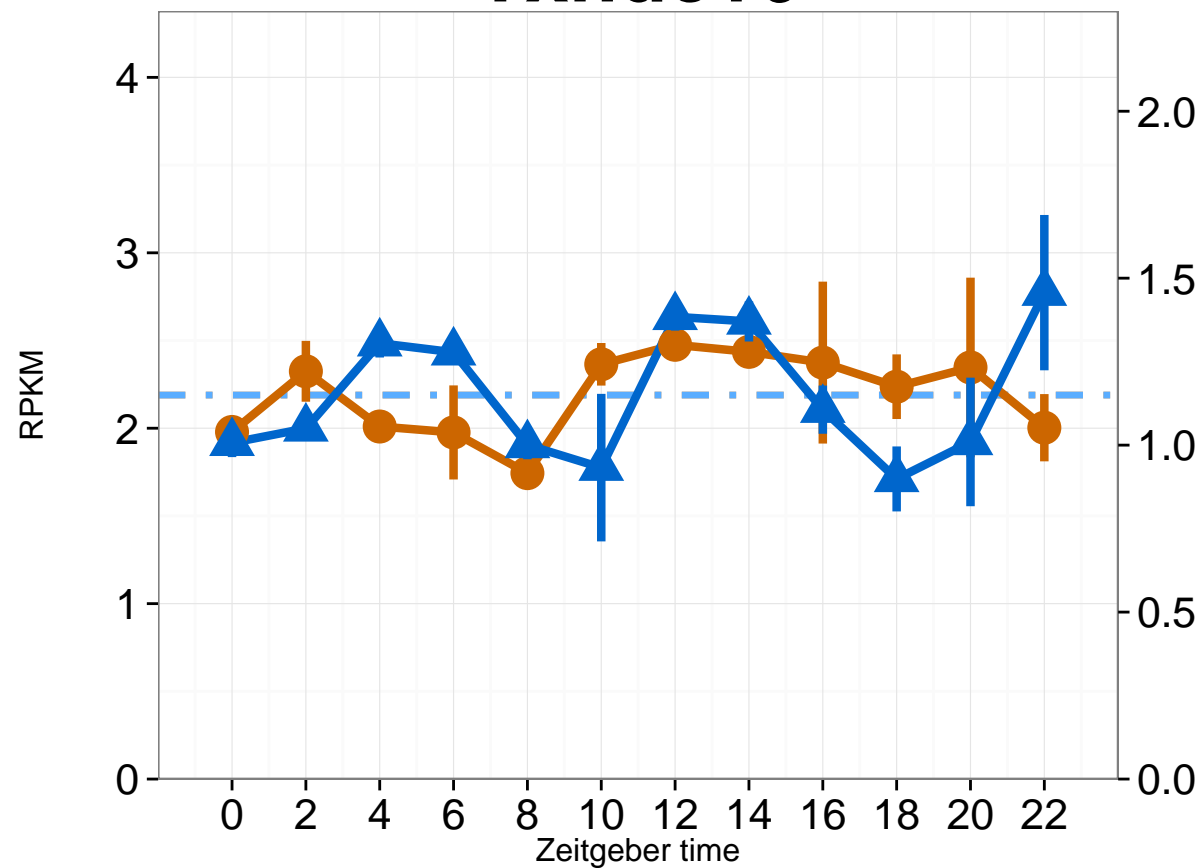

# Txndc16

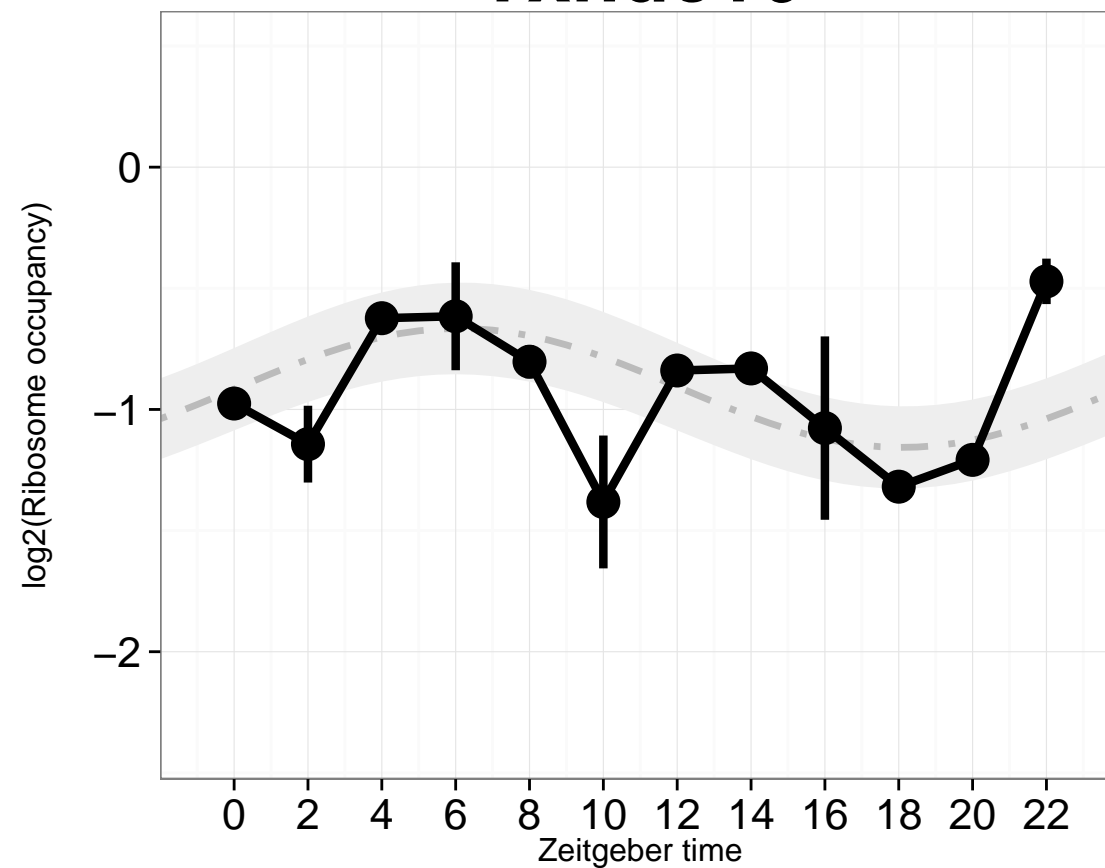

Supplement: SuppDataset_1.zip [file Txndc16_set_A.pdf › Supplemental Dataset 1/A-mRNA_nonrhyth_translation_nonrhyth/Txndc16_set_A.pdf]

# Txndc17

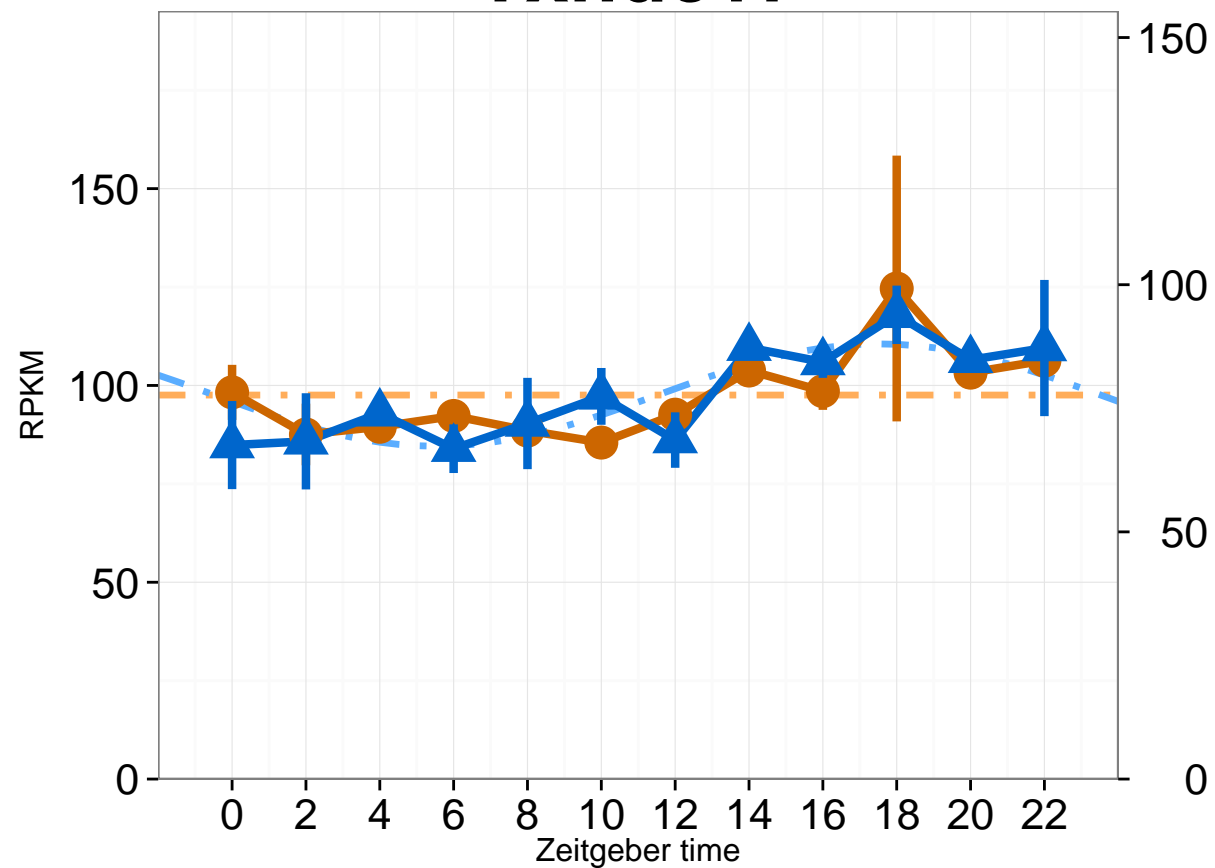

# Txndc17

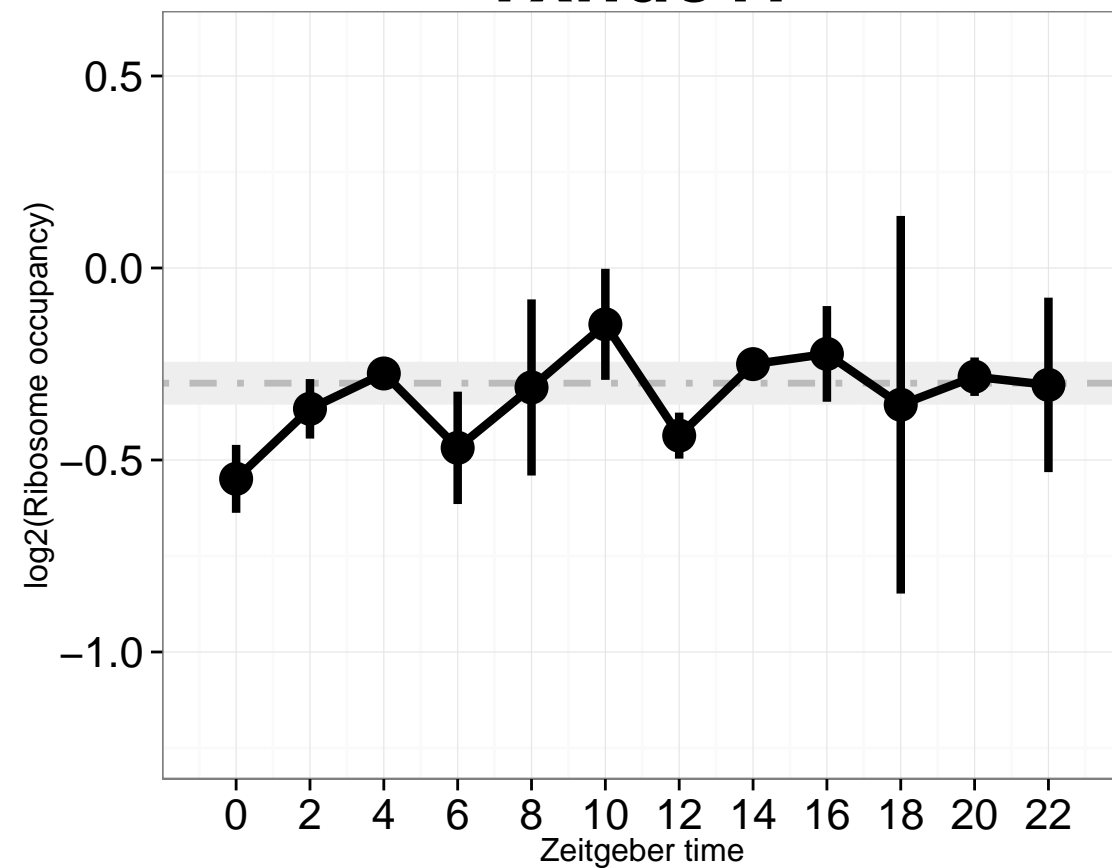

Supplement: SuppDataset_1.zip [file Txndc17_set_A.pdf › Supplemental Dataset 1/A-mRNA_nonrhyth_translation_nonrhyth/Txndc17_set_A.pdf]

## Txndc5

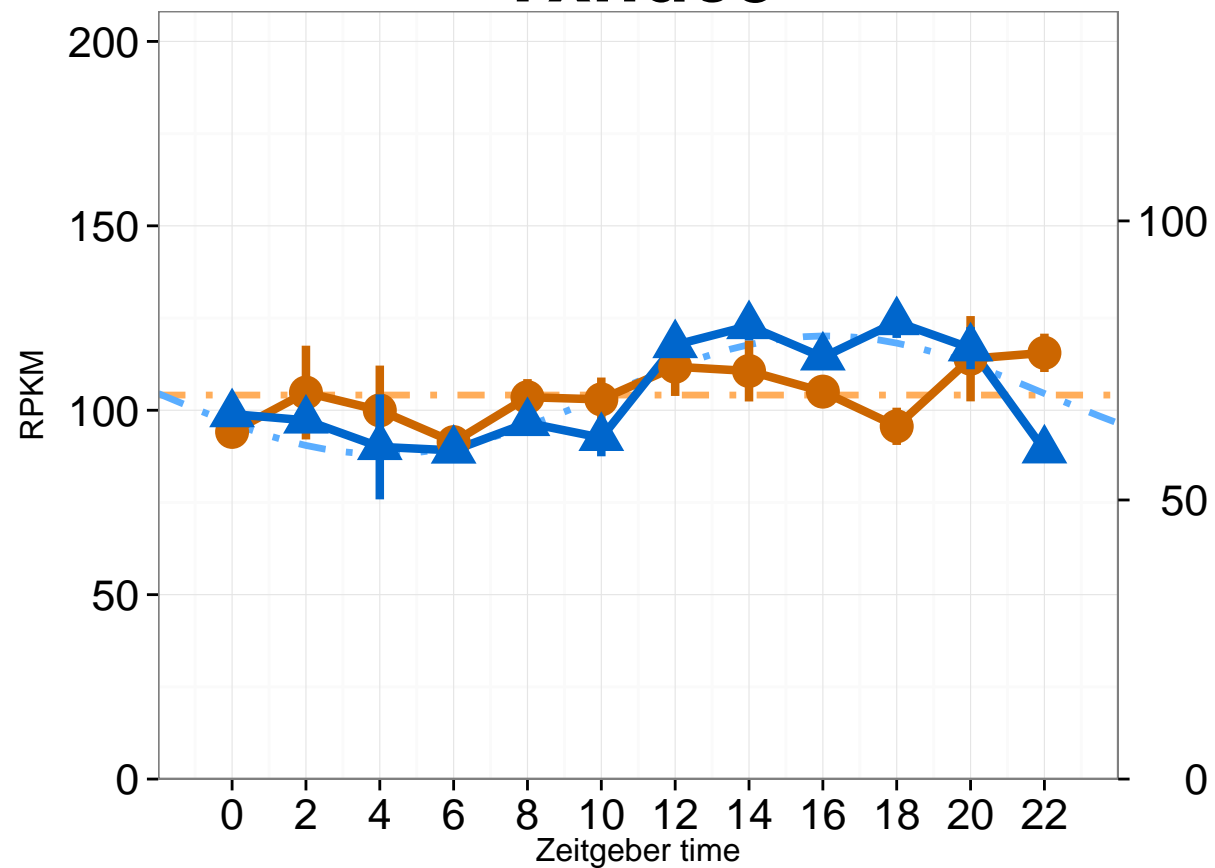

## Txndc5

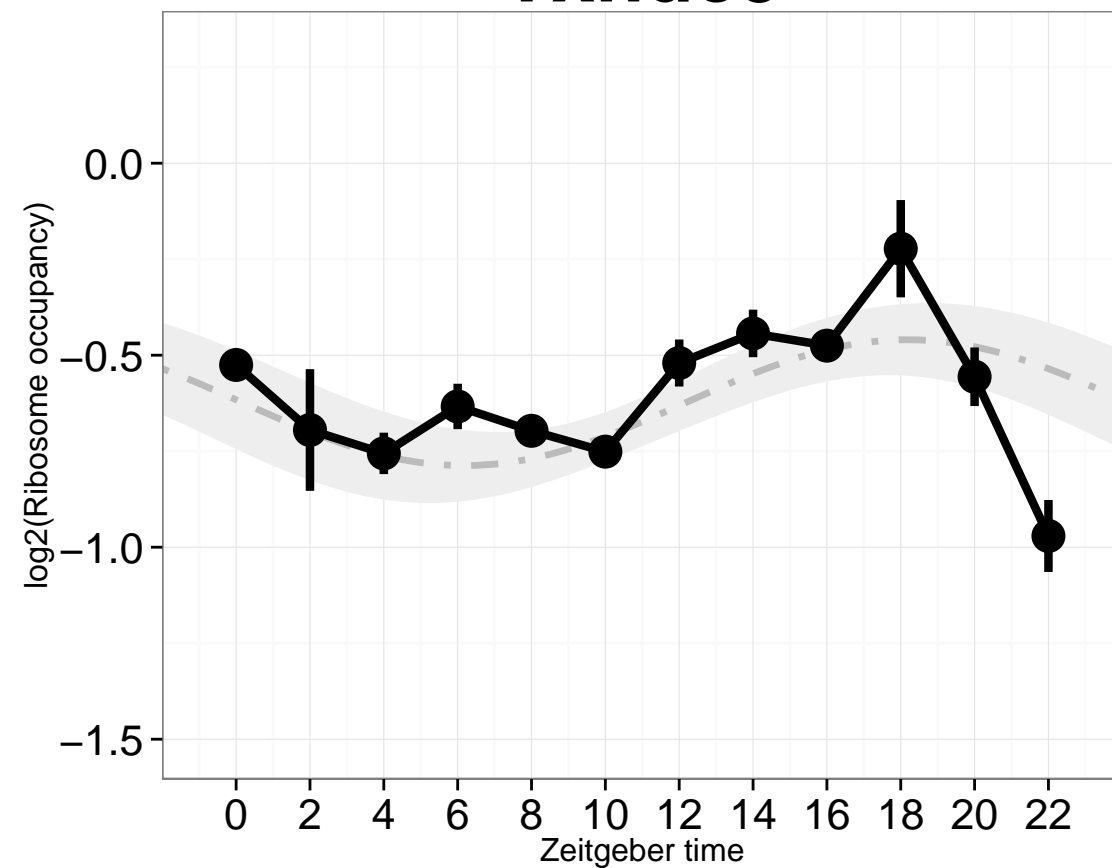

Supplement: SuppDataset_1.zip [file Txndc5_set_A.pdf › Supplemental Dataset 1/A-mRNA_nonrhyth_translation_nonrhyth/Txndc5_set_A.pdf]

# Txndc9

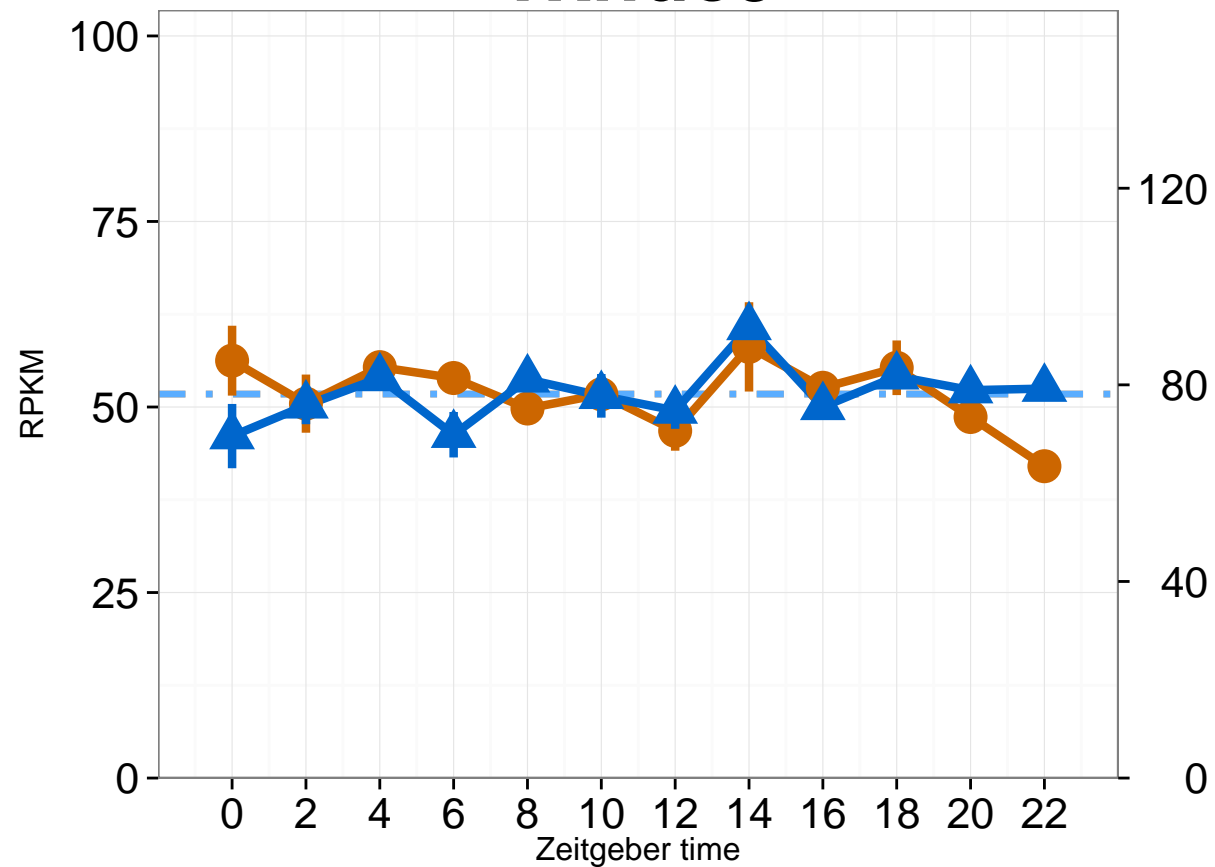

# Txndc9

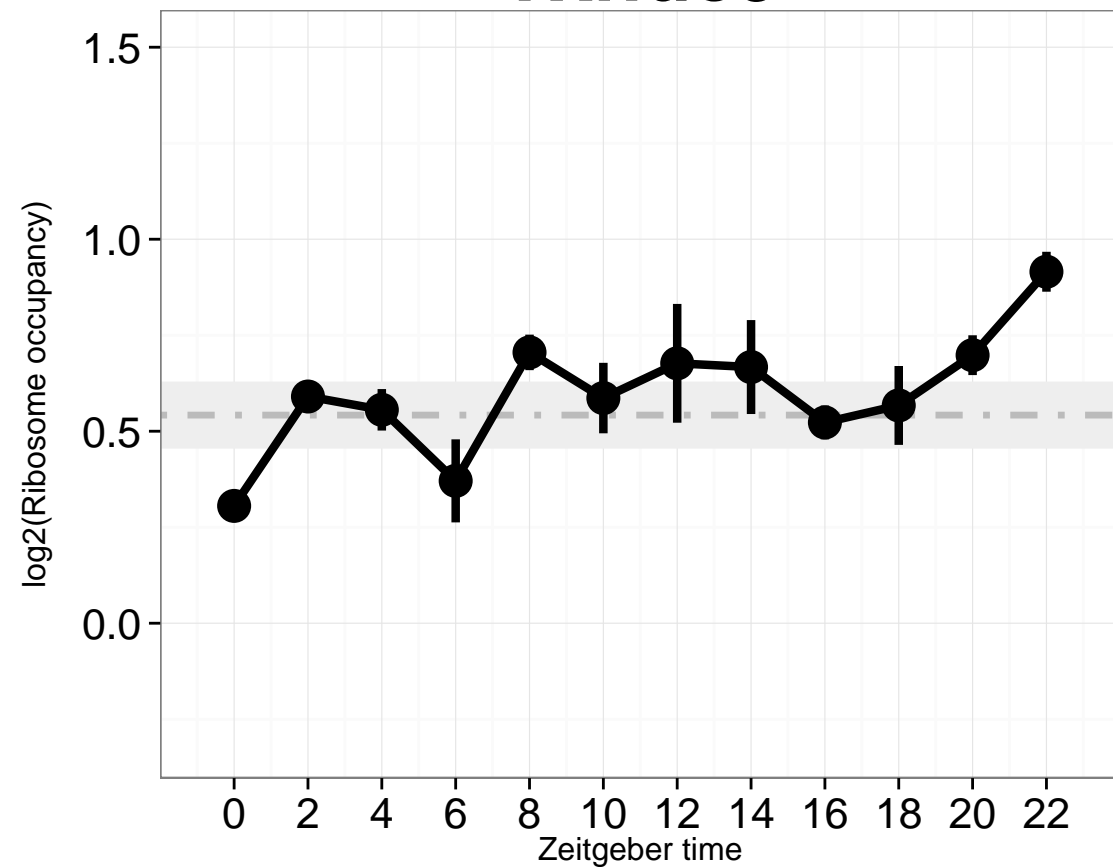

Supplement: SuppDataset_1.zip [file Txndc9_set_A.pdf › Supplemental Dataset 1/A-mRNA_nonrhyth_translation_nonrhyth/Txndc9_set_A.pdf]

## Txnip

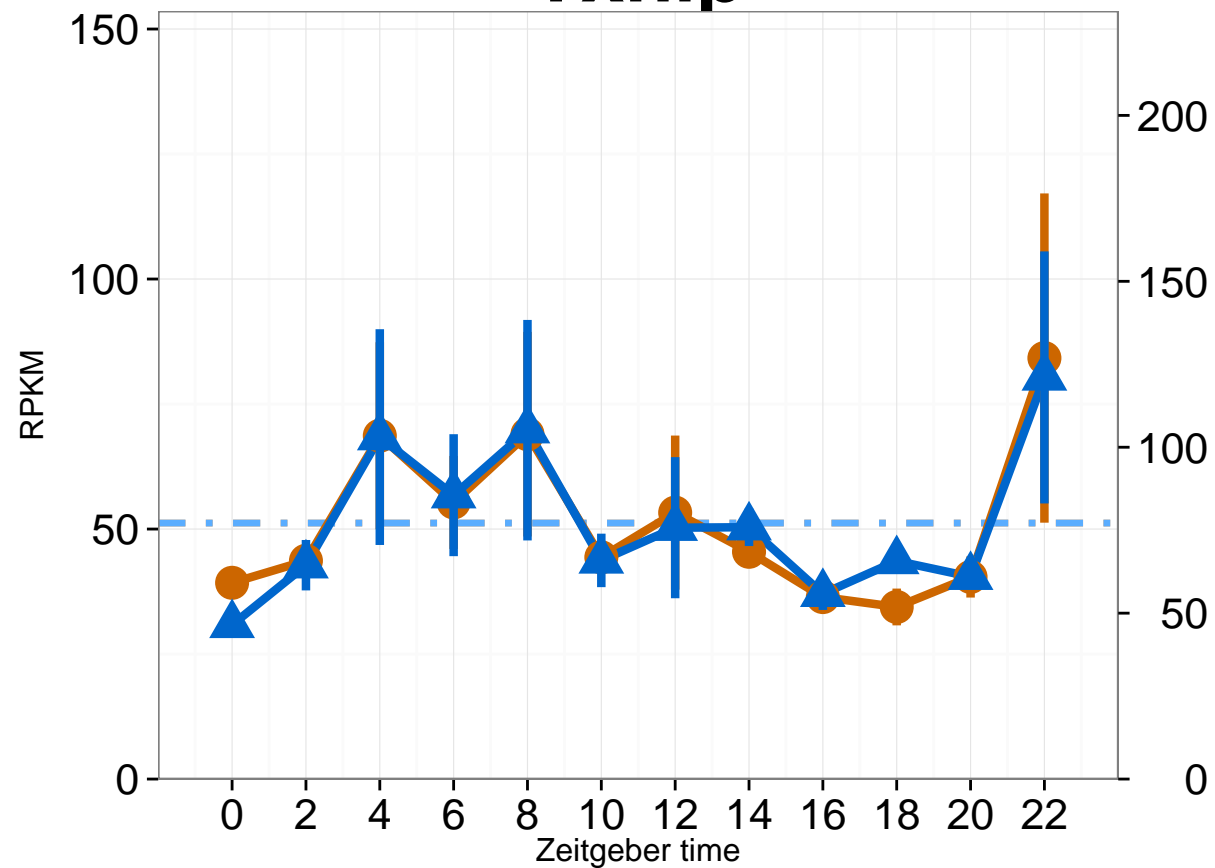

## Txnip

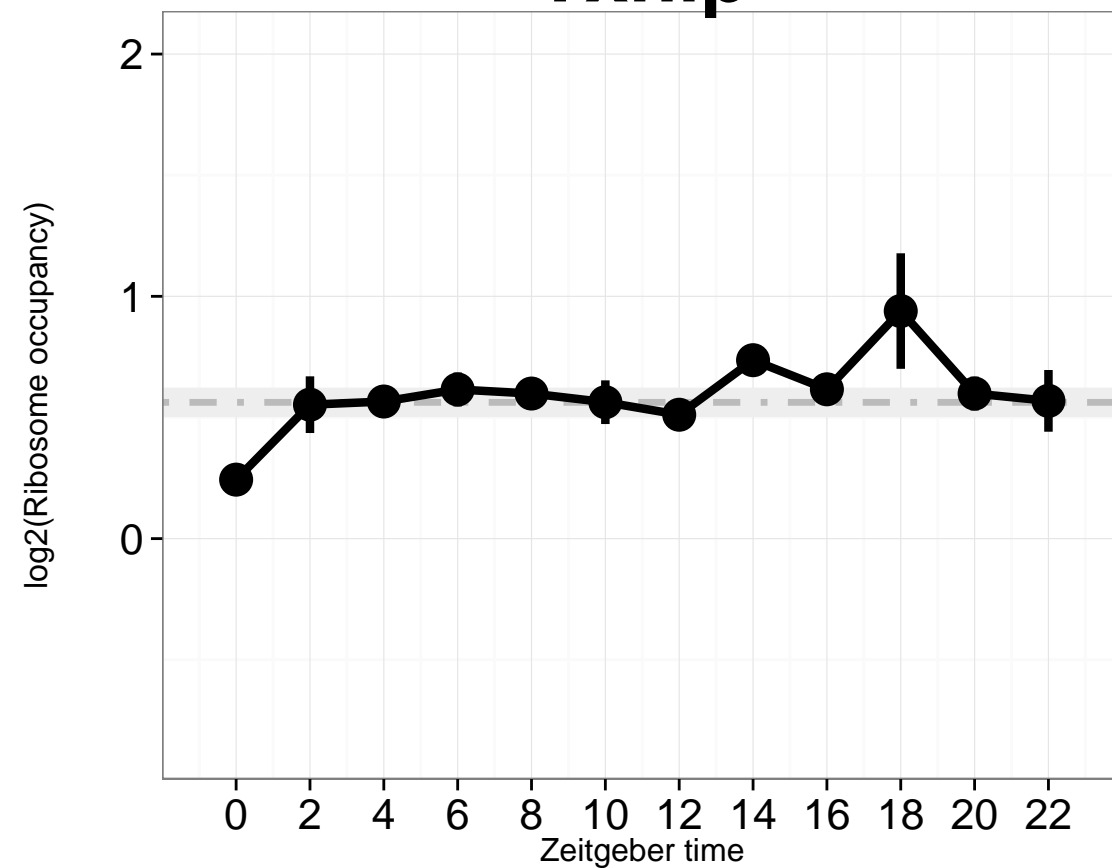

Supplement: SuppDataset_1.zip [file Txnip_set_A.pdf › Supplemental Dataset 1/A-mRNA_nonrhyth_translation_nonrhyth/Txnip_set_A.pdf]

## Txn1l1

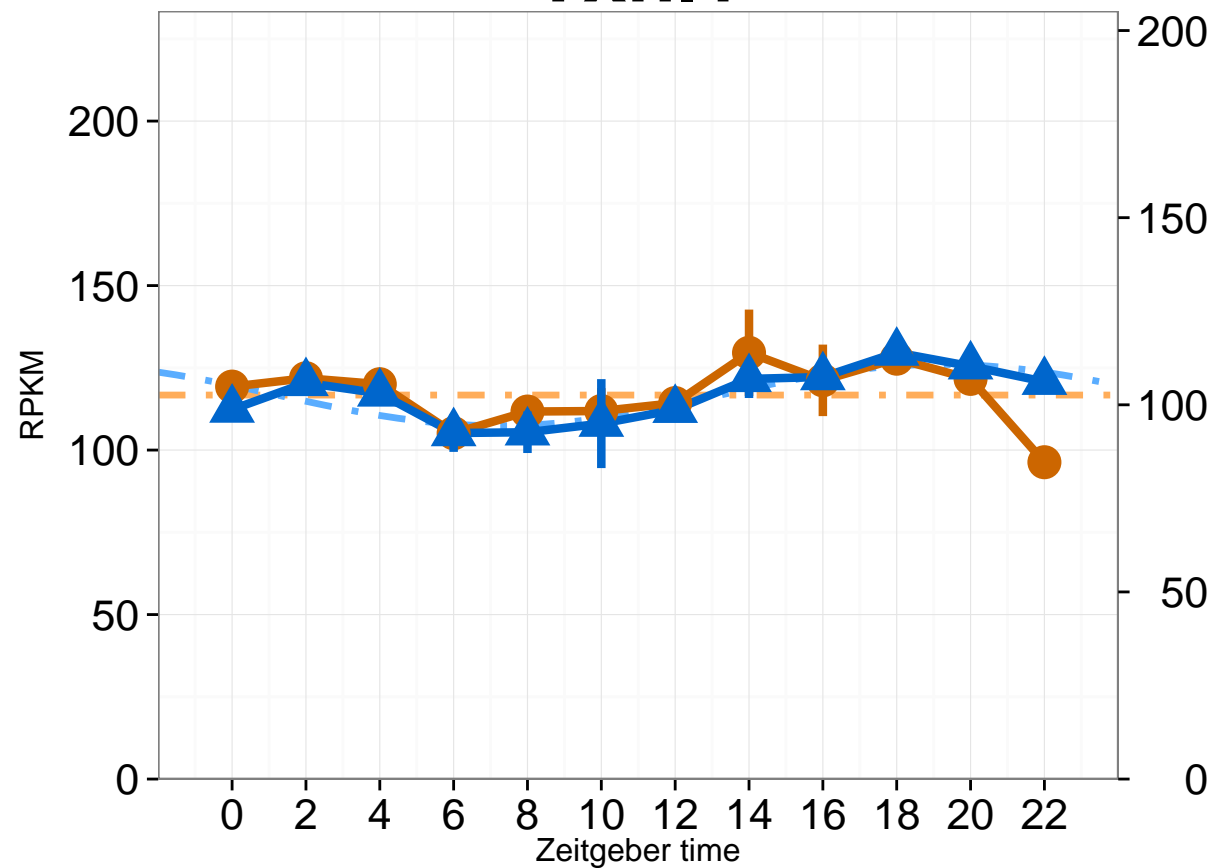

## Txn1l1

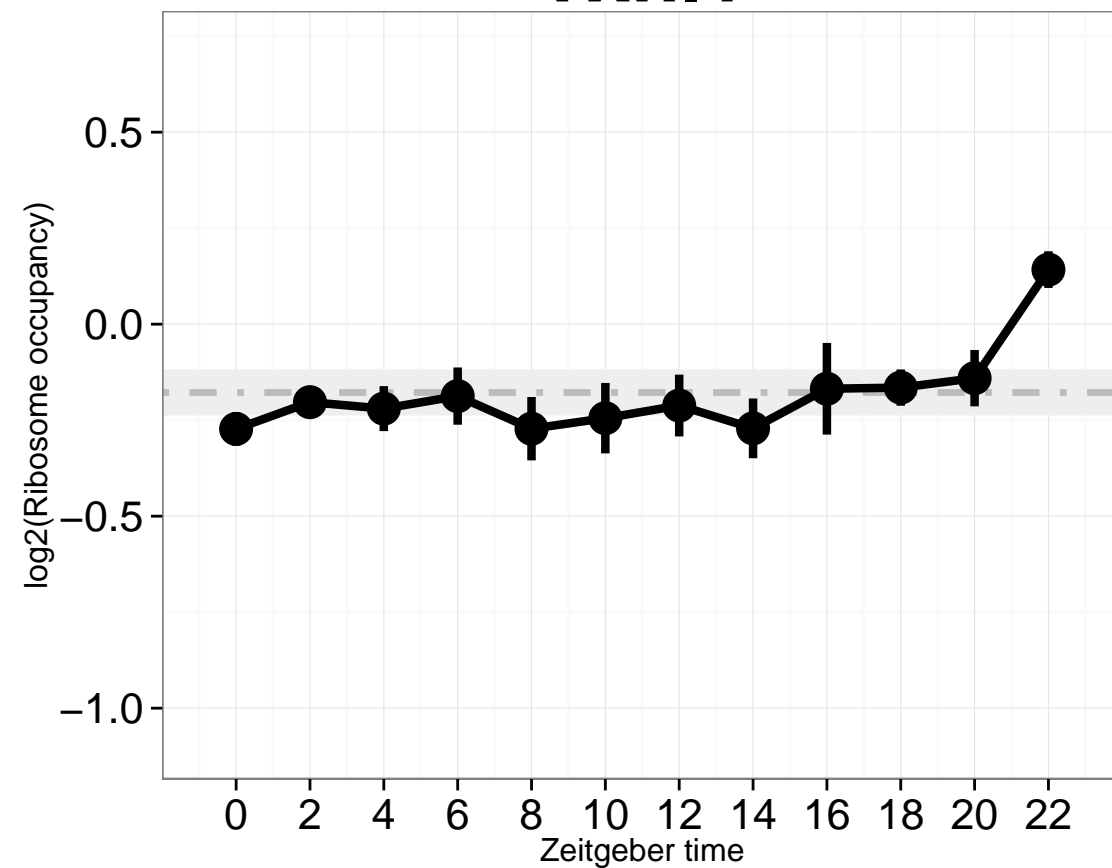

Supplement: SuppDataset_1.zip [file Txnl1_set_A.pdf › Supplemental Dataset 1/A-mRNA_nonrhyth_translation_nonrhyth/Txnl1_set_A.pdf]

# Txn14b

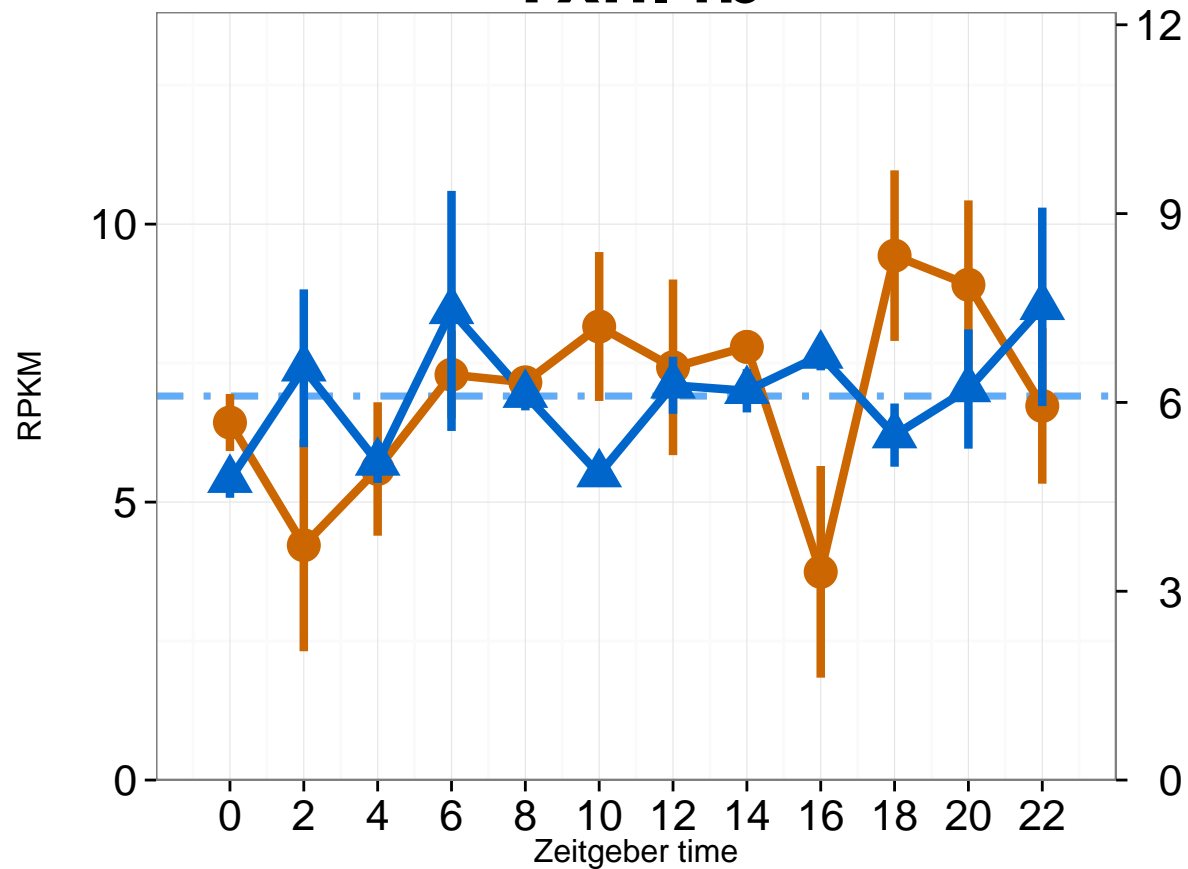

# Txn14b

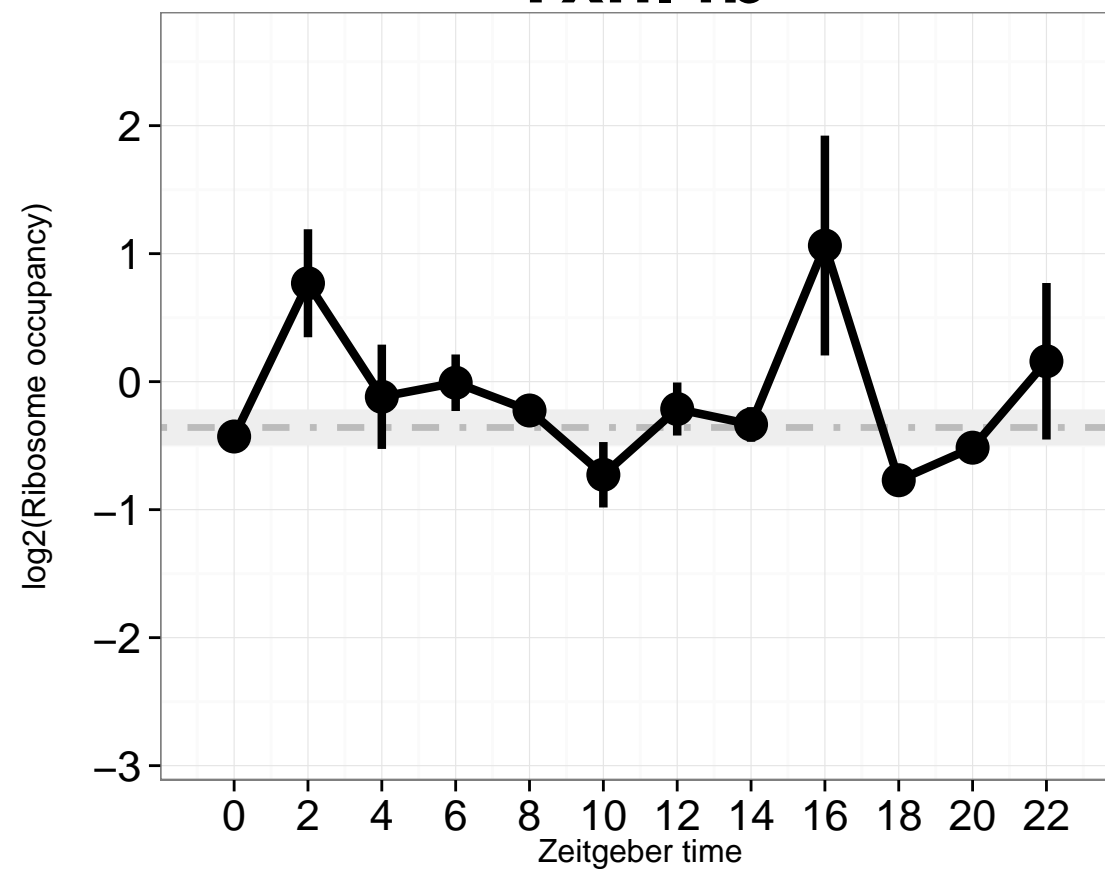

Supplement: SuppDataset_1.zip [file Txnl4b_set_A.pdf › Supplemental Dataset 1/A-mRNA_nonrhyth_translation_nonrhyth/Txnl4b_set_A.pdf]

## Txnrd1

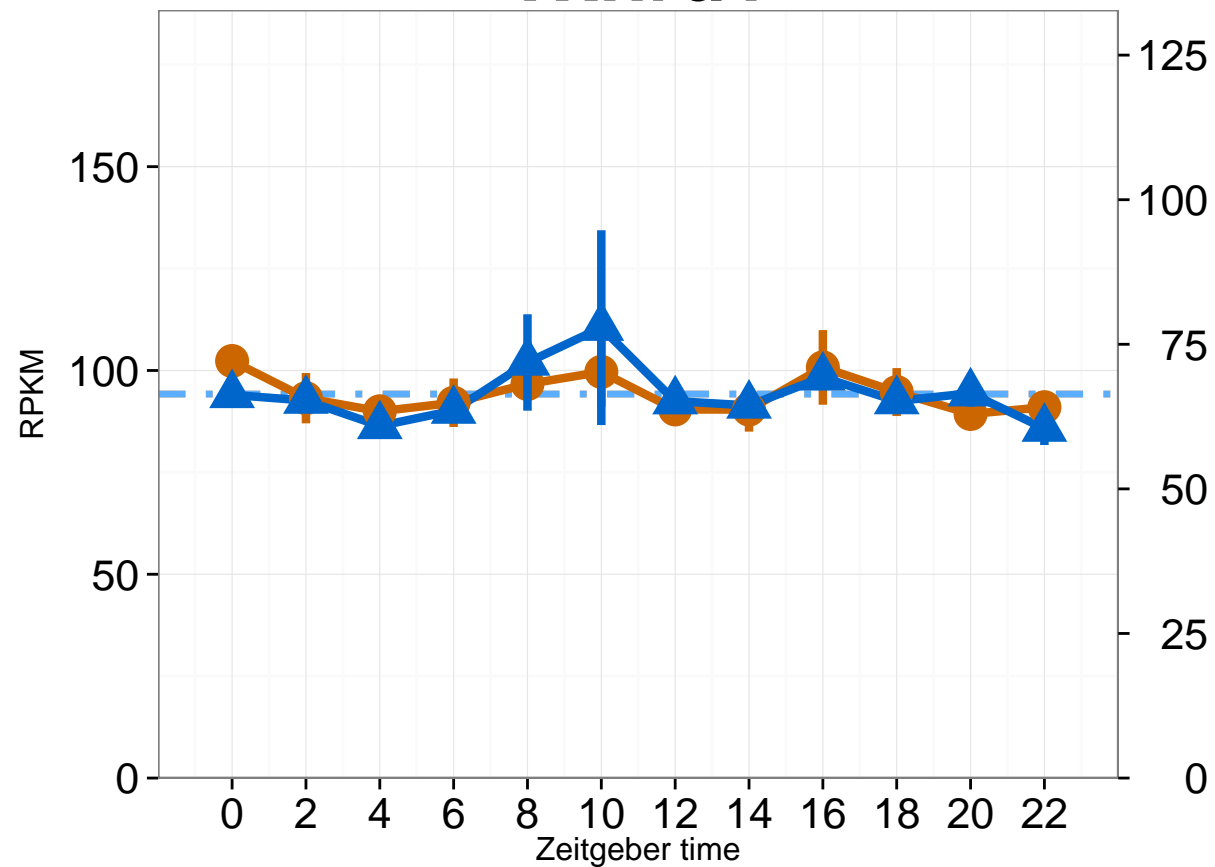

## Txnrd1

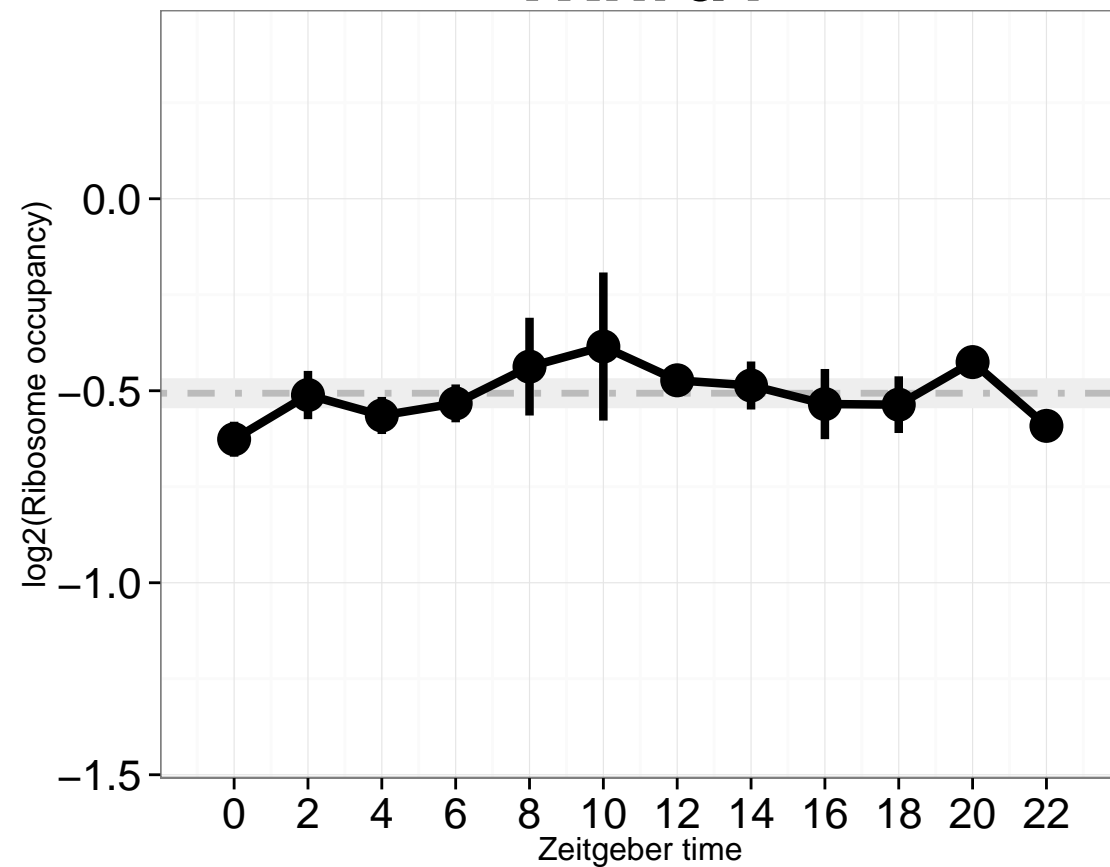

Supplement: SuppDataset_1.zip [file Txnrd1_set_A.pdf › Supplemental Dataset 1/A-mRNA_nonrhyth_translation_nonrhyth/Txnrd1_set_A.pdf]

## Tyms

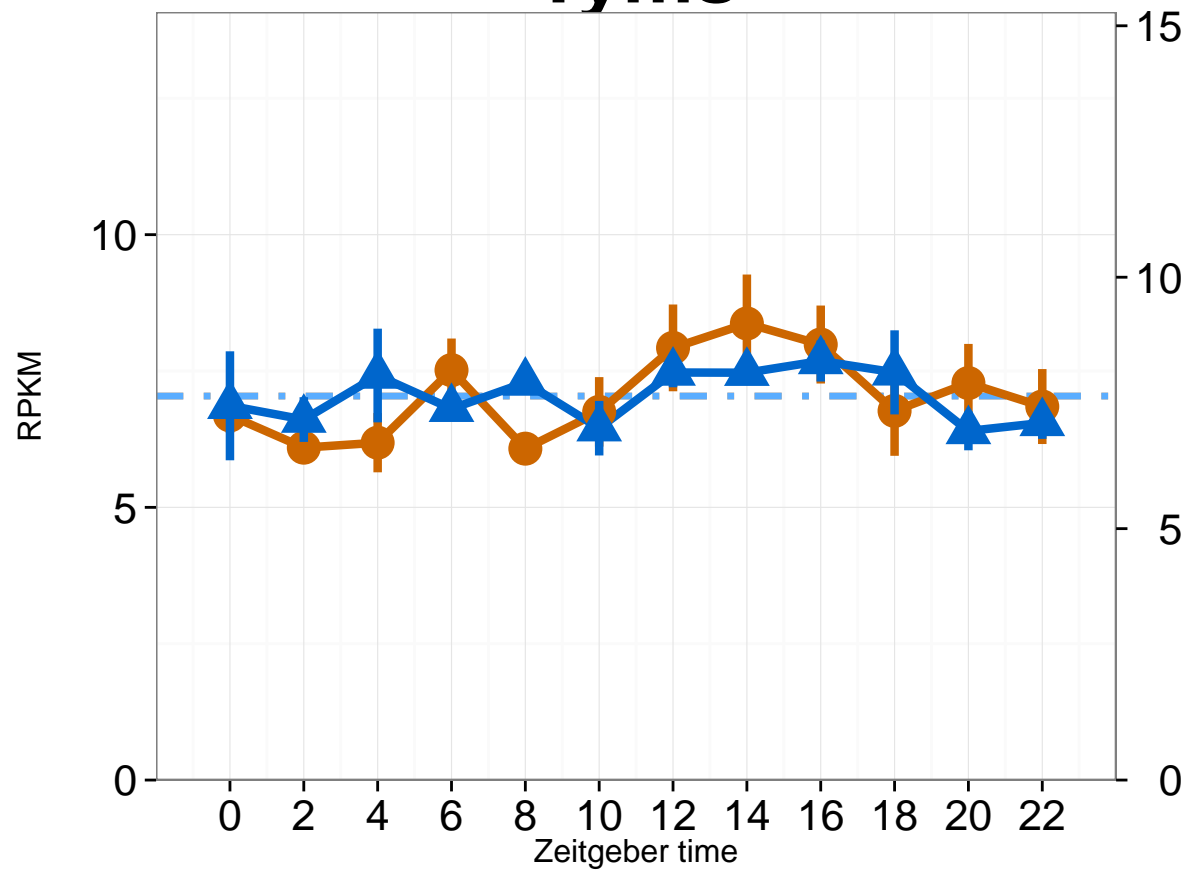

## Tyms

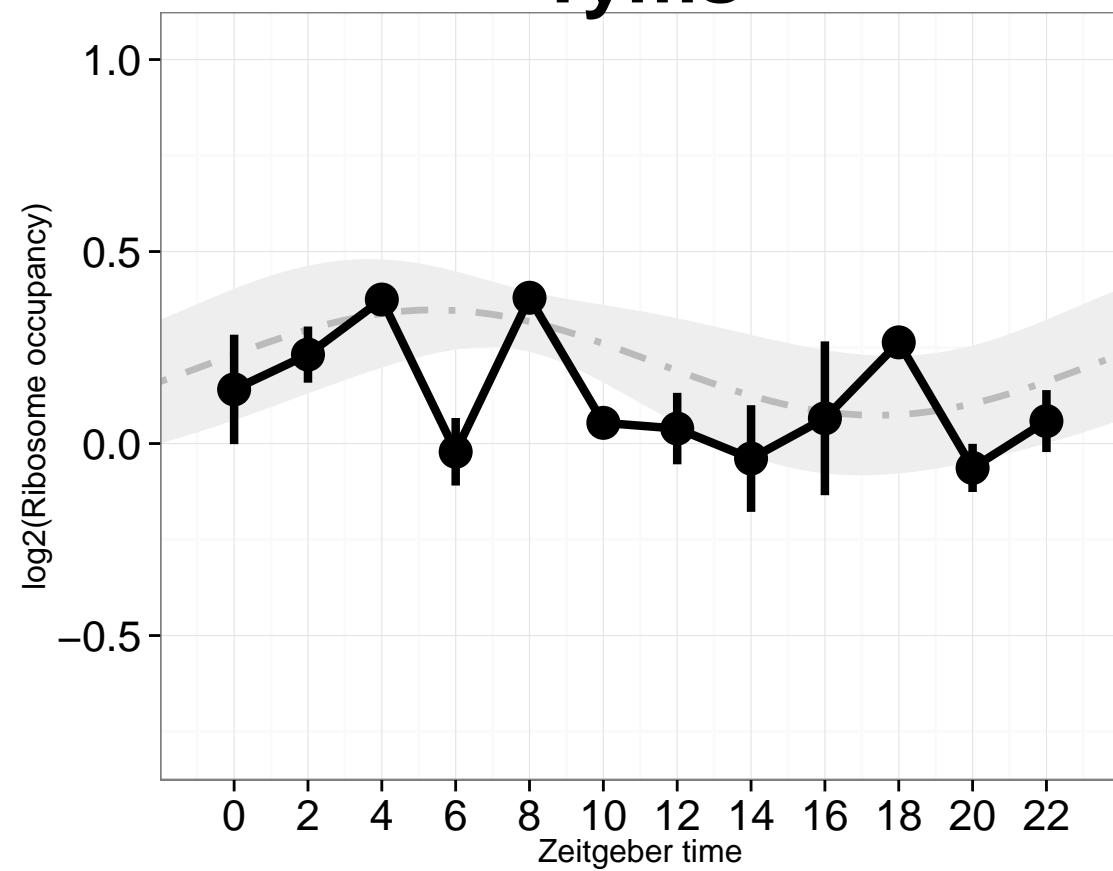

Supplement: SuppDataset_1.zip [file Tyms_set_A.pdf › Supplemental Dataset 1/A-mRNA_nonrhyth_translation_nonrhyth/Tyms_set_A.pdf]

## Tyrobp

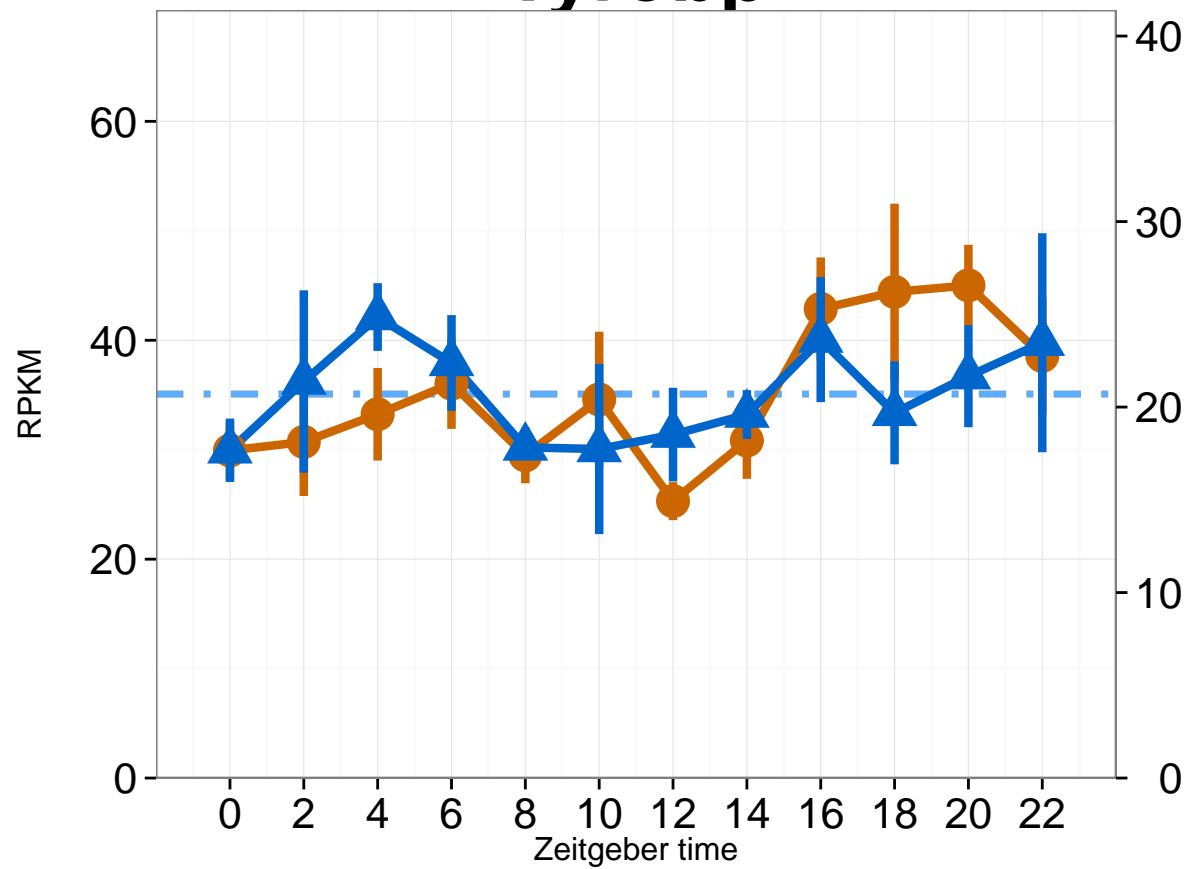

## Tyrobp

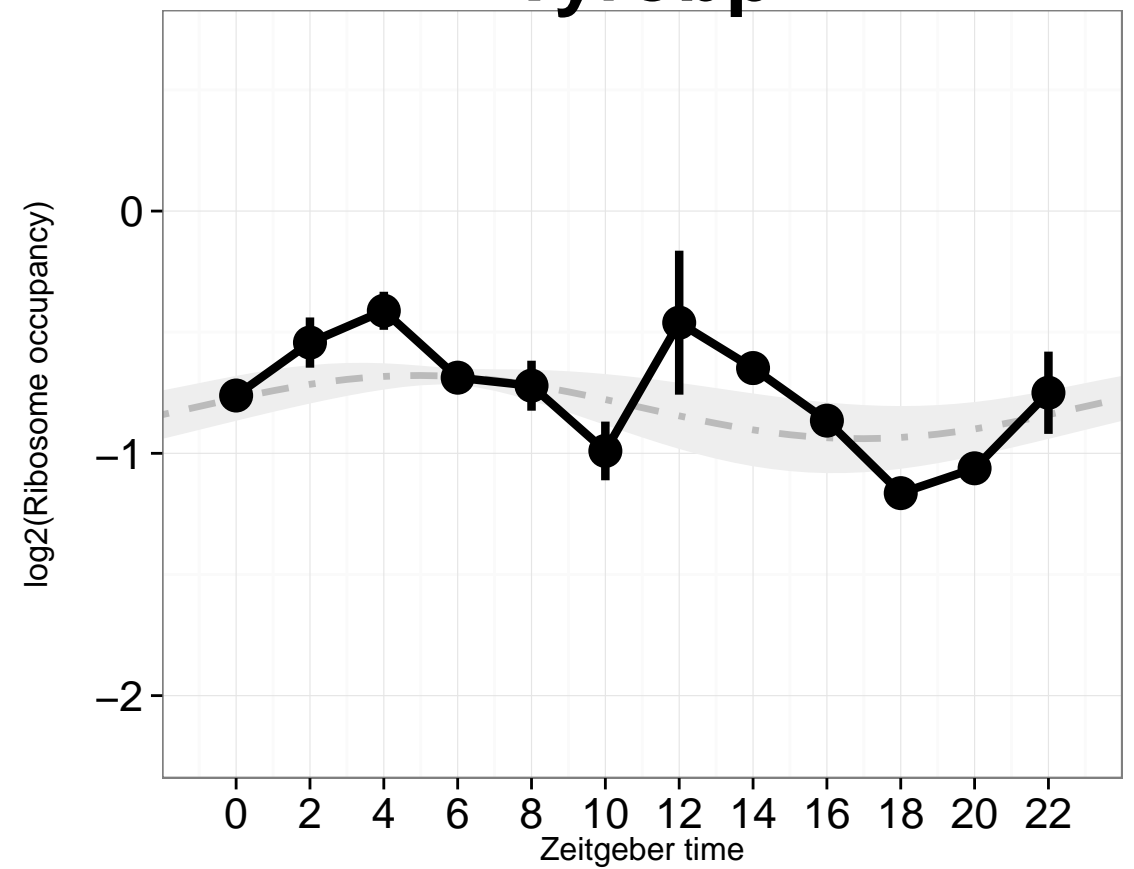

Supplement: SuppDataset_1.zip [file Tyrobp_set_A.pdf › Supplemental Dataset 1/A-mRNA_nonrhyth_translation_nonrhyth/Tyrobp_set_A.pdf]

# Tysnd1

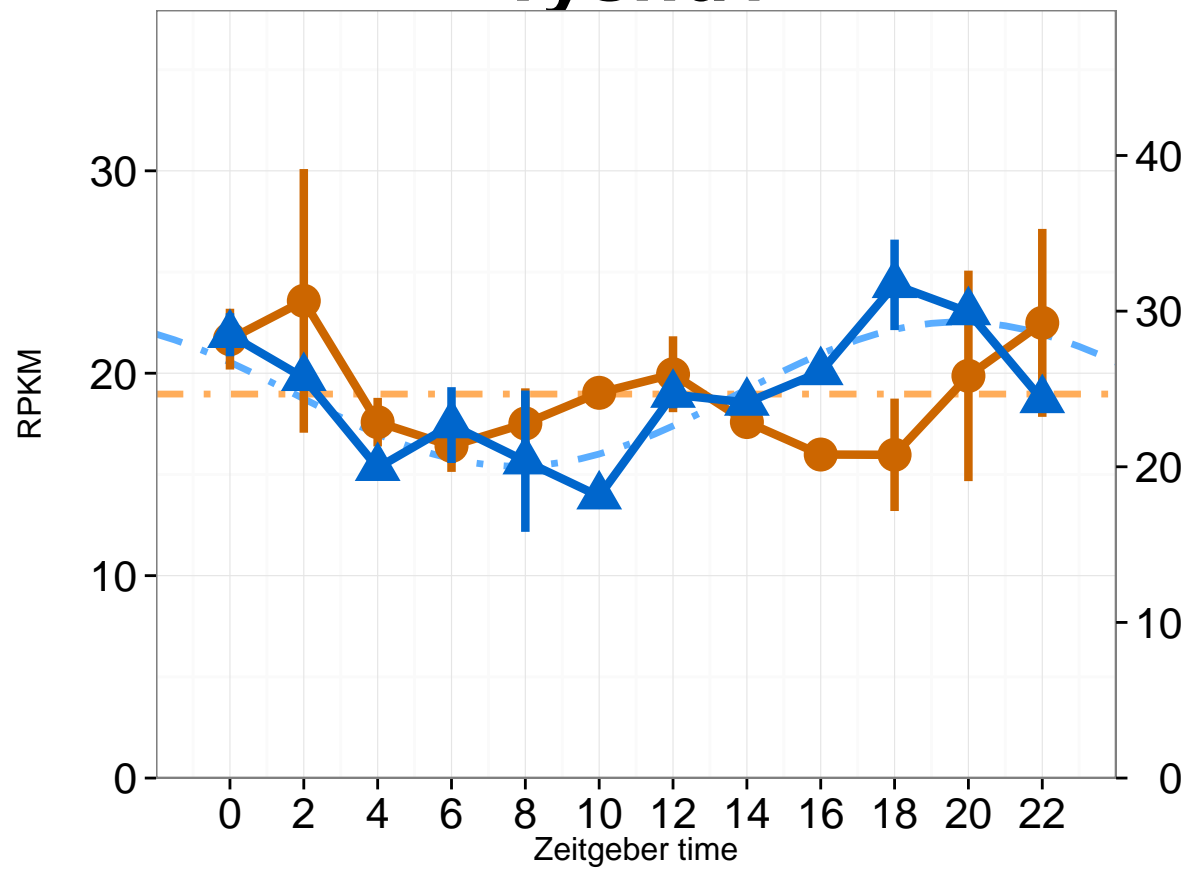

# Tysnd1

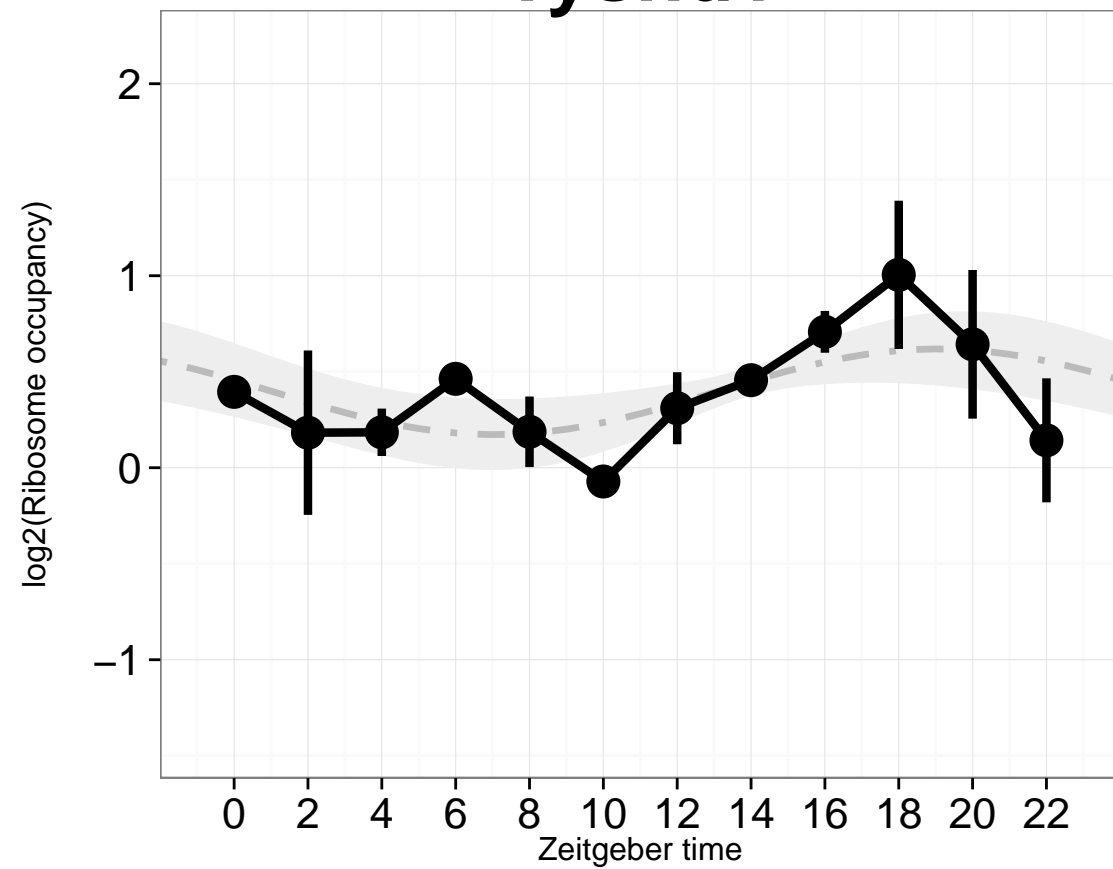

Supplement: SuppDataset_1.zip [file Tysnd1_set_A.pdf › Supplemental Dataset 1/A-mRNA_nonrhyth_translation_nonrhyth/Tysnd1_set_A.pdf]

# Tyw1

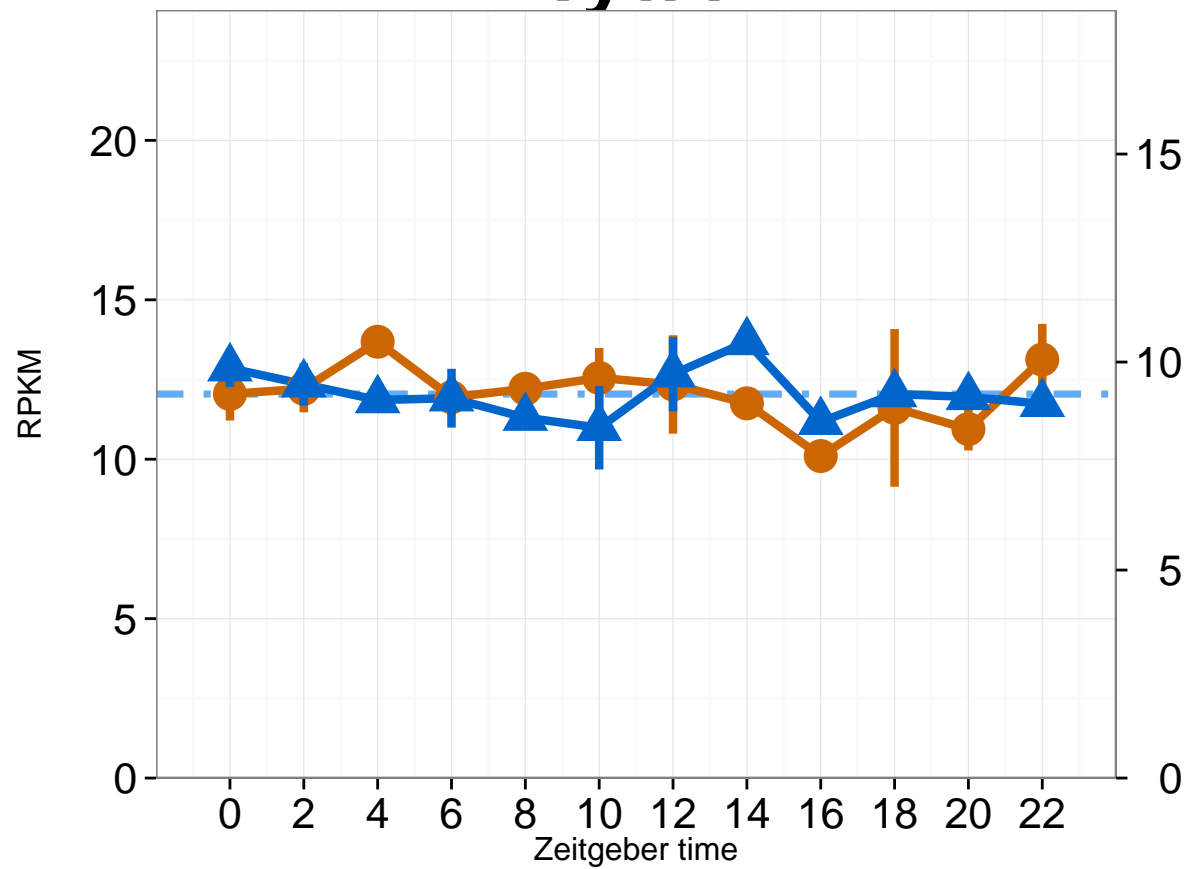

# Tyw1

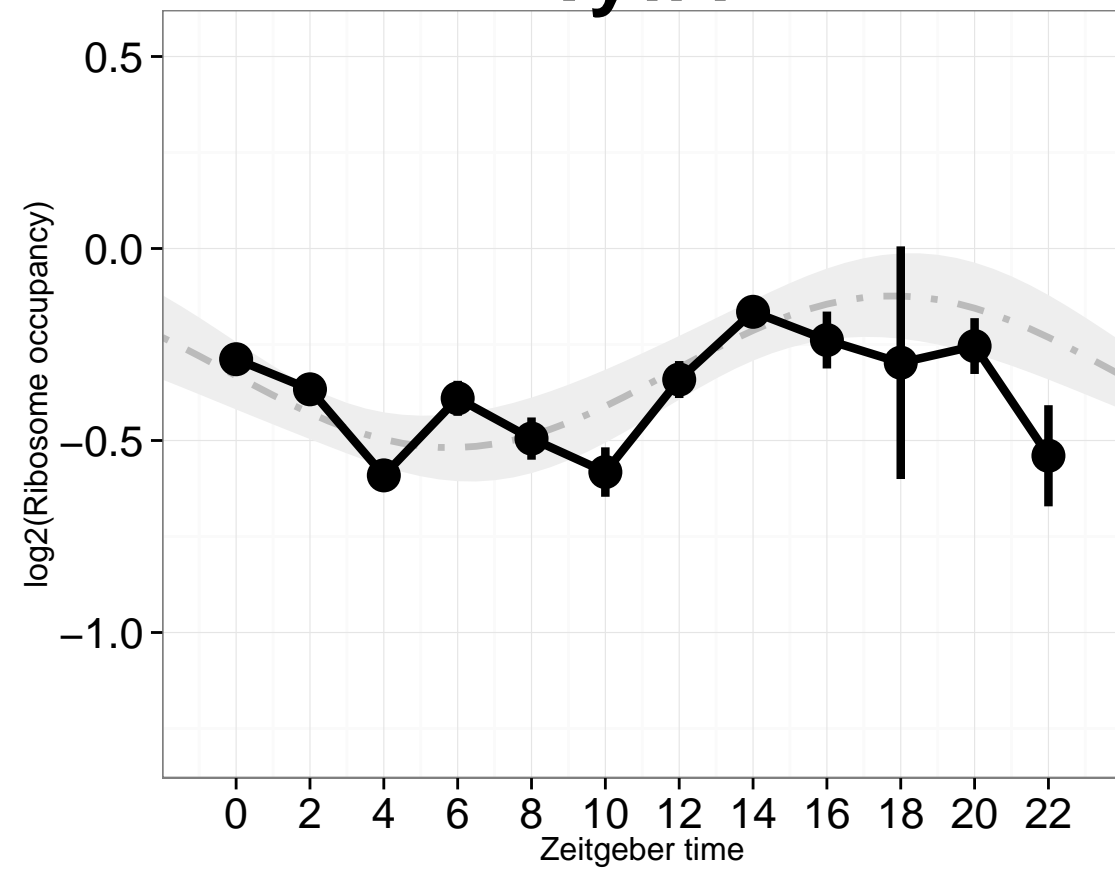

Supplement: SuppDataset_1.zip [file Tyw1_set_A.pdf › Supplemental Dataset 1/A-mRNA_nonrhyth_translation_nonrhyth/Tyw1_set_A.pdf]

# Tyw5

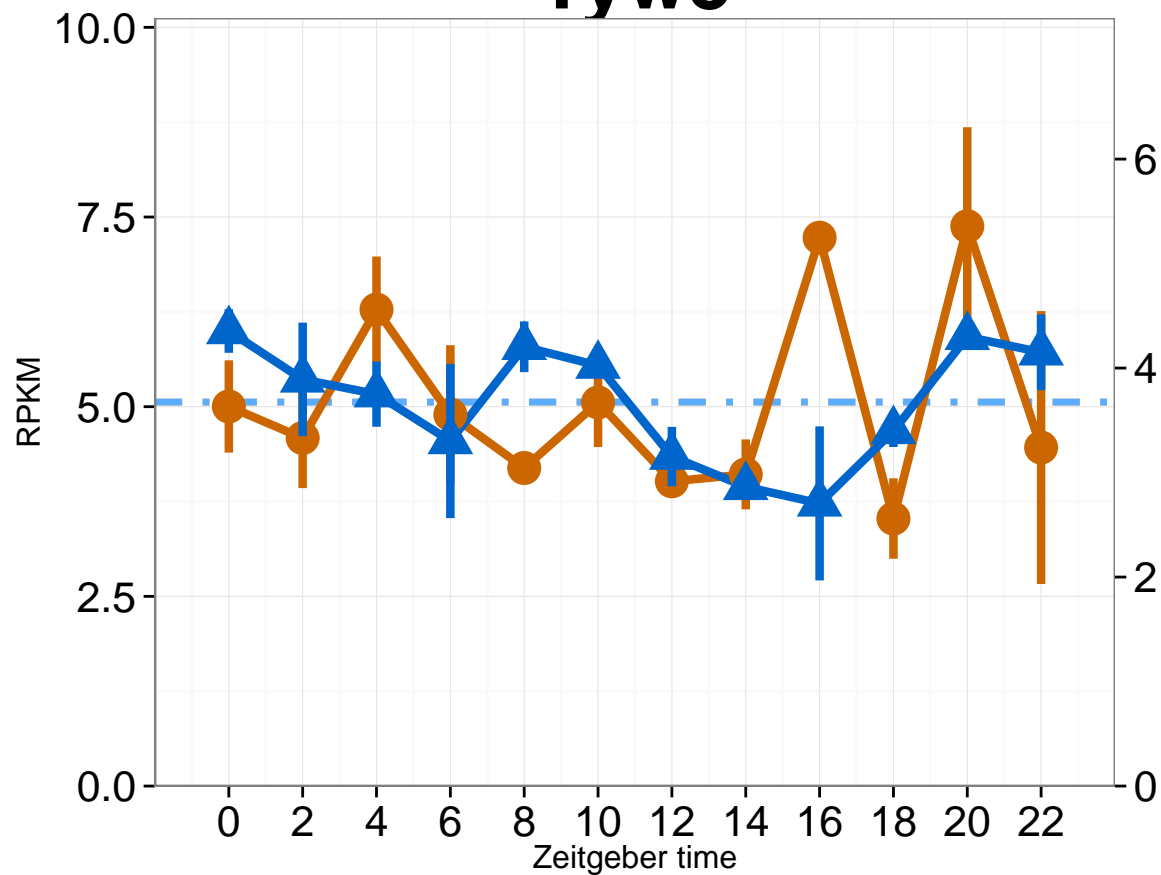

# Tyw5

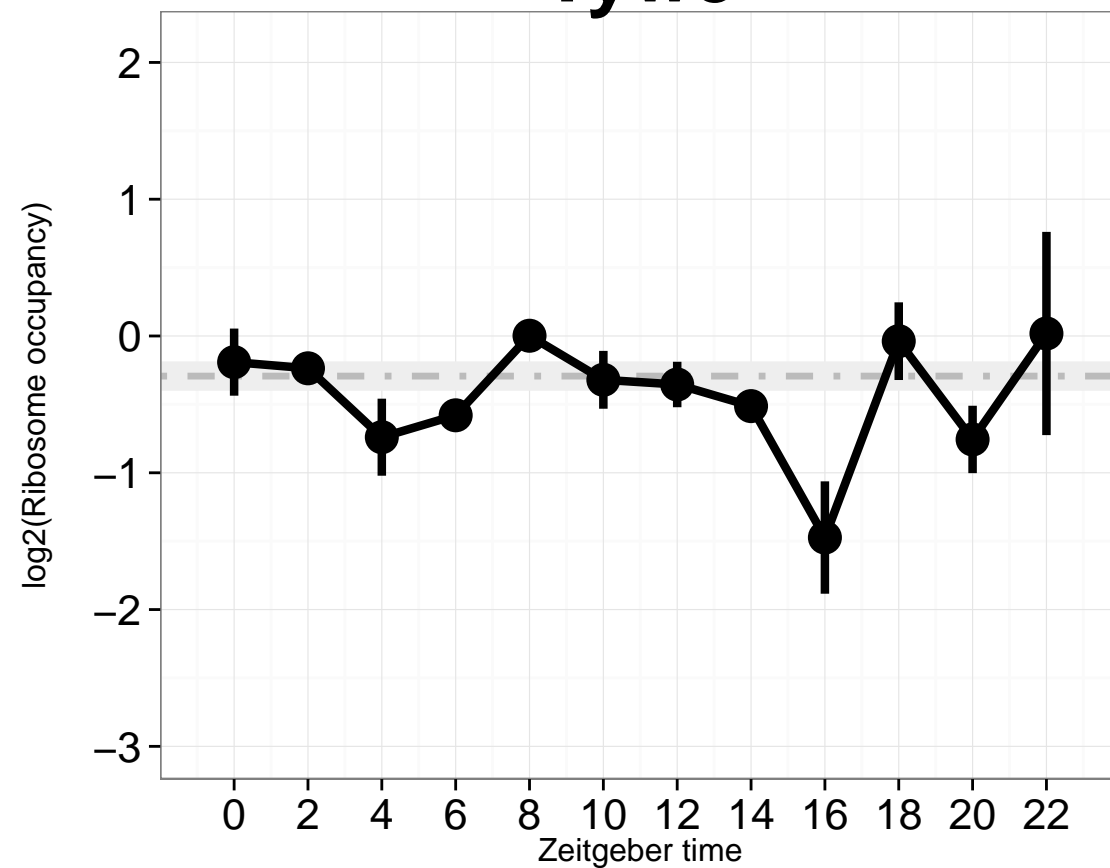

Supplement: SuppDataset_1.zip [file Tyw5_set_A.pdf › Supplemental Dataset 1/A-mRNA_nonrhyth_translation_nonrhyth/Tyw5_set_A.pdf]

## U2af1

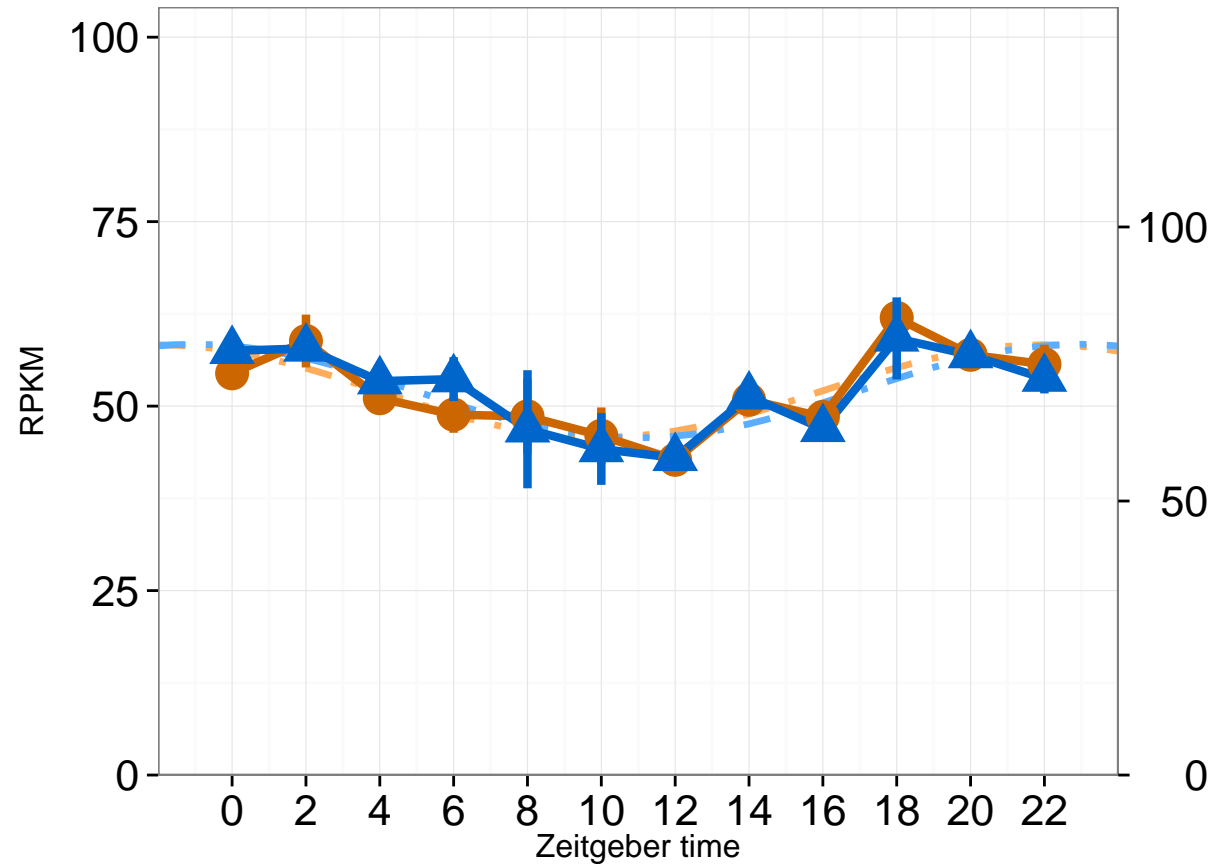

## U2af1

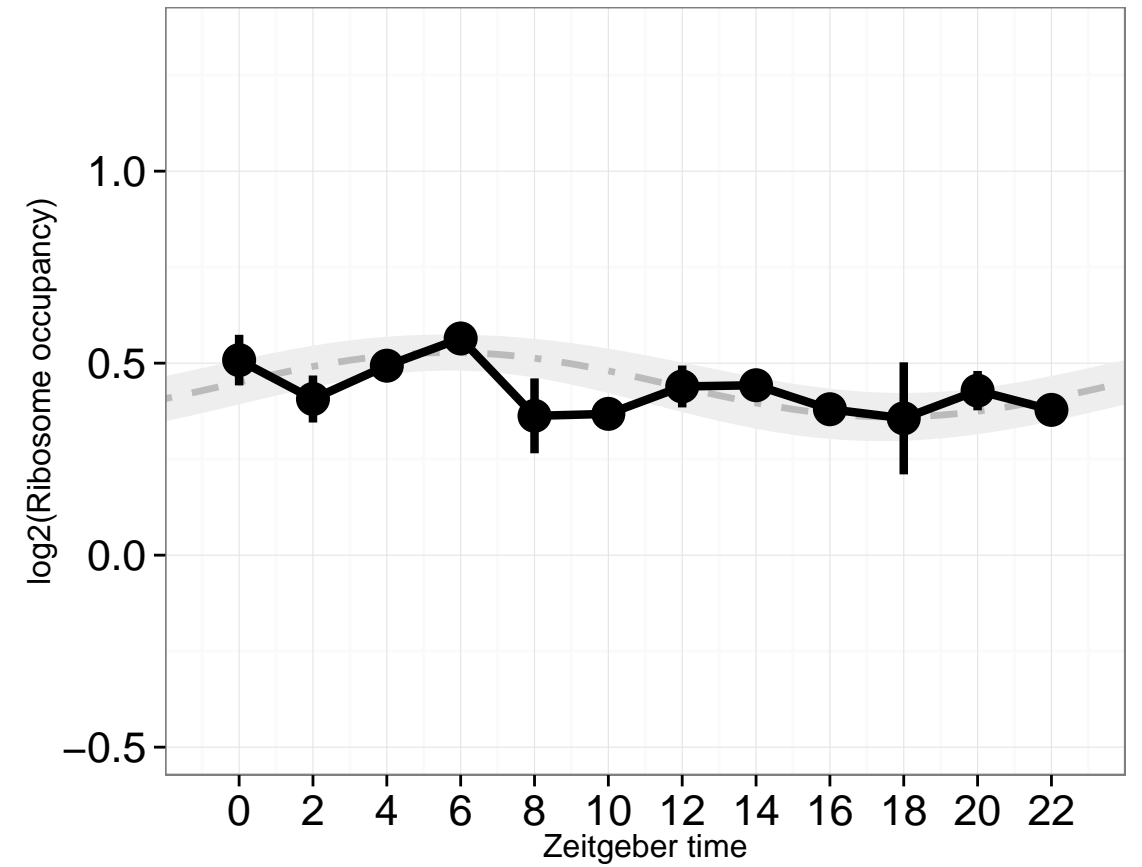

Supplement: SuppDataset_1.zip [file U2af1_set_A.pdf › Supplemental Dataset 1/A-mRNA_nonrhyth_translation_nonrhyth/U2af1_set_A.pdf]

# U2af1l4

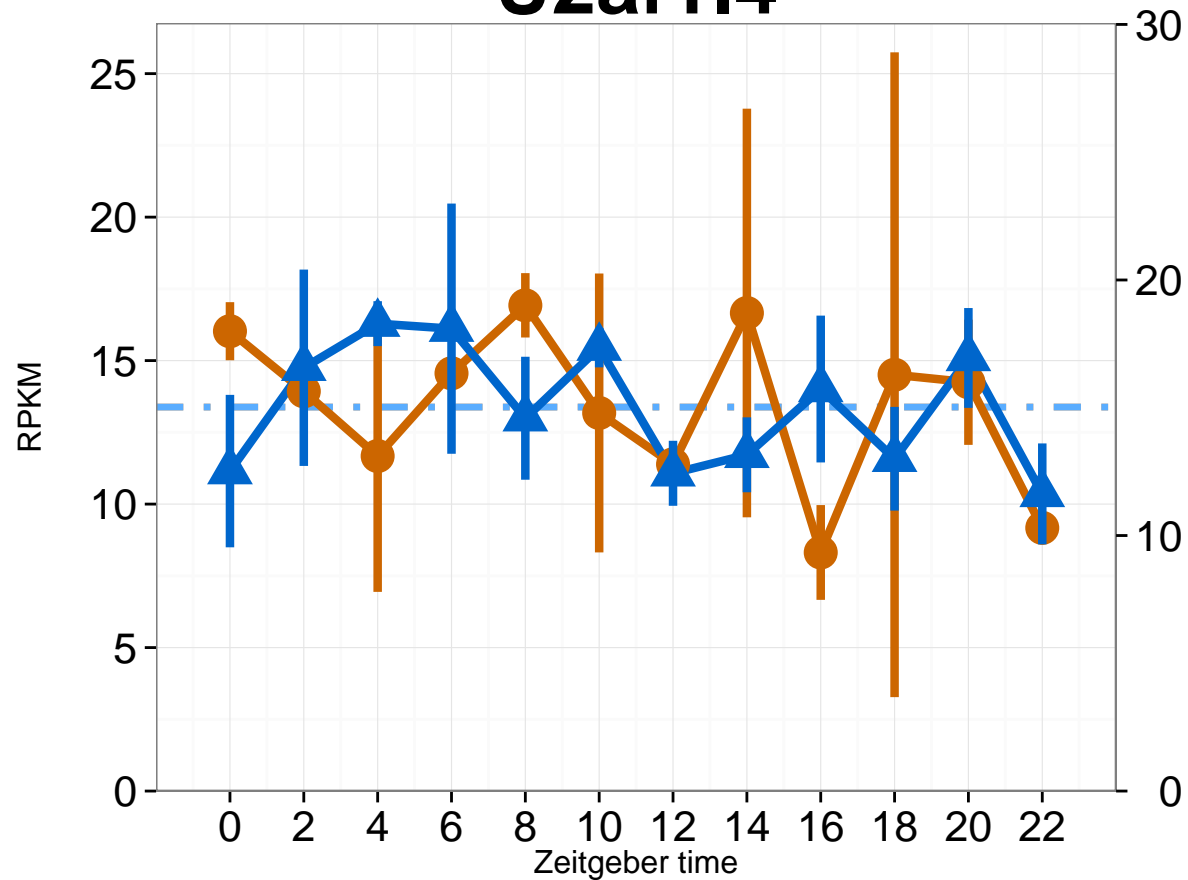

# U2af1l4

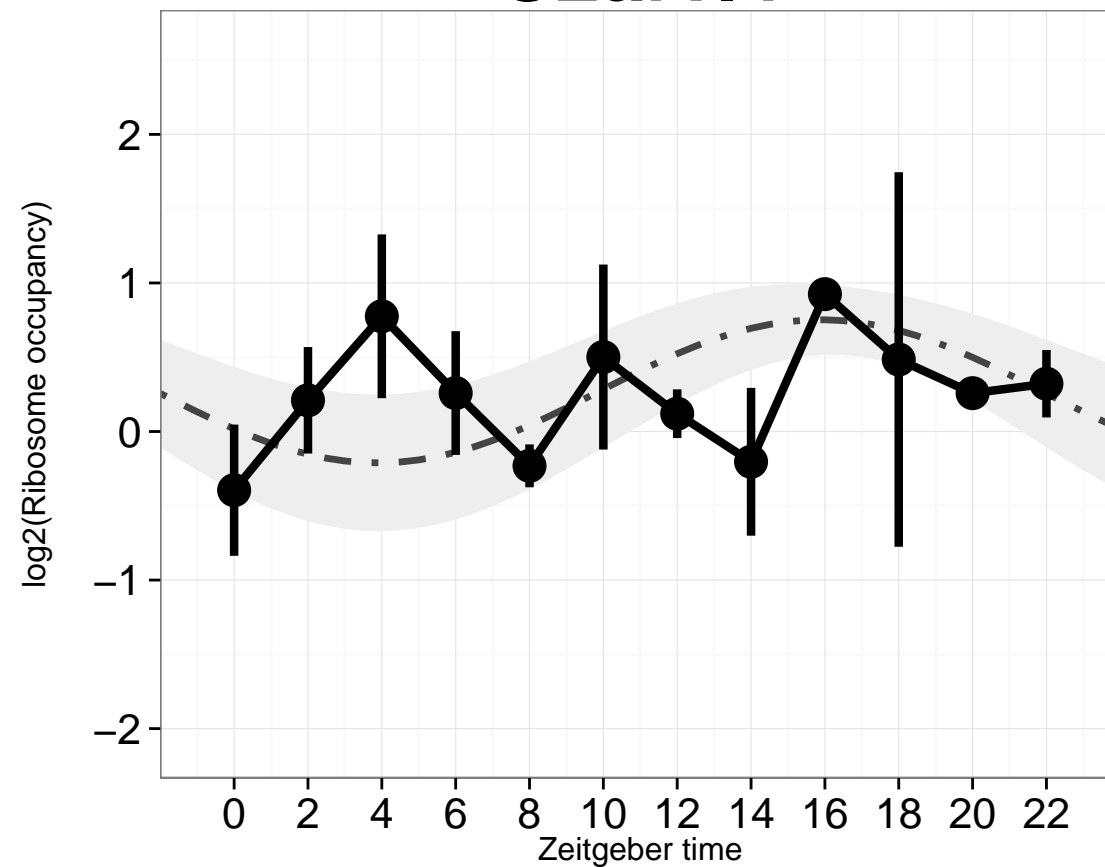

Supplement: SuppDataset_1.zip [file U2af1l4_set_A.pdf › Supplemental Dataset 1/A-mRNA_nonrhyth_translation_nonrhyth/U2af1l4_set_A.pdf]

## U2af2

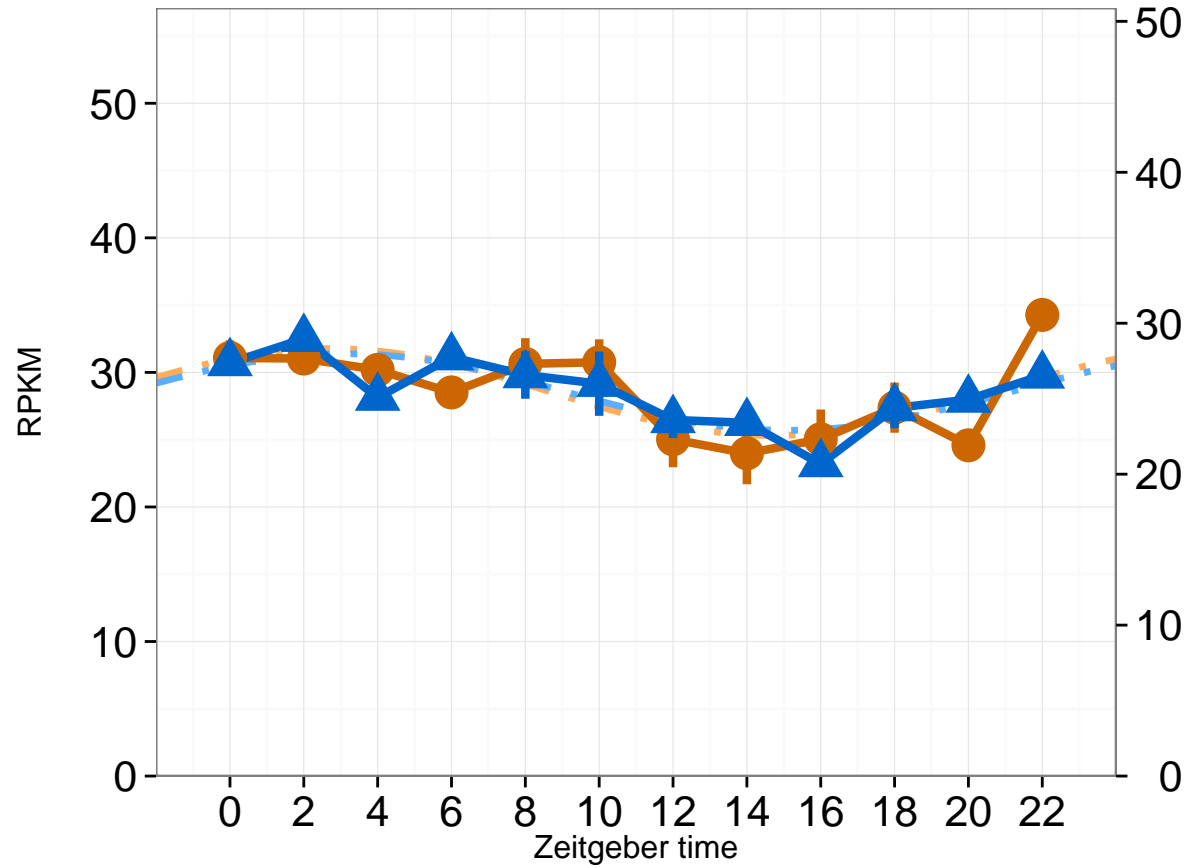

## U2af2

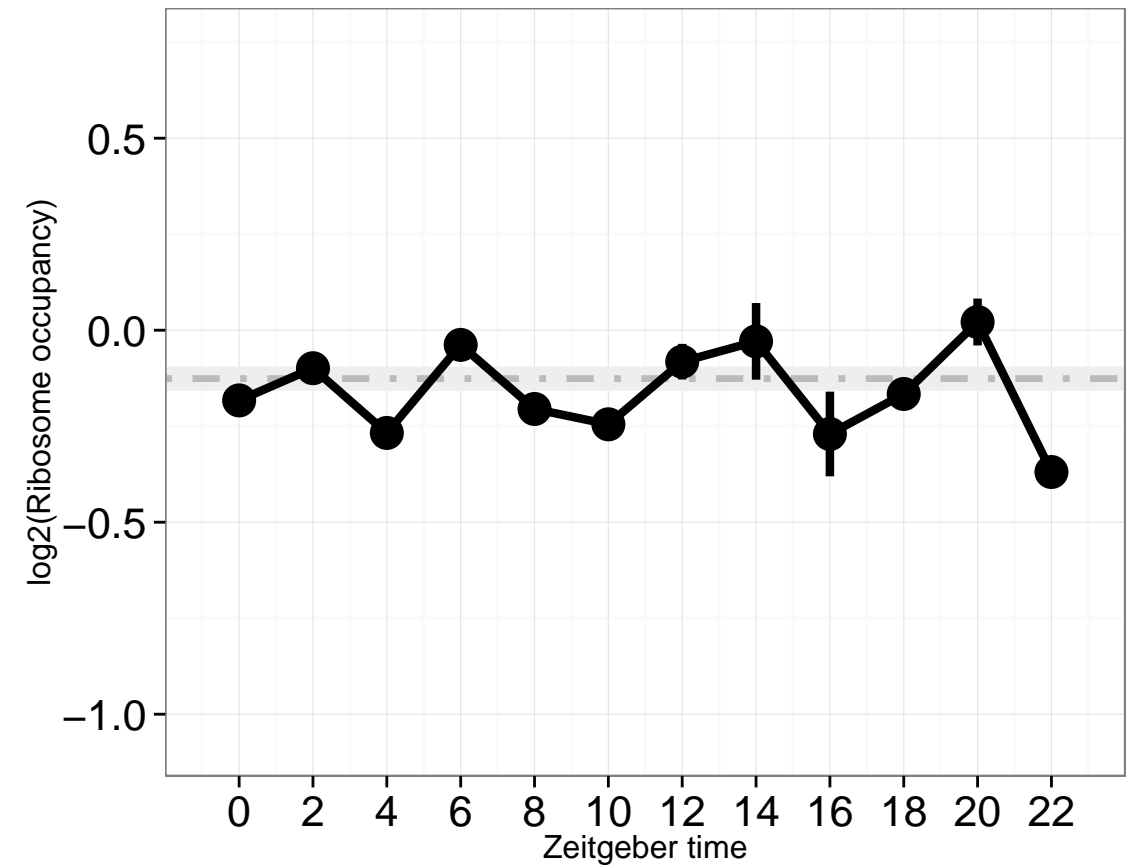

Supplement: SuppDataset_1.zip [file U2af2_set_A.pdf › Supplemental Dataset 1/A-mRNA_nonrhyth_translation_nonrhyth/U2af2_set_A.pdf]

# U2surp

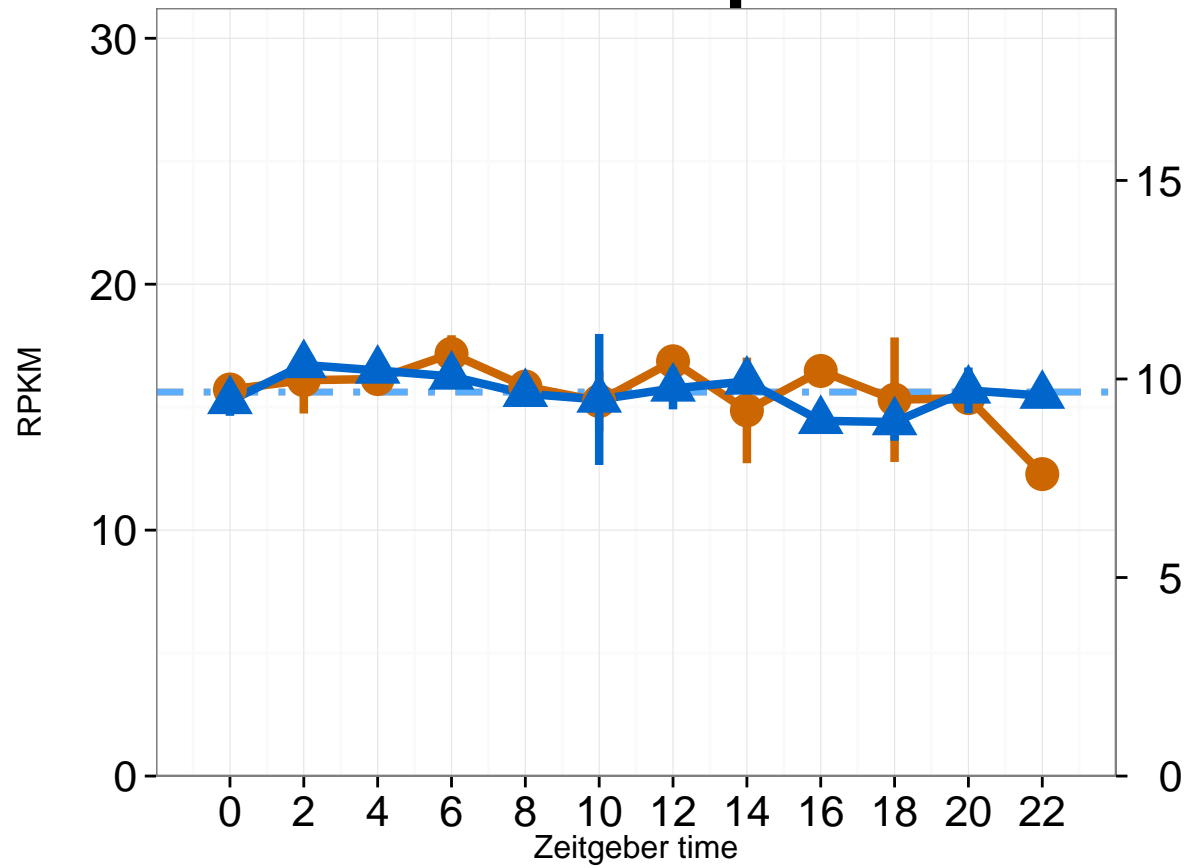

# U2surp

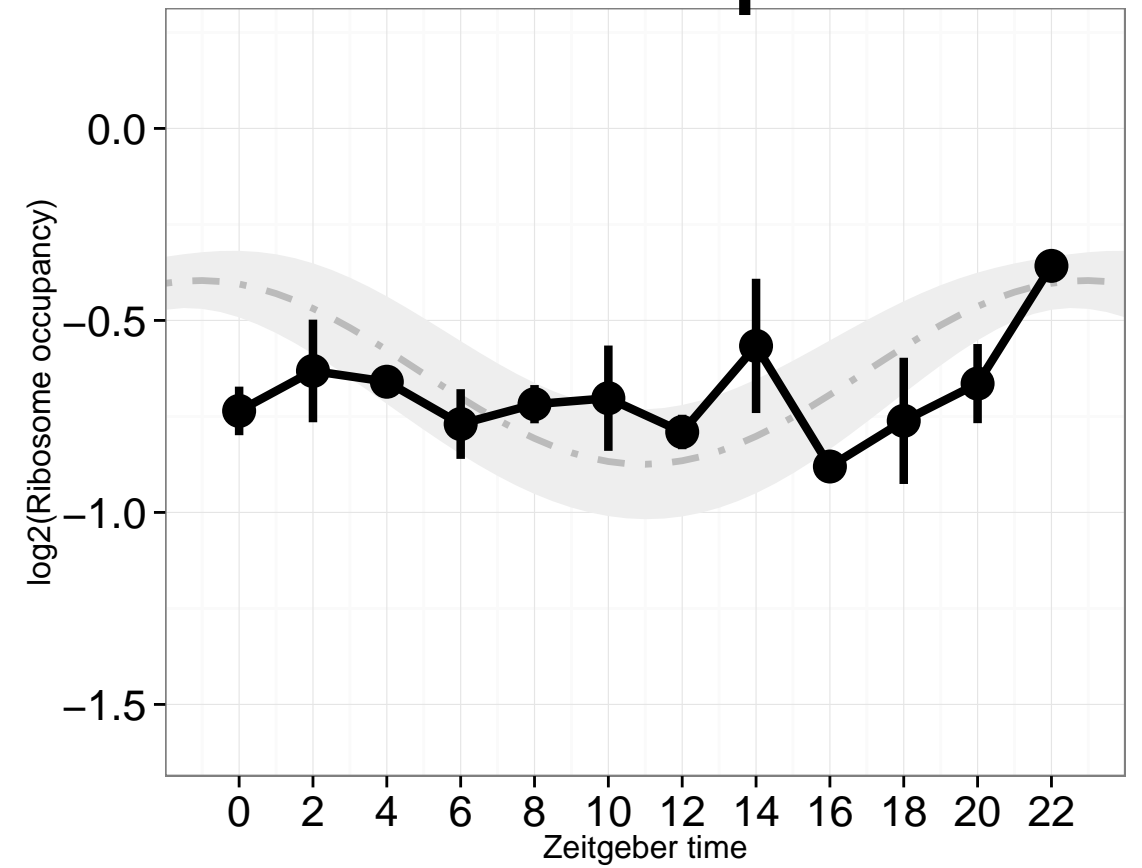

Supplement: SuppDataset_1.zip [file U2surp_set_A.pdf › Supplemental Dataset 1/A-mRNA_nonrhyth_translation_nonrhyth/U2surp_set_A.pdf]

## Uaca

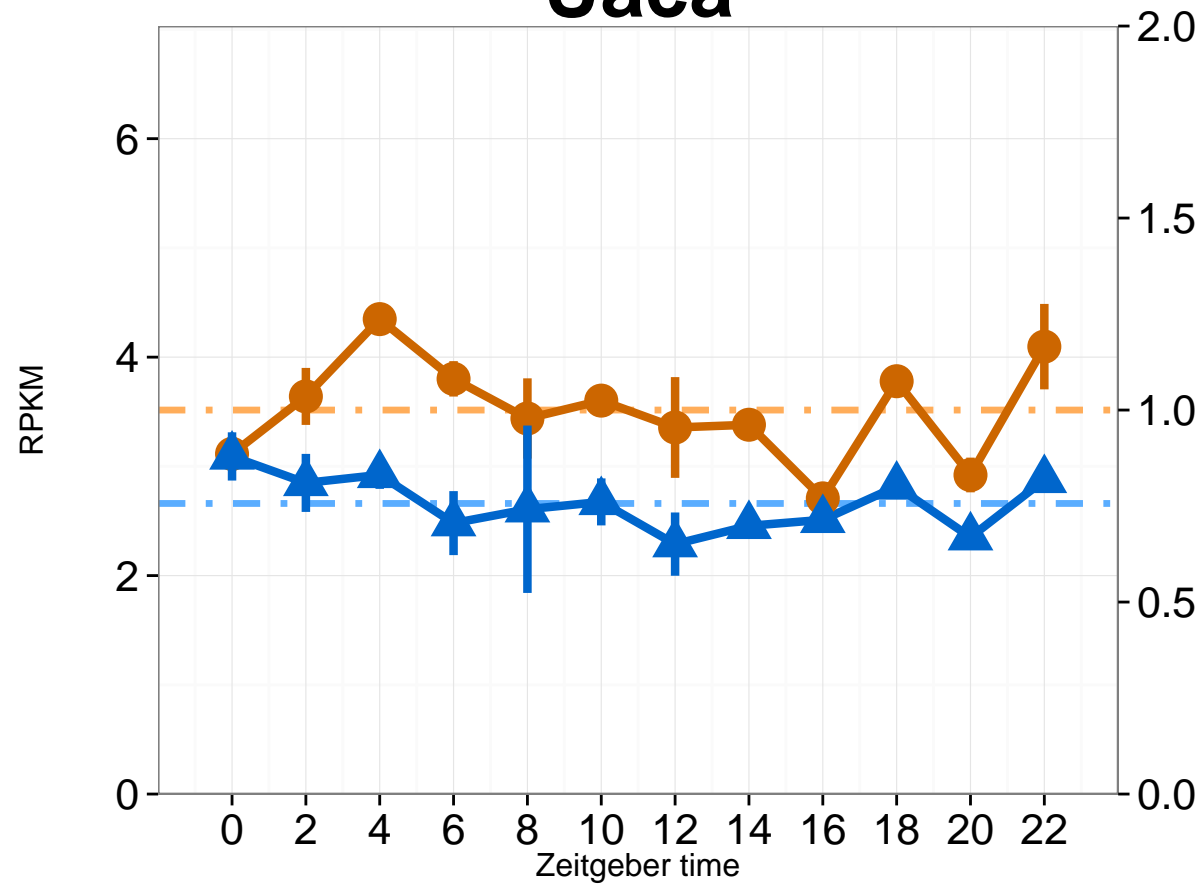

## Uaca

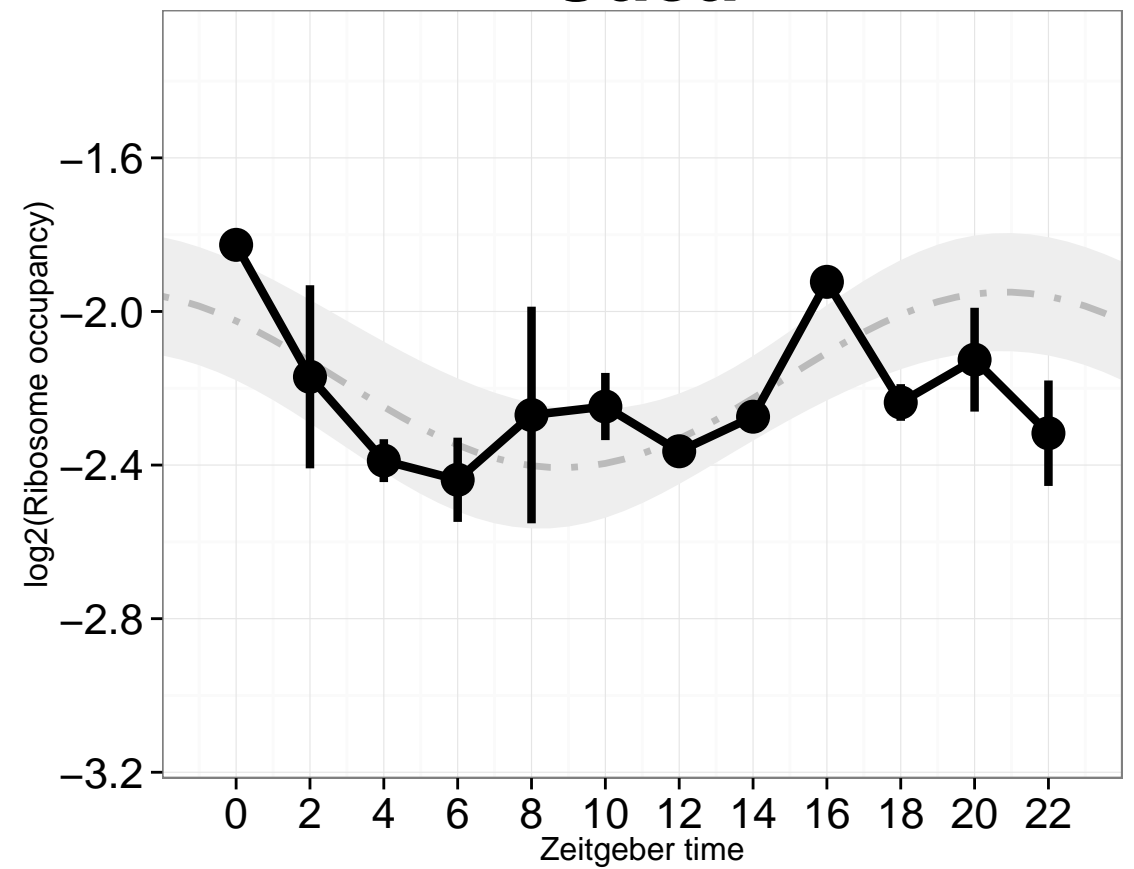

Supplement: SuppDataset_1.zip [file Uaca_set_A.pdf › Supplemental Dataset 1/A-mRNA_nonrhyth_translation_nonrhyth/Uaca_set_A.pdf]

# Uap1l1

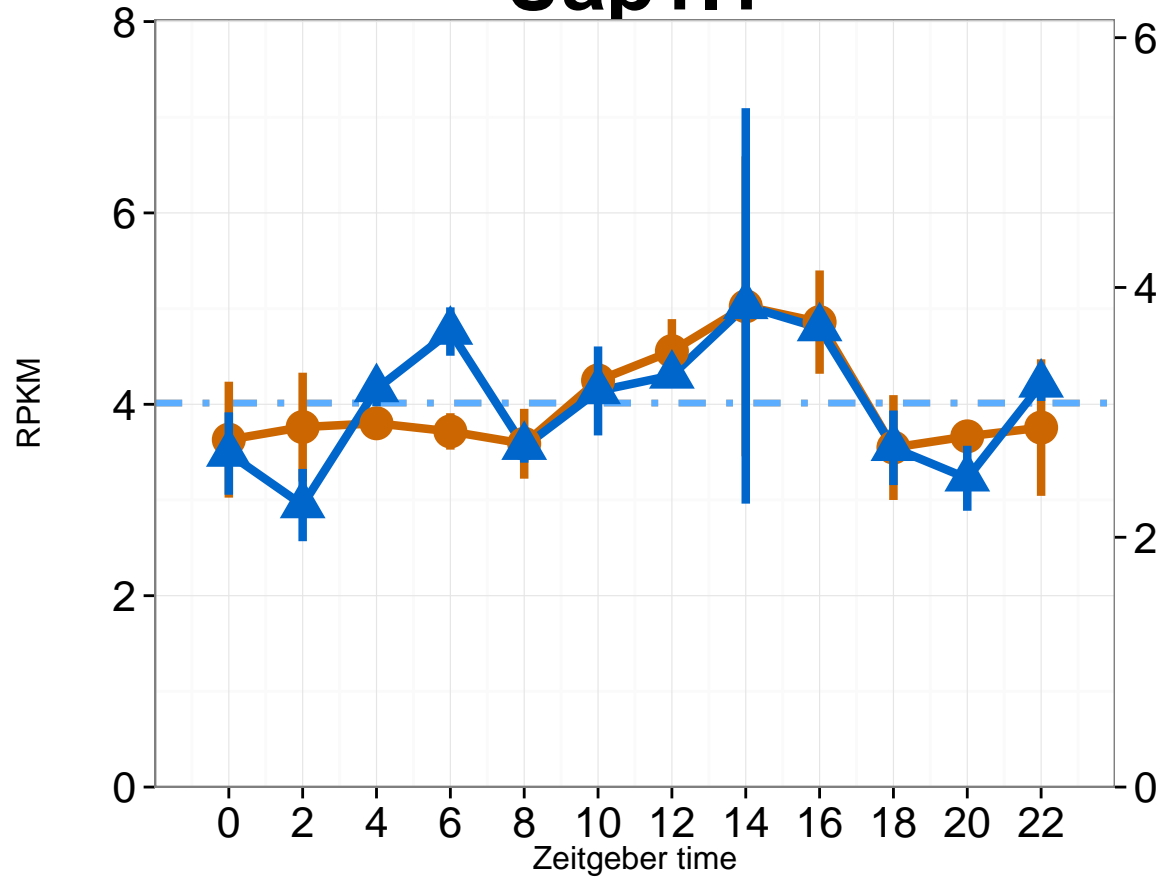

# Uap1l1

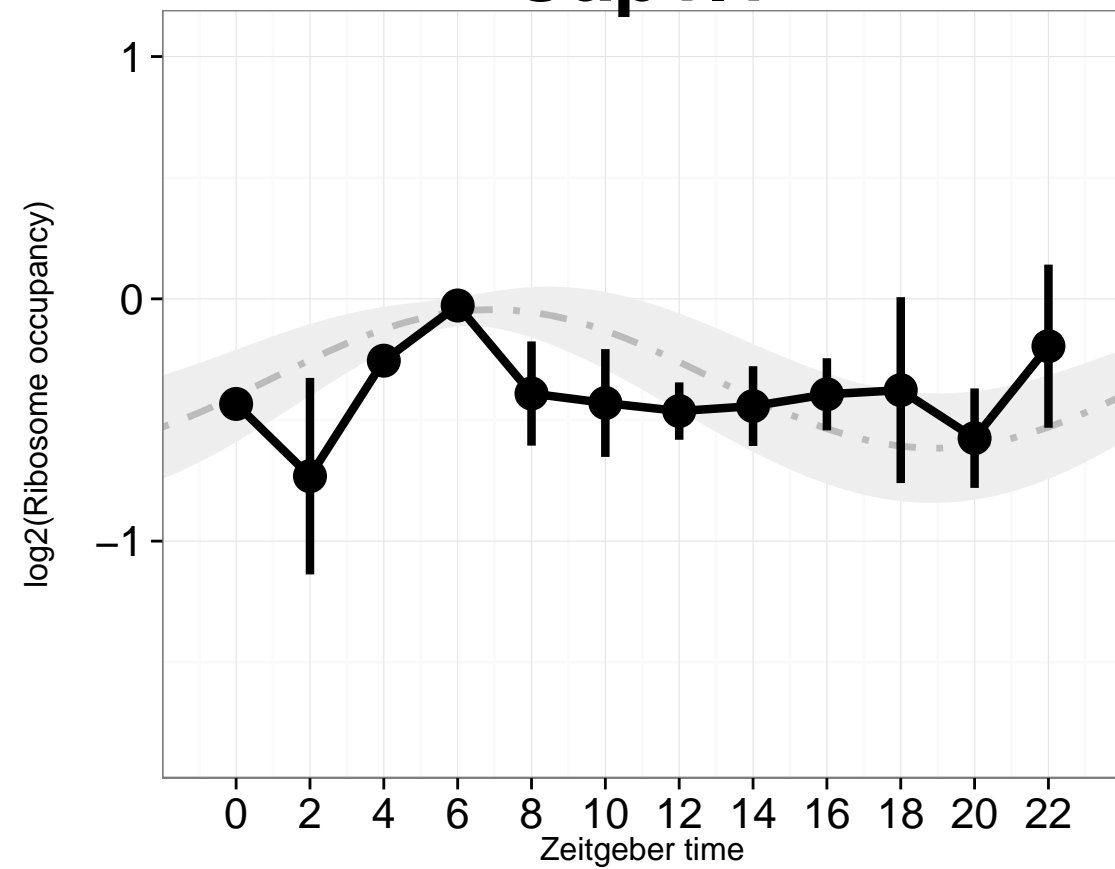

Supplement: SuppDataset_1.zip [file Uap1l1_set_A.pdf › Supplemental Dataset 1/A-mRNA_nonrhyth_translation_nonrhyth/Uap1l1_set_A.pdf]

## Uba1

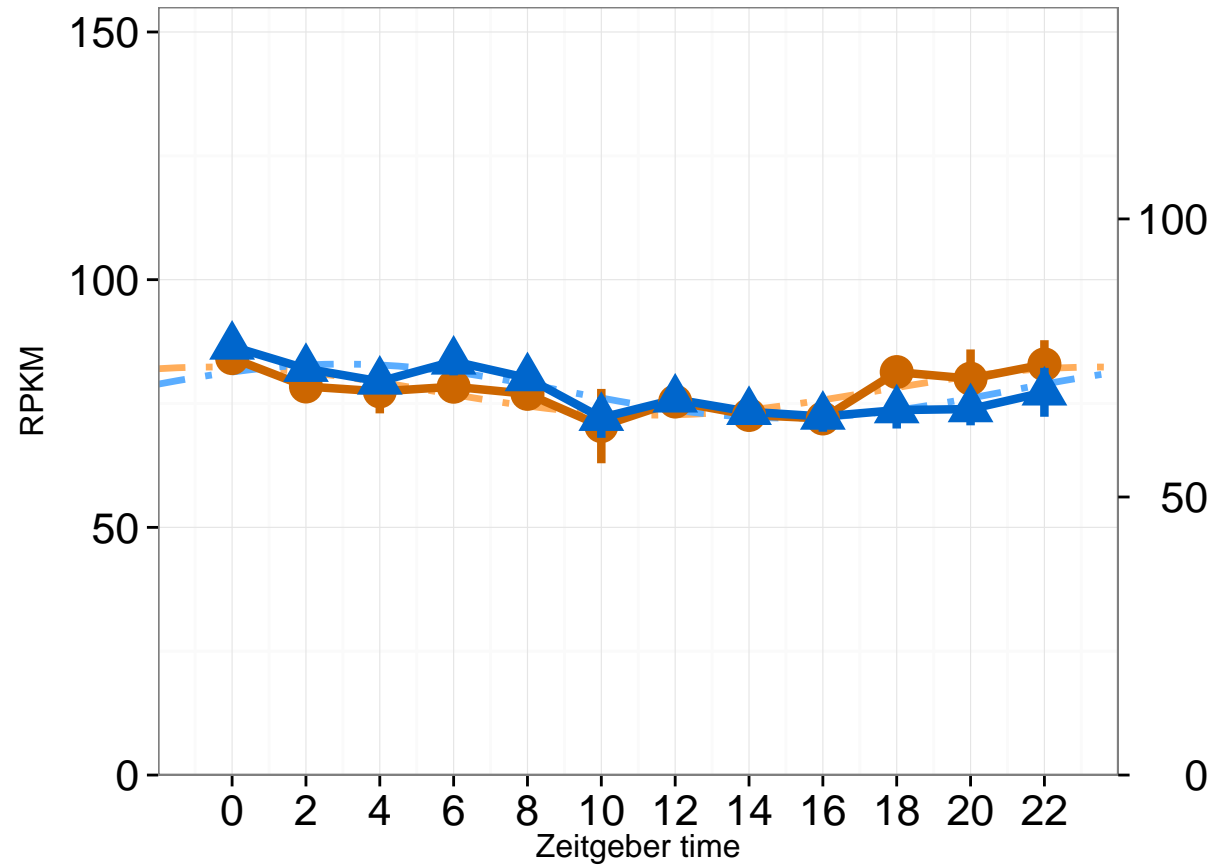

## Uba1

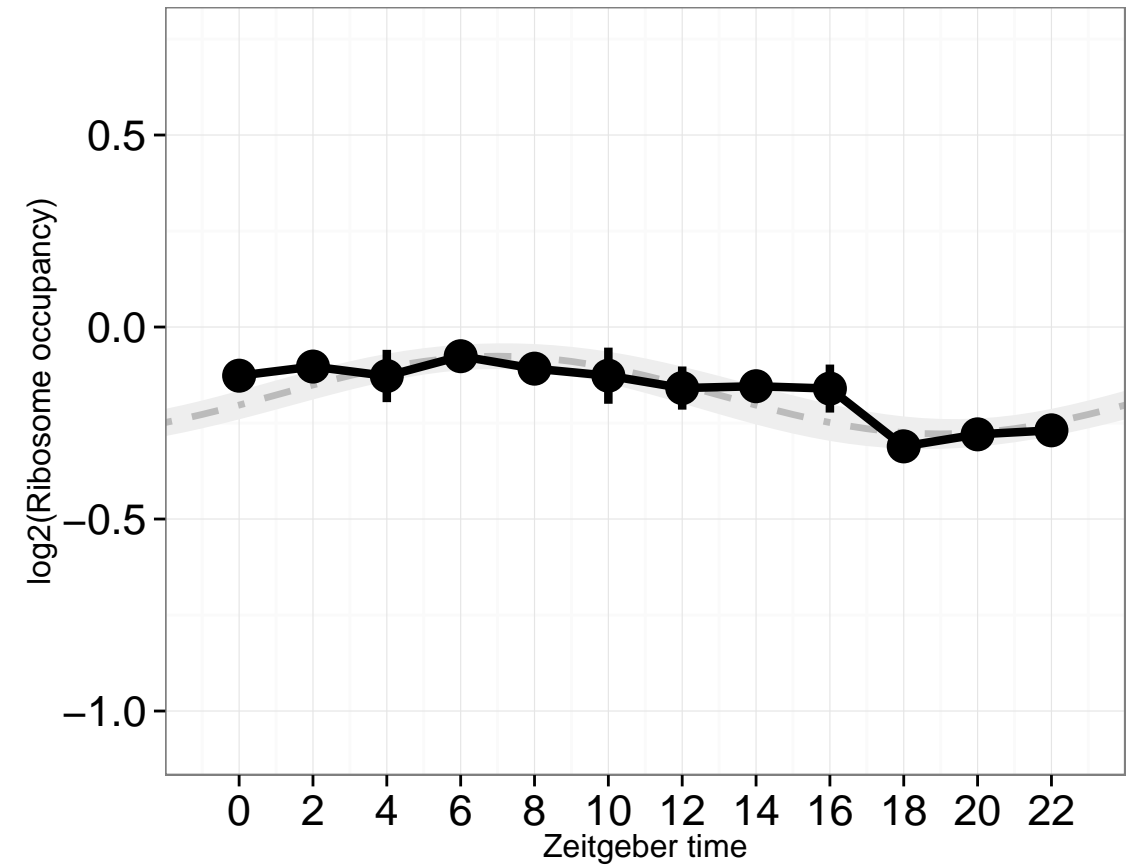

Supplement: SuppDataset_1.zip [file Uba1_set_A.pdf › Supplemental Dataset 1/A-mRNA_nonrhyth_translation_nonrhyth/Uba1_set_A.pdf]

## Uba2

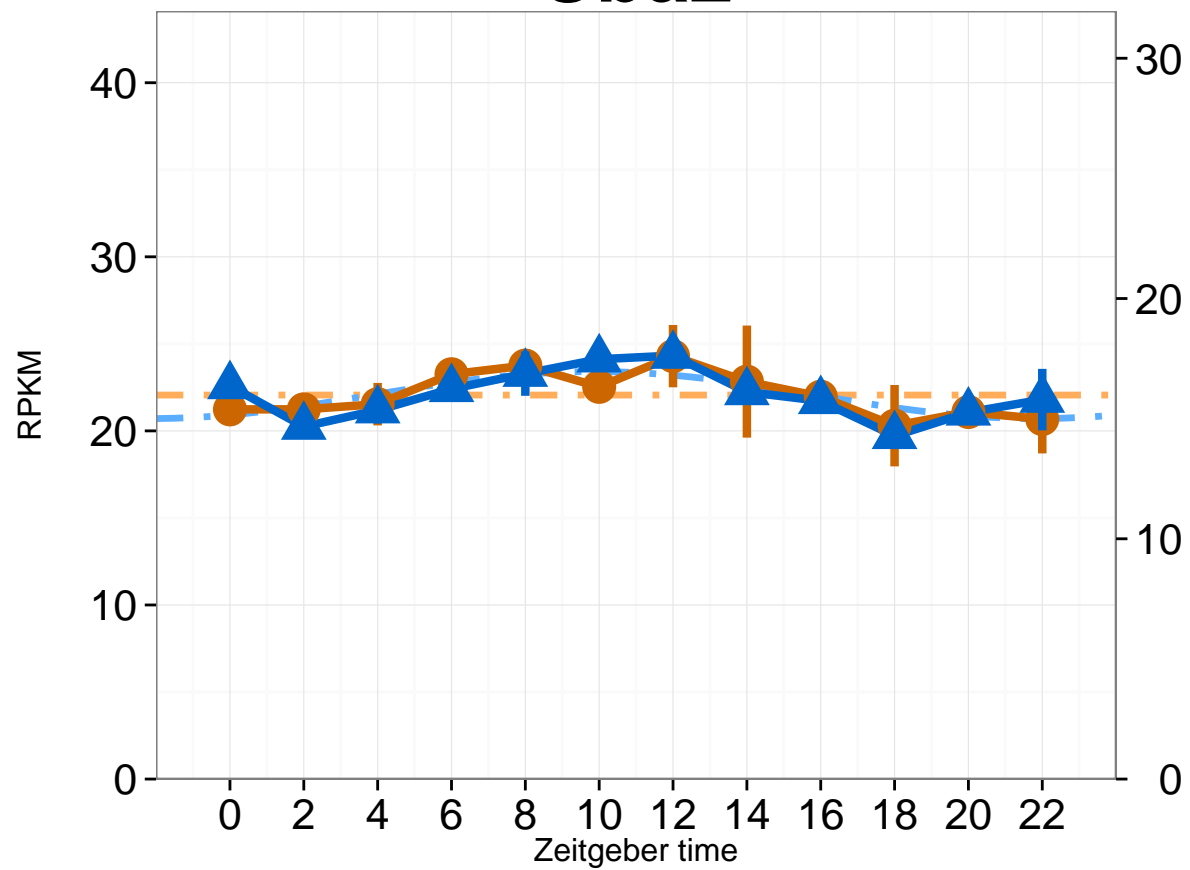

## Uba2

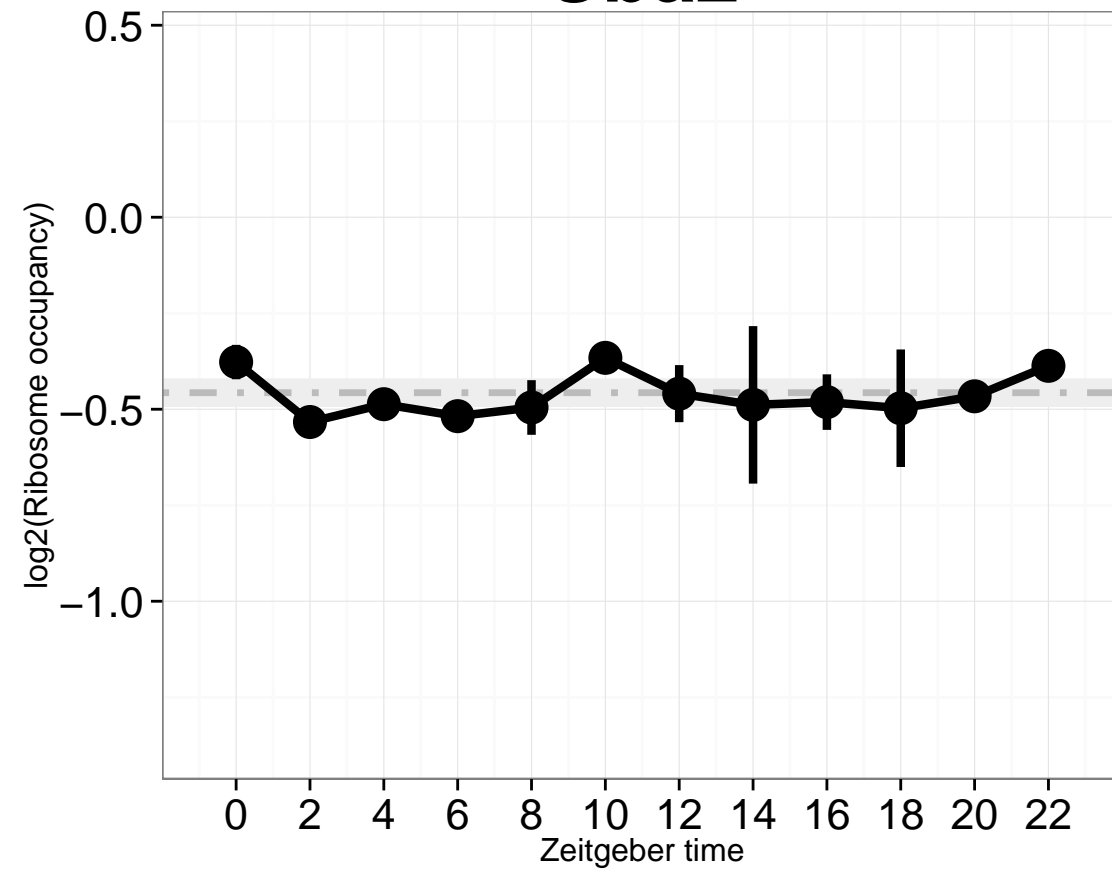

Supplement: SuppDataset_1.zip [file Uba2_set_A.pdf › Supplemental Dataset 1/A-mRNA_nonrhyth_translation_nonrhyth/Uba2_set_A.pdf]

# Uba3

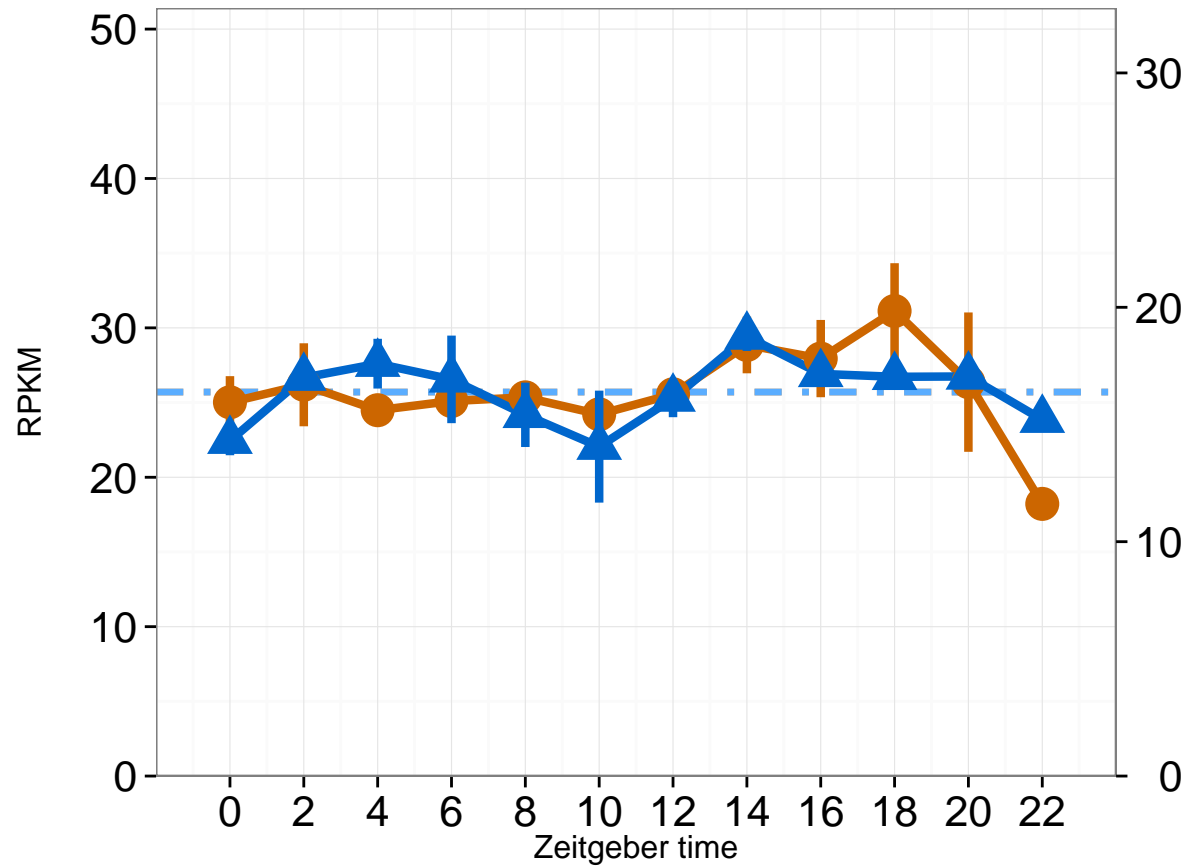

# Uba3

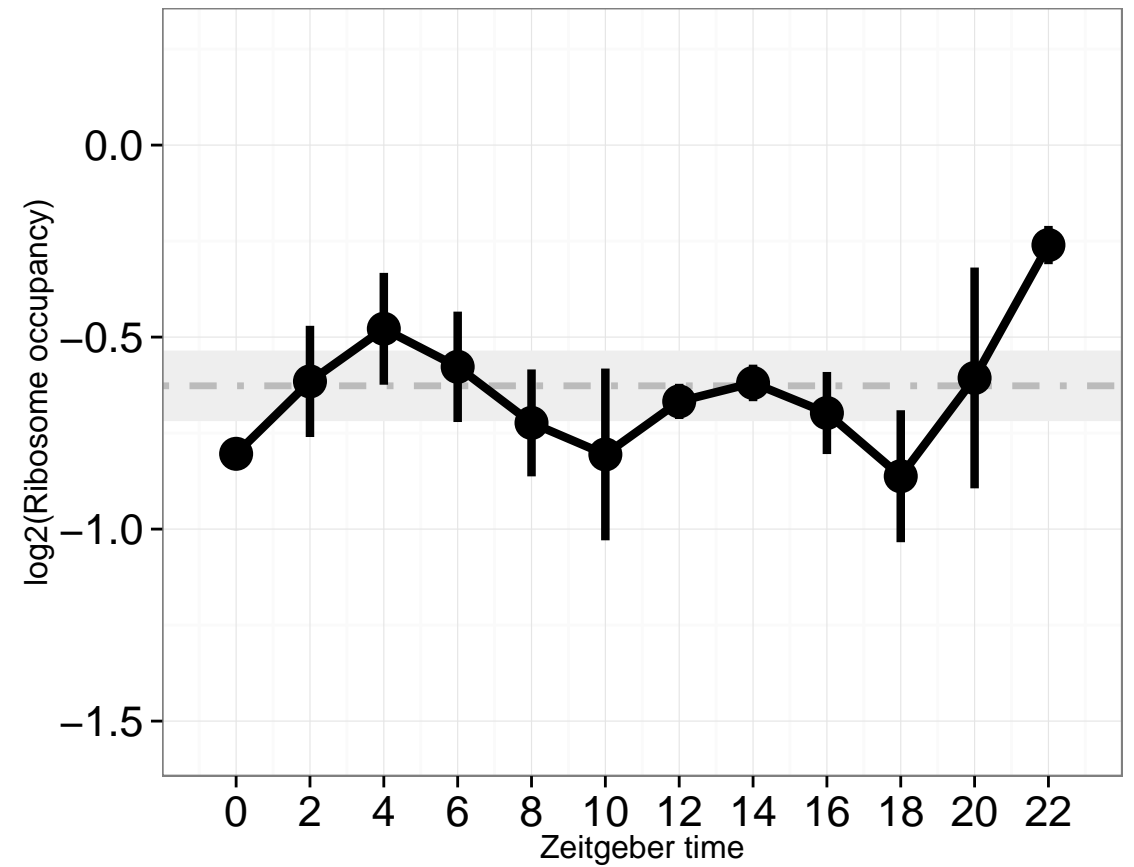

Supplement: SuppDataset_1.zip [file Uba3_set_A.pdf › Supplemental Dataset 1/A-mRNA_nonrhyth_translation_nonrhyth/Uba3_set_A.pdf]

## Uba52

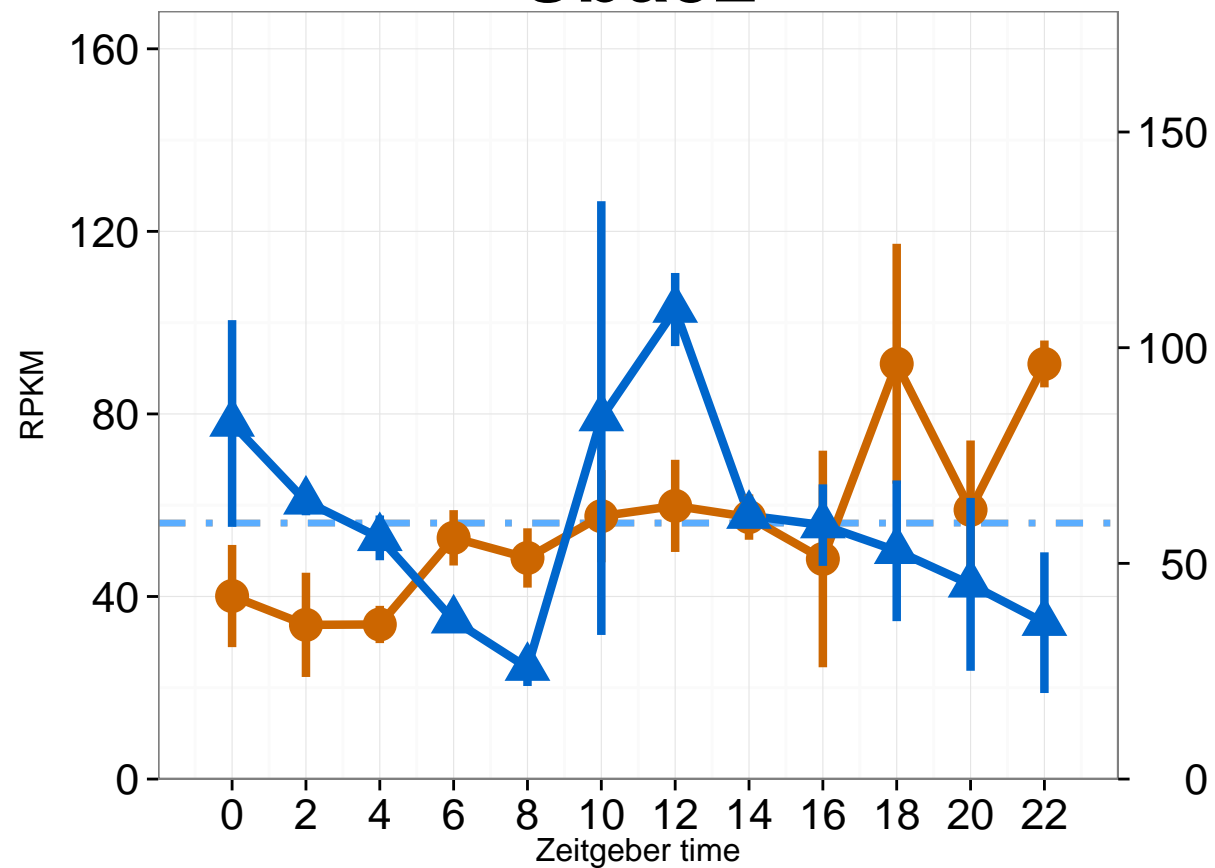

## Uba52

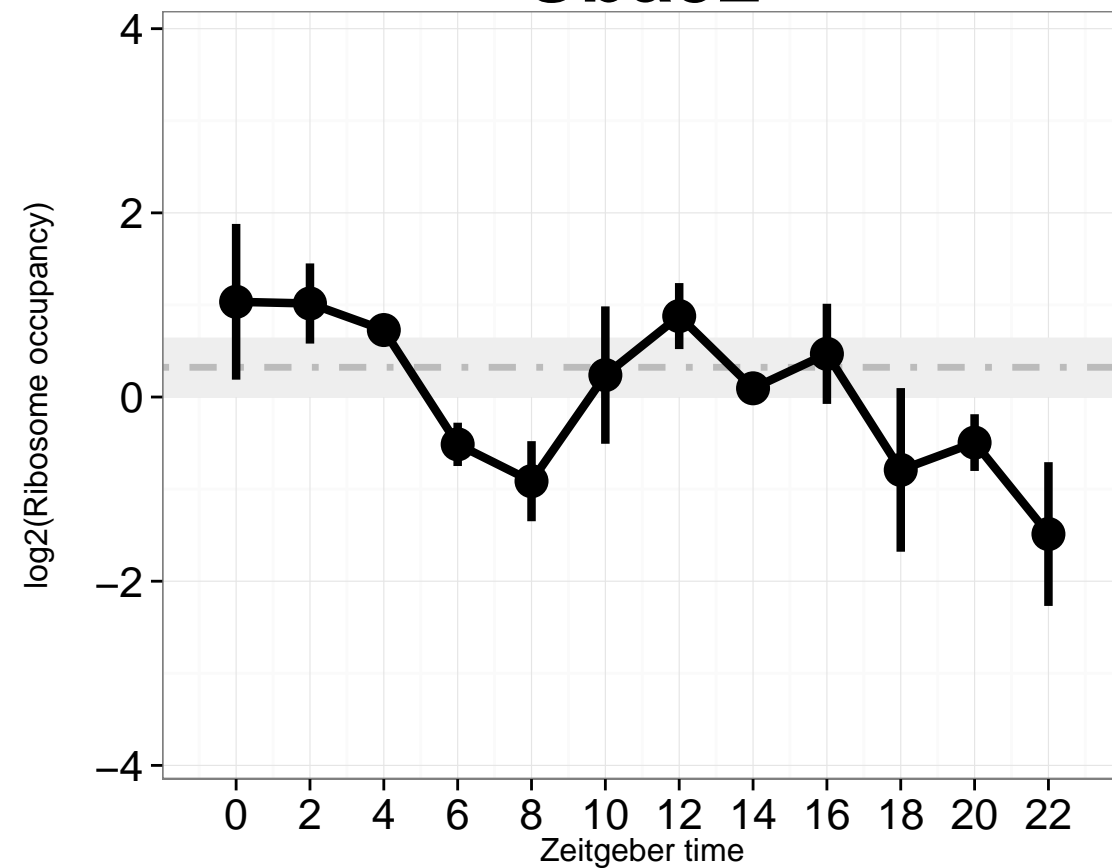

Supplement: SuppDataset_1.zip [file Uba52_set_A.pdf › Supplemental Dataset 1/A-mRNA_nonrhyth_translation_nonrhyth/Uba52_set_A.pdf]

## Uba5

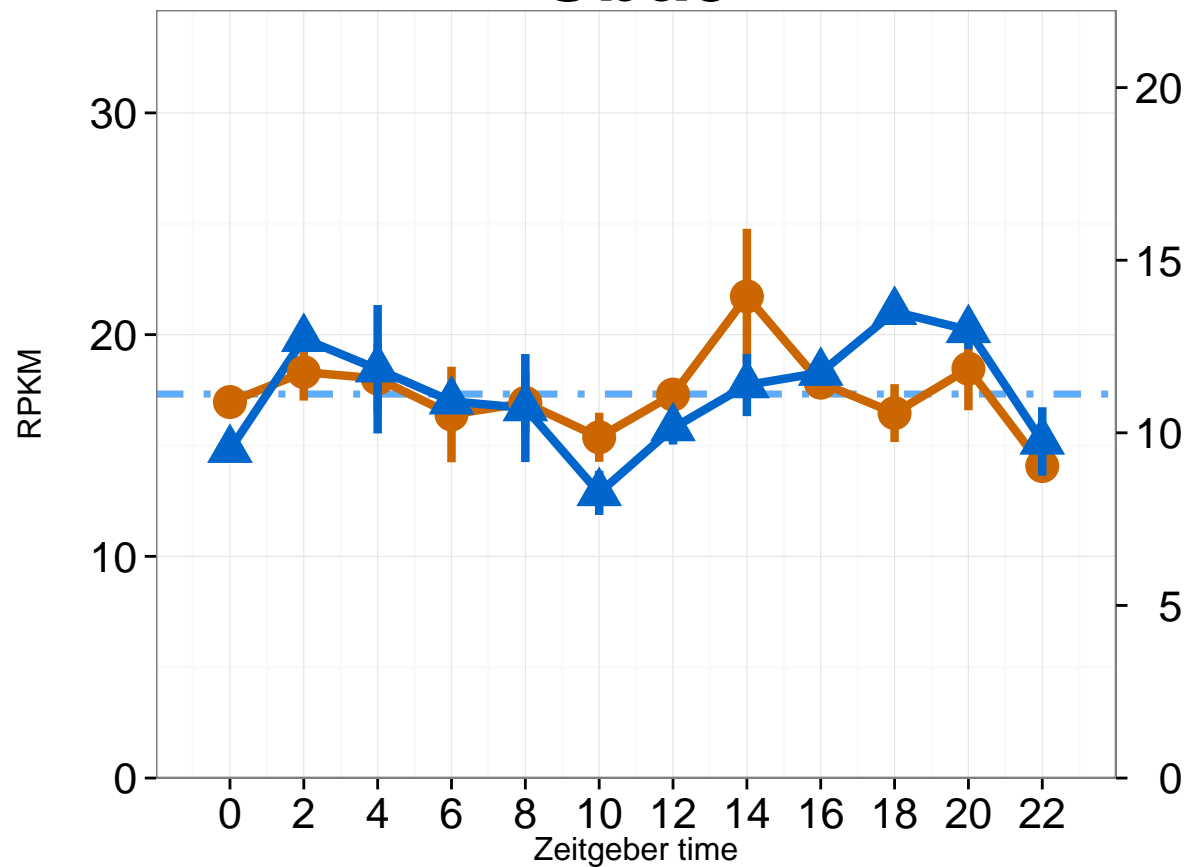

## Uba5

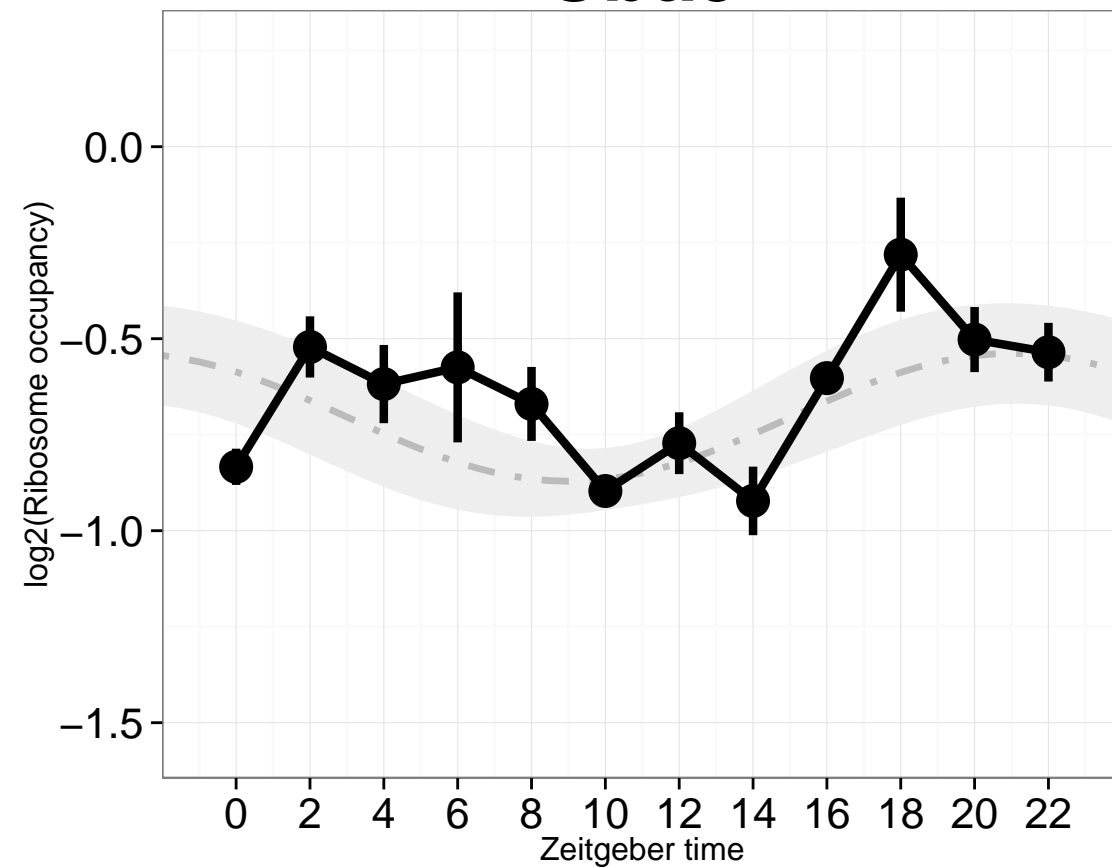

Supplement: SuppDataset_1.zip [file Uba5_set_A.pdf › Supplemental Dataset 1/A-mRNA_nonrhyth_translation_nonrhyth/Uba5_set_A.pdf]

## Uba7

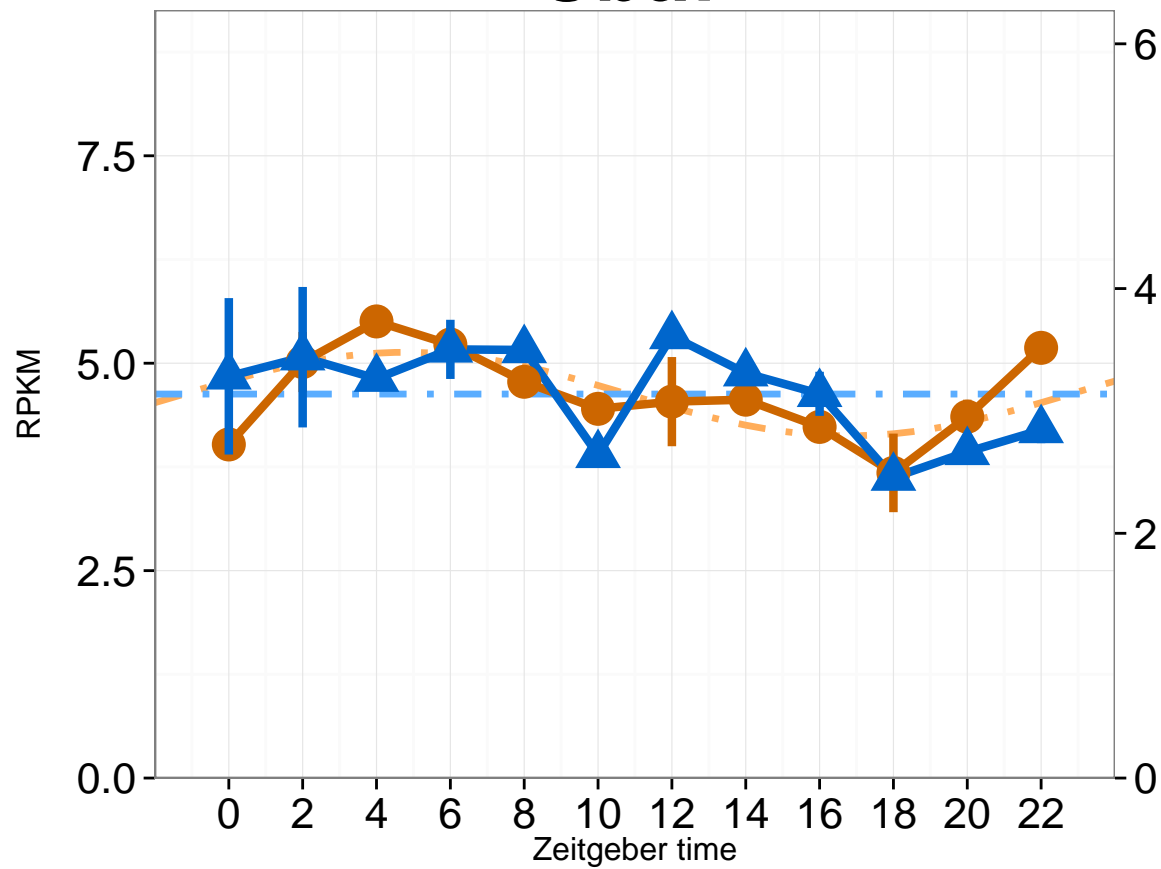

## Uba7

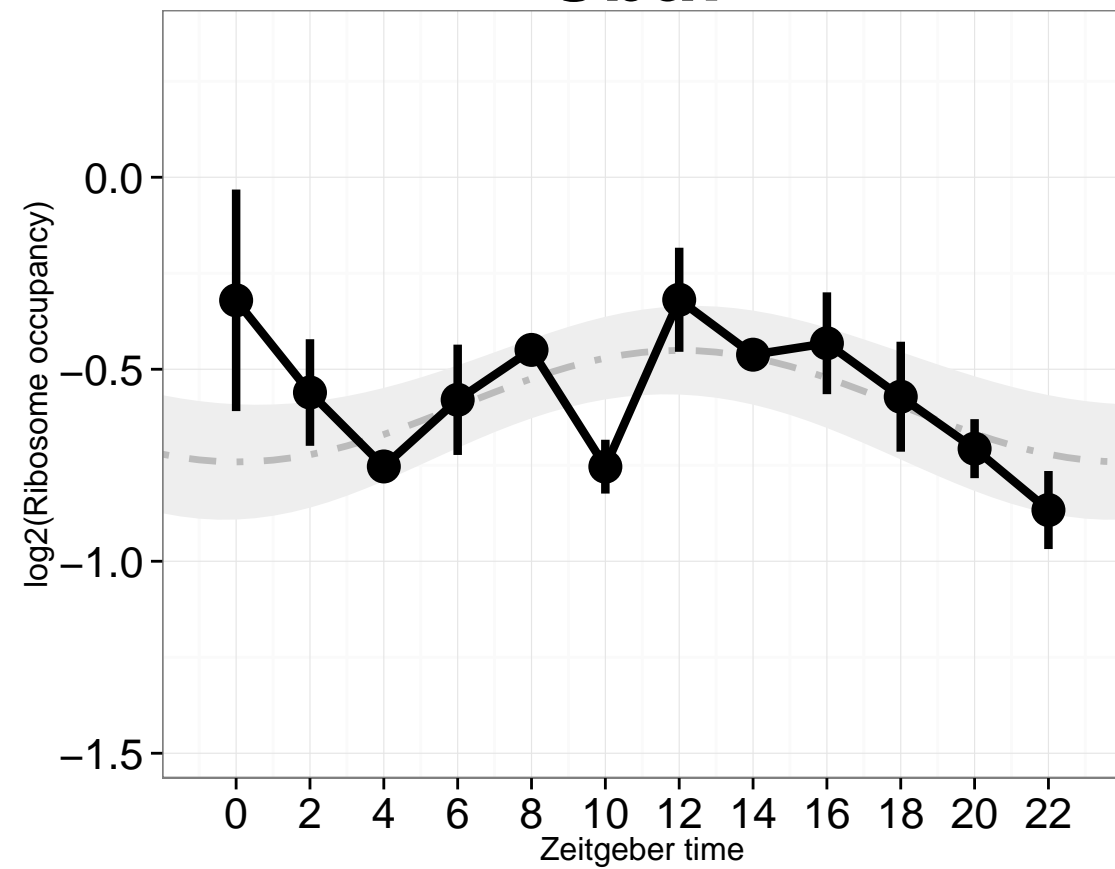

Supplement: SuppDataset_1.zip [file Uba7_set_A.pdf › Supplemental Dataset 1/A-mRNA_nonrhyth_translation_nonrhyth/Uba7_set_A.pdf]

## Ubac2

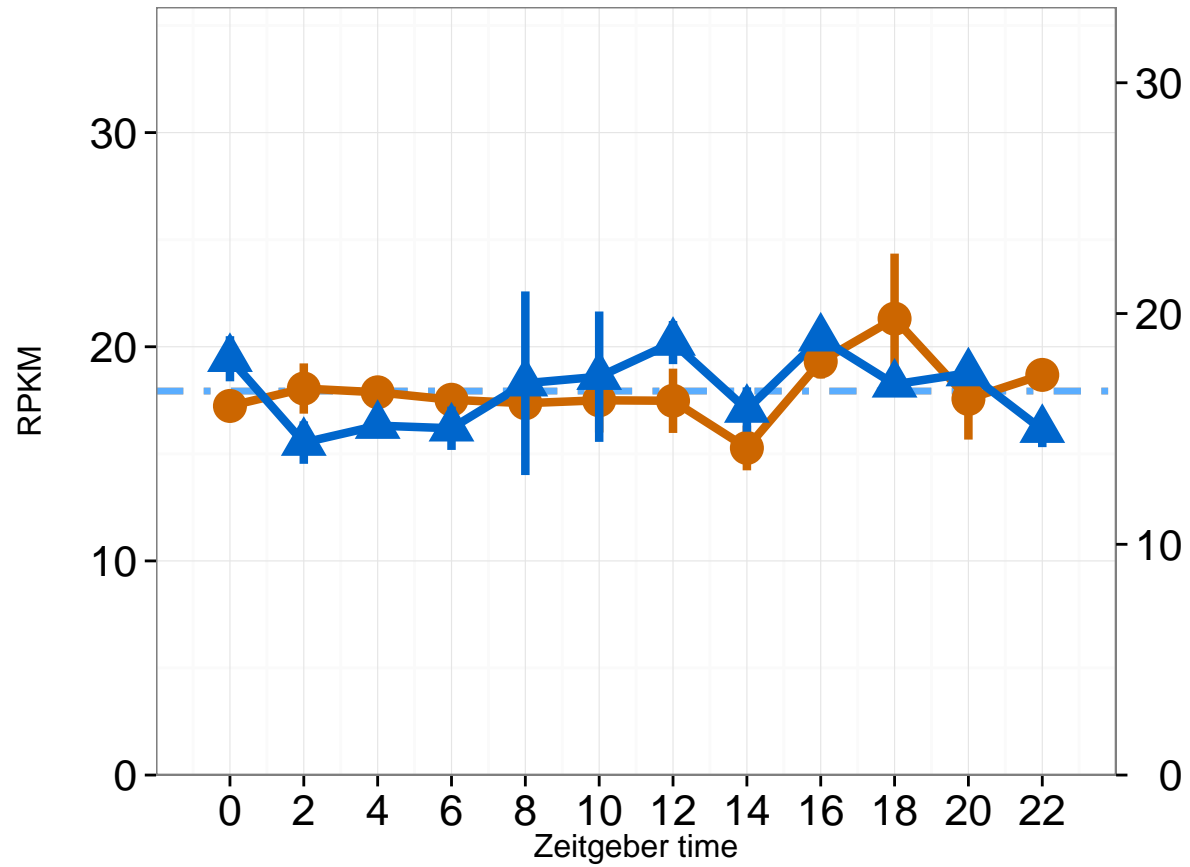

## Ubac2

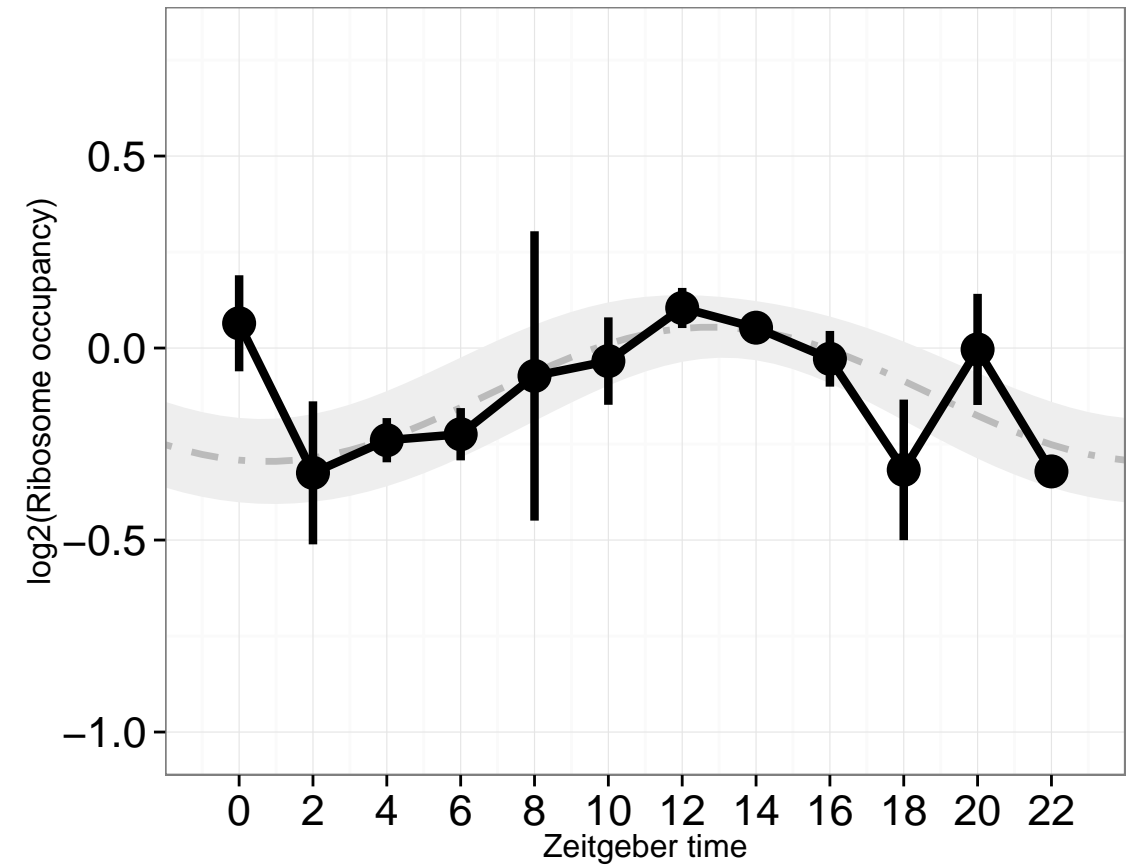

Supplement: SuppDataset_1.zip [file Ubac2_set_A.pdf › Supplemental Dataset 1/A-mRNA_nonrhyth_translation_nonrhyth/Ubac2_set_A.pdf]

## Uald1

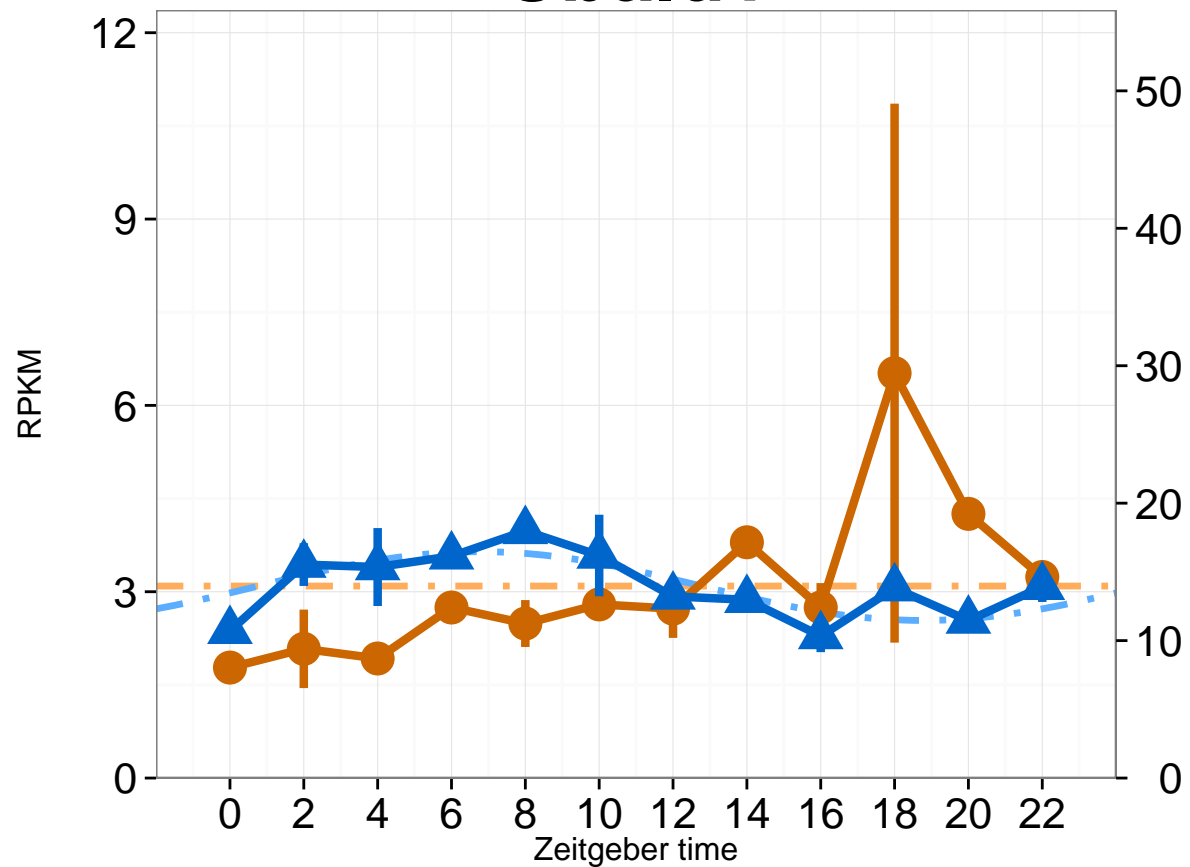

## Uald1

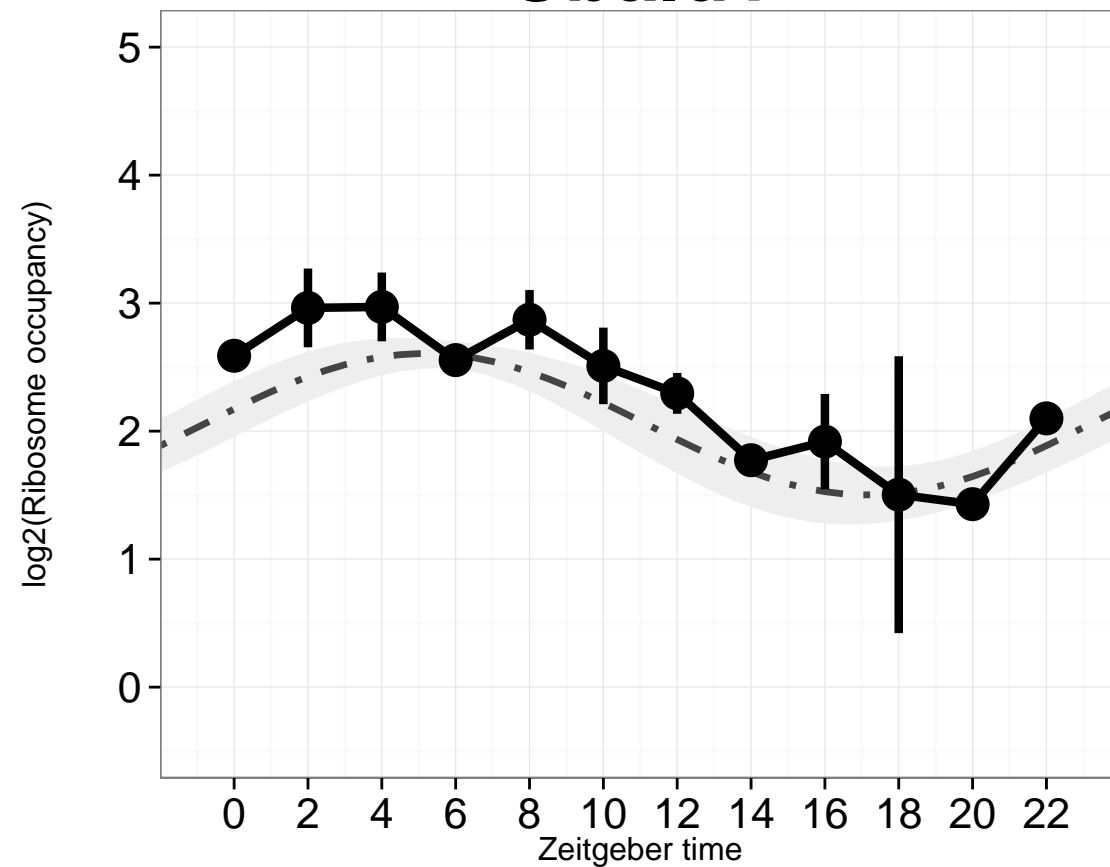

Supplement: SuppDataset_1.zip [file Ubald1_set_A.pdf › Supplemental Dataset 1/A-mRNA_nonrhyth_translation_nonrhyth/Ubald1_set_A.pdf]

## Ubap1

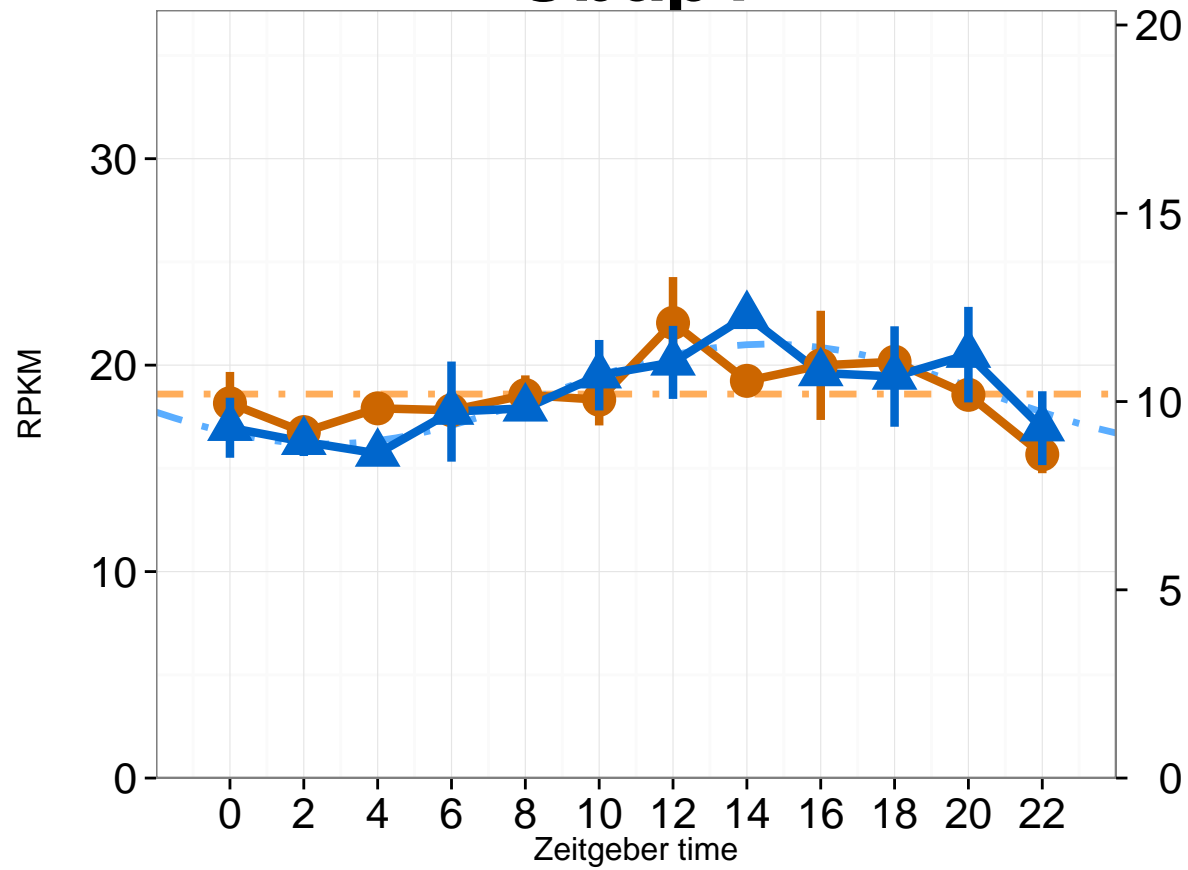

## Ubap1

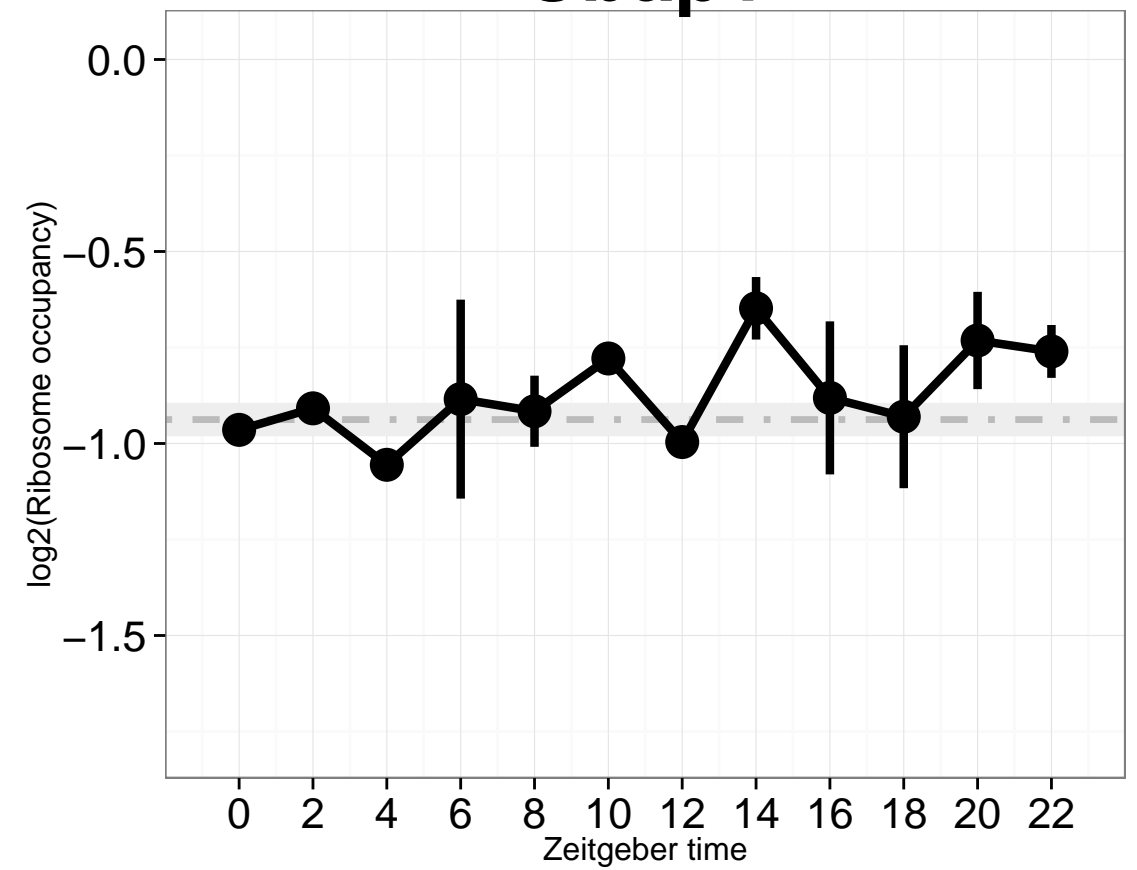

Supplement: SuppDataset_1.zip [file Ubap1_set_A.pdf › Supplemental Dataset 1/A-mRNA_nonrhyth_translation_nonrhyth/Ubap1_set_A.pdf]

## Ubp2l

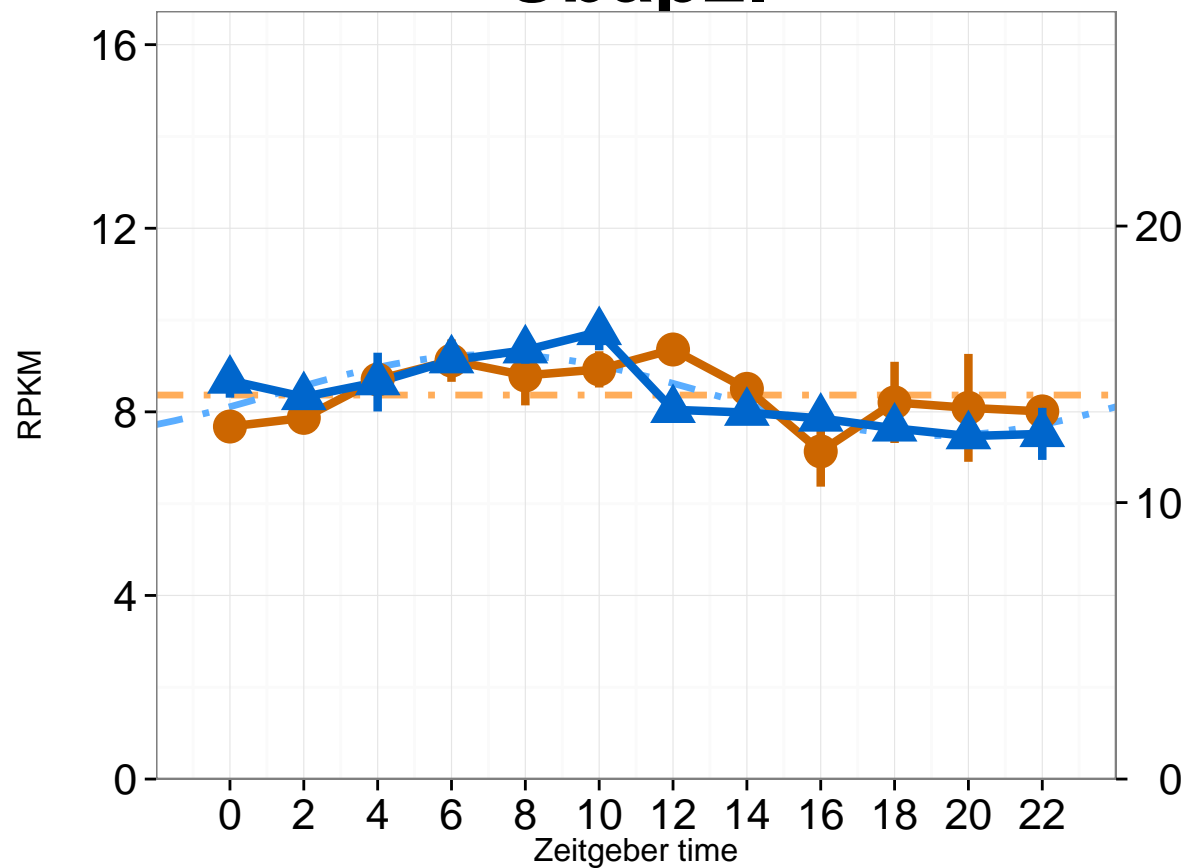

## Ubp2l

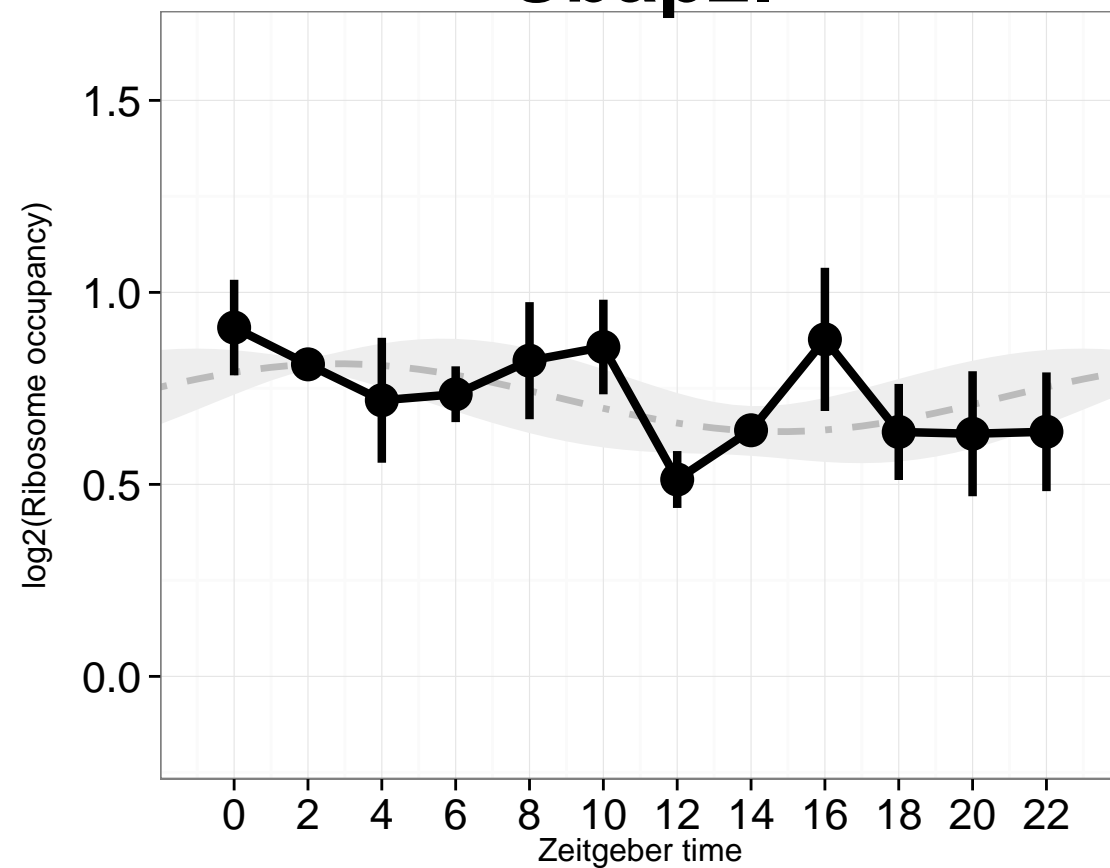

Supplement: SuppDataset_1.zip [file Ubap2l_set_A.pdf › Supplemental Dataset 1/A-mRNA_nonrhyth_translation_nonrhyth/Ubap2l_set_A.pdf]

## Ubash3b

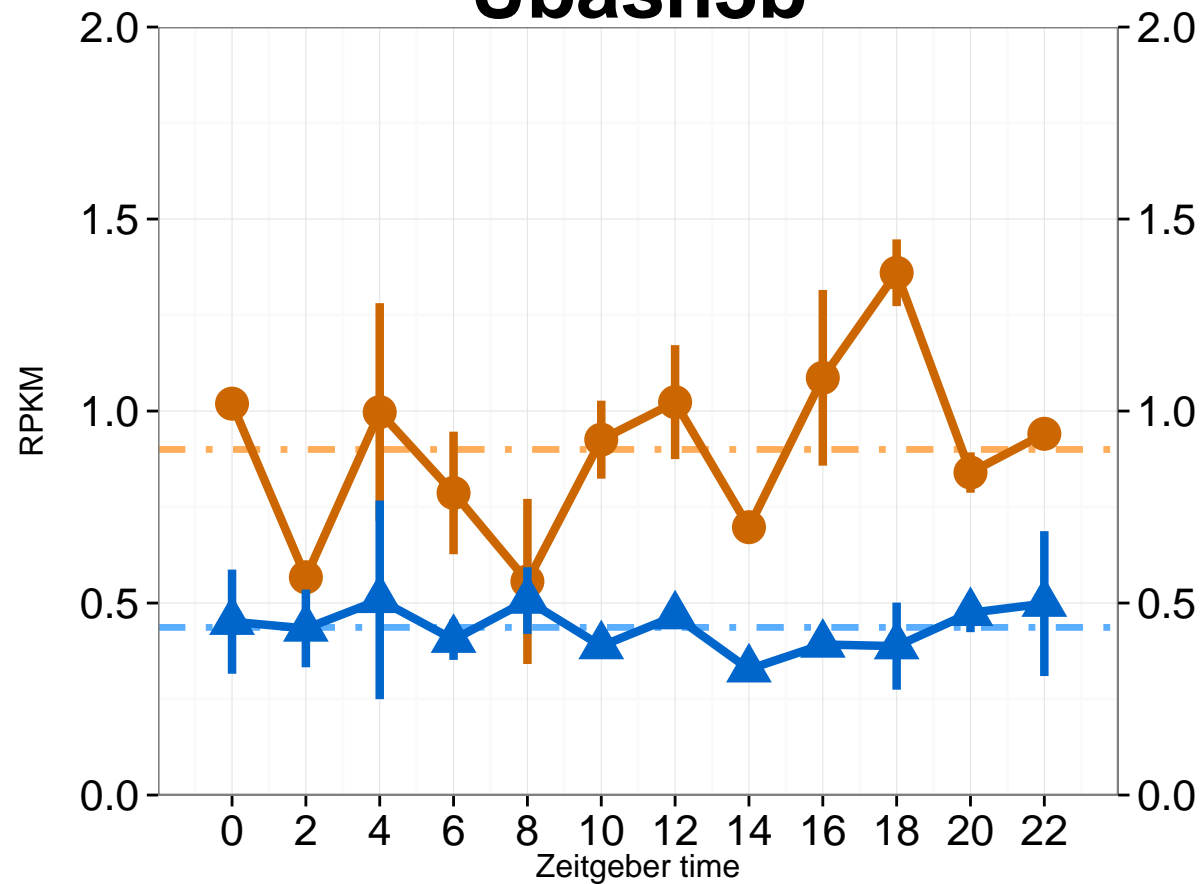

## Ubash3b

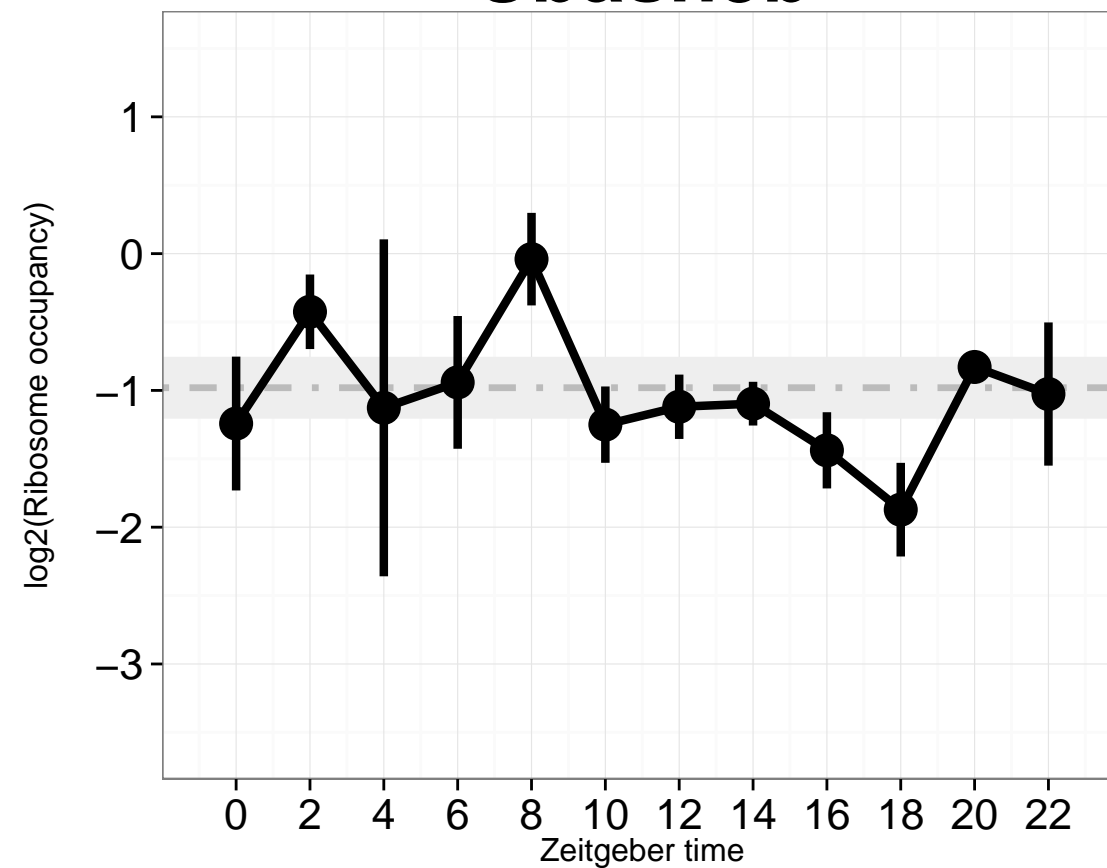

Supplement: SuppDataset_1.zip [file Ubash3b_set_A.pdf › Supplemental Dataset 1/A-mRNA_nonrhyth_translation_nonrhyth/Ubash3b_set_A.pdf]

## Ubb

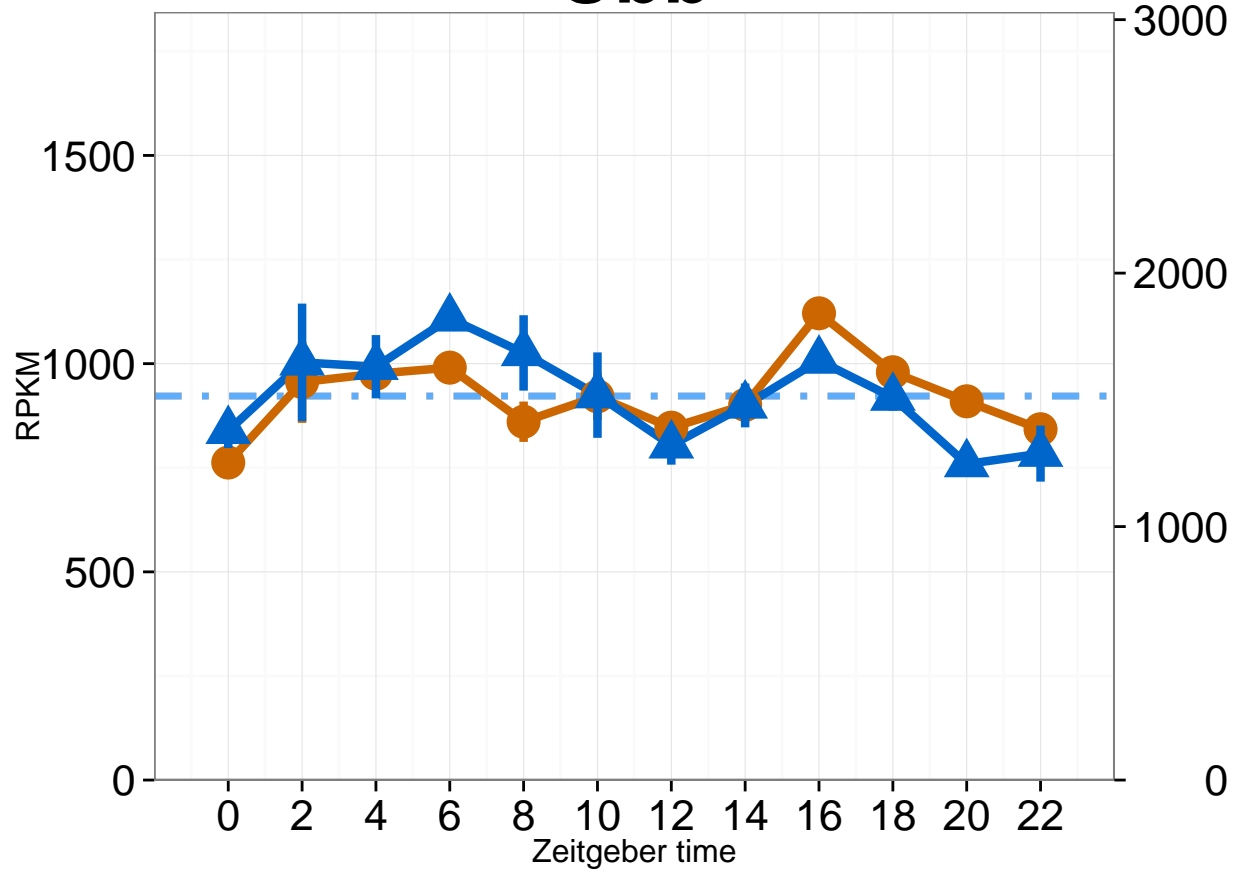

## Ubb

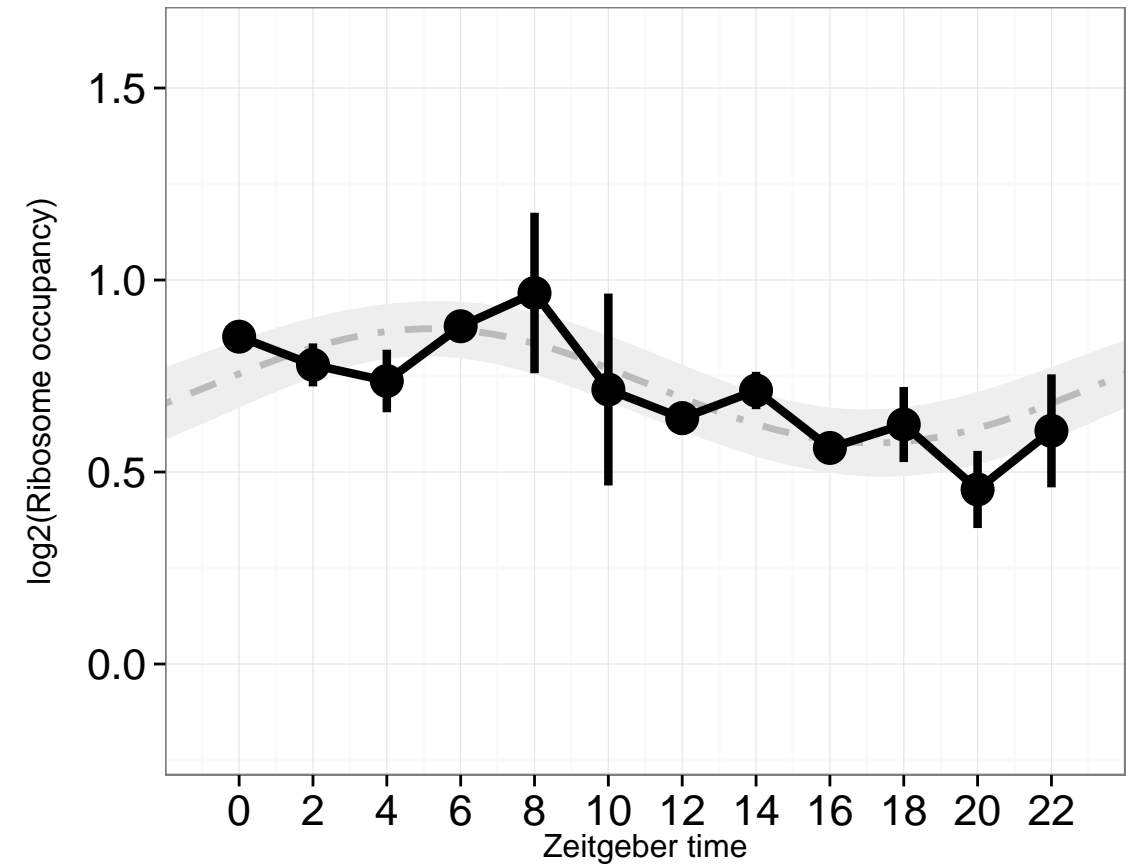

Supplement: SuppDataset_1.zip [file Ubb_set_A.pdf › Supplemental Dataset 1/A-mRNA_nonrhyth_translation_nonrhyth/Ubb_set_A.pdf]

## Ube2a

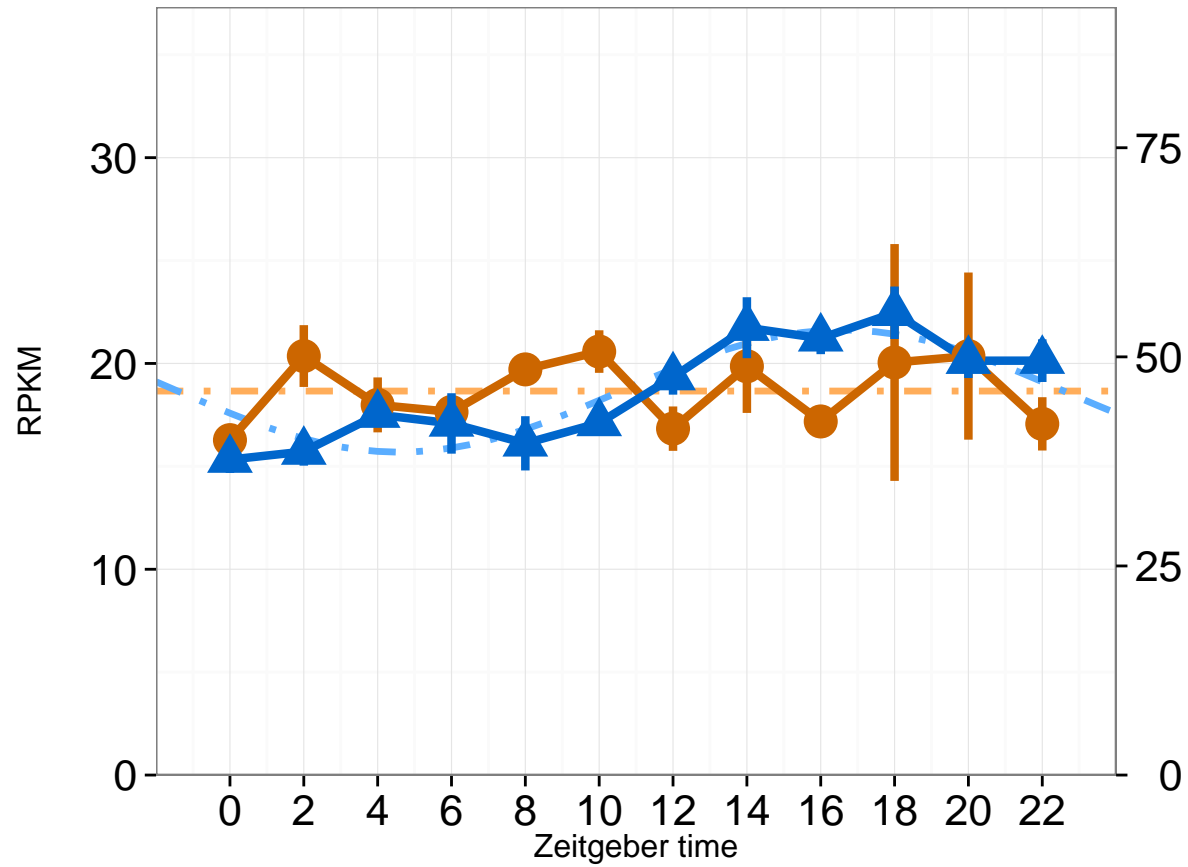

## Ube2a

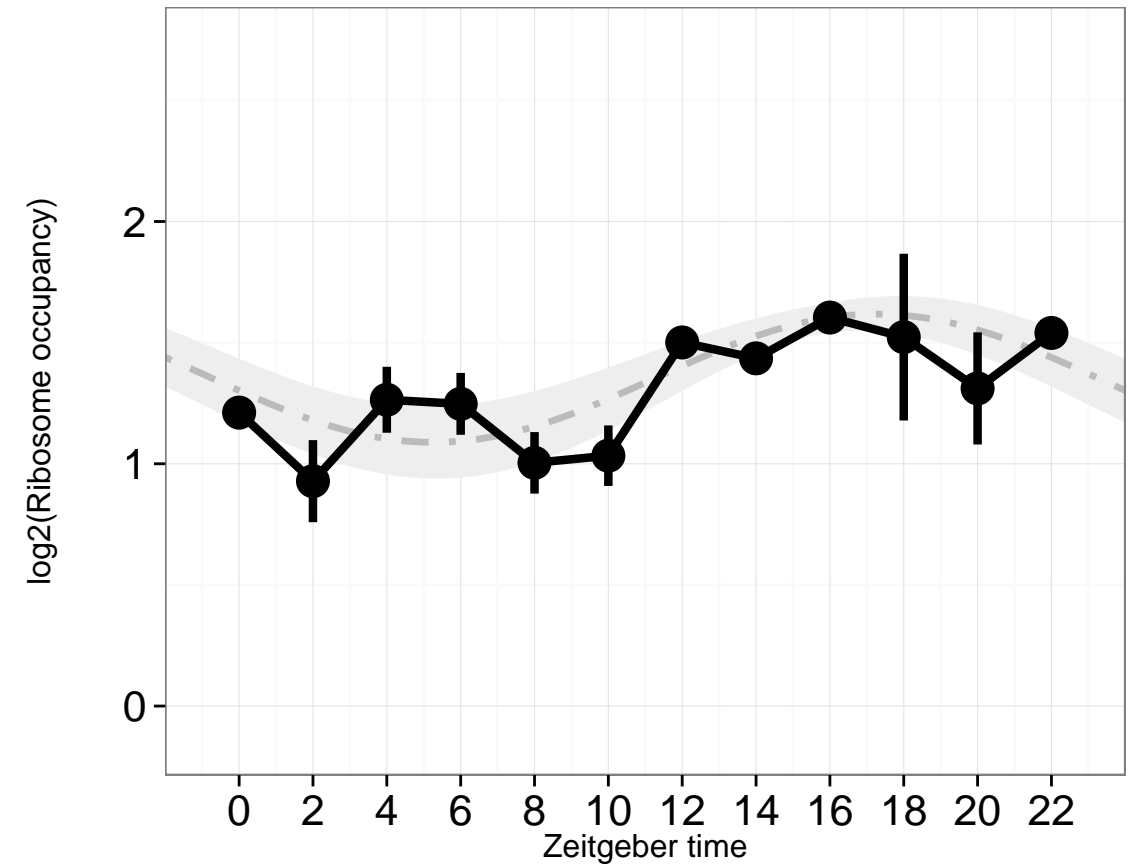

Supplement: SuppDataset_1.zip [file Ube2a_set_A.pdf › Supplemental Dataset 1/A-mRNA_nonrhyth_translation_nonrhyth/Ube2a_set_A.pdf]

## Ube2b

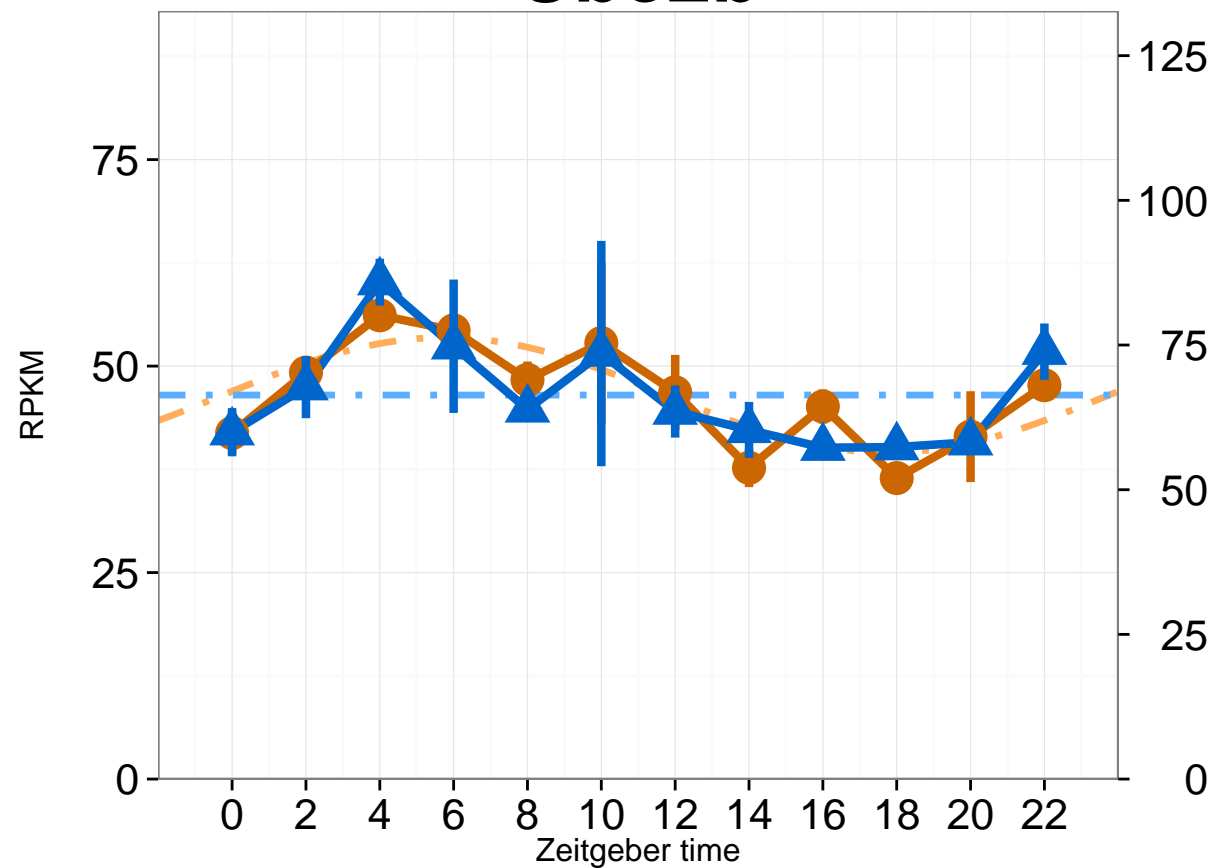

## Ube2b

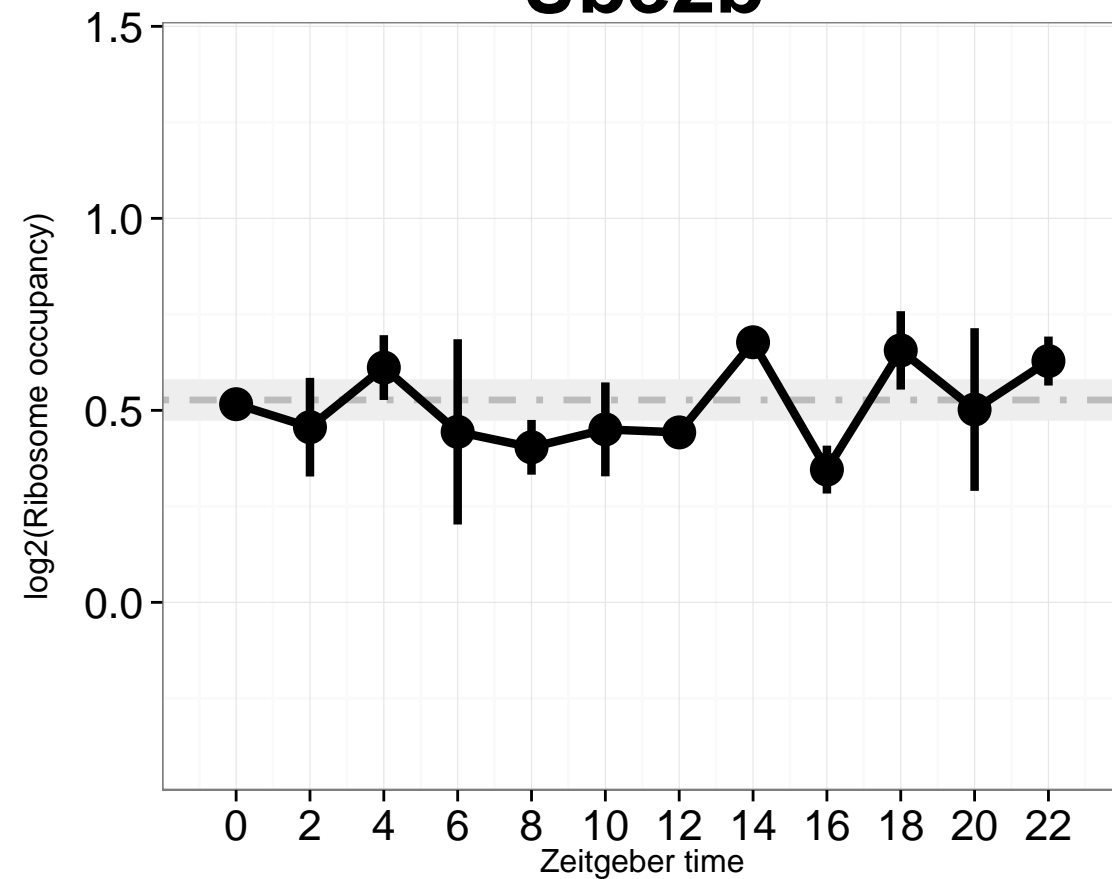

Supplement: SuppDataset_1.zip [file Ube2b_set_A.pdf › Supplemental Dataset 1/A-mRNA_nonrhyth_translation_nonrhyth/Ube2b_set_A.pdf]

**Ube2c TR**

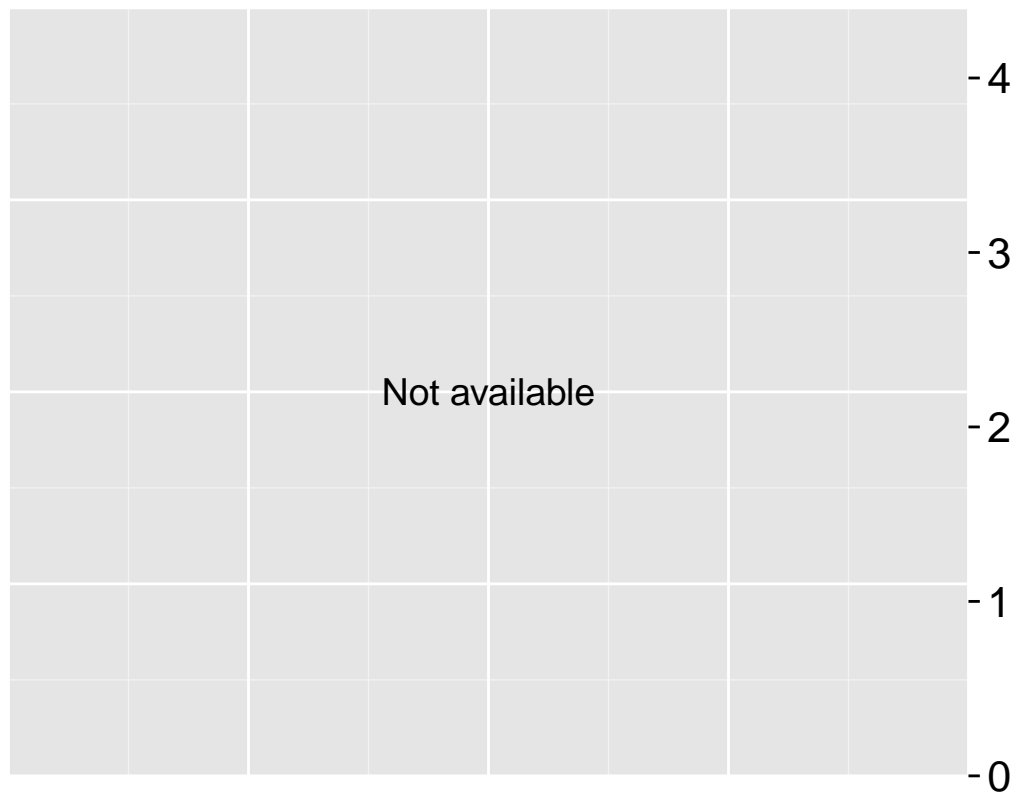

**Ube2c log2(Ribosome occupancy**

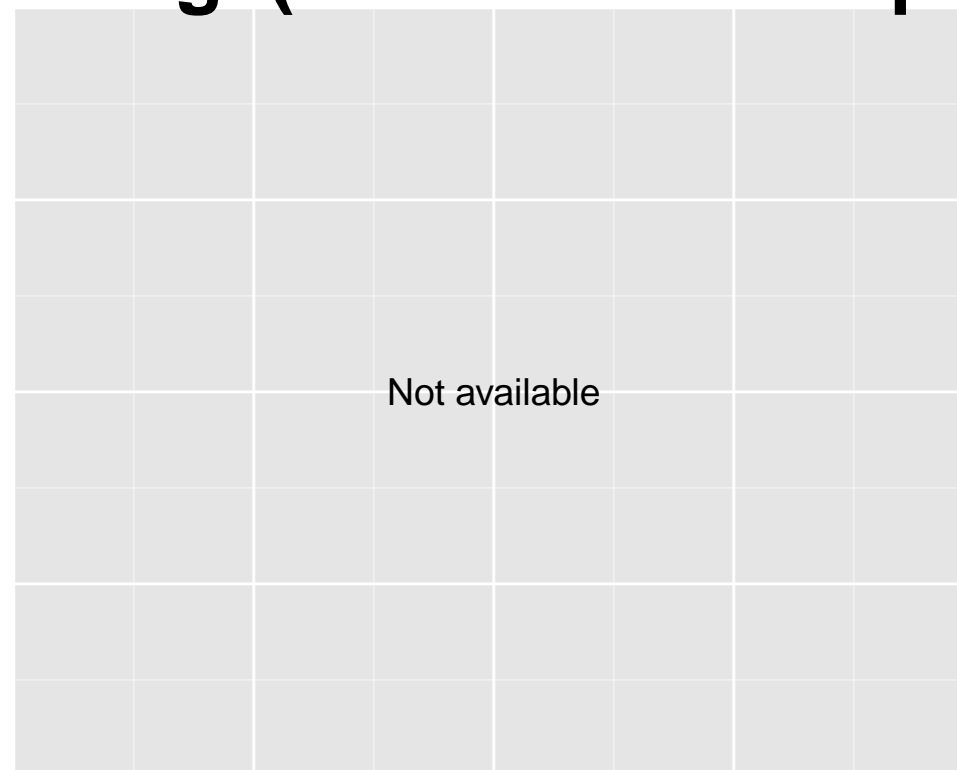

Supplement: SuppDataset_1.zip [file Ube2c_set_A.pdf › Supplemental Dataset 1/A-mRNA_nonrhyth_translation_nonrhyth/Ube2c_set_A.pdf]

# Ube2cbp

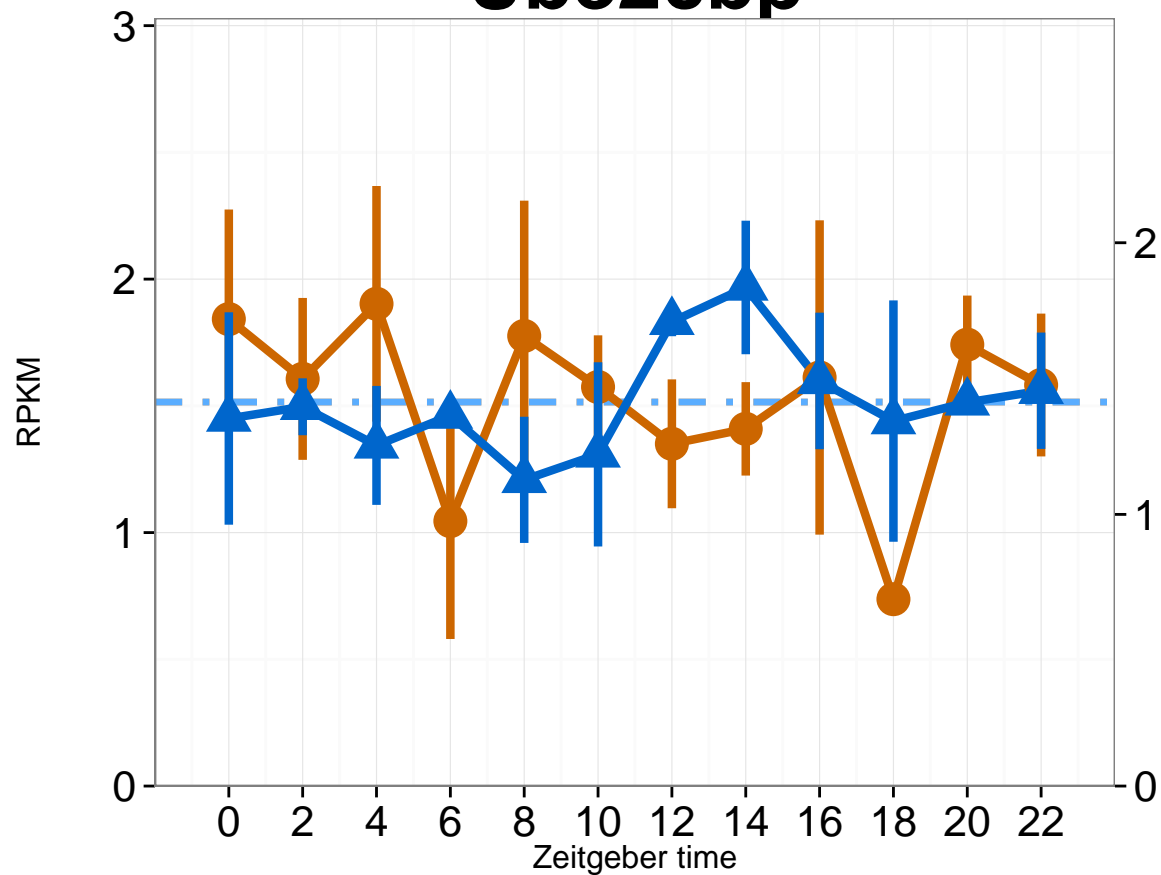

# Ube2cbp

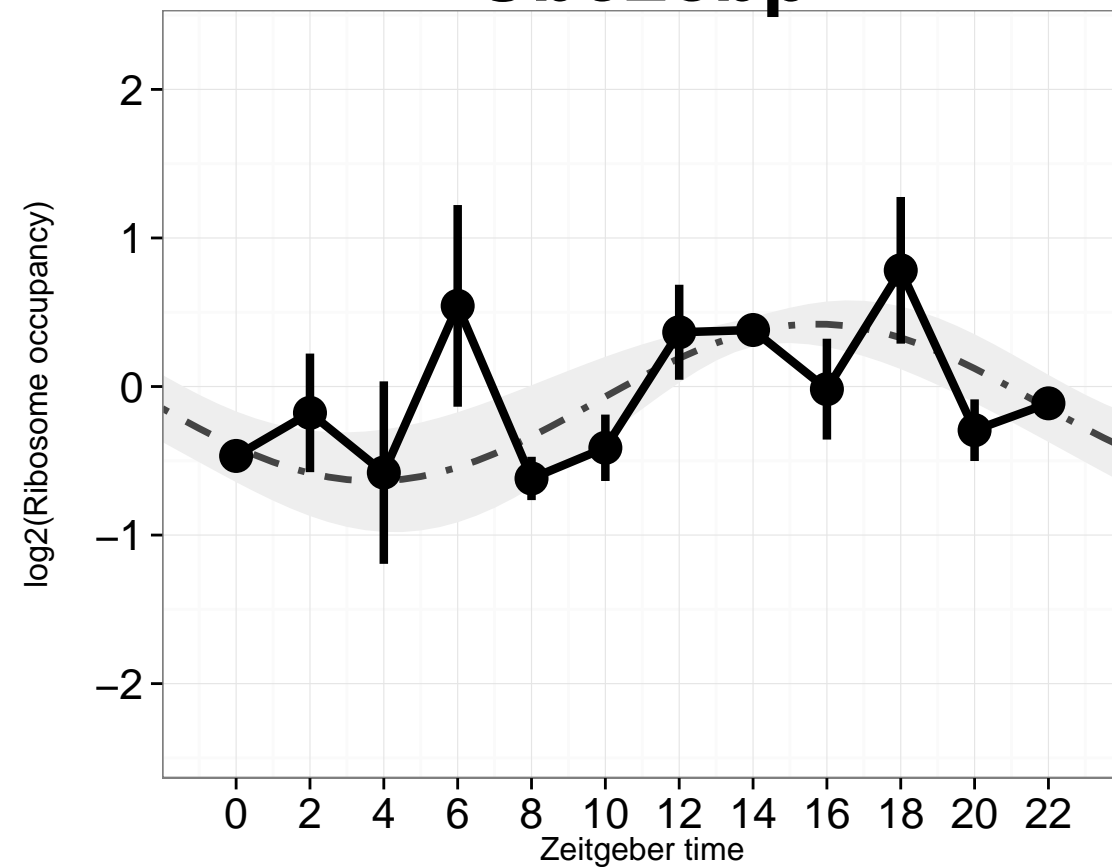

Supplement: SuppDataset_1.zip [file Ube2cbp_set_A.pdf › Supplemental Dataset 1/A-mRNA_nonrhyth_translation_nonrhyth/Ube2cbp_set_A.pdf]

# Ube2d1

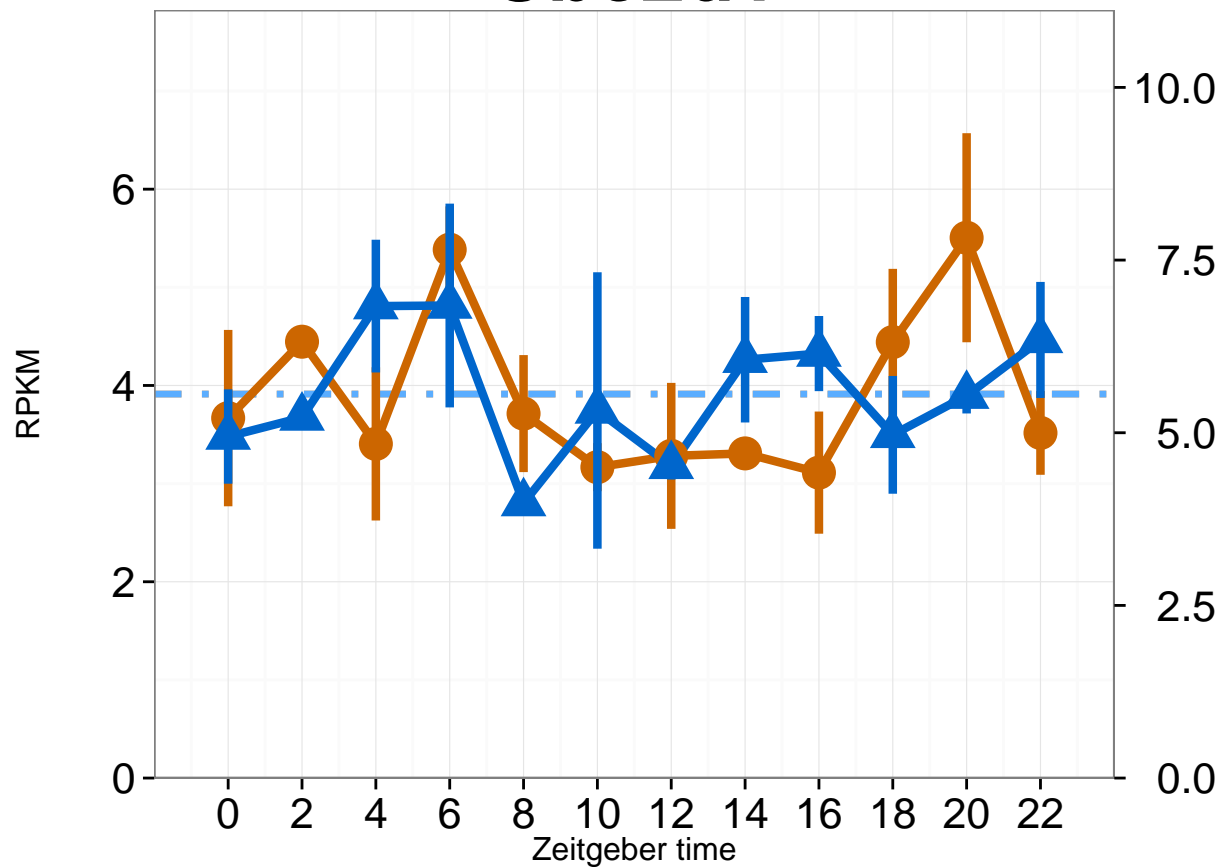

# Ube2d1

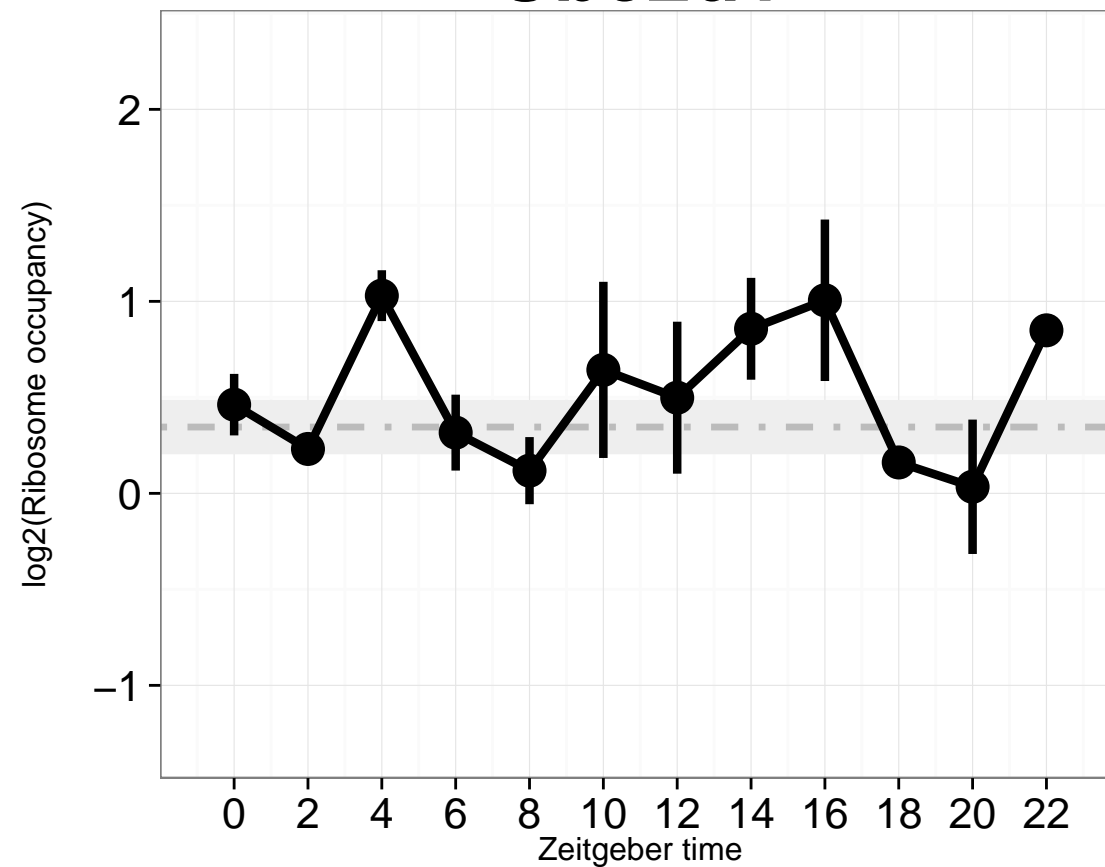

Supplement: SuppDataset_1.zip [file Ube2d1_set_A.pdf › Supplemental Dataset 1/A-mRNA_nonrhyth_translation_nonrhyth/Ube2d1_set_A.pdf]

# Ube2d2a

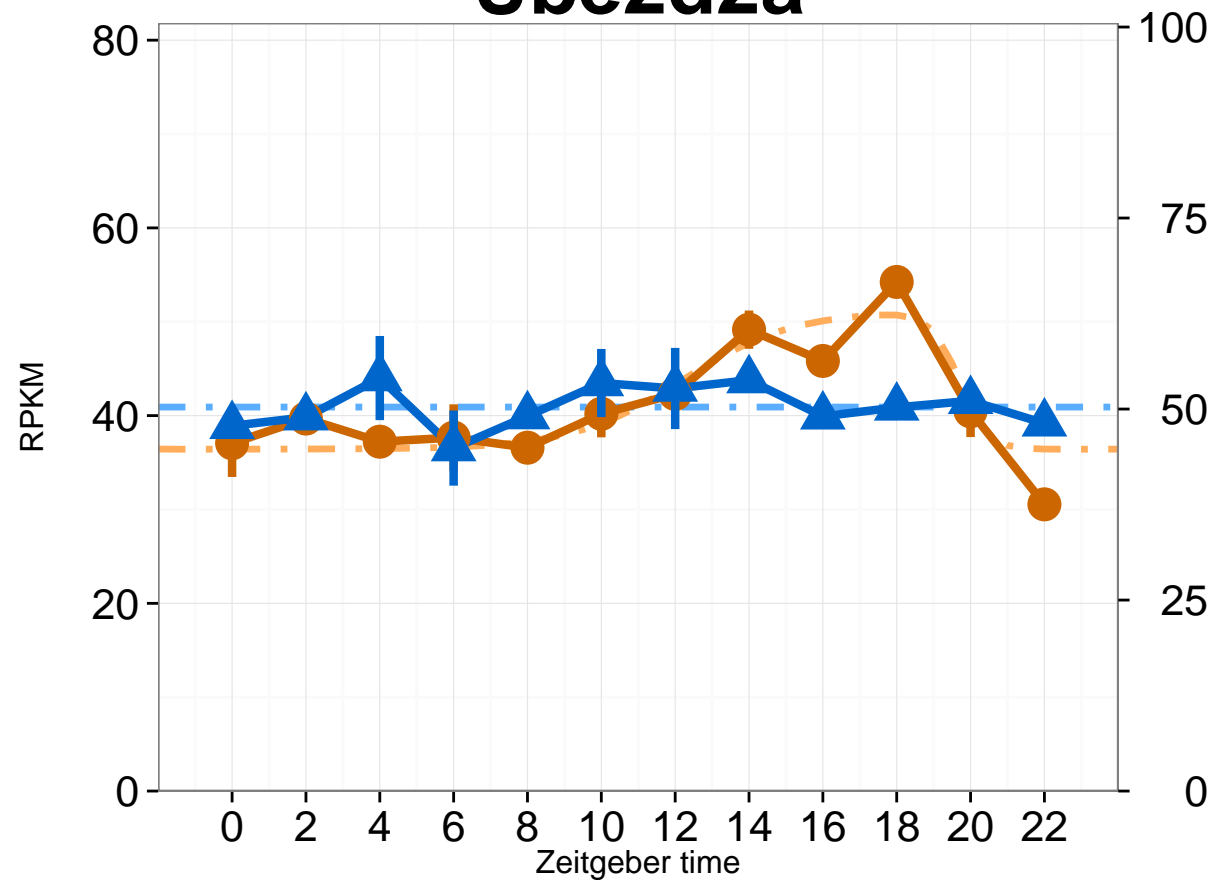

# Ube2d2a

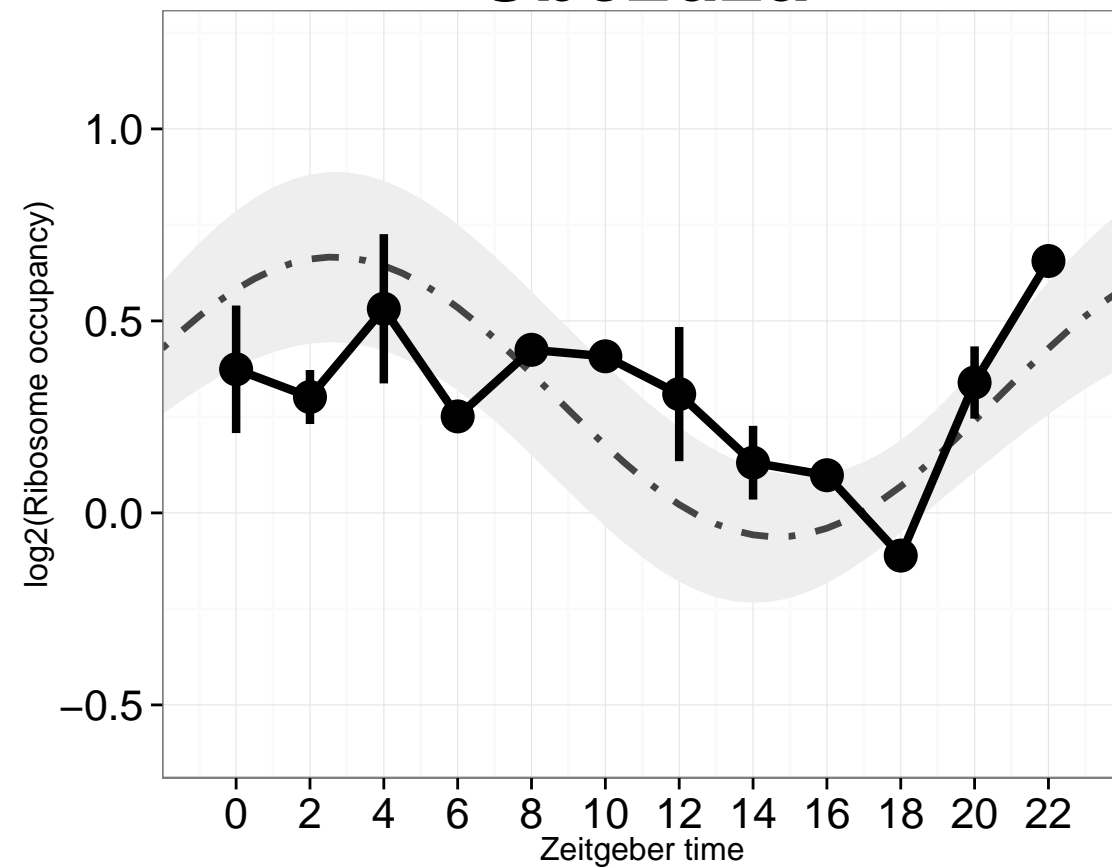

Supplement: SuppDataset_1.zip [file Ube2d2a_set_A.pdf › Supplemental Dataset 1/A-mRNA_nonrhyth_translation_nonrhyth/Ube2d2a_set_A.pdf]

## Ube2d3

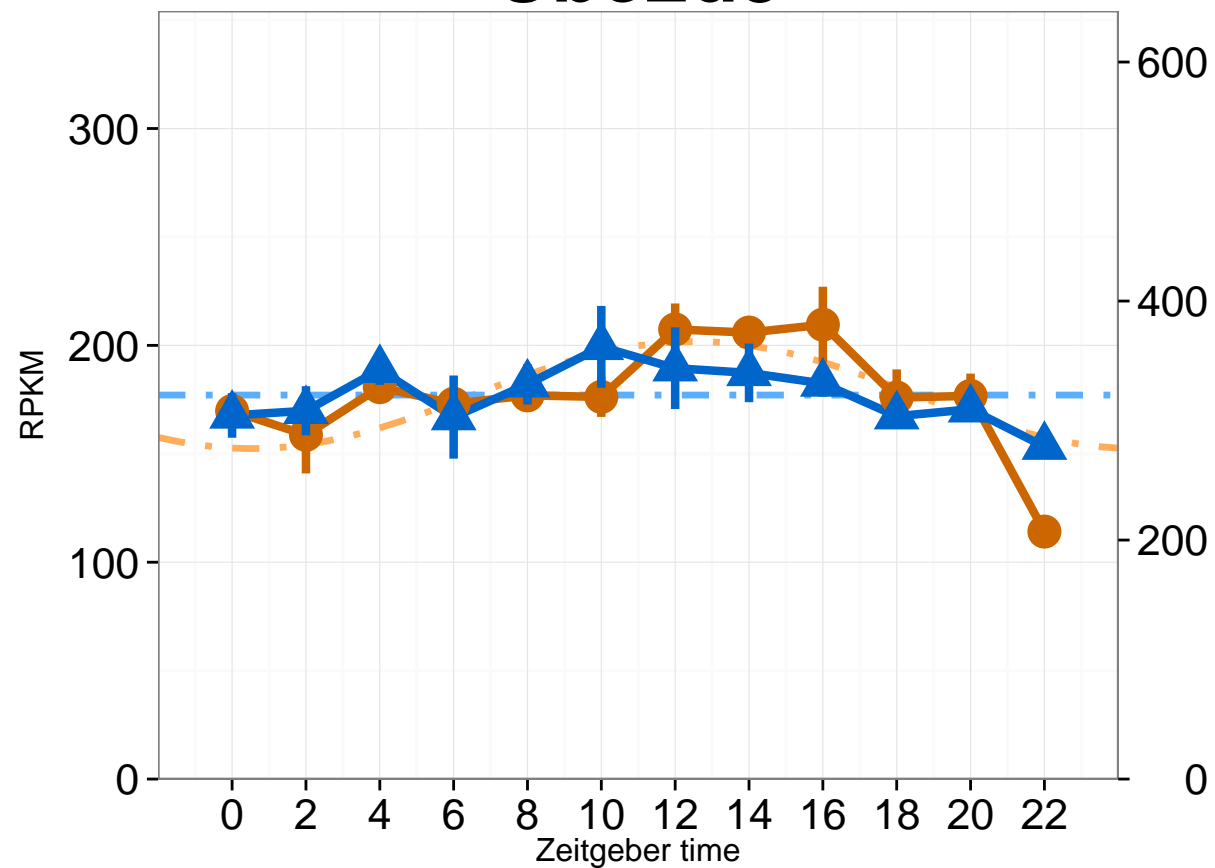

## Ube2d3

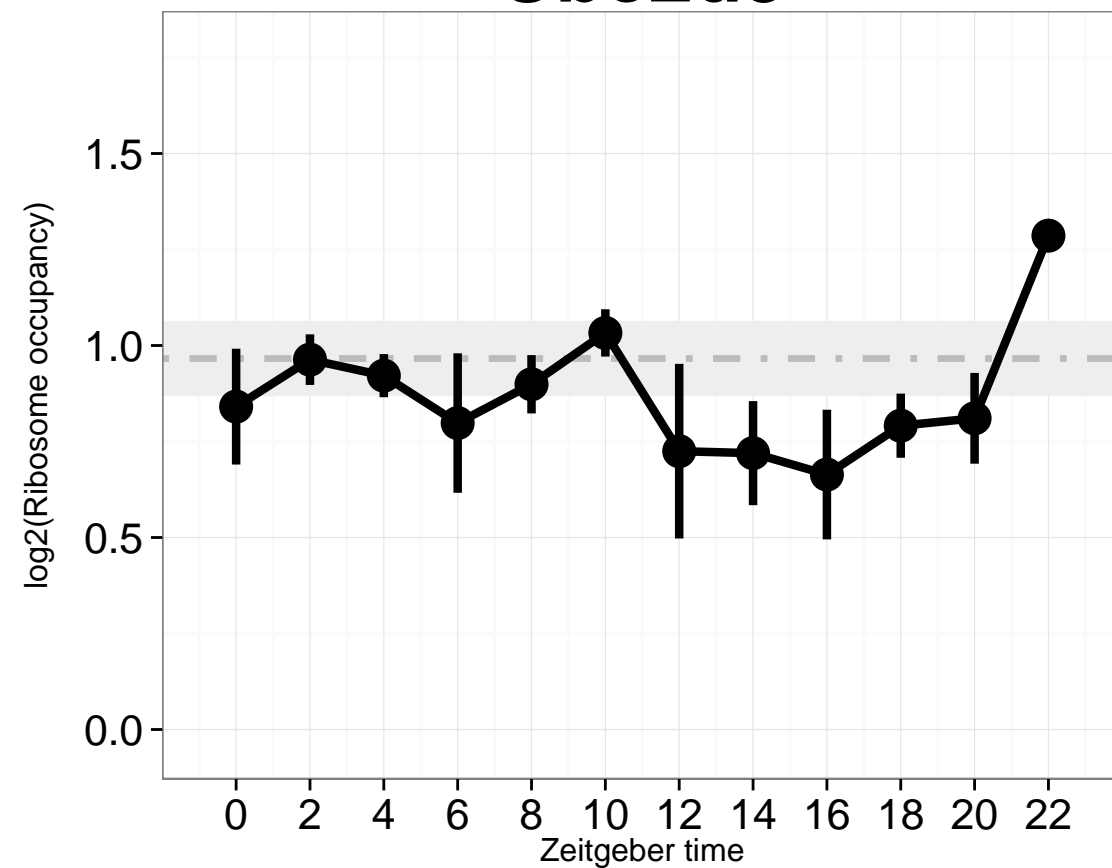

Supplement: SuppDataset_1.zip [file Ube2d3_set_A.pdf › Supplemental Dataset 1/A-mRNA_nonrhyth_translation_nonrhyth/Ube2d3_set_A.pdf]

## Ube2e2

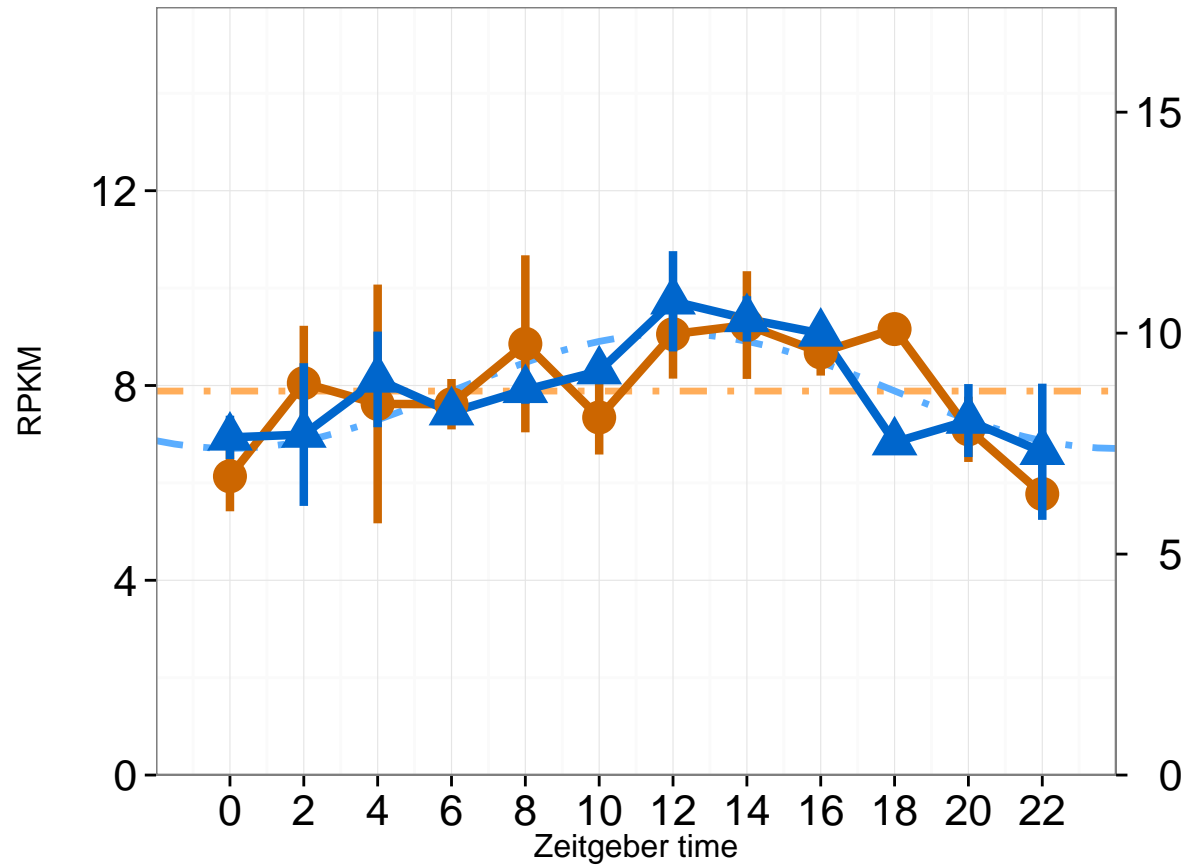

## Ube2e2

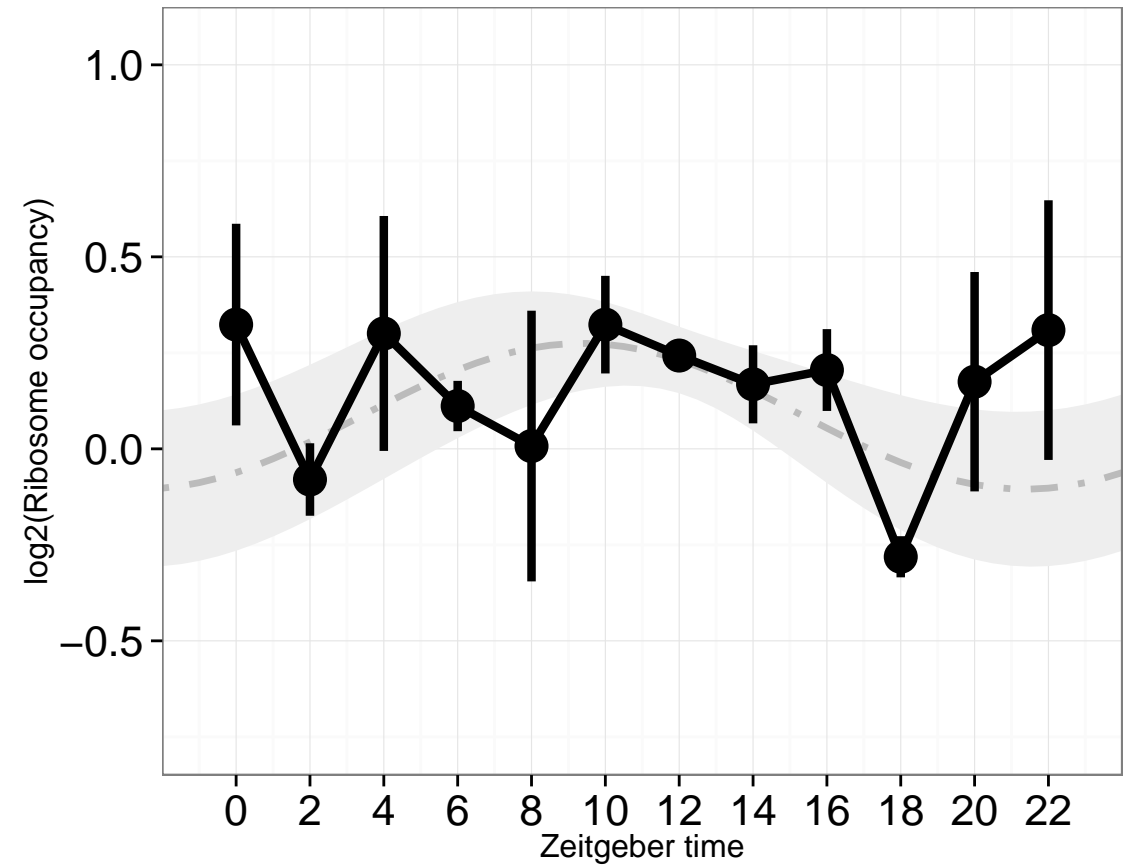

Supplement: SuppDataset_1.zip [file Ube2e2_set_A.pdf › Supplemental Dataset 1/A-mRNA_nonrhyth_translation_nonrhyth/Ube2e2_set_A.pdf]

## Ube2e3

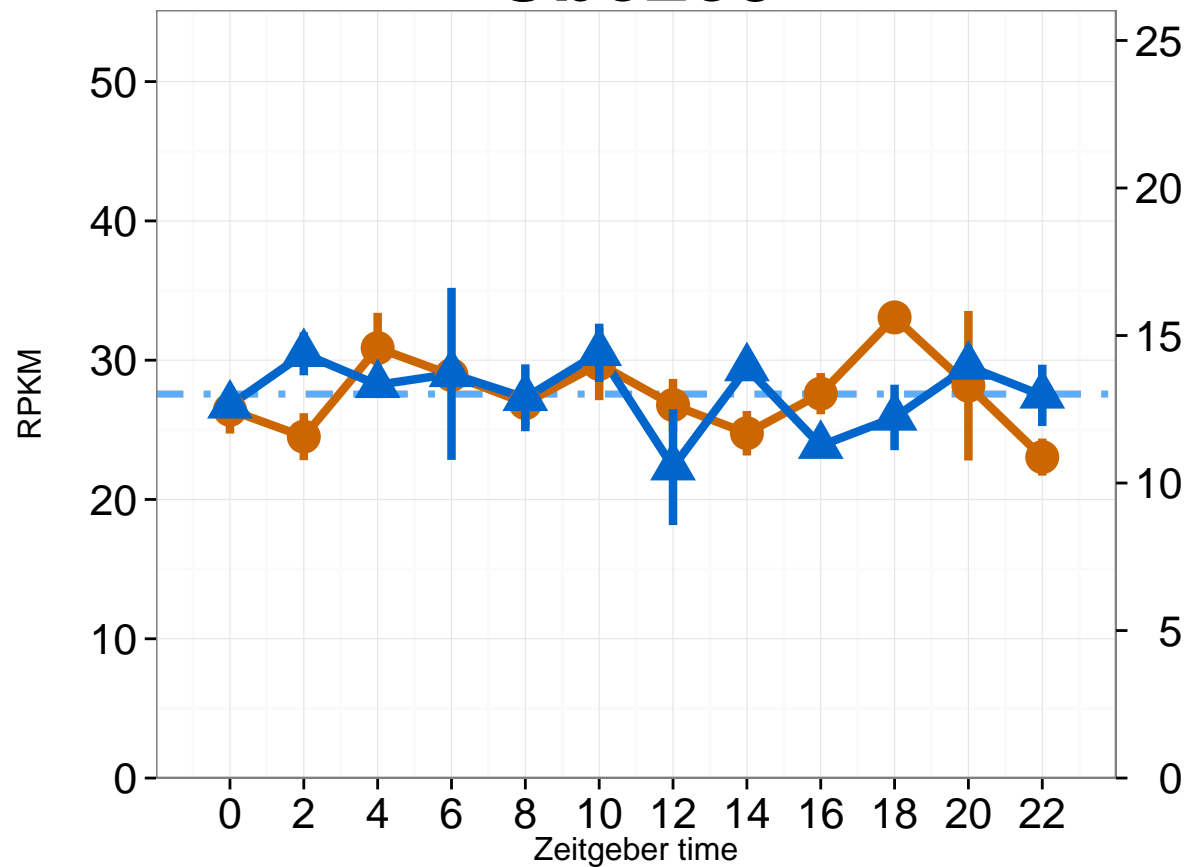

## Ube2e3

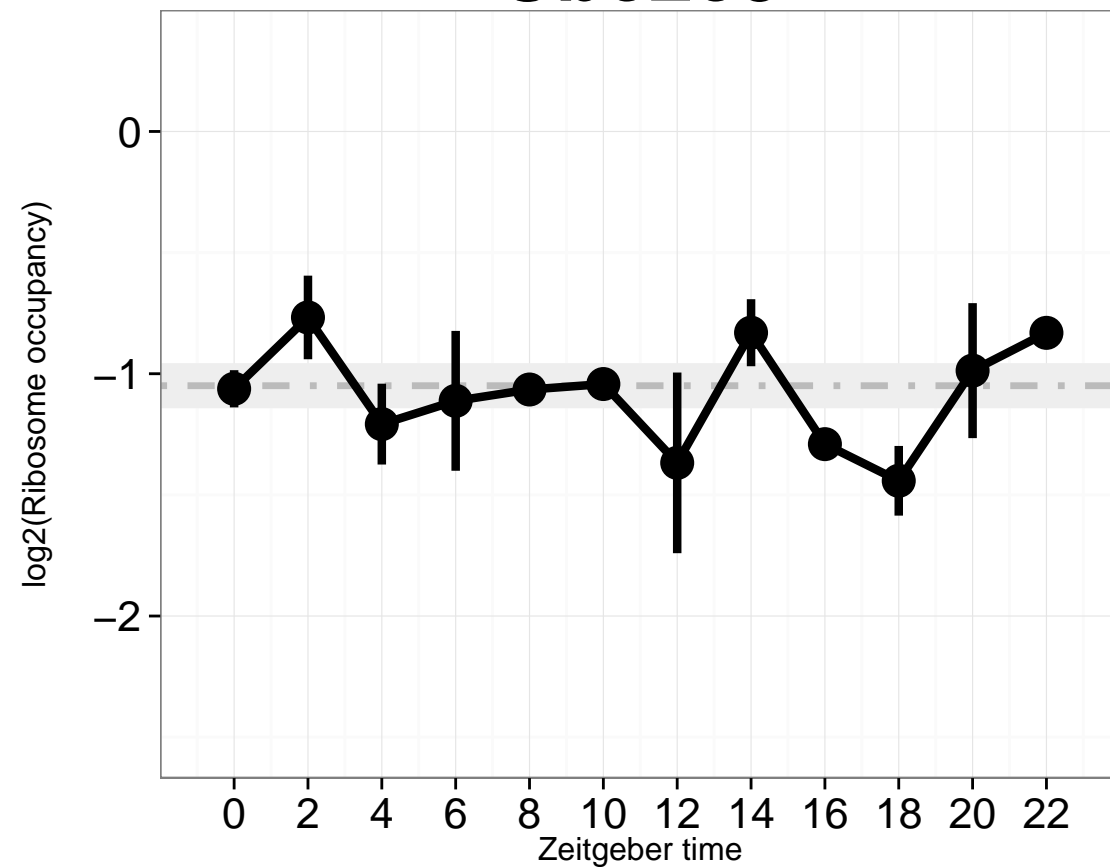

Supplement: SuppDataset_1.zip [file Ube2e3_set_A.pdf › Supplemental Dataset 1/A-mRNA_nonrhyth_translation_nonrhyth/Ube2e3_set_A.pdf]

# Ube2g1

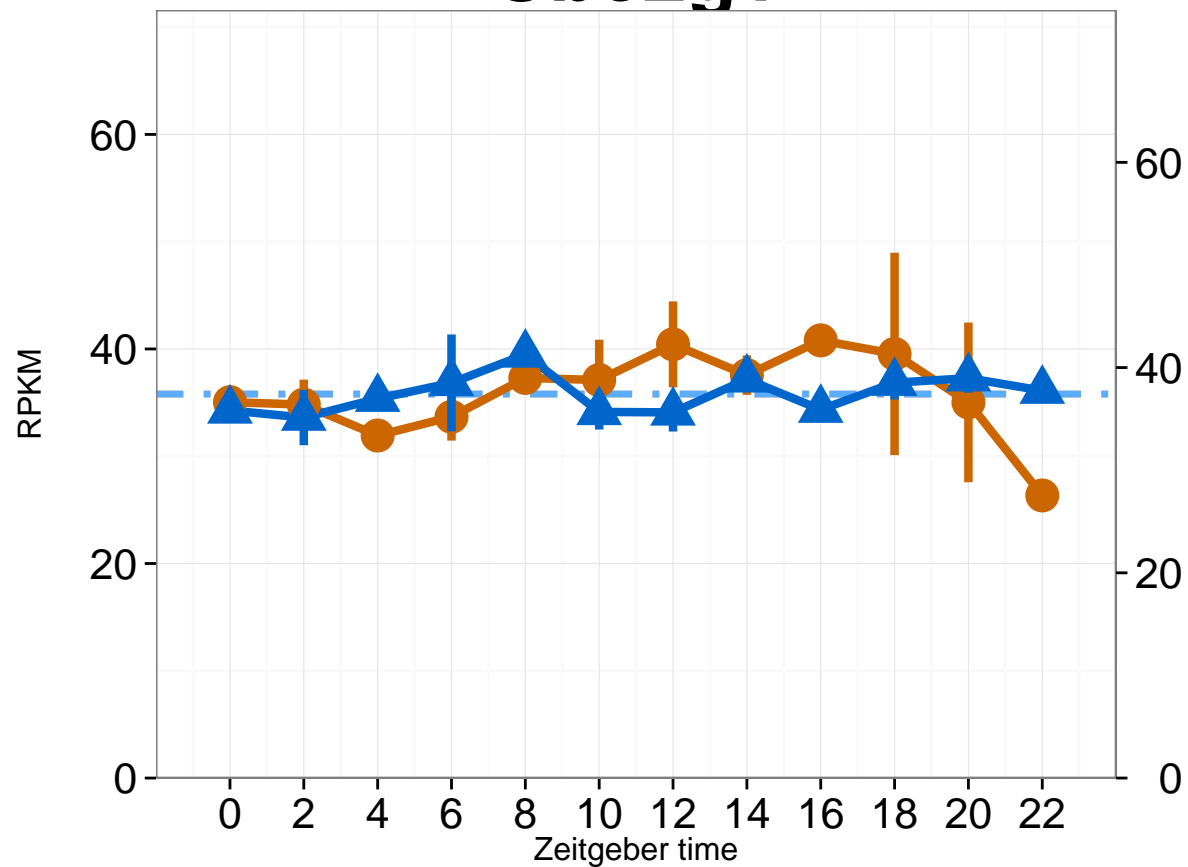

# Ube2g1

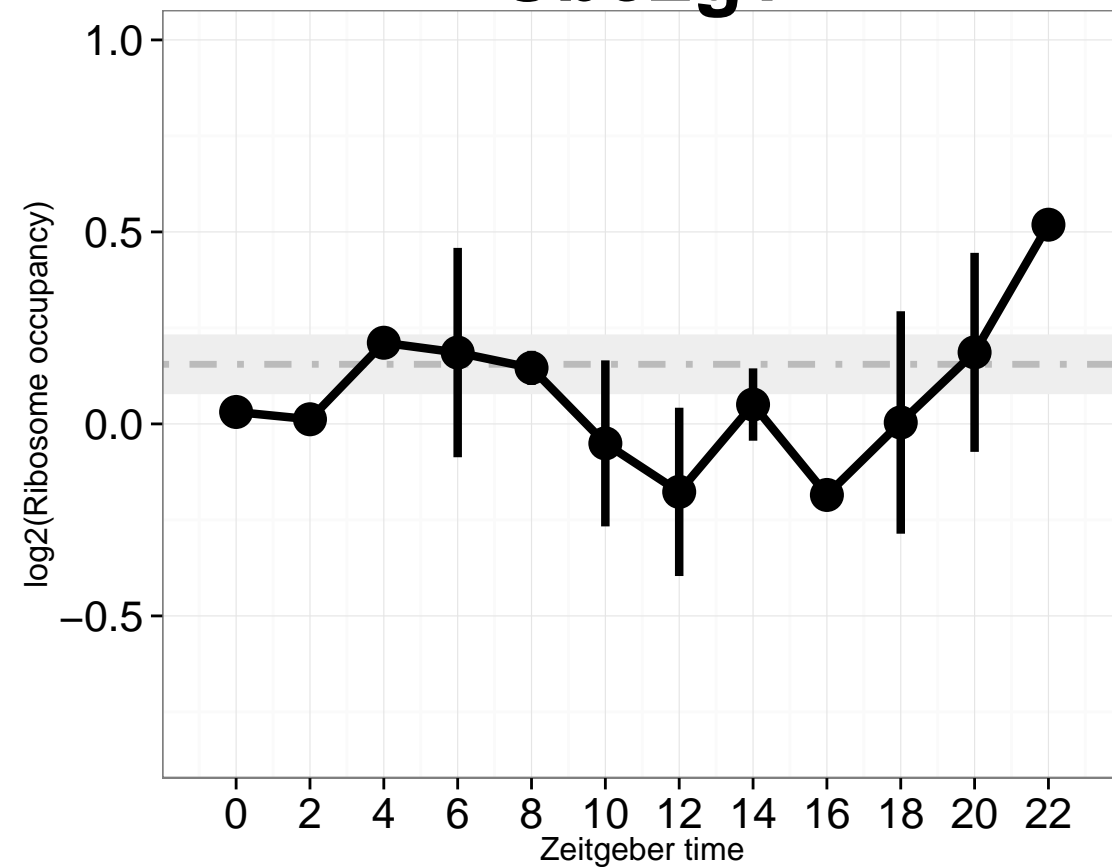

Supplement: SuppDataset_1.zip [file Ube2g1_set_A.pdf › Supplemental Dataset 1/A-mRNA_nonrhyth_translation_nonrhyth/Ube2g1_set_A.pdf]

# Ube2h

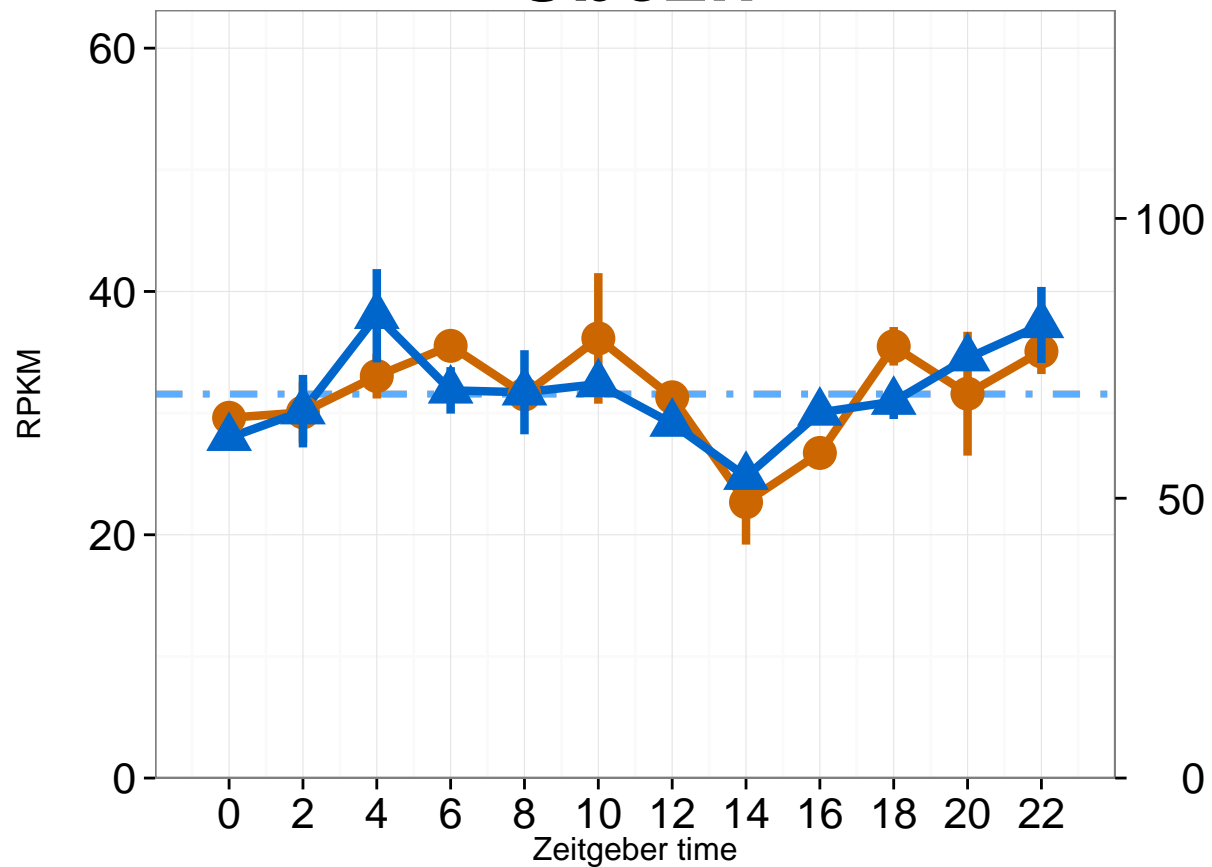

# Ube2h

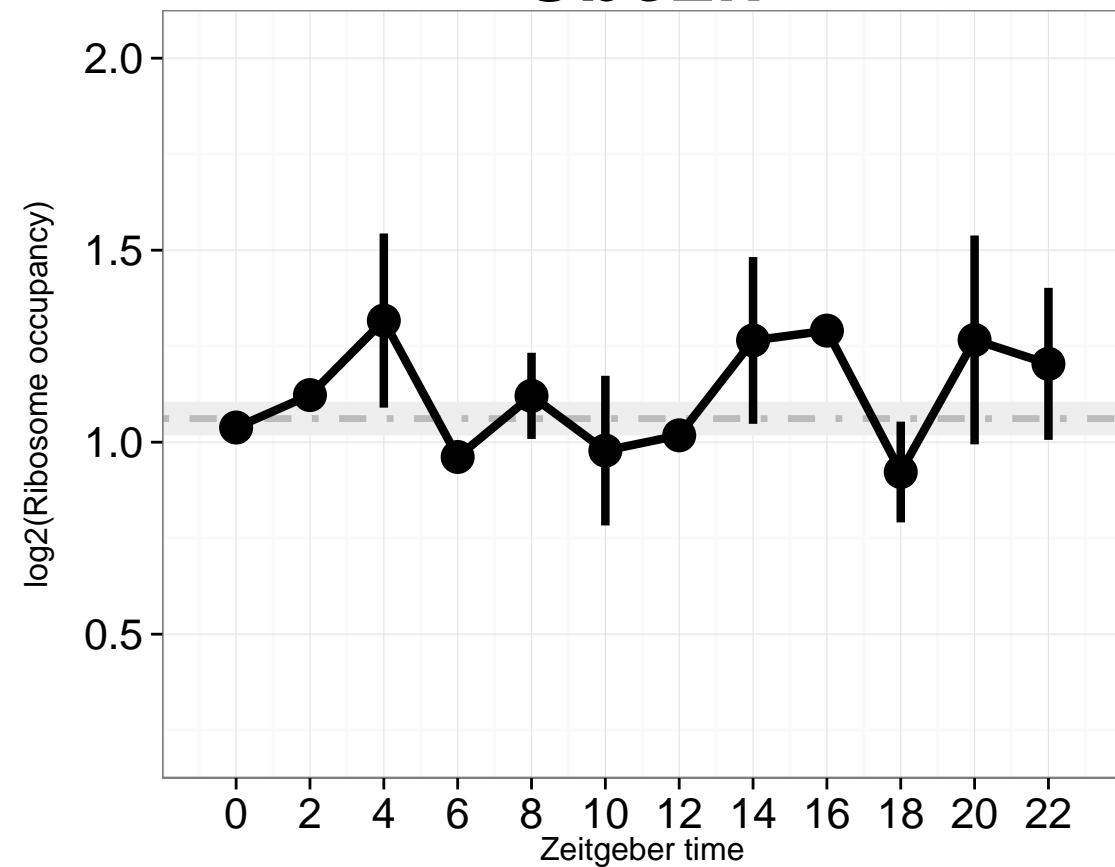

Supplement: SuppDataset_1.zip [file Ube2h_set_A.pdf › Supplemental Dataset 1/A-mRNA_nonrhyth_translation_nonrhyth/Ube2h_set_A.pdf]

## Ube2i

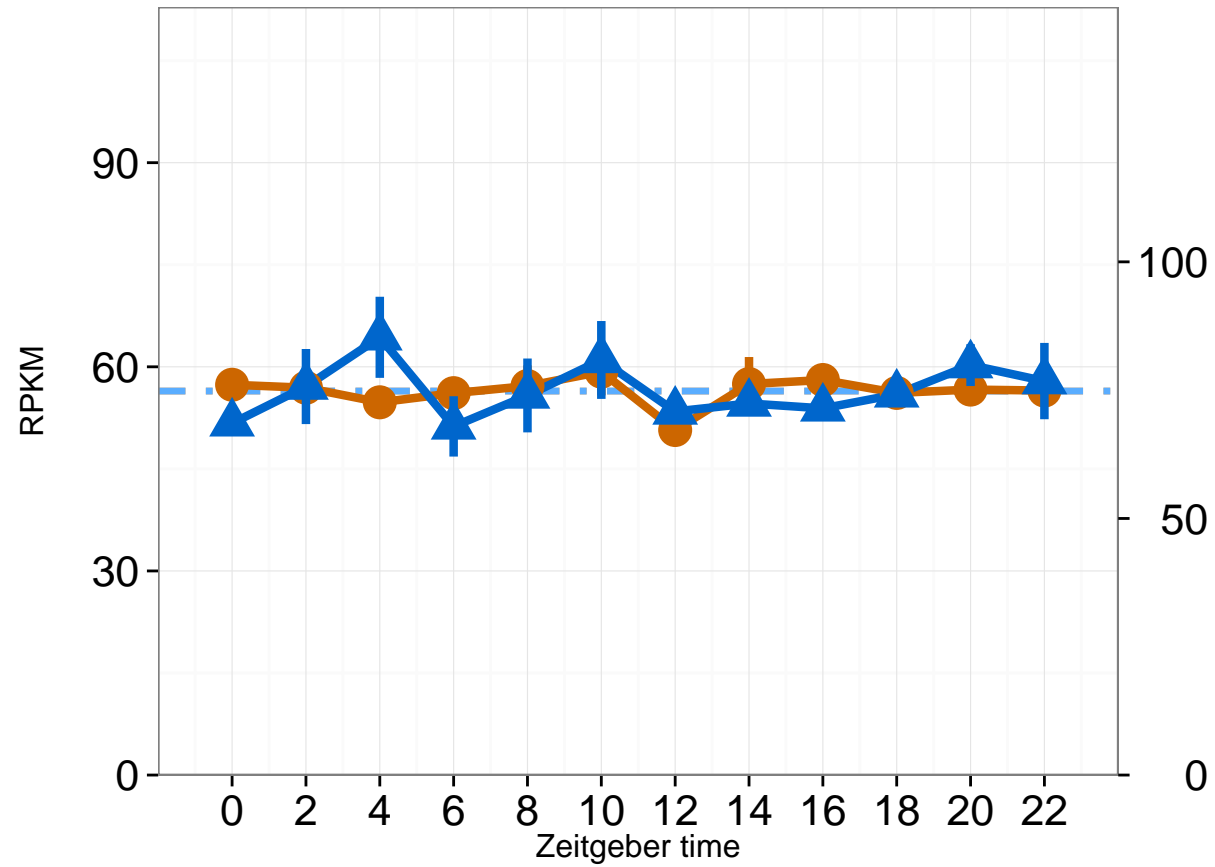

## Ube2i

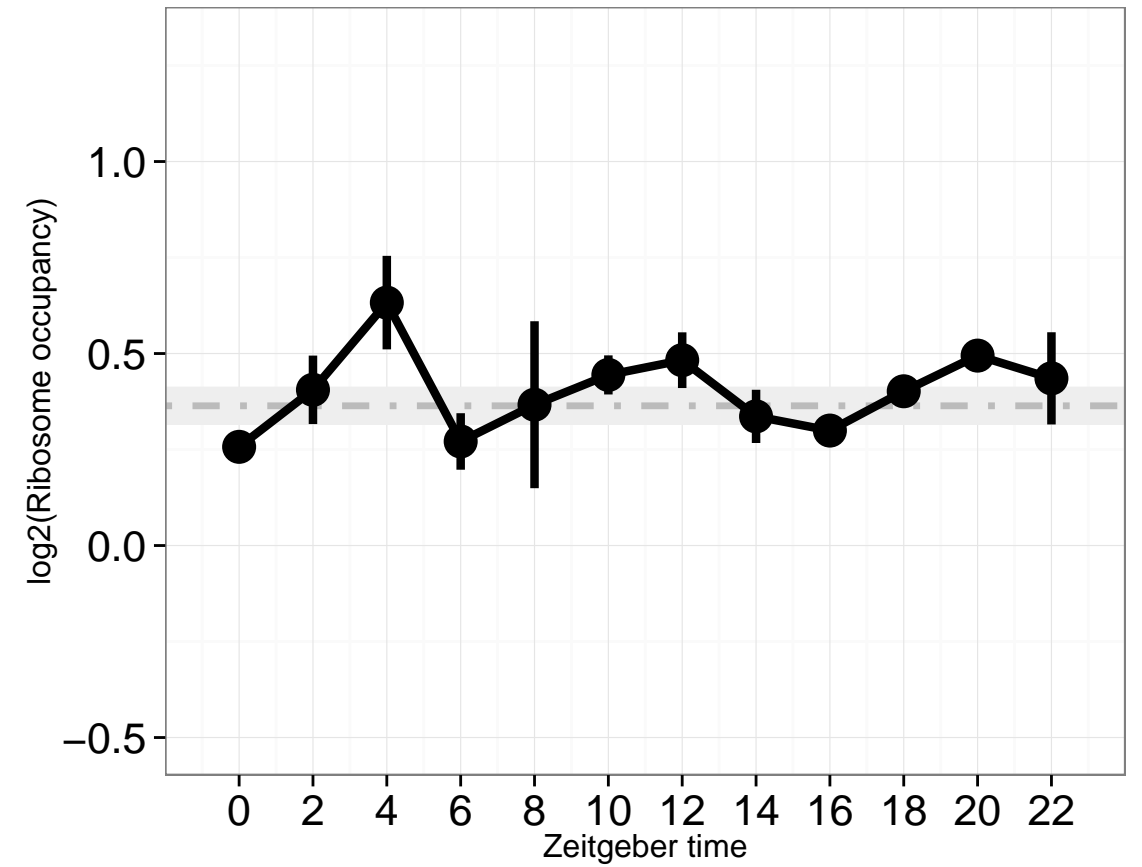

Supplement: SuppDataset_1.zip [file Ube2i_set_A.pdf › Supplemental Dataset 1/A-mRNA_nonrhyth_translation_nonrhyth/Ube2i_set_A.pdf]

## Ube2j1

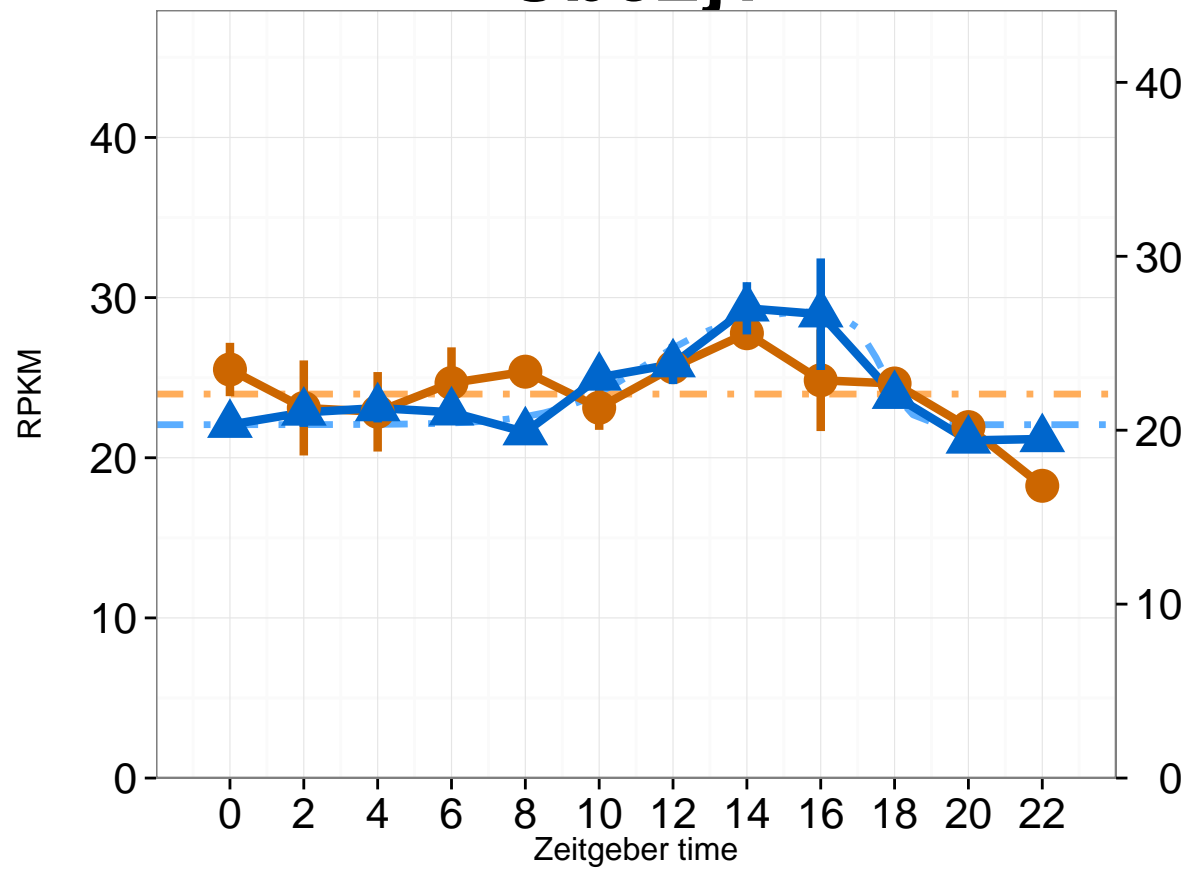

## Ube2j1

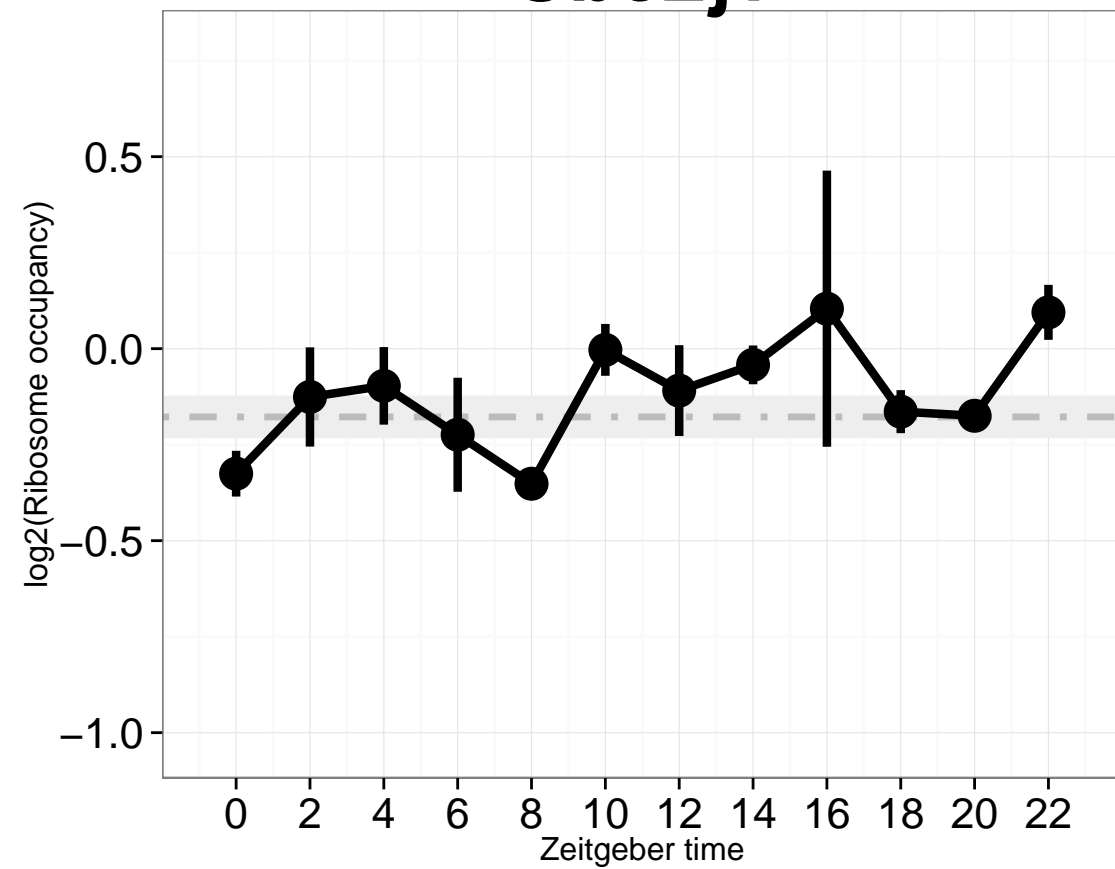

Supplement: SuppDataset_1.zip [file Ube2j1_set_A.pdf › Supplemental Dataset 1/A-mRNA_nonrhyth_translation_nonrhyth/Ube2j1_set_A.pdf]

## Ube2j2

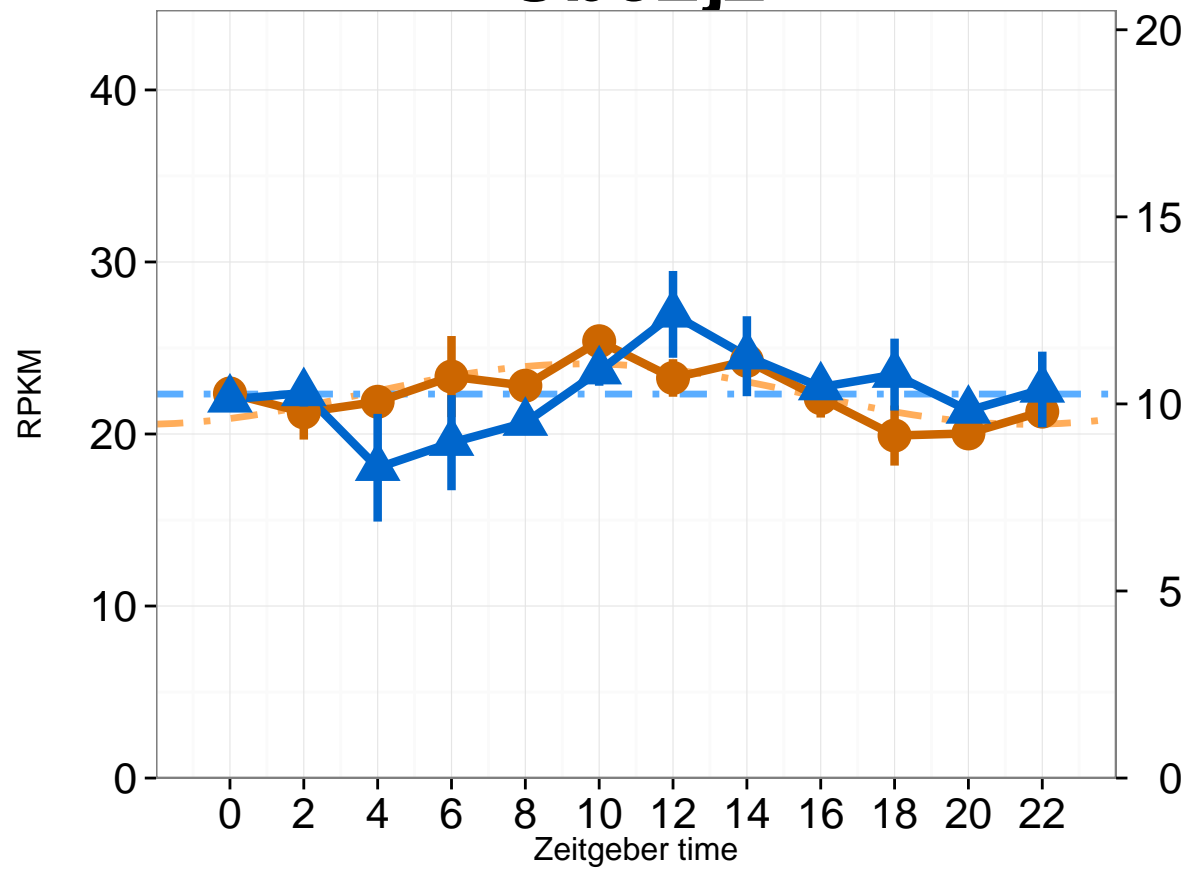

## Ube2j2

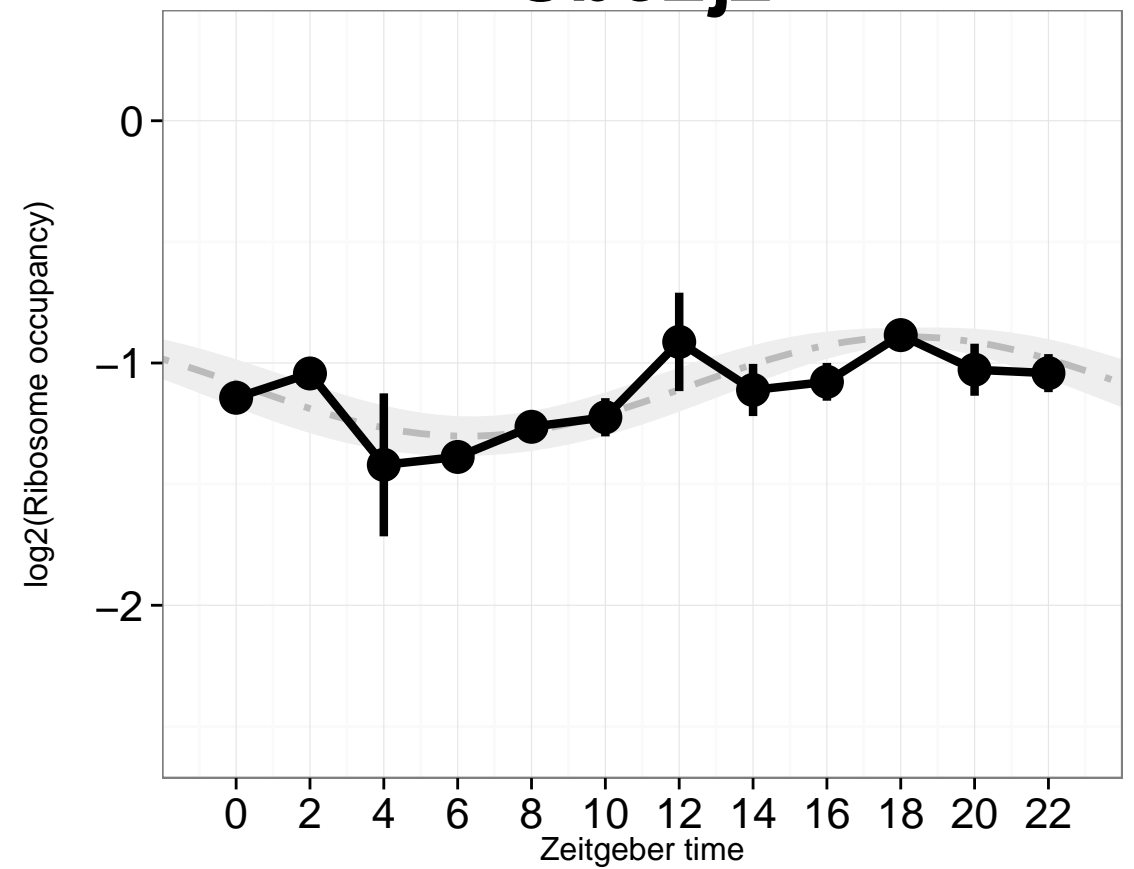

Supplement: SuppDataset_1.zip [file Ube2j2_set_A.pdf › Supplemental Dataset 1/A-mRNA_nonrhyth_translation_nonrhyth/Ube2j2_set_A.pdf]

## Ube2k

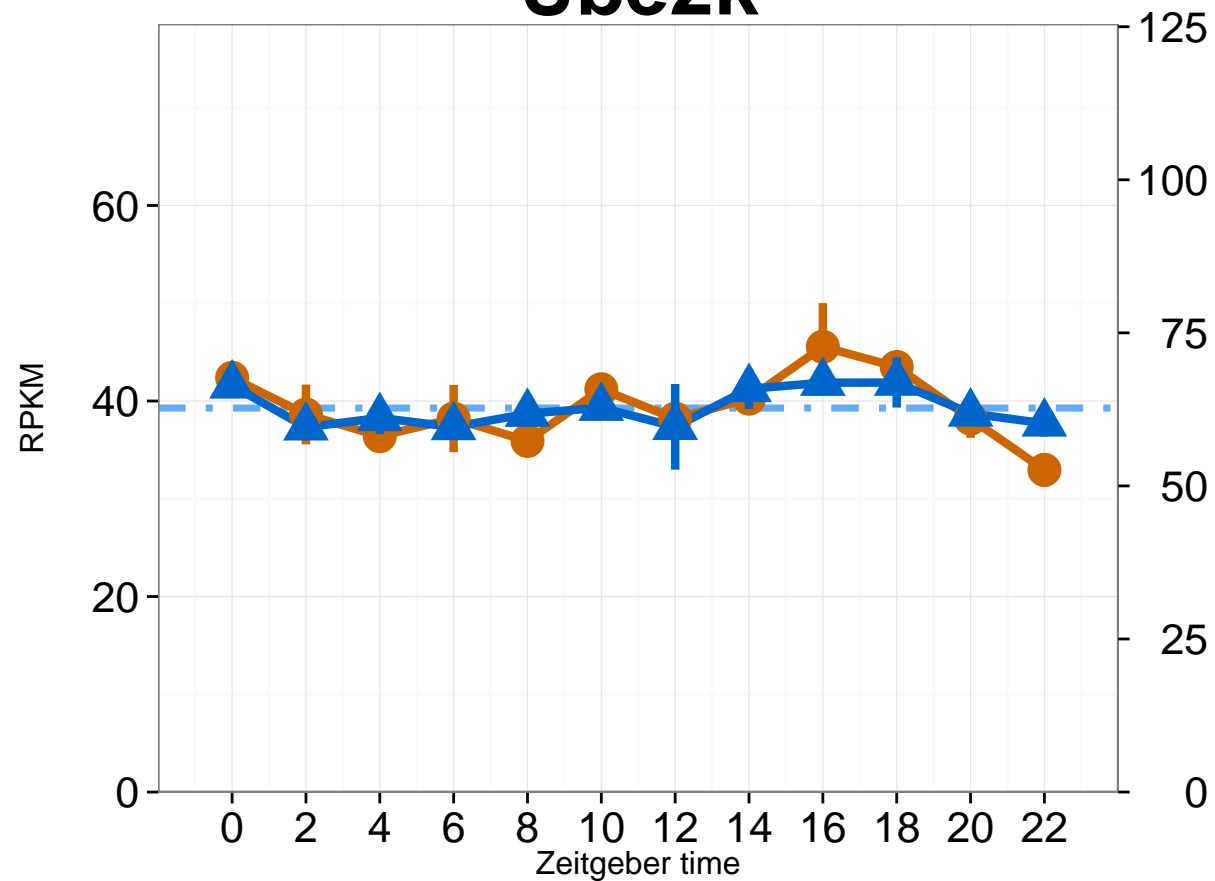

## Ube2k

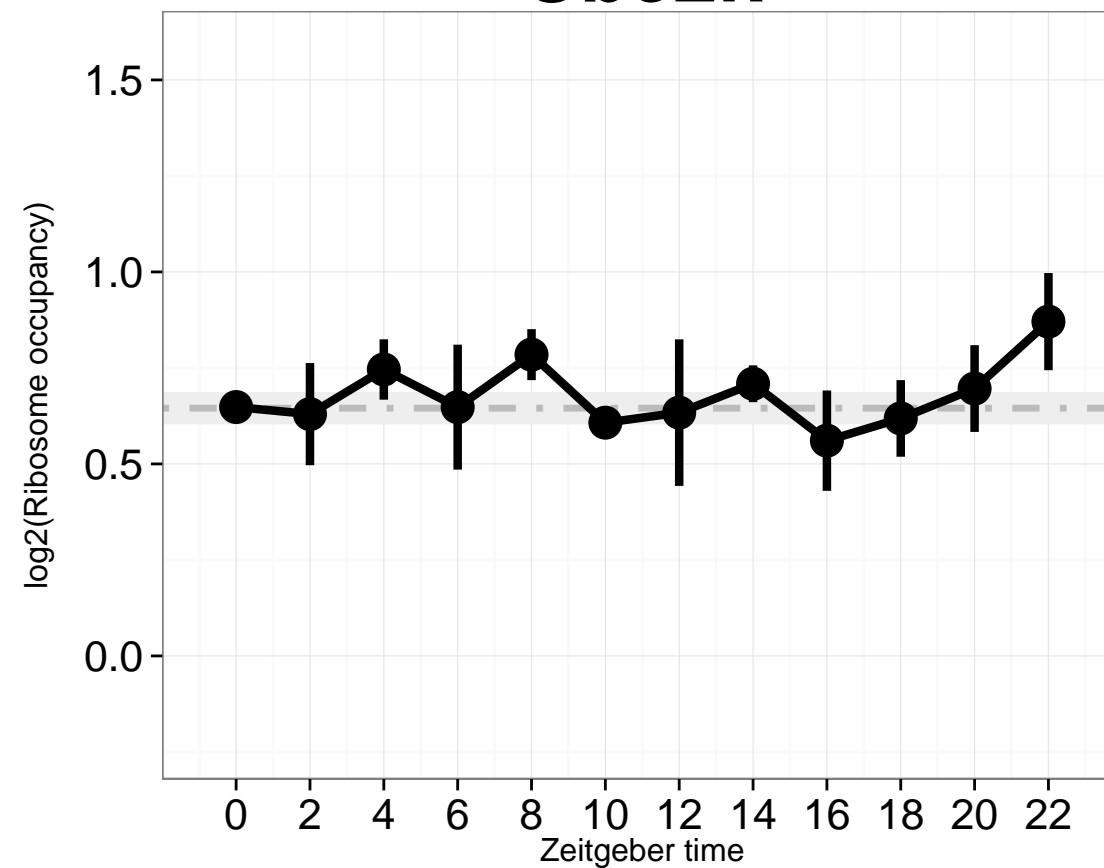

Supplement: SuppDataset_1.zip [file Ube2k_set_A.pdf › Supplemental Dataset 1/A-mRNA_nonrhyth_translation_nonrhyth/Ube2k_set_A.pdf]

# Ube2l6

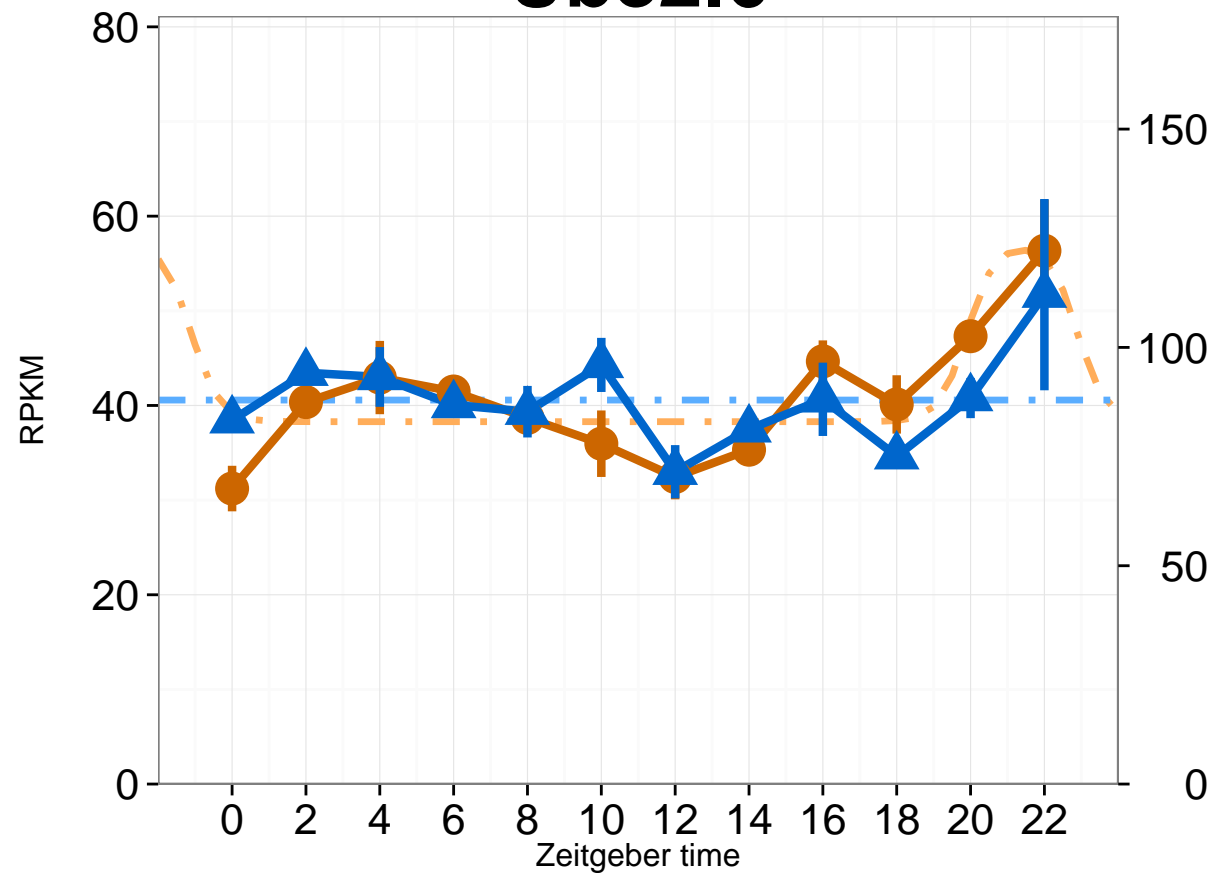

# Ube2l6

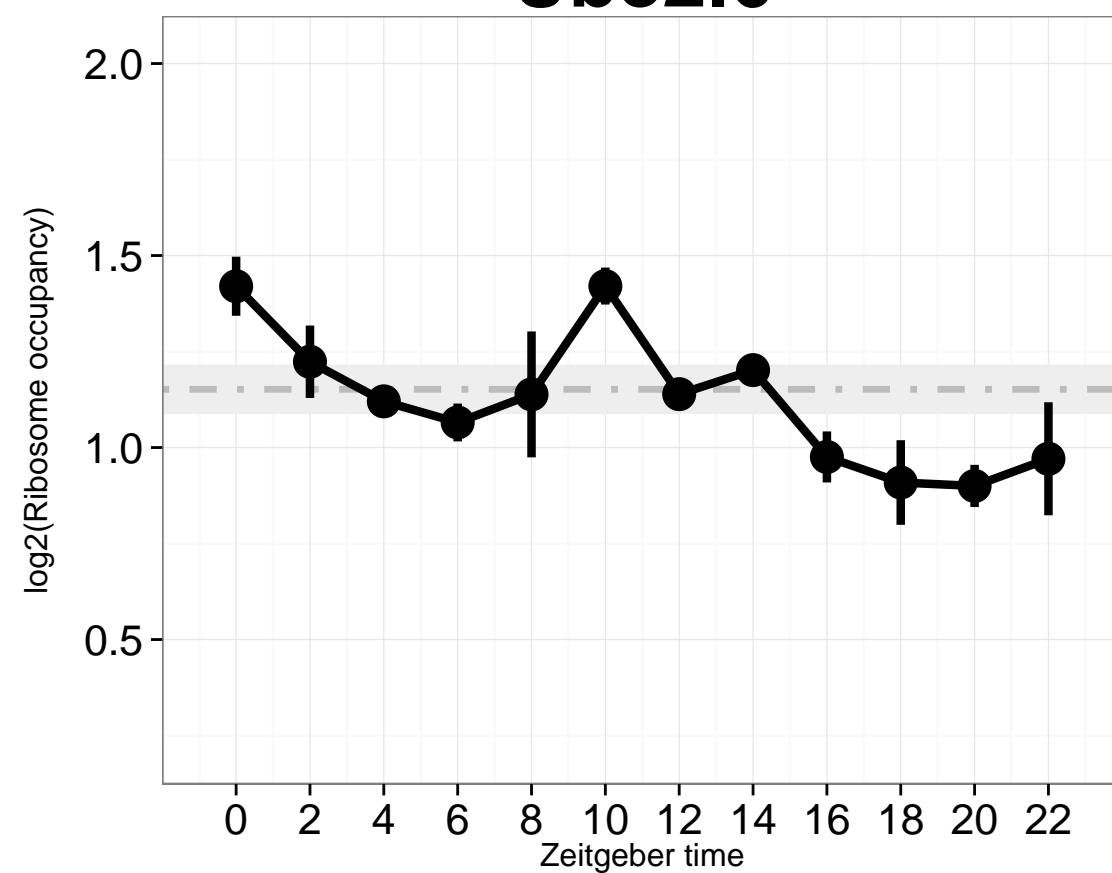

Supplement: SuppDataset_1.zip [file Ube2l6_set_A.pdf › Supplemental Dataset 1/A-mRNA_nonrhyth_translation_nonrhyth/Ube2l6_set_A.pdf]

## Ube2m

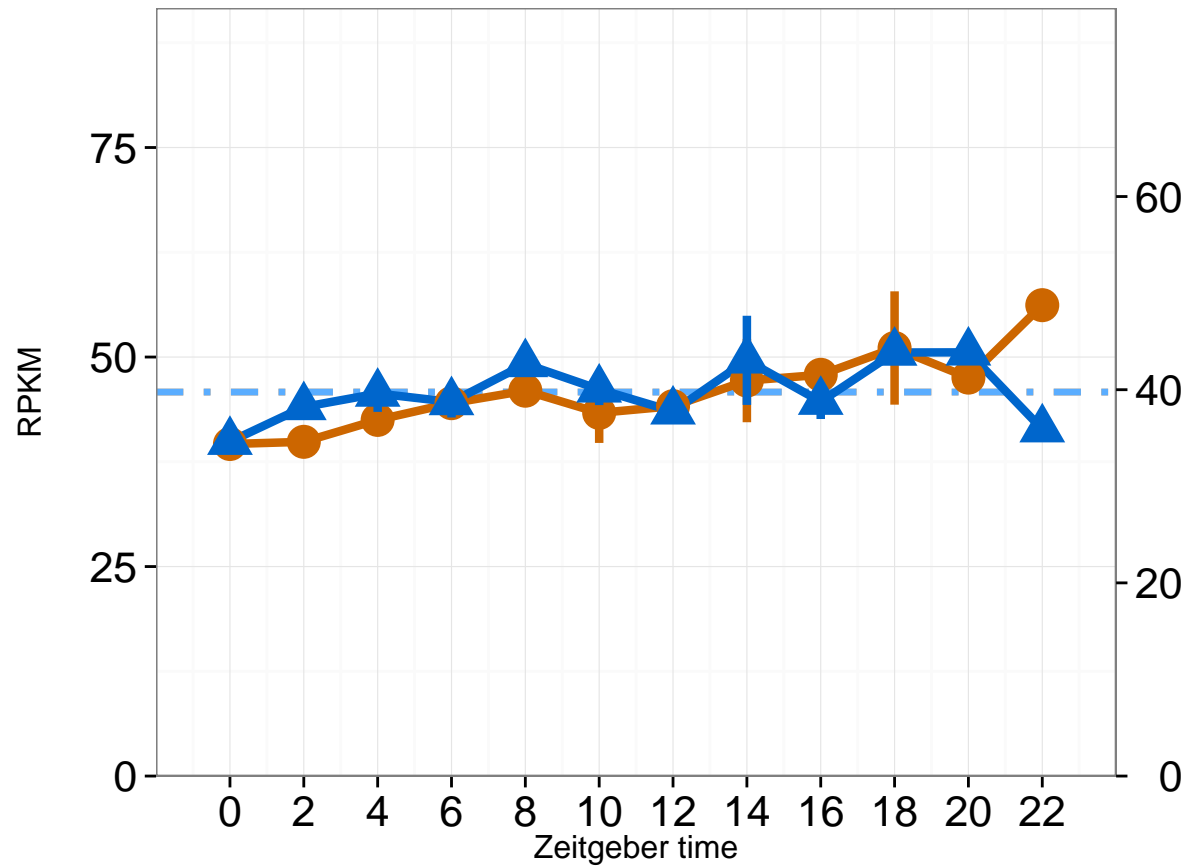

## Ube2m

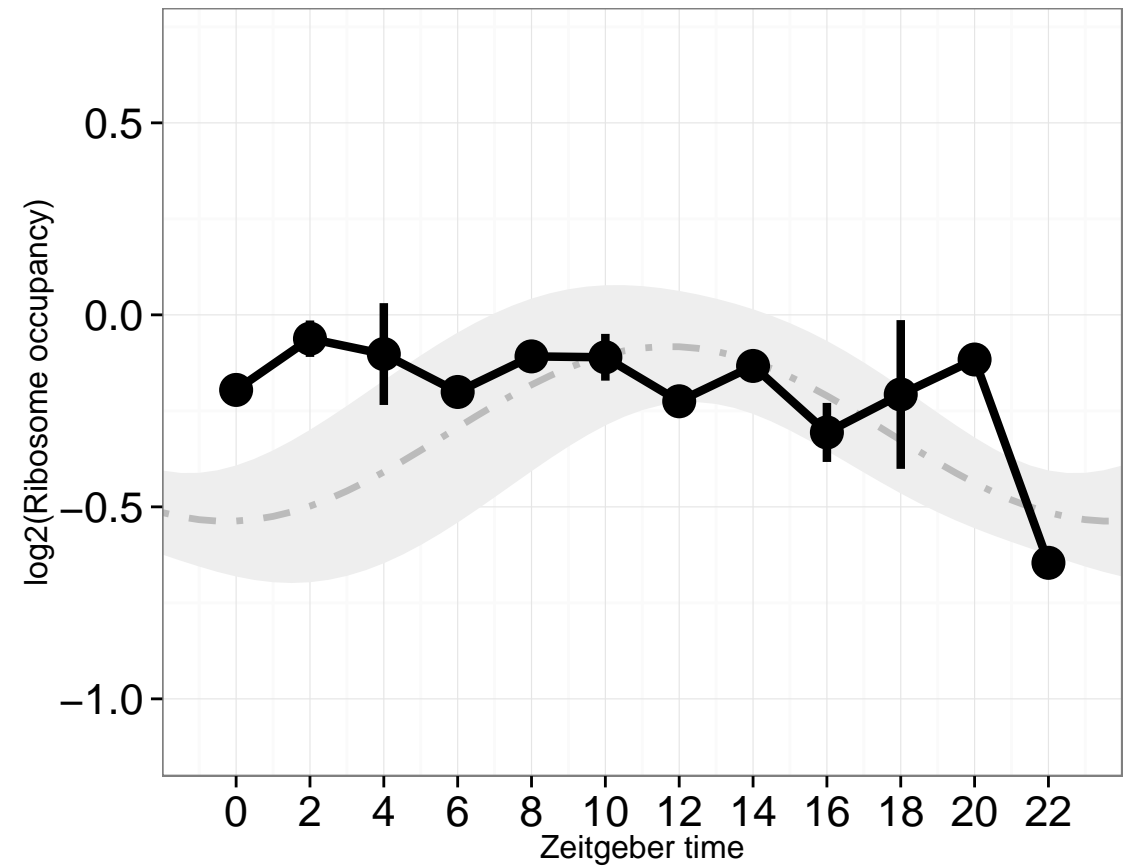

Supplement: SuppDataset_1.zip [file Ube2m_set_A.pdf › Supplemental Dataset 1/A-mRNA_nonrhyth_translation_nonrhyth/Ube2m_set_A.pdf]

## Ube2n

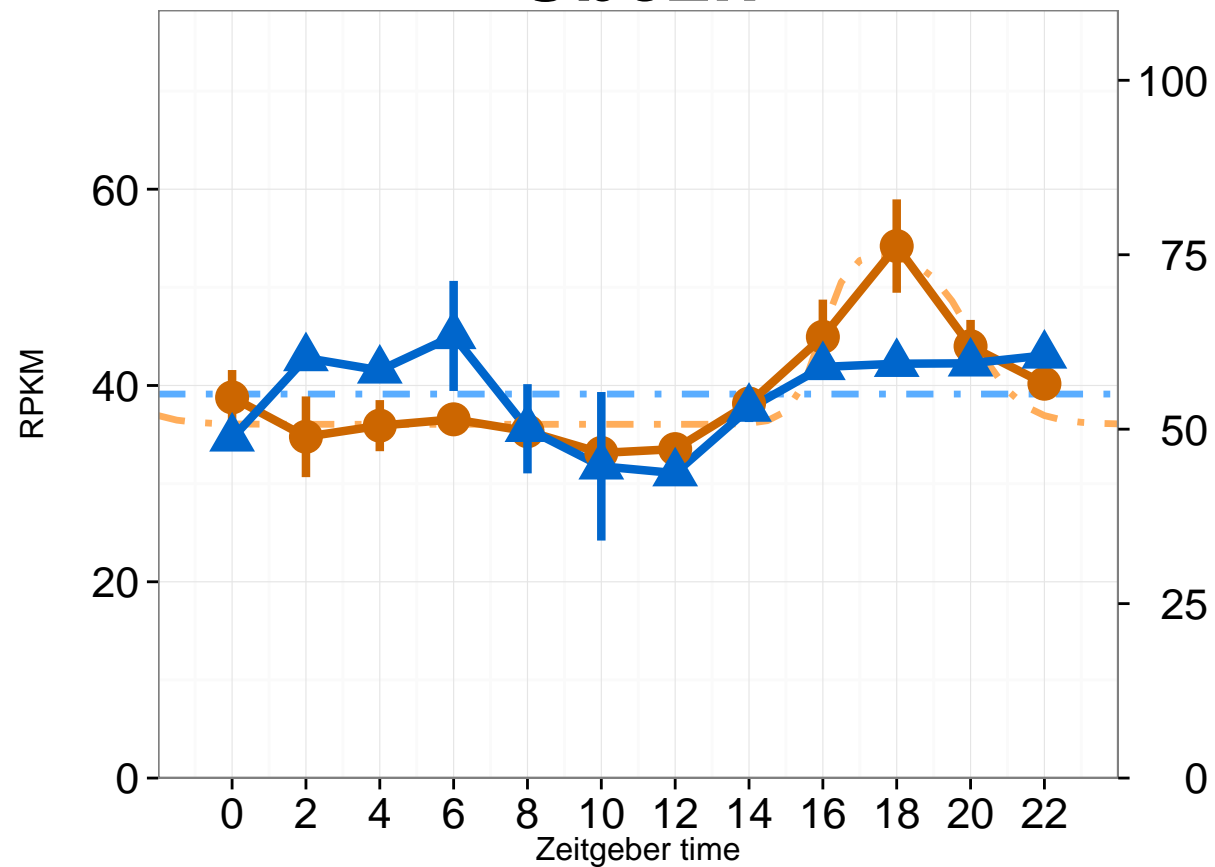

## Ube2n

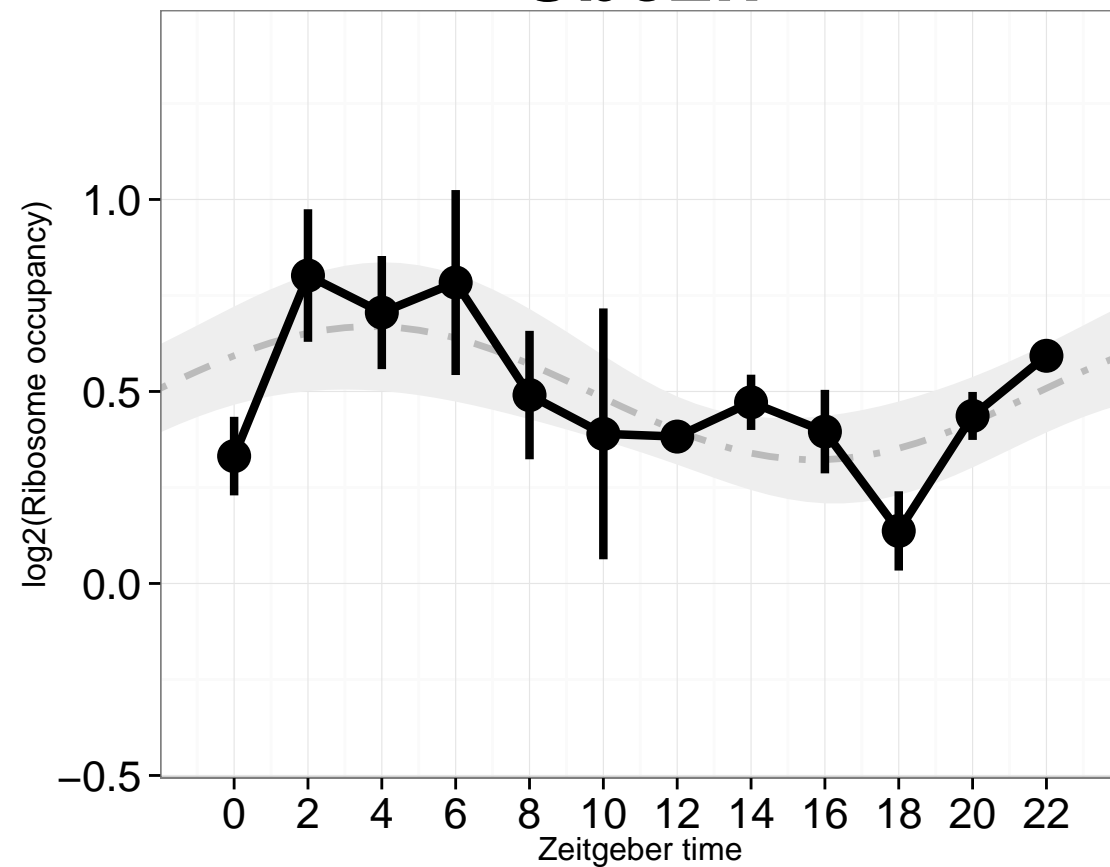

Supplement: SuppDataset_1.zip [file Ube2n_set_A.pdf › Supplemental Dataset 1/A-mRNA_nonrhyth_translation_nonrhyth/Ube2n_set_A.pdf]

## Ube2o

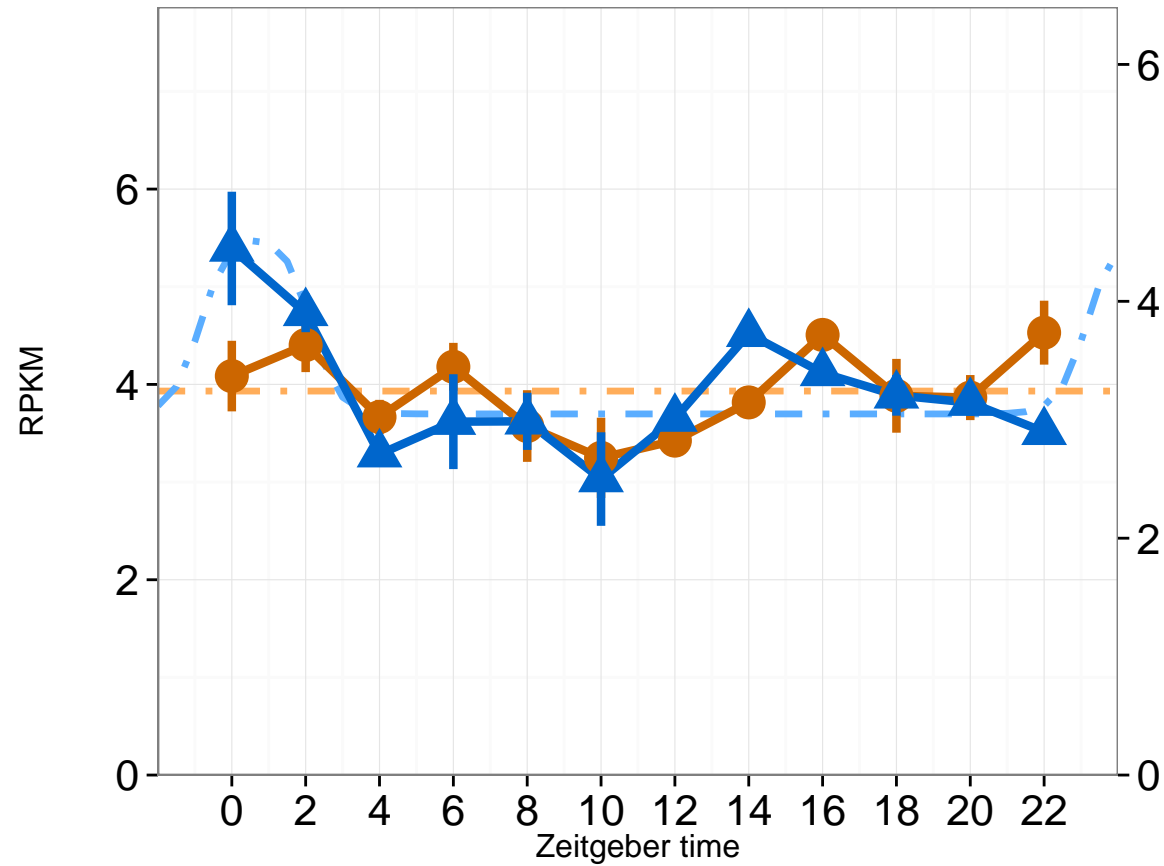

## Ube2o

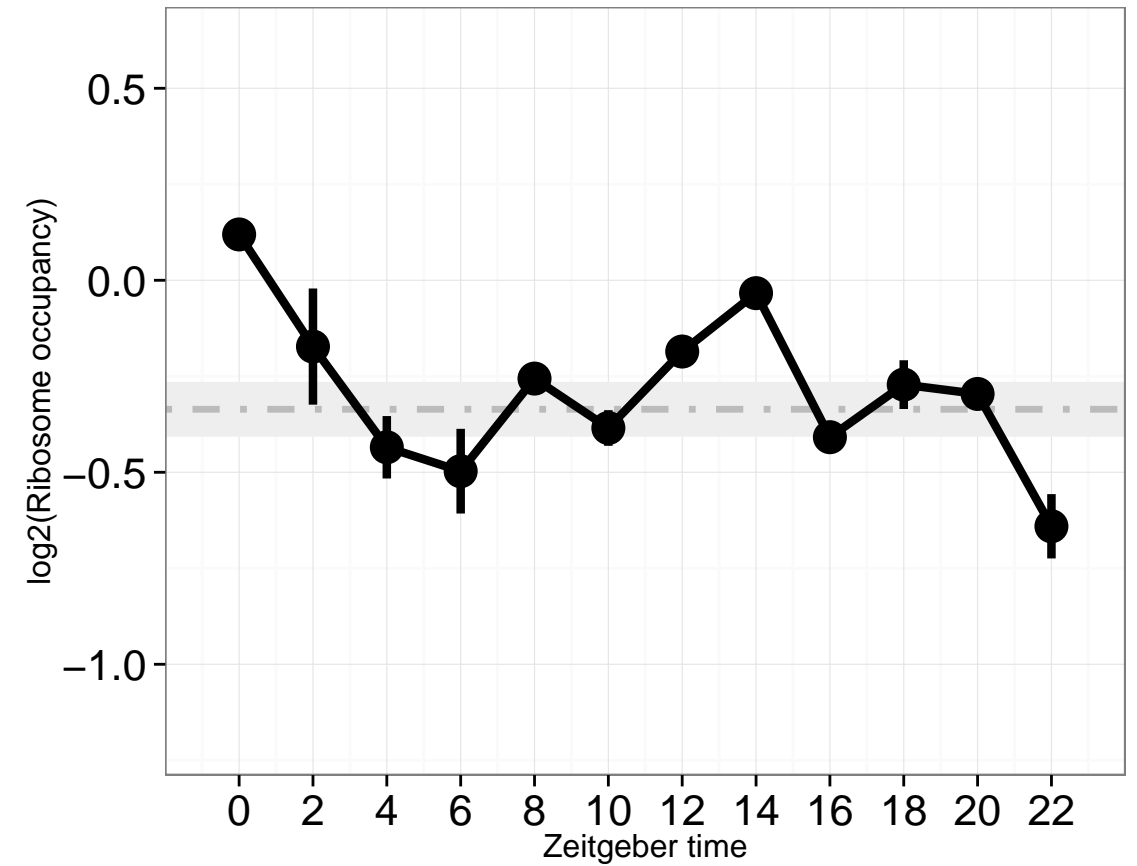

Supplement: SuppDataset_1.zip [file Ube2o_set_A.pdf › Supplemental Dataset 1/A-mRNA_nonrhyth_translation_nonrhyth/Ube2o_set_A.pdf]

# Ube2q1

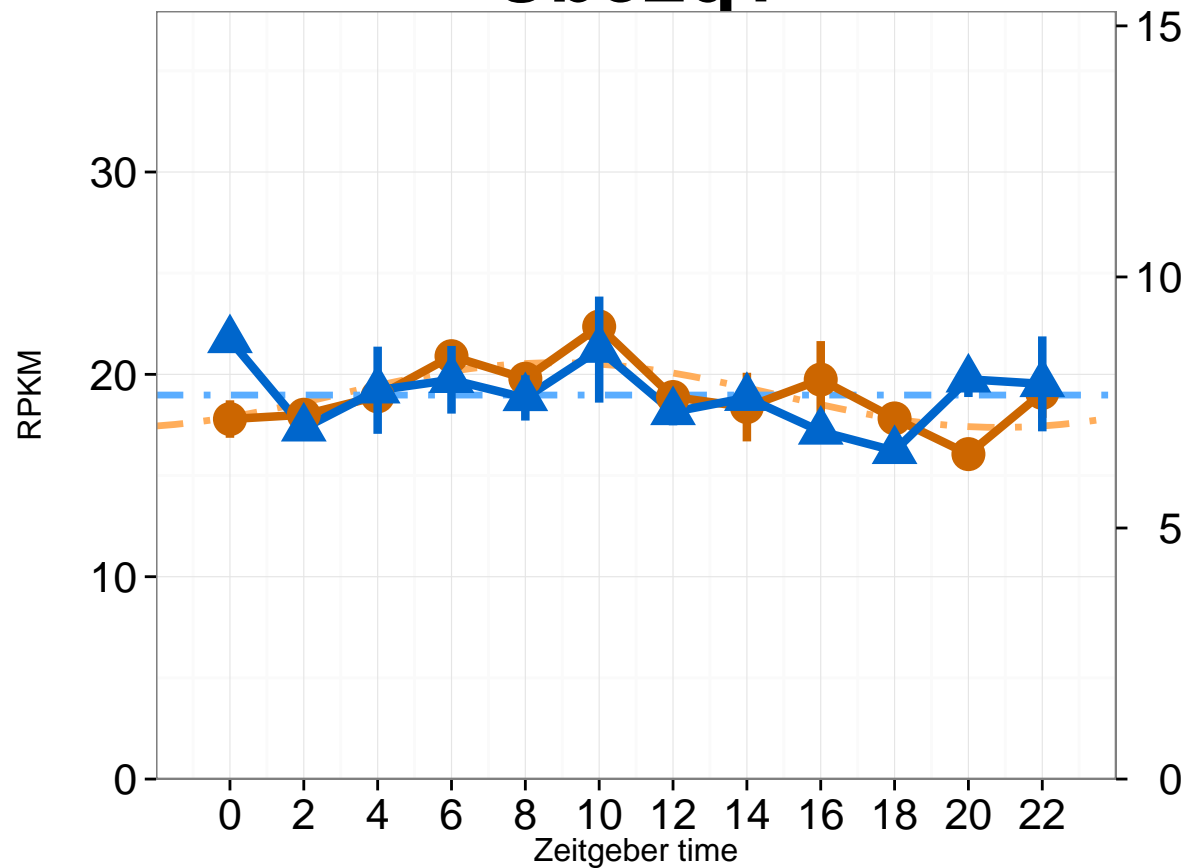

# Ube2q1

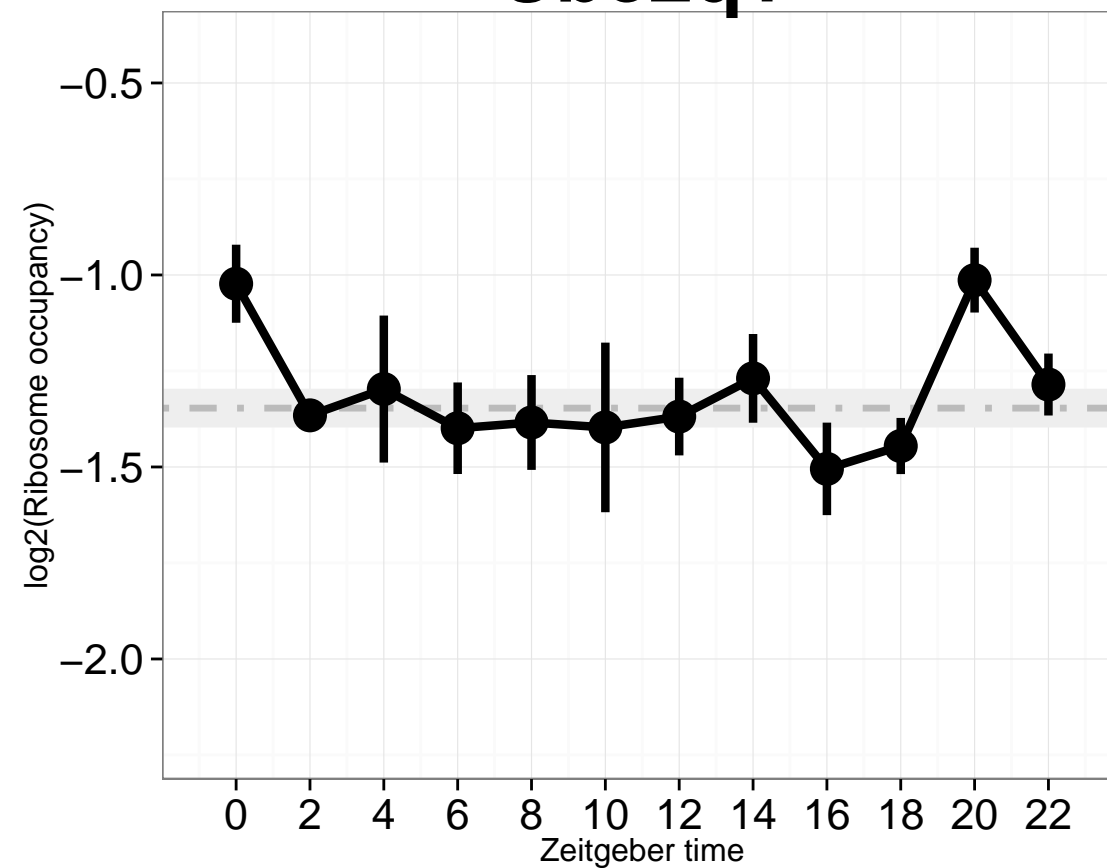

Supplement: SuppDataset_1.zip [file Ube2q1_set_A.pdf › Supplemental Dataset 1/A-mRNA_nonrhyth_translation_nonrhyth/Ube2q1_set_A.pdf]

# Ube2q2

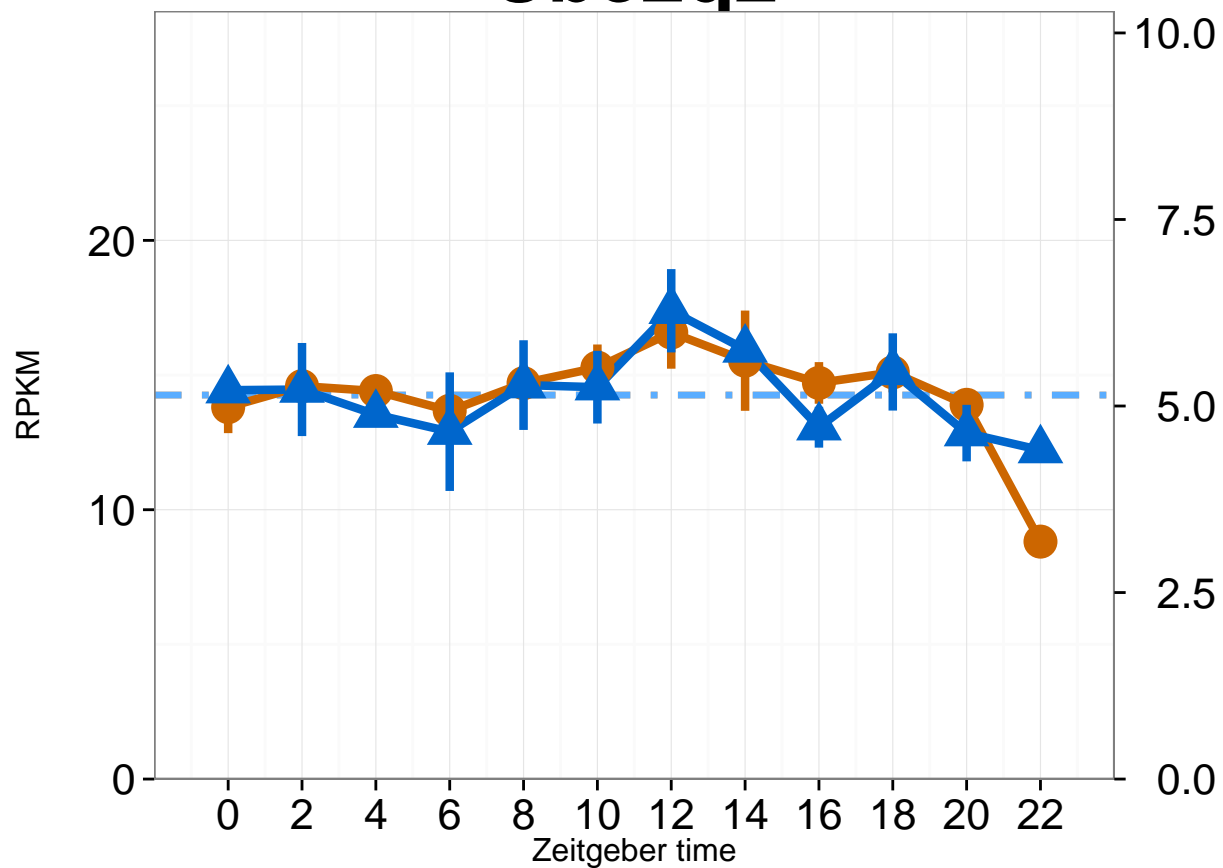

# Ube2q2

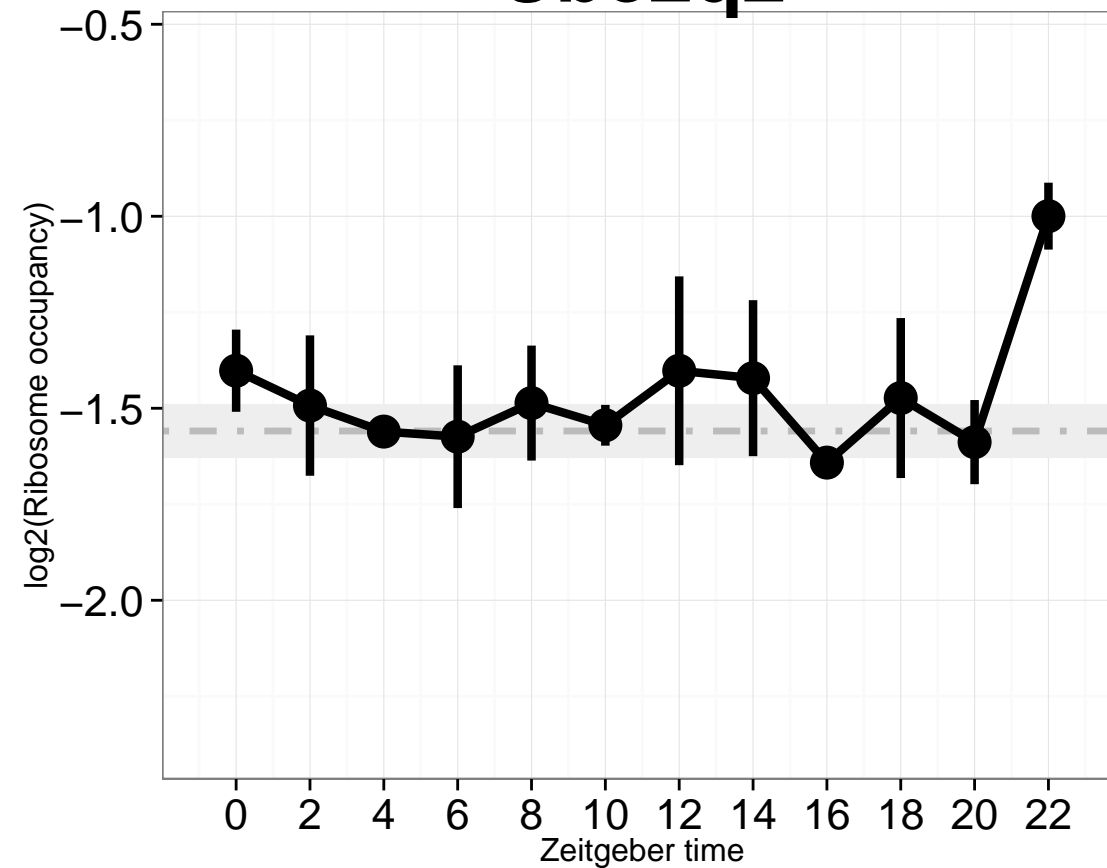

Supplement: SuppDataset_1.zip [file Ube2q2_set_A.pdf › Supplemental Dataset 1/A-mRNA_nonrhyth_translation_nonrhyth/Ube2q2_set_A.pdf]

## Ube2r2

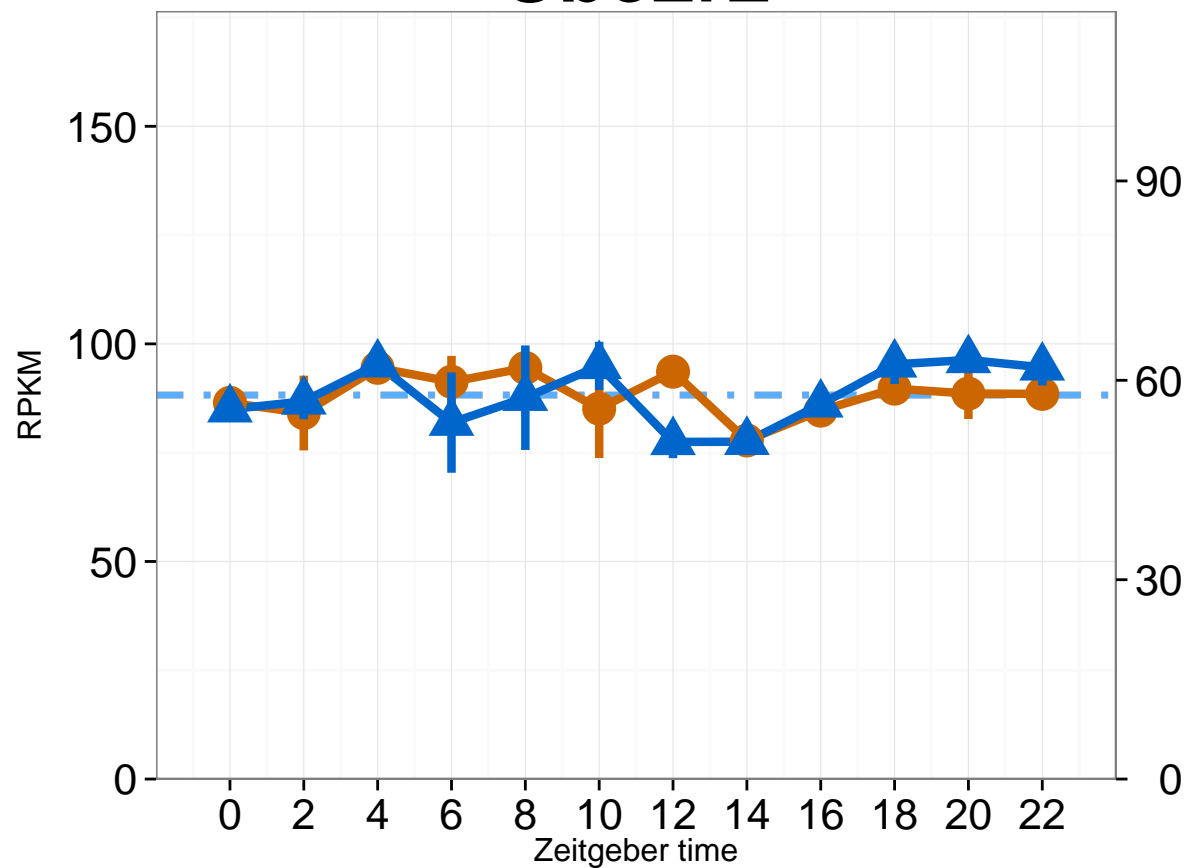

## Ube2r2

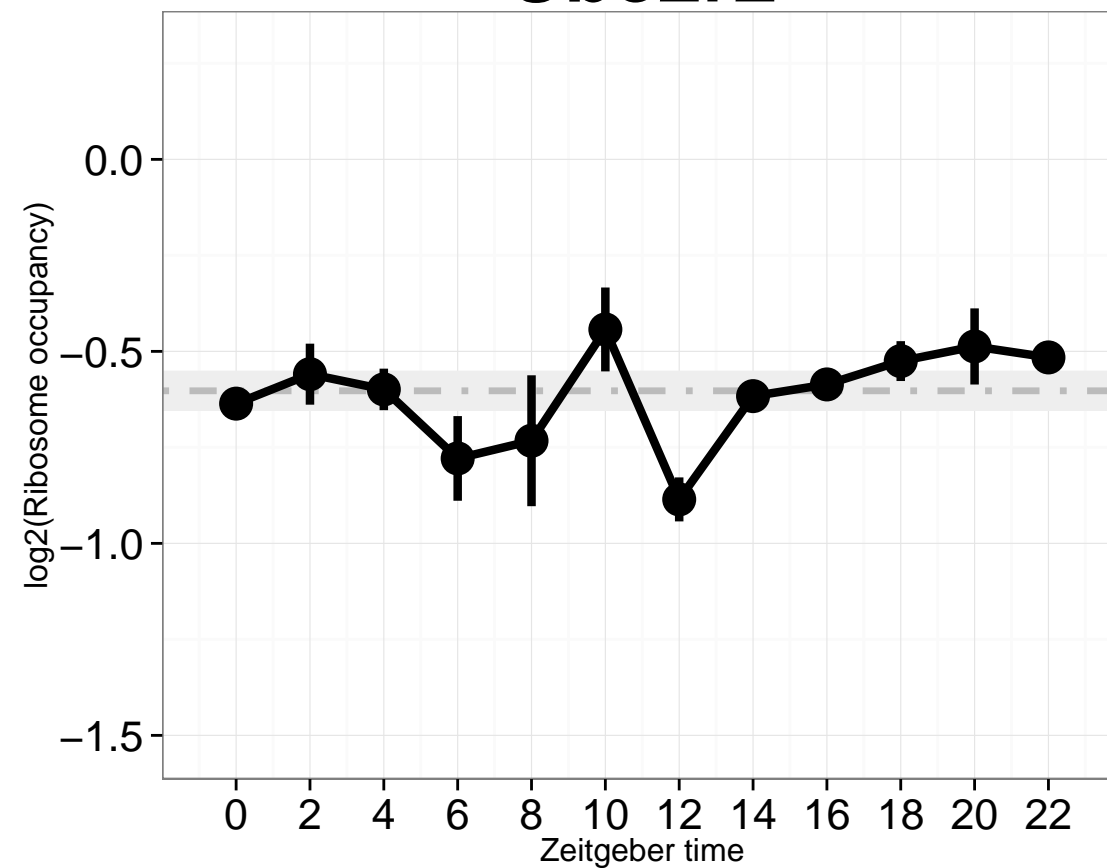

Supplement: SuppDataset_1.zip [file Ube2r2_set_A.pdf › Supplemental Dataset 1/A-mRNA_nonrhyth_translation_nonrhyth/Ube2r2_set_A.pdf]

## Ube2s

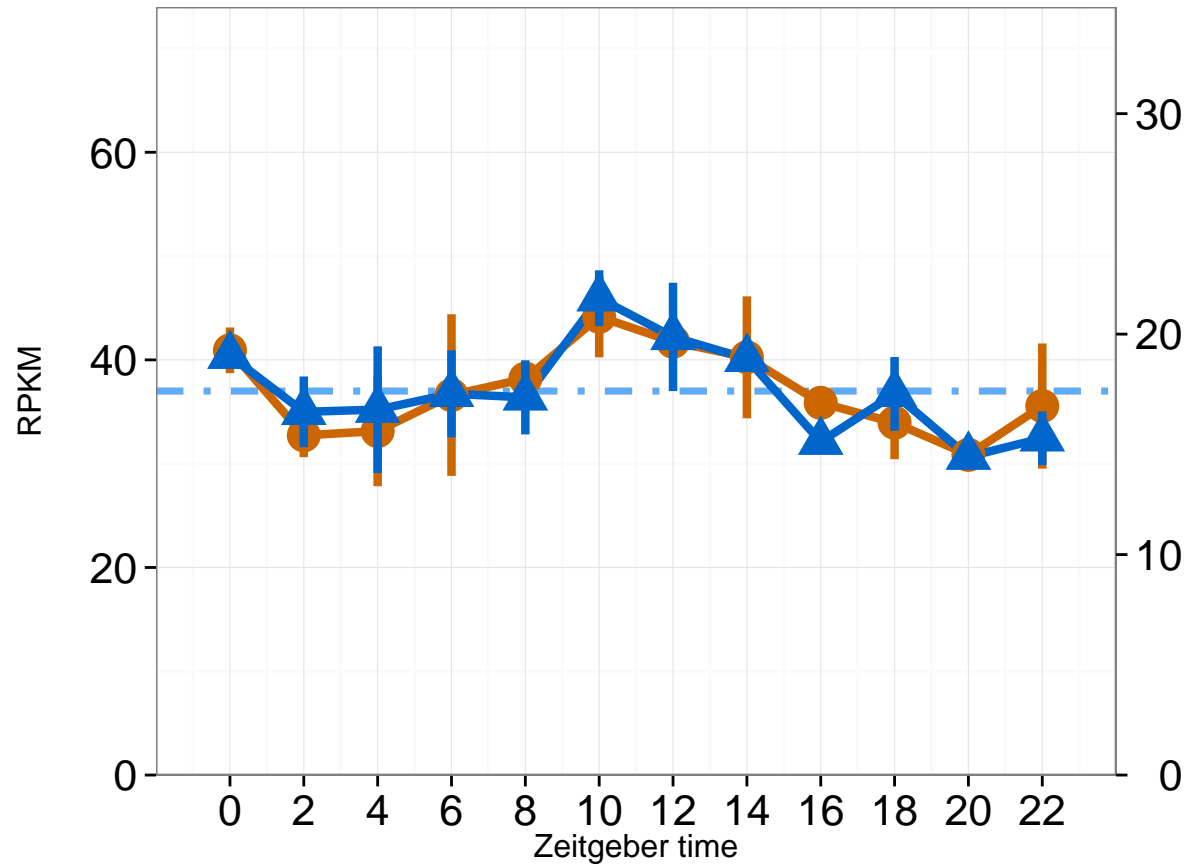

## Ube2s

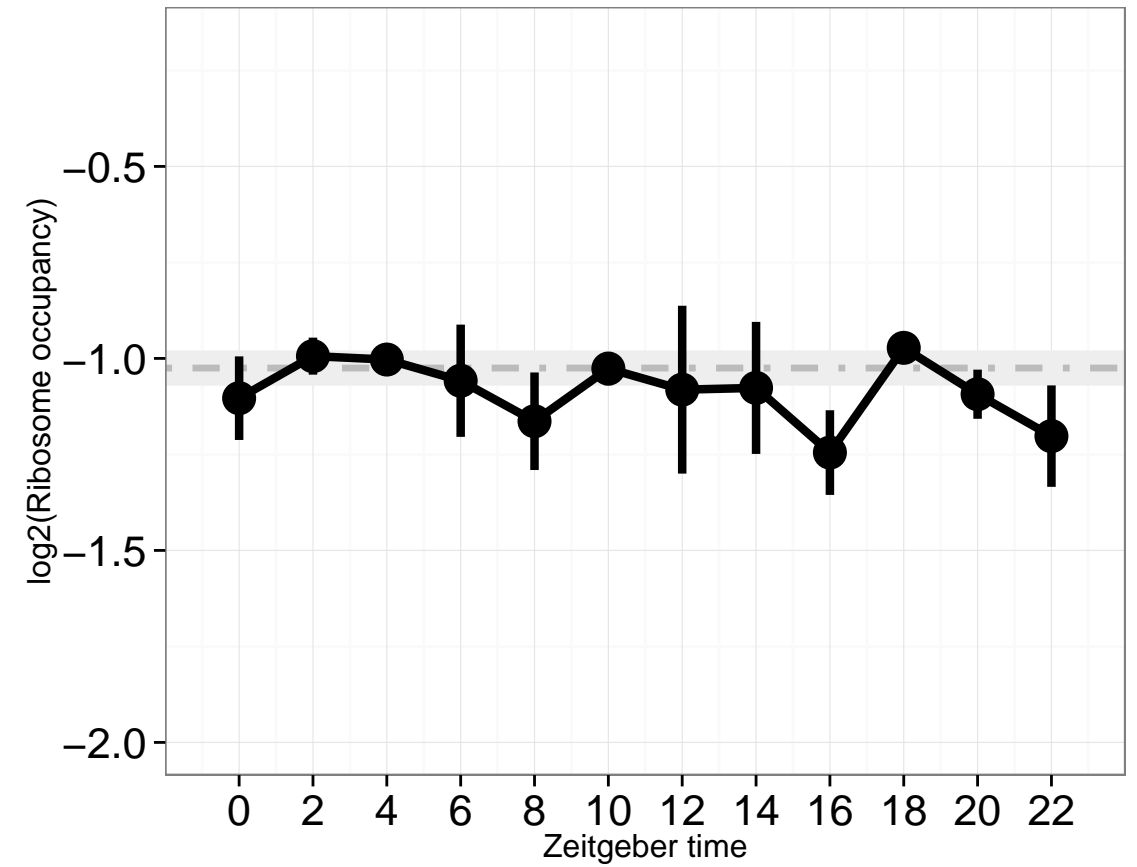

Supplement: SuppDataset_1.zip [file Ube2s_set_A.pdf › Supplemental Dataset 1/A-mRNA_nonrhyth_translation_nonrhyth/Ube2s_set_A.pdf]

**Ube2t TR**

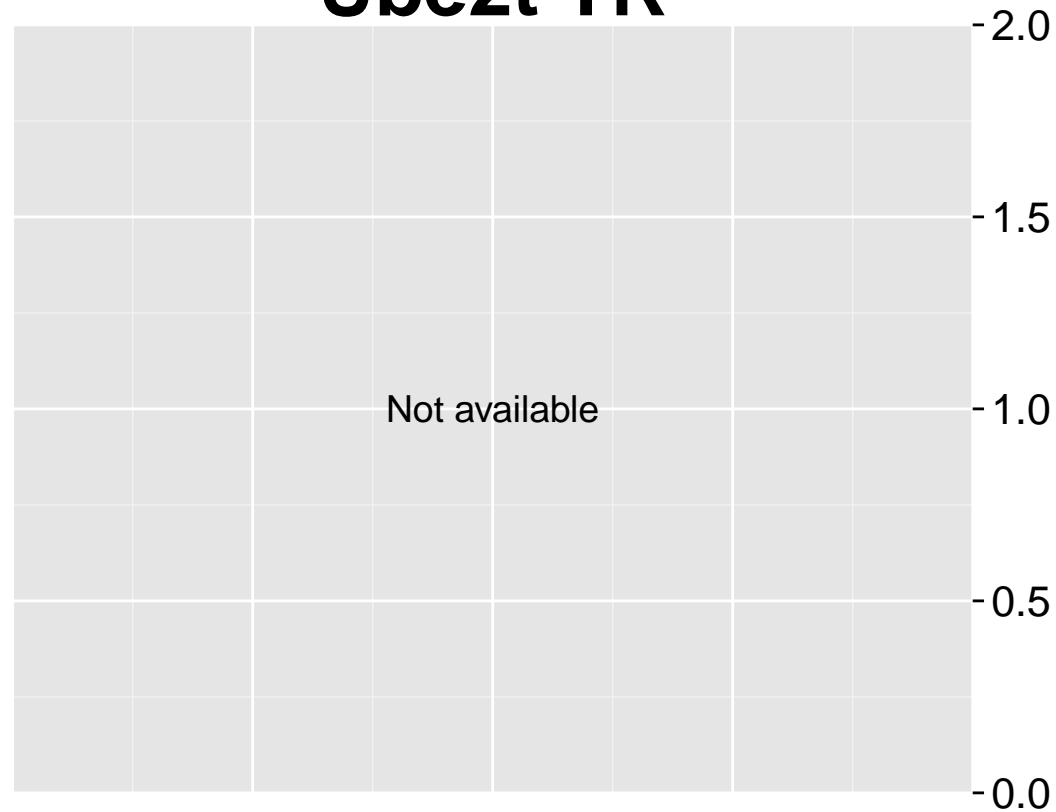

**Ube2t log2(Ribosome occupancy**

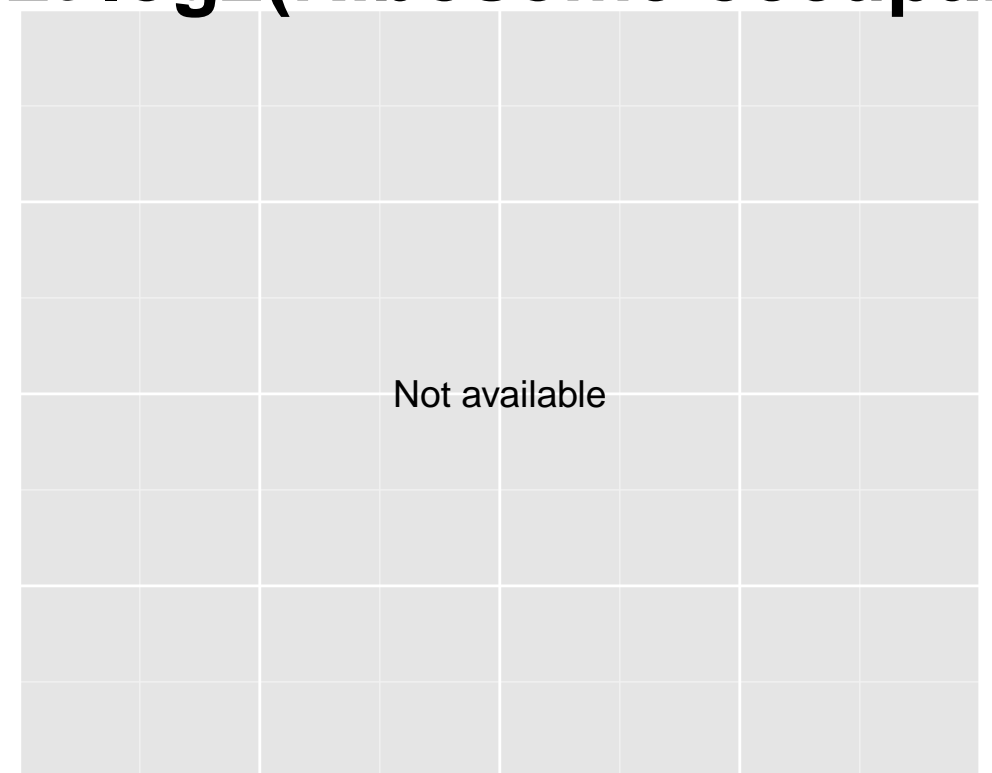

Supplement: SuppDataset_1.zip [file Ube2t_set_A.pdf › Supplemental Dataset 1/A-mRNA_nonrhyth_translation_nonrhyth/Ube2t_set_A.pdf]

# Ube2v1

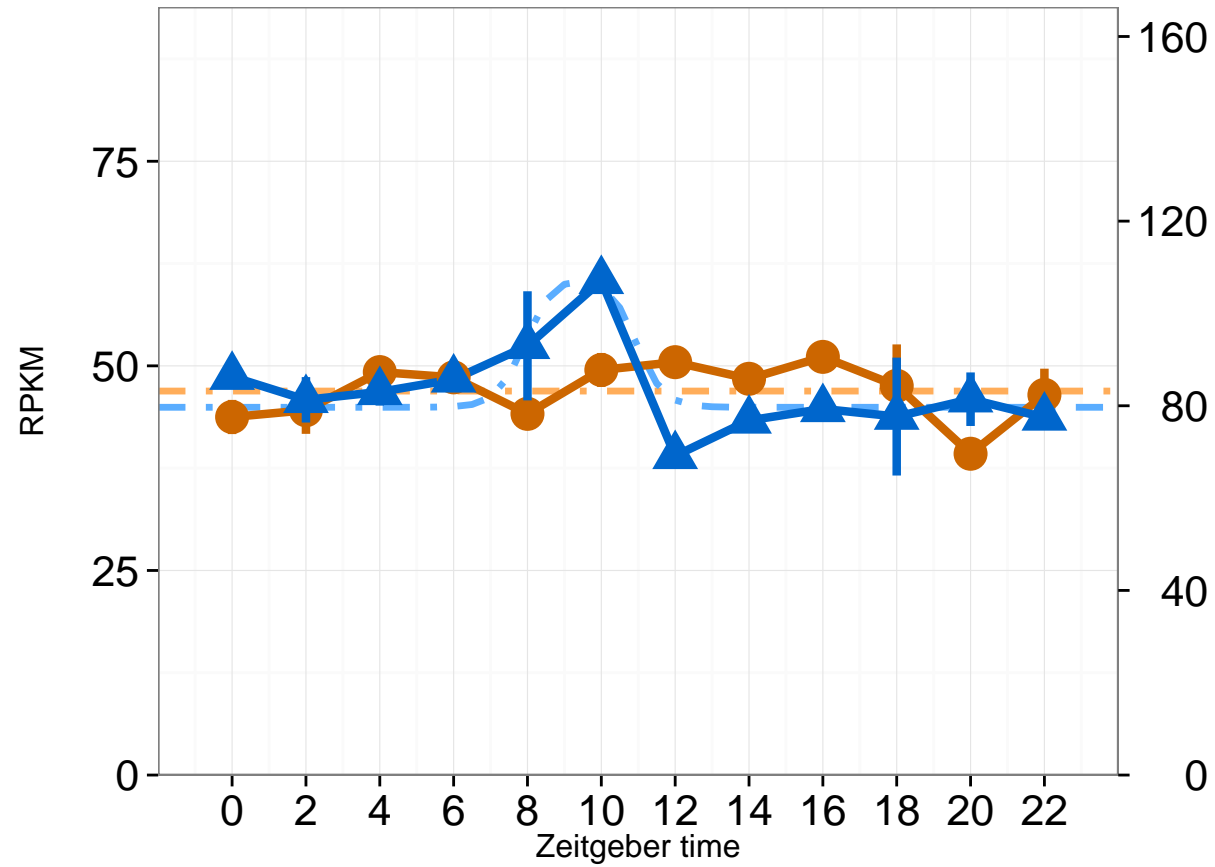

# Ube2v1

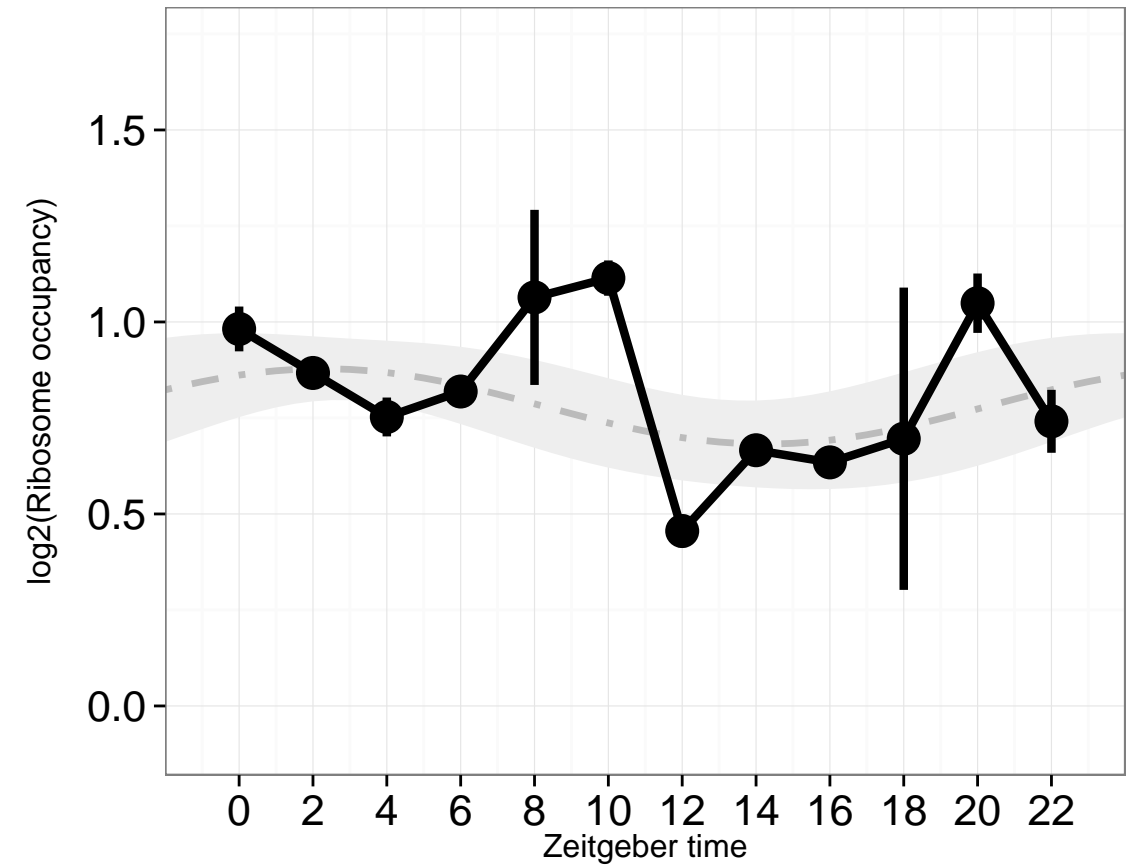

Supplement: SuppDataset_1.zip [file Ube2v1_set_A.pdf › Supplemental Dataset 1/A-mRNA_nonrhyth_translation_nonrhyth/Ube2v1_set_A.pdf]

## Ube2v2

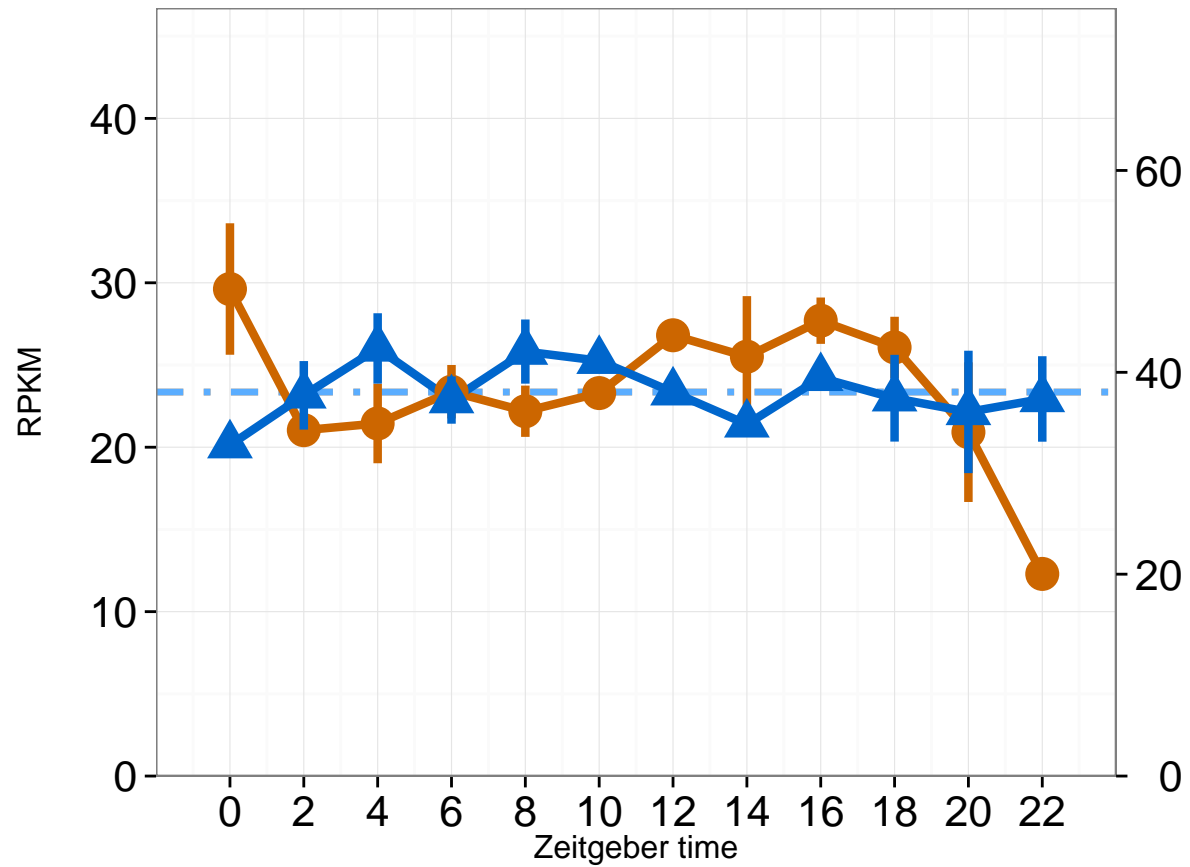

## Ube2v2

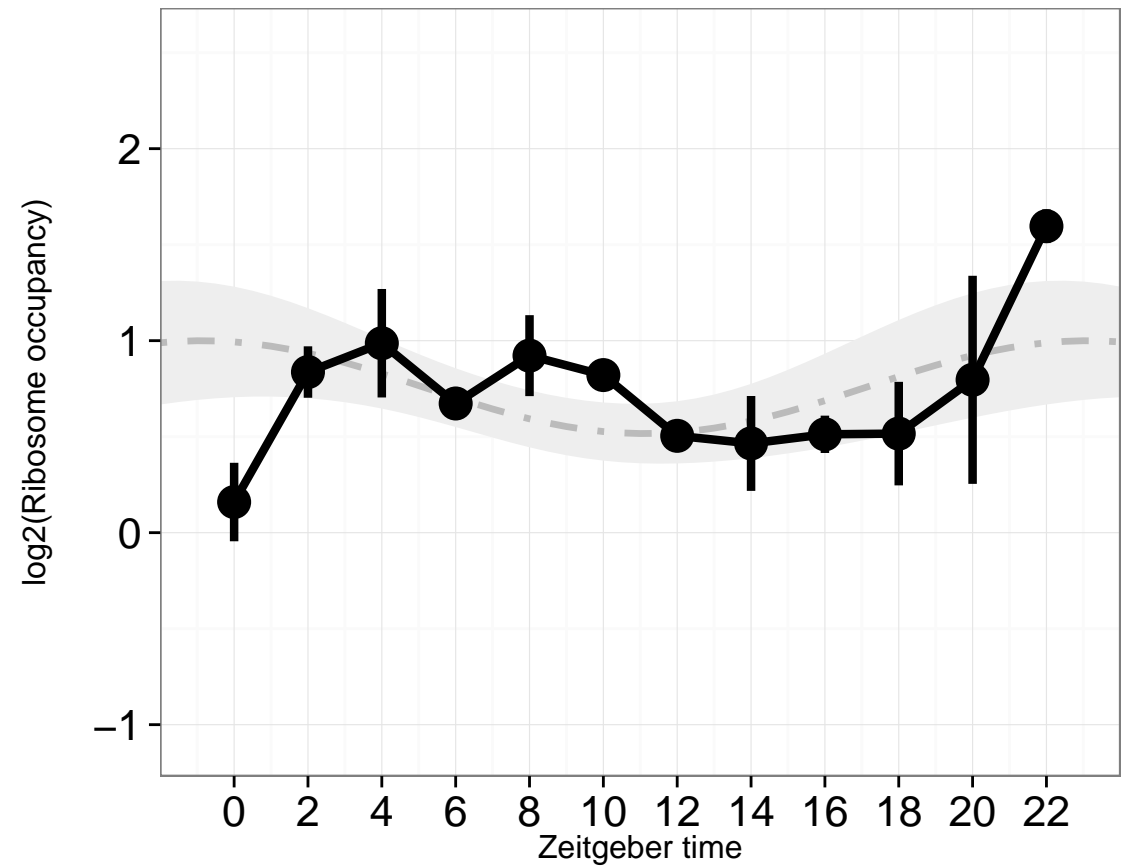

Supplement: SuppDataset_1.zip [file Ube2v2_set_A.pdf › Supplemental Dataset 1/A-mRNA_nonrhyth_translation_nonrhyth/Ube2v2_set_A.pdf]

## Ube2w

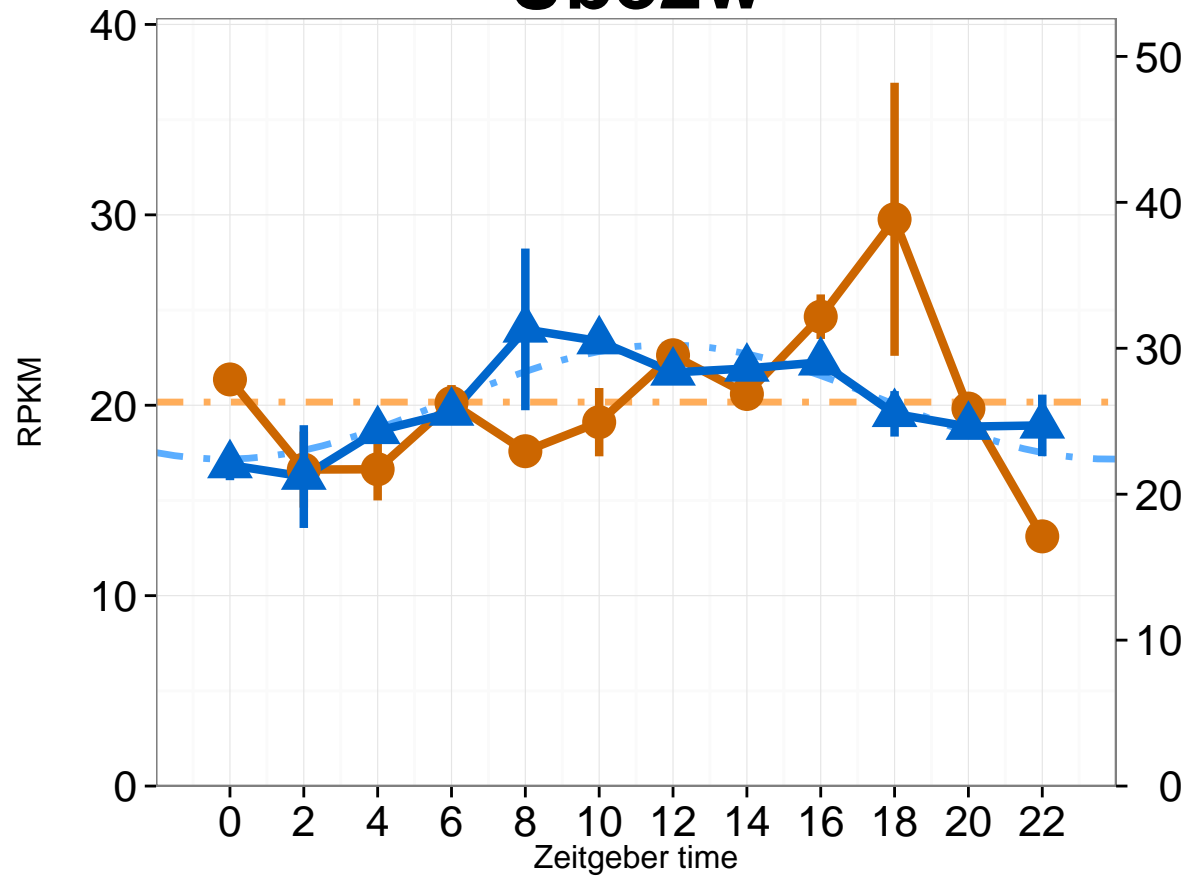

## Ube2w

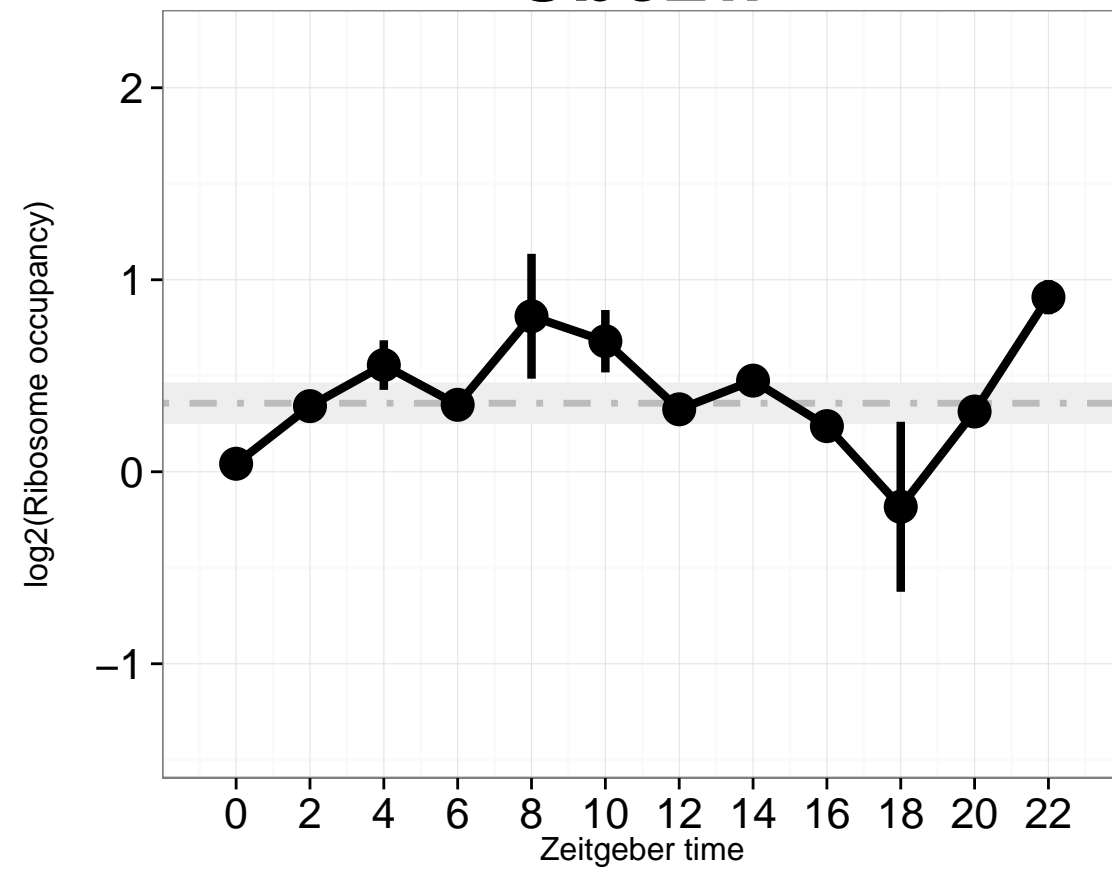

Supplement: SuppDataset_1.zip [file Ube2w_set_A.pdf › Supplemental Dataset 1/A-mRNA_nonrhyth_translation_nonrhyth/Ube2w_set_A.pdf]

## Ube2z

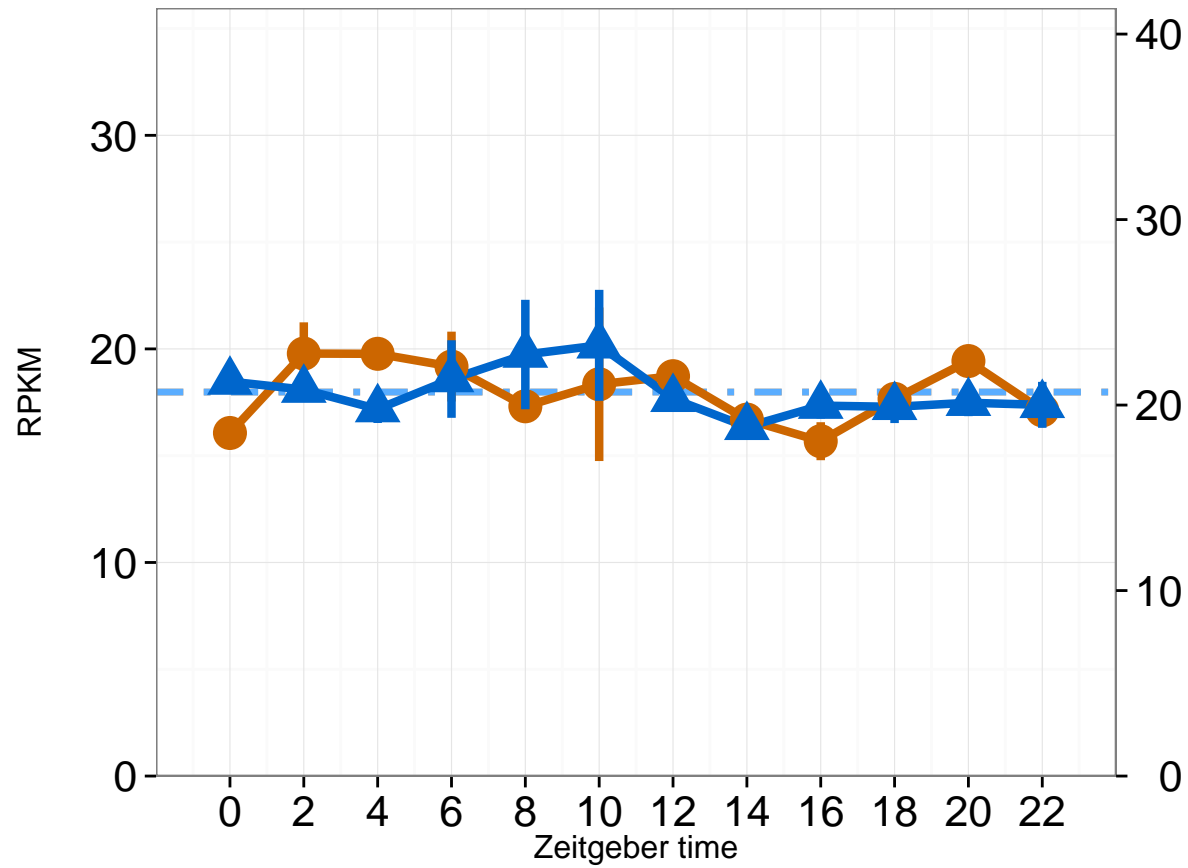

## Ube2z

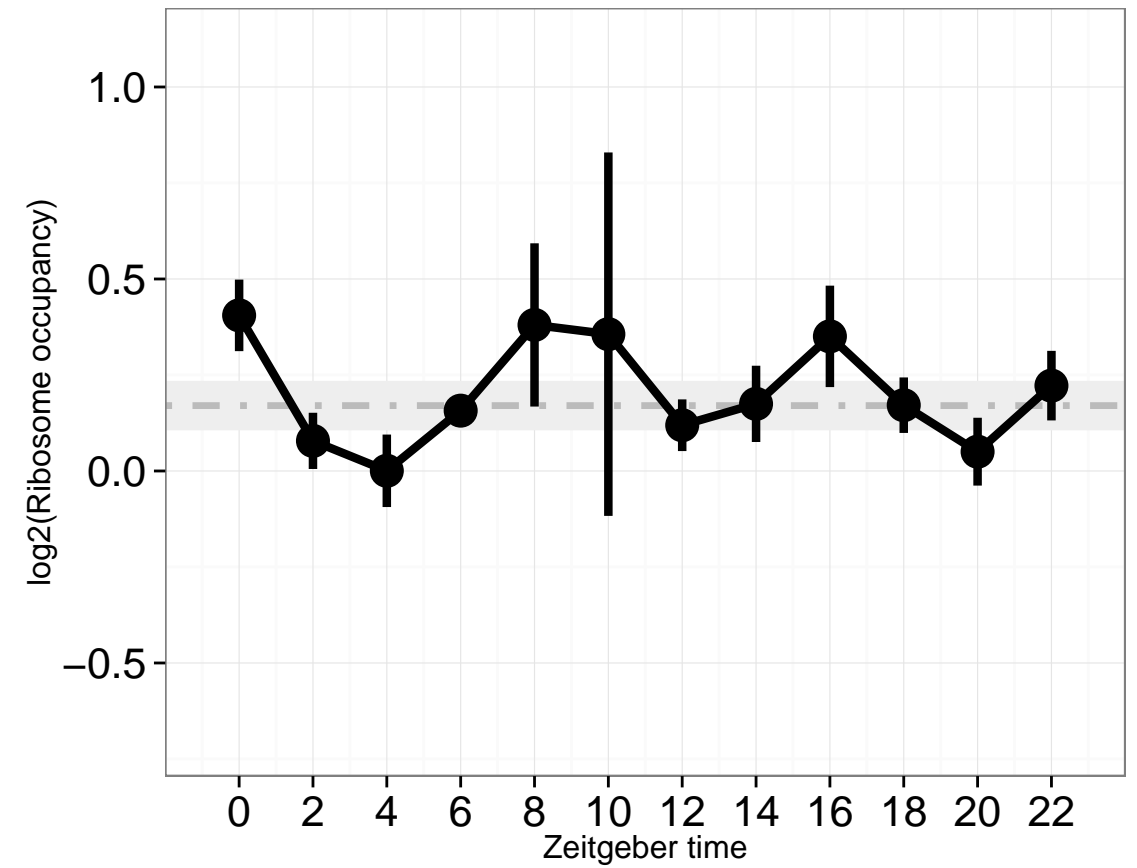

Supplement: SuppDataset_1.zip [file Ube2z_set_A.pdf › Supplemental Dataset 1/A-mRNA_nonrhyth_translation_nonrhyth/Ube2z_set_A.pdf]

## Ube3a

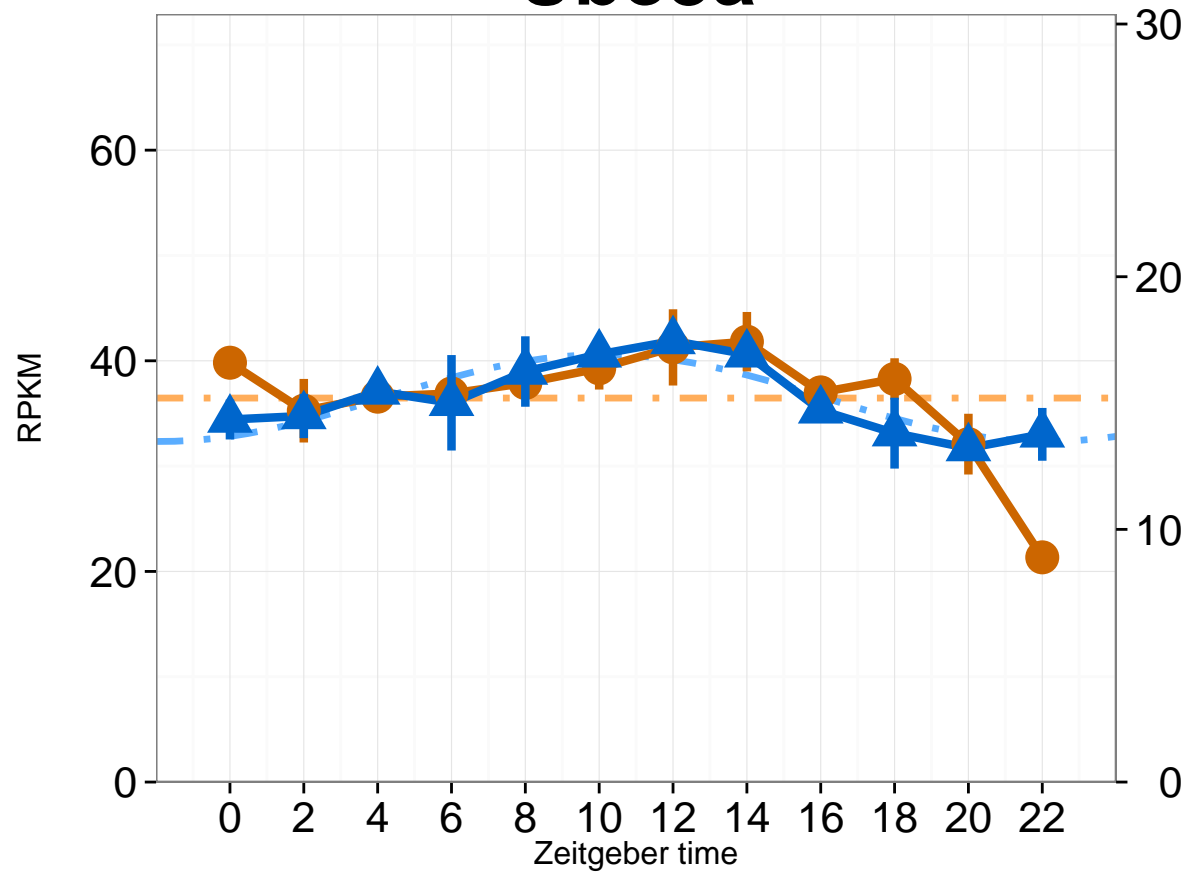

## Ube3a

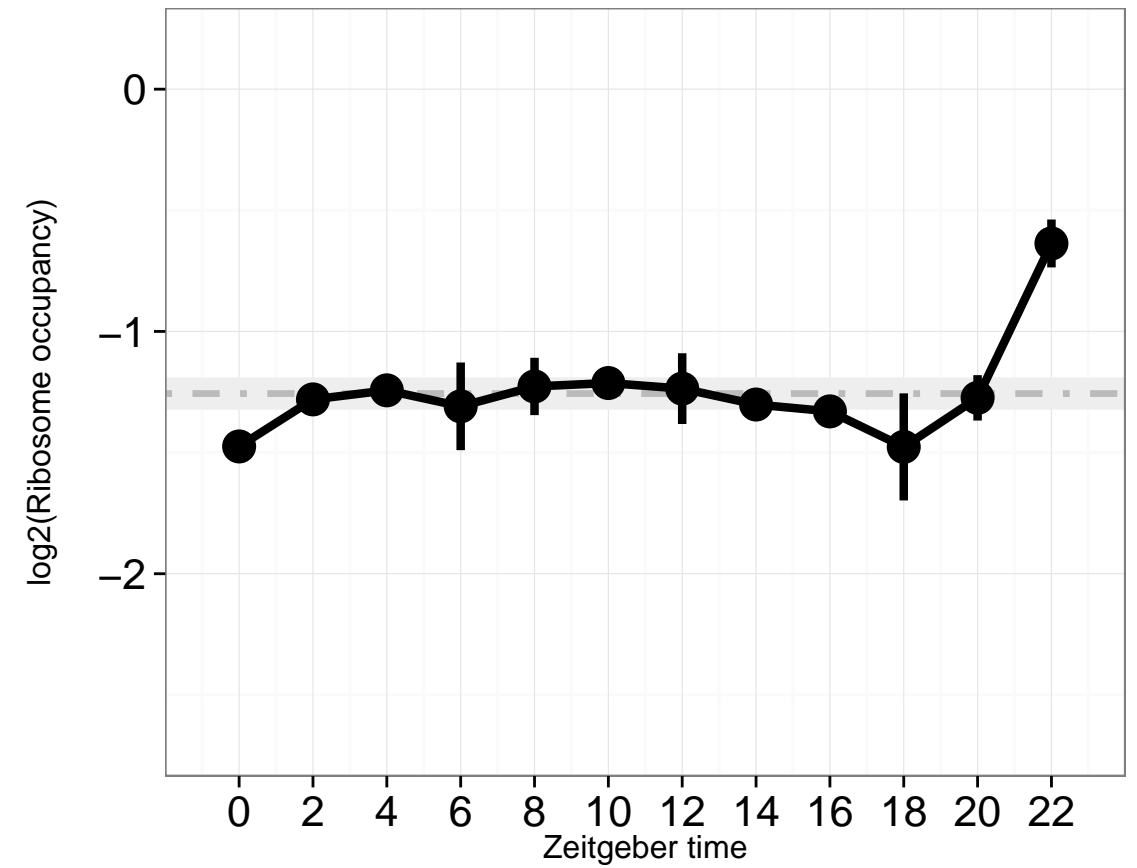

Supplement: SuppDataset_1.zip [file Ube3a_set_A.pdf › Supplemental Dataset 1/A-mRNA_nonrhyth_translation_nonrhyth/Ube3a_set_A.pdf]

## Ube3b

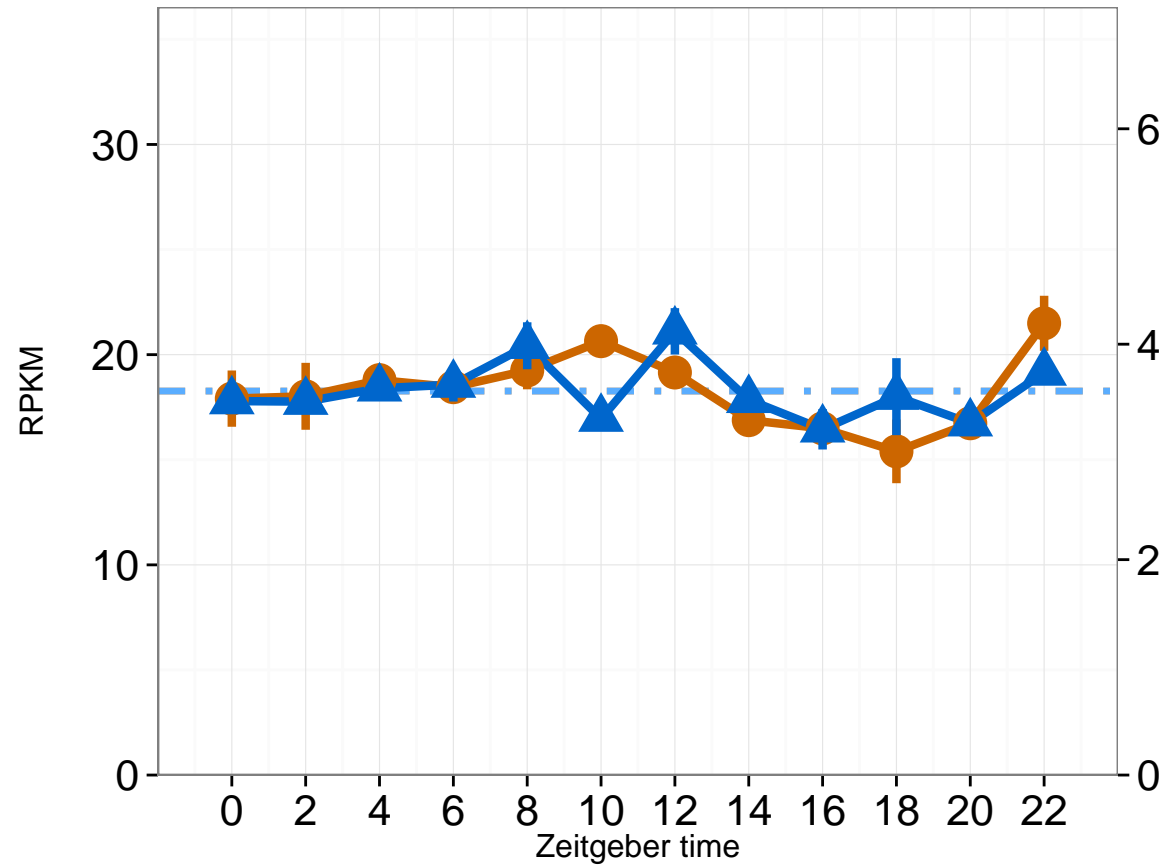

## Ube3b

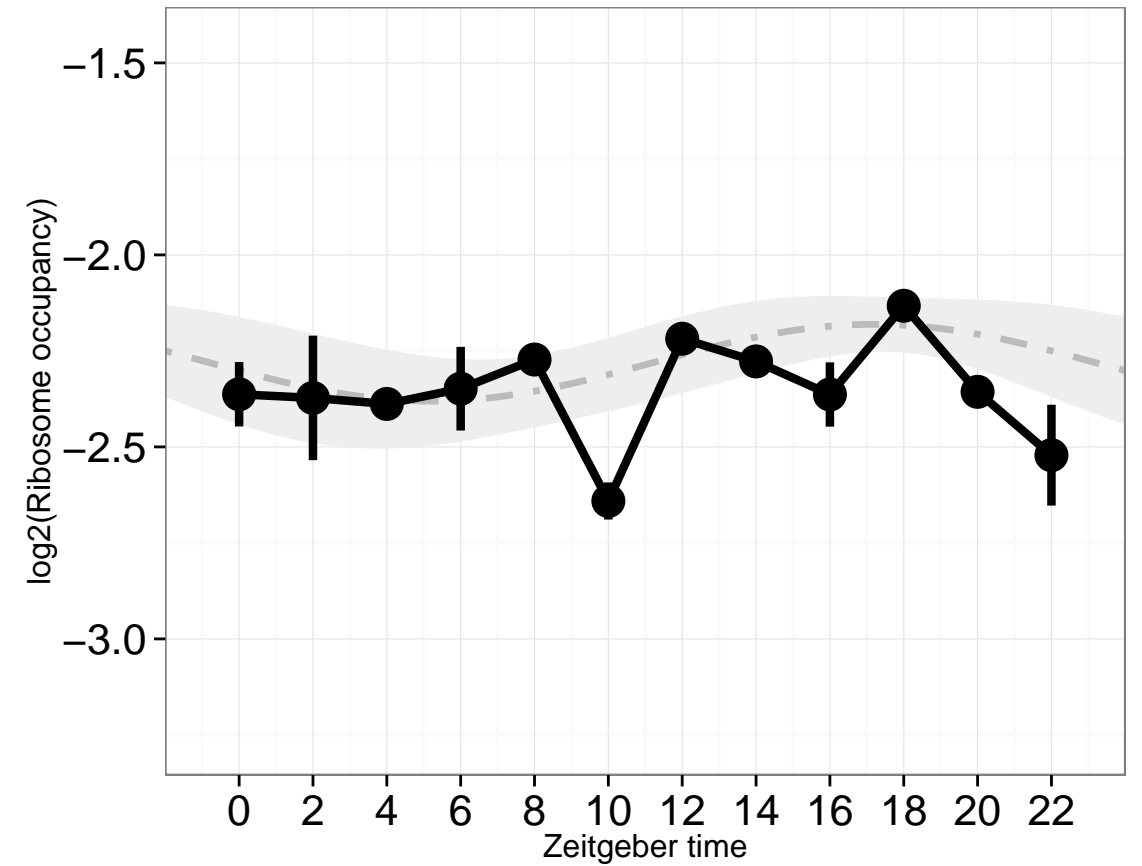

Supplement: SuppDataset_1.zip [file Ube3b_set_A.pdf › Supplemental Dataset 1/A-mRNA_nonrhyth_translation_nonrhyth/Ube3b_set_A.pdf]

## Ube3c

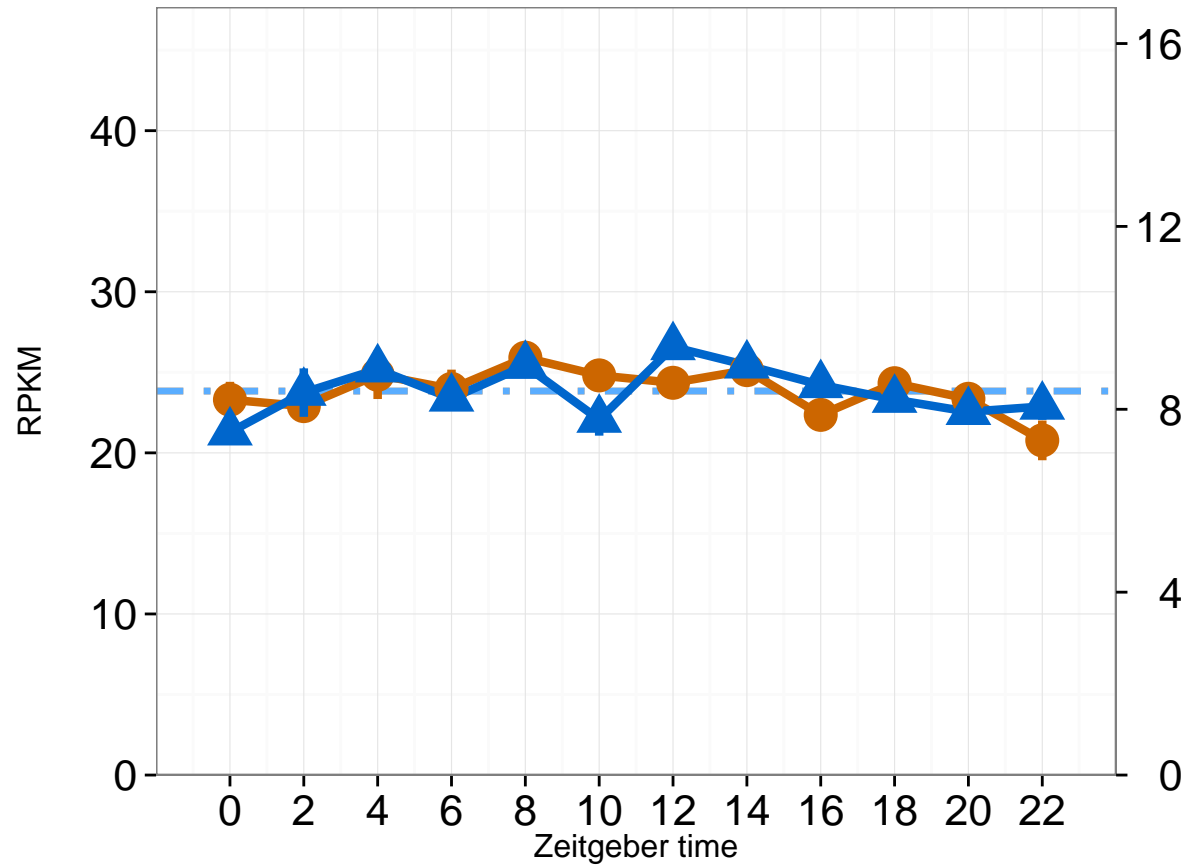

## Ube3c

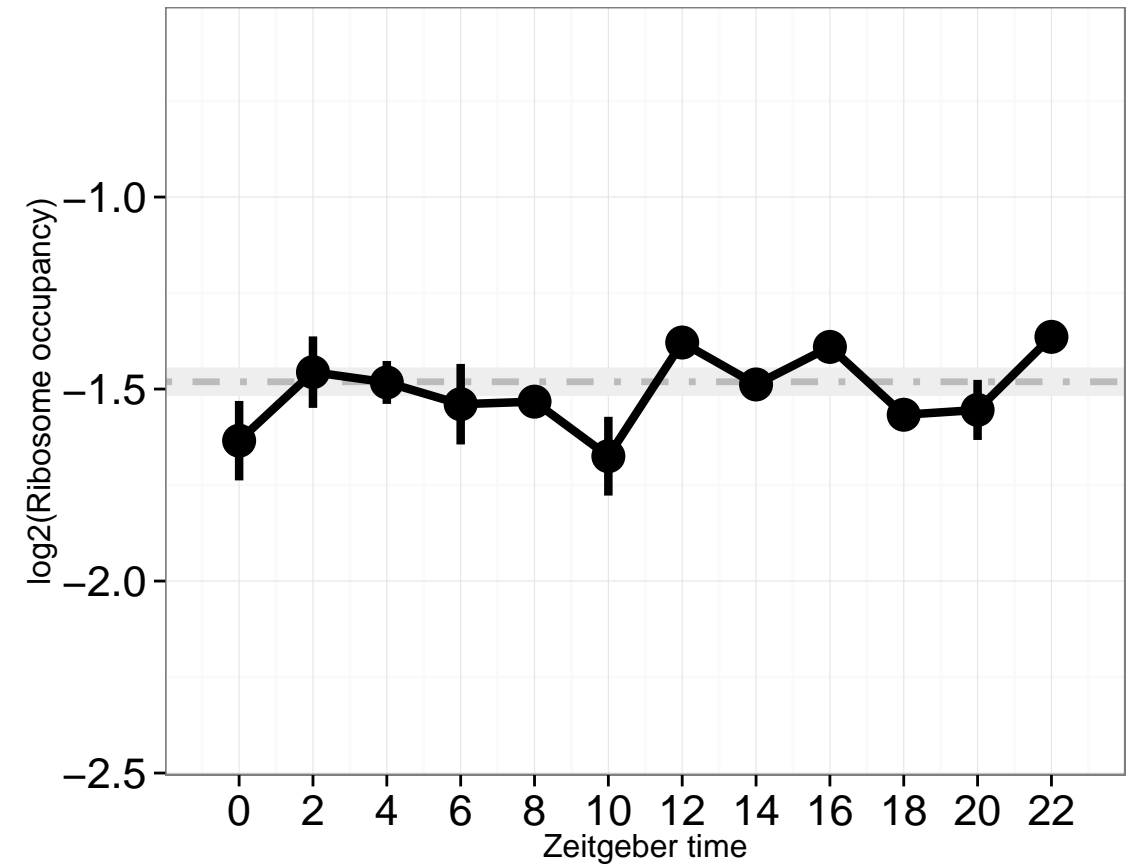

Supplement: SuppDataset_1.zip [file Ube3c_set_A.pdf › Supplemental Dataset 1/A-mRNA_nonrhyth_translation_nonrhyth/Ube3c_set_A.pdf]

## Ube4a

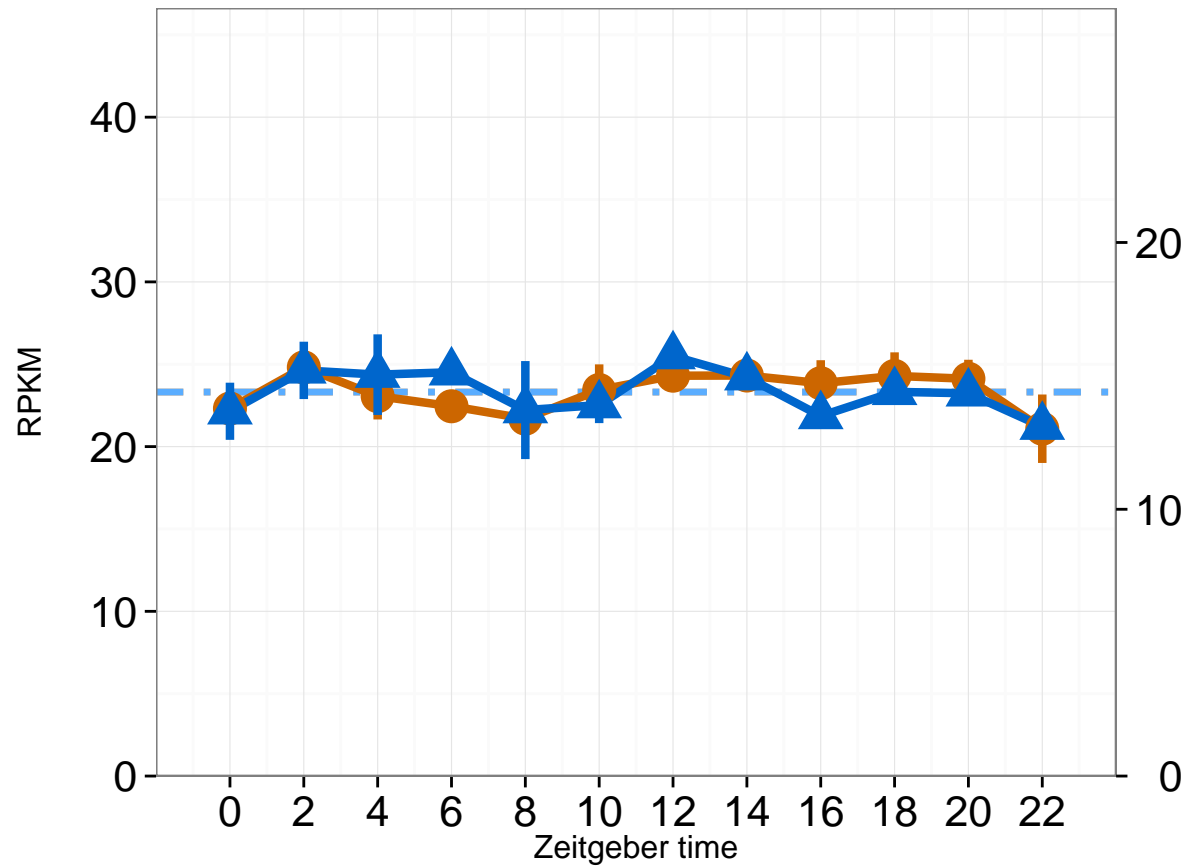

## Ube4a

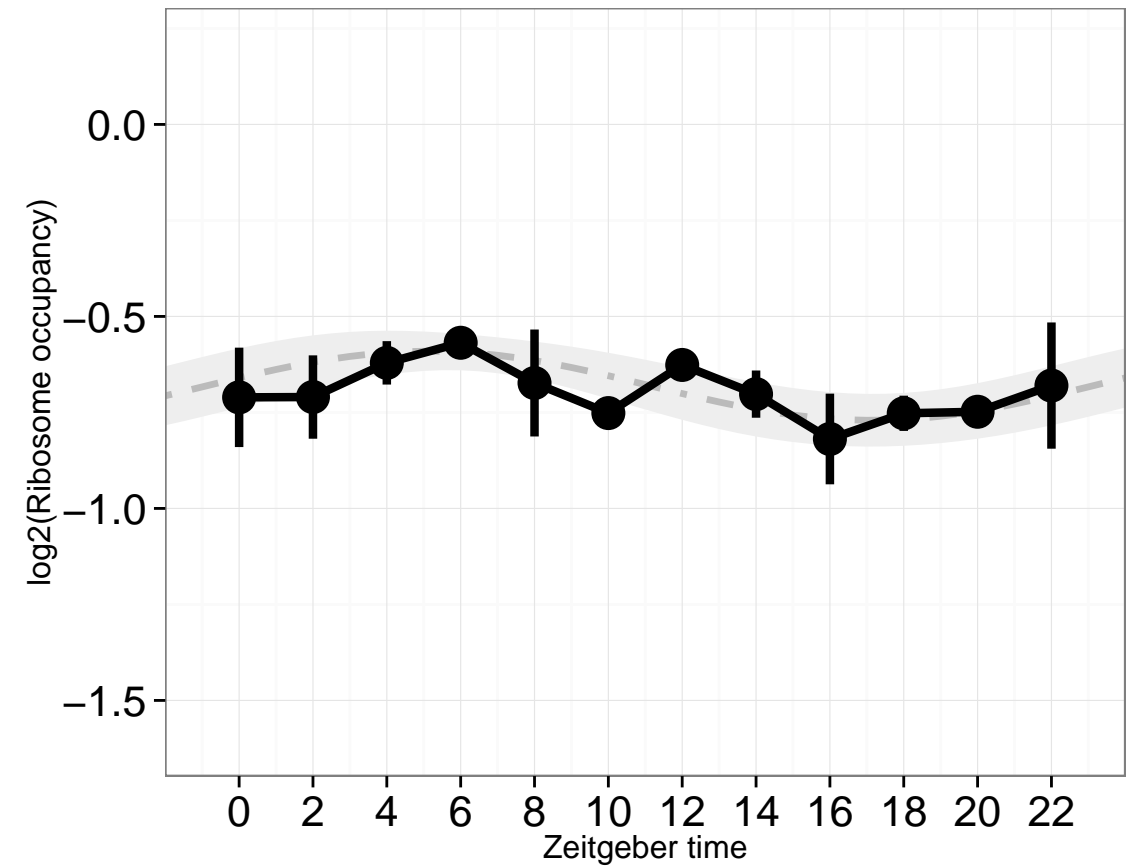

Supplement: SuppDataset_1.zip [file Ube4a_set_A.pdf › Supplemental Dataset 1/A-mRNA_nonrhyth_translation_nonrhyth/Ube4a_set_A.pdf]

## Ube4b

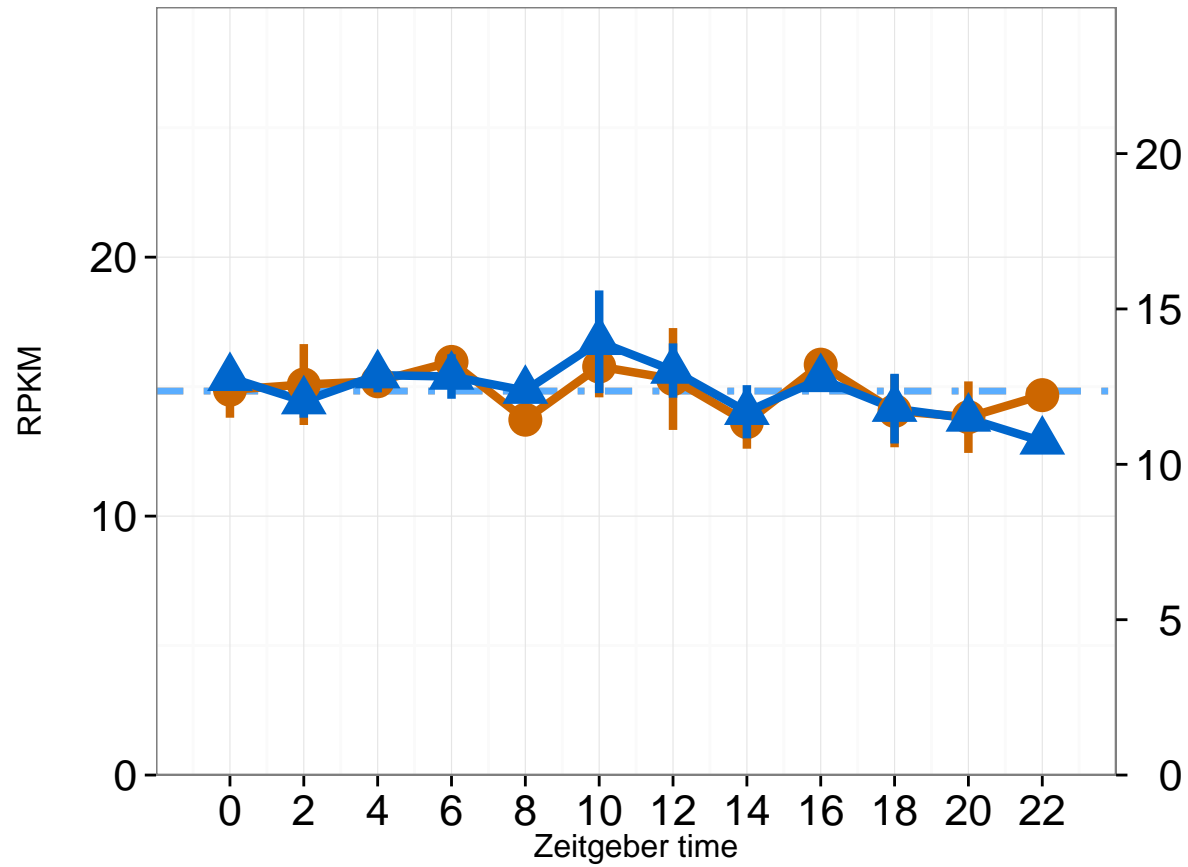

## Ube4b

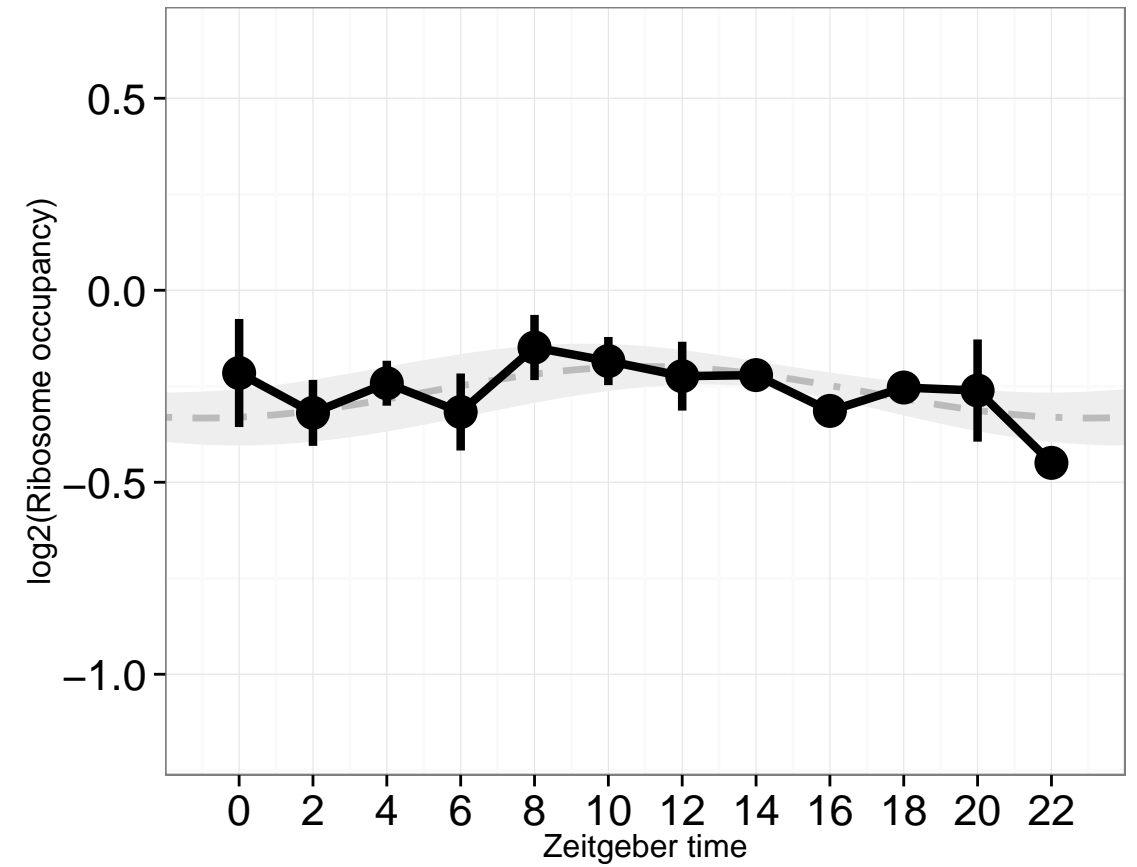

Supplement: SuppDataset_1.zip [file Ube4b_set_A.pdf › Supplemental Dataset 1/A-mRNA_nonrhyth_translation_nonrhyth/Ube4b_set_A.pdf]

## Ubfd1

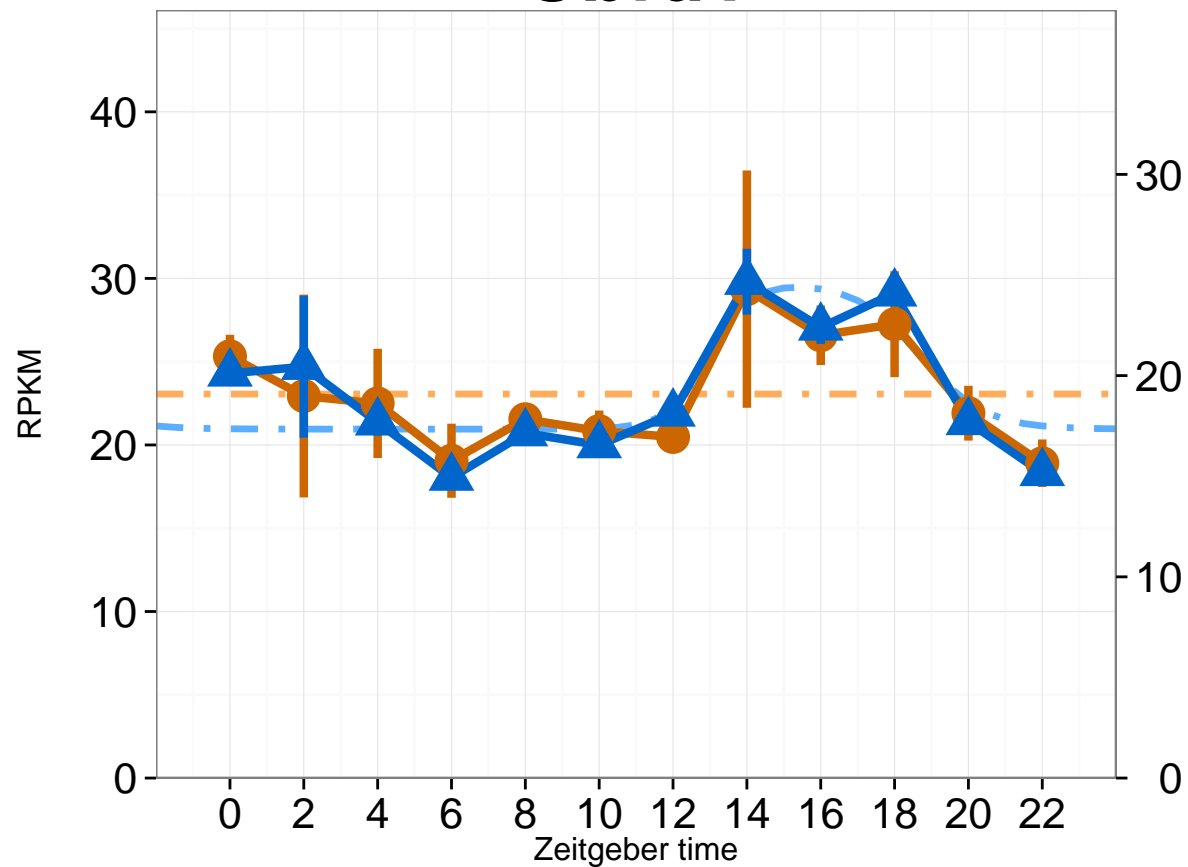

## Ubfd1

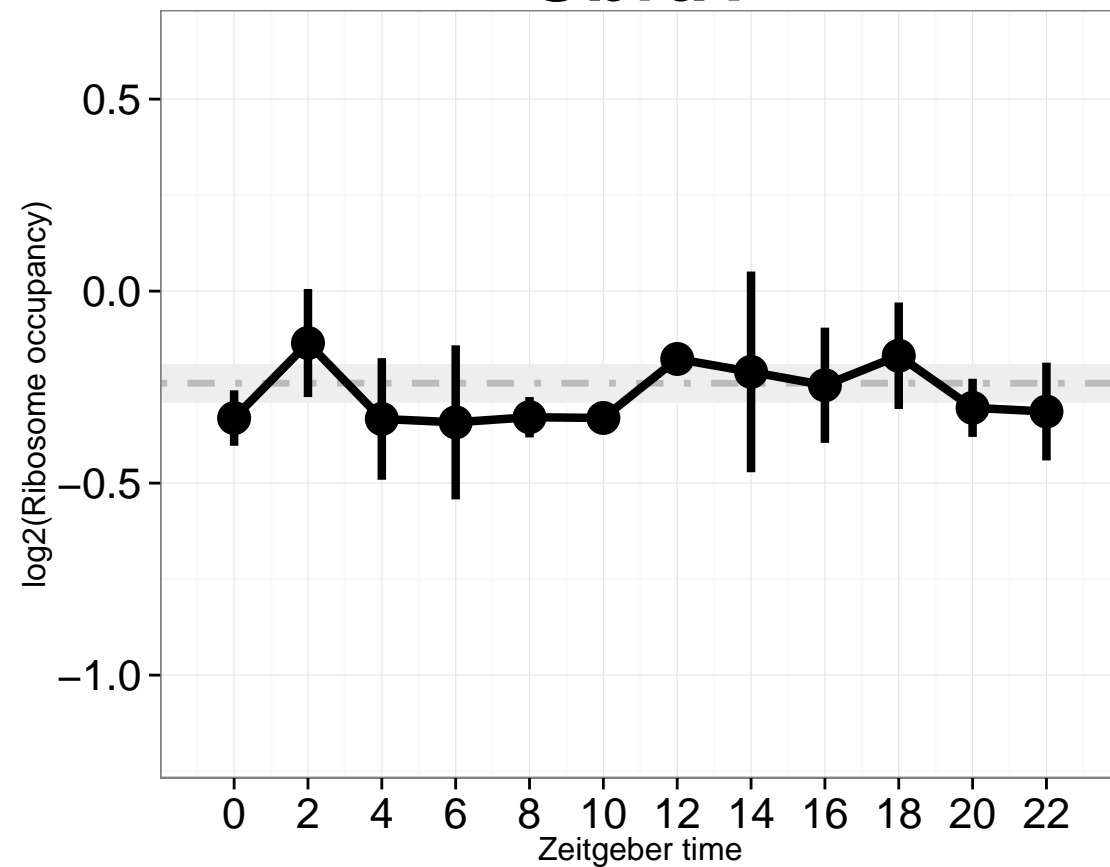

Supplement: SuppDataset_1.zip [file Ubfd1_set_A.pdf › Supplemental Dataset 1/A-mRNA_nonrhyth_translation_nonrhyth/Ubfd1_set_A.pdf]

## Ubiad1

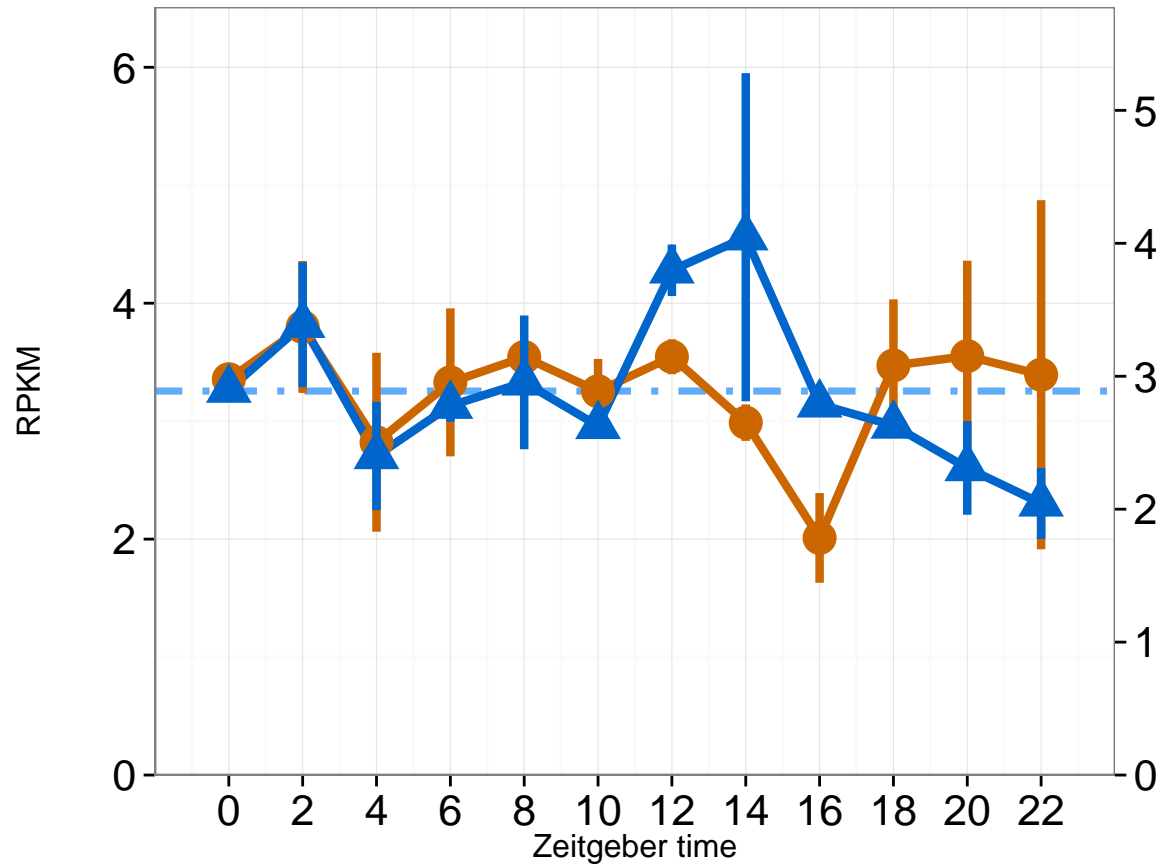

## Ubiad1

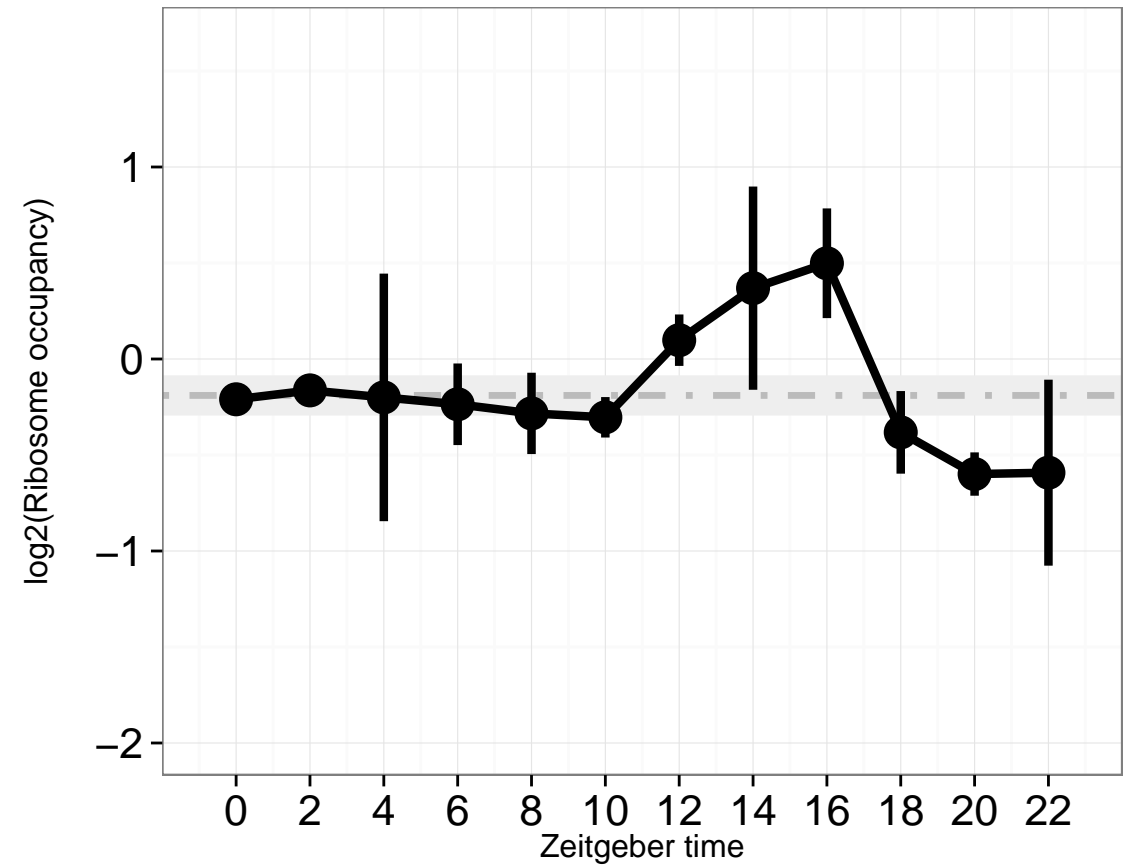

Supplement: SuppDataset_1.zip [file Ubiad1_set_A.pdf › Supplemental Dataset 1/A-mRNA_nonrhyth_translation_nonrhyth/Ubiad1_set_A.pdf]

## Ubl3

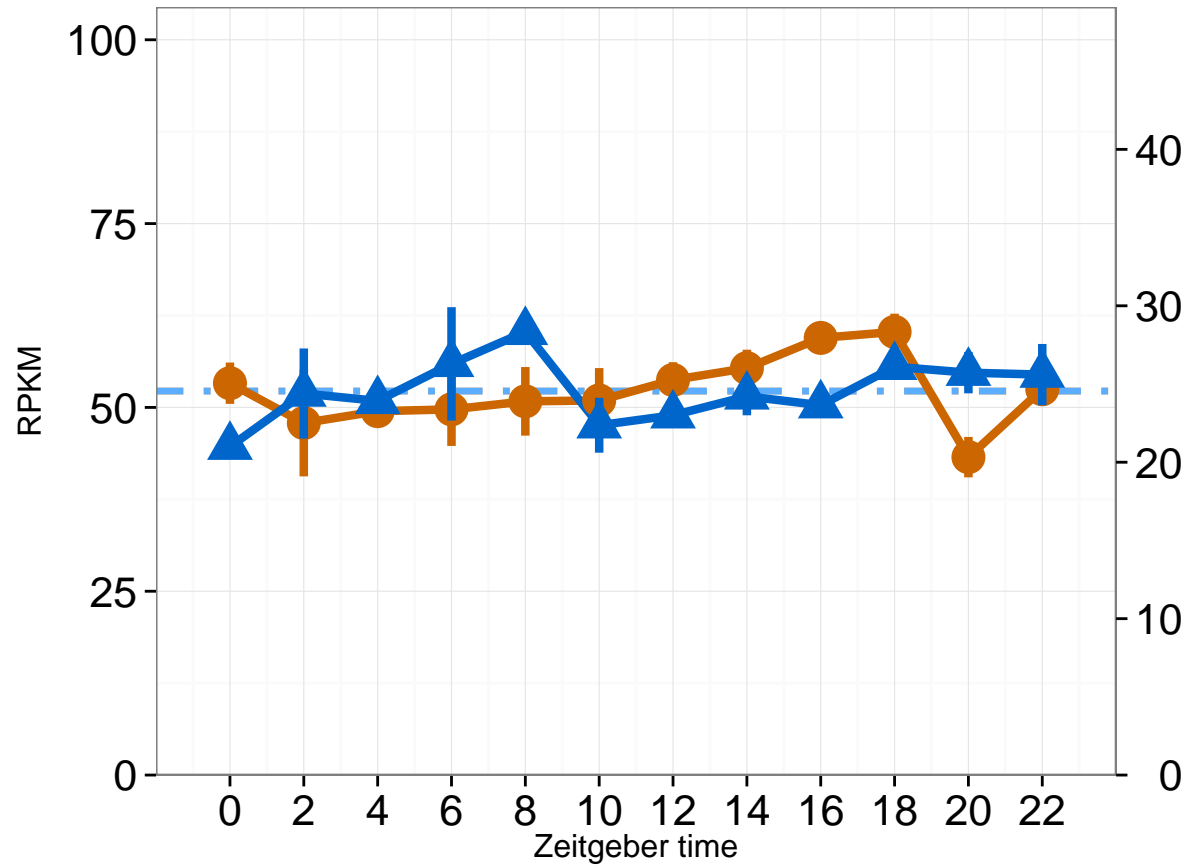

## Ubl3

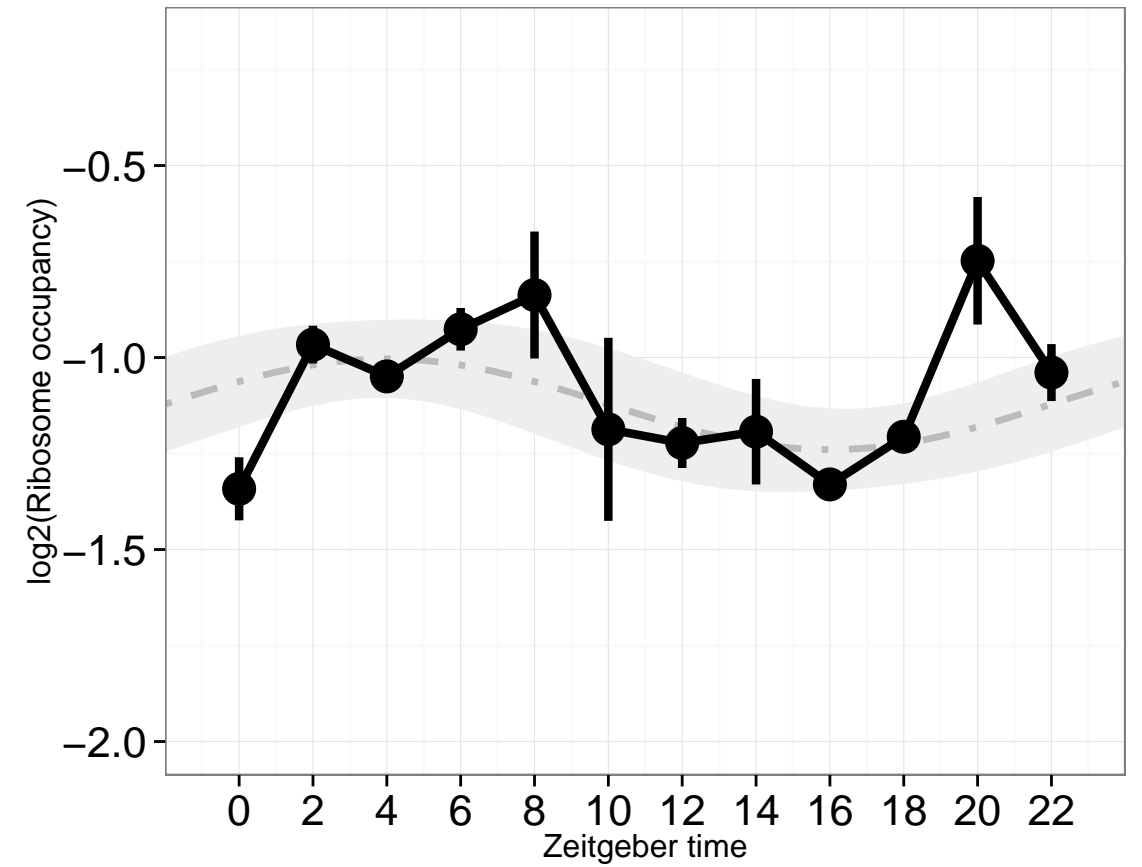

Supplement: SuppDataset_1.zip [file Ubl3_set_A.pdf › Supplemental Dataset 1/A-mRNA_nonrhyth_translation_nonrhyth/Ubl3_set_A.pdf]

## Ubl4

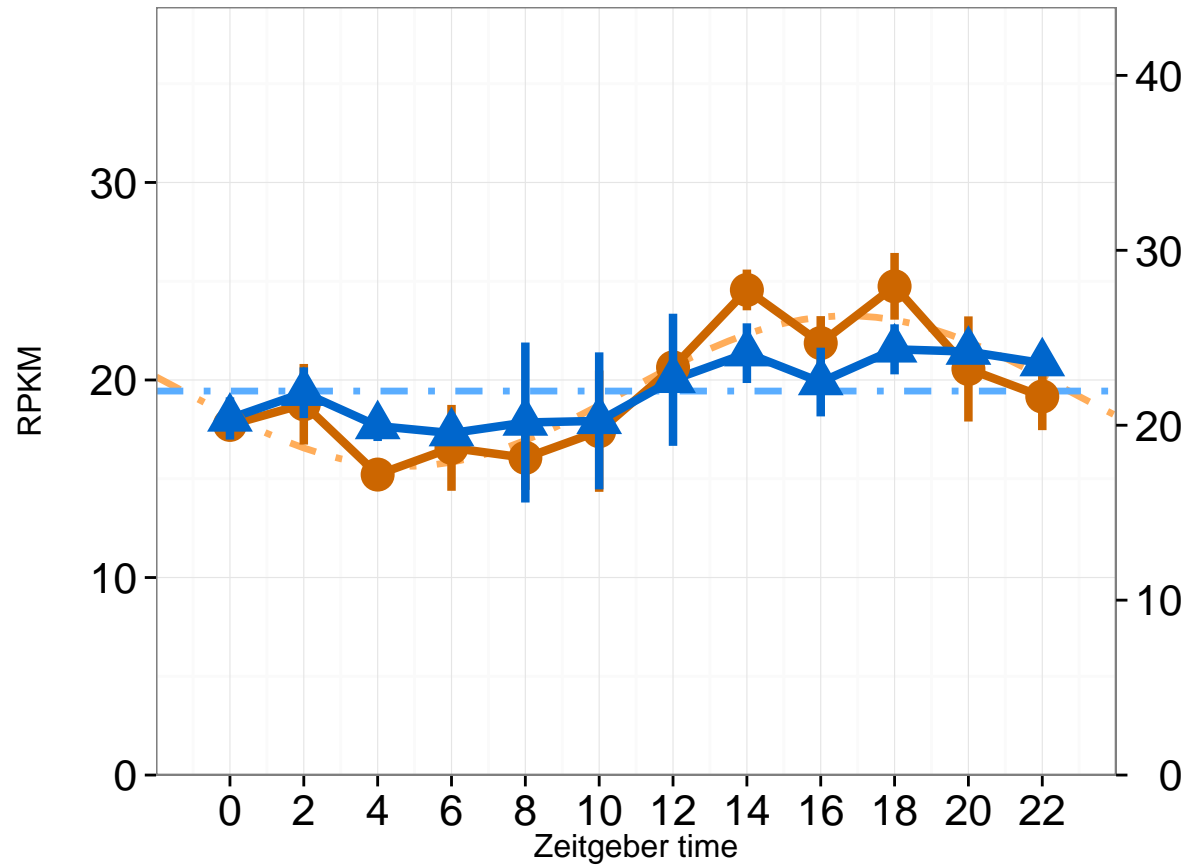

## Ubl4

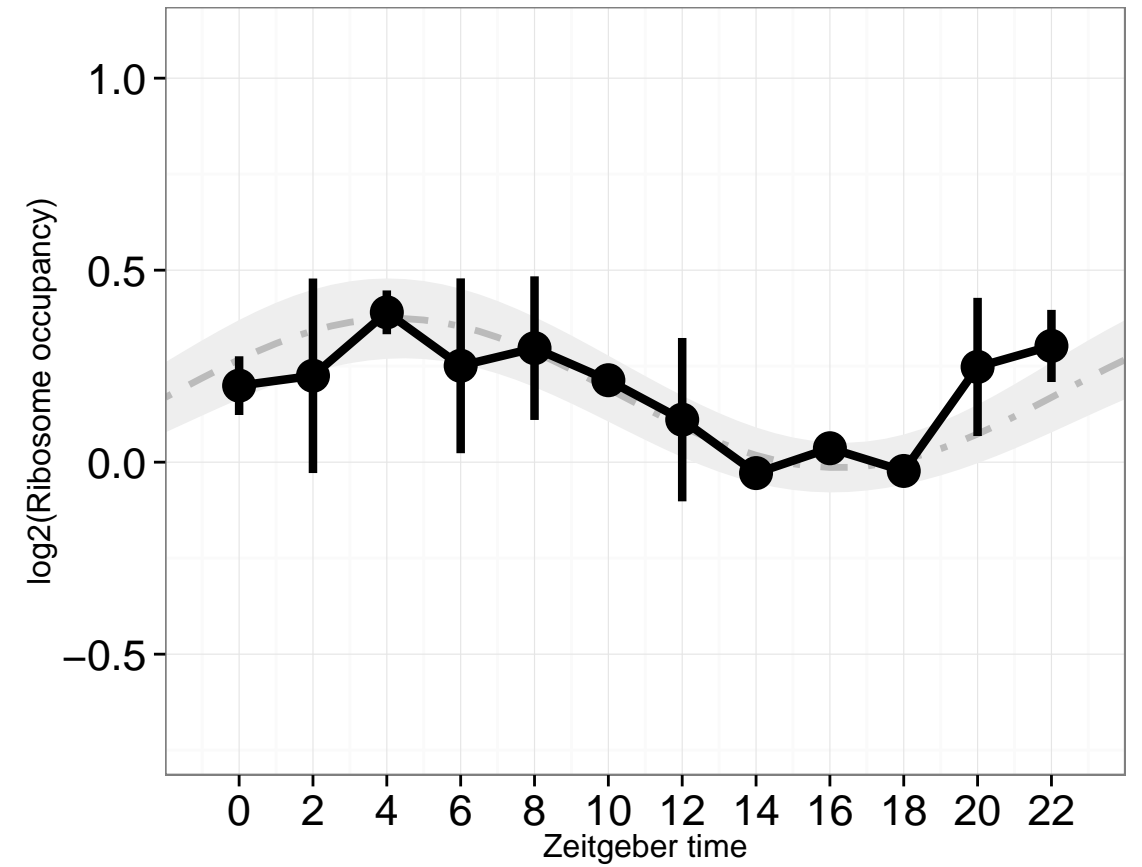

Supplement: SuppDataset_1.zip [file Ubl4_set_A.pdf › Supplemental Dataset 1/A-mRNA_nonrhyth_translation_nonrhyth/Ubl4_set_A.pdf]

## Ubl5

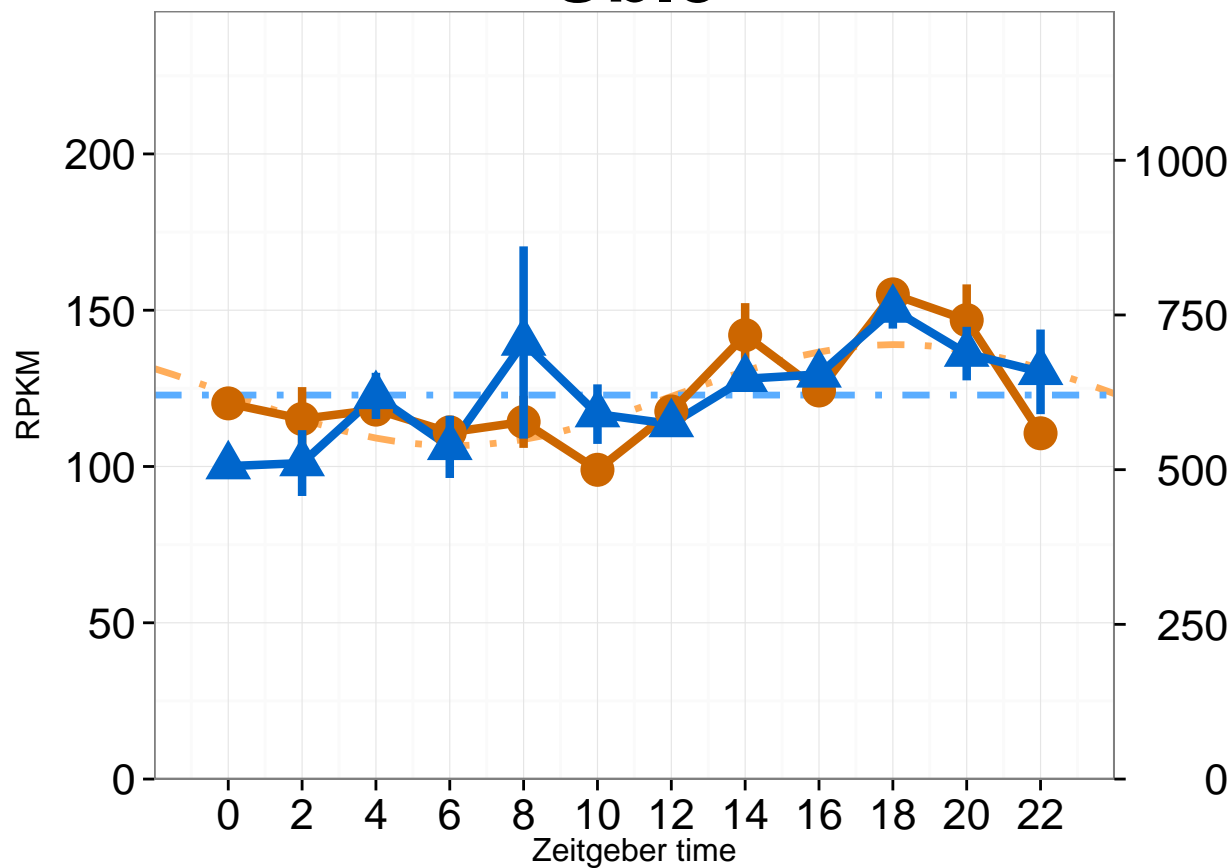

## Ubl5

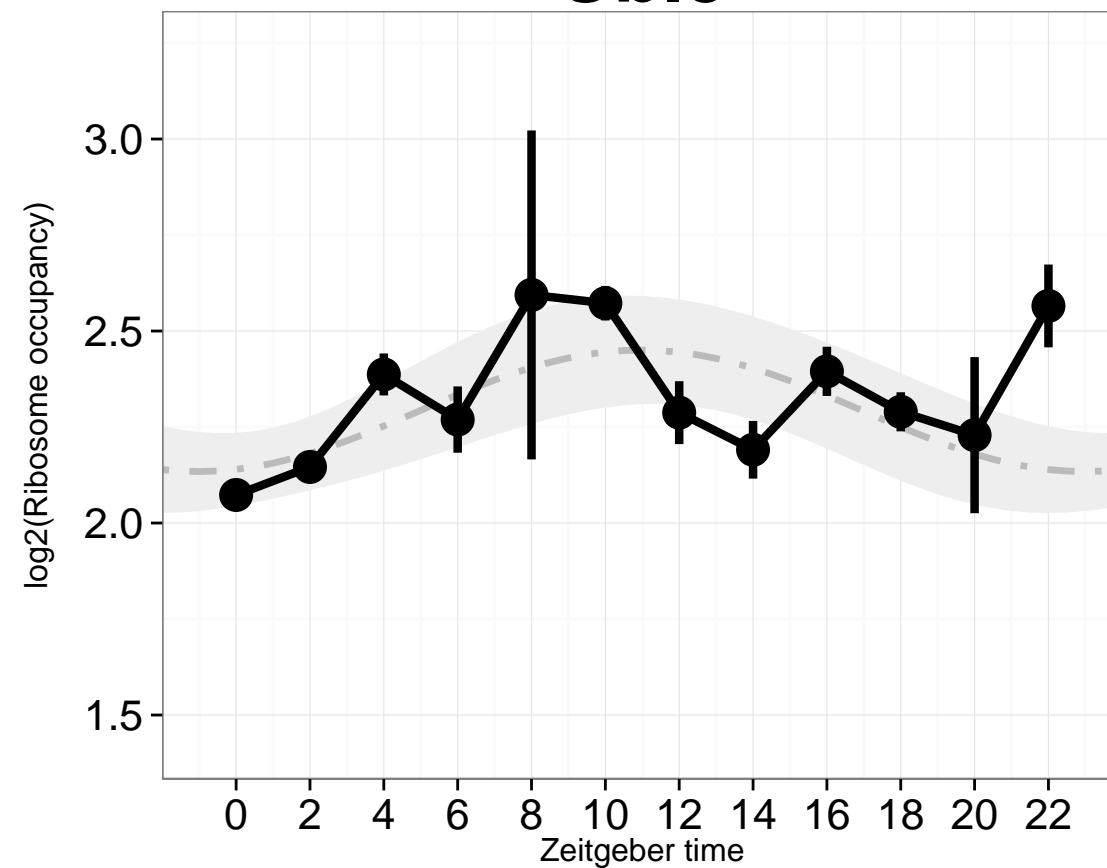

Supplement: SuppDataset_1.zip [file Ubl5_set_A.pdf › Supplemental Dataset 1/A-mRNA_nonrhyth_translation_nonrhyth/Ubl5_set_A.pdf]

## Ubl7

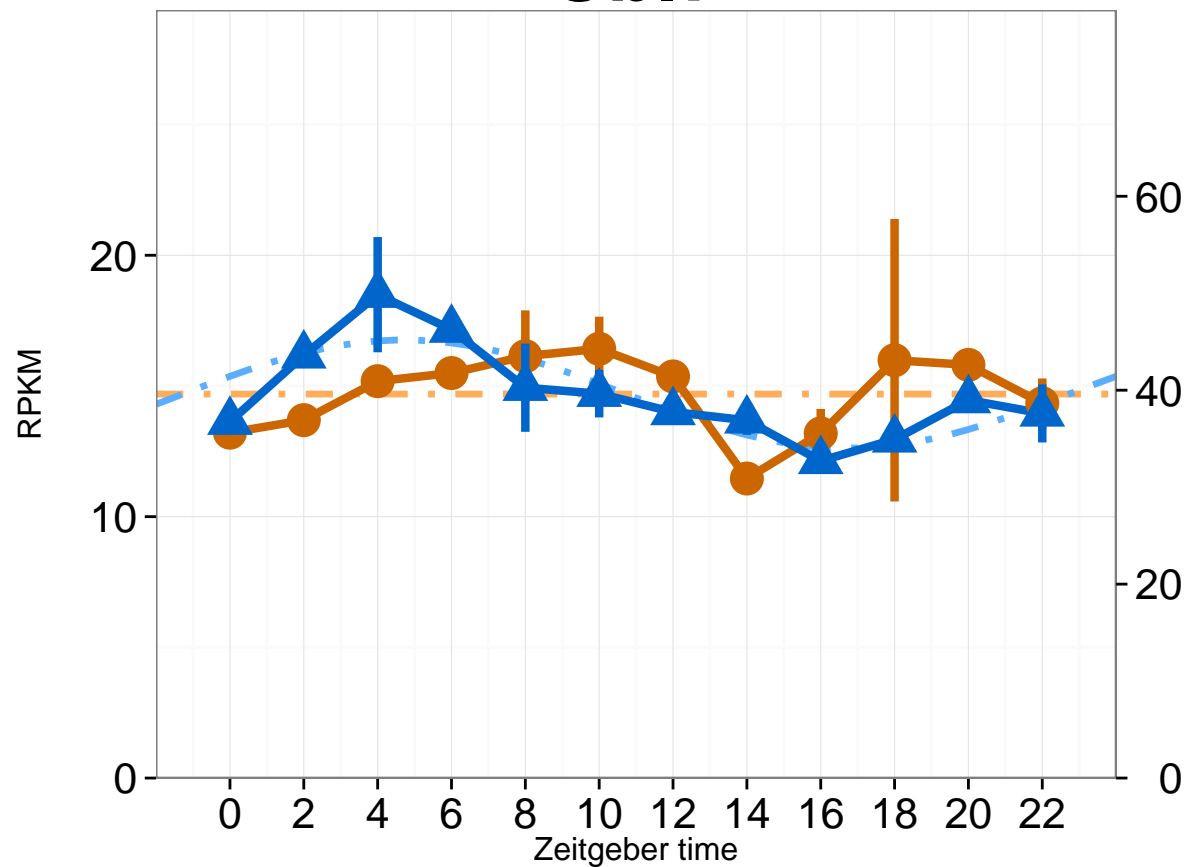

## Ubl7

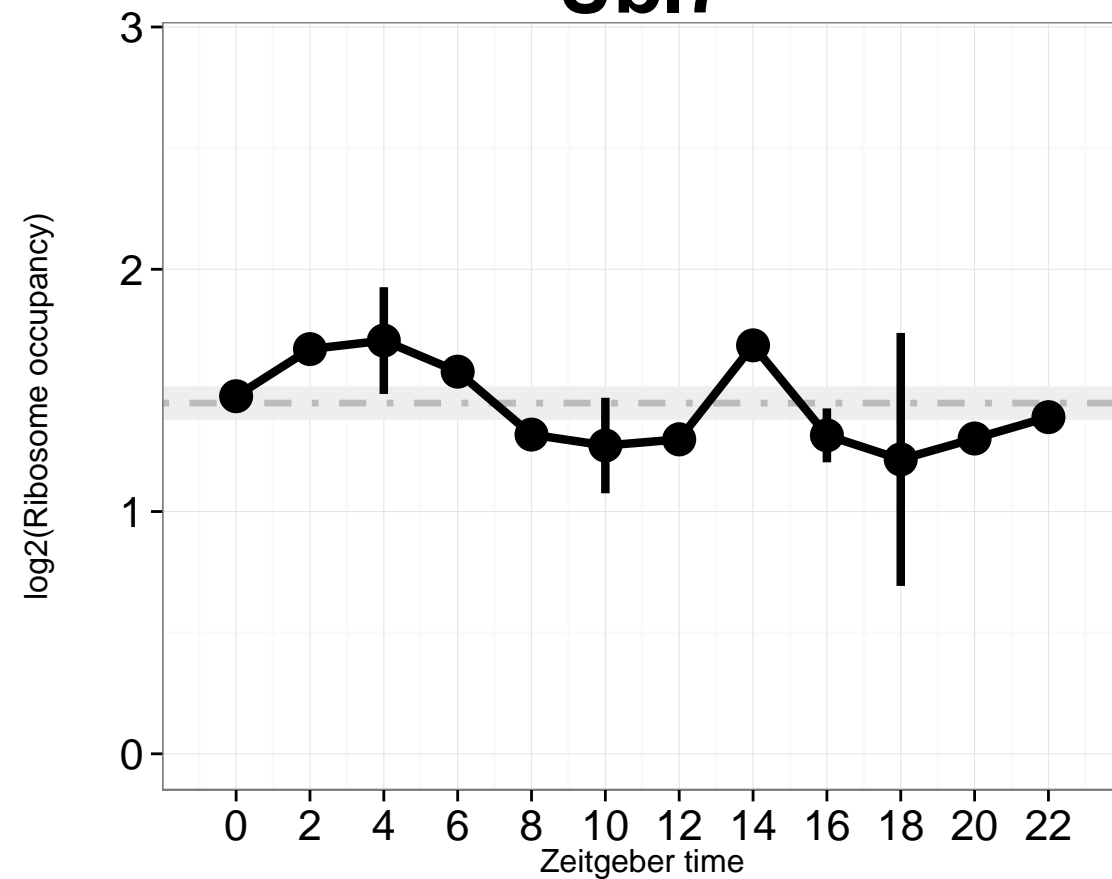

Supplement: SuppDataset_1.zip [file Ubl7_set_A.pdf › Supplemental Dataset 1/A-mRNA_nonrhyth_translation_nonrhyth/Ubl7_set_A.pdf]

# Ublcp1

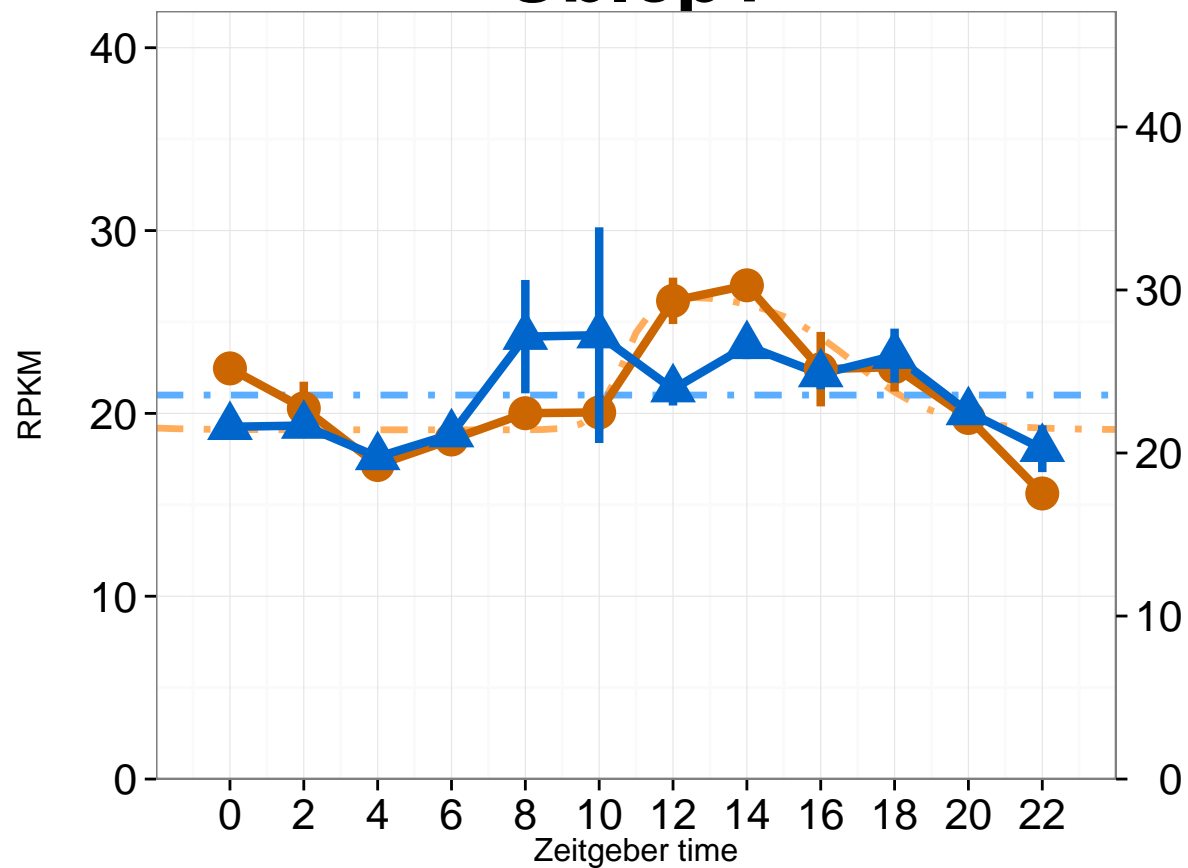

# Ublcp1

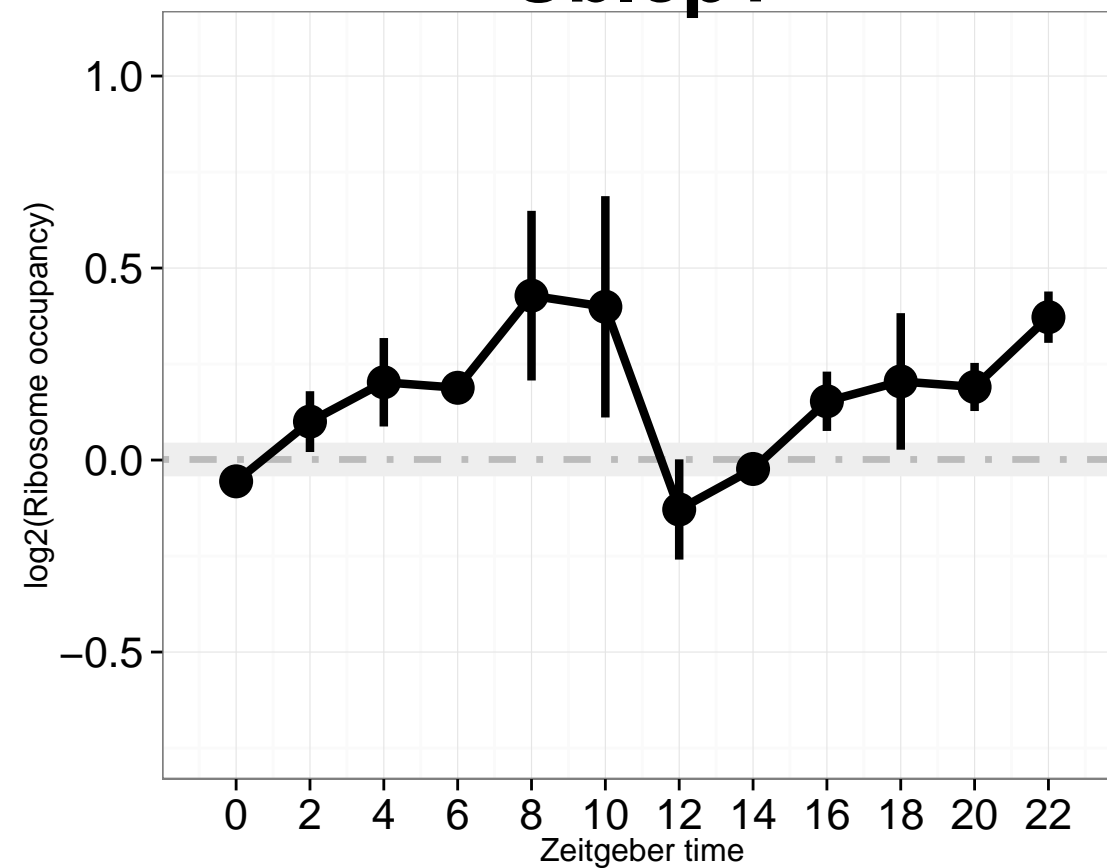

Supplement: SuppDataset_1.zip [file Ublcp1_set_A.pdf › Supplemental Dataset 1/A-mRNA_nonrhyth_translation_nonrhyth/Ublcp1_set_A.pdf]

## Ubn1

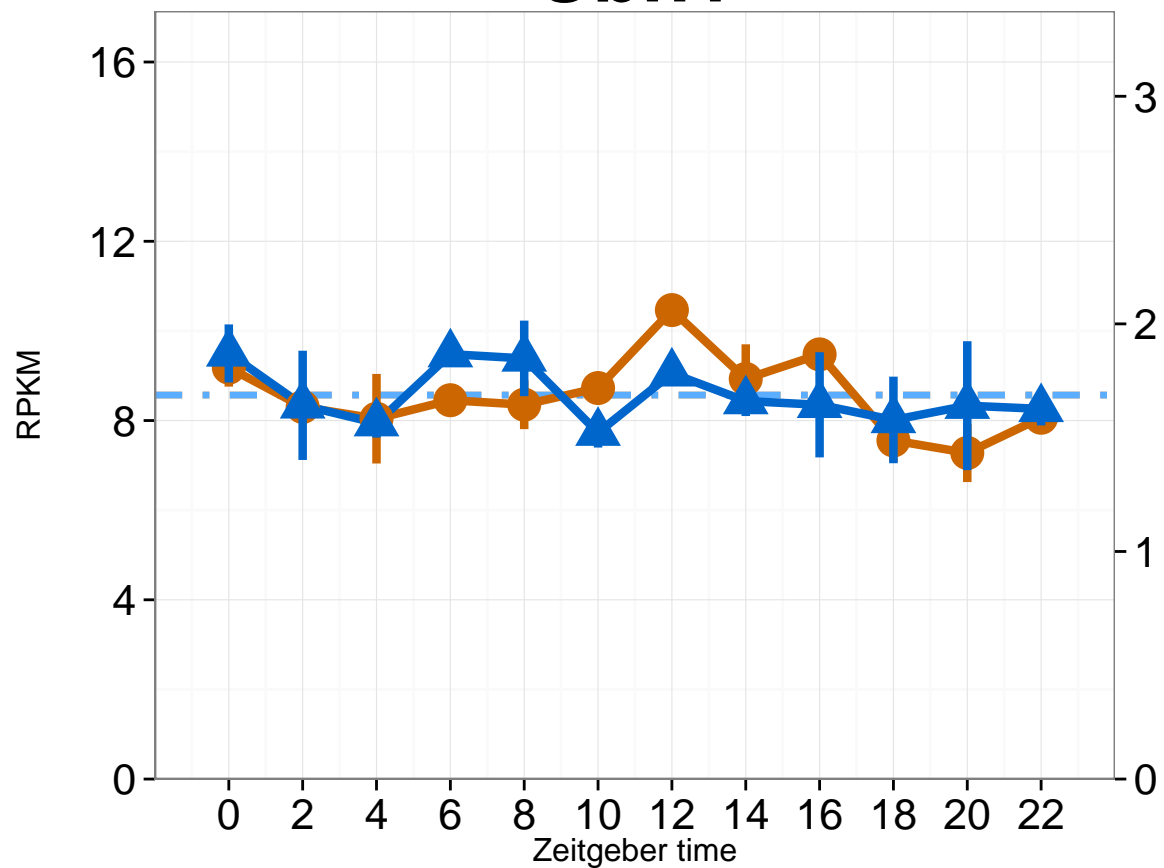

## Ubn1

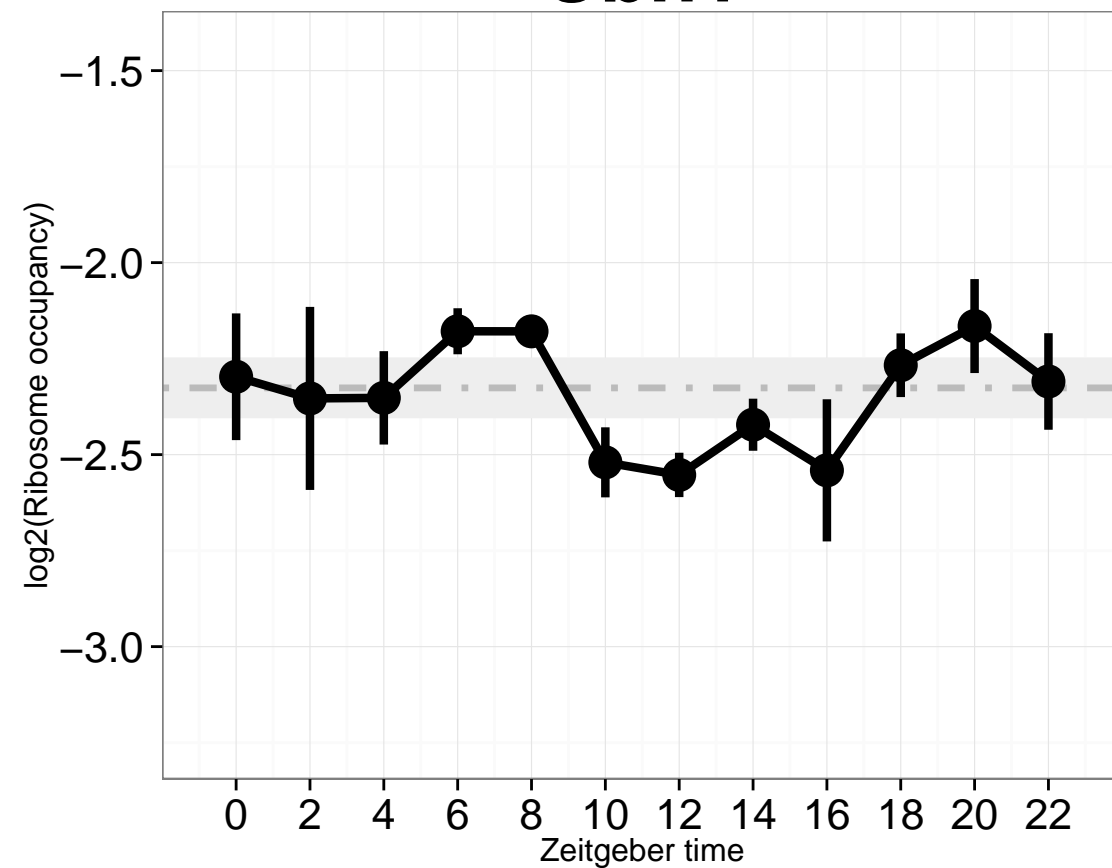

Supplement: SuppDataset_1.zip [file Ubn1_set_A.pdf › Supplemental Dataset 1/A-mRNA_nonrhyth_translation_nonrhyth/Ubn1_set_A.pdf]

## Ubn2

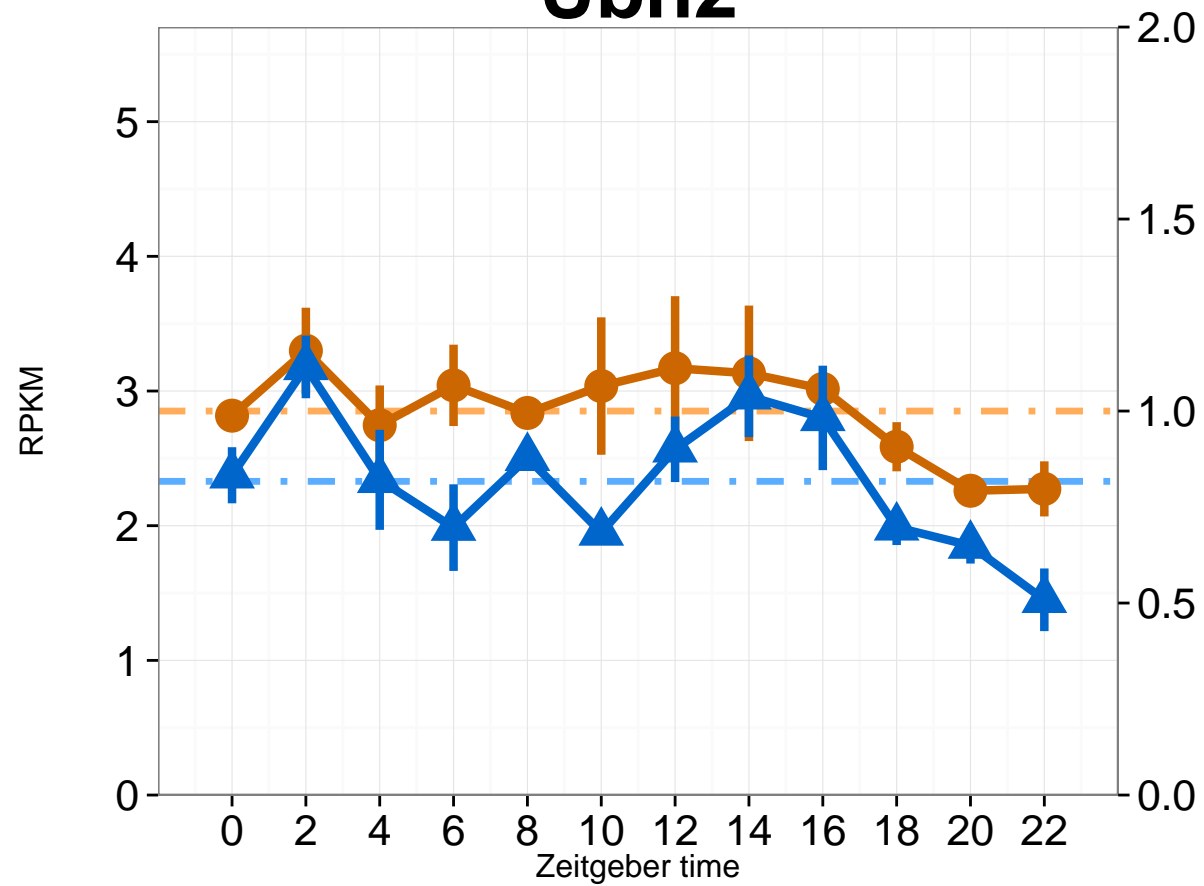

## Ubn2

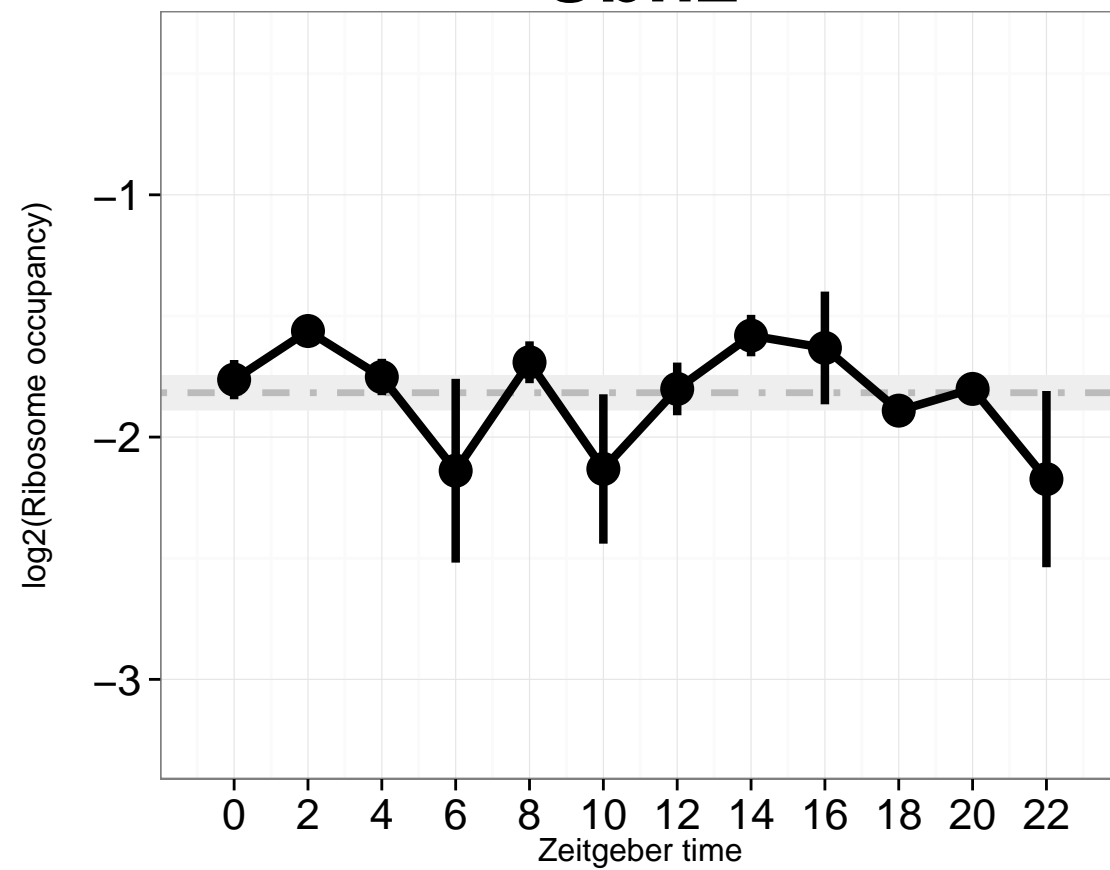

Supplement: SuppDataset_1.zip [file Ubn2_set_A.pdf › Supplemental Dataset 1/A-mRNA_nonrhyth_translation_nonrhyth/Ubn2_set_A.pdf]

## Ubox5

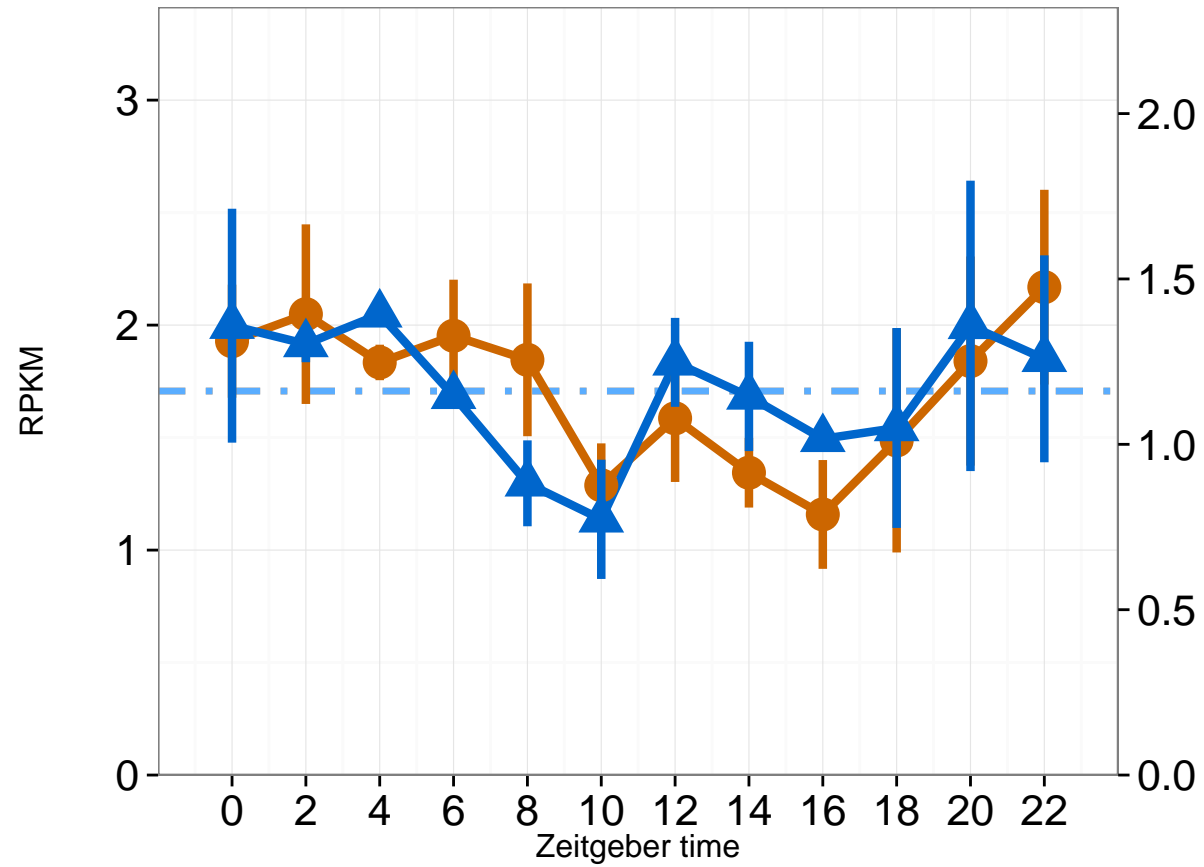

## Ubox5

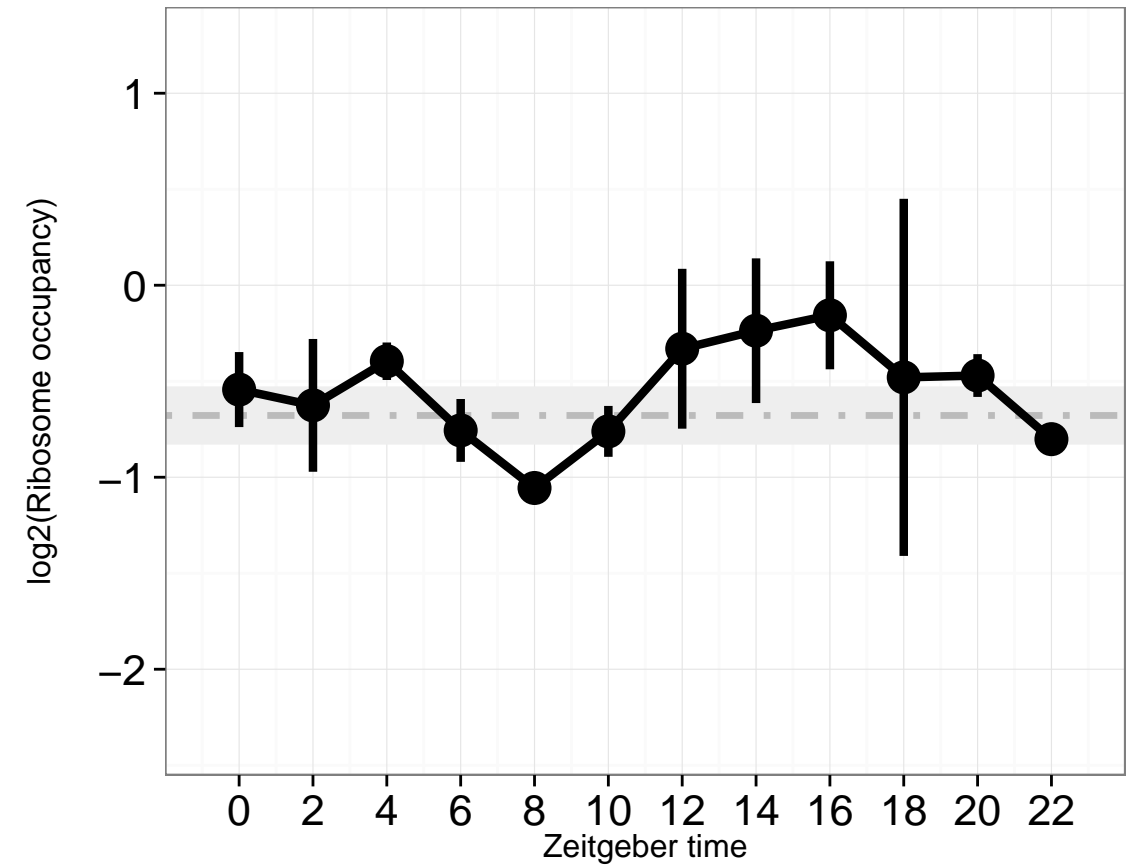

Supplement: SuppDataset_1.zip [file Ubox5_set_A.pdf › Supplemental Dataset 1/A-mRNA_nonrhyth_translation_nonrhyth/Ubox5_set_A.pdf]

## Ubp1

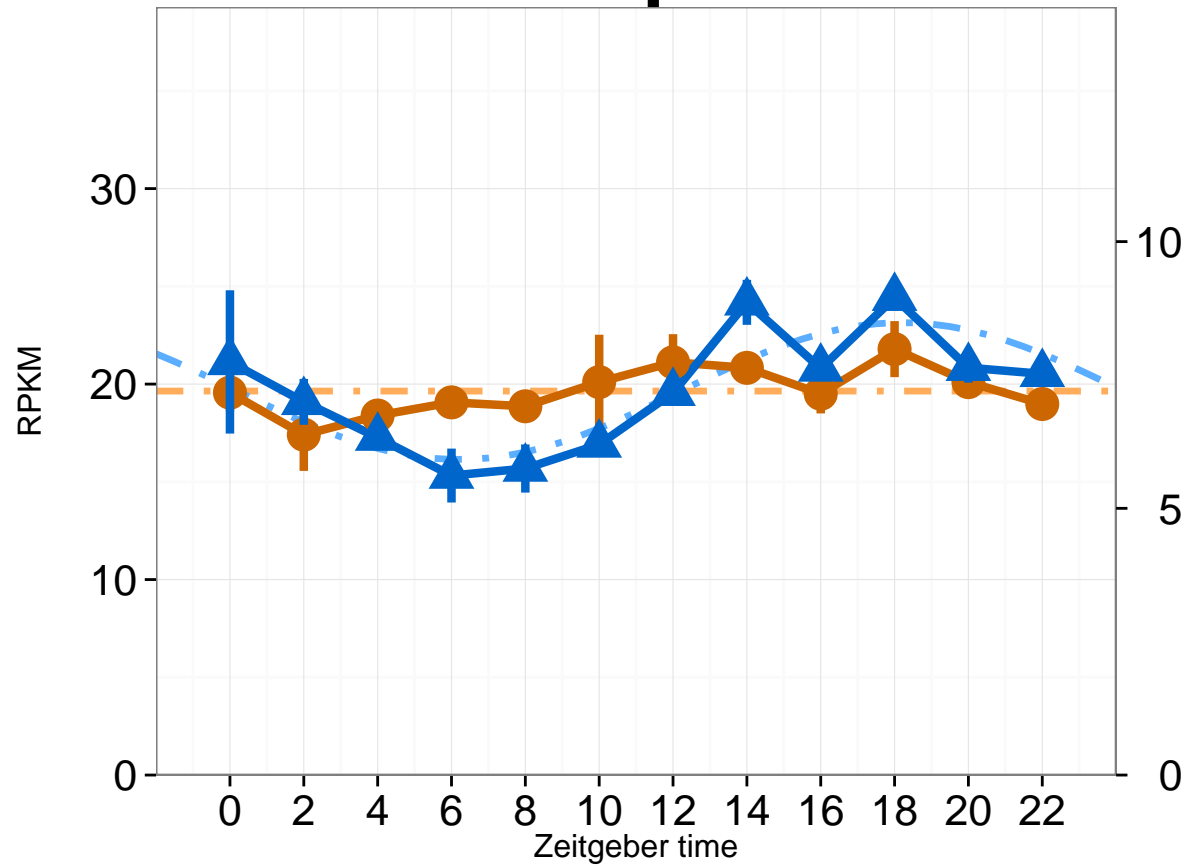

## Ubp1

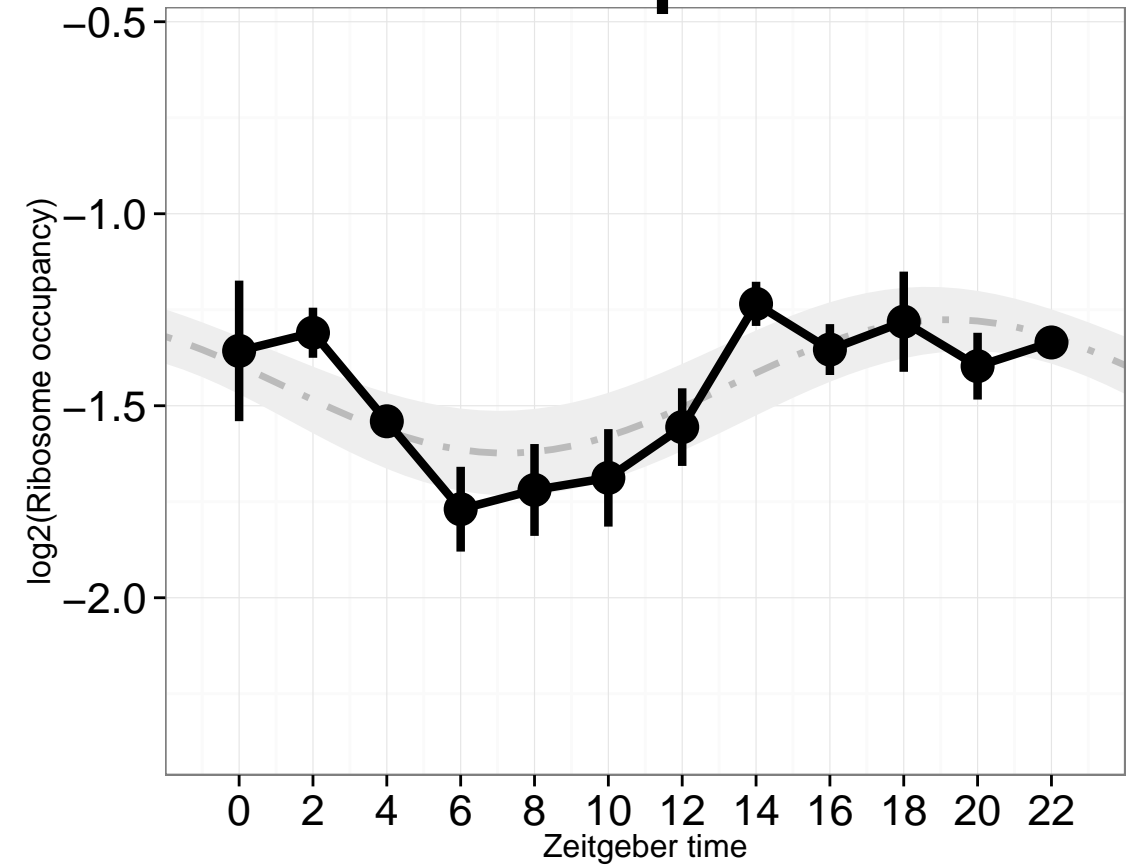

Supplement: SuppDataset_1.zip [file Ubp1_set_A.pdf › Supplemental Dataset 1/A-mRNA_nonrhyth_translation_nonrhyth/Ubp1_set_A.pdf]

## Ubqln1

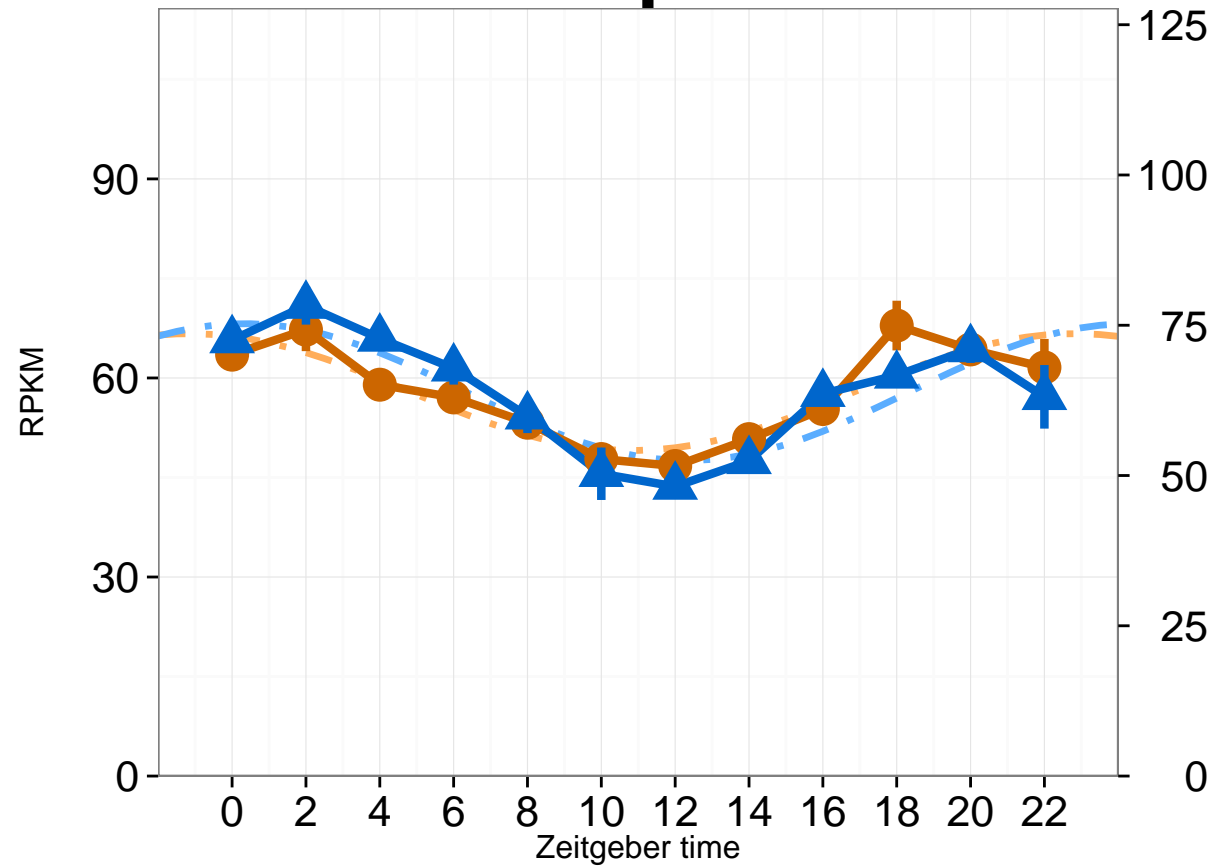

## Ubqln1

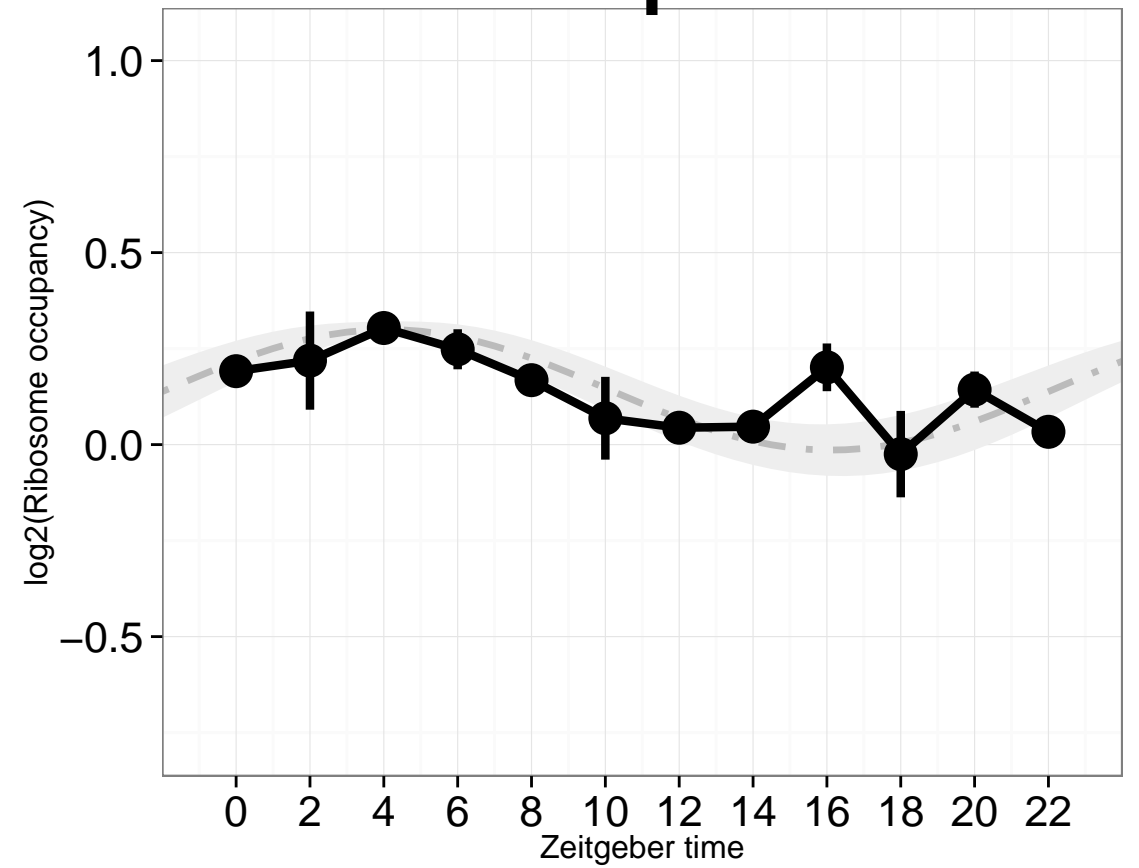

Supplement: SuppDataset_1.zip [file Ubqln1_set_A.pdf › Supplemental Dataset 1/A-mRNA_nonrhyth_translation_nonrhyth/Ubqln1_set_A.pdf]

## Ubqln2

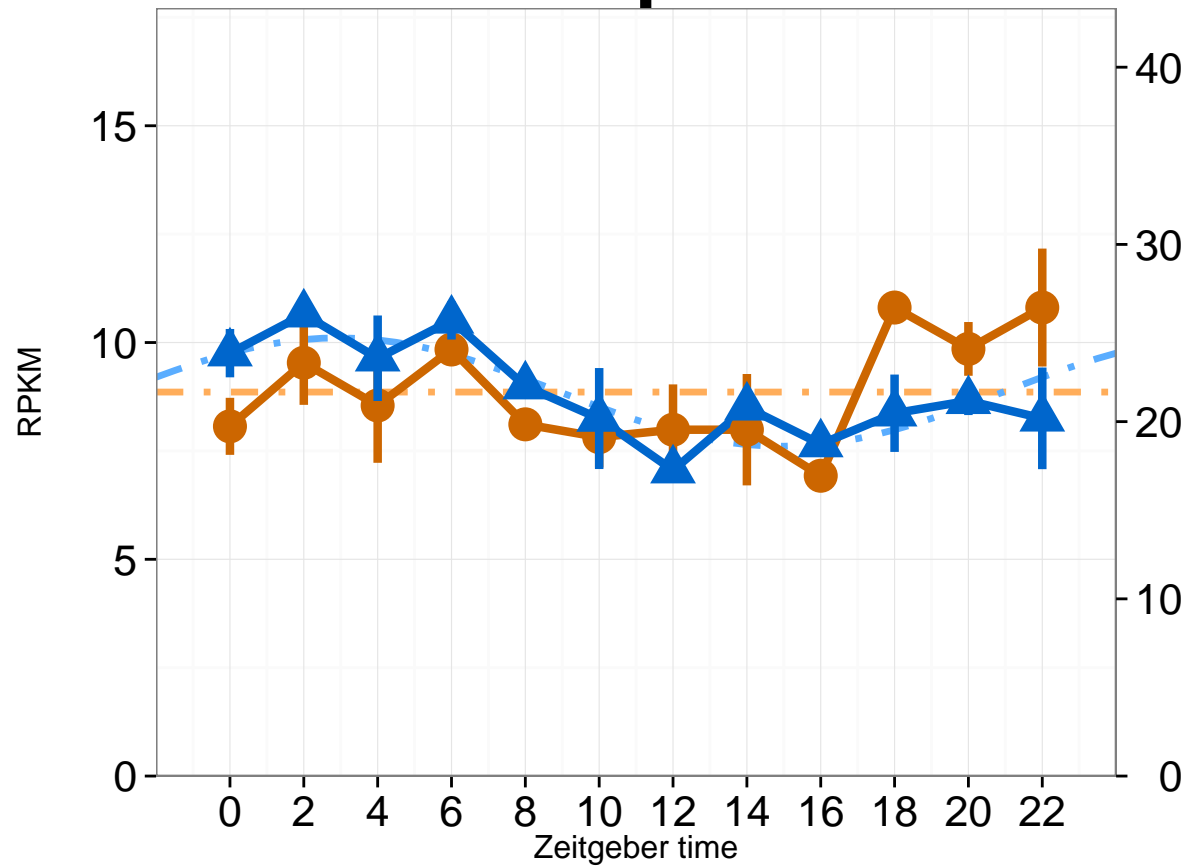

## Ubqln2

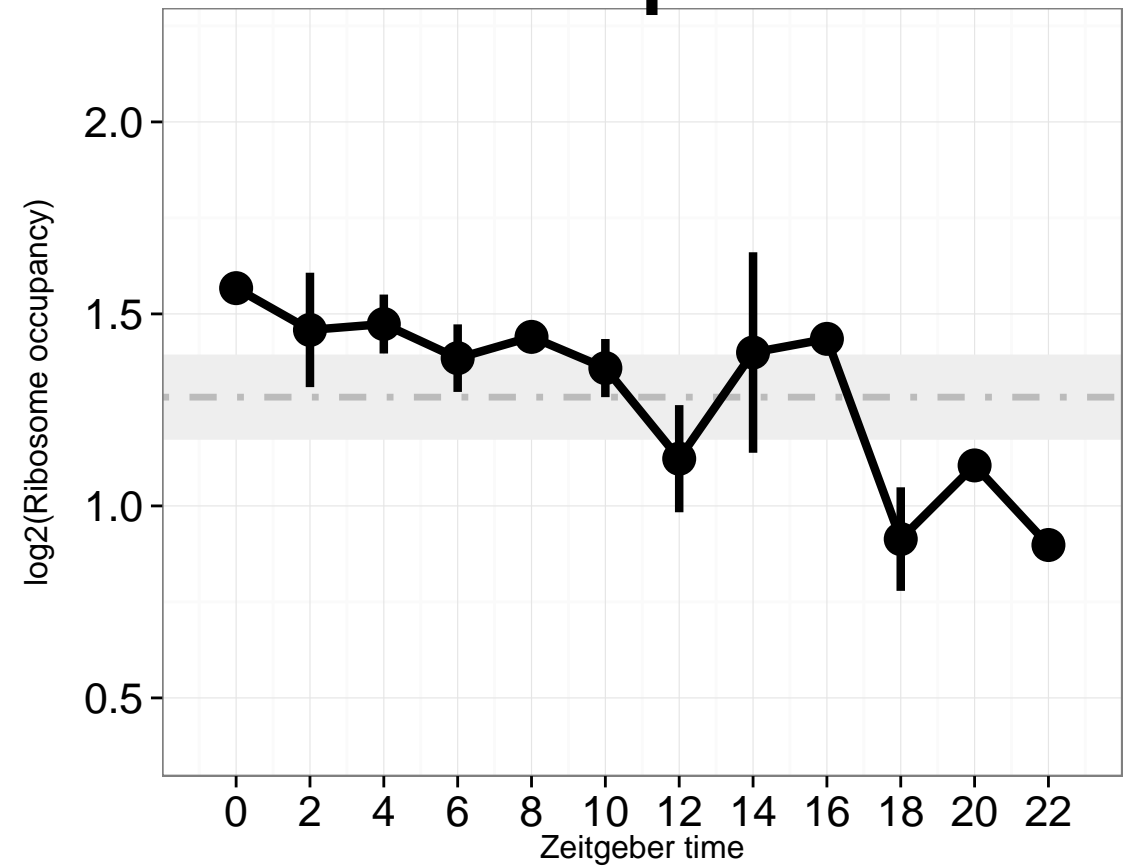

Supplement: SuppDataset_1.zip [file Ubqln2_set_A.pdf › Supplemental Dataset 1/A-mRNA_nonrhyth_translation_nonrhyth/Ubqln2_set_A.pdf]

## Ubr1

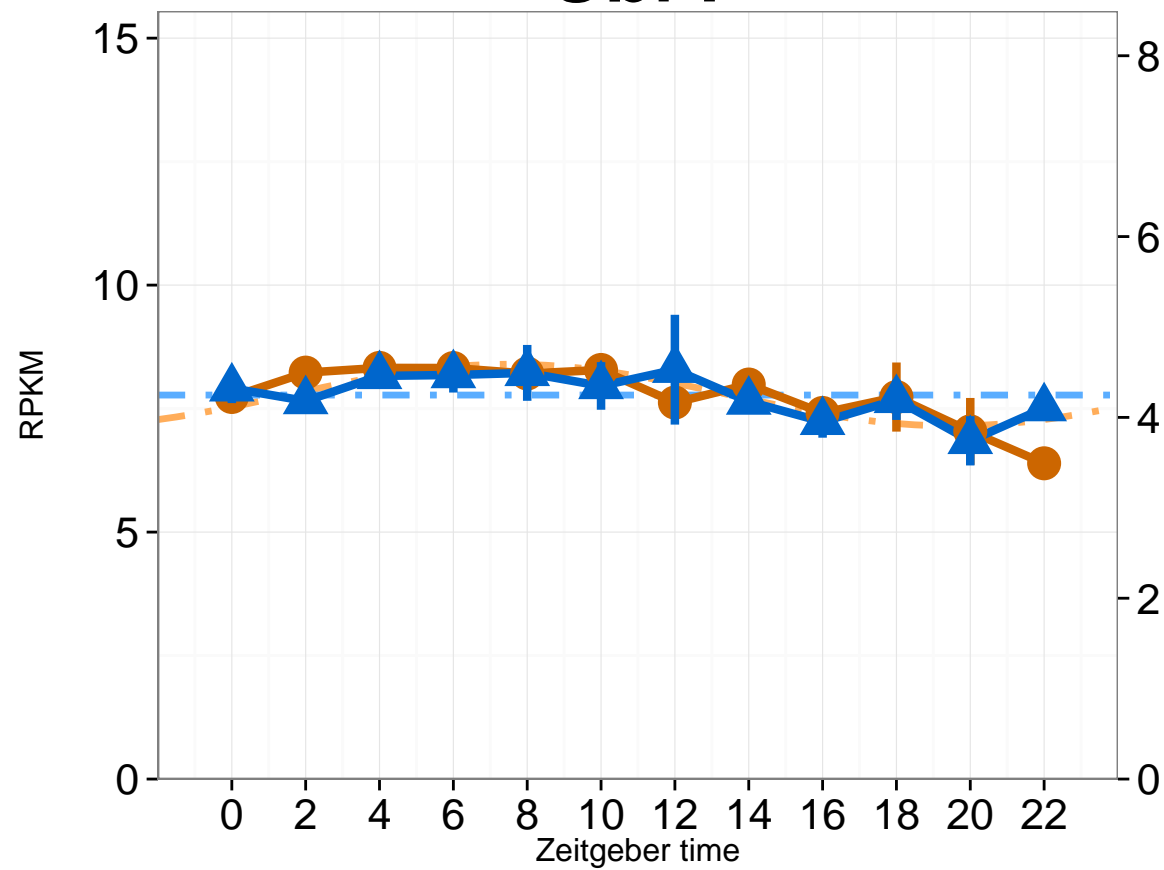

## Ubr1

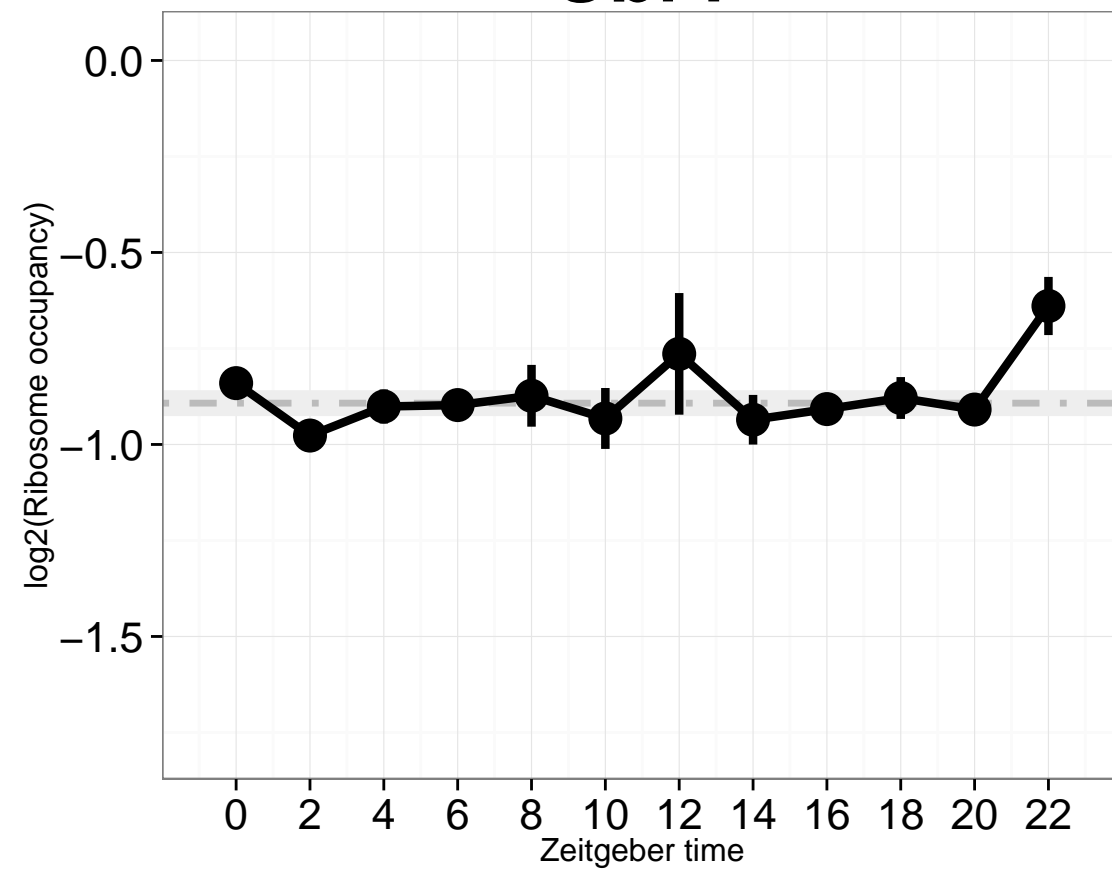

Supplement: SuppDataset_1.zip [file Ubr1_set_A.pdf › Supplemental Dataset 1/A-mRNA_nonrhyth_translation_nonrhyth/Ubr1_set_A.pdf]

## Ubr3

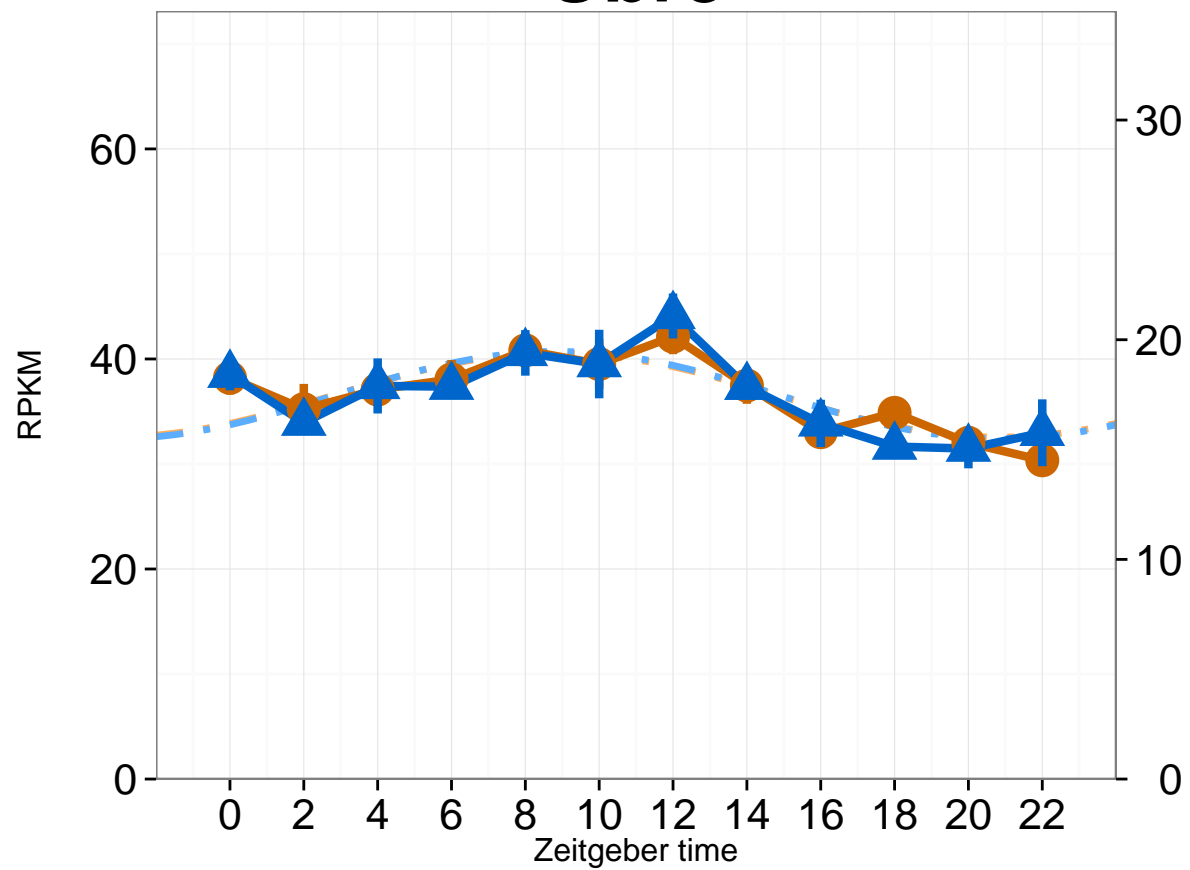

## Ubr3

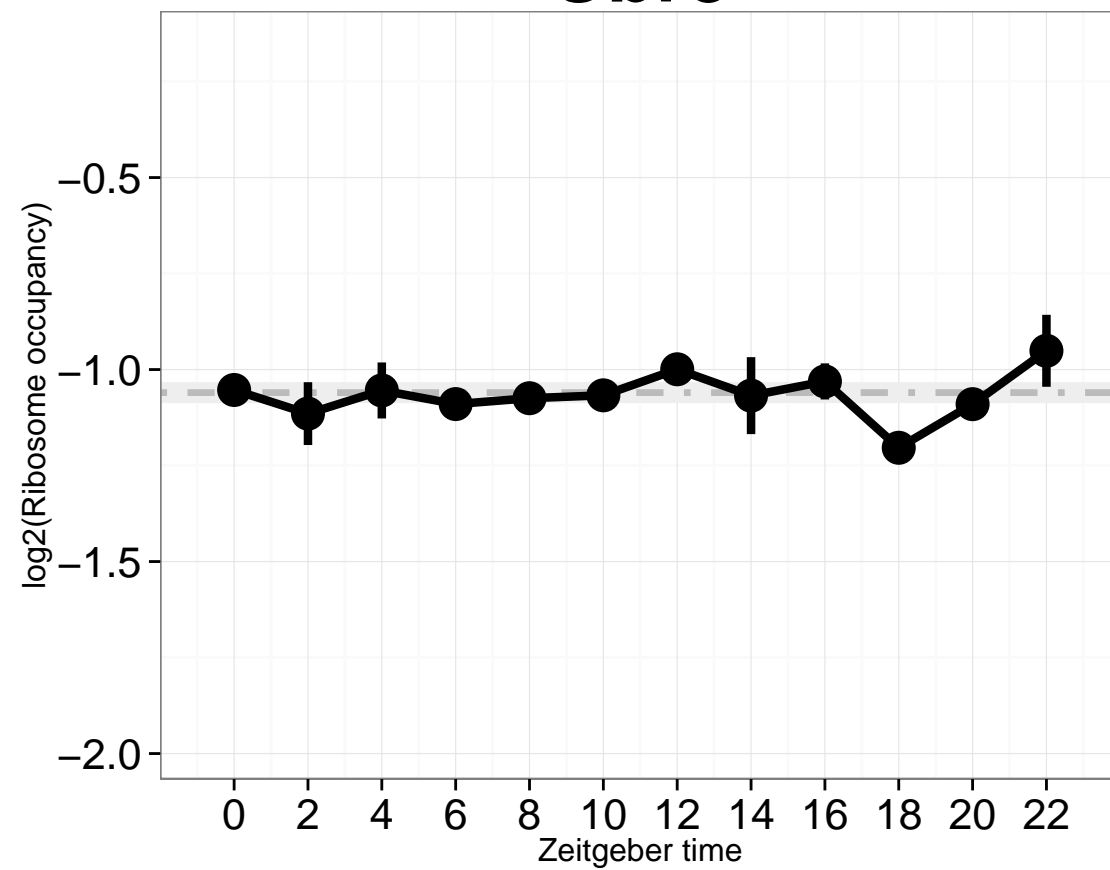

Supplement: SuppDataset_1.zip [file Ubr3_set_A.pdf › Supplemental Dataset 1/A-mRNA_nonrhyth_translation_nonrhyth/Ubr3_set_A.pdf]

## Ubr4

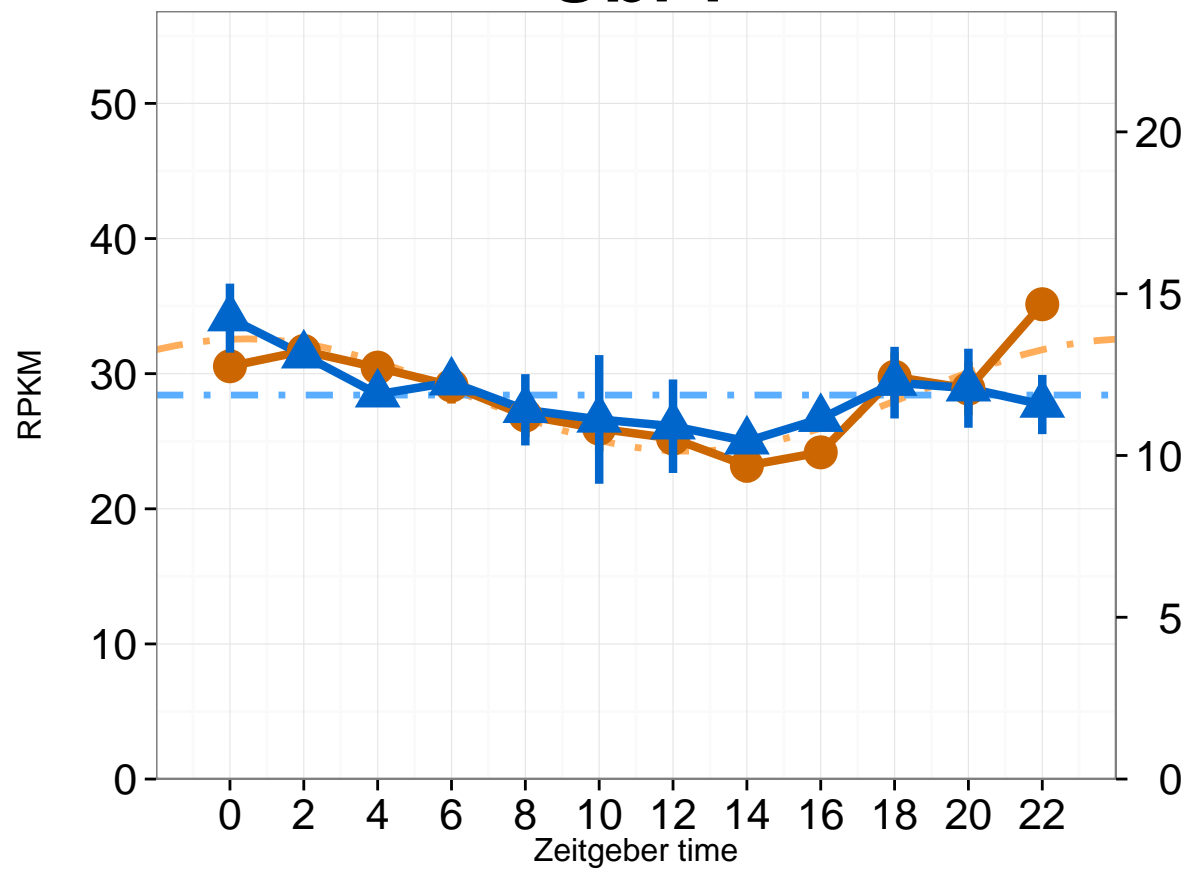

## Ubr4

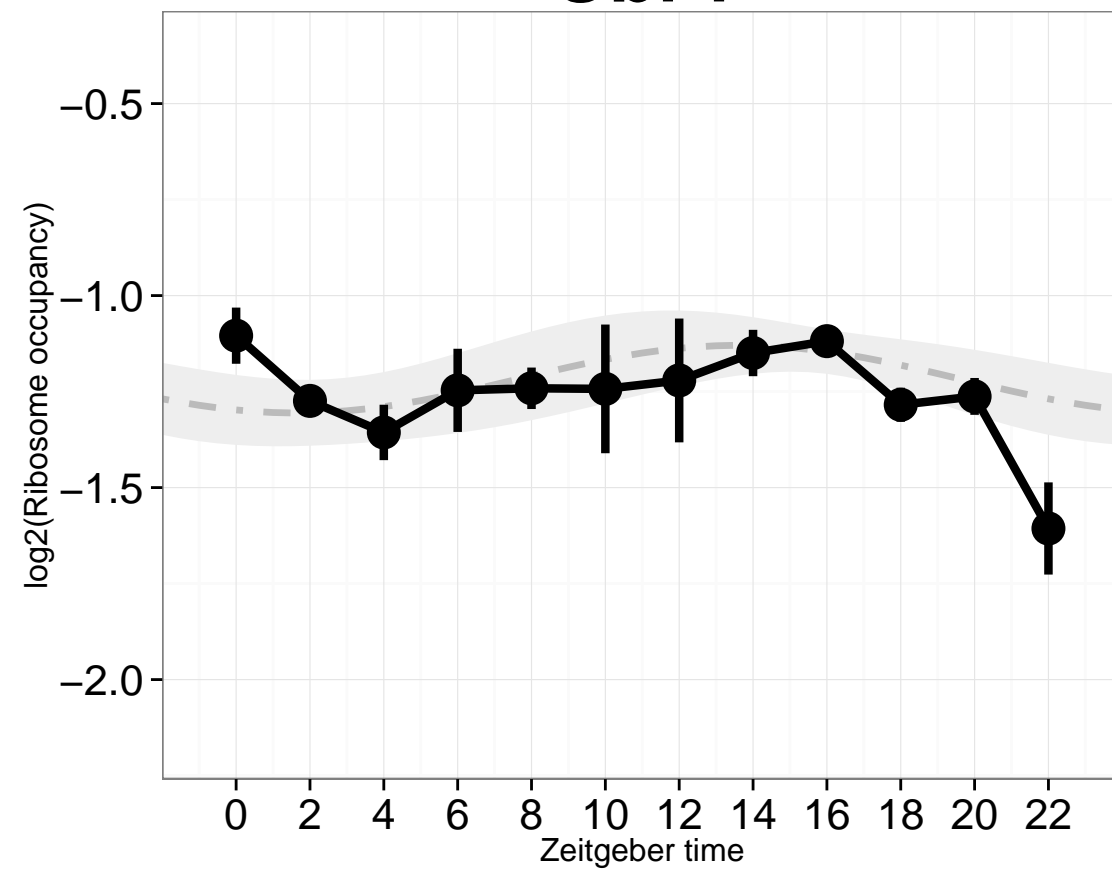

Supplement: SuppDataset_1.zip [file Ubr4_set_A.pdf › Supplemental Dataset 1/A-mRNA_nonrhyth_translation_nonrhyth/Ubr4_set_A.pdf]

## Ubr5

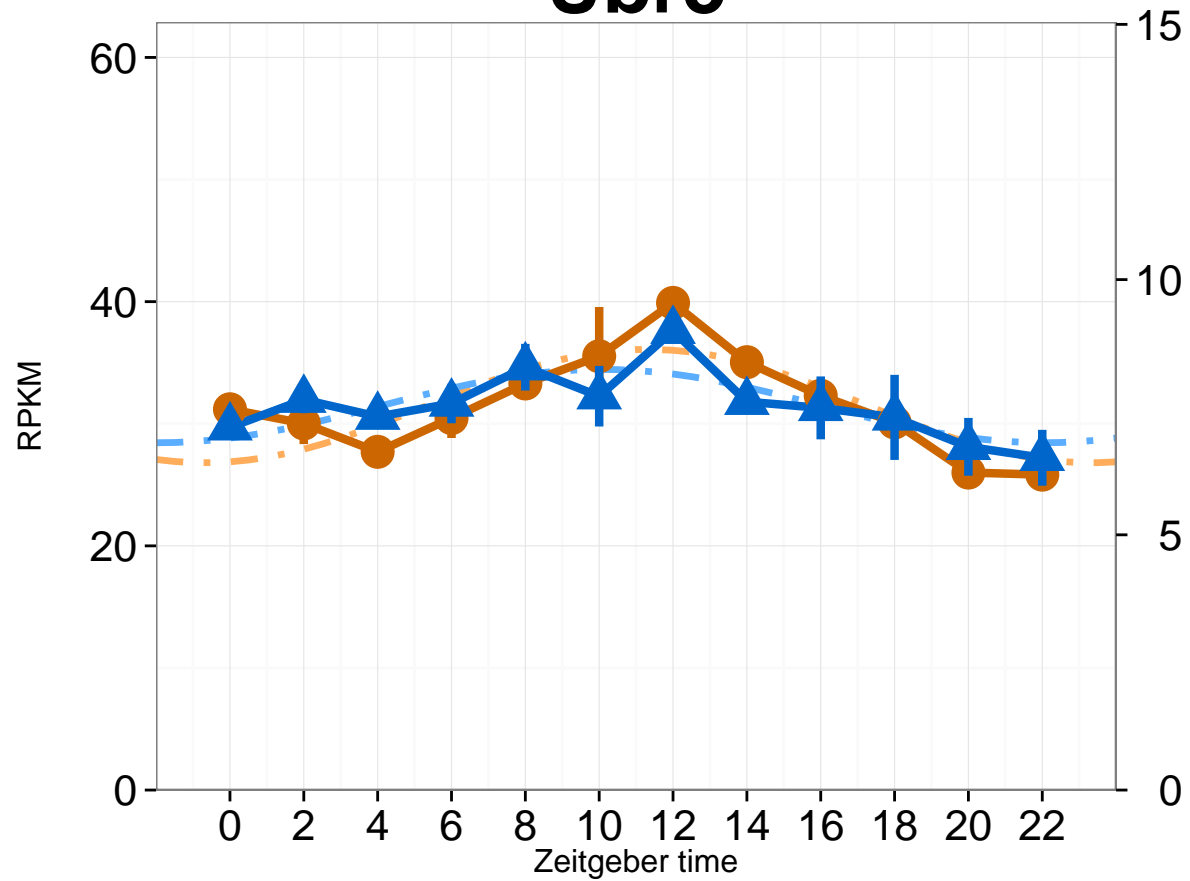

## Ubr5

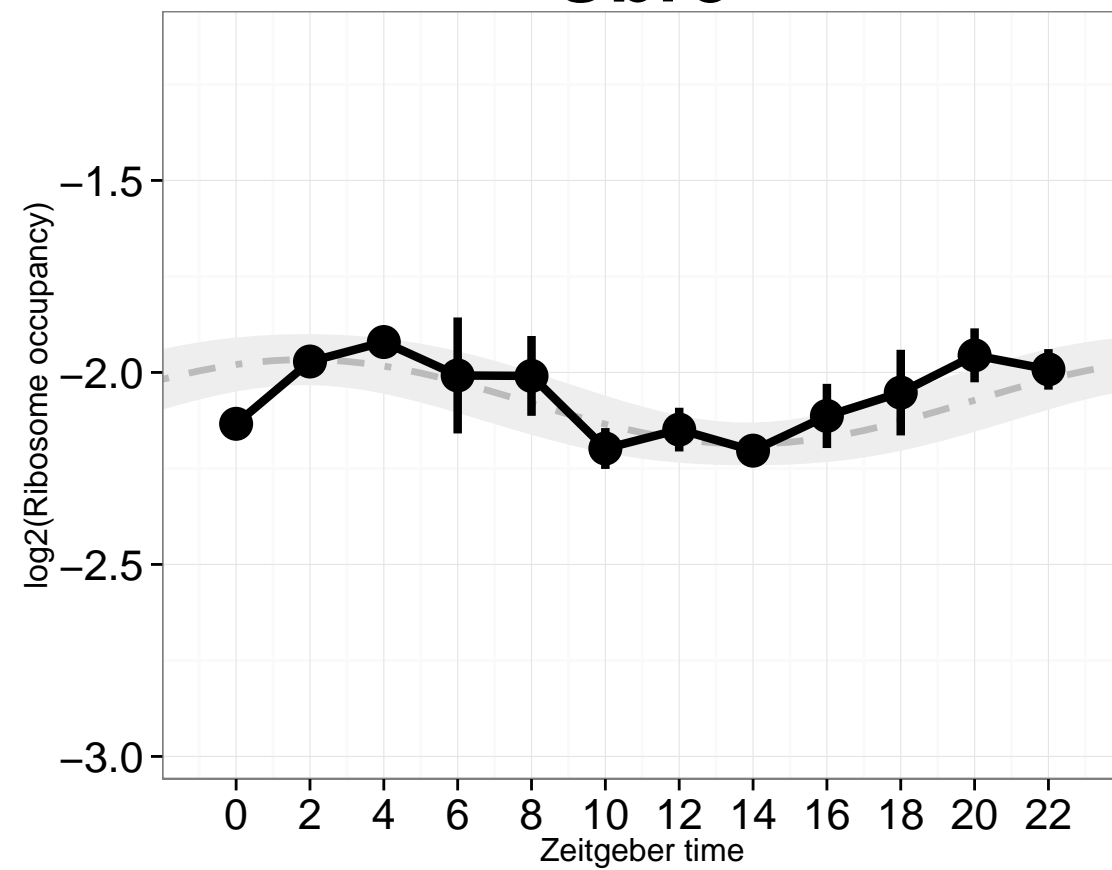

Supplement: SuppDataset_1.zip [file Ubr5_set_A.pdf › Supplemental Dataset 1/A-mRNA_nonrhyth_translation_nonrhyth/Ubr5_set_A.pdf]

## Ubr7

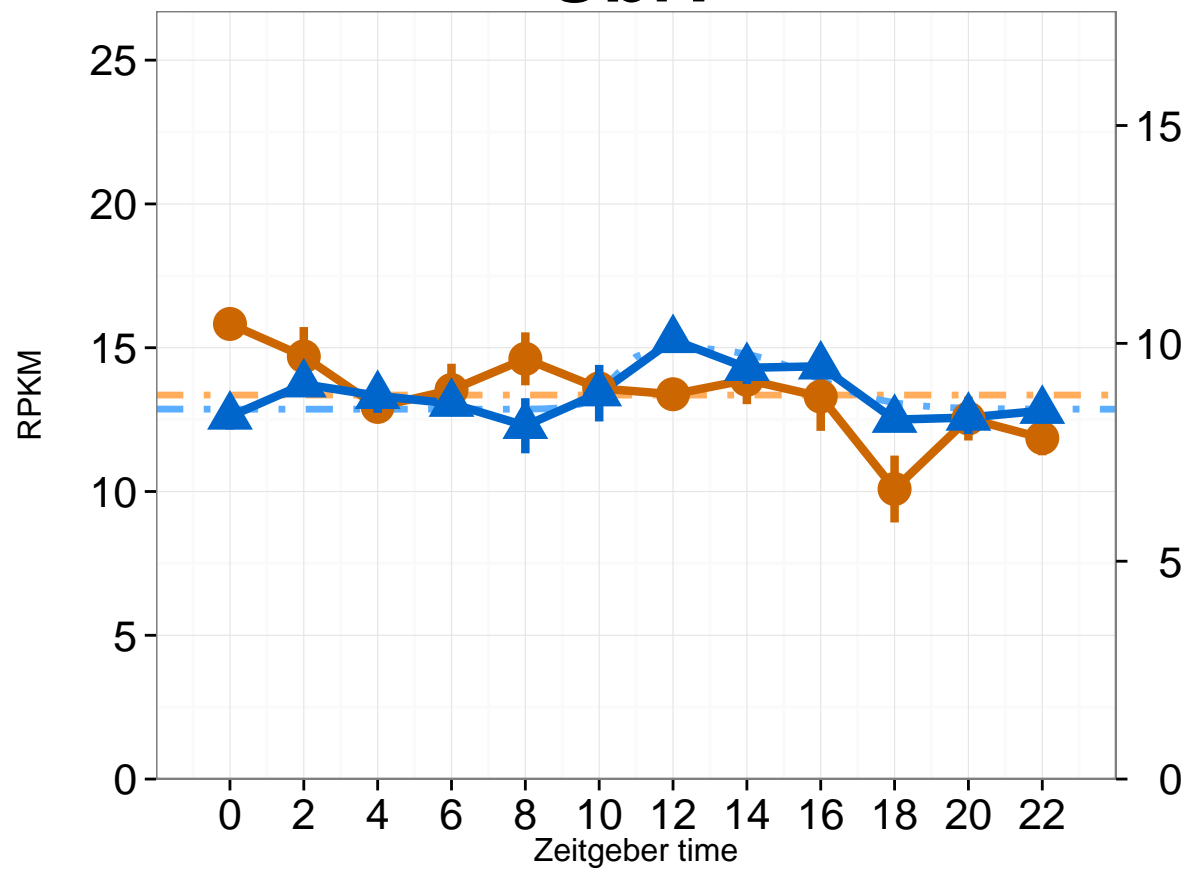

## Ubr7

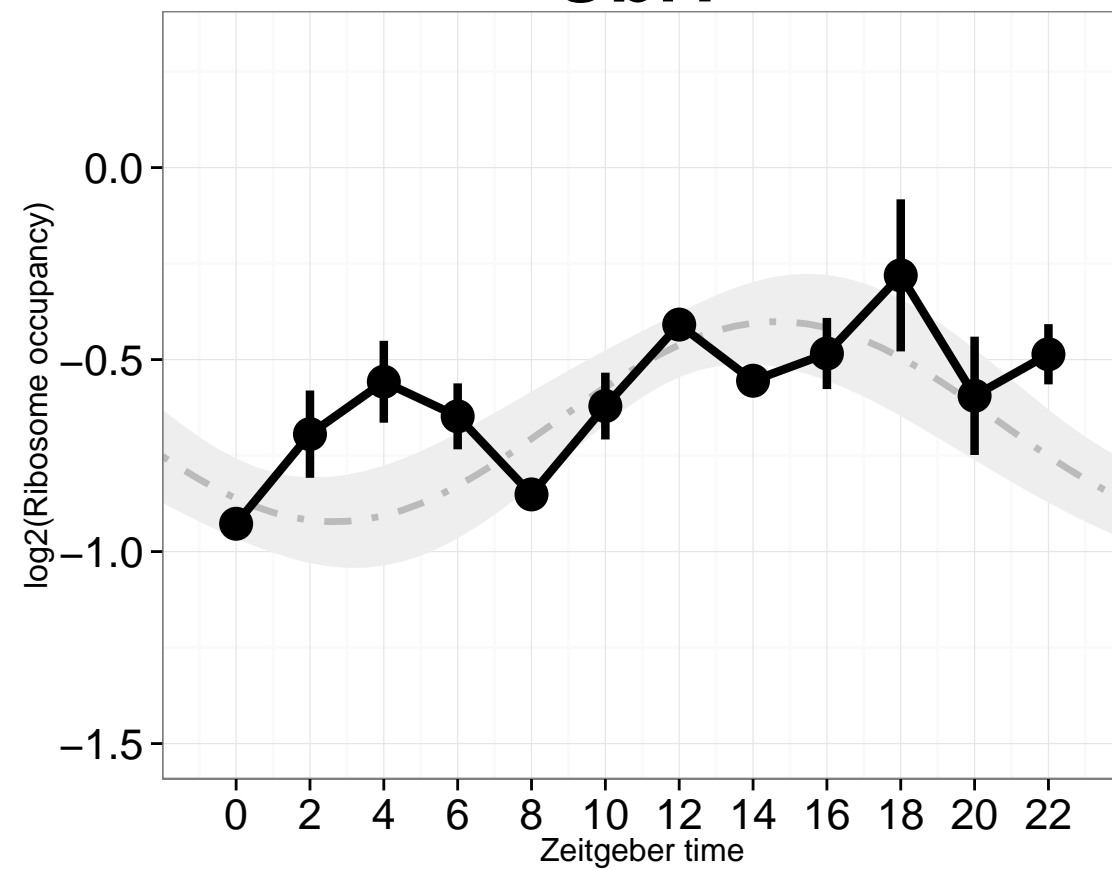

Supplement: SuppDataset_1.zip [file Ubr7_set_A.pdf › Supplemental Dataset 1/A-mRNA_nonrhyth_translation_nonrhyth/Ubr7_set_A.pdf]

## Ubtd1

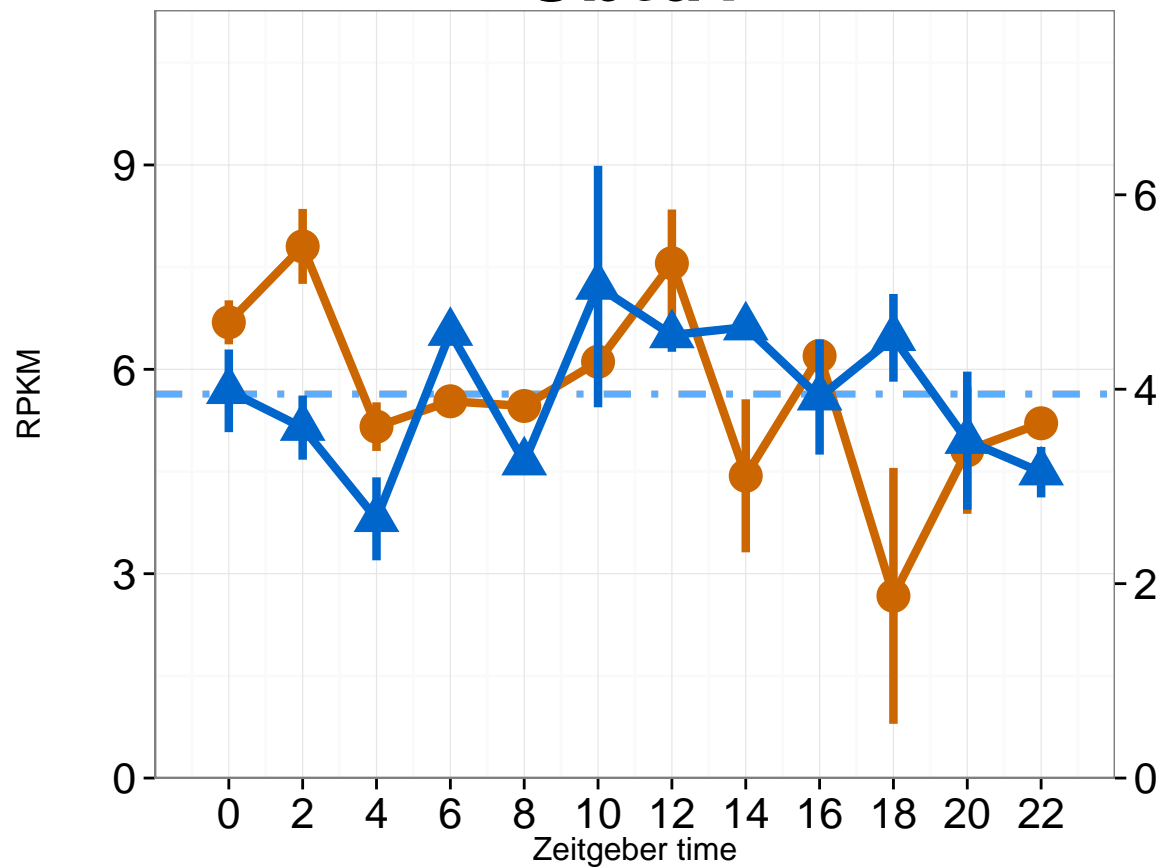

## Ubtd1

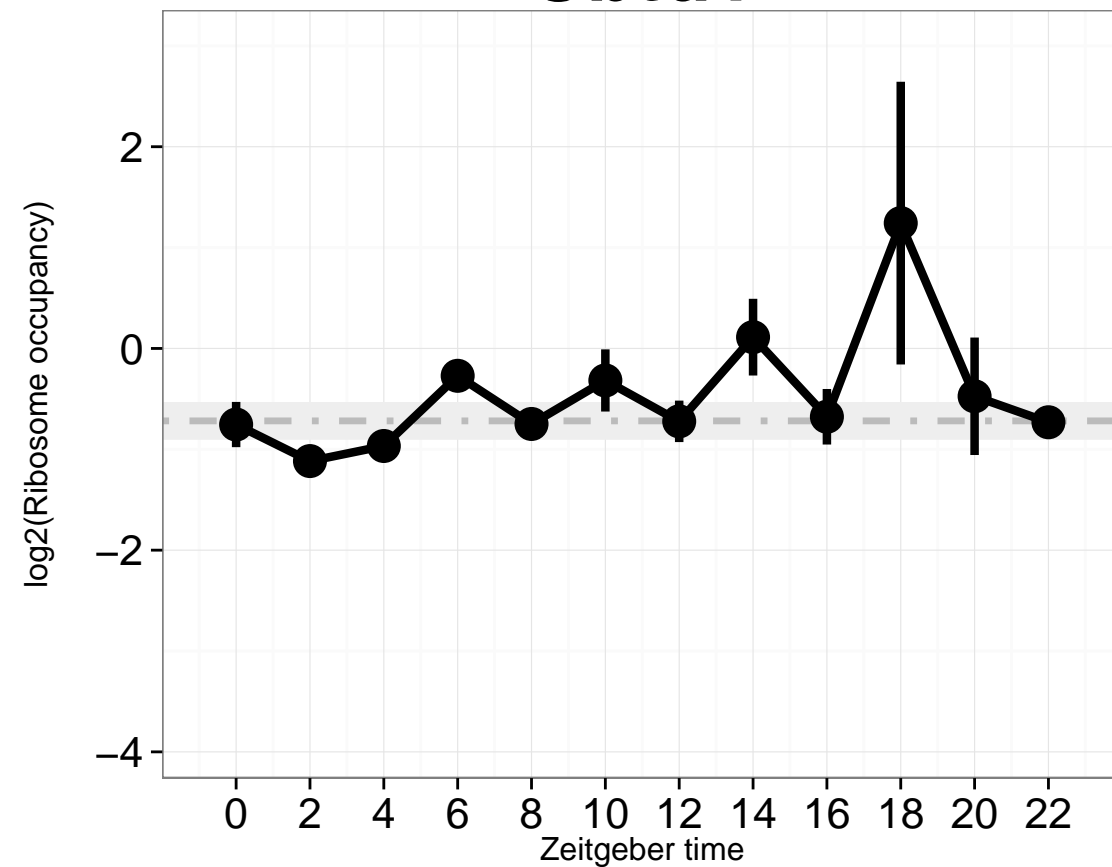

Supplement: SuppDataset_1.zip [file Ubtd1_set_A.pdf › Supplemental Dataset 1/A-mRNA_nonrhyth_translation_nonrhyth/Ubtd1_set_A.pdf]

## Ubtd2

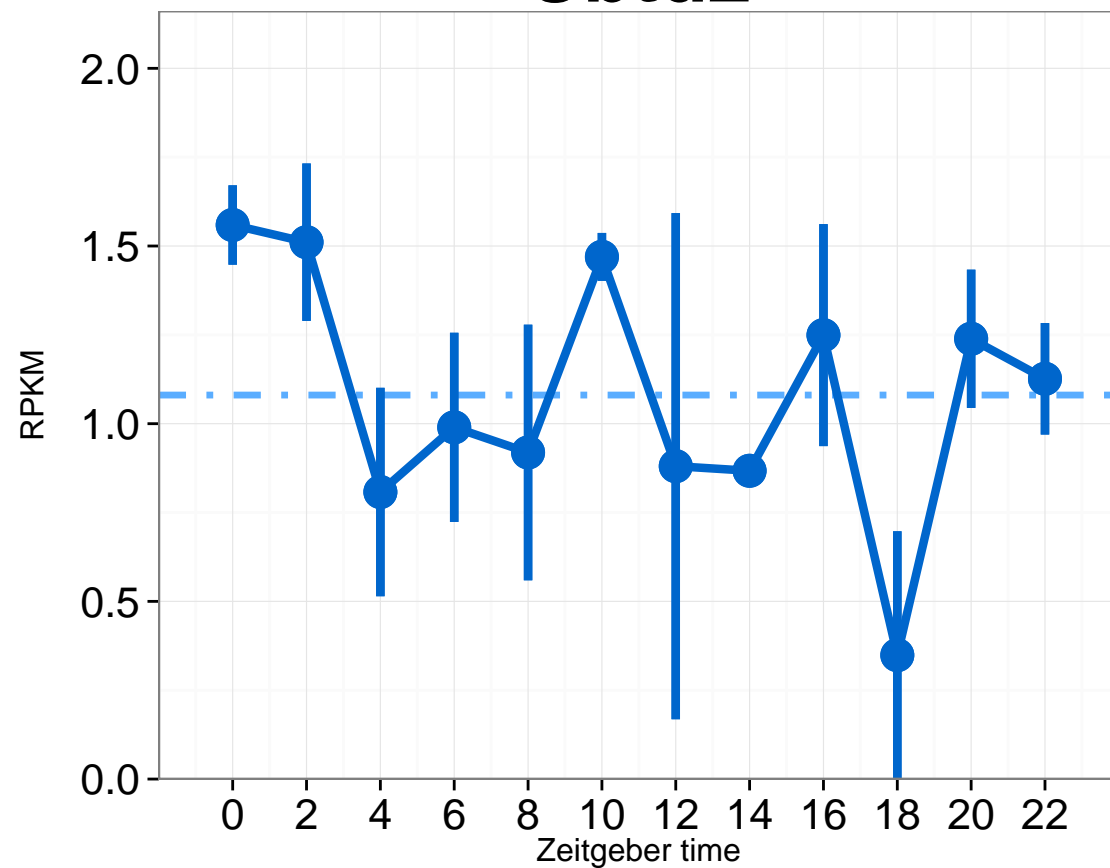

## Ubtd2 log2(Ribosome occupancy

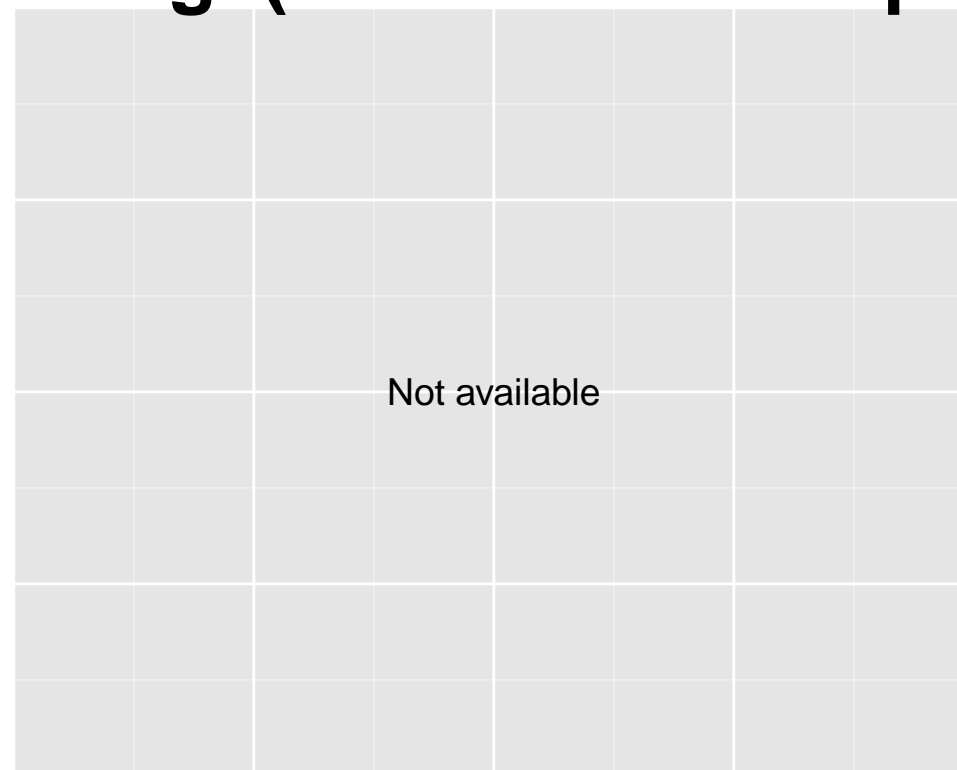

Supplement: SuppDataset_1.zip [file Ubtd2_set_A.pdf › Supplemental Dataset 1/A-mRNA_nonrhyth_translation_nonrhyth/Ubtd2_set_A.pdf]

## Ubtf

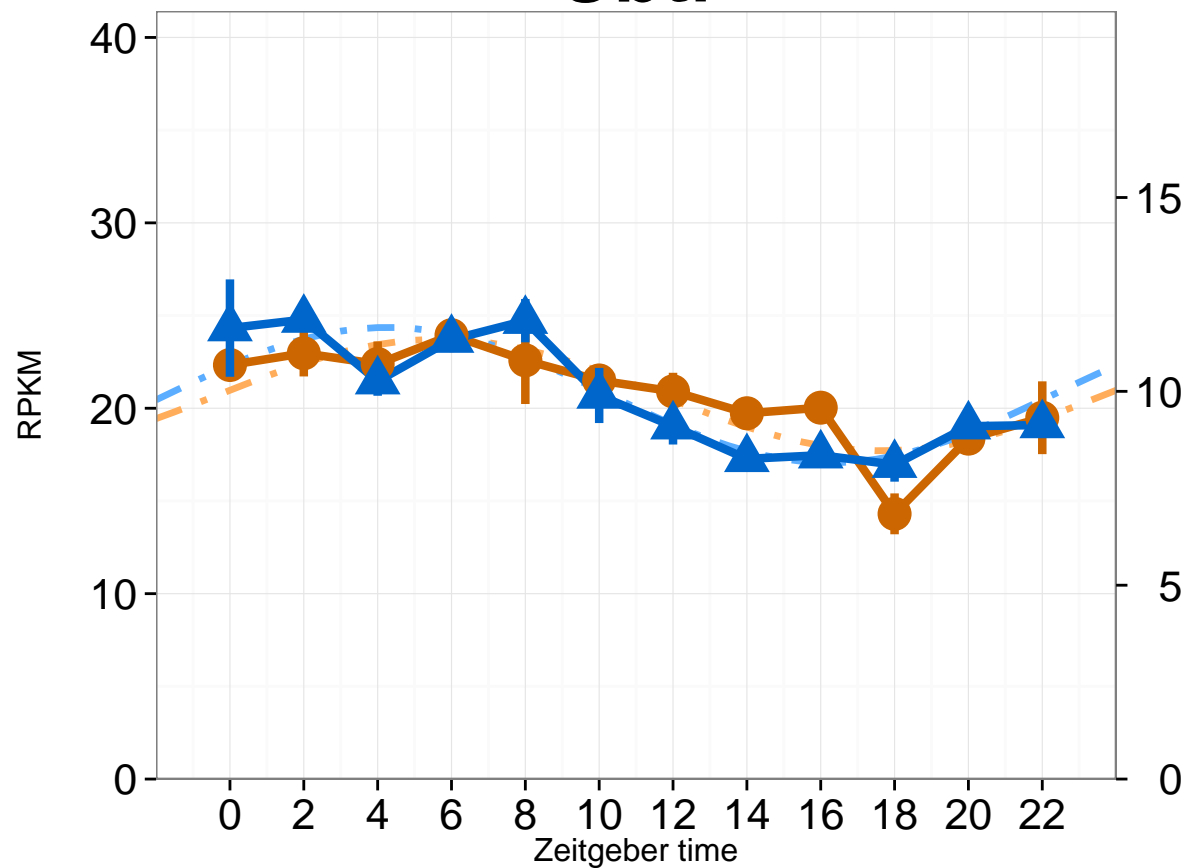

## Ubtf

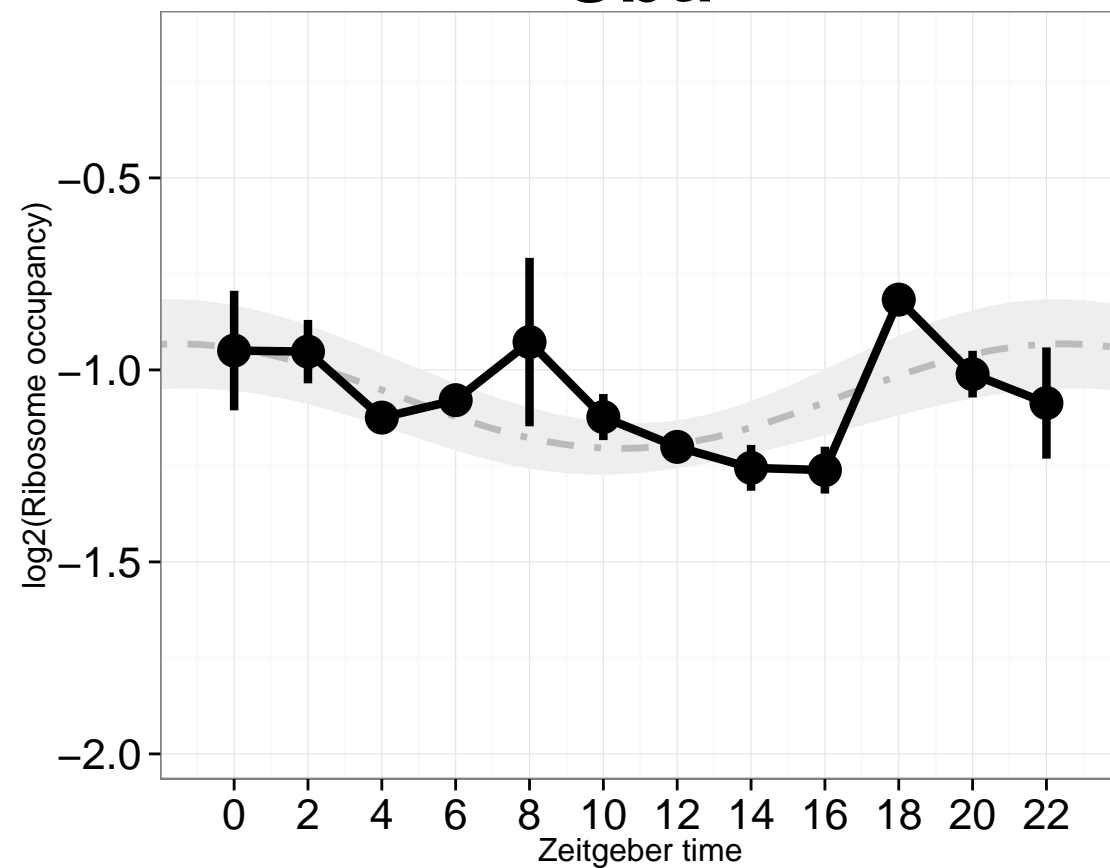

Supplement: SuppDataset_1.zip [file Ubtf_set_A.pdf › Supplemental Dataset 1/A-mRNA_nonrhyth_translation_nonrhyth/Ubtf_set_A.pdf]

## Ubxn2a

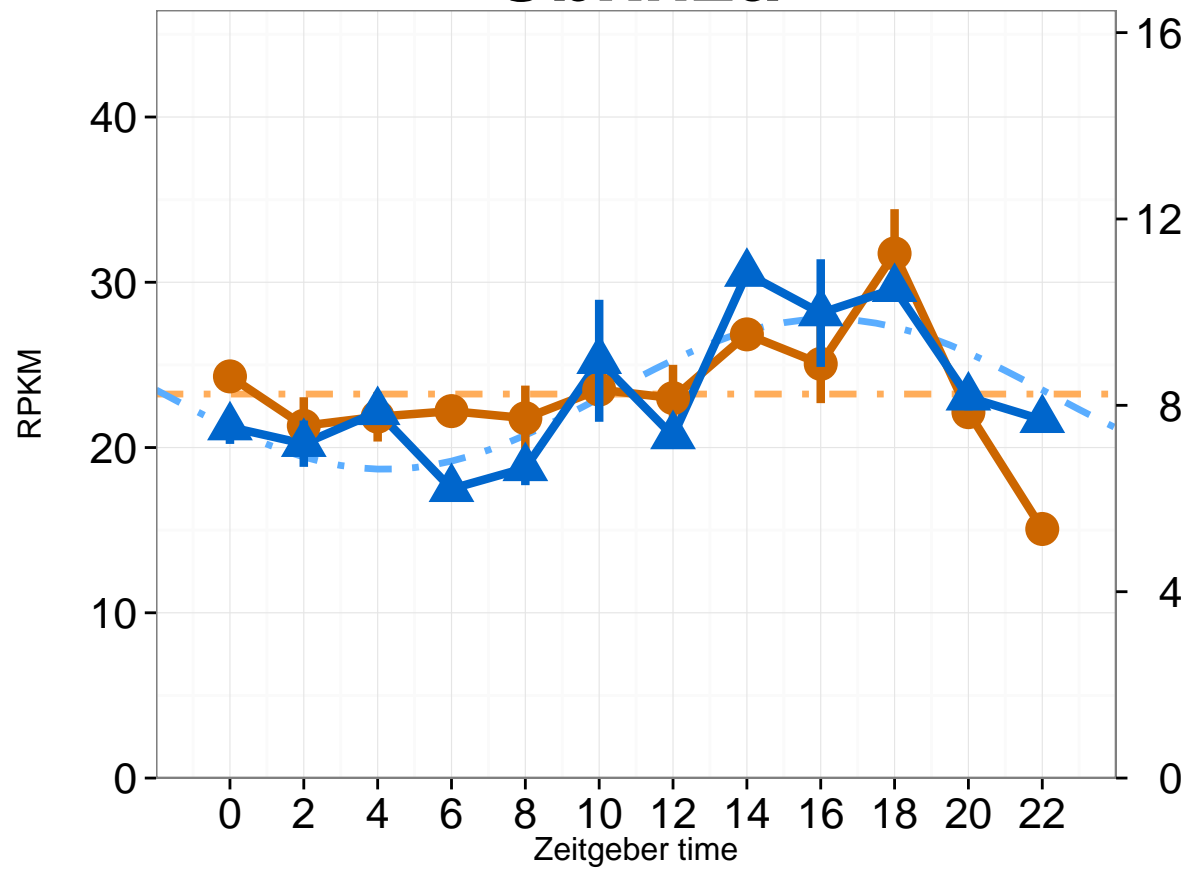

## Ubxn2a

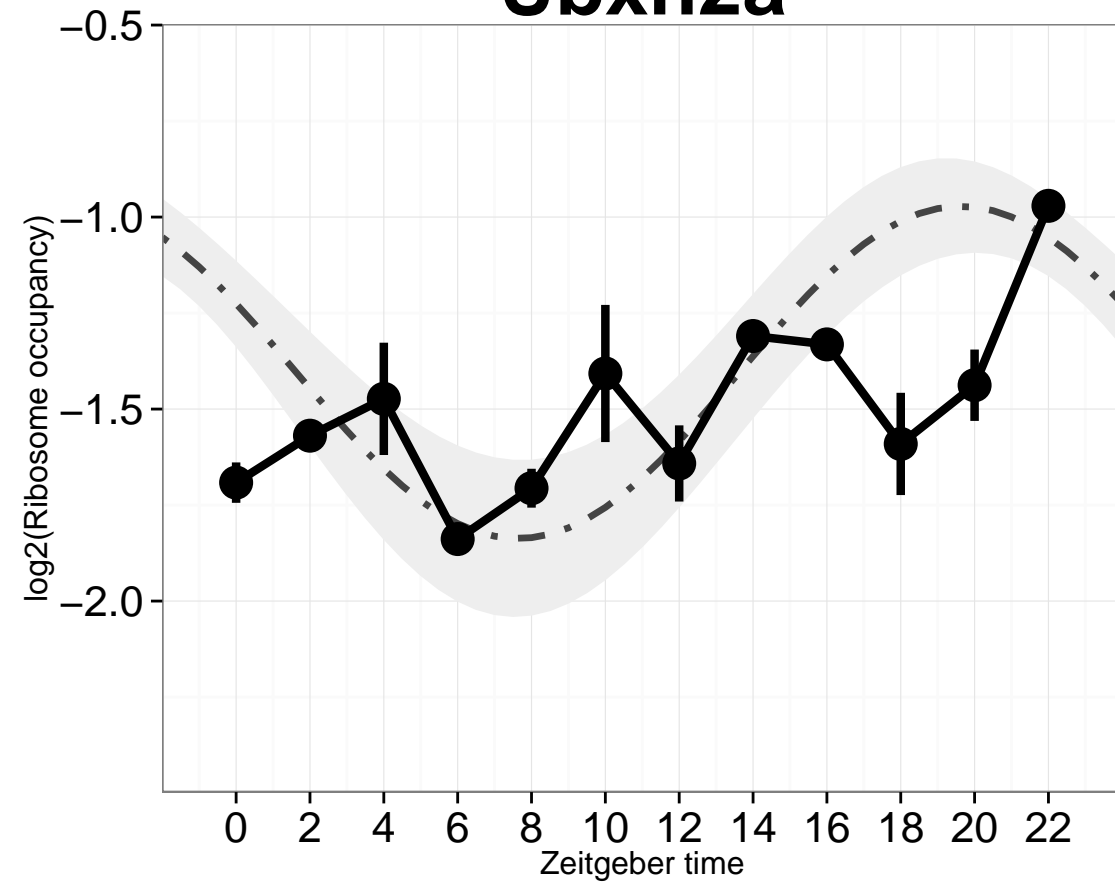

Supplement: SuppDataset_1.zip [file Ubxn2a_set_A.pdf › Supplemental Dataset 1/A-mRNA_nonrhyth_translation_nonrhyth/Ubxn2a_set_A.pdf]

## Ubxn2b

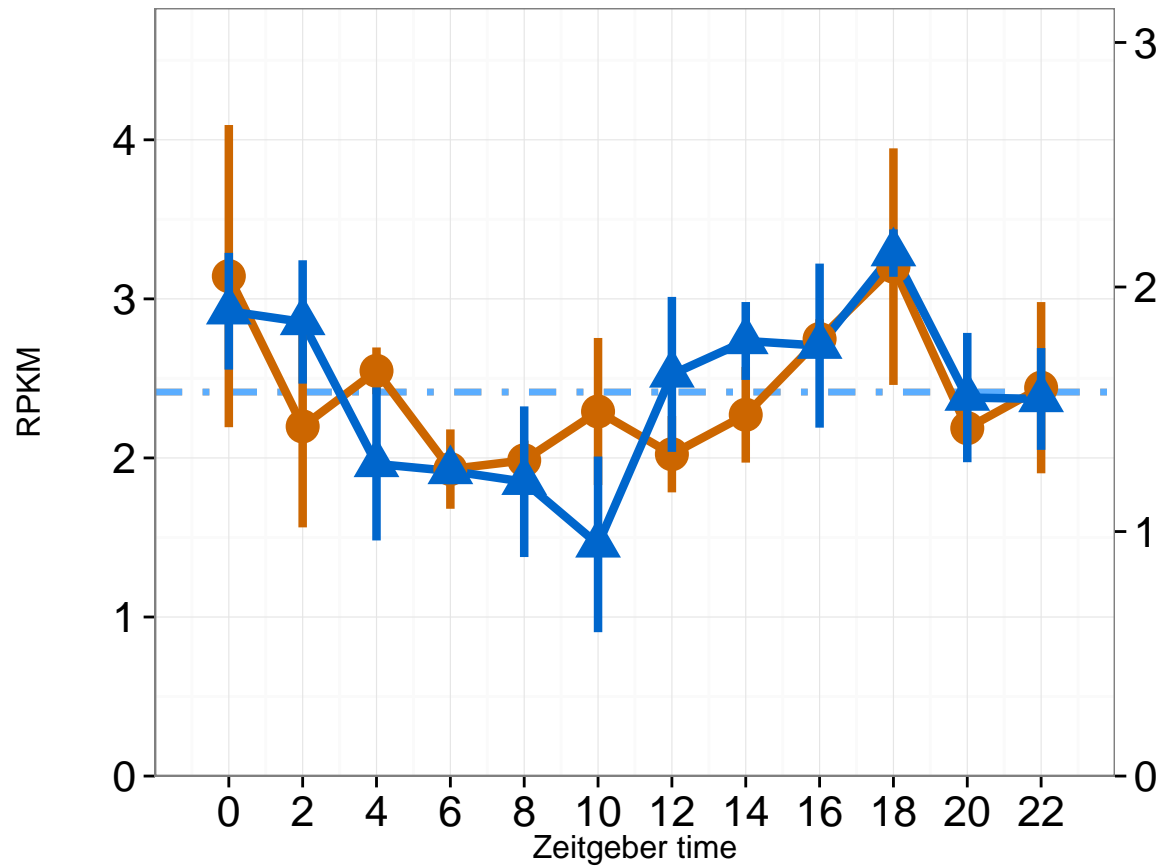

## Ubxn2b

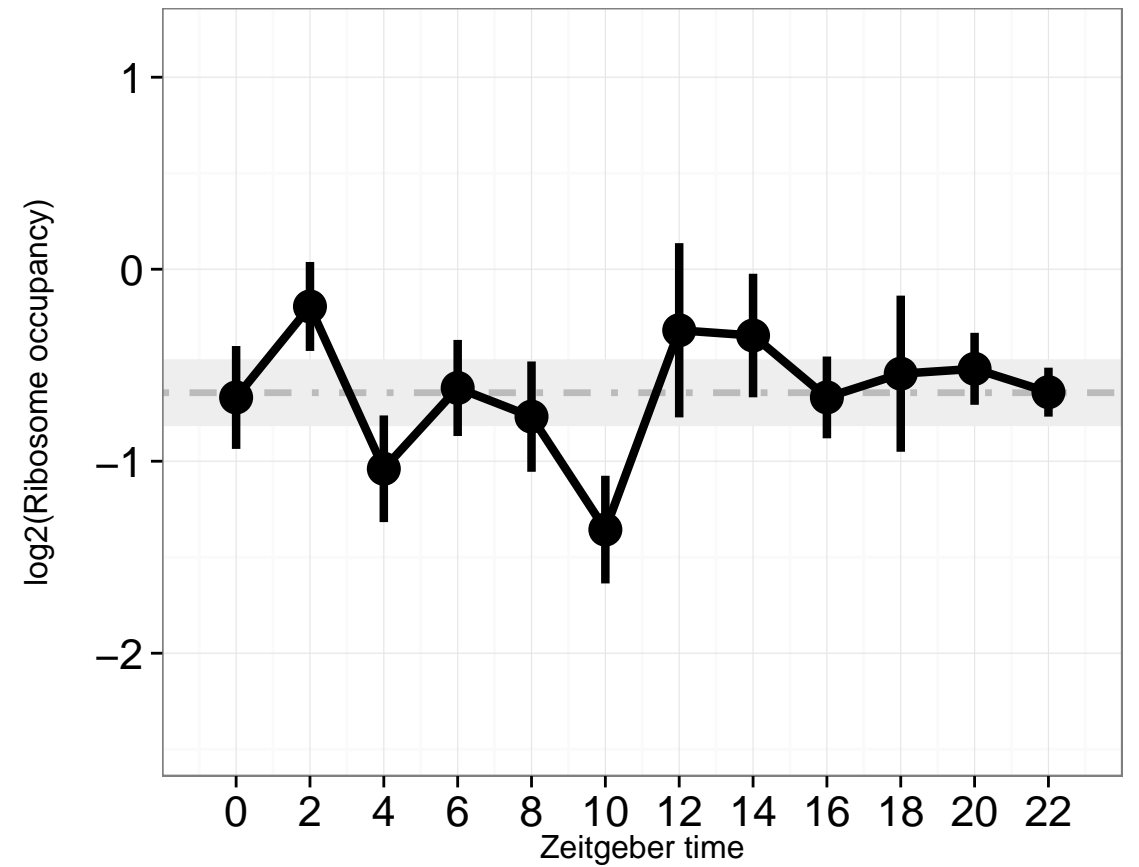

Supplement: SuppDataset_1.zip [file Ubxn2b_set_A.pdf › Supplemental Dataset 1/A-mRNA_nonrhyth_translation_nonrhyth/Ubxn2b_set_A.pdf]
