# Supplementary figures and images for: Ribosome profiling reveals the rhythmic liver translatome and circadian clock regulation by upstream open reading frames (part 80 of 113)
Source: HighWire-hosted journal article supplement (doi:10.1101/gr.195404.115), 2015-10-20

## Ubxn4

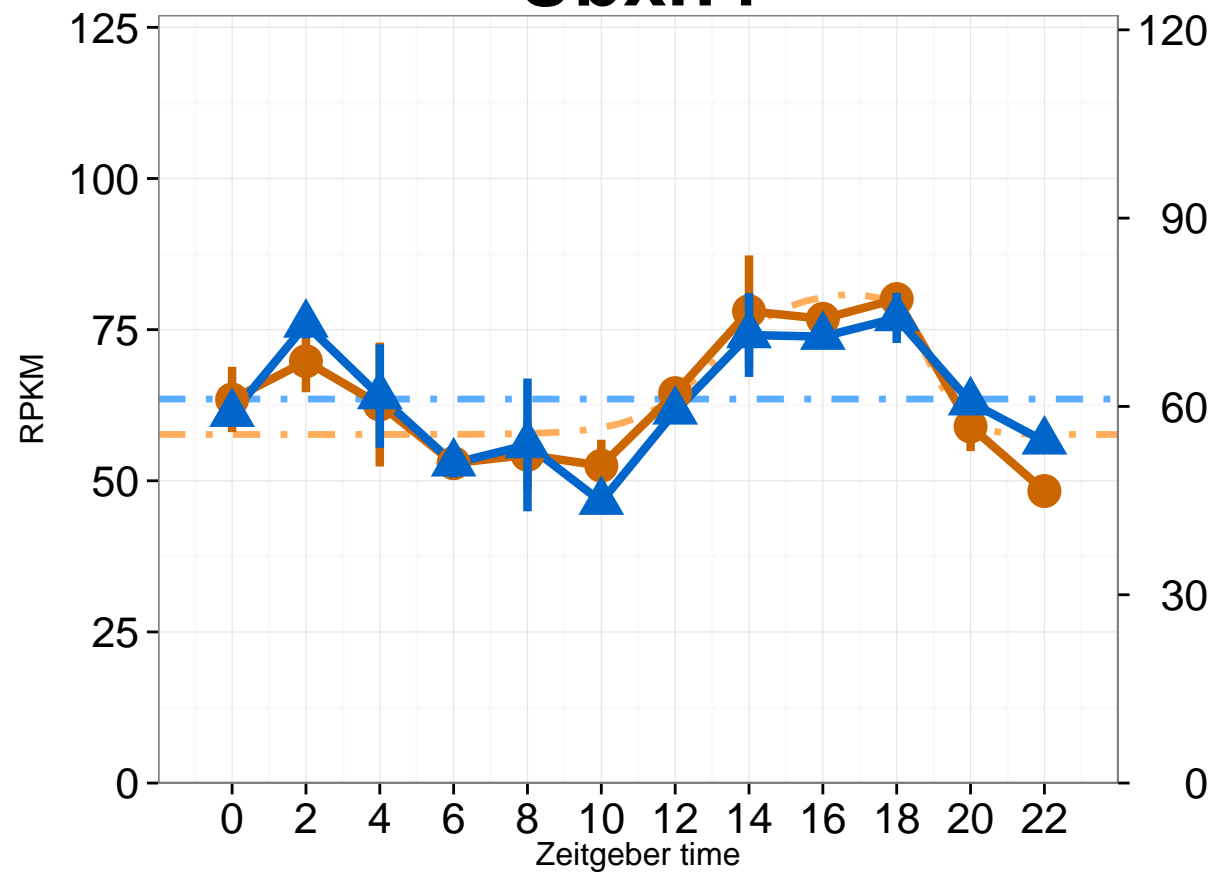

## Ubxn4

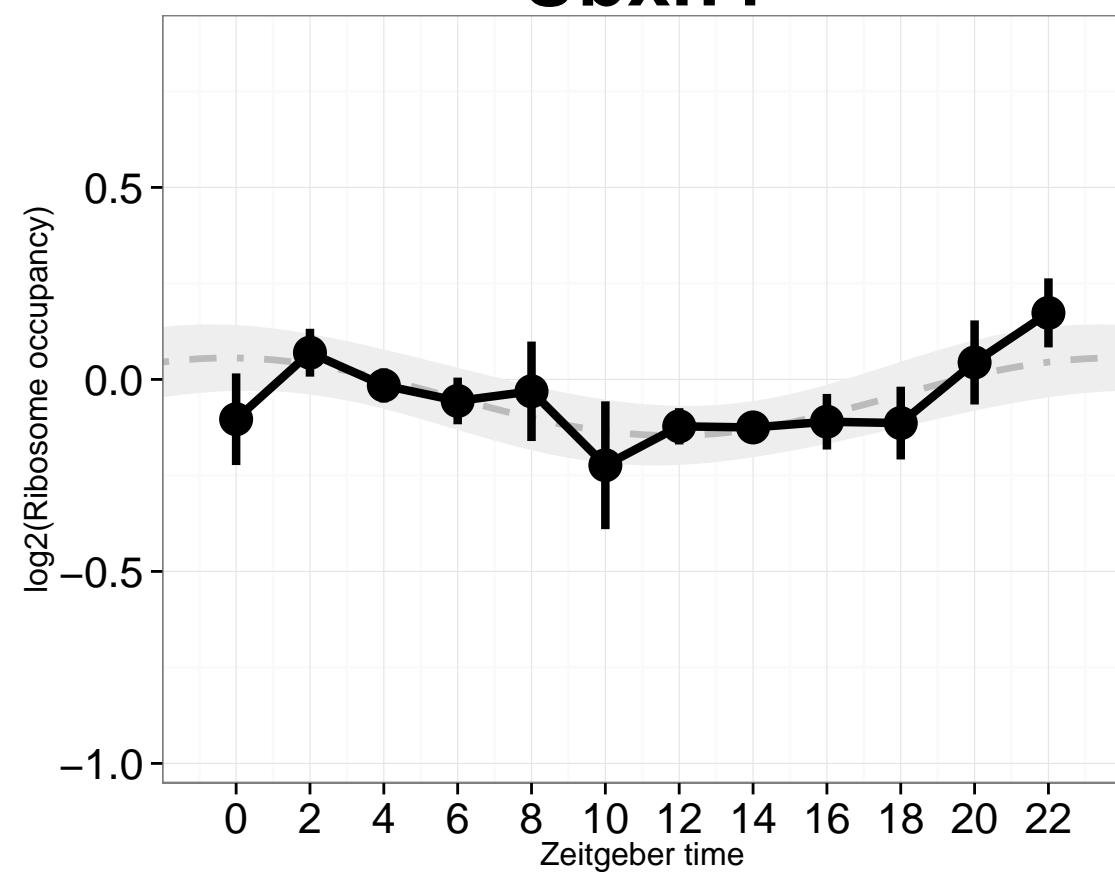

Supplement: SuppDataset_1.zip [file Ubxn4_set_A.pdf › Supplemental Dataset 1/A-mRNA_nonrhyth_translation_nonrhyth/Ubxn4_set_A.pdf]

## Ubxn6

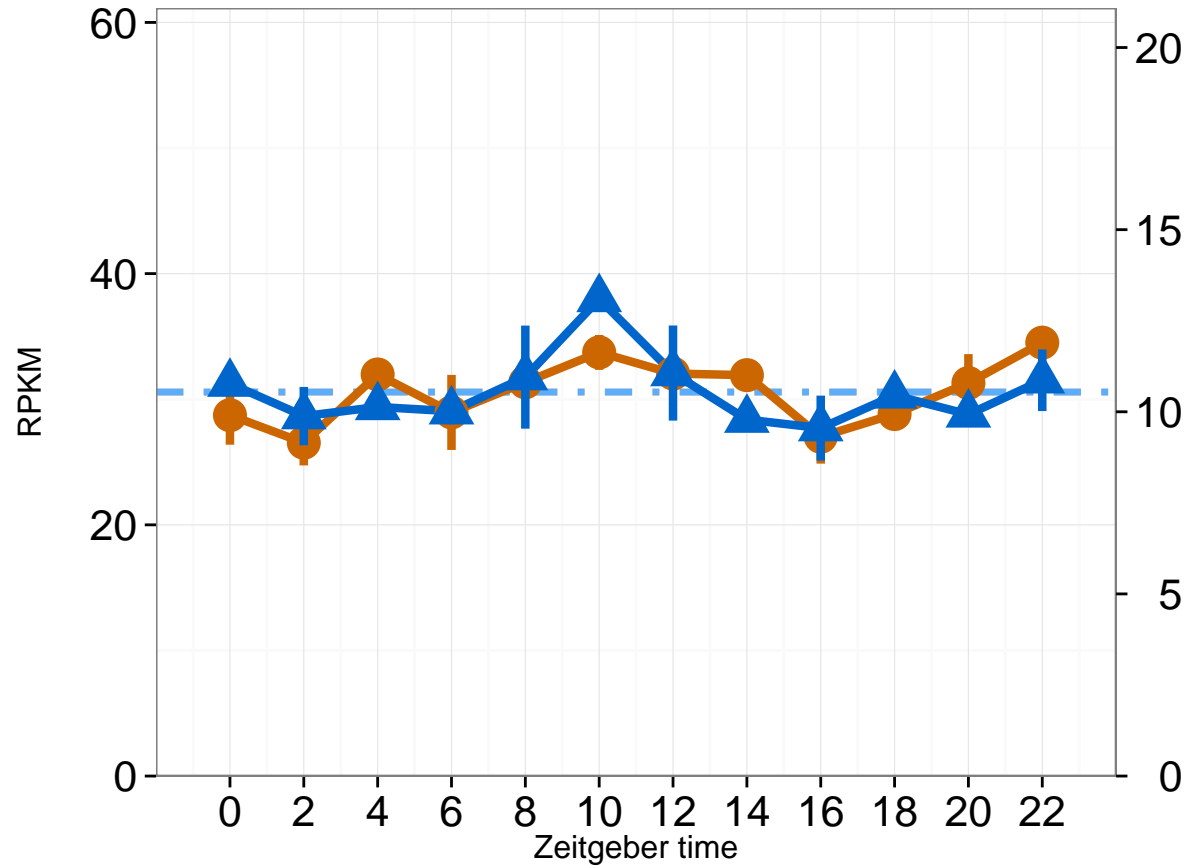

## Ubxn6

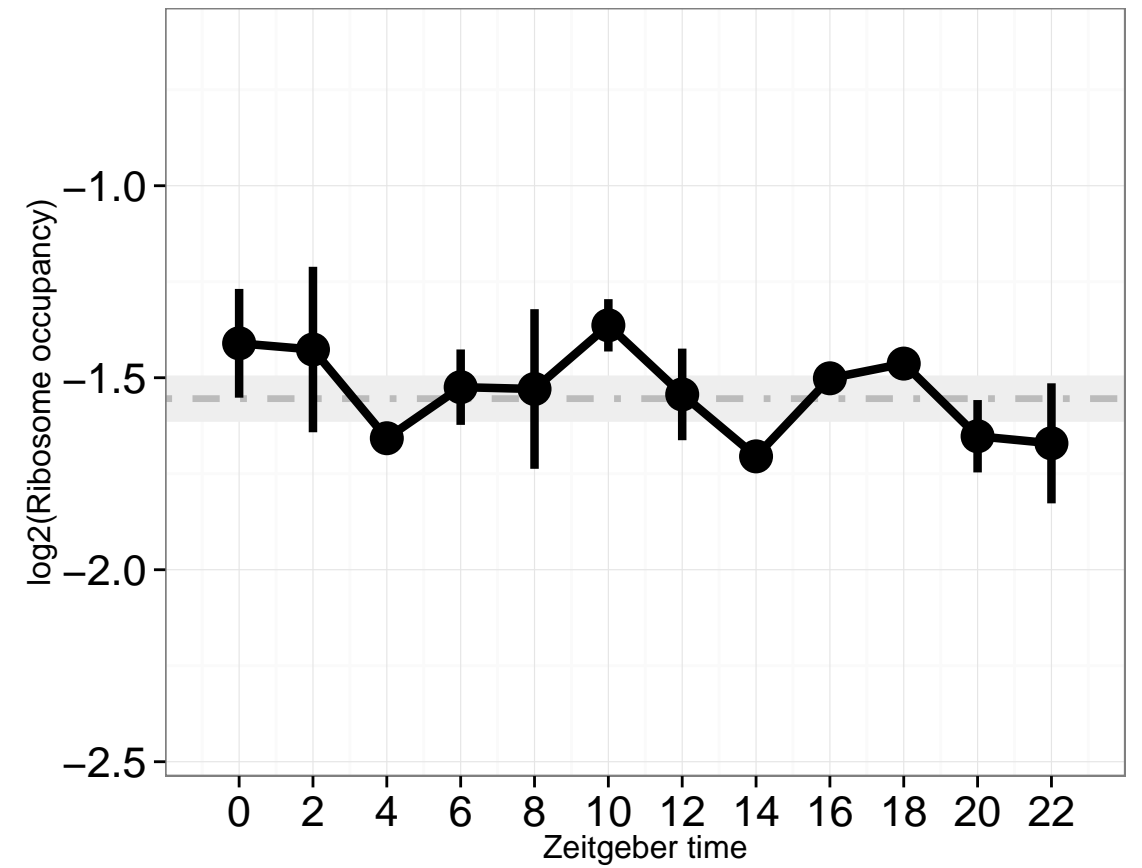

Supplement: SuppDataset_1.zip [file Ubxn6_set_A.pdf › Supplemental Dataset 1/A-mRNA_nonrhyth_translation_nonrhyth/Ubxn6_set_A.pdf]

## Ubxn7

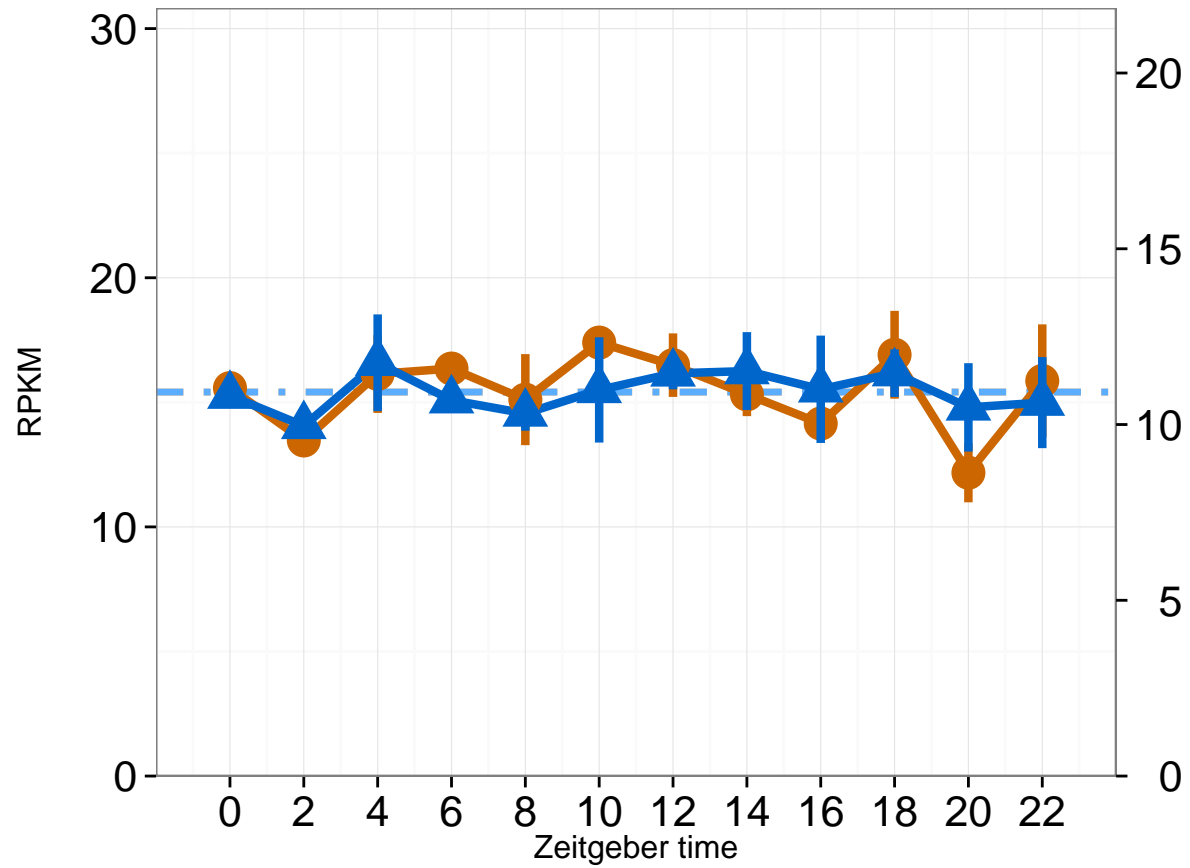

## Ubxn7

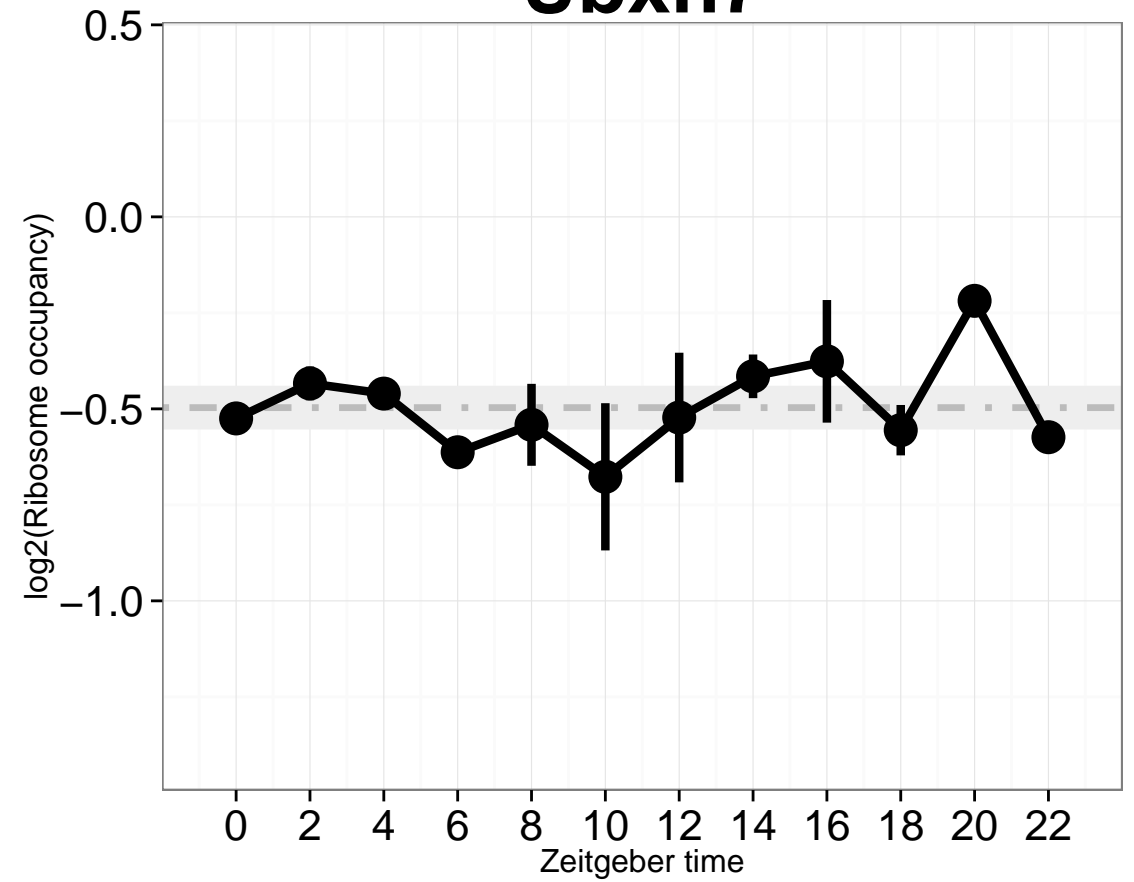

Supplement: SuppDataset_1.zip [file Ubxn7_set_A.pdf › Supplemental Dataset 1/A-mRNA_nonrhyth_translation_nonrhyth/Ubxn7_set_A.pdf]

## Ubxn8

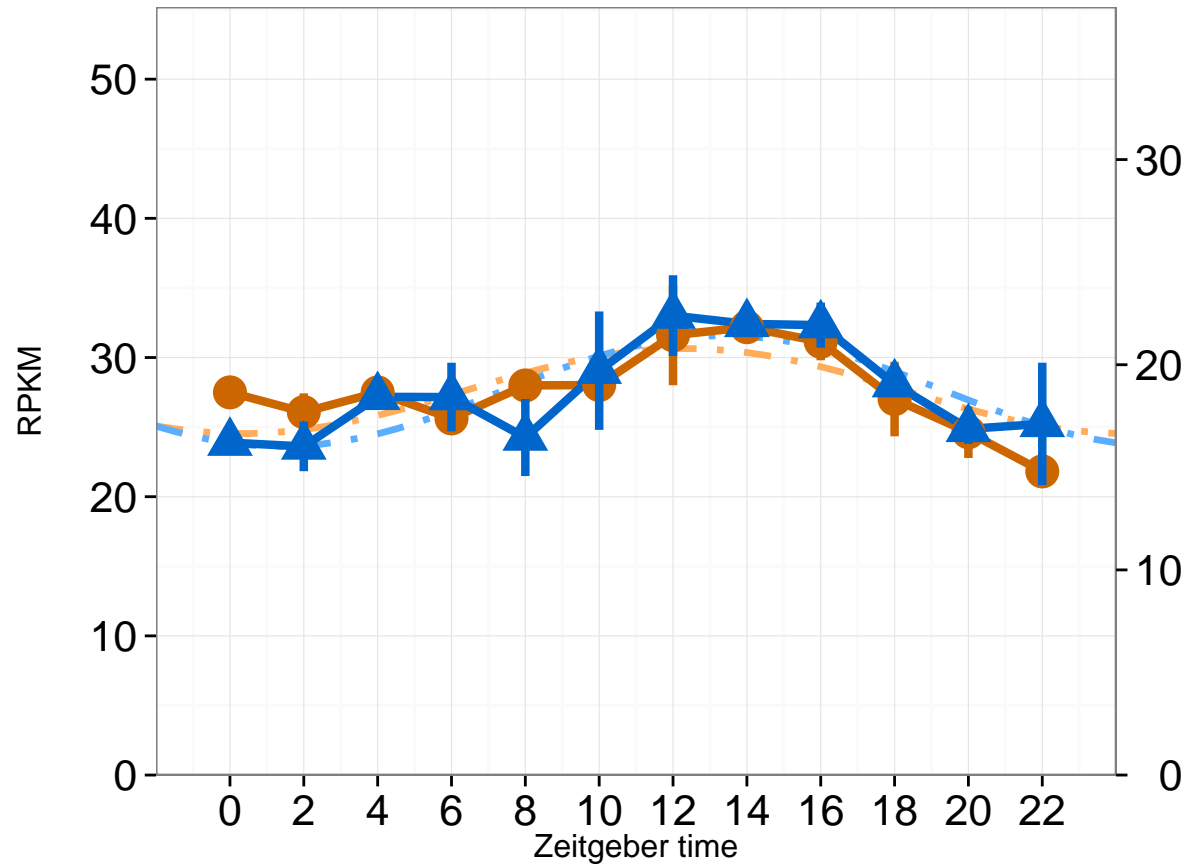

## Ubxn8

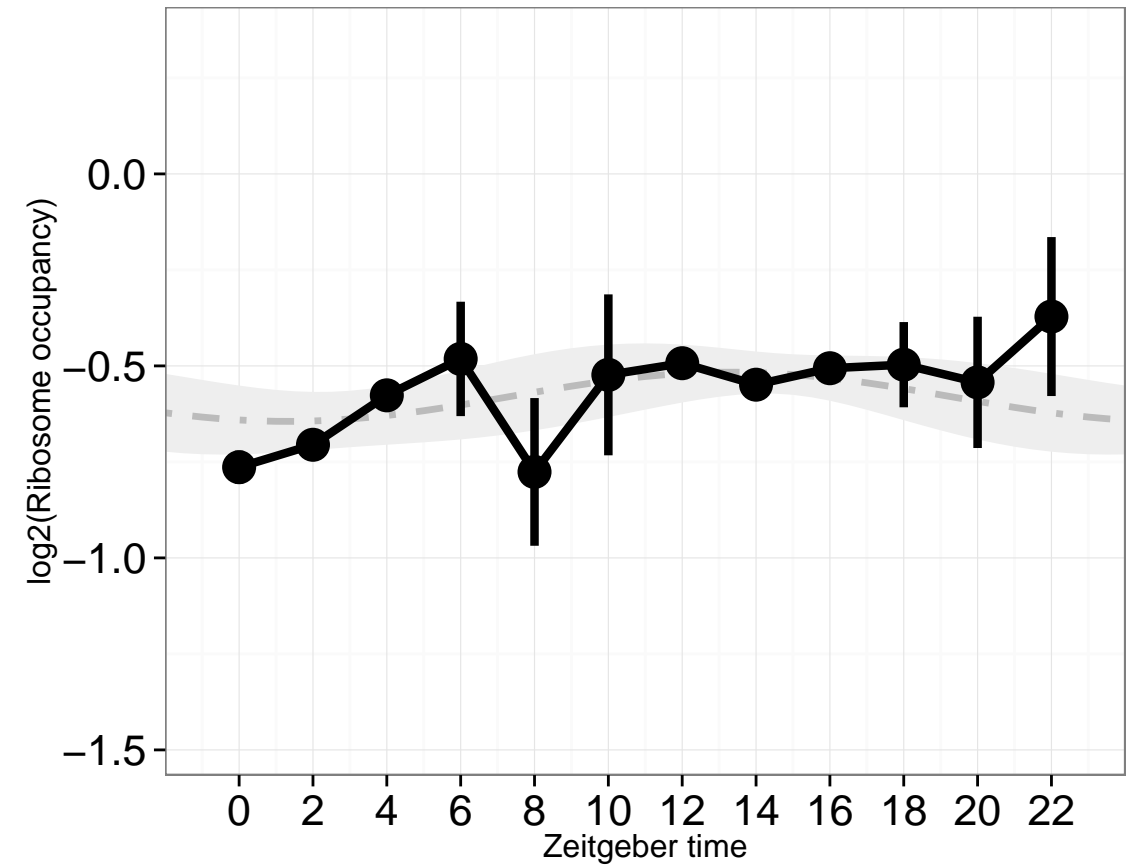

Supplement: SuppDataset_1.zip [file Ubxn8_set_A.pdf › Supplemental Dataset 1/A-mRNA_nonrhyth_translation_nonrhyth/Ubxn8_set_A.pdf]

# Uchl3

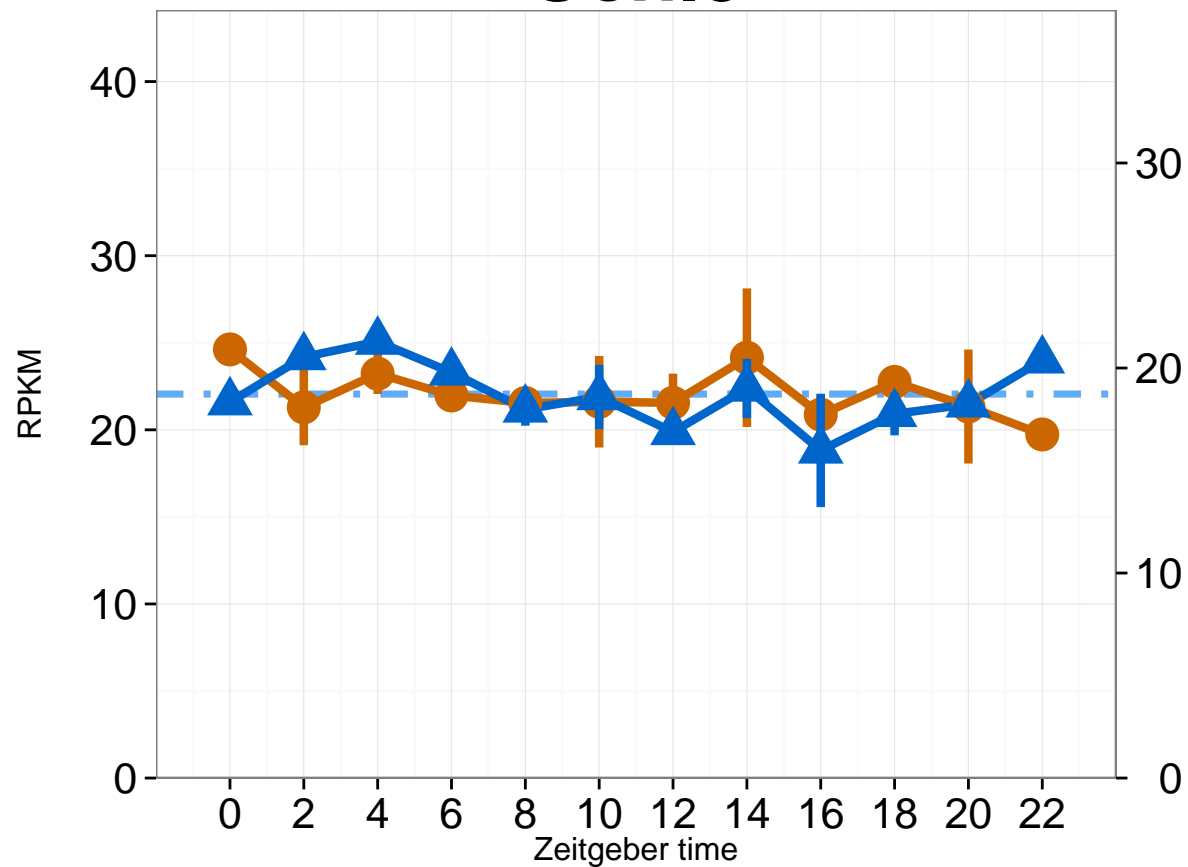

# Uchl3

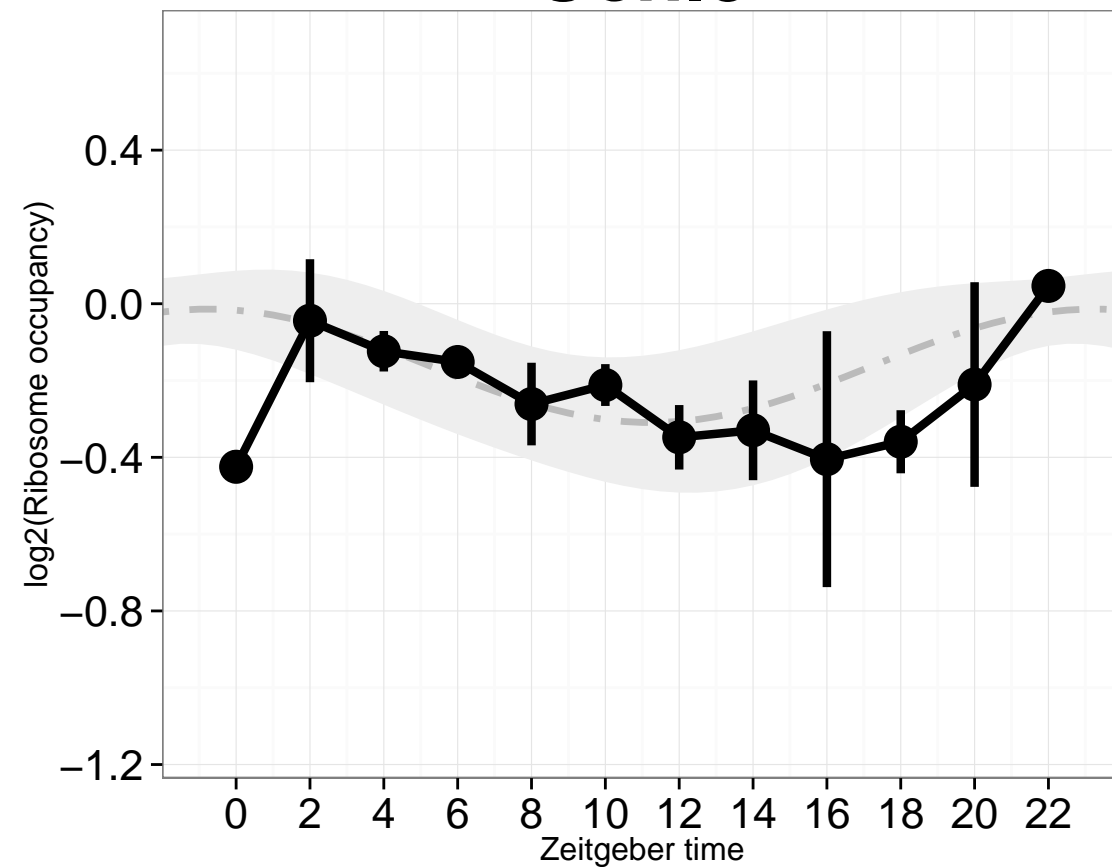

Supplement: SuppDataset_1.zip [file Uchl3_set_A.pdf › Supplemental Dataset 1/A-mRNA_nonrhyth_translation_nonrhyth/Uchl3_set_A.pdf]

# Uchl5

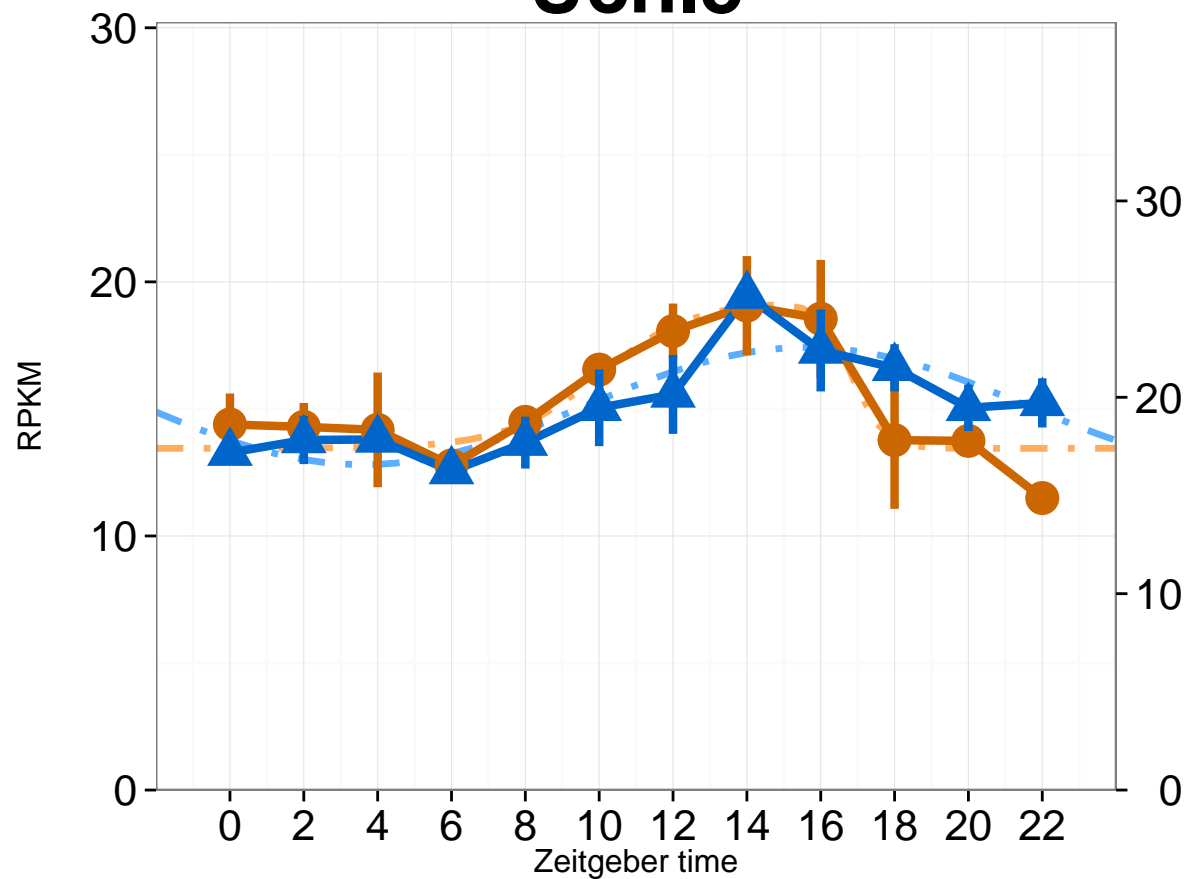

# Uchl5

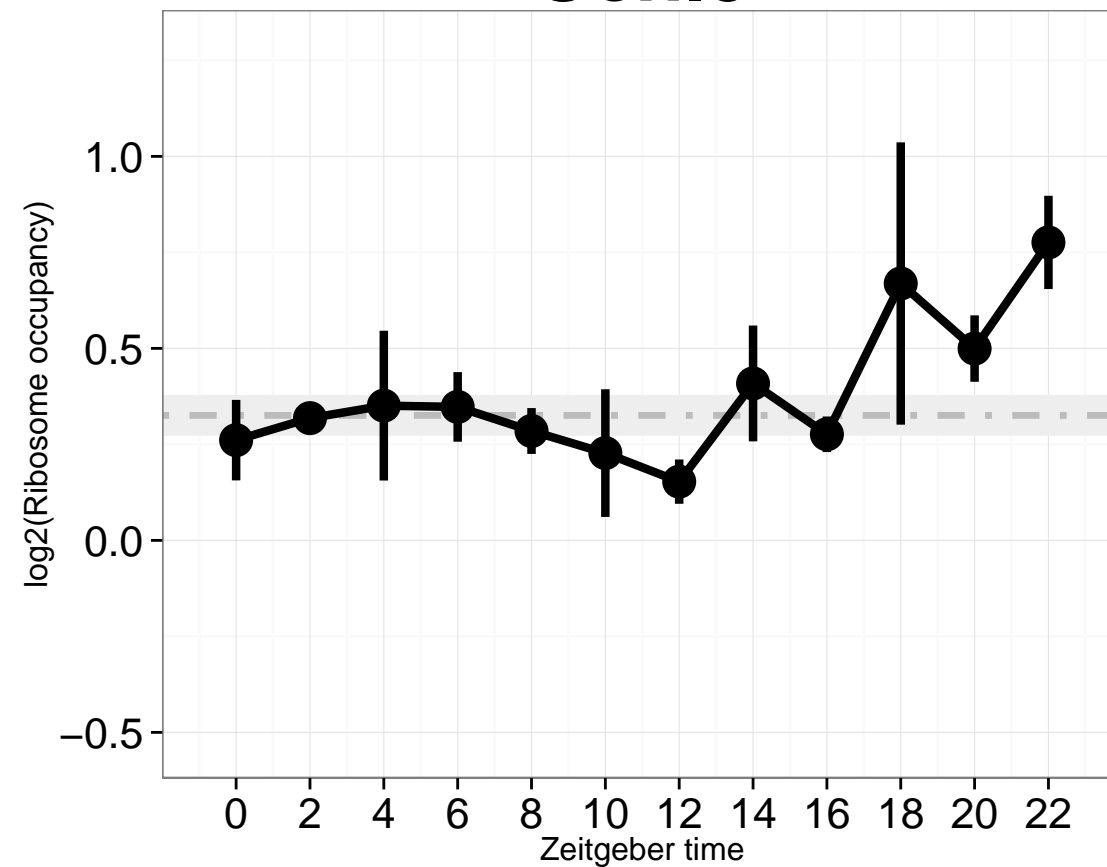

Supplement: SuppDataset_1.zip [file Uchl5_set_A.pdf › Supplemental Dataset 1/A-mRNA_nonrhyth_translation_nonrhyth/Uchl5_set_A.pdf]

## Uck1

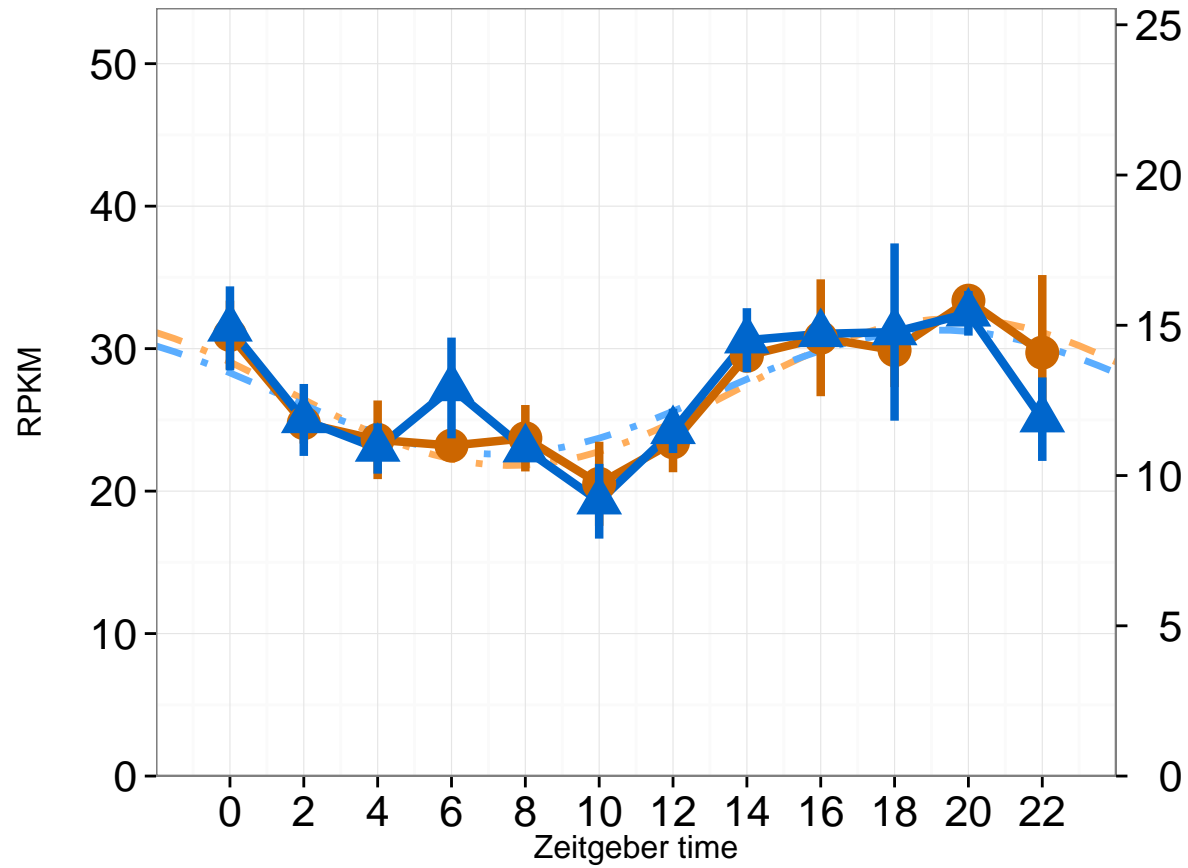

## Uck1

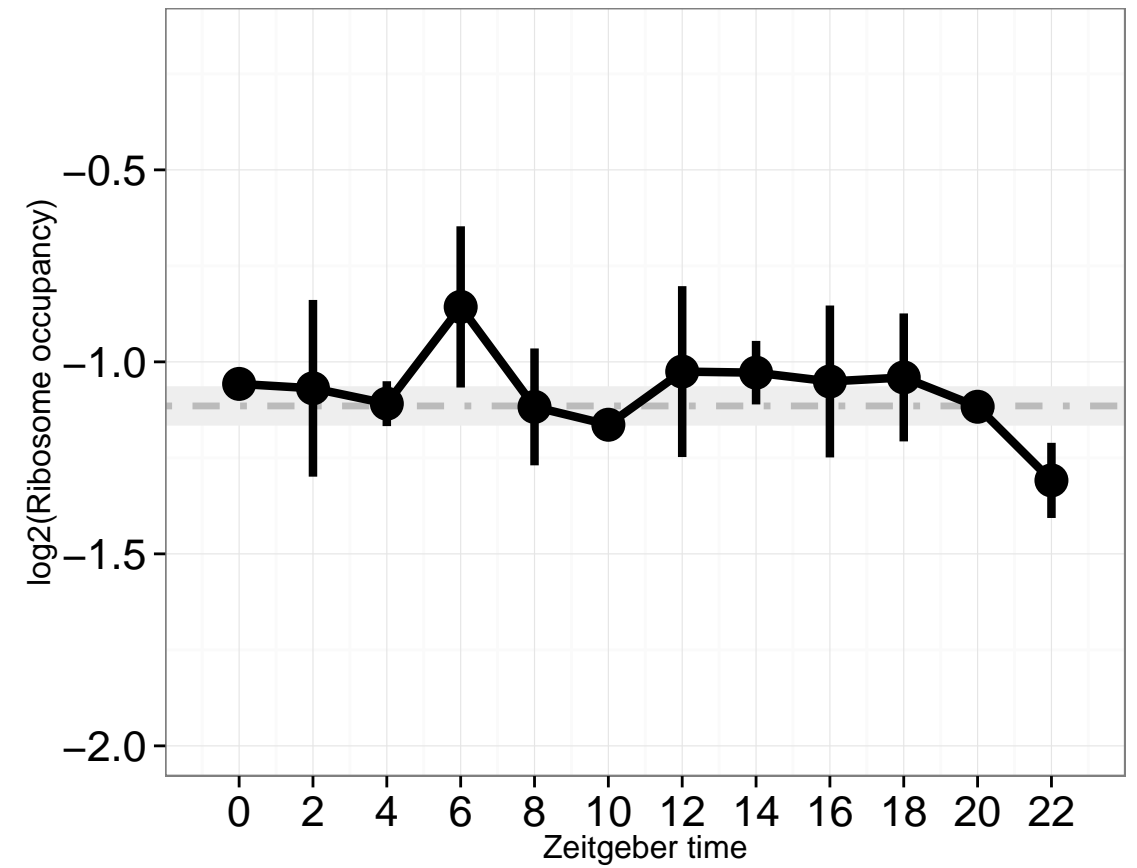

Supplement: SuppDataset_1.zip [file Uck1_set_A.pdf › Supplemental Dataset 1/A-mRNA_nonrhyth_translation_nonrhyth/Uck1_set_A.pdf]

## Uck2

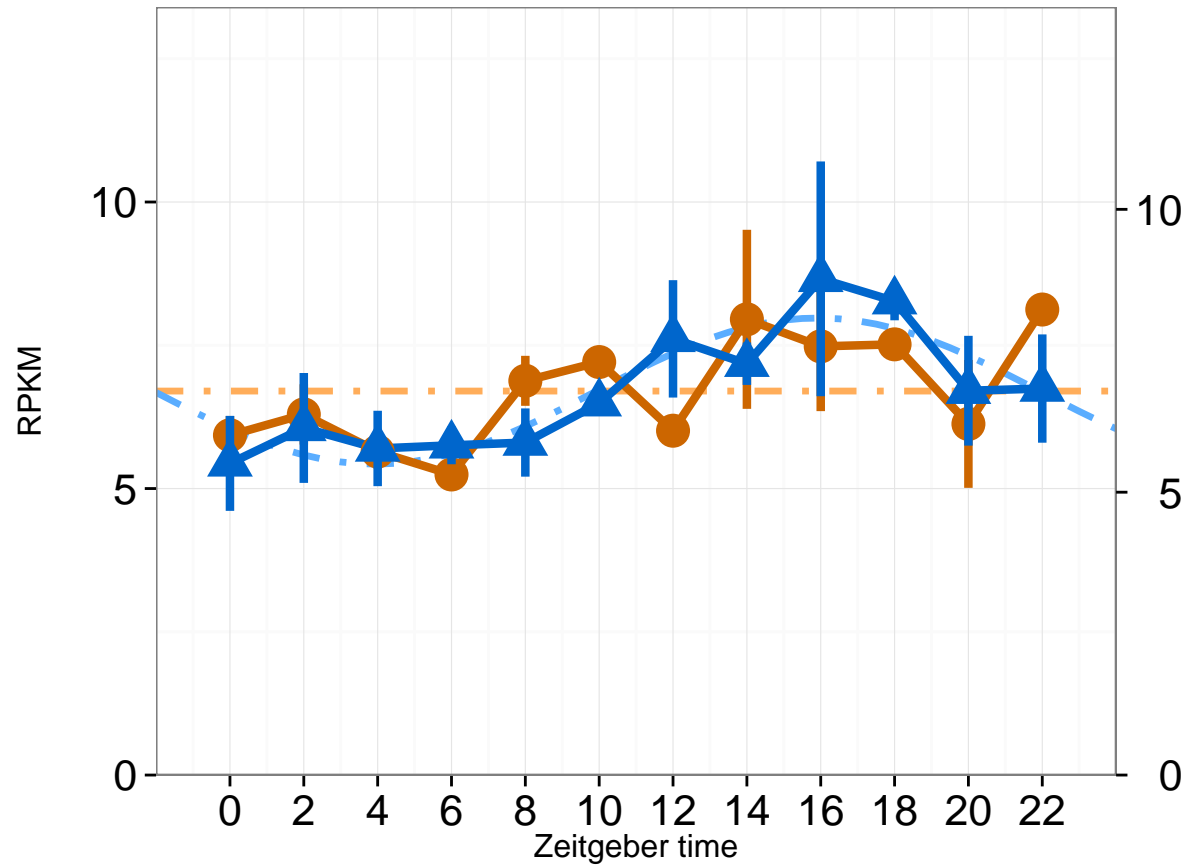

## Uck2

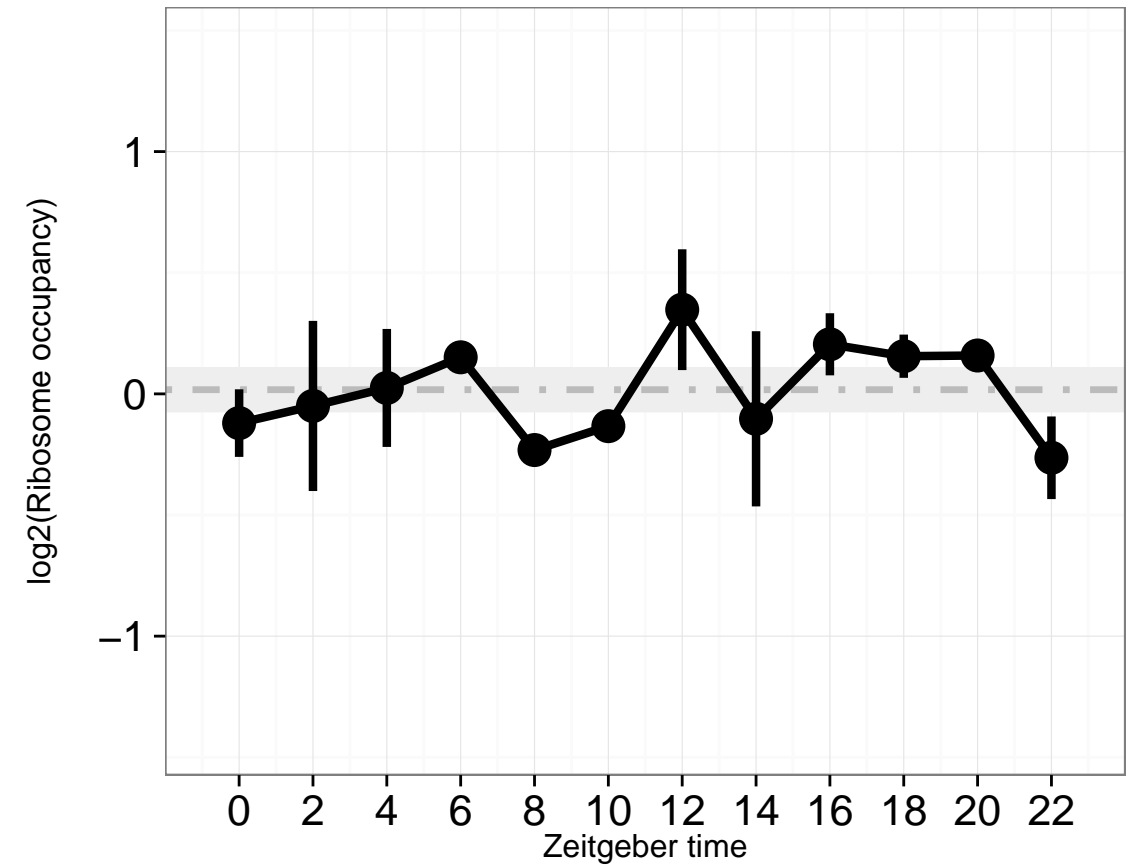

Supplement: SuppDataset_1.zip [file Uck2_set_A.pdf › Supplemental Dataset 1/A-mRNA_nonrhyth_translation_nonrhyth/Uck2_set_A.pdf]

## Uckl1

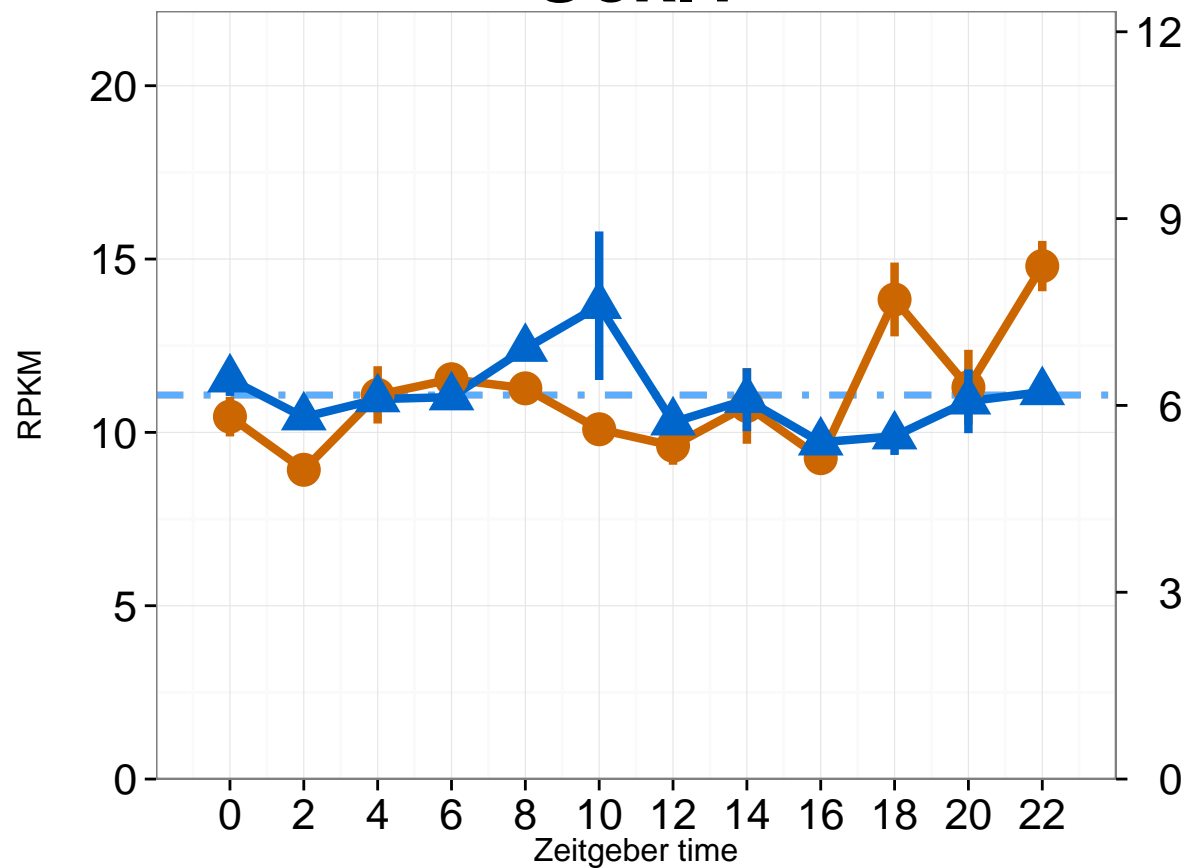

## Uckl1

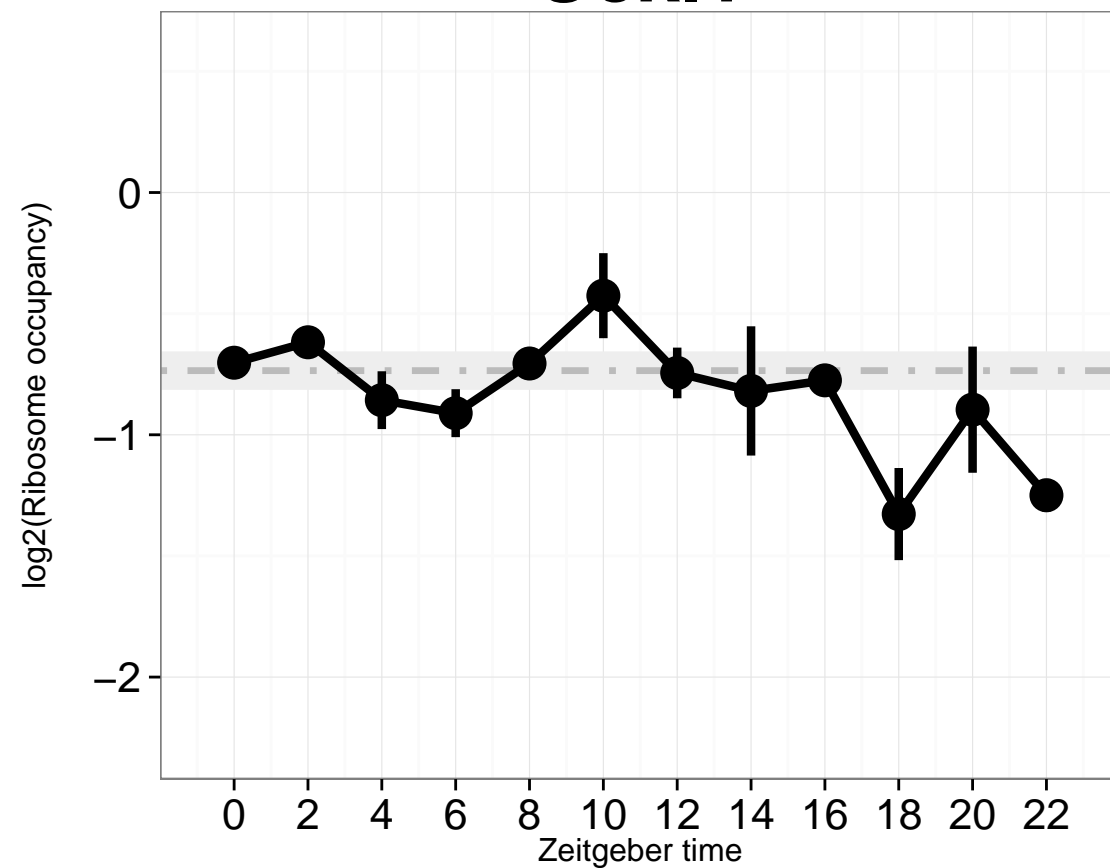

Supplement: SuppDataset_1.zip [file Uckl1_set_A.pdf › Supplemental Dataset 1/A-mRNA_nonrhyth_translation_nonrhyth/Uckl1_set_A.pdf]

## Ucp2

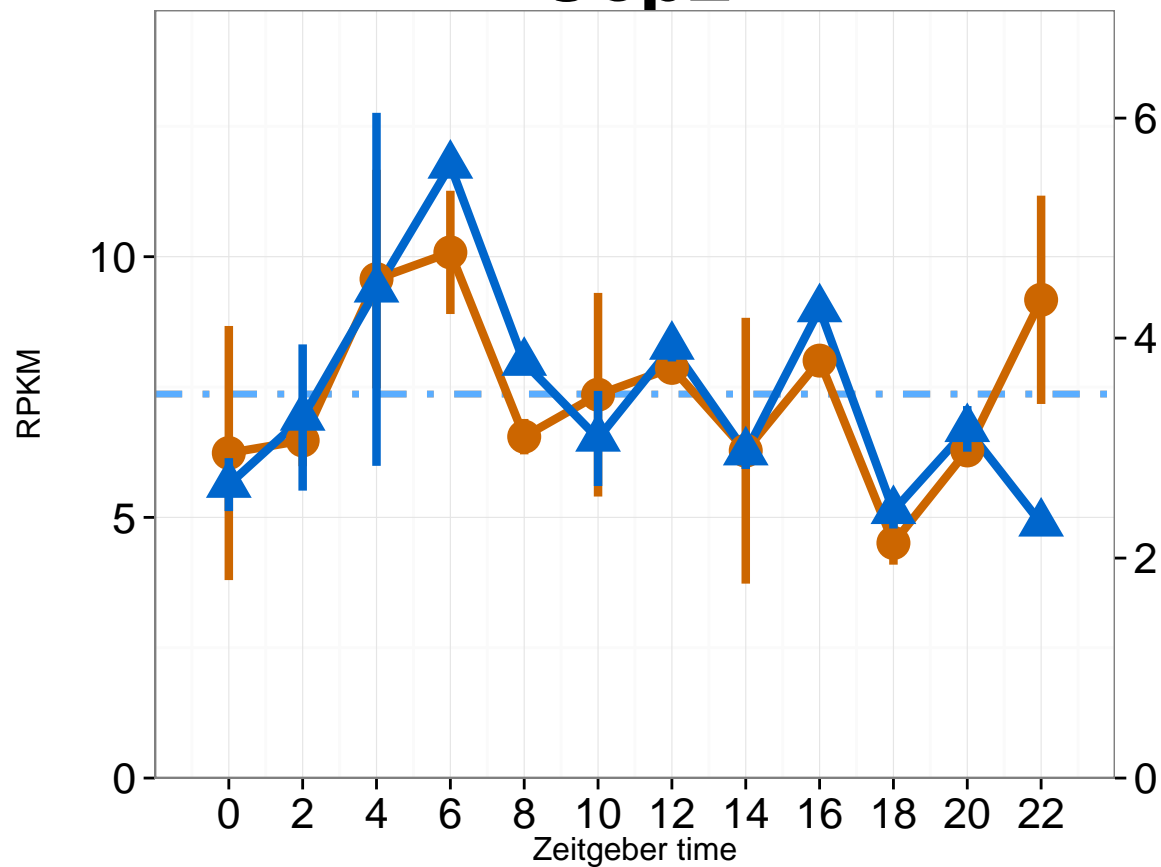

## Ucp2

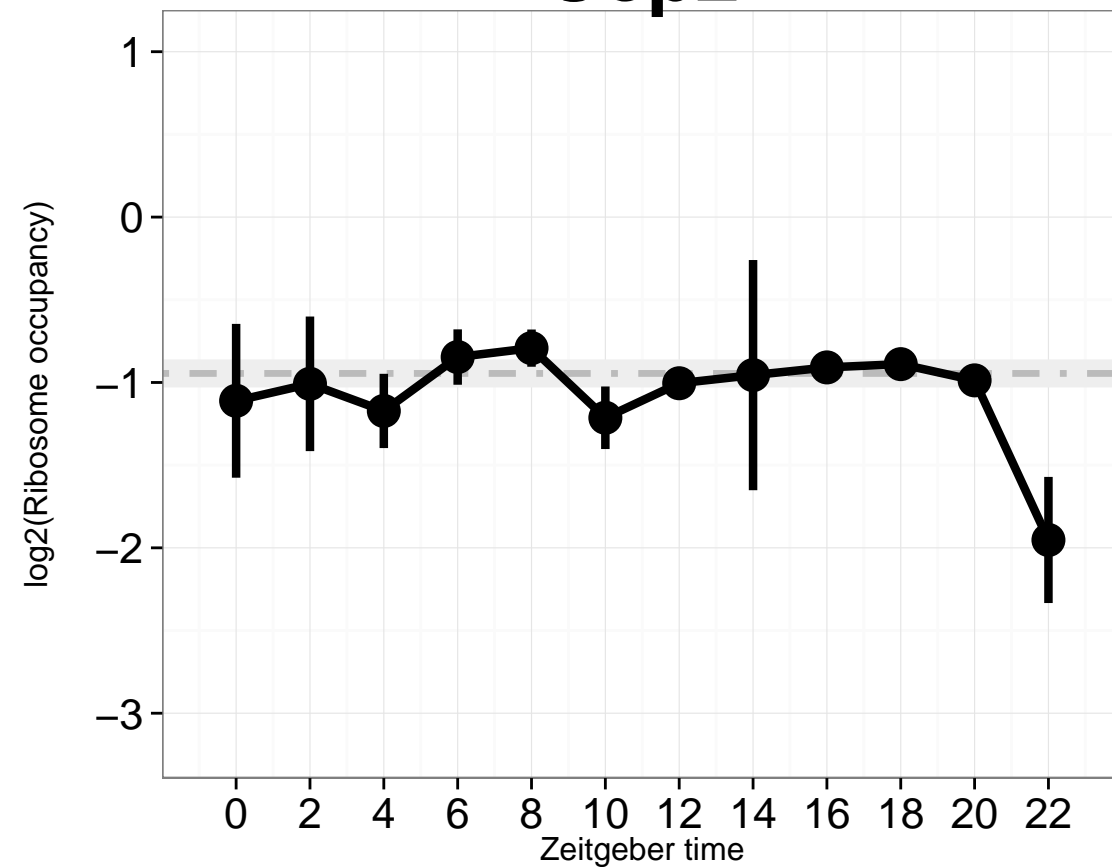

Supplement: SuppDataset_1.zip [file Ucp2_set_A.pdf › Supplemental Dataset 1/A-mRNA_nonrhyth_translation_nonrhyth/Ucp2_set_A.pdf]

## Uevld

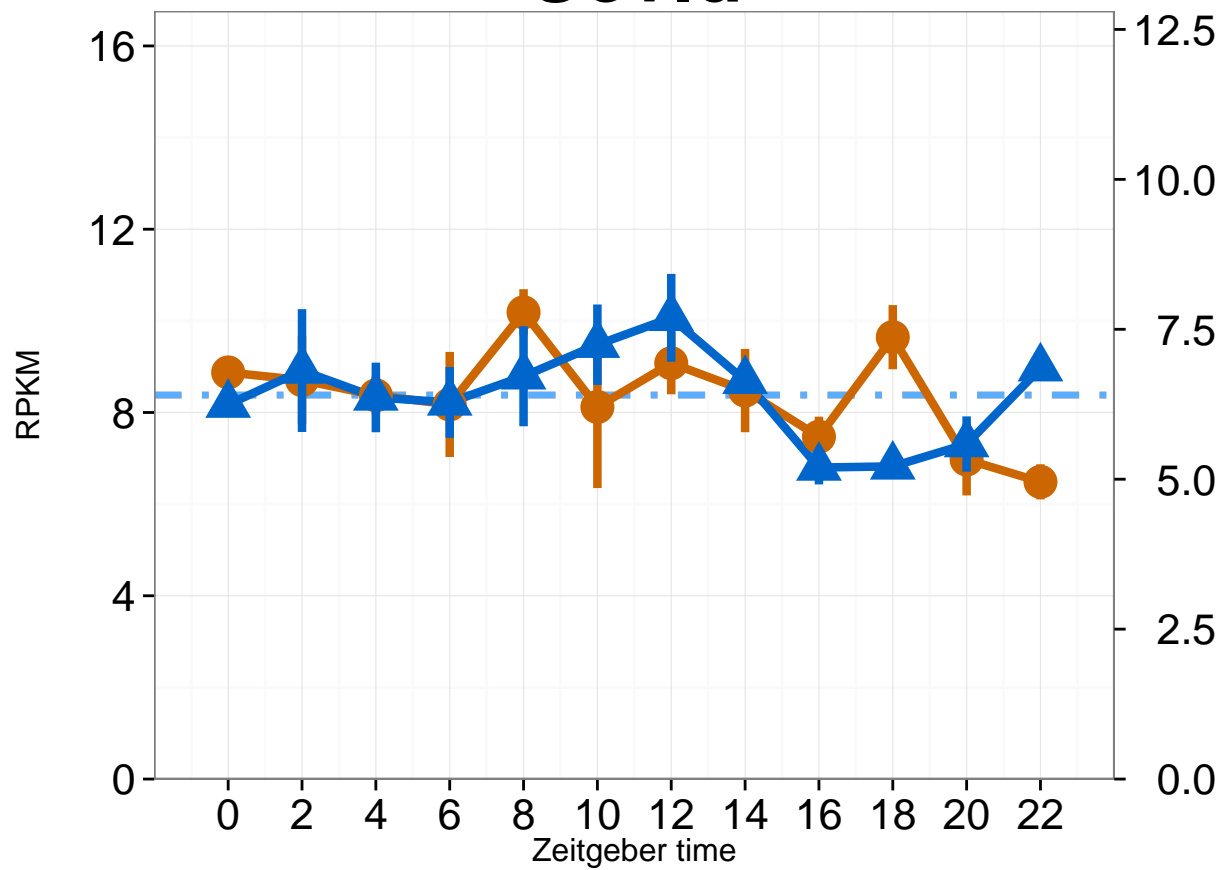

## Uevld

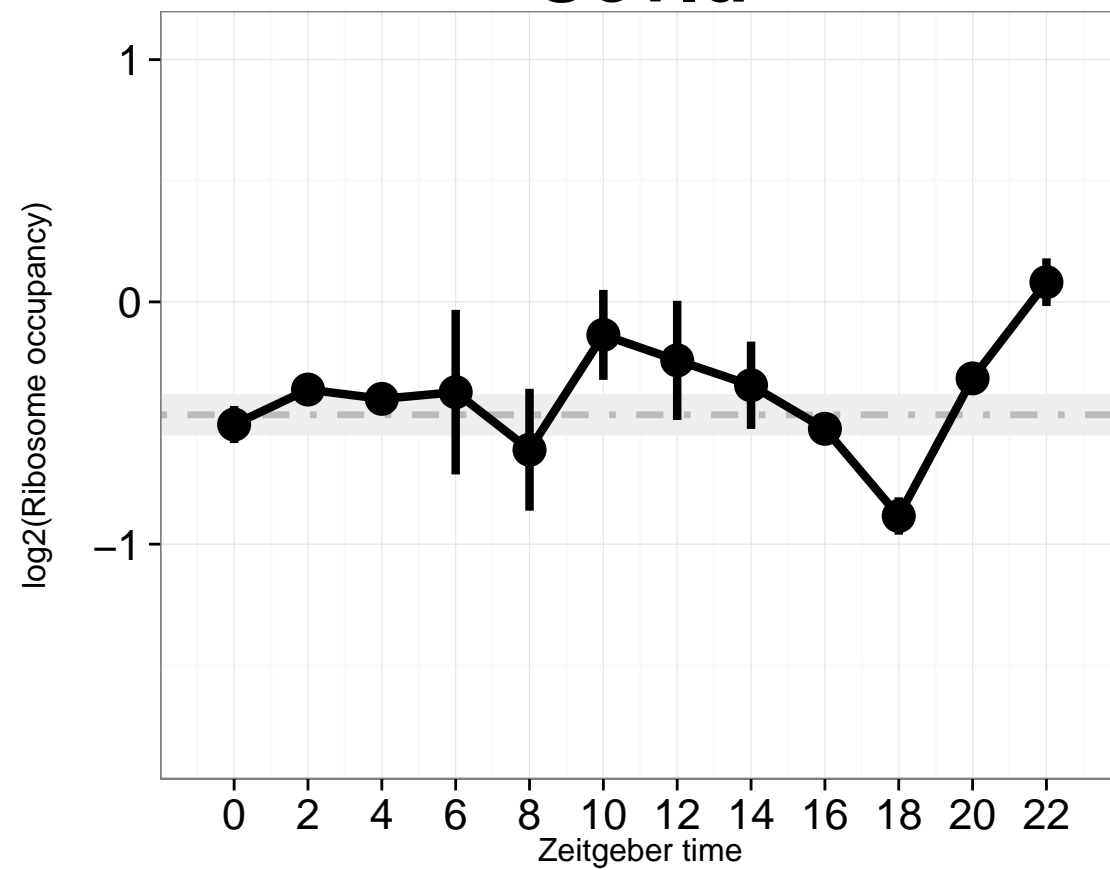

Supplement: SuppDataset_1.zip [file Uevld_set_A.pdf › Supplemental Dataset 1/A-mRNA_nonrhyth_translation_nonrhyth/Uevld_set_A.pdf]

# Ufc1

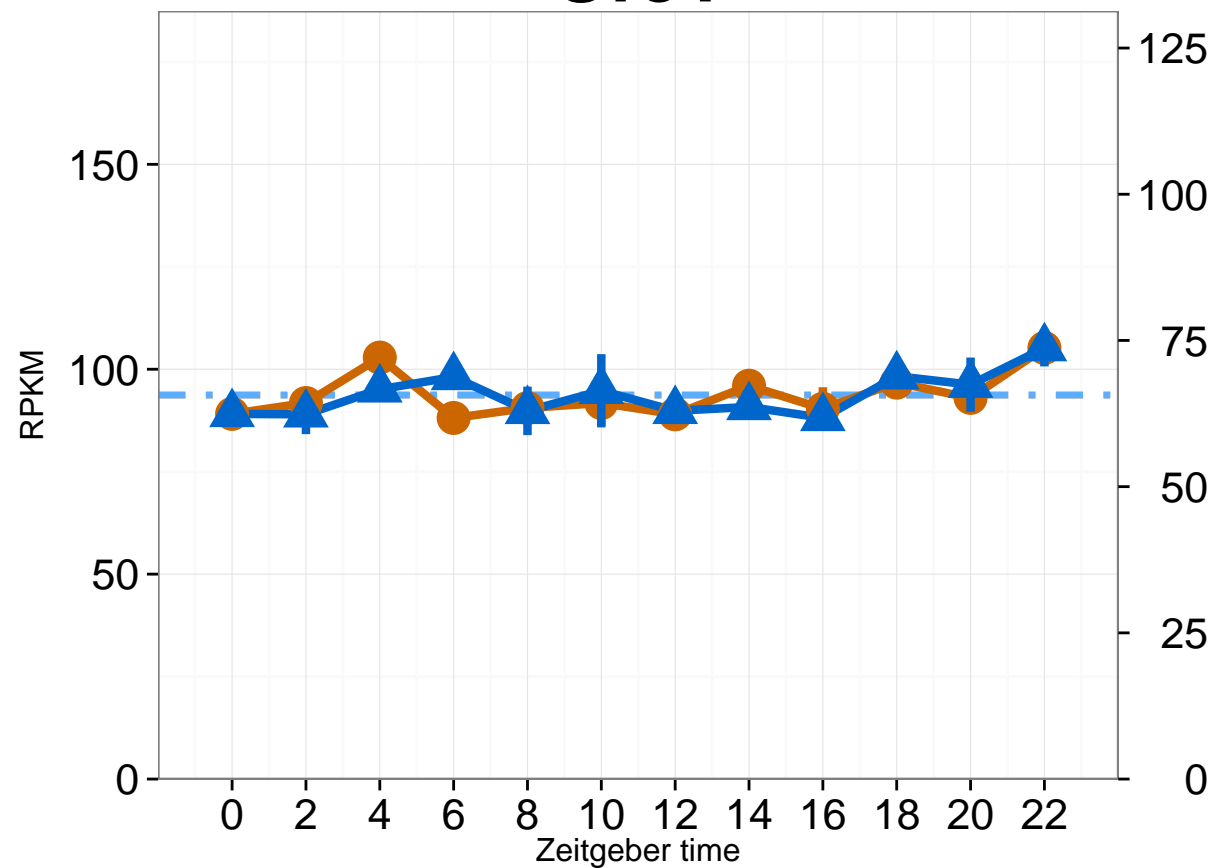

# Ufc1

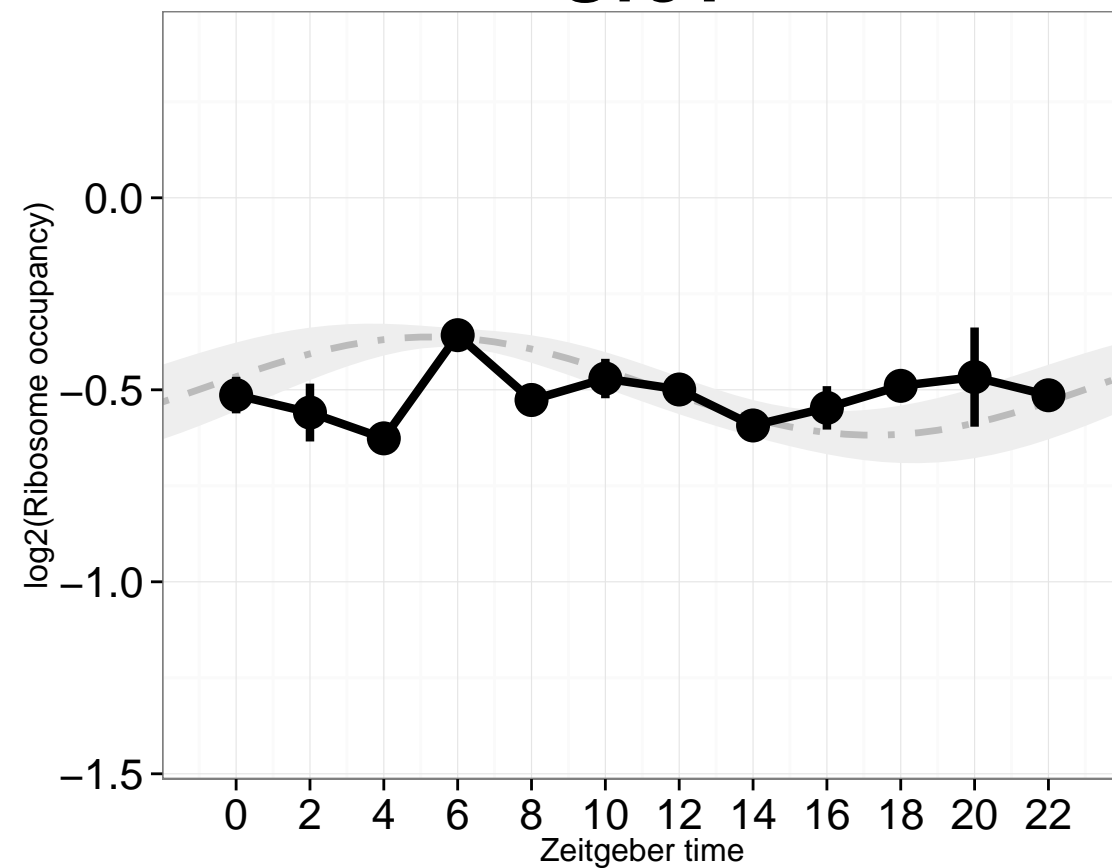

Supplement: SuppDataset_1.zip [file Ufc1_set_A.pdf › Supplemental Dataset 1/A-mRNA_nonrhyth_translation_nonrhyth/Ufc1_set_A.pdf]

## Ufd1l

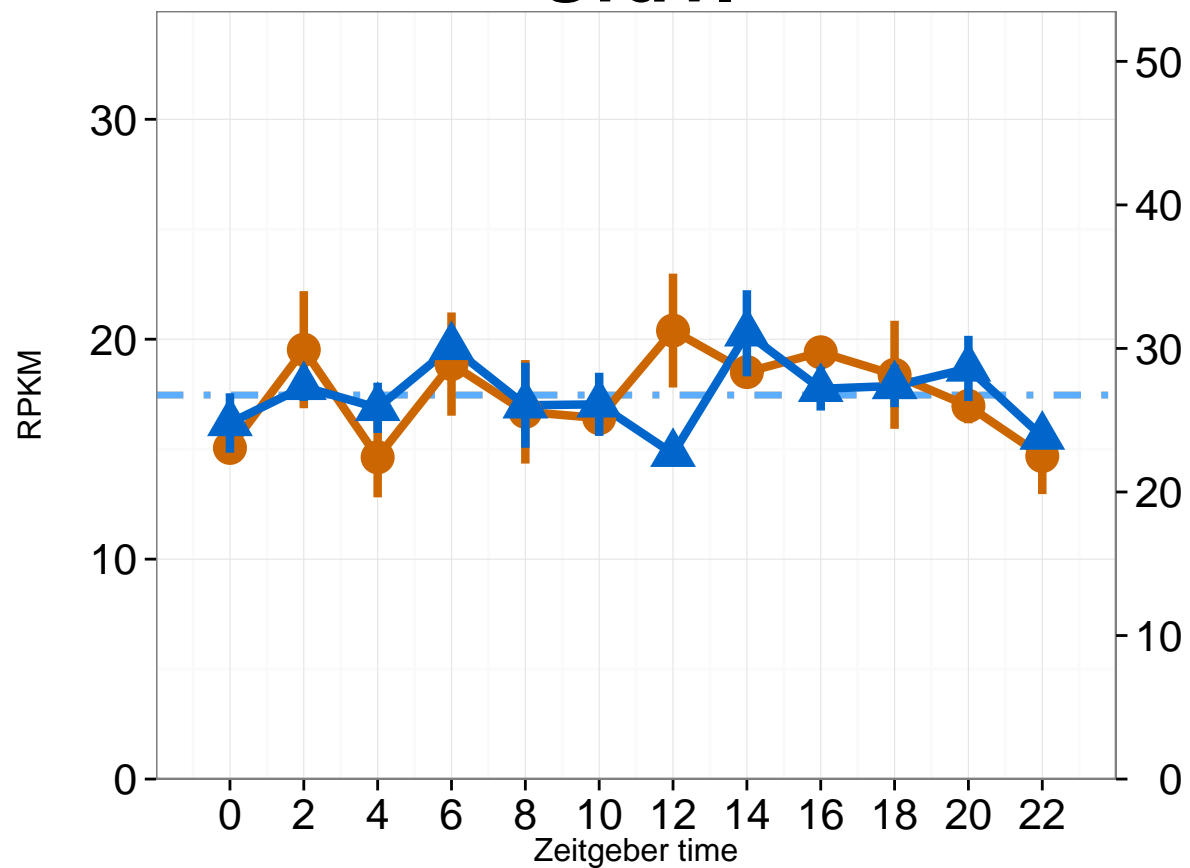

## Ufd1l

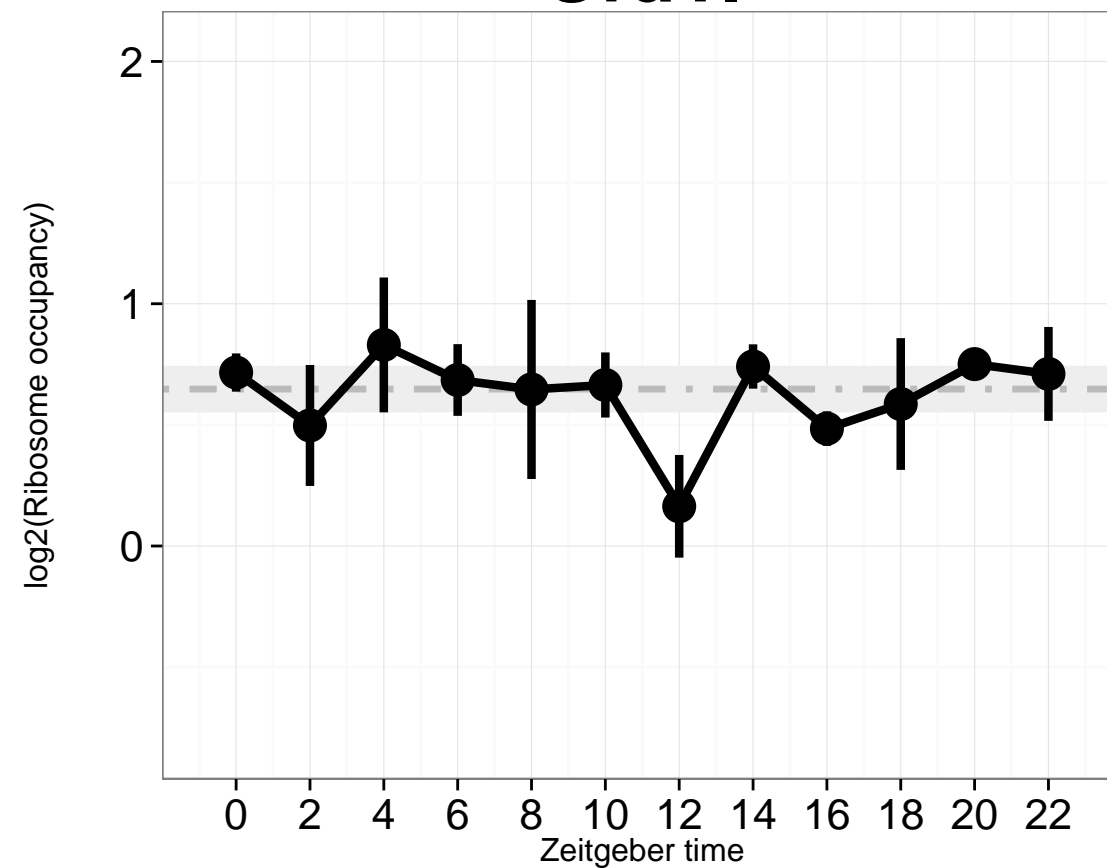

Supplement: SuppDataset_1.zip [file Ufd1l_set_A.pdf › Supplemental Dataset 1/A-mRNA_nonrhyth_translation_nonrhyth/Ufd1l_set_A.pdf]

## Ufl1

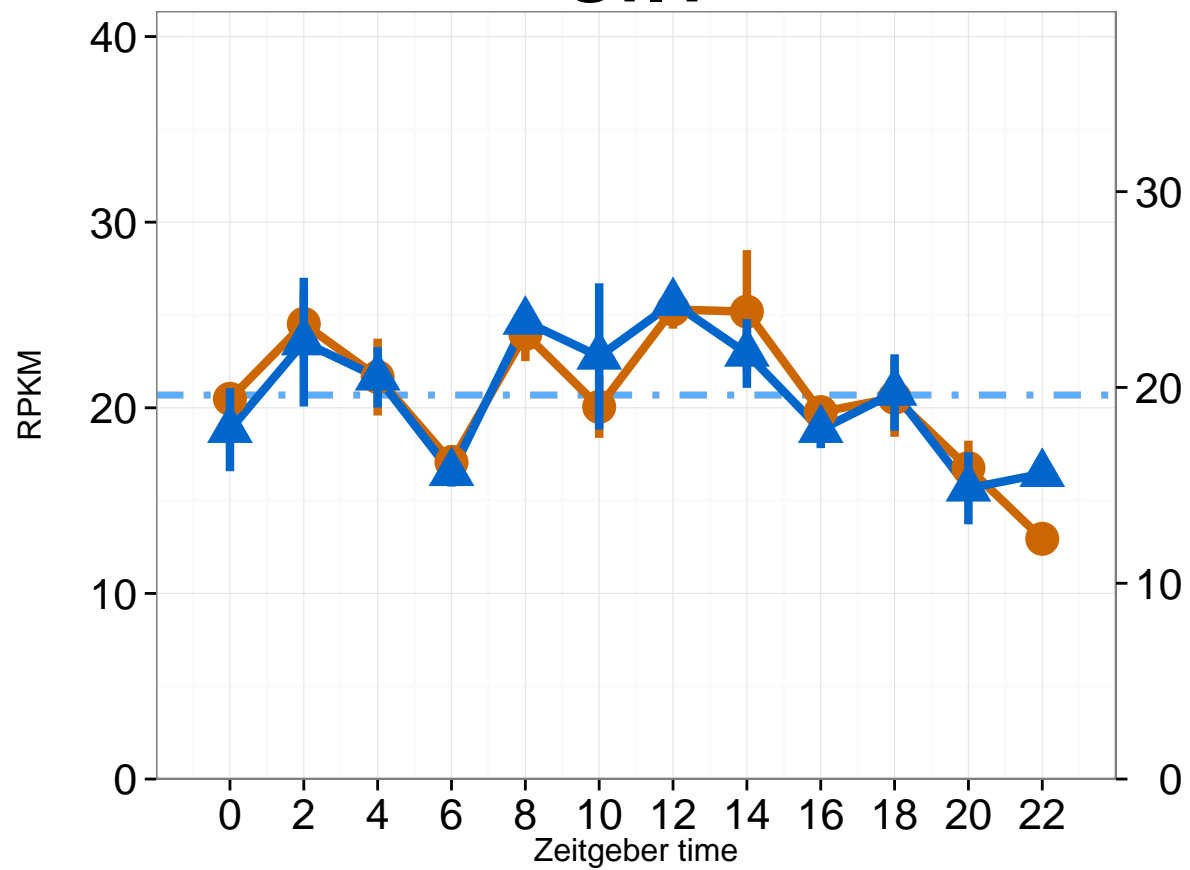

## Ufl1

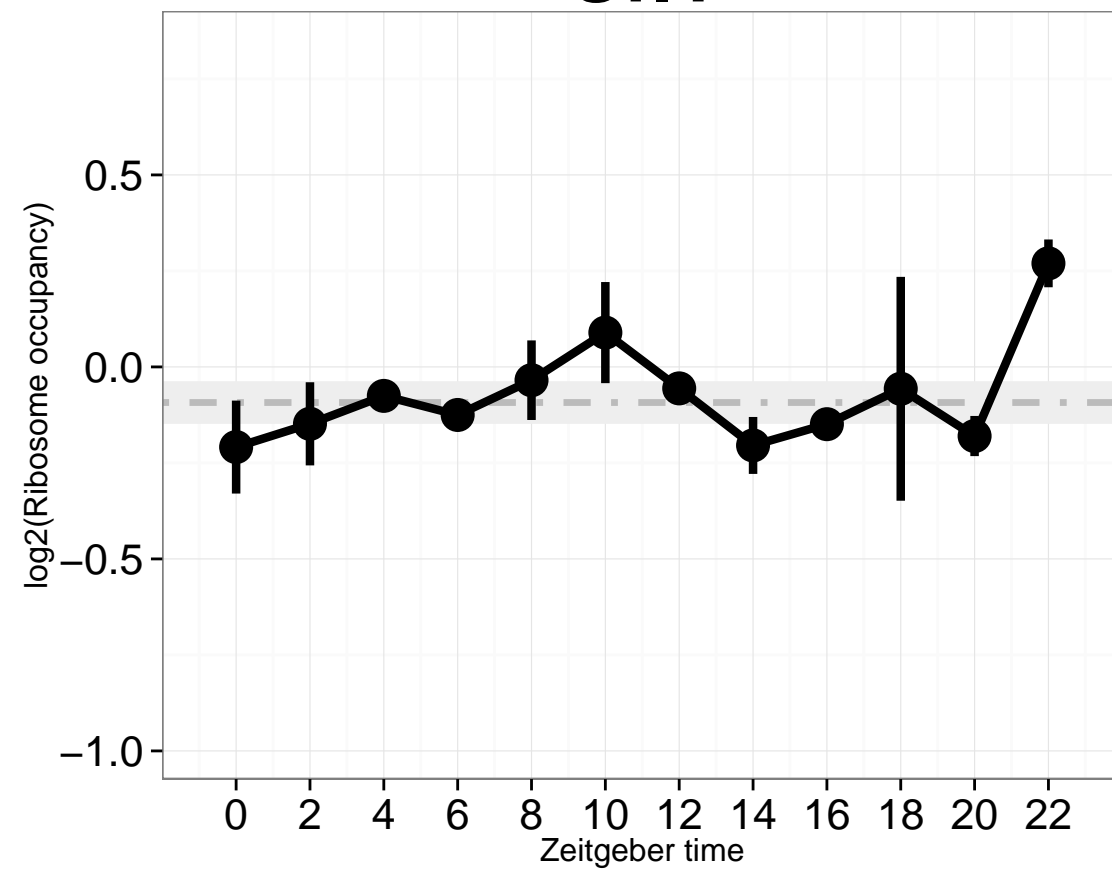

Supplement: SuppDataset_1.zip [file Ufl1_set_A.pdf › Supplemental Dataset 1/A-mRNA_nonrhyth_translation_nonrhyth/Ufl1_set_A.pdf]

## Ufm1

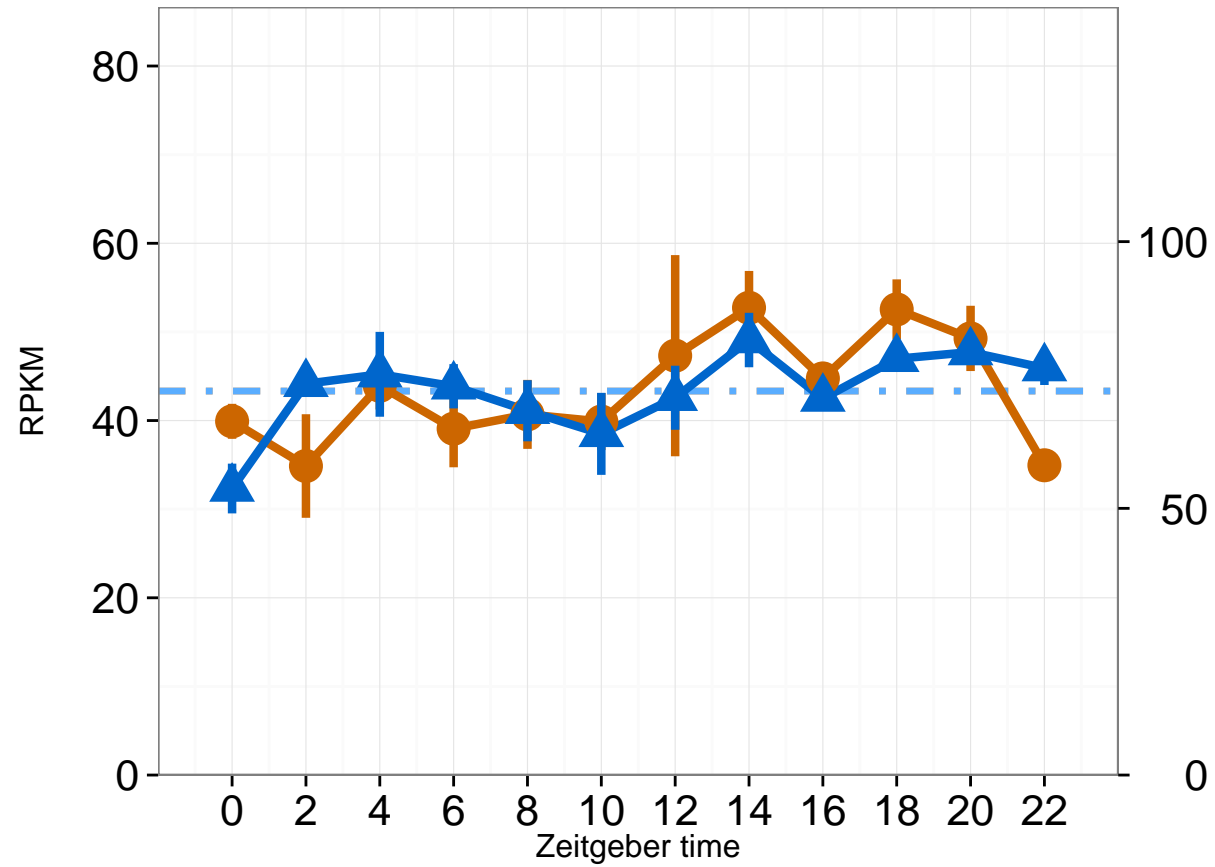

## Ufm1

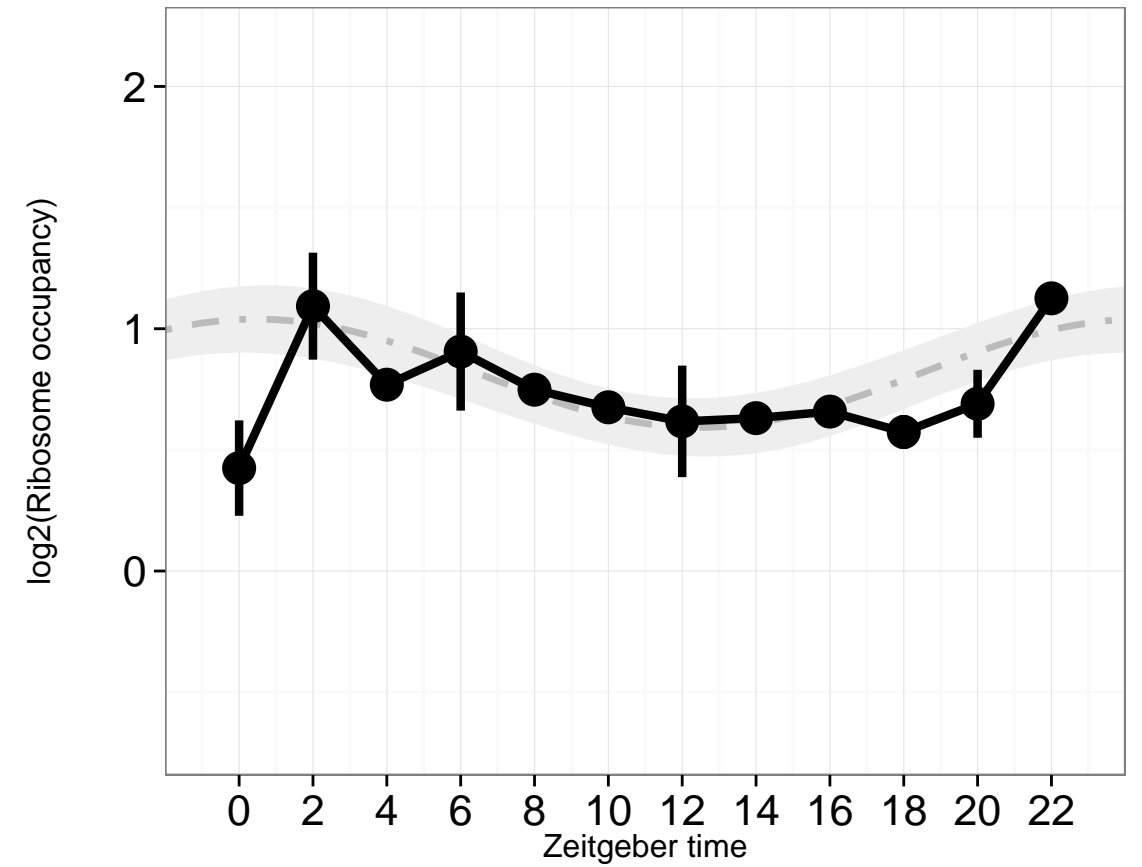

Supplement: SuppDataset_1.zip [file Ufm1_set_A.pdf › Supplemental Dataset 1/A-mRNA_nonrhyth_translation_nonrhyth/Ufm1_set_A.pdf]

## Ufsp1

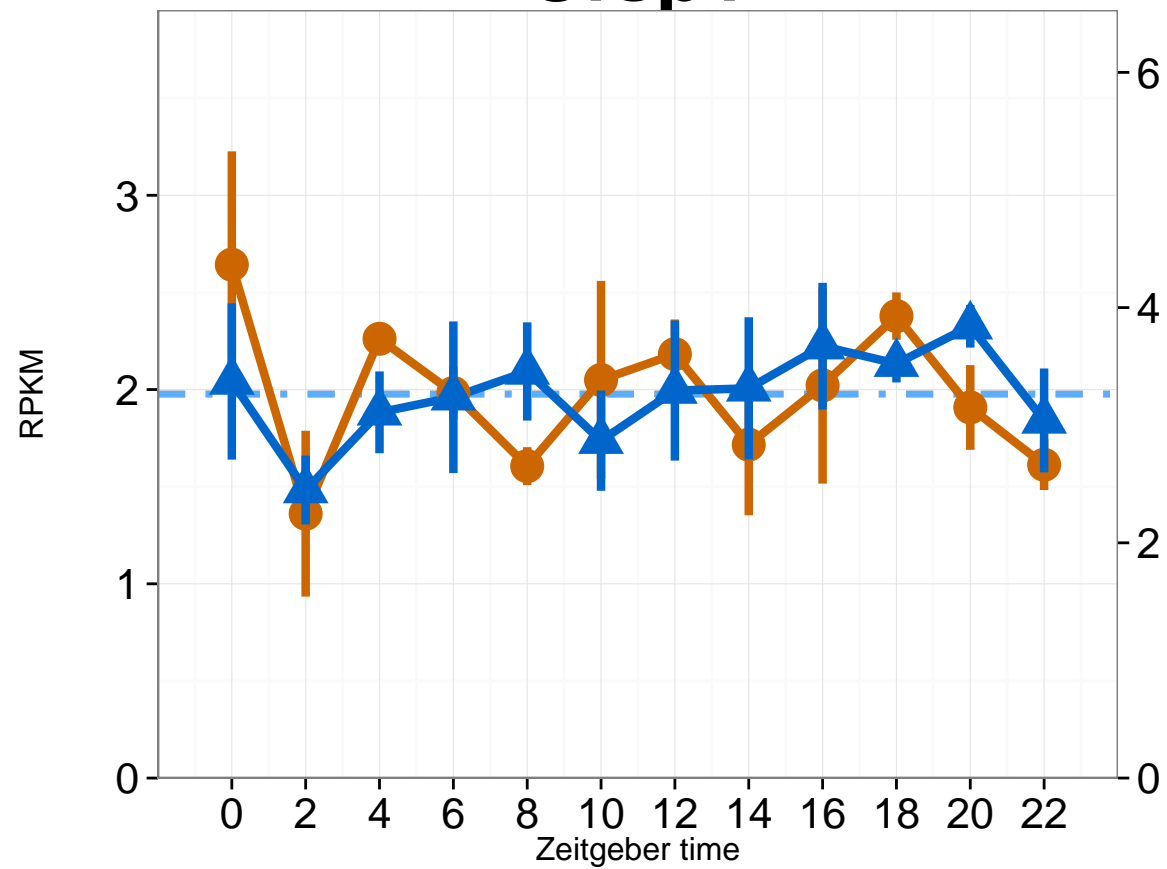

## Ufsp1

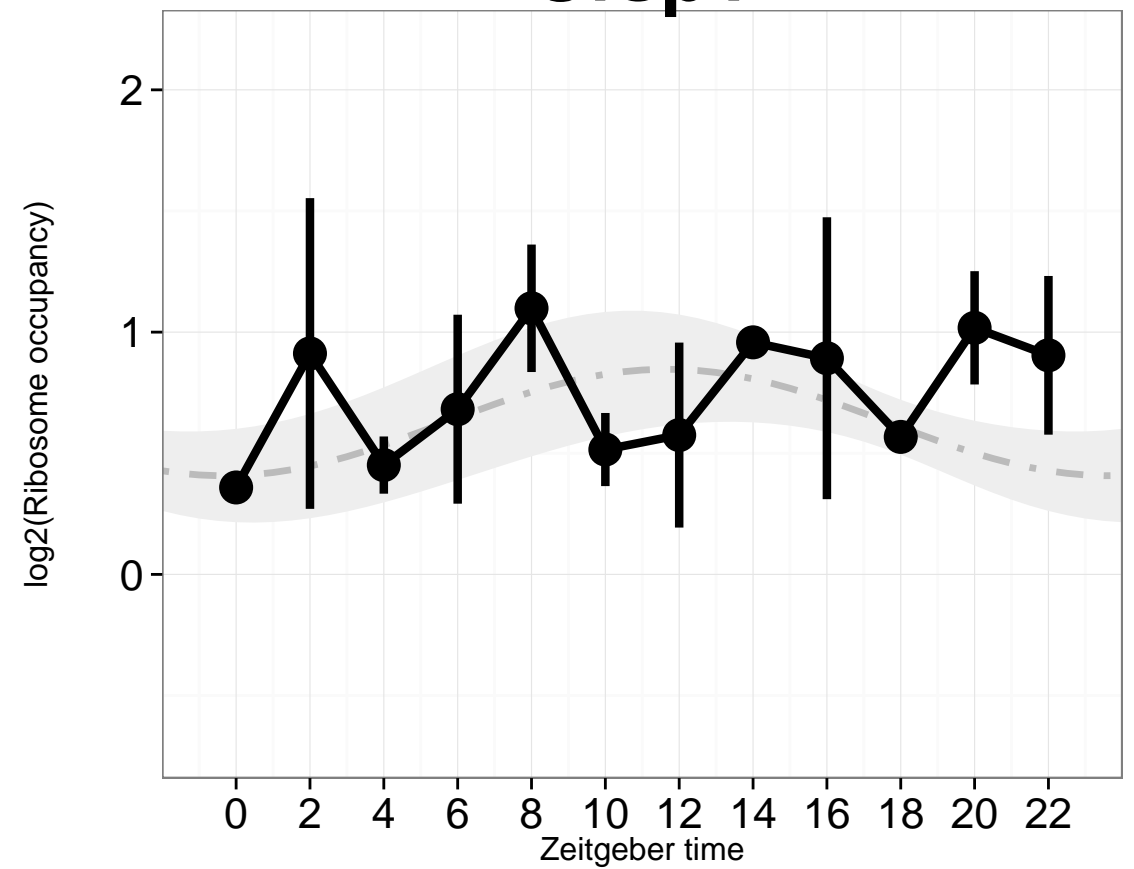

Supplement: SuppDataset_1.zip [file Ufsp1_set_A.pdf › Supplemental Dataset 1/A-mRNA_nonrhyth_translation_nonrhyth/Ufsp1_set_A.pdf]

## Ufsp2

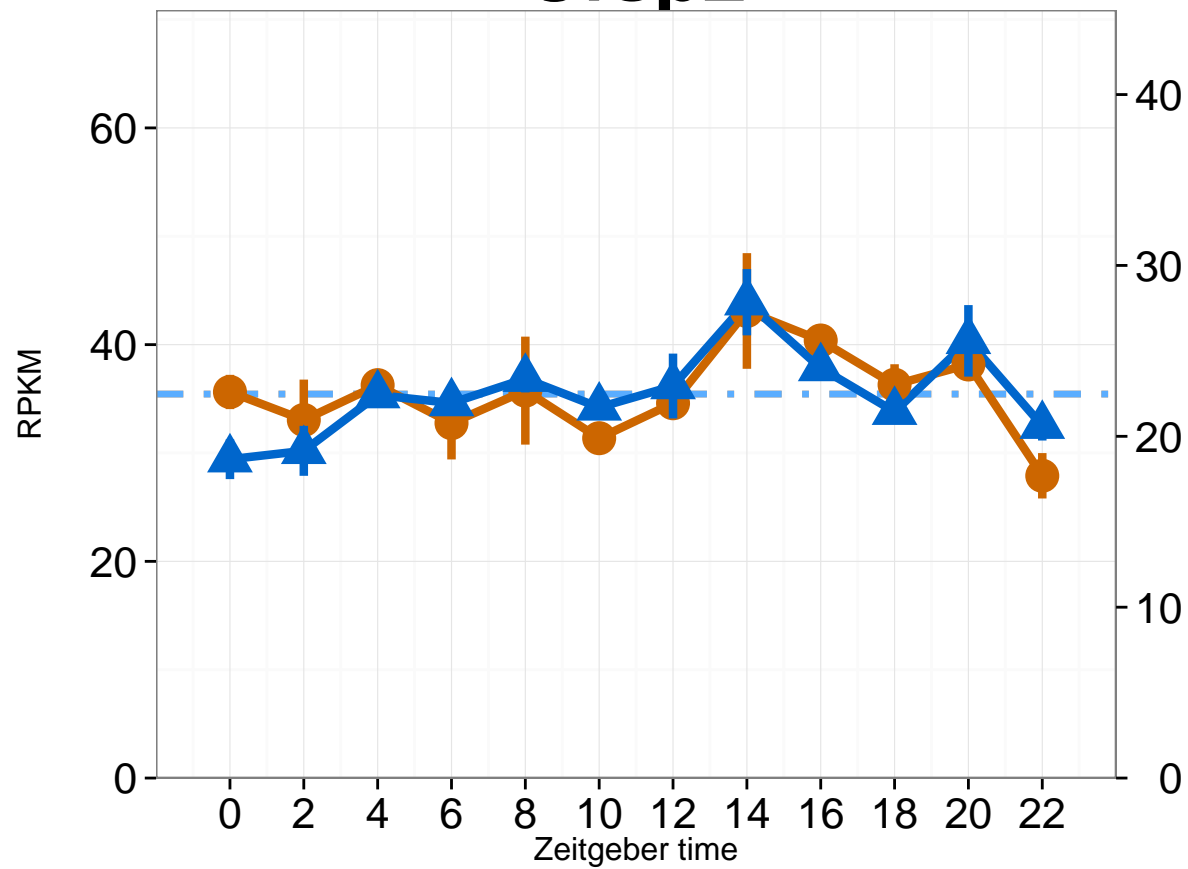

## Ufsp2

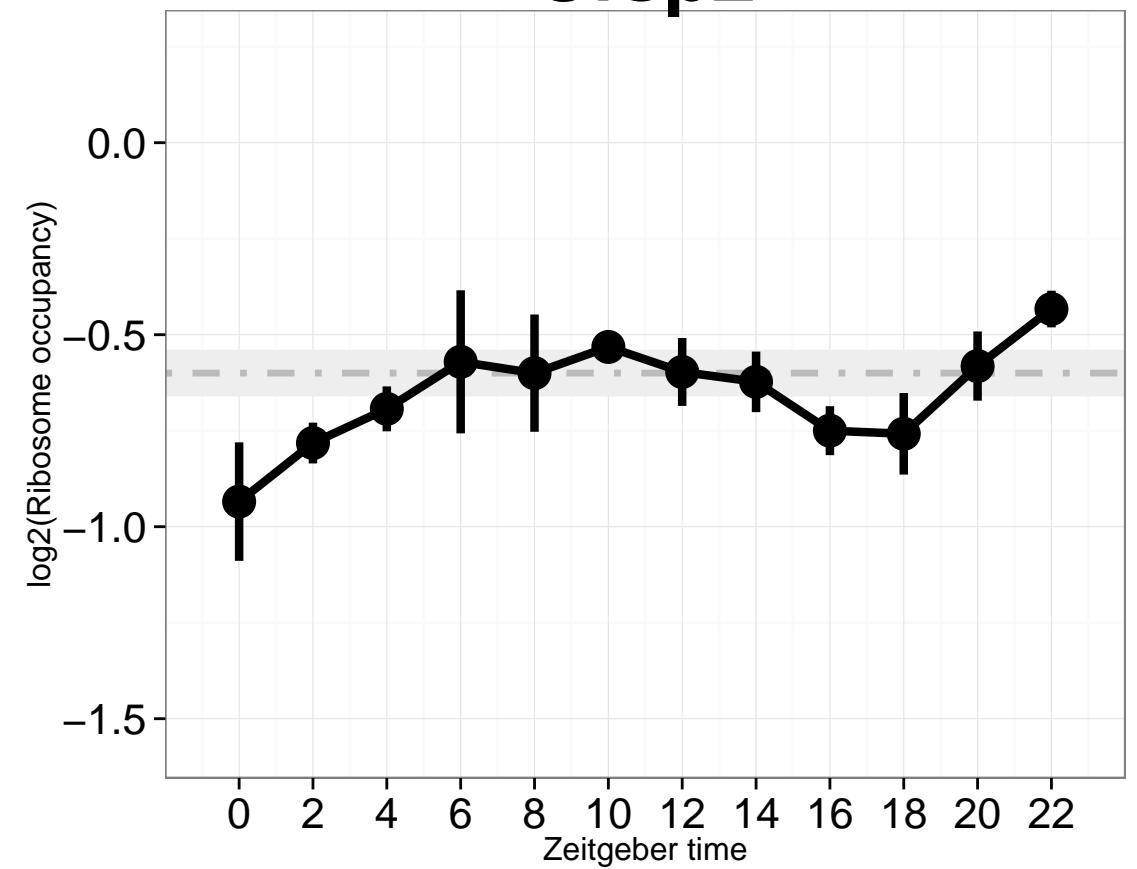

Supplement: SuppDataset_1.zip [file Ufsp2_set_A.pdf › Supplemental Dataset 1/A-mRNA_nonrhyth_translation_nonrhyth/Ufsp2_set_A.pdf]

## Ugcg

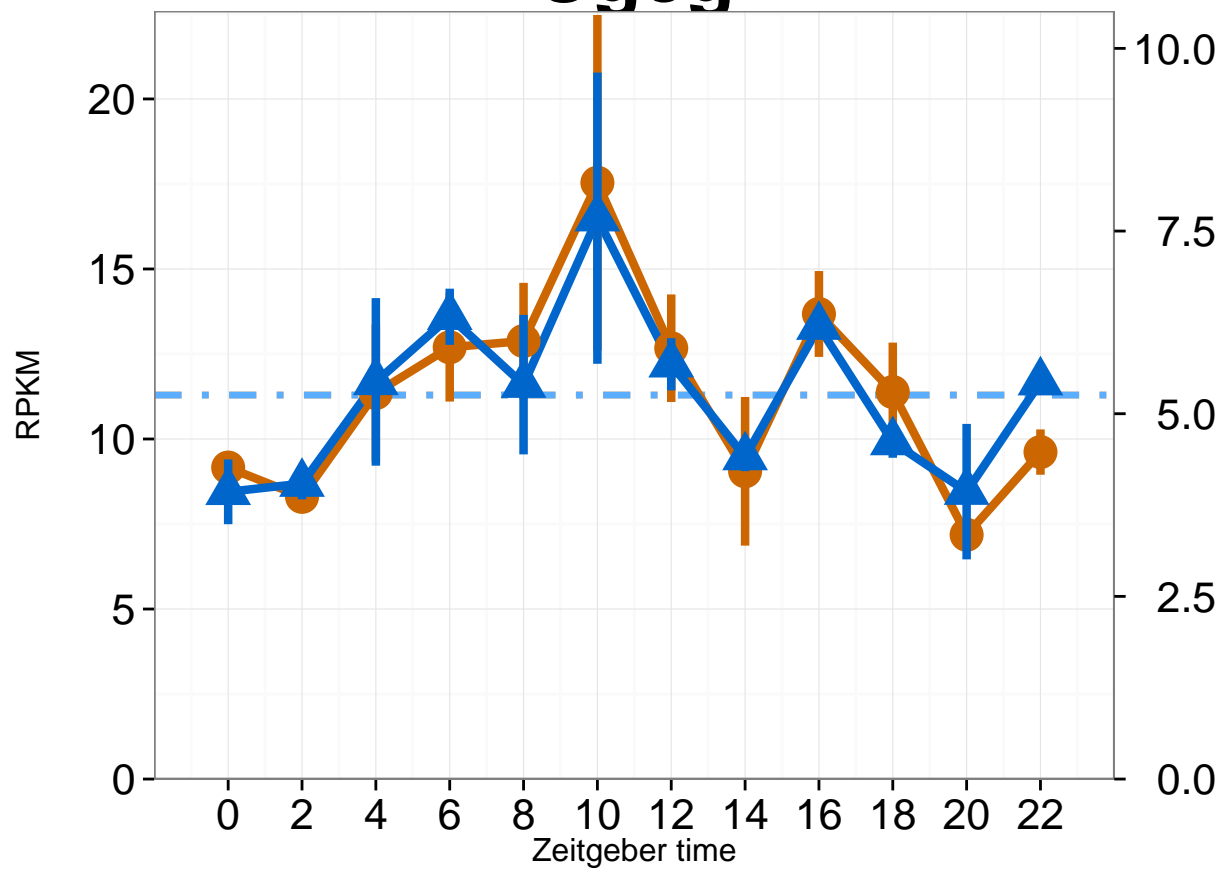

## Ugcg

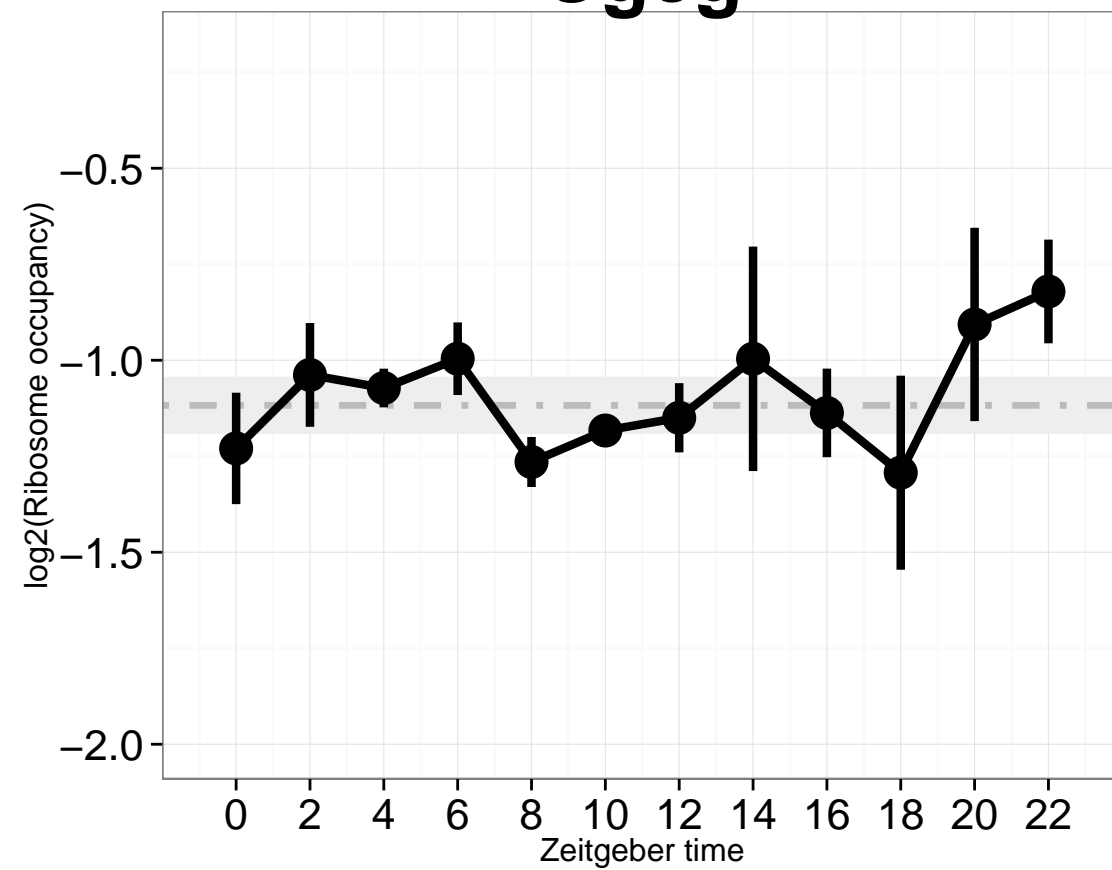

Supplement: SuppDataset_1.zip [file Ugcg_set_A.pdf › Supplemental Dataset 1/A-mRNA_nonrhyth_translation_nonrhyth/Ugcg_set_A.pdf]

## Ugdh

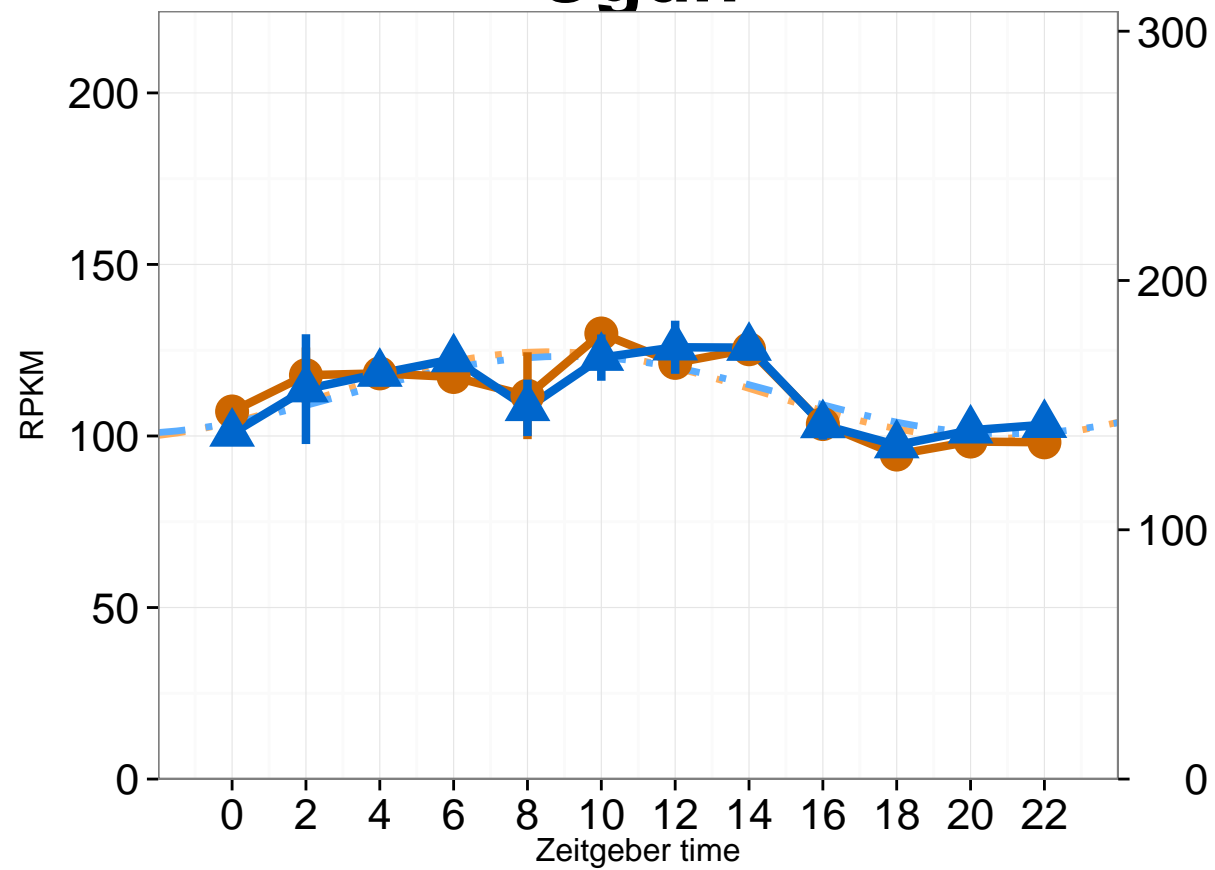

## Ugdh

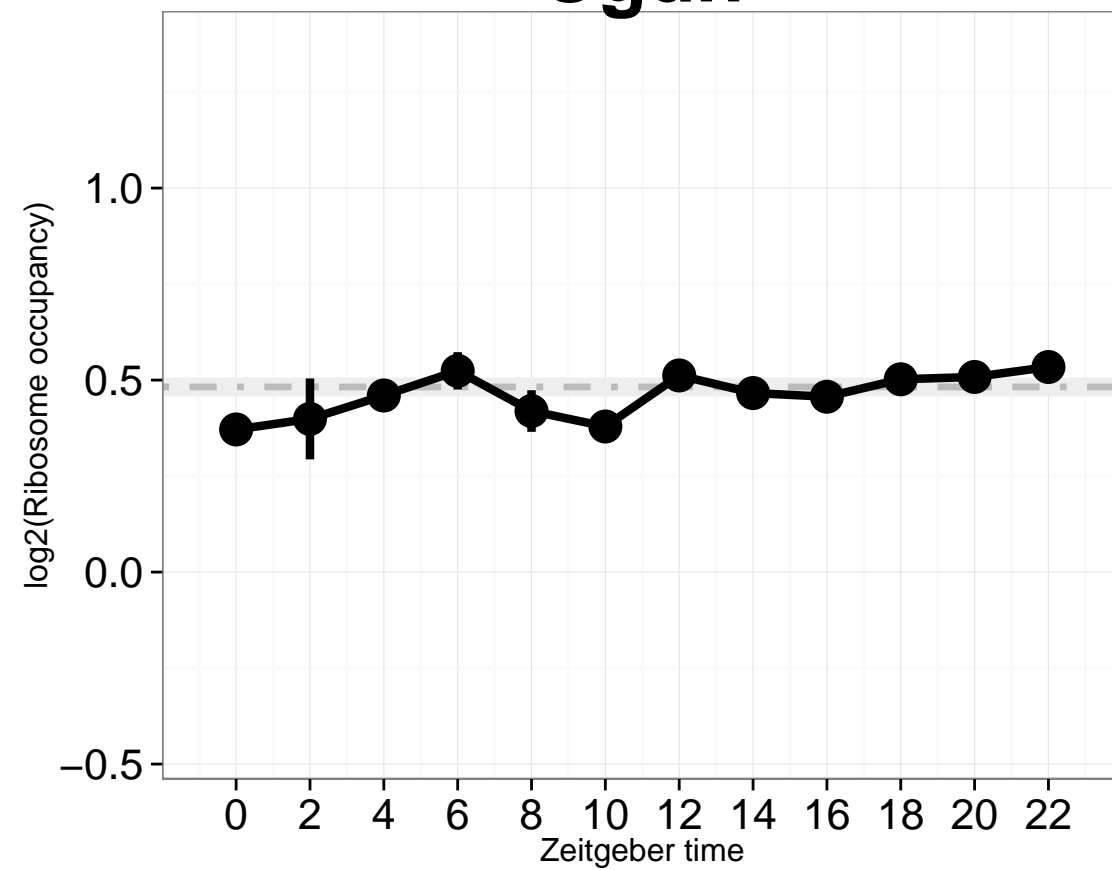

Supplement: SuppDataset_1.zip [file Ugdh_set_A.pdf › Supplemental Dataset 1/A-mRNA_nonrhyth_translation_nonrhyth/Ugdh_set_A.pdf]

# Uggt1

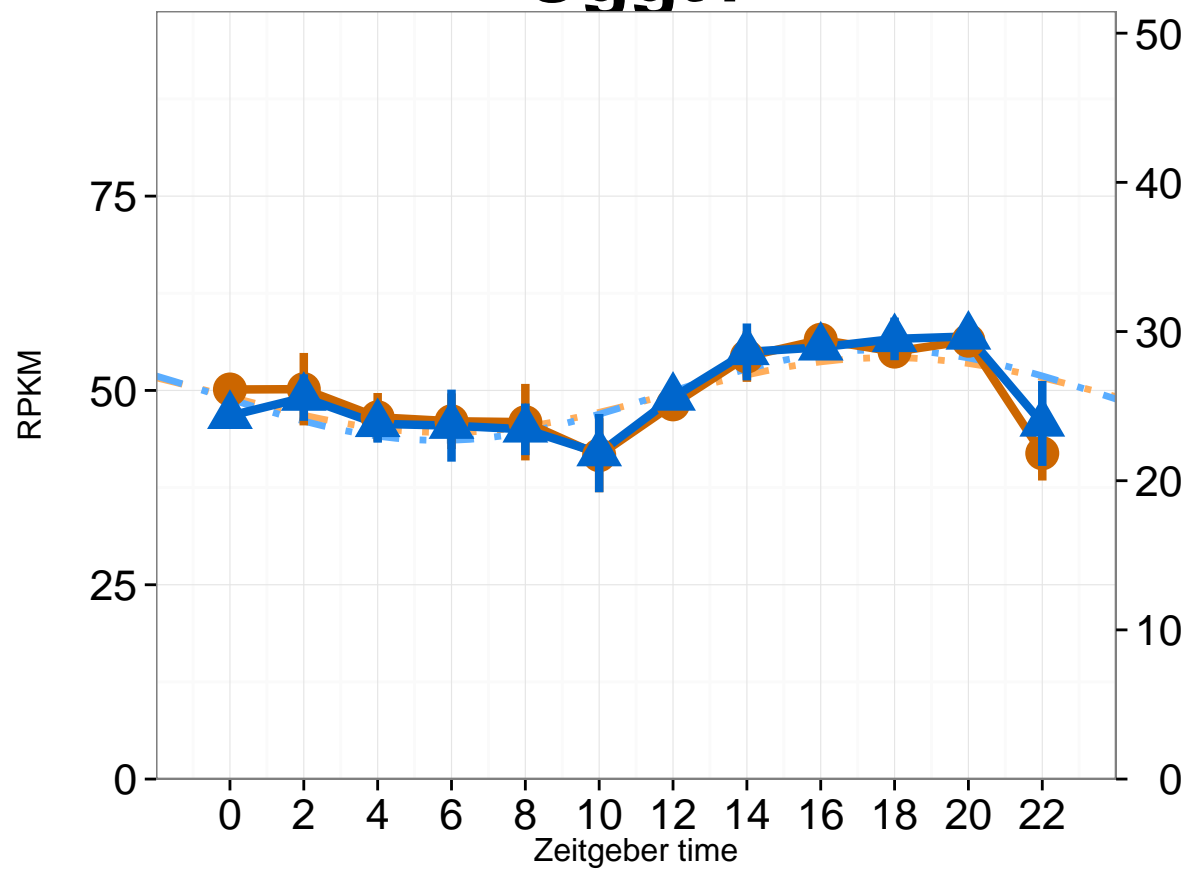

# Uggt1

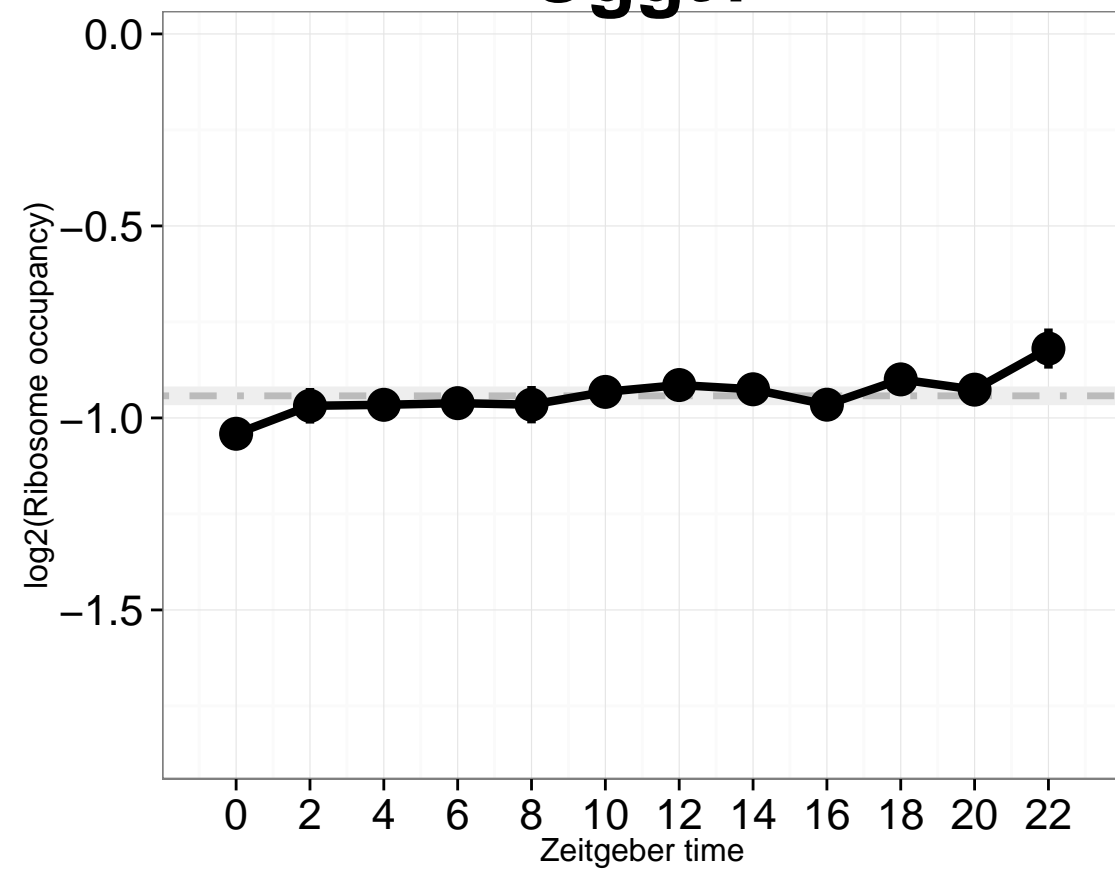

Supplement: SuppDataset_1.zip [file Uggt1_set_A.pdf › Supplemental Dataset 1/A-mRNA_nonrhyth_translation_nonrhyth/Uggt1_set_A.pdf]

# Uggt2

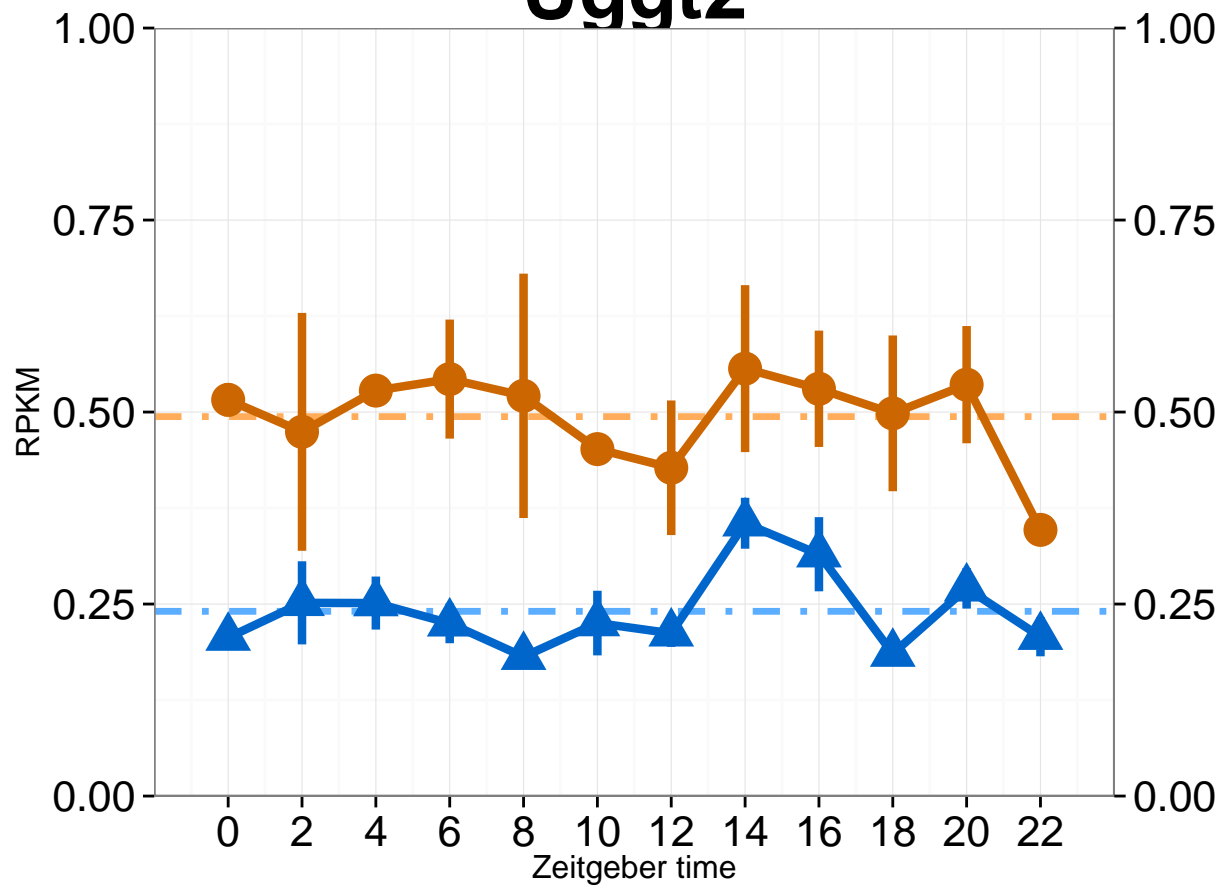

# Uggt2

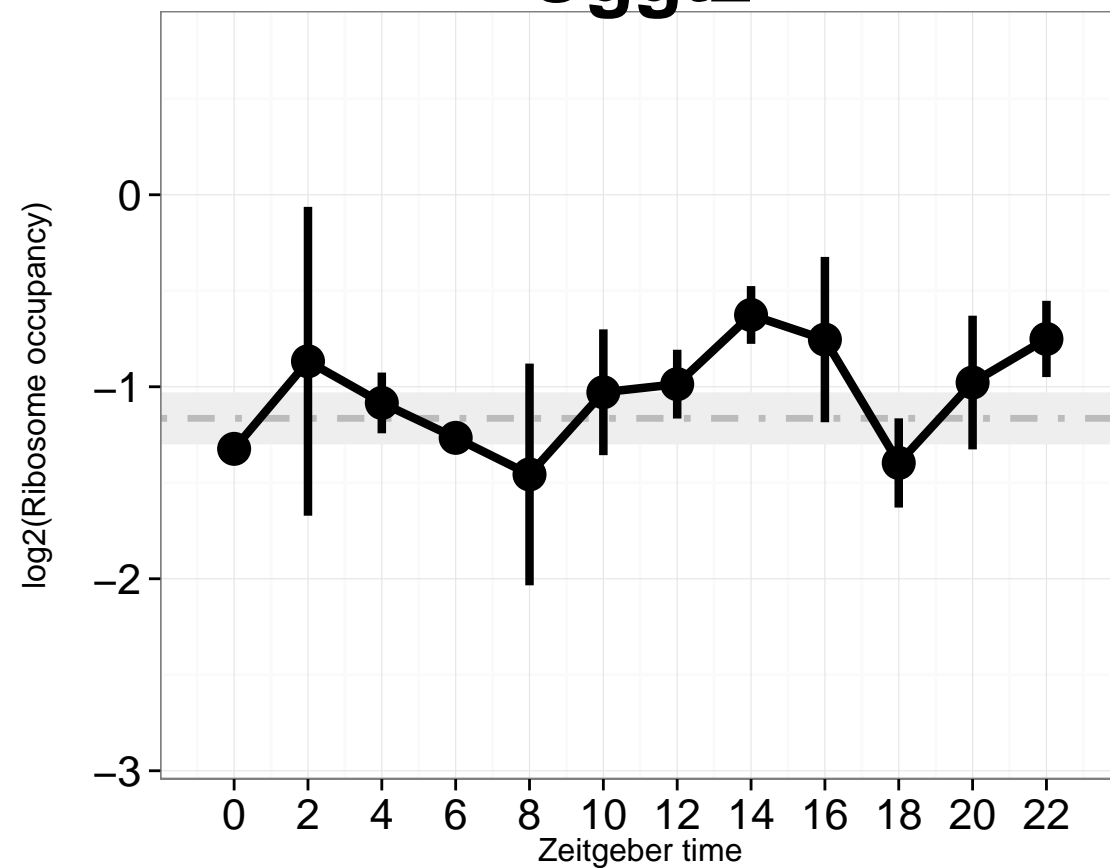

Supplement: SuppDataset_1.zip [file Uggt2_set_A.pdf › Supplemental Dataset 1/A-mRNA_nonrhyth_translation_nonrhyth/Uggt2_set_A.pdf]

# Ugt1a10

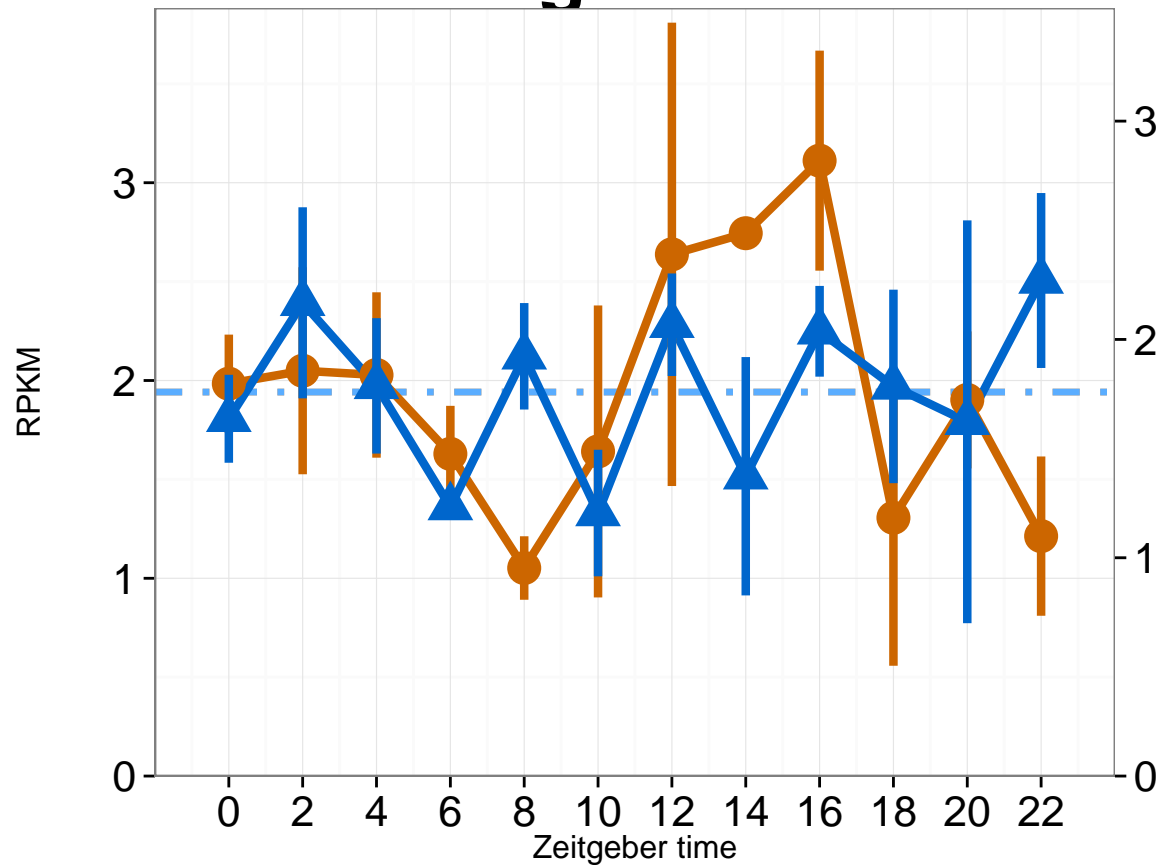

# Ugt1a10

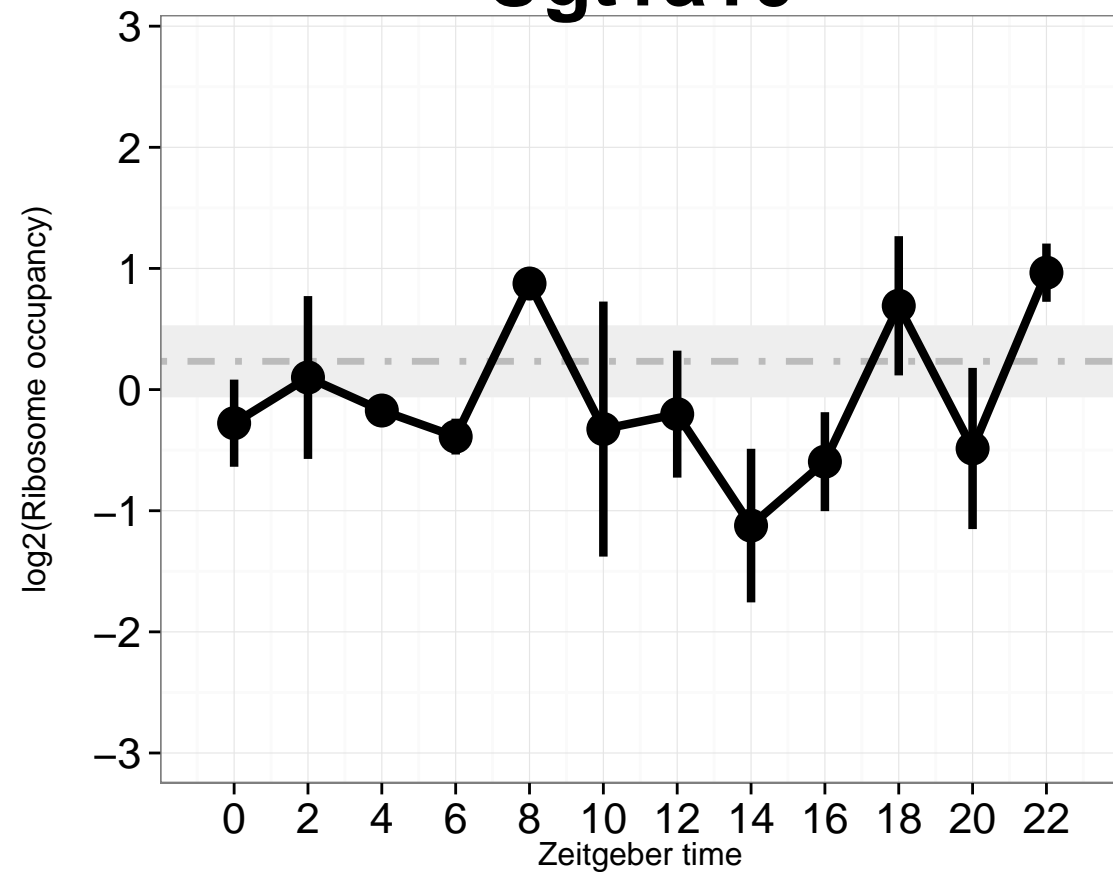

Supplement: SuppDataset_1.zip [file Ugt1a10_set_A.pdf › Supplemental Dataset 1/A-mRNA_nonrhyth_translation_nonrhyth/Ugt1a10_set_A.pdf]

# Ugt1a1

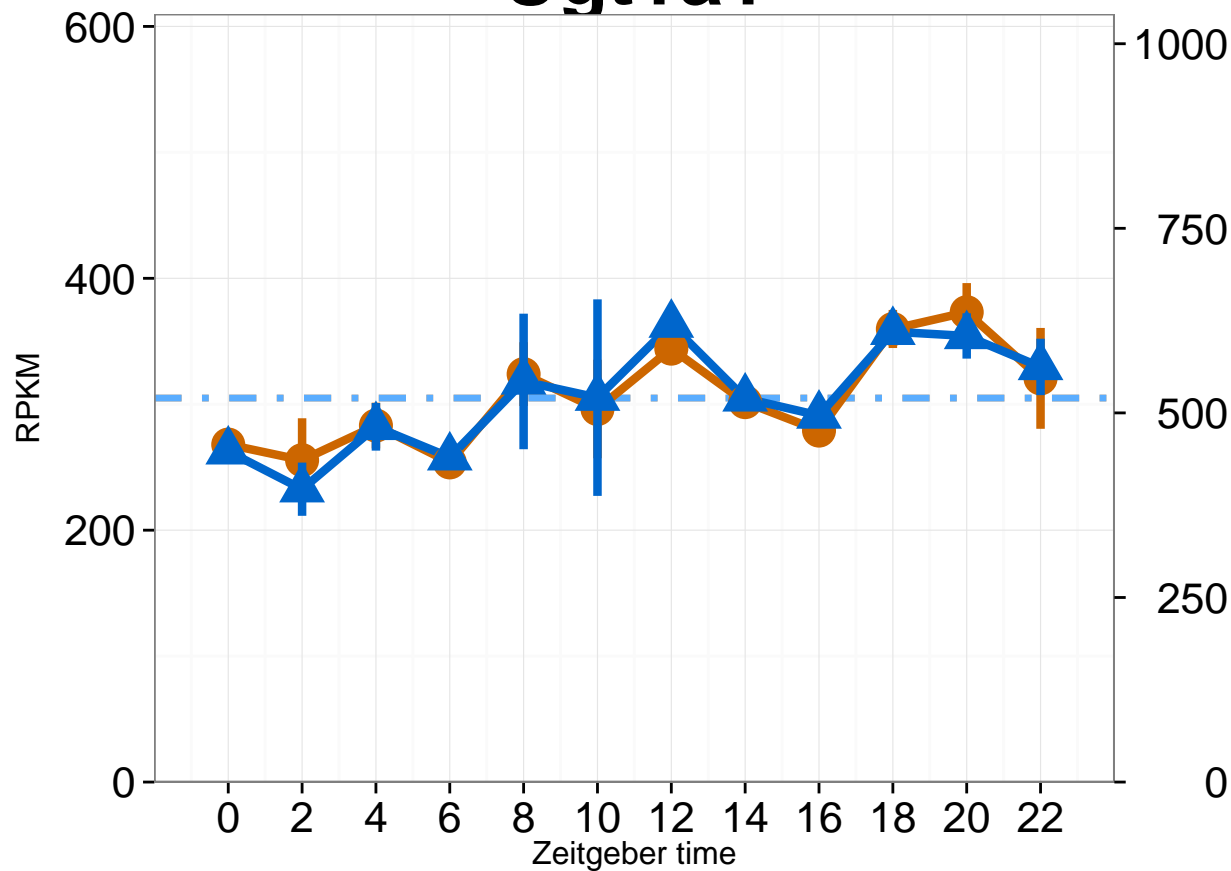

# Ugt1a1

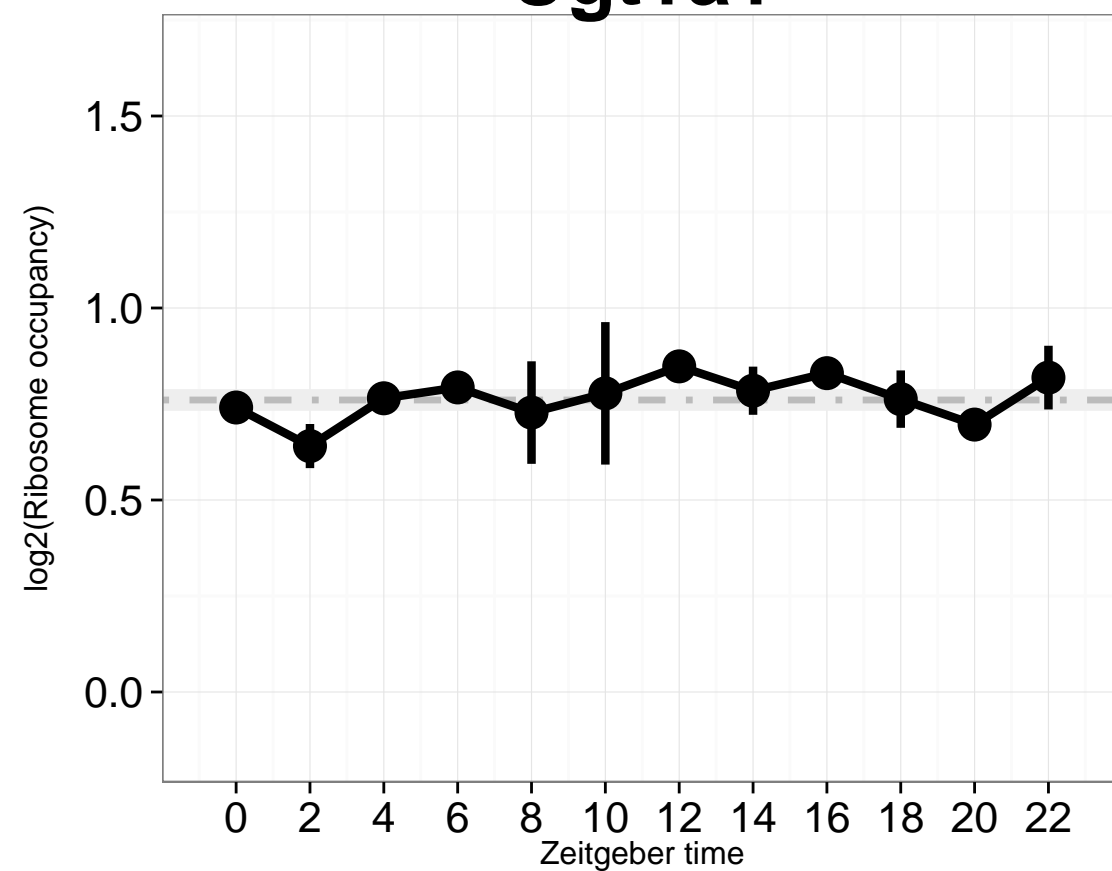

Supplement: SuppDataset_1.zip [file Ugt1a1_set_A.pdf › Supplemental Dataset 1/A-mRNA_nonrhyth_translation_nonrhyth/Ugt1a1_set_A.pdf]

# Ugt1a5

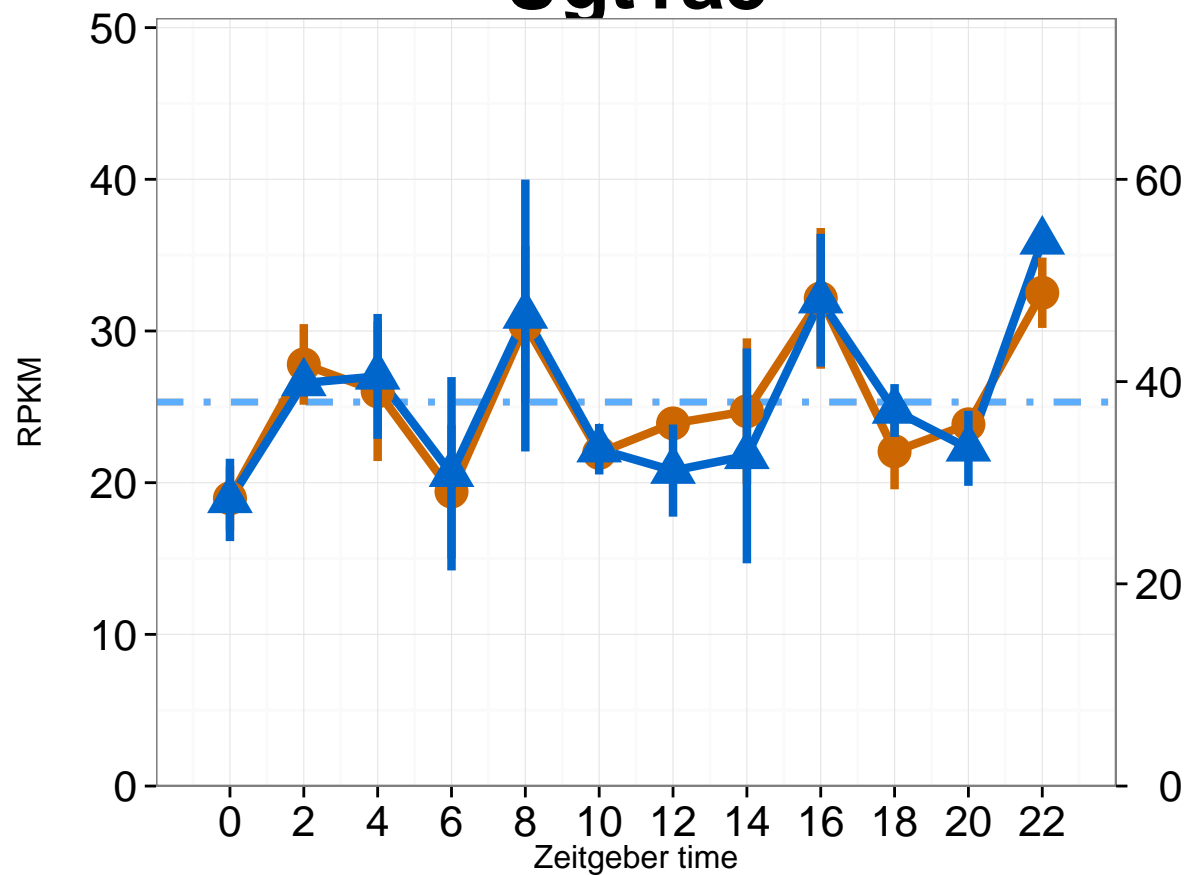

# Ugt1a5

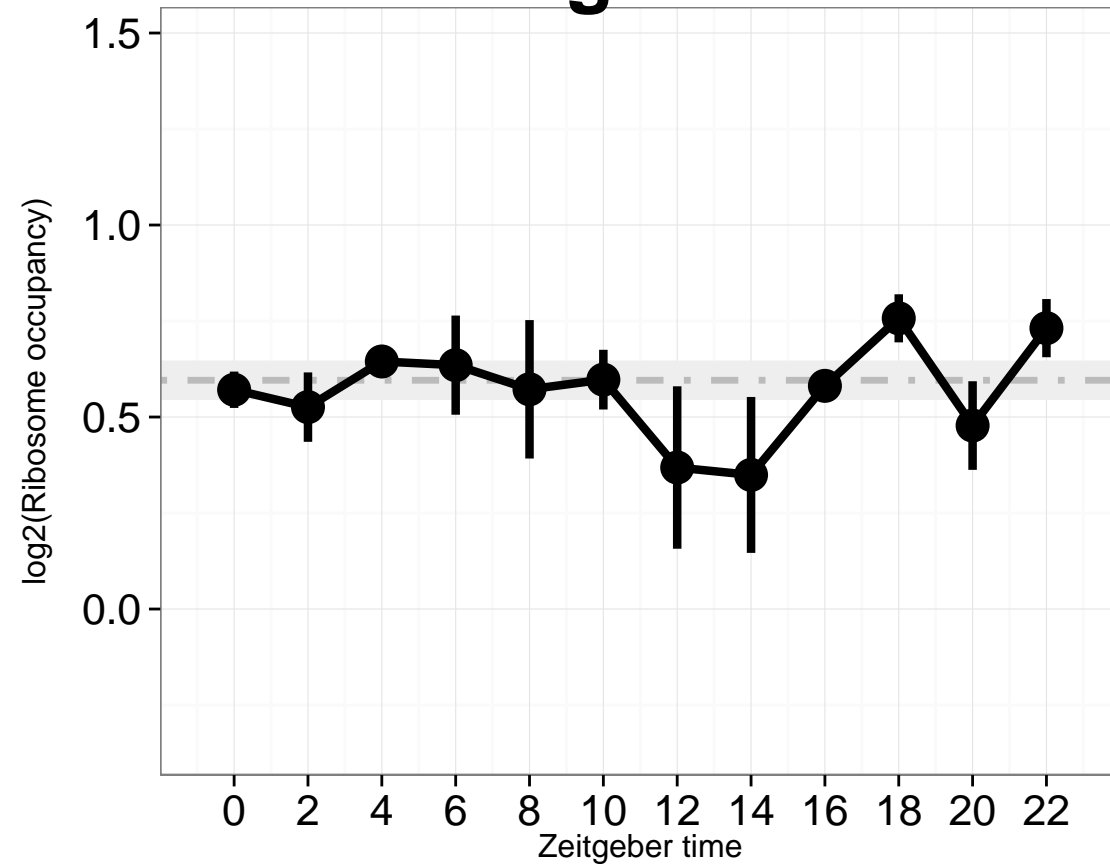

Supplement: SuppDataset_1.zip [file Ugt1a5_set_A.pdf › Supplemental Dataset 1/A-mRNA_nonrhyth_translation_nonrhyth/Ugt1a5_set_A.pdf]

# Ugt1a6a

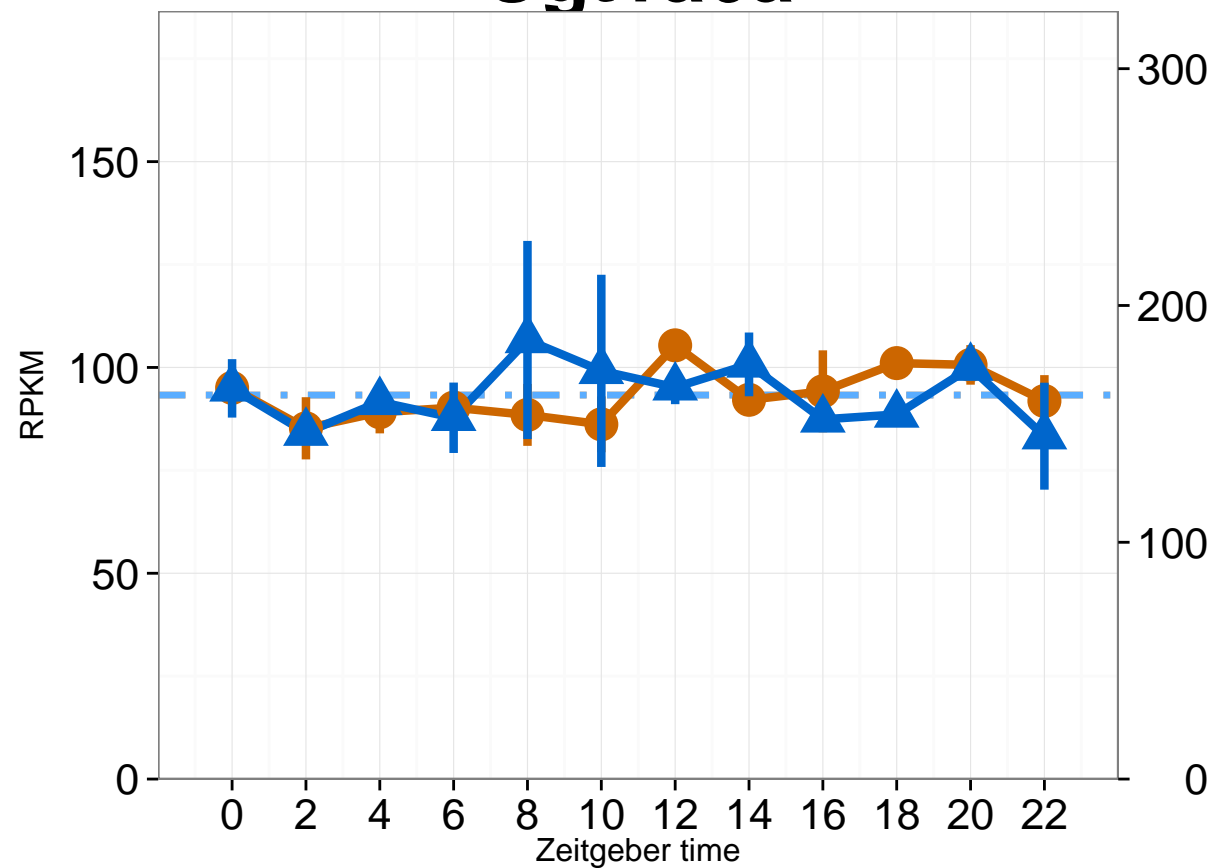

# Ugt1a6a

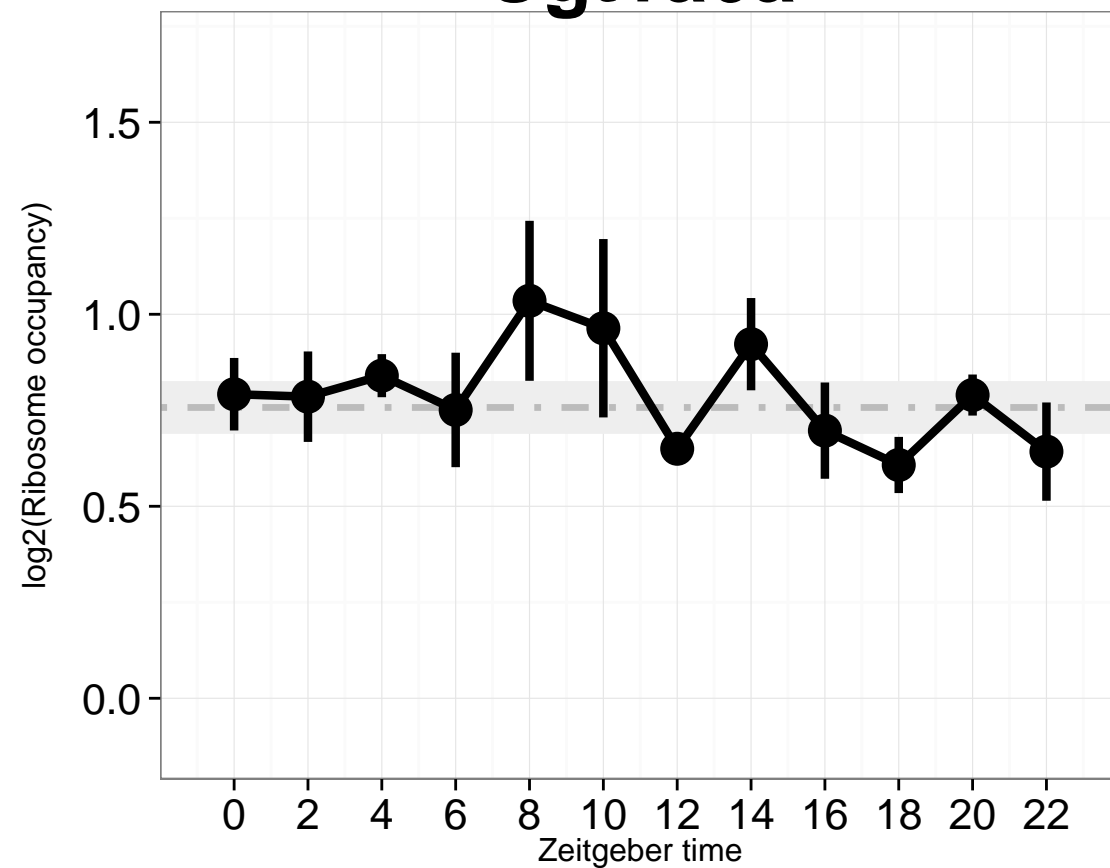

Supplement: SuppDataset_1.zip [file Ugt1a6a_set_A.pdf › Supplemental Dataset 1/A-mRNA_nonrhyth_translation_nonrhyth/Ugt1a6a_set_A.pdf]

# Ugt1a6b

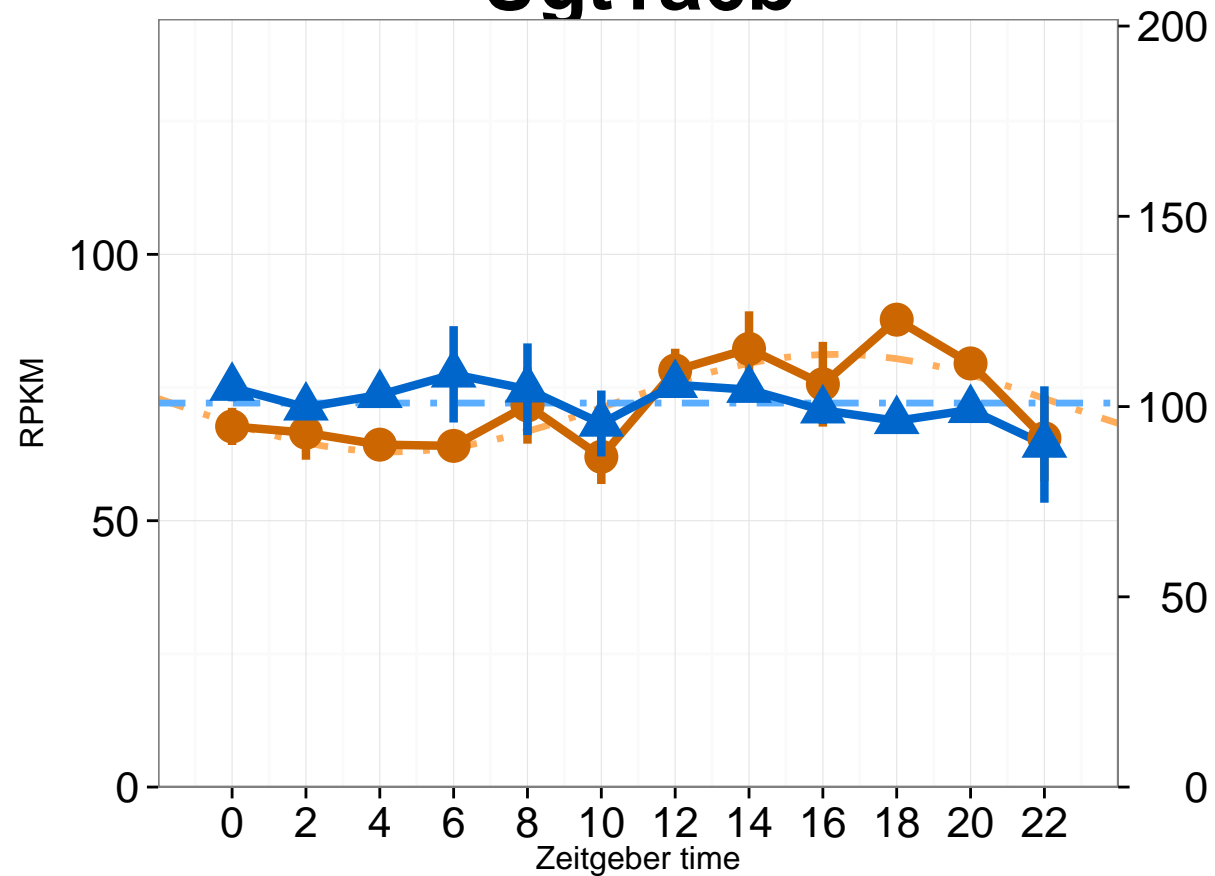

# Ugt1a6b

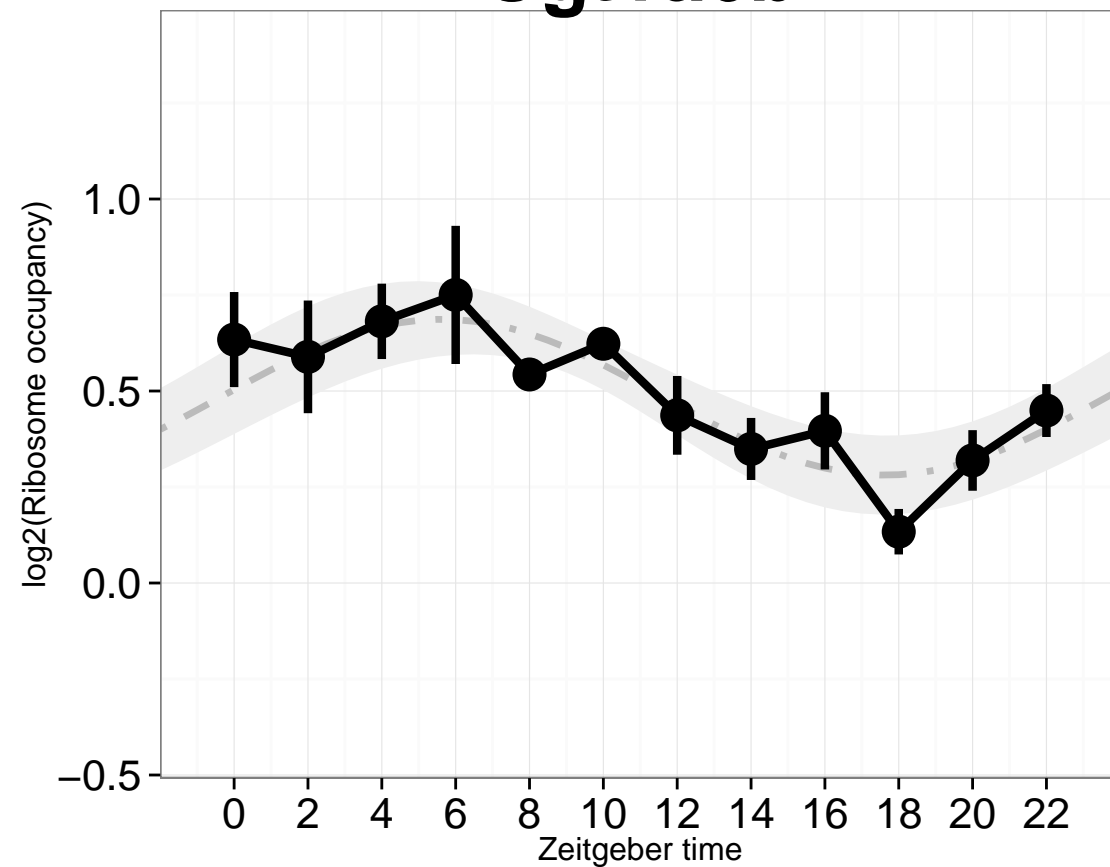

Supplement: SuppDataset_1.zip [file Ugt1a6b_set_A.pdf › Supplemental Dataset 1/A-mRNA_nonrhyth_translation_nonrhyth/Ugt1a6b_set_A.pdf]

# Ugt1a9

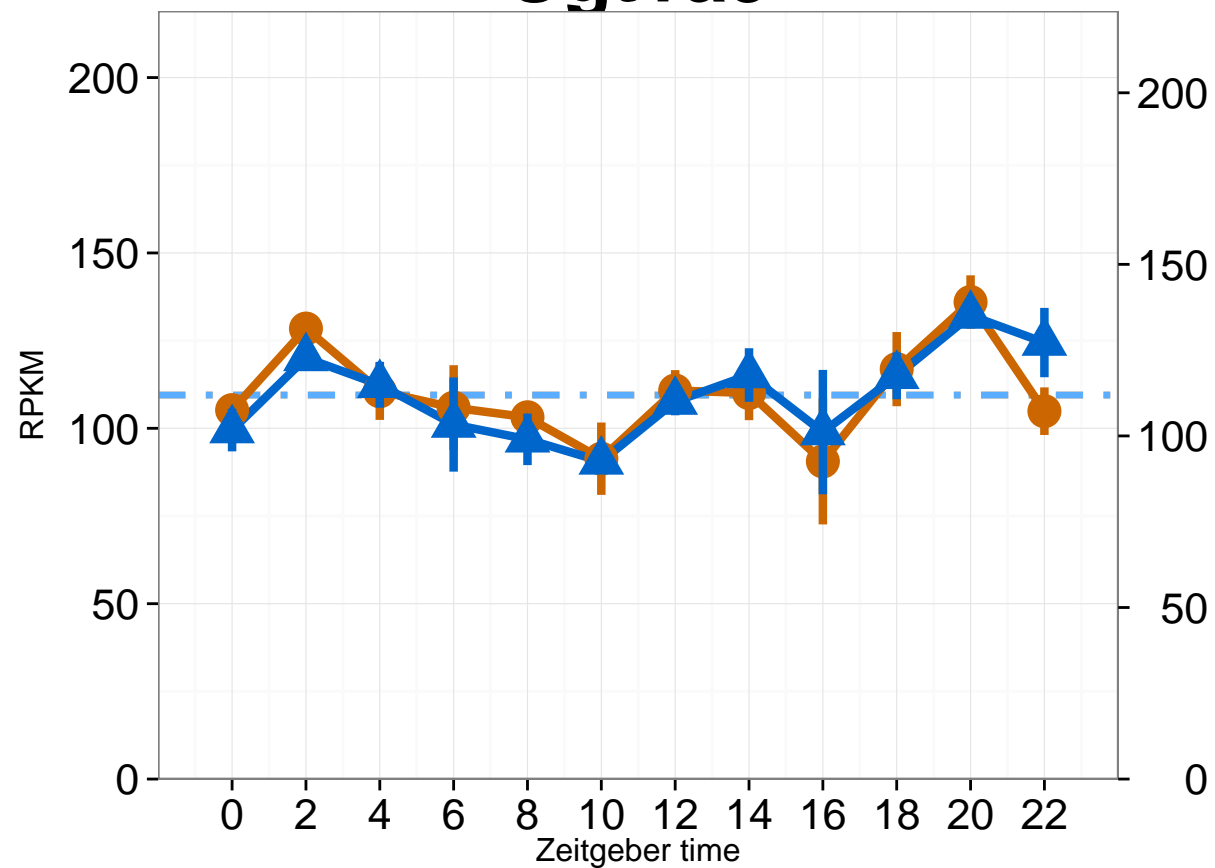

# Ugt1a9

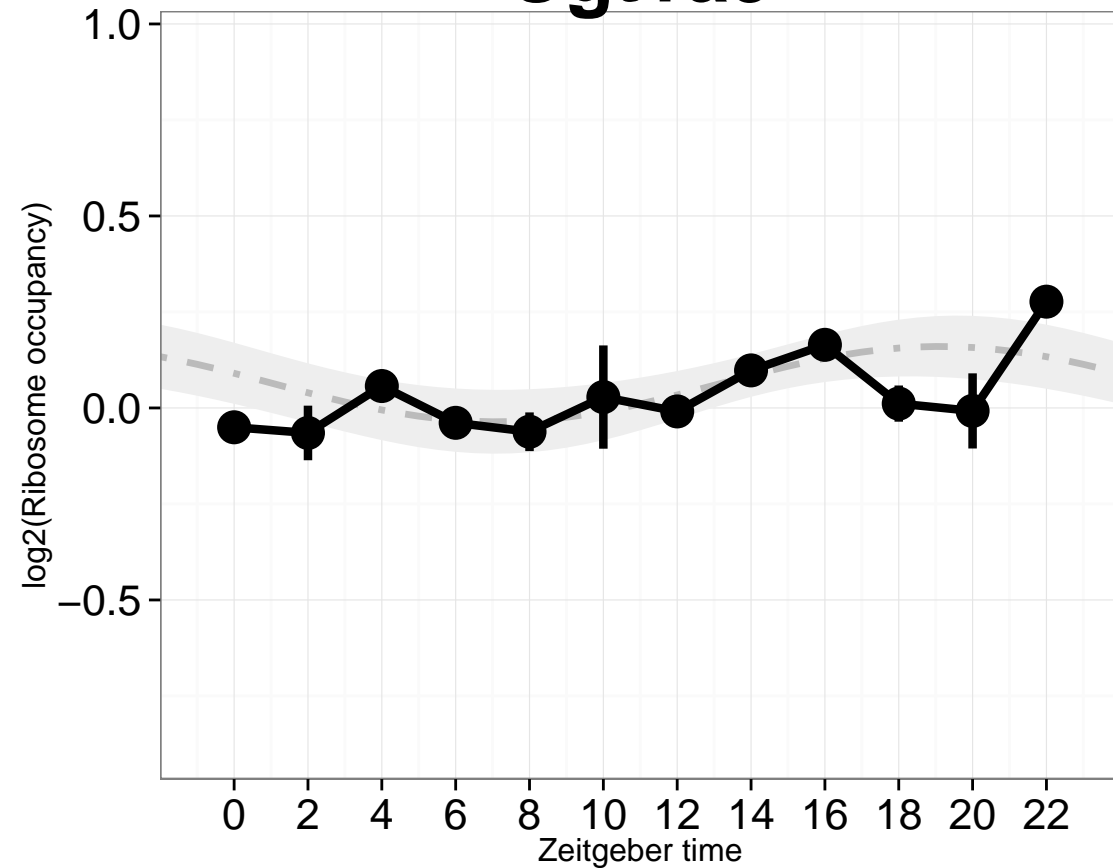

Supplement: SuppDataset_1.zip [file Ugt1a9_set_A.pdf › Supplemental Dataset 1/A-mRNA_nonrhyth_translation_nonrhyth/Ugt1a9_set_A.pdf]

## Ugt2a1

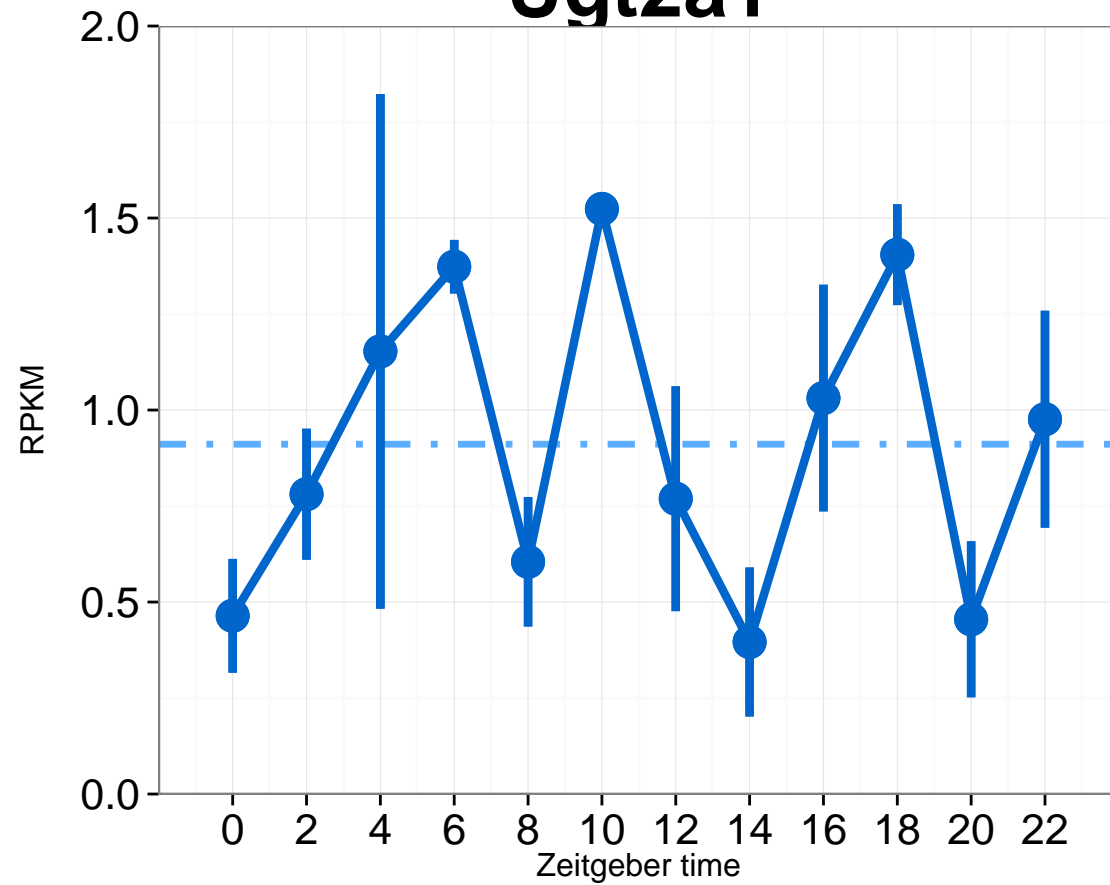

## Ugt2a1 log2(Ribosome occupancy

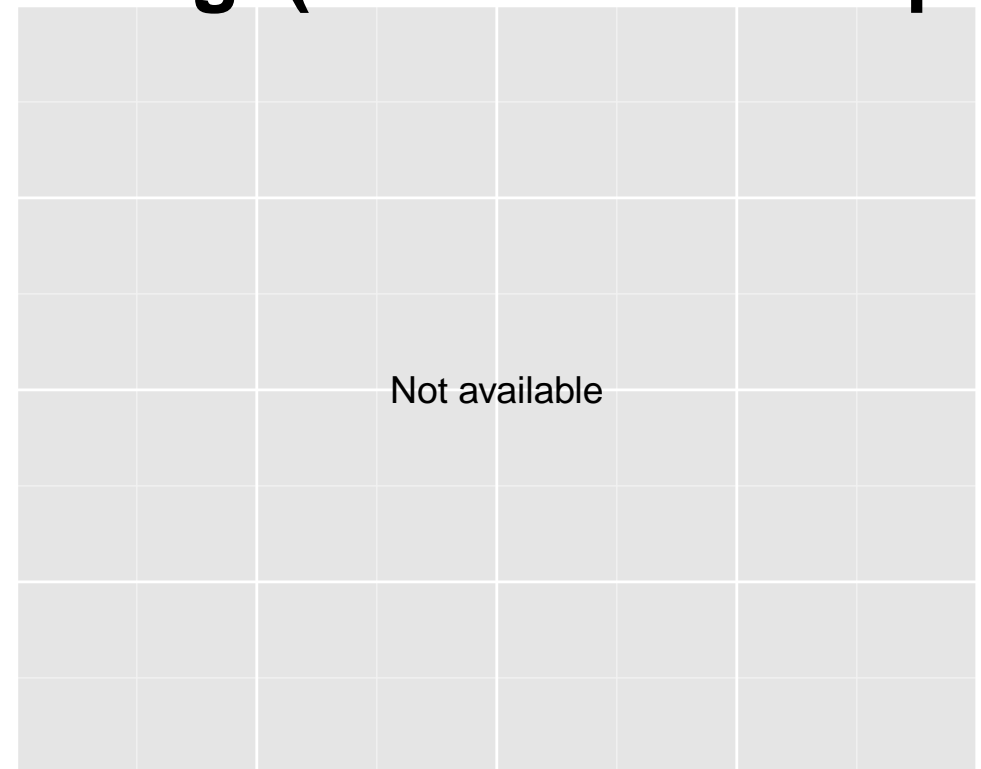

Supplement: SuppDataset_1.zip [file Ugt2a1_set_A.pdf › Supplemental Dataset 1/A-mRNA_nonrhyth_translation_nonrhyth/Ugt2a1_set_A.pdf]

# Ugt2a3

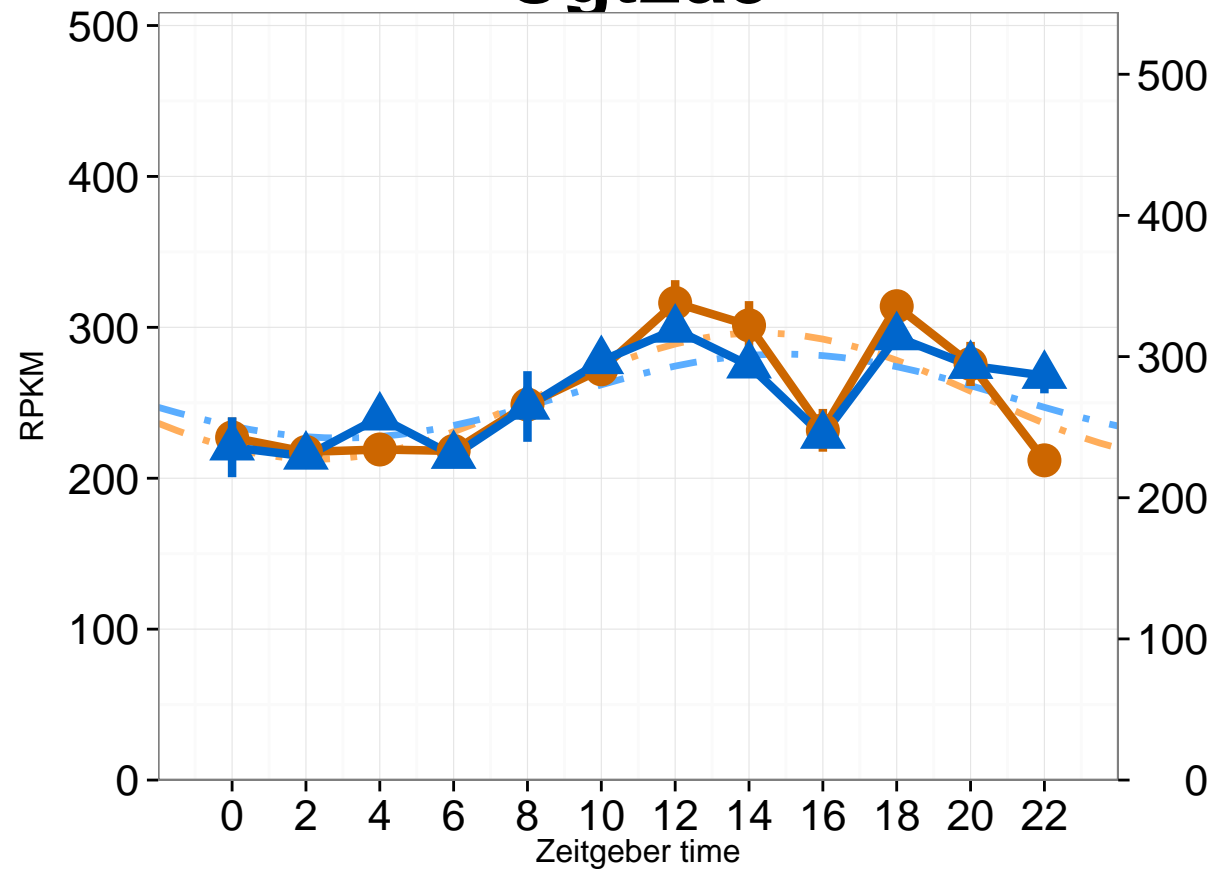

# Ugt2a3

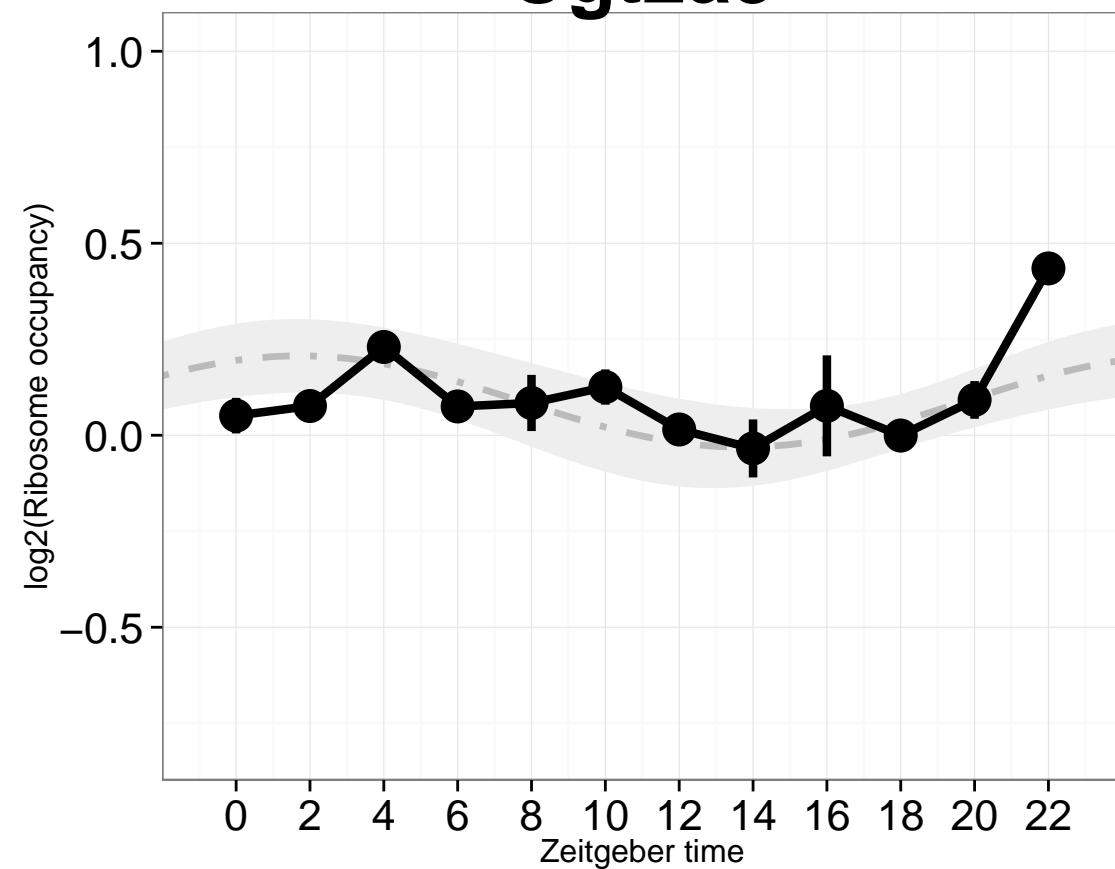

Supplement: SuppDataset_1.zip [file Ugt2a3_set_A.pdf › Supplemental Dataset 1/A-mRNA_nonrhyth_translation_nonrhyth/Ugt2a3_set_A.pdf]

# Ugt2b1

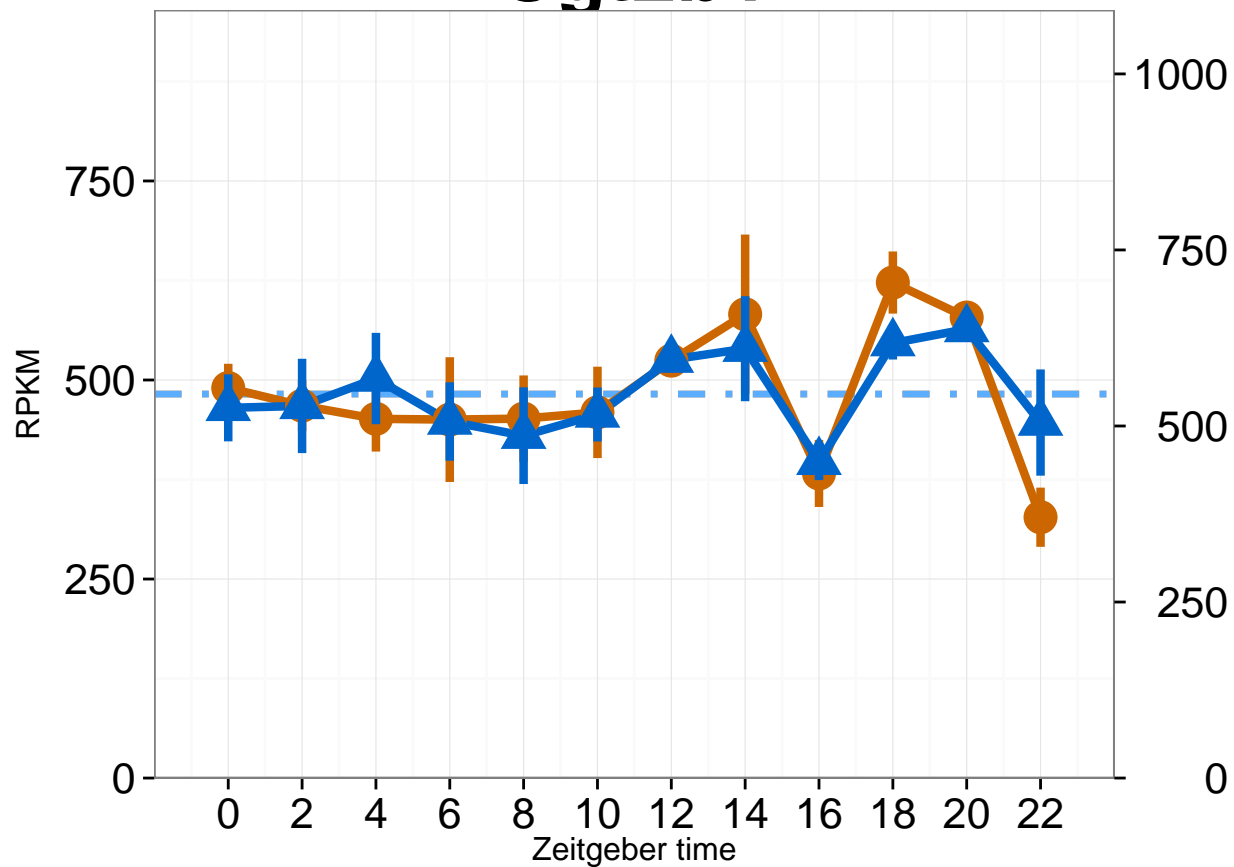

# Ugt2b1

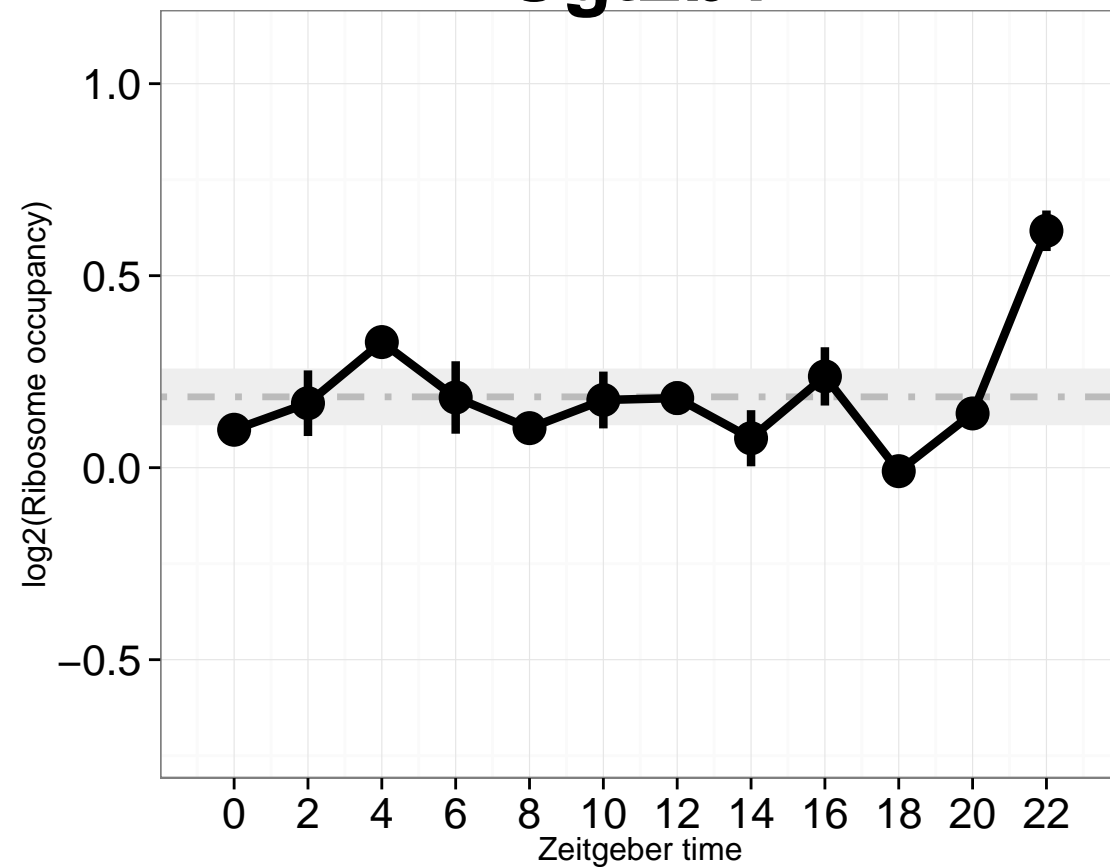

Supplement: SuppDataset_1.zip [file Ugt2b1_set_A.pdf › Supplemental Dataset 1/A-mRNA_nonrhyth_translation_nonrhyth/Ugt2b1_set_A.pdf]

# Ugt2b36

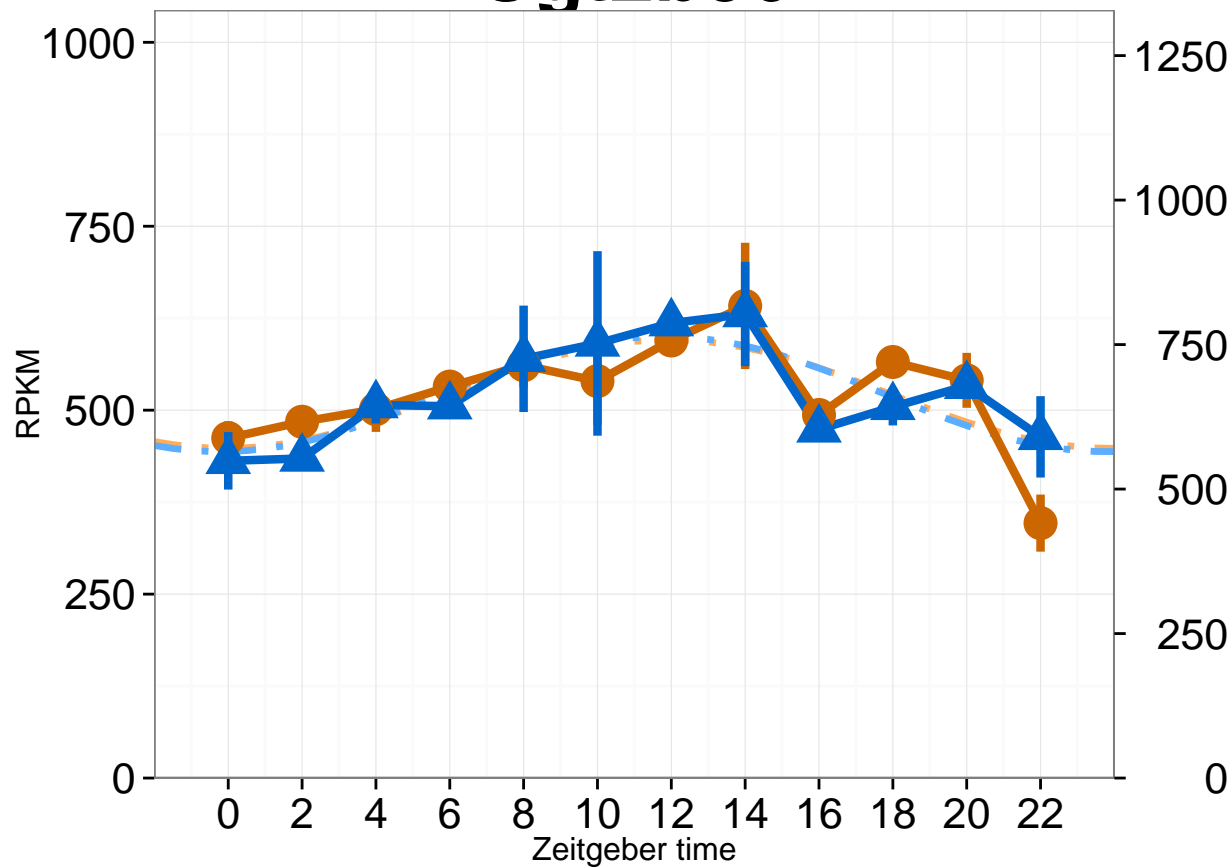

# Ugt2b36

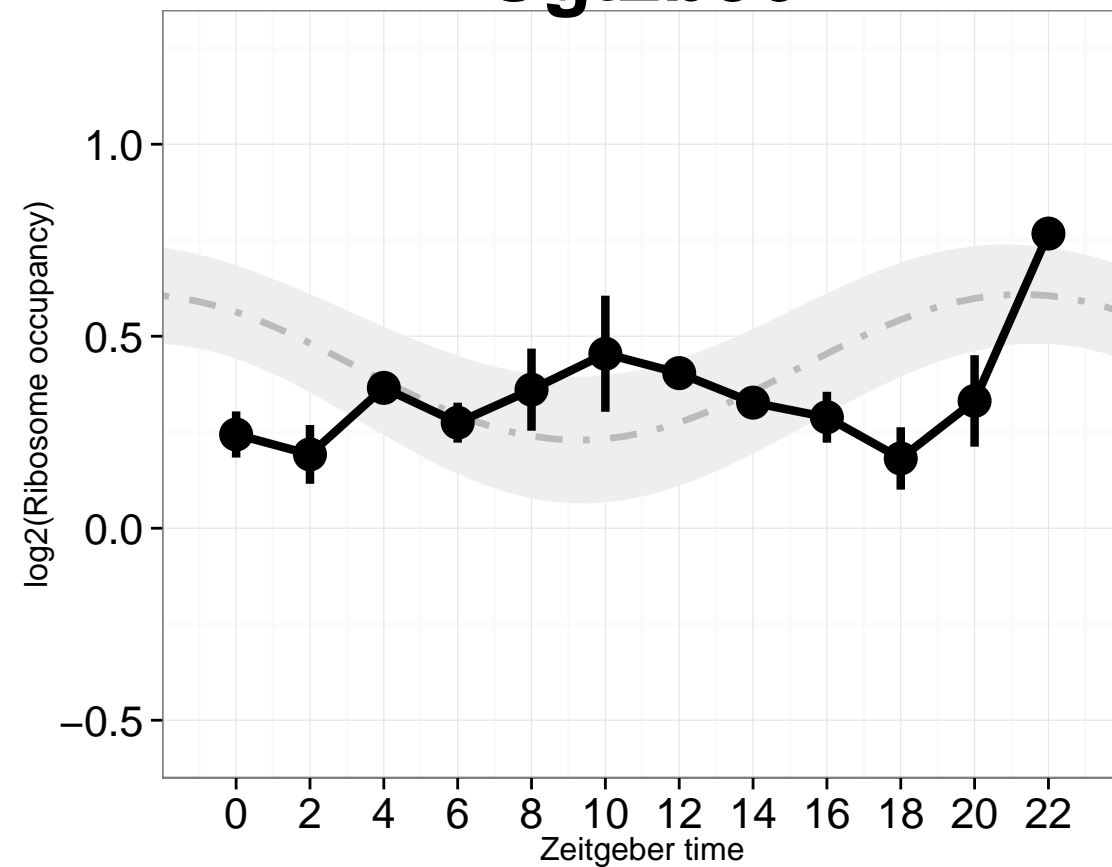

Supplement: SuppDataset_1.zip [file Ugt2b36_set_A.pdf › Supplemental Dataset 1/A-mRNA_nonrhyth_translation_nonrhyth/Ugt2b36_set_A.pdf]

# Ugt2b37

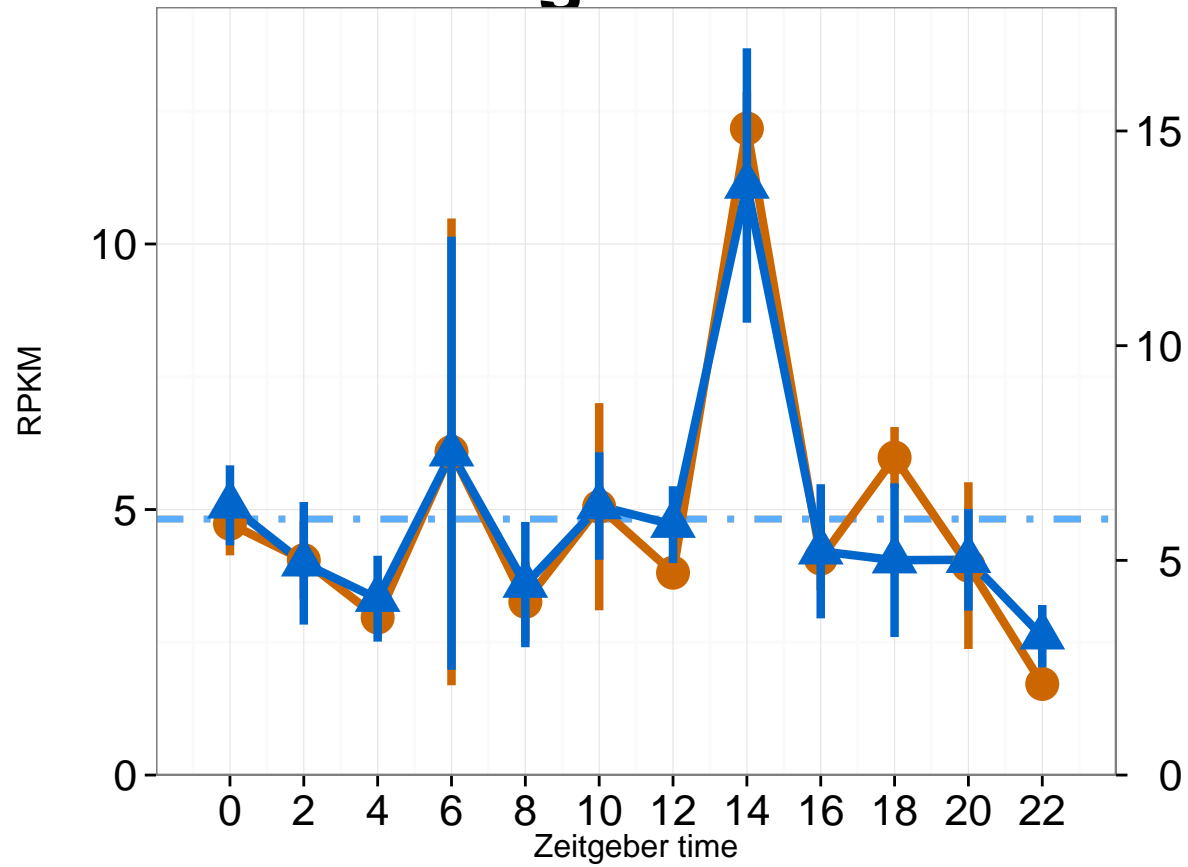

# Ugt2b37

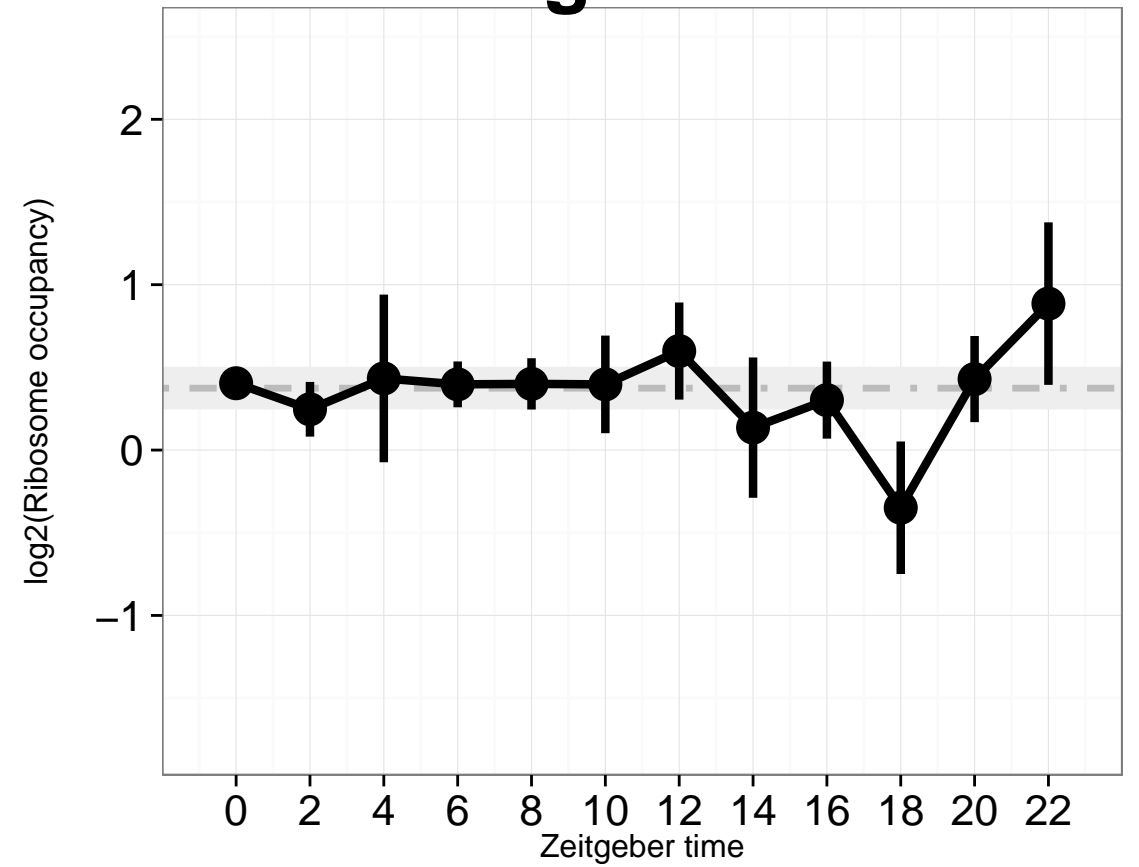

Supplement: SuppDataset_1.zip [file Ugt2b37_set_A.pdf › Supplemental Dataset 1/A-mRNA_nonrhyth_translation_nonrhyth/Ugt2b37_set_A.pdf]

# Ugt2b38

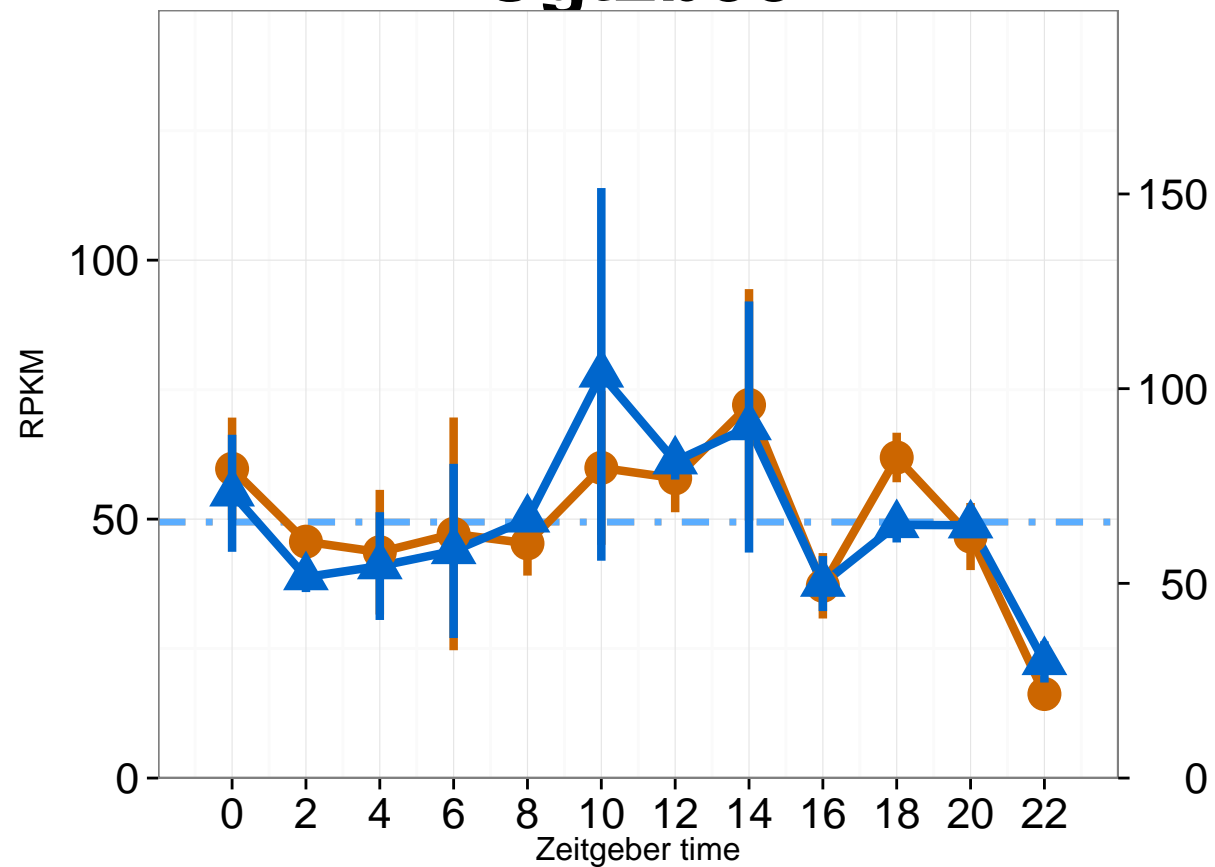

# Ugt2b38

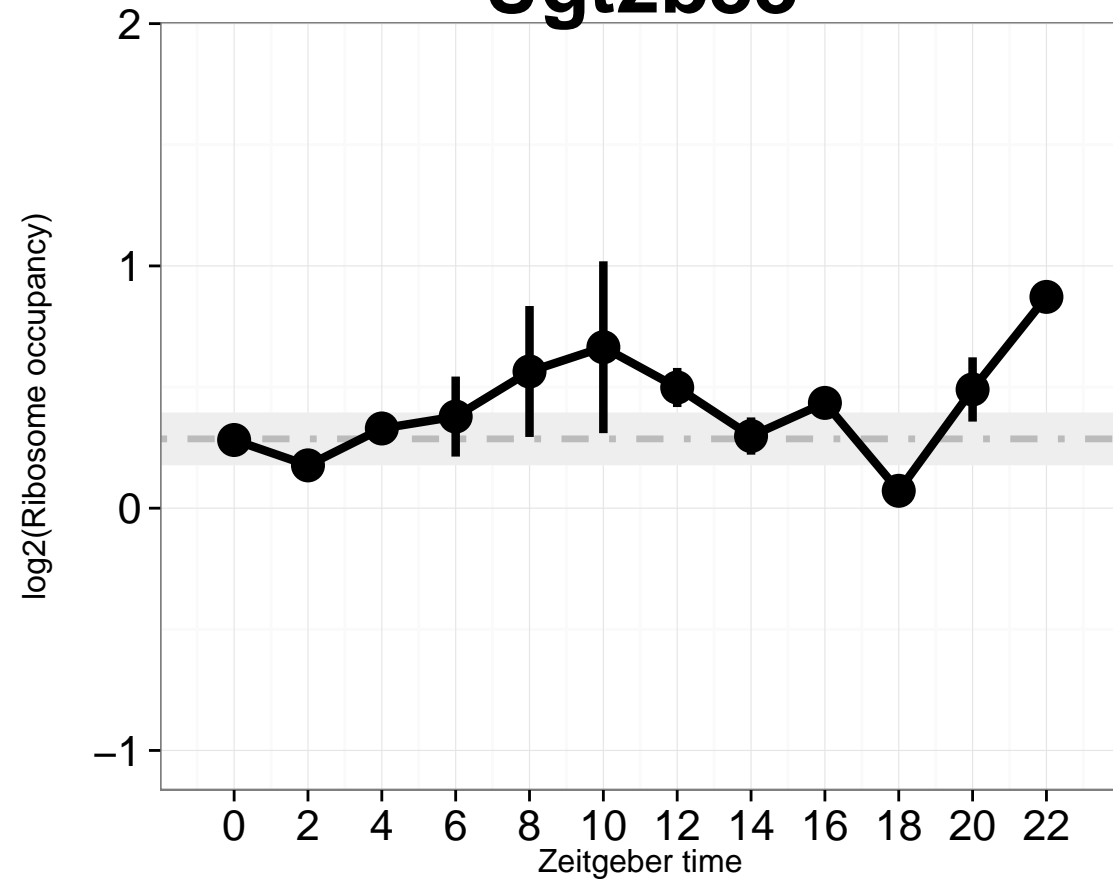

Supplement: SuppDataset_1.zip [file Ugt2b38_set_A.pdf › Supplemental Dataset 1/A-mRNA_nonrhyth_translation_nonrhyth/Ugt2b38_set_A.pdf]

# Ugt2b5

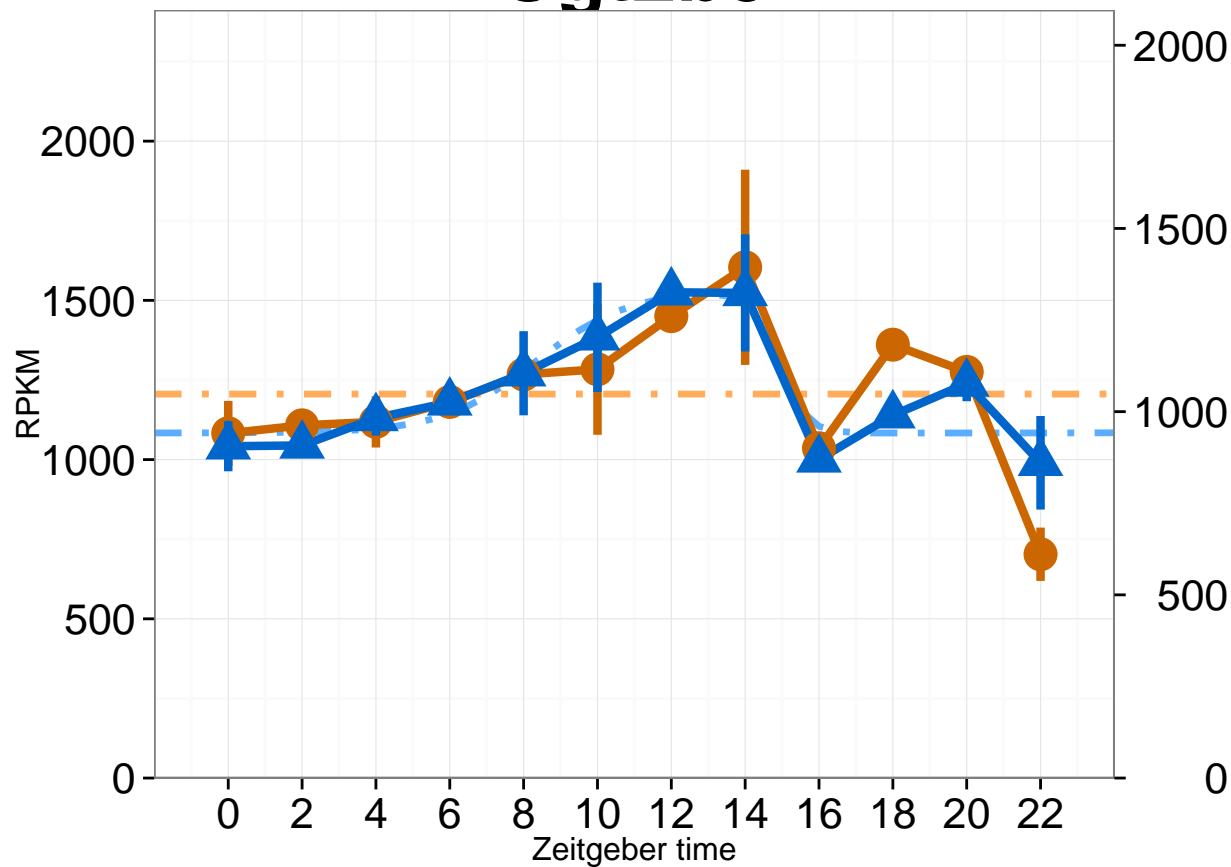

# Ugt2b5

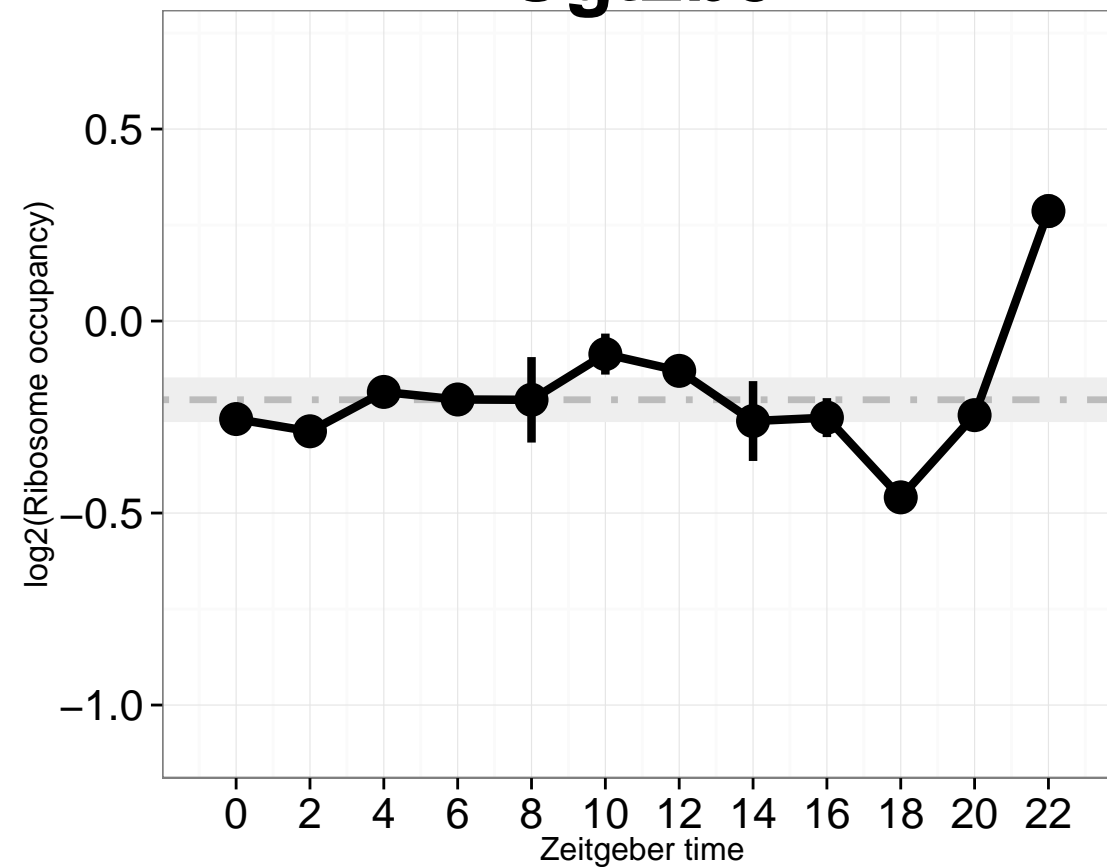

Supplement: SuppDataset_1.zip [file Ugt2b5_set_A.pdf › Supplemental Dataset 1/A-mRNA_nonrhyth_translation_nonrhyth/Ugt2b5_set_A.pdf]

# Ugt3a1

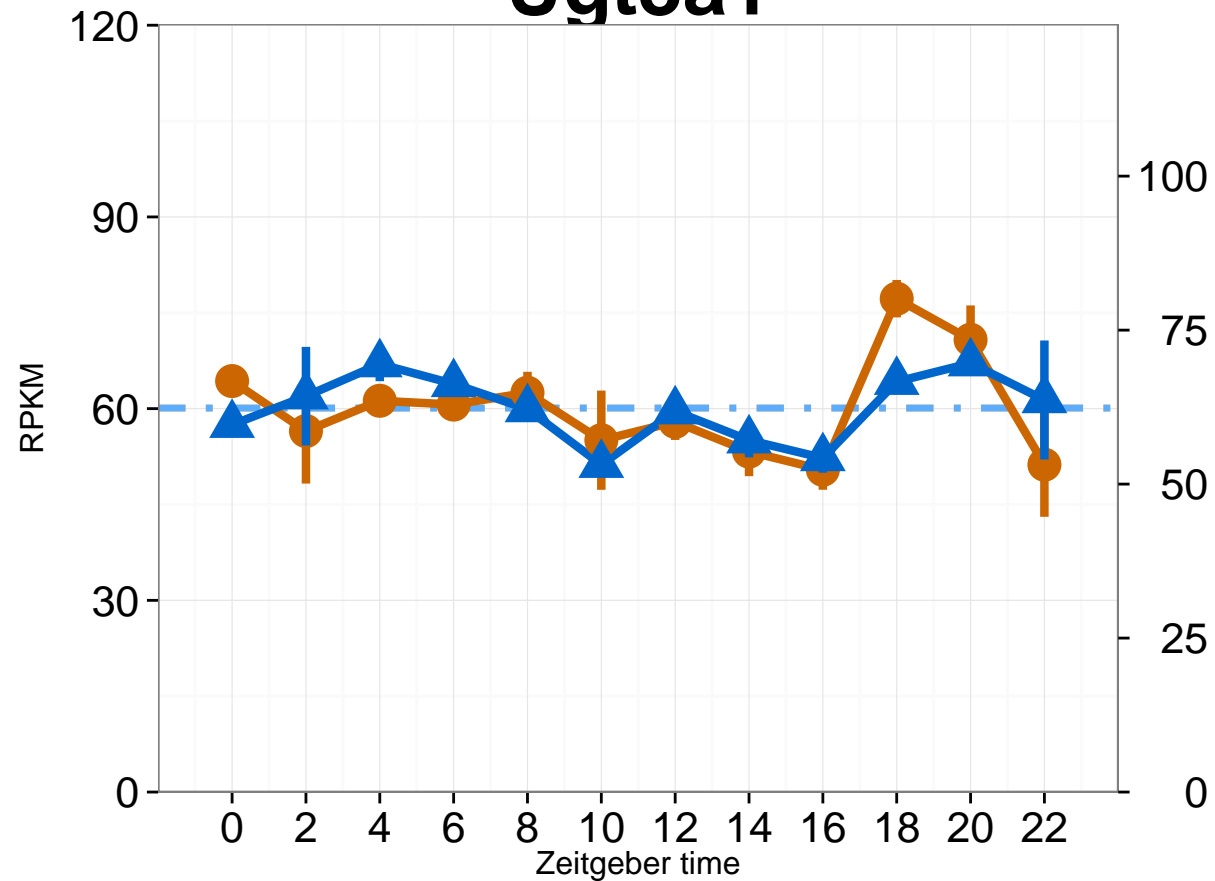

# Ugt3a1

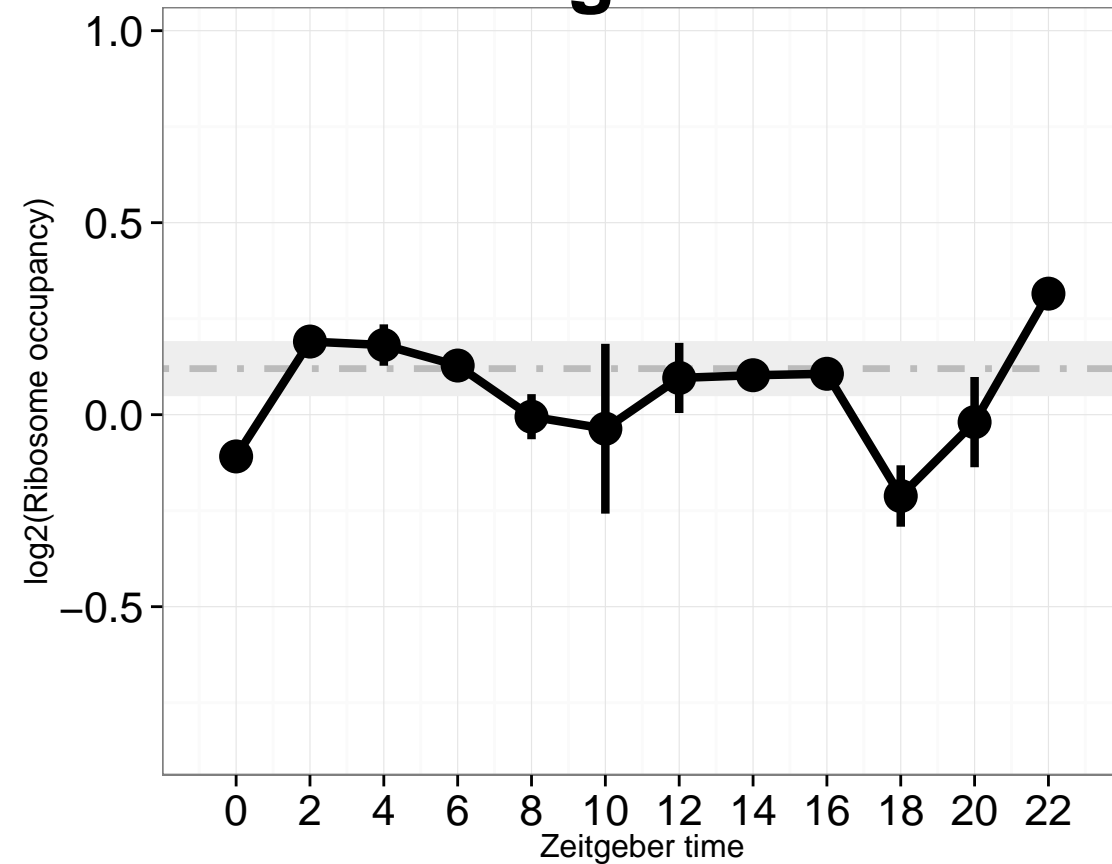

Supplement: SuppDataset_1.zip [file Ugt3a1_set_A.pdf › Supplemental Dataset 1/A-mRNA_nonrhyth_translation_nonrhyth/Ugt3a1_set_A.pdf]

# Ugt3a2

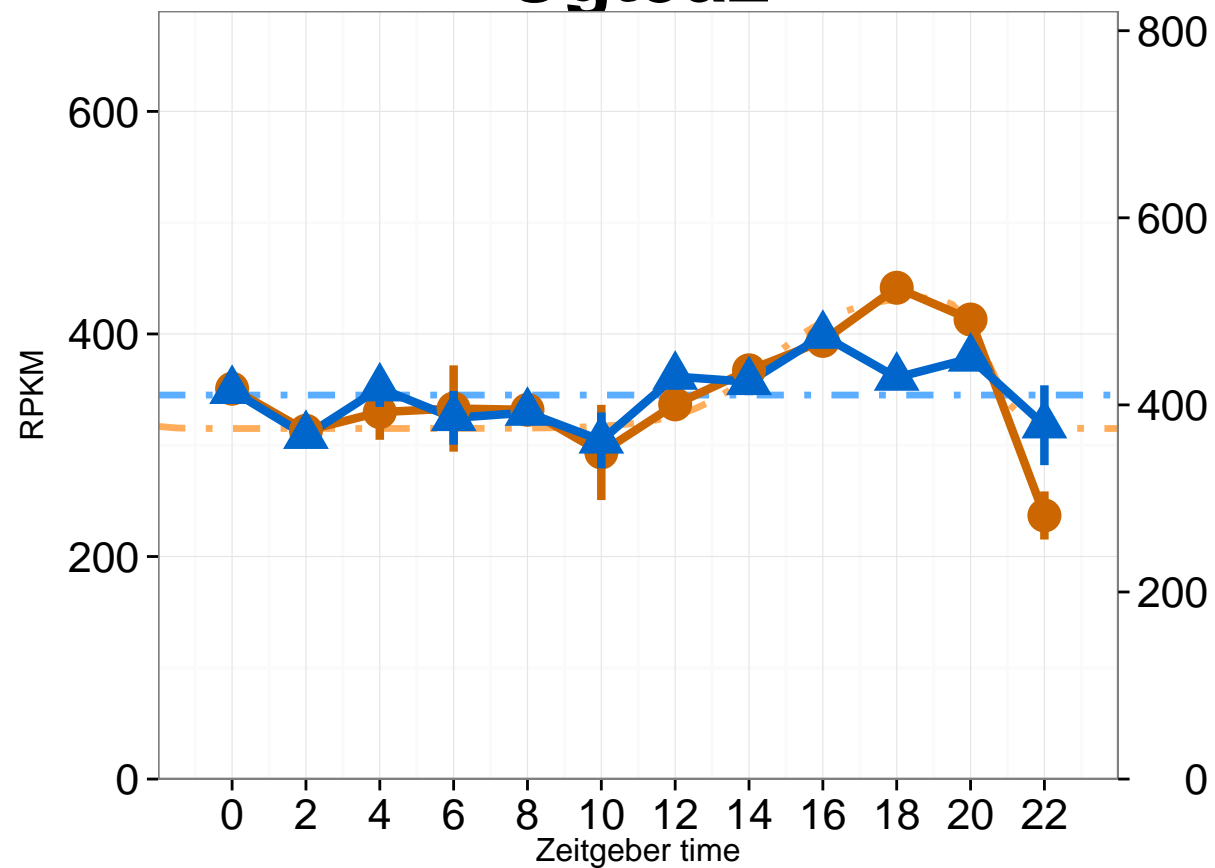

# Ugt3a2

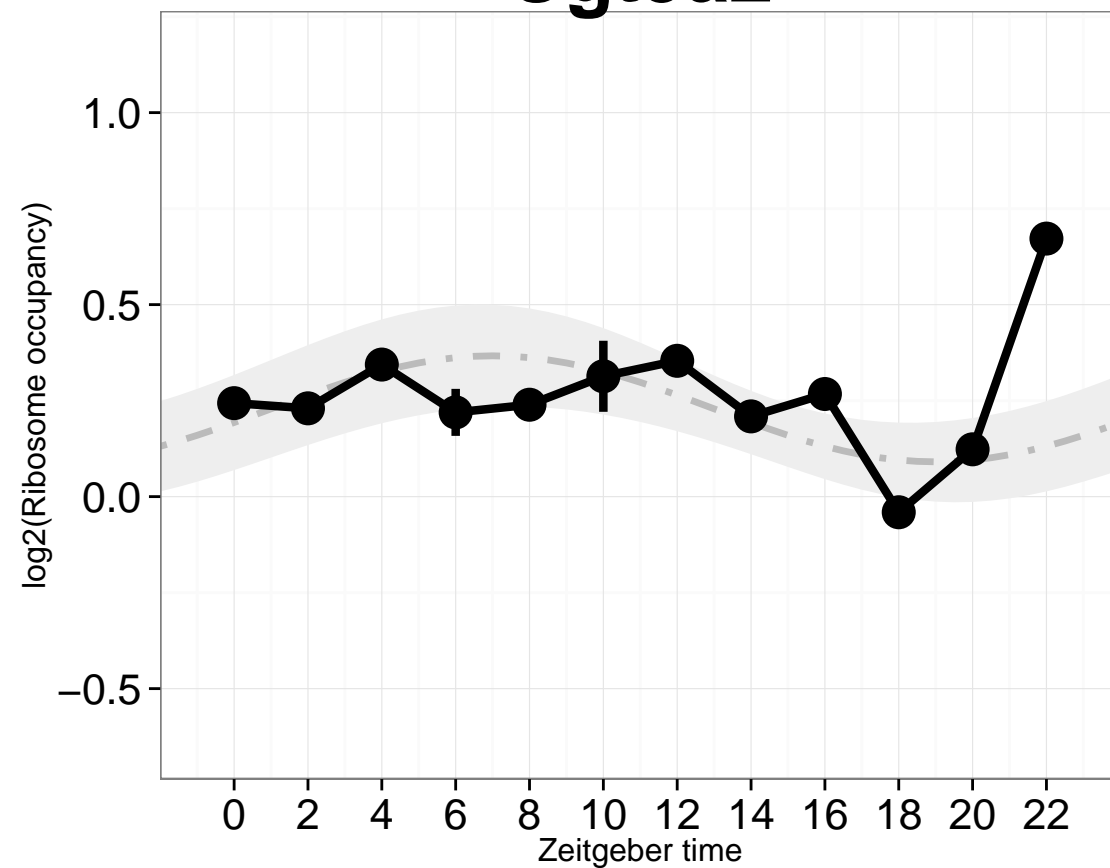

Supplement: SuppDataset_1.zip [file Ugt3a2_set_A.pdf › Supplemental Dataset 1/A-mRNA_nonrhyth_translation_nonrhyth/Ugt3a2_set_A.pdf]

# Uhmk1

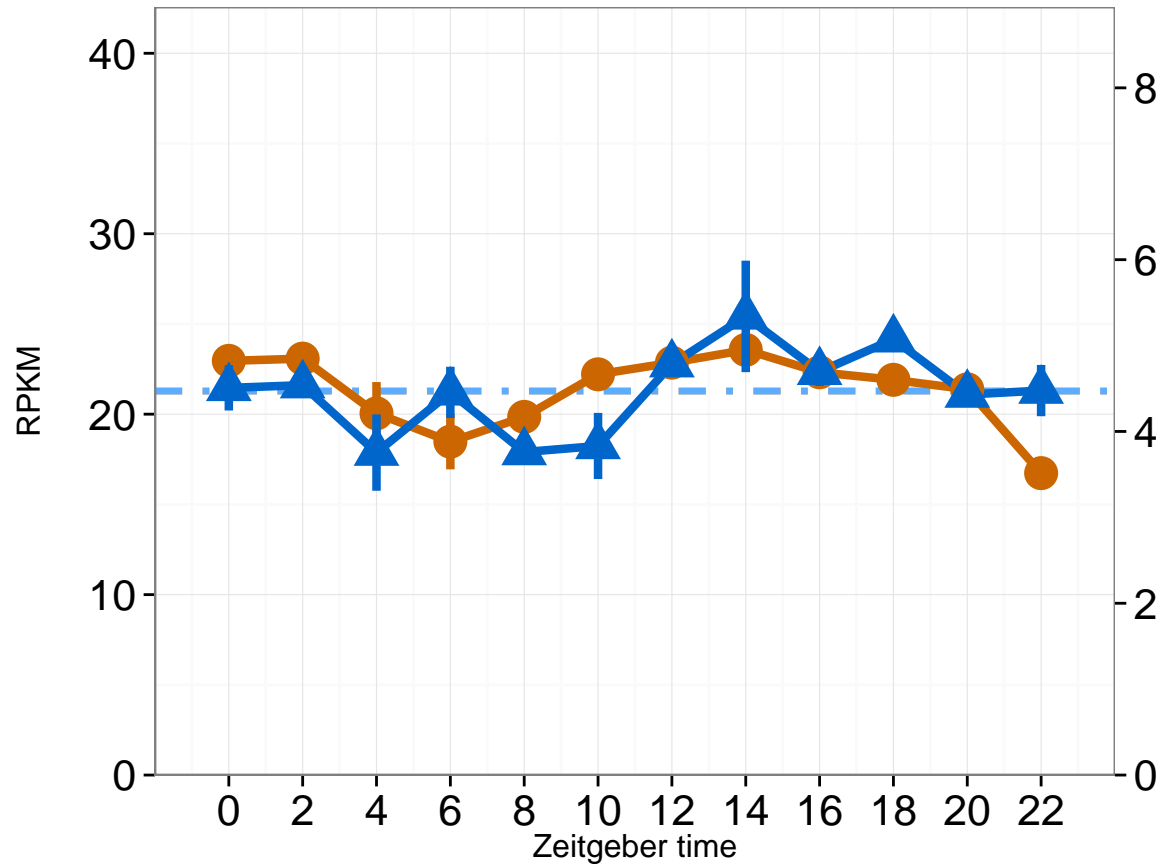

# Uhmk1

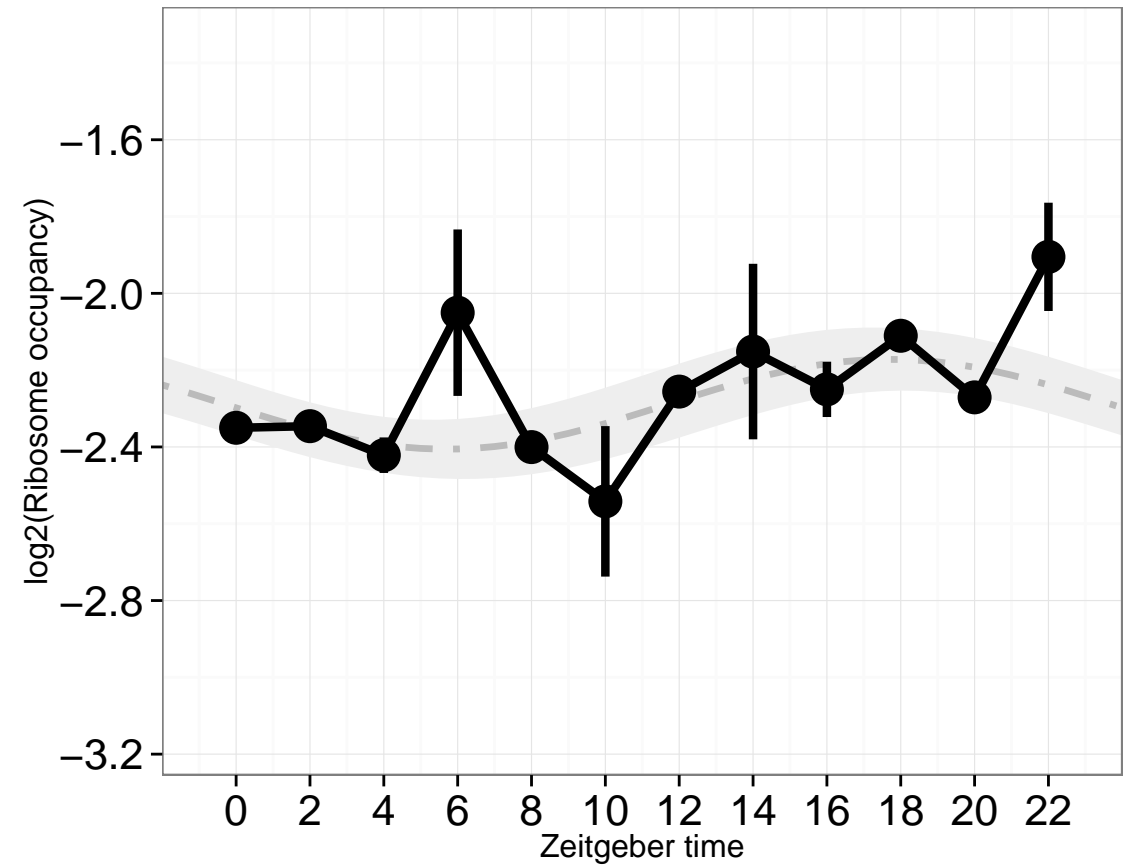

Supplement: SuppDataset_1.zip [file Uhmk1_set_A.pdf › Supplemental Dataset 1/A-mRNA_nonrhyth_translation_nonrhyth/Uhmk1_set_A.pdf]

## Uhrf1

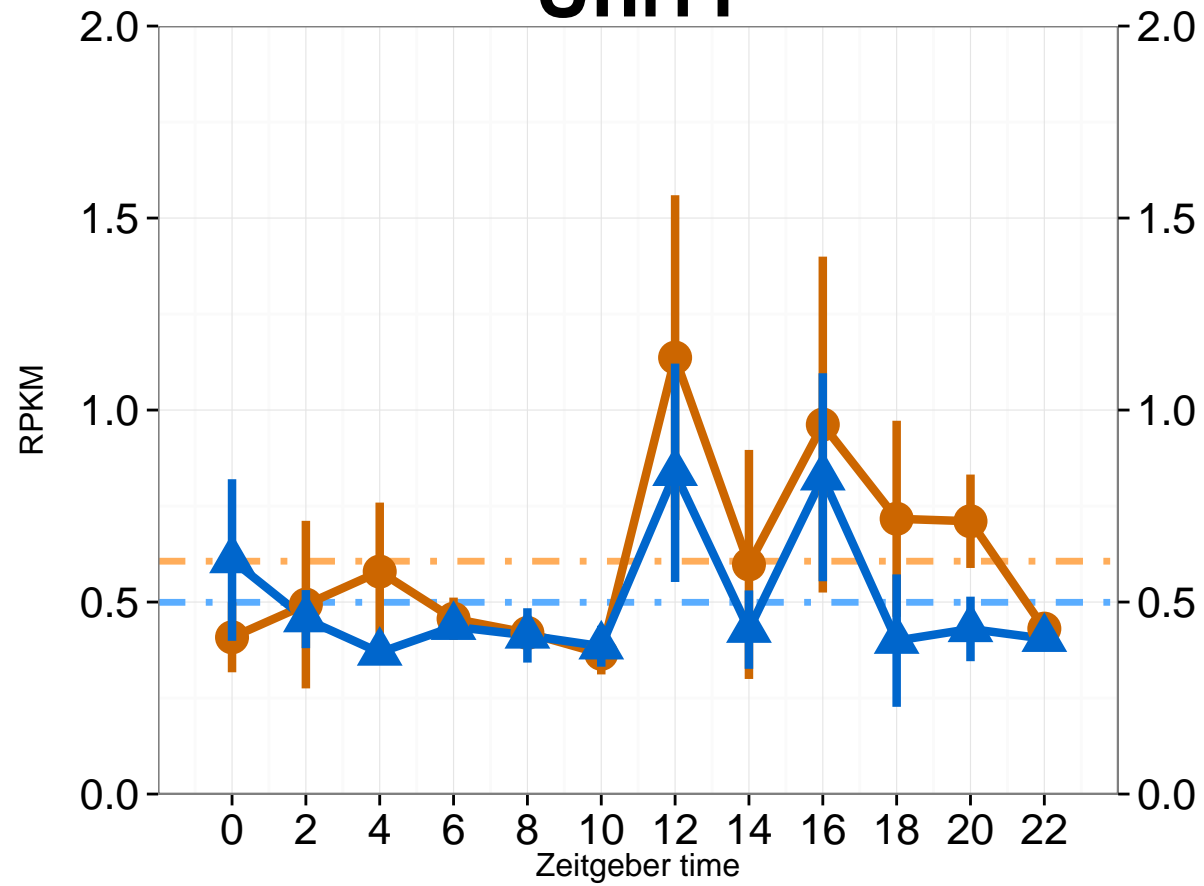

## Uhrf1

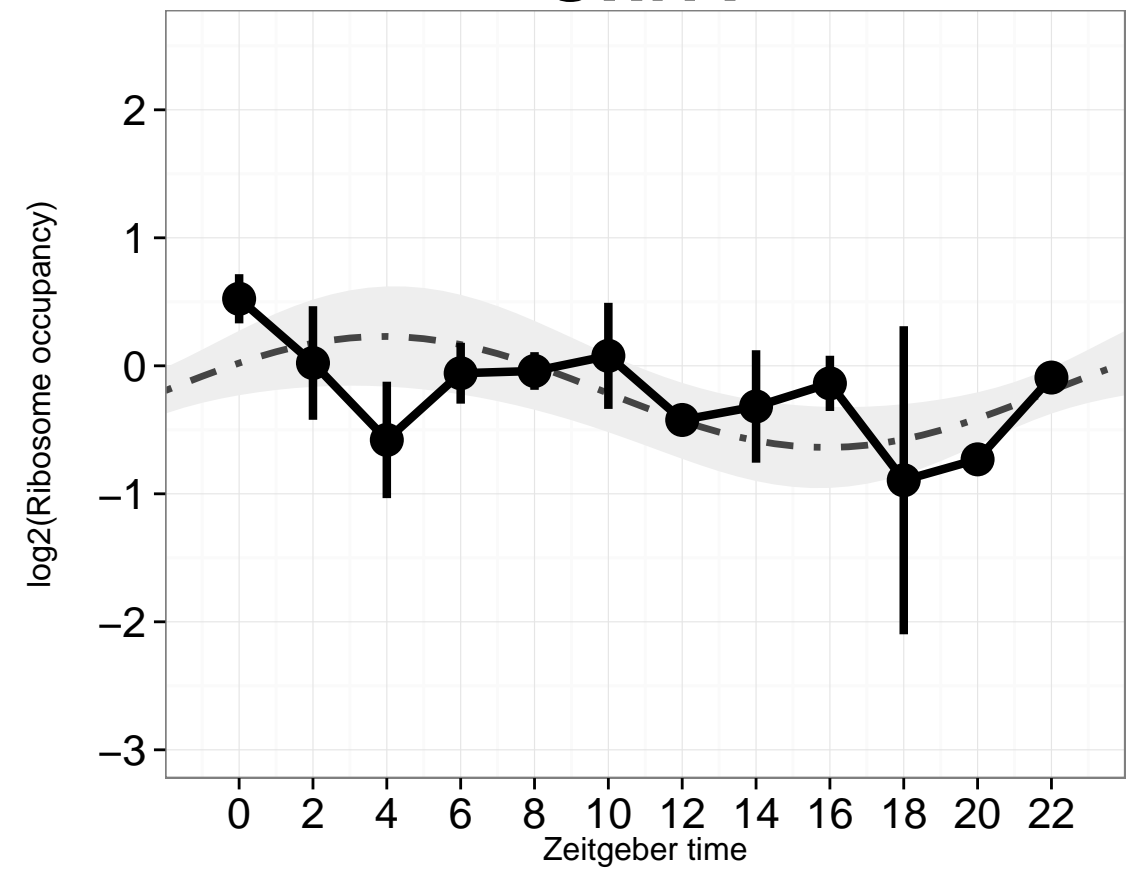

Supplement: SuppDataset_1.zip [file Uhrf1_set_A.pdf › Supplemental Dataset 1/A-mRNA_nonrhyth_translation_nonrhyth/Uhrf1_set_A.pdf]

# Uhrf1bp1

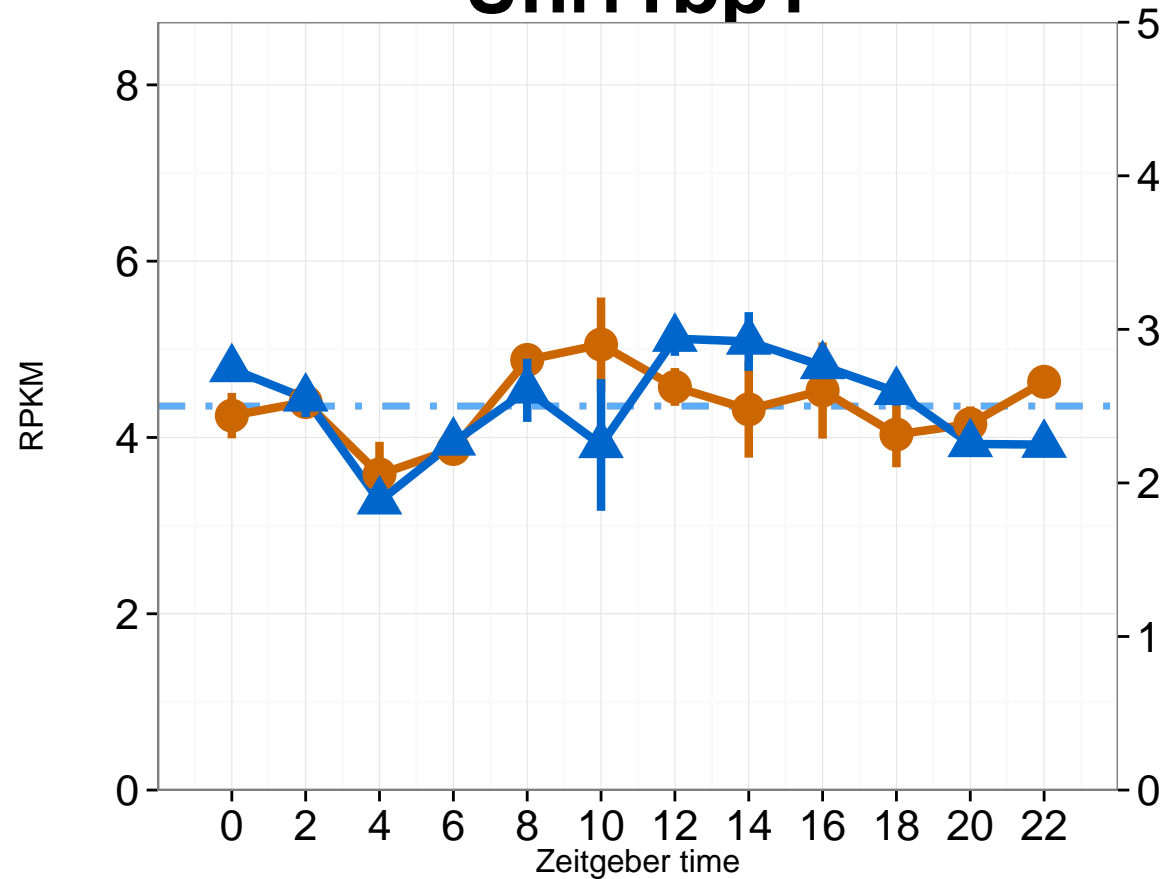

# Uhrf1bp1

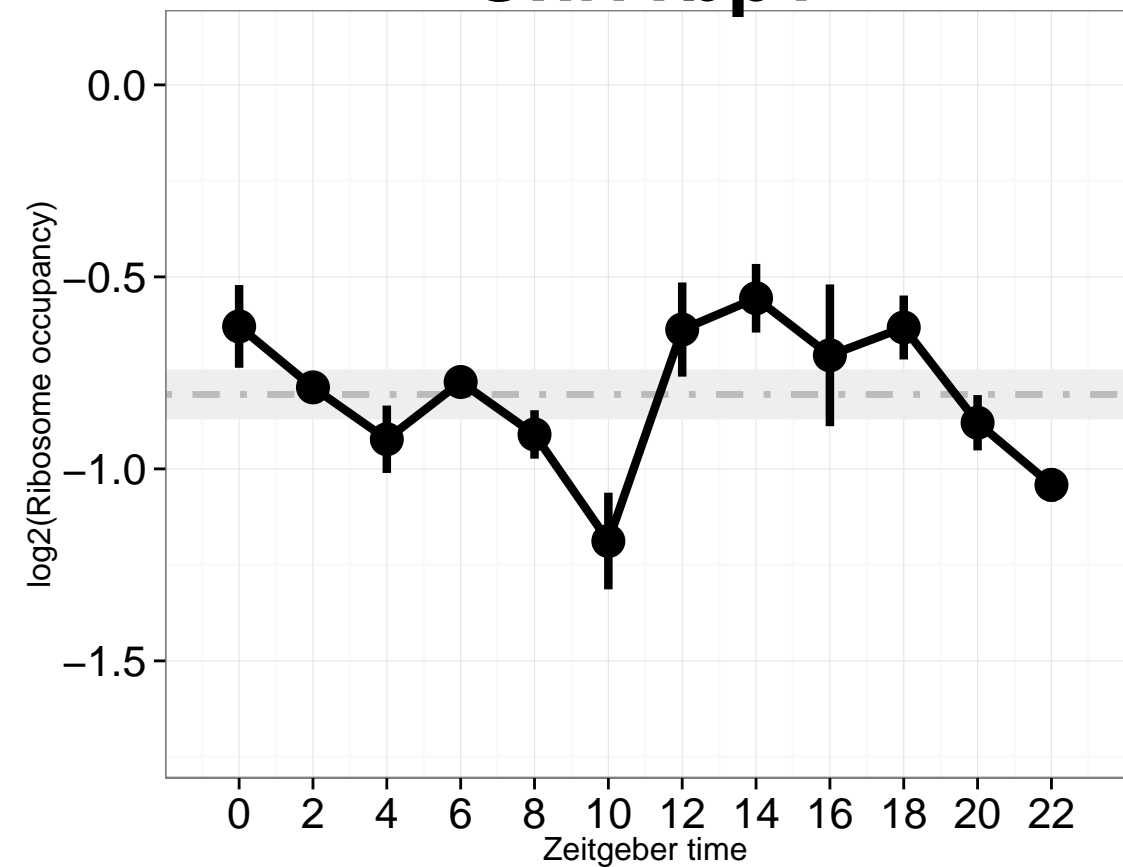

Supplement: SuppDataset_1.zip [file Uhrf1bp1_set_A.pdf › Supplemental Dataset 1/A-mRNA_nonrhyth_translation_nonrhyth/Uhrf1bp1_set_A.pdf]

# Uhrf1bp1l

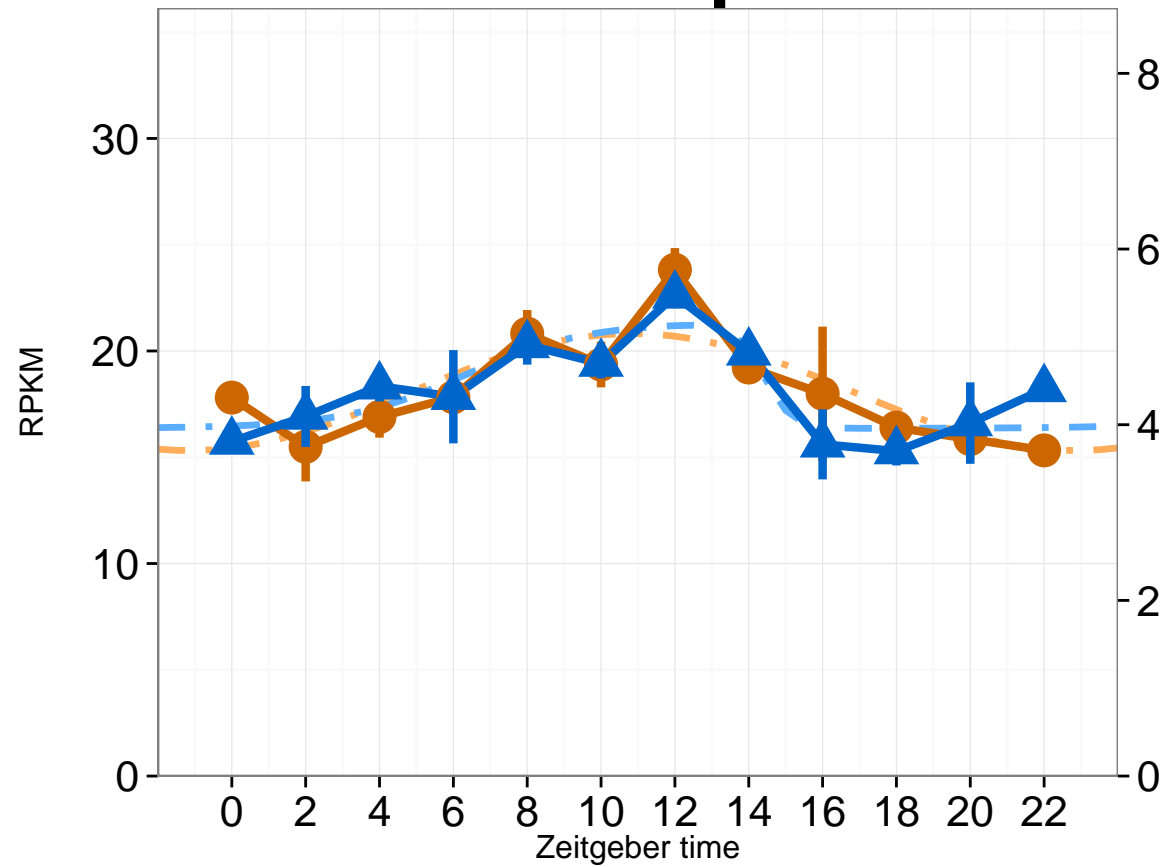

# Uhrf1bp1l

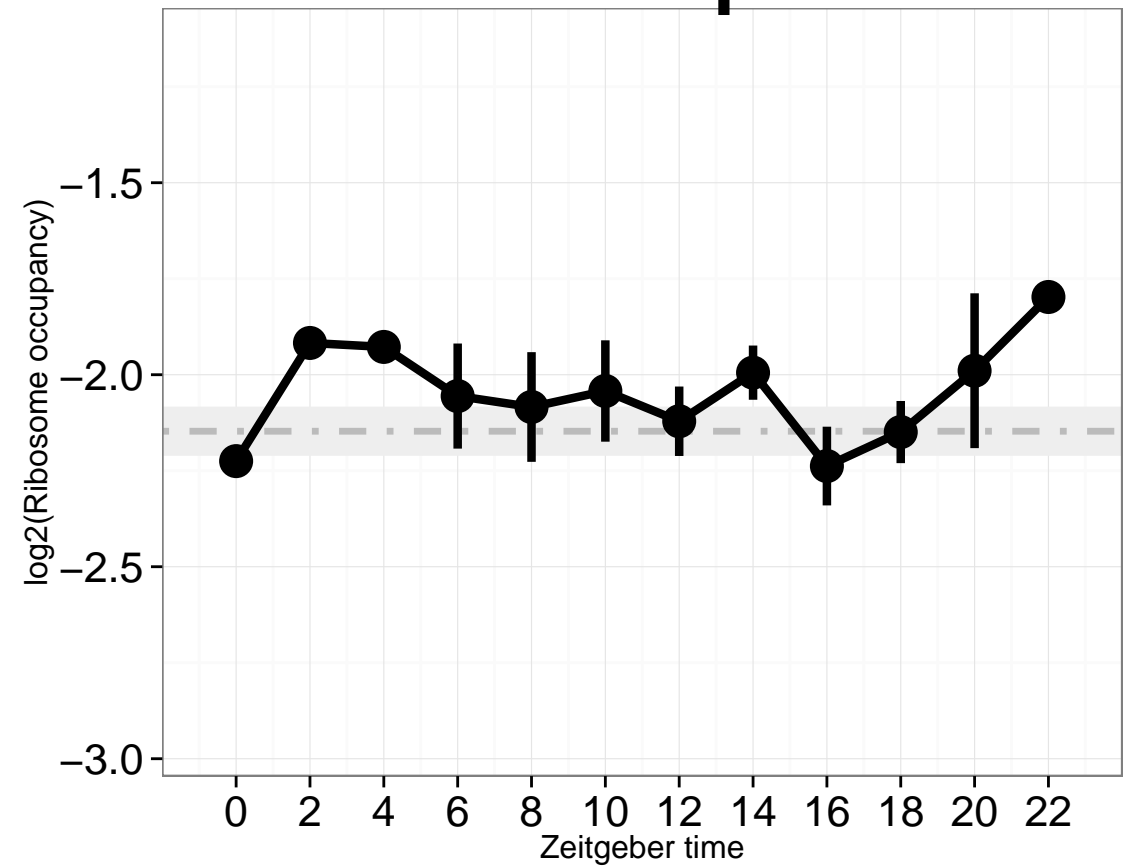

Supplement: SuppDataset_1.zip [file Uhrf1bp1l_set_A.pdf › Supplemental Dataset 1/A-mRNA_nonrhyth_translation_nonrhyth/Uhrf1bp1l_set_A.pdf]

## Uhrf2

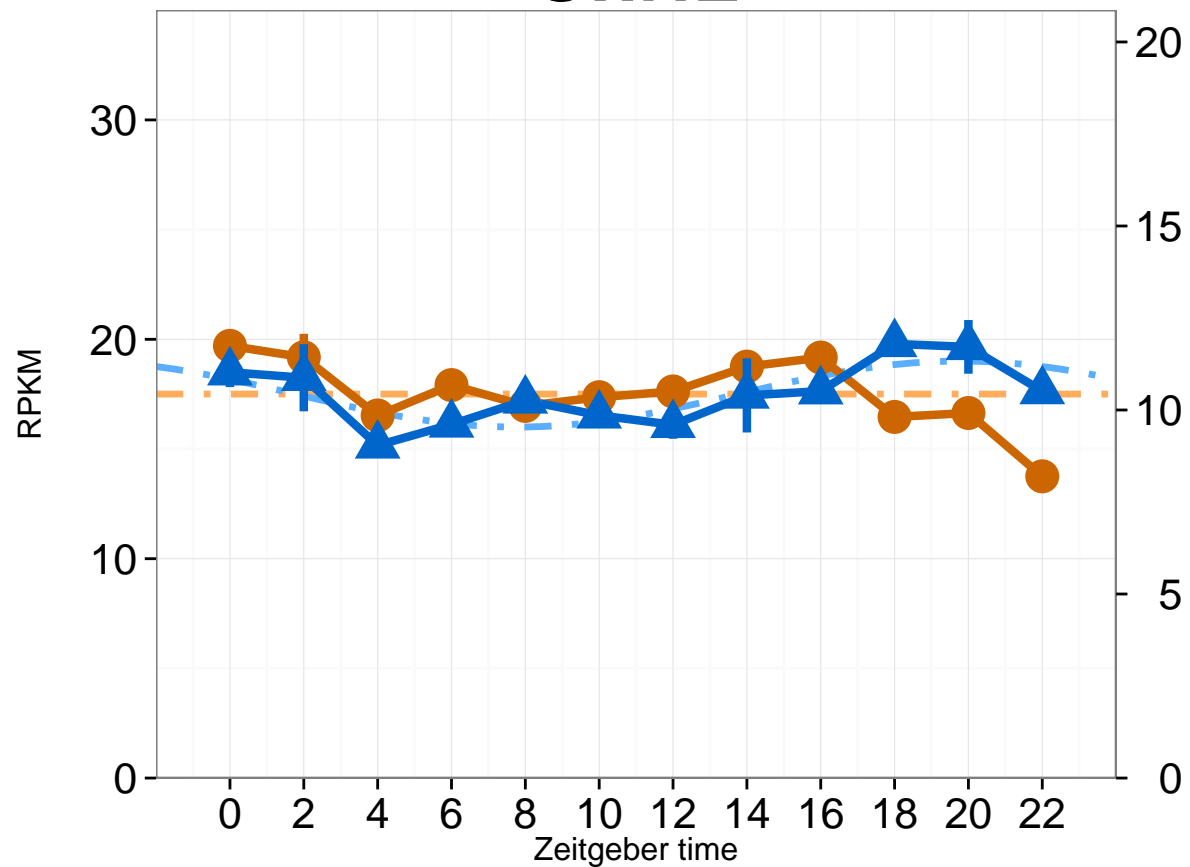

## Uhrf2

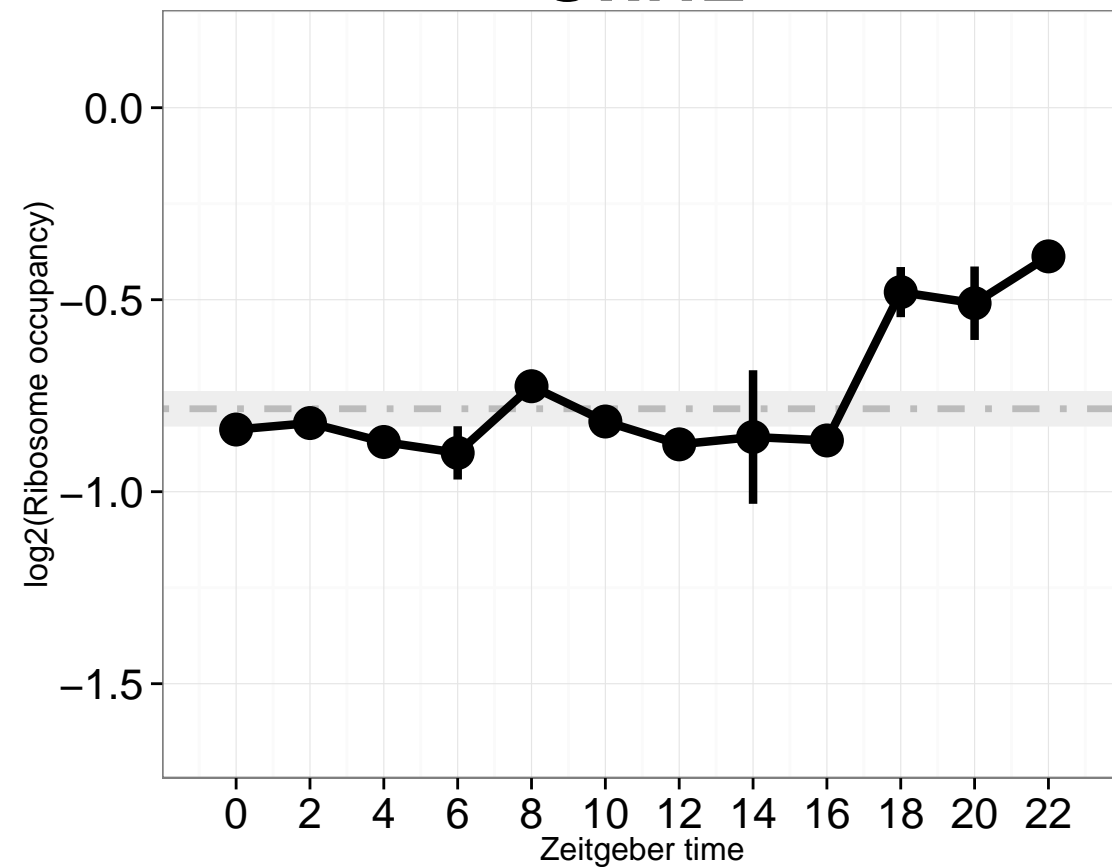

Supplement: SuppDataset_1.zip [file Uhrf2_set_A.pdf › Supplemental Dataset 1/A-mRNA_nonrhyth_translation_nonrhyth/Uhrf2_set_A.pdf]

## Uimc1

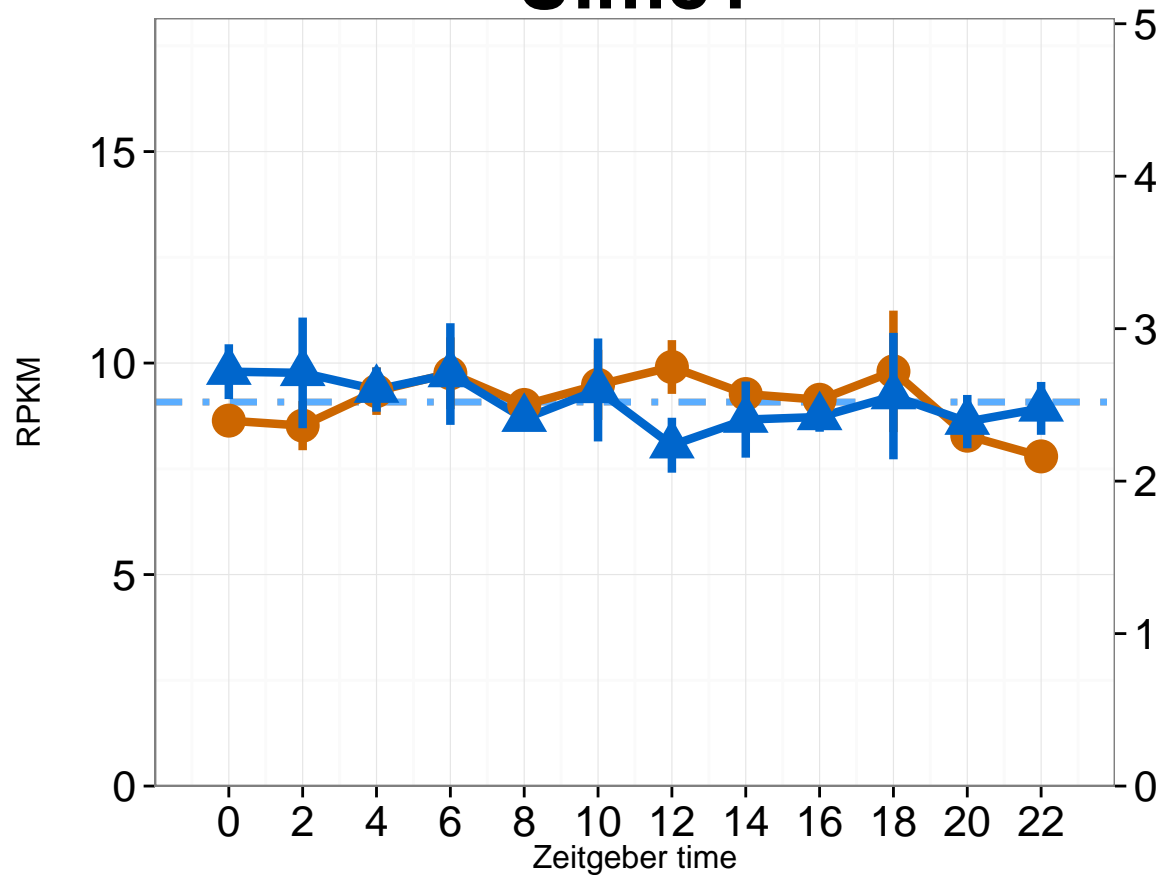

## Uimc1

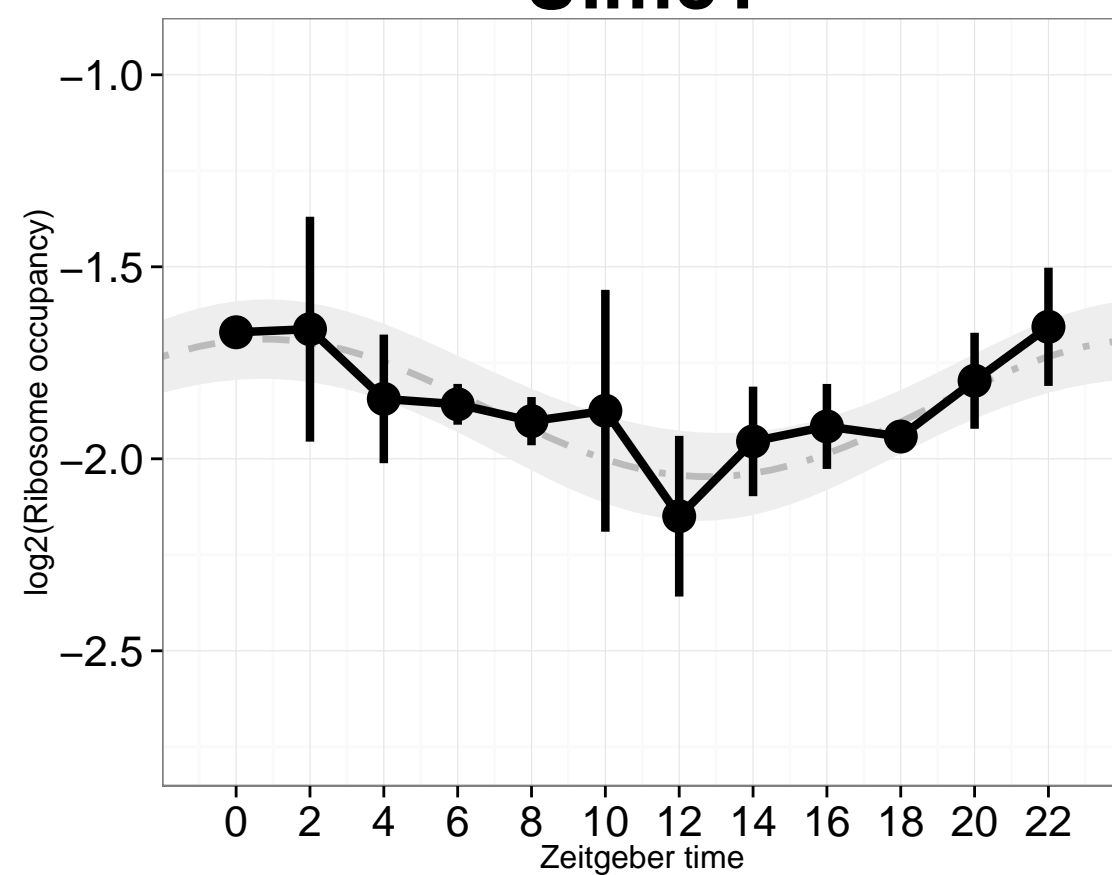

Supplement: SuppDataset_1.zip [file Uimc1_set_A.pdf › Supplemental Dataset 1/A-mRNA_nonrhyth_translation_nonrhyth/Uimc1_set_A.pdf]

## Ulk2

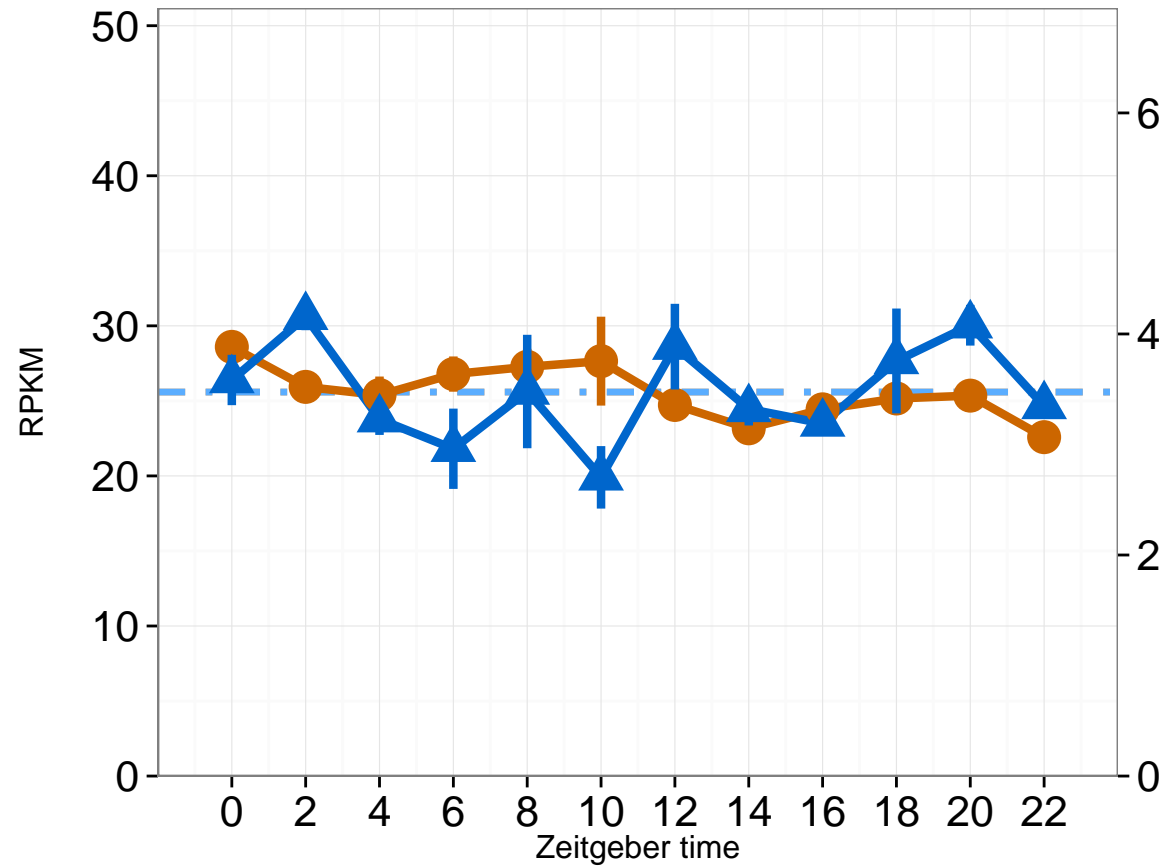

## Ulk2

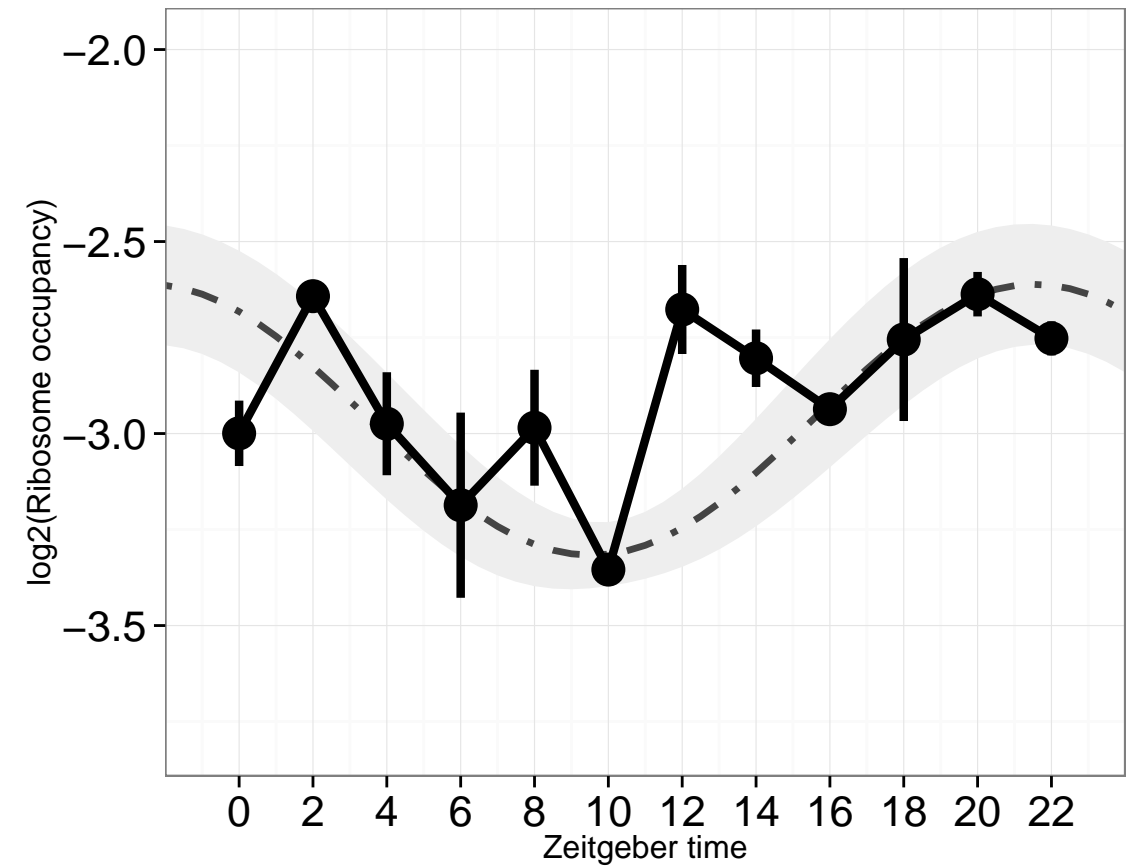

Supplement: SuppDataset_1.zip [file Ulk2_set_A.pdf › Supplemental Dataset 1/A-mRNA_nonrhyth_translation_nonrhyth/Ulk2_set_A.pdf]

## Ulk3

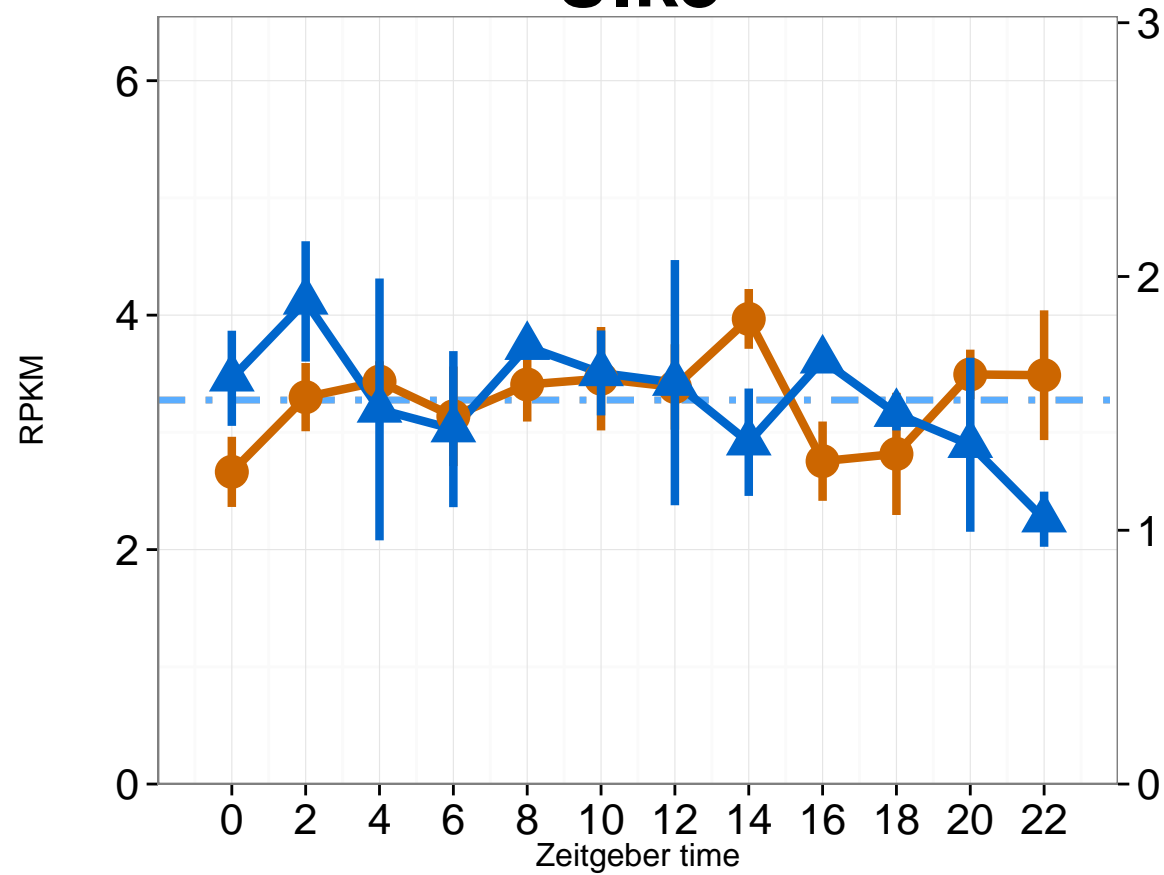

## Ulk3

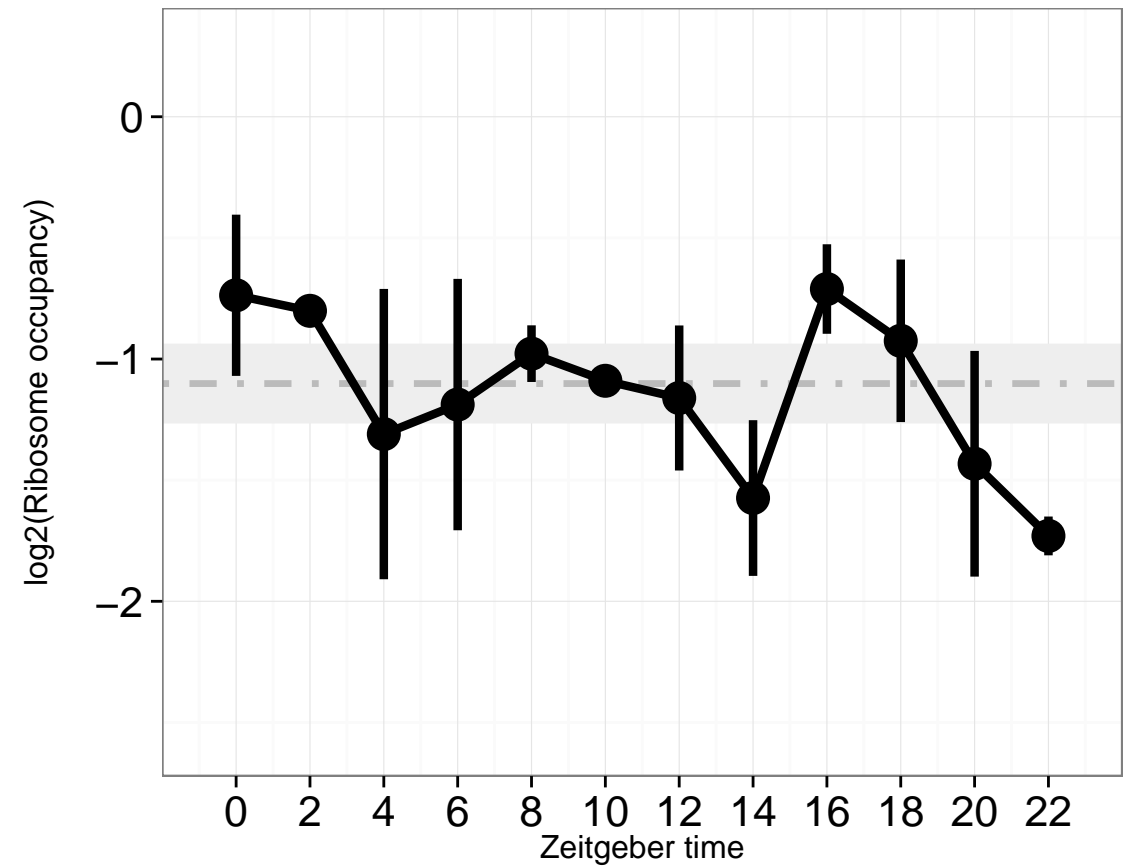

Supplement: SuppDataset_1.zip [file Ulk3_set_A.pdf › Supplemental Dataset 1/A-mRNA_nonrhyth_translation_nonrhyth/Ulk3_set_A.pdf]

## Umps

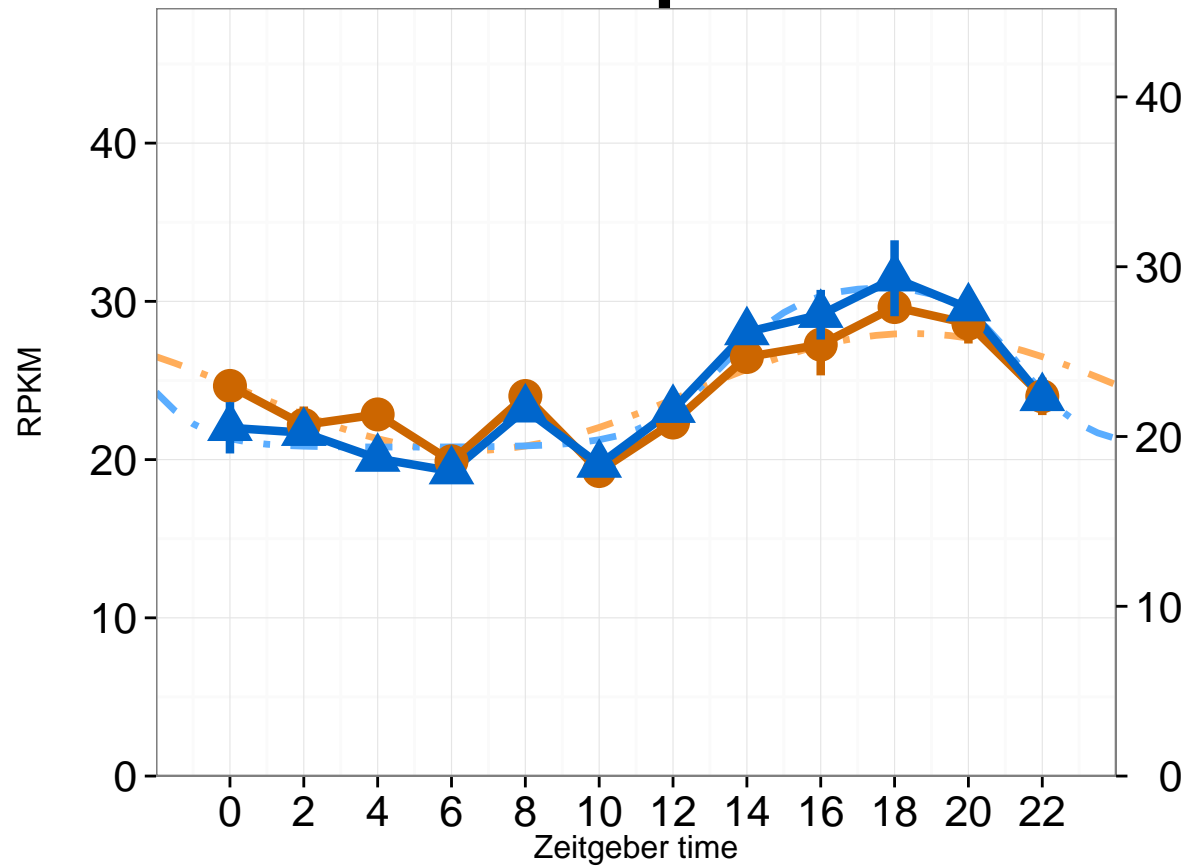

## Umps

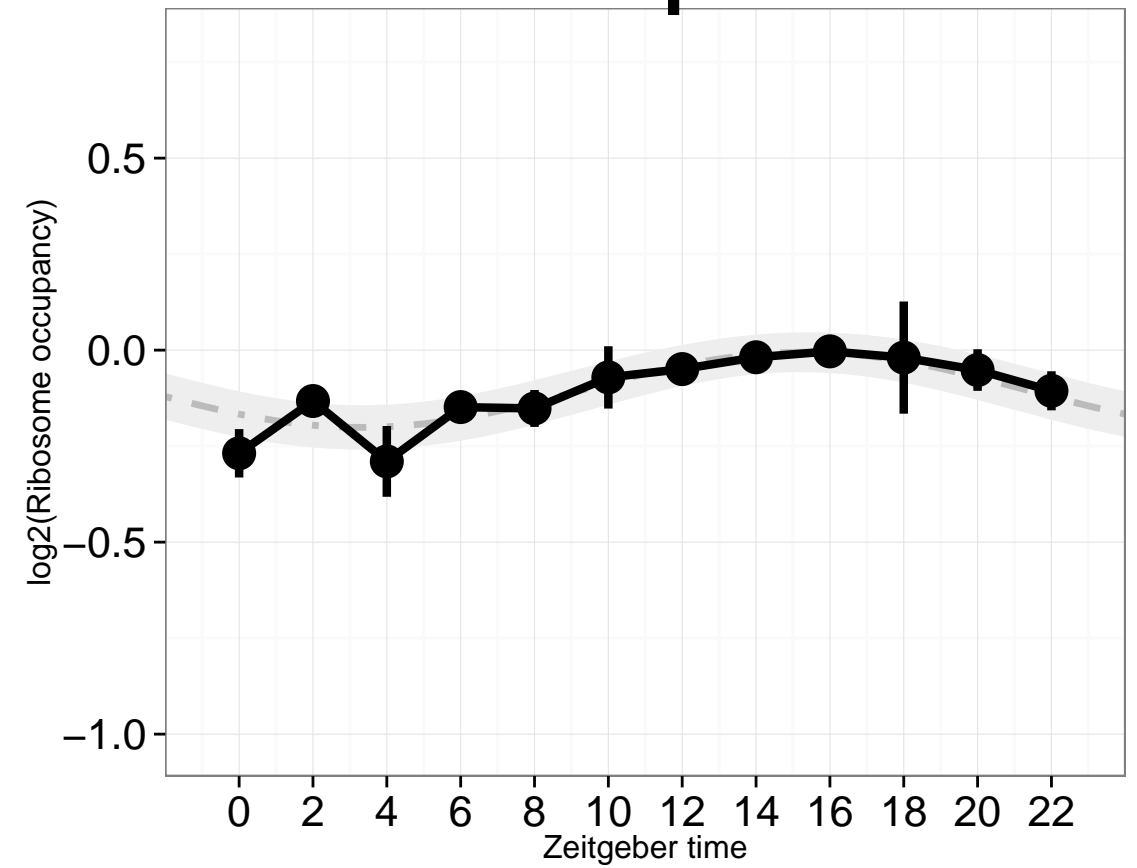

Supplement: SuppDataset_1.zip [file Umps_set_A.pdf › Supplemental Dataset 1/A-mRNA_nonrhyth_translation_nonrhyth/Umps_set_A.pdf]

## Unc119

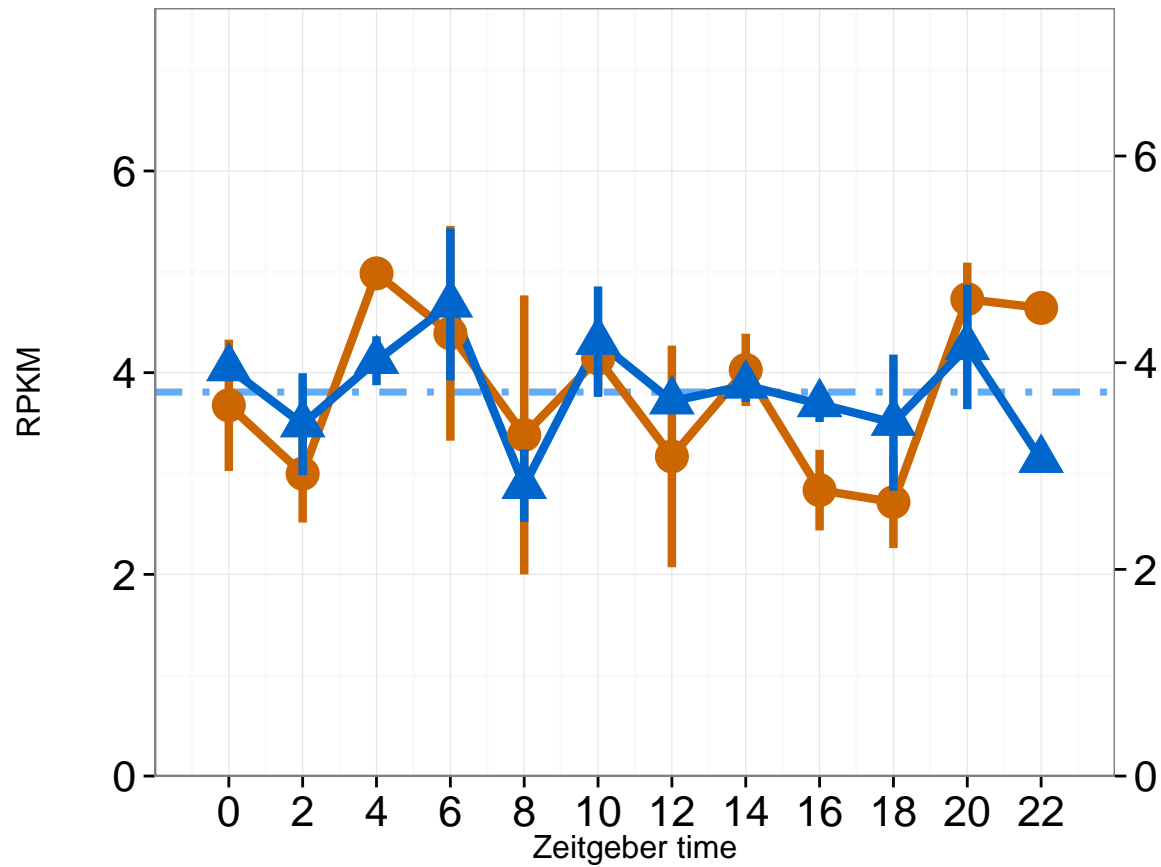

## Unc119

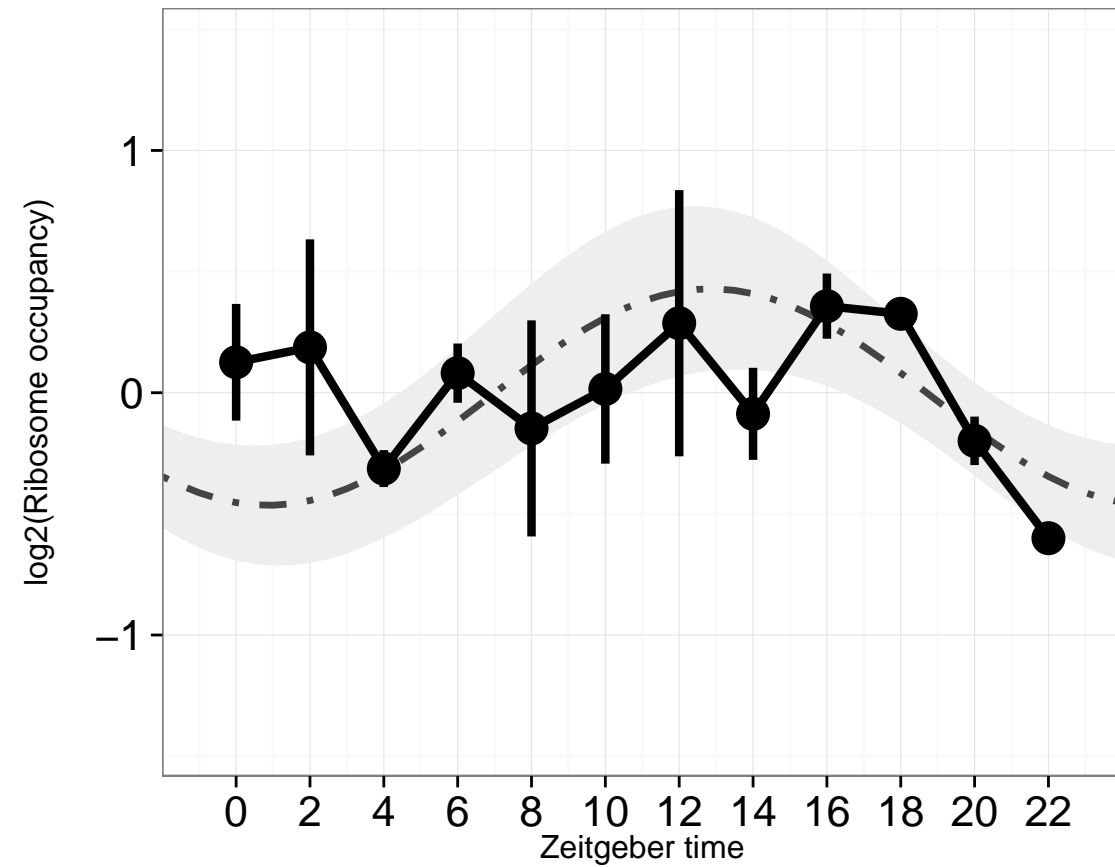

Supplement: SuppDataset_1.zip [file Unc119_set_A.pdf › Supplemental Dataset 1/A-mRNA_nonrhyth_translation_nonrhyth/Unc119_set_A.pdf]

## Unc119b

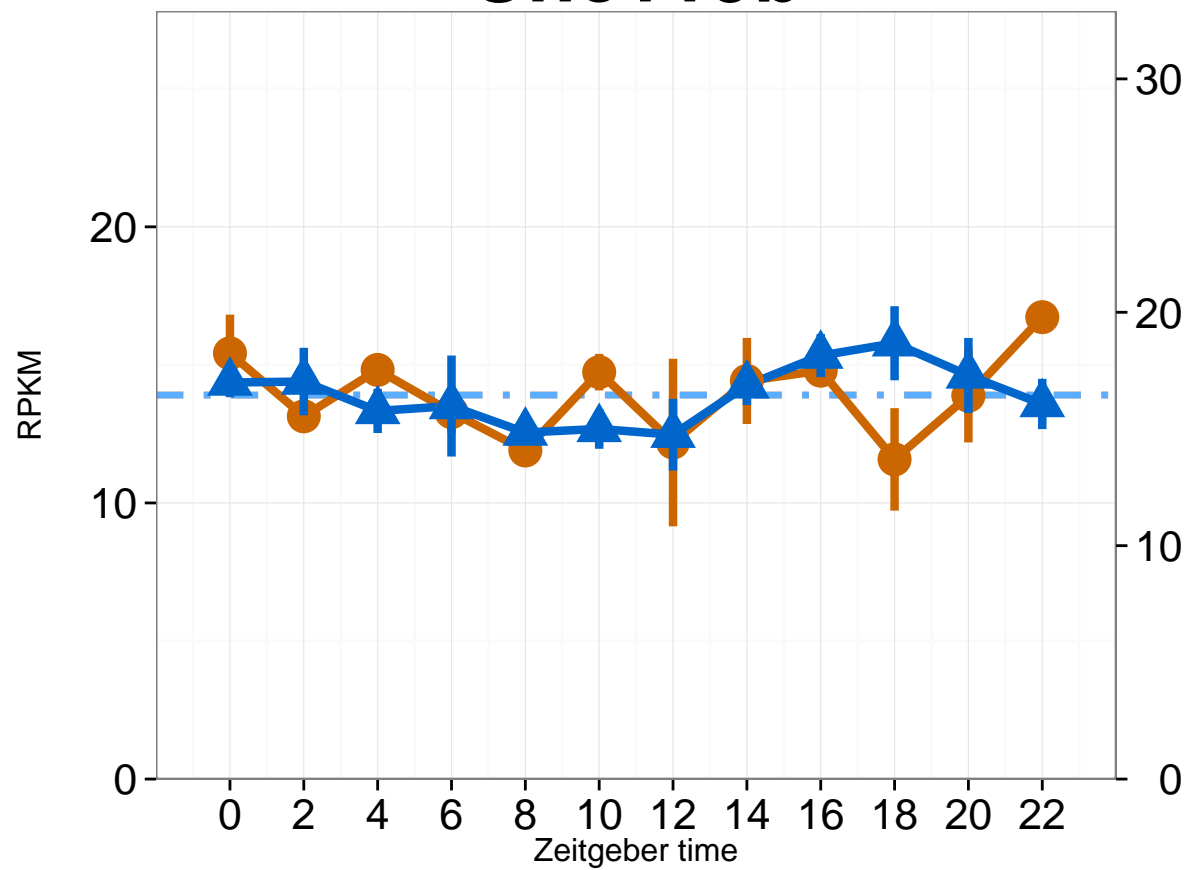

## Unc119b

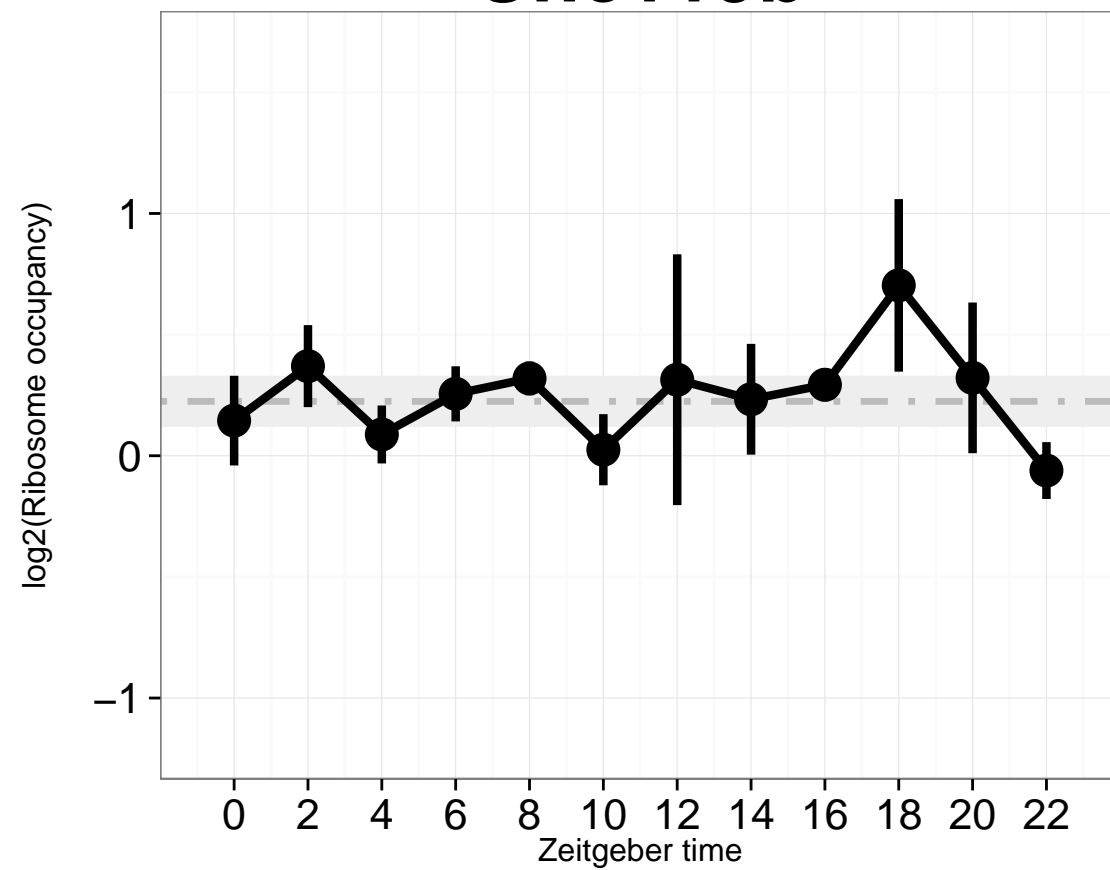

Supplement: SuppDataset_1.zip [file Unc119b_set_A.pdf › Supplemental Dataset 1/A-mRNA_nonrhyth_translation_nonrhyth/Unc119b_set_A.pdf]

## Unc13b

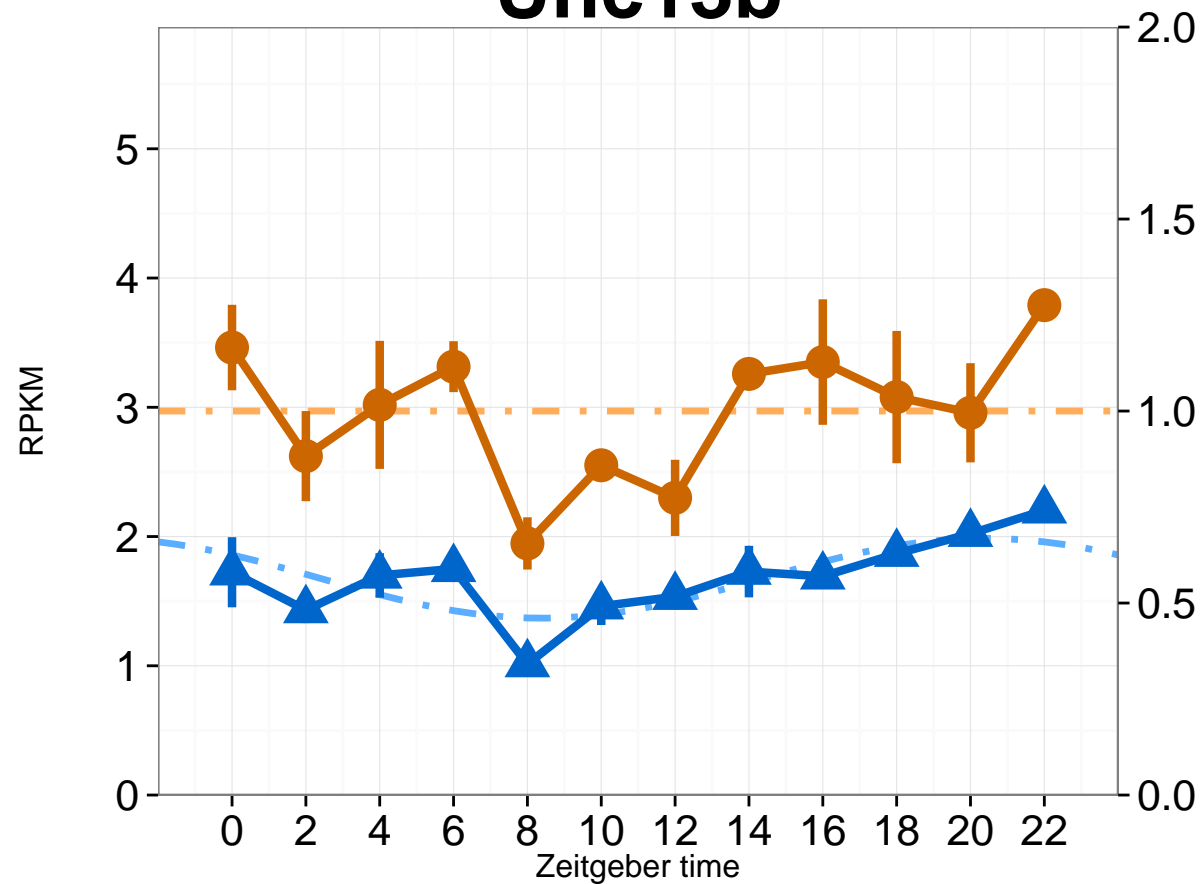

## Unc13b

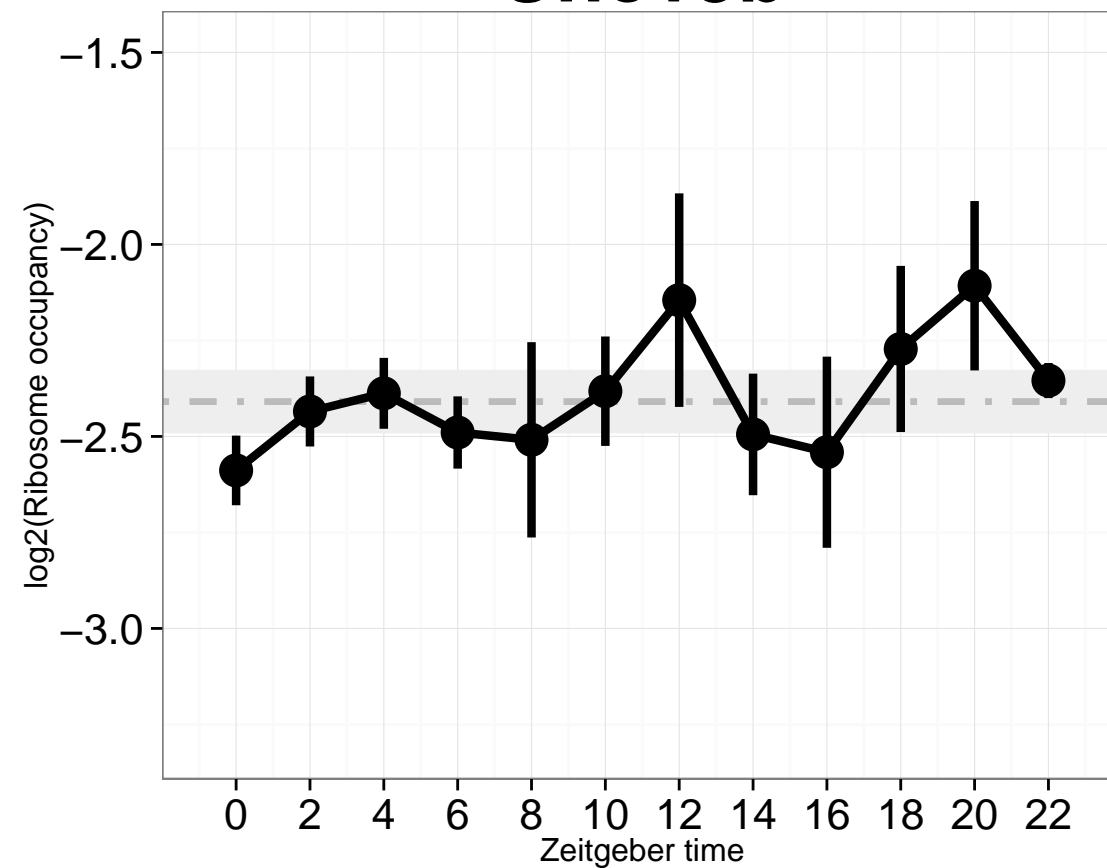

Supplement: SuppDataset_1.zip [file Unc13b_set_A.pdf › Supplemental Dataset 1/A-mRNA_nonrhyth_translation_nonrhyth/Unc13b_set_A.pdf]

## Unc45a

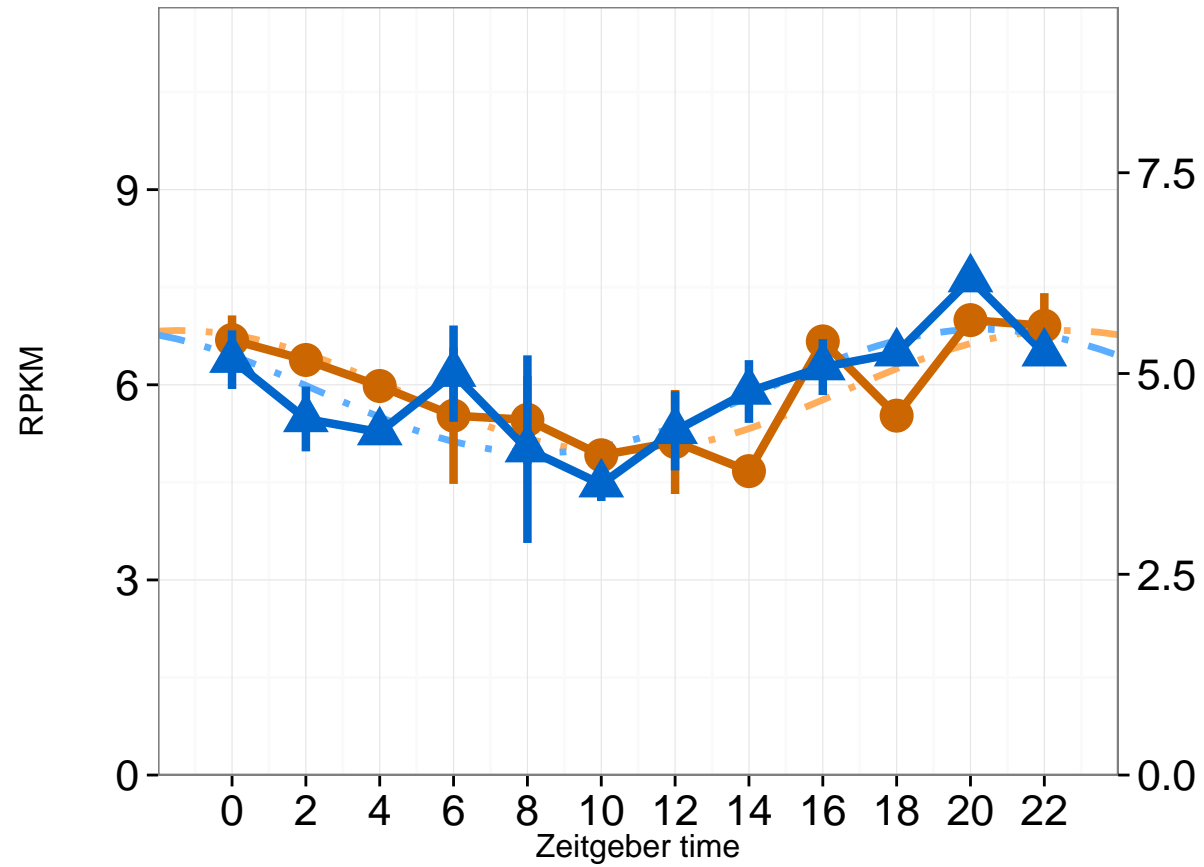

## Unc45a

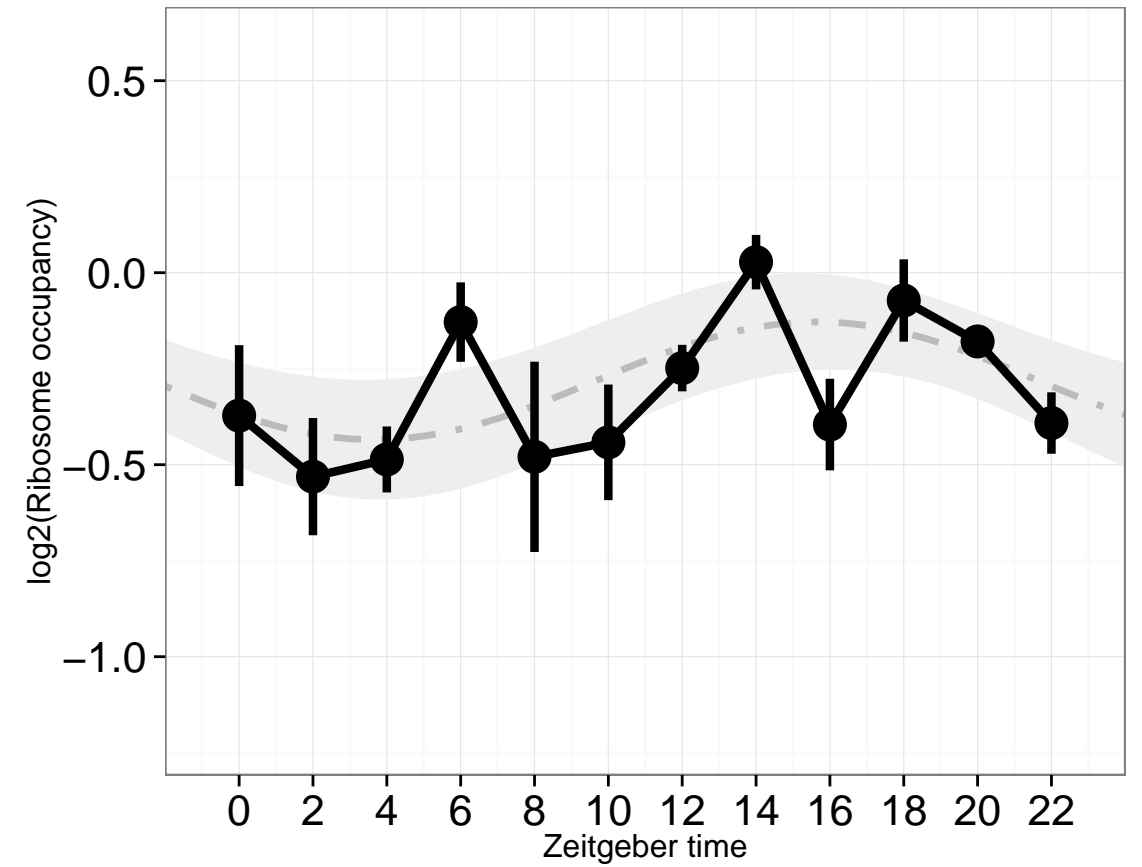

Supplement: SuppDataset_1.zip [file Unc45a_set_A.pdf › Supplemental Dataset 1/A-mRNA_nonrhyth_translation_nonrhyth/Unc45a_set_A.pdf]

## Unc45b

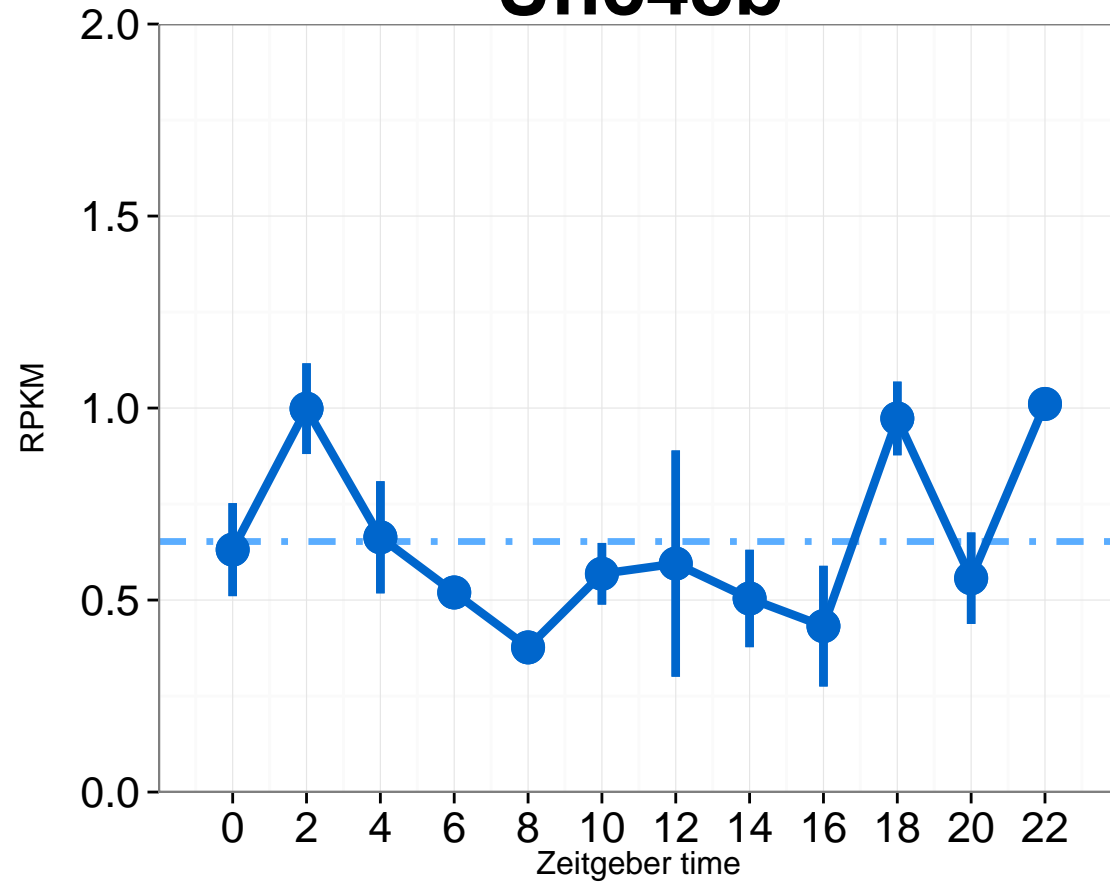

## Unc45b log2(Ribosome occupancy)

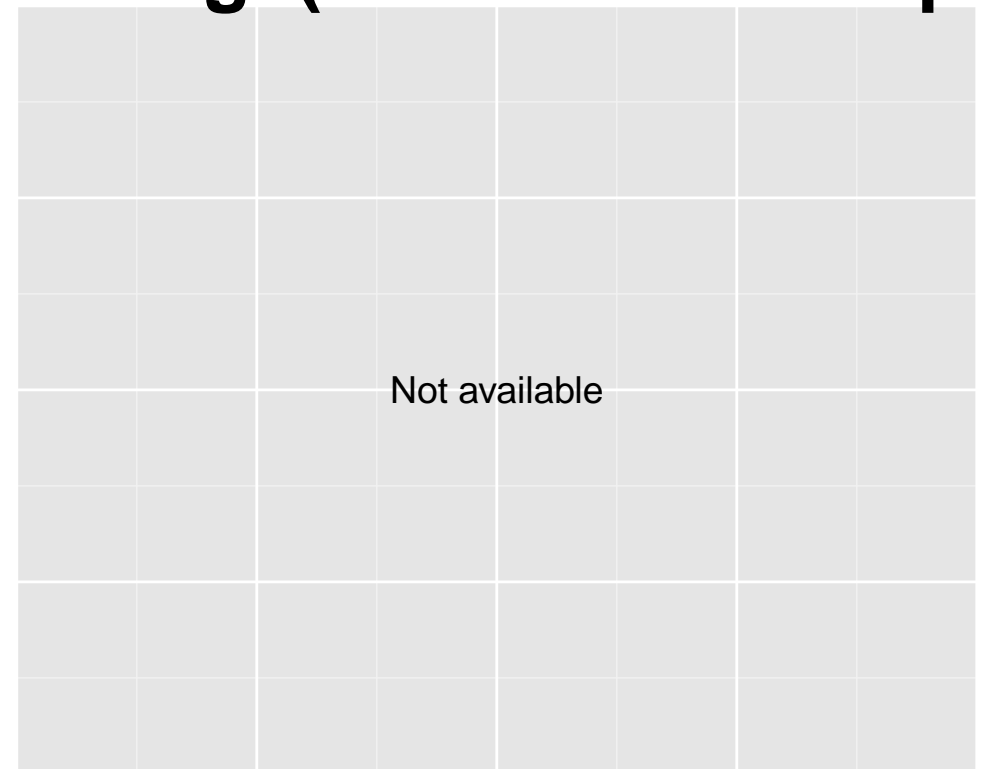

Supplement: SuppDataset_1.zip [file Unc45b_set_A.pdf › Supplemental Dataset 1/A-mRNA_nonrhyth_translation_nonrhyth/Unc45b_set_A.pdf]

## Unc50

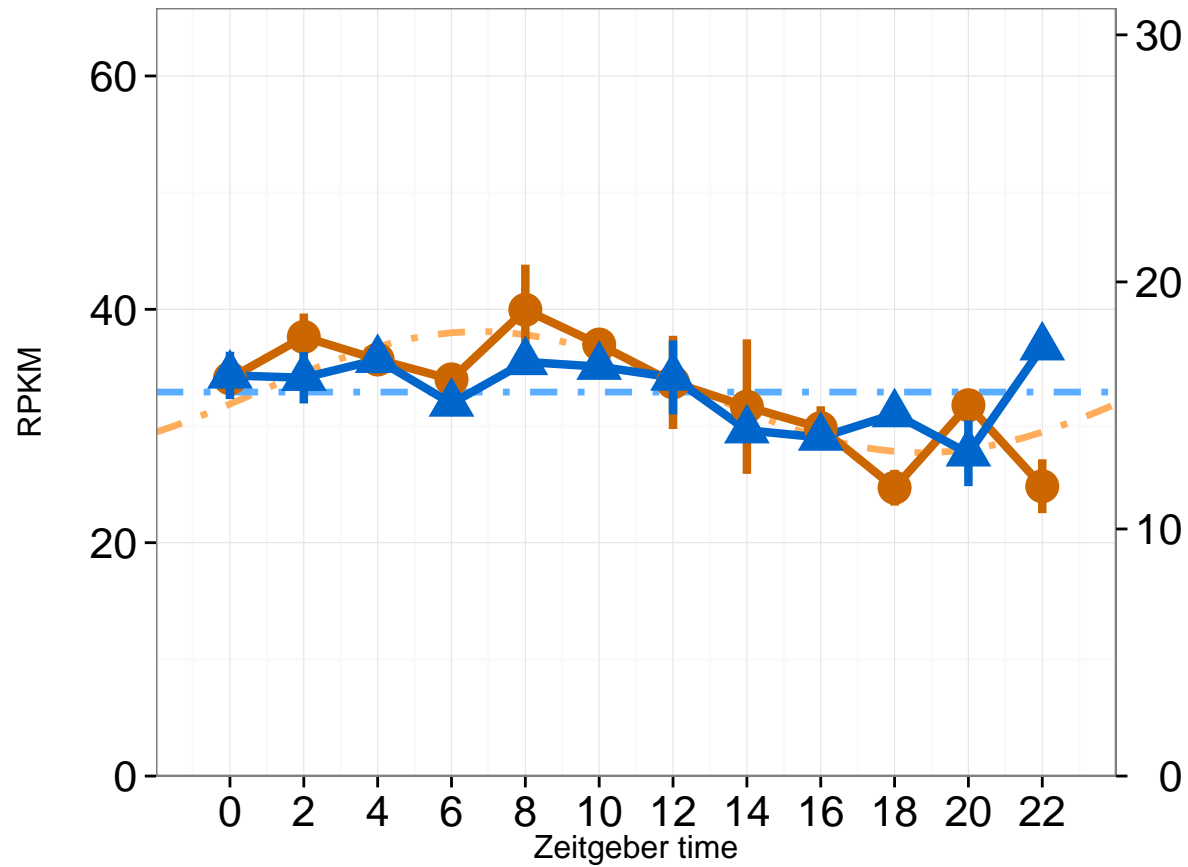

## Unc50

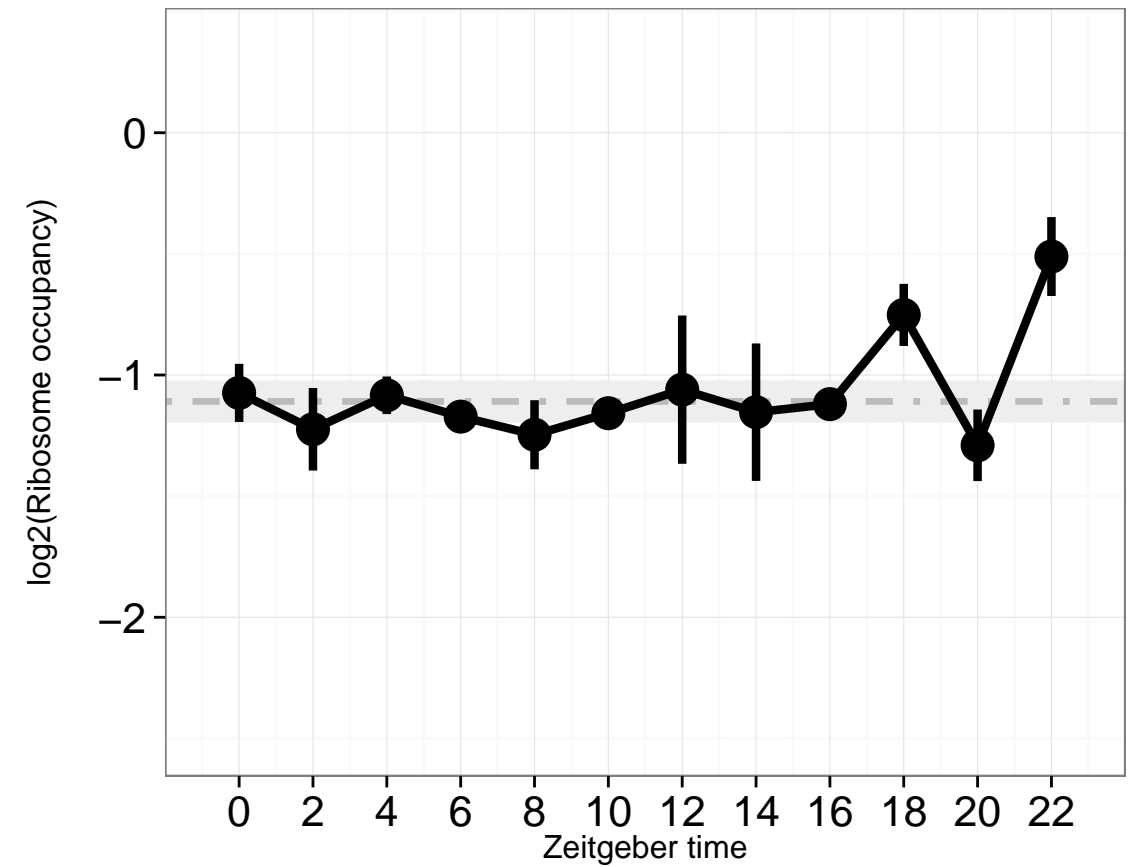

Supplement: SuppDataset_1.zip [file Unc50_set_A.pdf › Supplemental Dataset 1/A-mRNA_nonrhyth_translation_nonrhyth/Unc50_set_A.pdf]

## Unc5a

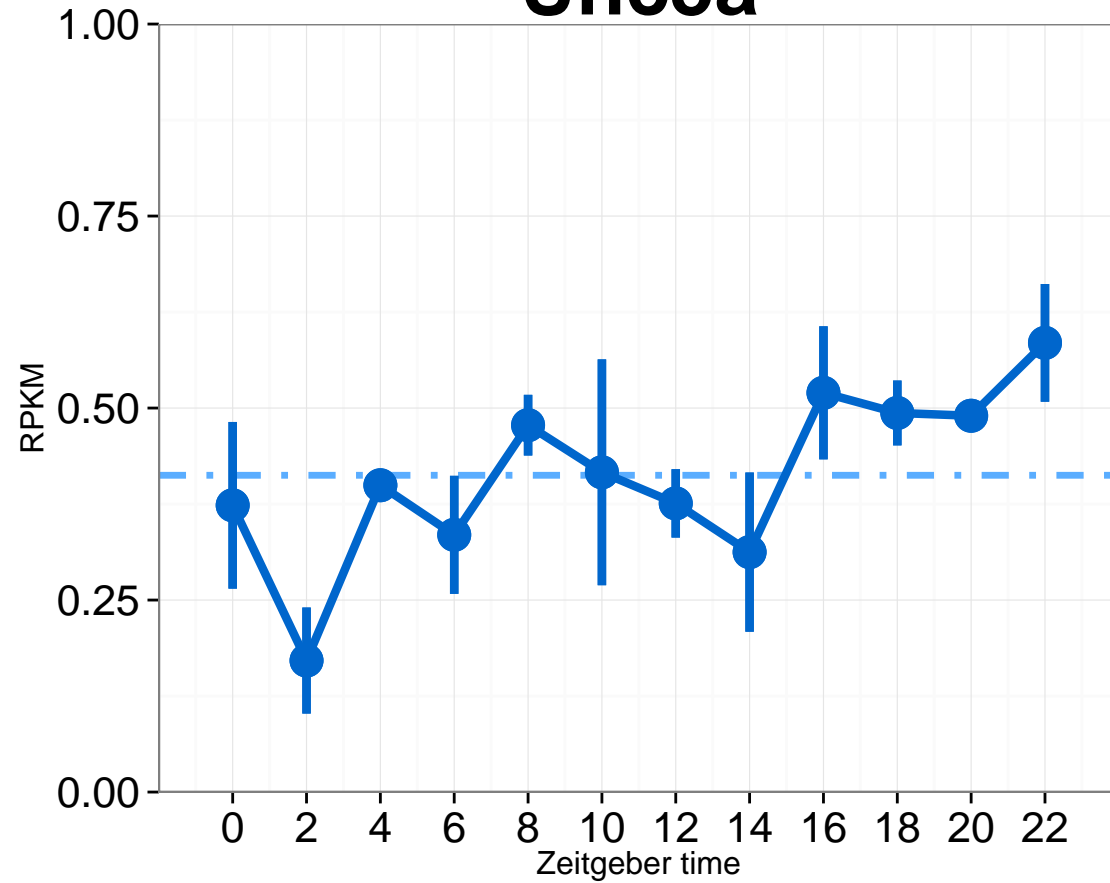

## Unc5a log2(Ribosome occupancy

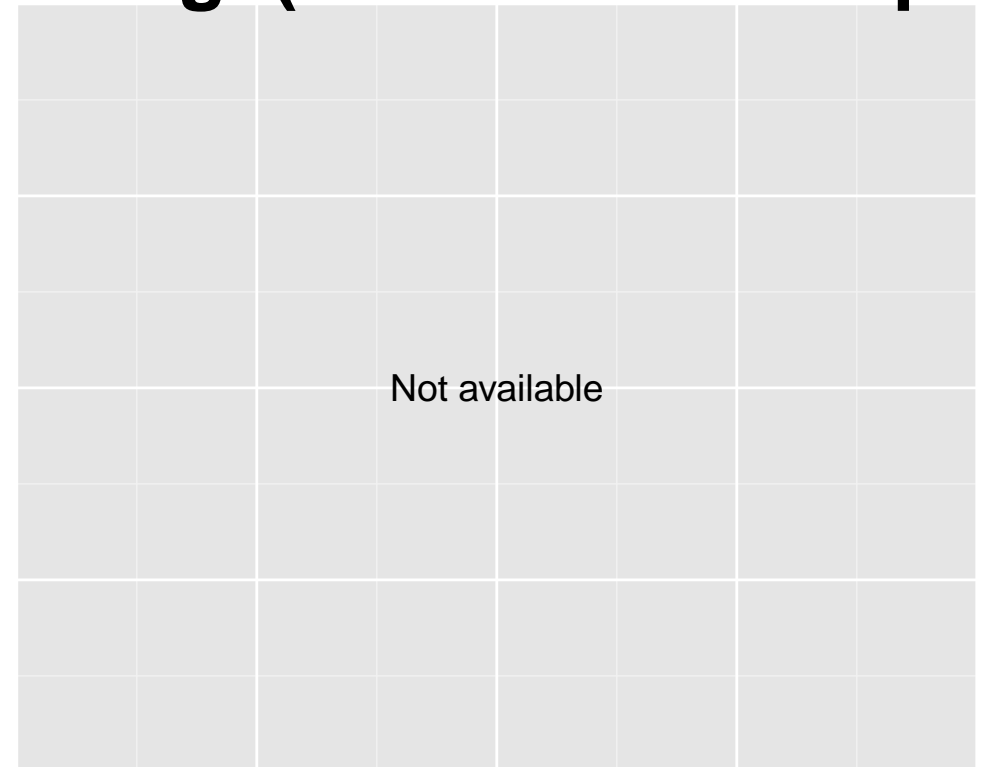

Supplement: SuppDataset_1.zip [file Unc5a_set_A.pdf › Supplemental Dataset 1/A-mRNA_nonrhyth_translation_nonrhyth/Unc5a_set_A.pdf]

## Unc5b

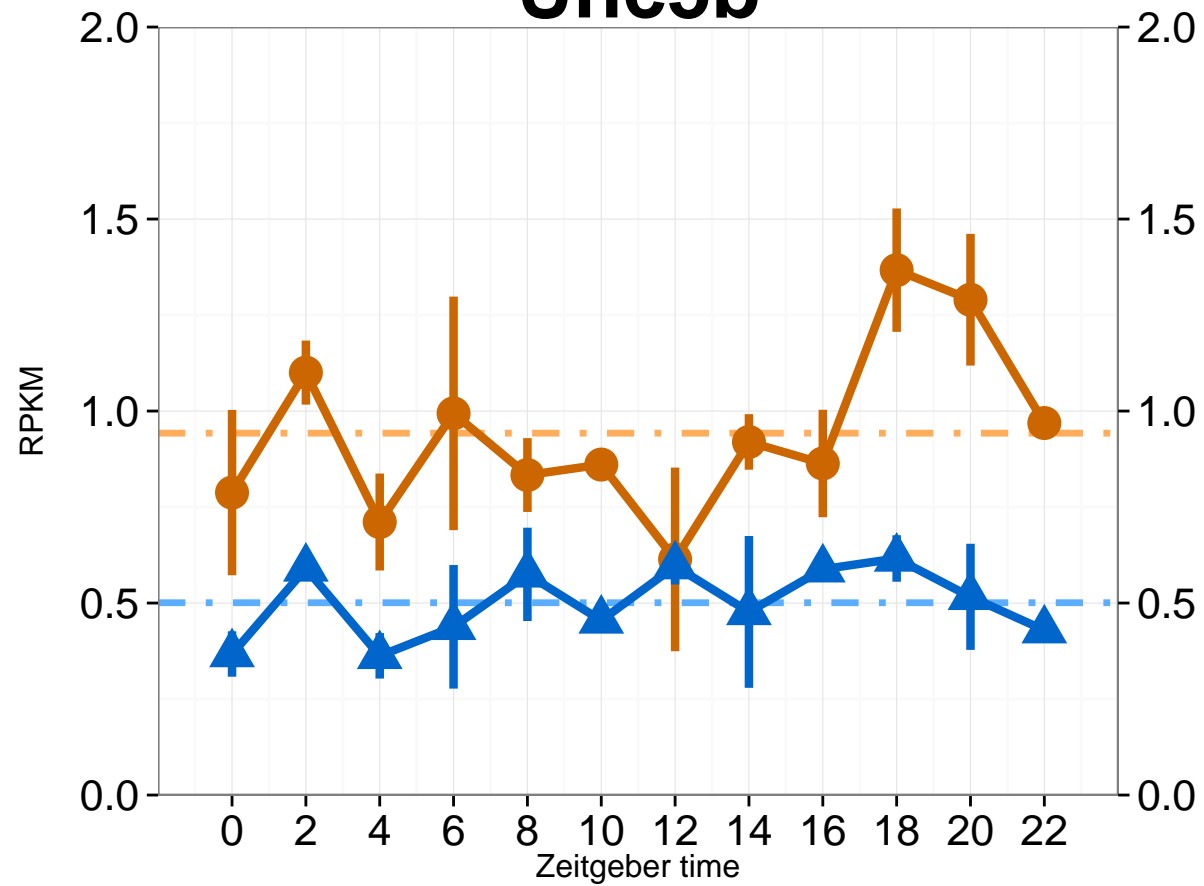

## Unc5b

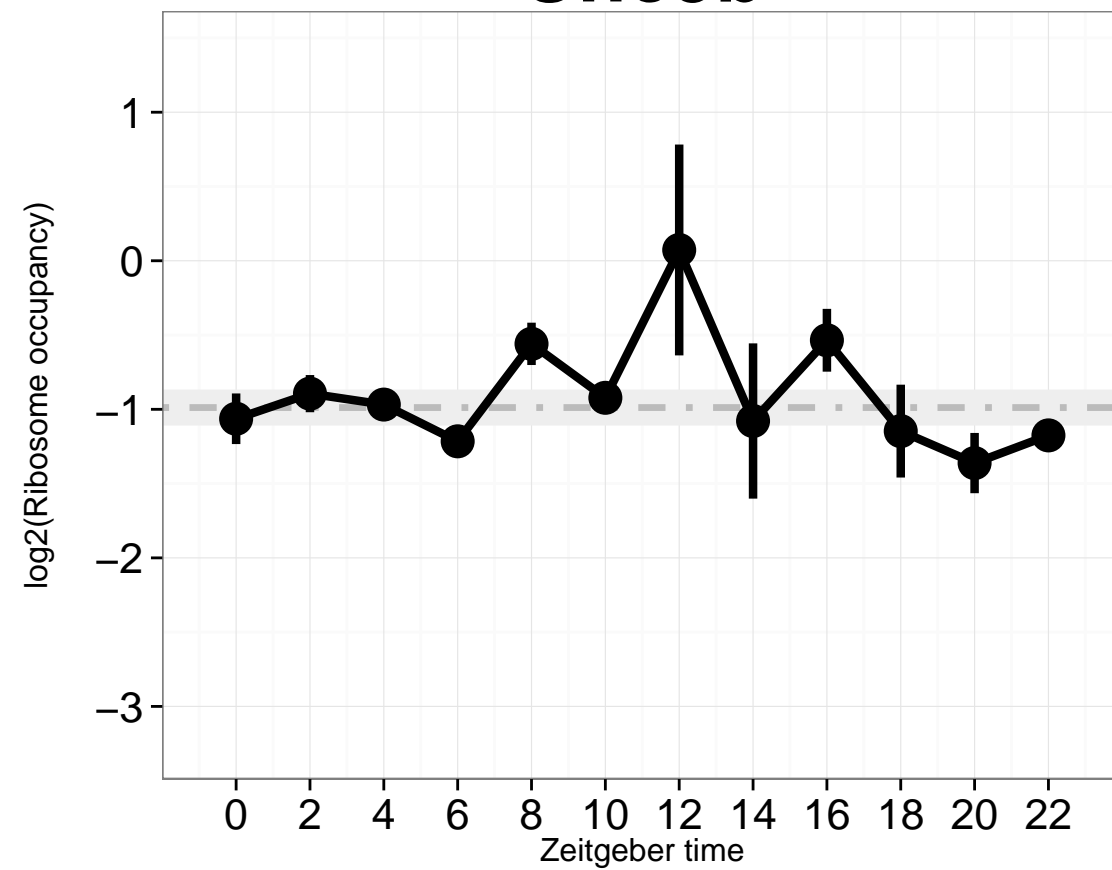

Supplement: SuppDataset_1.zip [file Unc5b_set_A.pdf › Supplemental Dataset 1/A-mRNA_nonrhyth_translation_nonrhyth/Unc5b_set_A.pdf]

## Unc93b1

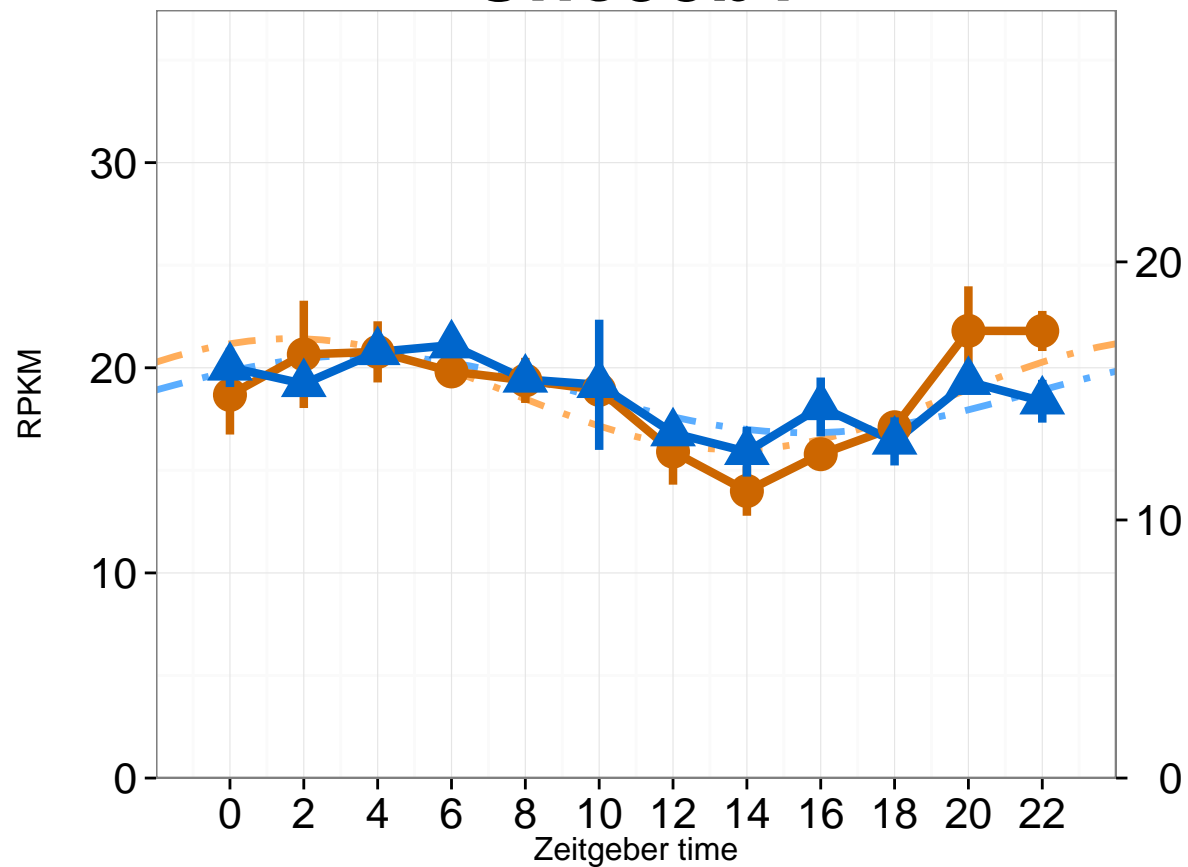

## Unc93b1

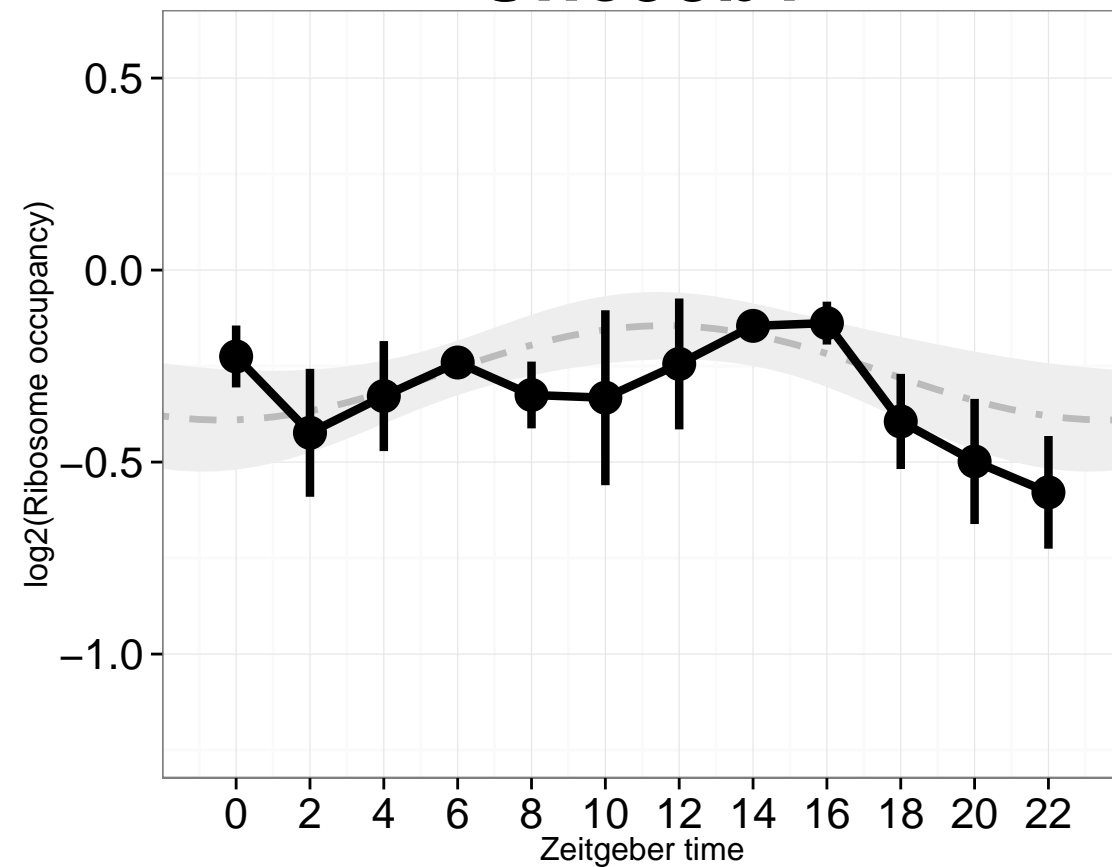

Supplement: SuppDataset_1.zip [file Unc93b1_set_A.pdf › Supplemental Dataset 1/A-mRNA_nonrhyth_translation_nonrhyth/Unc93b1_set_A.pdf]

## Unk

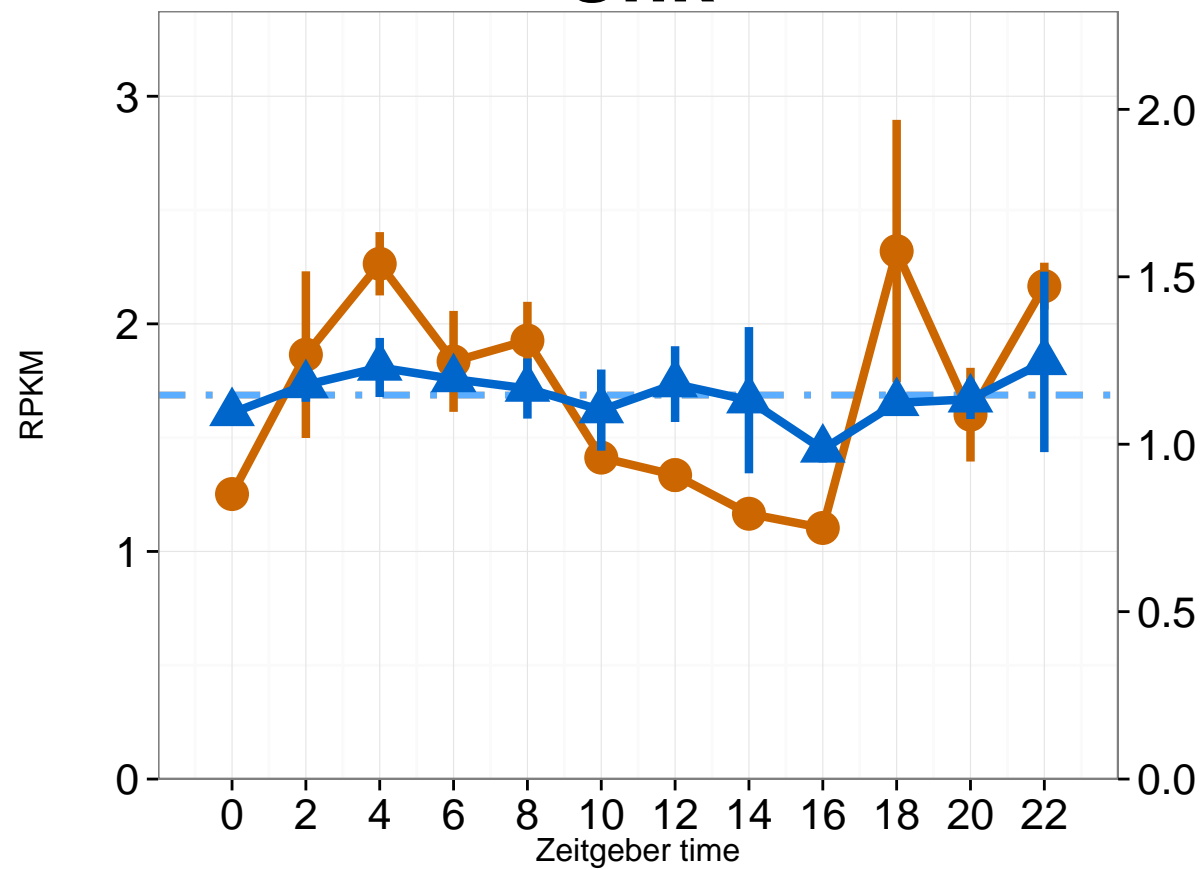

## Unk

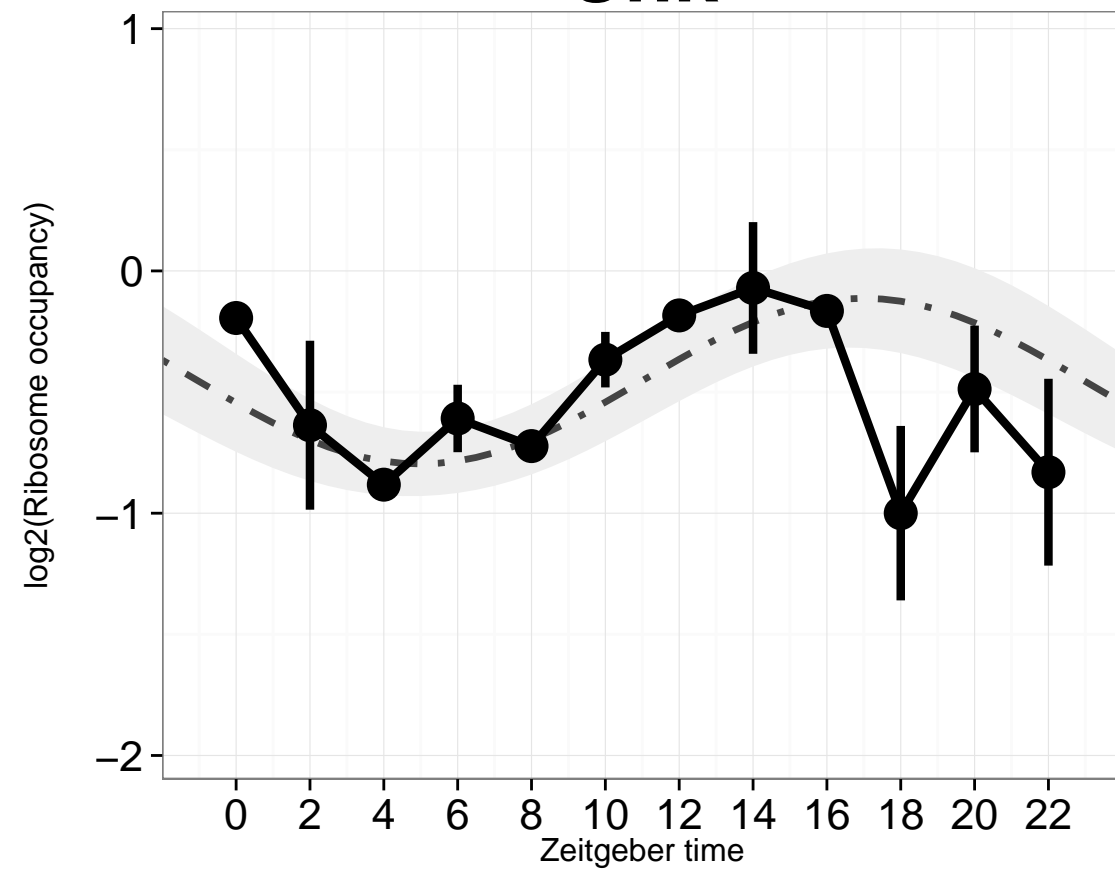

Supplement: SuppDataset_1.zip [file Unk_set_A.pdf › Supplemental Dataset 1/A-mRNA_nonrhyth_translation_nonrhyth/Unk_set_A.pdf]

## Unkl

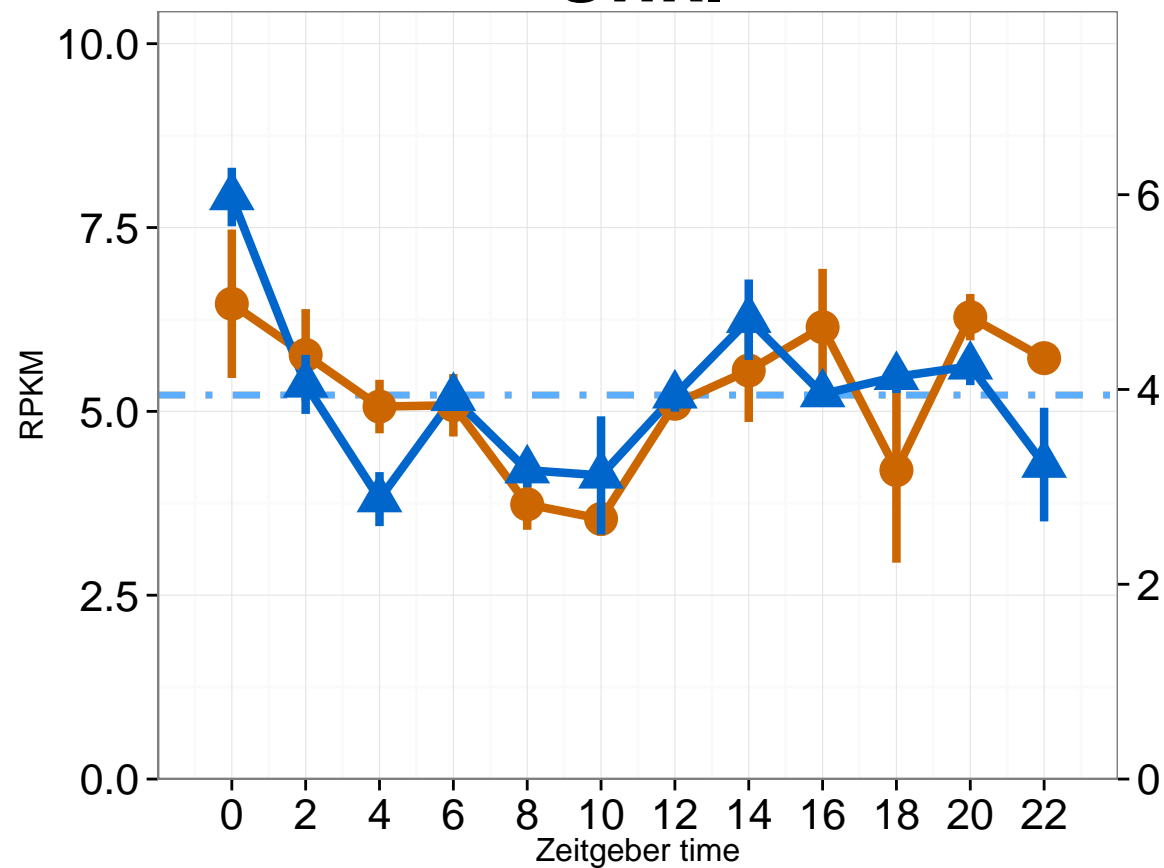

## Unkl

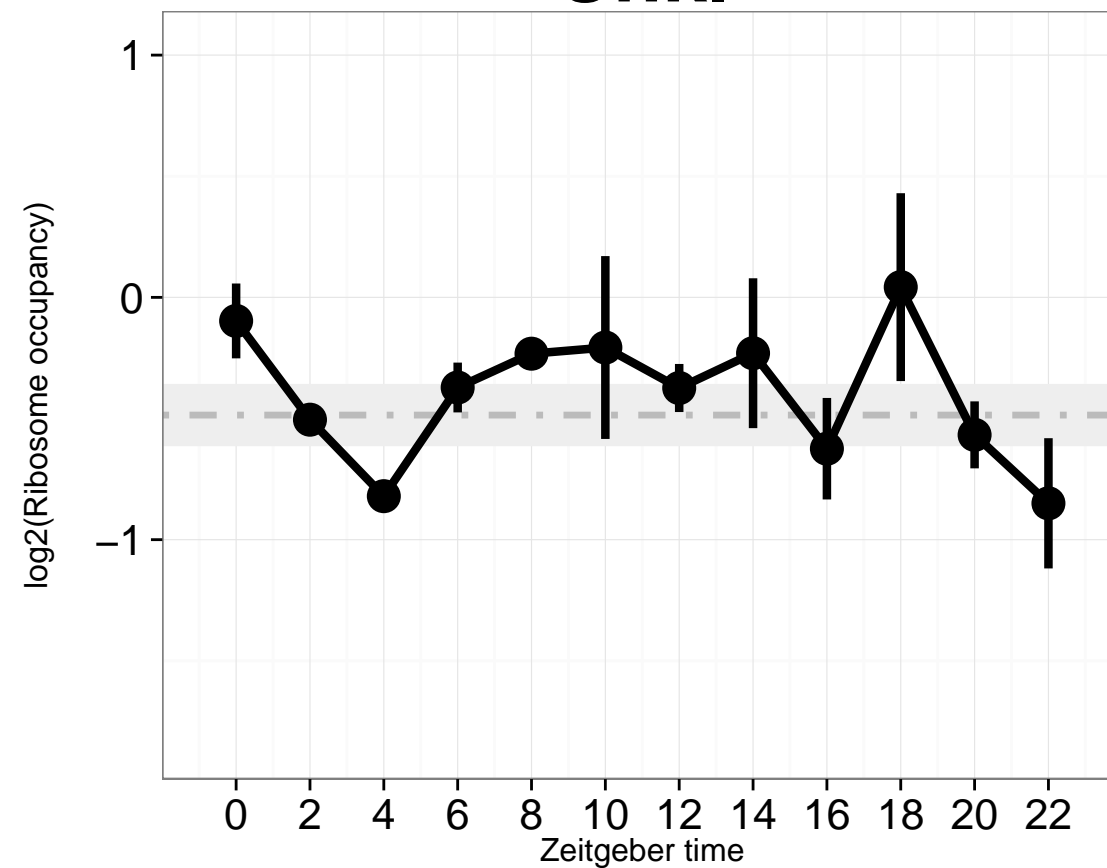

Supplement: SuppDataset_1.zip [file Unkl_set_A.pdf › Supplemental Dataset 1/A-mRNA_nonrhyth_translation_nonrhyth/Unkl_set_A.pdf]

# Upb1

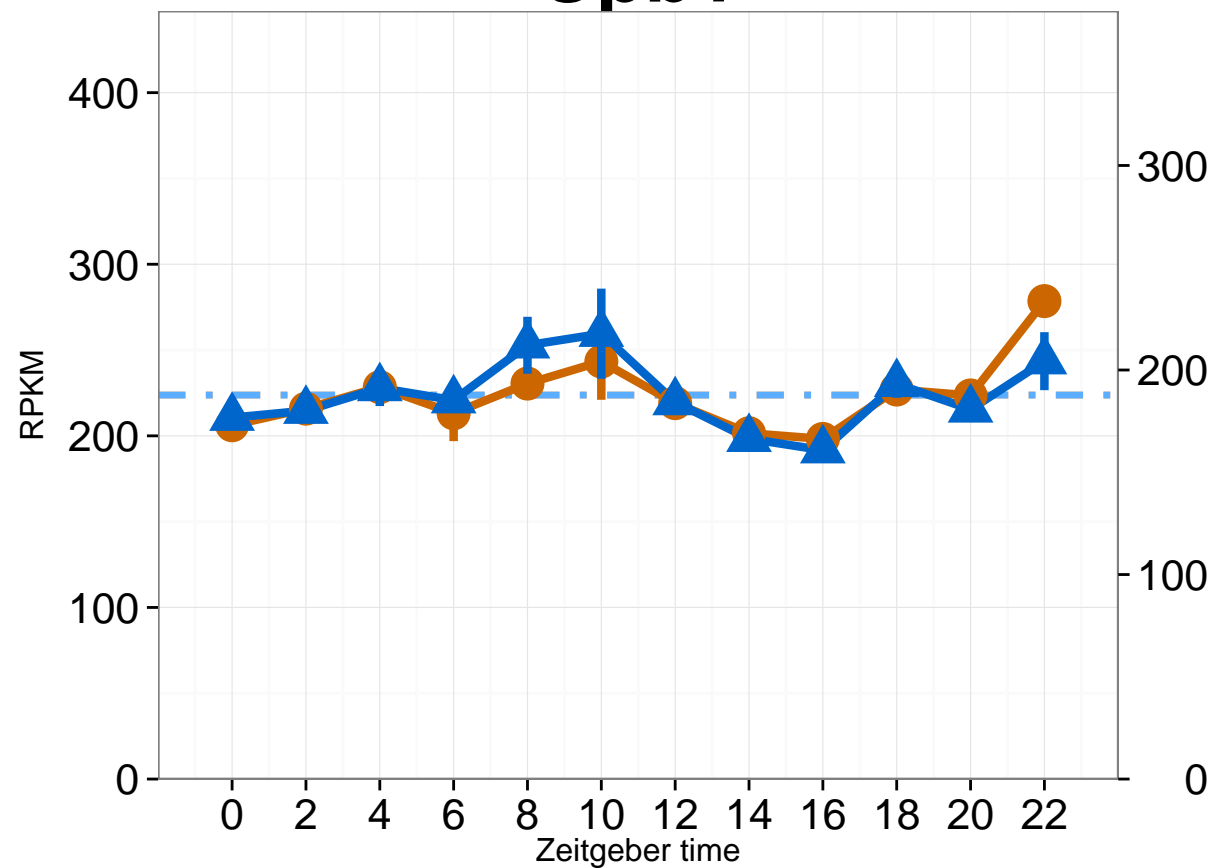

# Upb1

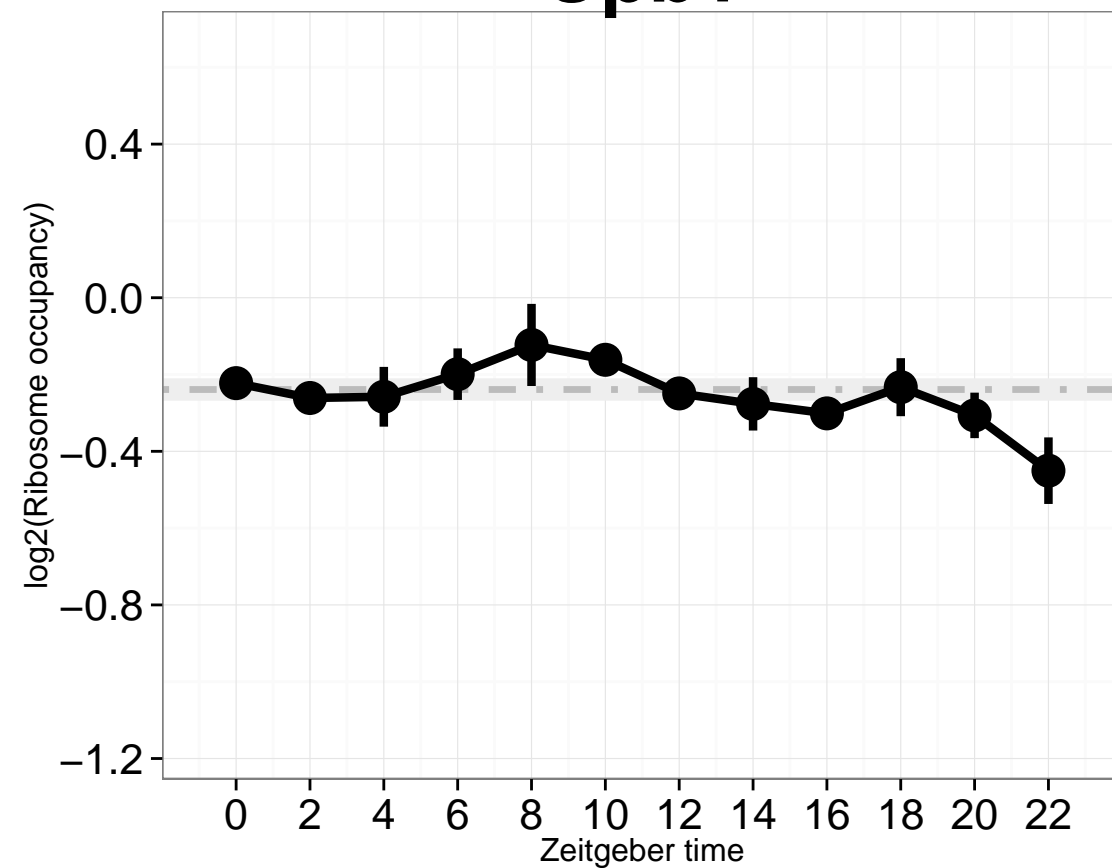

Supplement: SuppDataset_1.zip [file Upb1_set_A.pdf › Supplemental Dataset 1/A-mRNA_nonrhyth_translation_nonrhyth/Upb1_set_A.pdf]

## Upf1

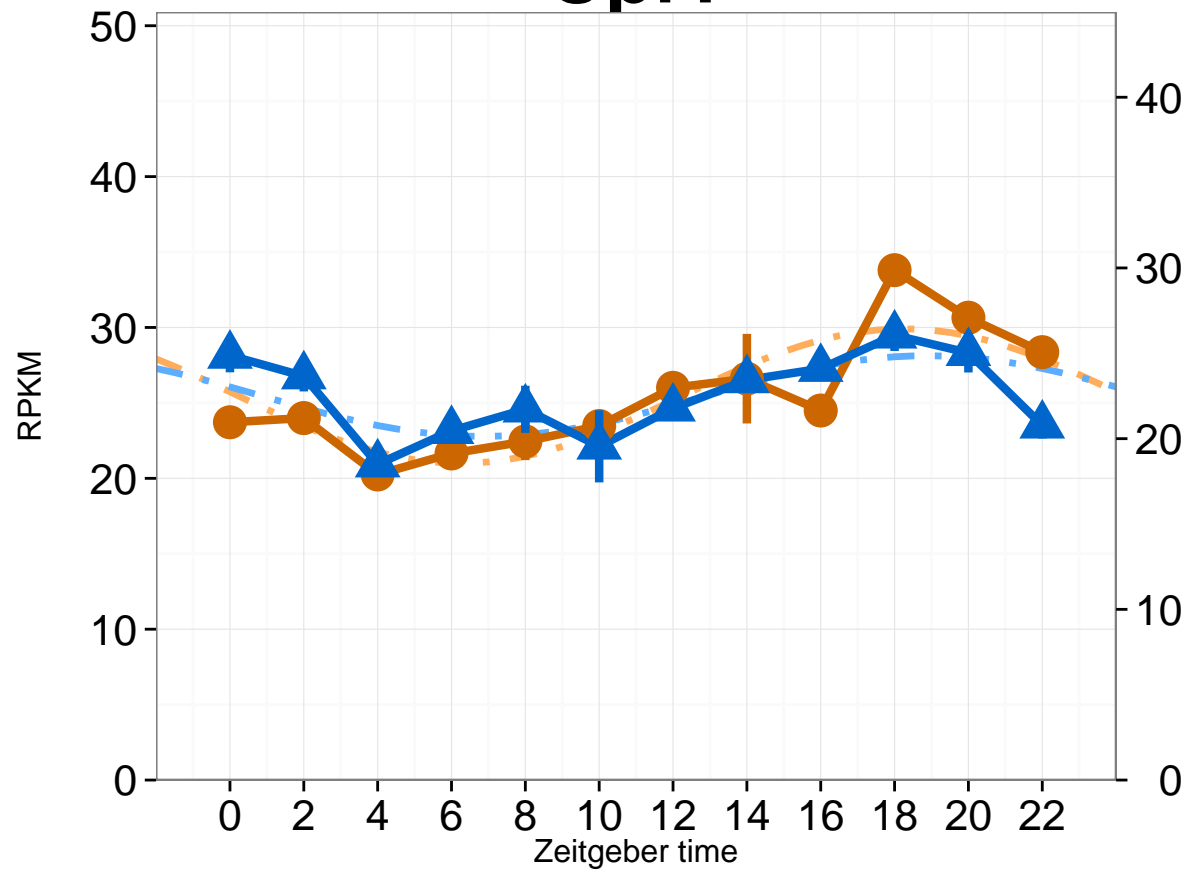

## Upf1

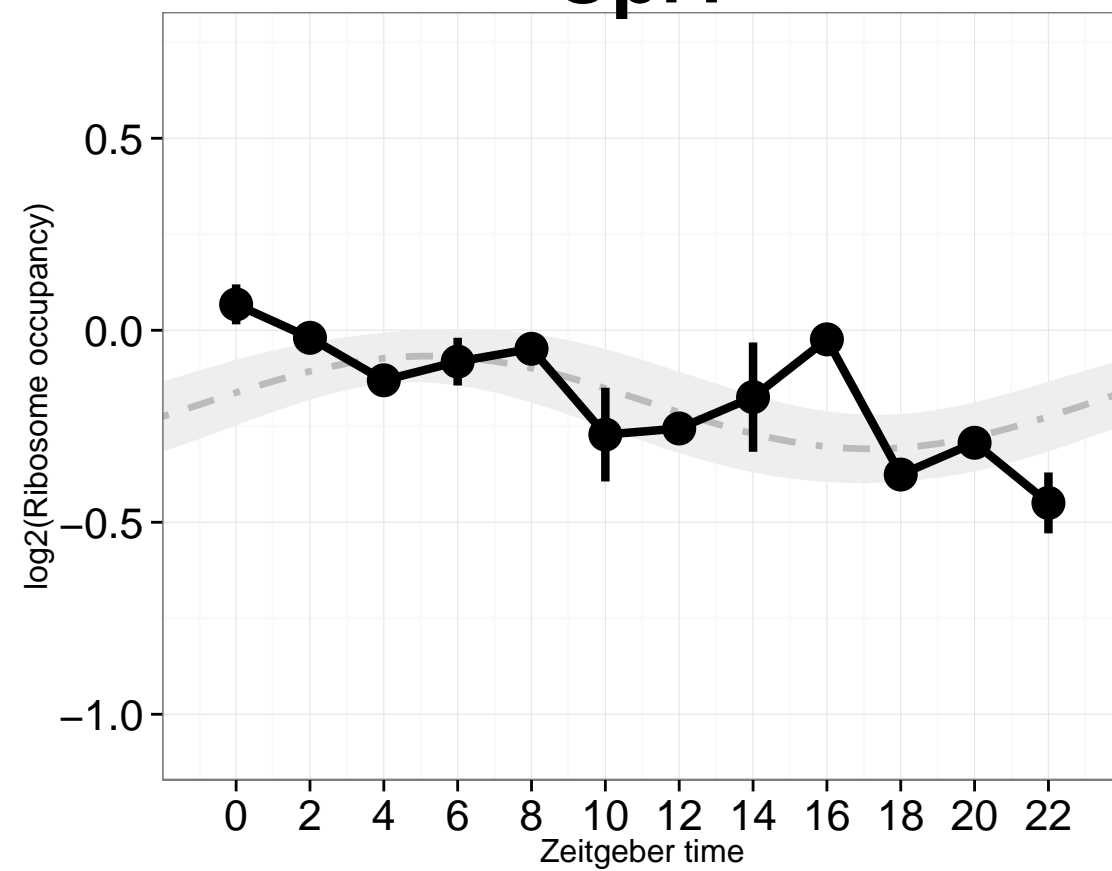

Supplement: SuppDataset_1.zip [file Upf1_set_A.pdf › Supplemental Dataset 1/A-mRNA_nonrhyth_translation_nonrhyth/Upf1_set_A.pdf]

## Upf2

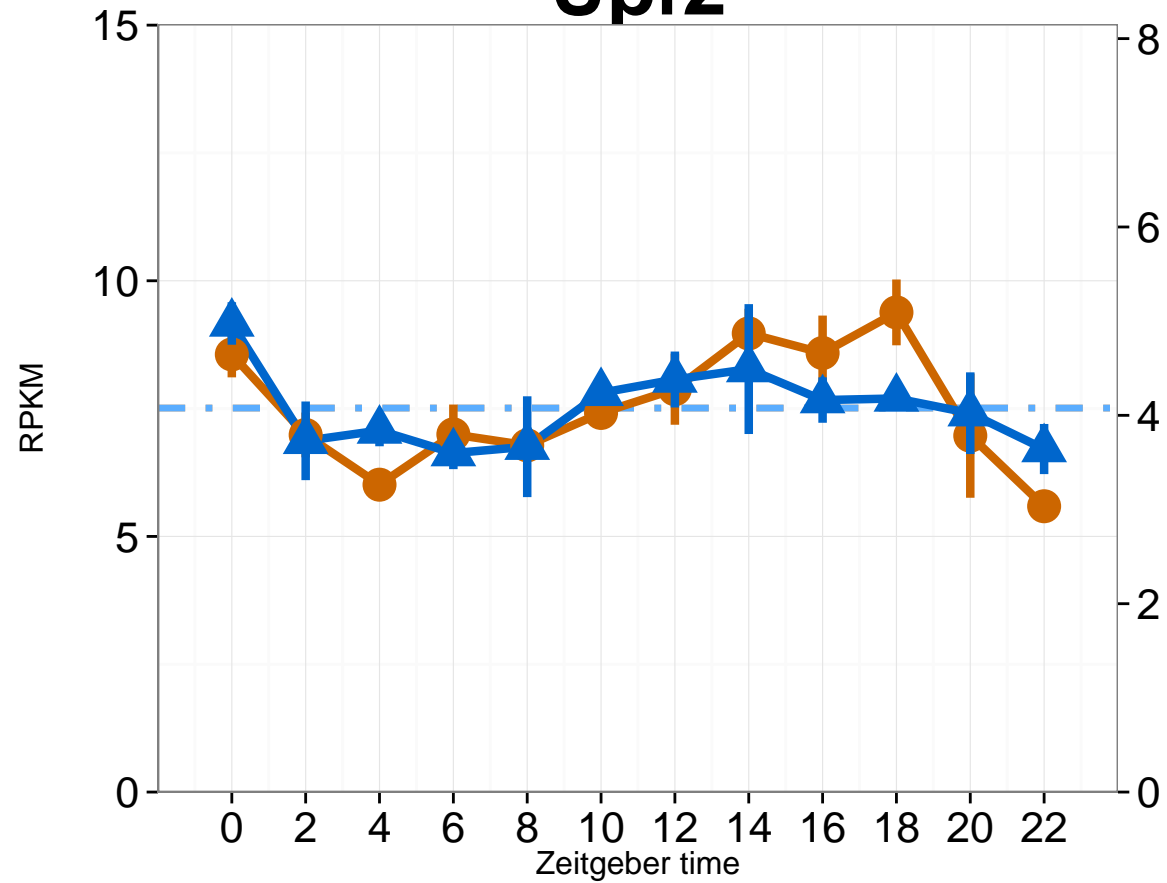

## Upf2

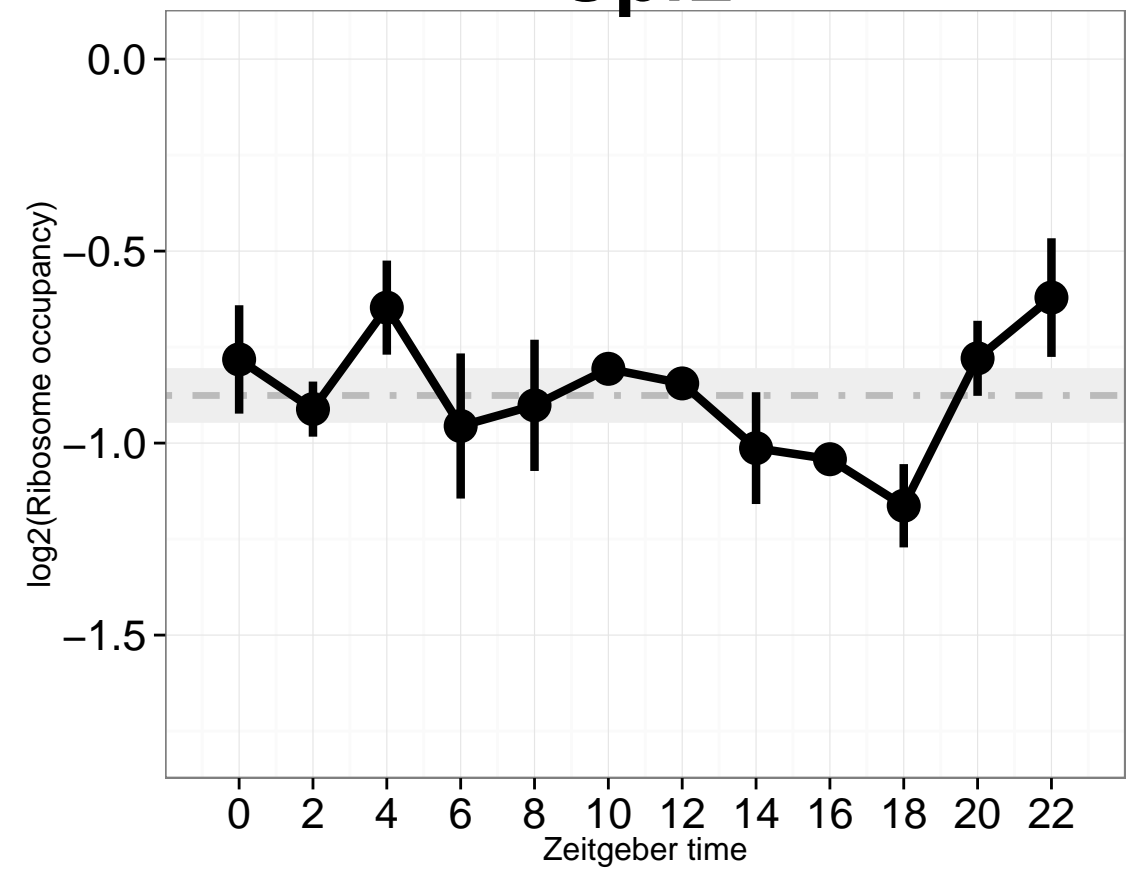

Supplement: SuppDataset_1.zip [file Upf2_set_A.pdf › Supplemental Dataset 1/A-mRNA_nonrhyth_translation_nonrhyth/Upf2_set_A.pdf]

## Upf3a

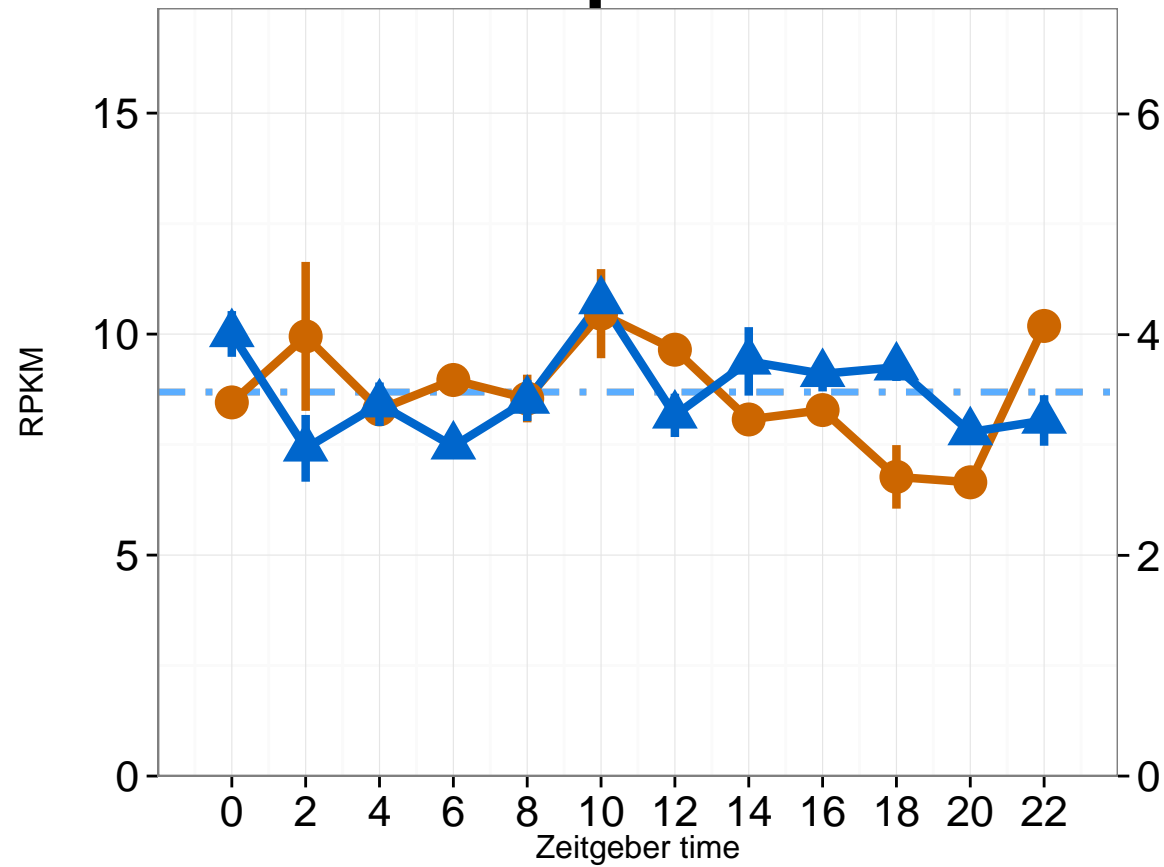

## Upf3a

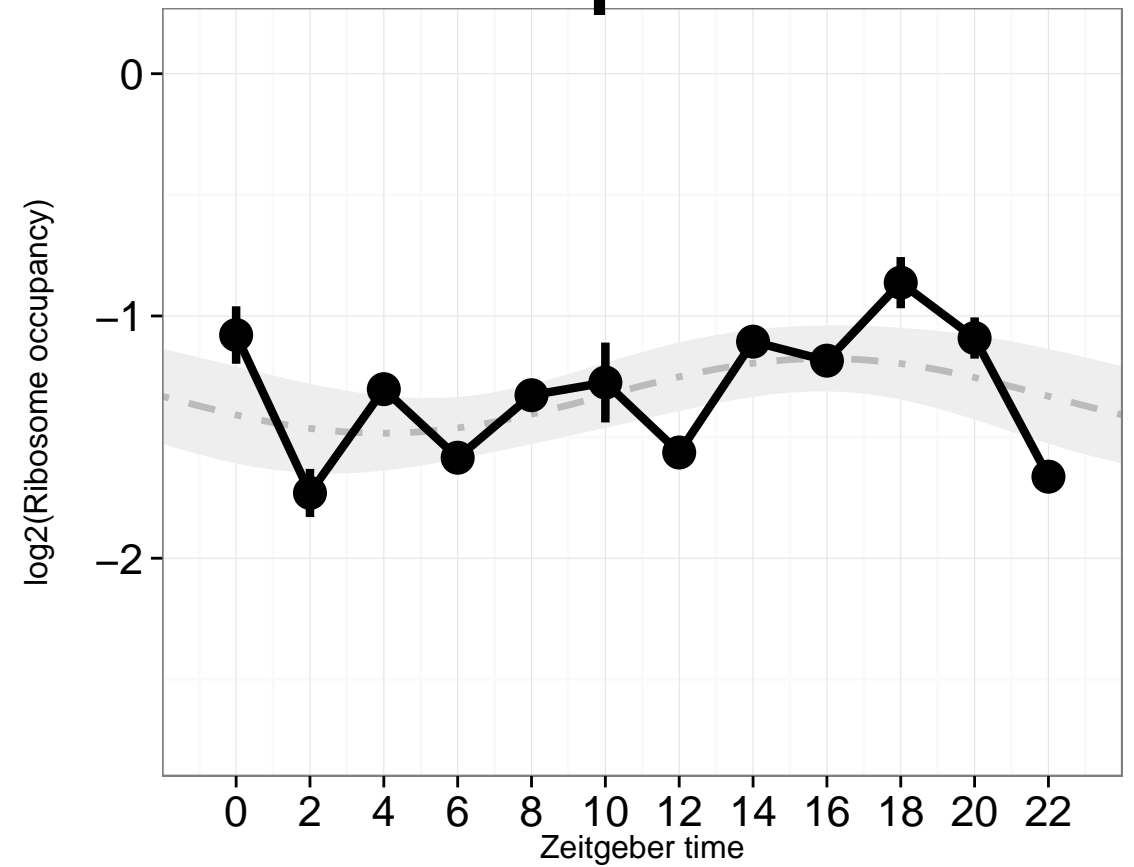

Supplement: SuppDataset_1.zip [file Upf3a_set_A.pdf › Supplemental Dataset 1/A-mRNA_nonrhyth_translation_nonrhyth/Upf3a_set_A.pdf]

# Upf3b

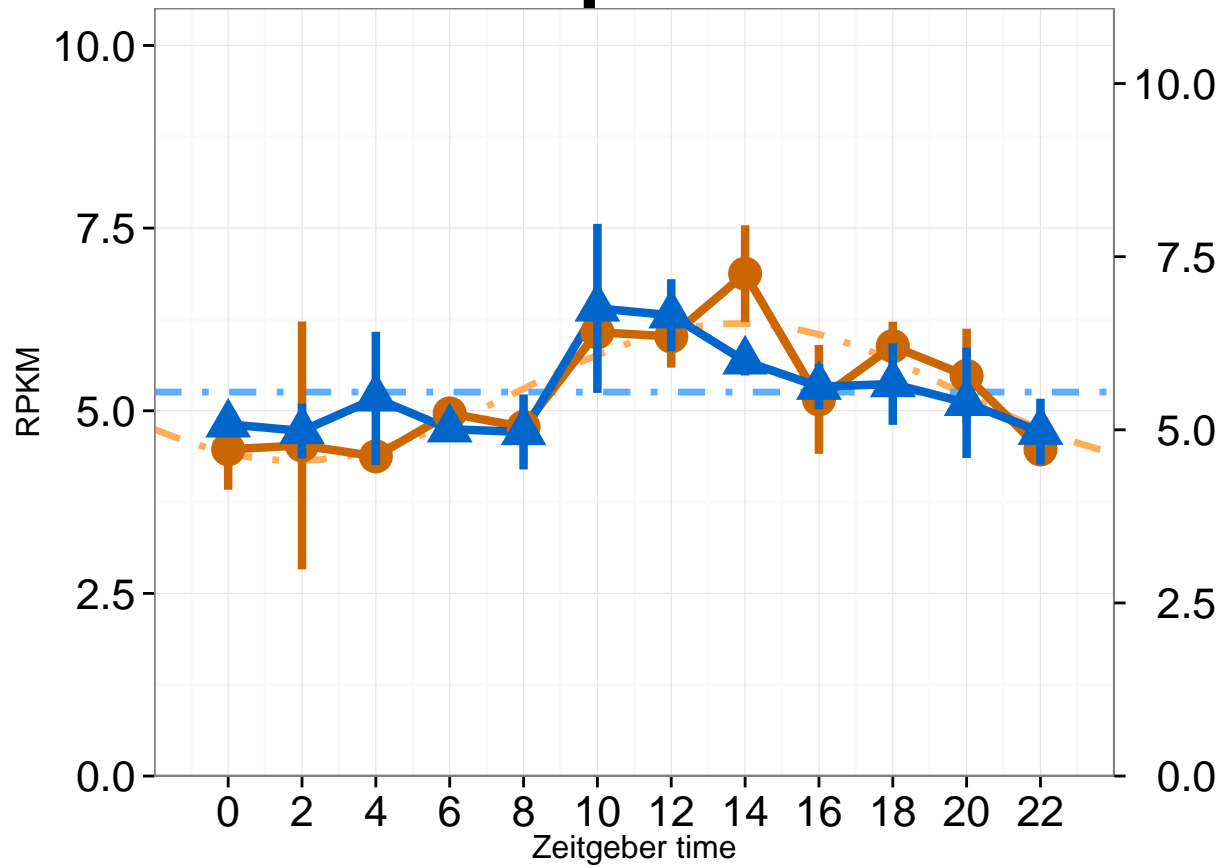

# Upf3b

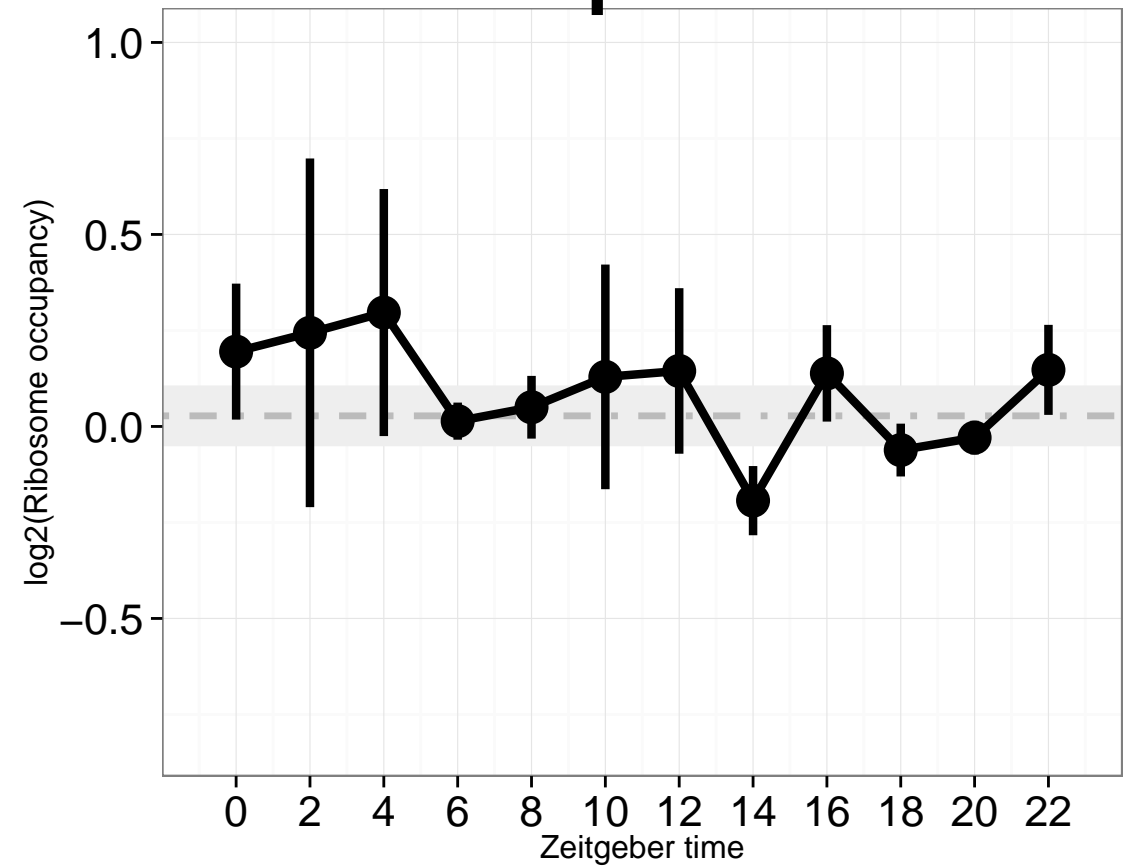

Supplement: SuppDataset_1.zip [file Upf3b_set_A.pdf › Supplemental Dataset 1/A-mRNA_nonrhyth_translation_nonrhyth/Upf3b_set_A.pdf]

**Upk3b TR**

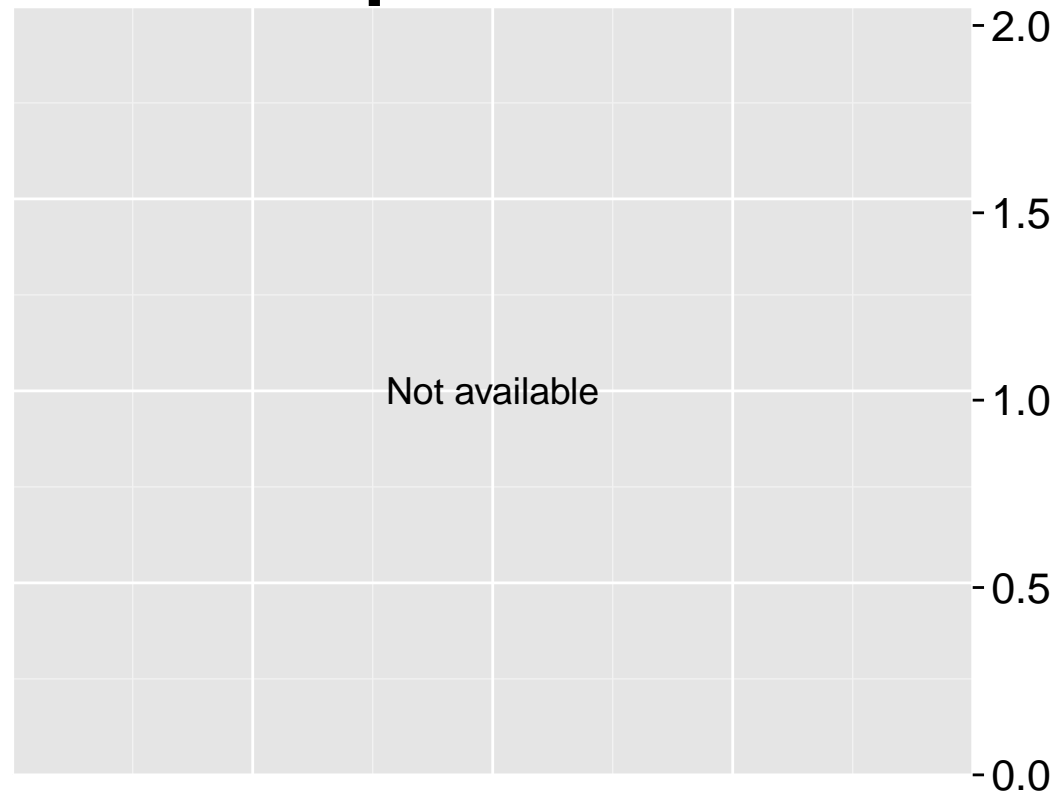

**Upk3b log2(Ribosome occupancy**

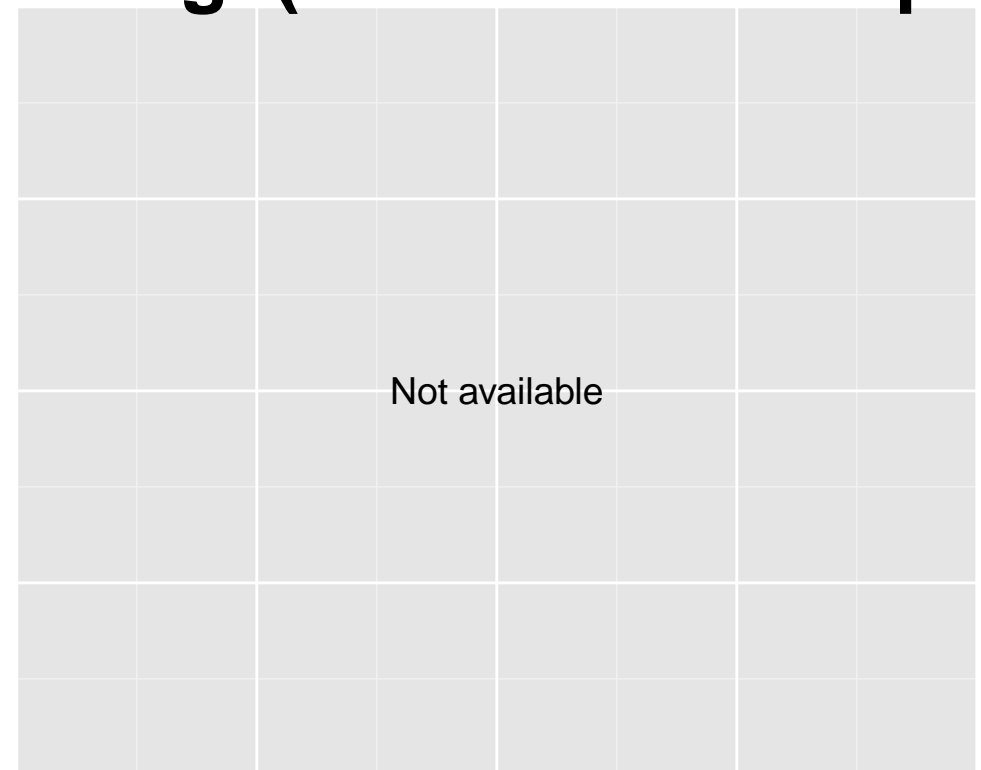

Supplement: SuppDataset_1.zip [file Upk3b_set_A.pdf › Supplemental Dataset 1/A-mRNA_nonrhyth_translation_nonrhyth/Upk3b_set_A.pdf]

## Upp1

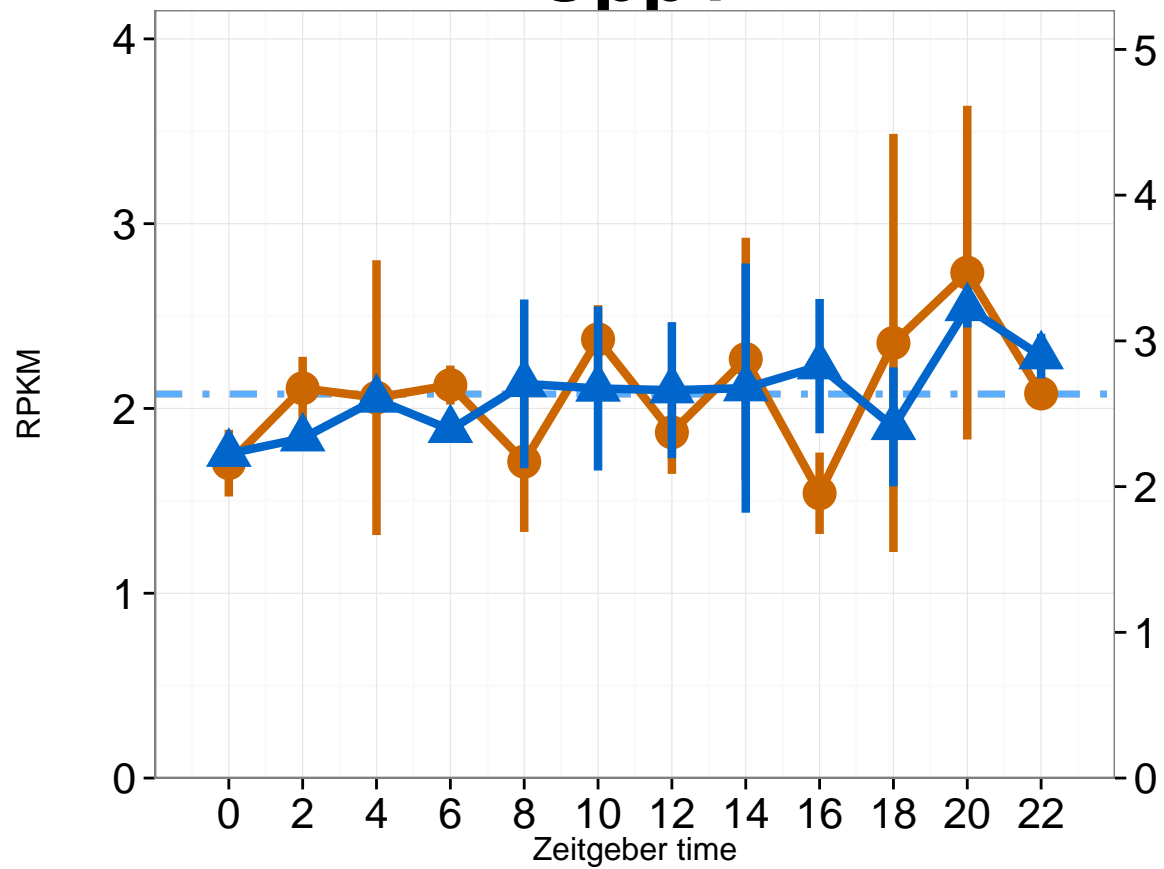

## Upp1

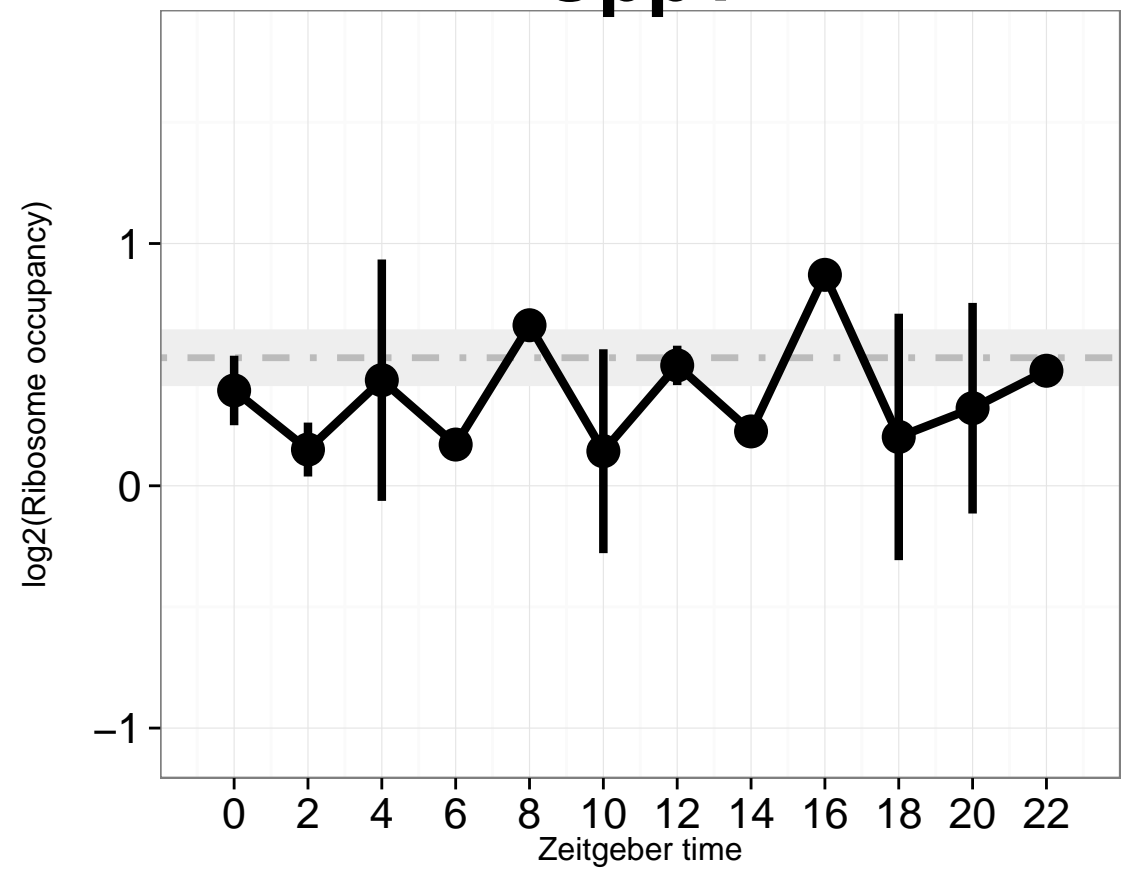

Supplement: SuppDataset_1.zip [file Upp1_set_A.pdf › Supplemental Dataset 1/A-mRNA_nonrhyth_translation_nonrhyth/Upp1_set_A.pdf]

## Uprt

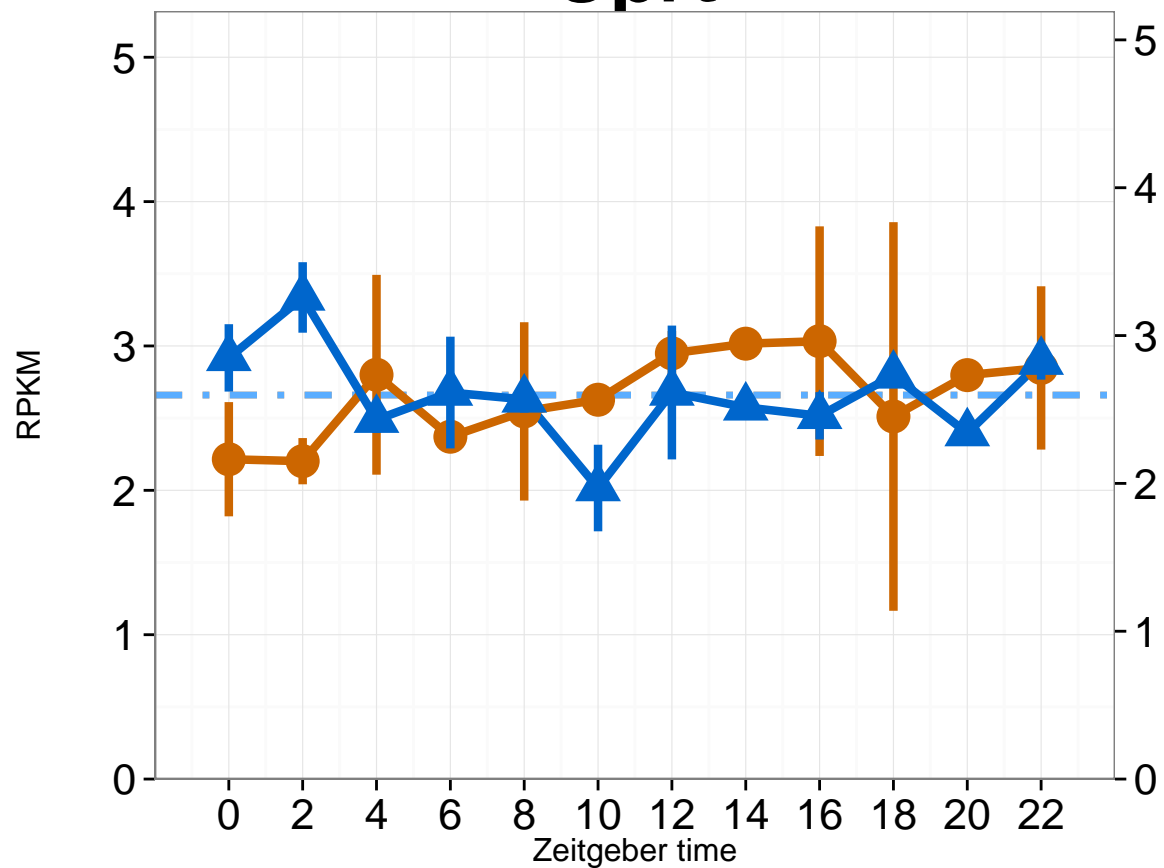

## Uprt

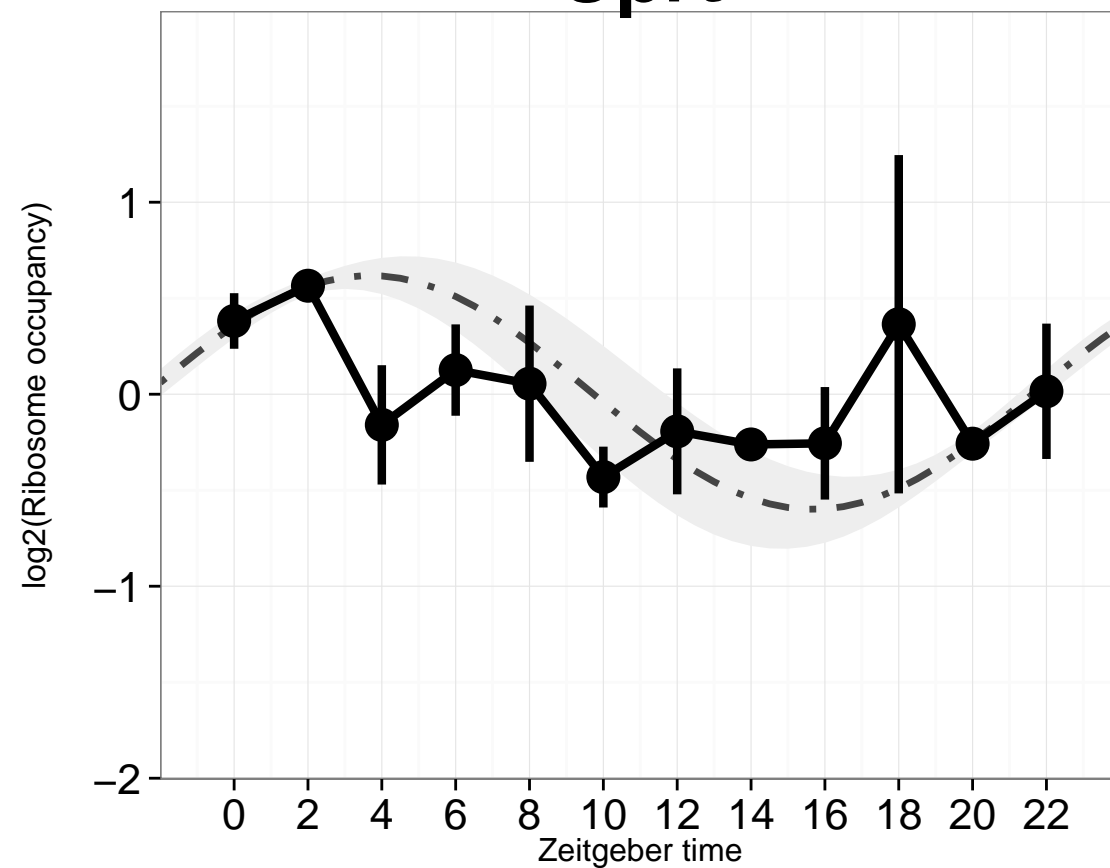

Supplement: SuppDataset_1.zip [file Uprt_set_A.pdf › Supplemental Dataset 1/A-mRNA_nonrhyth_translation_nonrhyth/Uprt_set_A.pdf]

# Uqcc2

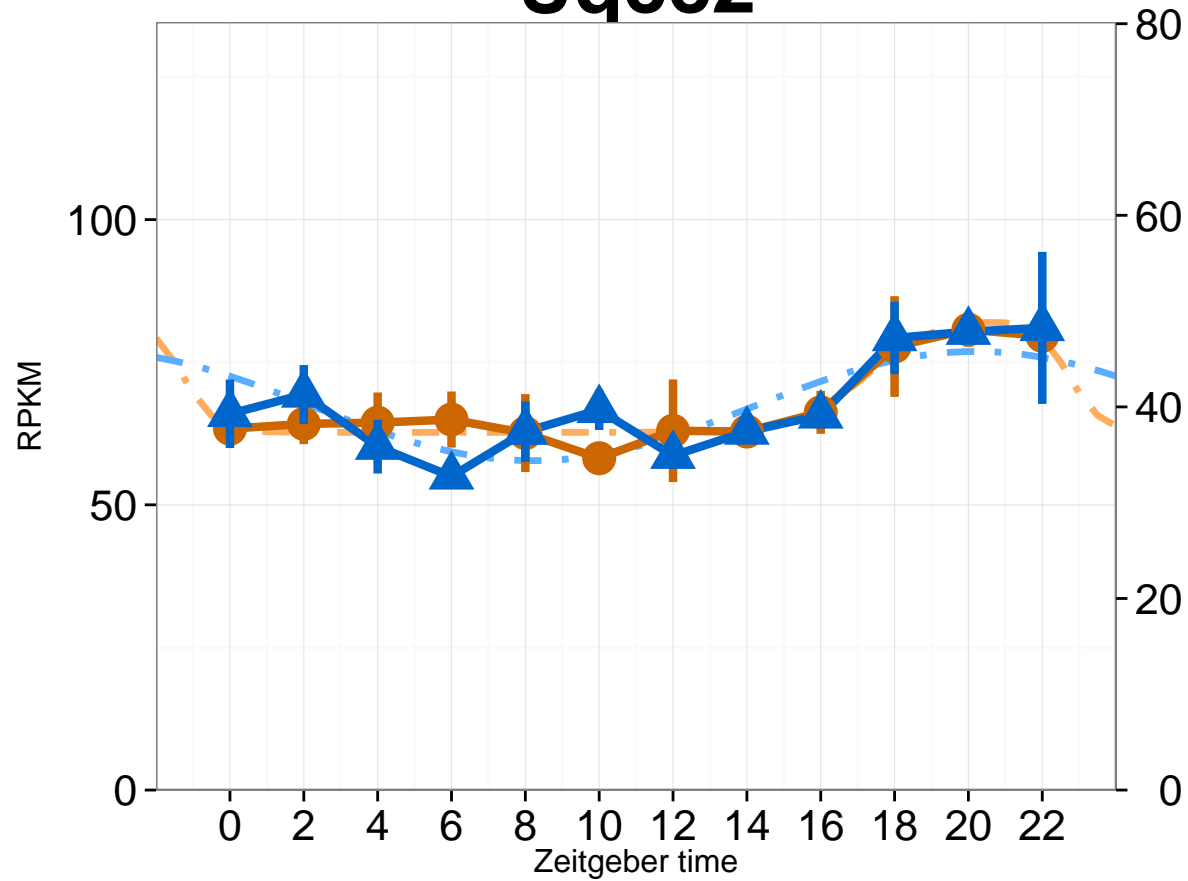

# Uqcc2

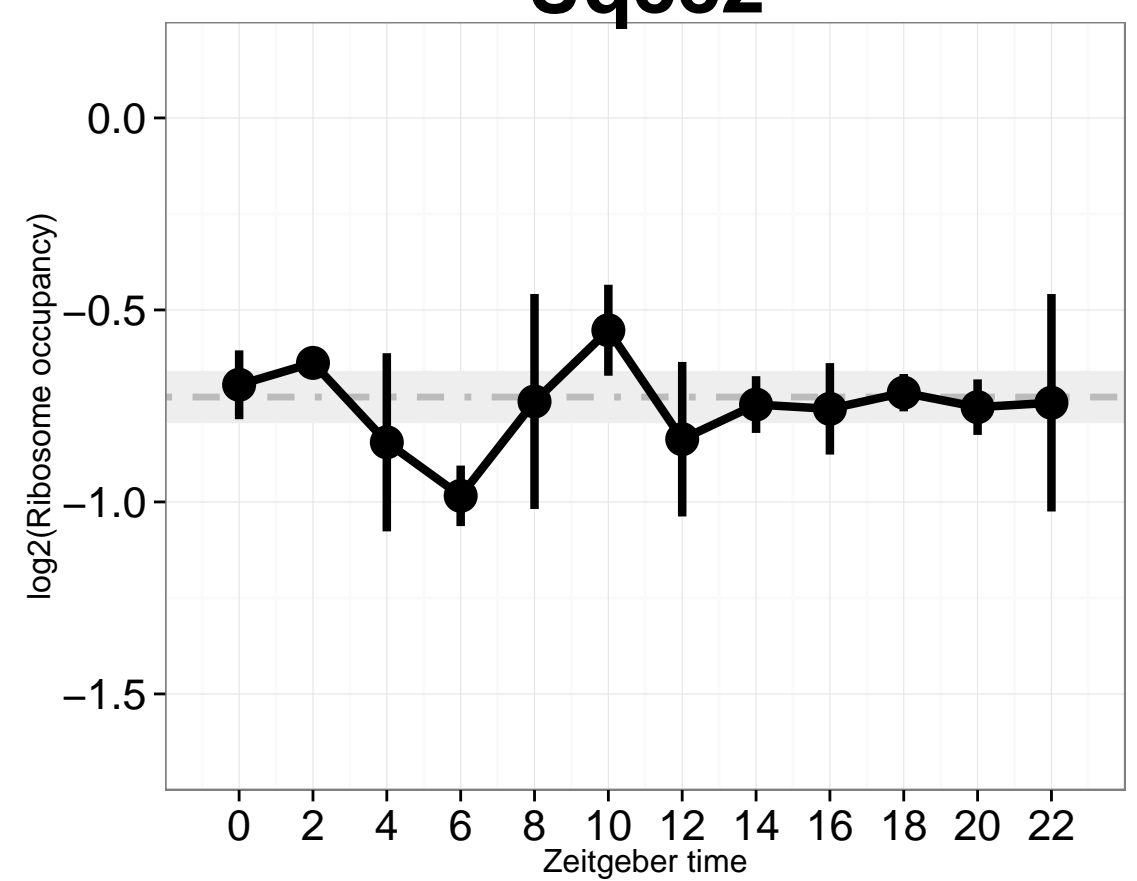

Supplement: SuppDataset_1.zip [file Uqcc2_set_A.pdf › Supplemental Dataset 1/A-mRNA_nonrhyth_translation_nonrhyth/Uqcc2_set_A.pdf]

# Uqcr11

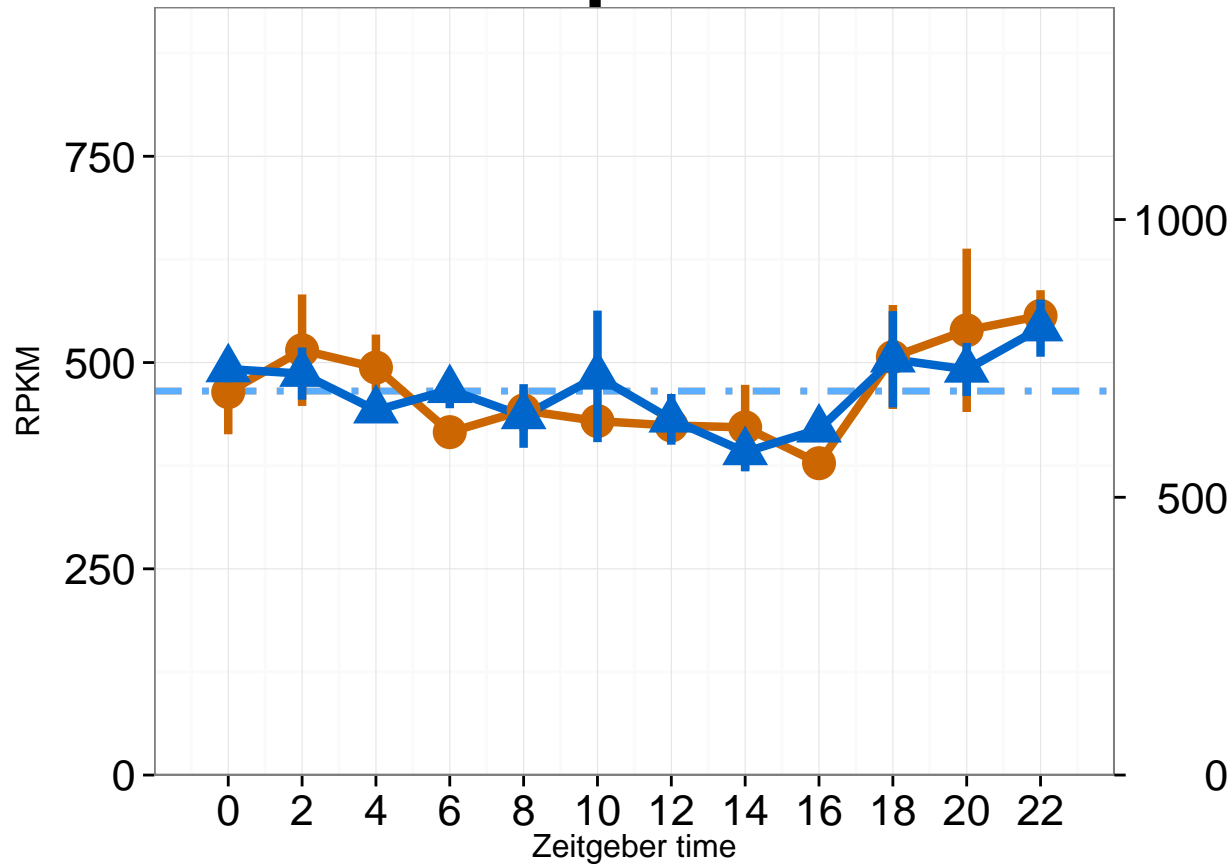

# Uqcr11

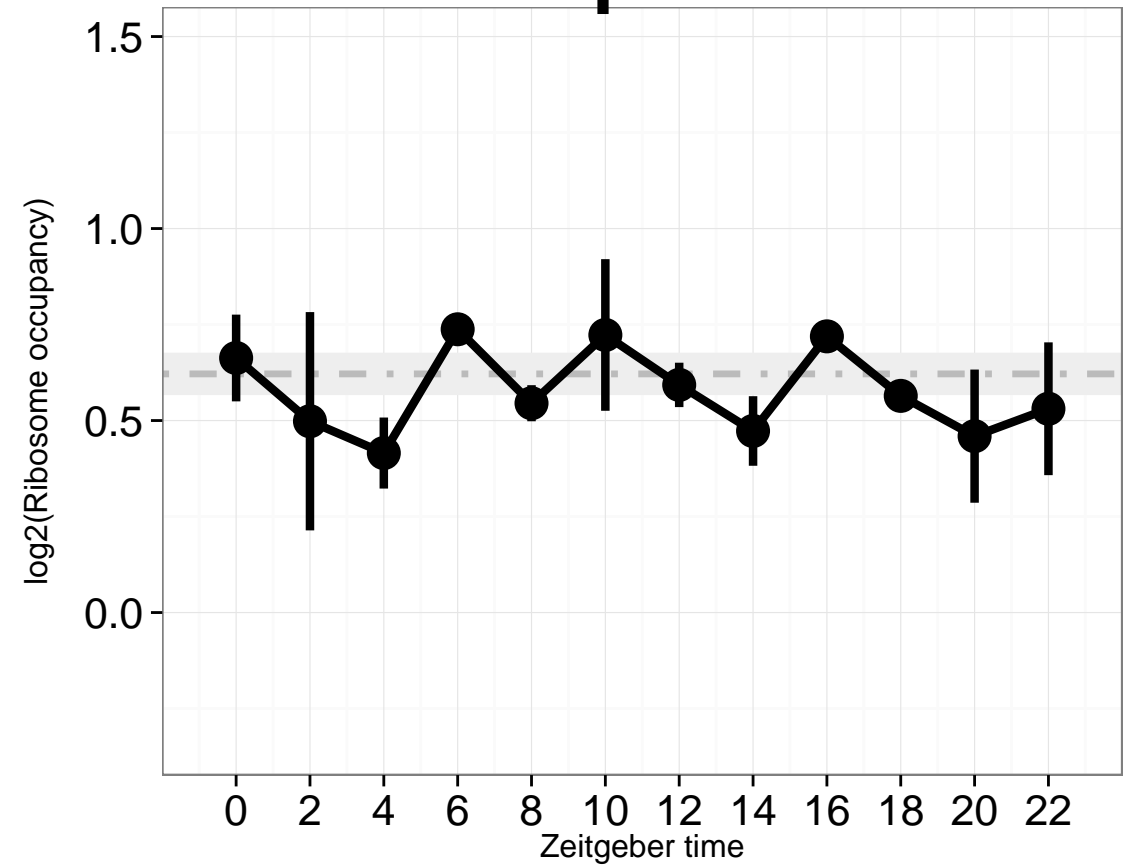

Supplement: SuppDataset_1.zip [file Uqcr11_set_A.pdf › Supplemental Dataset 1/A-mRNA_nonrhyth_translation_nonrhyth/Uqcr11_set_A.pdf]

# Uqcrb

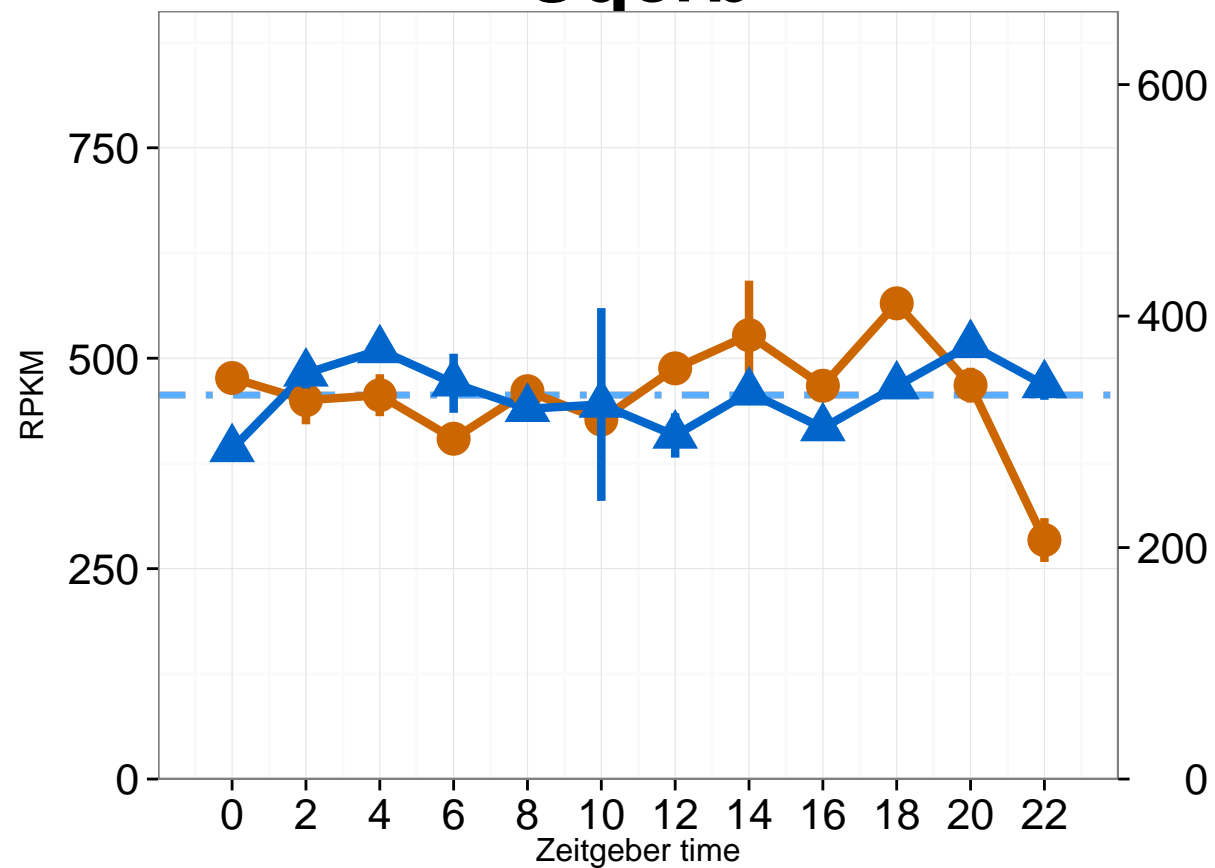

# Uqcrb

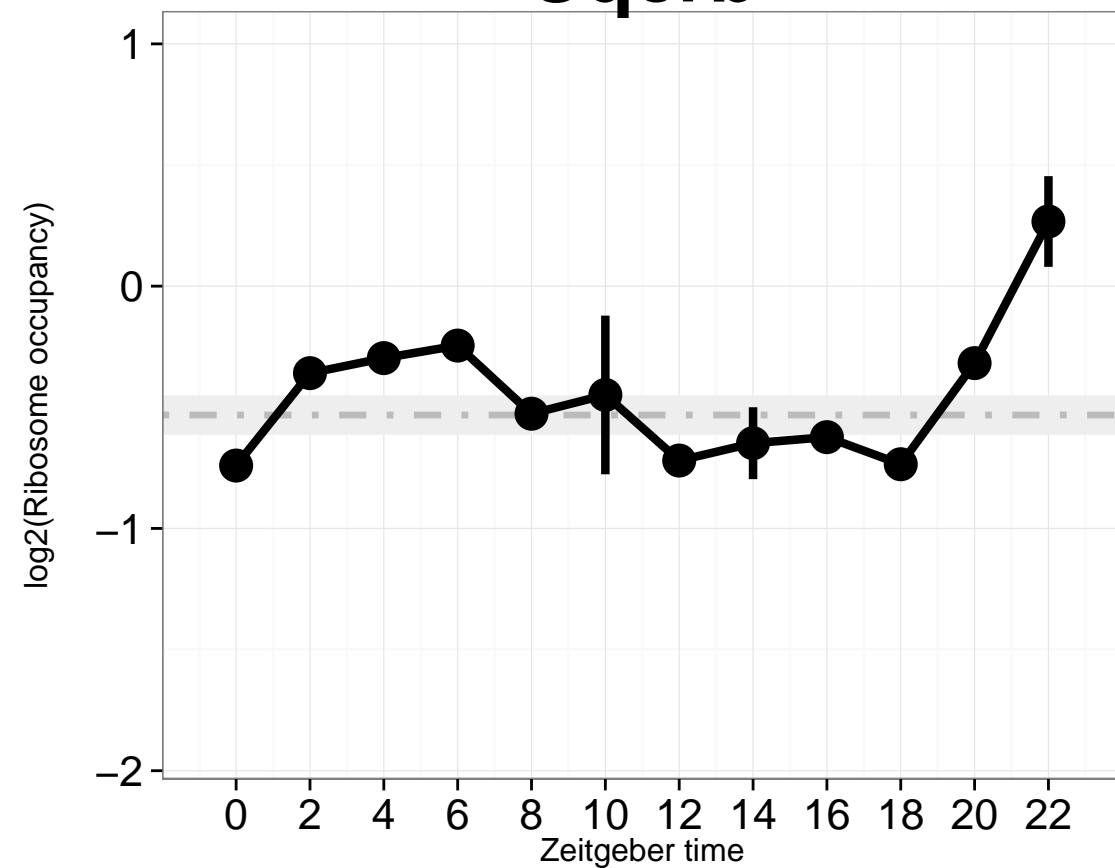

Supplement: SuppDataset_1.zip [file Uqcrb_set_A.pdf › Supplemental Dataset 1/A-mRNA_nonrhyth_translation_nonrhyth/Uqcrb_set_A.pdf]

# Uqcrc1

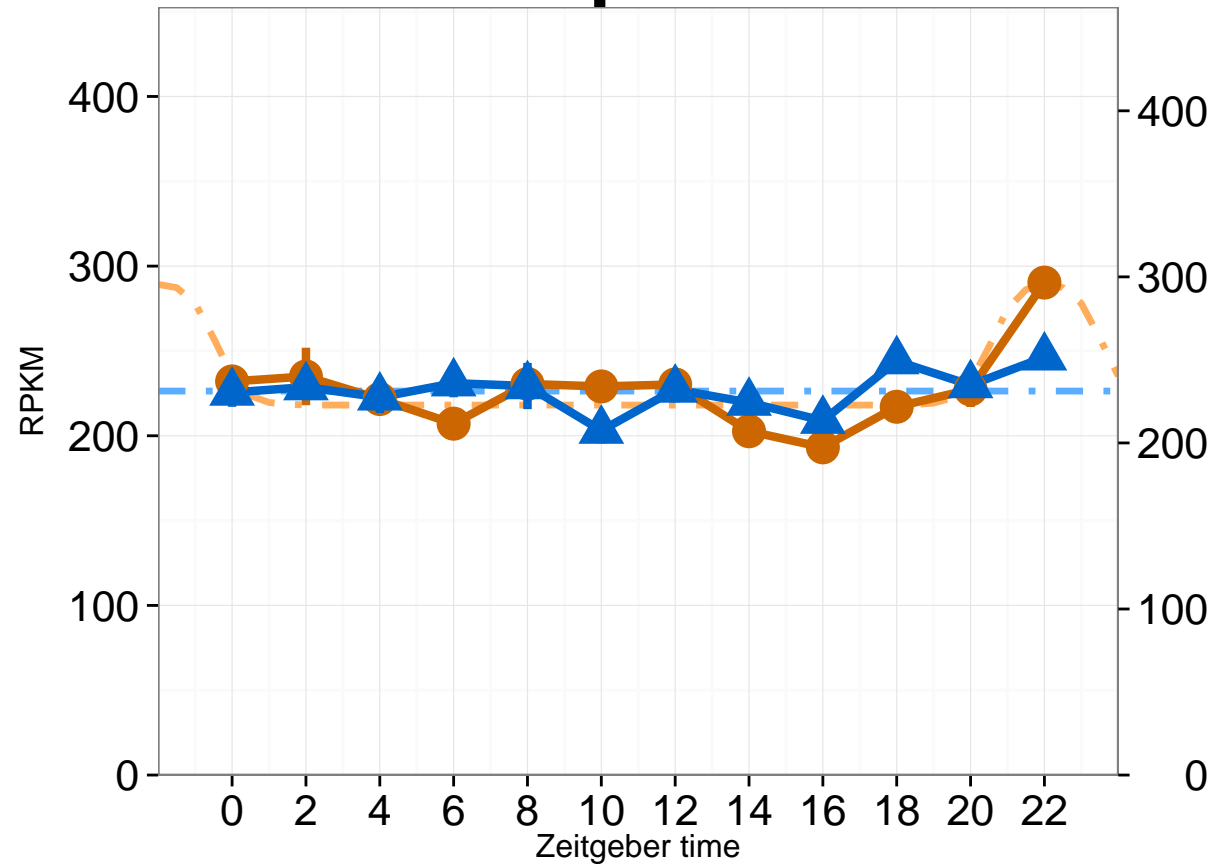

# Uqcrc1

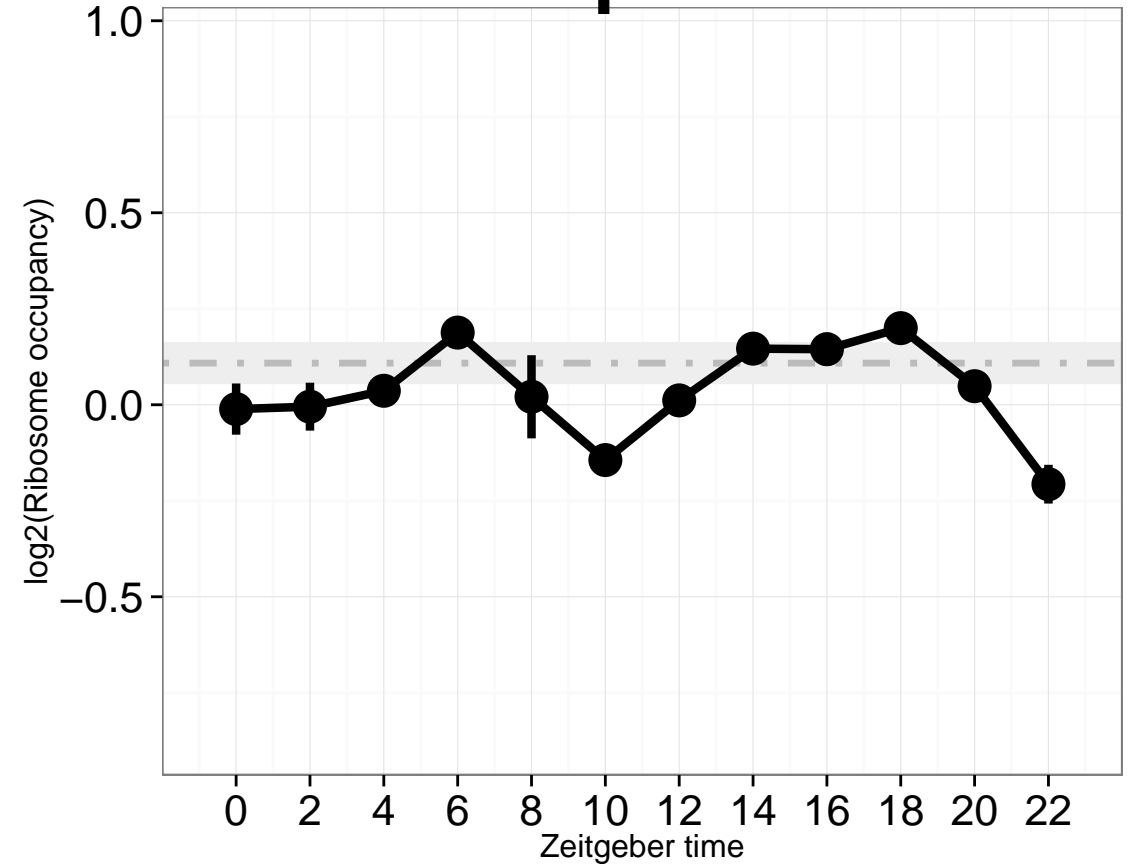

Supplement: SuppDataset_1.zip [file Uqcrc1_set_A.pdf › Supplemental Dataset 1/A-mRNA_nonrhyth_translation_nonrhyth/Uqcrc1_set_A.pdf]

## Uqcrc2

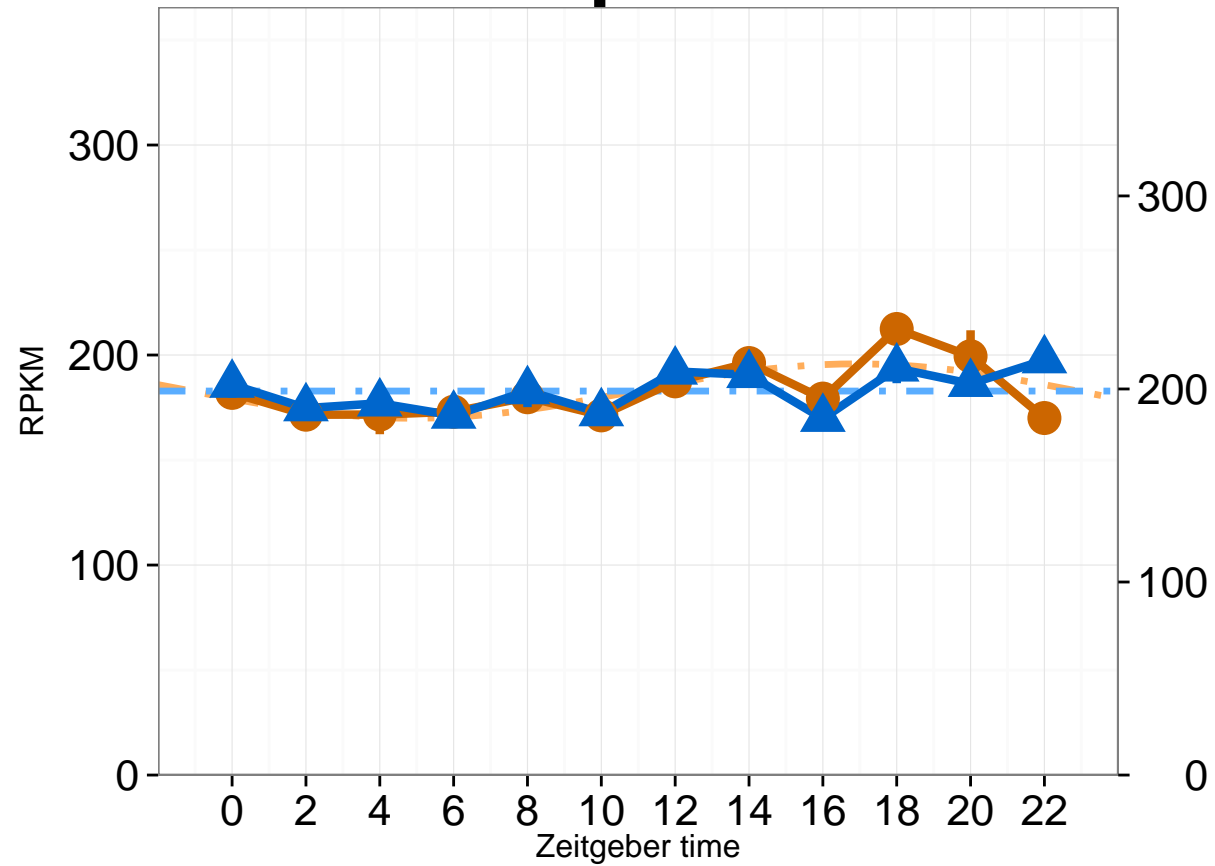

## Uqcrc2

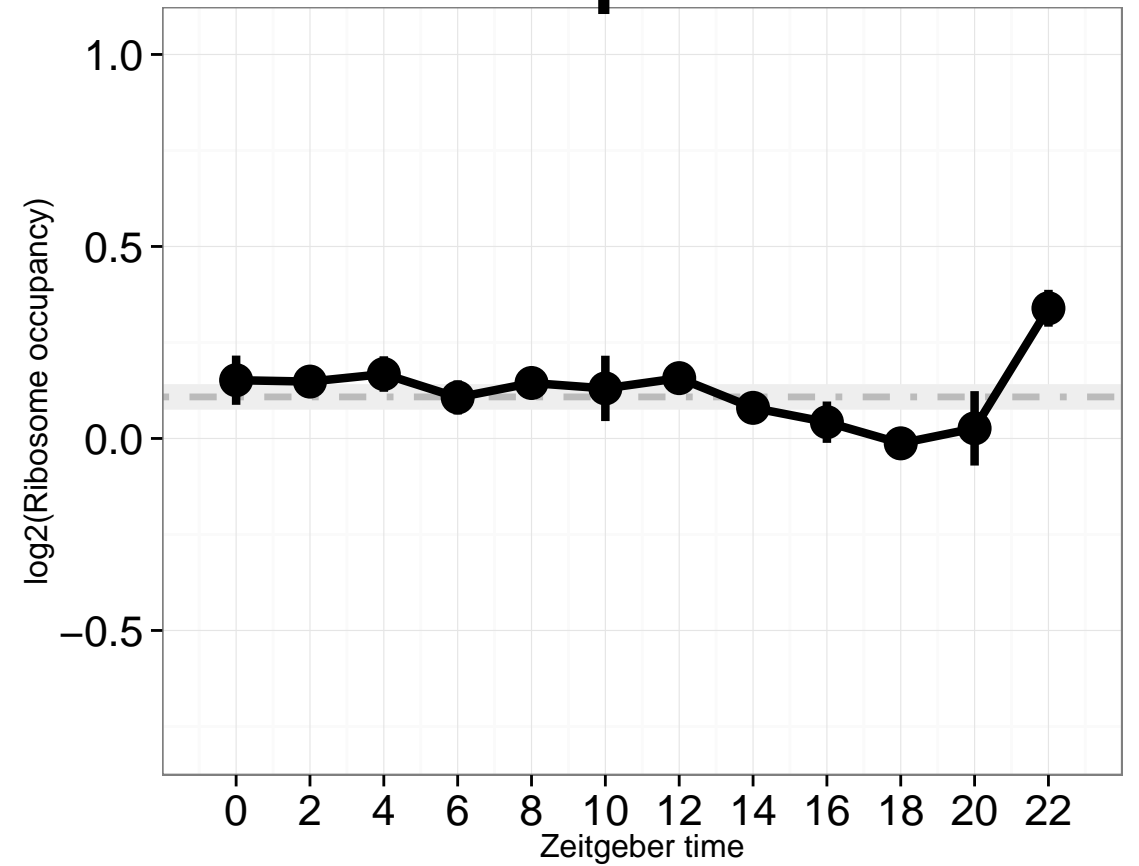

Supplement: SuppDataset_1.zip [file Uqcrc2_set_A.pdf › Supplemental Dataset 1/A-mRNA_nonrhyth_translation_nonrhyth/Uqcrc2_set_A.pdf]

# Uqcrfs1

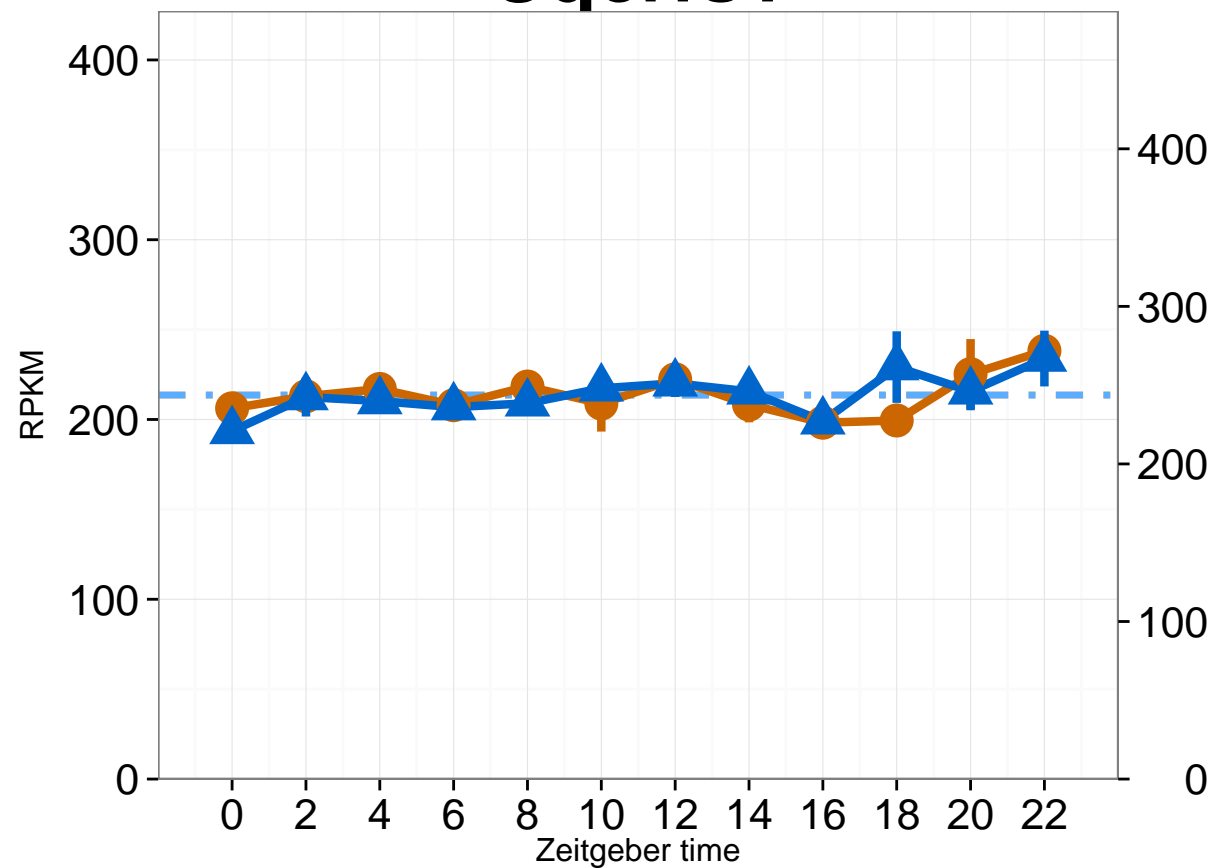

# Uqcrfs1

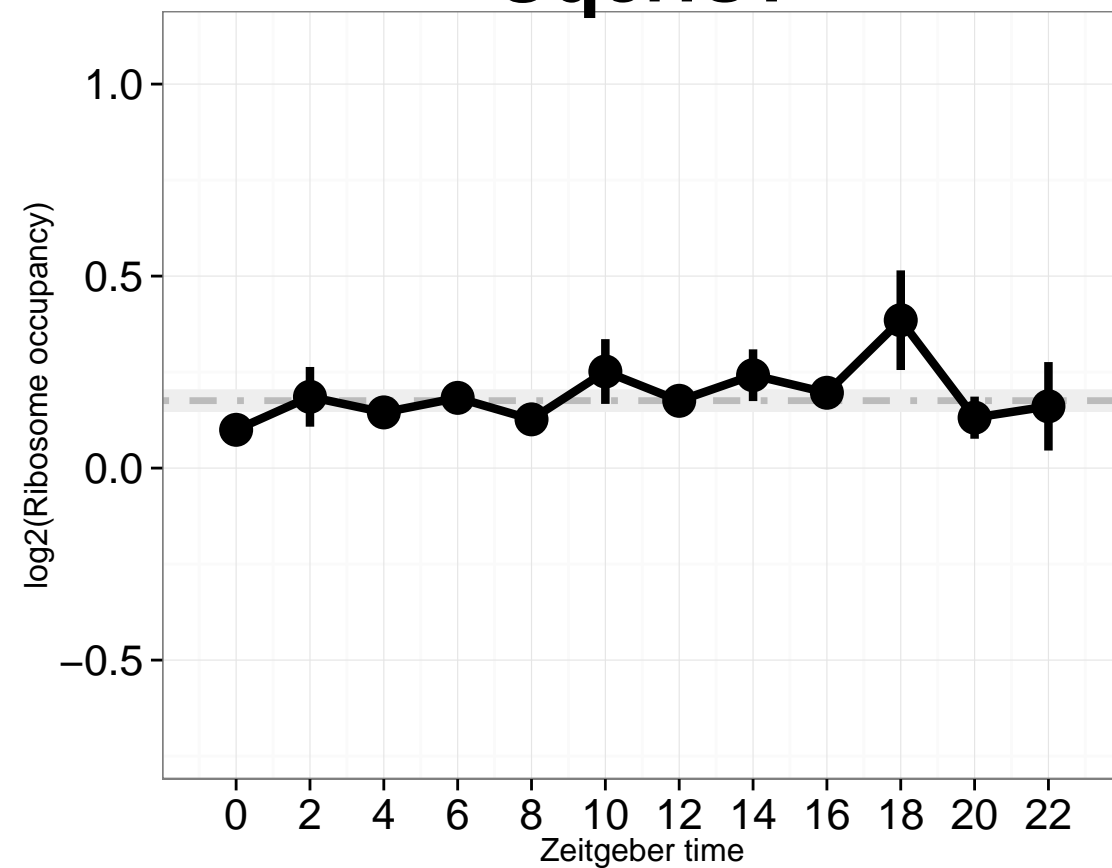

Supplement: SuppDataset_1.zip [file Uqcrfs1_set_A.pdf › Supplemental Dataset 1/A-mRNA_nonrhyth_translation_nonrhyth/Uqcrfs1_set_A.pdf]

## Uqcrh

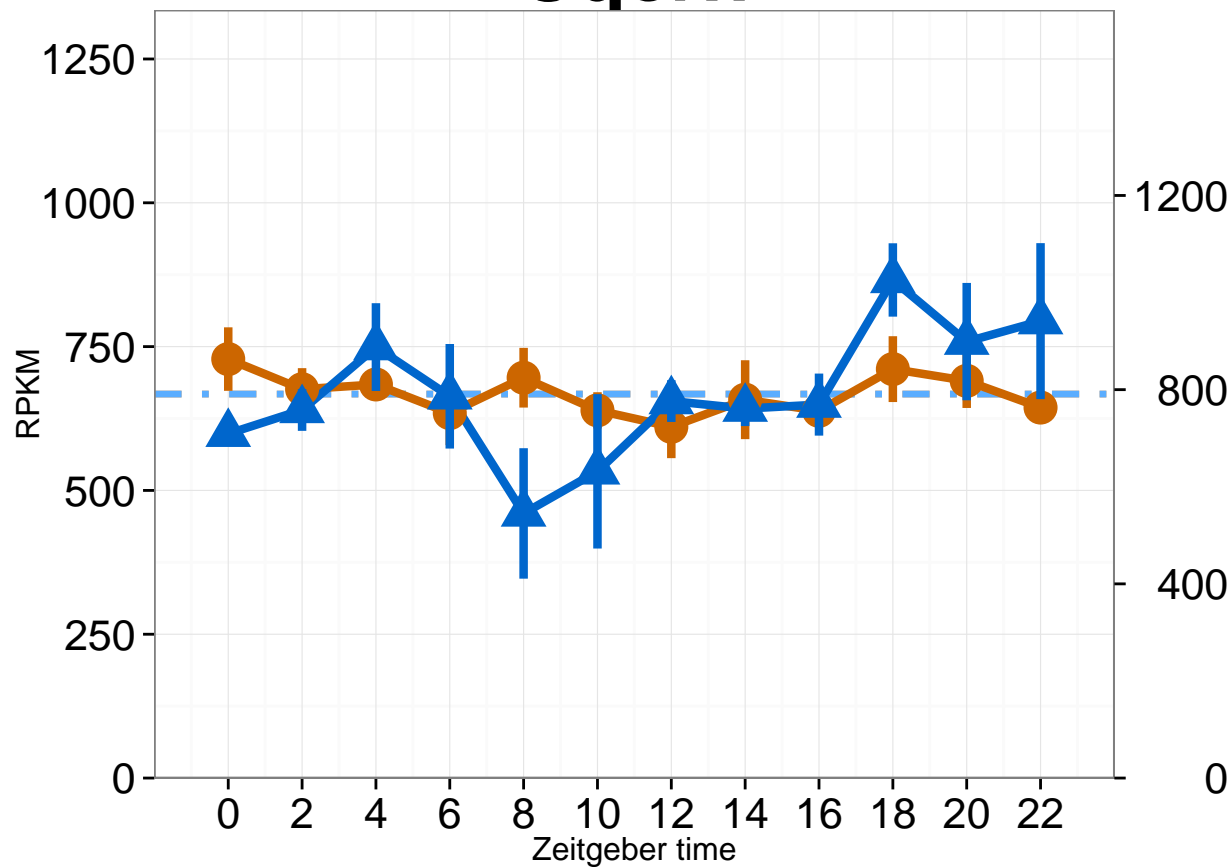

## Uqcrh

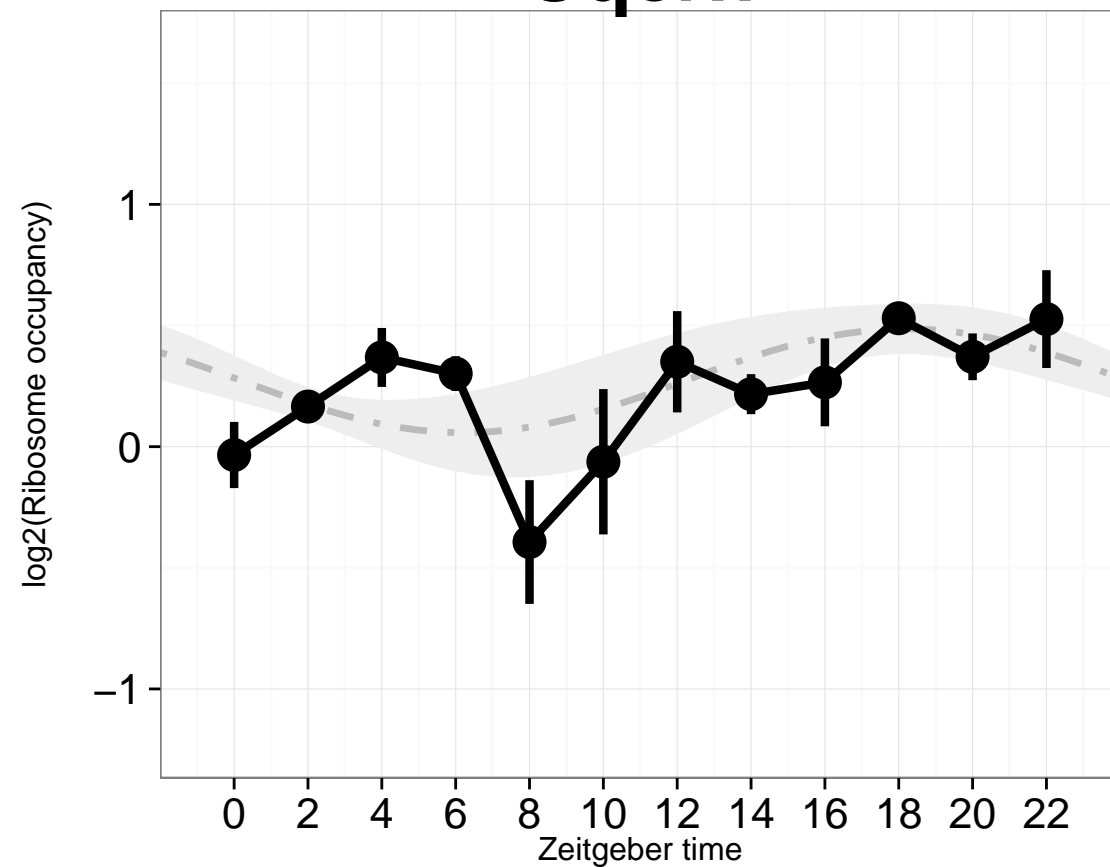

Supplement: SuppDataset_1.zip [file Uqcrh_set_A.pdf › Supplemental Dataset 1/A-mRNA_nonrhyth_translation_nonrhyth/Uqcrh_set_A.pdf]

## Uqcrq

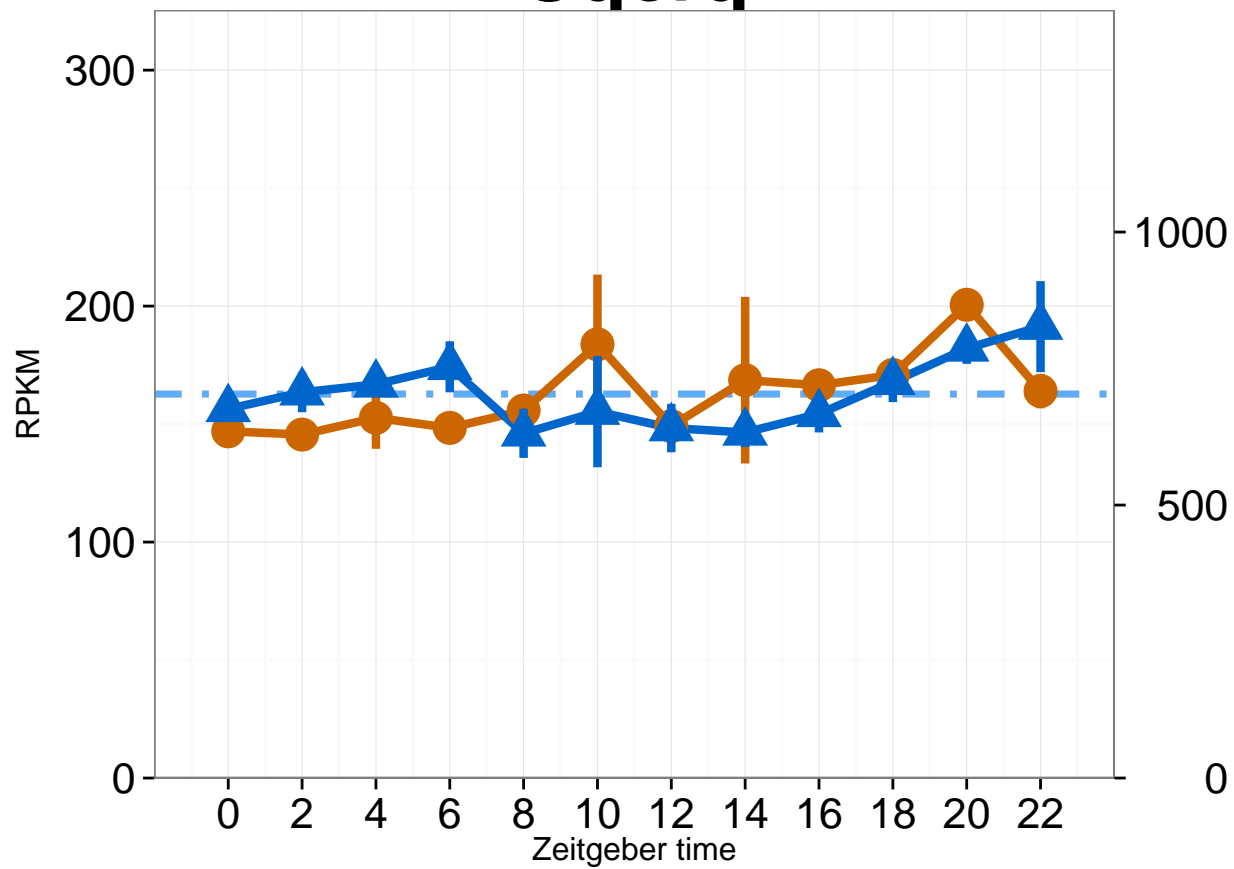

## Uqcrq

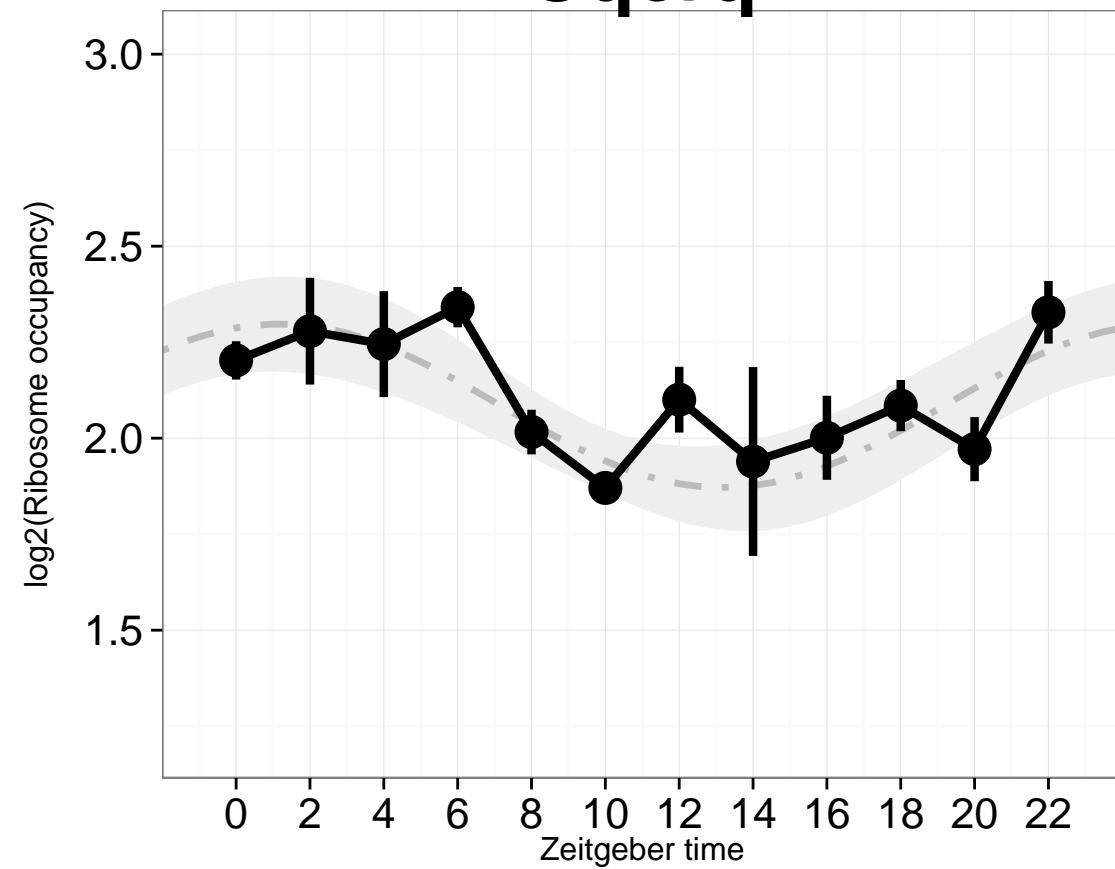

Supplement: SuppDataset_1.zip [file Uqcrq_set_A.pdf › Supplemental Dataset 1/A-mRNA_nonrhyth_translation_nonrhyth/Uqcrq_set_A.pdf]

## Urah

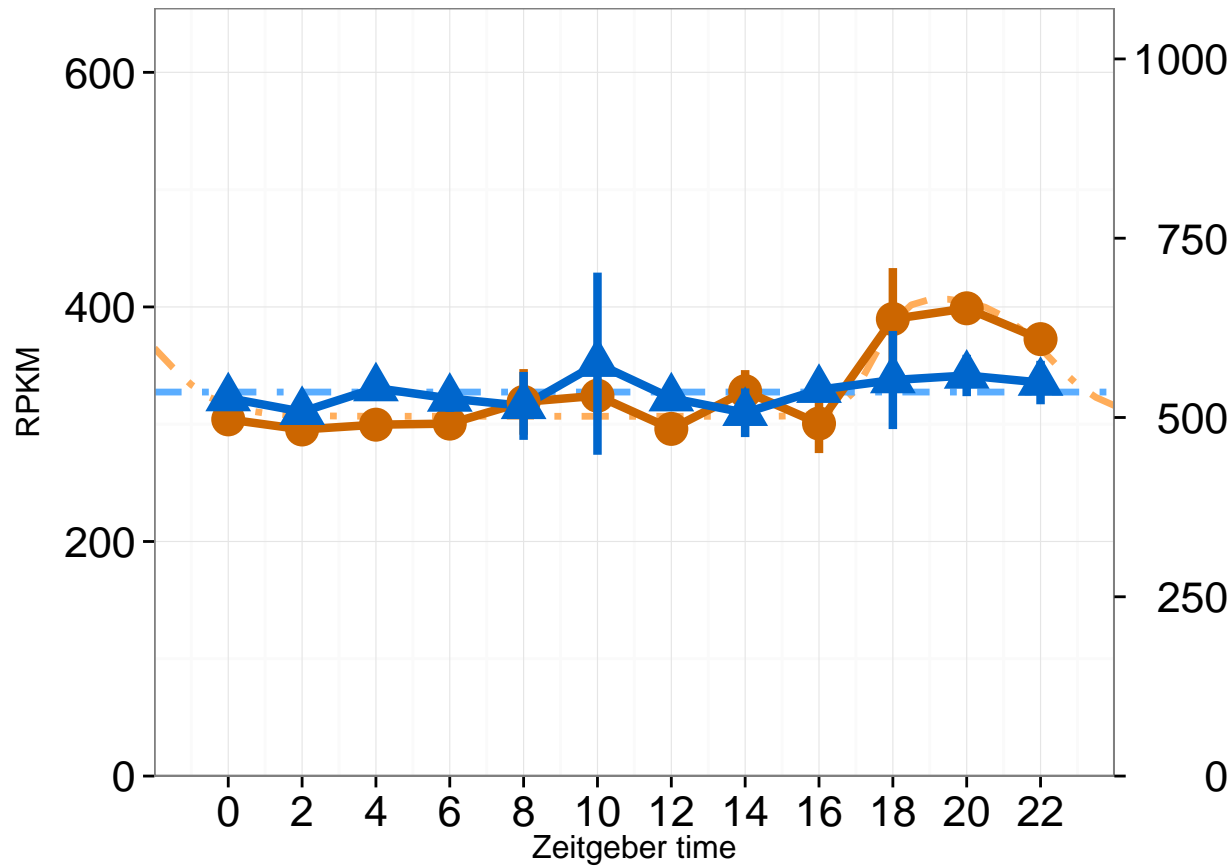

## Urah

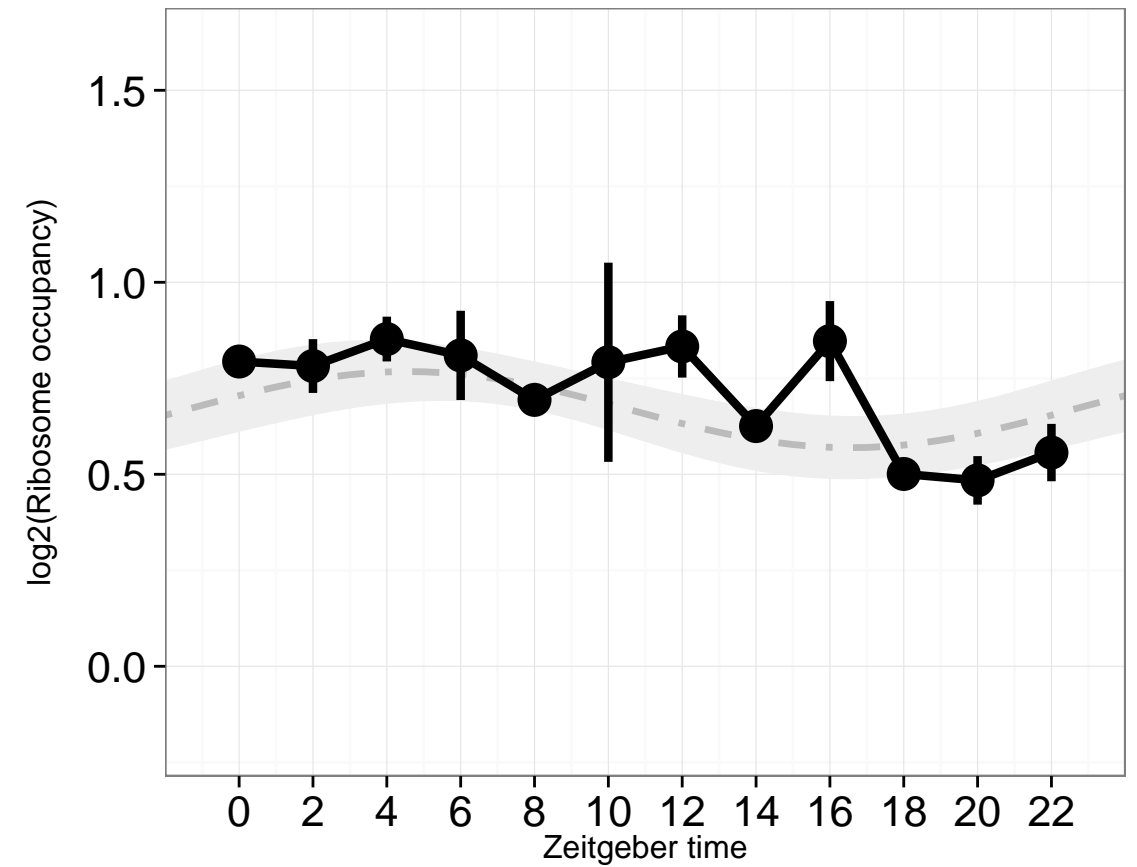

Supplement: SuppDataset_1.zip [file Urah_set_A.pdf › Supplemental Dataset 1/A-mRNA_nonrhyth_translation_nonrhyth/Urah_set_A.pdf]

## Urgcp

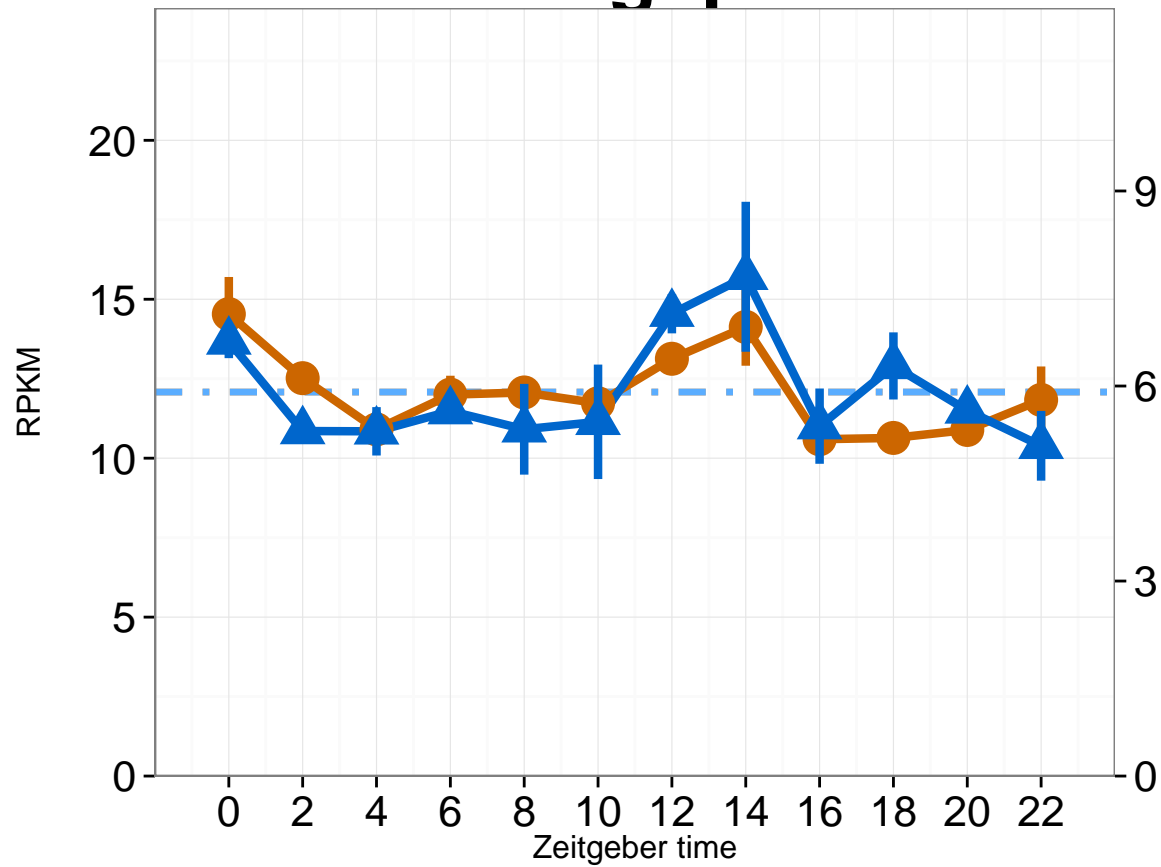

## Urgcp

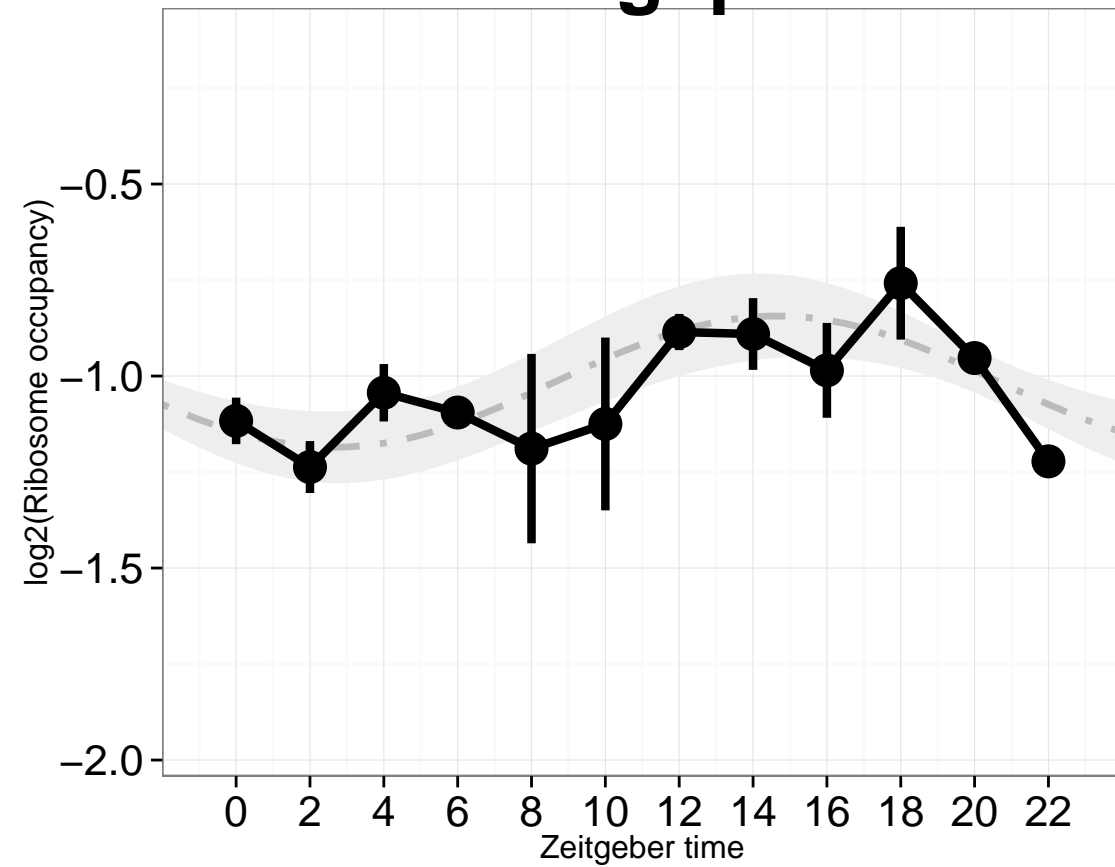

Supplement: SuppDataset_1.zip [file Urgcp_set_A.pdf › Supplemental Dataset 1/A-mRNA_nonrhyth_translation_nonrhyth/Urgcp_set_A.pdf]

## Urm1

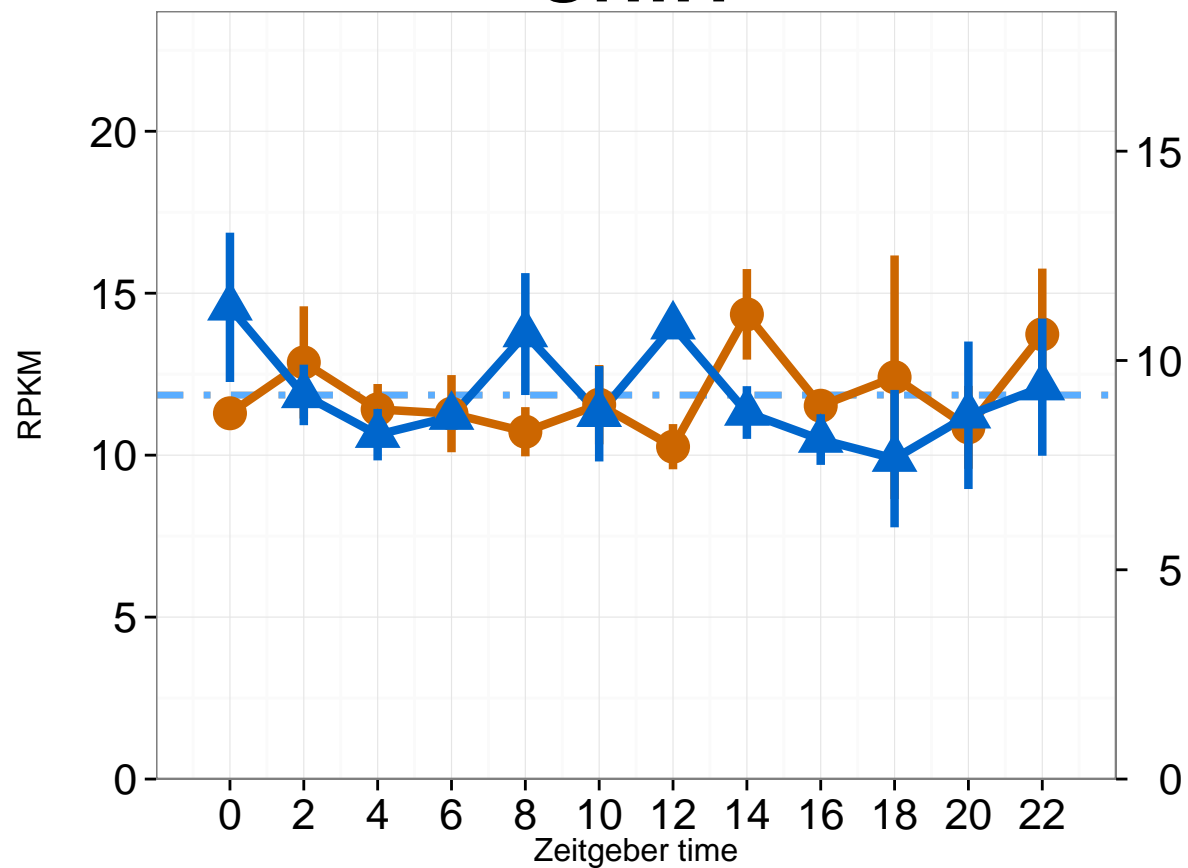

## Urm1

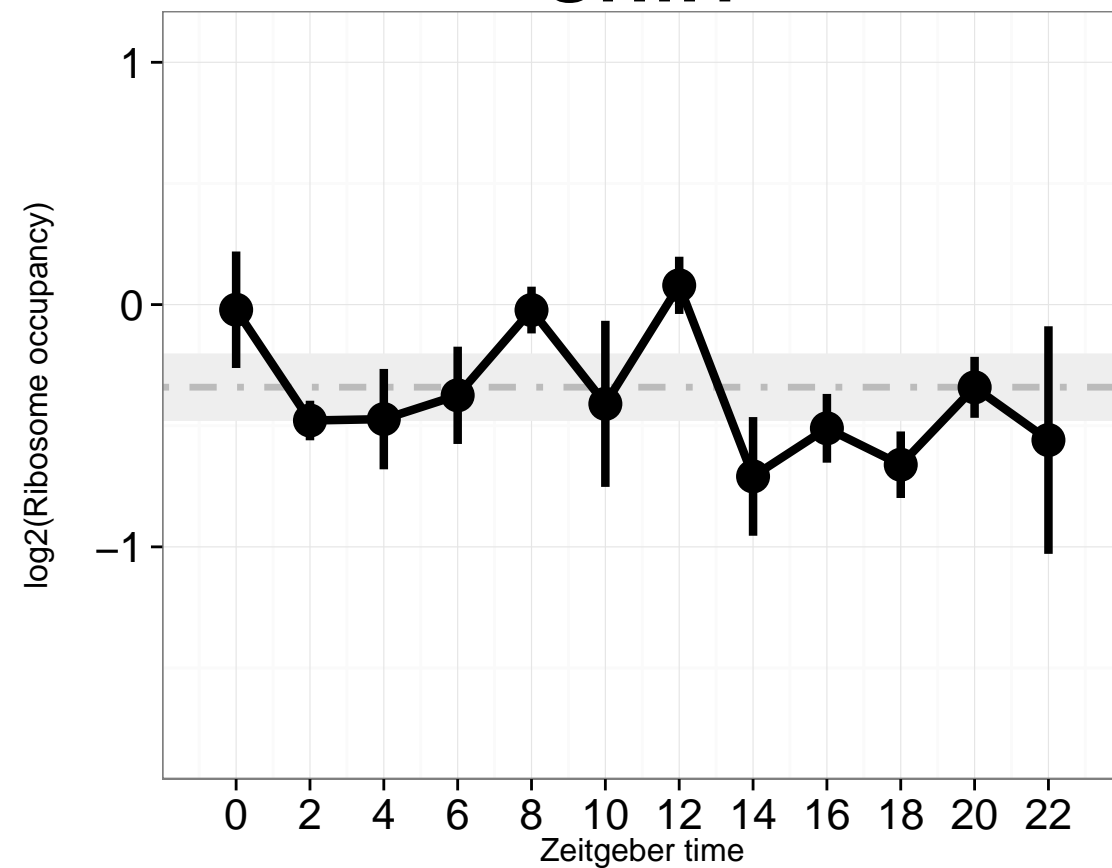

Supplement: SuppDataset_1.zip [file Urm1_set_A.pdf › Supplemental Dataset 1/A-mRNA_nonrhyth_translation_nonrhyth/Urm1_set_A.pdf]

## Uroc1

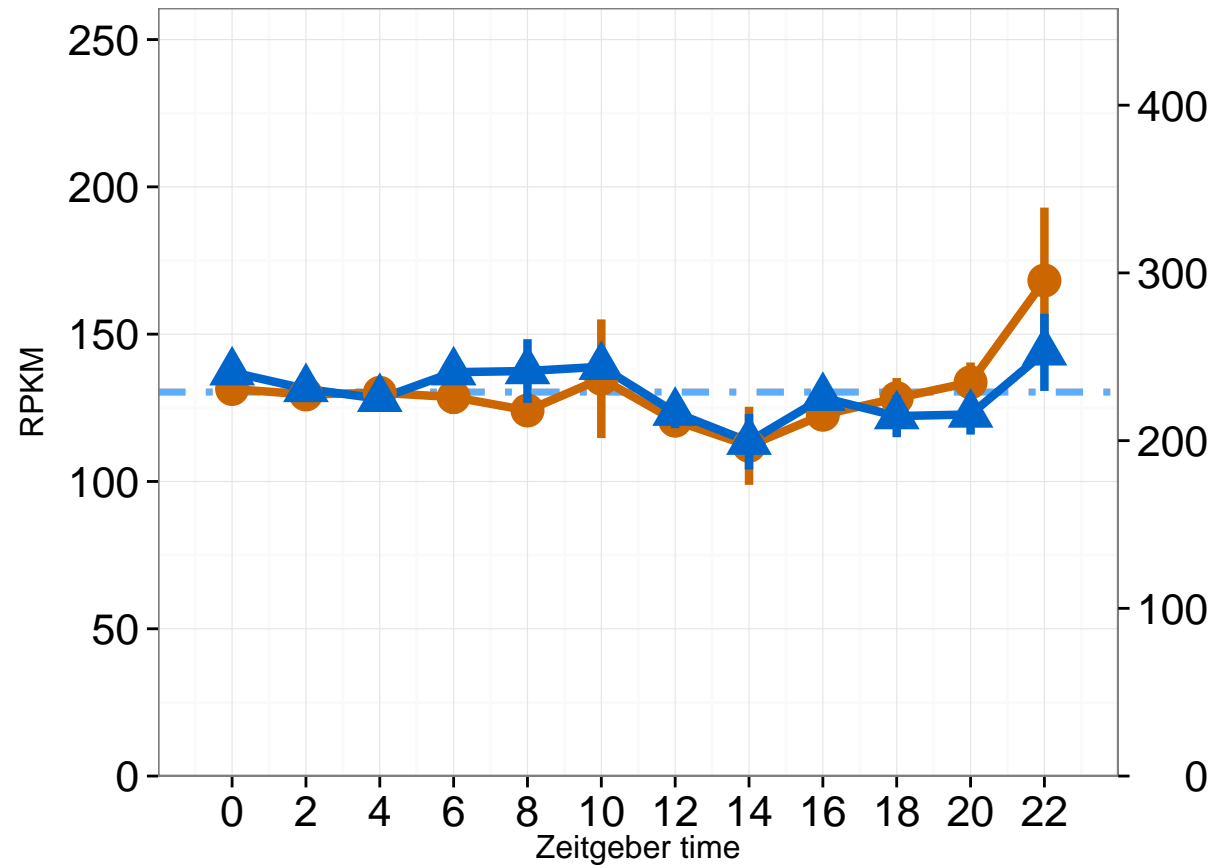

## Uroc1

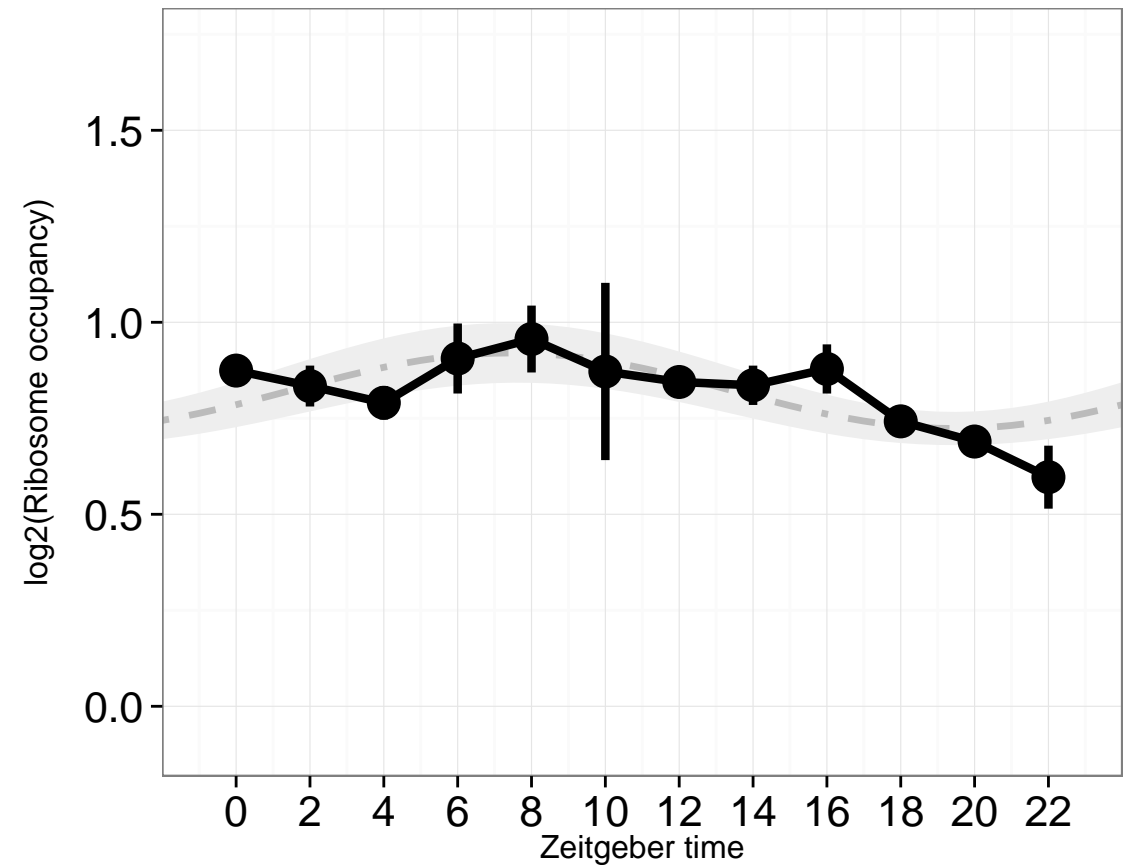

Supplement: SuppDataset_1.zip [file Uroc1_set_A.pdf › Supplemental Dataset 1/A-mRNA_nonrhyth_translation_nonrhyth/Uroc1_set_A.pdf]

## Urod

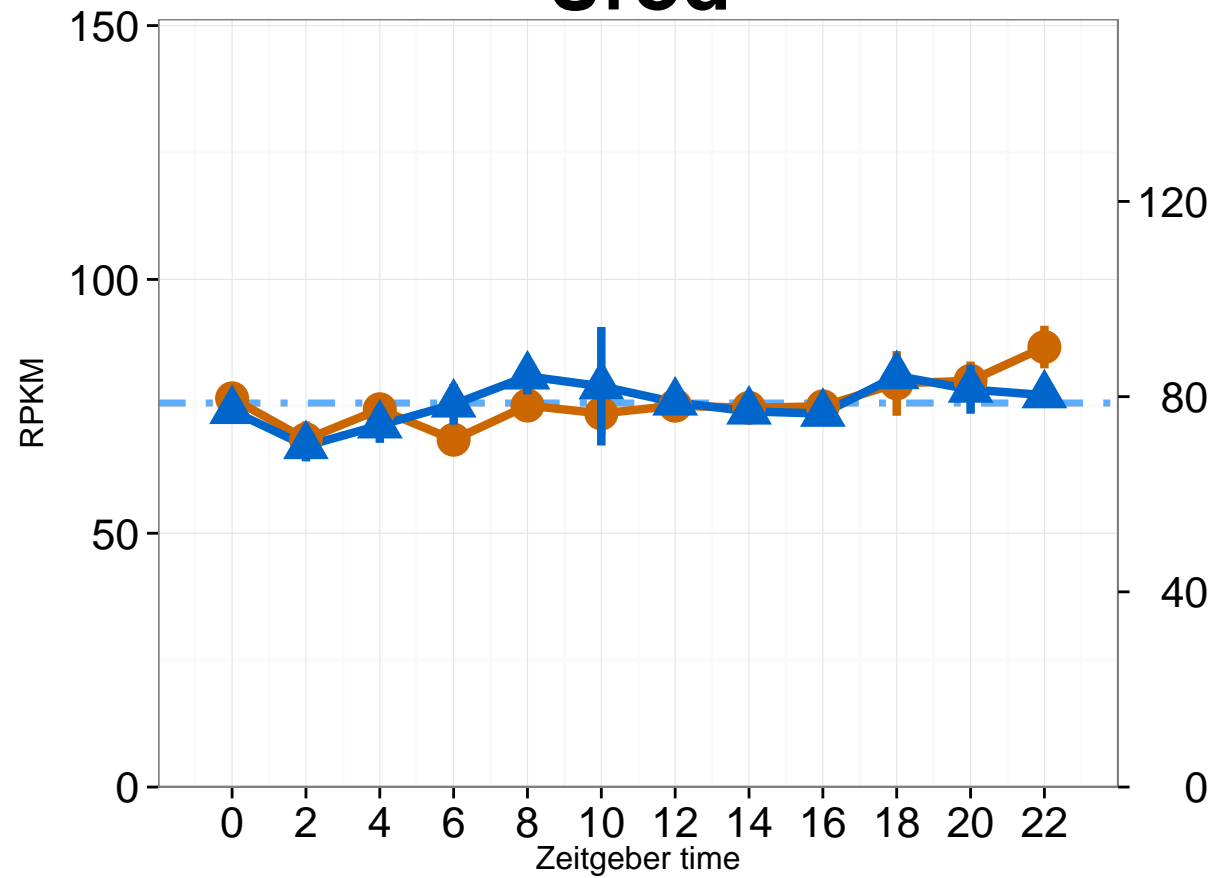

## Urod

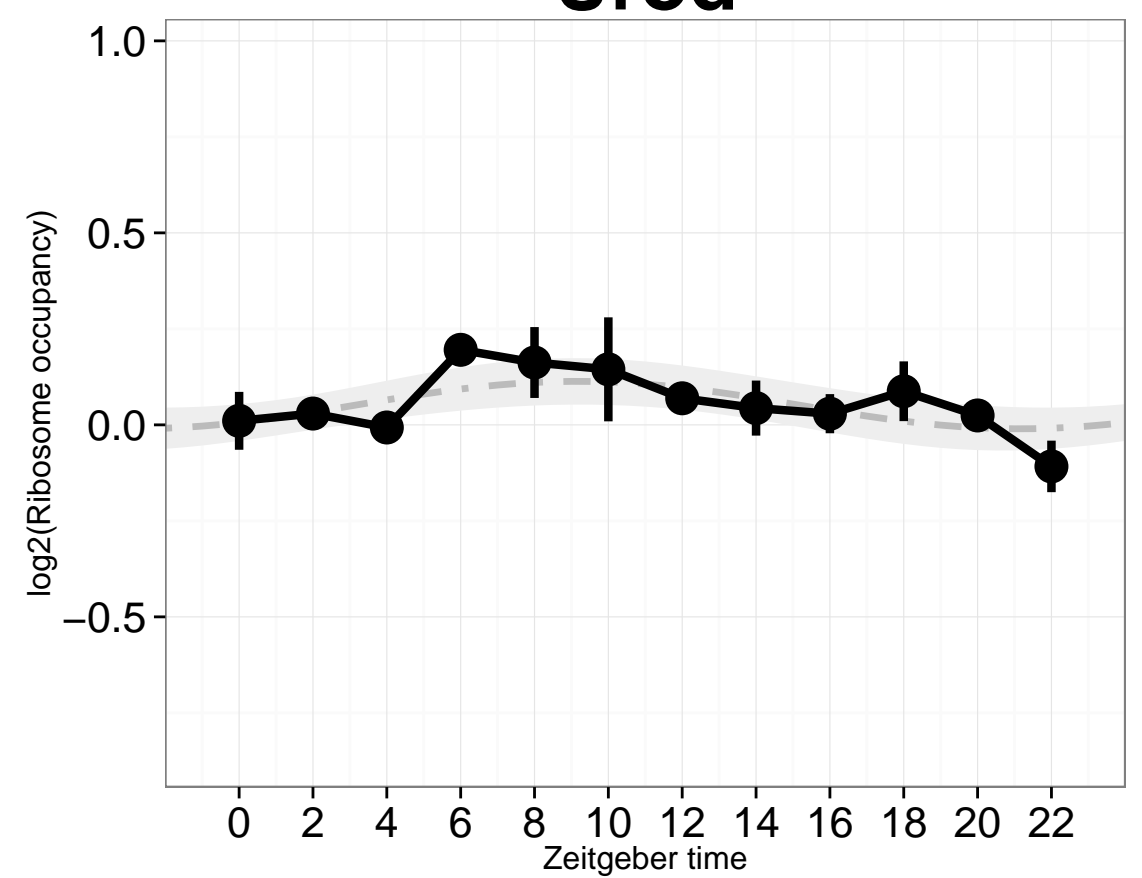

Supplement: SuppDataset_1.zip [file Urod_set_A.pdf › Supplemental Dataset 1/A-mRNA_nonrhyth_translation_nonrhyth/Urod_set_A.pdf]

## Uros

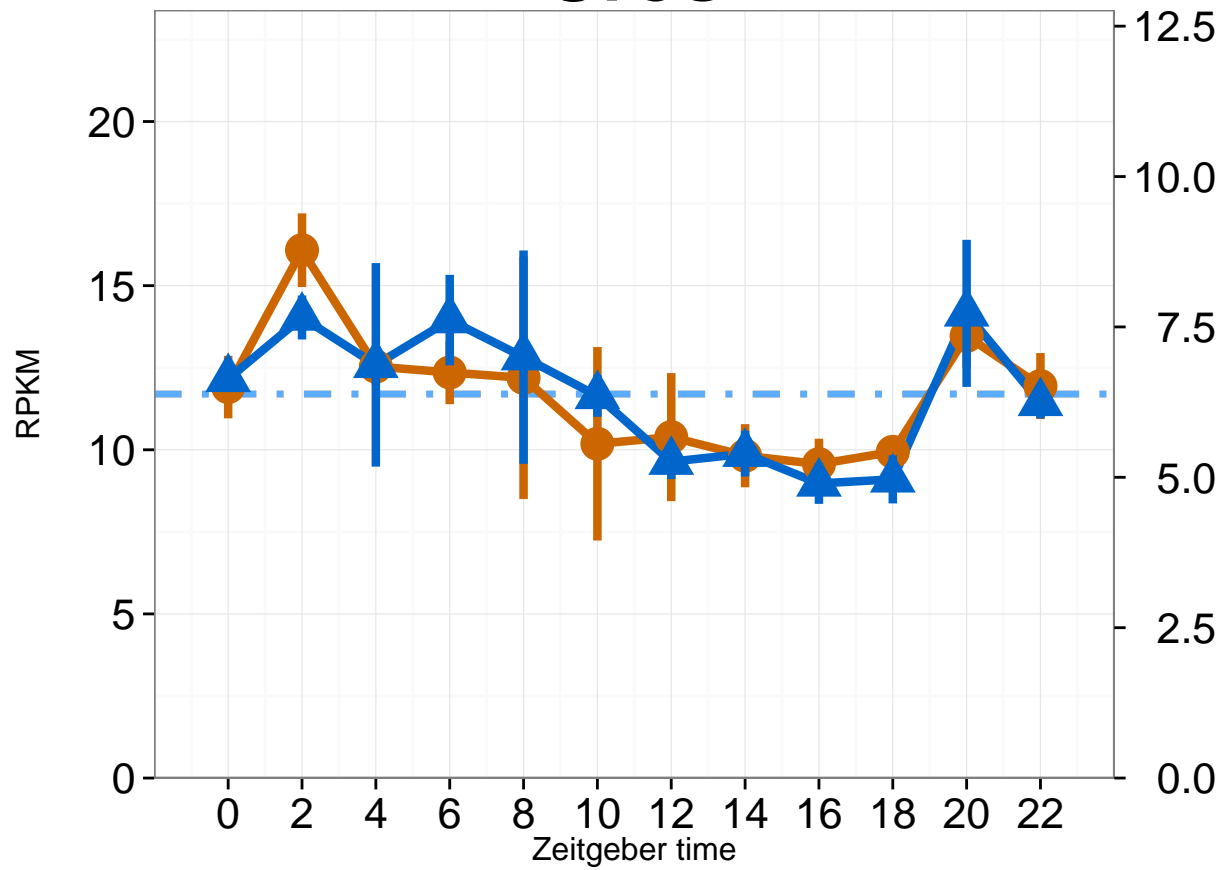

## Uros

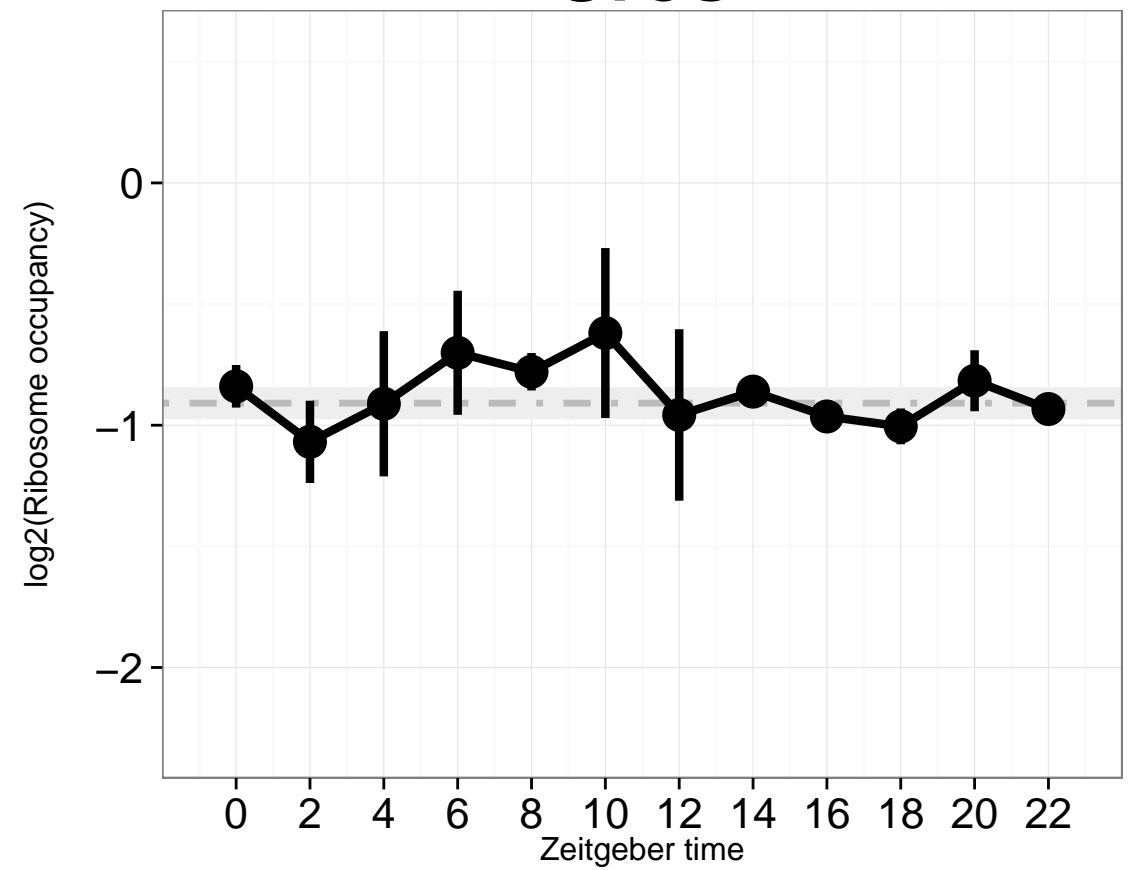

Supplement: SuppDataset_1.zip [file Uros_set_A.pdf › Supplemental Dataset 1/A-mRNA_nonrhyth_translation_nonrhyth/Uros_set_A.pdf]

# Use1

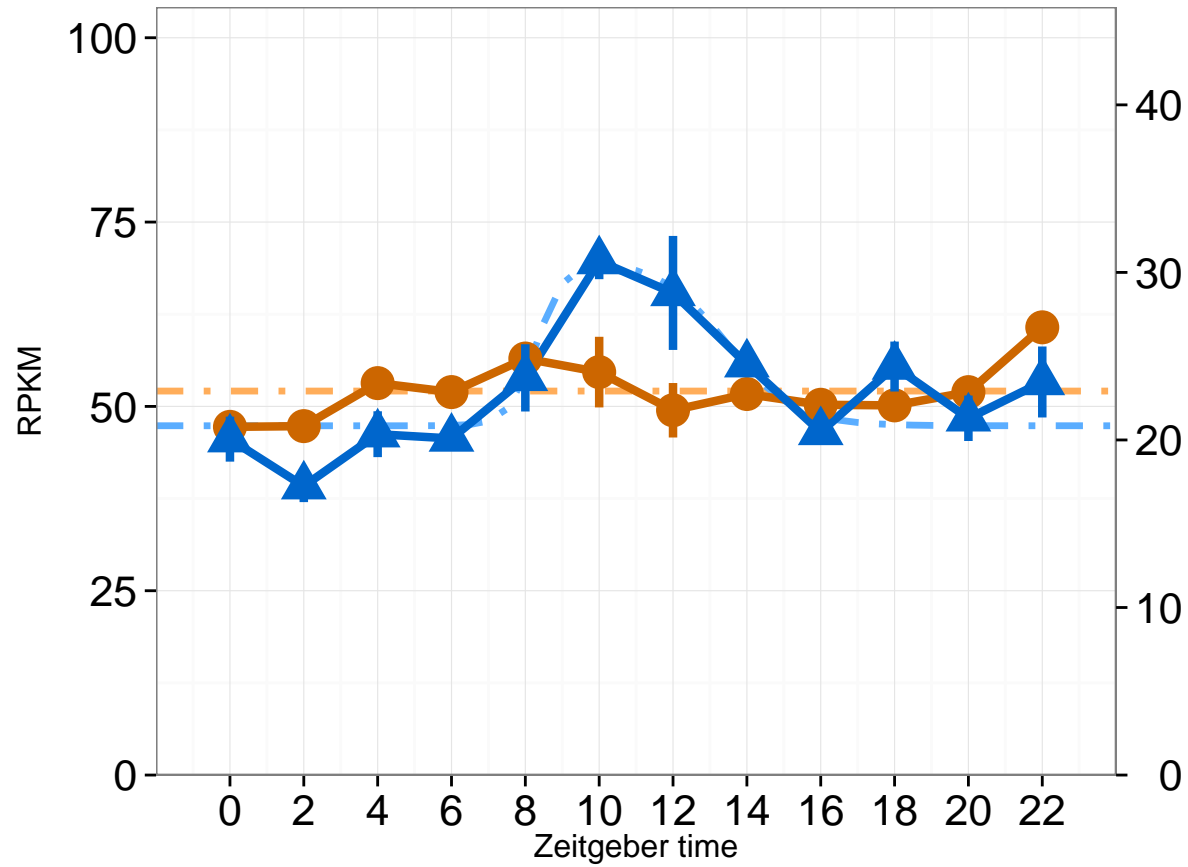

# Use1

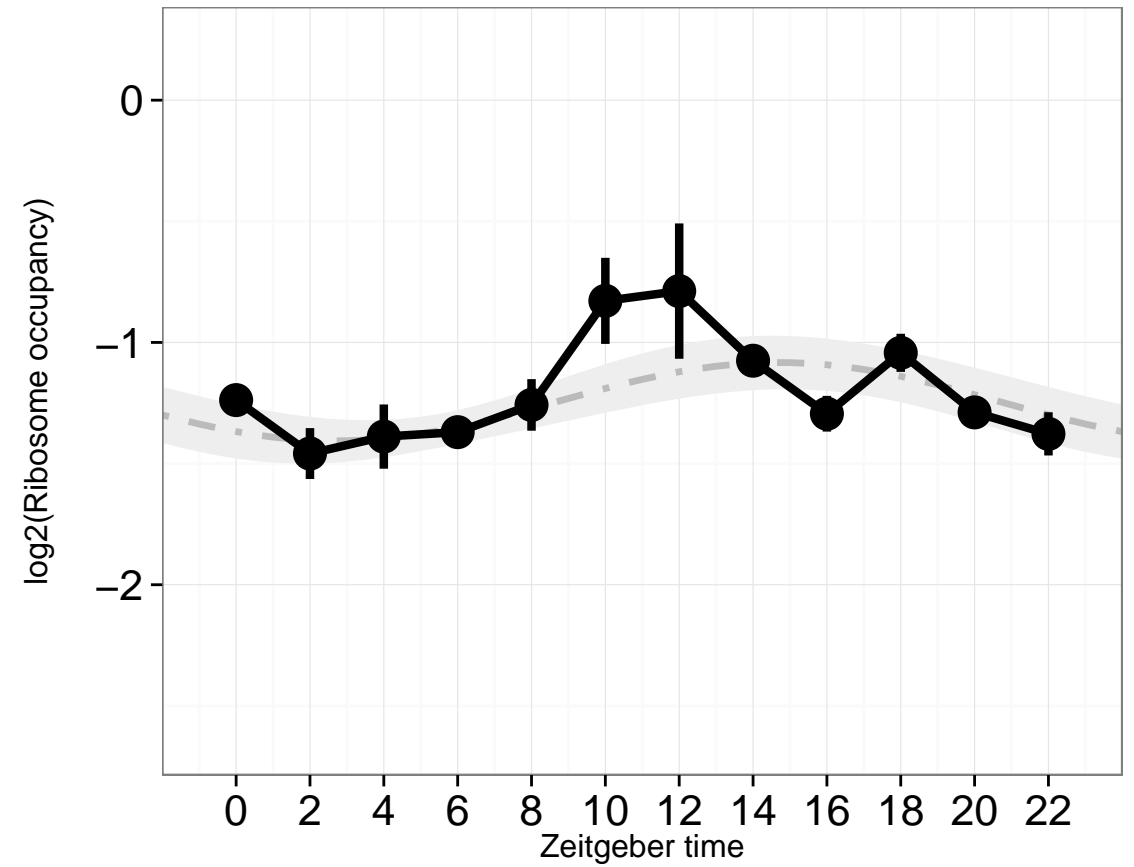

Supplement: SuppDataset_1.zip [file Use1_set_A.pdf › Supplemental Dataset 1/A-mRNA_nonrhyth_translation_nonrhyth/Use1_set_A.pdf]

## Usf1

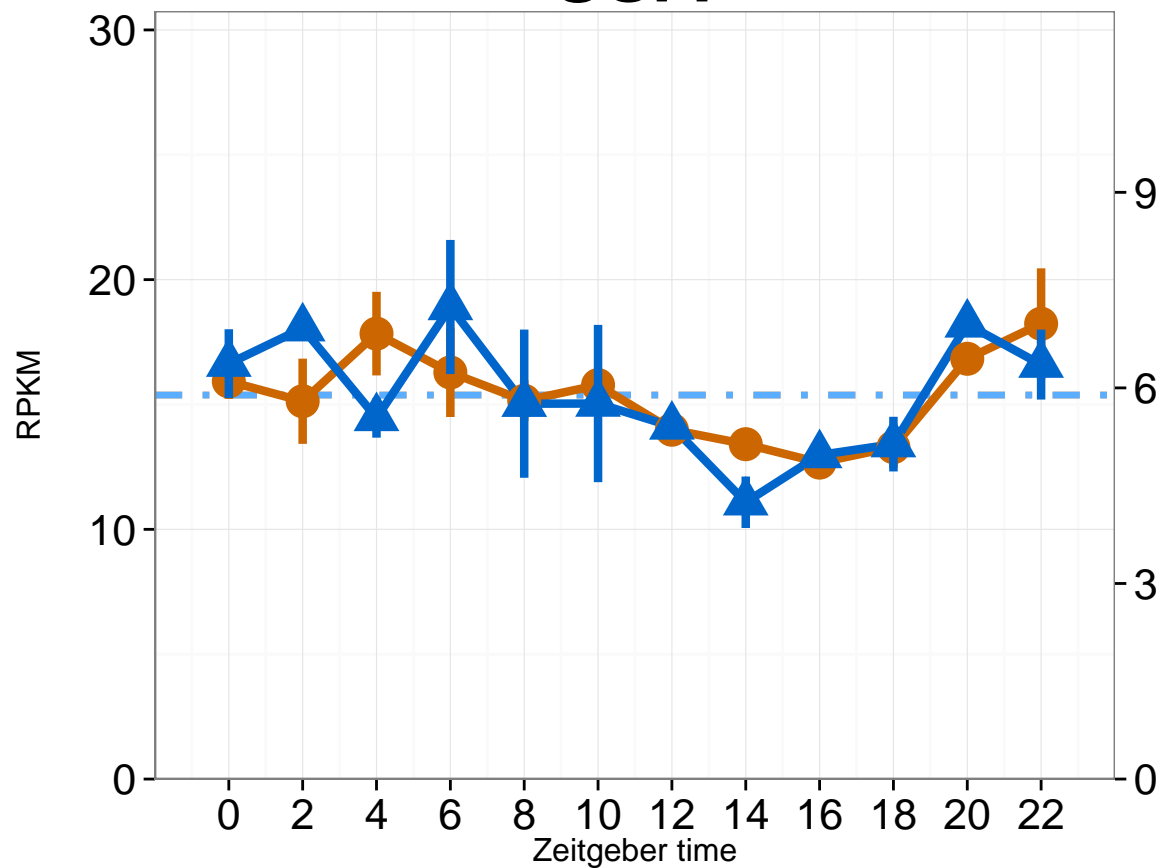

## Usf1

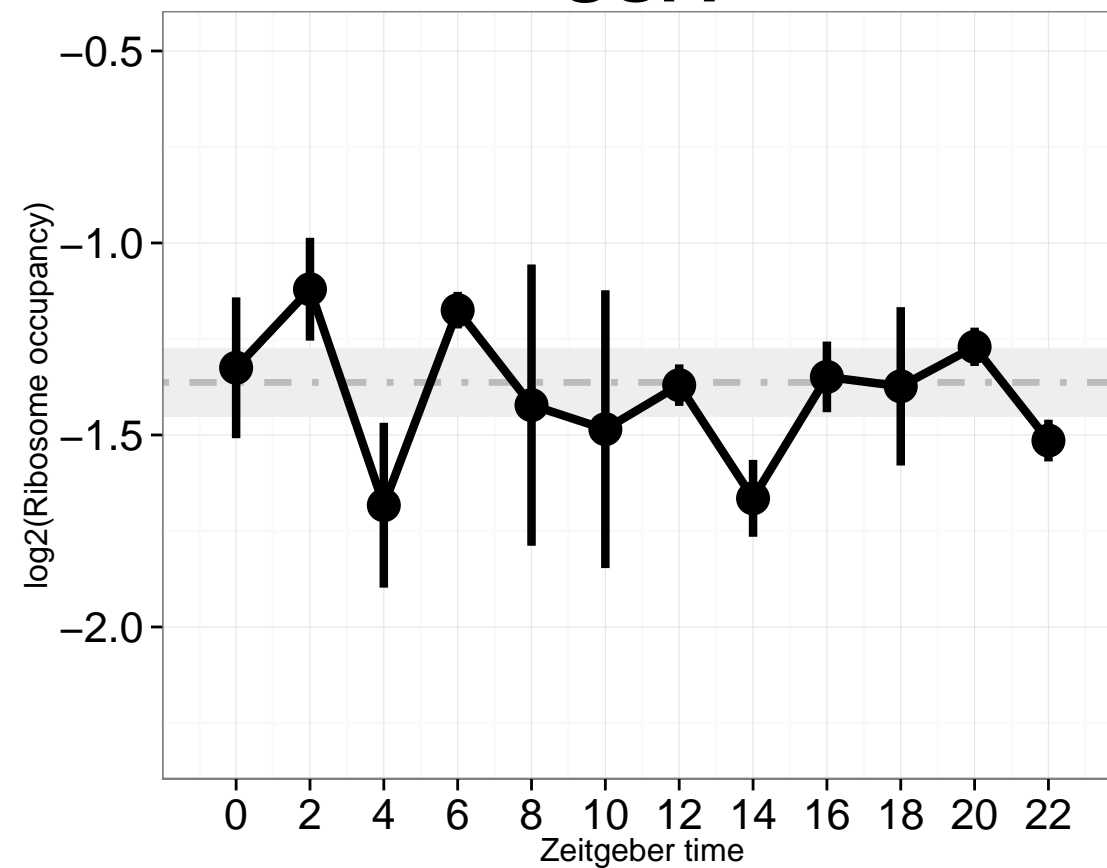

Supplement: SuppDataset_1.zip [file Usf1_set_A.pdf › Supplemental Dataset 1/A-mRNA_nonrhyth_translation_nonrhyth/Usf1_set_A.pdf]

## Usf2

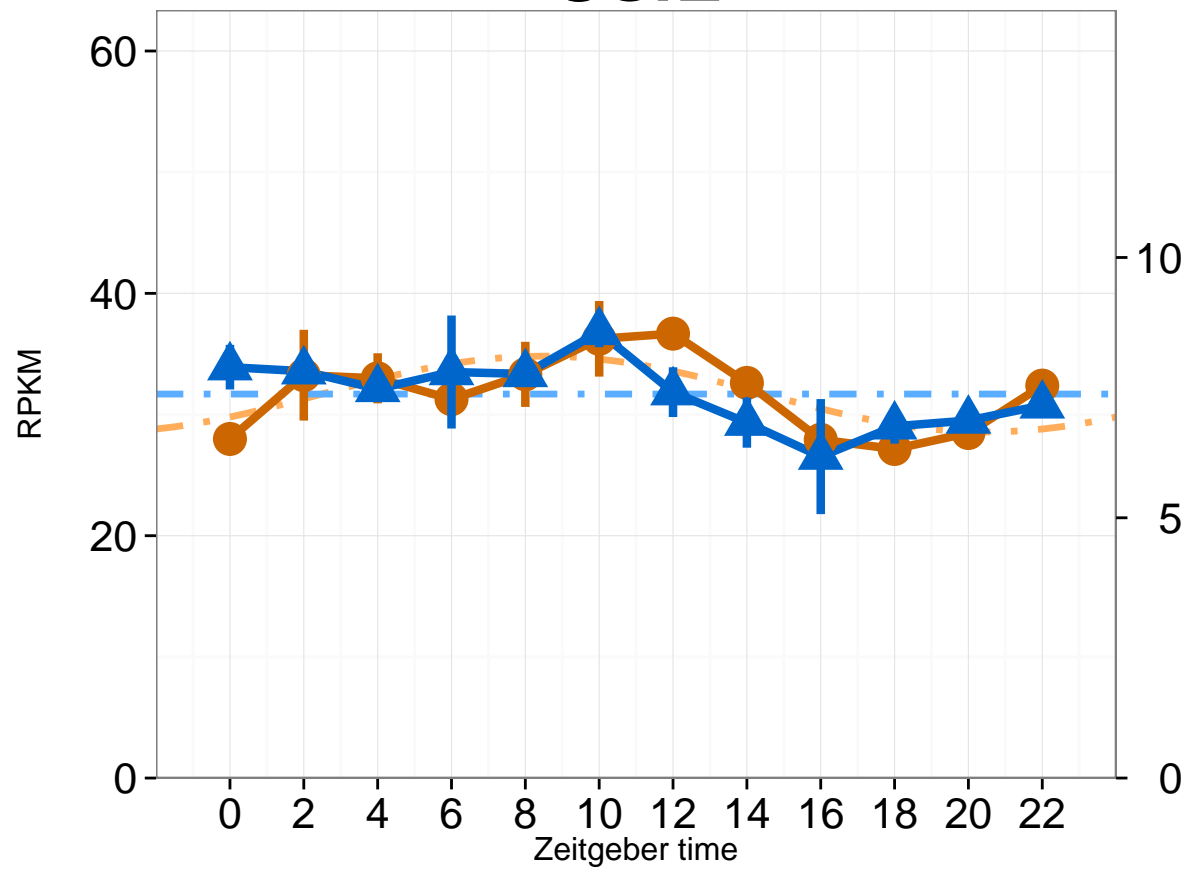

## Usf2

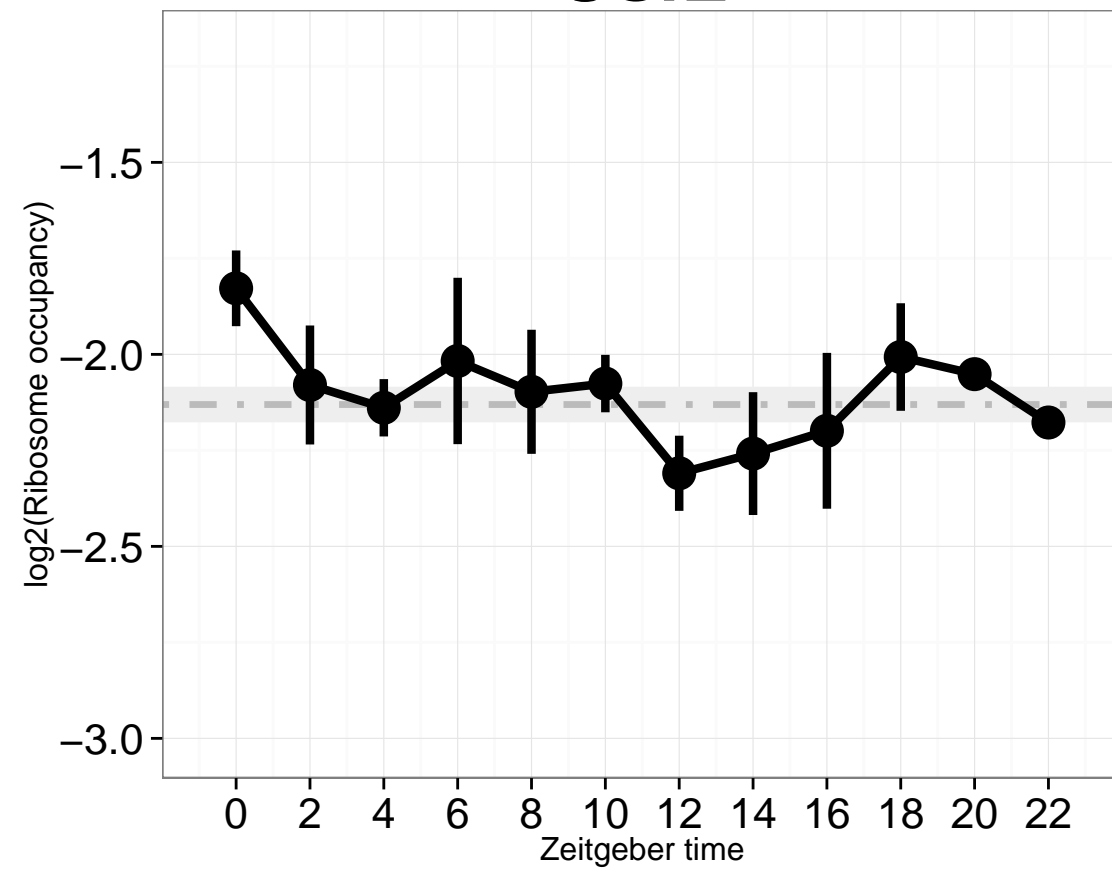

Supplement: SuppDataset_1.zip [file Usf2_set_A.pdf › Supplemental Dataset 1/A-mRNA_nonrhyth_translation_nonrhyth/Usf2_set_A.pdf]

# Ushbp1

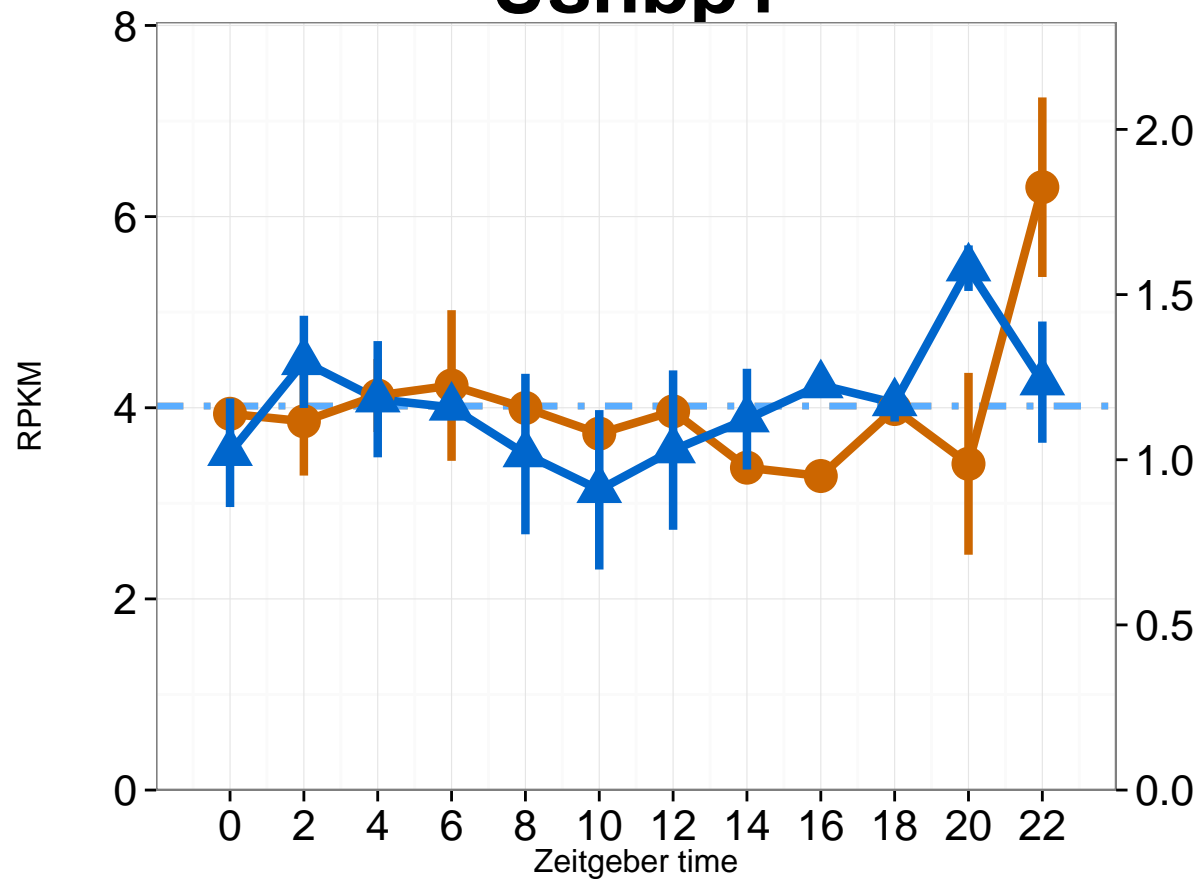

# Ushbp1

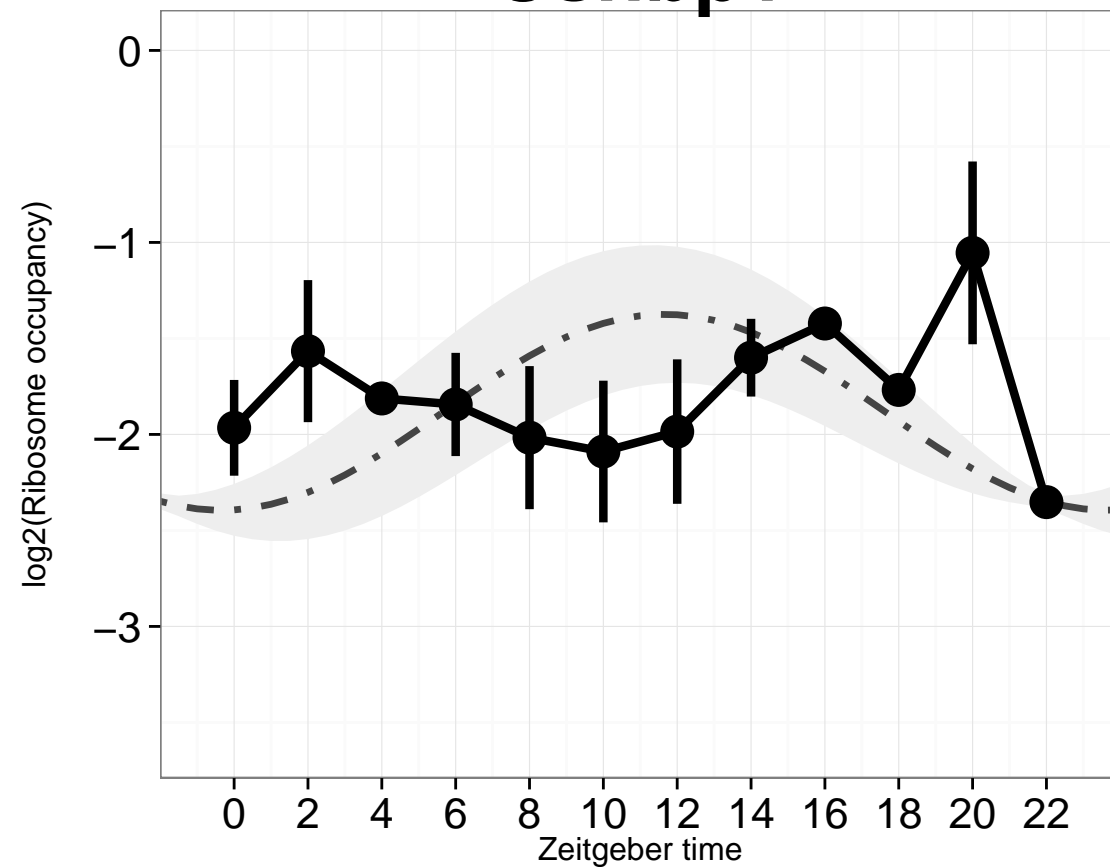

Supplement: SuppDataset_1.zip [file Ushbp1_set_A.pdf › Supplemental Dataset 1/A-mRNA_nonrhyth_translation_nonrhyth/Ushbp1_set_A.pdf]

## Uso1

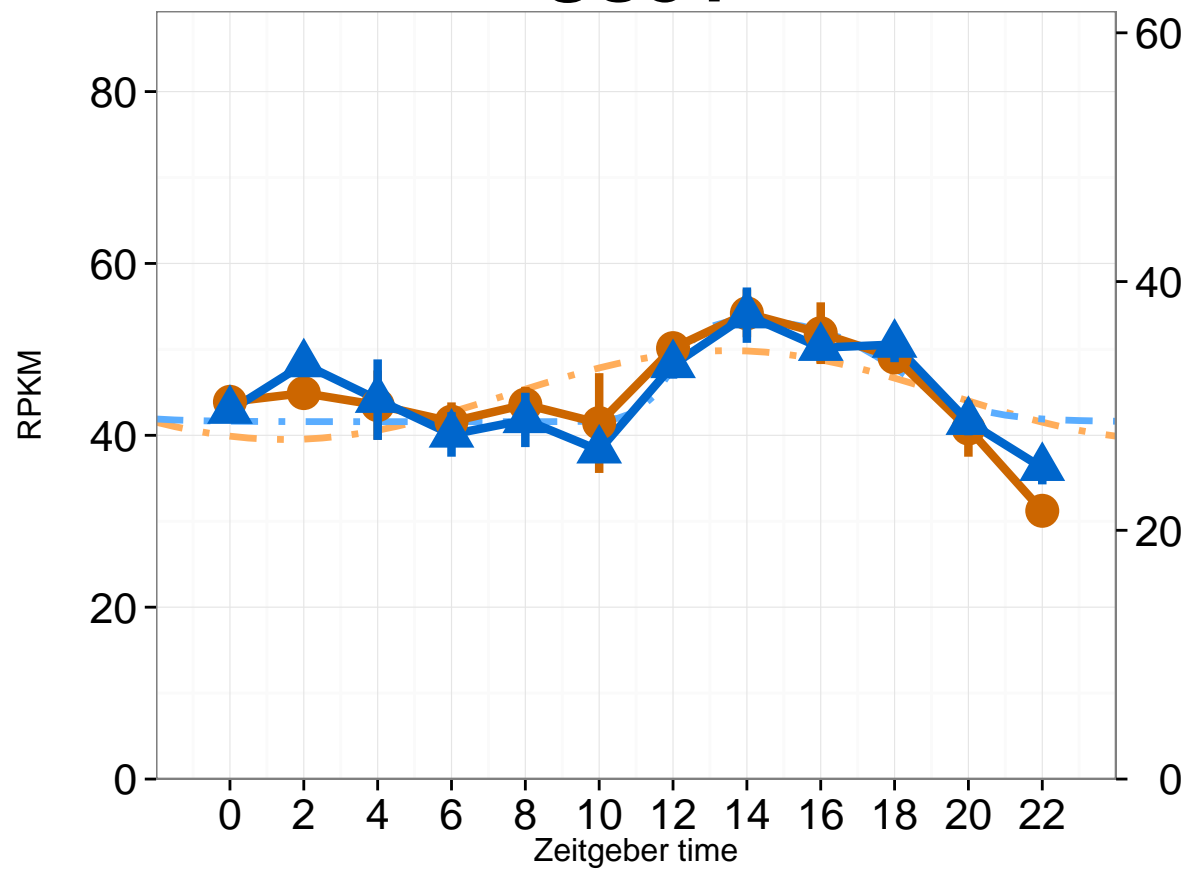

## Uso1

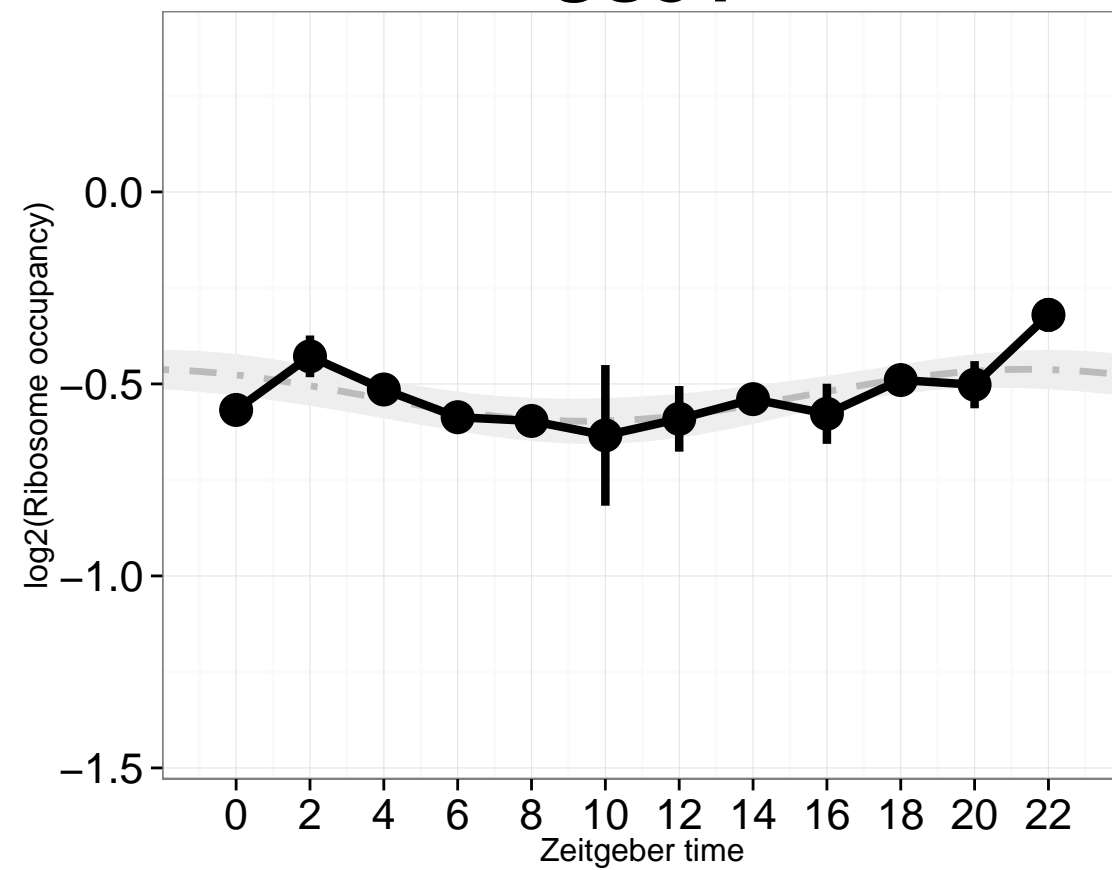

Supplement: SuppDataset_1.zip [file Uso1_set_A.pdf › Supplemental Dataset 1/A-mRNA_nonrhyth_translation_nonrhyth/Uso1_set_A.pdf]

## Usp11

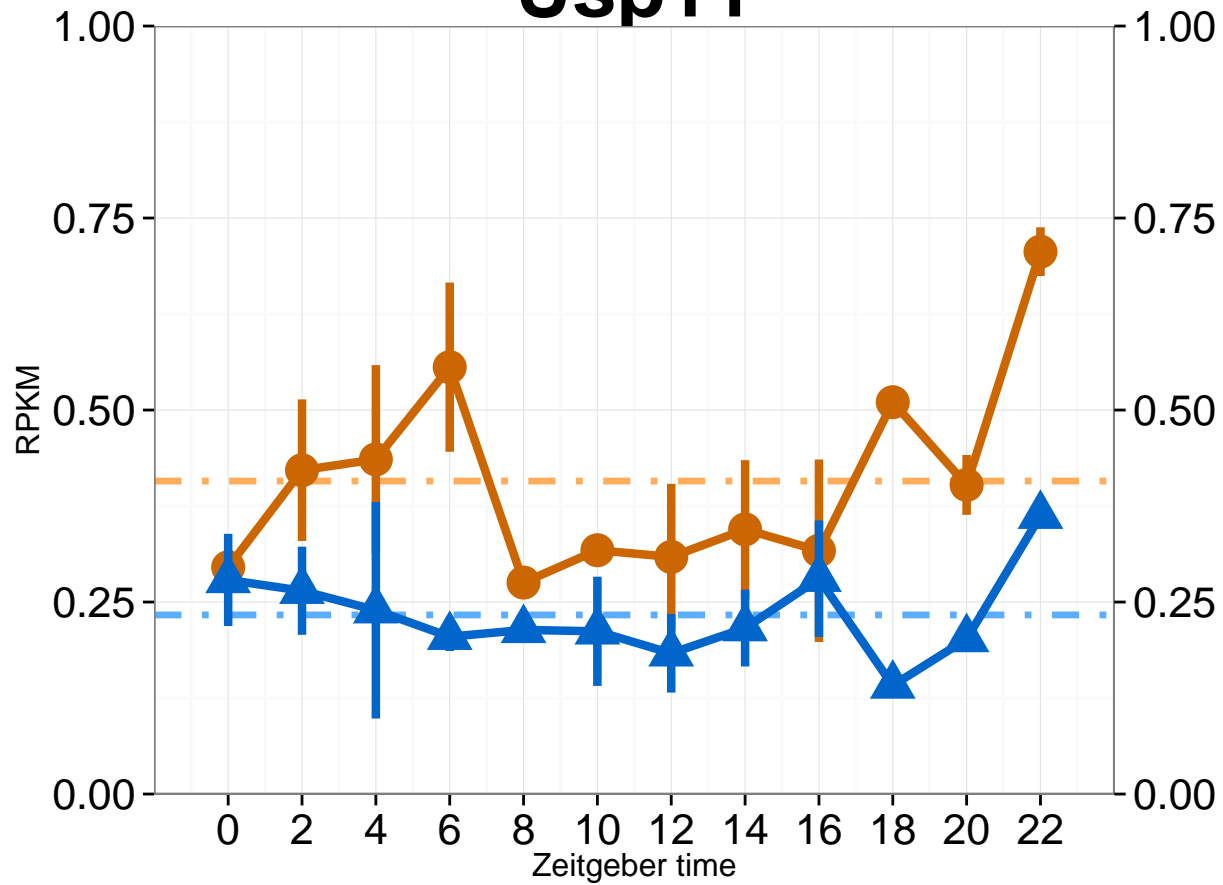

## Usp11

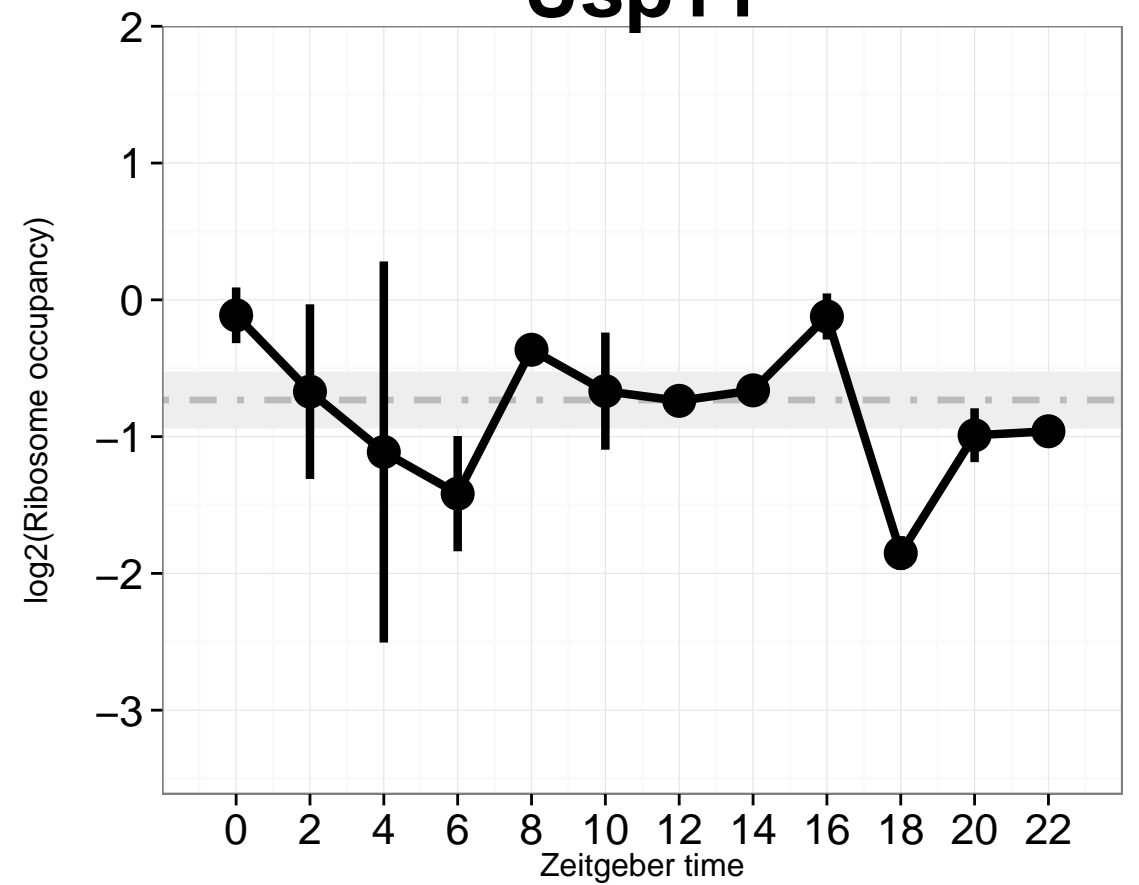

Supplement: SuppDataset_1.zip [file Usp11_set_A.pdf › Supplemental Dataset 1/A-mRNA_nonrhyth_translation_nonrhyth/Usp11_set_A.pdf]

# Usp12

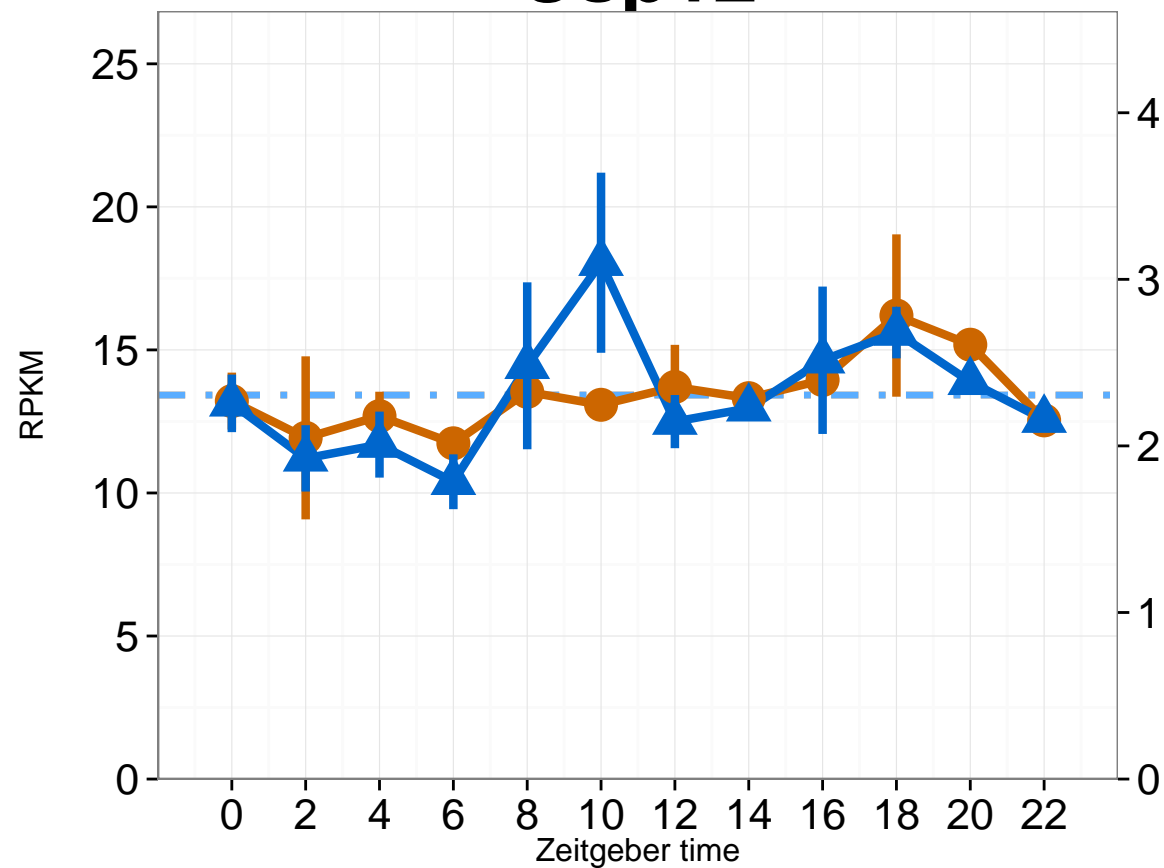

# Usp12

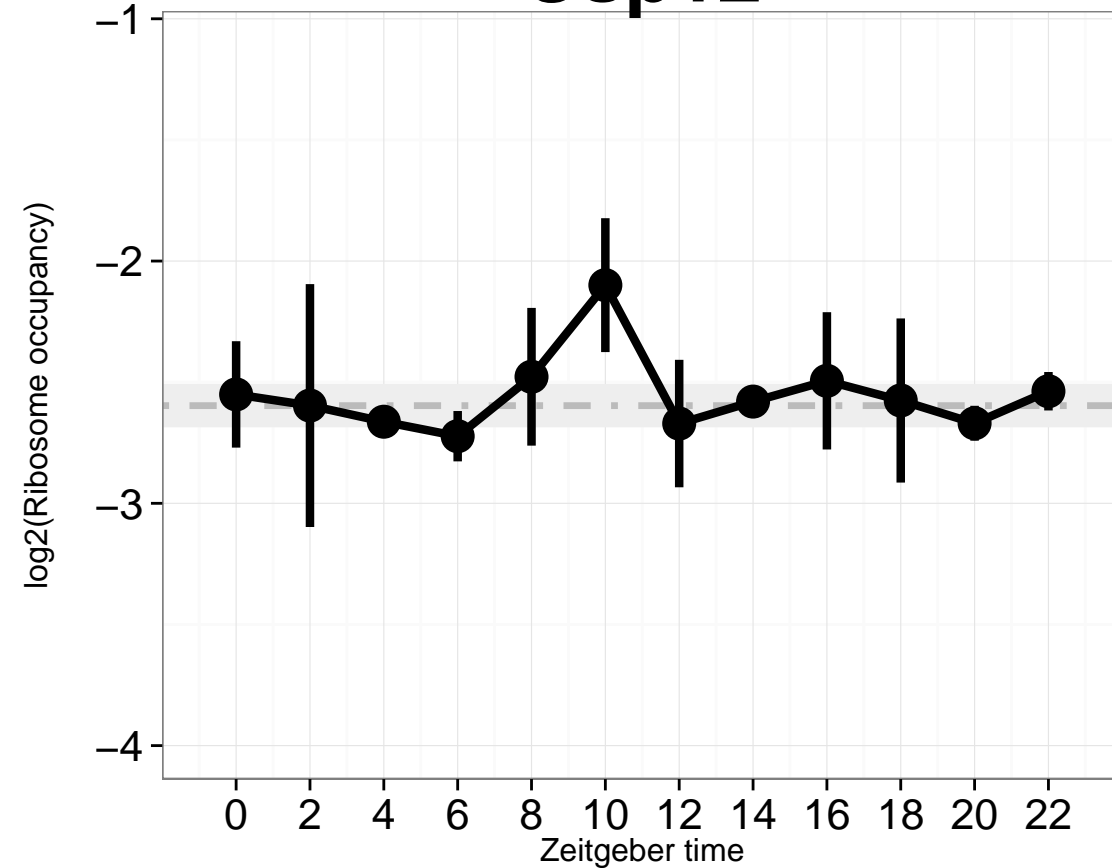

Supplement: SuppDataset_1.zip [file Usp12_set_A.pdf › Supplemental Dataset 1/A-mRNA_nonrhyth_translation_nonrhyth/Usp12_set_A.pdf]

## Usp14

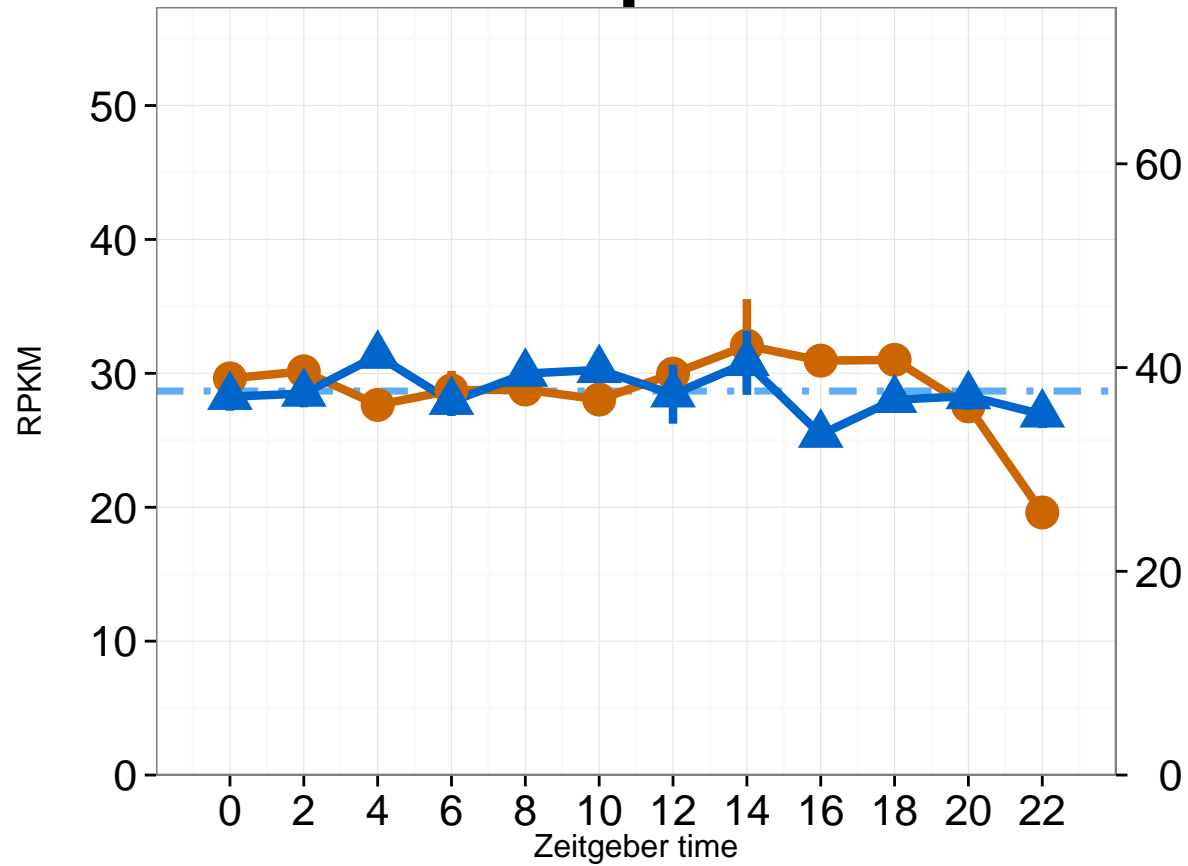

## Usp14

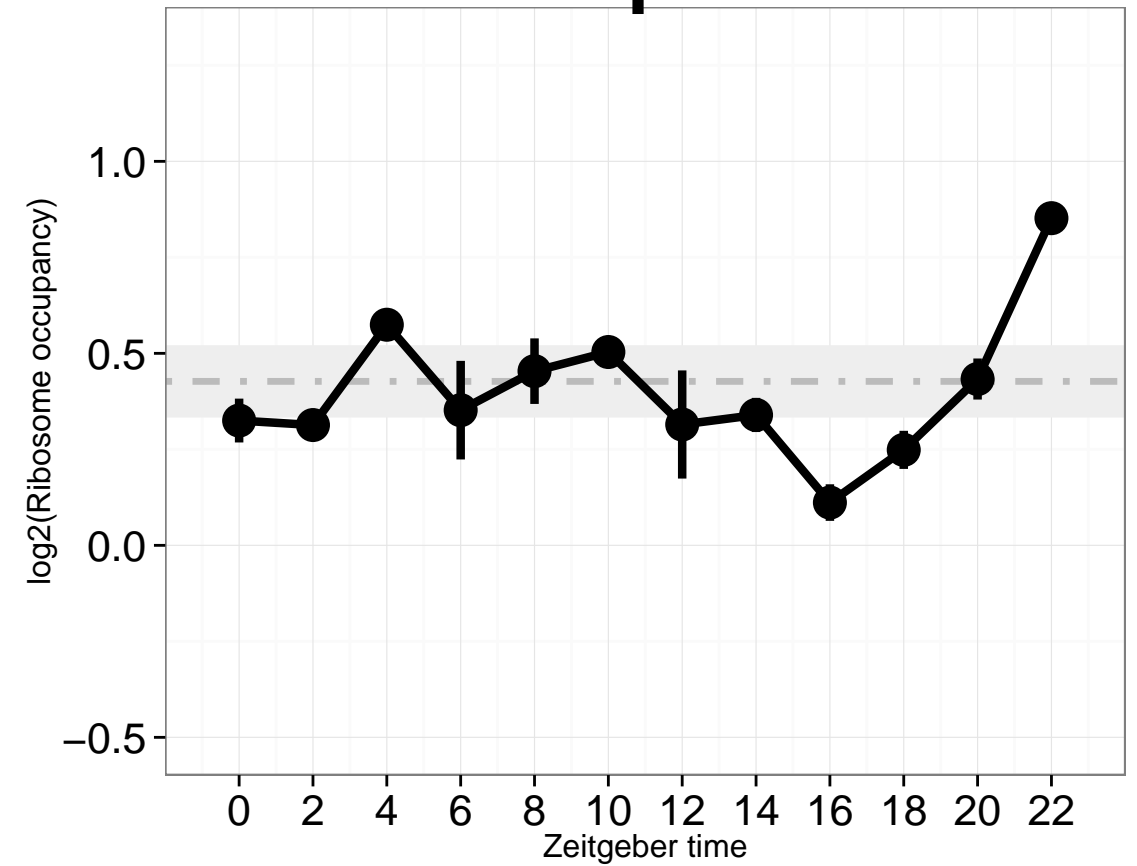

Supplement: SuppDataset_1.zip [file Usp14_set_A.pdf › Supplemental Dataset 1/A-mRNA_nonrhyth_translation_nonrhyth/Usp14_set_A.pdf]

## Usp15

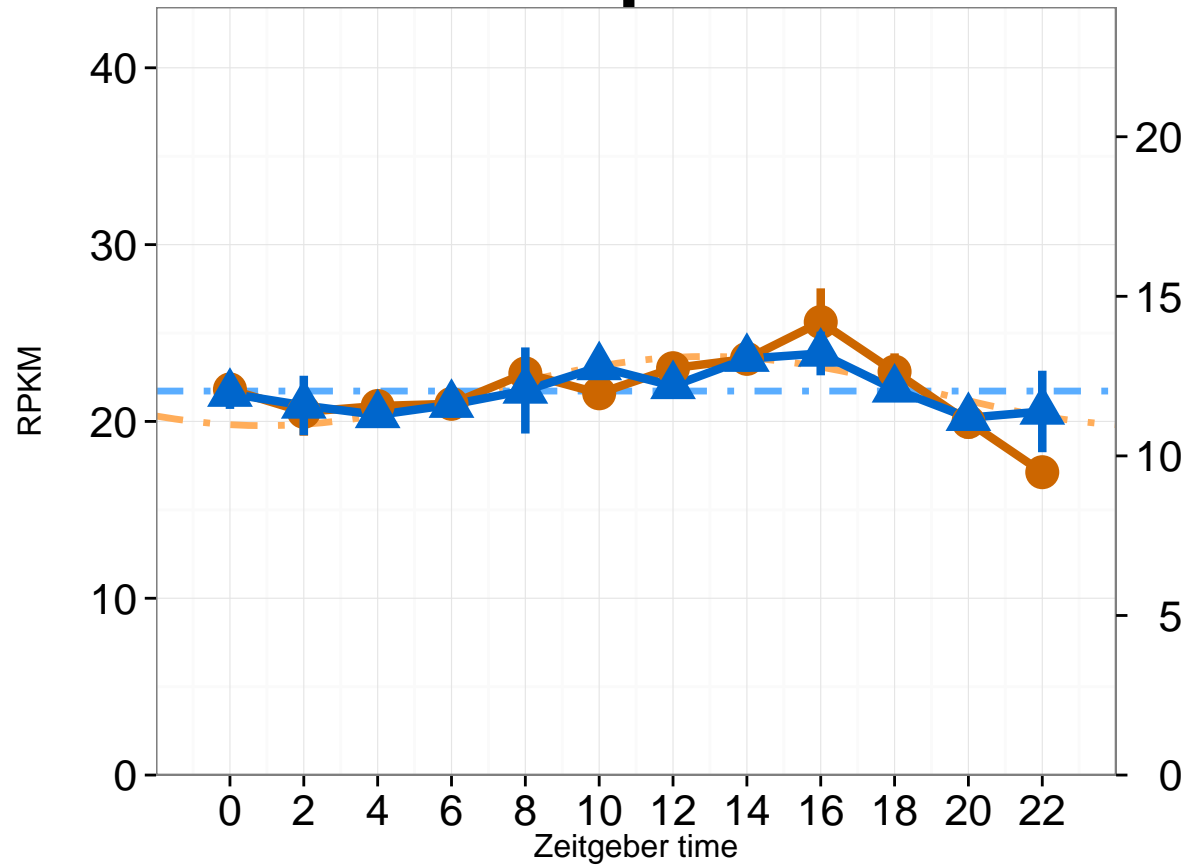

## Usp15

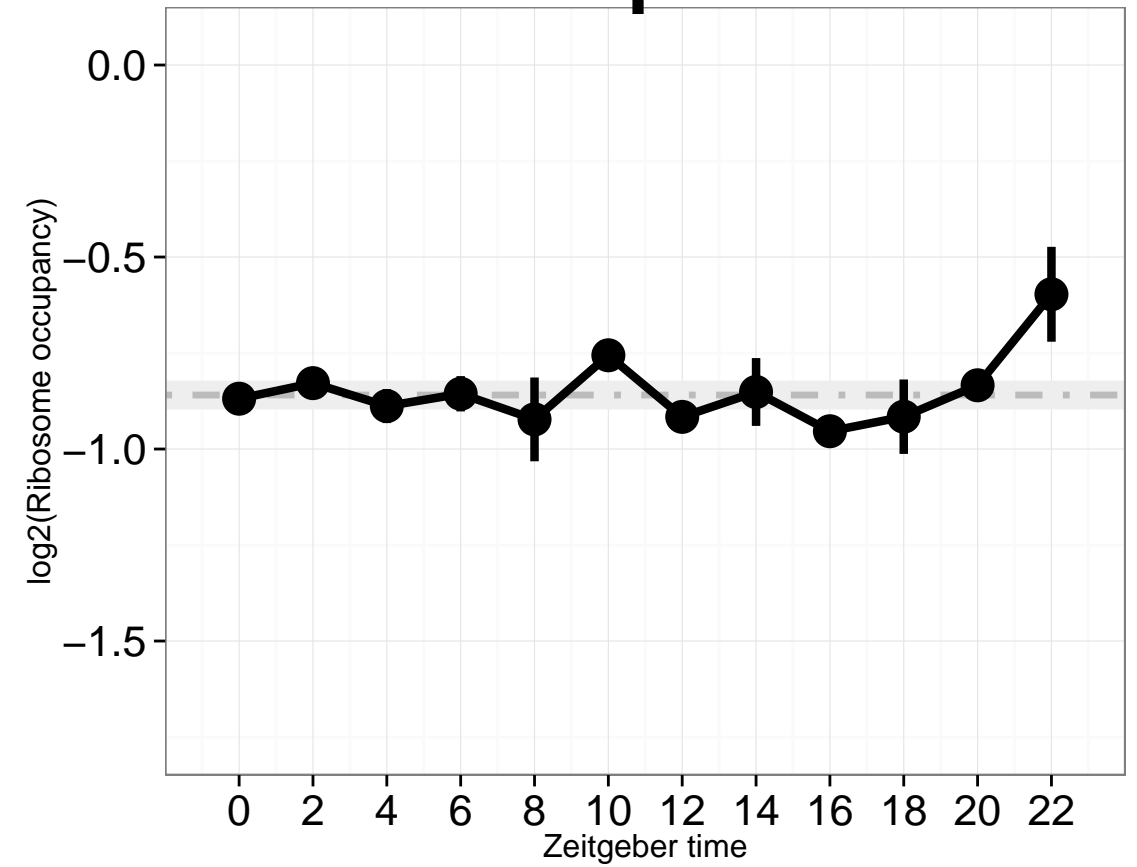

Supplement: SuppDataset_1.zip [file Usp15_set_A.pdf › Supplemental Dataset 1/A-mRNA_nonrhyth_translation_nonrhyth/Usp15_set_A.pdf]

## Usp19

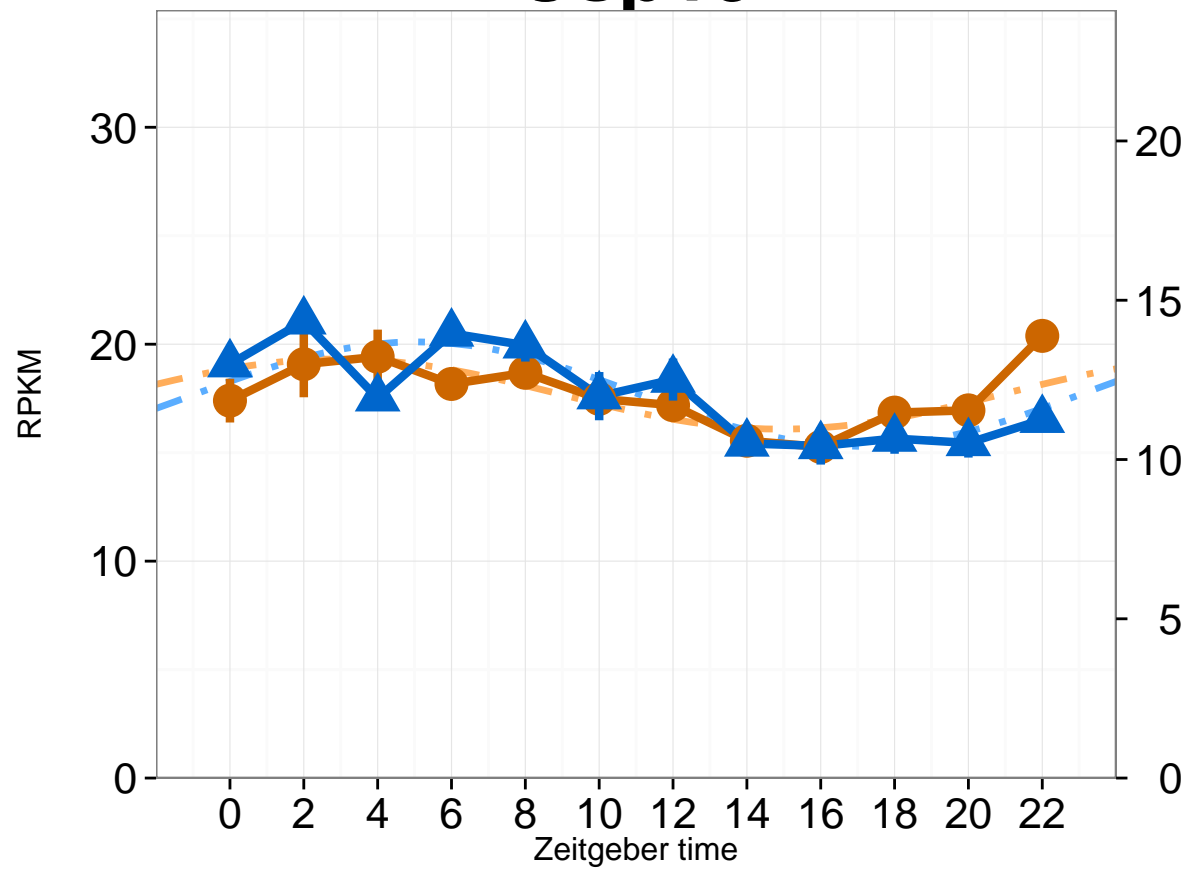

## Usp19

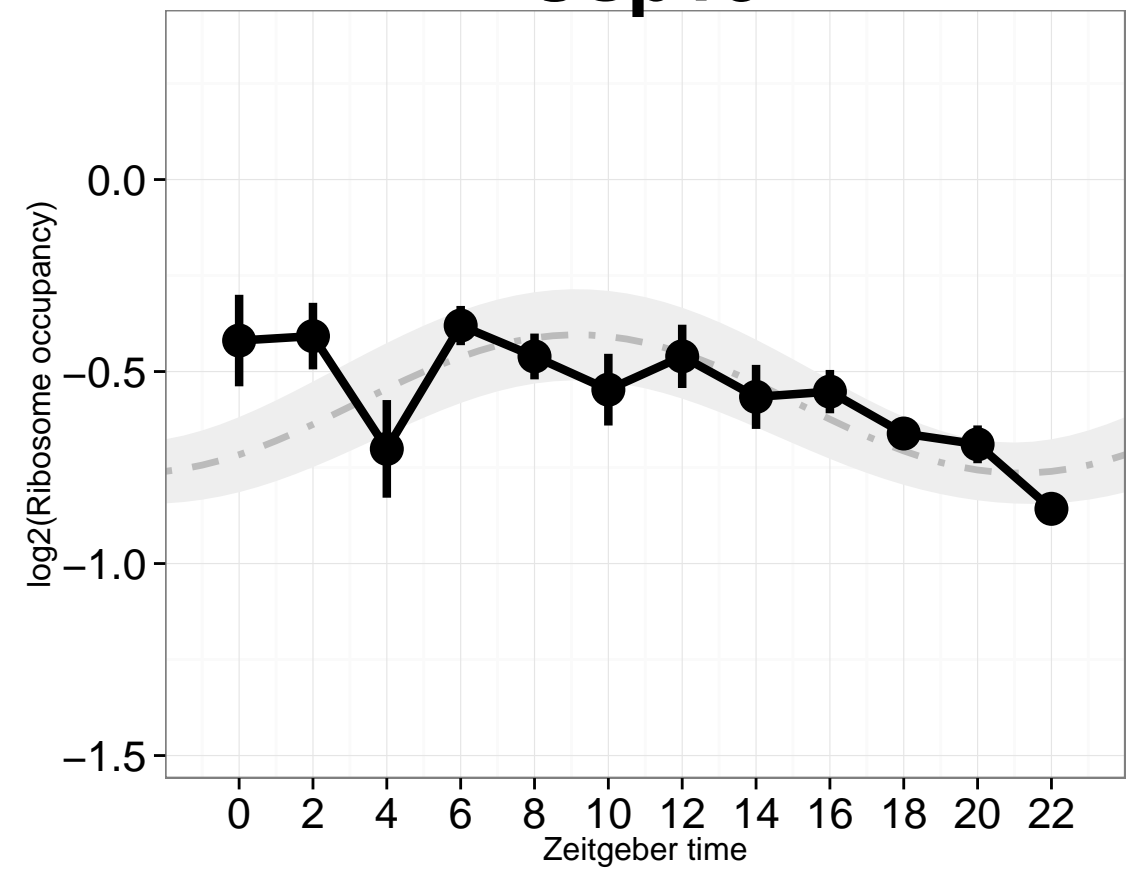

Supplement: SuppDataset_1.zip [file Usp19_set_A.pdf › Supplemental Dataset 1/A-mRNA_nonrhyth_translation_nonrhyth/Usp19_set_A.pdf]

## Usp1

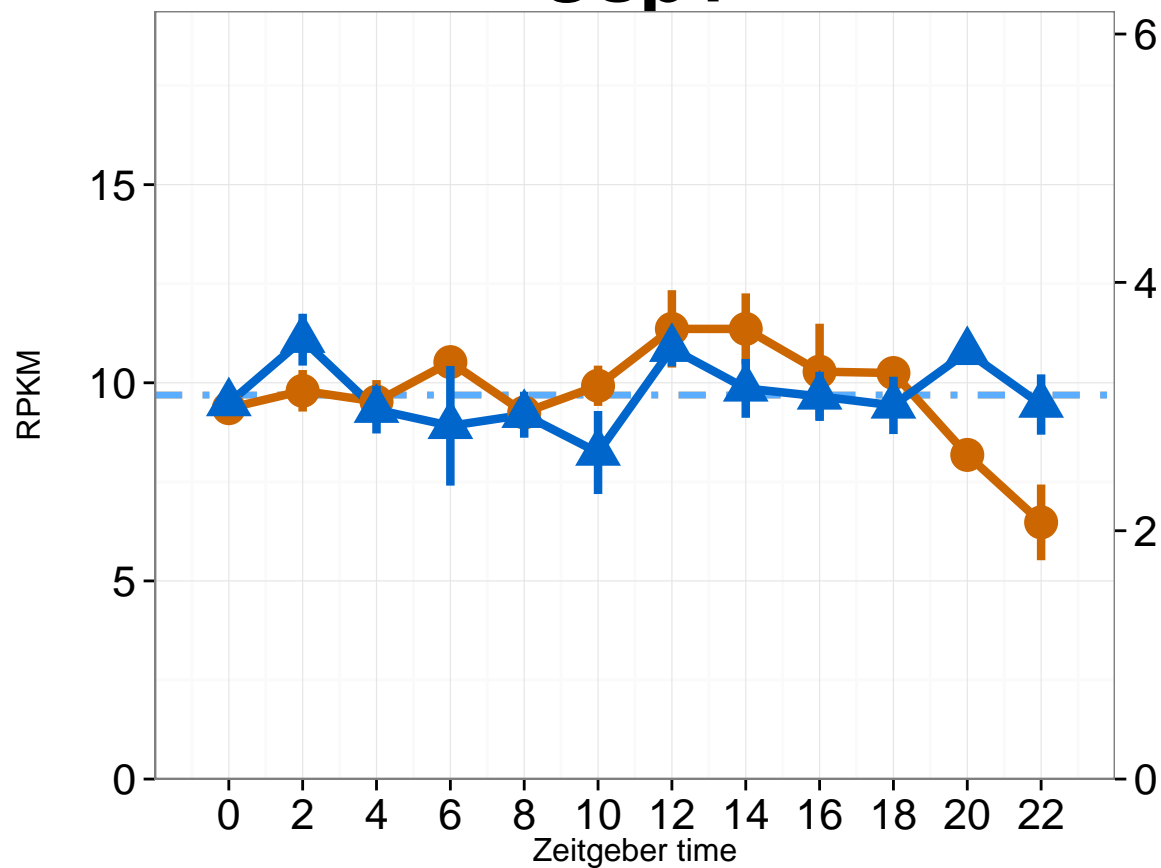

## Usp1

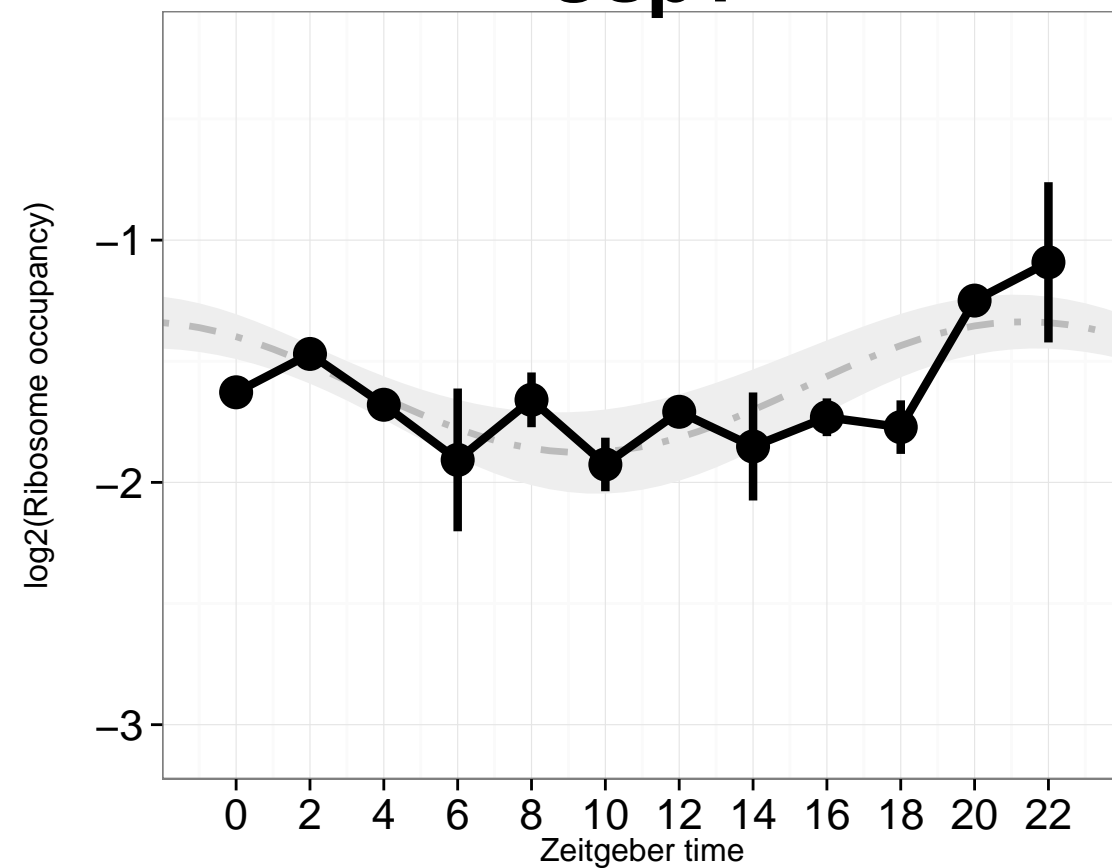

Supplement: SuppDataset_1.zip [file Usp1_set_A.pdf › Supplemental Dataset 1/A-mRNA_nonrhyth_translation_nonrhyth/Usp1_set_A.pdf]

# Usp20

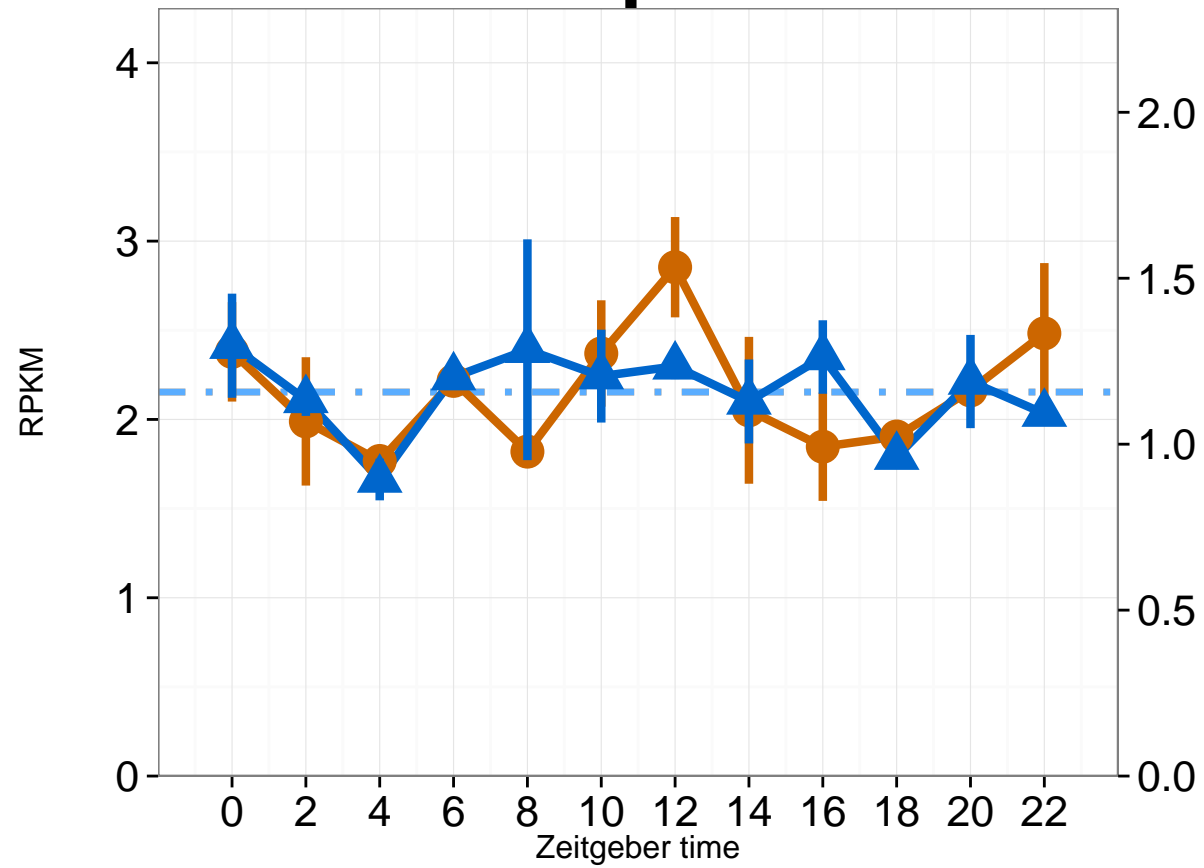

# Usp20

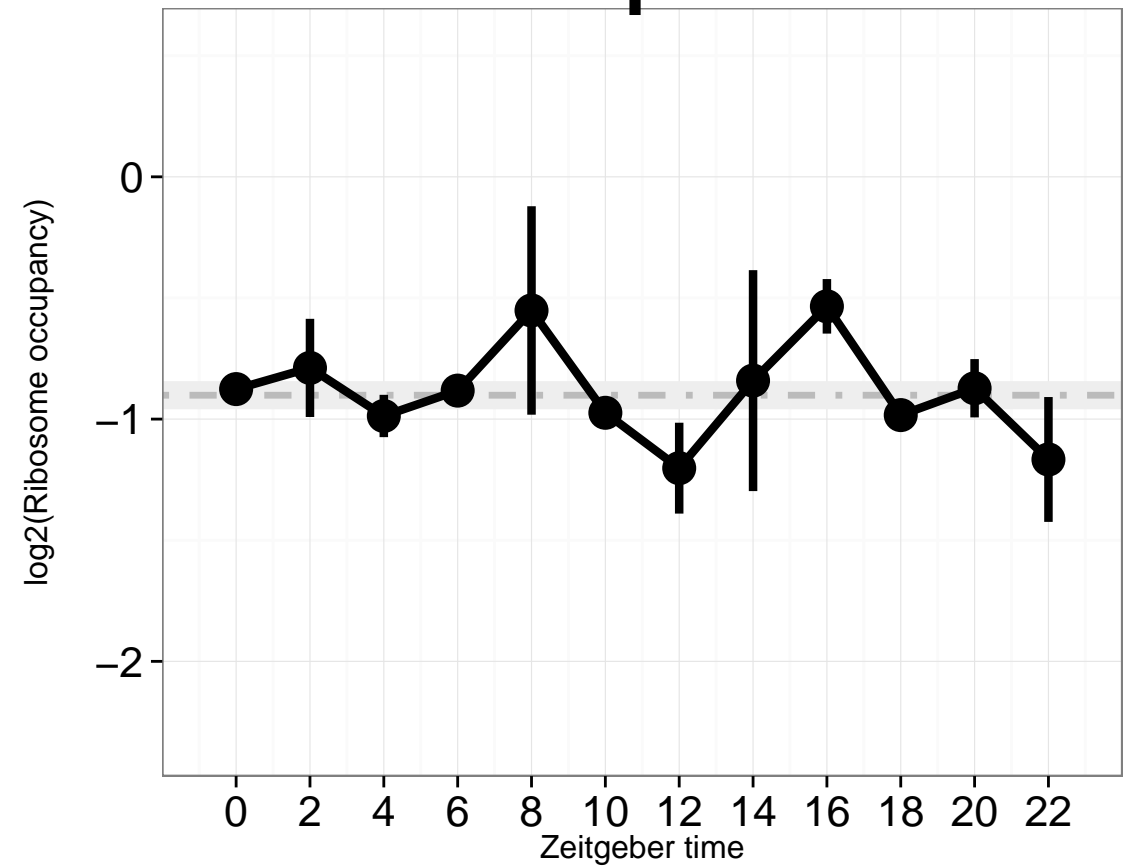

Supplement: SuppDataset_1.zip [file Usp20_set_A.pdf › Supplemental Dataset 1/A-mRNA_nonrhyth_translation_nonrhyth/Usp20_set_A.pdf]

# Usp21

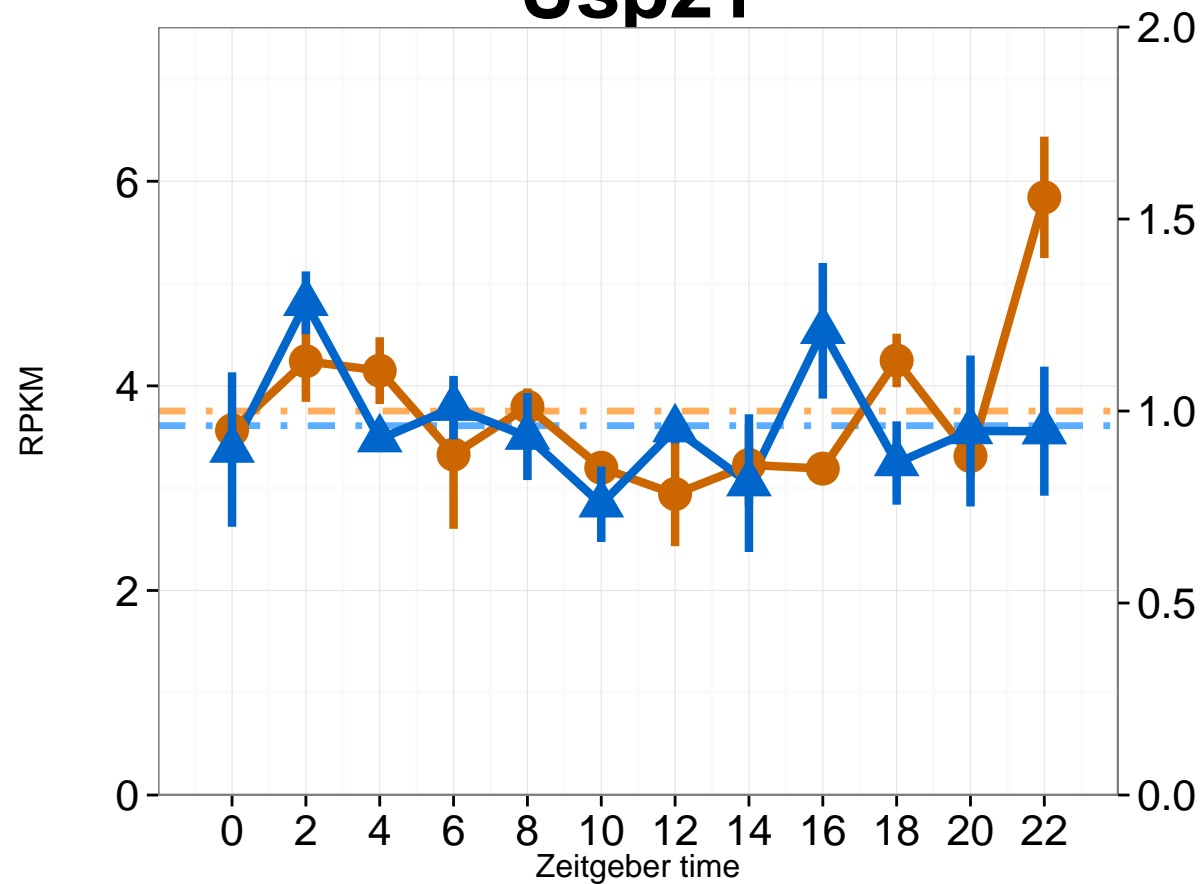

# Usp21

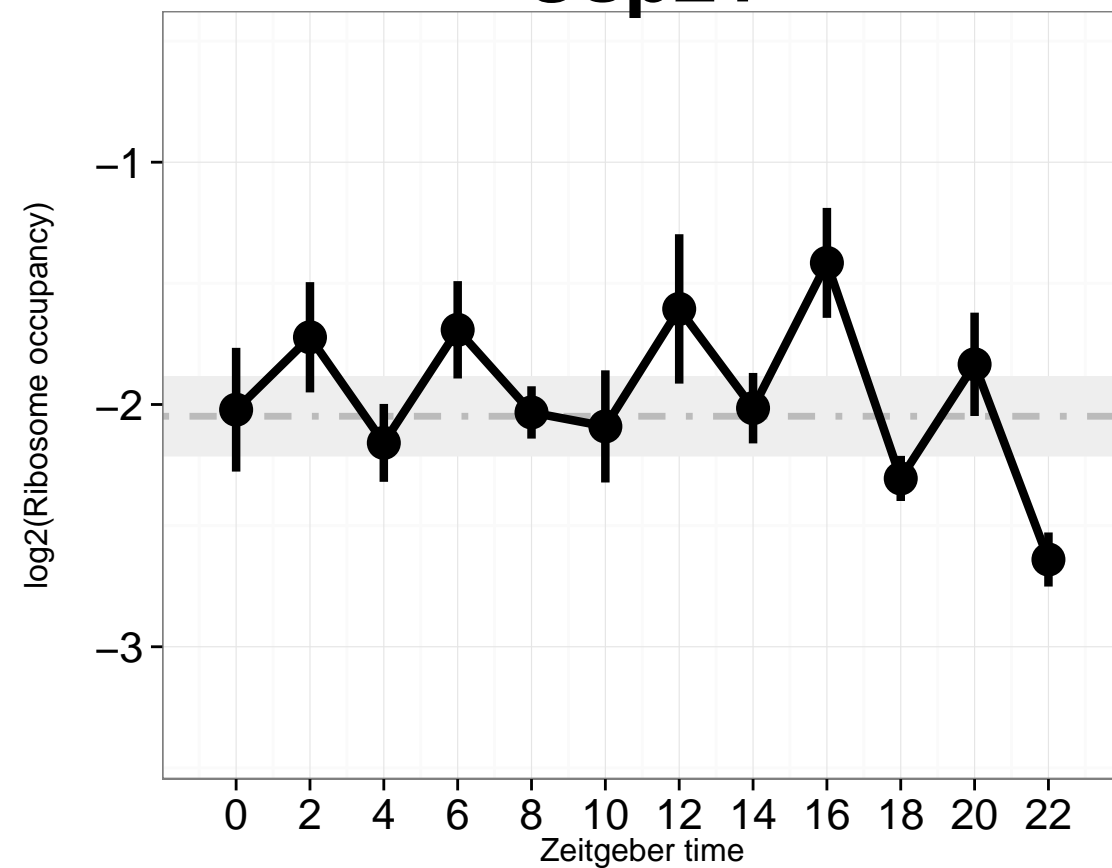

Supplement: SuppDataset_1.zip [file Usp21_set_A.pdf › Supplemental Dataset 1/A-mRNA_nonrhyth_translation_nonrhyth/Usp21_set_A.pdf]

## Usp22

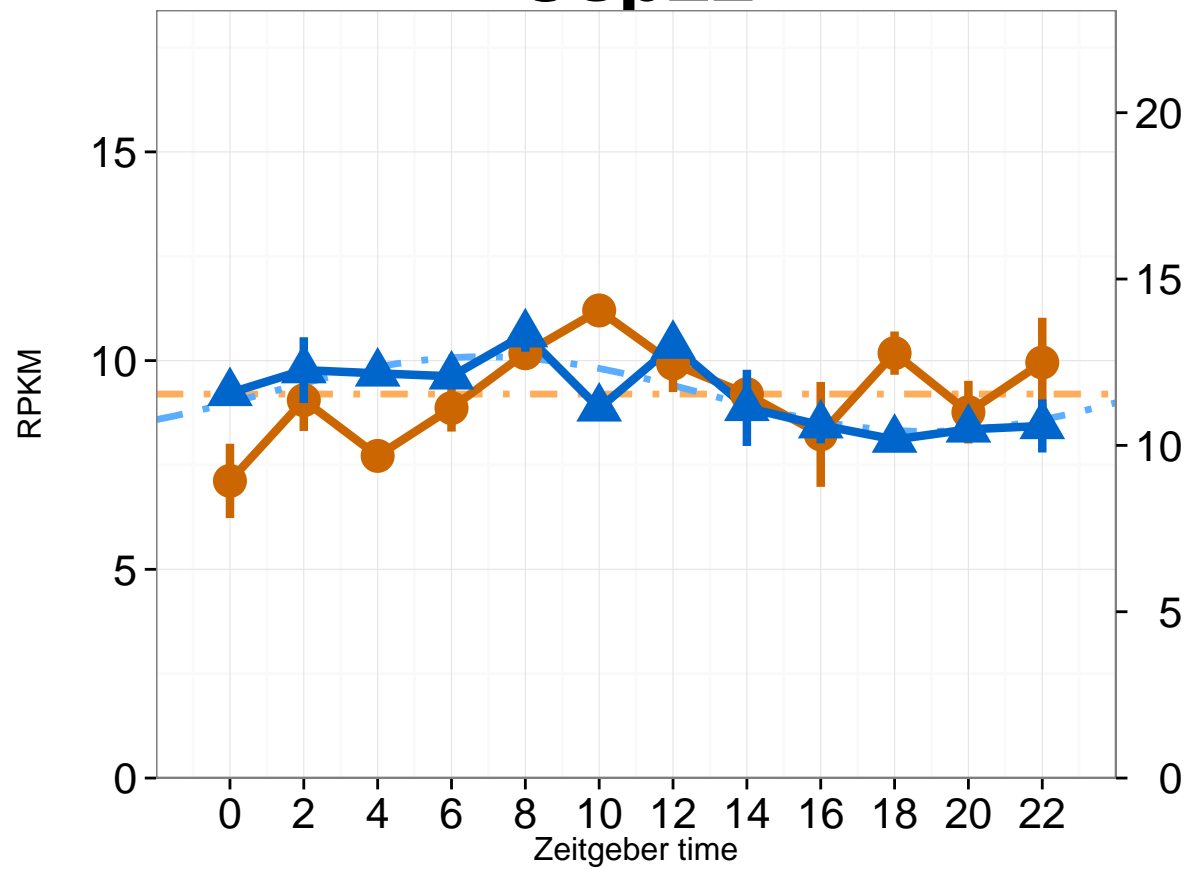

## Usp22

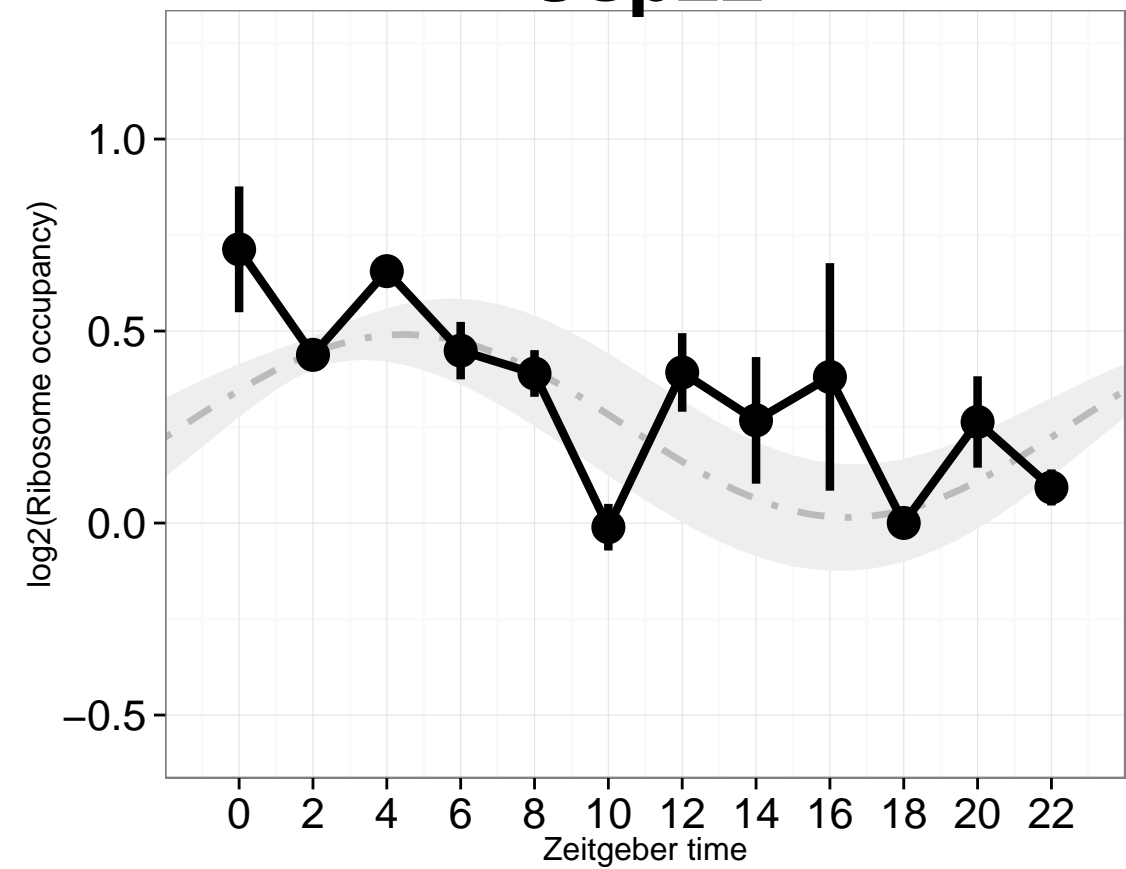

Supplement: SuppDataset_1.zip [file Usp22_set_A.pdf › Supplemental Dataset 1/A-mRNA_nonrhyth_translation_nonrhyth/Usp22_set_A.pdf]

## Usp24

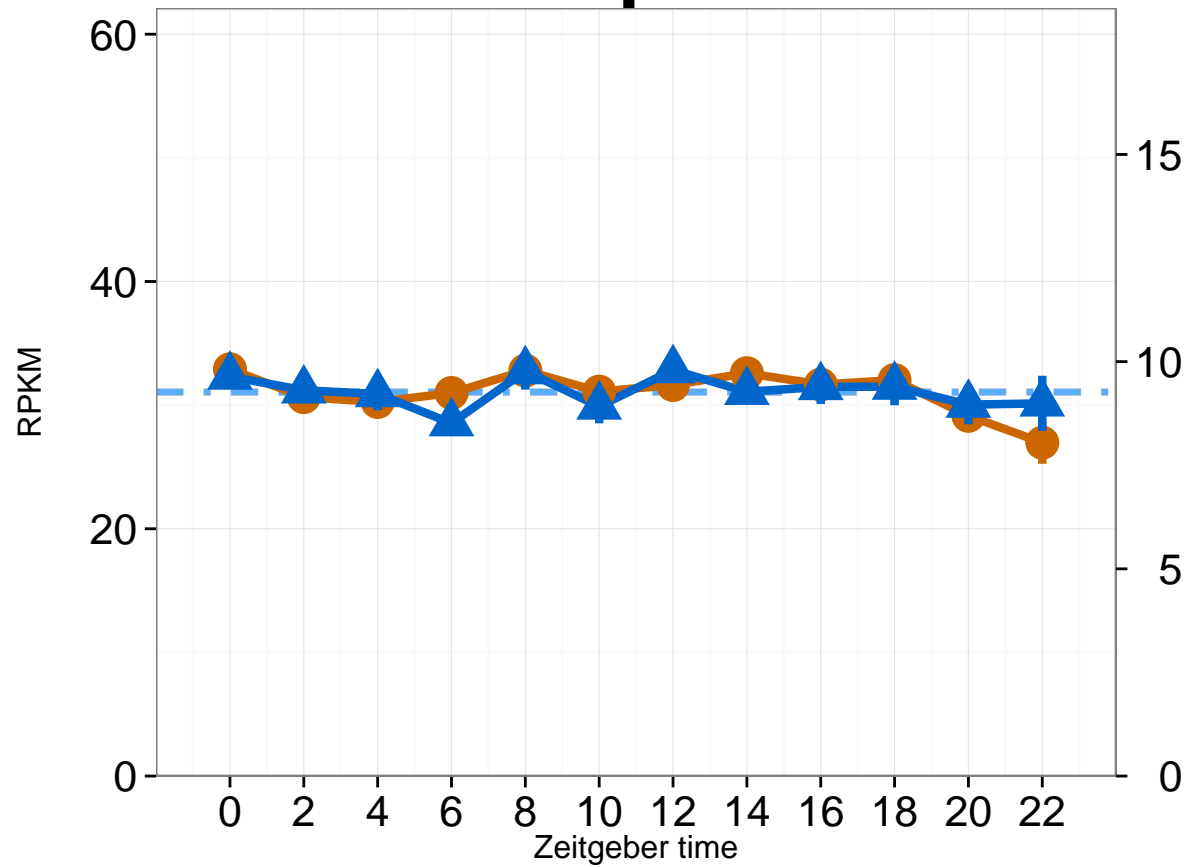

## Usp24

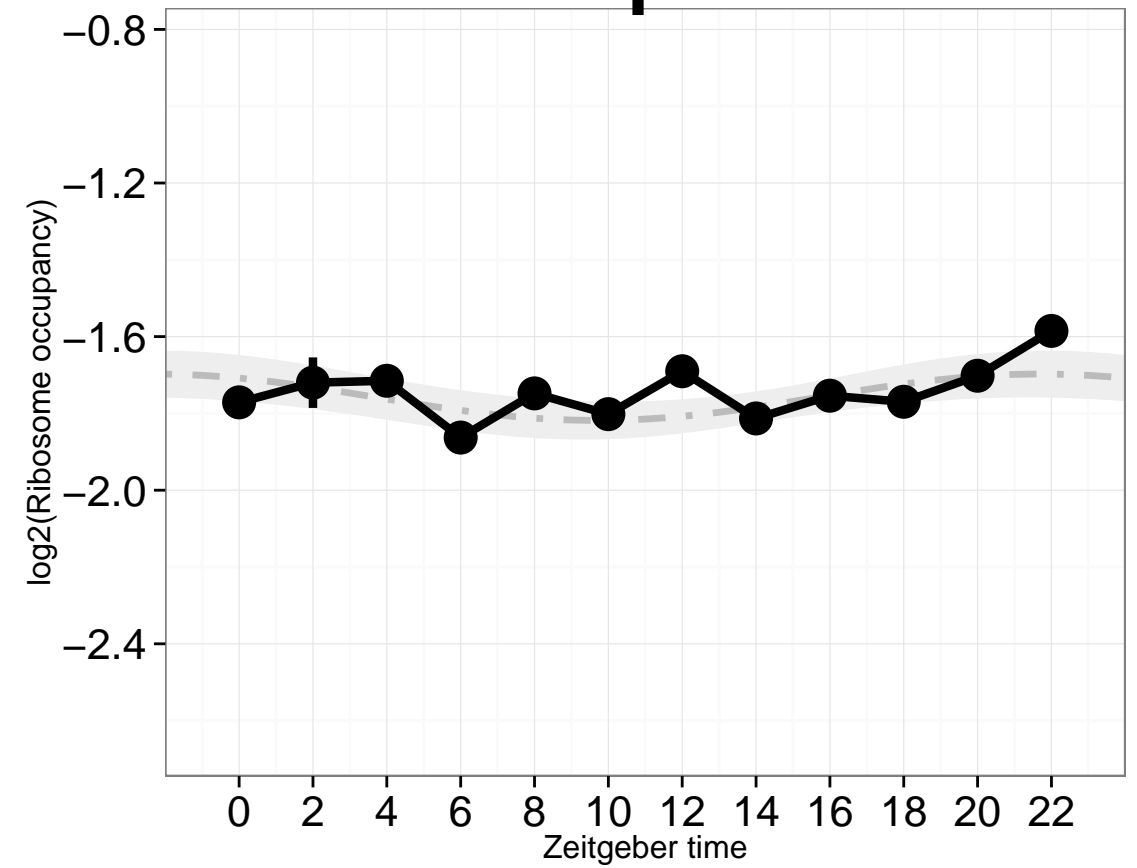

Supplement: SuppDataset_1.zip [file Usp24_set_A.pdf › Supplemental Dataset 1/A-mRNA_nonrhyth_translation_nonrhyth/Usp24_set_A.pdf]

## Usp25

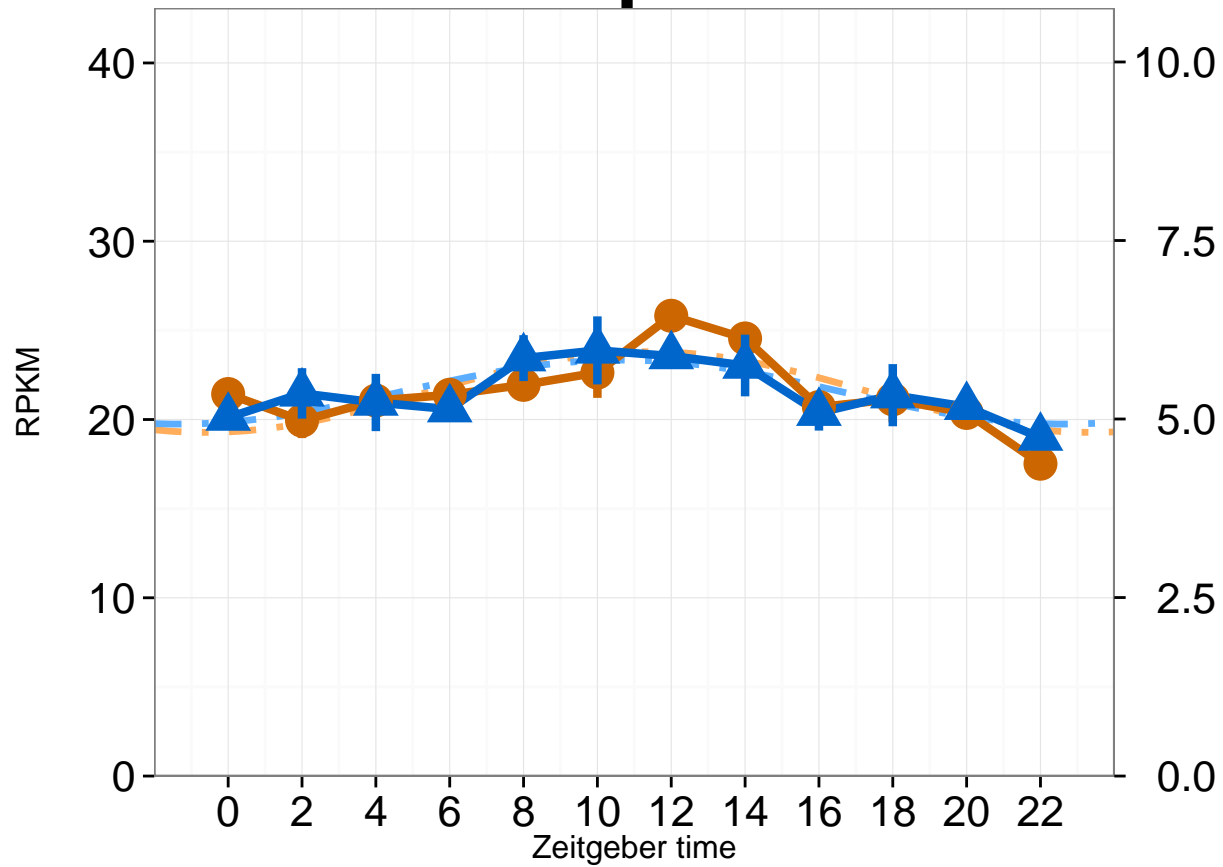

## Usp25

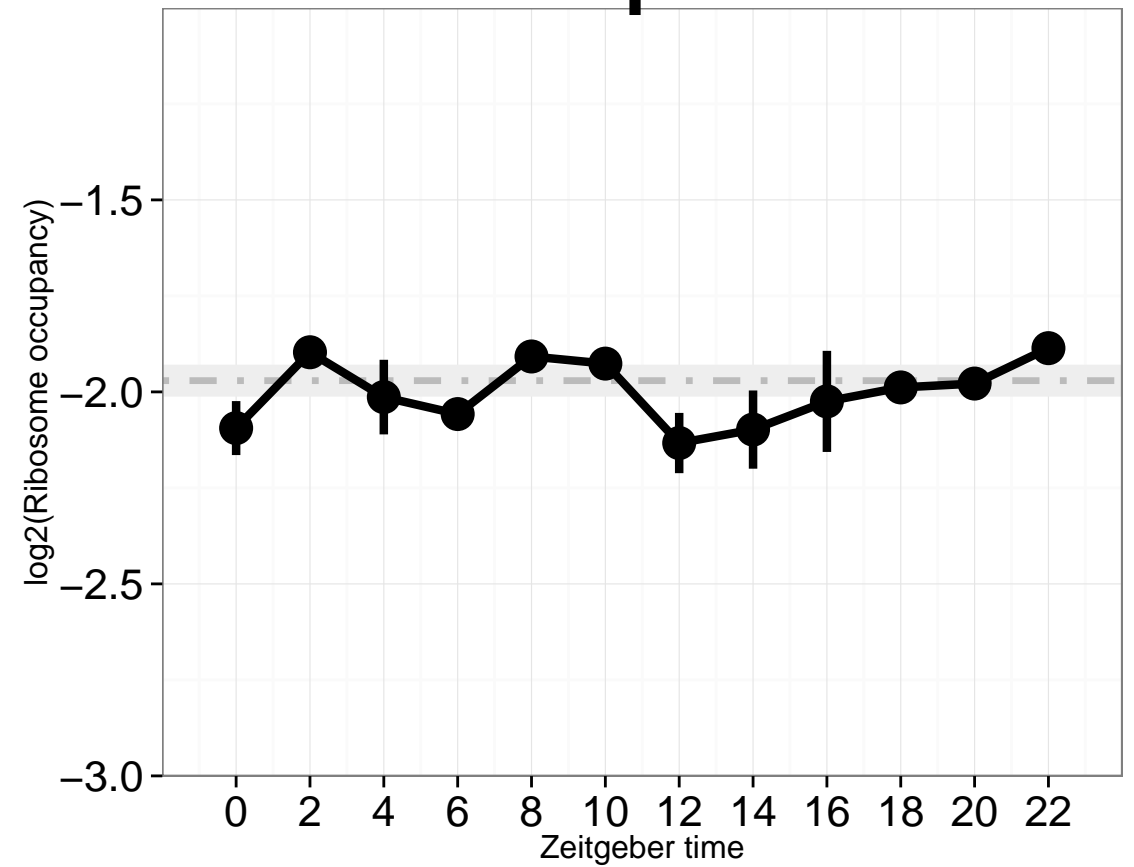

Supplement: SuppDataset_1.zip [file Usp25_set_A.pdf › Supplemental Dataset 1/A-mRNA_nonrhyth_translation_nonrhyth/Usp25_set_A.pdf]

## Usp28

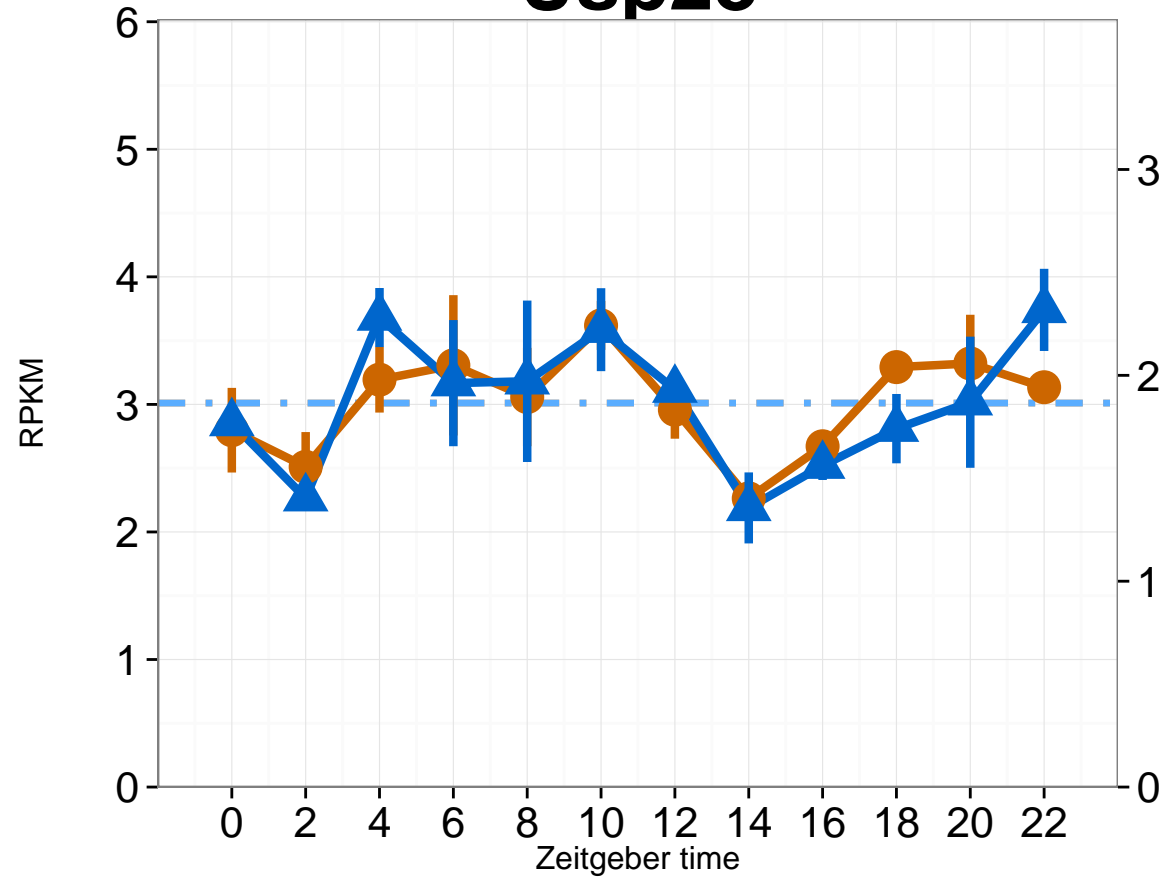

## Usp28

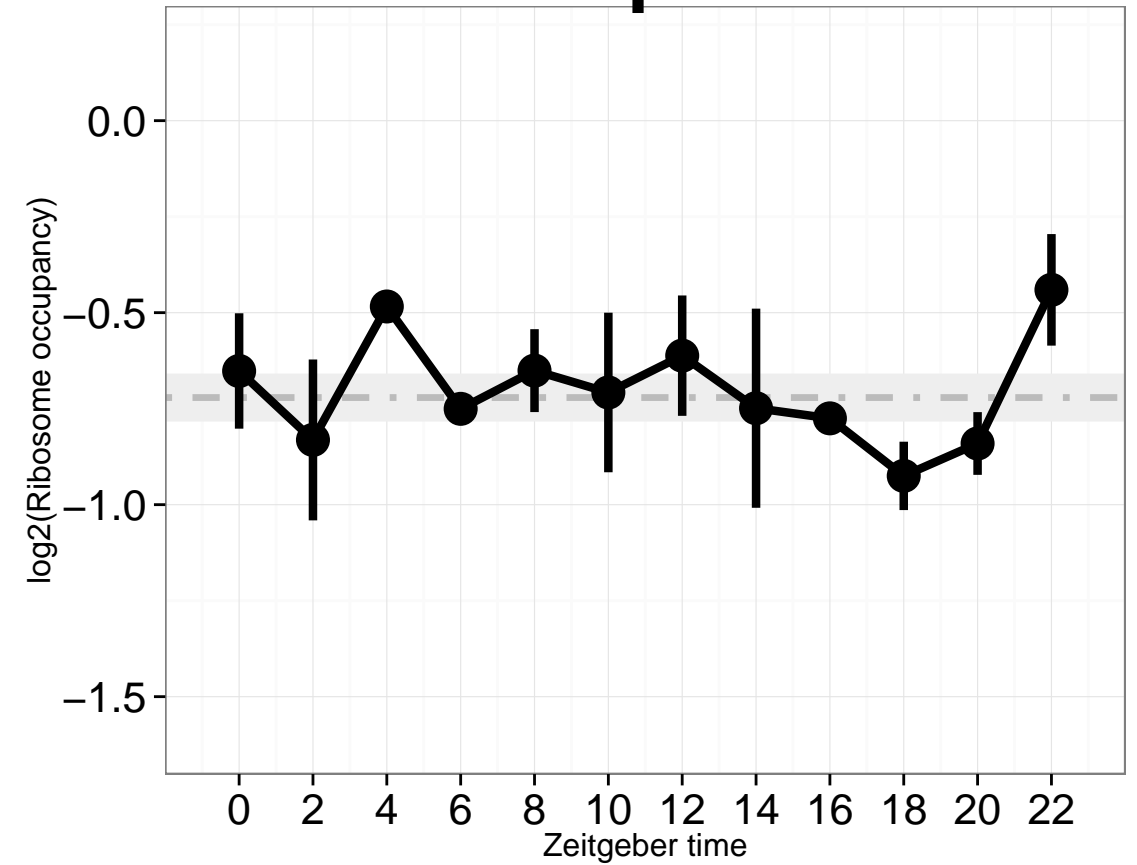

Supplement: SuppDataset_1.zip [file Usp28_set_A.pdf › Supplemental Dataset 1/A-mRNA_nonrhyth_translation_nonrhyth/Usp28_set_A.pdf]

## Usp30

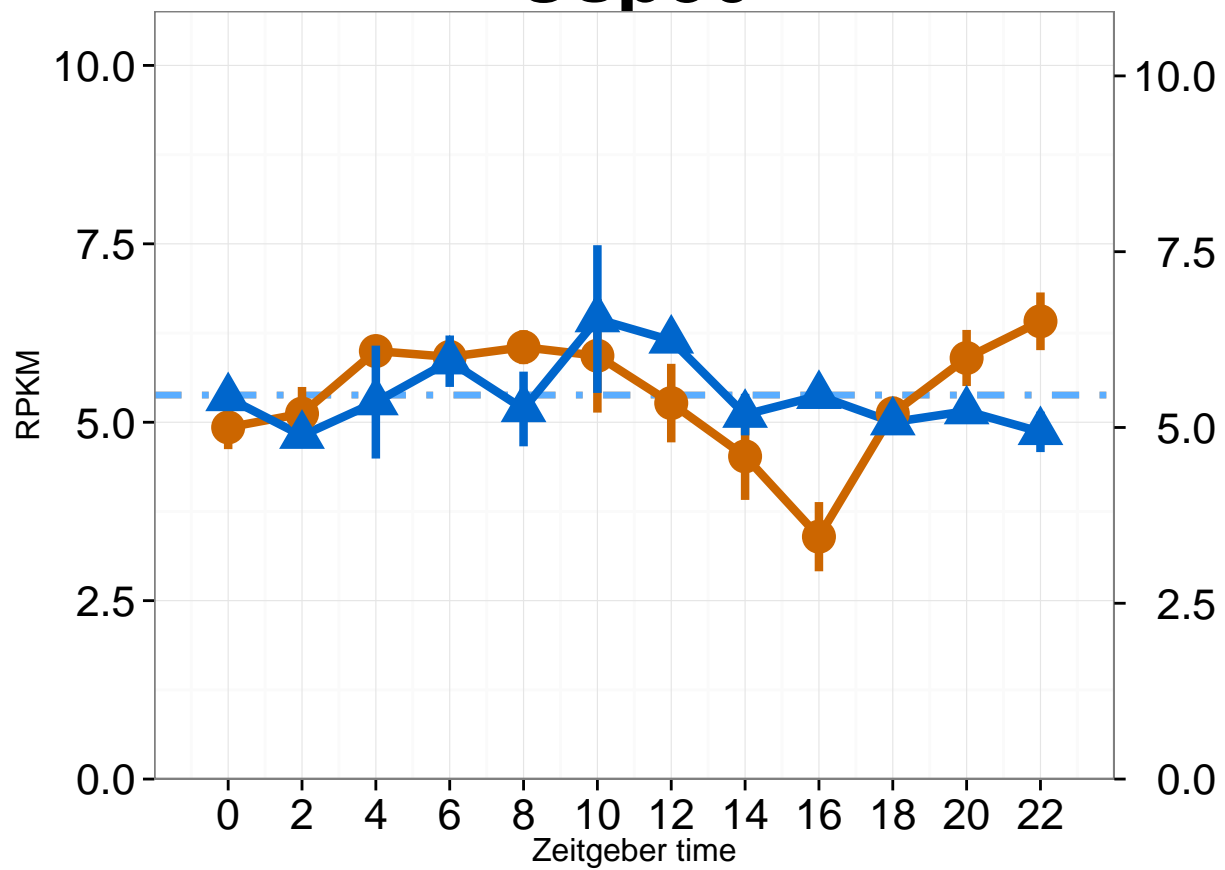

## Usp30

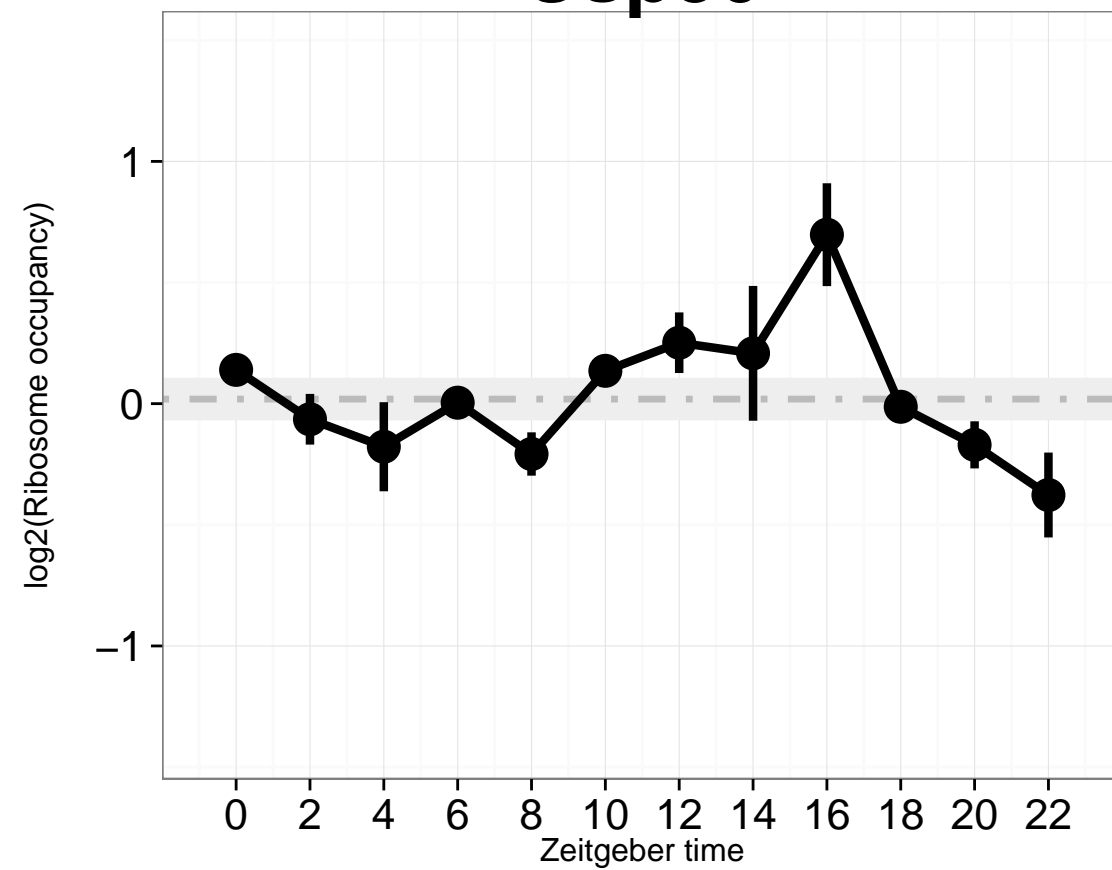

Supplement: SuppDataset_1.zip [file Usp30_set_A.pdf › Supplemental Dataset 1/A-mRNA_nonrhyth_translation_nonrhyth/Usp30_set_A.pdf]

## Usp31

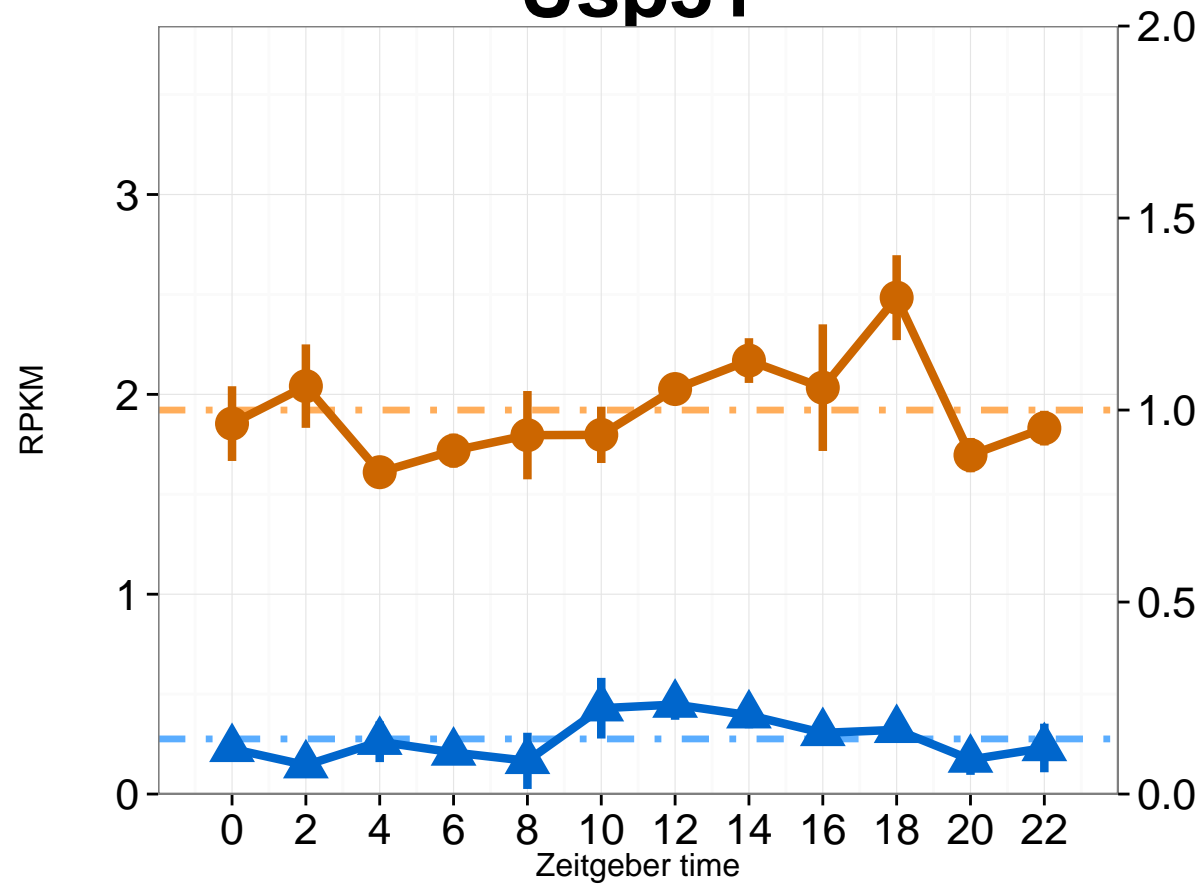

## Usp31

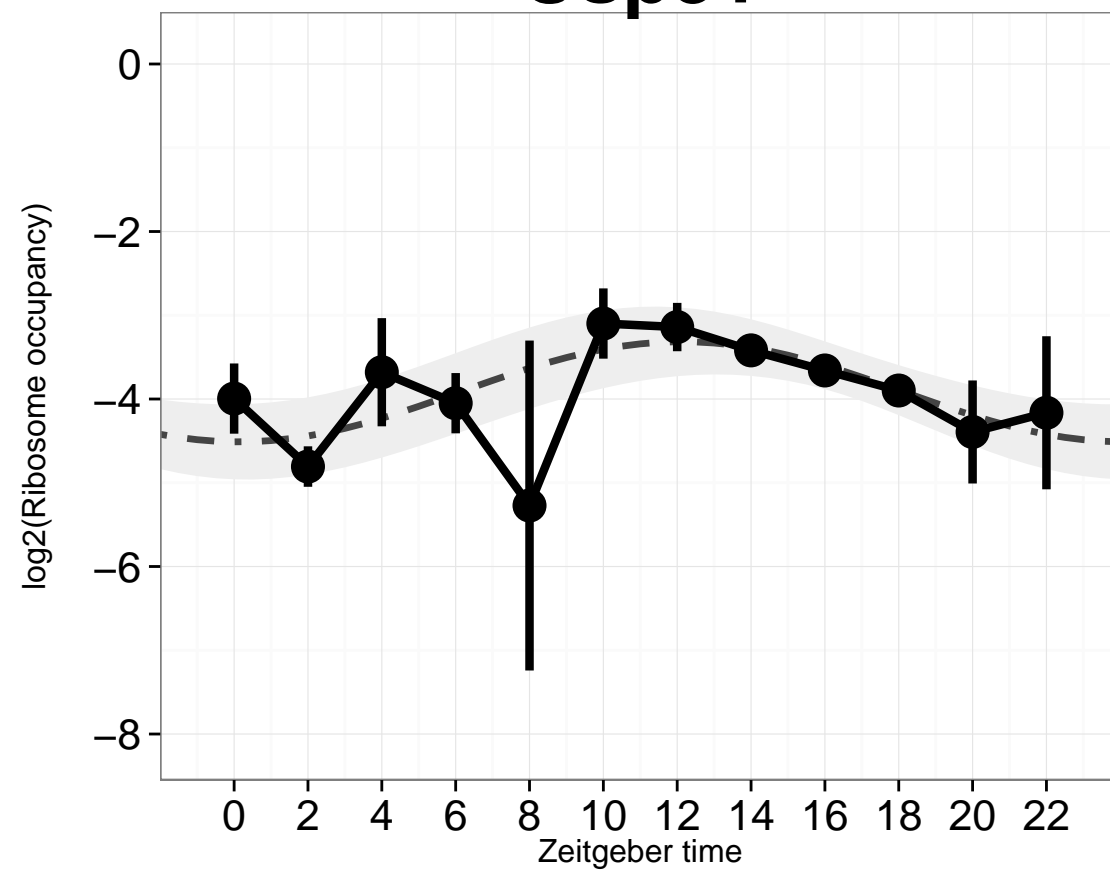

Supplement: SuppDataset_1.zip [file Usp31_set_A.pdf › Supplemental Dataset 1/A-mRNA_nonrhyth_translation_nonrhyth/Usp31_set_A.pdf]

# Usp32

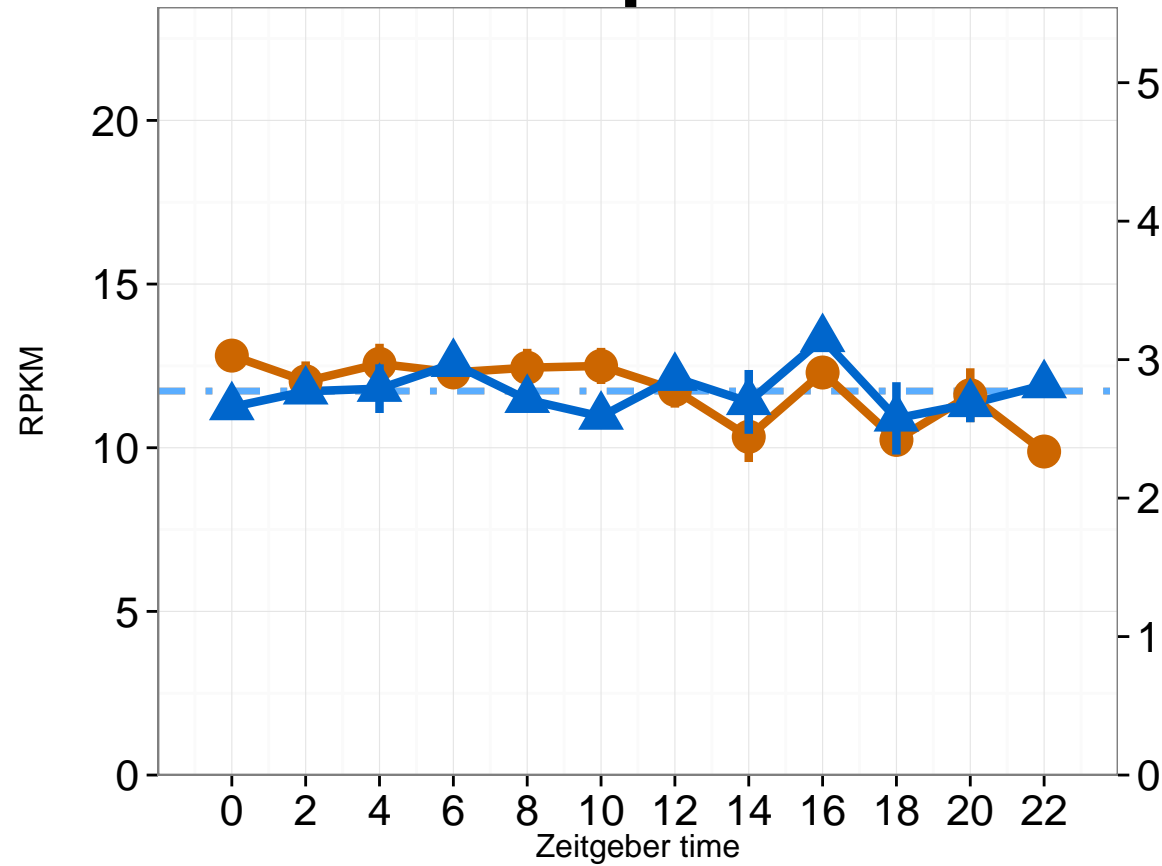

# Usp32

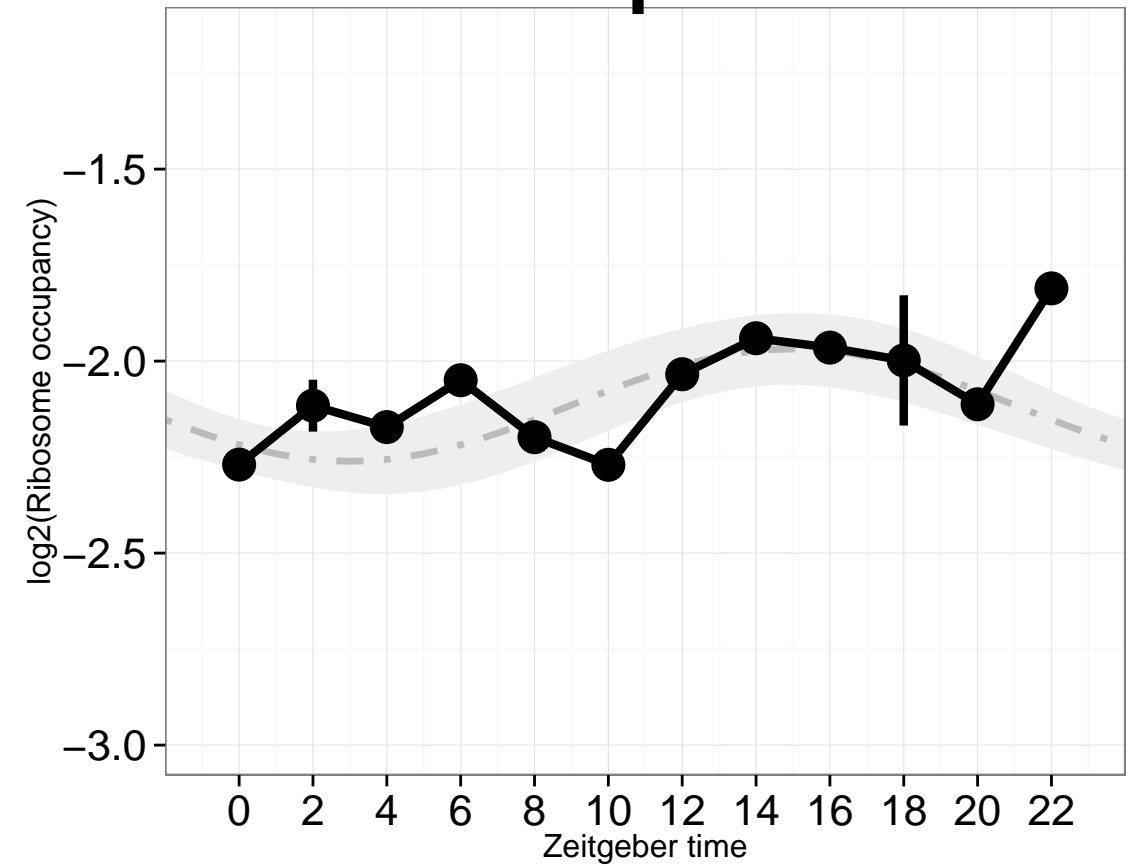

Supplement: SuppDataset_1.zip [file Usp32_set_A.pdf › Supplemental Dataset 1/A-mRNA_nonrhyth_translation_nonrhyth/Usp32_set_A.pdf]

## Usp33

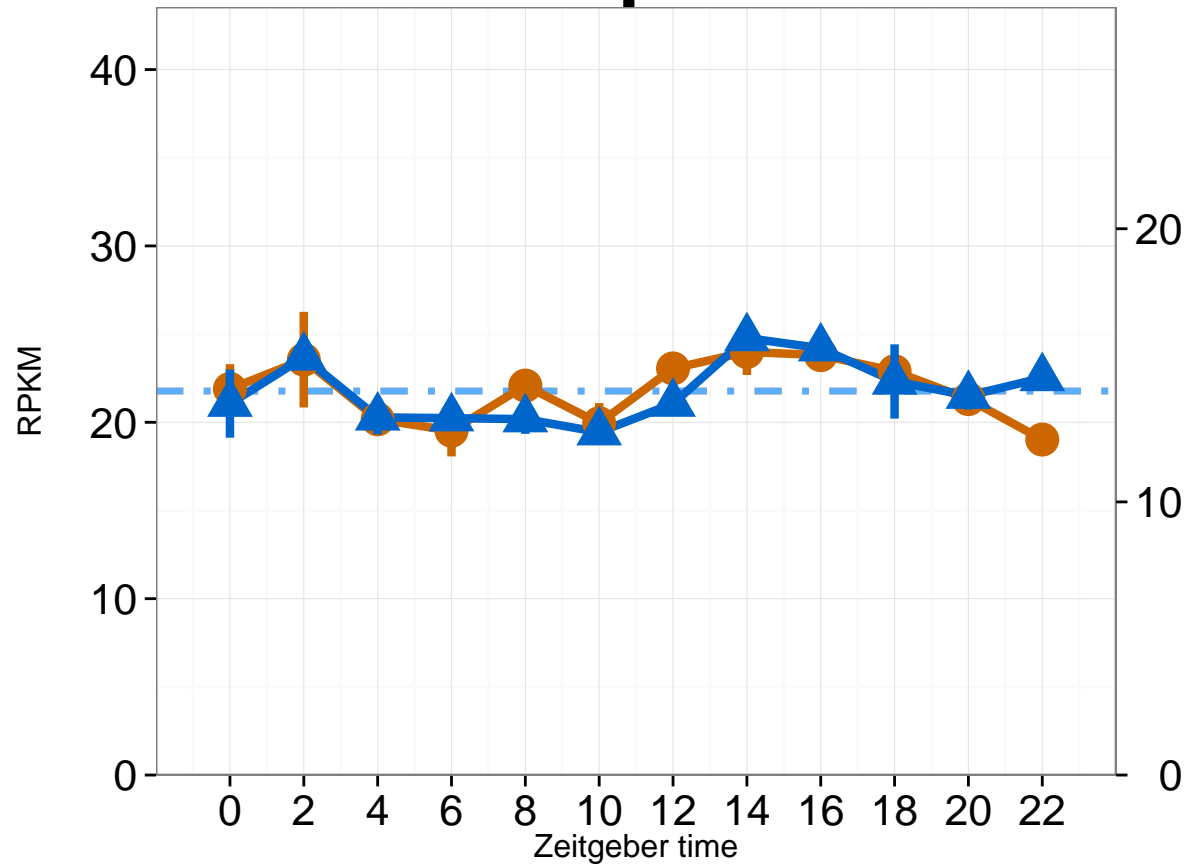

## Usp33

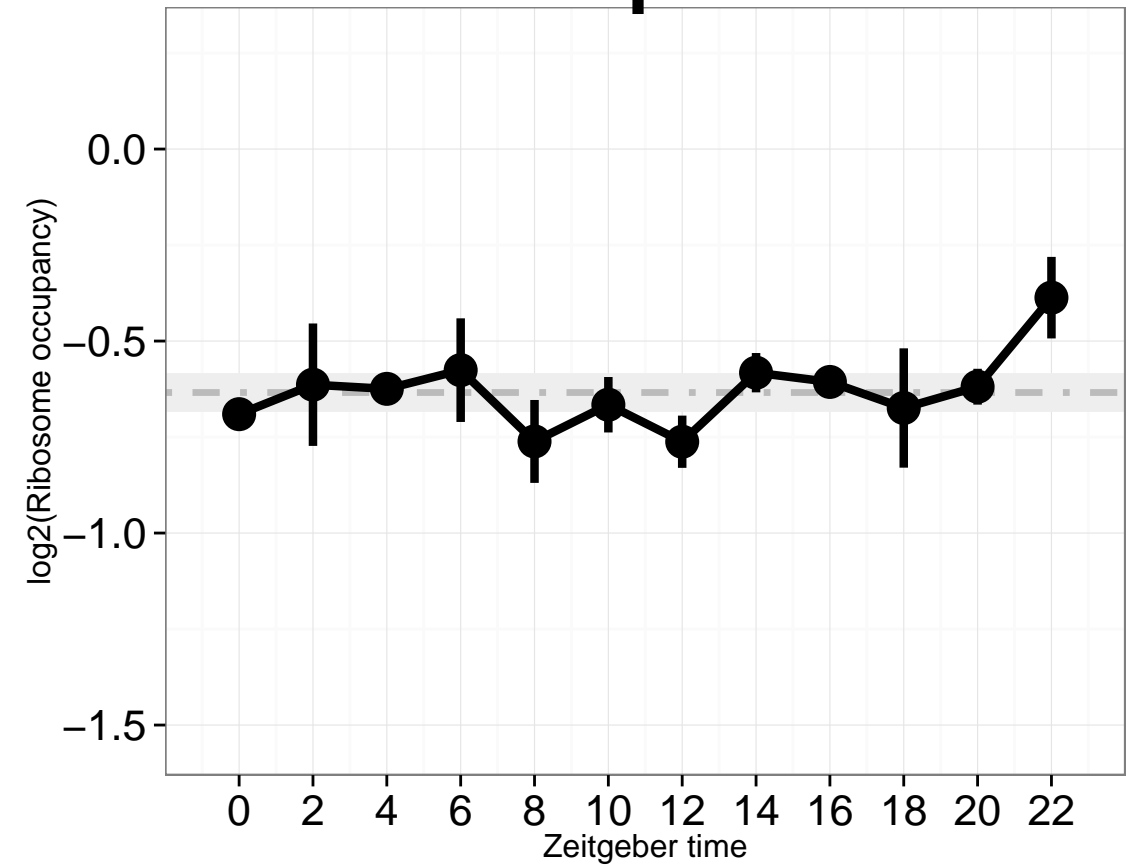

Supplement: SuppDataset_1.zip [file Usp33_set_A.pdf › Supplemental Dataset 1/A-mRNA_nonrhyth_translation_nonrhyth/Usp33_set_A.pdf]

# Usp34

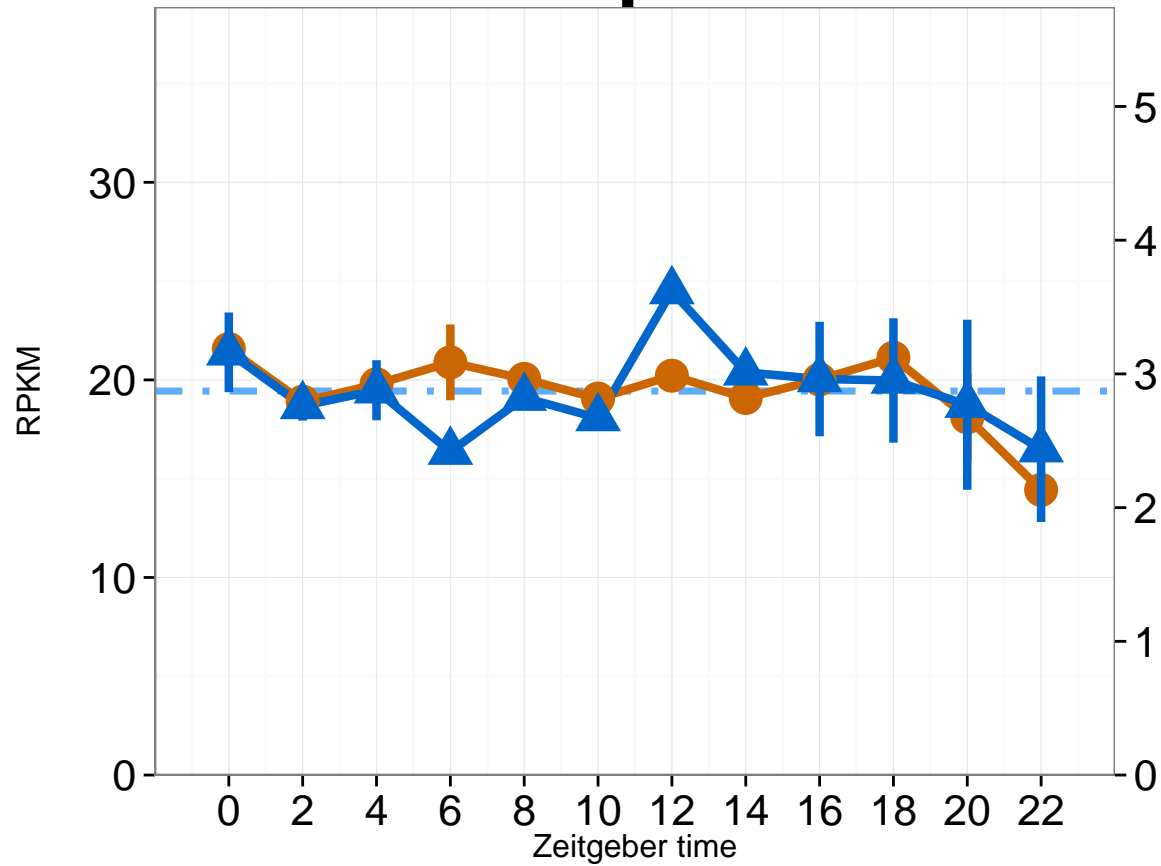

# Usp34

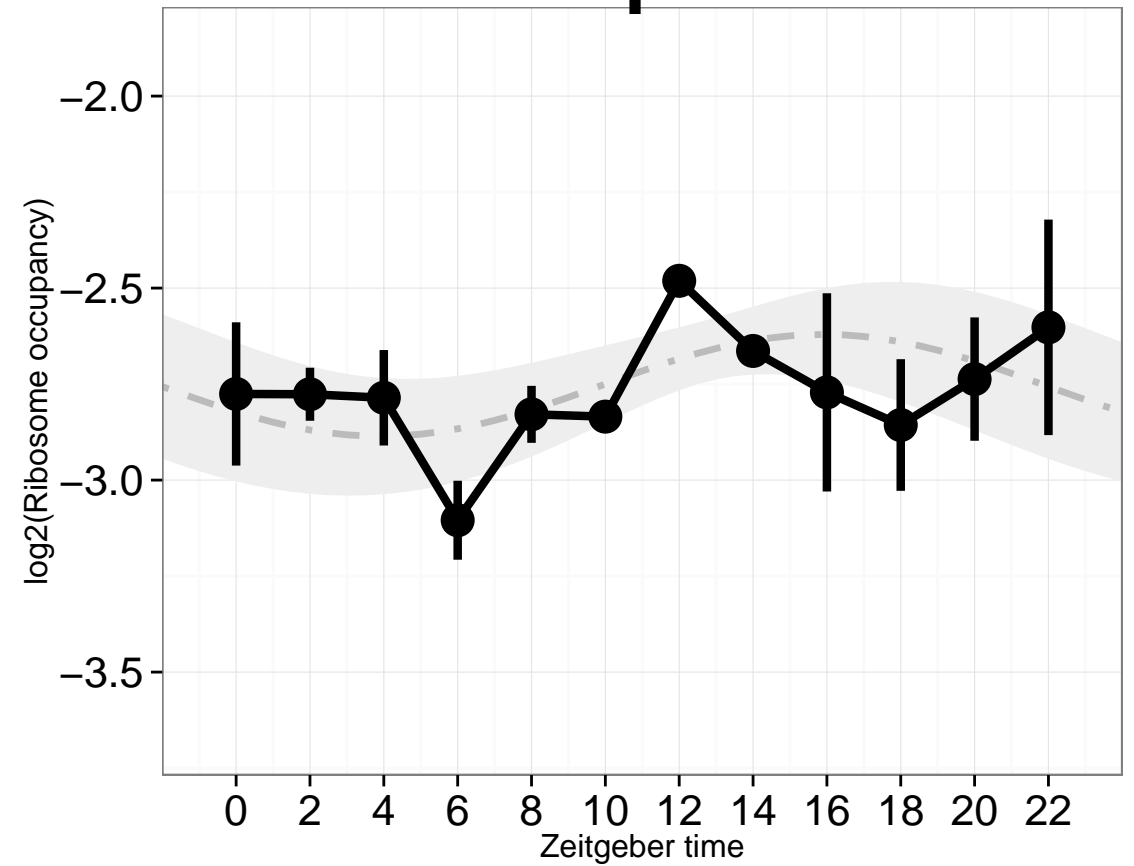

Supplement: SuppDataset_1.zip [file Usp34_set_A.pdf › Supplemental Dataset 1/A-mRNA_nonrhyth_translation_nonrhyth/Usp34_set_A.pdf]
