# Supplementary figures and images for: Ribosome profiling reveals the rhythmic liver translatome and circadian clock regulation by upstream open reading frames (part 81 of 113)
Source: HighWire-hosted journal article supplement (doi:10.1101/gr.195404.115), 2015-10-20

# Usp35

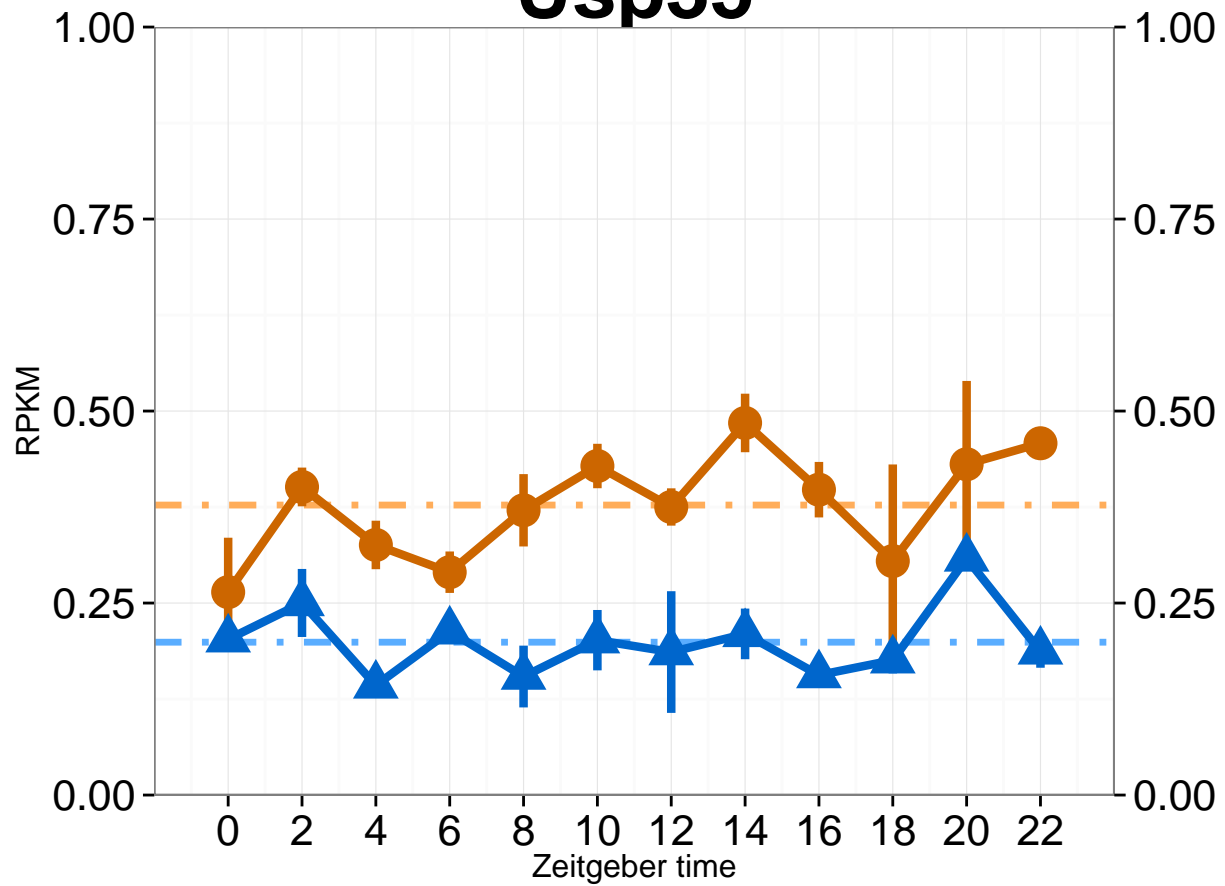

# Usp35

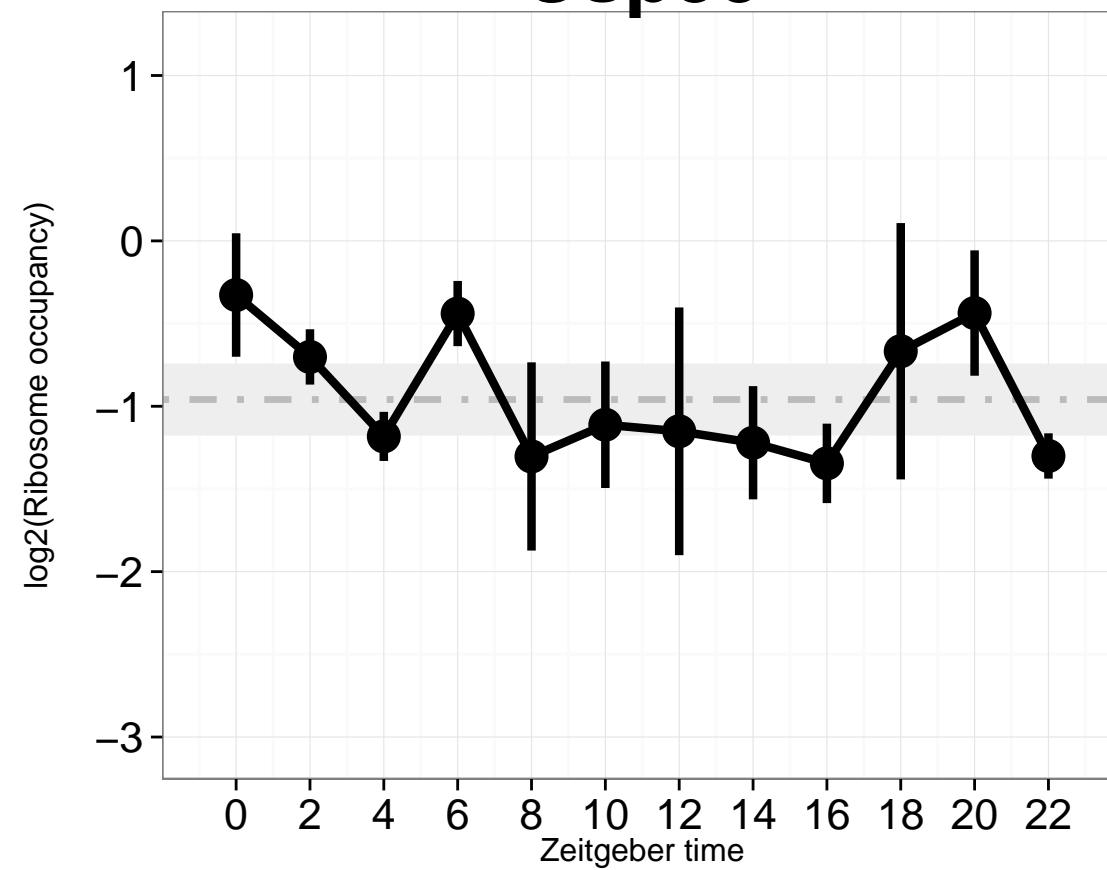

Supplement: SuppDataset_1.zip [file Usp35_set_A.pdf › Supplemental Dataset 1/A-mRNA_nonrhyth_translation_nonrhyth/Usp35_set_A.pdf]

## Usp37

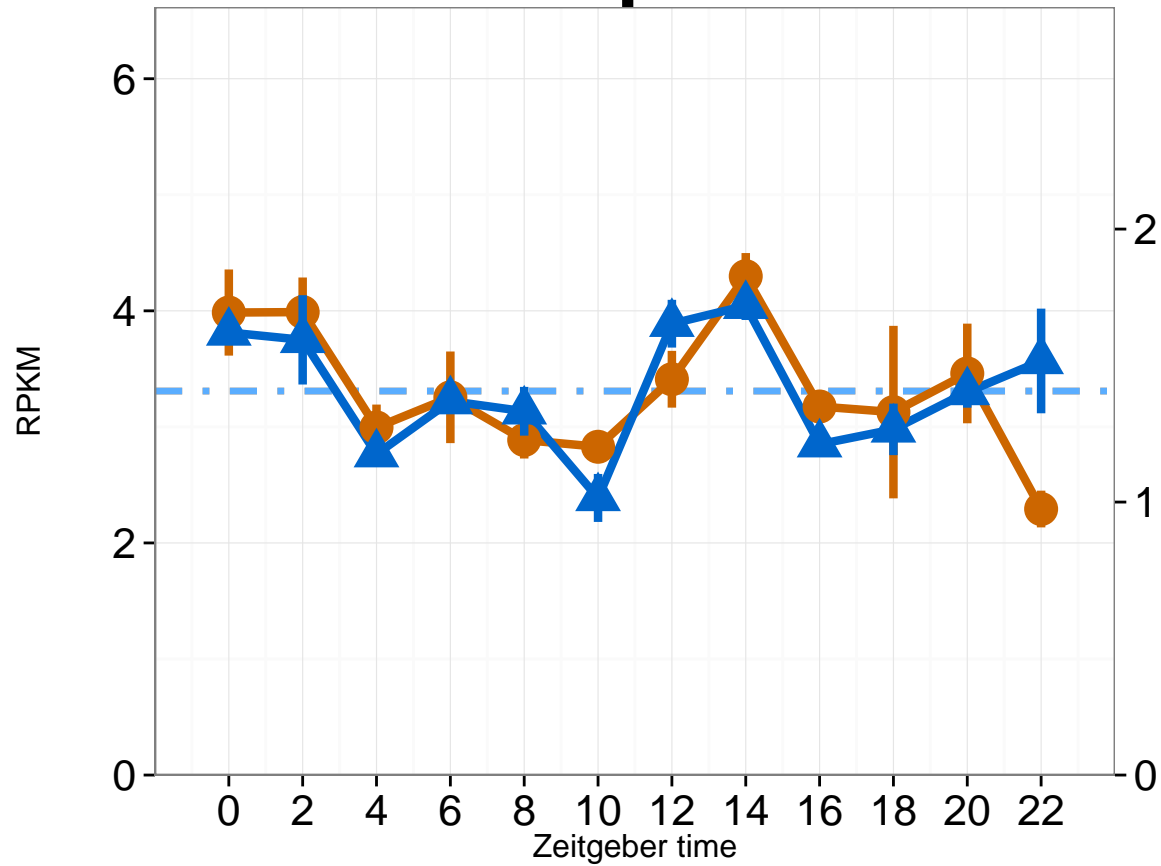

## Usp37

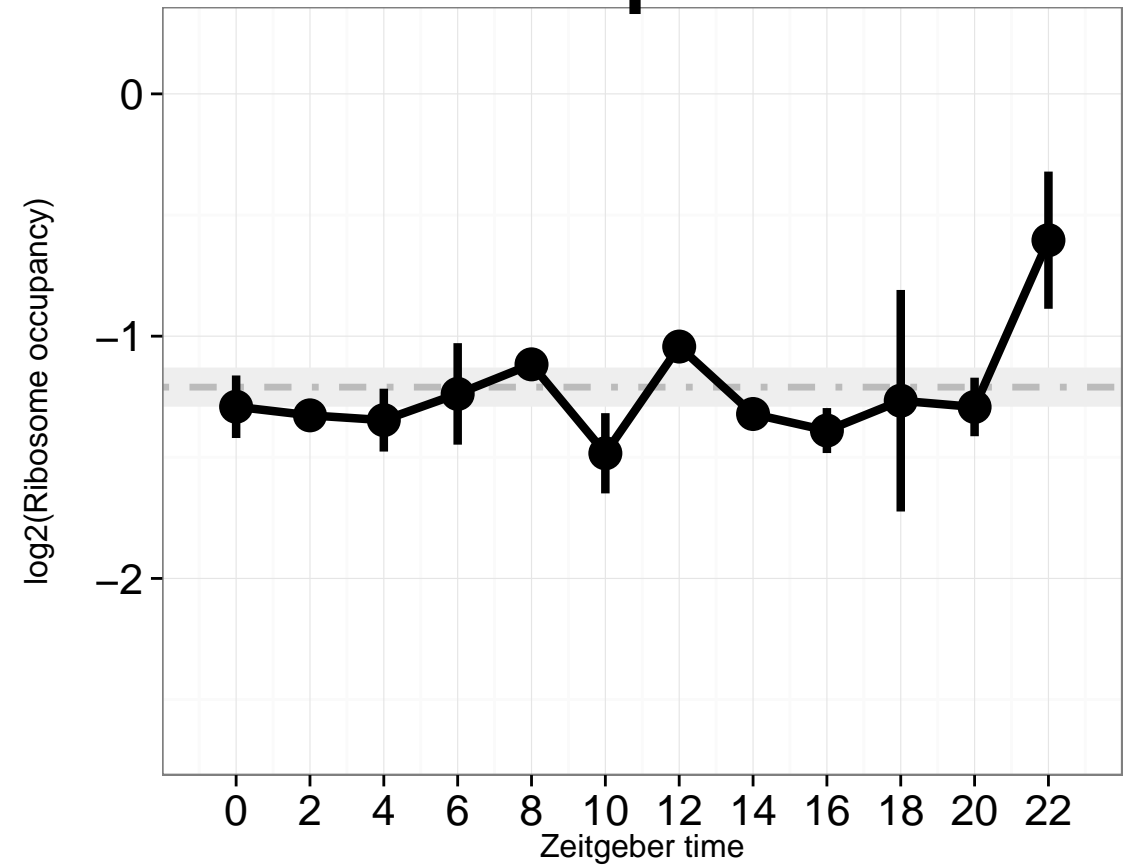

Supplement: SuppDataset_1.zip [file Usp37_set_A.pdf › Supplemental Dataset 1/A-mRNA_nonrhyth_translation_nonrhyth/Usp37_set_A.pdf]

# Usp38

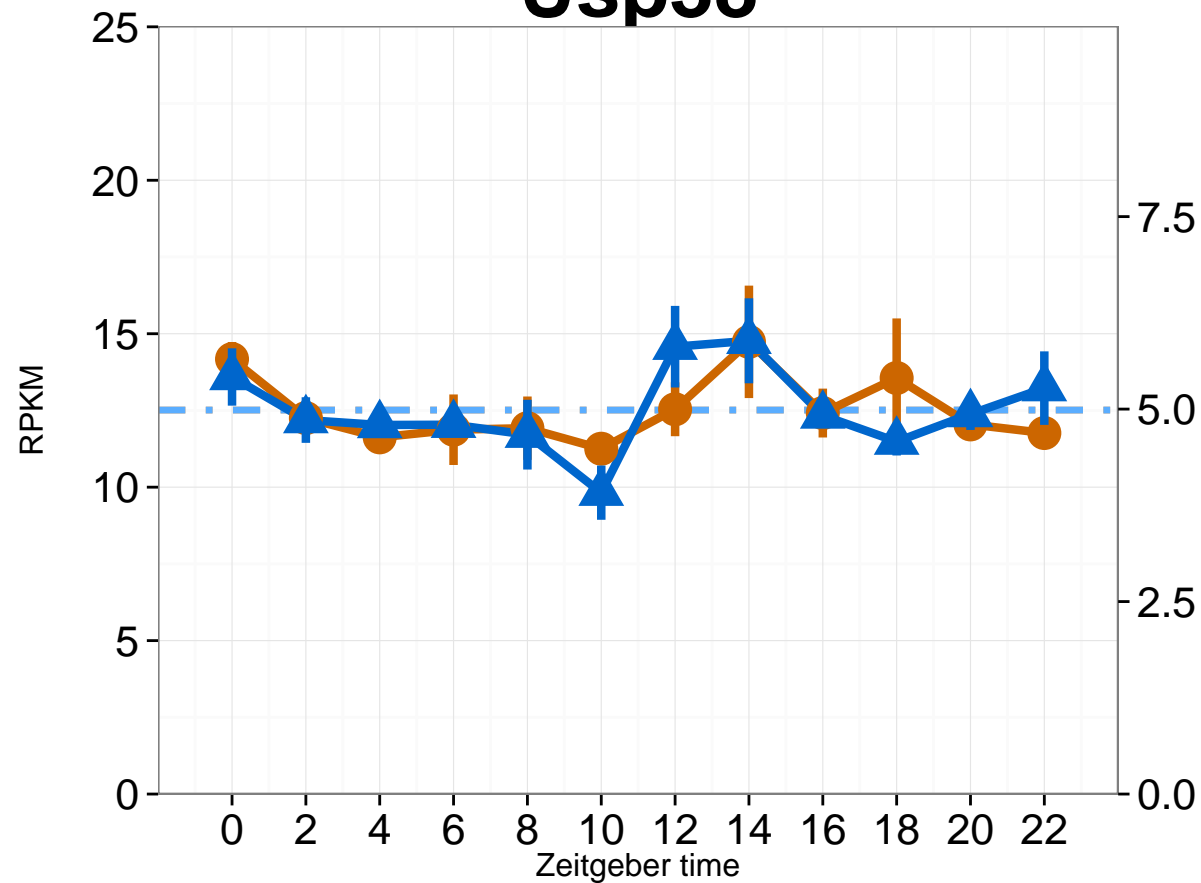

# Usp38

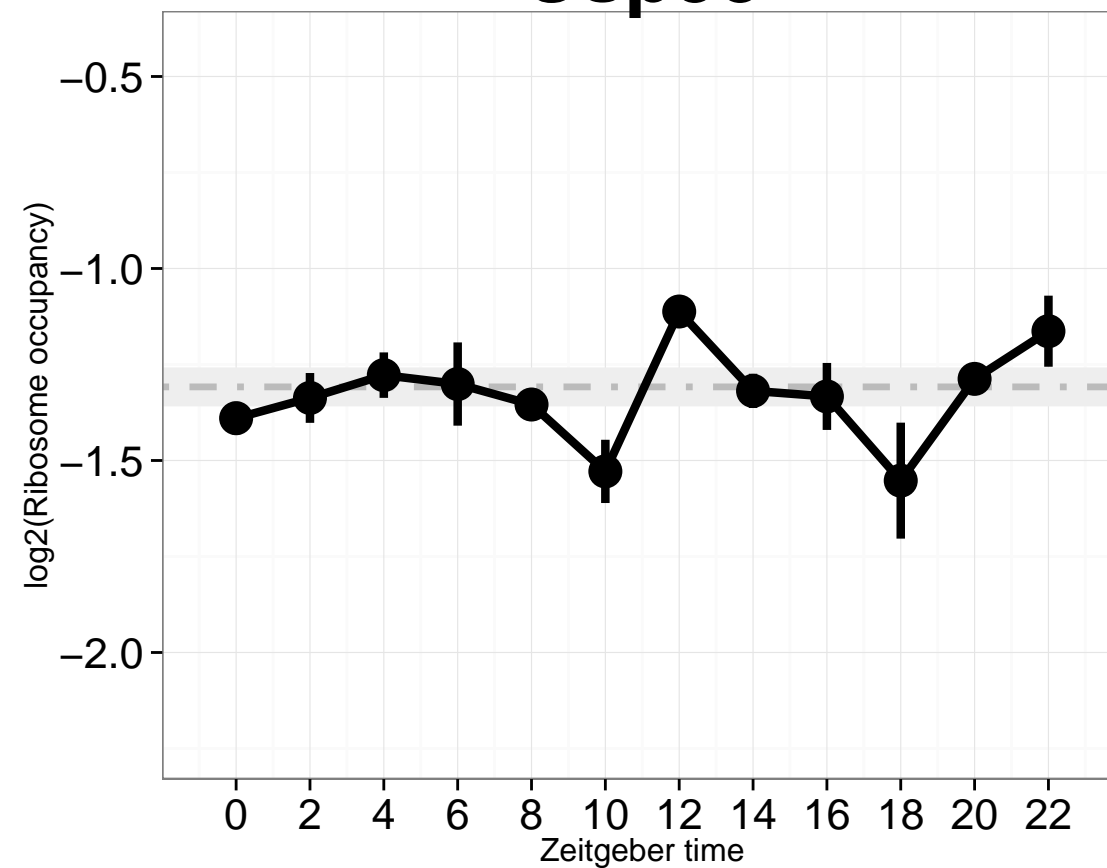

Supplement: SuppDataset_1.zip [file Usp38_set_A.pdf › Supplemental Dataset 1/A-mRNA_nonrhyth_translation_nonrhyth/Usp38_set_A.pdf]

## Usp39

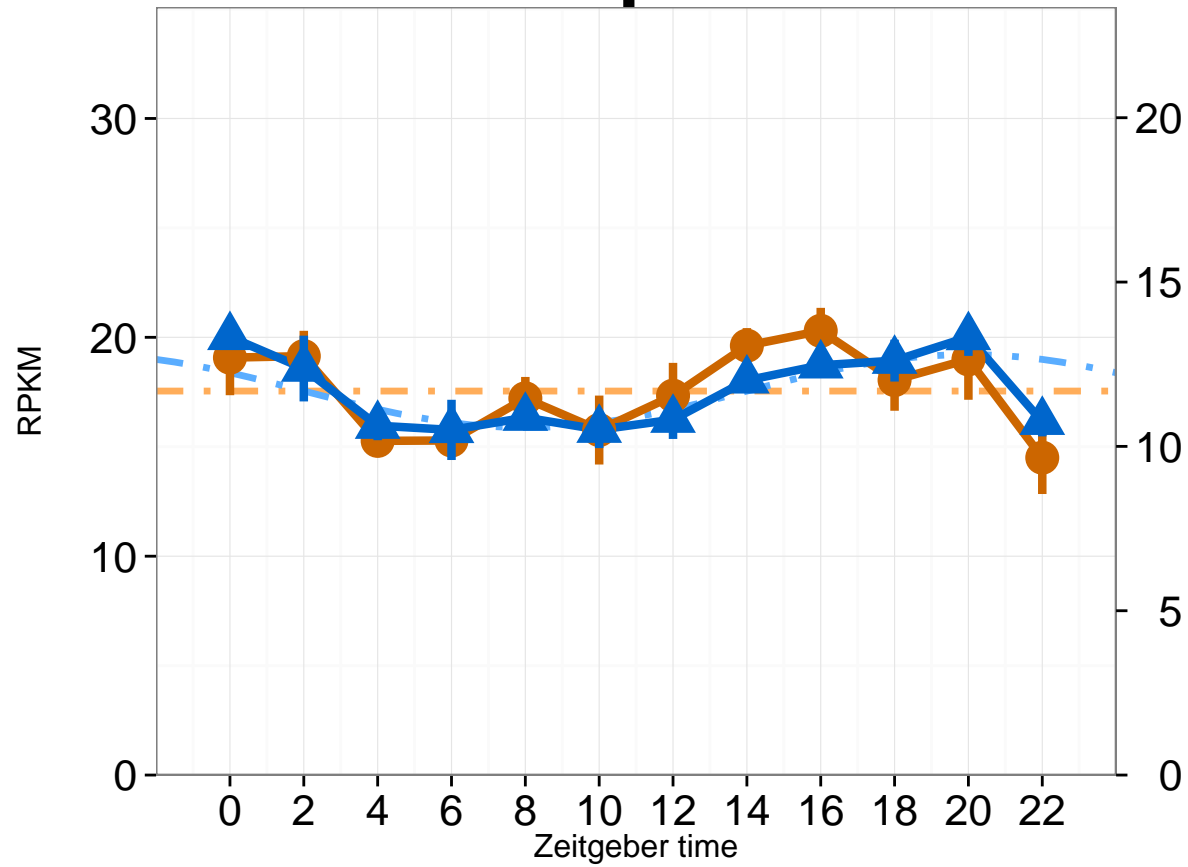

## Usp39

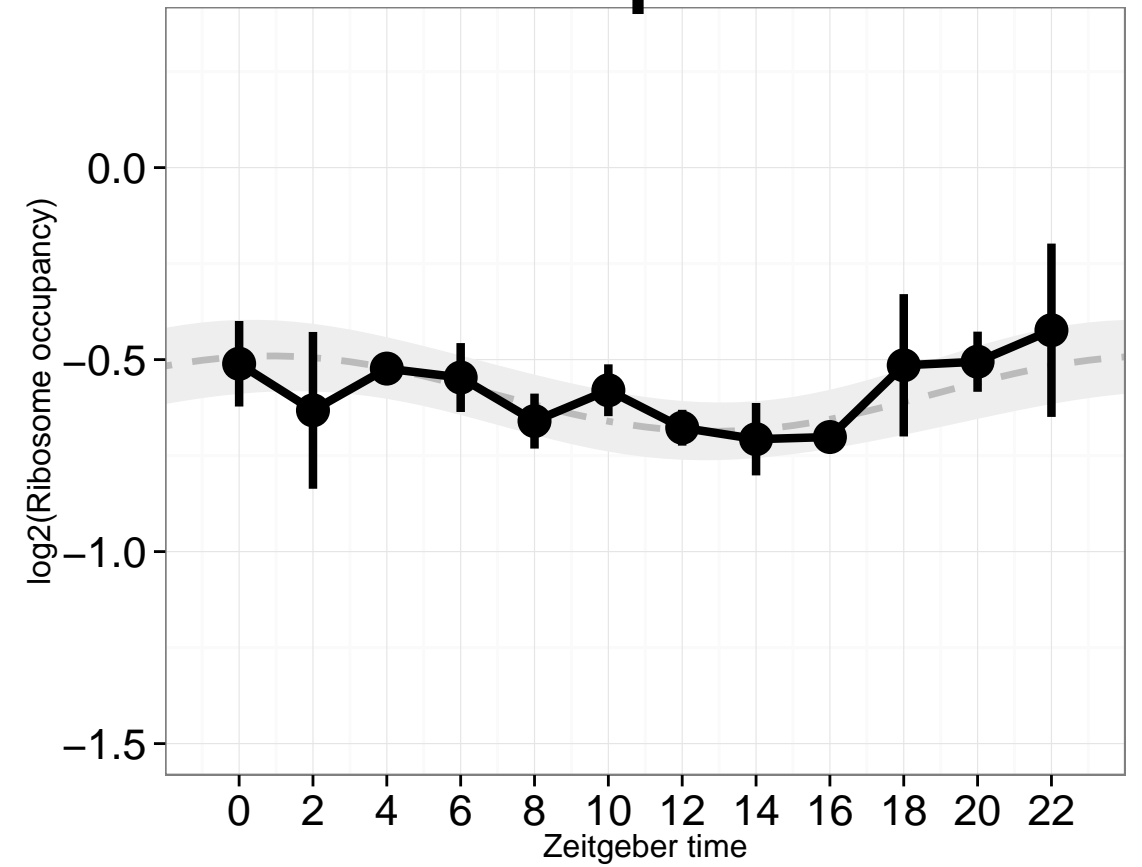

Supplement: SuppDataset_1.zip [file Usp39_set_A.pdf › Supplemental Dataset 1/A-mRNA_nonrhyth_translation_nonrhyth/Usp39_set_A.pdf]

## Usp3

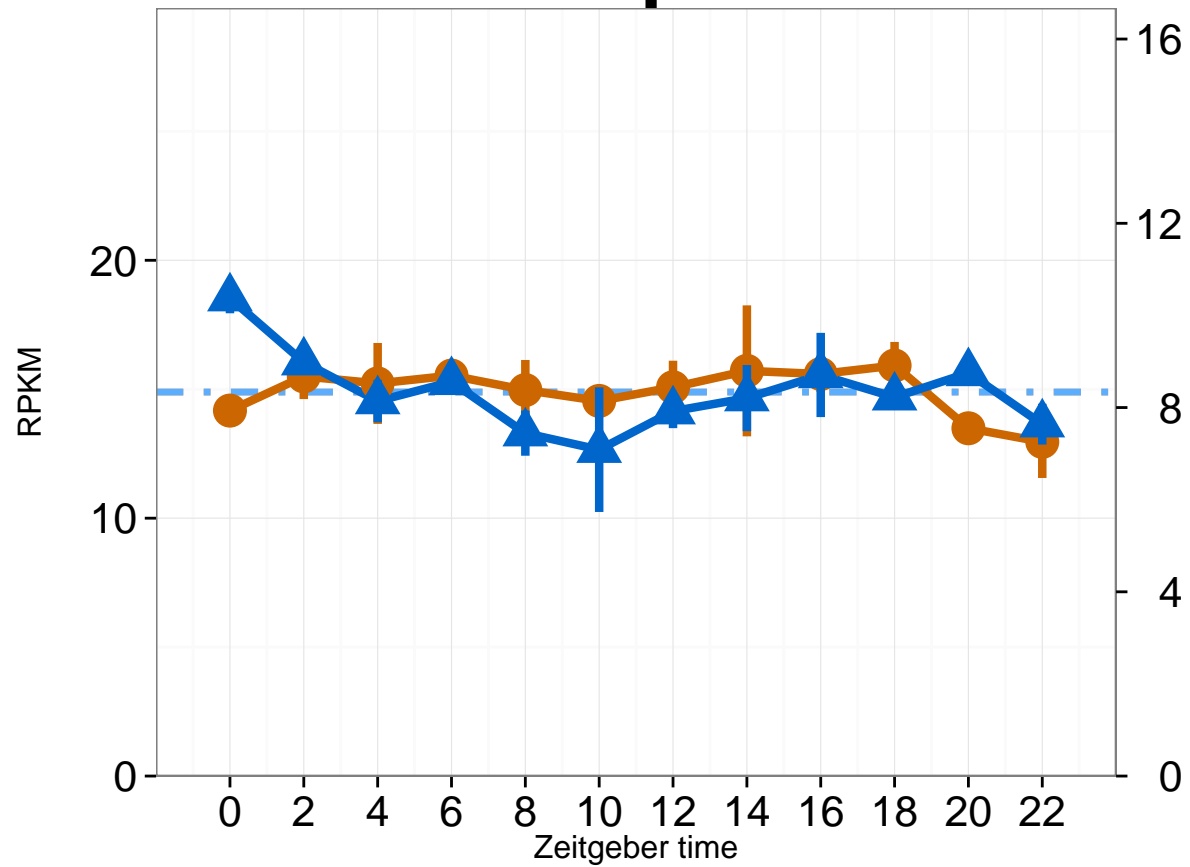

## Usp3

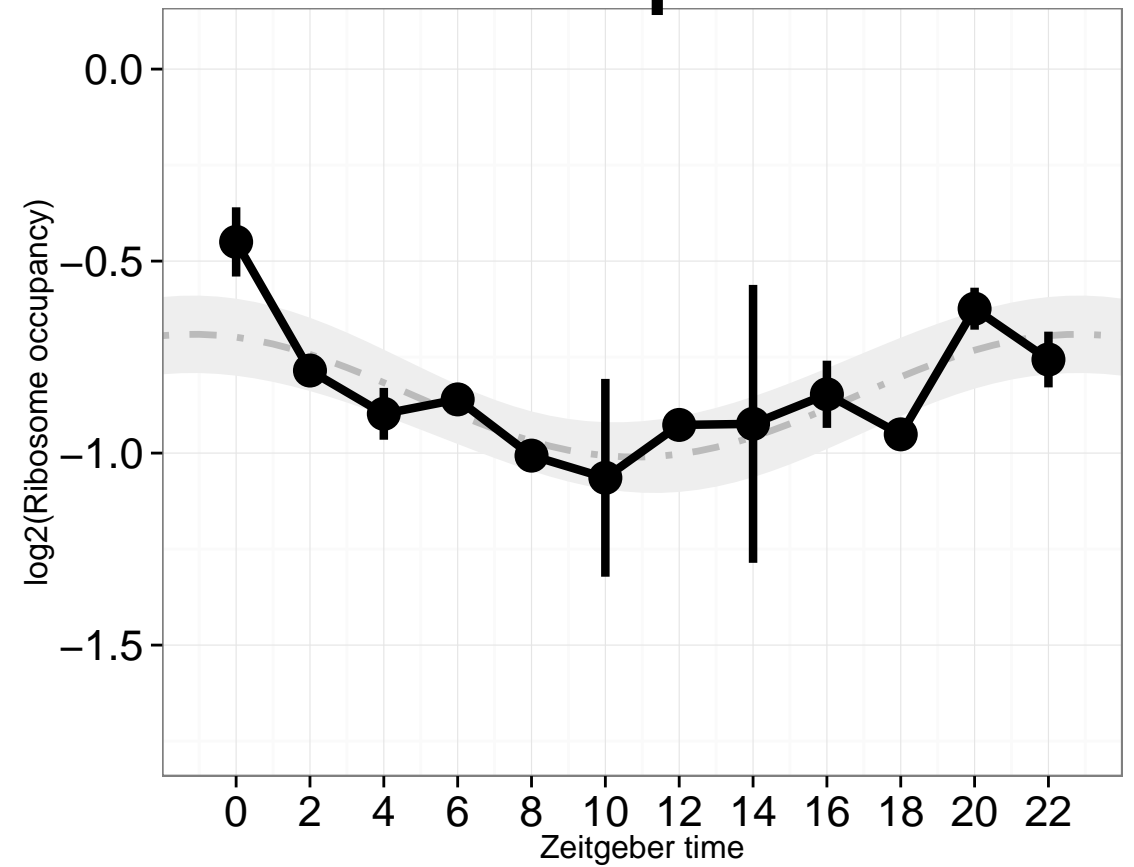

Supplement: SuppDataset_1.zip [file Usp3_set_A.pdf › Supplemental Dataset 1/A-mRNA_nonrhyth_translation_nonrhyth/Usp3_set_A.pdf]

## Usp40

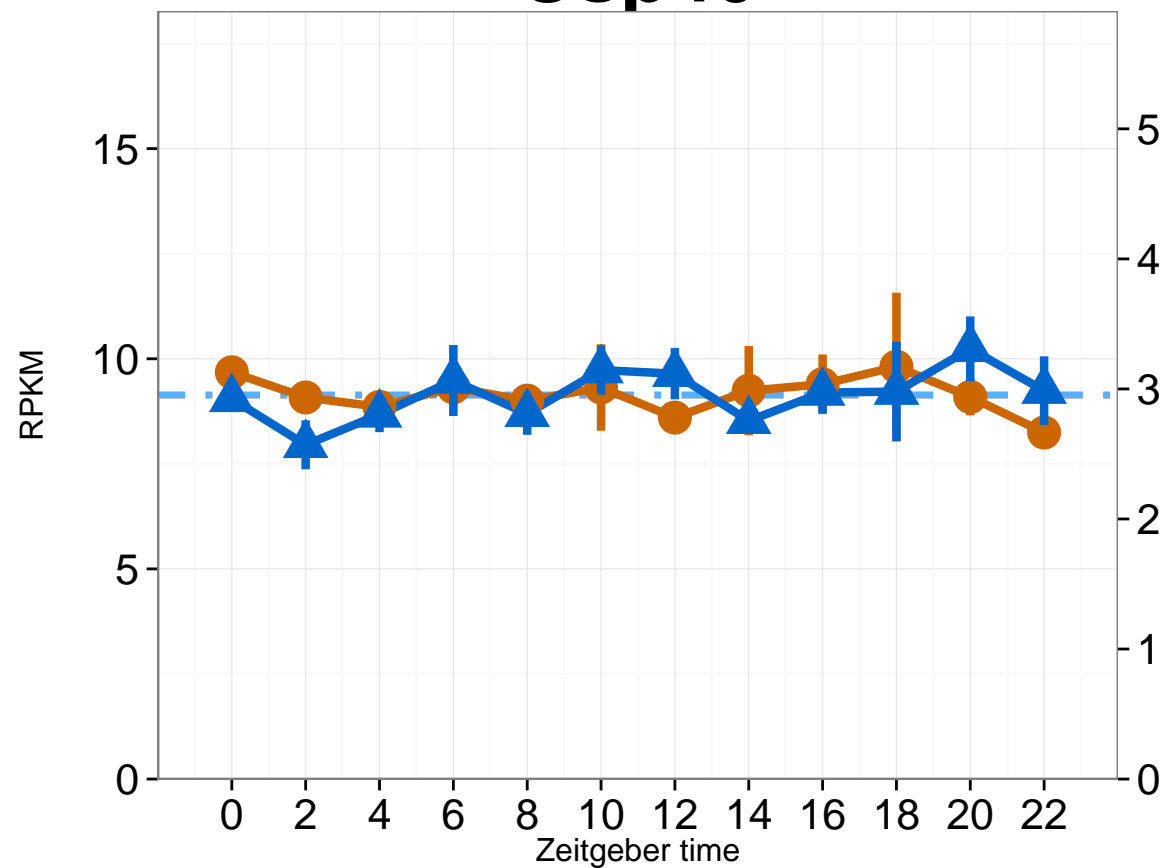

## Usp40

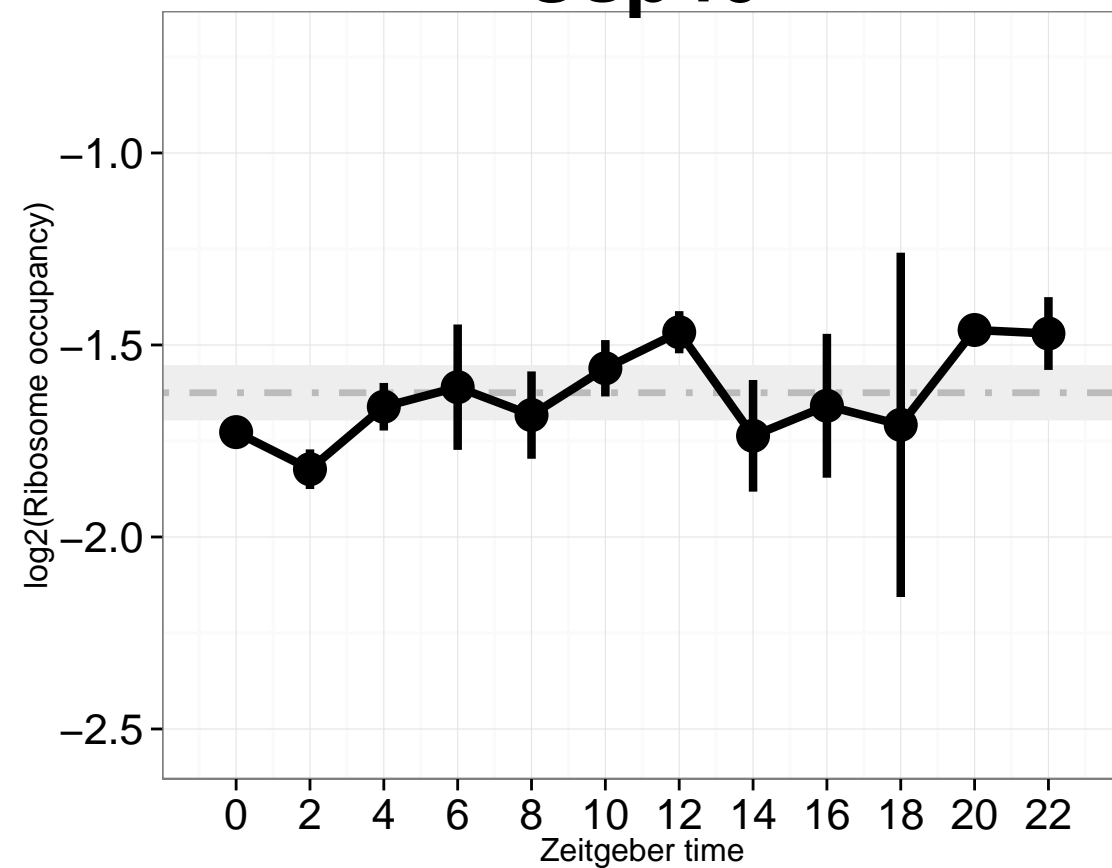

Supplement: SuppDataset_1.zip [file Usp40_set_A.pdf › Supplemental Dataset 1/A-mRNA_nonrhyth_translation_nonrhyth/Usp40_set_A.pdf]

## Usp42

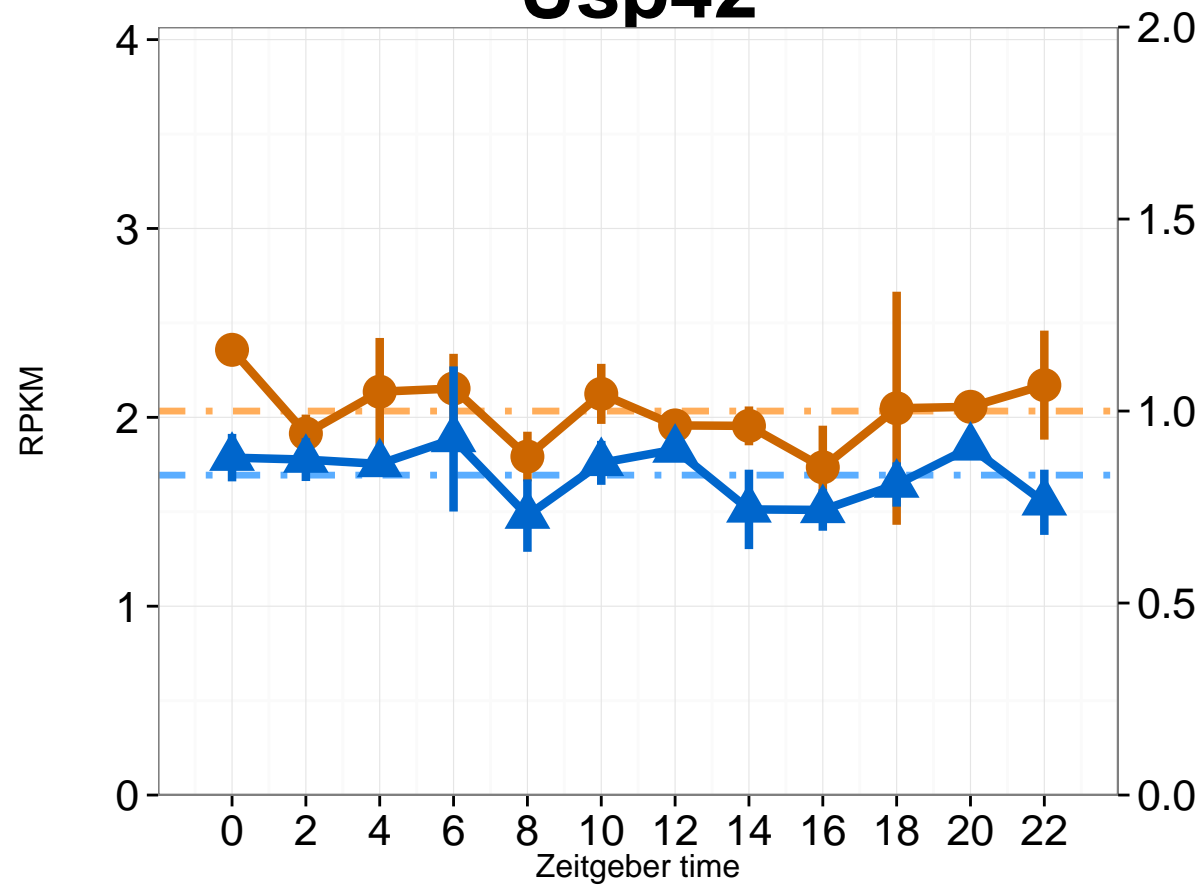

## Usp42

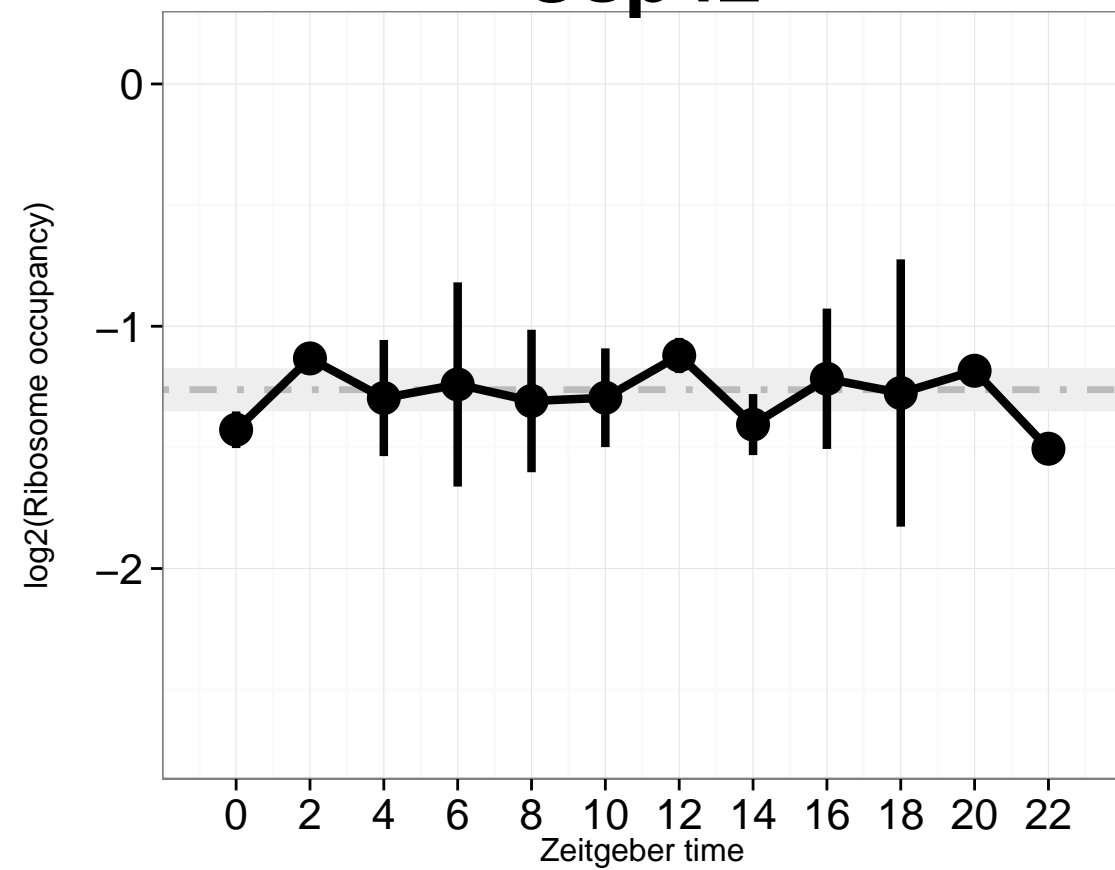

Supplement: SuppDataset_1.zip [file Usp42_set_A.pdf › Supplemental Dataset 1/A-mRNA_nonrhyth_translation_nonrhyth/Usp42_set_A.pdf]

# Usp46

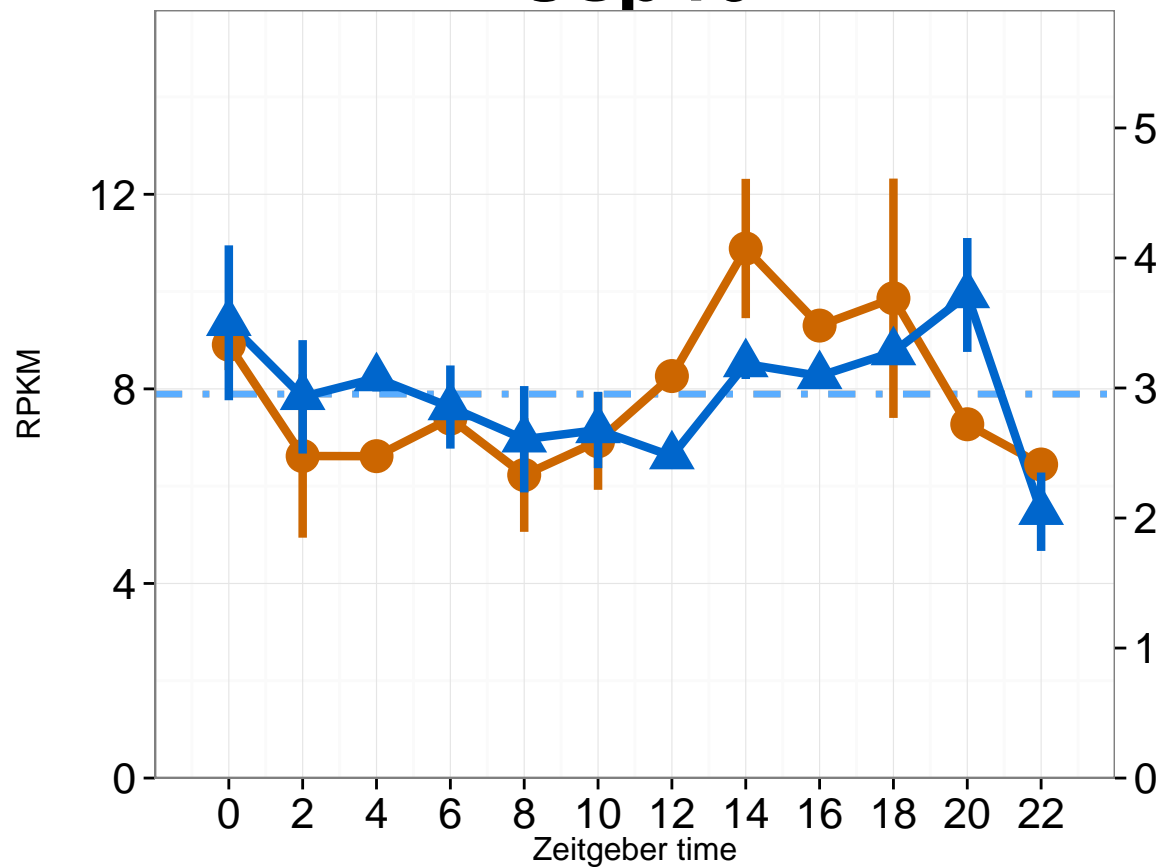

# Usp46

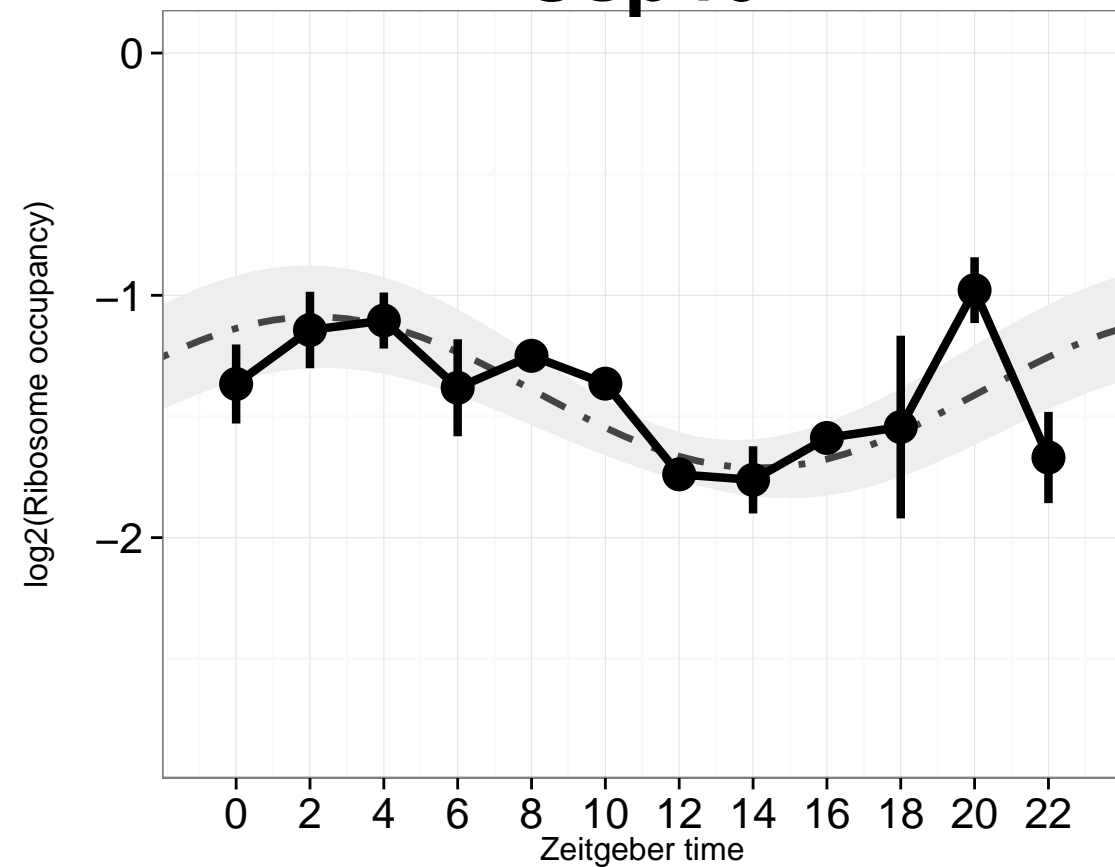

Supplement: SuppDataset_1.zip [file Usp46_set_A.pdf › Supplemental Dataset 1/A-mRNA_nonrhyth_translation_nonrhyth/Usp46_set_A.pdf]

## Usp47

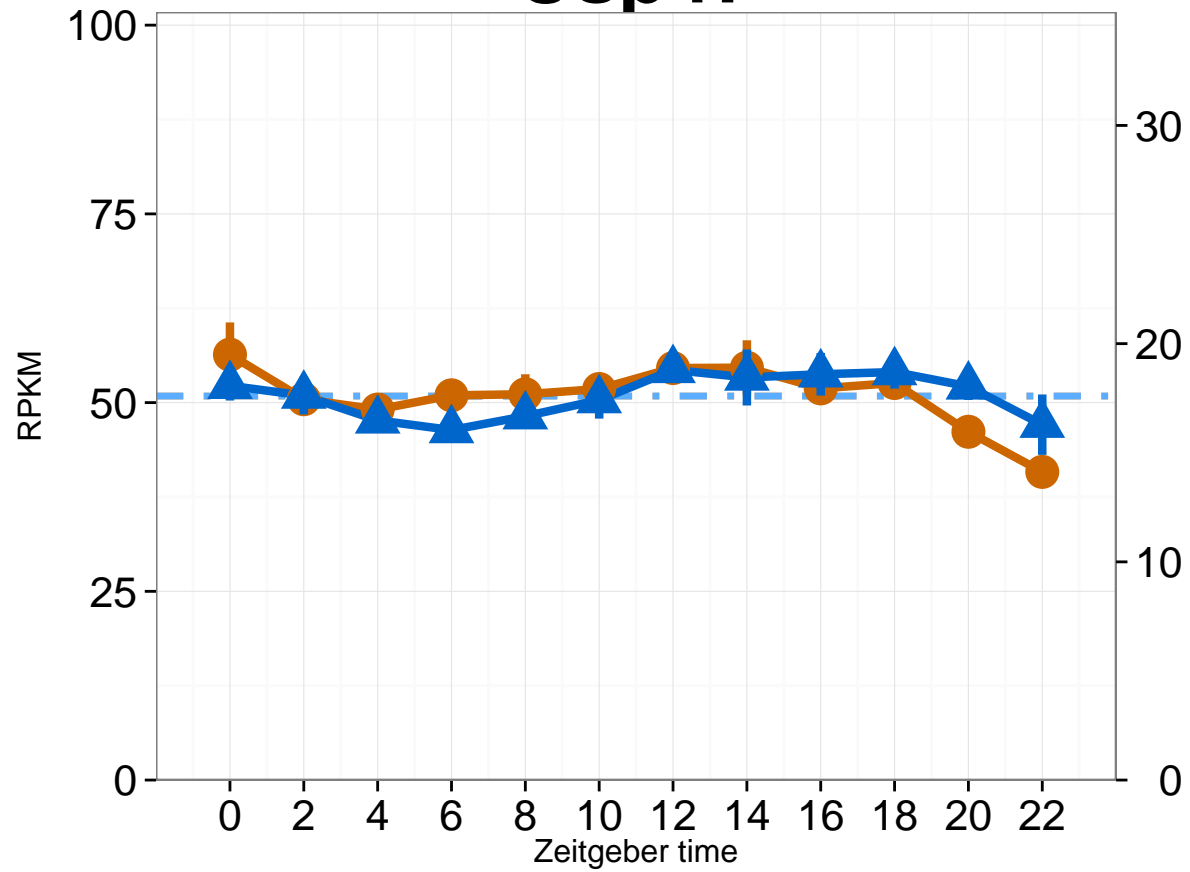

## Usp47

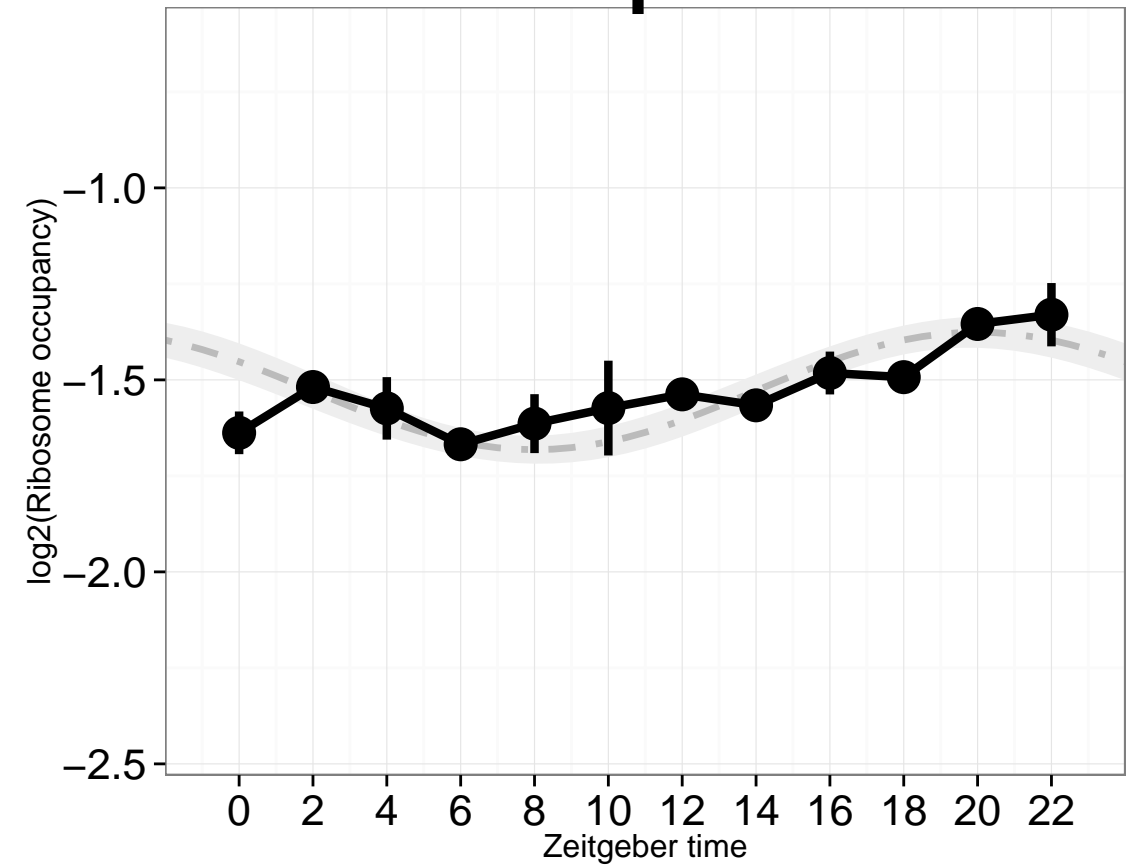

Supplement: SuppDataset_1.zip [file Usp47_set_A.pdf › Supplemental Dataset 1/A-mRNA_nonrhyth_translation_nonrhyth/Usp47_set_A.pdf]

# Usp48

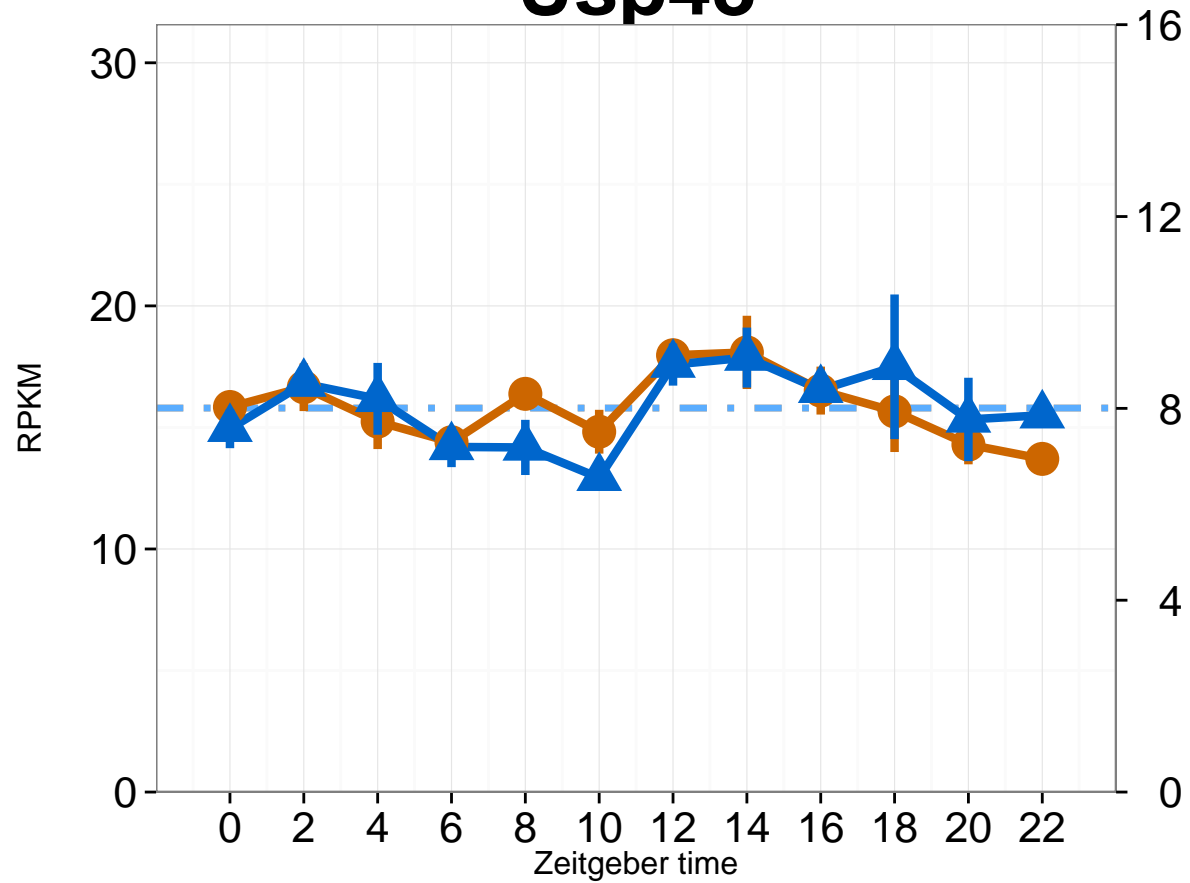

# Usp48

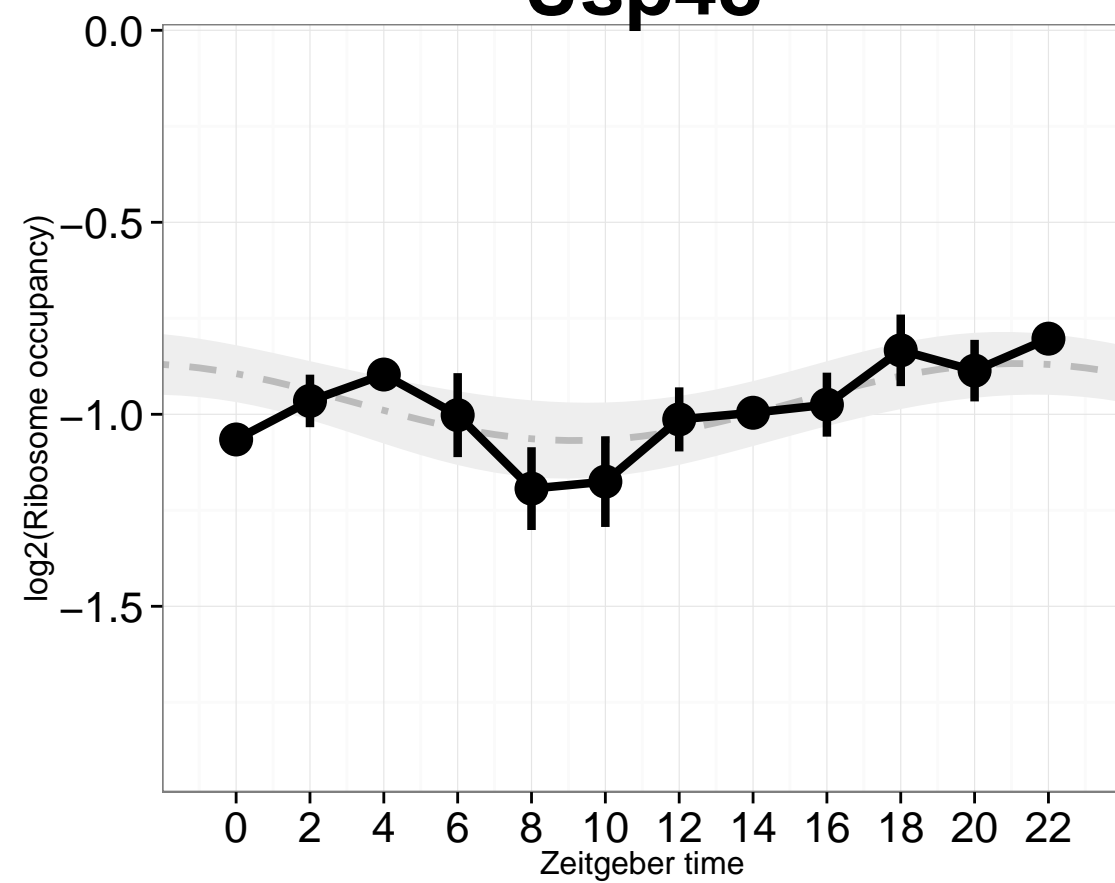

Supplement: SuppDataset_1.zip [file Usp48_set_A.pdf › Supplemental Dataset 1/A-mRNA_nonrhyth_translation_nonrhyth/Usp48_set_A.pdf]

## Usp4

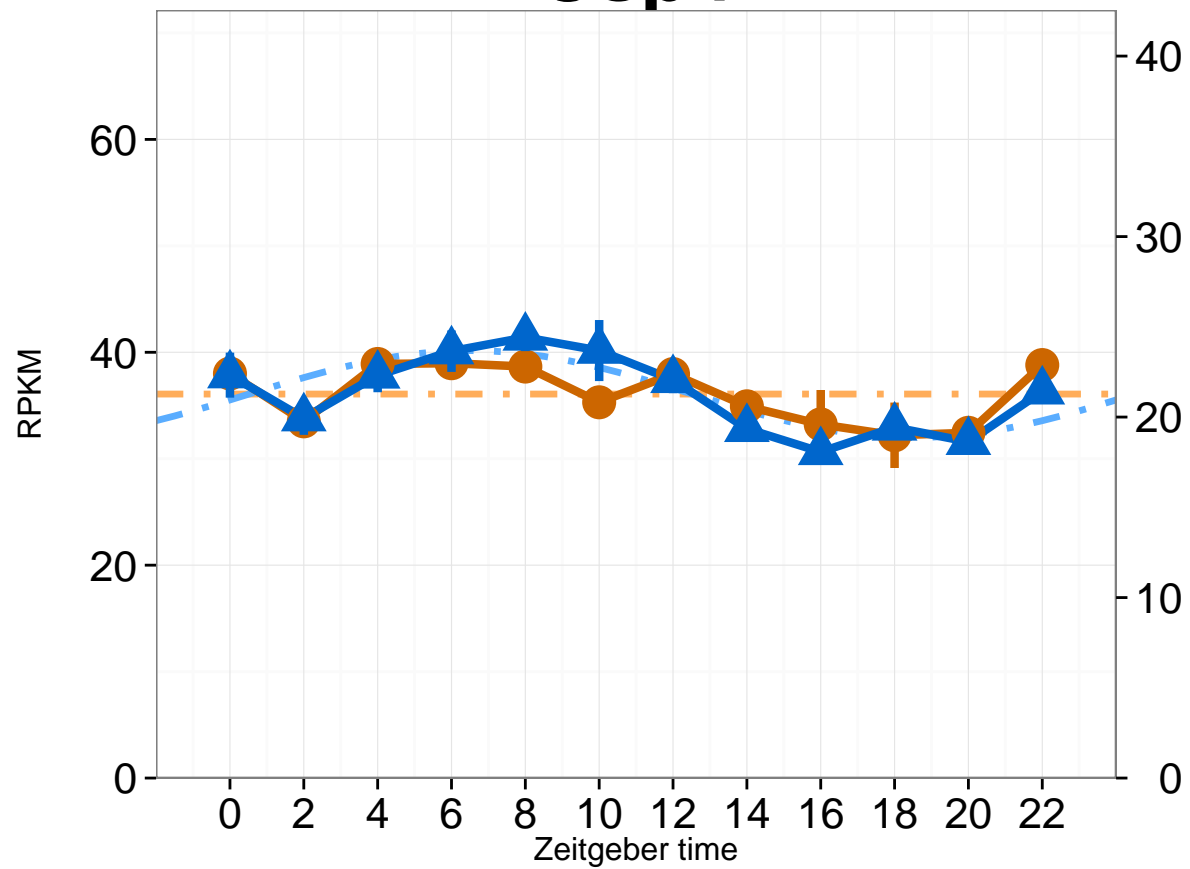

## Usp4

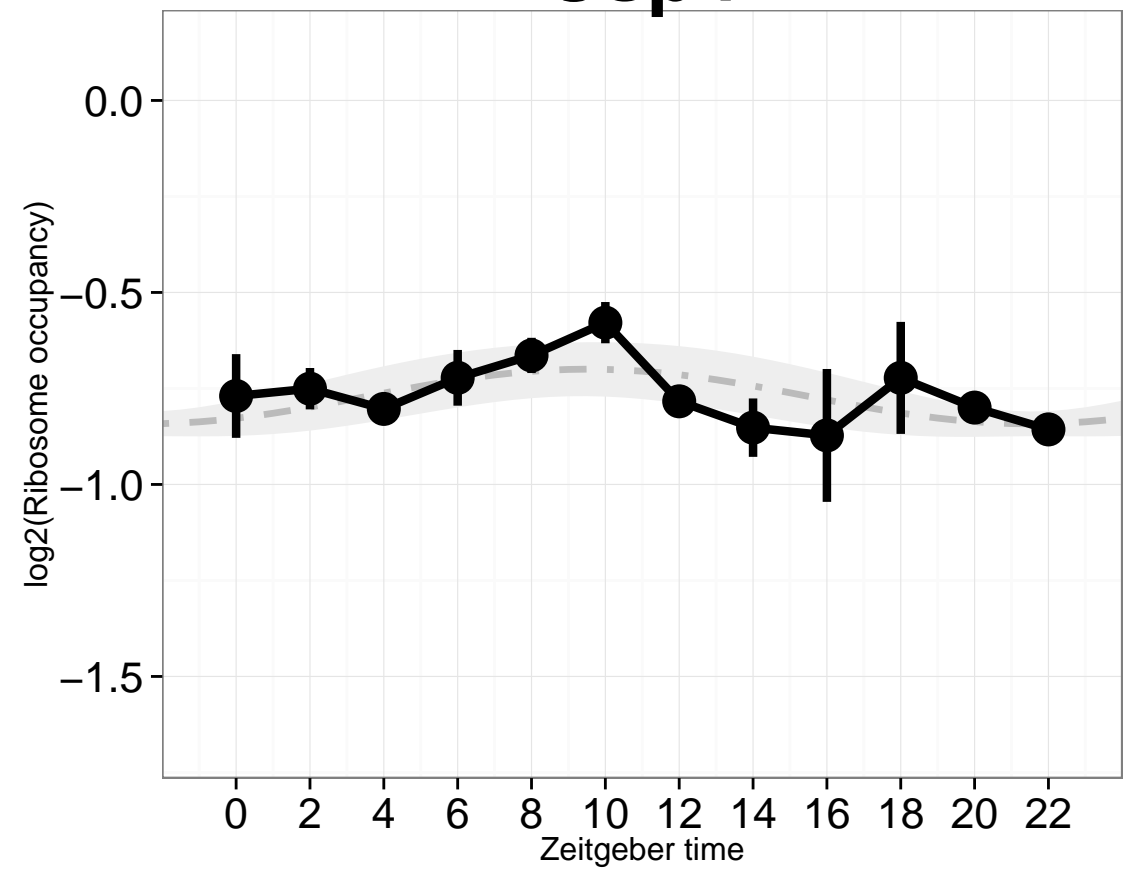

Supplement: SuppDataset_1.zip [file Usp4_set_A.pdf › Supplemental Dataset 1/A-mRNA_nonrhyth_translation_nonrhyth/Usp4_set_A.pdf]

# Usp53

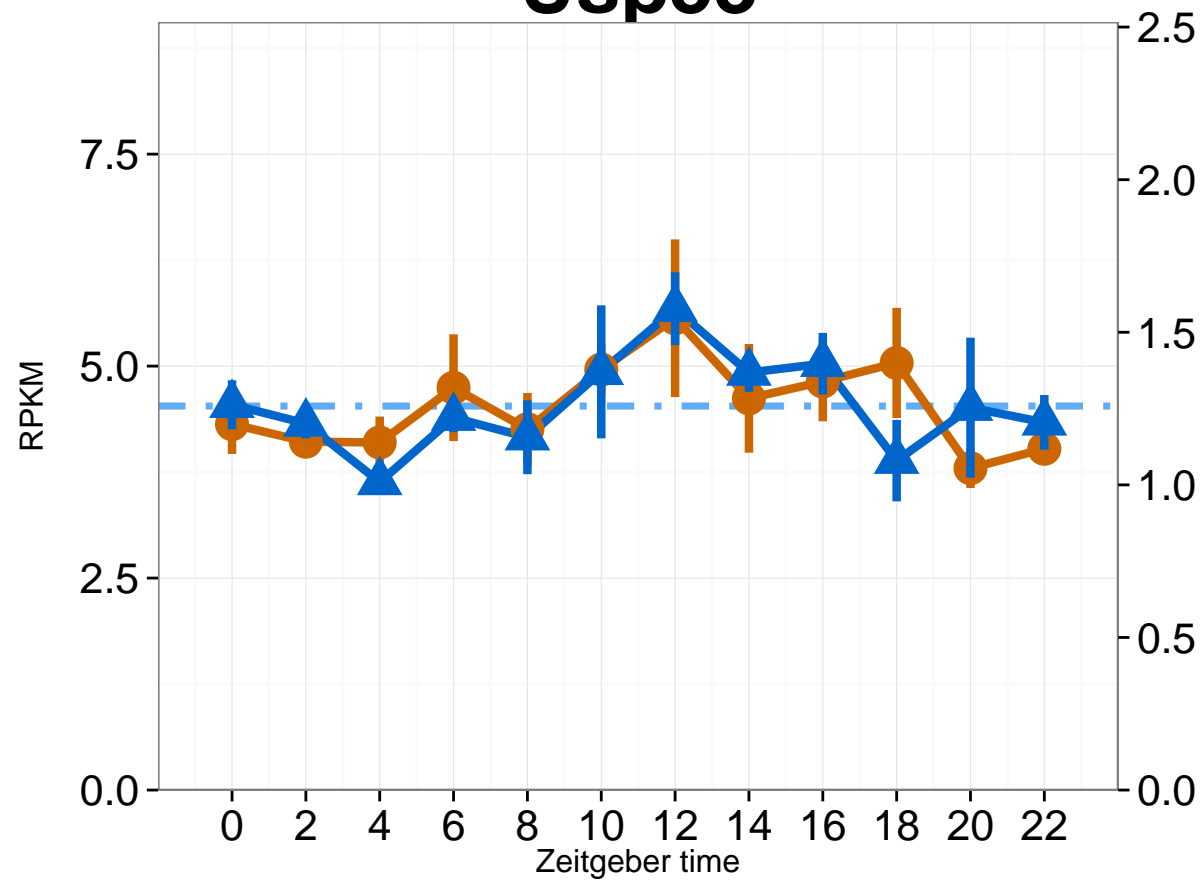

# Usp53

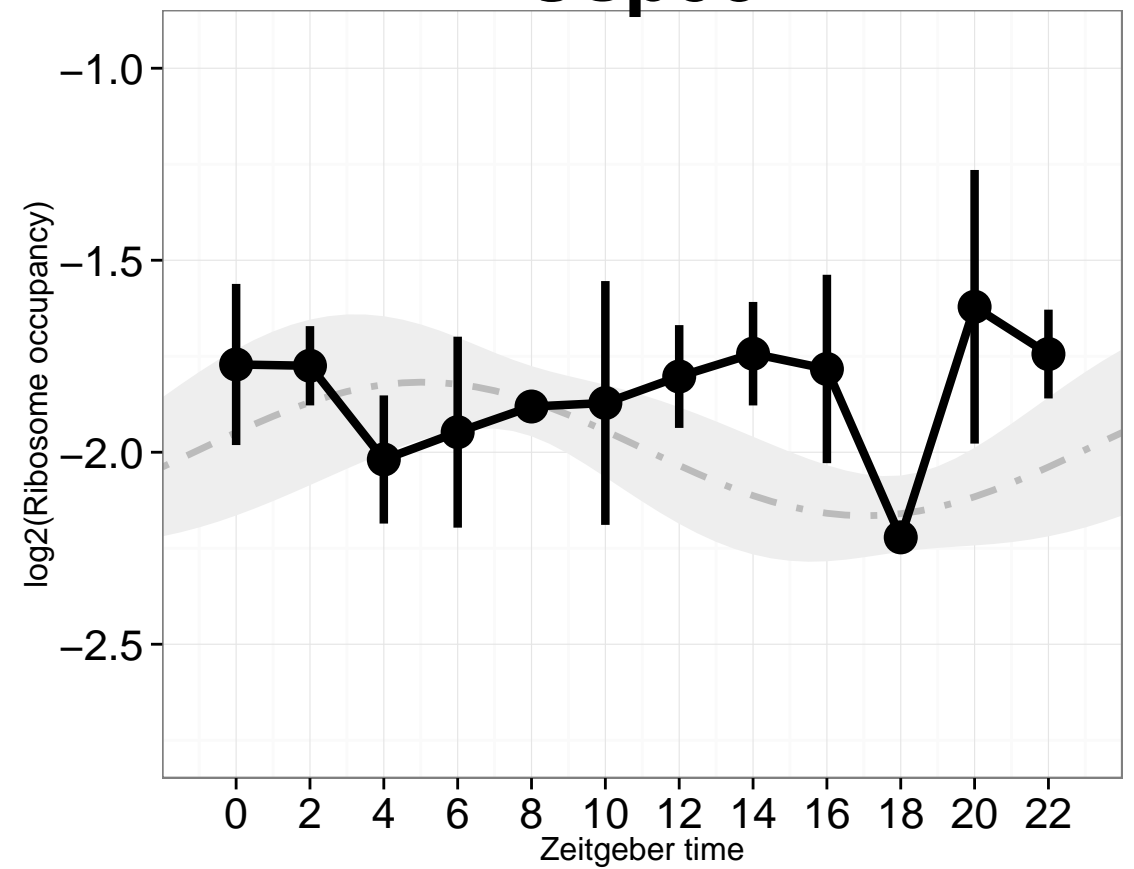

Supplement: SuppDataset_1.zip [file Usp53_set_A.pdf › Supplemental Dataset 1/A-mRNA_nonrhyth_translation_nonrhyth/Usp53_set_A.pdf]

## Usp54

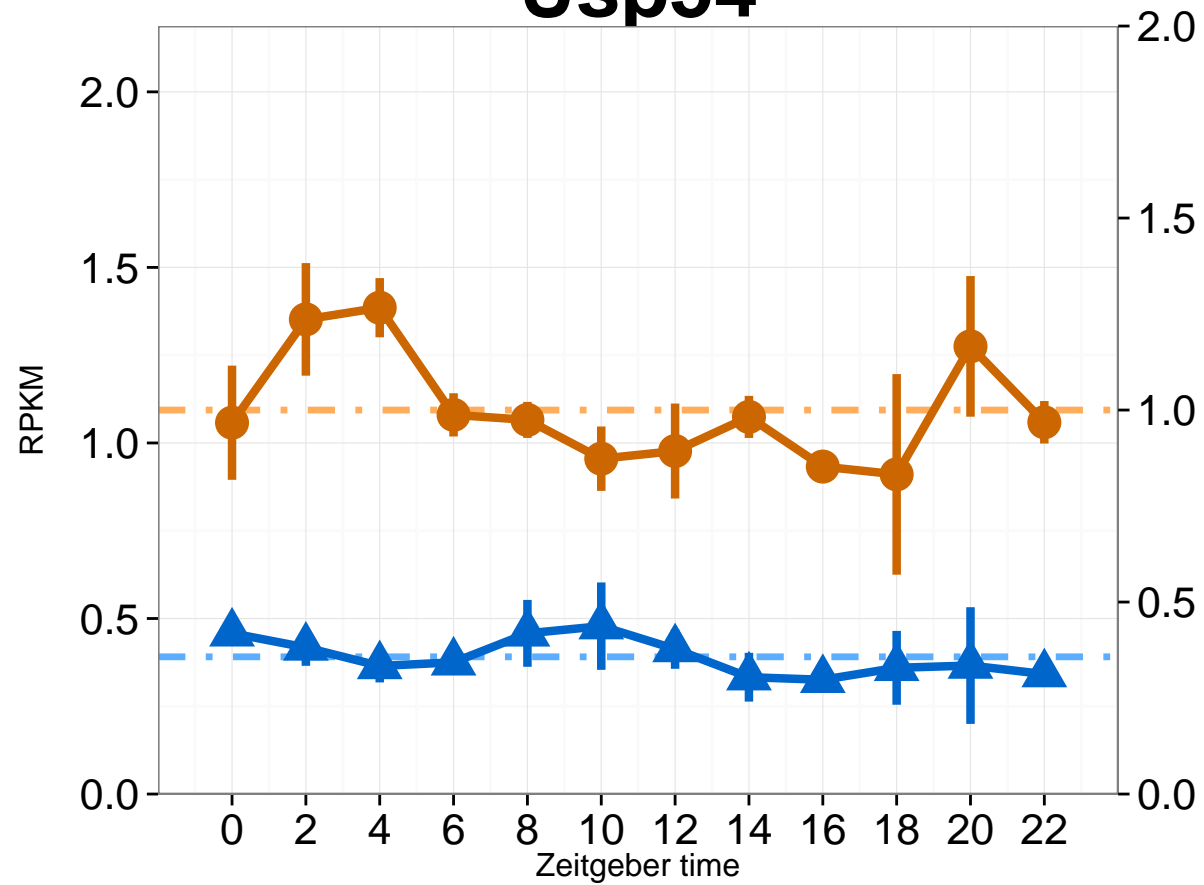

## Usp54

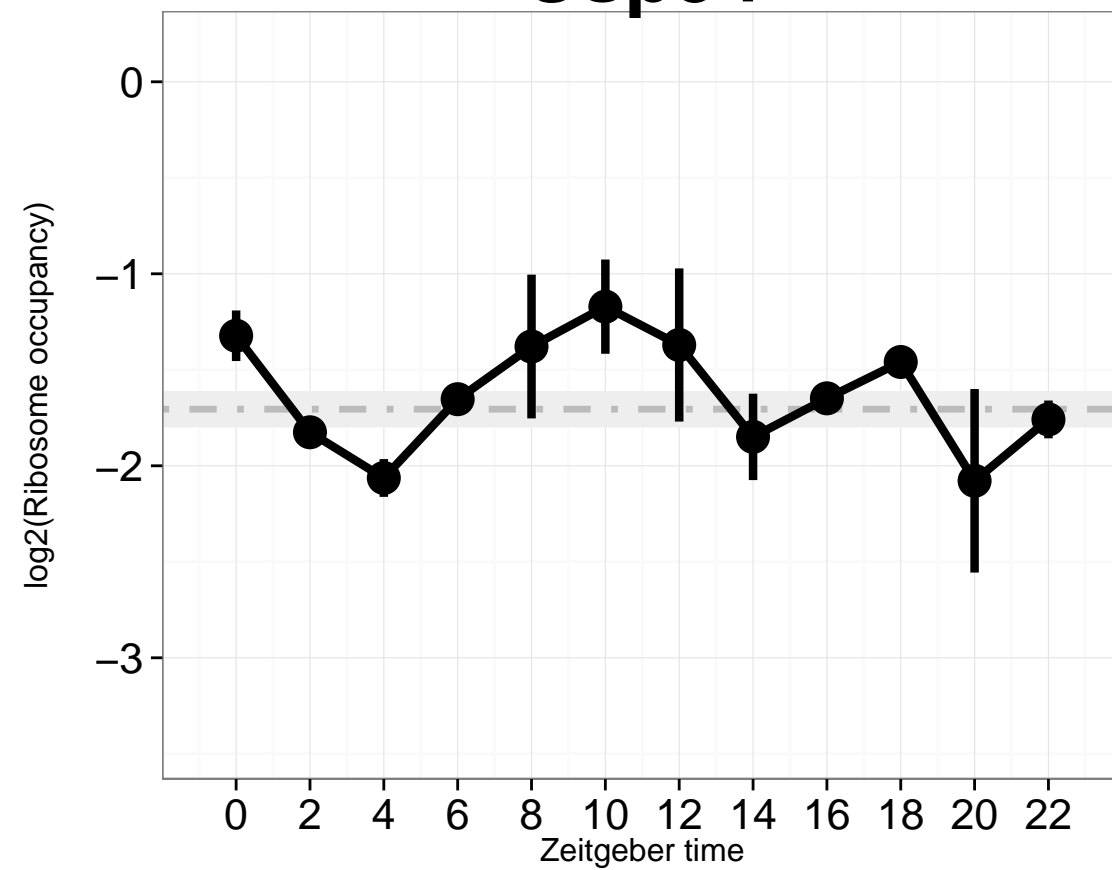

Supplement: SuppDataset_1.zip [file Usp54_set_A.pdf › Supplemental Dataset 1/A-mRNA_nonrhyth_translation_nonrhyth/Usp54_set_A.pdf]

## Usp5

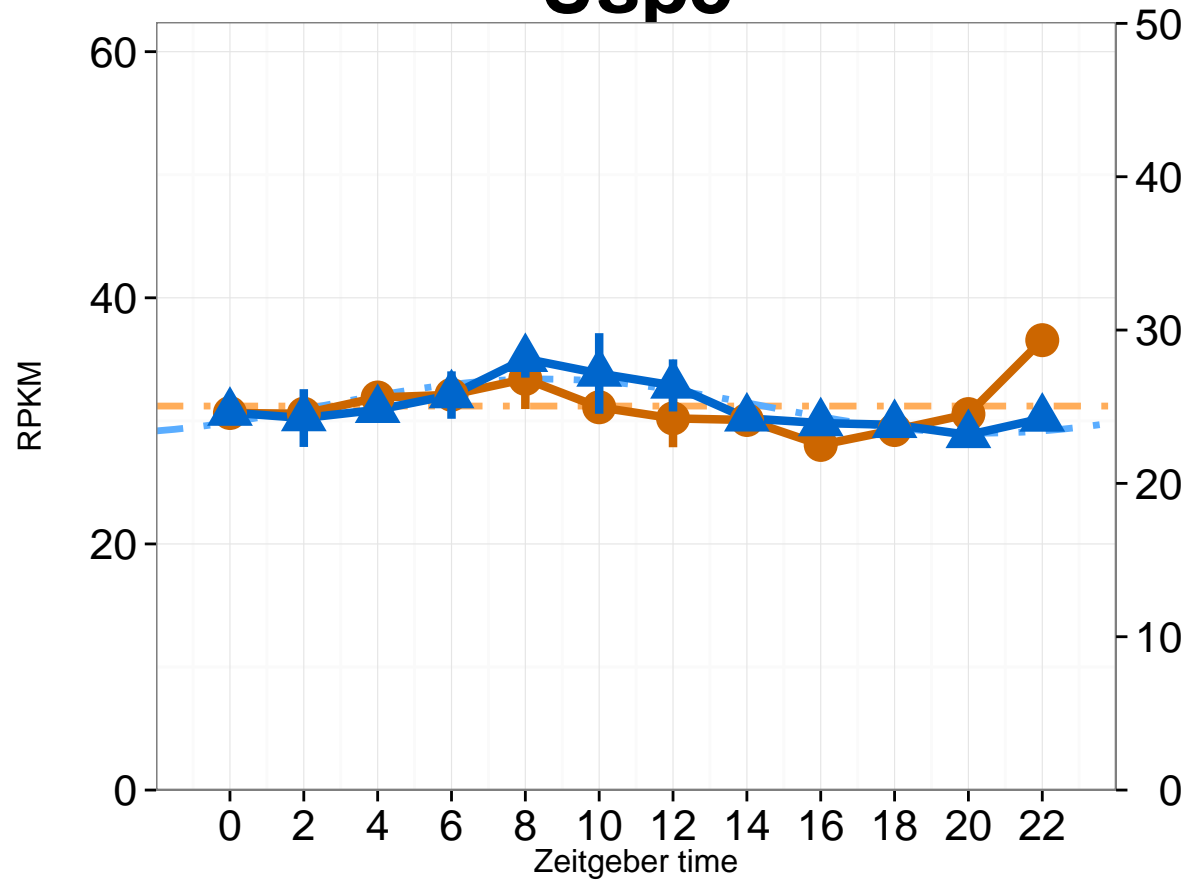

## Usp5

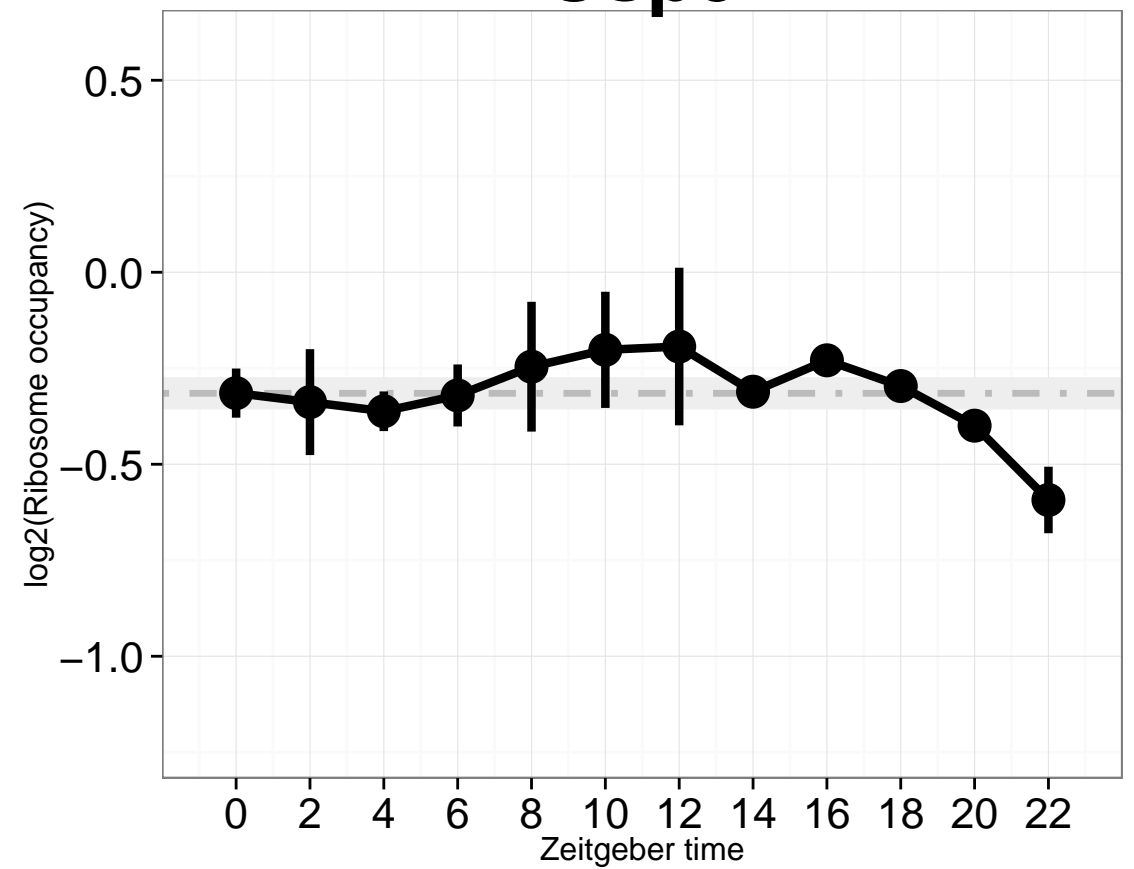

Supplement: SuppDataset_1.zip [file Usp5_set_A.pdf › Supplemental Dataset 1/A-mRNA_nonrhyth_translation_nonrhyth/Usp5_set_A.pdf]

## Usp6nl

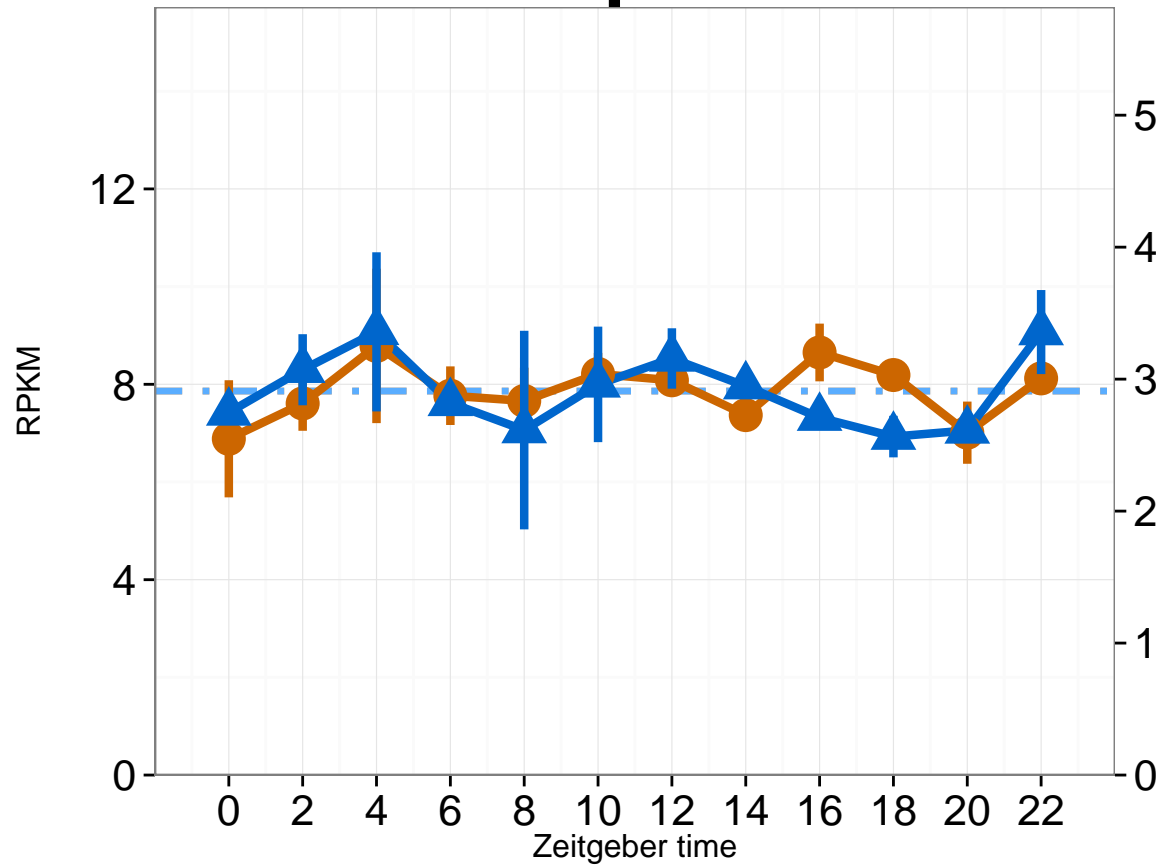

## Usp6nl

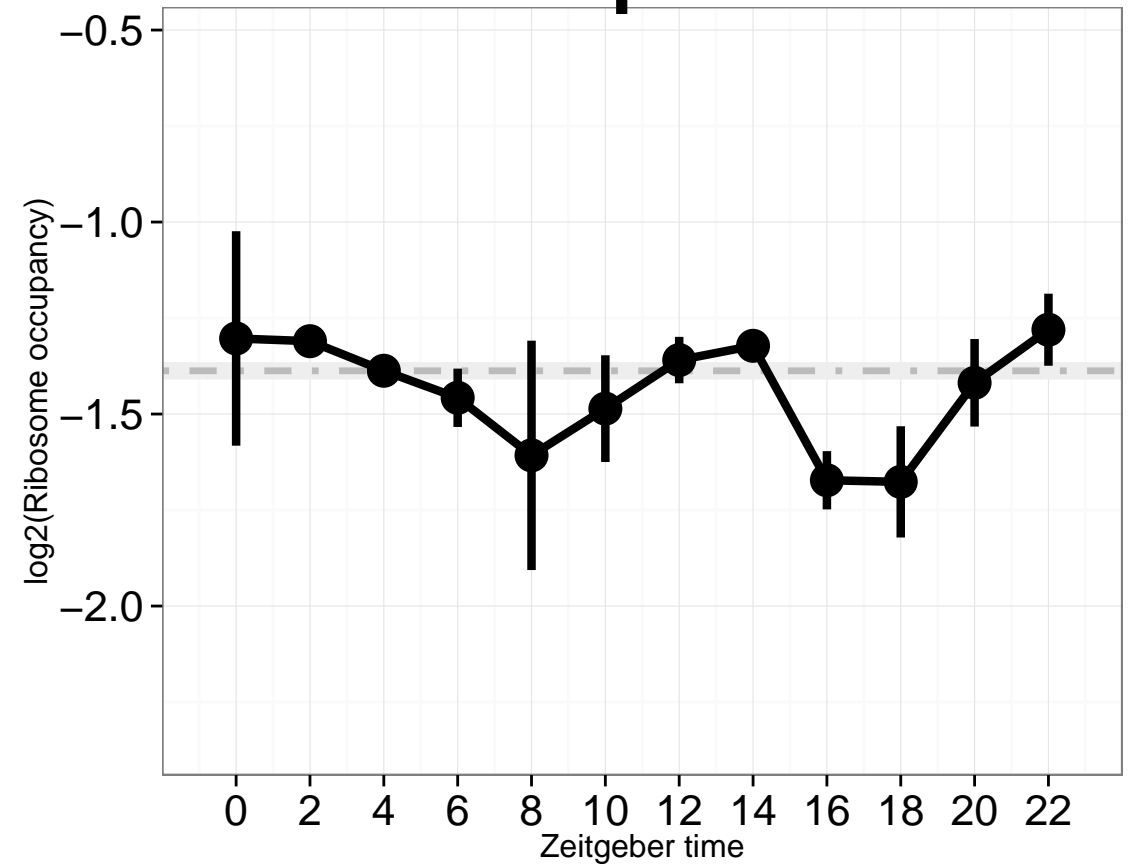

Supplement: SuppDataset_1.zip [file Usp6nl_set_A.pdf › Supplemental Dataset 1/A-mRNA_nonrhyth_translation_nonrhyth/Usp6nl_set_A.pdf]

## Usp7

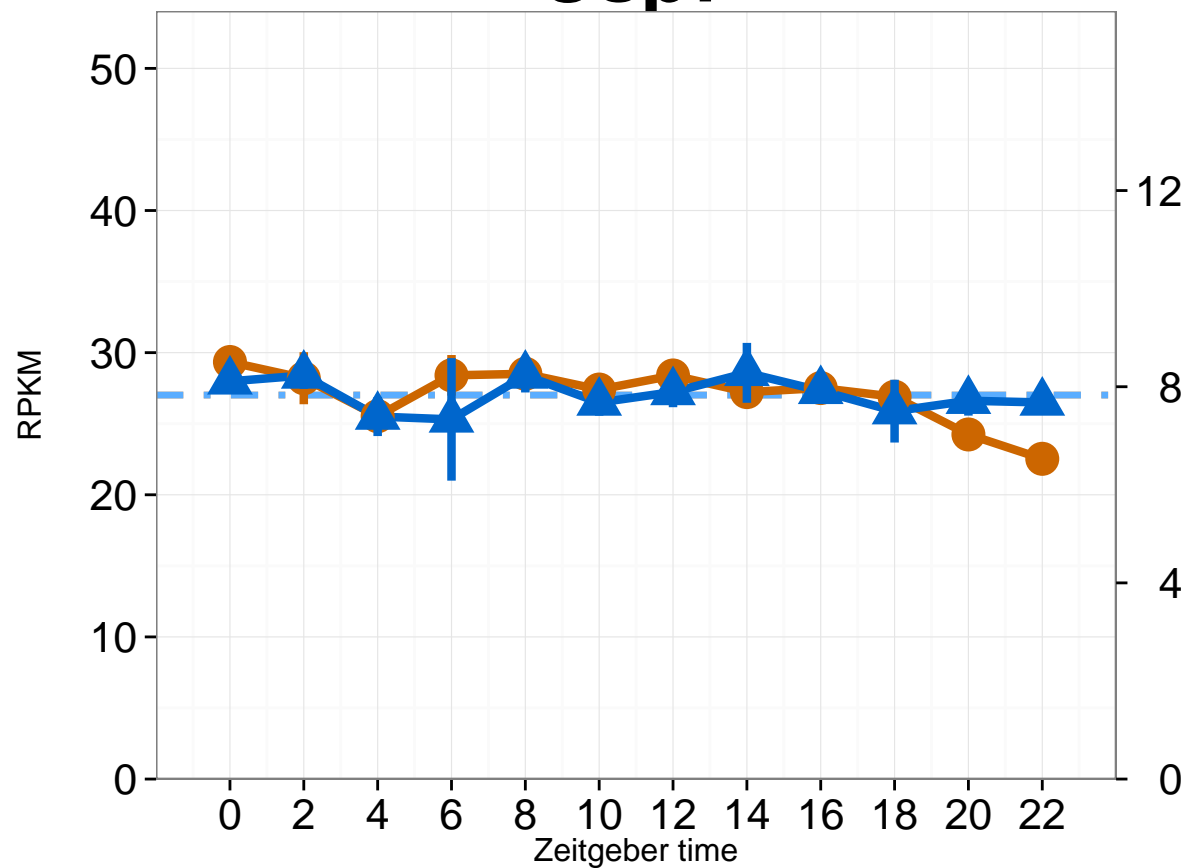

## Usp7

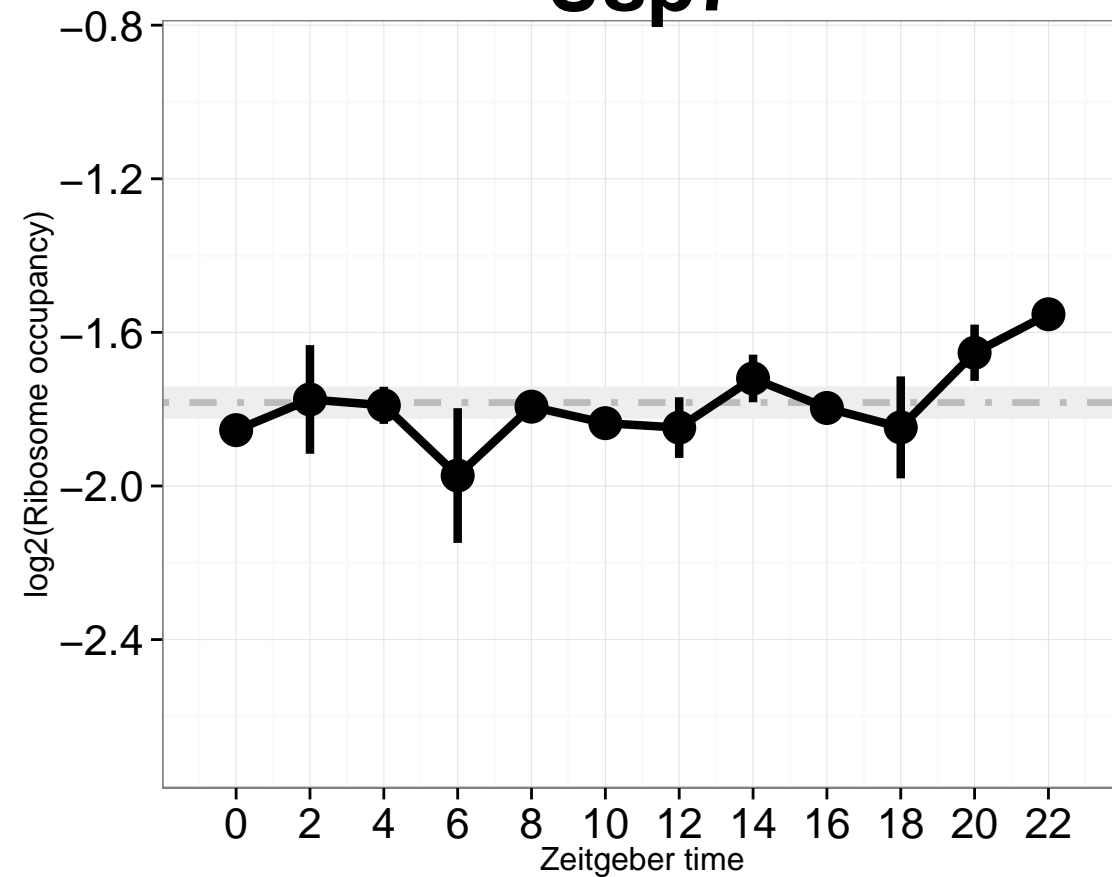

Supplement: SuppDataset_1.zip [file Usp7_set_A.pdf › Supplemental Dataset 1/A-mRNA_nonrhyth_translation_nonrhyth/Usp7_set_A.pdf]

## Usp8

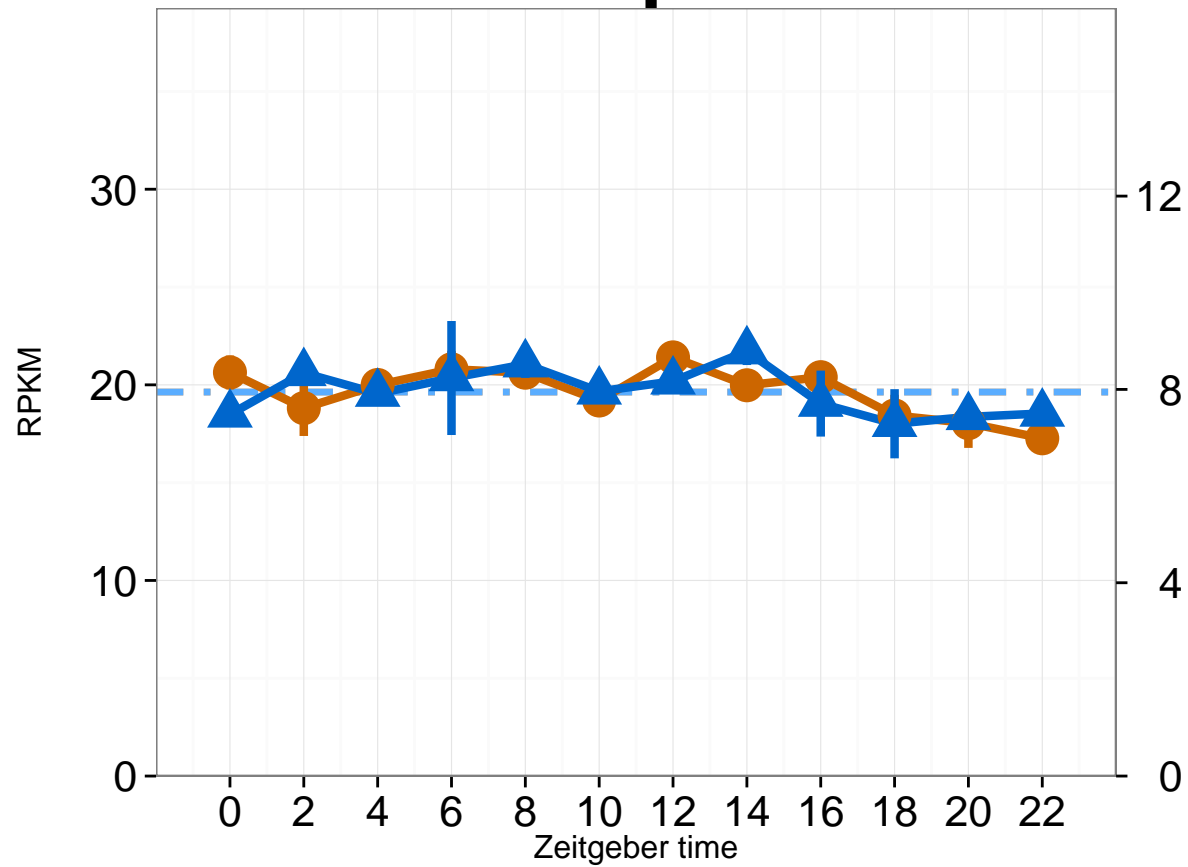

## Usp8

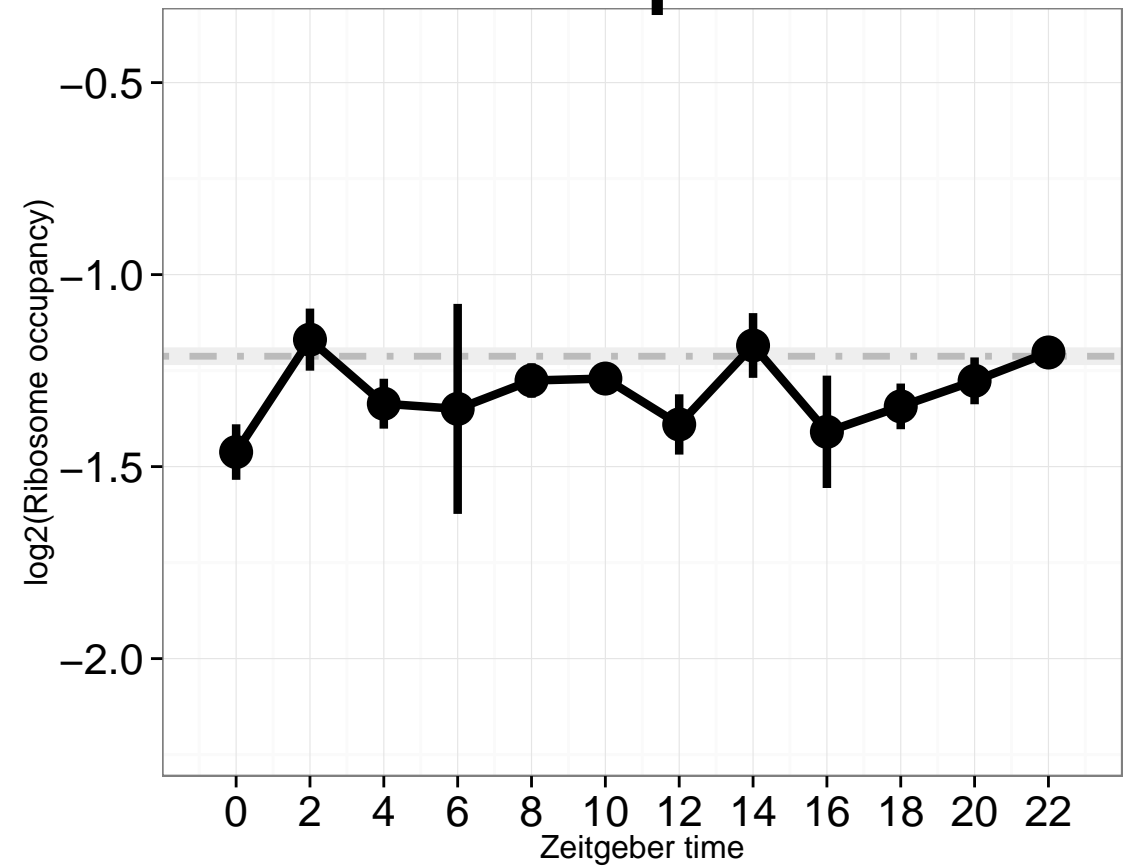

Supplement: SuppDataset_1.zip [file Usp8_set_A.pdf › Supplemental Dataset 1/A-mRNA_nonrhyth_translation_nonrhyth/Usp8_set_A.pdf]

# Usp9x

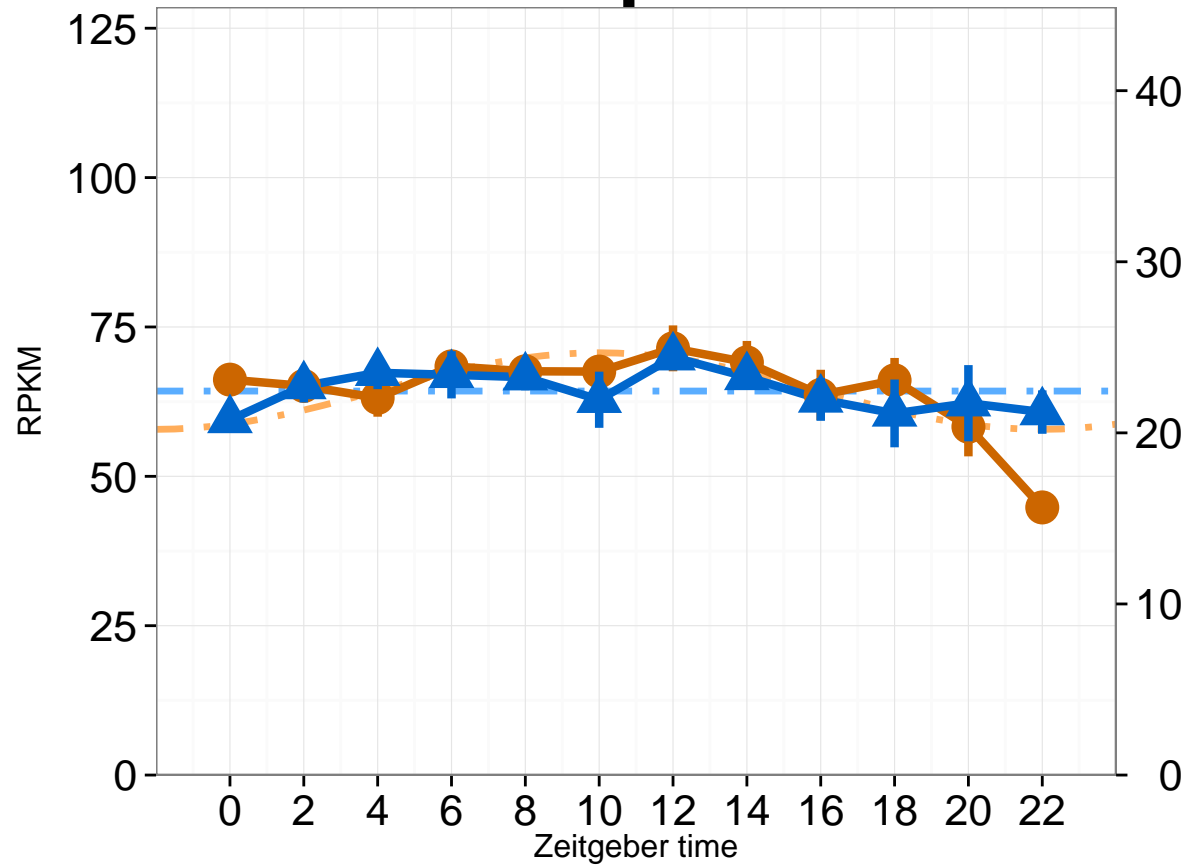

# Usp9x

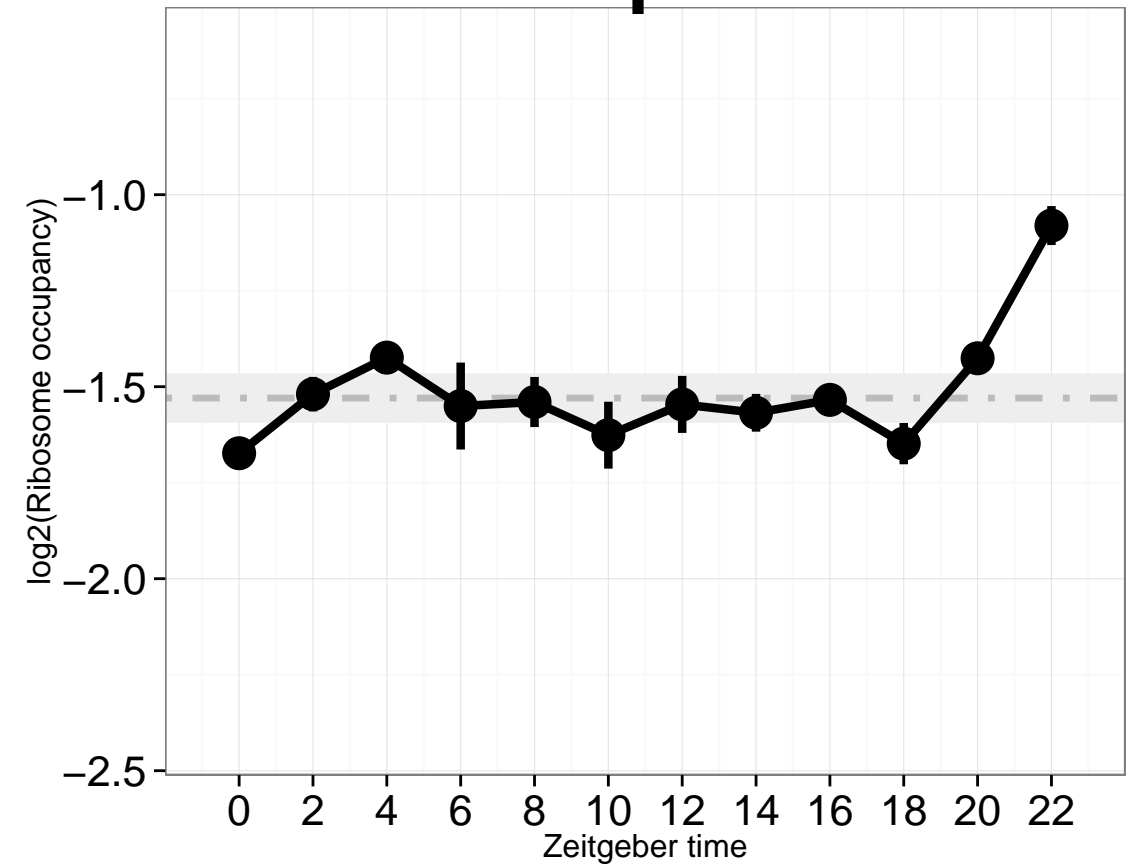

Supplement: SuppDataset_1.zip [file Usp9x_set_A.pdf › Supplemental Dataset 1/A-mRNA_nonrhyth_translation_nonrhyth/Usp9x_set_A.pdf]

## Utp11l

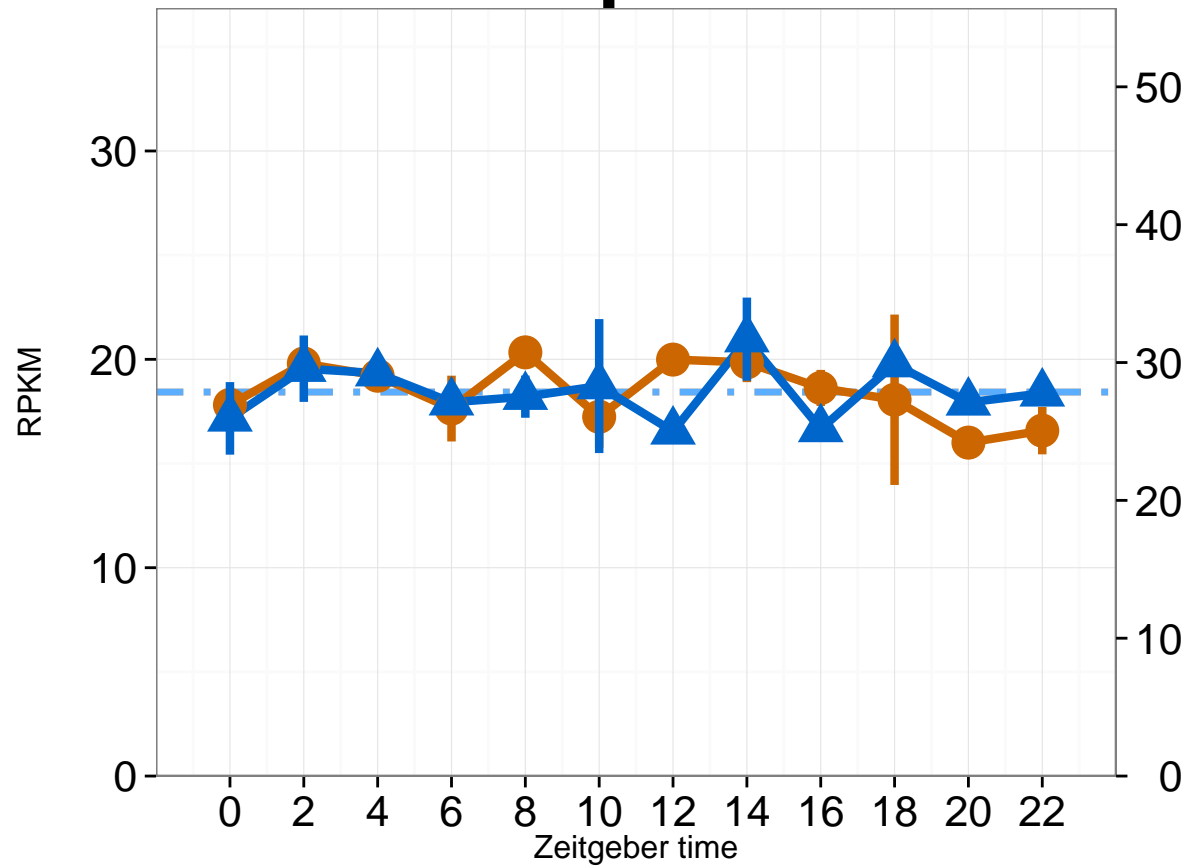

## Utp11l

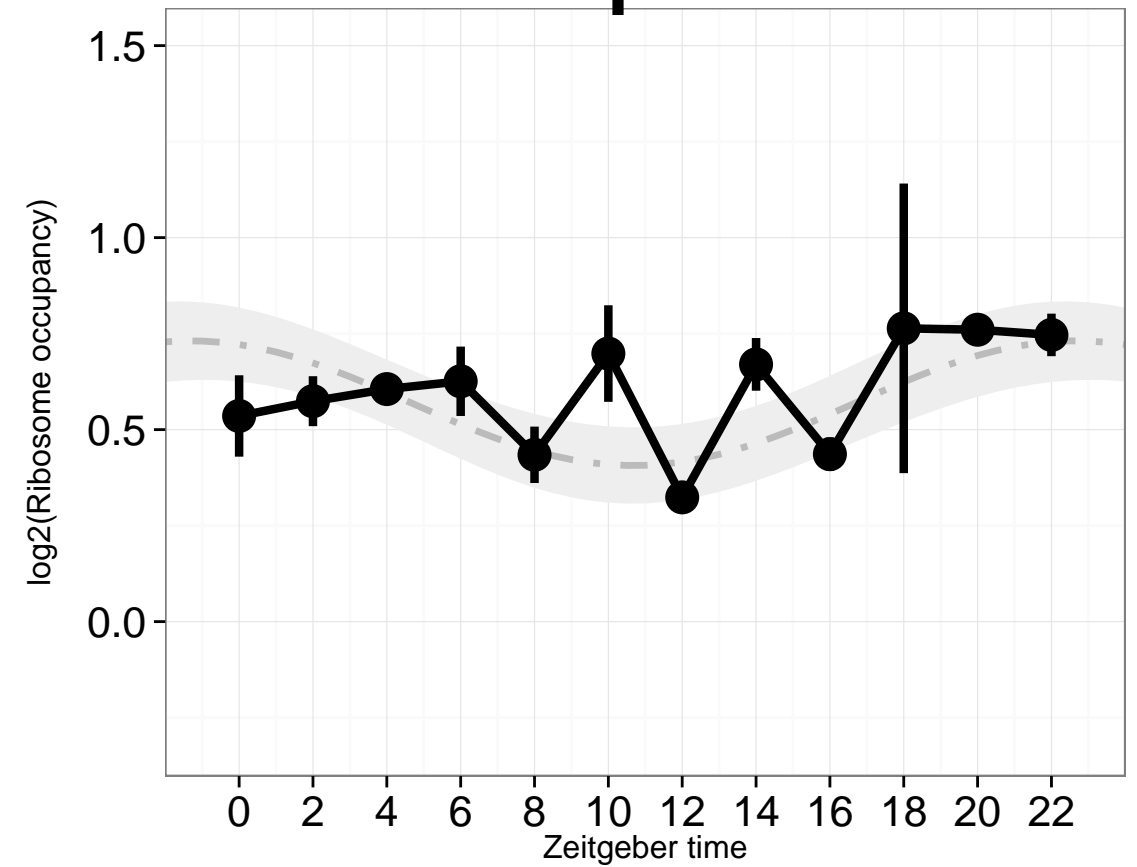

Supplement: SuppDataset_1.zip [file Utp11l_set_A.pdf › Supplemental Dataset 1/A-mRNA_nonrhyth_translation_nonrhyth/Utp11l_set_A.pdf]

# Utp14a

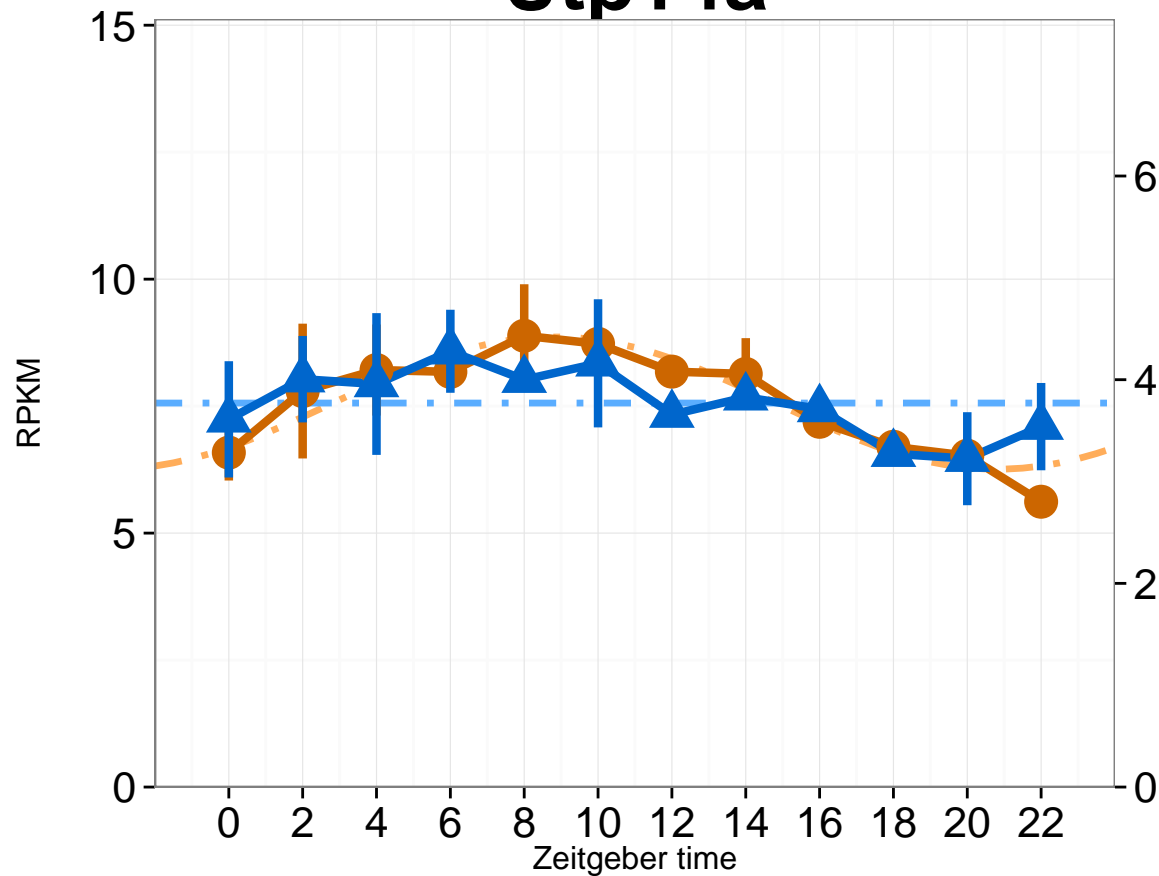

# Utp14a

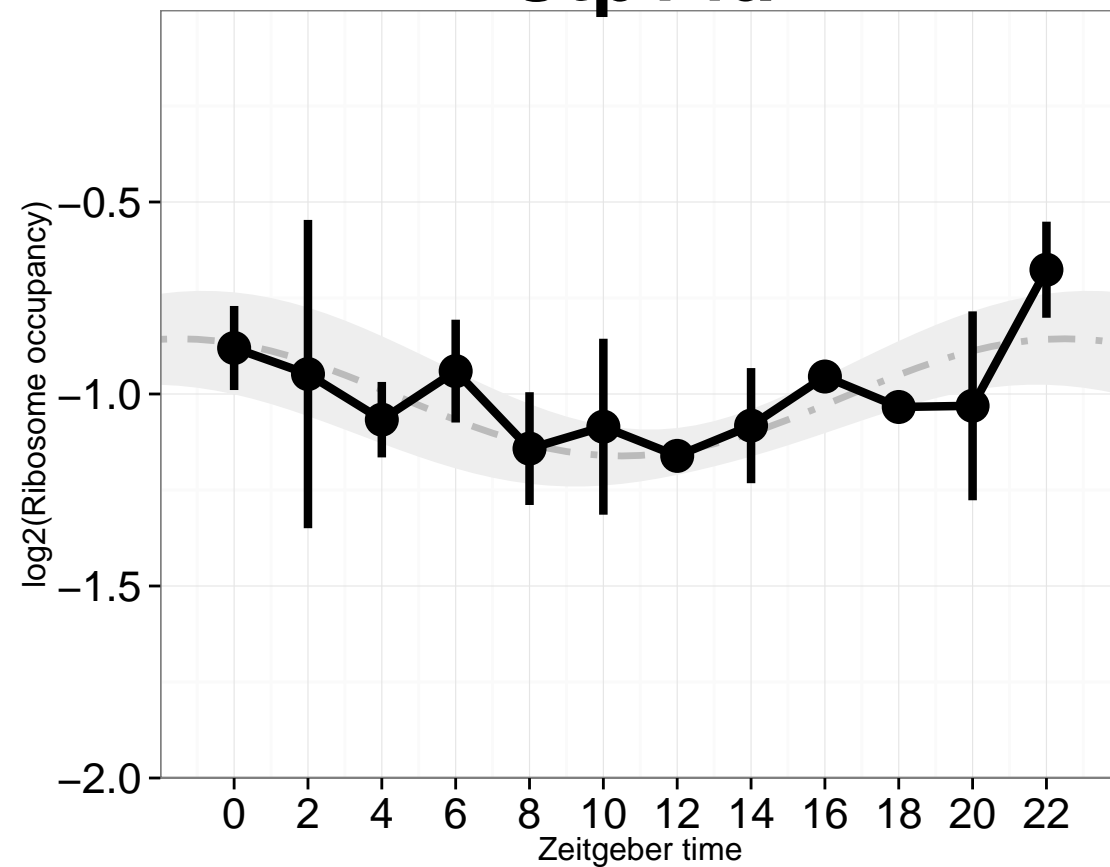

Supplement: SuppDataset_1.zip [file Utp14a_set_A.pdf › Supplemental Dataset 1/A-mRNA_nonrhyth_translation_nonrhyth/Utp14a_set_A.pdf]

# Utp15

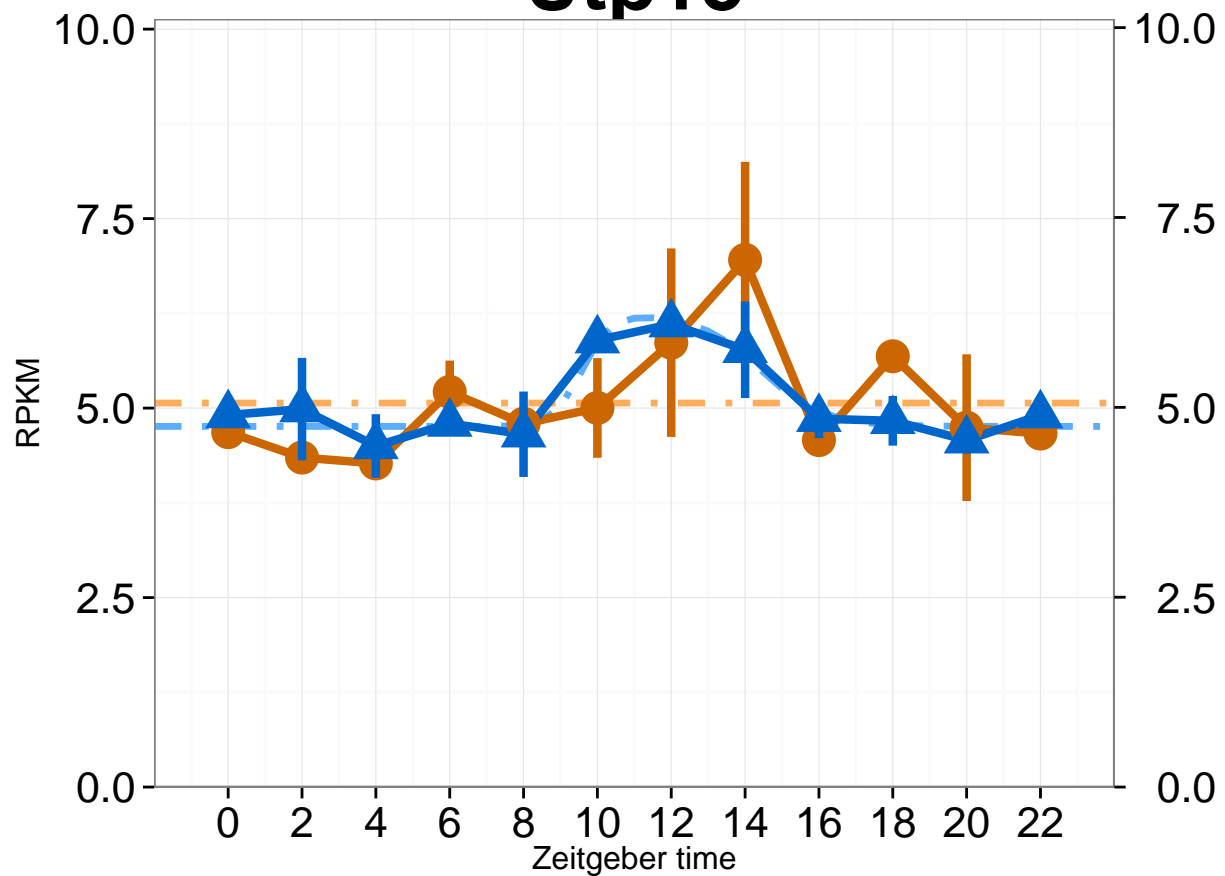

# Utp15

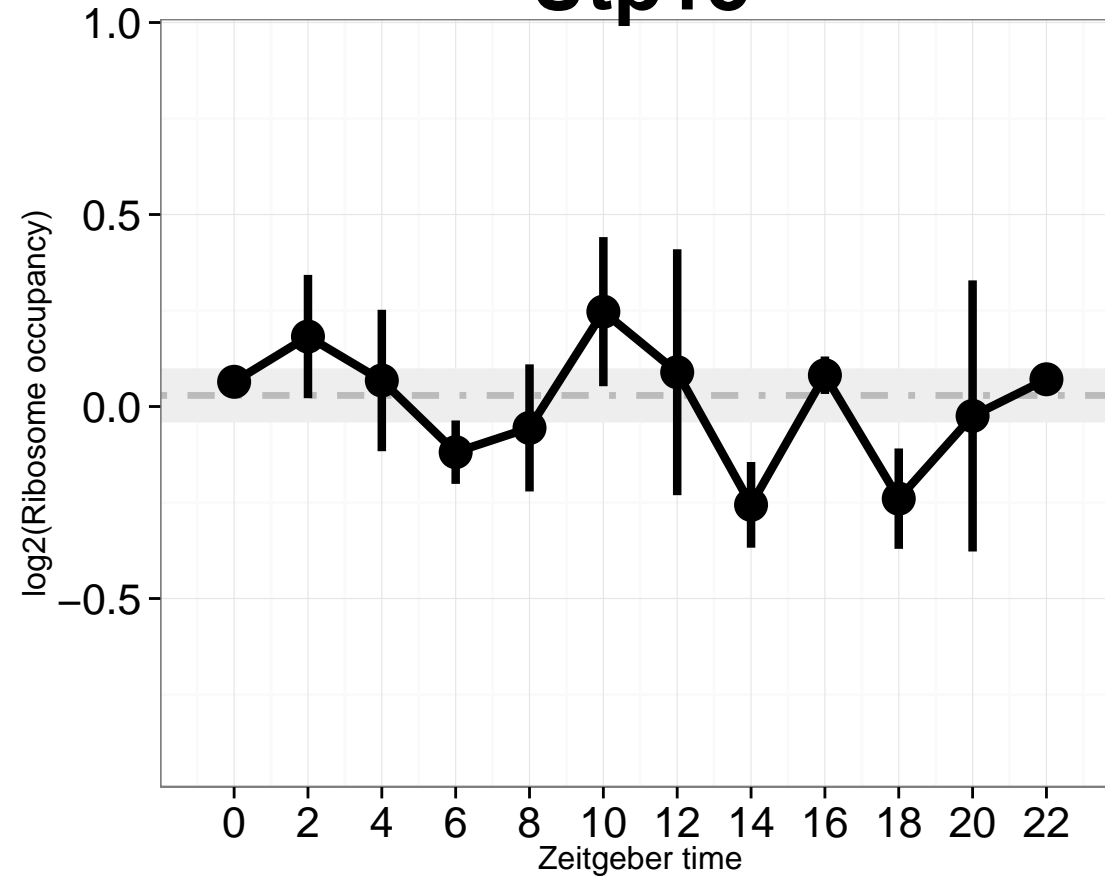

Supplement: SuppDataset_1.zip [file Utp15_set_A.pdf › Supplemental Dataset 1/A-mRNA_nonrhyth_translation_nonrhyth/Utp15_set_A.pdf]

## Utp20

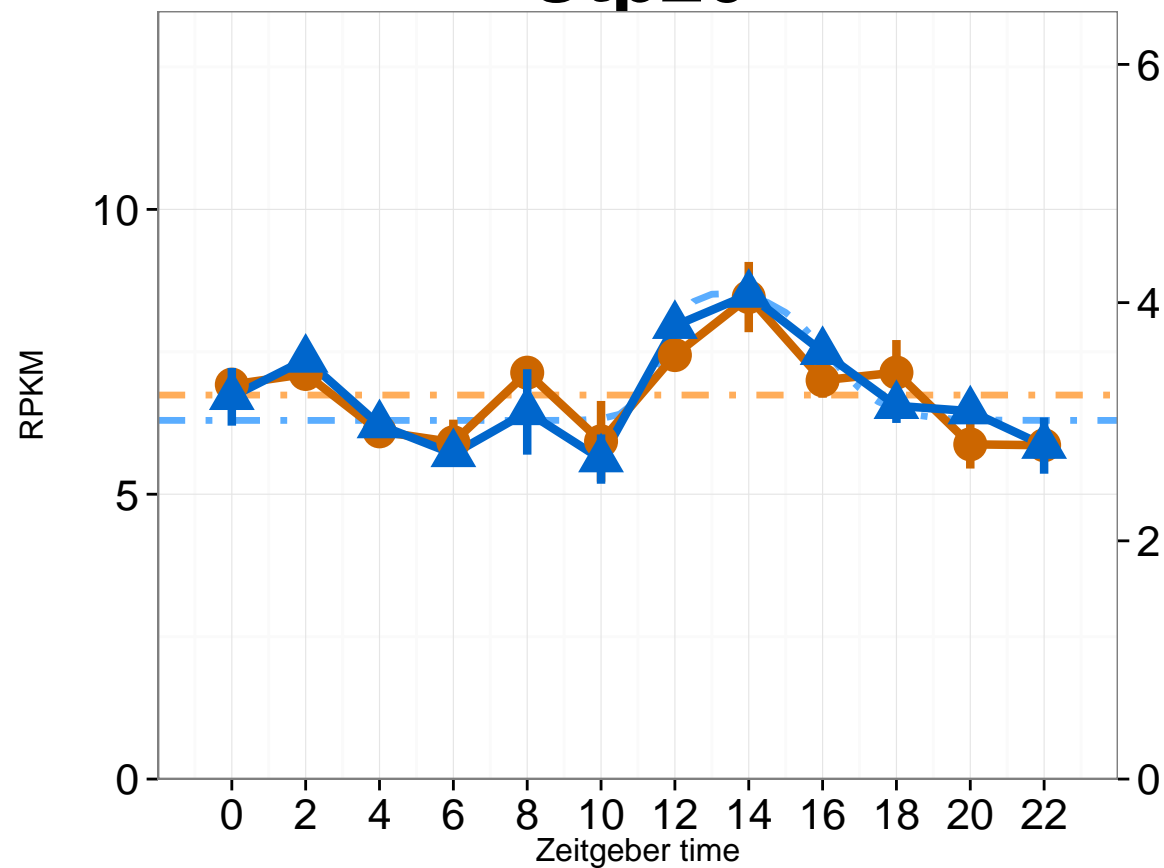

## Utp20

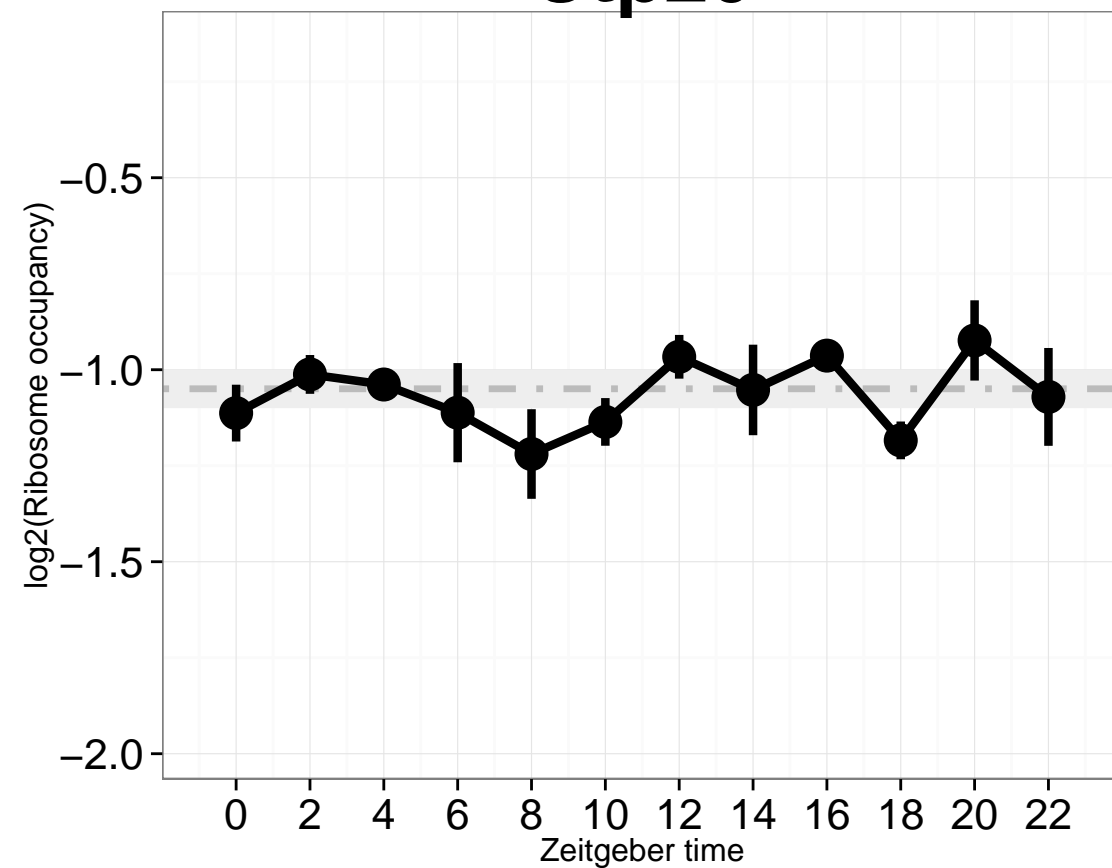

Supplement: SuppDataset_1.zip [file Utp20_set_A.pdf › Supplemental Dataset 1/A-mRNA_nonrhyth_translation_nonrhyth/Utp20_set_A.pdf]

# Utp23

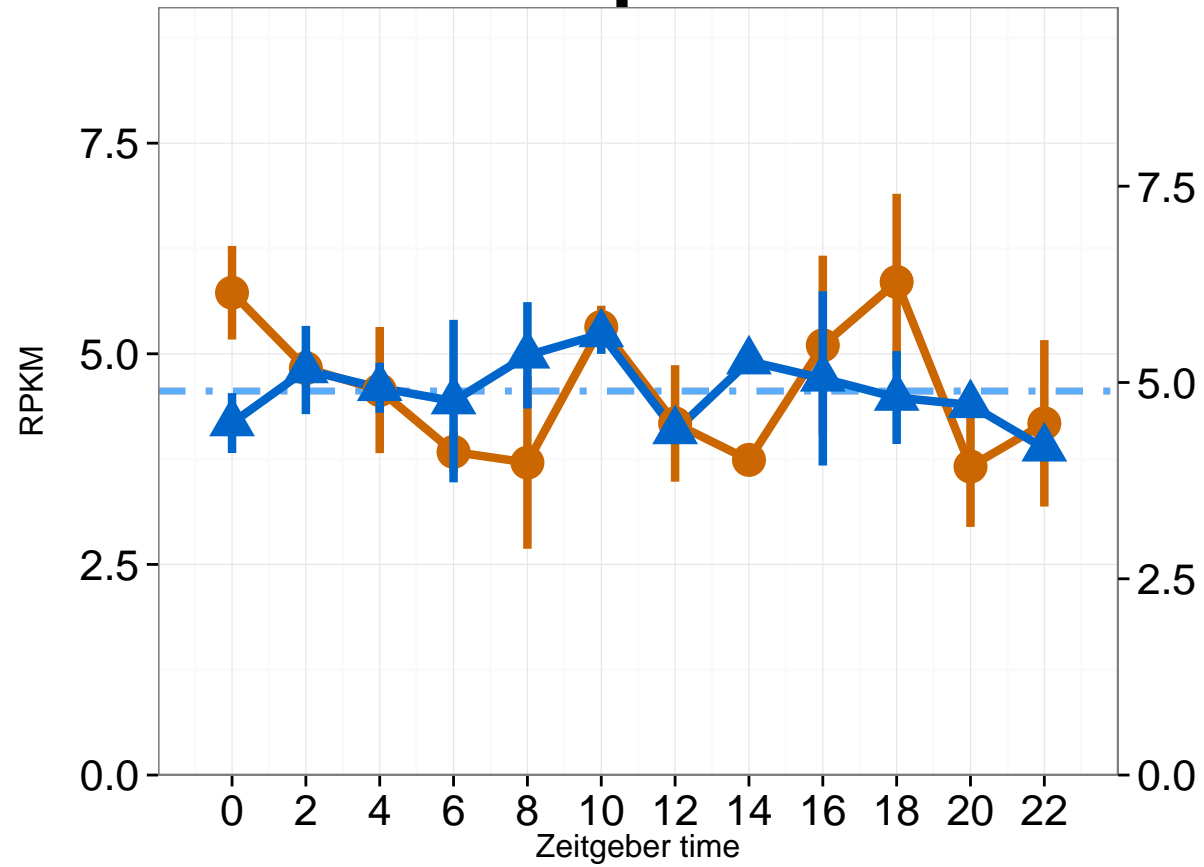

# Utp23

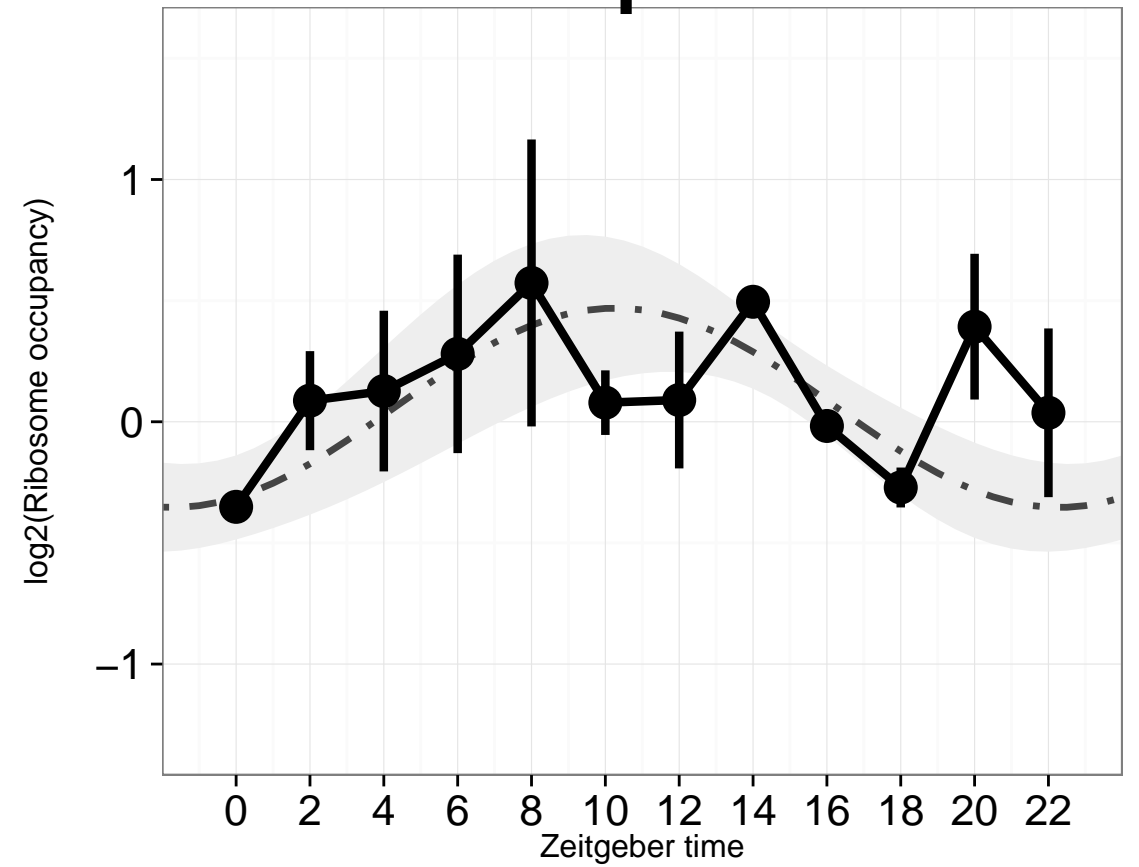

Supplement: SuppDataset_1.zip [file Utp23_set_A.pdf › Supplemental Dataset 1/A-mRNA_nonrhyth_translation_nonrhyth/Utp23_set_A.pdf]

# Utp3

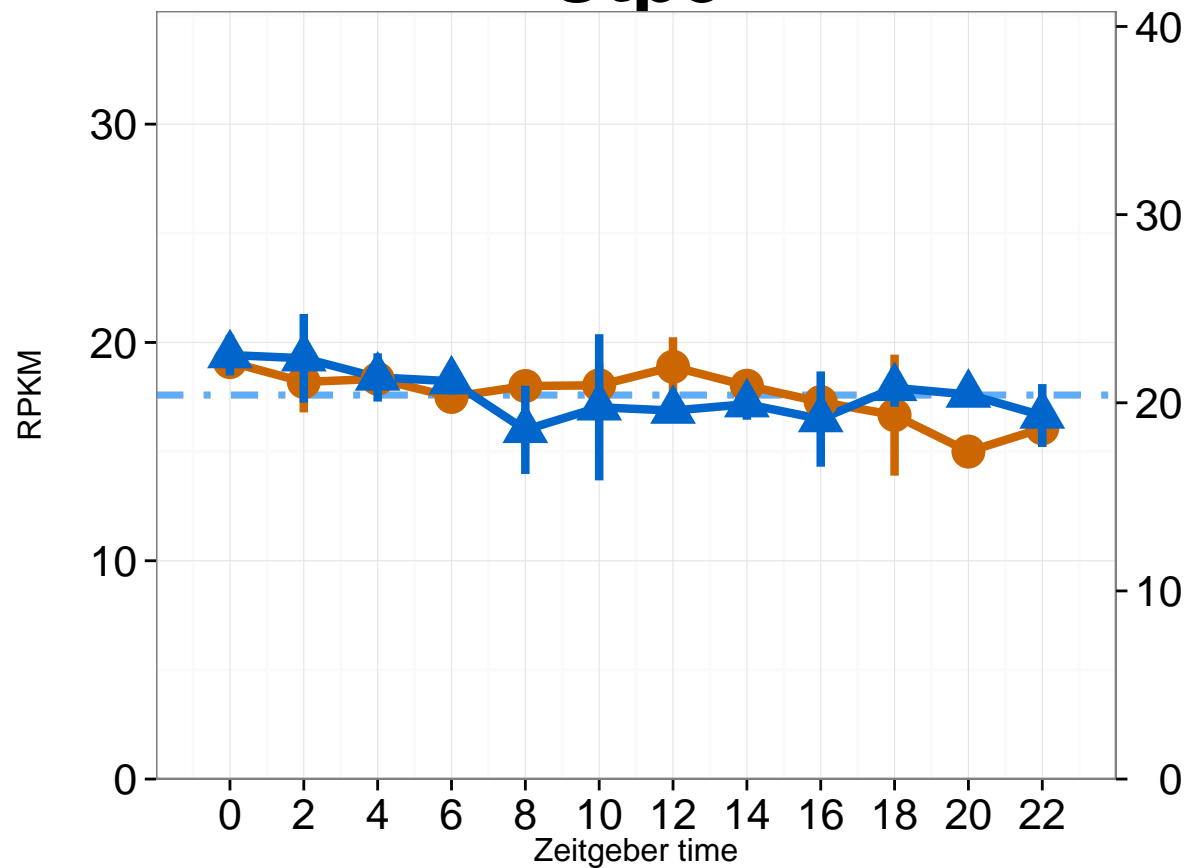

# Utp3

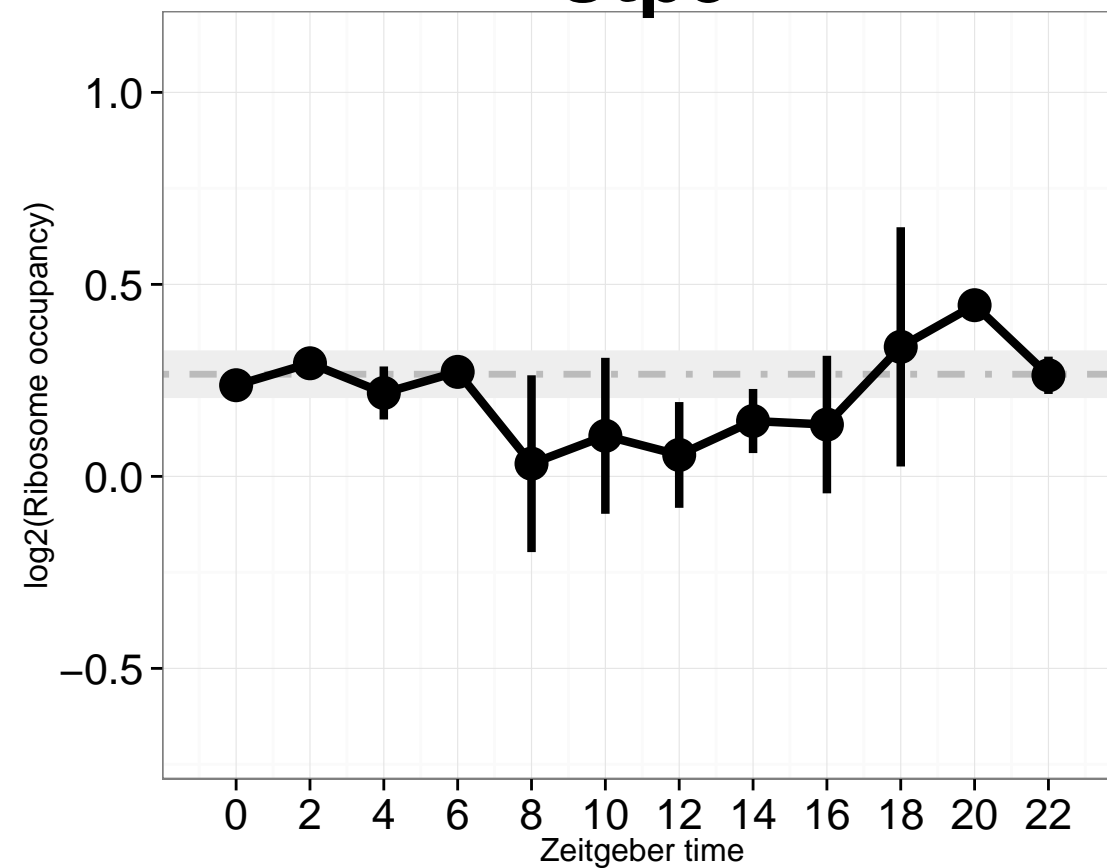

Supplement: SuppDataset_1.zip [file Utp3_set_A.pdf › Supplemental Dataset 1/A-mRNA_nonrhyth_translation_nonrhyth/Utp3_set_A.pdf]

# Utp6

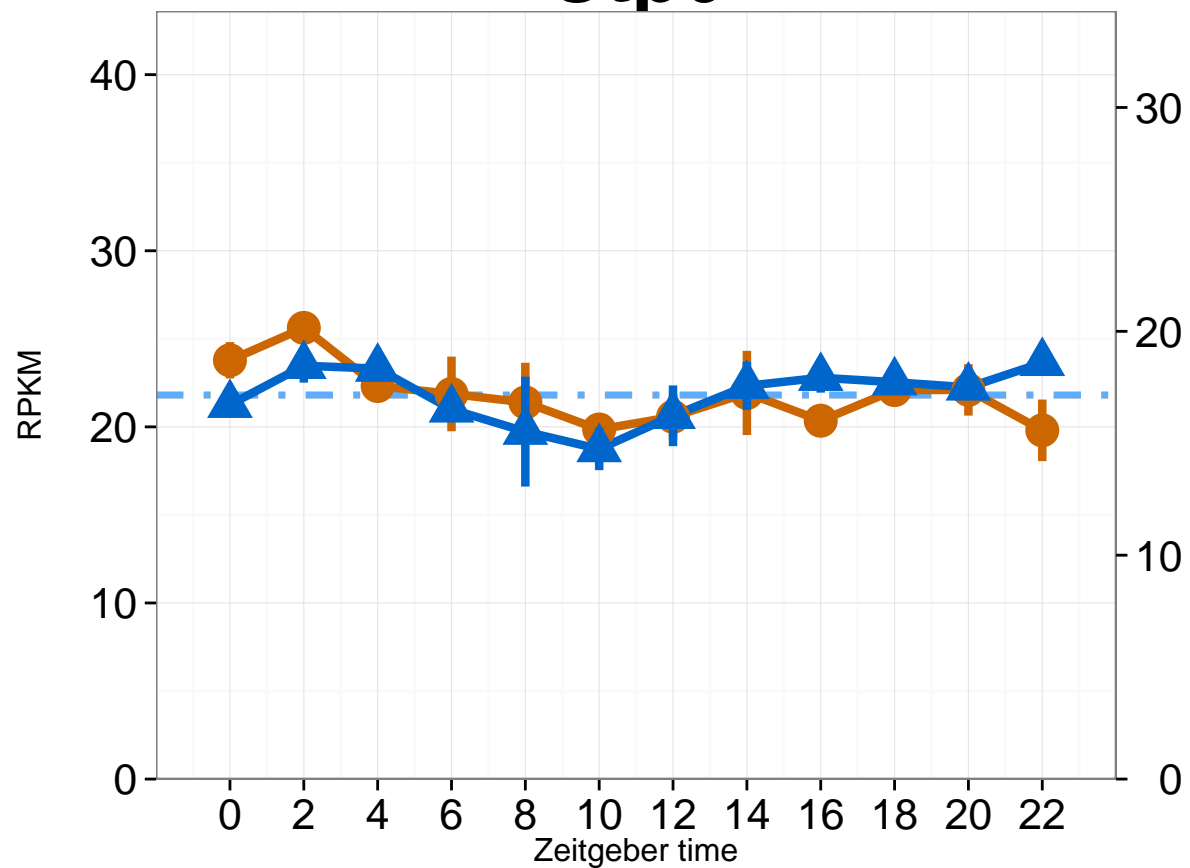

# Utp6

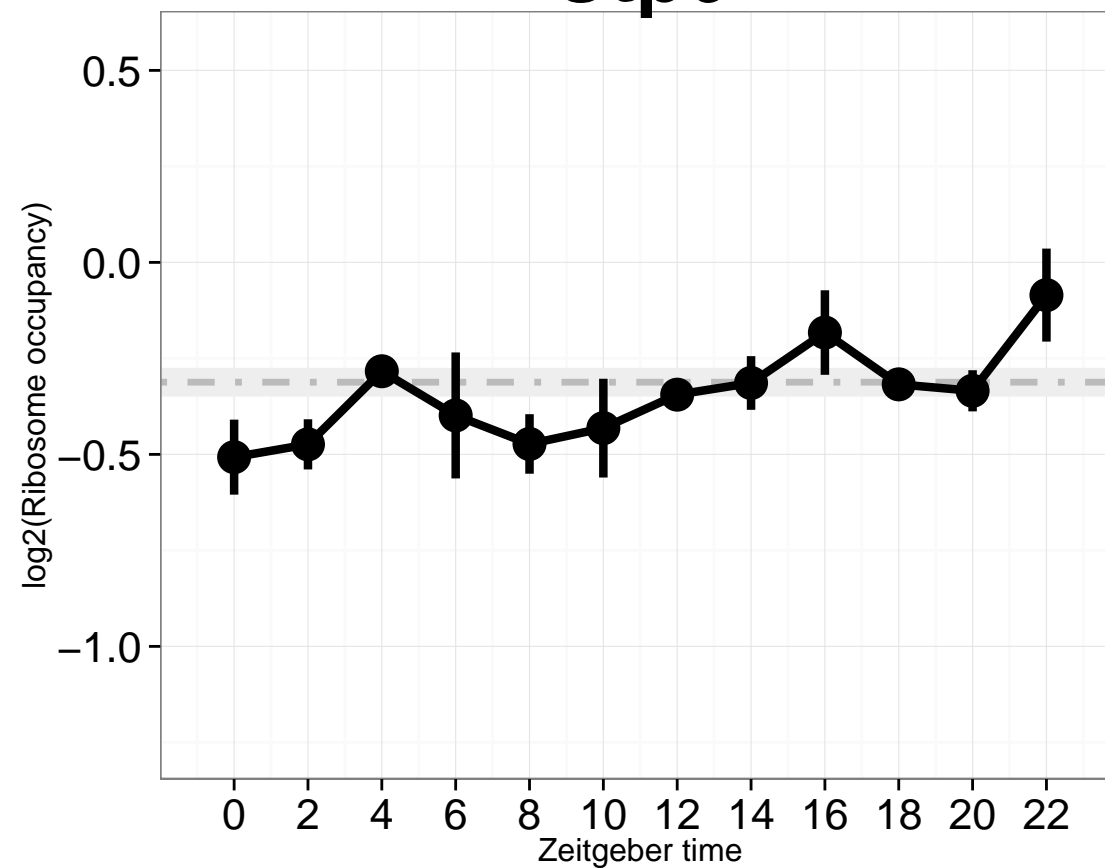

Supplement: SuppDataset_1.zip [file Utp6_set_A.pdf › Supplemental Dataset 1/A-mRNA_nonrhyth_translation_nonrhyth/Utp6_set_A.pdf]

## Uty

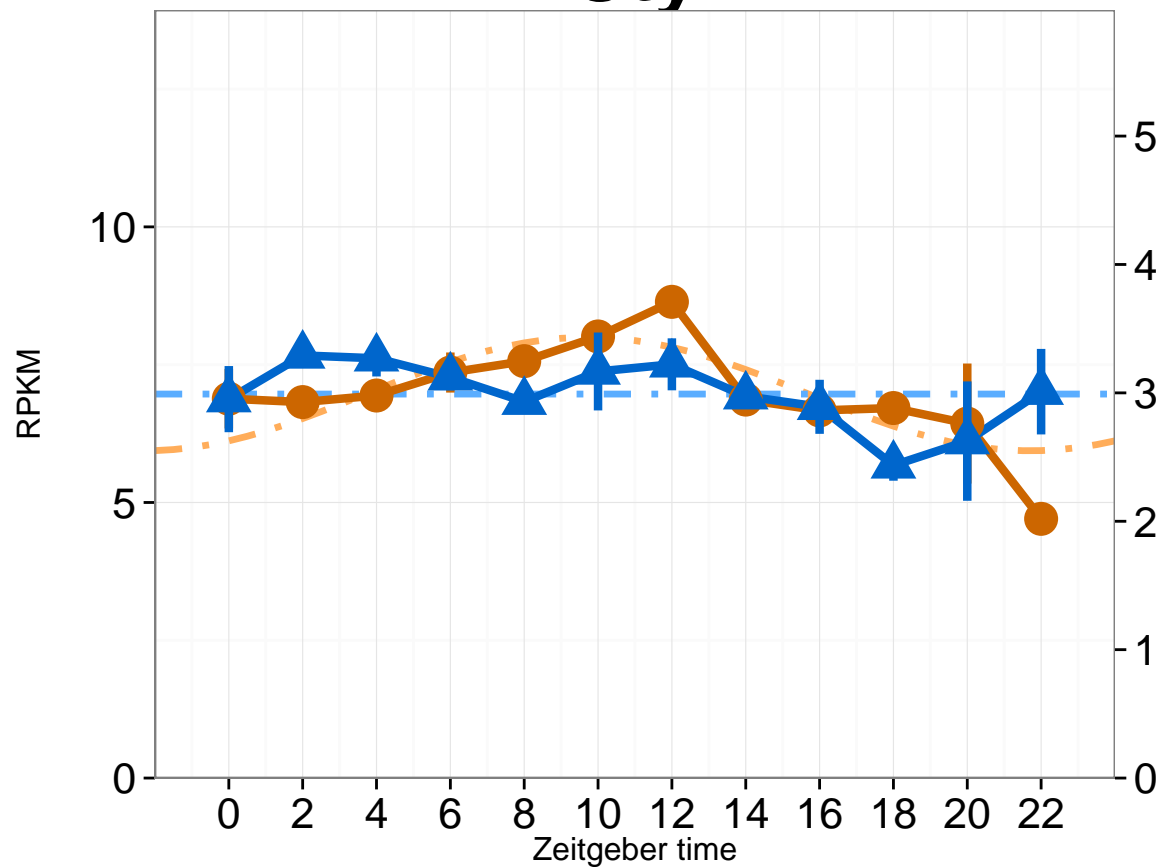

## Uty

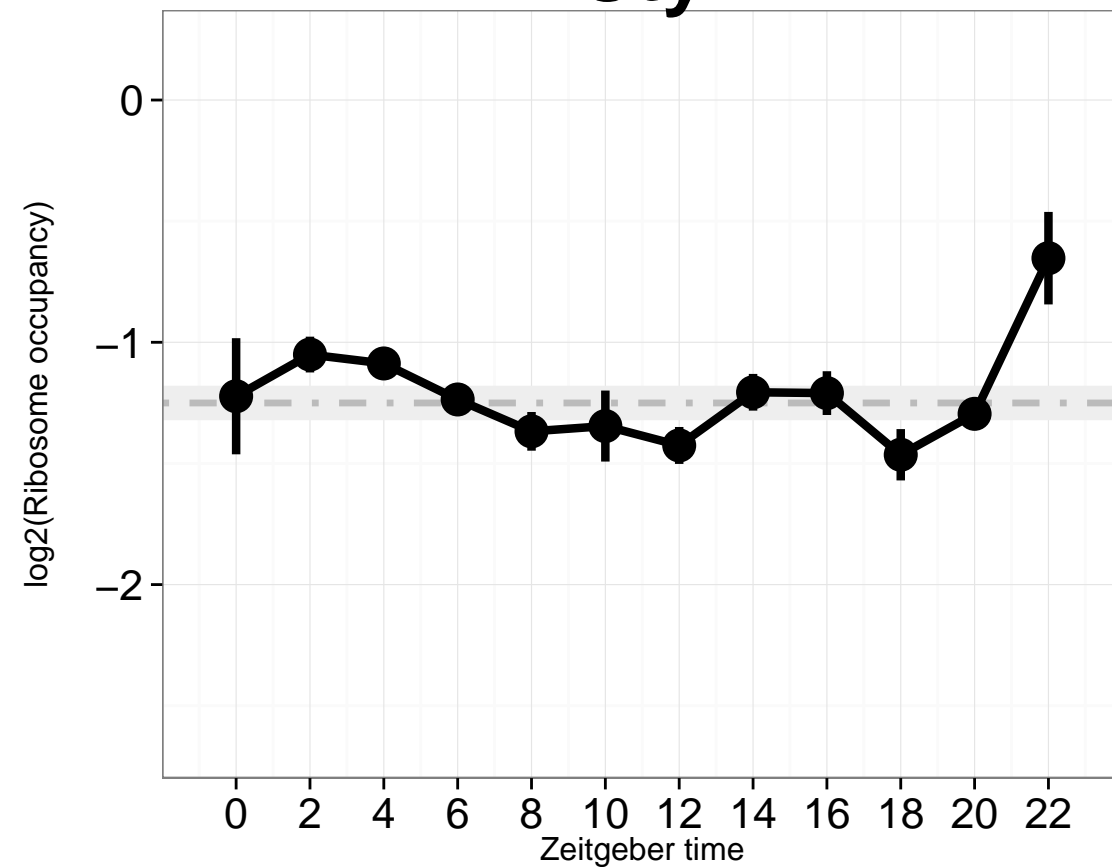

Supplement: SuppDataset_1.zip [file Uty_set_A.pdf › Supplemental Dataset 1/A-mRNA_nonrhyth_translation_nonrhyth/Uty_set_A.pdf]

## Uvrag

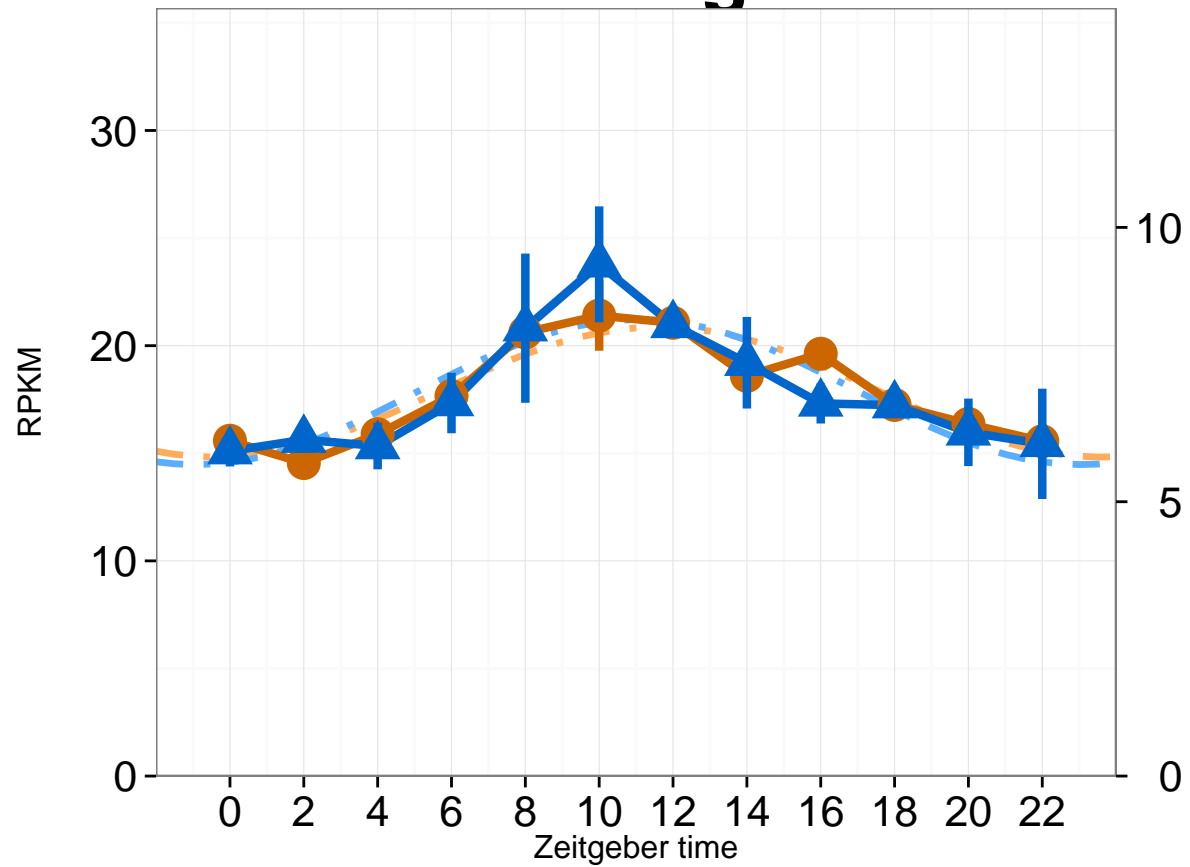

## Uvrag

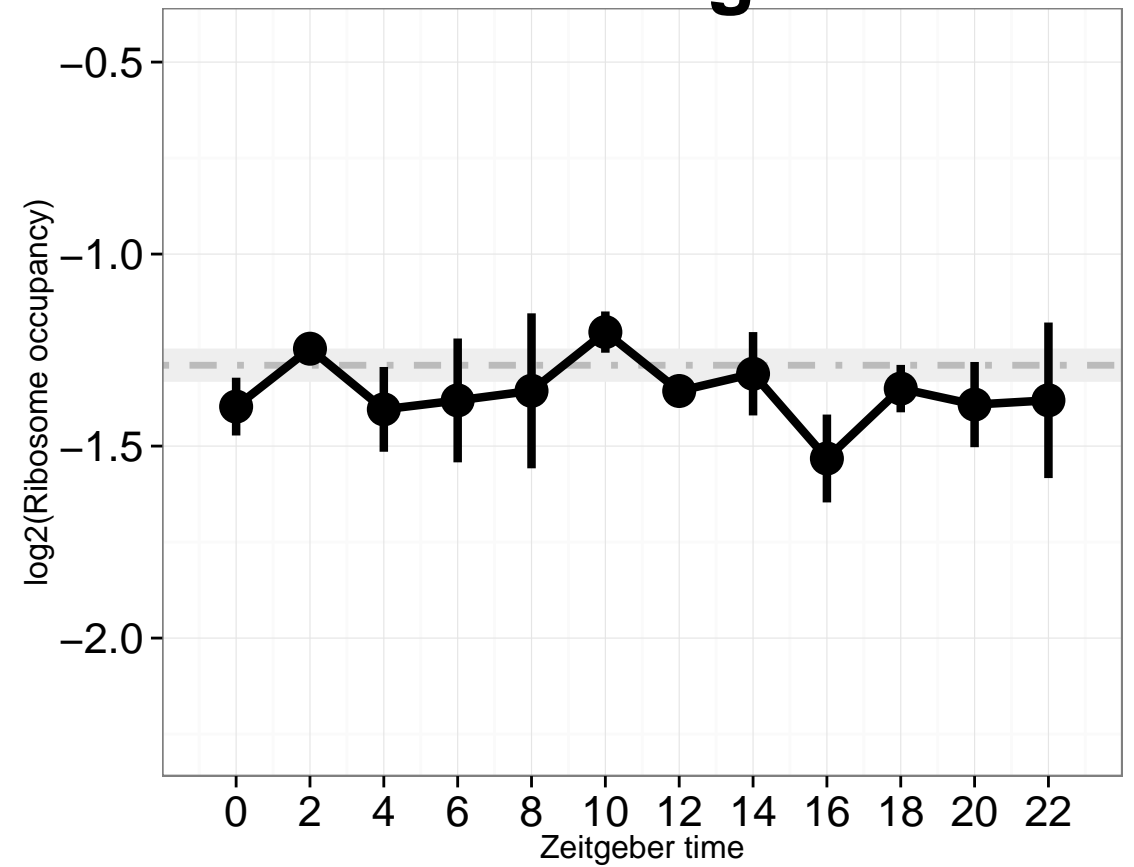

Supplement: SuppDataset_1.zip [file Uvrag_set_A.pdf › Supplemental Dataset 1/A-mRNA_nonrhyth_translation_nonrhyth/Uvrag_set_A.pdf]

## Uvssa

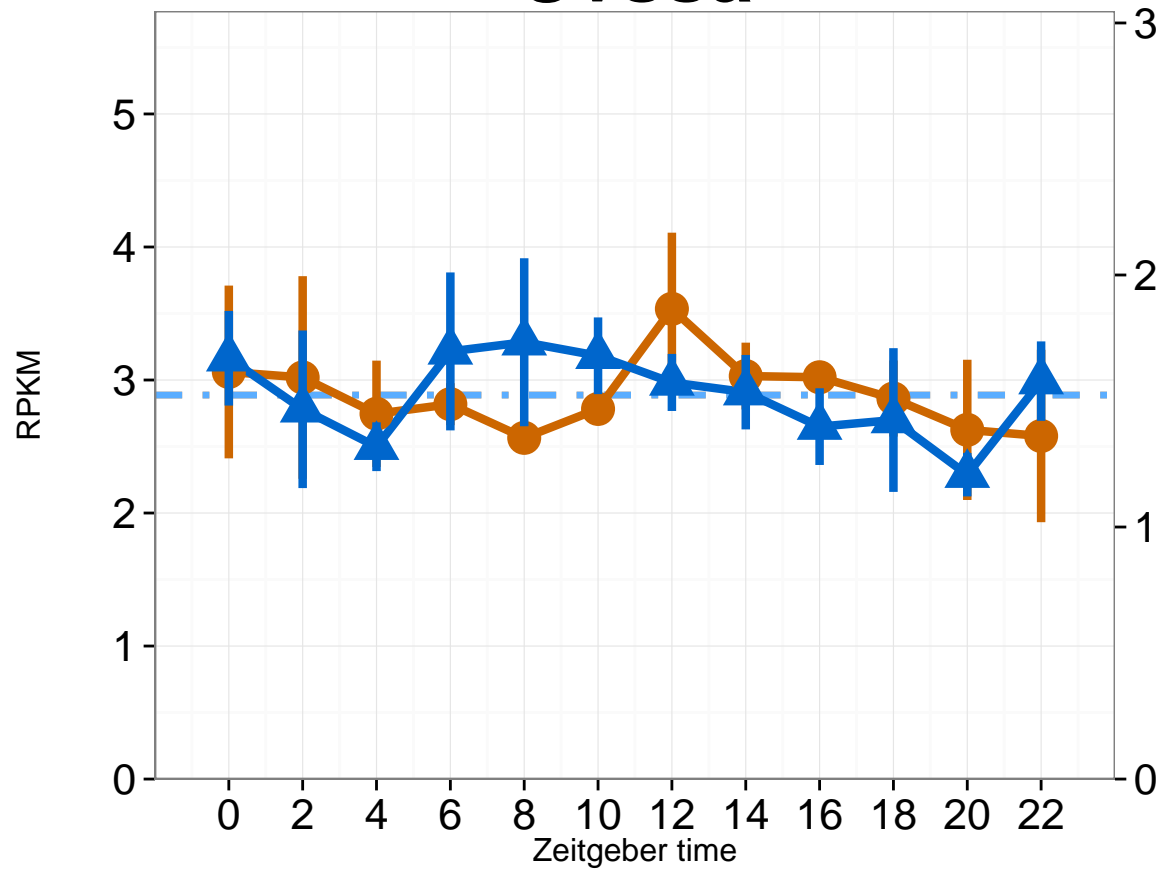

## Uvssa

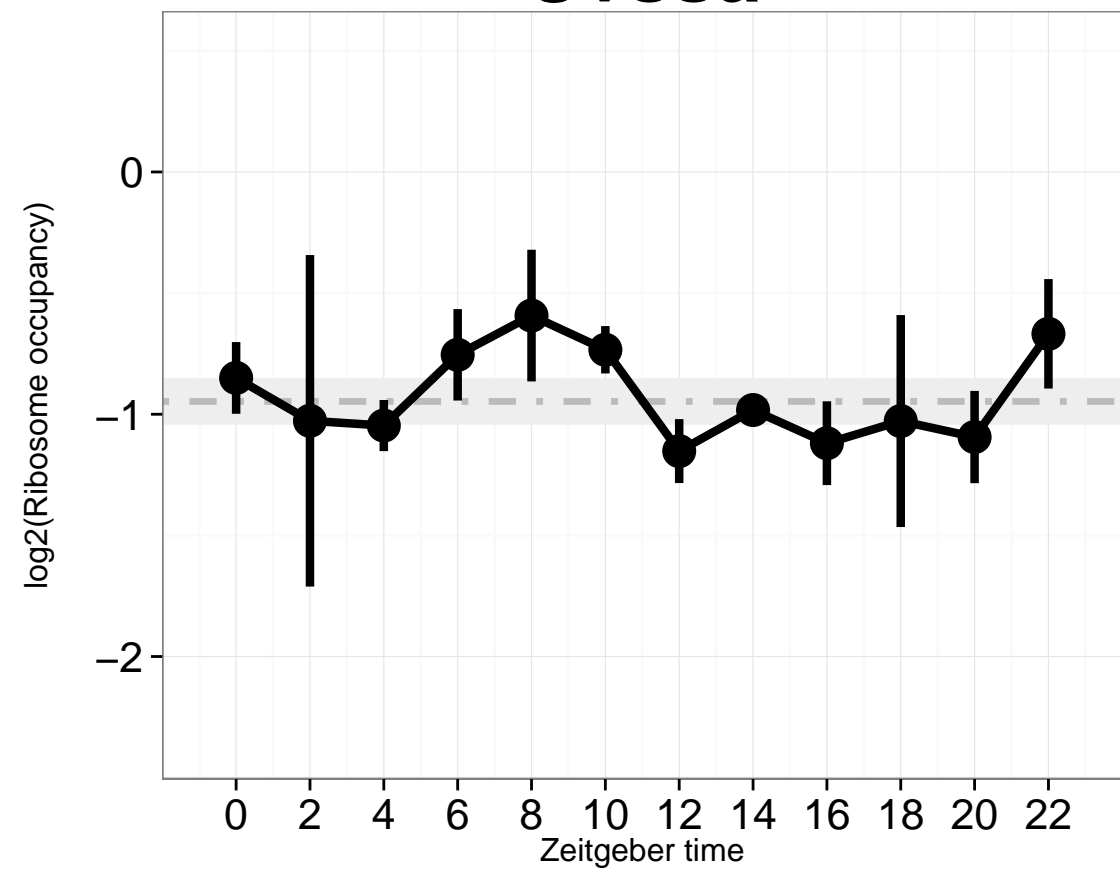

Supplement: SuppDataset_1.zip [file Uvssa_set_A.pdf › Supplemental Dataset 1/A-mRNA_nonrhyth_translation_nonrhyth/Uvssa_set_A.pdf]

## Uxt

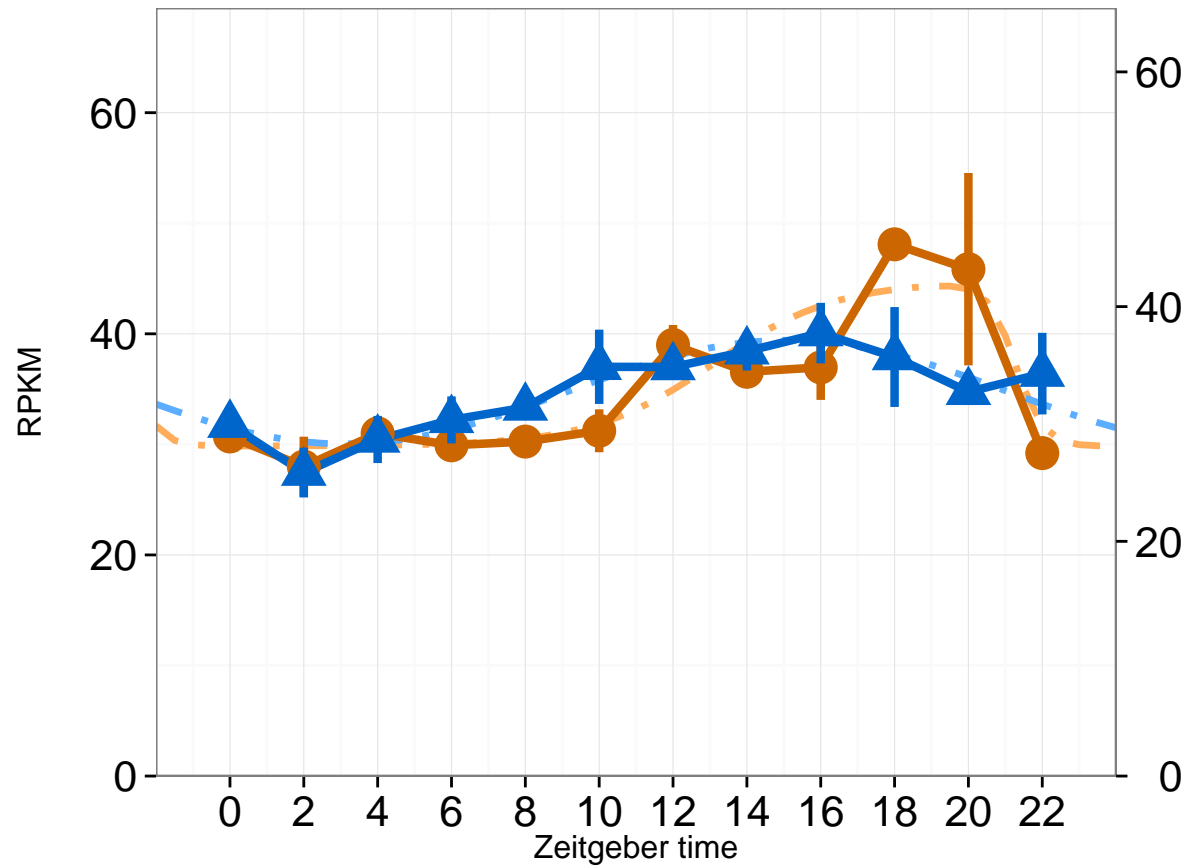

## Uxt

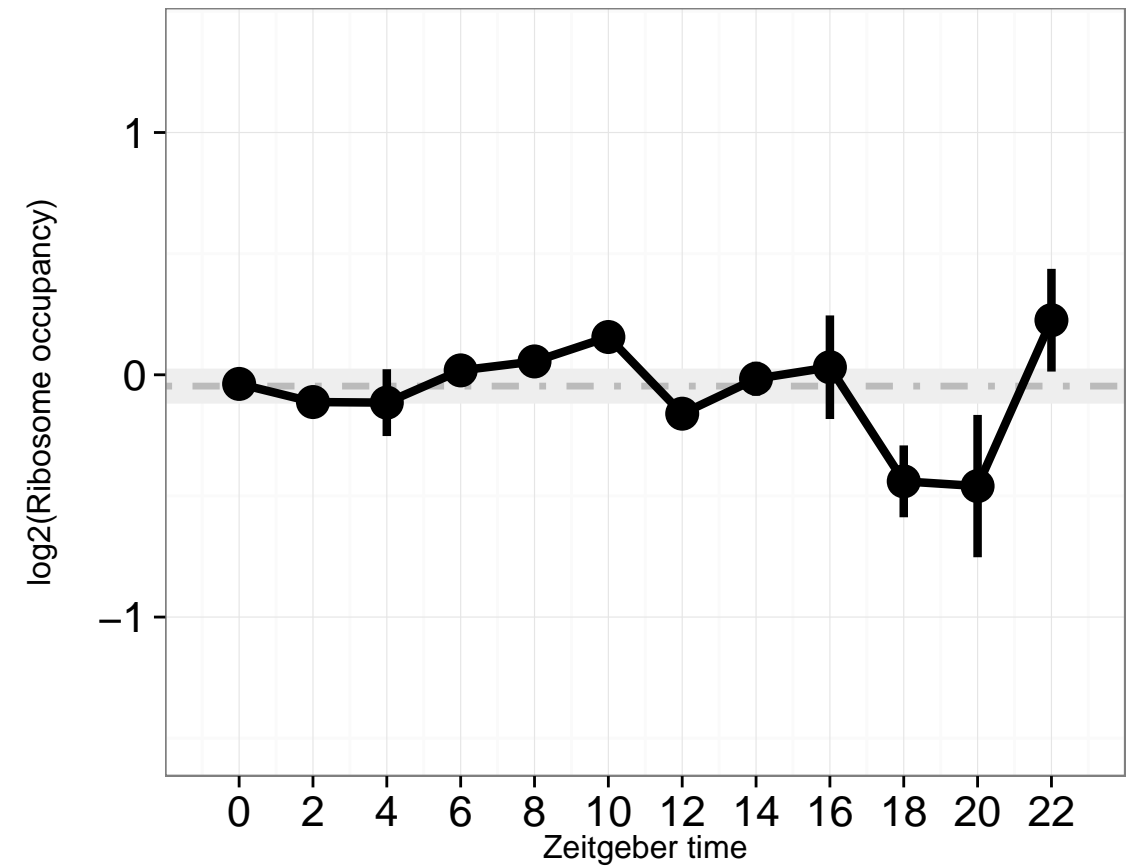

Supplement: SuppDataset_1.zip [file Uxt_set_A.pdf › Supplemental Dataset 1/A-mRNA_nonrhyth_translation_nonrhyth/Uxt_set_A.pdf]

## Vamp2

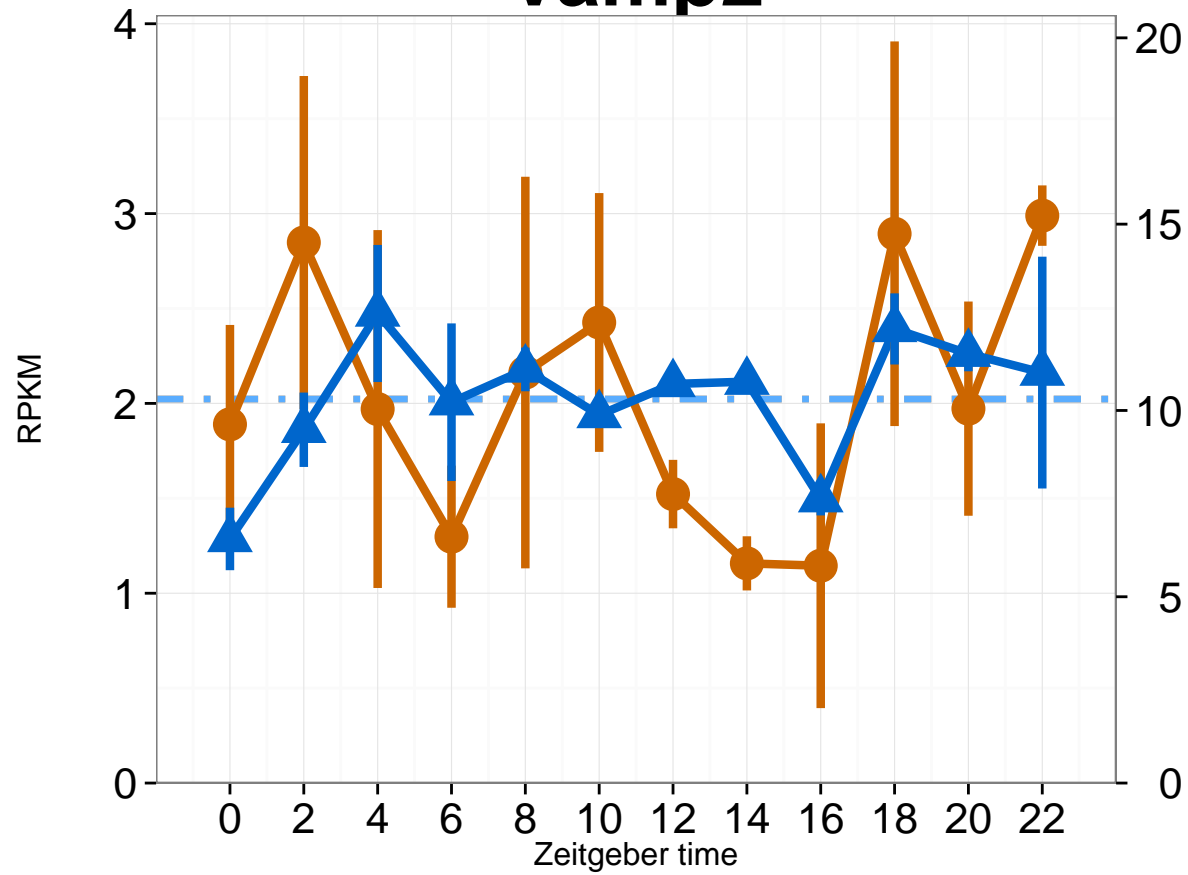

## Vamp2

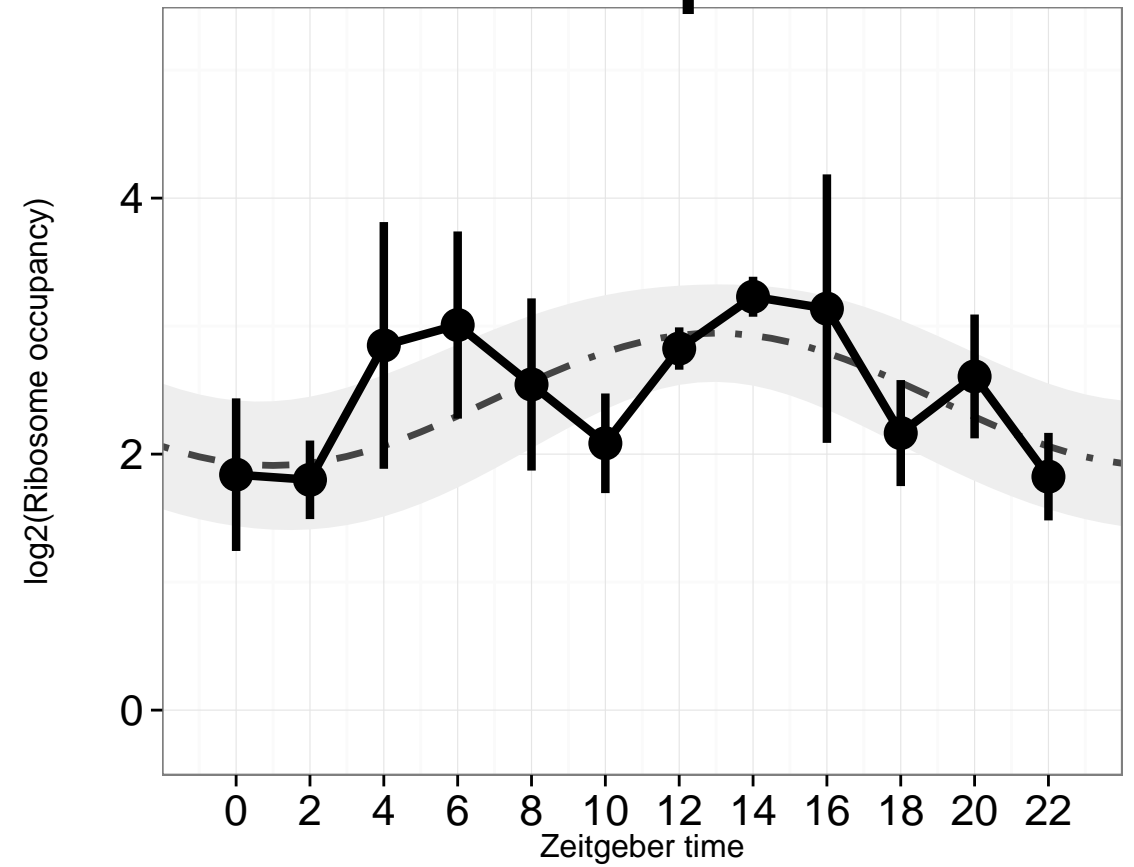

Supplement: SuppDataset_1.zip [file Vamp2_set_A.pdf › Supplemental Dataset 1/A-mRNA_nonrhyth_translation_nonrhyth/Vamp2_set_A.pdf]

## Vamp3

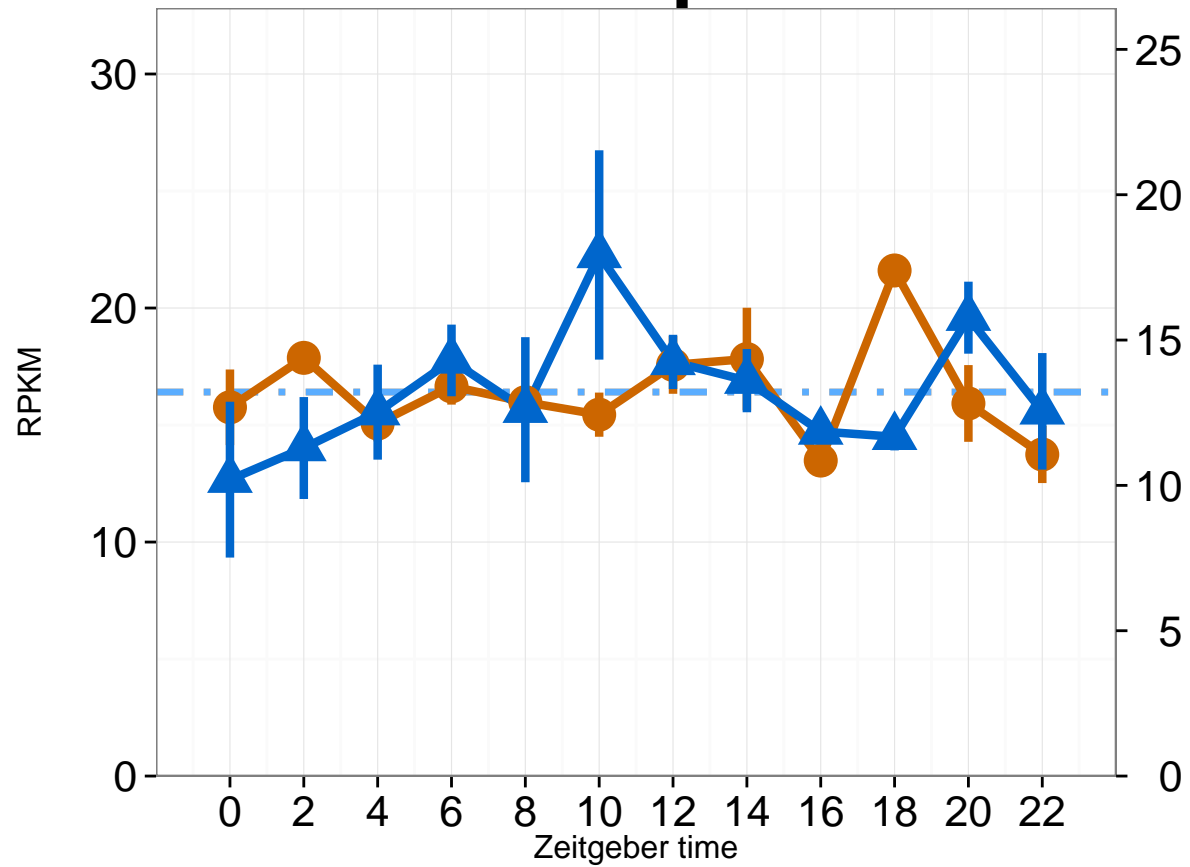

## Vamp3

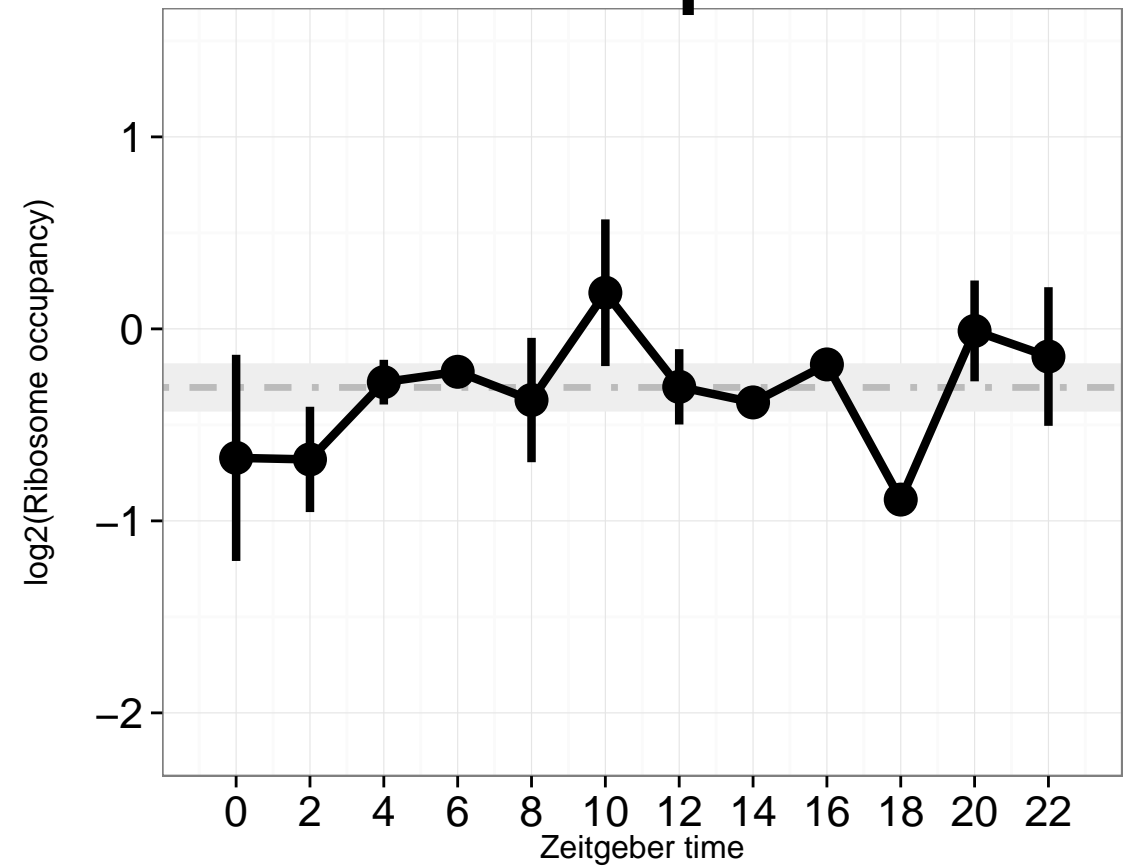

Supplement: SuppDataset_1.zip [file Vamp3_set_A.pdf › Supplemental Dataset 1/A-mRNA_nonrhyth_translation_nonrhyth/Vamp3_set_A.pdf]

## Vamp4

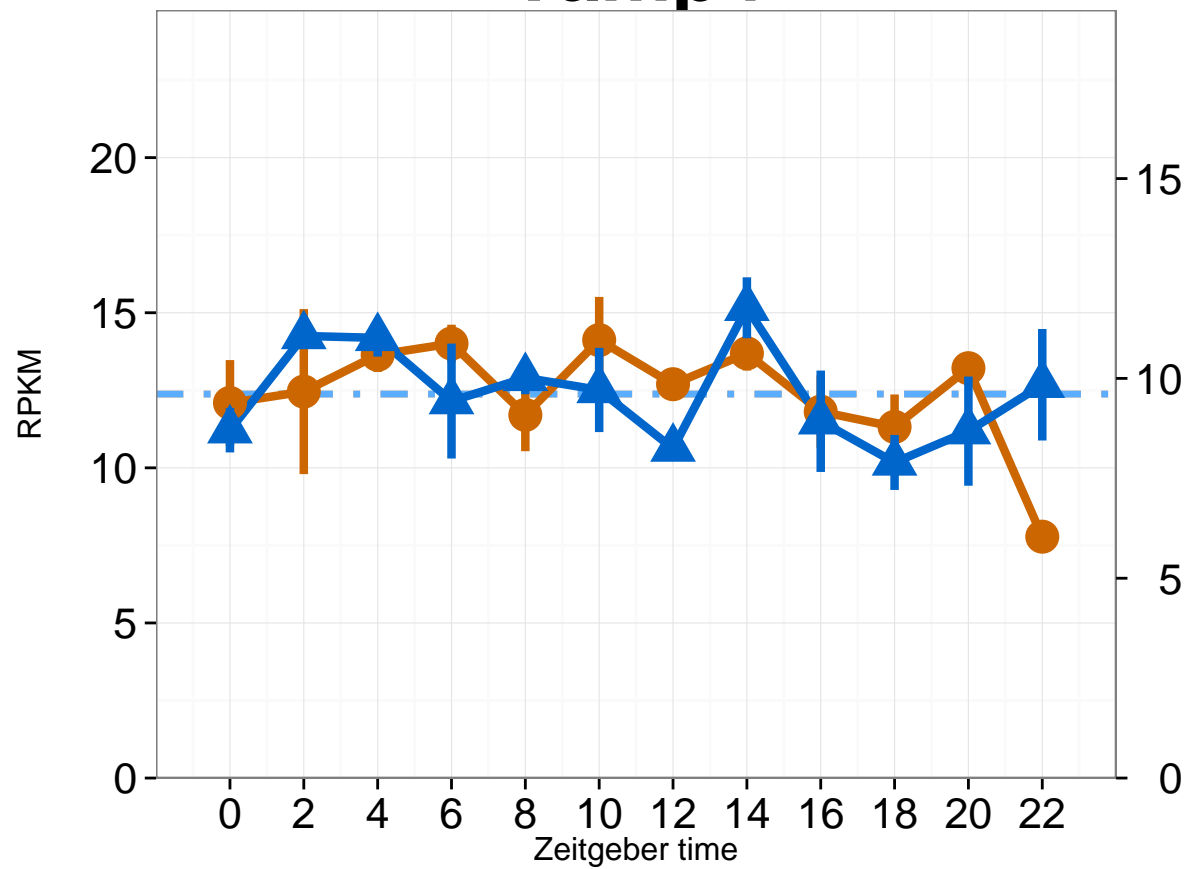

## Vamp4

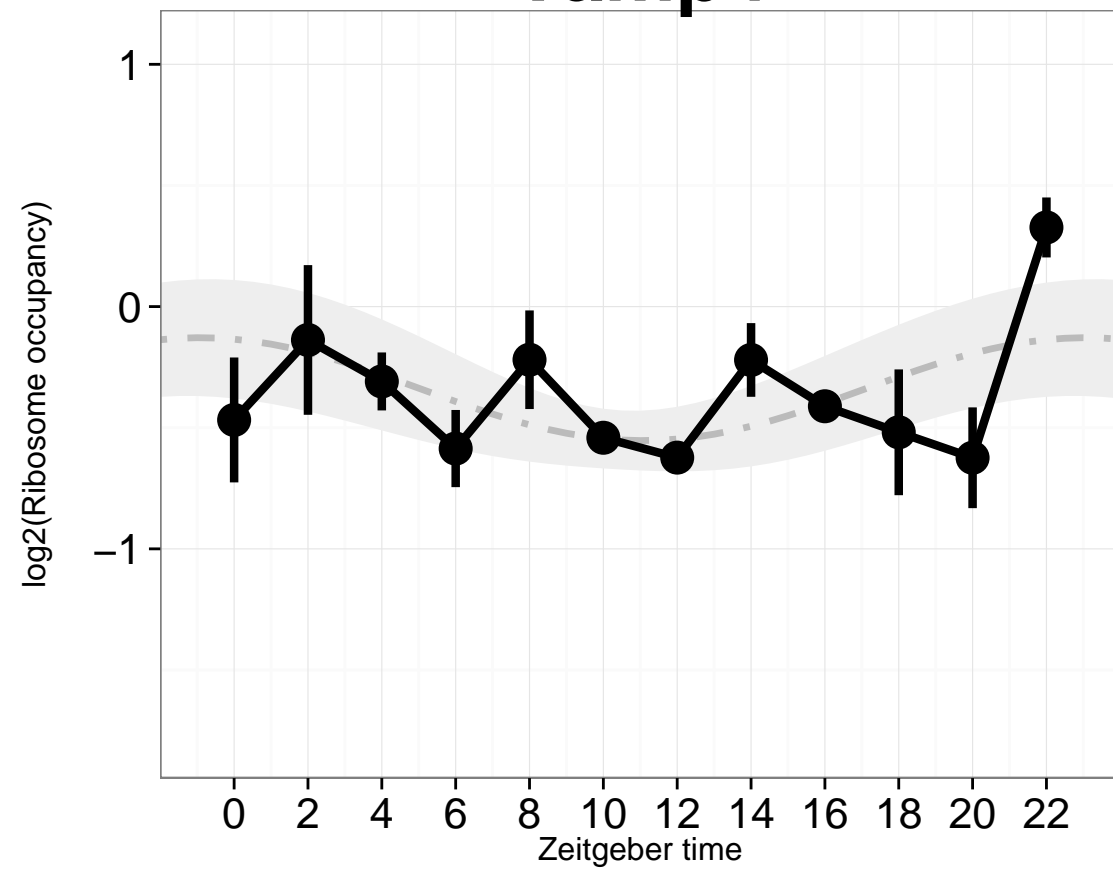

Supplement: SuppDataset_1.zip [file Vamp4_set_A.pdf › Supplemental Dataset 1/A-mRNA_nonrhyth_translation_nonrhyth/Vamp4_set_A.pdf]

## Vamp5

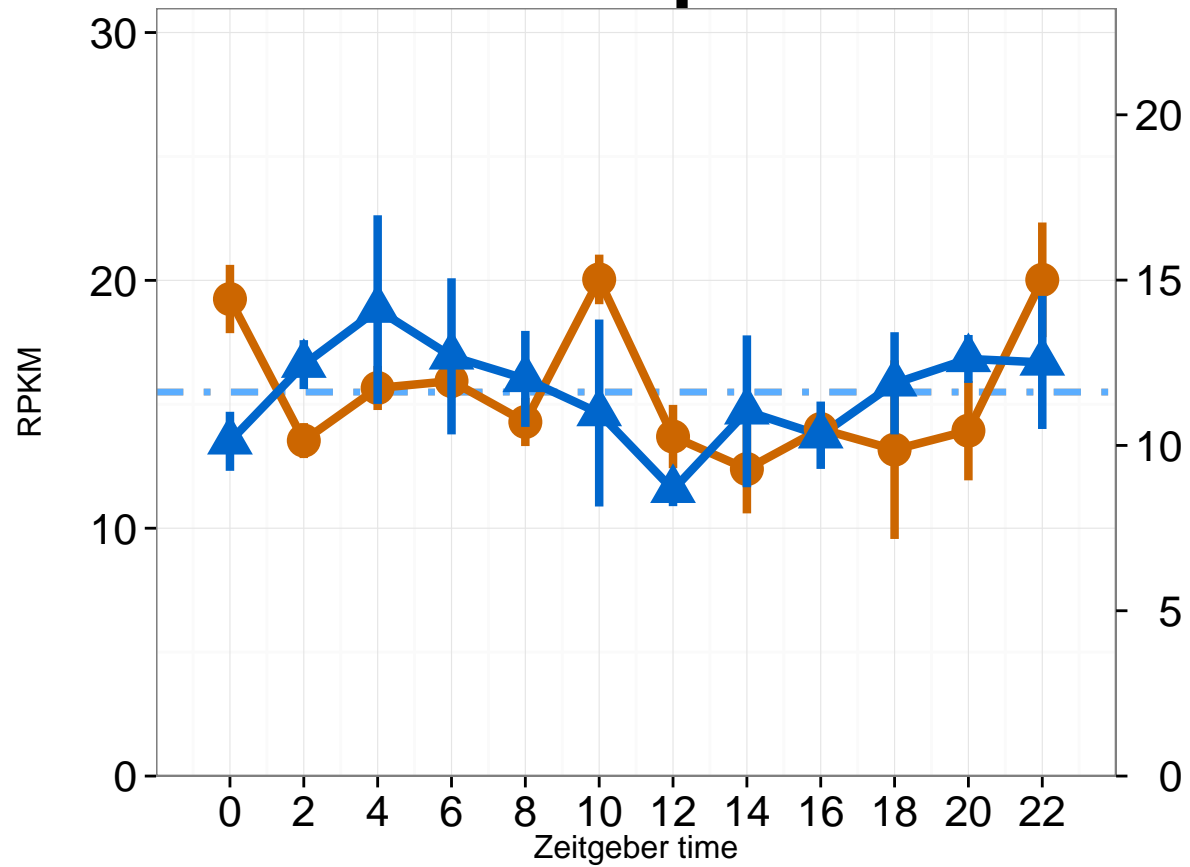

## Vamp5

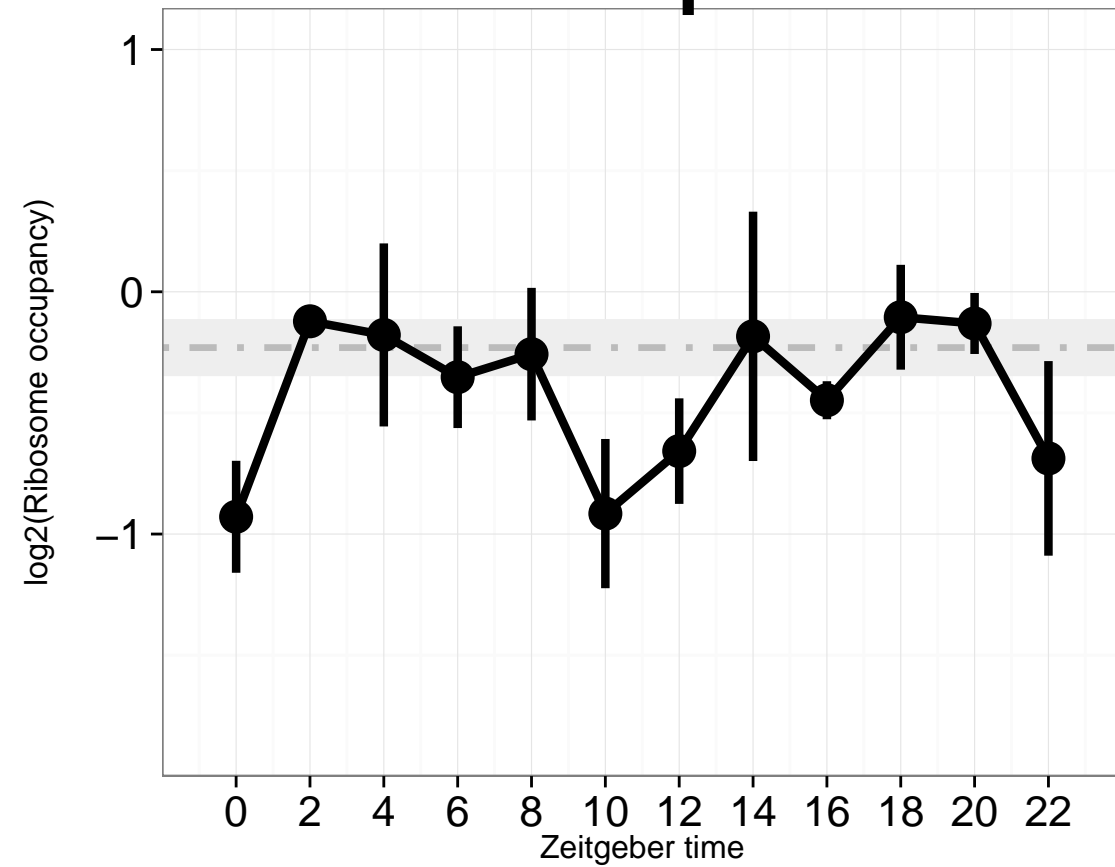

Supplement: SuppDataset_1.zip [file Vamp5_set_A.pdf › Supplemental Dataset 1/A-mRNA_nonrhyth_translation_nonrhyth/Vamp5_set_A.pdf]

## Vamp8

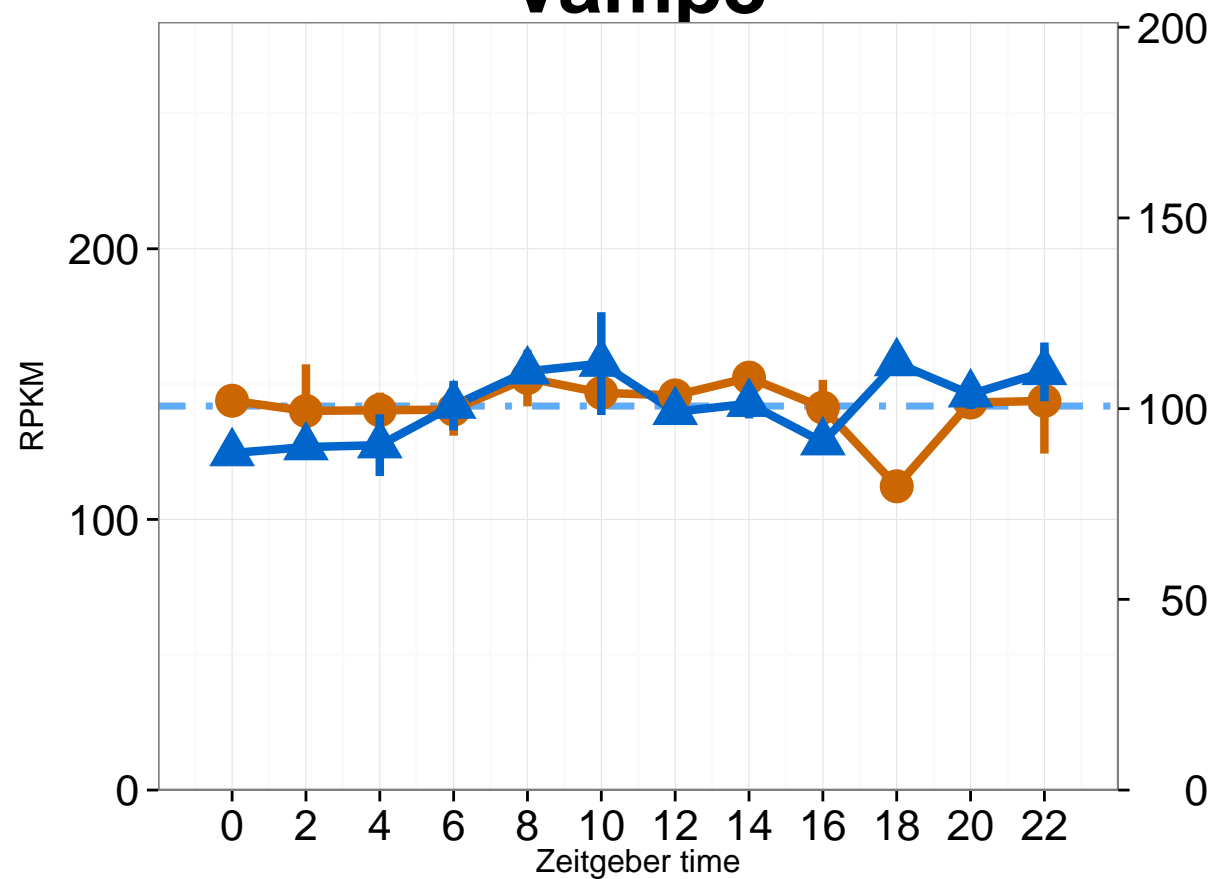

## Vamp8

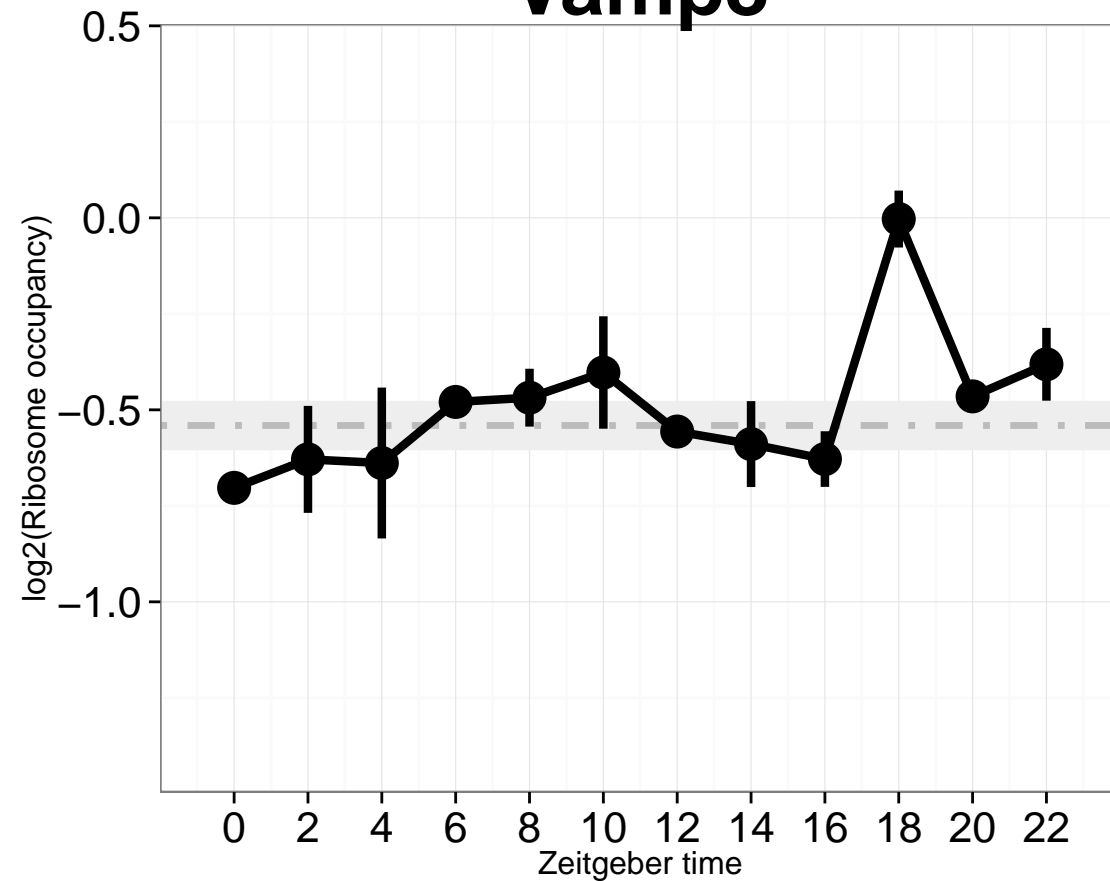

Supplement: SuppDataset_1.zip [file Vamp8_set_A.pdf › Supplemental Dataset 1/A-mRNA_nonrhyth_translation_nonrhyth/Vamp8_set_A.pdf]

# Vangl1

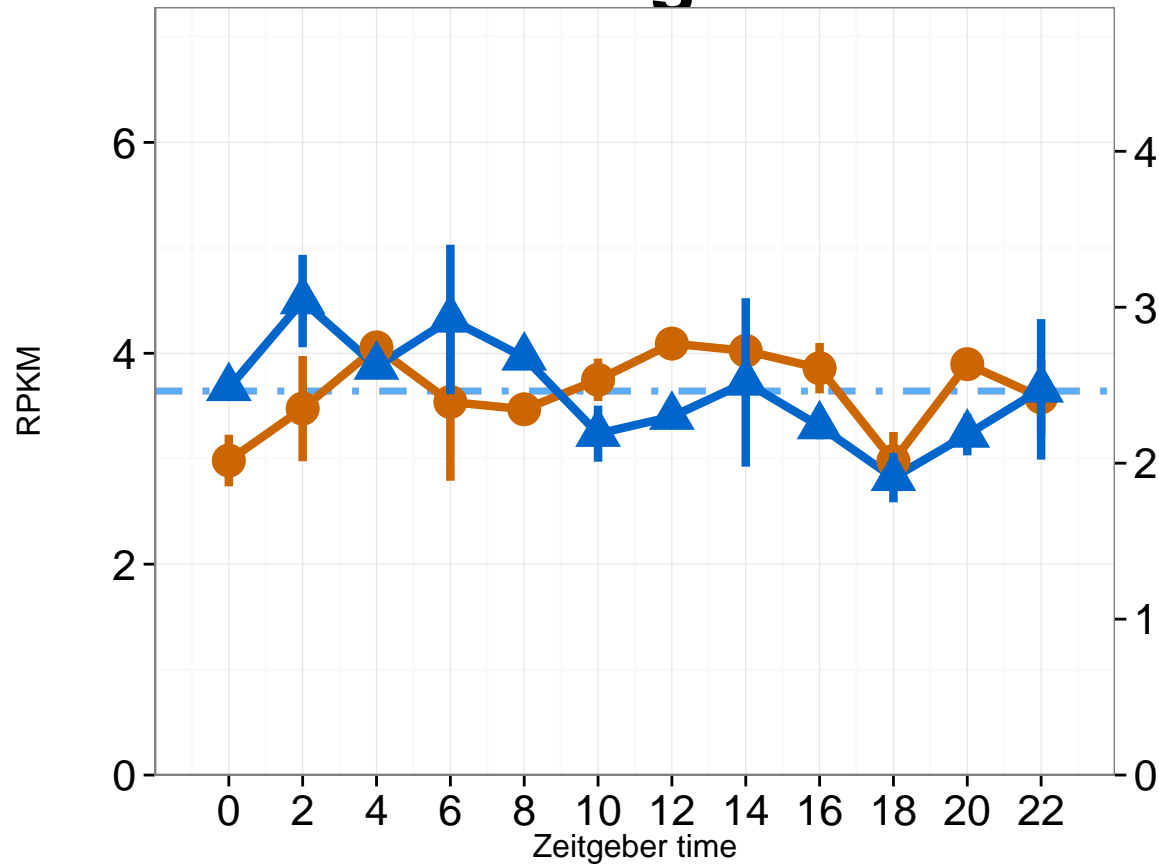

# Vangl1

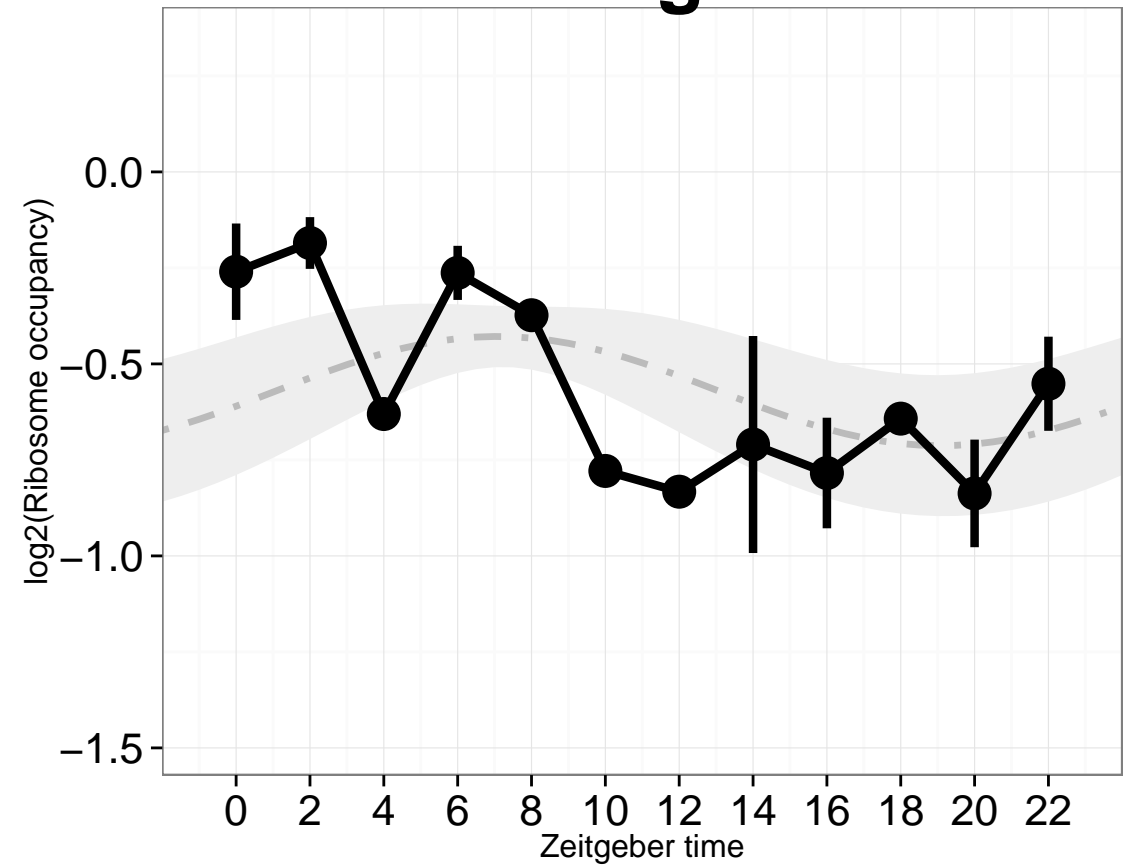

Supplement: SuppDataset_1.zip [file Vangl1_set_A.pdf › Supplemental Dataset 1/A-mRNA_nonrhyth_translation_nonrhyth/Vangl1_set_A.pdf]

## Vapa

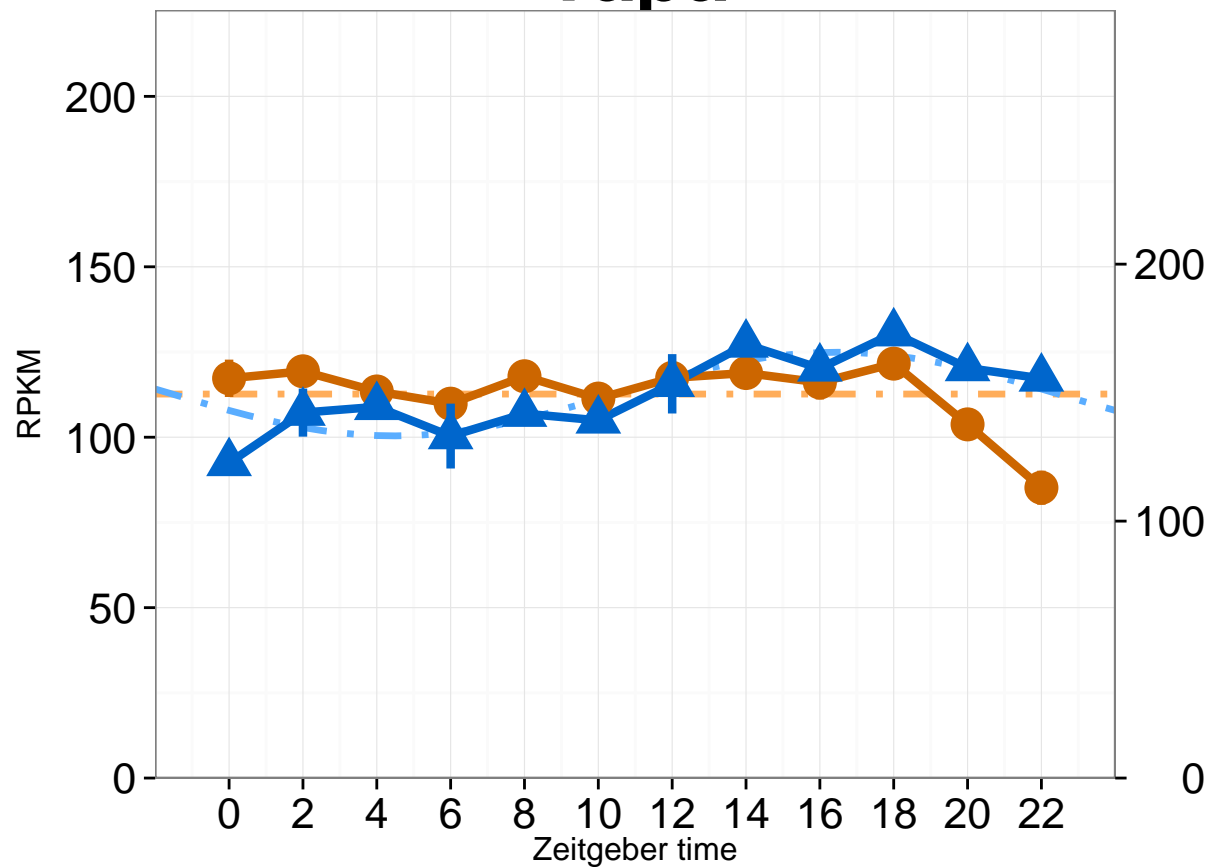

## Vapa

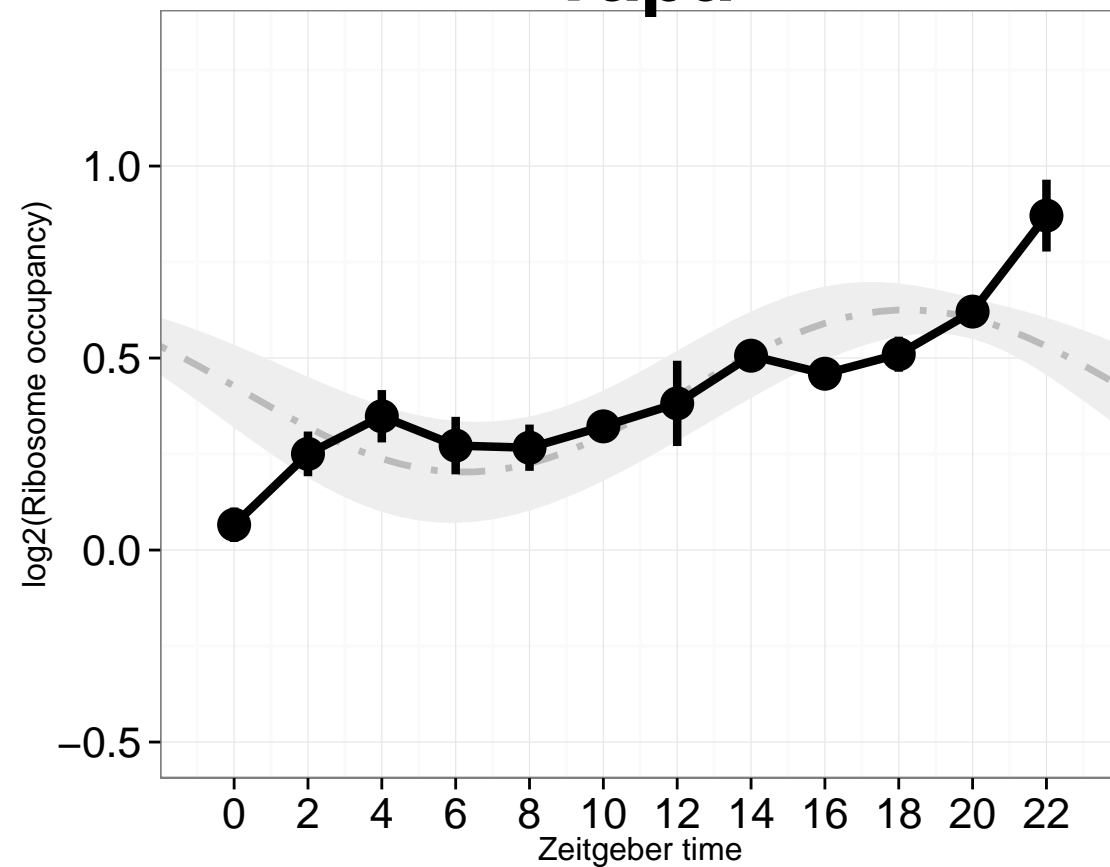

Supplement: SuppDataset_1.zip [file Vapa_set_A.pdf › Supplemental Dataset 1/A-mRNA_nonrhyth_translation_nonrhyth/Vapa_set_A.pdf]

## Vapb

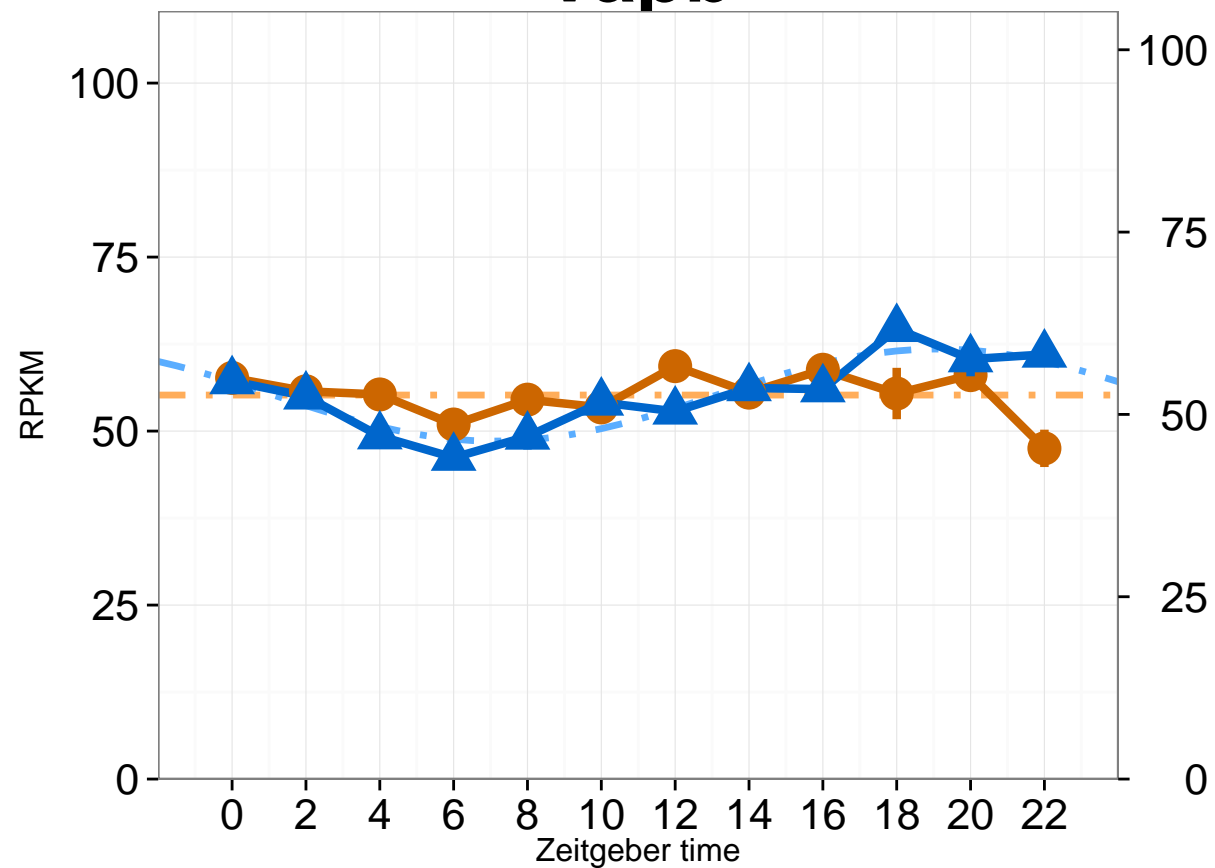

## Vapb

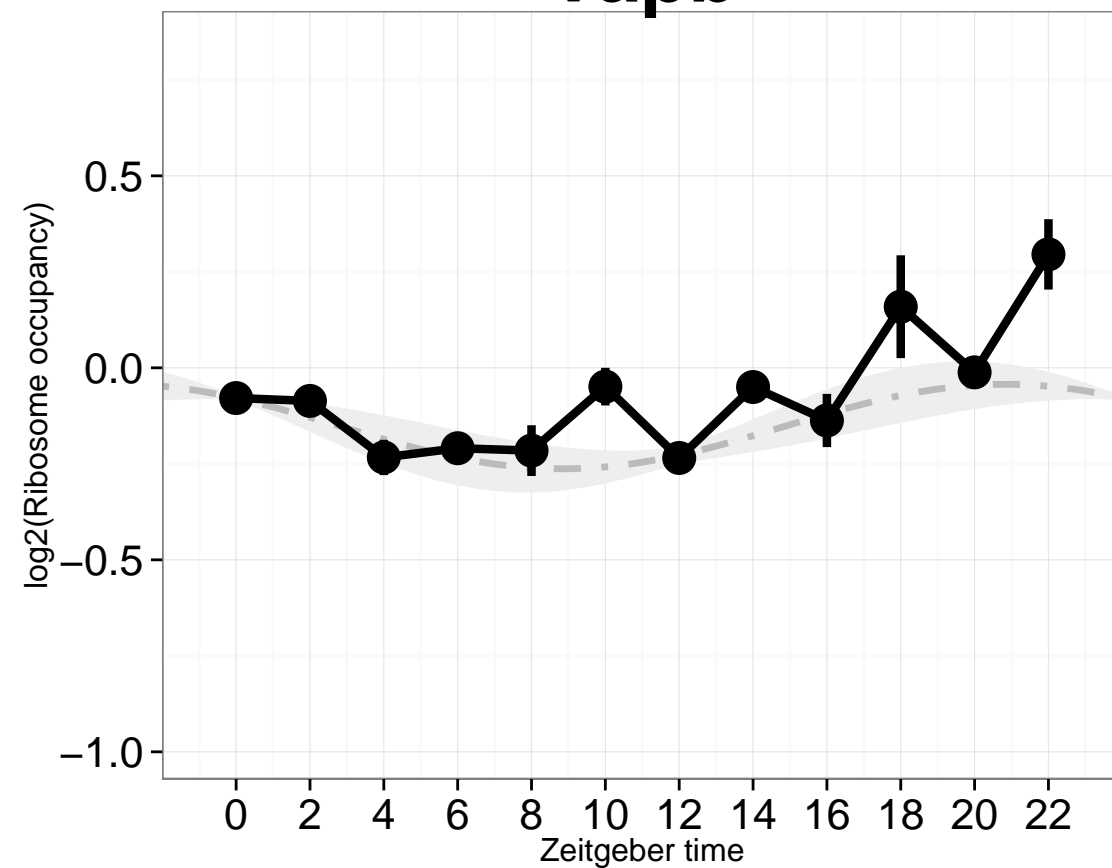

Supplement: SuppDataset_1.zip [file Vapb_set_A.pdf › Supplemental Dataset 1/A-mRNA_nonrhyth_translation_nonrhyth/Vapb_set_A.pdf]

# Vars2

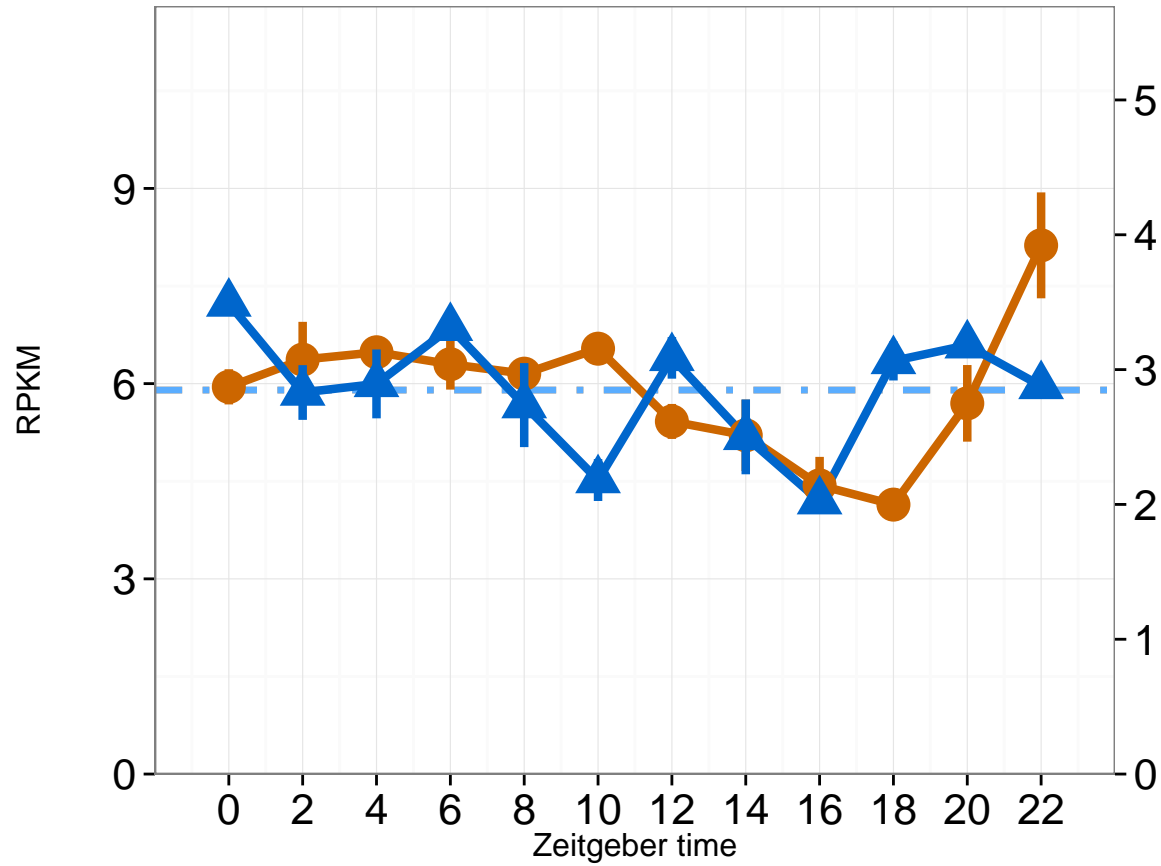

# Vars2

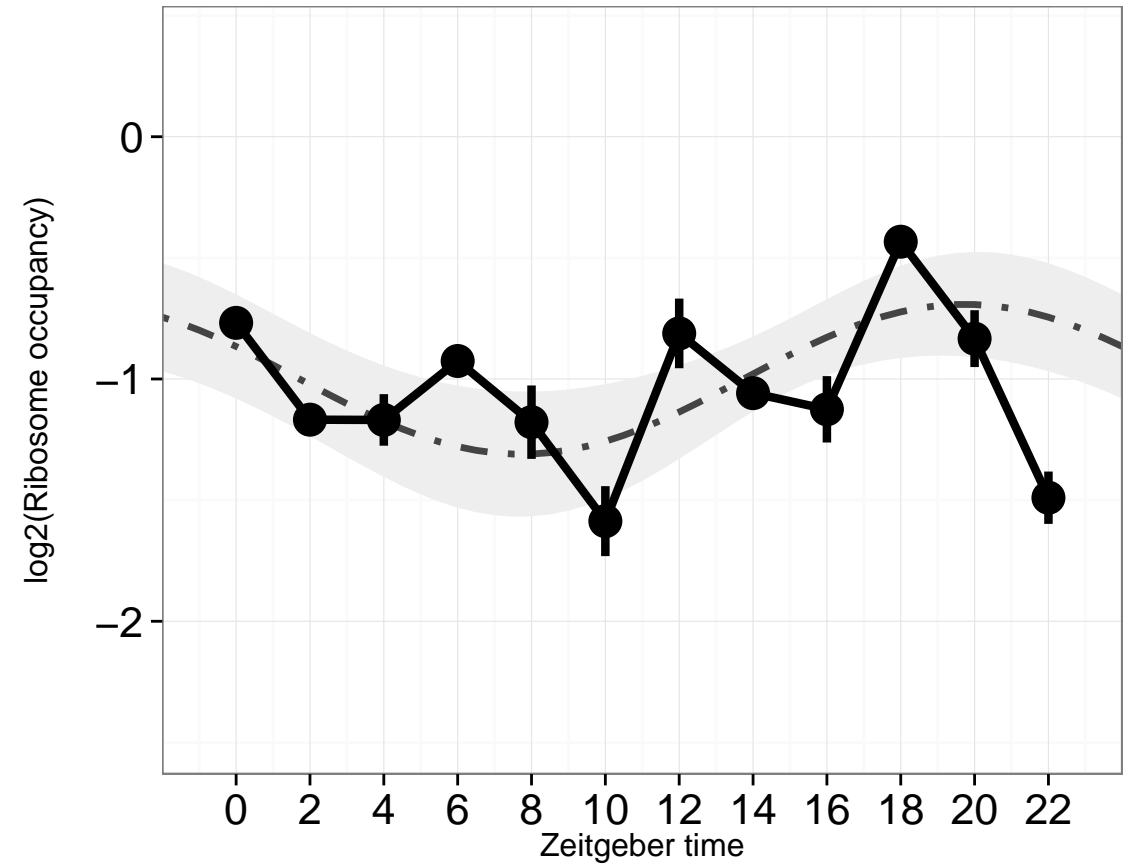

Supplement: SuppDataset_1.zip [file Vars2_set_A.pdf › Supplemental Dataset 1/A-mRNA_nonrhyth_translation_nonrhyth/Vars2_set_A.pdf]

## Vars

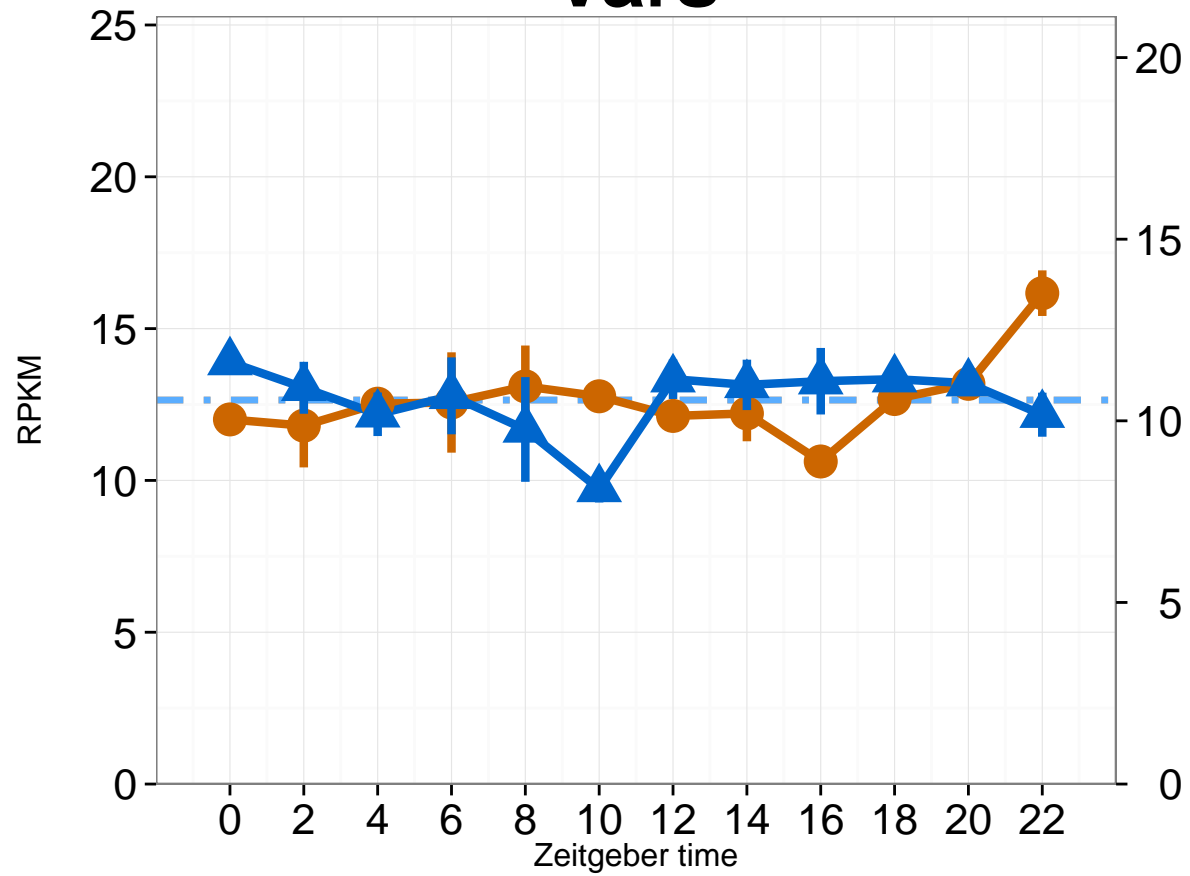

## Vars

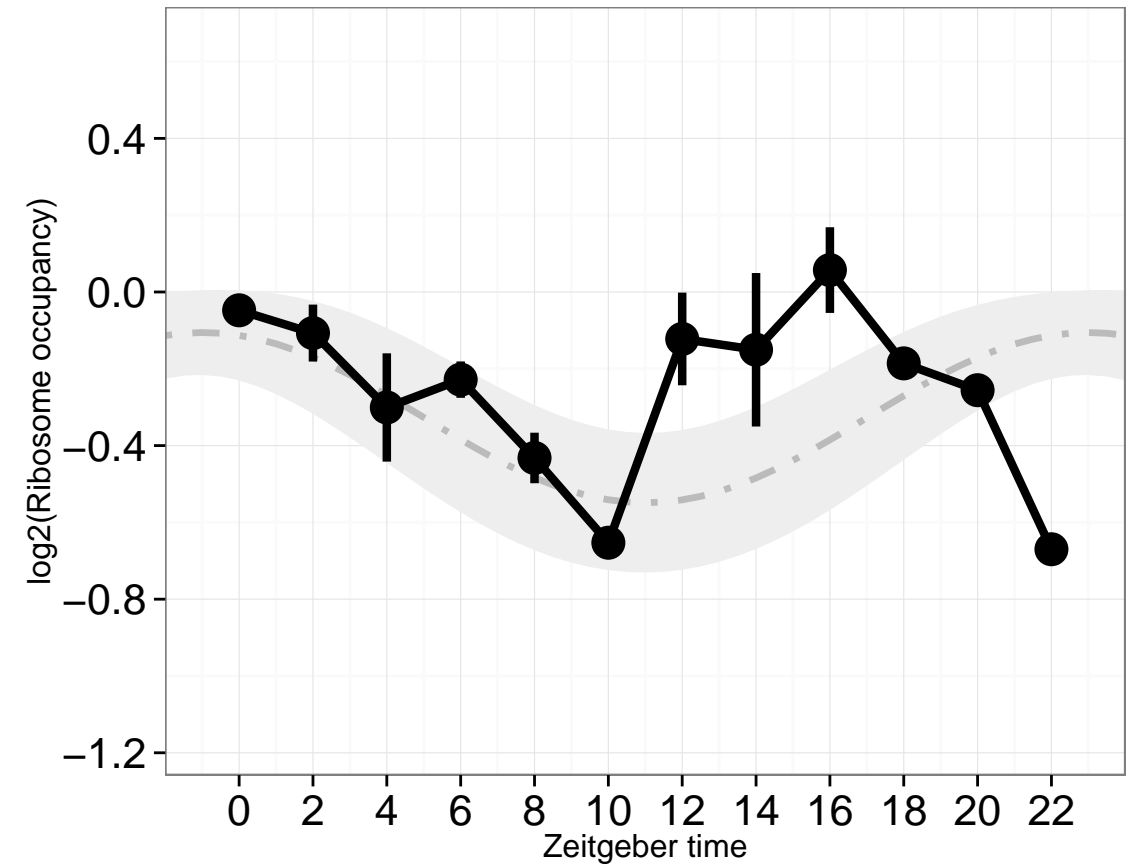

Supplement: SuppDataset_1.zip [file Vars_set_A.pdf › Supplemental Dataset 1/A-mRNA_nonrhyth_translation_nonrhyth/Vars_set_A.pdf]

## Vash1

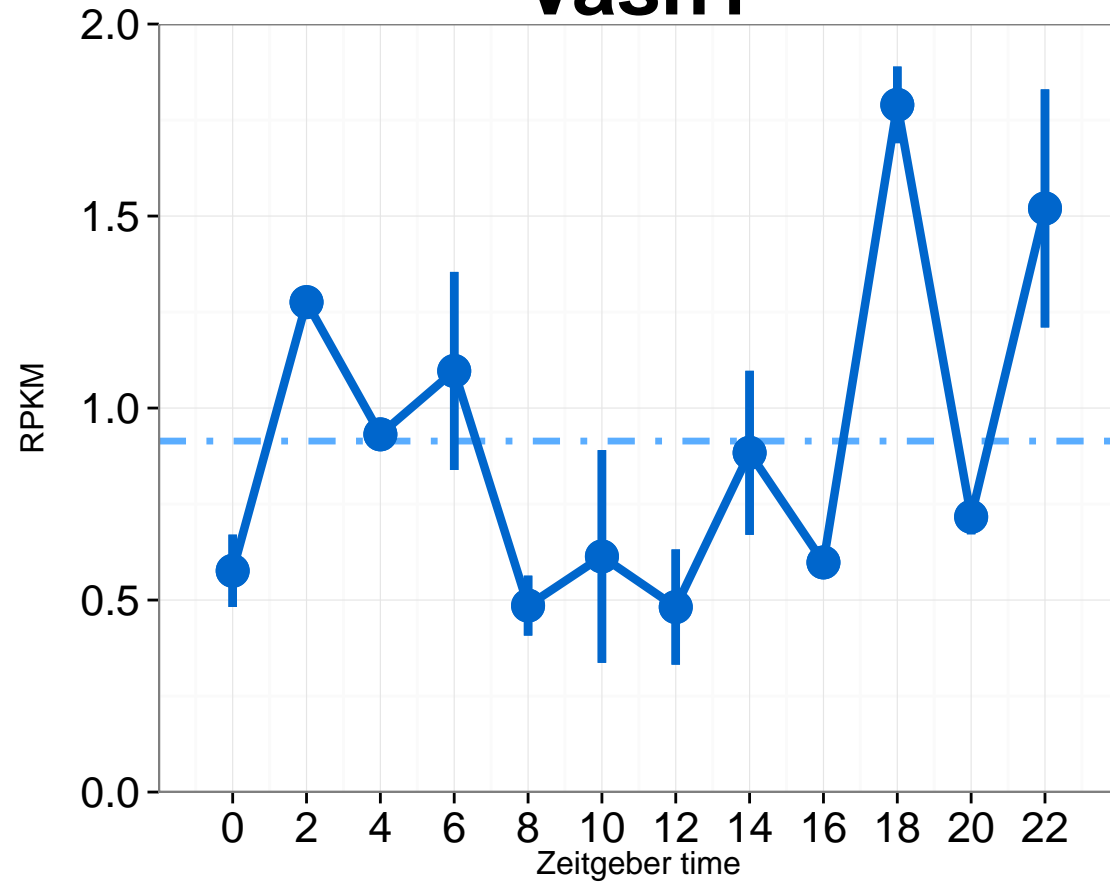

## Vash1 log2(Ribosome occupancy

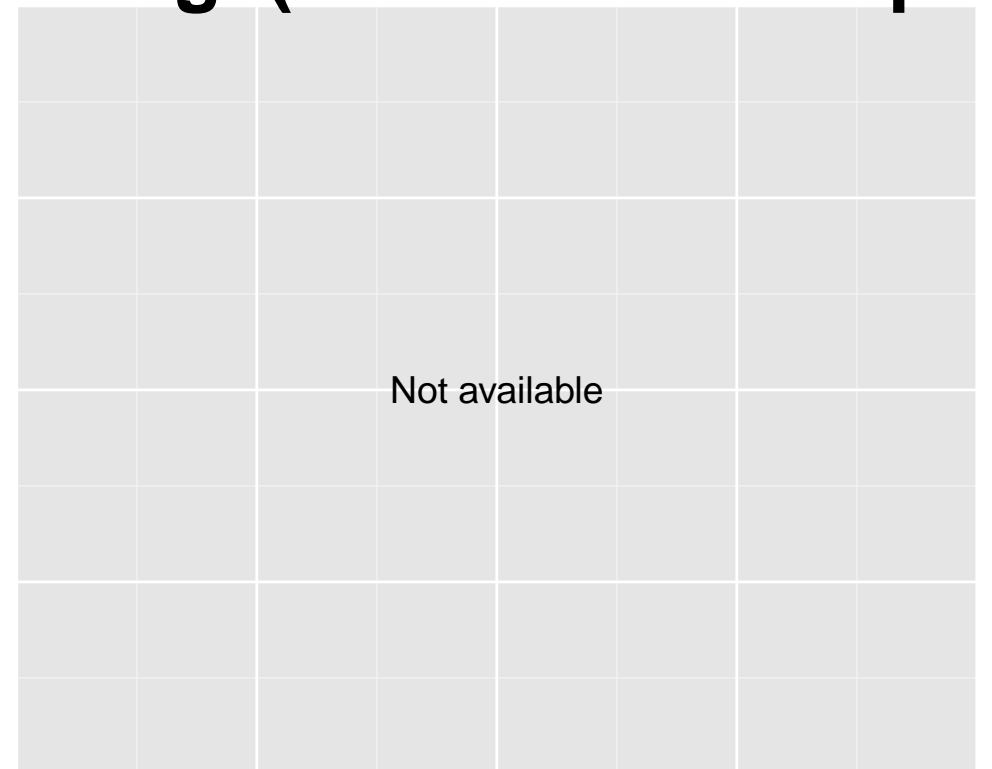

Supplement: SuppDataset_1.zip [file Vash1_set_A.pdf › Supplemental Dataset 1/A-mRNA_nonrhyth_translation_nonrhyth/Vash1_set_A.pdf]

## Vasp

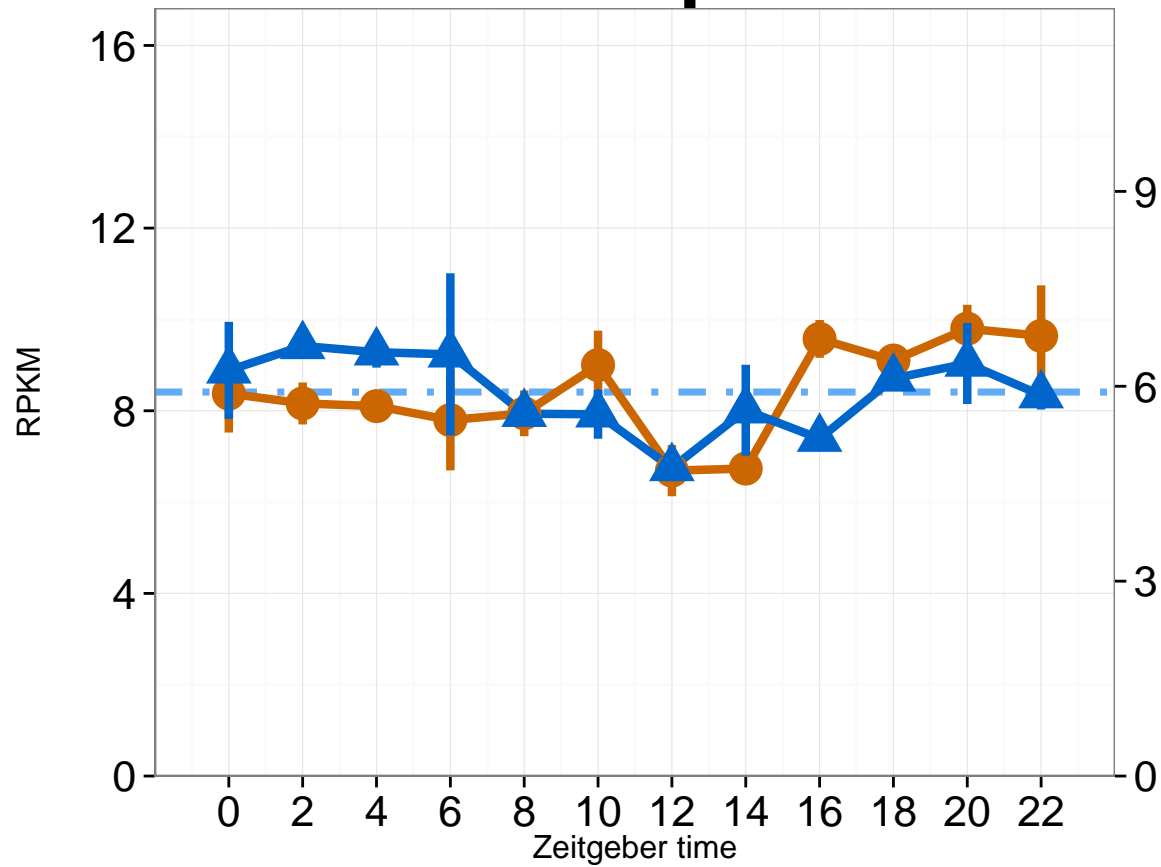

## Vasp

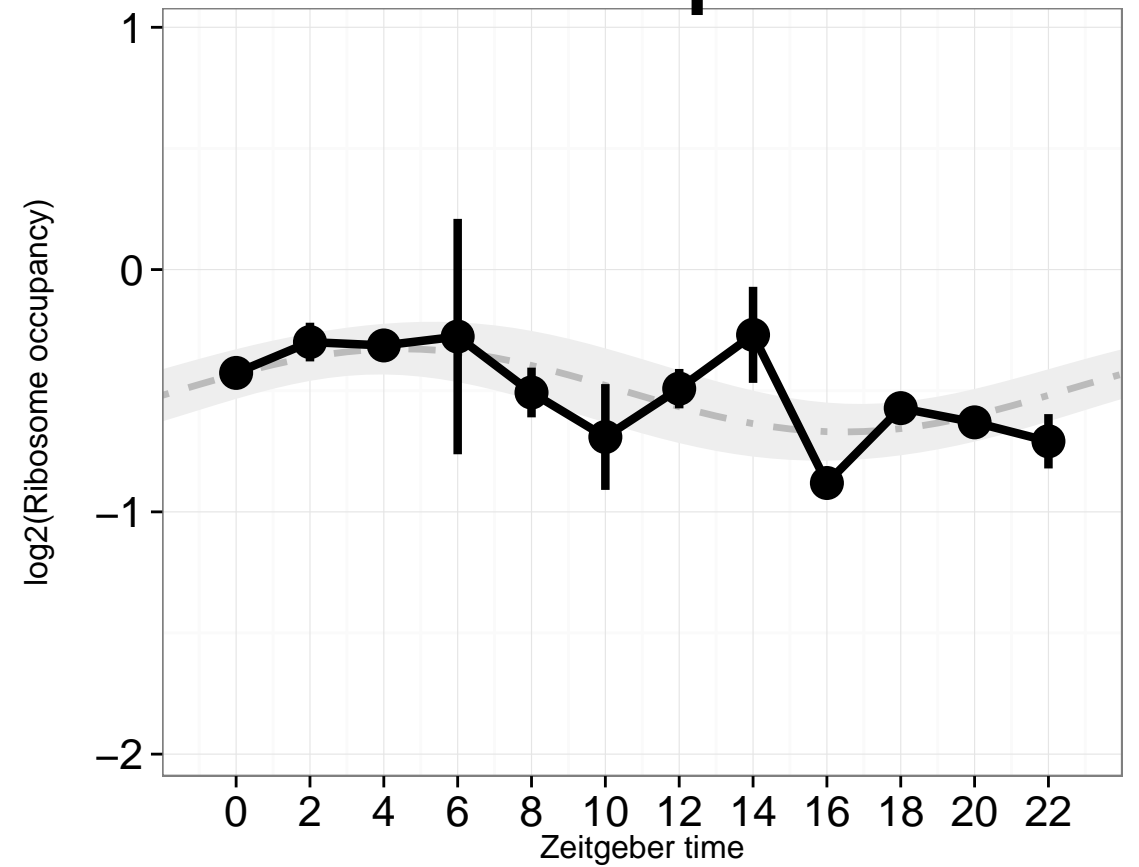

Supplement: SuppDataset_1.zip [file Vasp_set_A.pdf › Supplemental Dataset 1/A-mRNA_nonrhyth_translation_nonrhyth/Vasp_set_A.pdf]

# Vat1

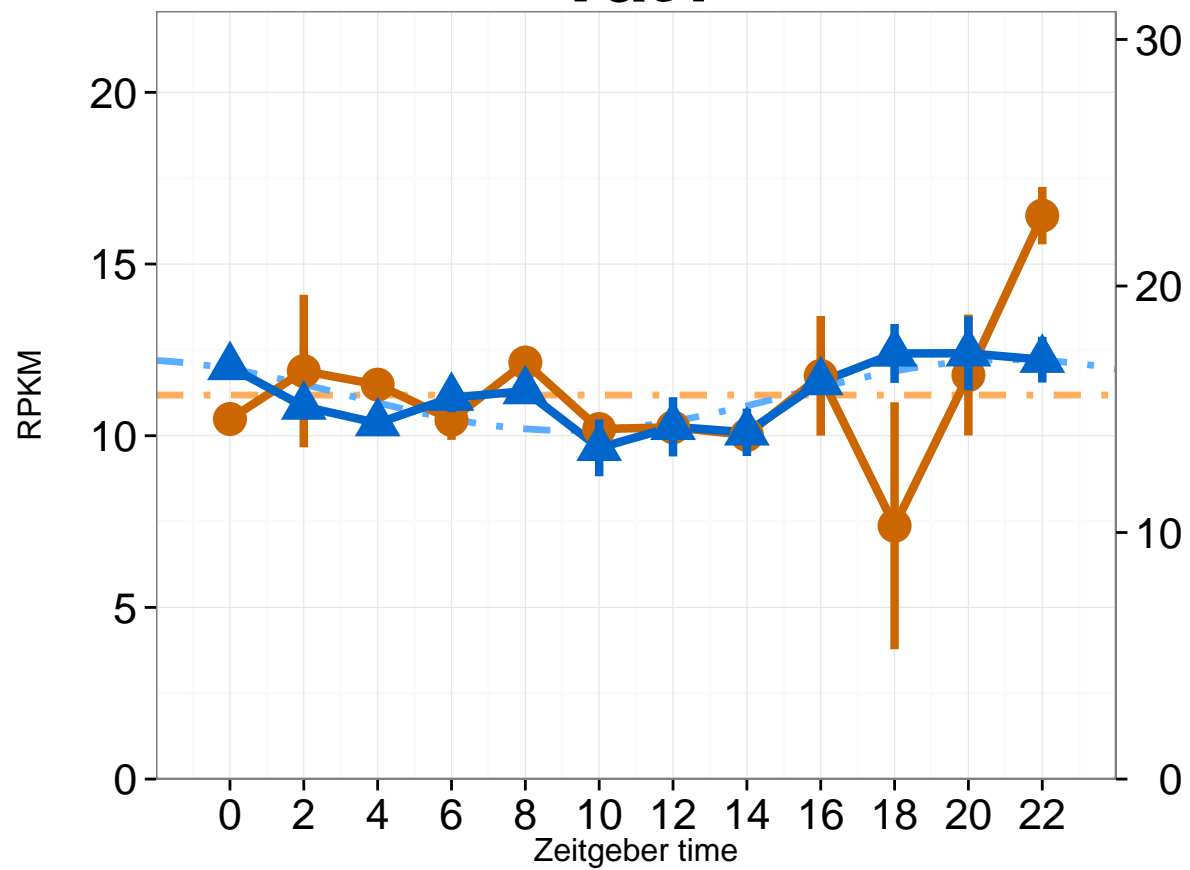

# Vat1

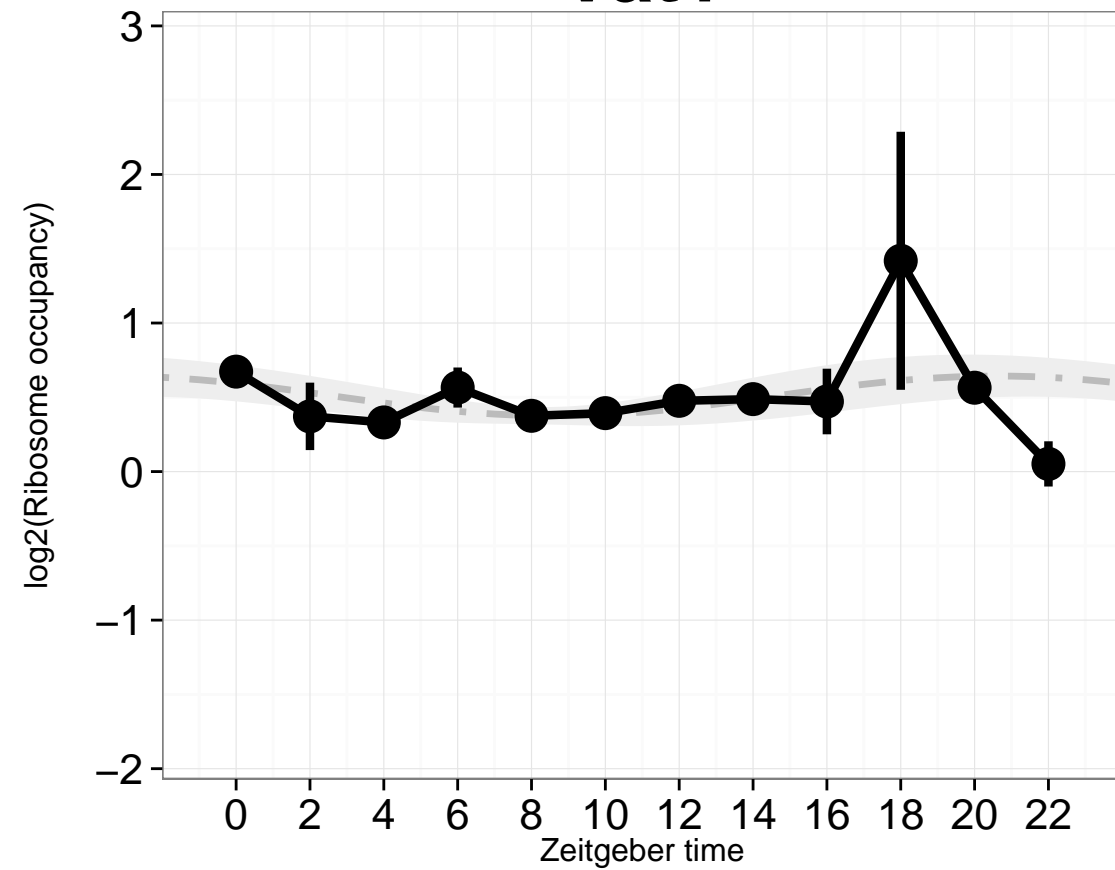

Supplement: SuppDataset_1.zip [file Vat1_set_A.pdf › Supplemental Dataset 1/A-mRNA_nonrhyth_translation_nonrhyth/Vat1_set_A.pdf]

## Vav1

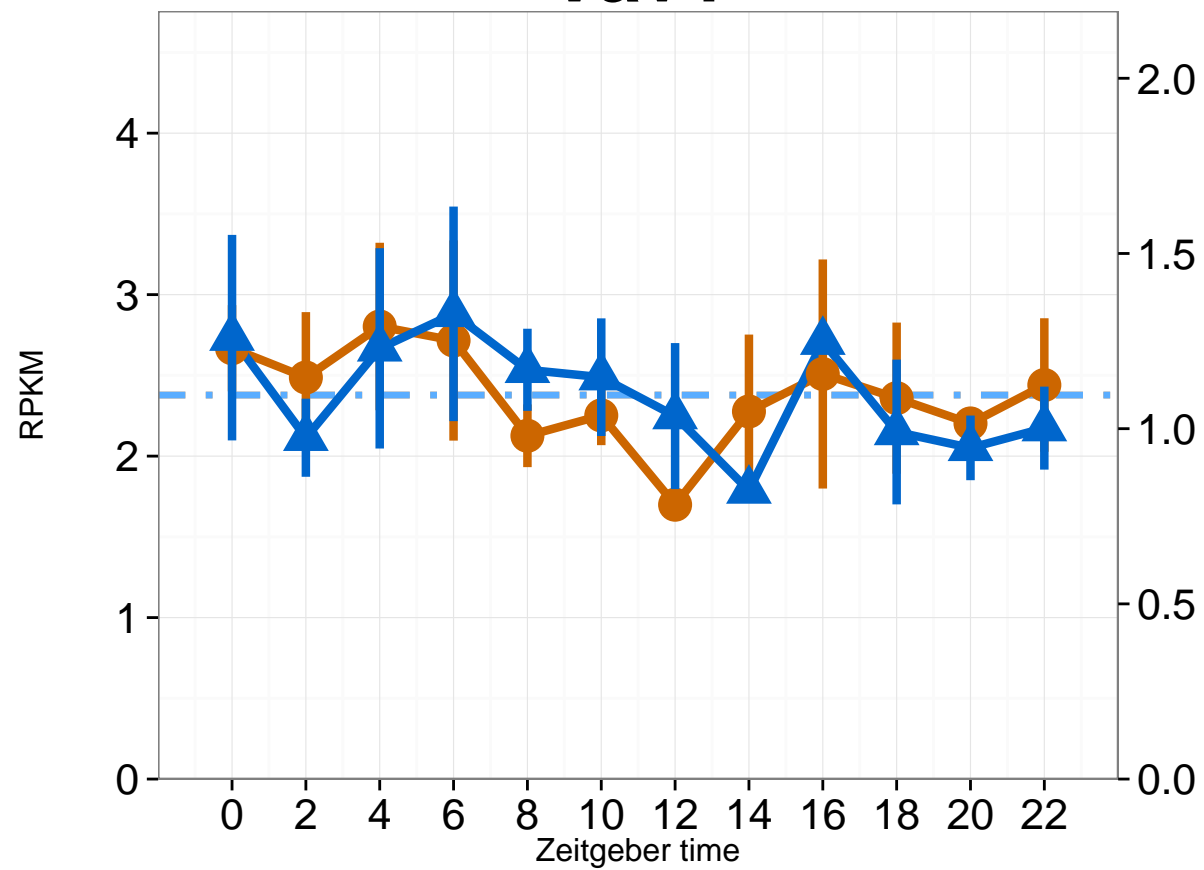

## Vav1

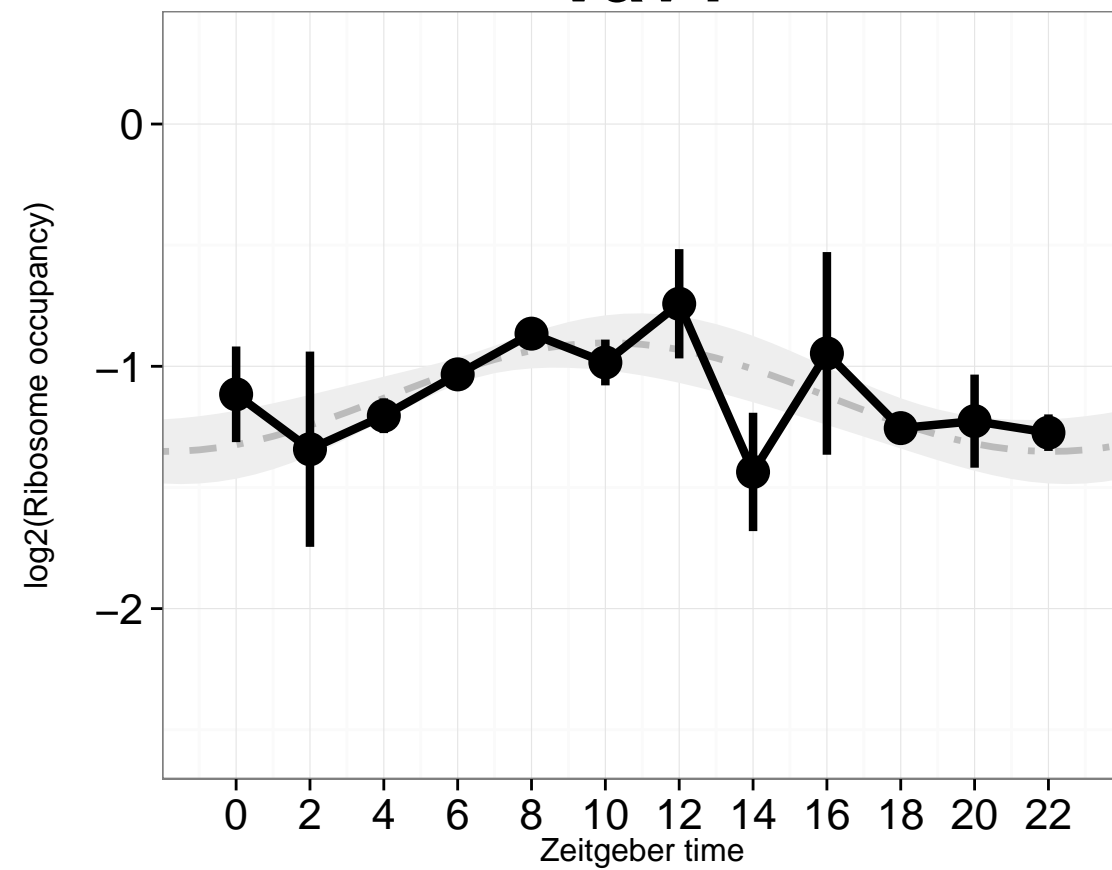

Supplement: SuppDataset_1.zip [file Vav1_set_A.pdf › Supplemental Dataset 1/A-mRNA_nonrhyth_translation_nonrhyth/Vav1_set_A.pdf]

## Vav2

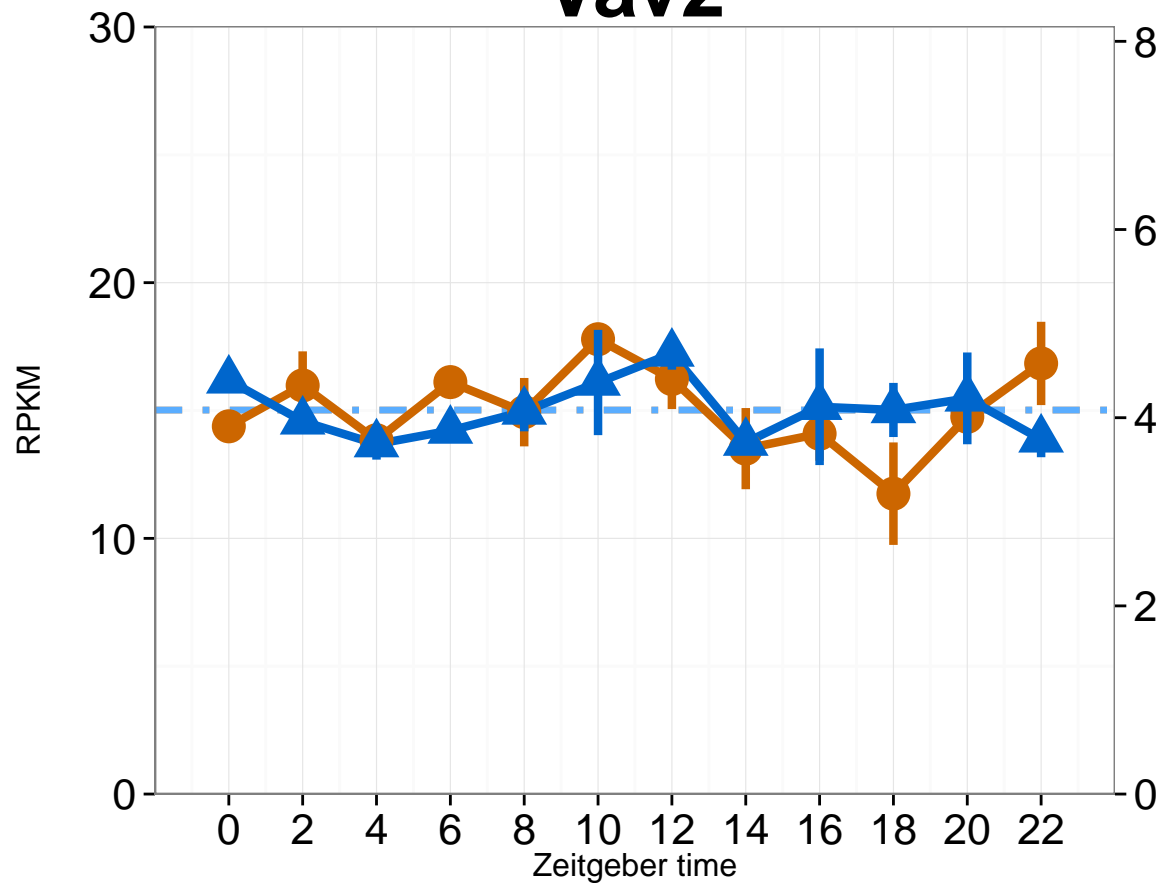

## Vav2

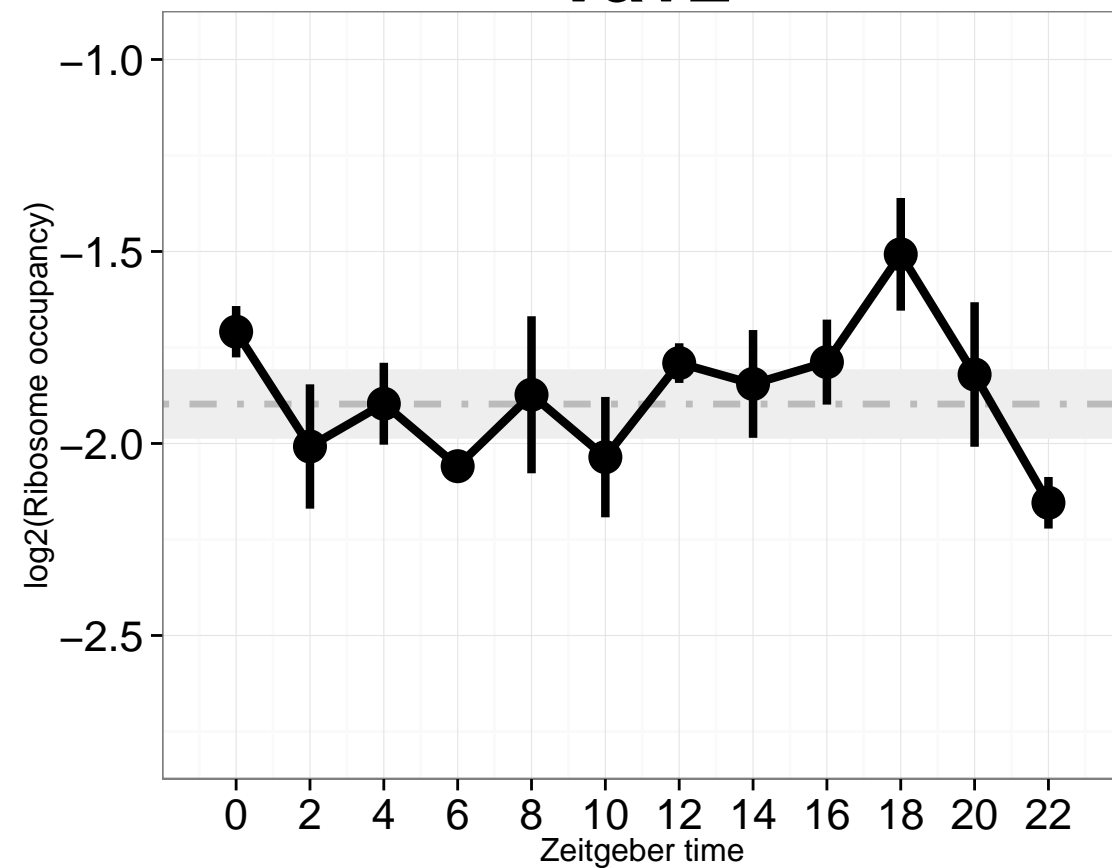

Supplement: SuppDataset_1.zip [file Vav2_set_A.pdf › Supplemental Dataset 1/A-mRNA_nonrhyth_translation_nonrhyth/Vav2_set_A.pdf]

# Vav3

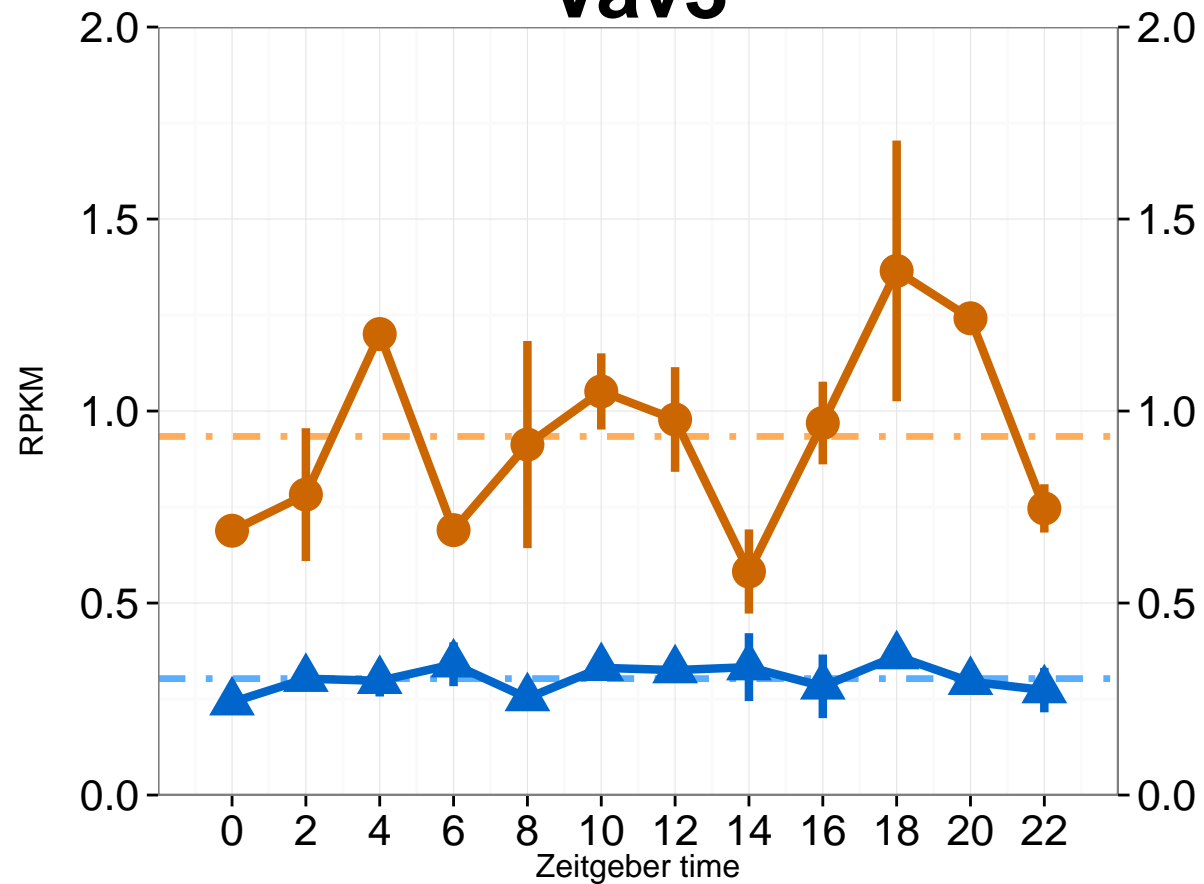

# Vav3

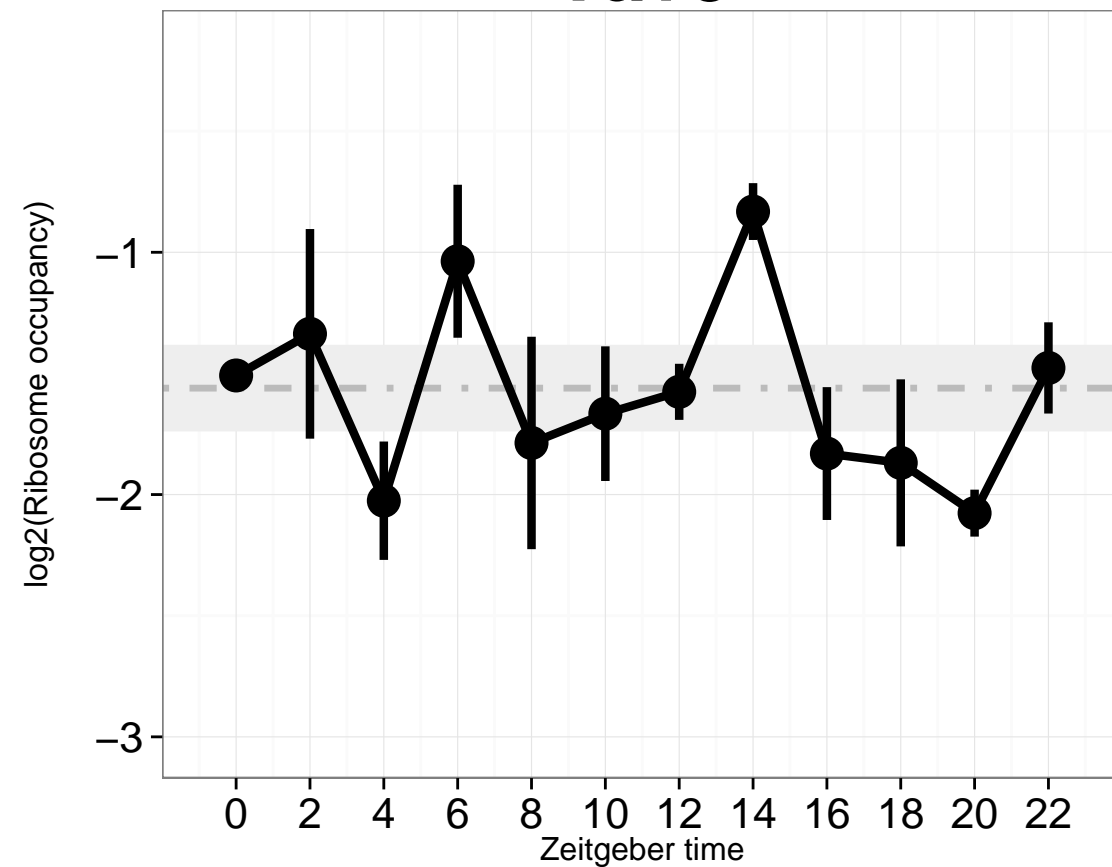

Supplement: SuppDataset_1.zip [file Vav3_set_A.pdf › Supplemental Dataset 1/A-mRNA_nonrhyth_translation_nonrhyth/Vav3_set_A.pdf]

# Vbp1

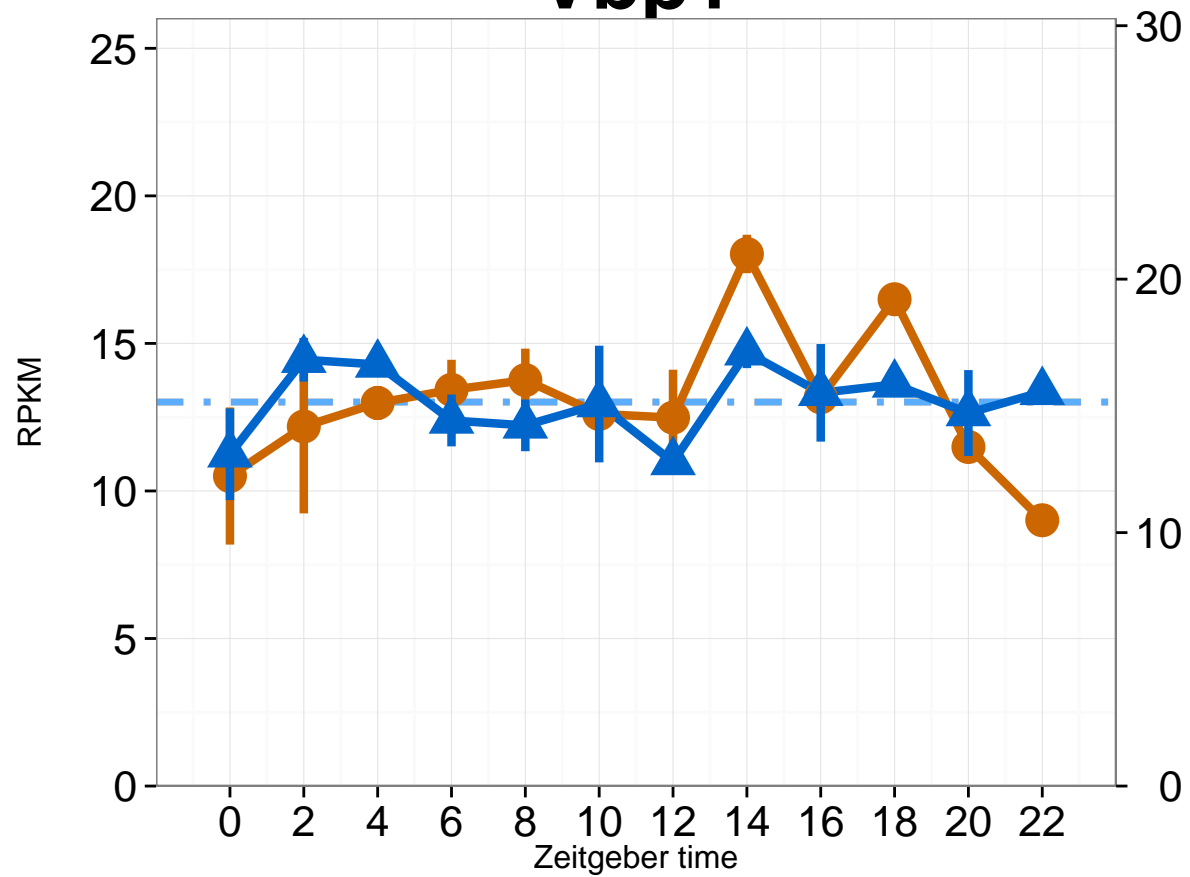

# Vbp1

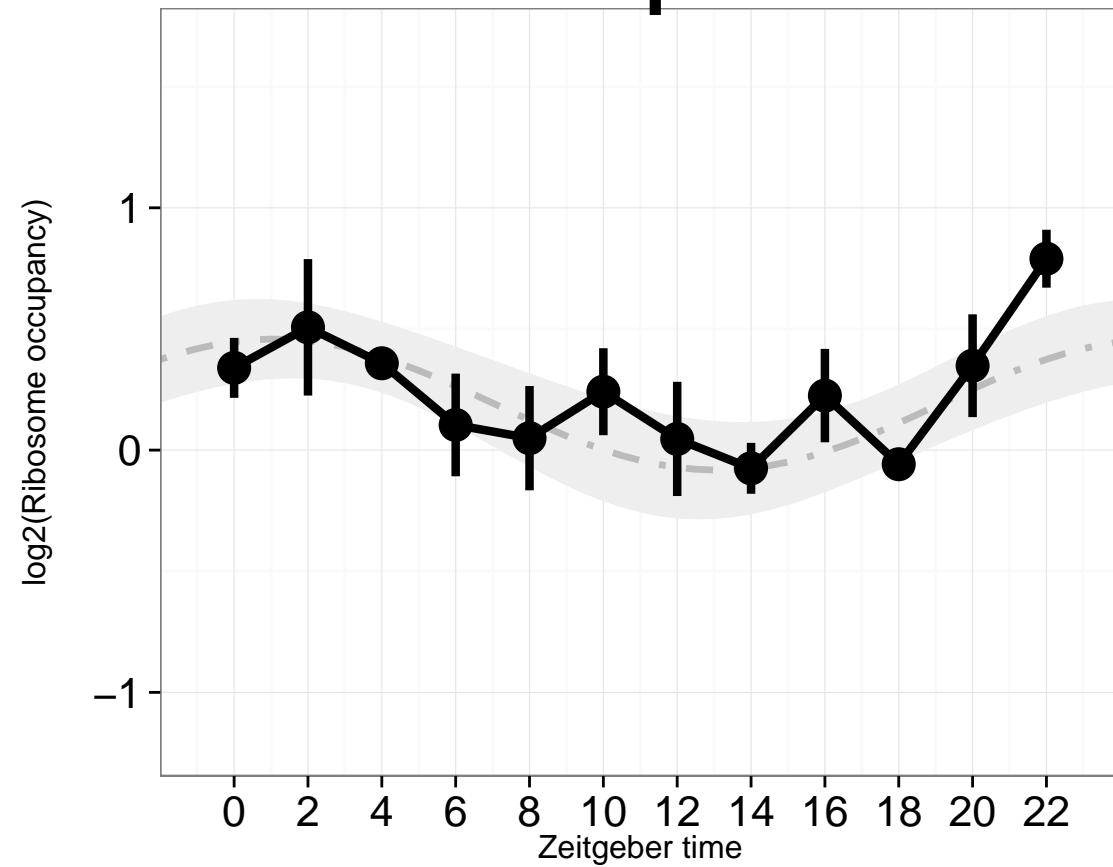

Supplement: SuppDataset_1.zip [file Vbp1_set_A.pdf › Supplemental Dataset 1/A-mRNA_nonrhyth_translation_nonrhyth/Vbp1_set_A.pdf]

## Vcl

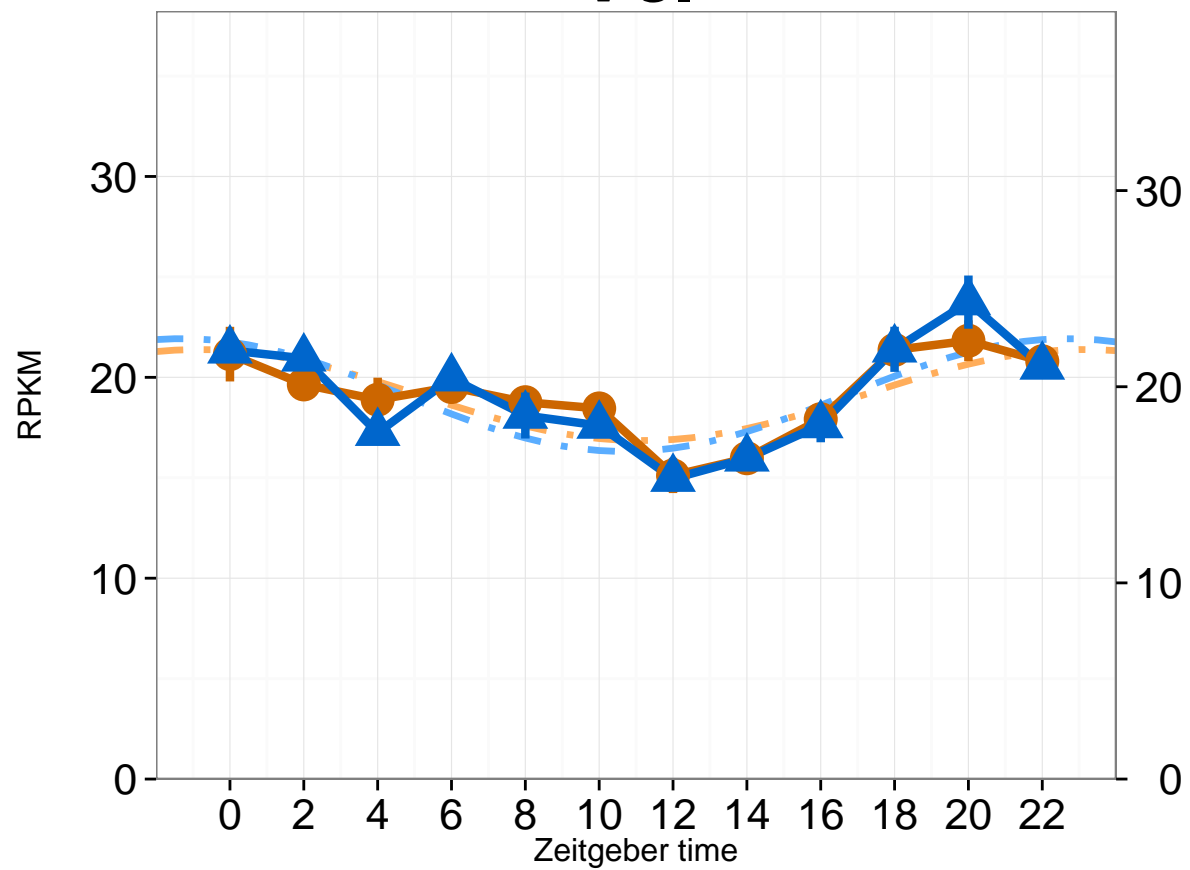

## Vcl

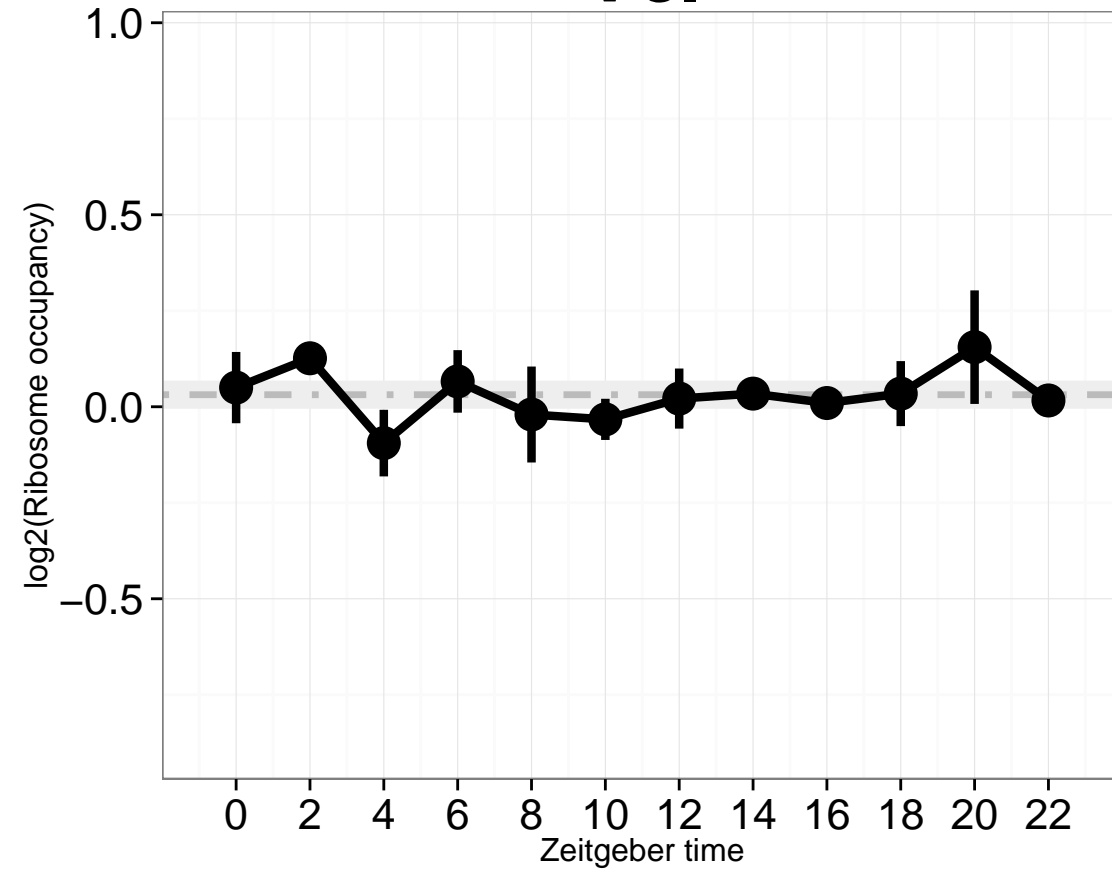

Supplement: SuppDataset_1.zip [file Vcl_set_A.pdf › Supplemental Dataset 1/A-mRNA_nonrhyth_translation_nonrhyth/Vcl_set_A.pdf]

## Vcp

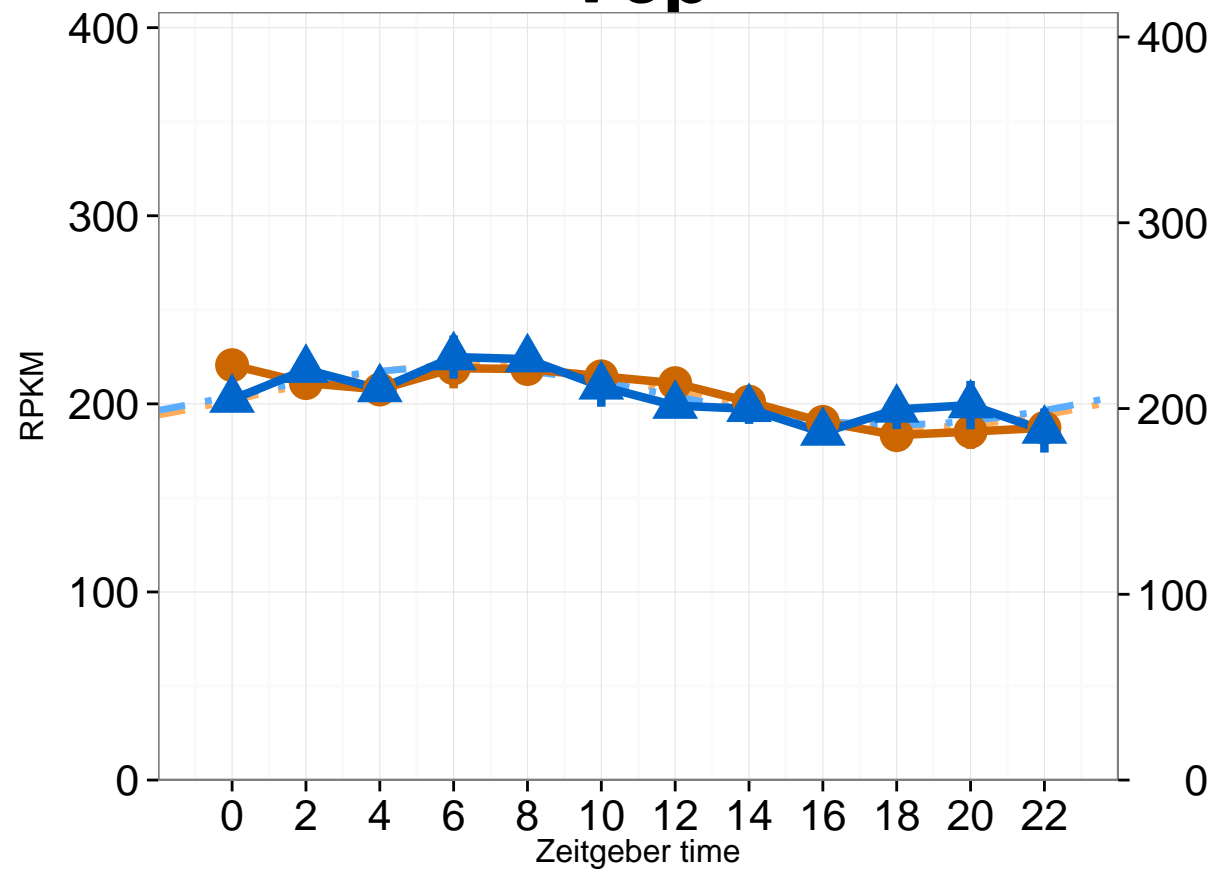

## Vcp

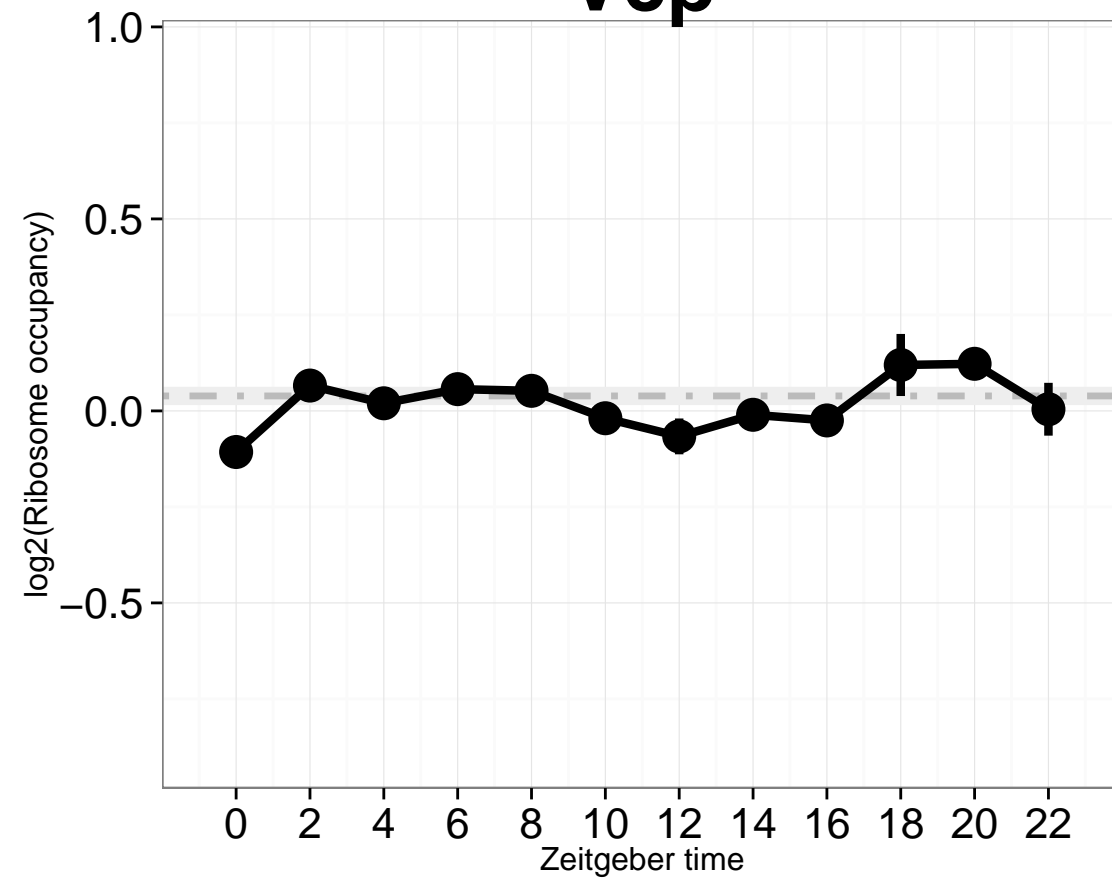

Supplement: SuppDataset_1.zip [file Vcp_set_A.pdf › Supplemental Dataset 1/A-mRNA_nonrhyth_translation_nonrhyth/Vcp_set_A.pdf]

# Vcpip1

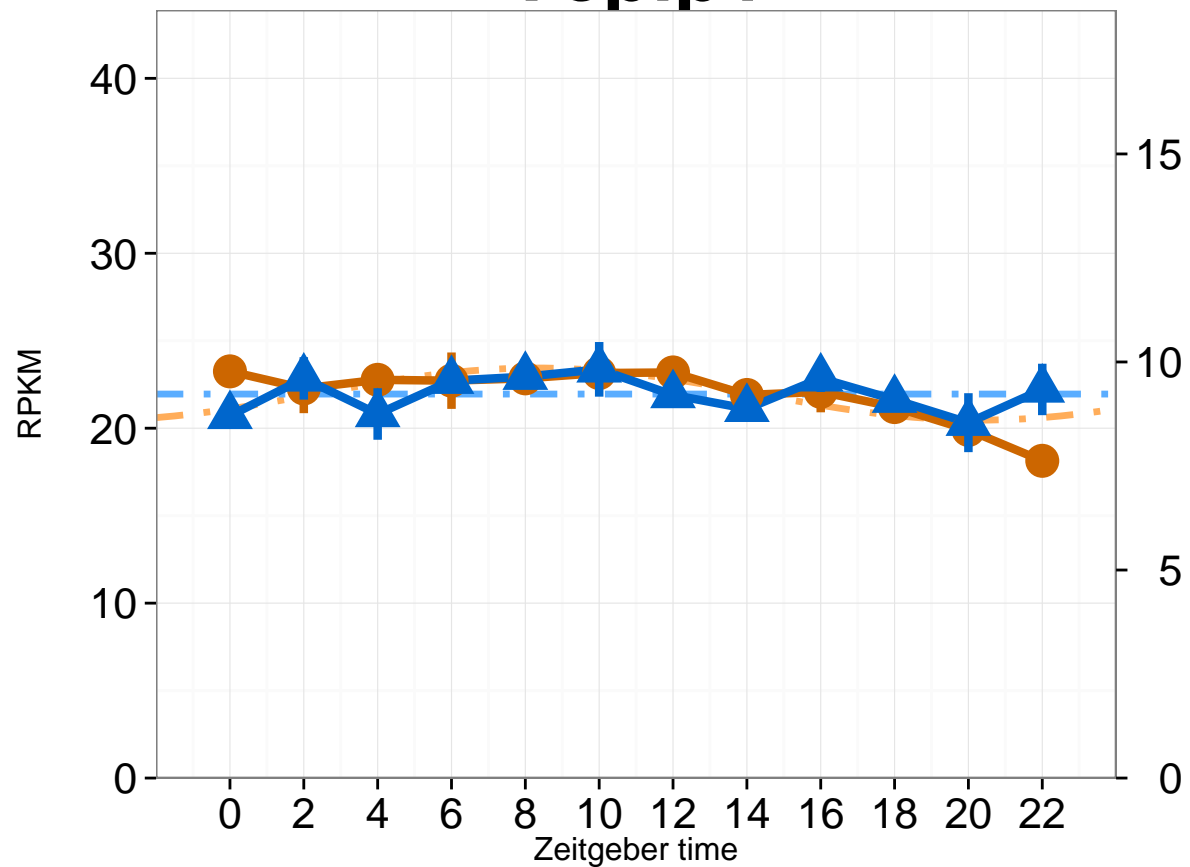

# Vcpip1

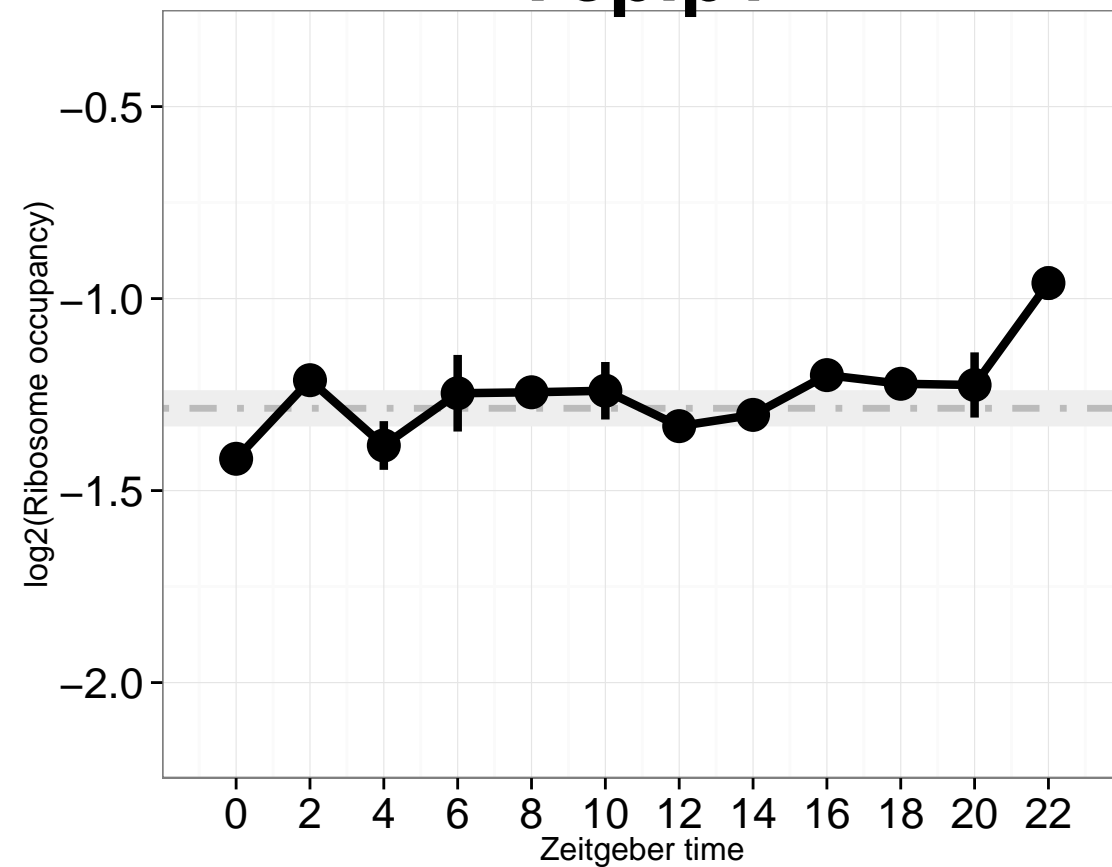

Supplement: SuppDataset_1.zip [file Vcpip1_set_A.pdf › Supplemental Dataset 1/A-mRNA_nonrhyth_translation_nonrhyth/Vcpip1_set_A.pdf]

## Vdac1

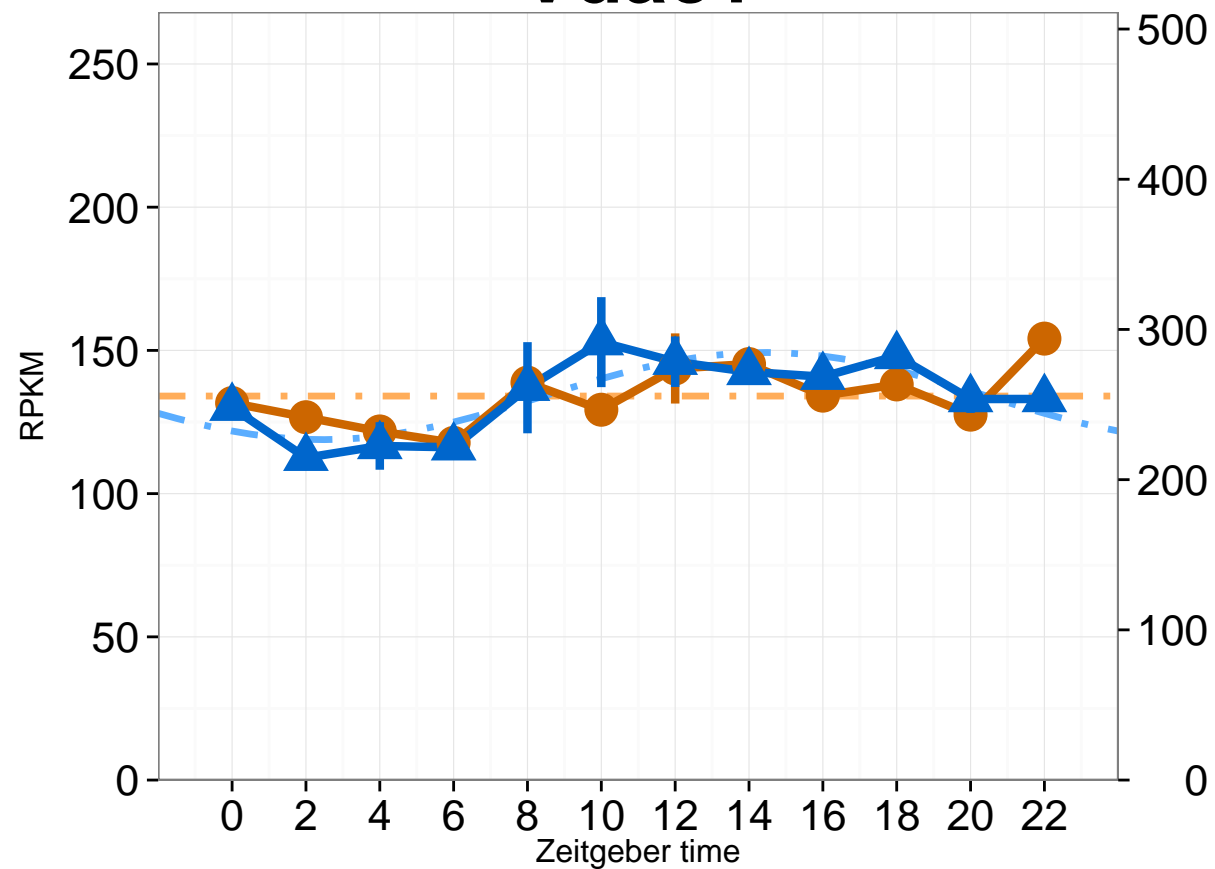

## Vdac1

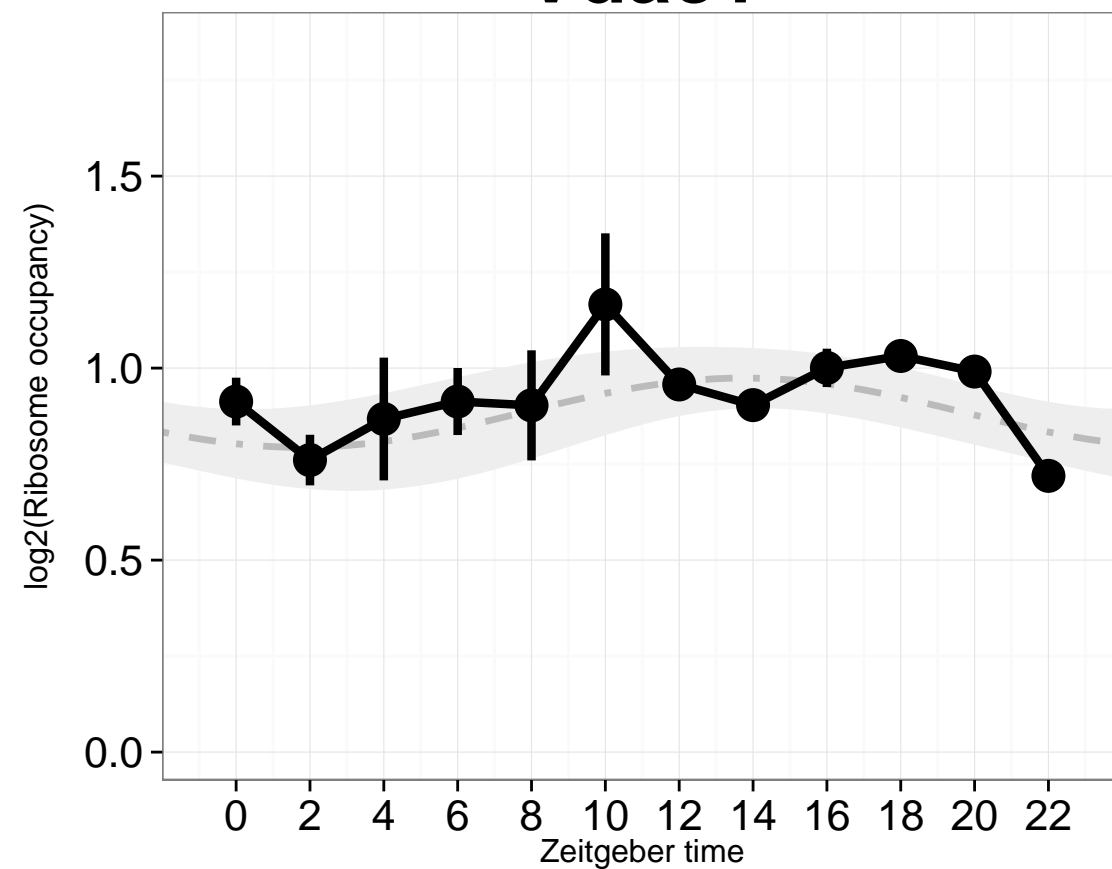

Supplement: SuppDataset_1.zip [file Vdac1_set_A.pdf › Supplemental Dataset 1/A-mRNA_nonrhyth_translation_nonrhyth/Vdac1_set_A.pdf]

## Vdac2

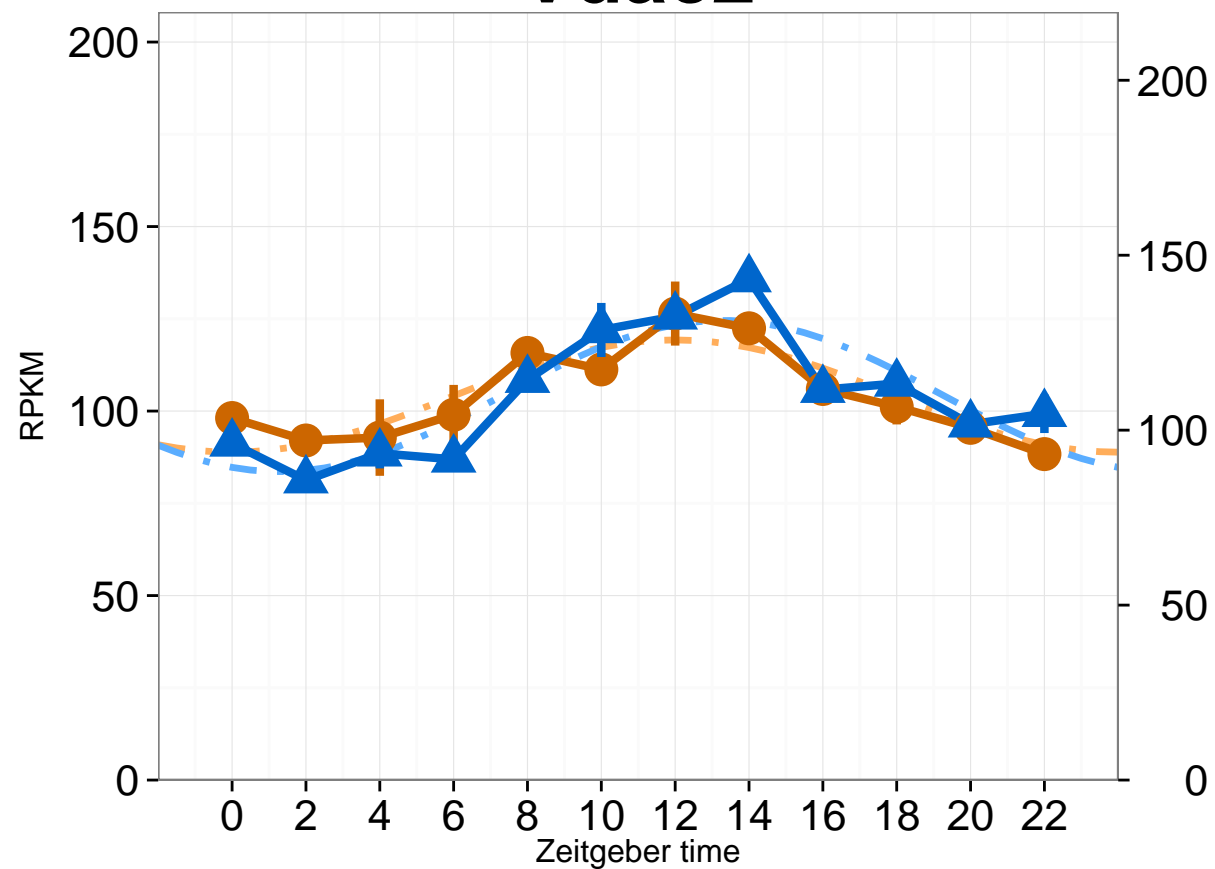

## Vdac2

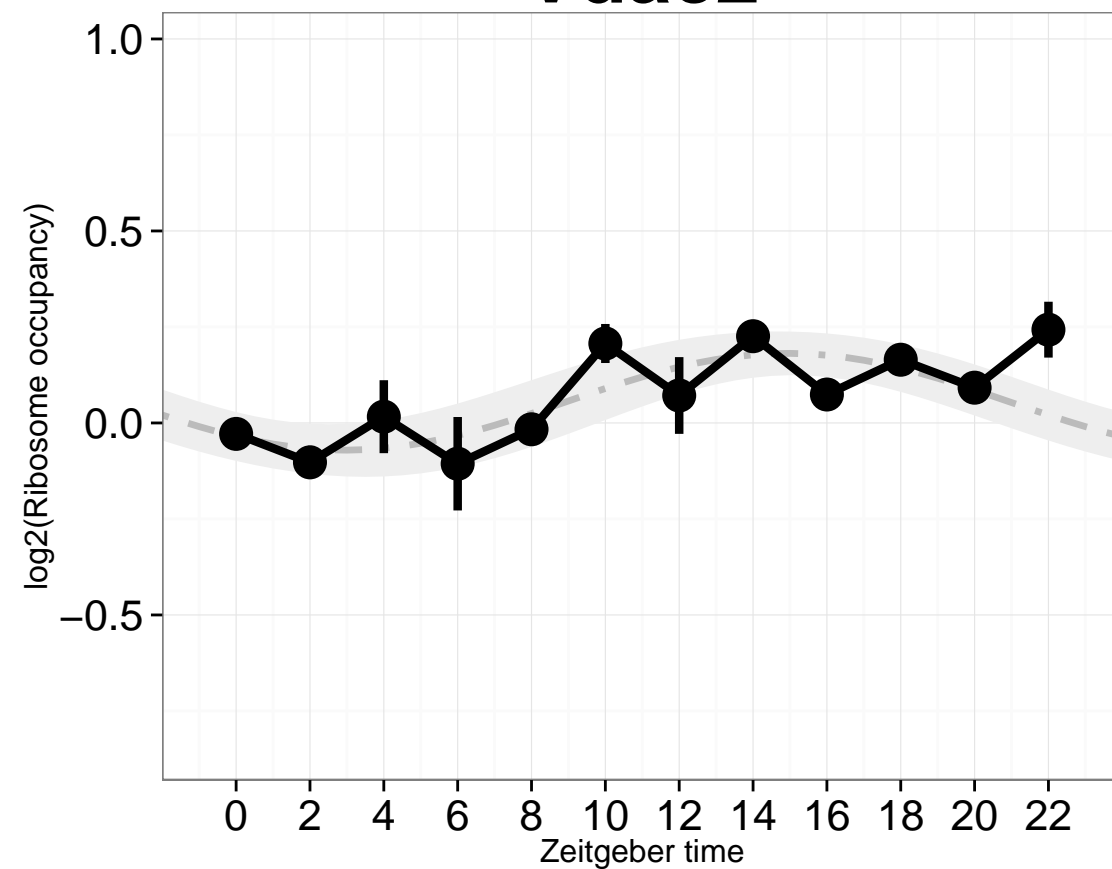

Supplement: SuppDataset_1.zip [file Vdac2_set_A.pdf › Supplemental Dataset 1/A-mRNA_nonrhyth_translation_nonrhyth/Vdac2_set_A.pdf]

## Vdac3

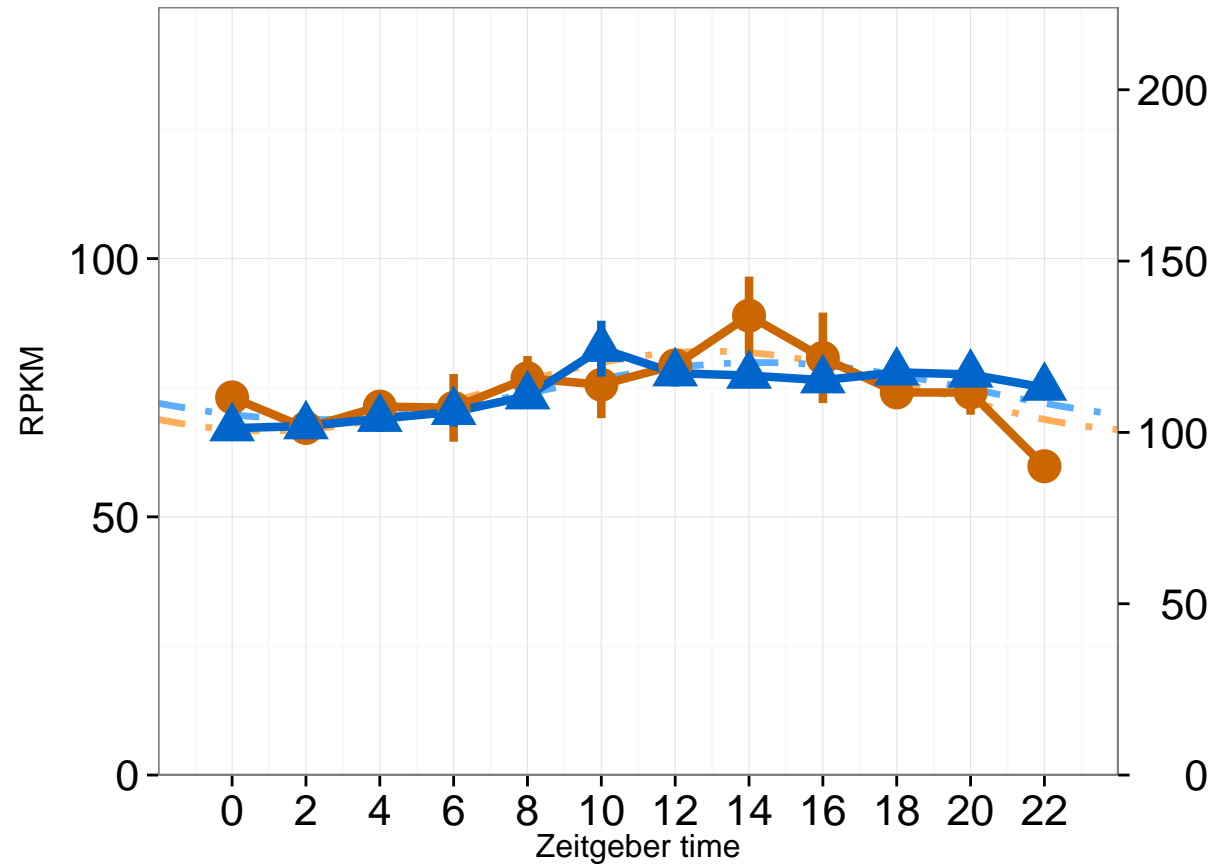

## Vdac3

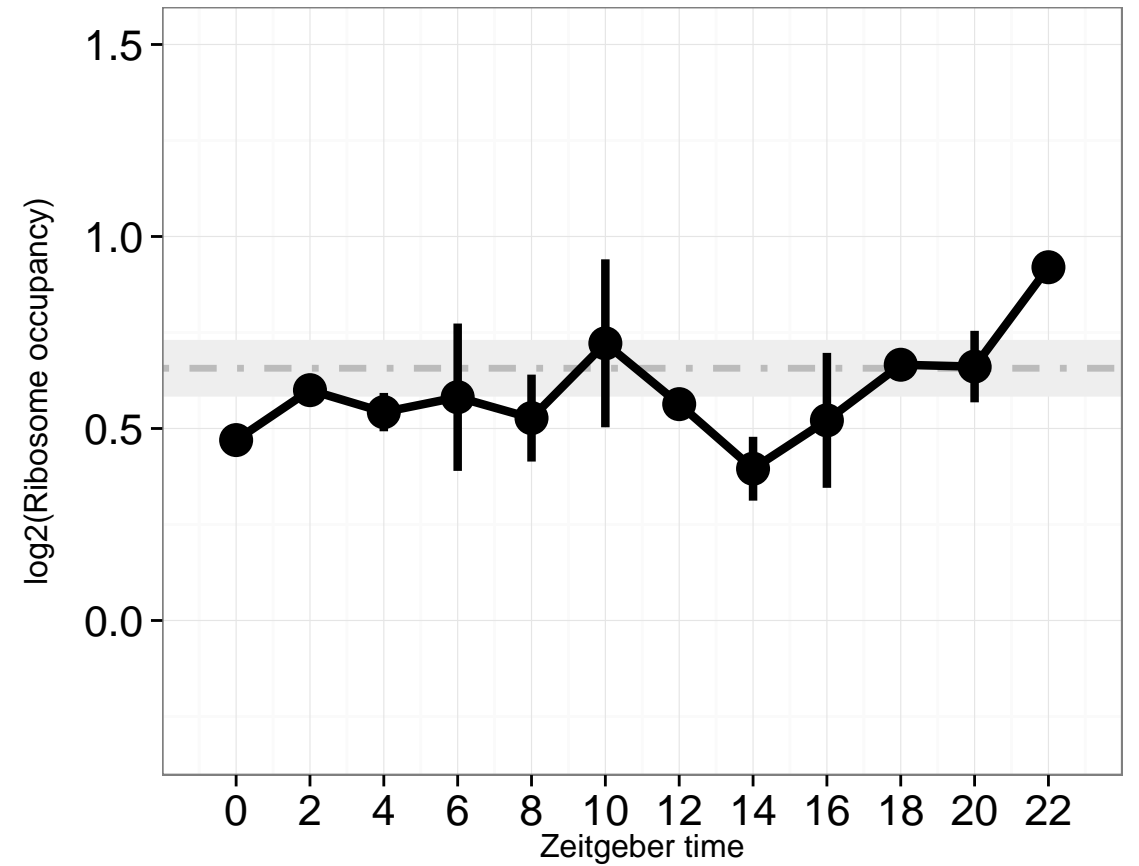

Supplement: SuppDataset_1.zip [file Vdac3_set_A.pdf › Supplemental Dataset 1/A-mRNA_nonrhyth_translation_nonrhyth/Vdac3_set_A.pdf]

# Vegfa

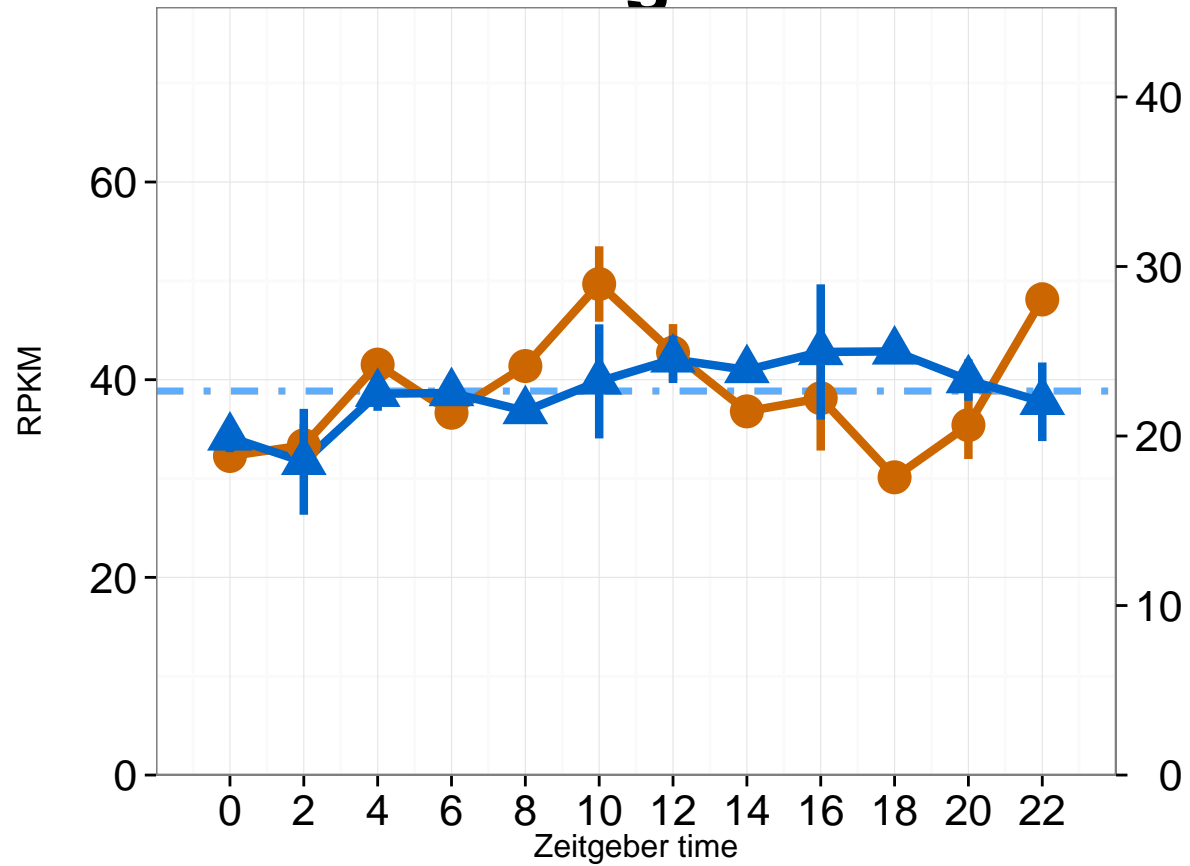

# Vegfa

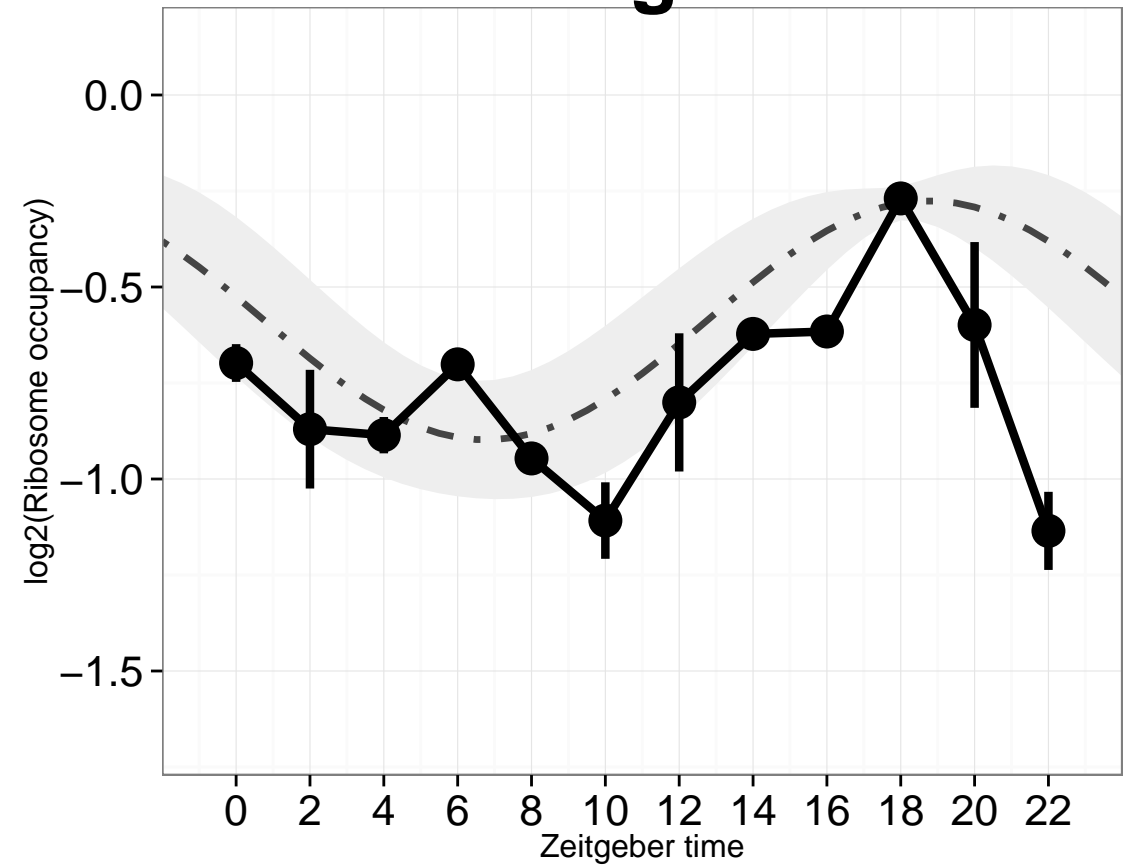

Supplement: SuppDataset_1.zip [file Vegfa_set_A.pdf › Supplemental Dataset 1/A-mRNA_nonrhyth_translation_nonrhyth/Vegfa_set_A.pdf]

# Vegfb

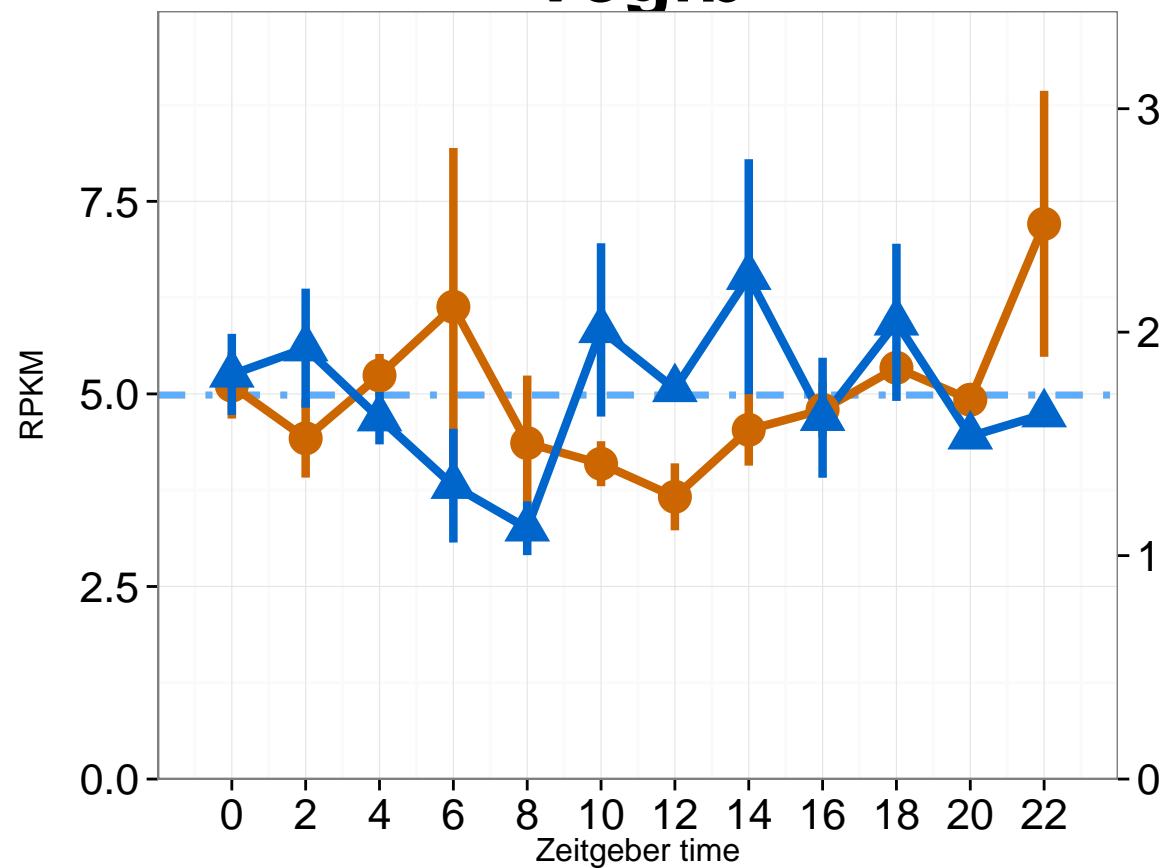

# Vegfb

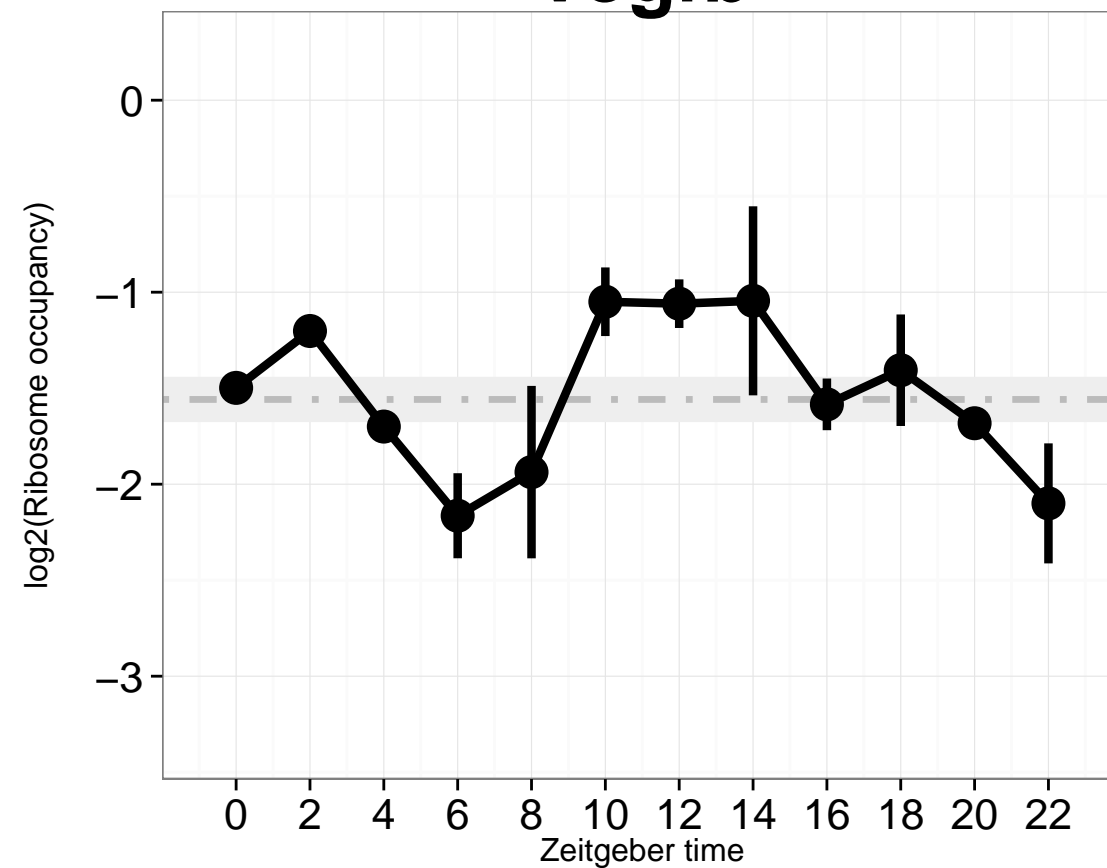

Supplement: SuppDataset_1.zip [file Vegfb_set_A.pdf › Supplemental Dataset 1/A-mRNA_nonrhyth_translation_nonrhyth/Vegfb_set_A.pdf]

## Vegfc

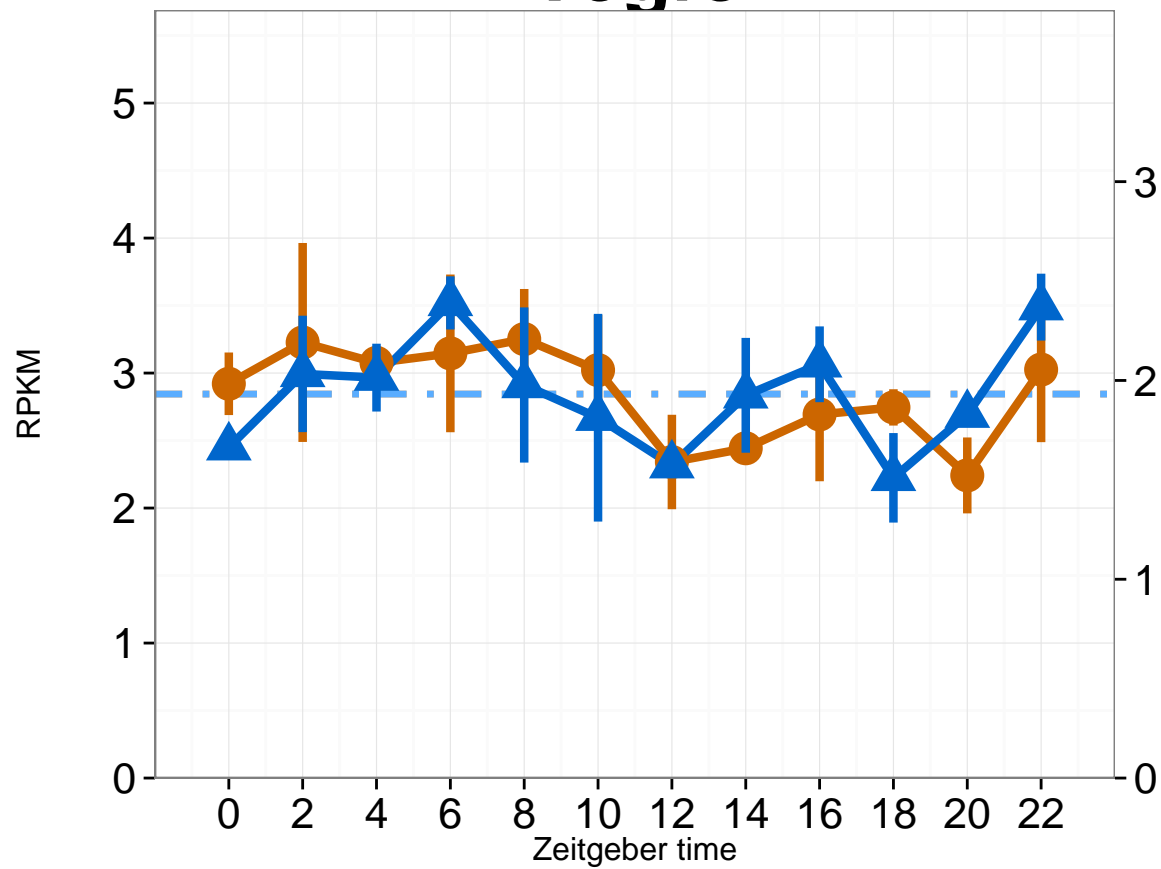

## Vegfc

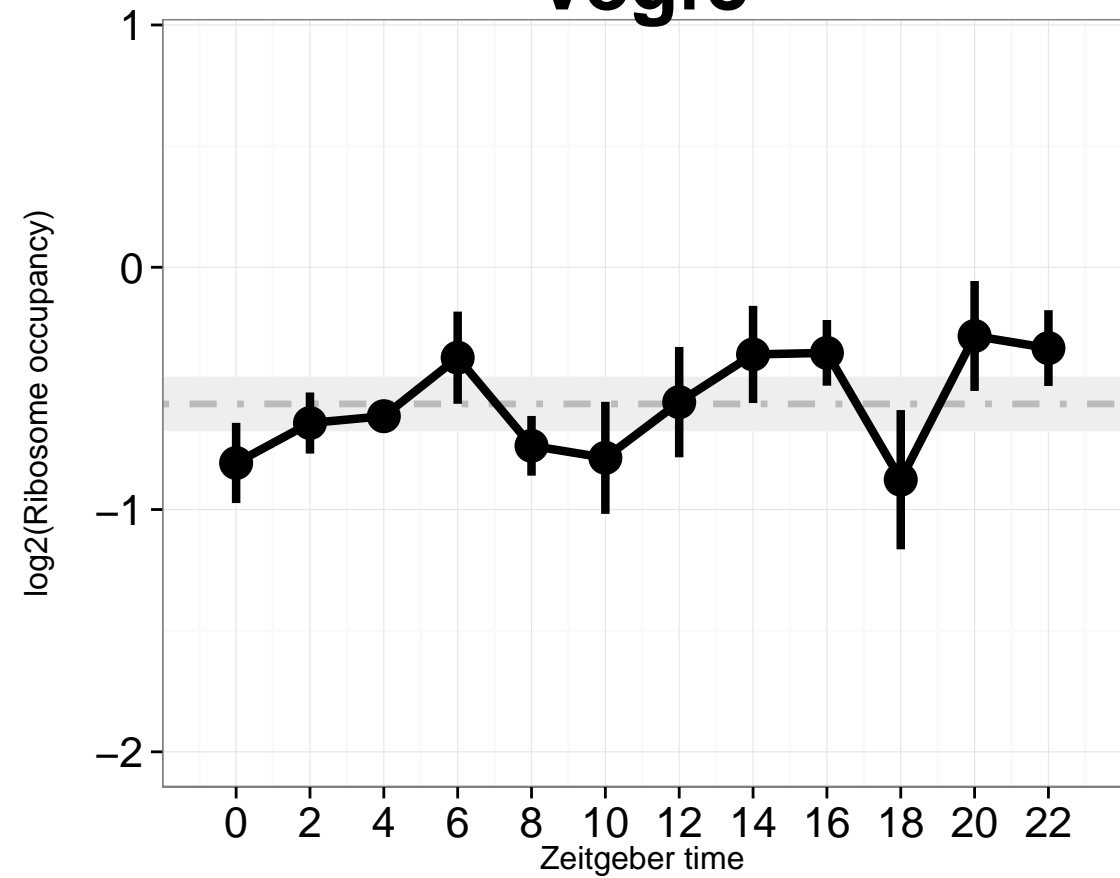

Supplement: SuppDataset_1.zip [file Vegfc_set_A.pdf › Supplemental Dataset 1/A-mRNA_nonrhyth_translation_nonrhyth/Vegfc_set_A.pdf]

## Vezt

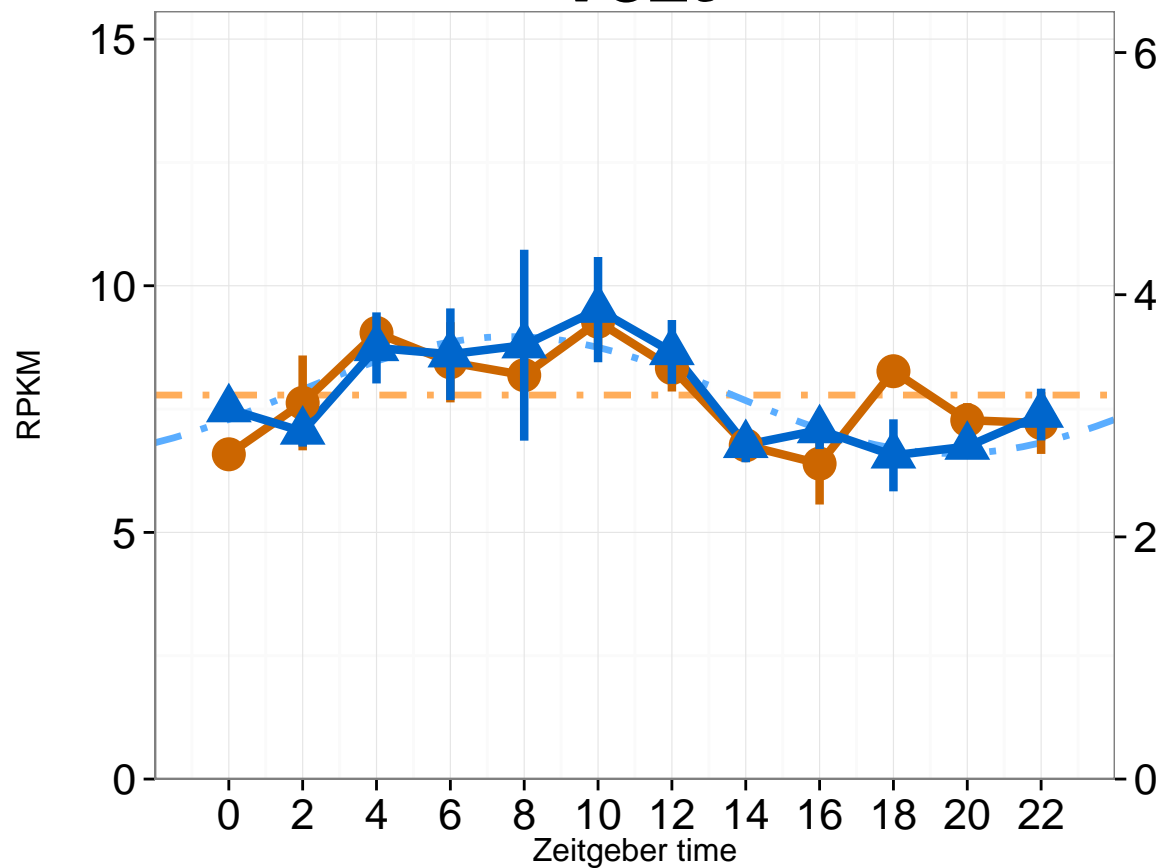

## Vezt

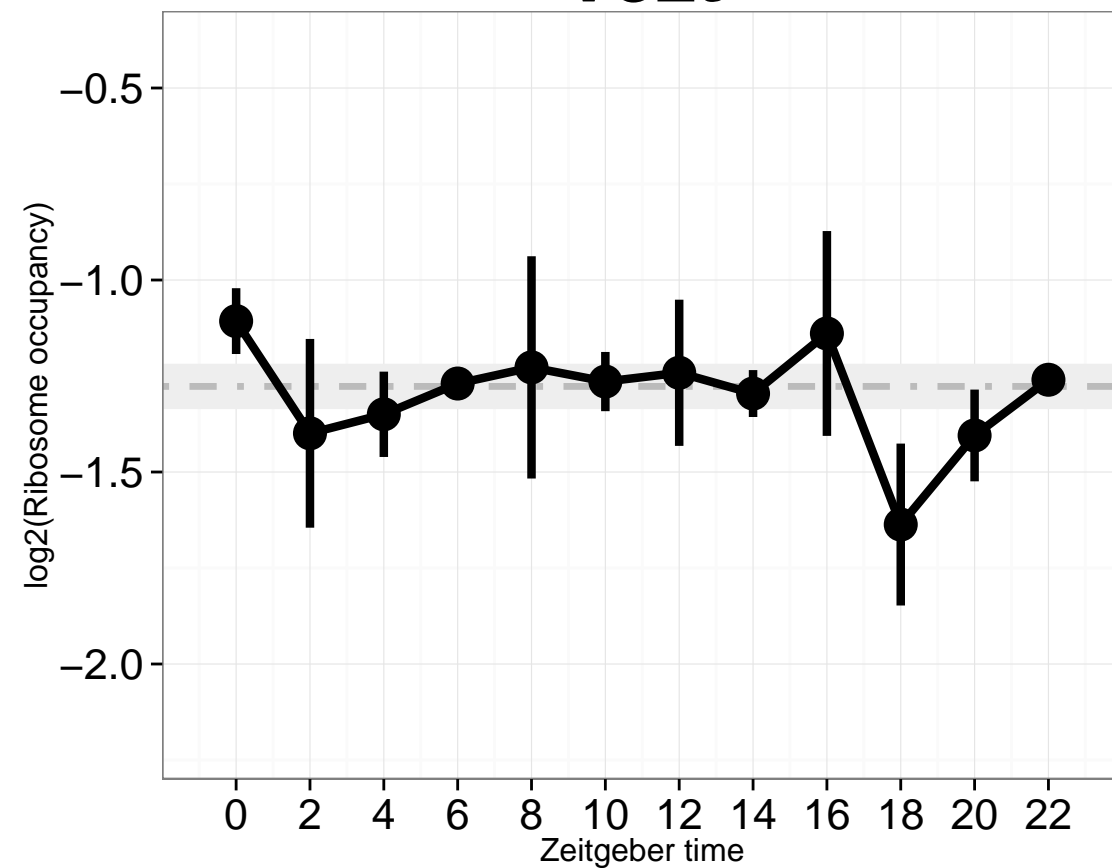

Supplement: SuppDataset_1.zip [file Vezt_set_A.pdf › Supplemental Dataset 1/A-mRNA_nonrhyth_translation_nonrhyth/Vezt_set_A.pdf]

## VgII4

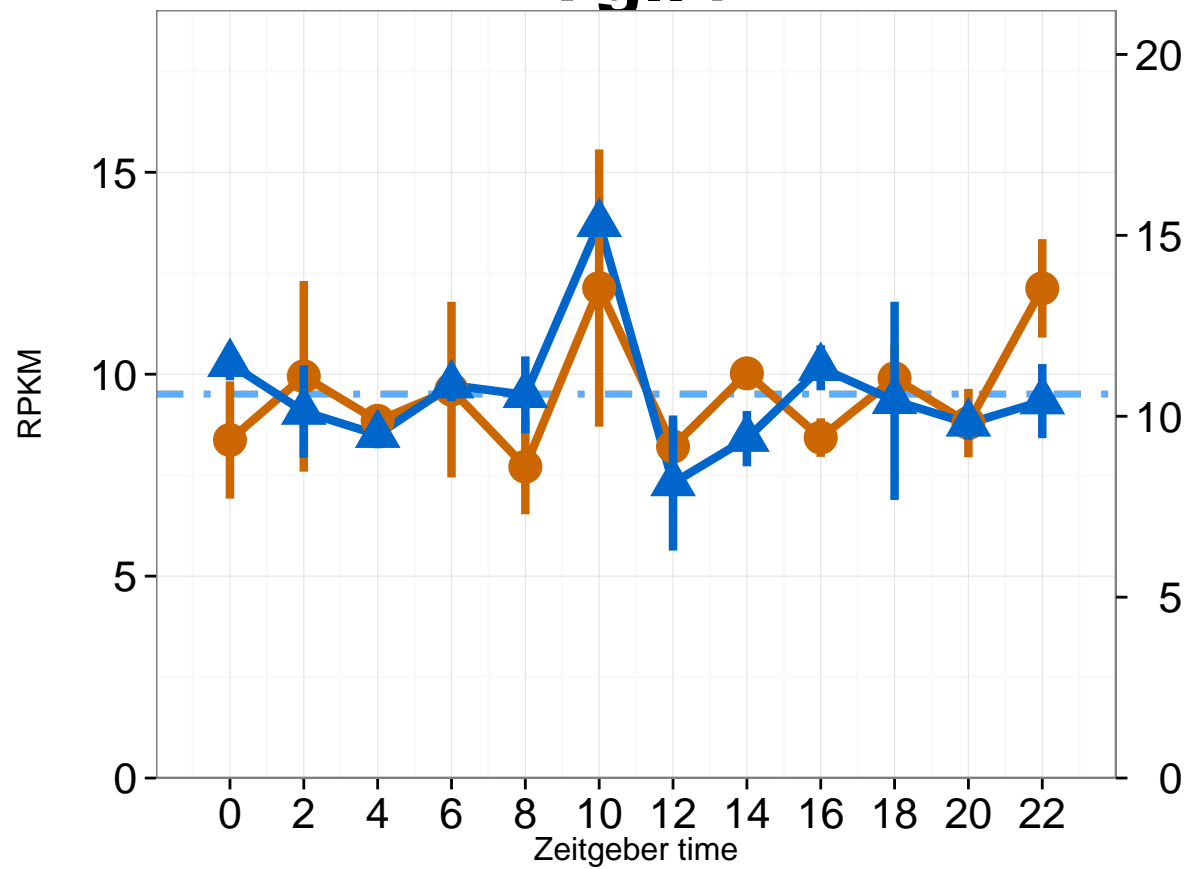

## VgII4

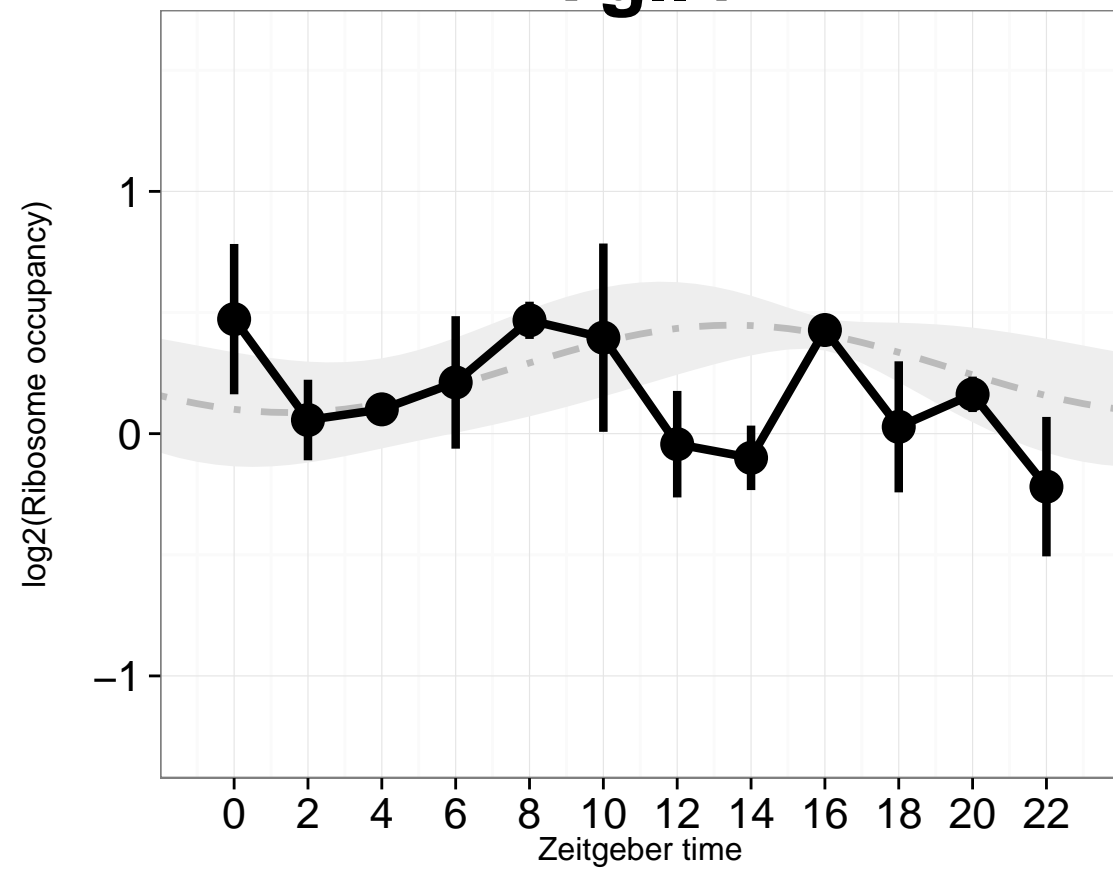

Supplement: SuppDataset_1.zip [file Vgll4_set_A.pdf › Supplemental Dataset 1/A-mRNA_nonrhyth_translation_nonrhyth/Vgll4_set_A.pdf]

## Vhl

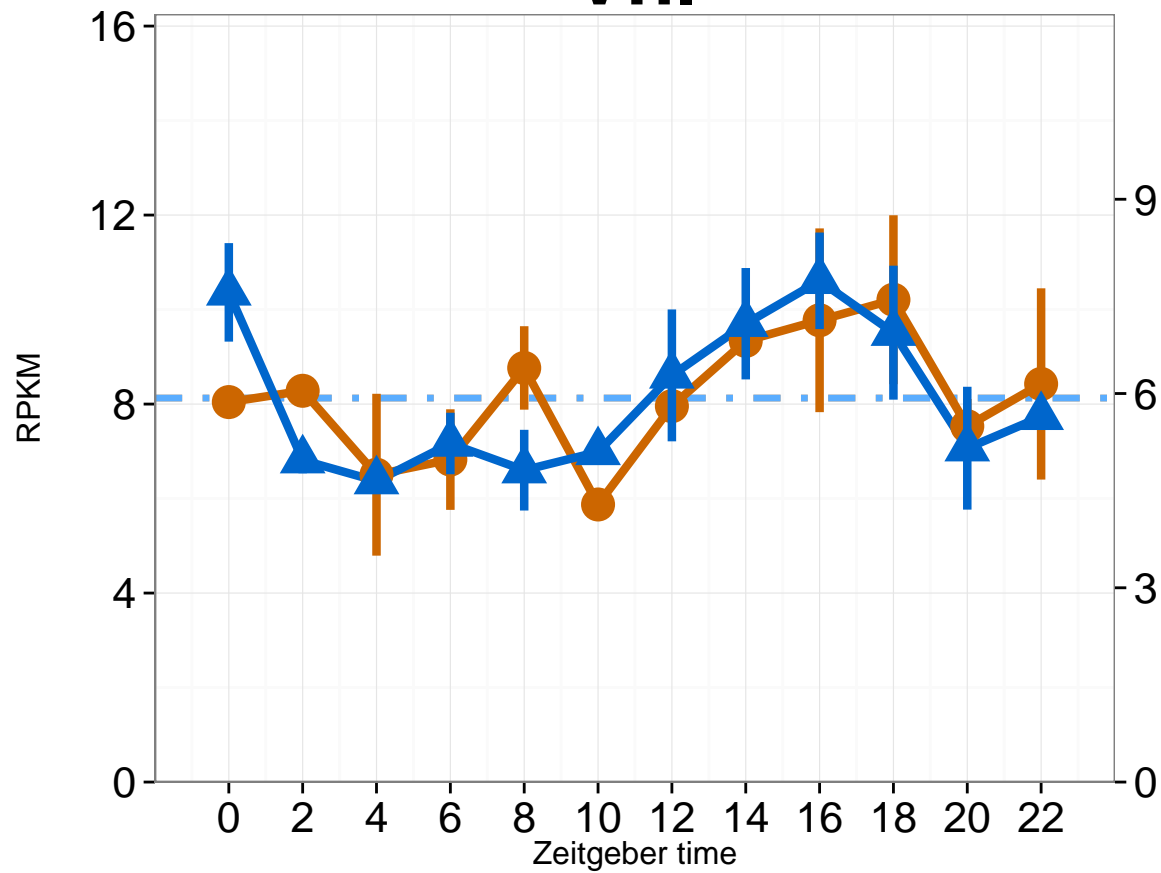

## Vhl

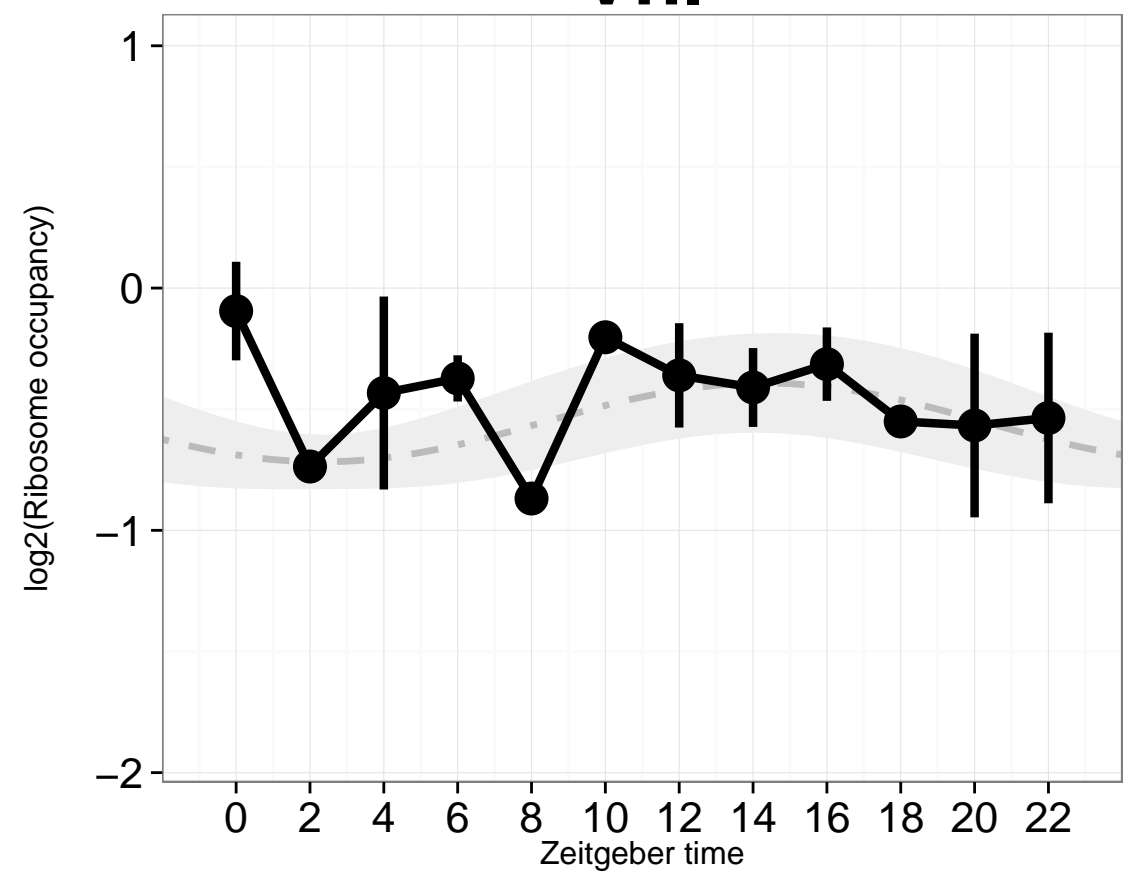

Supplement: SuppDataset_1.zip [file Vhl_set_A.pdf › Supplemental Dataset 1/A-mRNA_nonrhyth_translation_nonrhyth/Vhl_set_A.pdf]

## Vim

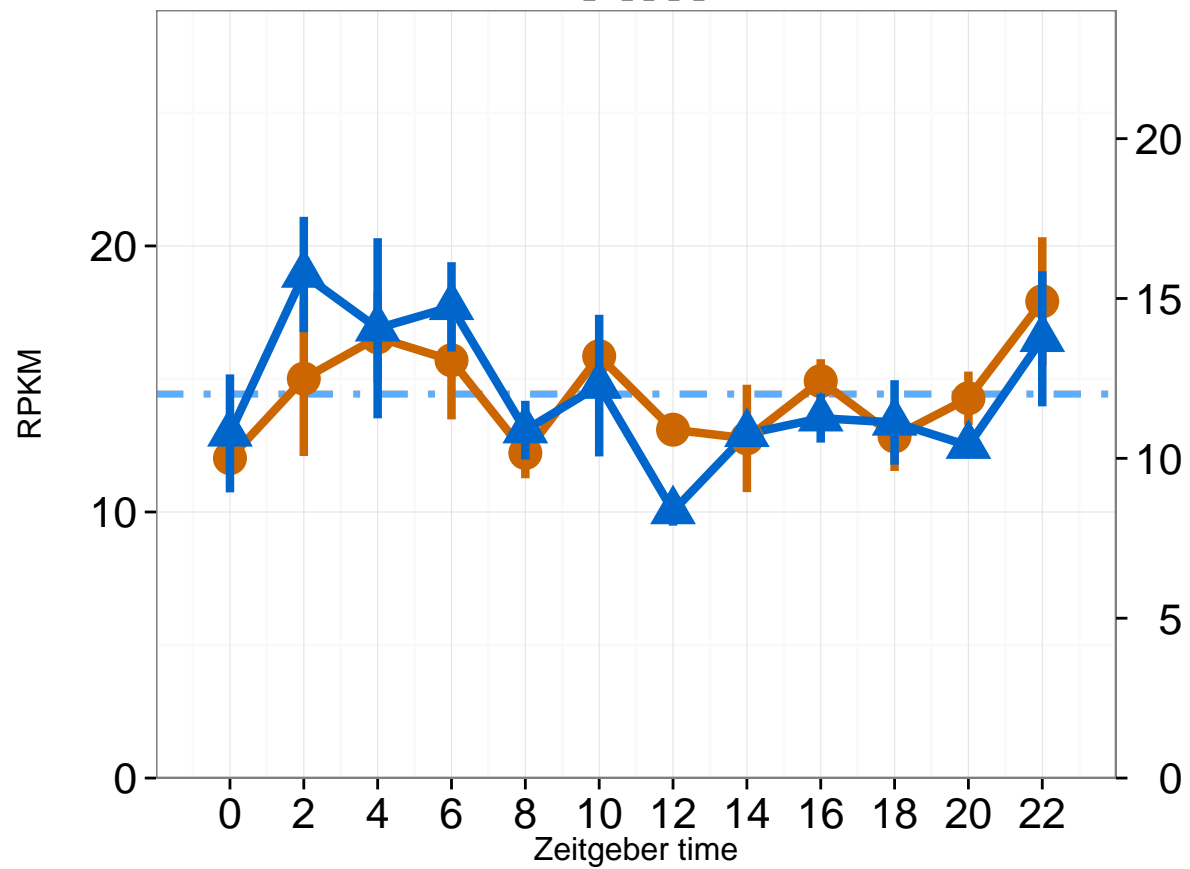

## Vim

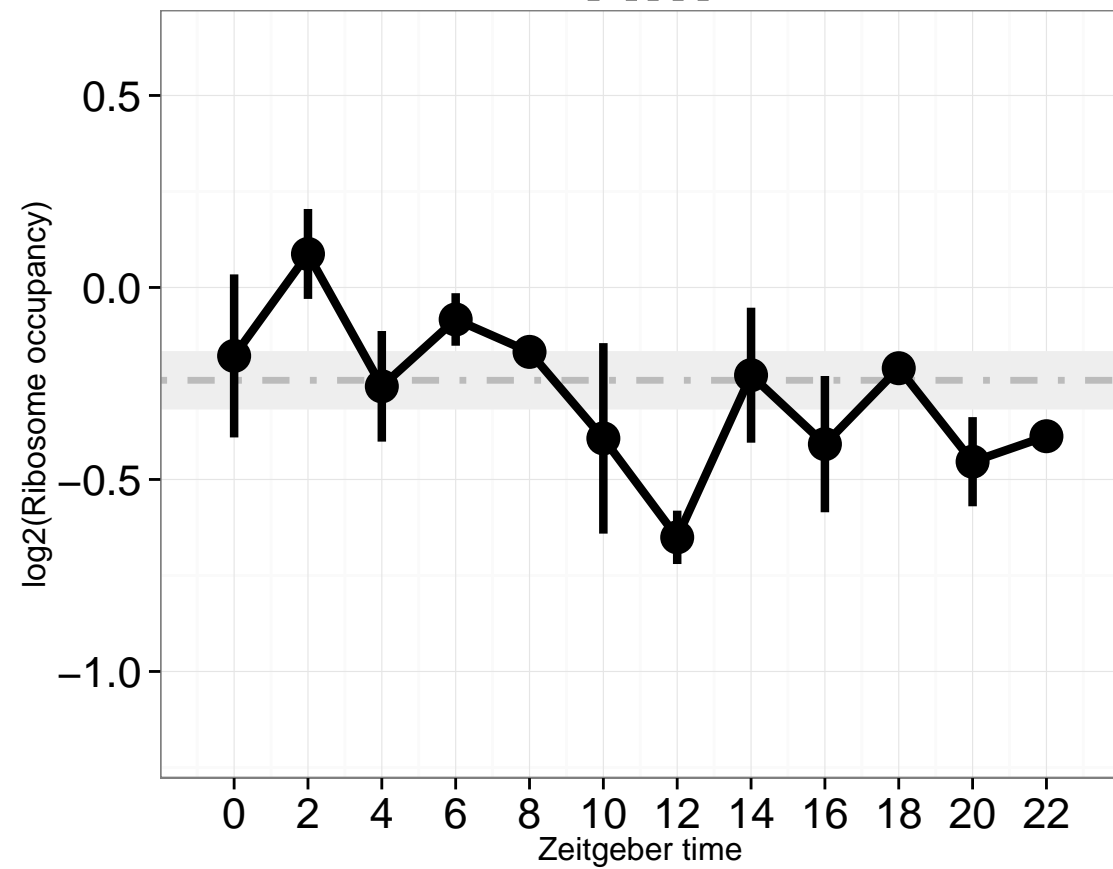

Supplement: SuppDataset_1.zip [file Vim_set_A.pdf › Supplemental Dataset 1/A-mRNA_nonrhyth_translation_nonrhyth/Vim_set_A.pdf]

## Vimp

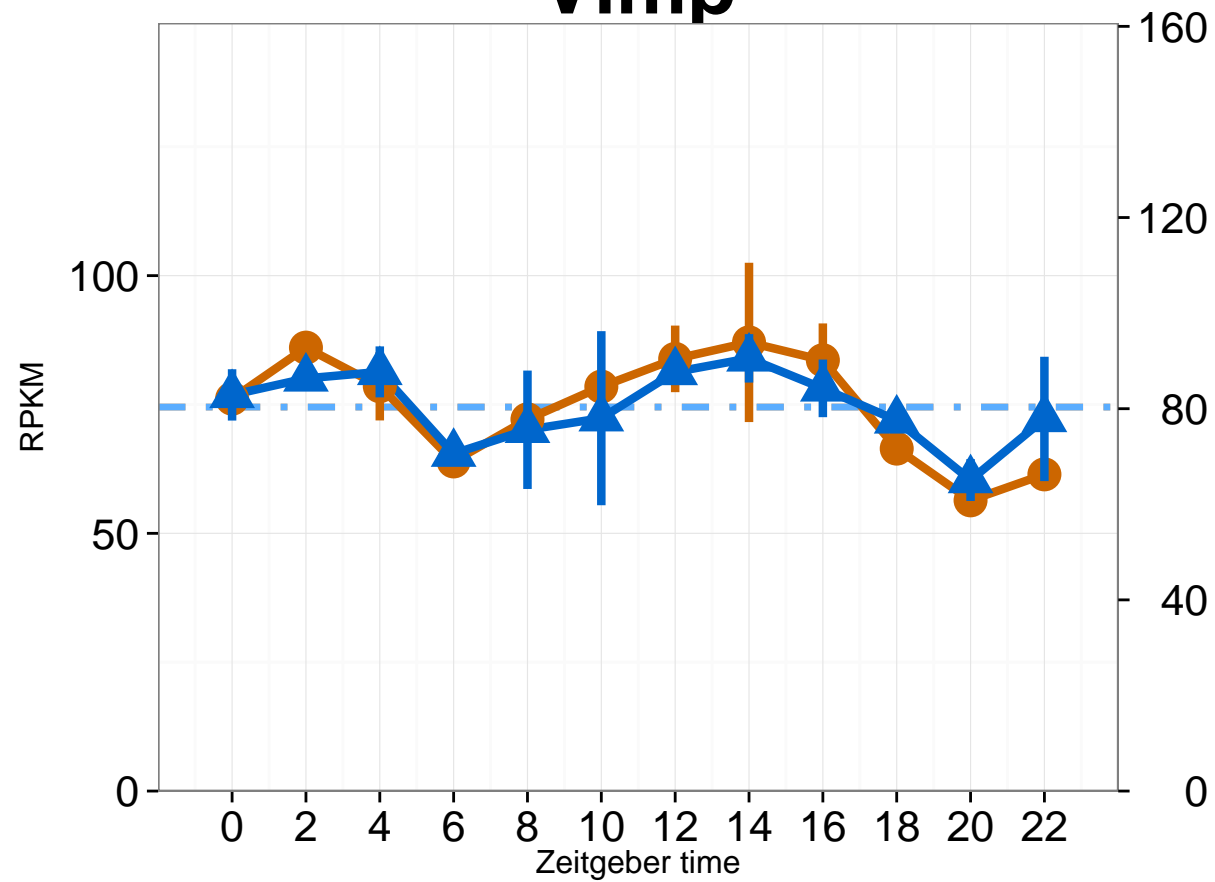

## Vimp

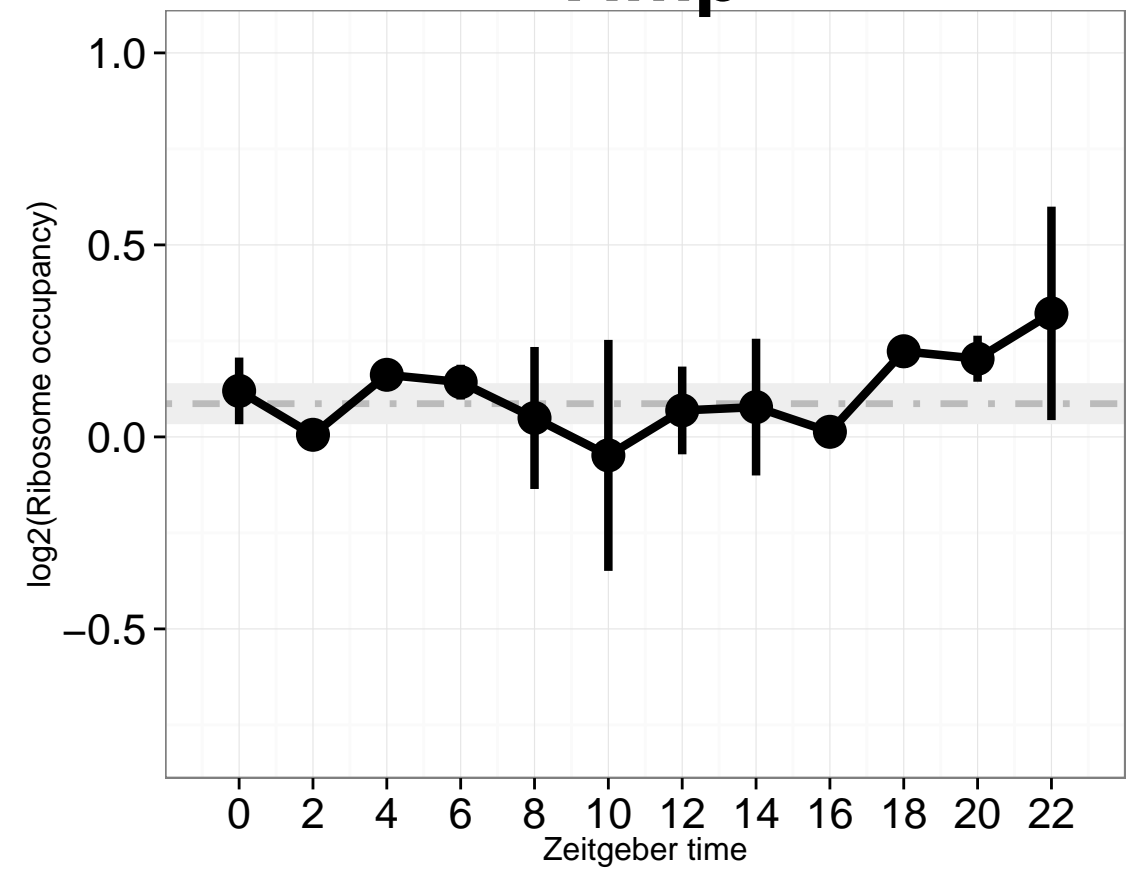

Supplement: SuppDataset_1.zip [file Vimp_set_A.pdf › Supplemental Dataset 1/A-mRNA_nonrhyth_translation_nonrhyth/Vimp_set_A.pdf]

# Vipas39

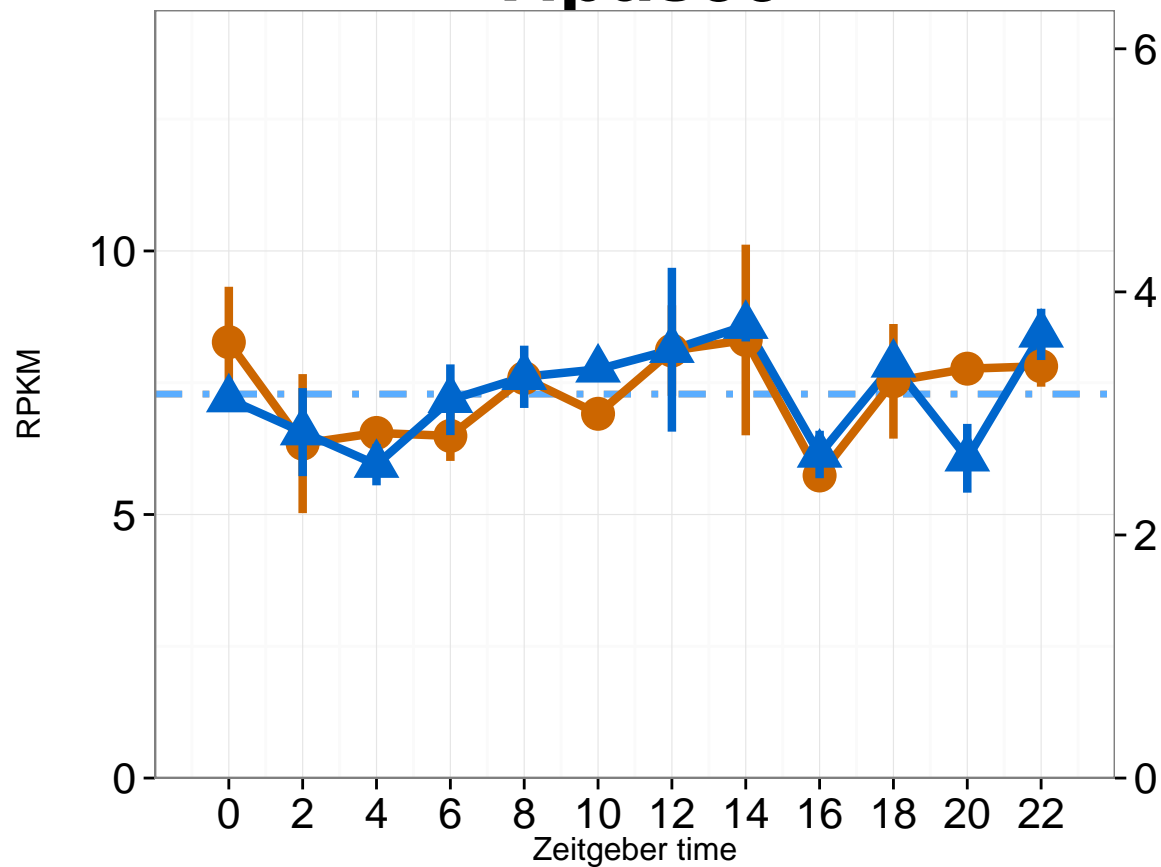

# Vipas39

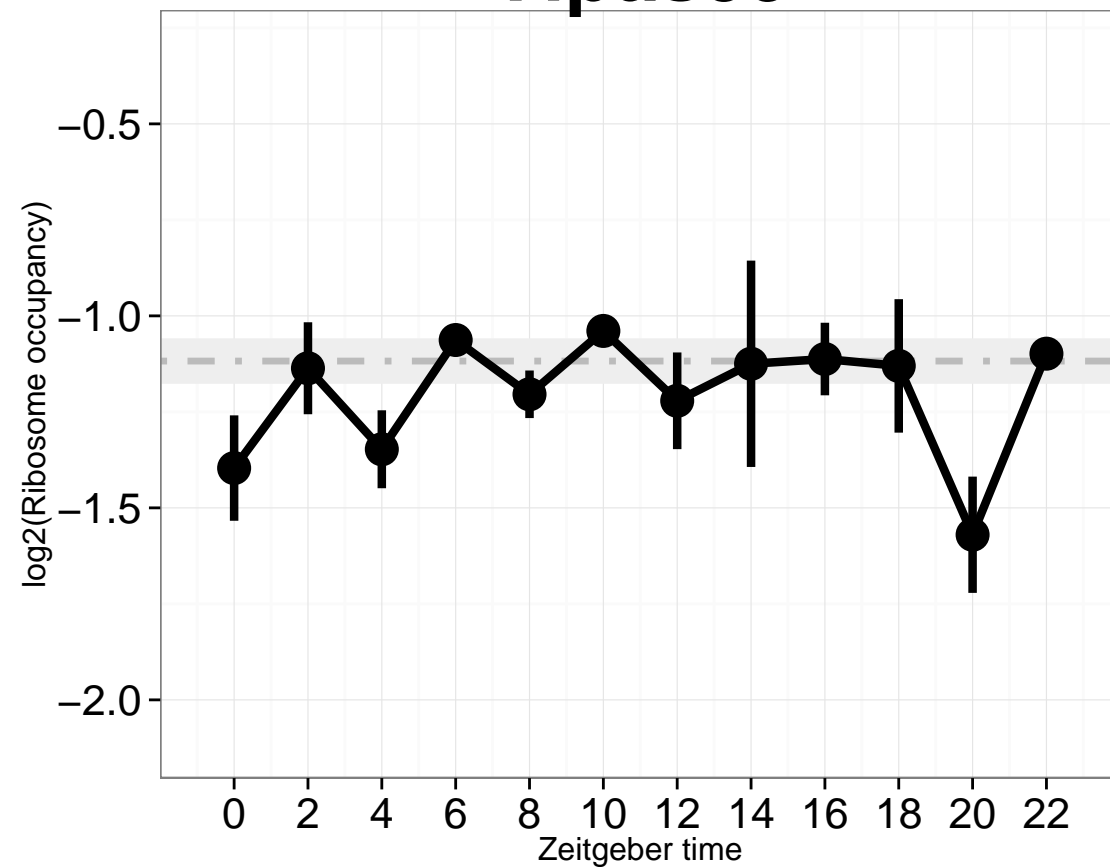

Supplement: SuppDataset_1.zip [file Vipas39_set_A.pdf › Supplemental Dataset 1/A-mRNA_nonrhyth_translation_nonrhyth/Vipas39_set_A.pdf]

## Vkorc1l1

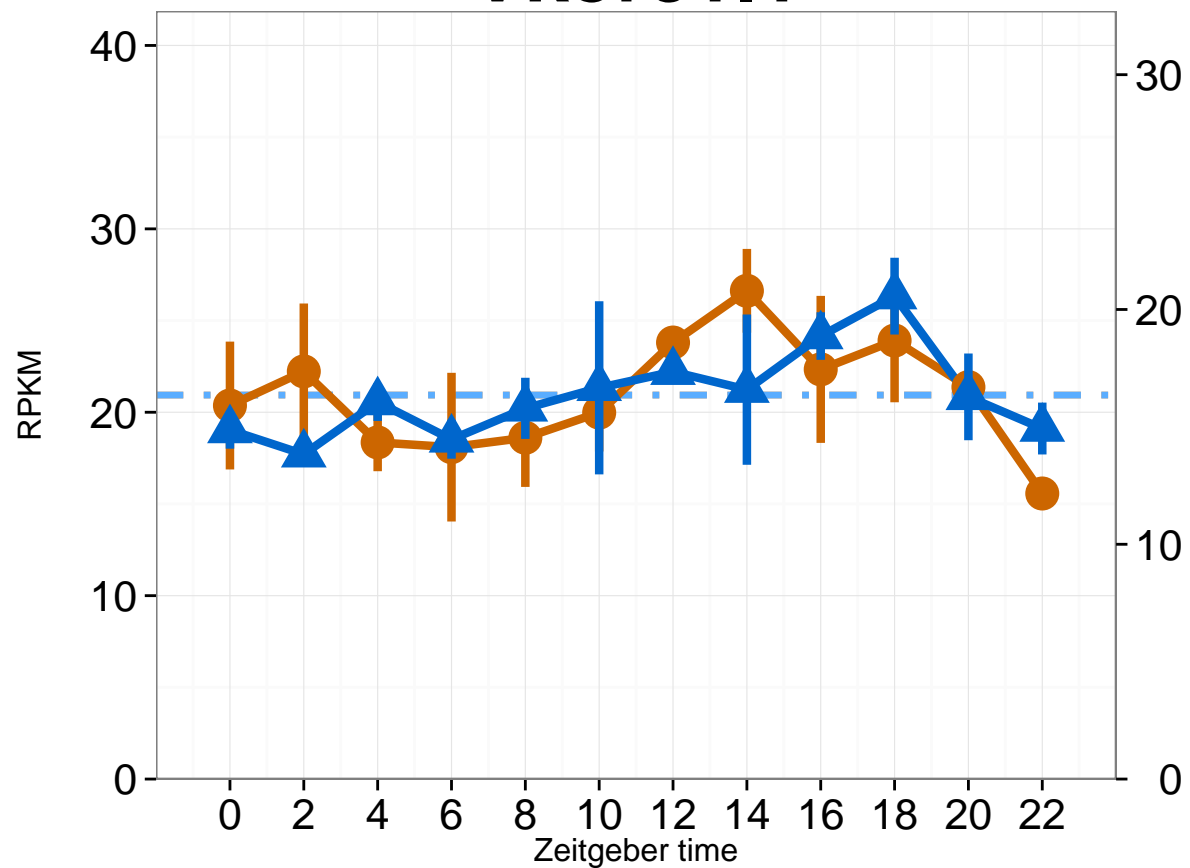

## Vkorc1l1

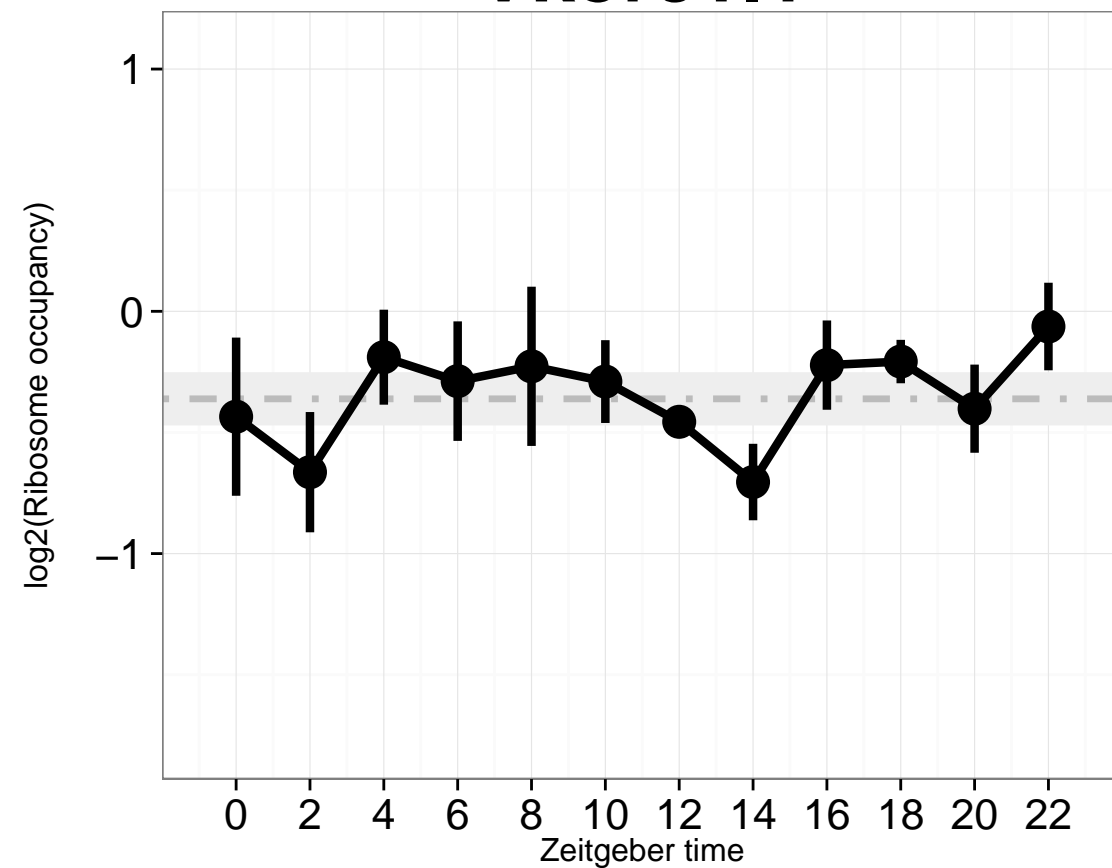

Supplement: SuppDataset_1.zip [file Vkorc1l1_set_A.pdf › Supplemental Dataset 1/A-mRNA_nonrhyth_translation_nonrhyth/Vkorc1l1_set_A.pdf]

## Vldlr

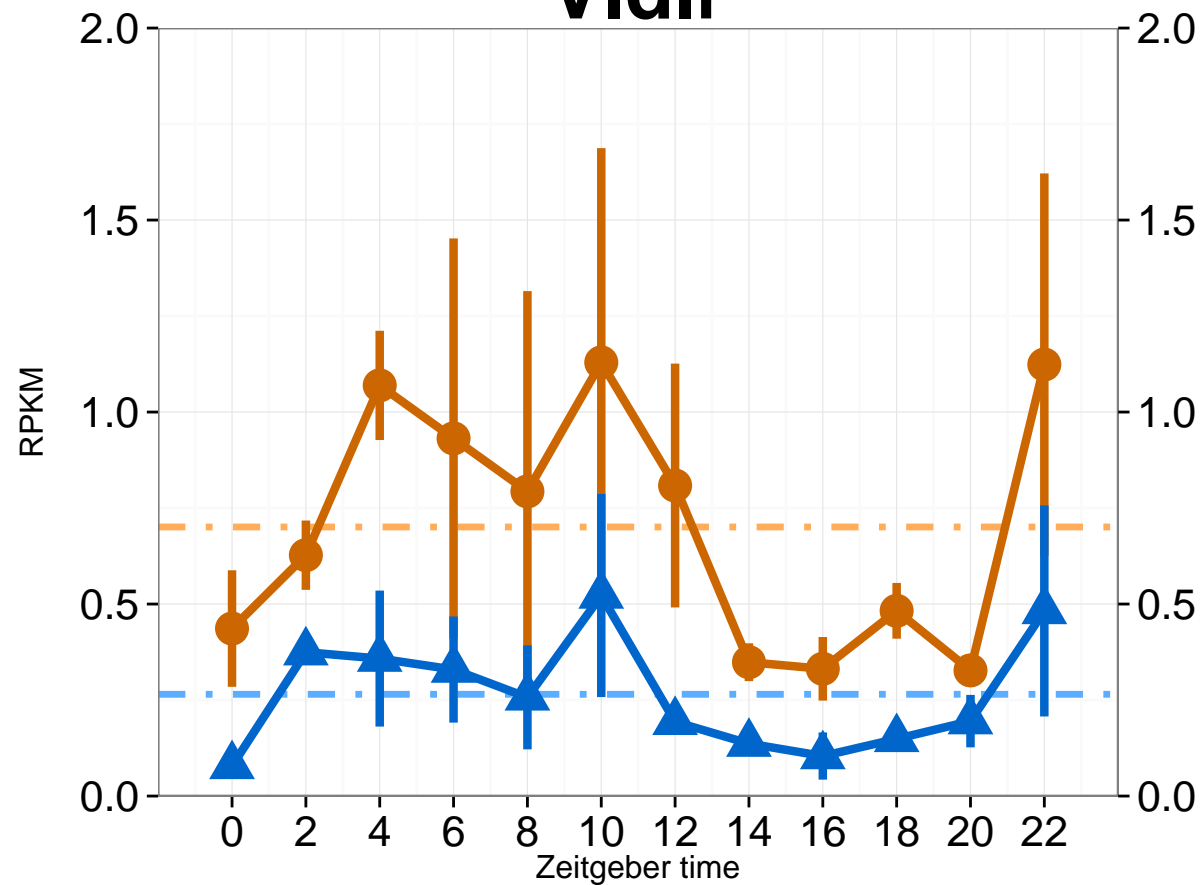

## Vldlr

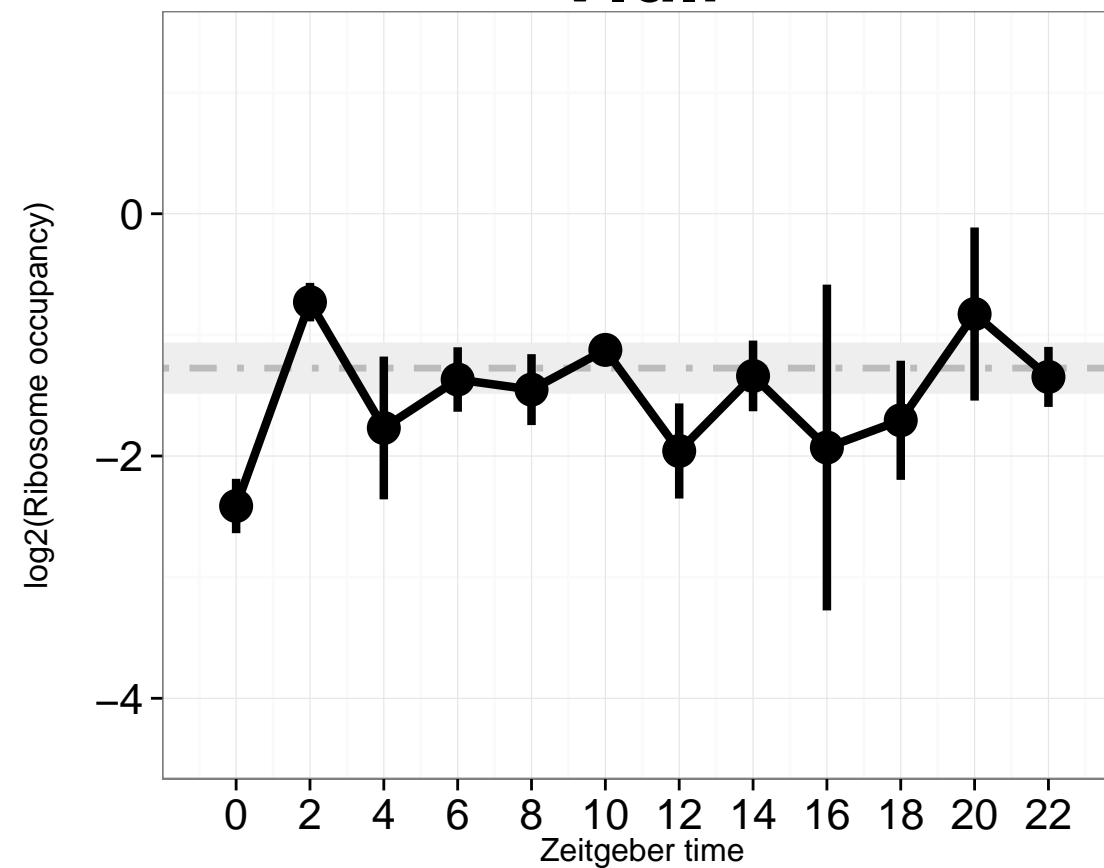

Supplement: SuppDataset_1.zip [file Vldlr_set_A.pdf › Supplemental Dataset 1/A-mRNA_nonrhyth_translation_nonrhyth/Vldlr_set_A.pdf]

## Vmac

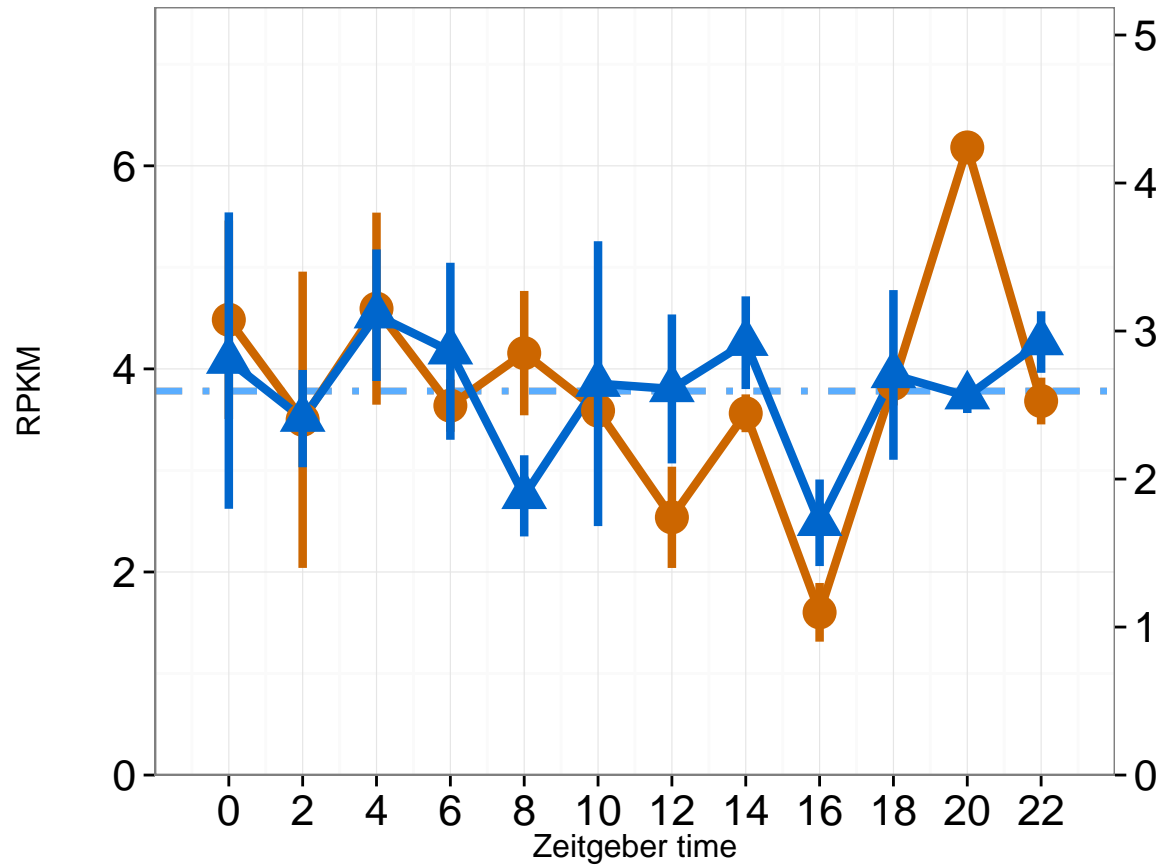

## Vmac

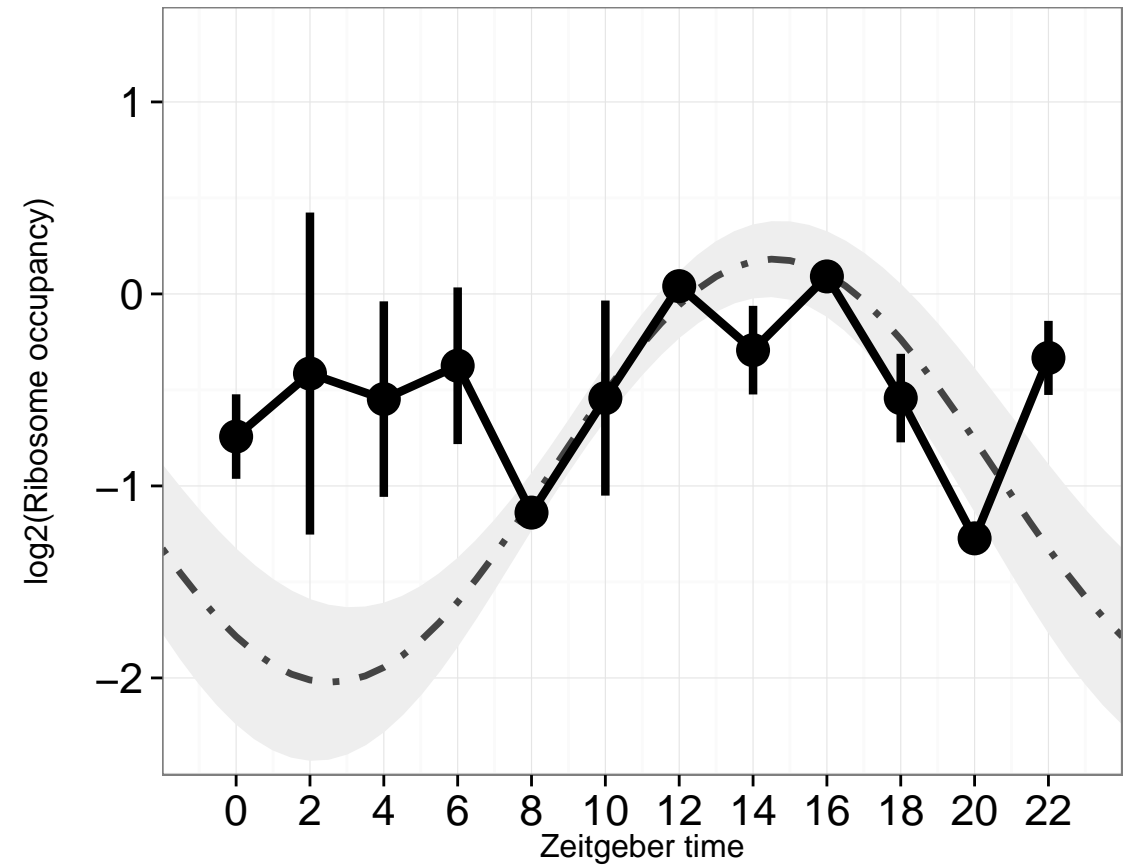

Supplement: SuppDataset_1.zip [file Vmac_set_A.pdf › Supplemental Dataset 1/A-mRNA_nonrhyth_translation_nonrhyth/Vmac_set_A.pdf]

## Vmp1

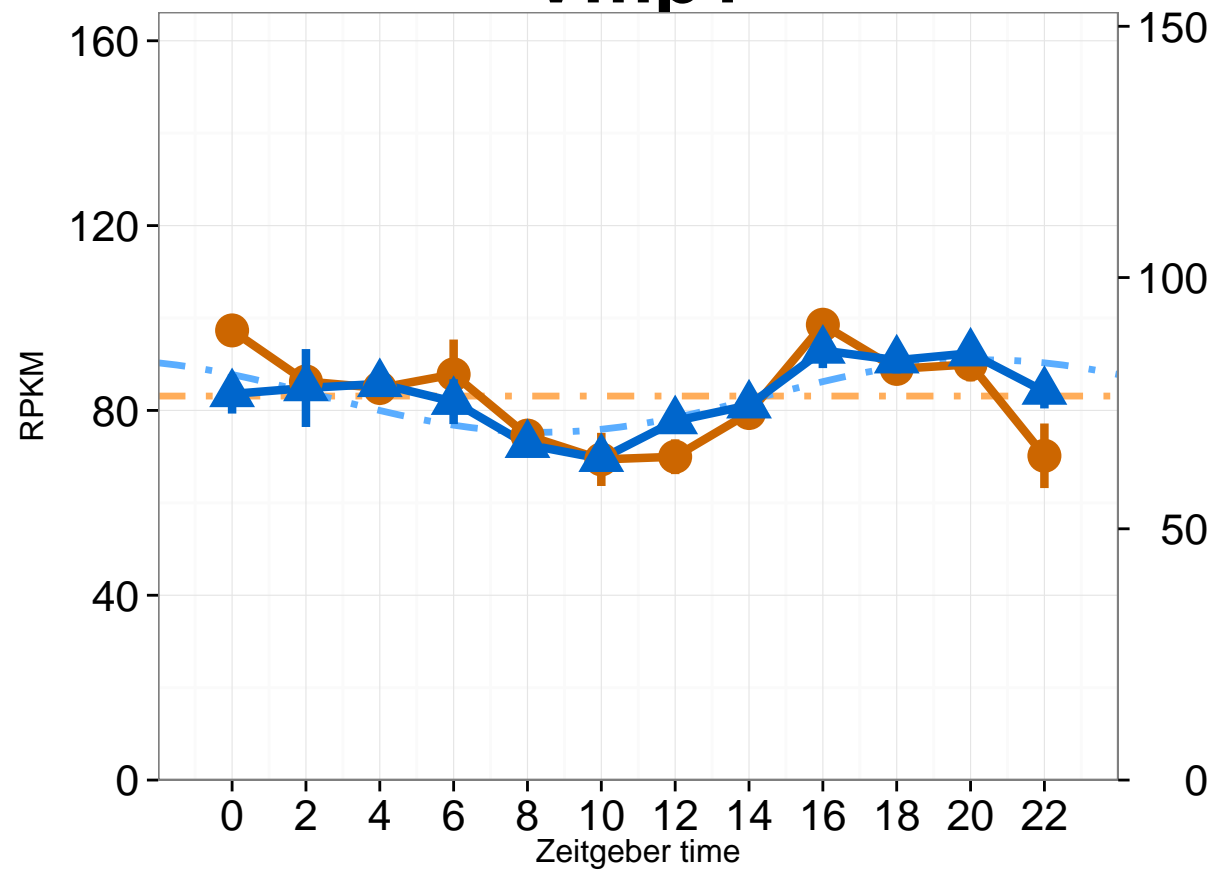

## Vmp1

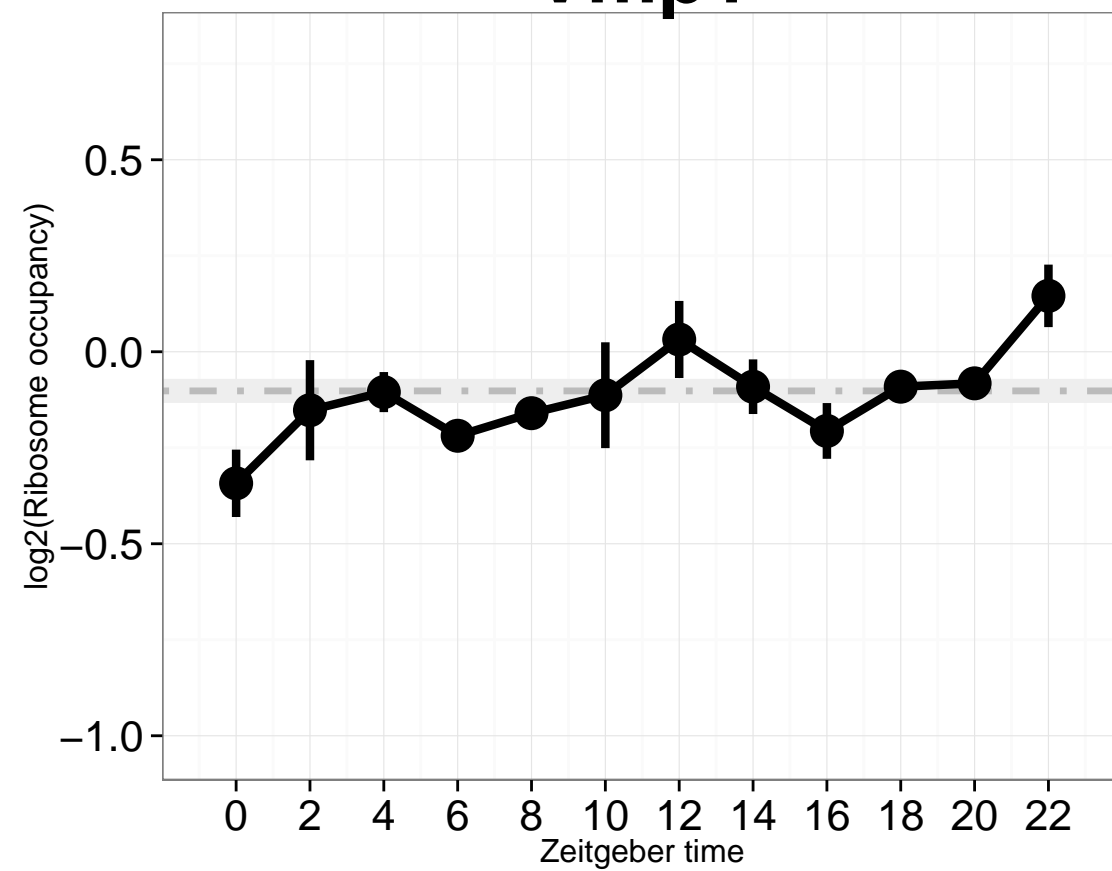

Supplement: SuppDataset_1.zip [file Vmp1_set_A.pdf › Supplemental Dataset 1/A-mRNA_nonrhyth_translation_nonrhyth/Vmp1_set_A.pdf]

## Vnn1

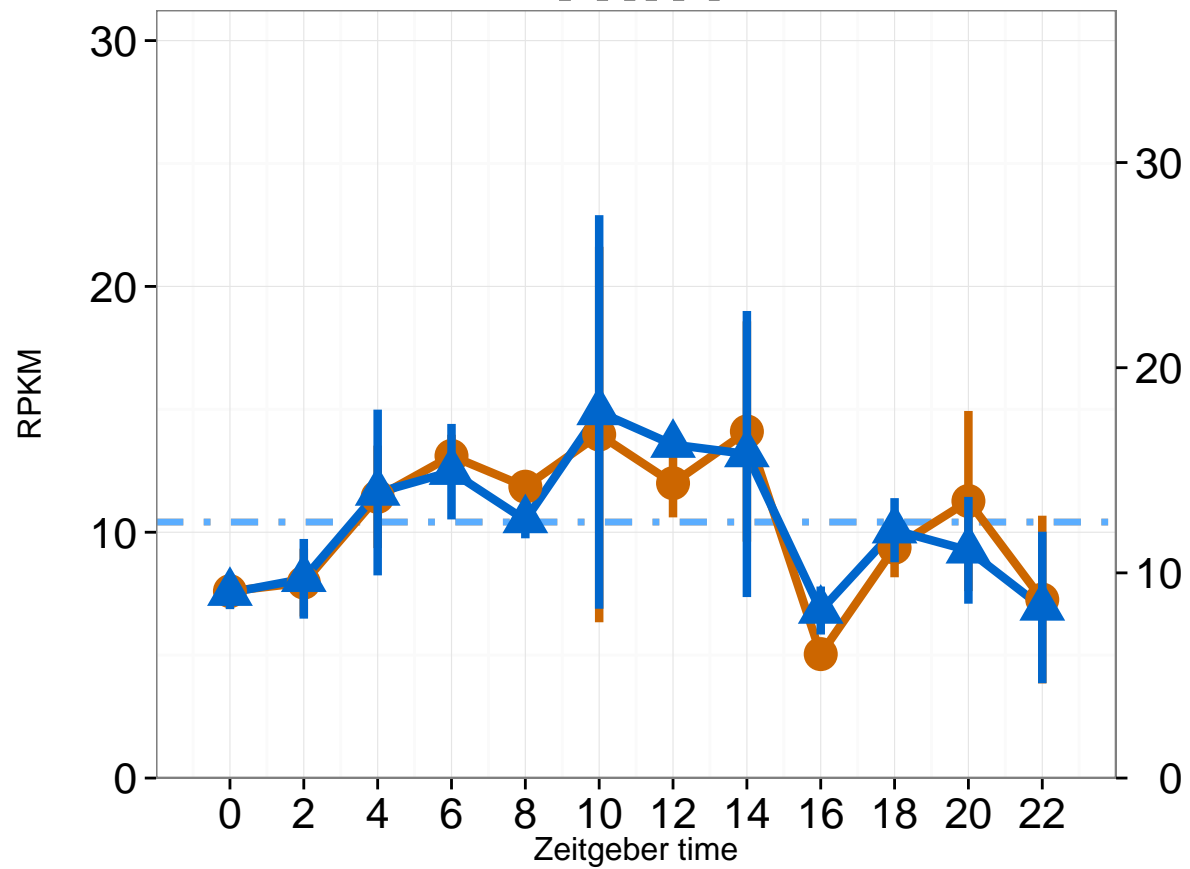

## Vnn1

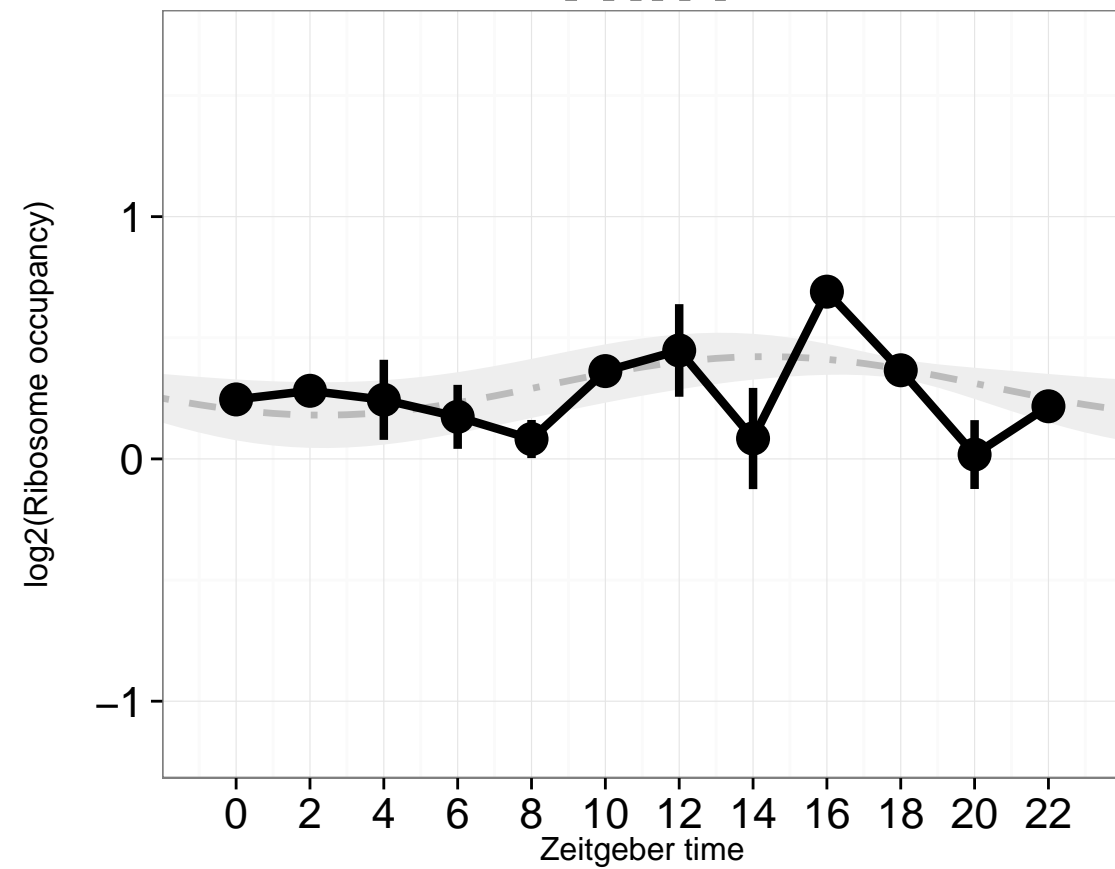

Supplement: SuppDataset_1.zip [file Vnn1_set_A.pdf › Supplemental Dataset 1/A-mRNA_nonrhyth_translation_nonrhyth/Vnn1_set_A.pdf]

## Vnn3

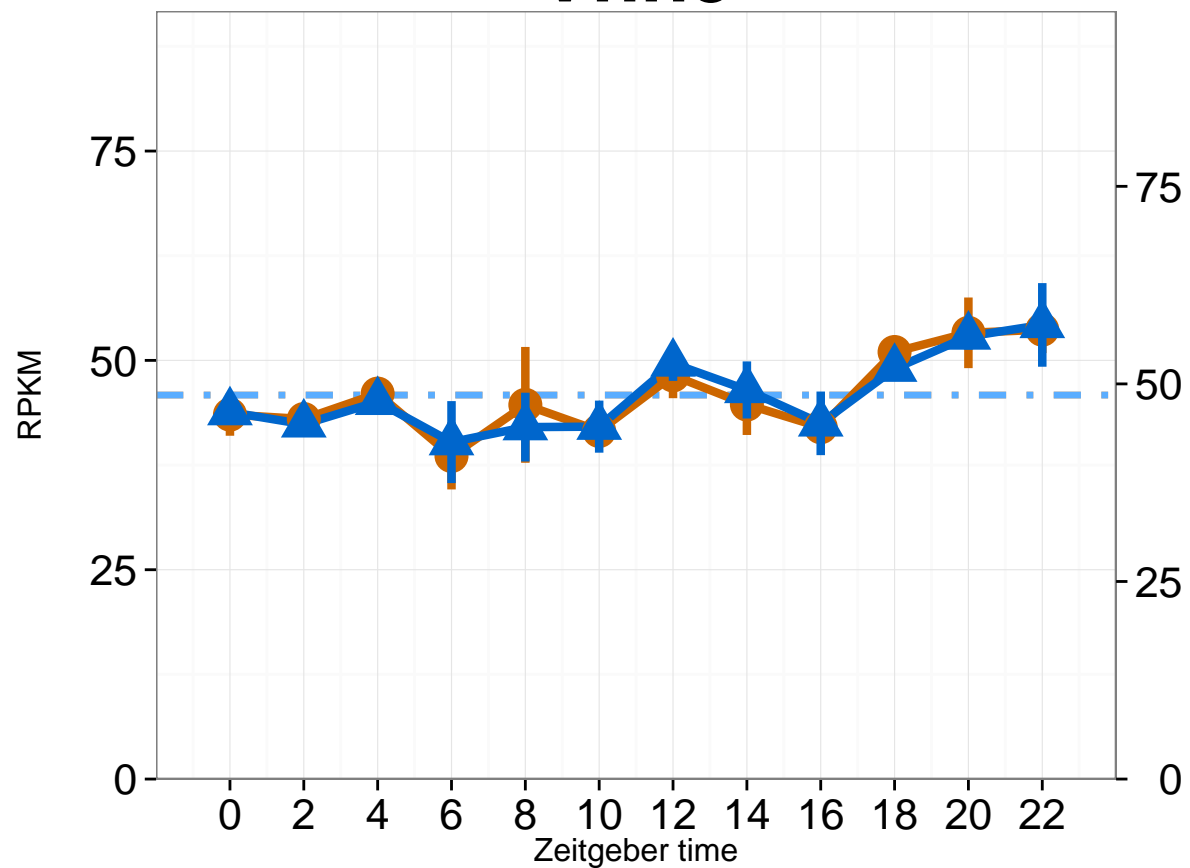

## Vnn3

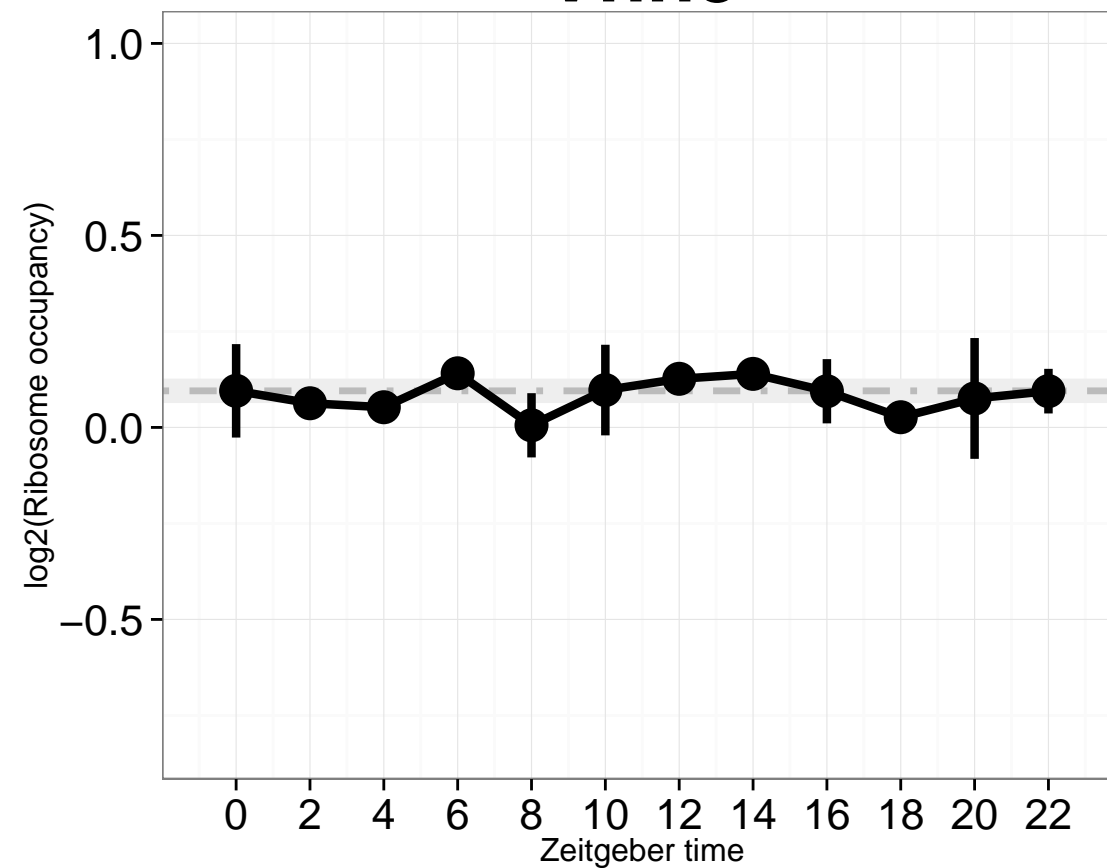

Supplement: SuppDataset_1.zip [file Vnn3_set_A.pdf › Supplemental Dataset 1/A-mRNA_nonrhyth_translation_nonrhyth/Vnn3_set_A.pdf]

# Vopp1

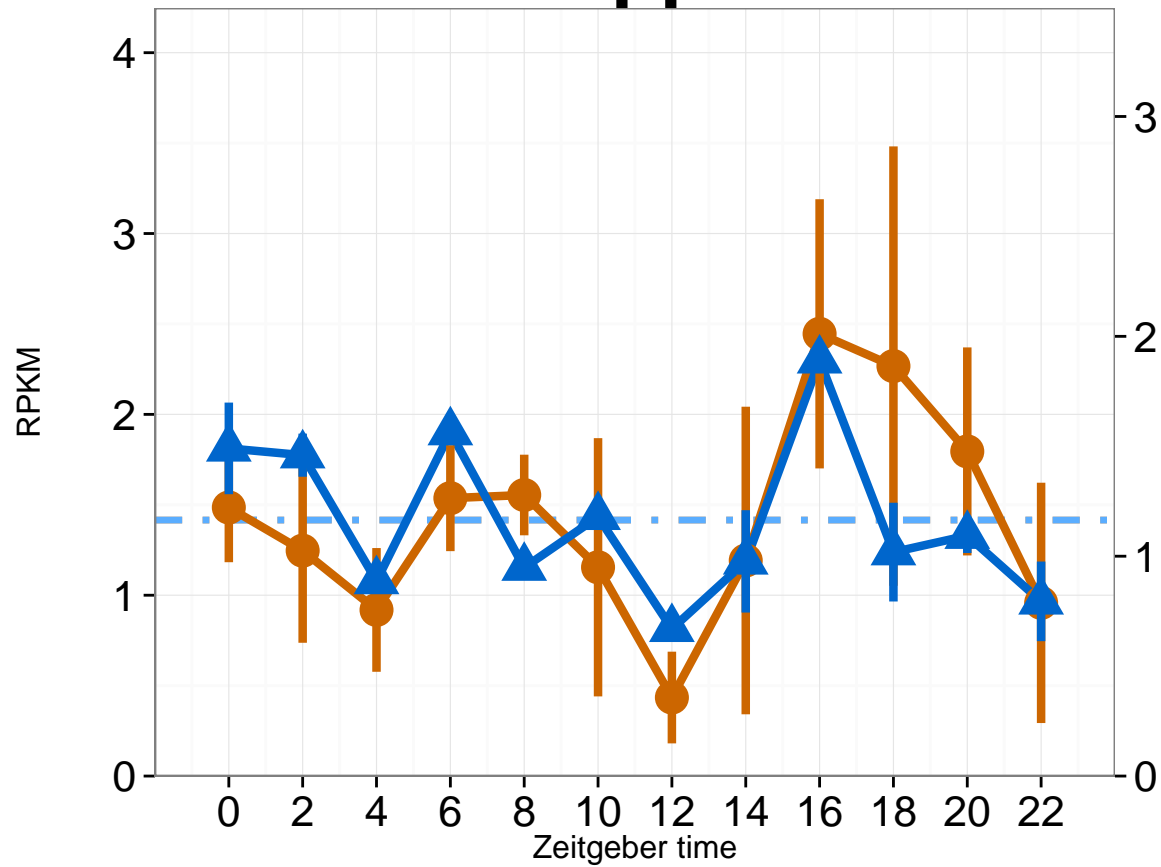

# Vopp1

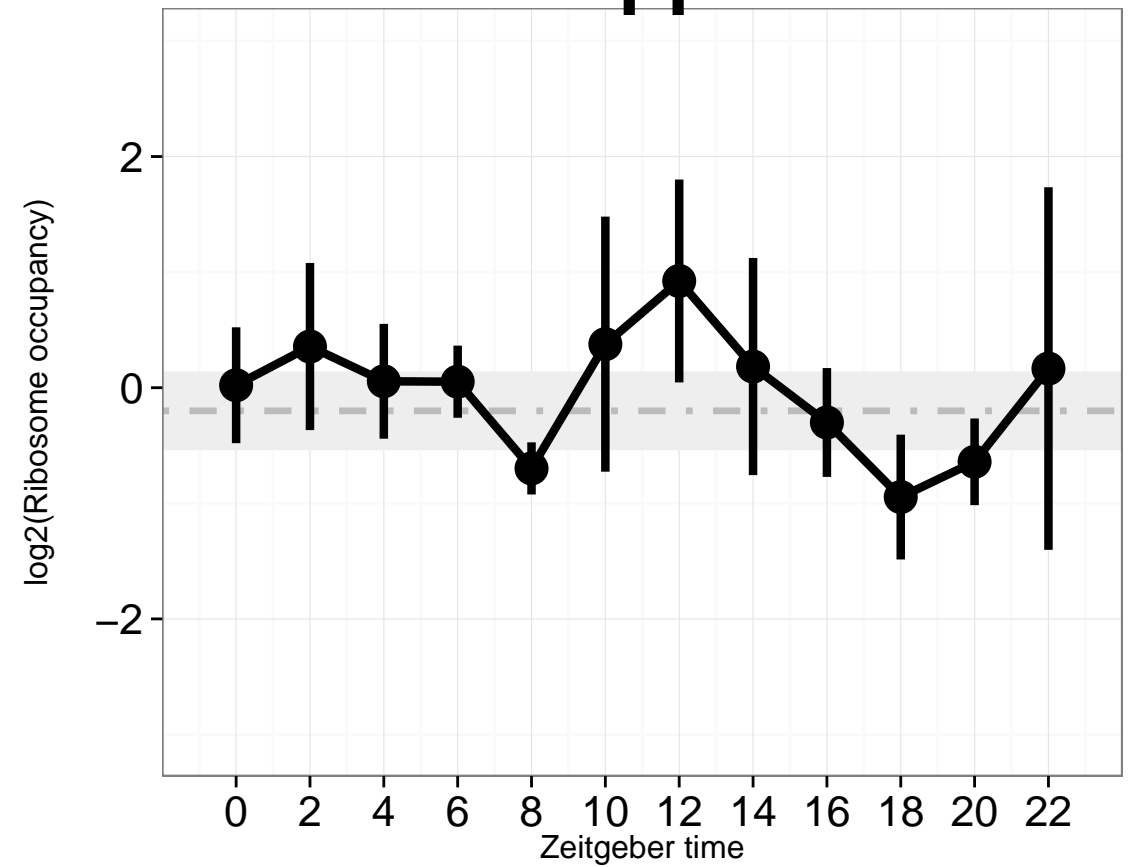

Supplement: SuppDataset_1.zip [file Vopp1_set_A.pdf › Supplemental Dataset 1/A-mRNA_nonrhyth_translation_nonrhyth/Vopp1_set_A.pdf]

## Vprbp

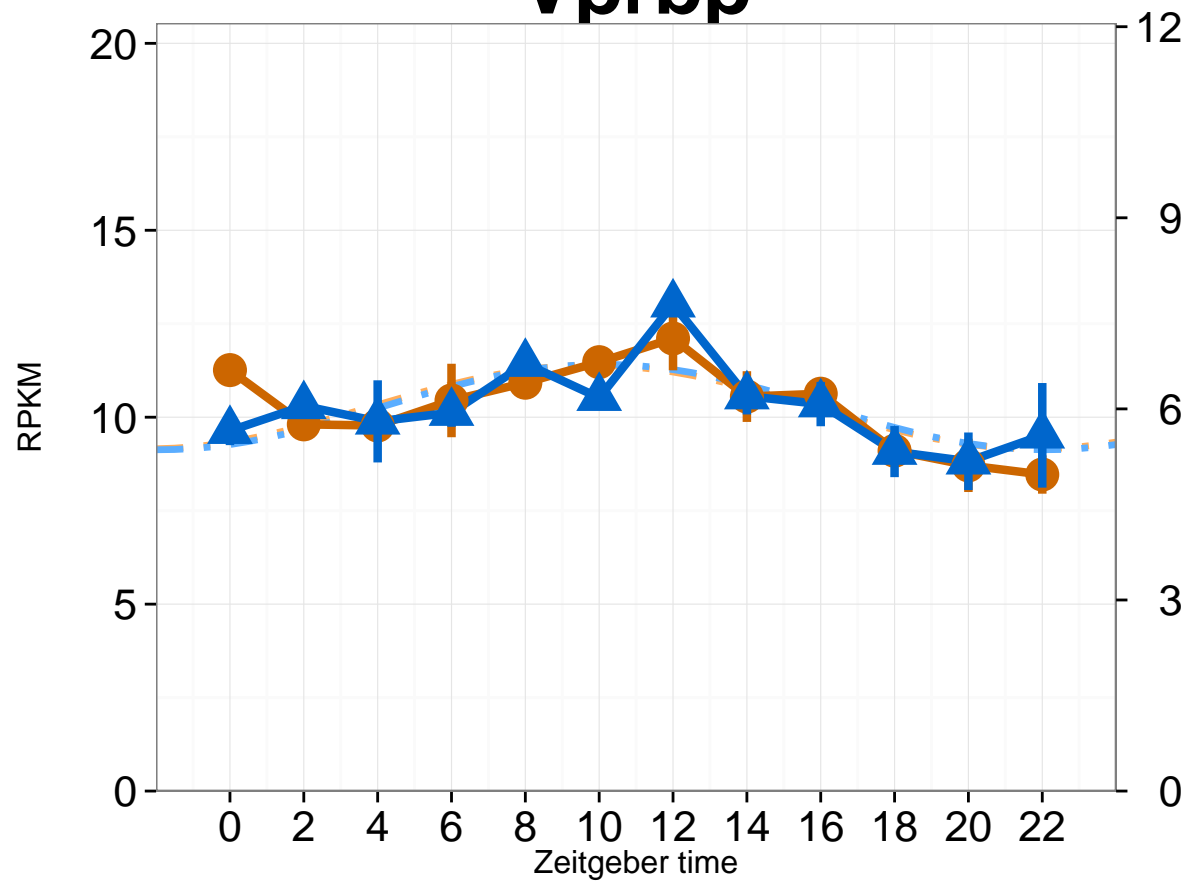

## Vprbp

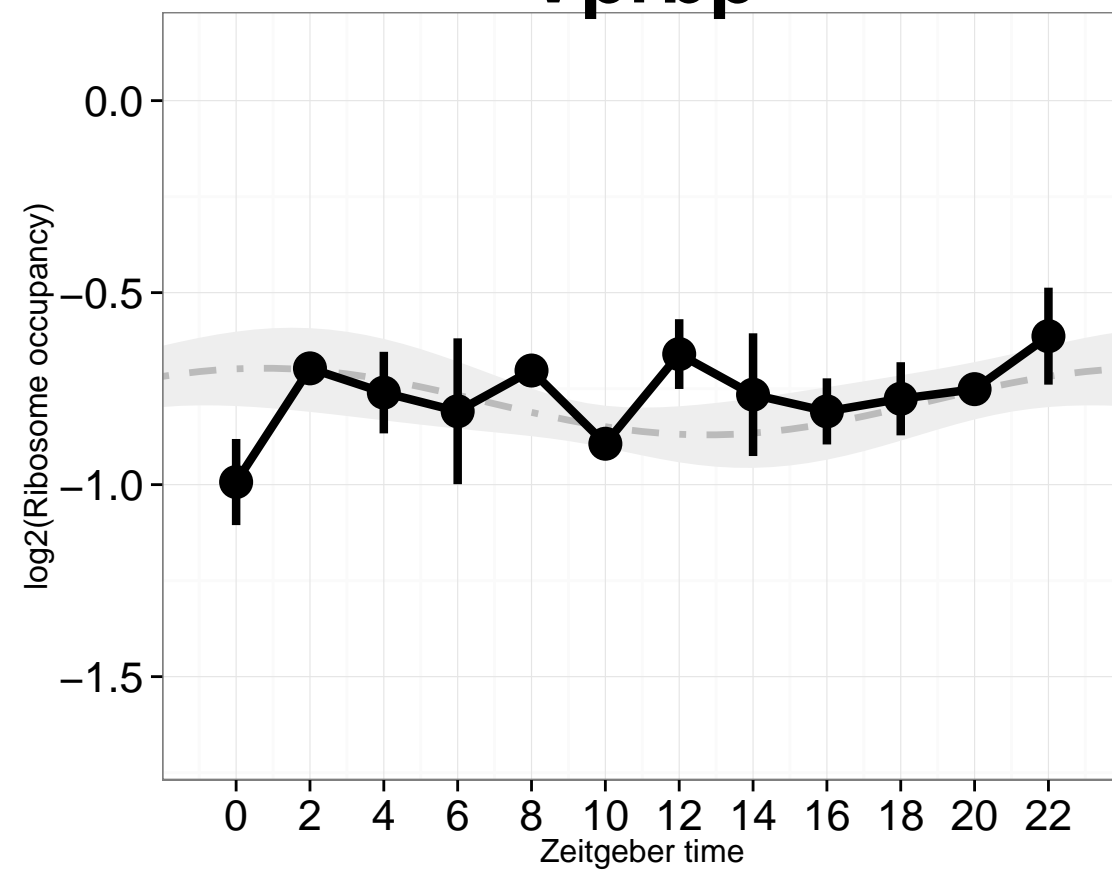

Supplement: SuppDataset_1.zip [file Vprbp_set_A.pdf › Supplemental Dataset 1/A-mRNA_nonrhyth_translation_nonrhyth/Vprbp_set_A.pdf]

## Vps11

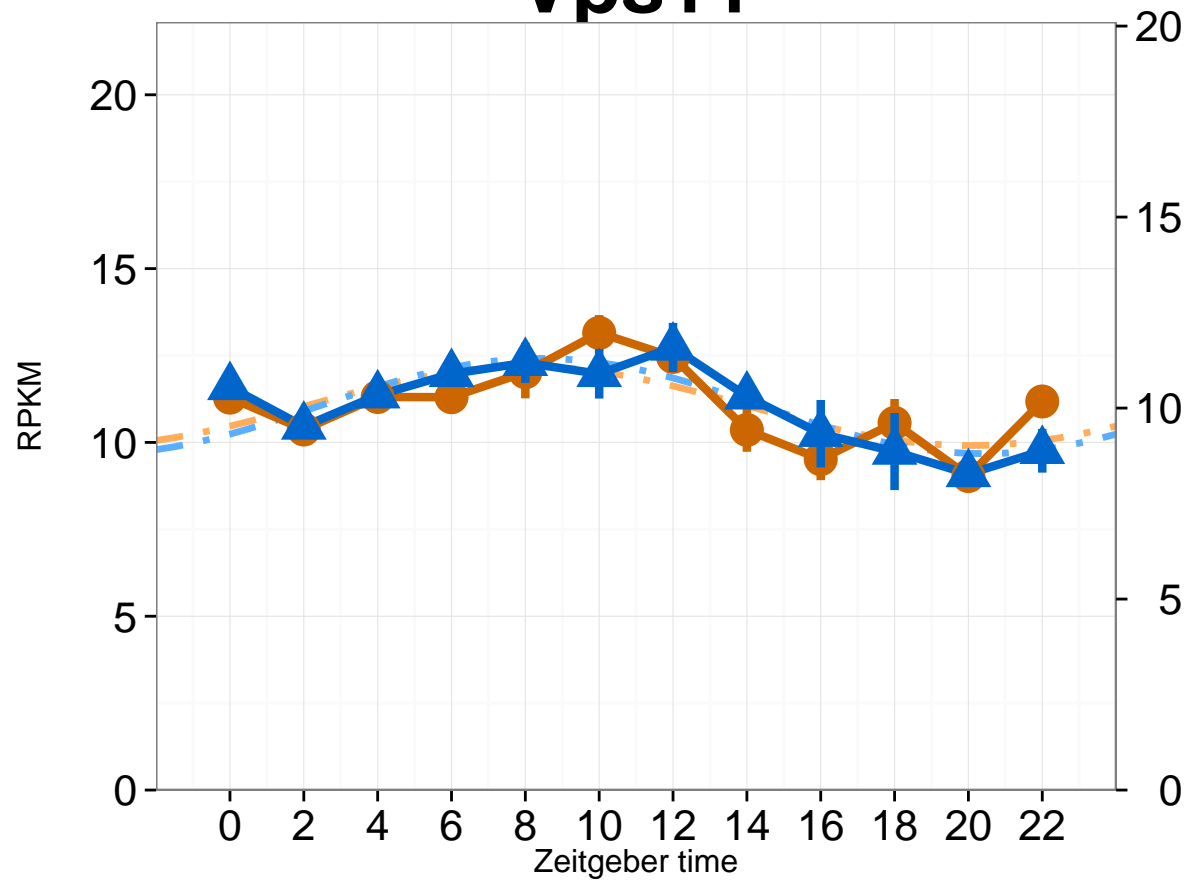

## Vps11

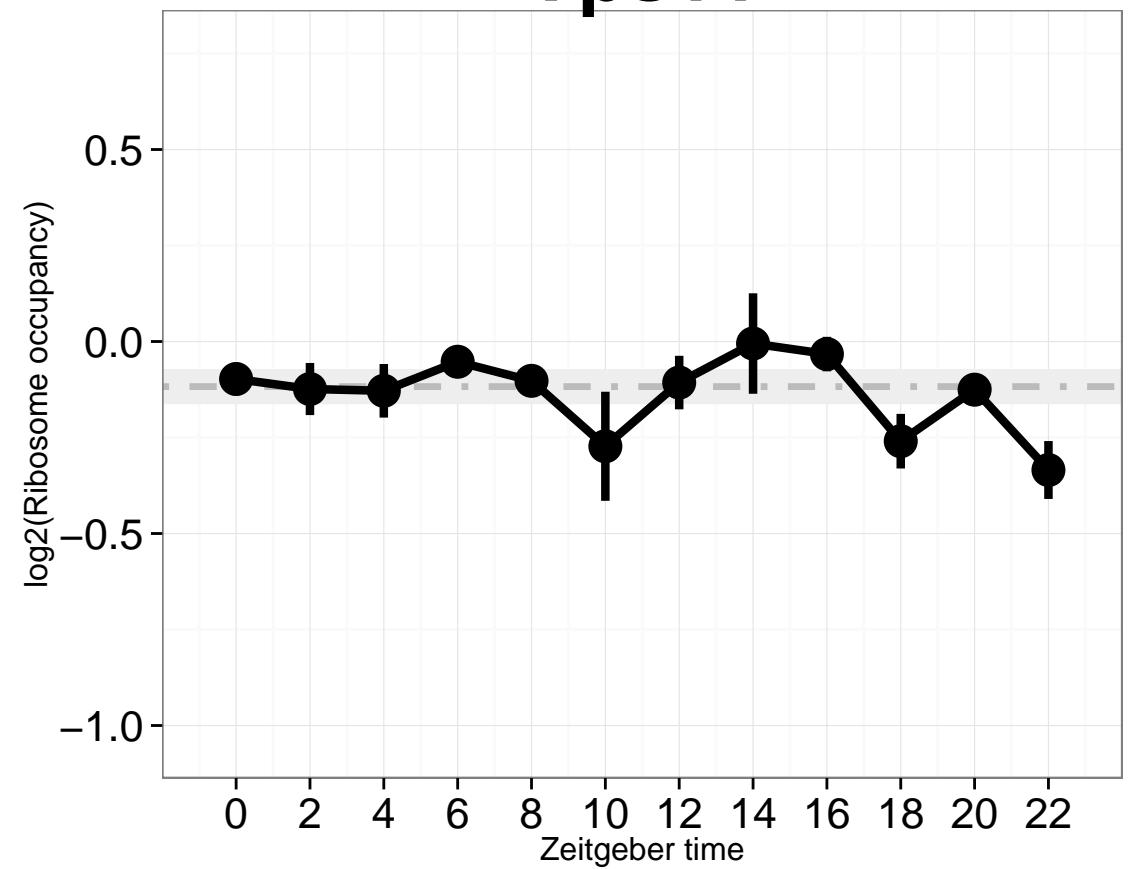

Supplement: SuppDataset_1.zip [file Vps11_set_A.pdf › Supplemental Dataset 1/A-mRNA_nonrhyth_translation_nonrhyth/Vps11_set_A.pdf]

# Vps13b

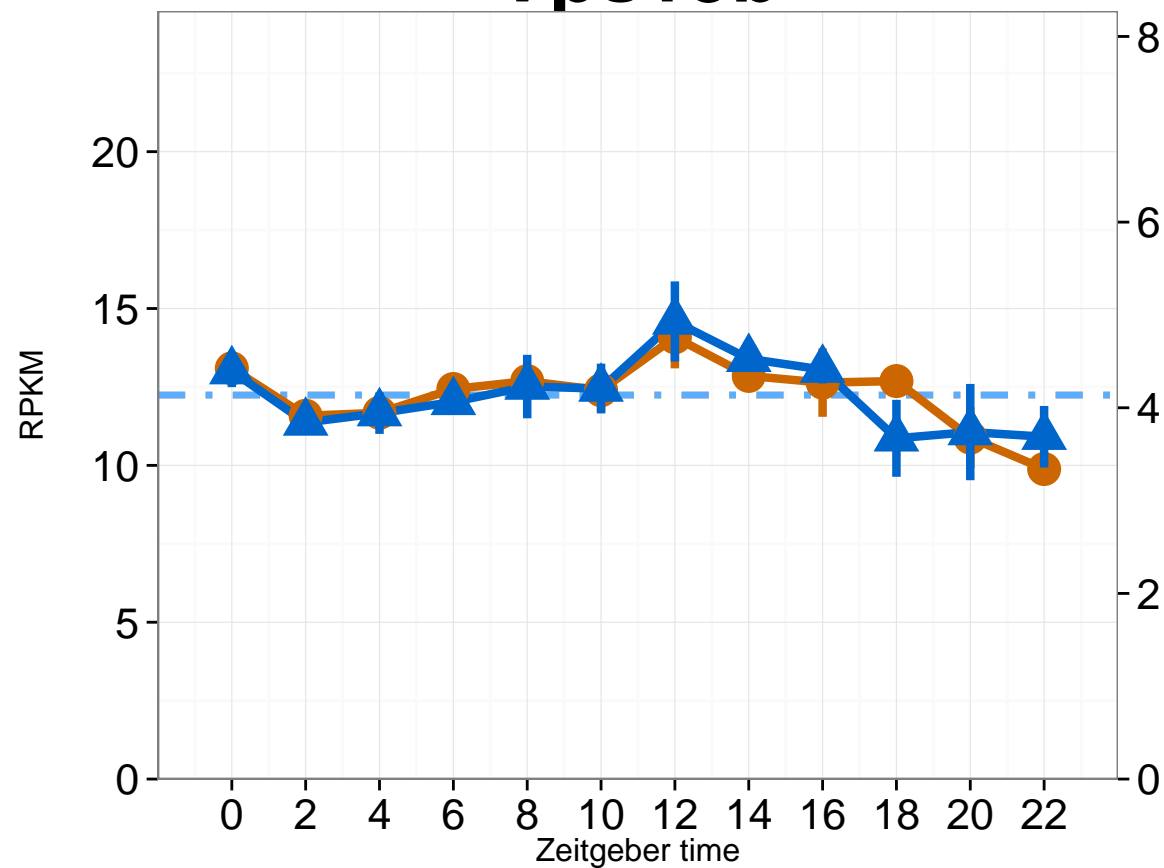

# Vps13b

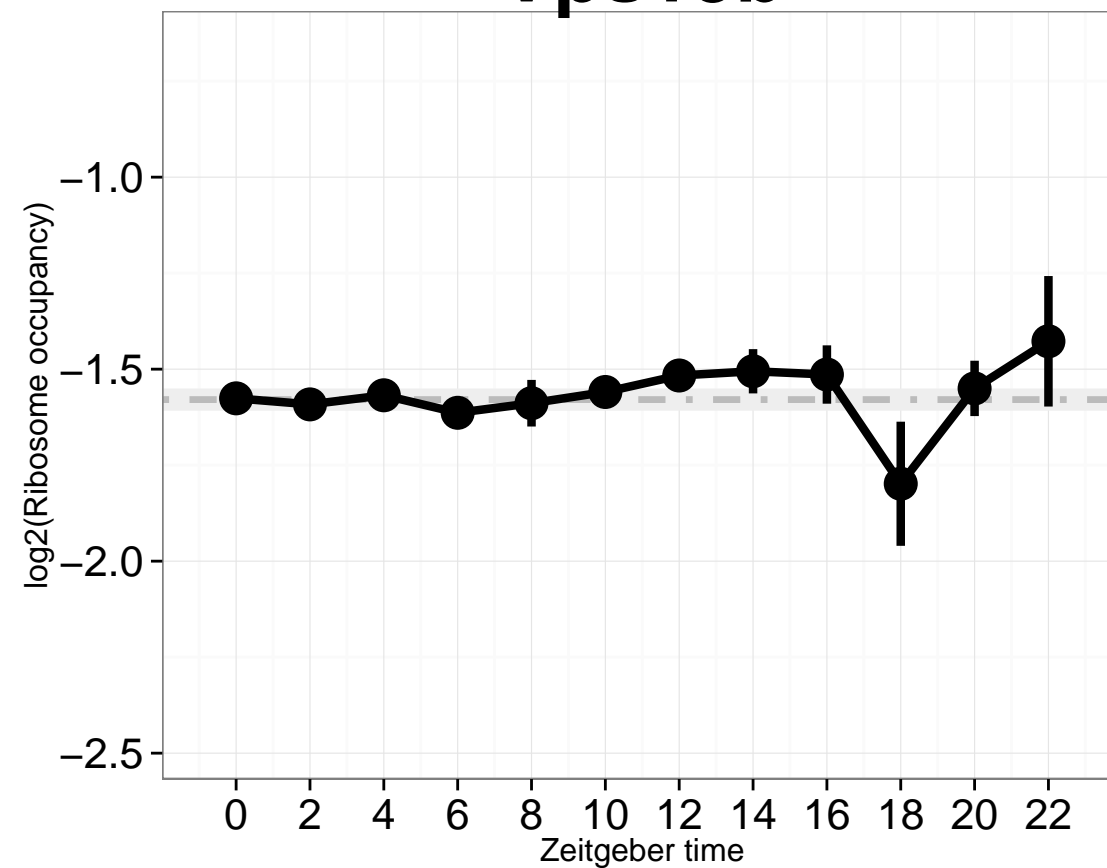

Supplement: SuppDataset_1.zip [file Vps13b_set_A.pdf › Supplemental Dataset 1/A-mRNA_nonrhyth_translation_nonrhyth/Vps13b_set_A.pdf]

# Vps13c

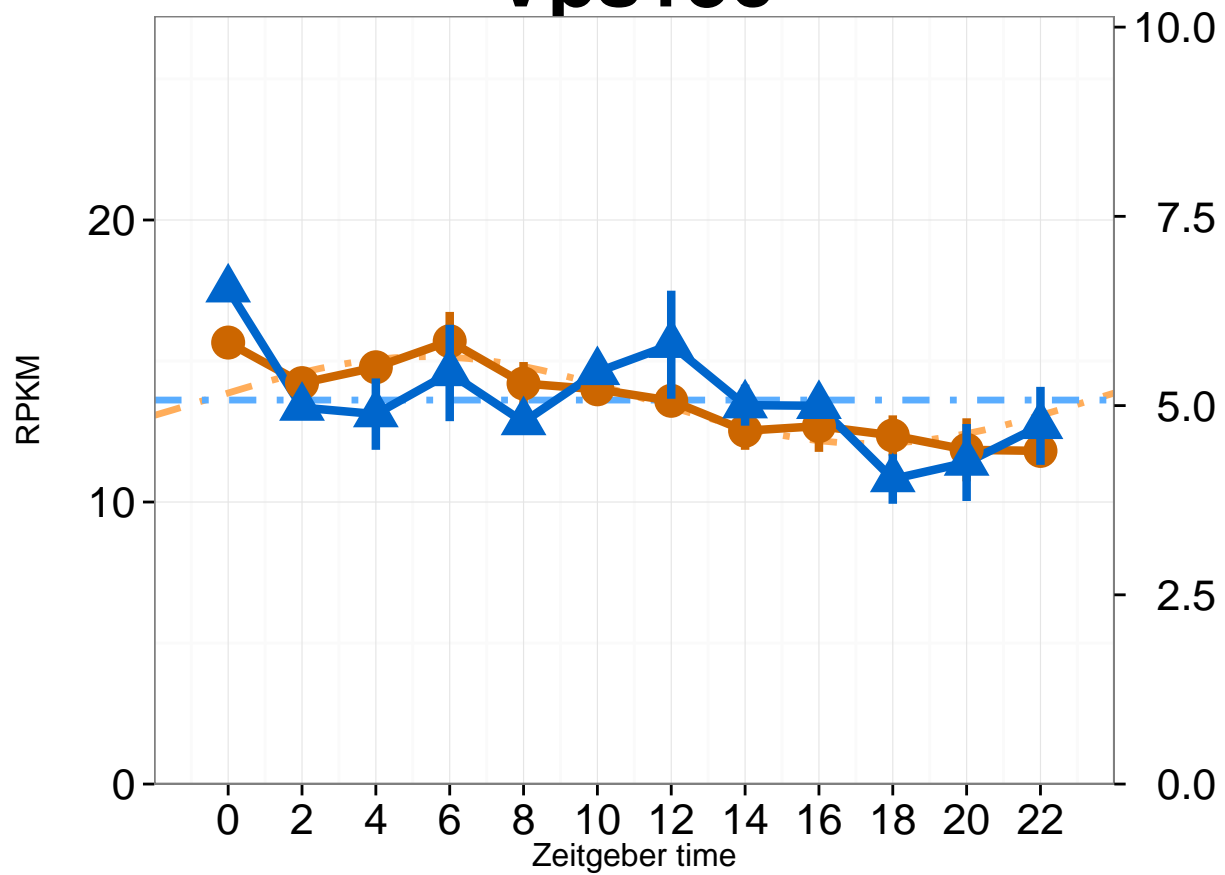

# Vps13c

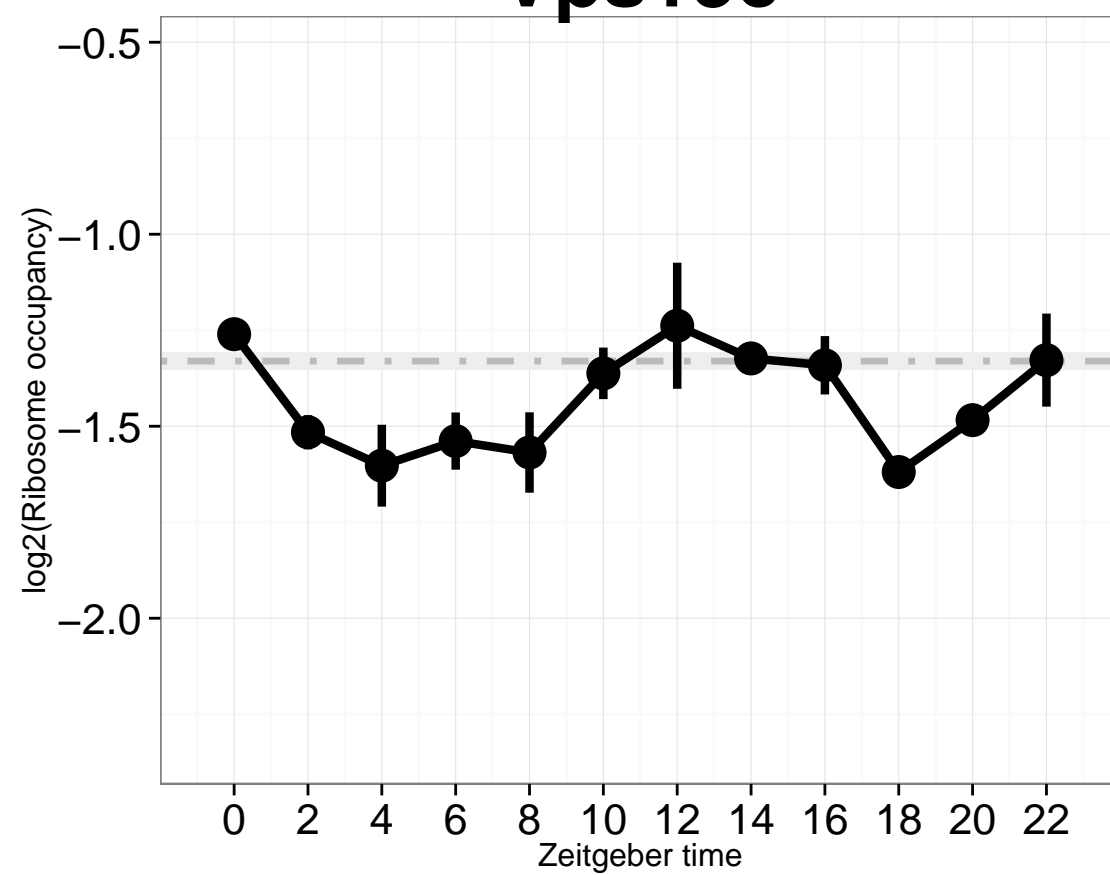

Supplement: SuppDataset_1.zip [file Vps13c_set_A.pdf › Supplemental Dataset 1/A-mRNA_nonrhyth_translation_nonrhyth/Vps13c_set_A.pdf]

# Vps13d

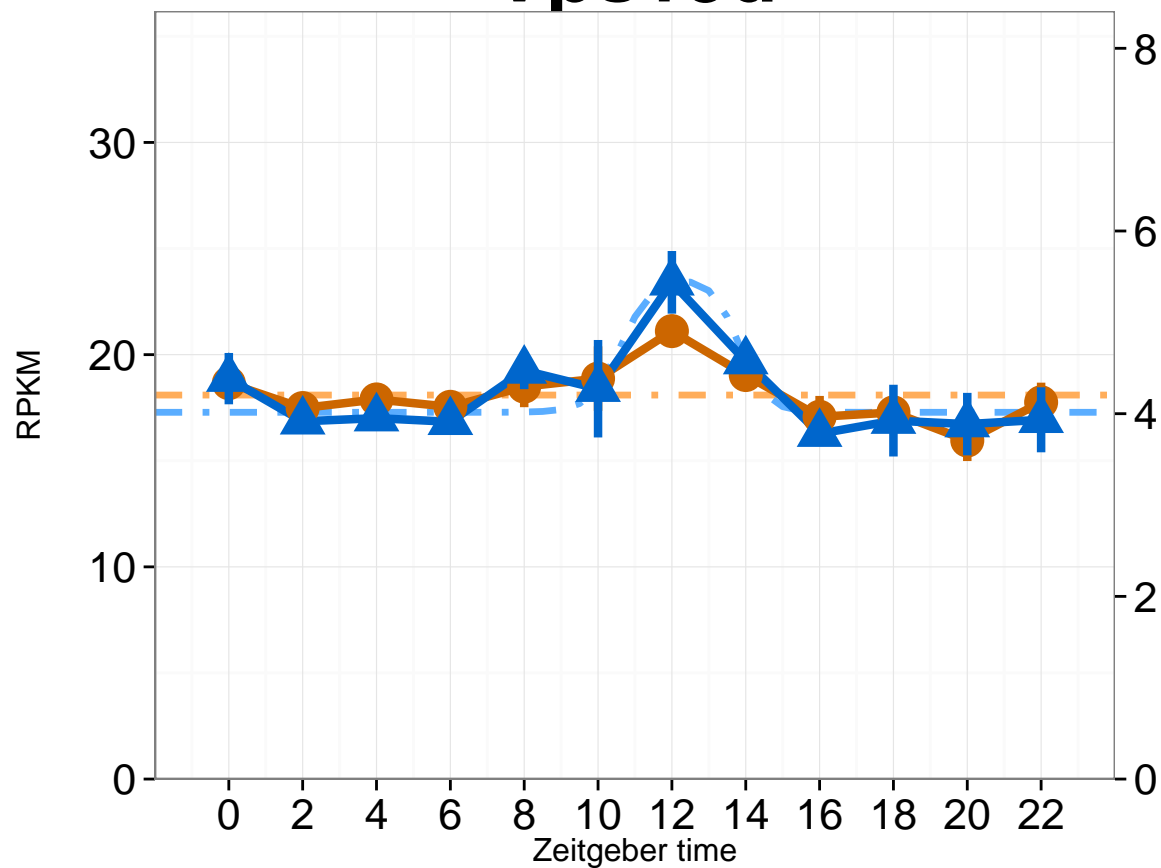

# Vps13d

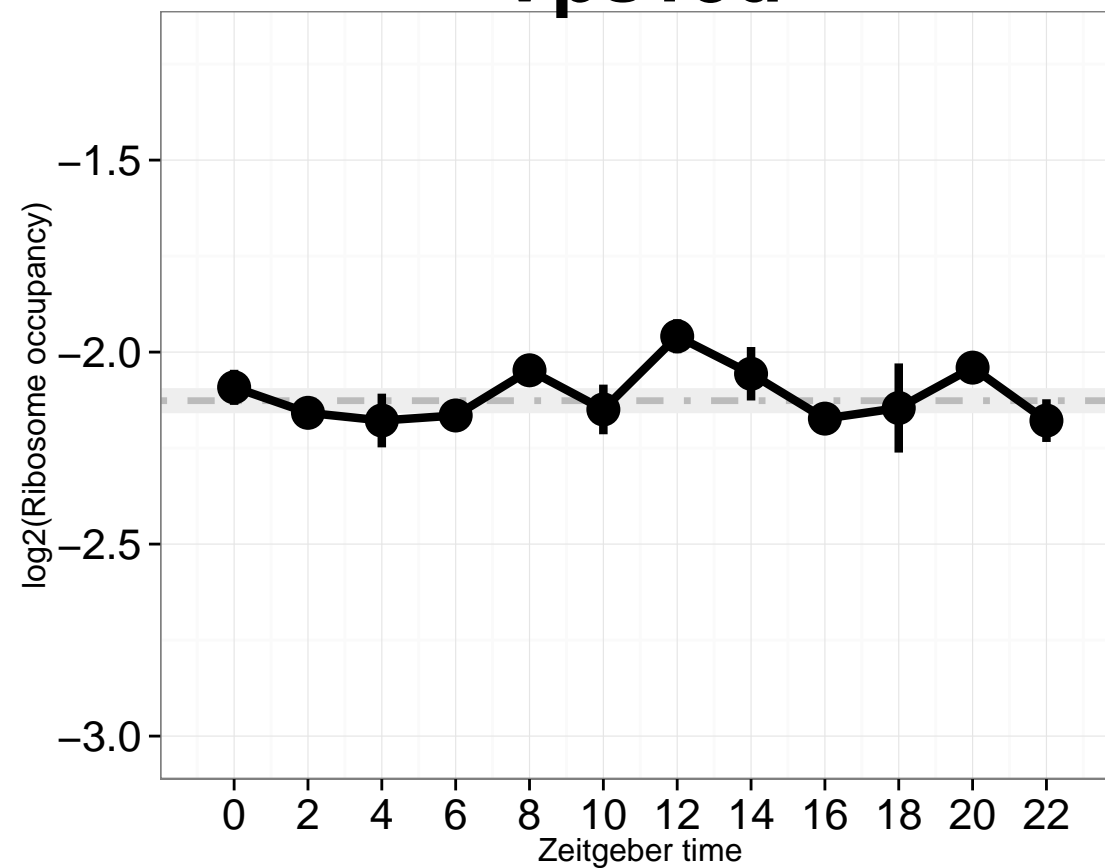

Supplement: SuppDataset_1.zip [file Vps13d_set_A.pdf › Supplemental Dataset 1/A-mRNA_nonrhyth_translation_nonrhyth/Vps13d_set_A.pdf]

## Vps16

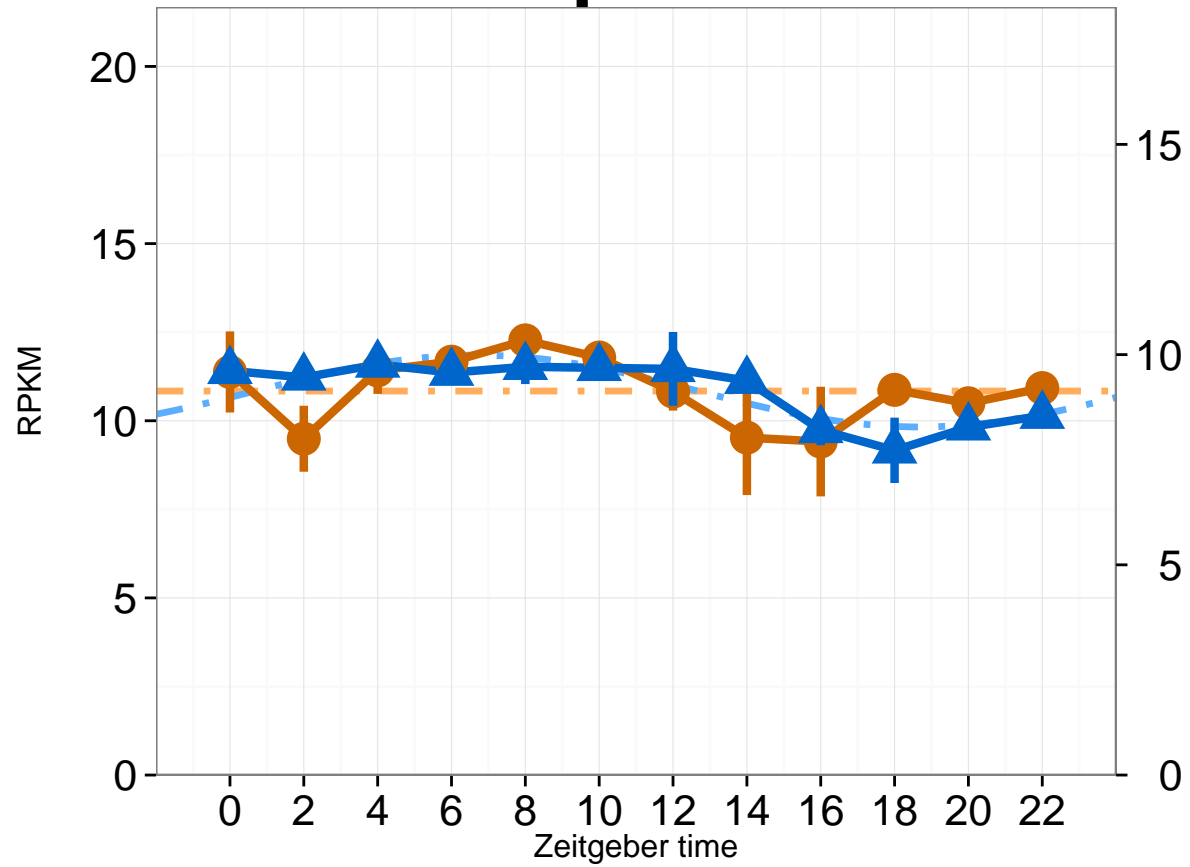

## Vps16

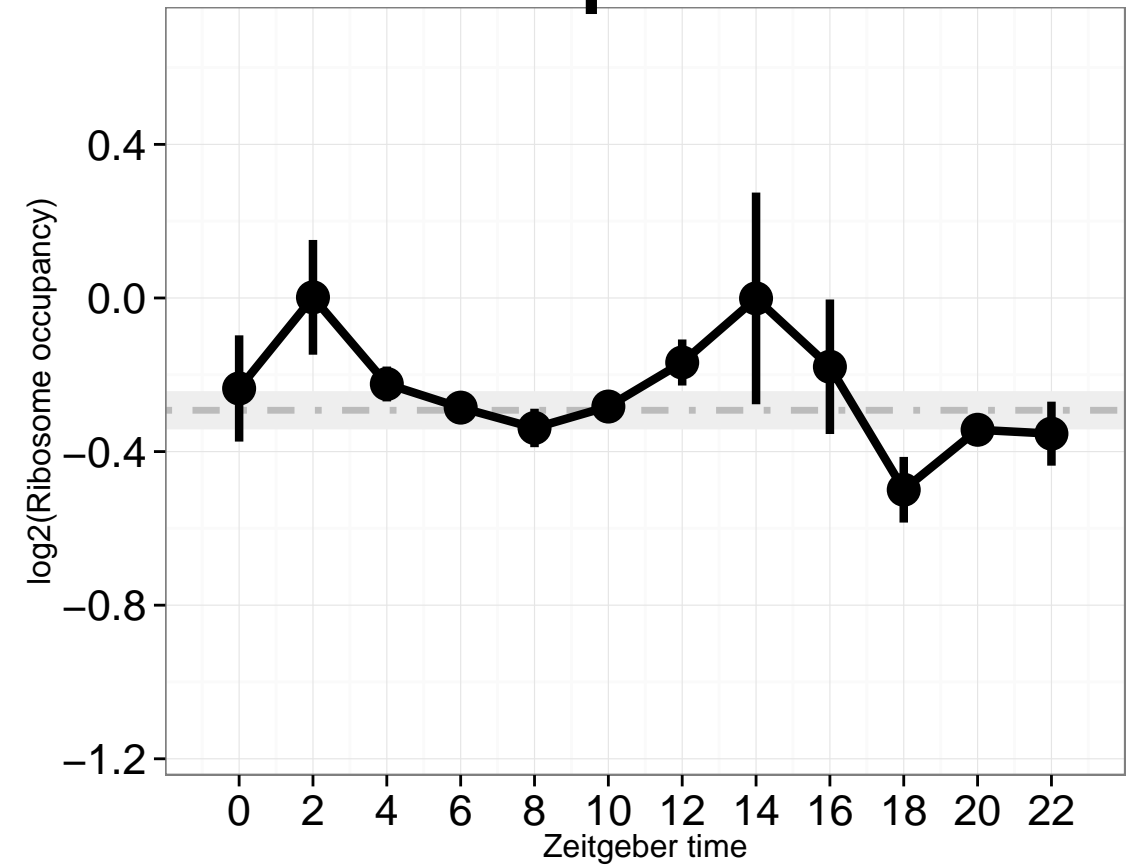

Supplement: SuppDataset_1.zip [file Vps16_set_A.pdf › Supplemental Dataset 1/A-mRNA_nonrhyth_translation_nonrhyth/Vps16_set_A.pdf]

## Vps18

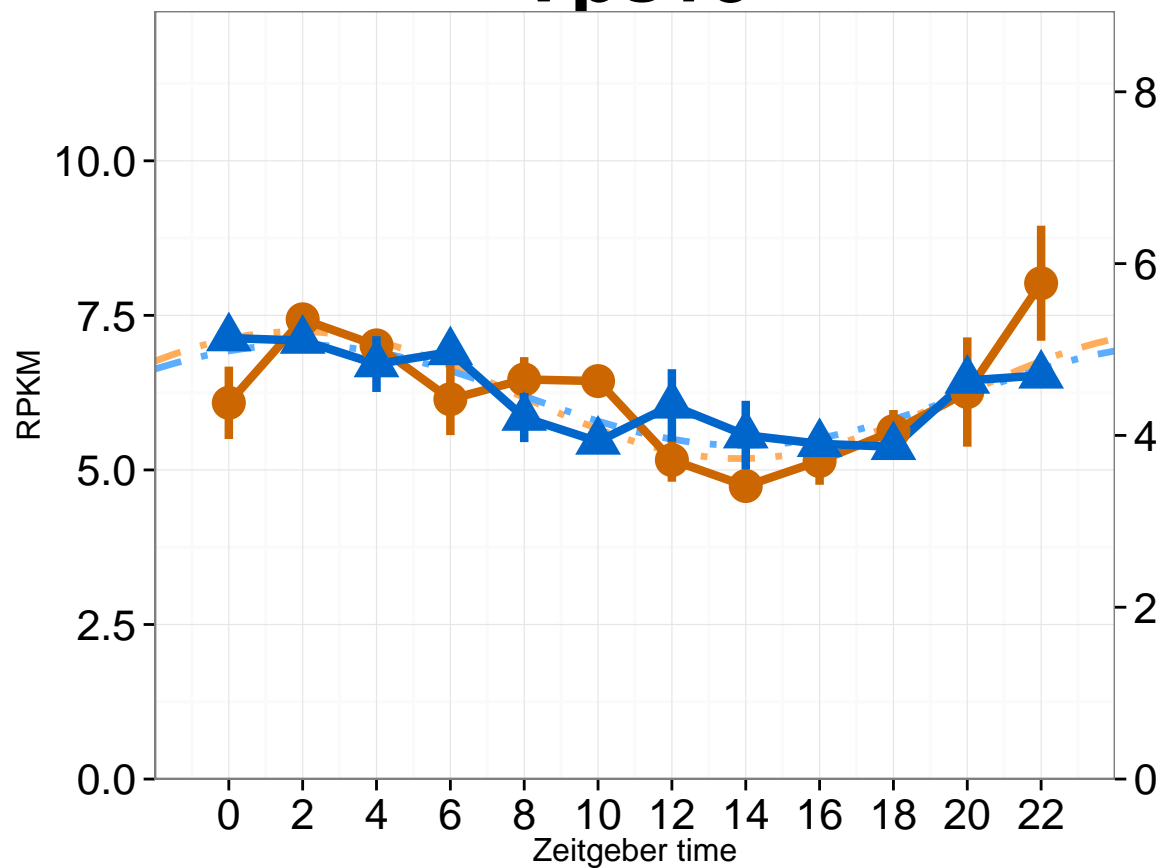

## Vps18

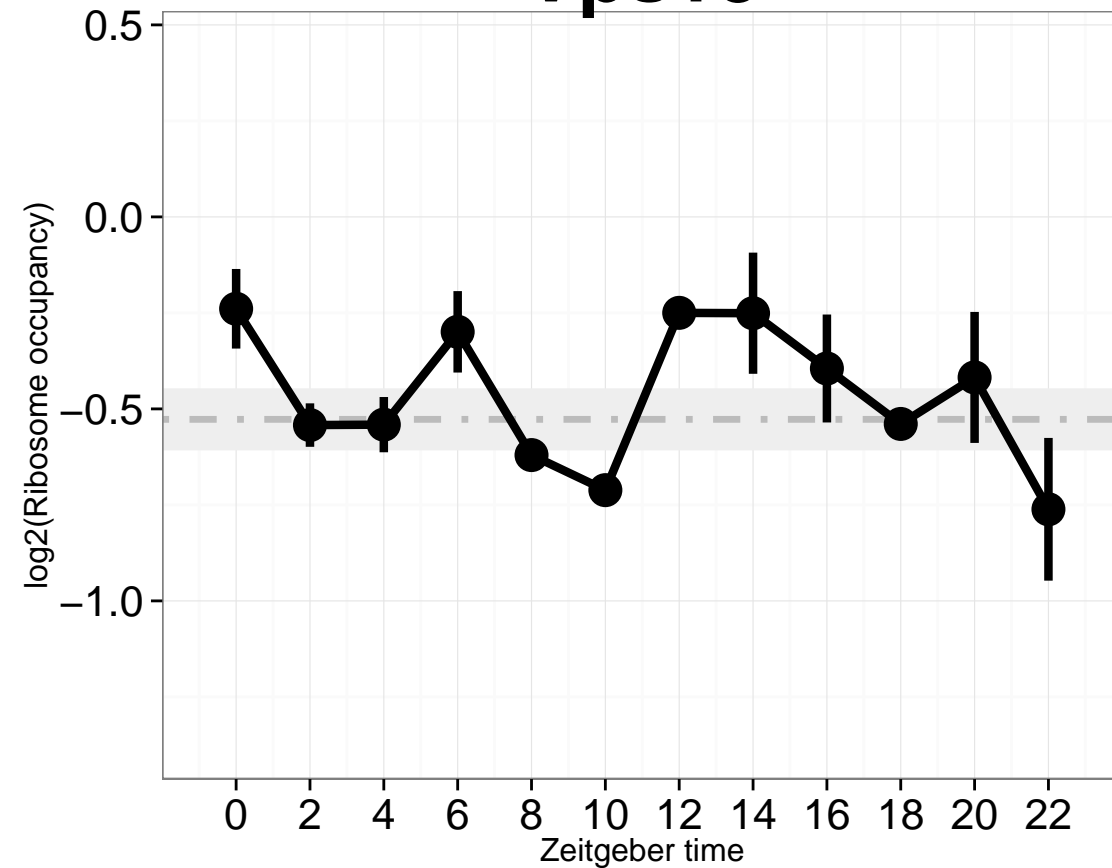

Supplement: SuppDataset_1.zip [file Vps18_set_A.pdf › Supplemental Dataset 1/A-mRNA_nonrhyth_translation_nonrhyth/Vps18_set_A.pdf]

## Vps25

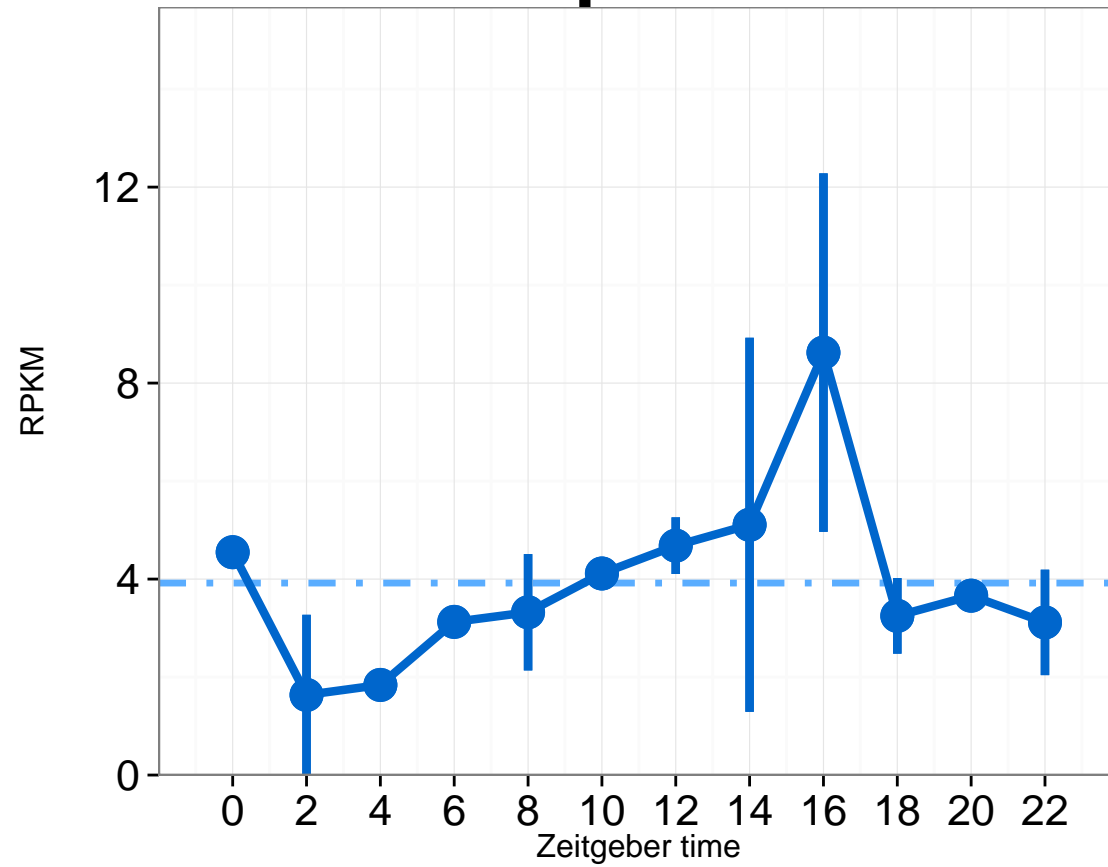

## Vps25 log2(Ribosome occupancy

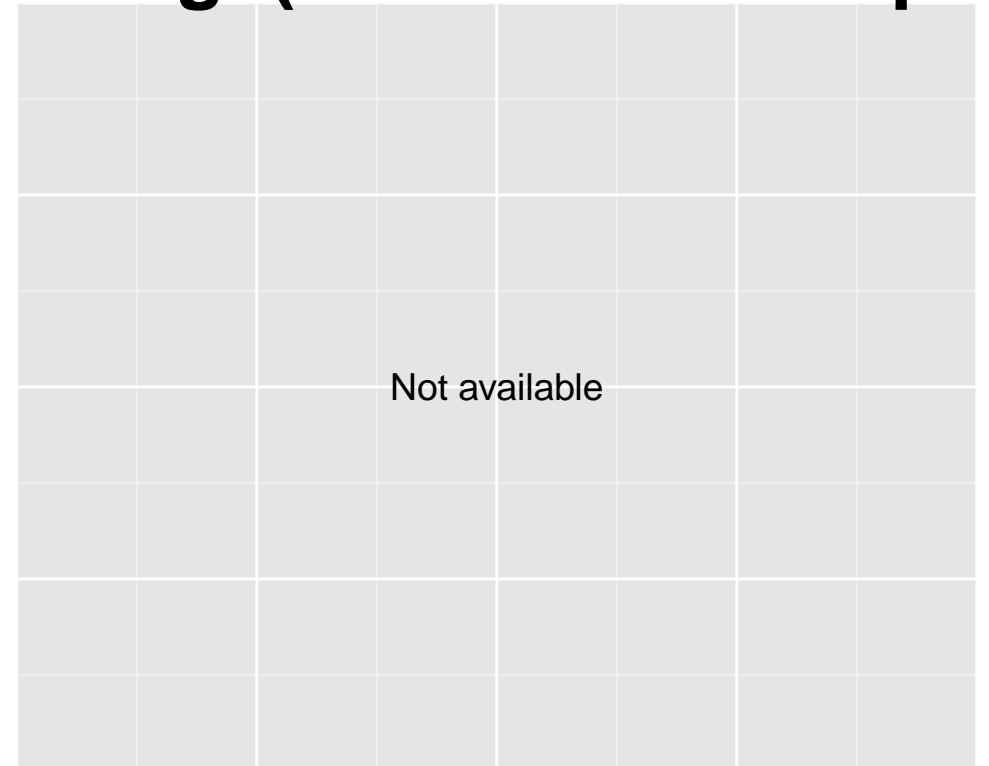

Supplement: SuppDataset_1.zip [file Vps25_set_A.pdf › Supplemental Dataset 1/A-mRNA_nonrhyth_translation_nonrhyth/Vps25_set_A.pdf]

# Vps26a

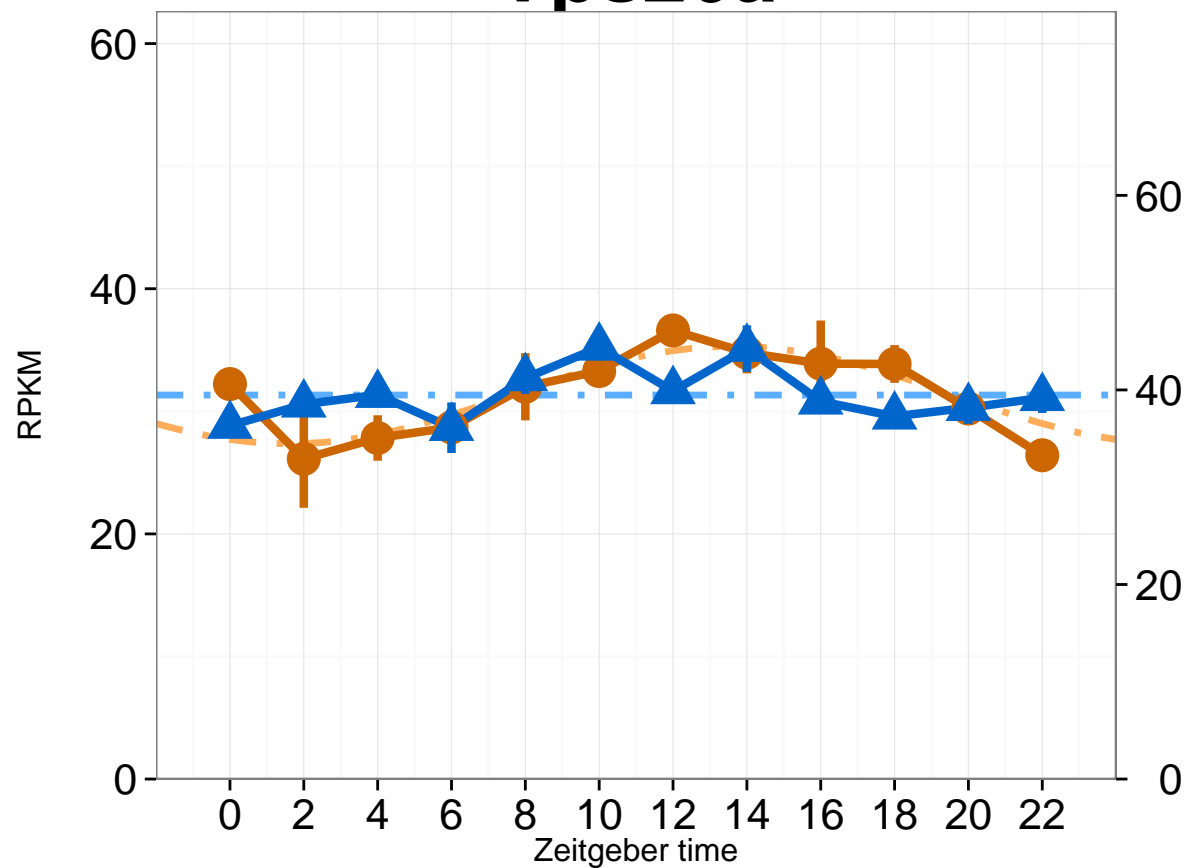

# Vps26a

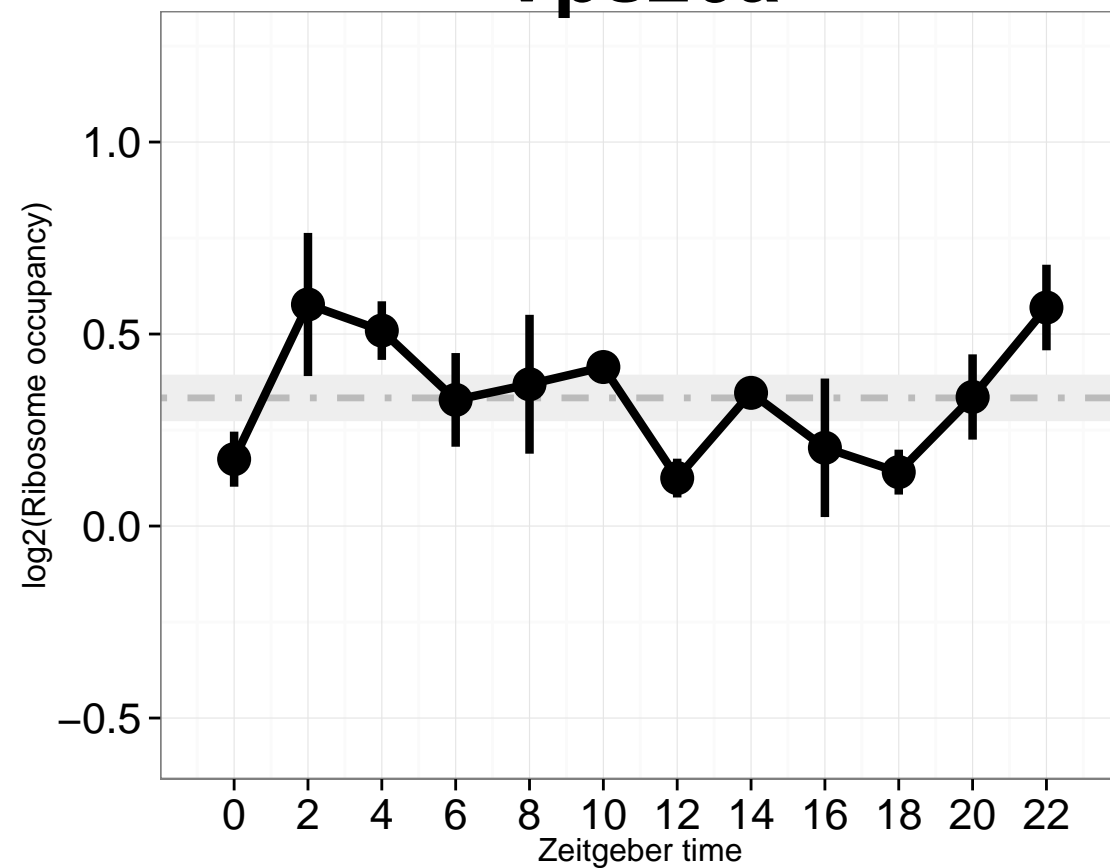

Supplement: SuppDataset_1.zip [file Vps26a_set_A.pdf › Supplemental Dataset 1/A-mRNA_nonrhyth_translation_nonrhyth/Vps26a_set_A.pdf]

## Vps26b

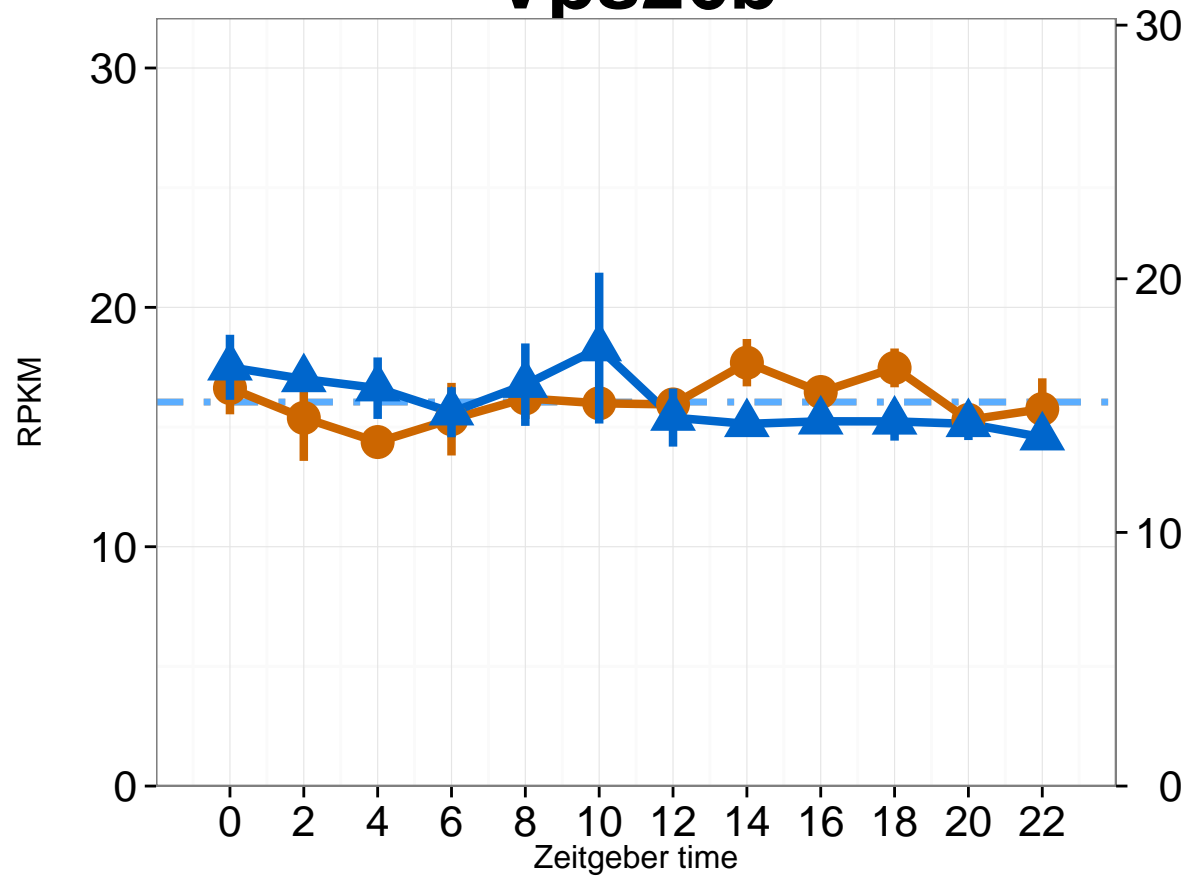

## Vps26b

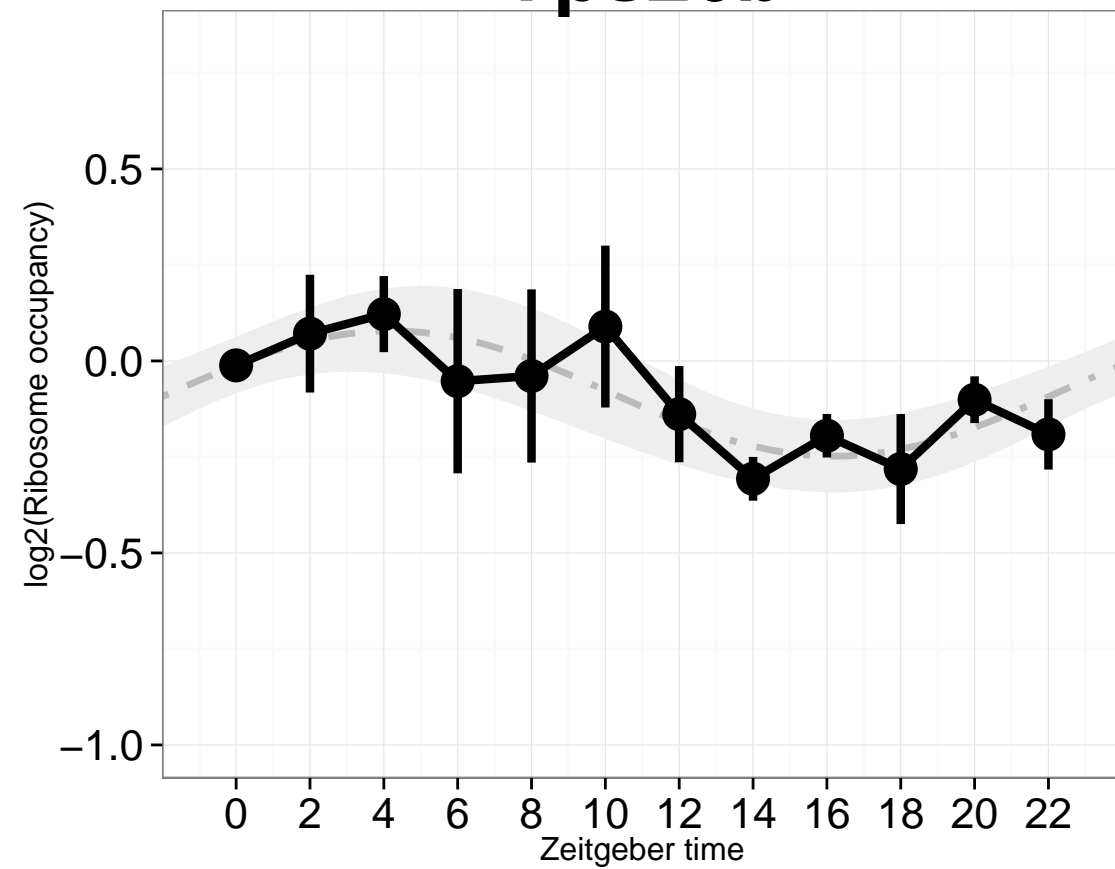

Supplement: SuppDataset_1.zip [file Vps26b_set_A.pdf › Supplemental Dataset 1/A-mRNA_nonrhyth_translation_nonrhyth/Vps26b_set_A.pdf]

## Vps28

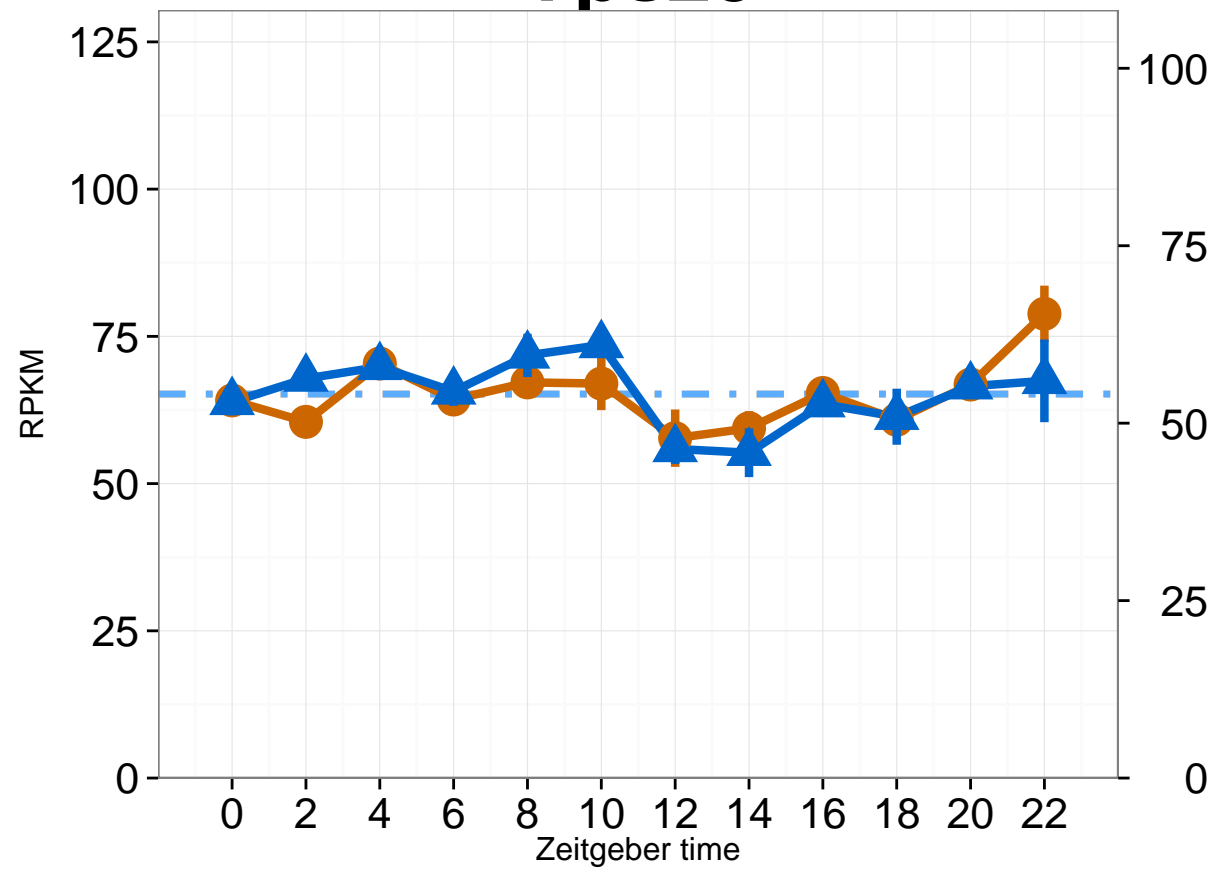

## Vps28

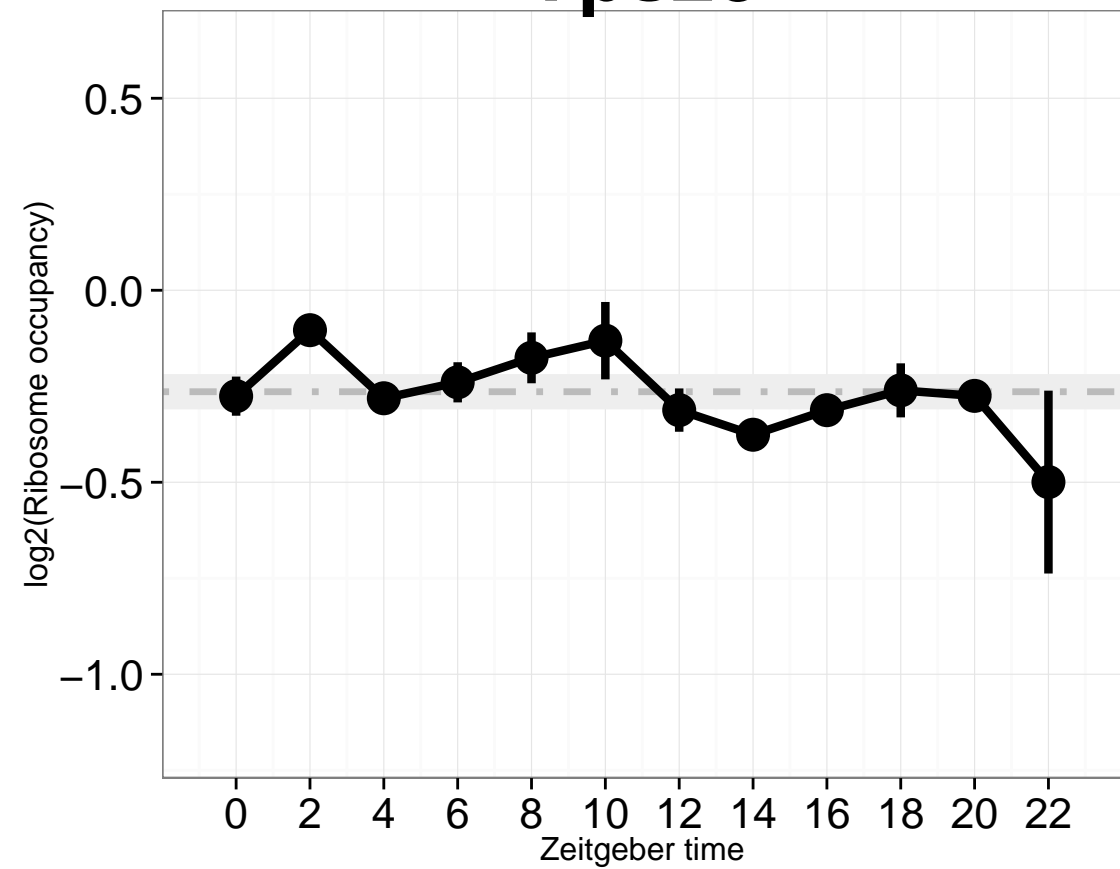

Supplement: SuppDataset_1.zip [file Vps28_set_A.pdf › Supplemental Dataset 1/A-mRNA_nonrhyth_translation_nonrhyth/Vps28_set_A.pdf]

## Vps29

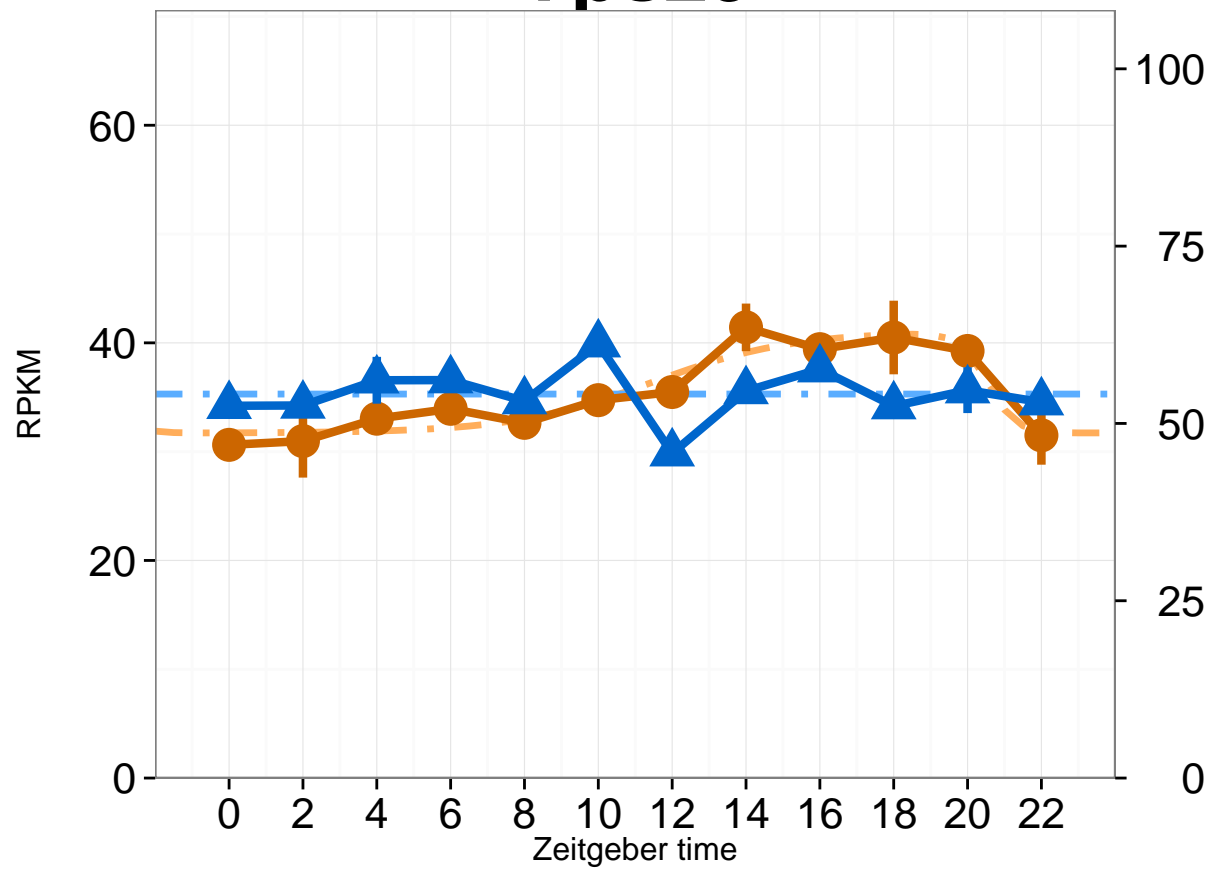

## Vps29

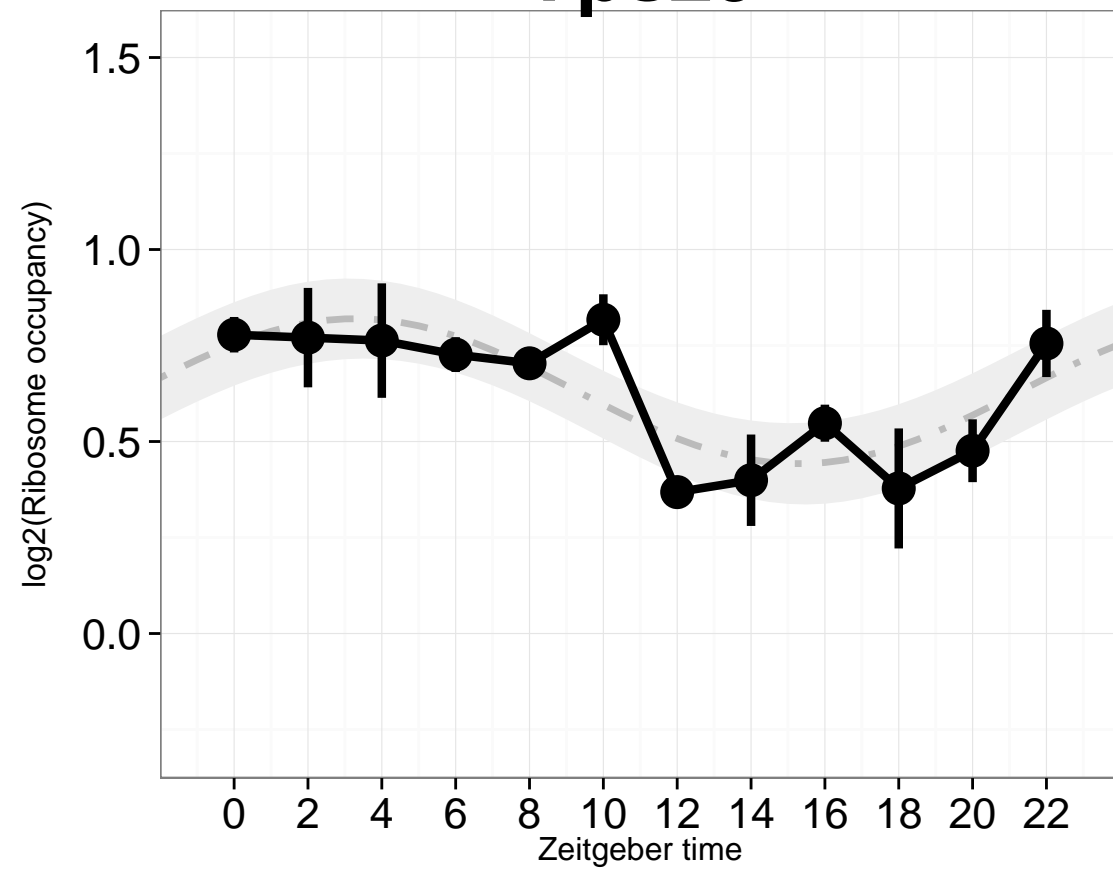

Supplement: SuppDataset_1.zip [file Vps29_set_A.pdf › Supplemental Dataset 1/A-mRNA_nonrhyth_translation_nonrhyth/Vps29_set_A.pdf]

## Vps33a

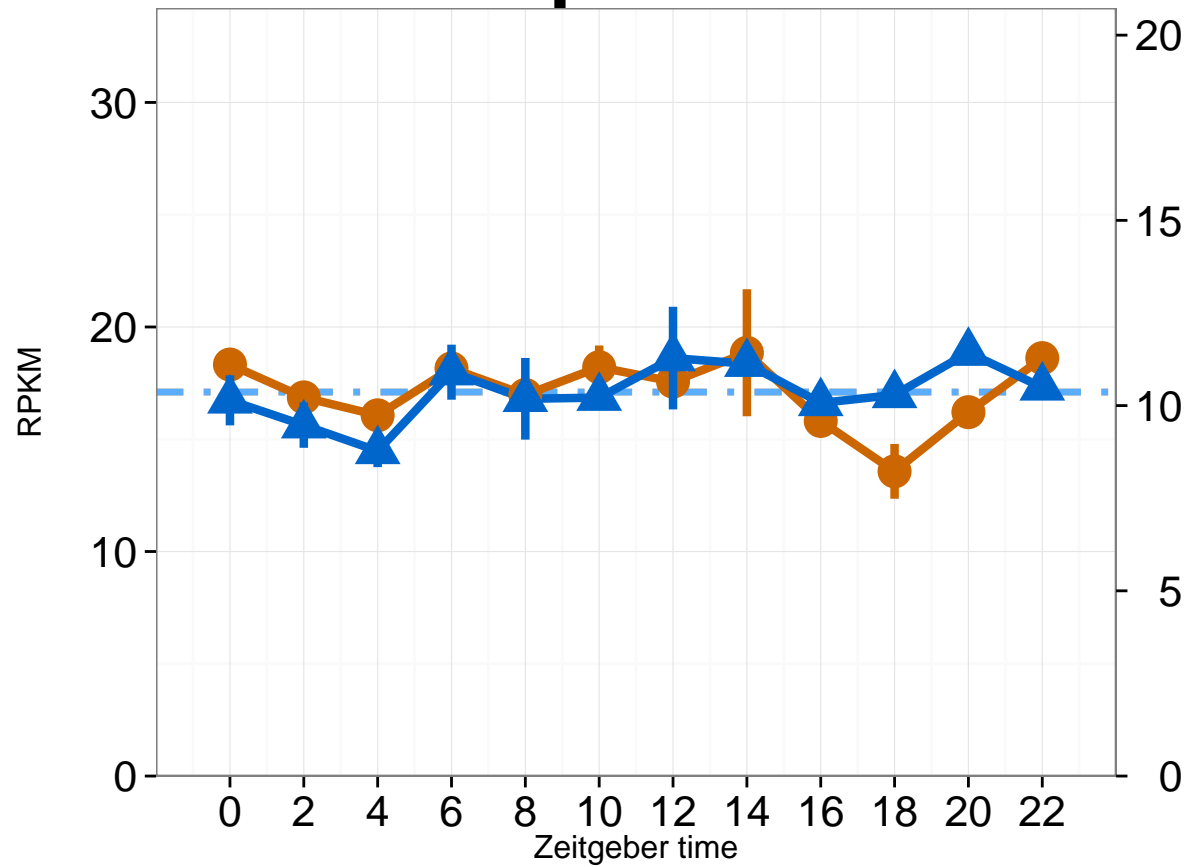

## Vps33a

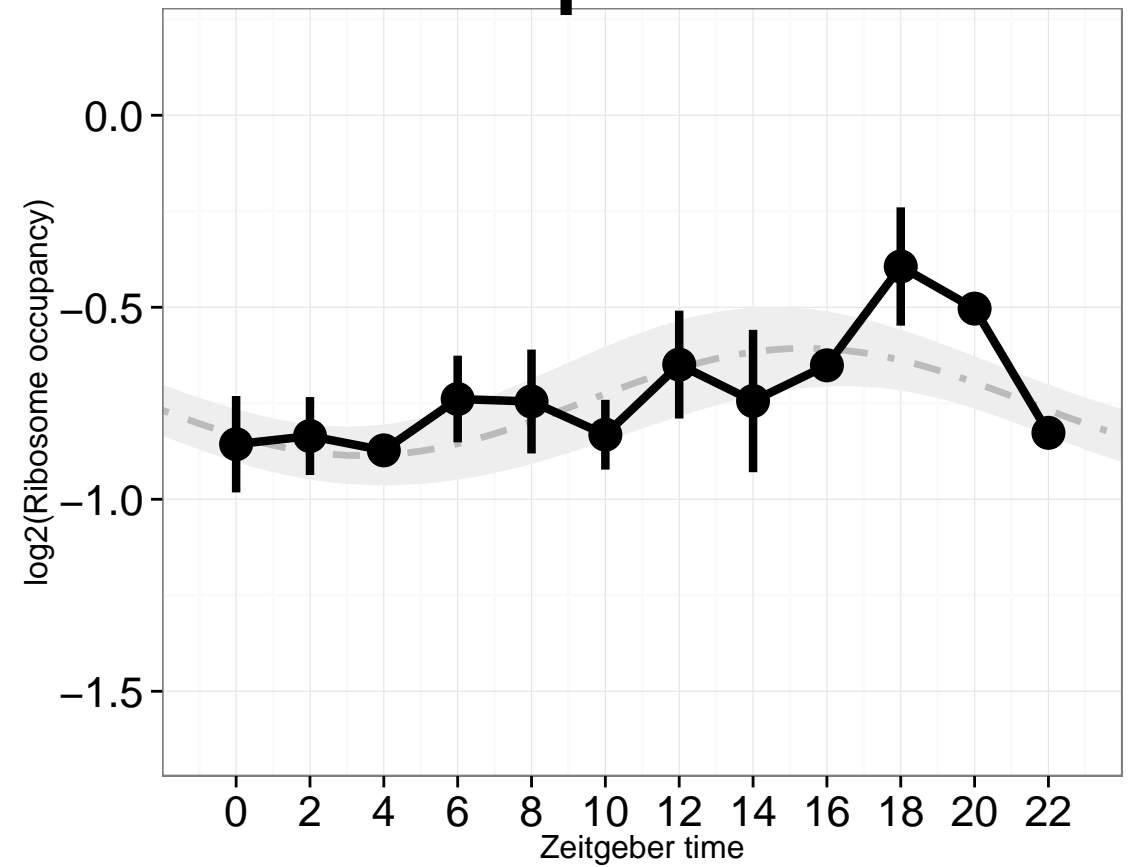

Supplement: SuppDataset_1.zip [file Vps33a_set_A.pdf › Supplemental Dataset 1/A-mRNA_nonrhyth_translation_nonrhyth/Vps33a_set_A.pdf]

## Vps33b

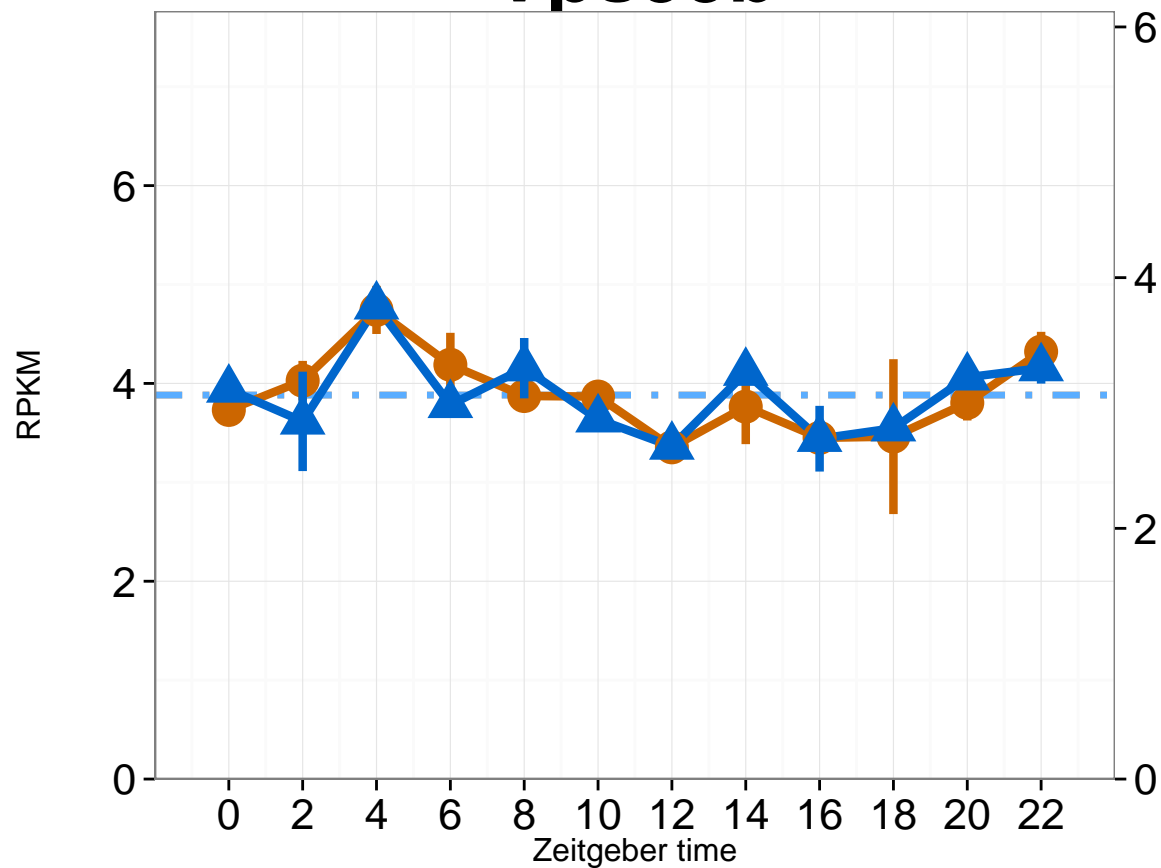

## Vps33b

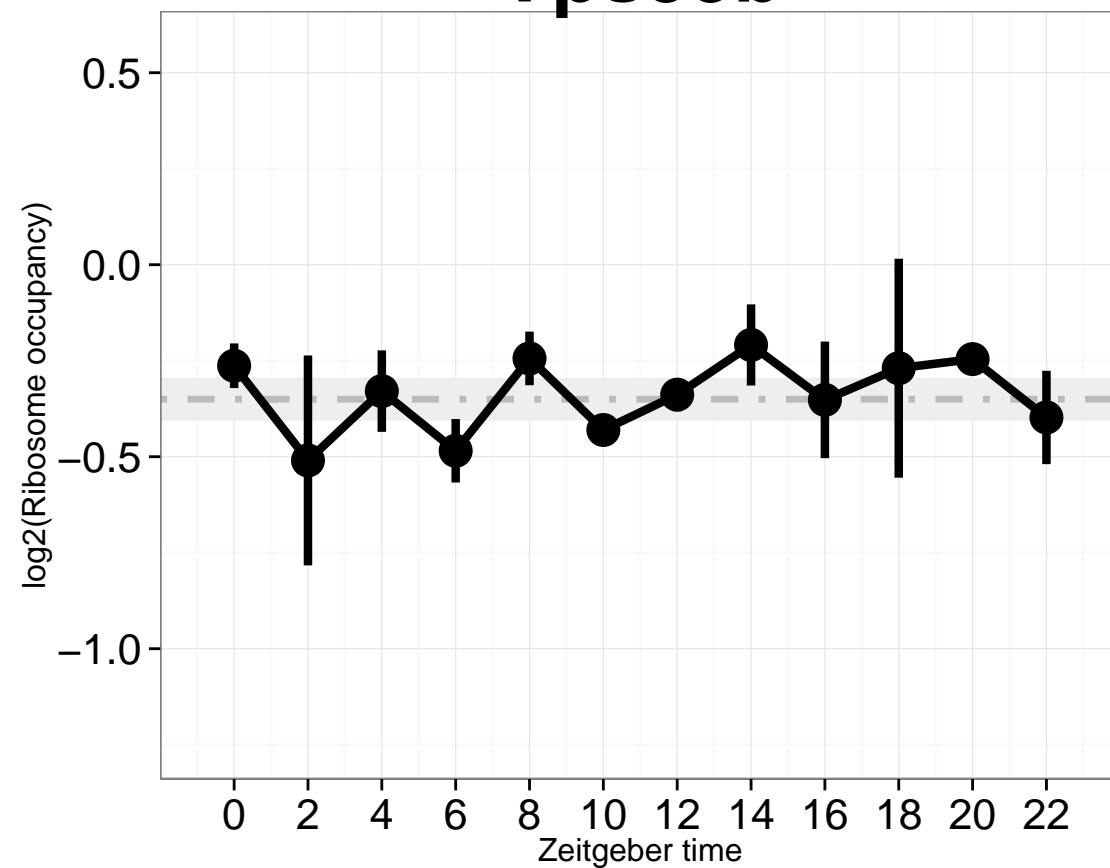

Supplement: SuppDataset_1.zip [file Vps33b_set_A.pdf › Supplemental Dataset 1/A-mRNA_nonrhyth_translation_nonrhyth/Vps33b_set_A.pdf]

## Vps35

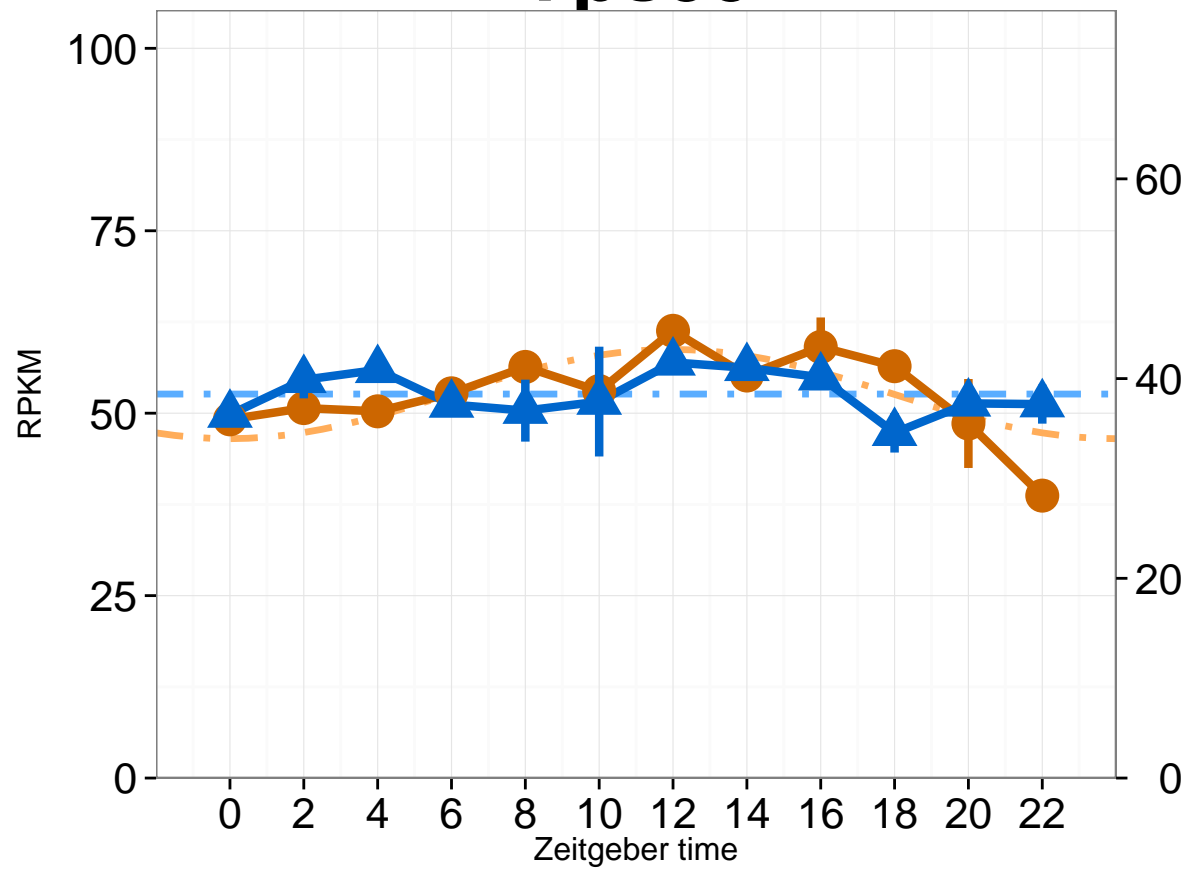

## Vps35

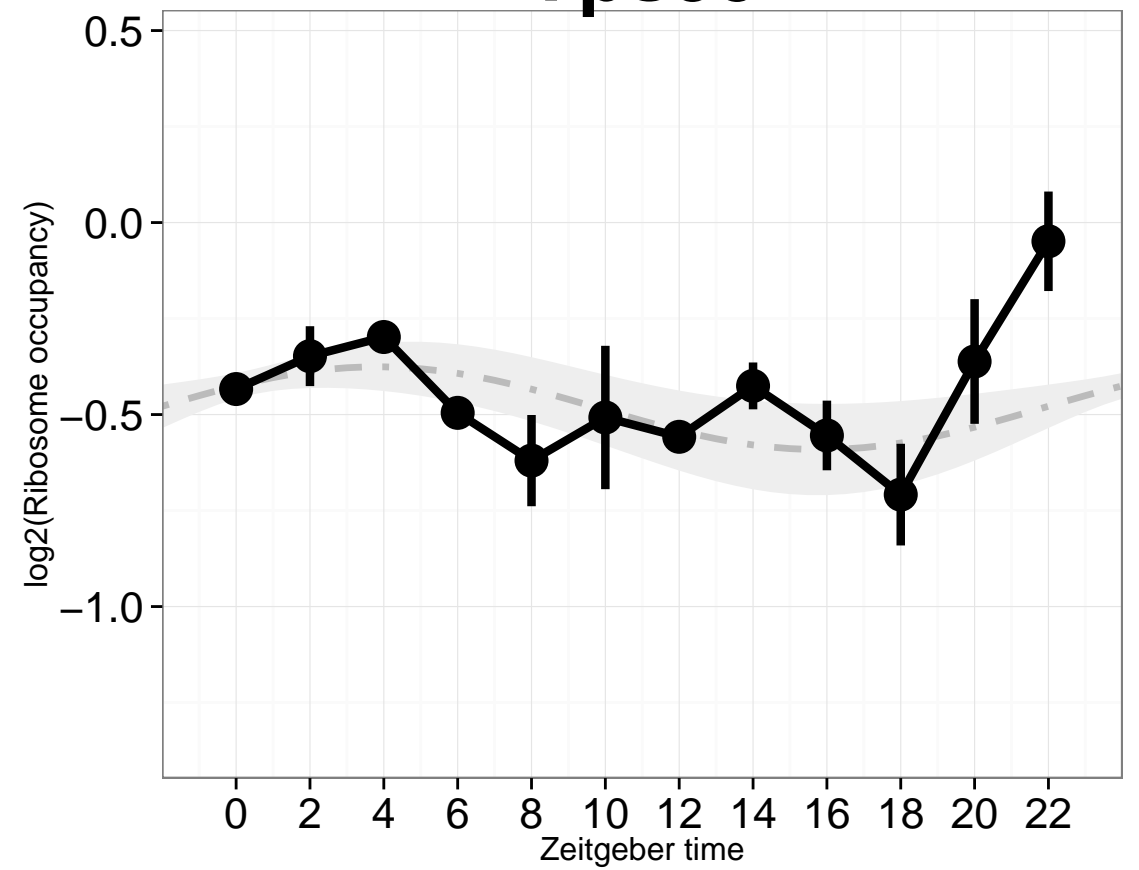

Supplement: SuppDataset_1.zip [file Vps35_set_A.pdf › Supplemental Dataset 1/A-mRNA_nonrhyth_translation_nonrhyth/Vps35_set_A.pdf]

## Vps36

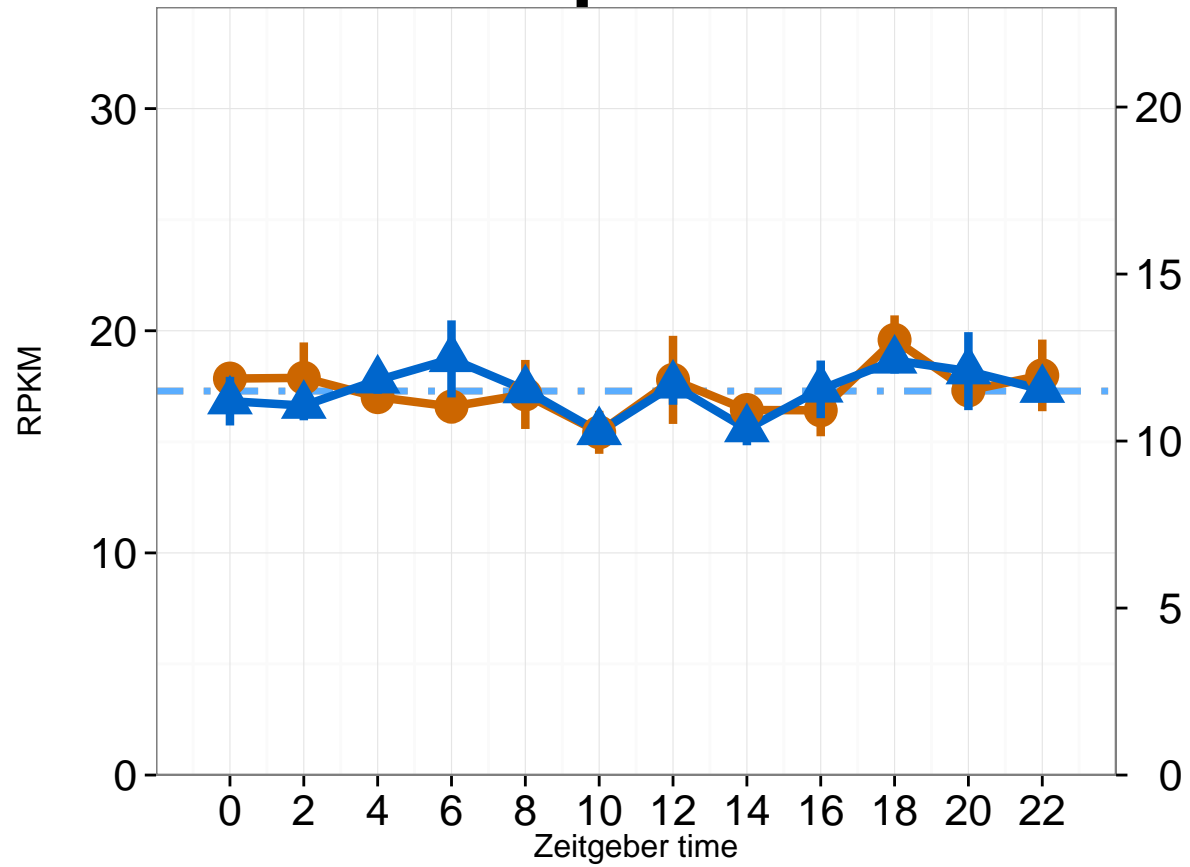

## Vps36

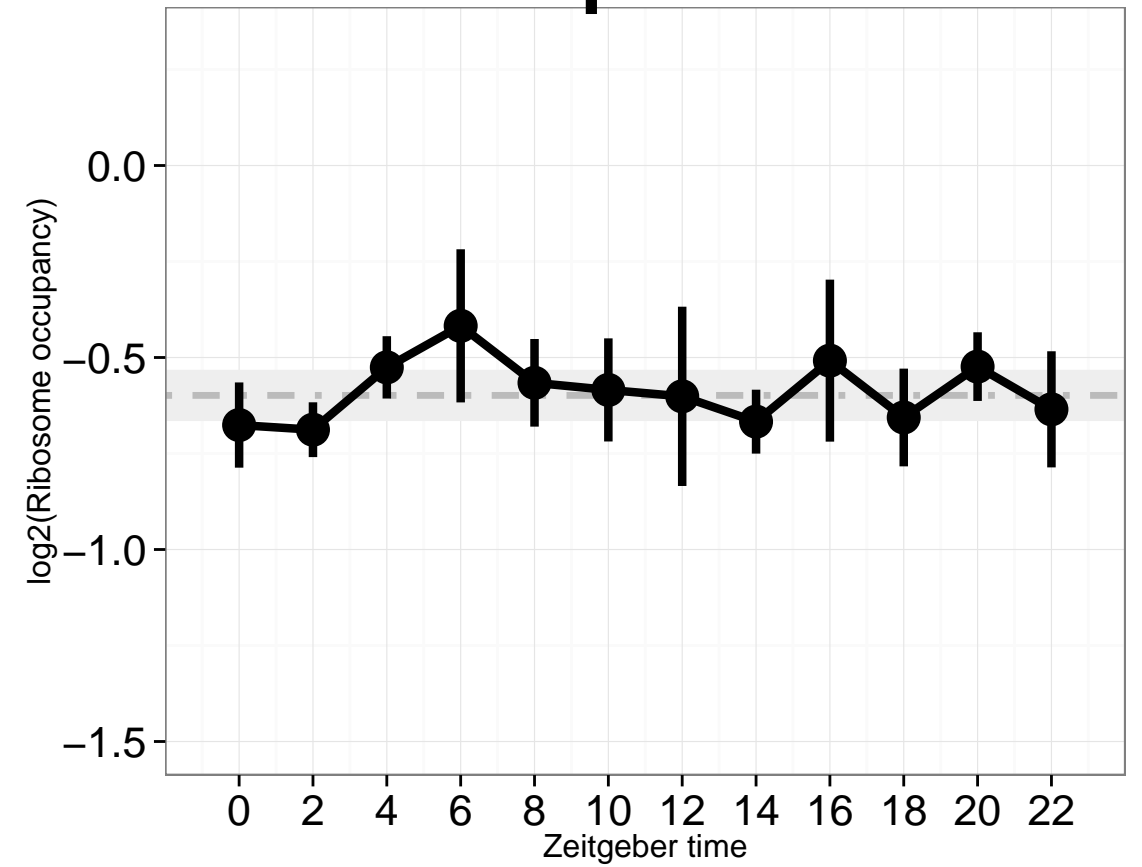

Supplement: SuppDataset_1.zip [file Vps36_set_A.pdf › Supplemental Dataset 1/A-mRNA_nonrhyth_translation_nonrhyth/Vps36_set_A.pdf]

# Vps37a

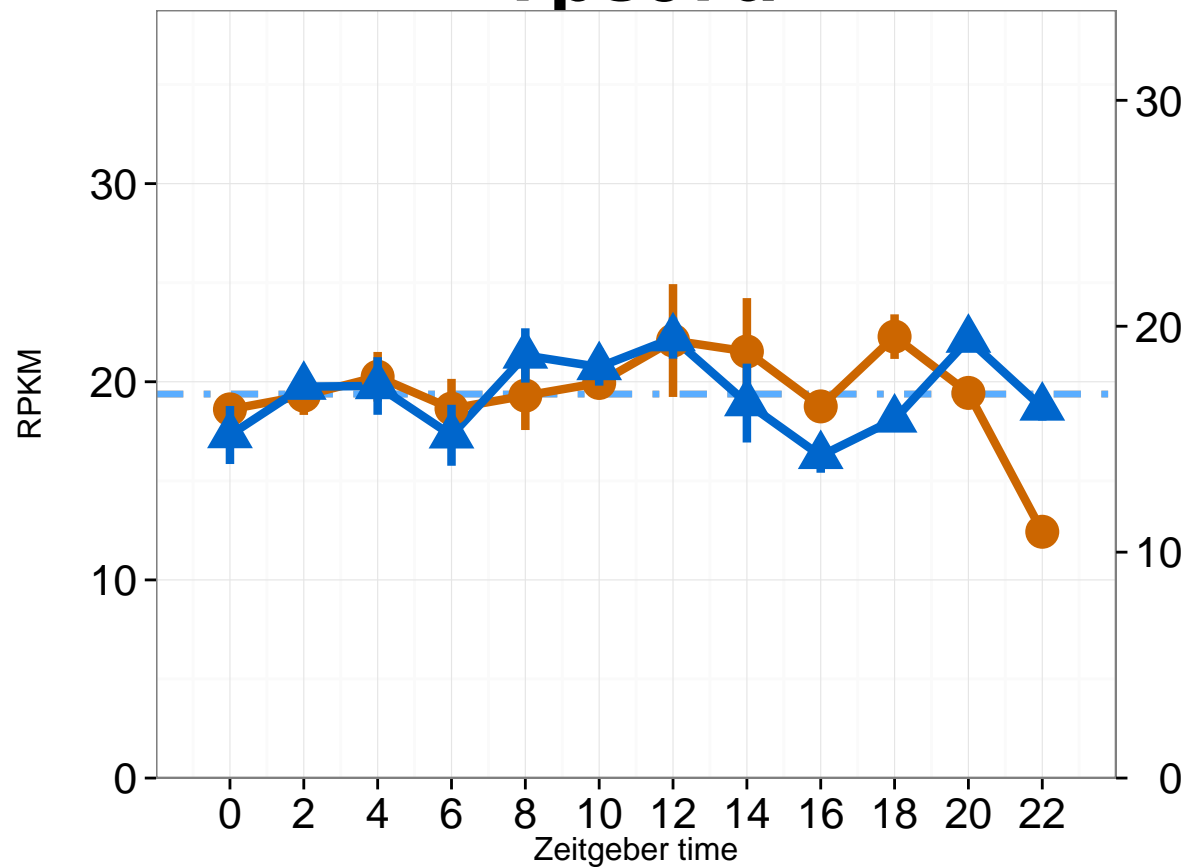

# Vps37a

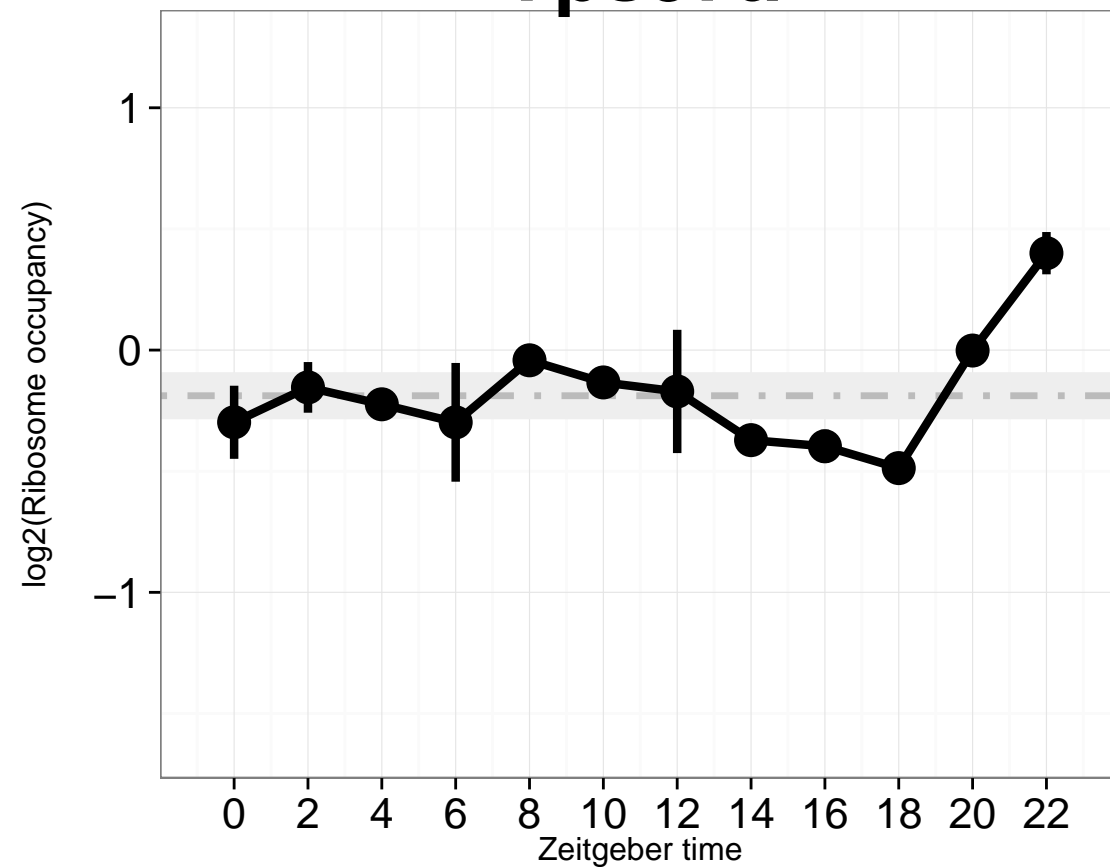

Supplement: SuppDataset_1.zip [file Vps37a_set_A.pdf › Supplemental Dataset 1/A-mRNA_nonrhyth_translation_nonrhyth/Vps37a_set_A.pdf]

## Vps37c

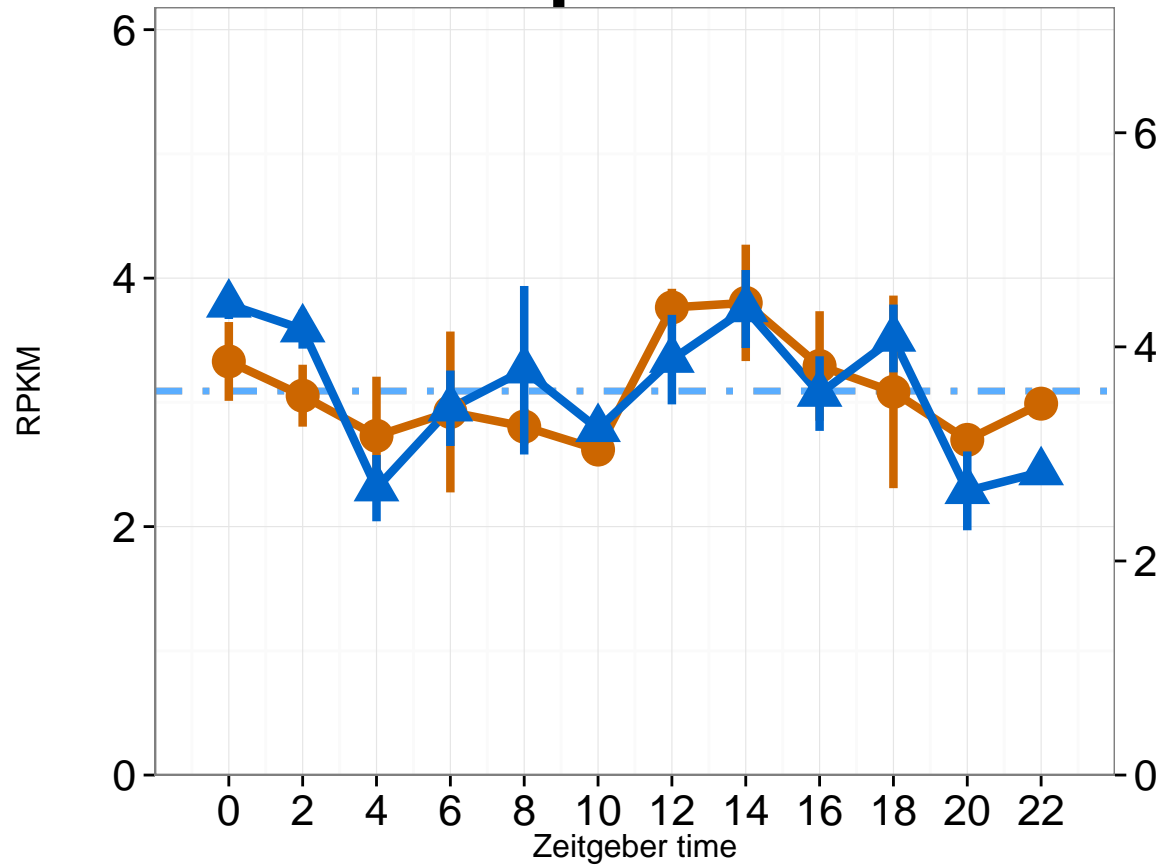

## Vps37c

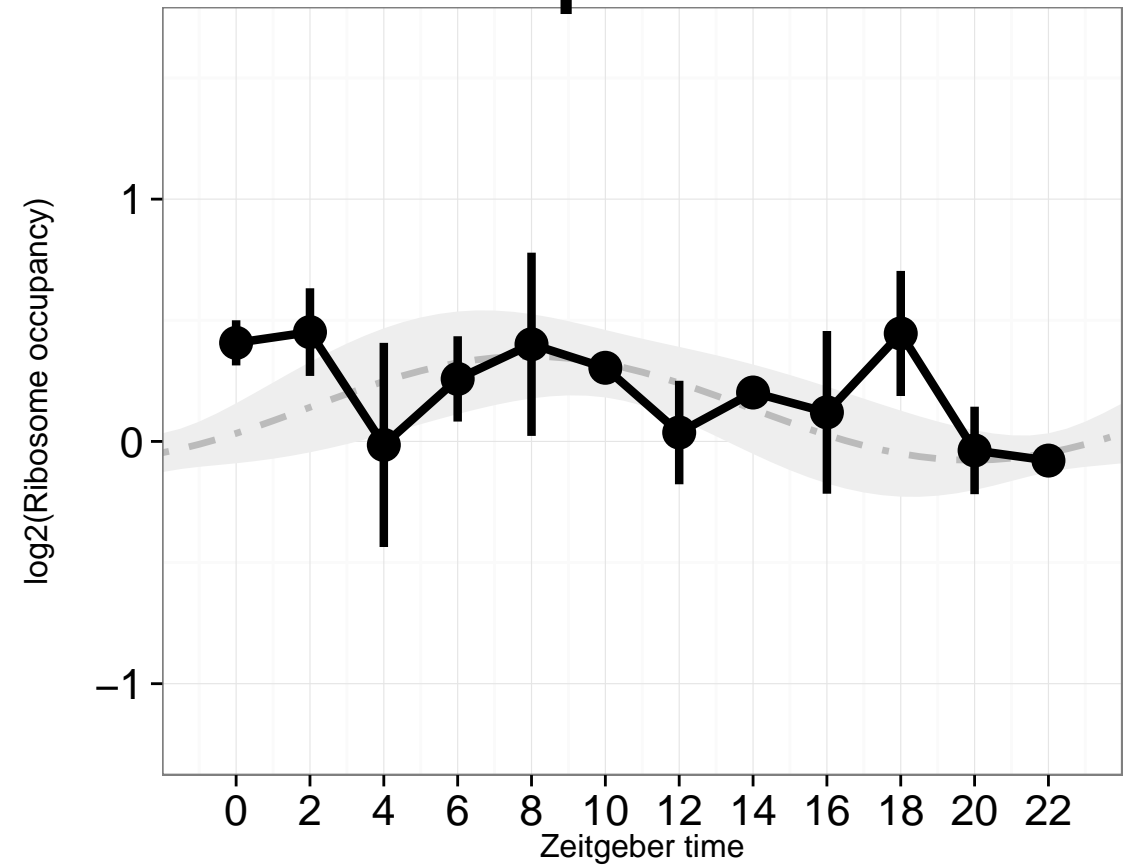

Supplement: SuppDataset_1.zip [file Vps37c_set_A.pdf › Supplemental Dataset 1/A-mRNA_nonrhyth_translation_nonrhyth/Vps37c_set_A.pdf]

## Vps39

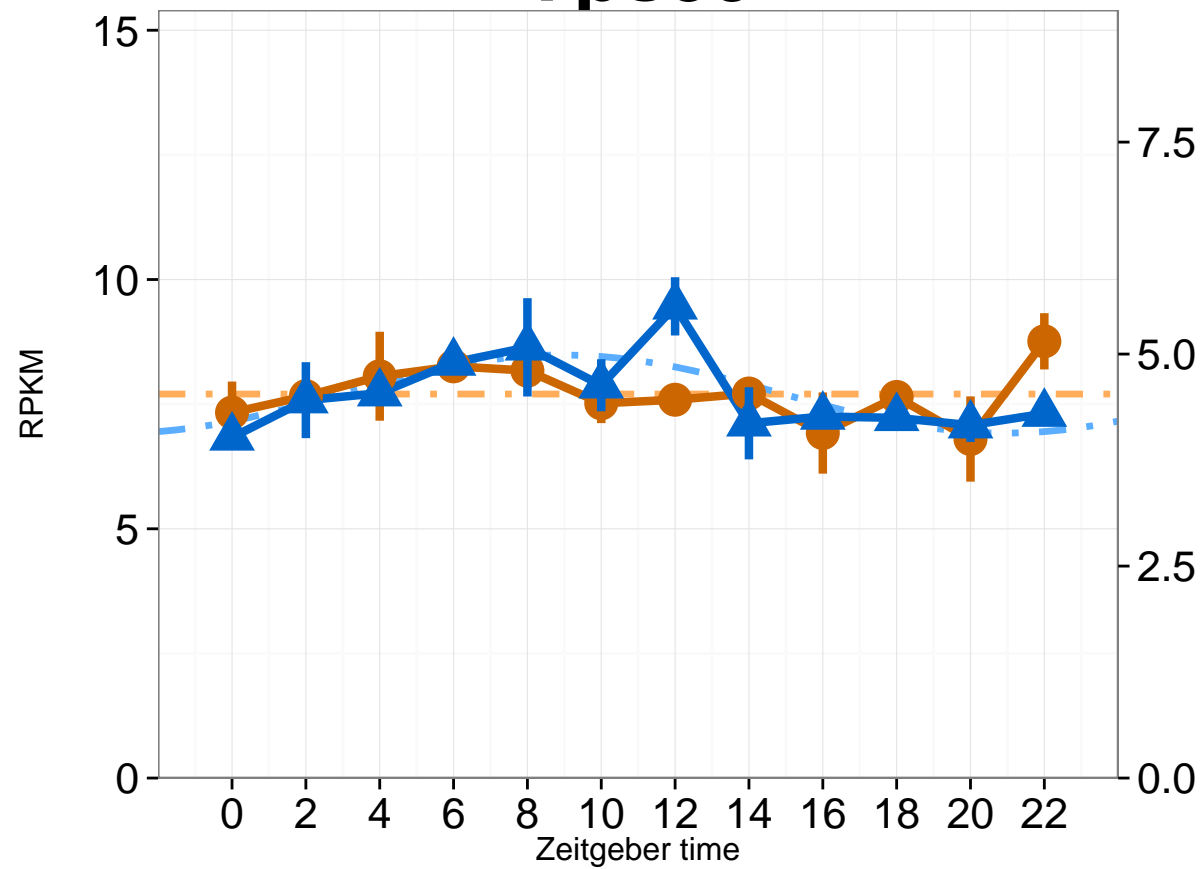

## Vps39

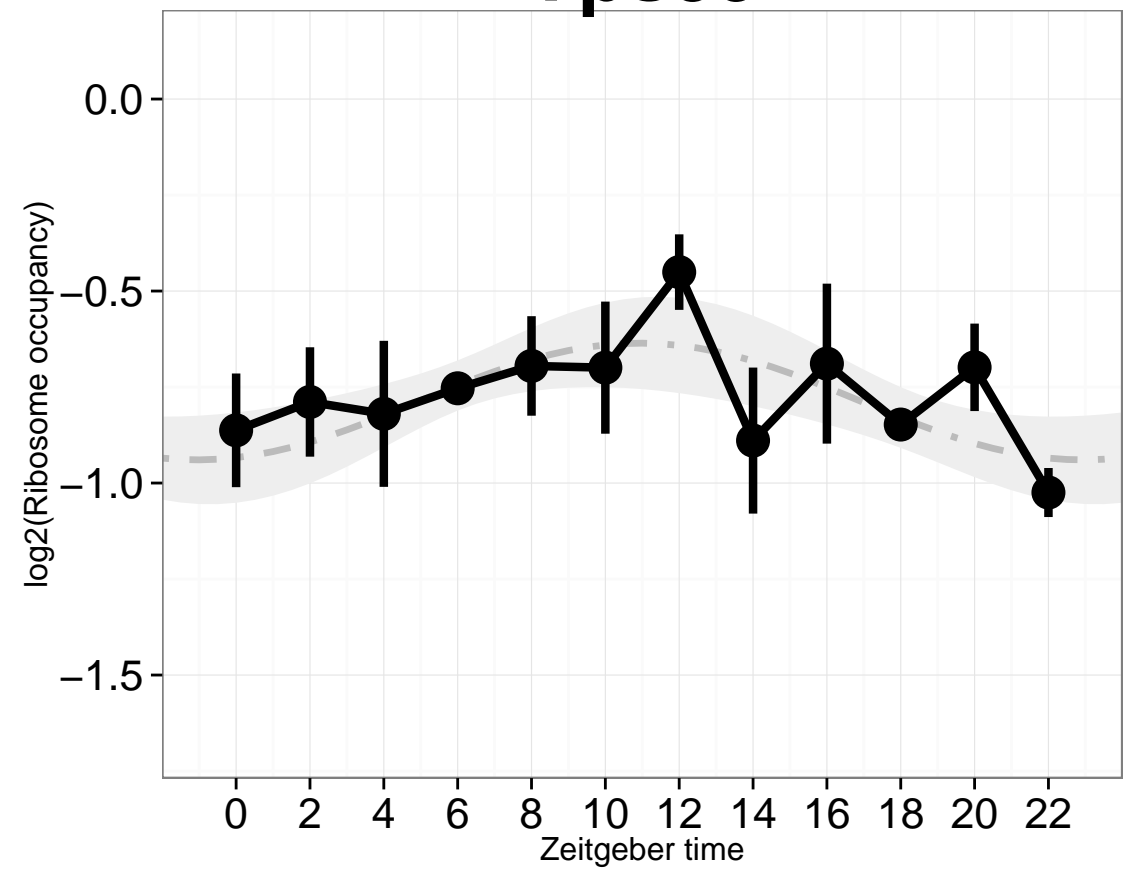

Supplement: SuppDataset_1.zip [file Vps39_set_A.pdf › Supplemental Dataset 1/A-mRNA_nonrhyth_translation_nonrhyth/Vps39_set_A.pdf]

## Vps41

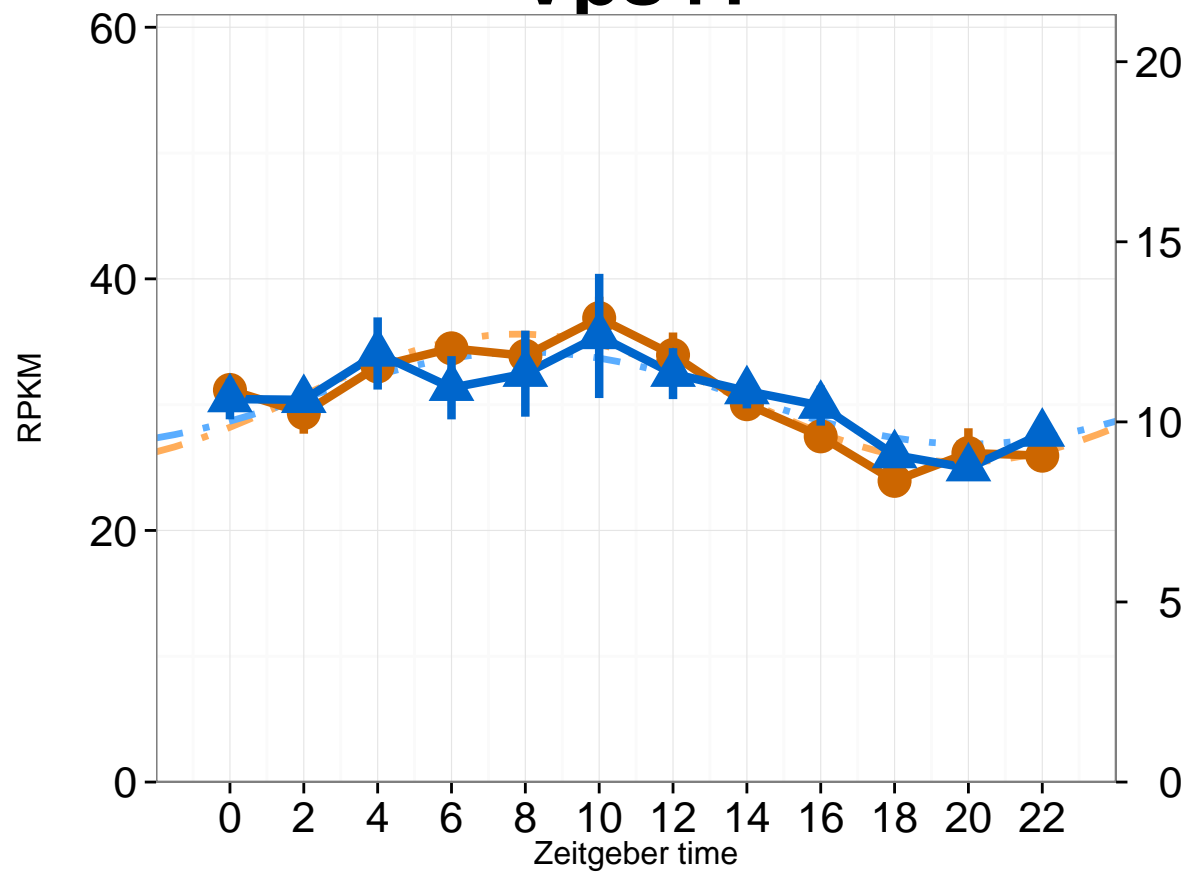

## Vps41

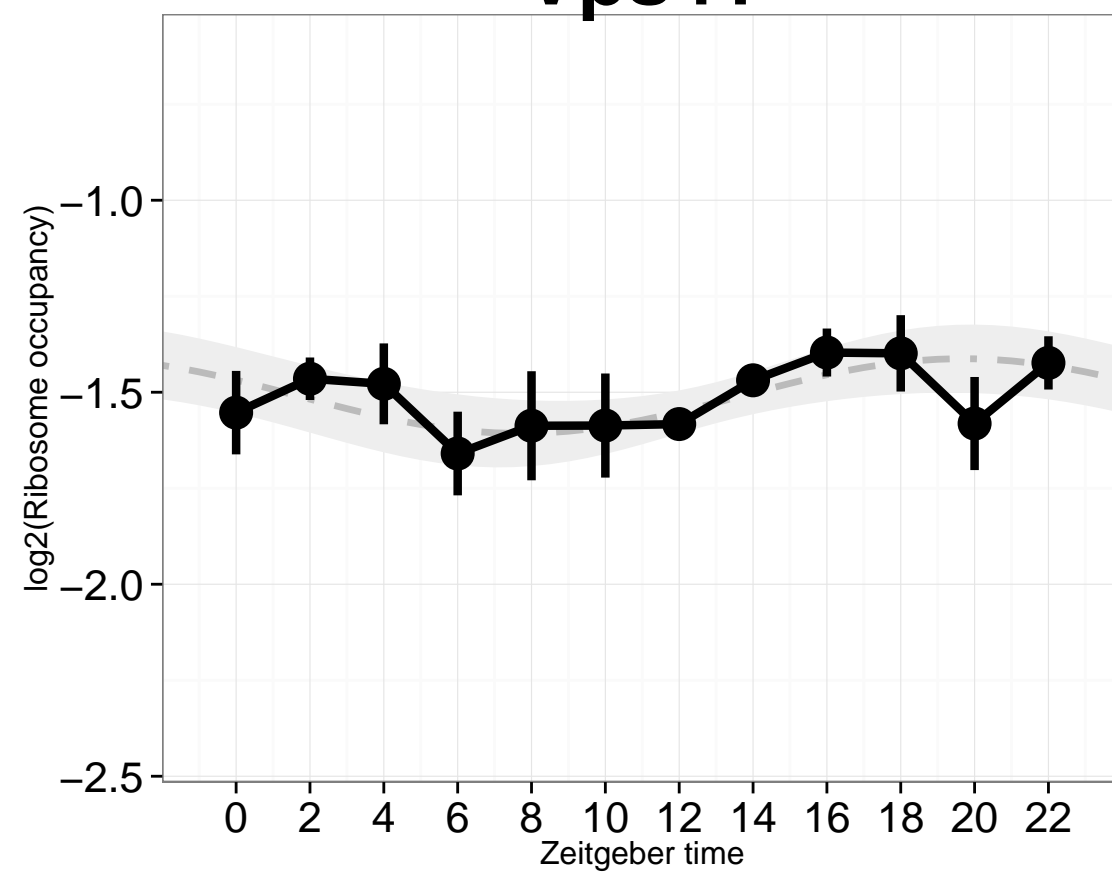

Supplement: SuppDataset_1.zip [file Vps41_set_A.pdf › Supplemental Dataset 1/A-mRNA_nonrhyth_translation_nonrhyth/Vps41_set_A.pdf]

## Vps45

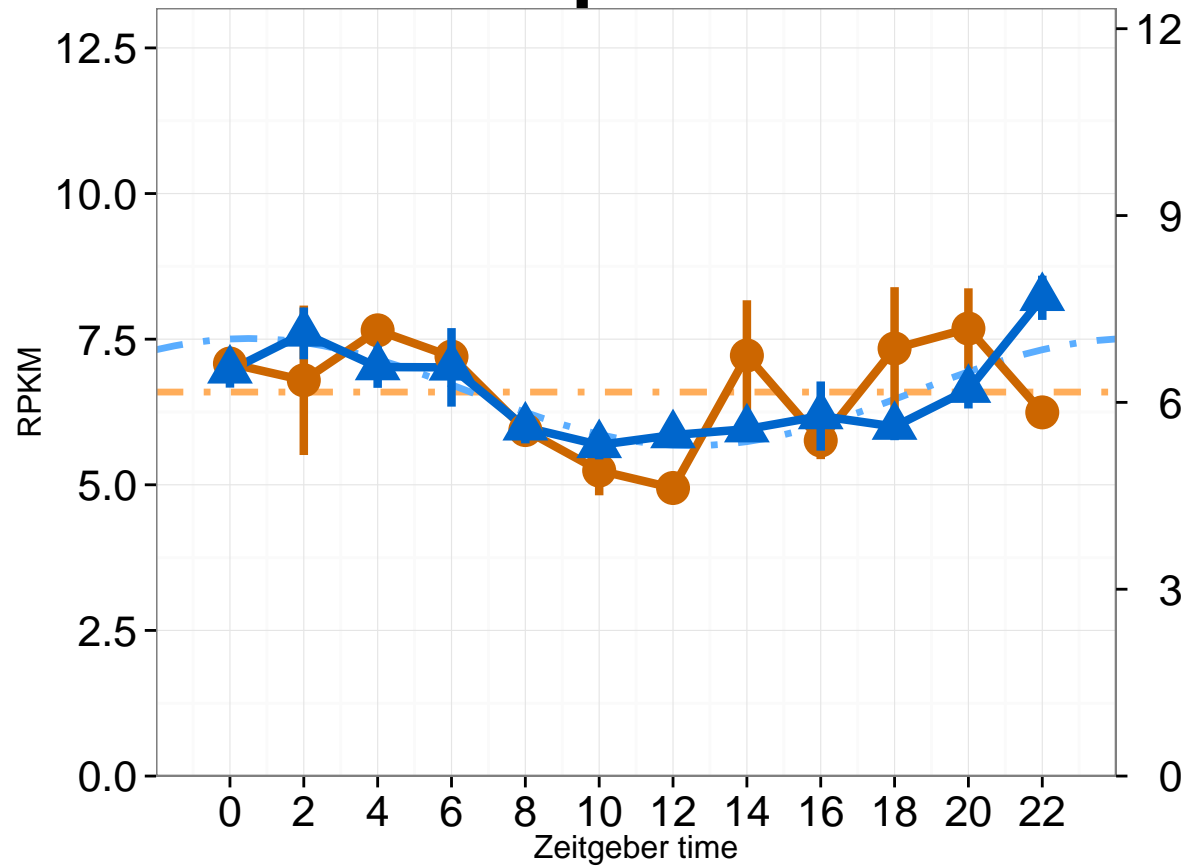

## Vps45

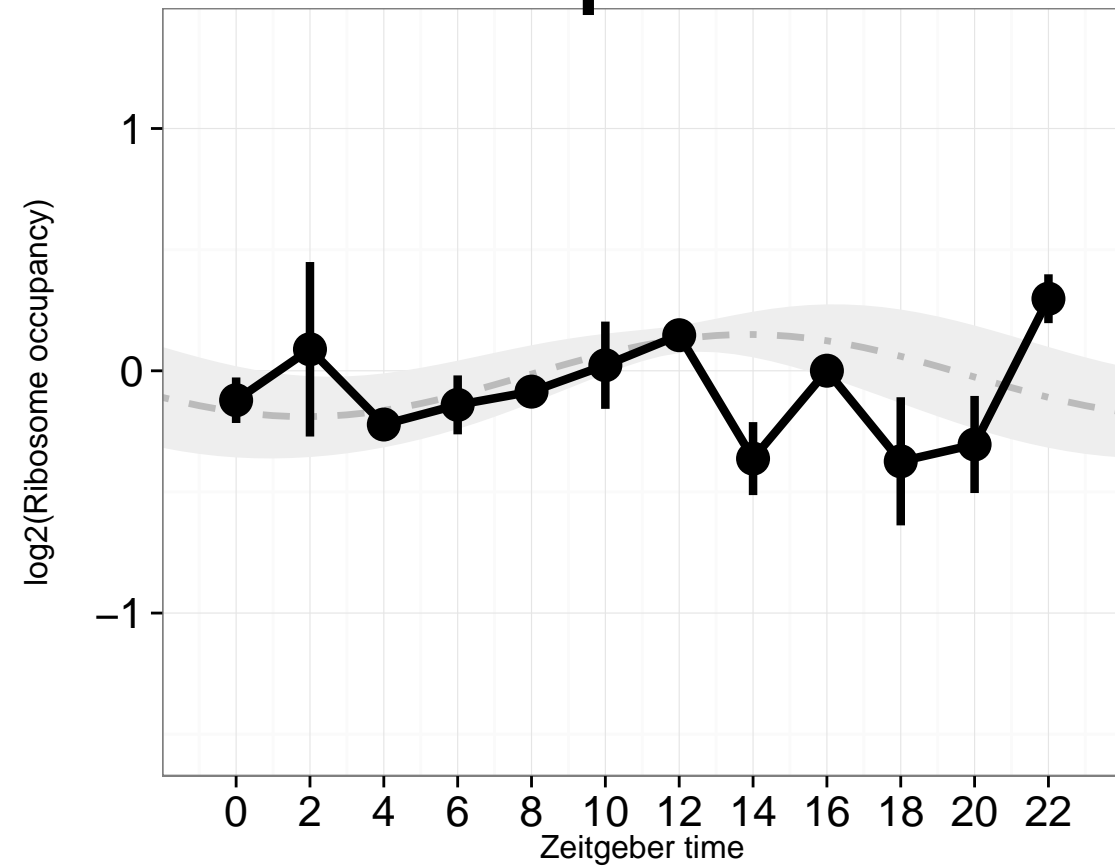

Supplement: SuppDataset_1.zip [file Vps45_set_A.pdf › Supplemental Dataset 1/A-mRNA_nonrhyth_translation_nonrhyth/Vps45_set_A.pdf]

## Vps4a

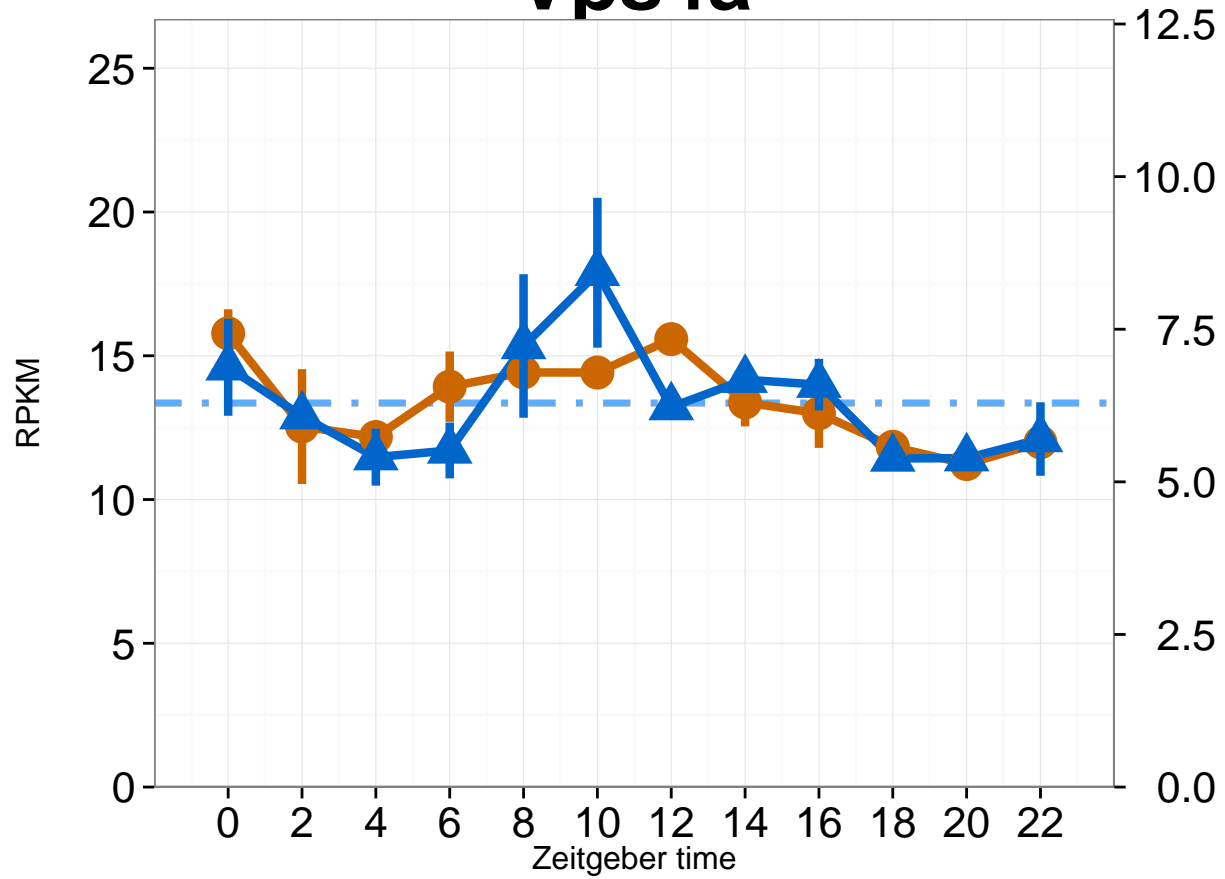

## Vps4a

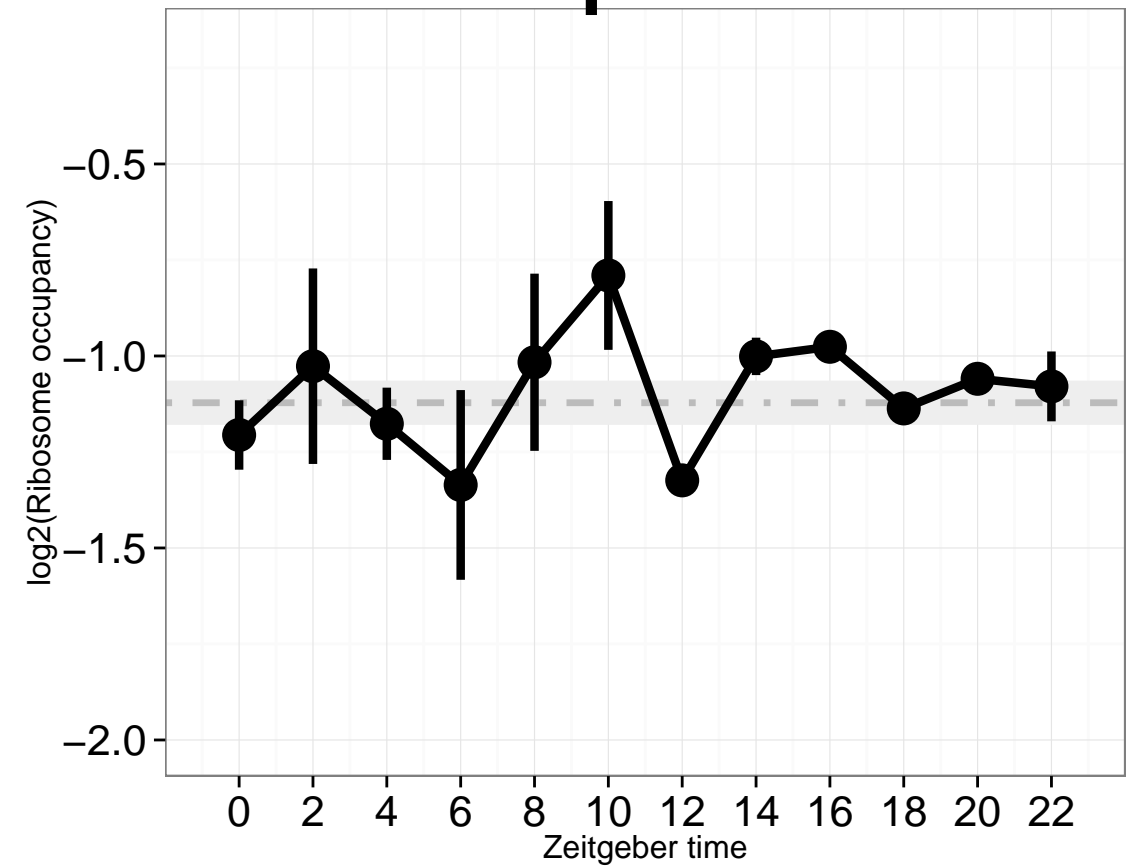

Supplement: SuppDataset_1.zip [file Vps4a_set_A.pdf › Supplemental Dataset 1/A-mRNA_nonrhyth_translation_nonrhyth/Vps4a_set_A.pdf]

## Vps4b

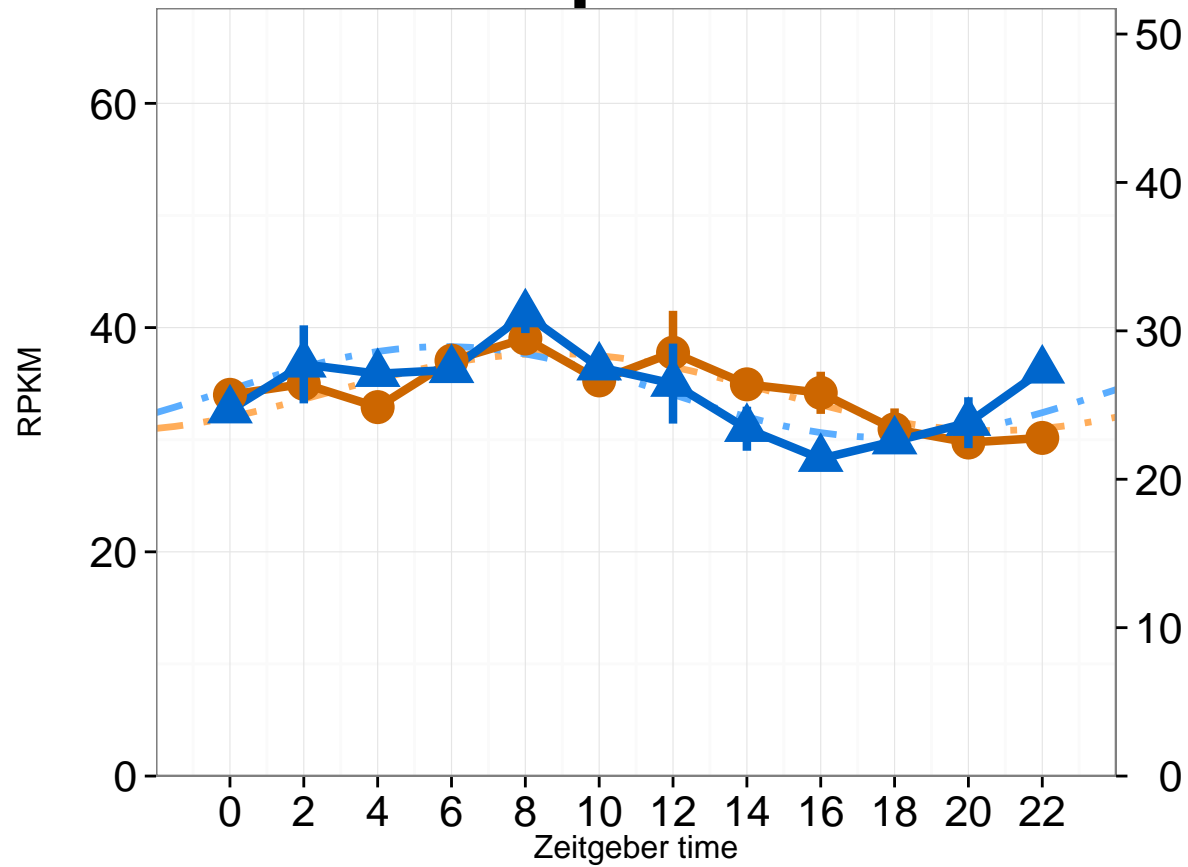

## Vps4b

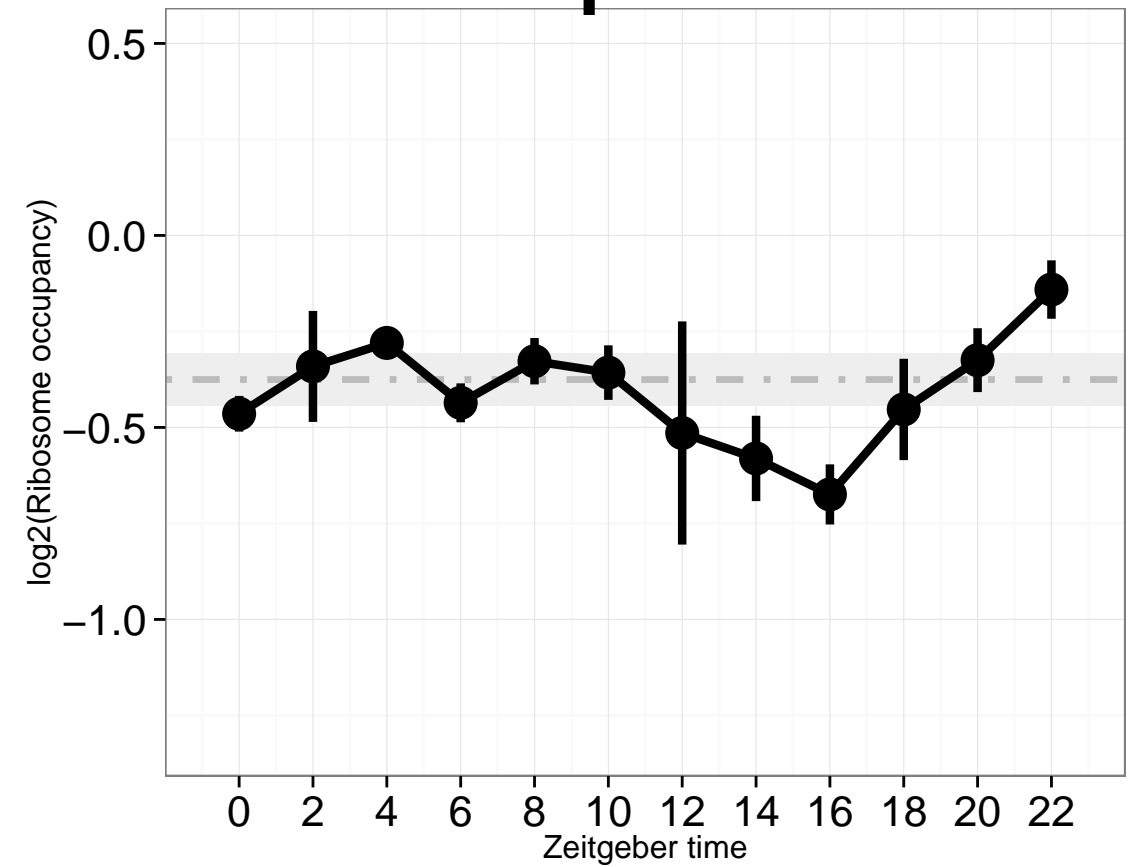

Supplement: SuppDataset_1.zip [file Vps4b_set_A.pdf › Supplemental Dataset 1/A-mRNA_nonrhyth_translation_nonrhyth/Vps4b_set_A.pdf]

## Vps52

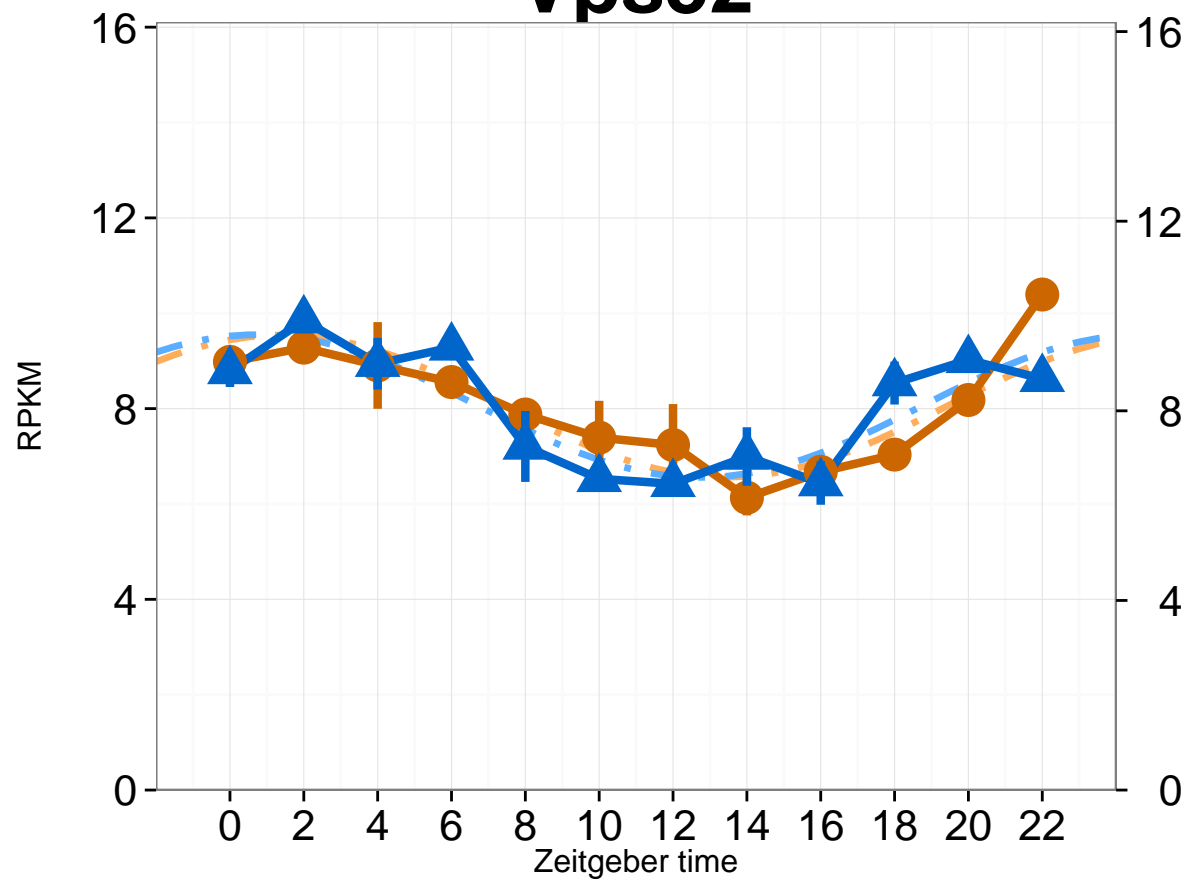

## Vps52

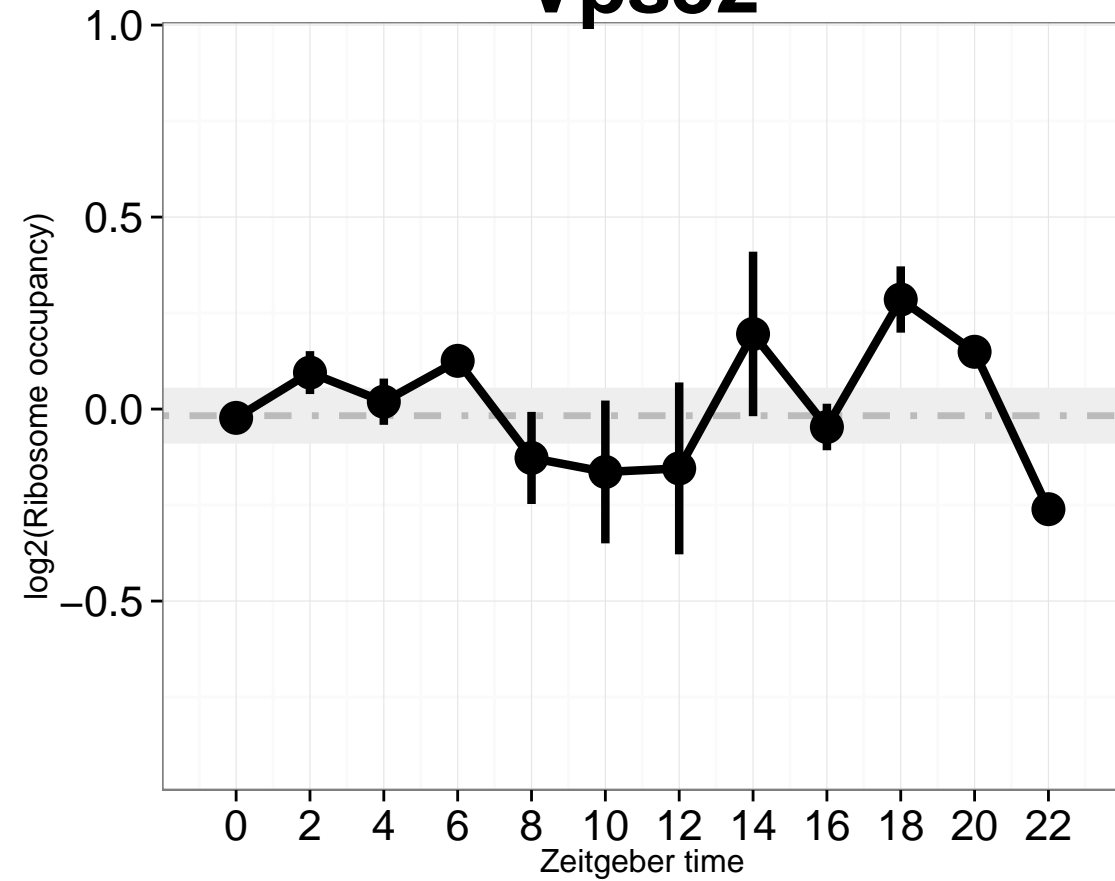

Supplement: SuppDataset_1.zip [file Vps52_set_A.pdf › Supplemental Dataset 1/A-mRNA_nonrhyth_translation_nonrhyth/Vps52_set_A.pdf]

## Vps53

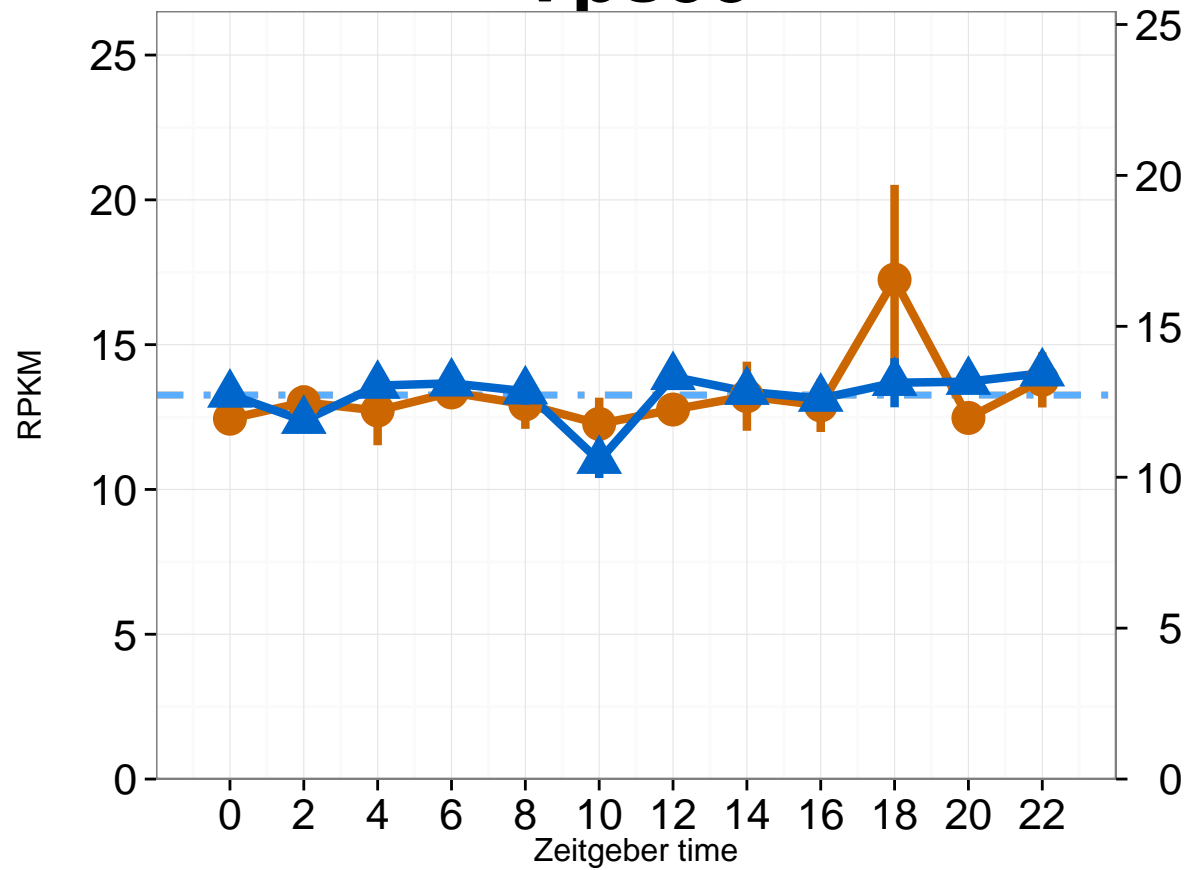

## Vps53

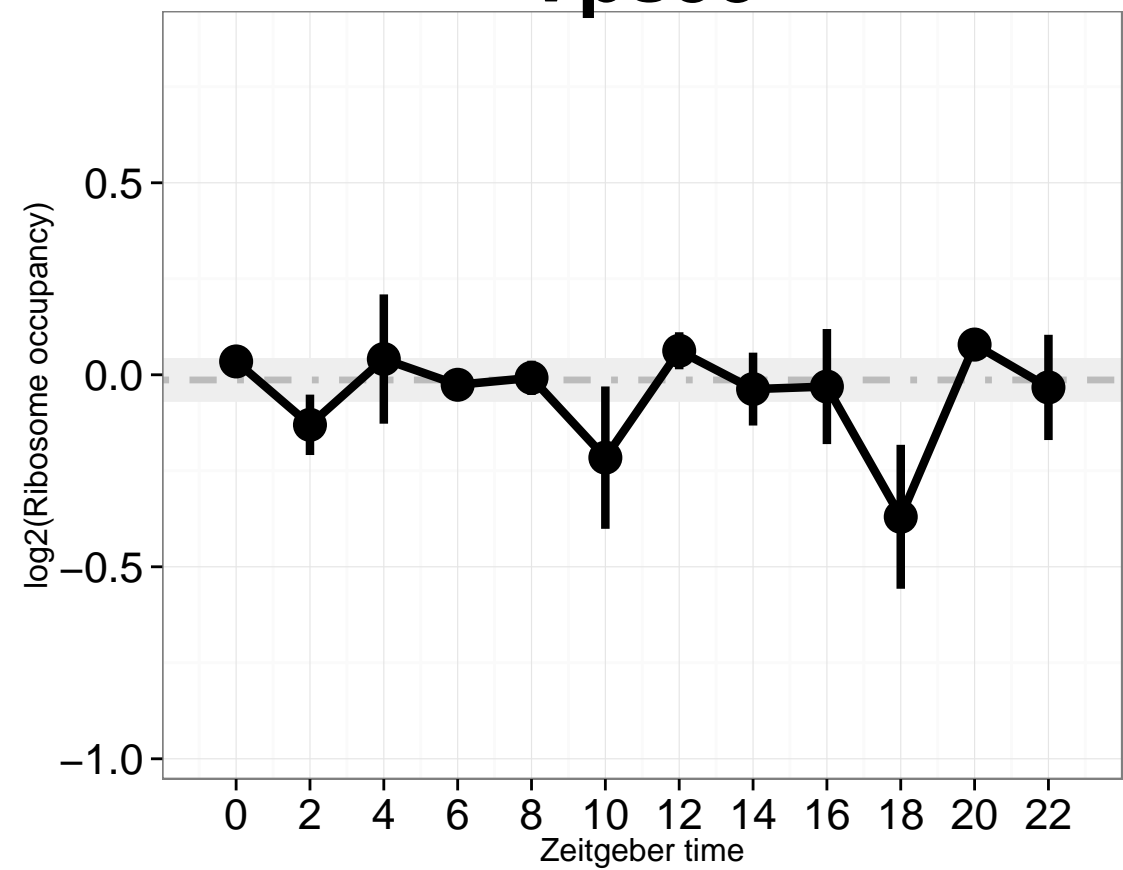

Supplement: SuppDataset_1.zip [file Vps53_set_A.pdf › Supplemental Dataset 1/A-mRNA_nonrhyth_translation_nonrhyth/Vps53_set_A.pdf]

## Vps54

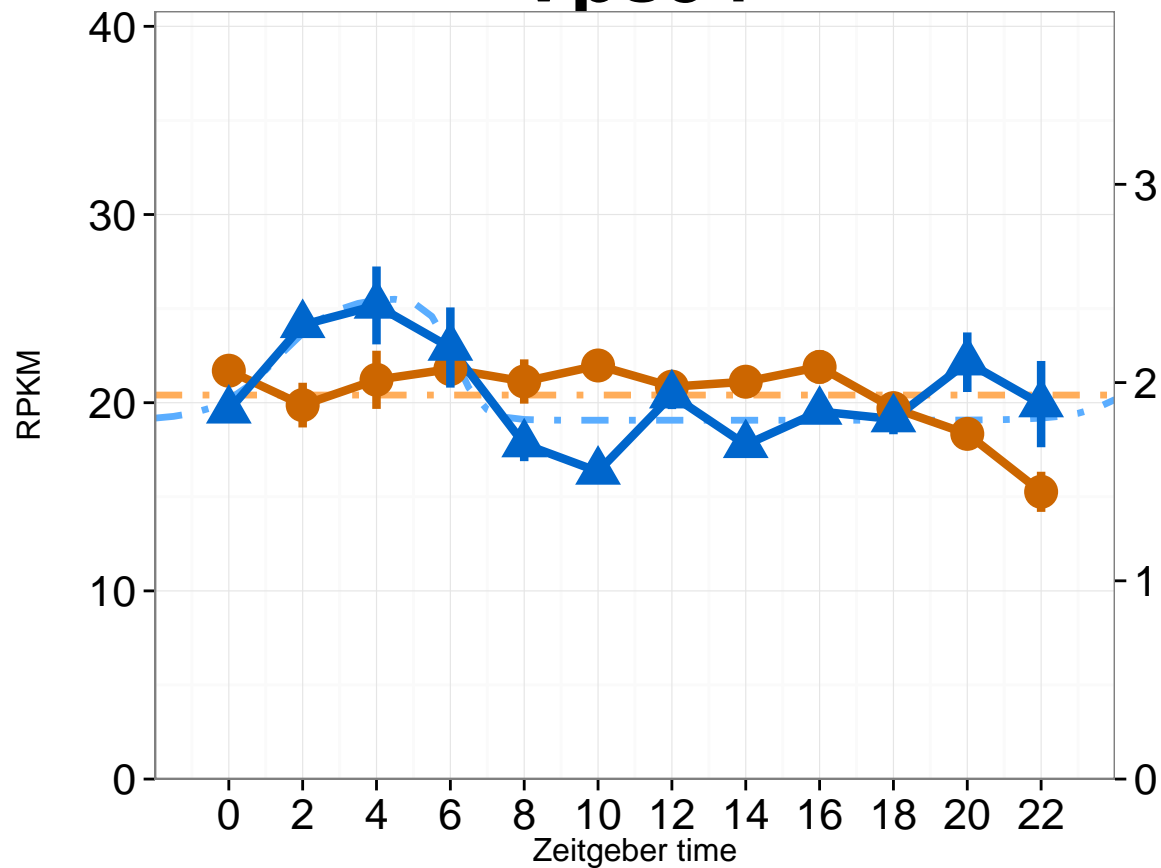

## Vps54

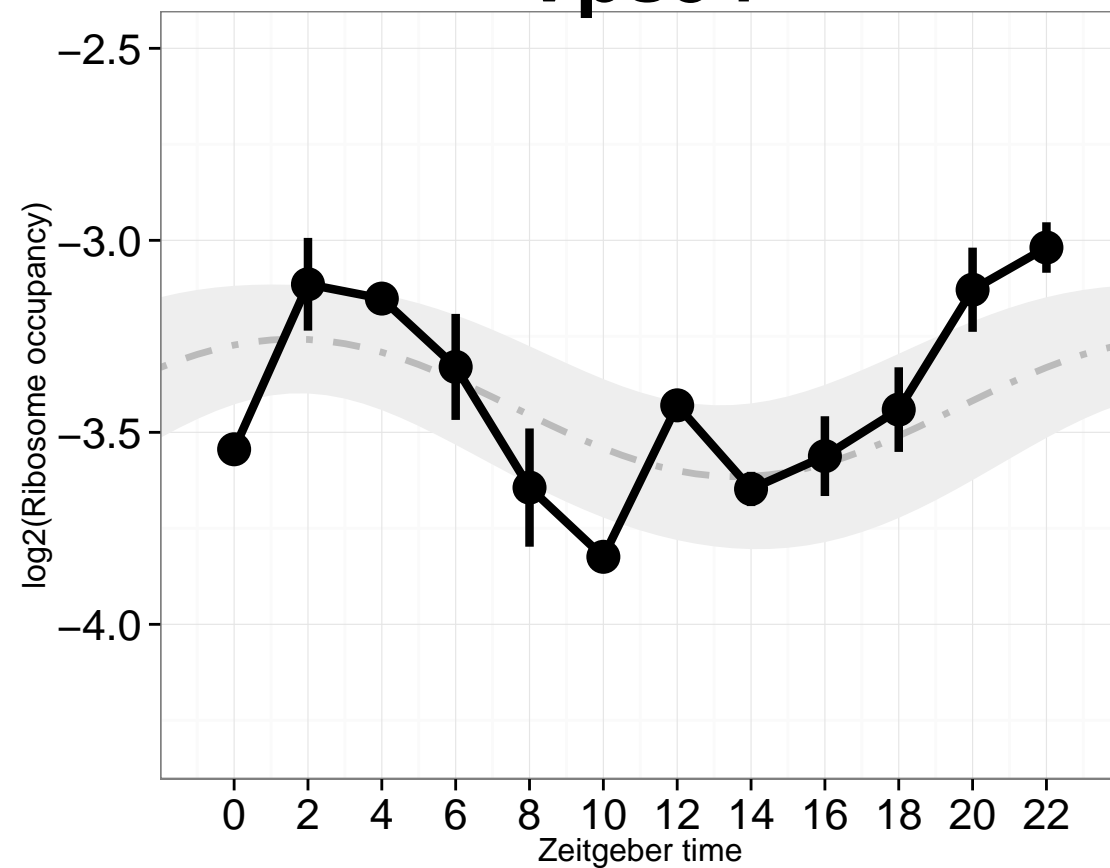

Supplement: SuppDataset_1.zip [file Vps54_set_A.pdf › Supplemental Dataset 1/A-mRNA_nonrhyth_translation_nonrhyth/Vps54_set_A.pdf]

## Vps72

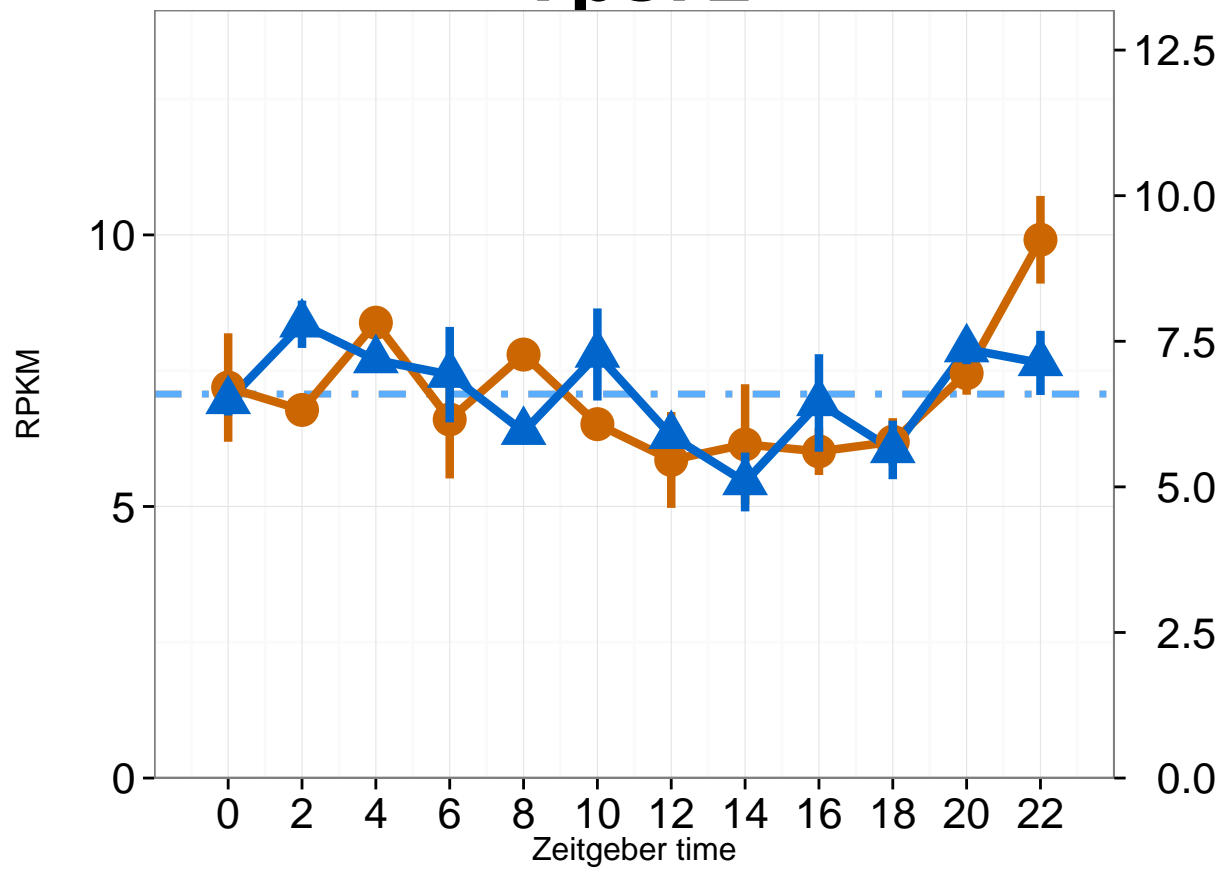

## Vps72

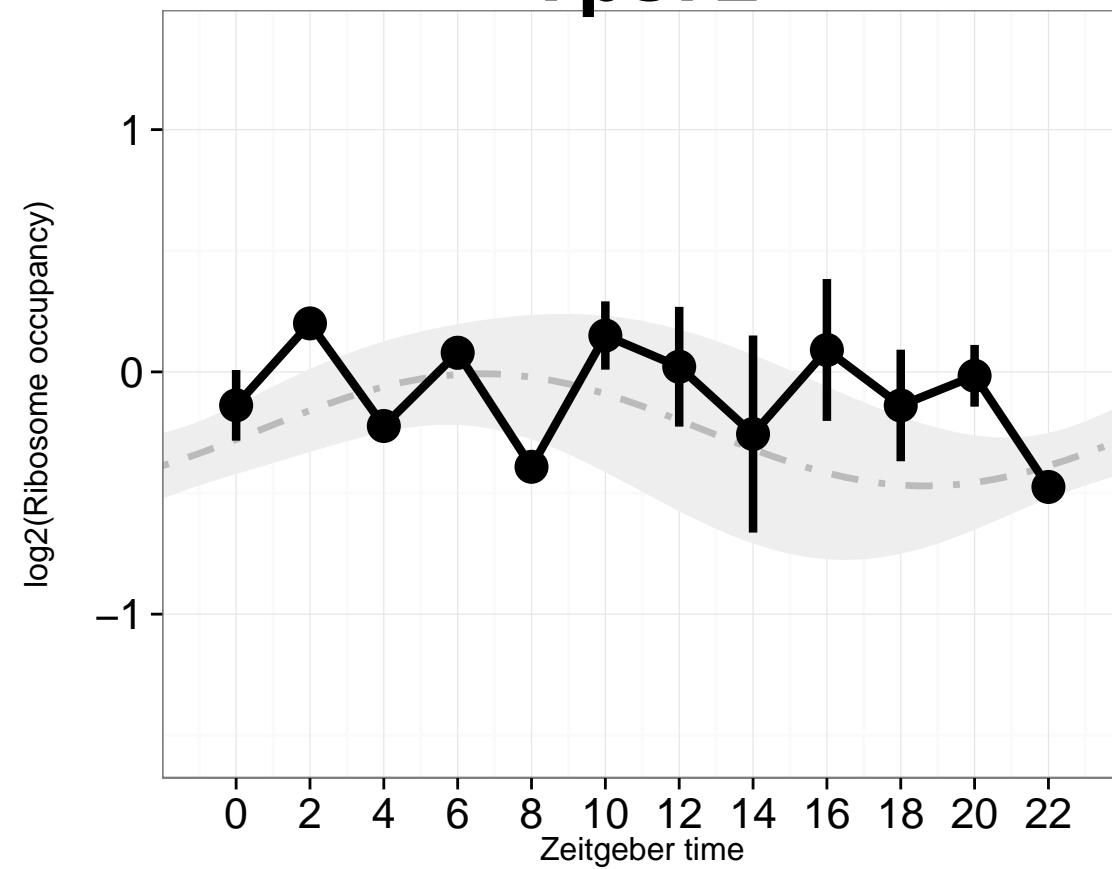

Supplement: SuppDataset_1.zip [file Vps72_set_A.pdf › Supplemental Dataset 1/A-mRNA_nonrhyth_translation_nonrhyth/Vps72_set_A.pdf]

## Vps8

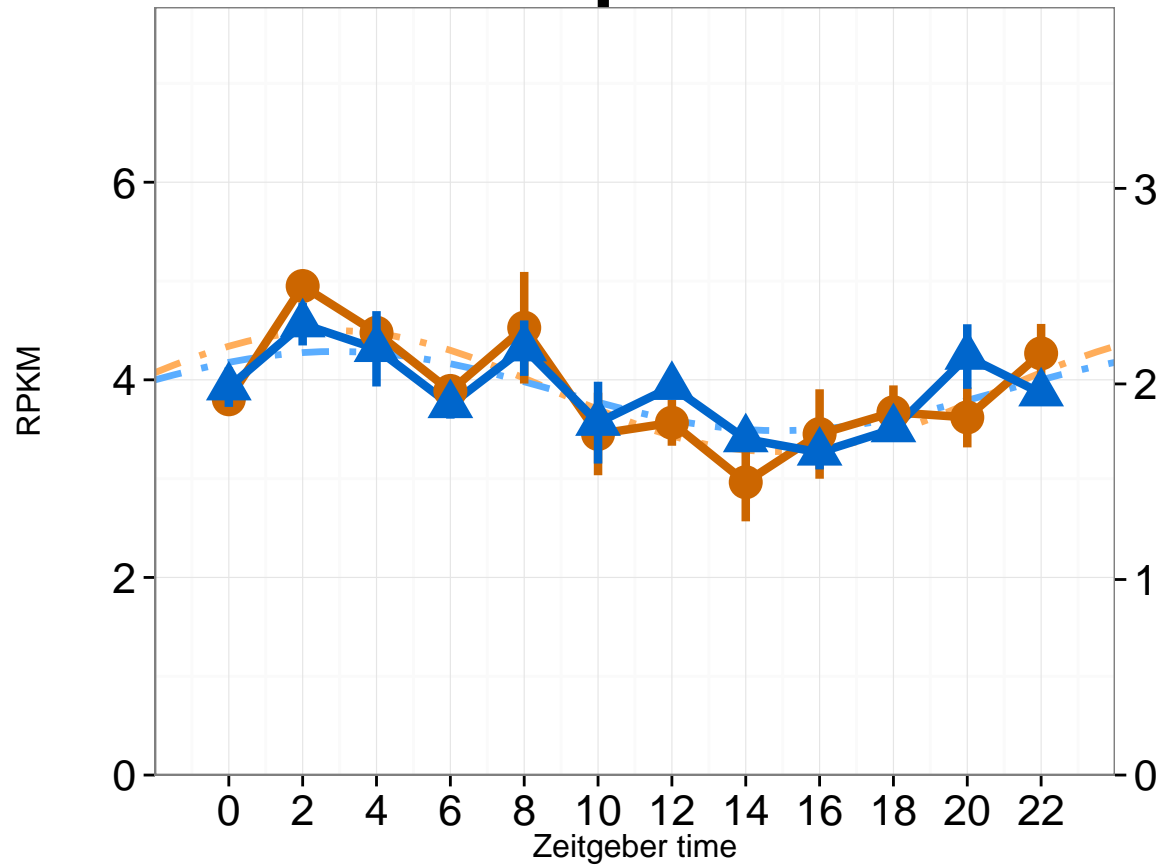

## Vps8

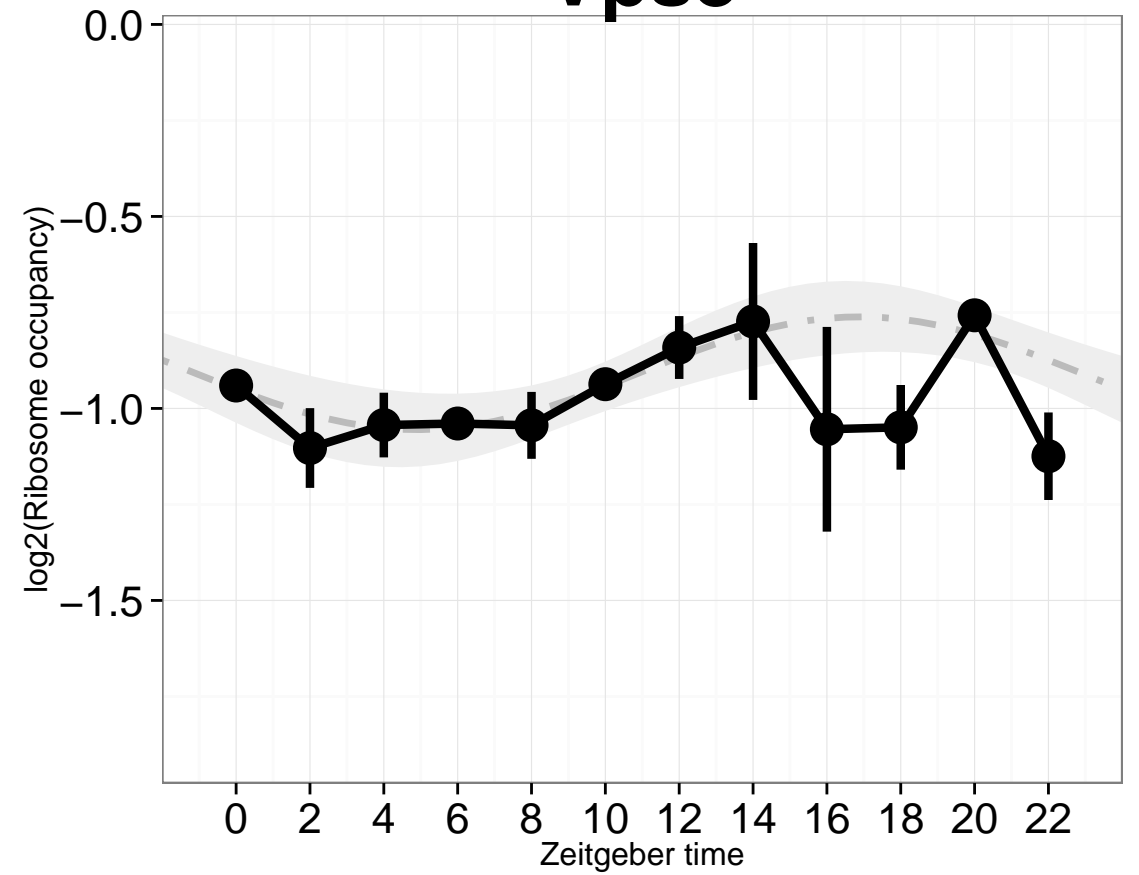

Supplement: SuppDataset_1.zip [file Vps8_set_A.pdf › Supplemental Dataset 1/A-mRNA_nonrhyth_translation_nonrhyth/Vps8_set_A.pdf]

# Vrk1

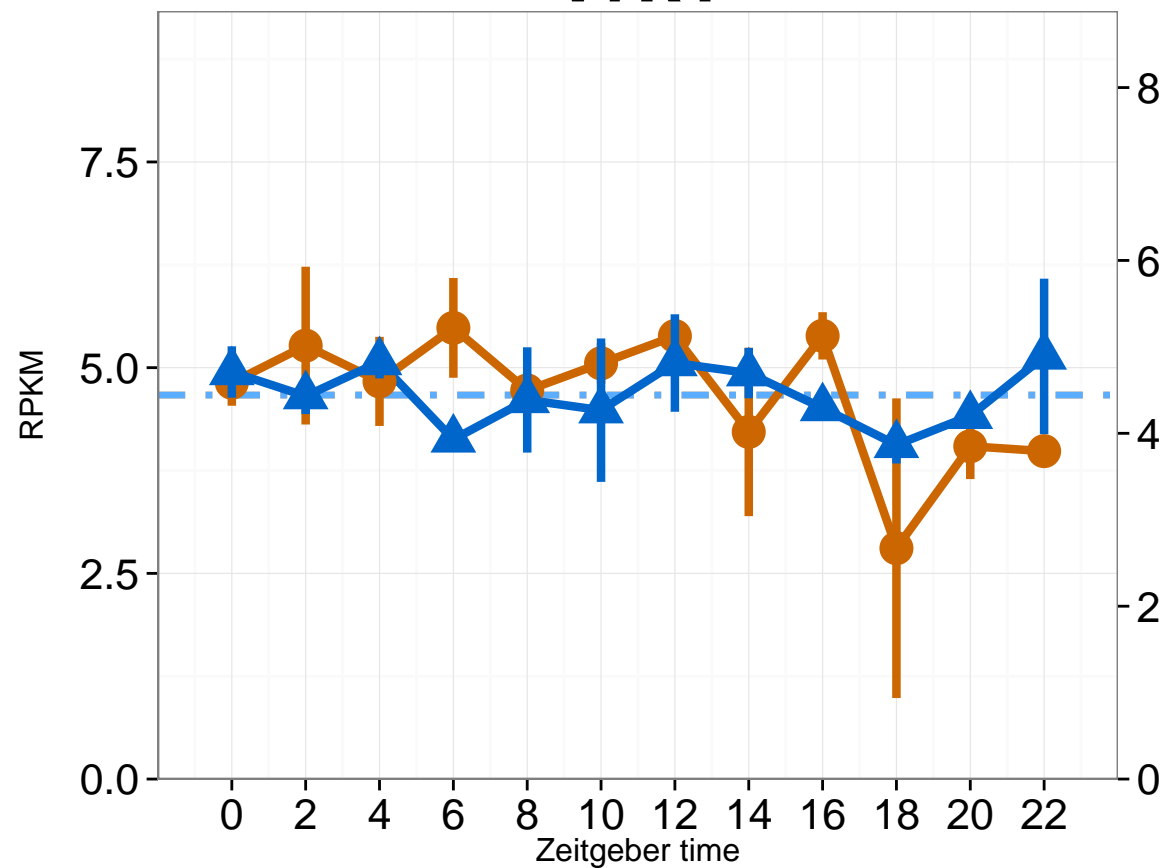

# Vrk1

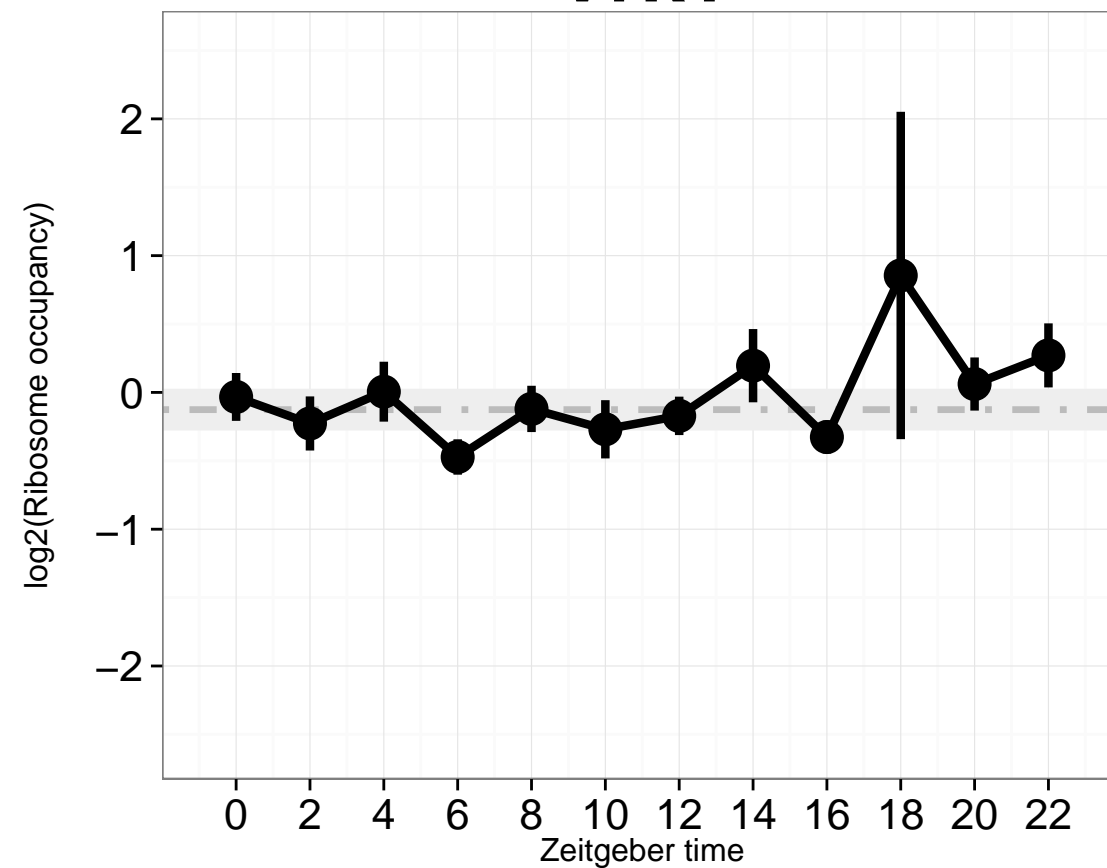

Supplement: SuppDataset_1.zip [file Vrk1_set_A.pdf › Supplemental Dataset 1/A-mRNA_nonrhyth_translation_nonrhyth/Vrk1_set_A.pdf]

## Vrk2

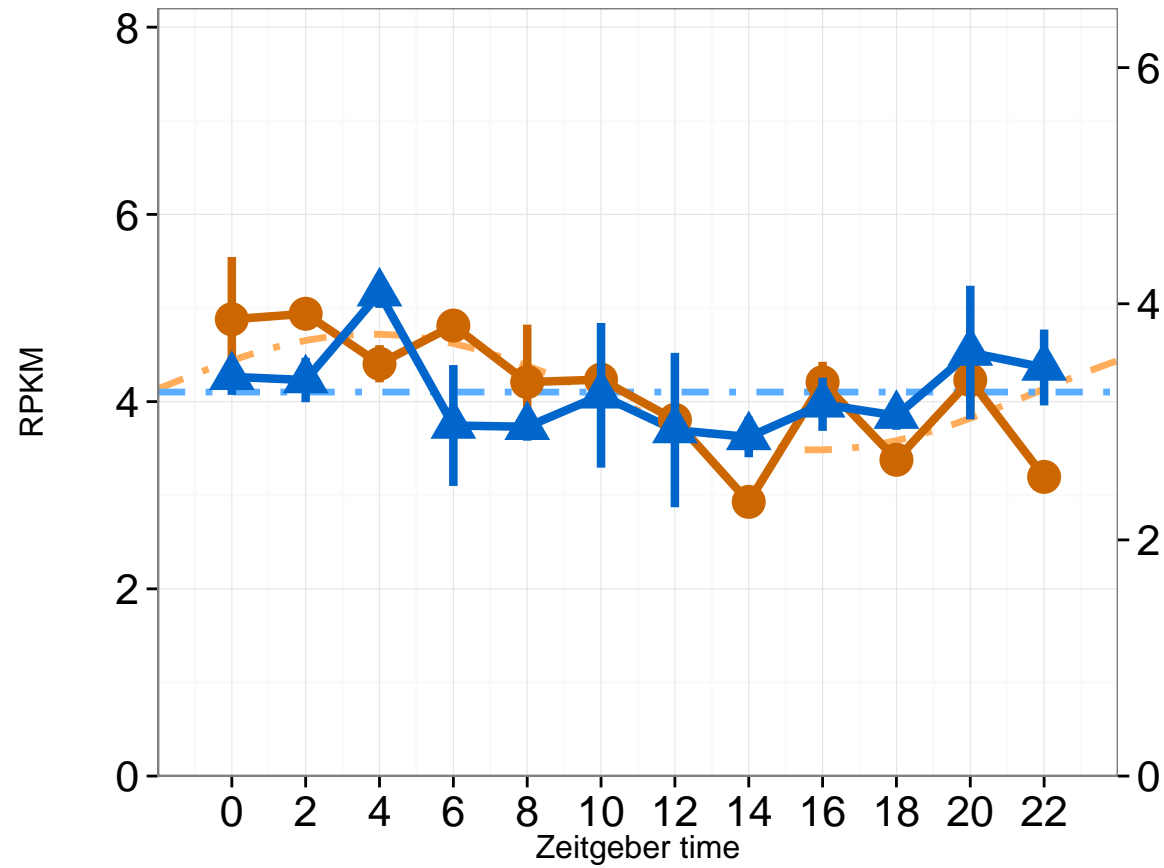

## Vrk2

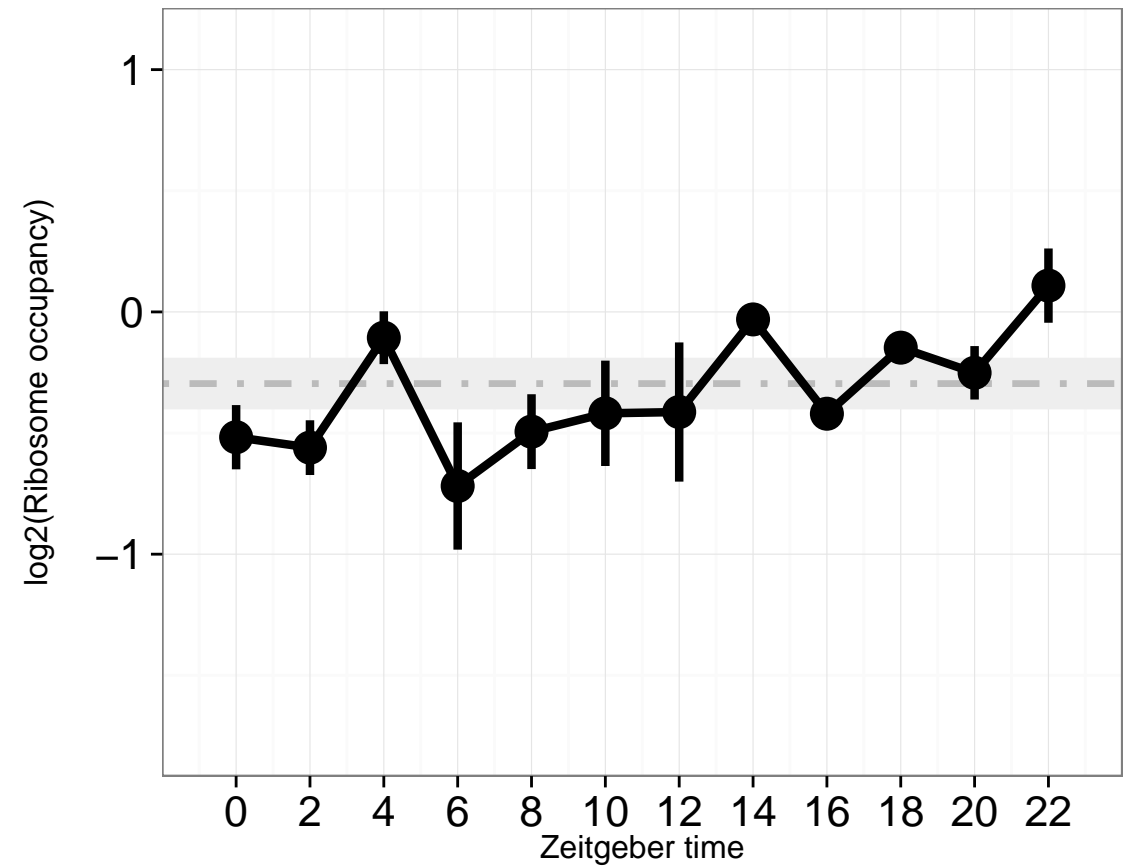

Supplement: SuppDataset_1.zip [file Vrk2_set_A.pdf › Supplemental Dataset 1/A-mRNA_nonrhyth_translation_nonrhyth/Vrk2_set_A.pdf]

## Vrk3

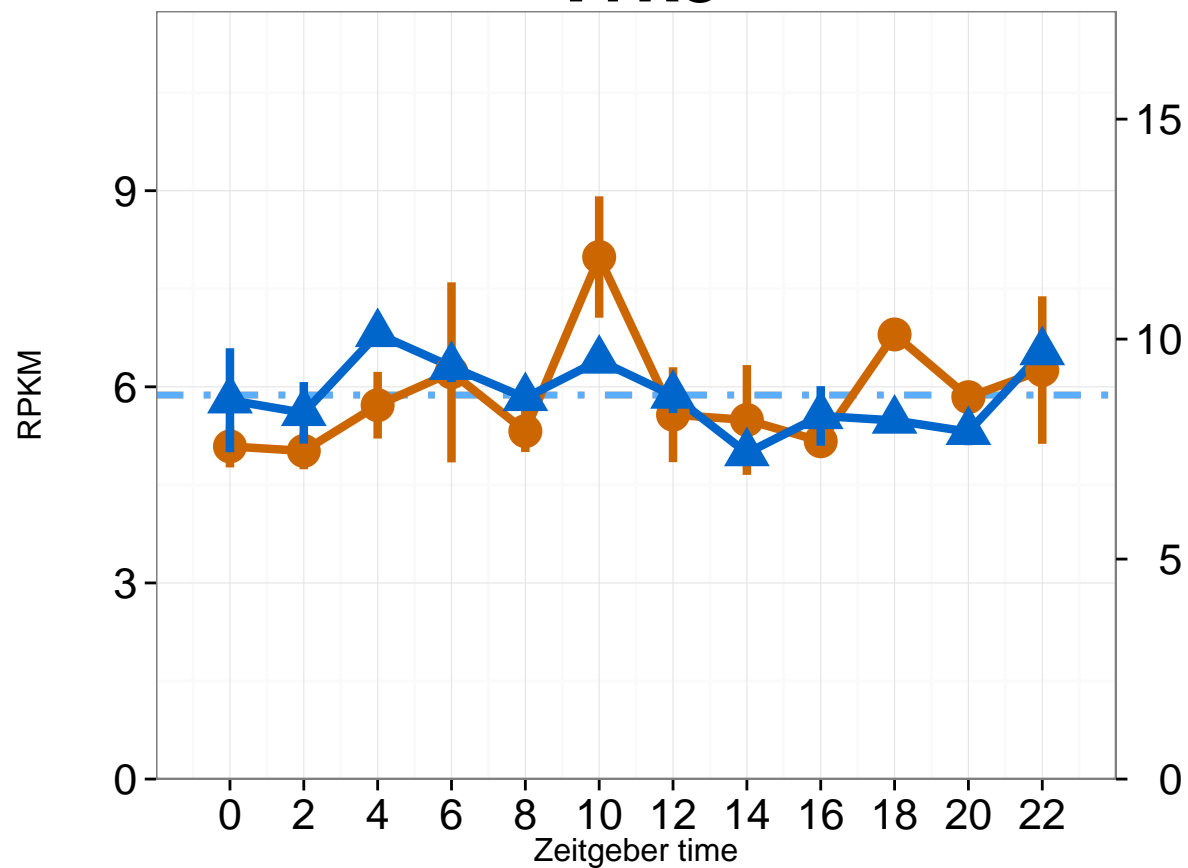

## Vrk3

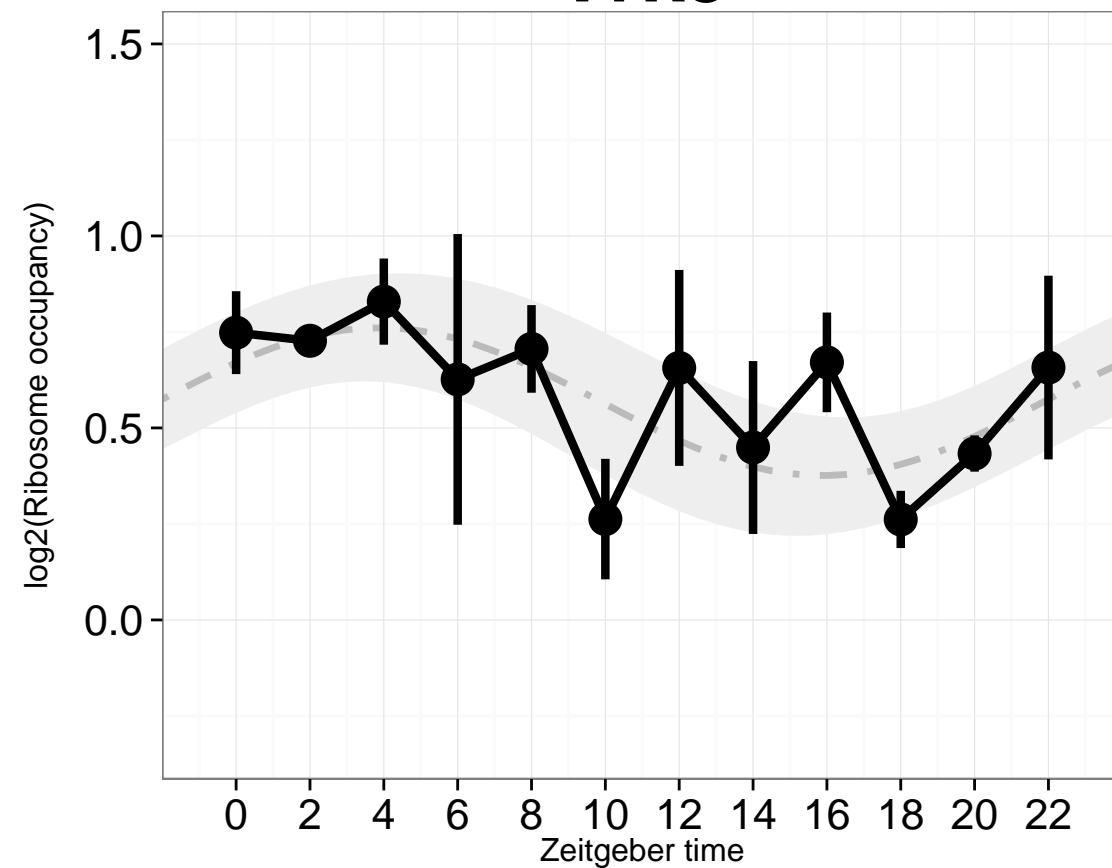

Supplement: SuppDataset_1.zip [file Vrk3_set_A.pdf › Supplemental Dataset 1/A-mRNA_nonrhyth_translation_nonrhyth/Vrk3_set_A.pdf]

## Vsig4

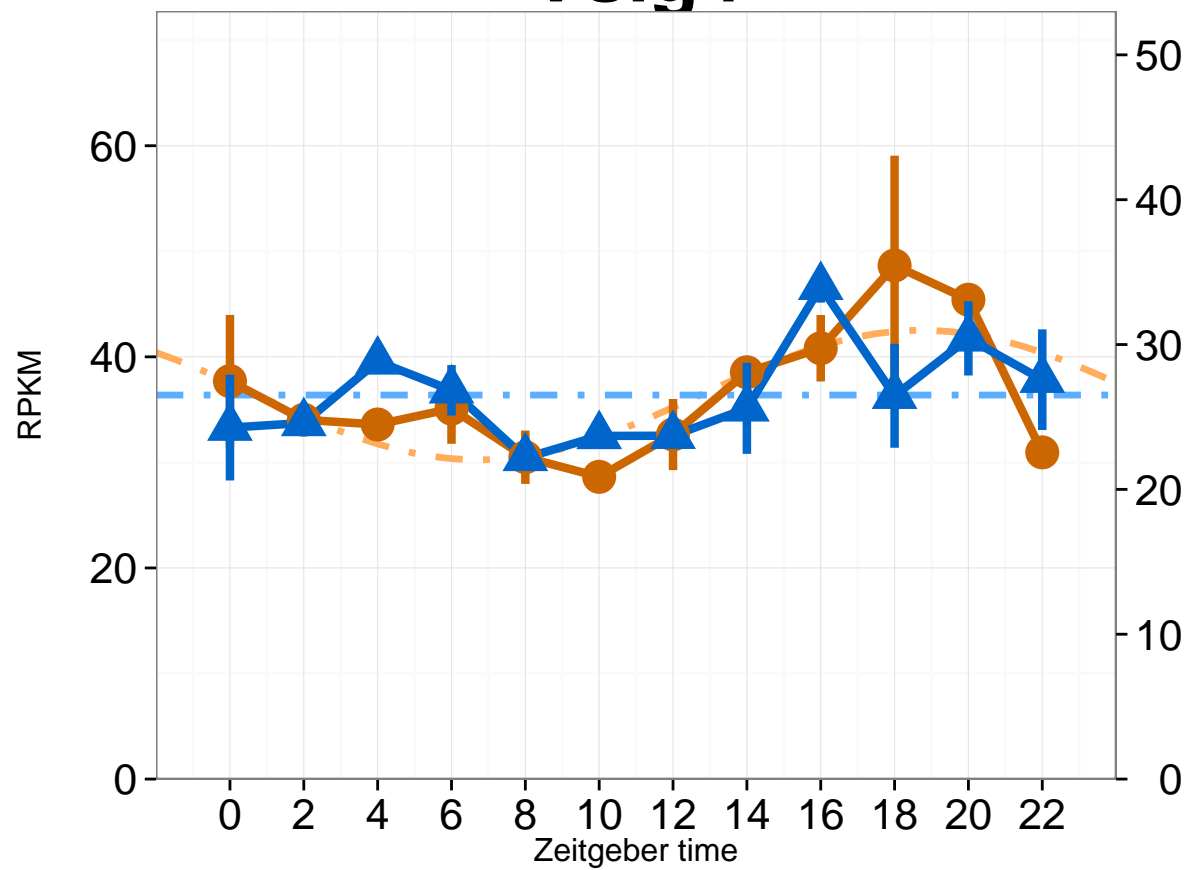

## Vsig4

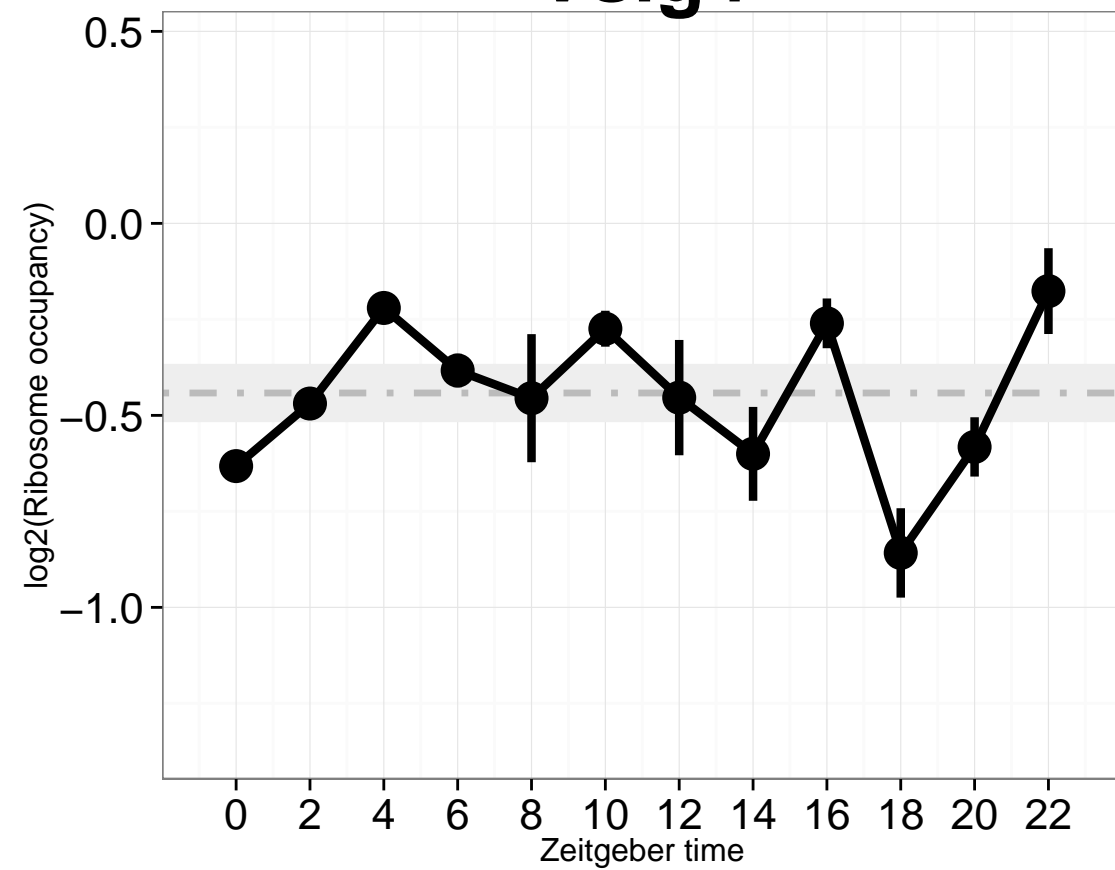

Supplement: SuppDataset_1.zip [file Vsig4_set_A.pdf › Supplemental Dataset 1/A-mRNA_nonrhyth_translation_nonrhyth/Vsig4_set_A.pdf]
