# Supplementary figures and images for: Ribosome profiling reveals the rhythmic liver translatome and circadian clock regulation by upstream open reading frames (part 82 of 113)
Source: HighWire-hosted journal article supplement (doi:10.1101/gr.195404.115), 2015-10-20

# Vstm4

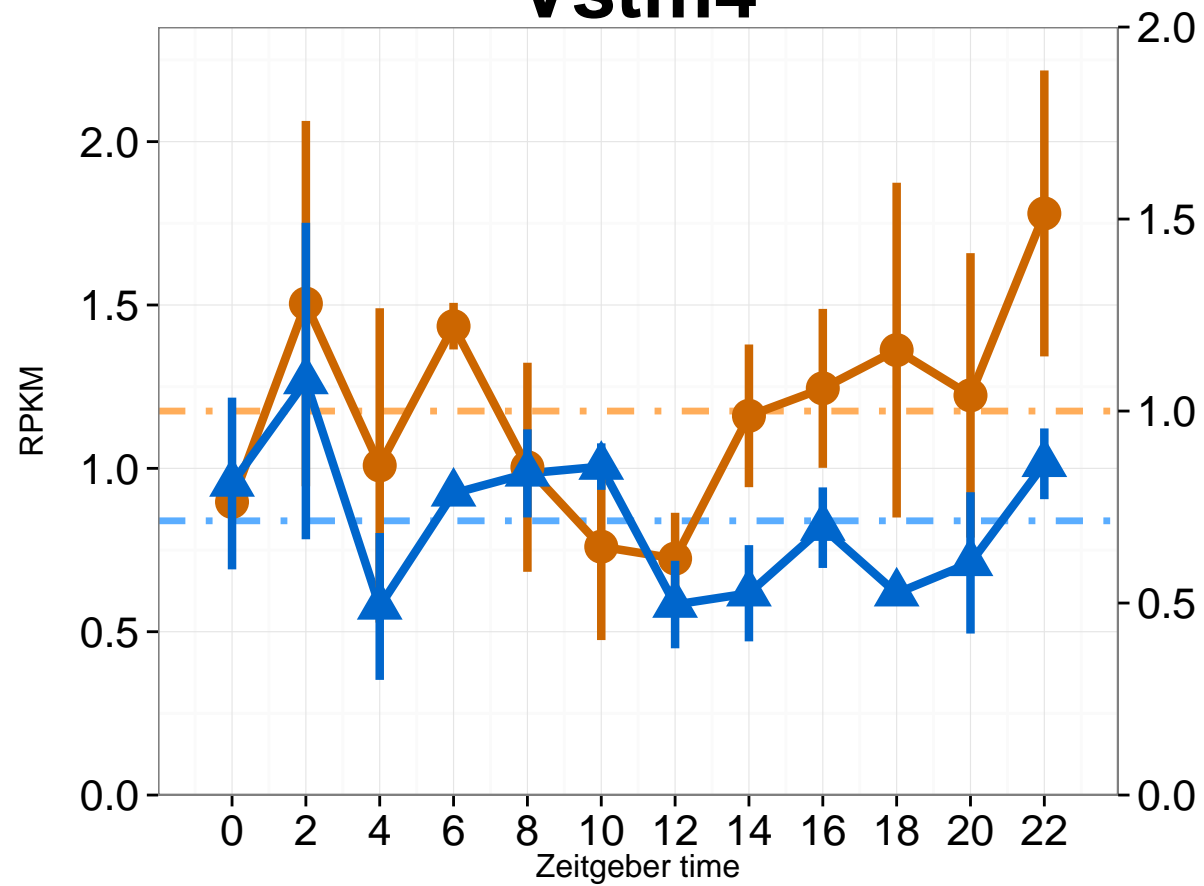

# Vstm4

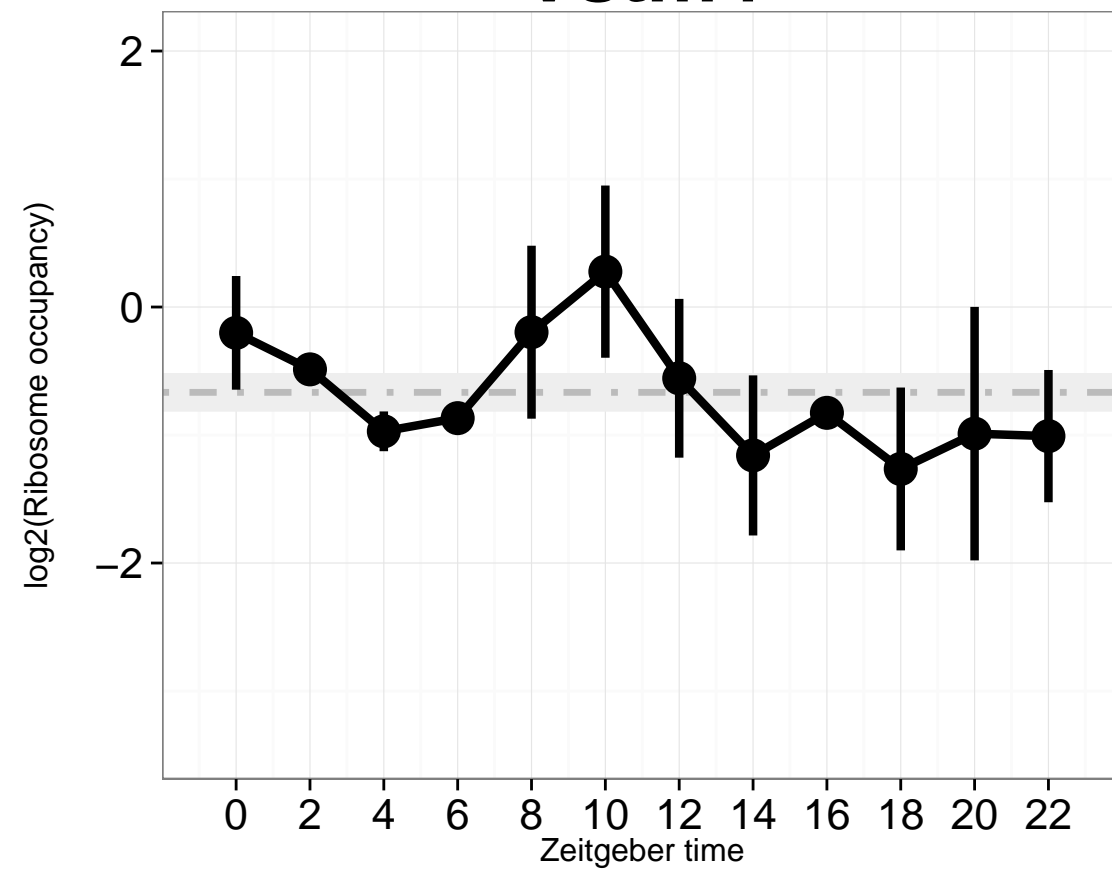

Supplement: SuppDataset_1.zip [file Vstm4_set_A.pdf › Supplemental Dataset 1/A-mRNA_nonrhyth_translation_nonrhyth/Vstm4_set_A.pdf]

## Vta1

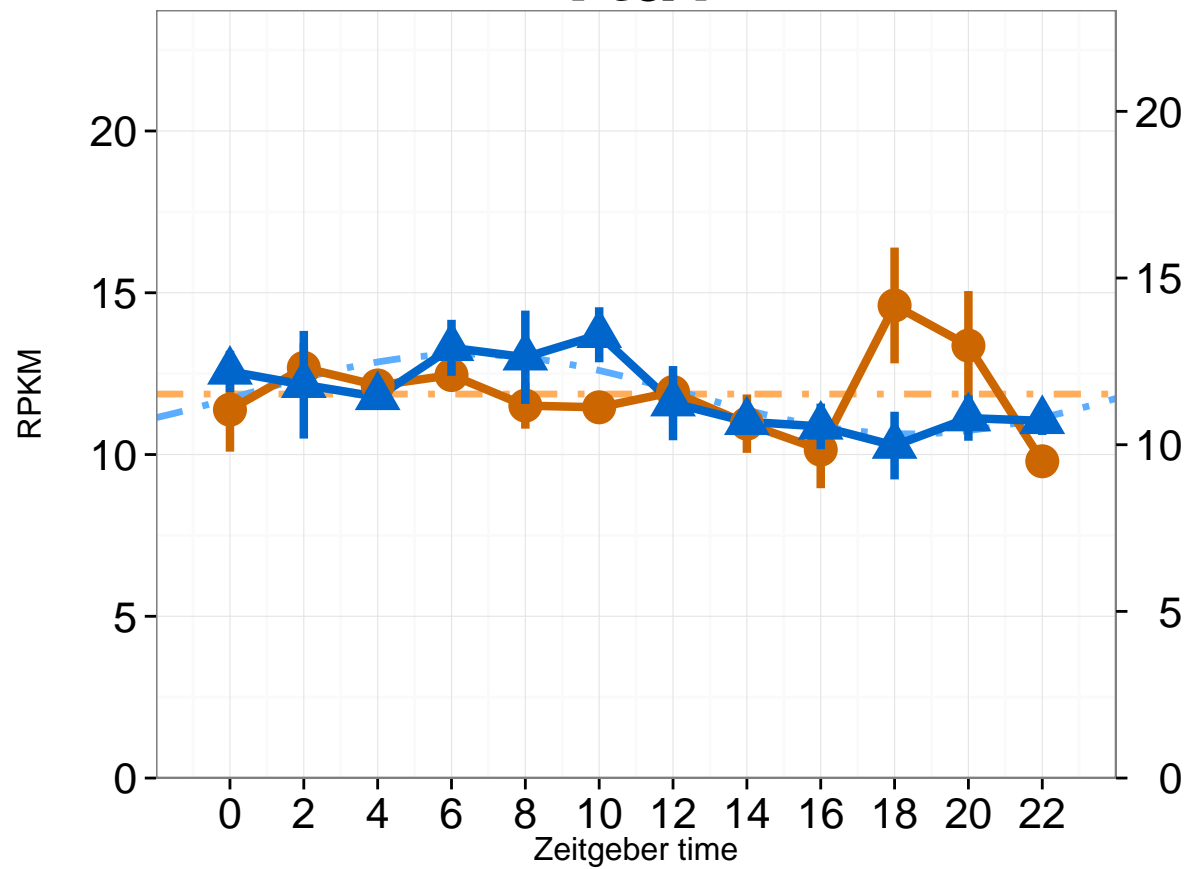

## Vta1

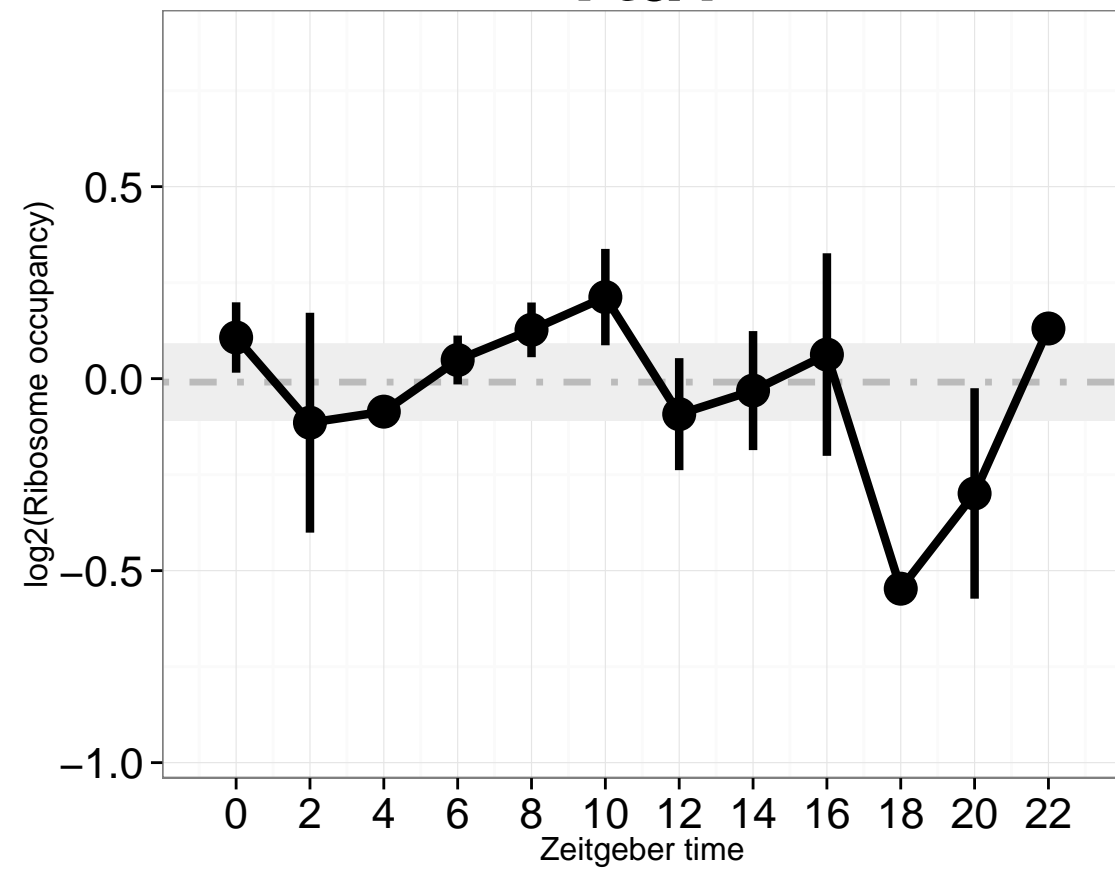

Supplement: SuppDataset_1.zip [file Vta1_set_A.pdf › Supplemental Dataset 1/A-mRNA_nonrhyth_translation_nonrhyth/Vta1_set_A.pdf]

# Vti1a

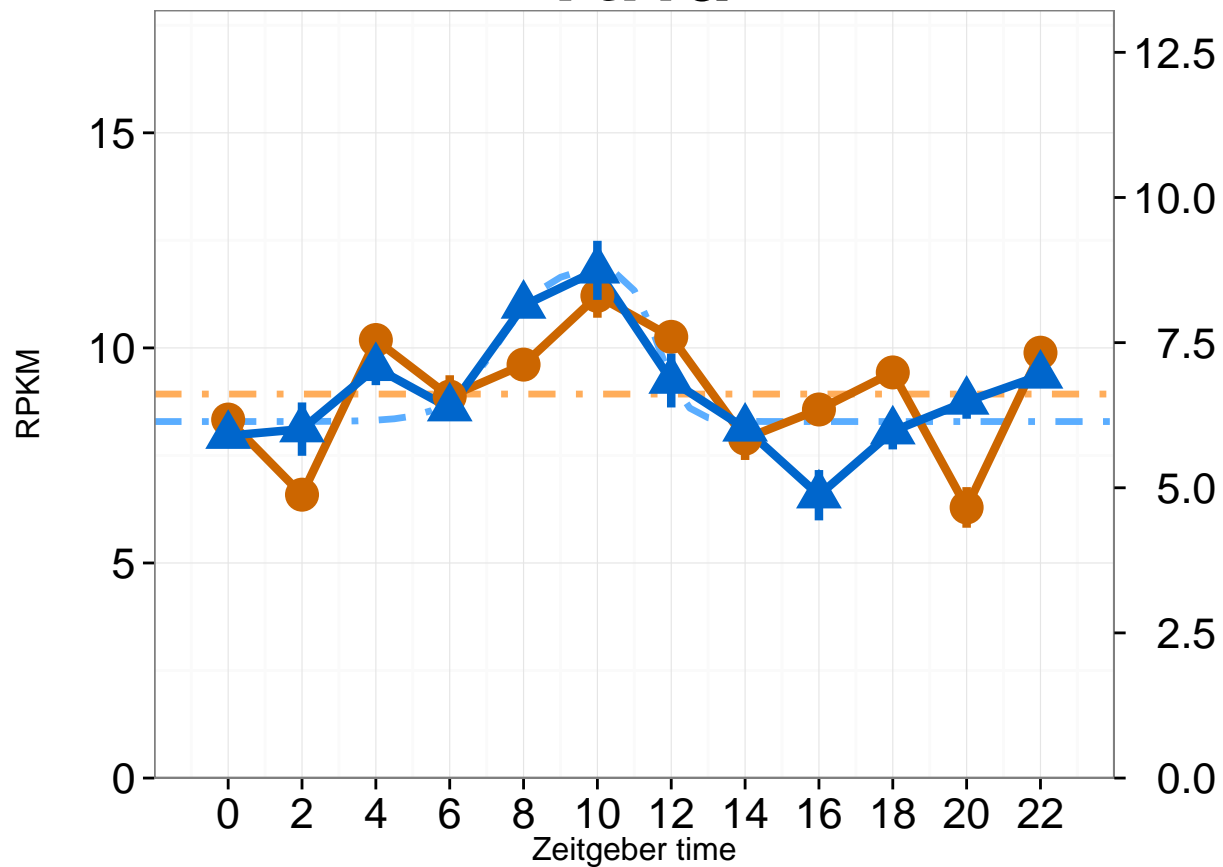

# Vti1a

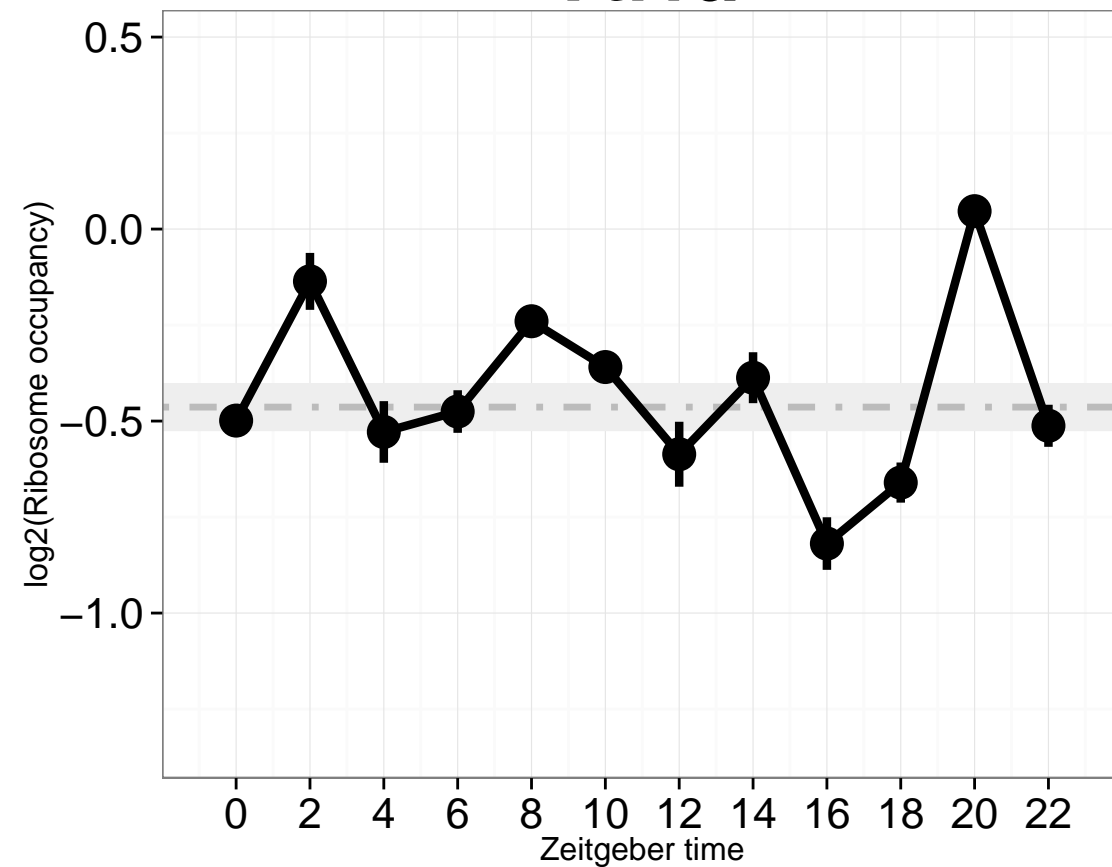

Supplement: SuppDataset_1.zip [file Vti1a_set_A.pdf › Supplemental Dataset 1/A-mRNA_nonrhyth_translation_nonrhyth/Vti1a_set_A.pdf]

## Vti1b

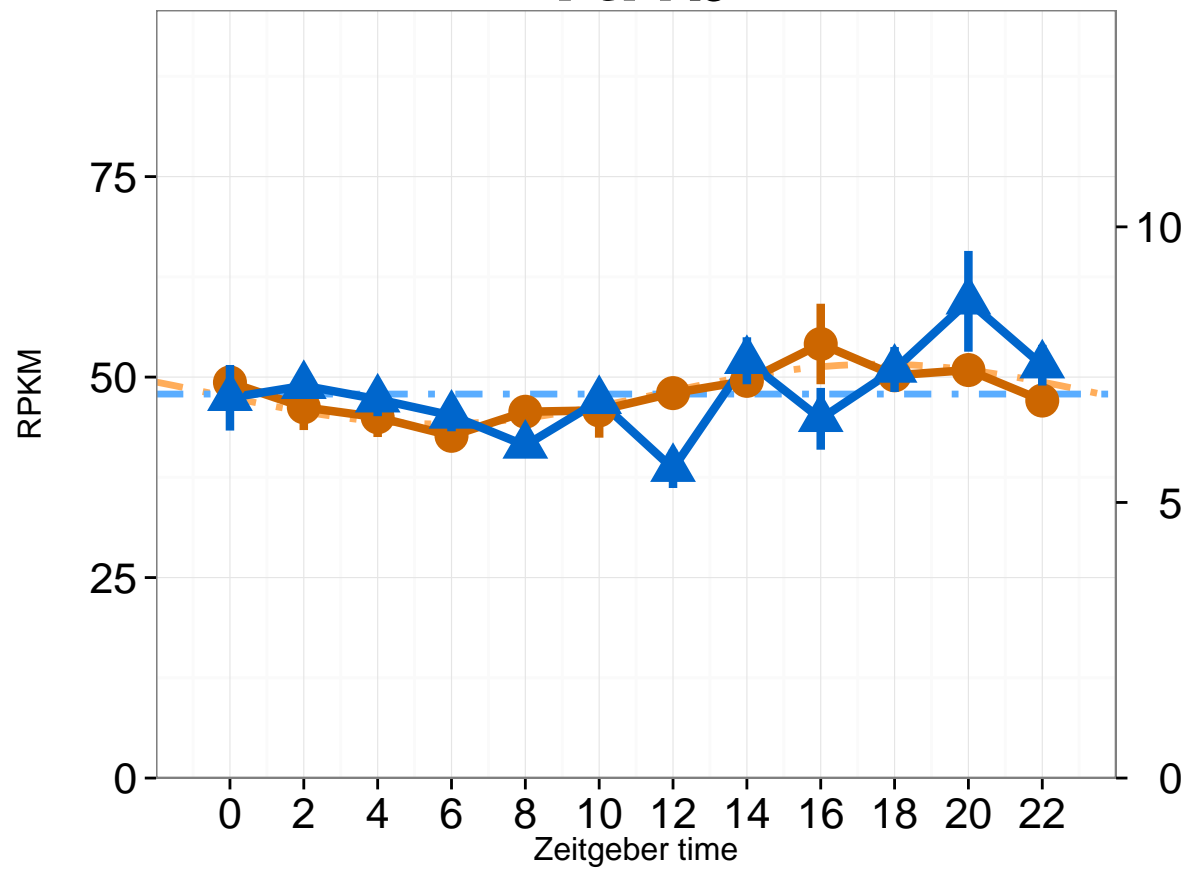

## Vti1b

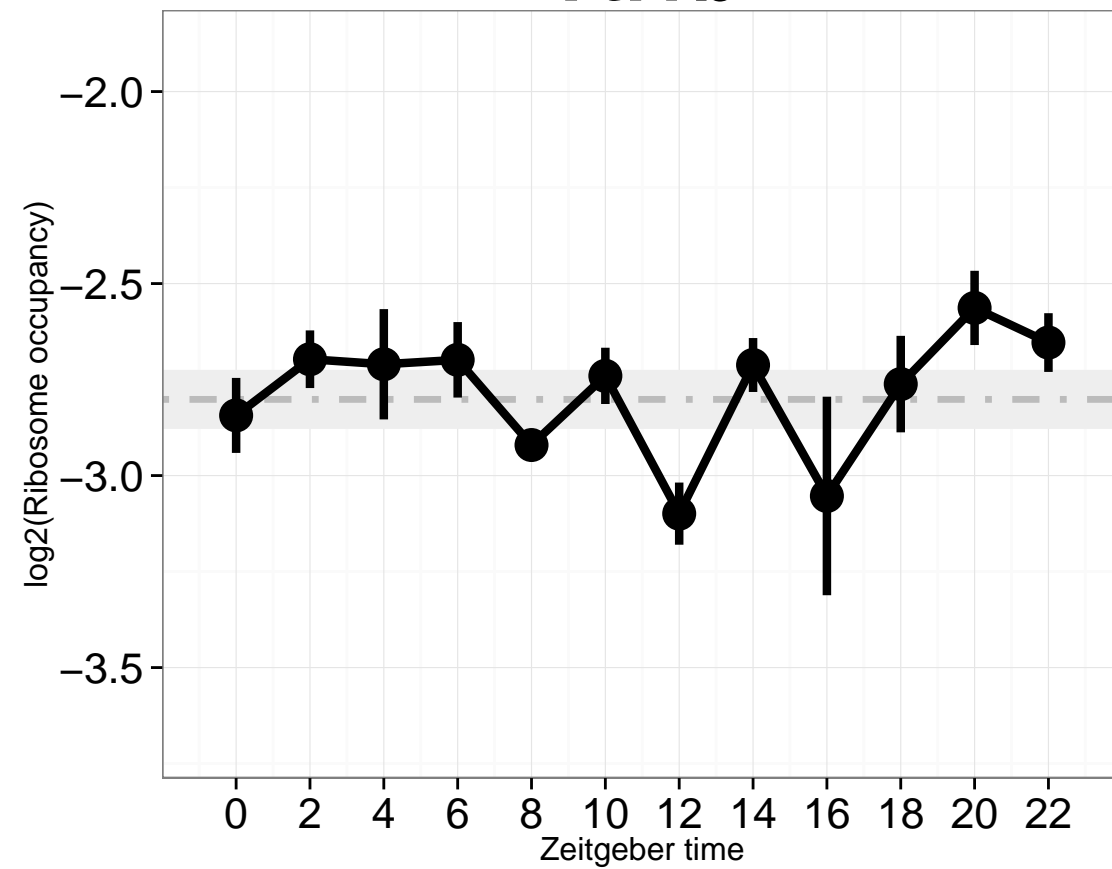

Supplement: SuppDataset_1.zip [file Vti1b_set_A.pdf › Supplemental Dataset 1/A-mRNA_nonrhyth_translation_nonrhyth/Vti1b_set_A.pdf]

**Vtn**

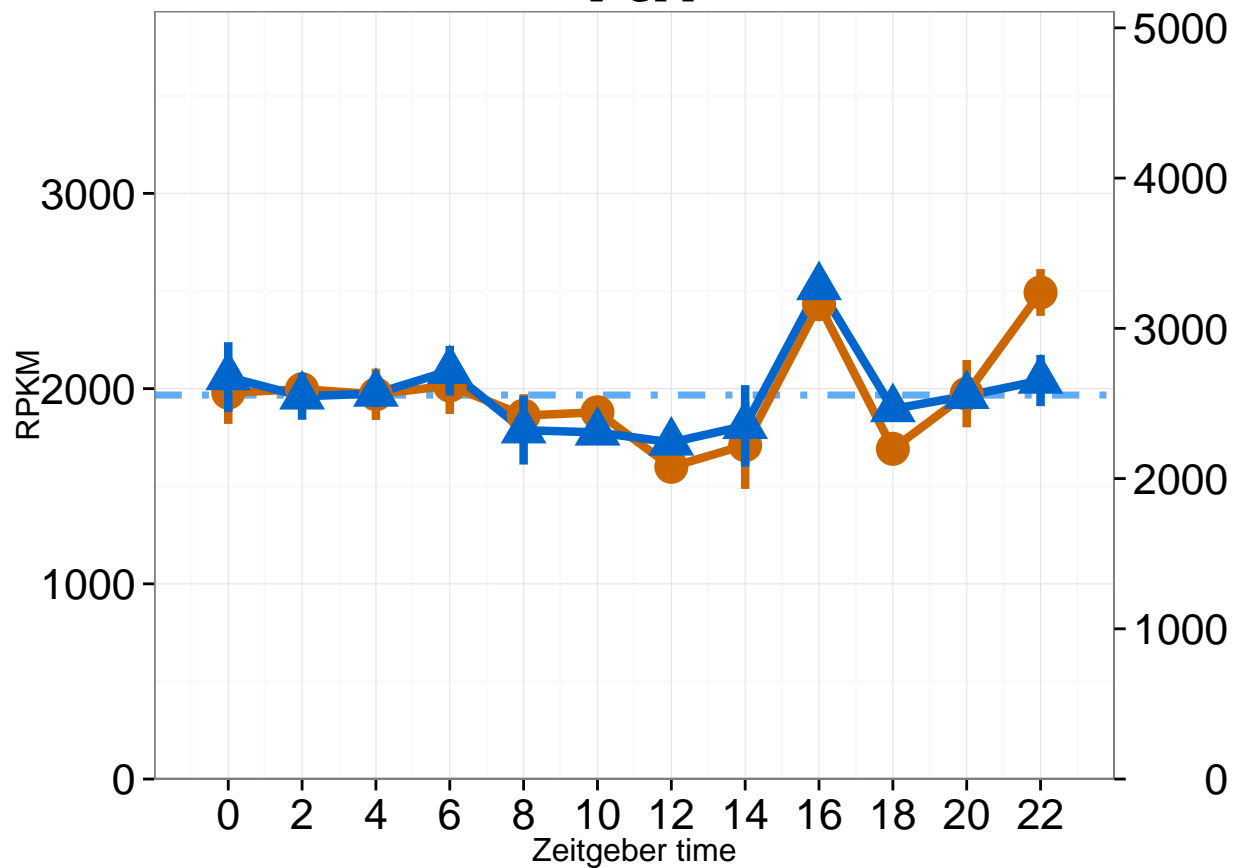

**Vtn**

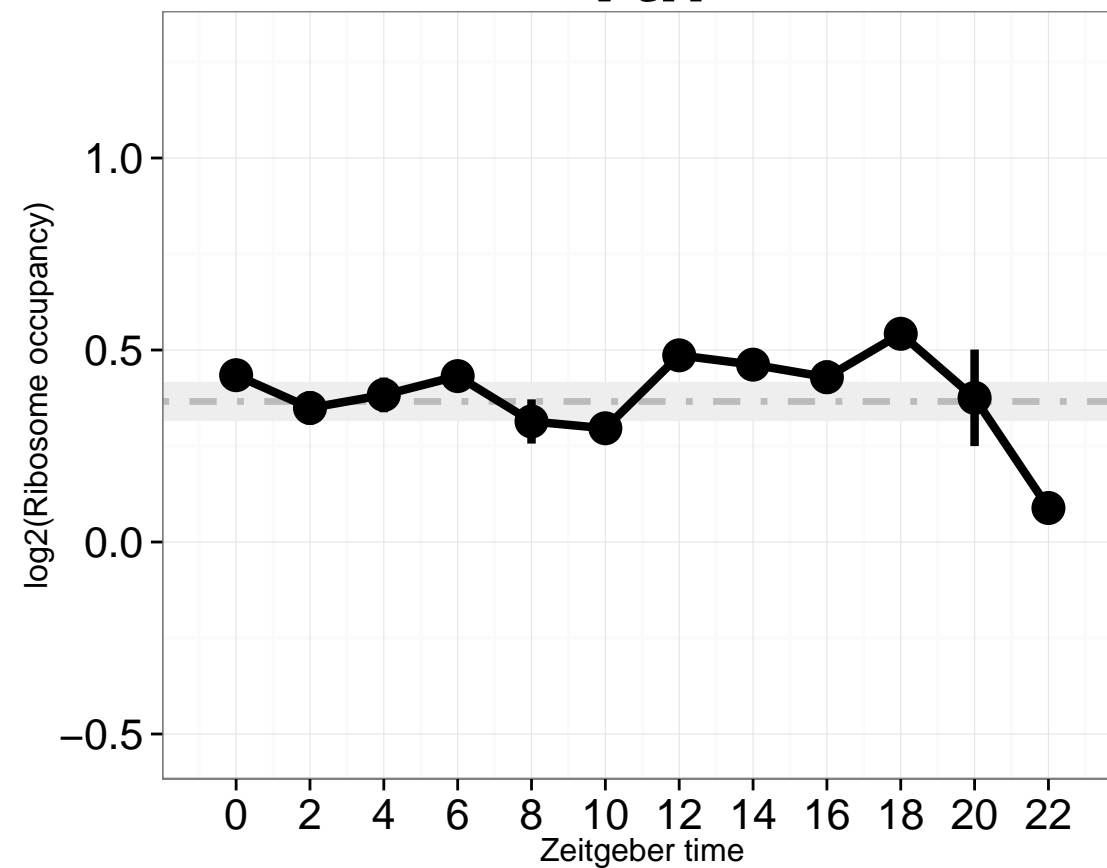

Supplement: SuppDataset_1.zip [file Vtn_set_A.pdf › Supplemental Dataset 1/A-mRNA_nonrhyth_translation_nonrhyth/Vtn_set_A.pdf]

## Vwa5a

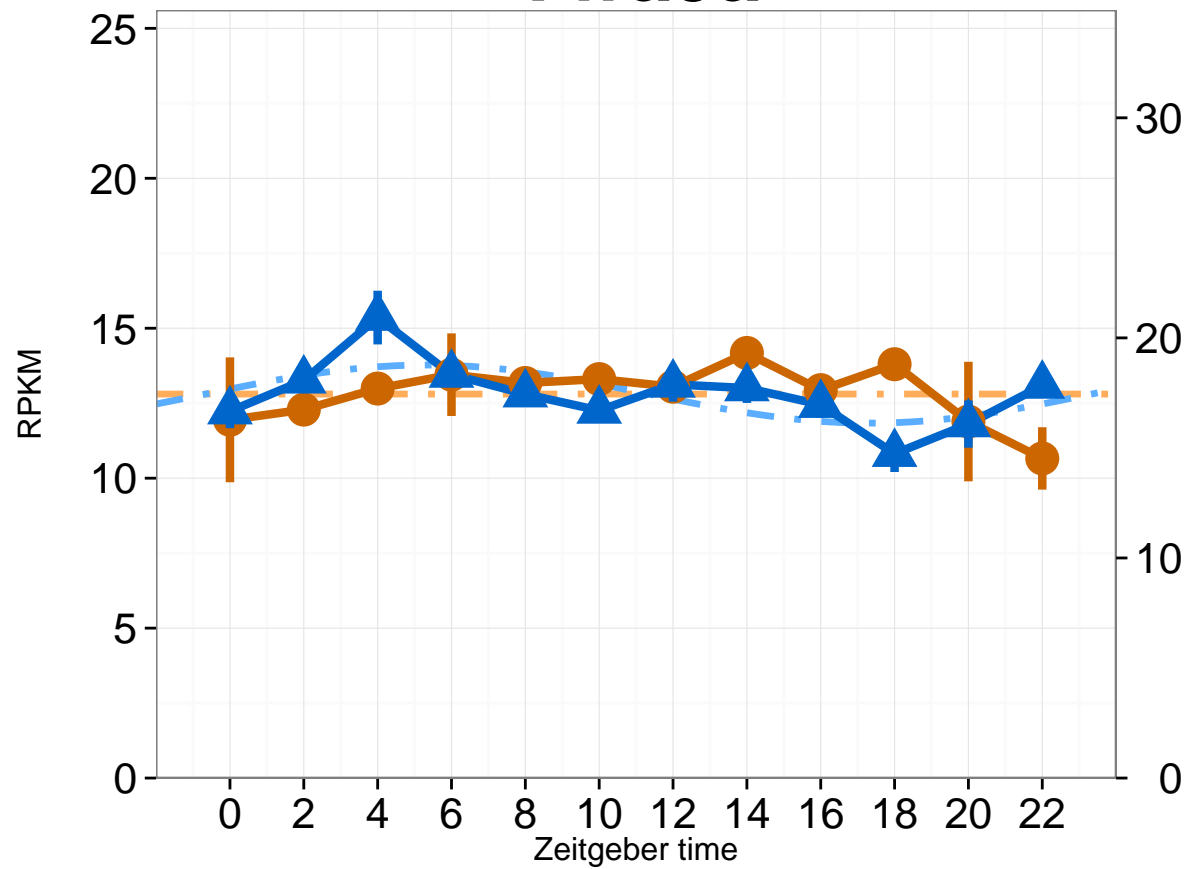

## Vwa5a

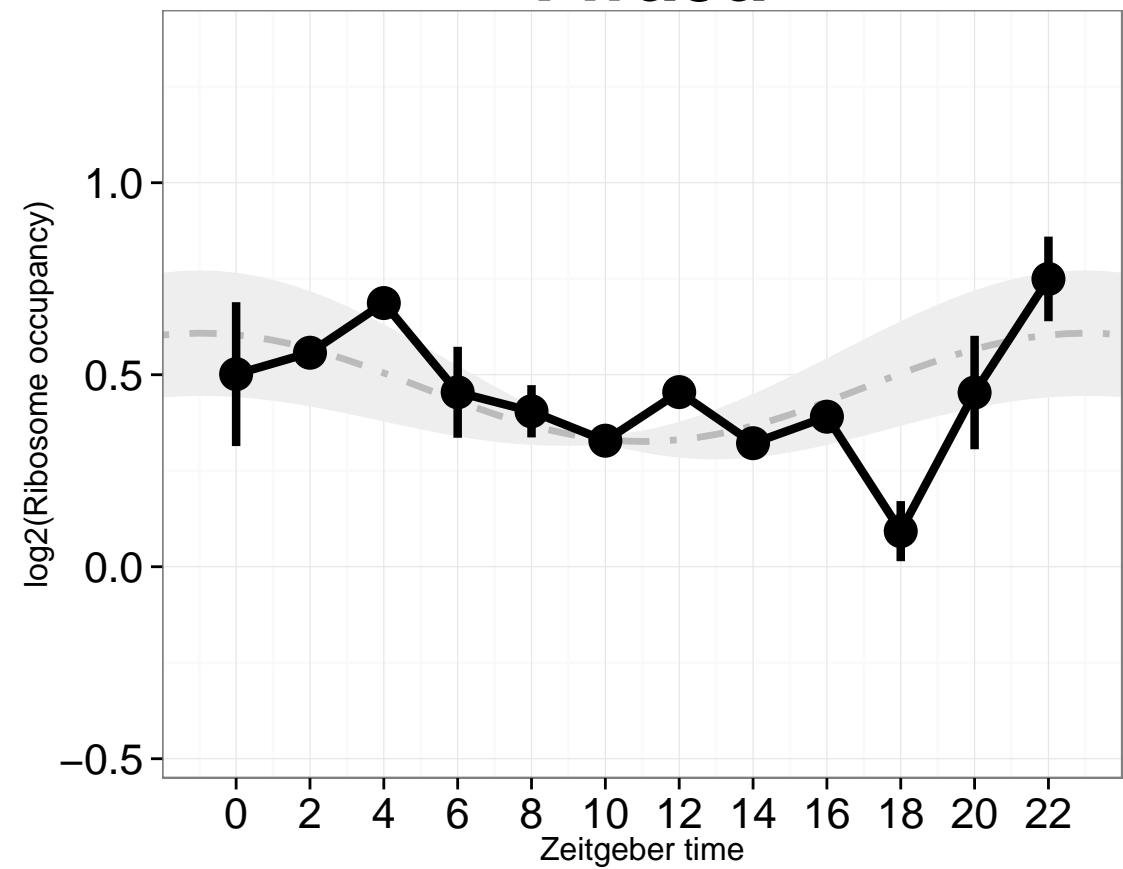

Supplement: SuppDataset_1.zip [file Vwa5a_set_A.pdf › Supplemental Dataset 1/A-mRNA_nonrhyth_translation_nonrhyth/Vwa5a_set_A.pdf]

## Vwa8

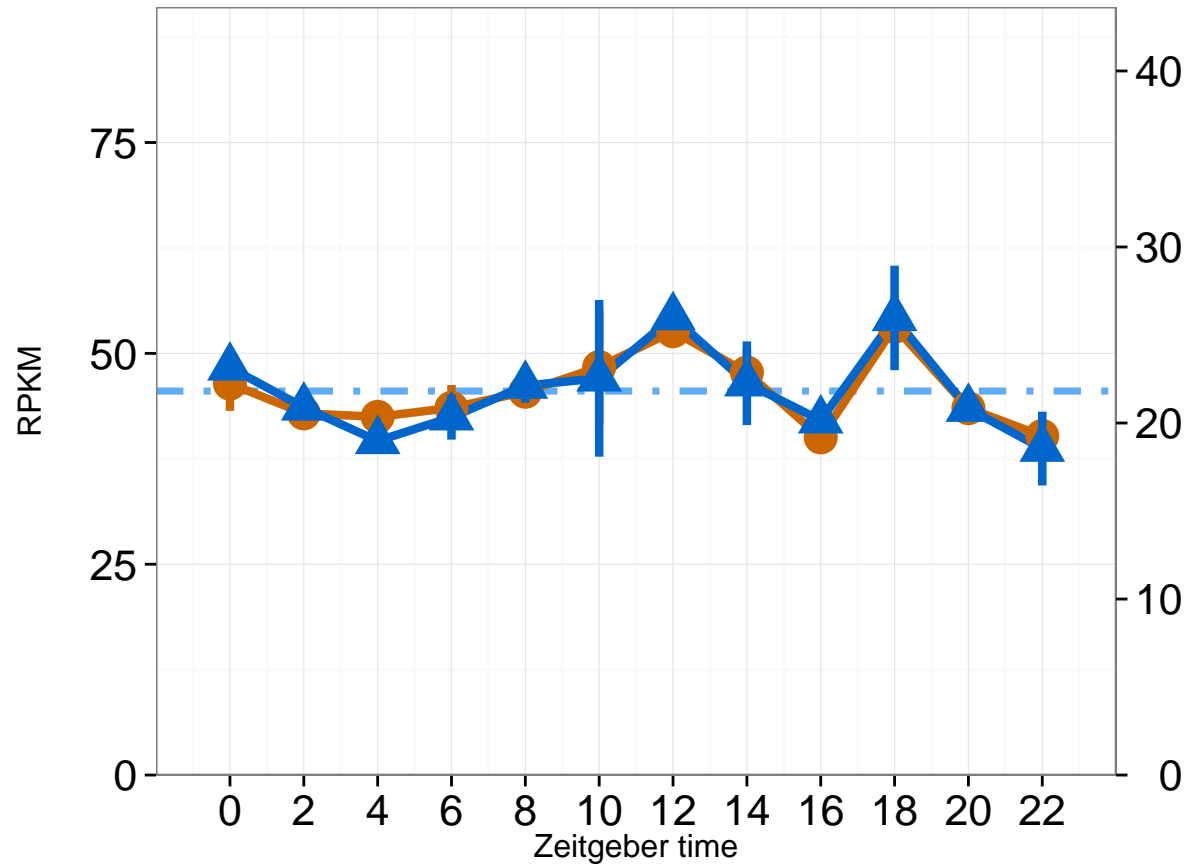

## Vwa8

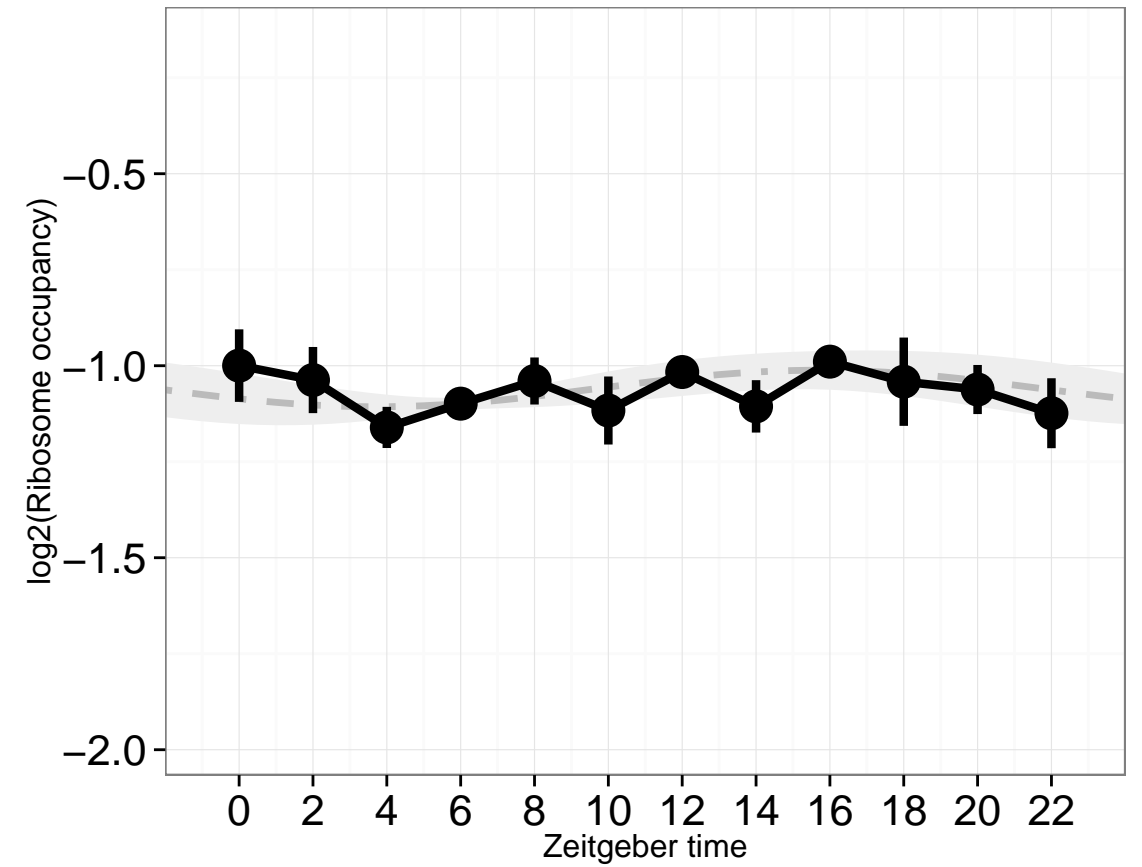

Supplement: SuppDataset_1.zip [file Vwa8_set_A.pdf › Supplemental Dataset 1/A-mRNA_nonrhyth_translation_nonrhyth/Vwa8_set_A.pdf]

# Vwa9

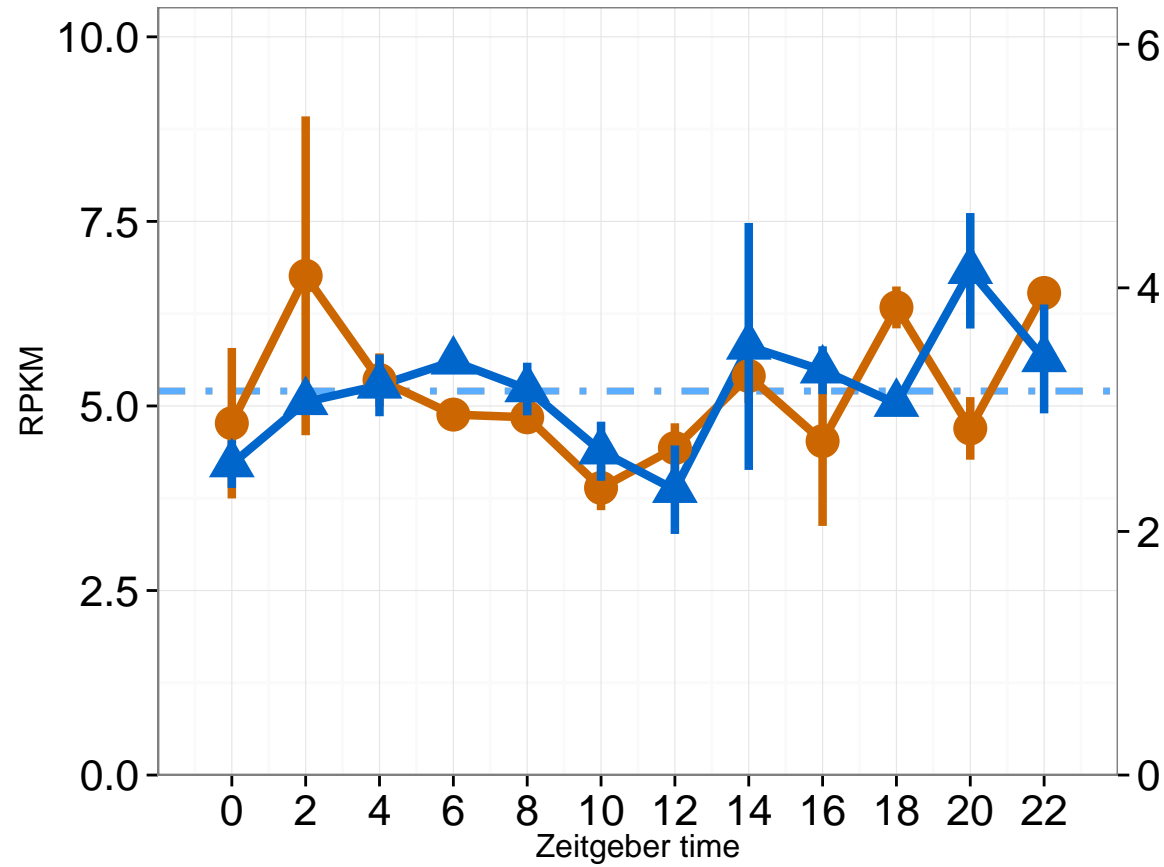

# Vwa9

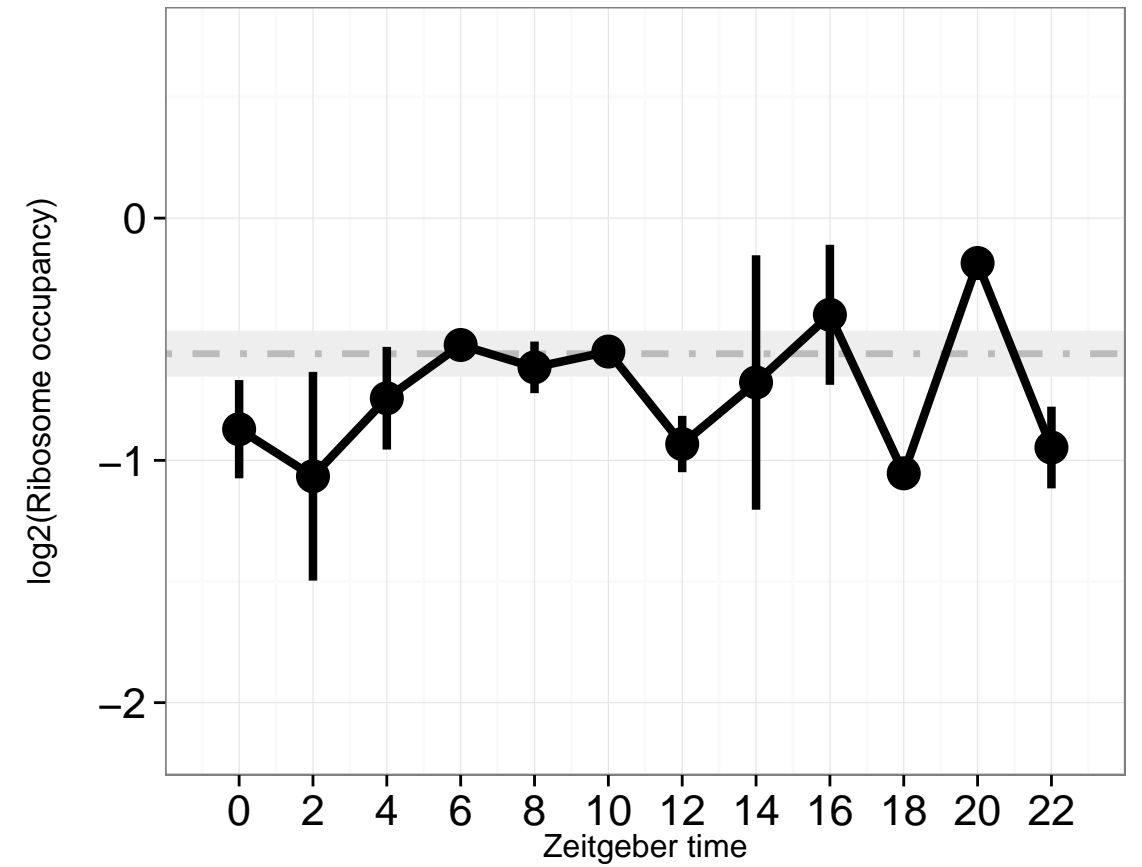

Supplement: SuppDataset_1.zip [file Vwa9_set_A.pdf › Supplemental Dataset 1/A-mRNA_nonrhyth_translation_nonrhyth/Vwa9_set_A.pdf]

## Vwce

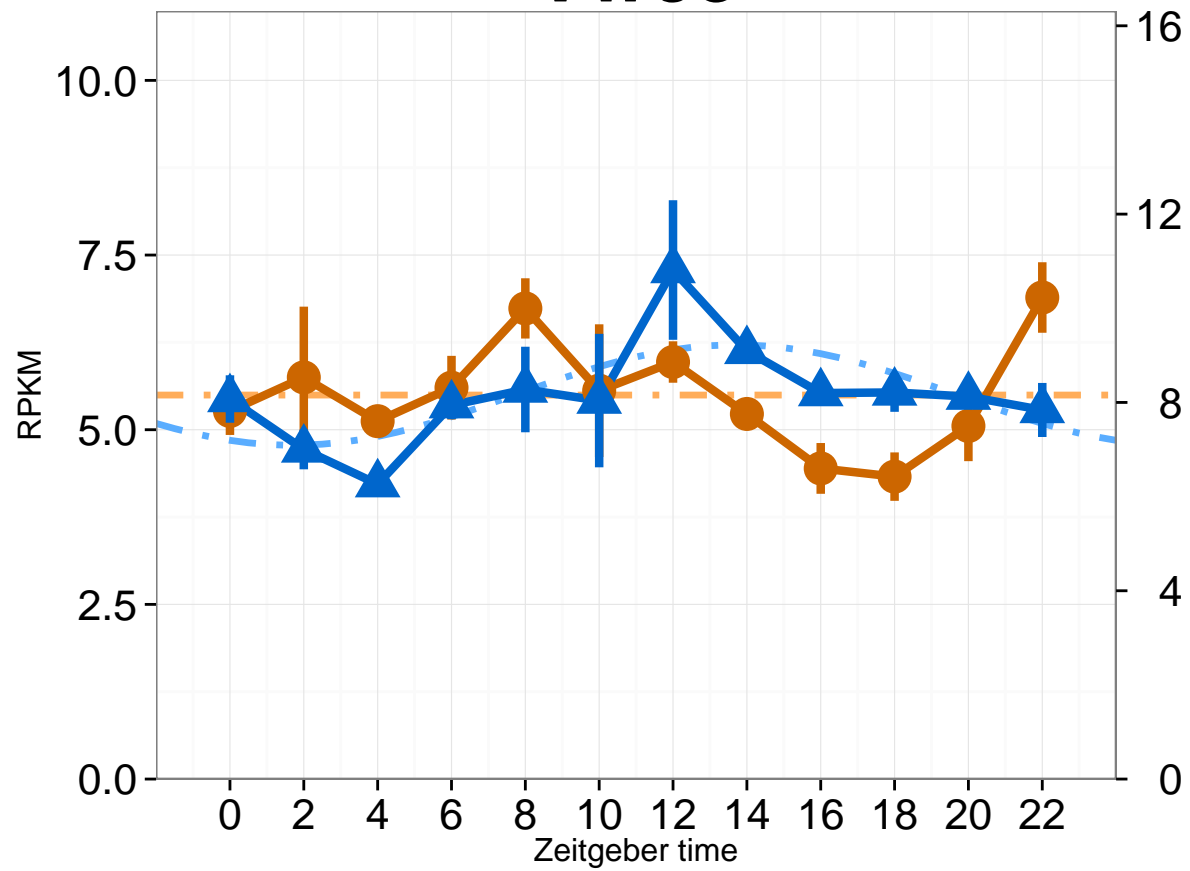

## Vwce

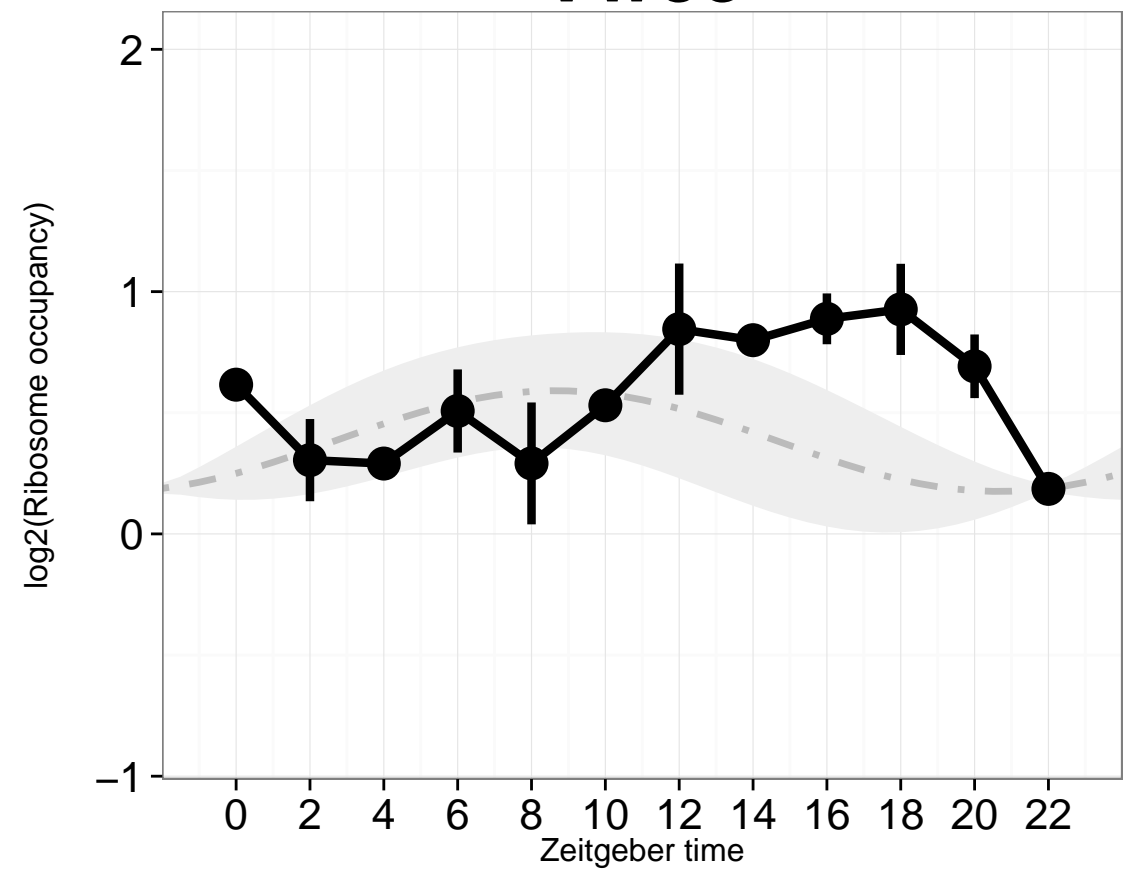

Supplement: SuppDataset_1.zip [file Vwce_set_A.pdf › Supplemental Dataset 1/A-mRNA_nonrhyth_translation_nonrhyth/Vwce_set_A.pdf]

## Vwf

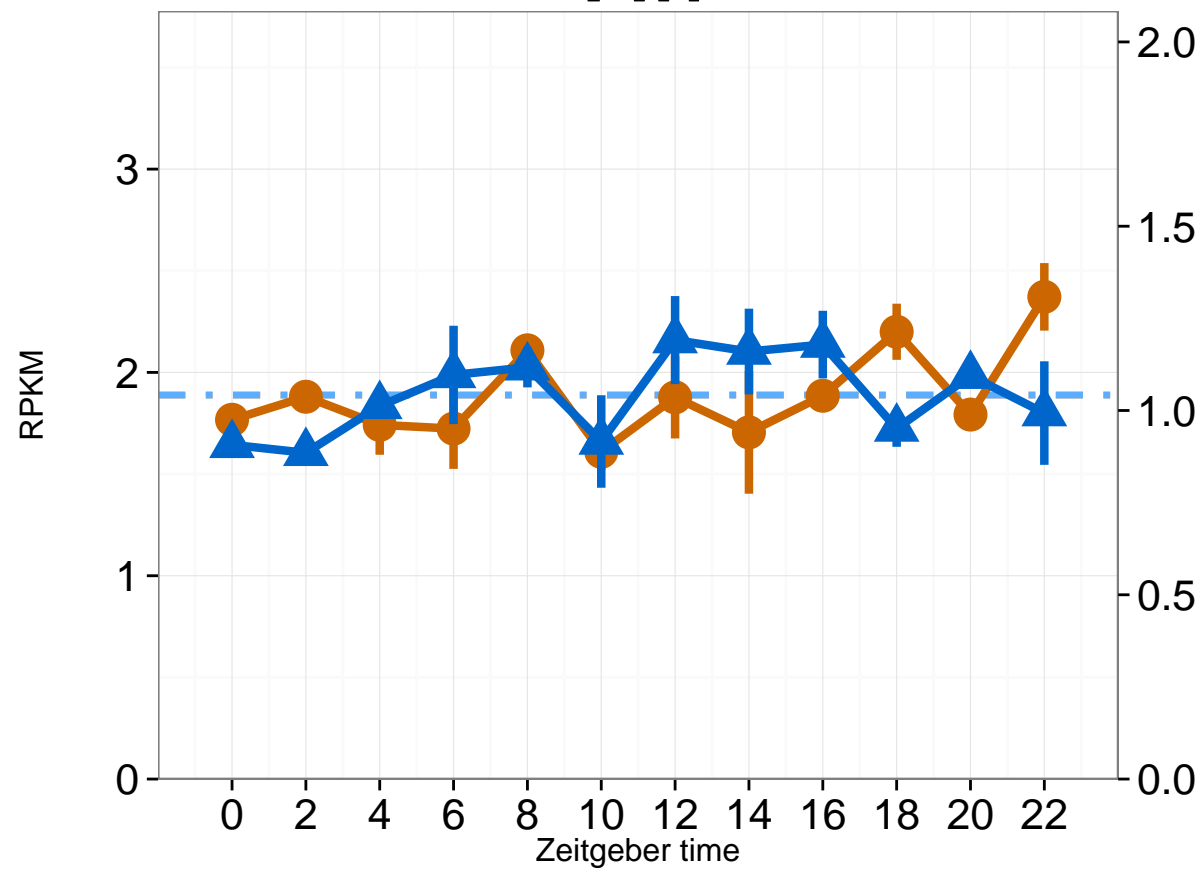

## Vwf

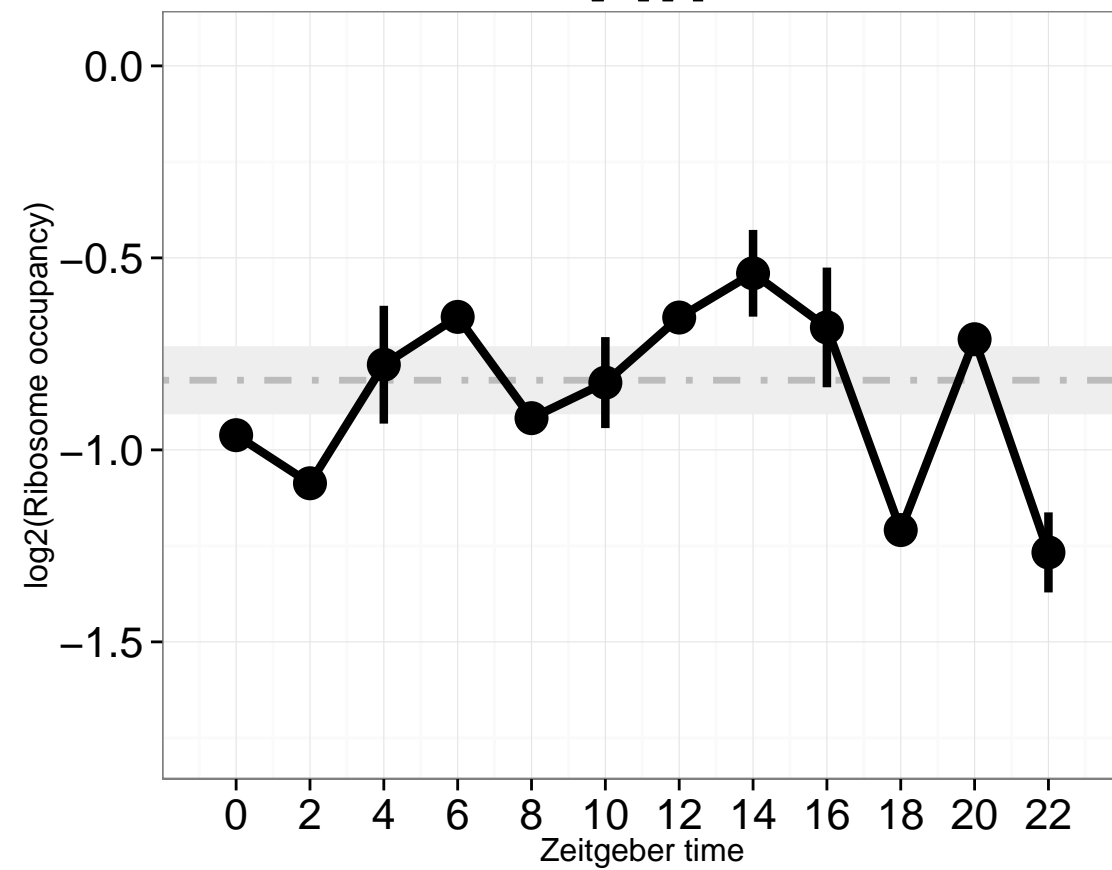

Supplement: SuppDataset_1.zip [file Vwf_set_A.pdf › Supplemental Dataset 1/A-mRNA_nonrhyth_translation_nonrhyth/Vwf_set_A.pdf]

## Wac

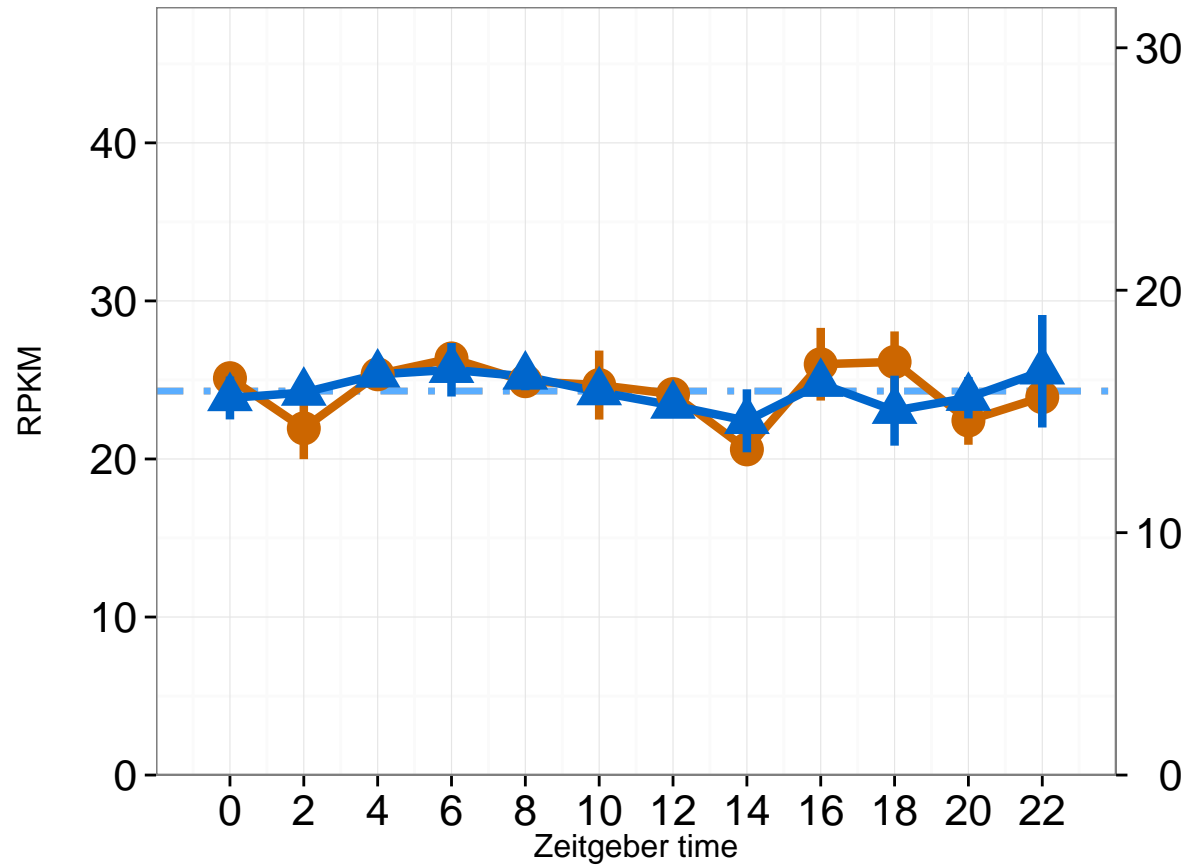

## Wac

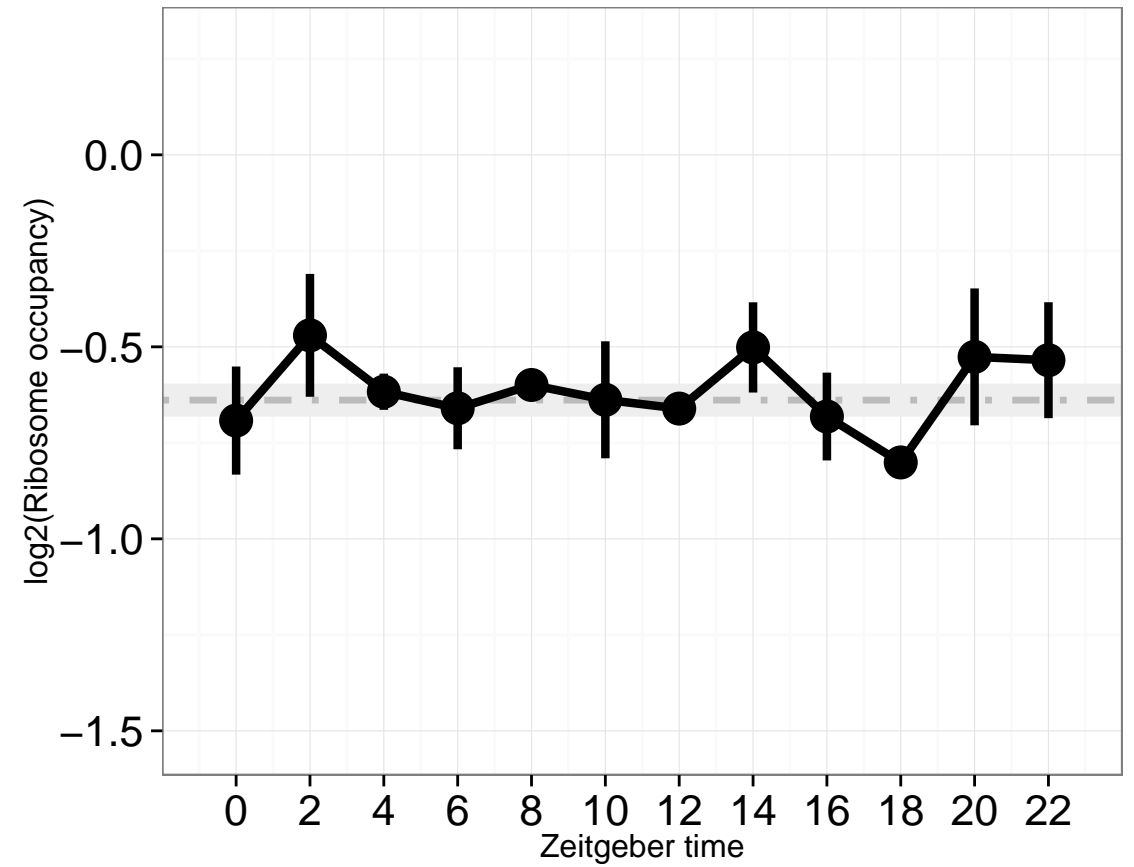

Supplement: SuppDataset_1.zip [file Wac_set_A.pdf › Supplemental Dataset 1/A-mRNA_nonrhyth_translation_nonrhyth/Wac_set_A.pdf]

## Wapal

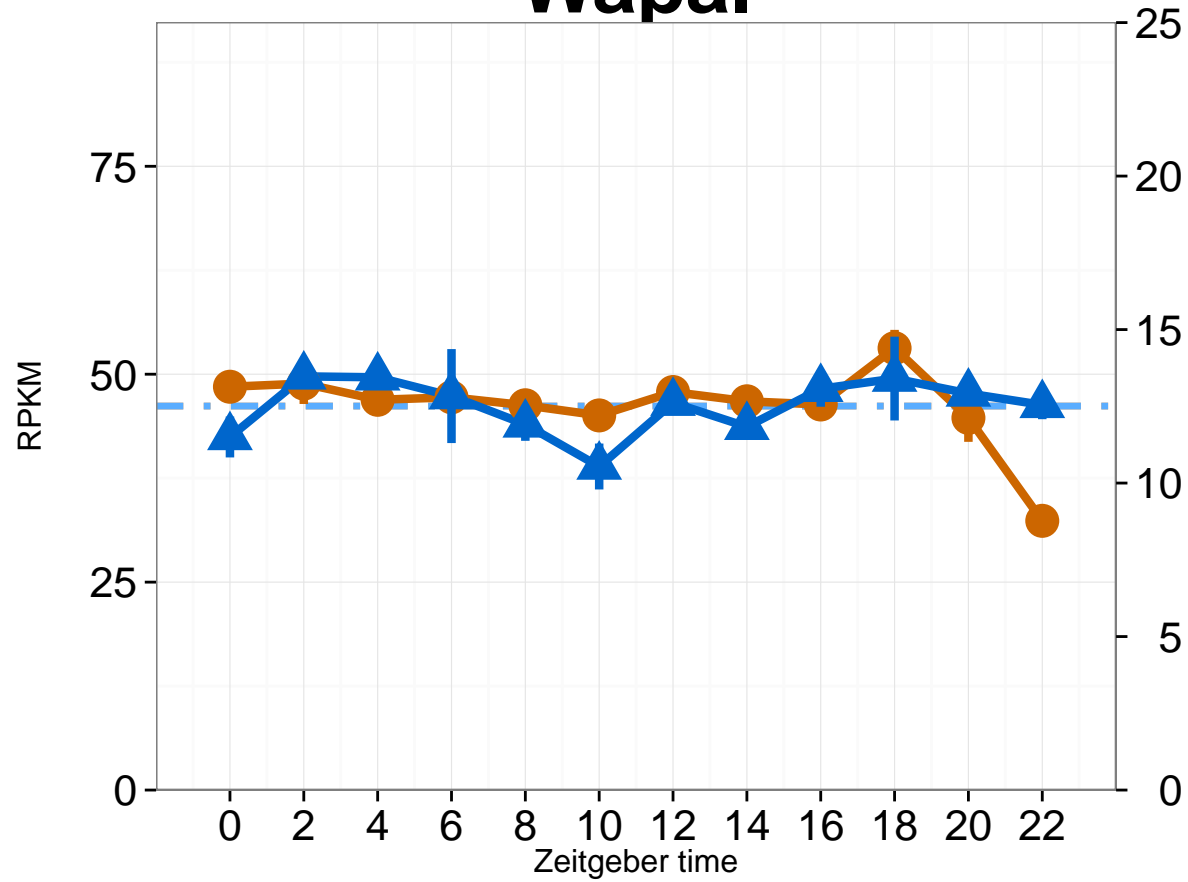

## Wapal

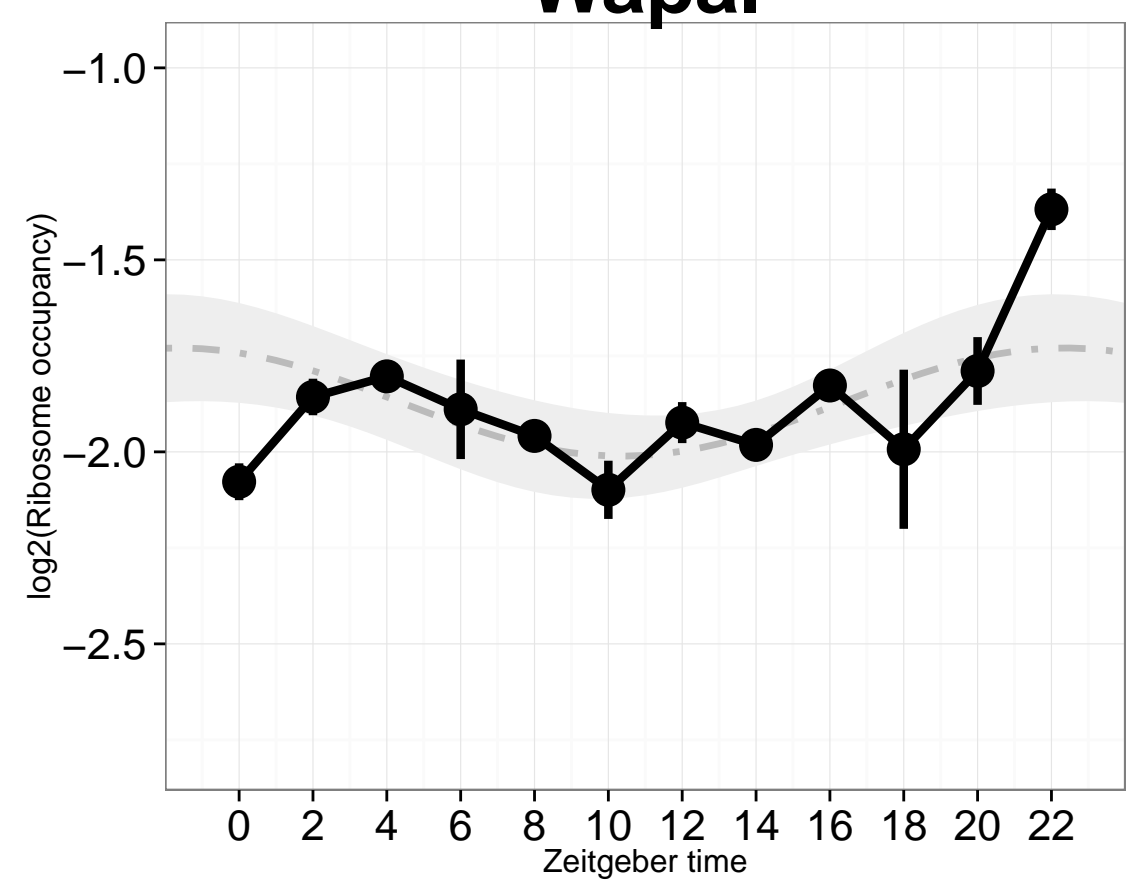

Supplement: SuppDataset_1.zip [file Wapal_set_A.pdf › Supplemental Dataset 1/A-mRNA_nonrhyth_translation_nonrhyth/Wapal_set_A.pdf]

# Wars2

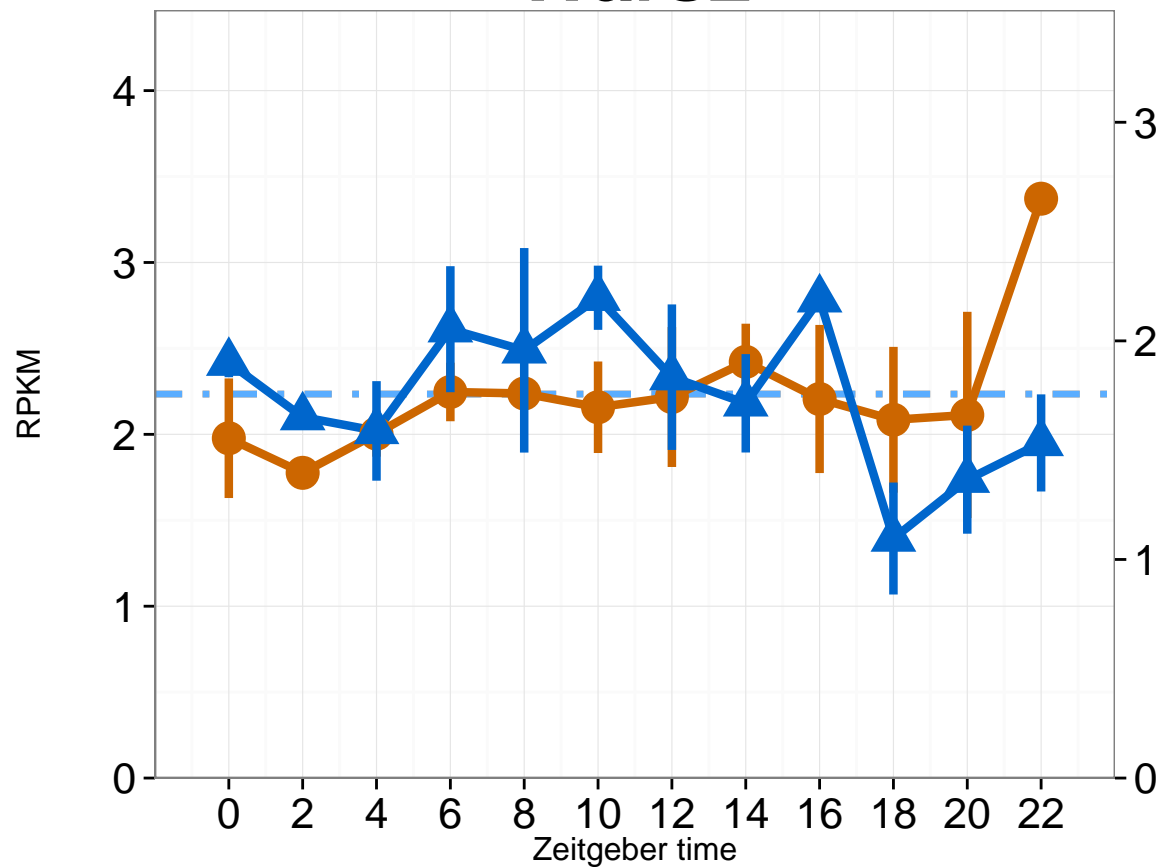

# Wars2

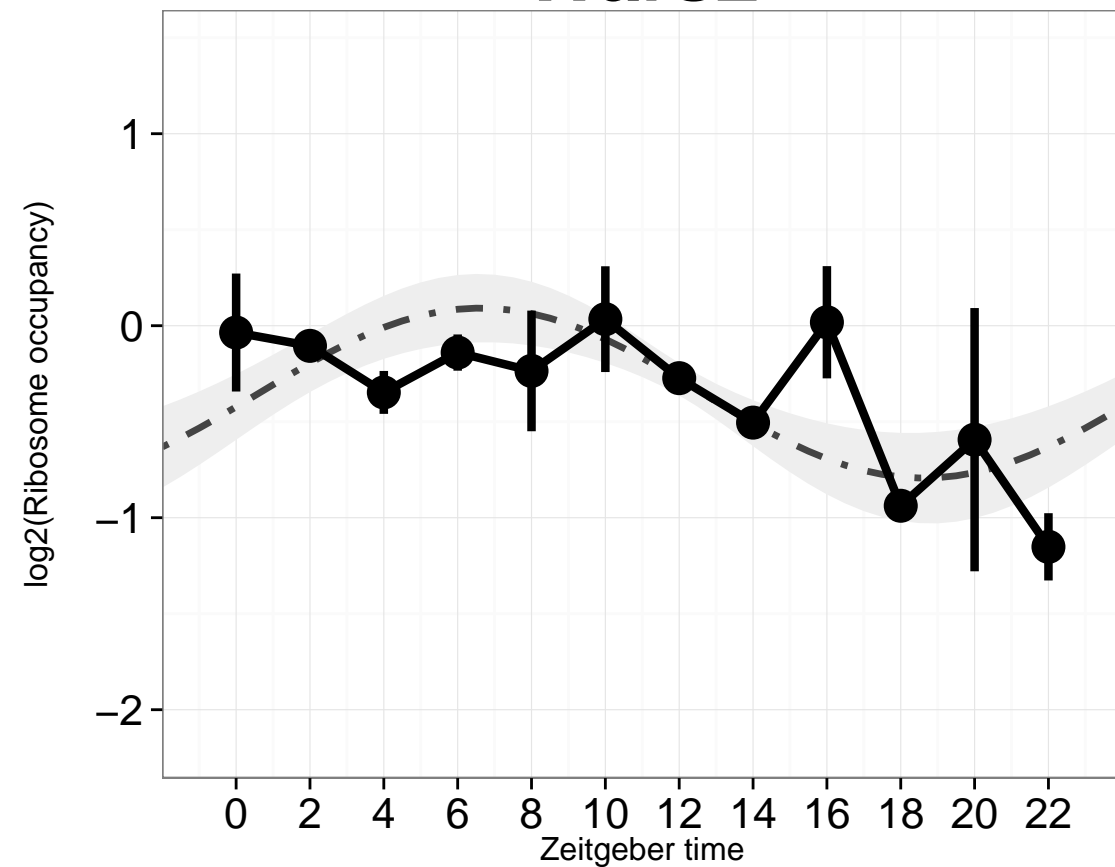

Supplement: SuppDataset_1.zip [file Wars2_set_A.pdf › Supplemental Dataset 1/A-mRNA_nonrhyth_translation_nonrhyth/Wars2_set_A.pdf]

## Wars

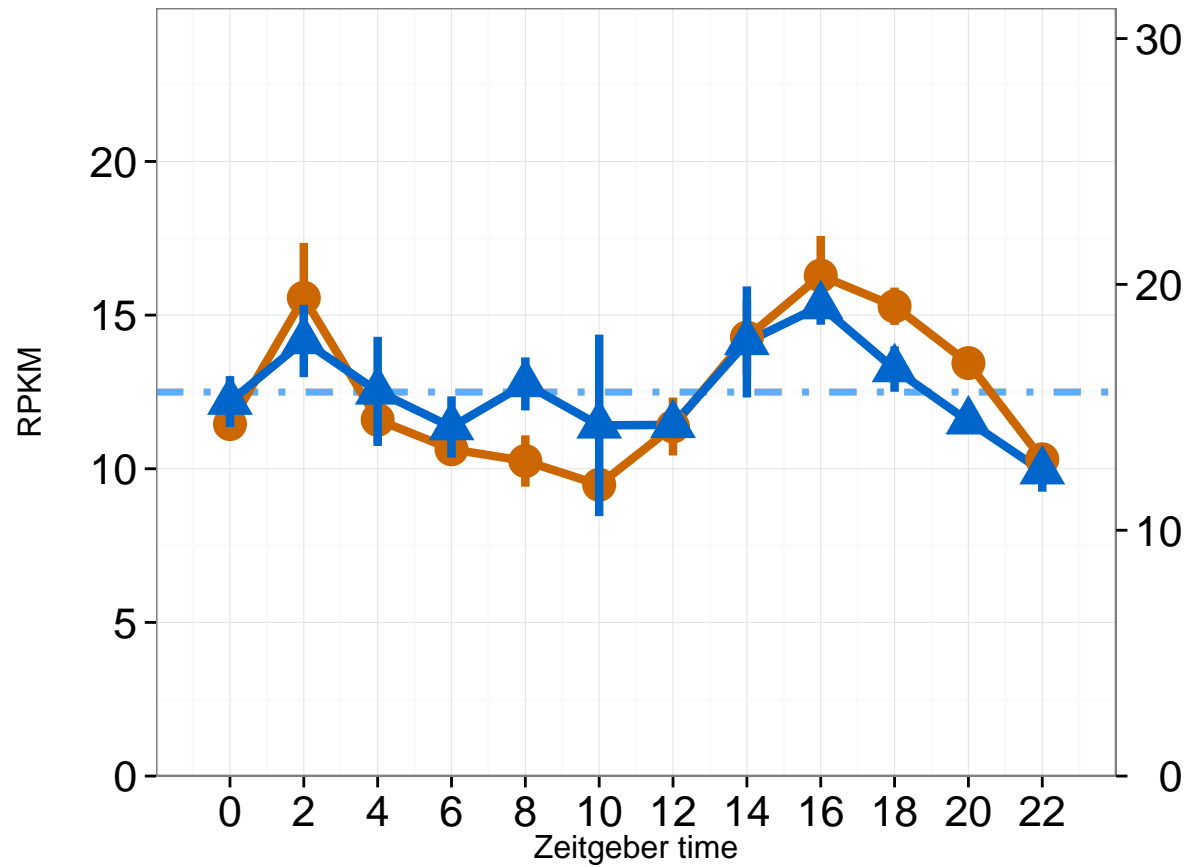

## Wars

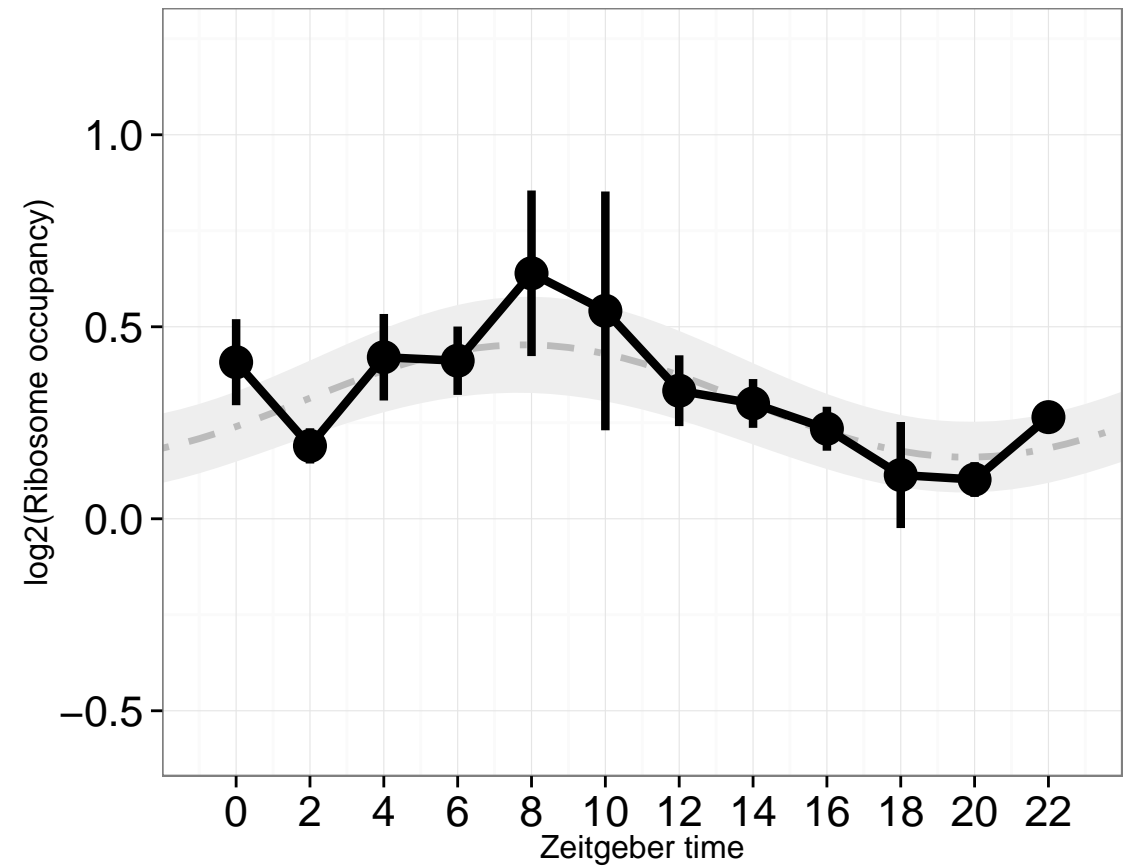

Supplement: SuppDataset_1.zip [file Wars_set_A.pdf › Supplemental Dataset 1/A-mRNA_nonrhyth_translation_nonrhyth/Wars_set_A.pdf]

# Was

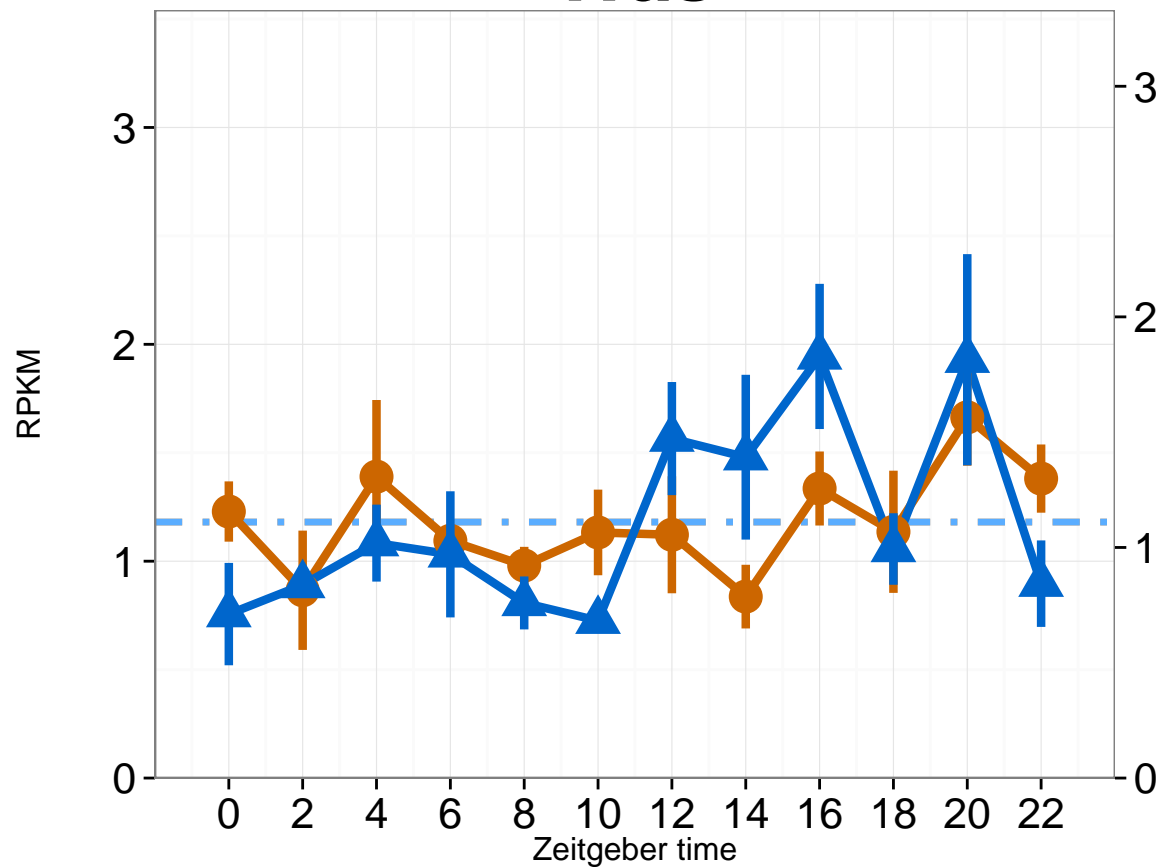

# Was

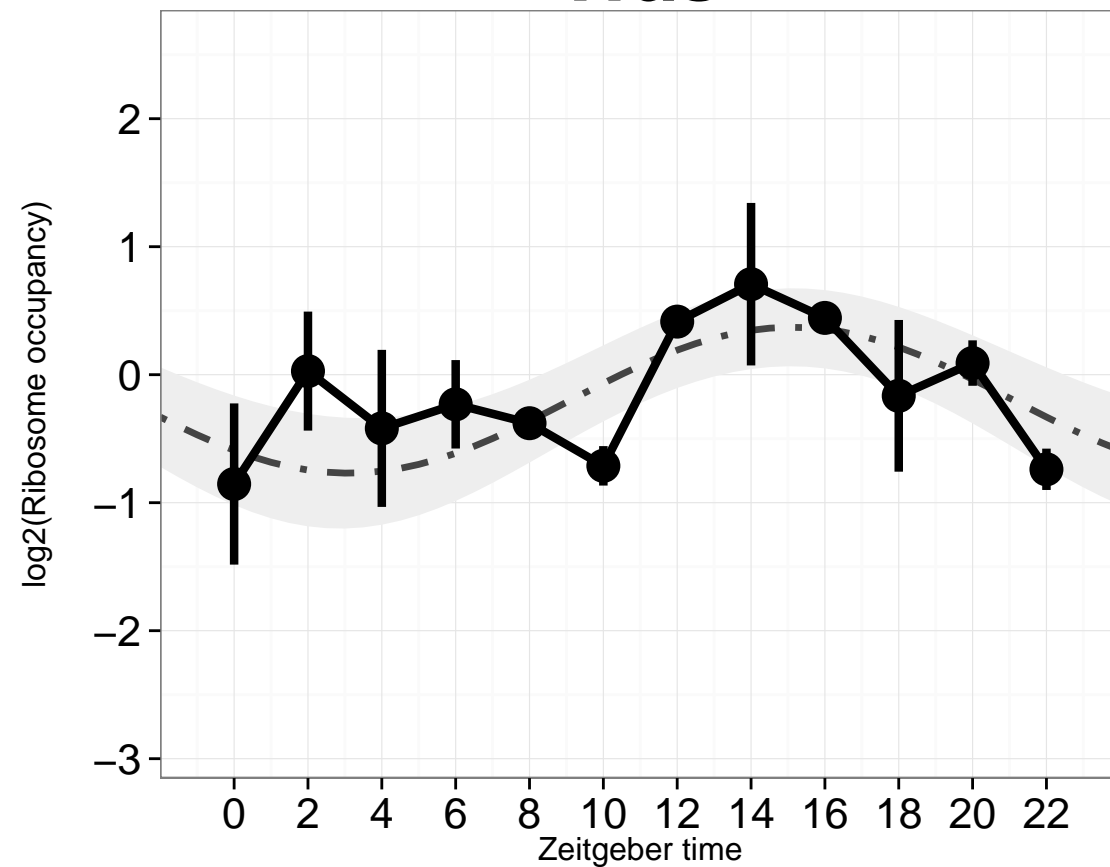

Supplement: SuppDataset_1.zip [file Was_set_A.pdf › Supplemental Dataset 1/A-mRNA_nonrhyth_translation_nonrhyth/Was_set_A.pdf]

## Wasf2

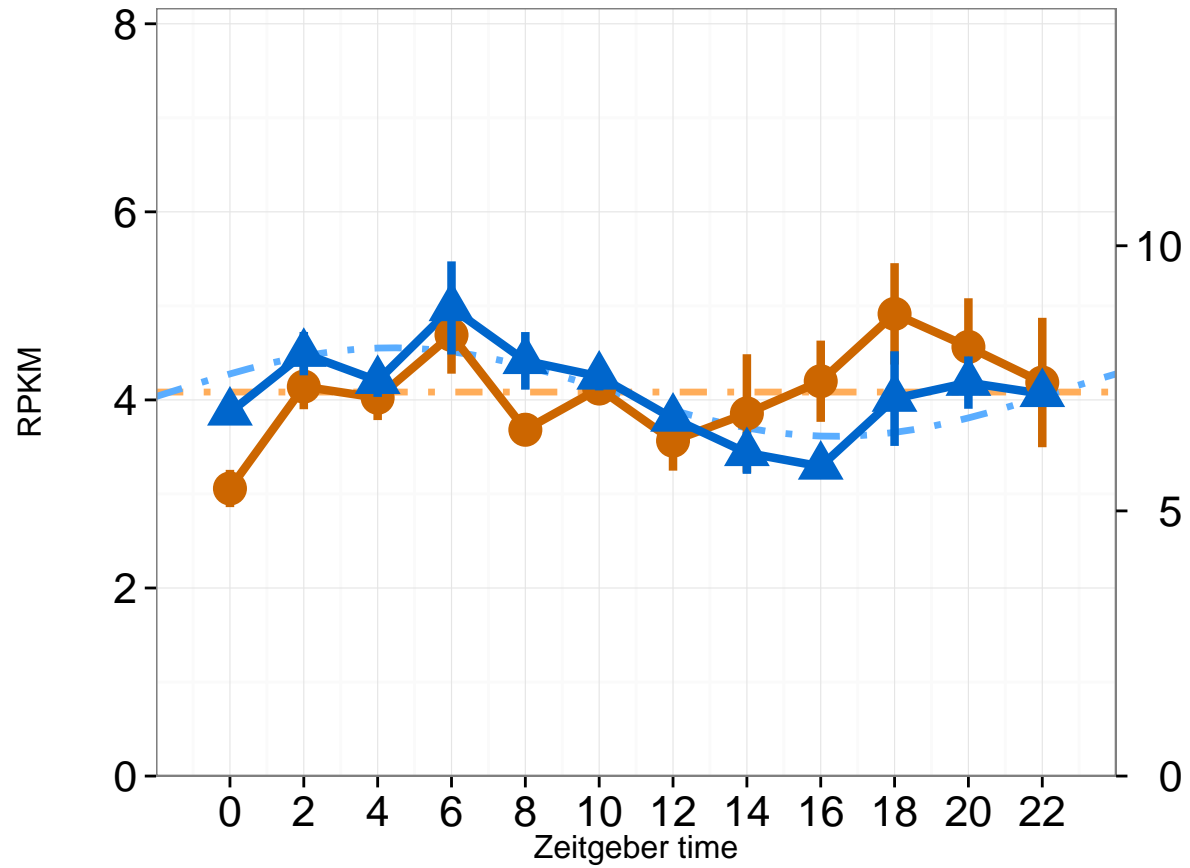

## Wasf2

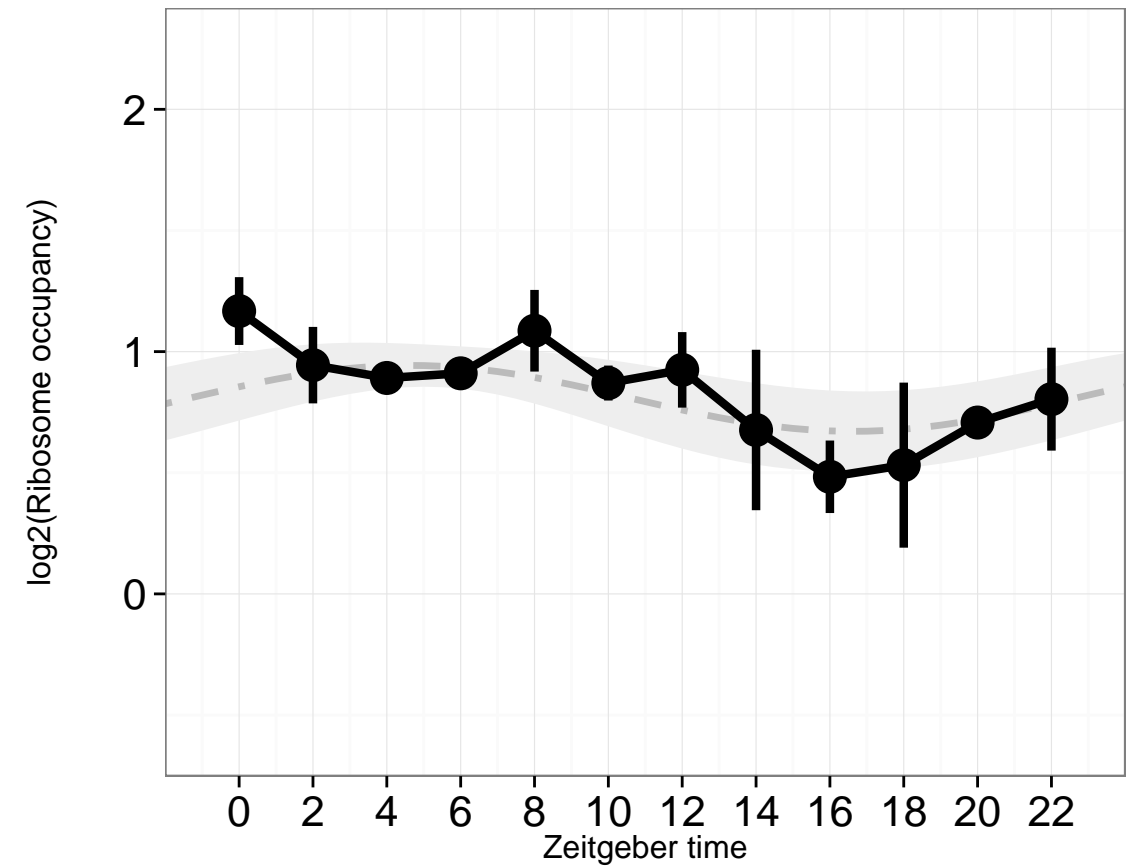

Supplement: SuppDataset_1.zip [file Wasf2_set_A.pdf › Supplemental Dataset 1/A-mRNA_nonrhyth_translation_nonrhyth/Wasf2_set_A.pdf]

# Wasl

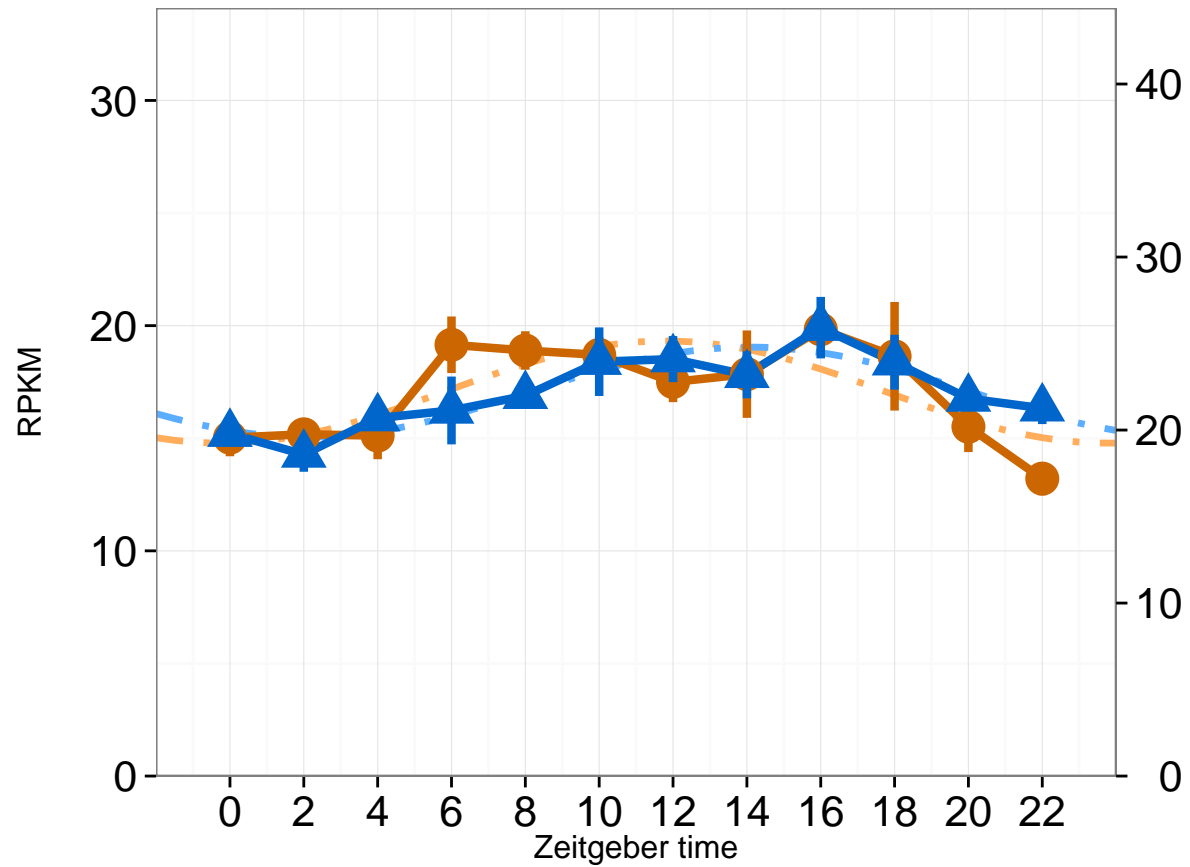

# Wasl

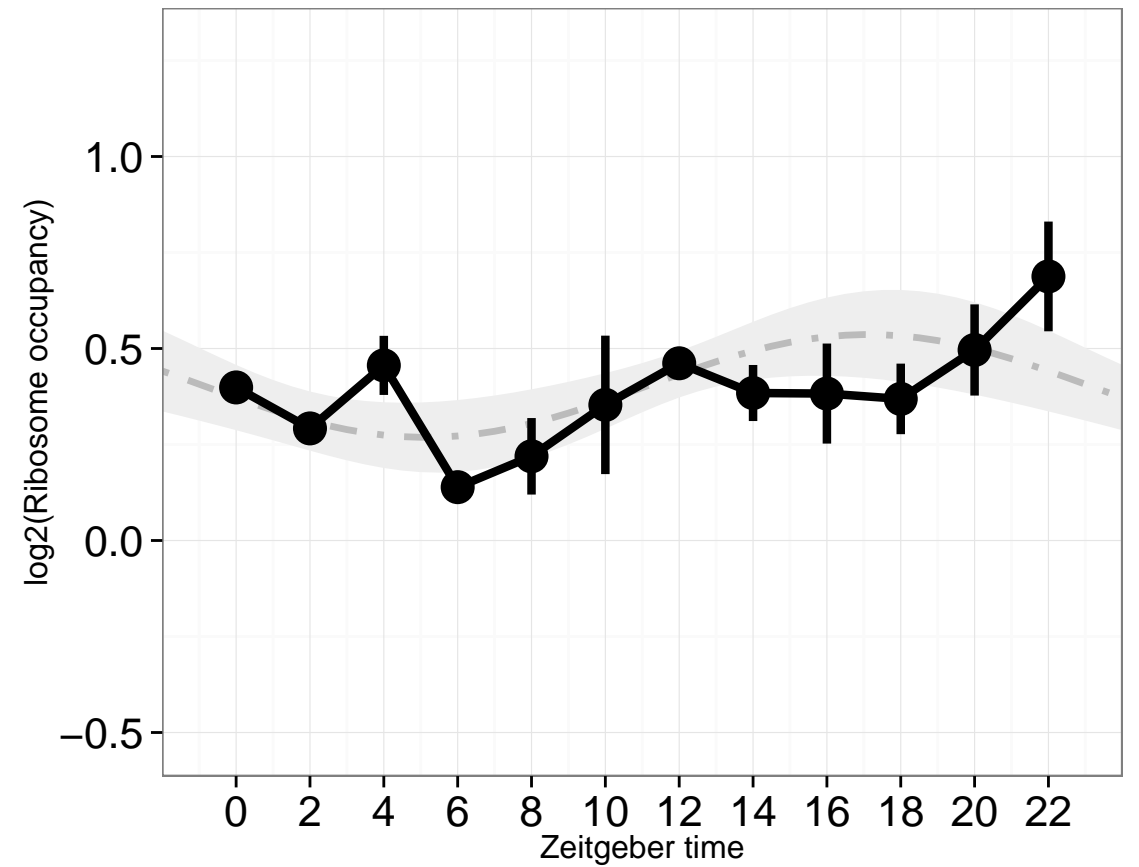

Supplement: SuppDataset_1.zip [file Wasl_set_A.pdf › Supplemental Dataset 1/A-mRNA_nonrhyth_translation_nonrhyth/Wasl_set_A.pdf]

# Wbp11

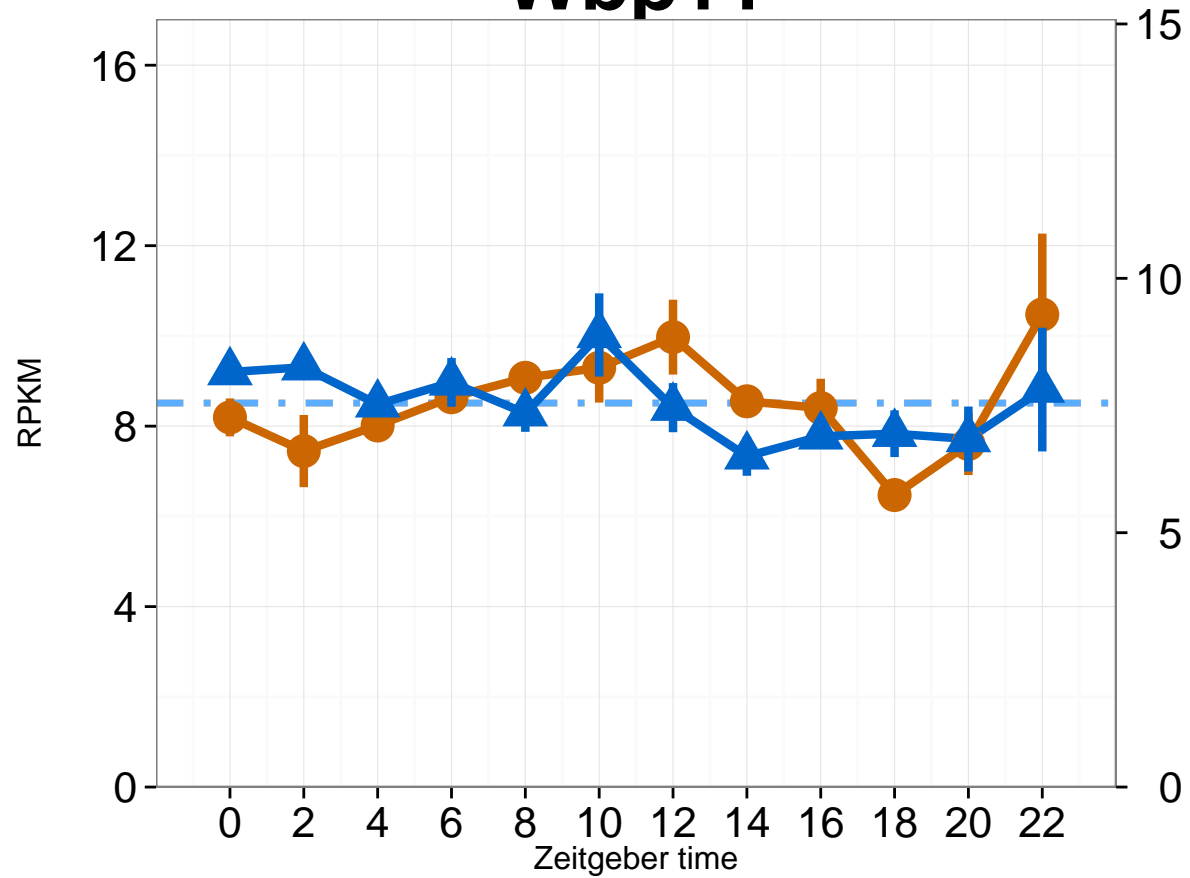

# Wbp11

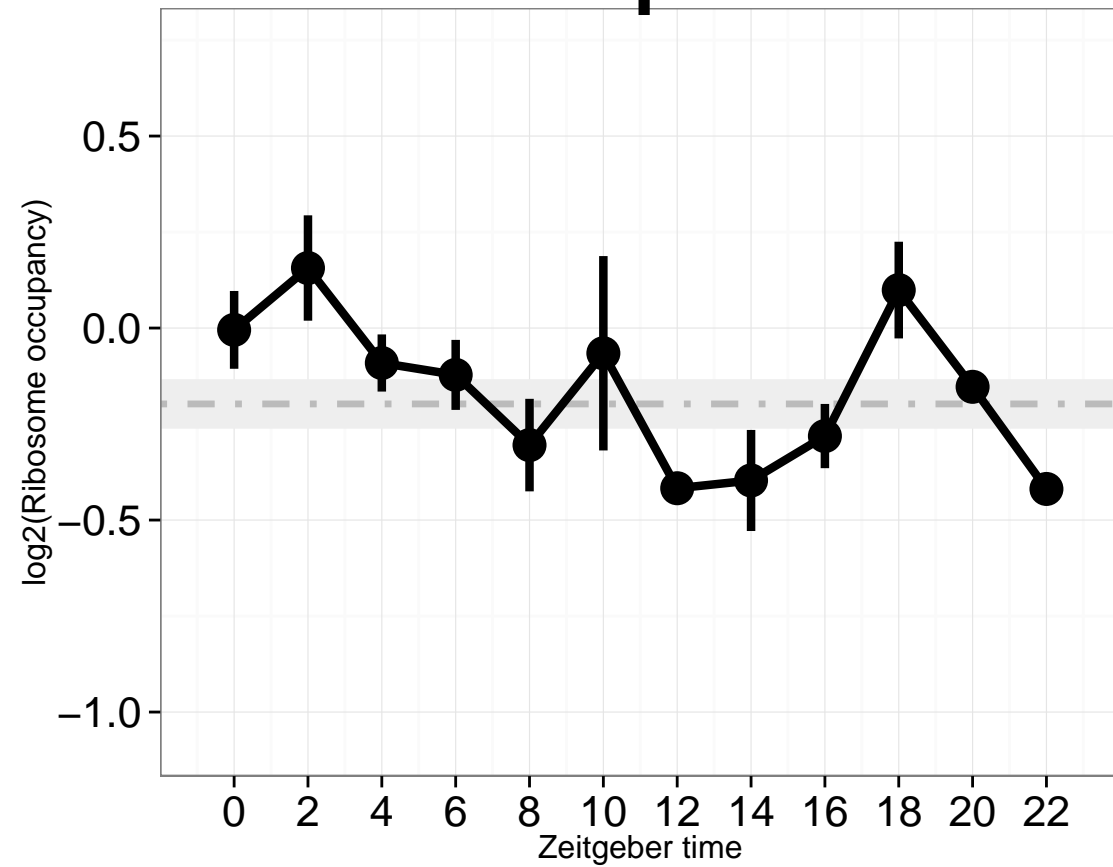

Supplement: SuppDataset_1.zip [file Wbp11_set_A.pdf › Supplemental Dataset 1/A-mRNA_nonrhyth_translation_nonrhyth/Wbp11_set_A.pdf]

# Wbp1

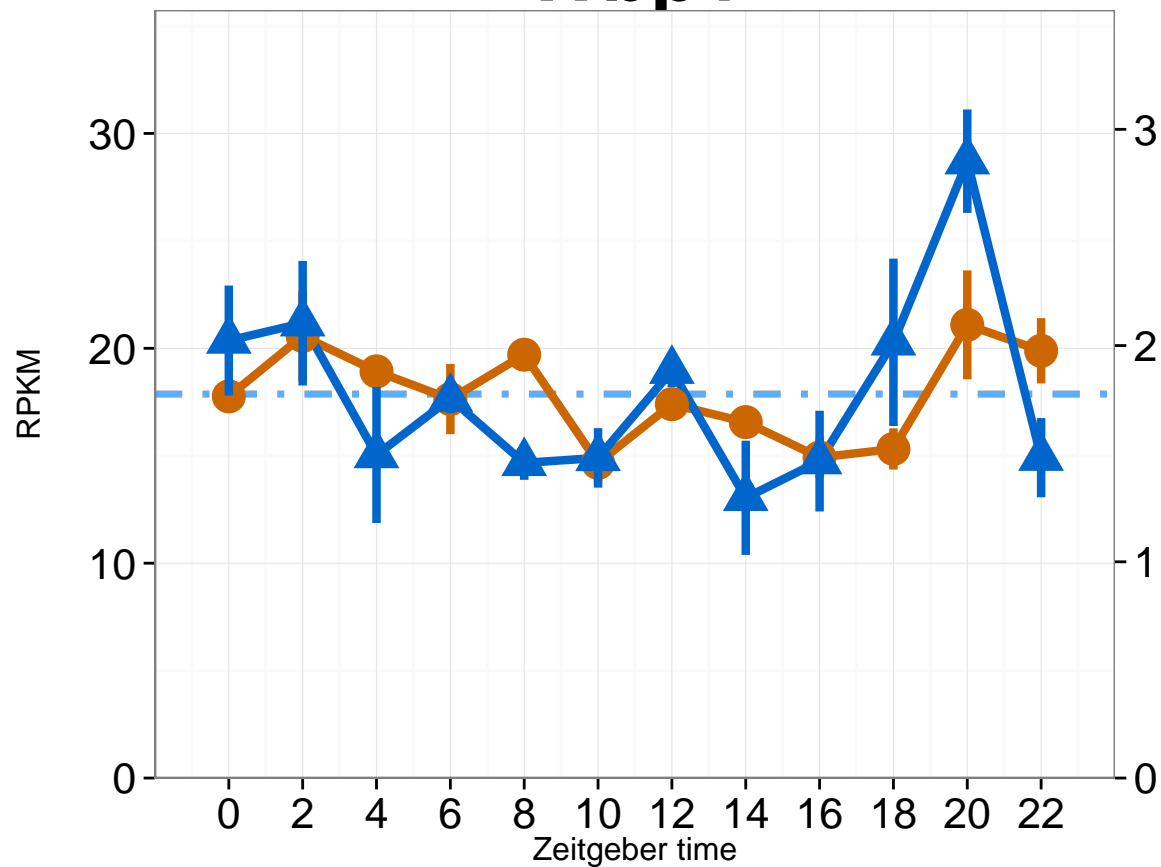

# Wbp1

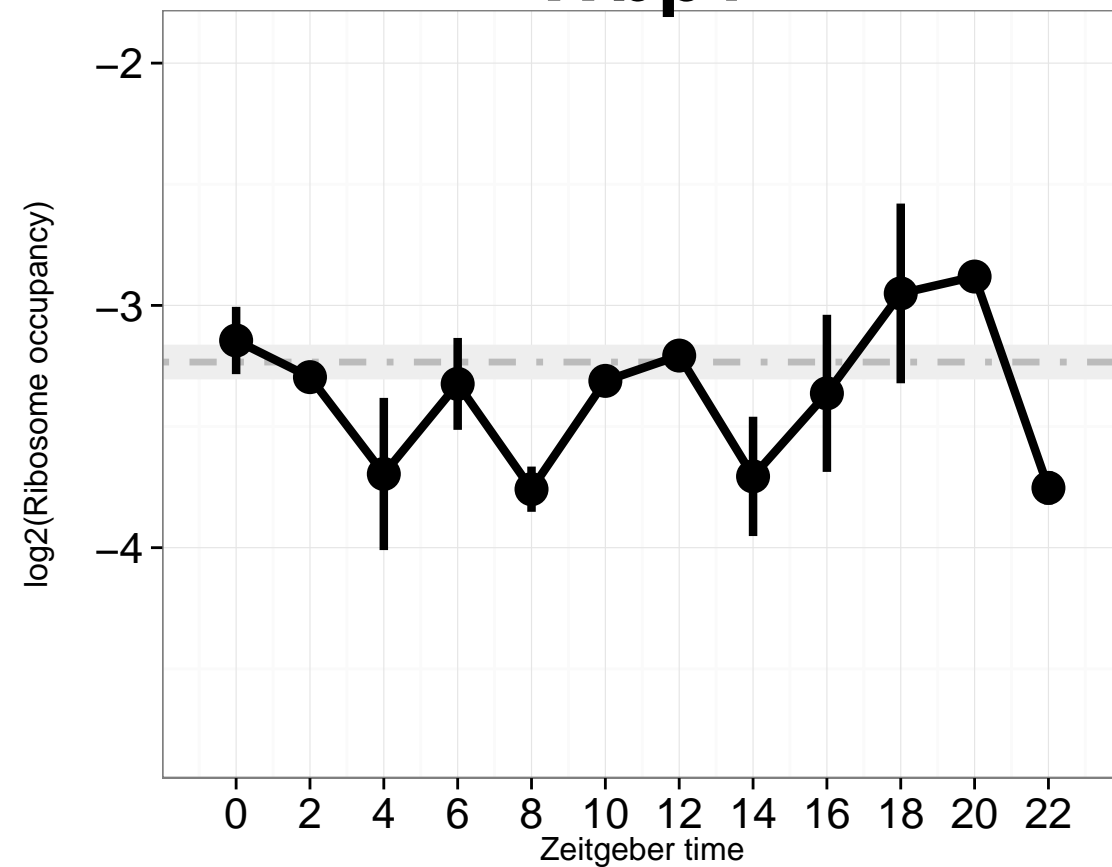

Supplement: SuppDataset_1.zip [file Wbp1_set_A.pdf › Supplemental Dataset 1/A-mRNA_nonrhyth_translation_nonrhyth/Wbp1_set_A.pdf]

## Wbp1l

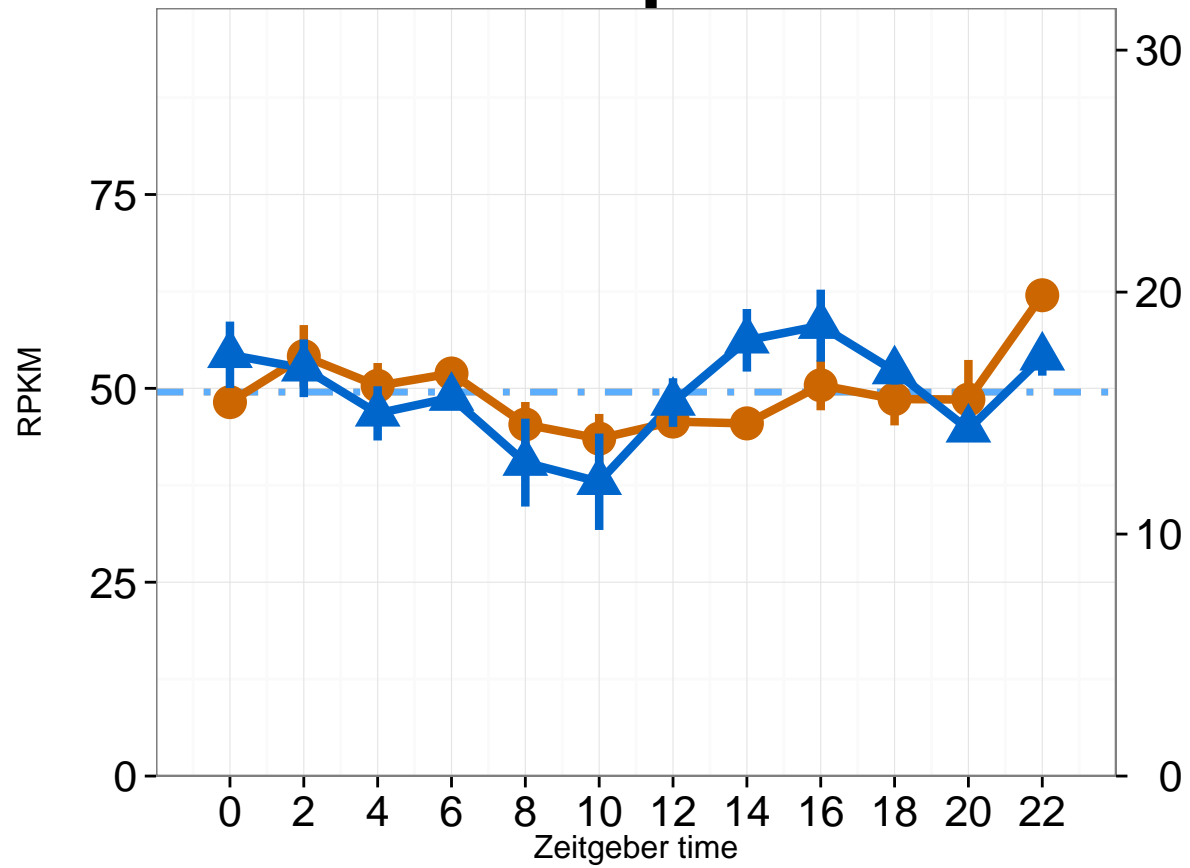

## Wbp1l

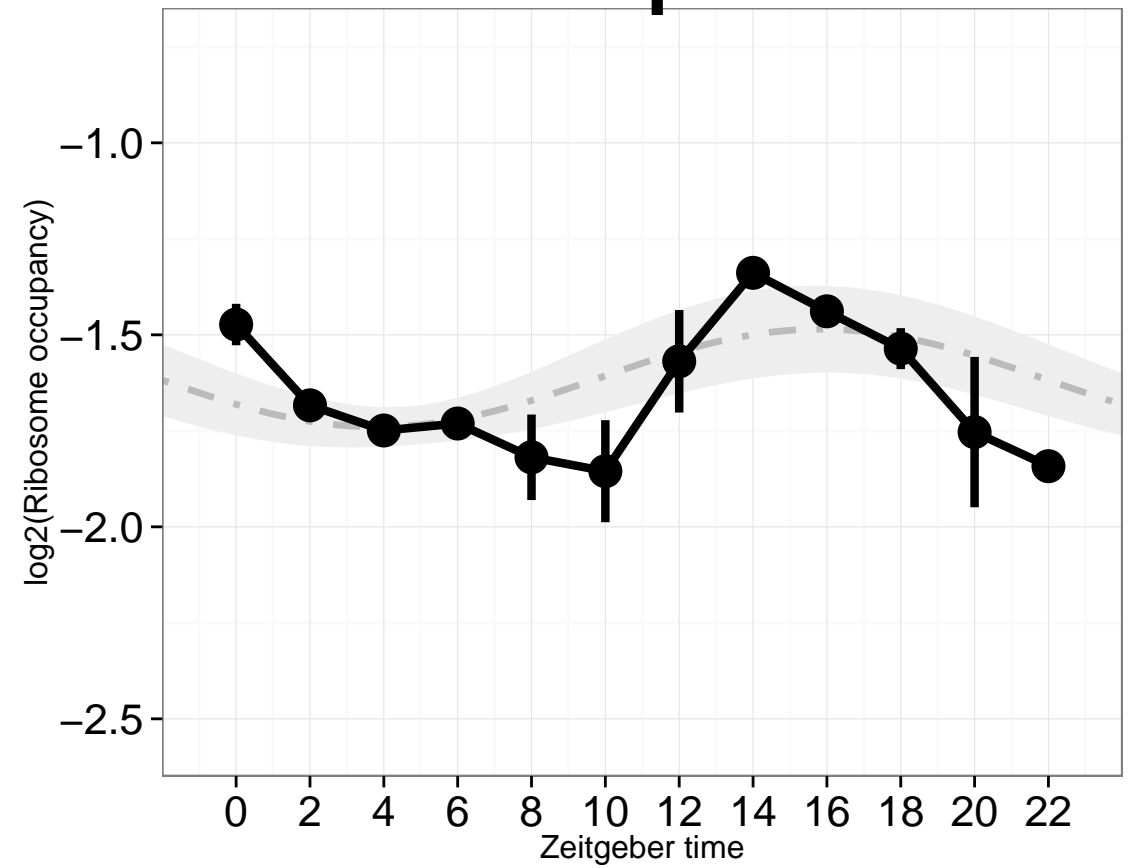

Supplement: SuppDataset_1.zip [file Wbp1l_set_A.pdf › Supplemental Dataset 1/A-mRNA_nonrhyth_translation_nonrhyth/Wbp1l_set_A.pdf]

# Wbp4

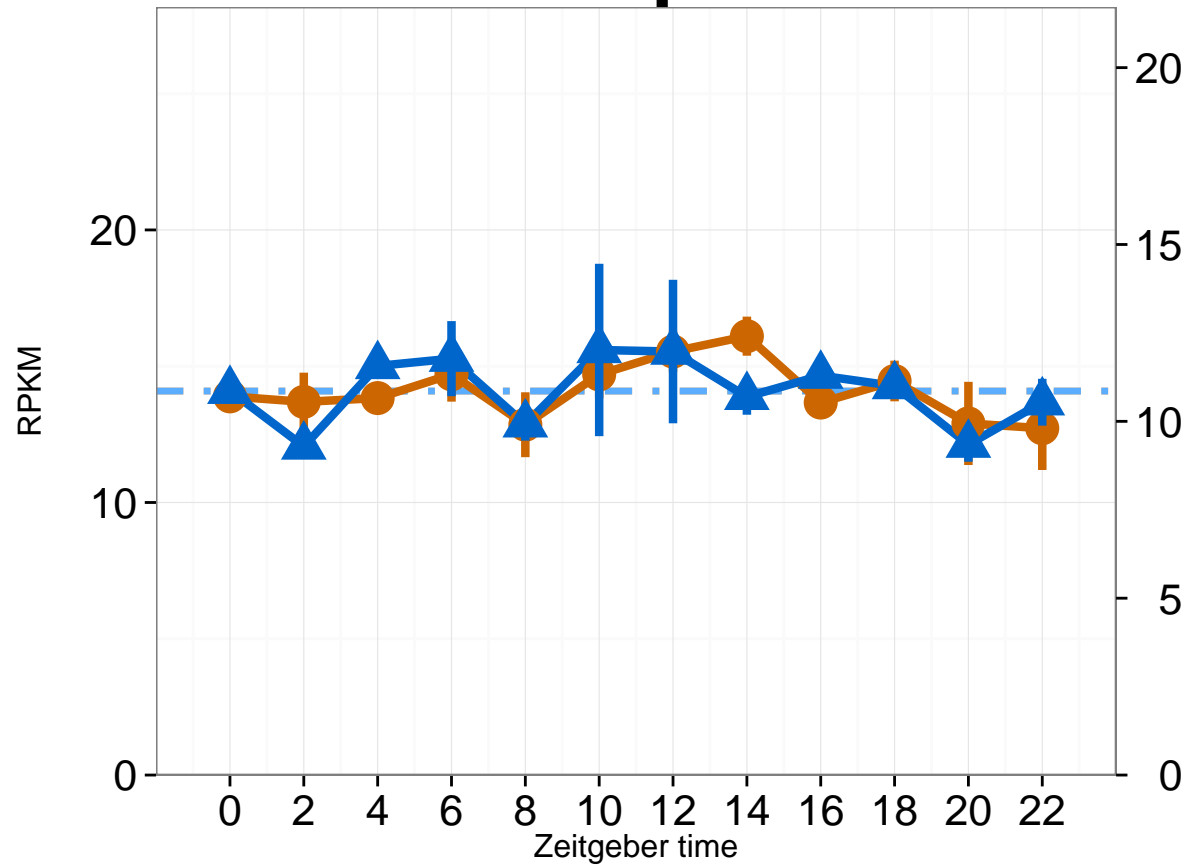

# Wbp4

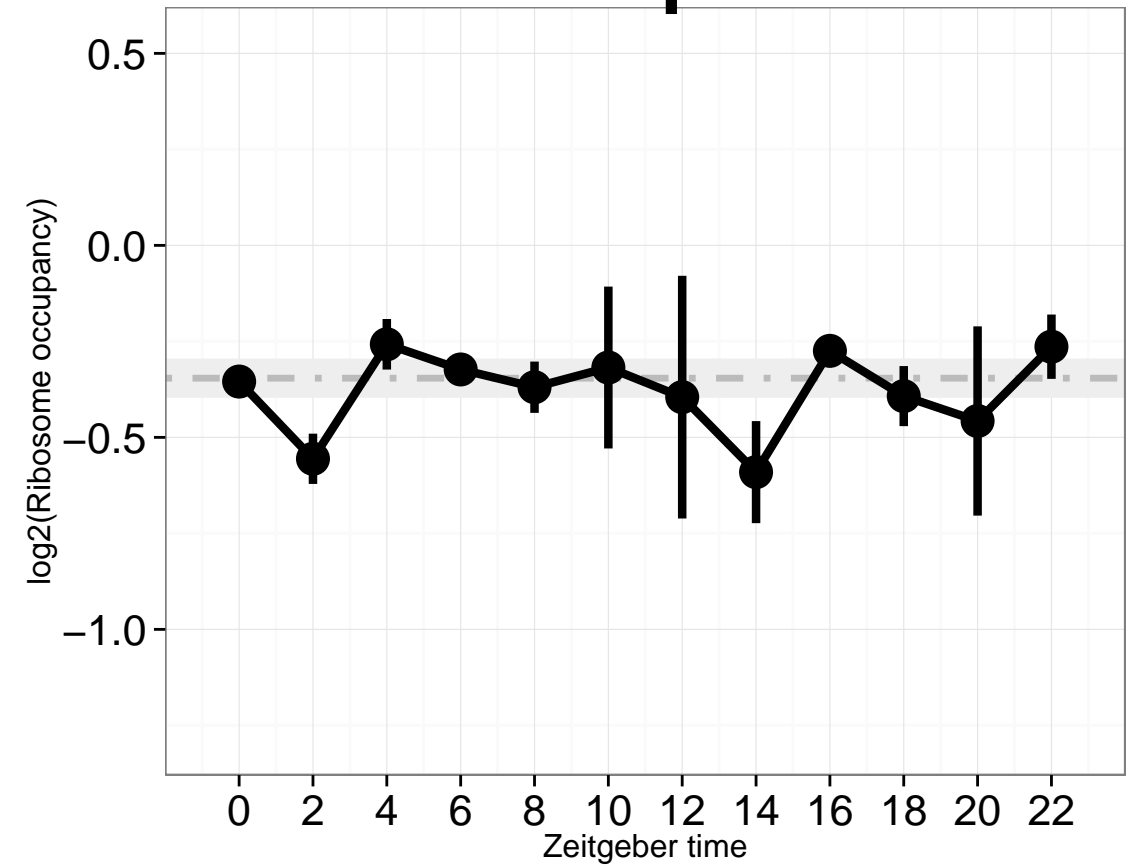

Supplement: SuppDataset_1.zip [file Wbp4_set_A.pdf › Supplemental Dataset 1/A-mRNA_nonrhyth_translation_nonrhyth/Wbp4_set_A.pdf]

## Wbp5

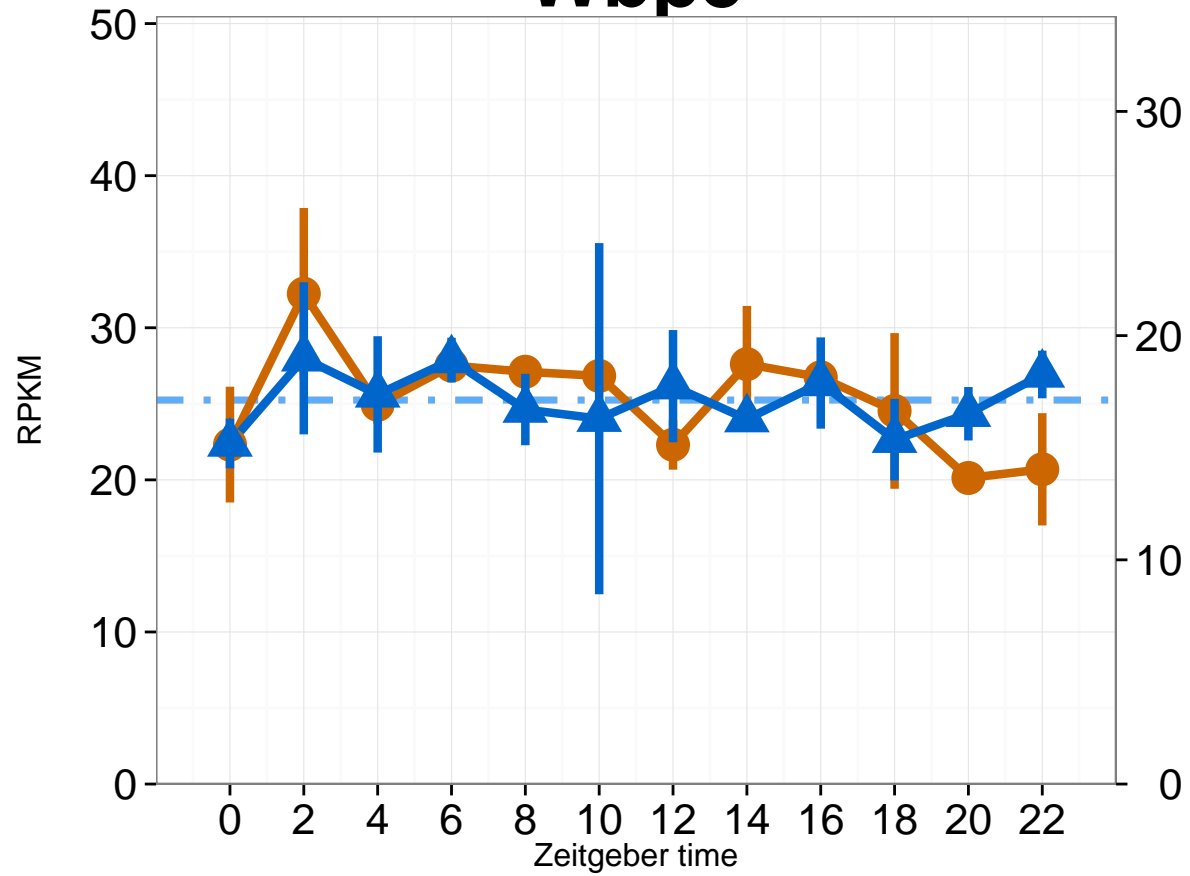

## Wbp5

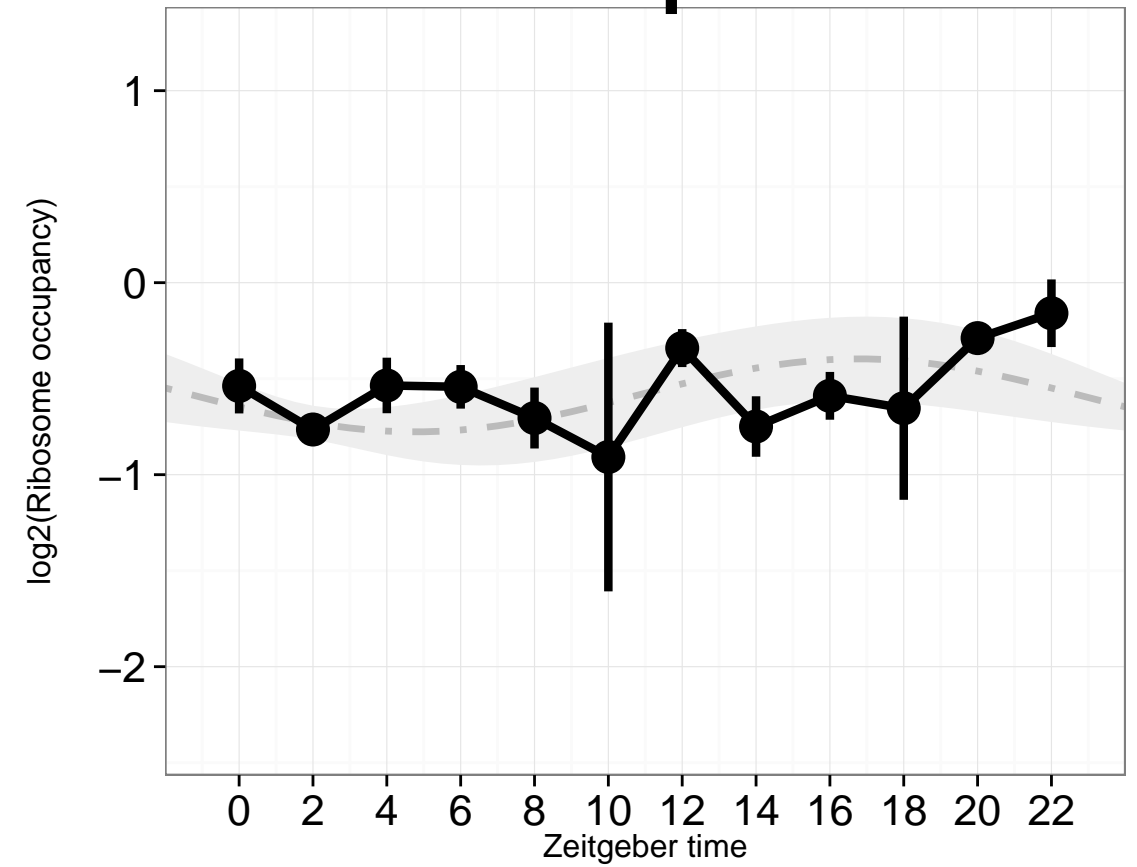

Supplement: SuppDataset_1.zip [file Wbp5_set_A.pdf › Supplemental Dataset 1/A-mRNA_nonrhyth_translation_nonrhyth/Wbp5_set_A.pdf]

# Wbscr16

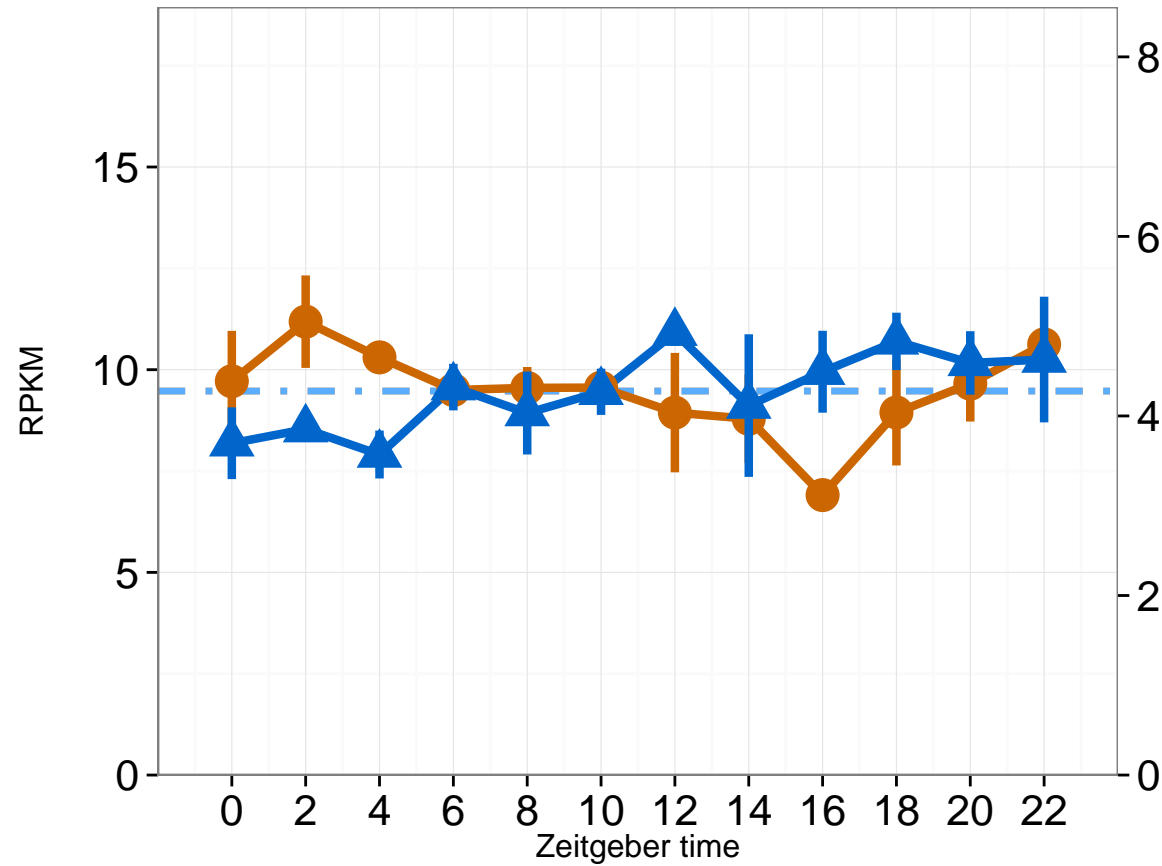

# Wbscr16

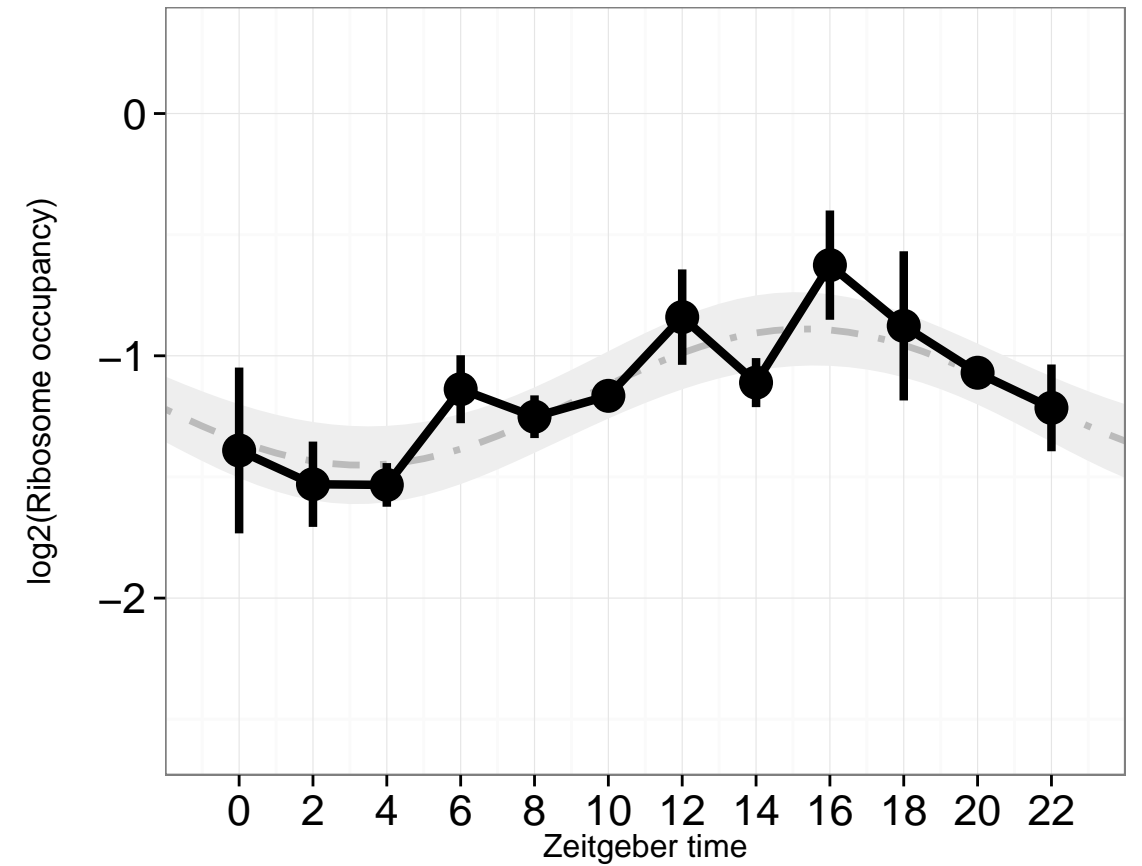

Supplement: SuppDataset_1.zip [file Wbscr16_set_A.pdf › Supplemental Dataset 1/A-mRNA_nonrhyth_translation_nonrhyth/Wbscr16_set_A.pdf]

## Wdfy2

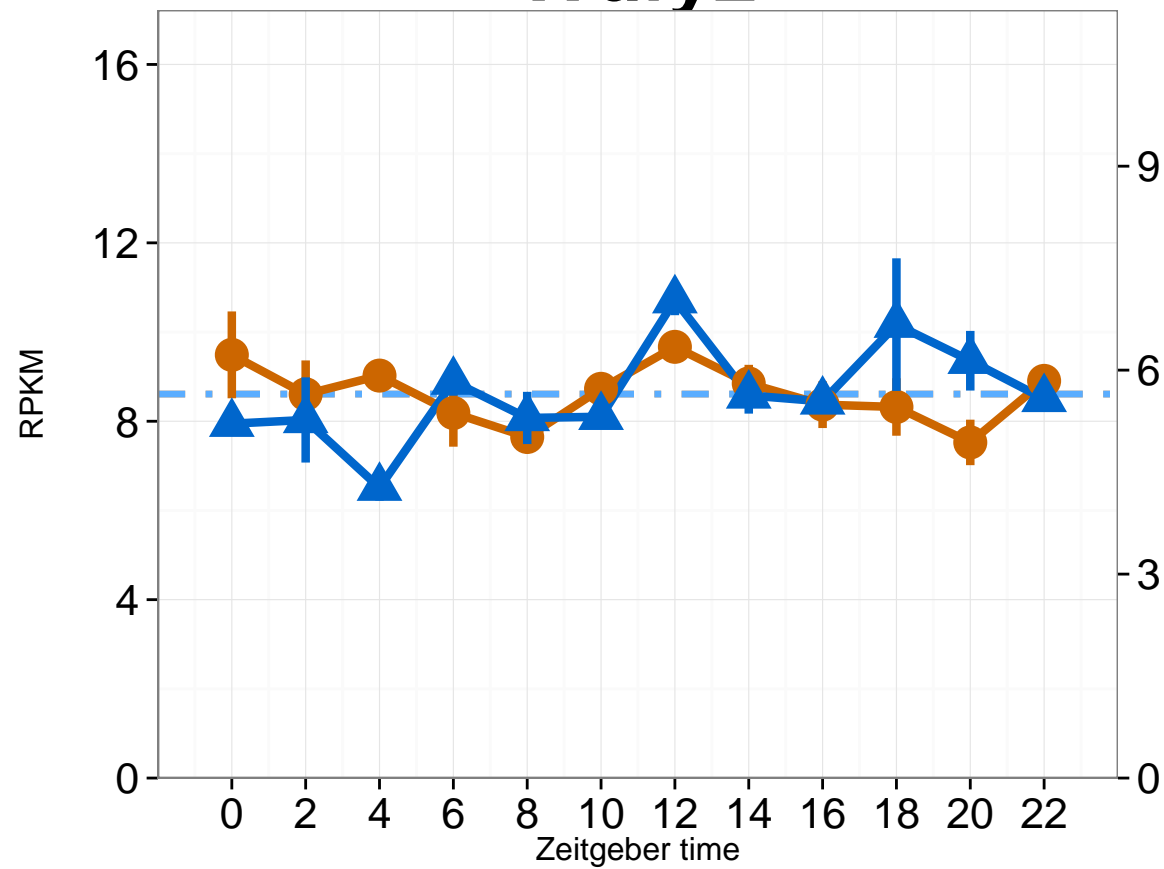

## Wdfy2

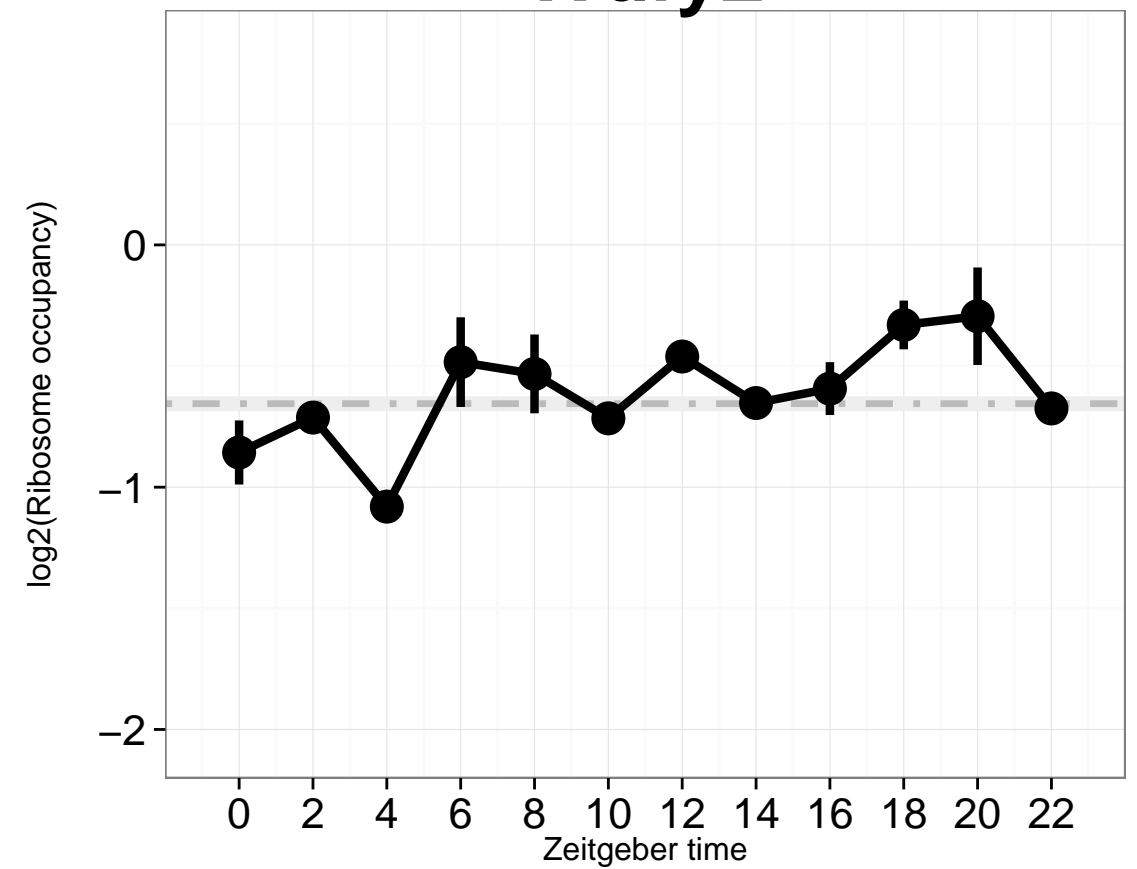

Supplement: SuppDataset_1.zip [file Wdfy2_set_A.pdf › Supplemental Dataset 1/A-mRNA_nonrhyth_translation_nonrhyth/Wdfy2_set_A.pdf]

# Wdfy3

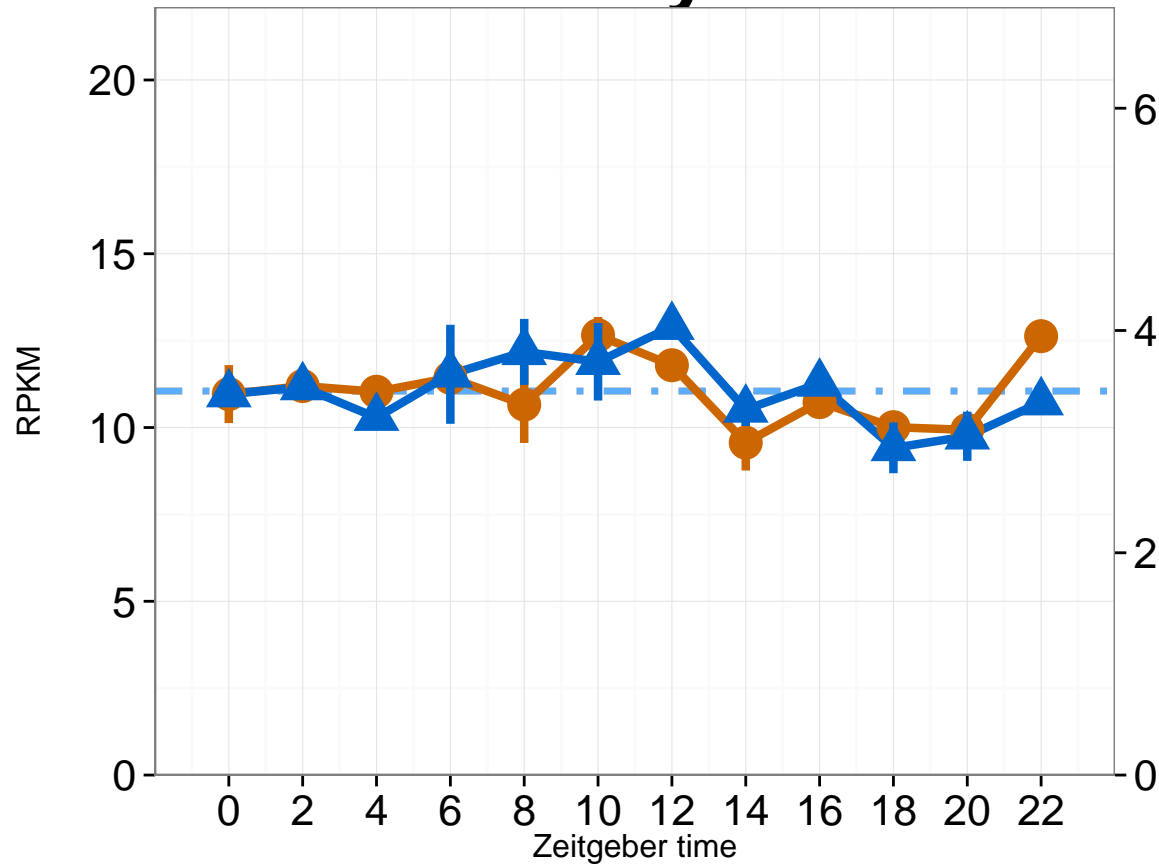

# Wdfy3

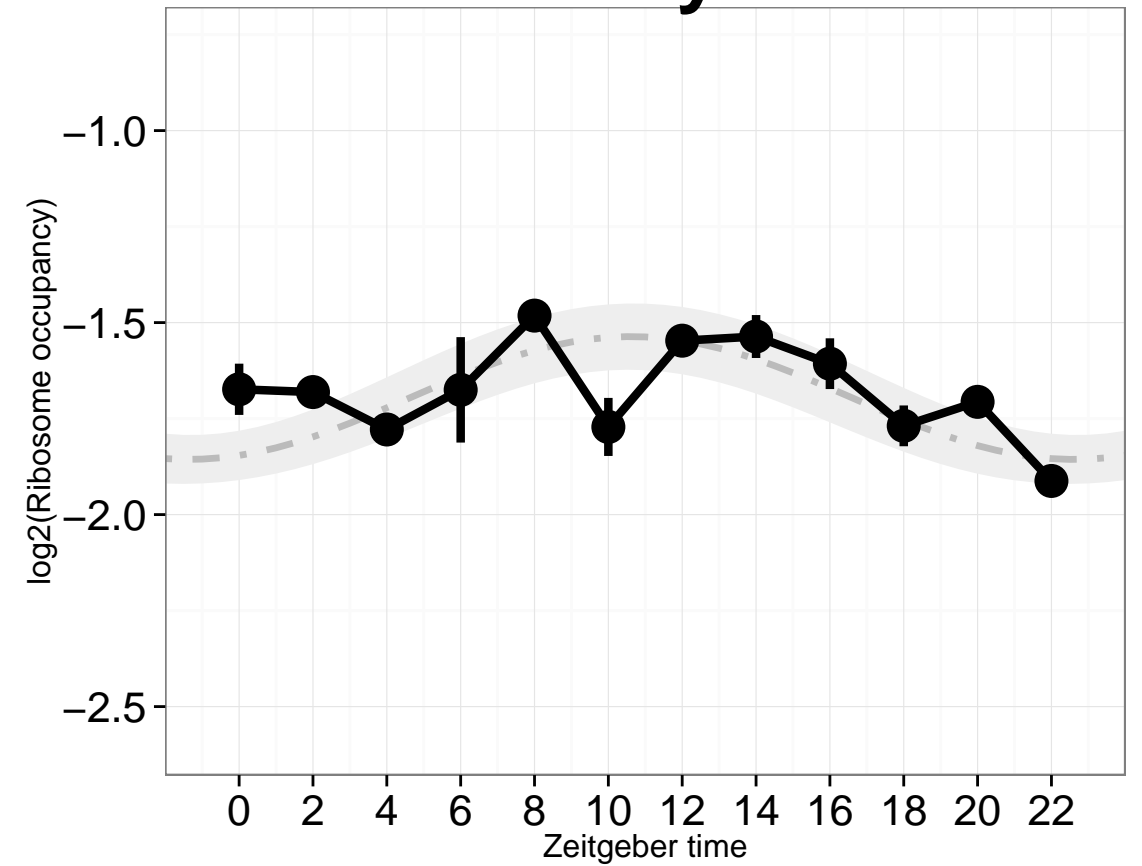

Supplement: SuppDataset_1.zip [file Wdfy3_set_A.pdf › Supplemental Dataset 1/A-mRNA_nonrhyth_translation_nonrhyth/Wdfy3_set_A.pdf]

# Wdfy4

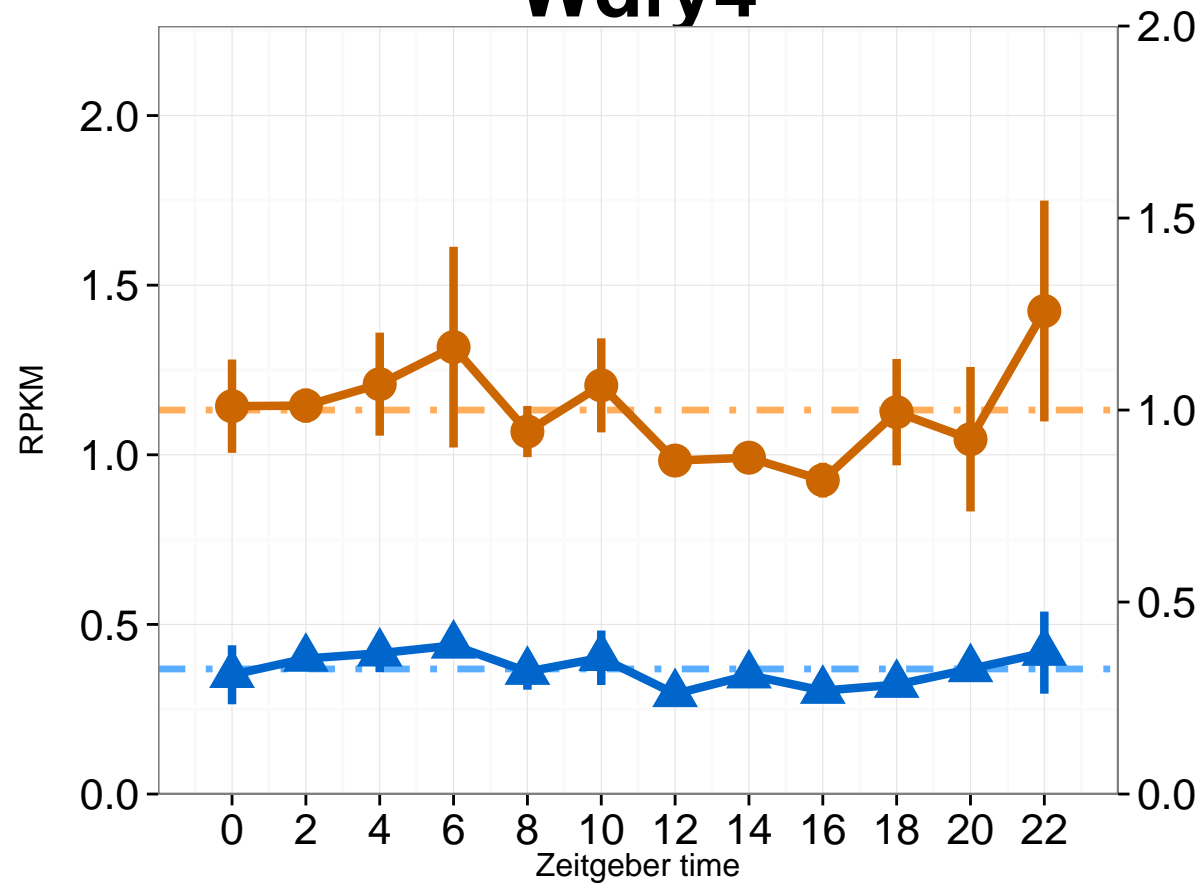

# Wdfy4

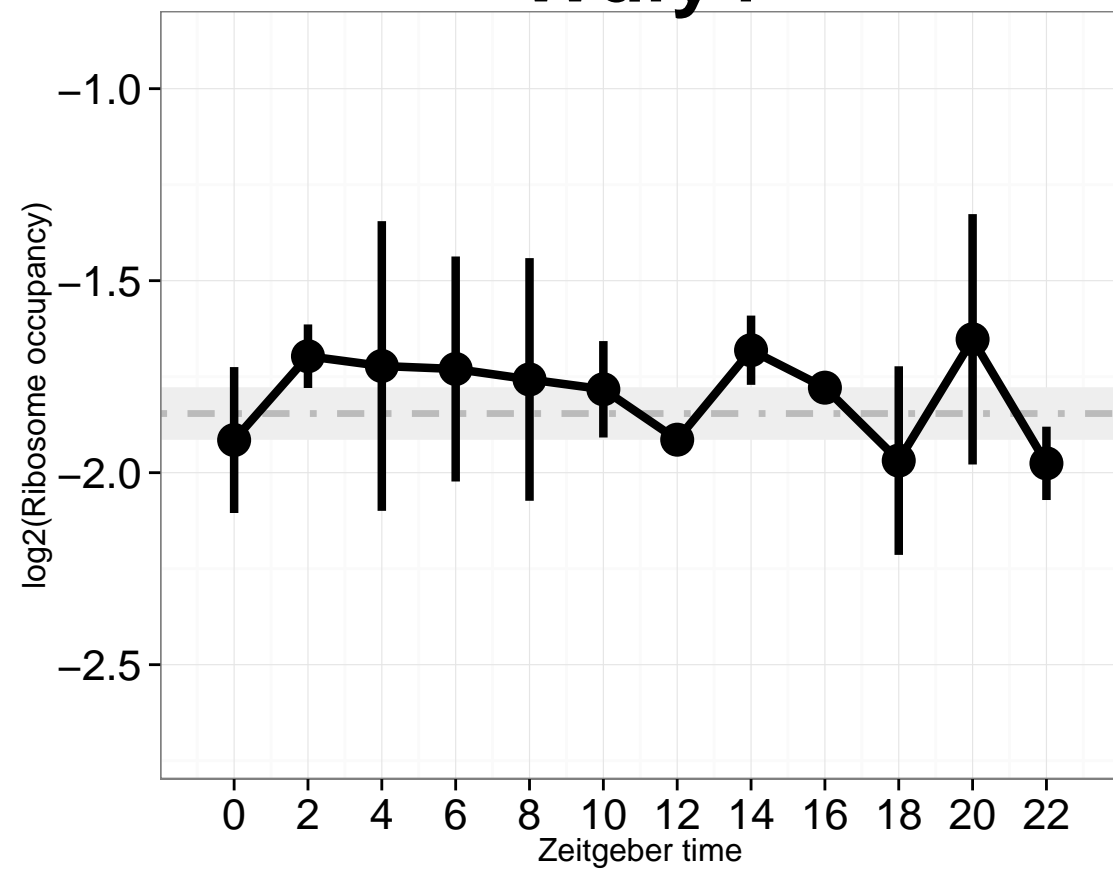

Supplement: SuppDataset_1.zip [file Wdfy4_set_A.pdf › Supplemental Dataset 1/A-mRNA_nonrhyth_translation_nonrhyth/Wdfy4_set_A.pdf]

## Wdpcp

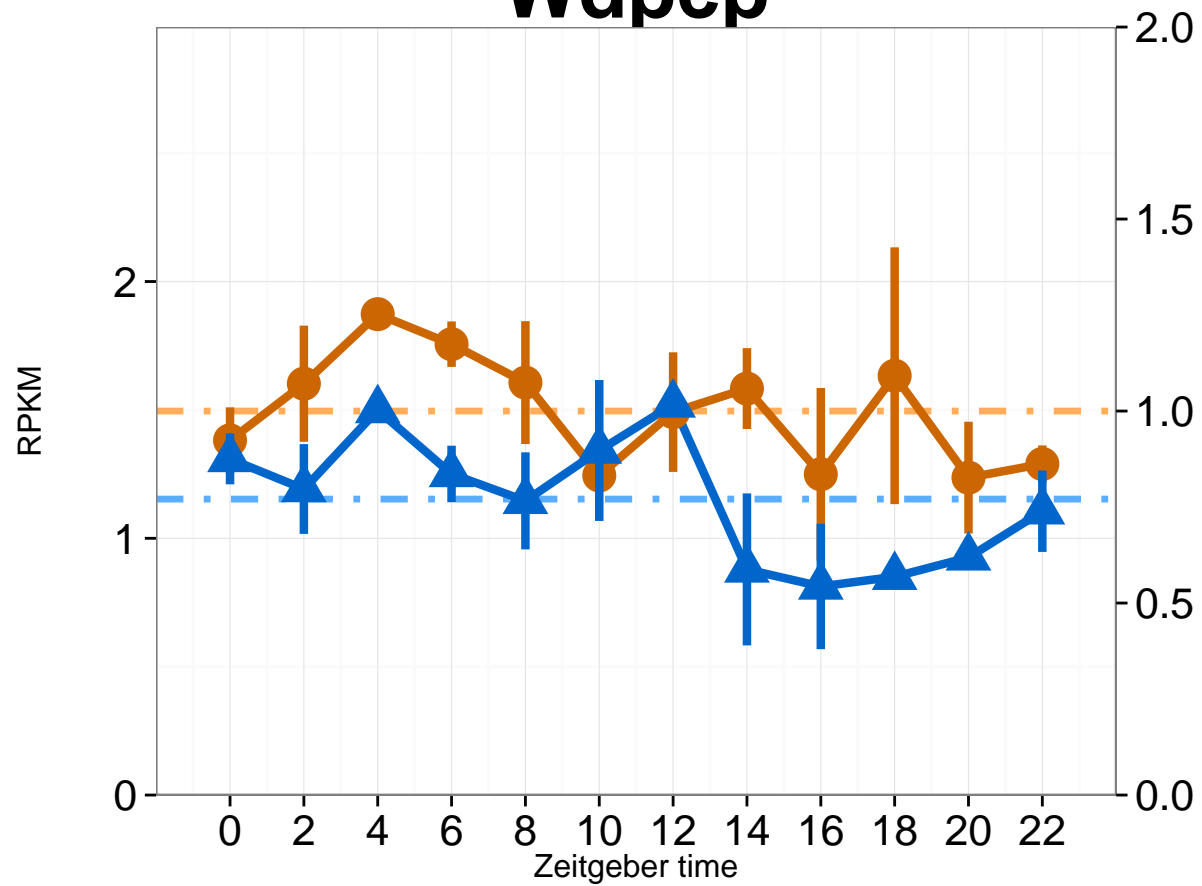

## Wdpcp

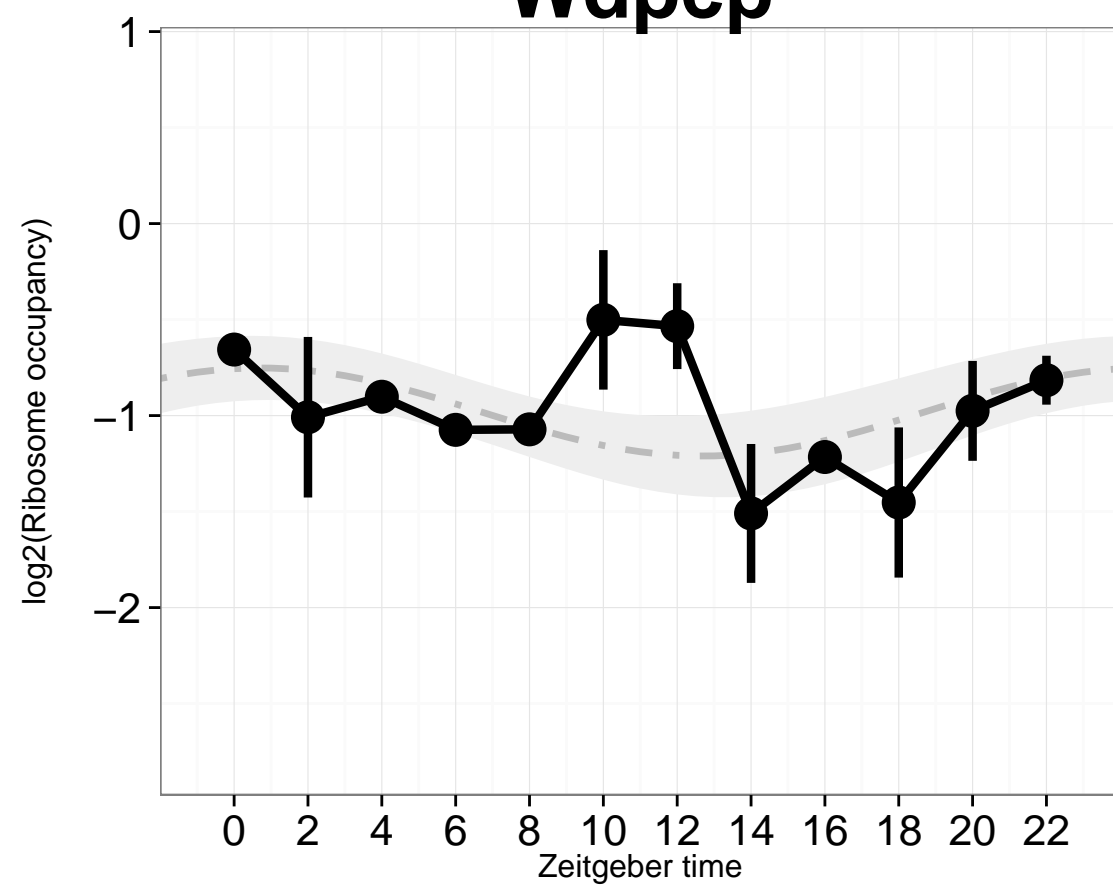

Supplement: SuppDataset_1.zip [file Wdpcp_set_A.pdf › Supplemental Dataset 1/A-mRNA_nonrhyth_translation_nonrhyth/Wdpcp_set_A.pdf]

## Wdr11

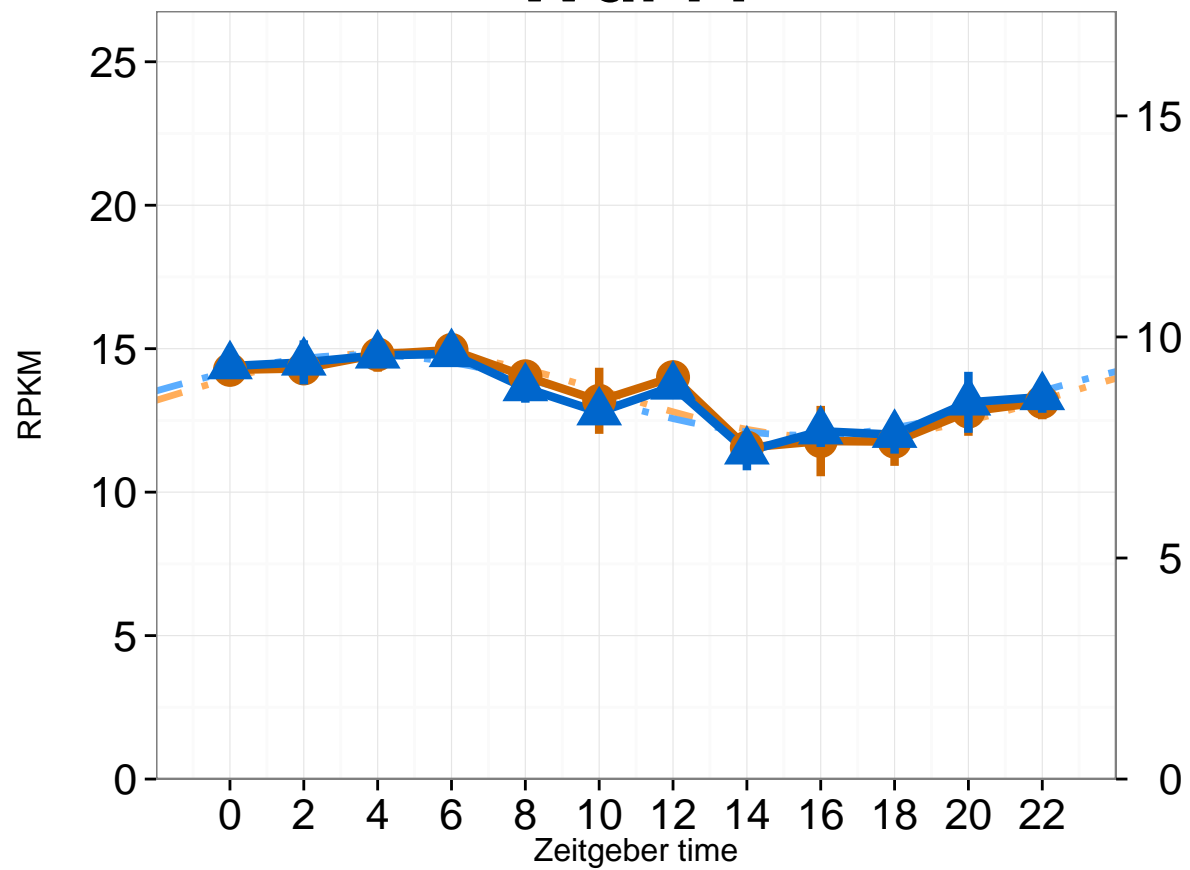

## Wdr11

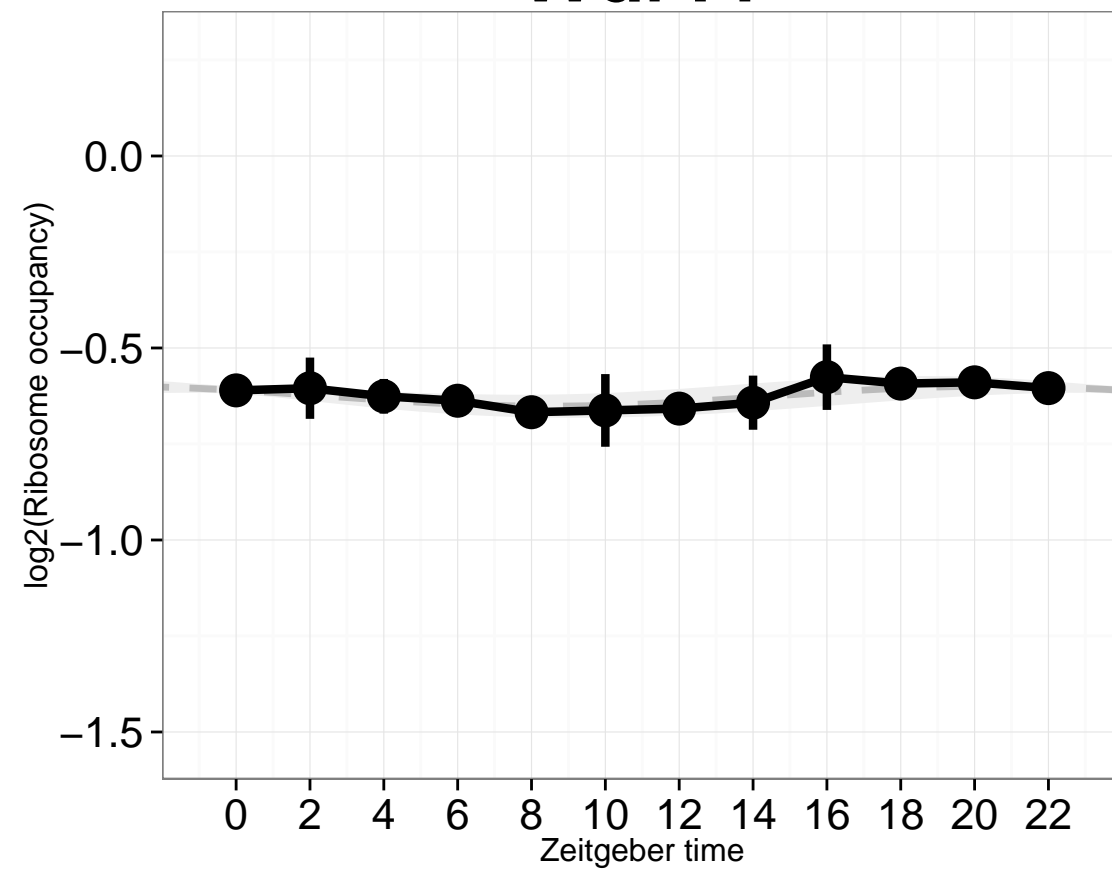

Supplement: SuppDataset_1.zip [file Wdr11_set_A.pdf › Supplemental Dataset 1/A-mRNA_nonrhyth_translation_nonrhyth/Wdr11_set_A.pdf]

## Wdr13

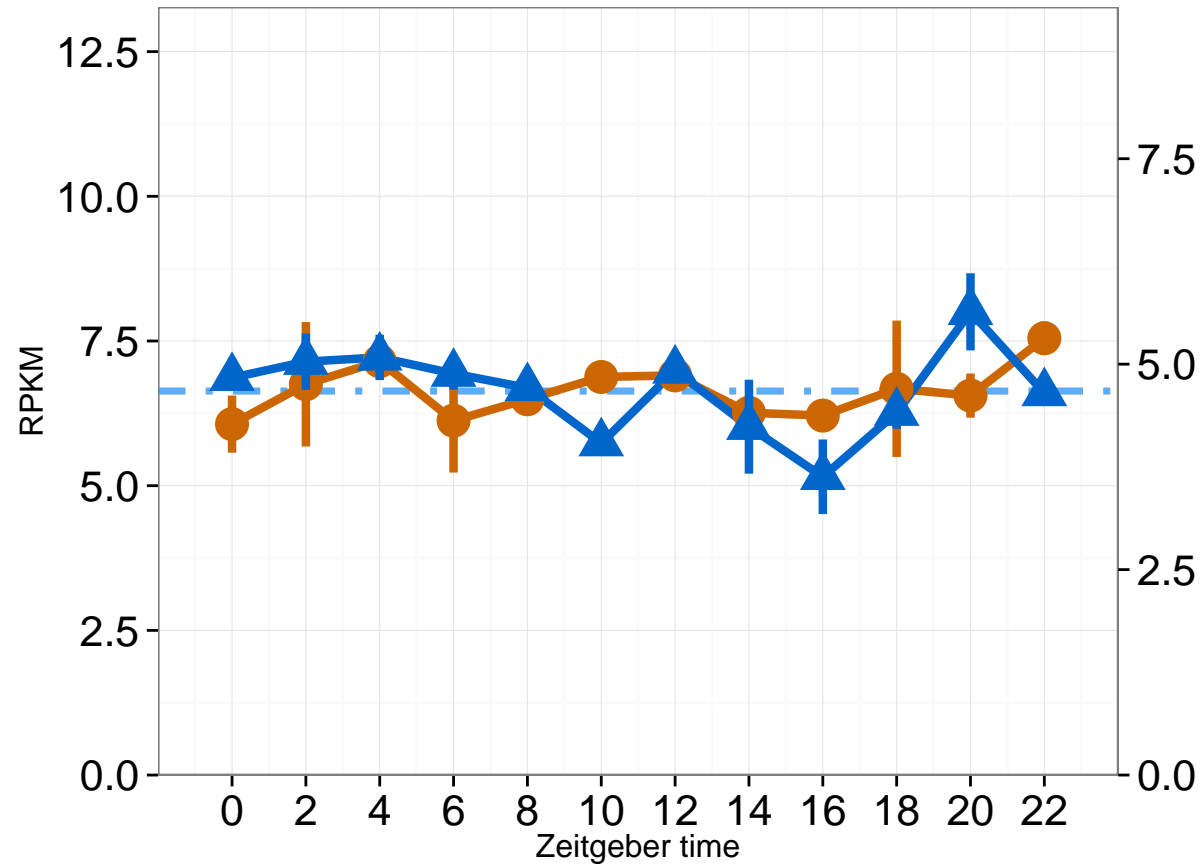

## Wdr13

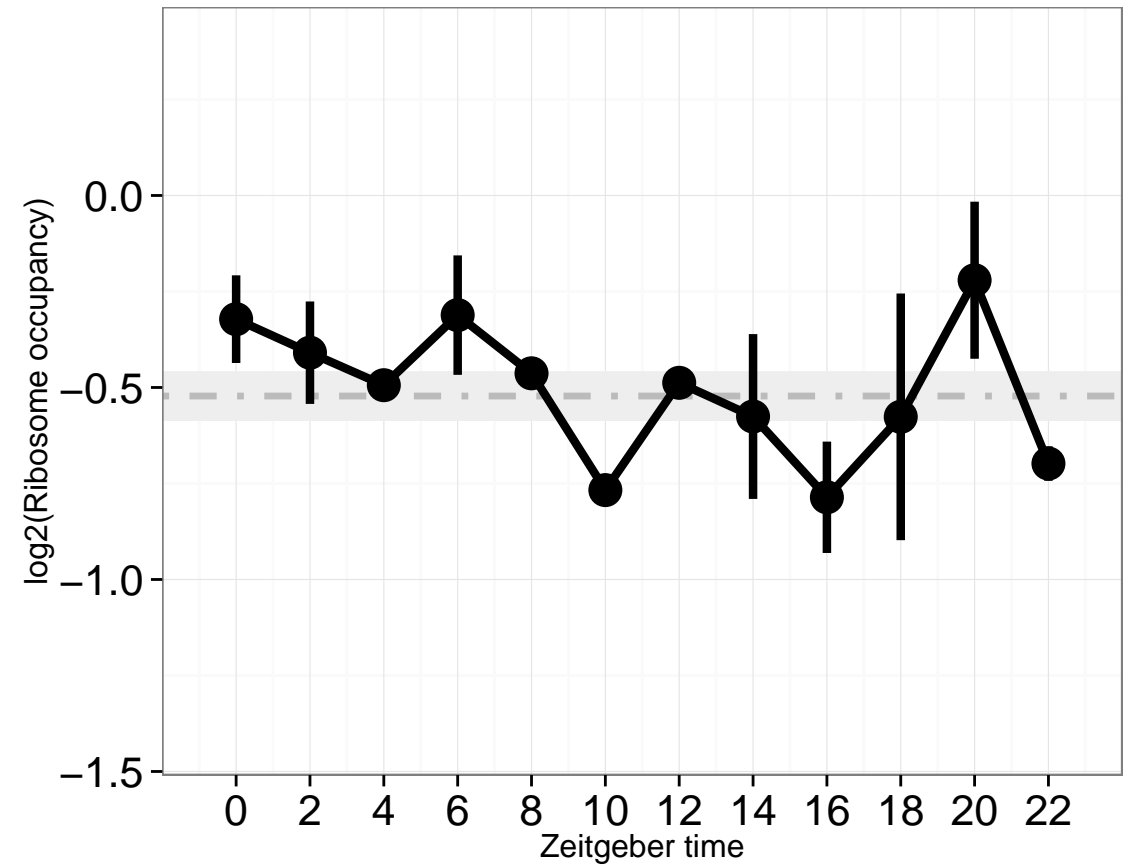

Supplement: SuppDataset_1.zip [file Wdr13_set_A.pdf › Supplemental Dataset 1/A-mRNA_nonrhyth_translation_nonrhyth/Wdr13_set_A.pdf]

# Wdr18

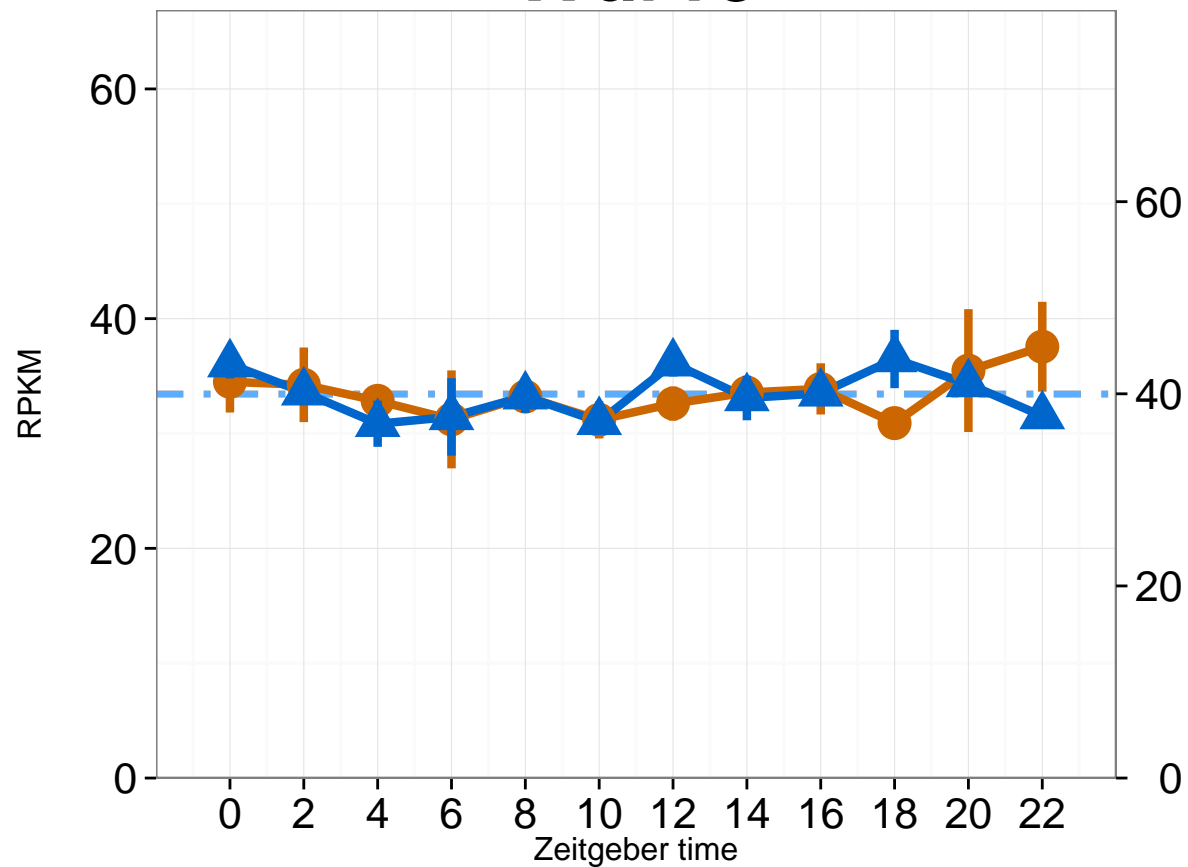

# Wdr18

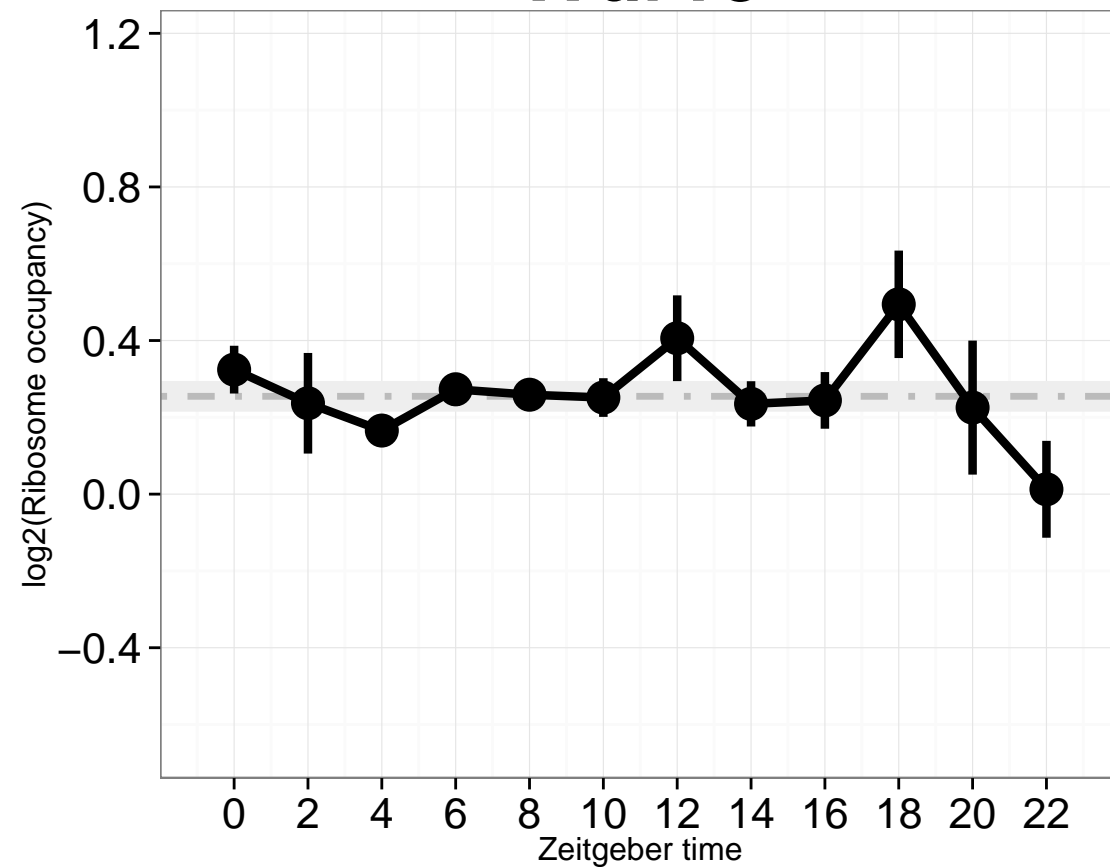

Supplement: SuppDataset_1.zip [file Wdr18_set_A.pdf › Supplemental Dataset 1/A-mRNA_nonrhyth_translation_nonrhyth/Wdr18_set_A.pdf]

# Wdr1

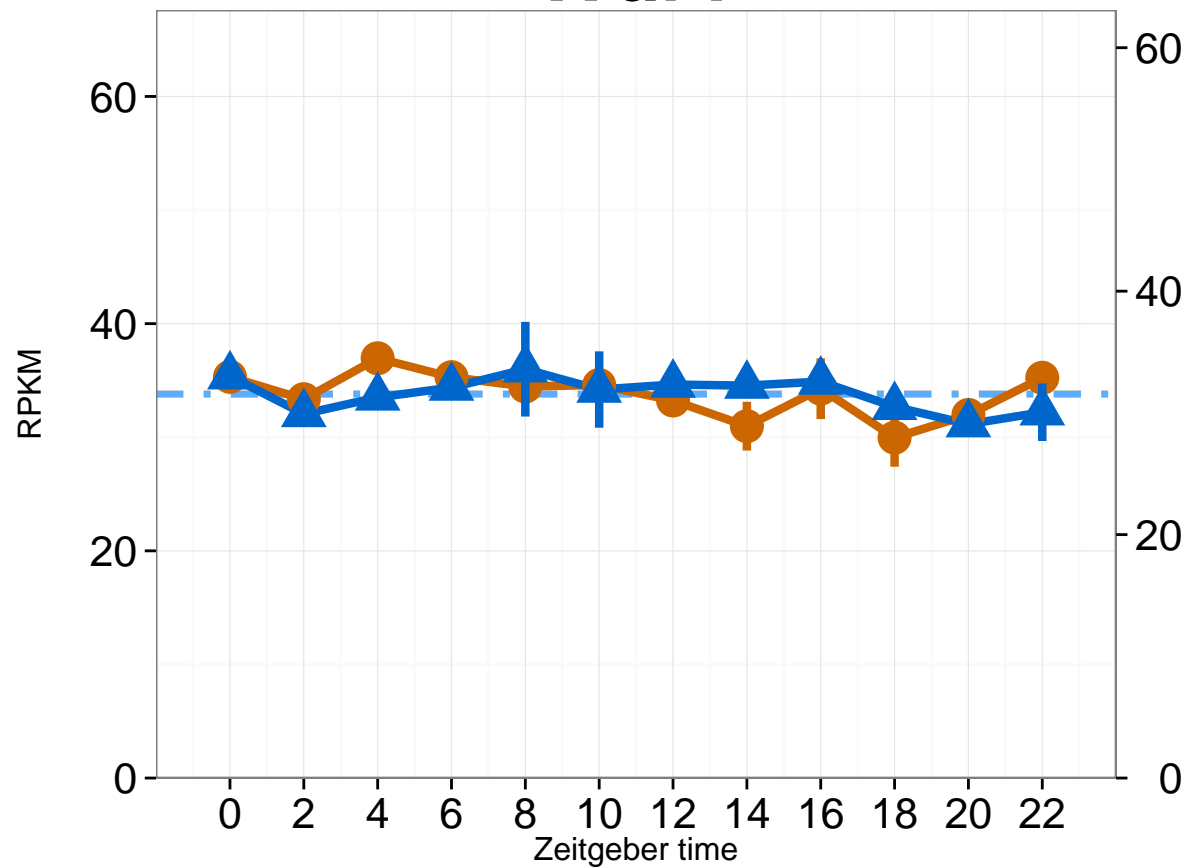

# Wdr1

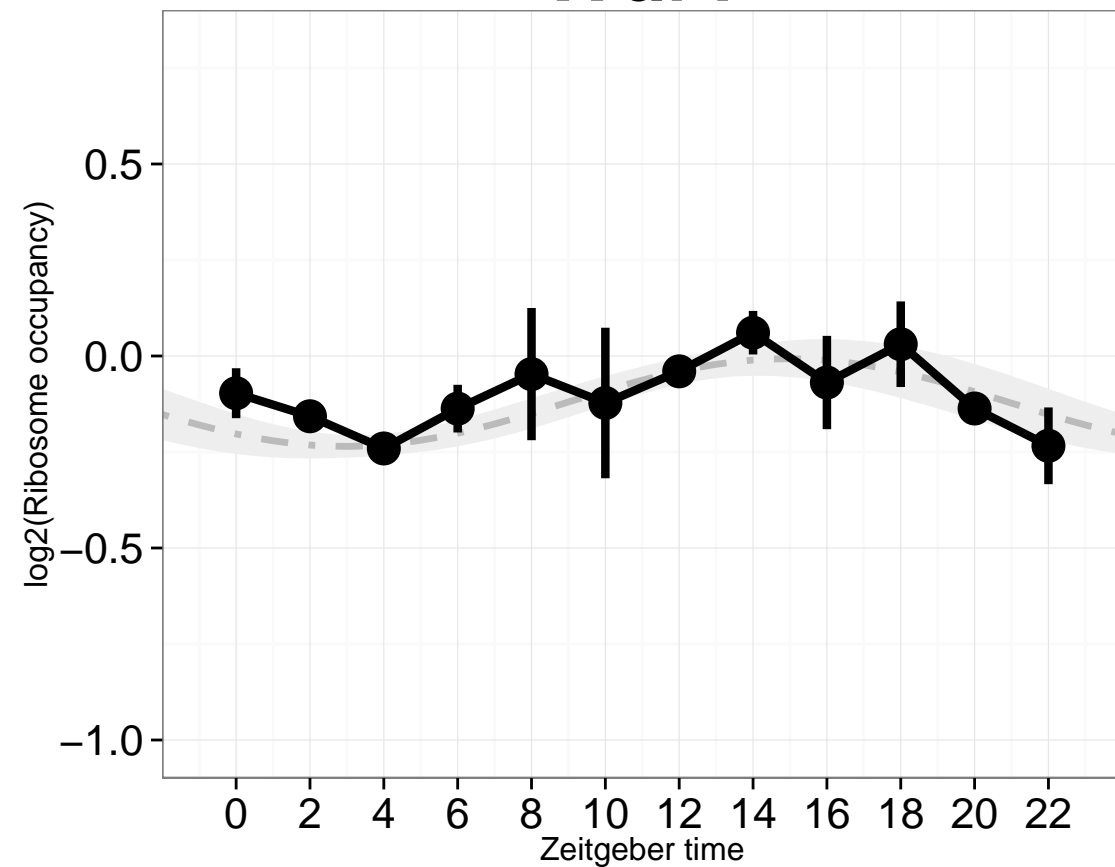

Supplement: SuppDataset_1.zip [file Wdr1_set_A.pdf › Supplemental Dataset 1/A-mRNA_nonrhyth_translation_nonrhyth/Wdr1_set_A.pdf]

# Wdr20a

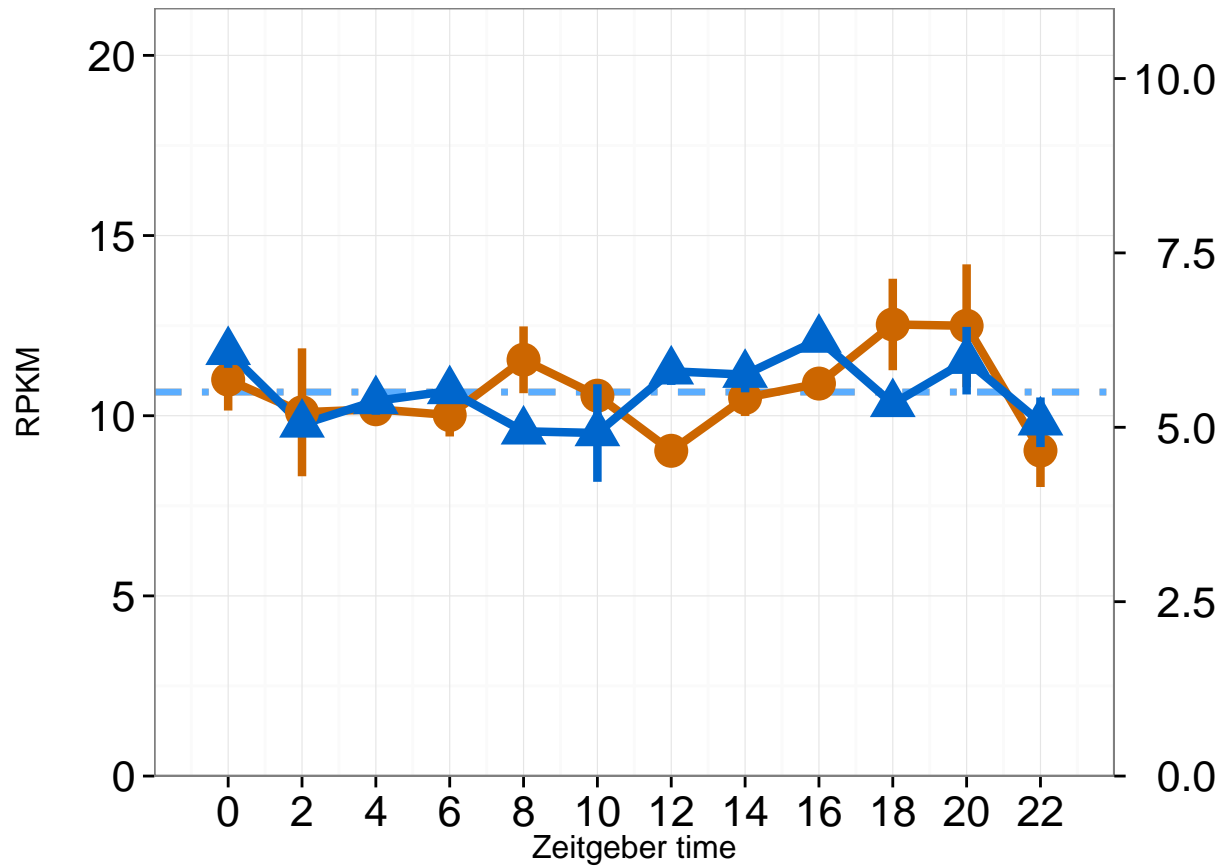

# Wdr20a

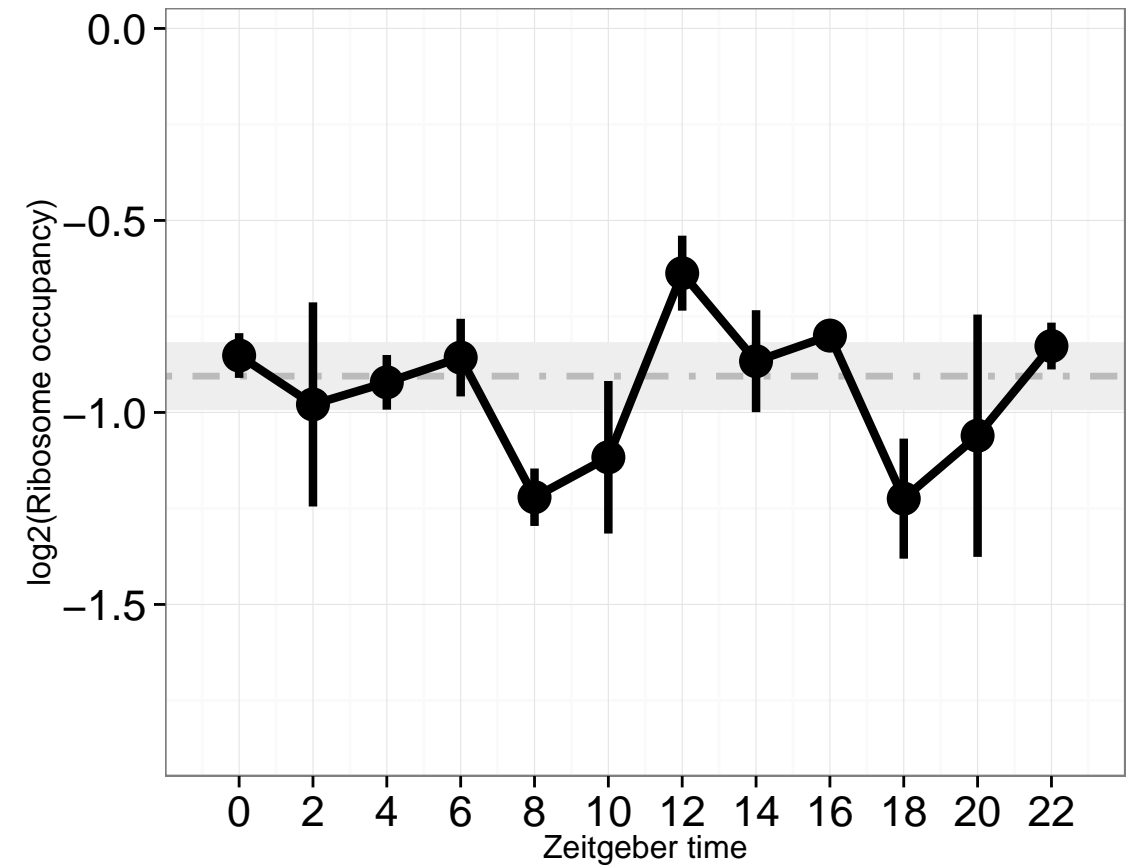

Supplement: SuppDataset_1.zip [file Wdr20a_set_A.pdf › Supplemental Dataset 1/A-mRNA_nonrhyth_translation_nonrhyth/Wdr20a_set_A.pdf]

## Wdr24

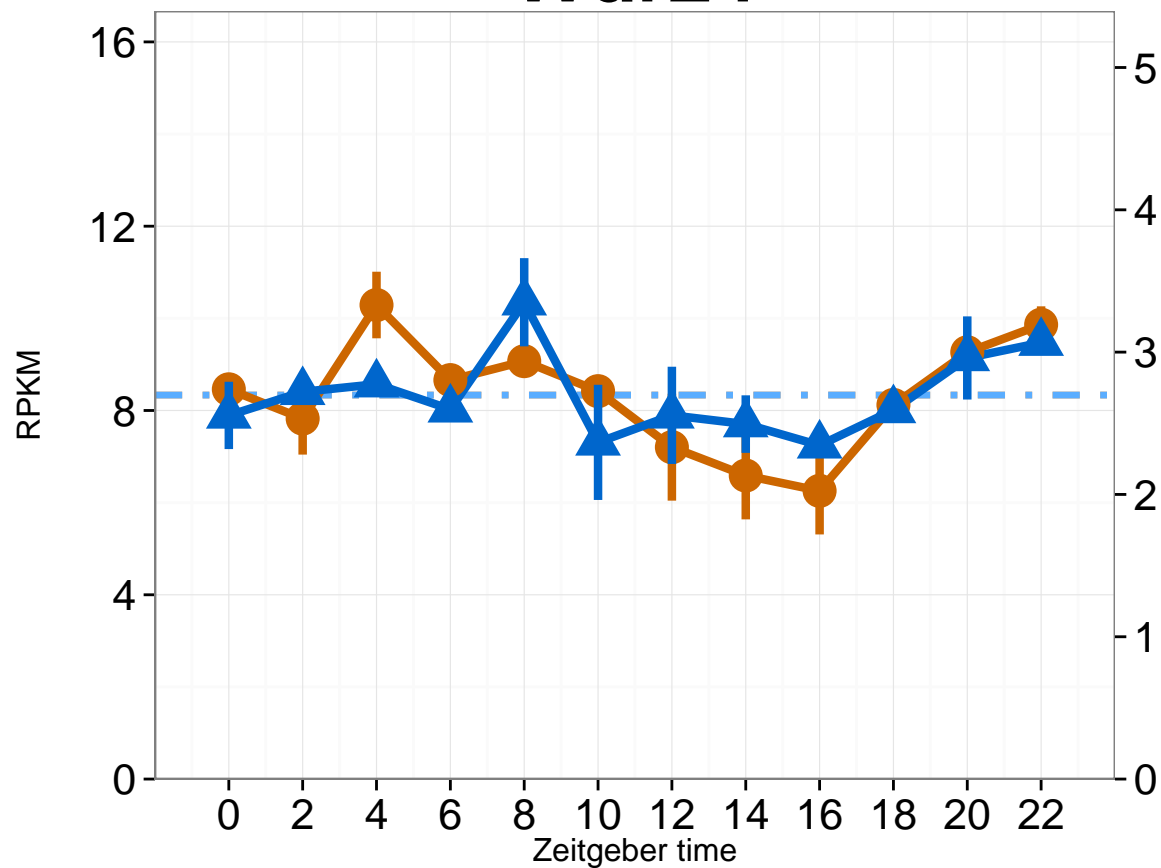

## Wdr24

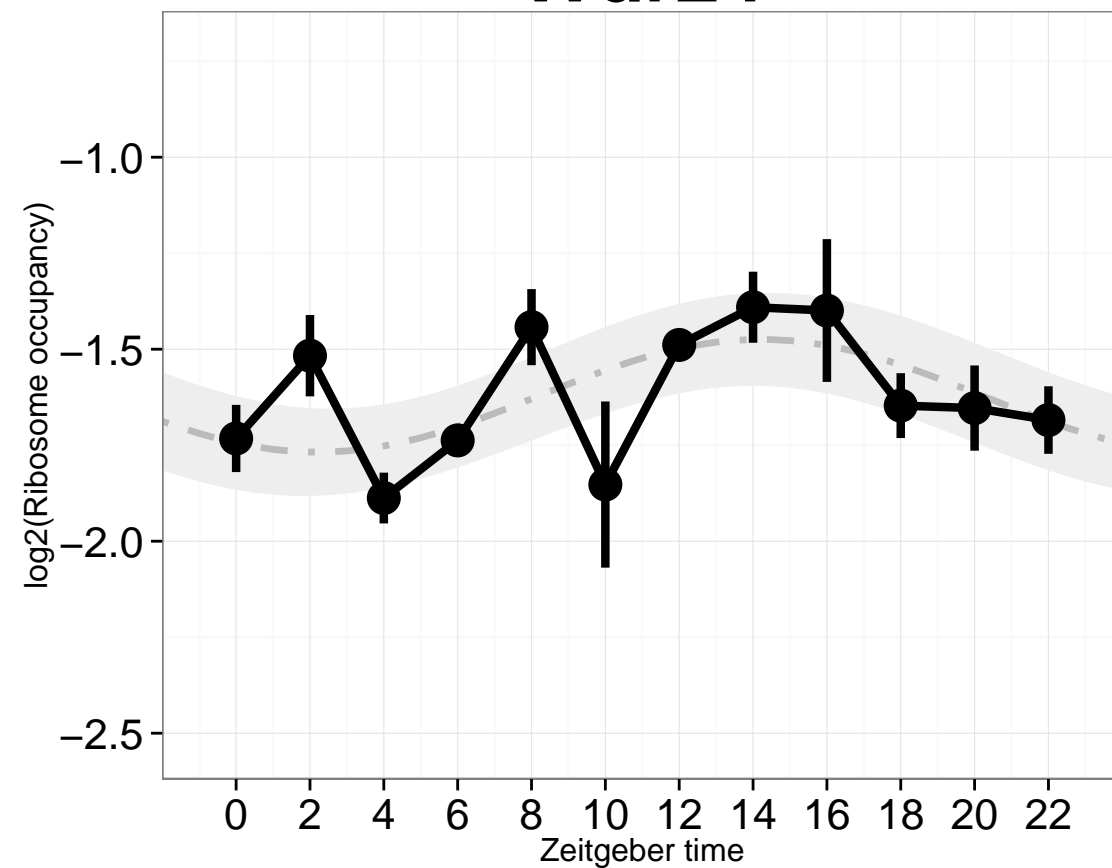

Supplement: SuppDataset_1.zip [file Wdr24_set_A.pdf › Supplemental Dataset 1/A-mRNA_nonrhyth_translation_nonrhyth/Wdr24_set_A.pdf]

## Wdr25

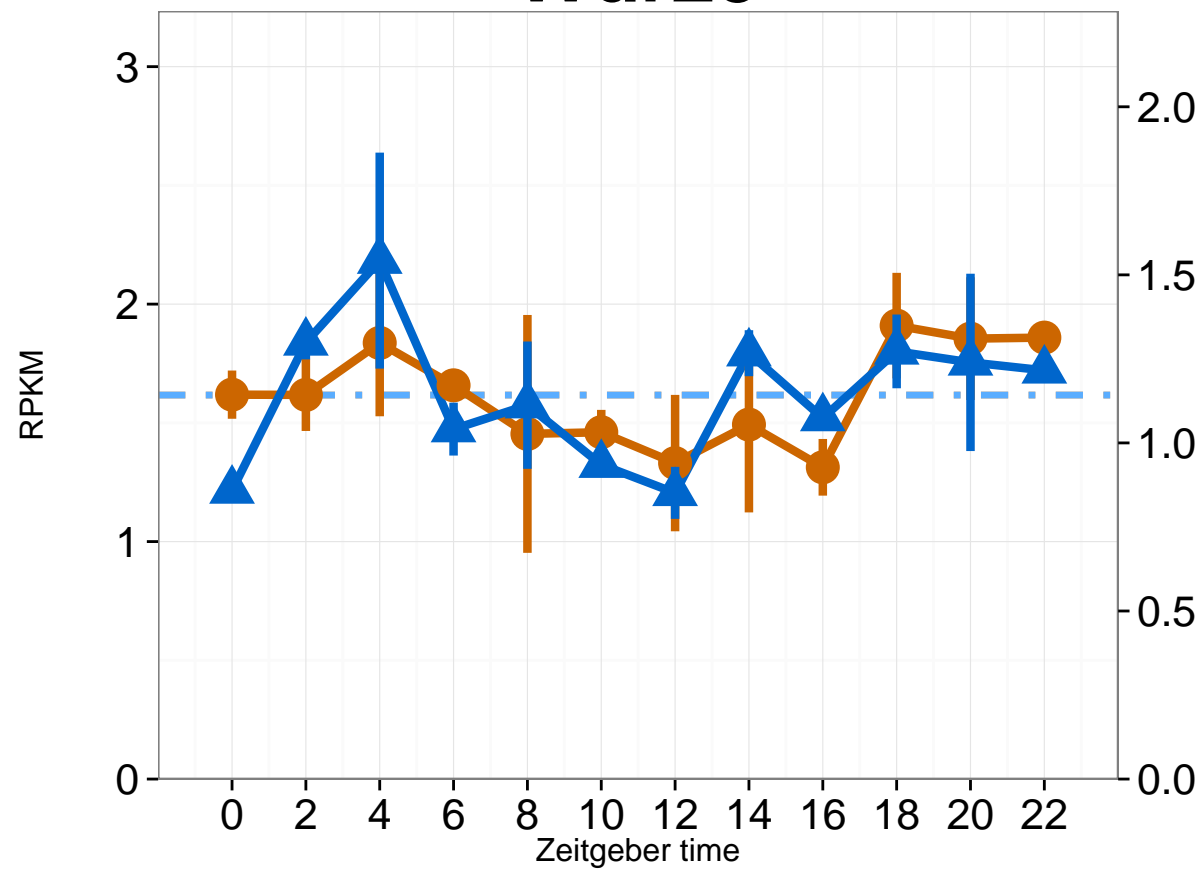

## Wdr25

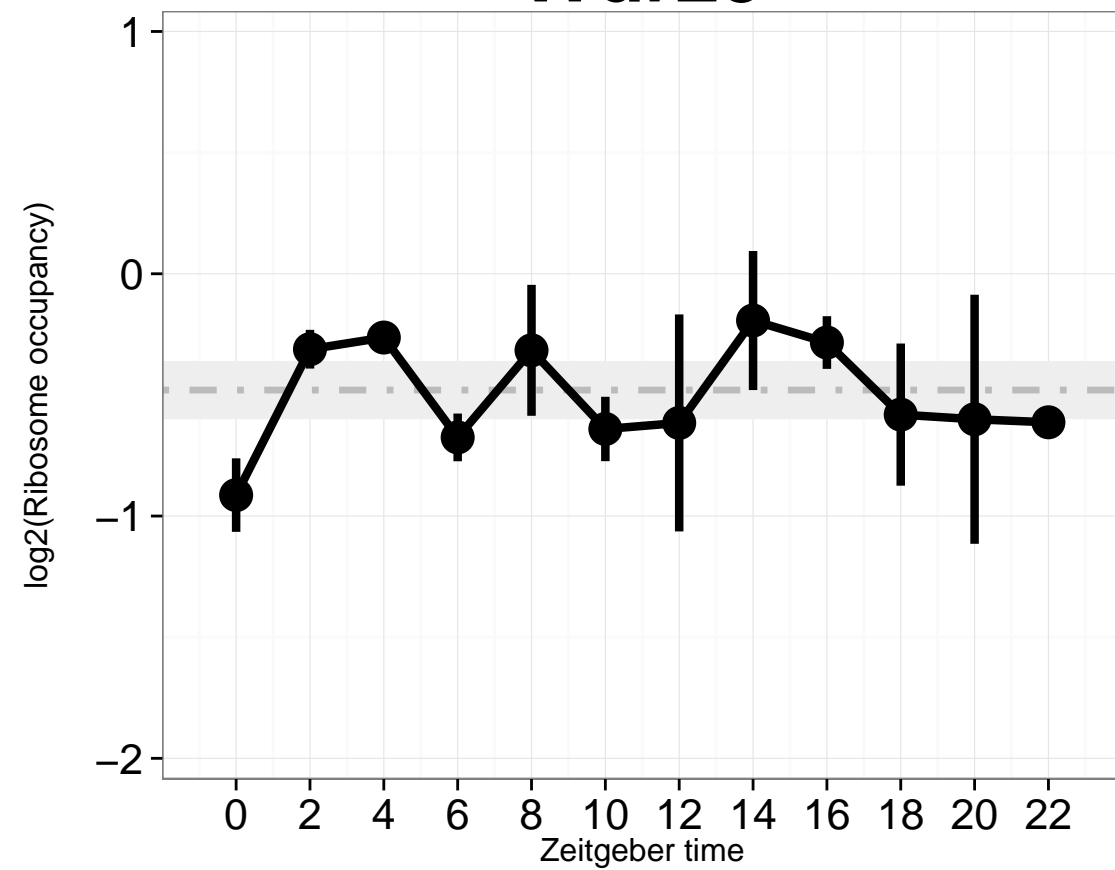

Supplement: SuppDataset_1.zip [file Wdr25_set_A.pdf › Supplemental Dataset 1/A-mRNA_nonrhyth_translation_nonrhyth/Wdr25_set_A.pdf]

# Wdr26

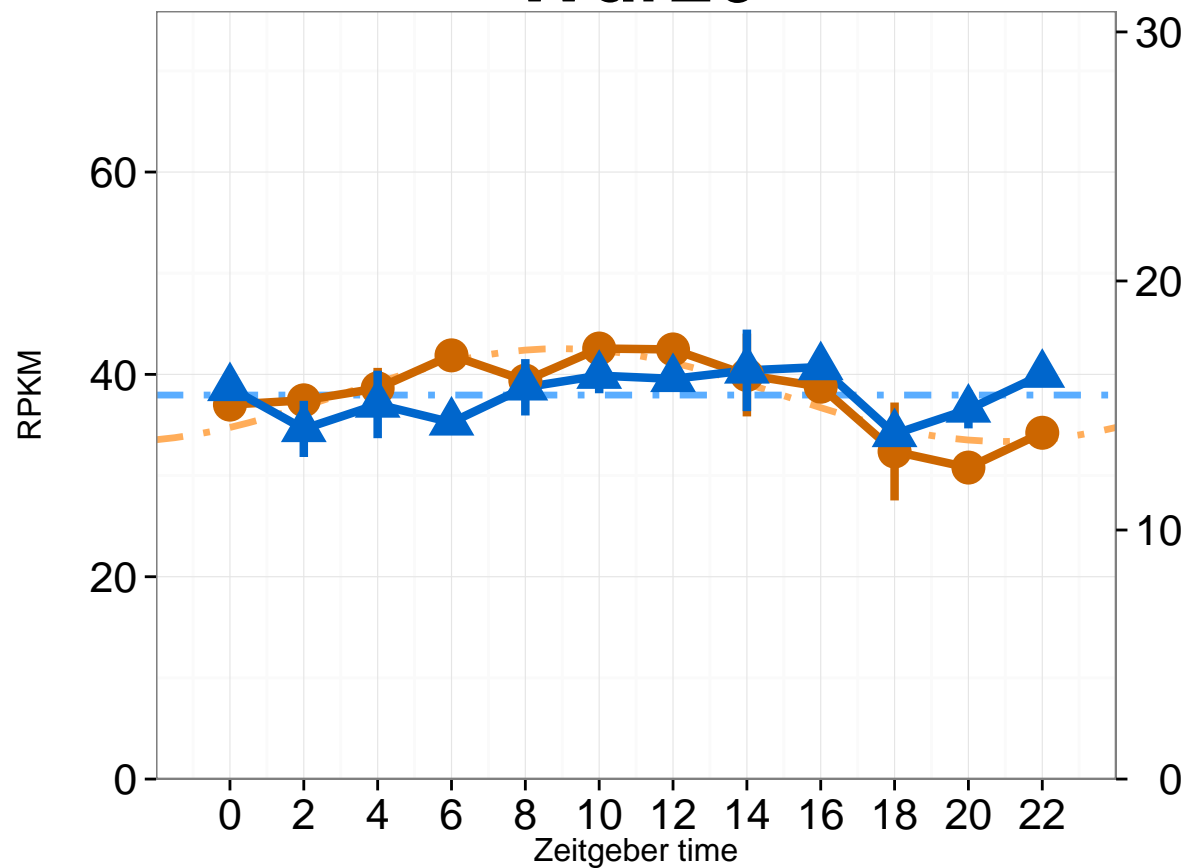

# Wdr26

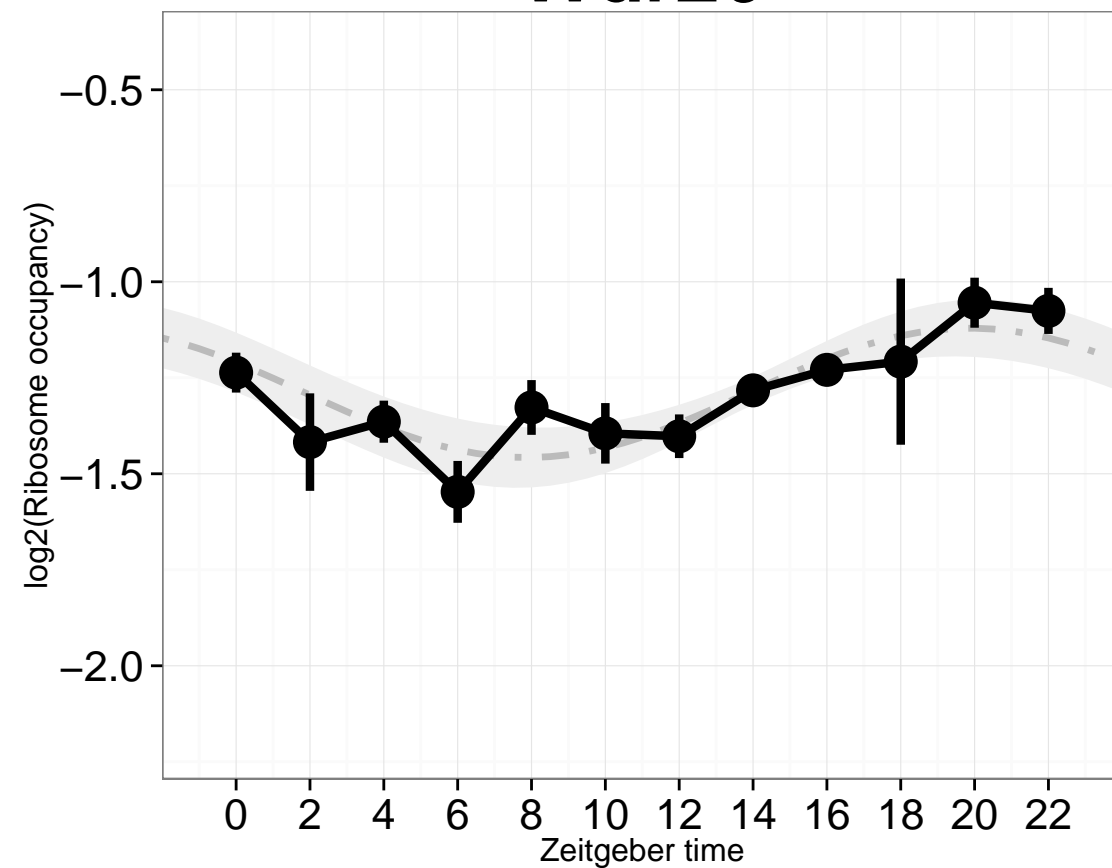

Supplement: SuppDataset_1.zip [file Wdr26_set_A.pdf › Supplemental Dataset 1/A-mRNA_nonrhyth_translation_nonrhyth/Wdr26_set_A.pdf]

## Wdr33

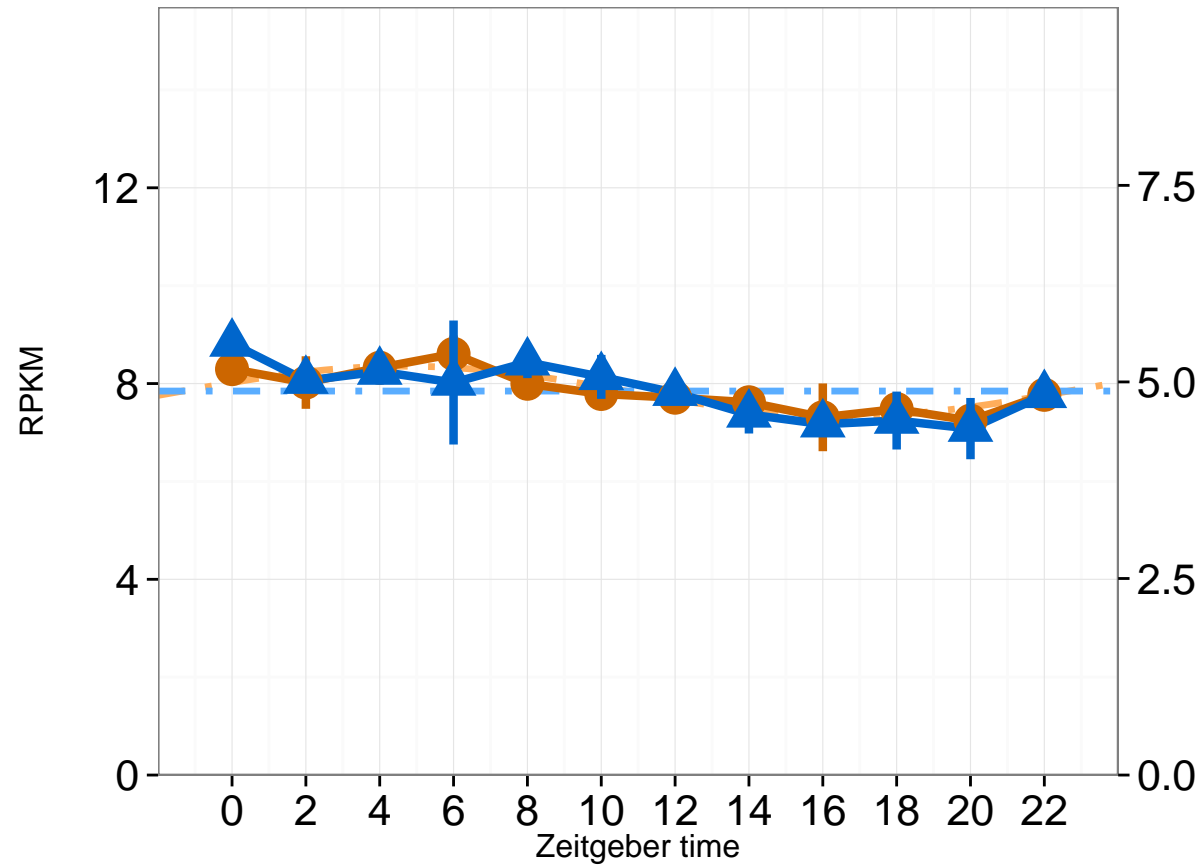

## Wdr33

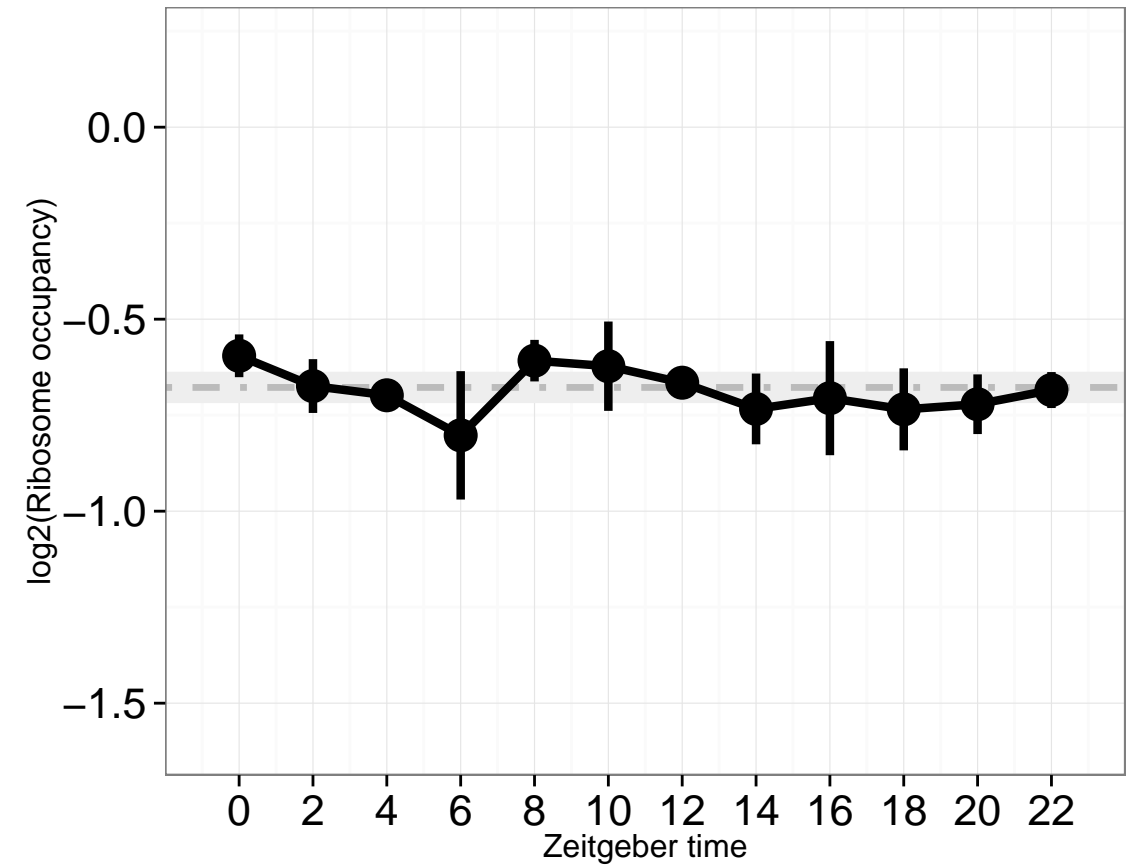

Supplement: SuppDataset_1.zip [file Wdr33_set_A.pdf › Supplemental Dataset 1/A-mRNA_nonrhyth_translation_nonrhyth/Wdr33_set_A.pdf]

## Wdr34

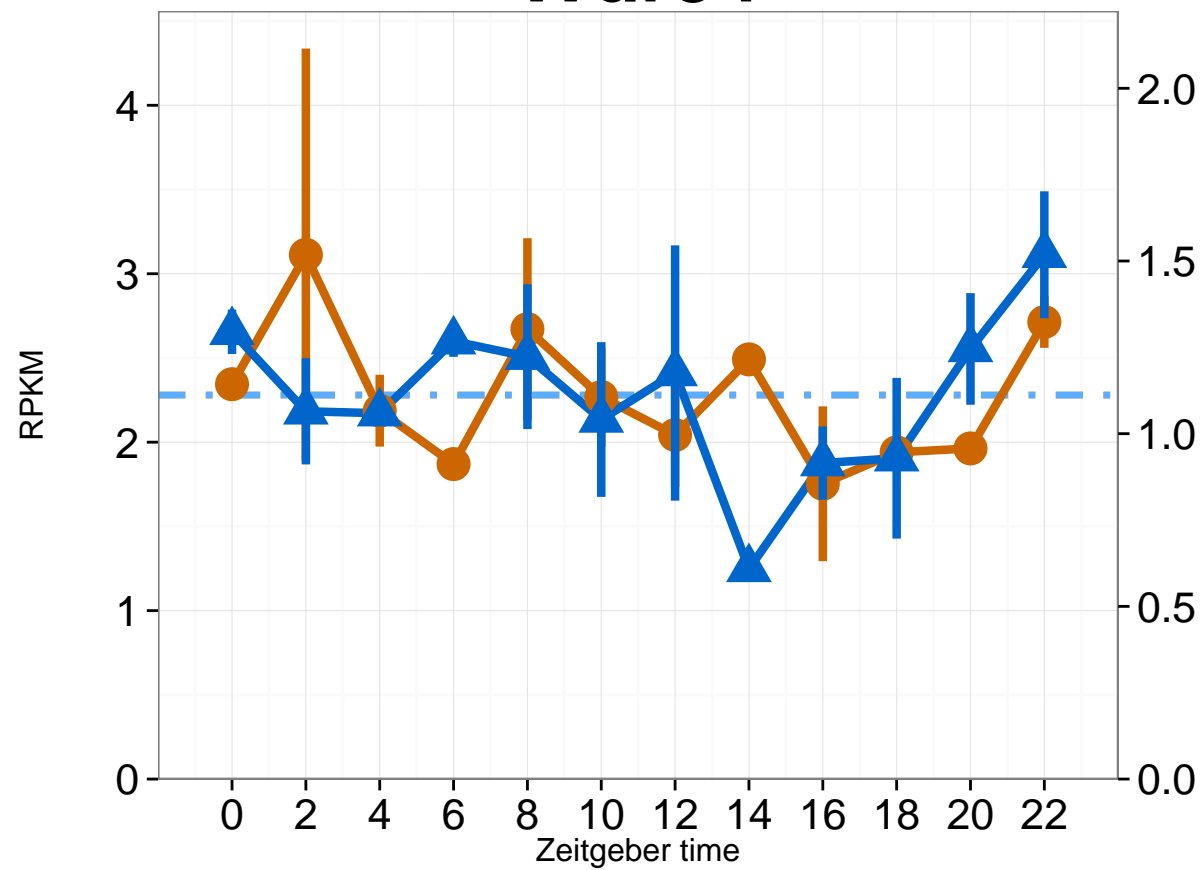

## Wdr34

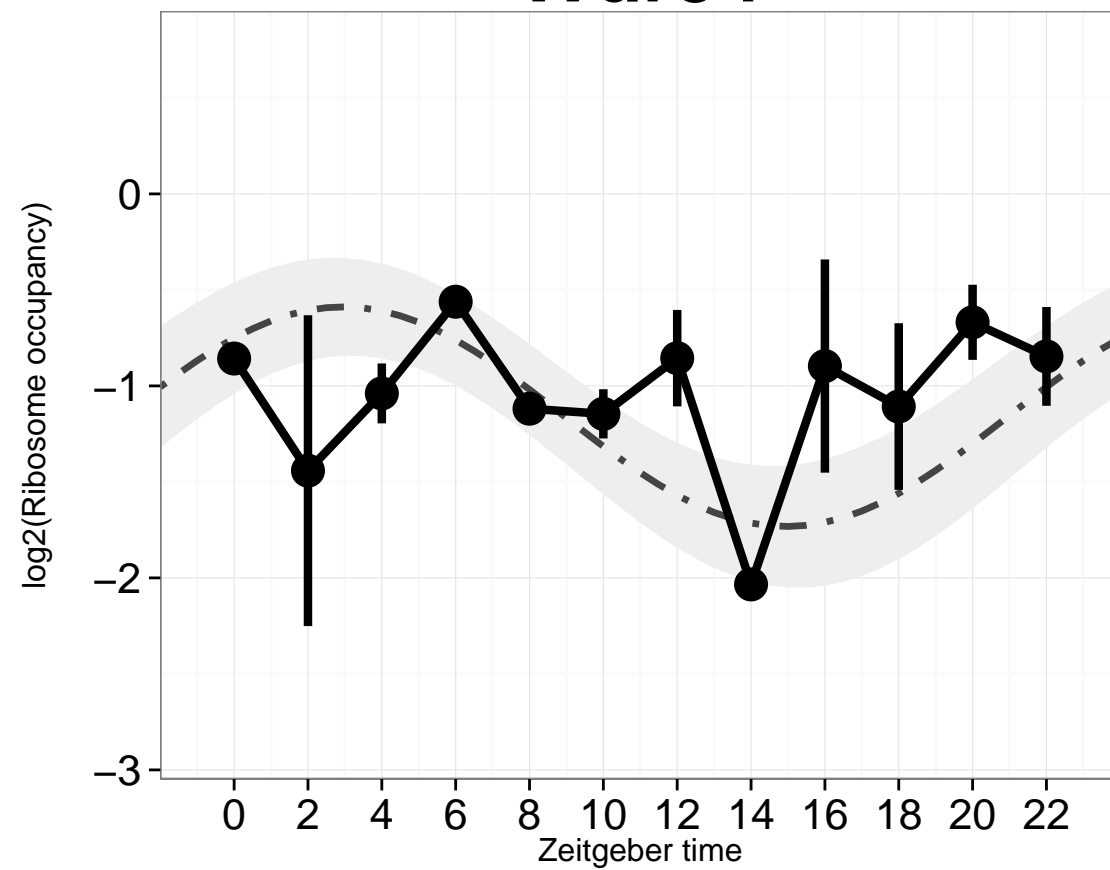

Supplement: SuppDataset_1.zip [file Wdr34_set_A.pdf › Supplemental Dataset 1/A-mRNA_nonrhyth_translation_nonrhyth/Wdr34_set_A.pdf]

## Wdr35

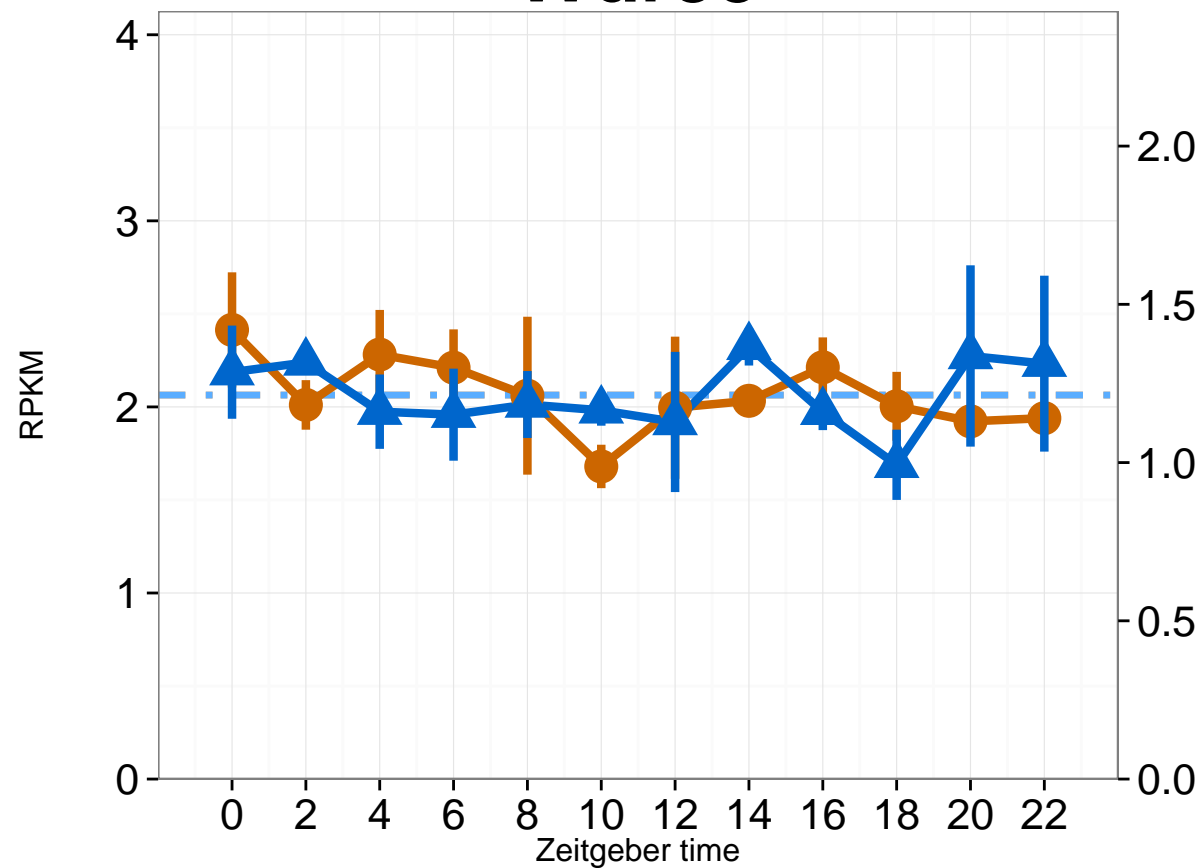

## Wdr35

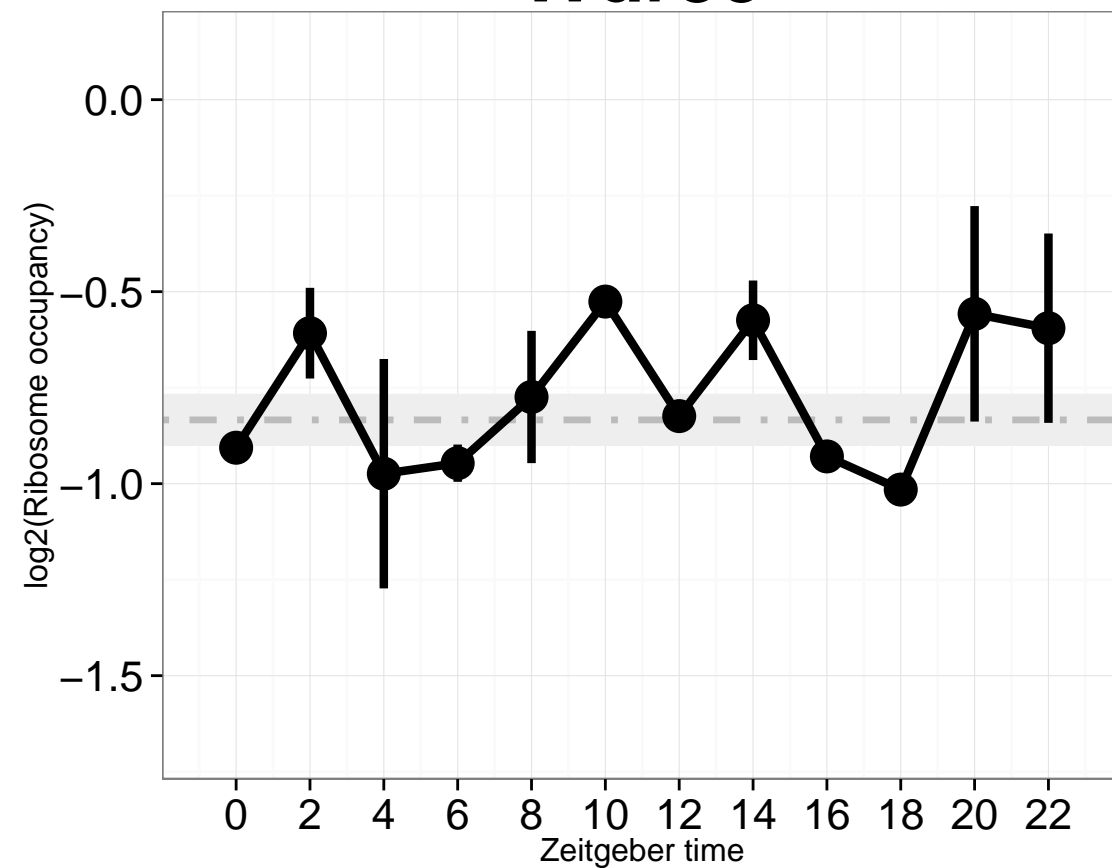

Supplement: SuppDataset_1.zip [file Wdr35_set_A.pdf › Supplemental Dataset 1/A-mRNA_nonrhyth_translation_nonrhyth/Wdr35_set_A.pdf]

## Wdr36

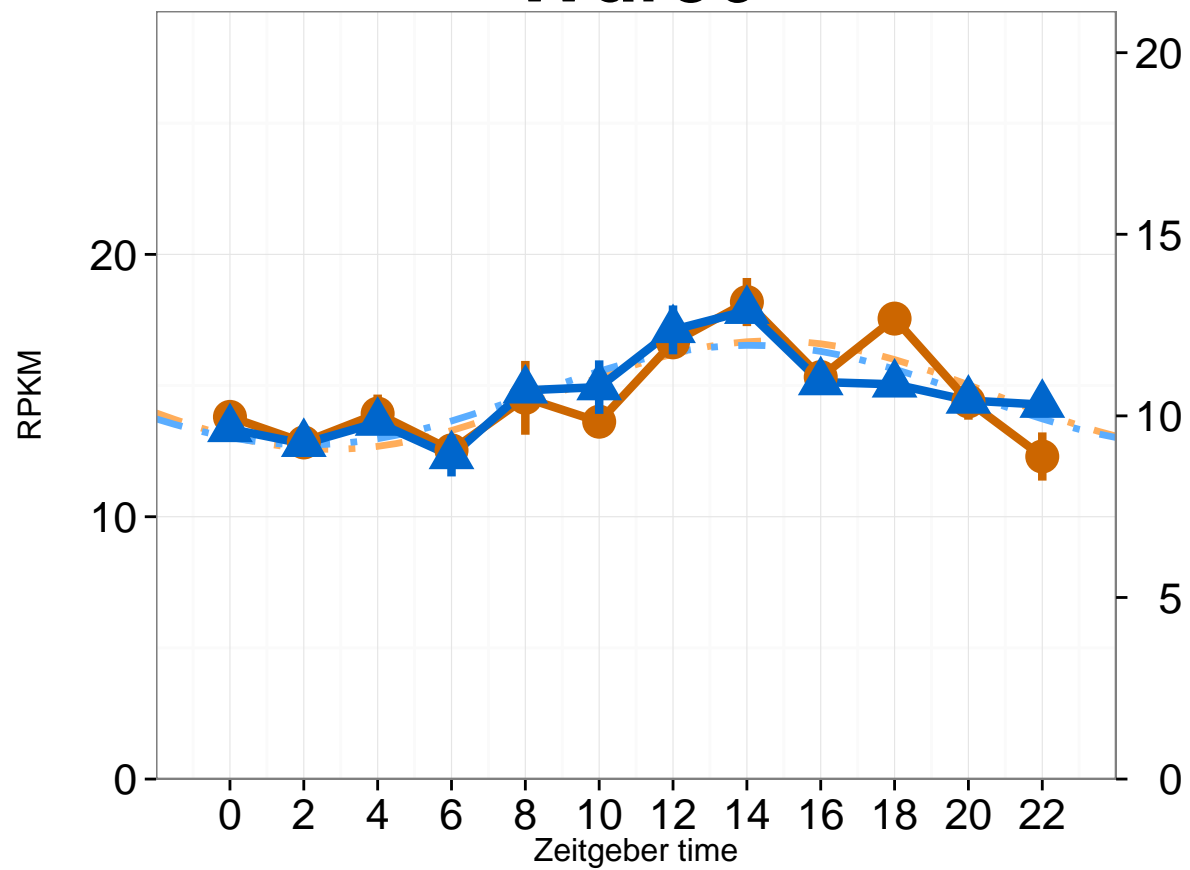

## Wdr36

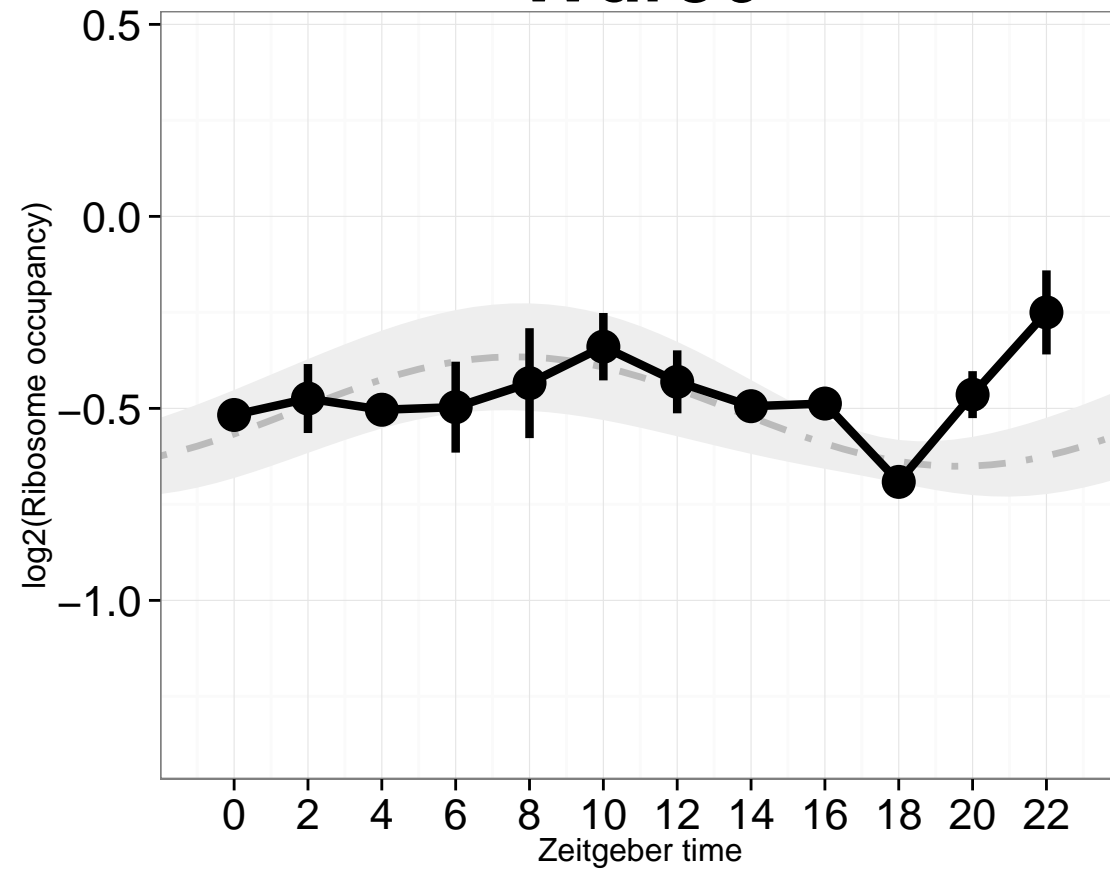

Supplement: SuppDataset_1.zip [file Wdr36_set_A.pdf › Supplemental Dataset 1/A-mRNA_nonrhyth_translation_nonrhyth/Wdr36_set_A.pdf]

## Wdr37

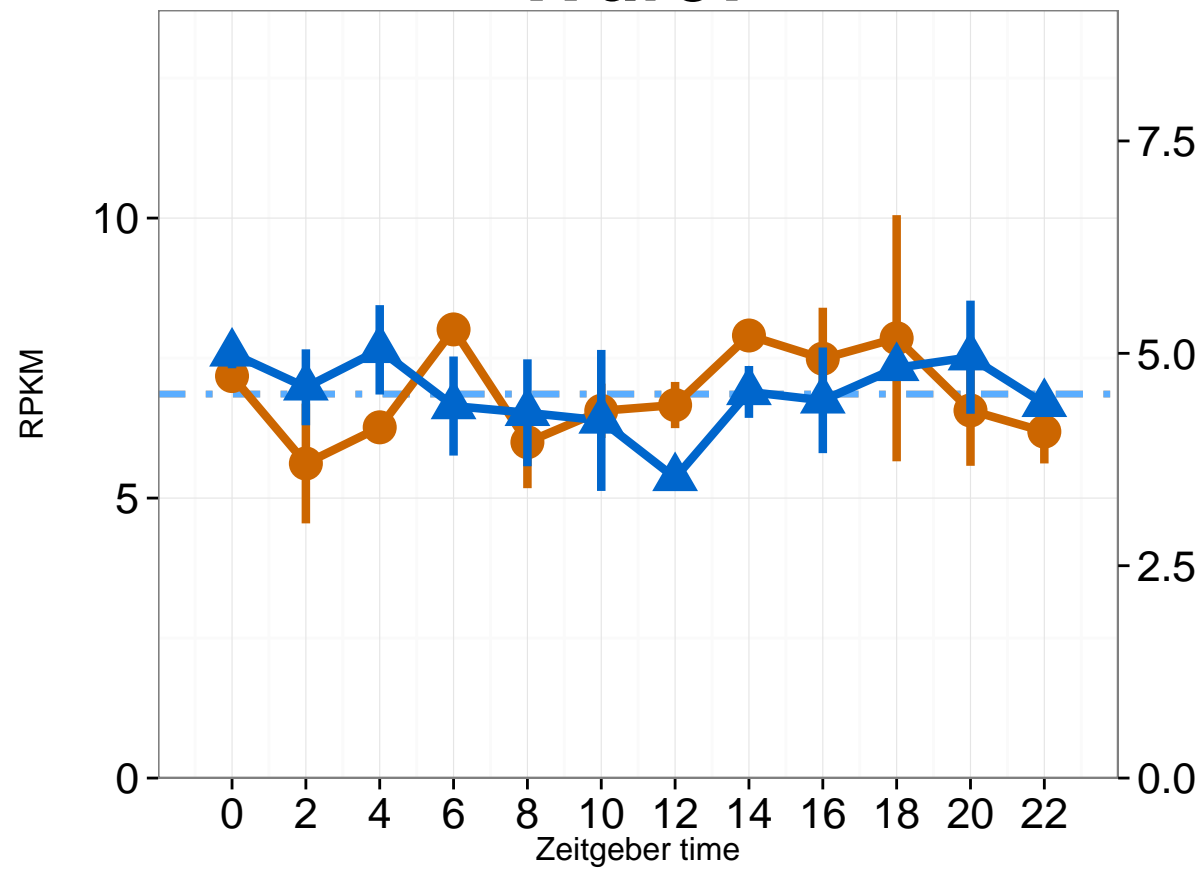

## Wdr37

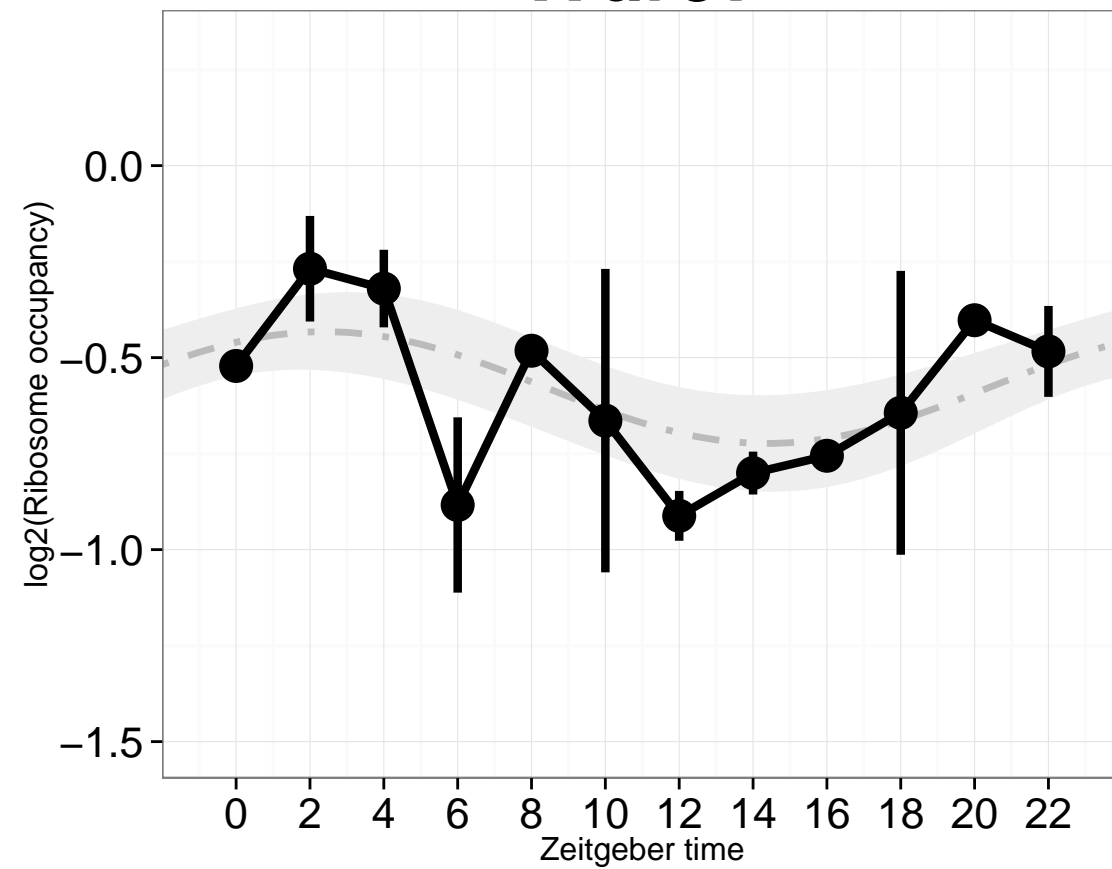

Supplement: SuppDataset_1.zip [file Wdr37_set_A.pdf › Supplemental Dataset 1/A-mRNA_nonrhyth_translation_nonrhyth/Wdr37_set_A.pdf]

## Wdr3

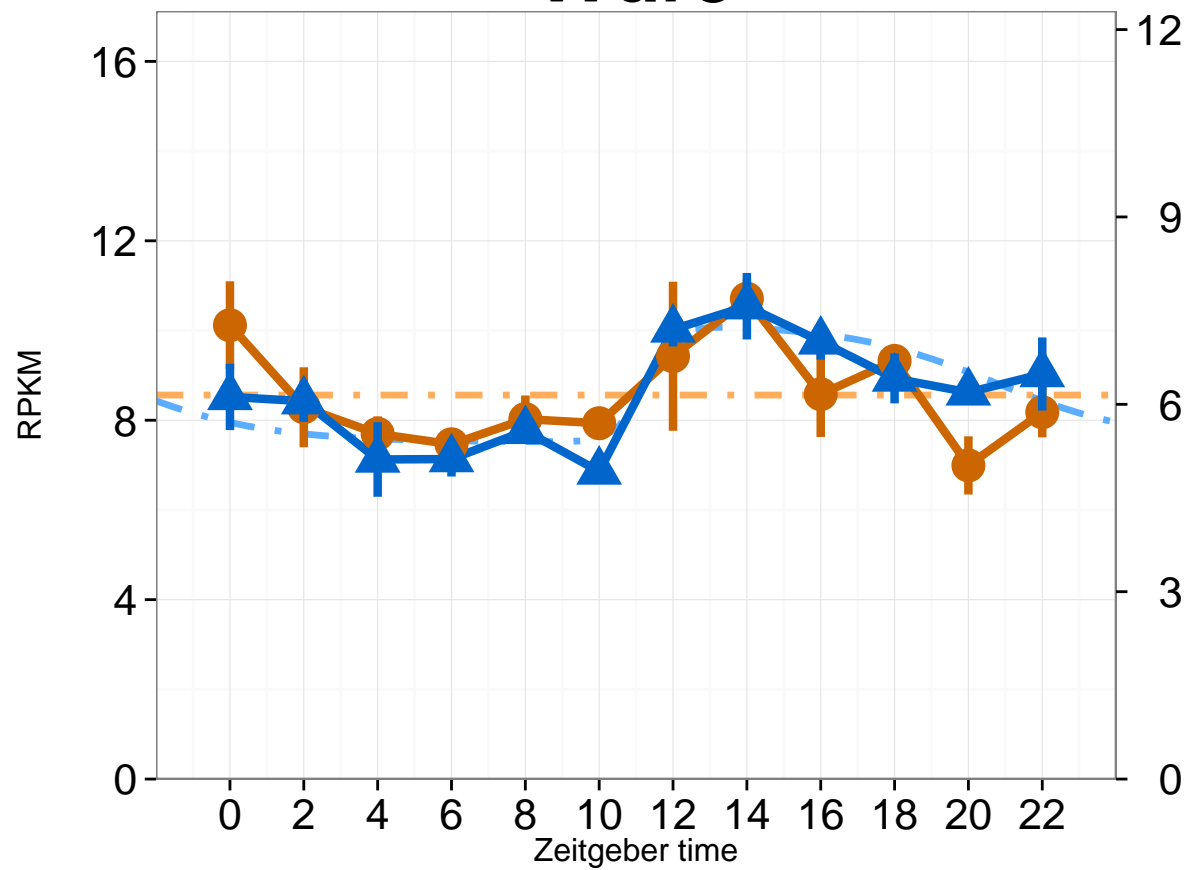

## Wdr3

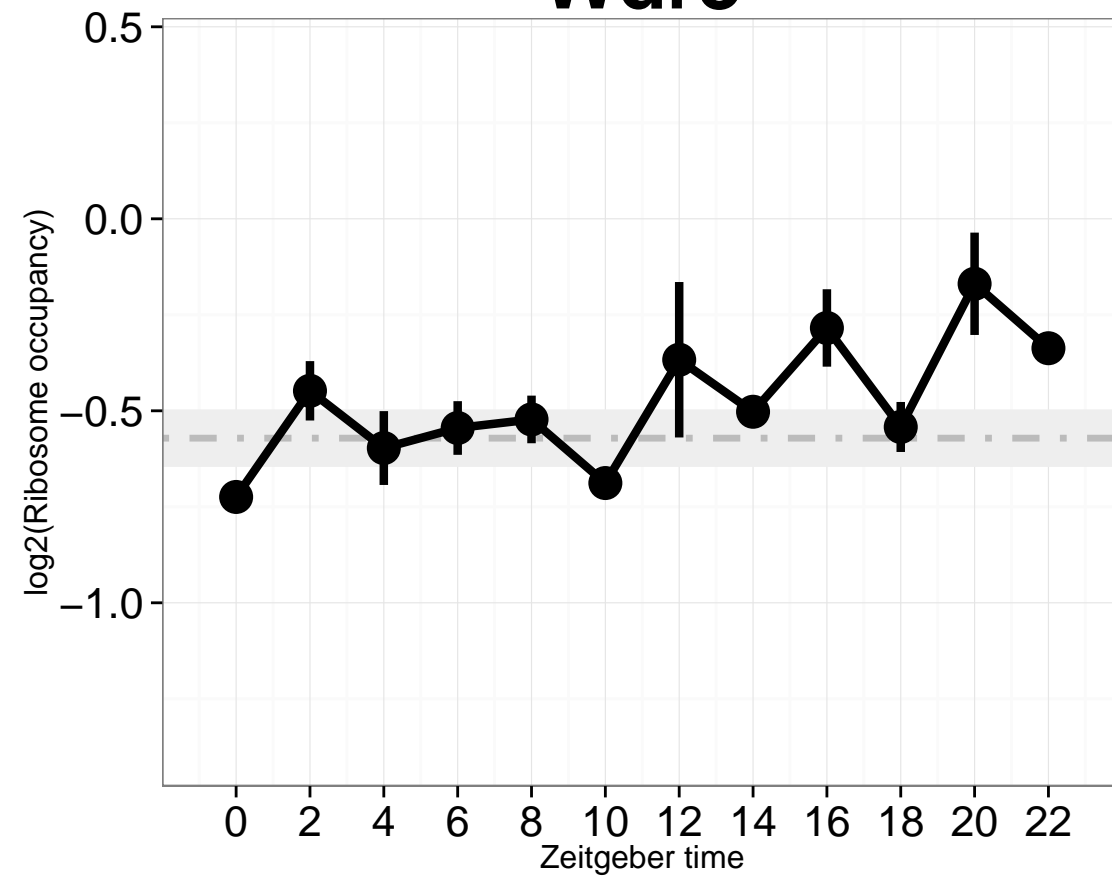

Supplement: SuppDataset_1.zip [file Wdr3_set_A.pdf › Supplemental Dataset 1/A-mRNA_nonrhyth_translation_nonrhyth/Wdr3_set_A.pdf]

## Wdr44

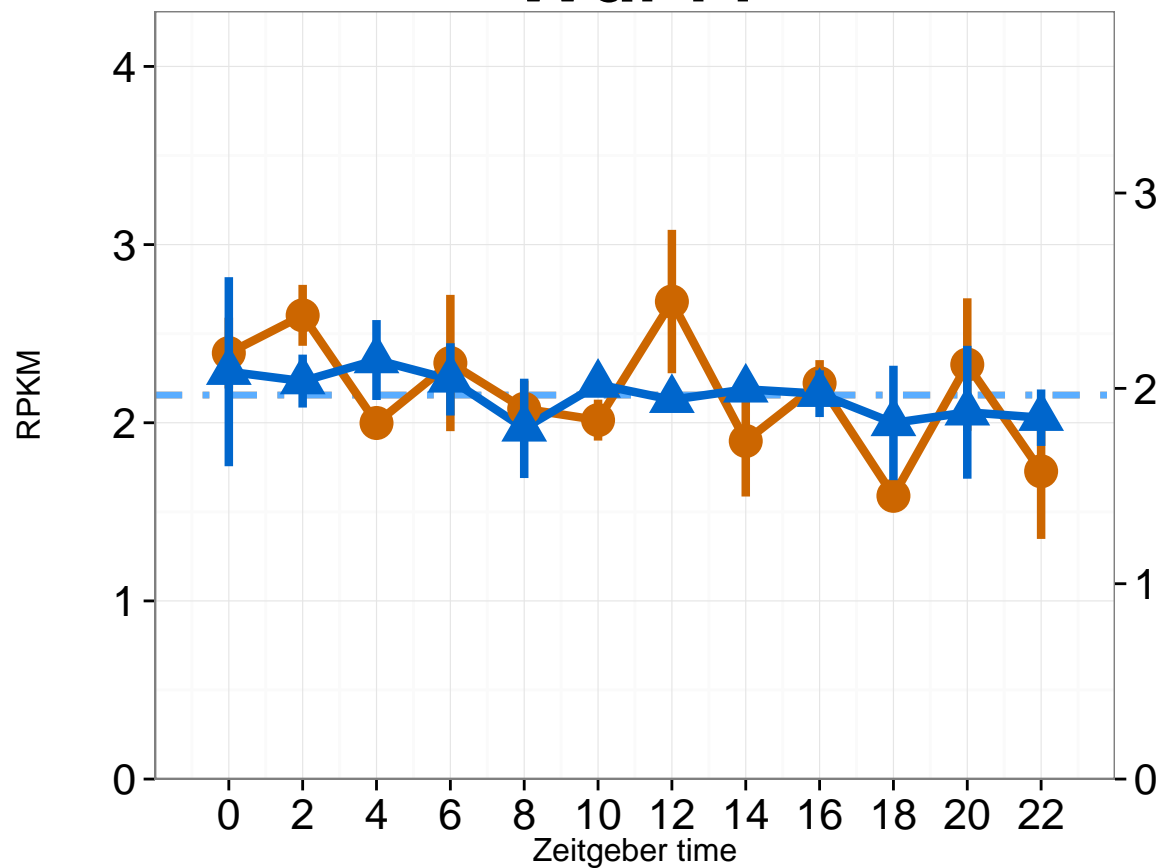

## Wdr44

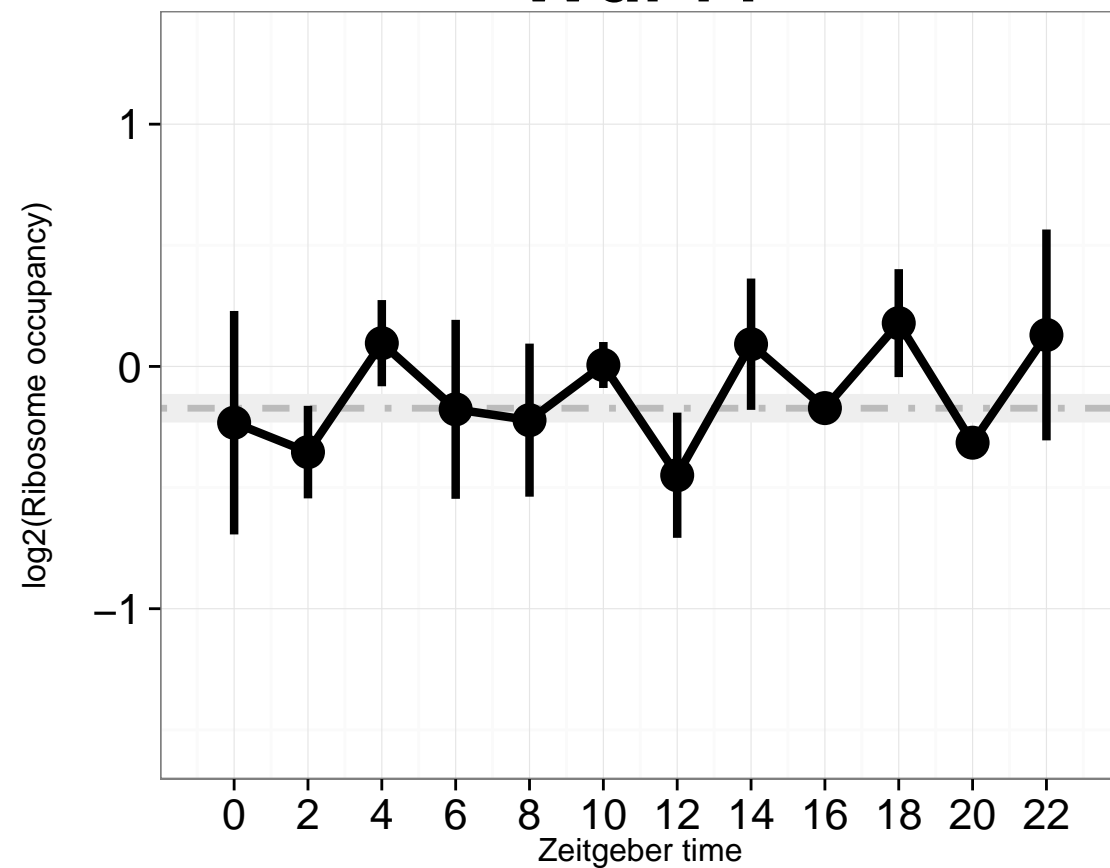

Supplement: SuppDataset_1.zip [file Wdr44_set_A.pdf › Supplemental Dataset 1/A-mRNA_nonrhyth_translation_nonrhyth/Wdr44_set_A.pdf]

## Wdr45

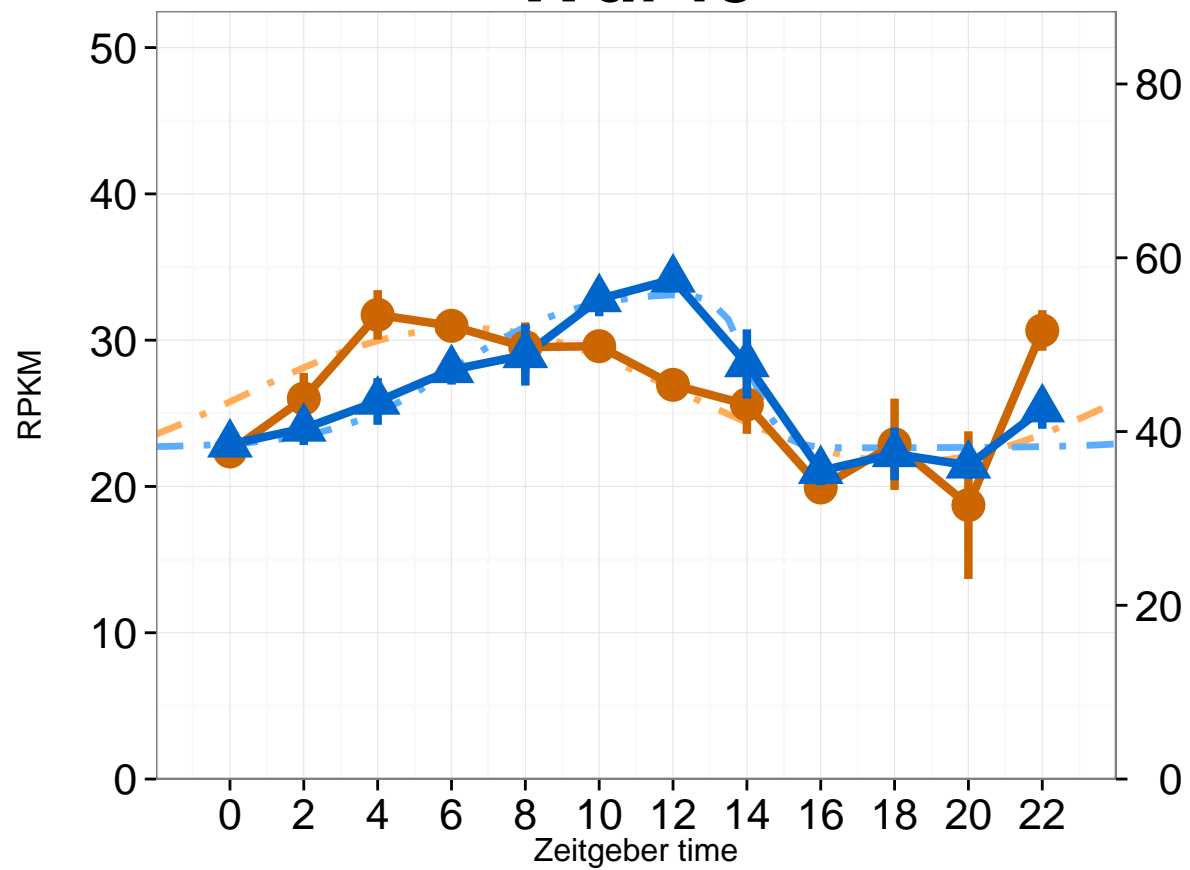

## Wdr45

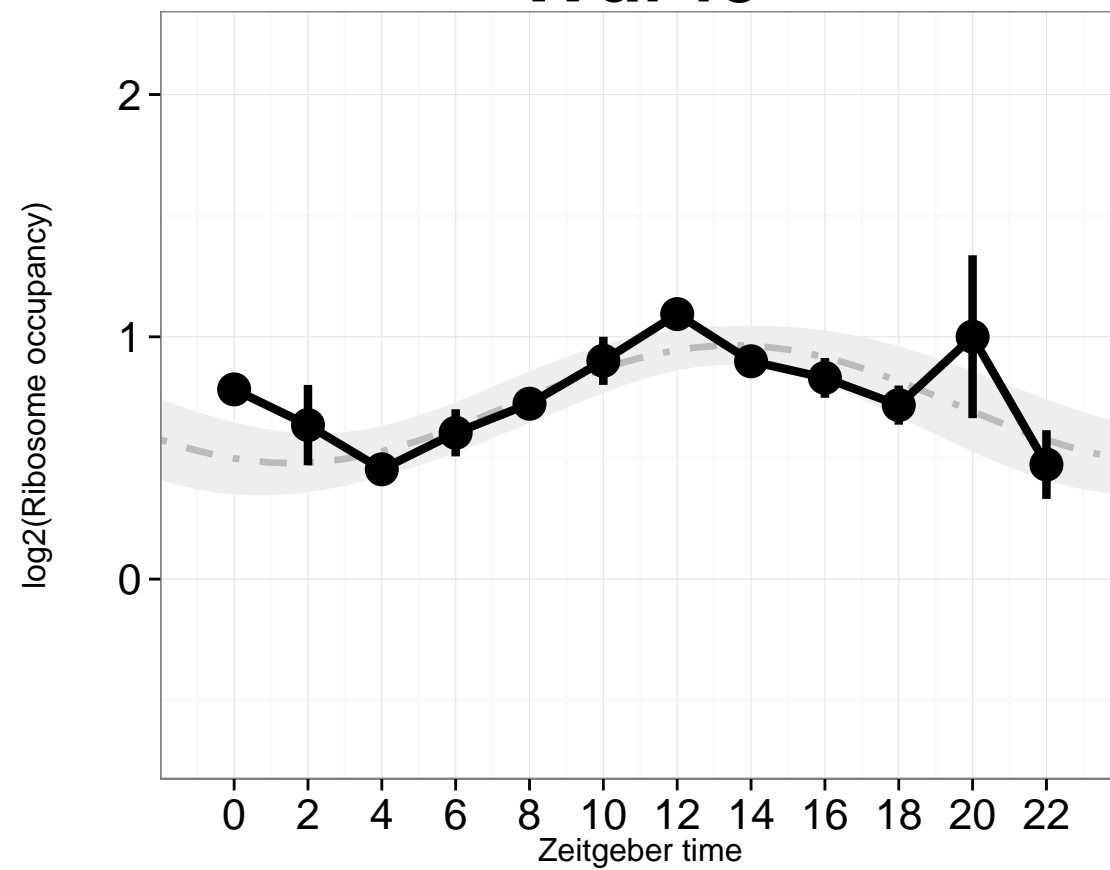

Supplement: SuppDataset_1.zip [file Wdr45_set_A.pdf › Supplemental Dataset 1/A-mRNA_nonrhyth_translation_nonrhyth/Wdr45_set_A.pdf]

## Wdr46

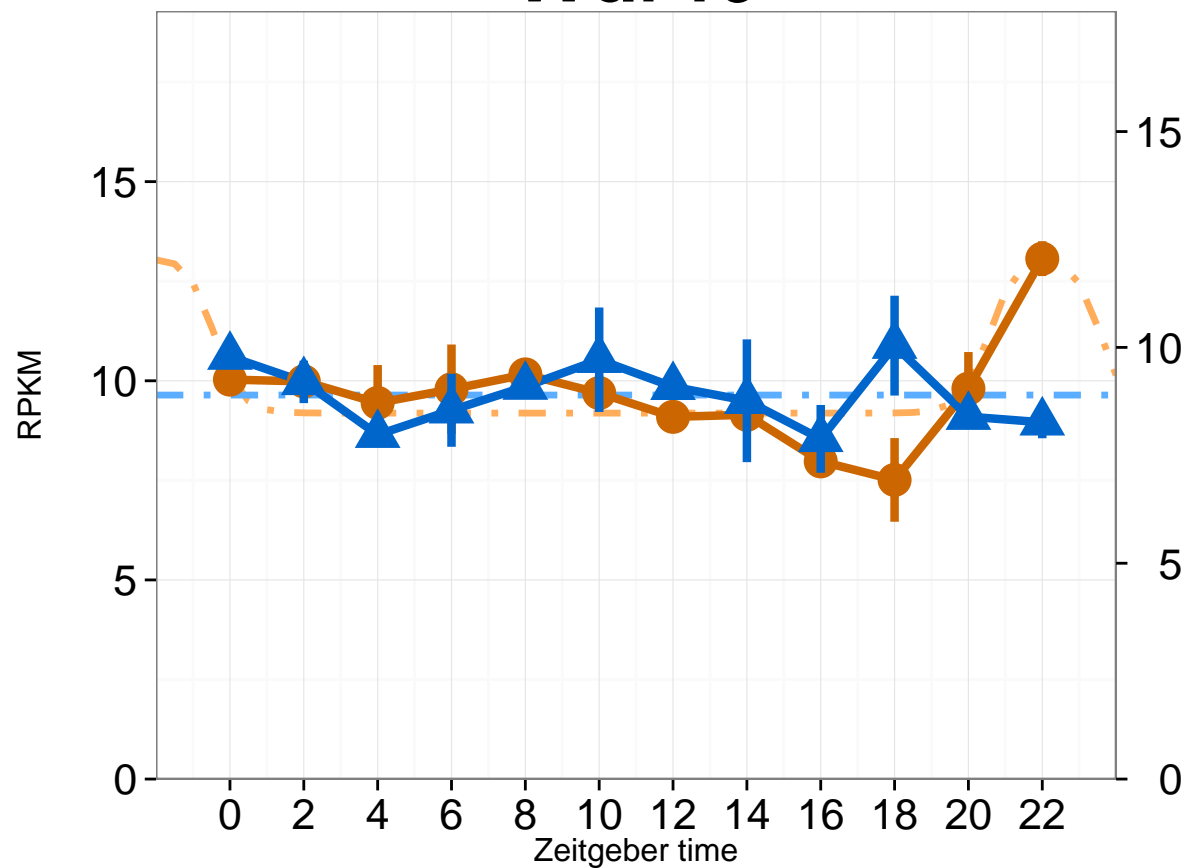

## Wdr46

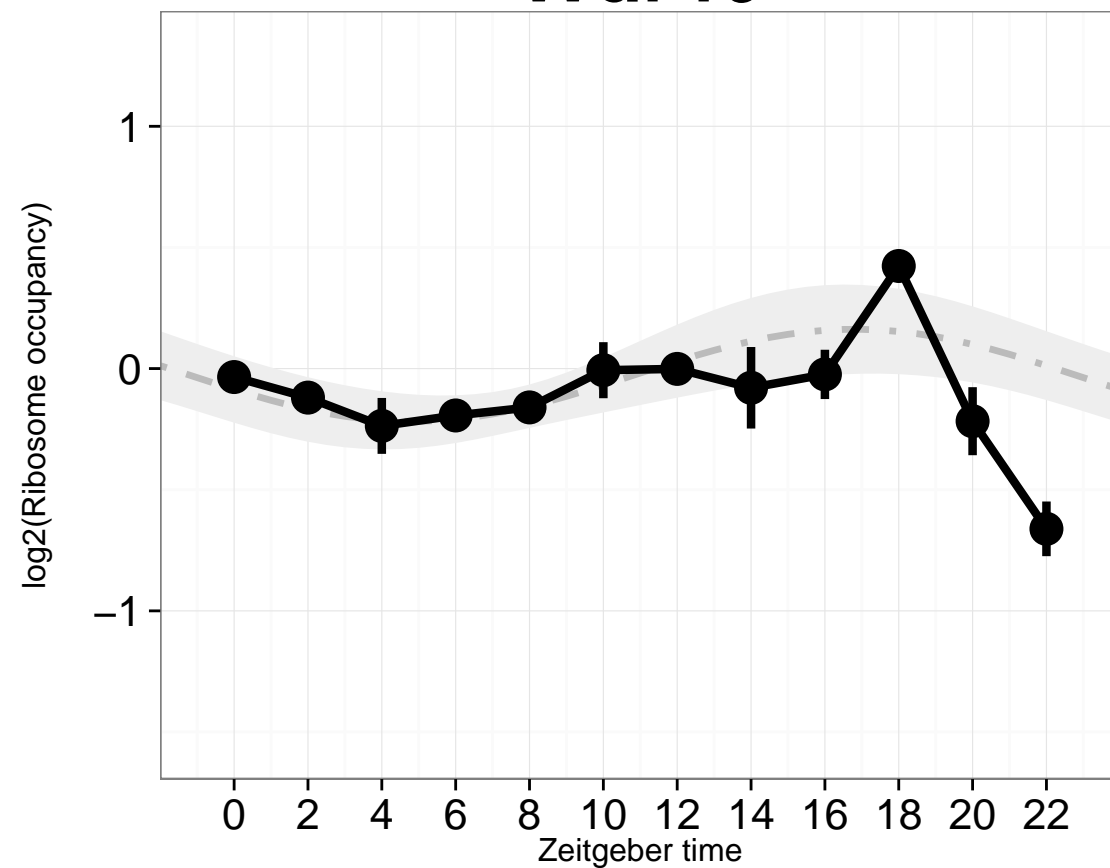

Supplement: SuppDataset_1.zip [file Wdr46_set_A.pdf › Supplemental Dataset 1/A-mRNA_nonrhyth_translation_nonrhyth/Wdr46_set_A.pdf]

## Wdr47

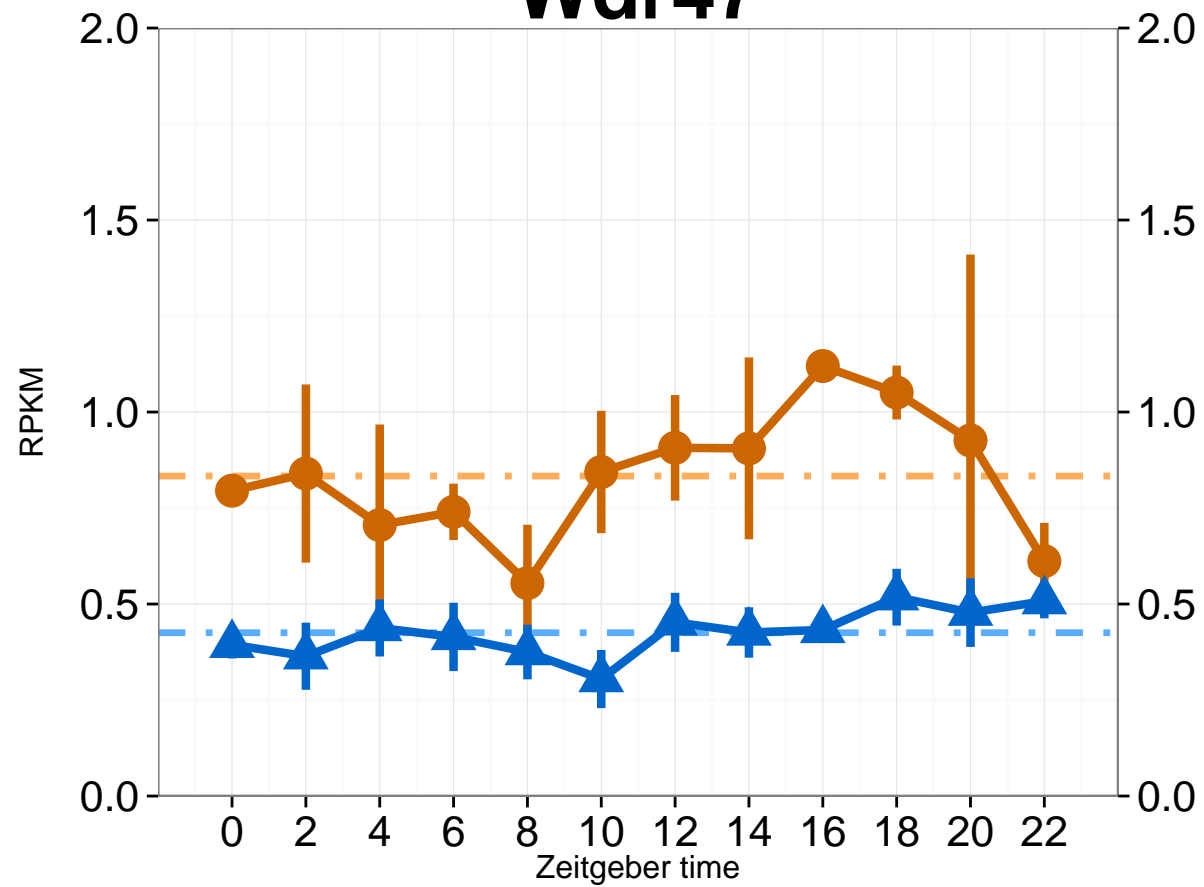

## Wdr47

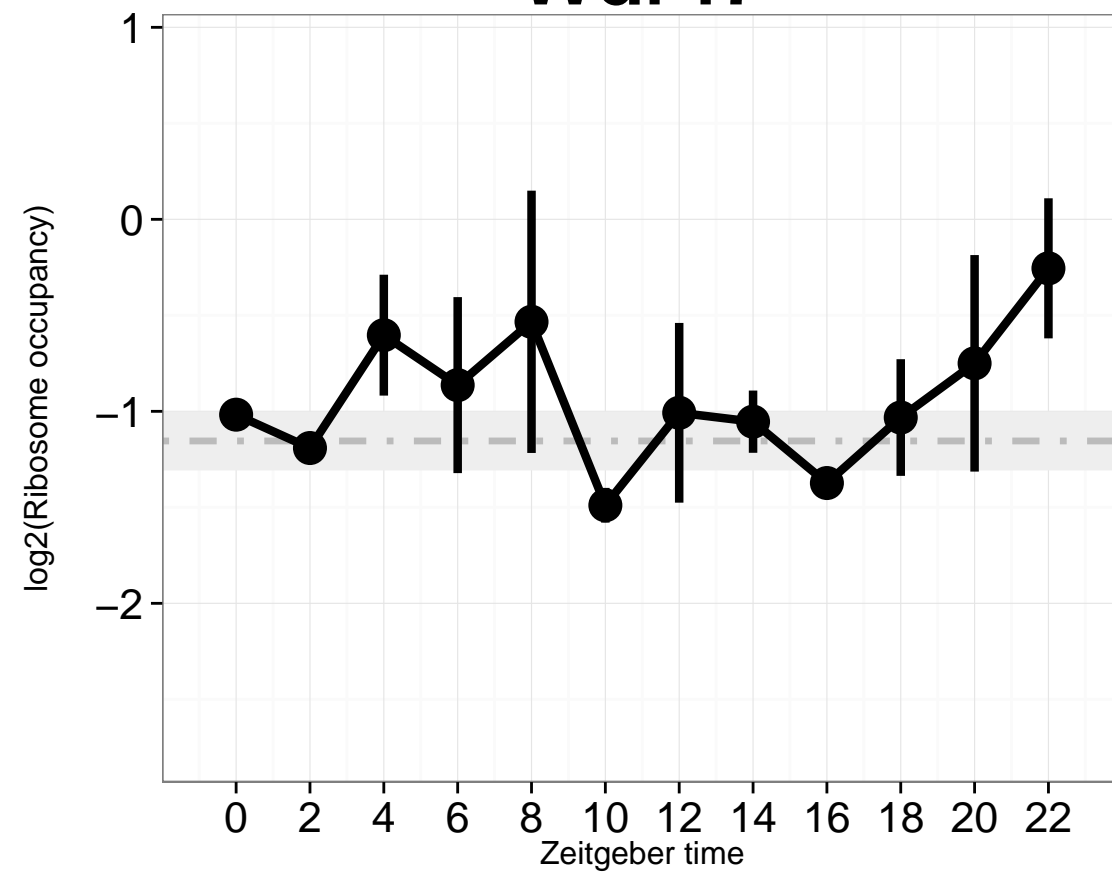

Supplement: SuppDataset_1.zip [file Wdr47_set_A.pdf › Supplemental Dataset 1/A-mRNA_nonrhyth_translation_nonrhyth/Wdr47_set_A.pdf]

# Wdr48

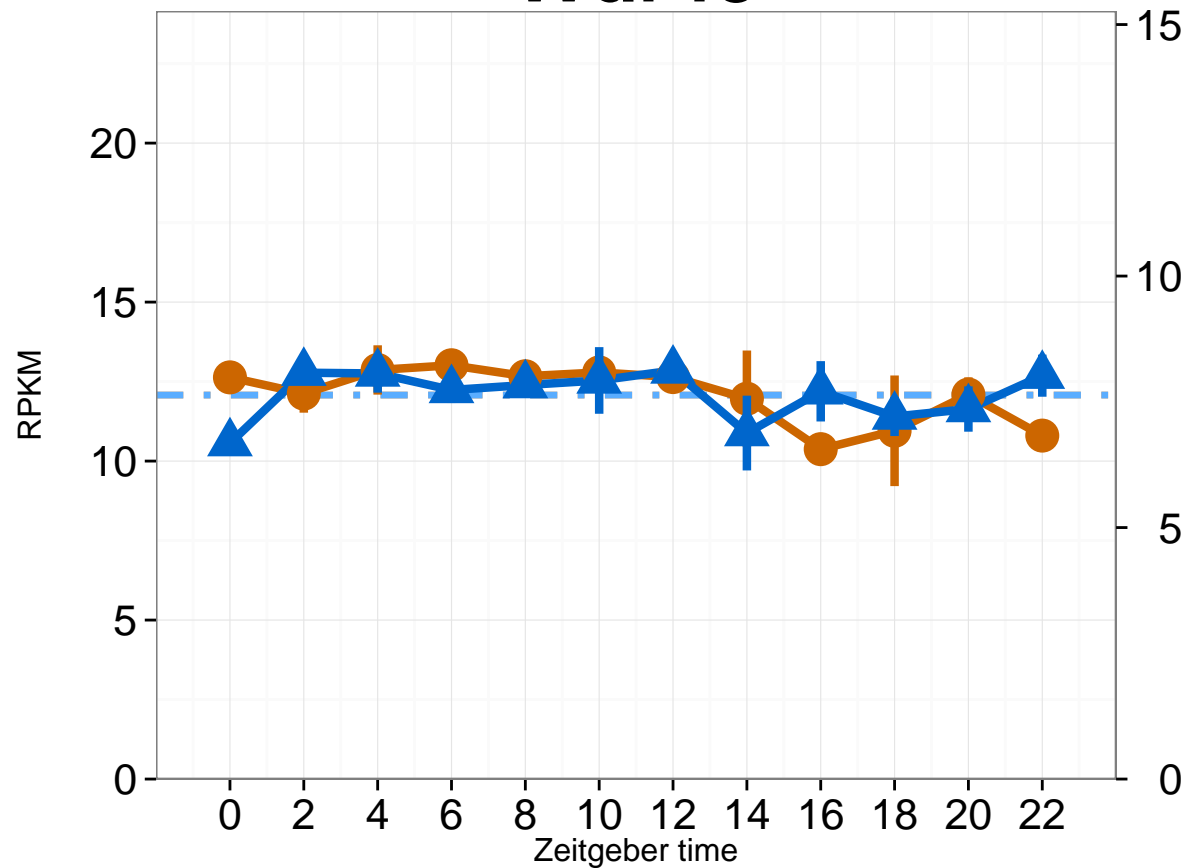

# Wdr48

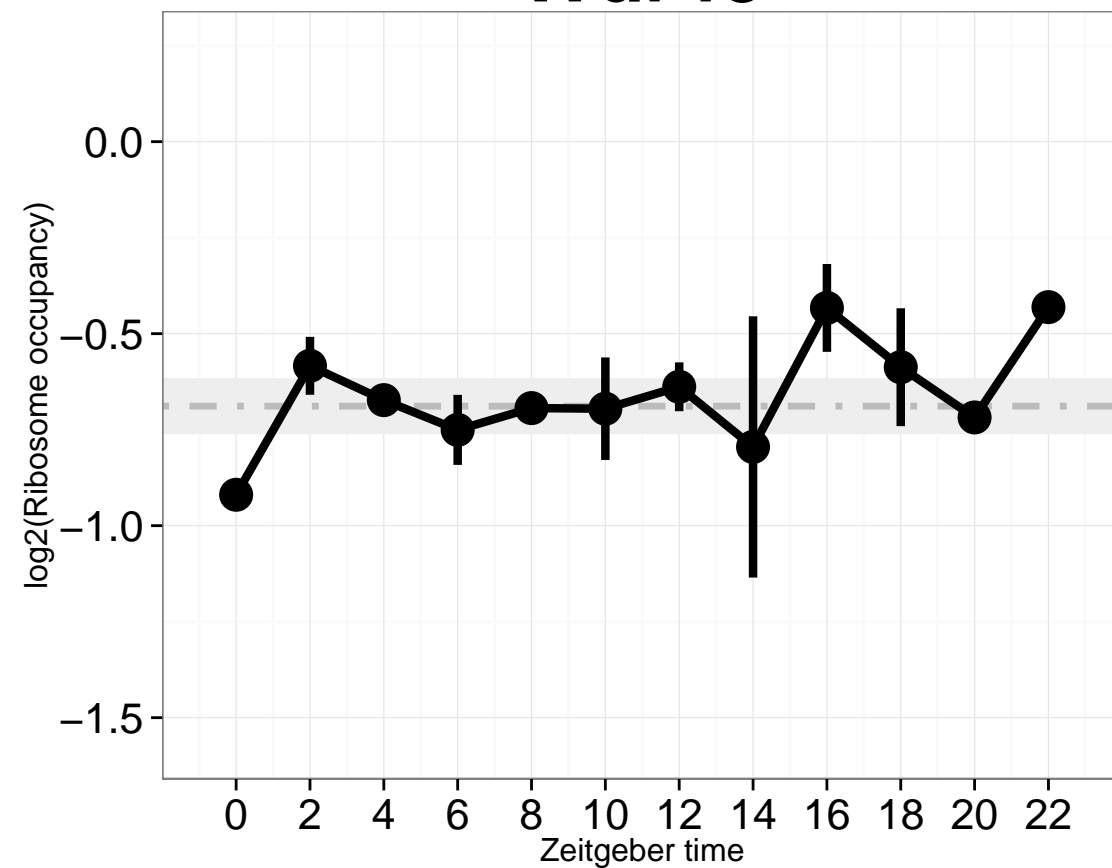

Supplement: SuppDataset_1.zip [file Wdr48_set_A.pdf › Supplemental Dataset 1/A-mRNA_nonrhyth_translation_nonrhyth/Wdr48_set_A.pdf]

# Wdr4

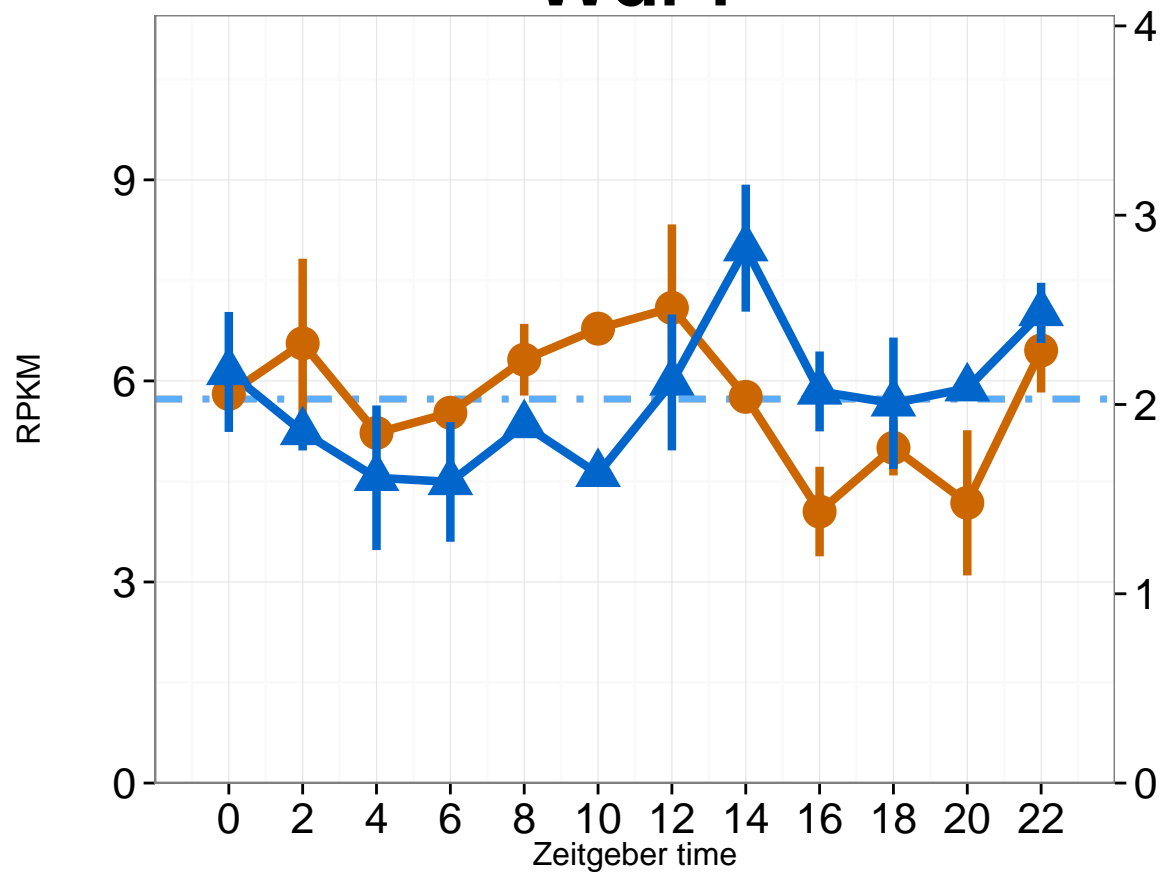

# Wdr4

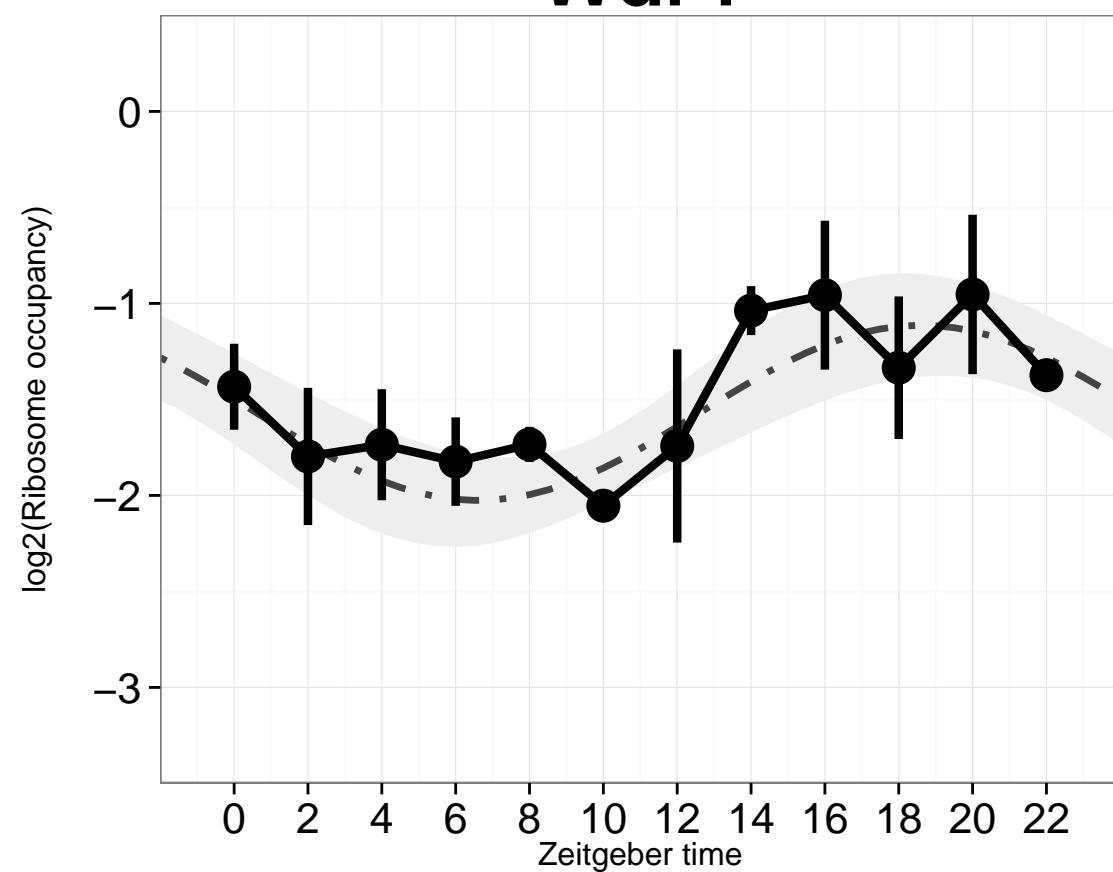

Supplement: SuppDataset_1.zip [file Wdr4_set_A.pdf › Supplemental Dataset 1/A-mRNA_nonrhyth_translation_nonrhyth/Wdr4_set_A.pdf]

## Wdr53

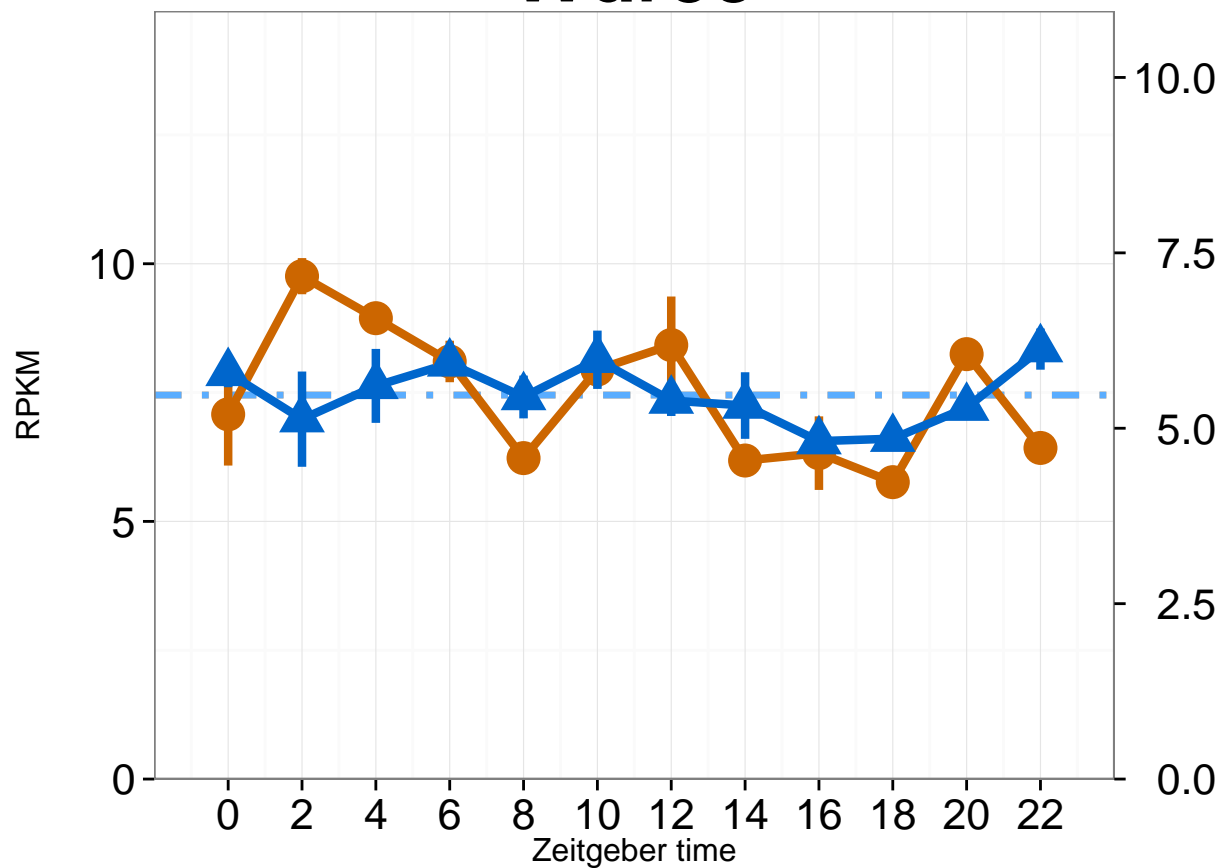

## Wdr53

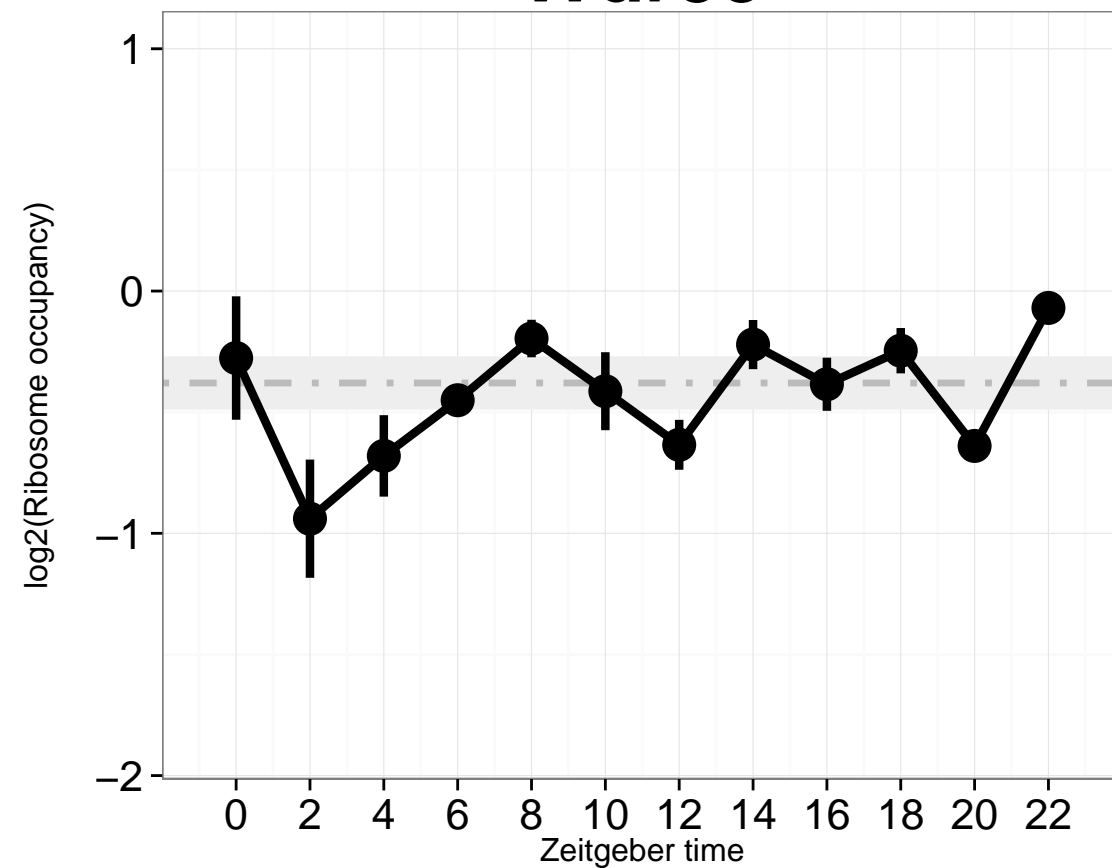

Supplement: SuppDataset_1.zip [file Wdr53_set_A.pdf › Supplemental Dataset 1/A-mRNA_nonrhyth_translation_nonrhyth/Wdr53_set_A.pdf]

## Wdr55

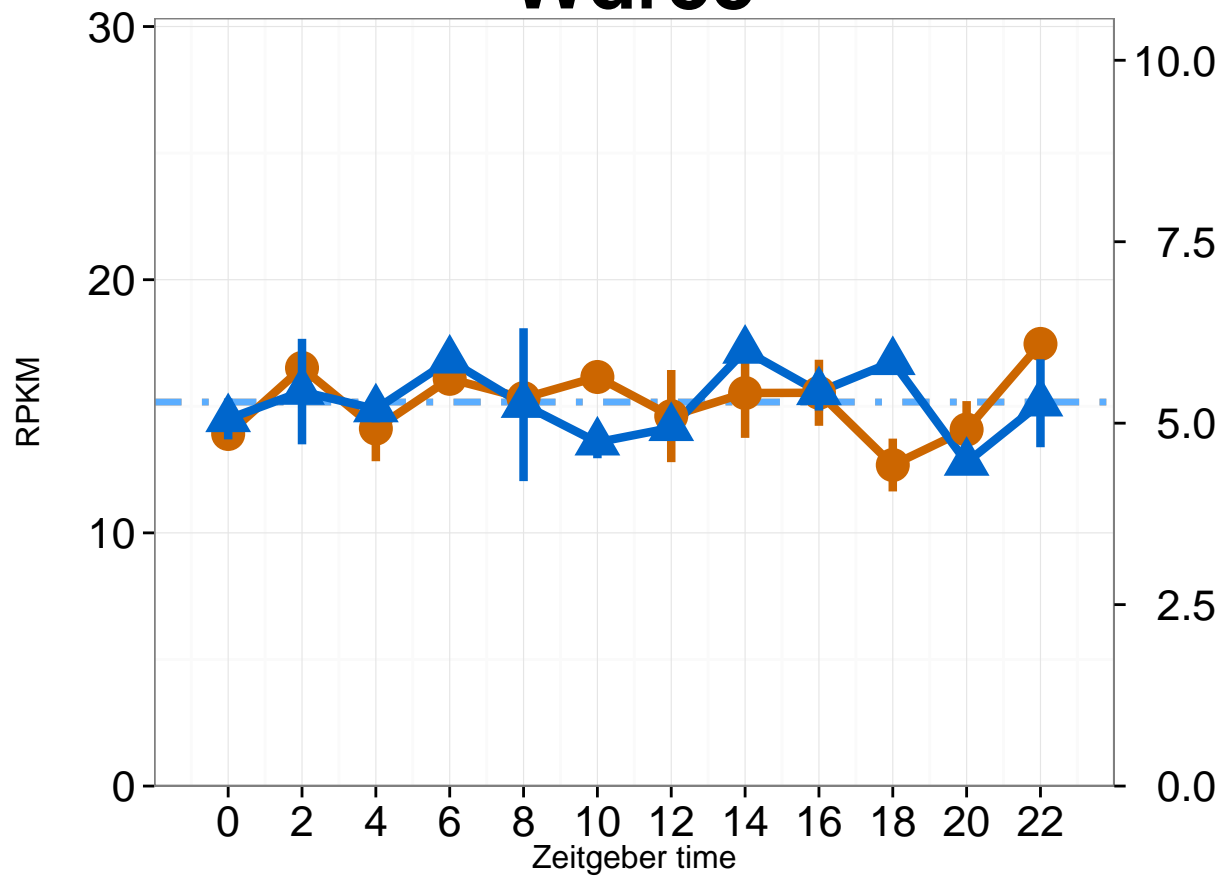

## Wdr55

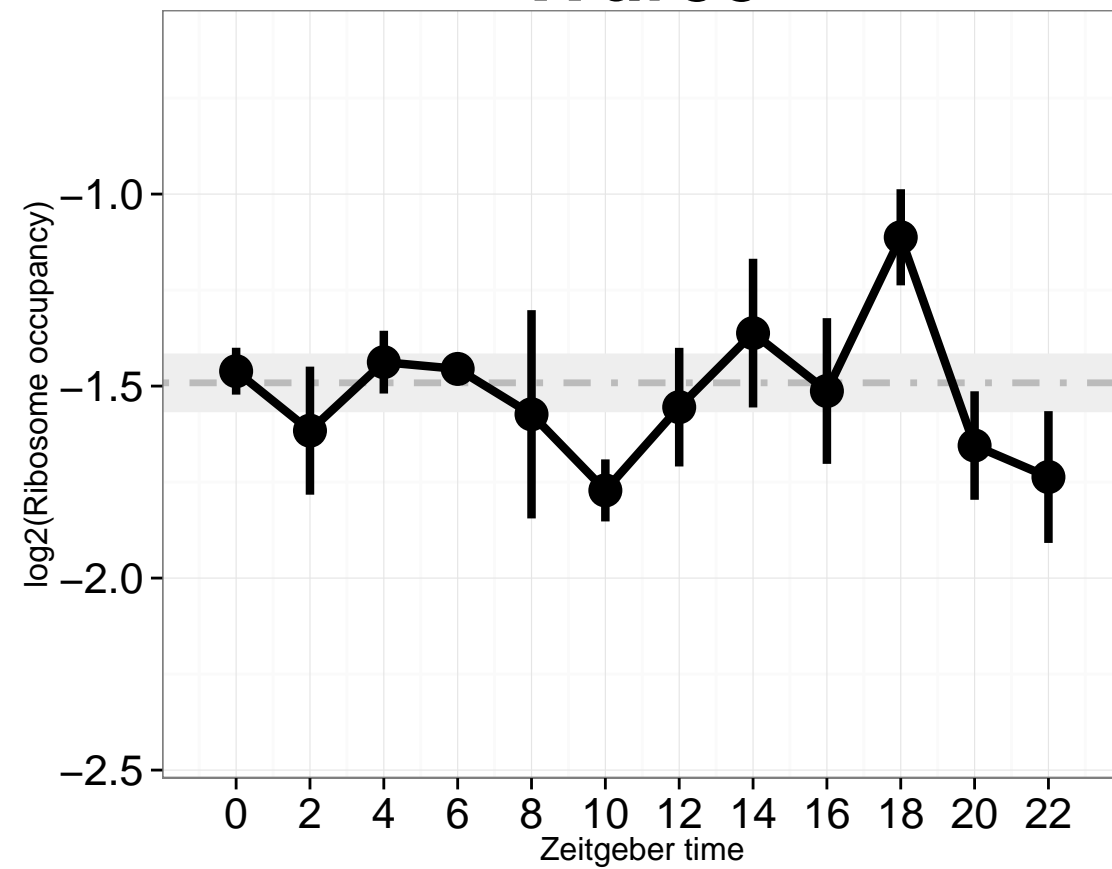

Supplement: SuppDataset_1.zip [file Wdr55_set_A.pdf › Supplemental Dataset 1/A-mRNA_nonrhyth_translation_nonrhyth/Wdr55_set_A.pdf]

# Wdr59

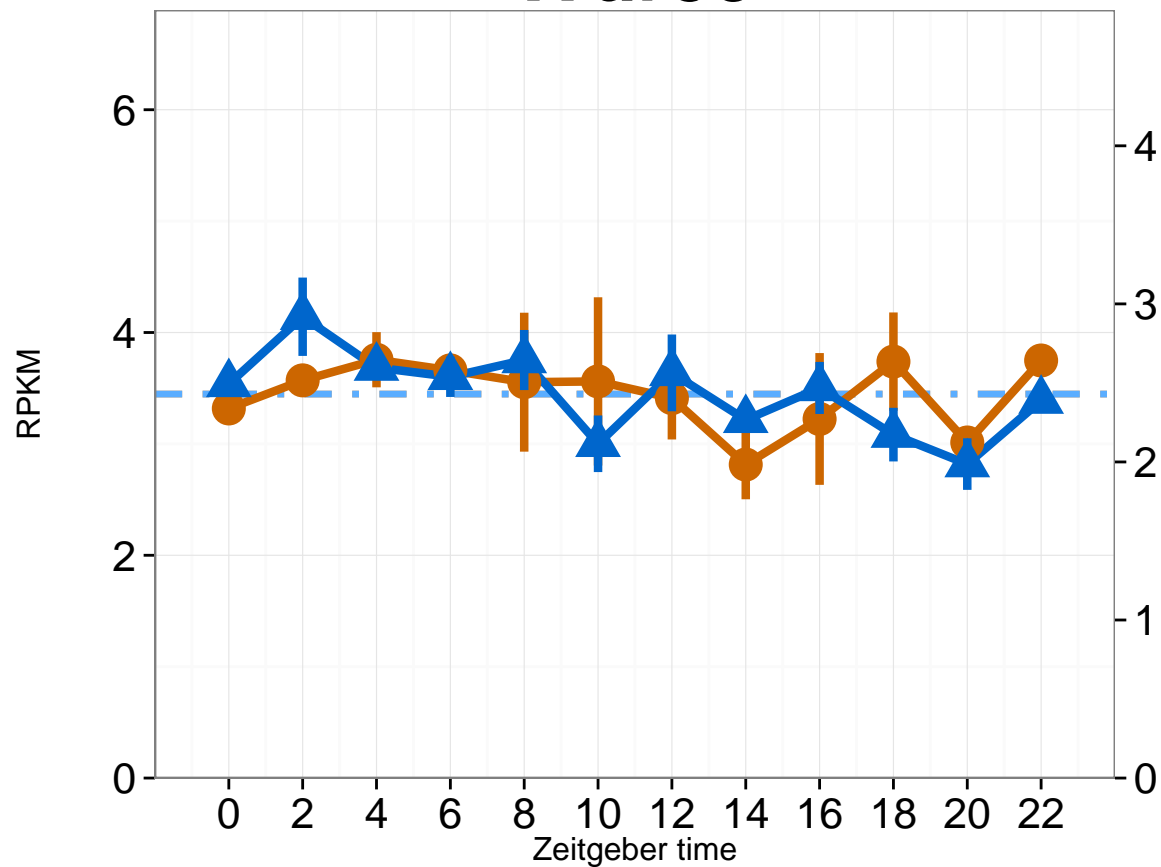

# Wdr59

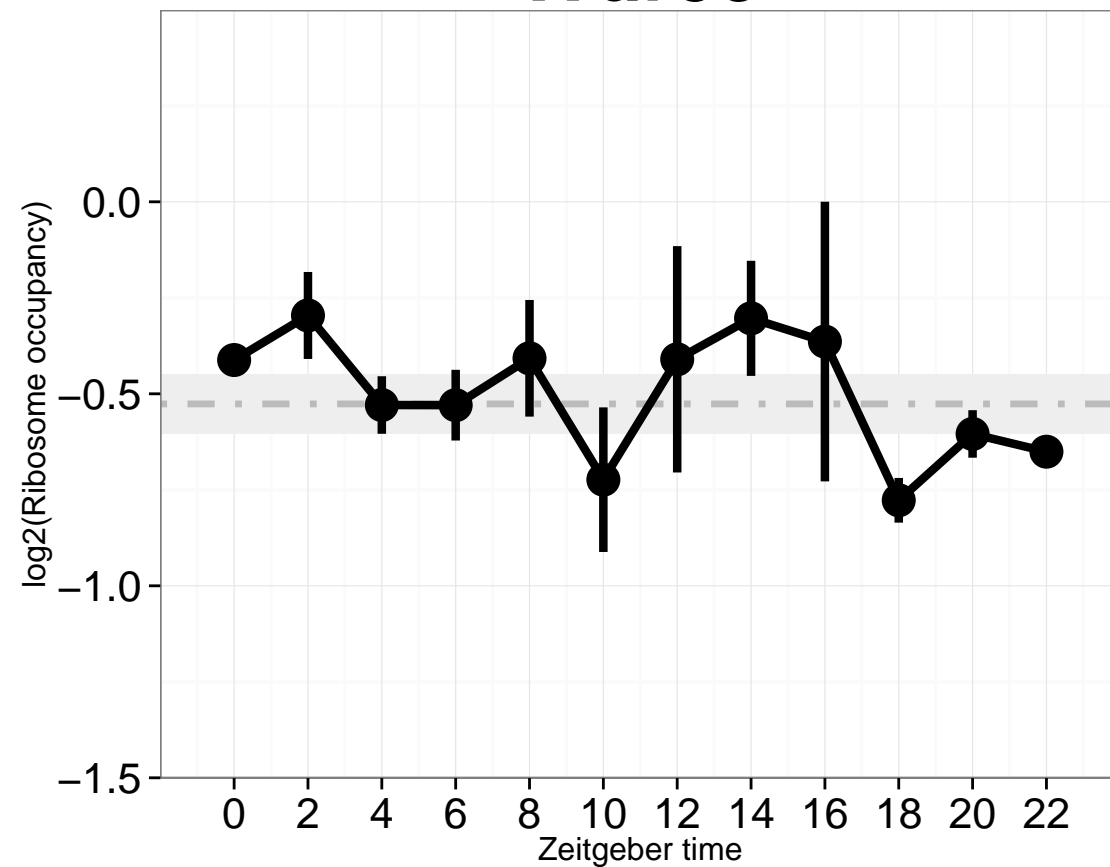

Supplement: SuppDataset_1.zip [file Wdr59_set_A.pdf › Supplemental Dataset 1/A-mRNA_nonrhyth_translation_nonrhyth/Wdr59_set_A.pdf]

# Wdr5

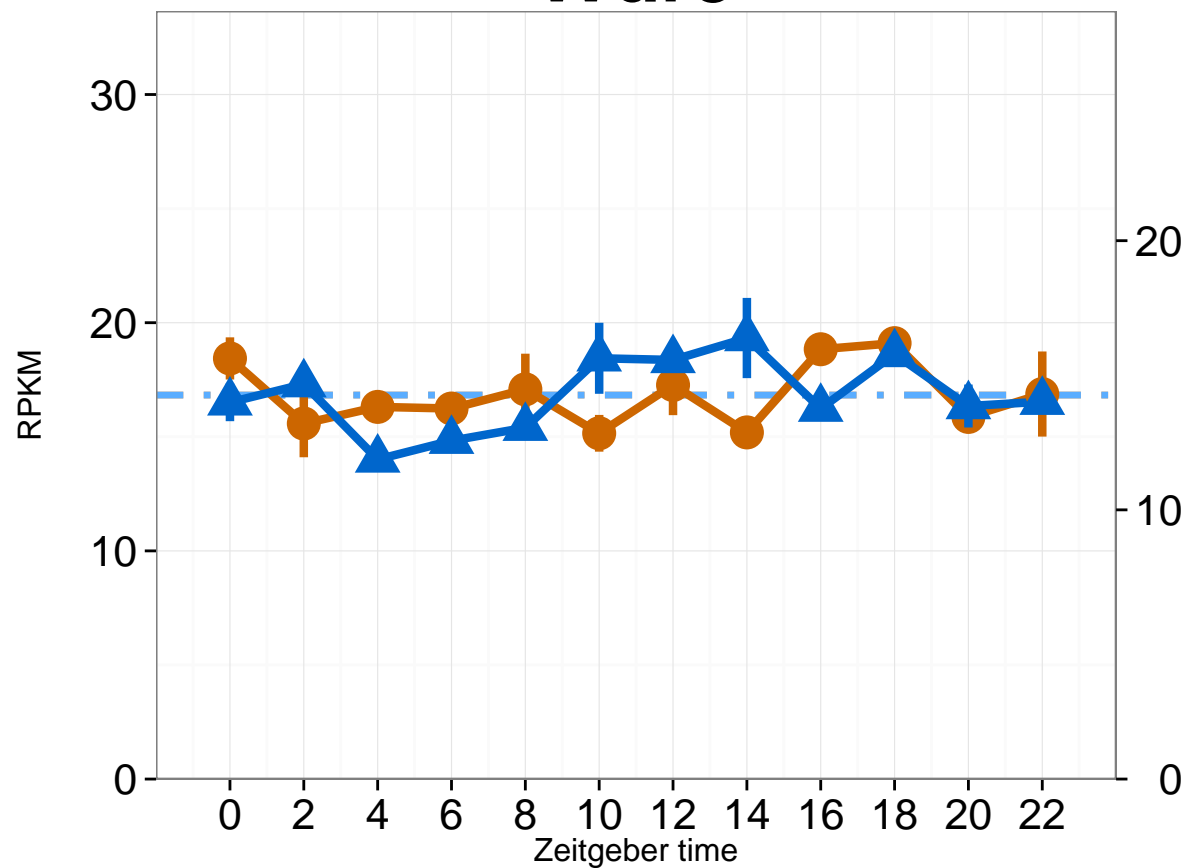

# Wdr5

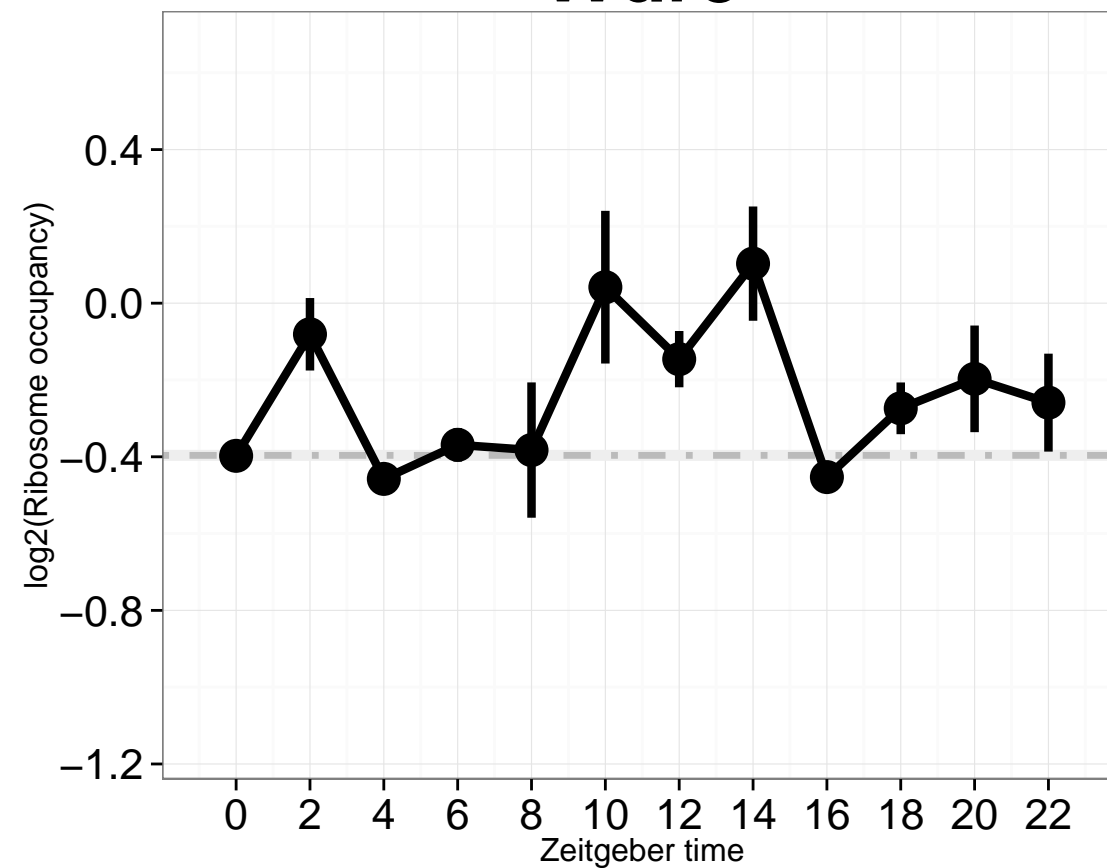

Supplement: SuppDataset_1.zip [file Wdr5_set_A.pdf › Supplemental Dataset 1/A-mRNA_nonrhyth_translation_nonrhyth/Wdr5_set_A.pdf]

## Wdr60

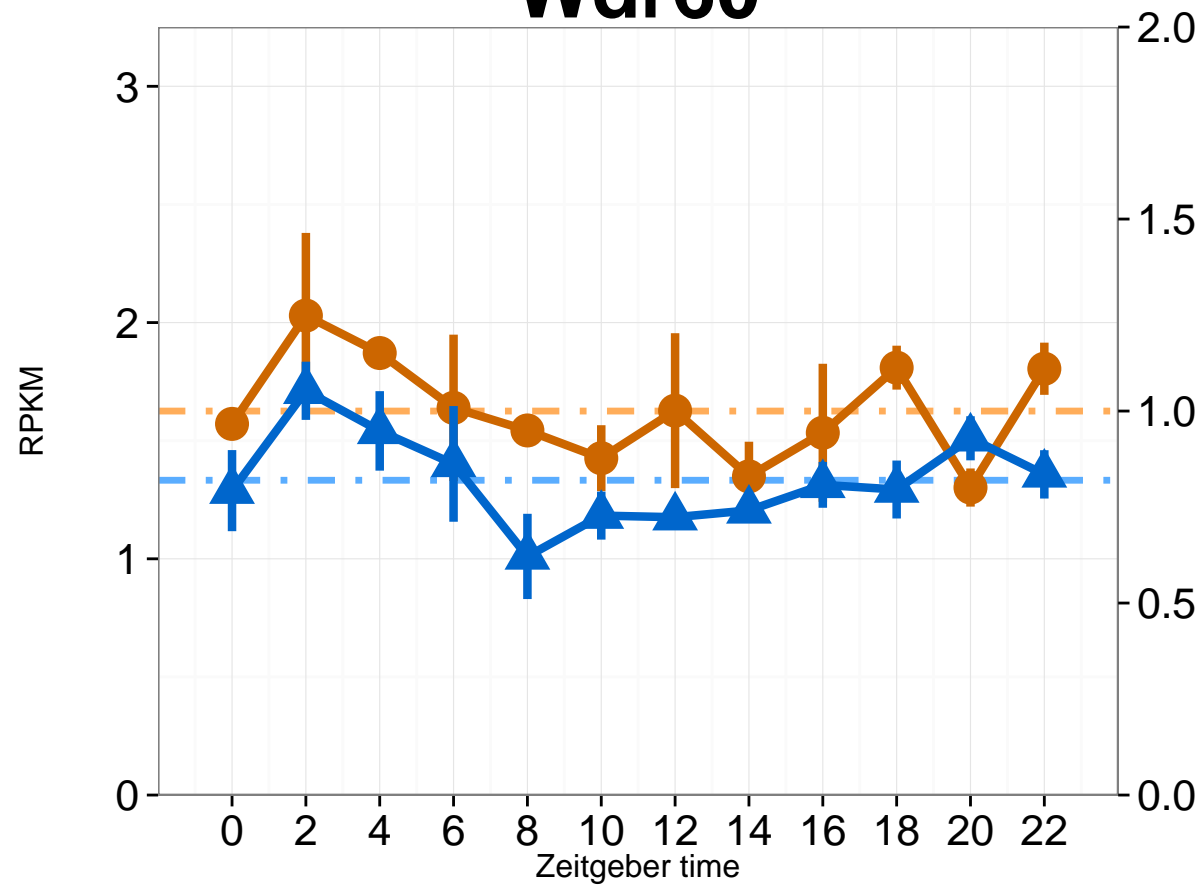

## Wdr60

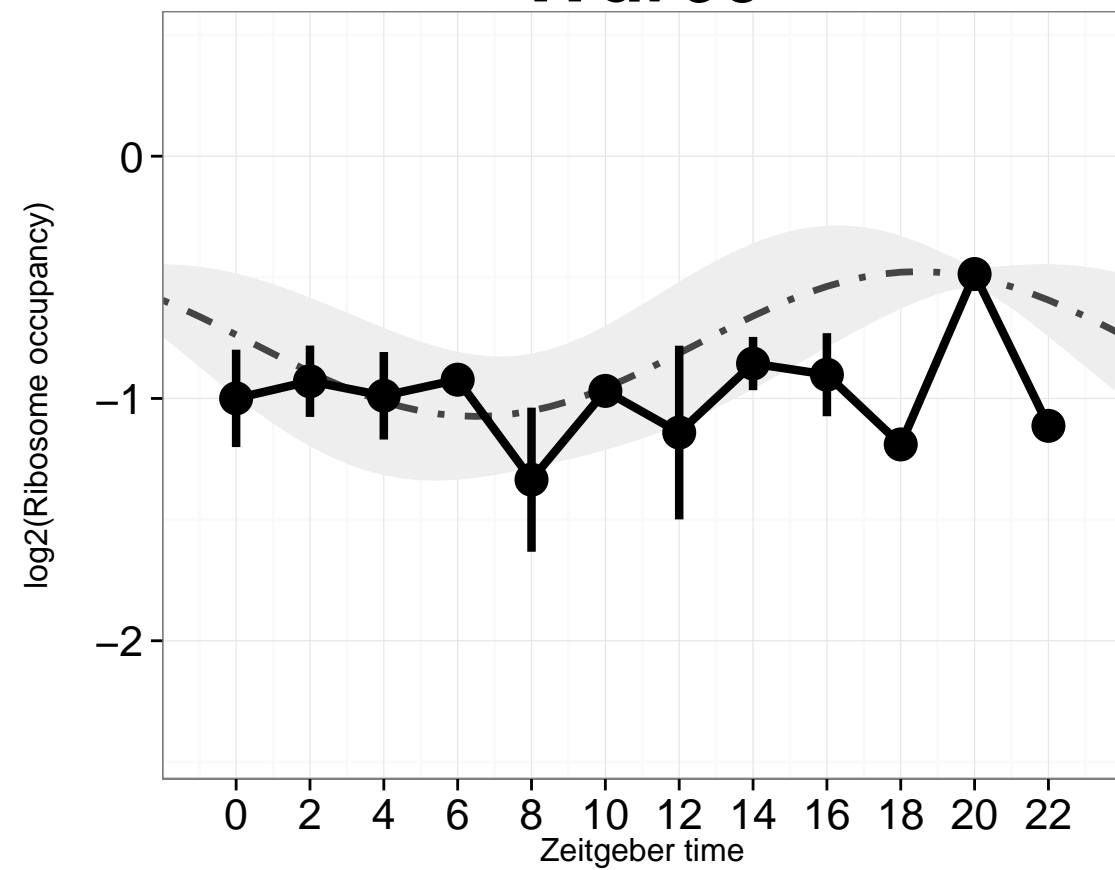

Supplement: SuppDataset_1.zip [file Wdr60_set_A.pdf › Supplemental Dataset 1/A-mRNA_nonrhyth_translation_nonrhyth/Wdr60_set_A.pdf]

## Wdr61

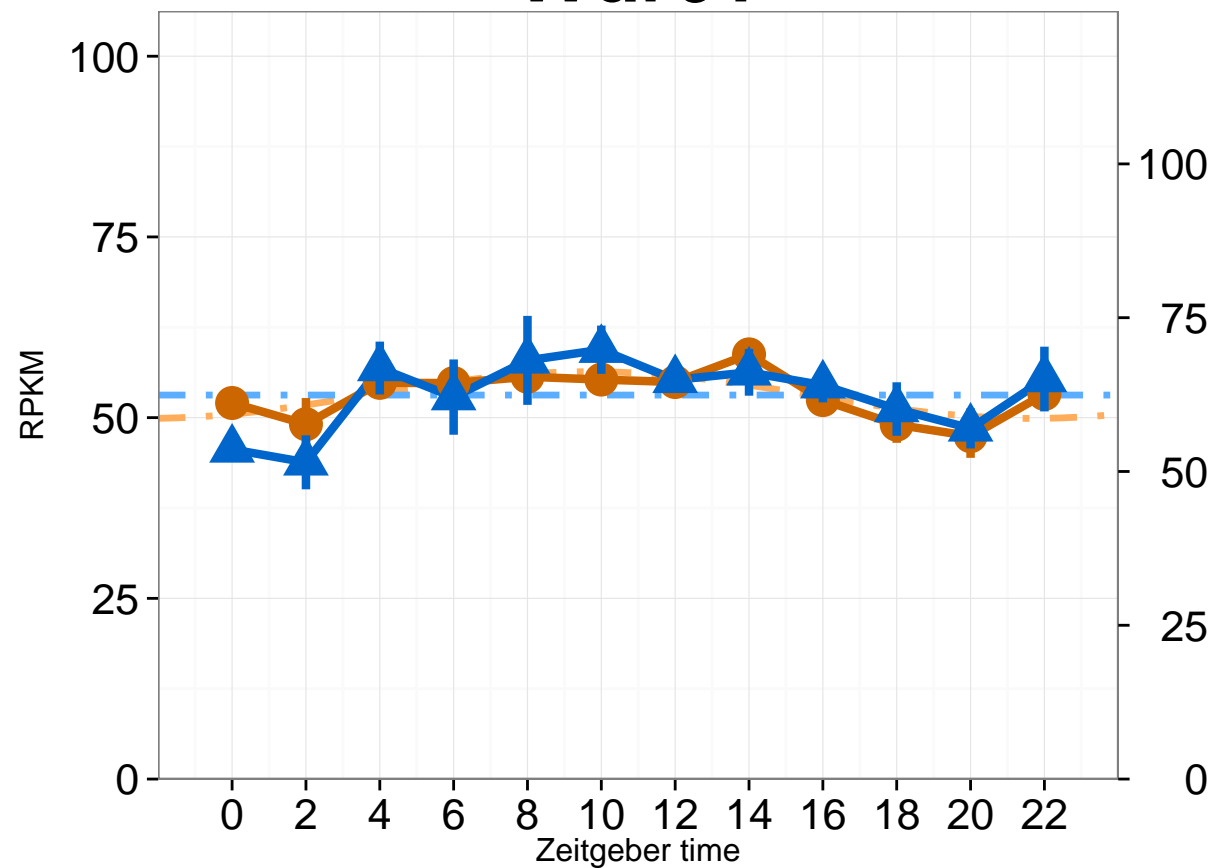

## Wdr61

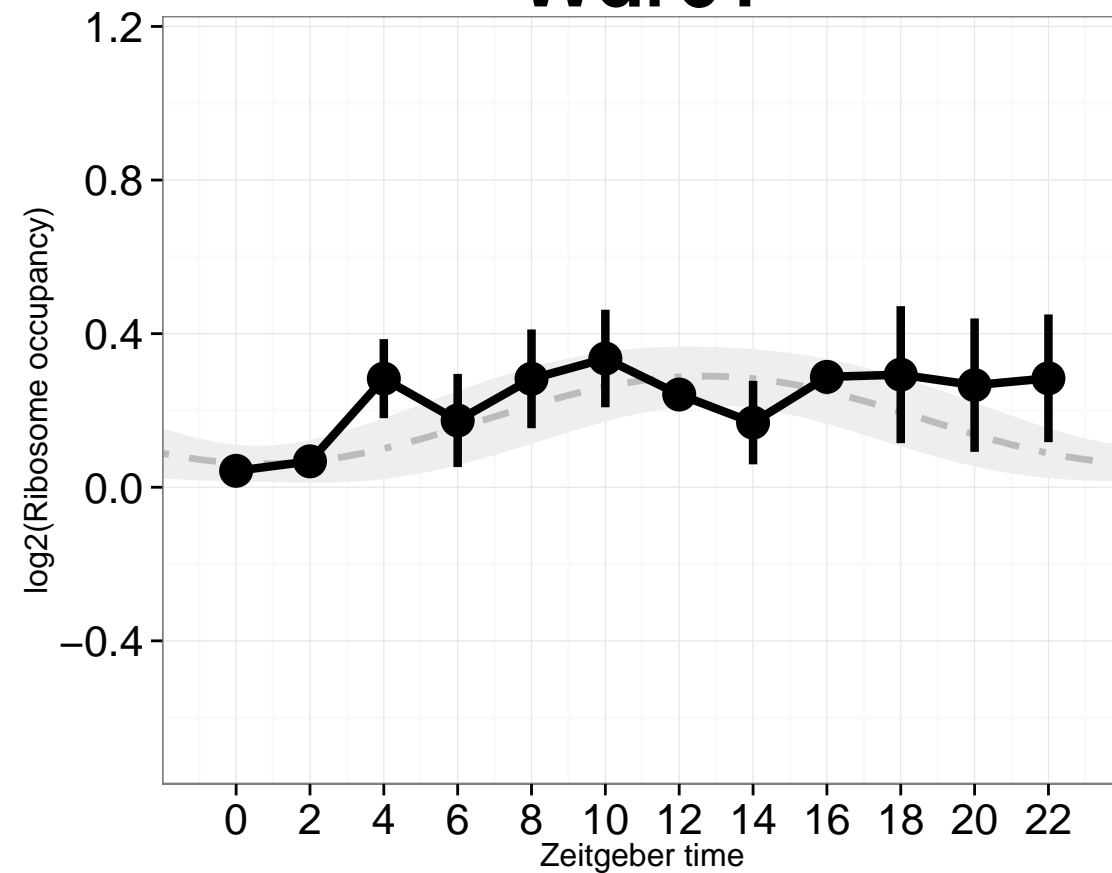

Supplement: SuppDataset_1.zip [file Wdr61_set_A.pdf › Supplemental Dataset 1/A-mRNA_nonrhyth_translation_nonrhyth/Wdr61_set_A.pdf]

## Wdr70

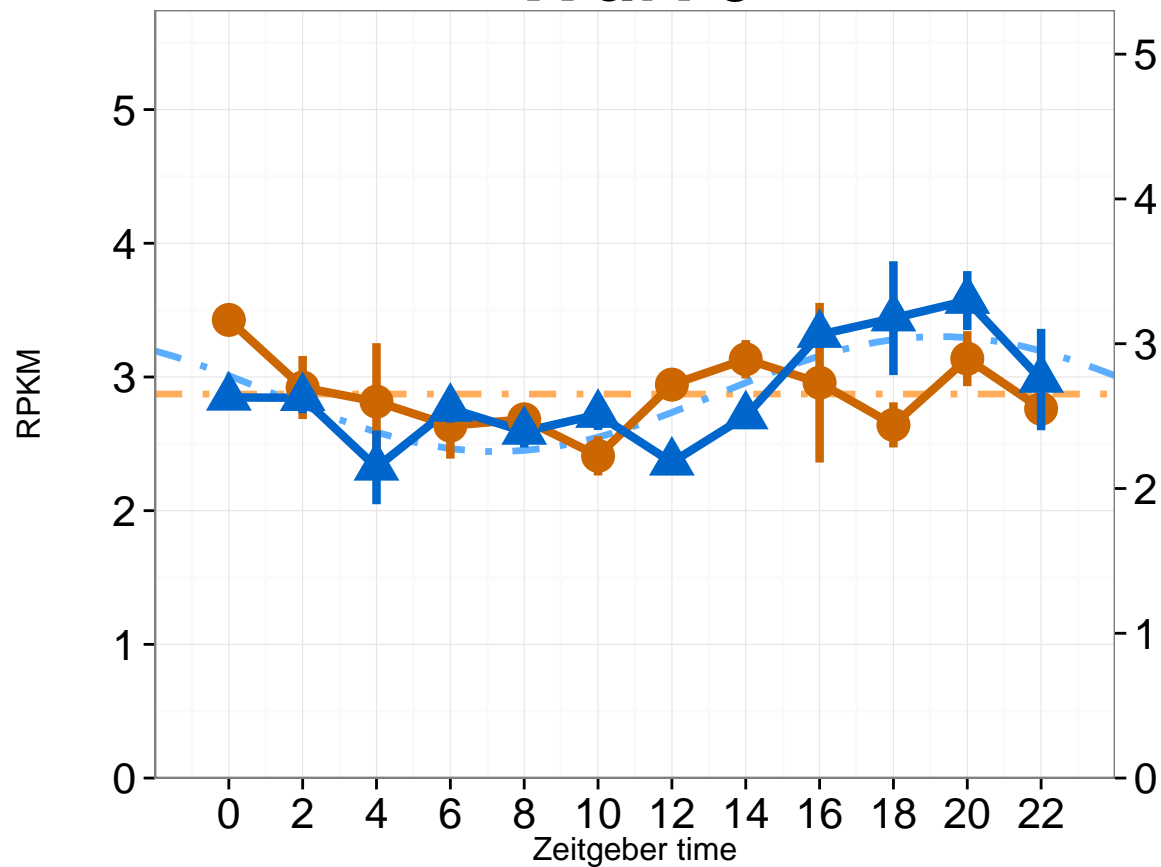

## Wdr70

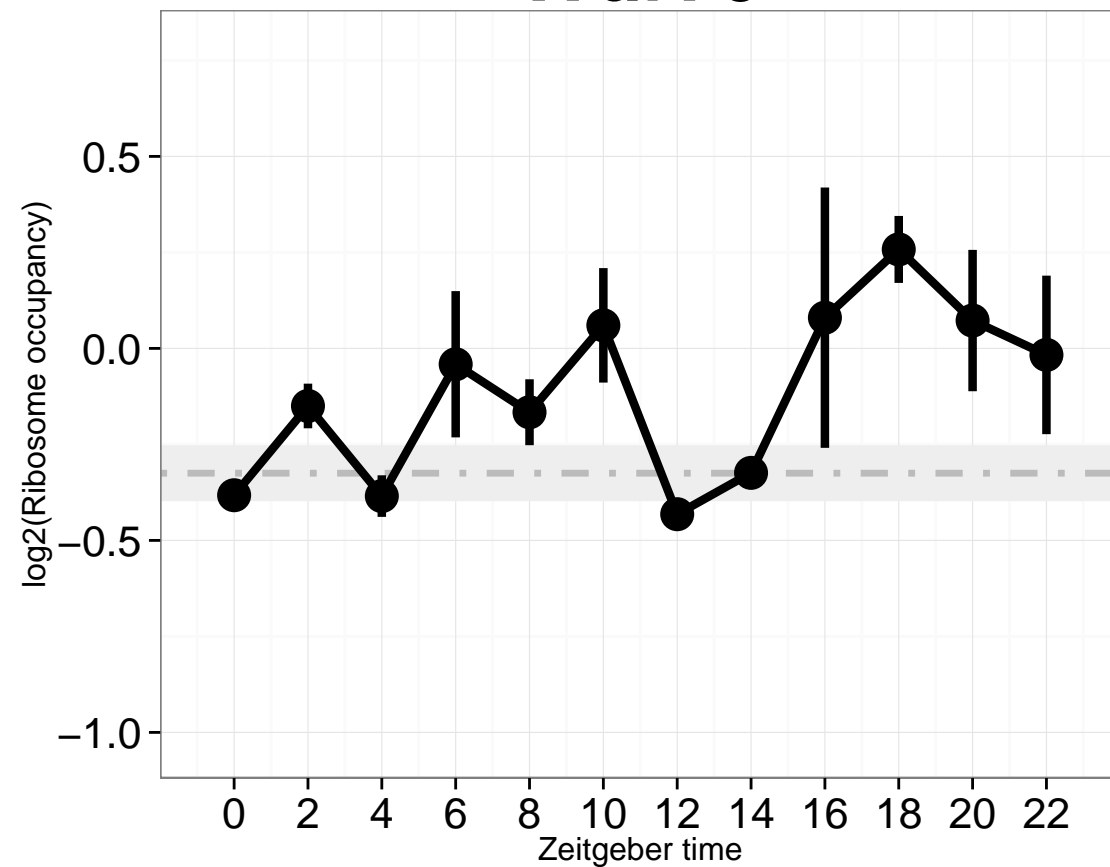

Supplement: SuppDataset_1.zip [file Wdr70_set_A.pdf › Supplemental Dataset 1/A-mRNA_nonrhyth_translation_nonrhyth/Wdr70_set_A.pdf]

## Wdr74

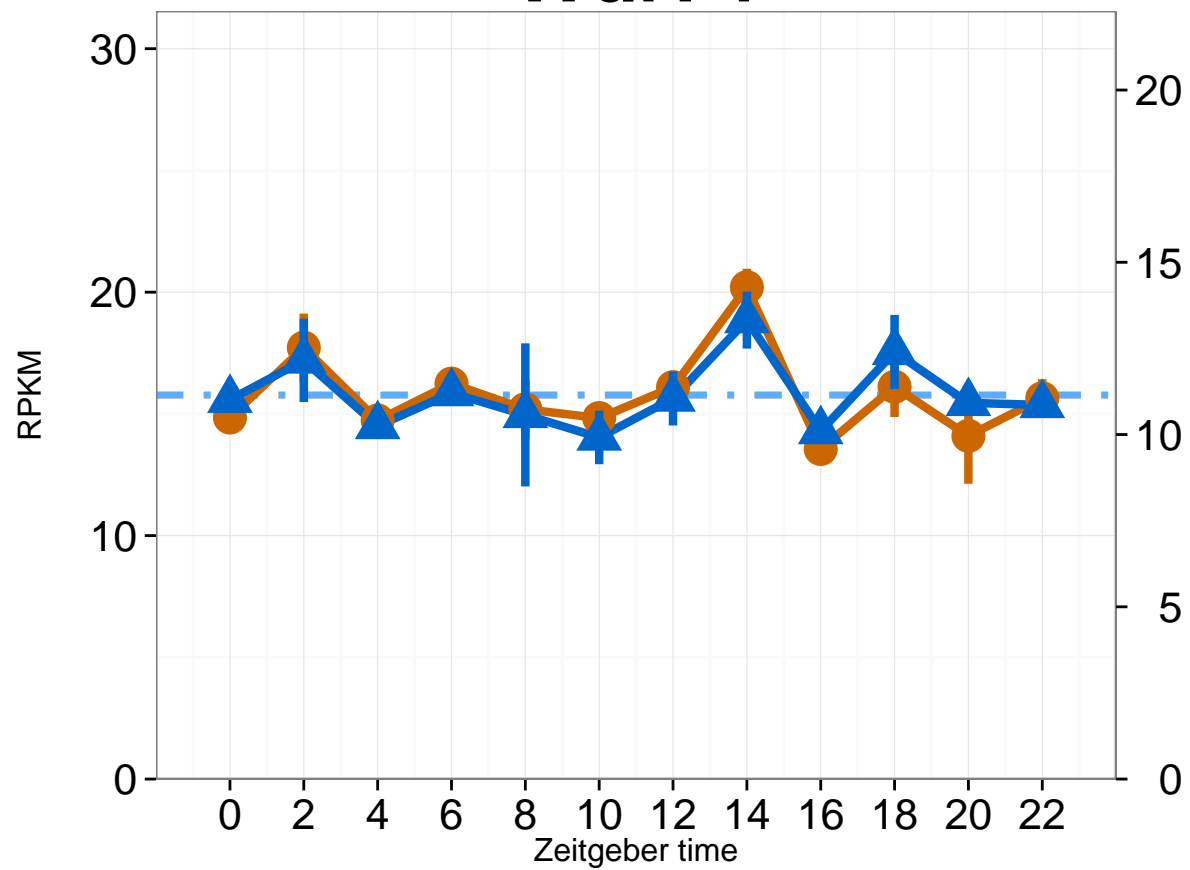

## Wdr74

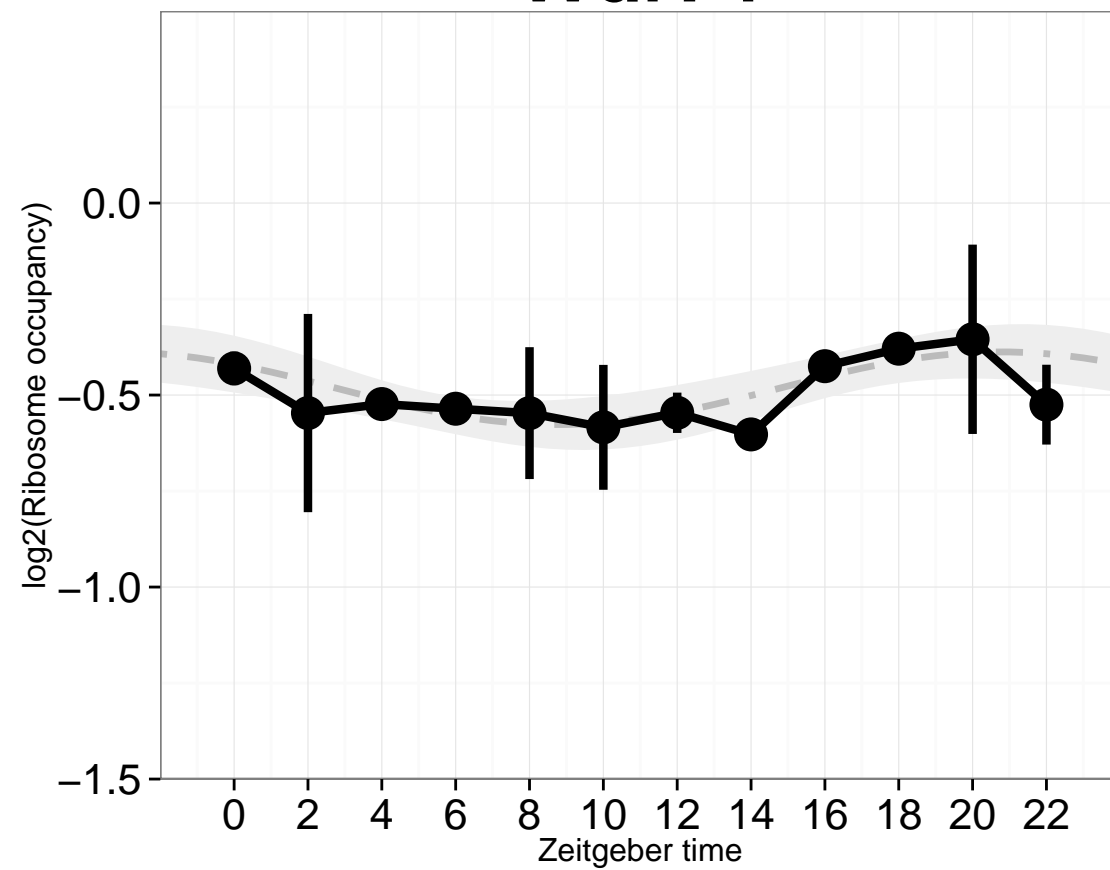

Supplement: SuppDataset_1.zip [file Wdr74_set_A.pdf › Supplemental Dataset 1/A-mRNA_nonrhyth_translation_nonrhyth/Wdr74_set_A.pdf]

# Wdr75

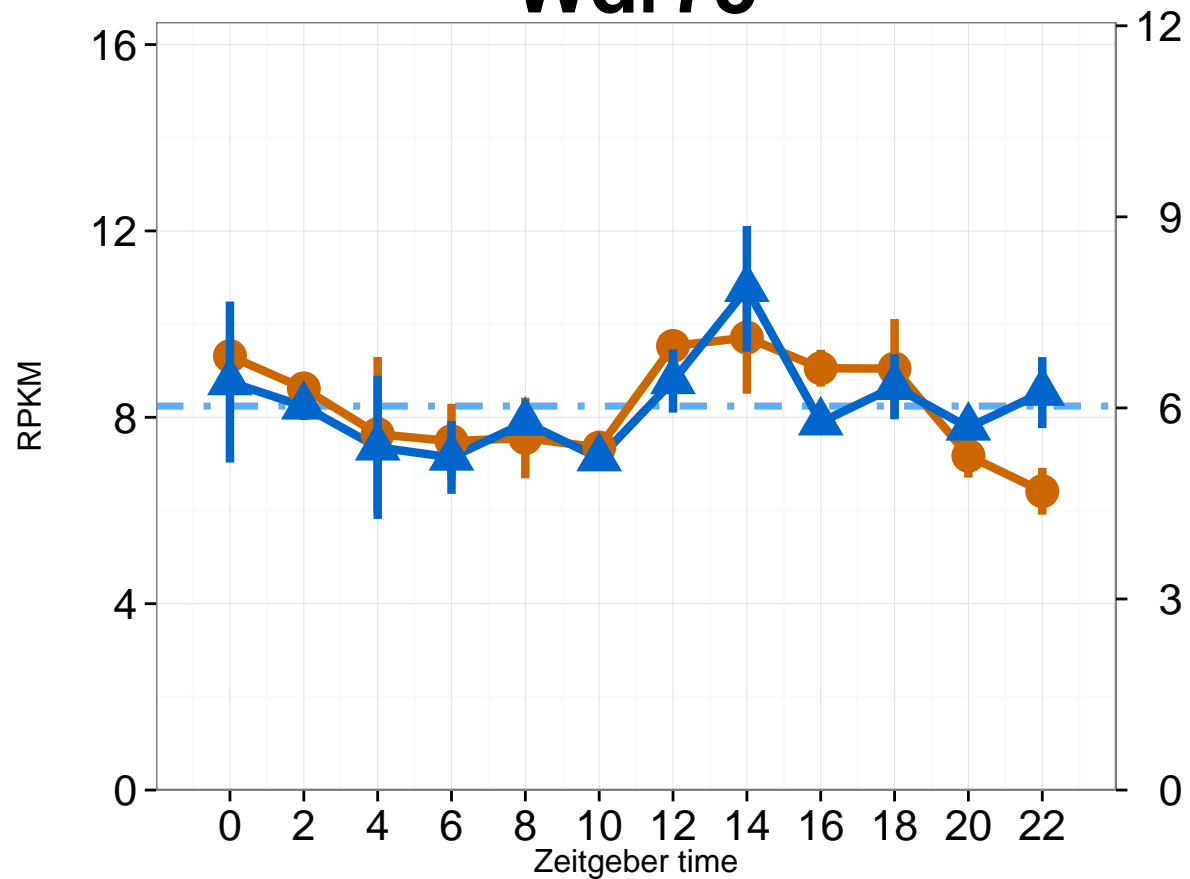

# Wdr75

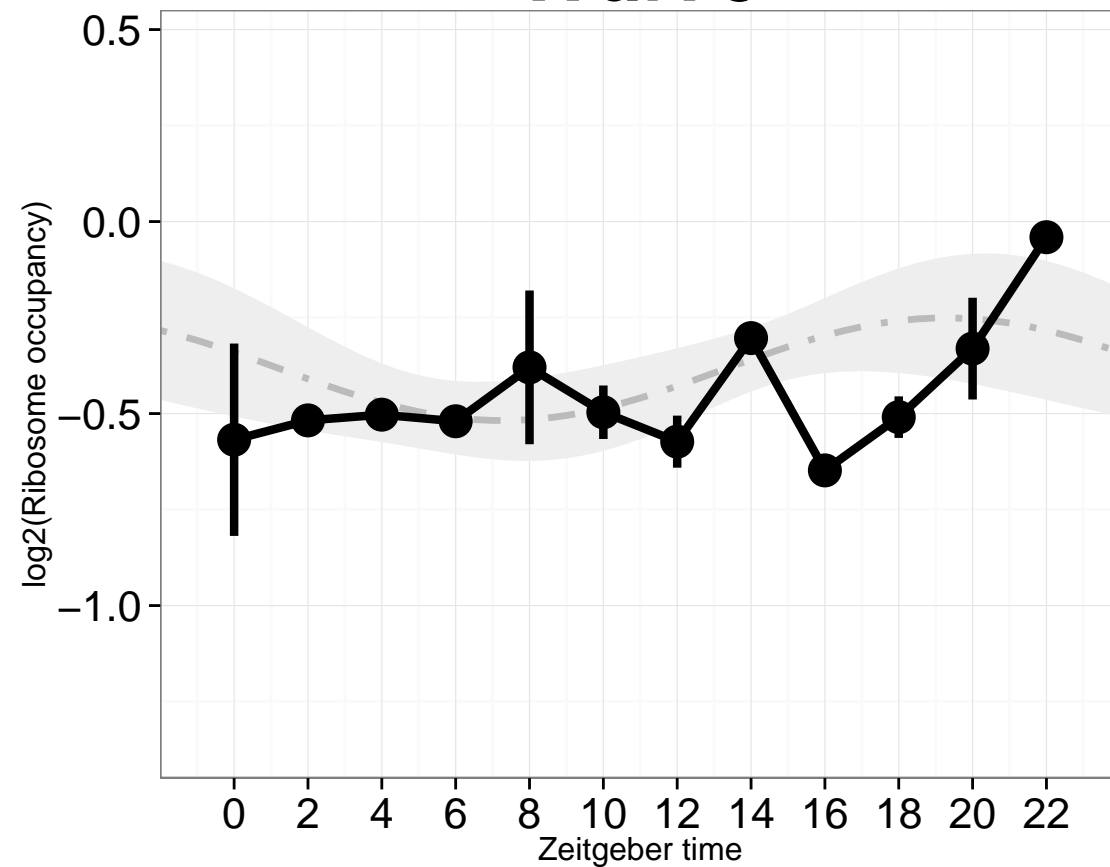

Supplement: SuppDataset_1.zip [file Wdr75_set_A.pdf › Supplemental Dataset 1/A-mRNA_nonrhyth_translation_nonrhyth/Wdr75_set_A.pdf]

# Wdr76

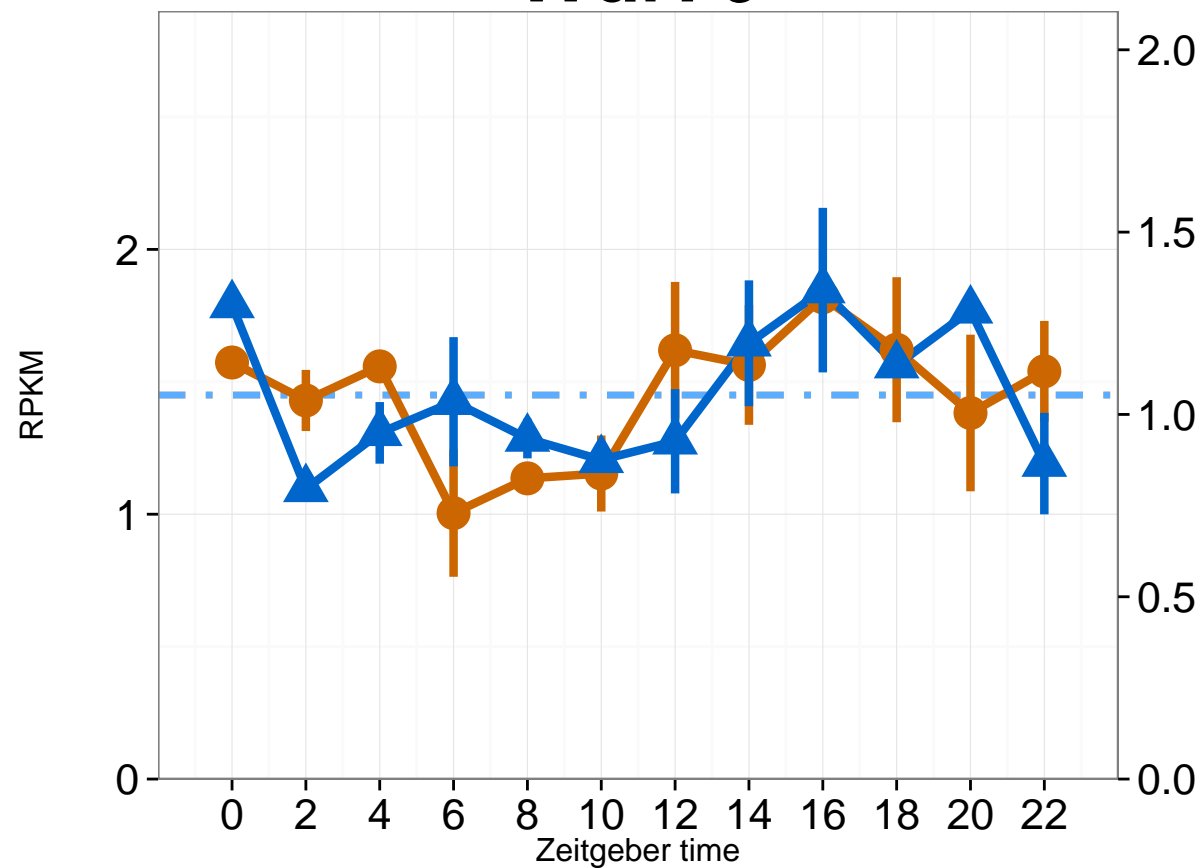

# Wdr76

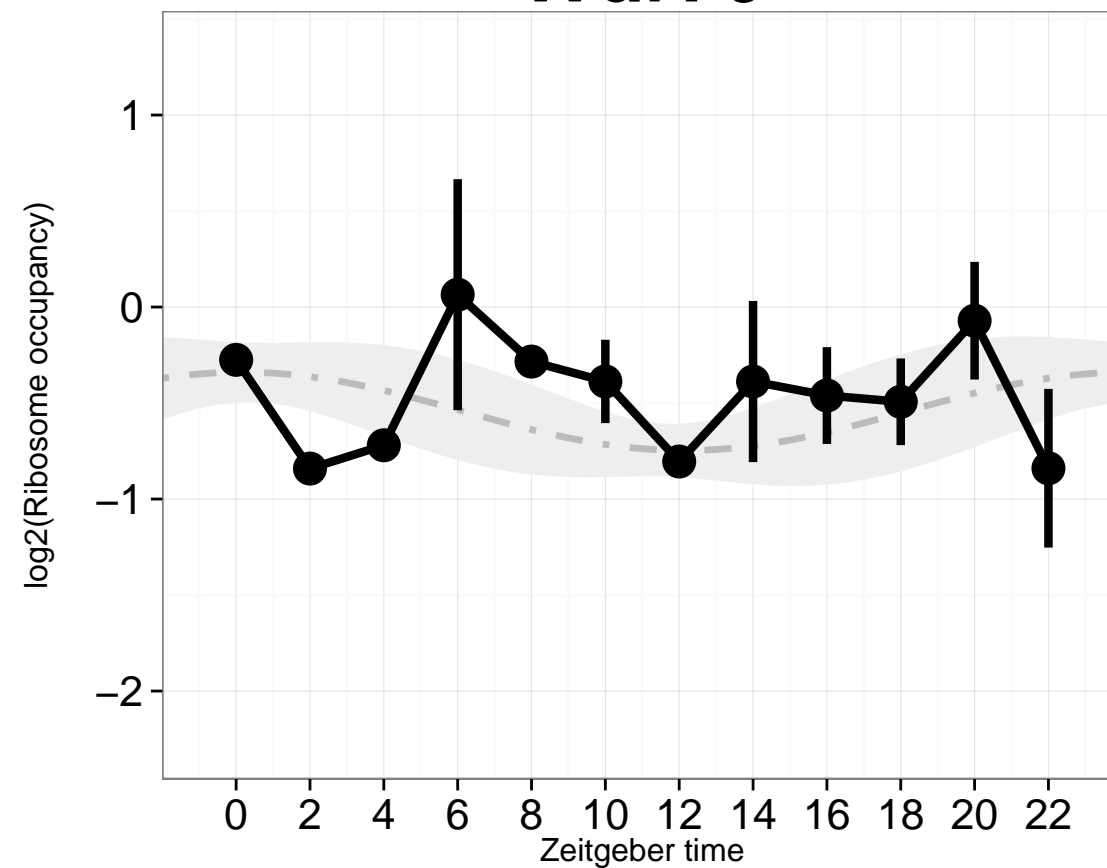

Supplement: SuppDataset_1.zip [file Wdr76_set_A.pdf › Supplemental Dataset 1/A-mRNA_nonrhyth_translation_nonrhyth/Wdr76_set_A.pdf]

## Wdr77

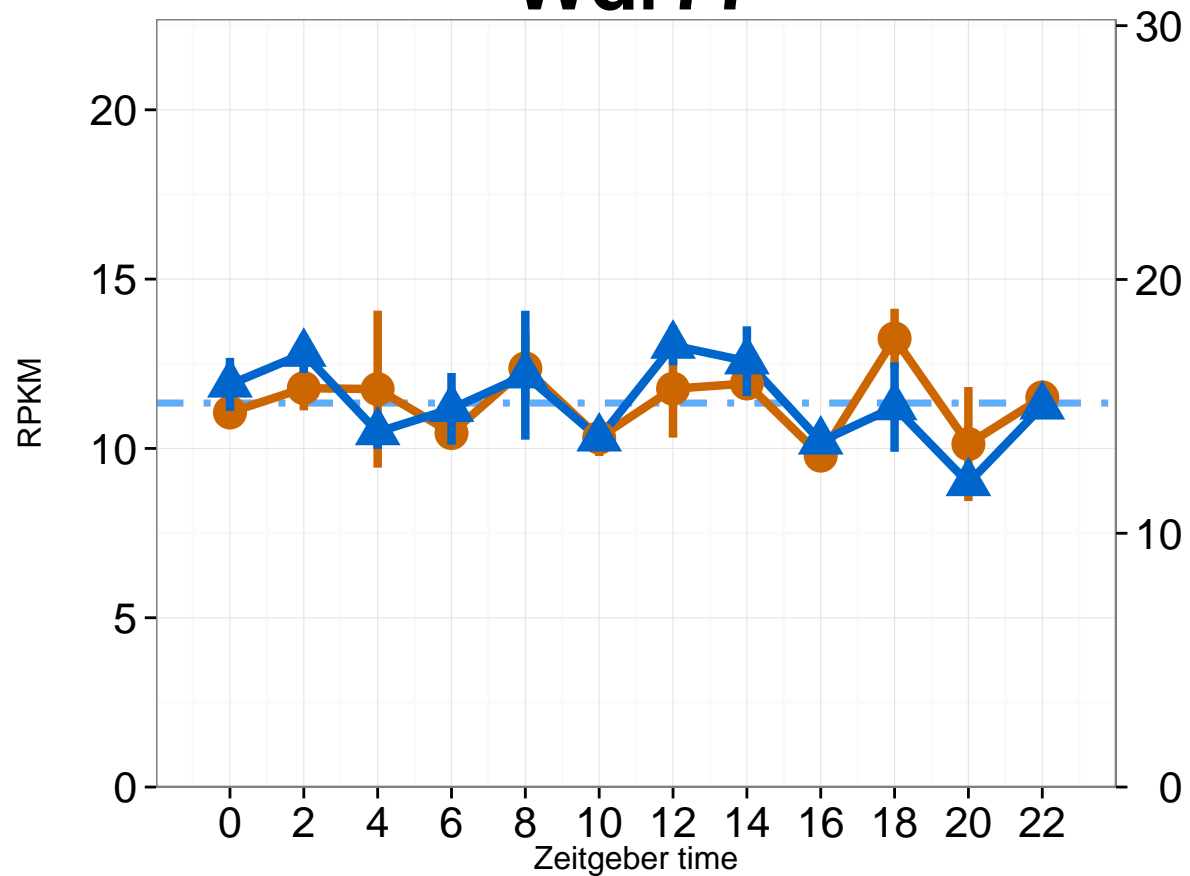

## Wdr77

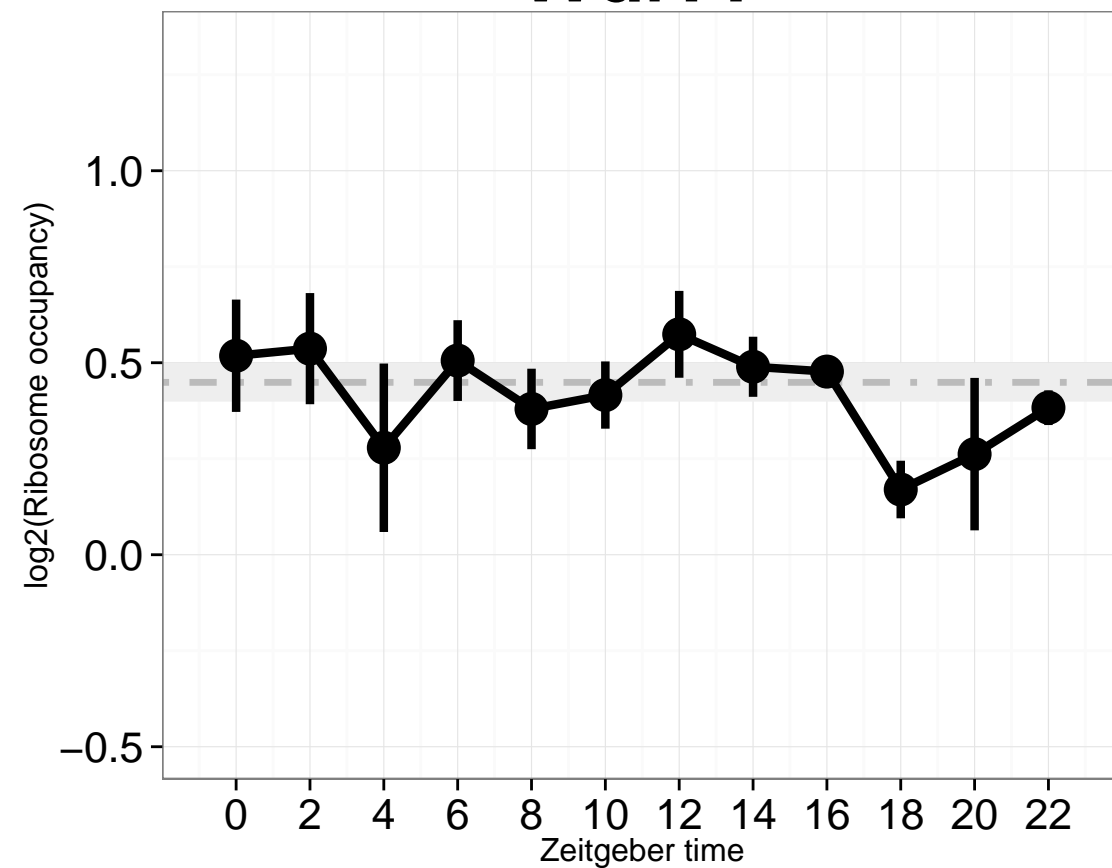

Supplement: SuppDataset_1.zip [file Wdr77_set_A.pdf › Supplemental Dataset 1/A-mRNA_nonrhyth_translation_nonrhyth/Wdr77_set_A.pdf]

## Wdr7

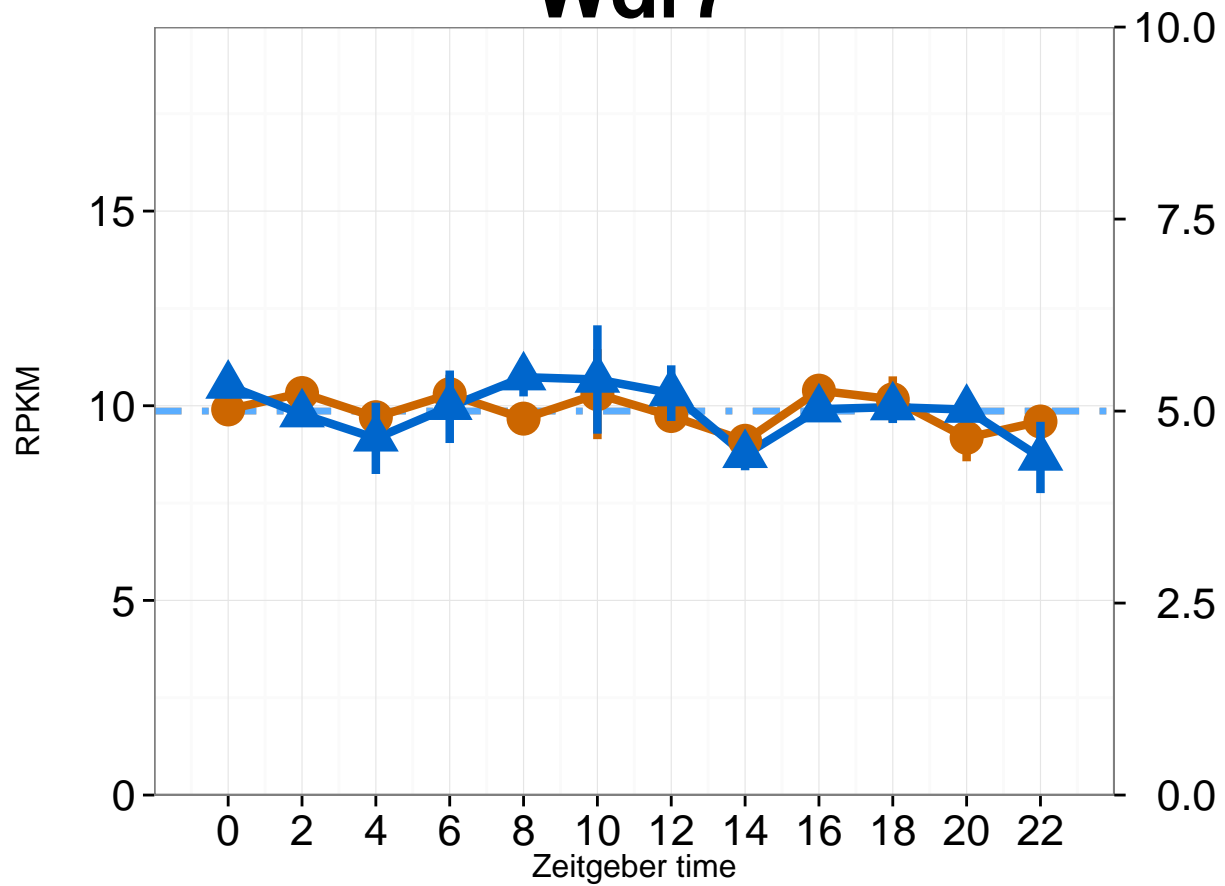

## Wdr7

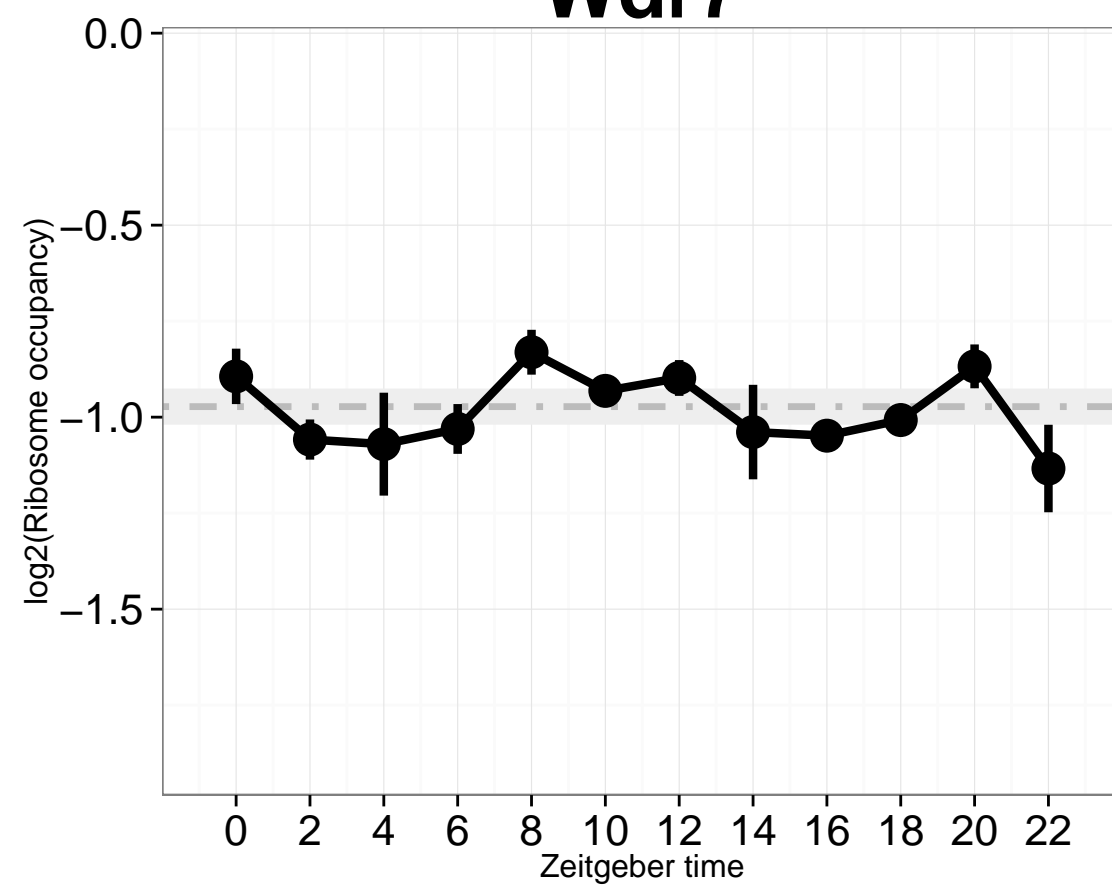

Supplement: SuppDataset_1.zip [file Wdr7_set_A.pdf › Supplemental Dataset 1/A-mRNA_nonrhyth_translation_nonrhyth/Wdr7_set_A.pdf]

## Wdr82

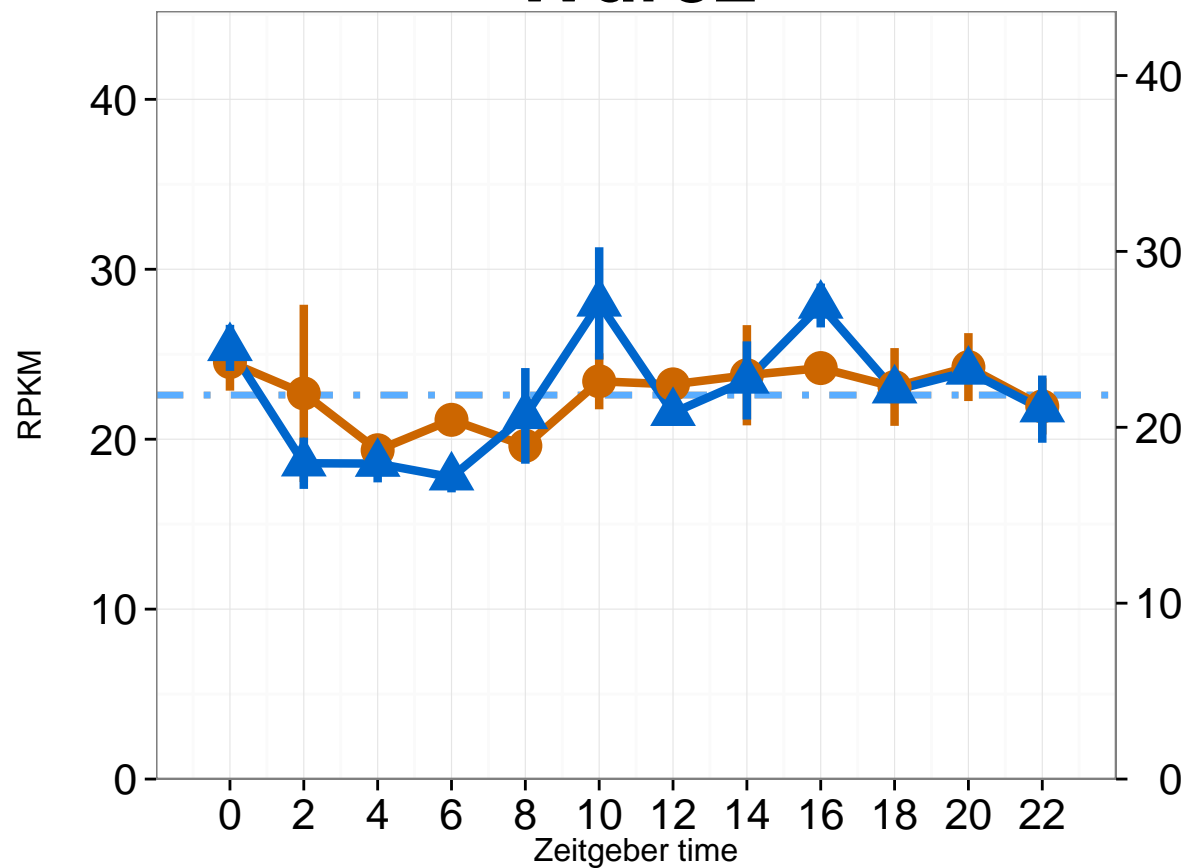

## Wdr82

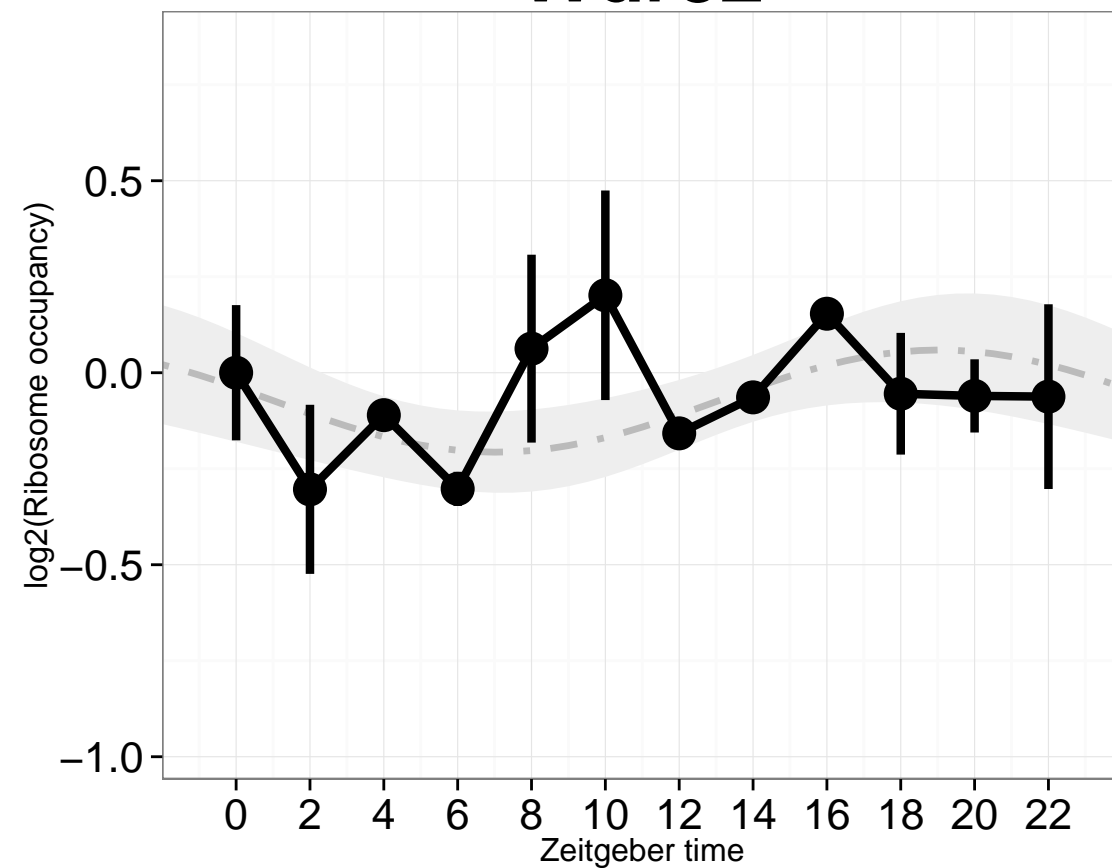

Supplement: SuppDataset_1.zip [file Wdr82_set_A.pdf › Supplemental Dataset 1/A-mRNA_nonrhyth_translation_nonrhyth/Wdr82_set_A.pdf]

## Wdr83

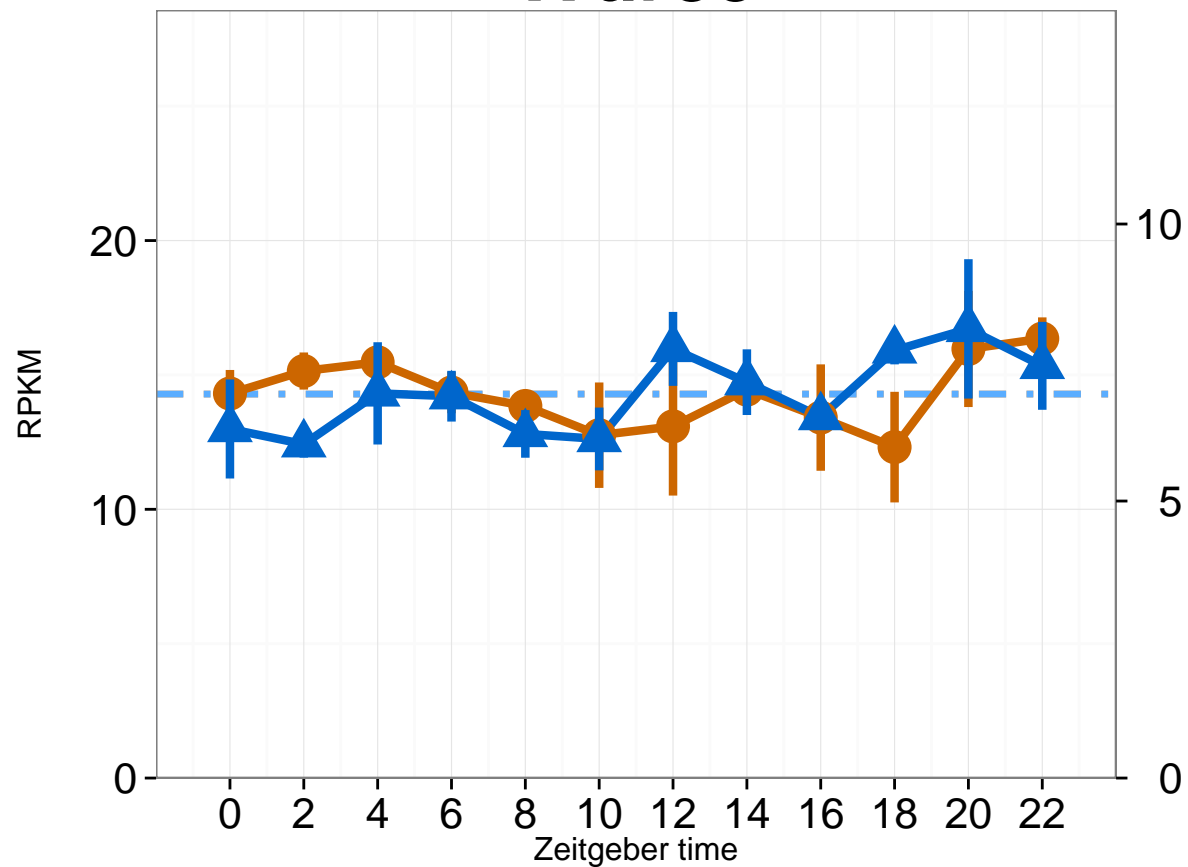

## Wdr83

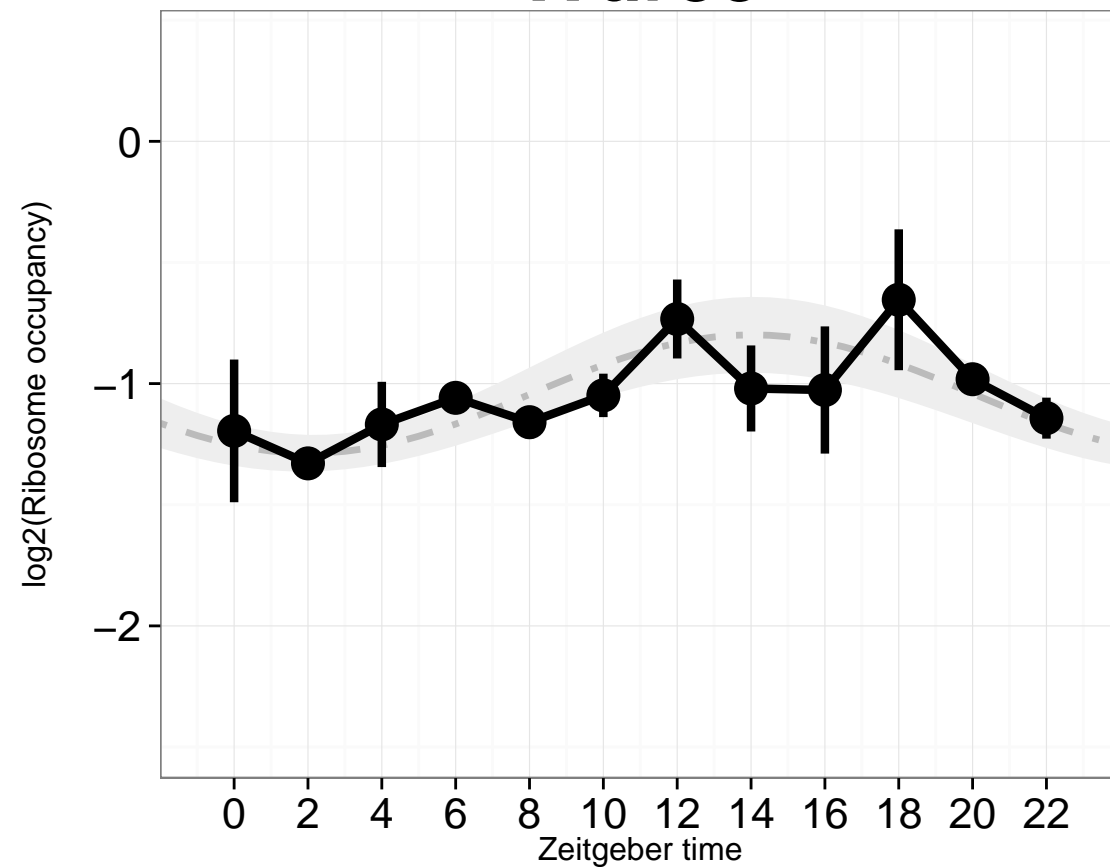

Supplement: SuppDataset_1.zip [file Wdr83_set_A.pdf › Supplemental Dataset 1/A-mRNA_nonrhyth_translation_nonrhyth/Wdr83_set_A.pdf]

## Wdr92

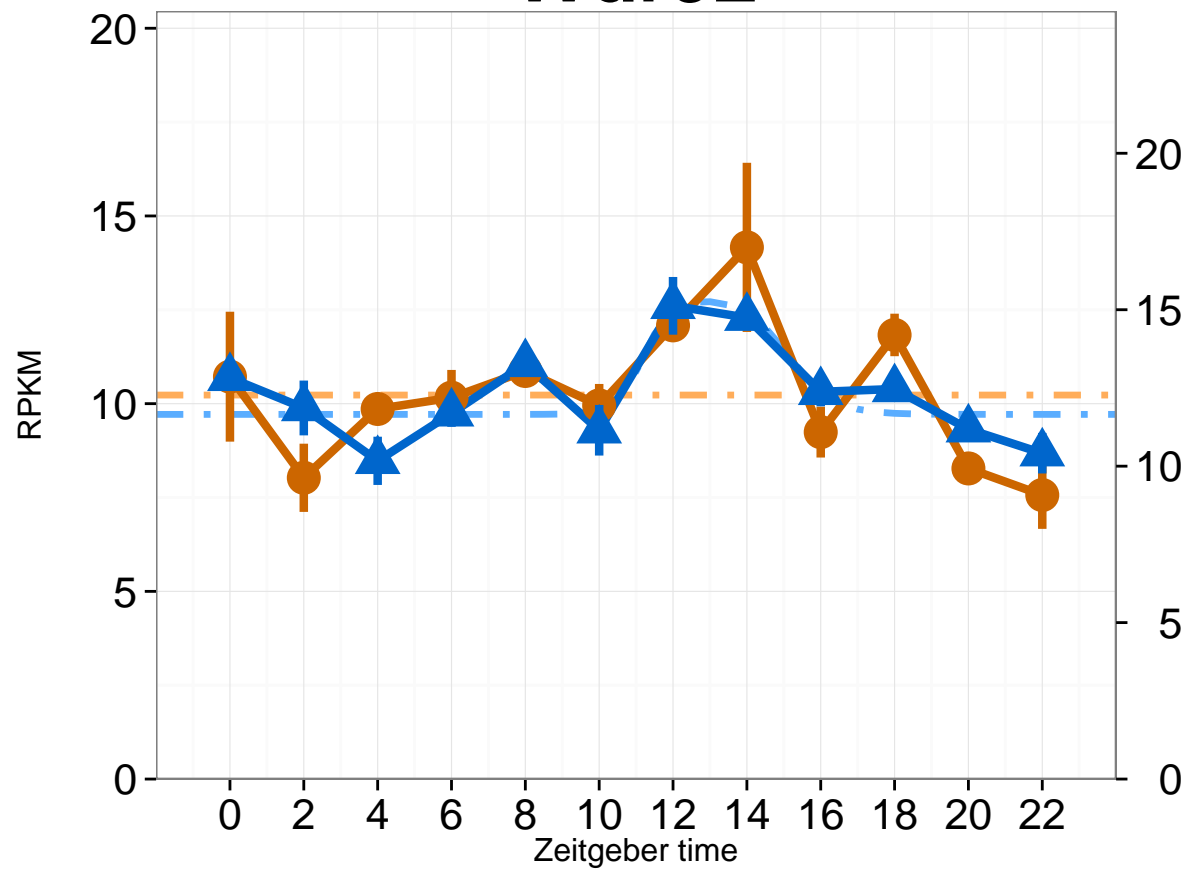

## Wdr92

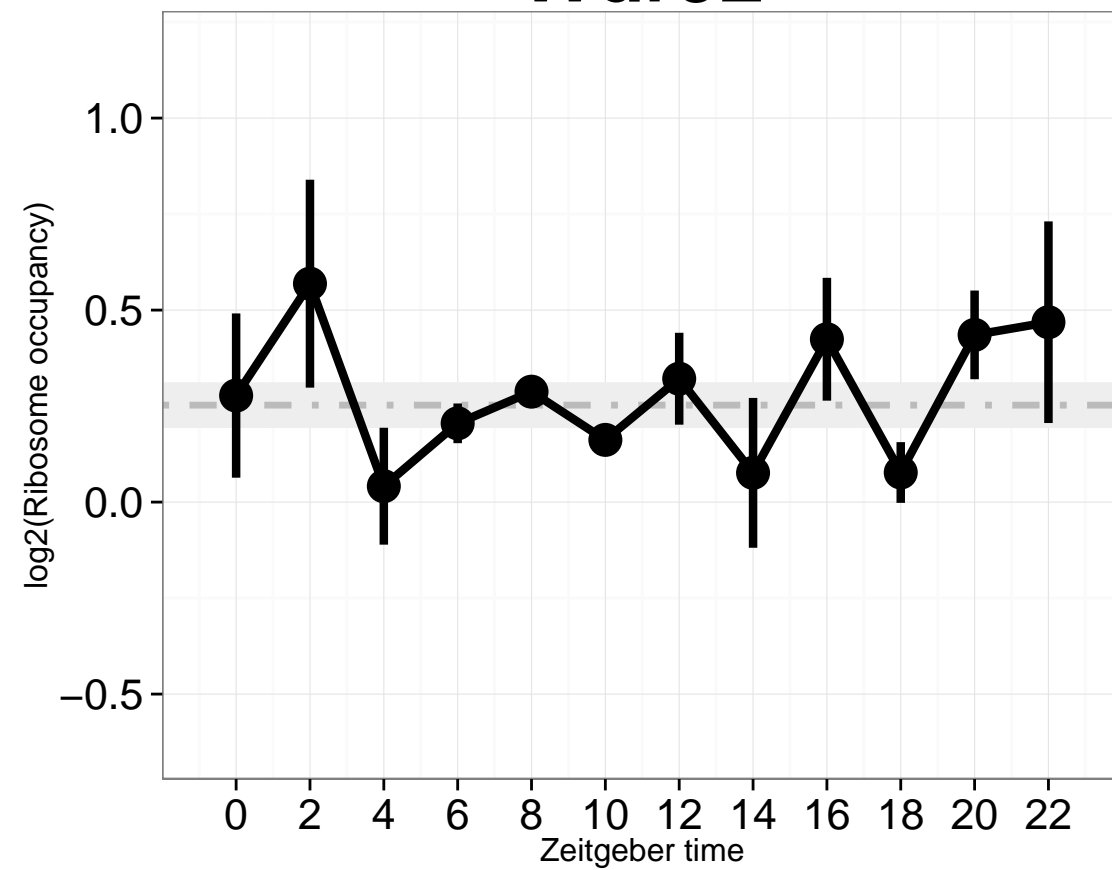

Supplement: SuppDataset_1.zip [file Wdr92_set_A.pdf › Supplemental Dataset 1/A-mRNA_nonrhyth_translation_nonrhyth/Wdr92_set_A.pdf]

# Wdr93

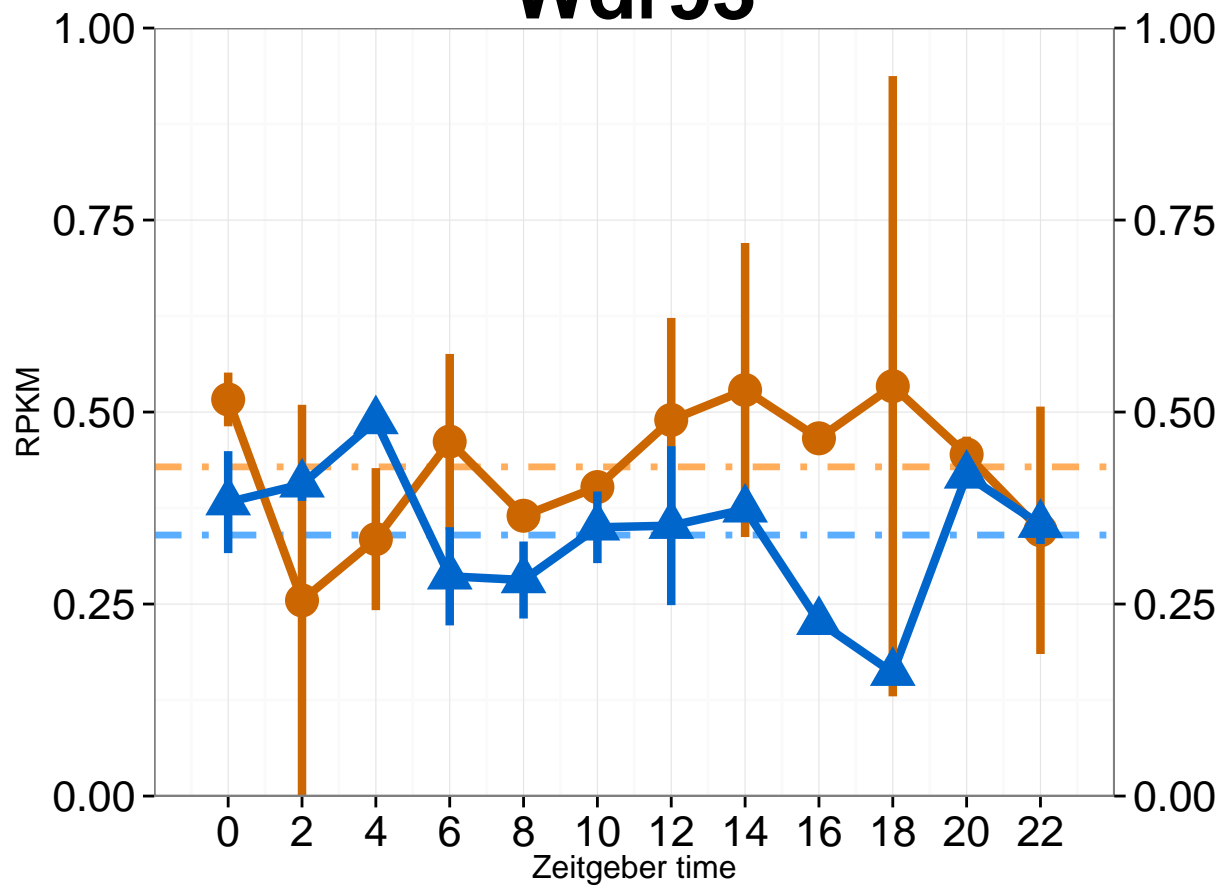

# Wdr93

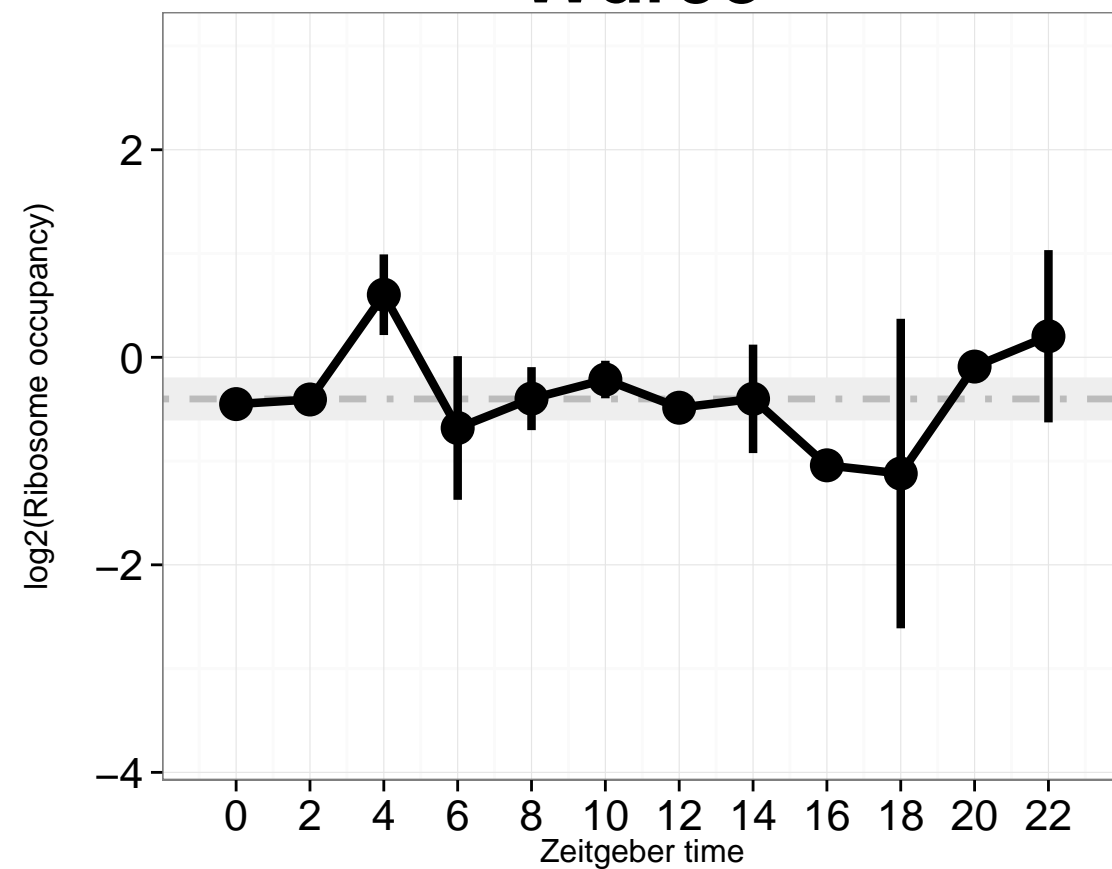

Supplement: SuppDataset_1.zip [file Wdr93_set_A.pdf › Supplemental Dataset 1/A-mRNA_nonrhyth_translation_nonrhyth/Wdr93_set_A.pdf]

# Wdsub1

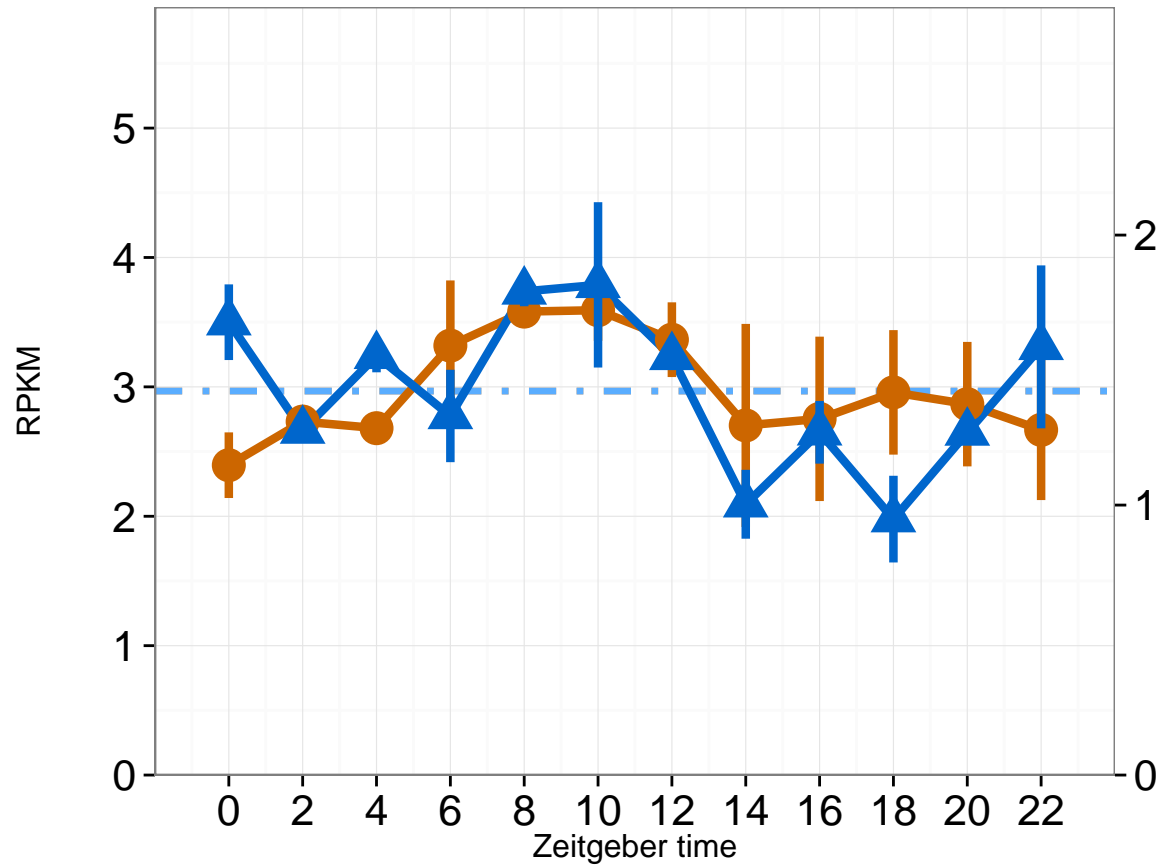

# Wdsub1

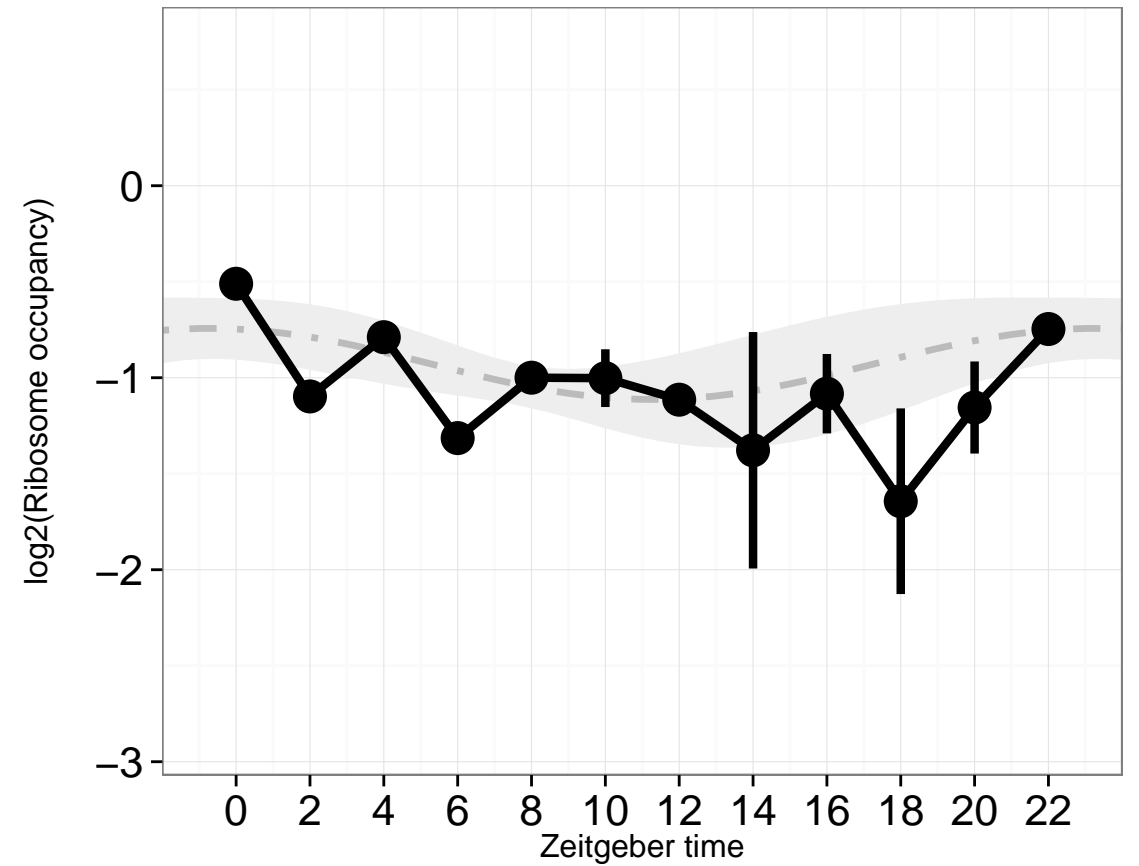

Supplement: SuppDataset_1.zip [file Wdsub1_set_A.pdf › Supplemental Dataset 1/A-mRNA_nonrhyth_translation_nonrhyth/Wdsub1_set_A.pdf]

## Wdyhv1

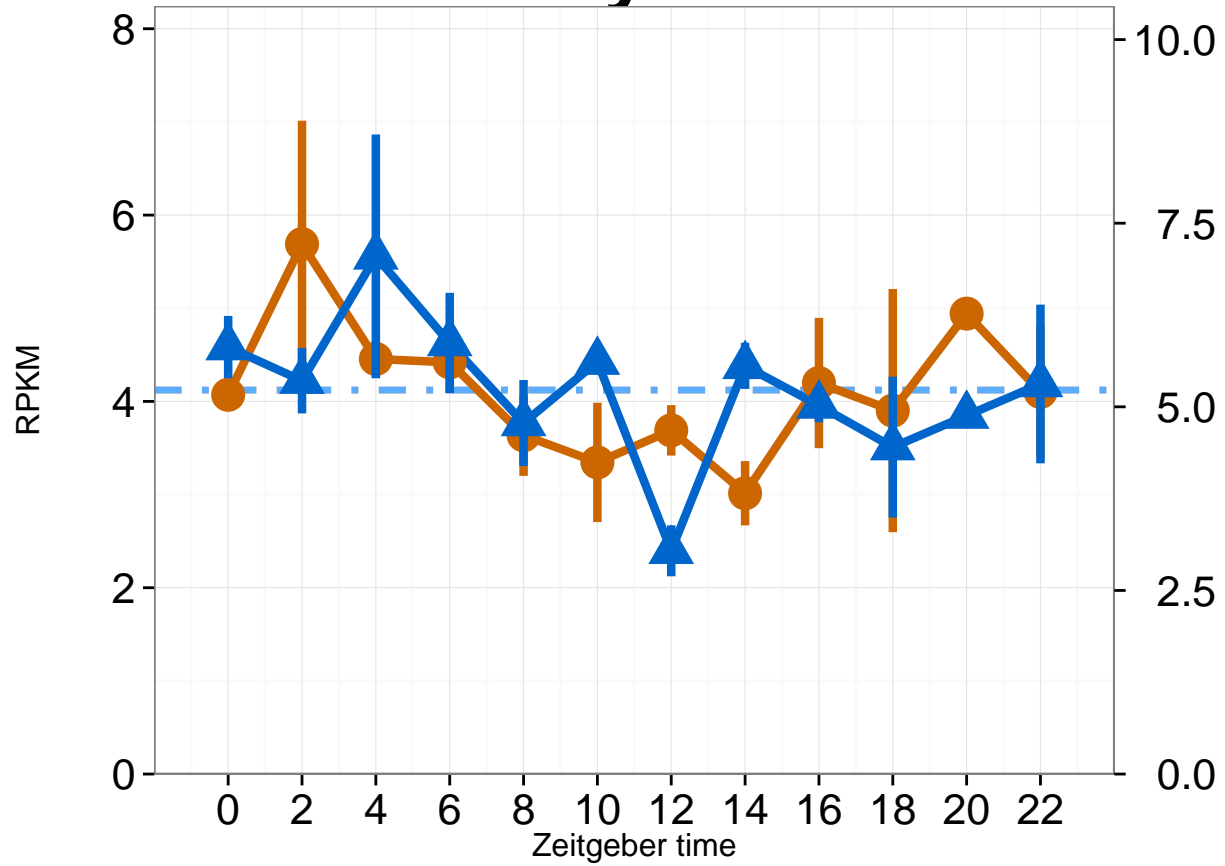

## Wdyhv1

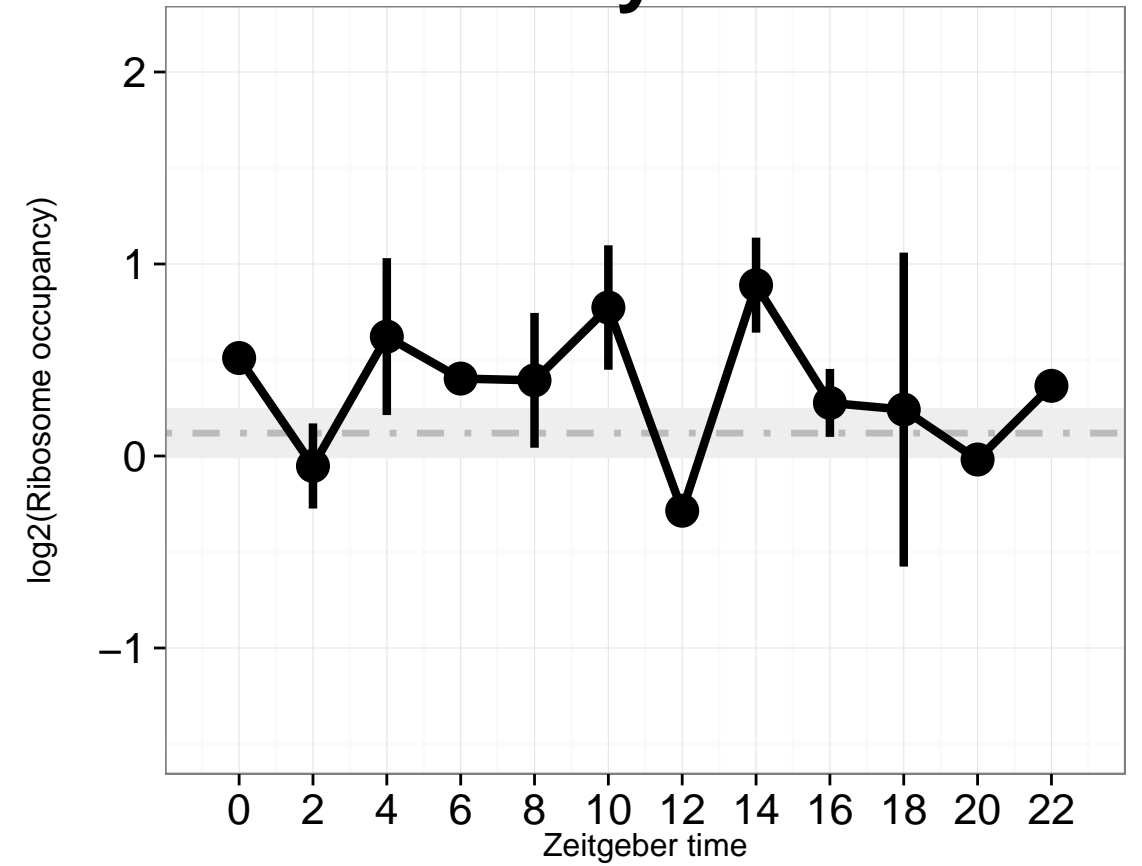

Supplement: SuppDataset_1.zip [file Wdyhv1_set_A.pdf › Supplemental Dataset 1/A-mRNA_nonrhyth_translation_nonrhyth/Wdyhv1_set_A.pdf]

# Wfdc1

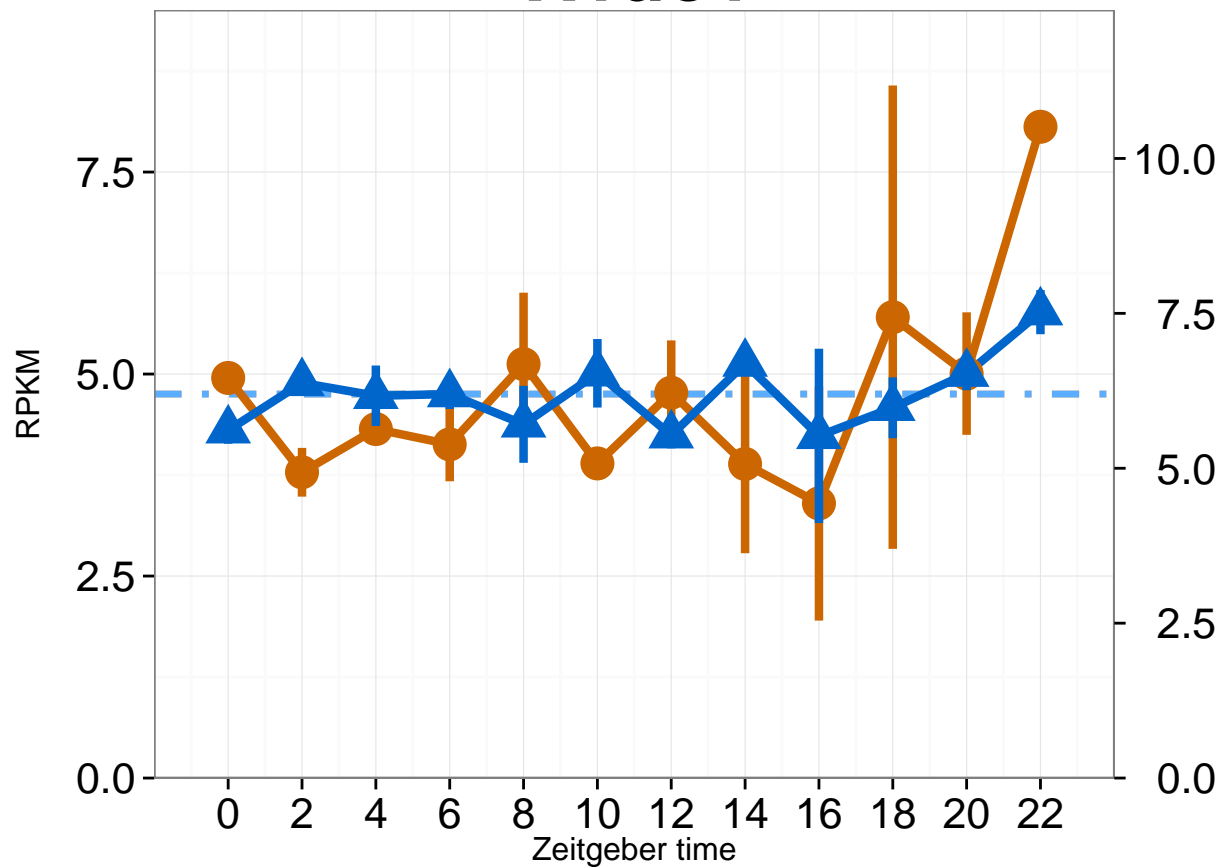

# Wfdc1

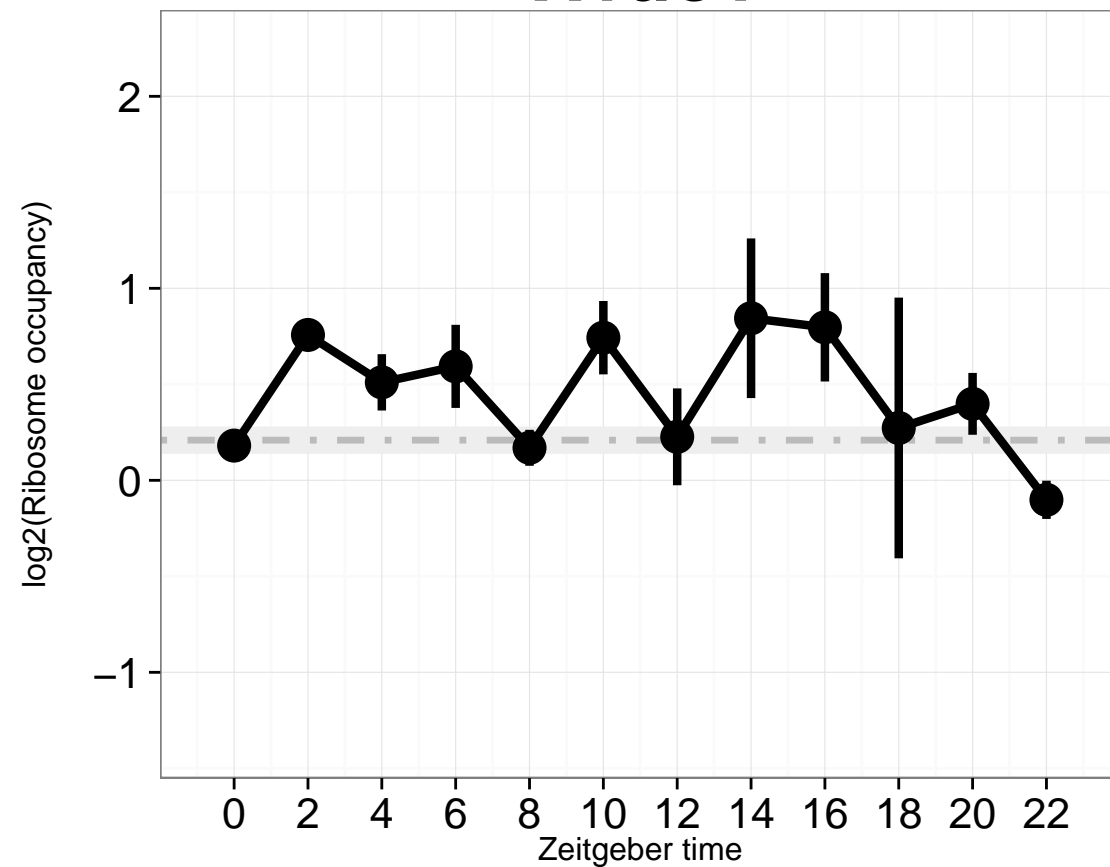

Supplement: SuppDataset_1.zip [file Wfdc1_set_A.pdf › Supplemental Dataset 1/A-mRNA_nonrhyth_translation_nonrhyth/Wfdc1_set_A.pdf]

# Wfs1

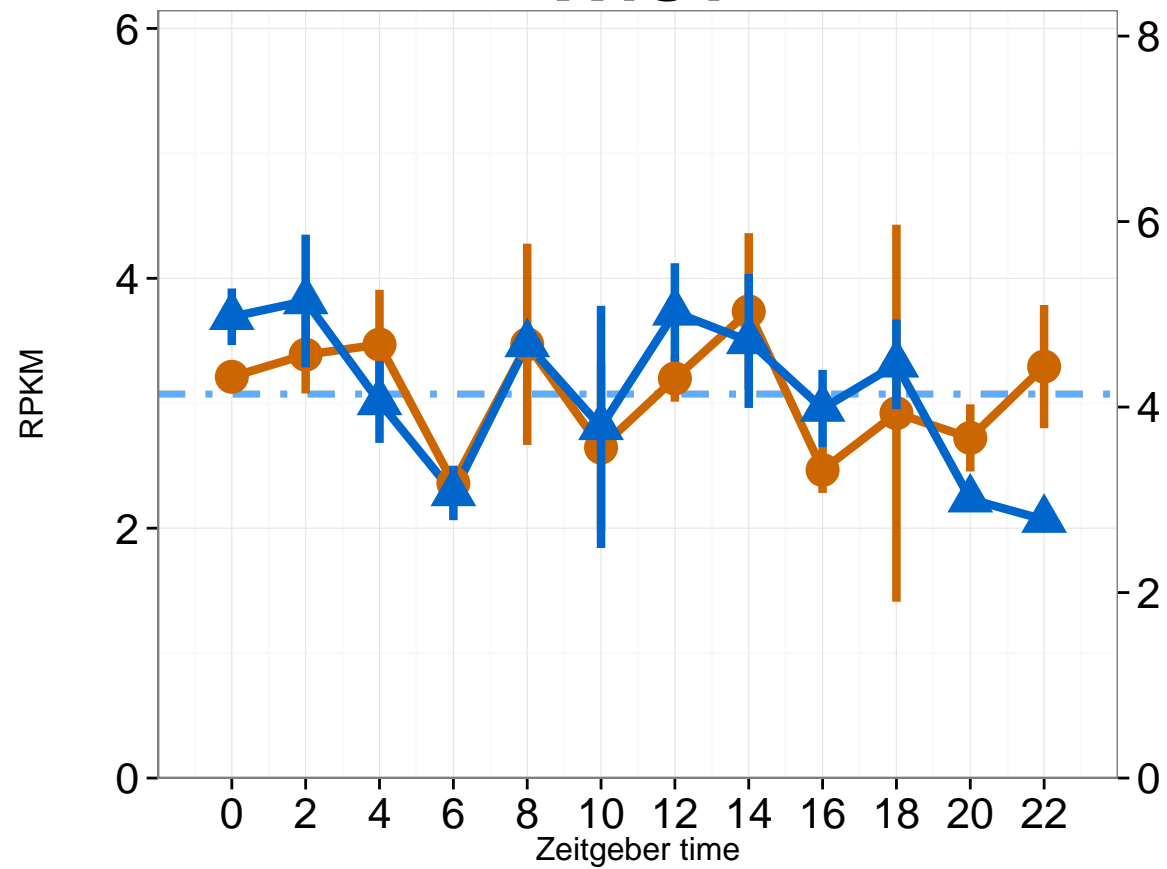

# Wfs1

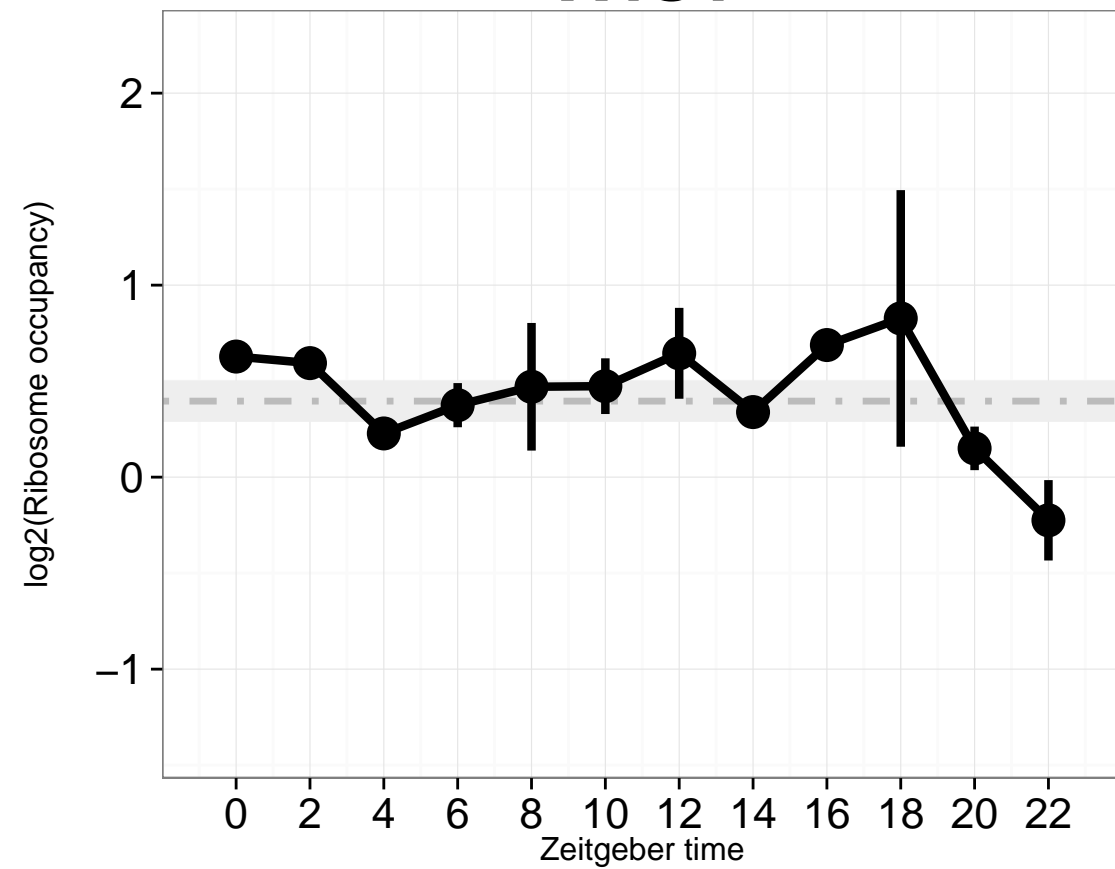

Supplement: SuppDataset_1.zip [file Wfs1_set_A.pdf › Supplemental Dataset 1/A-mRNA_nonrhyth_translation_nonrhyth/Wfs1_set_A.pdf]

# Whamm

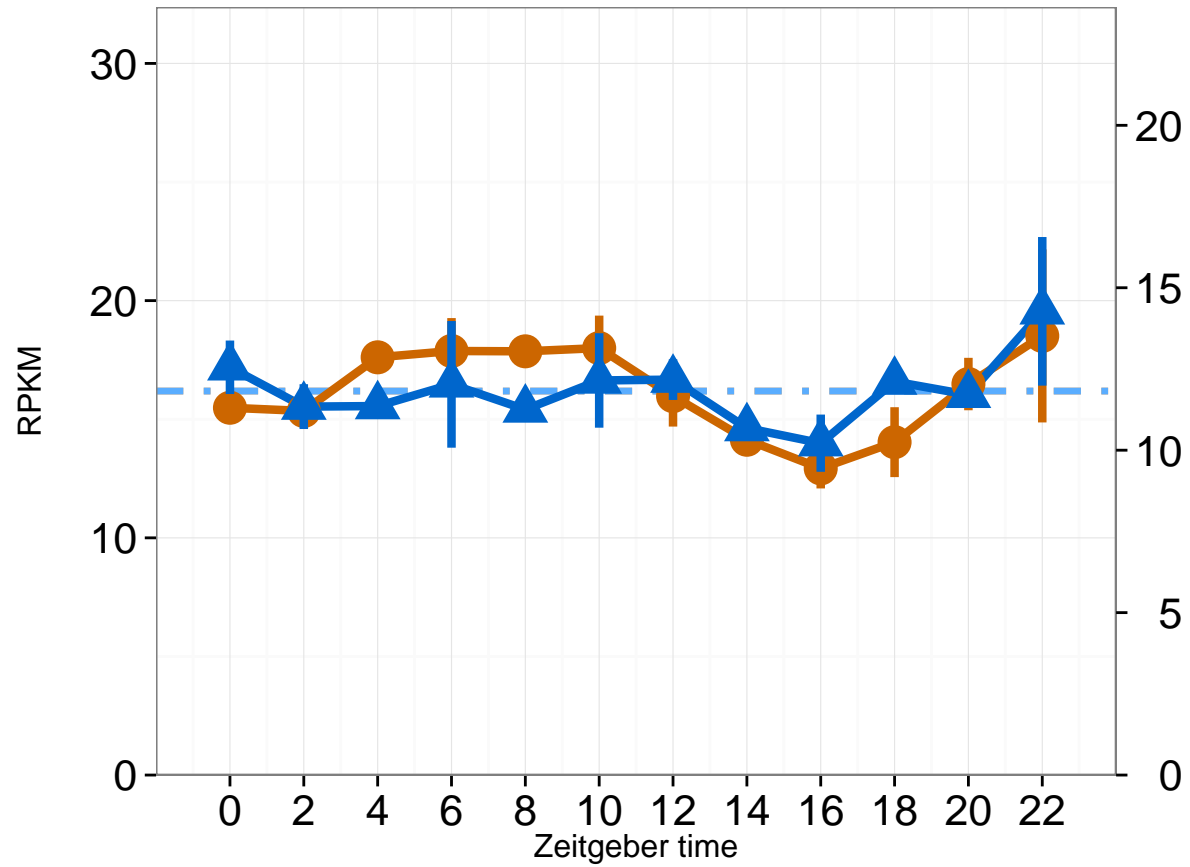

# Whamm

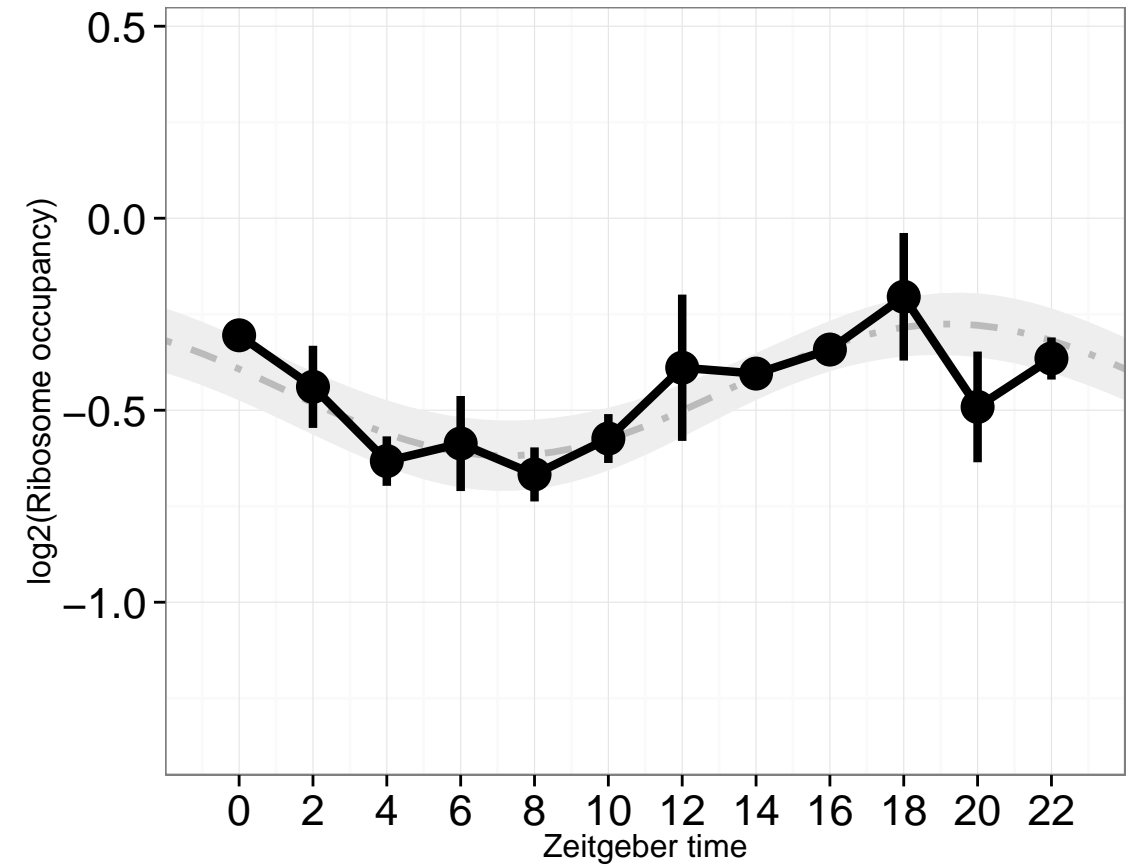

Supplement: SuppDataset_1.zip [file Whamm_set_A.pdf › Supplemental Dataset 1/A-mRNA_nonrhyth_translation_nonrhyth/Whamm_set_A.pdf]

## Whsc1

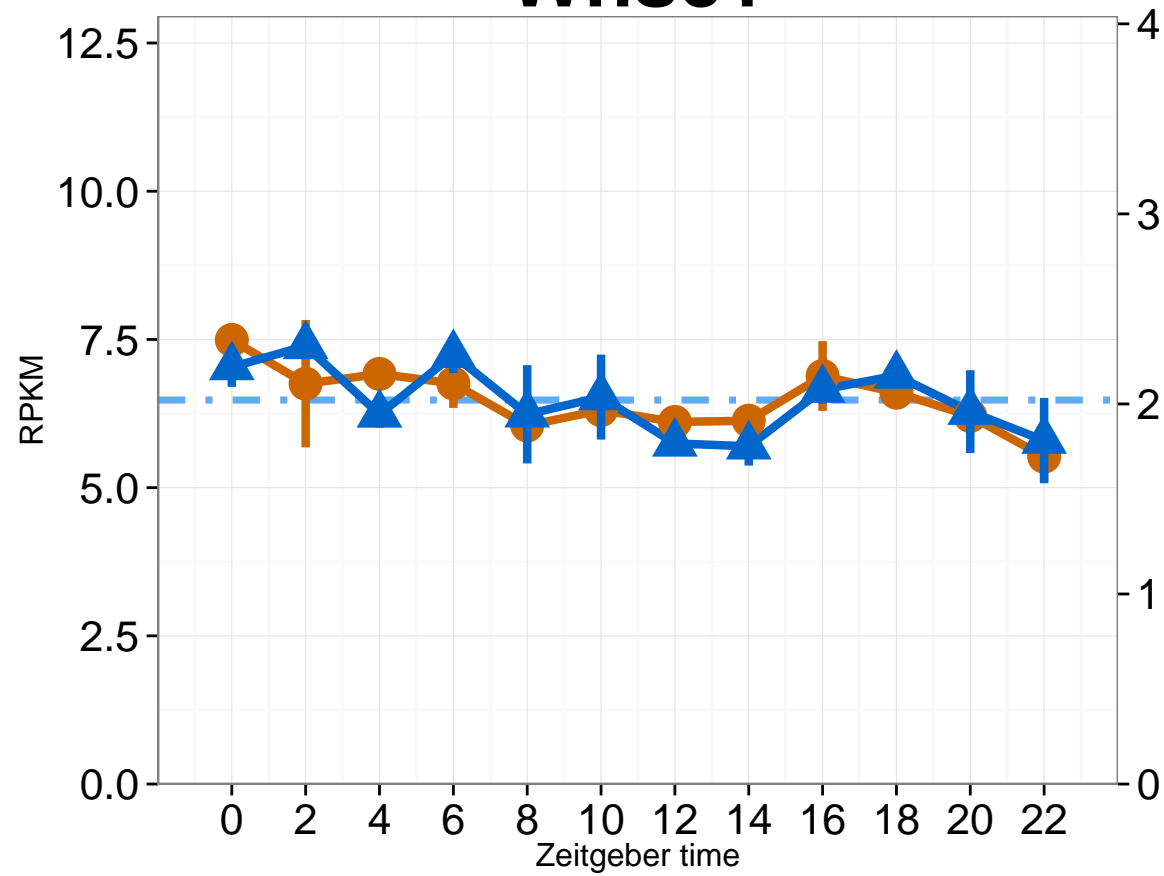

## Whsc1

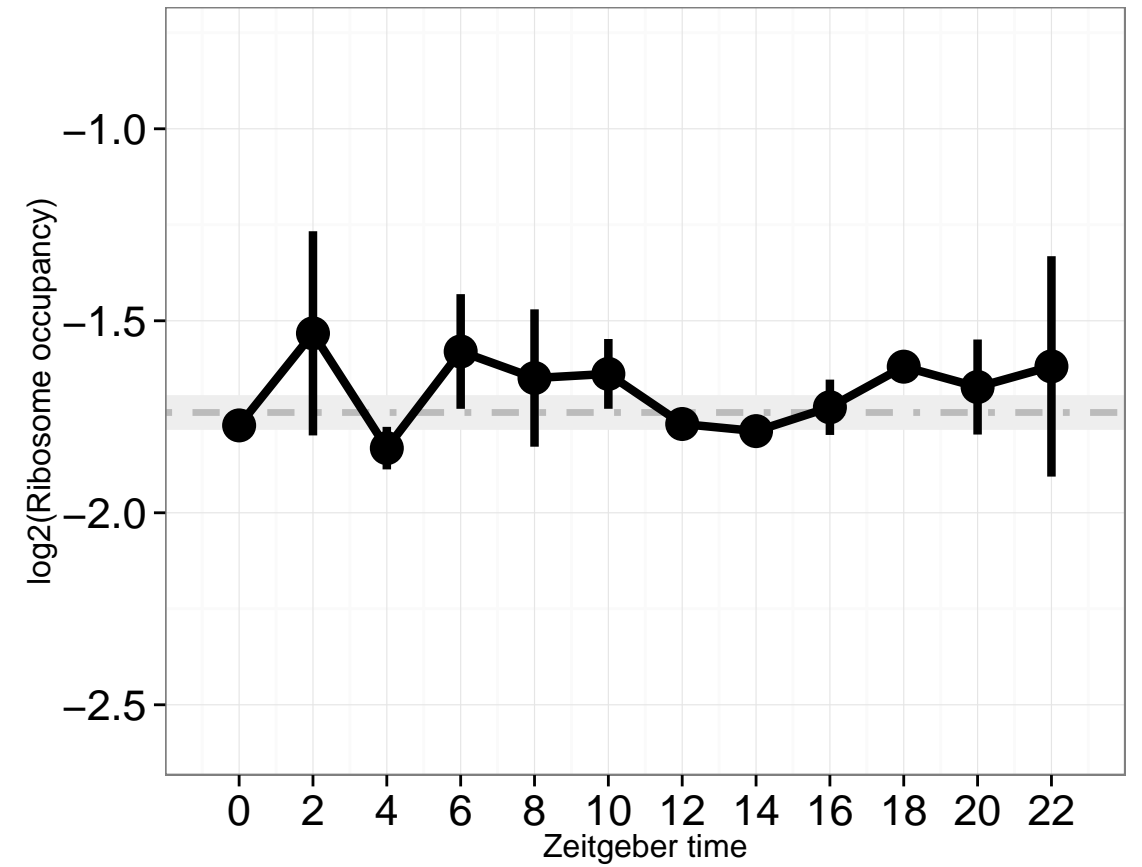

Supplement: SuppDataset_1.zip [file Whsc1_set_A.pdf › Supplemental Dataset 1/A-mRNA_nonrhyth_translation_nonrhyth/Whsc1_set_A.pdf]

## Whsc1l1

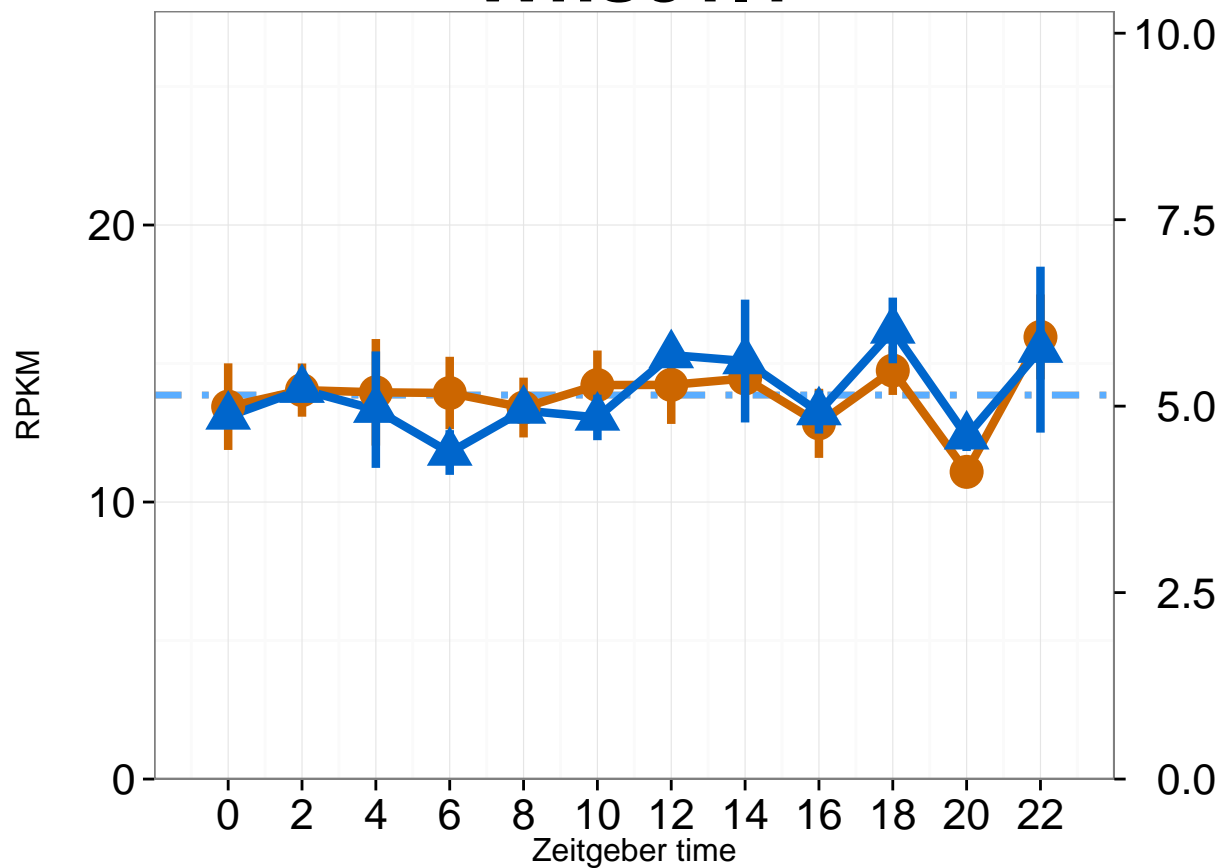

## Whsc1l1

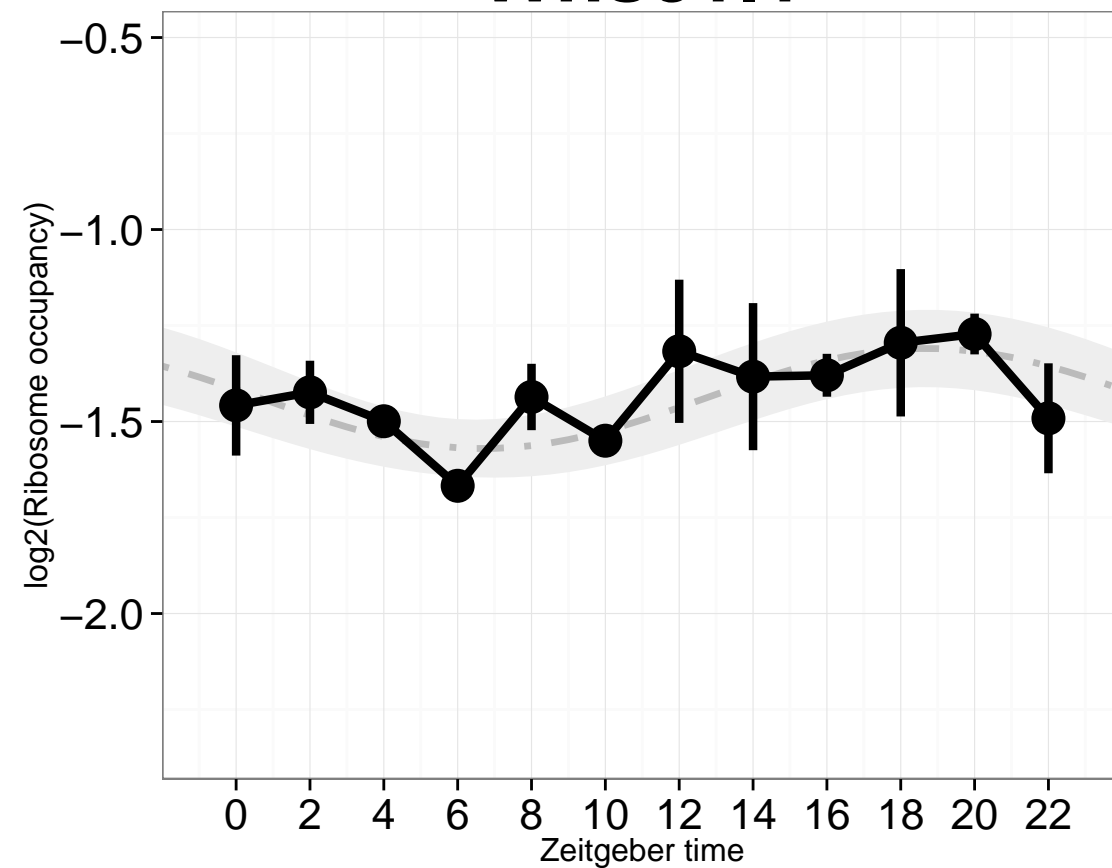

Supplement: SuppDataset_1.zip [file Whsc1l1_set_A.pdf › Supplemental Dataset 1/A-mRNA_nonrhyth_translation_nonrhyth/Whsc1l1_set_A.pdf]

## Wibg

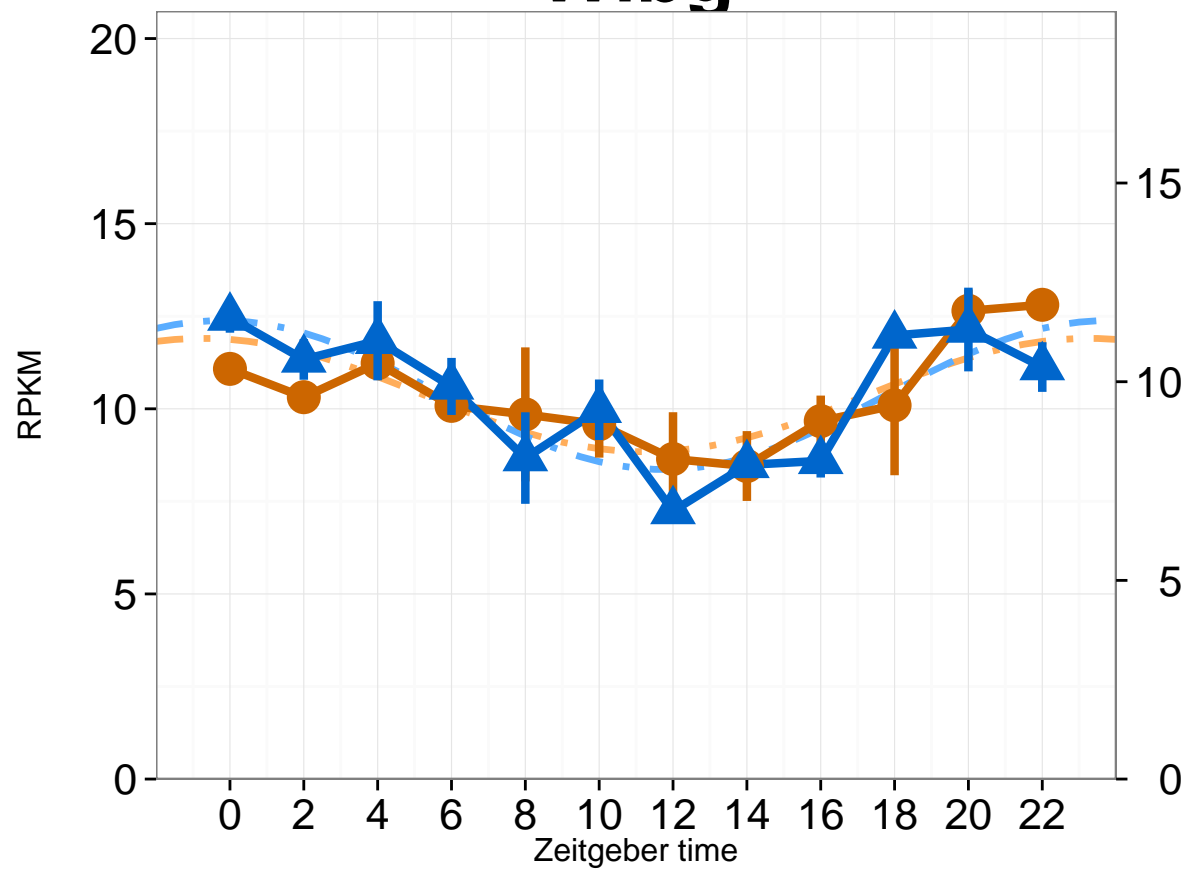

## Wibg

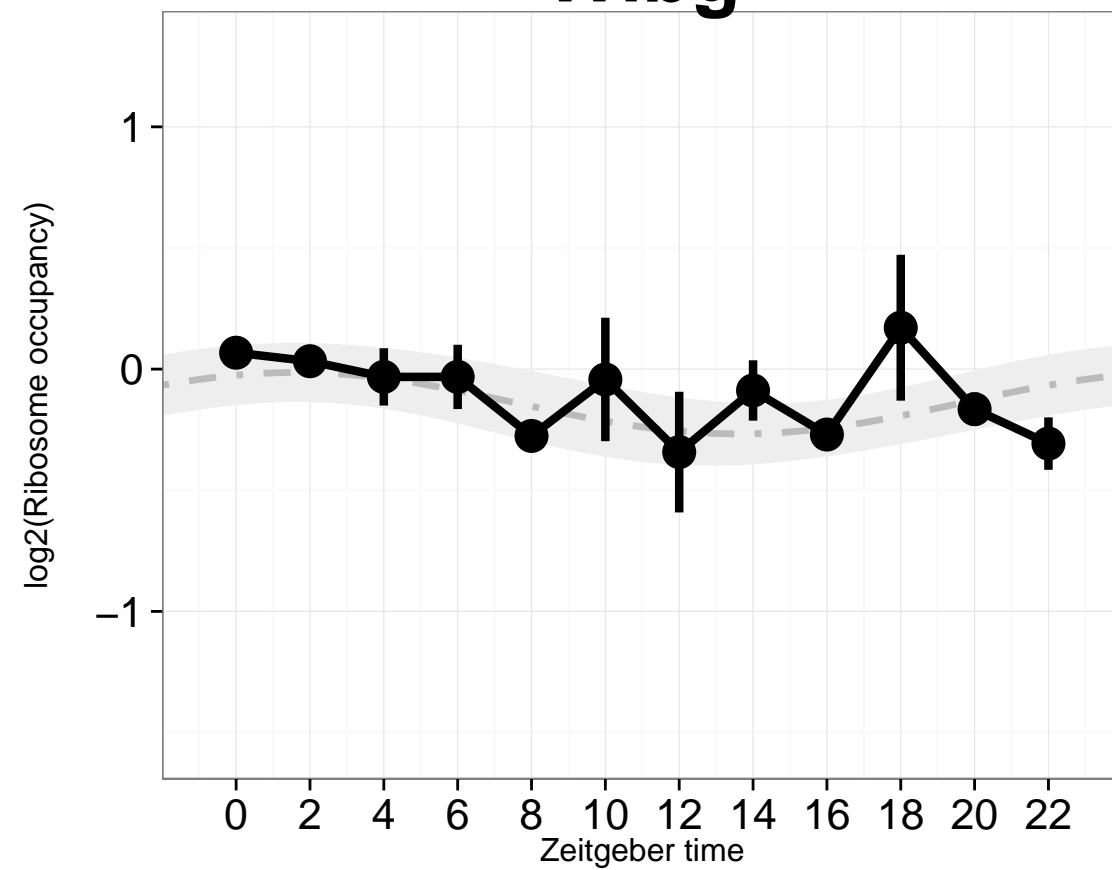

Supplement: SuppDataset_1.zip [file Wibg_set_A.pdf › Supplemental Dataset 1/A-mRNA_nonrhyth_translation_nonrhyth/Wibg_set_A.pdf]

# Wipf1

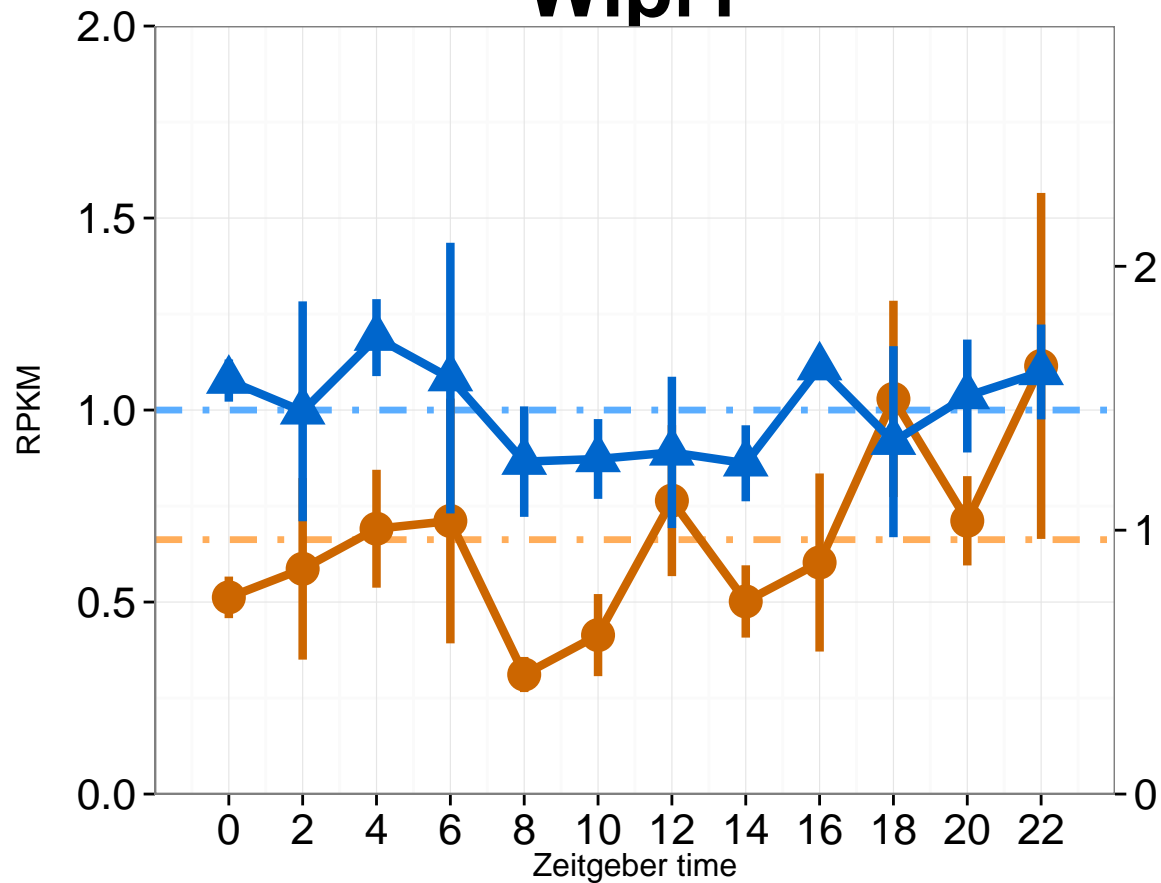

# Wipf1

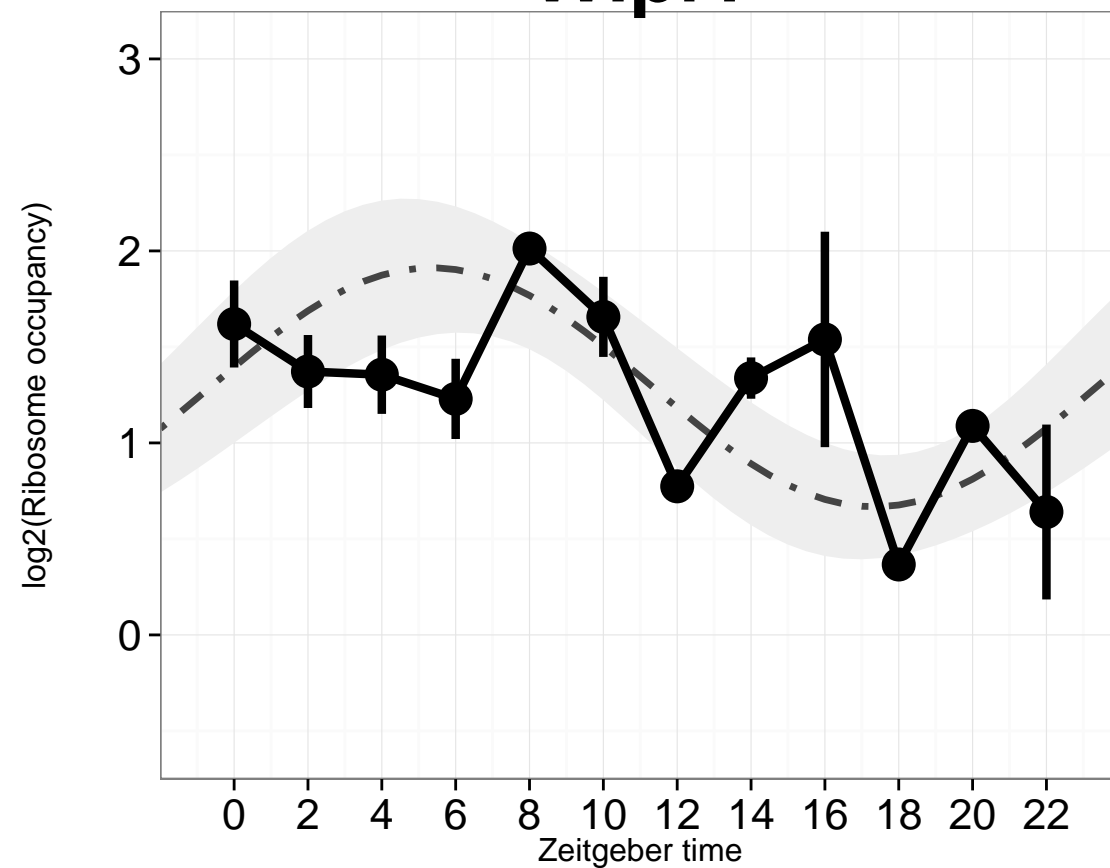

Supplement: SuppDataset_1.zip [file Wipf1_set_A.pdf › Supplemental Dataset 1/A-mRNA_nonrhyth_translation_nonrhyth/Wipf1_set_A.pdf]

## Wipf2

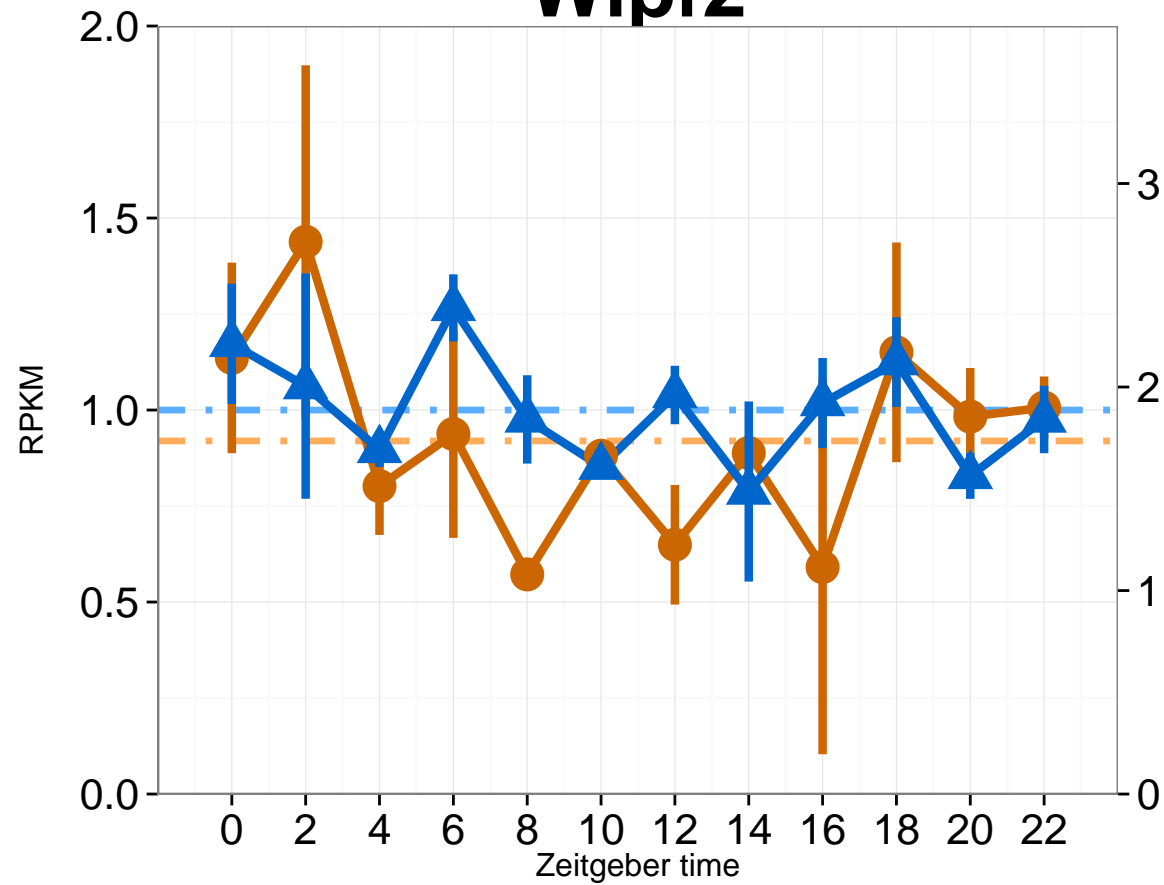

## Wipf2

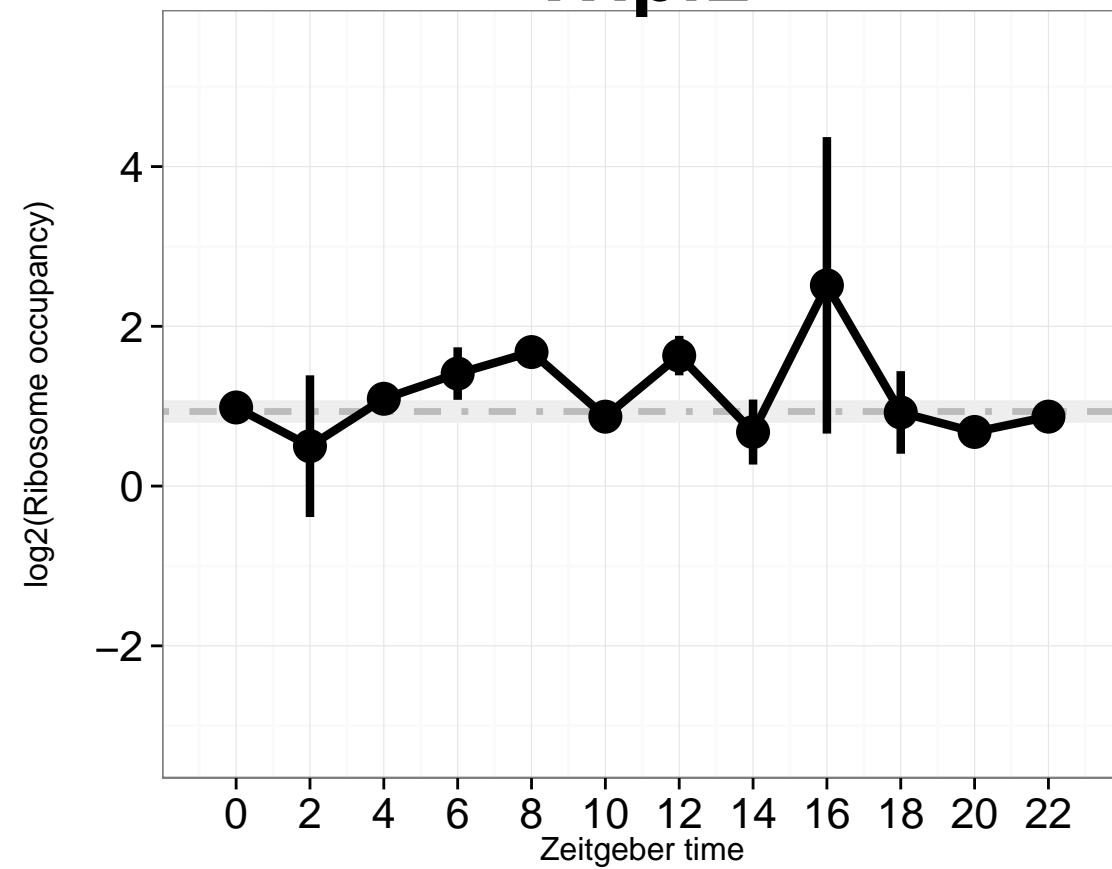

Supplement: SuppDataset_1.zip [file Wipf2_set_A.pdf › Supplemental Dataset 1/A-mRNA_nonrhyth_translation_nonrhyth/Wipf2_set_A.pdf]

## Wipi1

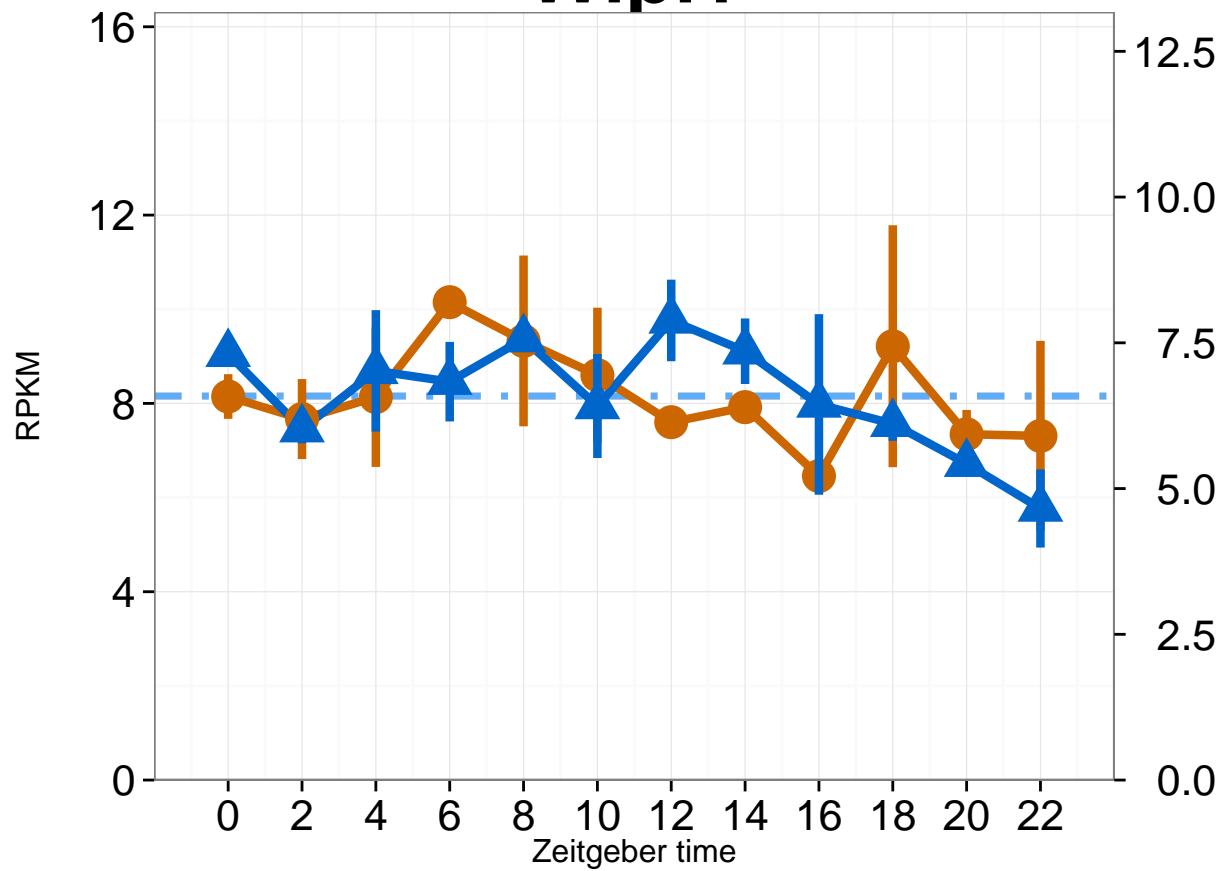

## Wipi1

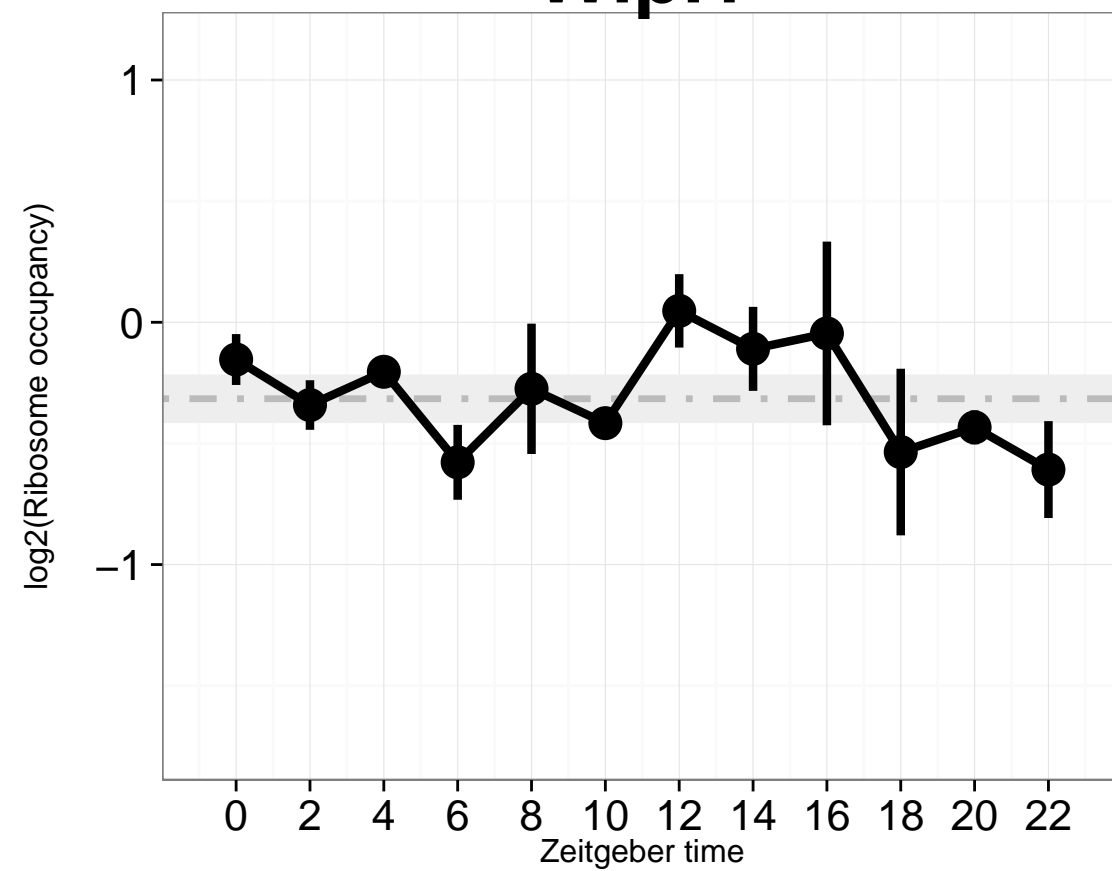

Supplement: SuppDataset_1.zip [file Wipi1_set_A.pdf › Supplemental Dataset 1/A-mRNA_nonrhyth_translation_nonrhyth/Wipi1_set_A.pdf]

## Wipi2

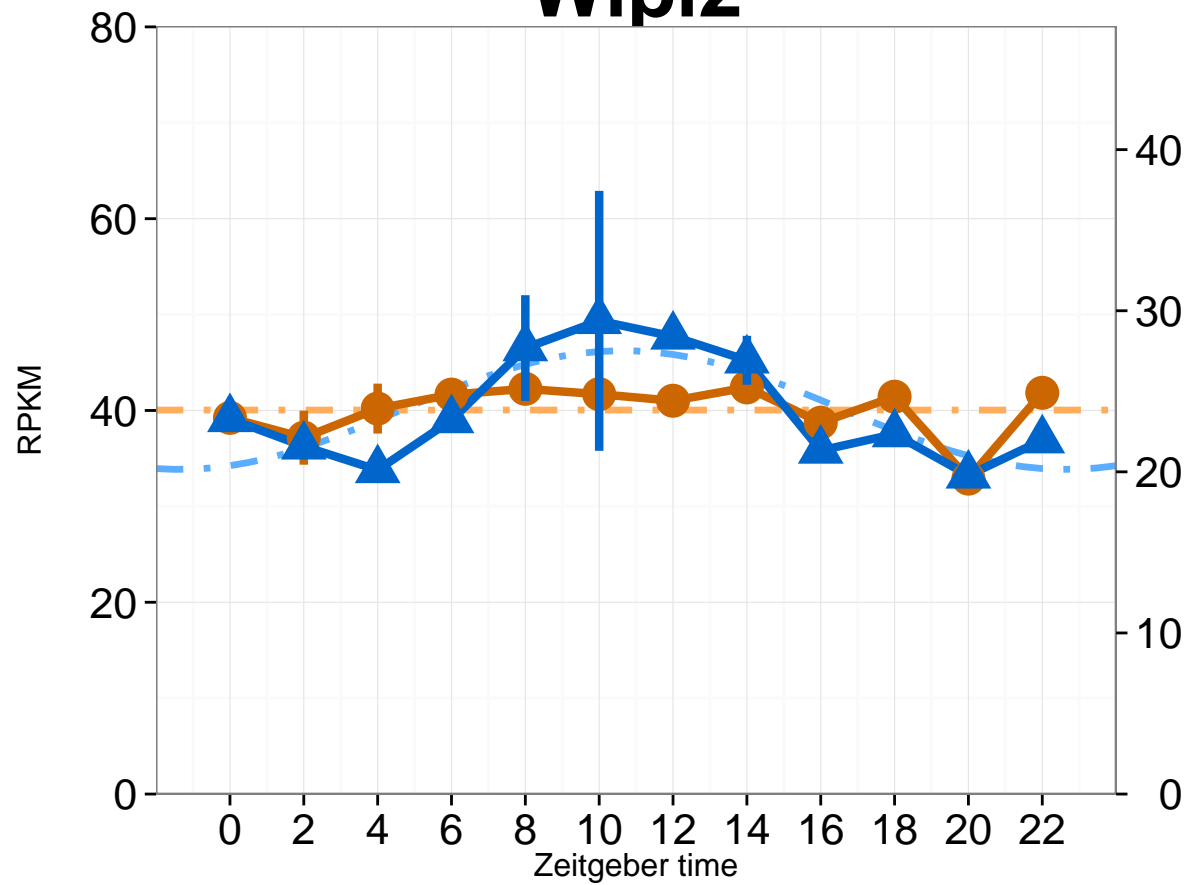

## Wipi2

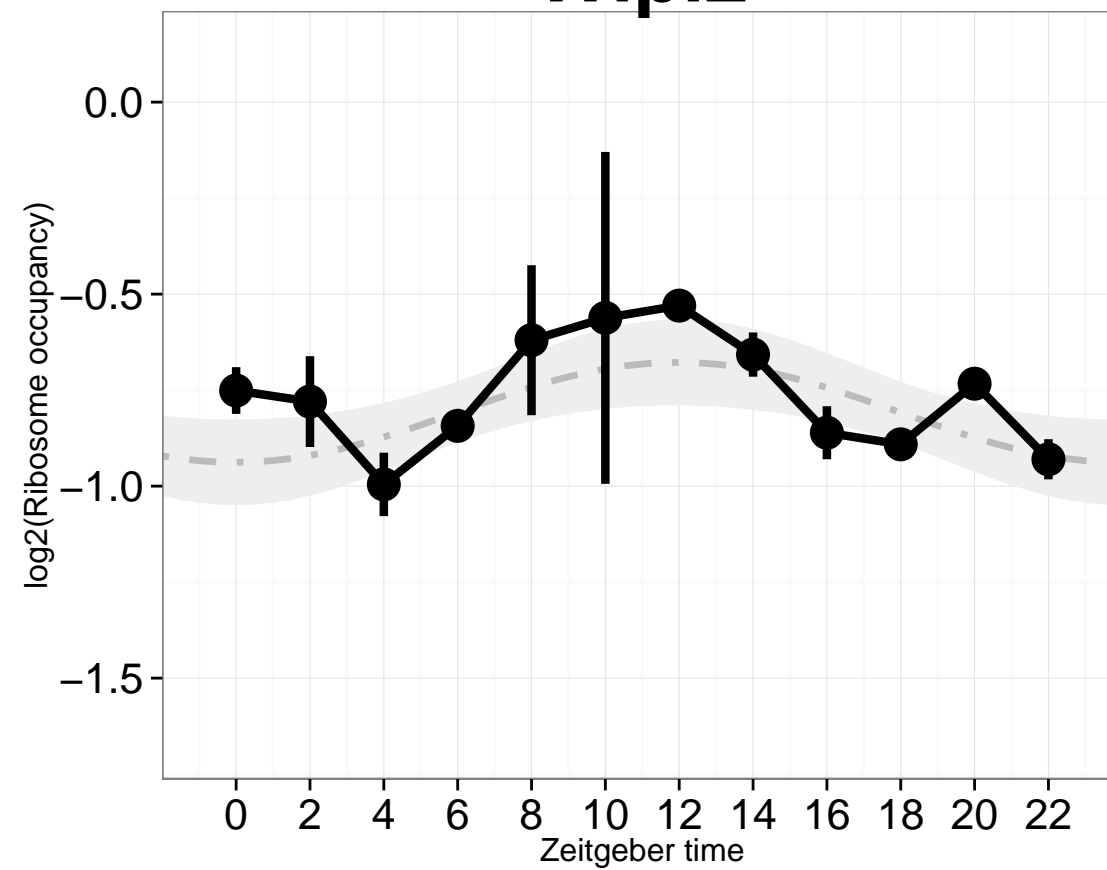

Supplement: SuppDataset_1.zip [file Wipi2_set_A.pdf › Supplemental Dataset 1/A-mRNA_nonrhyth_translation_nonrhyth/Wipi2_set_A.pdf]

## Wiz

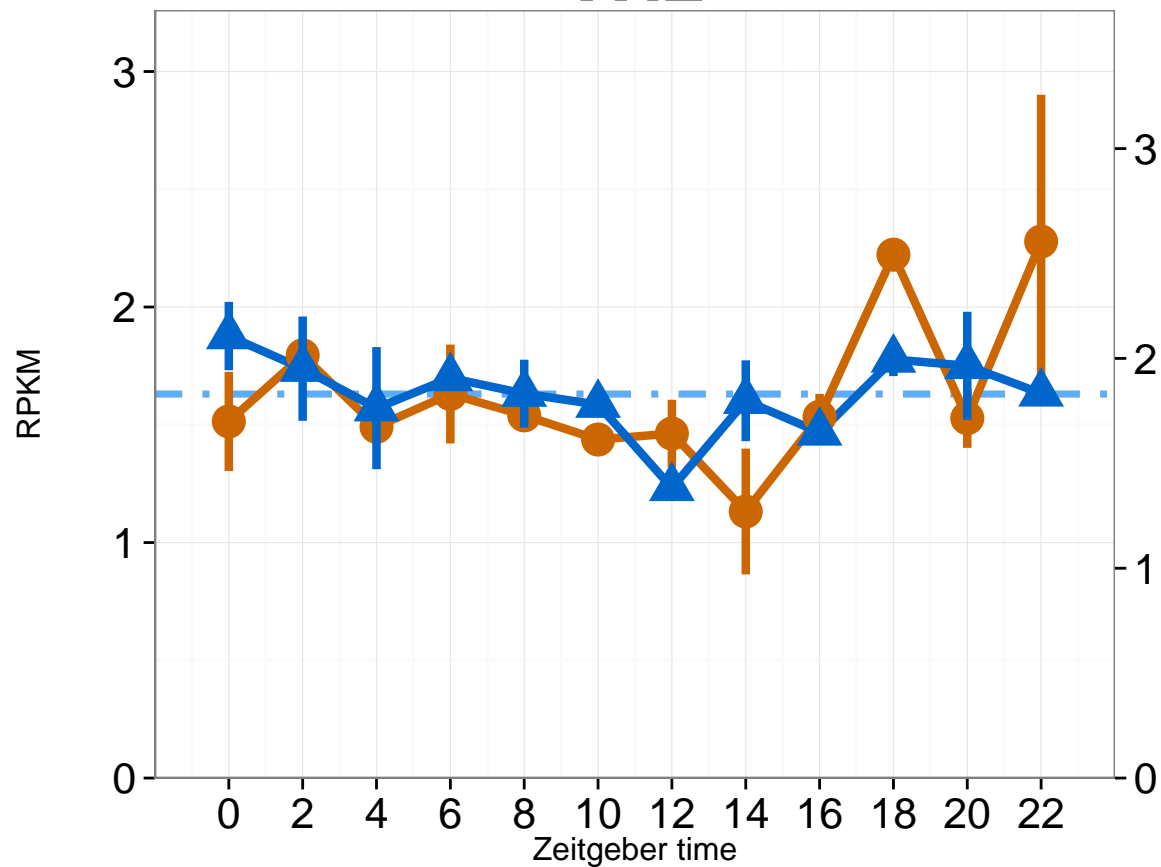

## Wiz

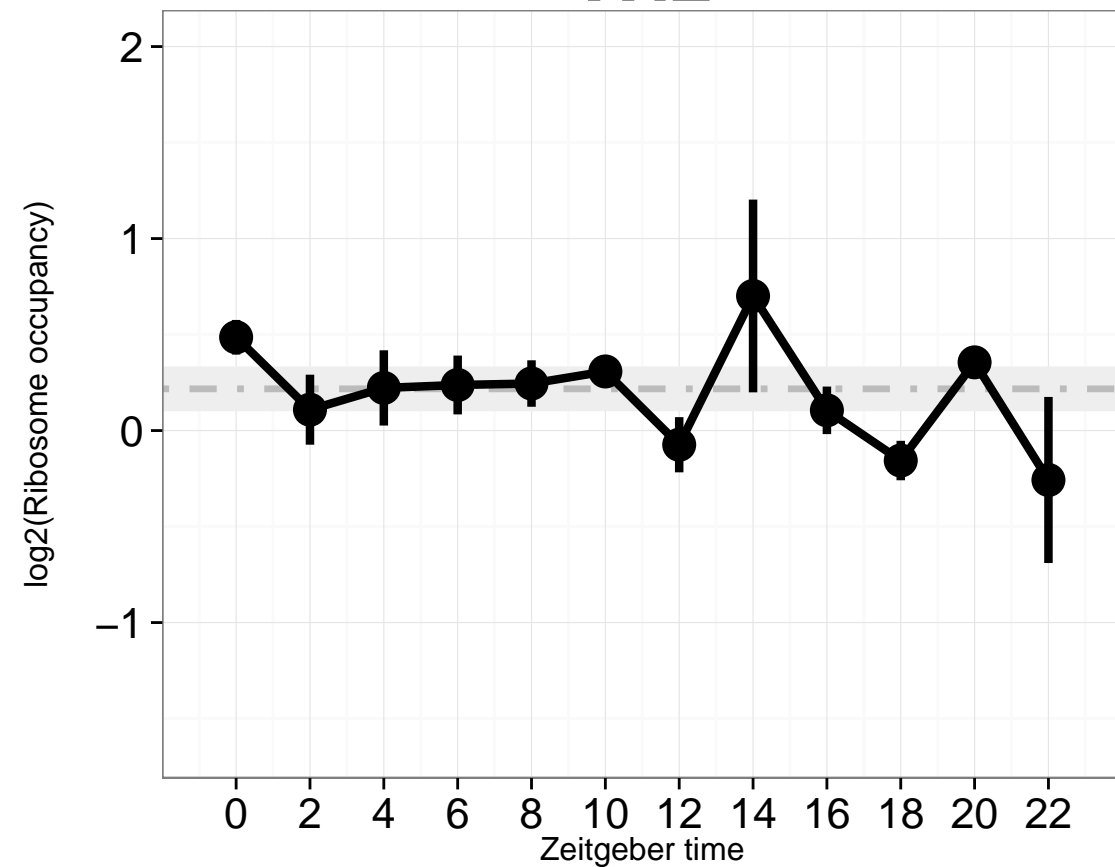

Supplement: SuppDataset_1.zip [file Wiz_set_A.pdf › Supplemental Dataset 1/A-mRNA_nonrhyth_translation_nonrhyth/Wiz_set_A.pdf]

# Wls

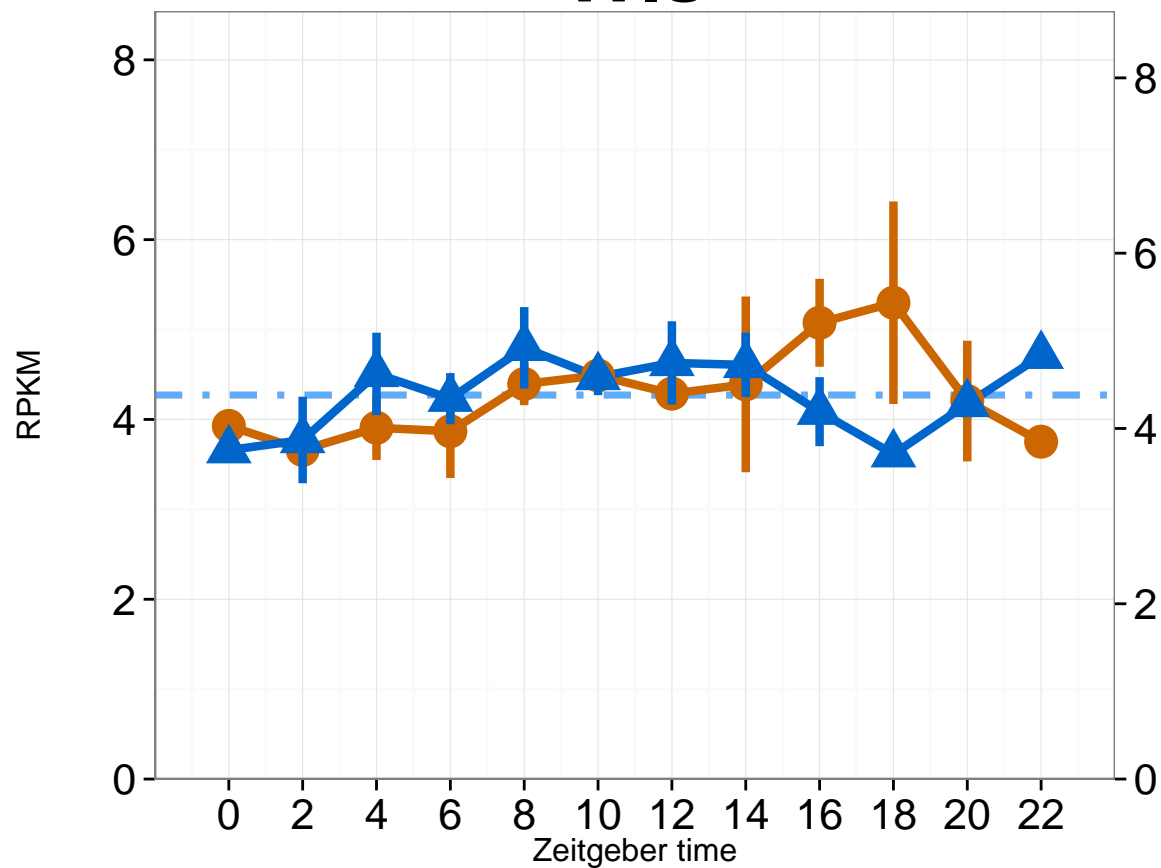

# Wls

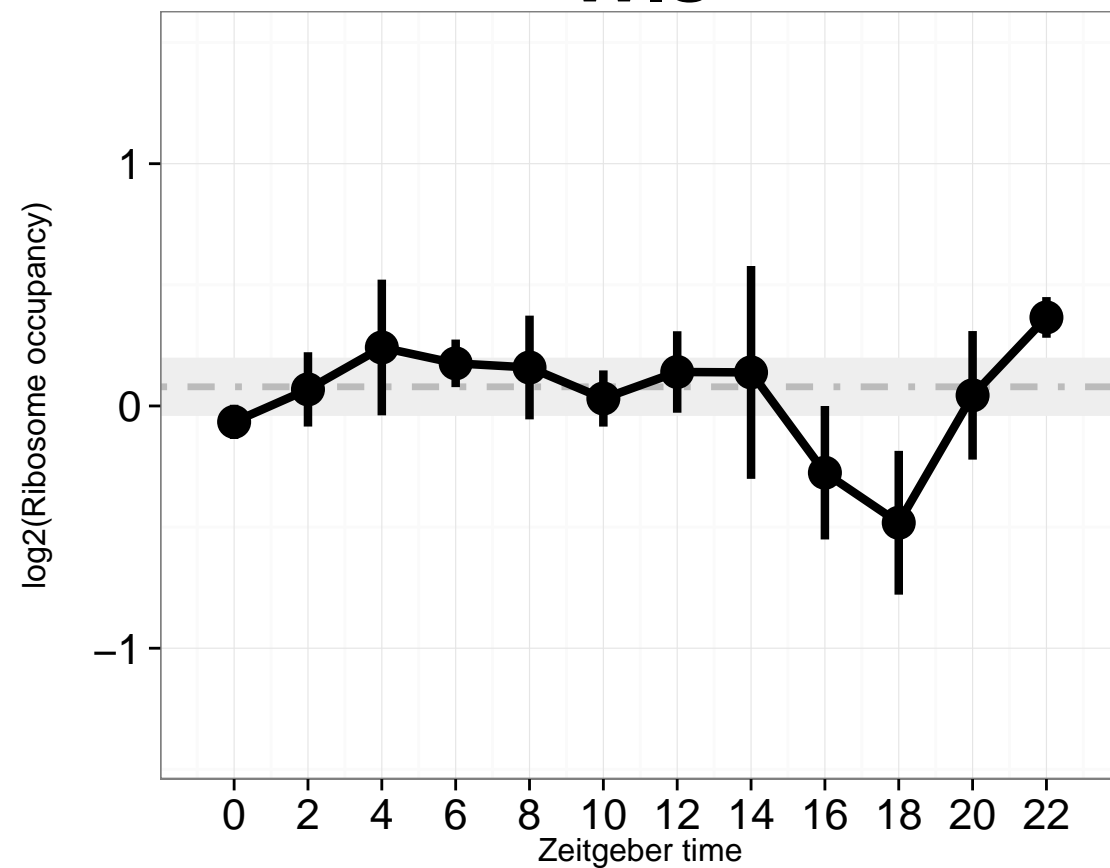

Supplement: SuppDataset_1.zip [file Wls_set_A.pdf › Supplemental Dataset 1/A-mRNA_nonrhyth_translation_nonrhyth/Wls_set_A.pdf]

## Wnk1

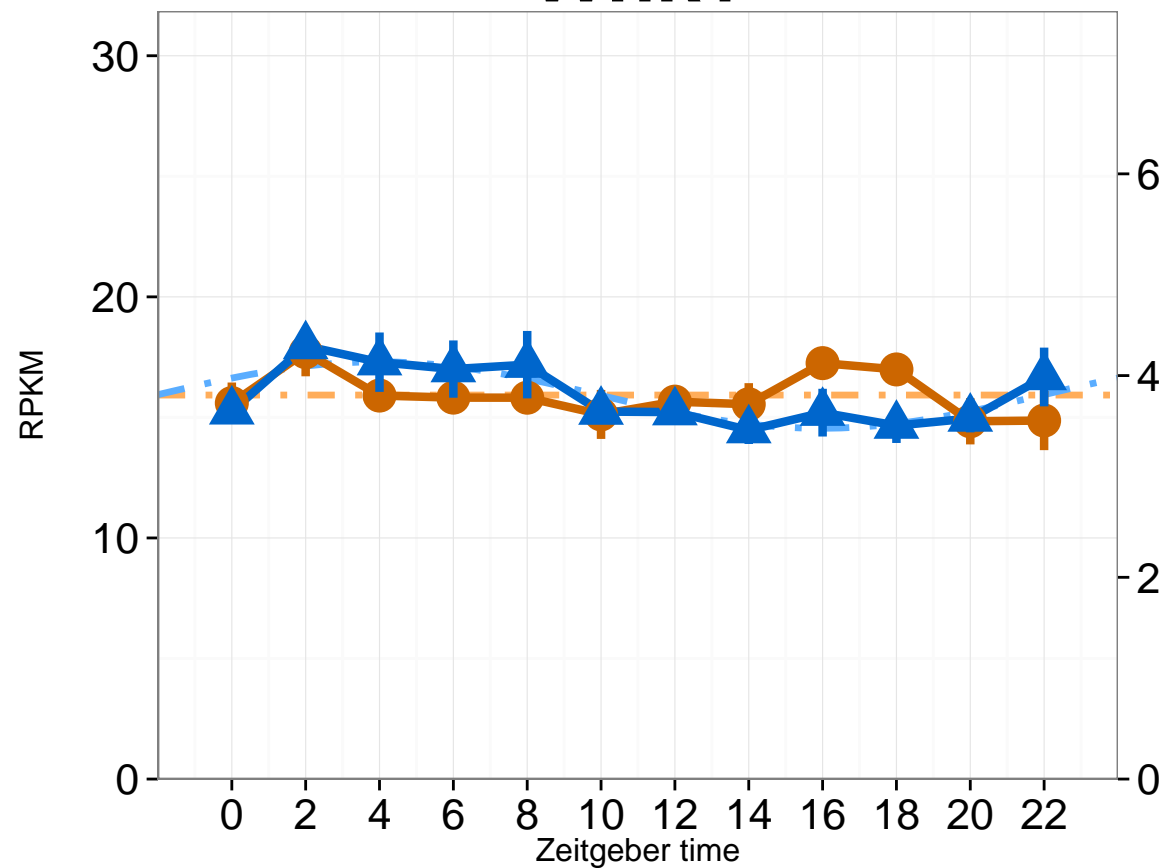

## Wnk1

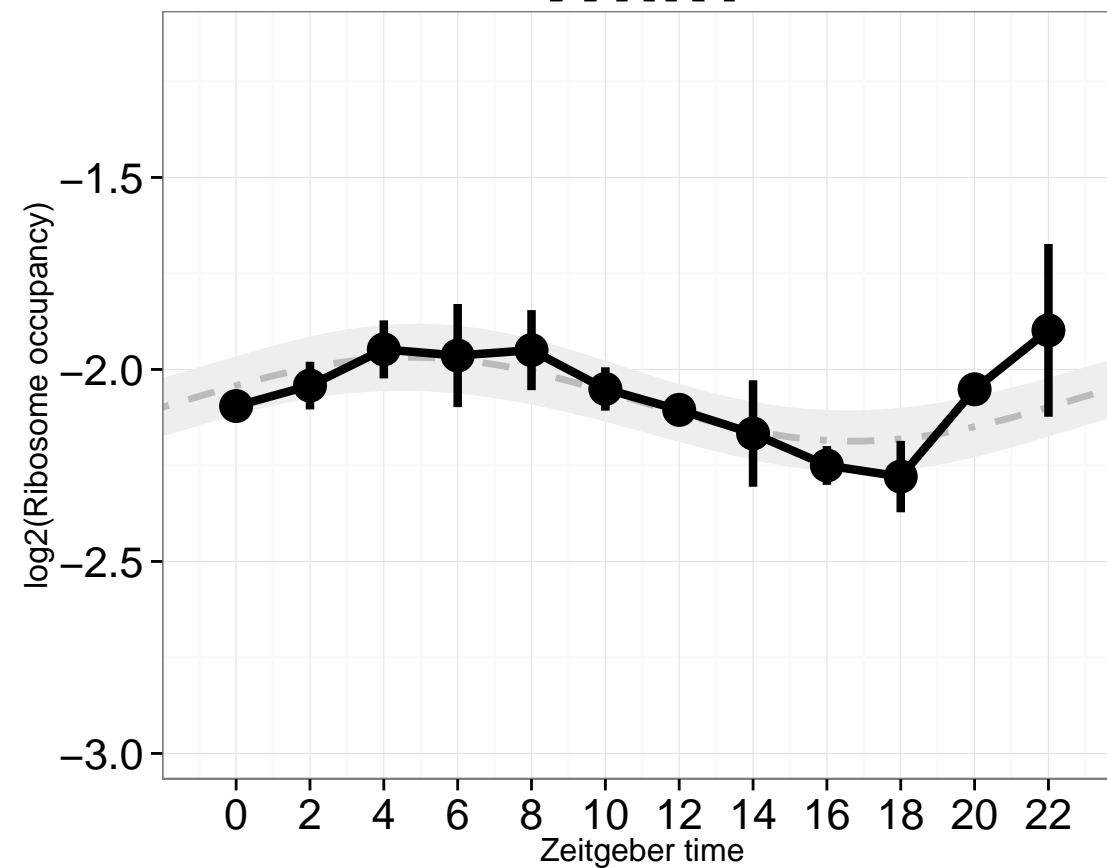

Supplement: SuppDataset_1.zip [file Wnk1_set_A.pdf › Supplemental Dataset 1/A-mRNA_nonrhyth_translation_nonrhyth/Wnk1_set_A.pdf]

## Wnt2

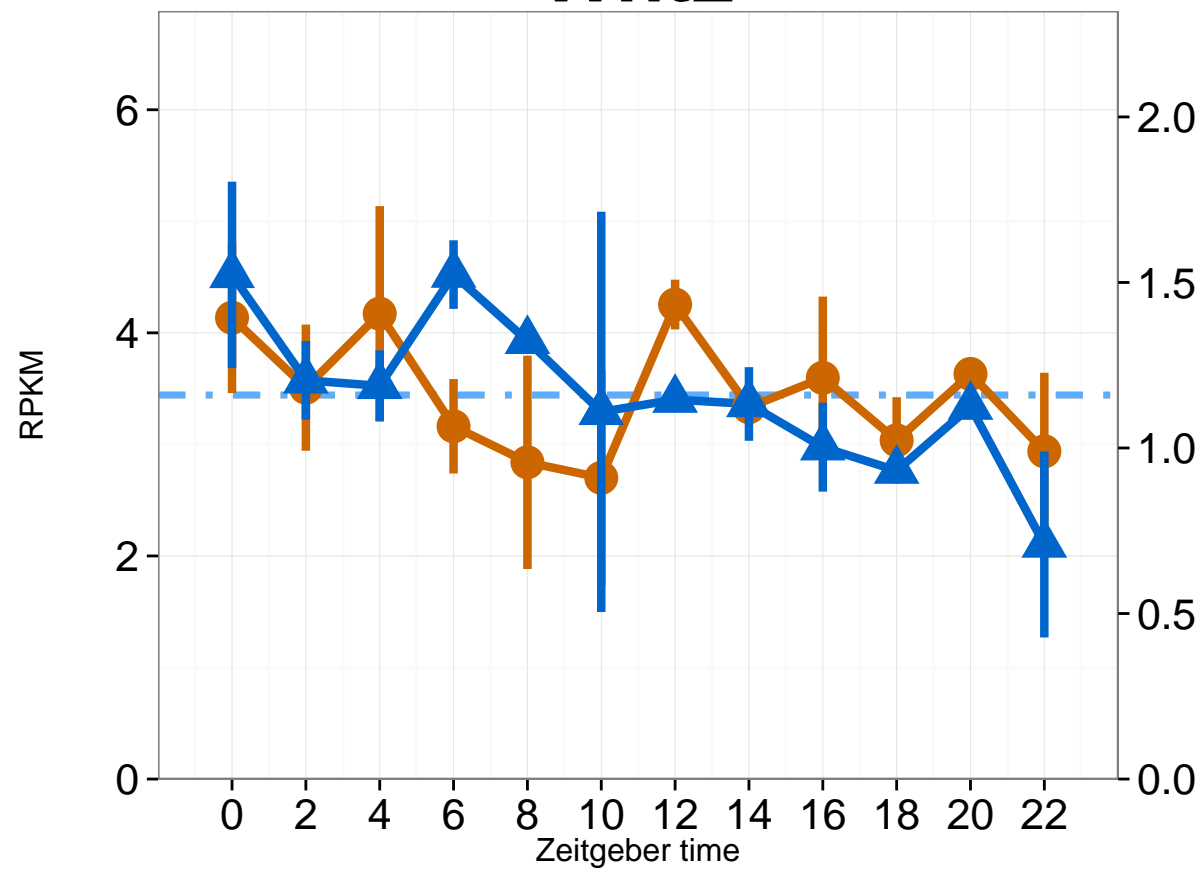

## Wnt2

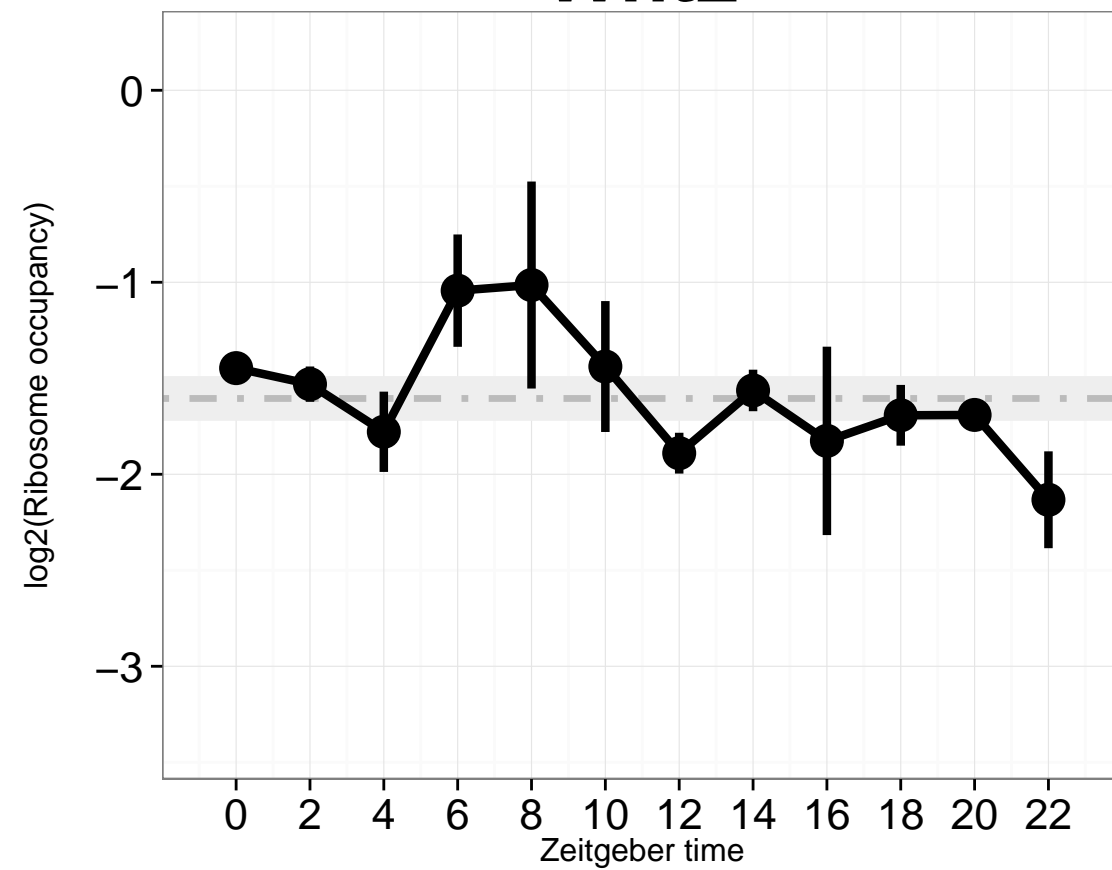

Supplement: SuppDataset_1.zip [file Wnt2_set_A.pdf › Supplemental Dataset 1/A-mRNA_nonrhyth_translation_nonrhyth/Wnt2_set_A.pdf]

## Wnt4

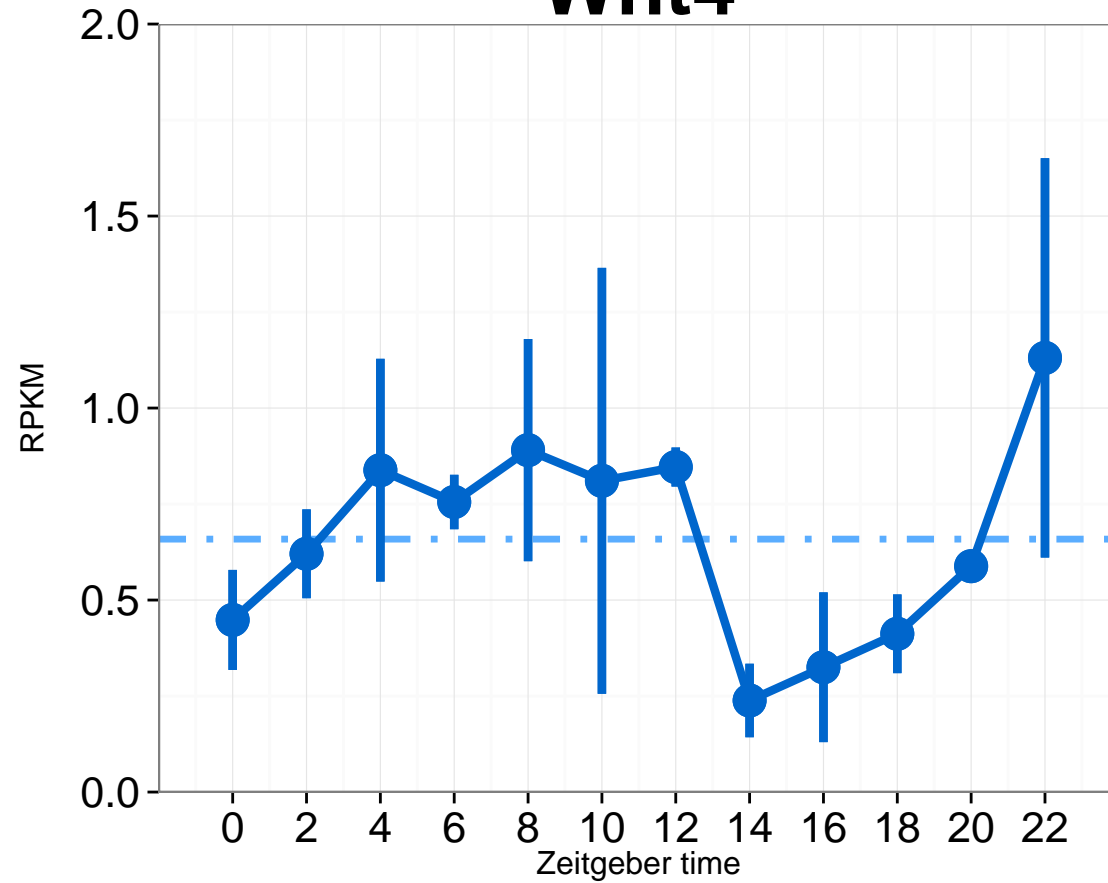

## Wnt4 log2(Ribosome occupancy)

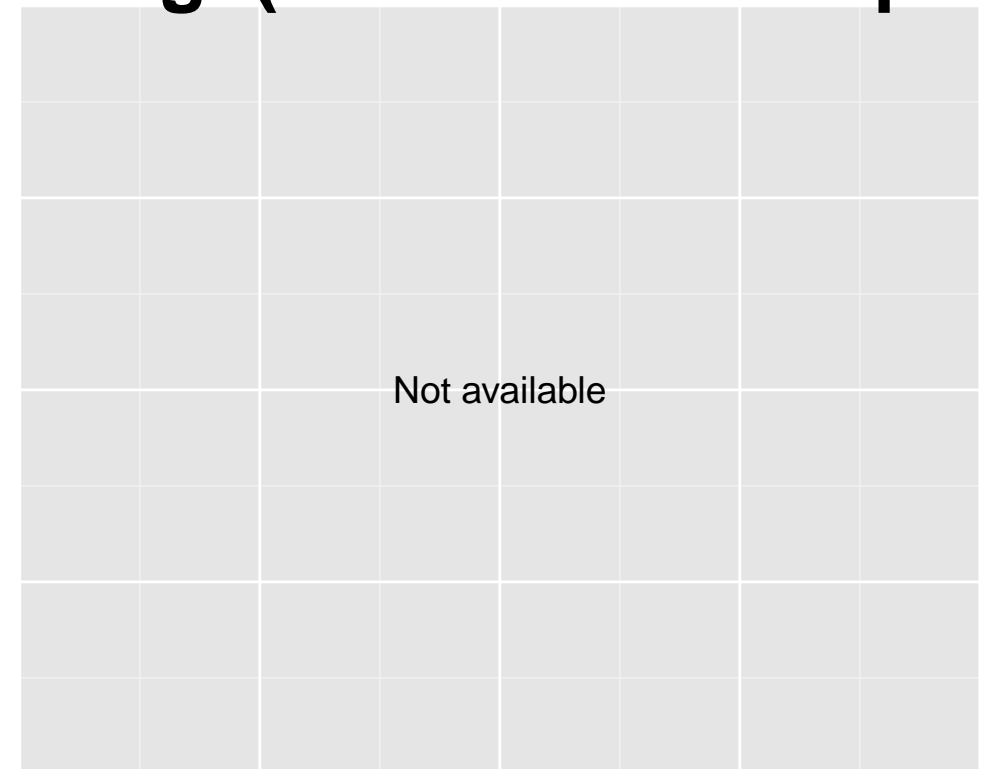

Supplement: SuppDataset_1.zip [file Wnt4_set_A.pdf › Supplemental Dataset 1/A-mRNA_nonrhyth_translation_nonrhyth/Wnt4_set_A.pdf]

## Wrap53

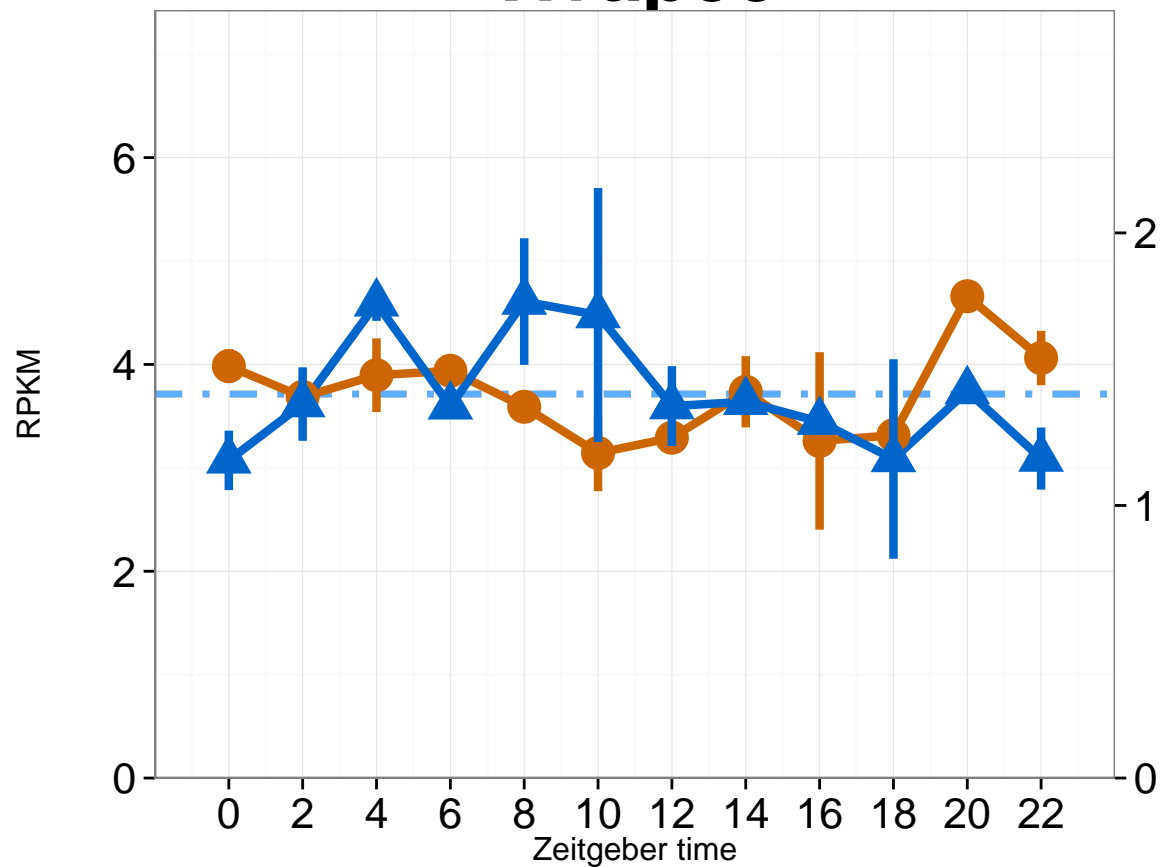

## Wrap53

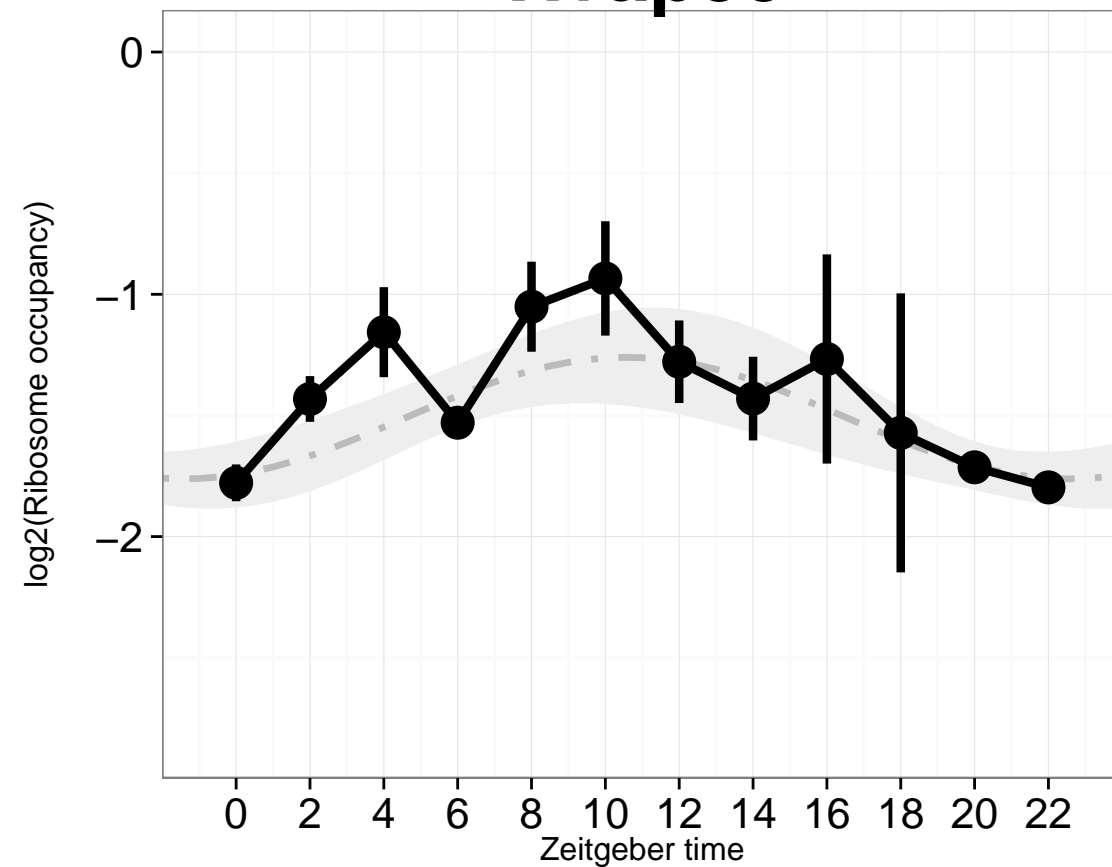

Supplement: SuppDataset_1.zip [file Wrap53_set_A.pdf › Supplemental Dataset 1/A-mRNA_nonrhyth_translation_nonrhyth/Wrap53_set_A.pdf]

## Wrb

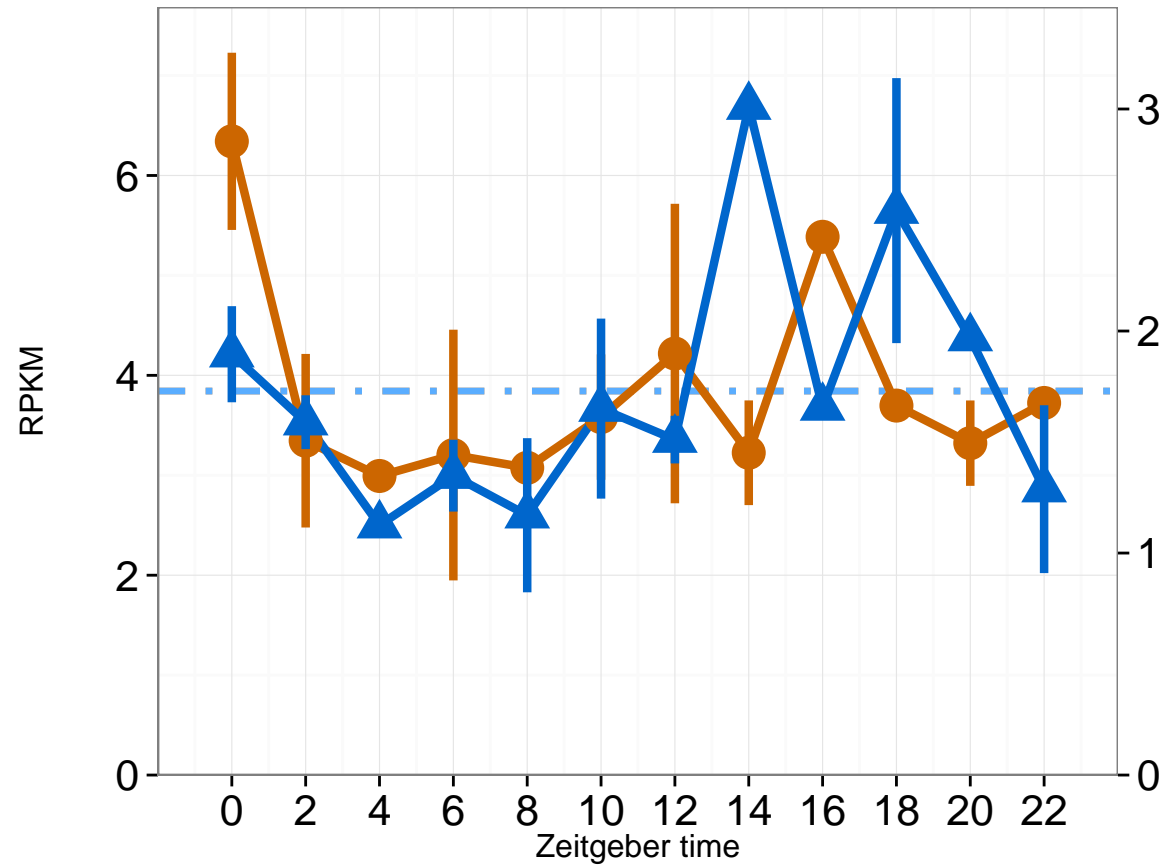

## Wrb

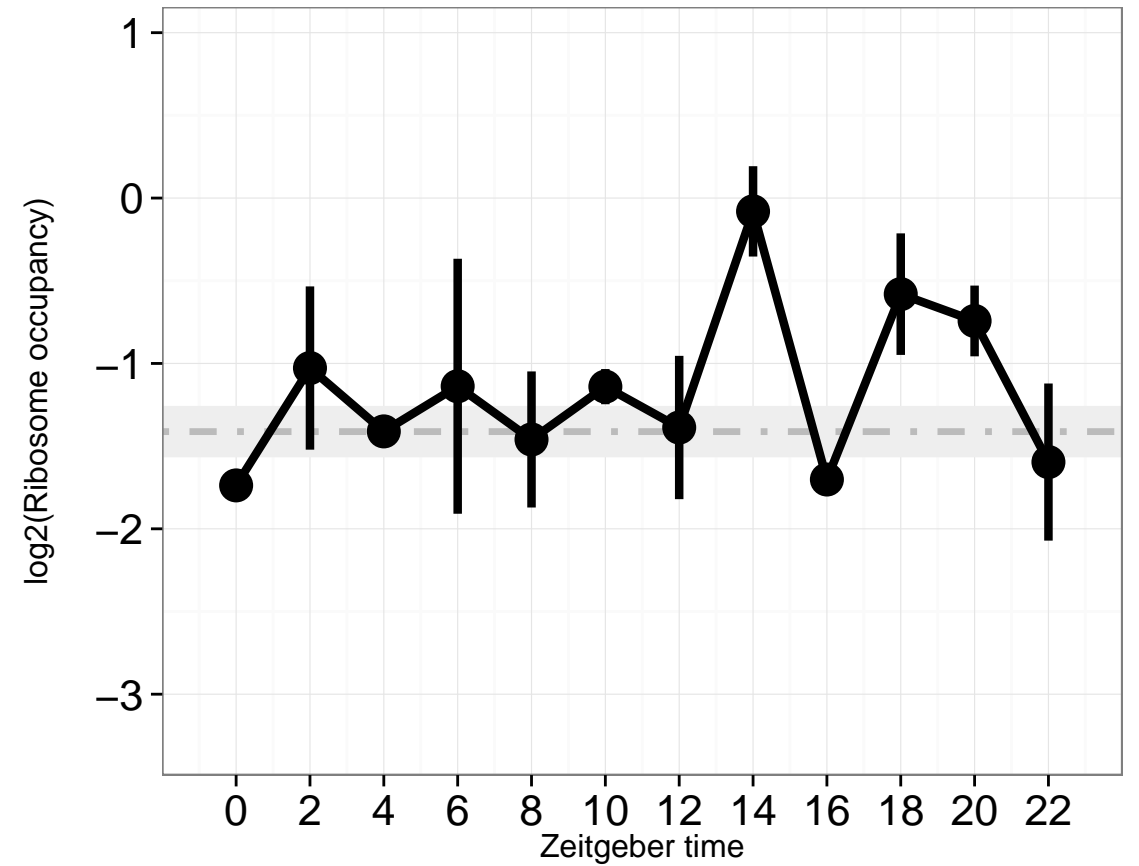

Supplement: SuppDataset_1.zip [file Wrb_set_A.pdf › Supplemental Dataset 1/A-mRNA_nonrhyth_translation_nonrhyth/Wrb_set_A.pdf]

## Wrn

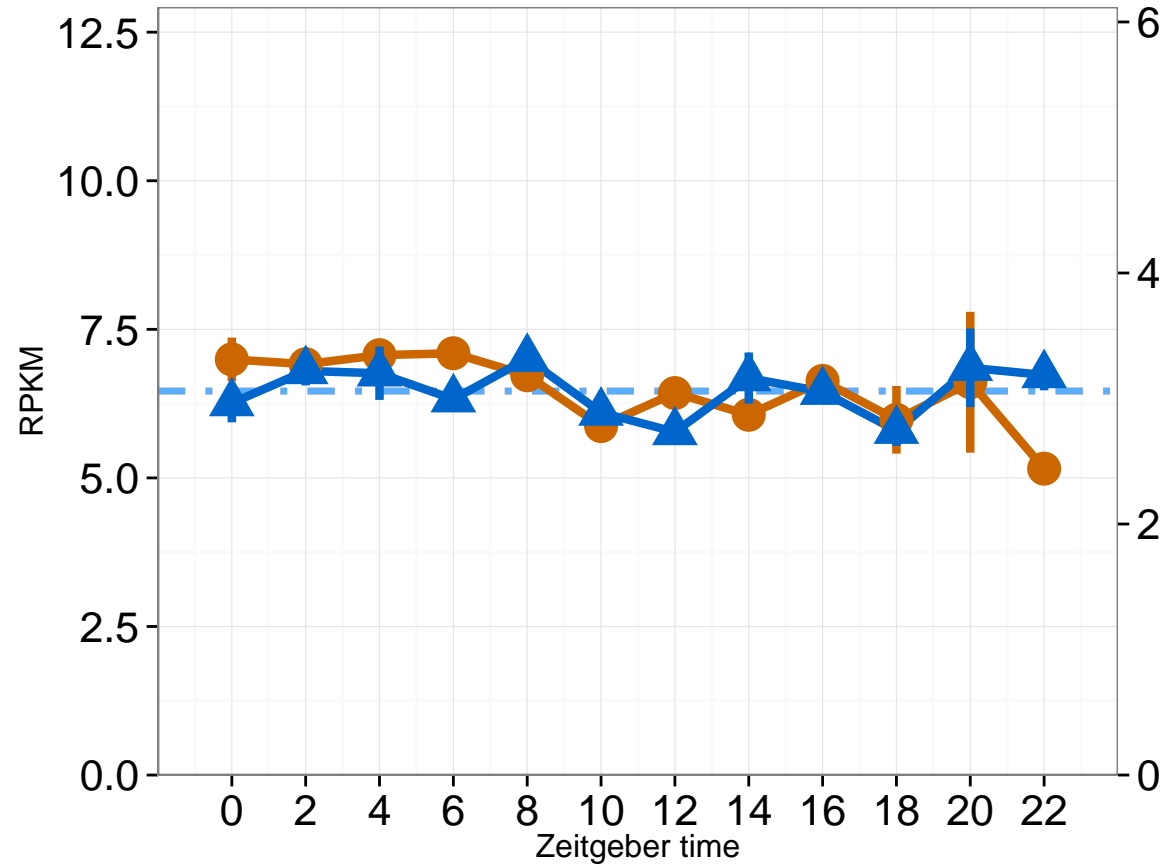

## Wrn

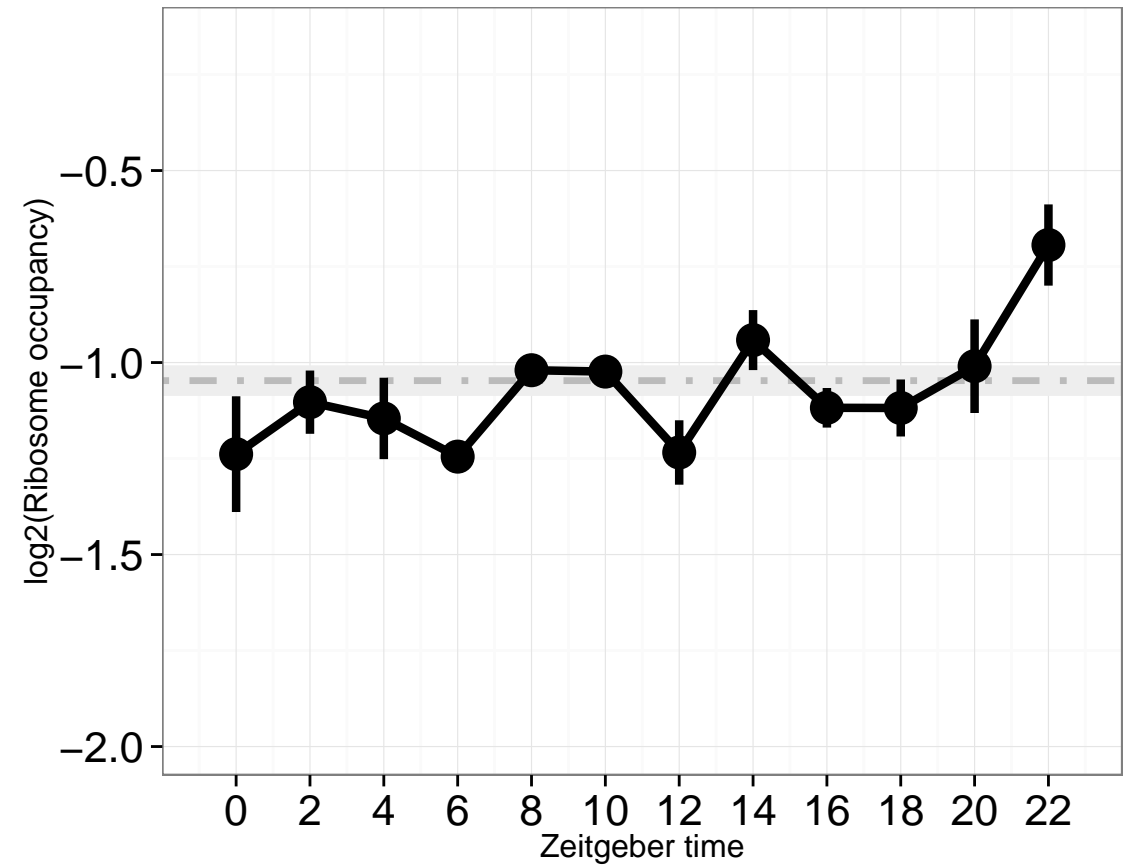

Supplement: SuppDataset_1.zip [file Wrn_set_A.pdf › Supplemental Dataset 1/A-mRNA_nonrhyth_translation_nonrhyth/Wrn_set_A.pdf]

## Wsb2

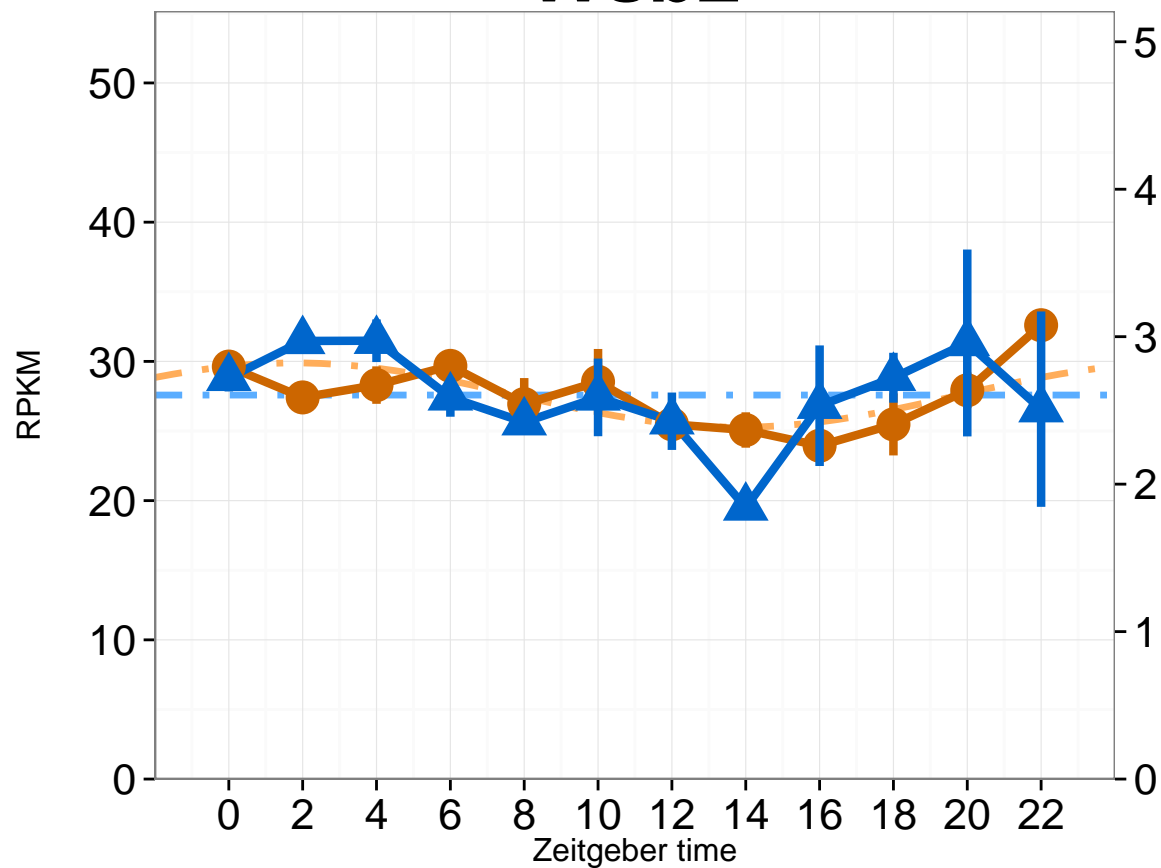

## Wsb2

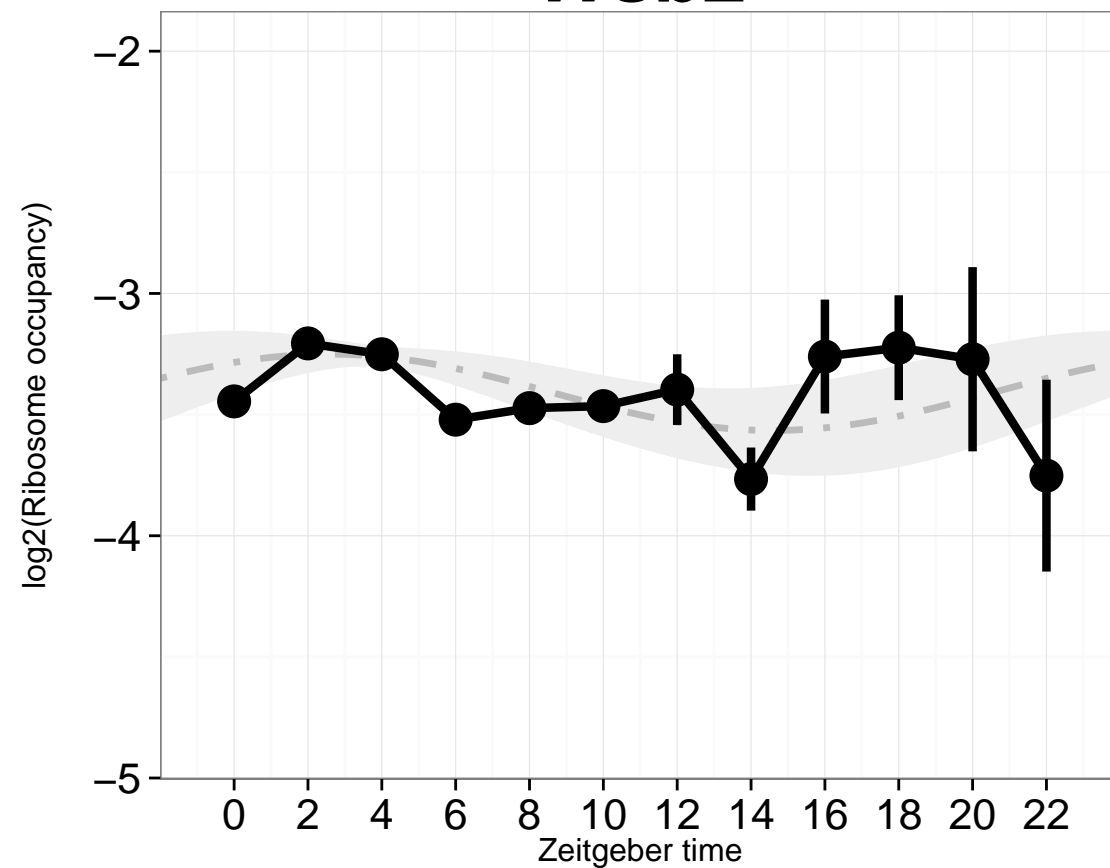

Supplement: SuppDataset_1.zip [file Wsb2_set_A.pdf › Supplemental Dataset 1/A-mRNA_nonrhyth_translation_nonrhyth/Wsb2_set_A.pdf]

## Wtap

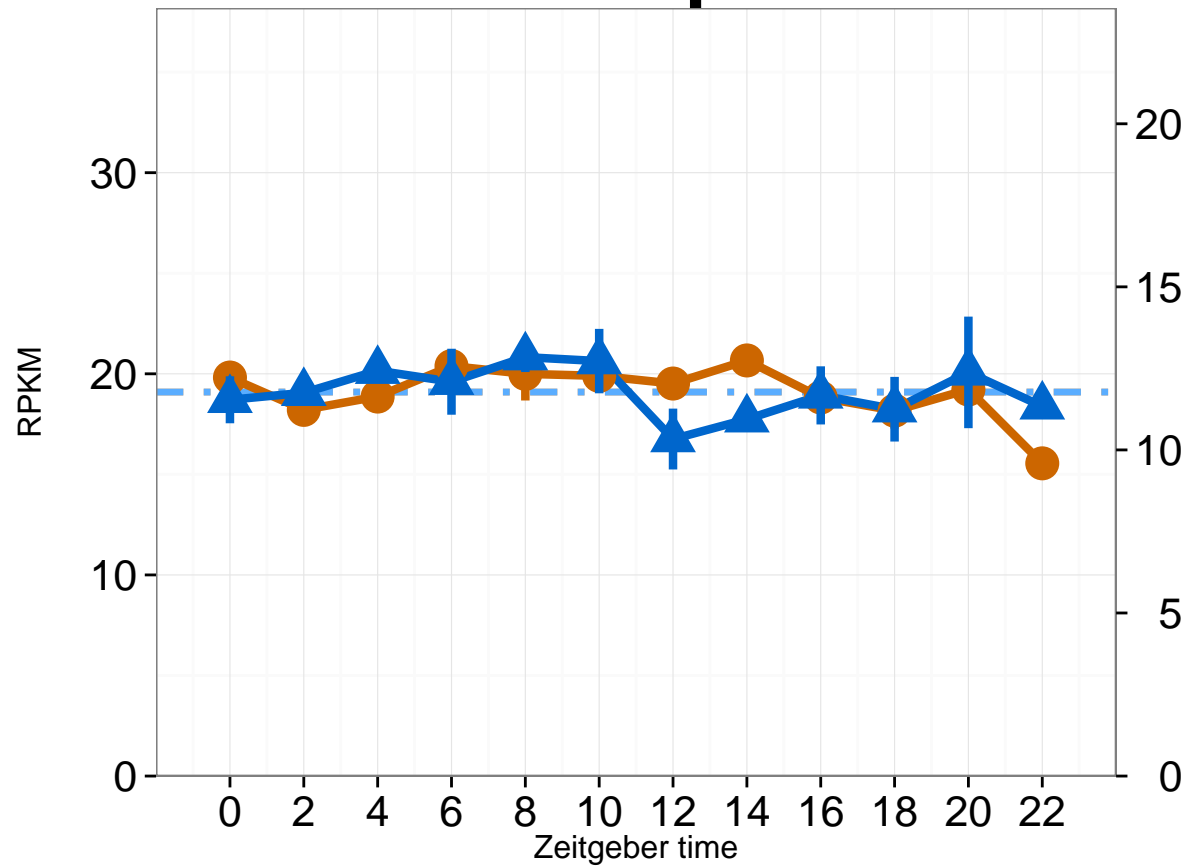

## Wtap

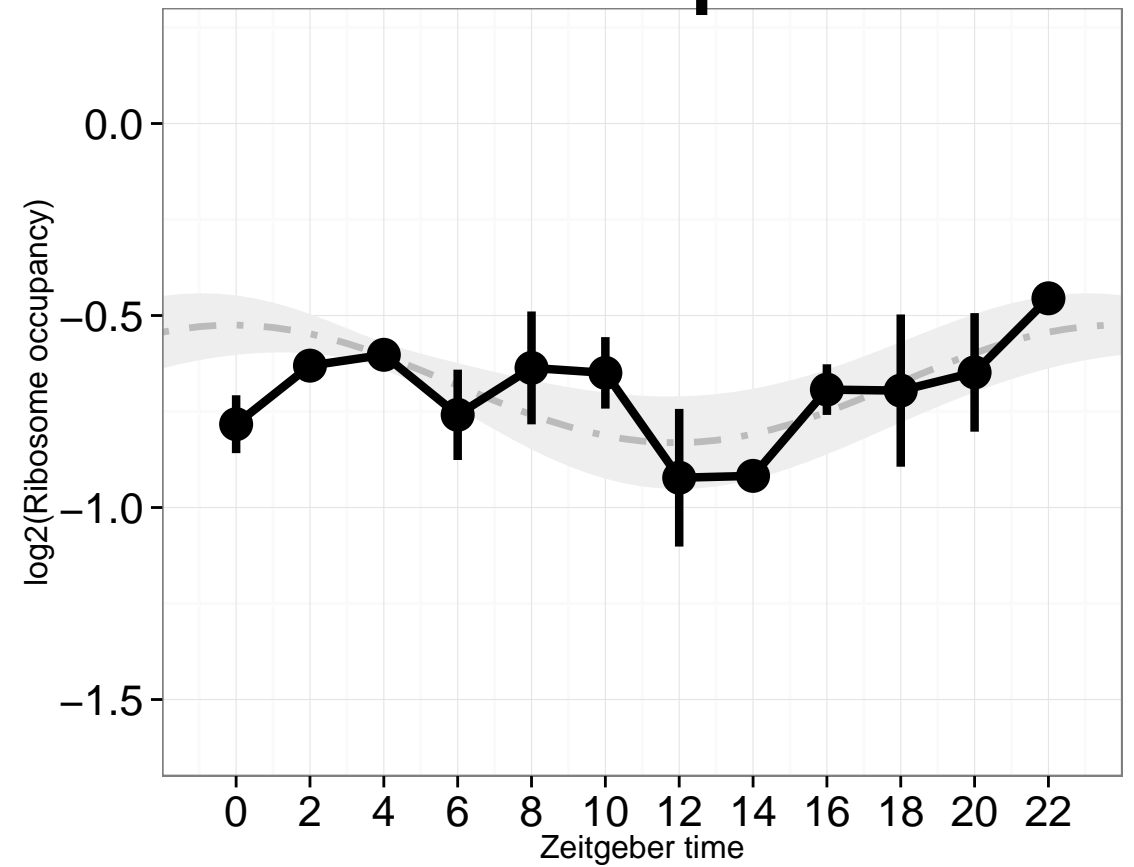

Supplement: SuppDataset_1.zip [file Wtap_set_A.pdf › Supplemental Dataset 1/A-mRNA_nonrhyth_translation_nonrhyth/Wtap_set_A.pdf]

## Wtip

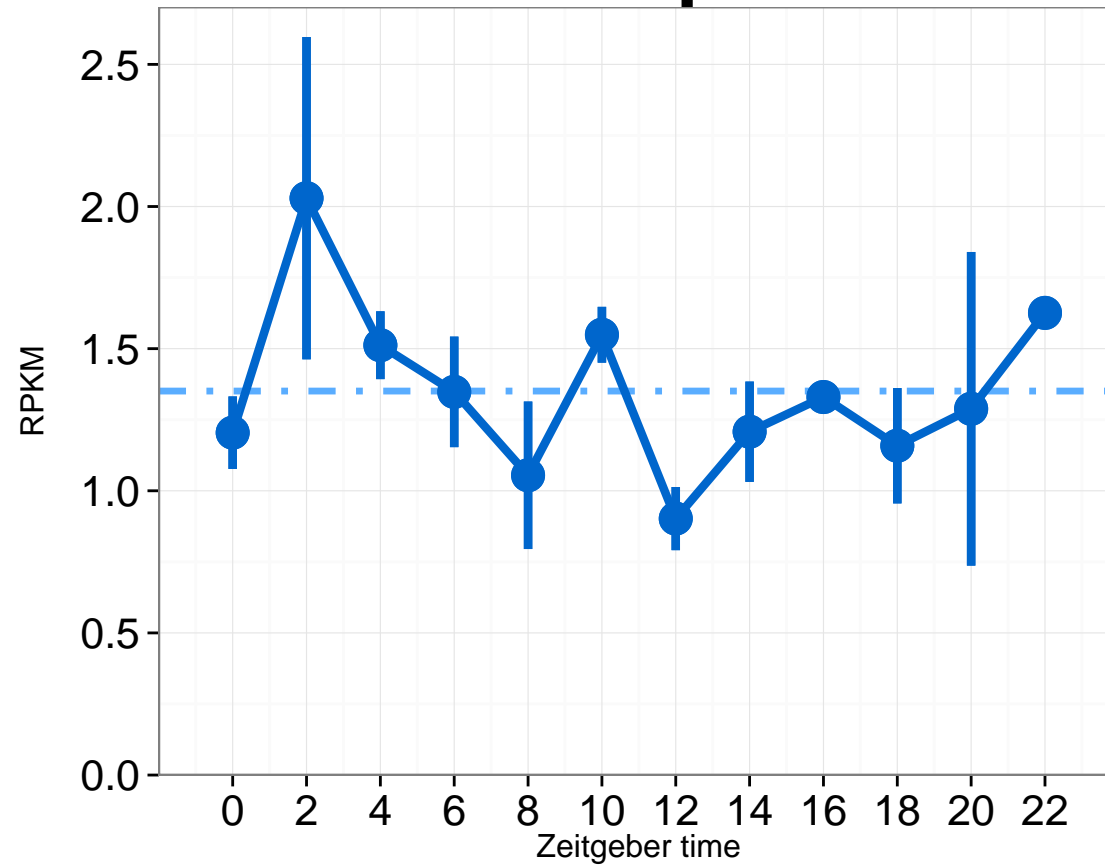

## Wtip log2(Ribosome occupancy)

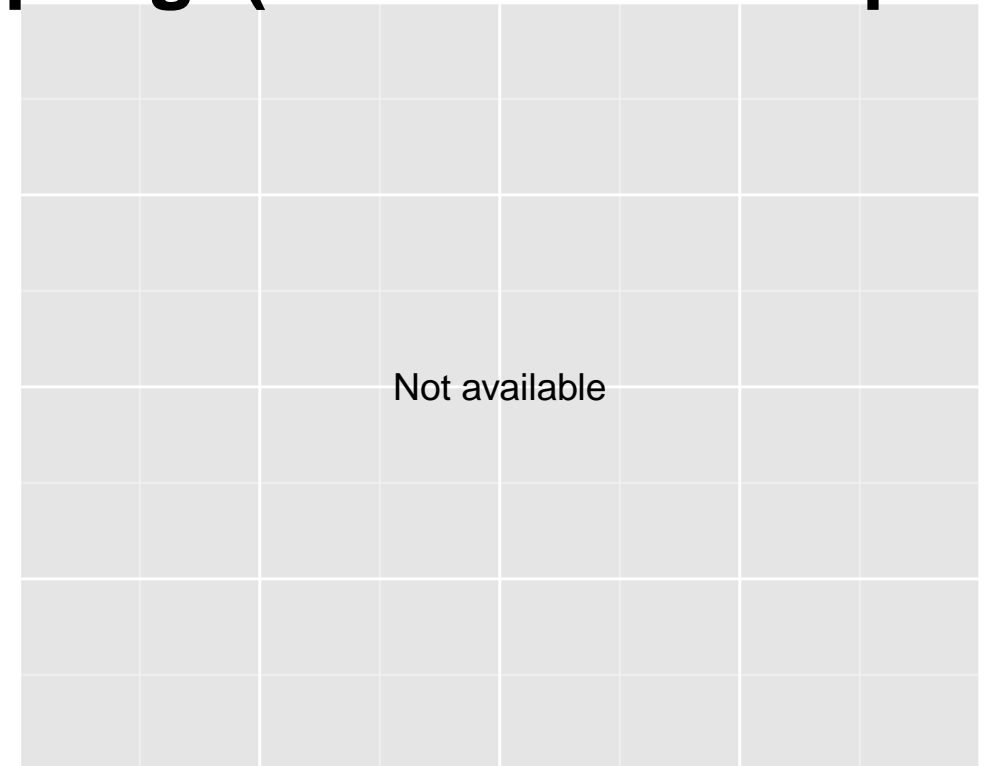

Supplement: SuppDataset_1.zip [file Wtip_set_A.pdf › Supplemental Dataset 1/A-mRNA_nonrhyth_translation_nonrhyth/Wtip_set_A.pdf]

# Wwc1

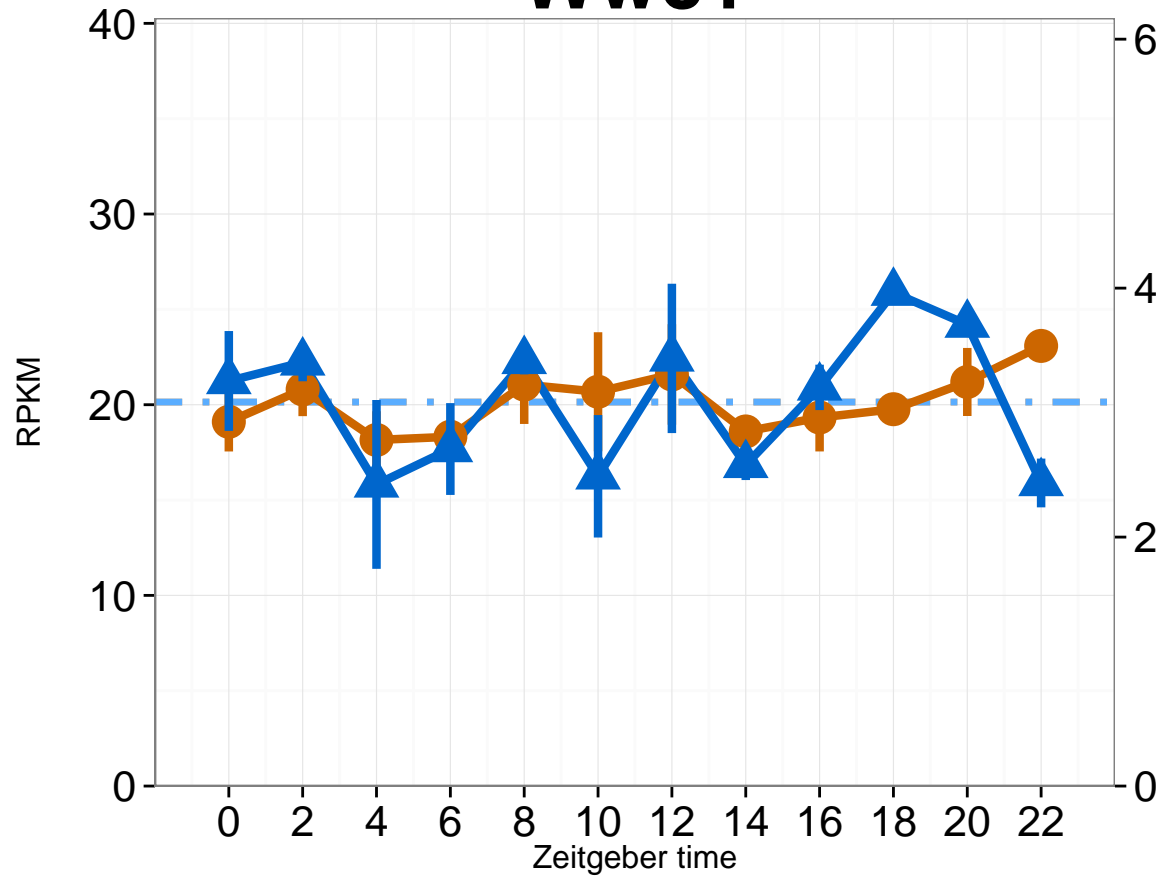

# Wwc1

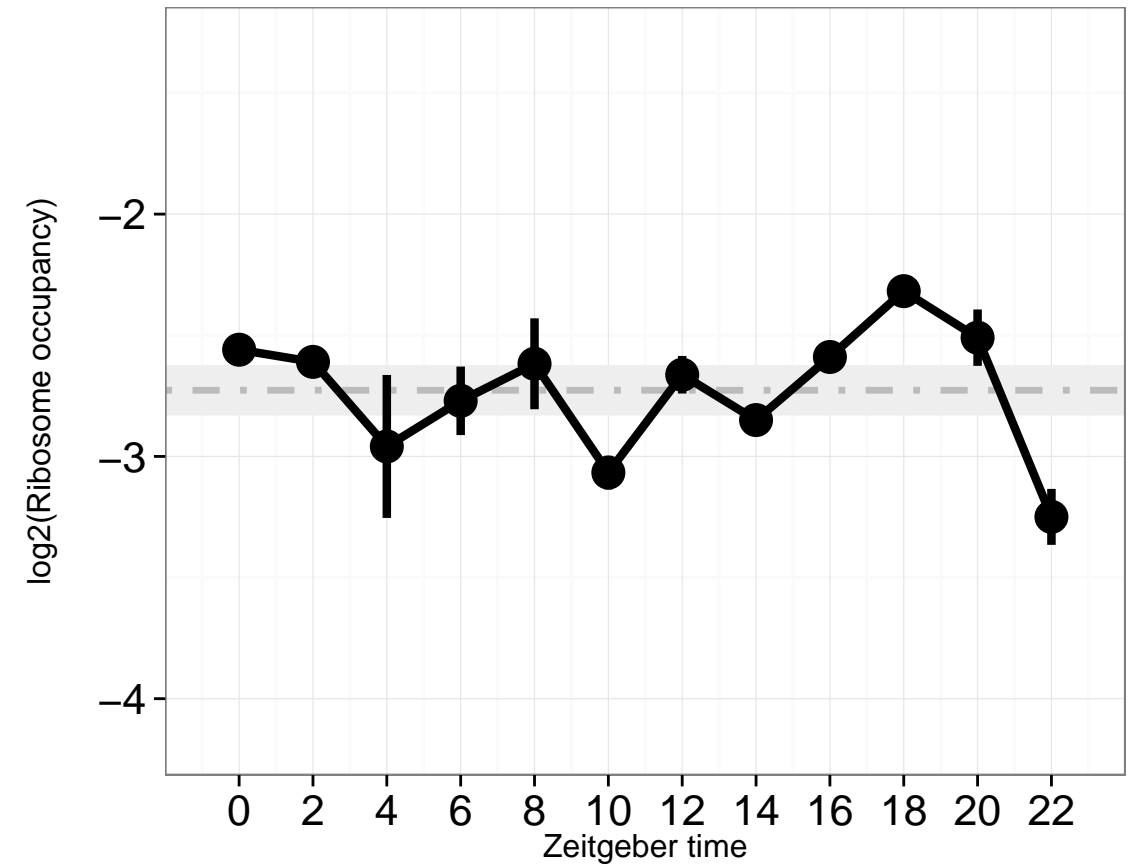

Supplement: SuppDataset_1.zip [file Wwc1_set_A.pdf › Supplemental Dataset 1/A-mRNA_nonrhyth_translation_nonrhyth/Wwc1_set_A.pdf]

## Wwc2

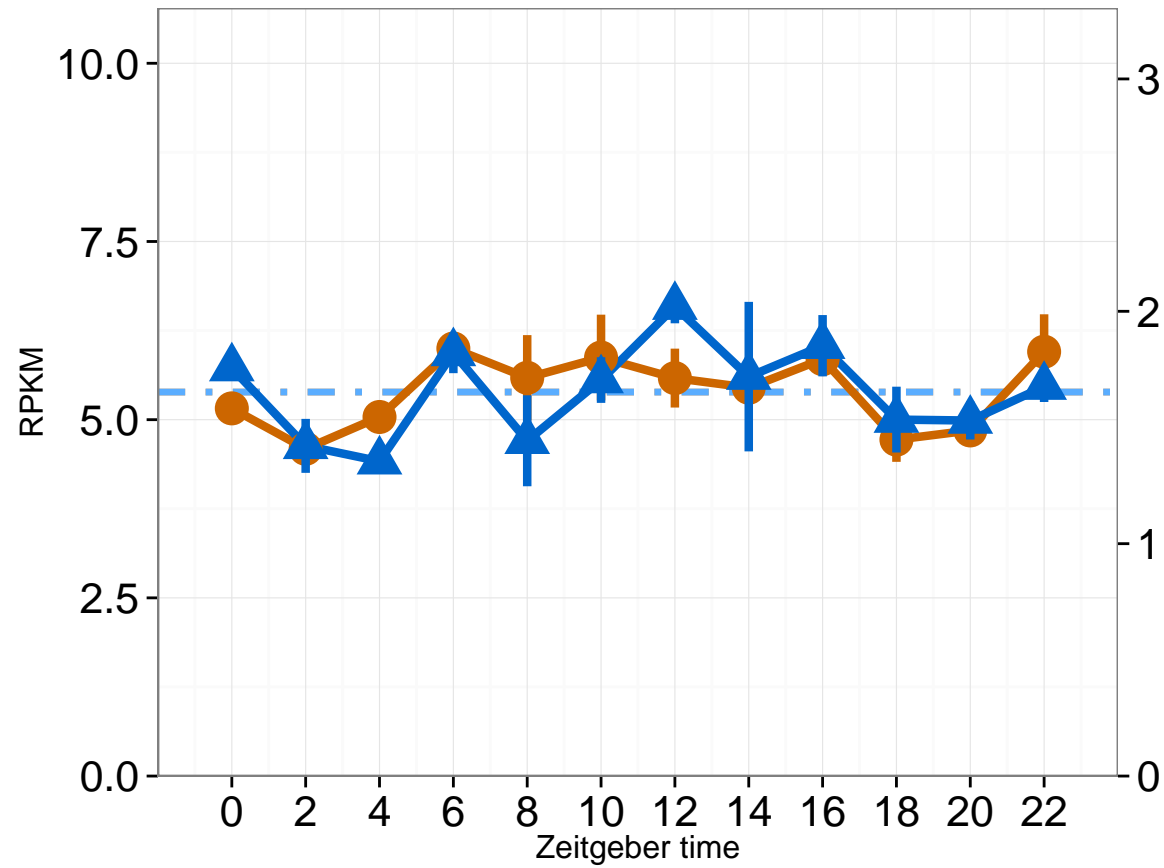

## Wwc2

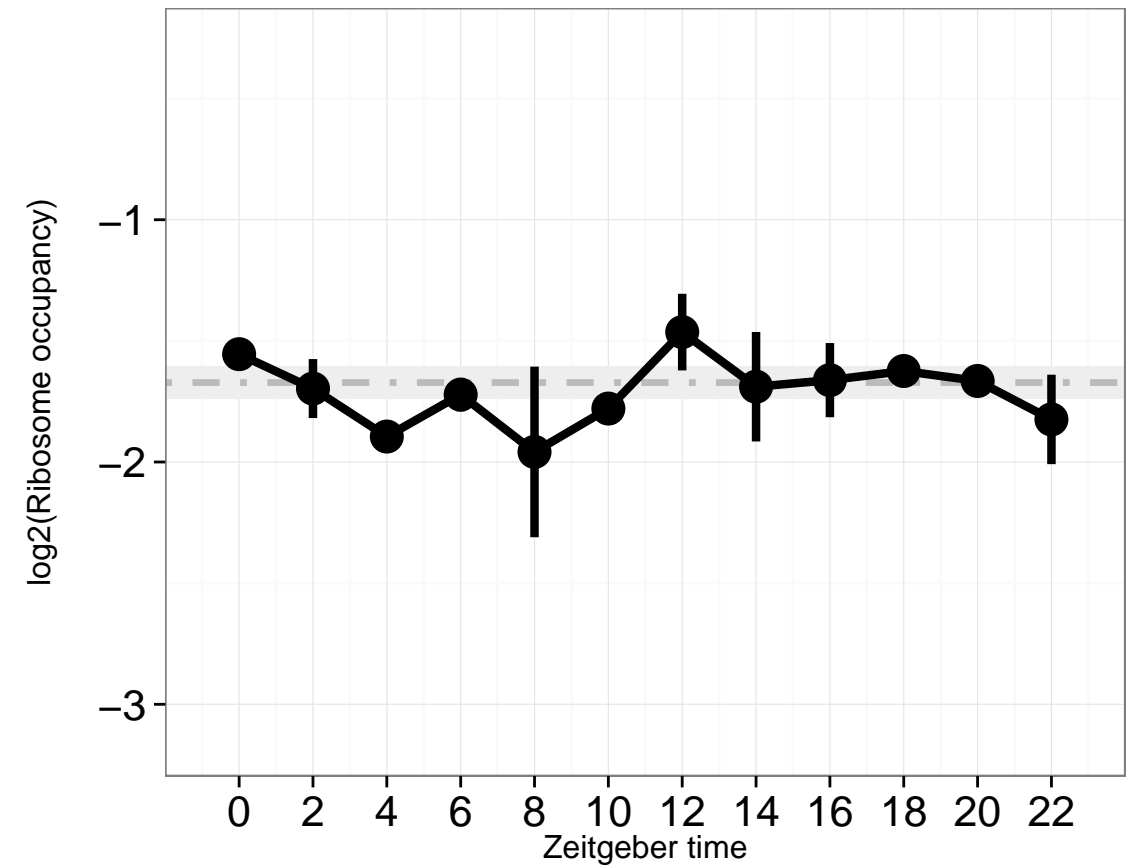

Supplement: SuppDataset_1.zip [file Wwc2_set_A.pdf › Supplemental Dataset 1/A-mRNA_nonrhyth_translation_nonrhyth/Wwc2_set_A.pdf]

## Wwox

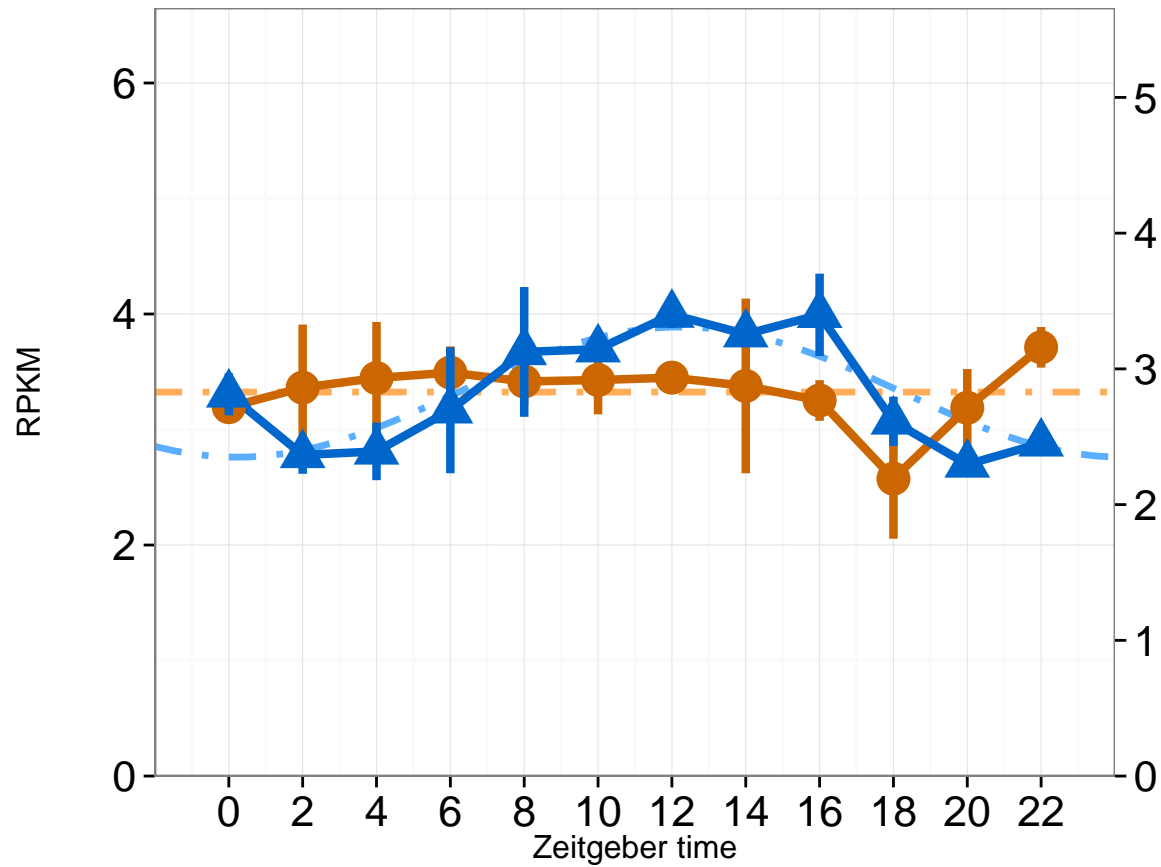

## Wwox

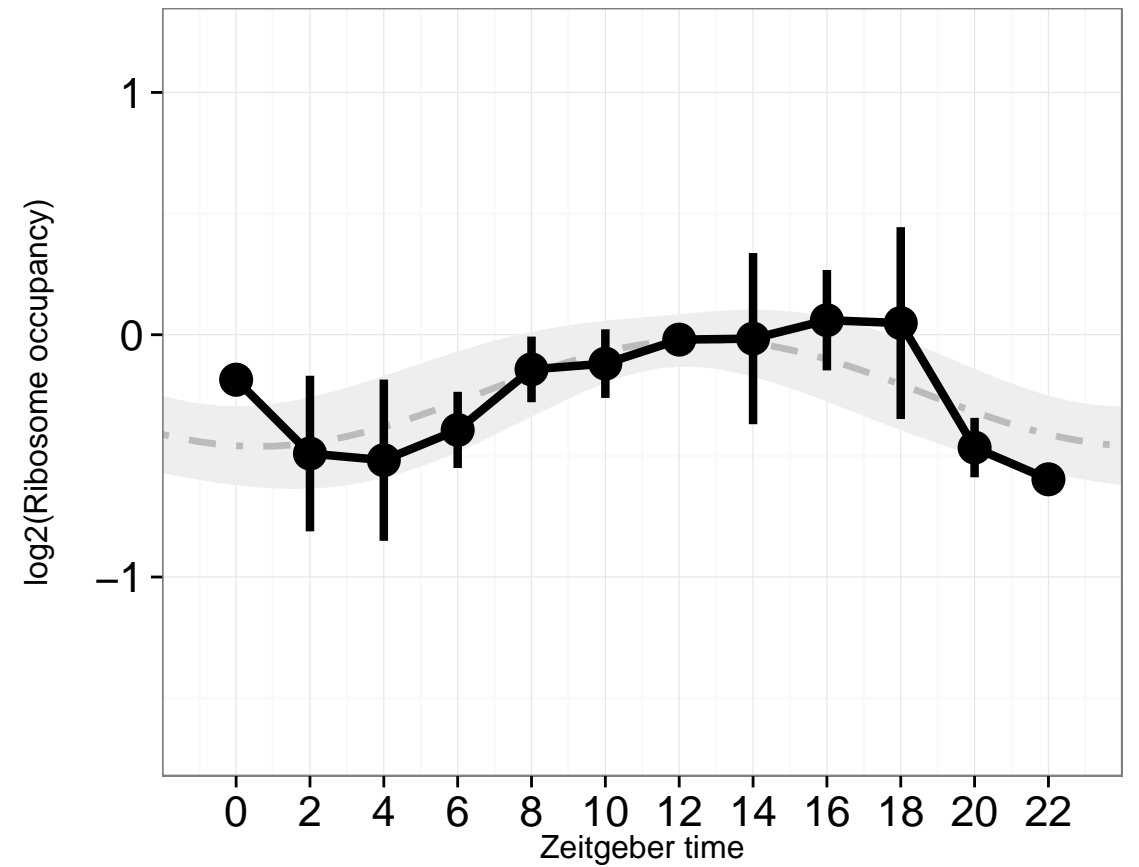

Supplement: SuppDataset_1.zip [file Wwox_set_A.pdf › Supplemental Dataset 1/A-mRNA_nonrhyth_translation_nonrhyth/Wwox_set_A.pdf]

## Wwp1

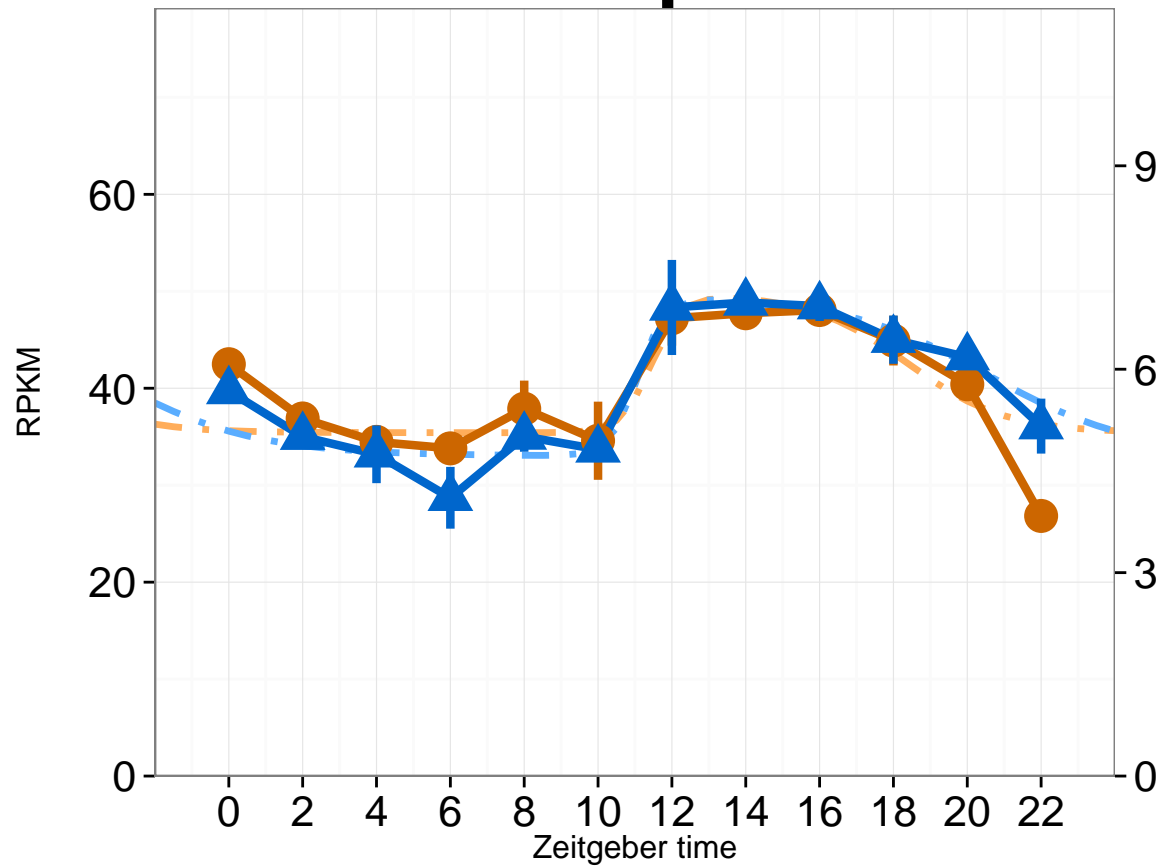

## Wwp1

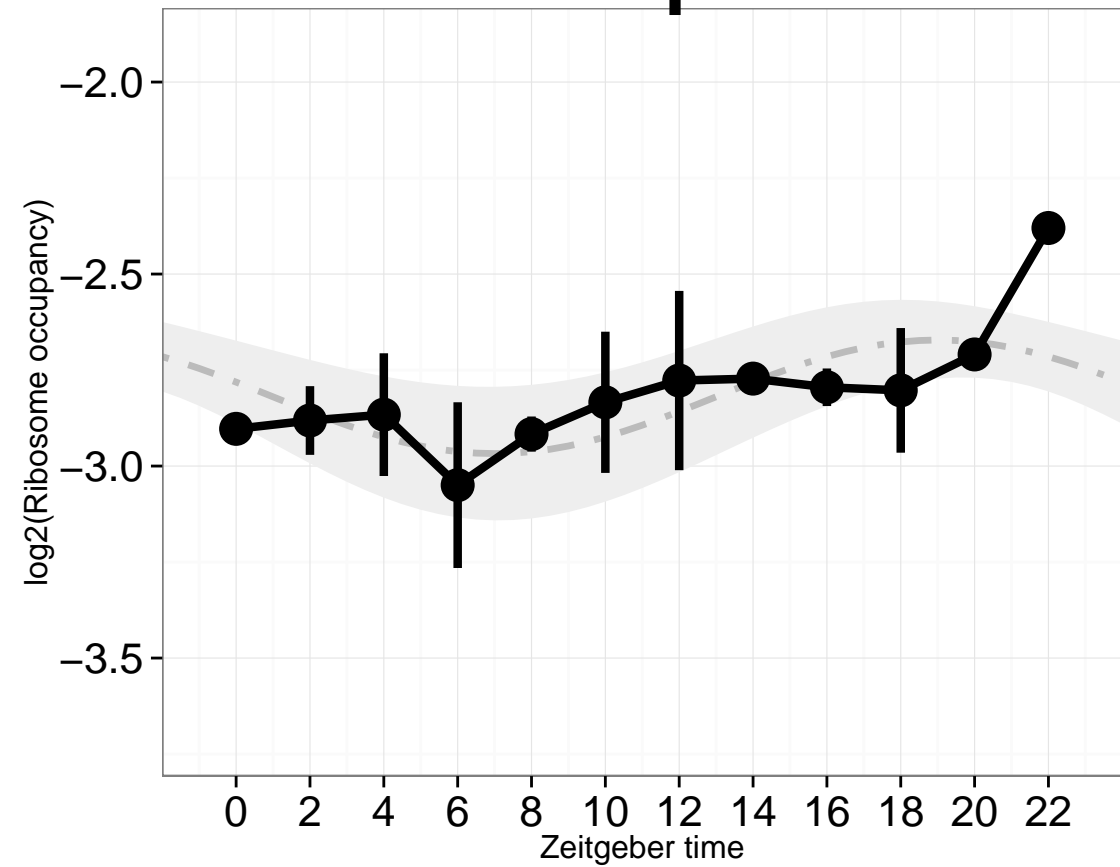

Supplement: SuppDataset_1.zip [file Wwp1_set_A.pdf › Supplemental Dataset 1/A-mRNA_nonrhyth_translation_nonrhyth/Wwp1_set_A.pdf]

## Wwp2

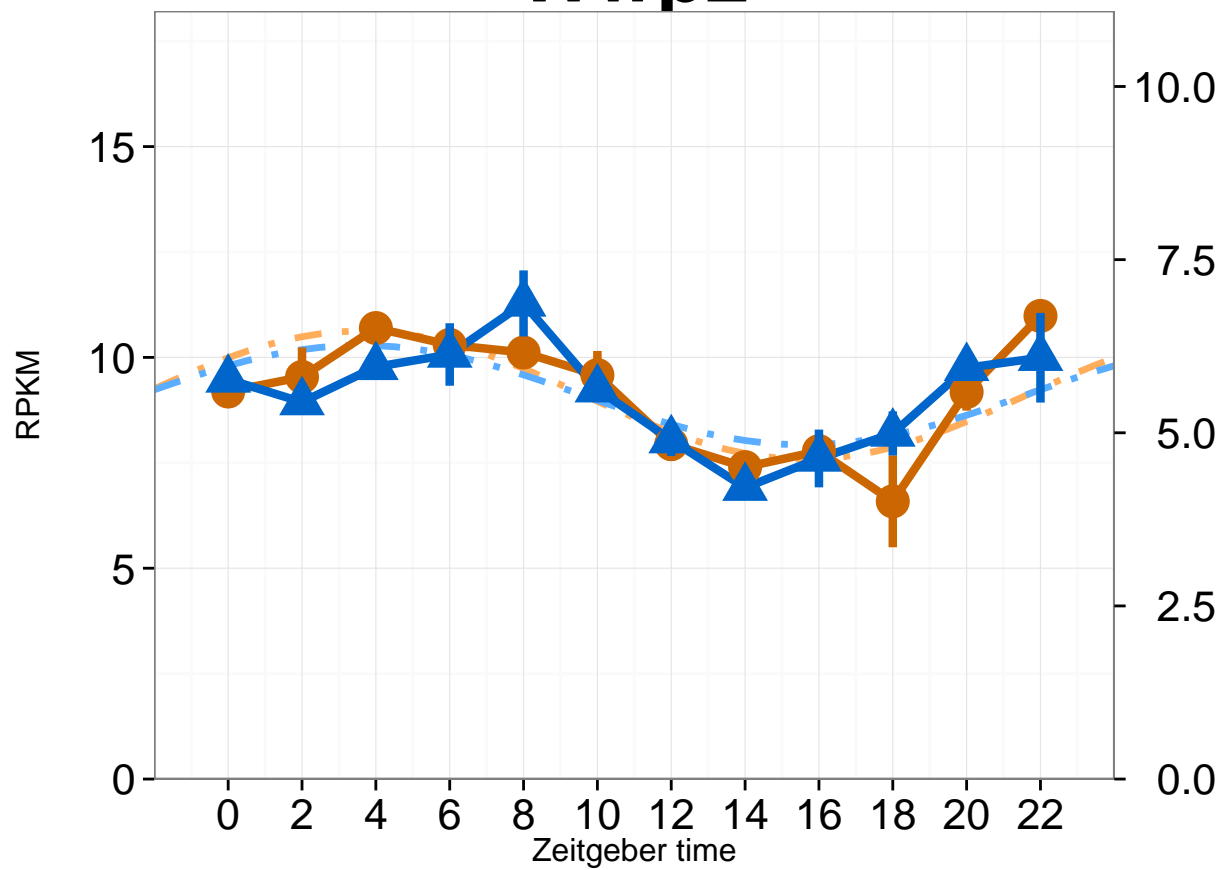

## Wwp2

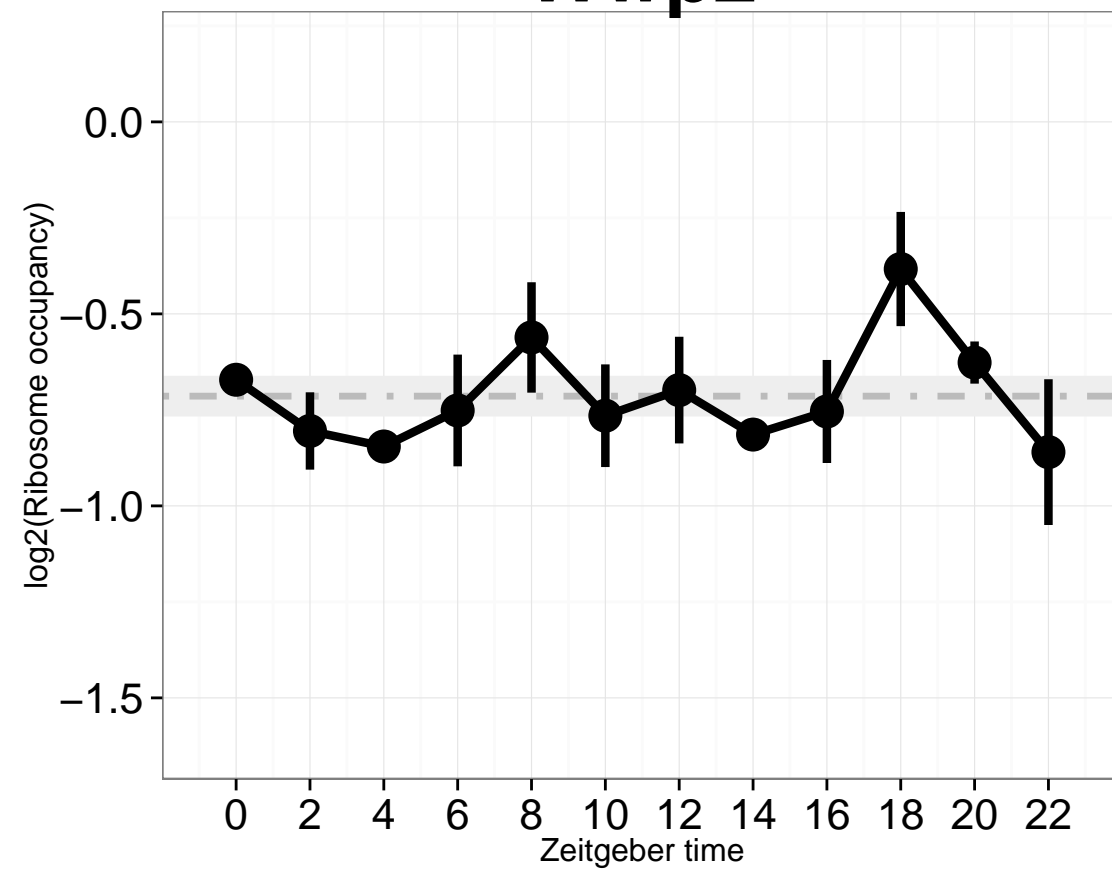

Supplement: SuppDataset_1.zip [file Wwp2_set_A.pdf › Supplemental Dataset 1/A-mRNA_nonrhyth_translation_nonrhyth/Wwp2_set_A.pdf]

## Wwtr1

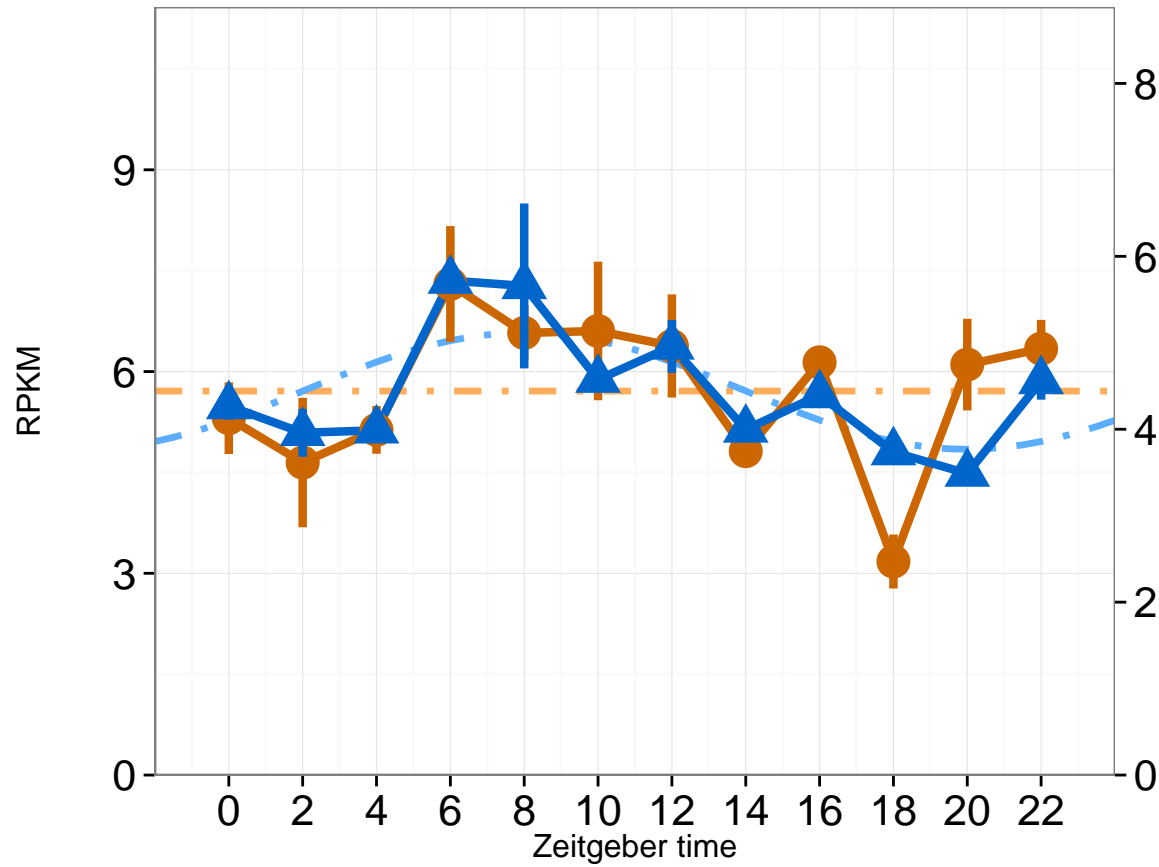

## Wwtr1

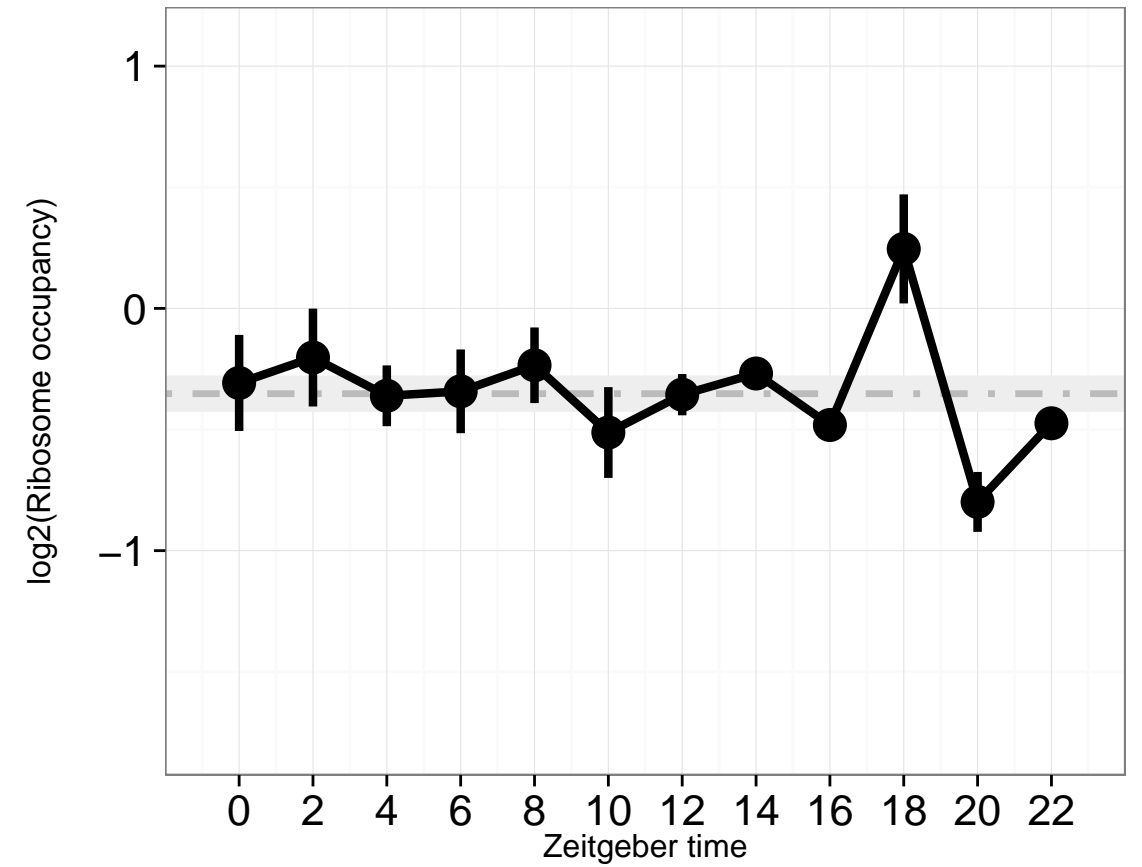

Supplement: SuppDataset_1.zip [file Wwtr1_set_A.pdf › Supplemental Dataset 1/A-mRNA_nonrhyth_translation_nonrhyth/Wwtr1_set_A.pdf]

## Xab2

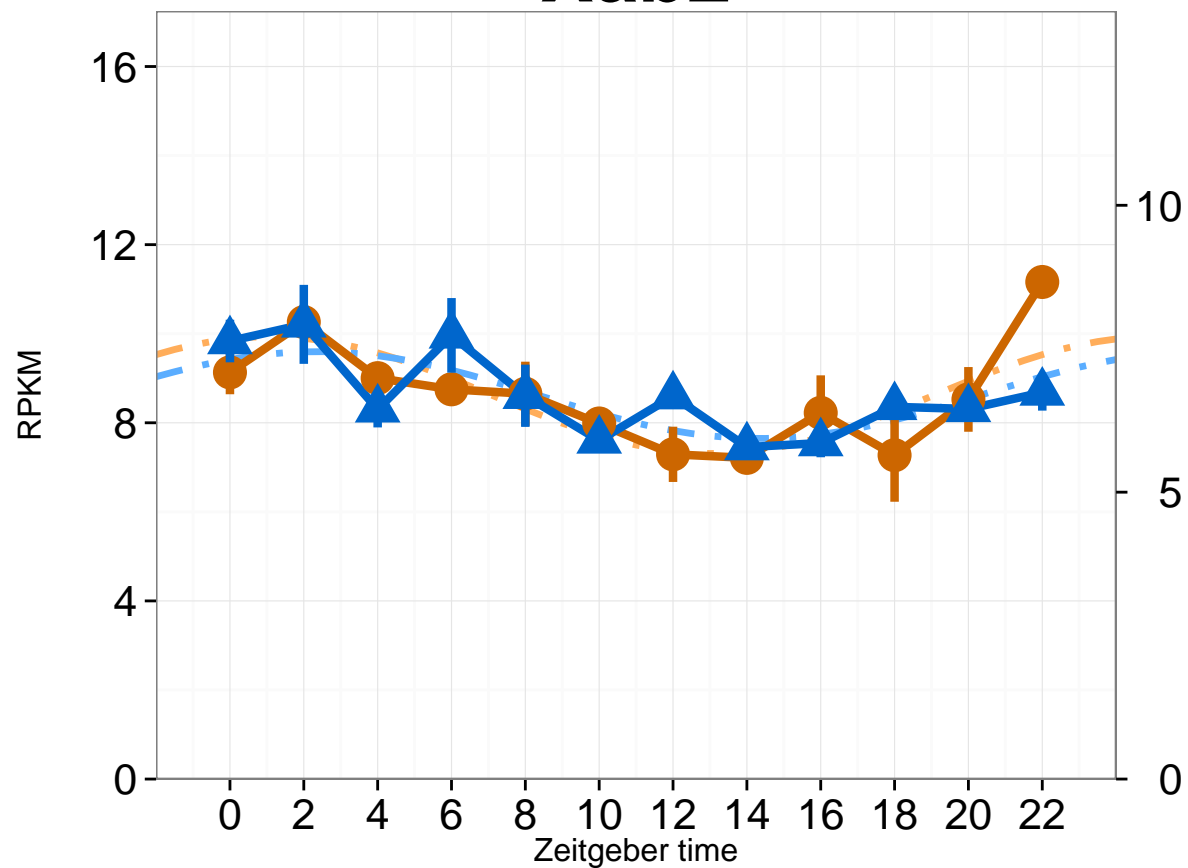

## Xab2

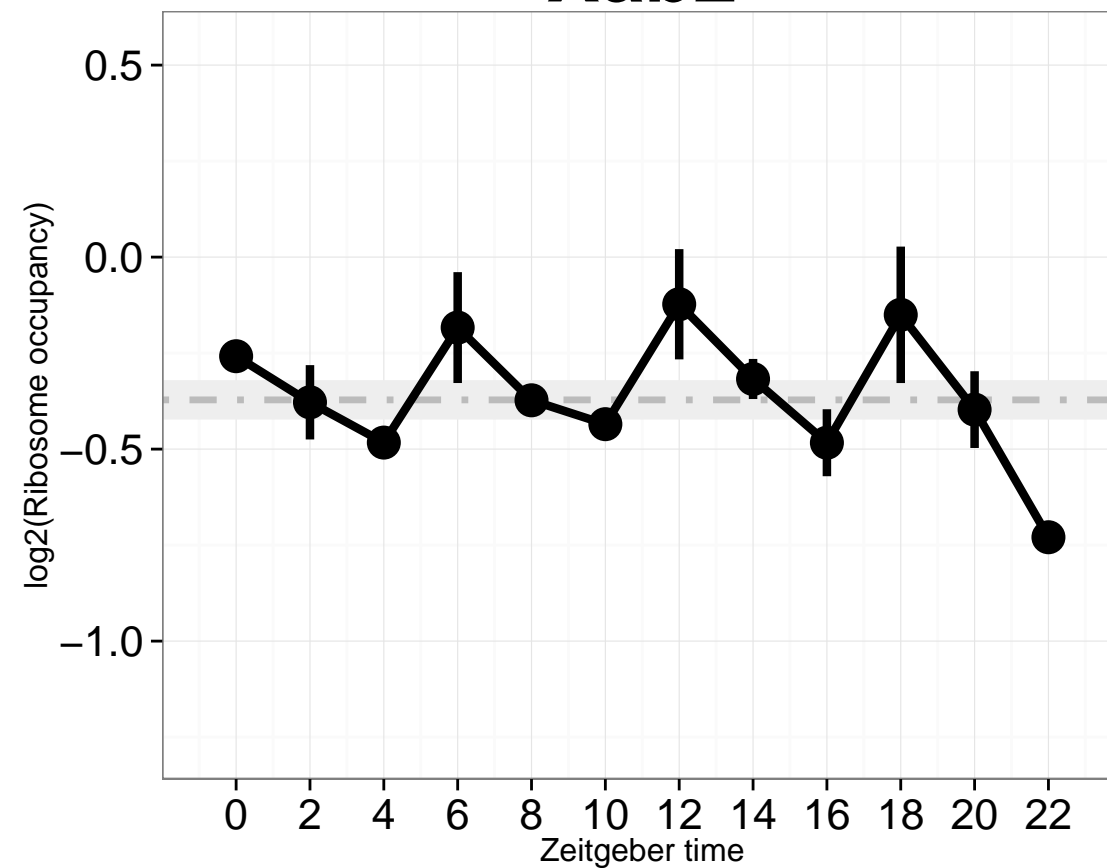

Supplement: SuppDataset_1.zip [file Xab2_set_A.pdf › Supplemental Dataset 1/A-mRNA_nonrhyth_translation_nonrhyth/Xab2_set_A.pdf]

## Xbp1

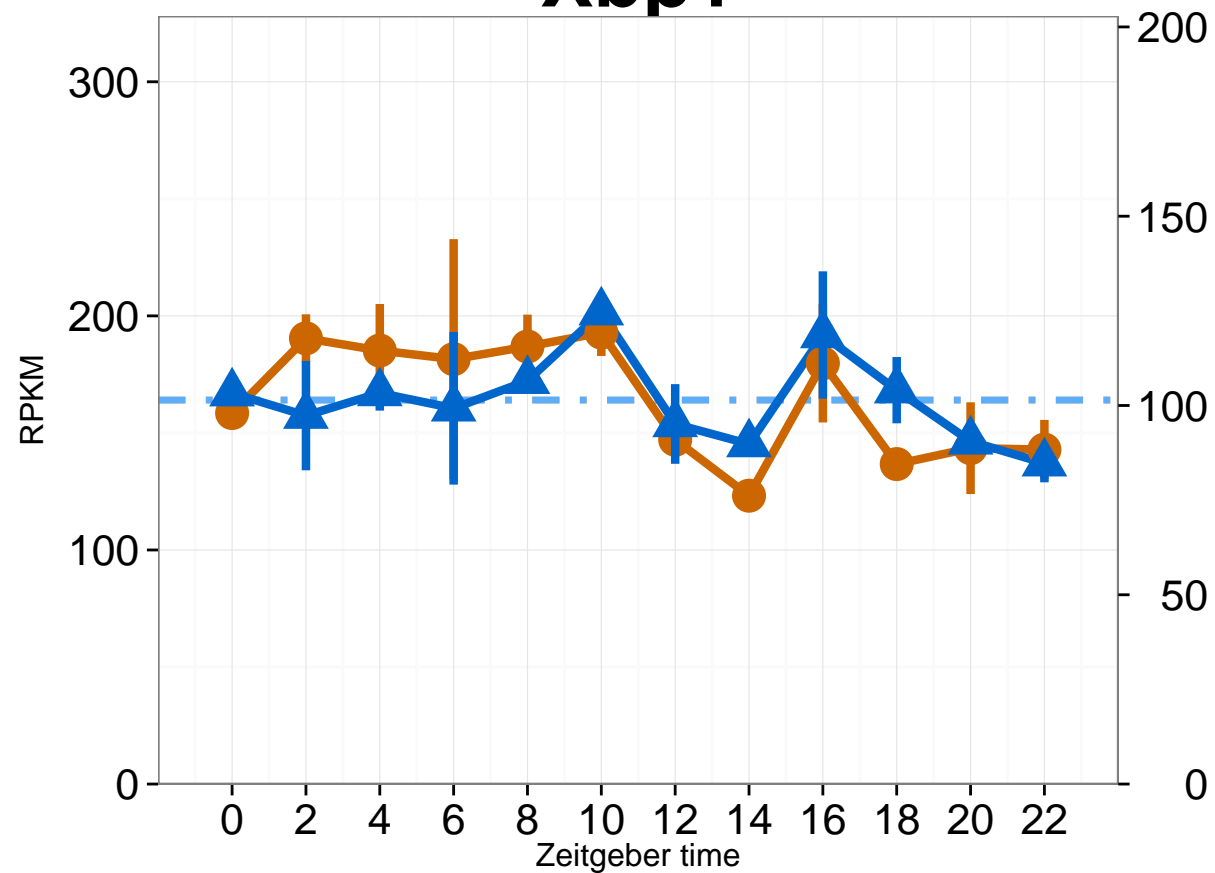

## Xbp1

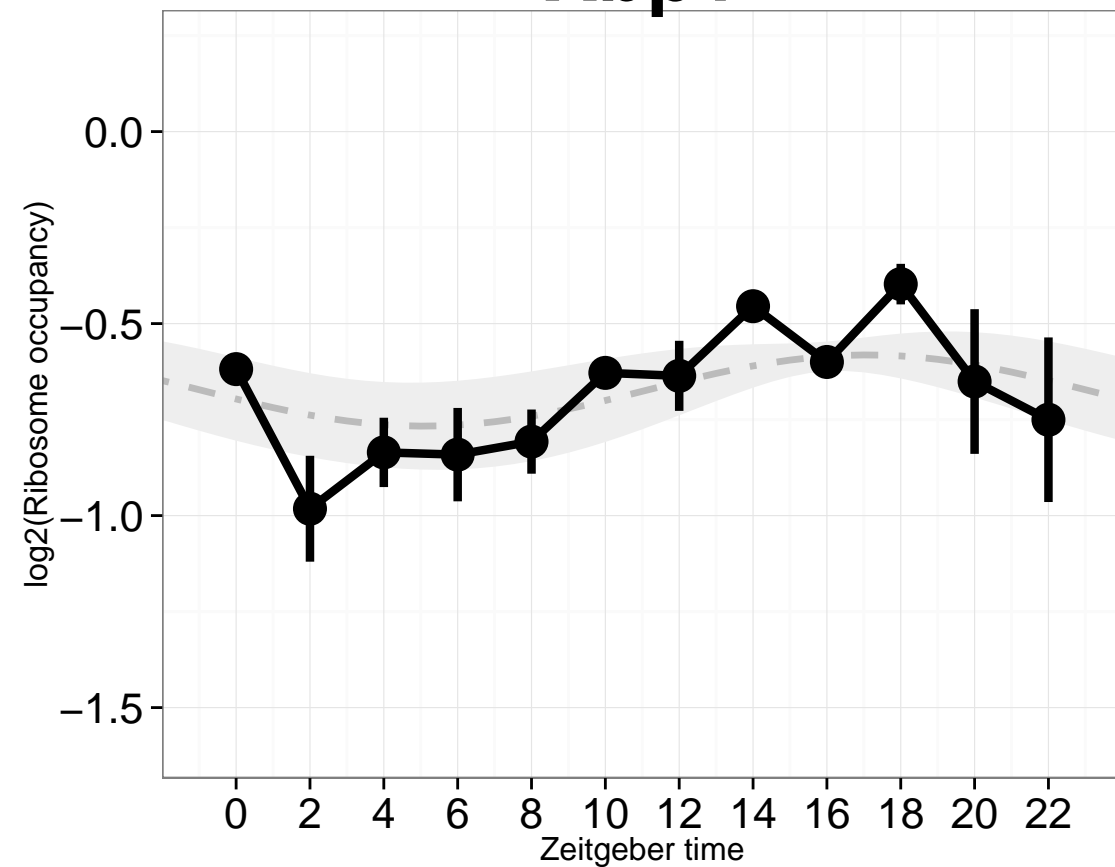

Supplement: SuppDataset_1.zip [file Xbp1_set_A.pdf › Supplemental Dataset 1/A-mRNA_nonrhyth_translation_nonrhyth/Xbp1_set_A.pdf]

## Xdh

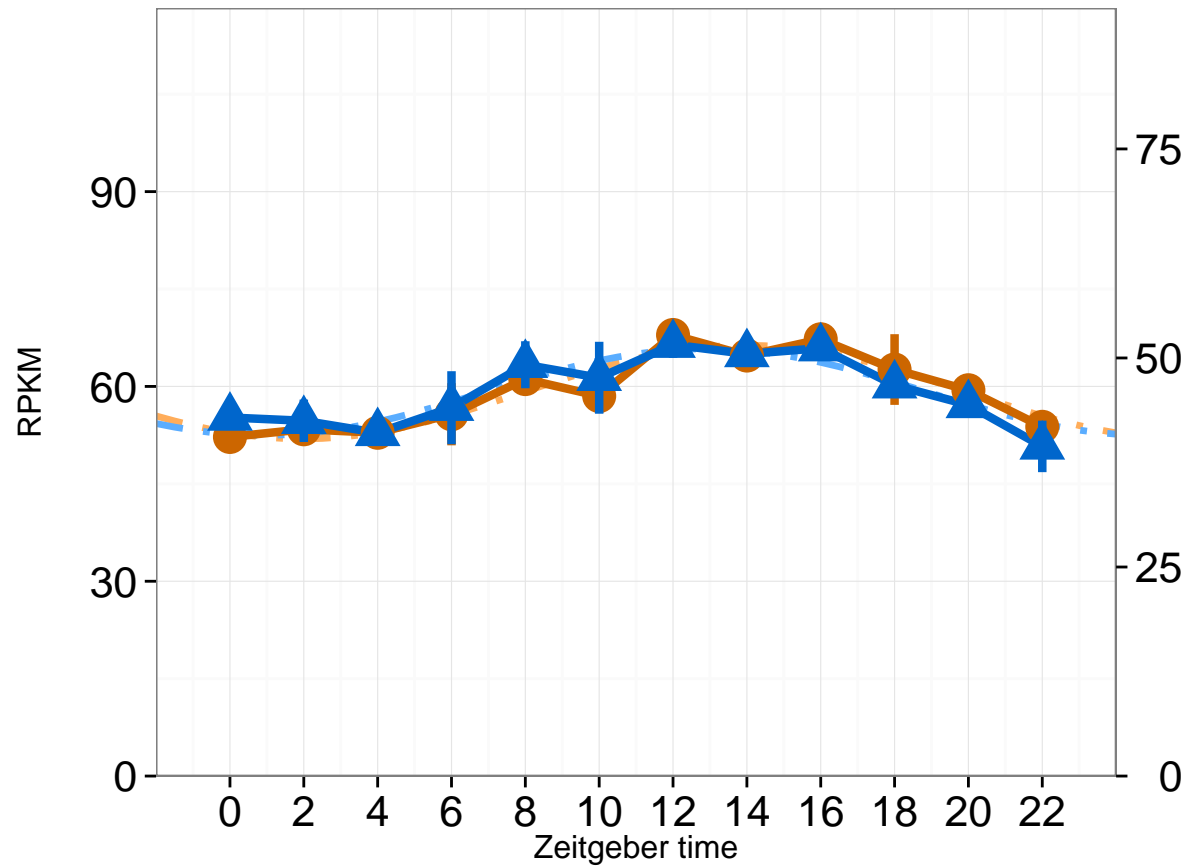

## Xdh

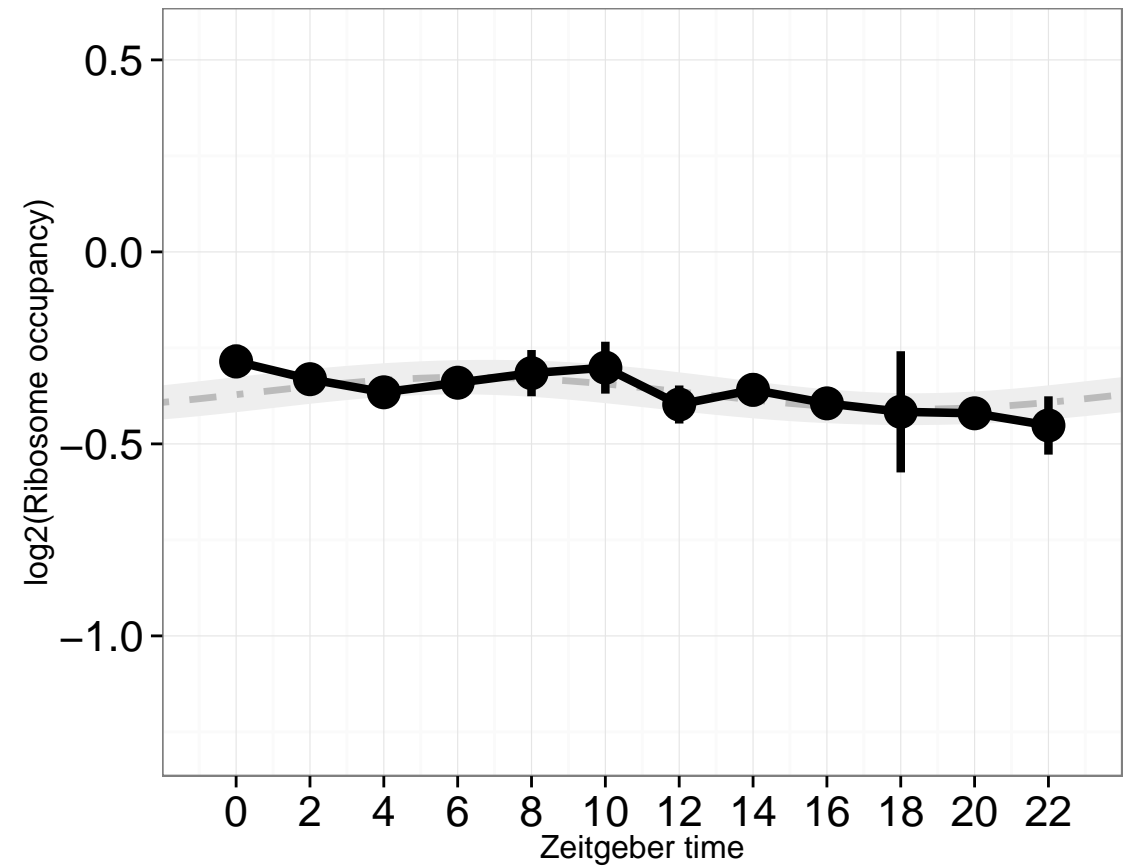

Supplement: SuppDataset_1.zip [file Xdh_set_A.pdf › Supplemental Dataset 1/A-mRNA_nonrhyth_translation_nonrhyth/Xdh_set_A.pdf]

## Xiap

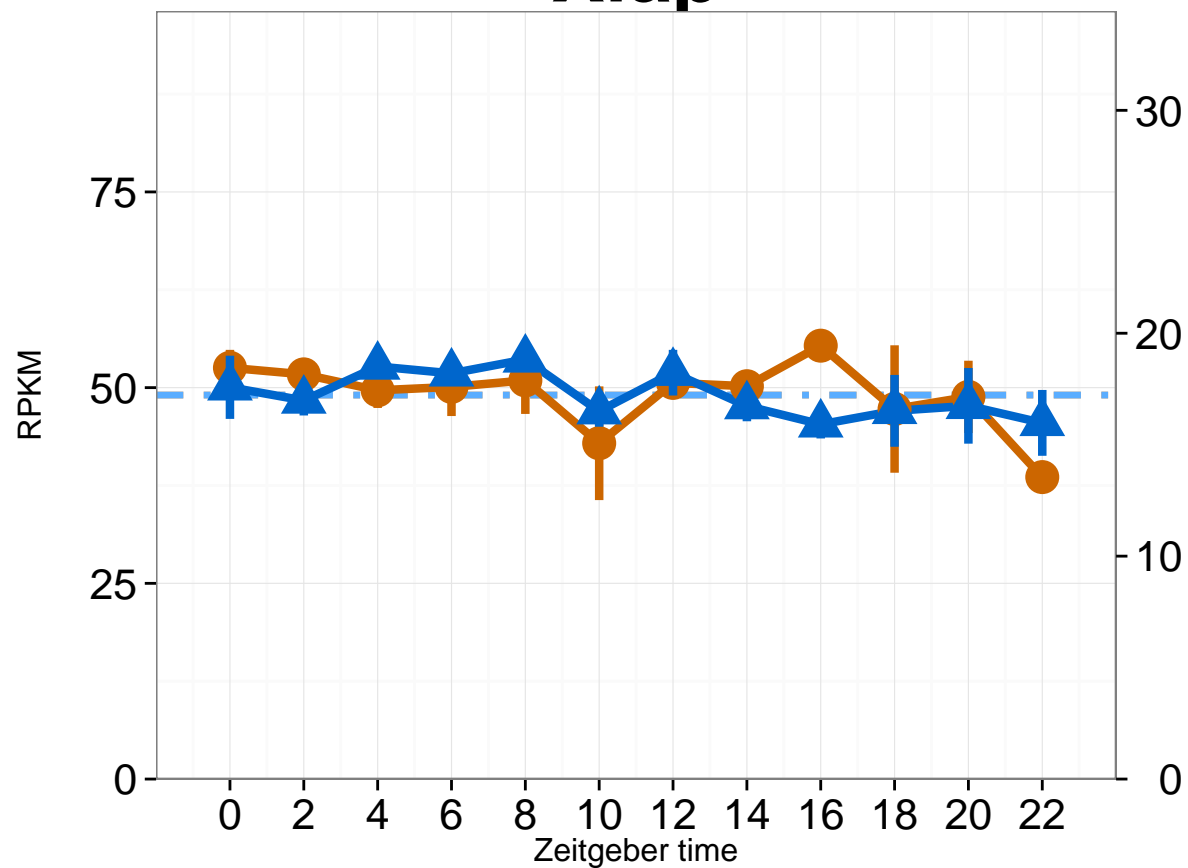

## Xiap

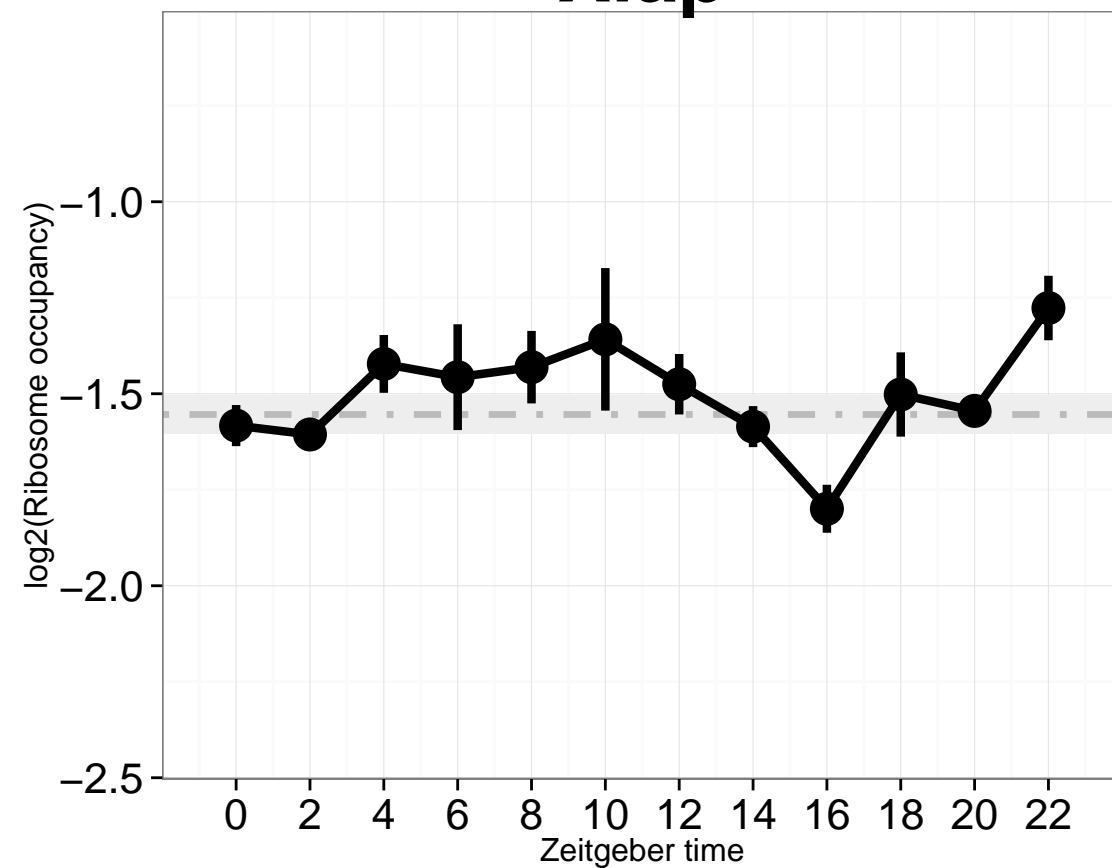

Supplement: SuppDataset_1.zip [file Xiap_set_A.pdf › Supplemental Dataset 1/A-mRNA_nonrhyth_translation_nonrhyth/Xiap_set_A.pdf]

**Xk**

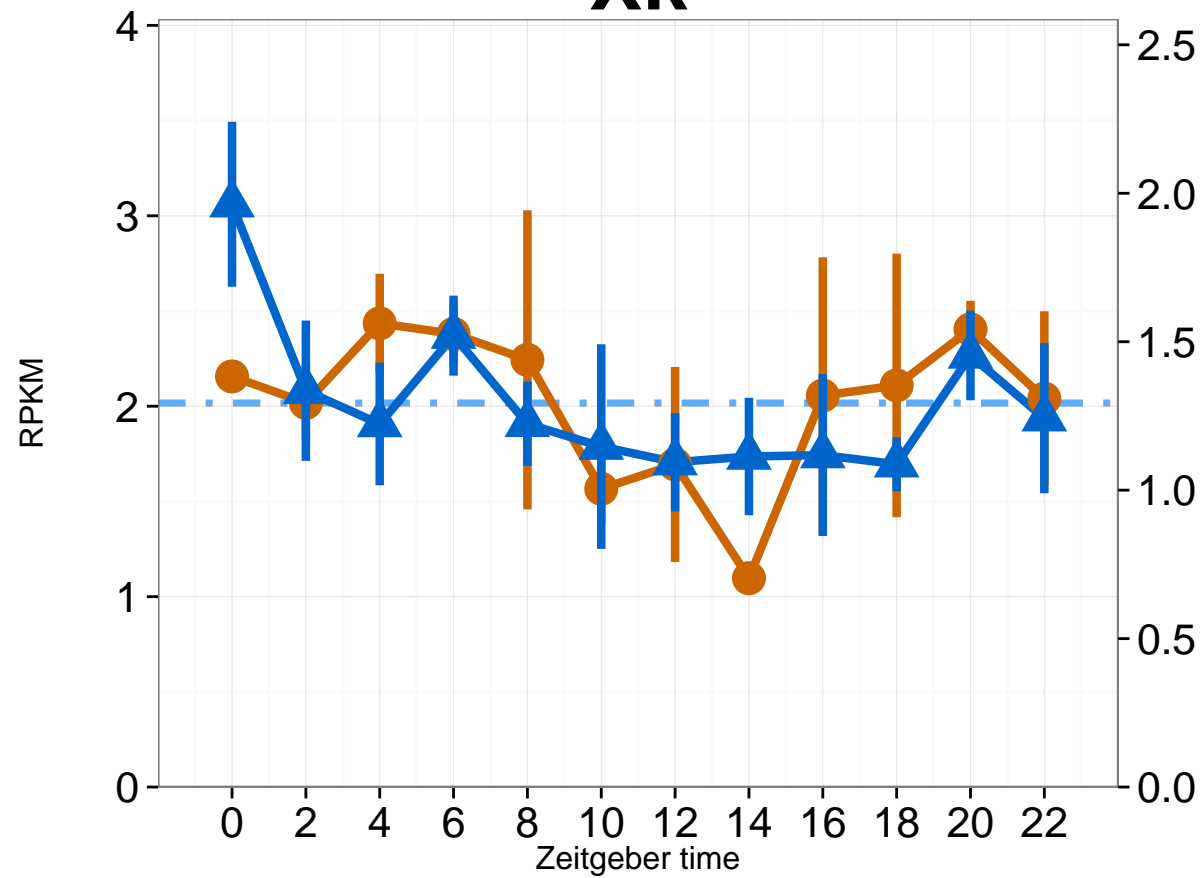

**Xk**

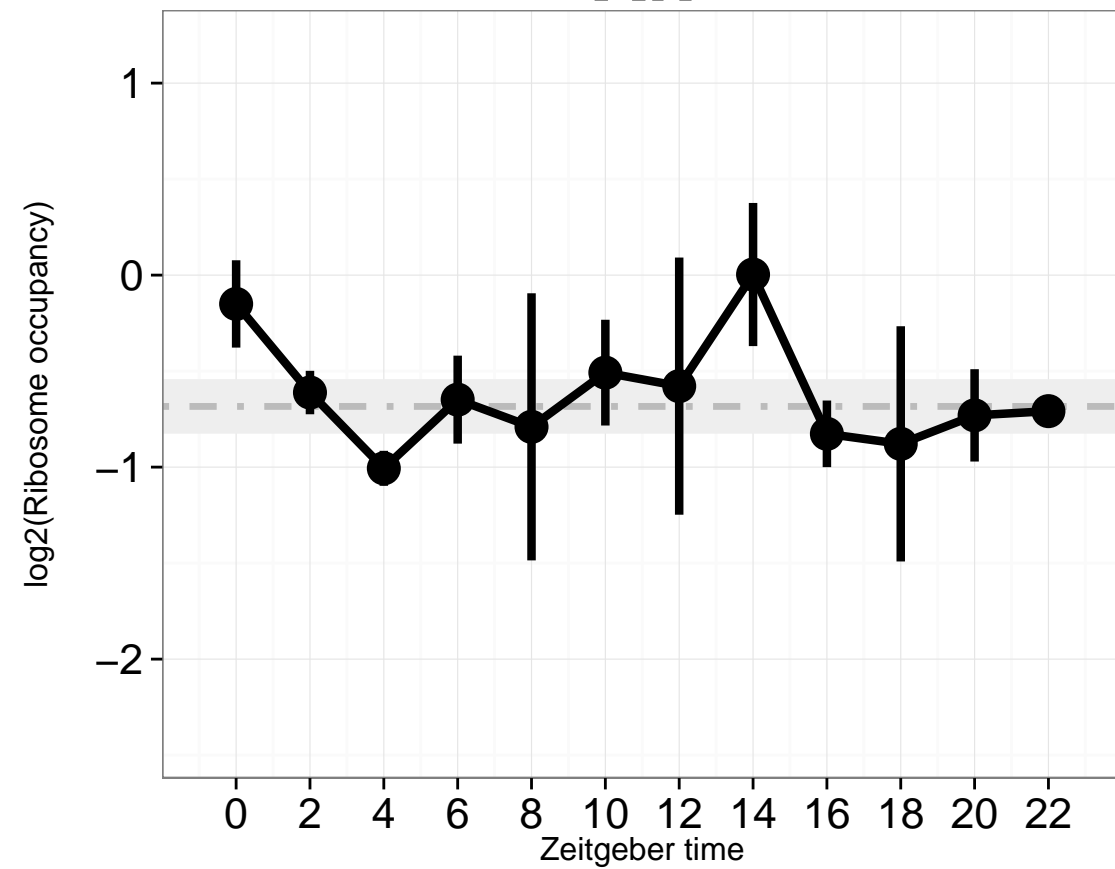

Supplement: SuppDataset_1.zip [file Xk_set_A.pdf › Supplemental Dataset 1/A-mRNA_nonrhyth_translation_nonrhyth/Xk_set_A.pdf]

## Xpa

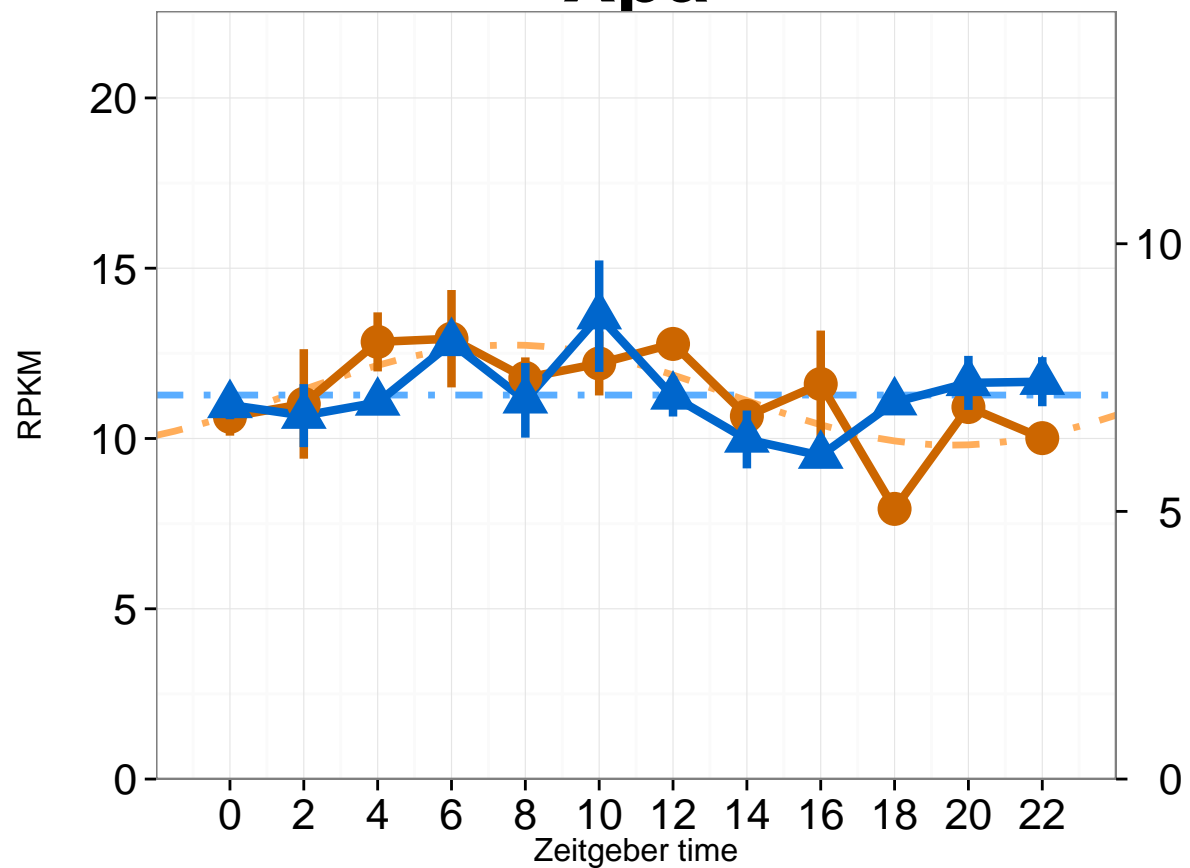

## Xpa

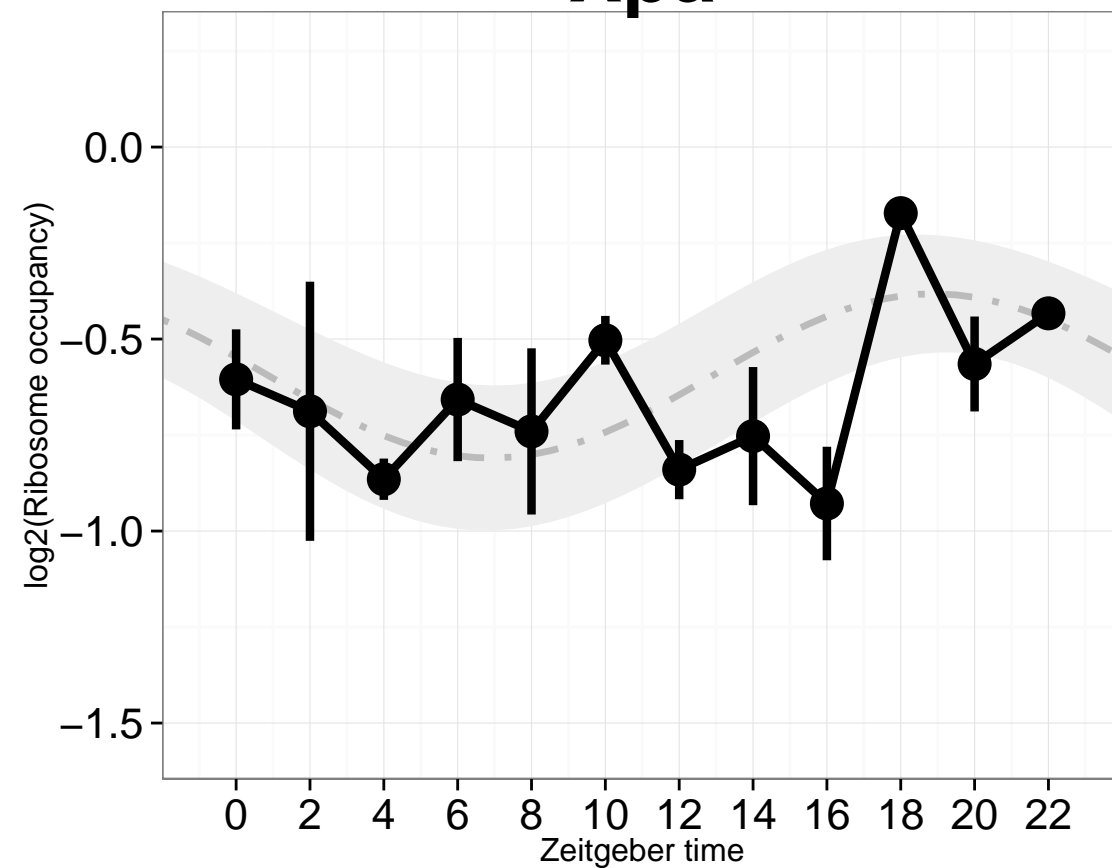

Supplement: SuppDataset_1.zip [file Xpa_set_A.pdf › Supplemental Dataset 1/A-mRNA_nonrhyth_translation_nonrhyth/Xpa_set_A.pdf]

## Xpc

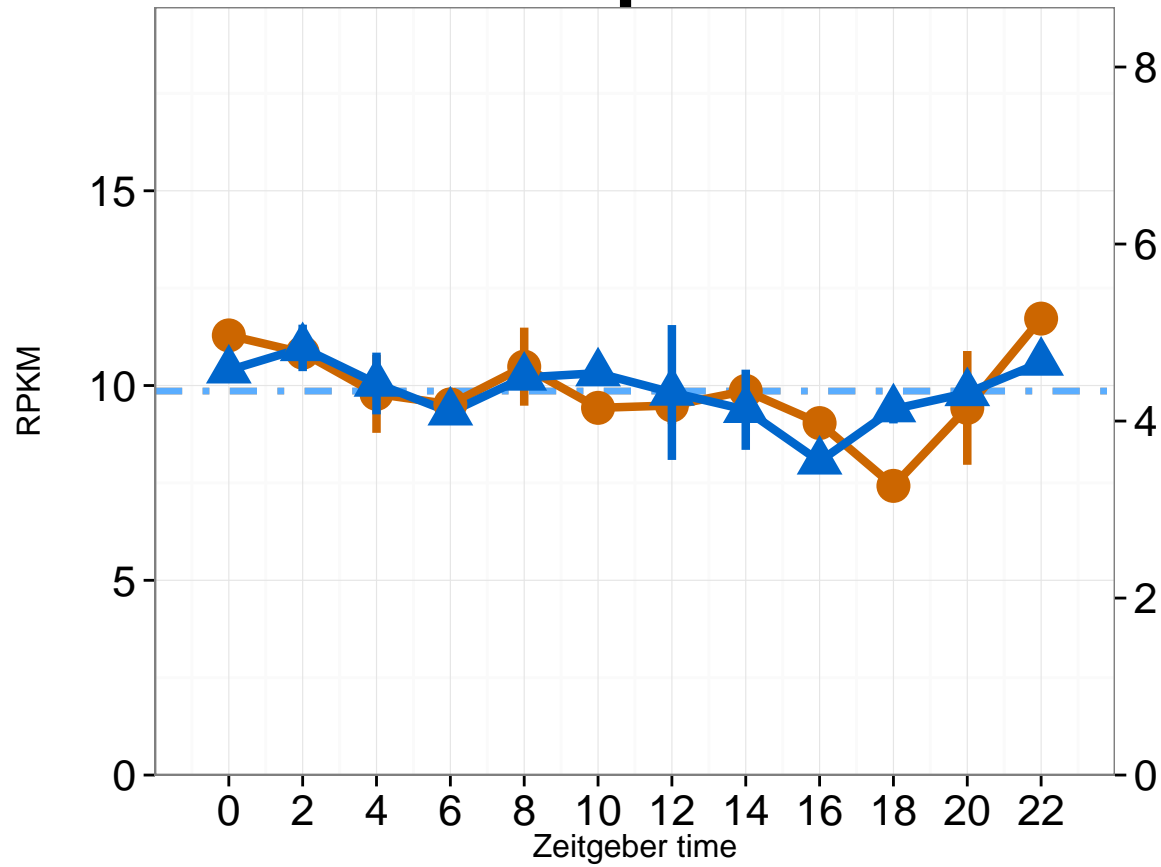

## Xpc

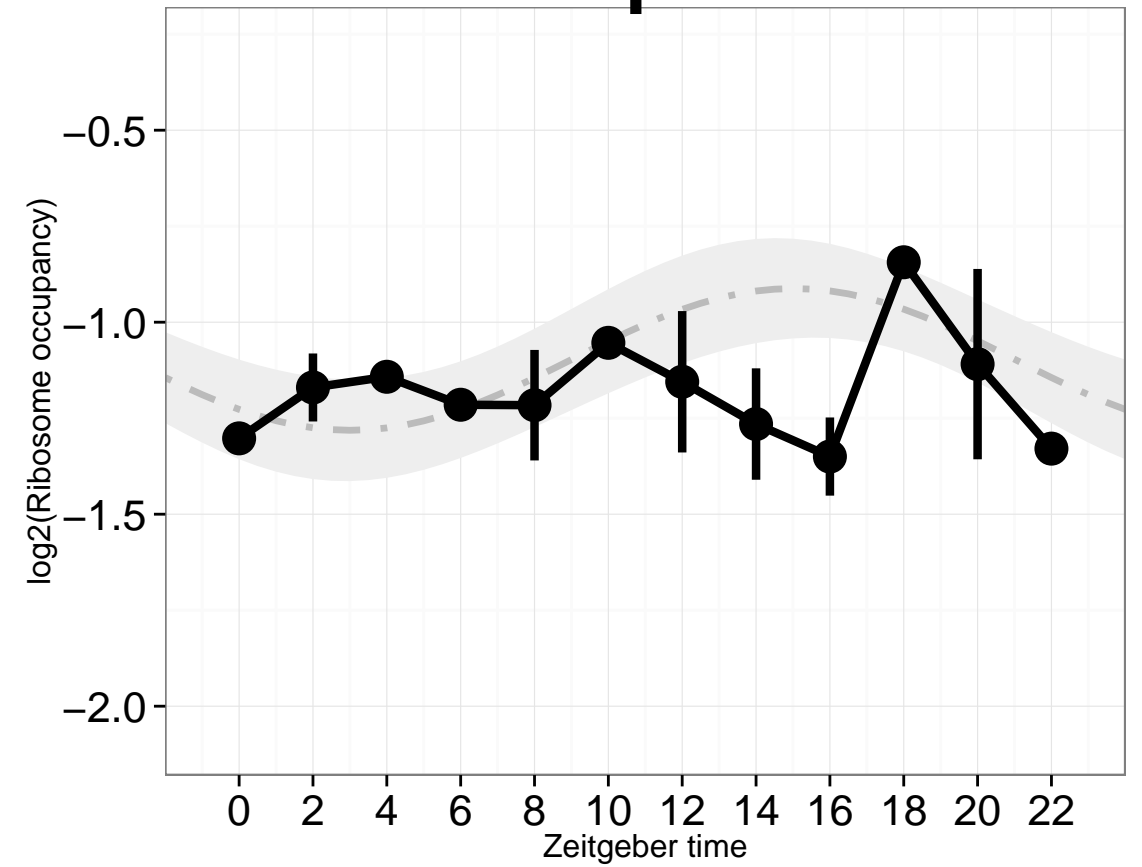

Supplement: SuppDataset_1.zip [file Xpc_set_A.pdf › Supplemental Dataset 1/A-mRNA_nonrhyth_translation_nonrhyth/Xpc_set_A.pdf]

## Xpnrep1

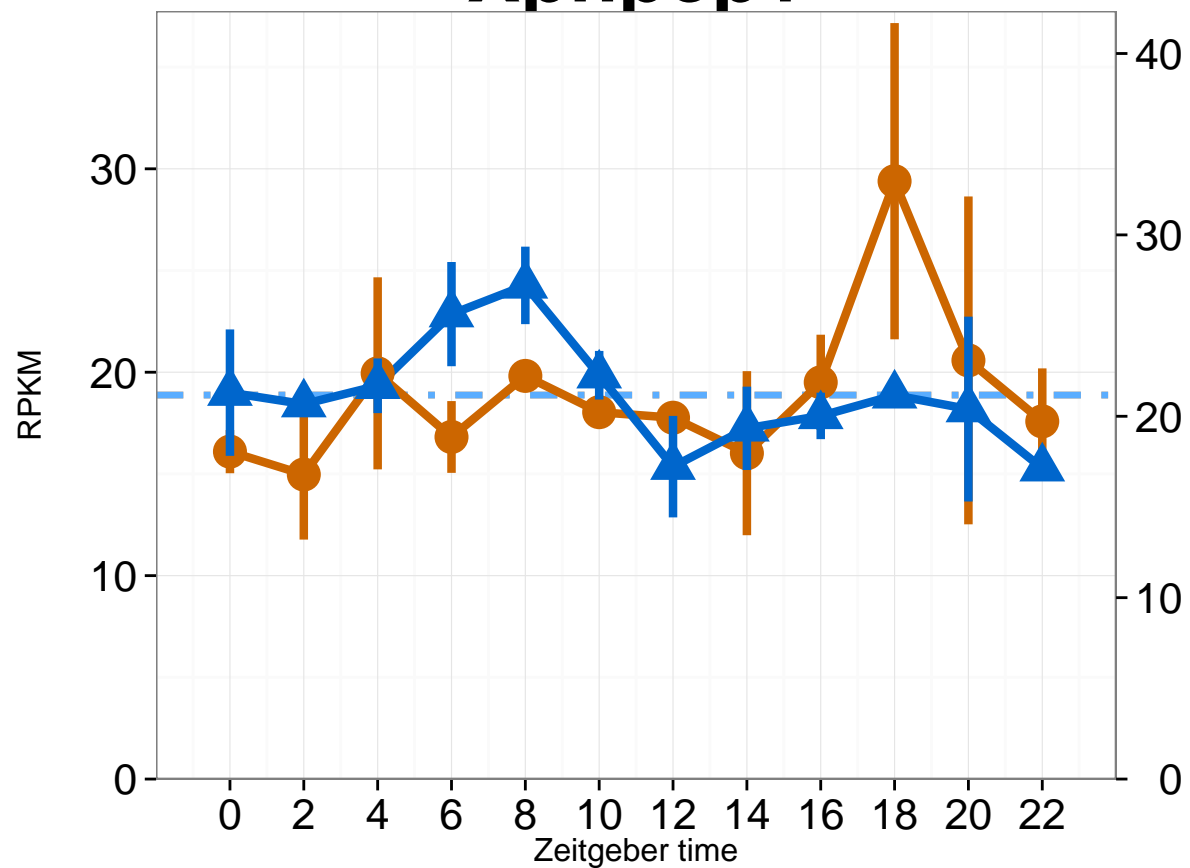

## Xpnrep1

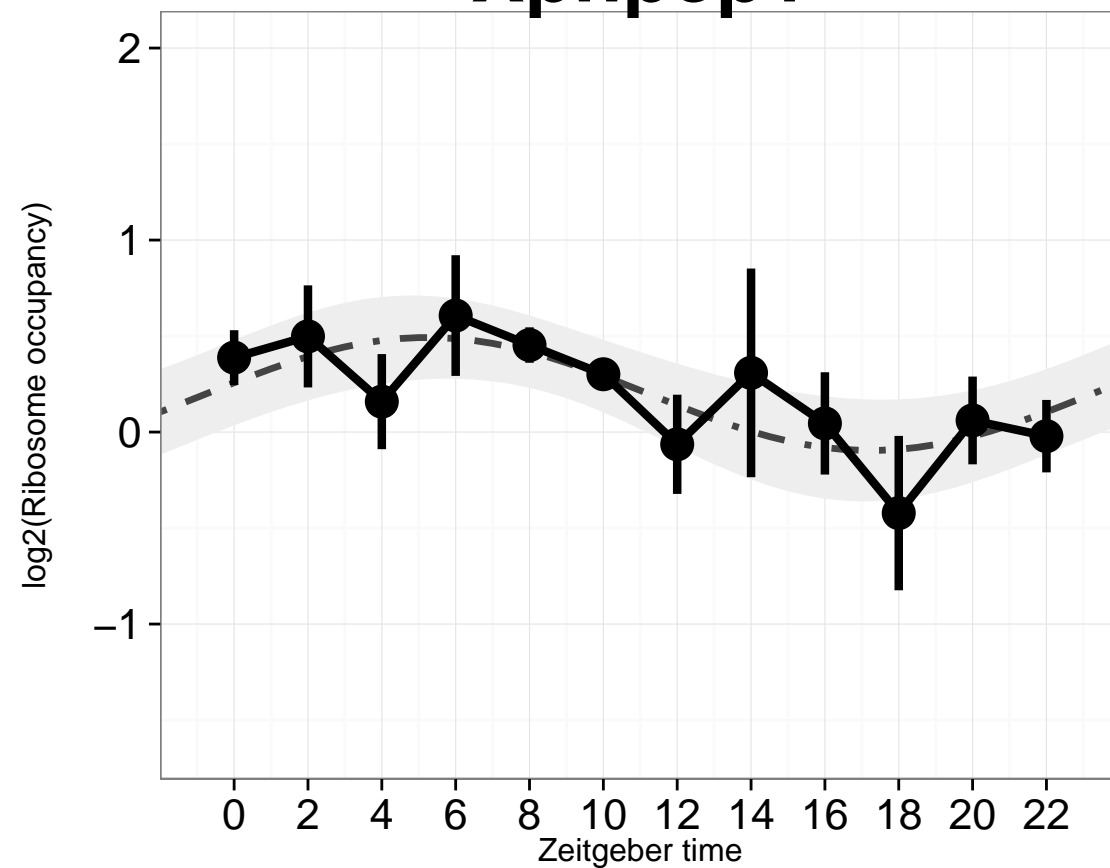

Supplement: SuppDataset_1.zip [file Xpnpep1_set_A.pdf › Supplemental Dataset 1/A-mRNA_nonrhyth_translation_nonrhyth/Xpnpep1_set_A.pdf]
