# Supplementary figures and images for: Ribosome profiling reveals the rhythmic liver translatome and circadian clock regulation by upstream open reading frames (part 83 of 113)
Source: HighWire-hosted journal article supplement (doi:10.1101/gr.195404.115), 2015-10-20

# Xpnrep3

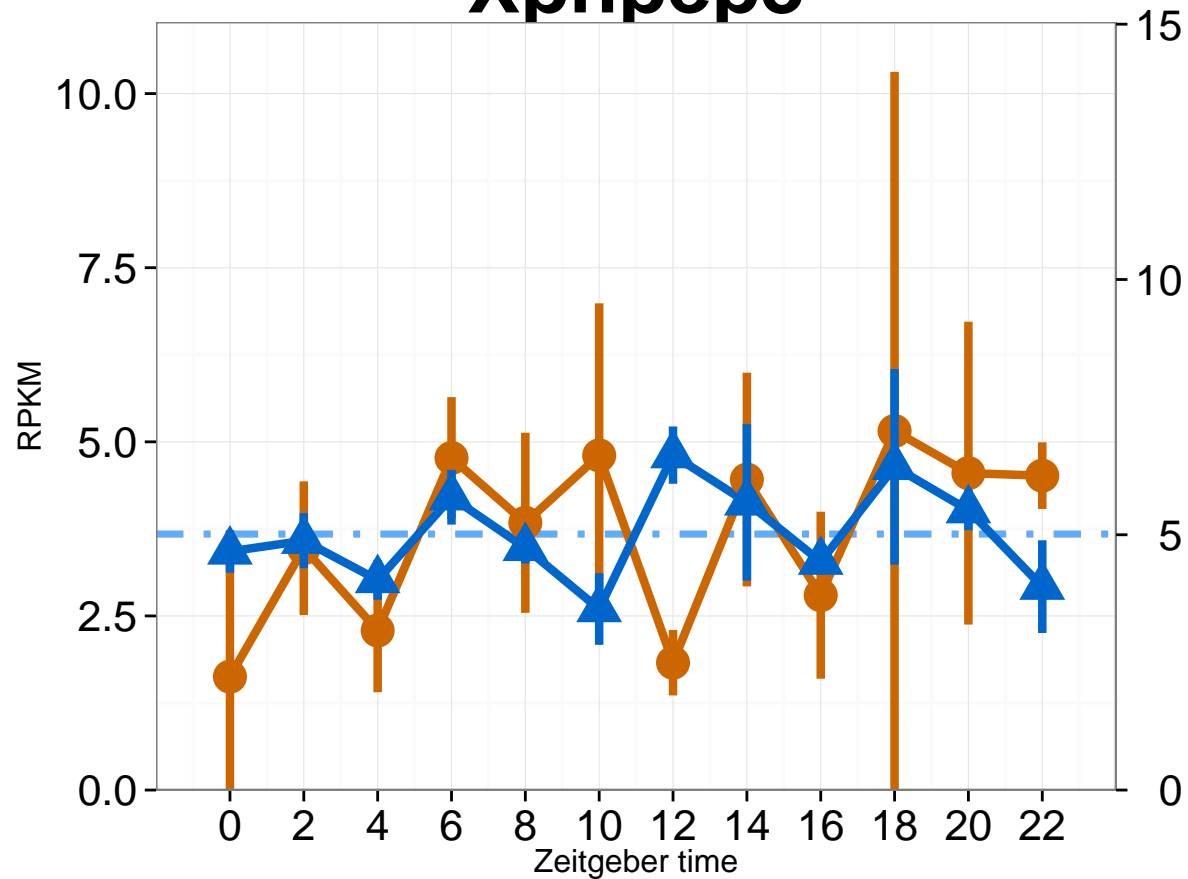

# Xpnrep3

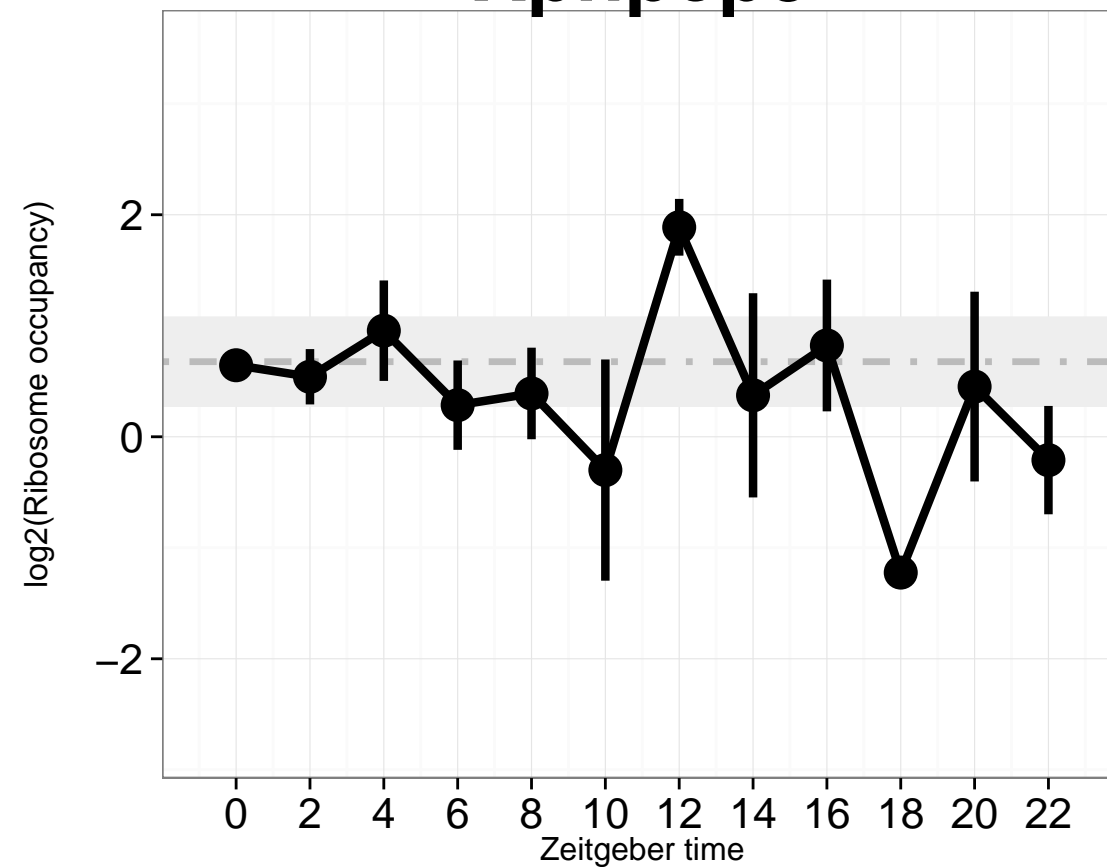

Supplement: SuppDataset_1.zip [file Xpnpep3_set_A.pdf › Supplemental Dataset 1/A-mRNA_nonrhyth_translation_nonrhyth/Xpnpep3_set_A.pdf]

## Xpo1

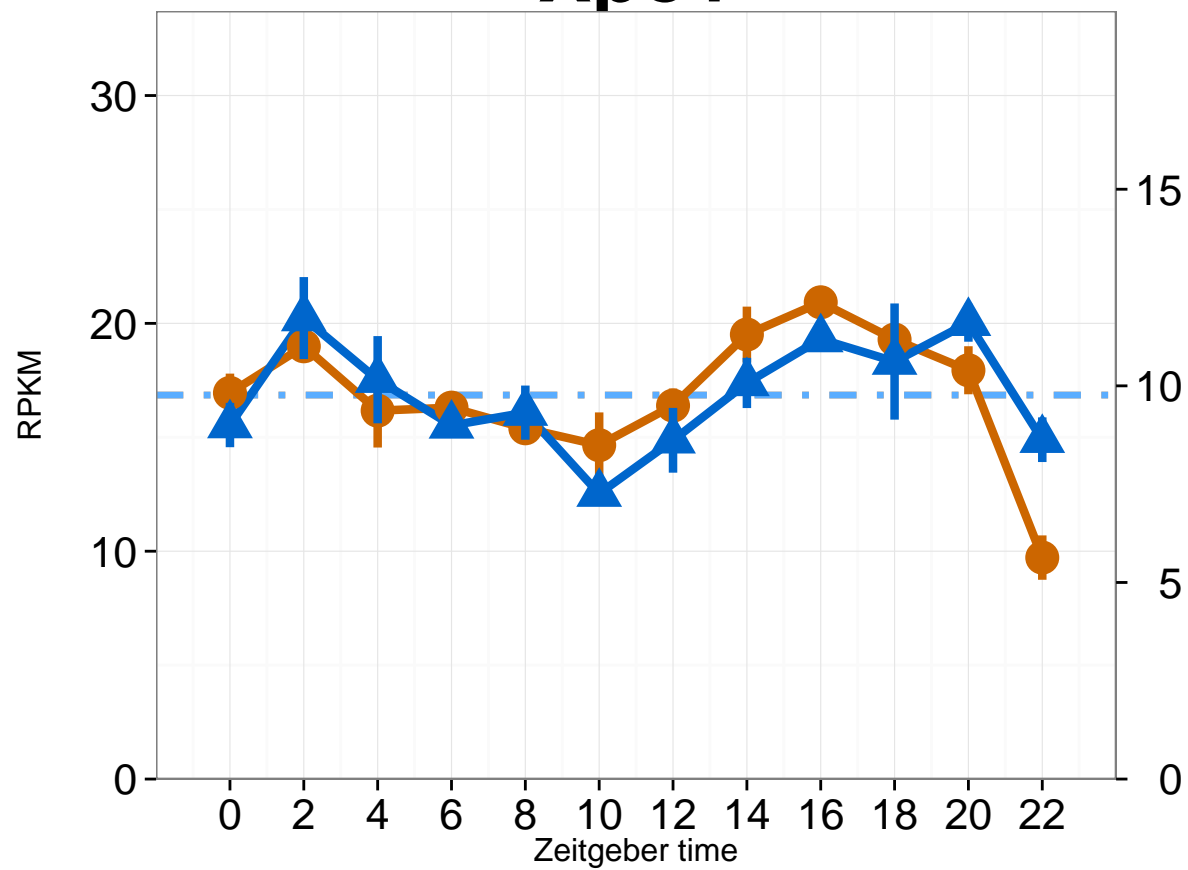

## Xpo1

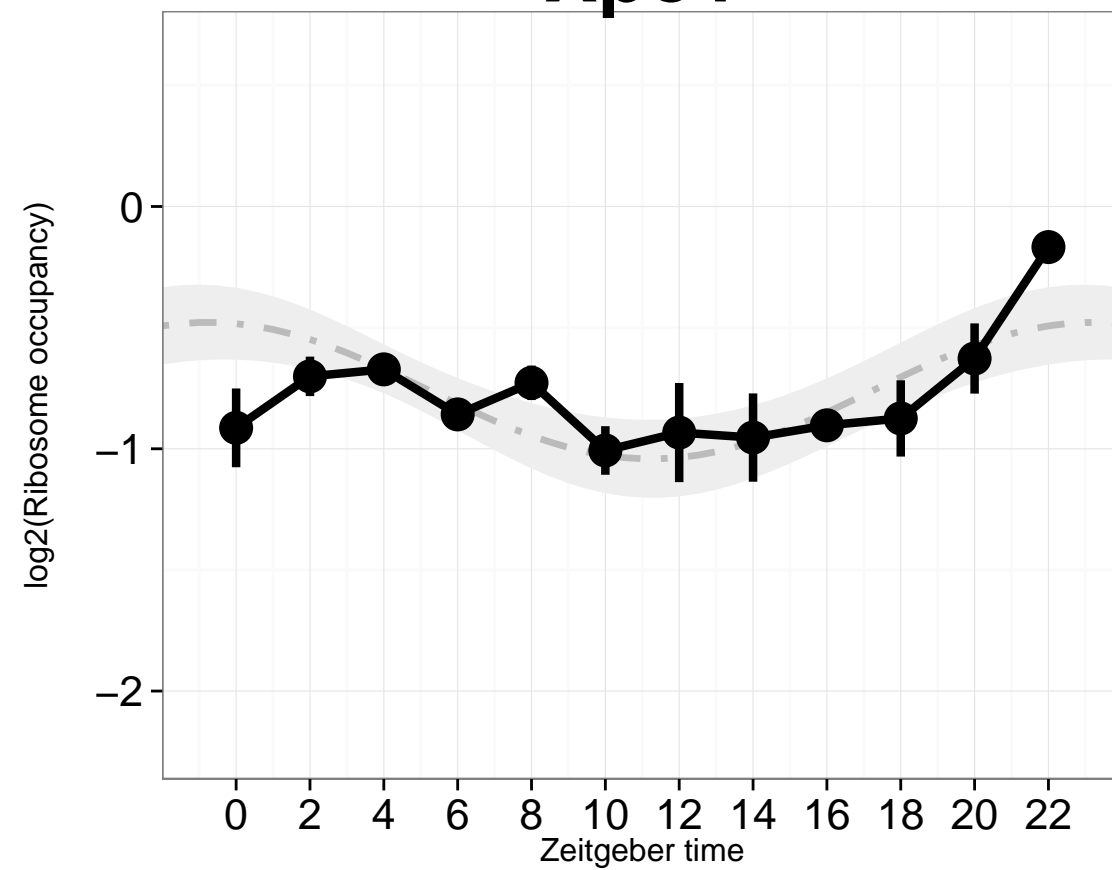

Supplement: SuppDataset_1.zip [file Xpo1_set_A.pdf › Supplemental Dataset 1/A-mRNA_nonrhyth_translation_nonrhyth/Xpo1_set_A.pdf]

## Xpo4

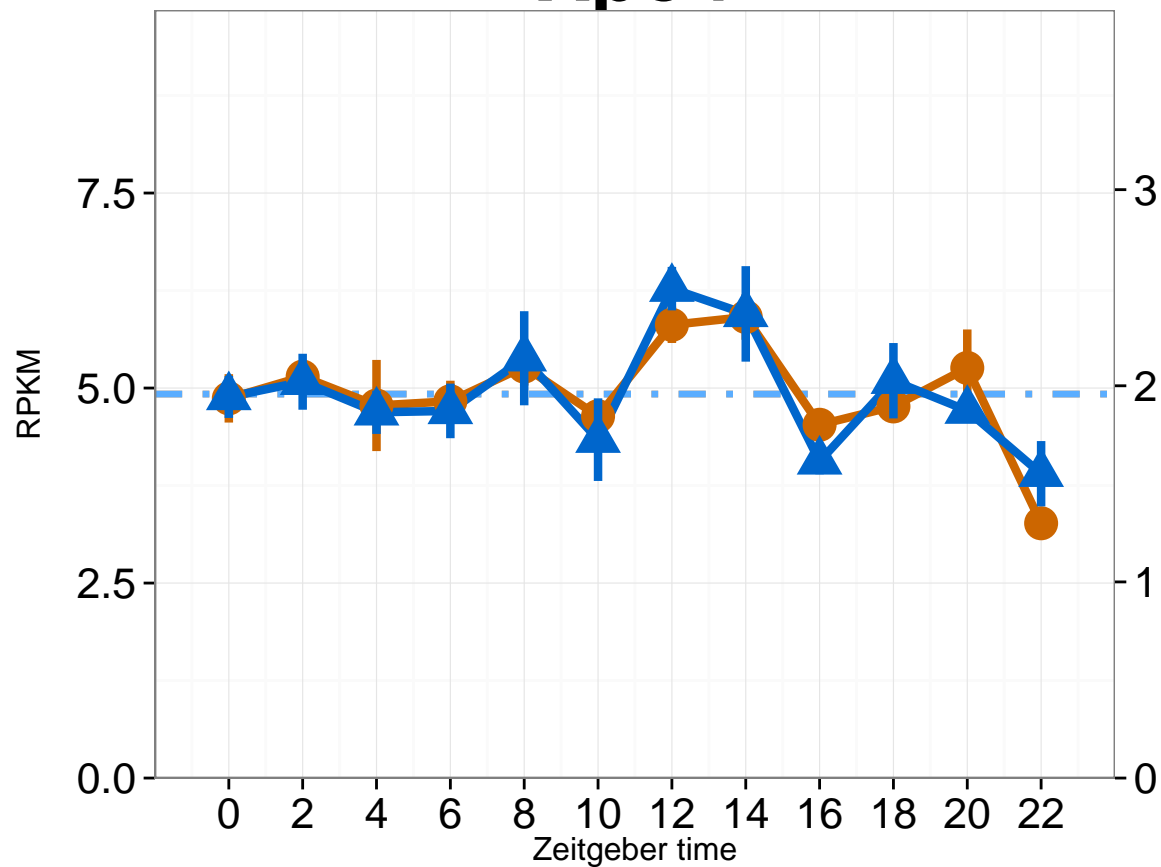

## Xpo4

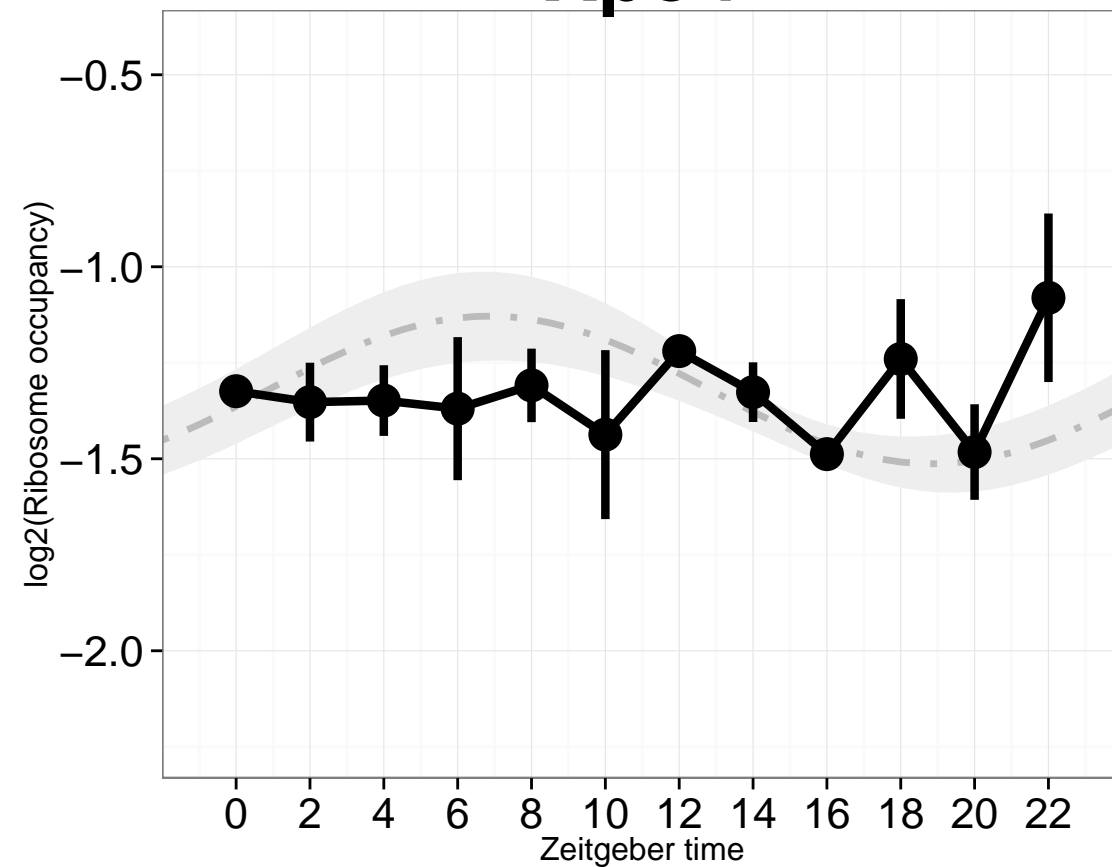

Supplement: SuppDataset_1.zip [file Xpo4_set_A.pdf › Supplemental Dataset 1/A-mRNA_nonrhyth_translation_nonrhyth/Xpo4_set_A.pdf]

## Xpo5

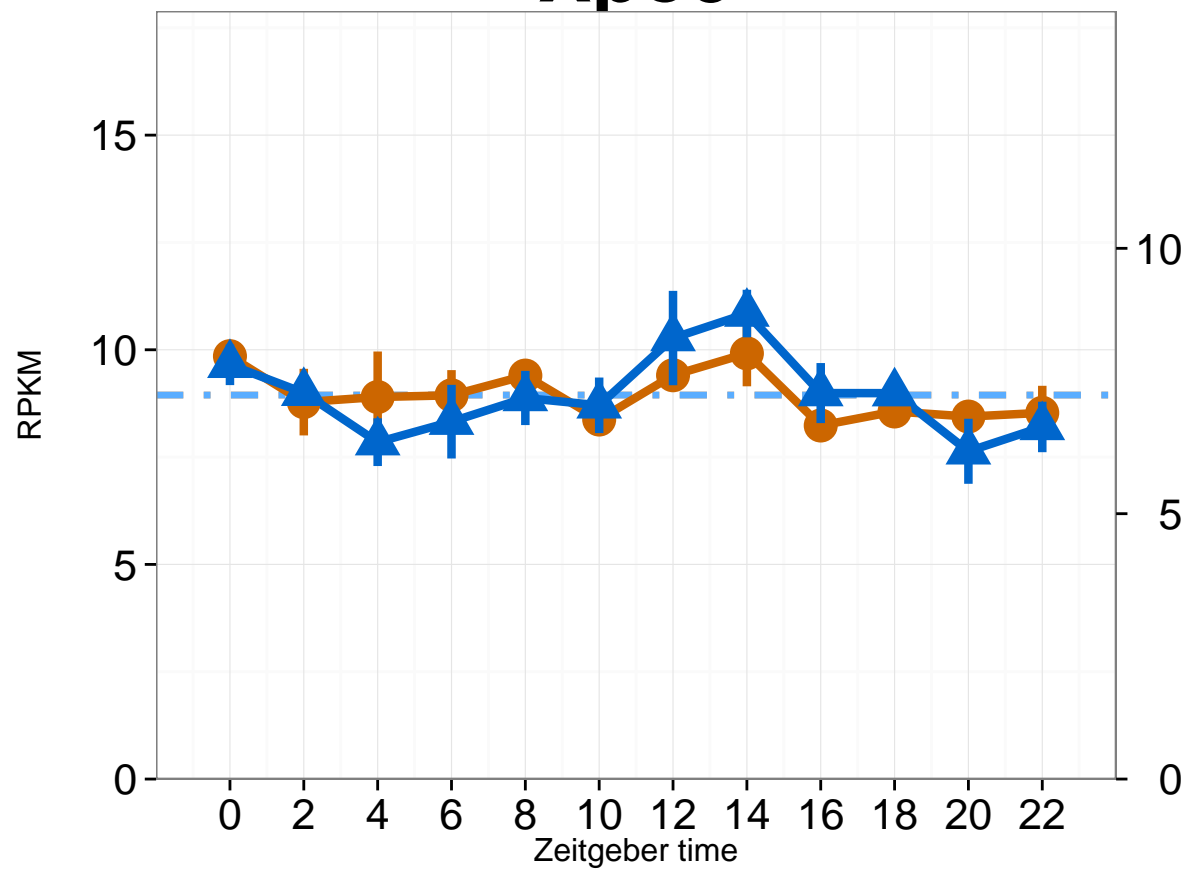

## Xpo5

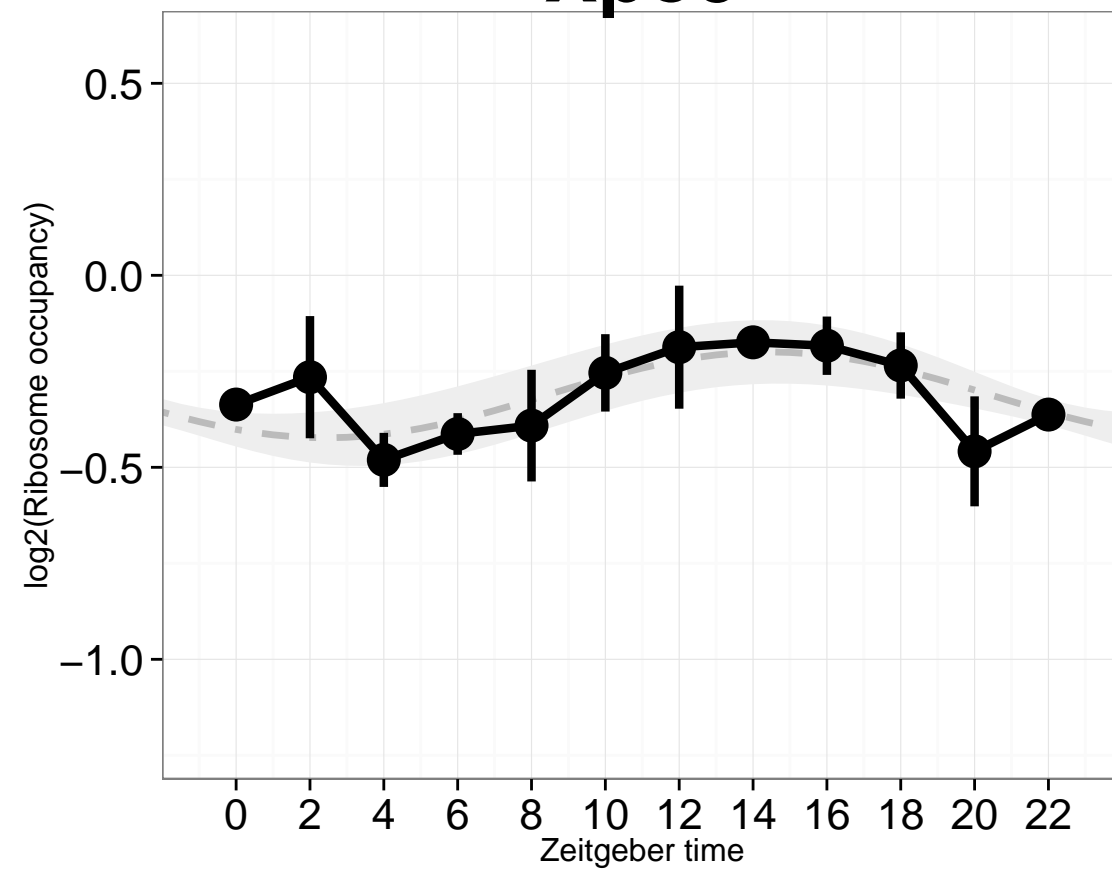

Supplement: SuppDataset_1.zip [file Xpo5_set_A.pdf › Supplemental Dataset 1/A-mRNA_nonrhyth_translation_nonrhyth/Xpo5_set_A.pdf]

## Xpo6

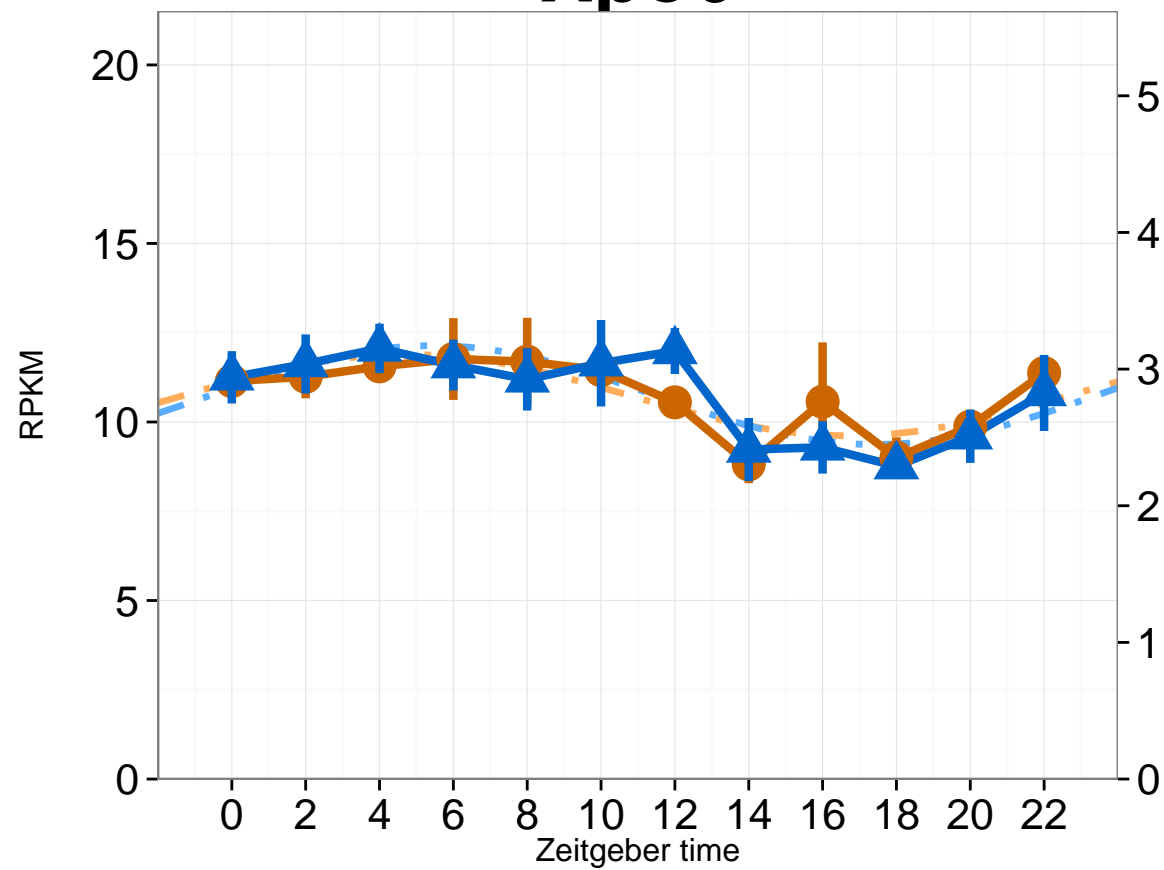

## Xpo6

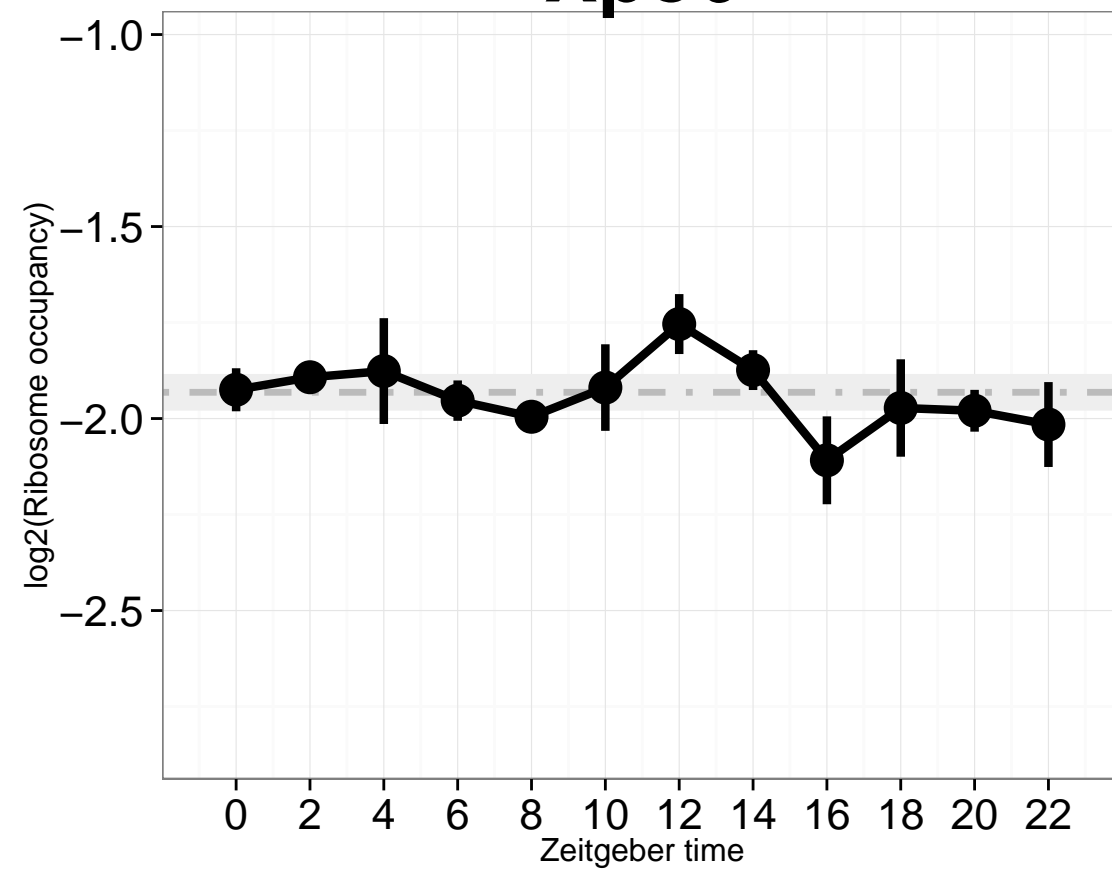

Supplement: SuppDataset_1.zip [file Xpo6_set_A.pdf › Supplemental Dataset 1/A-mRNA_nonrhyth_translation_nonrhyth/Xpo6_set_A.pdf]

## Xpo7

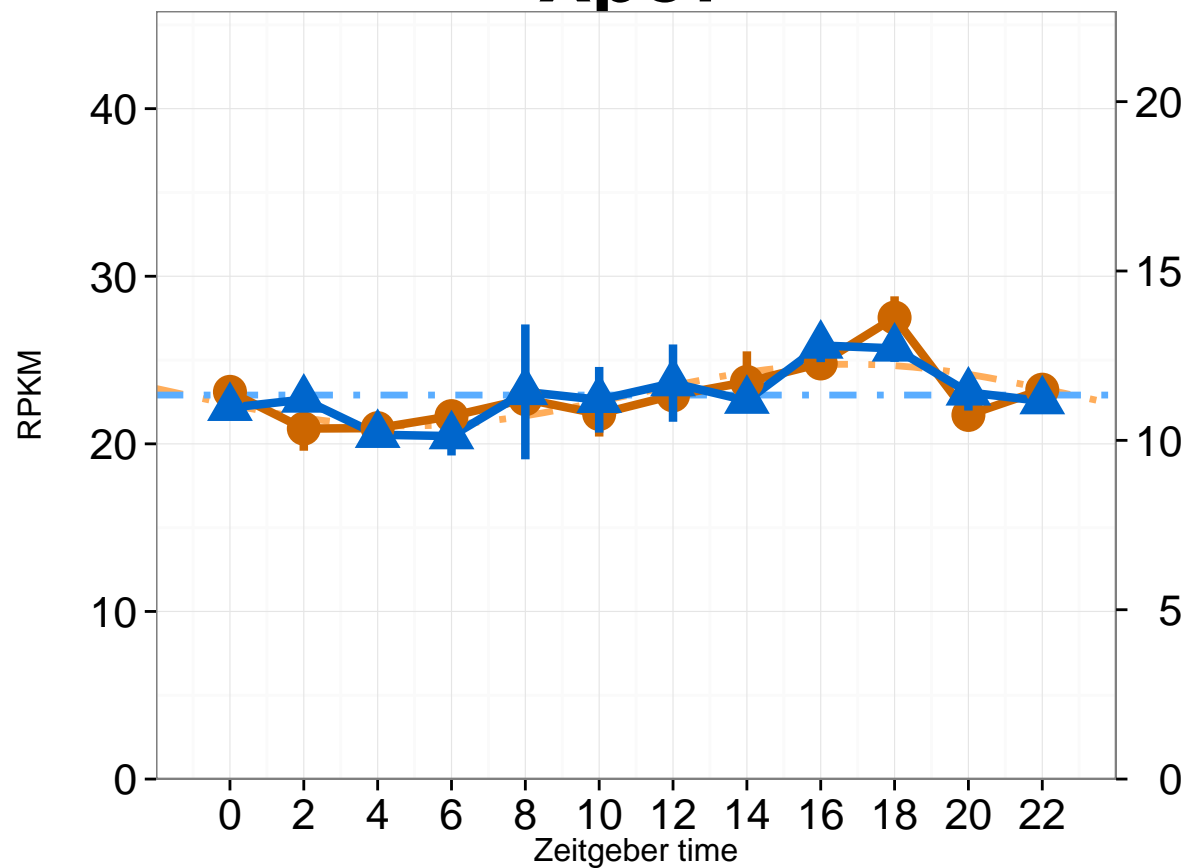

## Xpo7

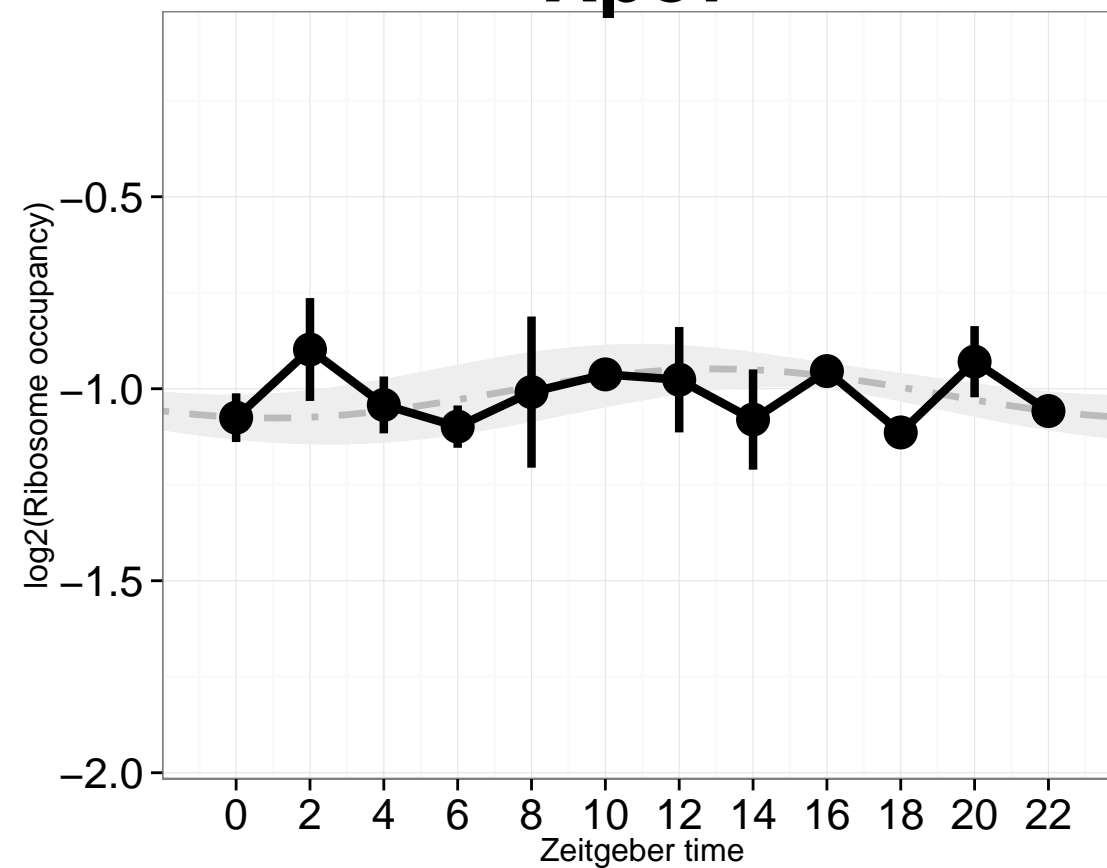

Supplement: SuppDataset_1.zip [file Xpo7_set_A.pdf › Supplemental Dataset 1/A-mRNA_nonrhyth_translation_nonrhyth/Xpo7_set_A.pdf]

## Xpot

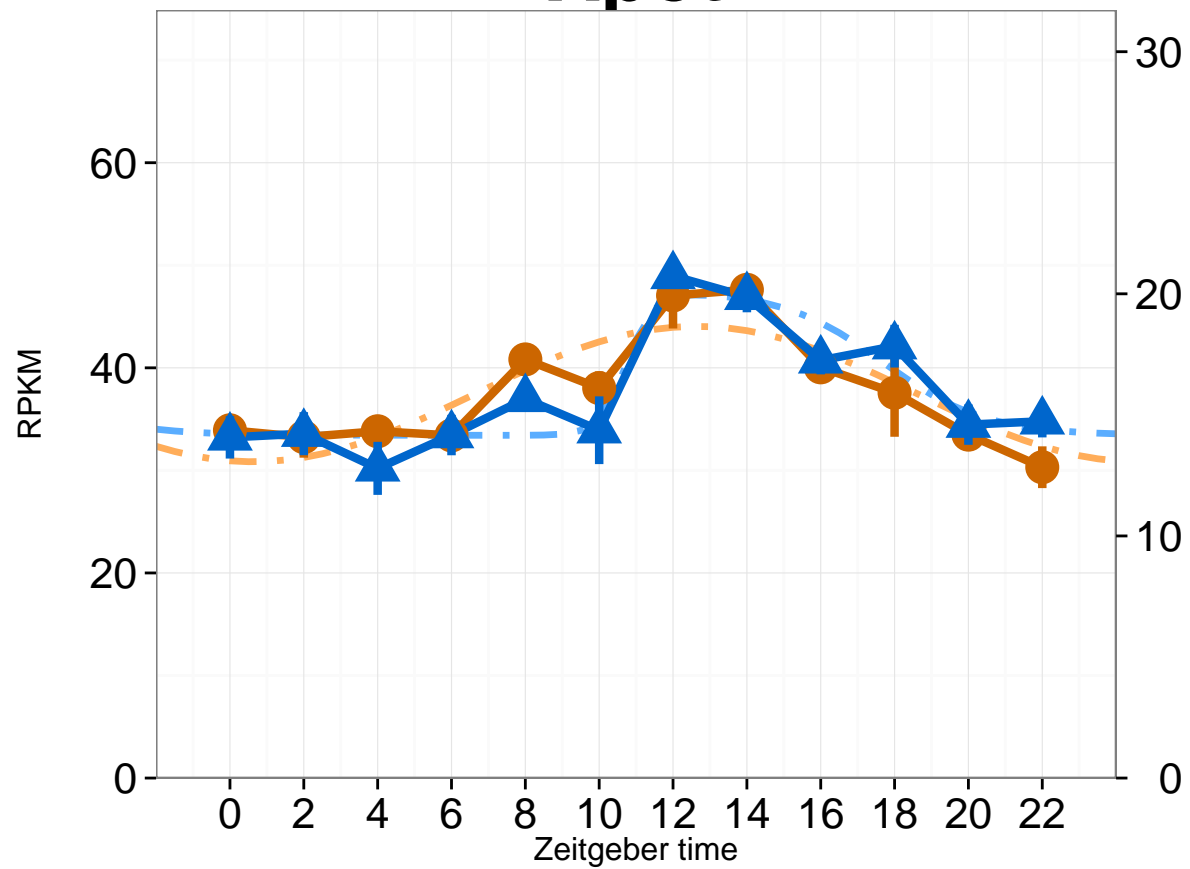

## Xpot

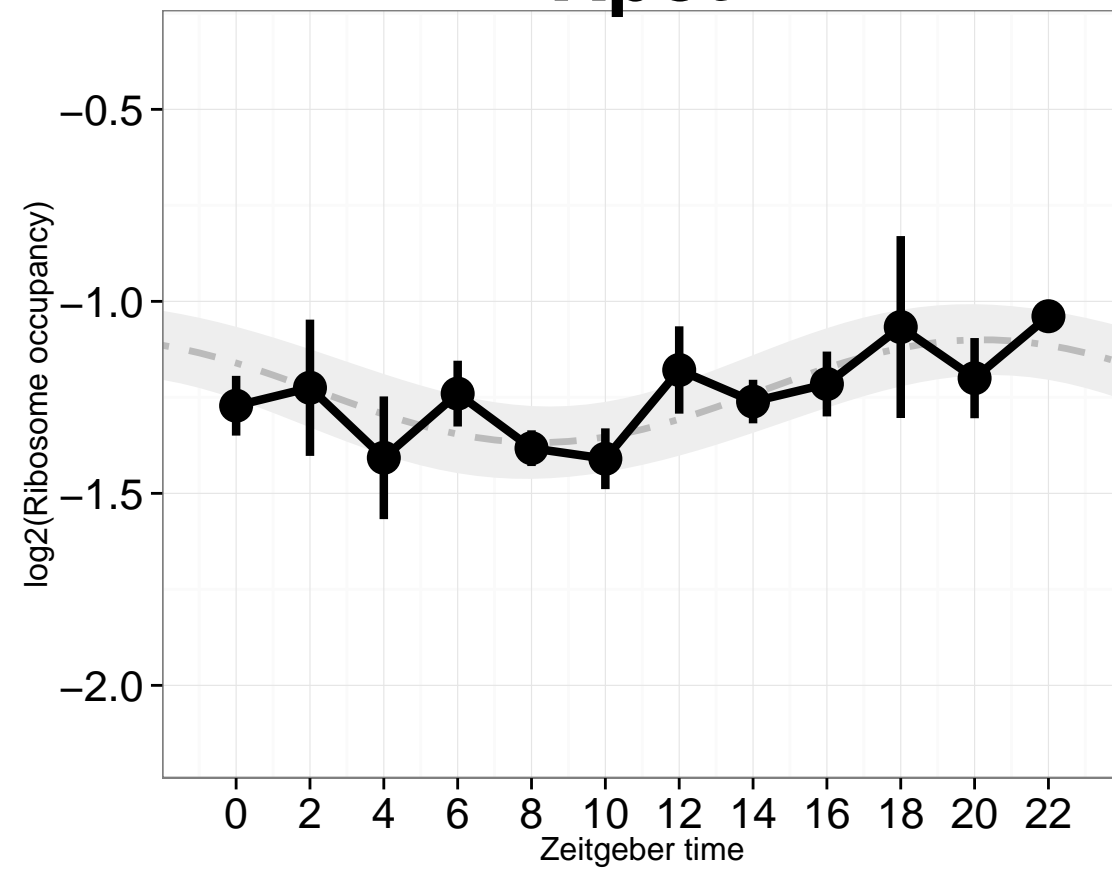

Supplement: SuppDataset_1.zip [file Xpot_set_A.pdf › Supplemental Dataset 1/A-mRNA_nonrhyth_translation_nonrhyth/Xpot_set_A.pdf]

# Xpr1

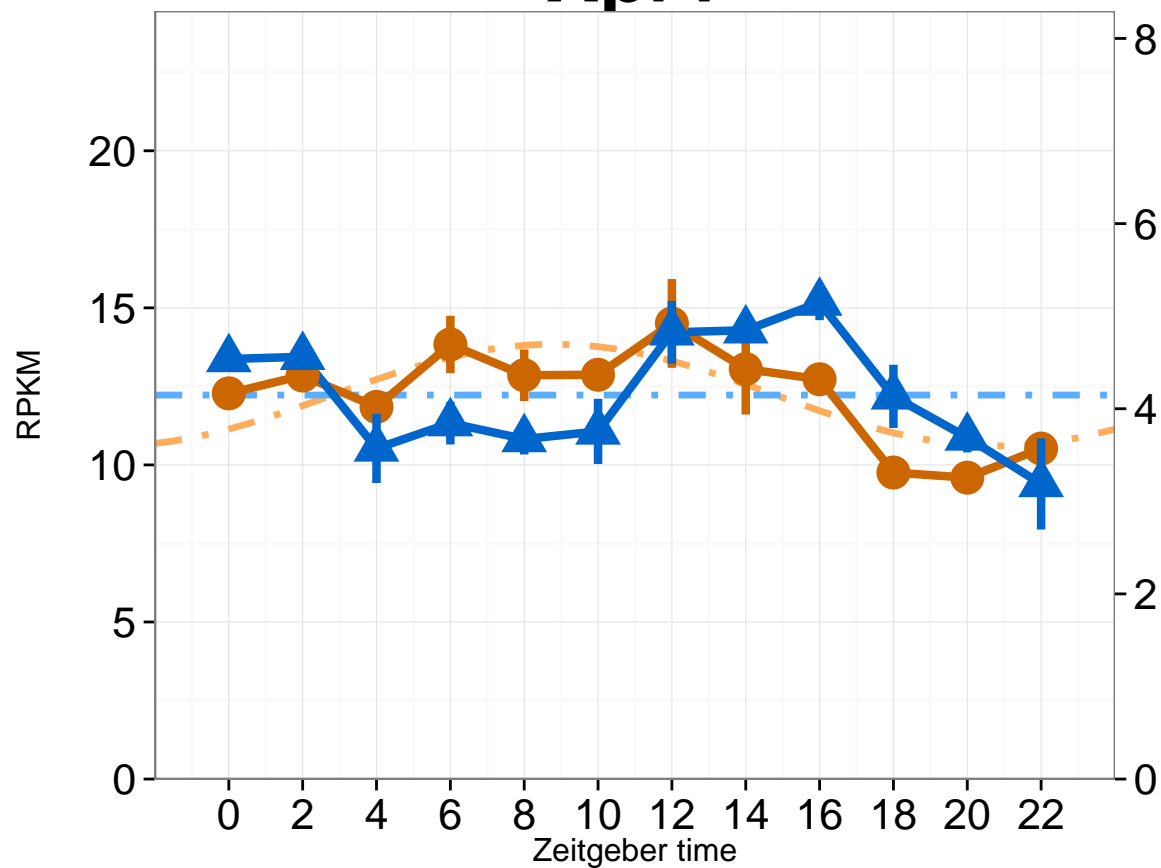

# Xpr1

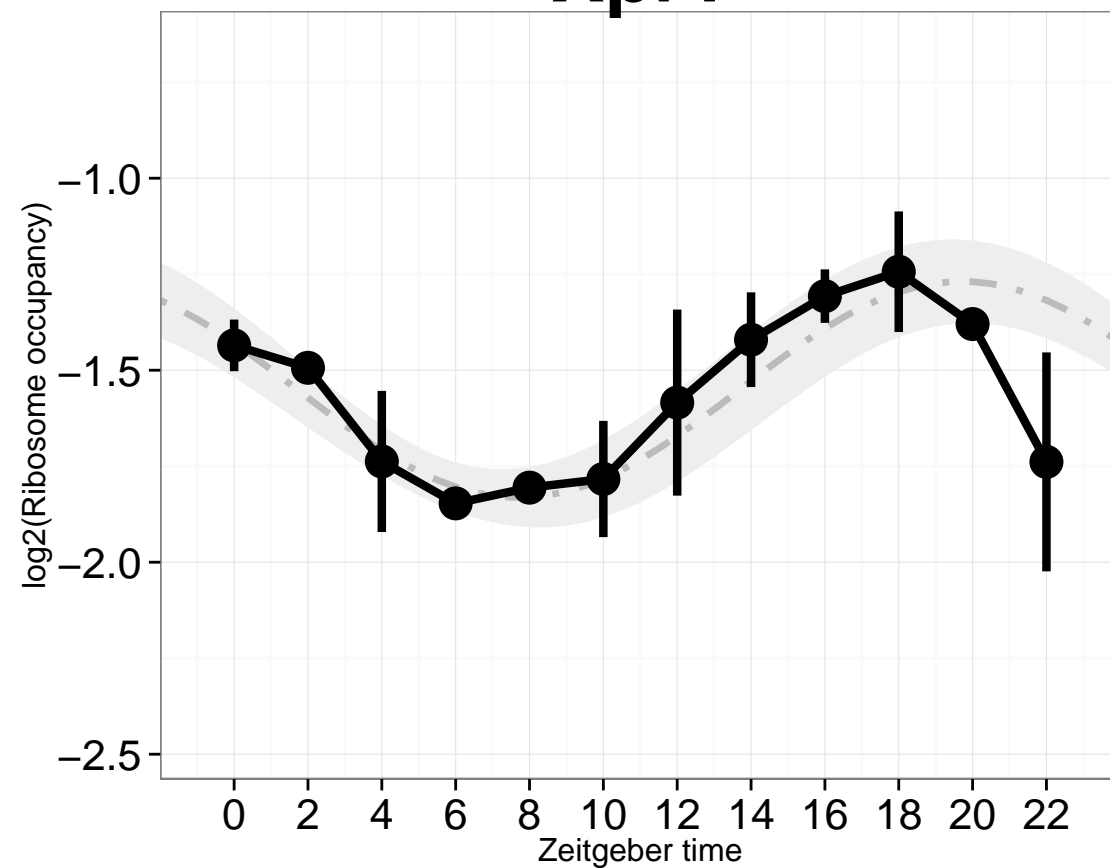

Supplement: SuppDataset_1.zip [file Xpr1_set_A.pdf › Supplemental Dataset 1/A-mRNA_nonrhyth_translation_nonrhyth/Xpr1_set_A.pdf]

## Xrcc2

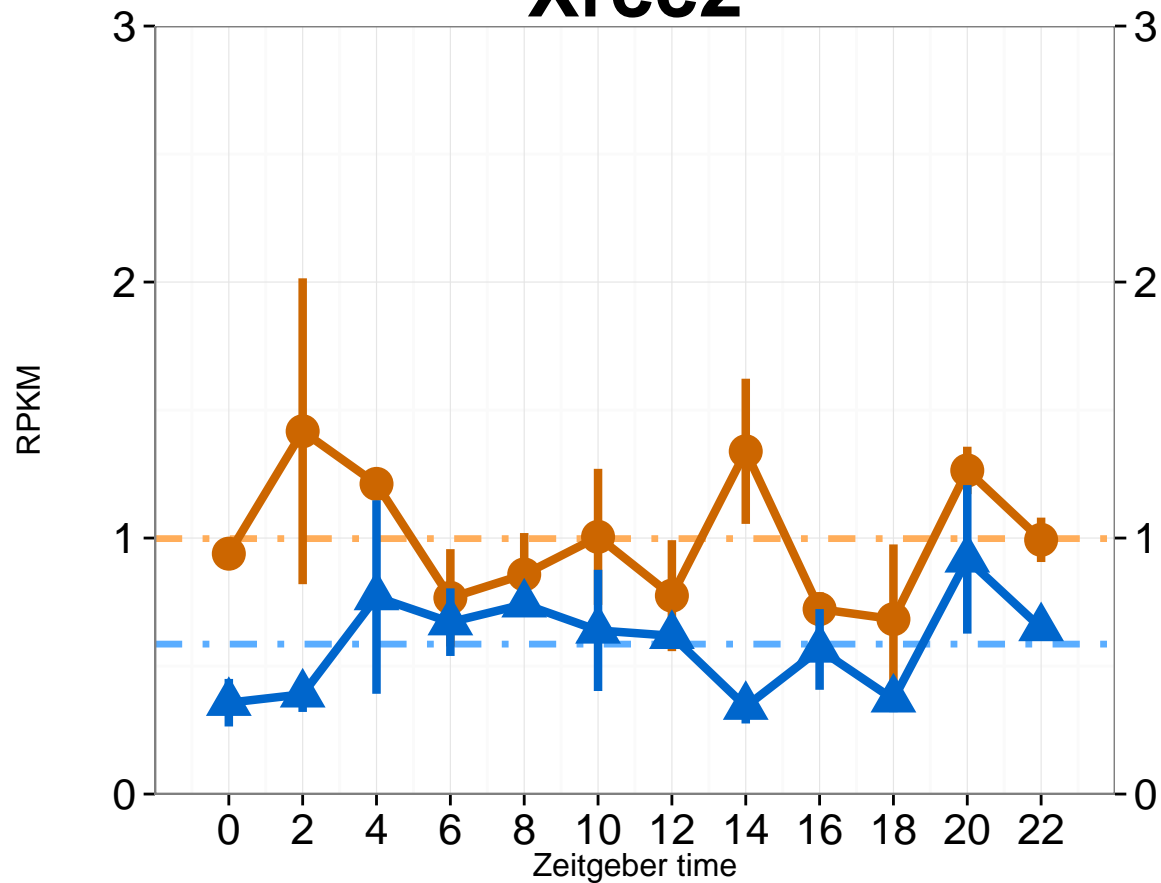

## Xrcc2

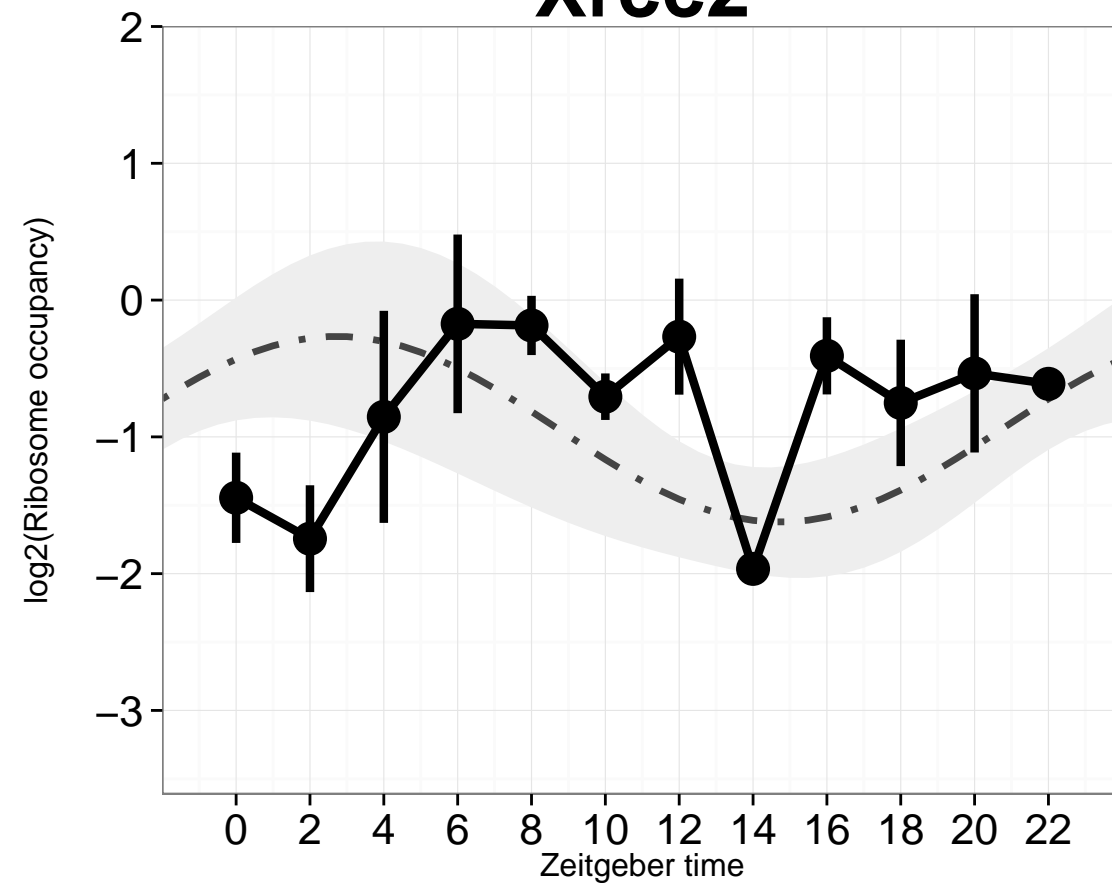

Supplement: SuppDataset_1.zip [file Xrcc2_set_A.pdf › Supplemental Dataset 1/A-mRNA_nonrhyth_translation_nonrhyth/Xrcc2_set_A.pdf]

## Xrcc3

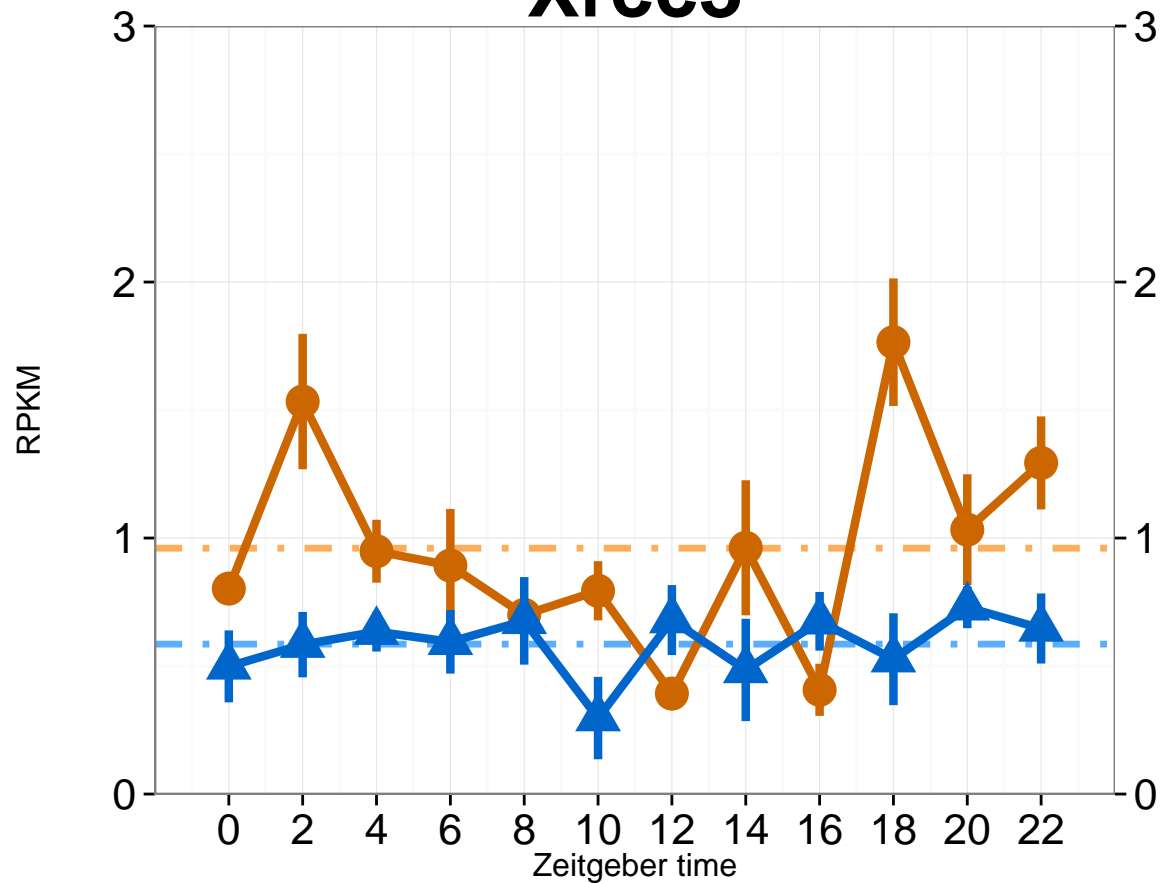

## Xrcc3

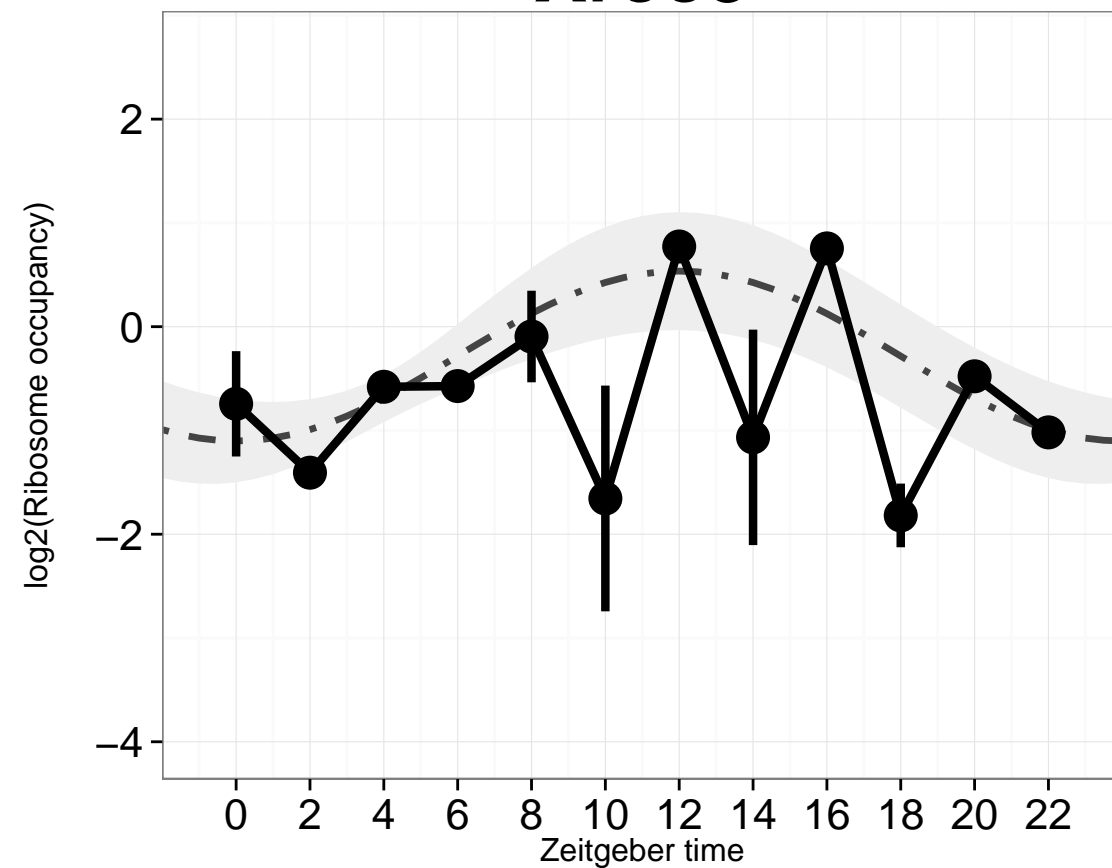

Supplement: SuppDataset_1.zip [file Xrcc3_set_A.pdf › Supplemental Dataset 1/A-mRNA_nonrhyth_translation_nonrhyth/Xrcc3_set_A.pdf]

## Xrcc4

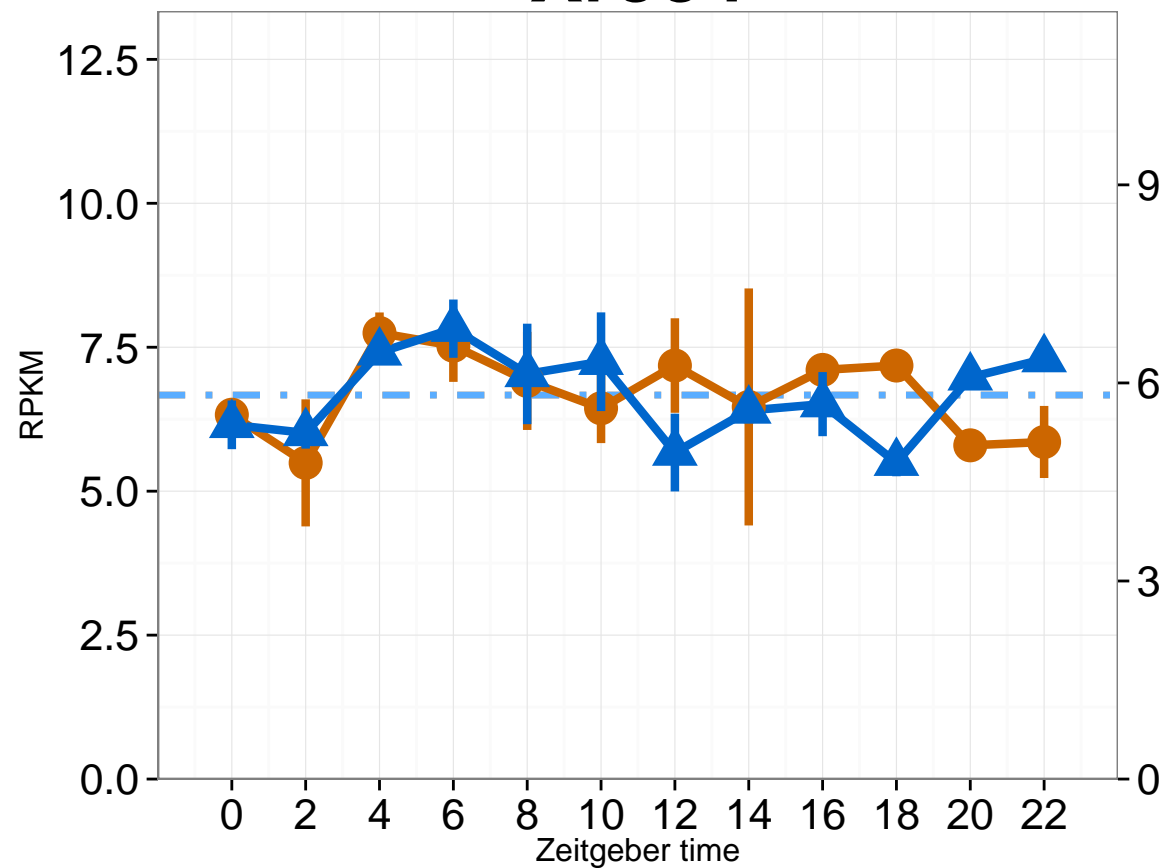

## Xrcc4

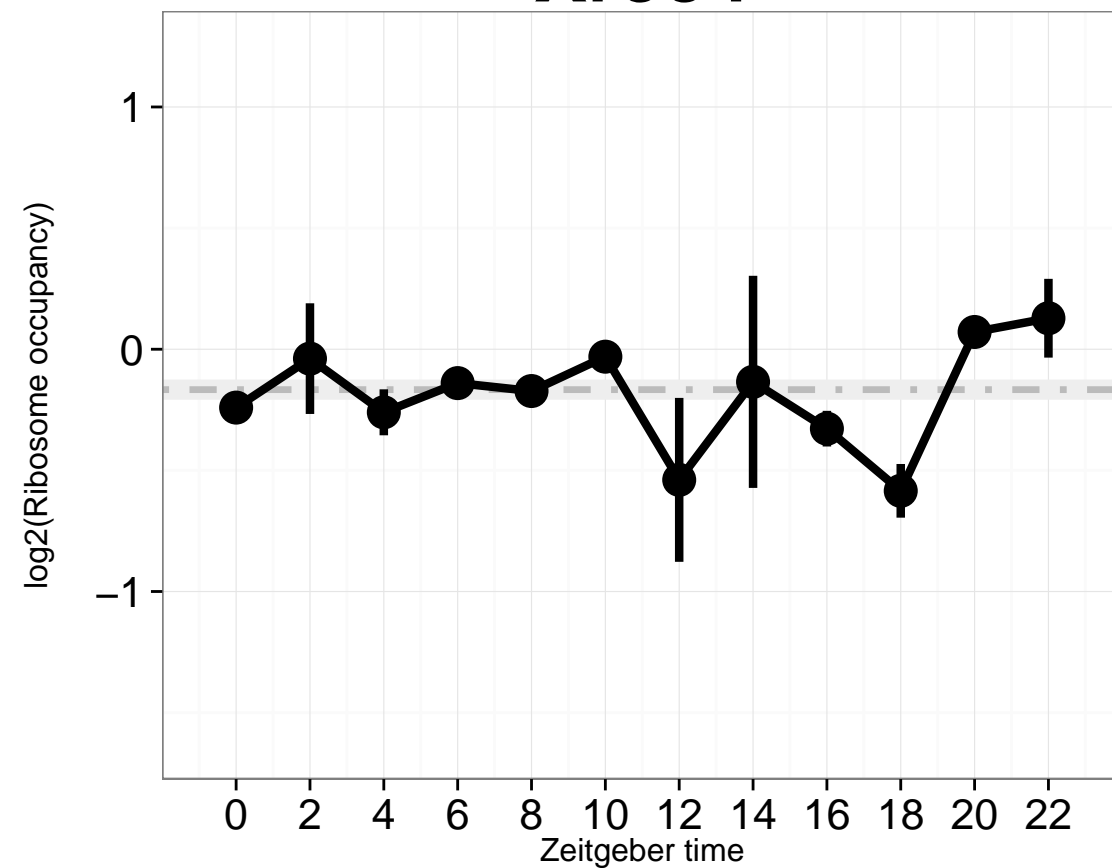

Supplement: SuppDataset_1.zip [file Xrcc4_set_A.pdf › Supplemental Dataset 1/A-mRNA_nonrhyth_translation_nonrhyth/Xrcc4_set_A.pdf]

## Xrcc5

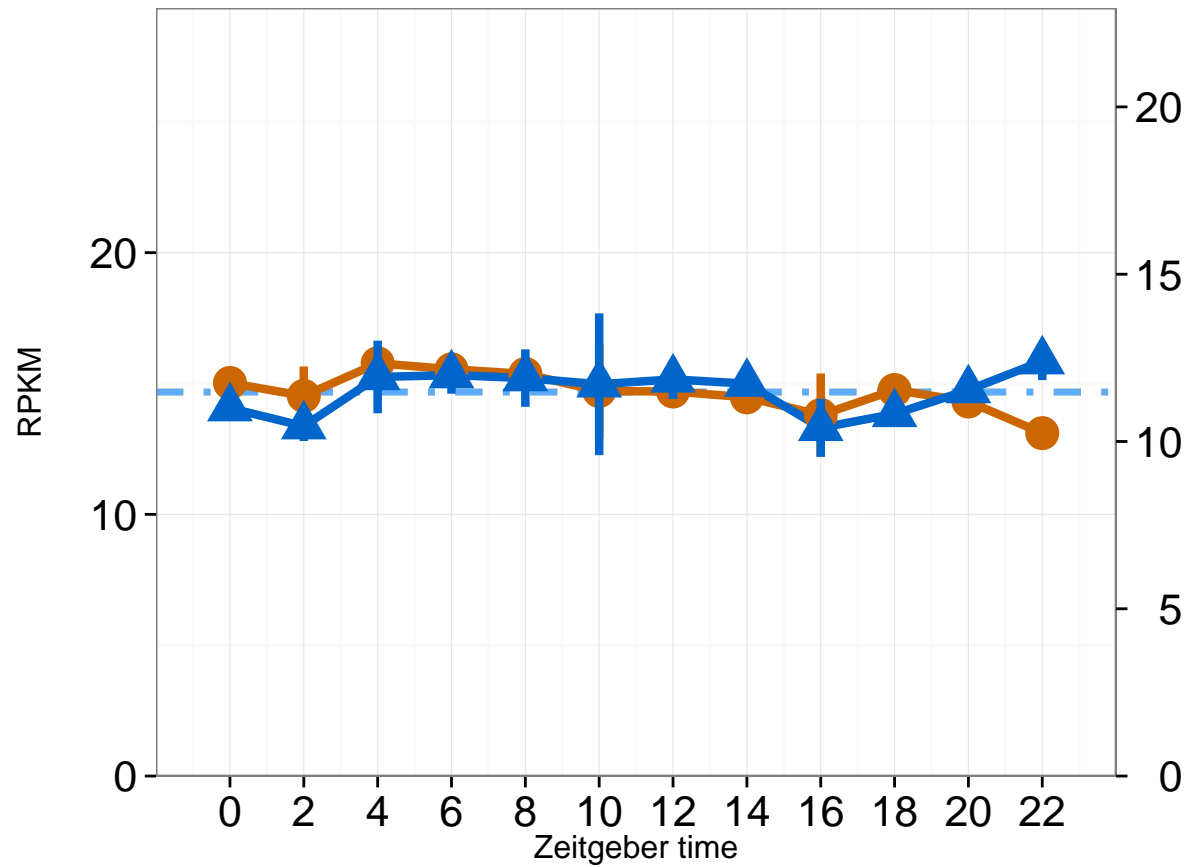

## Xrcc5

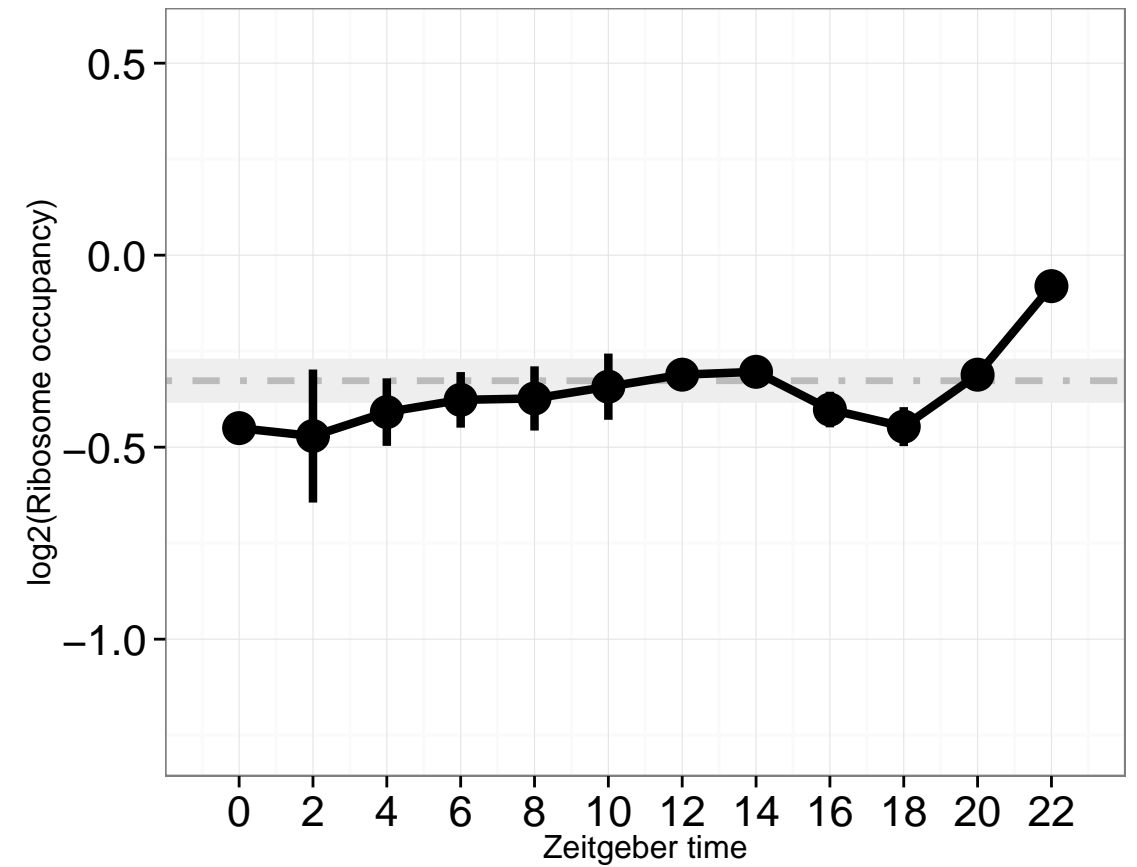

Supplement: SuppDataset_1.zip [file Xrcc5_set_A.pdf › Supplemental Dataset 1/A-mRNA_nonrhyth_translation_nonrhyth/Xrcc5_set_A.pdf]

## Xrcc6

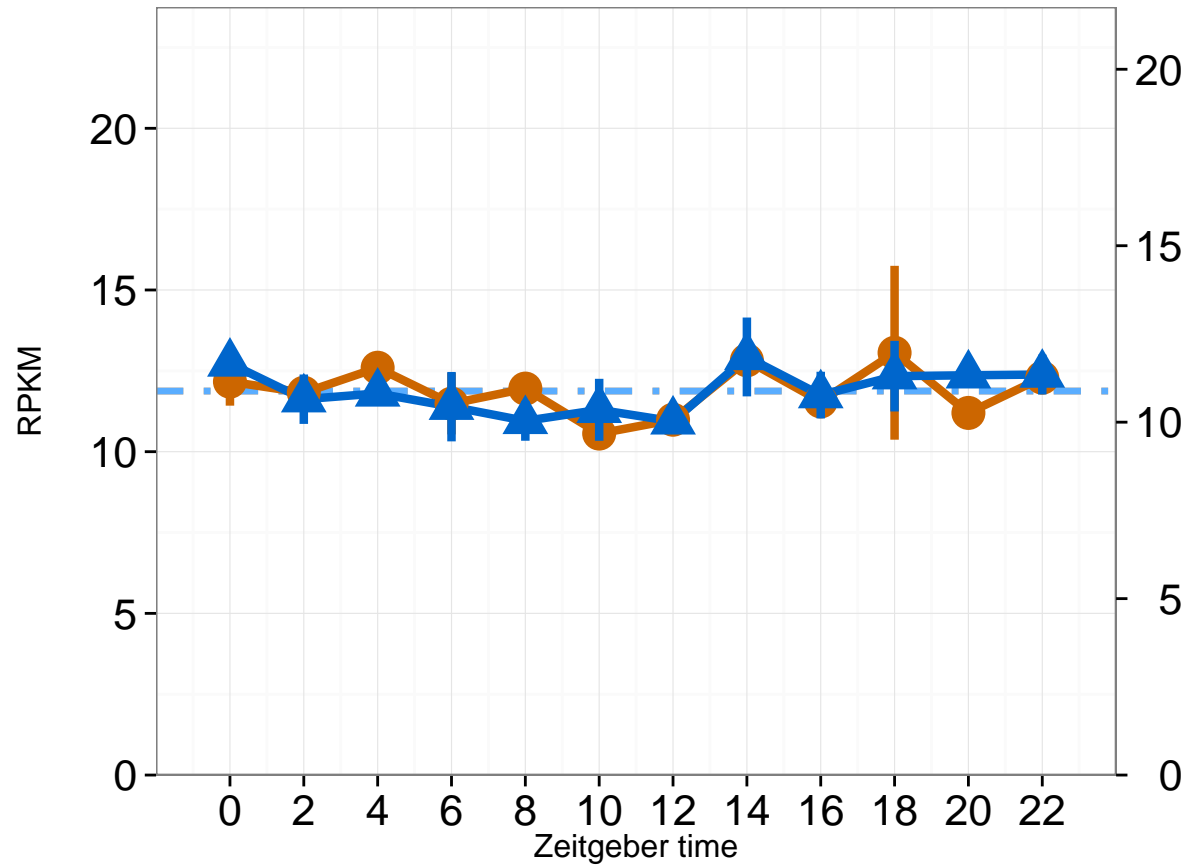

## Xrcc6

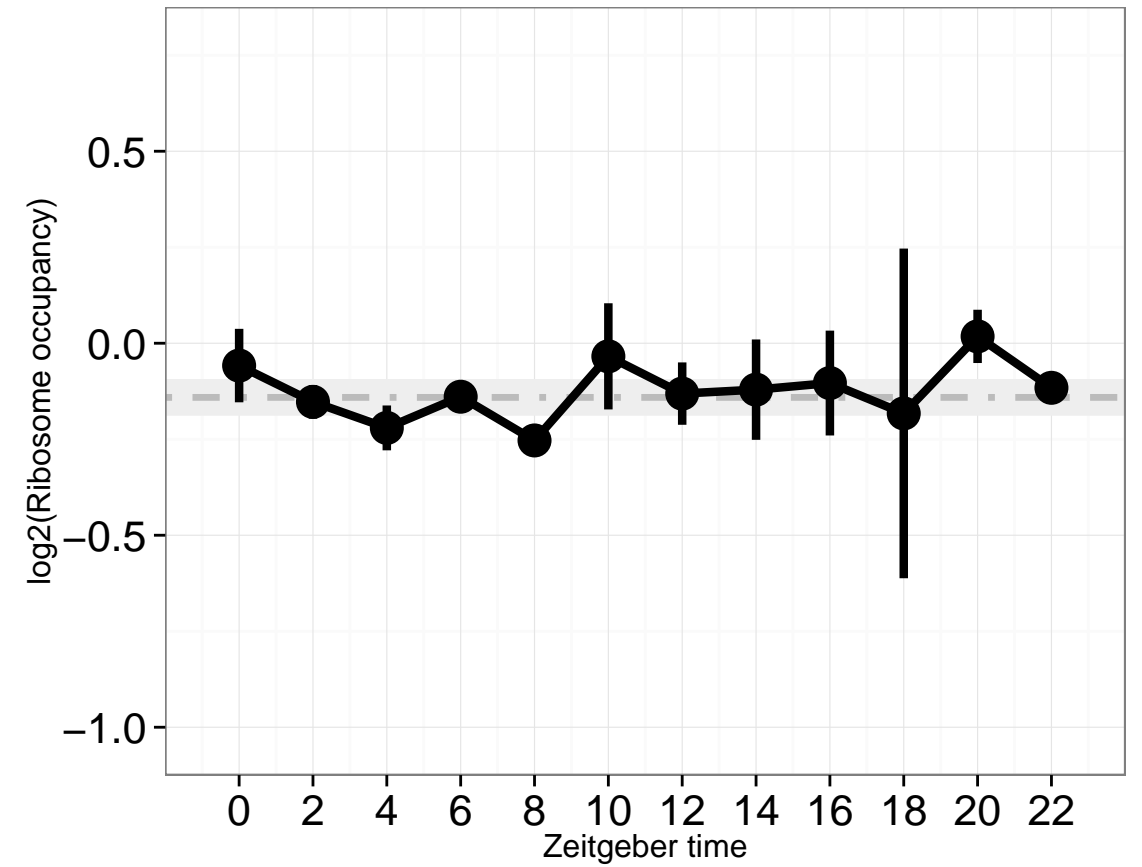

Supplement: SuppDataset_1.zip [file Xrcc6_set_A.pdf › Supplemental Dataset 1/A-mRNA_nonrhyth_translation_nonrhyth/Xrcc6_set_A.pdf]

## Xrn1

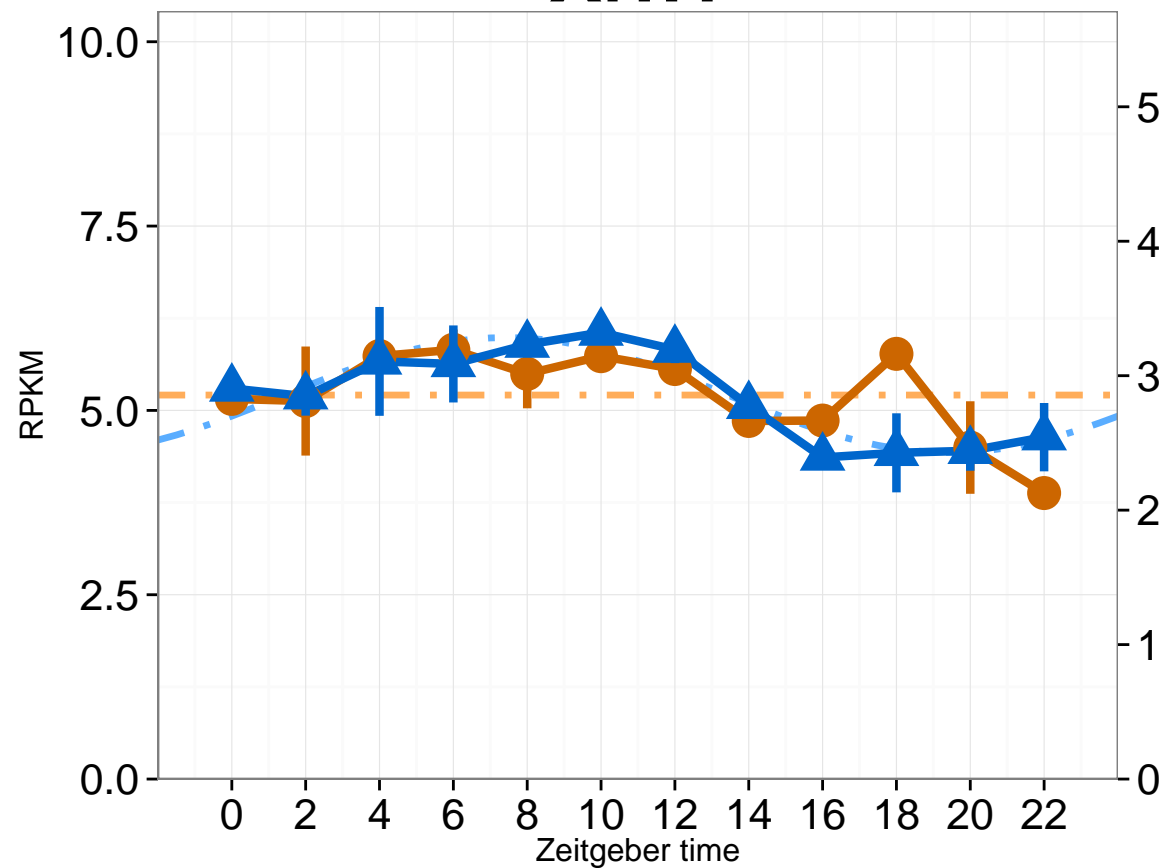

## Xrn1

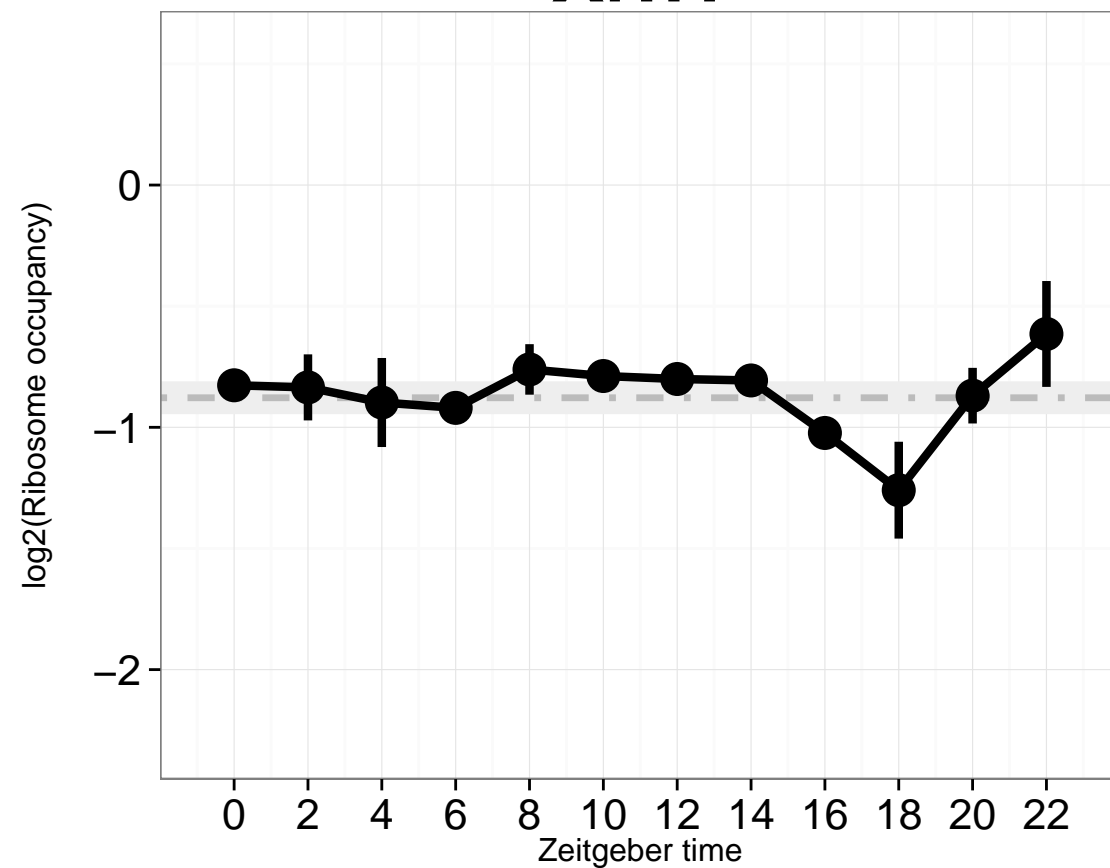

Supplement: SuppDataset_1.zip [file Xrn1_set_A.pdf › Supplemental Dataset 1/A-mRNA_nonrhyth_translation_nonrhyth/Xrn1_set_A.pdf]

## Xylb

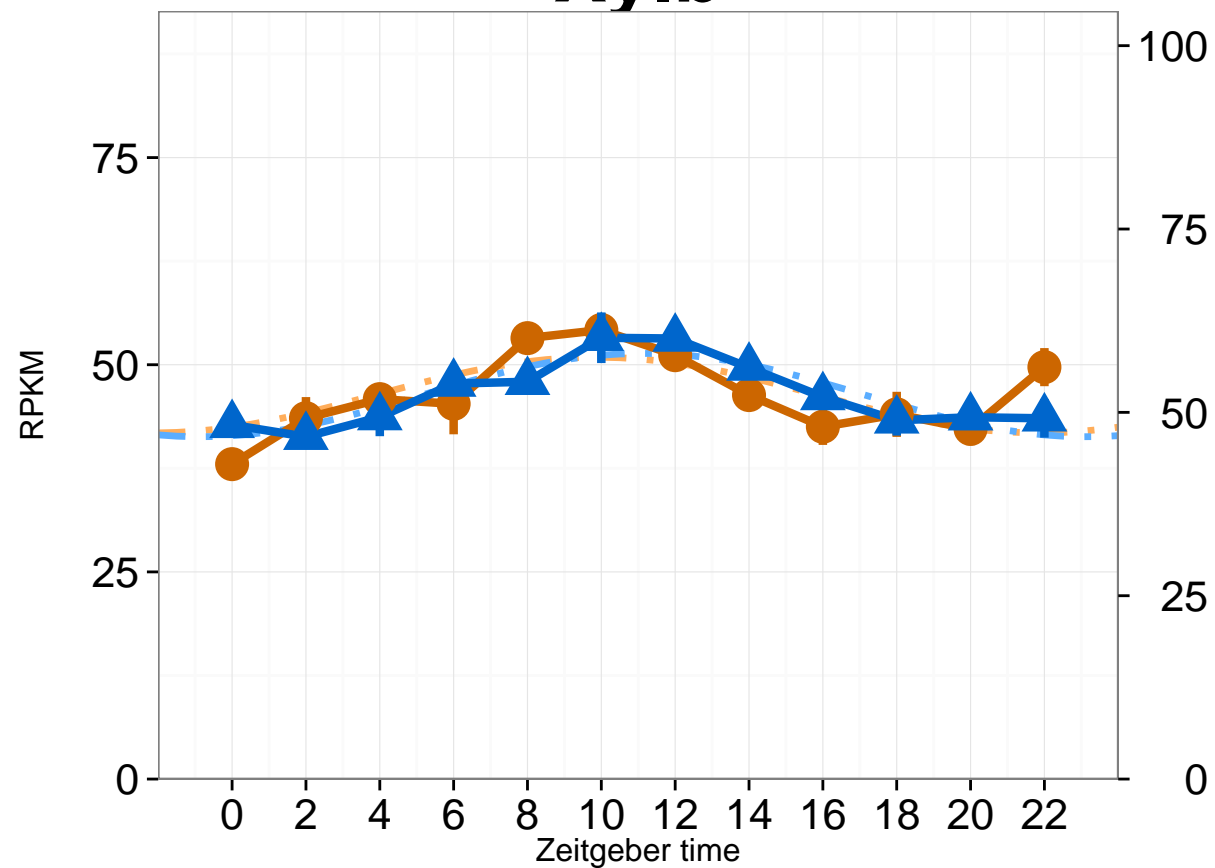

## Xylb

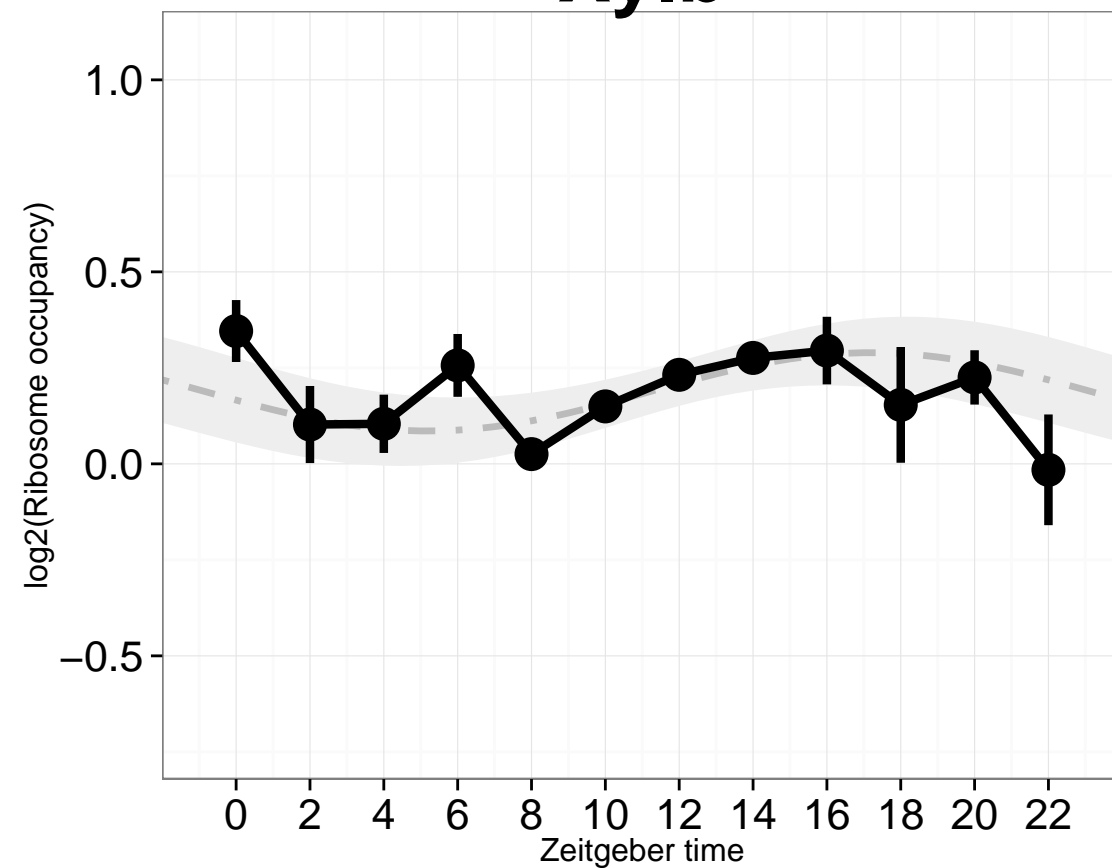

Supplement: SuppDataset_1.zip [file Xylb_set_A.pdf › Supplemental Dataset 1/A-mRNA_nonrhyth_translation_nonrhyth/Xylb_set_A.pdf]

## Xylt2

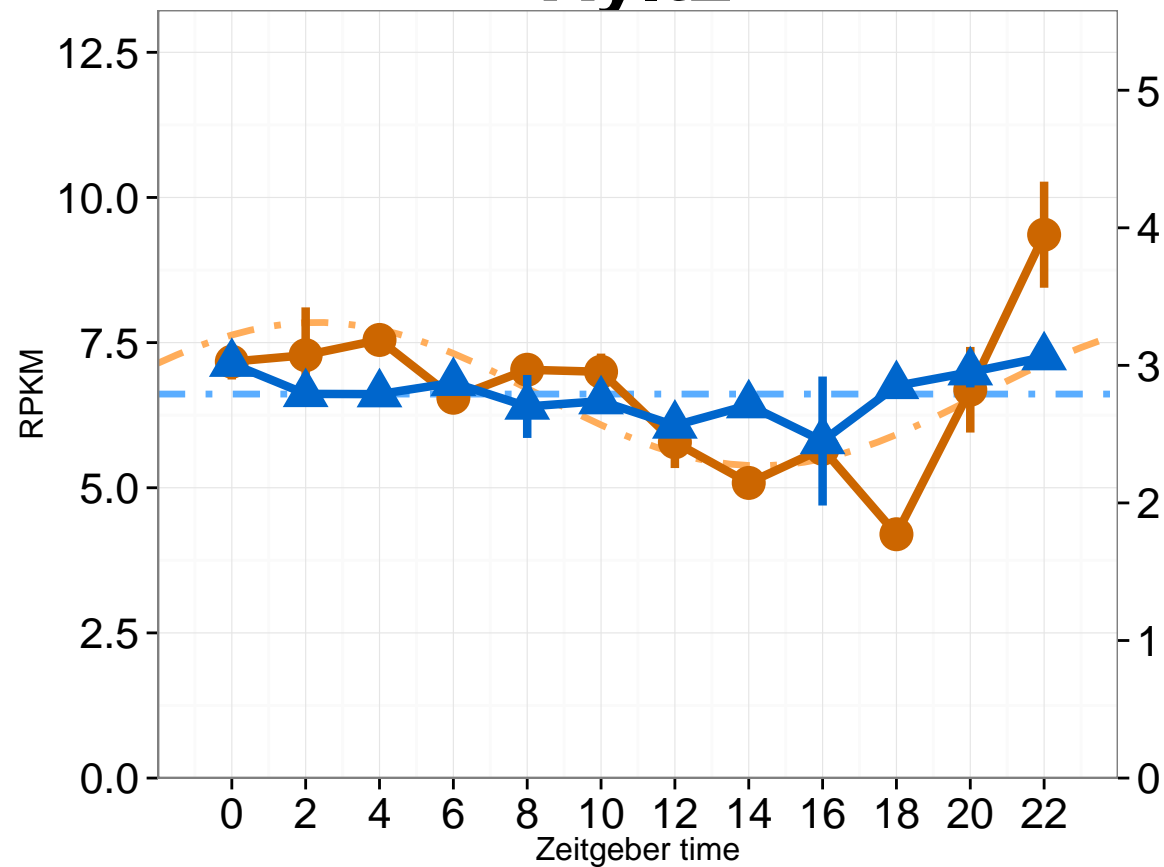

## Xylt2

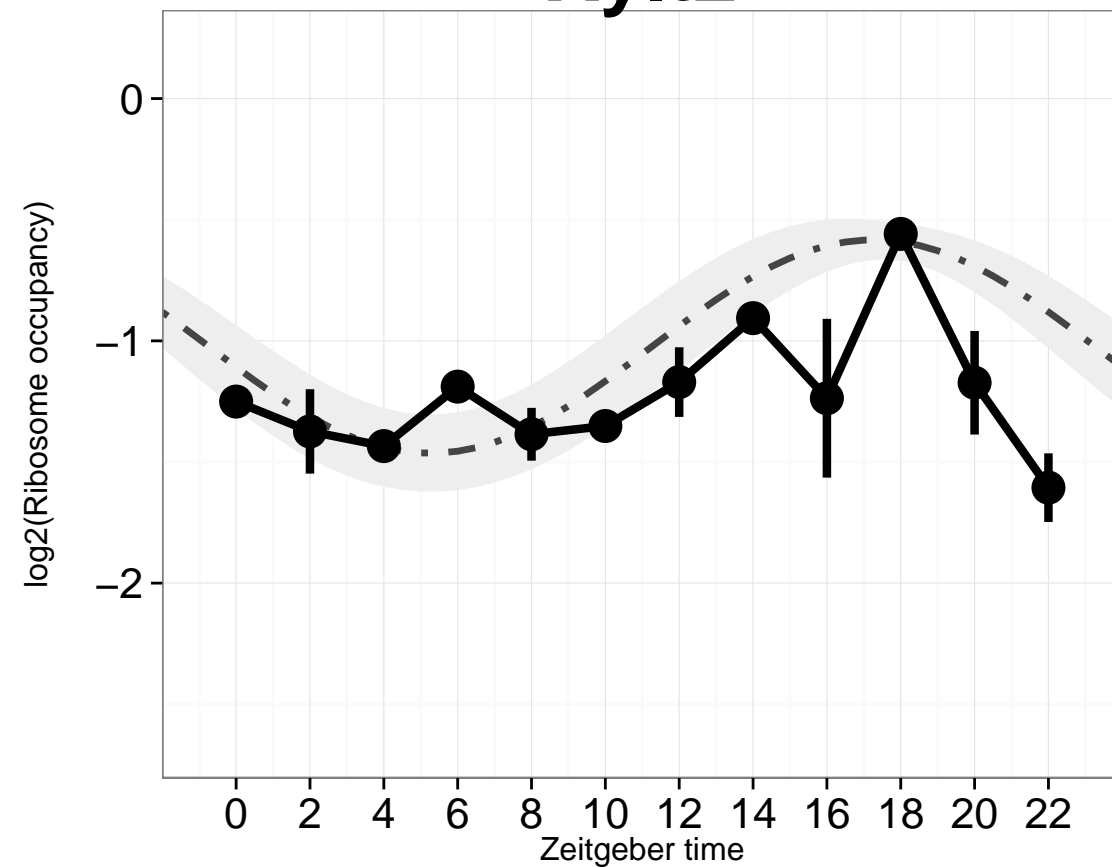

Supplement: SuppDataset_1.zip [file Xylt2_set_A.pdf › Supplemental Dataset 1/A-mRNA_nonrhyth_translation_nonrhyth/Xylt2_set_A.pdf]

# Yae1d1

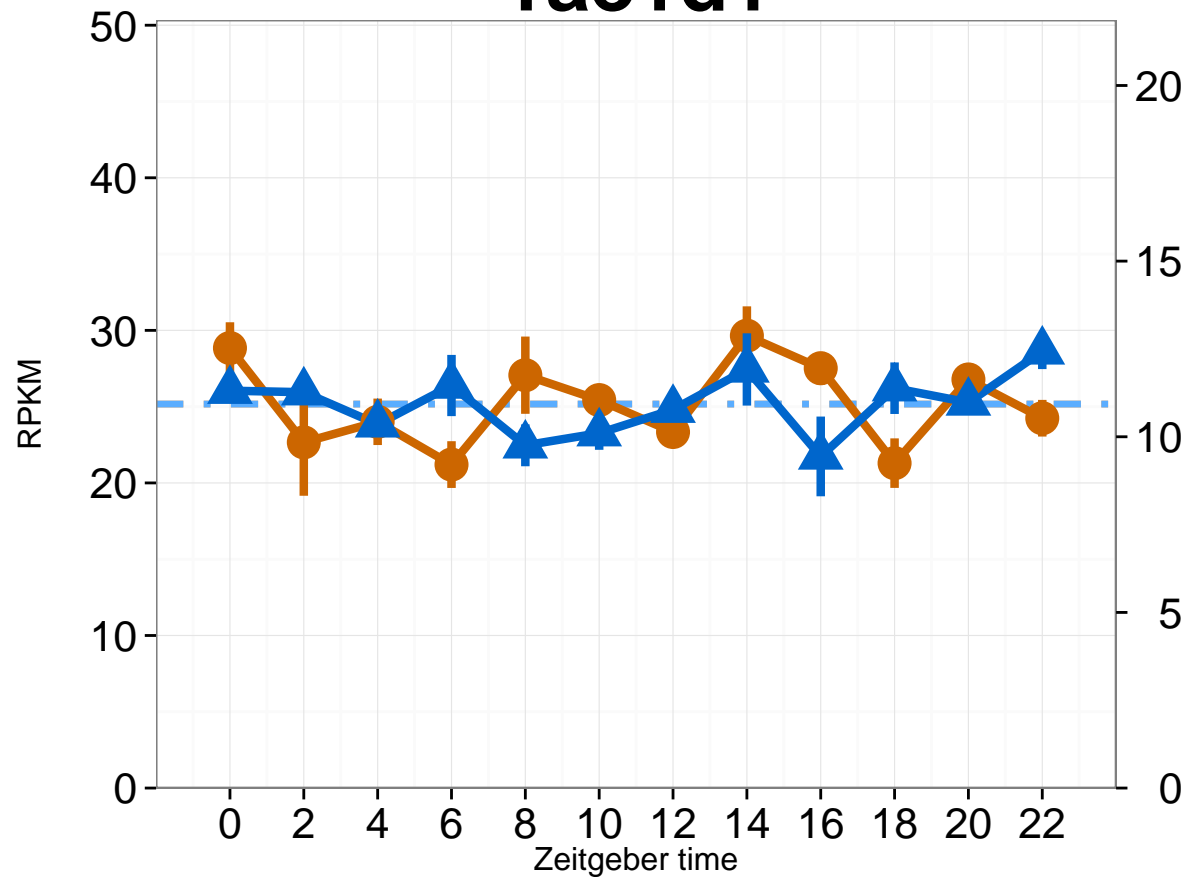

# Yae1d1

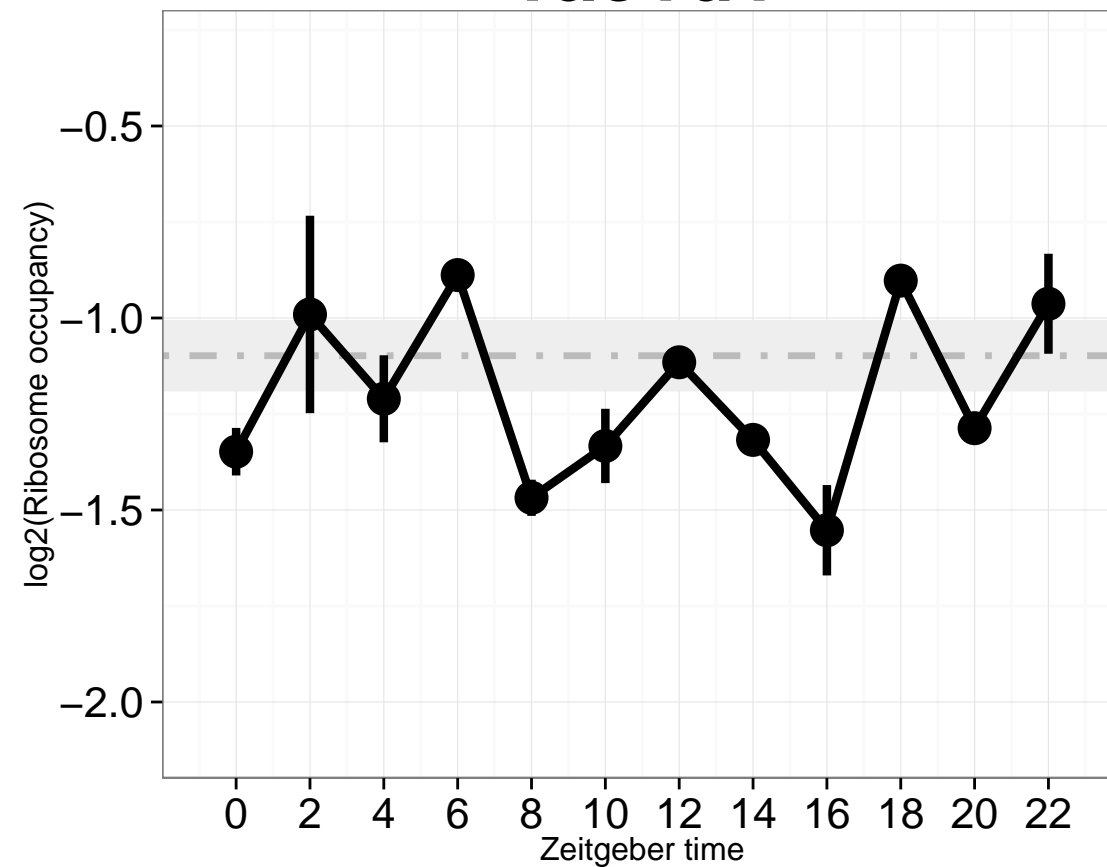

Supplement: SuppDataset_1.zip [file Yae1d1_set_A.pdf › Supplemental Dataset 1/A-mRNA_nonrhyth_translation_nonrhyth/Yae1d1_set_A.pdf]

# Yaf2

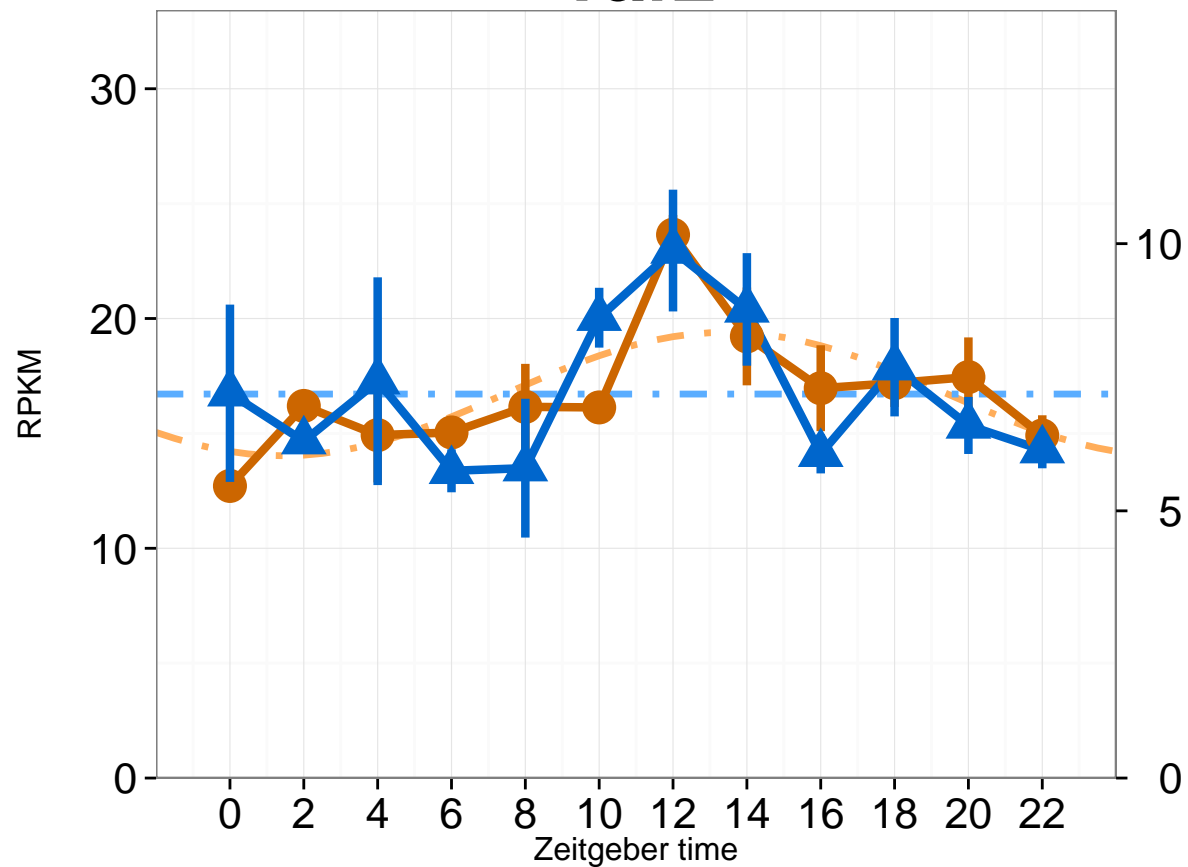

# Yaf2

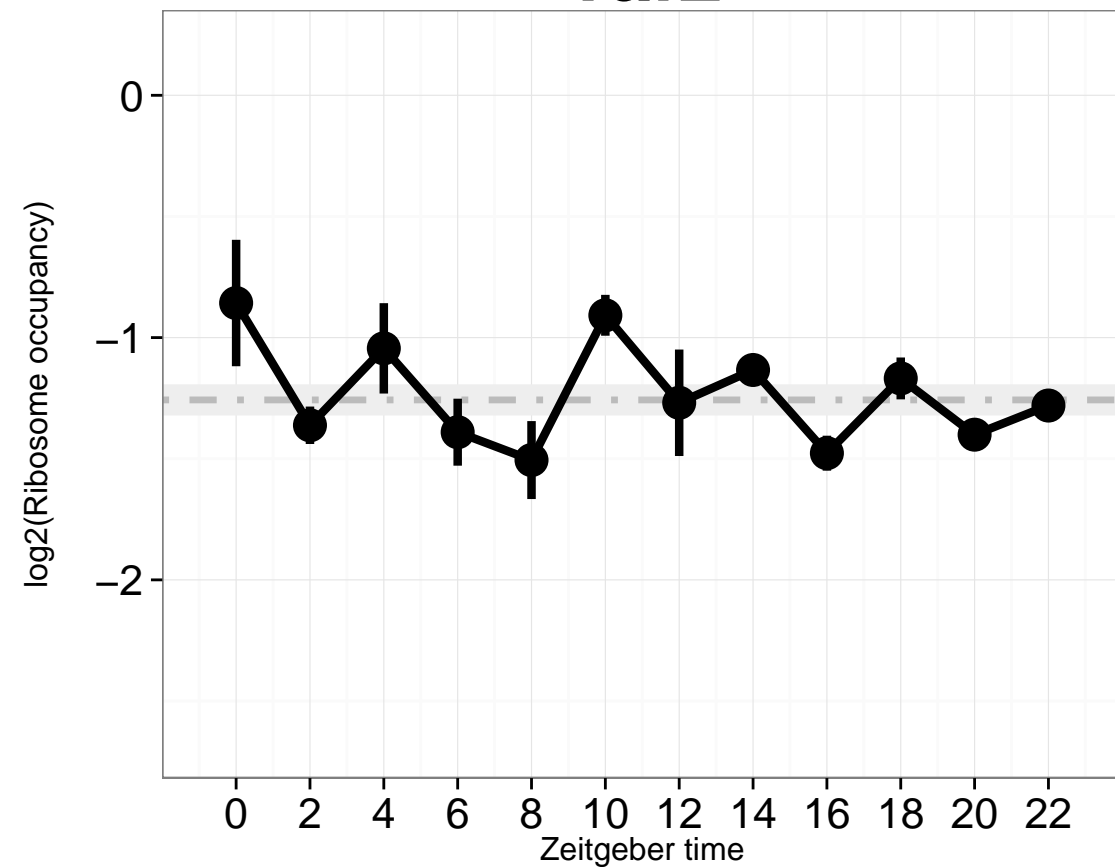

Supplement: SuppDataset_1.zip [file Yaf2_set_A.pdf › Supplemental Dataset 1/A-mRNA_nonrhyth_translation_nonrhyth/Yaf2_set_A.pdf]

## Yap1

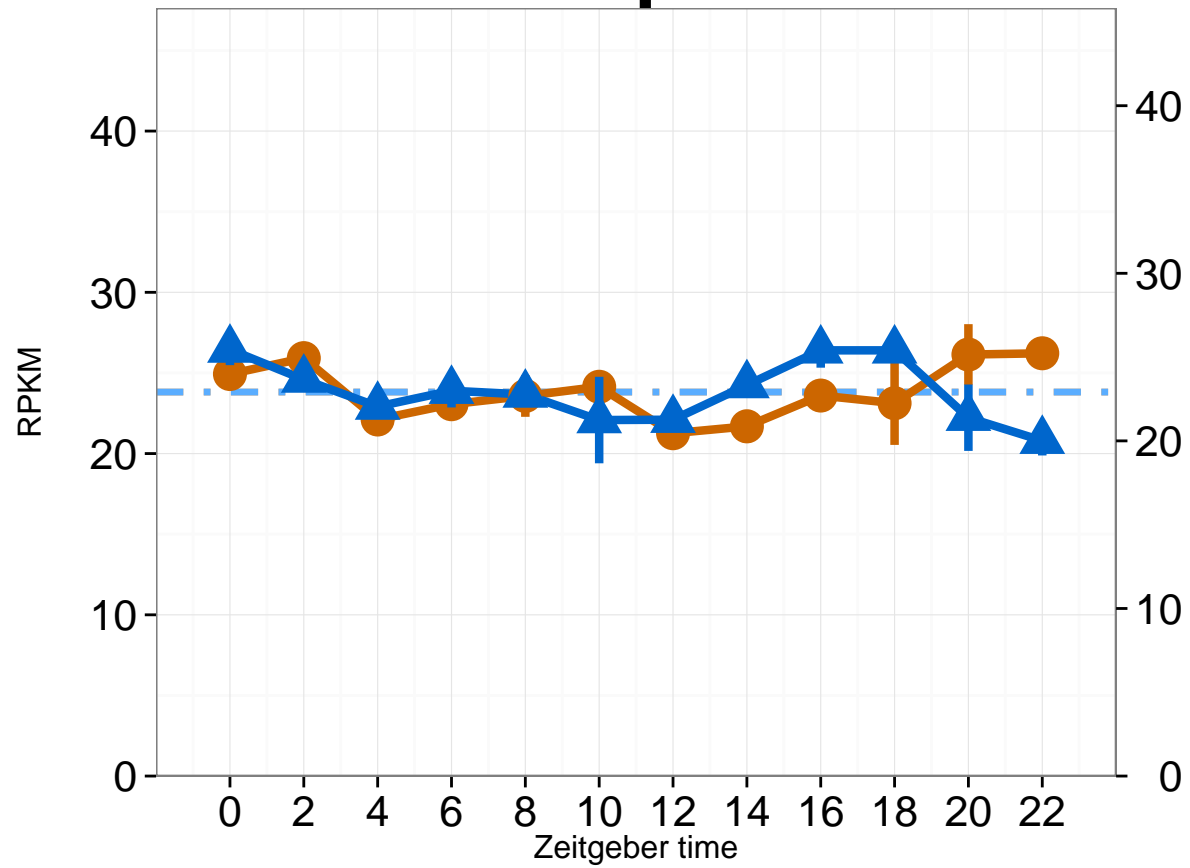

## Yap1

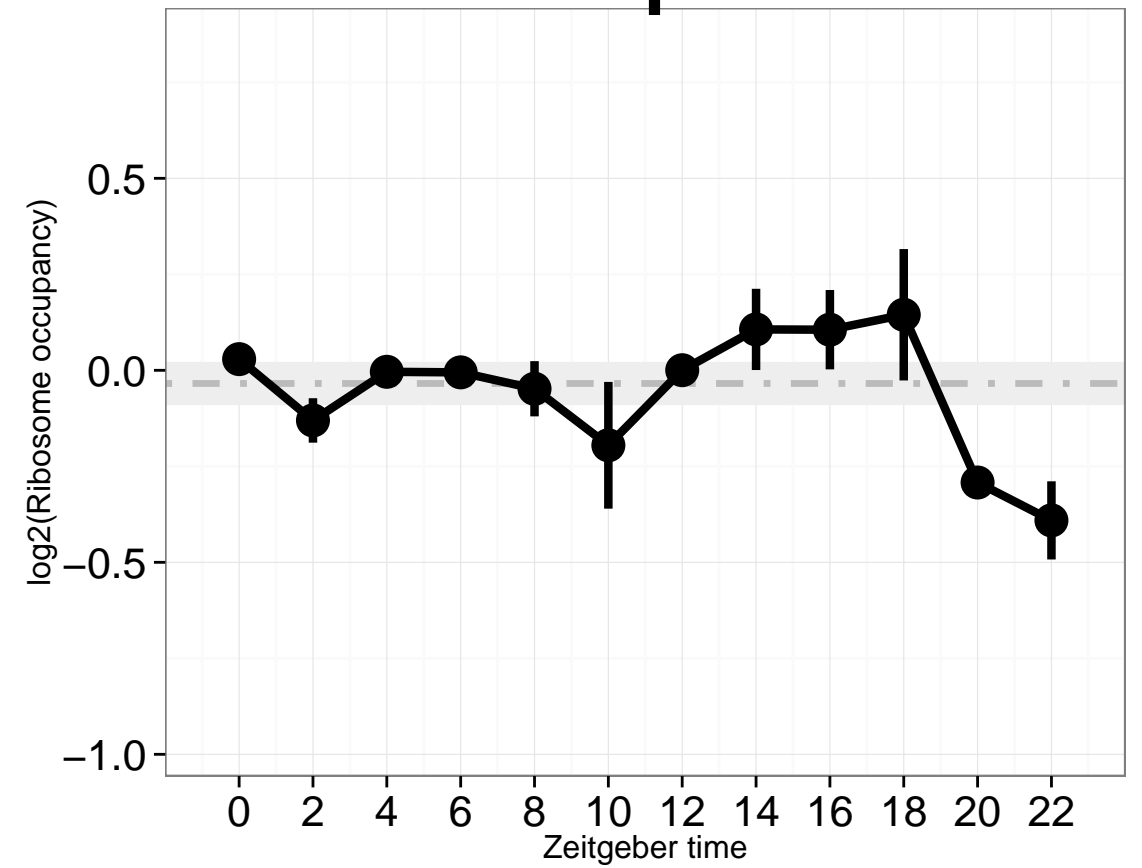

Supplement: SuppDataset_1.zip [file Yap1_set_A.pdf › Supplemental Dataset 1/A-mRNA_nonrhyth_translation_nonrhyth/Yap1_set_A.pdf]

# Yars2

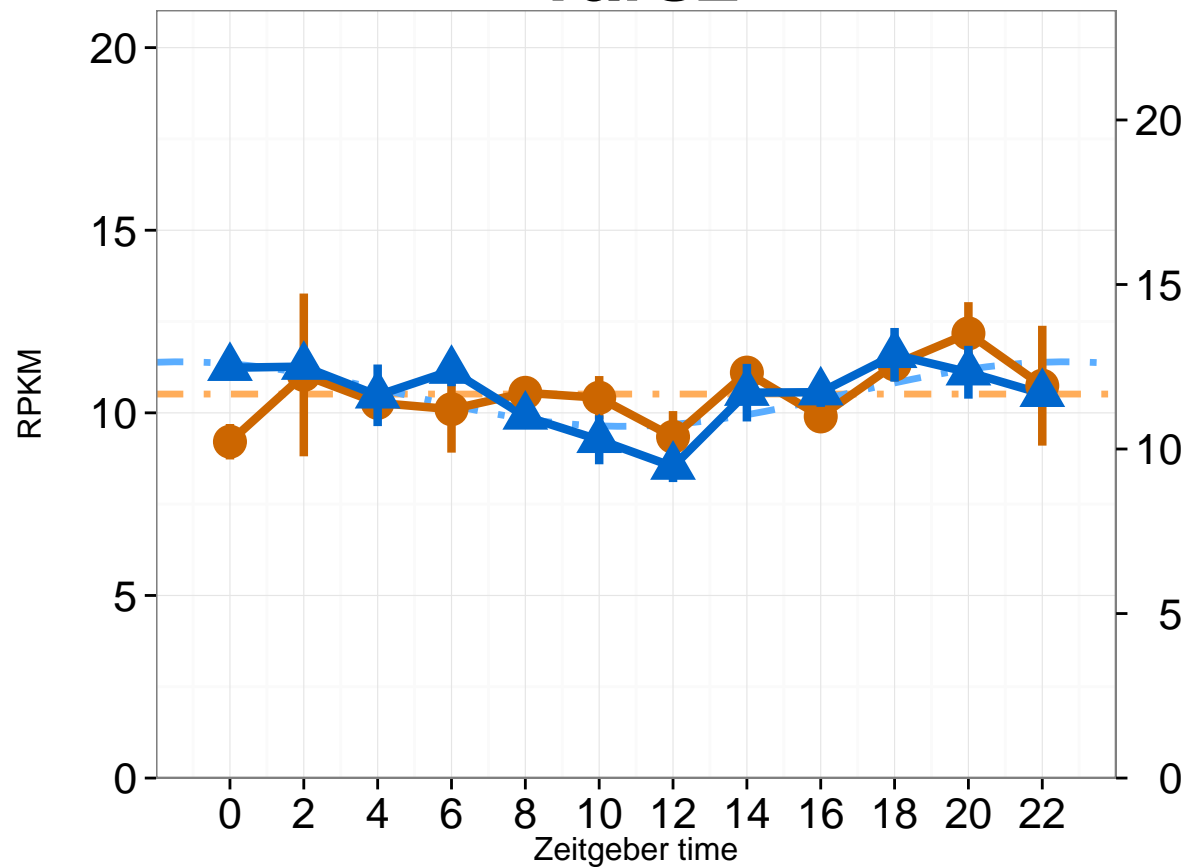

# Yars2

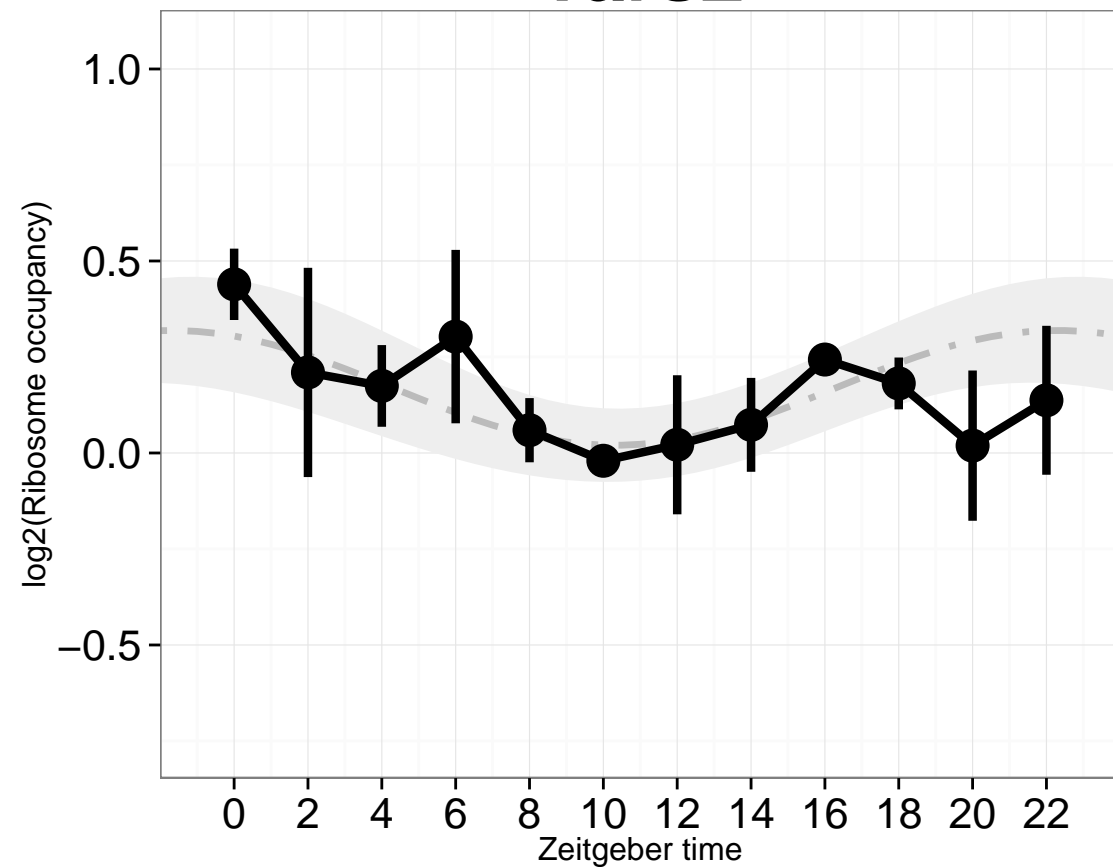

Supplement: SuppDataset_1.zip [file Yars2_set_A.pdf › Supplemental Dataset 1/A-mRNA_nonrhyth_translation_nonrhyth/Yars2_set_A.pdf]

# Yars

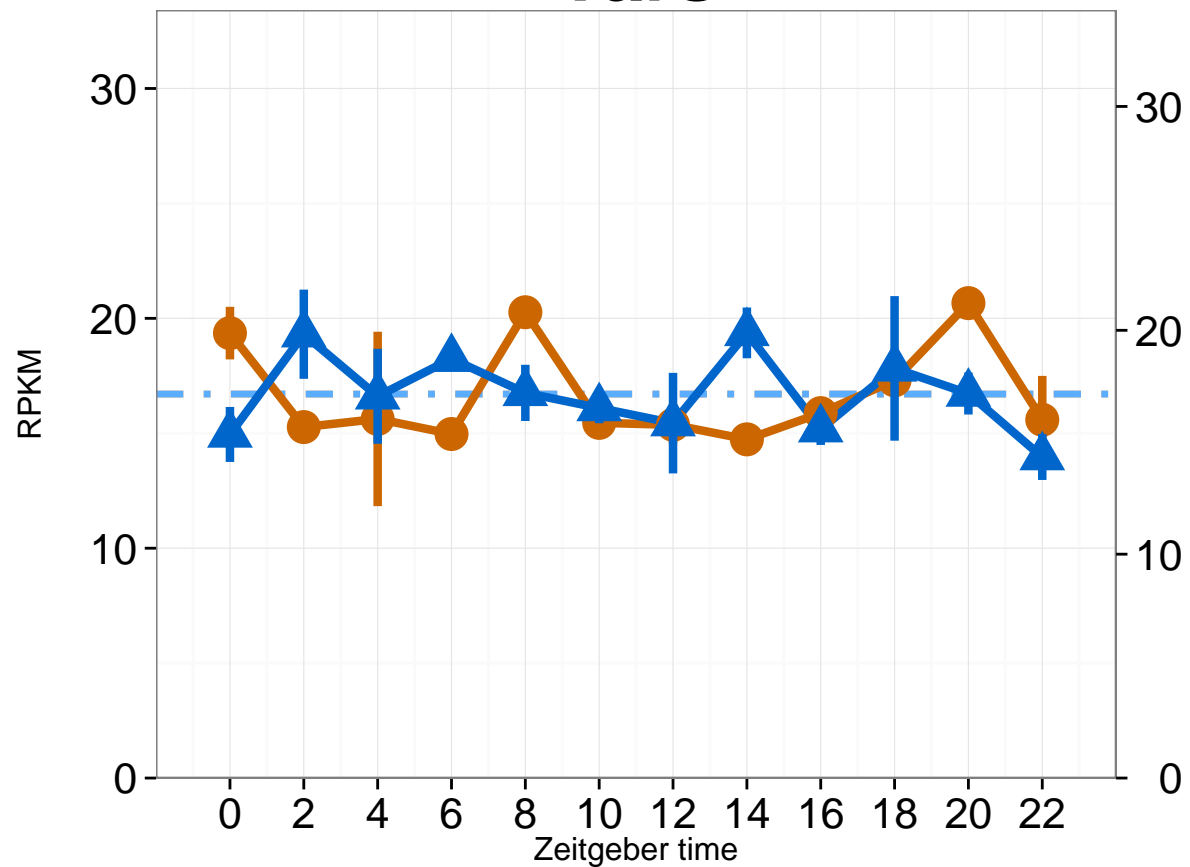

# Yars

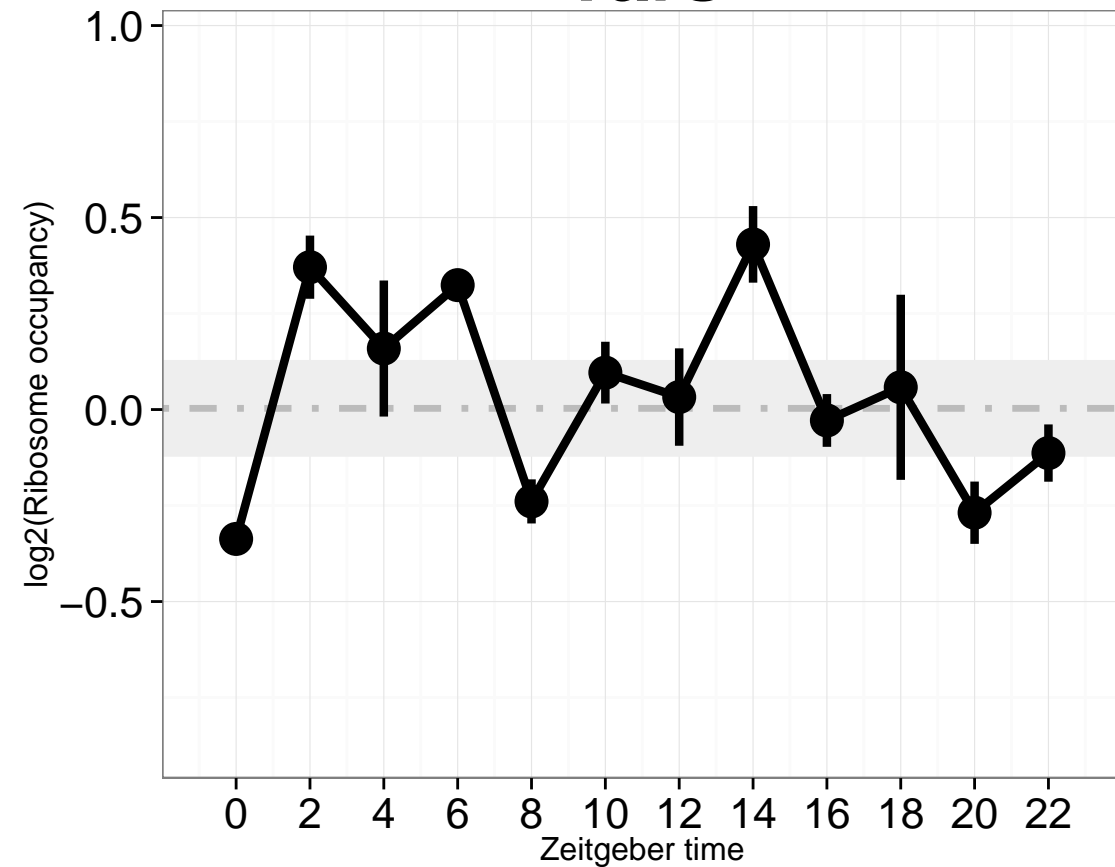

Supplement: SuppDataset_1.zip [file Yars_set_A.pdf › Supplemental Dataset 1/A-mRNA_nonrhyth_translation_nonrhyth/Yars_set_A.pdf]

## Ybey

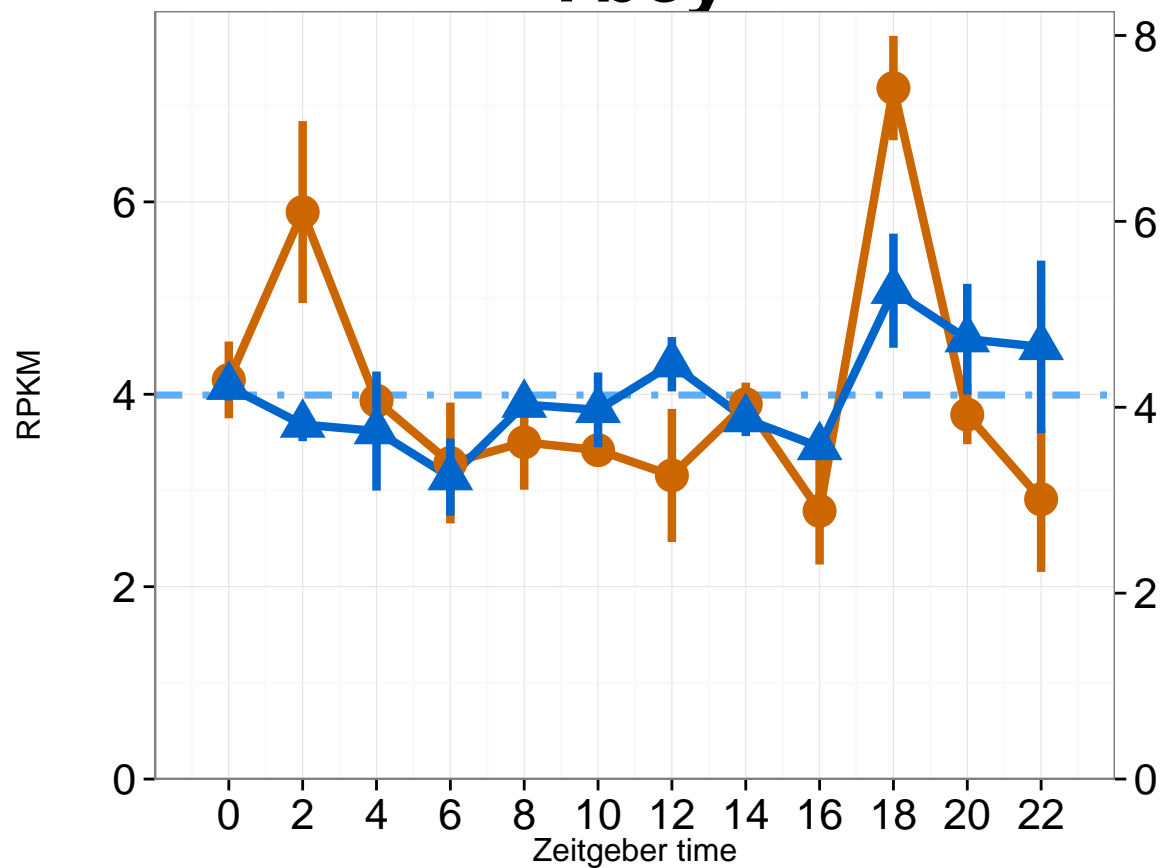

## Ybey

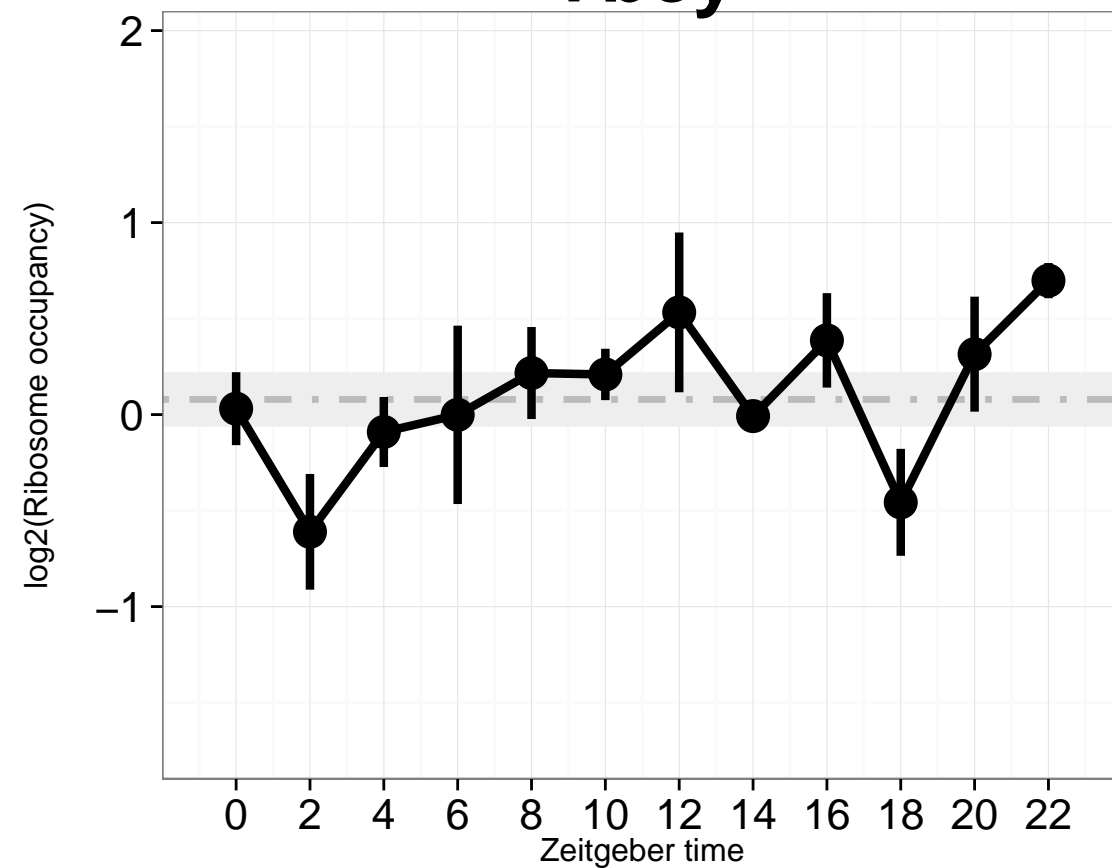

Supplement: SuppDataset_1.zip [file Ybey_set_A.pdf › Supplemental Dataset 1/A-mRNA_nonrhyth_translation_nonrhyth/Ybey_set_A.pdf]

# Ybx1

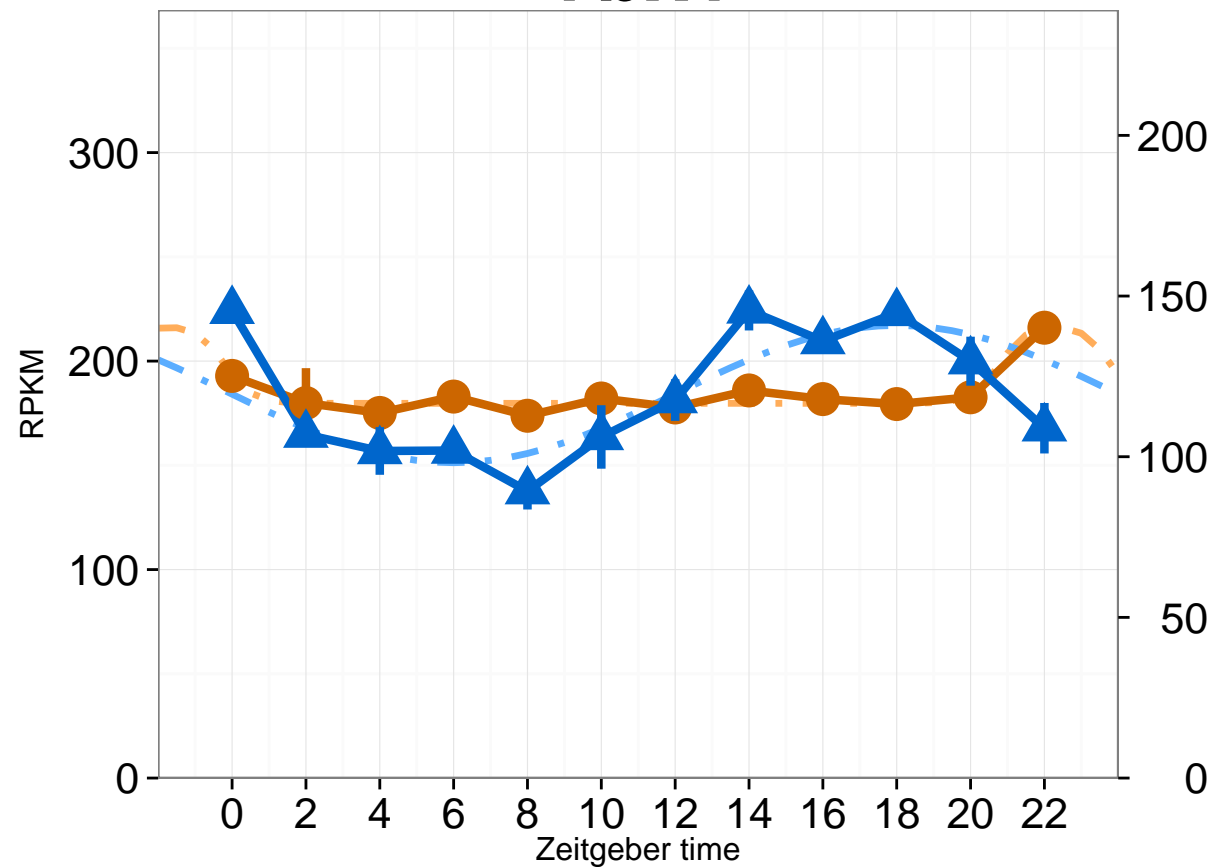

# Ybx1

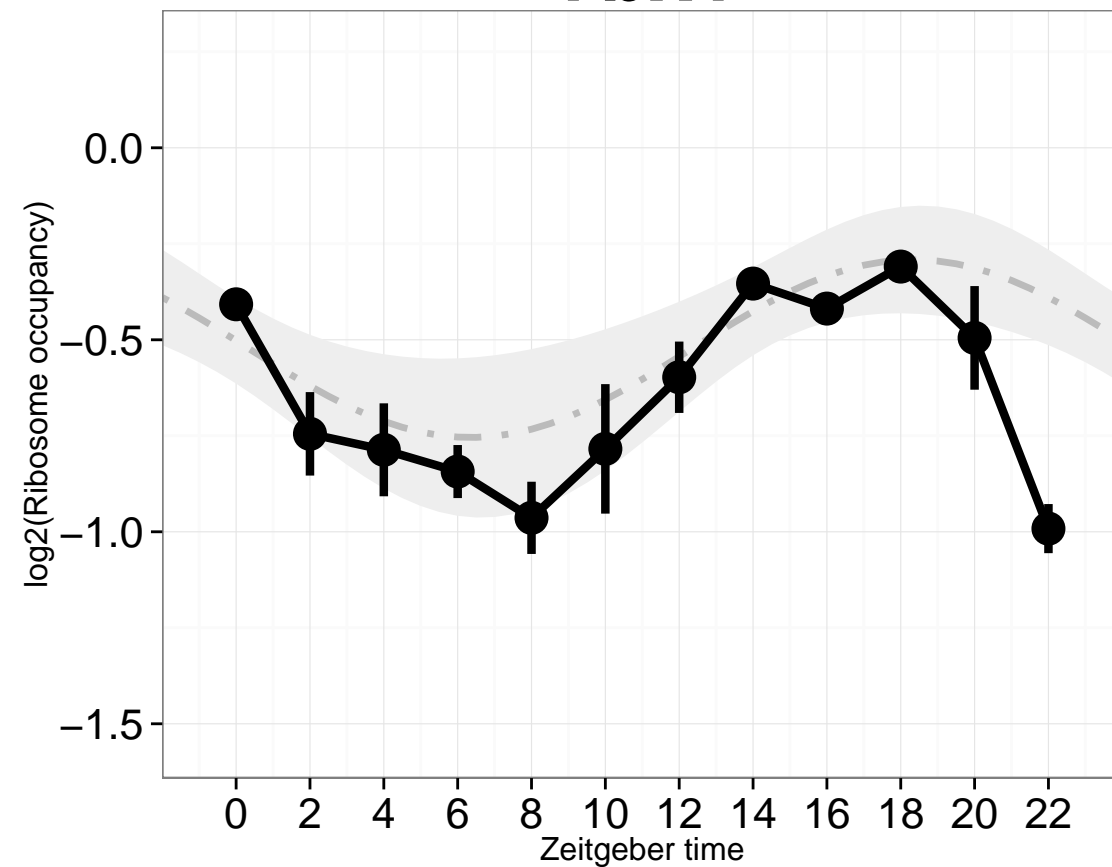

Supplement: SuppDataset_1.zip [file Ybx1_set_A.pdf › Supplemental Dataset 1/A-mRNA_nonrhyth_translation_nonrhyth/Ybx1_set_A.pdf]

# Yeats2

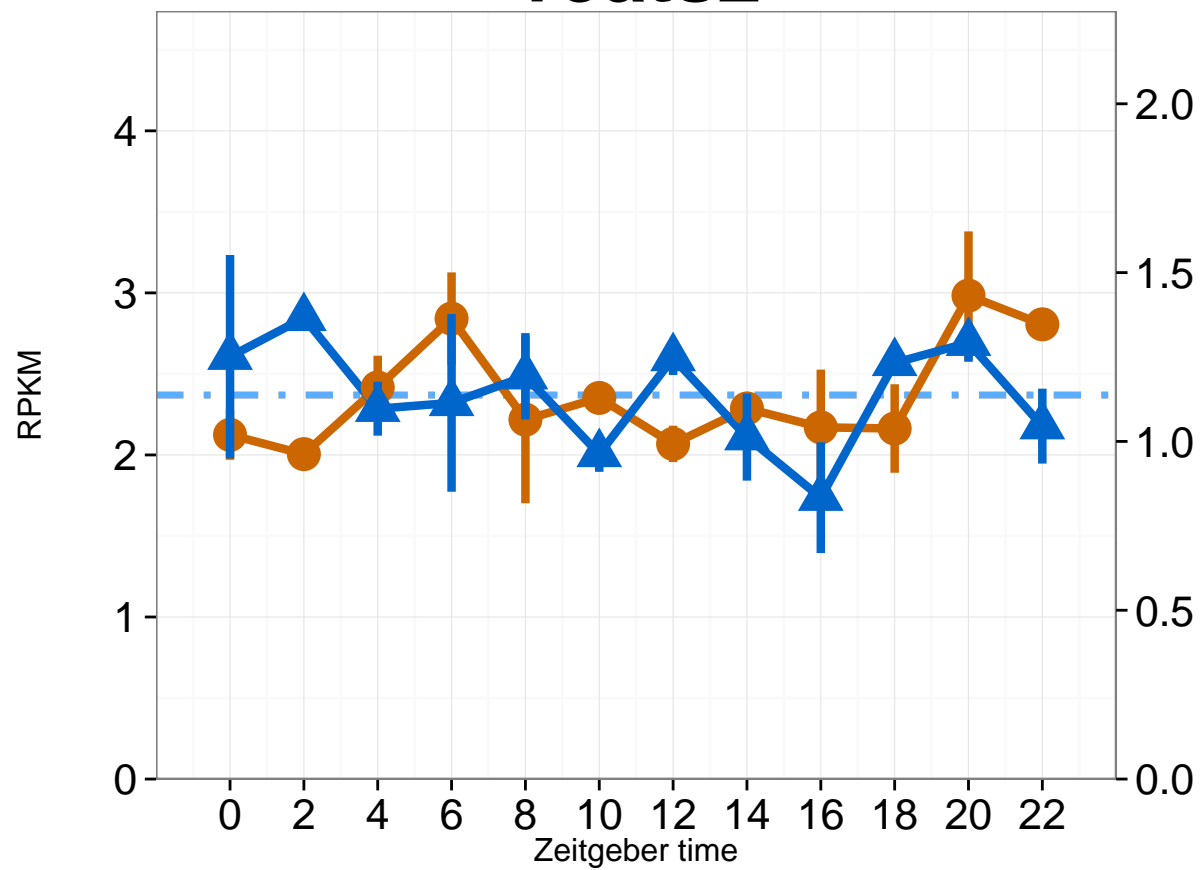

# Yeats2

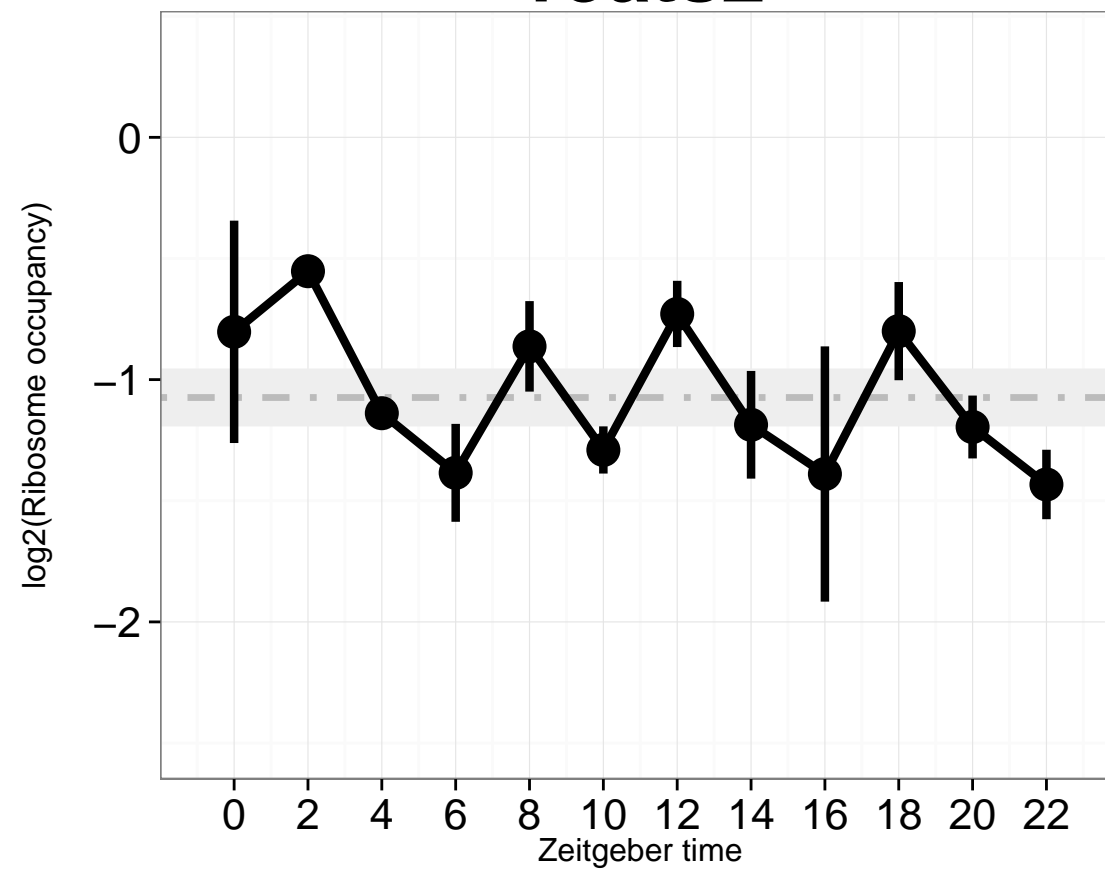

Supplement: SuppDataset_1.zip [file Yeats2_set_A.pdf › Supplemental Dataset 1/A-mRNA_nonrhyth_translation_nonrhyth/Yeats2_set_A.pdf]

# Yeats4

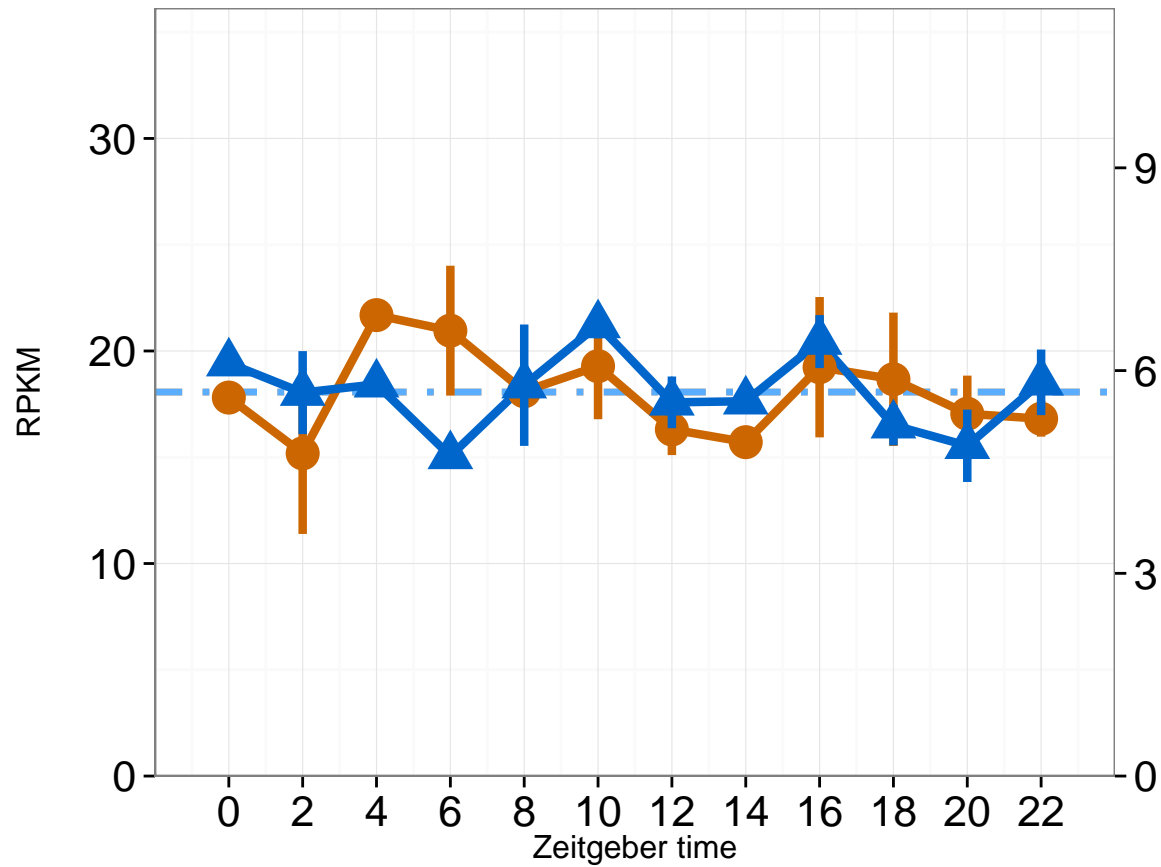

# Yeats4

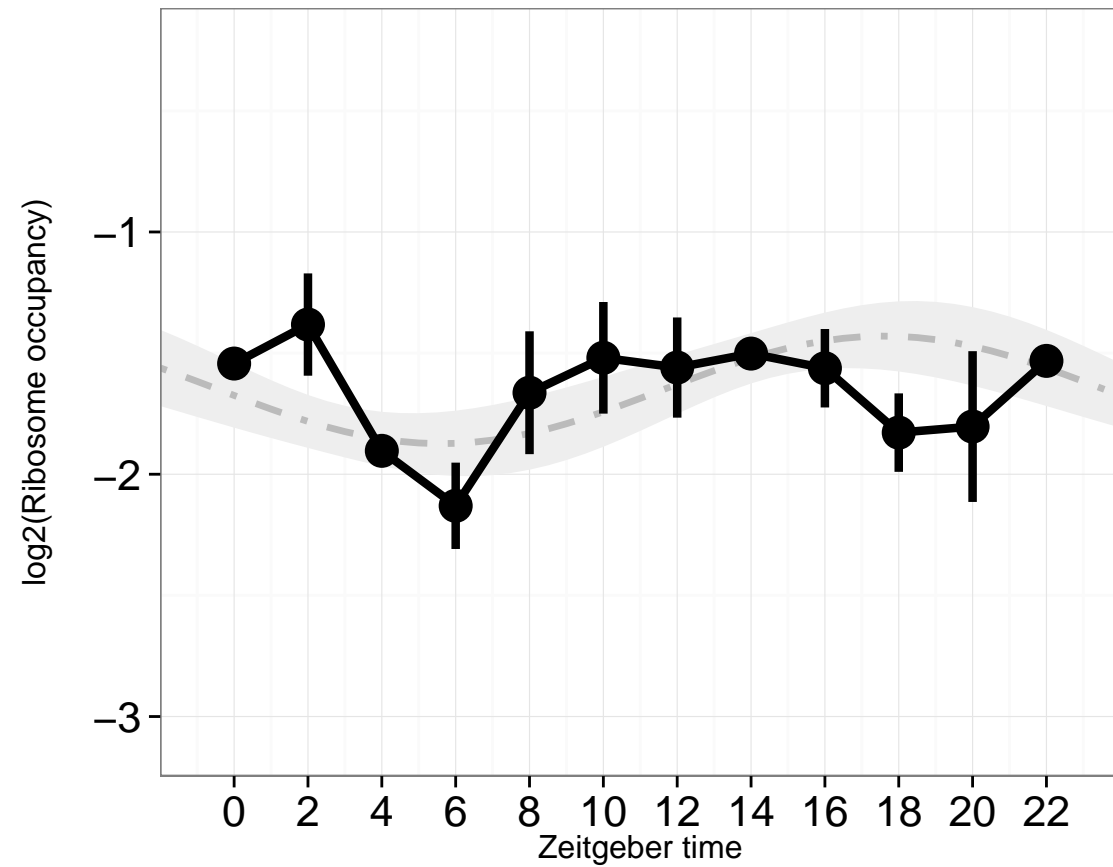

Supplement: SuppDataset_1.zip [file Yeats4_set_A.pdf › Supplemental Dataset 1/A-mRNA_nonrhyth_translation_nonrhyth/Yeats4_set_A.pdf]

# Yes1

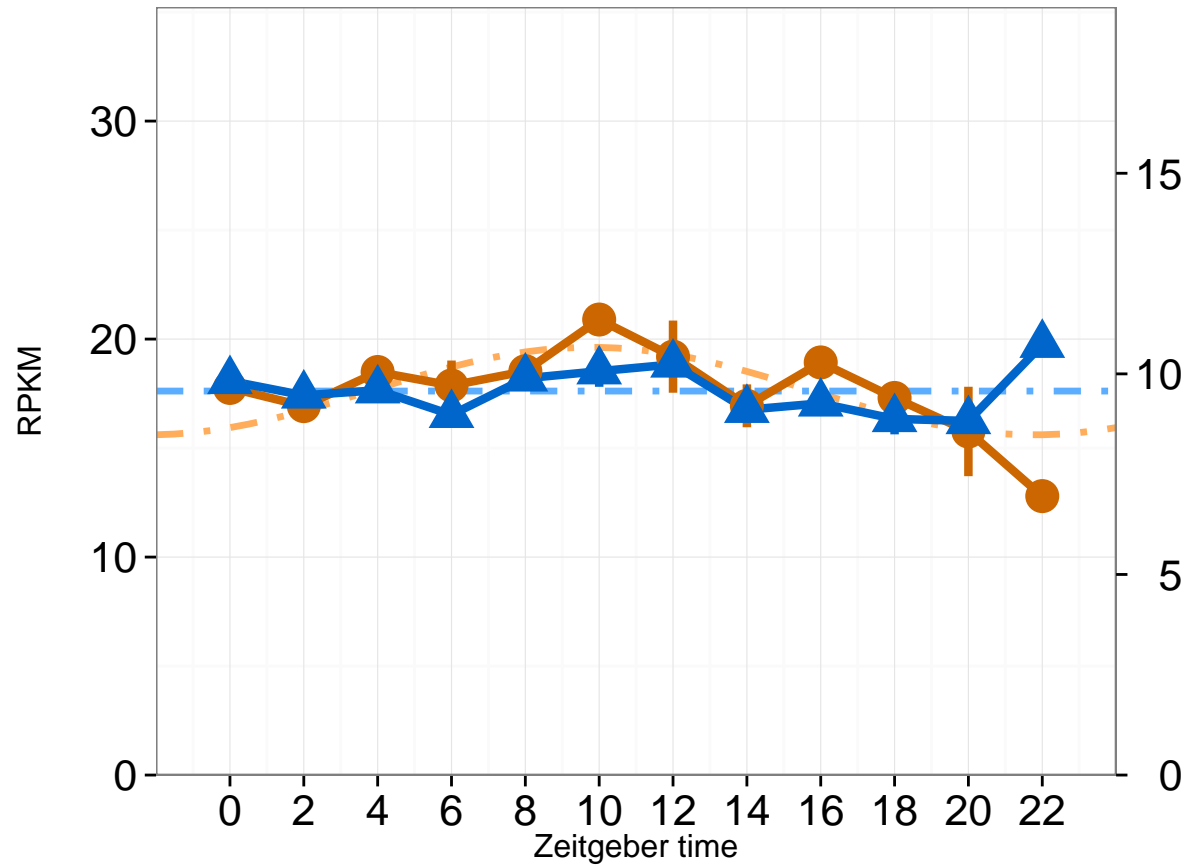

# Yes1

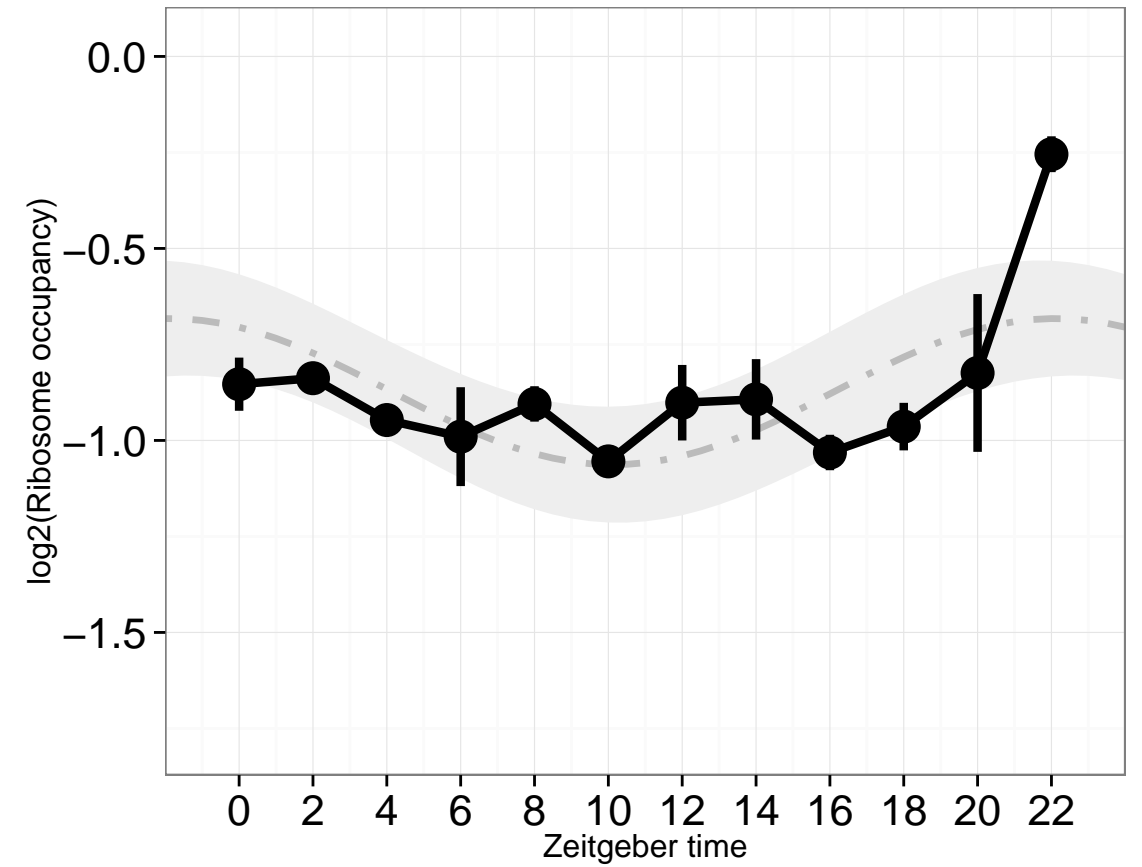

Supplement: SuppDataset_1.zip [file Yes1_set_A.pdf › Supplemental Dataset 1/A-mRNA_nonrhyth_translation_nonrhyth/Yes1_set_A.pdf]

# Yif1a

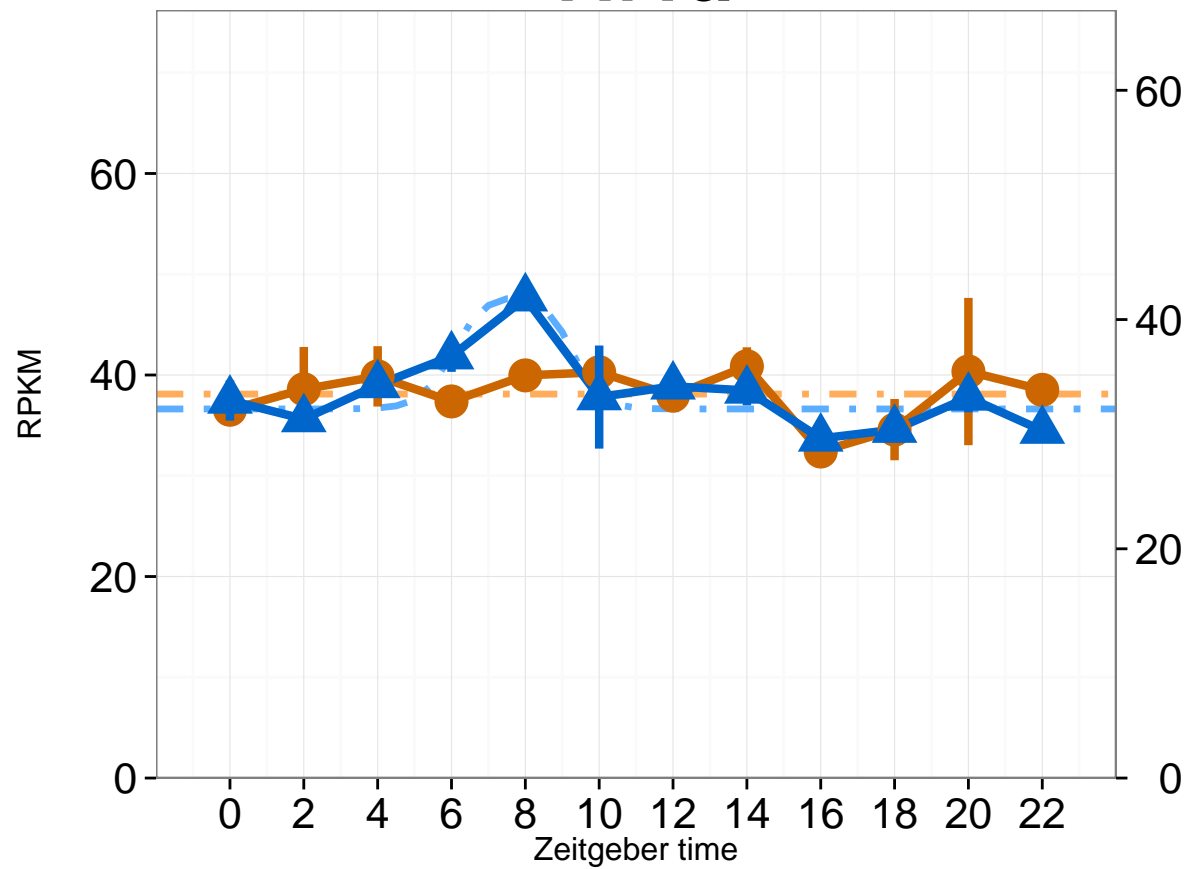

# Yif1a

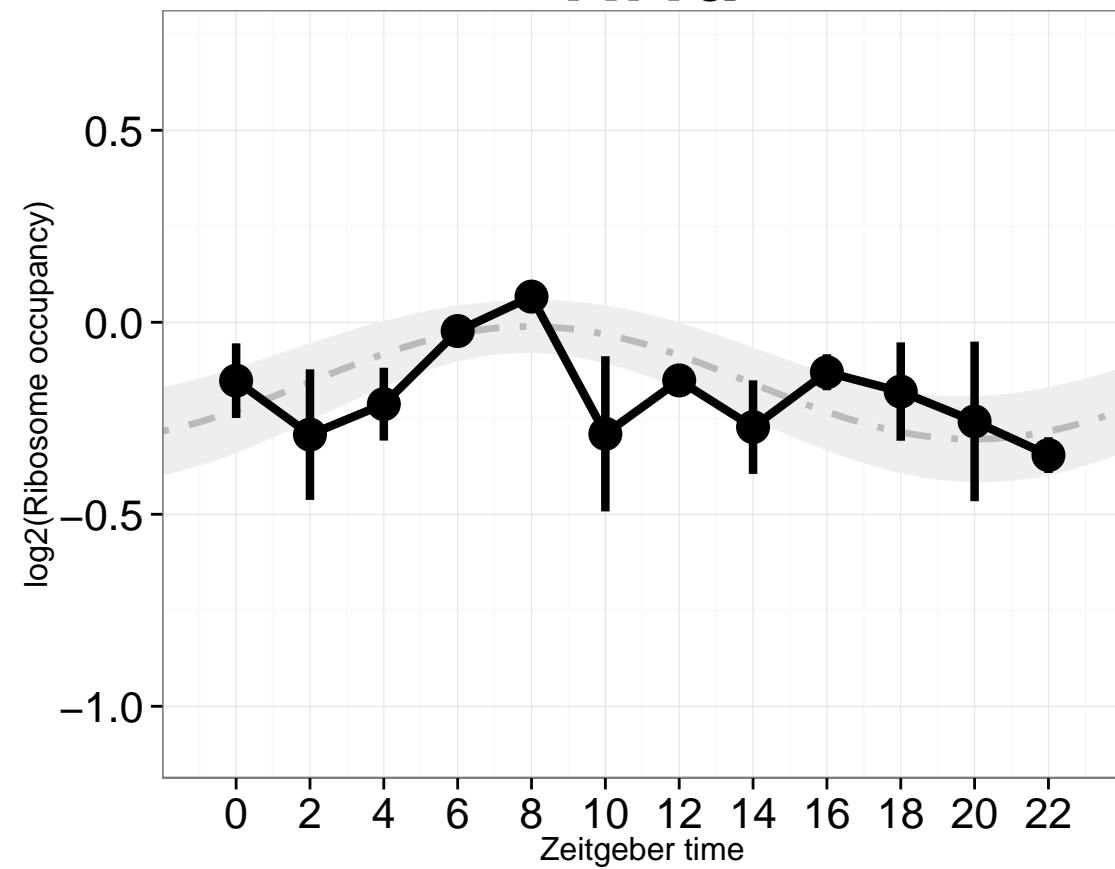

Supplement: SuppDataset_1.zip [file Yif1a_set_A.pdf › Supplemental Dataset 1/A-mRNA_nonrhyth_translation_nonrhyth/Yif1a_set_A.pdf]

## Yif1b

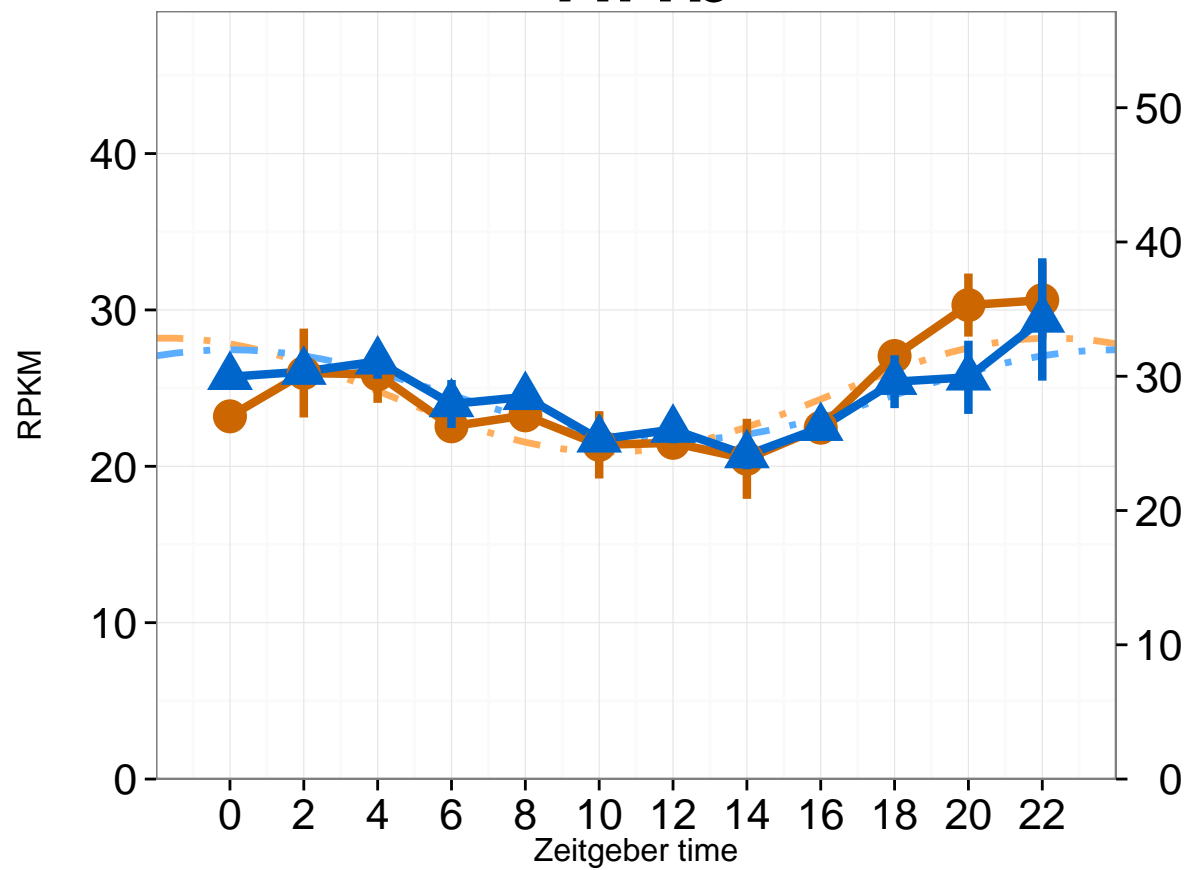

## Yif1b

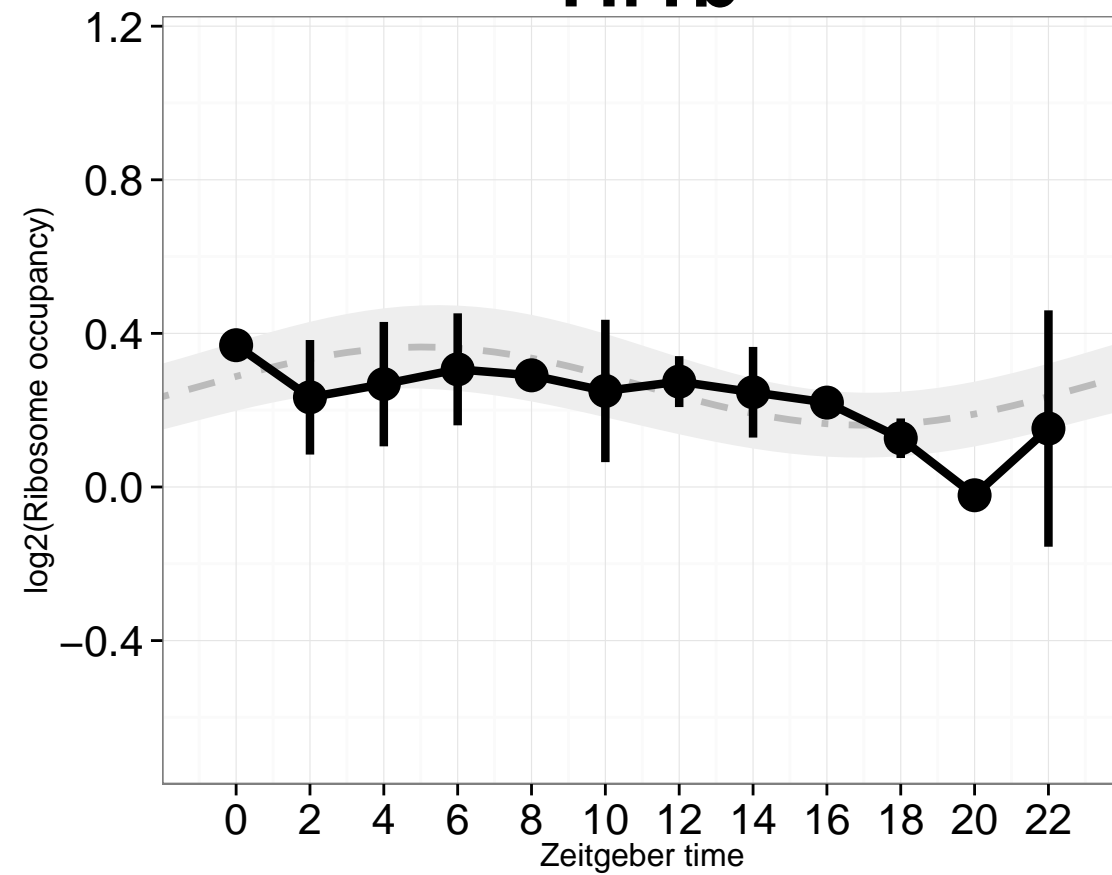

Supplement: SuppDataset_1.zip [file Yif1b_set_A.pdf › Supplemental Dataset 1/A-mRNA_nonrhyth_translation_nonrhyth/Yif1b_set_A.pdf]

## Yipf1

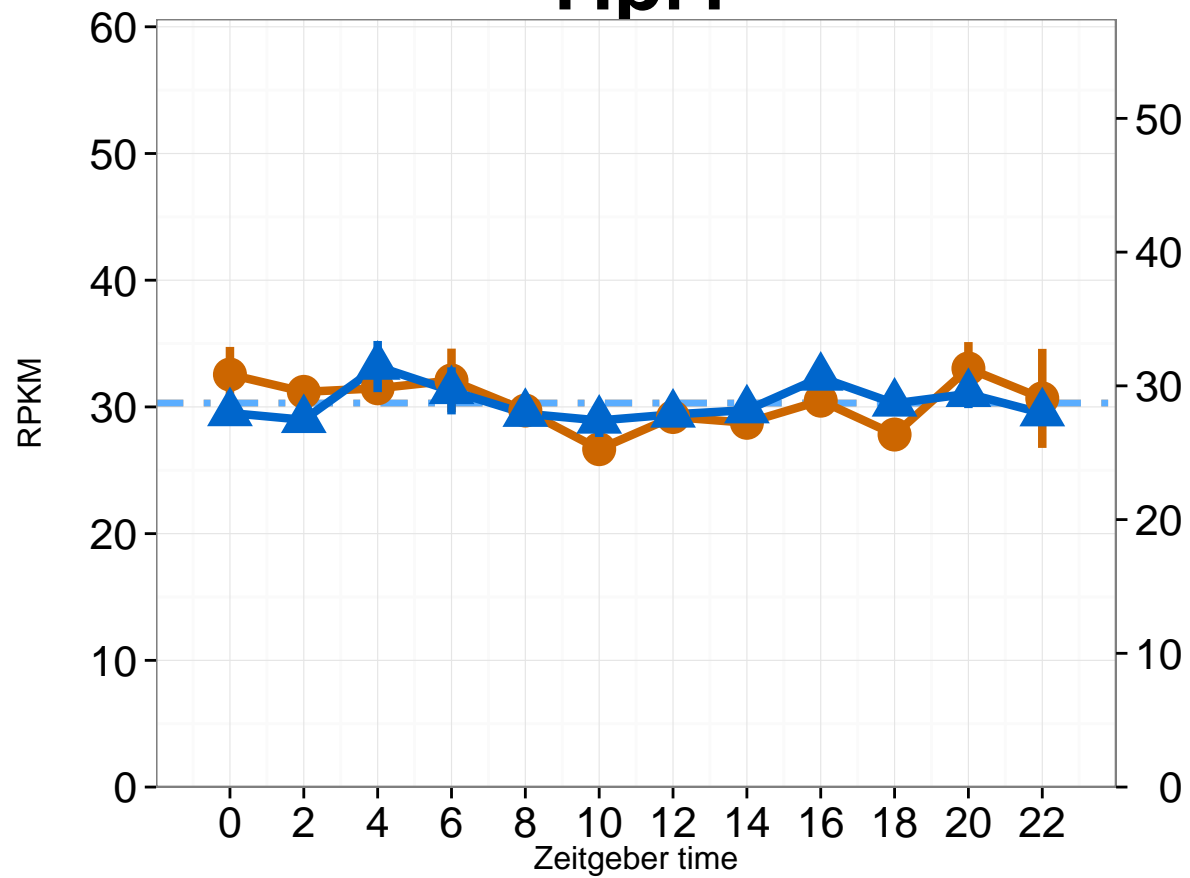

## Yipf1

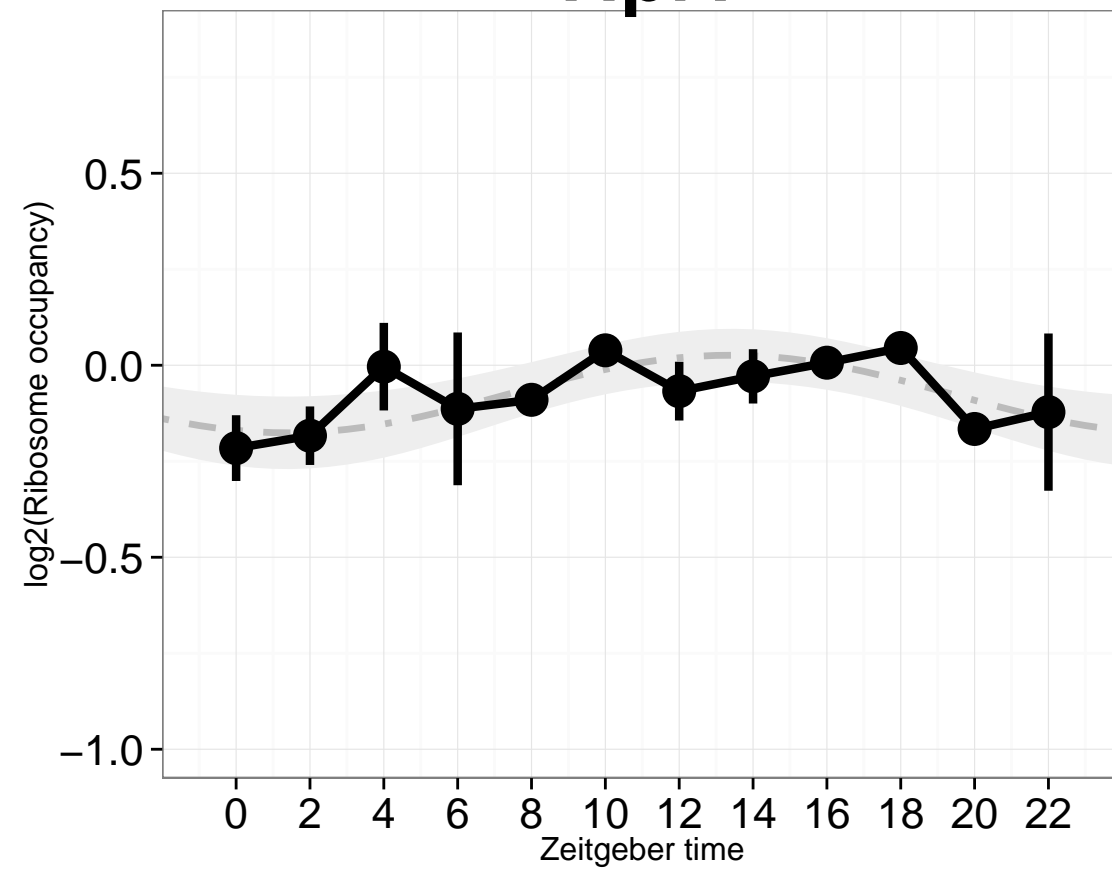

Supplement: SuppDataset_1.zip [file Yipf1_set_A.pdf › Supplemental Dataset 1/A-mRNA_nonrhyth_translation_nonrhyth/Yipf1_set_A.pdf]

## Yipf2

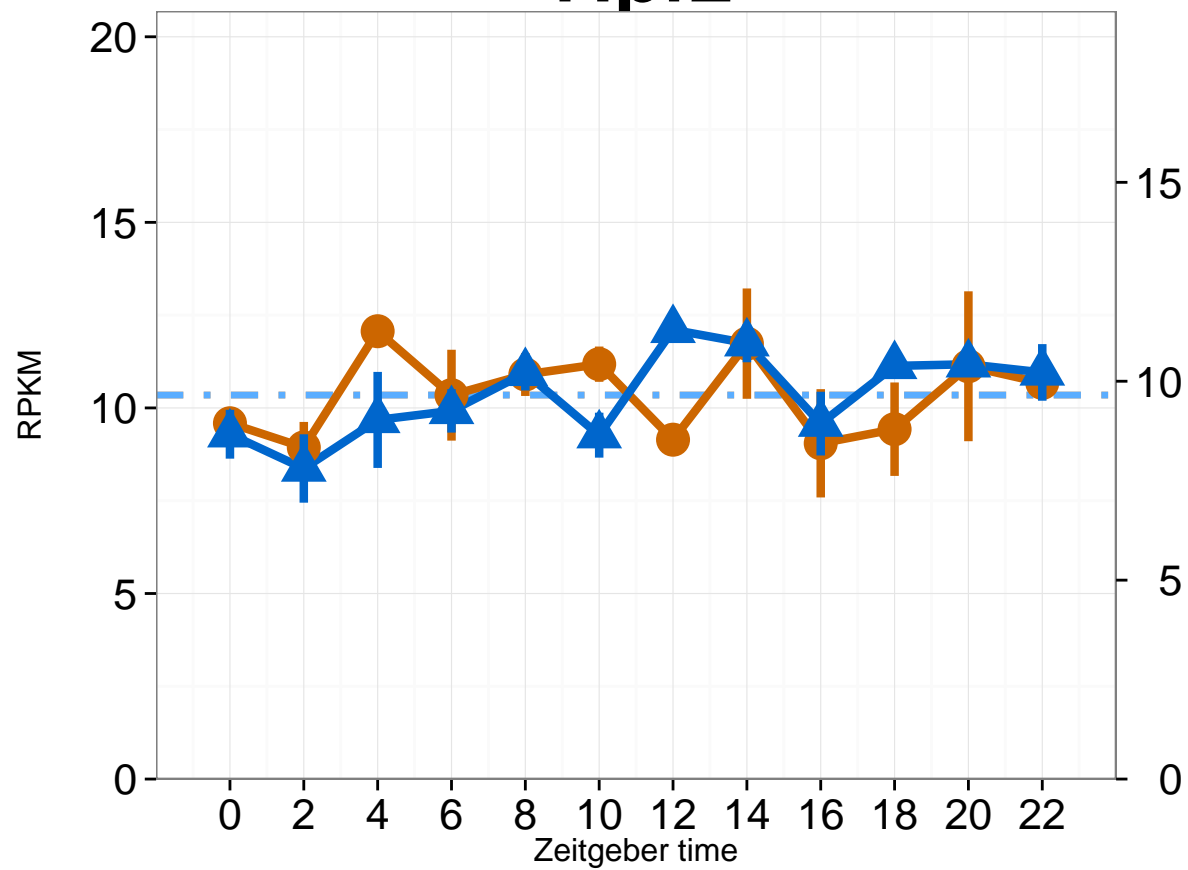

## Yipf2

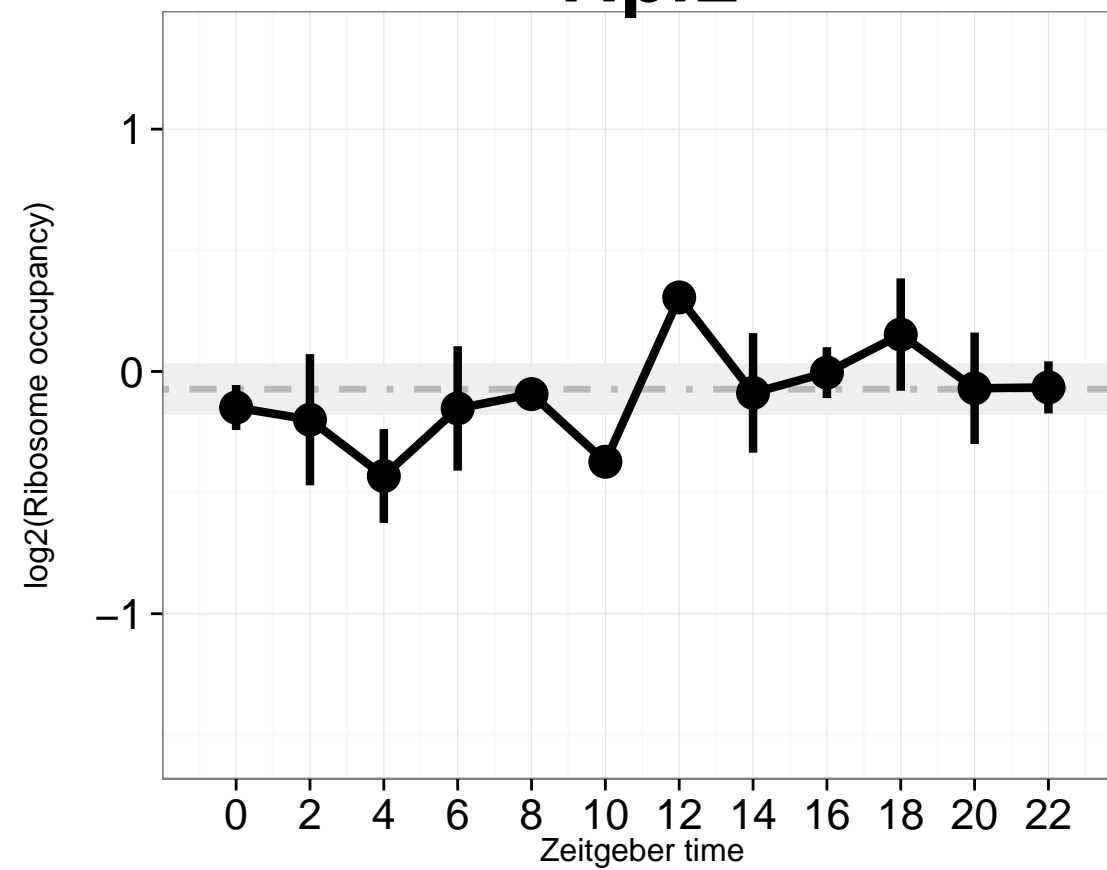

Supplement: SuppDataset_1.zip [file Yipf2_set_A.pdf › Supplemental Dataset 1/A-mRNA_nonrhyth_translation_nonrhyth/Yipf2_set_A.pdf]

## Yipf3

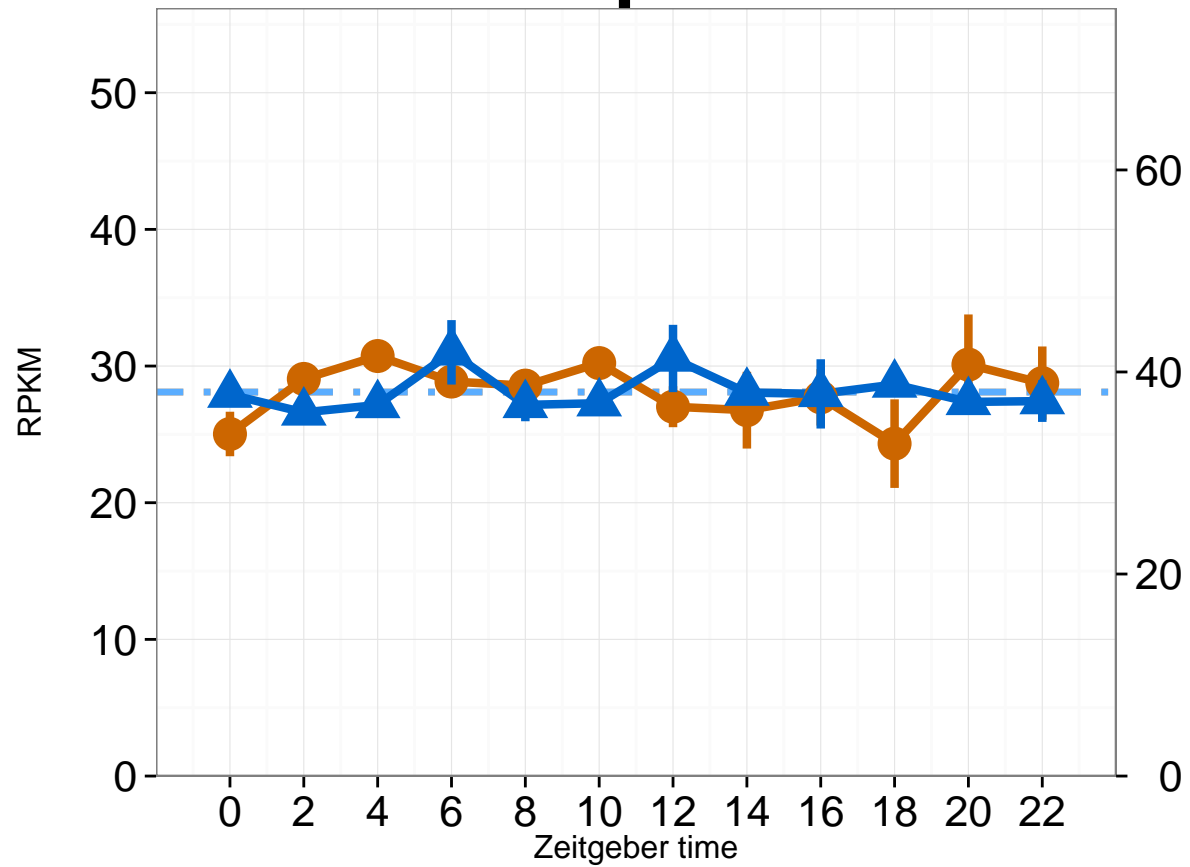

## Yipf3

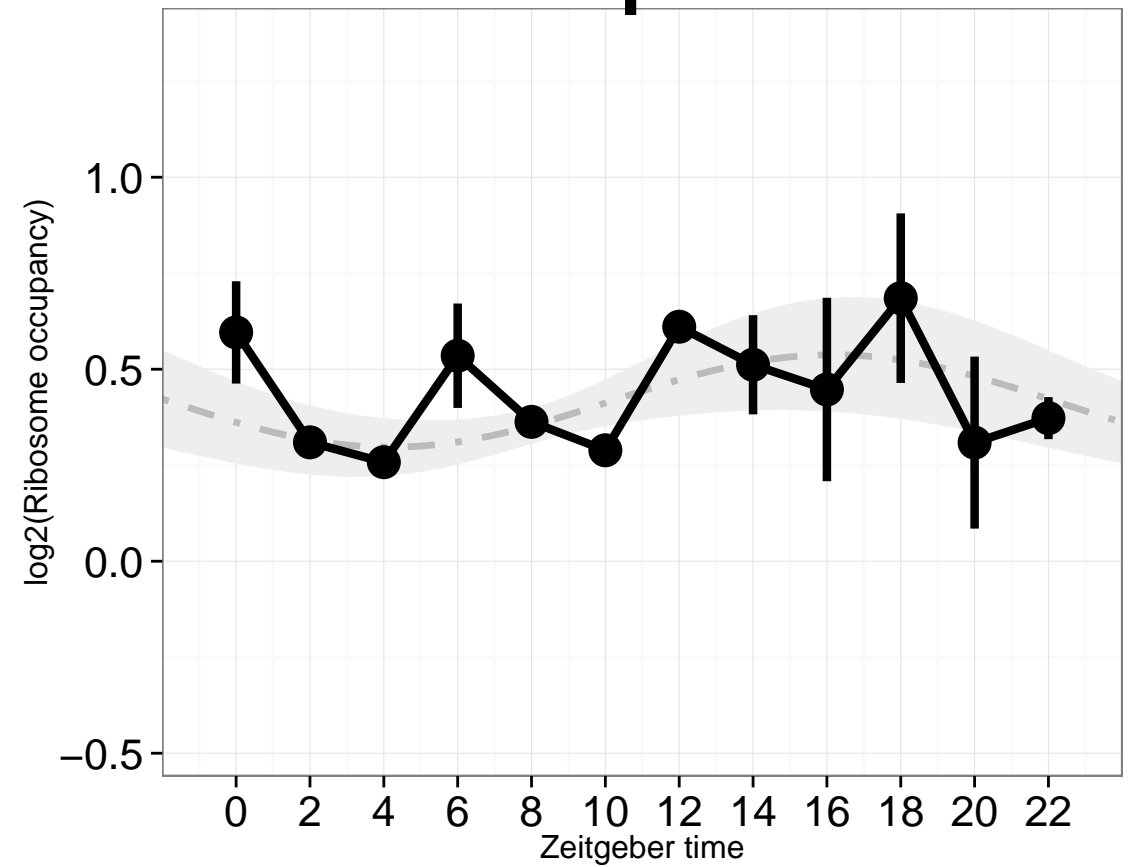

Supplement: SuppDataset_1.zip [file Yipf3_set_A.pdf › Supplemental Dataset 1/A-mRNA_nonrhyth_translation_nonrhyth/Yipf3_set_A.pdf]

## Yipf4

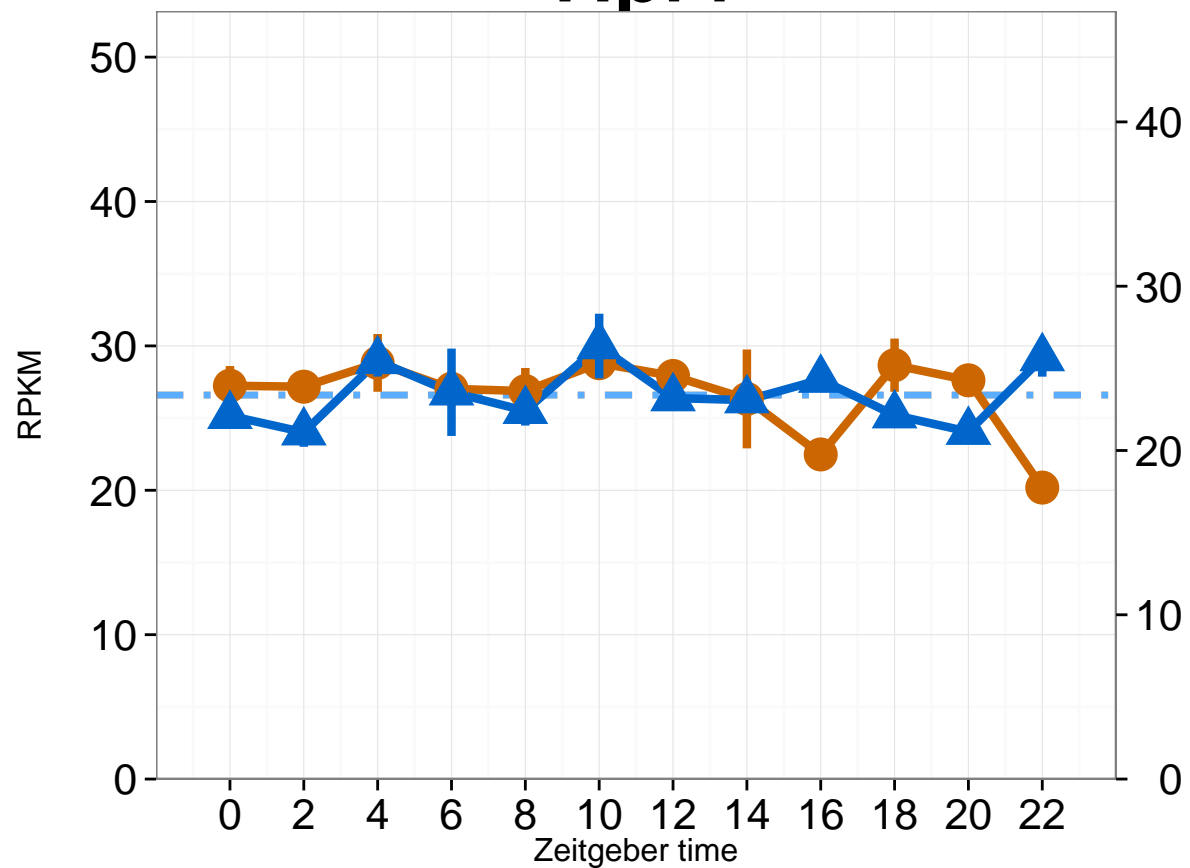

## Yipf4

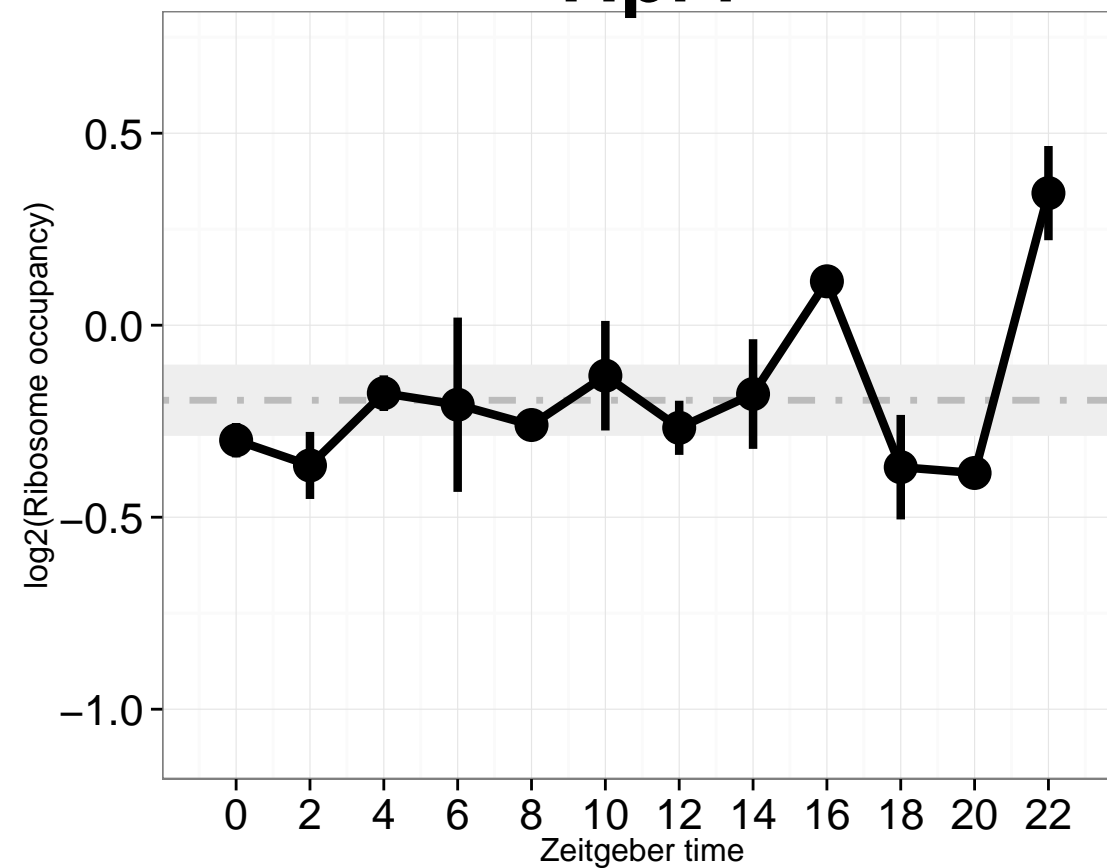

Supplement: SuppDataset_1.zip [file Yipf4_set_A.pdf › Supplemental Dataset 1/A-mRNA_nonrhyth_translation_nonrhyth/Yipf4_set_A.pdf]

## Yipf5

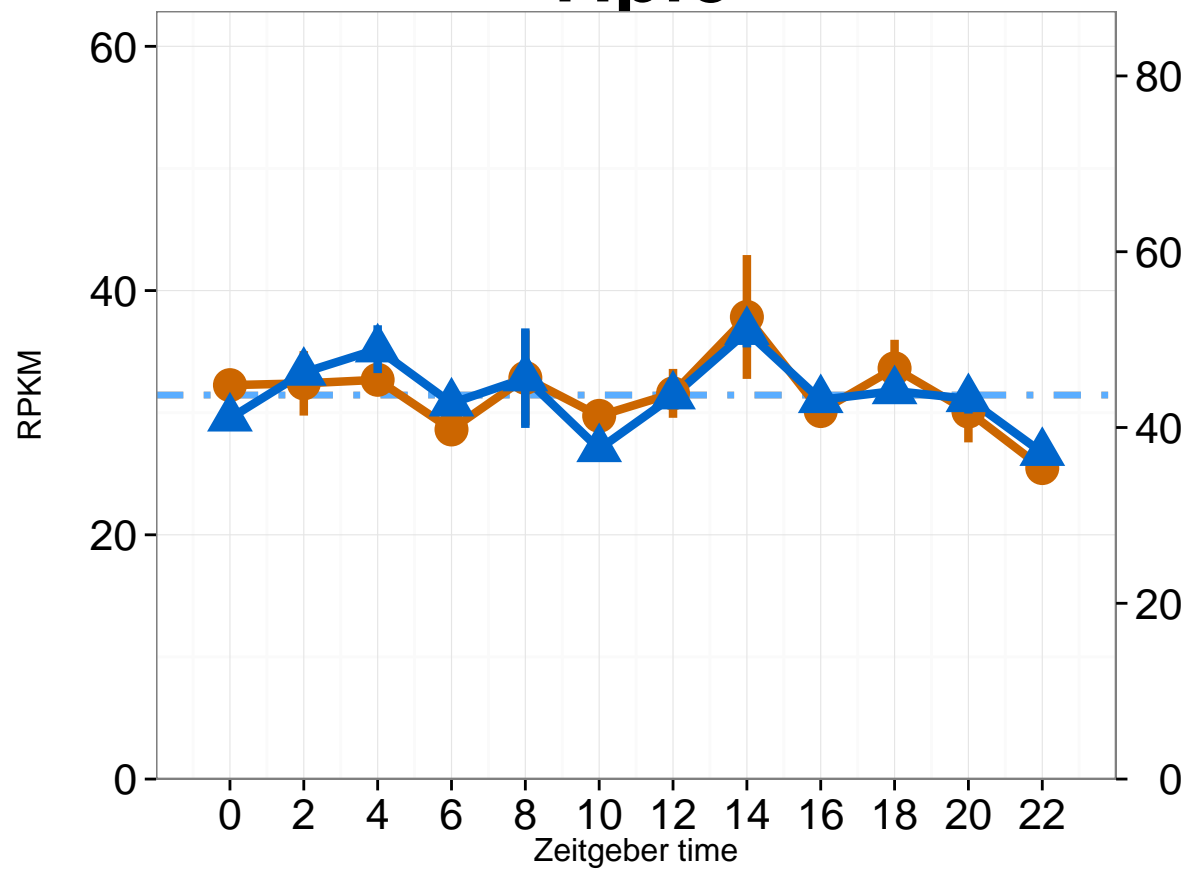

## Yipf5

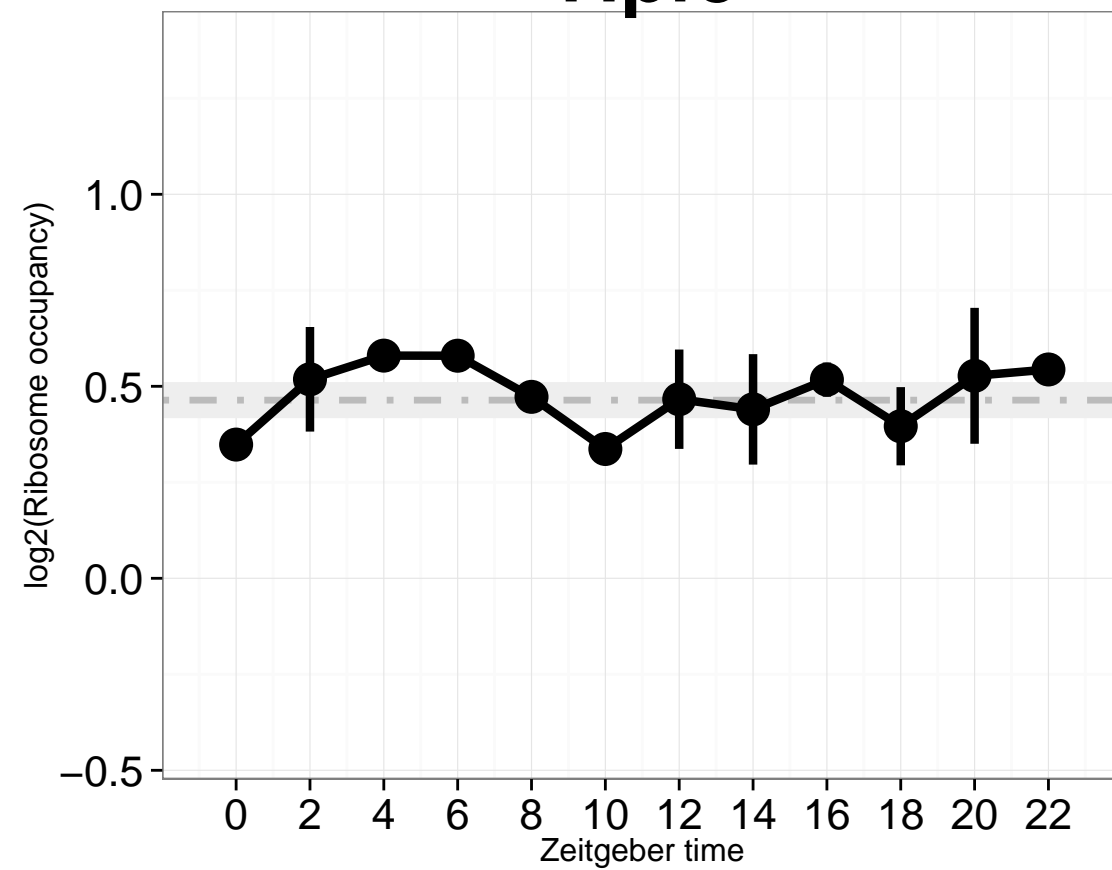

Supplement: SuppDataset_1.zip [file Yipf5_set_A.pdf › Supplemental Dataset 1/A-mRNA_nonrhyth_translation_nonrhyth/Yipf5_set_A.pdf]

## Yipf6

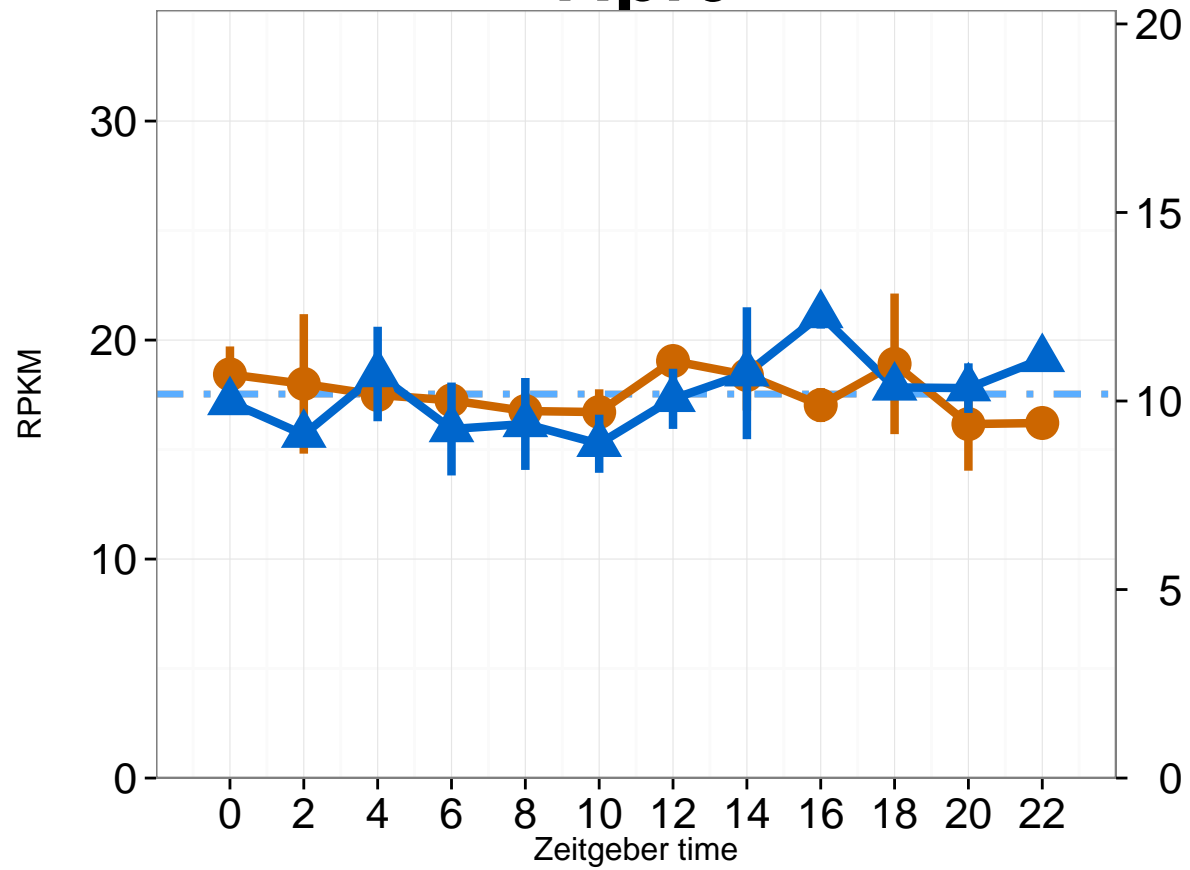

## Yipf6

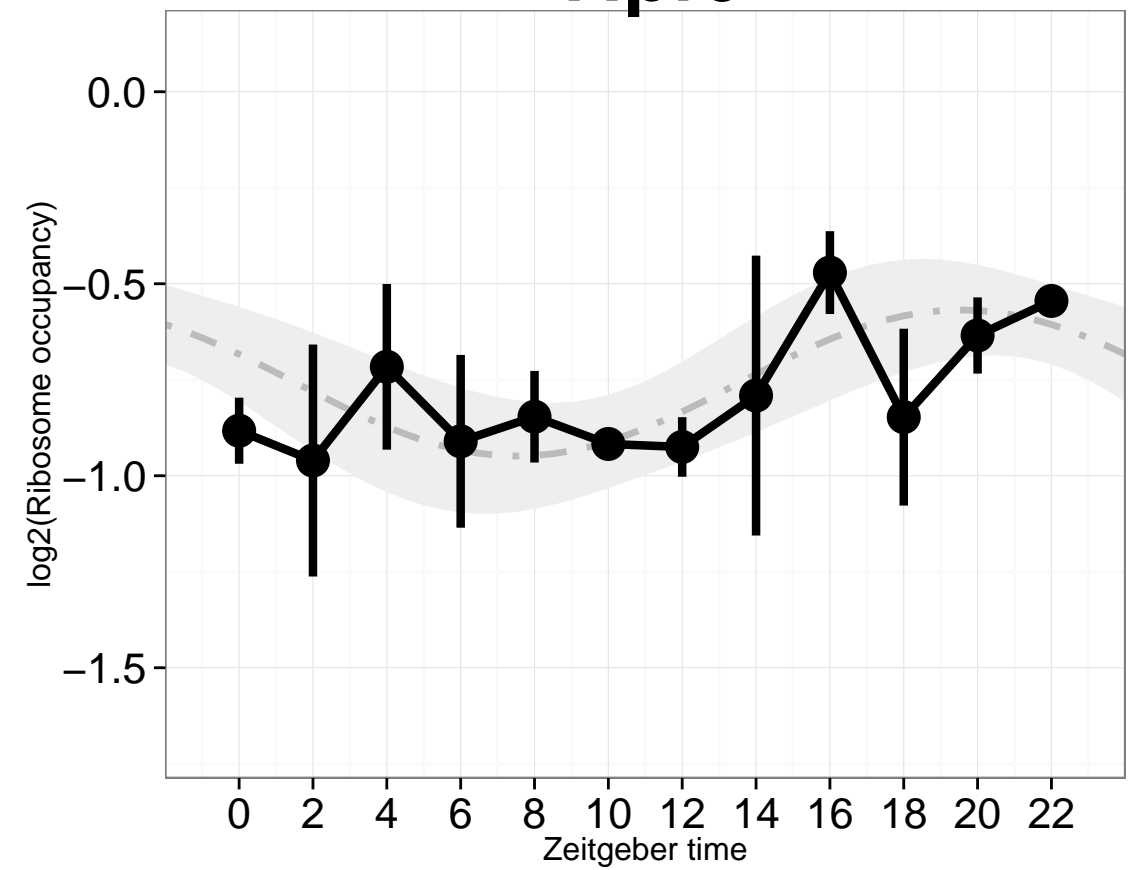

Supplement: SuppDataset_1.zip [file Yipf6_set_A.pdf › Supplemental Dataset 1/A-mRNA_nonrhyth_translation_nonrhyth/Yipf6_set_A.pdf]

## Ykt6

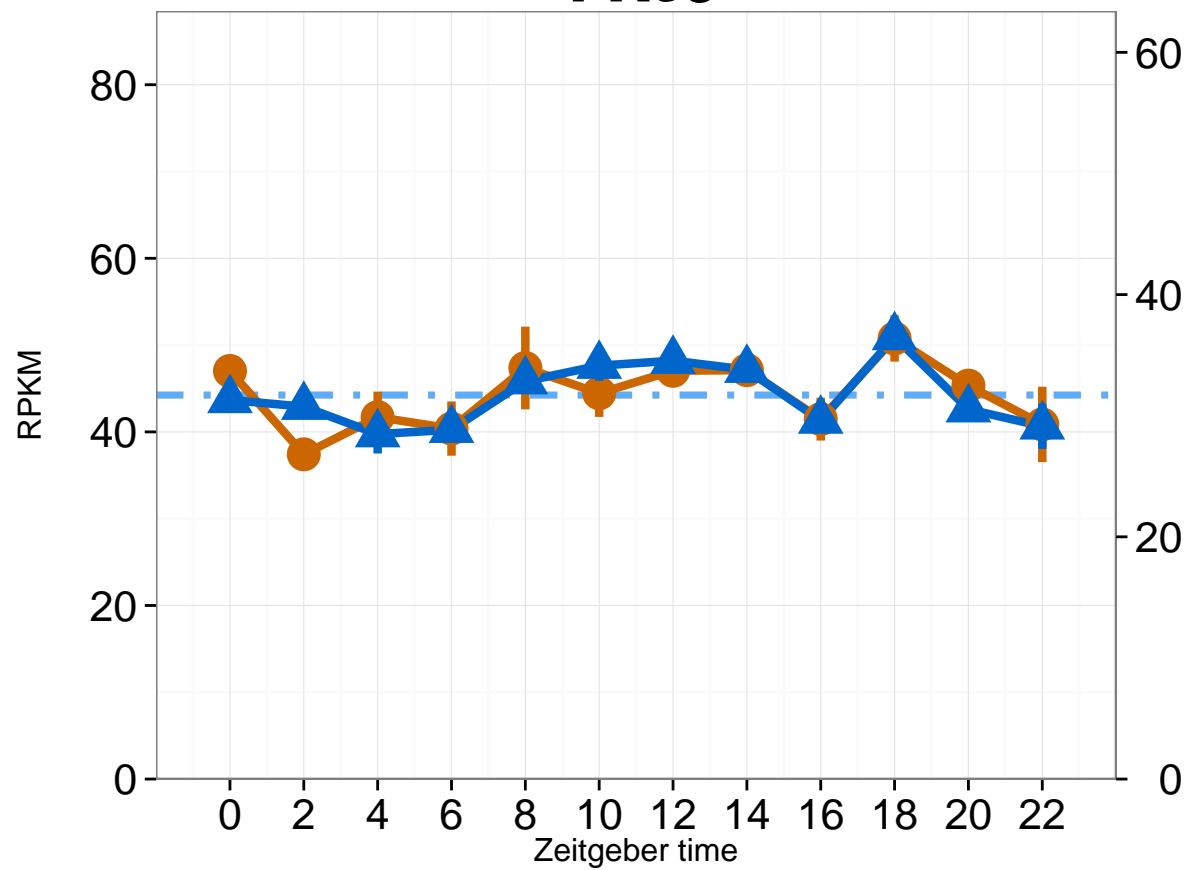

## Ykt6

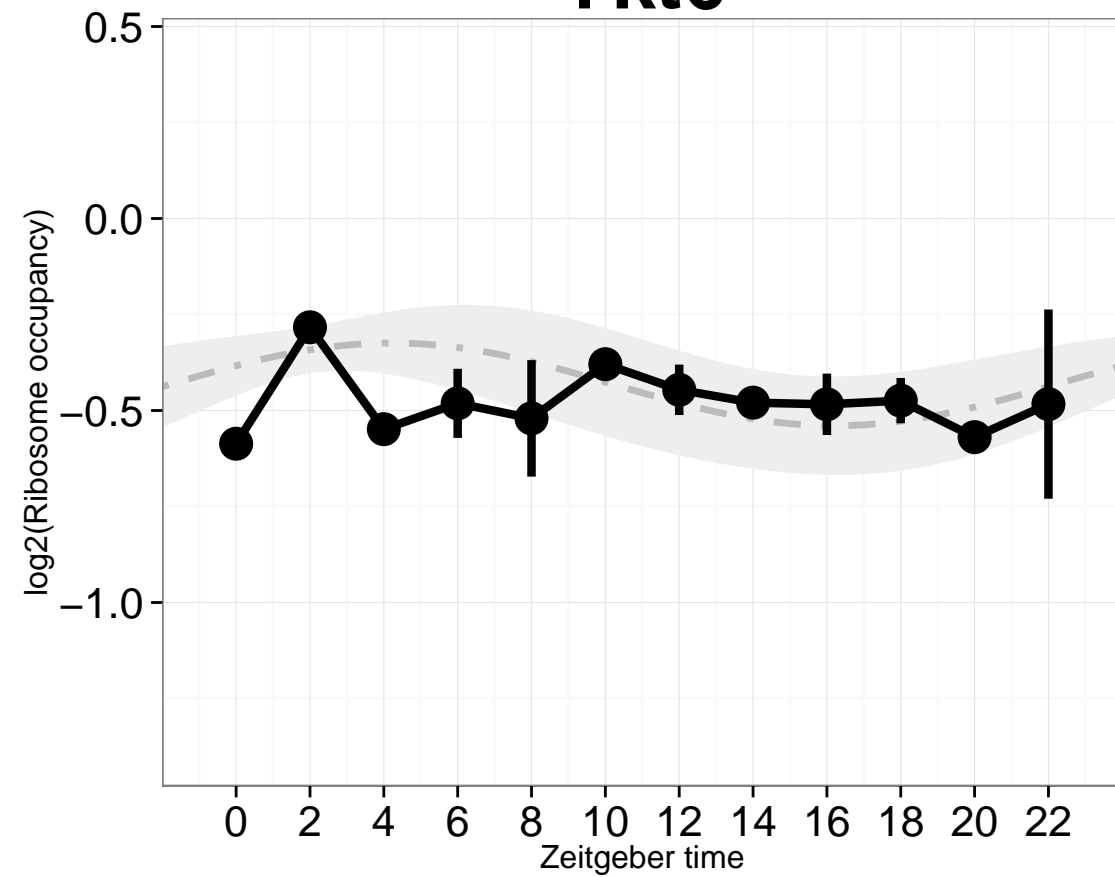

Supplement: SuppDataset_1.zip [file Ykt6_set_A.pdf › Supplemental Dataset 1/A-mRNA_nonrhyth_translation_nonrhyth/Ykt6_set_A.pdf]

# Ylpm1

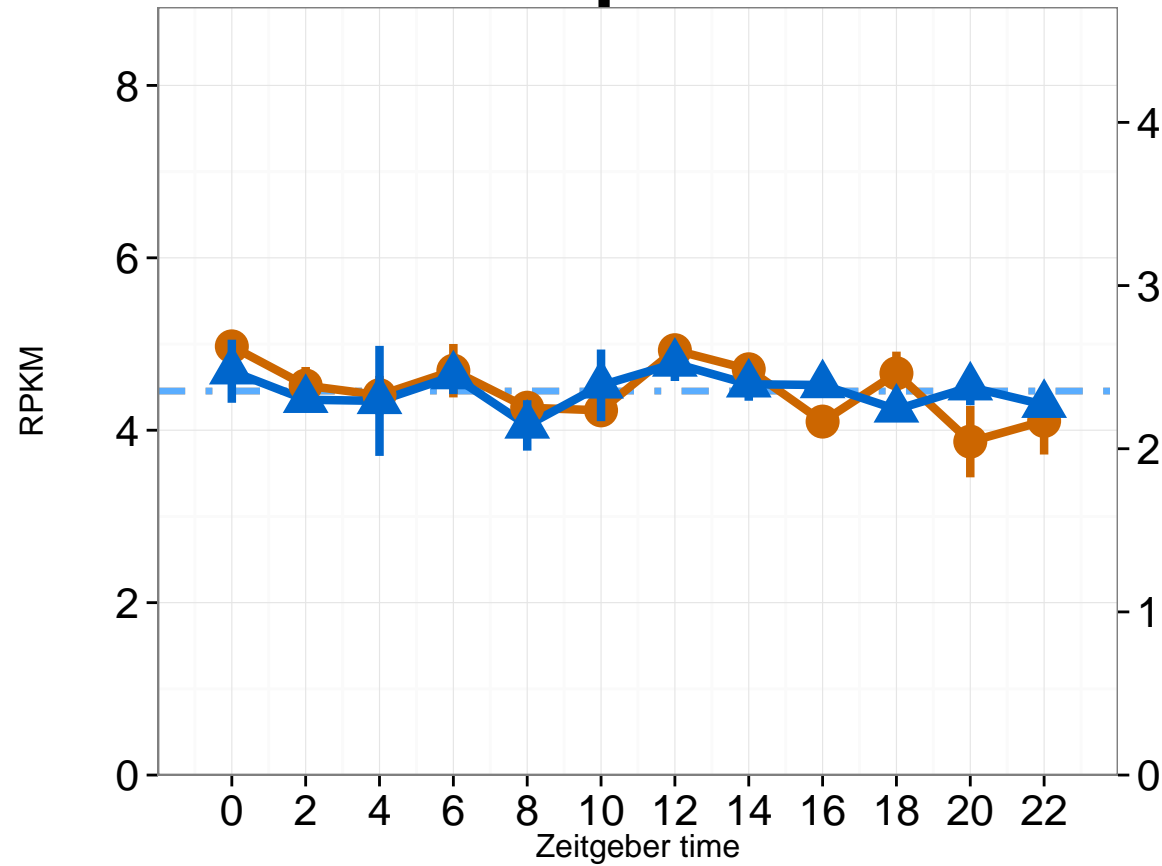

# Ylpm1

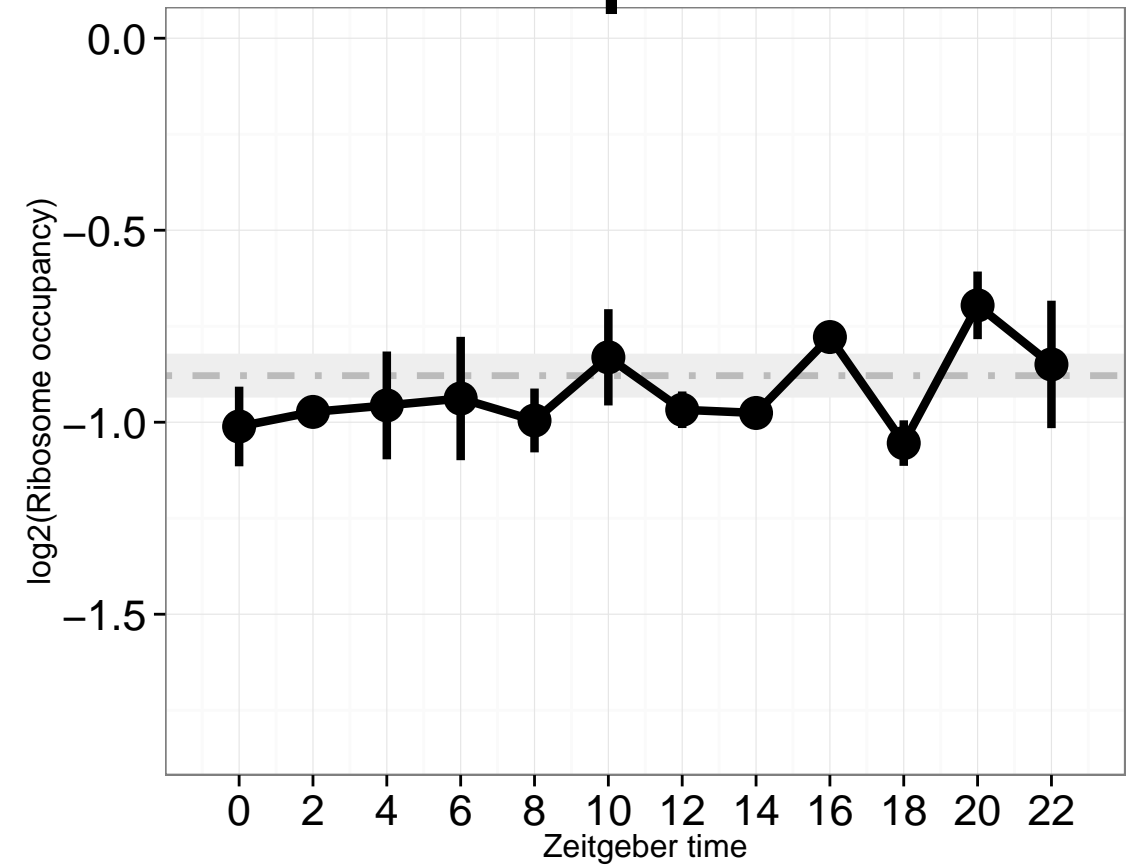

Supplement: SuppDataset_1.zip [file Ylpm1_set_A.pdf › Supplemental Dataset 1/A-mRNA_nonrhyth_translation_nonrhyth/Ylpm1_set_A.pdf]

# Yme1I1

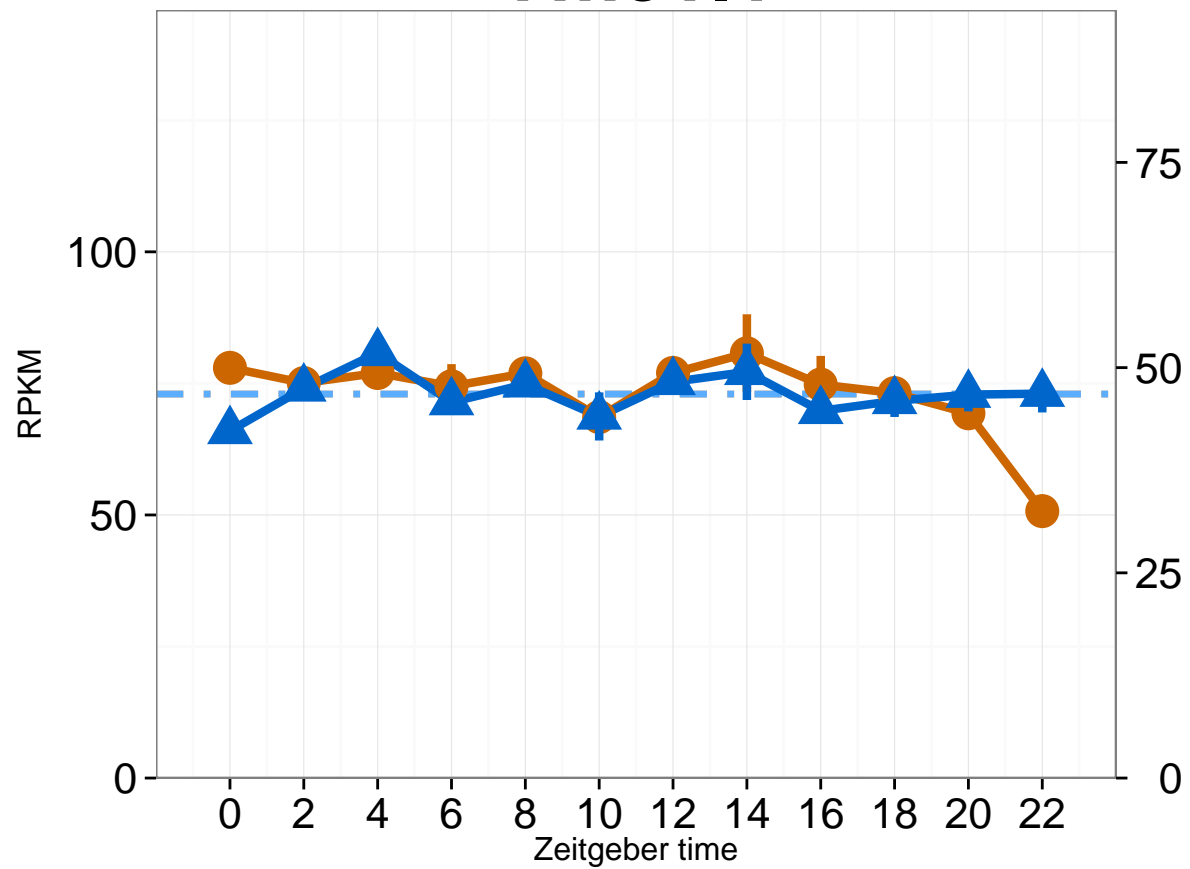

# Yme1I1

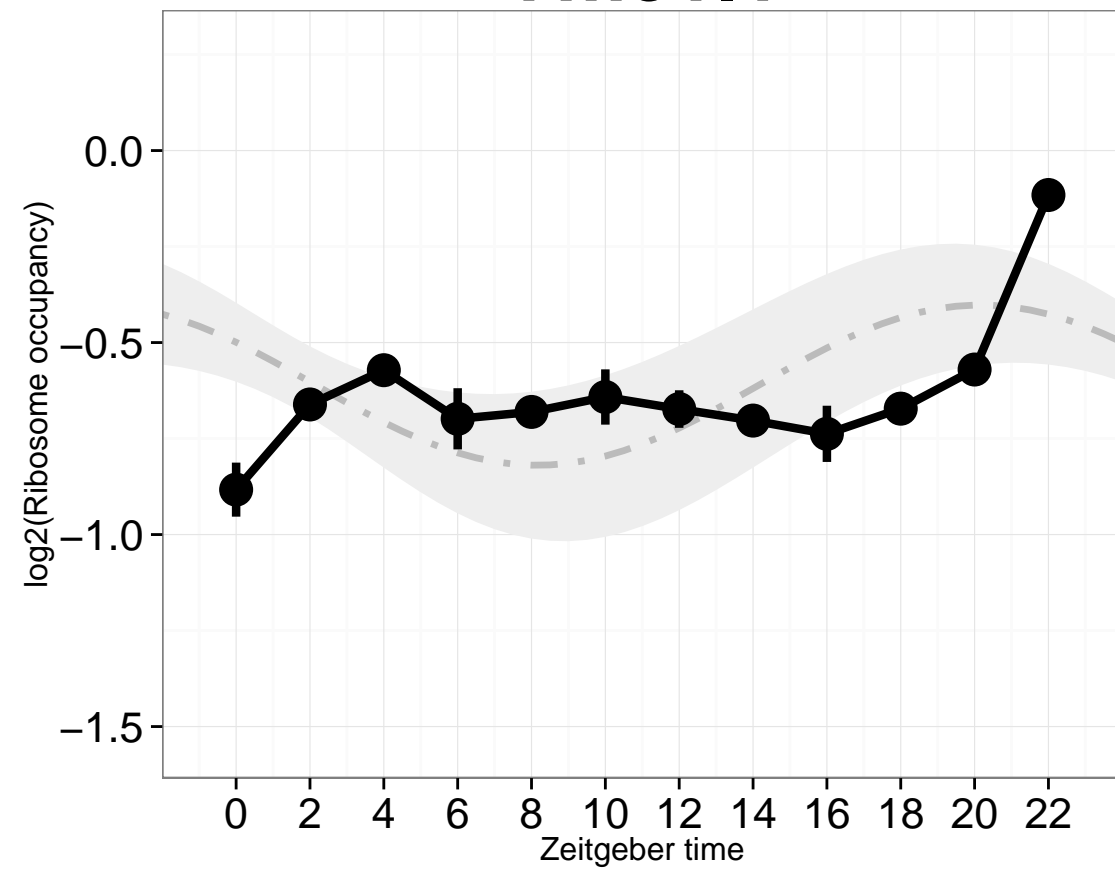

Supplement: SuppDataset_1.zip [file Yme1l1_set_A.pdf › Supplemental Dataset 1/A-mRNA_nonrhyth_translation_nonrhyth/Yme1l1_set_A.pdf]

## Ypel5

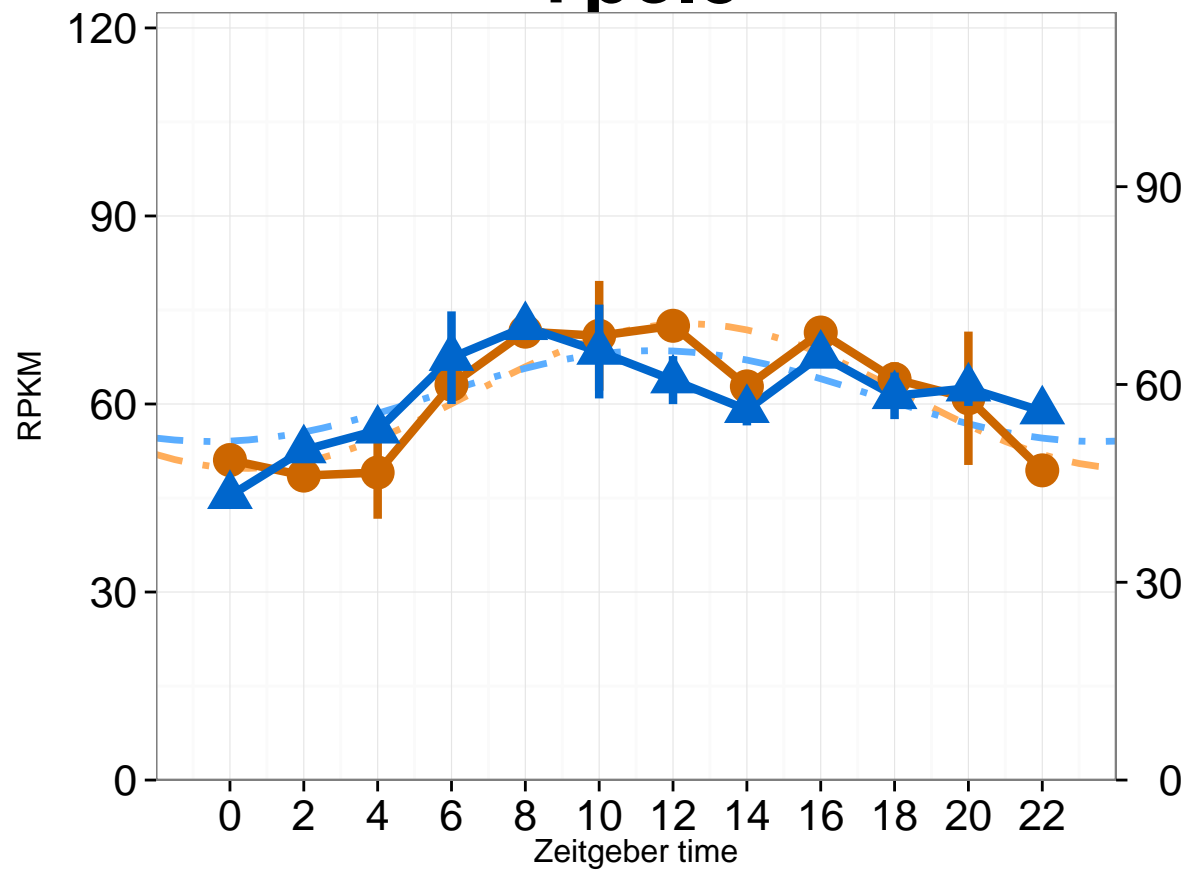

## Ypel5

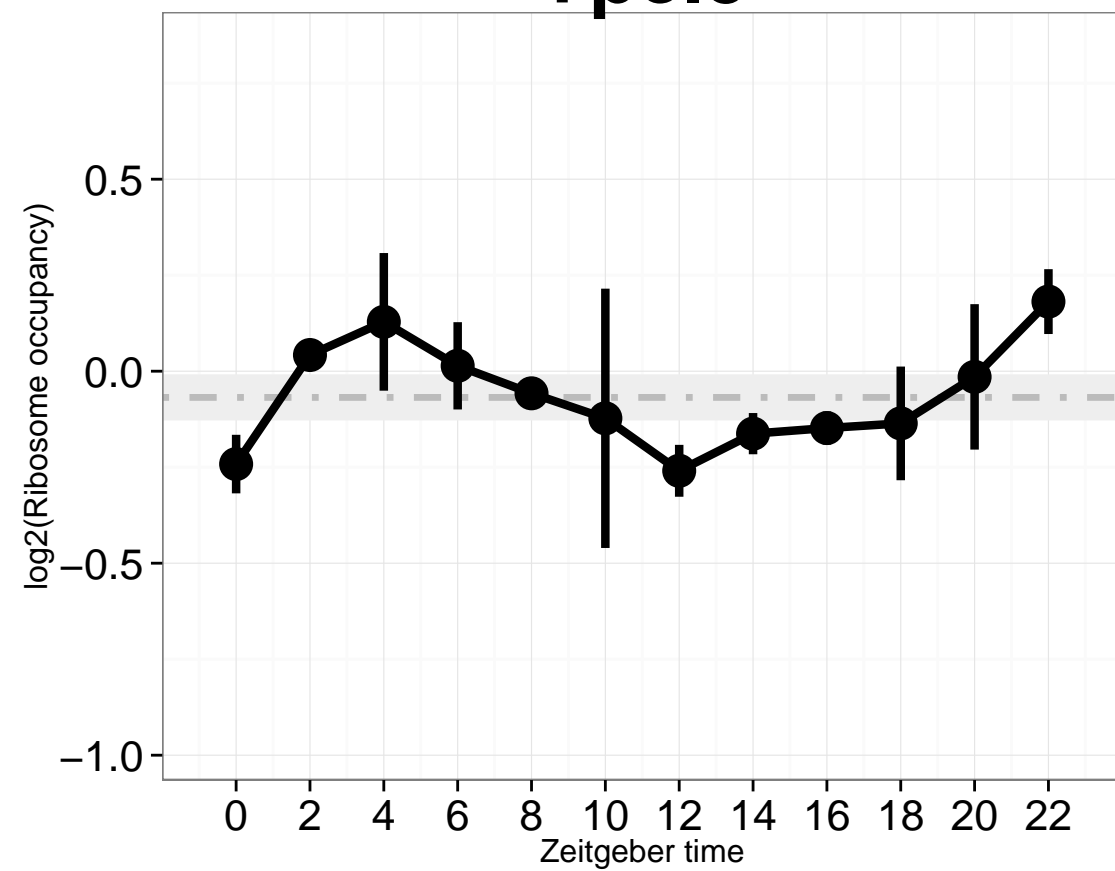

Supplement: SuppDataset_1.zip [file Ypel5_set_A.pdf › Supplemental Dataset 1/A-mRNA_nonrhyth_translation_nonrhyth/Ypel5_set_A.pdf]

## Yrdc

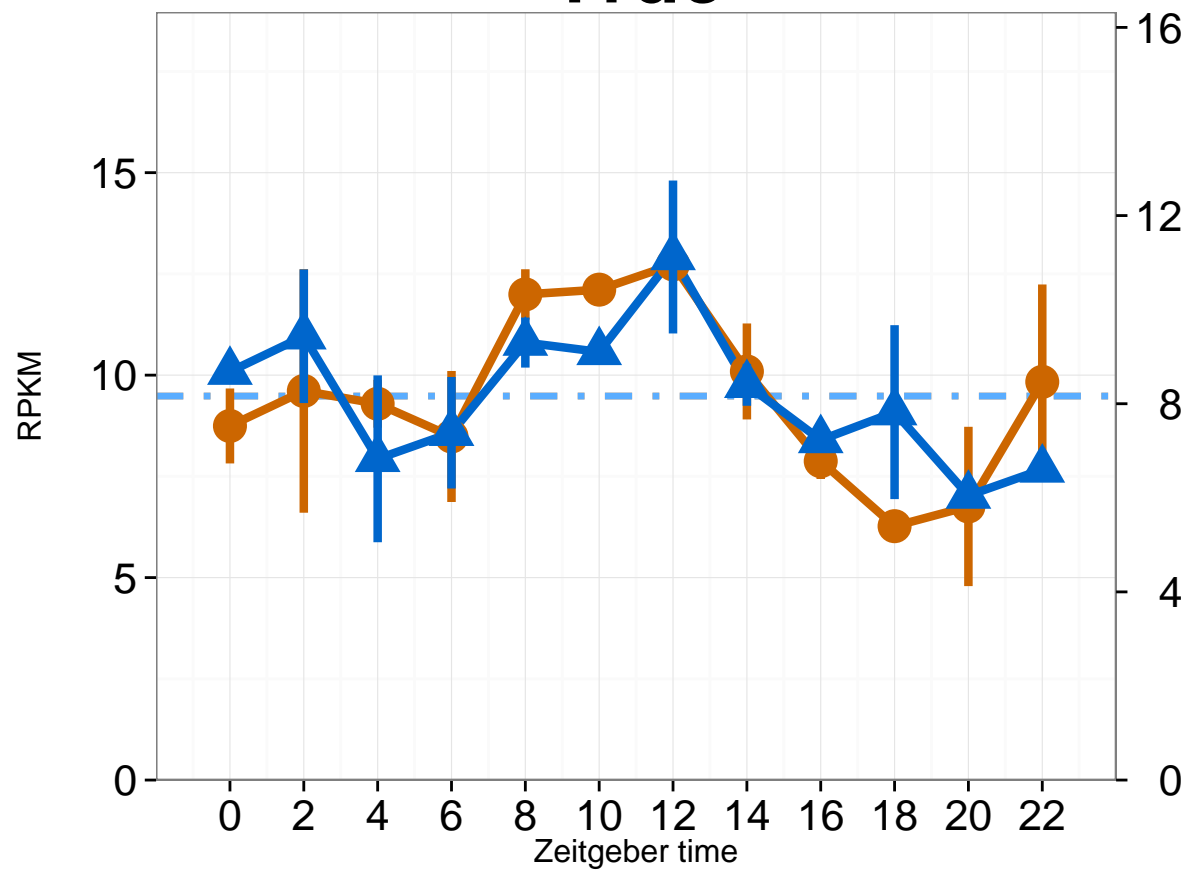

## Yrdc

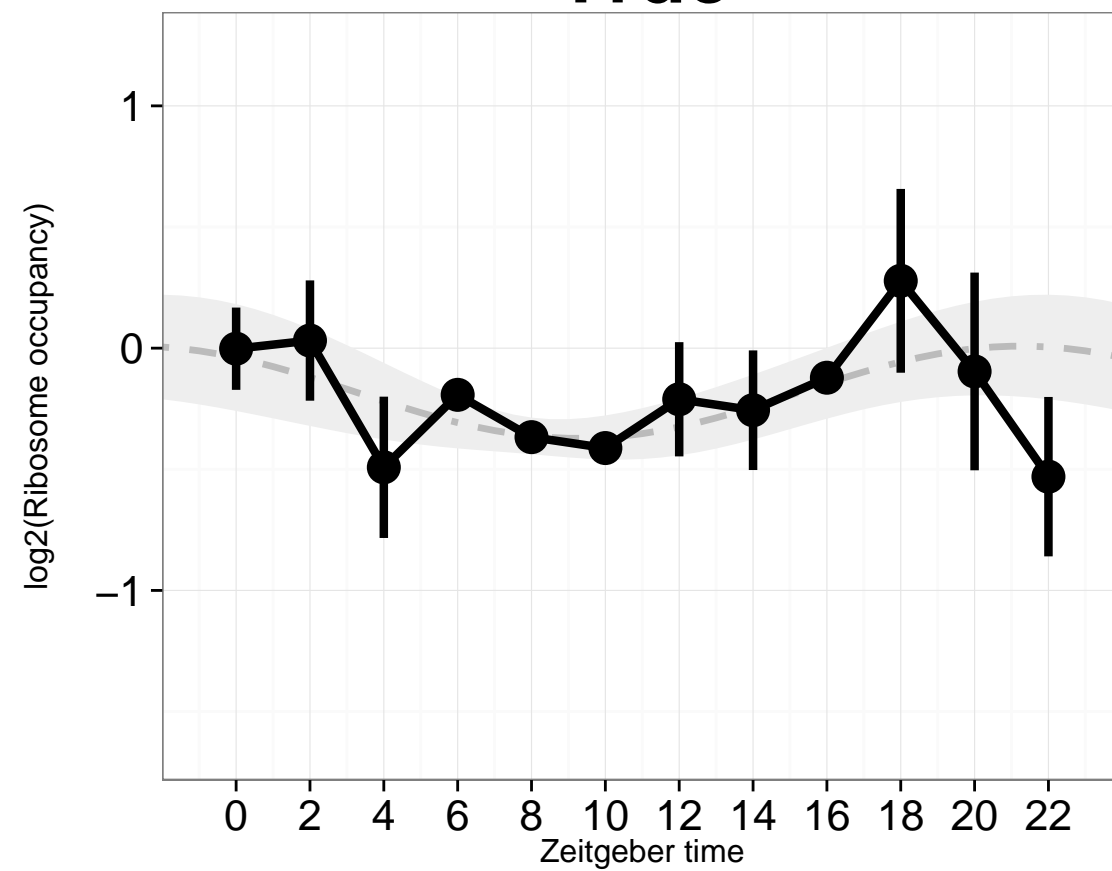

Supplement: SuppDataset_1.zip [file Yrdc_set_A.pdf › Supplemental Dataset 1/A-mRNA_nonrhyth_translation_nonrhyth/Yrdc_set_A.pdf]

## Ythdc1

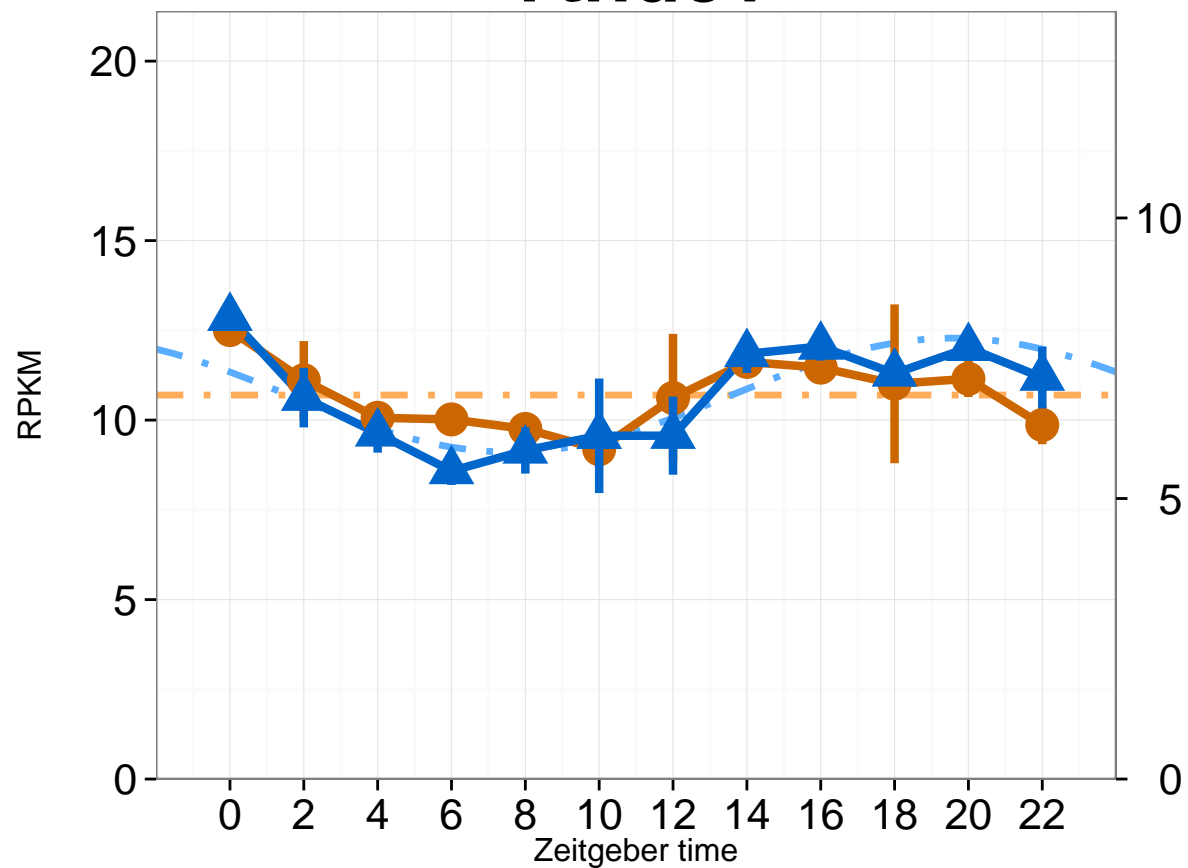

## Ythdc1

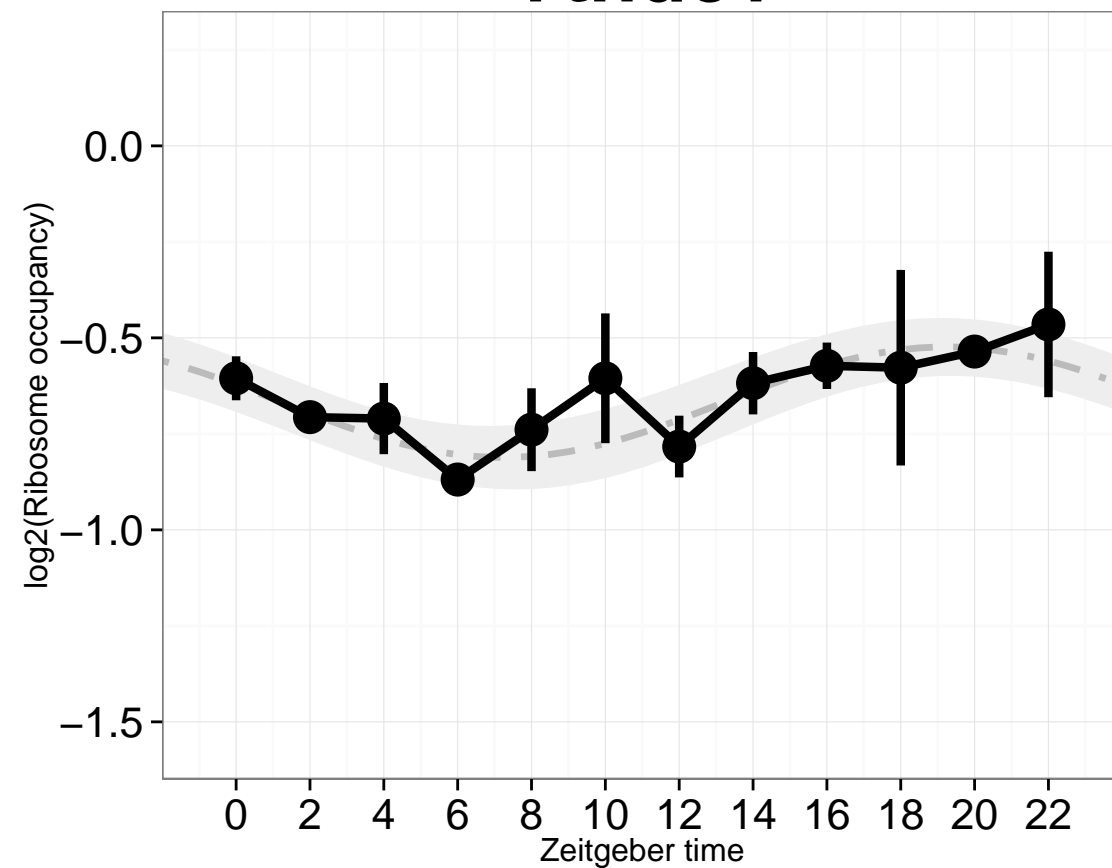

Supplement: SuppDataset_1.zip [file Ythdc1_set_A.pdf › Supplemental Dataset 1/A-mRNA_nonrhyth_translation_nonrhyth/Ythdc1_set_A.pdf]

## Ythdc2

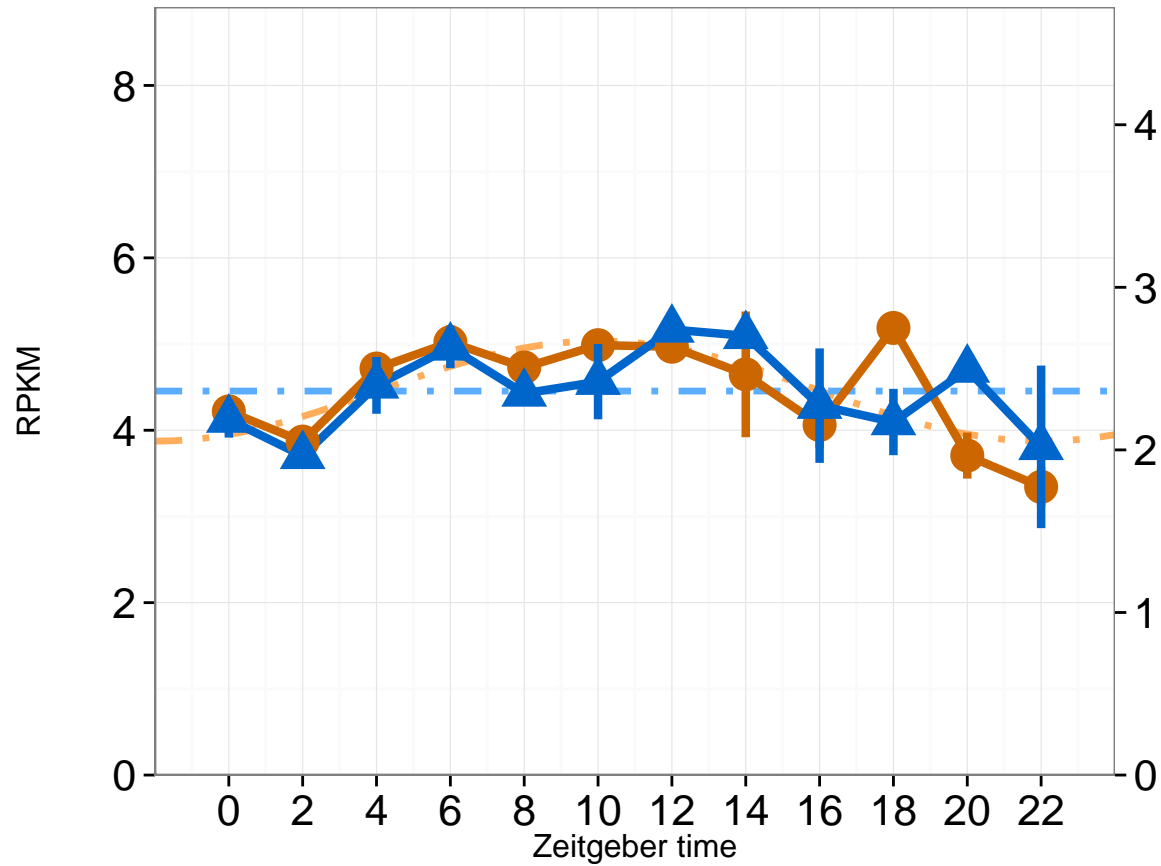

## Ythdc2

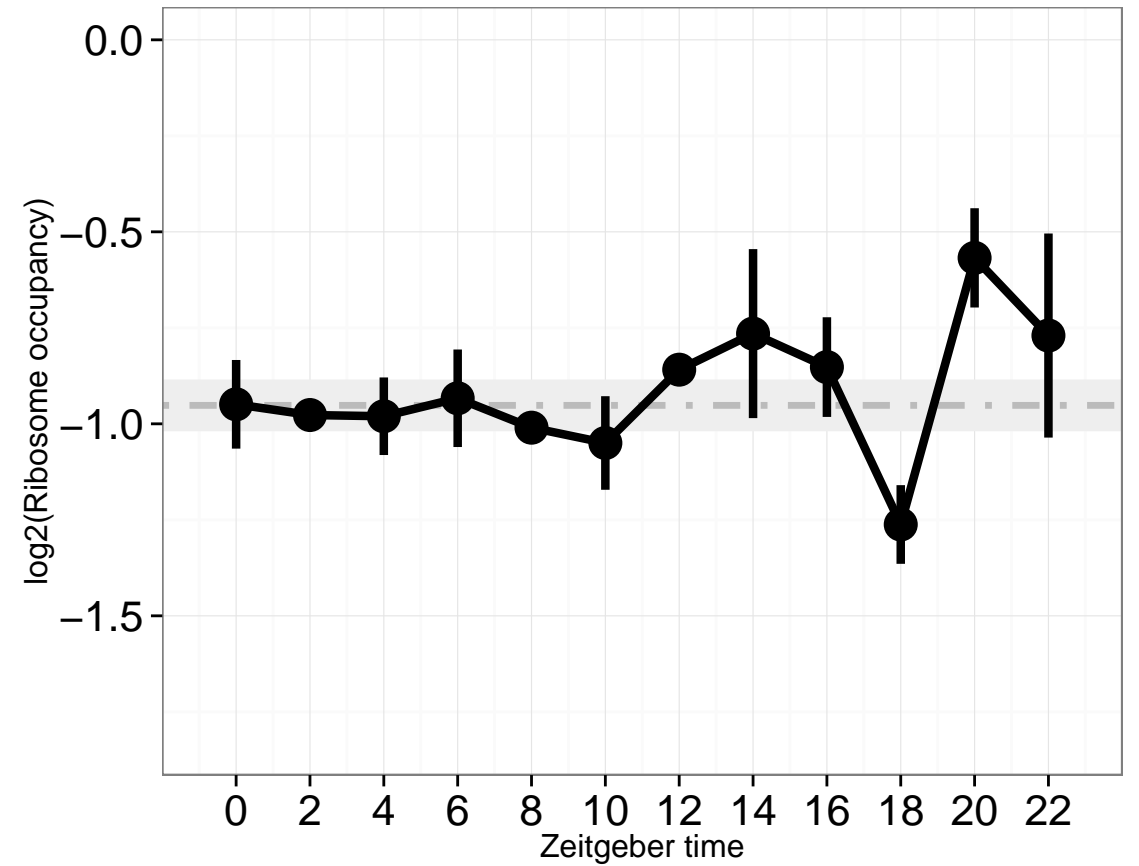

Supplement: SuppDataset_1.zip [file Ythdc2_set_A.pdf › Supplemental Dataset 1/A-mRNA_nonrhyth_translation_nonrhyth/Ythdc2_set_A.pdf]

# Ythdf1

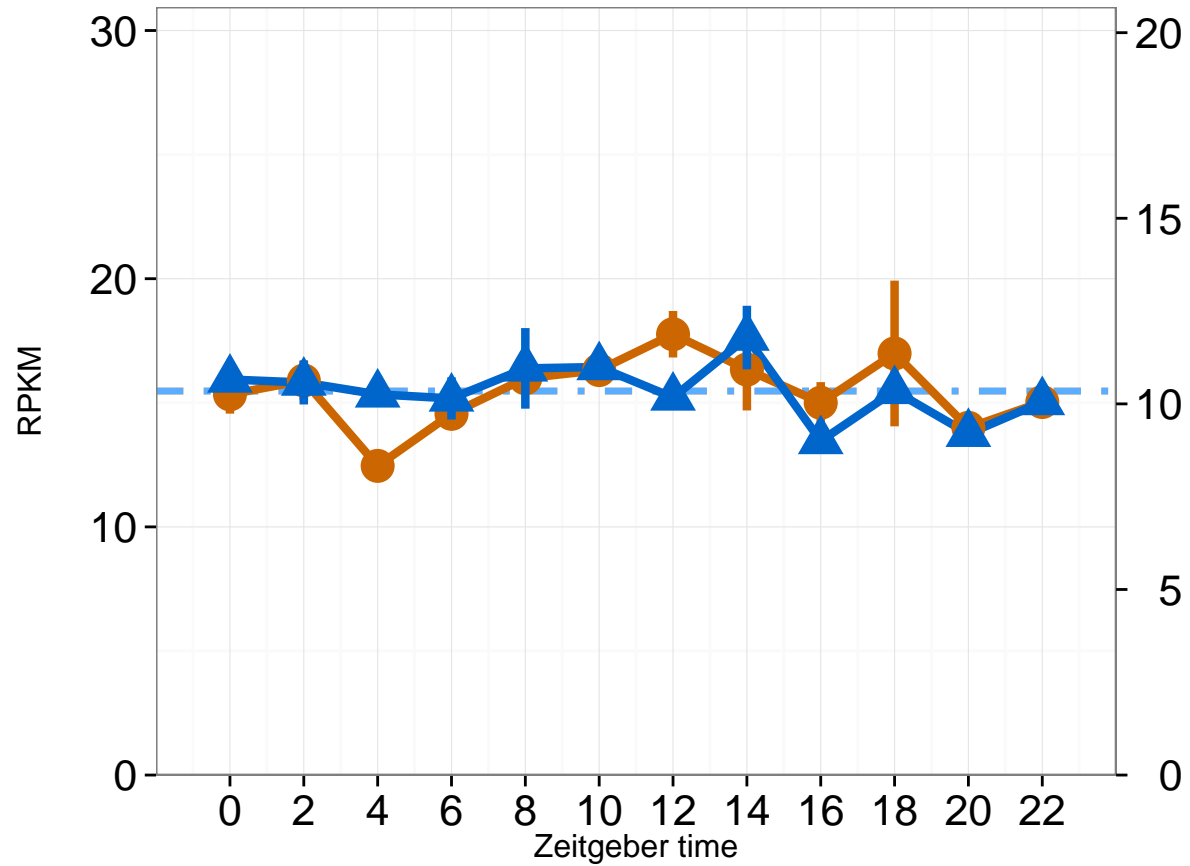

# Ythdf1

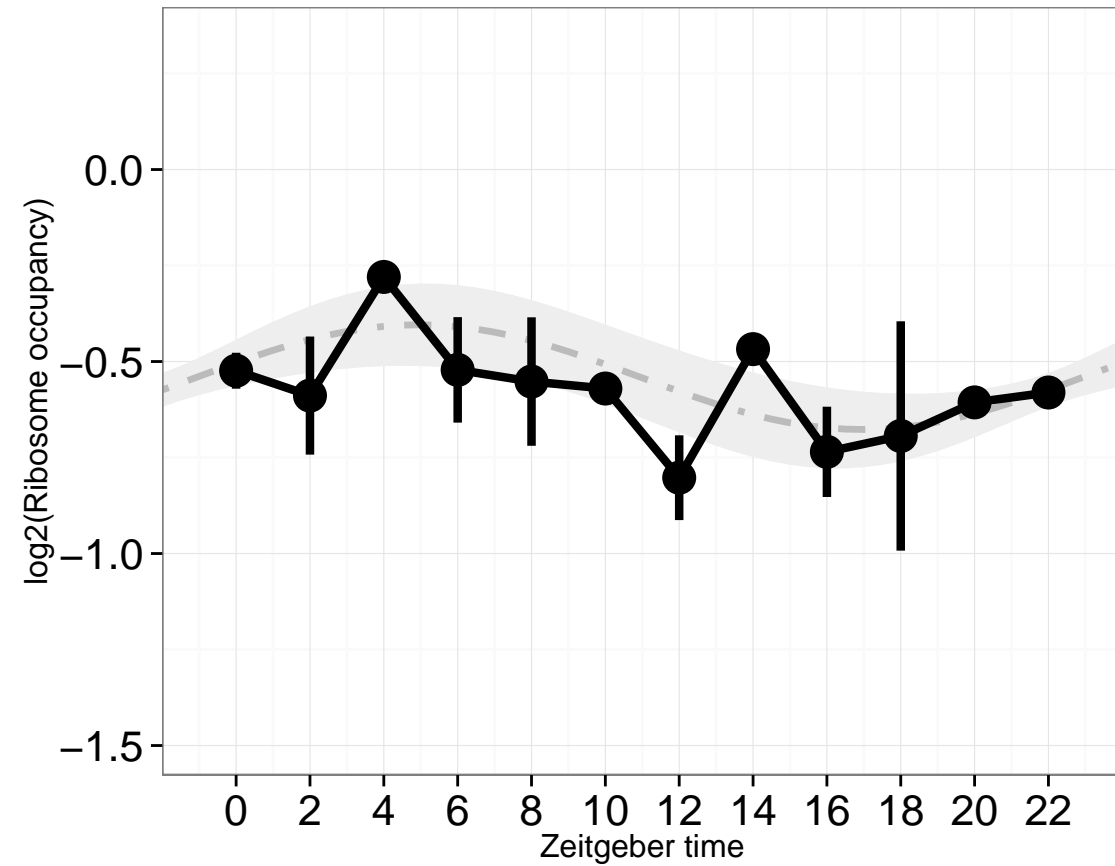

Supplement: SuppDataset_1.zip [file Ythdf1_set_A.pdf › Supplemental Dataset 1/A-mRNA_nonrhyth_translation_nonrhyth/Ythdf1_set_A.pdf]

## Ythdf2

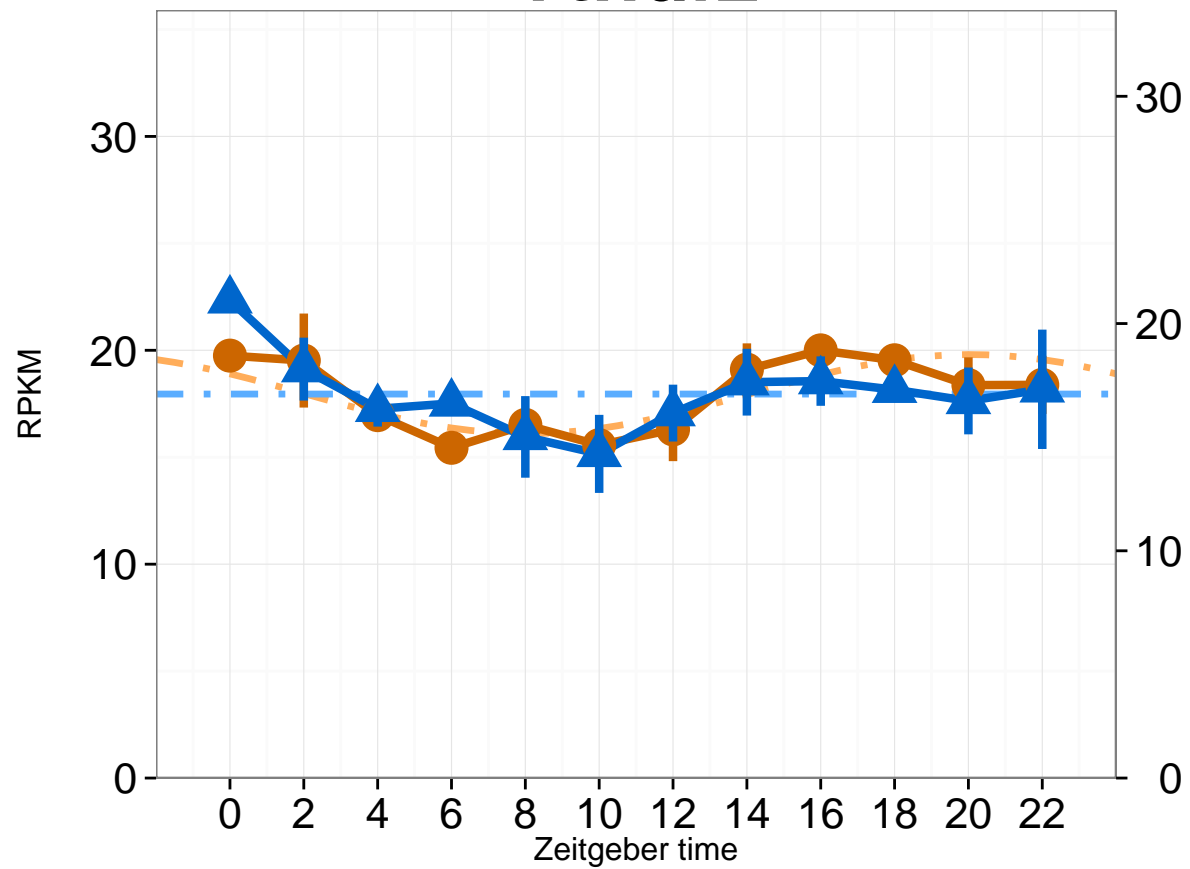

## Ythdf2

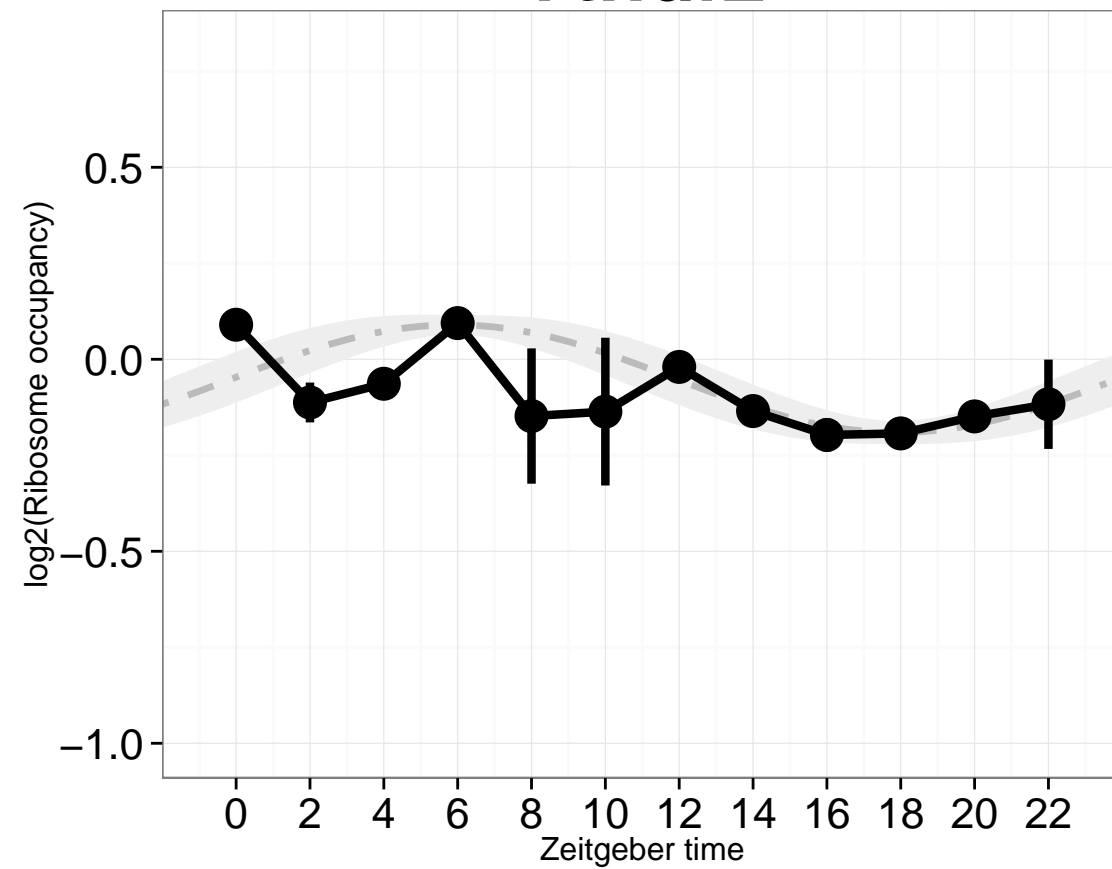

Supplement: SuppDataset_1.zip [file Ythdf2_set_A.pdf › Supplemental Dataset 1/A-mRNA_nonrhyth_translation_nonrhyth/Ythdf2_set_A.pdf]

## Ythdf3

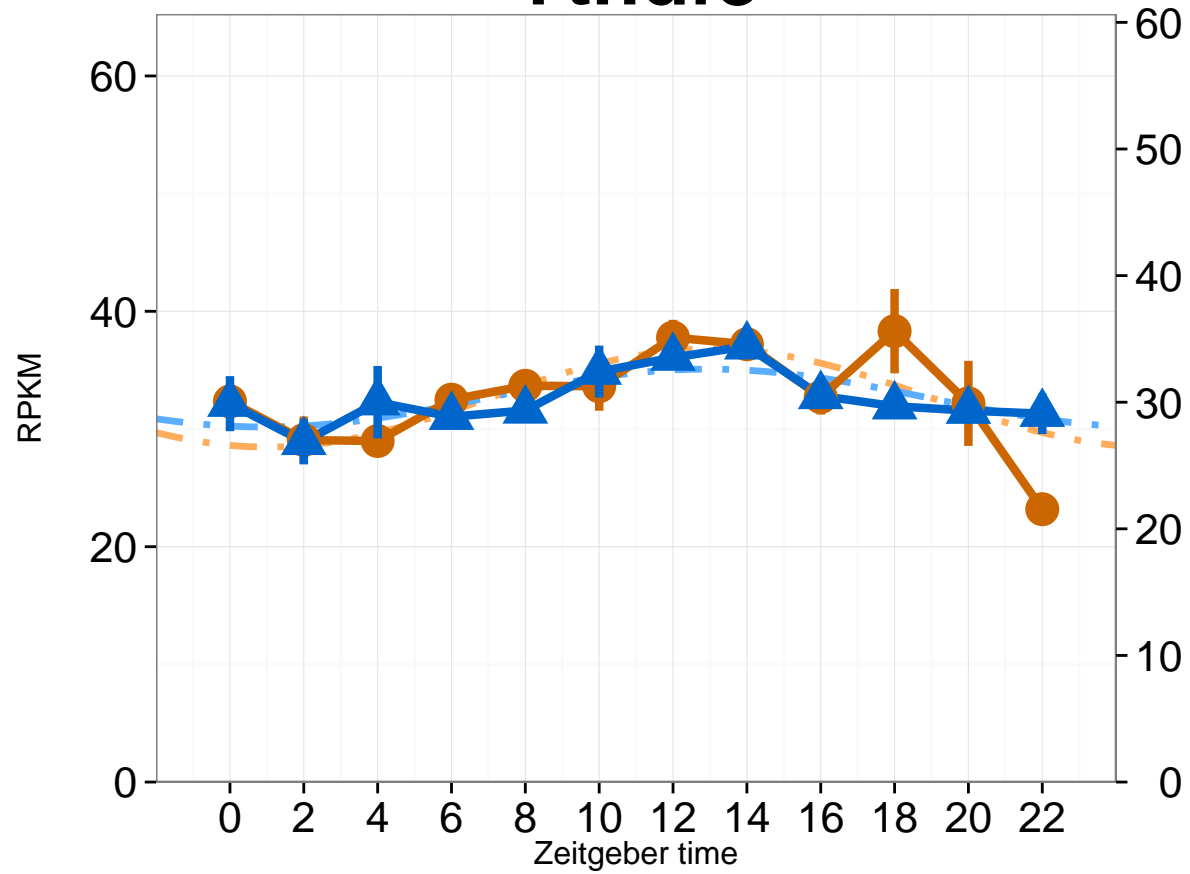

## Ythdf3

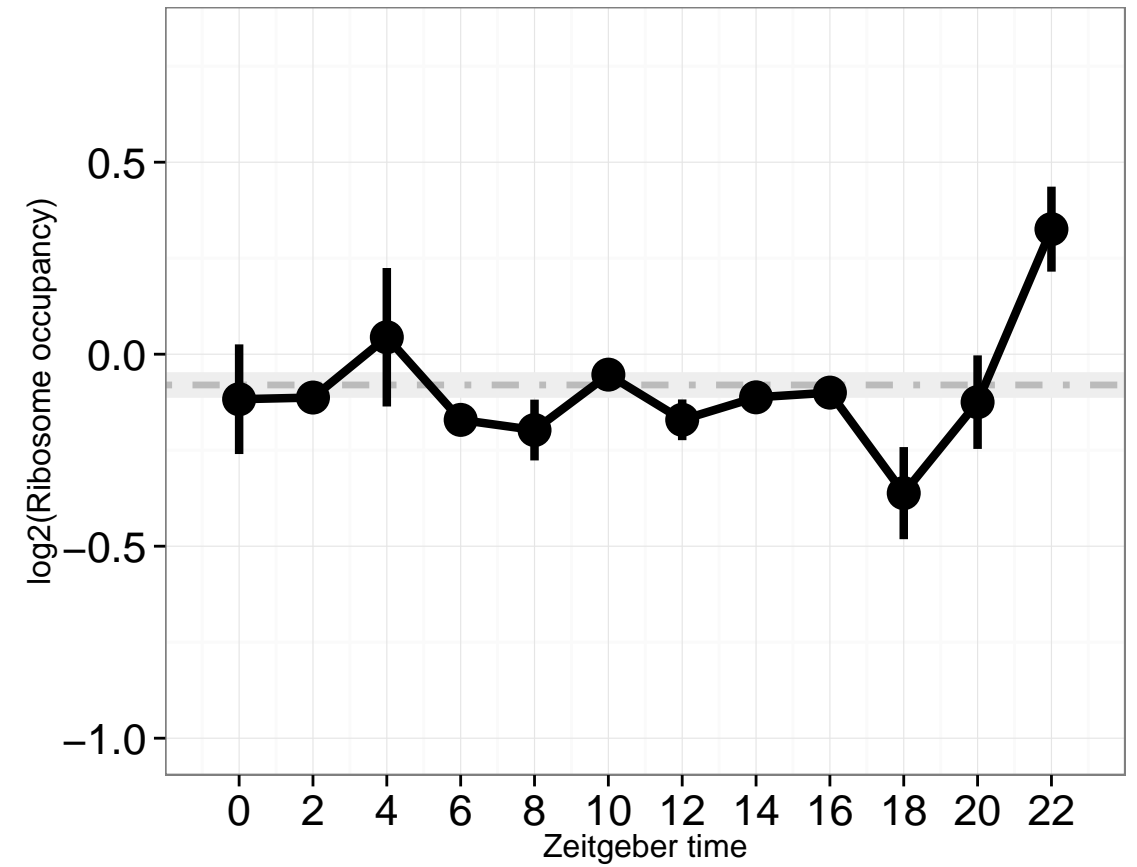

Supplement: SuppDataset_1.zip [file Ythdf3_set_A.pdf › Supplemental Dataset 1/A-mRNA_nonrhyth_translation_nonrhyth/Ythdf3_set_A.pdf]

## Ywhab

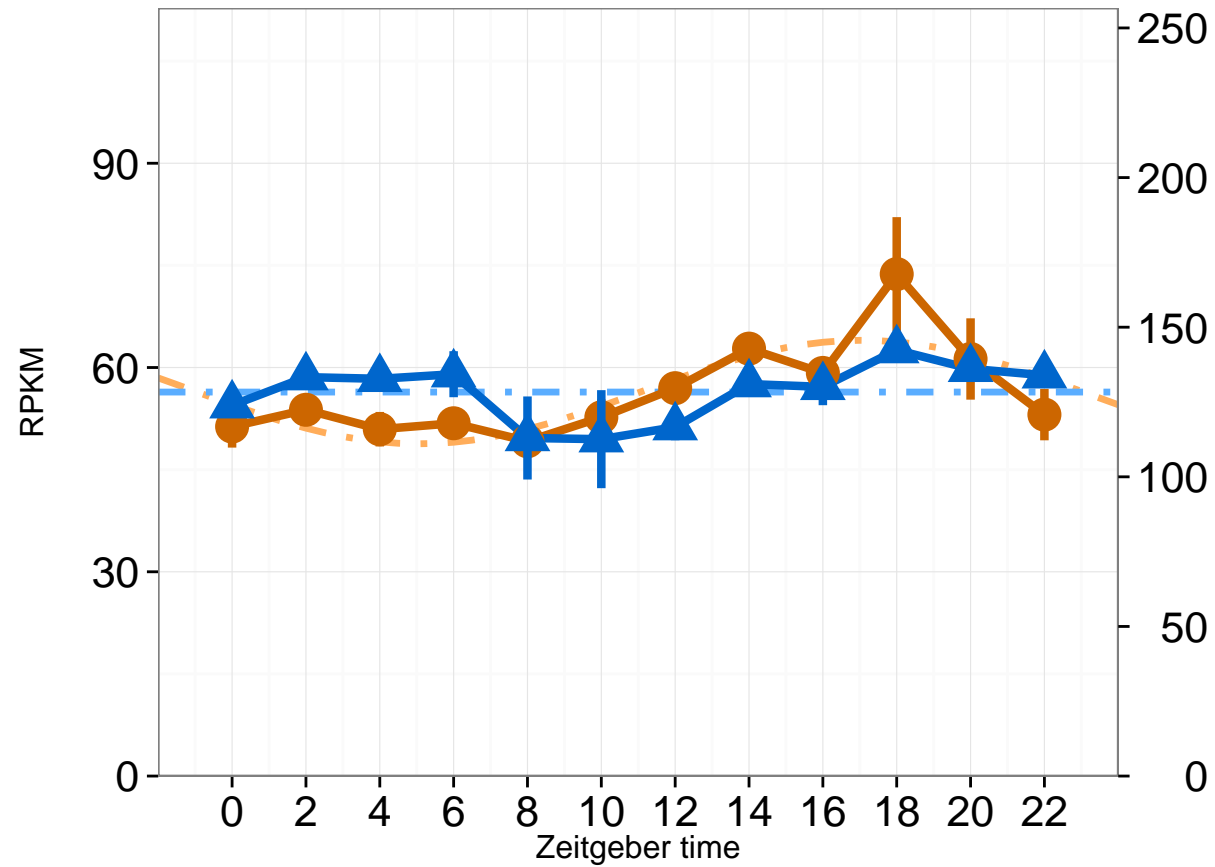

## Ywhab

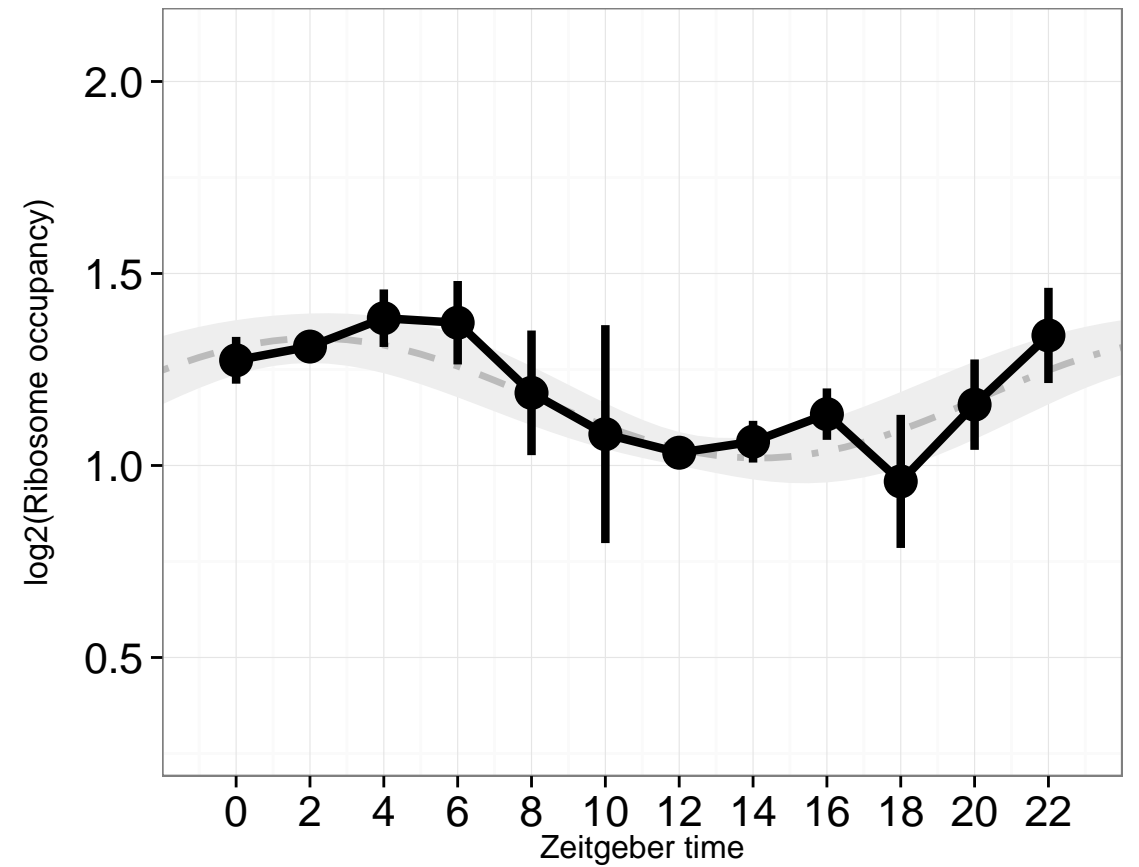

Supplement: SuppDataset_1.zip [file Ywhab_set_A.pdf › Supplemental Dataset 1/A-mRNA_nonrhyth_translation_nonrhyth/Ywhab_set_A.pdf]

## Ywhae

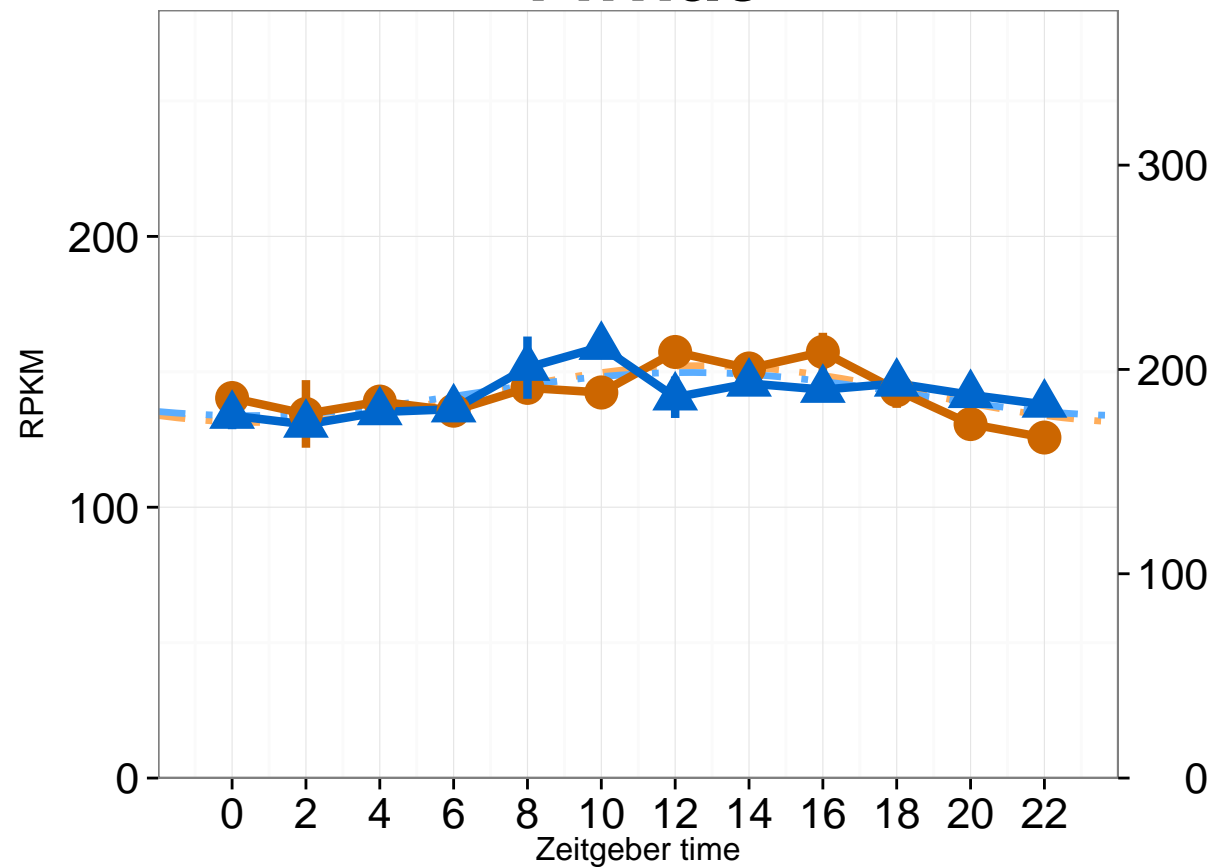

## Ywhae

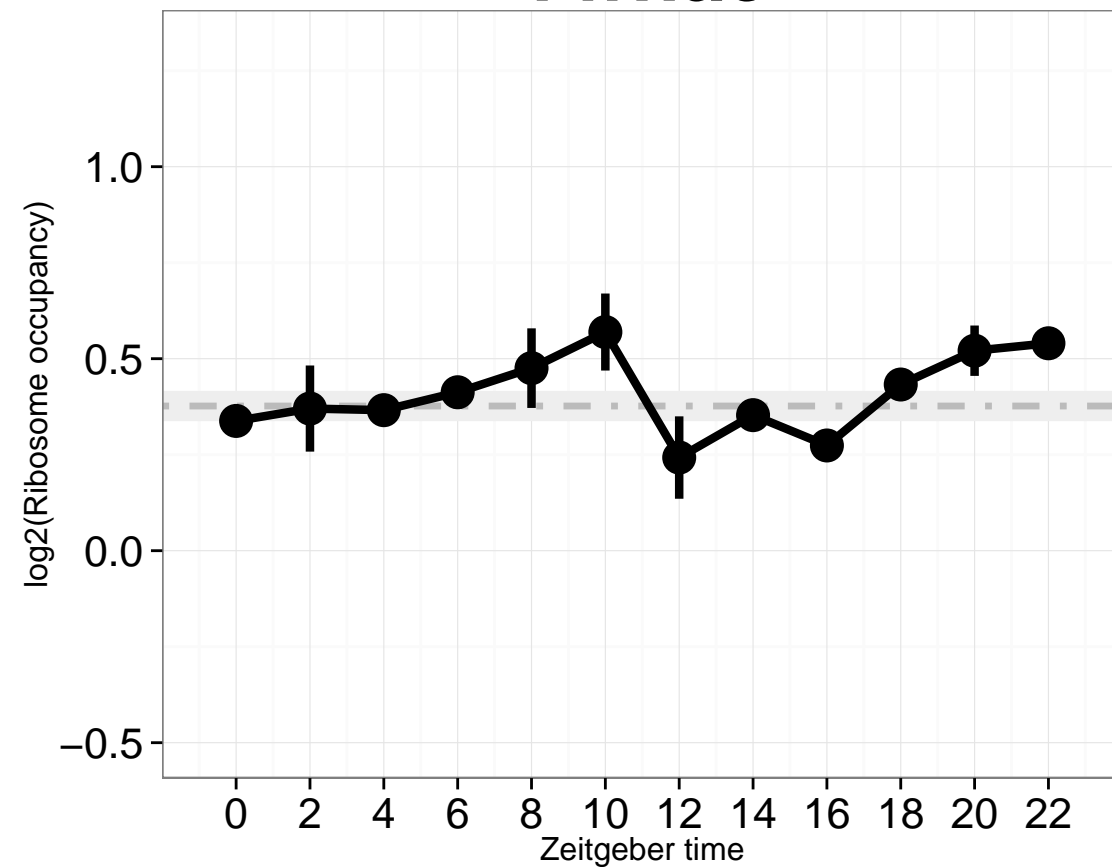

Supplement: SuppDataset_1.zip [file Ywhae_set_A.pdf › Supplemental Dataset 1/A-mRNA_nonrhyth_translation_nonrhyth/Ywhae_set_A.pdf]

## Ywhag

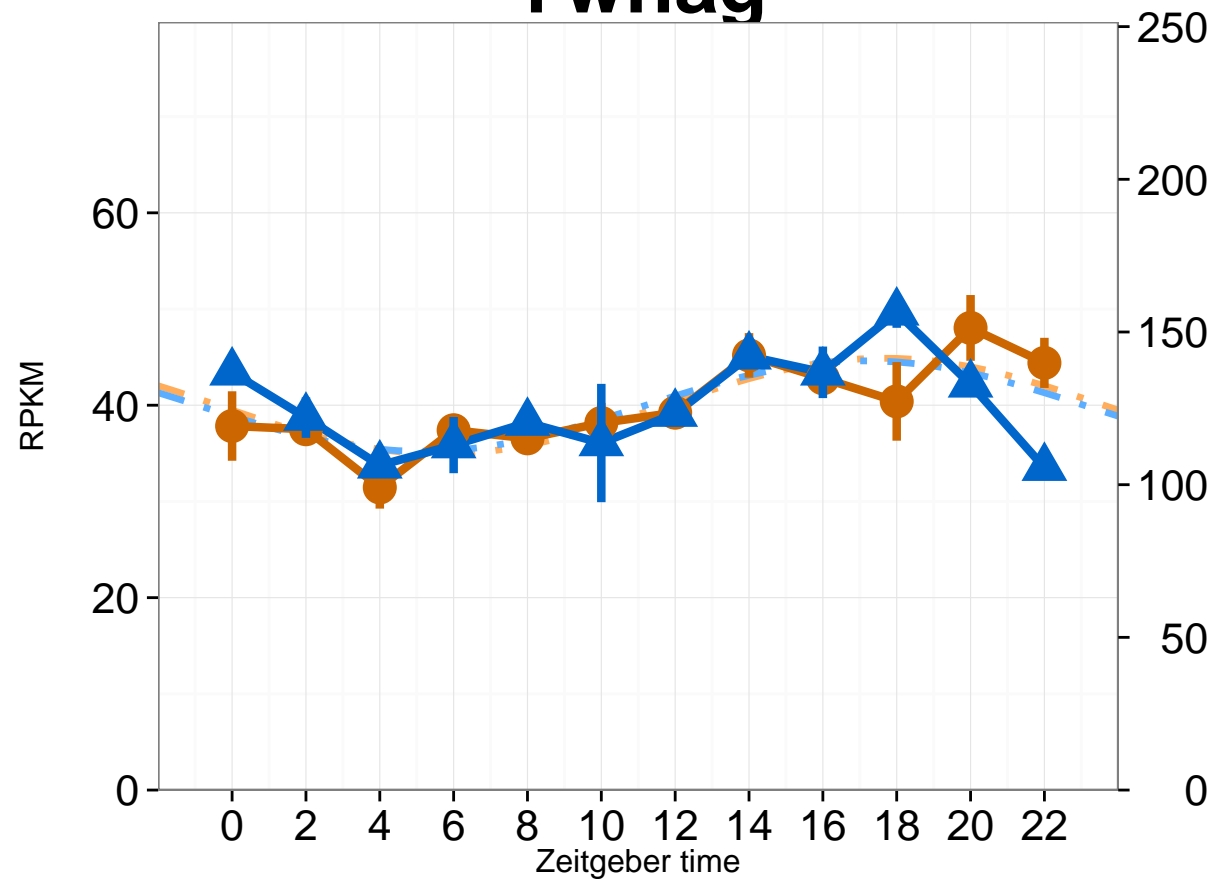

## Ywhag

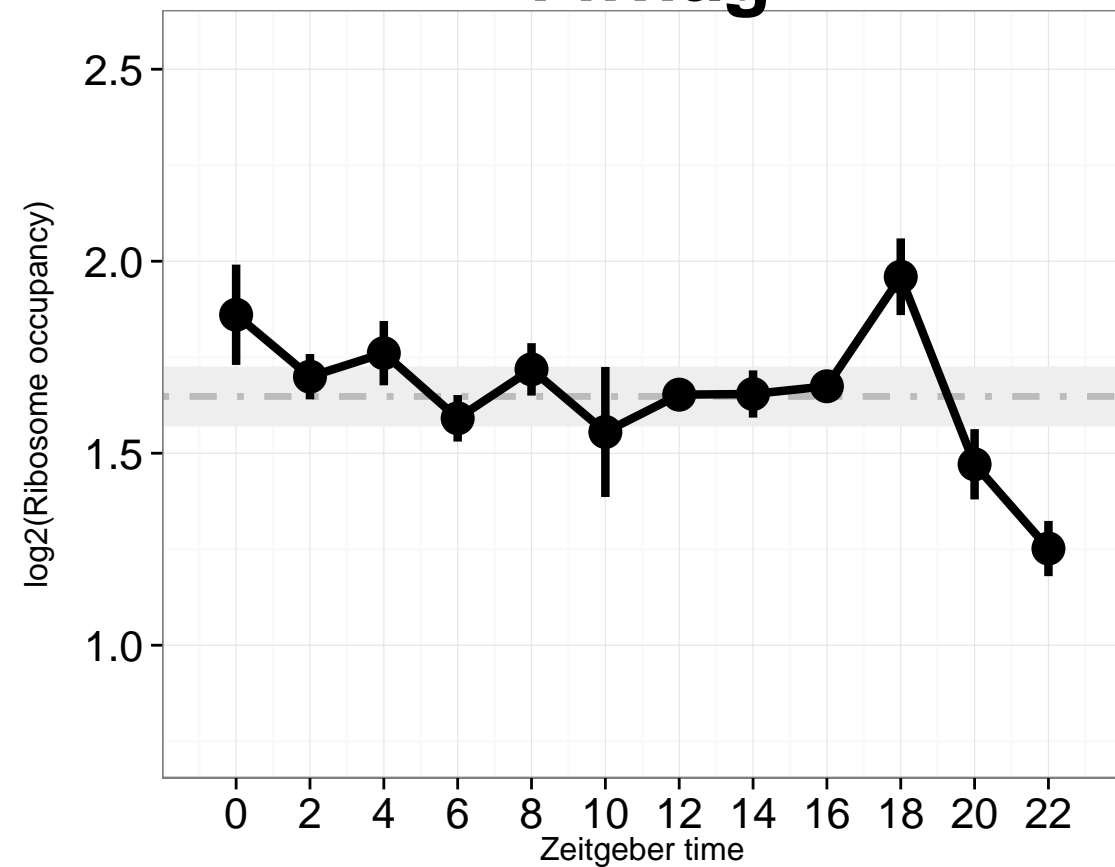

Supplement: SuppDataset_1.zip [file Ywhag_set_A.pdf › Supplemental Dataset 1/A-mRNA_nonrhyth_translation_nonrhyth/Ywhag_set_A.pdf]

## Ywhah

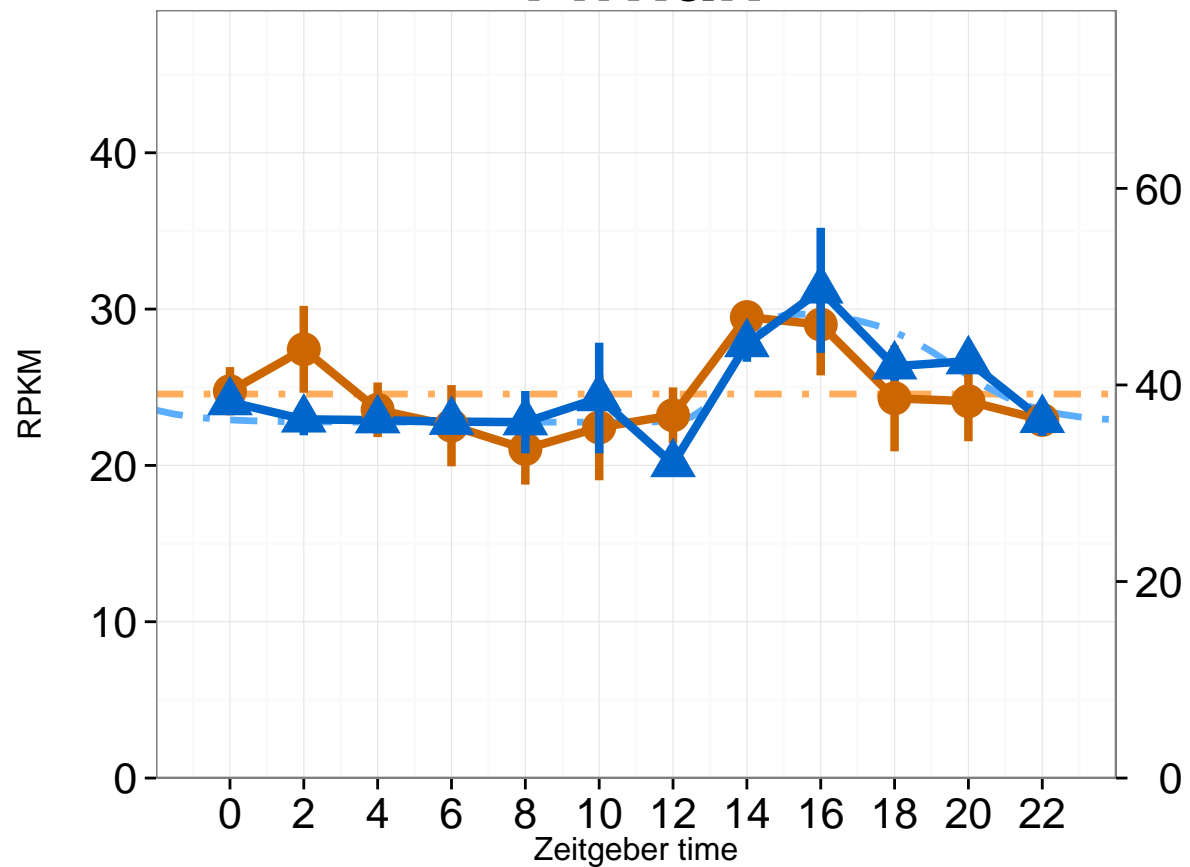

## Ywhah

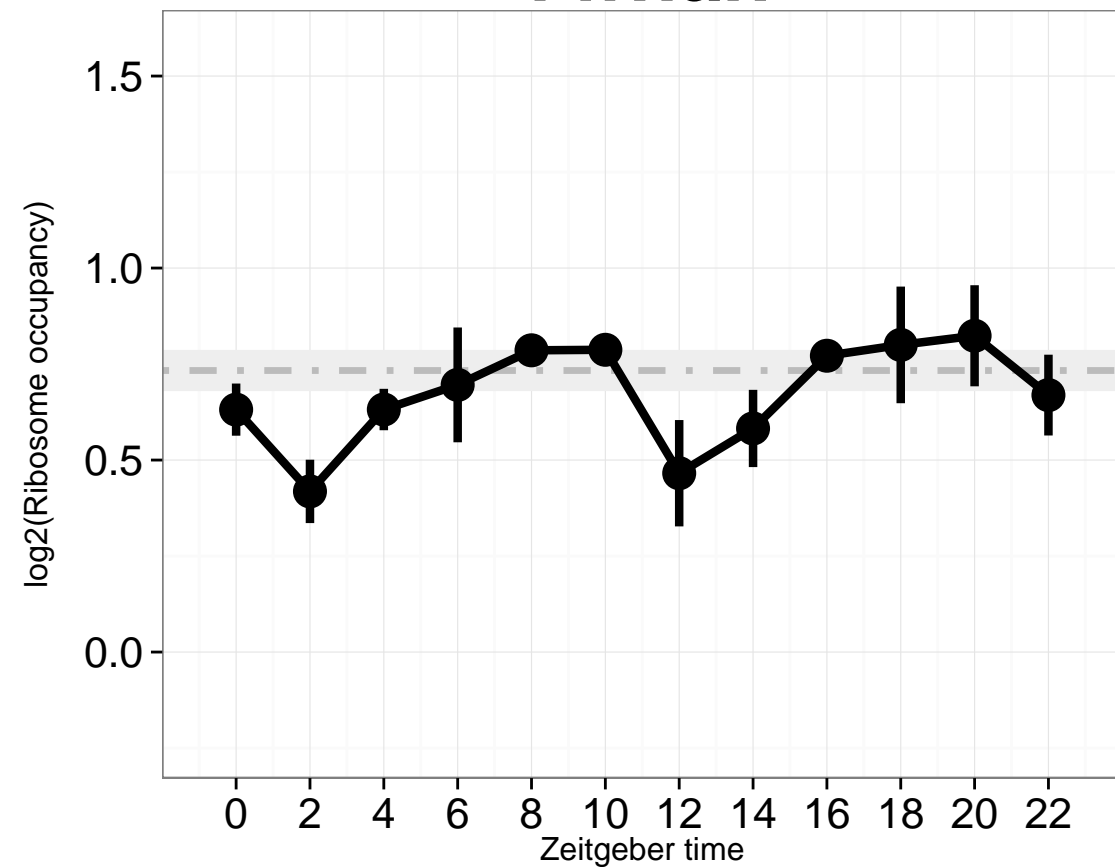

Supplement: SuppDataset_1.zip [file Ywhah_set_A.pdf › Supplemental Dataset 1/A-mRNA_nonrhyth_translation_nonrhyth/Ywhah_set_A.pdf]

## Ywhaq

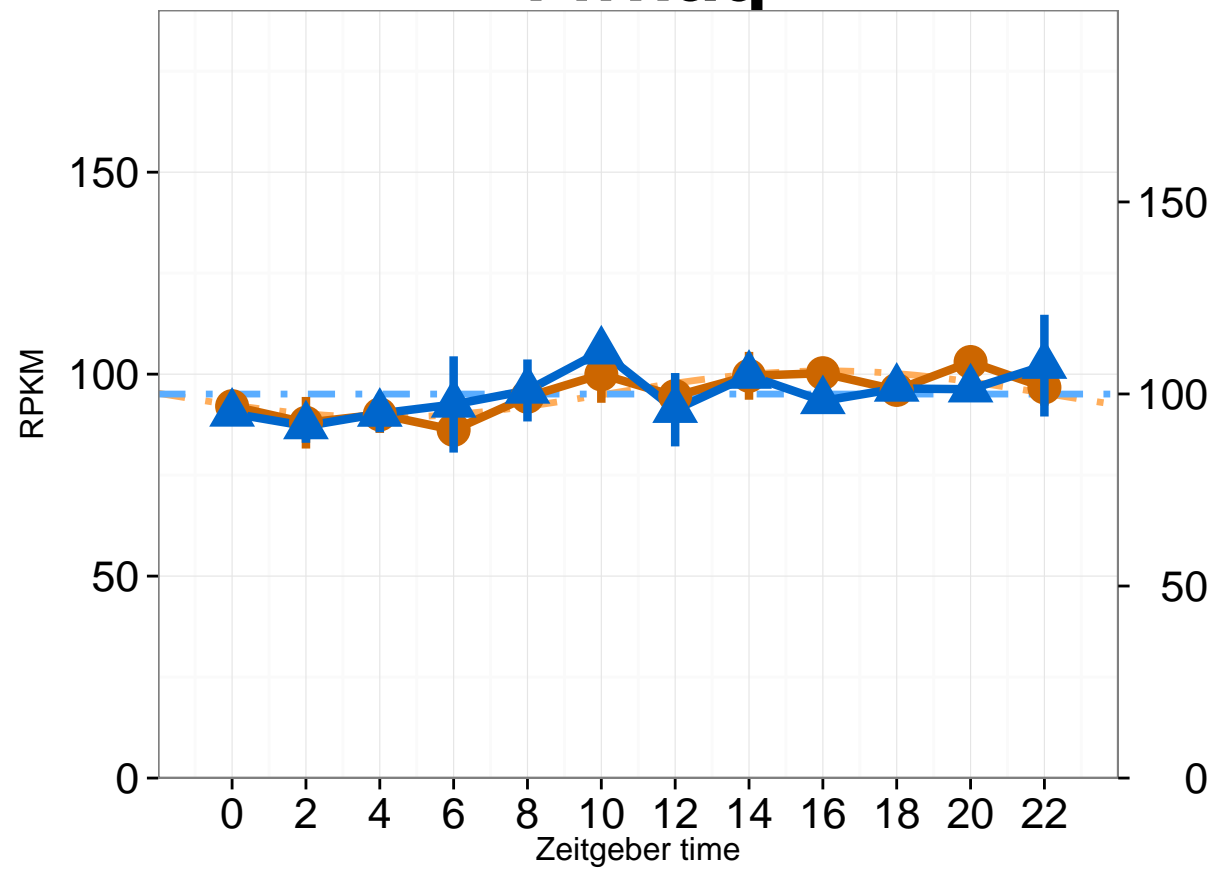

## Ywhaq

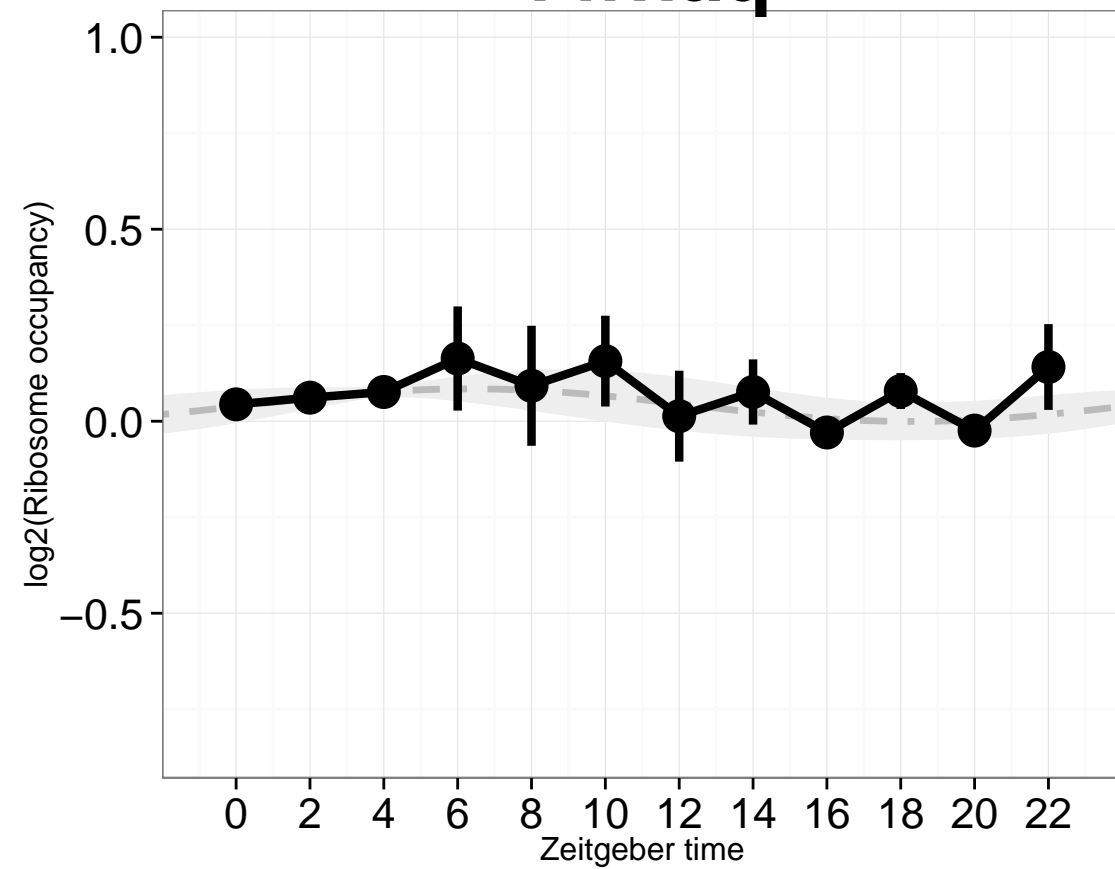

Supplement: SuppDataset_1.zip [file Ywhaq_set_A.pdf › Supplemental Dataset 1/A-mRNA_nonrhyth_translation_nonrhyth/Ywhaq_set_A.pdf]

## Ywhaz

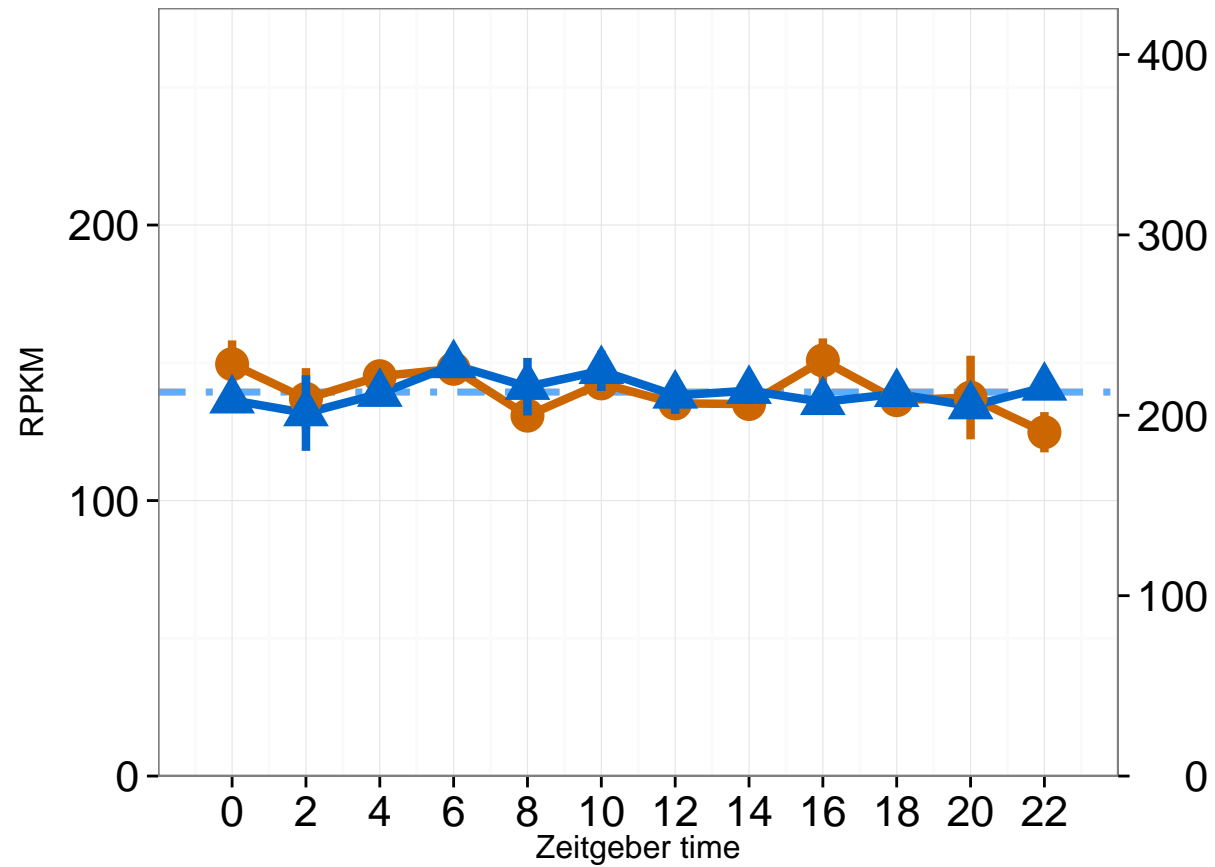

## Ywhaz

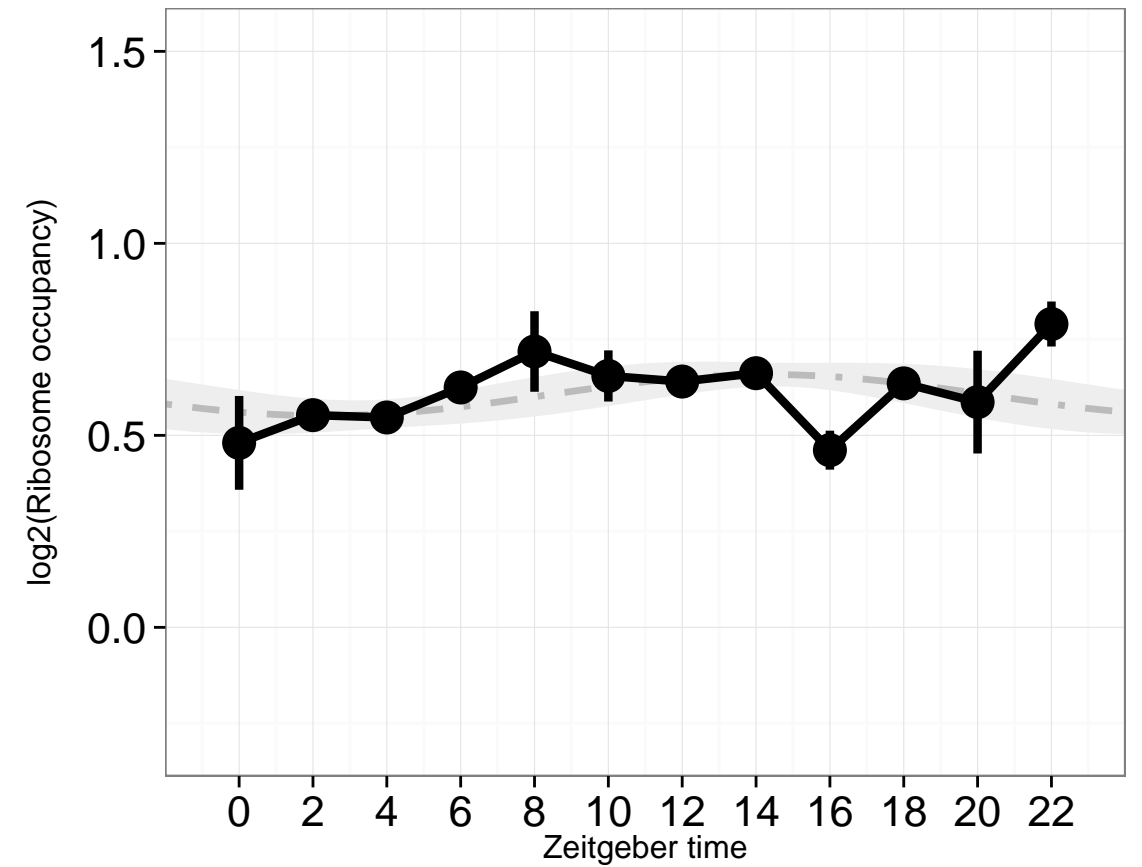

Supplement: SuppDataset_1.zip [file Ywhaz_set_A.pdf › Supplemental Dataset 1/A-mRNA_nonrhyth_translation_nonrhyth/Ywhaz_set_A.pdf]

# Yy1

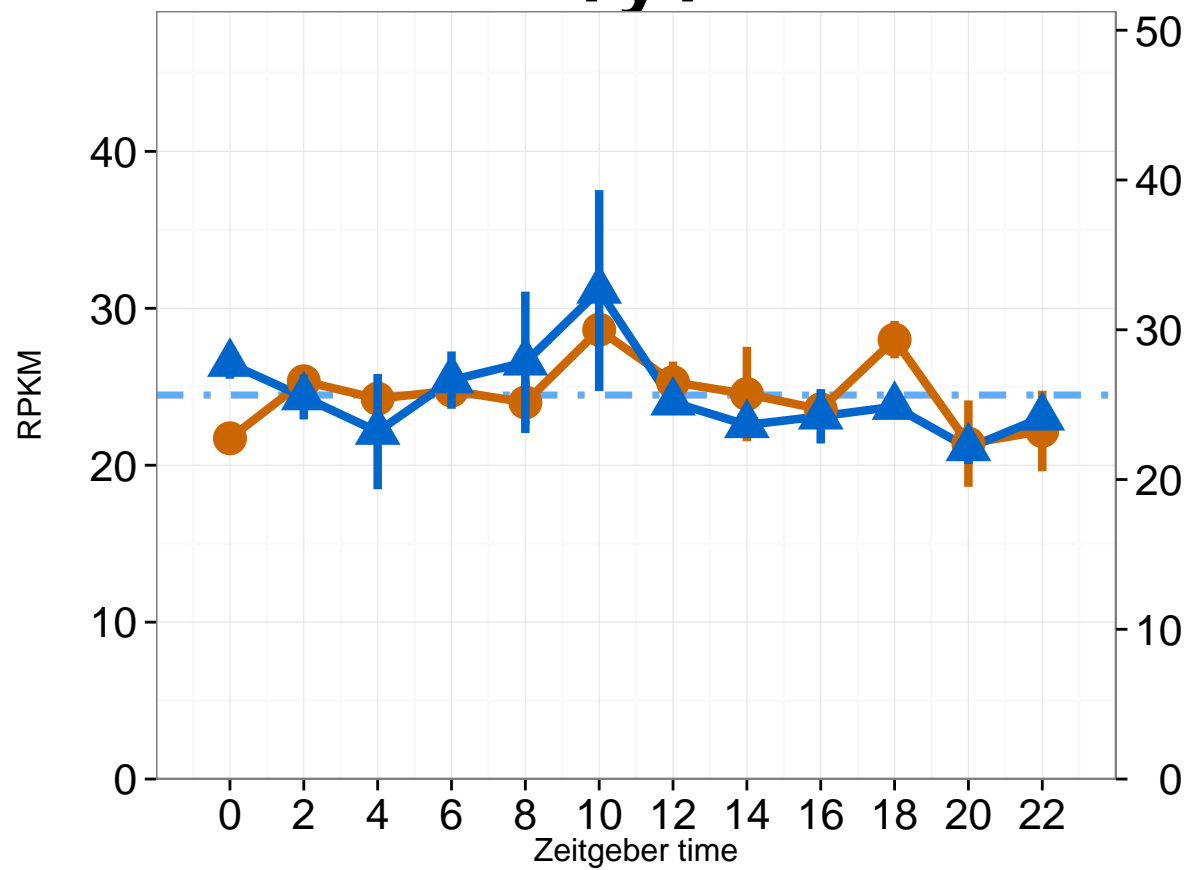

# Yy1

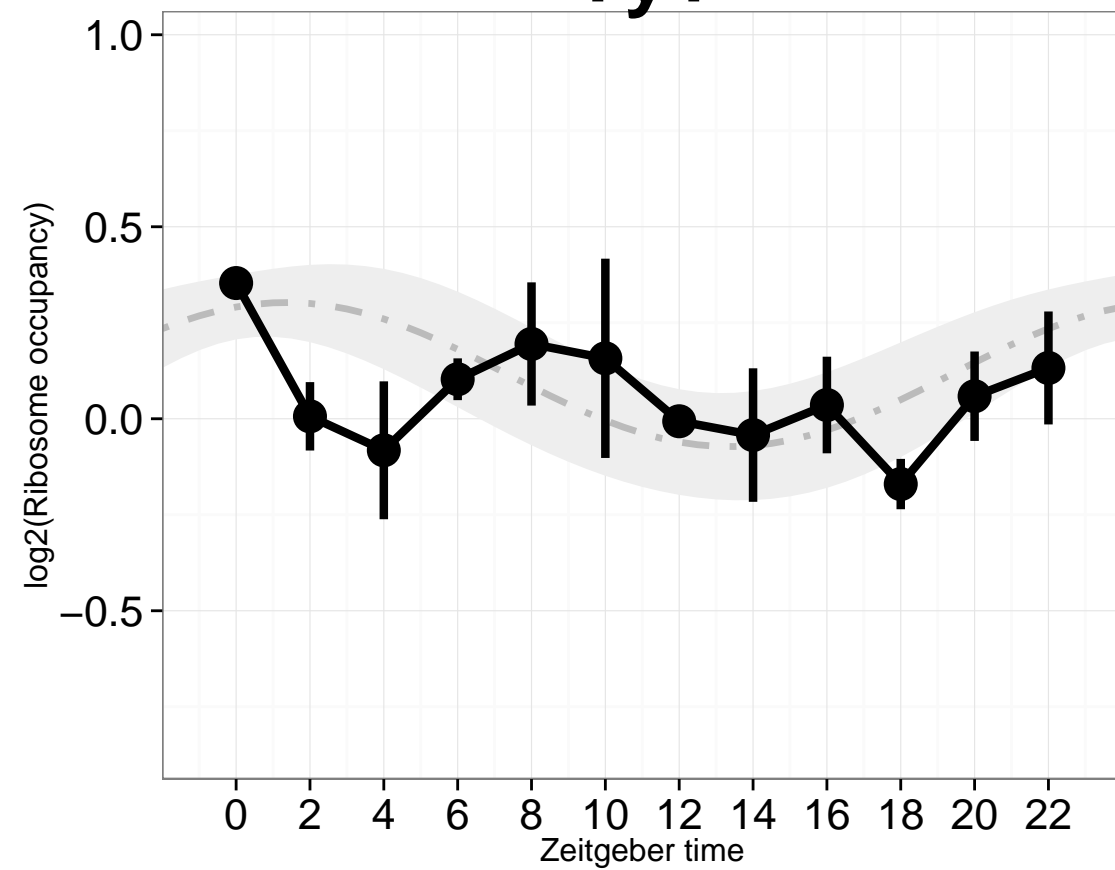

Supplement: SuppDataset_1.zip [file Yy1_set_A.pdf › Supplemental Dataset 1/A-mRNA_nonrhyth_translation_nonrhyth/Yy1_set_A.pdf]

## Yy2

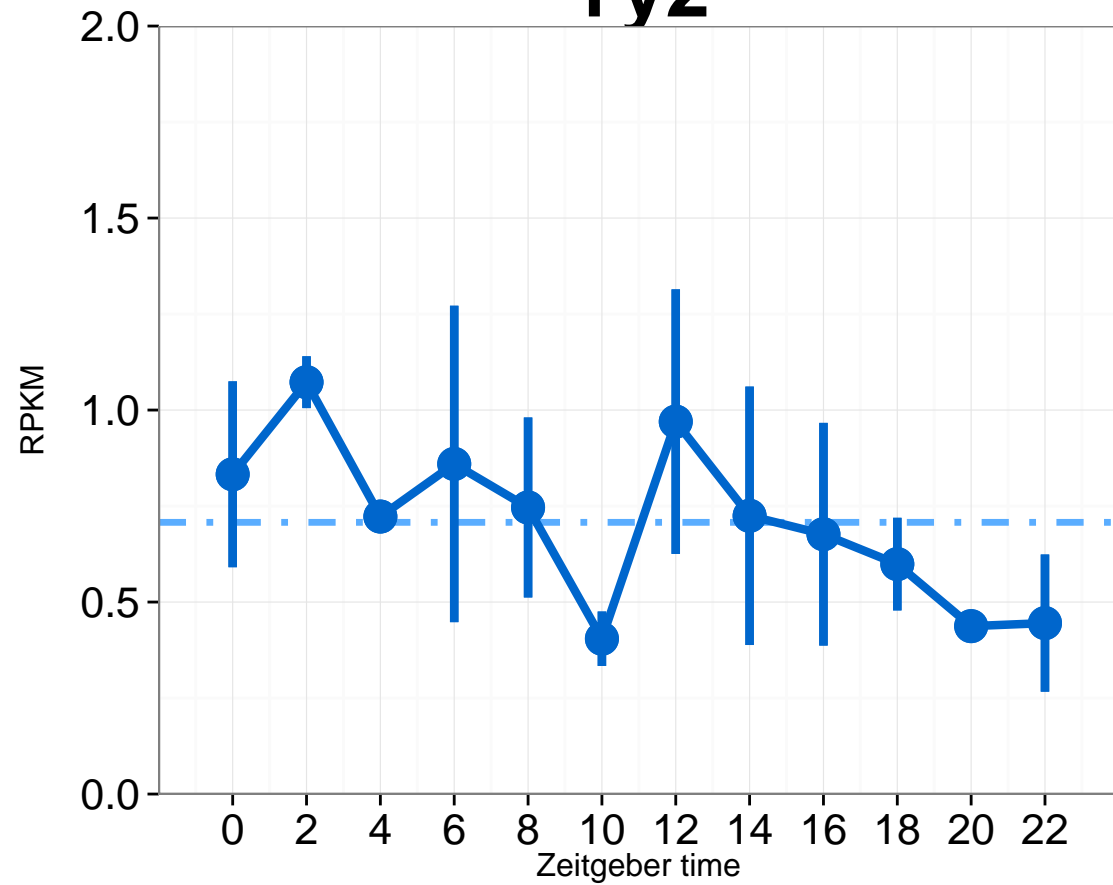

## Yy2 log2(Ribosome occupancy)

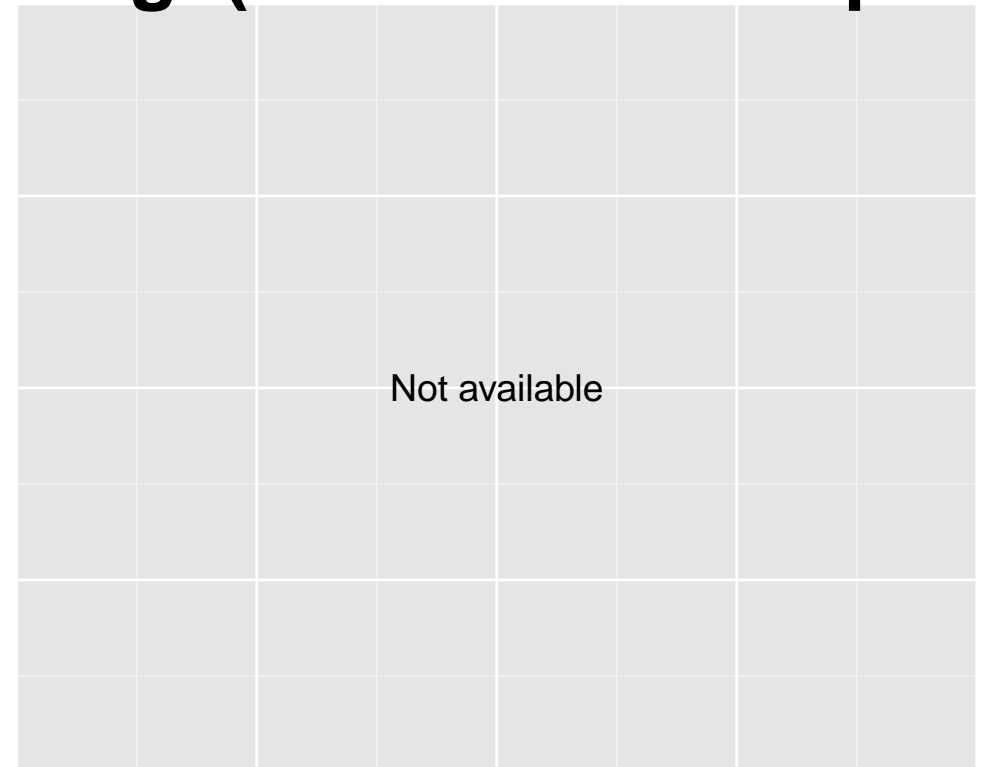

Supplement: SuppDataset_1.zip [file Yy2_set_A.pdf › Supplemental Dataset 1/A-mRNA_nonrhyth_translation_nonrhyth/Yy2_set_A.pdf]

## Zadh2

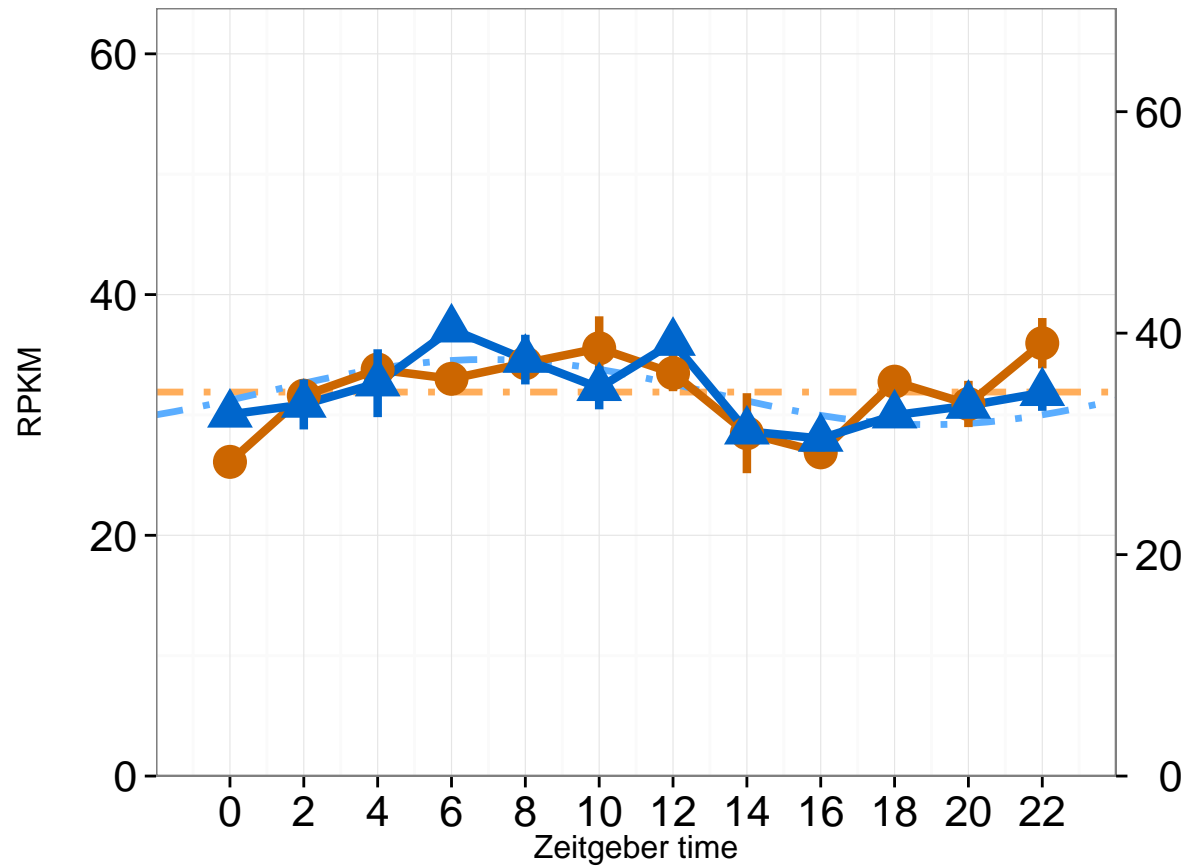

## Zadh2

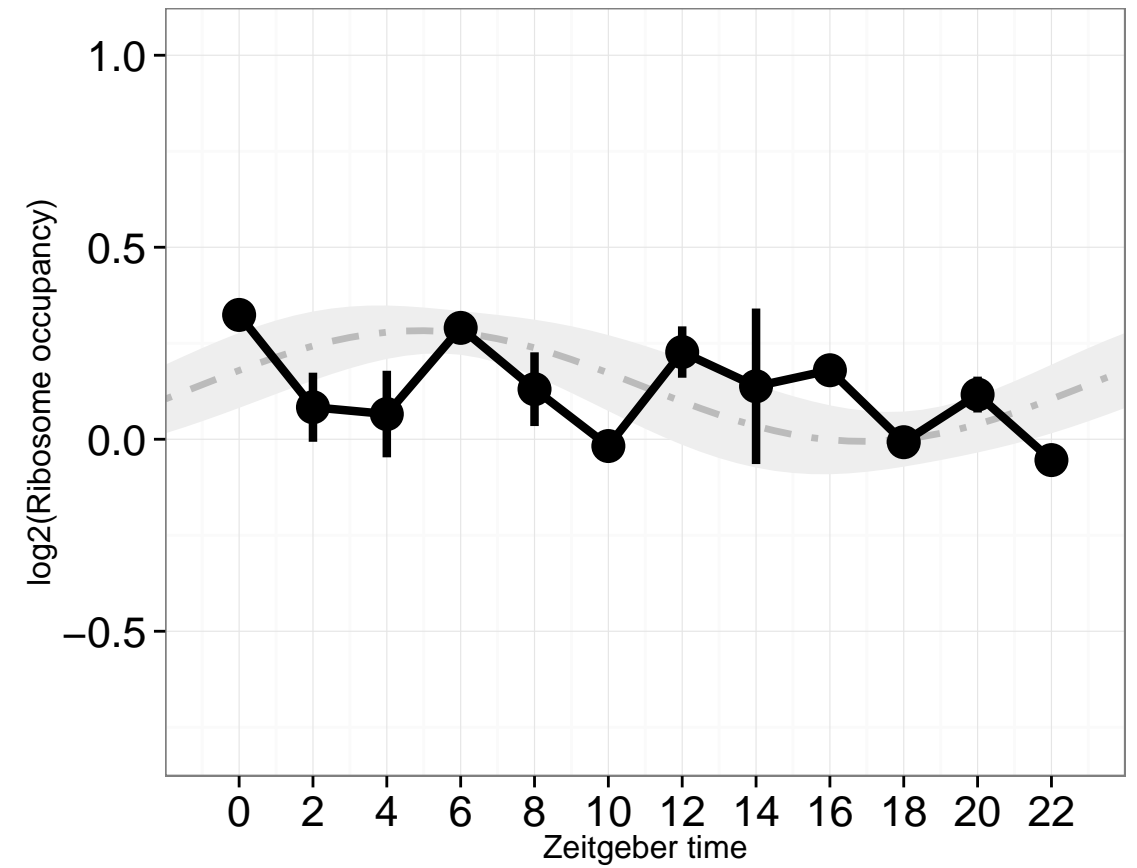

Supplement: SuppDataset_1.zip [file Zadh2_set_A.pdf › Supplemental Dataset 1/A-mRNA_nonrhyth_translation_nonrhyth/Zadh2_set_A.pdf]

## Zak

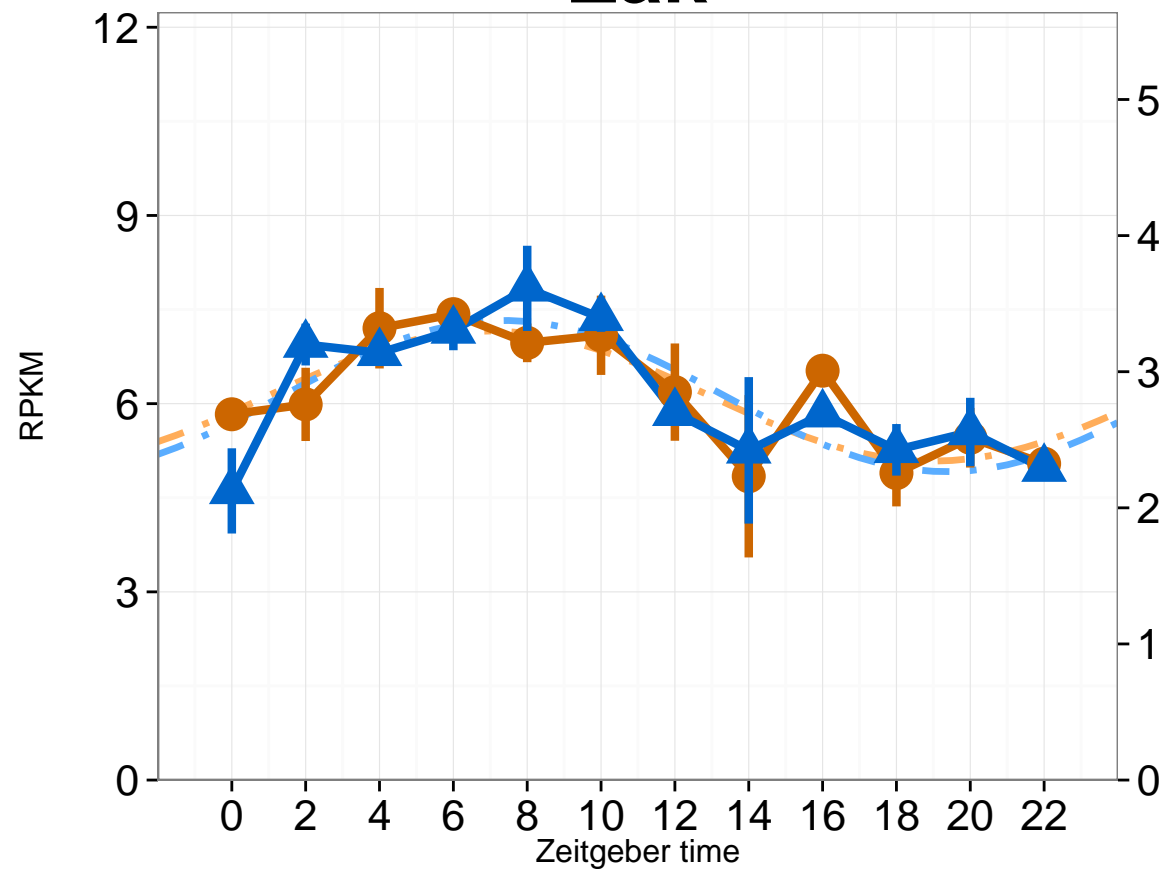

## Zak

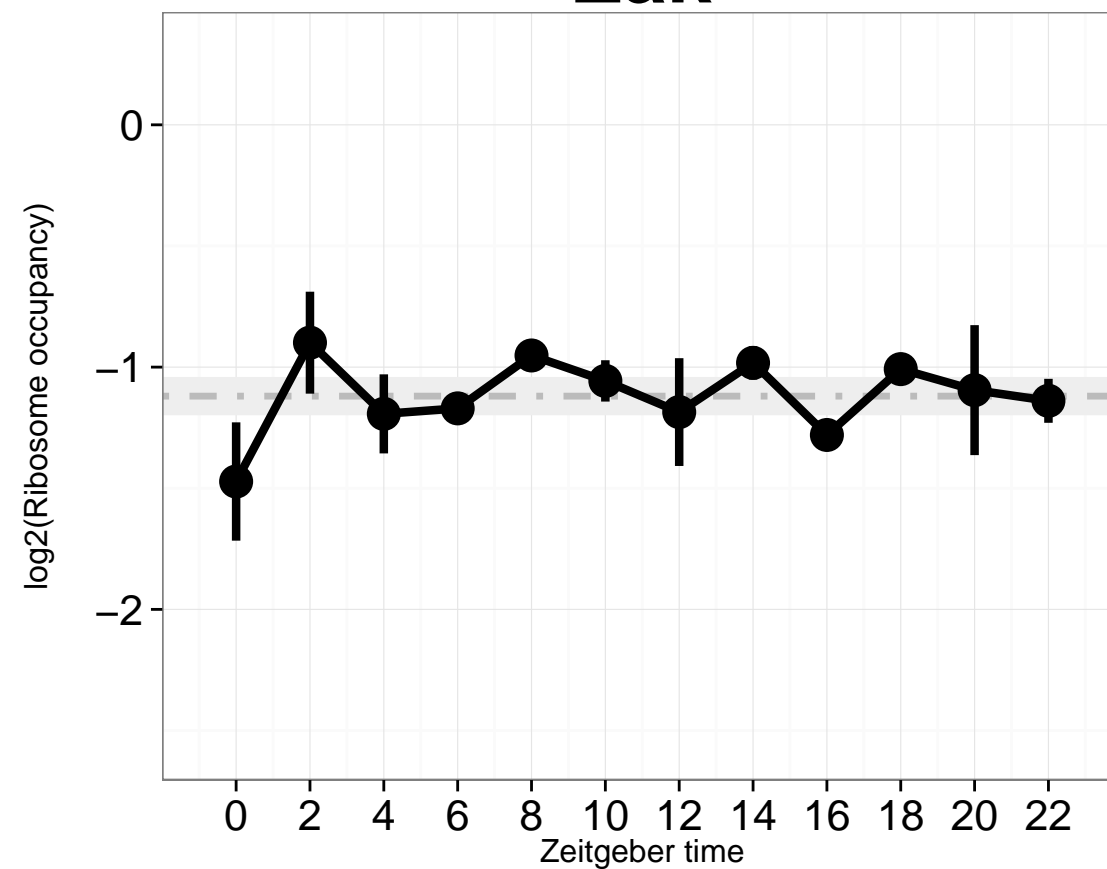

Supplement: SuppDataset_1.zip [file Zak_set_A.pdf › Supplemental Dataset 1/A-mRNA_nonrhyth_translation_nonrhyth/Zak_set_A.pdf]

## Zap70

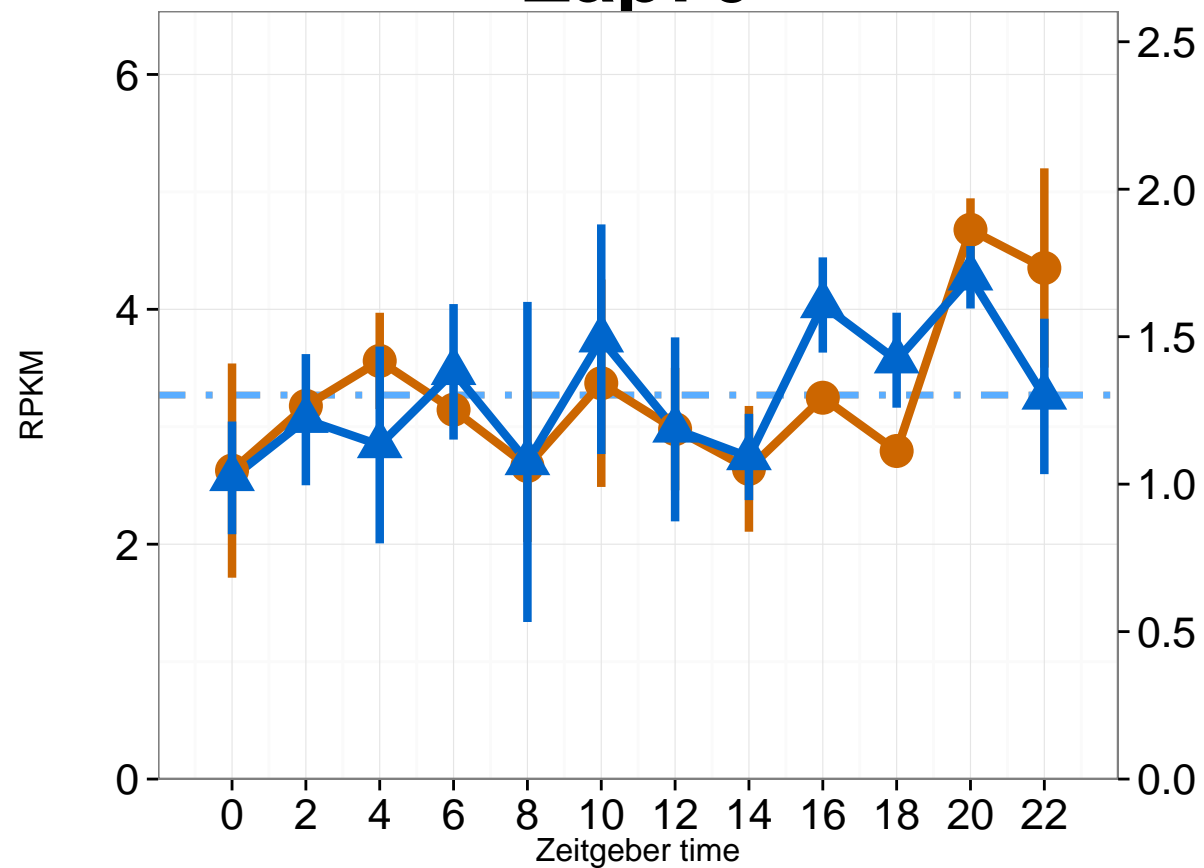

## Zap70

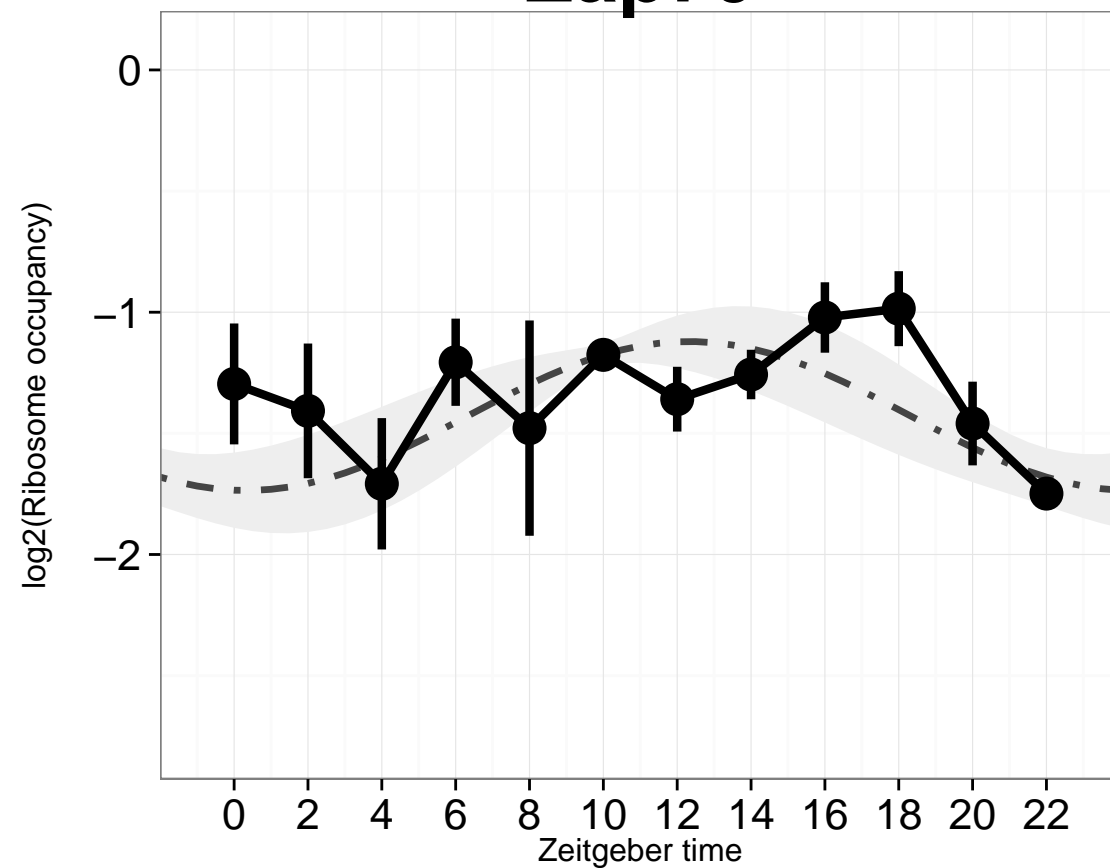

Supplement: SuppDataset_1.zip [file Zap70_set_A.pdf › Supplemental Dataset 1/A-mRNA_nonrhyth_translation_nonrhyth/Zap70_set_A.pdf]

# Zbed3

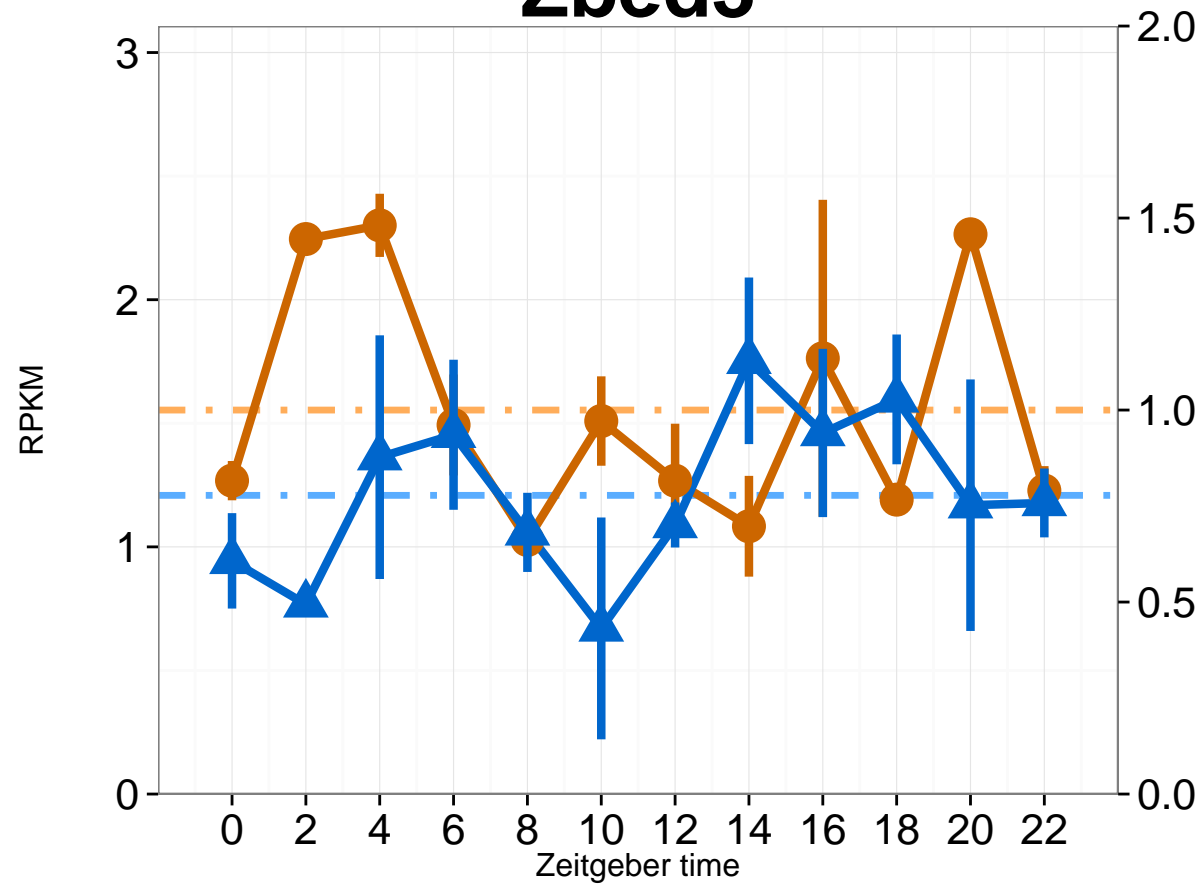

# Zbed3

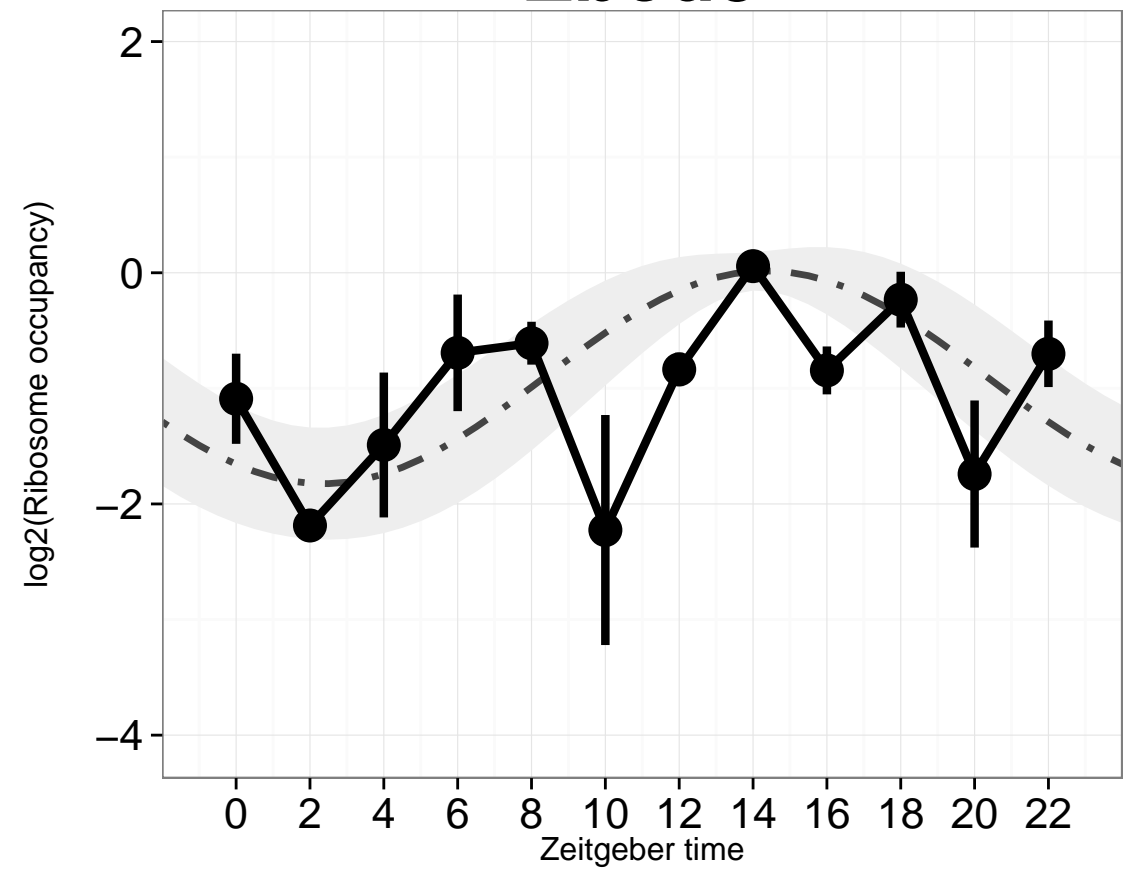

Supplement: SuppDataset_1.zip [file Zbed3_set_A.pdf › Supplemental Dataset 1/A-mRNA_nonrhyth_translation_nonrhyth/Zbed3_set_A.pdf]

## Zbed4

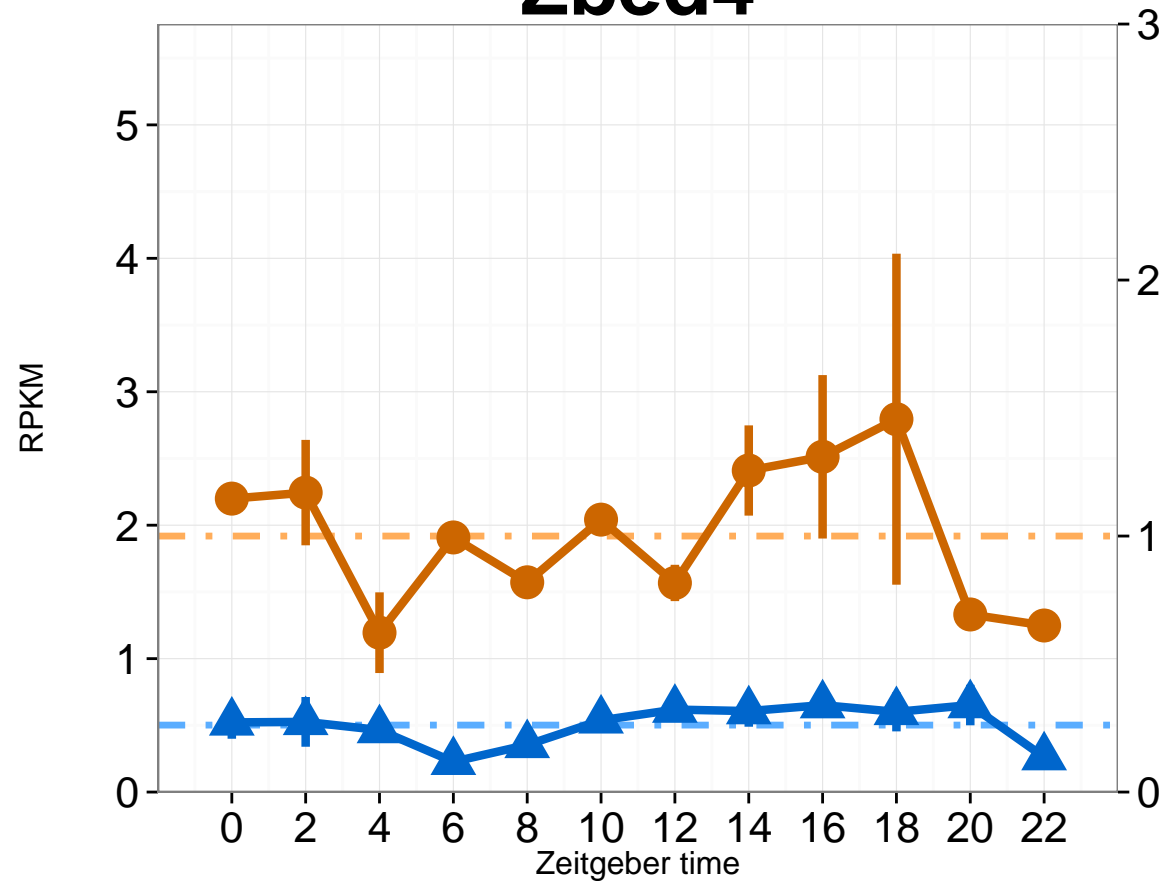

## Zbed4

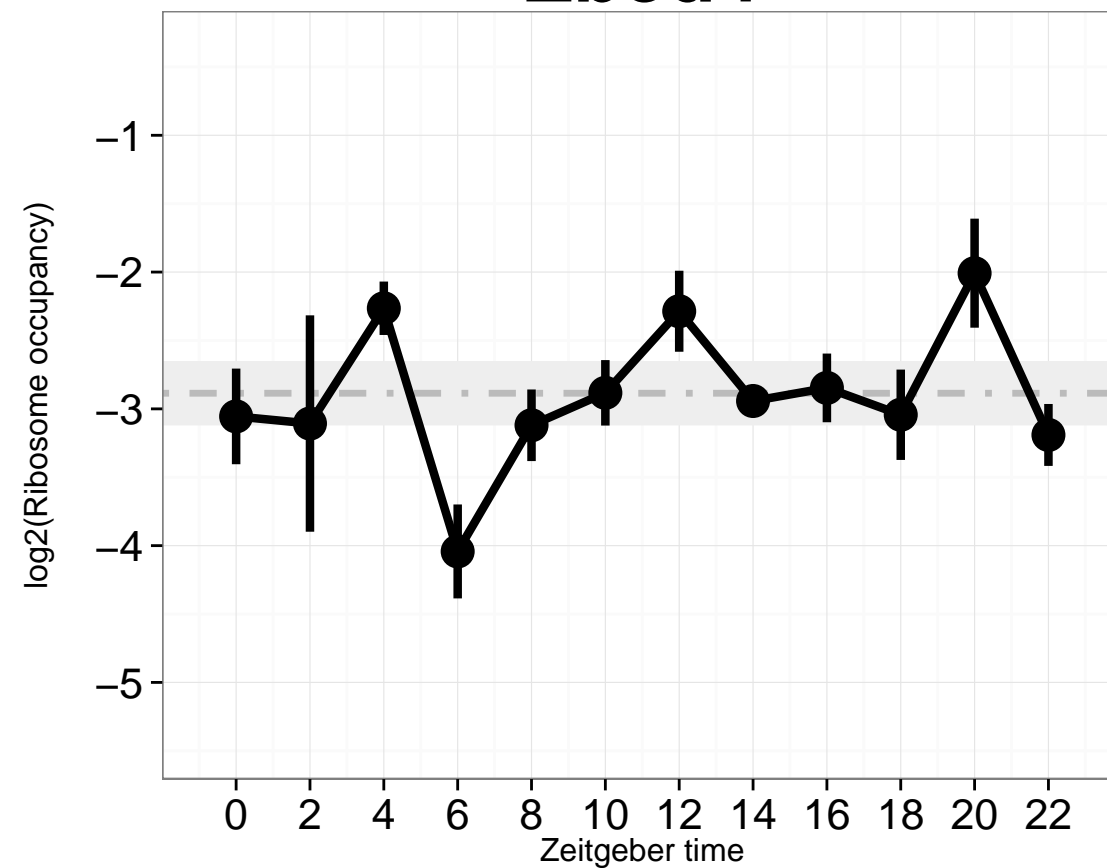

Supplement: SuppDataset_1.zip [file Zbed4_set_A.pdf › Supplemental Dataset 1/A-mRNA_nonrhyth_translation_nonrhyth/Zbed4_set_A.pdf]

# Zbed6

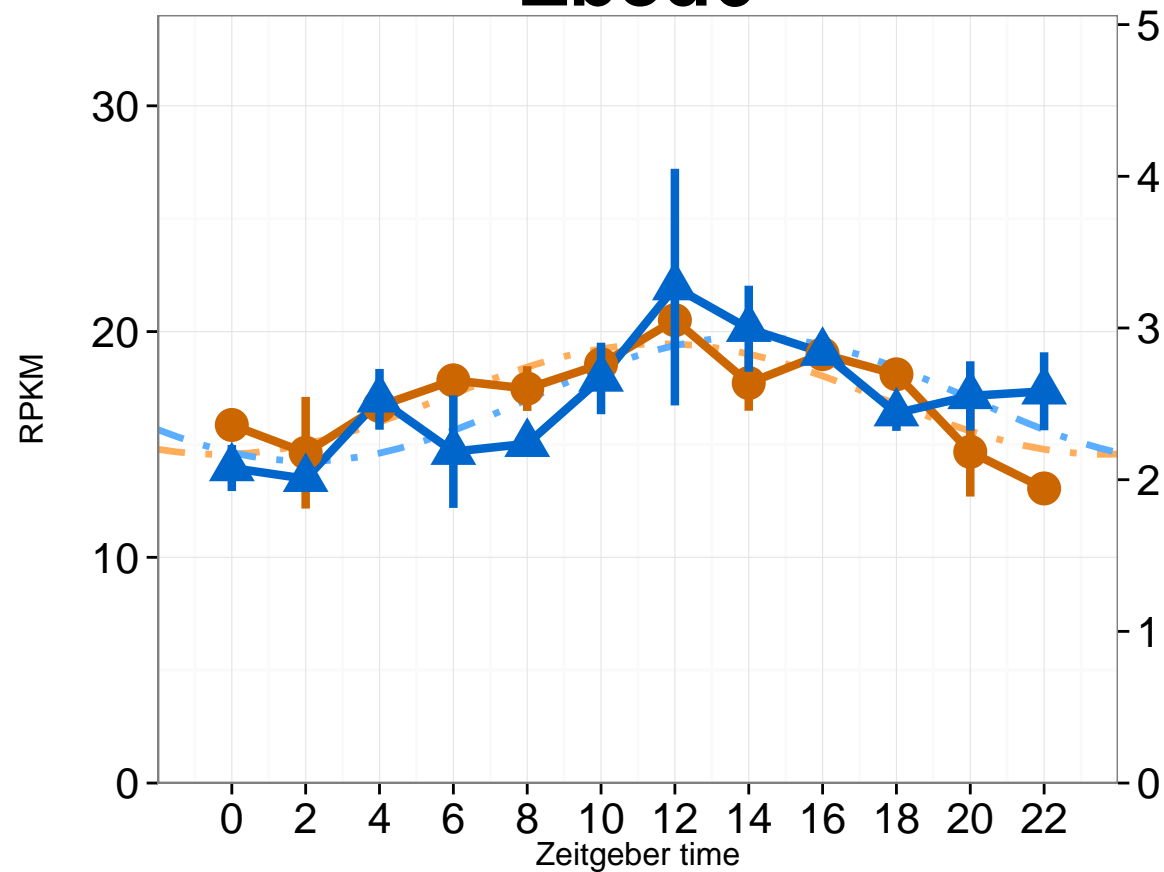

# Zbed6

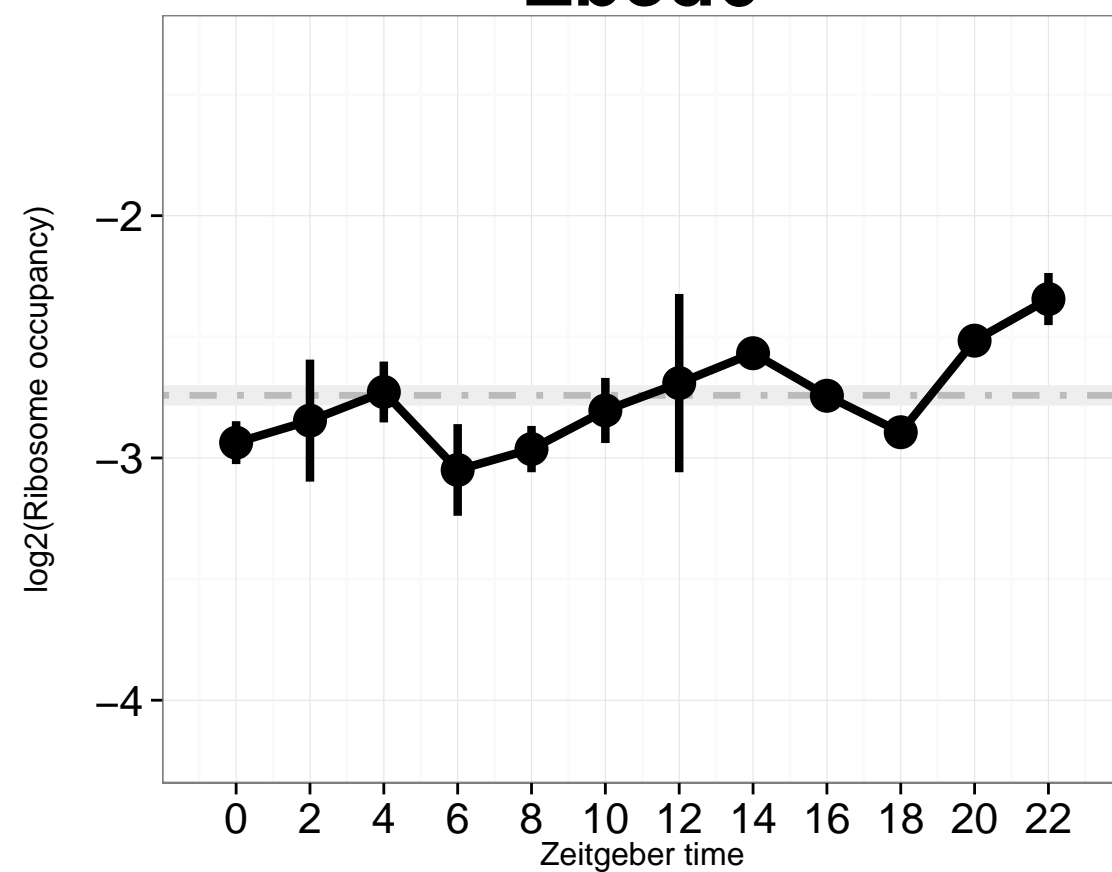

Supplement: SuppDataset_1.zip [file Zbed6_set_A.pdf › Supplemental Dataset 1/A-mRNA_nonrhyth_translation_nonrhyth/Zbed6_set_A.pdf]

# Zbtb12

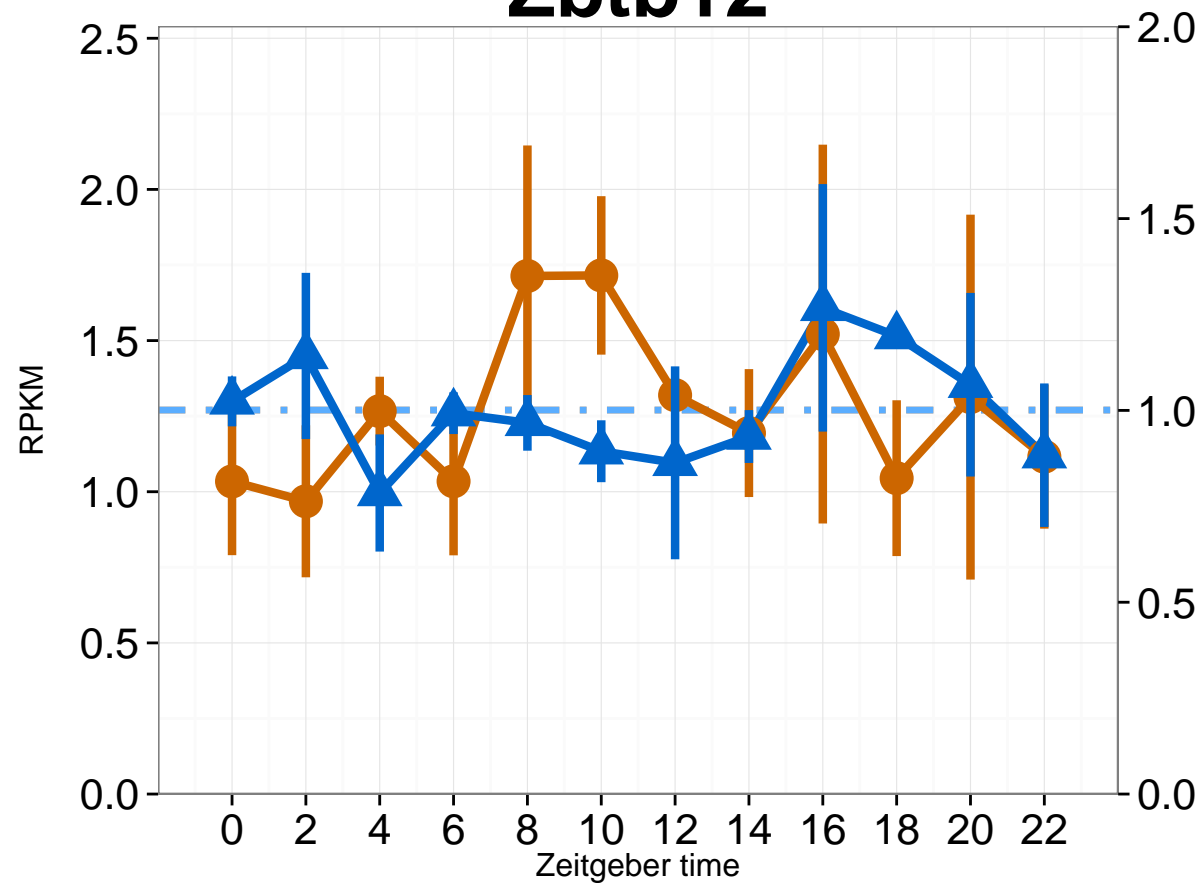

# Zbtb12

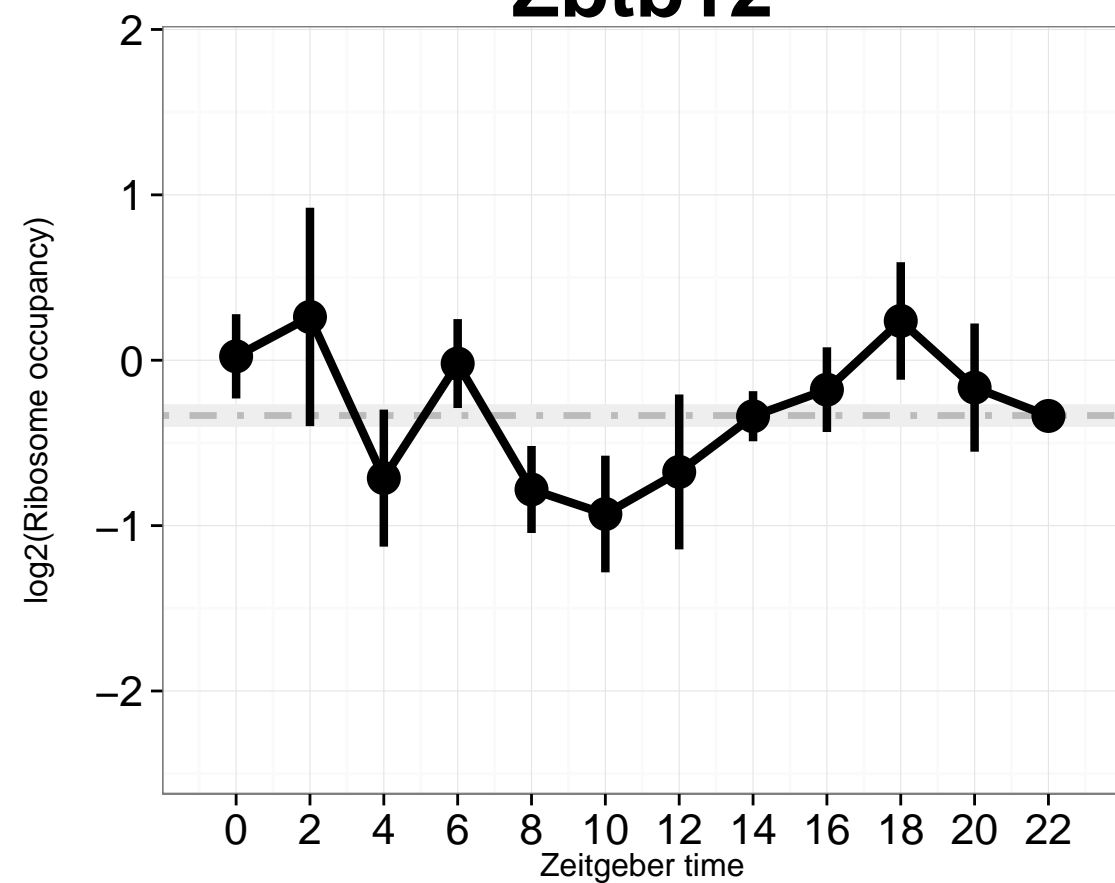

Supplement: SuppDataset_1.zip [file Zbtb12_set_A.pdf › Supplemental Dataset 1/A-mRNA_nonrhyth_translation_nonrhyth/Zbtb12_set_A.pdf]

# Zbtb14

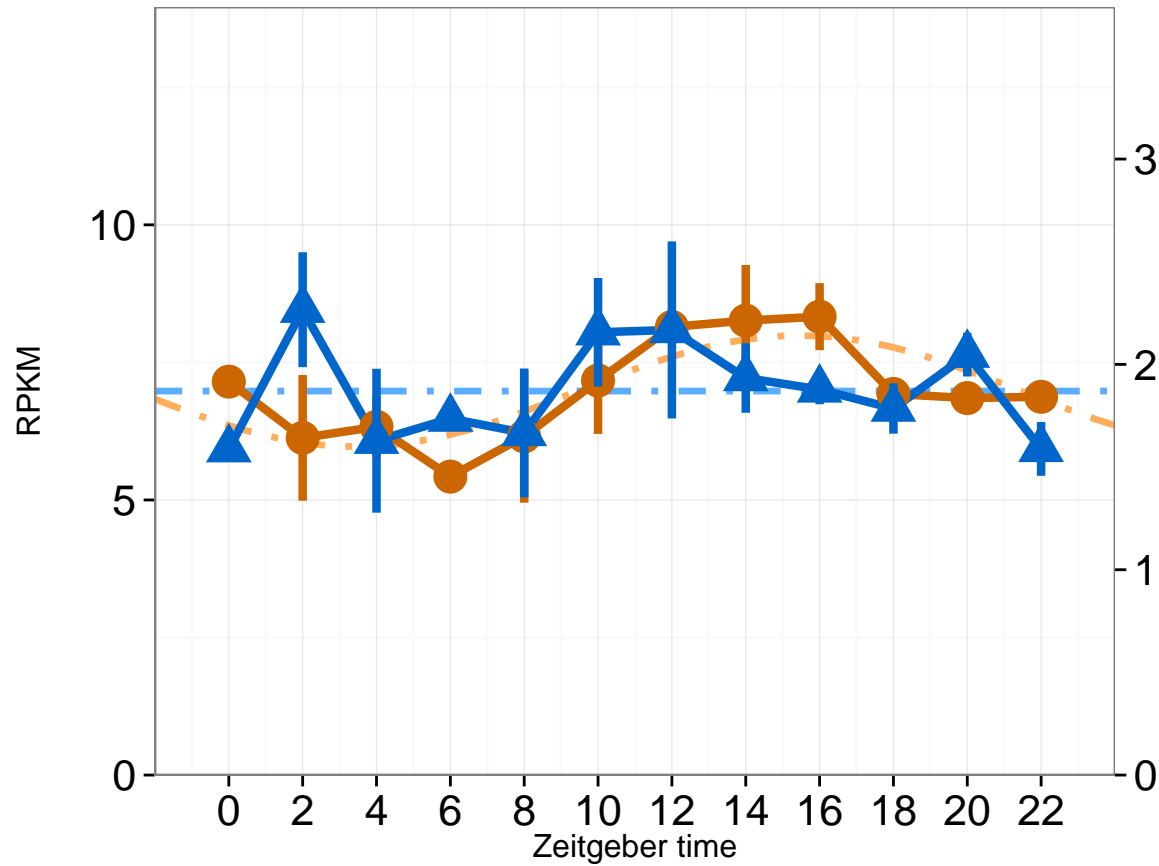

# Zbtb14

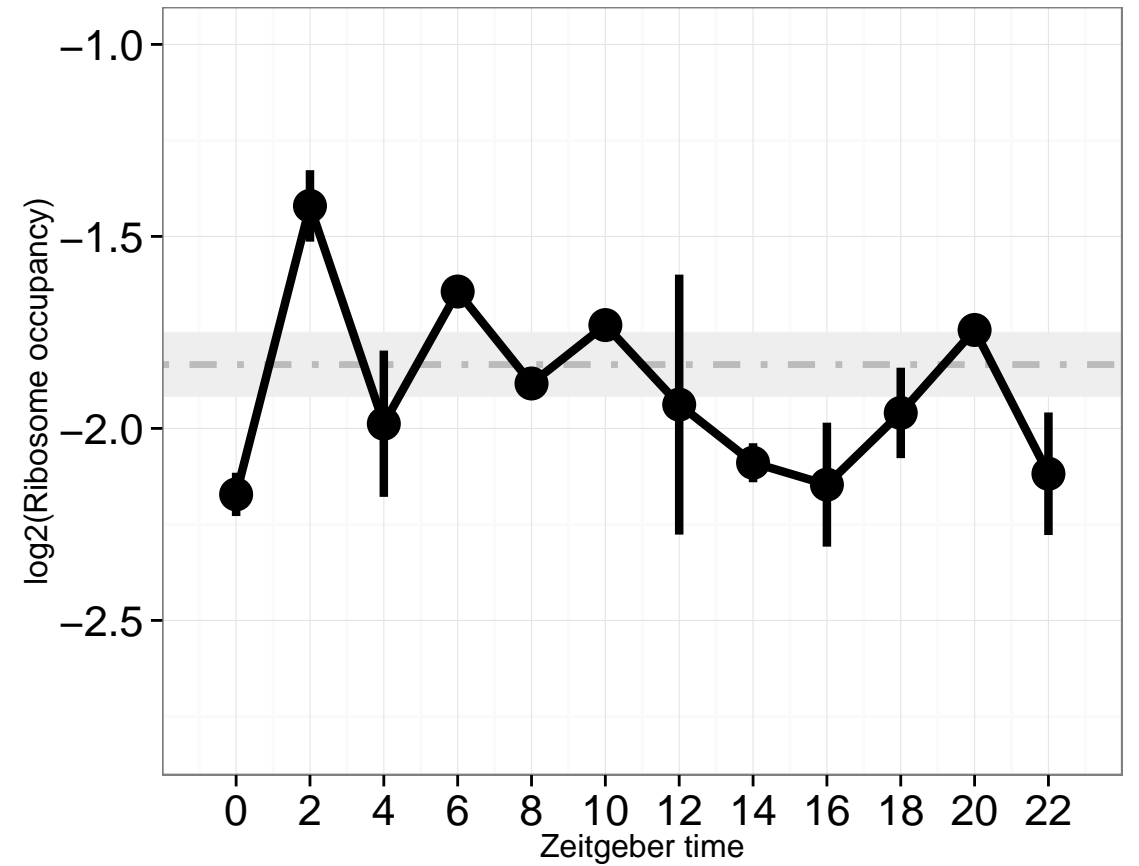

Supplement: SuppDataset_1.zip [file Zbtb14_set_A.pdf › Supplemental Dataset 1/A-mRNA_nonrhyth_translation_nonrhyth/Zbtb14_set_A.pdf]

# Zbtb17

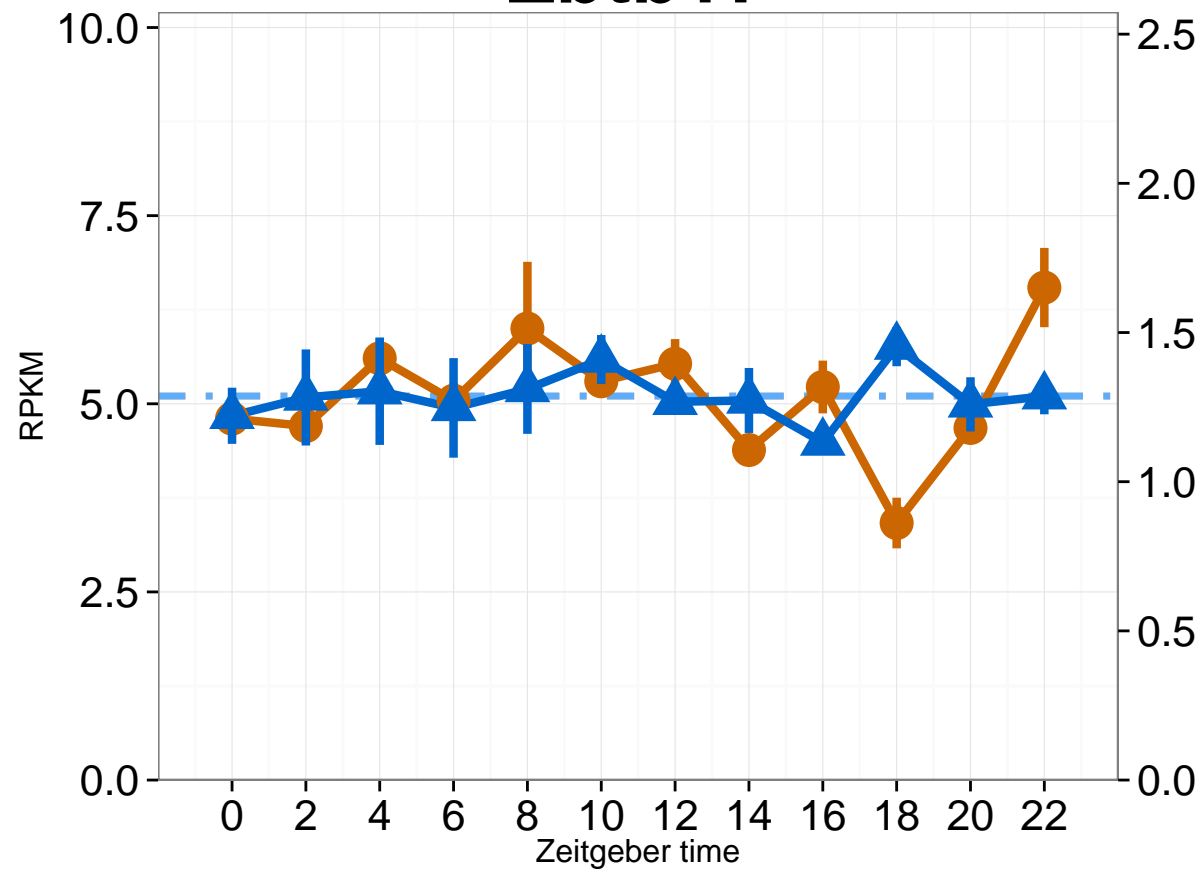

# Zbtb17

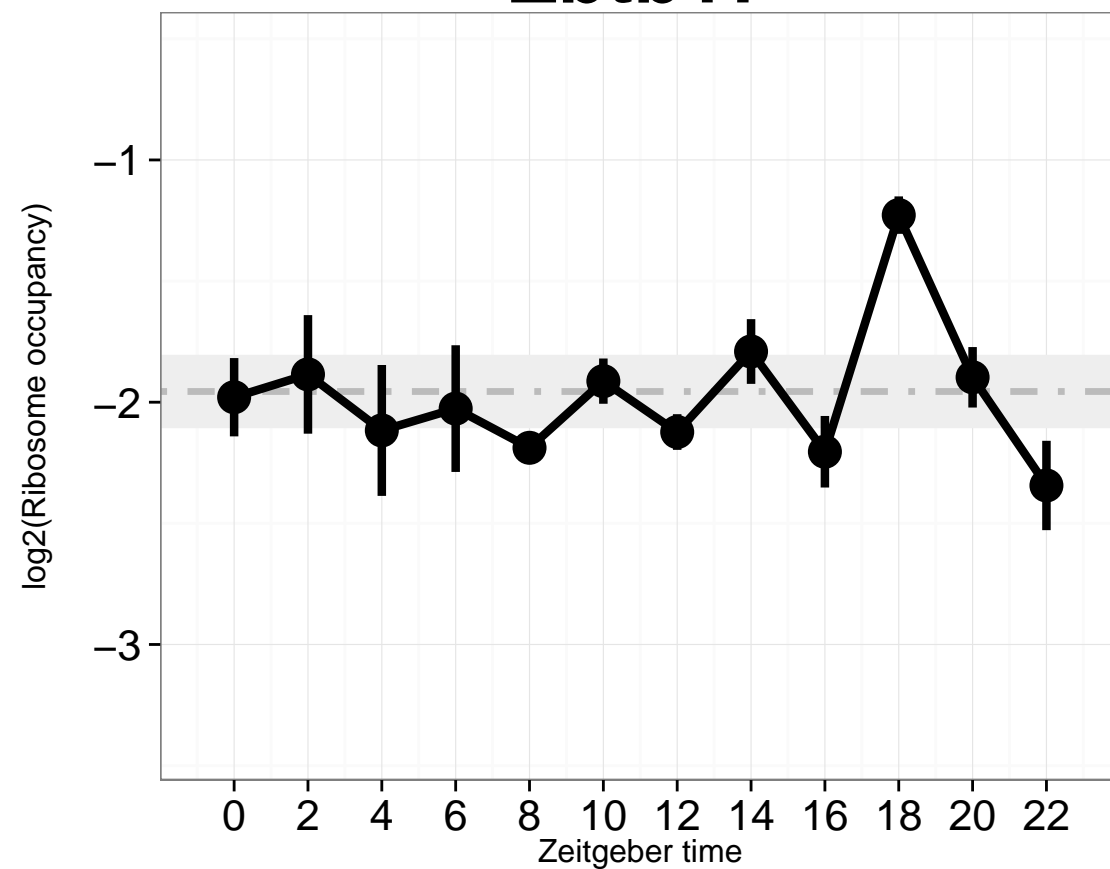

Supplement: SuppDataset_1.zip [file Zbtb17_set_A.pdf › Supplemental Dataset 1/A-mRNA_nonrhyth_translation_nonrhyth/Zbtb17_set_A.pdf]

# Zbtb18

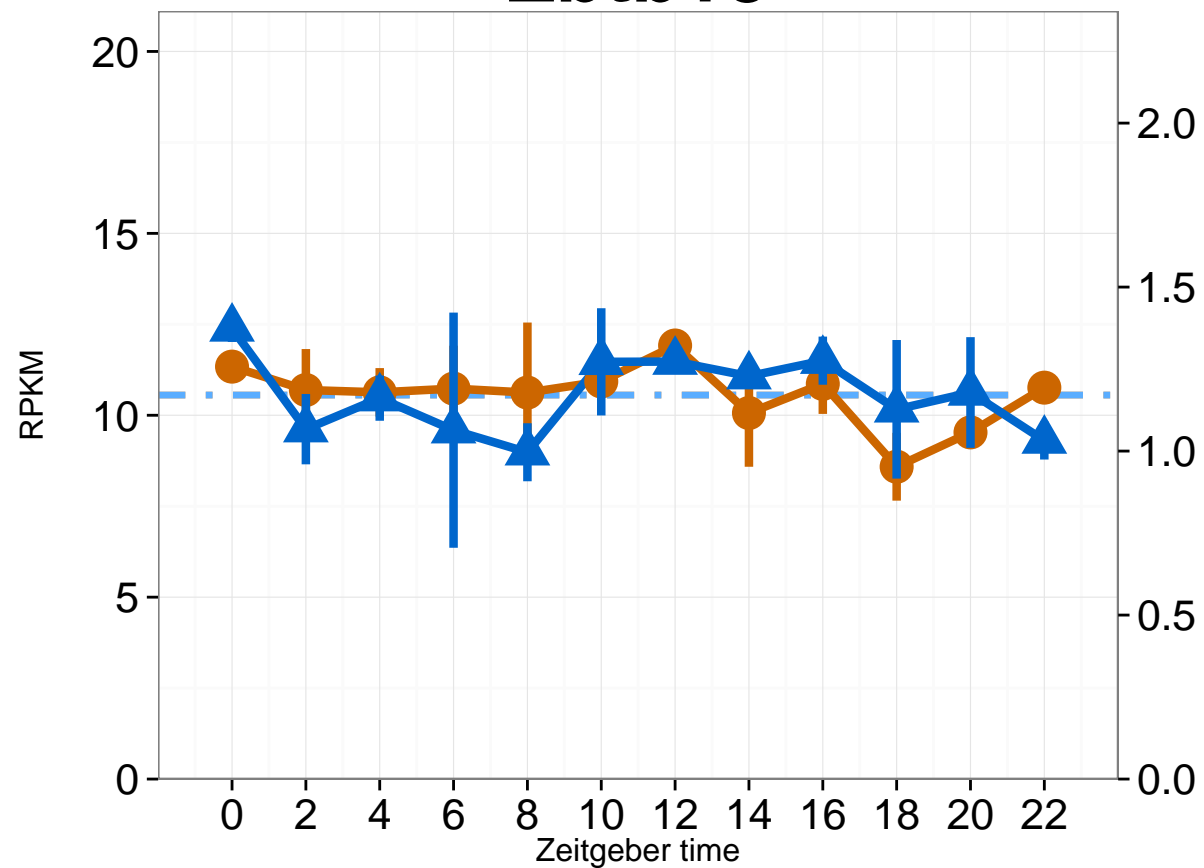

# Zbtb18

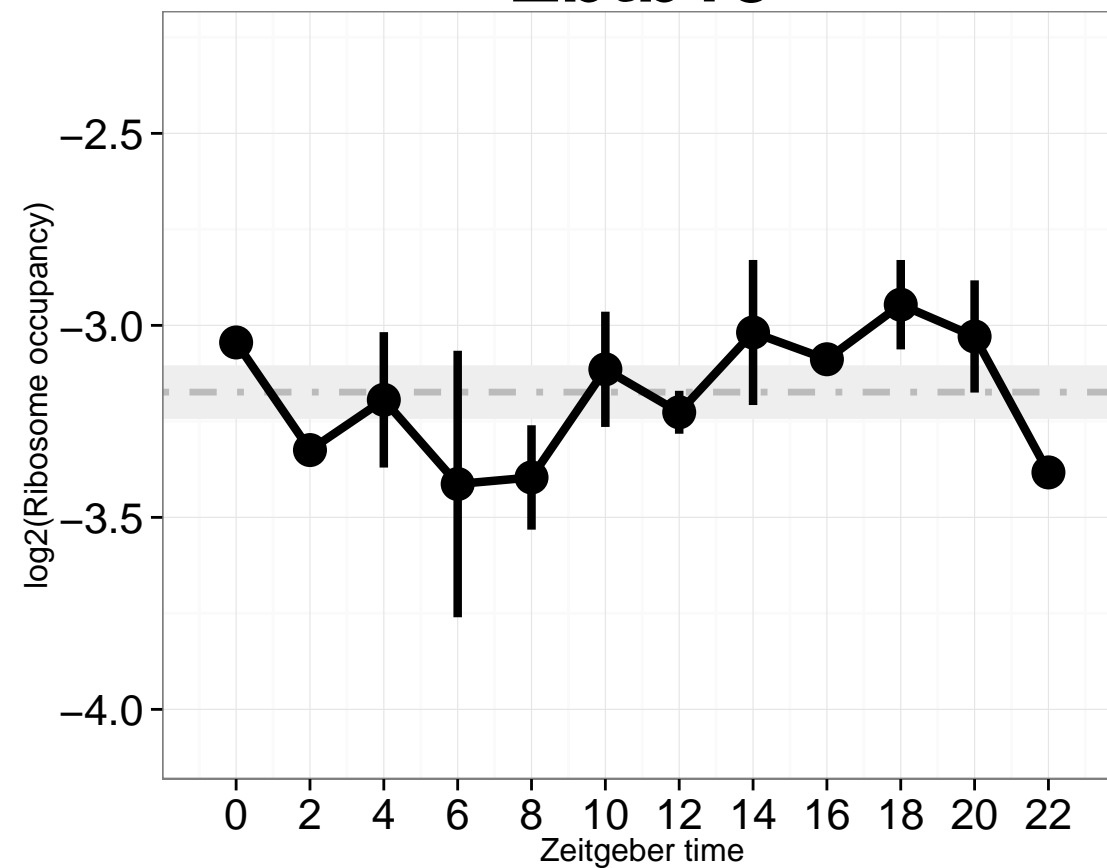

Supplement: SuppDataset_1.zip [file Zbtb18_set_A.pdf › Supplemental Dataset 1/A-mRNA_nonrhyth_translation_nonrhyth/Zbtb18_set_A.pdf]

## Zbtb1

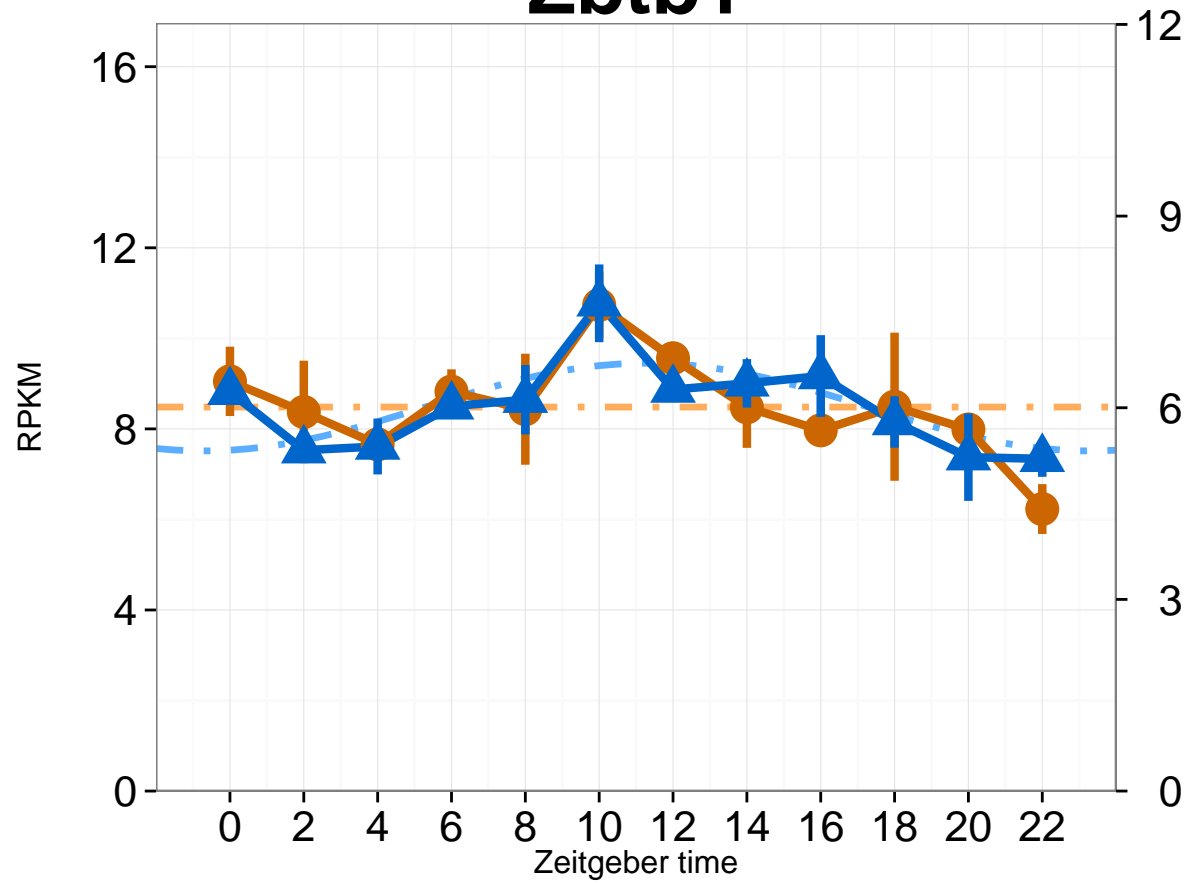

## Zbtb1

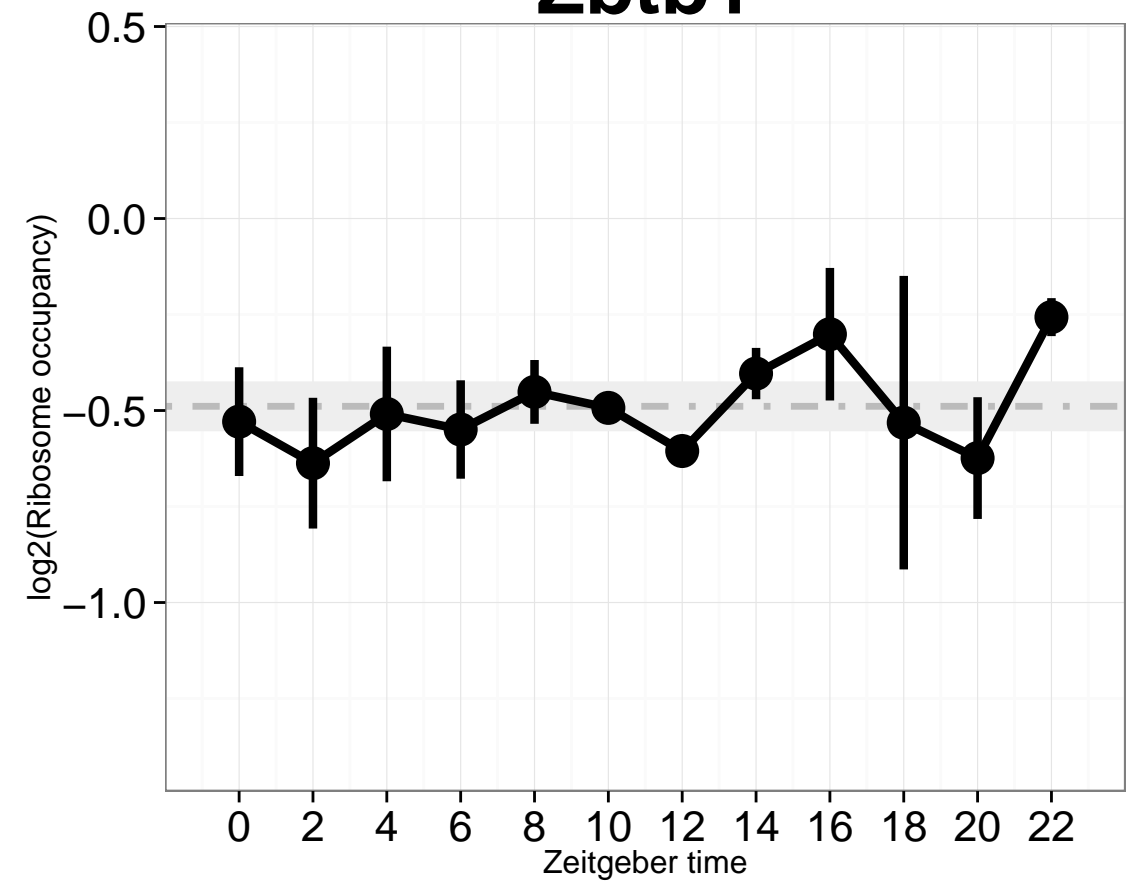

Supplement: SuppDataset_1.zip [file Zbtb1_set_A.pdf › Supplemental Dataset 1/A-mRNA_nonrhyth_translation_nonrhyth/Zbtb1_set_A.pdf]

## Zbtb20

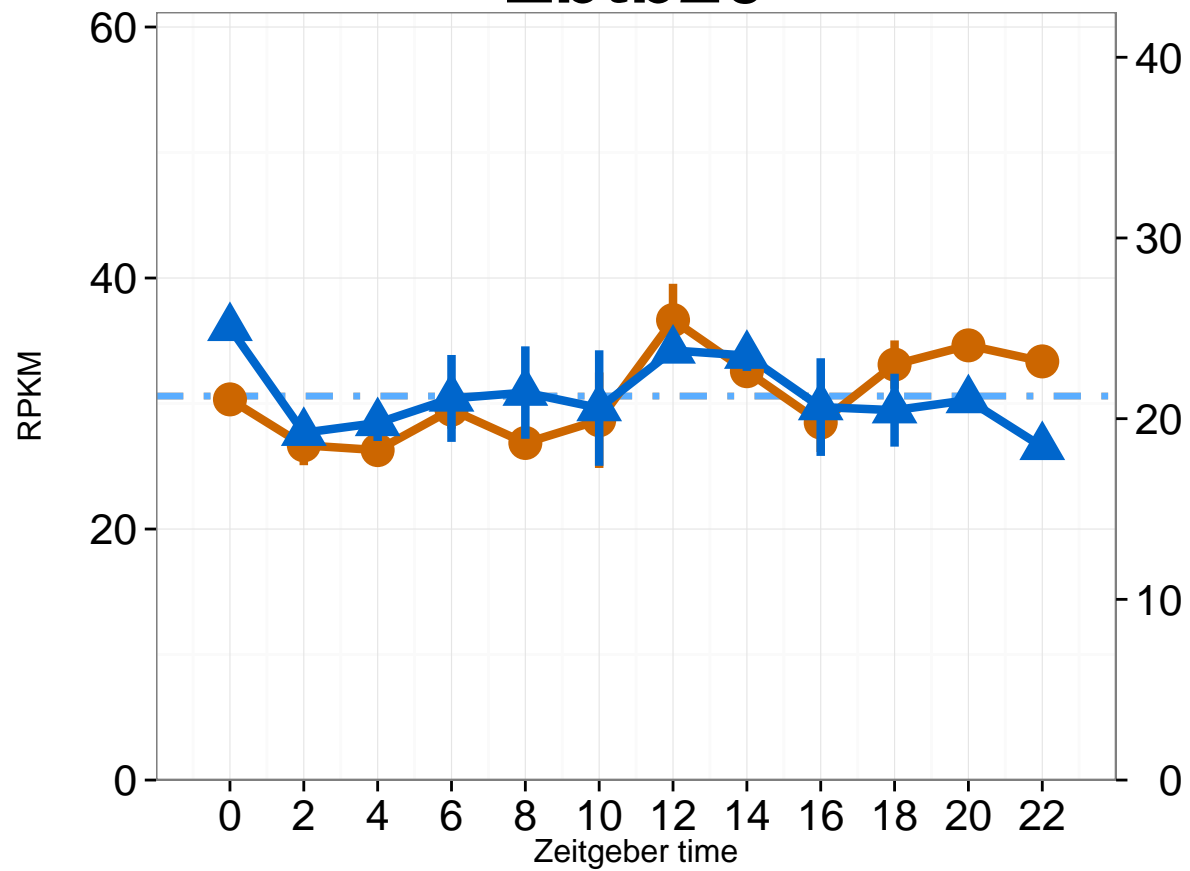

## Zbtb20

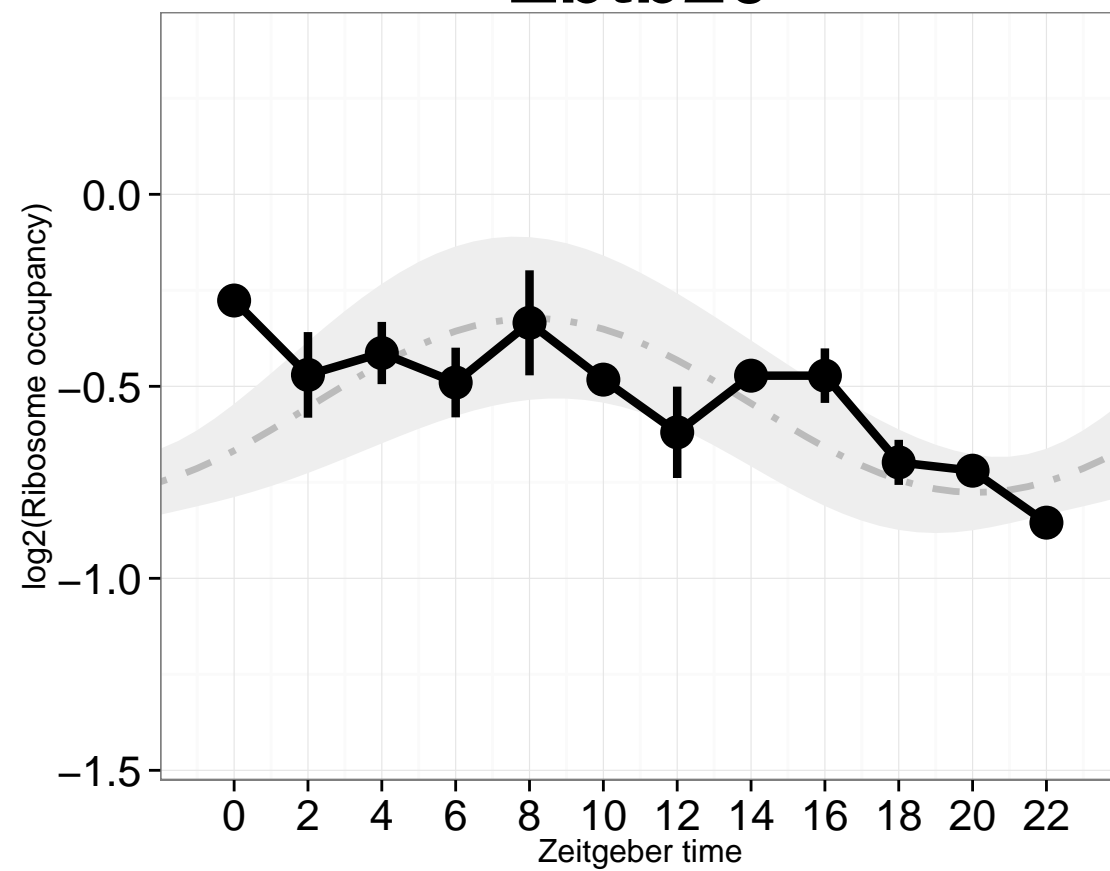

Supplement: SuppDataset_1.zip [file Zbtb20_set_A.pdf › Supplemental Dataset 1/A-mRNA_nonrhyth_translation_nonrhyth/Zbtb20_set_A.pdf]

# Zbtb24

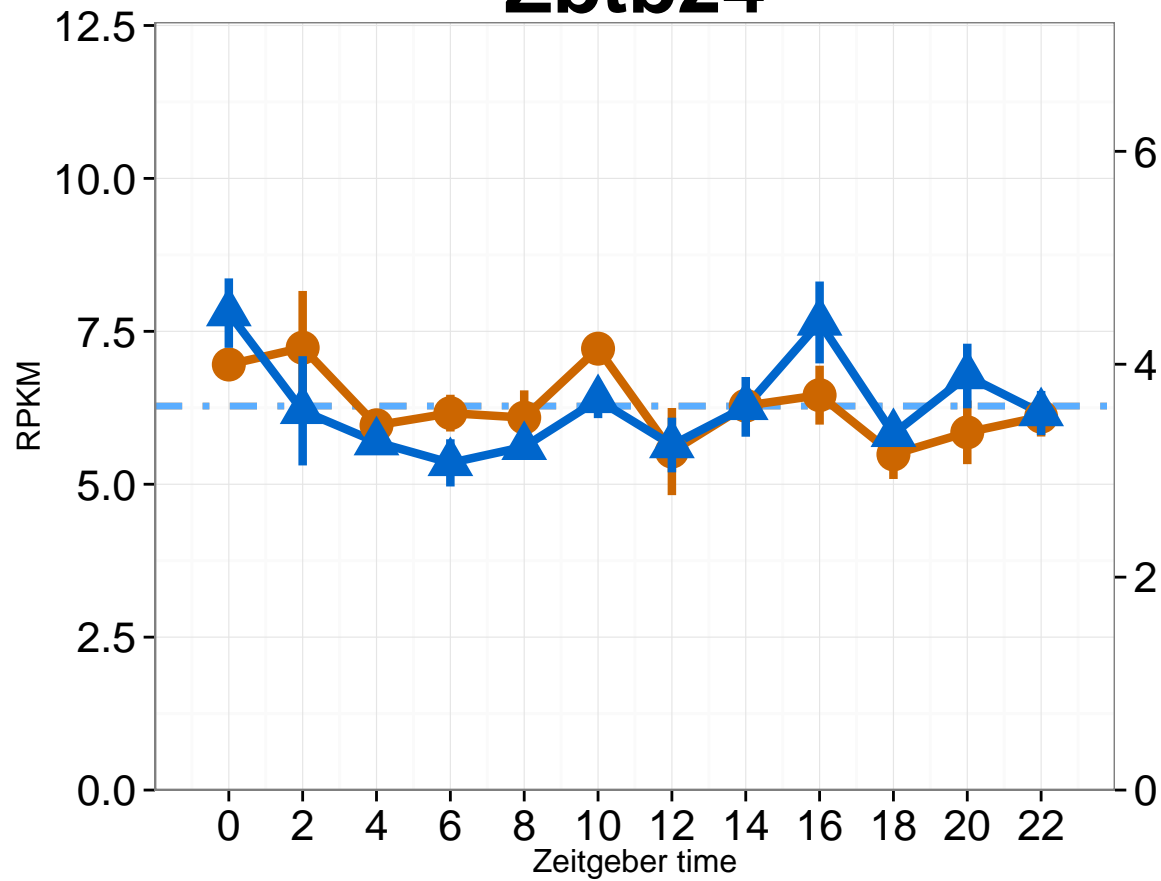

# Zbtb24

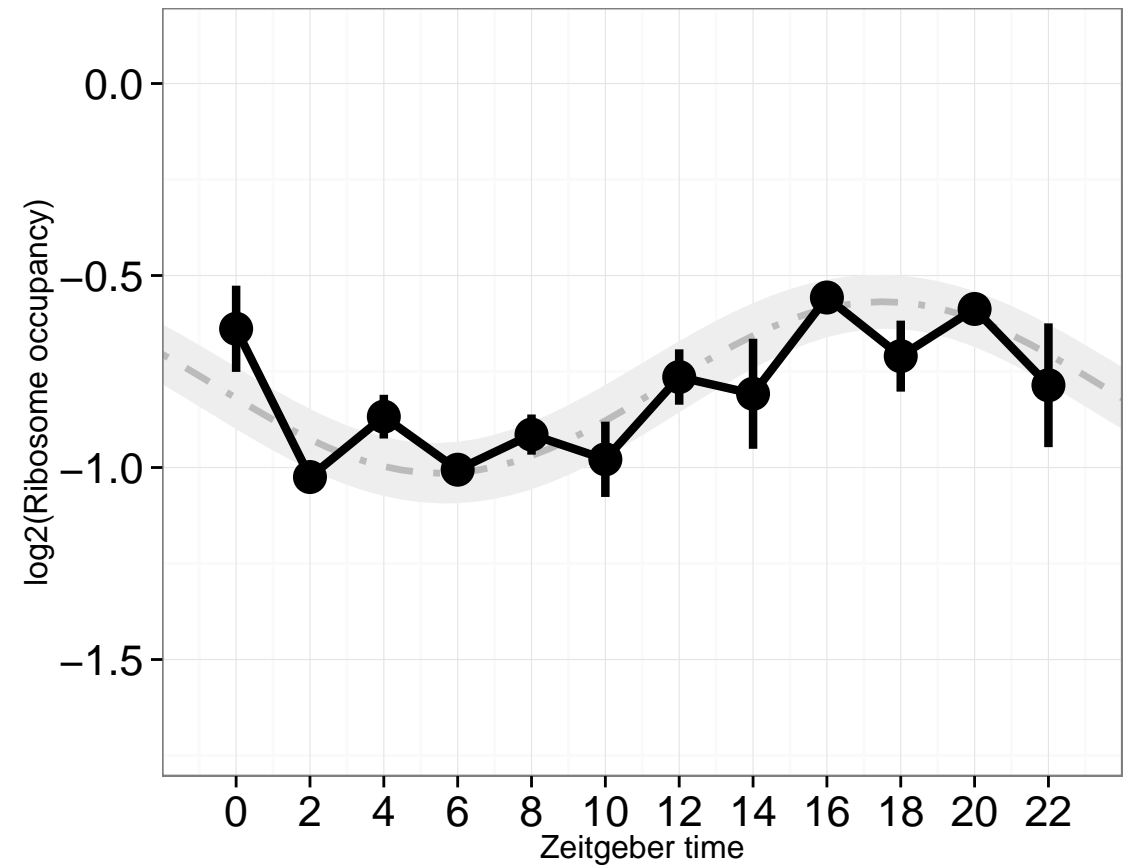

Supplement: SuppDataset_1.zip [file Zbtb24_set_A.pdf › Supplemental Dataset 1/A-mRNA_nonrhyth_translation_nonrhyth/Zbtb24_set_A.pdf]

# Zbtb25

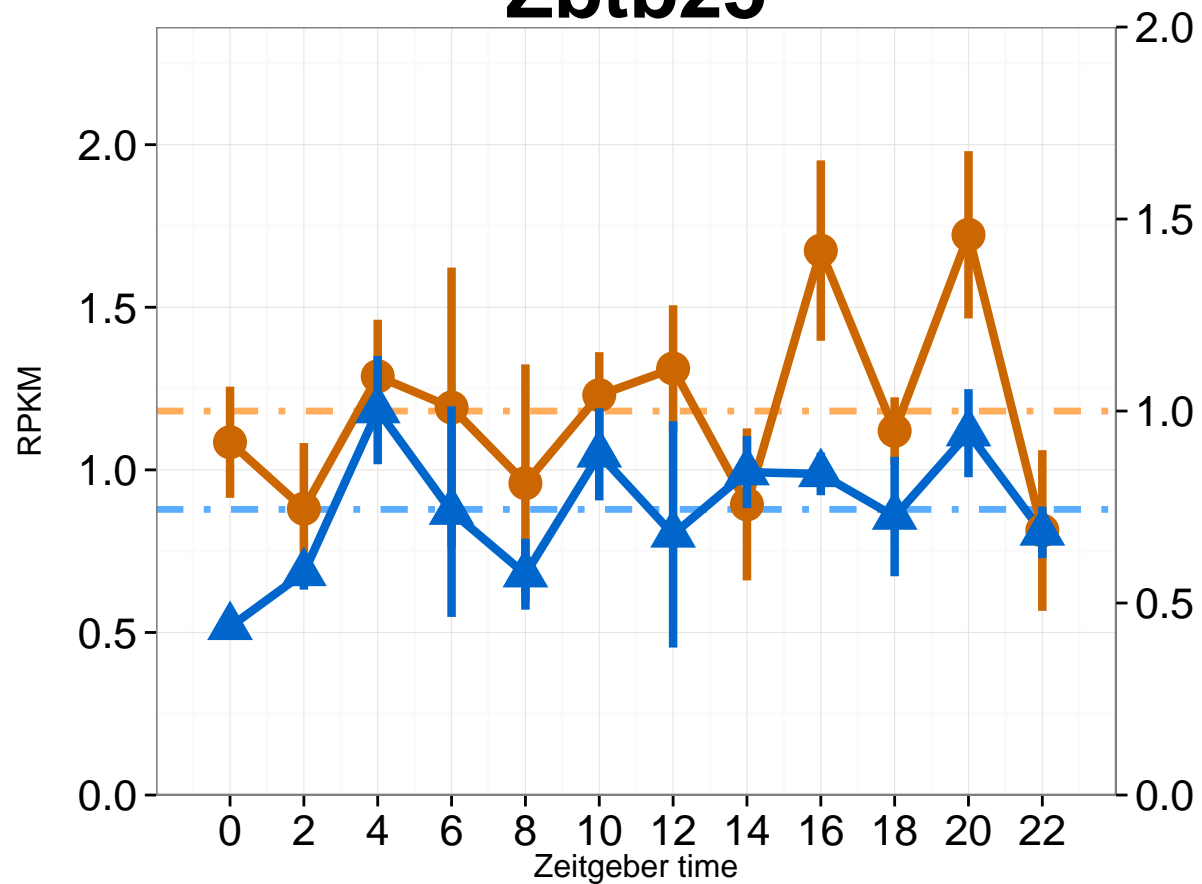

# Zbtb25

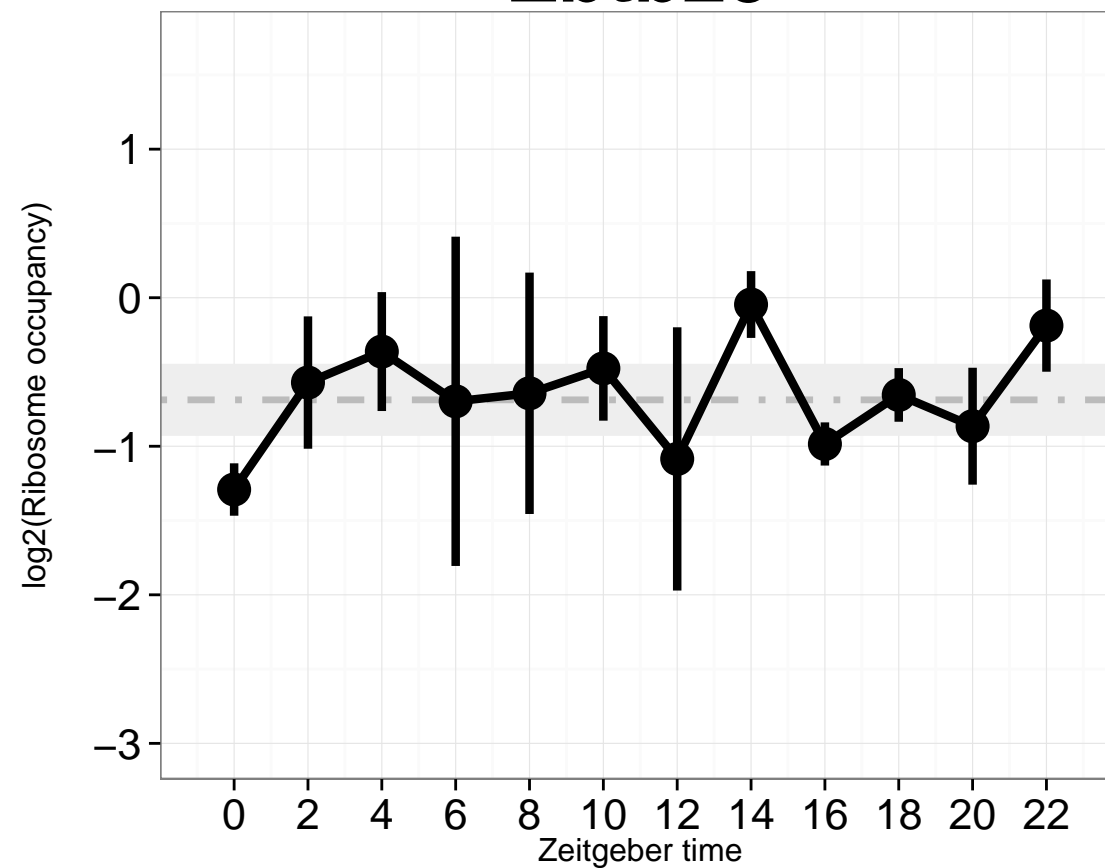

Supplement: SuppDataset_1.zip [file Zbtb25_set_A.pdf › Supplemental Dataset 1/A-mRNA_nonrhyth_translation_nonrhyth/Zbtb25_set_A.pdf]

# Zbtb26

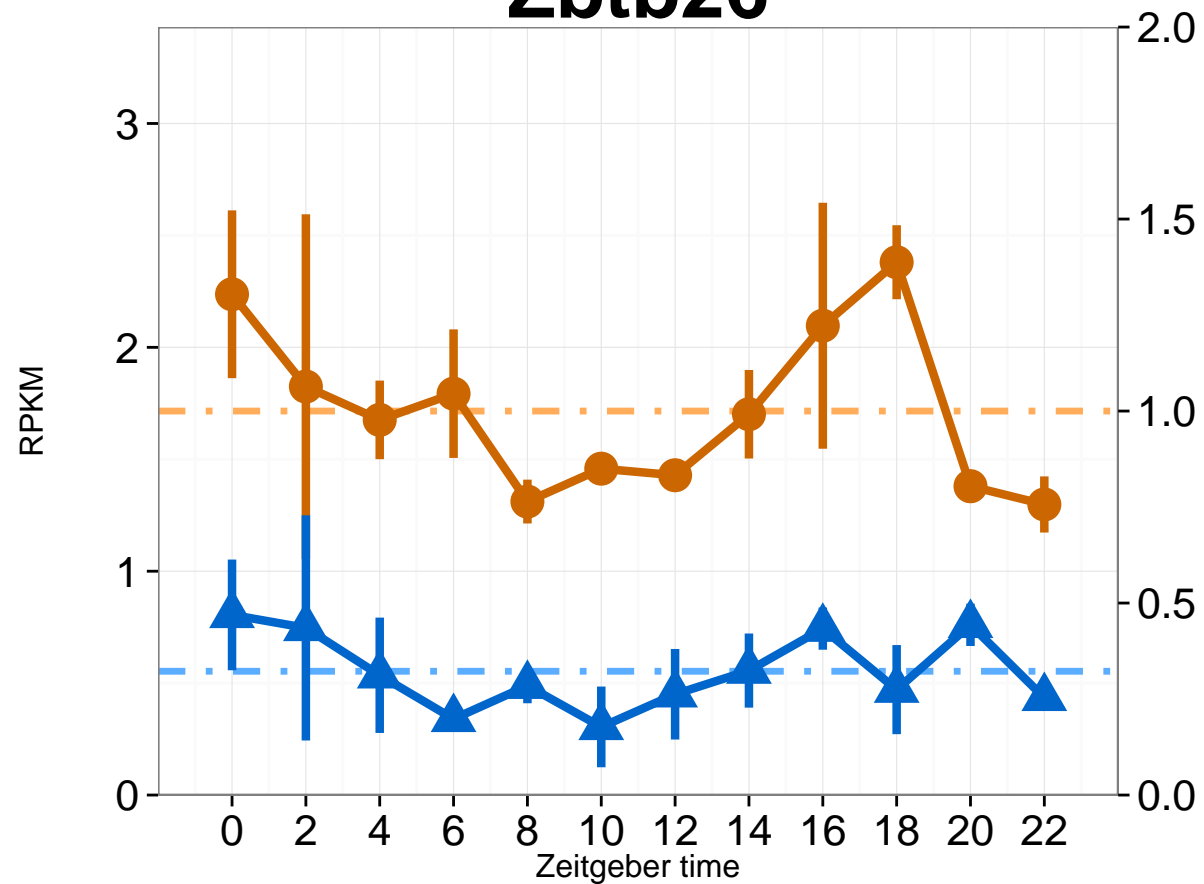

# Zbtb26

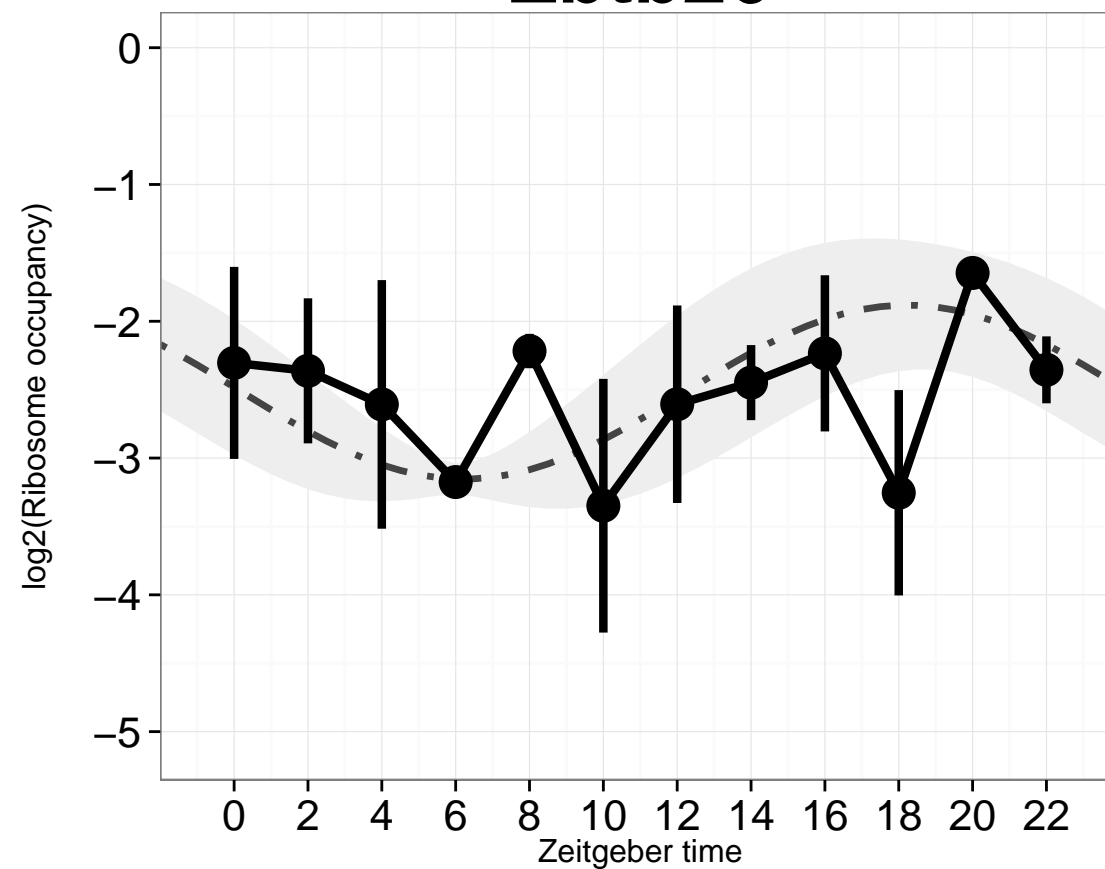

Supplement: SuppDataset_1.zip [file Zbtb26_set_A.pdf › Supplemental Dataset 1/A-mRNA_nonrhyth_translation_nonrhyth/Zbtb26_set_A.pdf]

## Zbtb2

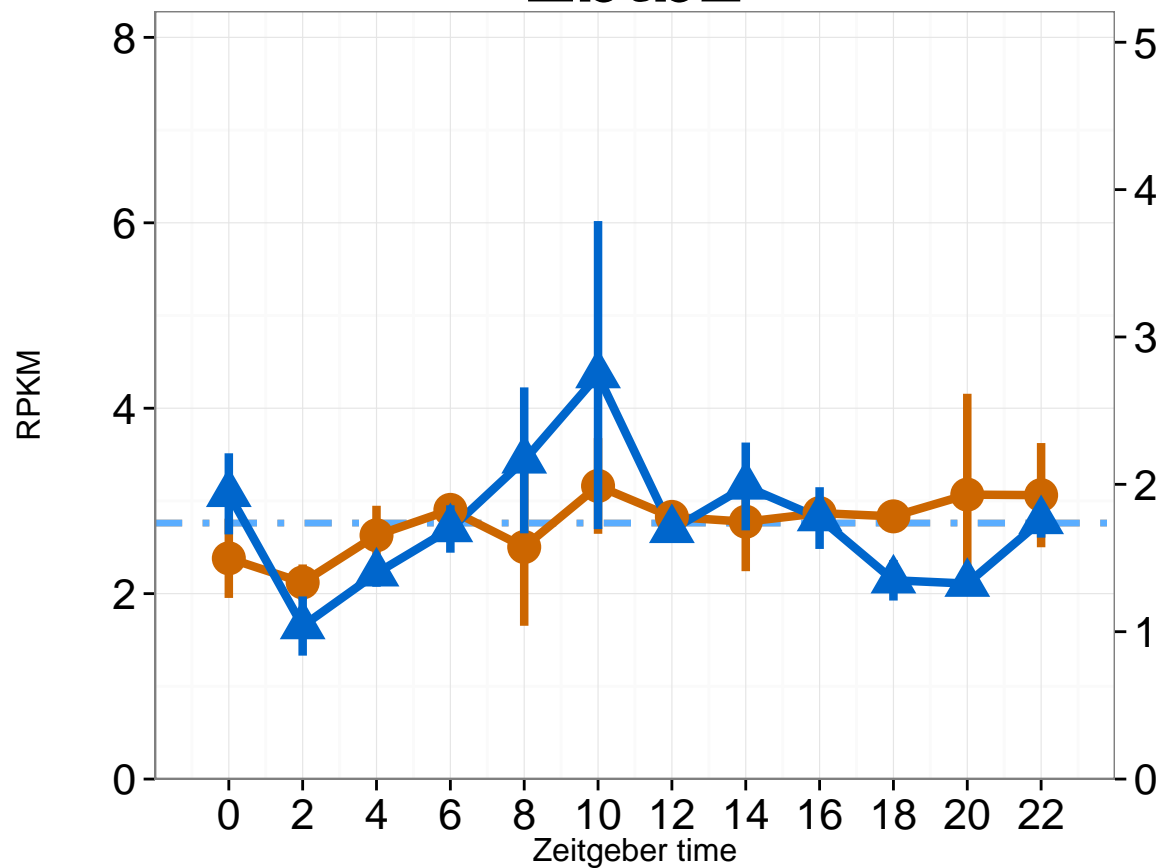

## Zbtb2

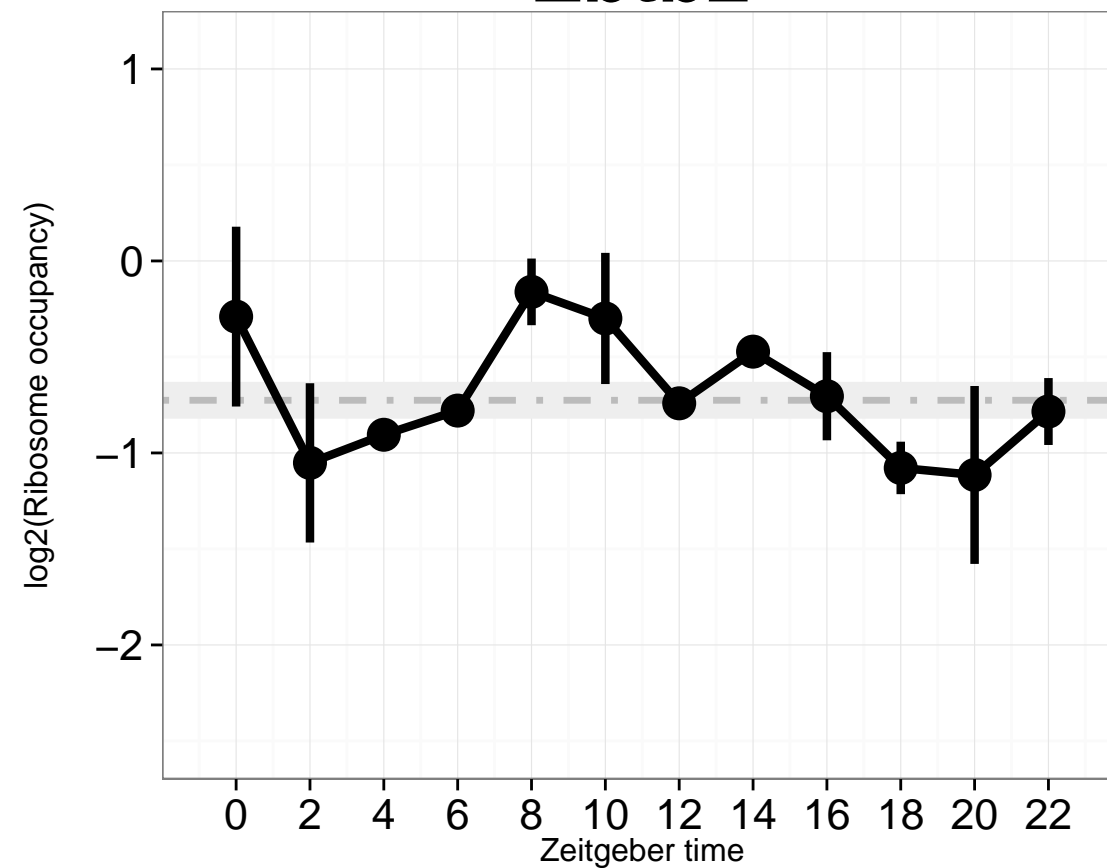

Supplement: SuppDataset_1.zip [file Zbtb2_set_A.pdf › Supplemental Dataset 1/A-mRNA_nonrhyth_translation_nonrhyth/Zbtb2_set_A.pdf]

# Zbtb33

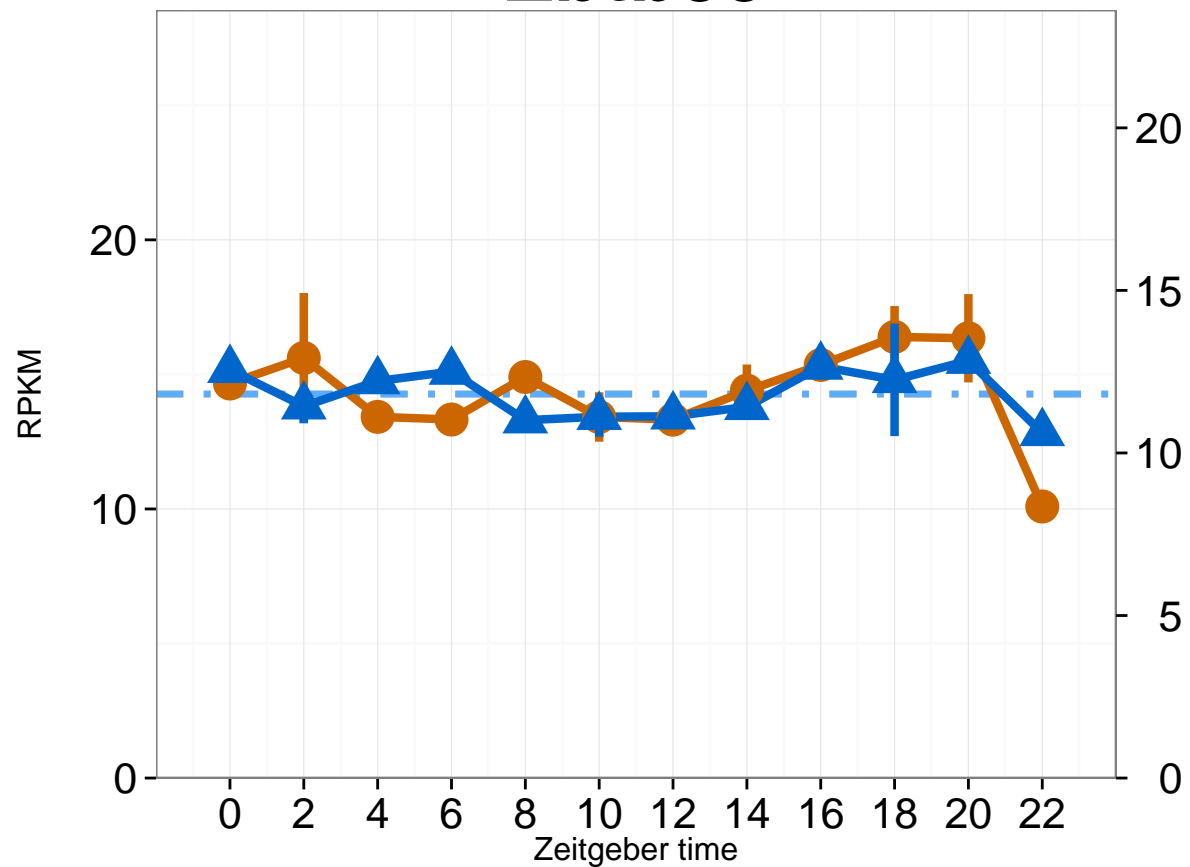

# Zbtb33

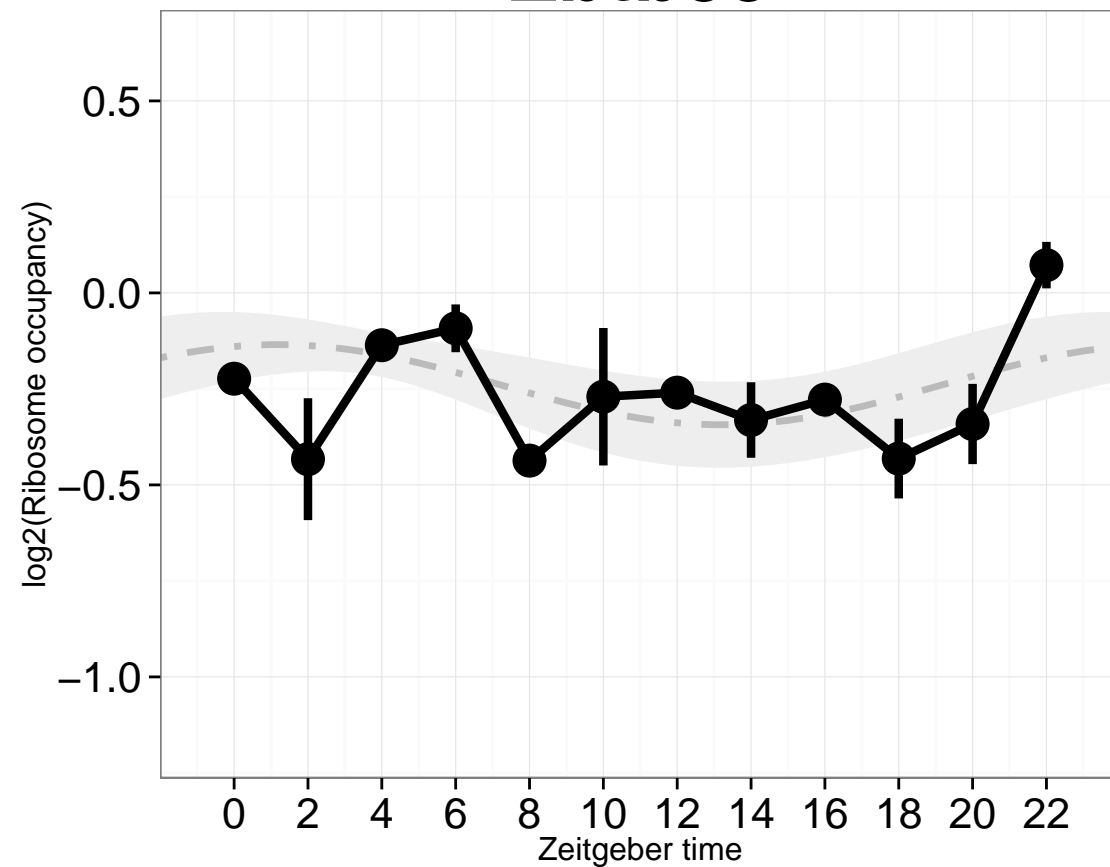

Supplement: SuppDataset_1.zip [file Zbtb33_set_A.pdf › Supplemental Dataset 1/A-mRNA_nonrhyth_translation_nonrhyth/Zbtb33_set_A.pdf]

# Zbtb34

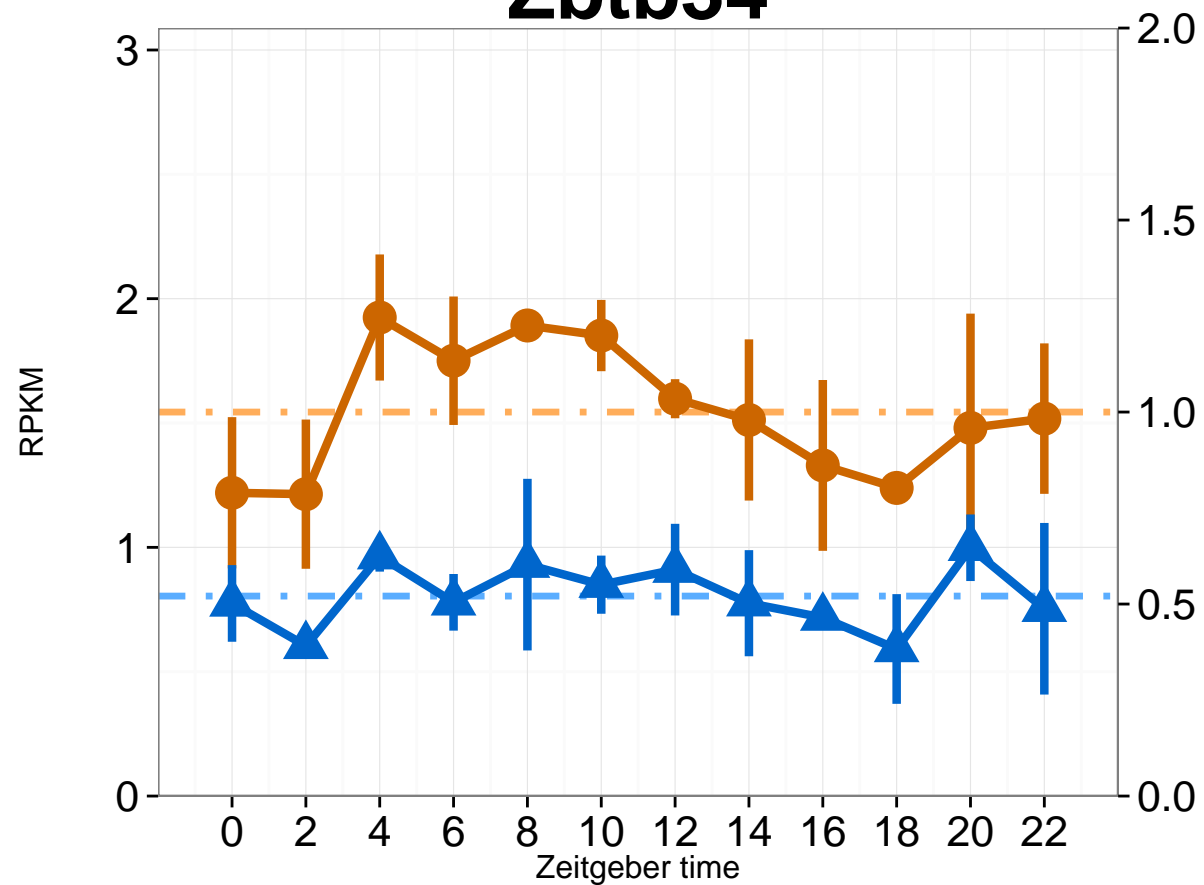

# Zbtb34

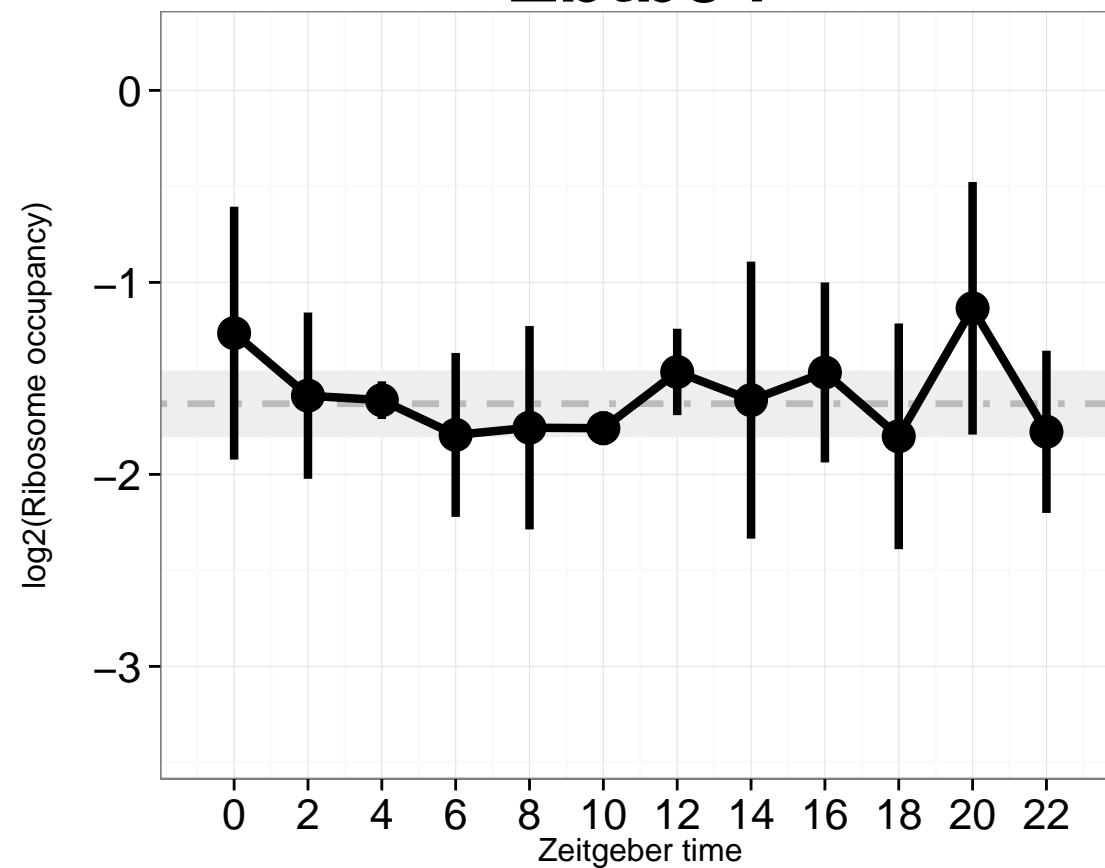

Supplement: SuppDataset_1.zip [file Zbtb34_set_A.pdf › Supplemental Dataset 1/A-mRNA_nonrhyth_translation_nonrhyth/Zbtb34_set_A.pdf]

# Zbtb37

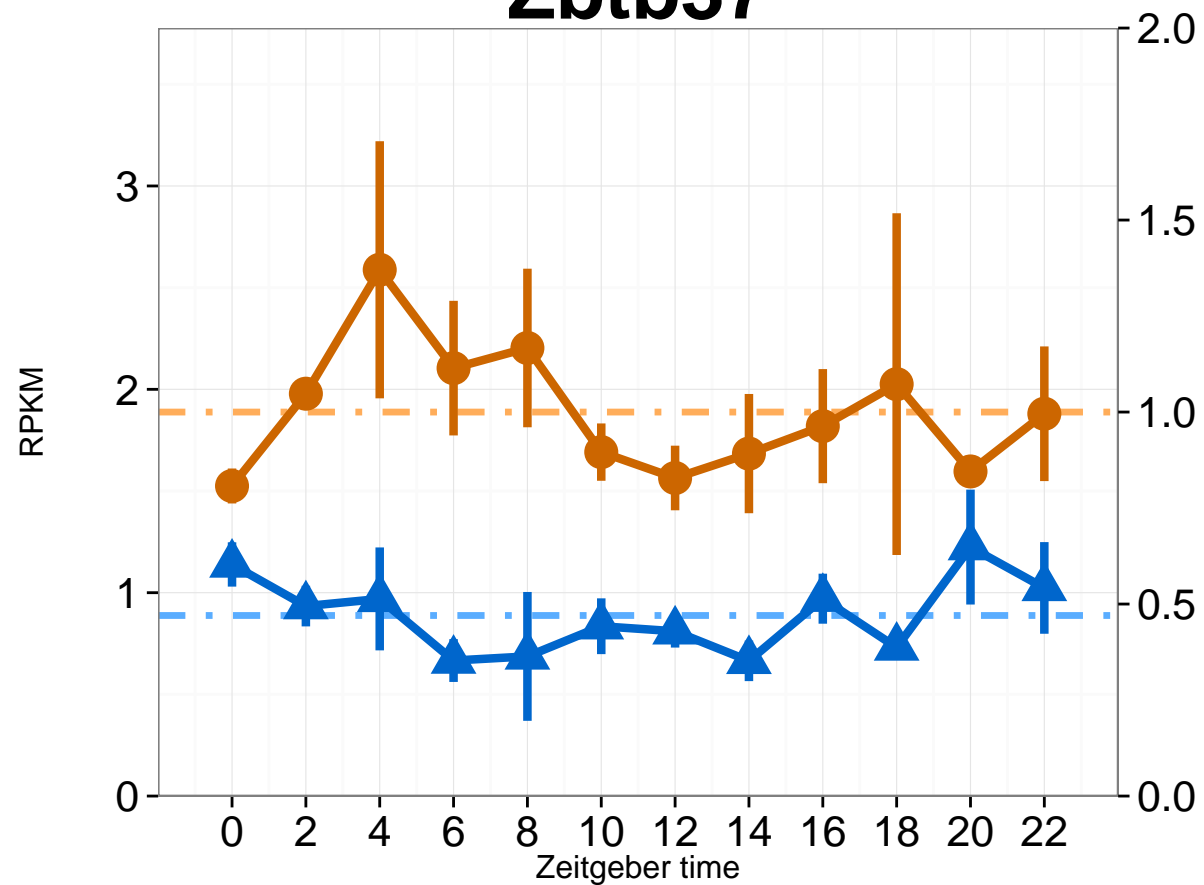

# Zbtb37

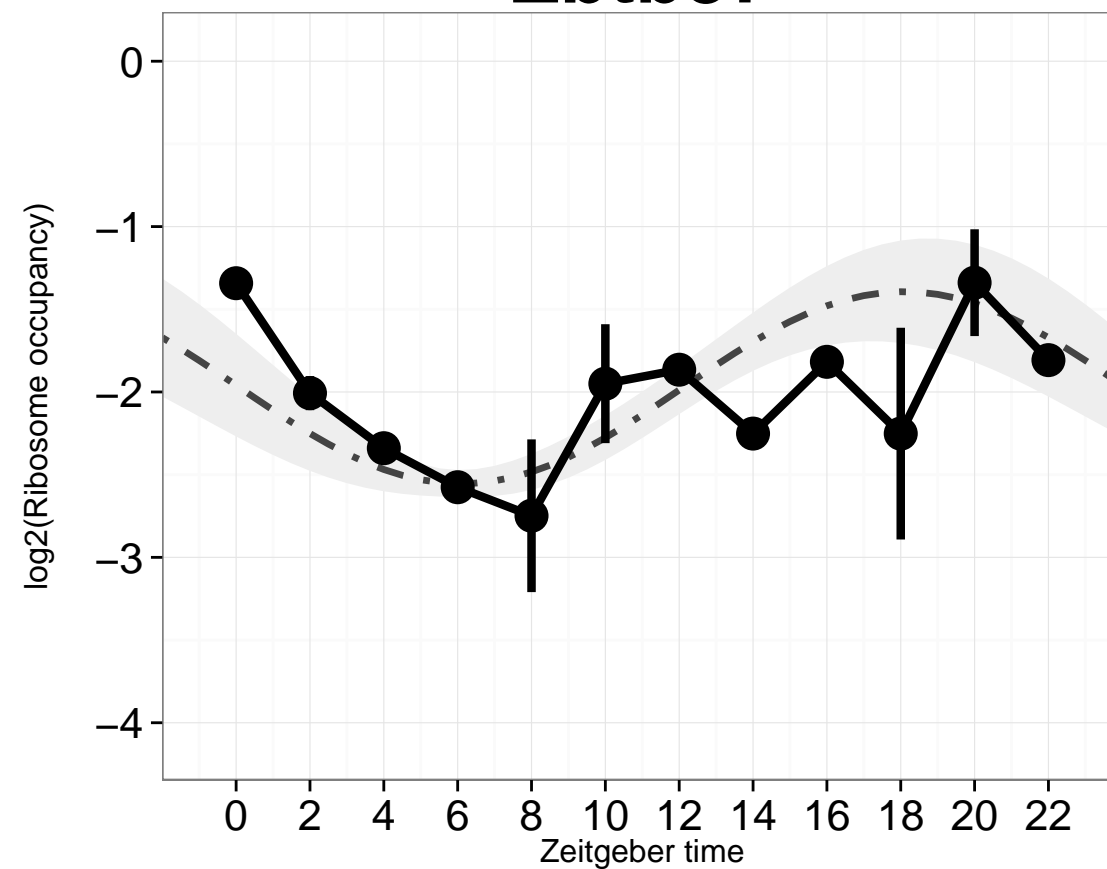

Supplement: SuppDataset_1.zip [file Zbtb37_set_A.pdf › Supplemental Dataset 1/A-mRNA_nonrhyth_translation_nonrhyth/Zbtb37_set_A.pdf]

## Zbtb38

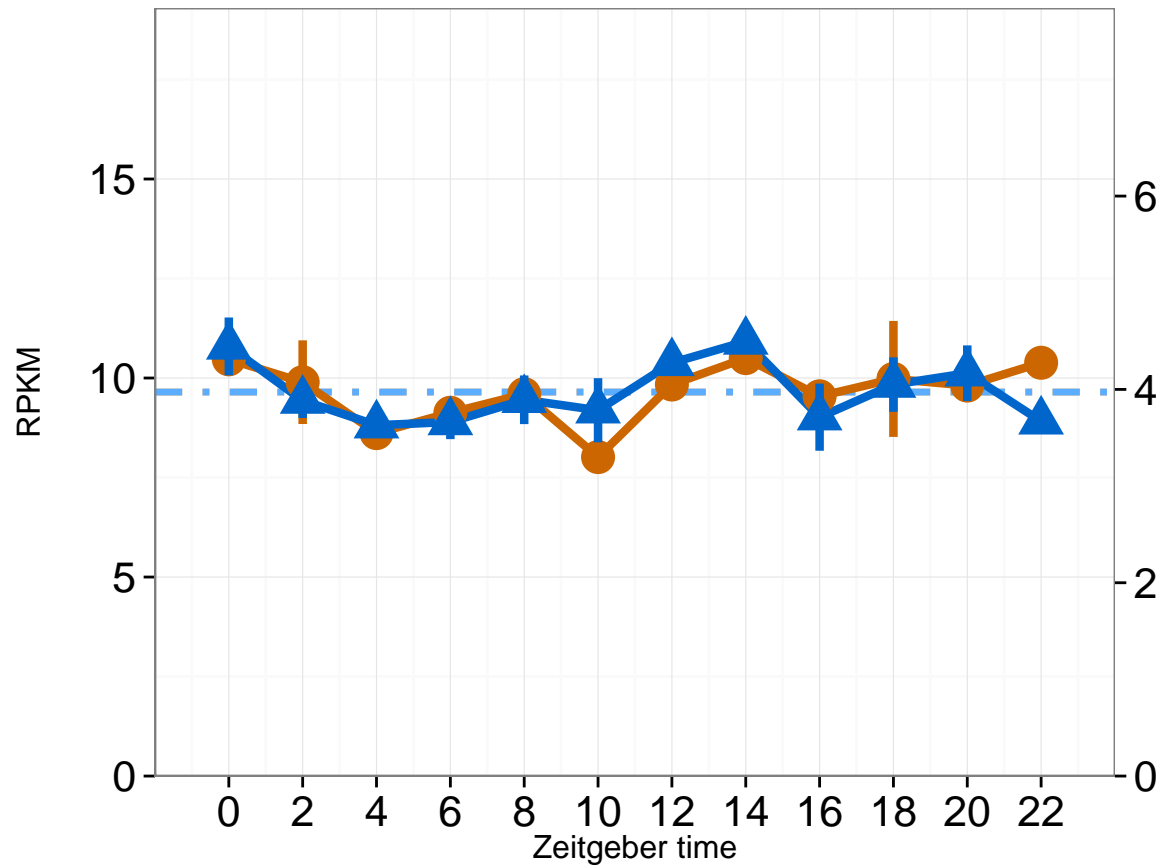

## Zbtb38

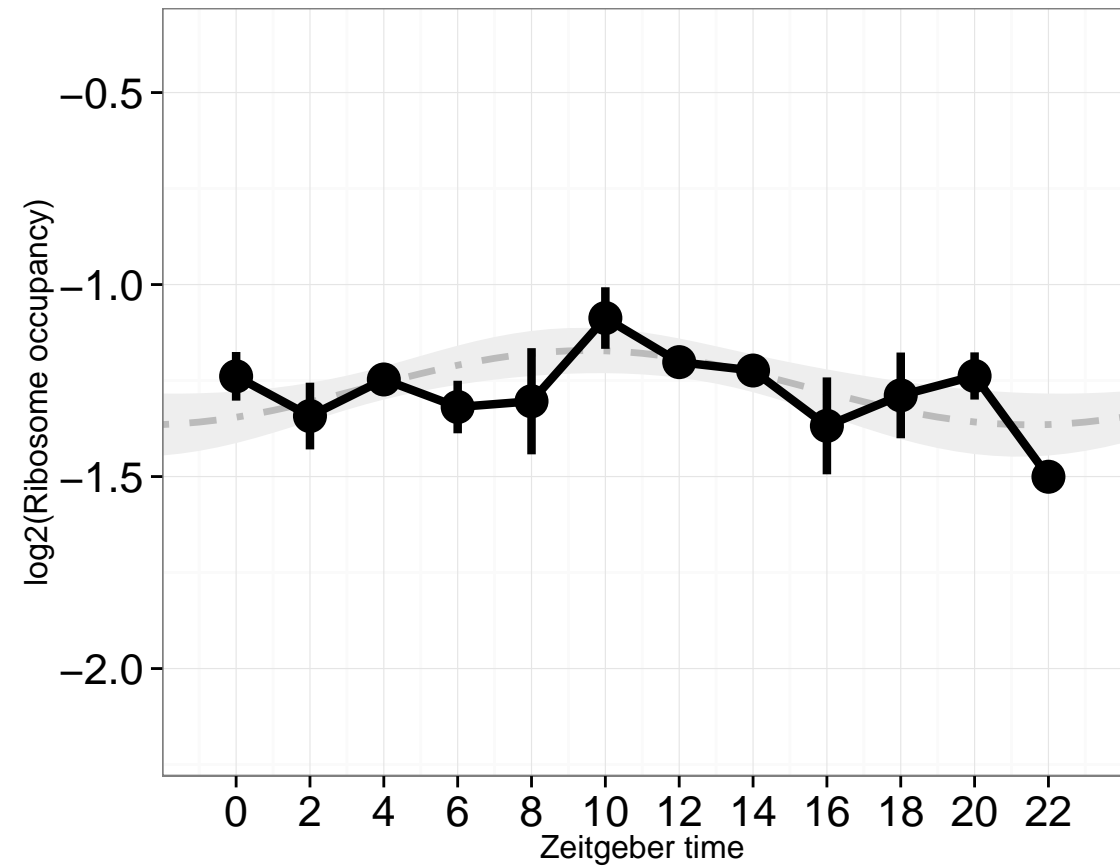

Supplement: SuppDataset_1.zip [file Zbtb38_set_A.pdf › Supplemental Dataset 1/A-mRNA_nonrhyth_translation_nonrhyth/Zbtb38_set_A.pdf]

# Zbtb39

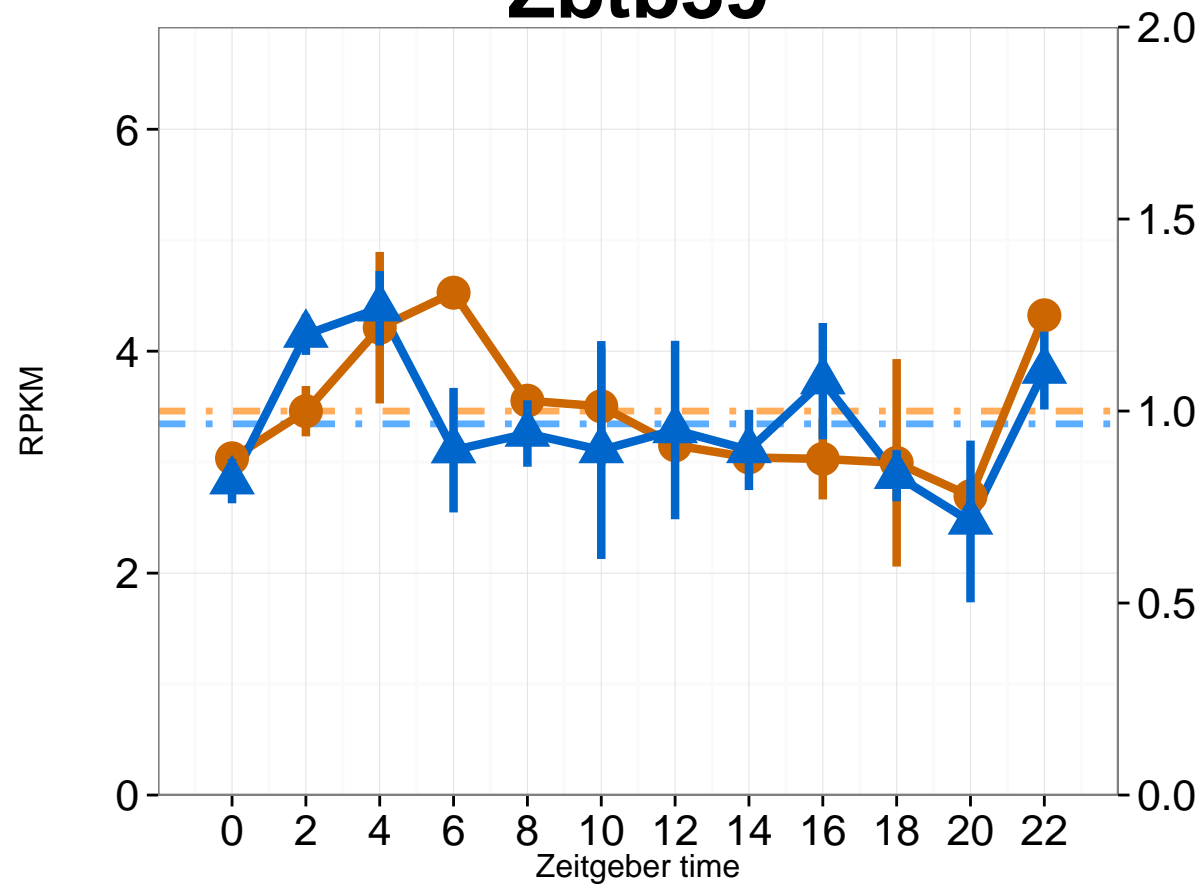

# Zbtb39

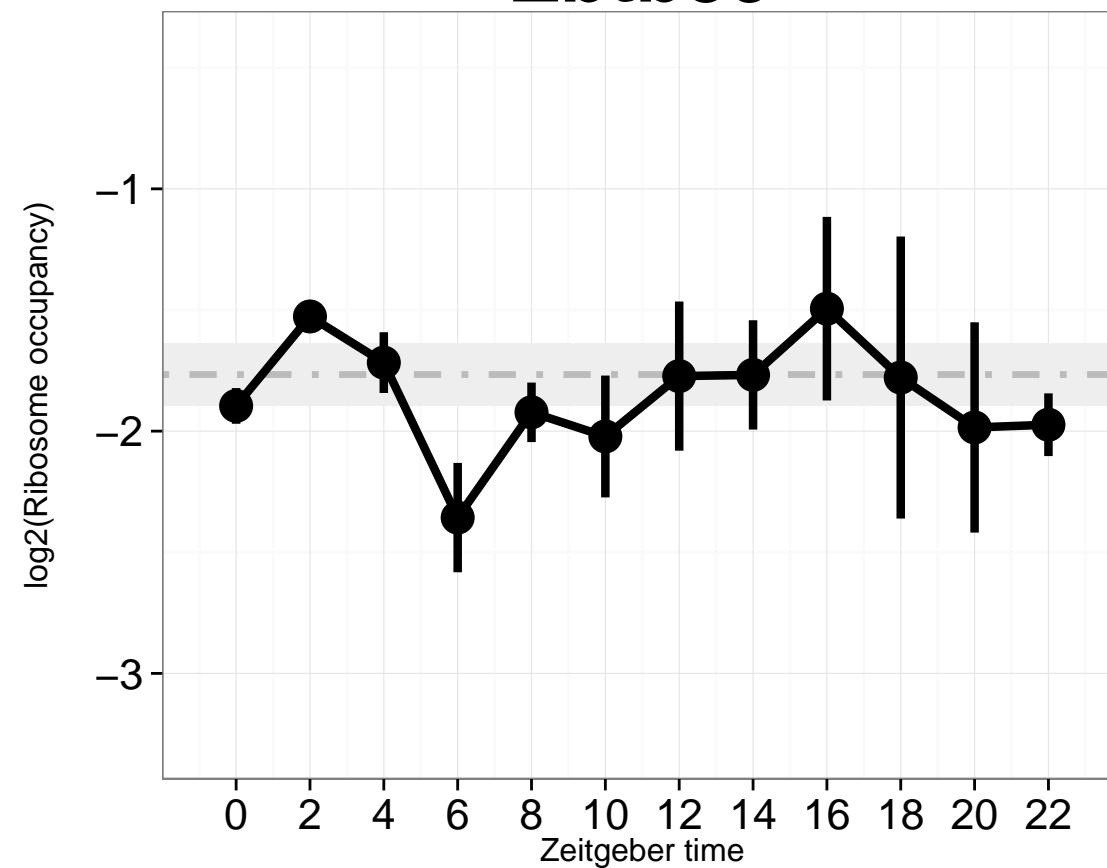

Supplement: SuppDataset_1.zip [file Zbtb39_set_A.pdf › Supplemental Dataset 1/A-mRNA_nonrhyth_translation_nonrhyth/Zbtb39_set_A.pdf]

# Zbtb41

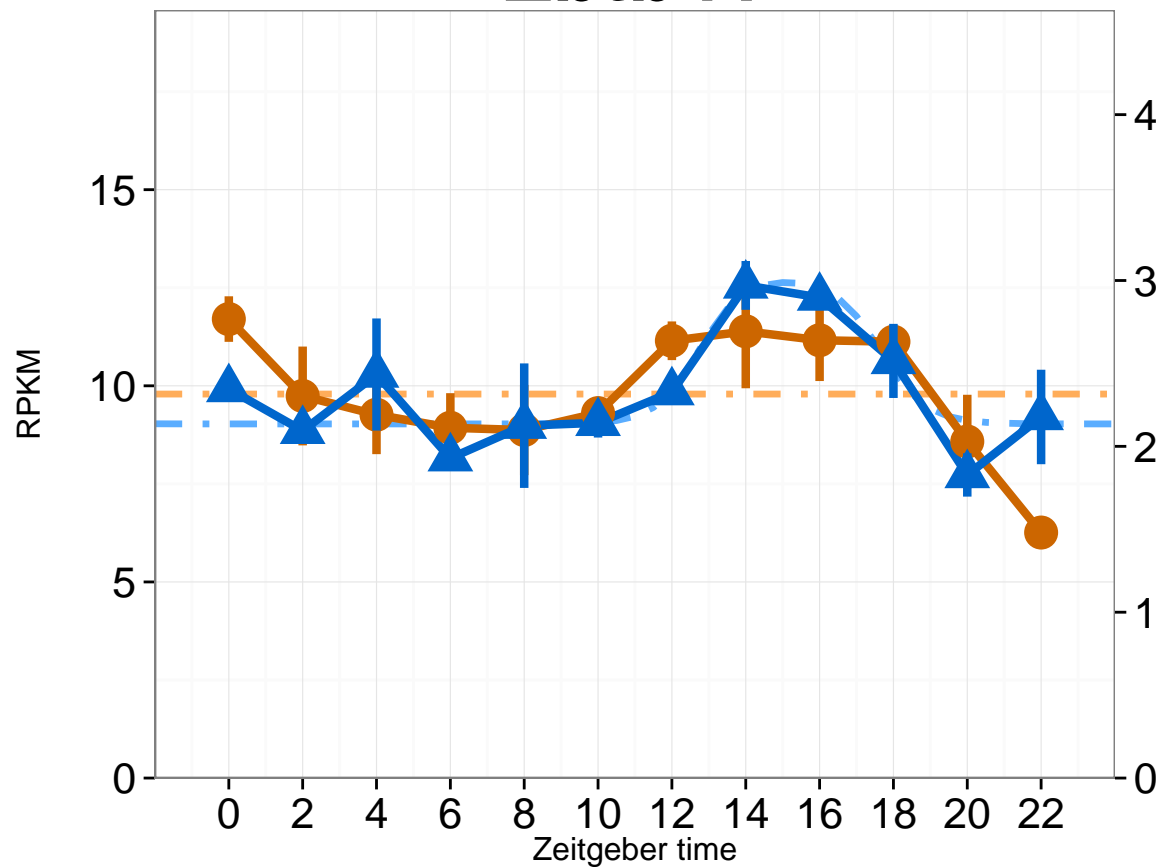

# Zbtb41

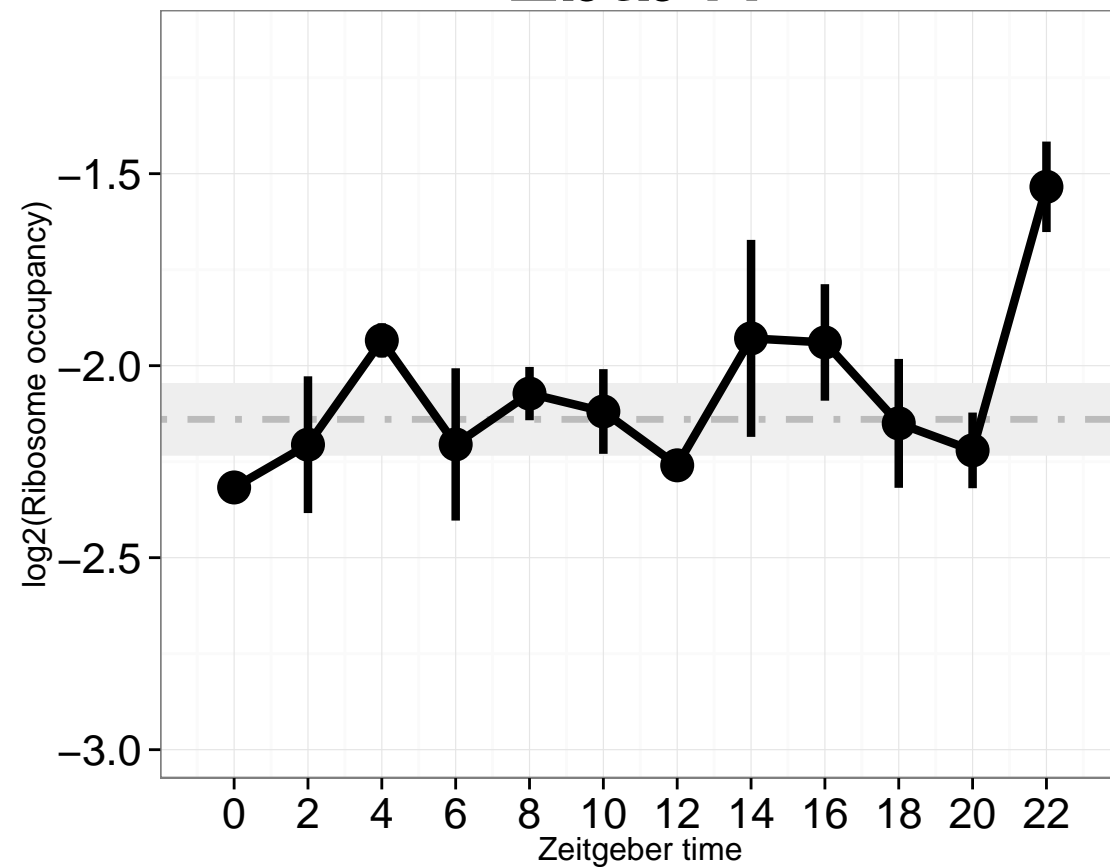

Supplement: SuppDataset_1.zip [file Zbtb41_set_A.pdf › Supplemental Dataset 1/A-mRNA_nonrhyth_translation_nonrhyth/Zbtb41_set_A.pdf]

## Zbtb42

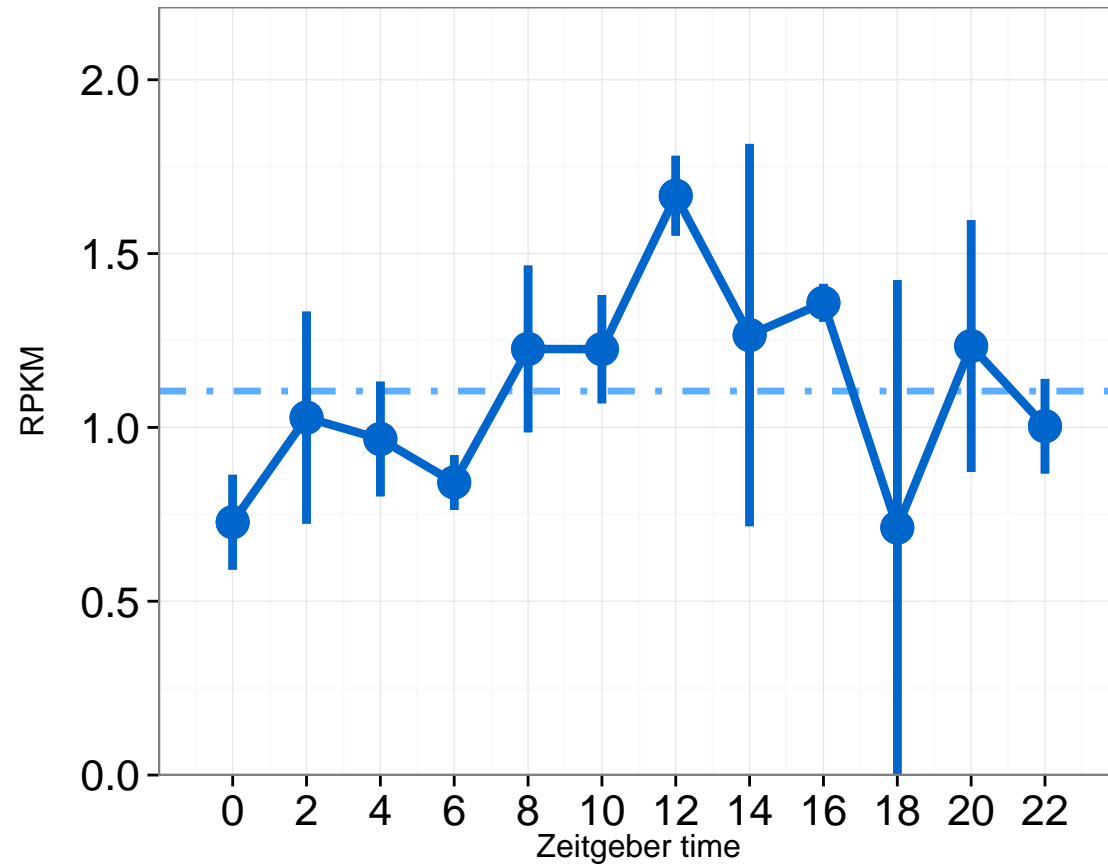

## Zbtb42 log2(Ribosome occupancy

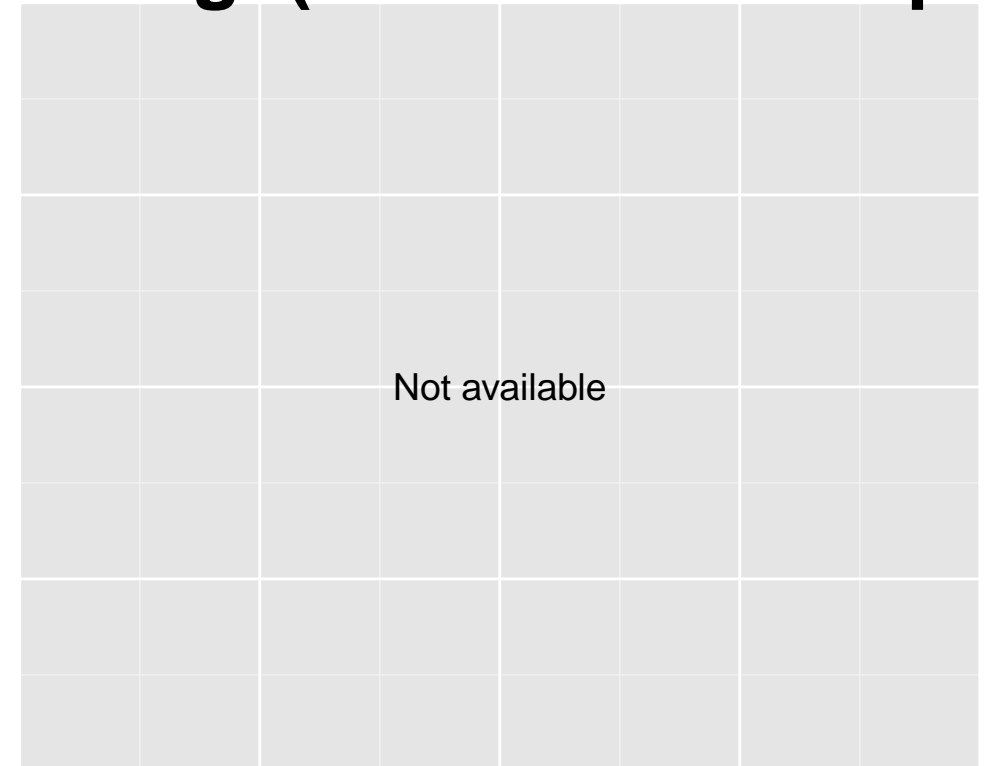

Supplement: SuppDataset_1.zip [file Zbtb42_set_A.pdf › Supplemental Dataset 1/A-mRNA_nonrhyth_translation_nonrhyth/Zbtb42_set_A.pdf]

# Zbtb43

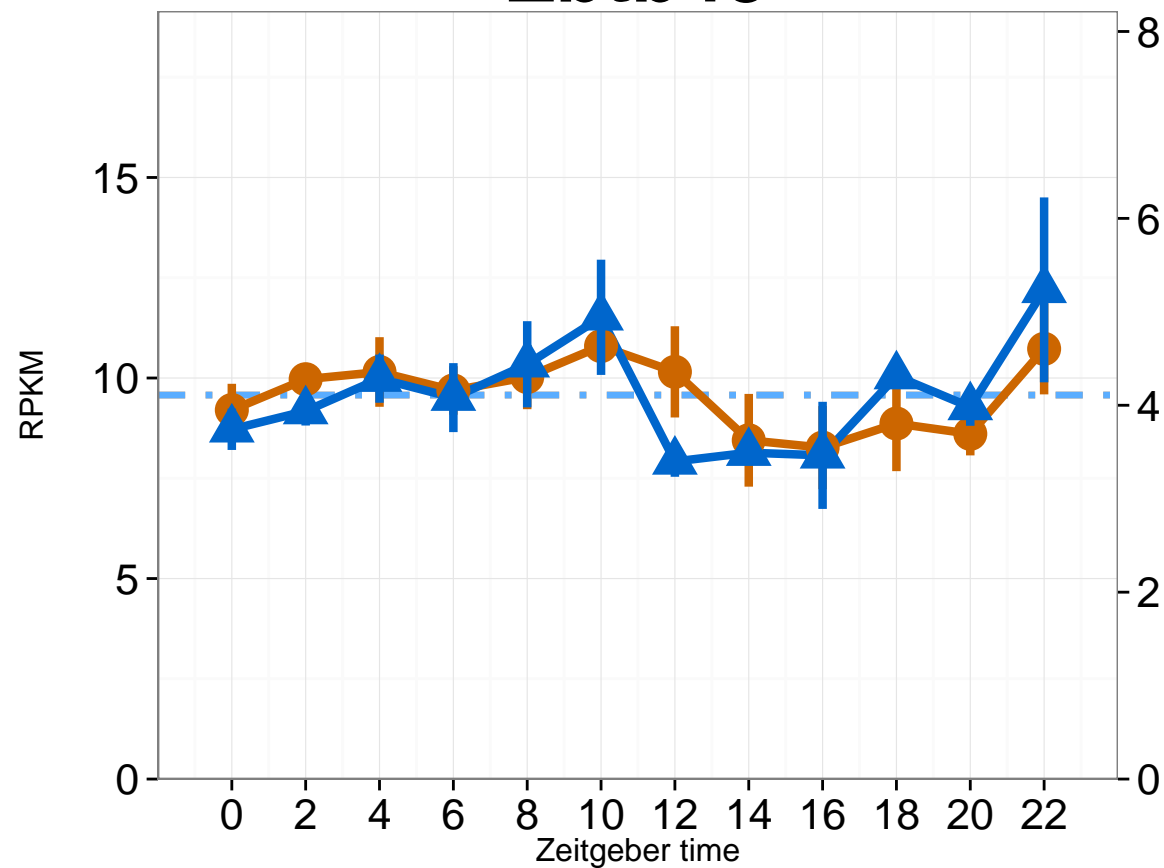

# Zbtb43

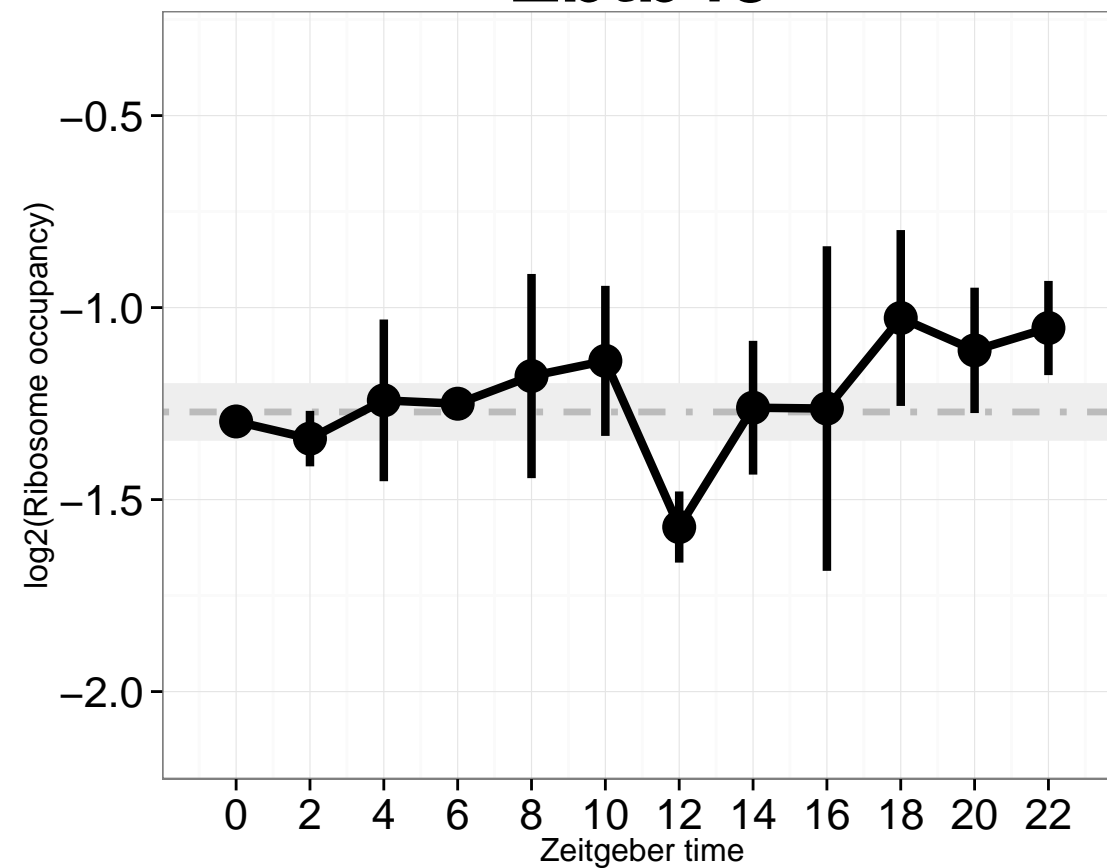

Supplement: SuppDataset_1.zip [file Zbtb43_set_A.pdf › Supplemental Dataset 1/A-mRNA_nonrhyth_translation_nonrhyth/Zbtb43_set_A.pdf]

## Zbtb44

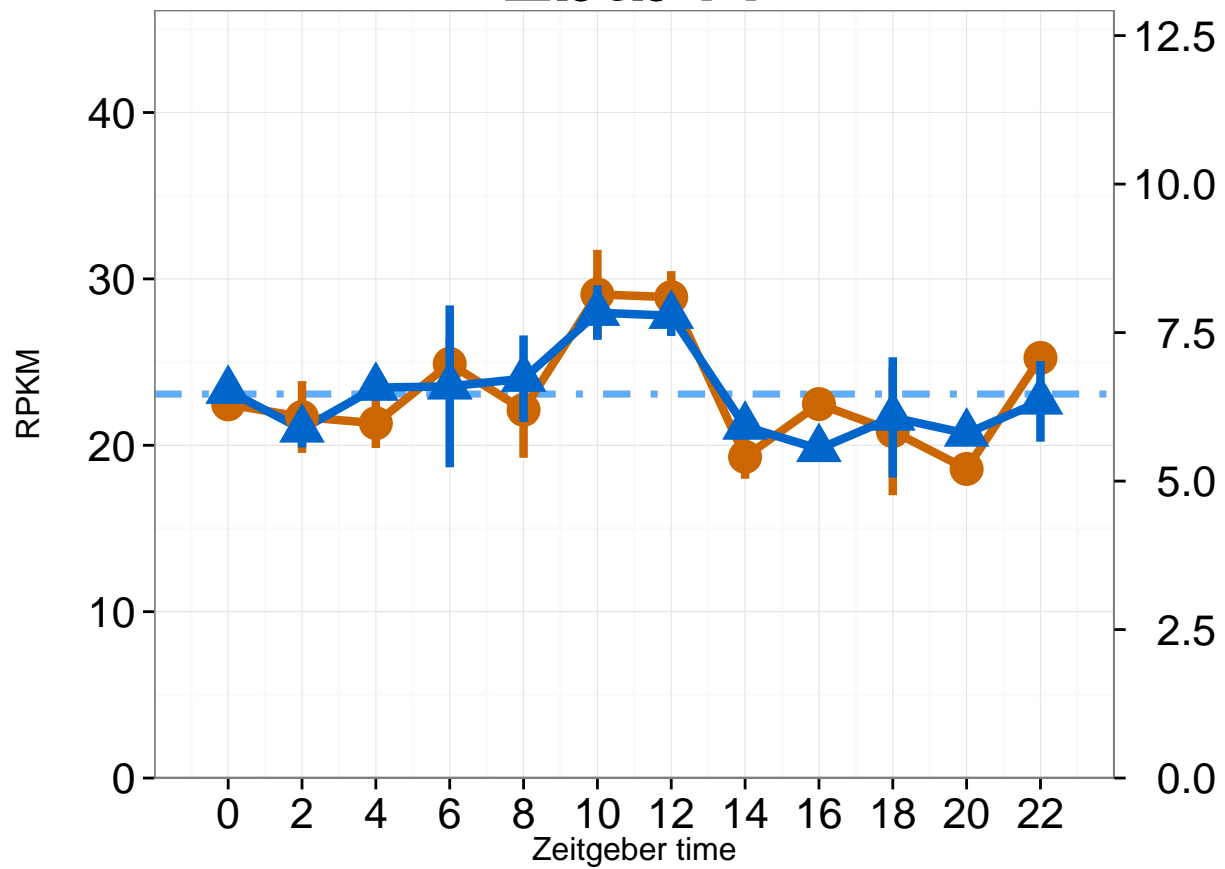

## Zbtb44

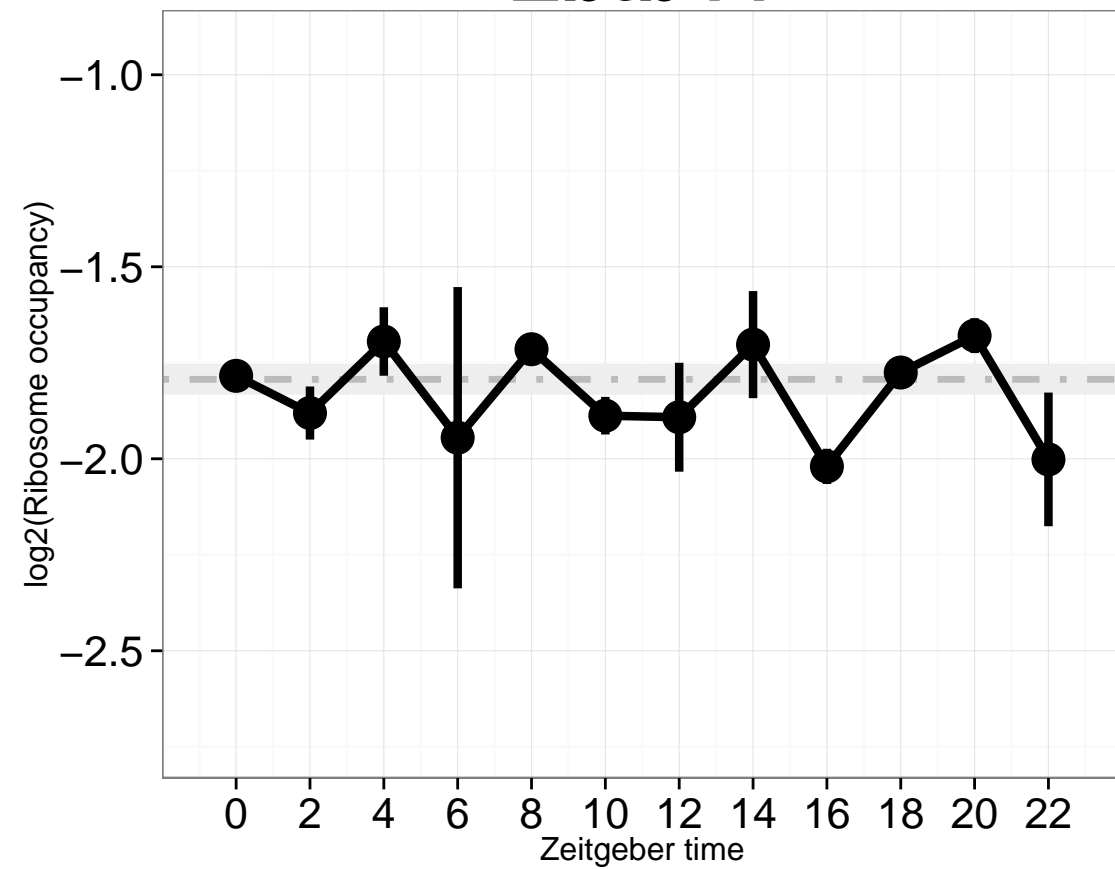

Supplement: SuppDataset_1.zip [file Zbtb44_set_A.pdf › Supplemental Dataset 1/A-mRNA_nonrhyth_translation_nonrhyth/Zbtb44_set_A.pdf]

## Zbtb46

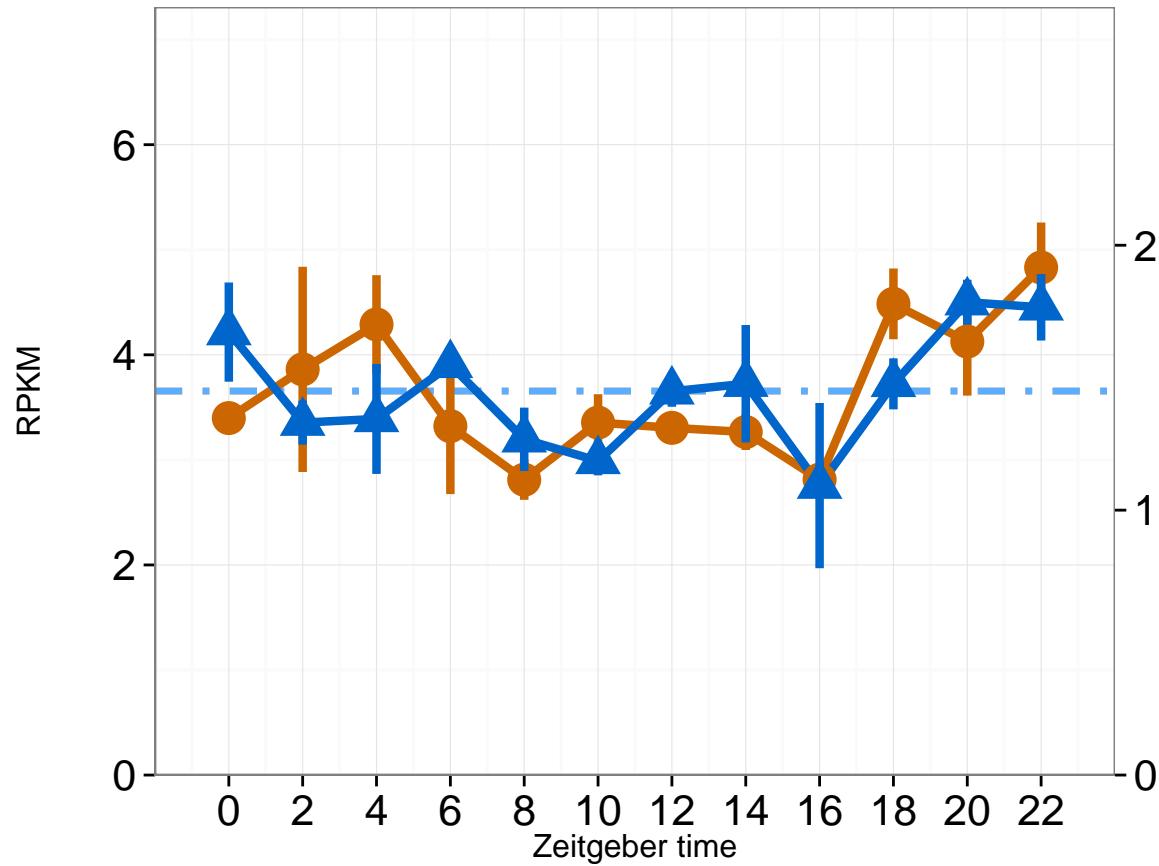

## Zbtb46

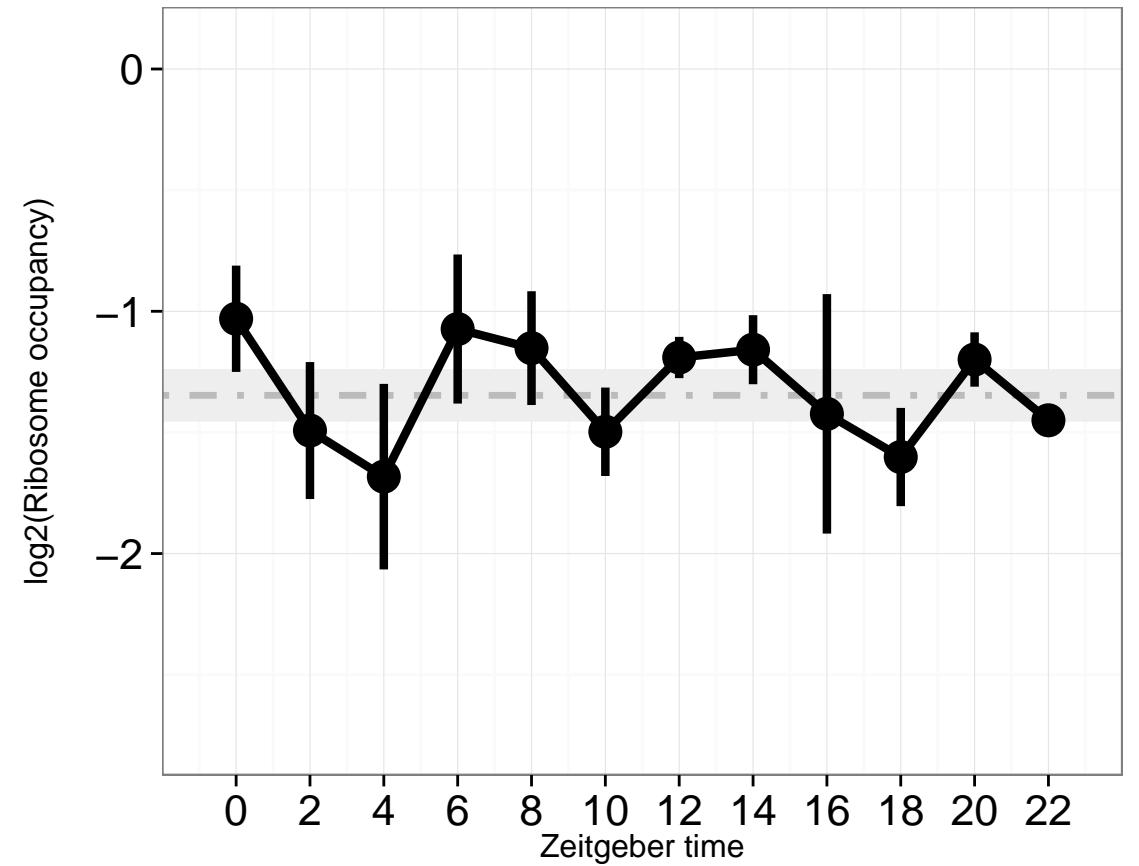

Supplement: SuppDataset_1.zip [file Zbtb46_set_A.pdf › Supplemental Dataset 1/A-mRNA_nonrhyth_translation_nonrhyth/Zbtb46_set_A.pdf]

# Zbtb49

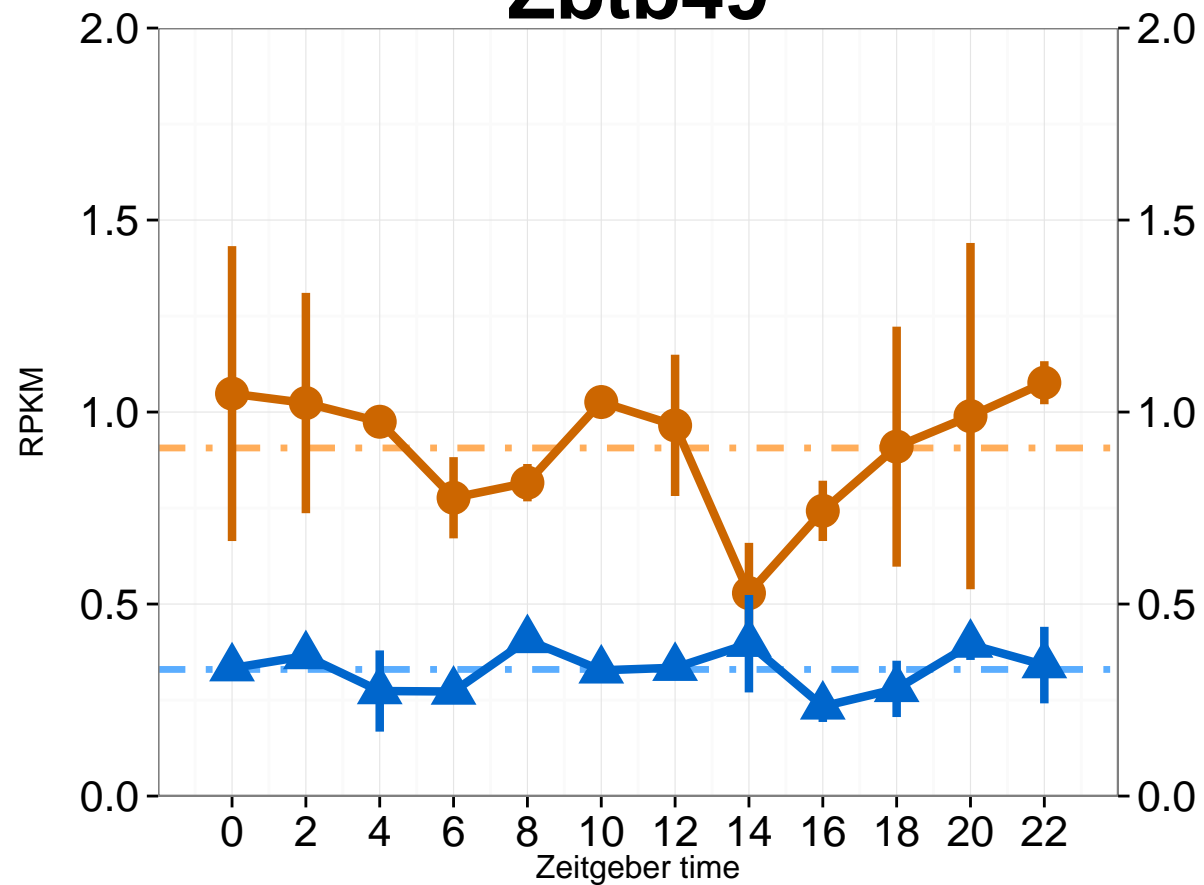

# Zbtb49

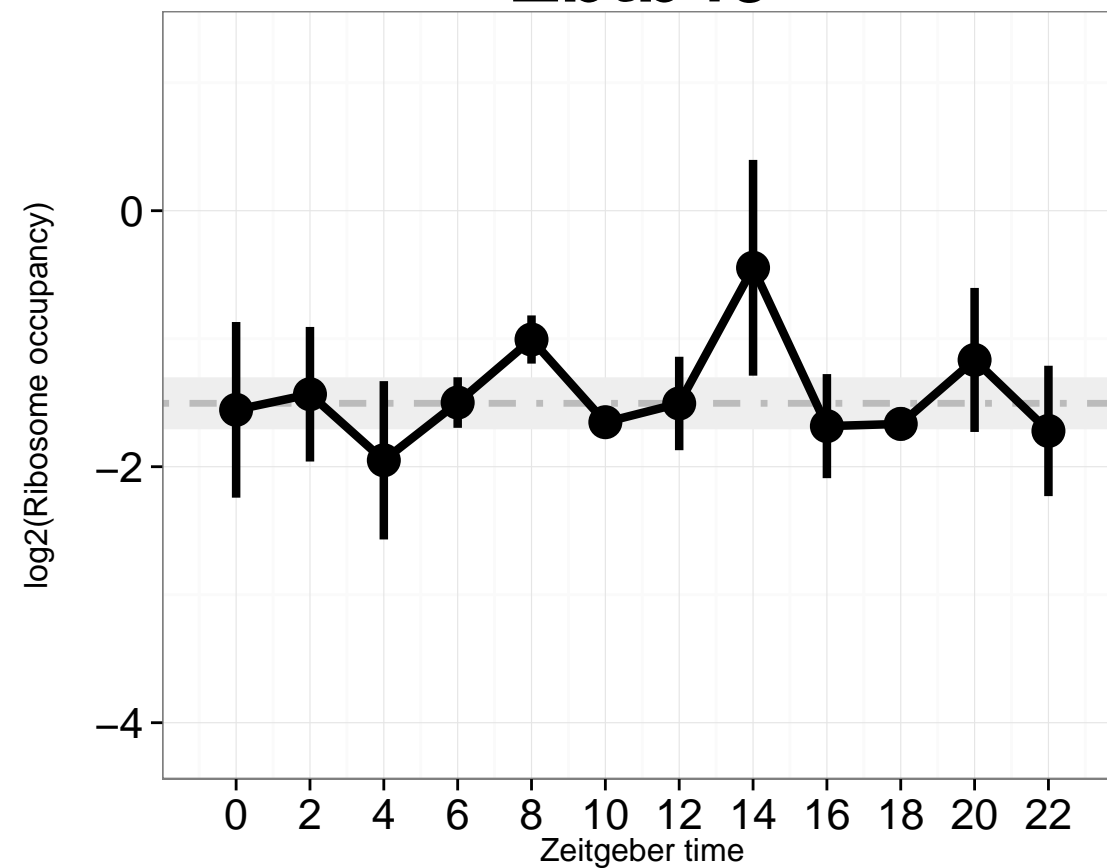

Supplement: SuppDataset_1.zip [file Zbtb49_set_A.pdf › Supplemental Dataset 1/A-mRNA_nonrhyth_translation_nonrhyth/Zbtb49_set_A.pdf]

## Zbtb4

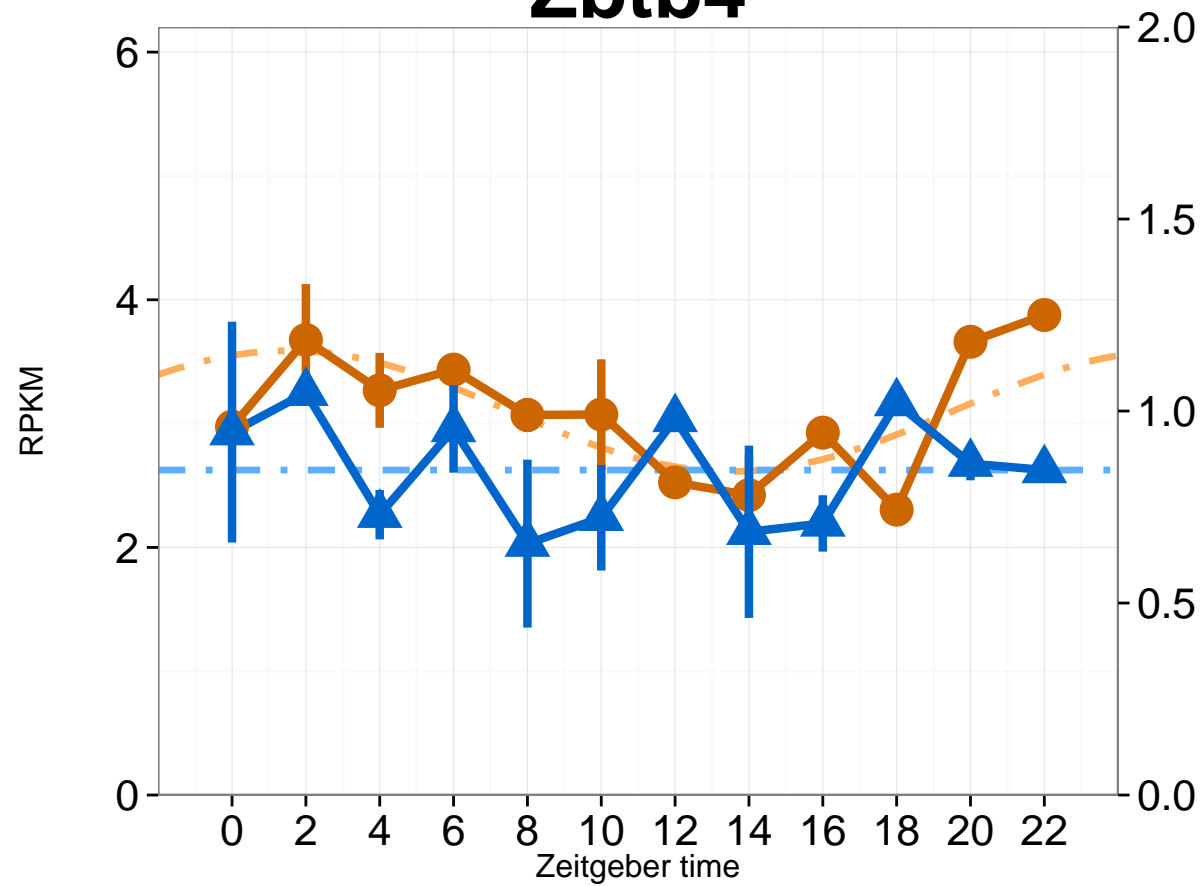

## Zbtb4

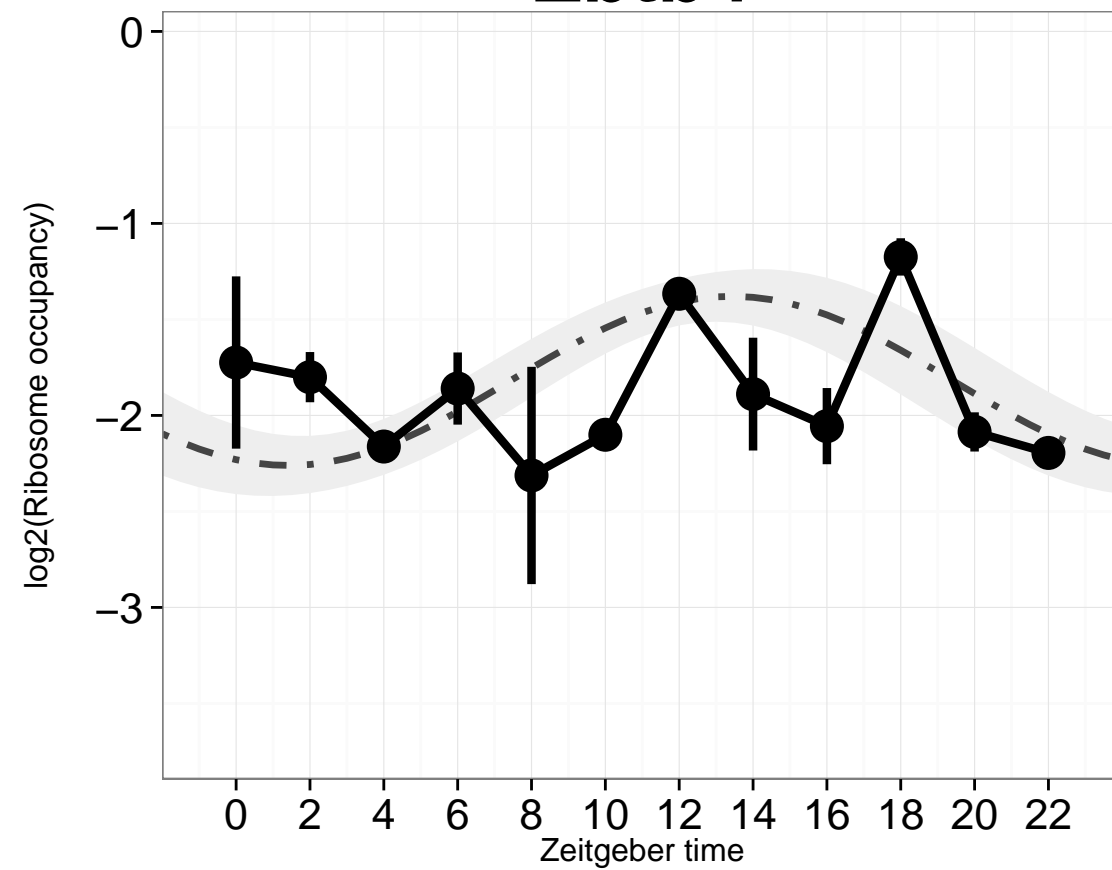

Supplement: SuppDataset_1.zip [file Zbtb4_set_A.pdf › Supplemental Dataset 1/A-mRNA_nonrhyth_translation_nonrhyth/Zbtb4_set_A.pdf]

# Zbtb5

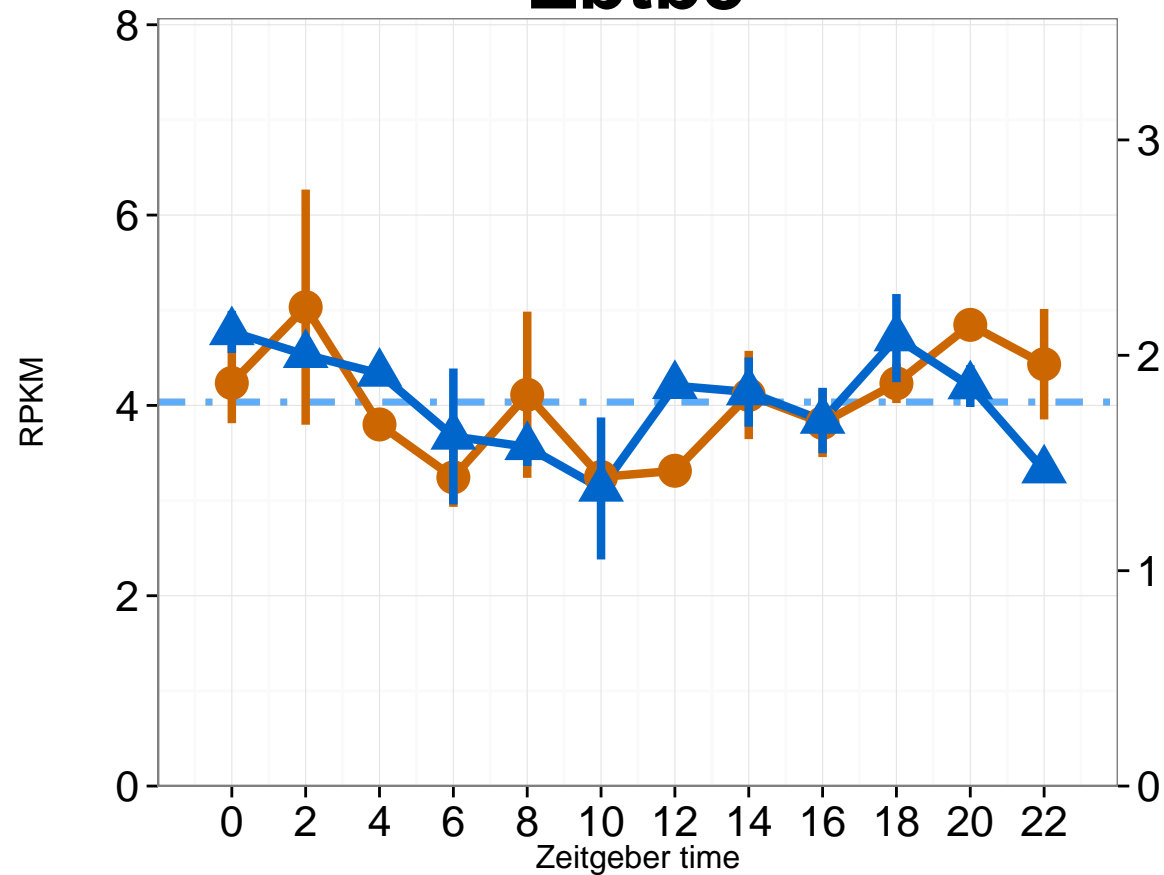

# Zbtb5

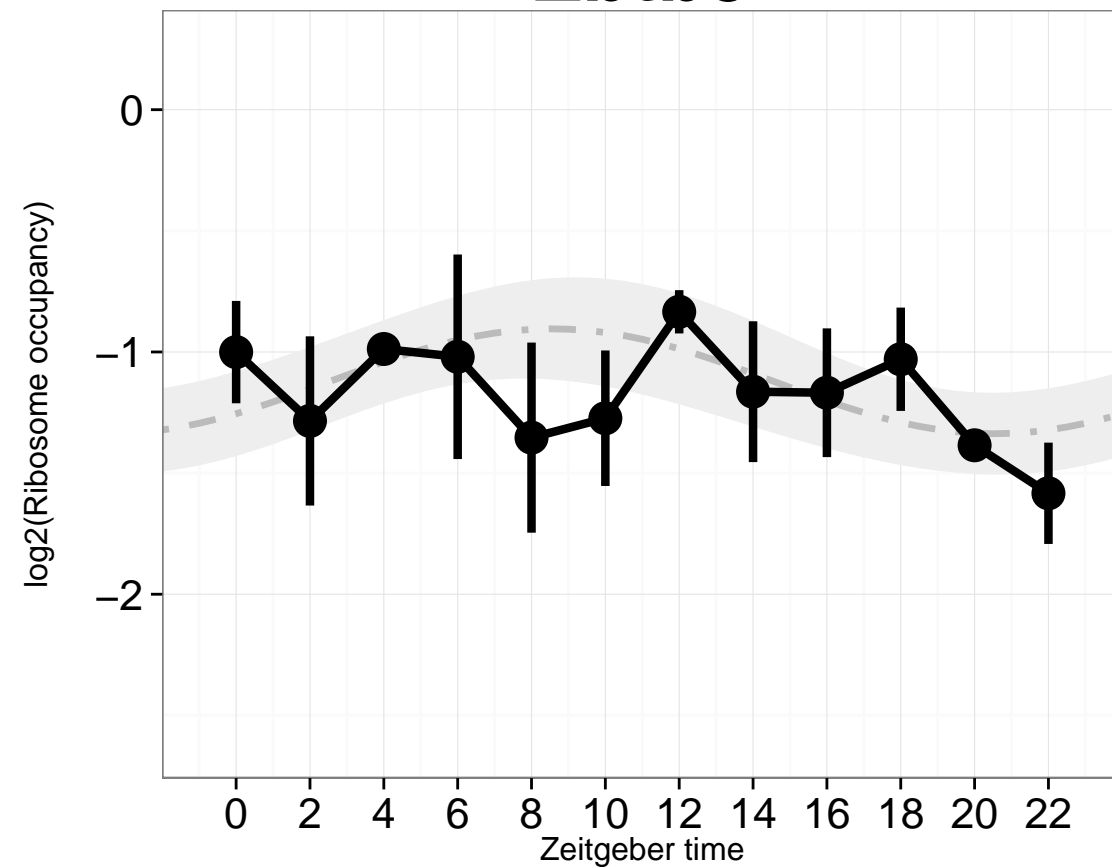

Supplement: SuppDataset_1.zip [file Zbtb5_set_A.pdf › Supplemental Dataset 1/A-mRNA_nonrhyth_translation_nonrhyth/Zbtb5_set_A.pdf]

## Zbtb6

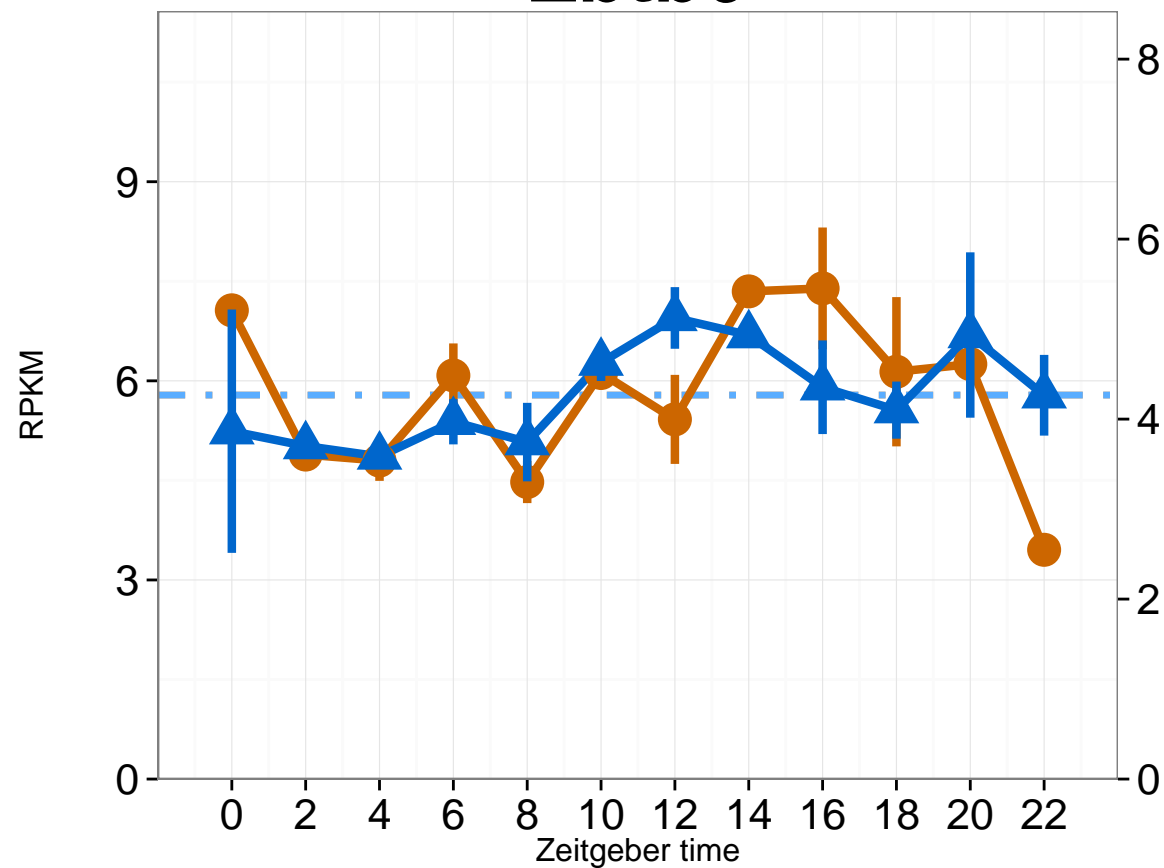

## Zbtb6

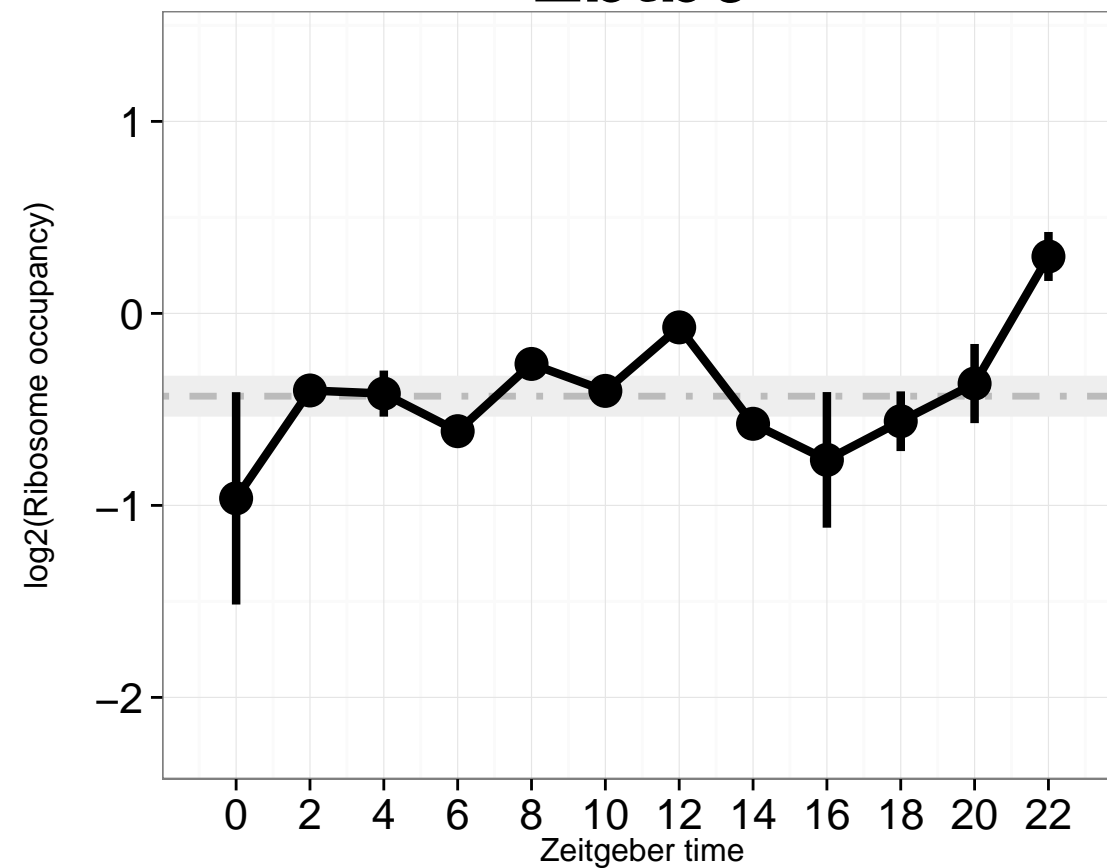

Supplement: SuppDataset_1.zip [file Zbtb6_set_A.pdf › Supplemental Dataset 1/A-mRNA_nonrhyth_translation_nonrhyth/Zbtb6_set_A.pdf]

# Zbtb7a

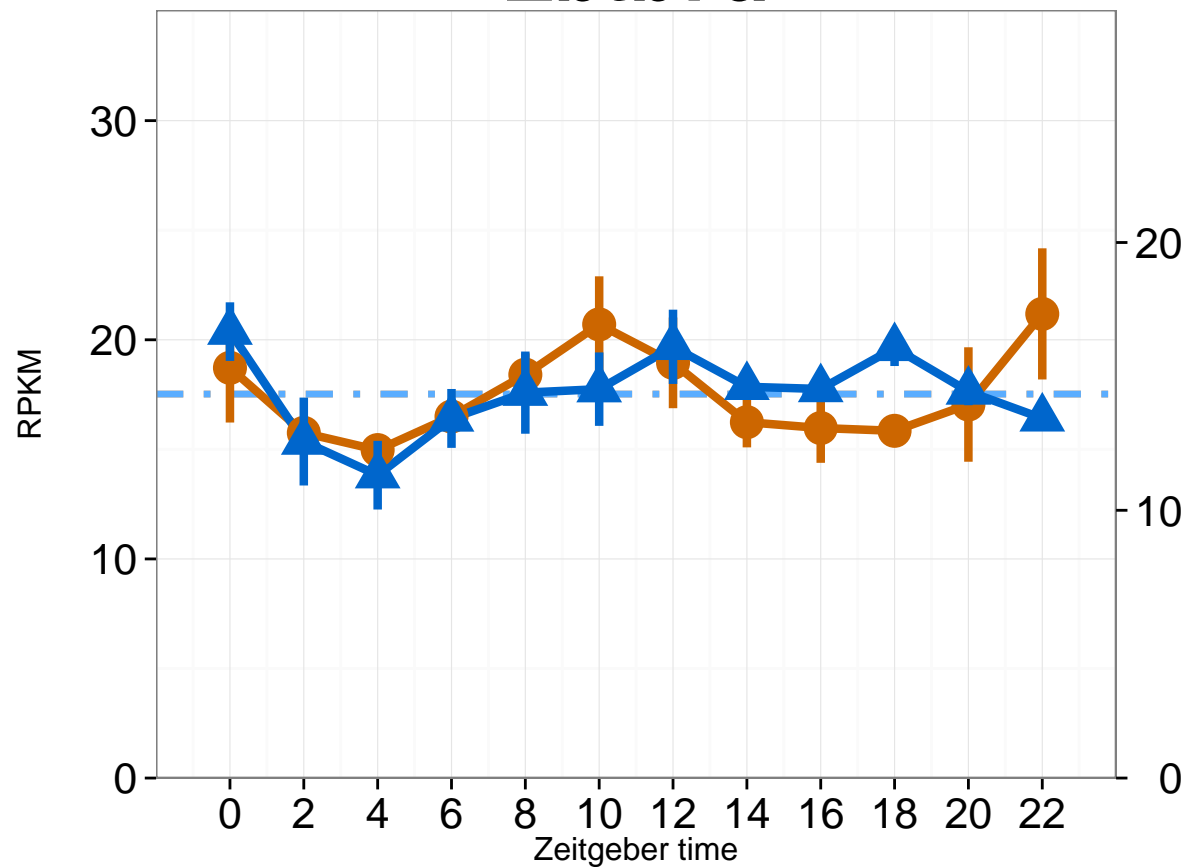

# Zbtb7a

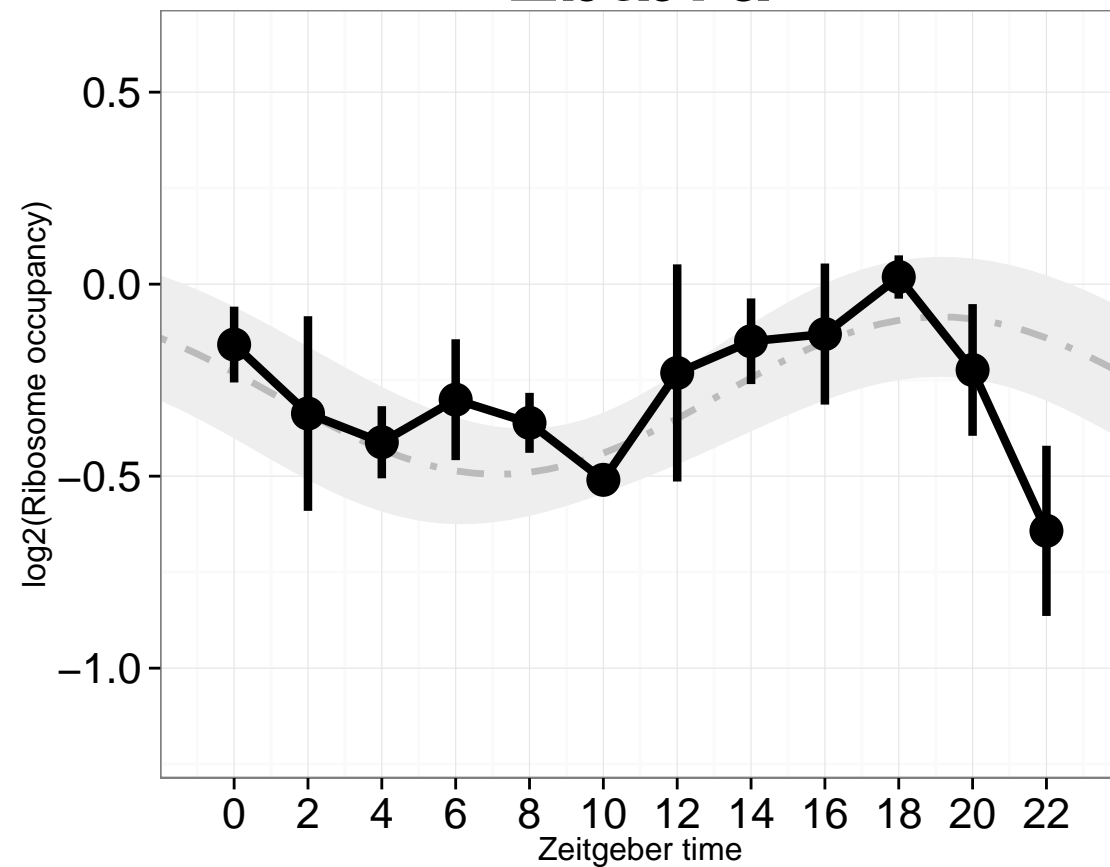

Supplement: SuppDataset_1.zip [file Zbtb7a_set_A.pdf › Supplemental Dataset 1/A-mRNA_nonrhyth_translation_nonrhyth/Zbtb7a_set_A.pdf]

# Zbtb7c

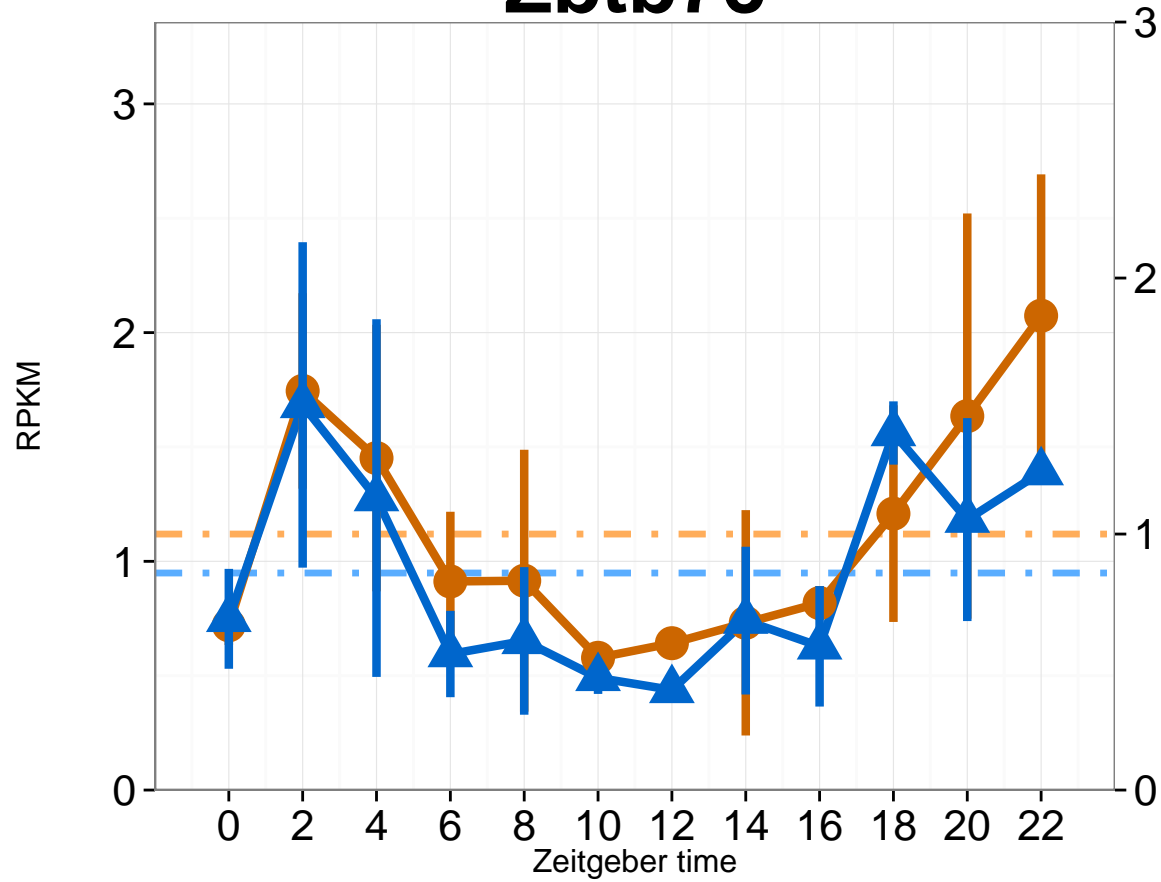

# Zbtb7c

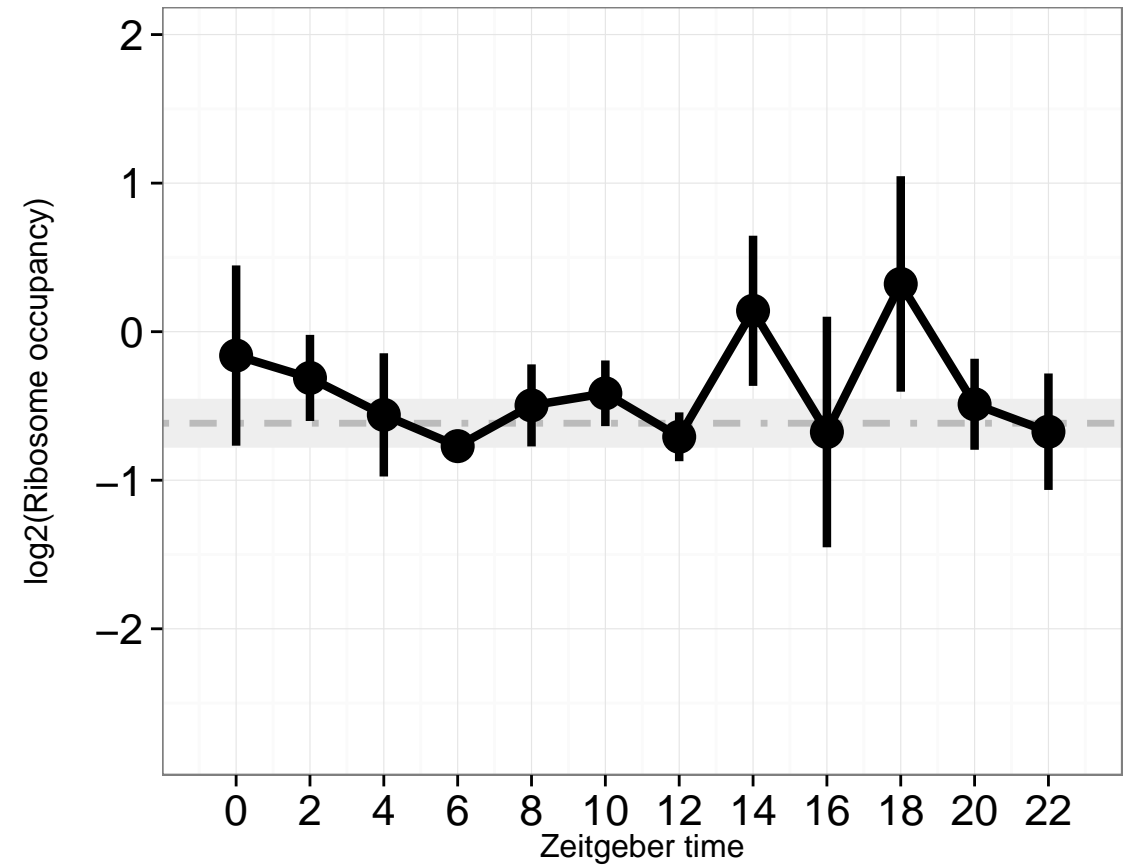

Supplement: SuppDataset_1.zip [file Zbtb7c_set_A.pdf › Supplemental Dataset 1/A-mRNA_nonrhyth_translation_nonrhyth/Zbtb7c_set_A.pdf]

# Zbtb8a

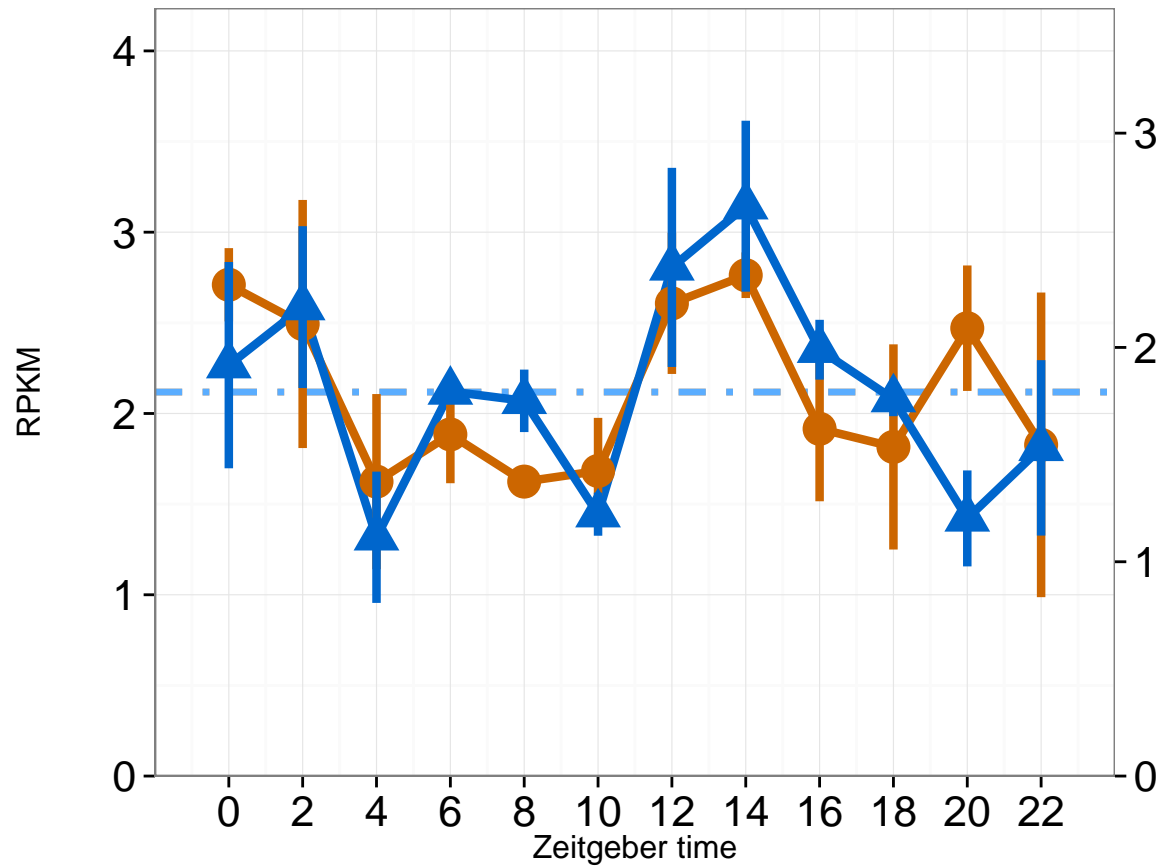

# Zbtb8a

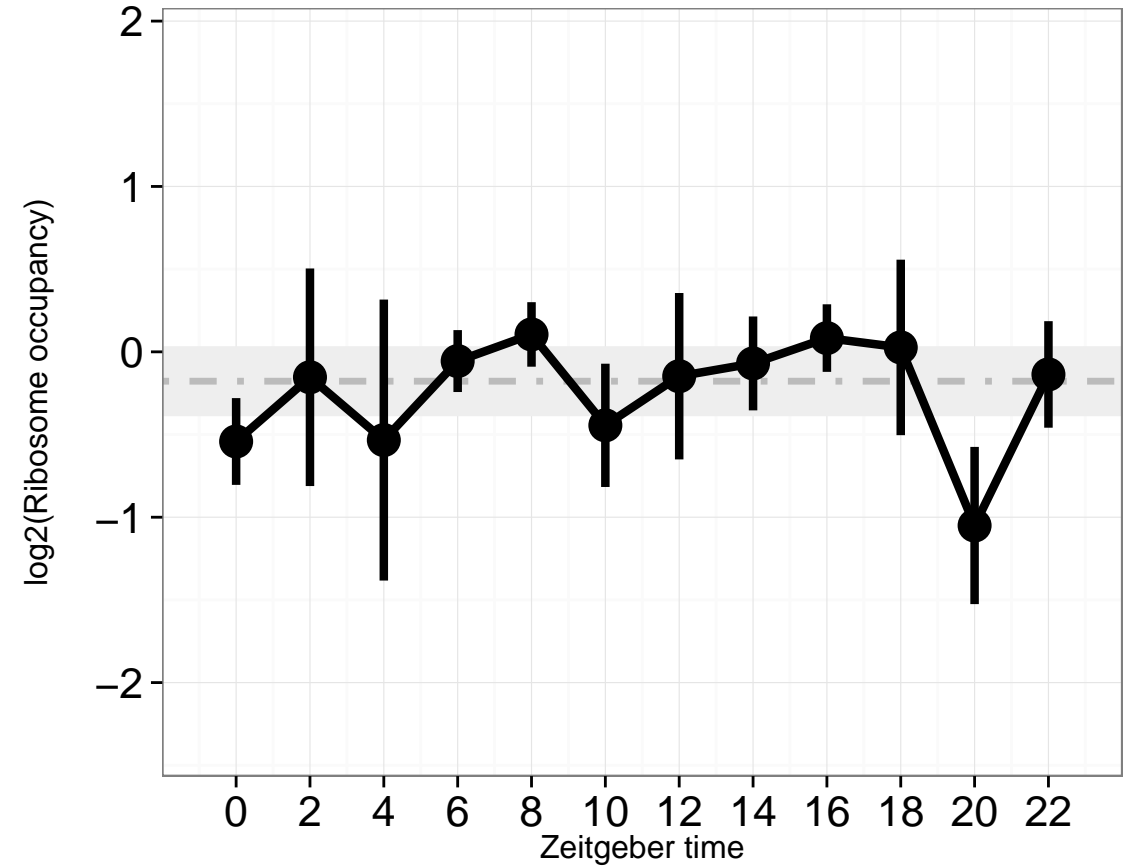

Supplement: SuppDataset_1.zip [file Zbtb8a_set_A.pdf › Supplemental Dataset 1/A-mRNA_nonrhyth_translation_nonrhyth/Zbtb8a_set_A.pdf]

## Zbtb8os

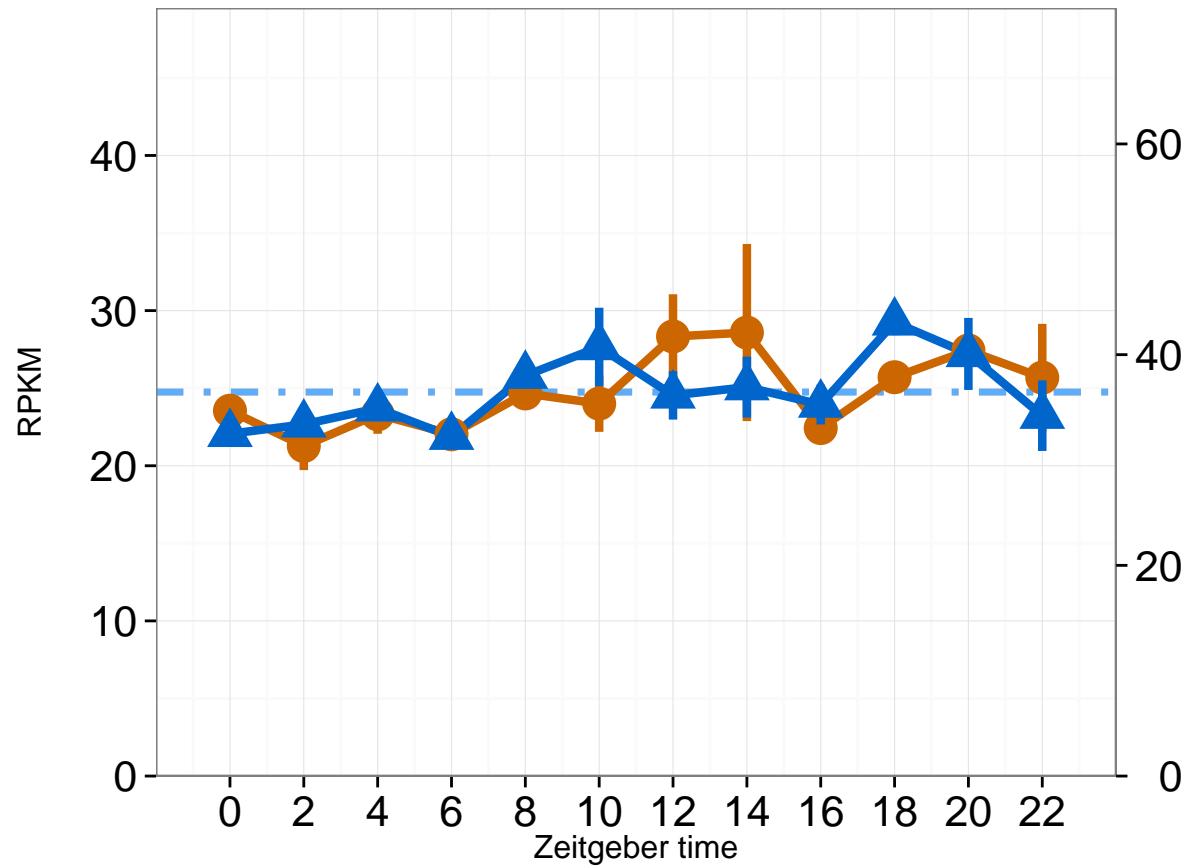

## Zbtb8os

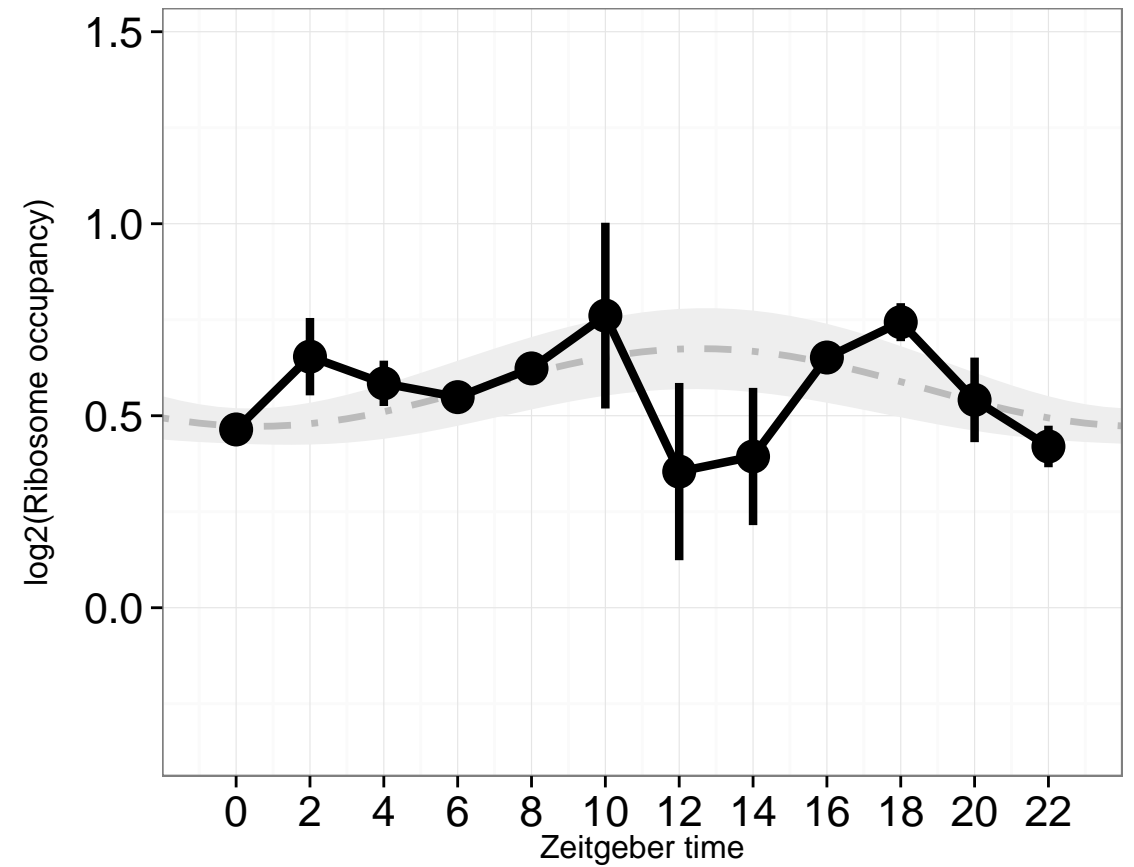

Supplement: SuppDataset_1.zip [file Zbtb8os_set_A.pdf › Supplemental Dataset 1/A-mRNA_nonrhyth_translation_nonrhyth/Zbtb8os_set_A.pdf]

# Zc2hc1a

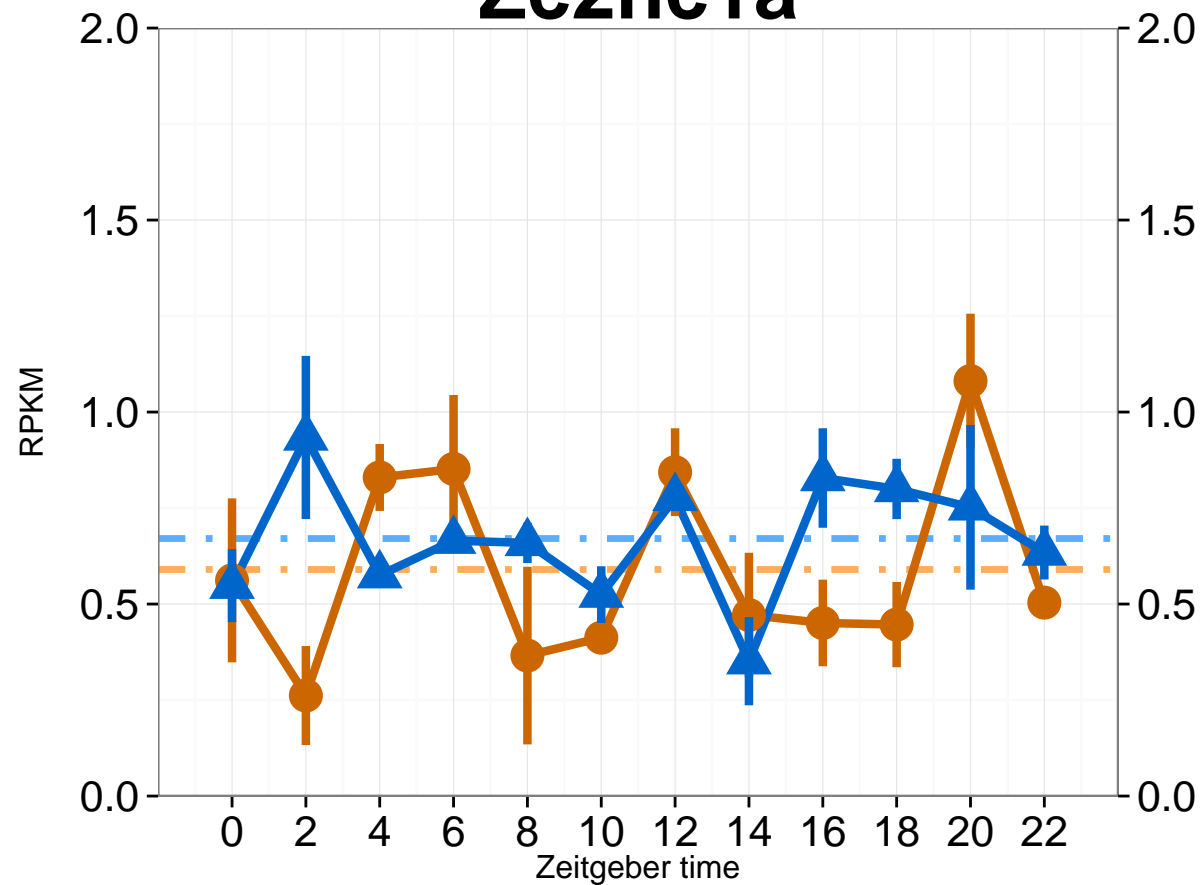

# Zc2hc1a

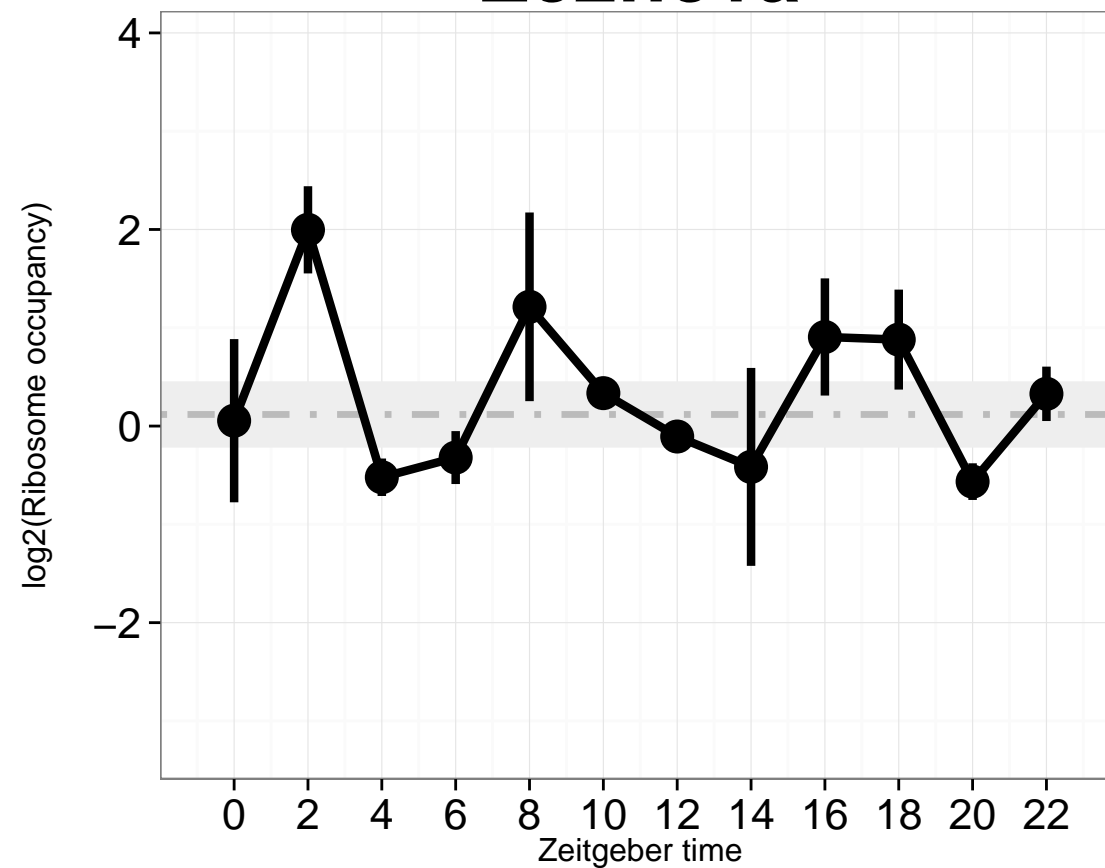

Supplement: SuppDataset_1.zip [file Zc2hc1a_set_A.pdf › Supplemental Dataset 1/A-mRNA_nonrhyth_translation_nonrhyth/Zc2hc1a_set_A.pdf]

# Zc2hc1c

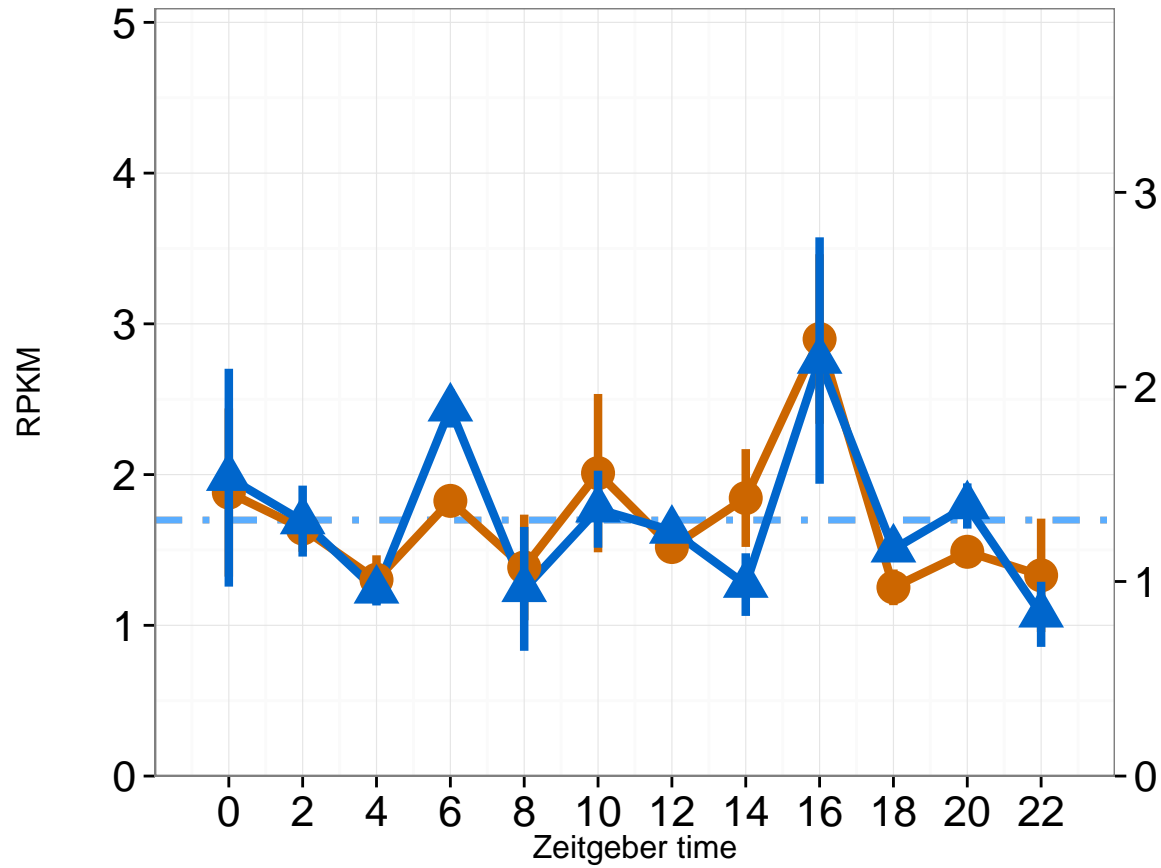

# Zc2hc1c

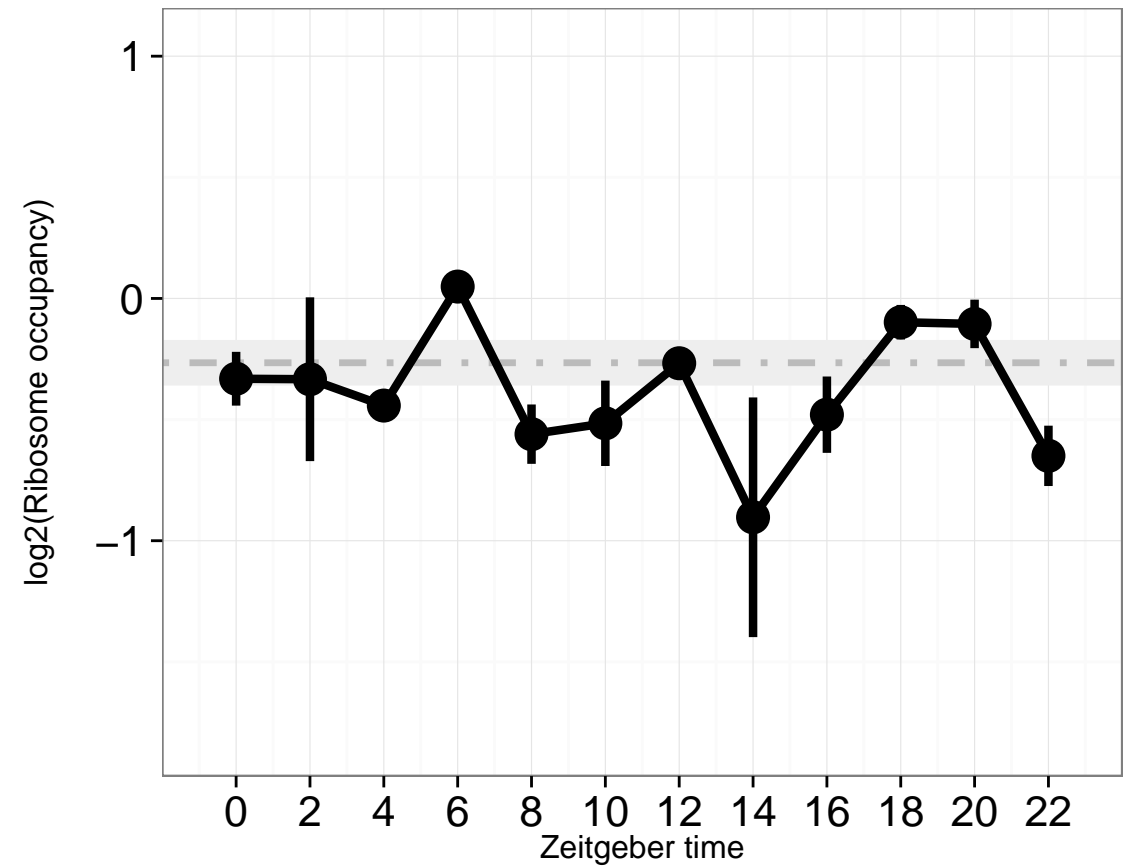

Supplement: SuppDataset_1.zip [file Zc2hc1c_set_A.pdf › Supplemental Dataset 1/A-mRNA_nonrhyth_translation_nonrhyth/Zc2hc1c_set_A.pdf]

## Zc3h10

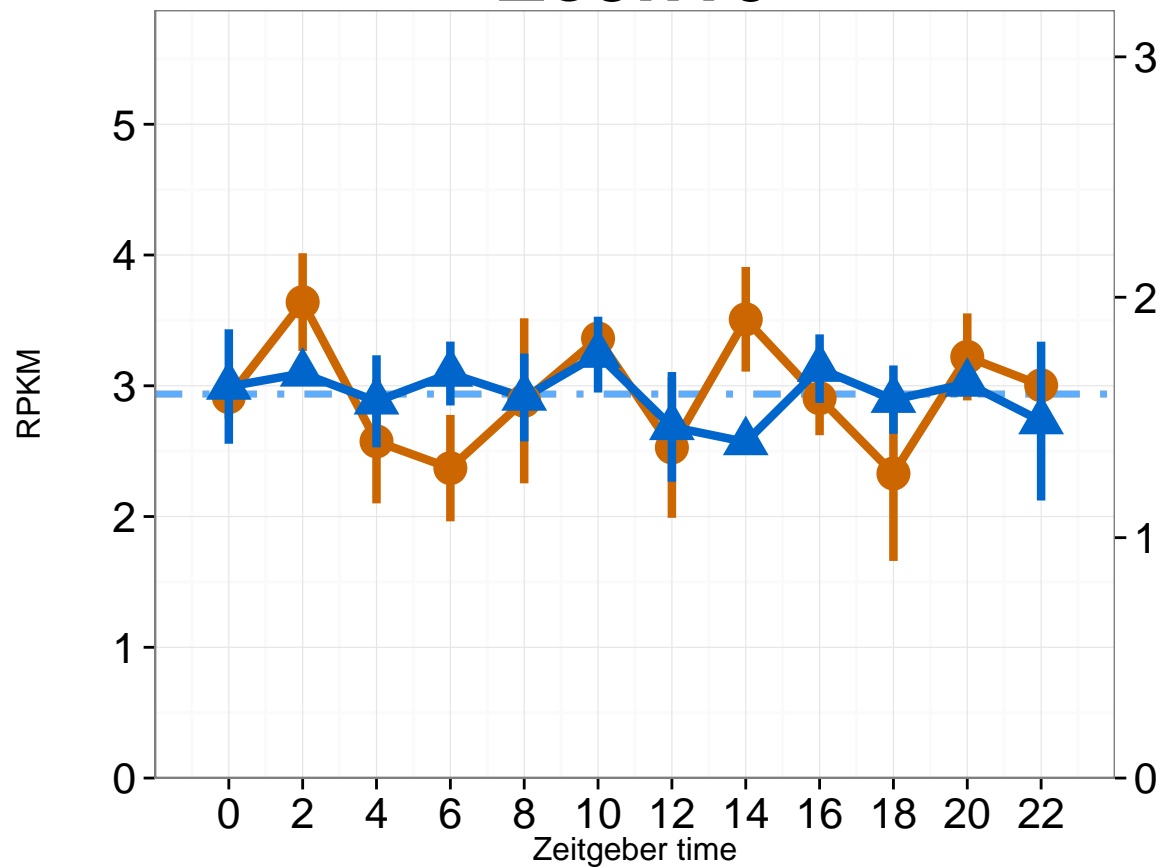

## Zc3h10

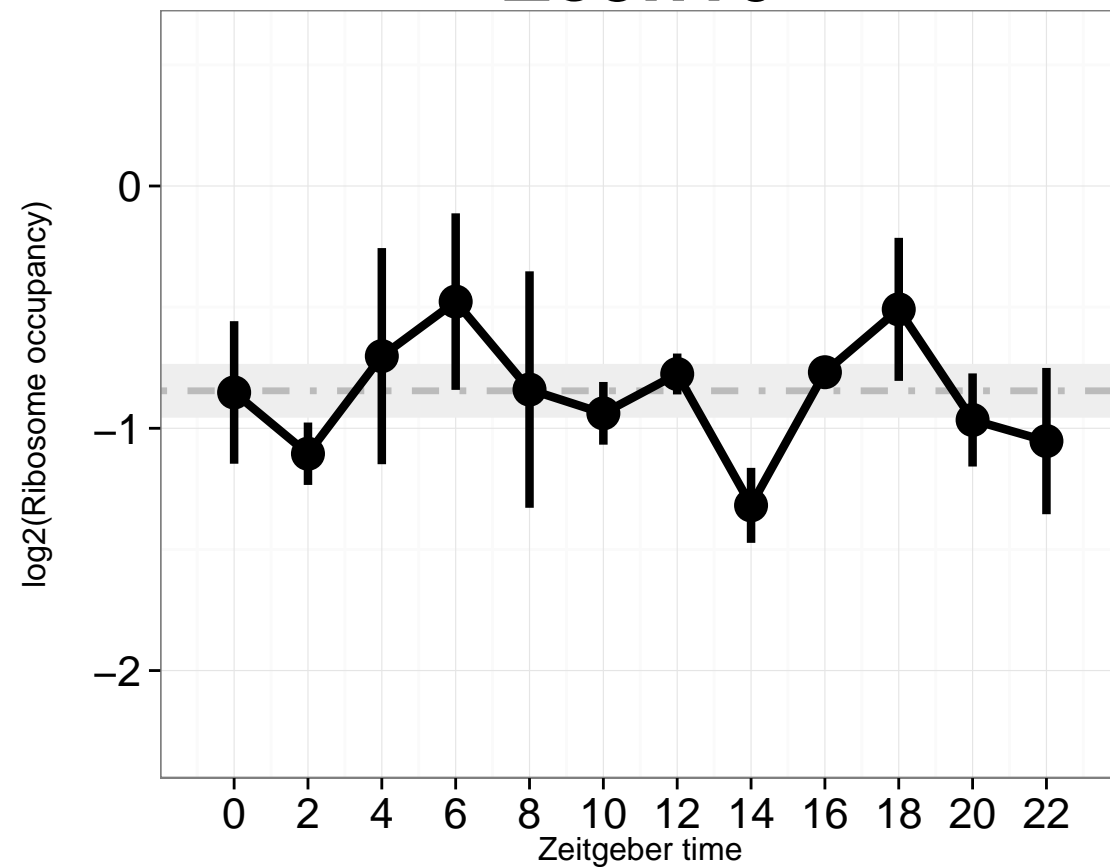

Supplement: SuppDataset_1.zip [file Zc3h10_set_A.pdf › Supplemental Dataset 1/A-mRNA_nonrhyth_translation_nonrhyth/Zc3h10_set_A.pdf]

# Zc3h12a

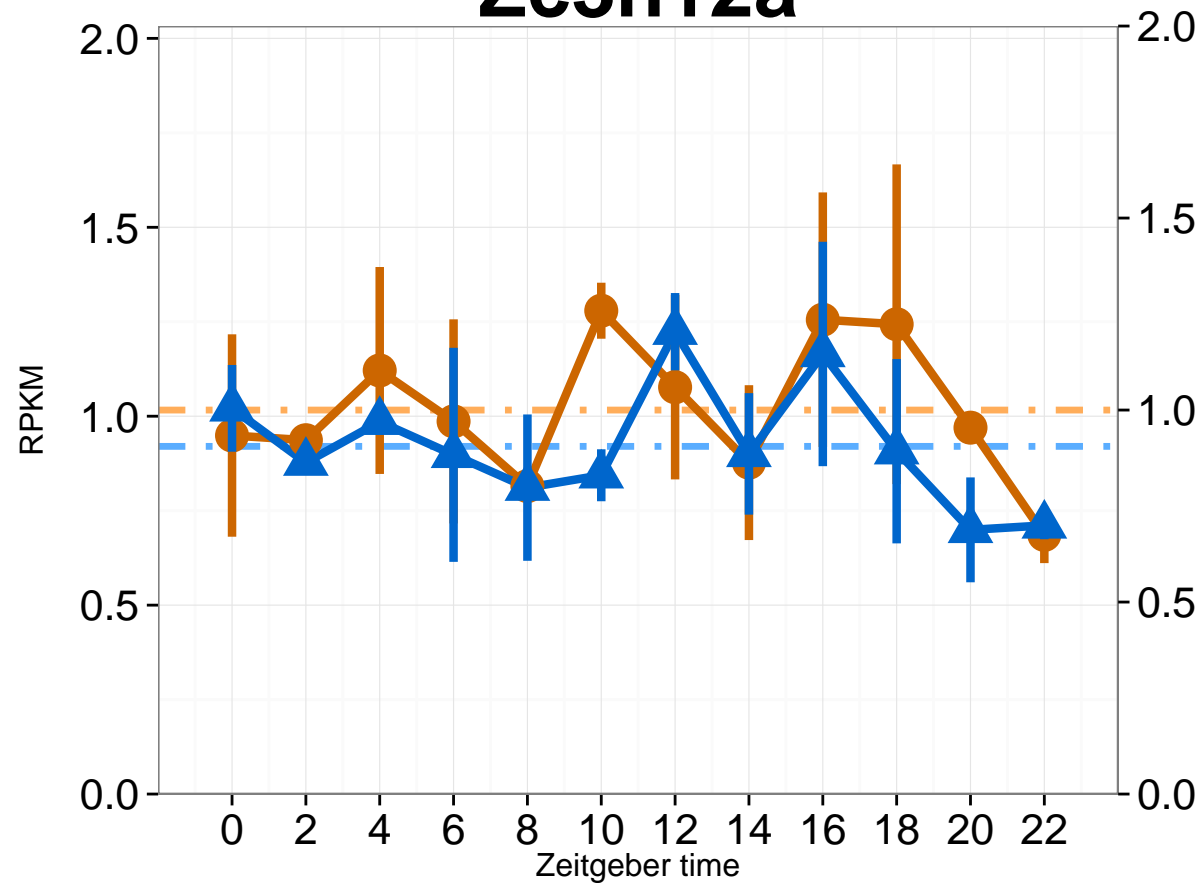

# Zc3h12a

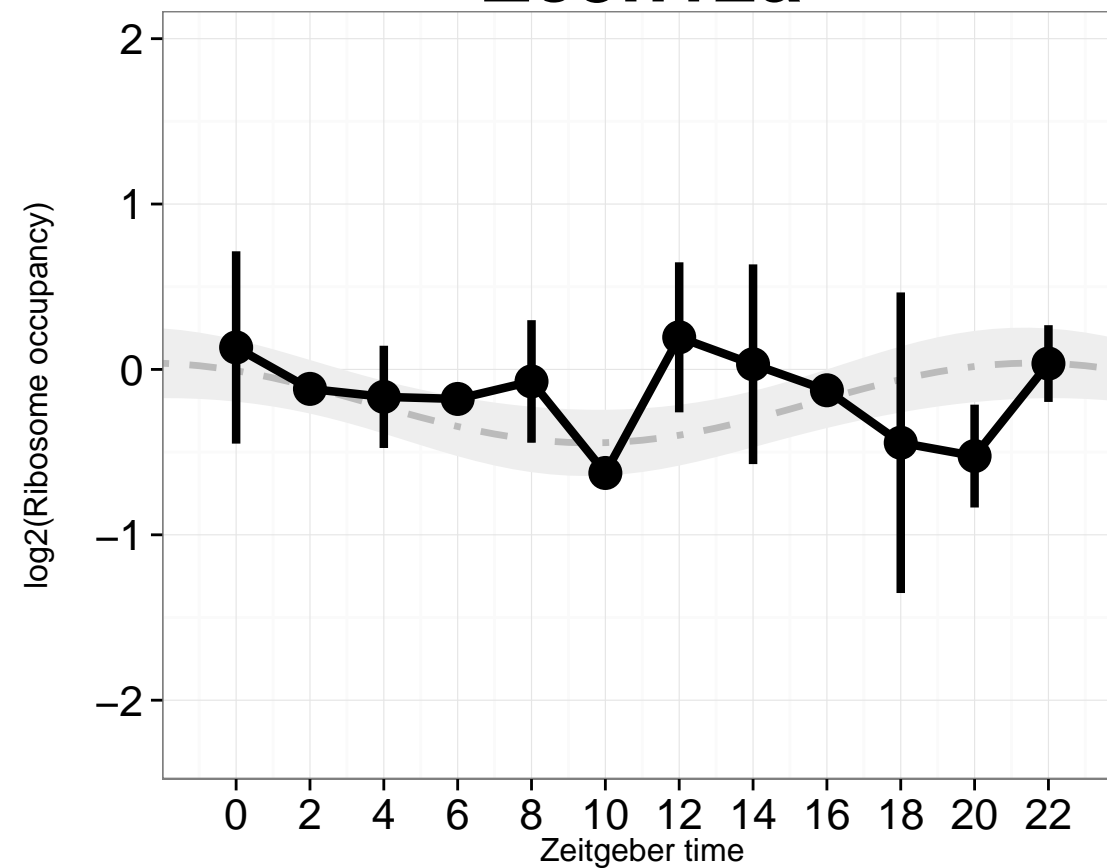

Supplement: SuppDataset_1.zip [file Zc3h12a_set_A.pdf › Supplemental Dataset 1/A-mRNA_nonrhyth_translation_nonrhyth/Zc3h12a_set_A.pdf]

# Zc3h12c

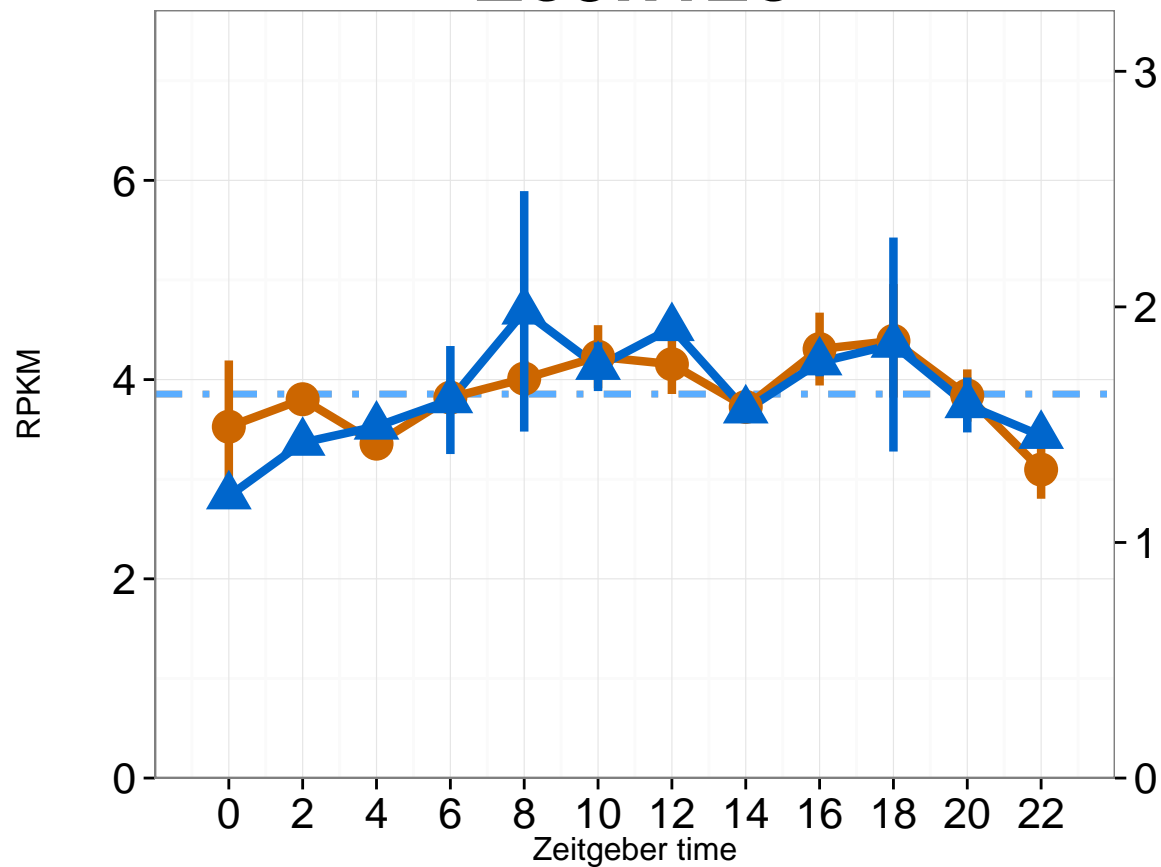

# Zc3h12c

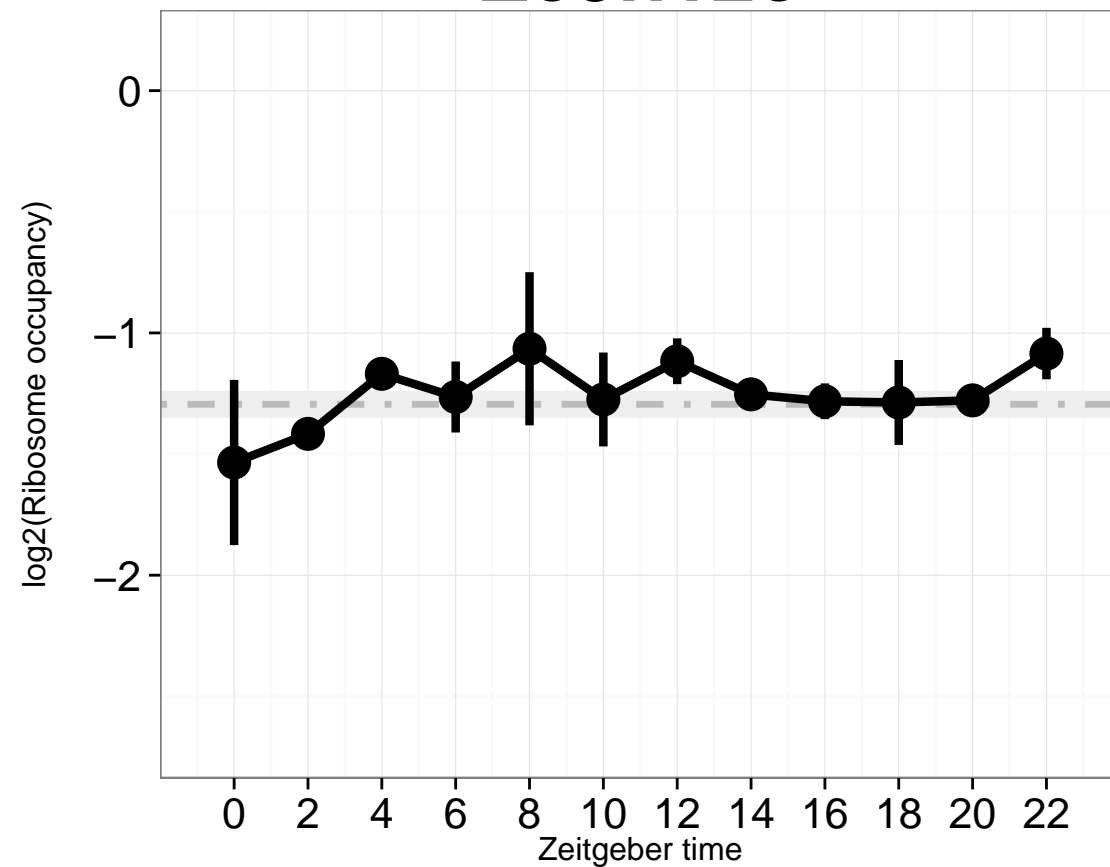

Supplement: SuppDataset_1.zip [file Zc3h12c_set_A.pdf › Supplemental Dataset 1/A-mRNA_nonrhyth_translation_nonrhyth/Zc3h12c_set_A.pdf]

# Zc3h13

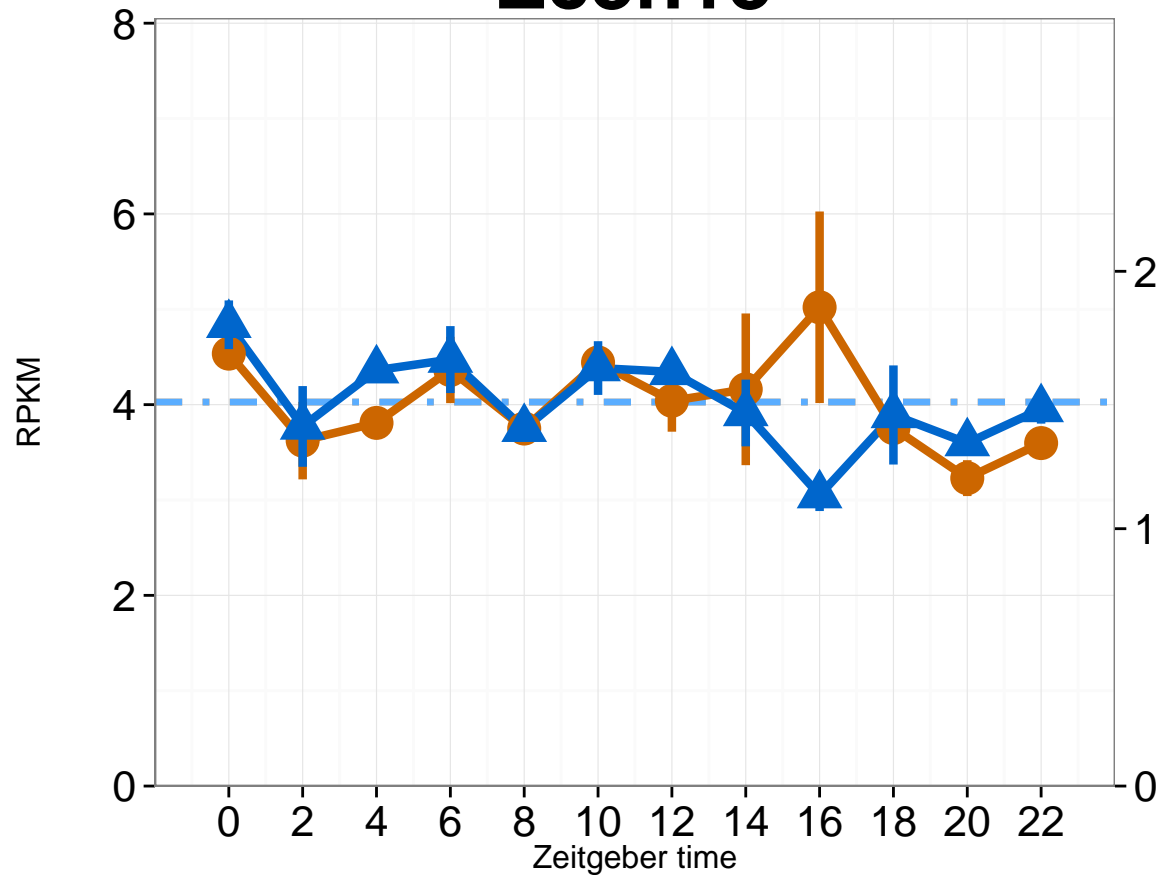

# Zc3h13

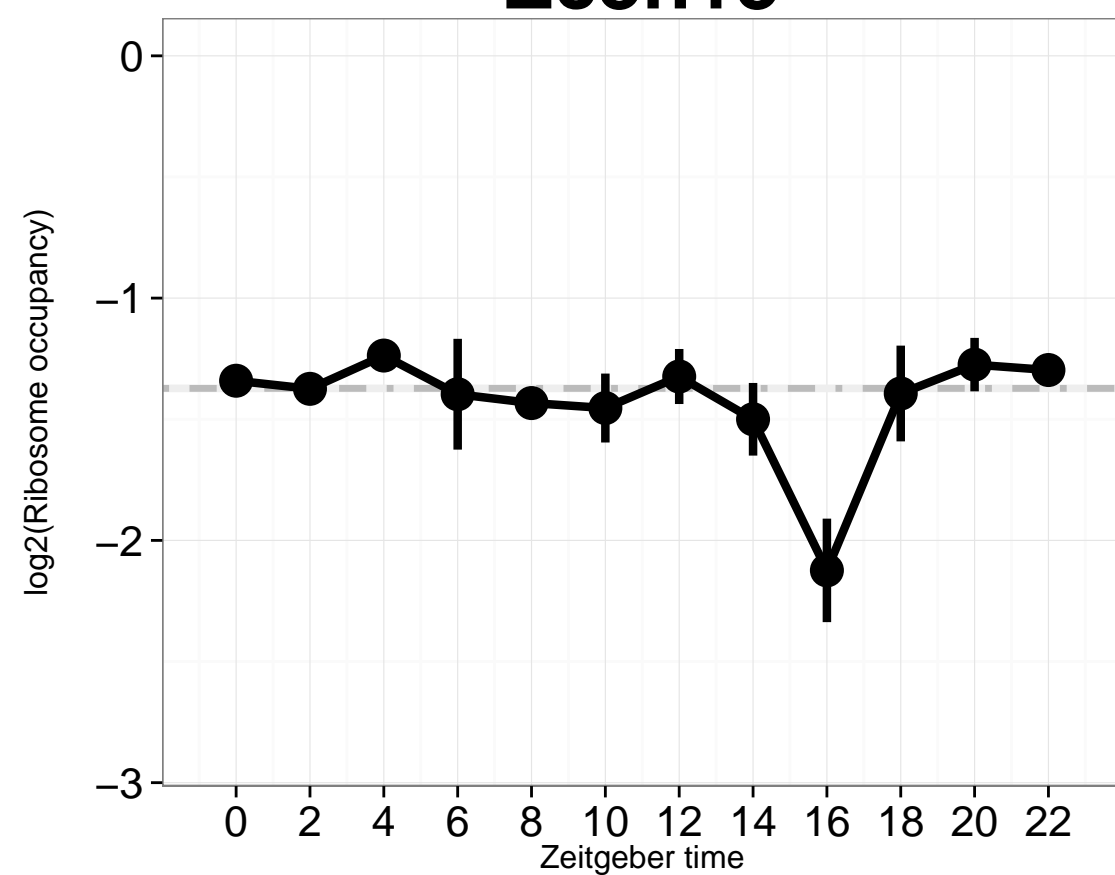

Supplement: SuppDataset_1.zip [file Zc3h13_set_A.pdf › Supplemental Dataset 1/A-mRNA_nonrhyth_translation_nonrhyth/Zc3h13_set_A.pdf]

## Zc3h14

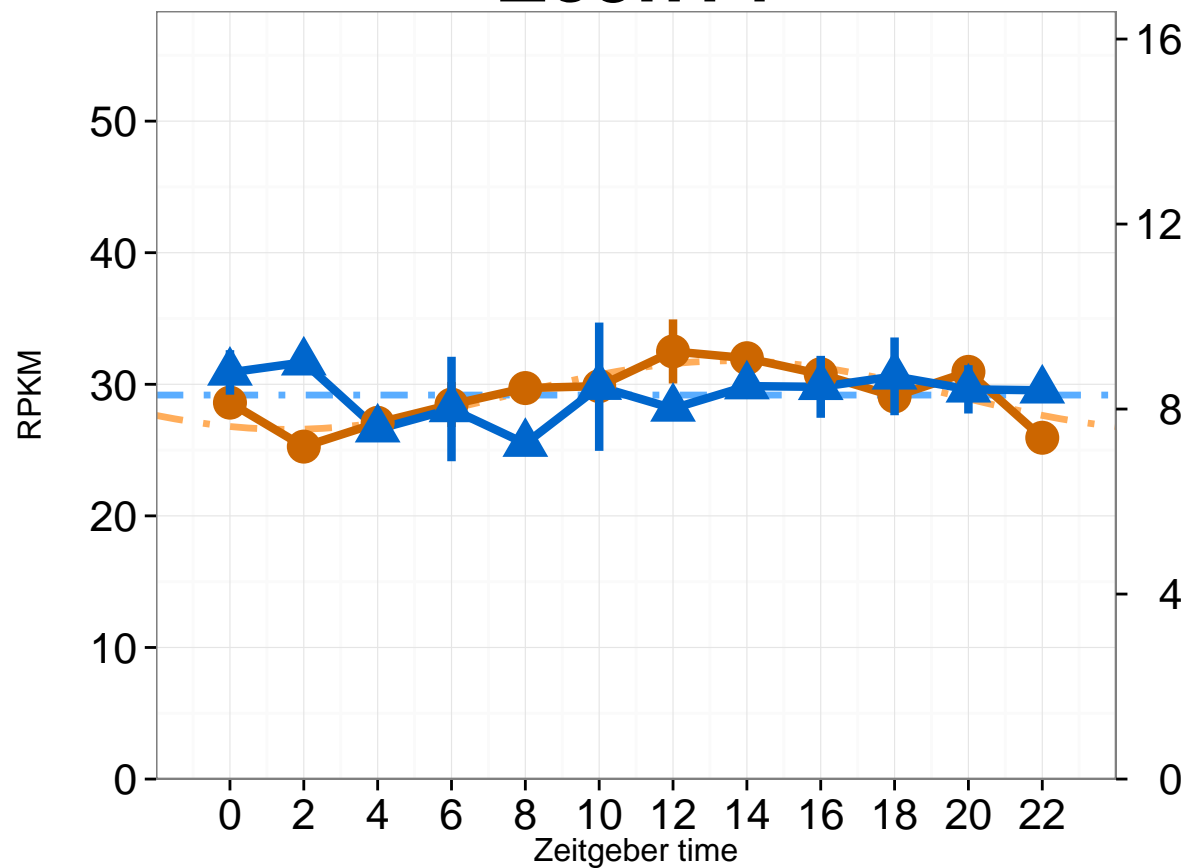

## Zc3h14

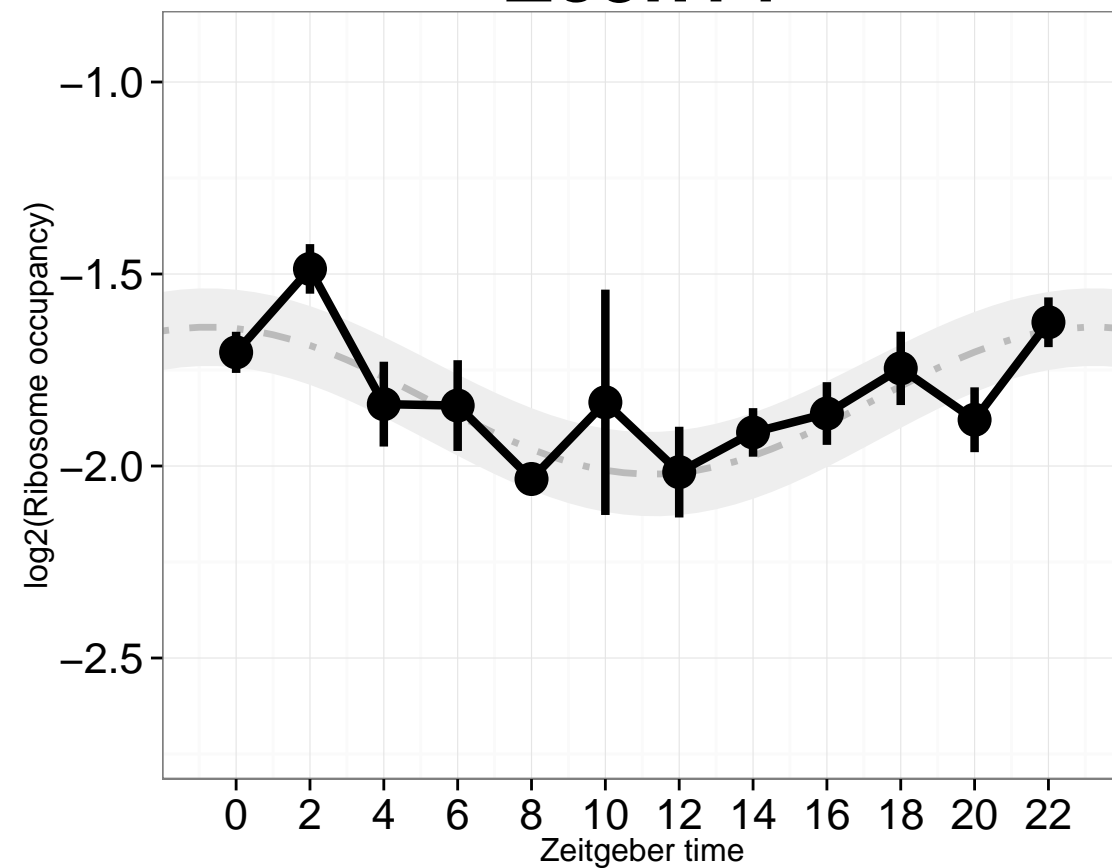

Supplement: SuppDataset_1.zip [file Zc3h14_set_A.pdf › Supplemental Dataset 1/A-mRNA_nonrhyth_translation_nonrhyth/Zc3h14_set_A.pdf]

## Zc3h15

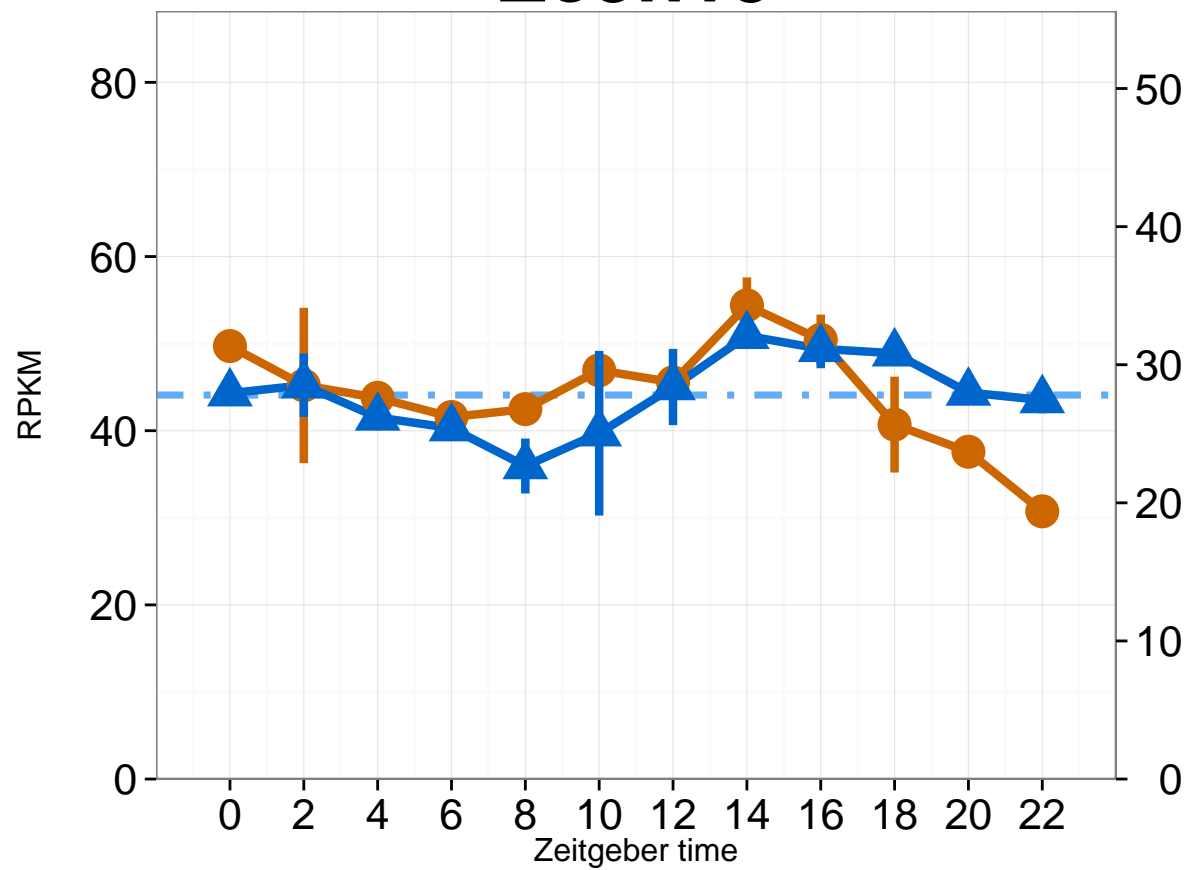

## Zc3h15

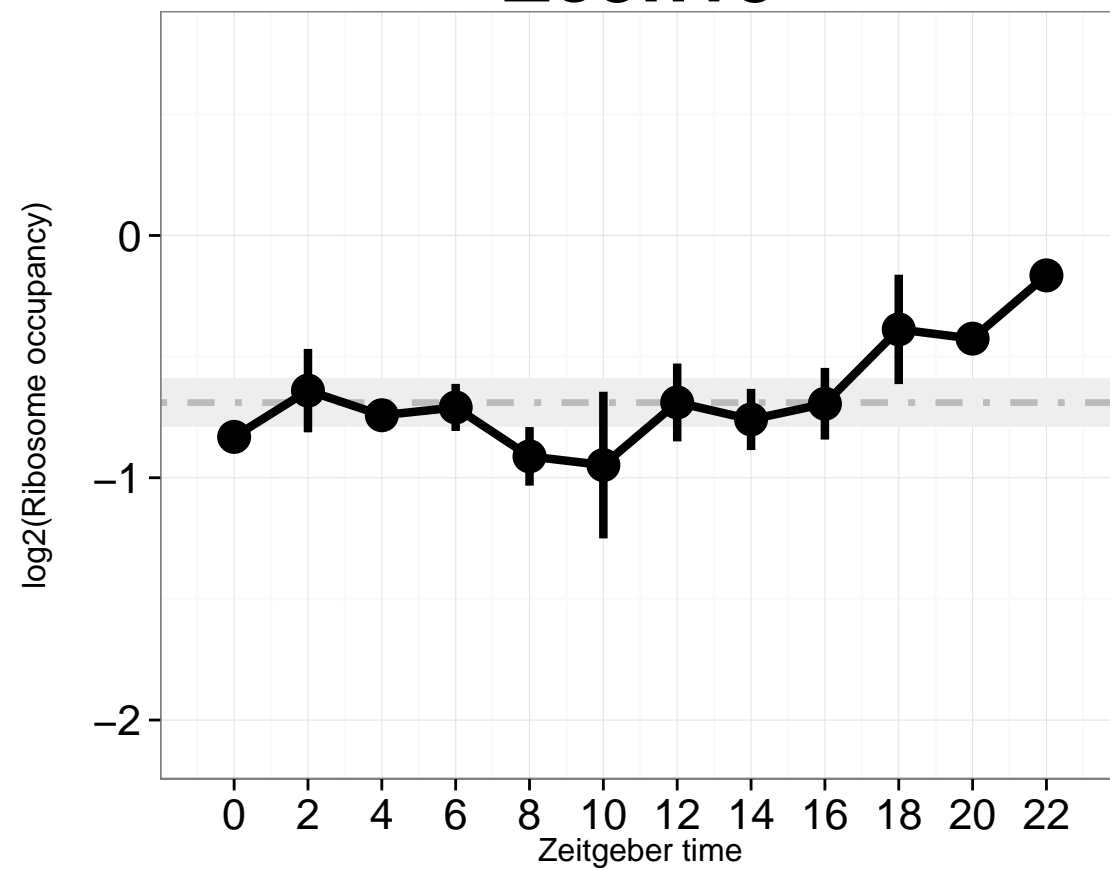

Supplement: SuppDataset_1.zip [file Zc3h15_set_A.pdf › Supplemental Dataset 1/A-mRNA_nonrhyth_translation_nonrhyth/Zc3h15_set_A.pdf]

## Zc3h3

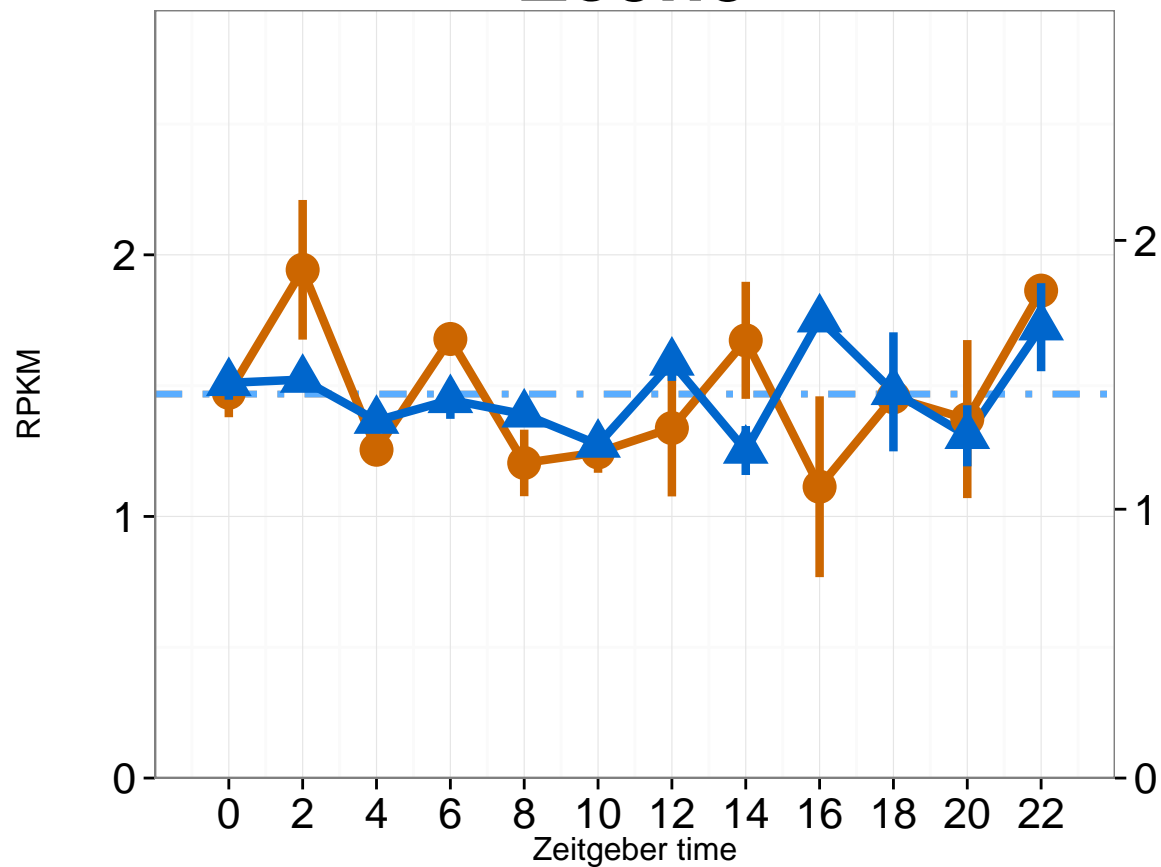

## Zc3h3

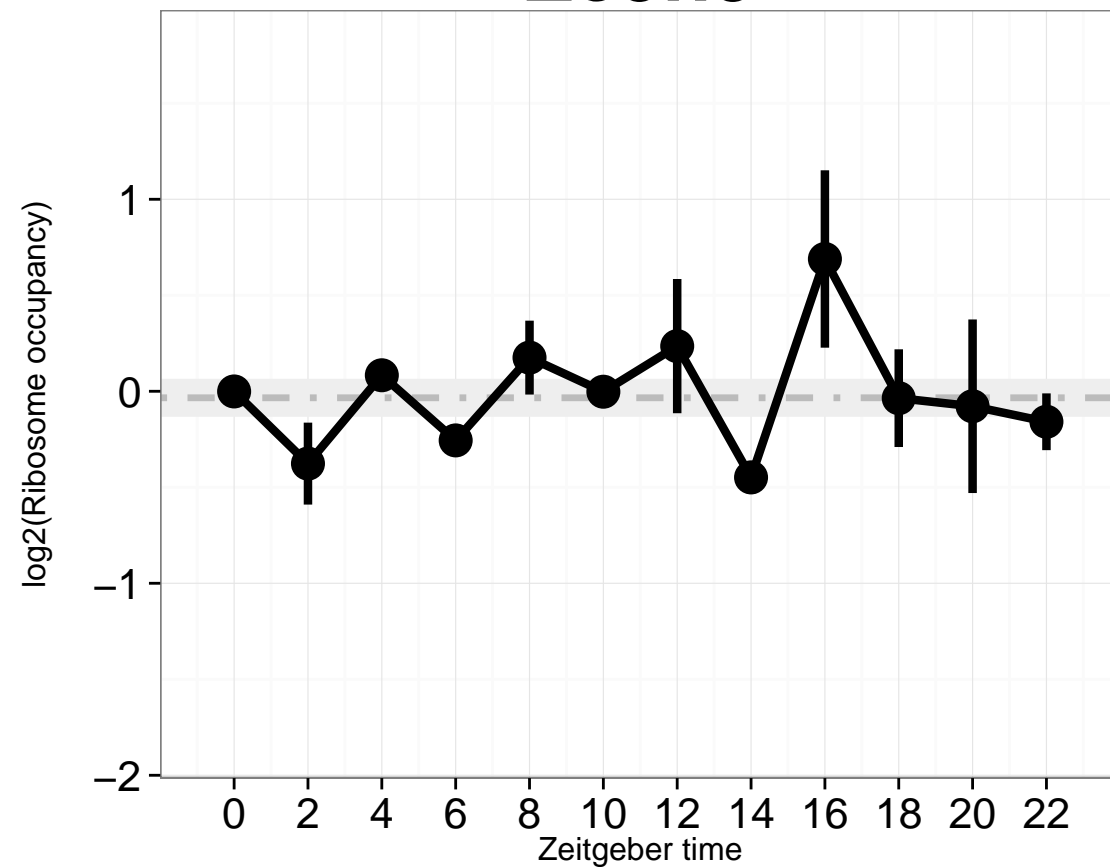

Supplement: SuppDataset_1.zip [file Zc3h3_set_A.pdf › Supplemental Dataset 1/A-mRNA_nonrhyth_translation_nonrhyth/Zc3h3_set_A.pdf]

## Zc3h4

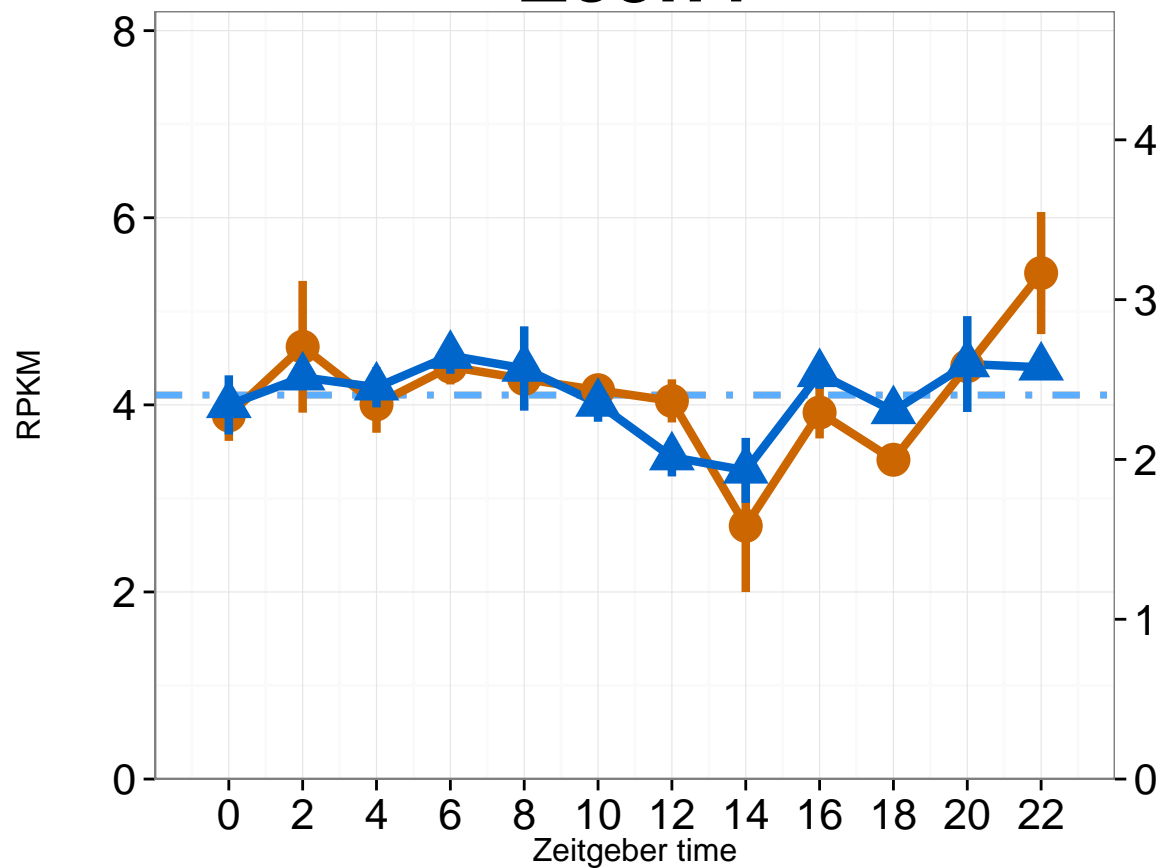

## Zc3h4

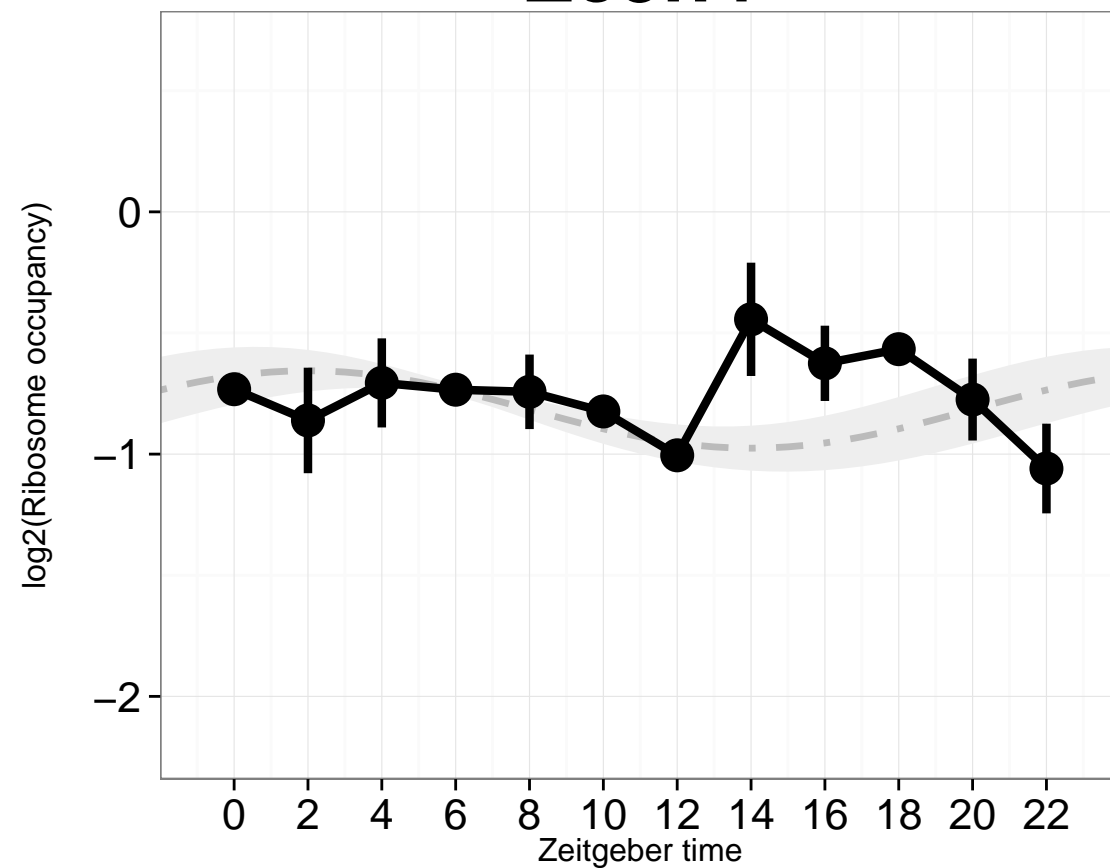

Supplement: SuppDataset_1.zip [file Zc3h4_set_A.pdf › Supplemental Dataset 1/A-mRNA_nonrhyth_translation_nonrhyth/Zc3h4_set_A.pdf]

# Zc3h6

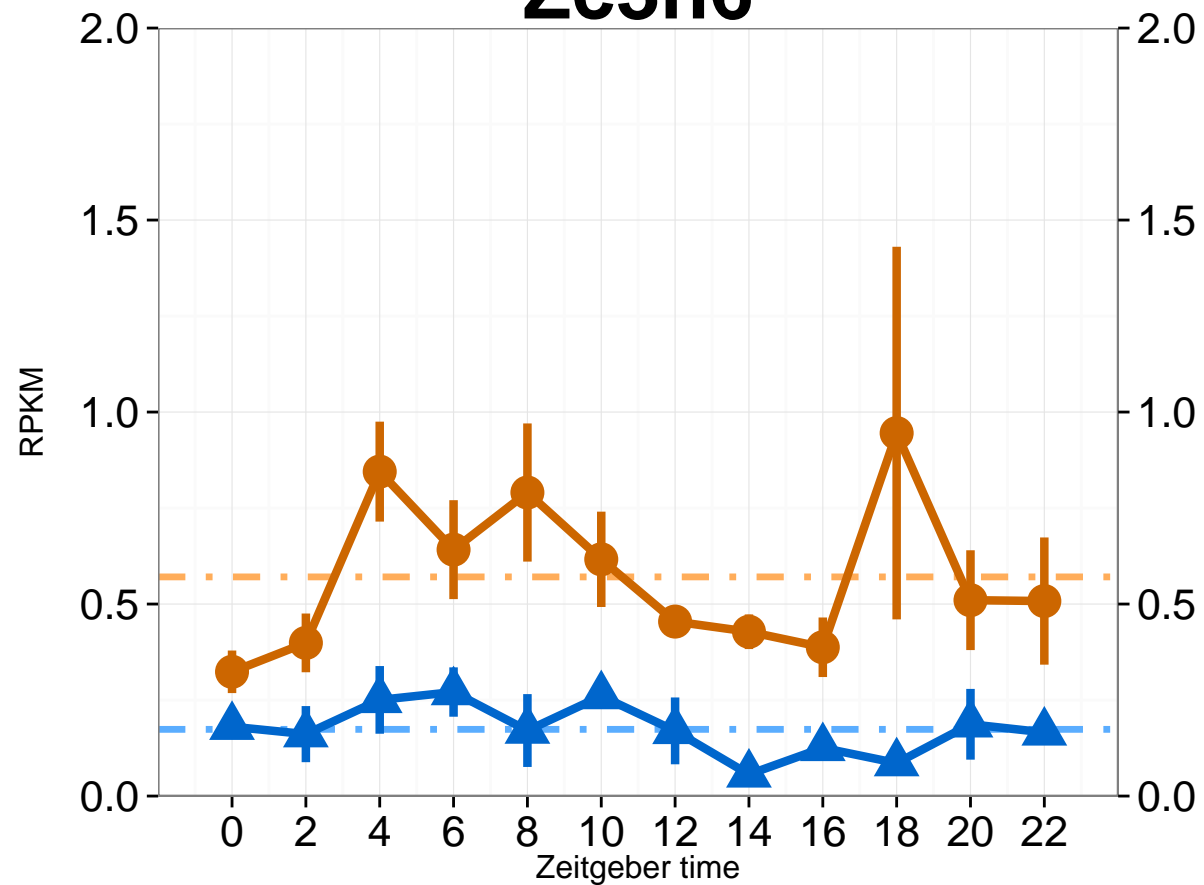

# Zc3h6

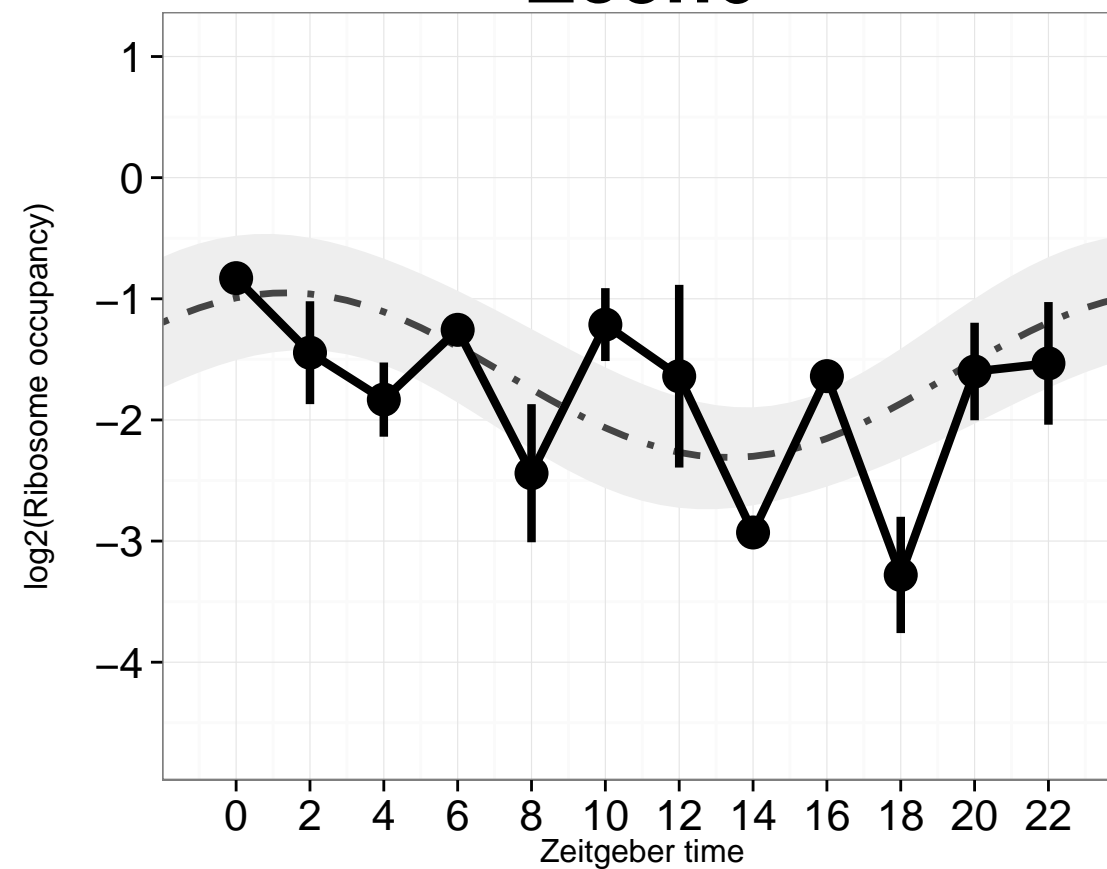

Supplement: SuppDataset_1.zip [file Zc3h6_set_A.pdf › Supplemental Dataset 1/A-mRNA_nonrhyth_translation_nonrhyth/Zc3h6_set_A.pdf]

# Zc3h7a

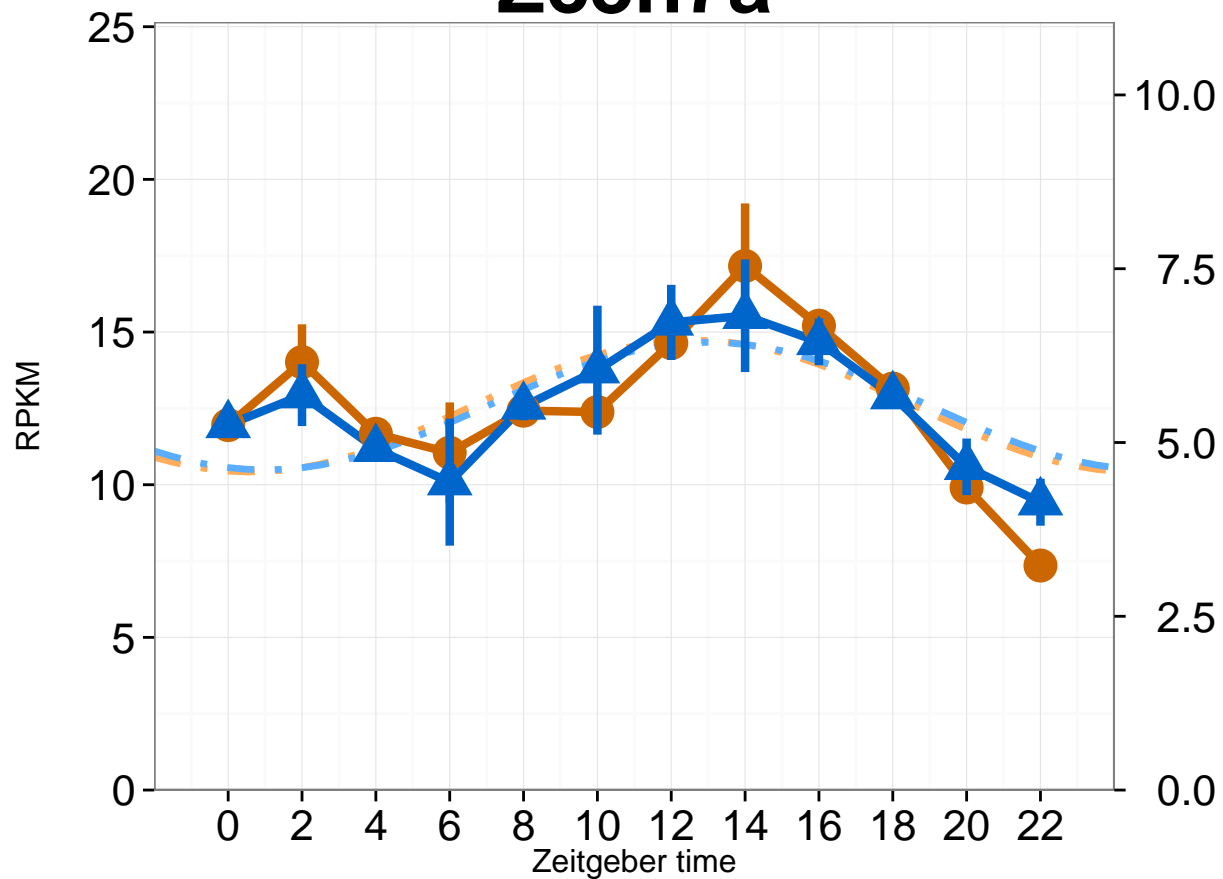

# Zc3h7a

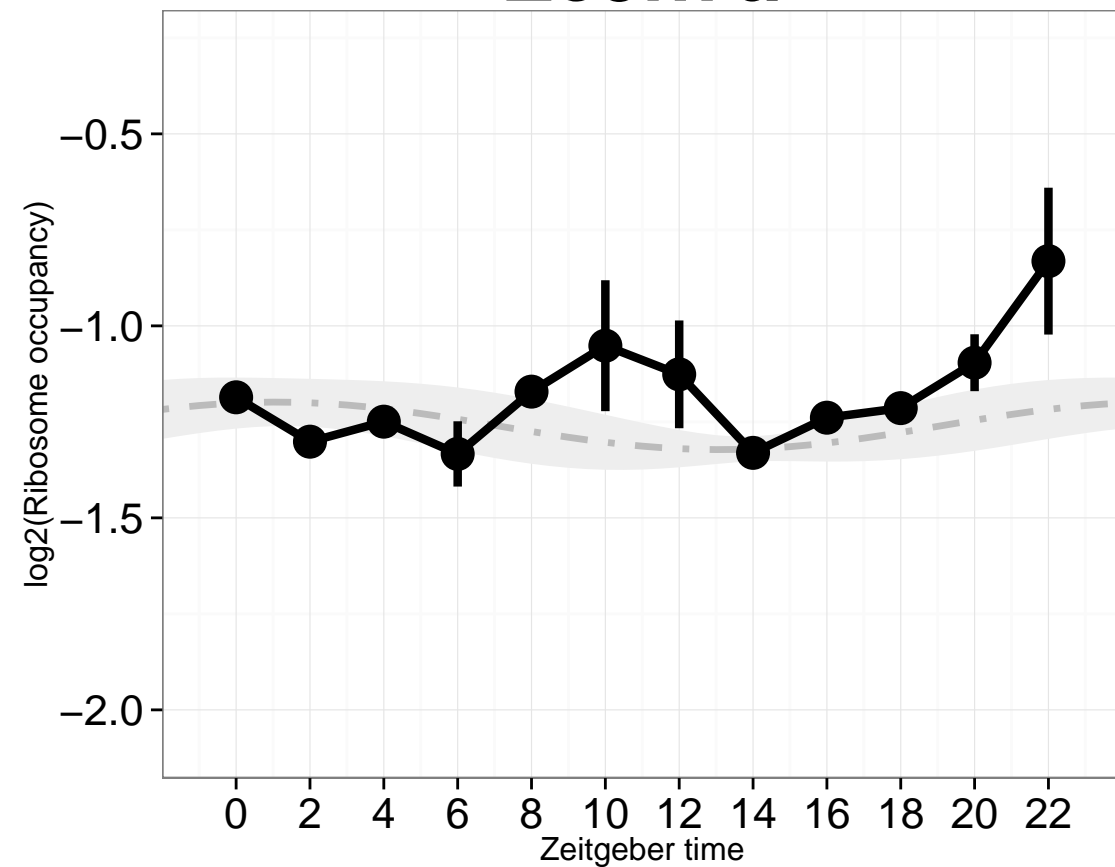

Supplement: SuppDataset_1.zip [file Zc3h7a_set_A.pdf › Supplemental Dataset 1/A-mRNA_nonrhyth_translation_nonrhyth/Zc3h7a_set_A.pdf]

# Zc3h7b

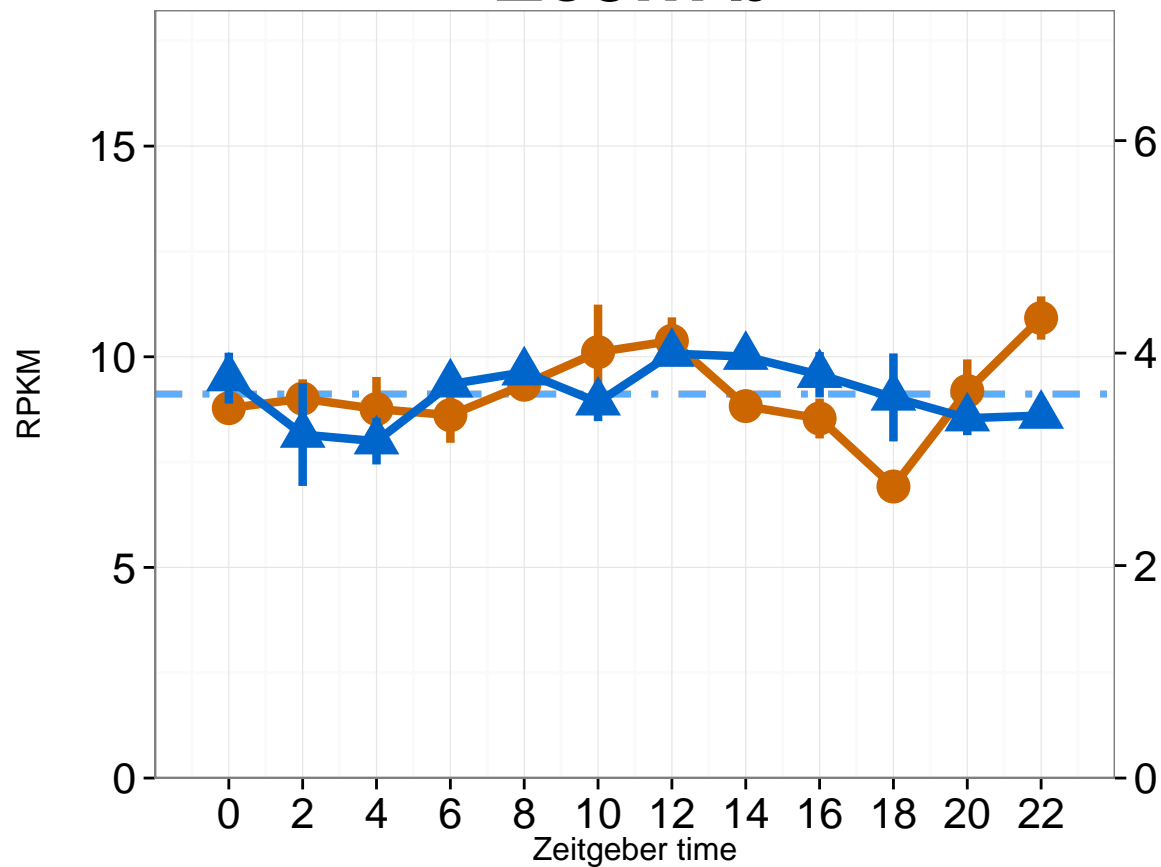

# Zc3h7b

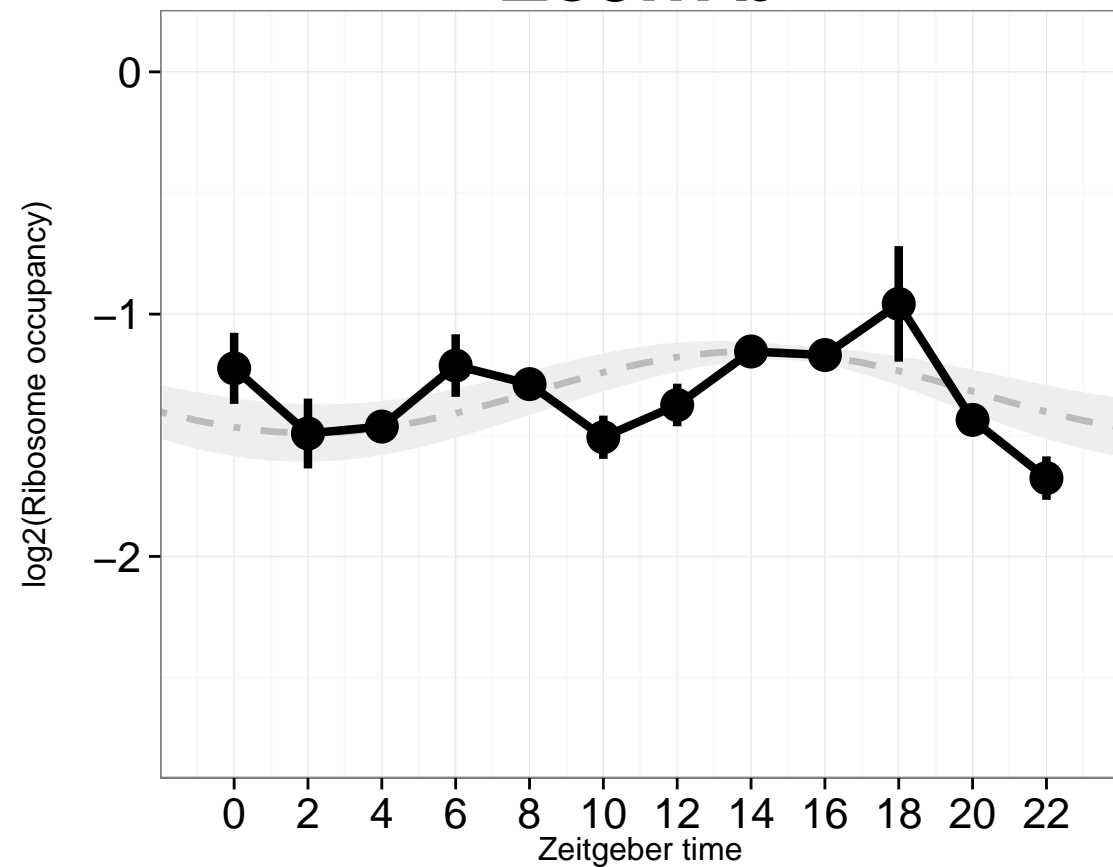

Supplement: SuppDataset_1.zip [file Zc3h7b_set_A.pdf › Supplemental Dataset 1/A-mRNA_nonrhyth_translation_nonrhyth/Zc3h7b_set_A.pdf]

# Zc3hc1

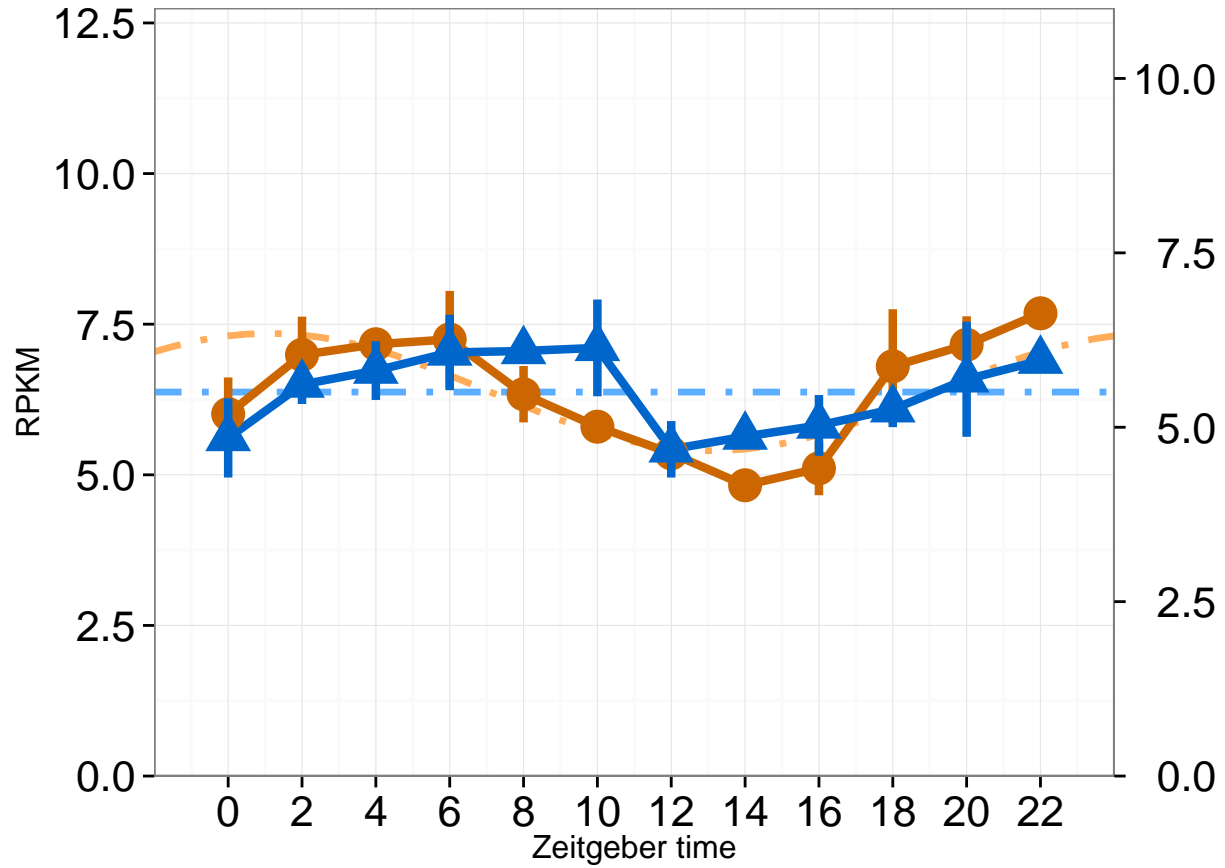

# Zc3hc1

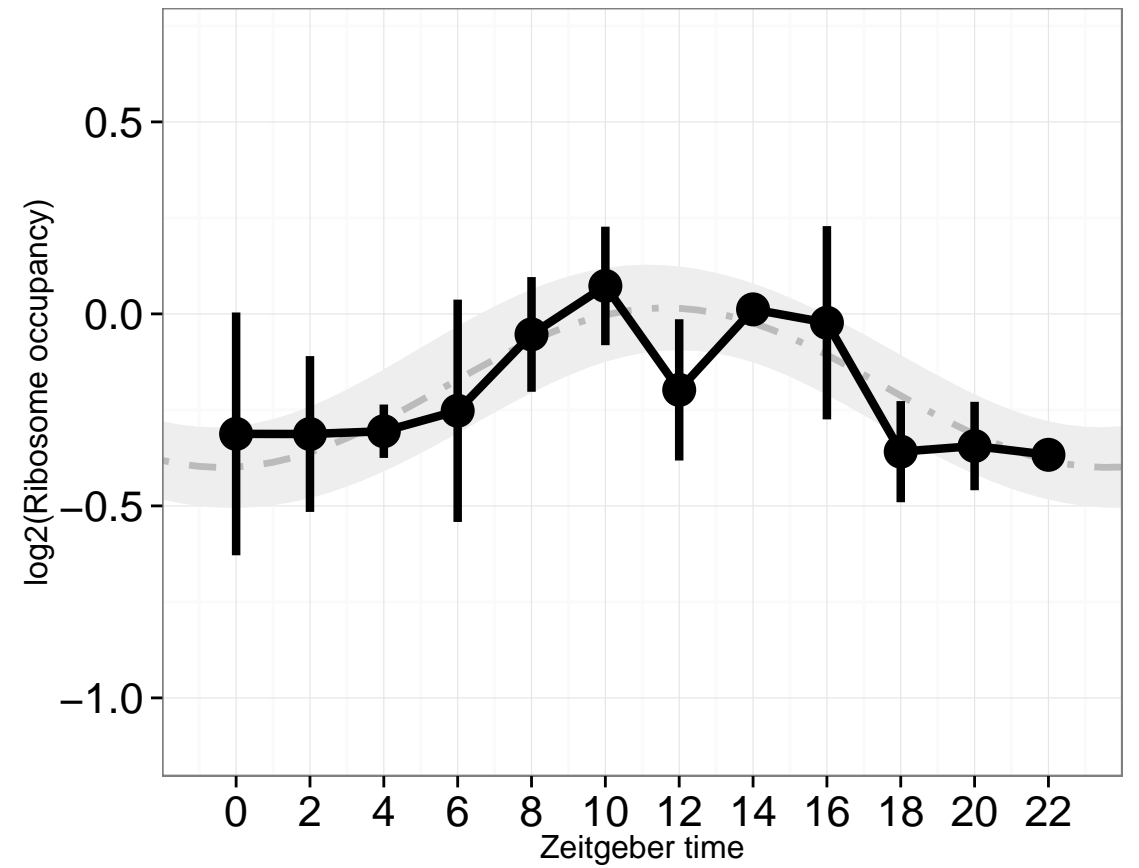

Supplement: SuppDataset_1.zip [file Zc3hc1_set_A.pdf › Supplemental Dataset 1/A-mRNA_nonrhyth_translation_nonrhyth/Zc3hc1_set_A.pdf]
