# Supplementary figures and images for: Ribosome profiling reveals the rhythmic liver translatome and circadian clock regulation by upstream open reading frames (part 84 of 113)
Source: HighWire-hosted journal article supplement (doi:10.1101/gr.195404.115), 2015-10-20

## Zcchc10

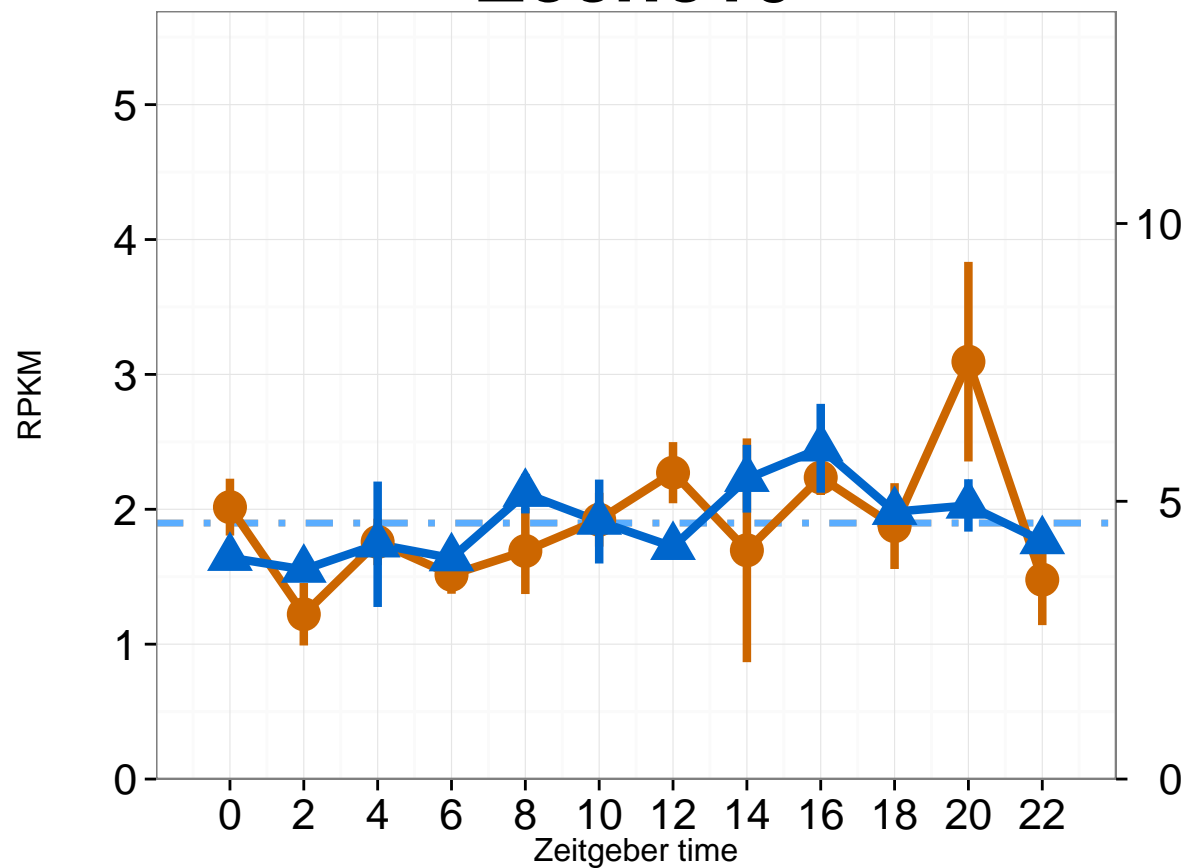

## Zcchc10

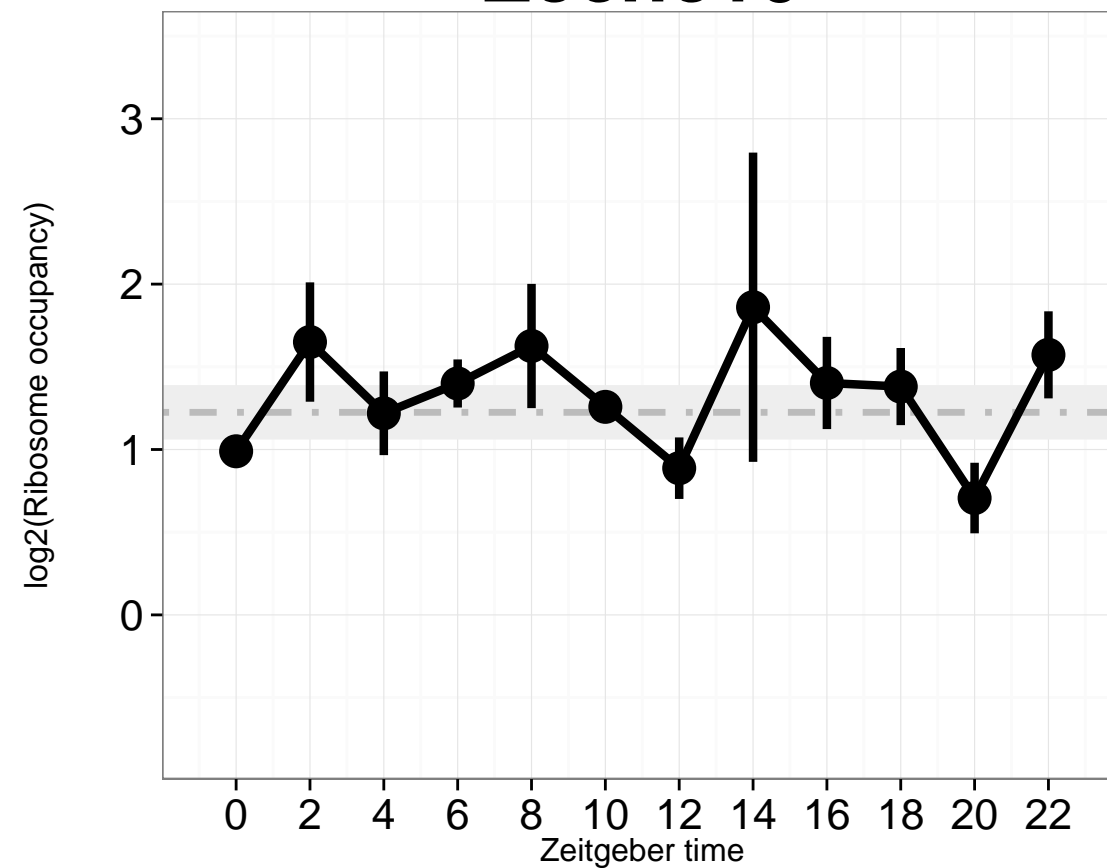

Supplement: SuppDataset_1.zip [file Zcchc10_set_A.pdf › Supplemental Dataset 1/A-mRNA_nonrhyth_translation_nonrhyth/Zcchc10_set_A.pdf]

## Zcchc17

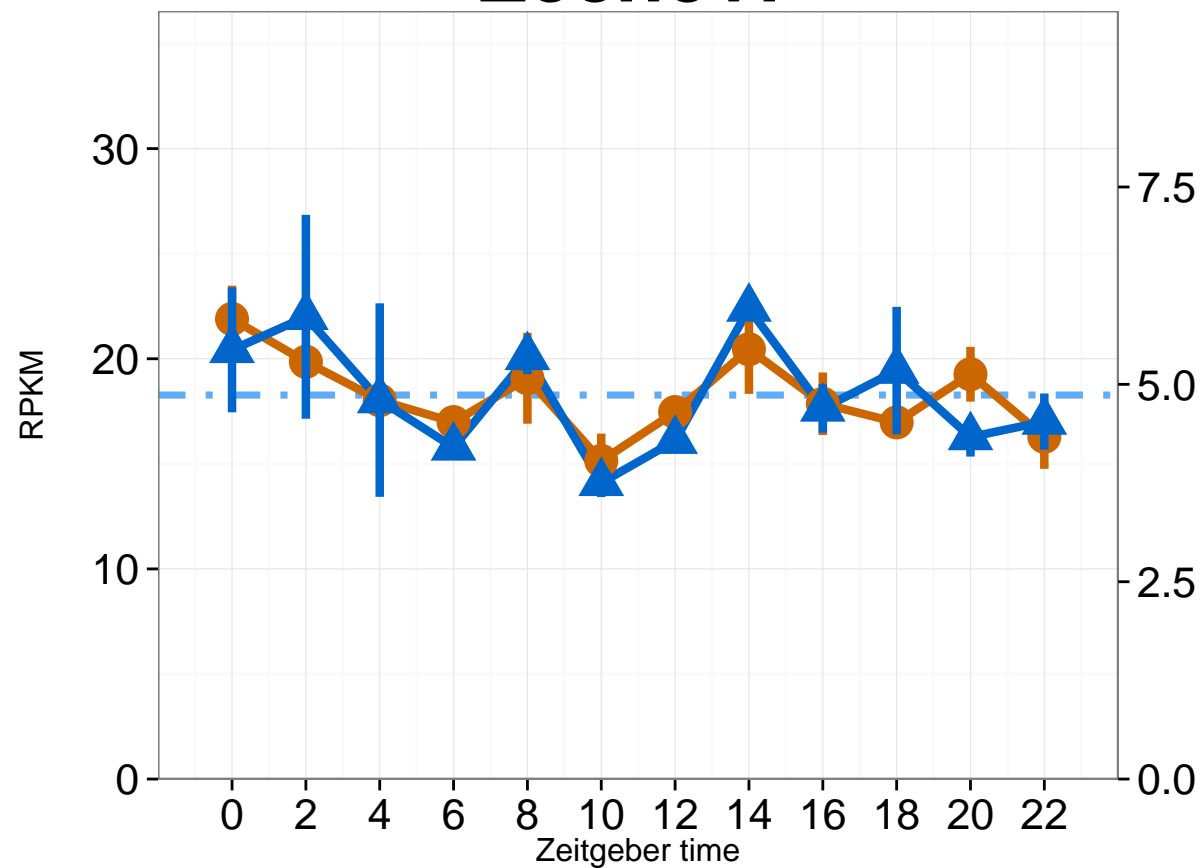

## Zcchc17

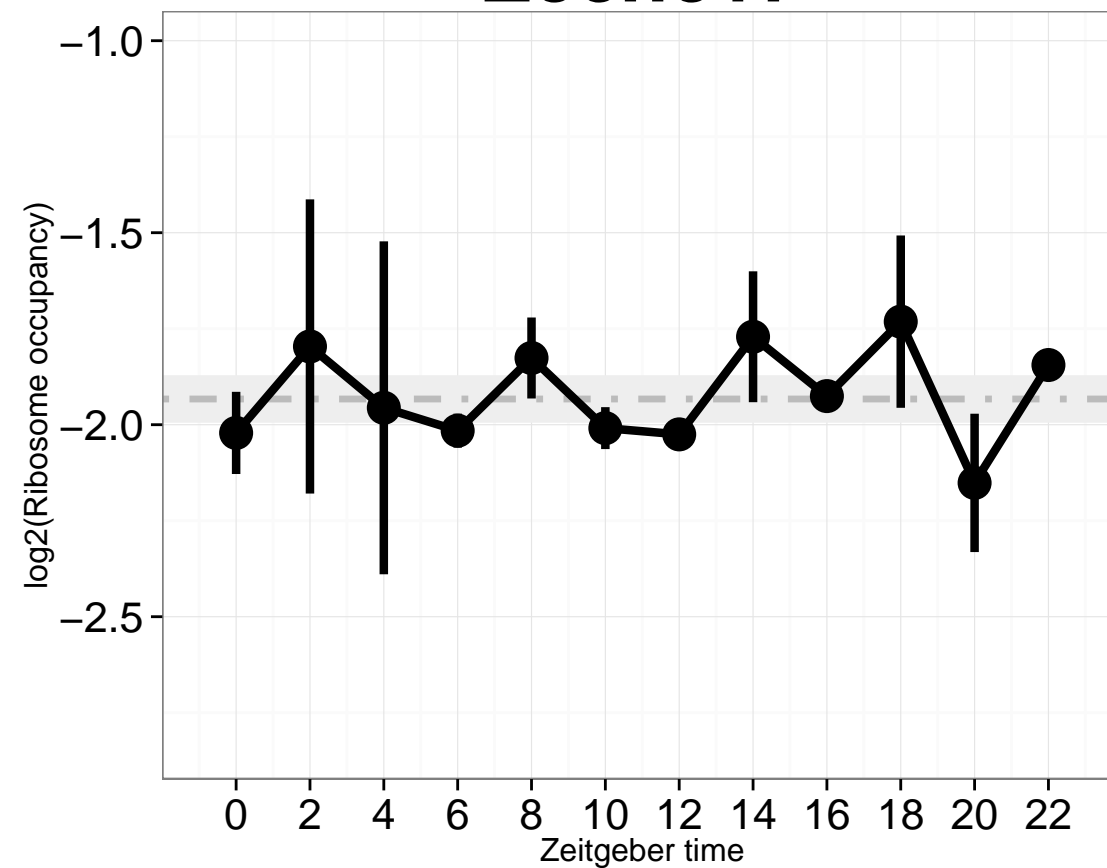

Supplement: SuppDataset_1.zip [file Zcchc17_set_A.pdf › Supplemental Dataset 1/A-mRNA_nonrhyth_translation_nonrhyth/Zcchc17_set_A.pdf]

# Zcchc24

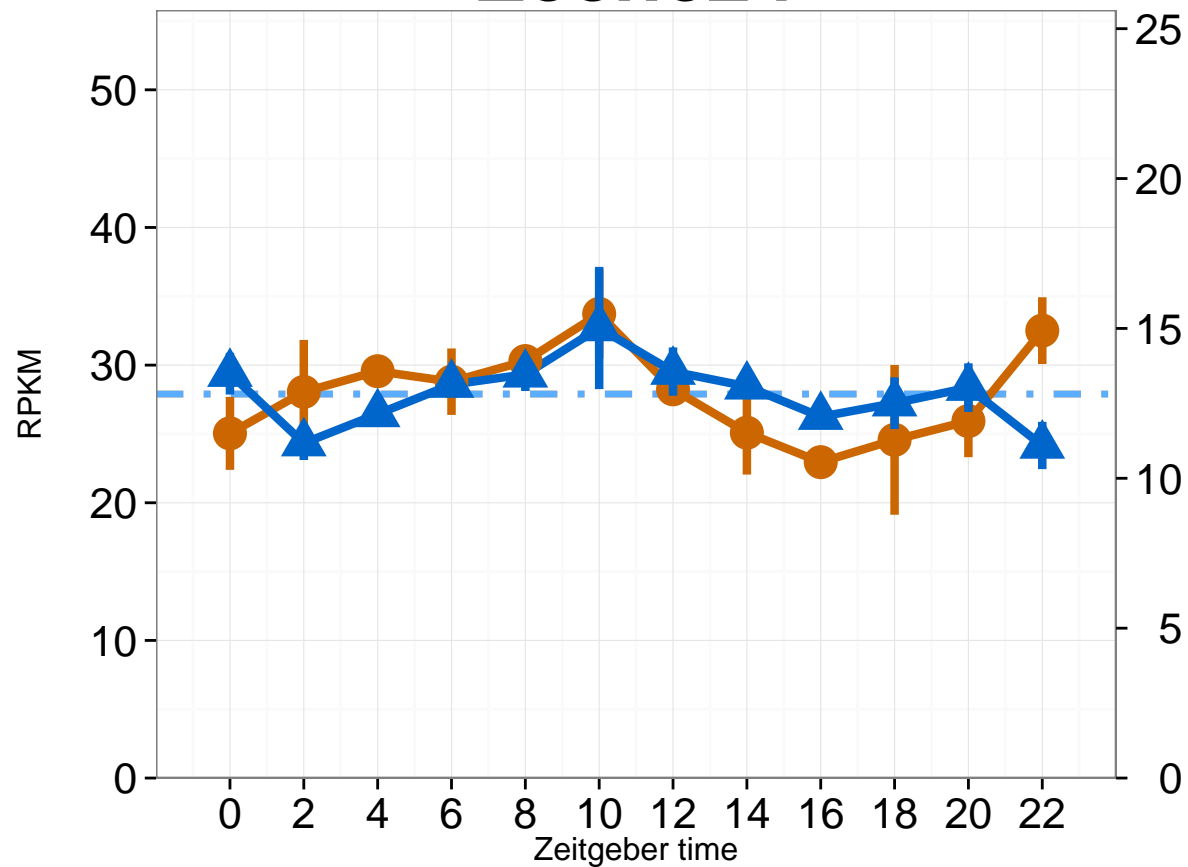

# Zcchc24

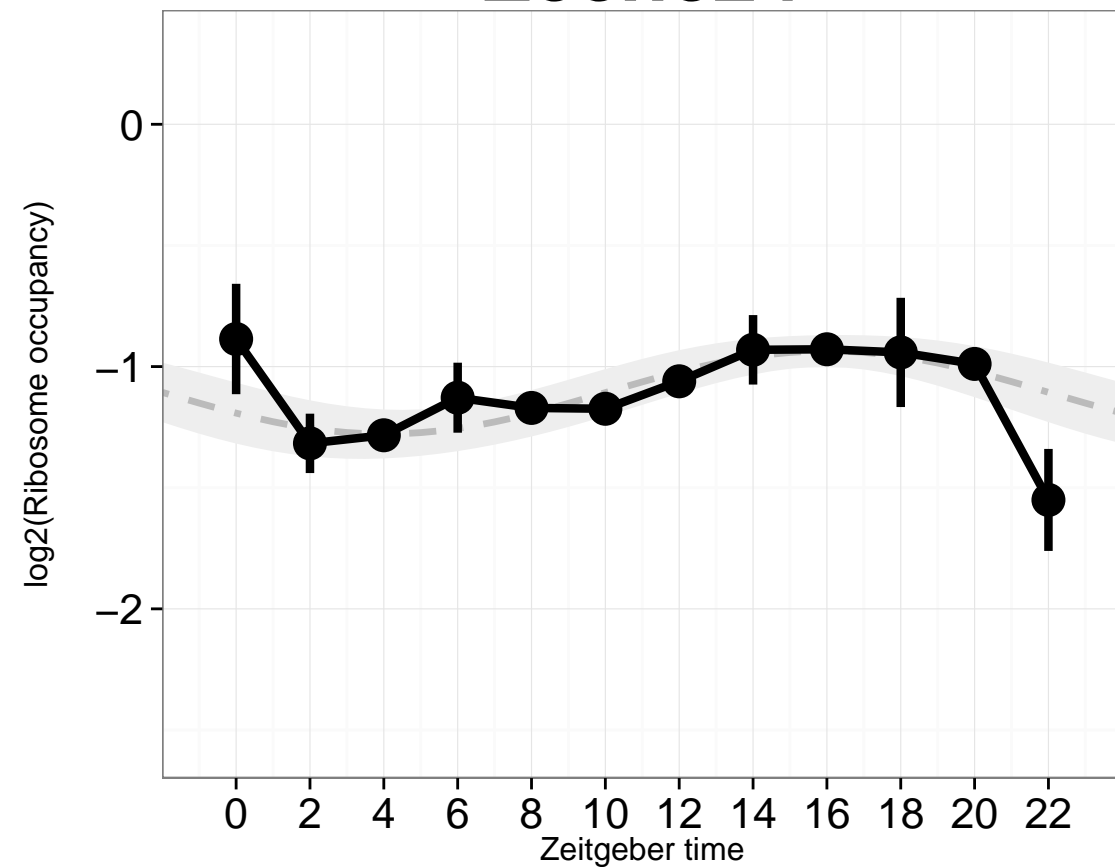

Supplement: SuppDataset_1.zip [file Zcchc24_set_A.pdf › Supplemental Dataset 1/A-mRNA_nonrhyth_translation_nonrhyth/Zcchc24_set_A.pdf]

## Zcchc2

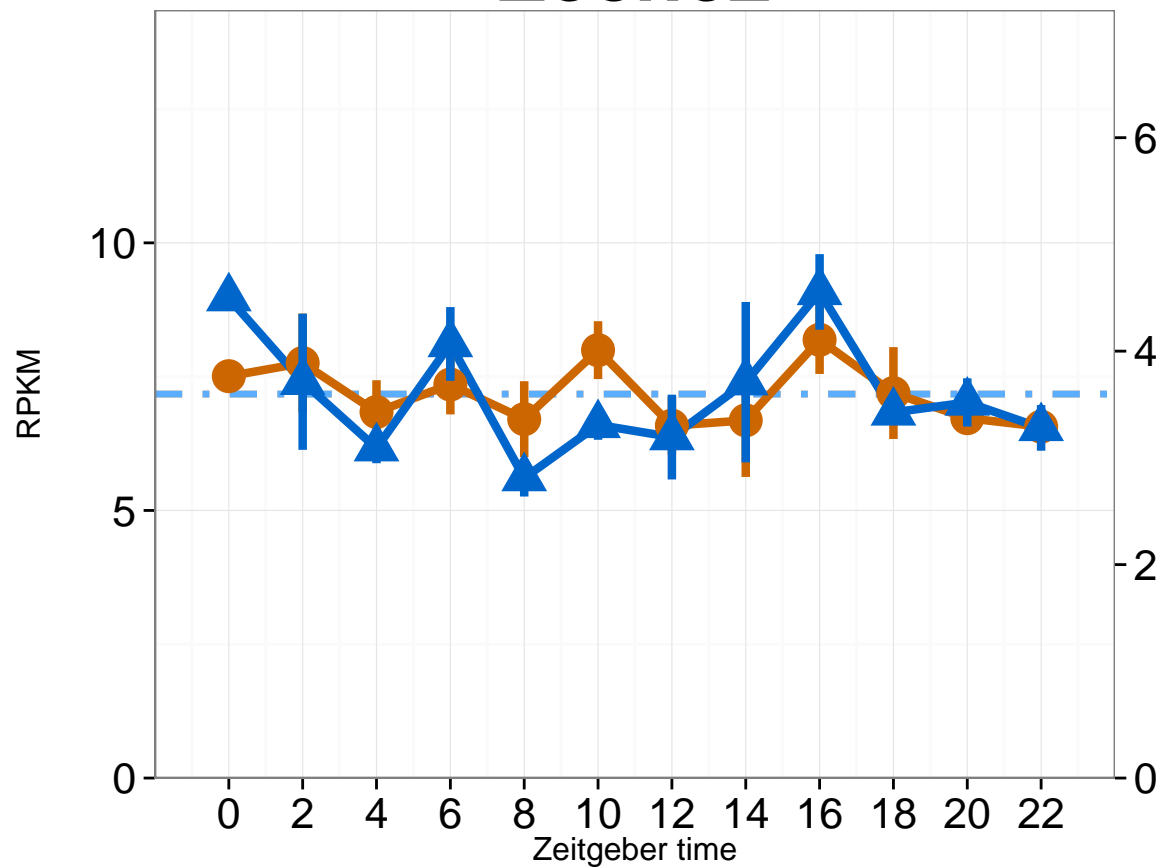

## Zcchc2

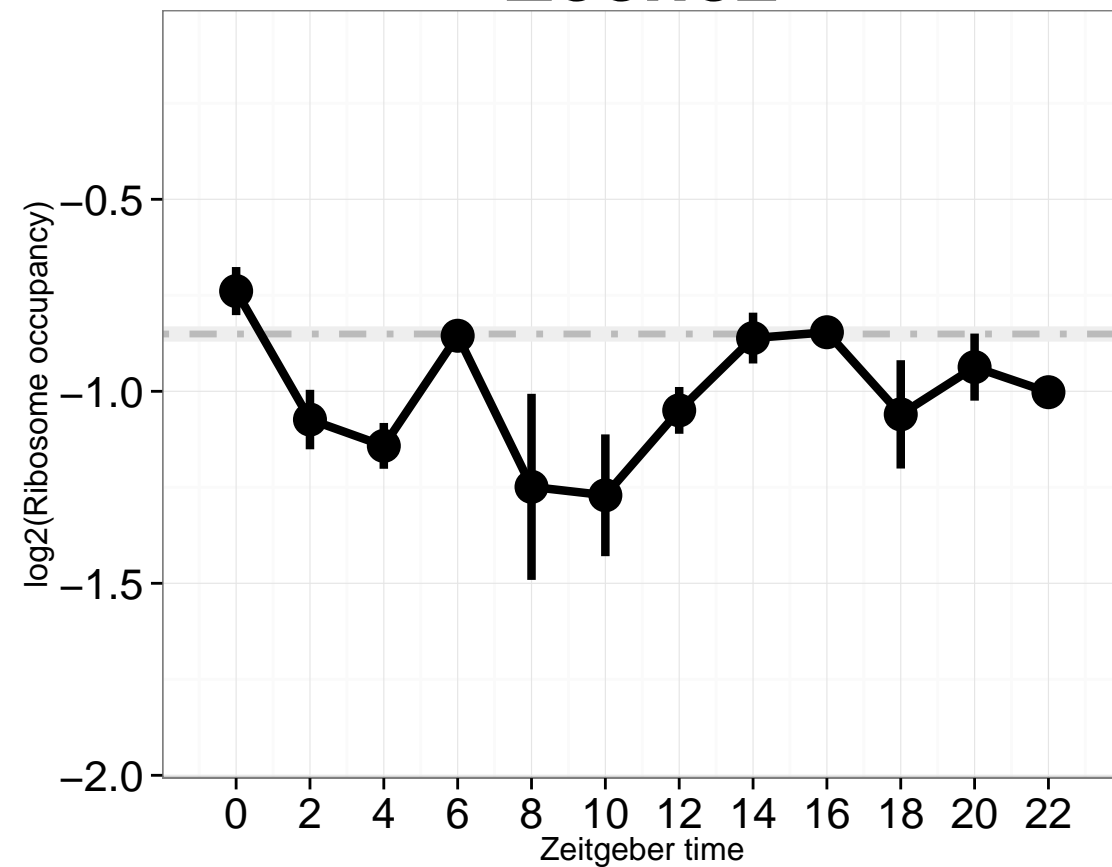

Supplement: SuppDataset_1.zip [file Zcchc2_set_A.pdf › Supplemental Dataset 1/A-mRNA_nonrhyth_translation_nonrhyth/Zcchc2_set_A.pdf]

## Zcchc4

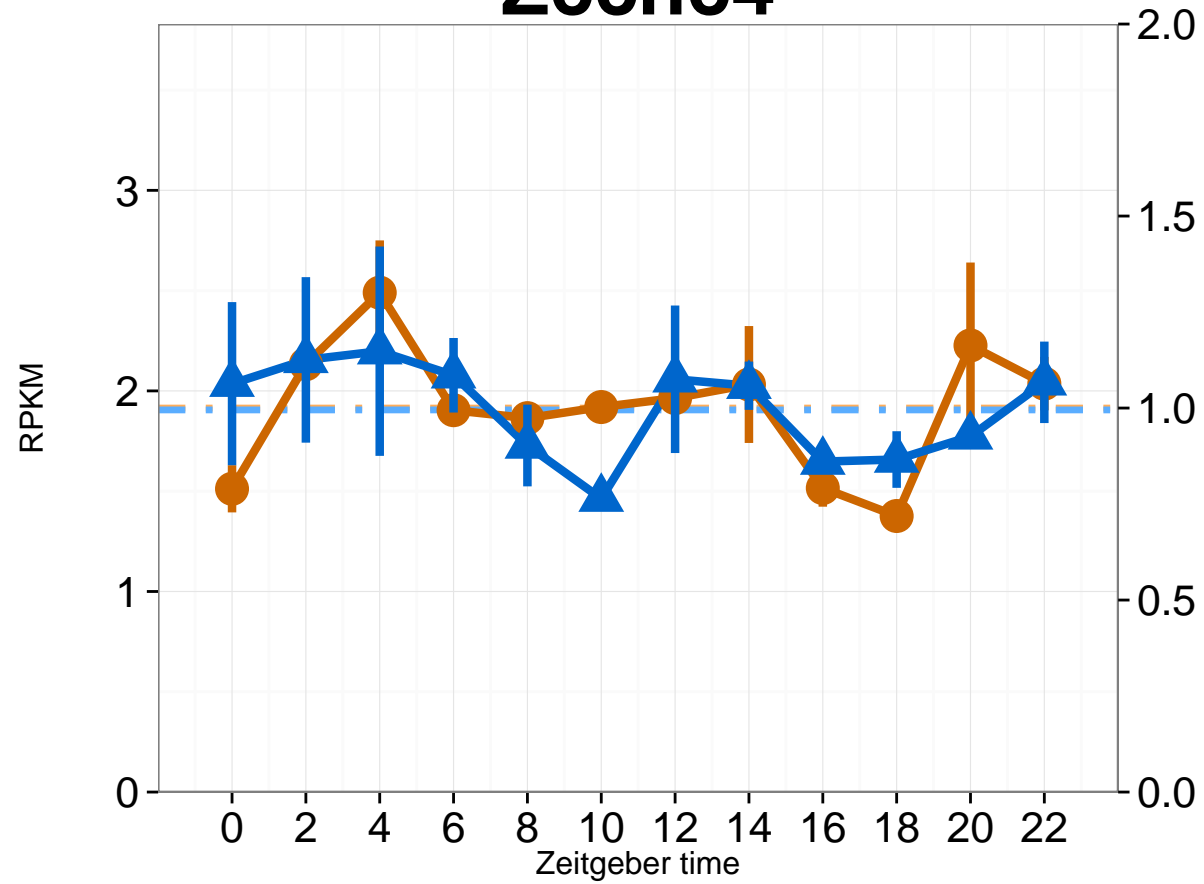

## Zcchc4

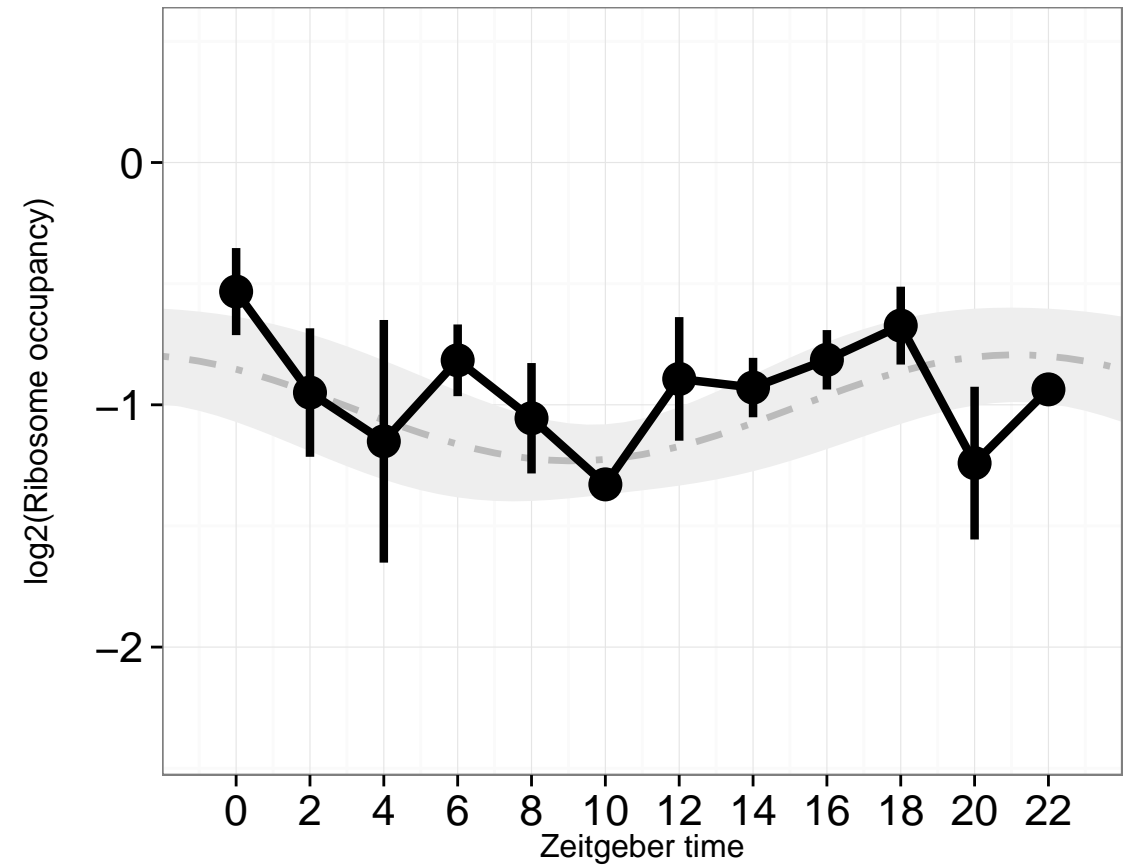

Supplement: SuppDataset_1.zip [file Zcchc4_set_A.pdf › Supplemental Dataset 1/A-mRNA_nonrhyth_translation_nonrhyth/Zcchc4_set_A.pdf]

## Zcchc6

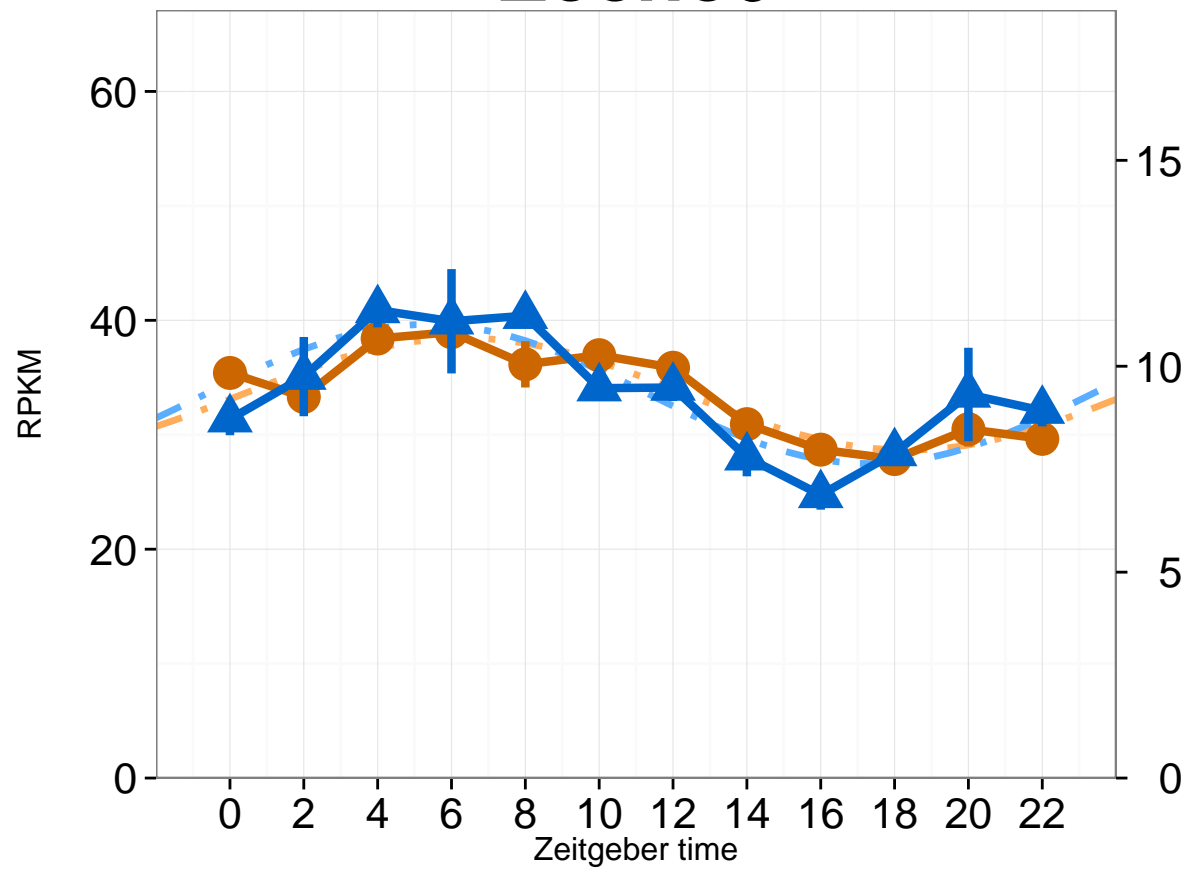

## Zcchc6

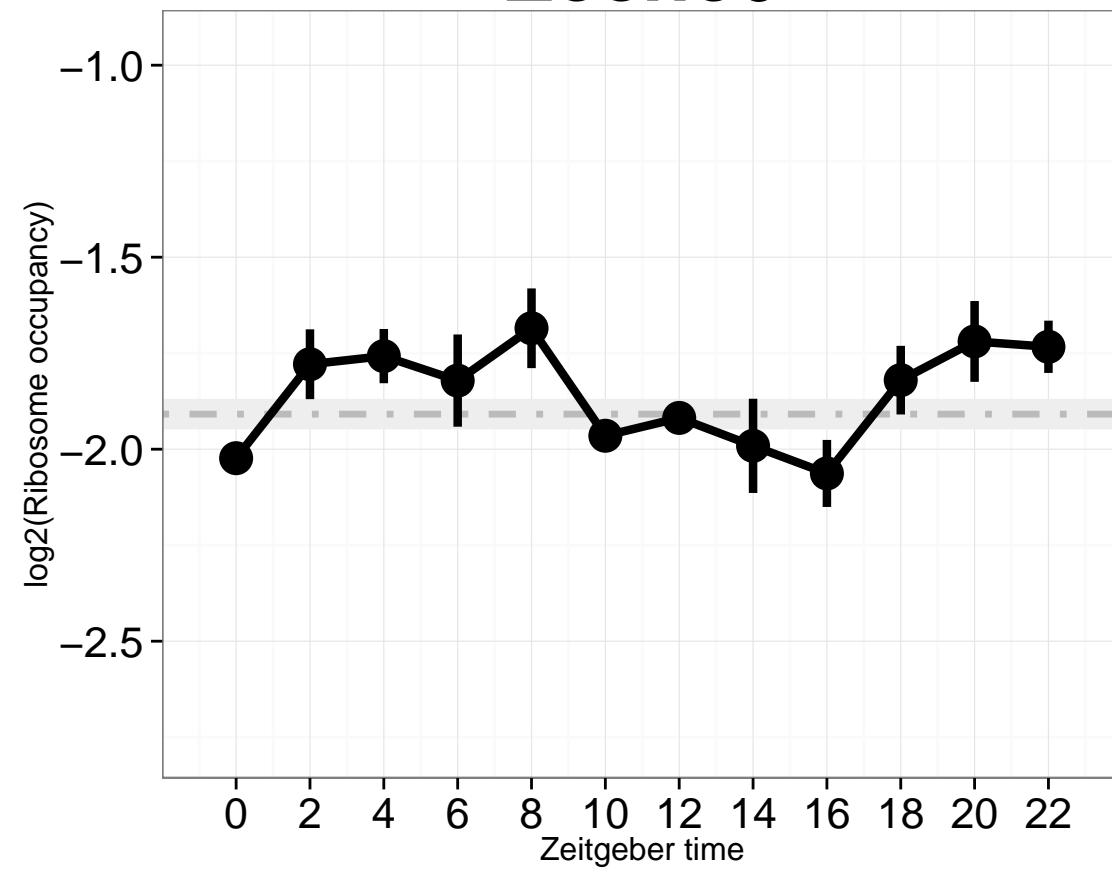

Supplement: SuppDataset_1.zip [file Zcchc6_set_A.pdf › Supplemental Dataset 1/A-mRNA_nonrhyth_translation_nonrhyth/Zcchc6_set_A.pdf]

## Zcchc7

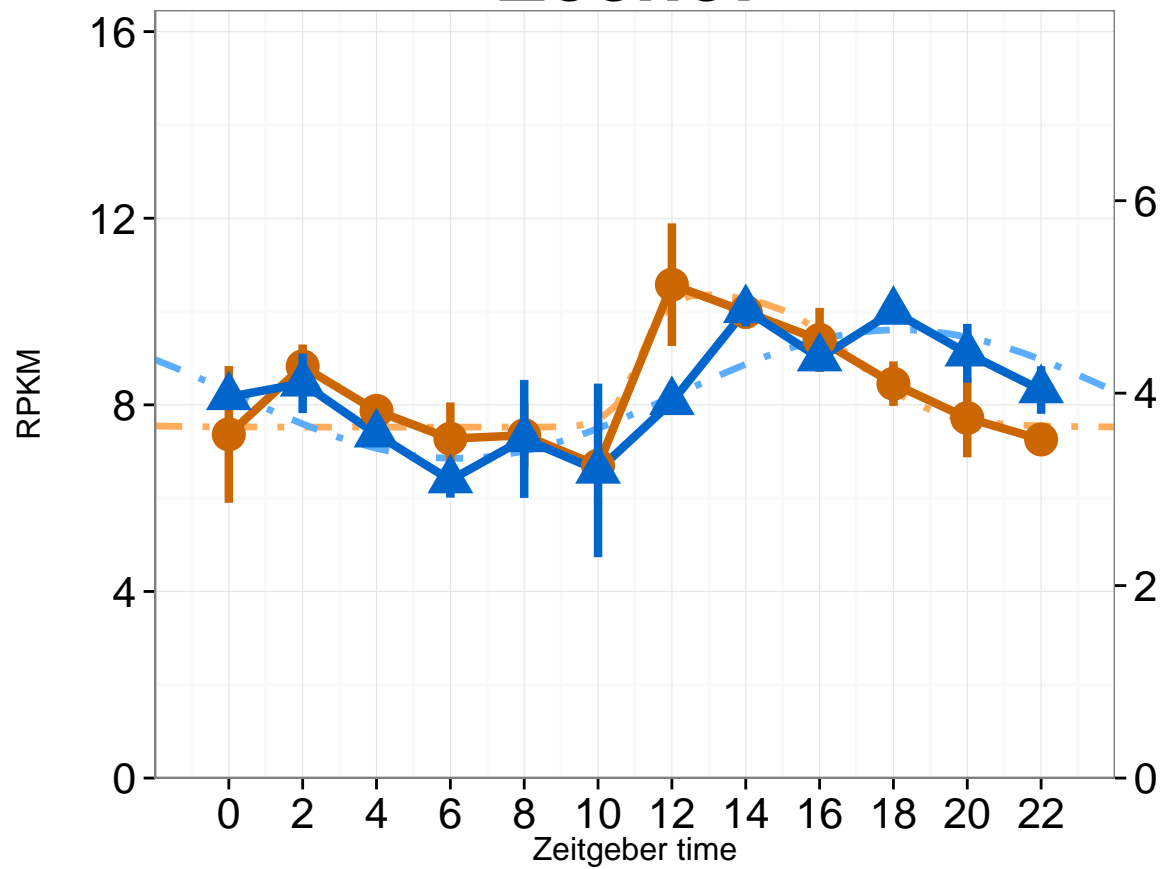

## Zcchc7

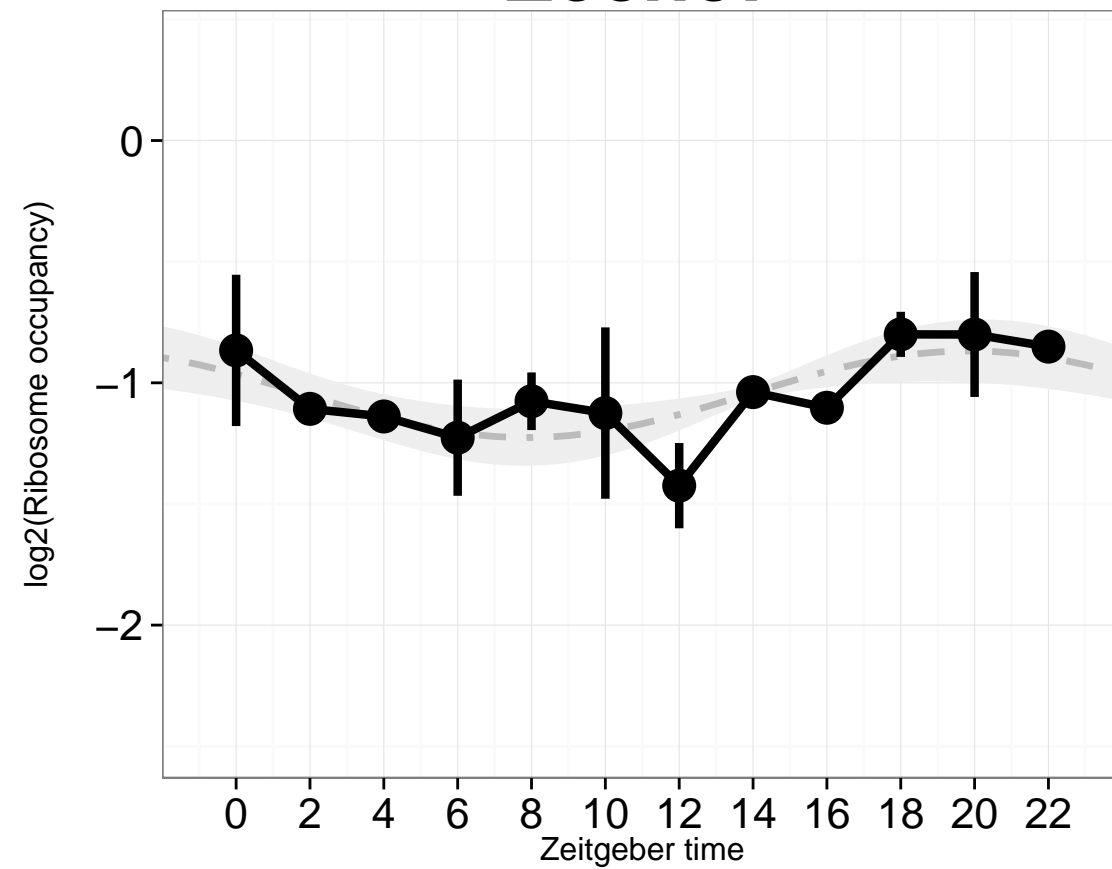

Supplement: SuppDataset_1.zip [file Zcchc7_set_A.pdf › Supplemental Dataset 1/A-mRNA_nonrhyth_translation_nonrhyth/Zcchc7_set_A.pdf]

## Zcchc8

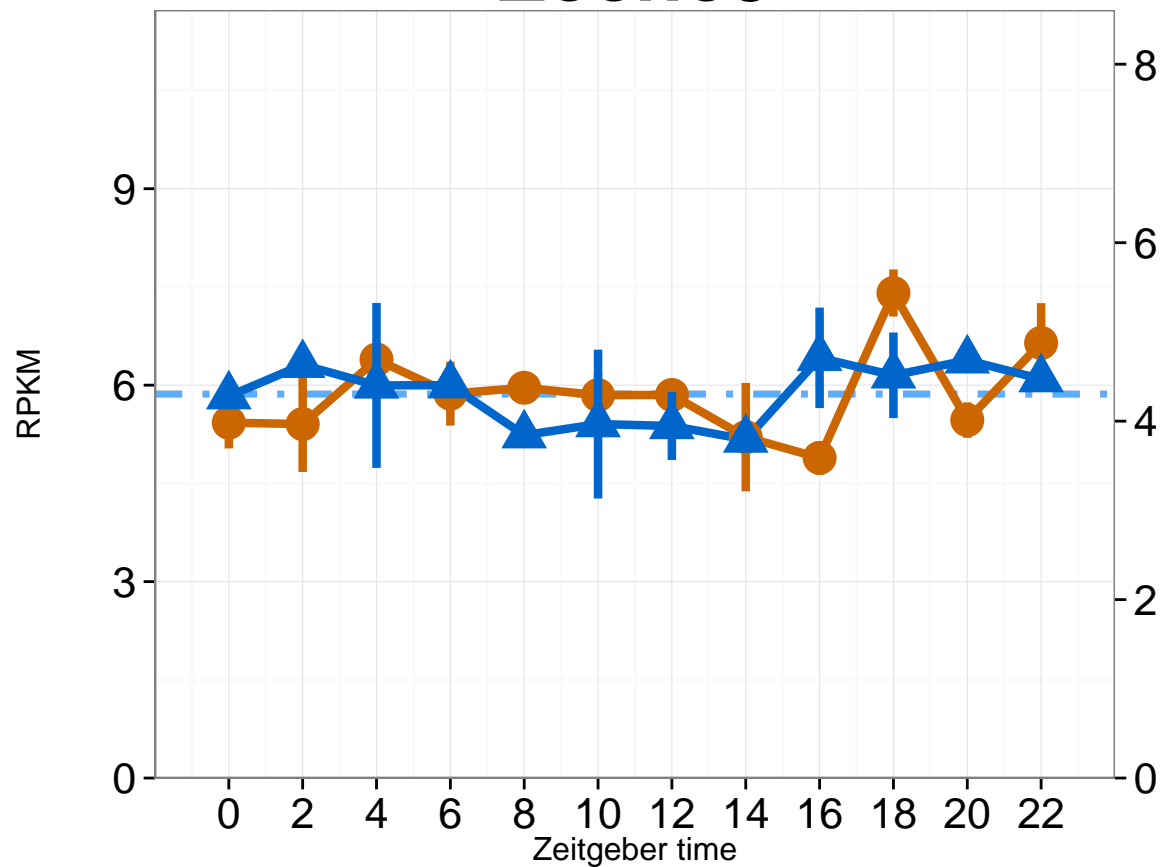

## Zcchc8

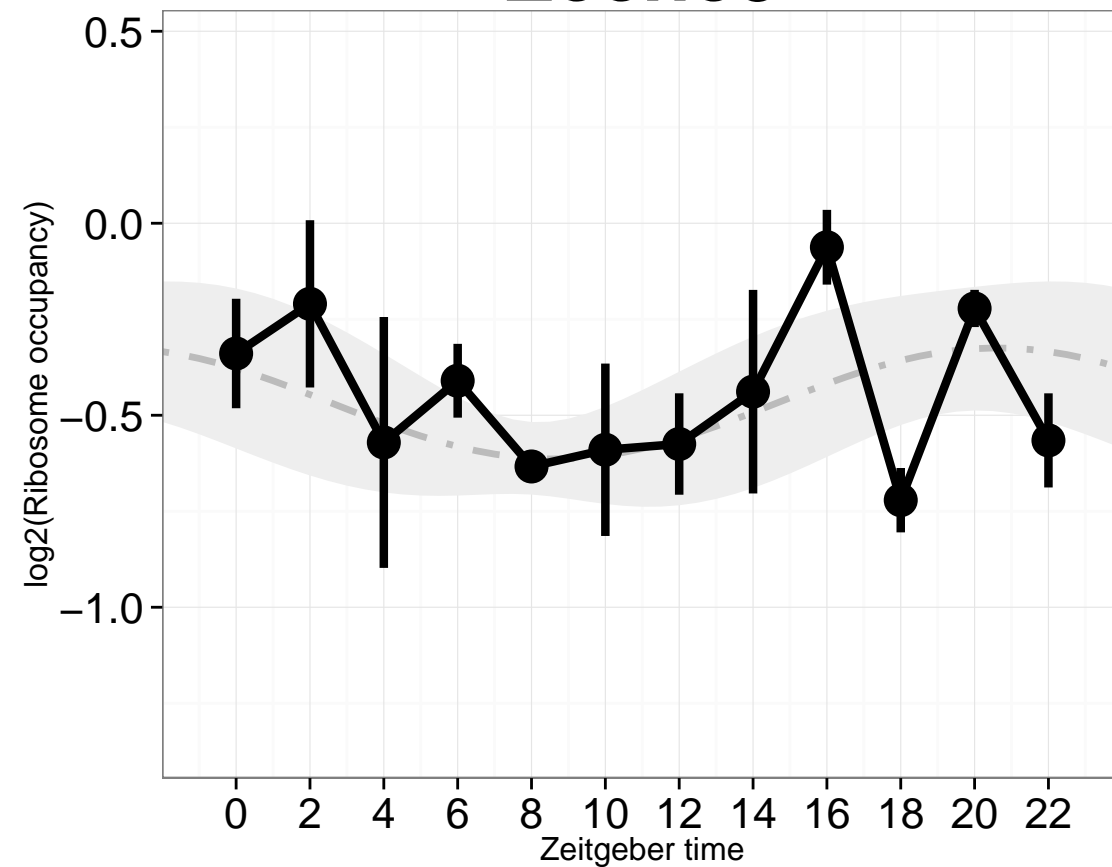

Supplement: SuppDataset_1.zip [file Zcchc8_set_A.pdf › Supplemental Dataset 1/A-mRNA_nonrhyth_translation_nonrhyth/Zcchc8_set_A.pdf]

## Zcchc9

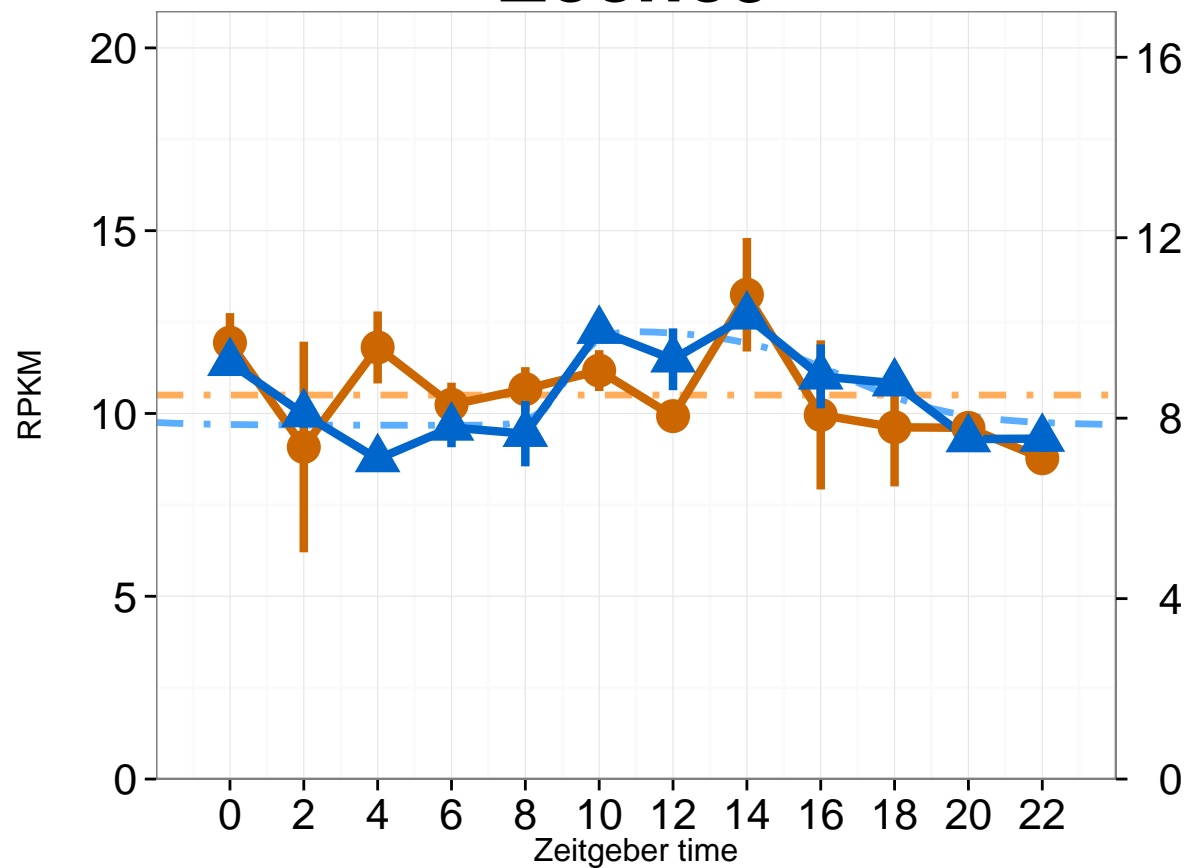

## Zcchc9

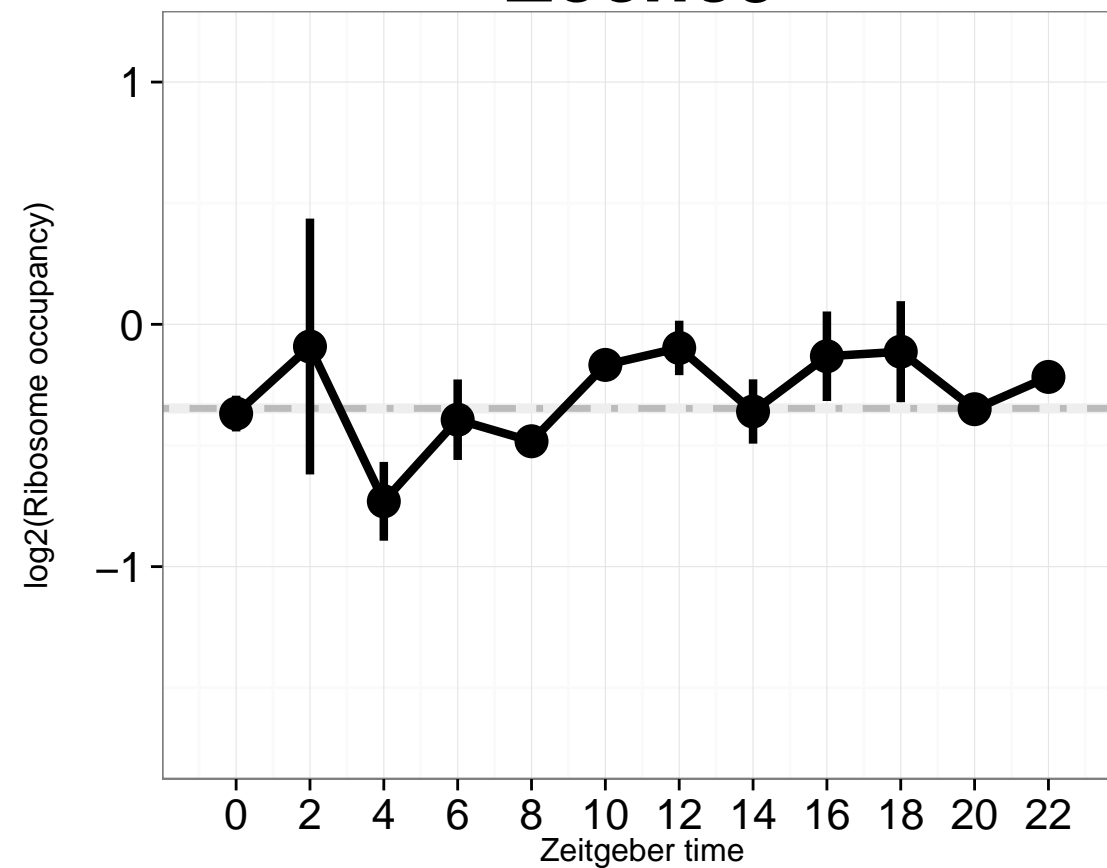

Supplement: SuppDataset_1.zip [file Zcchc9_set_A.pdf › Supplemental Dataset 1/A-mRNA_nonrhyth_translation_nonrhyth/Zcchc9_set_A.pdf]

## Zcrb1

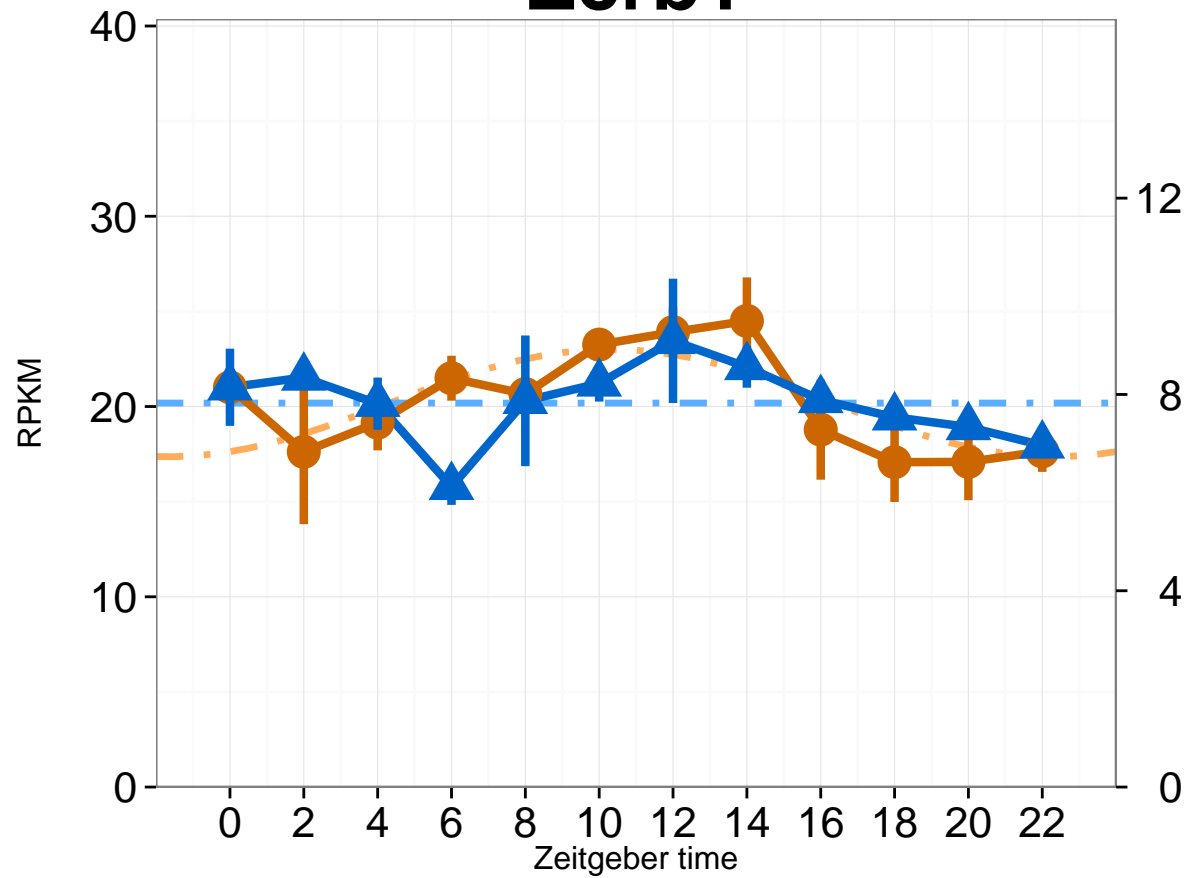

## Zcrb1

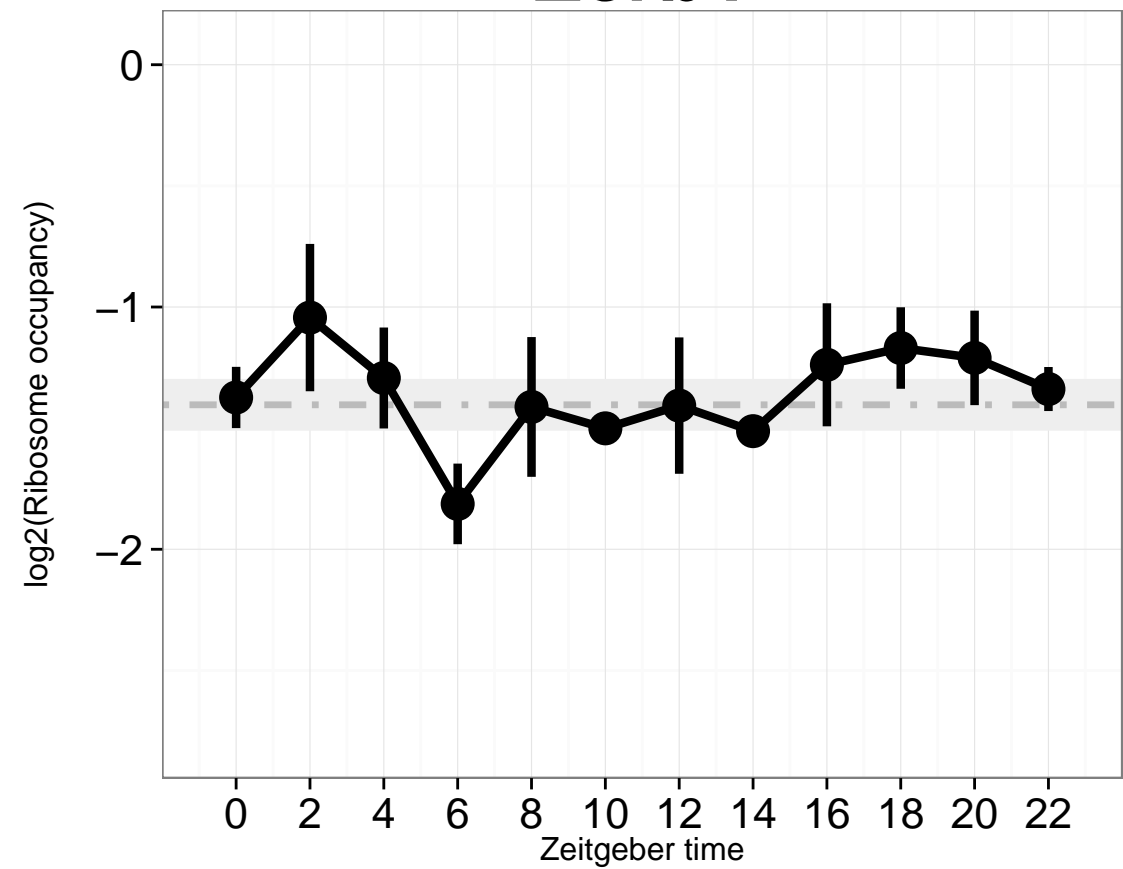

Supplement: SuppDataset_1.zip [file Zcrb1_set_A.pdf › Supplemental Dataset 1/A-mRNA_nonrhyth_translation_nonrhyth/Zcrb1_set_A.pdf]

## Zdhhc12

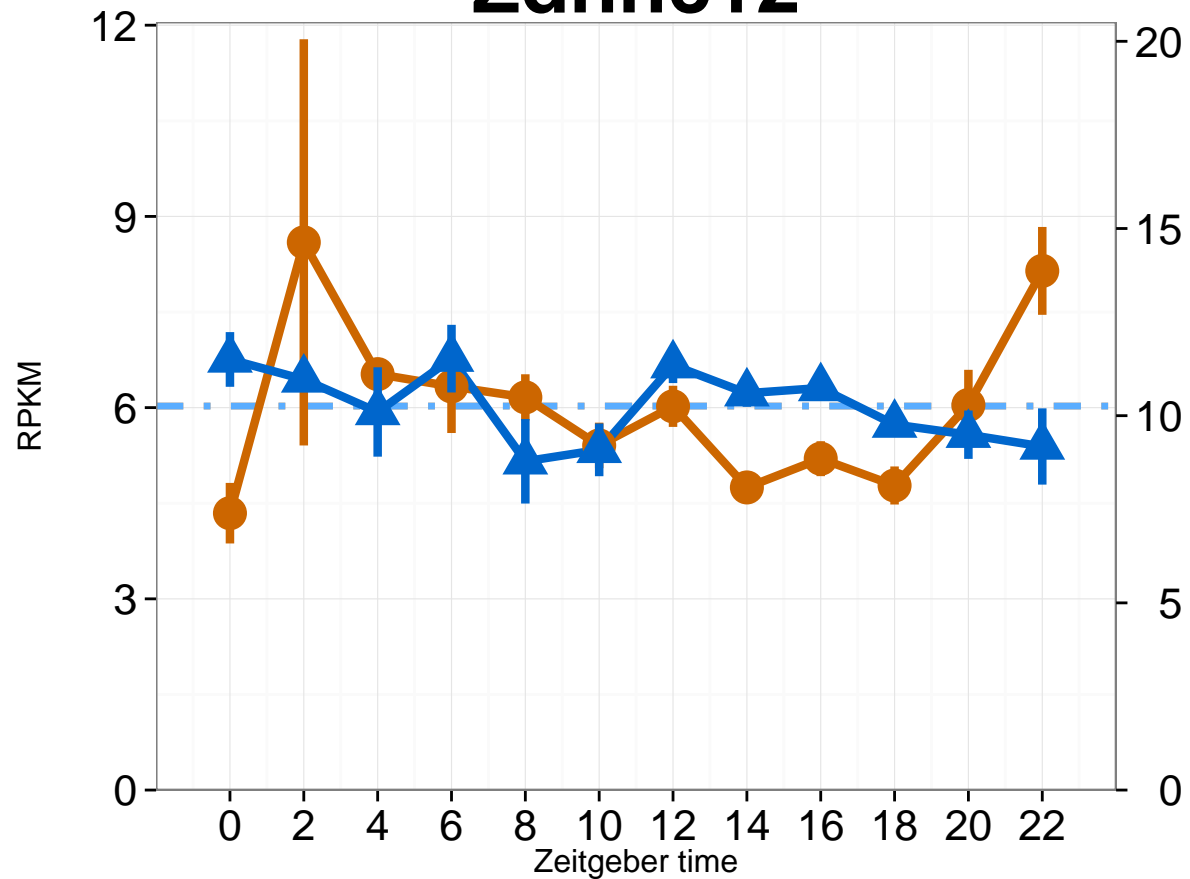

## Zdhhc12

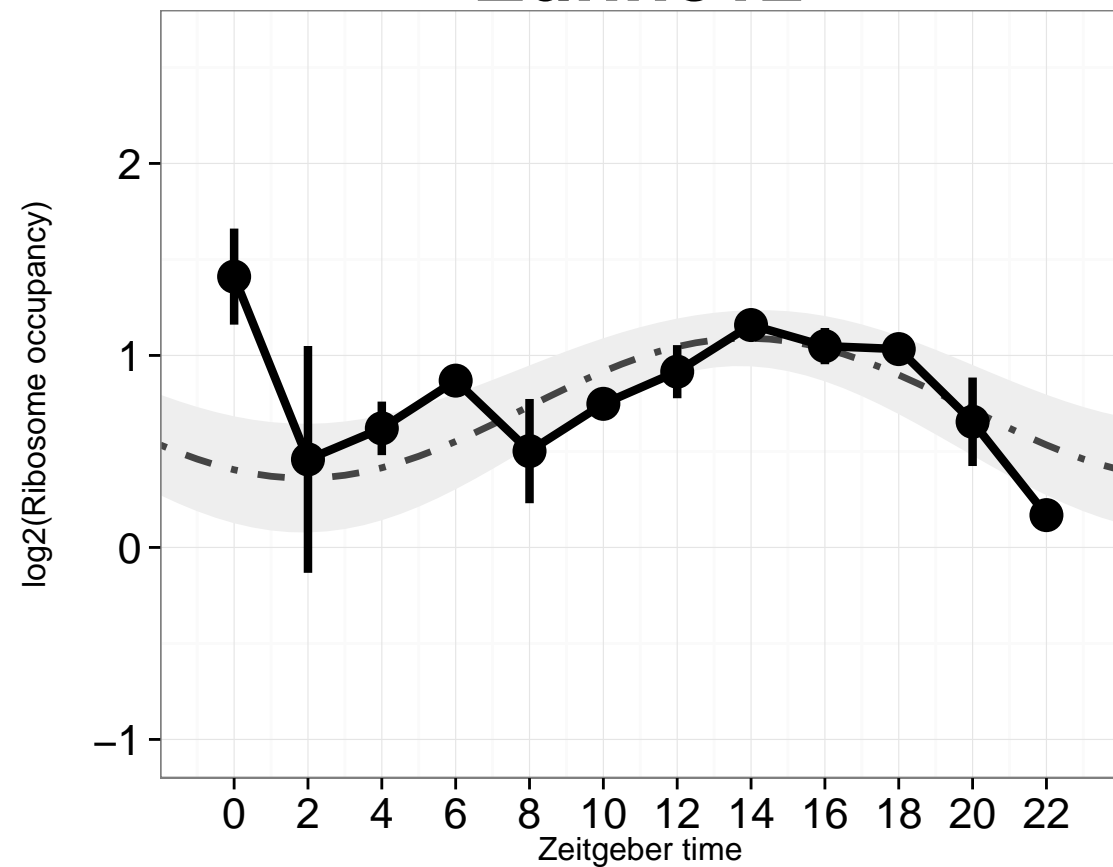

Supplement: SuppDataset_1.zip [file Zdhhc12_set_A.pdf › Supplemental Dataset 1/A-mRNA_nonrhyth_translation_nonrhyth/Zdhhc12_set_A.pdf]

**Zdhhc13**

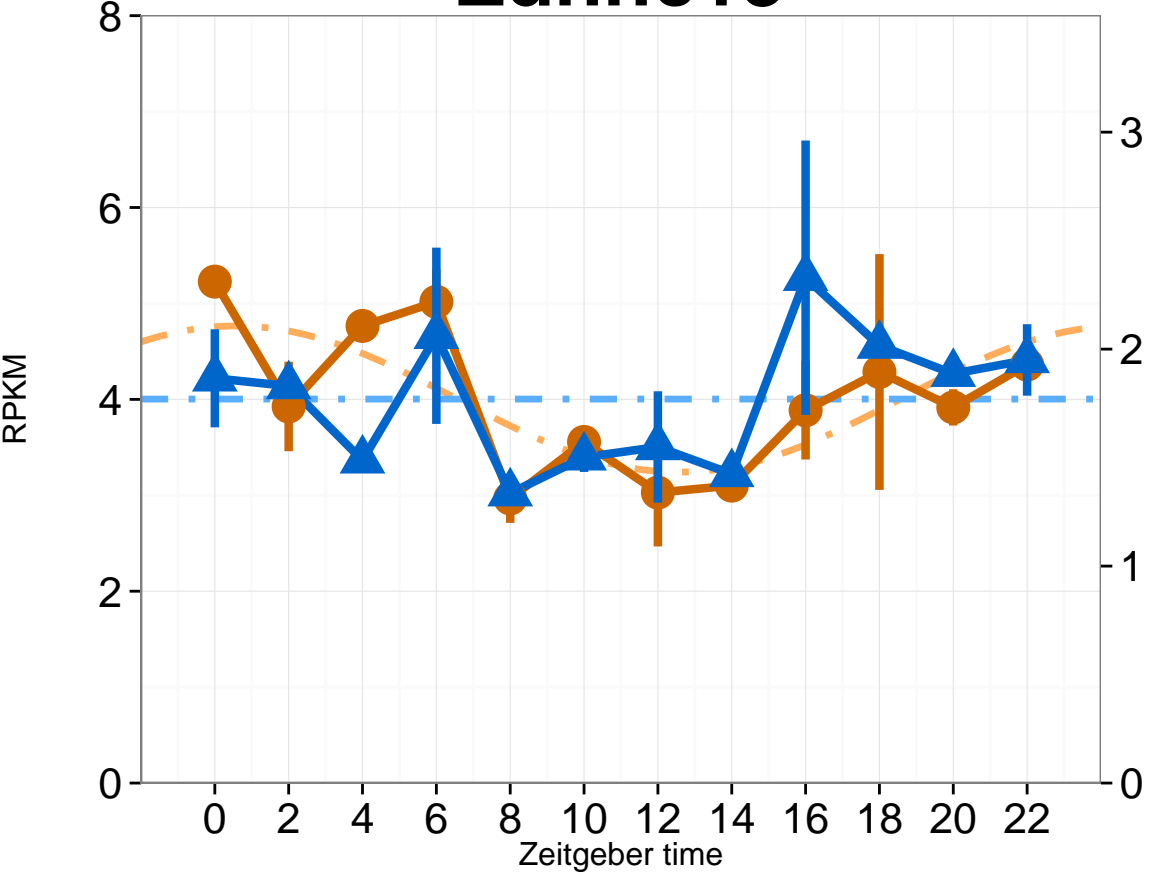

**Zdhhc13**

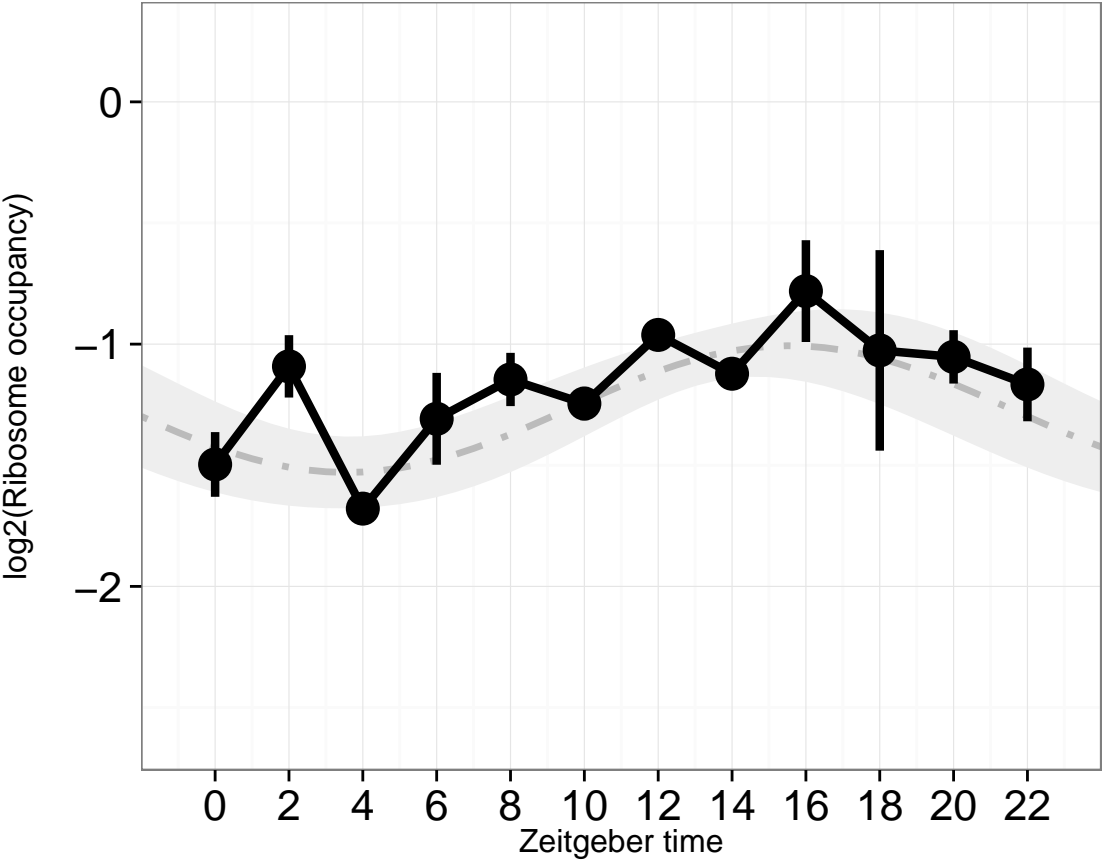

Supplement: SuppDataset_1.zip [file Zdhhc13_set_A.pdf › Supplemental Dataset 1/A-mRNA_nonrhyth_translation_nonrhyth/Zdhhc13_set_A.pdf]

# Zdhhc16

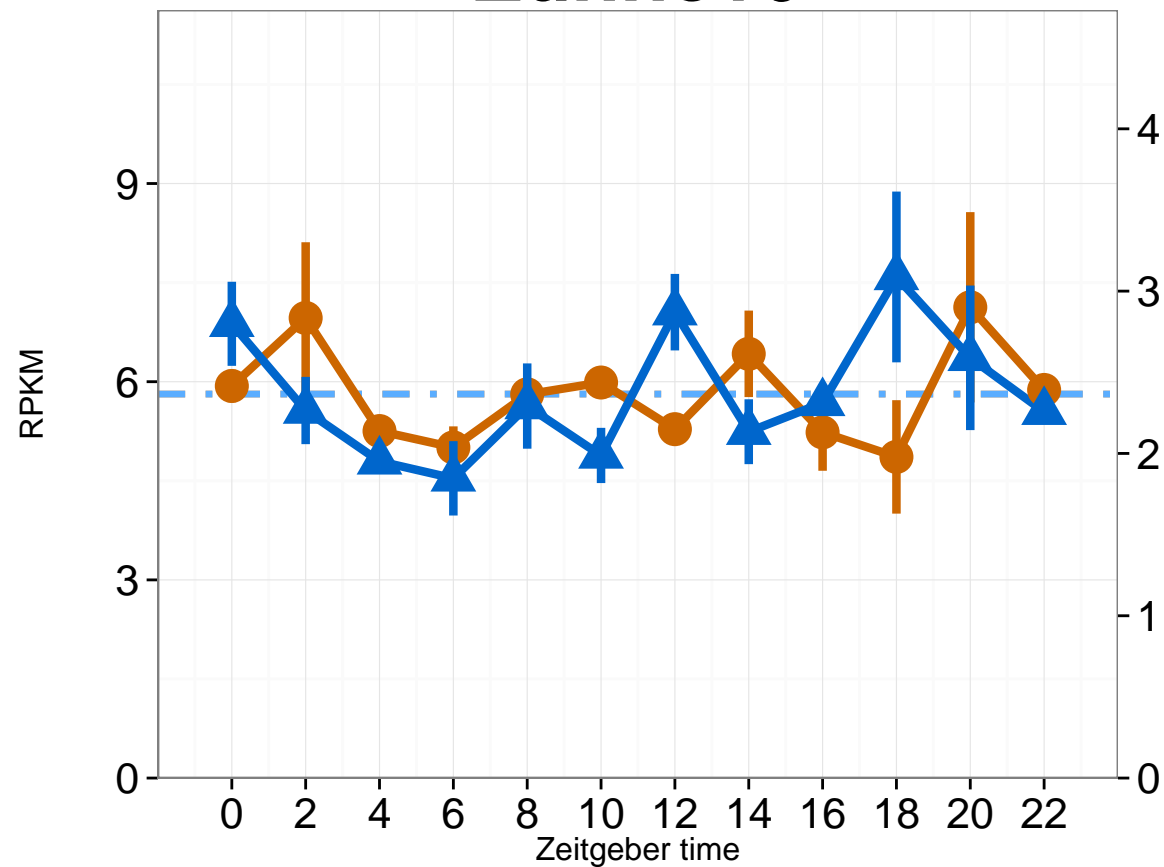

# Zdhhc16

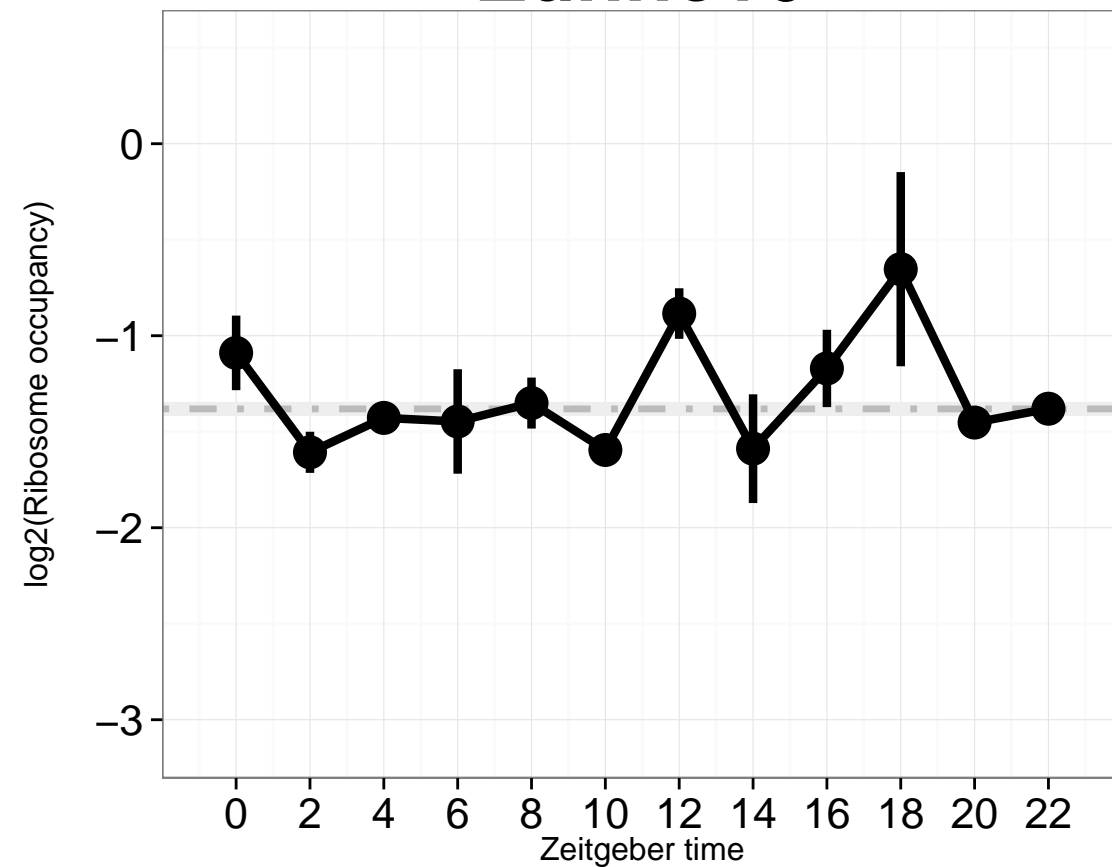

Supplement: SuppDataset_1.zip [file Zdhhc16_set_A.pdf › Supplemental Dataset 1/A-mRNA_nonrhyth_translation_nonrhyth/Zdhhc16_set_A.pdf]

## Zdhhc17

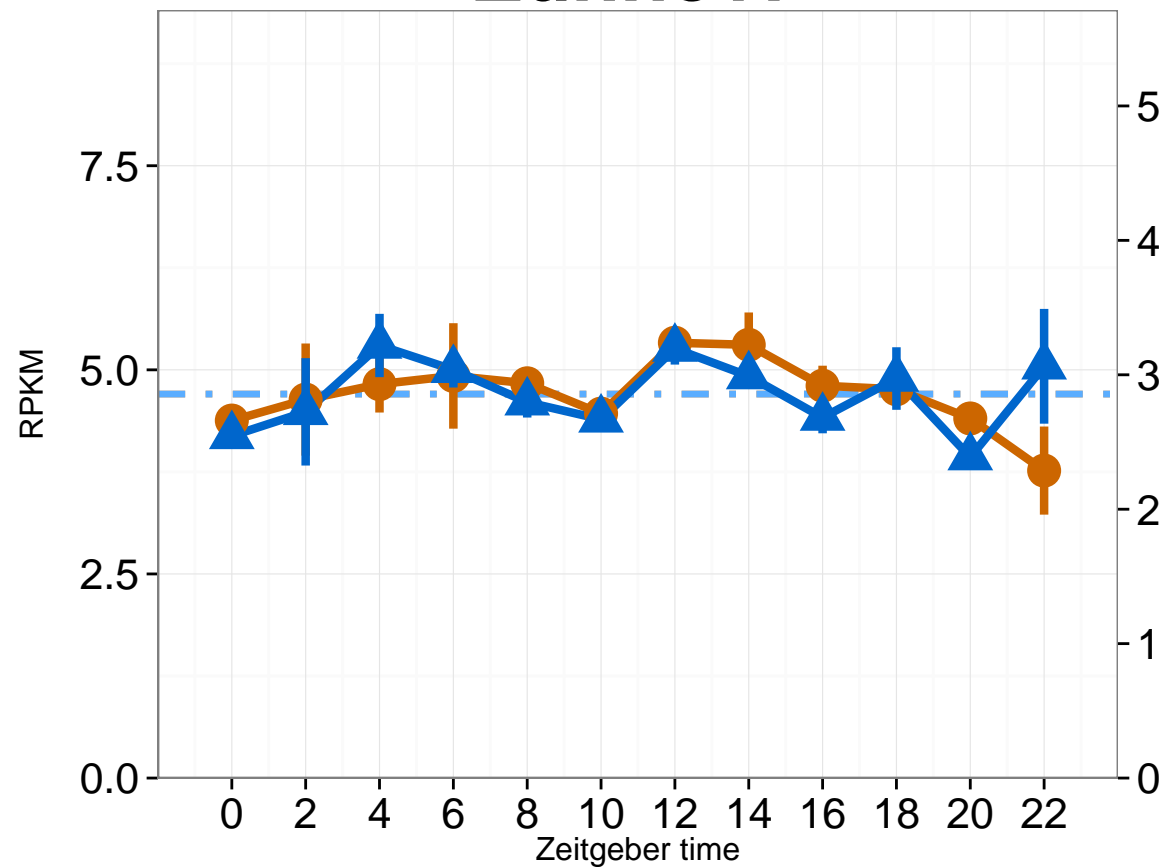

## Zdhhc17

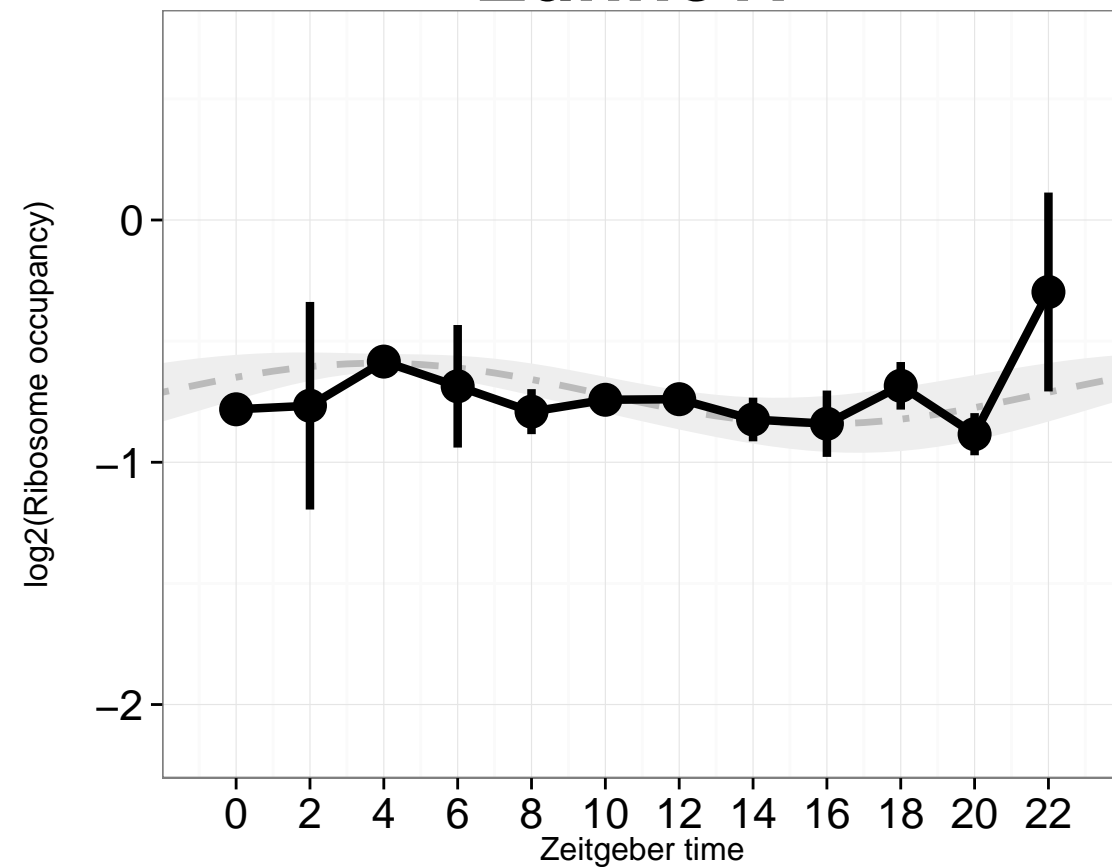

Supplement: SuppDataset_1.zip [file Zdhhc17_set_A.pdf › Supplemental Dataset 1/A-mRNA_nonrhyth_translation_nonrhyth/Zdhhc17_set_A.pdf]

# Zdhhc18

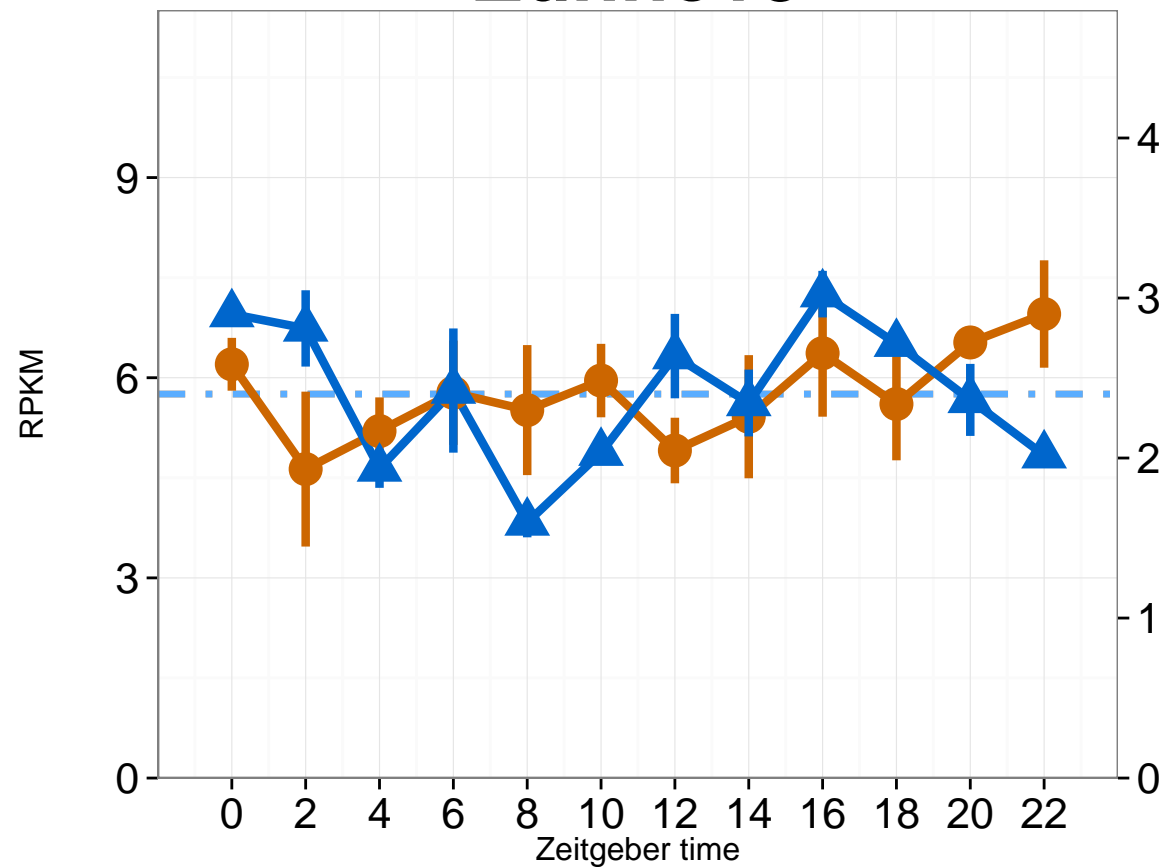

# Zdhhc18

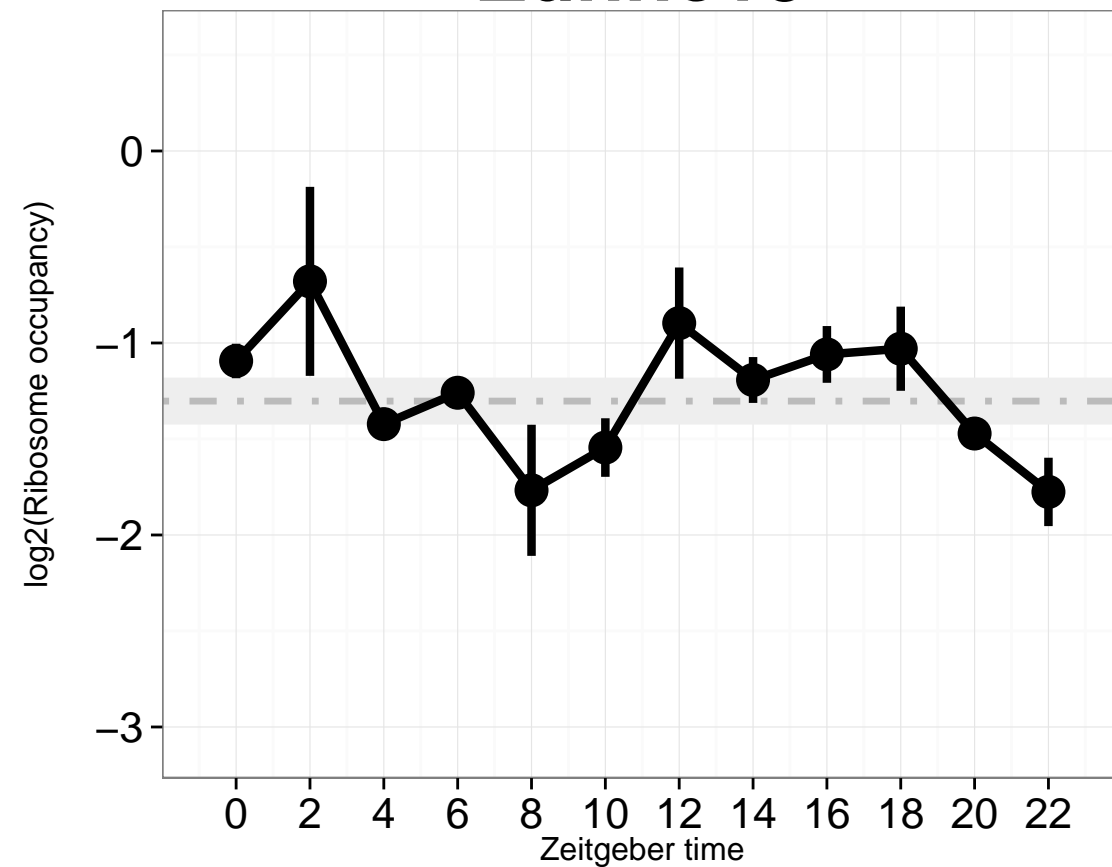

Supplement: SuppDataset_1.zip [file Zdhhc18_set_A.pdf › Supplemental Dataset 1/A-mRNA_nonrhyth_translation_nonrhyth/Zdhhc18_set_A.pdf]

## Zdhhc1

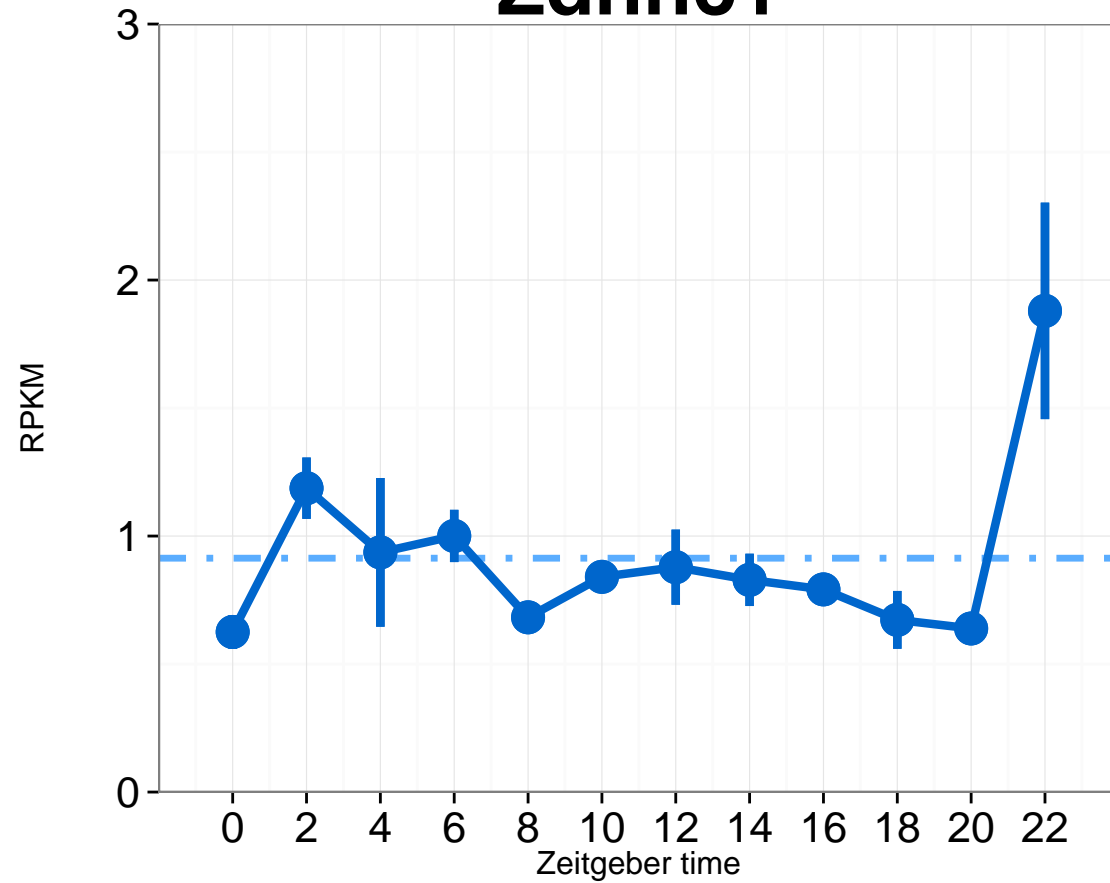

## Zdhhc1 log2(Ribosome occupancy)

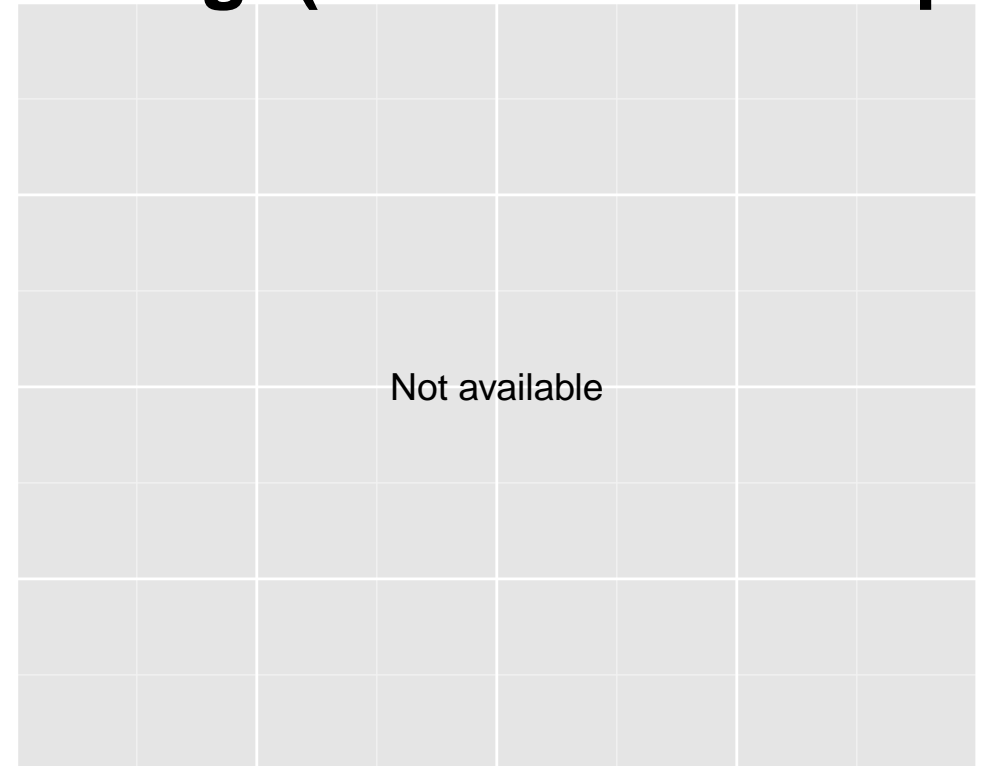

Supplement: SuppDataset_1.zip [file Zdhhc1_set_A.pdf › Supplemental Dataset 1/A-mRNA_nonrhyth_translation_nonrhyth/Zdhhc1_set_A.pdf]

## Zdhhc20

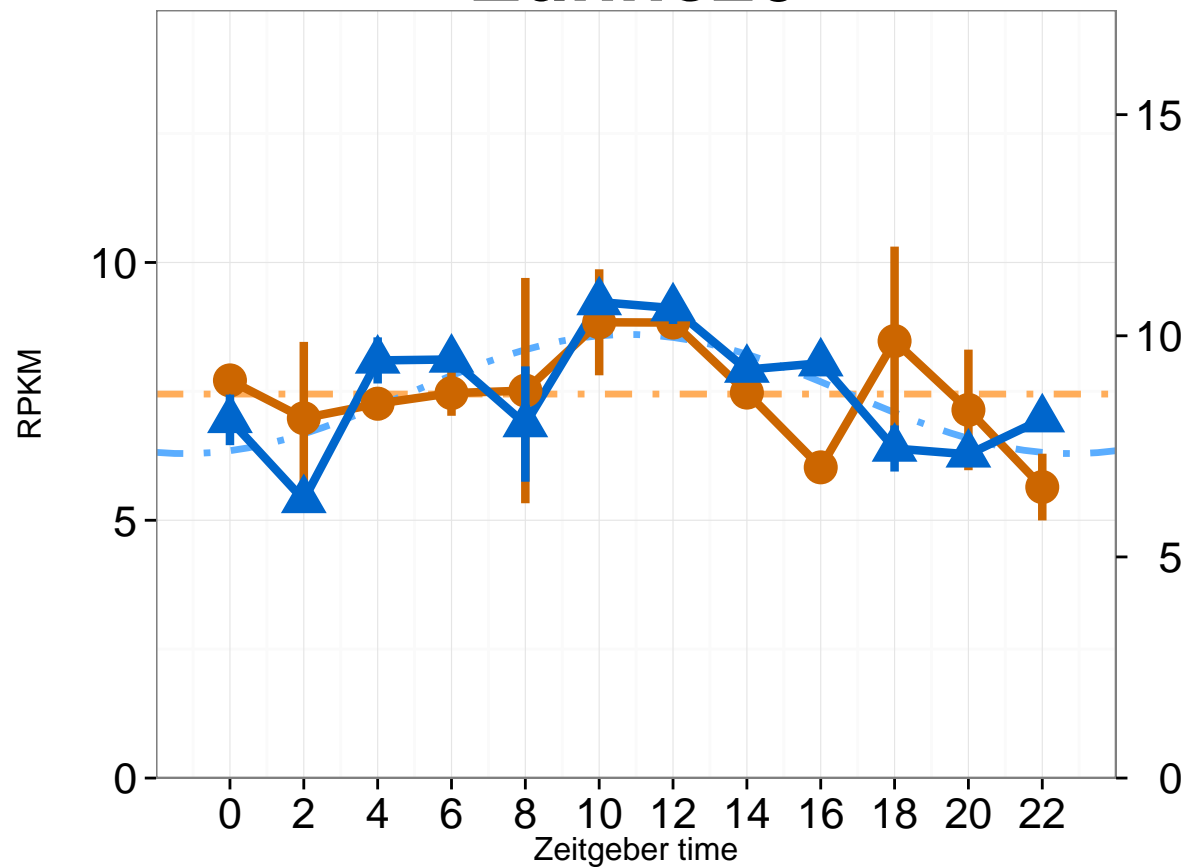

## Zdhhc20

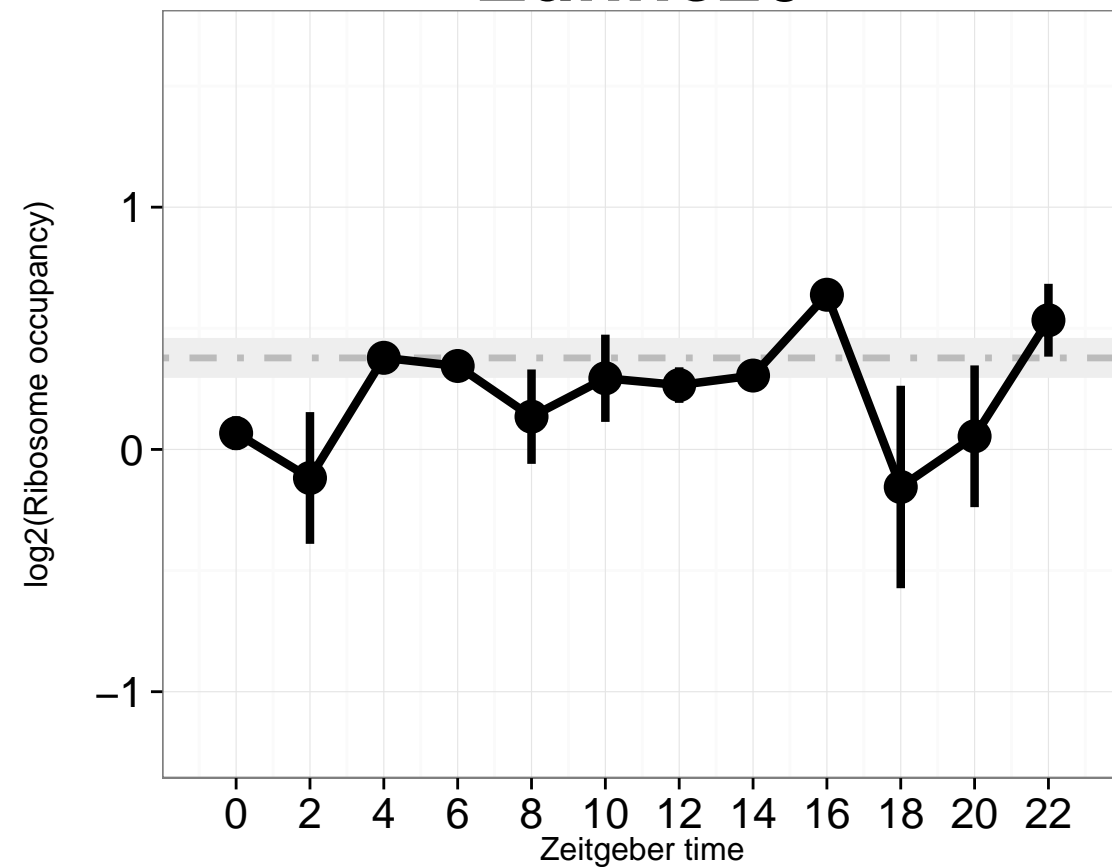

Supplement: SuppDataset_1.zip [file Zdhhc20_set_A.pdf › Supplemental Dataset 1/A-mRNA_nonrhyth_translation_nonrhyth/Zdhhc20_set_A.pdf]

# Zdhhc21

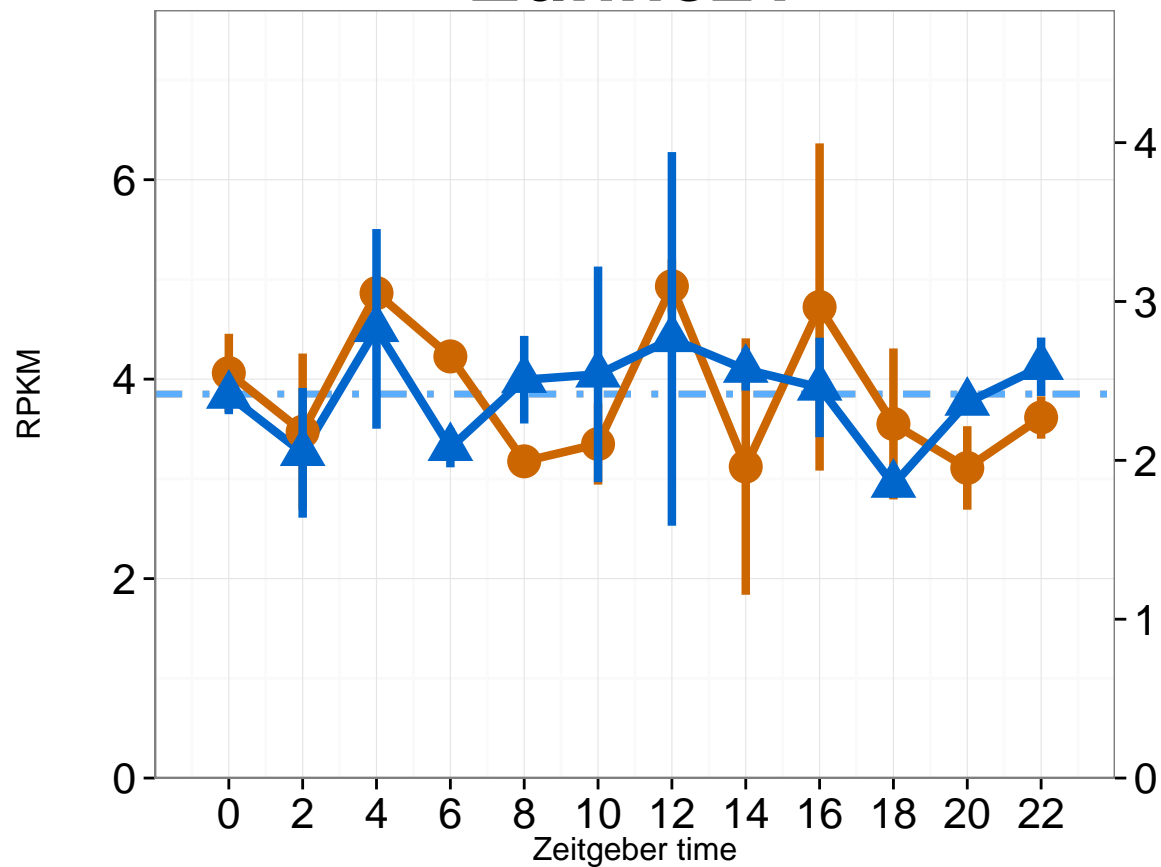

# Zdhhc21

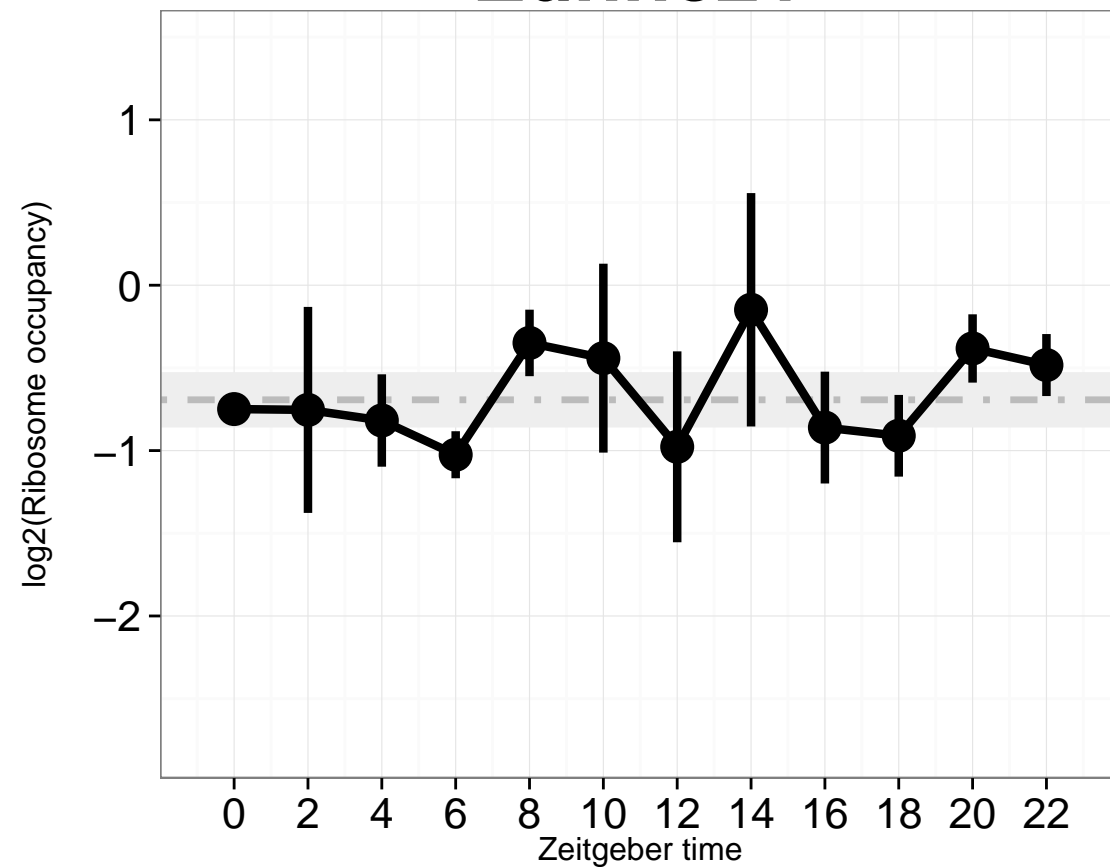

Supplement: SuppDataset_1.zip [file Zdhhc21_set_A.pdf › Supplemental Dataset 1/A-mRNA_nonrhyth_translation_nonrhyth/Zdhhc21_set_A.pdf]

# Zdhhc24

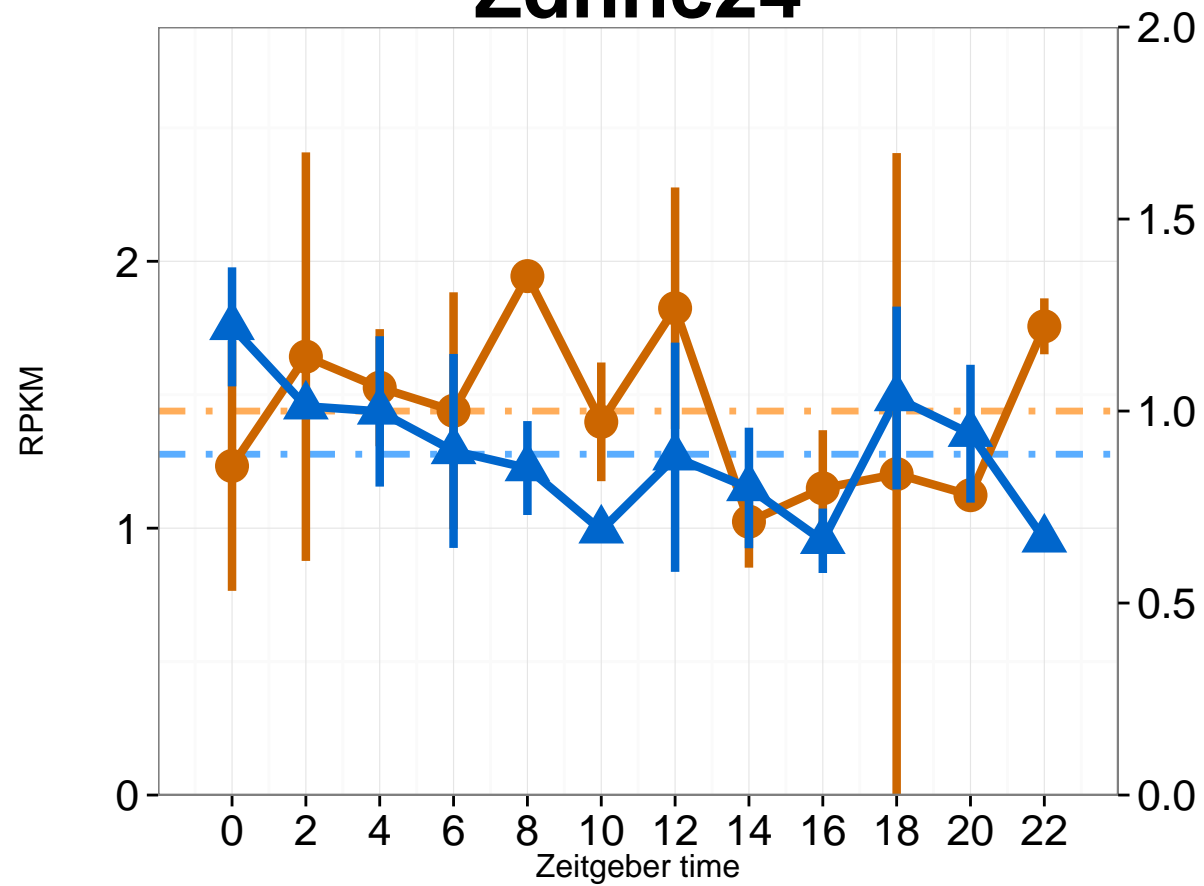

# Zdhhc24

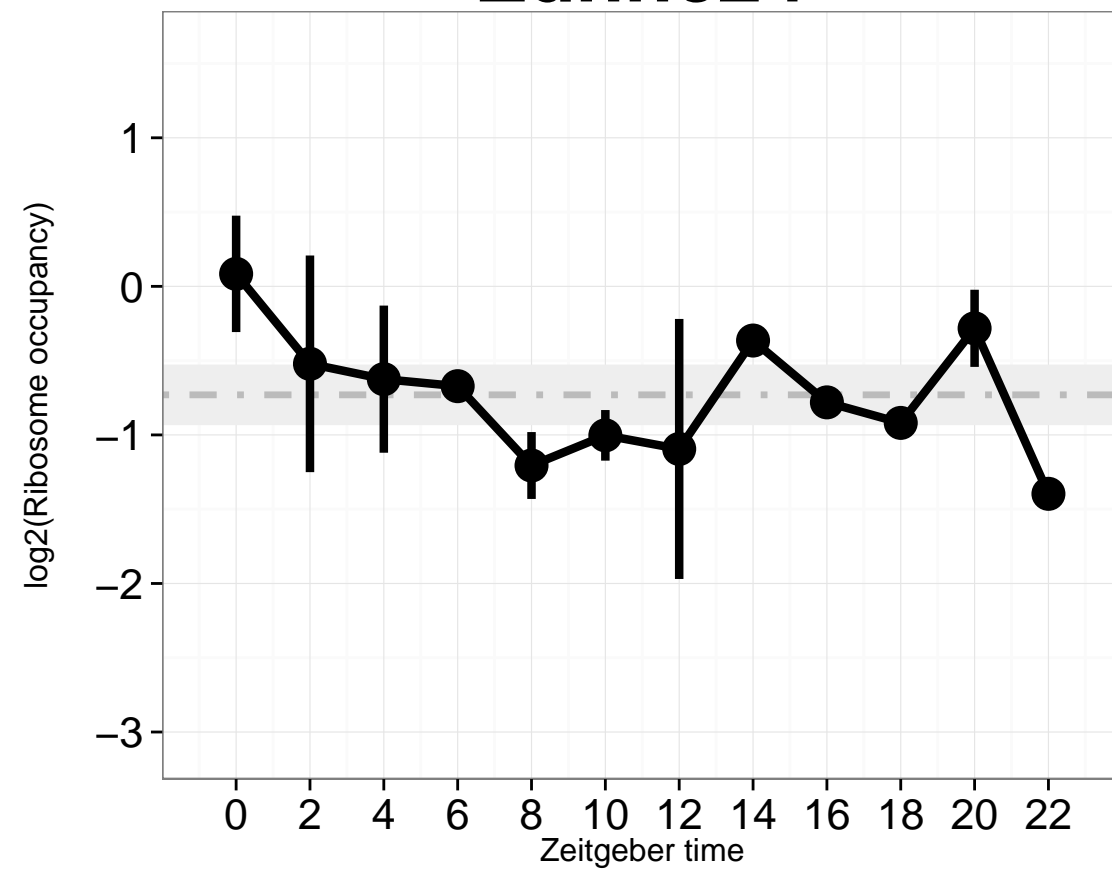

Supplement: SuppDataset_1.zip [file Zdhhc24_set_A.pdf › Supplemental Dataset 1/A-mRNA_nonrhyth_translation_nonrhyth/Zdhhc24_set_A.pdf]

## Zdhhc2

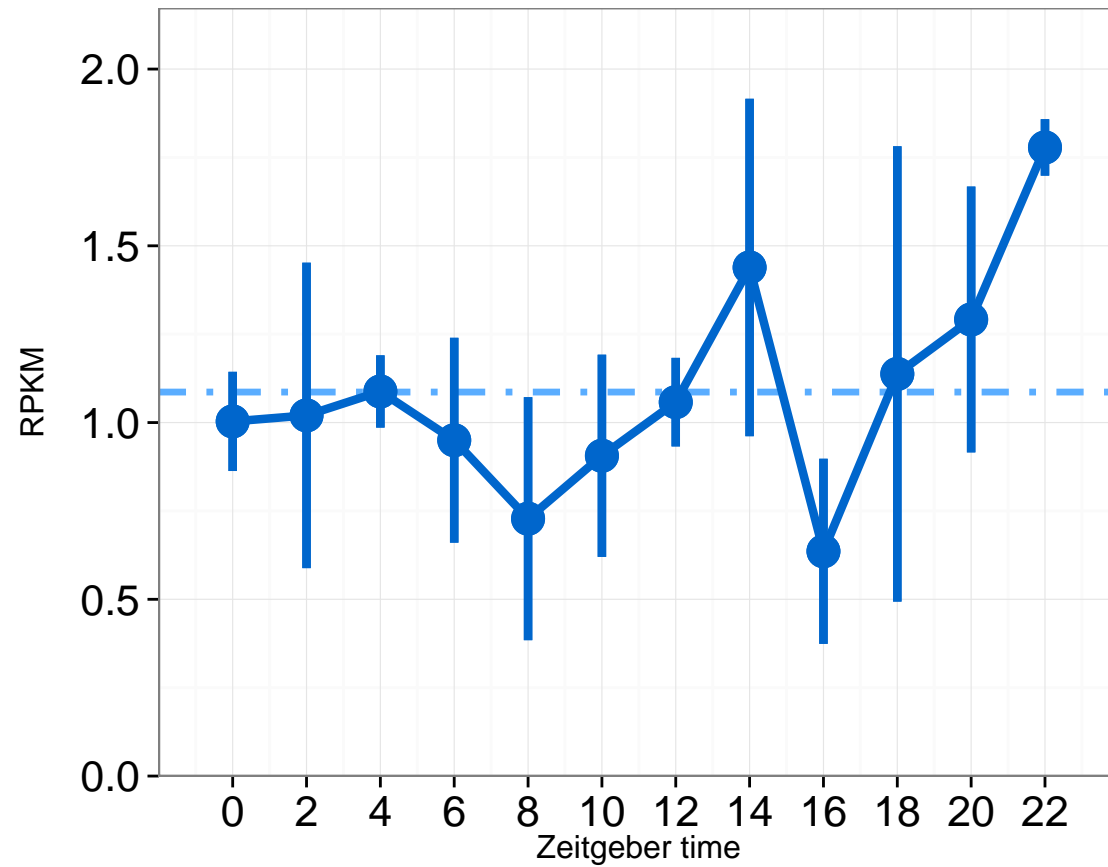

## Zdhhc2 log2(Ribosome occupancy)



Supplement: SuppDataset_1.zip [file Zdhhc2_set_A.pdf › Supplemental Dataset 1/A-mRNA_nonrhyth_translation_nonrhyth/Zdhhc2_set_A.pdf]

## Zdhhc3

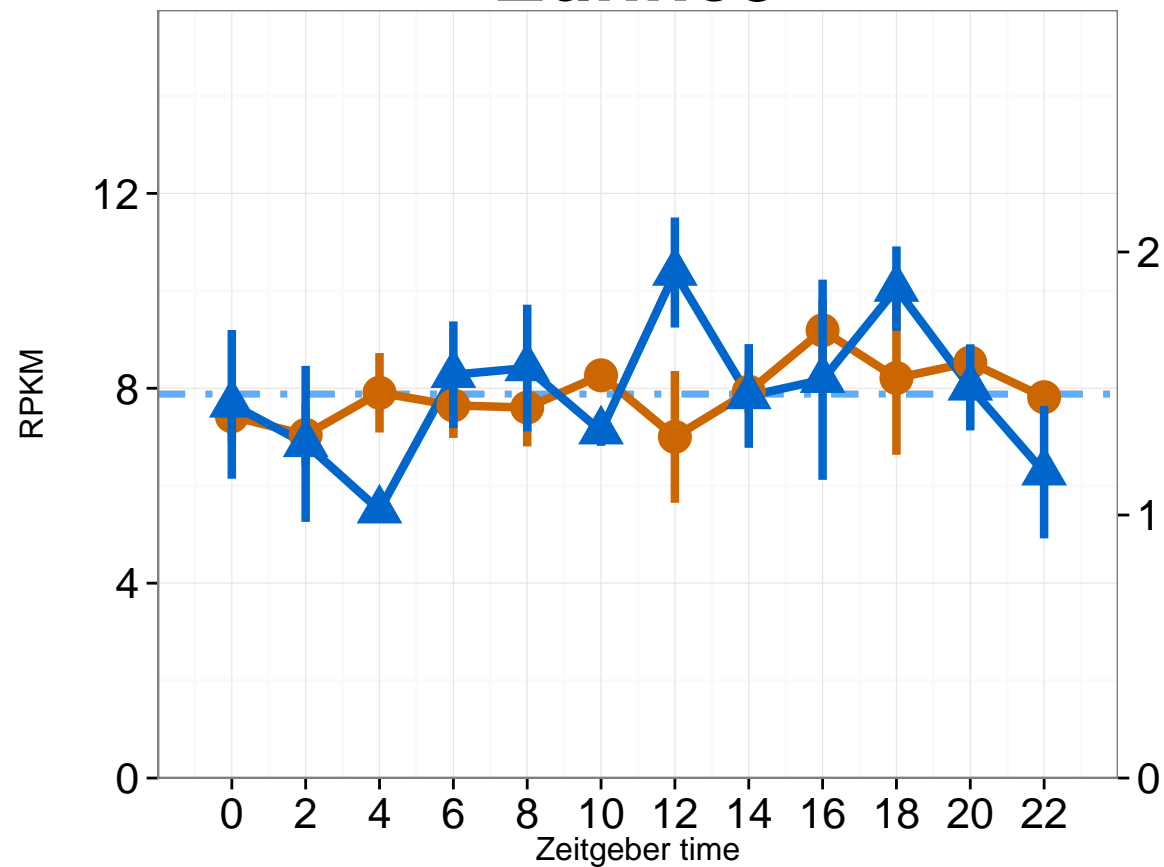

## Zdhhc3

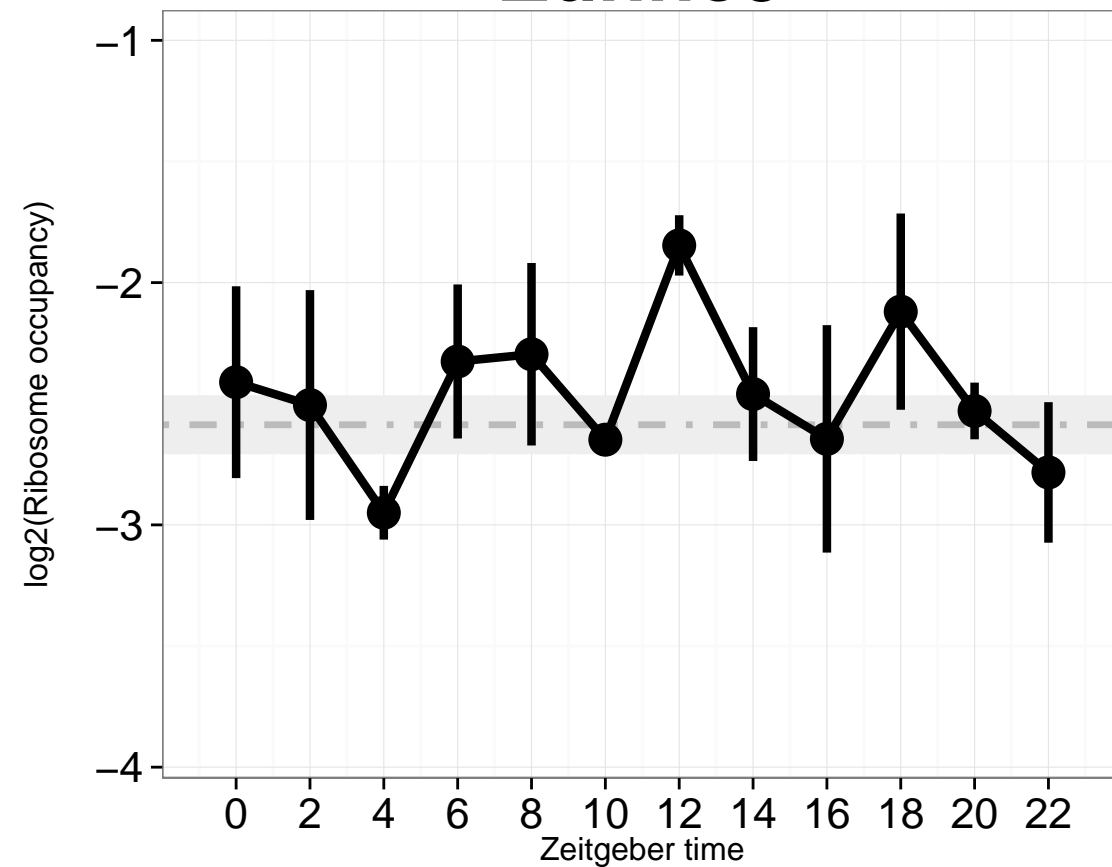

Supplement: SuppDataset_1.zip [file Zdhhc3_set_A.pdf › Supplemental Dataset 1/A-mRNA_nonrhyth_translation_nonrhyth/Zdhhc3_set_A.pdf]

## Zdhhc4

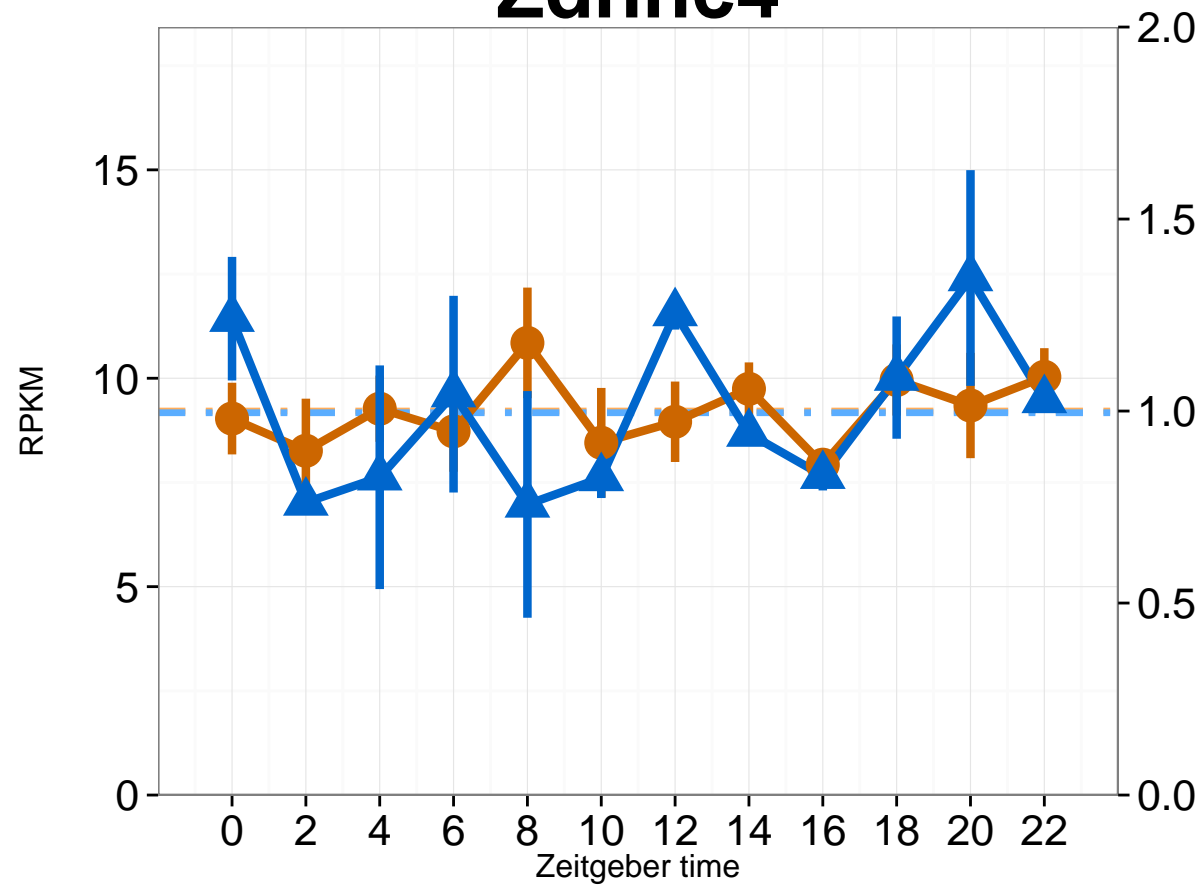

## Zdhhc4

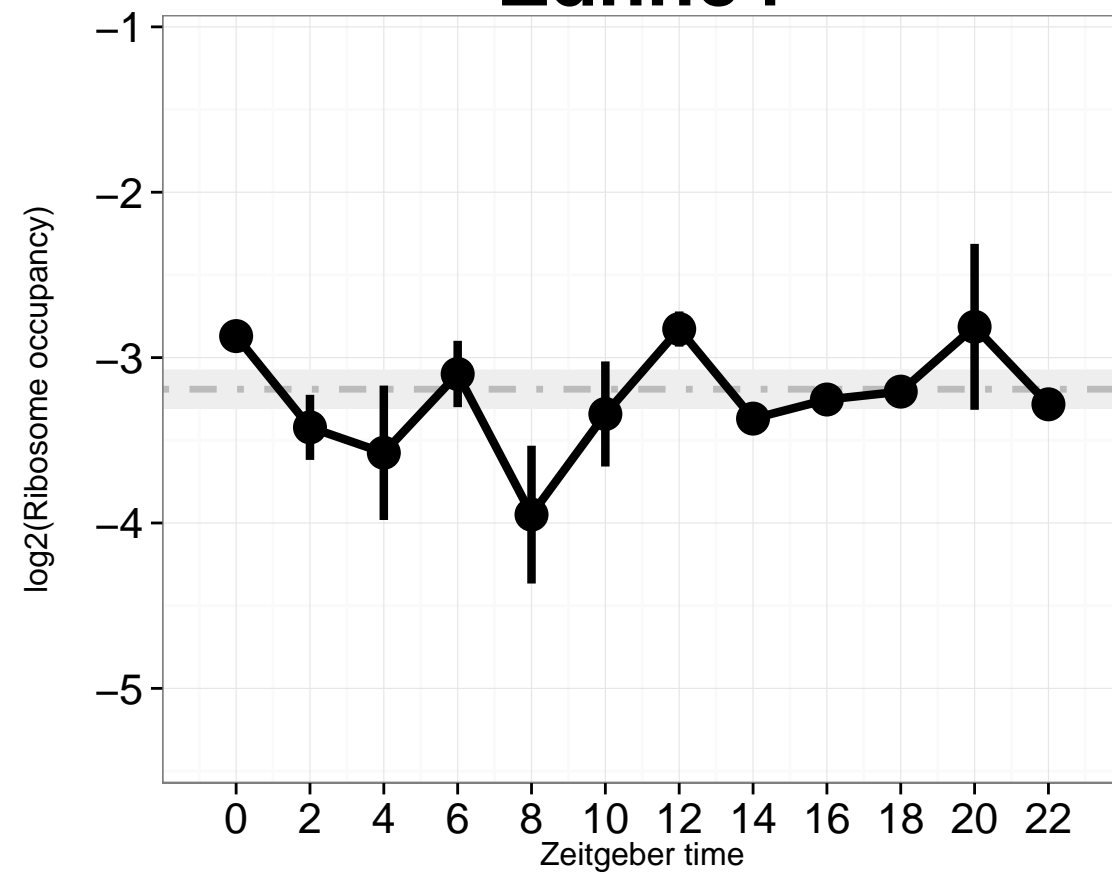

Supplement: SuppDataset_1.zip [file Zdhhc4_set_A.pdf › Supplemental Dataset 1/A-mRNA_nonrhyth_translation_nonrhyth/Zdhhc4_set_A.pdf]

## Zdhhc5

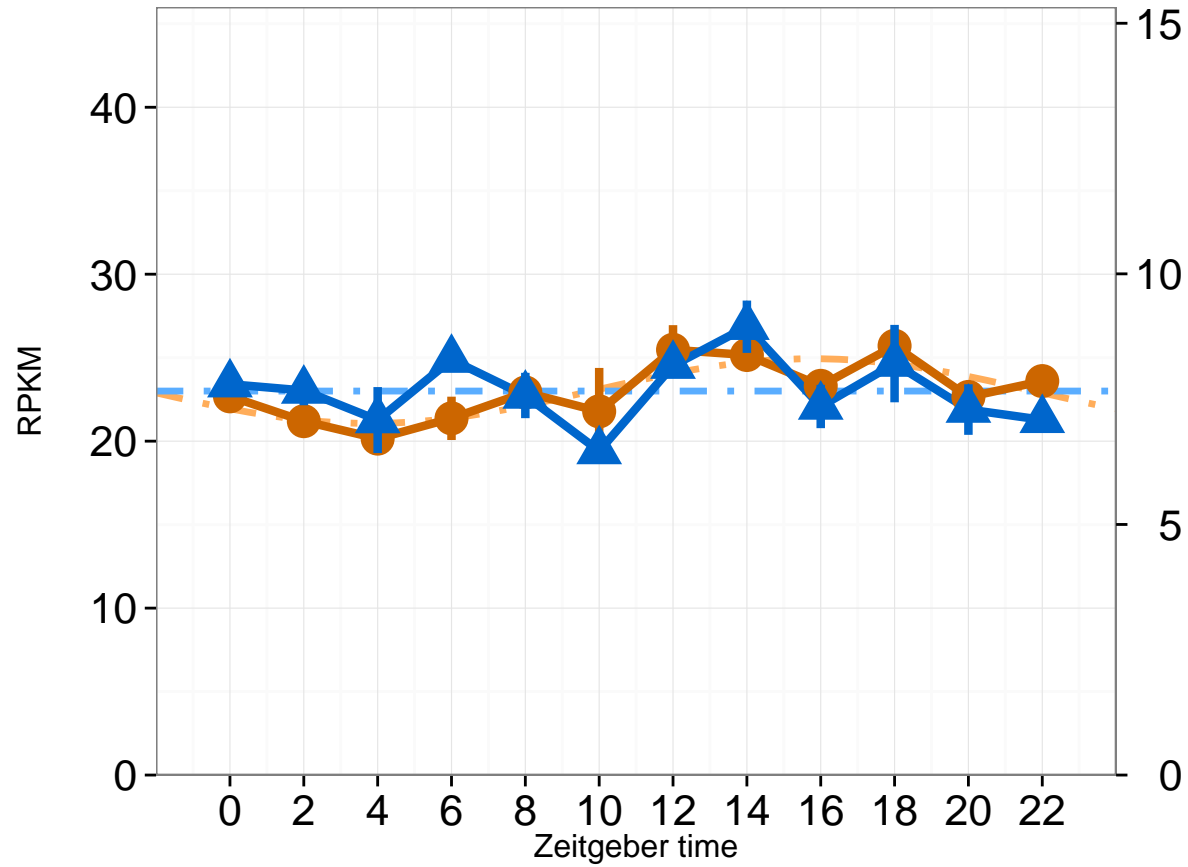

## Zdhhc5

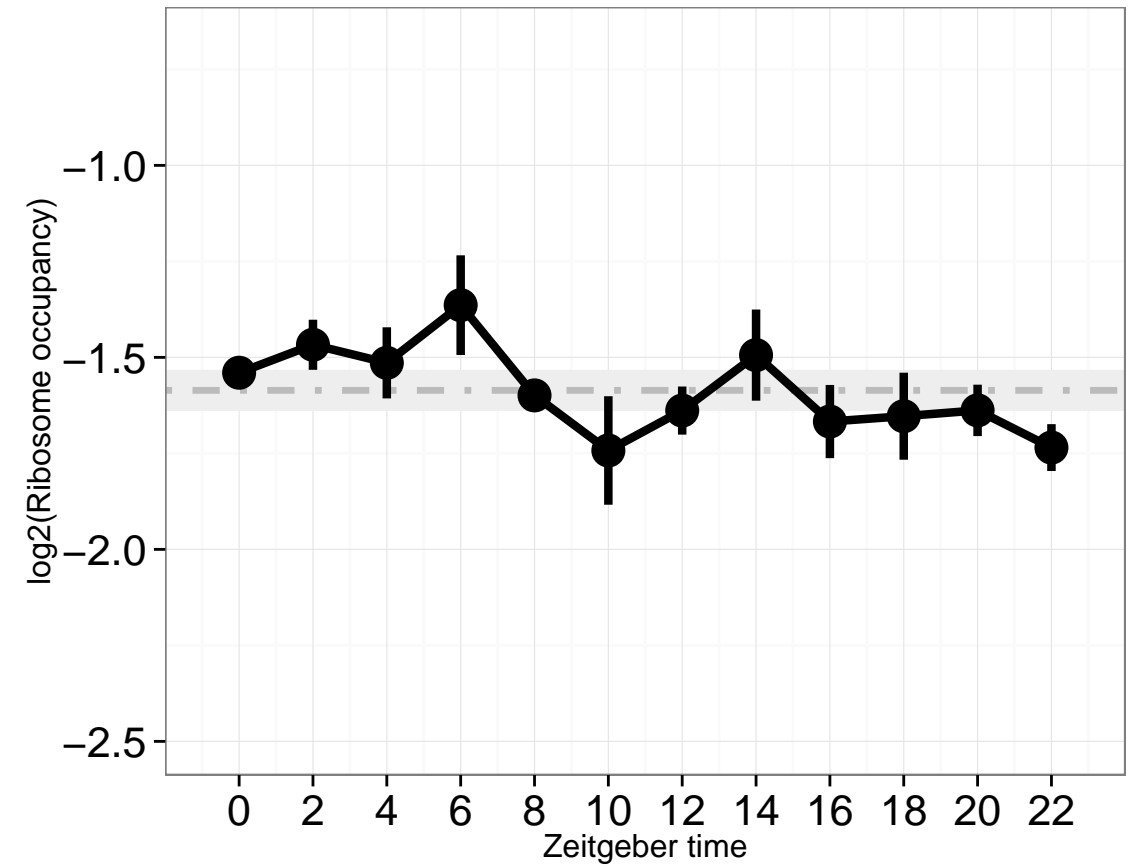

Supplement: SuppDataset_1.zip [file Zdhhc5_set_A.pdf › Supplemental Dataset 1/A-mRNA_nonrhyth_translation_nonrhyth/Zdhhc5_set_A.pdf]

## Zdhhc6

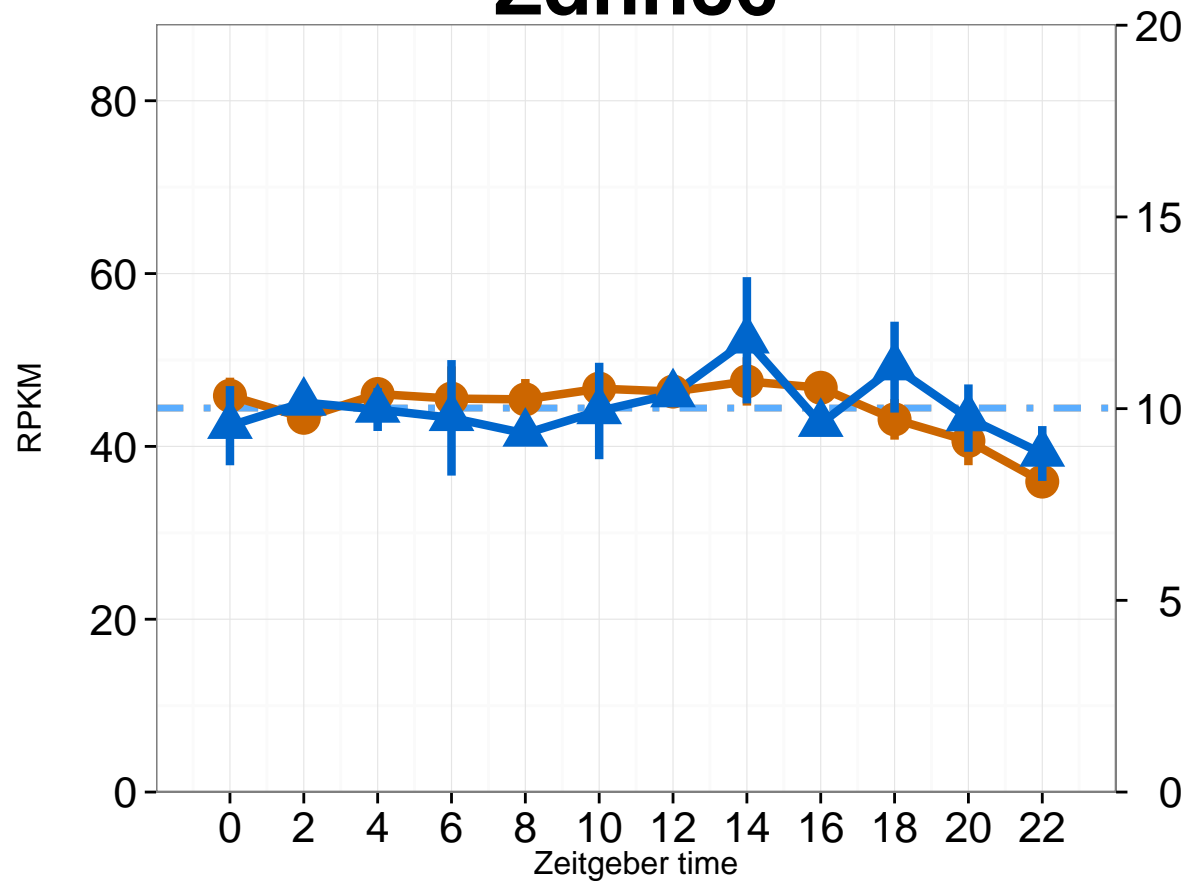

## Zdhhc6

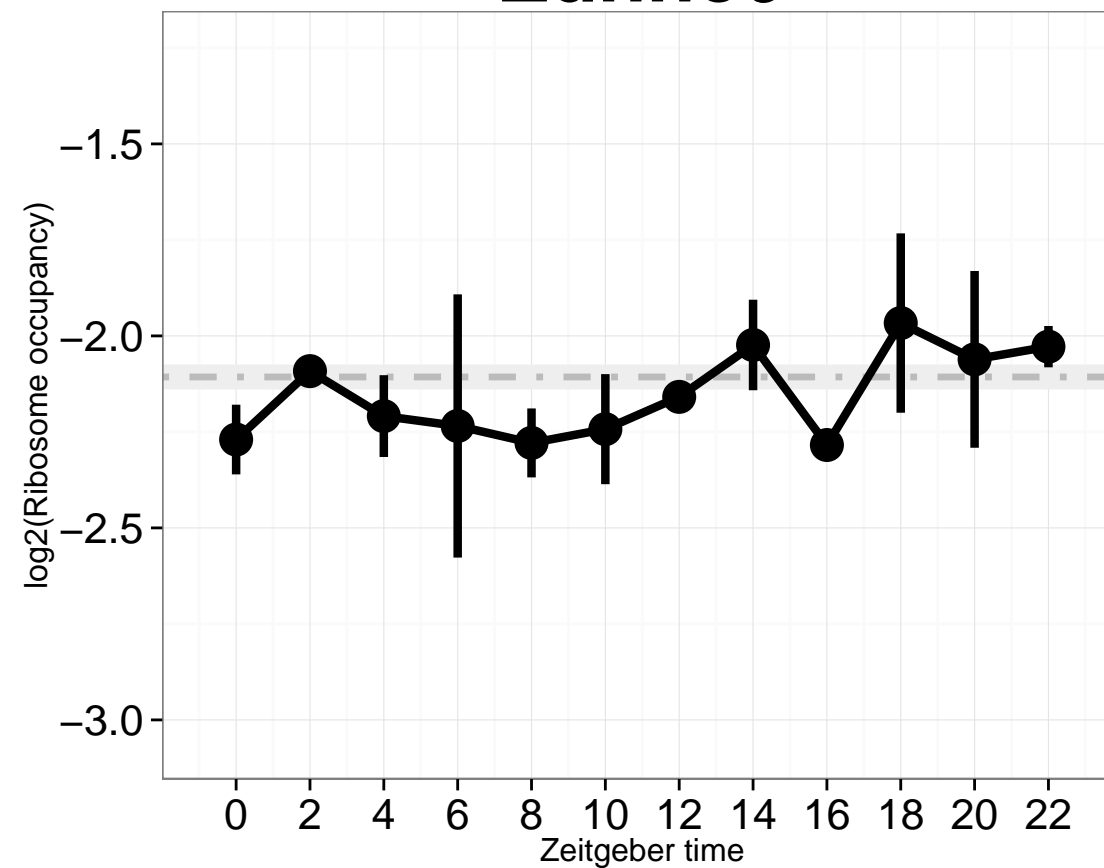

Supplement: SuppDataset_1.zip [file Zdhhc6_set_A.pdf › Supplemental Dataset 1/A-mRNA_nonrhyth_translation_nonrhyth/Zdhhc6_set_A.pdf]

## Zdhhc9

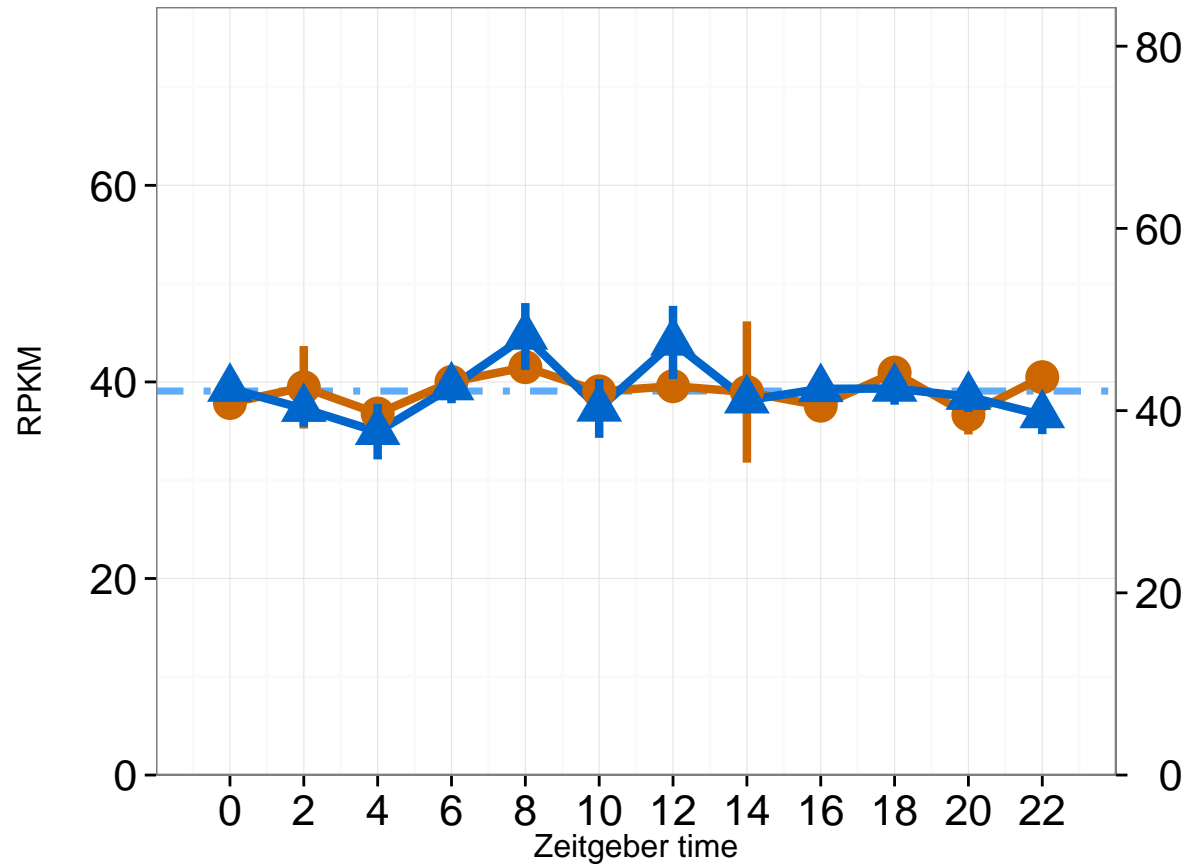

## Zdhhc9

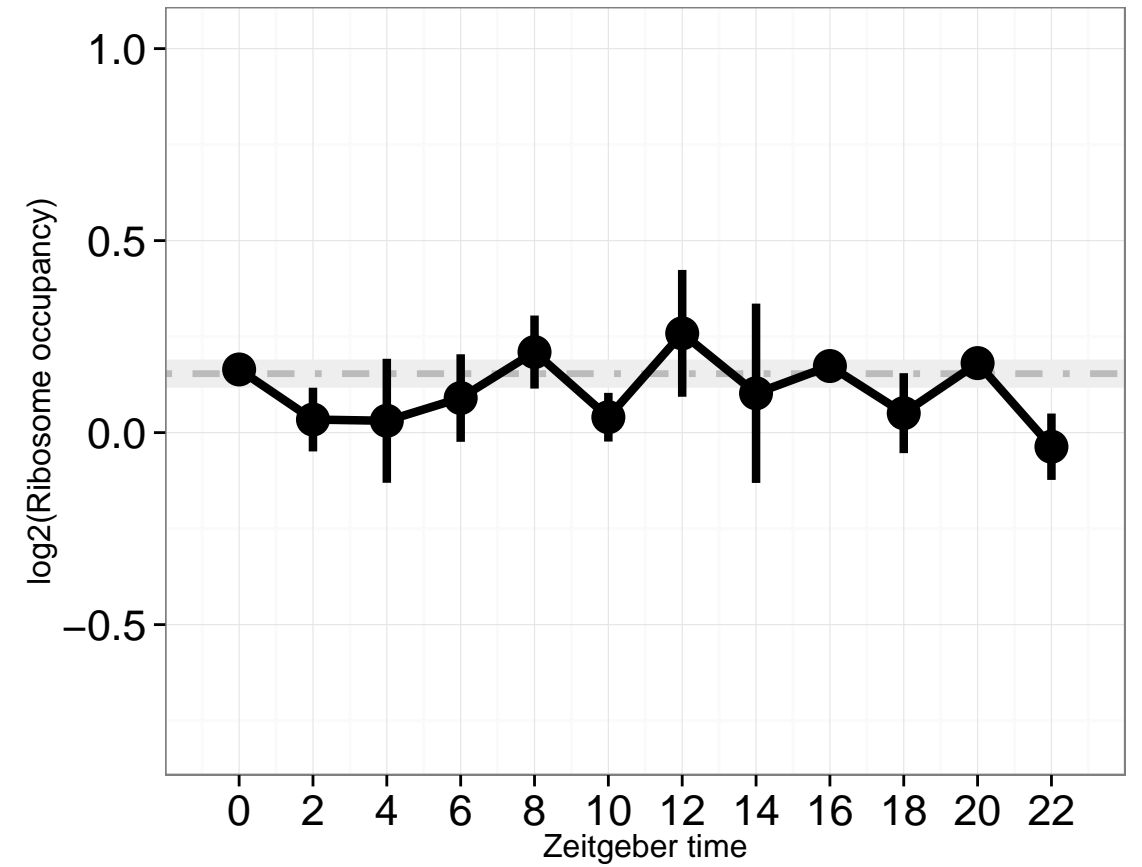

Supplement: SuppDataset_1.zip [file Zdhhc9_set_A.pdf › Supplemental Dataset 1/A-mRNA_nonrhyth_translation_nonrhyth/Zdhhc9_set_A.pdf]

## Zeb1

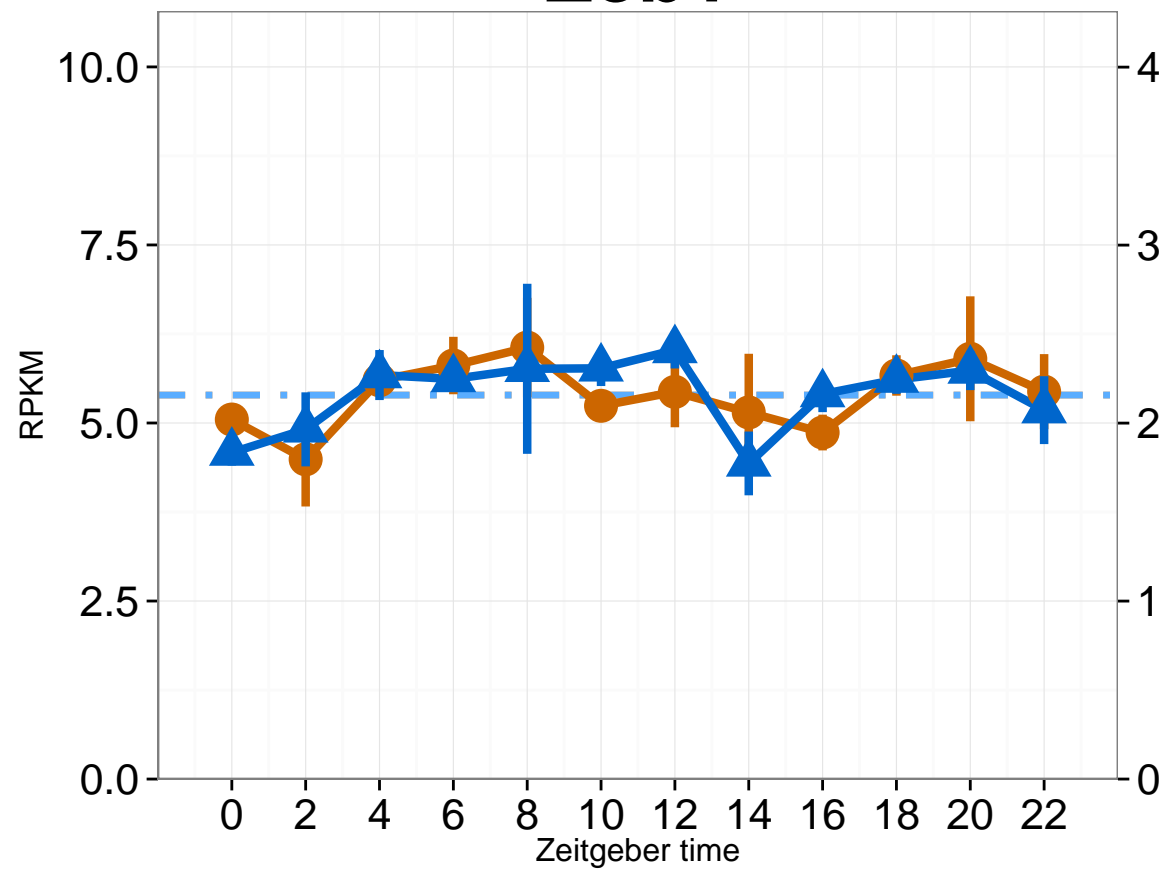

## Zeb1

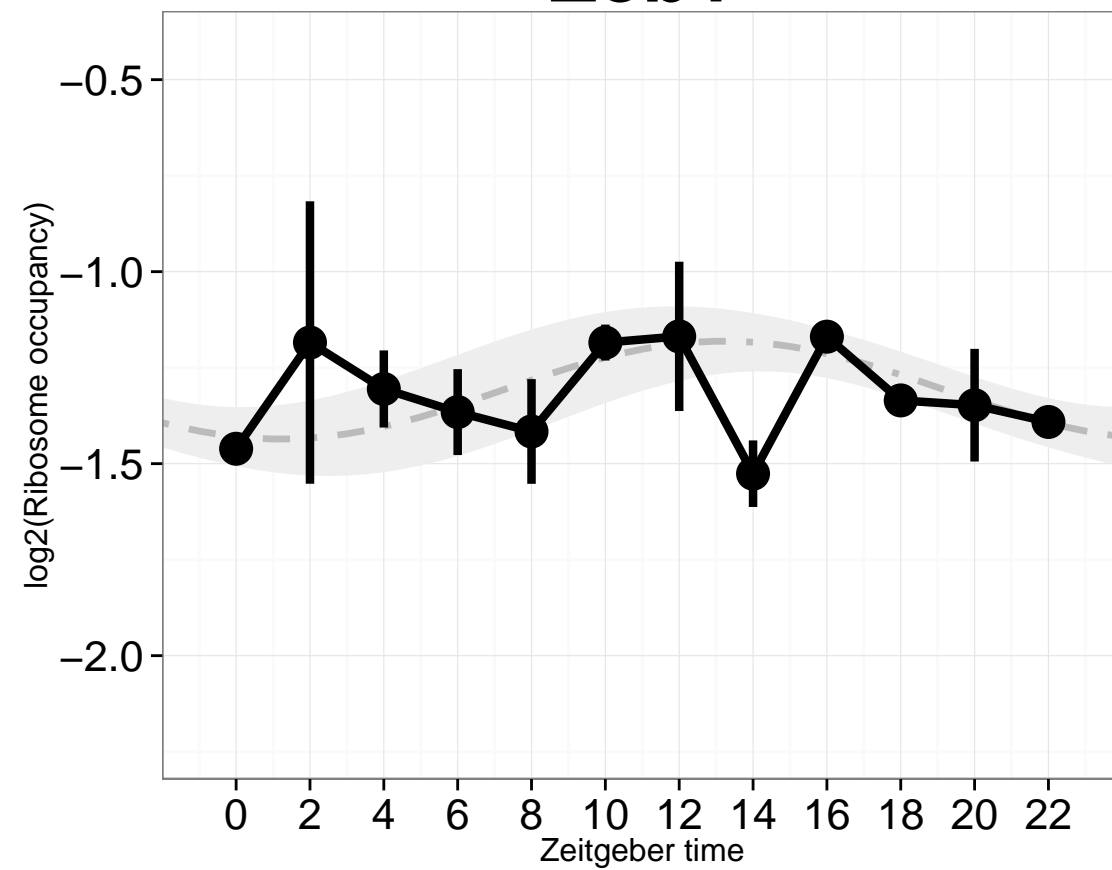

Supplement: SuppDataset_1.zip [file Zeb1_set_A.pdf › Supplemental Dataset 1/A-mRNA_nonrhyth_translation_nonrhyth/Zeb1_set_A.pdf]

## Zeb2

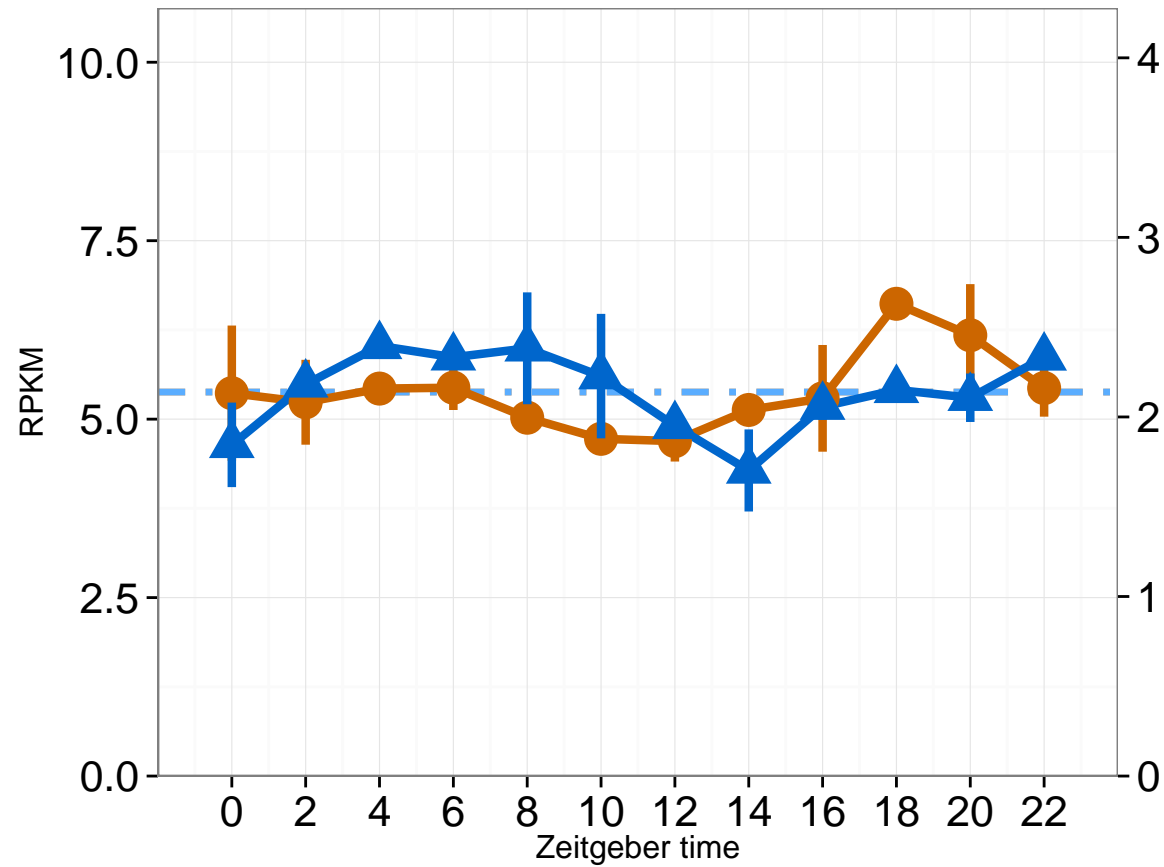

## Zeb2

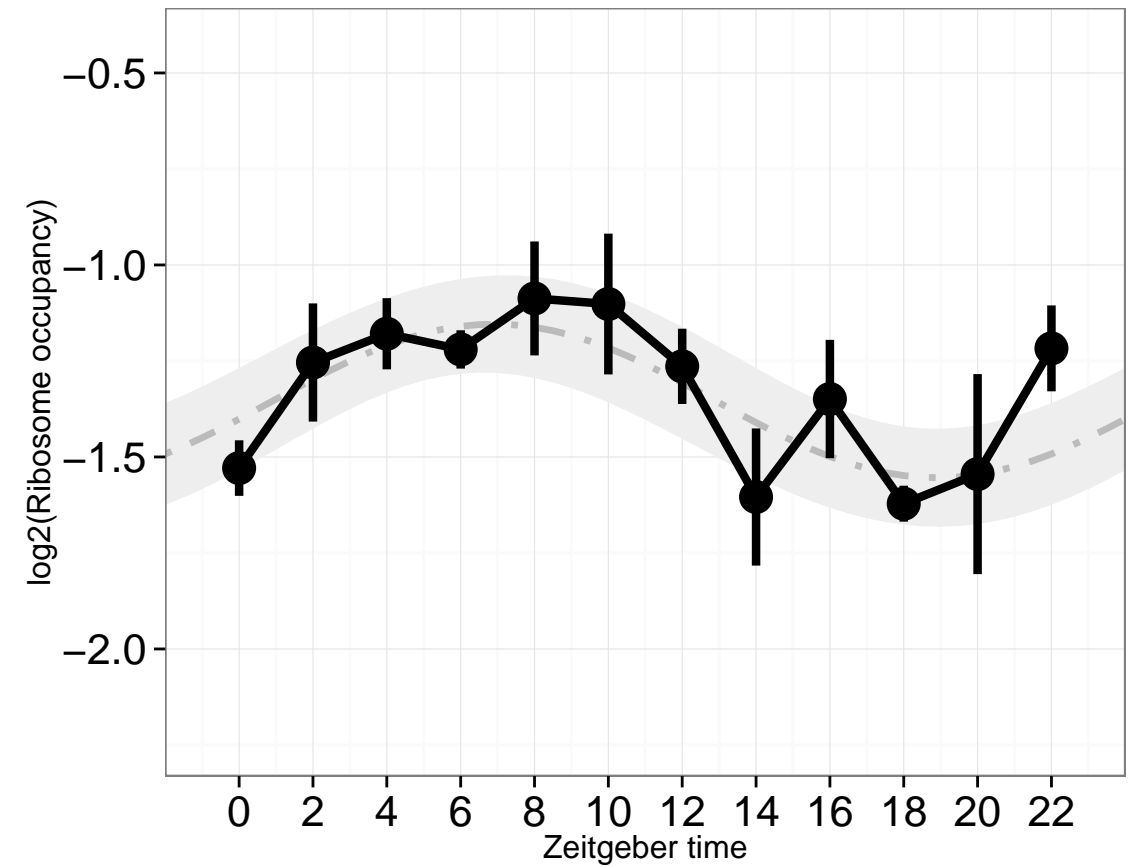

Supplement: SuppDataset_1.zip [file Zeb2_set_A.pdf › Supplemental Dataset 1/A-mRNA_nonrhyth_translation_nonrhyth/Zeb2_set_A.pdf]

## Zer1

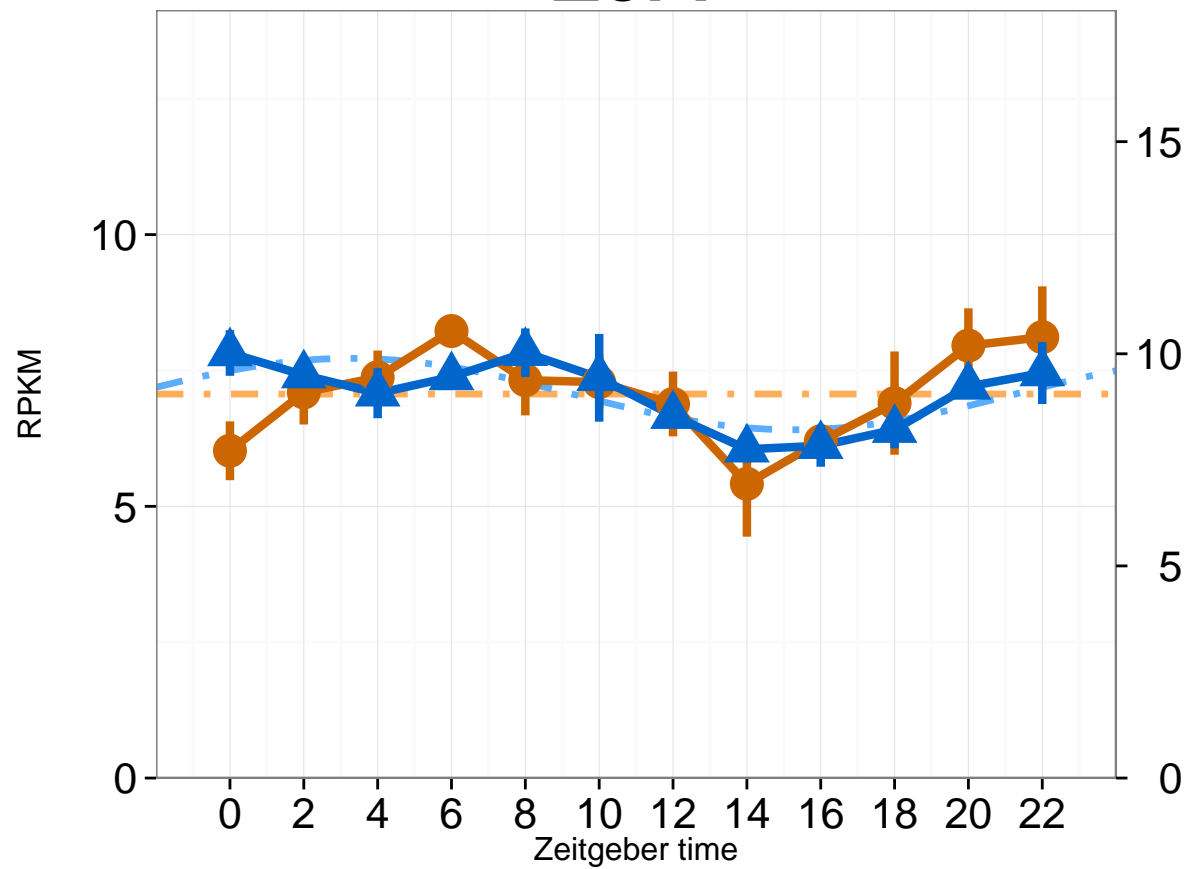

## Zer1

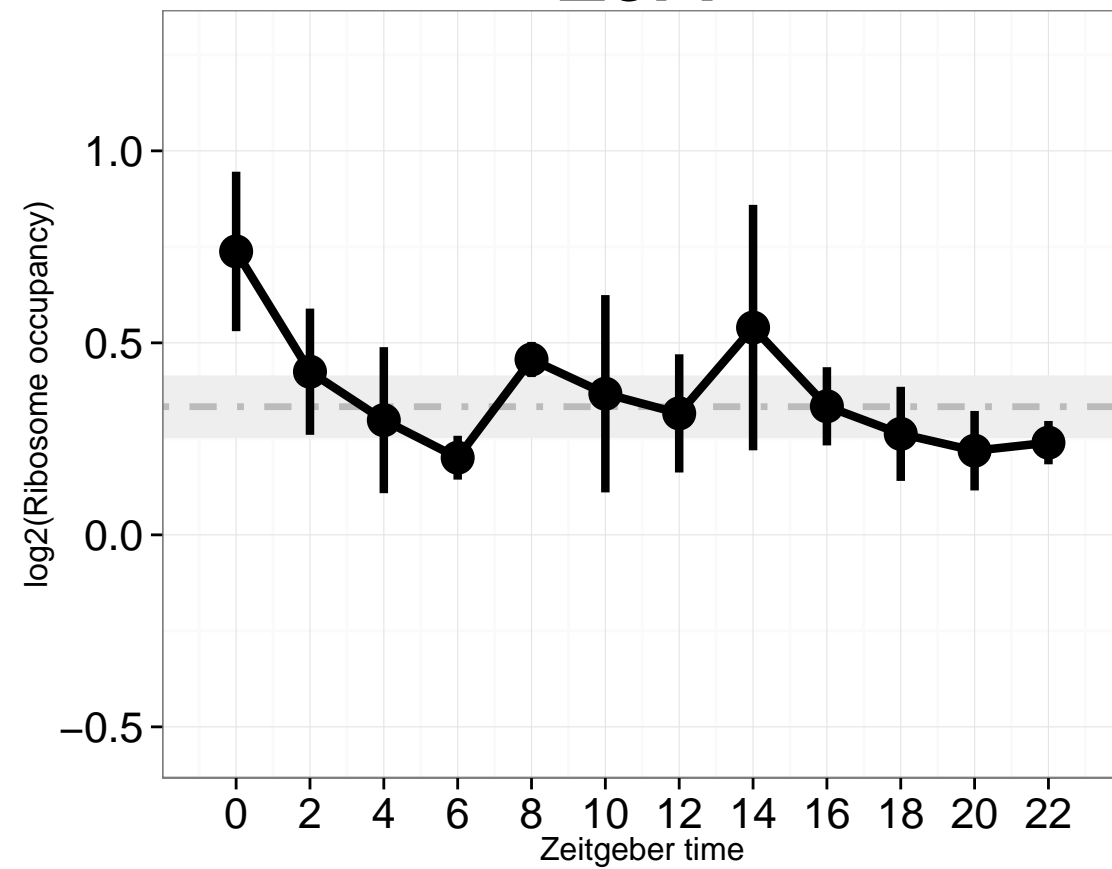

Supplement: SuppDataset_1.zip [file Zer1_set_A.pdf › Supplemental Dataset 1/A-mRNA_nonrhyth_translation_nonrhyth/Zer1_set_A.pdf]

## Zfand1

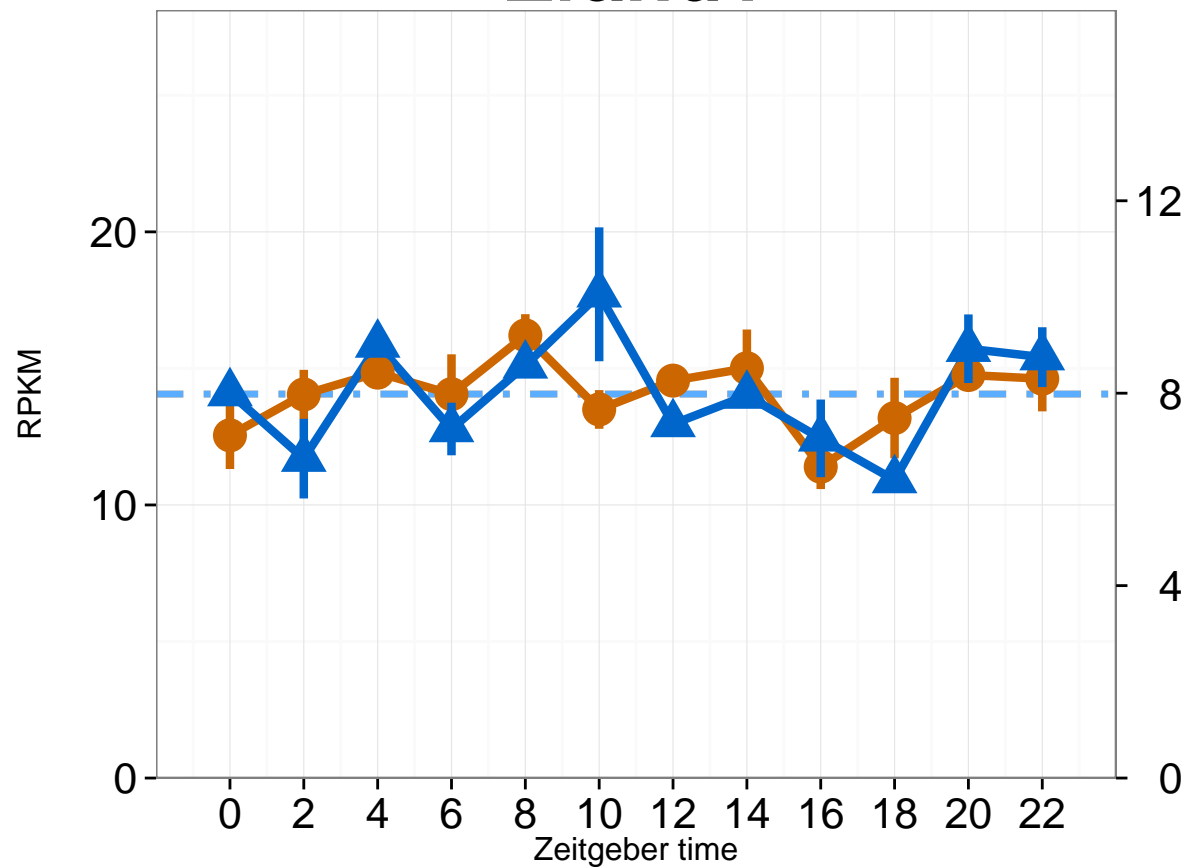

## Zfand1

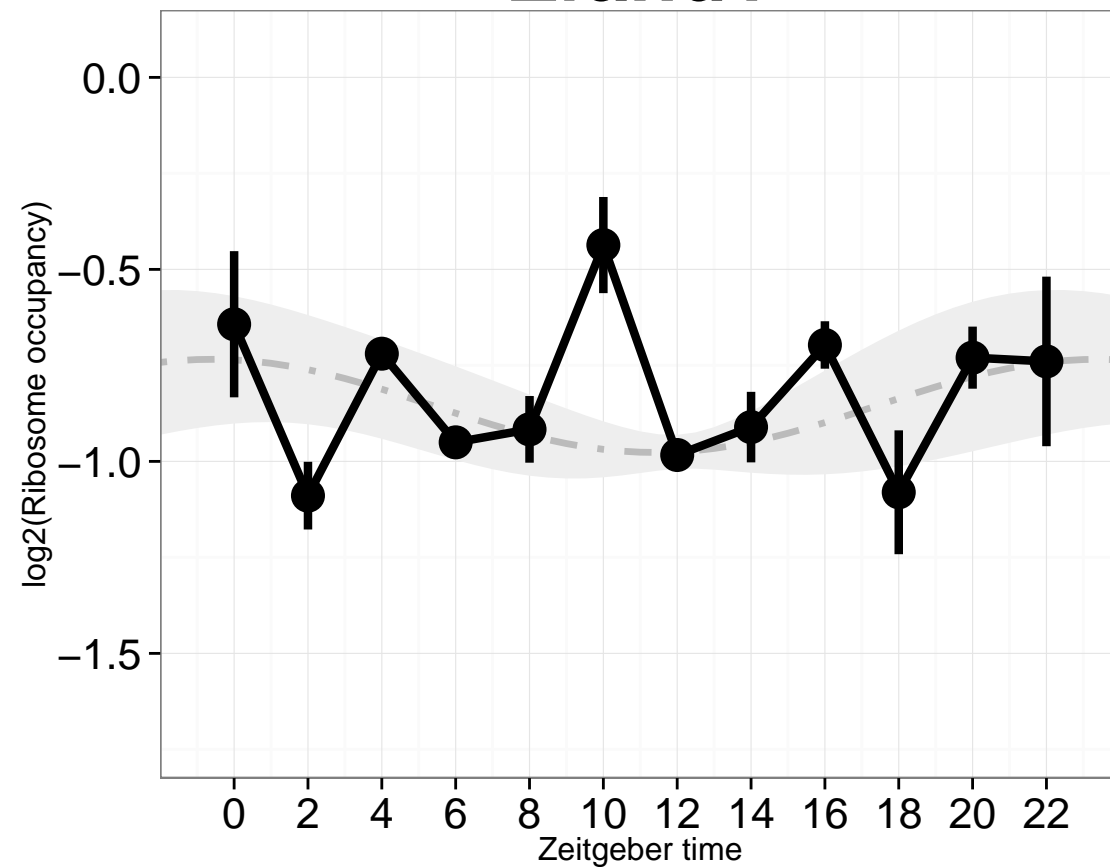

Supplement: SuppDataset_1.zip [file Zfand1_set_A.pdf › Supplemental Dataset 1/A-mRNA_nonrhyth_translation_nonrhyth/Zfand1_set_A.pdf]

# Zfand2a

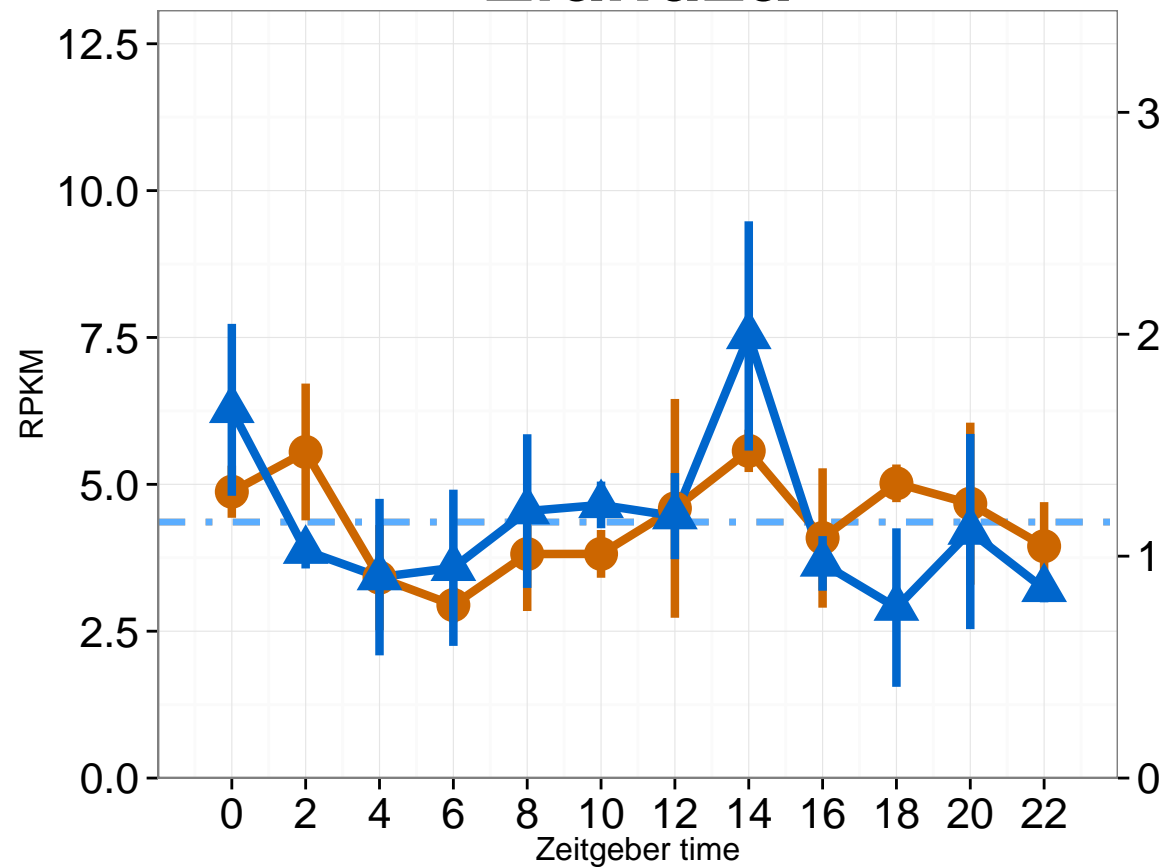

# Zfand2a

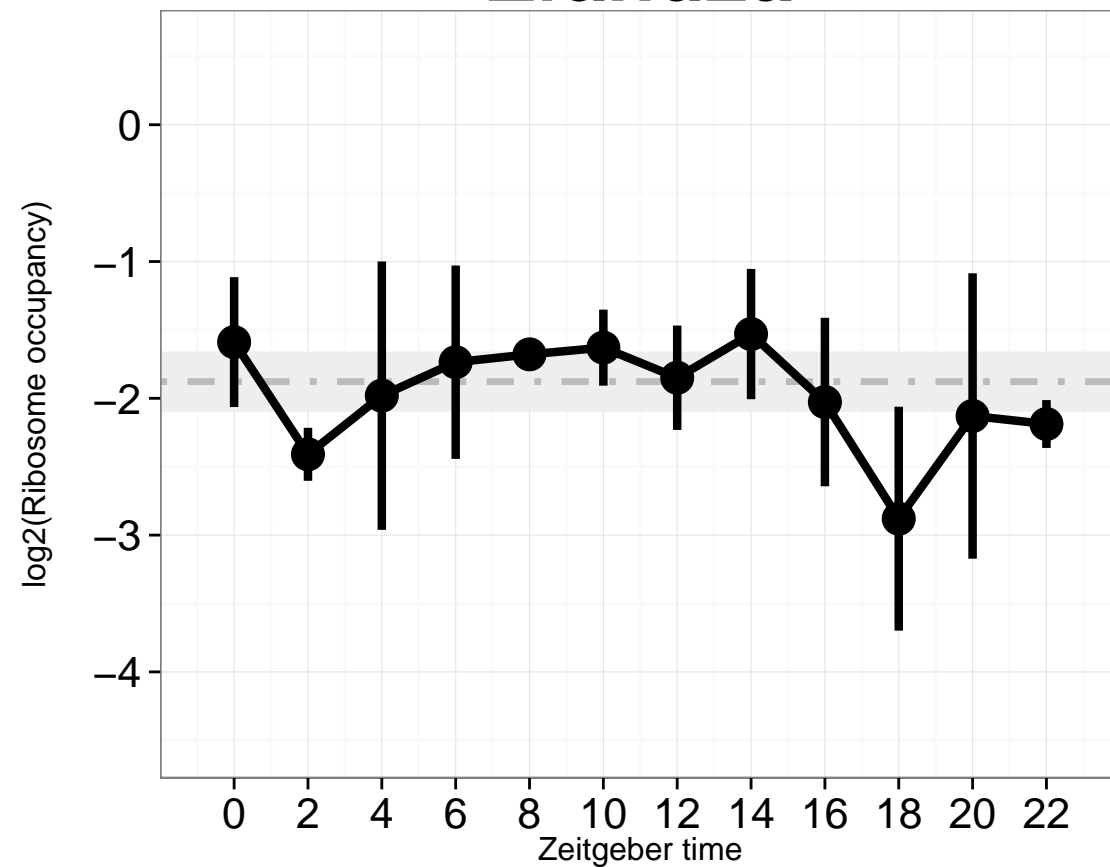

Supplement: SuppDataset_1.zip [file Zfand2a_set_A.pdf › Supplemental Dataset 1/A-mRNA_nonrhyth_translation_nonrhyth/Zfand2a_set_A.pdf]

# Zfand2b

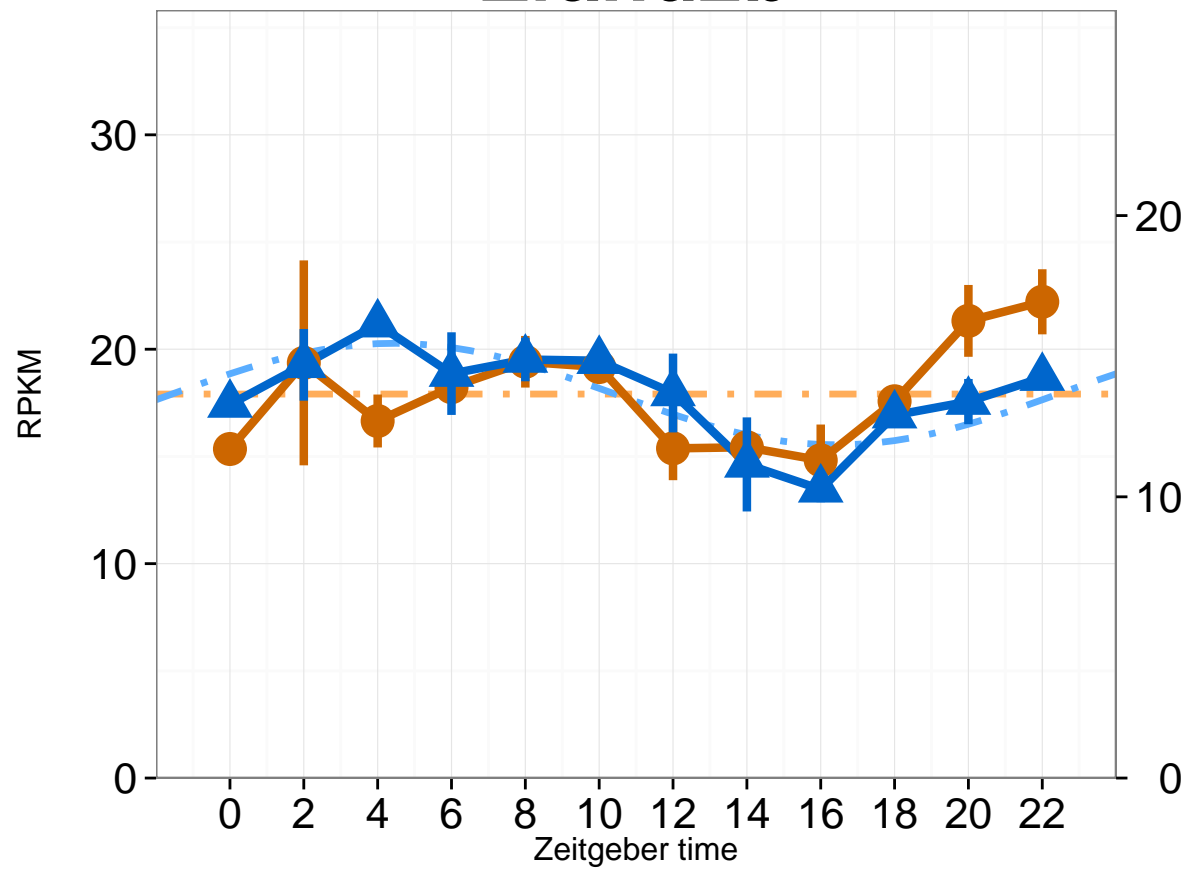

# Zfand2b

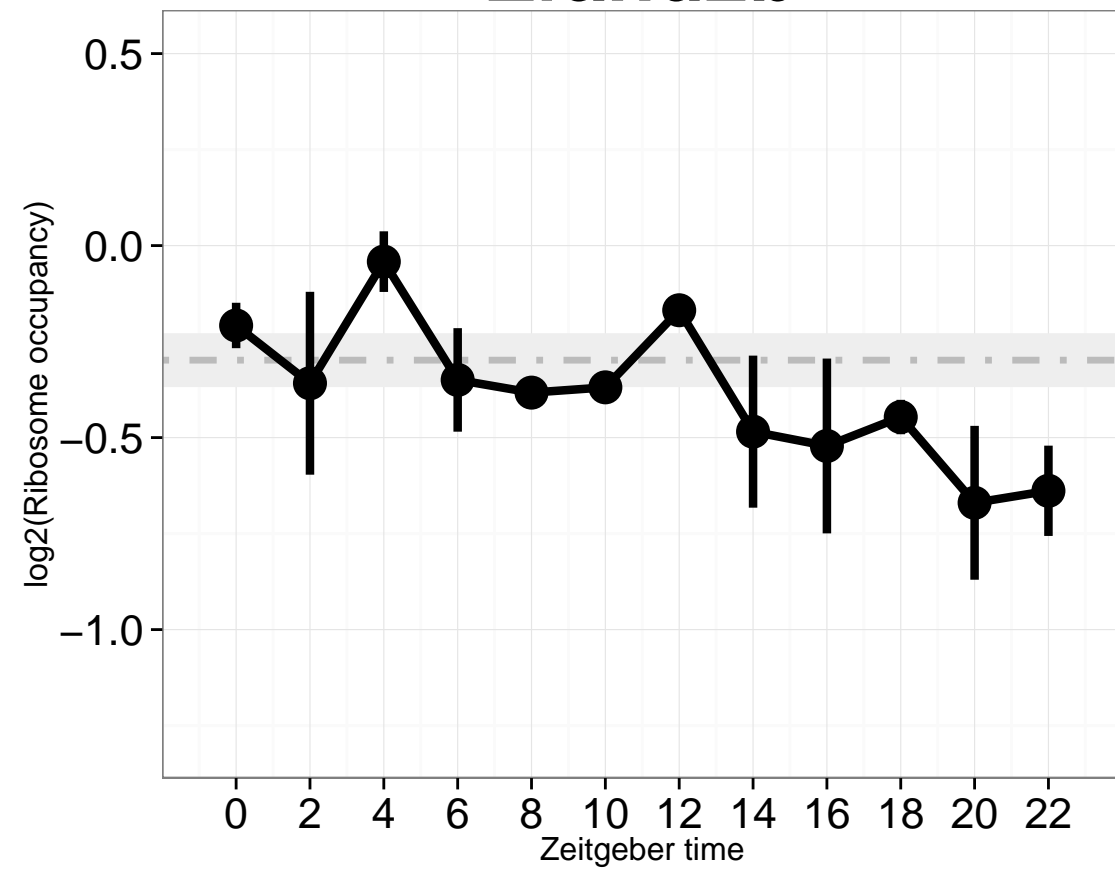

Supplement: SuppDataset_1.zip [file Zfand2b_set_A.pdf › Supplemental Dataset 1/A-mRNA_nonrhyth_translation_nonrhyth/Zfand2b_set_A.pdf]

## Zfand3

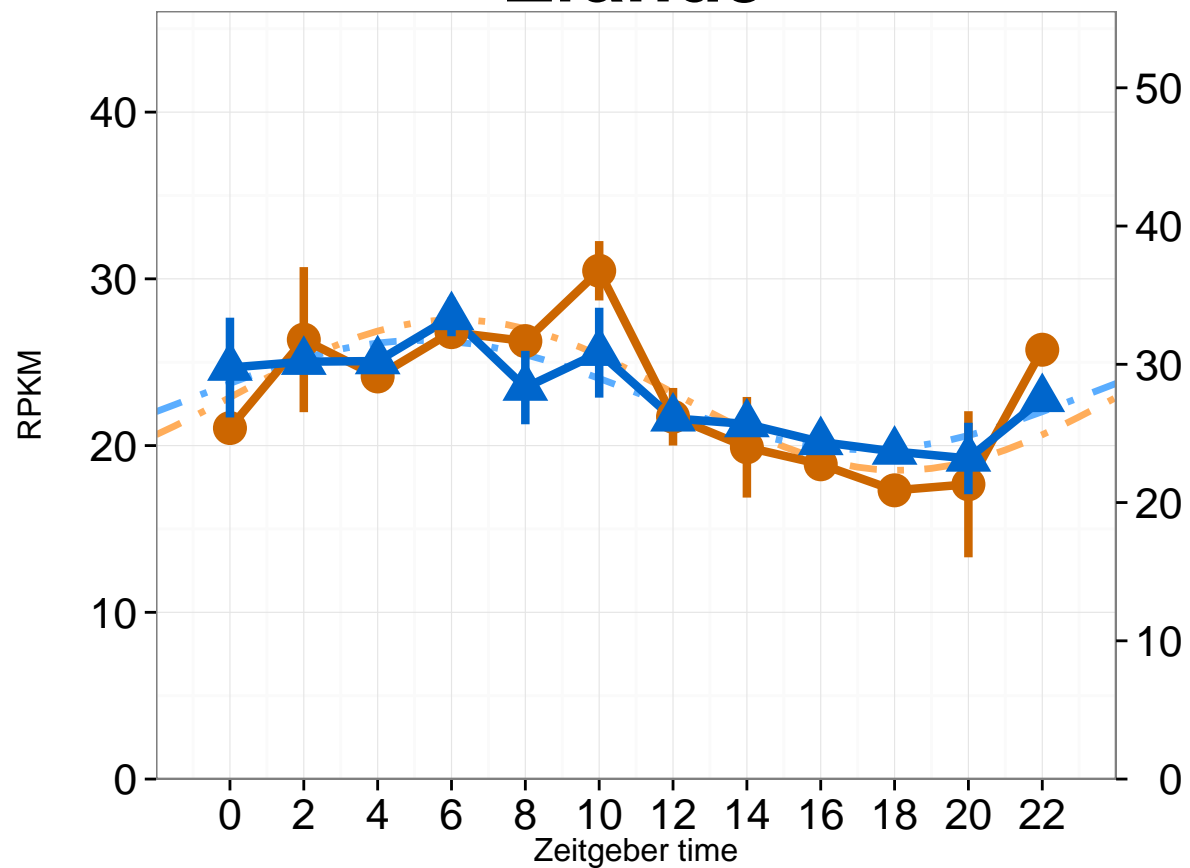

## Zfand3

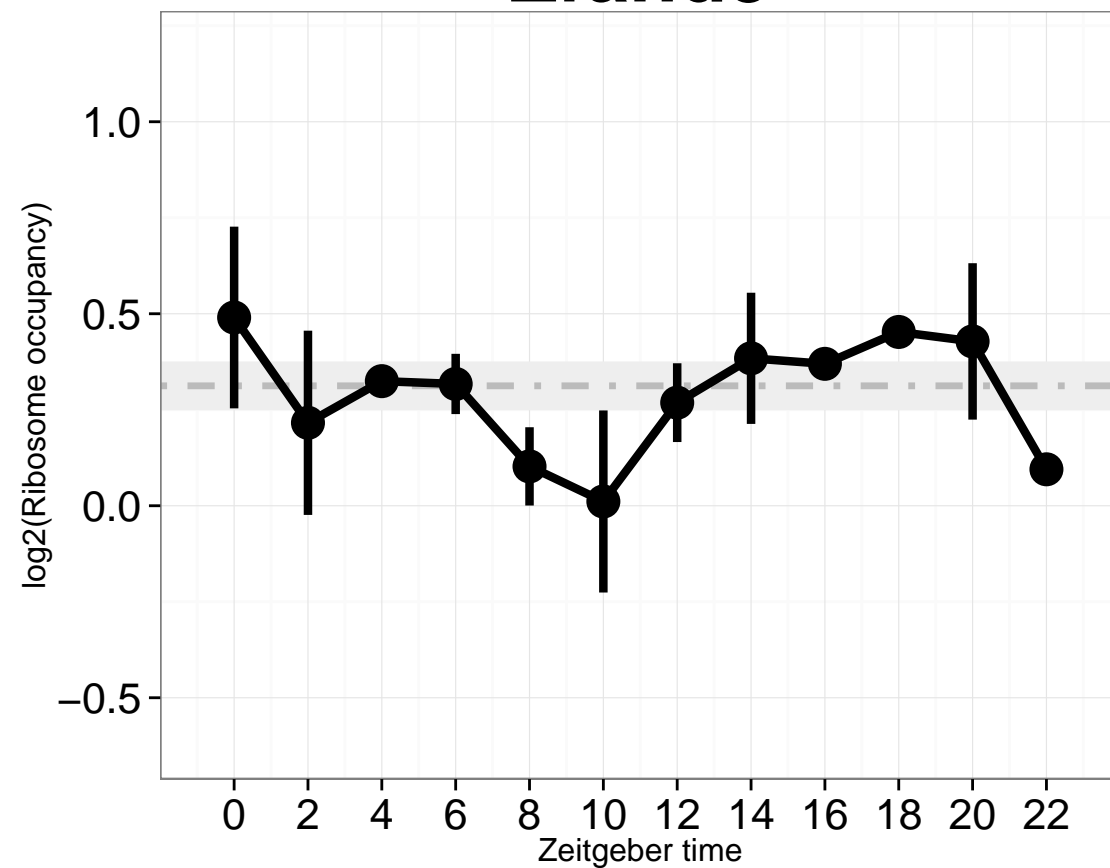

Supplement: SuppDataset_1.zip [file Zfand3_set_A.pdf › Supplemental Dataset 1/A-mRNA_nonrhyth_translation_nonrhyth/Zfand3_set_A.pdf]

## Zfand5

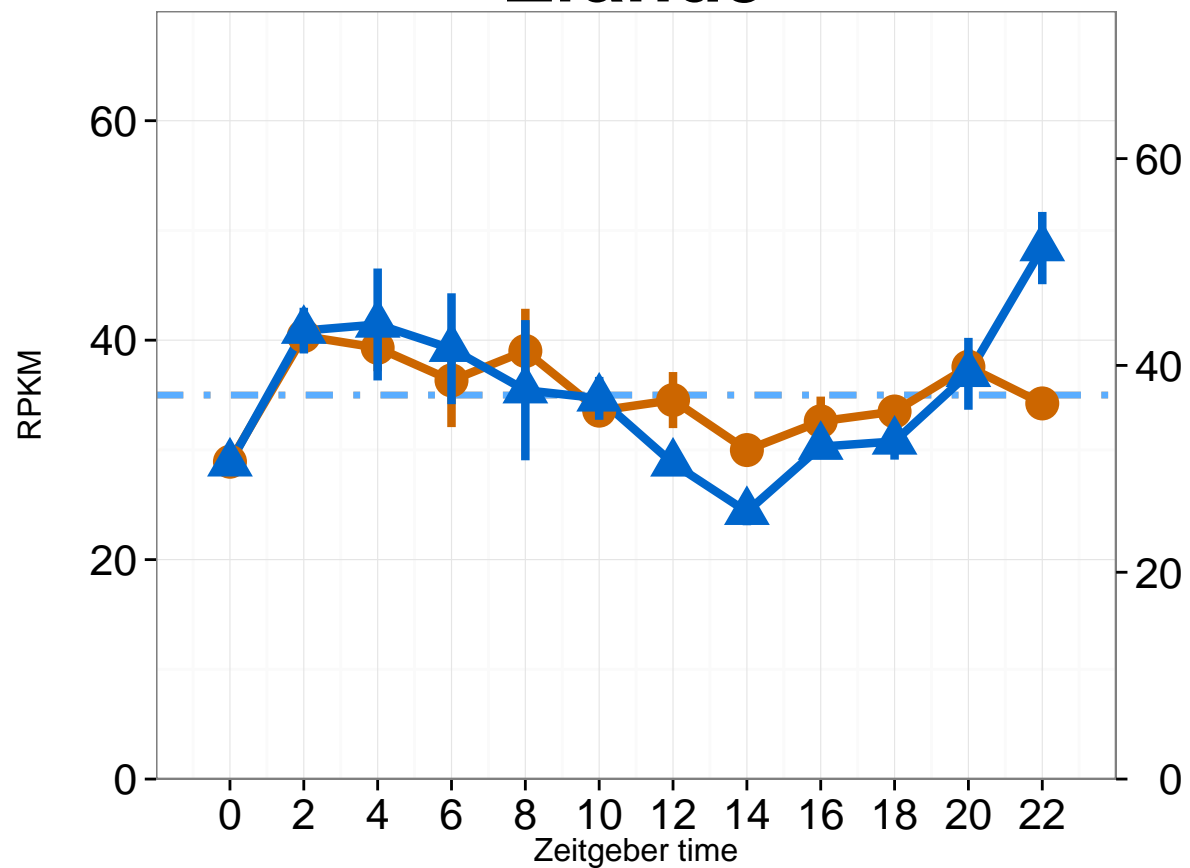

## Zfand5

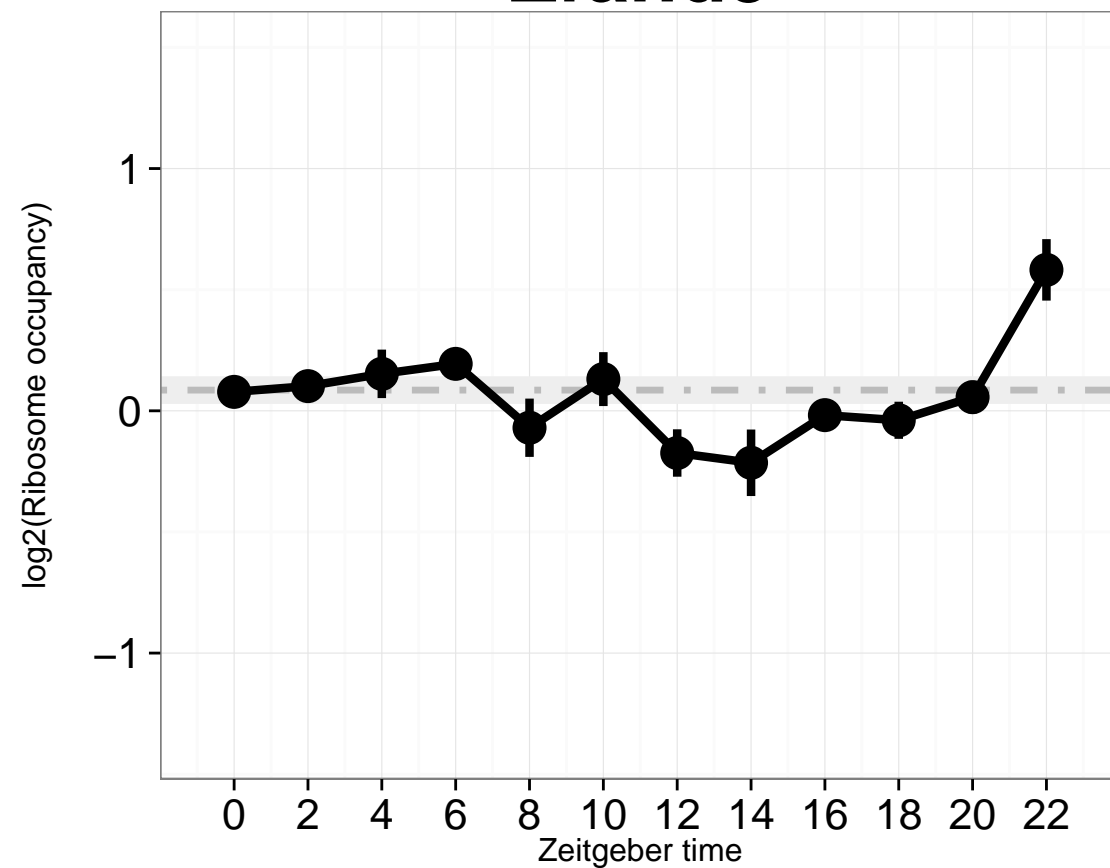

Supplement: SuppDataset_1.zip [file Zfand5_set_A.pdf › Supplemental Dataset 1/A-mRNA_nonrhyth_translation_nonrhyth/Zfand5_set_A.pdf]

# Zfand6

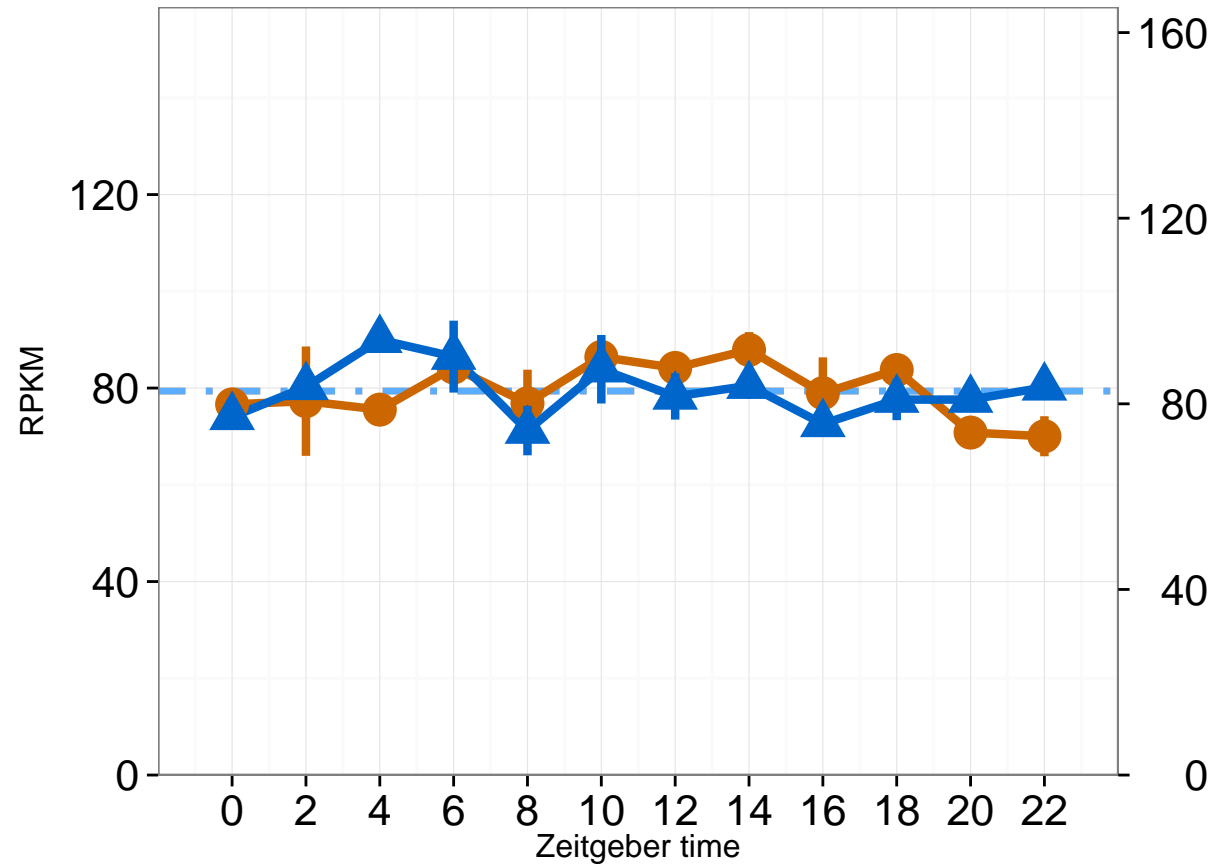

# Zfand6

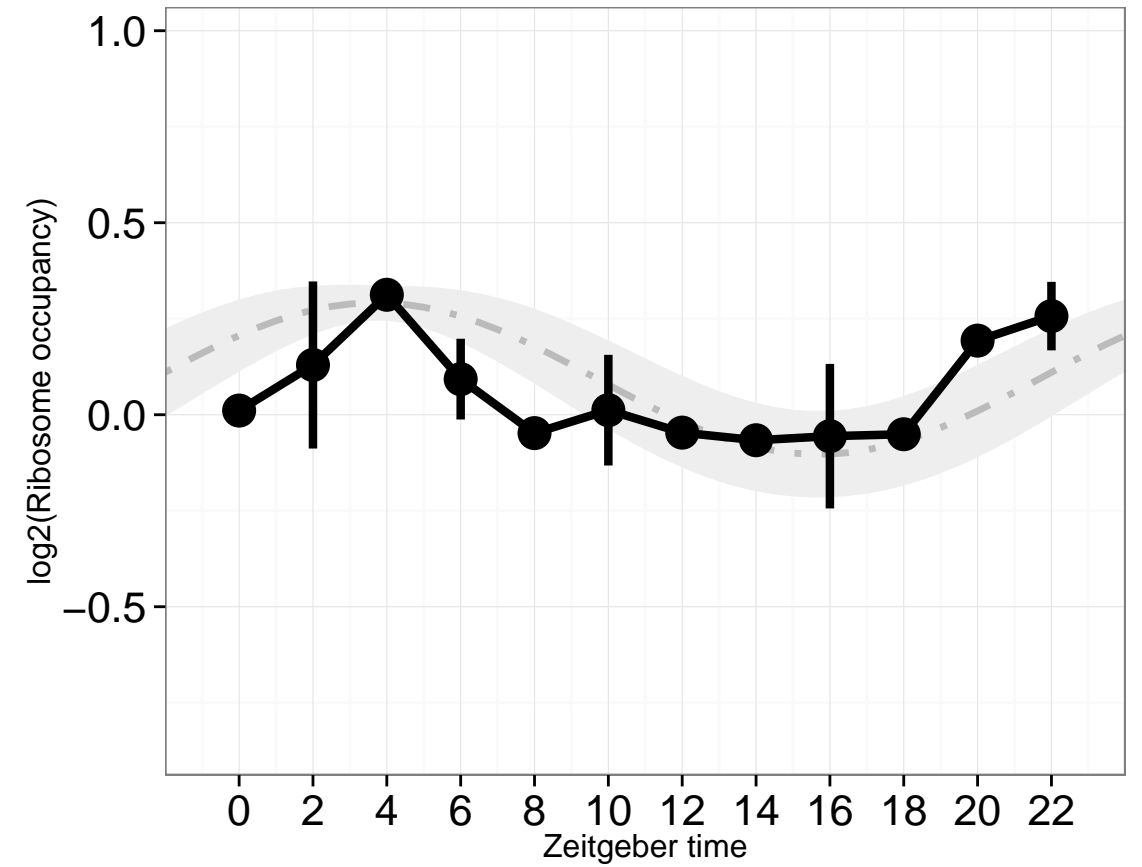

Supplement: SuppDataset_1.zip [file Zfand6_set_A.pdf › Supplemental Dataset 1/A-mRNA_nonrhyth_translation_nonrhyth/Zfand6_set_A.pdf]

# Zfc3h1

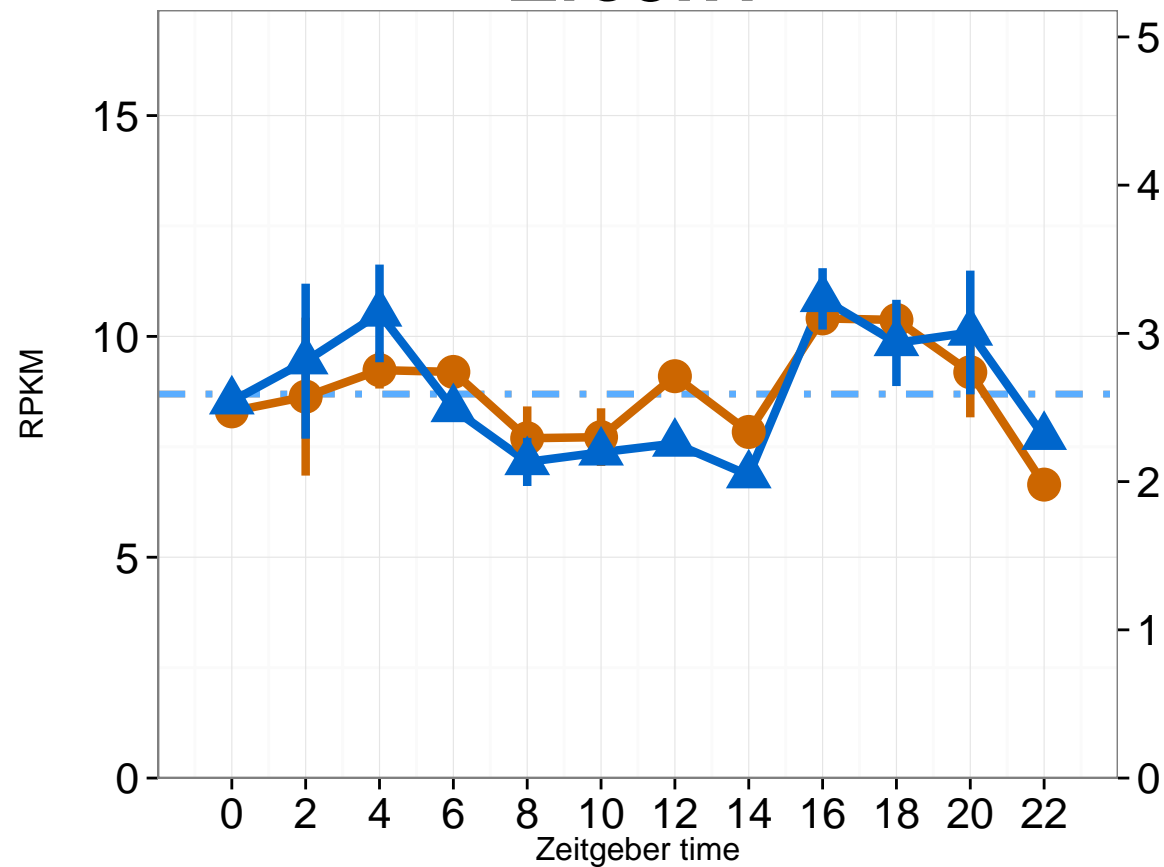

# Zfc3h1

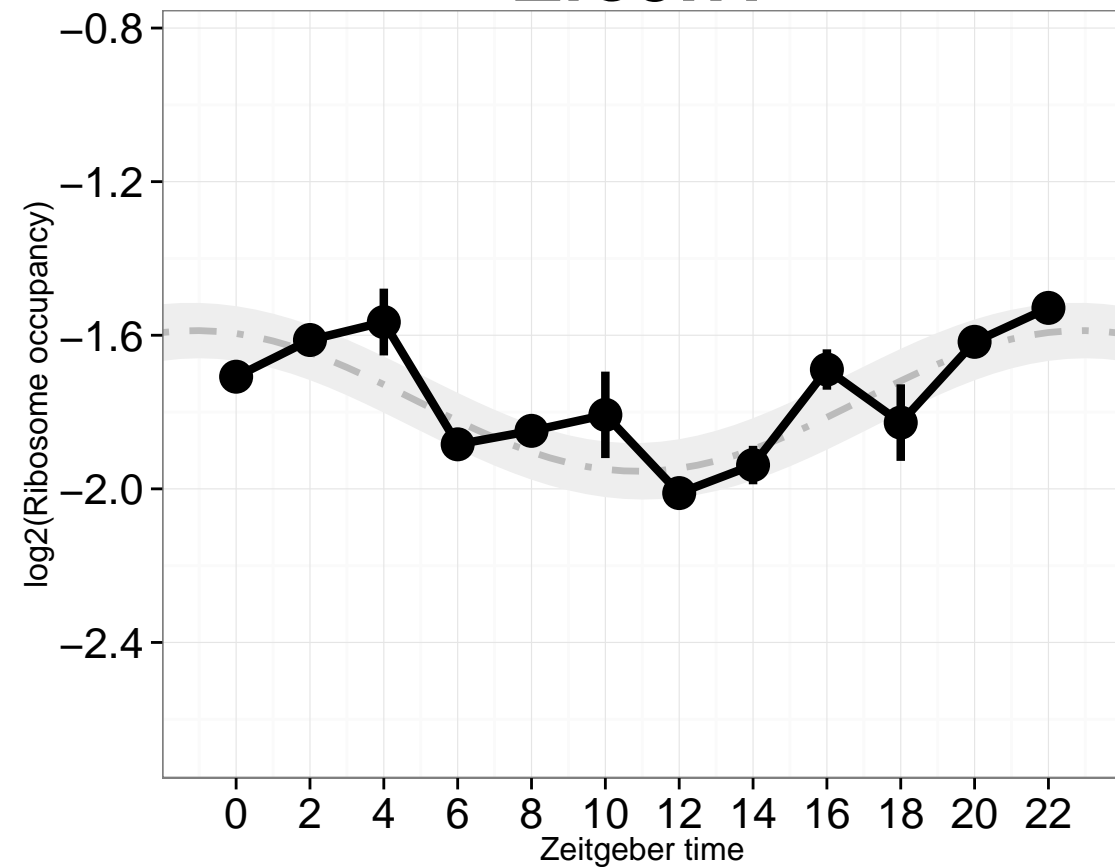

Supplement: SuppDataset_1.zip [file Zfc3h1_set_A.pdf › Supplemental Dataset 1/A-mRNA_nonrhyth_translation_nonrhyth/Zfc3h1_set_A.pdf]

## Zfhx2

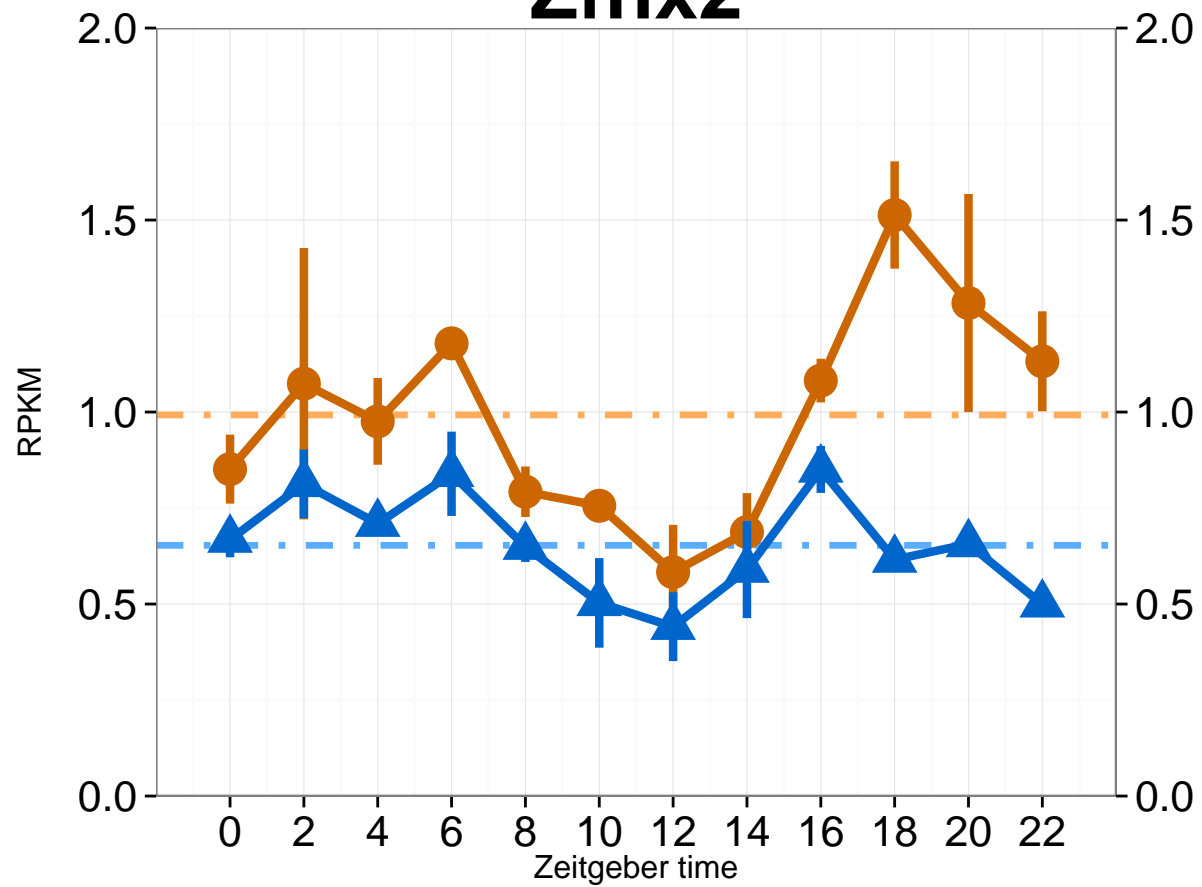

## Zfhx2

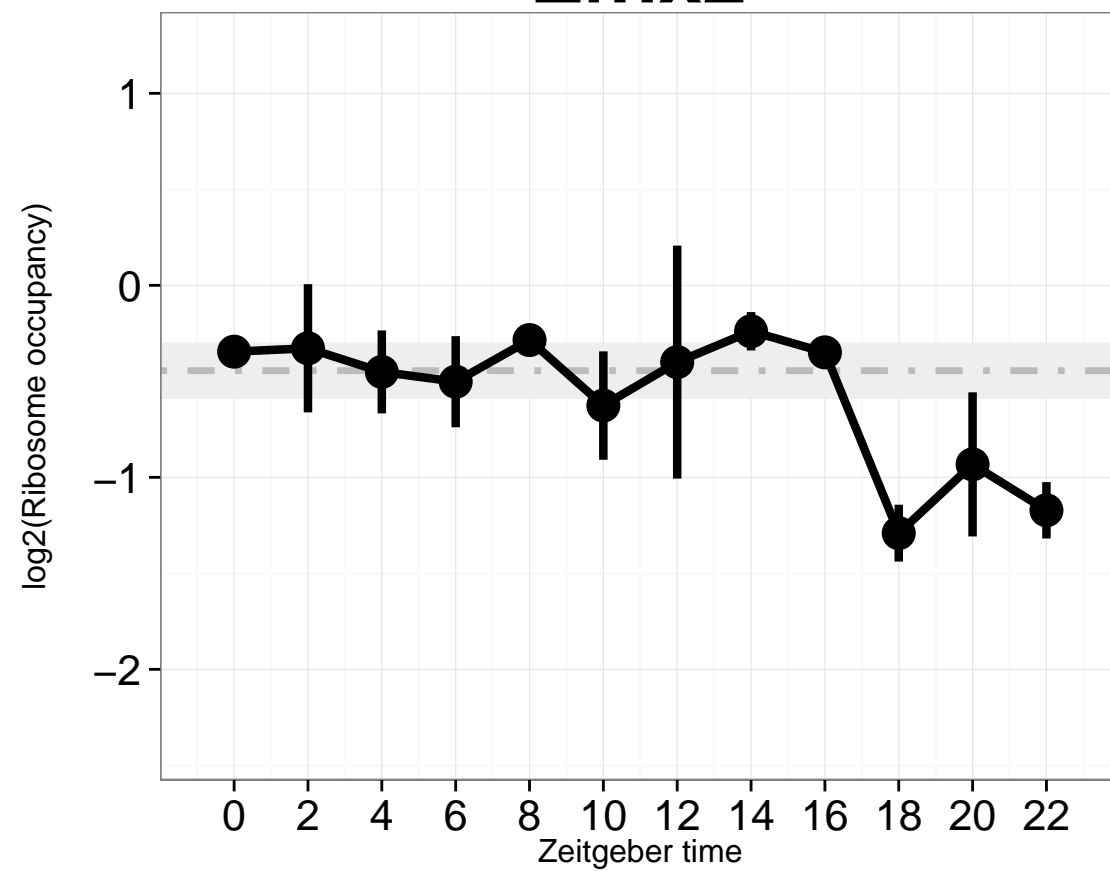

Supplement: SuppDataset_1.zip [file Zfhx2_set_A.pdf › Supplemental Dataset 1/A-mRNA_nonrhyth_translation_nonrhyth/Zfhx2_set_A.pdf]

## Zfhx3

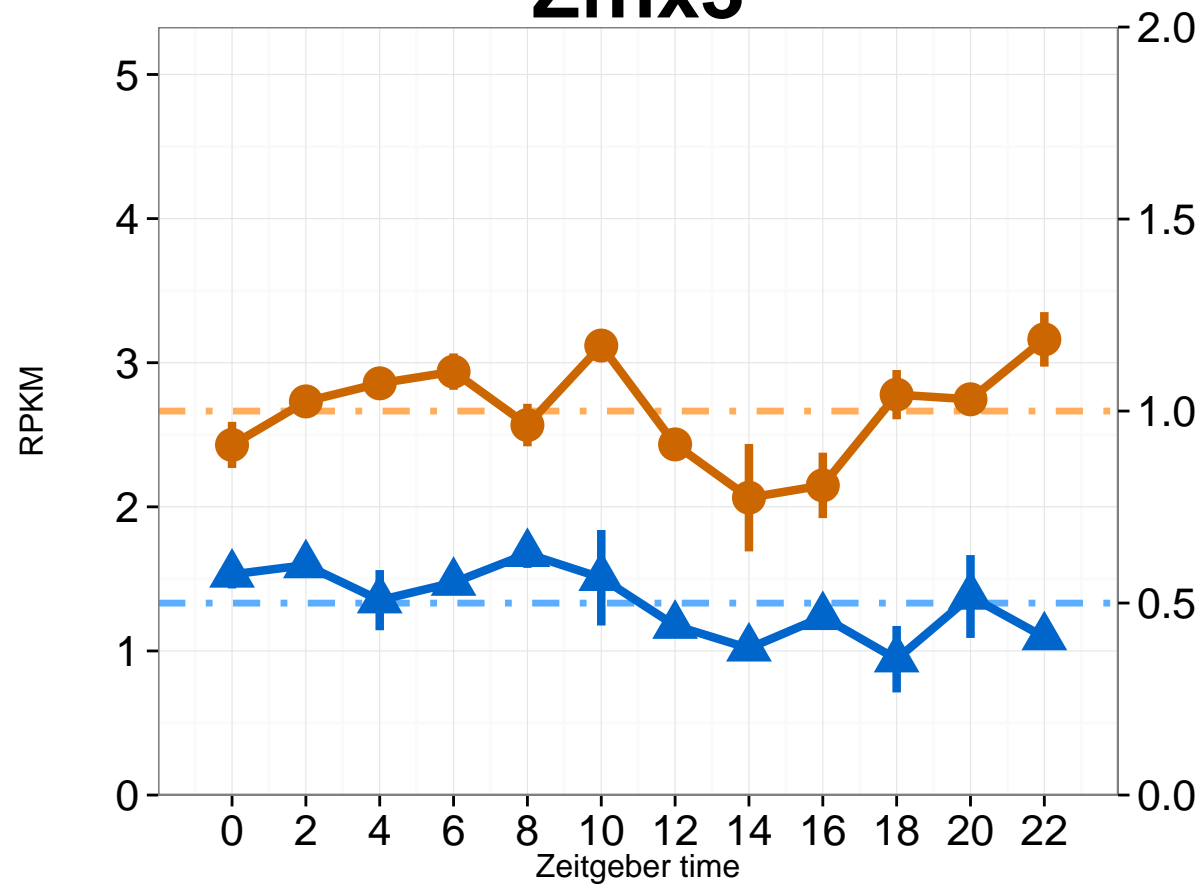

## Zfhx3

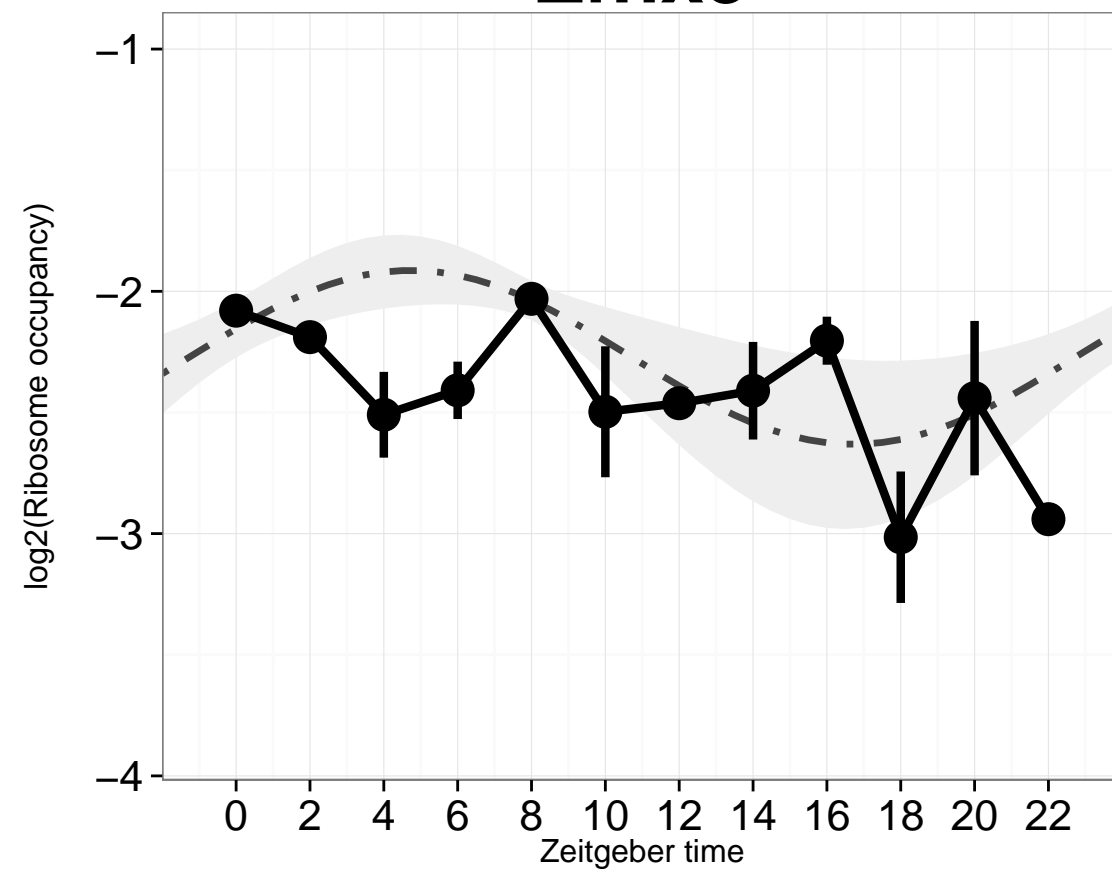

Supplement: SuppDataset_1.zip [file Zfhx3_set_A.pdf › Supplemental Dataset 1/A-mRNA_nonrhyth_translation_nonrhyth/Zfhx3_set_A.pdf]

## Zfhx4

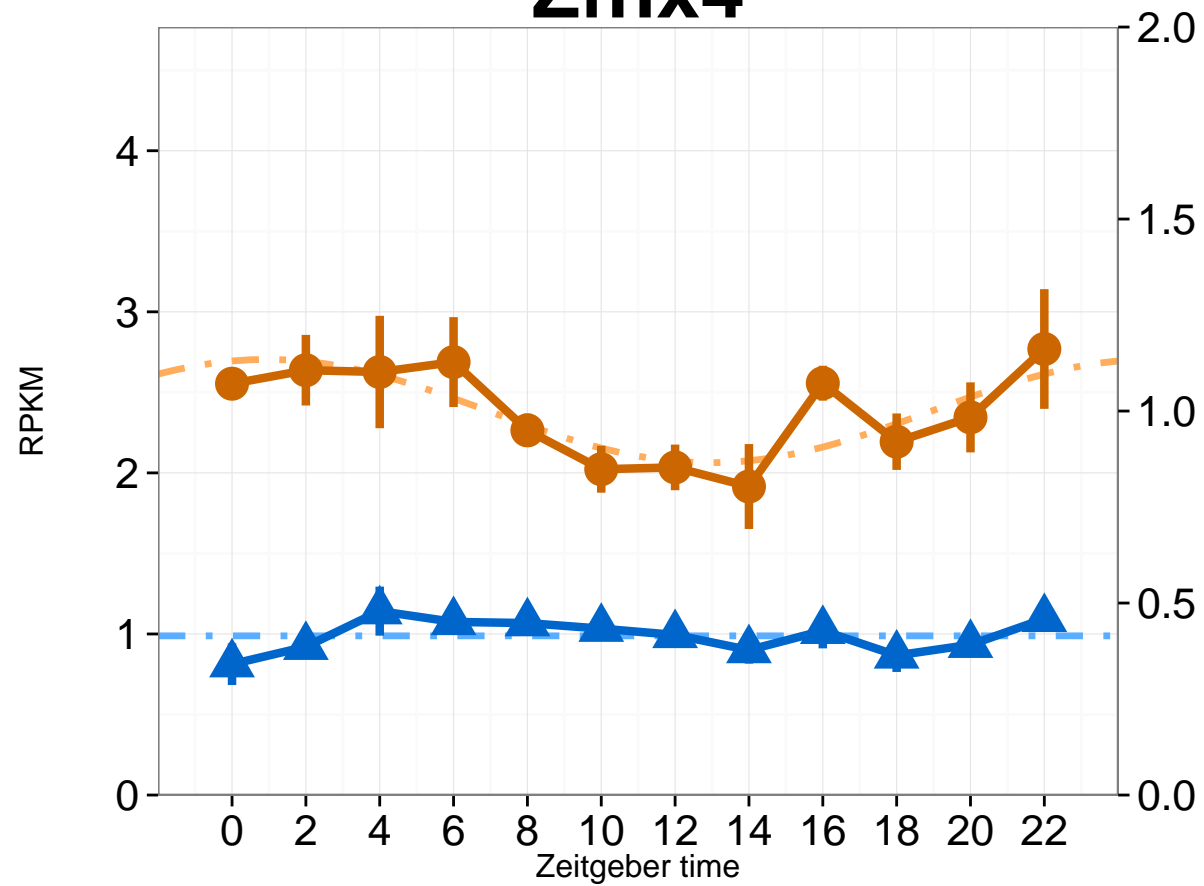

## Zfhx4

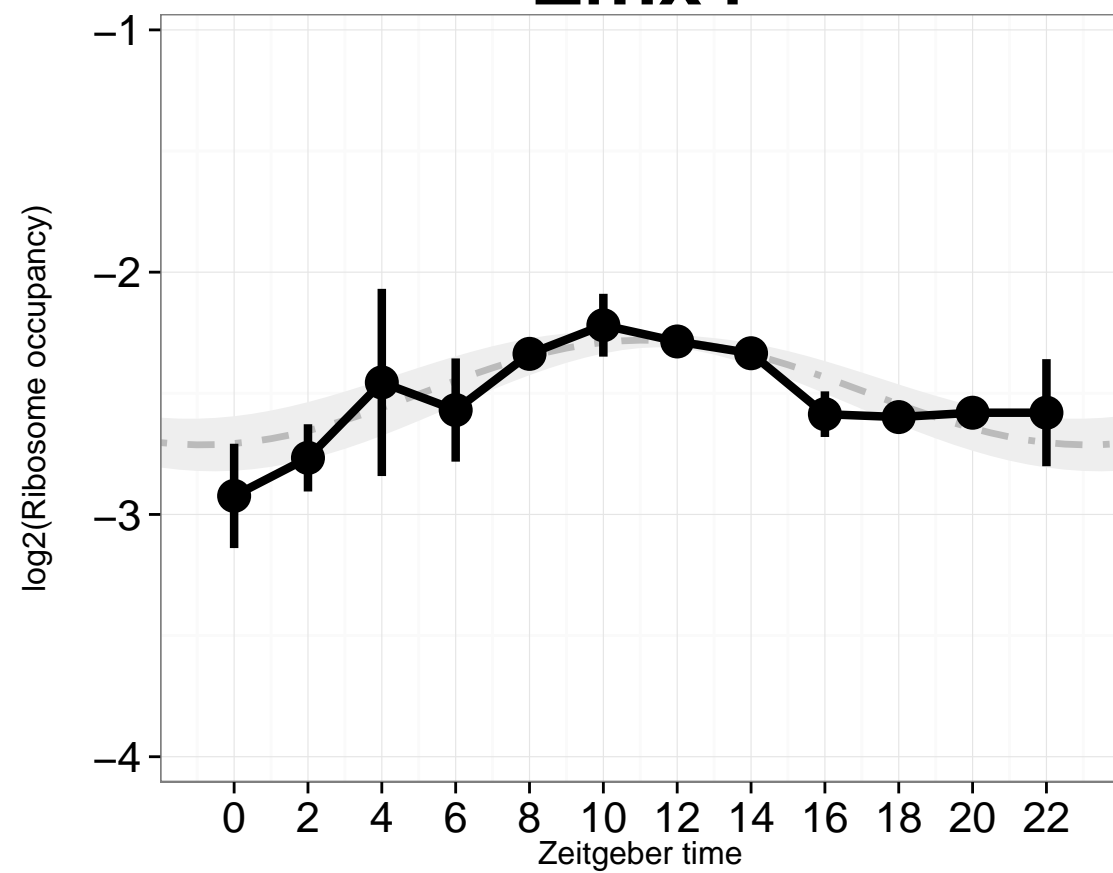

Supplement: SuppDataset_1.zip [file Zfhx4_set_A.pdf › Supplemental Dataset 1/A-mRNA_nonrhyth_translation_nonrhyth/Zfhx4_set_A.pdf]

## Zfml

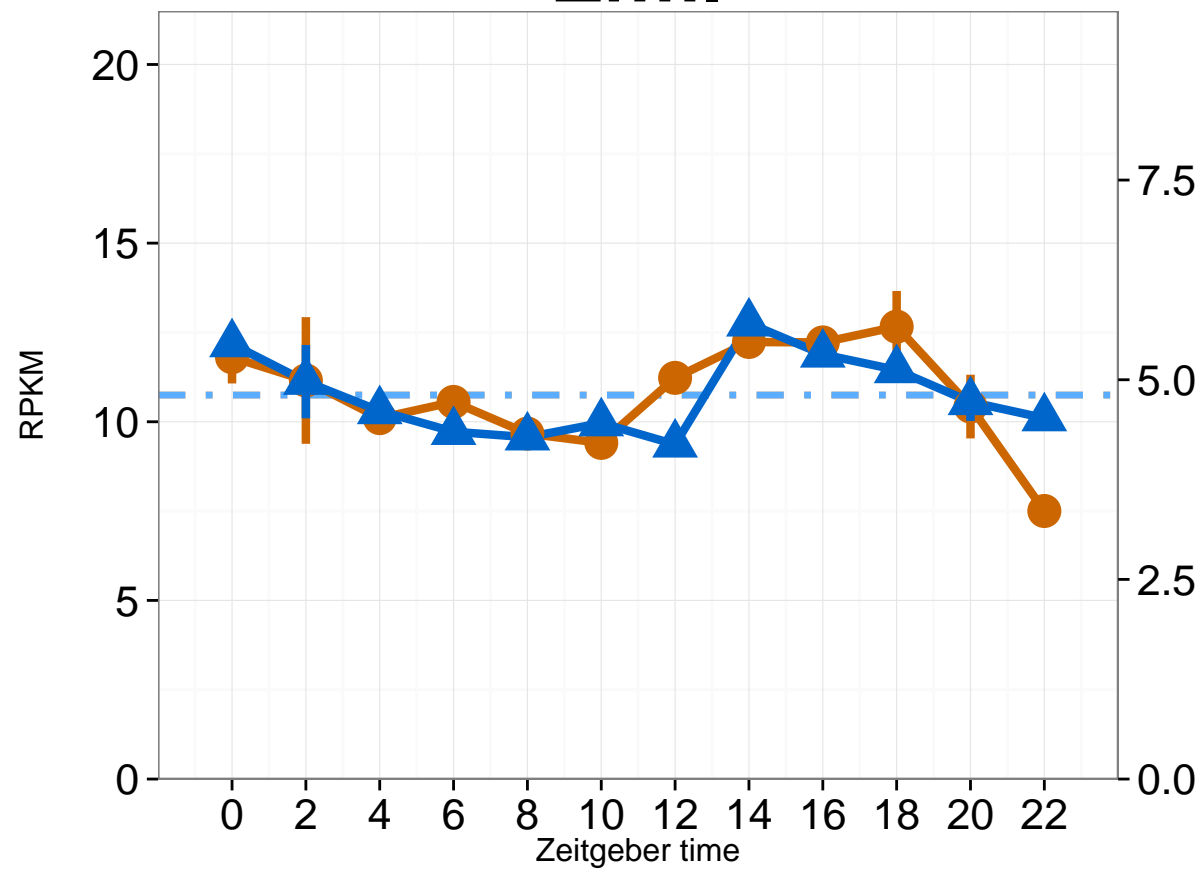

## Zfml

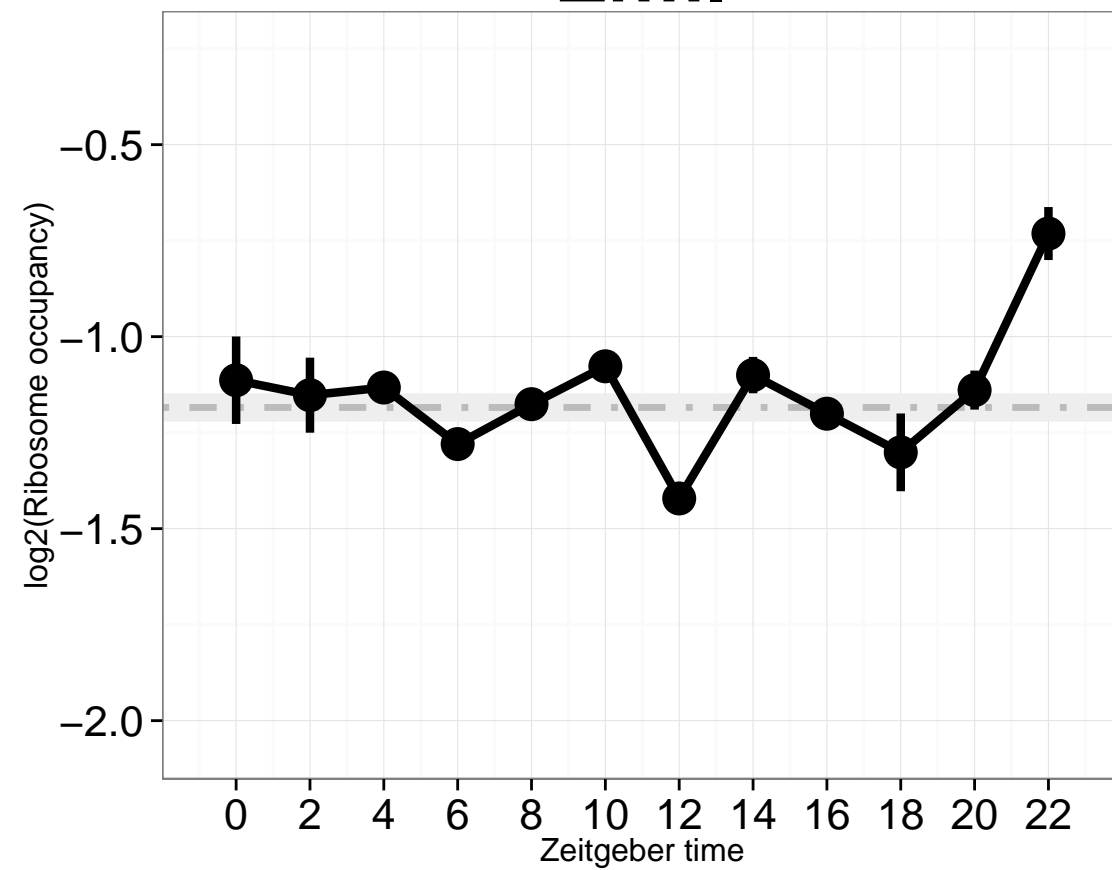

Supplement: SuppDataset_1.zip [file Zfml_set_A.pdf › Supplemental Dataset 1/A-mRNA_nonrhyth_translation_nonrhyth/Zfml_set_A.pdf]

## Zfp105

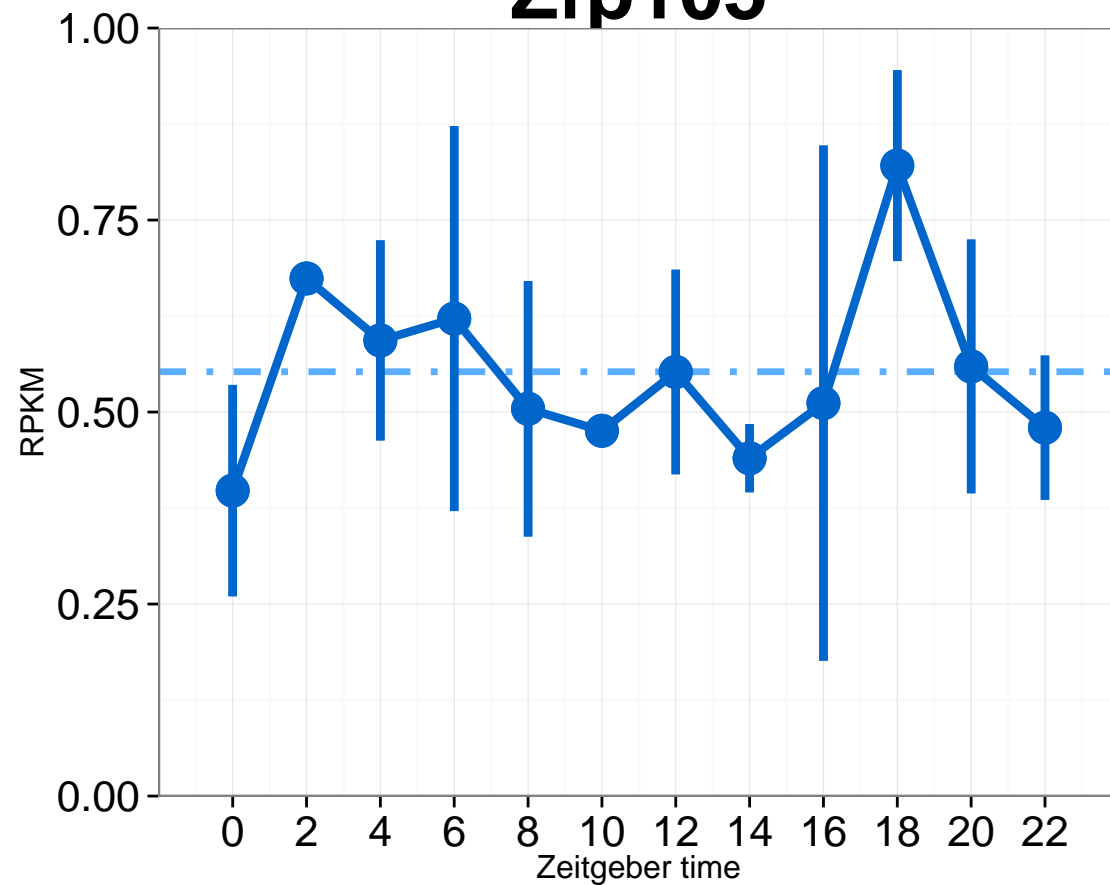

## Zfp105 log2(Ribosome occupancy

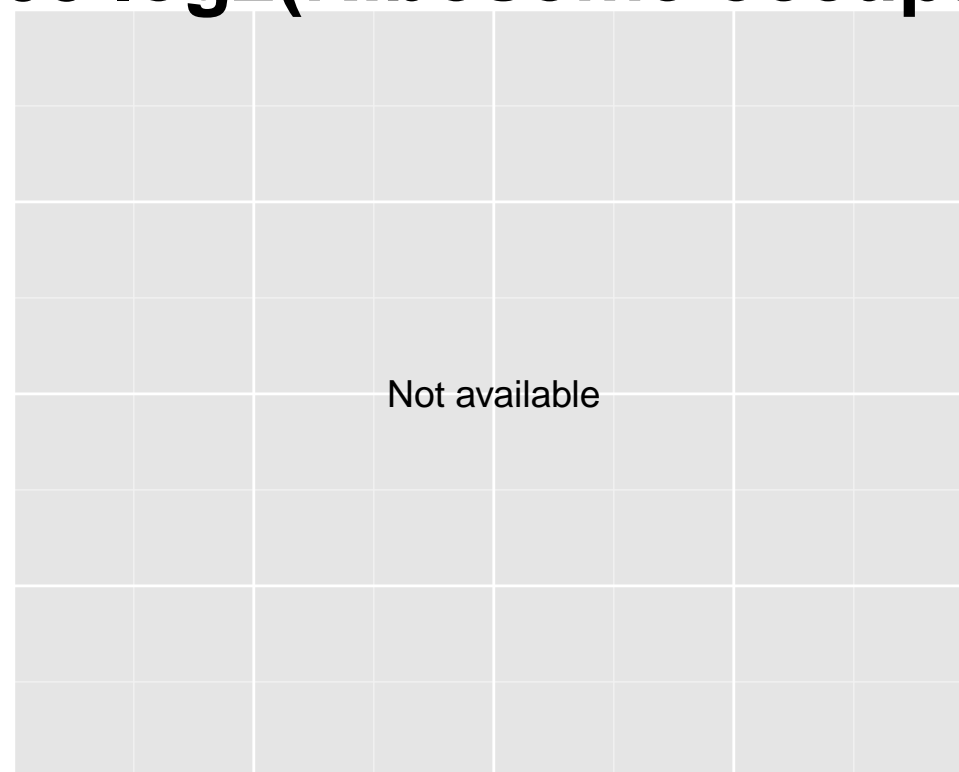

Supplement: SuppDataset_1.zip [file Zfp105_set_A.pdf › Supplemental Dataset 1/A-mRNA_nonrhyth_translation_nonrhyth/Zfp105_set_A.pdf]

# Zfp106

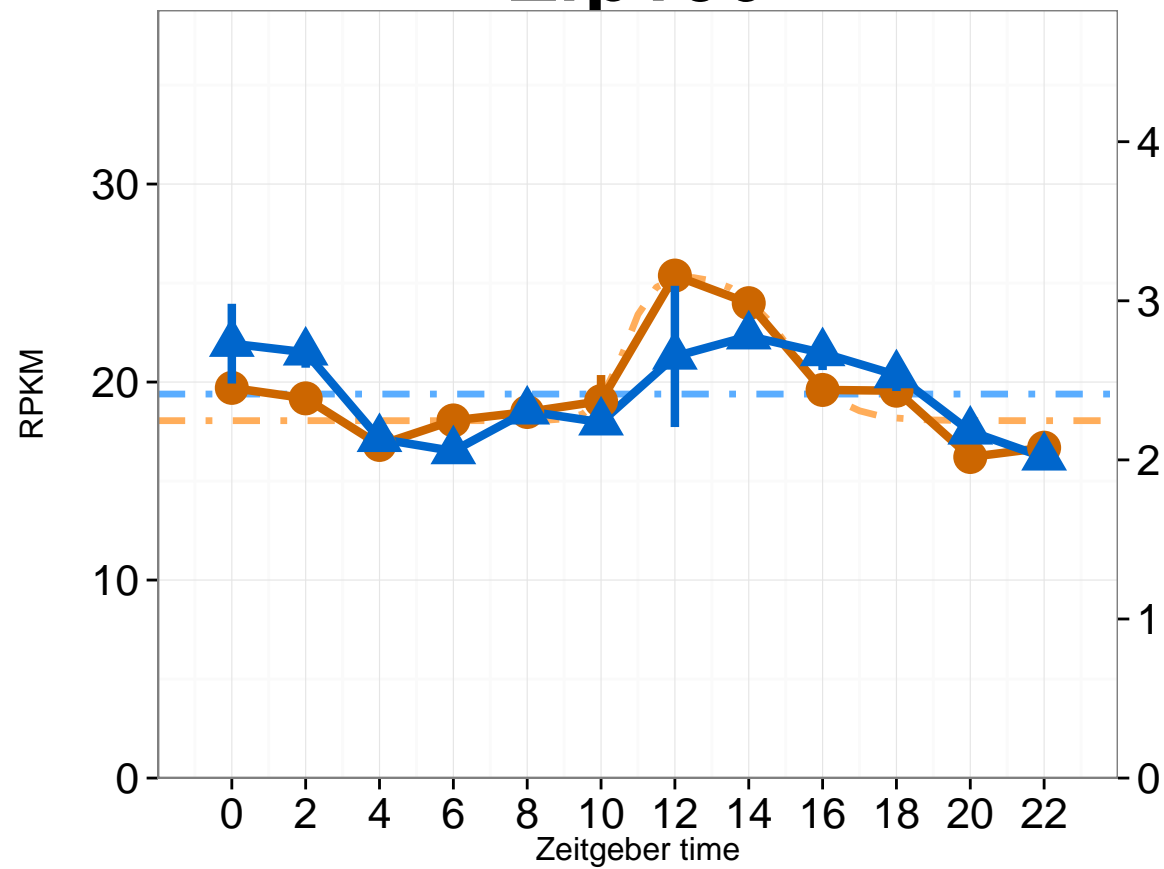

# Zfp106

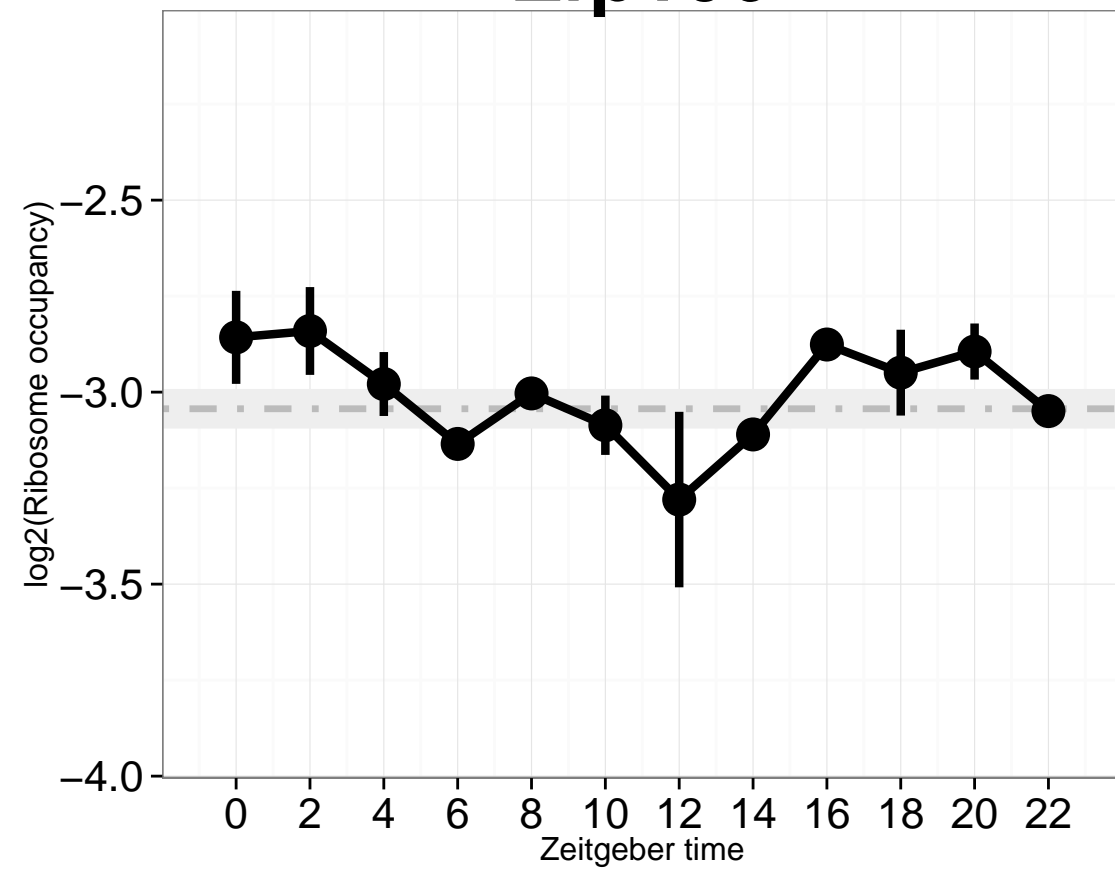

Supplement: SuppDataset_1.zip [file Zfp106_set_A.pdf › Supplemental Dataset 1/A-mRNA_nonrhyth_translation_nonrhyth/Zfp106_set_A.pdf]

# Zfp108

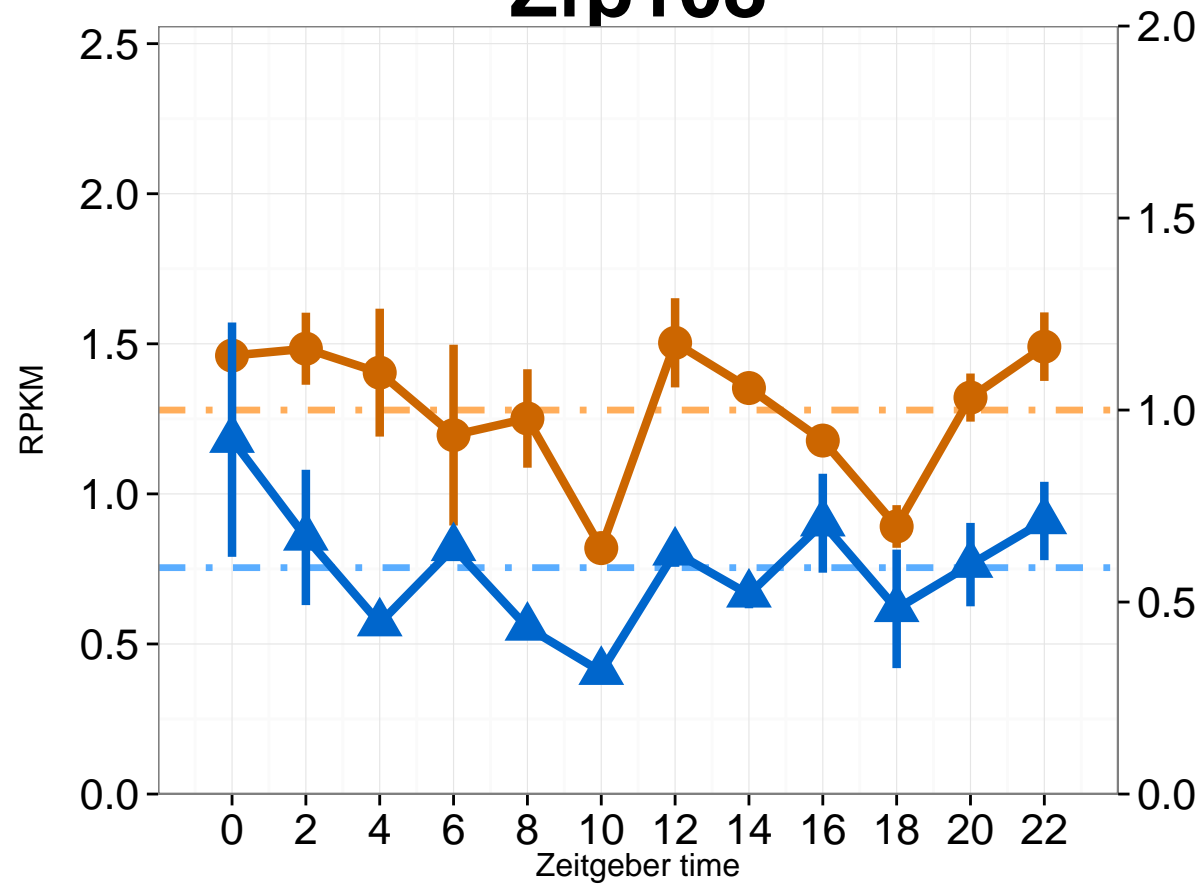

# Zfp108

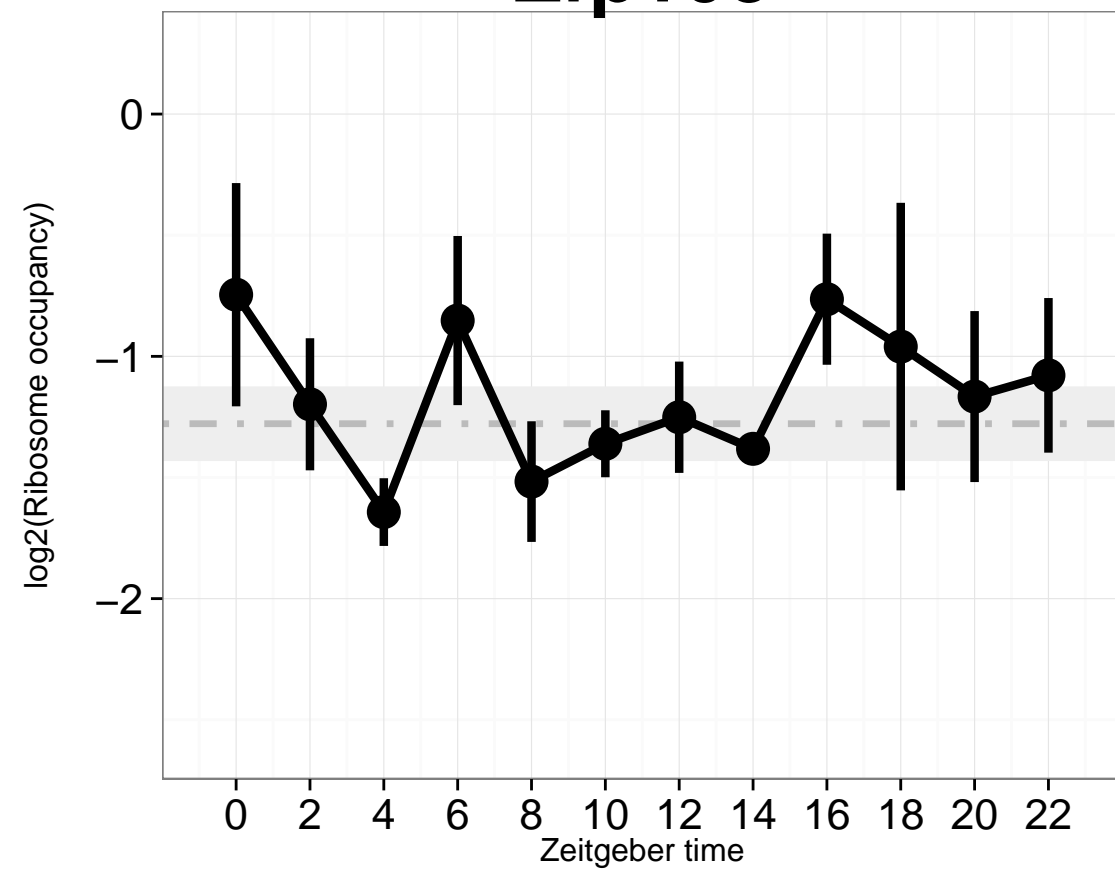

Supplement: SuppDataset_1.zip [file Zfp108_set_A.pdf › Supplemental Dataset 1/A-mRNA_nonrhyth_translation_nonrhyth/Zfp108_set_A.pdf]

# Zfp110

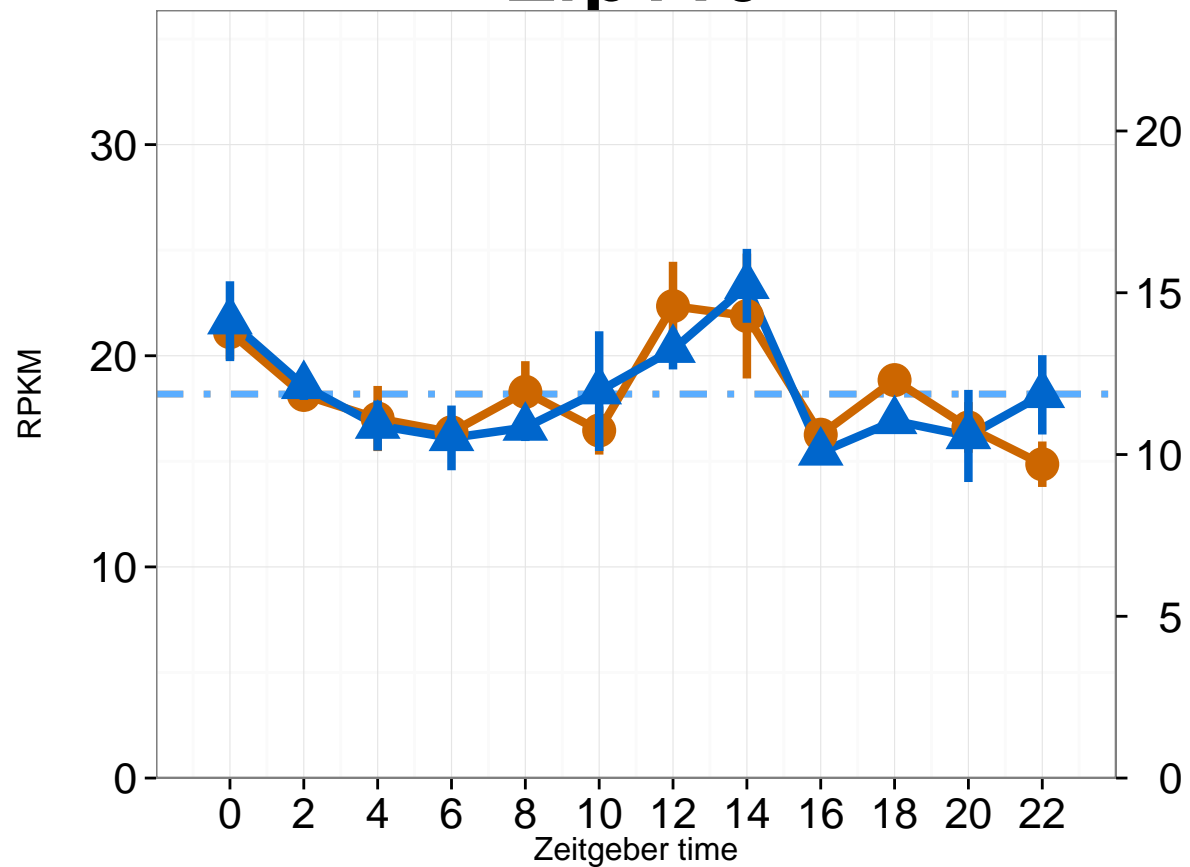

# Zfp110

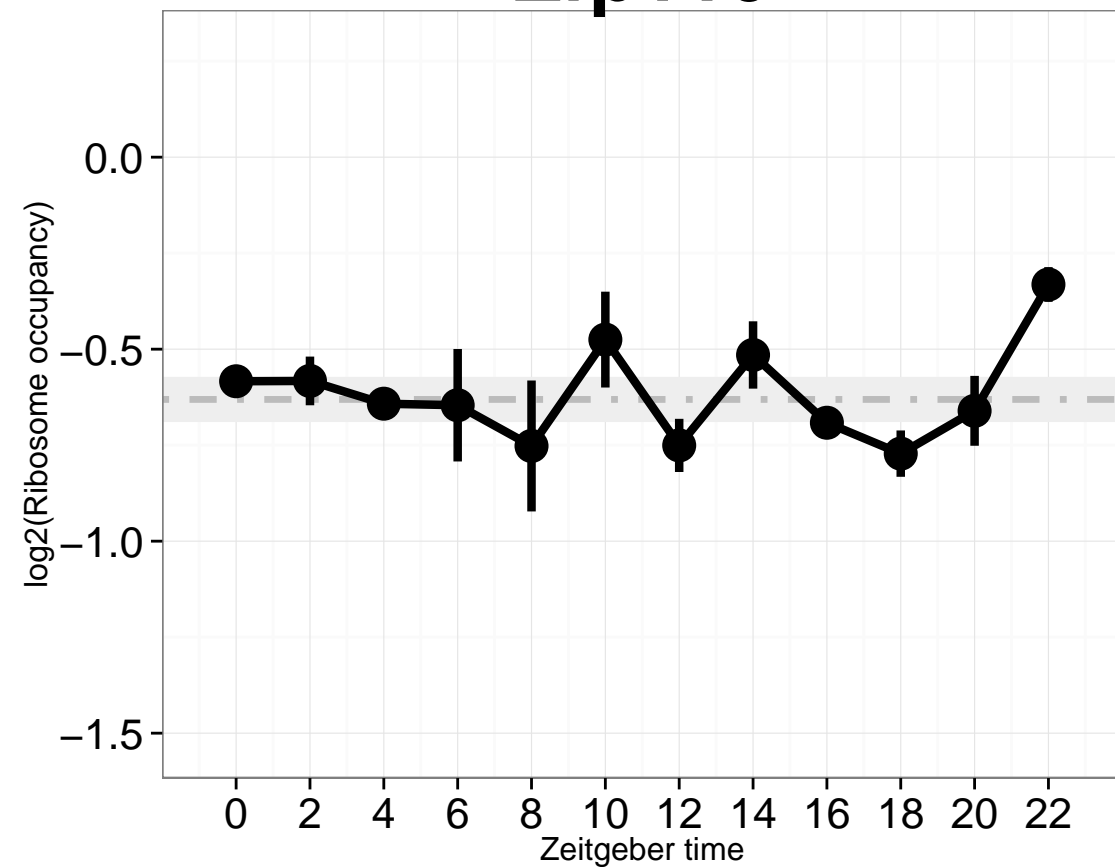

Supplement: SuppDataset_1.zip [file Zfp110_set_A.pdf › Supplemental Dataset 1/A-mRNA_nonrhyth_translation_nonrhyth/Zfp110_set_A.pdf]

# Zfp111

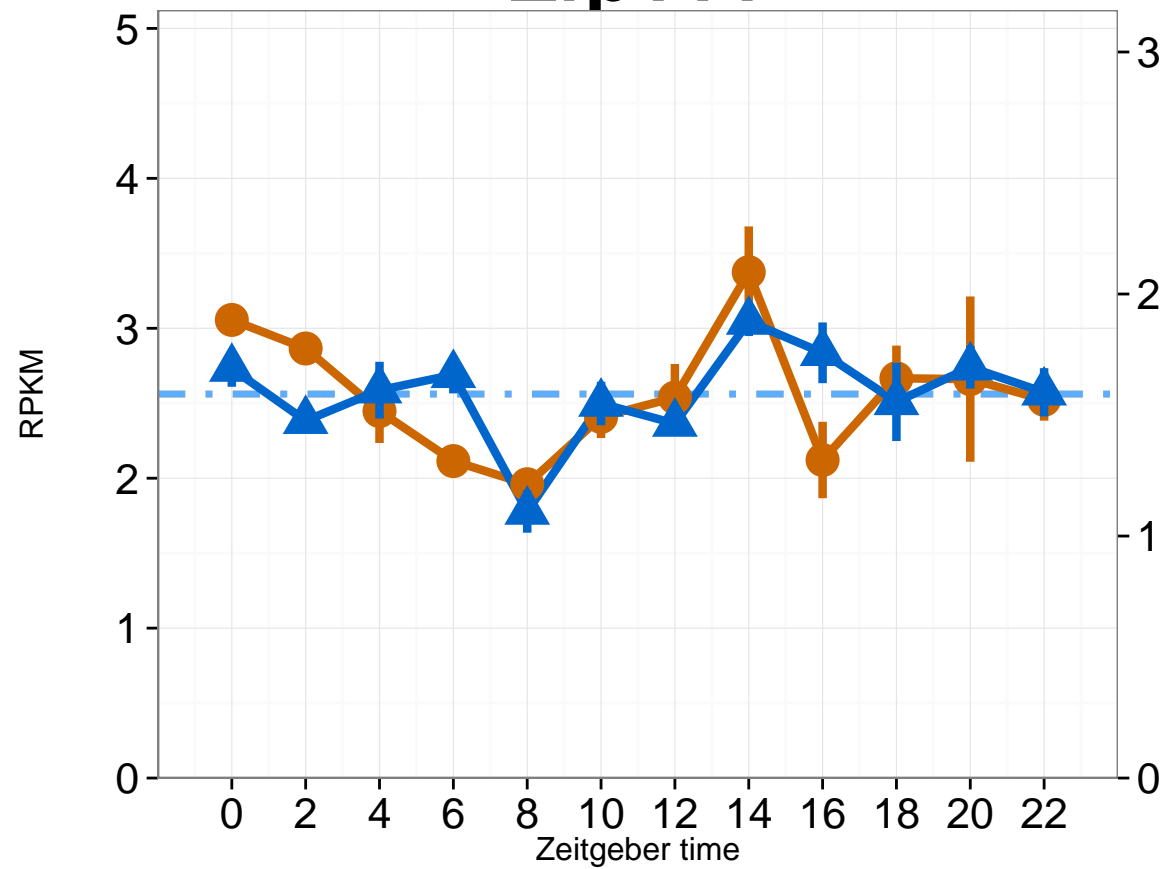

# Zfp111

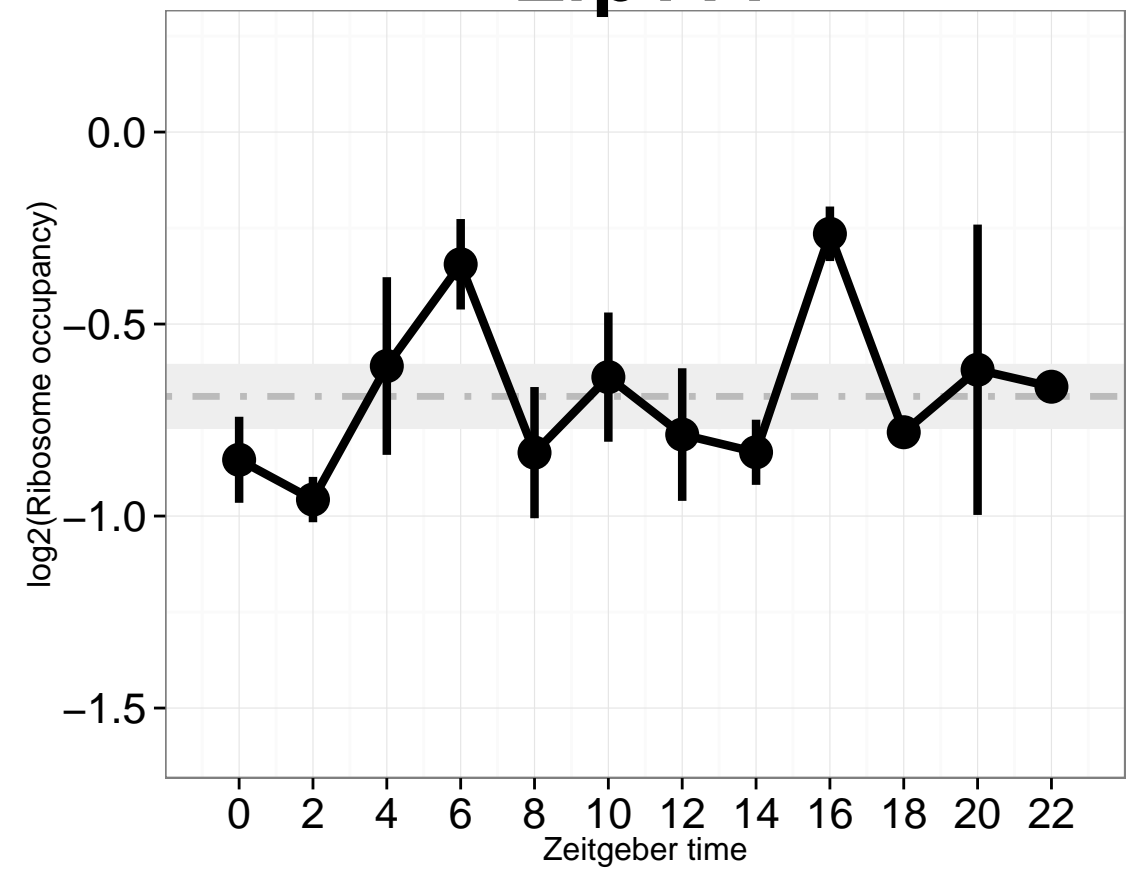

Supplement: SuppDataset_1.zip [file Zfp111_set_A.pdf › Supplemental Dataset 1/A-mRNA_nonrhyth_translation_nonrhyth/Zfp111_set_A.pdf]

## Zfp112

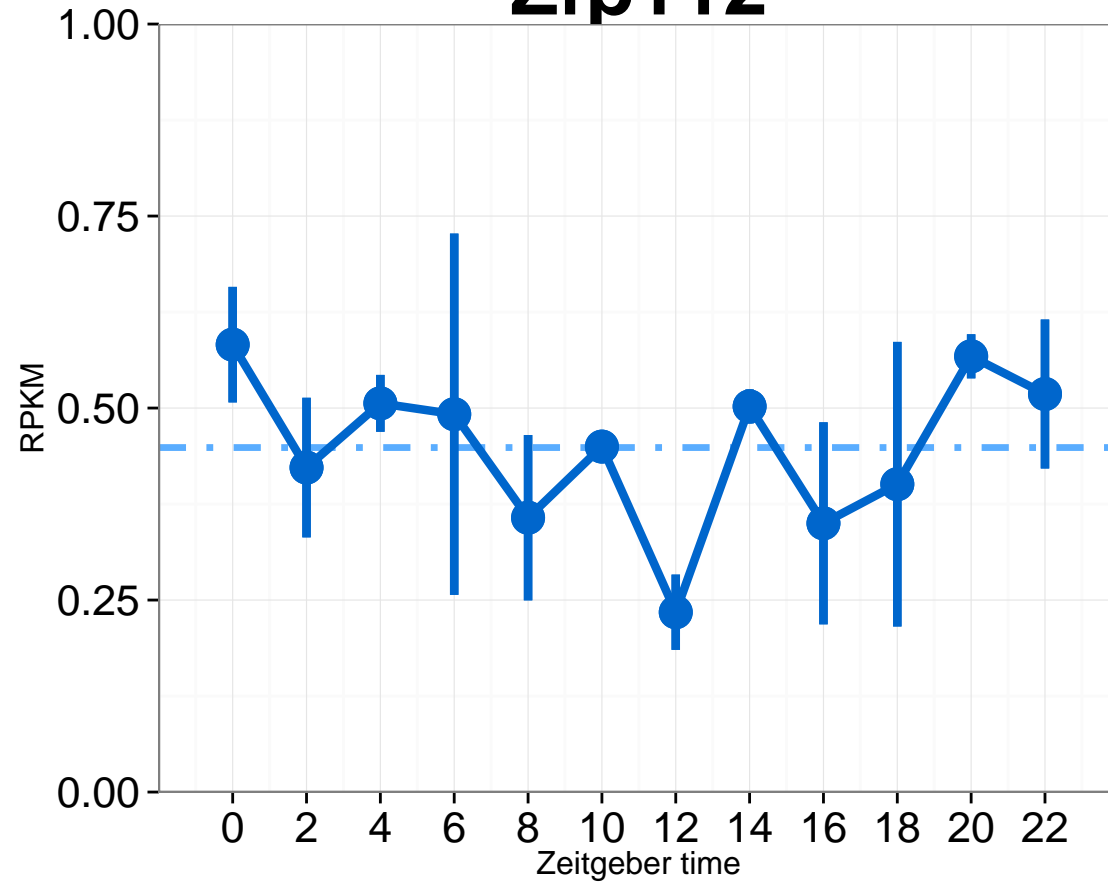

## Zfp112 log2(Ribosome occupancy

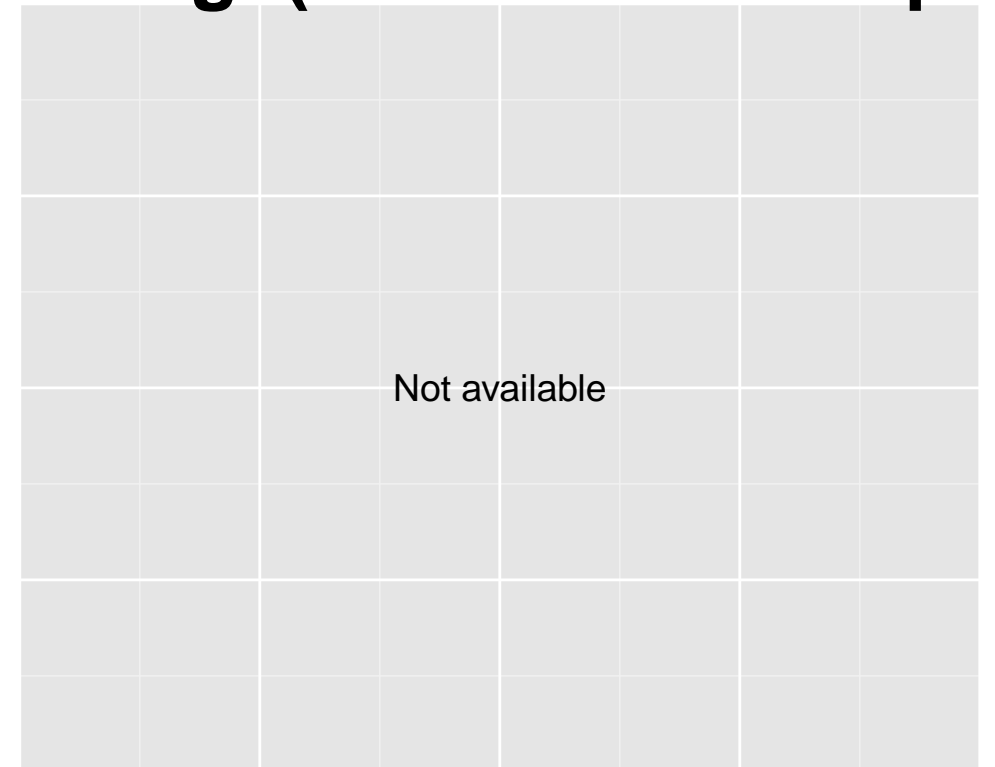

Supplement: SuppDataset_1.zip [file Zfp112_set_A.pdf › Supplemental Dataset 1/A-mRNA_nonrhyth_translation_nonrhyth/Zfp112_set_A.pdf]

# Zfp113

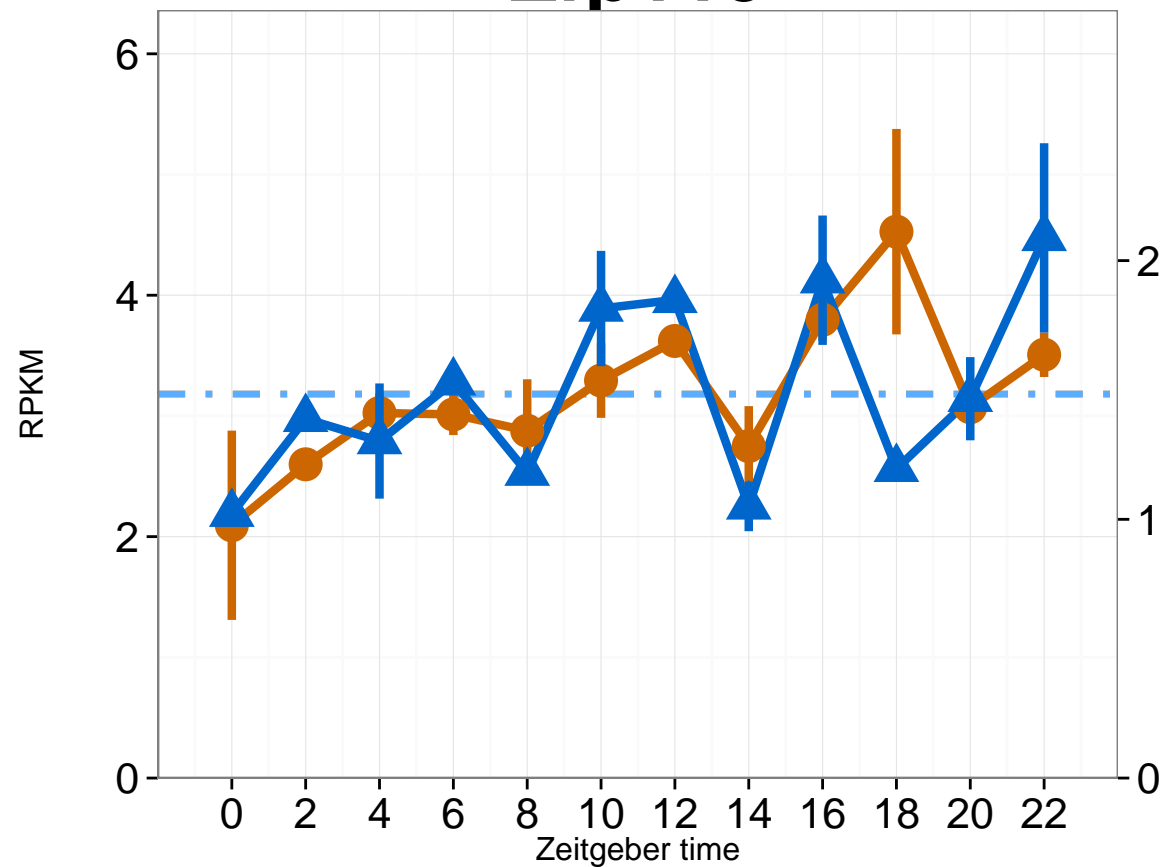

# Zfp113

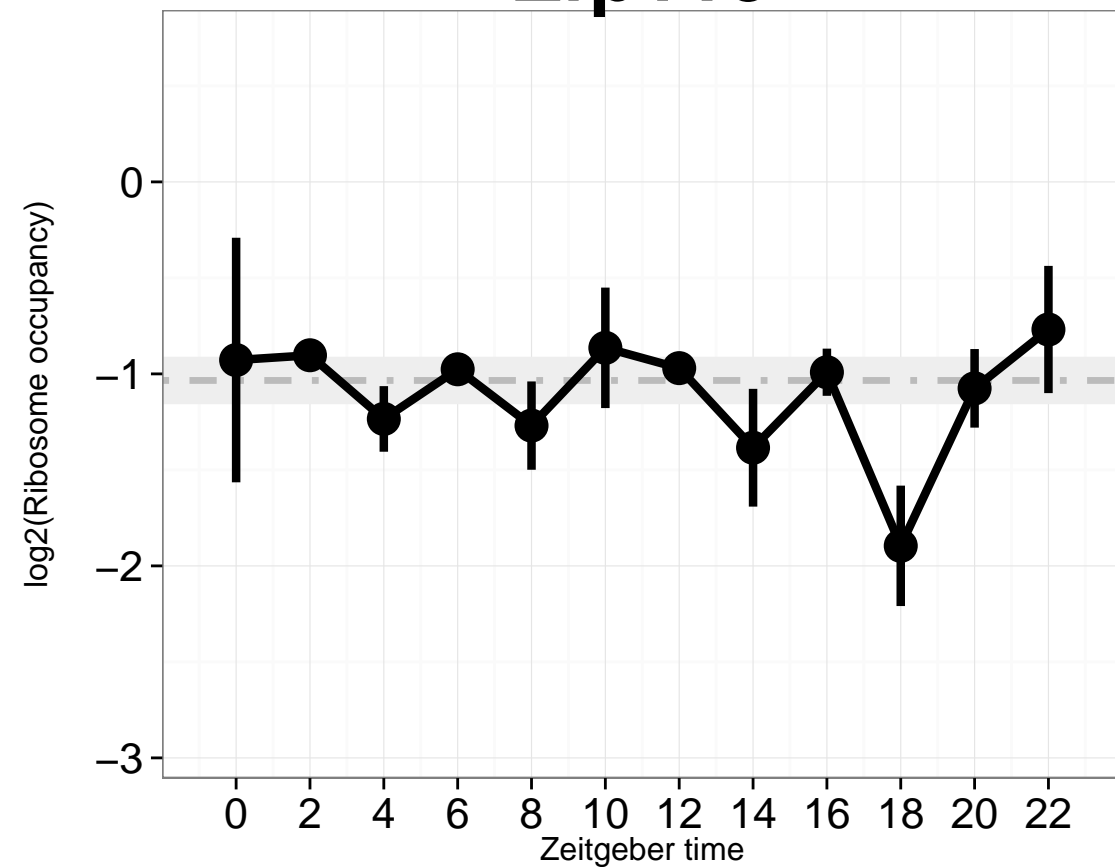

Supplement: SuppDataset_1.zip [file Zfp113_set_A.pdf › Supplemental Dataset 1/A-mRNA_nonrhyth_translation_nonrhyth/Zfp113_set_A.pdf]

# Zfp119a

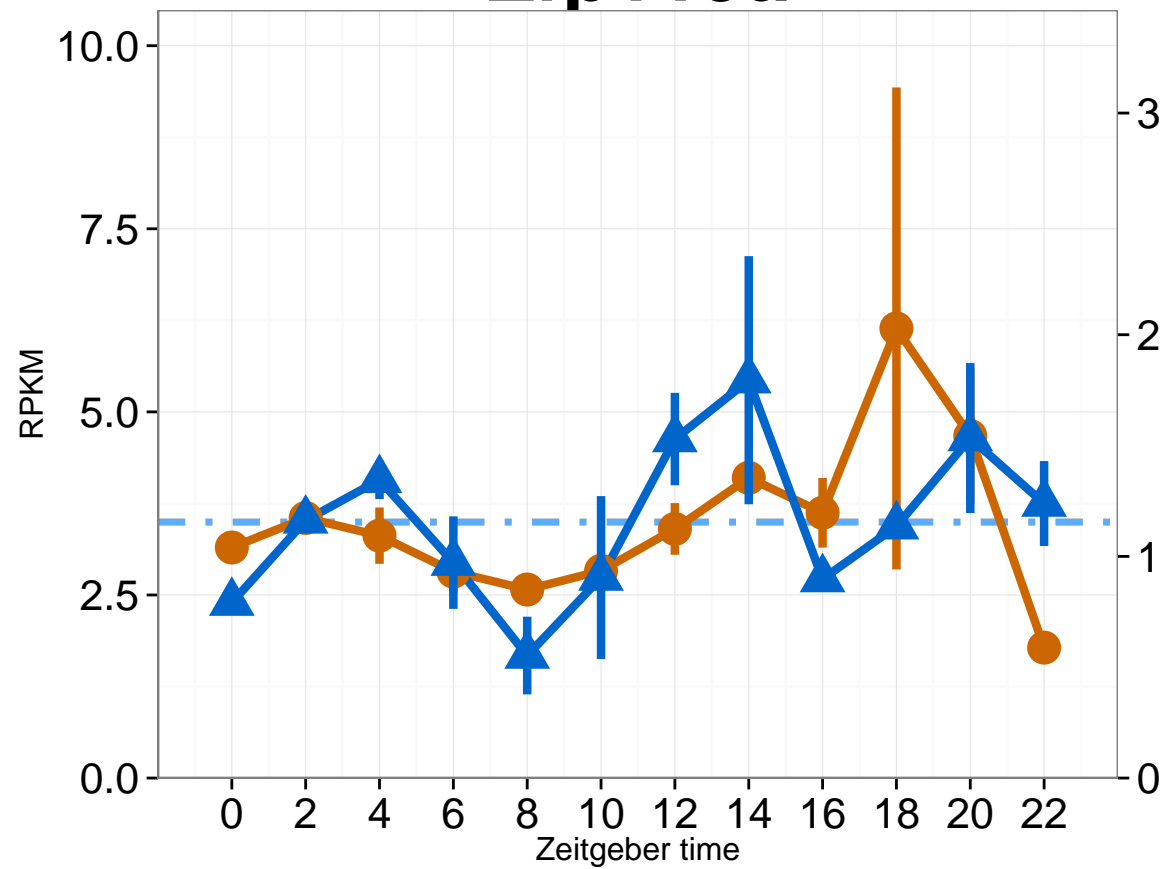

# Zfp119a

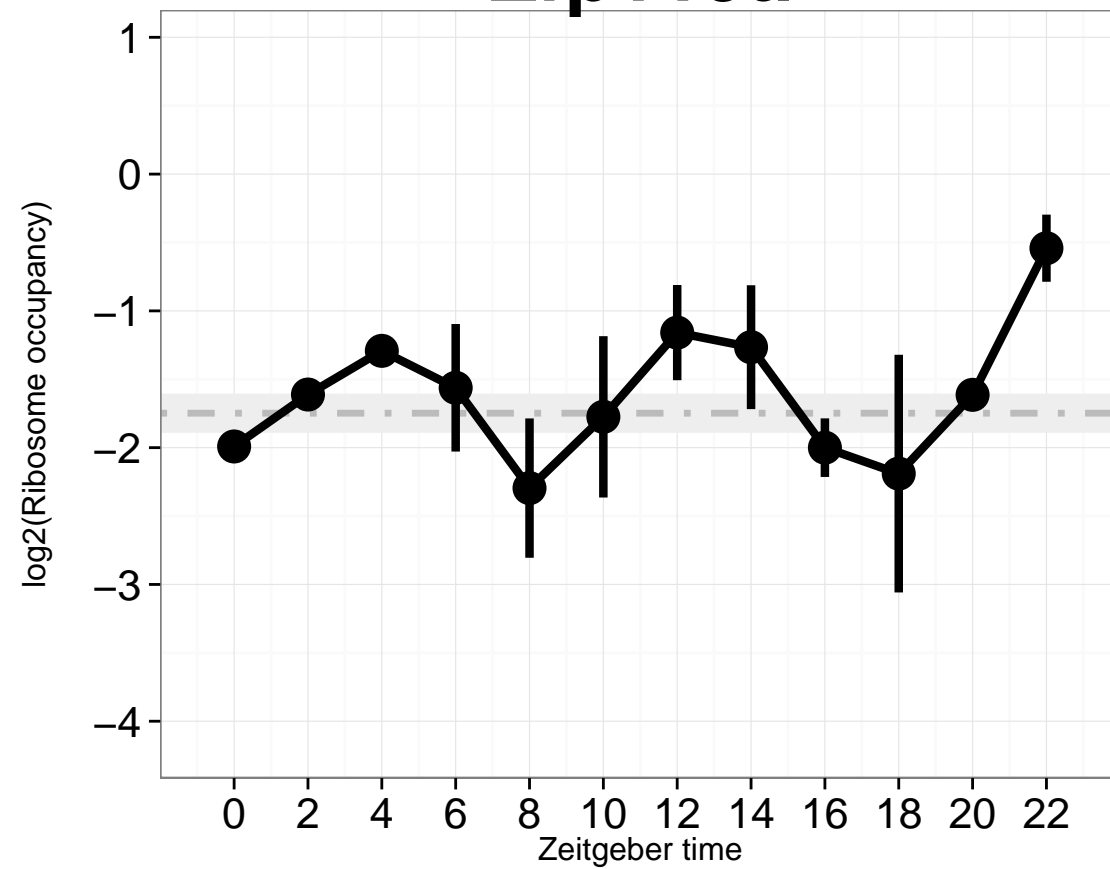

Supplement: SuppDataset_1.zip [file Zfp119a_set_A.pdf › Supplemental Dataset 1/A-mRNA_nonrhyth_translation_nonrhyth/Zfp119a_set_A.pdf]

# Zfp119b

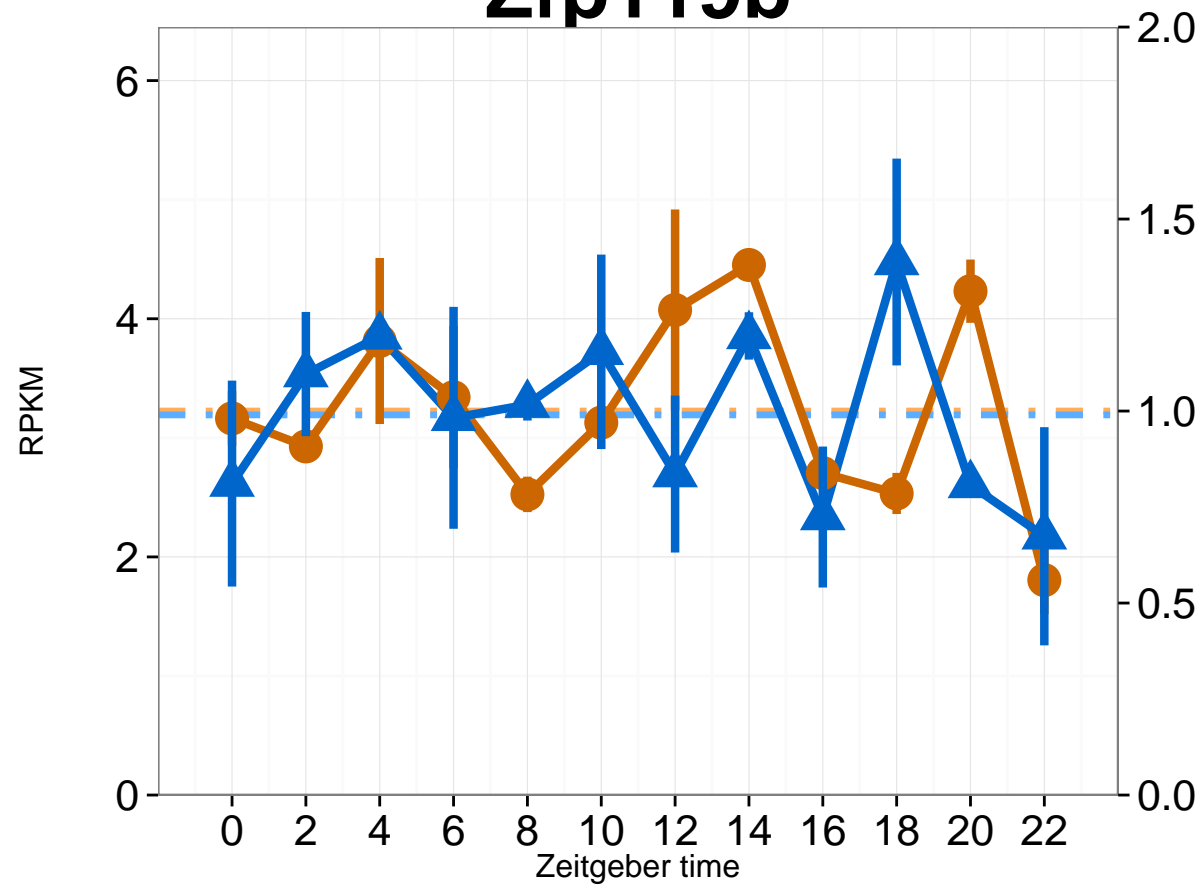

# Zfp119b

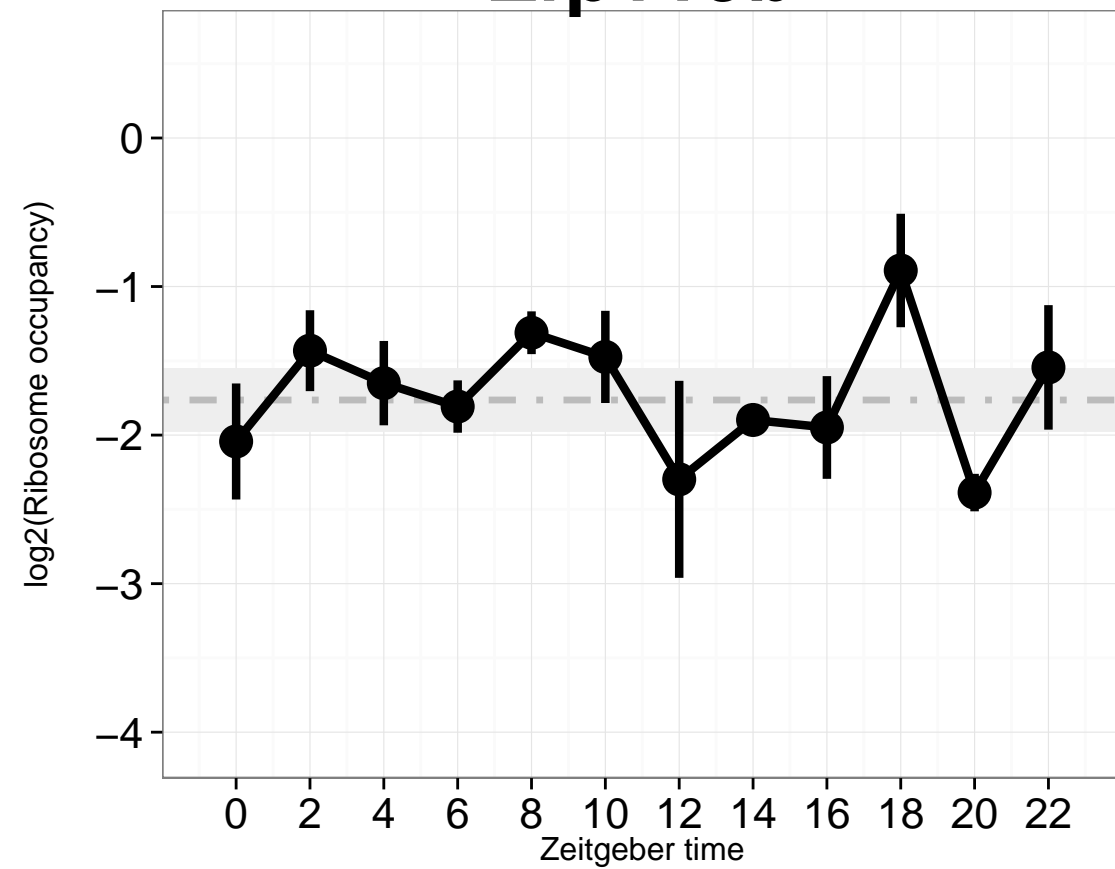

Supplement: SuppDataset_1.zip [file Zfp119b_set_A.pdf › Supplemental Dataset 1/A-mRNA_nonrhyth_translation_nonrhyth/Zfp119b_set_A.pdf]

# Zfp11

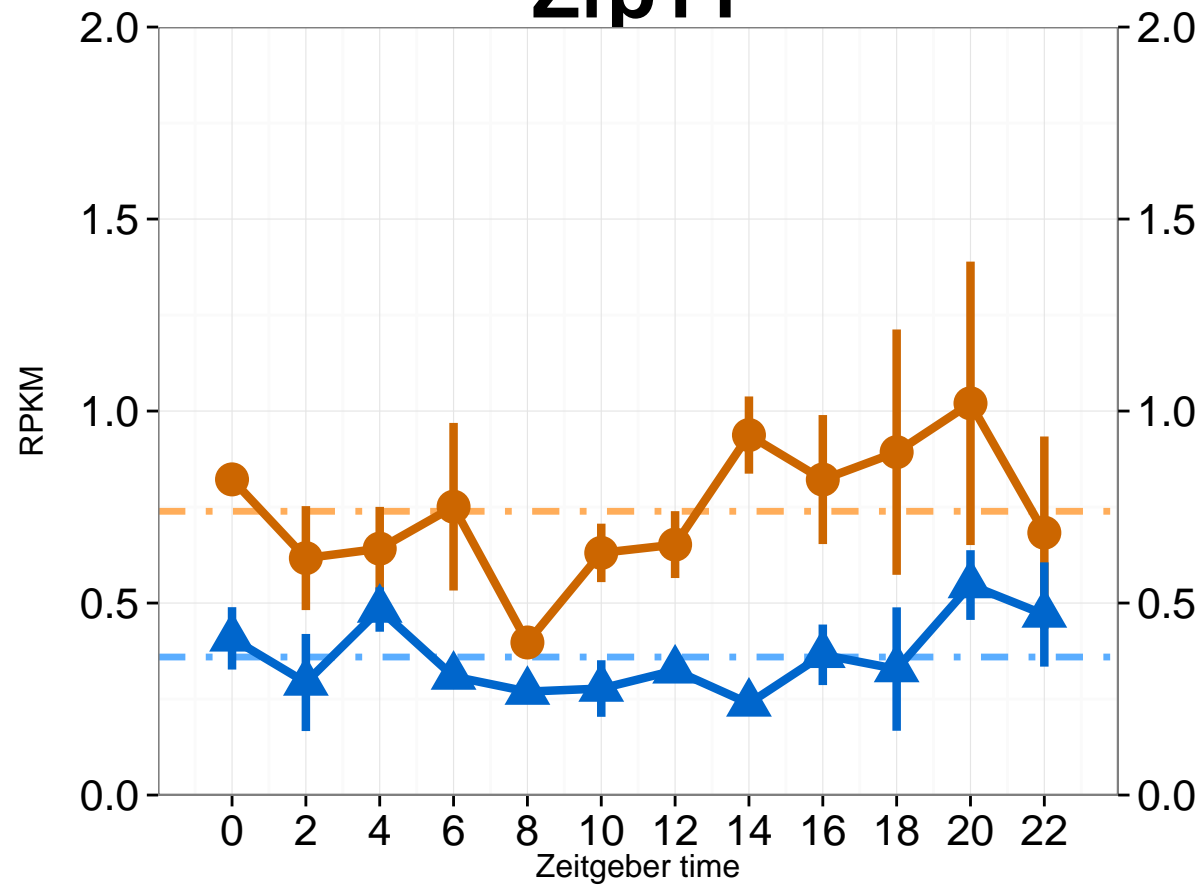

# Zfp11

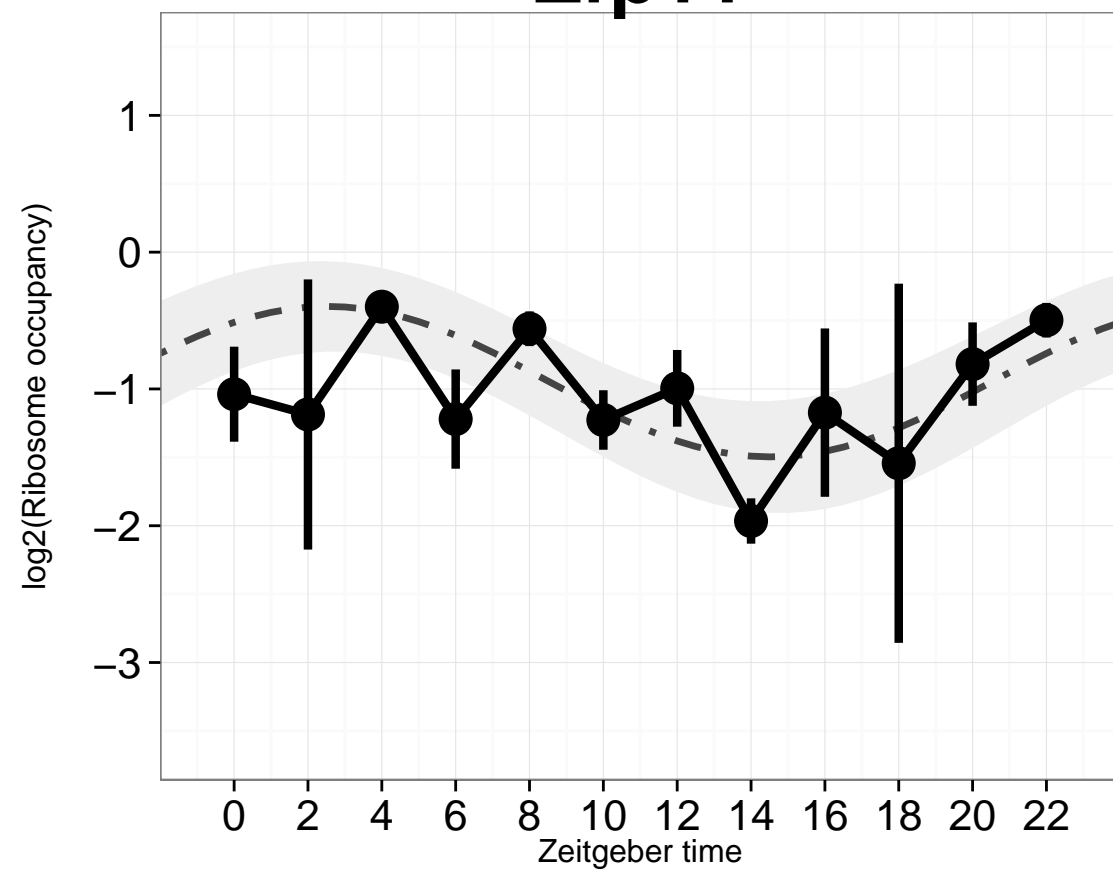

Supplement: SuppDataset_1.zip [file Zfp11_set_A.pdf › Supplemental Dataset 1/A-mRNA_nonrhyth_translation_nonrhyth/Zfp11_set_A.pdf]

# Zfp120

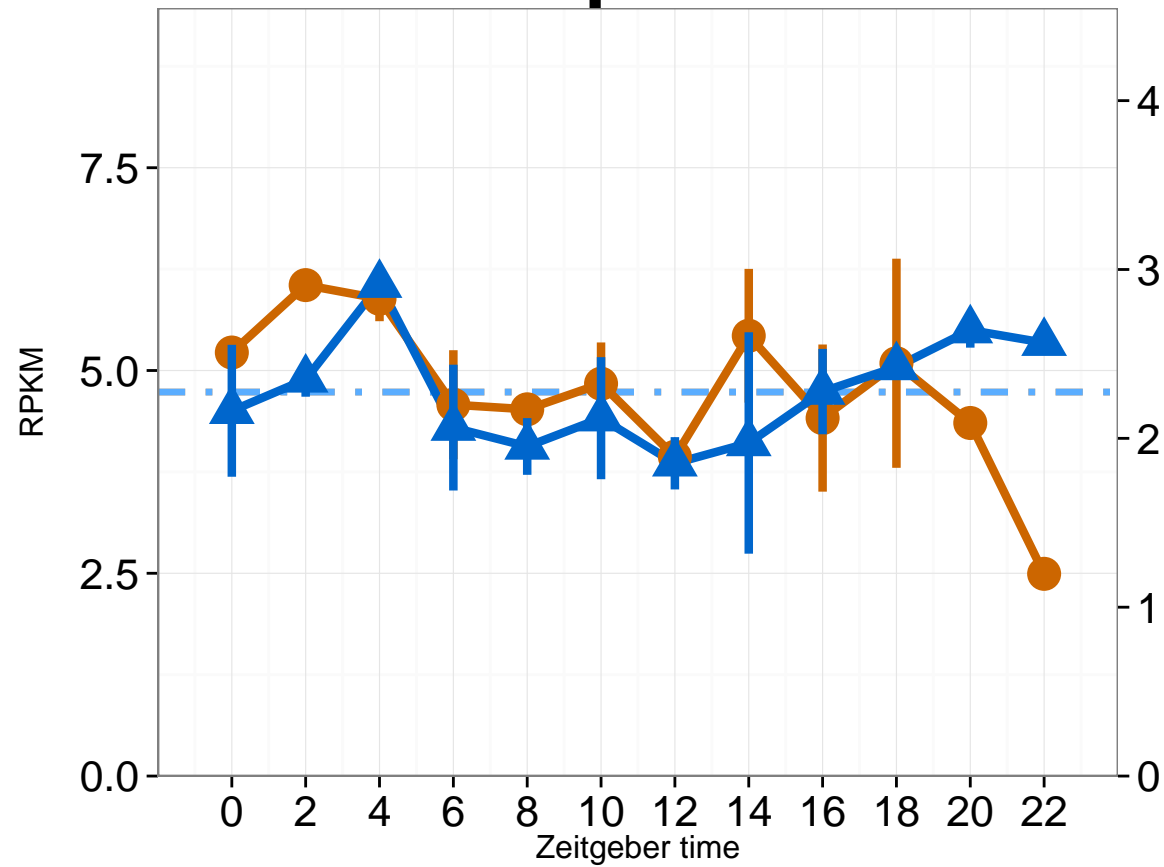

# Zfp120

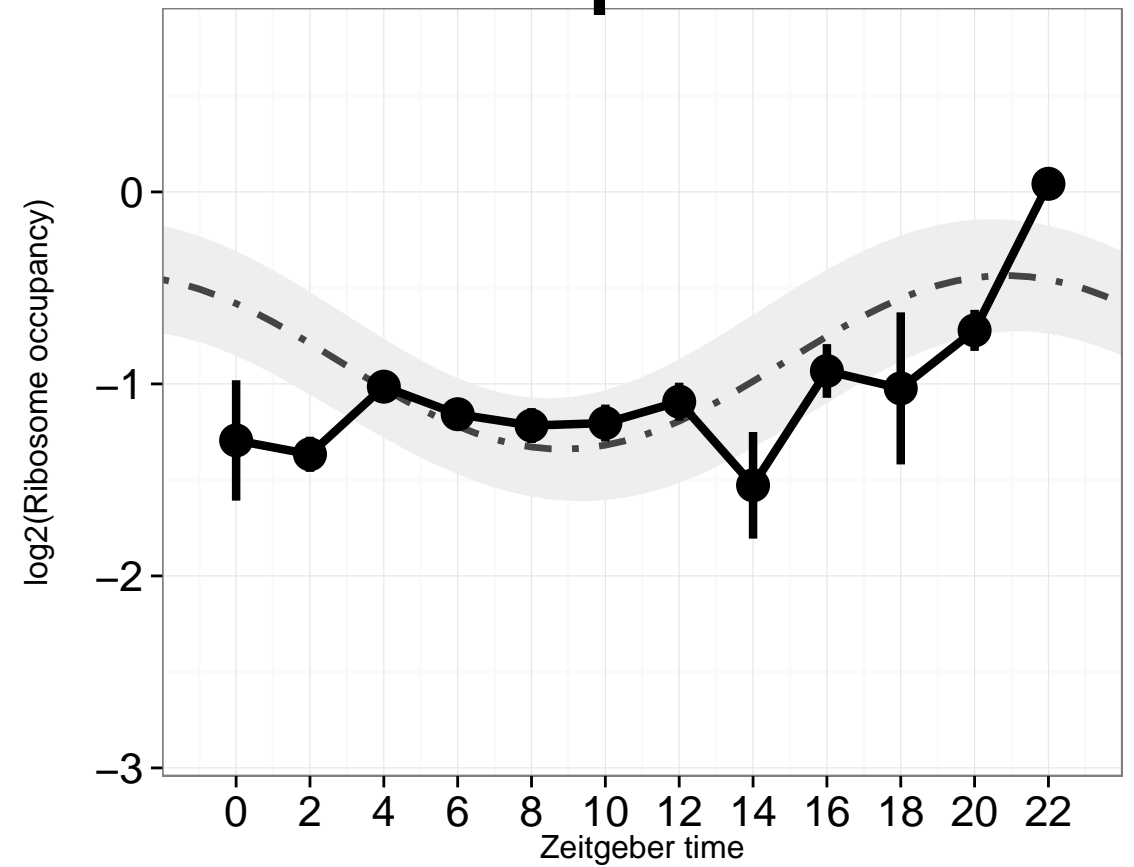

Supplement: SuppDataset_1.zip [file Zfp120_set_A.pdf › Supplemental Dataset 1/A-mRNA_nonrhyth_translation_nonrhyth/Zfp120_set_A.pdf]

# Zfp125

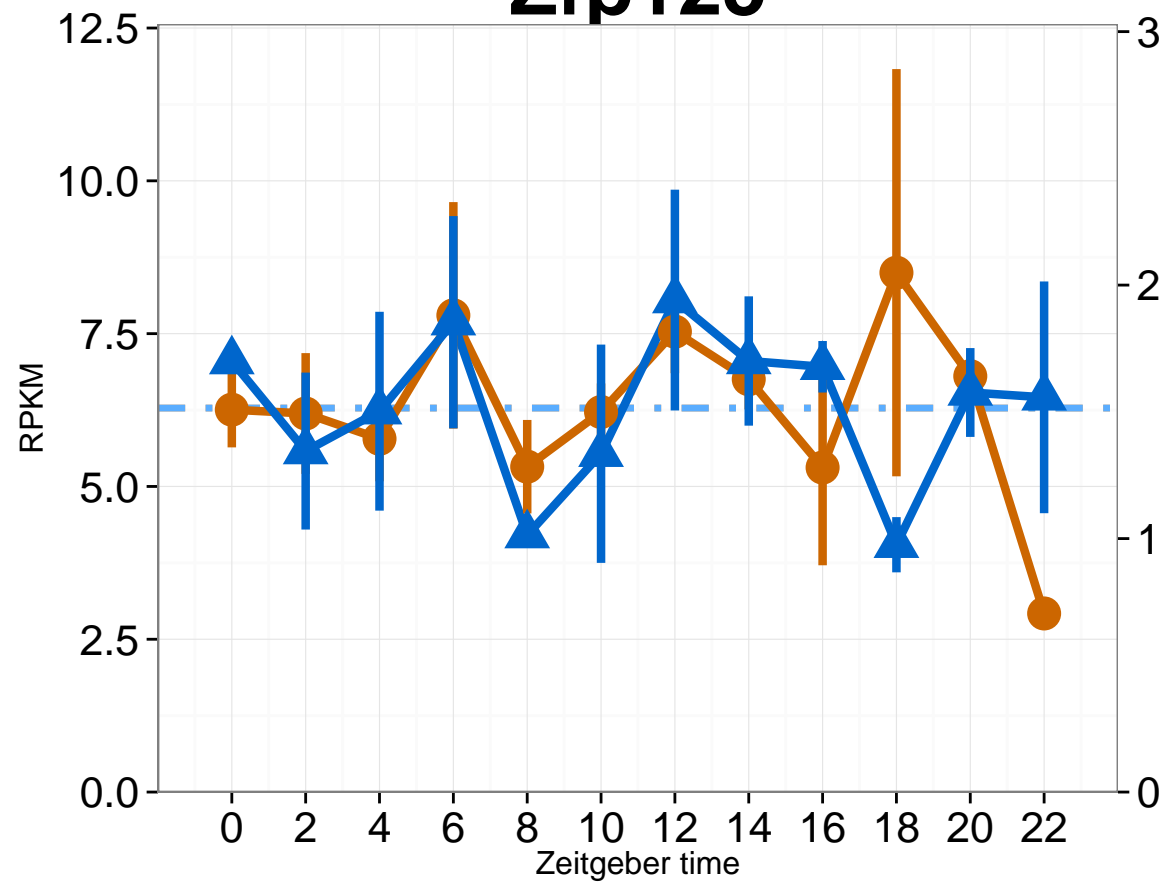

# Zfp125

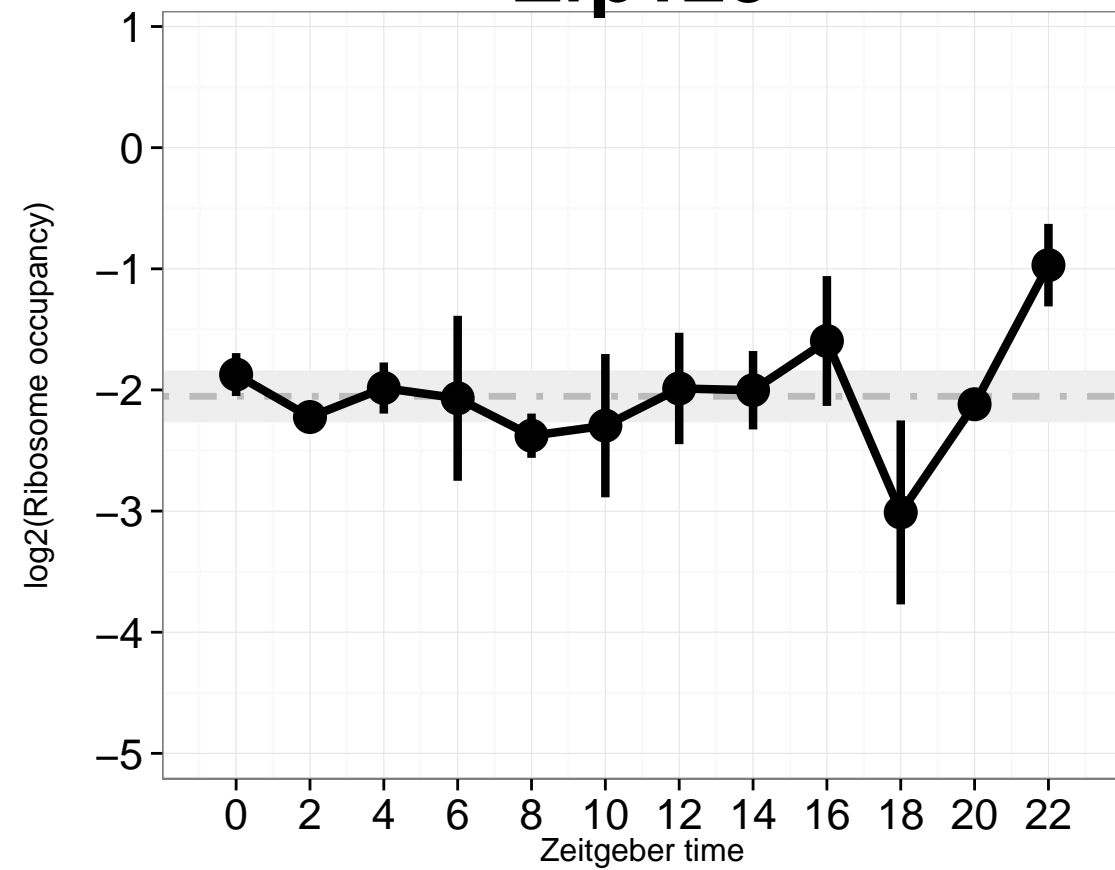

Supplement: SuppDataset_1.zip [file Zfp125_set_A.pdf › Supplemental Dataset 1/A-mRNA_nonrhyth_translation_nonrhyth/Zfp125_set_A.pdf]

# Zfp128

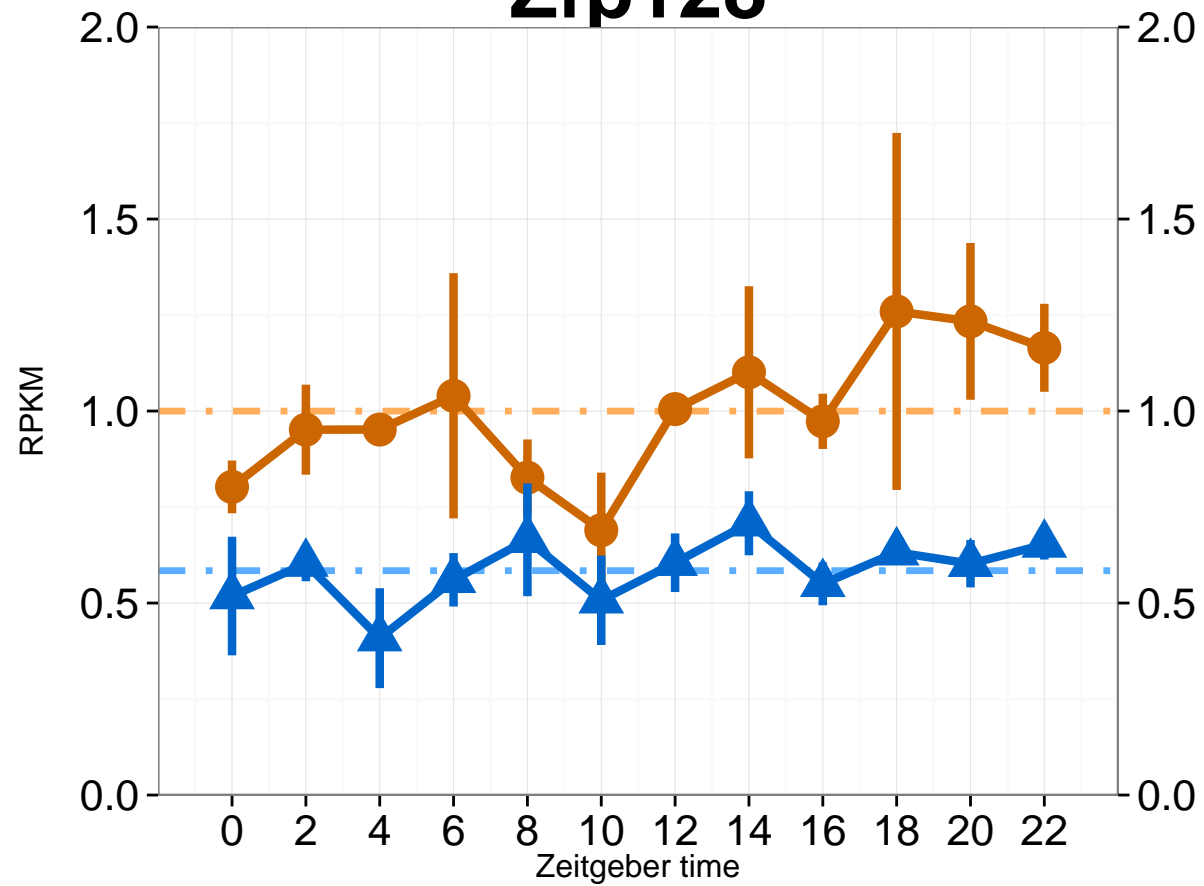

# Zfp128

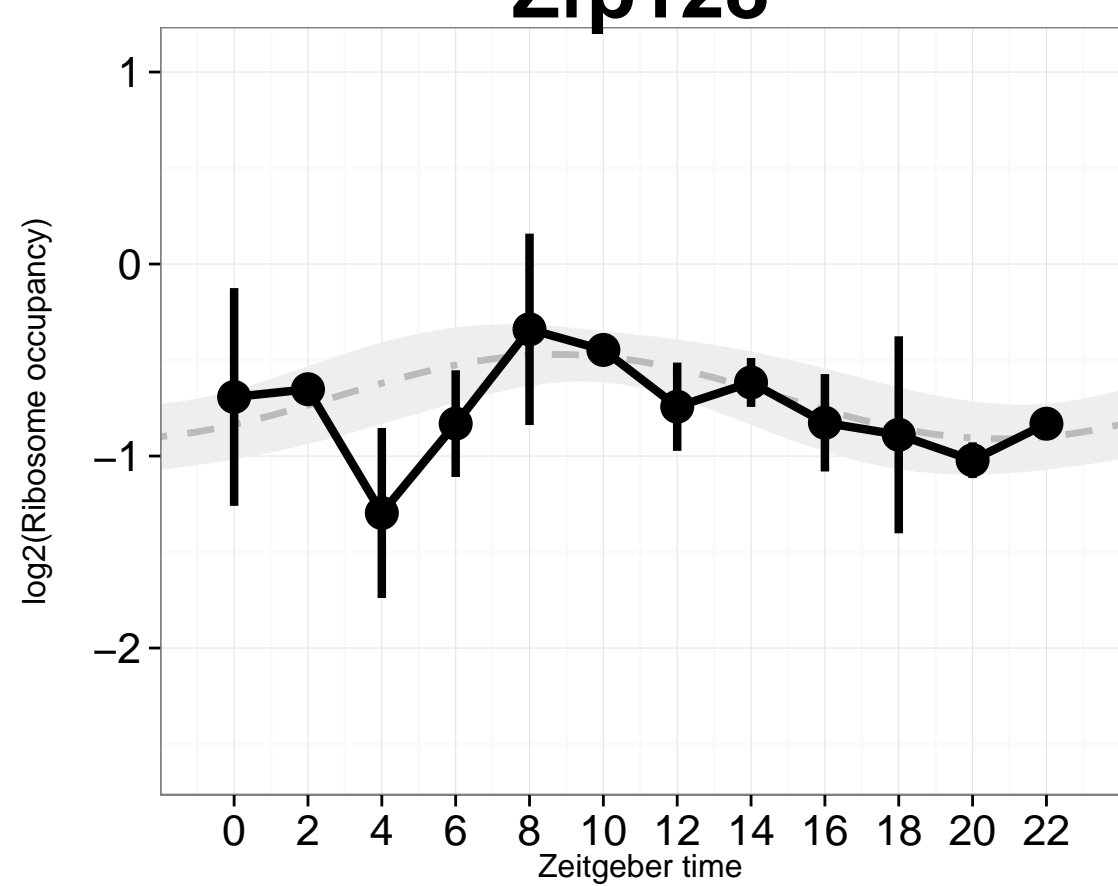

Supplement: SuppDataset_1.zip [file Zfp128_set_A.pdf › Supplemental Dataset 1/A-mRNA_nonrhyth_translation_nonrhyth/Zfp128_set_A.pdf]

## Zfp12

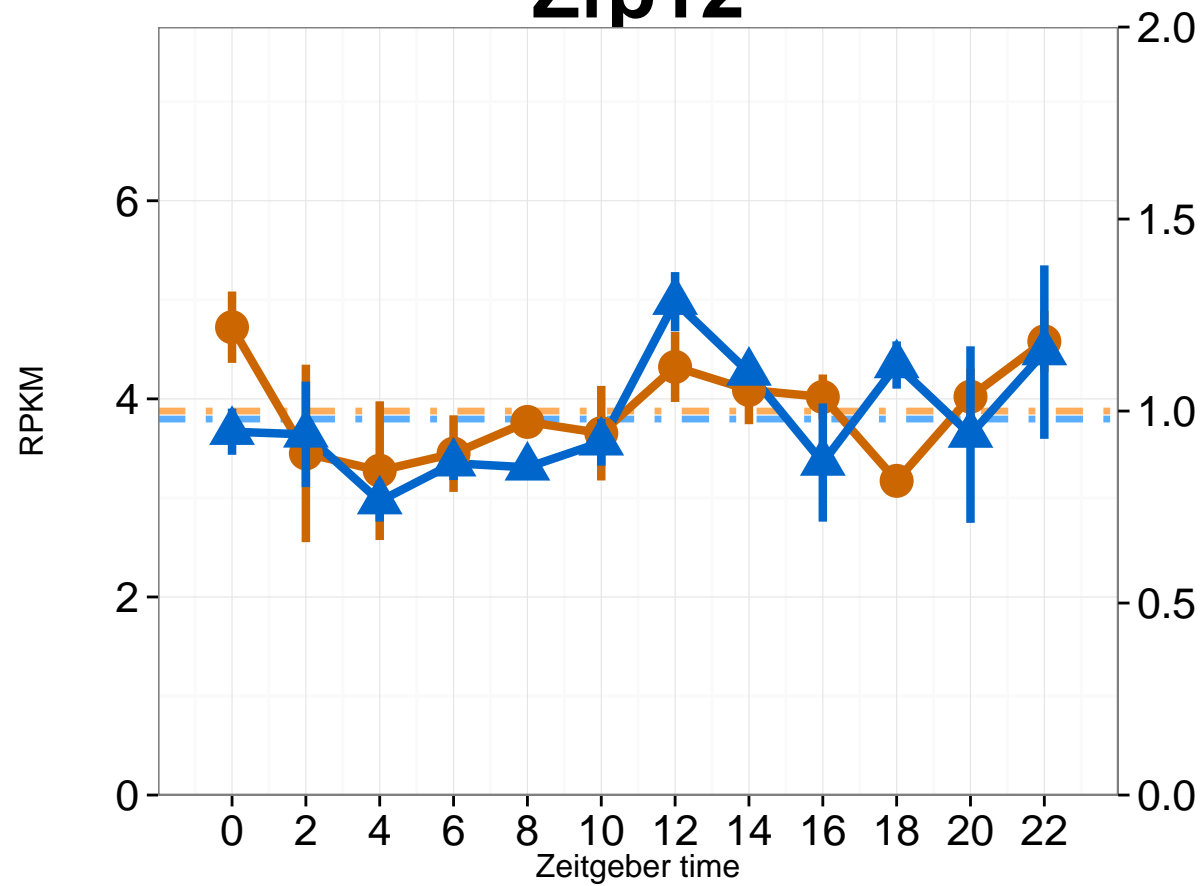

## Zfp12

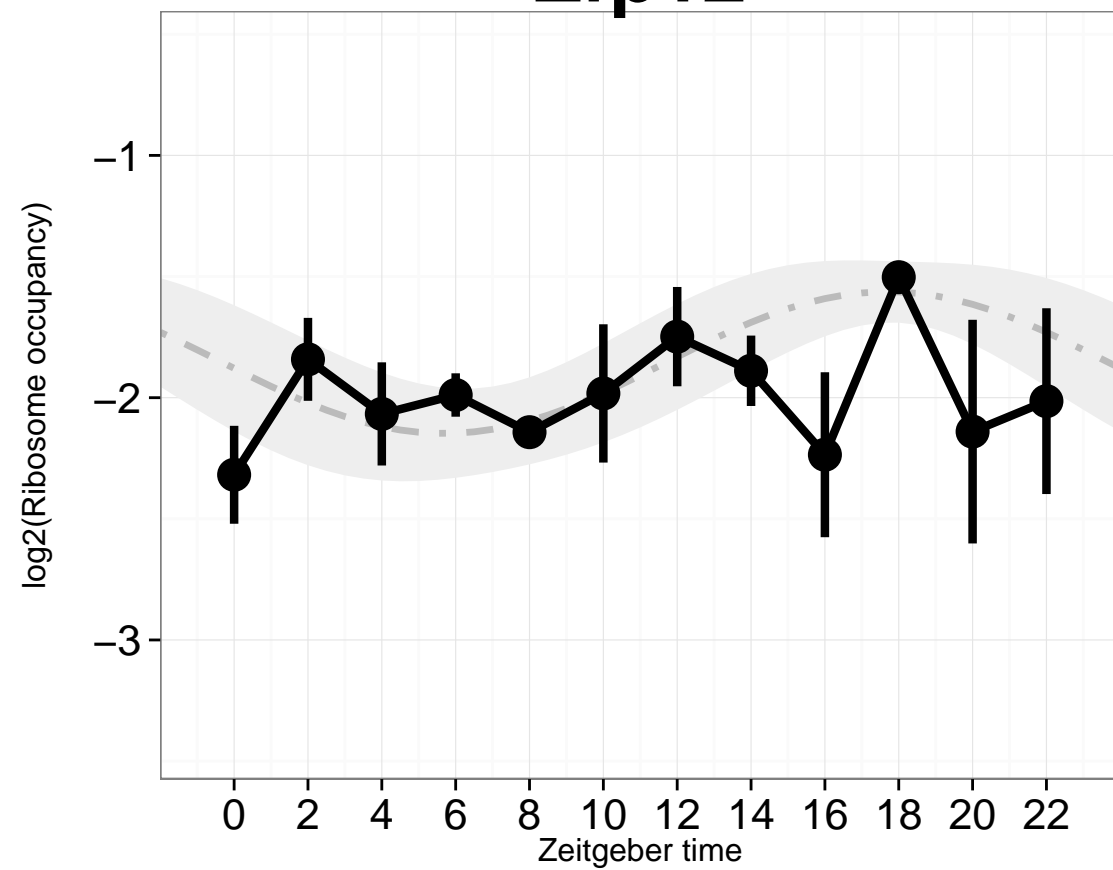

Supplement: SuppDataset_1.zip [file Zfp12_set_A.pdf › Supplemental Dataset 1/A-mRNA_nonrhyth_translation_nonrhyth/Zfp12_set_A.pdf]

# Zfp141

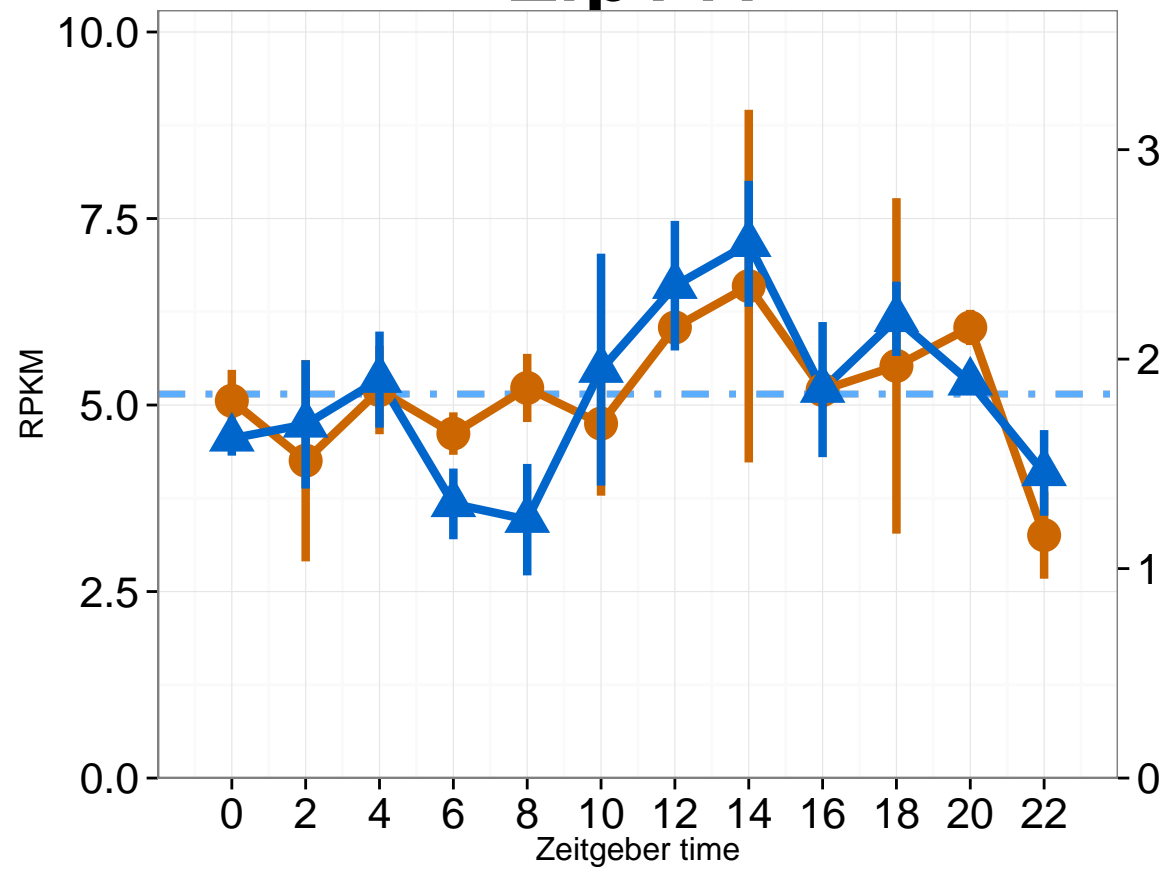

# Zfp141

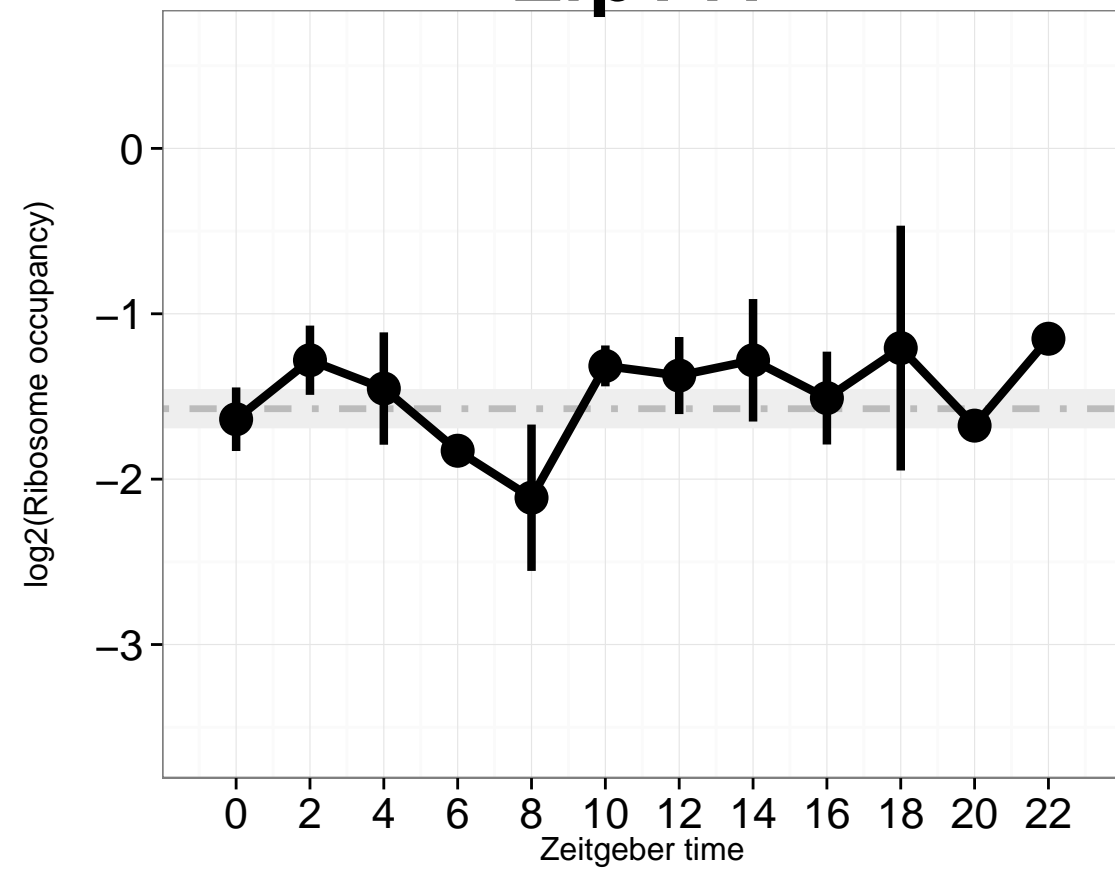

Supplement: SuppDataset_1.zip [file Zfp141_set_A.pdf › Supplemental Dataset 1/A-mRNA_nonrhyth_translation_nonrhyth/Zfp141_set_A.pdf]

# Zfp142

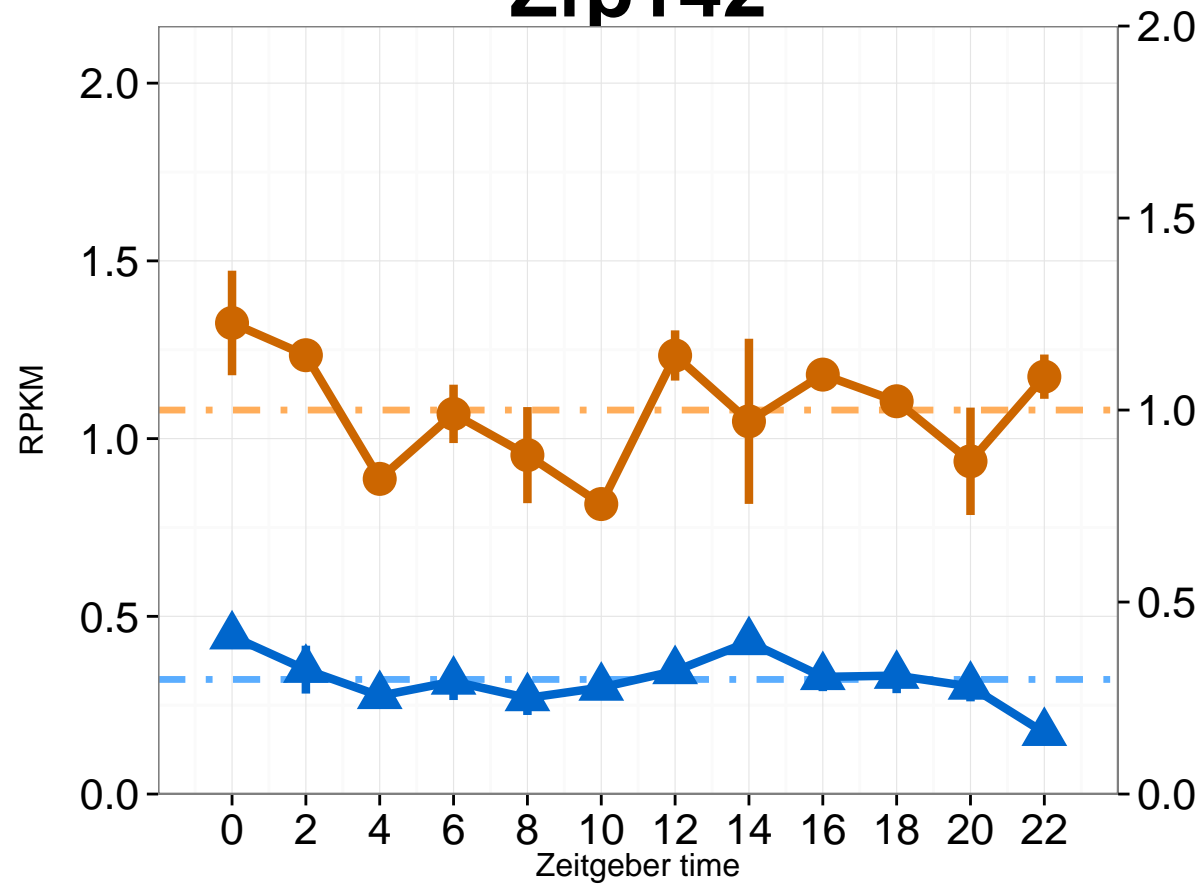

# Zfp142

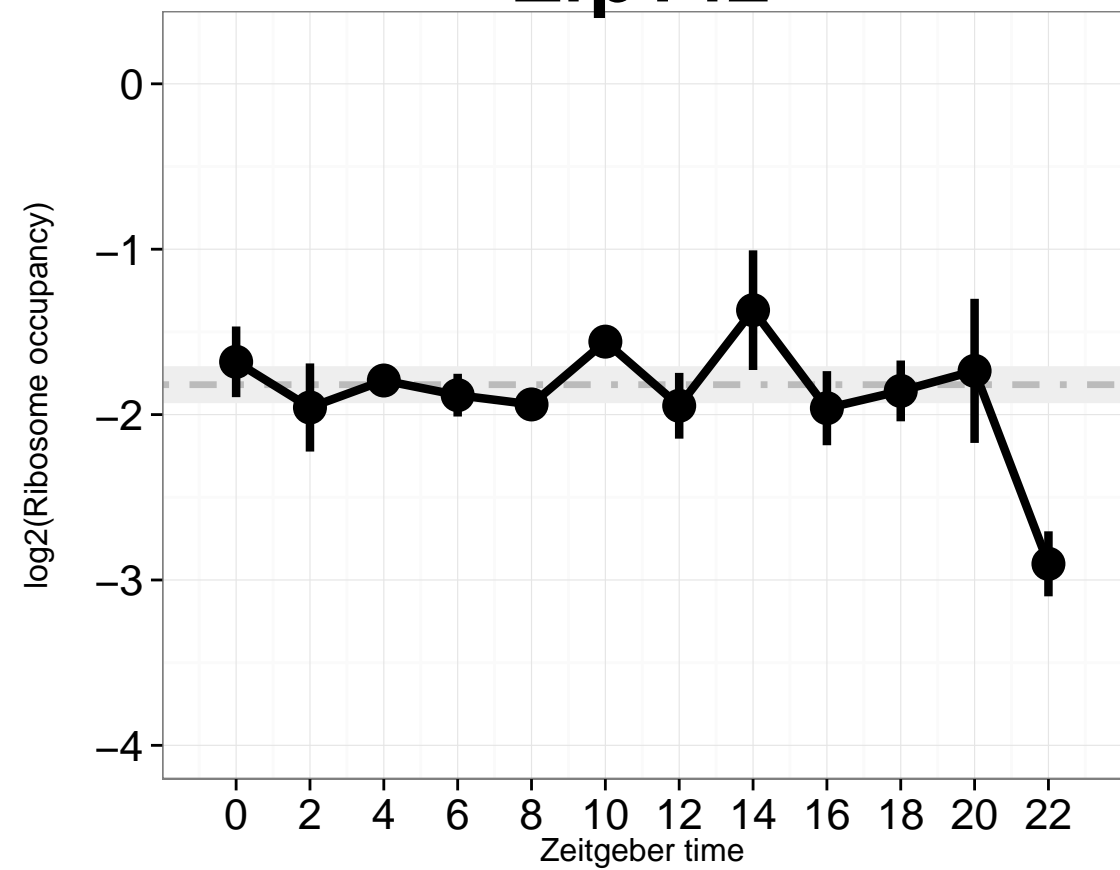

Supplement: SuppDataset_1.zip [file Zfp142_set_A.pdf › Supplemental Dataset 1/A-mRNA_nonrhyth_translation_nonrhyth/Zfp142_set_A.pdf]

# Zfp143

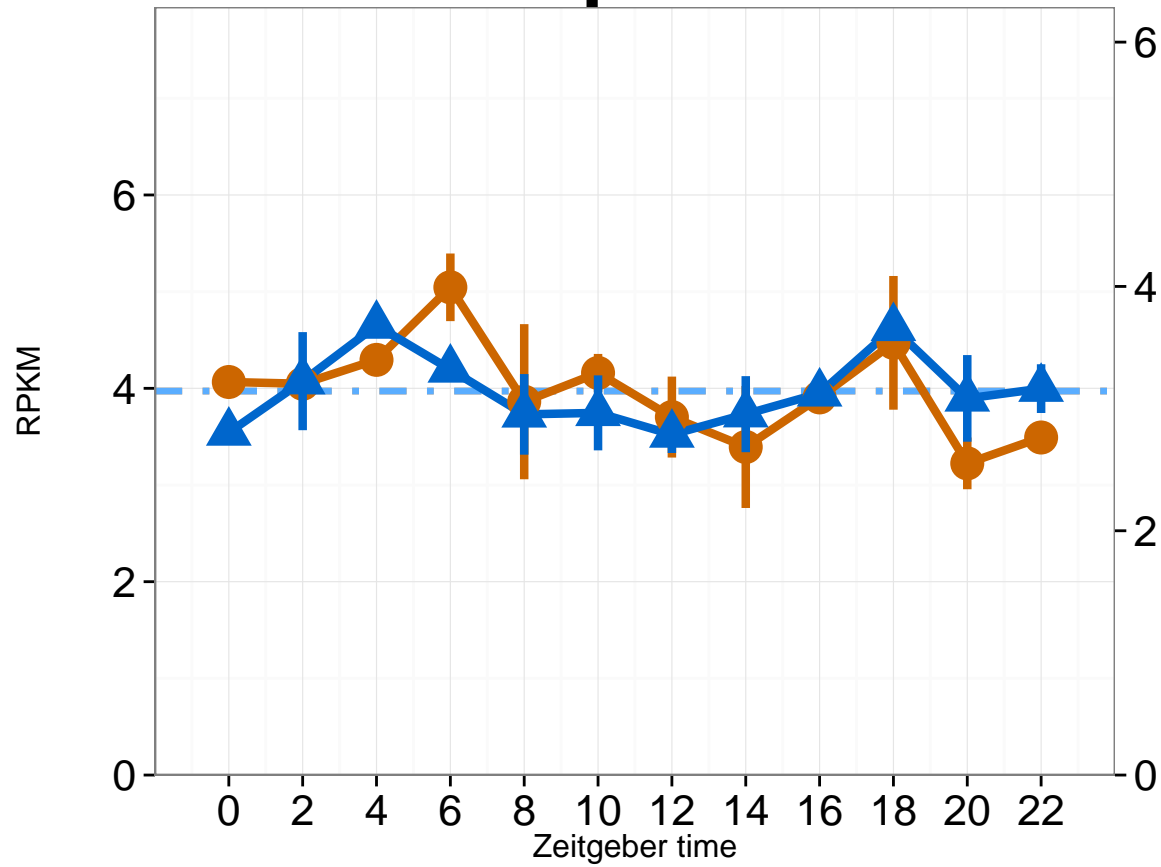

# Zfp143

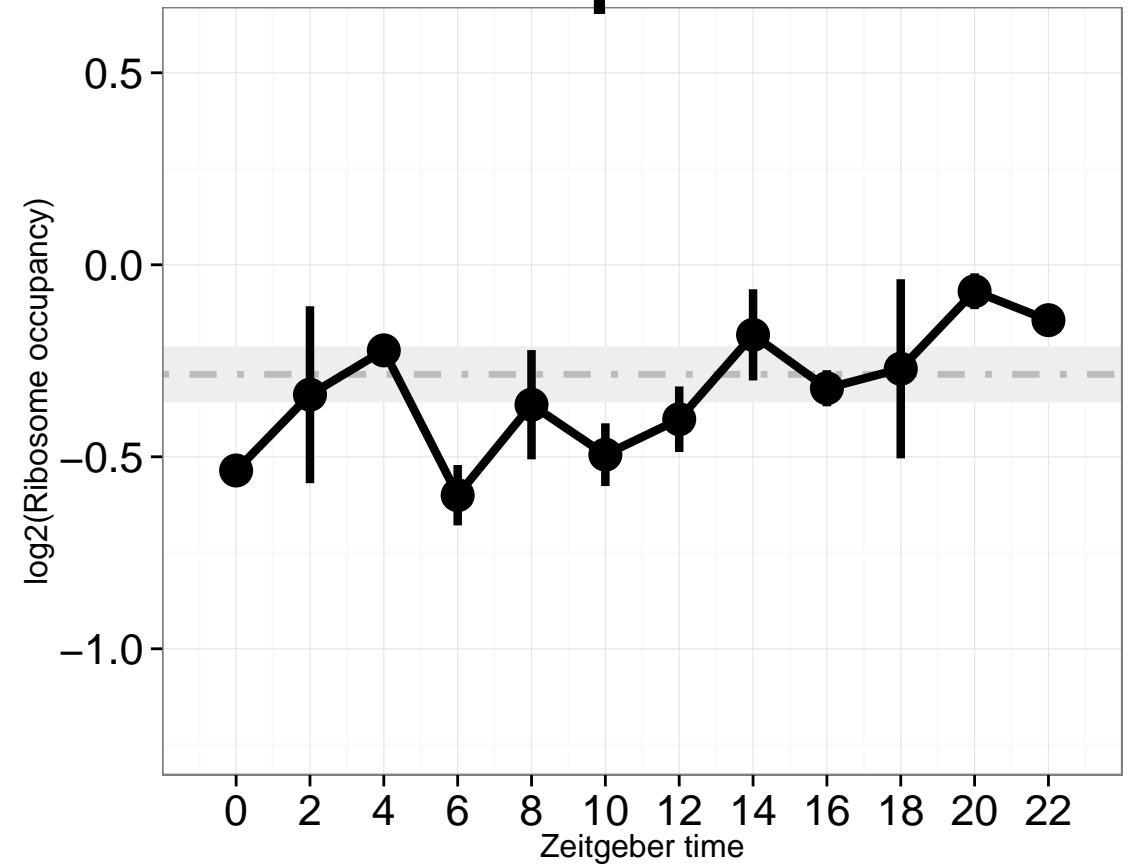

Supplement: SuppDataset_1.zip [file Zfp143_set_A.pdf › Supplemental Dataset 1/A-mRNA_nonrhyth_translation_nonrhyth/Zfp143_set_A.pdf]

# Zfp146

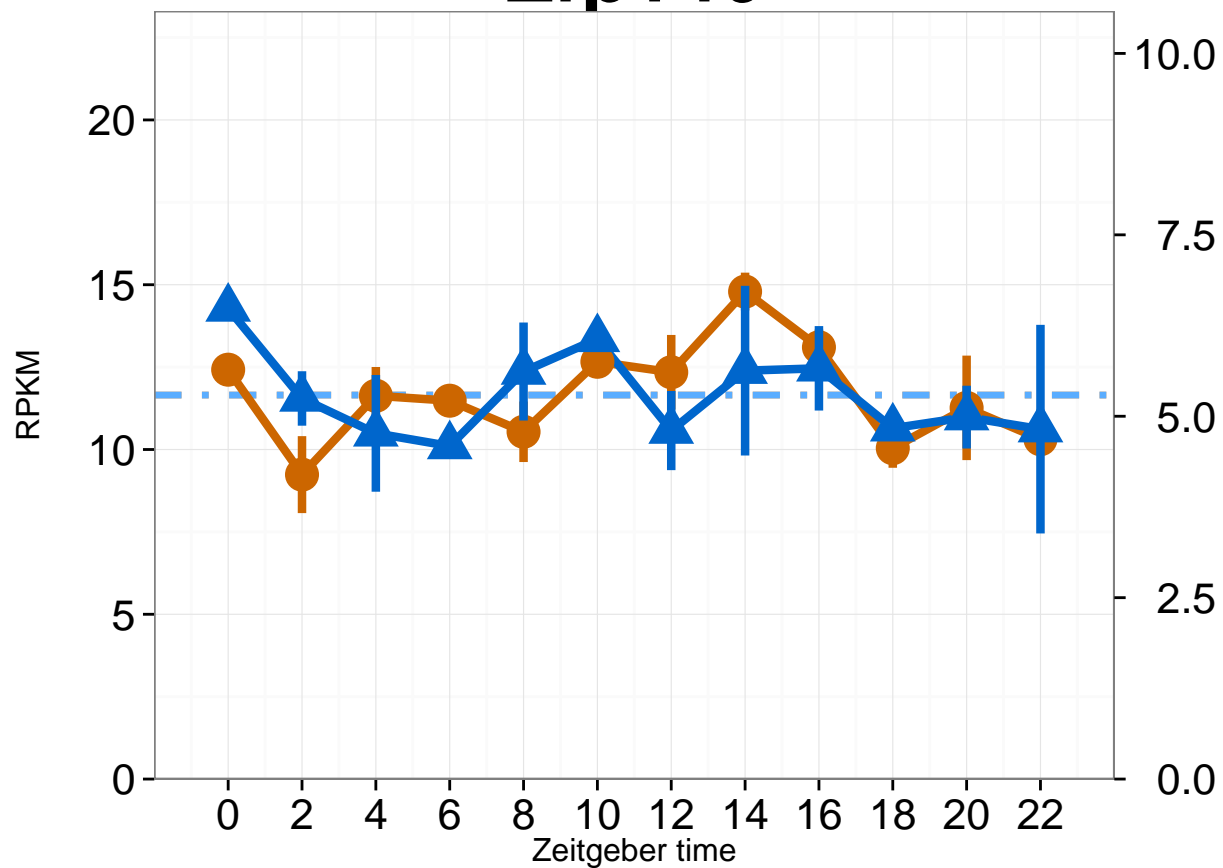

# Zfp146

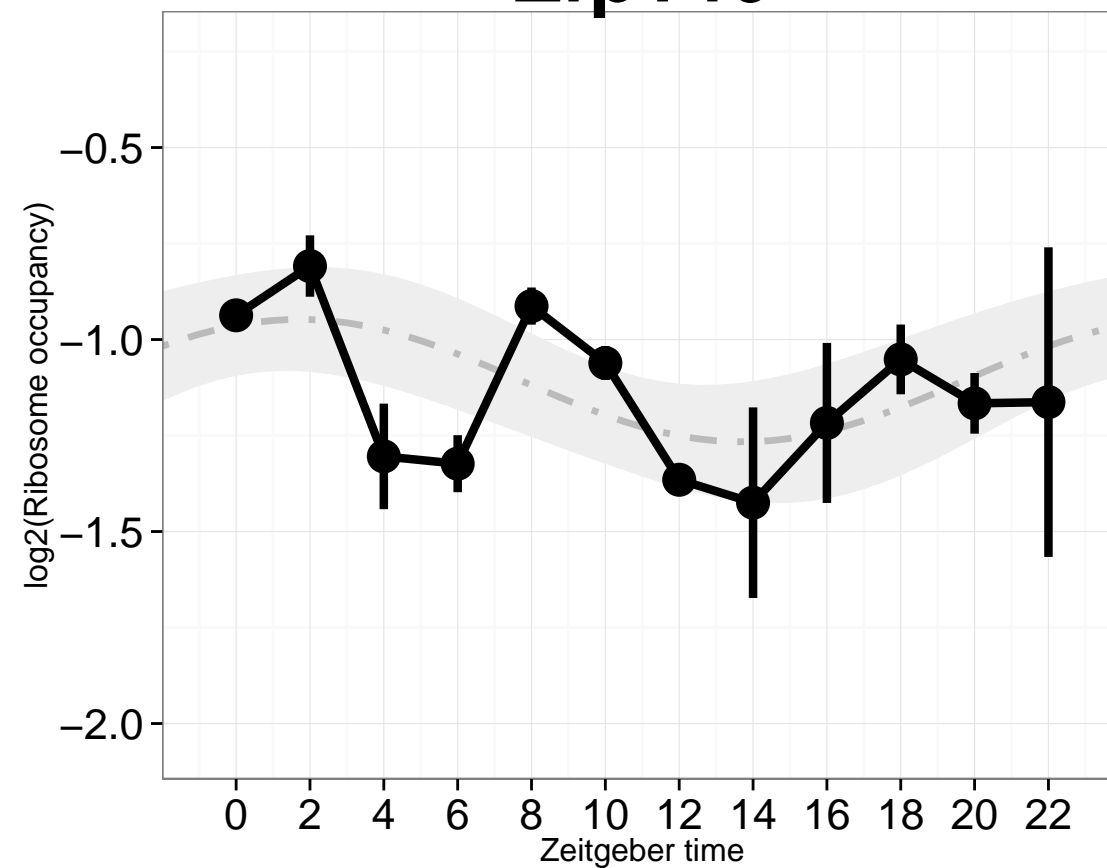

Supplement: SuppDataset_1.zip [file Zfp146_set_A.pdf › Supplemental Dataset 1/A-mRNA_nonrhyth_translation_nonrhyth/Zfp146_set_A.pdf]

# Zfp148

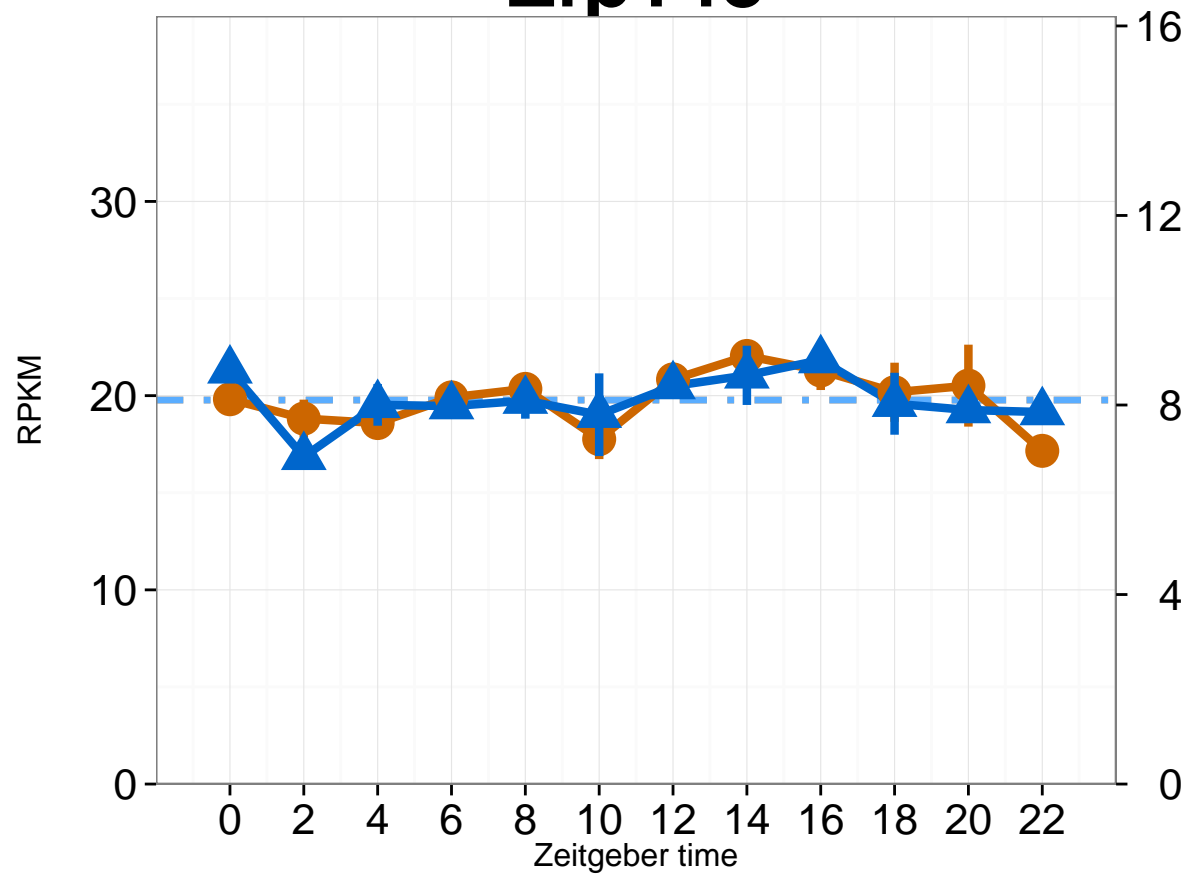

# Zfp148

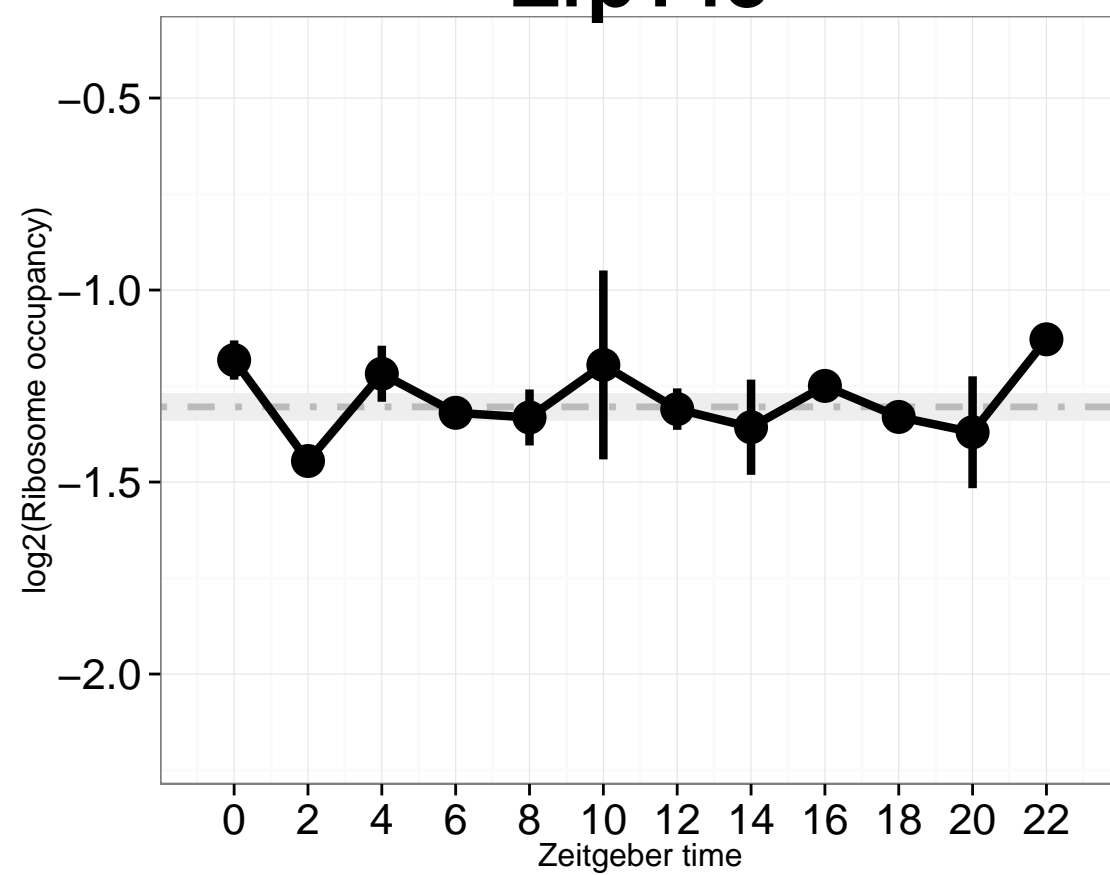

Supplement: SuppDataset_1.zip [file Zfp148_set_A.pdf › Supplemental Dataset 1/A-mRNA_nonrhyth_translation_nonrhyth/Zfp148_set_A.pdf]

# Zfp157

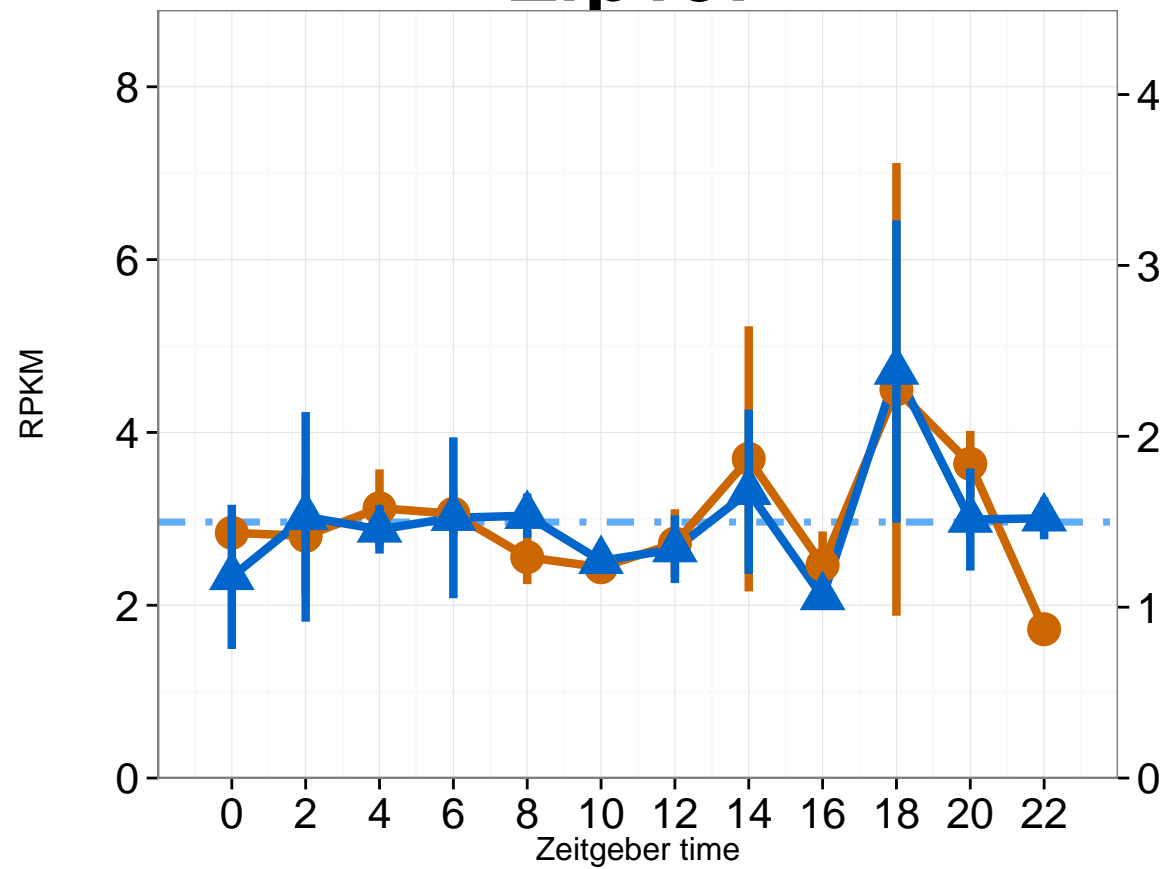

# Zfp157

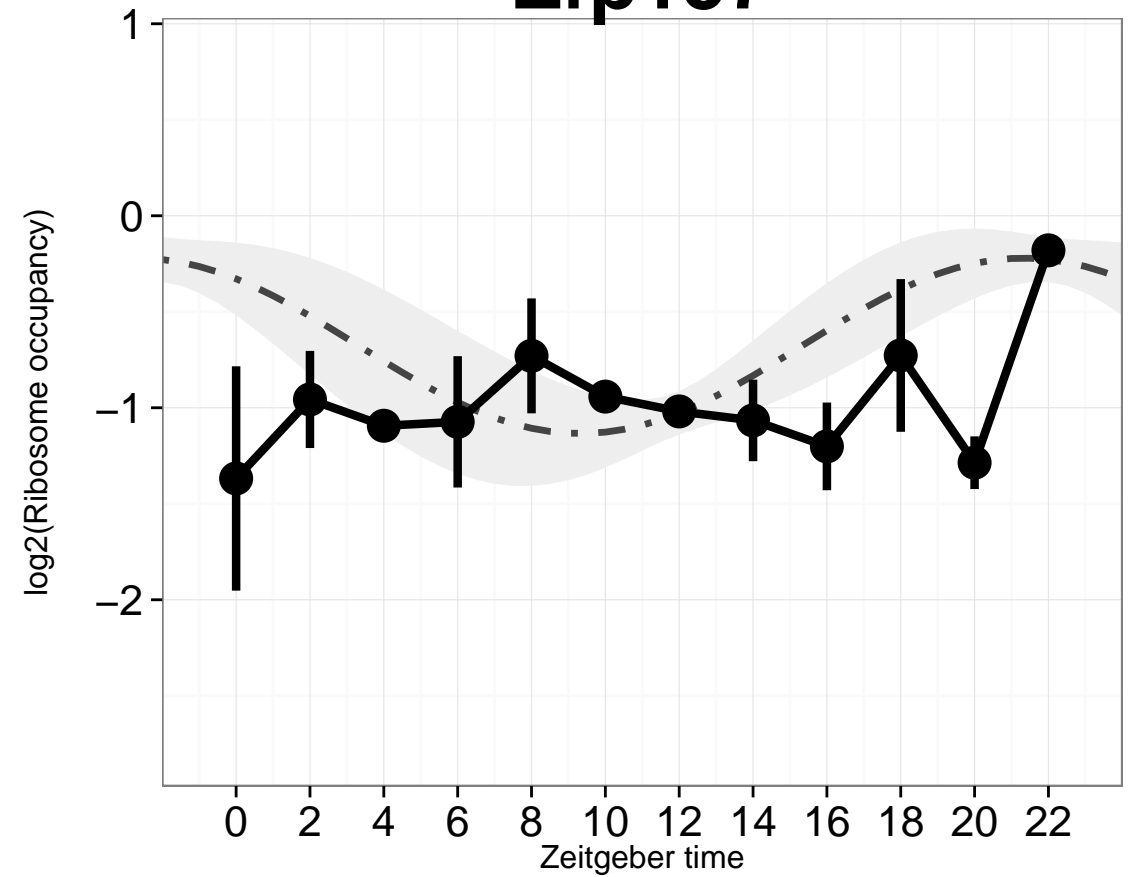

Supplement: SuppDataset_1.zip [file Zfp157_set_A.pdf › Supplemental Dataset 1/A-mRNA_nonrhyth_translation_nonrhyth/Zfp157_set_A.pdf]

# Zfp160

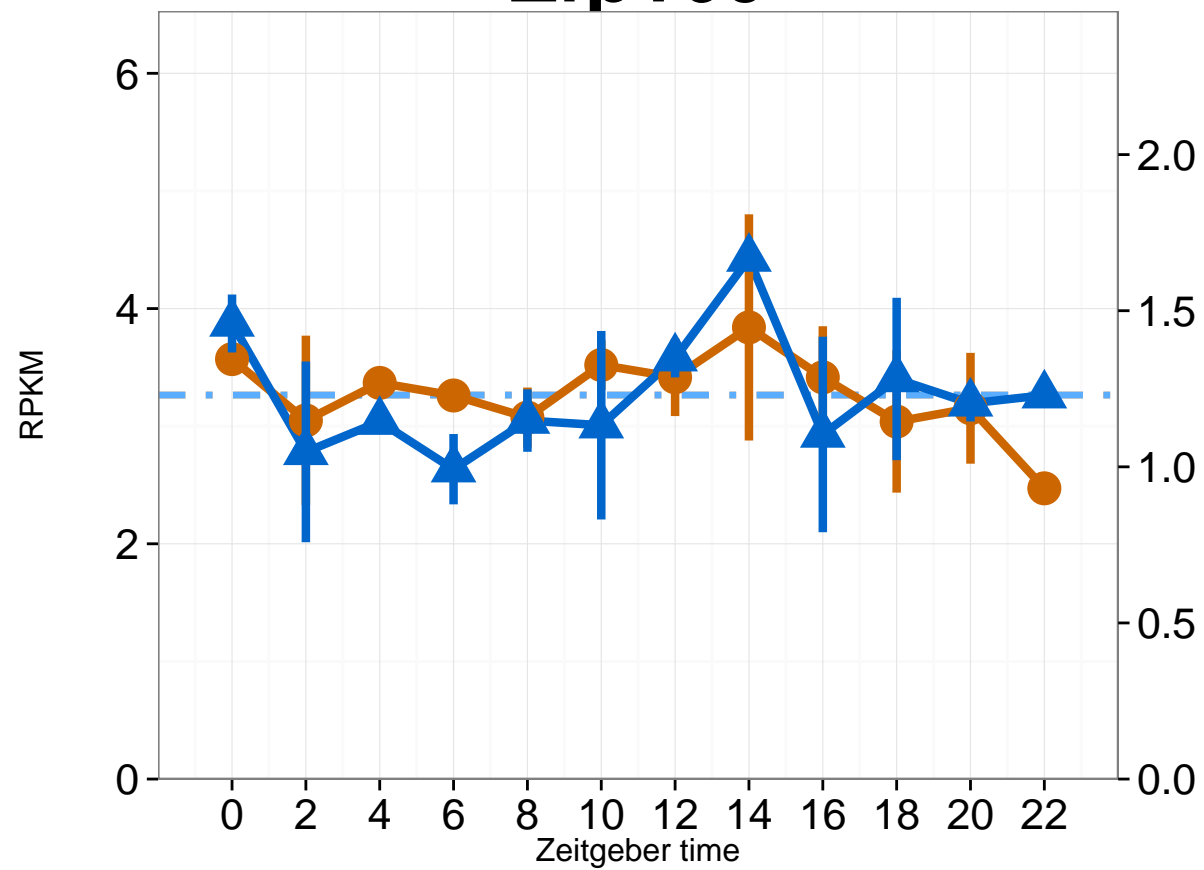

# Zfp160

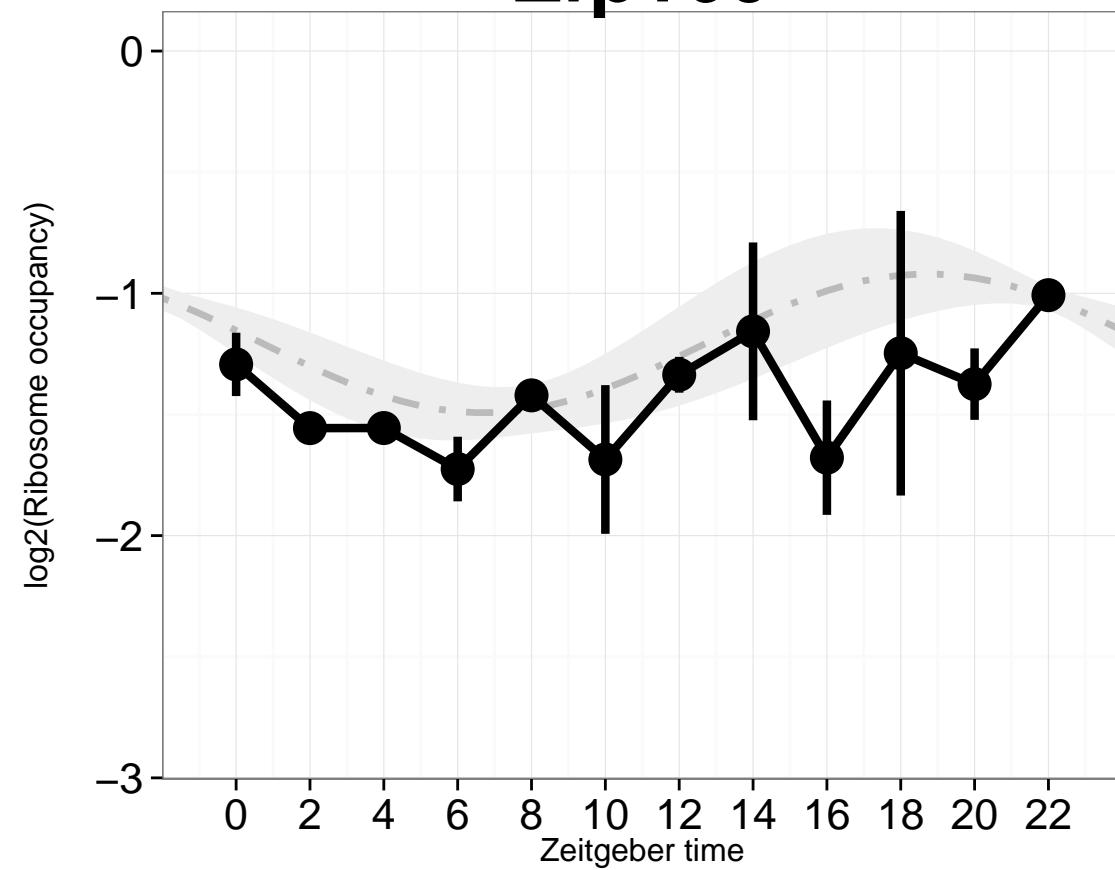

Supplement: SuppDataset_1.zip [file Zfp160_set_A.pdf › Supplemental Dataset 1/A-mRNA_nonrhyth_translation_nonrhyth/Zfp160_set_A.pdf]

# Zfp174

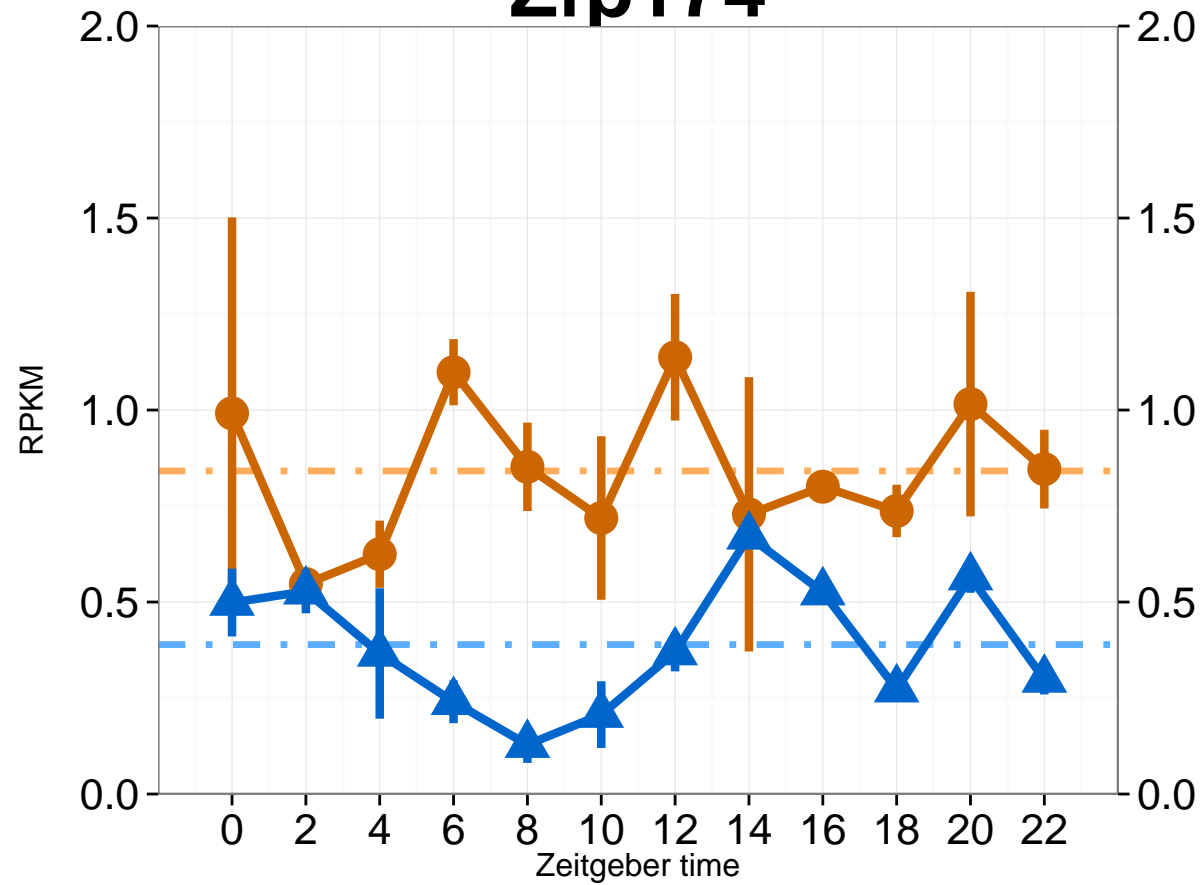

# Zfp174

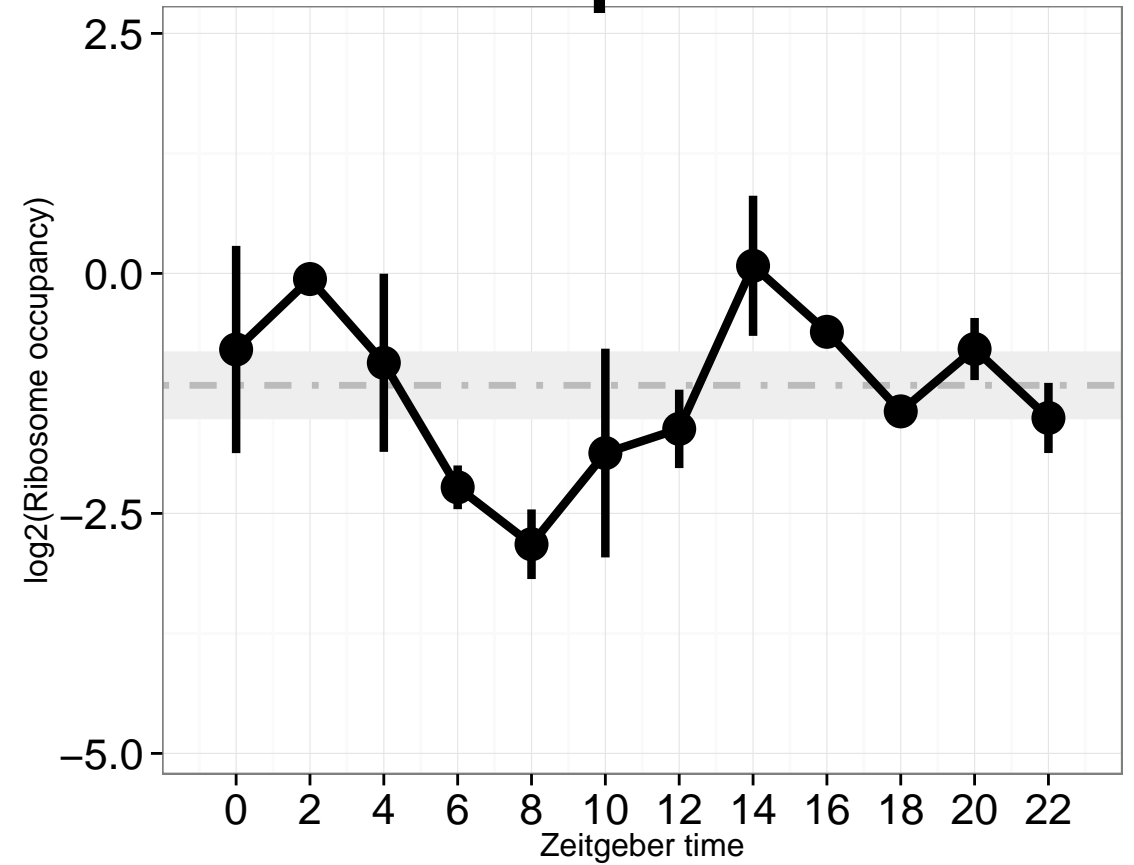

Supplement: SuppDataset_1.zip [file Zfp174_set_A.pdf › Supplemental Dataset 1/A-mRNA_nonrhyth_translation_nonrhyth/Zfp174_set_A.pdf]

# Zfp180

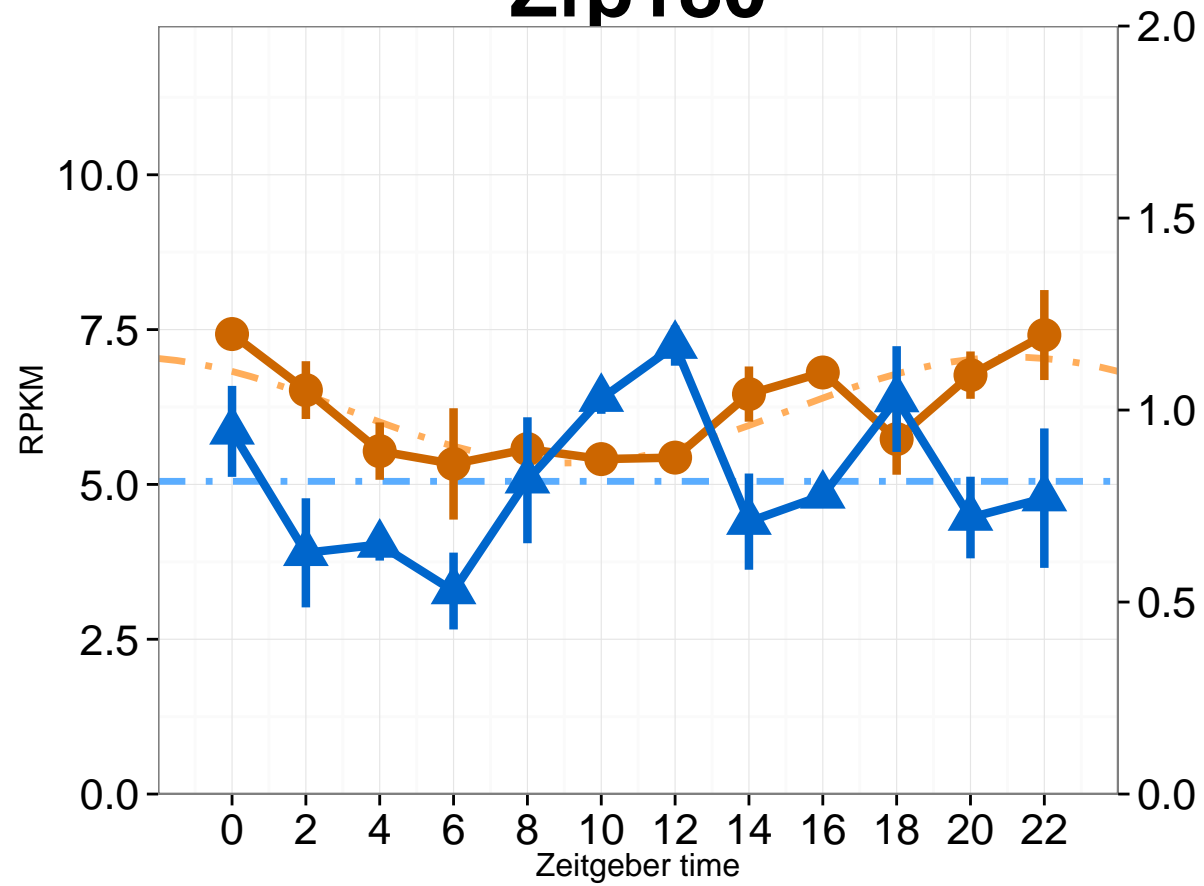

# Zfp180

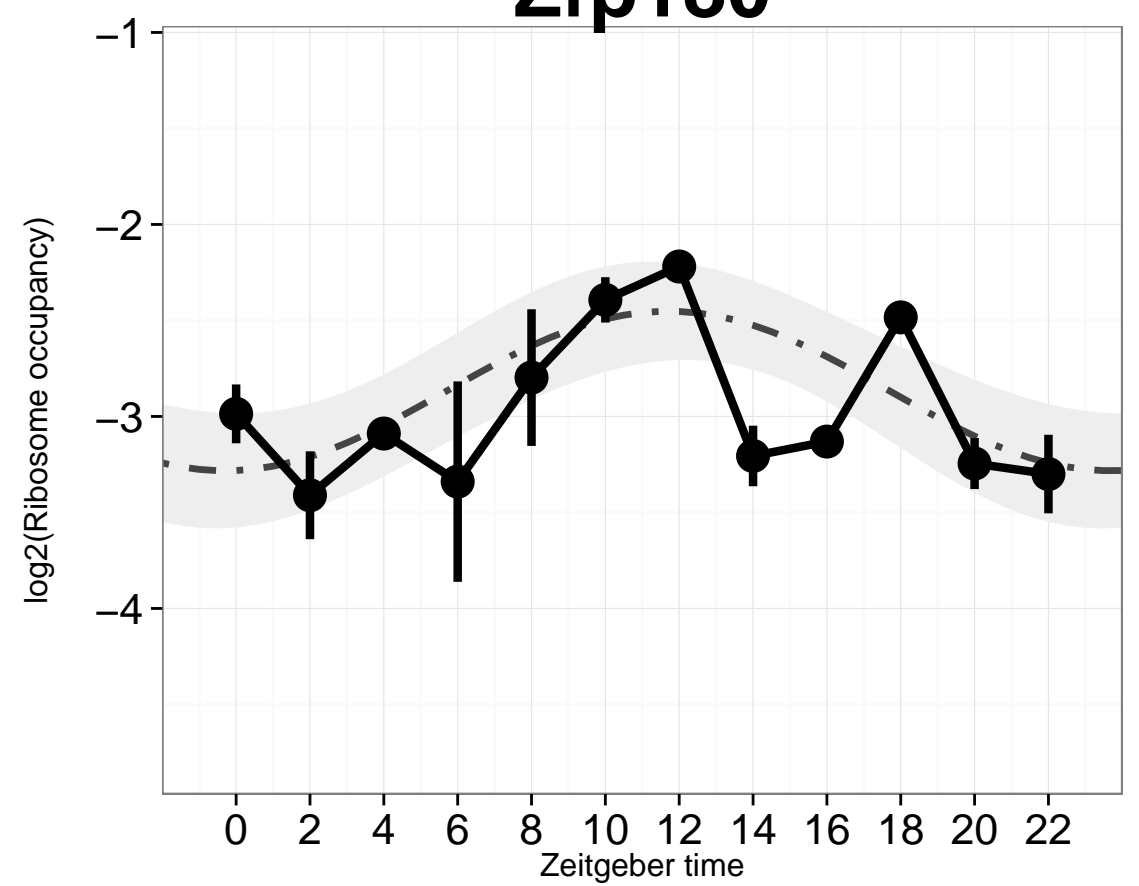

Supplement: SuppDataset_1.zip [file Zfp180_set_A.pdf › Supplemental Dataset 1/A-mRNA_nonrhyth_translation_nonrhyth/Zfp180_set_A.pdf]

# Zfp182

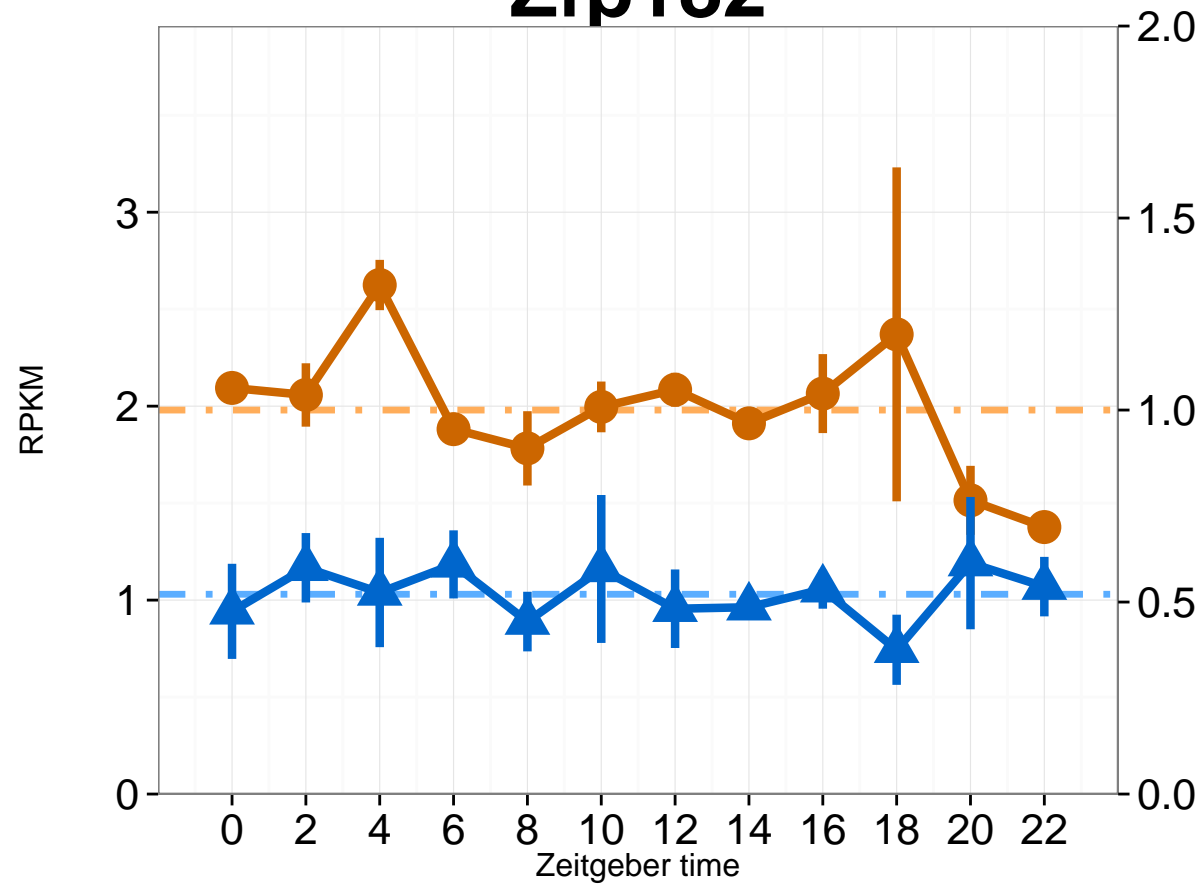

# Zfp182

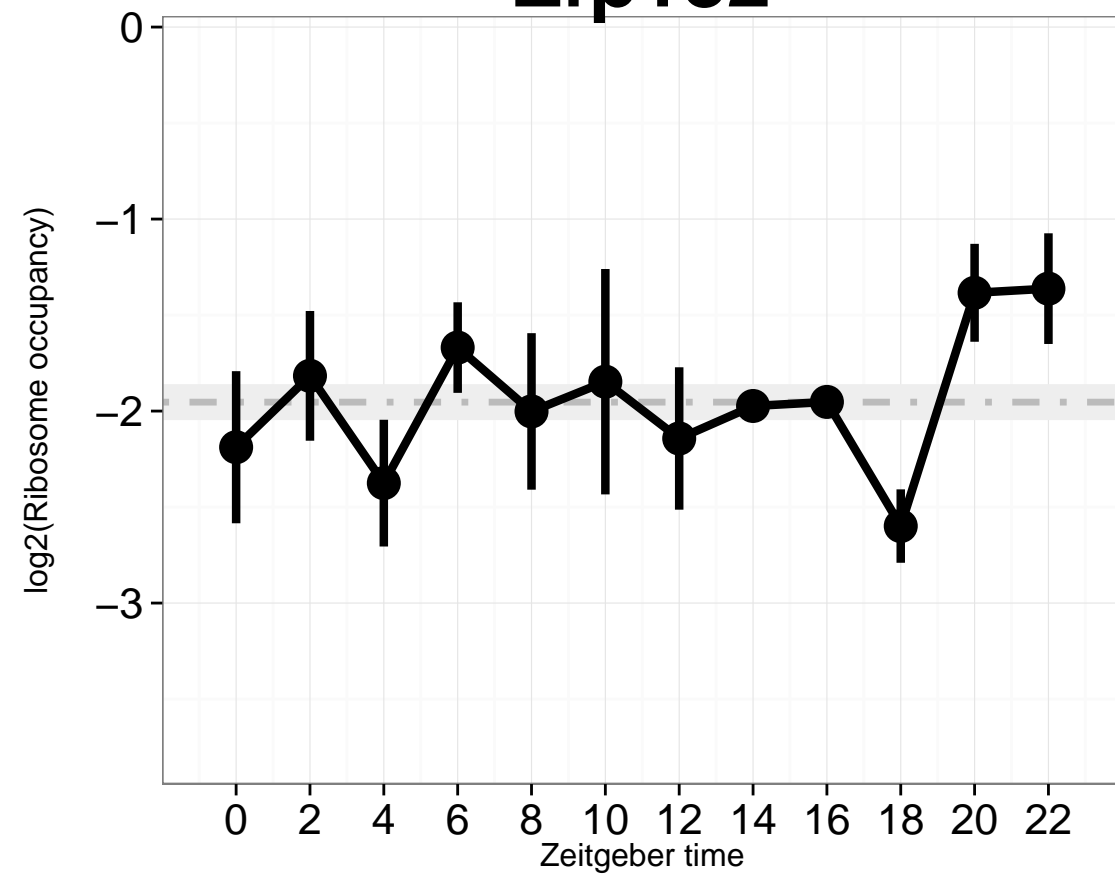

Supplement: SuppDataset_1.zip [file Zfp182_set_A.pdf › Supplemental Dataset 1/A-mRNA_nonrhyth_translation_nonrhyth/Zfp182_set_A.pdf]

# Zfp191

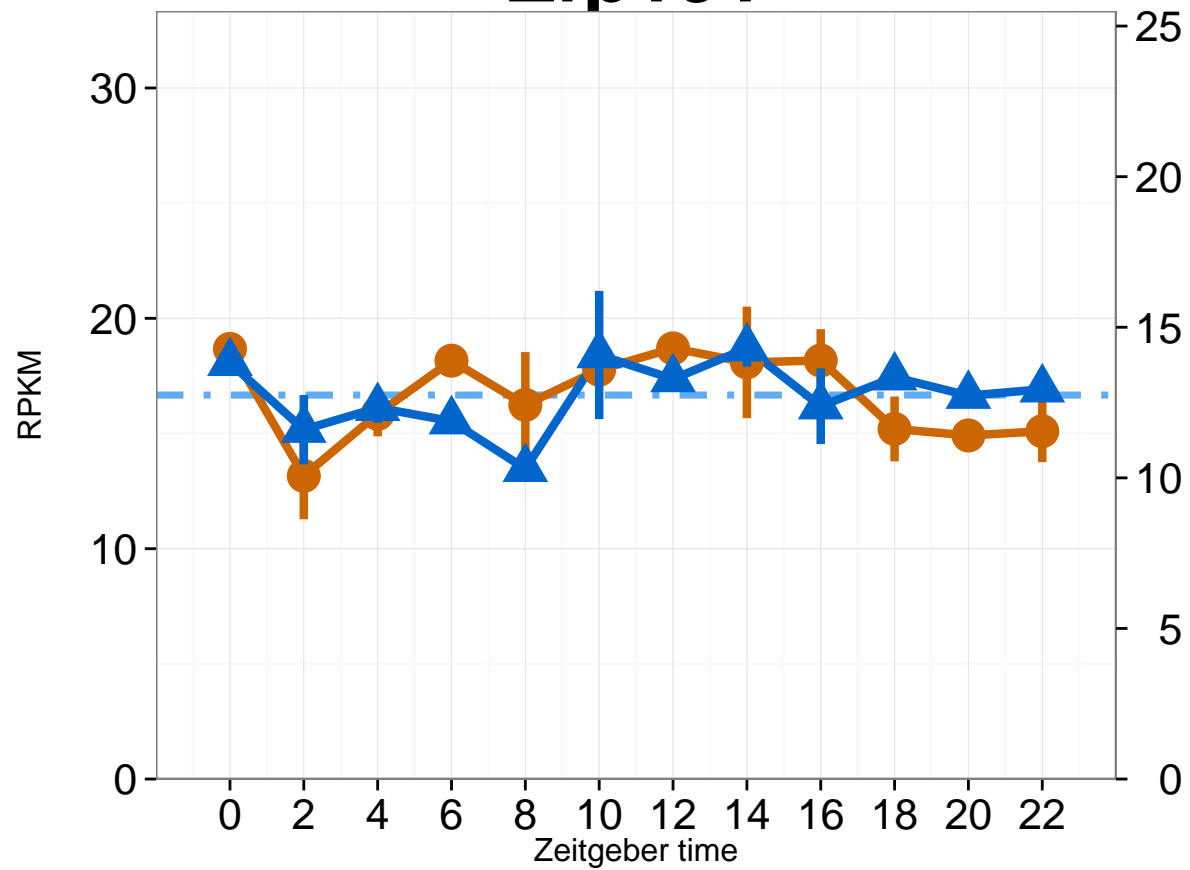

# Zfp191

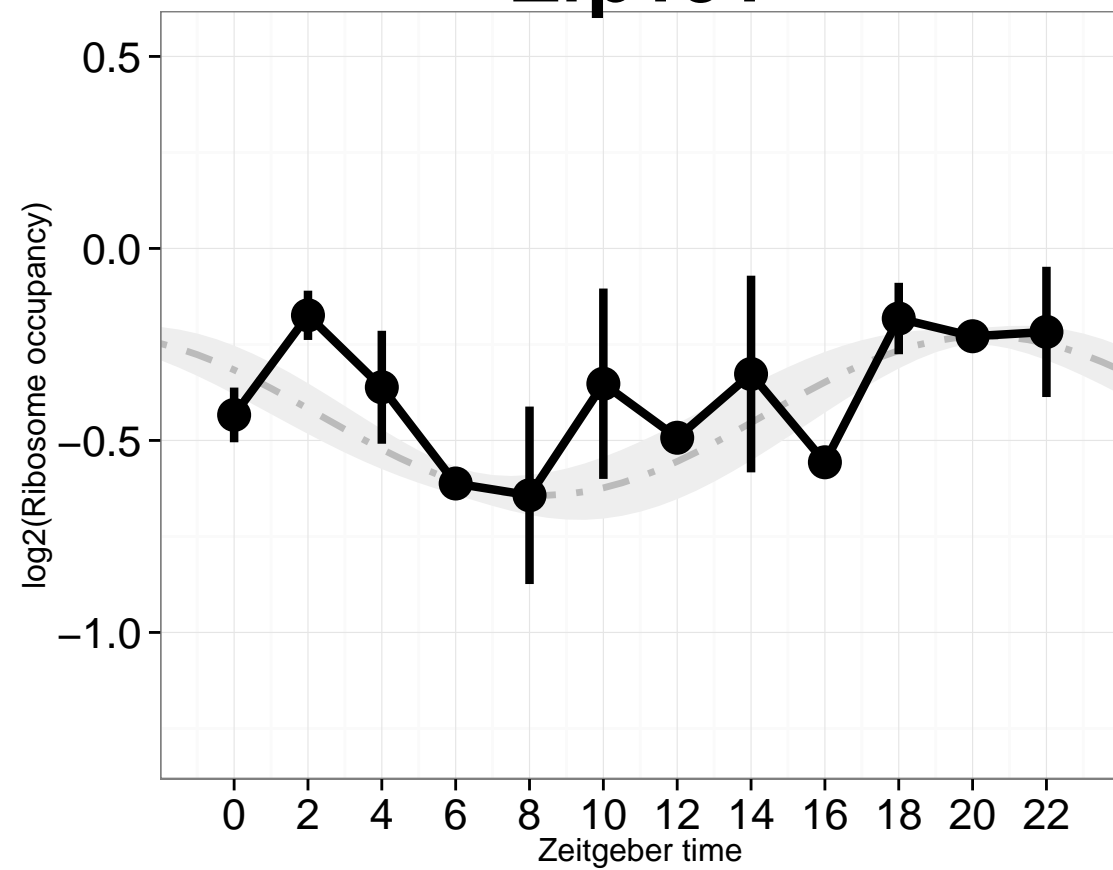

Supplement: SuppDataset_1.zip [file Zfp191_set_A.pdf › Supplemental Dataset 1/A-mRNA_nonrhyth_translation_nonrhyth/Zfp191_set_A.pdf]

# Zfp1

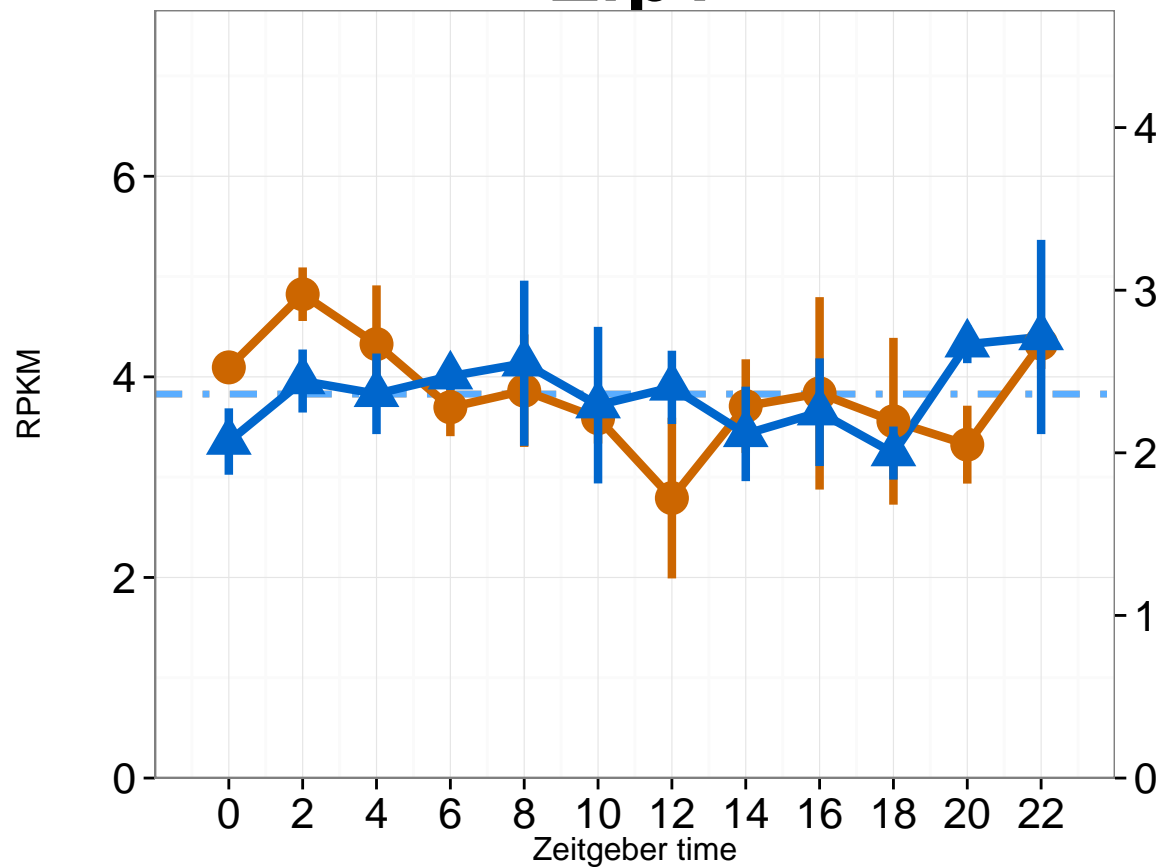

# Zfp1

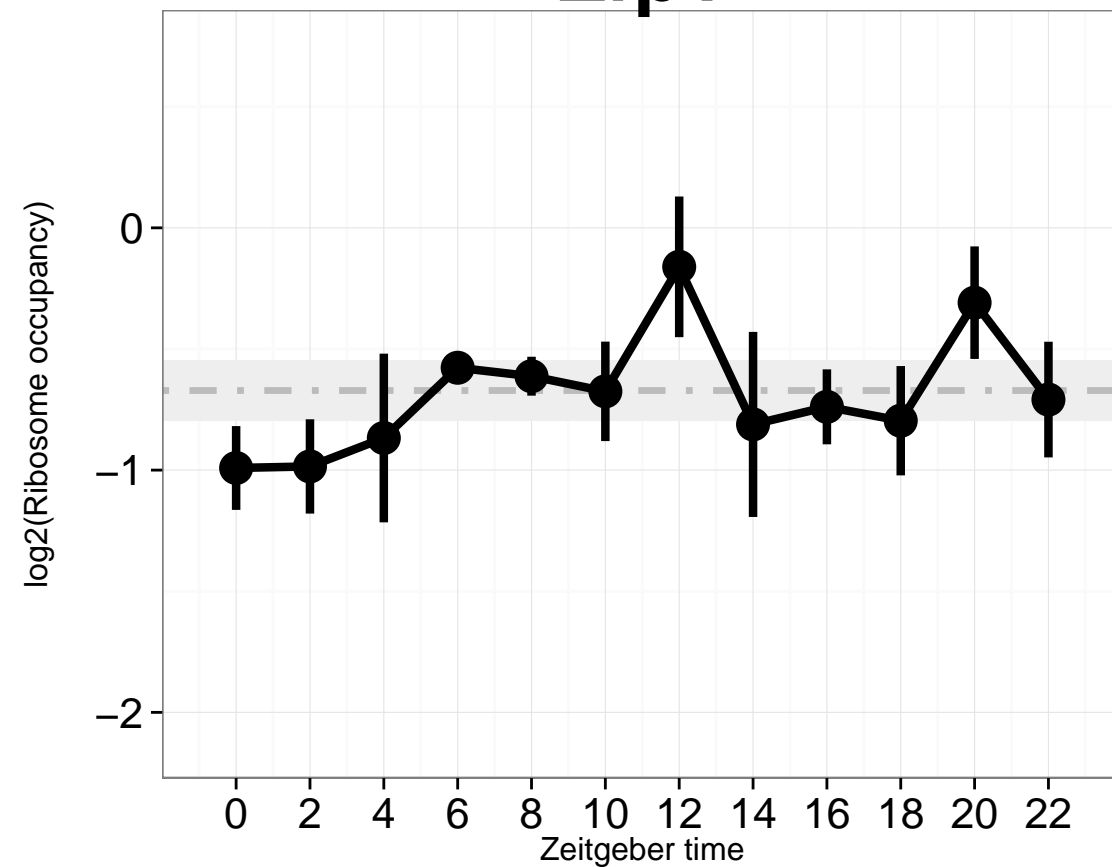

Supplement: SuppDataset_1.zip [file Zfp1_set_A.pdf › Supplemental Dataset 1/A-mRNA_nonrhyth_translation_nonrhyth/Zfp1_set_A.pdf]

# Zfp207

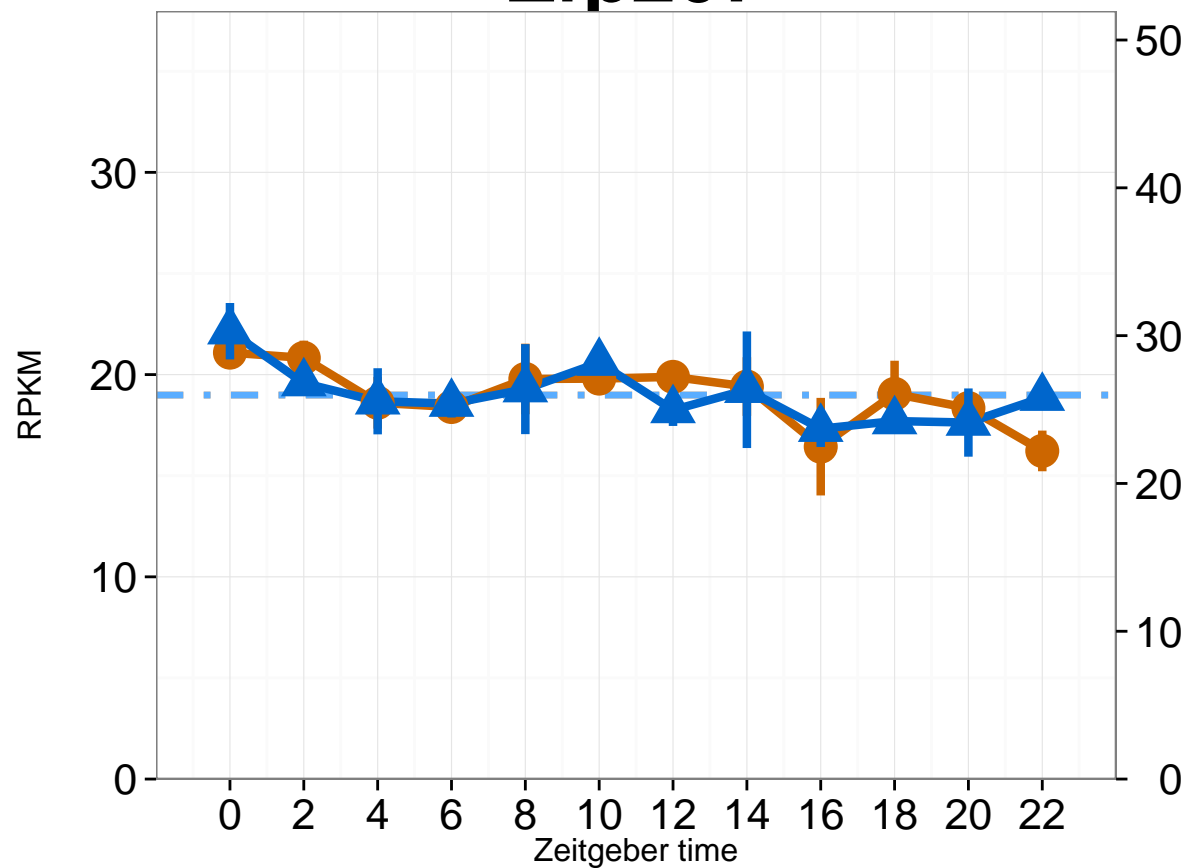

# Zfp207

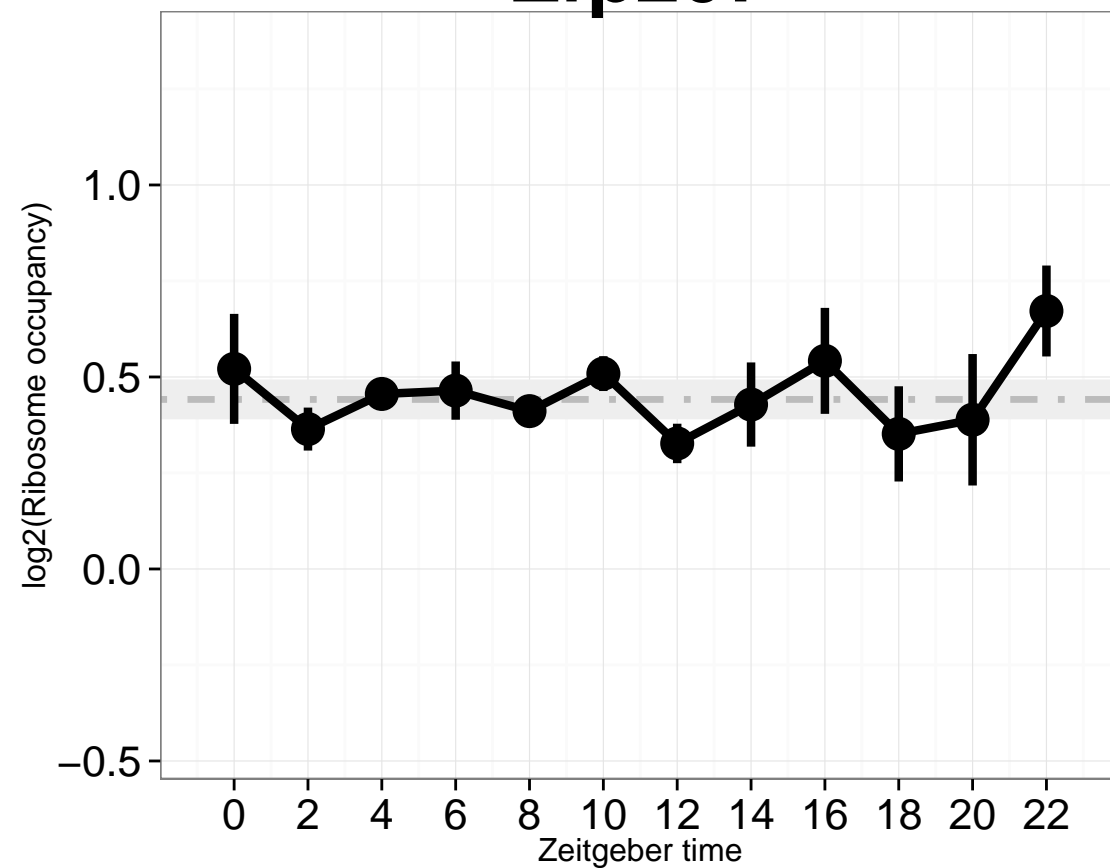

Supplement: SuppDataset_1.zip [file Zfp207_set_A.pdf › Supplemental Dataset 1/A-mRNA_nonrhyth_translation_nonrhyth/Zfp207_set_A.pdf]

# Zfp213

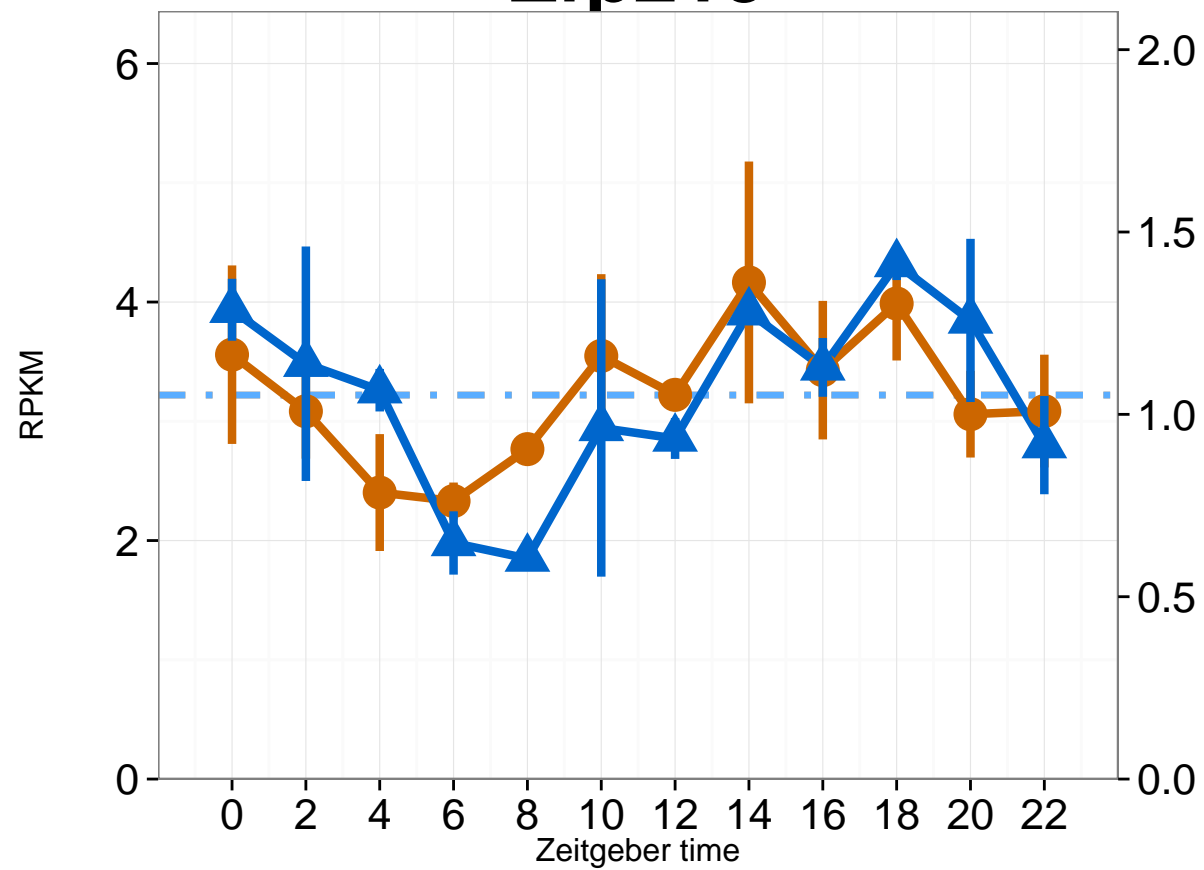

# Zfp213

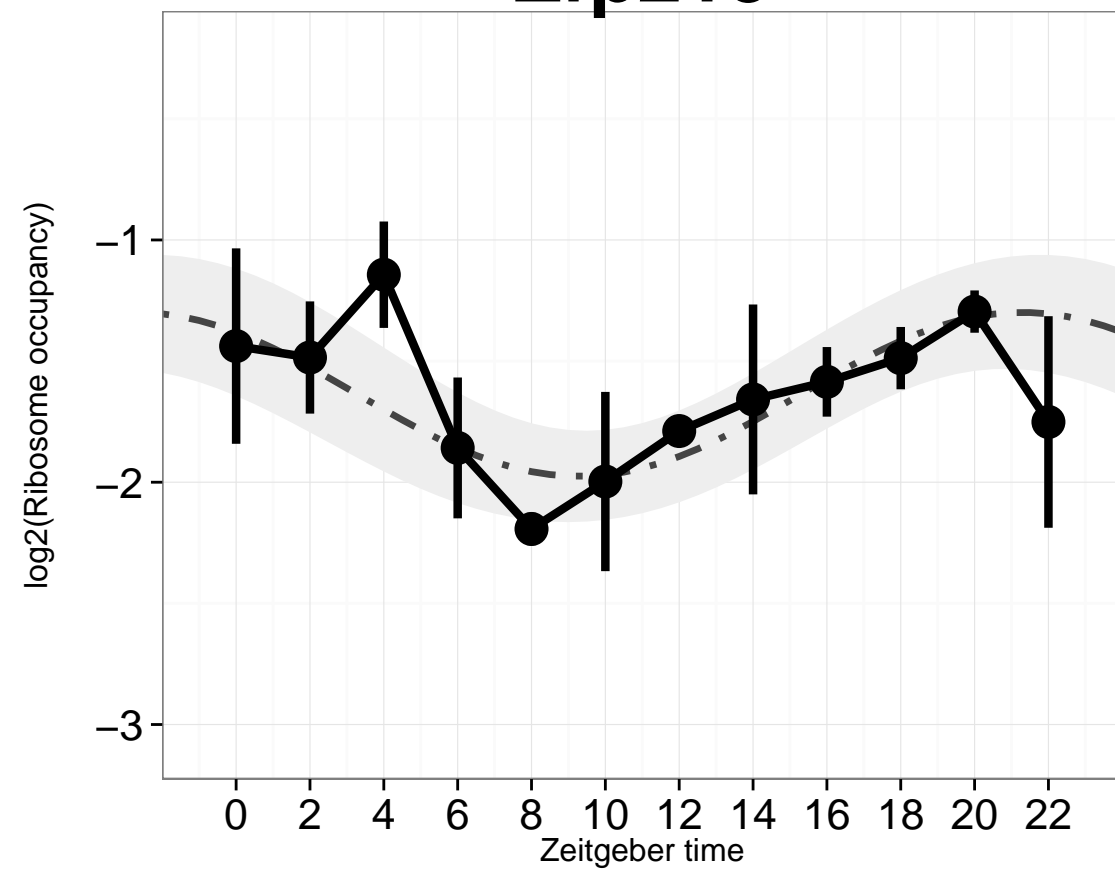

Supplement: SuppDataset_1.zip [file Zfp213_set_A.pdf › Supplemental Dataset 1/A-mRNA_nonrhyth_translation_nonrhyth/Zfp213_set_A.pdf]

# Zfp217

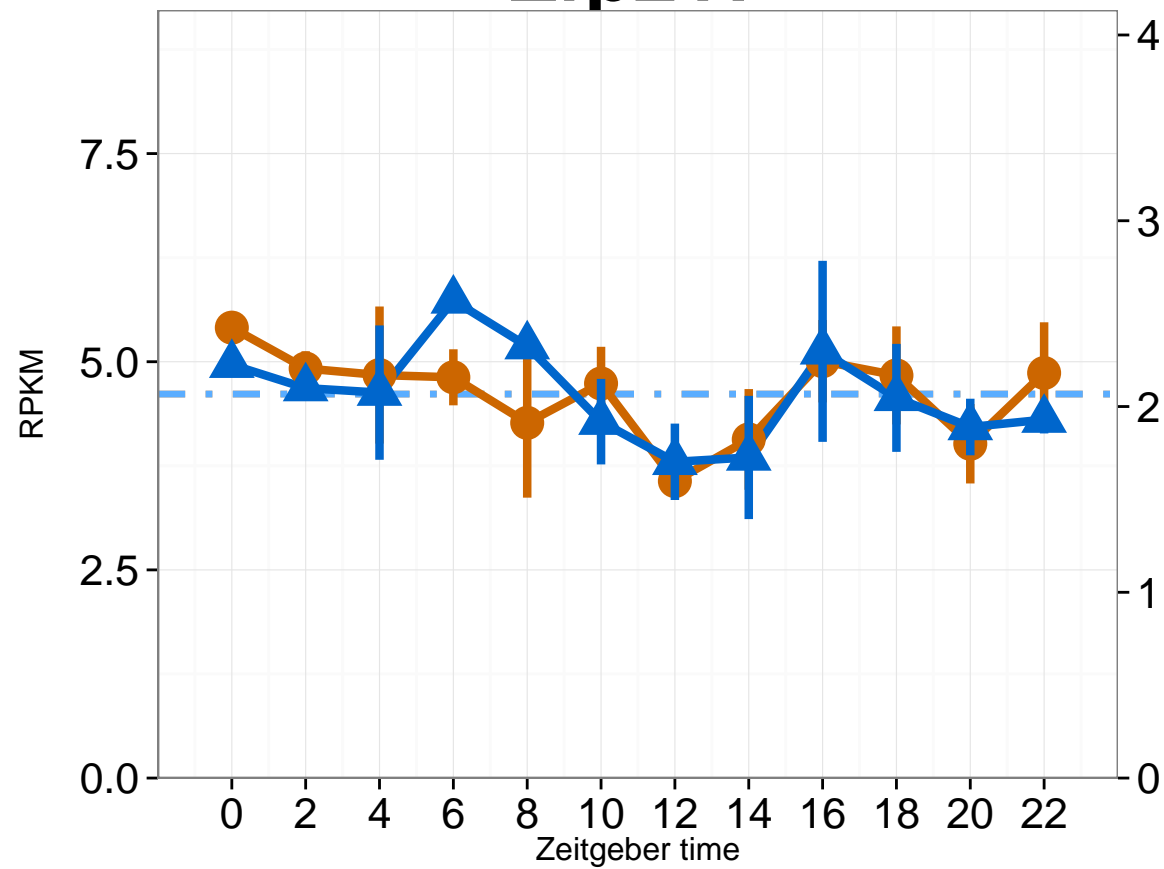

# Zfp217

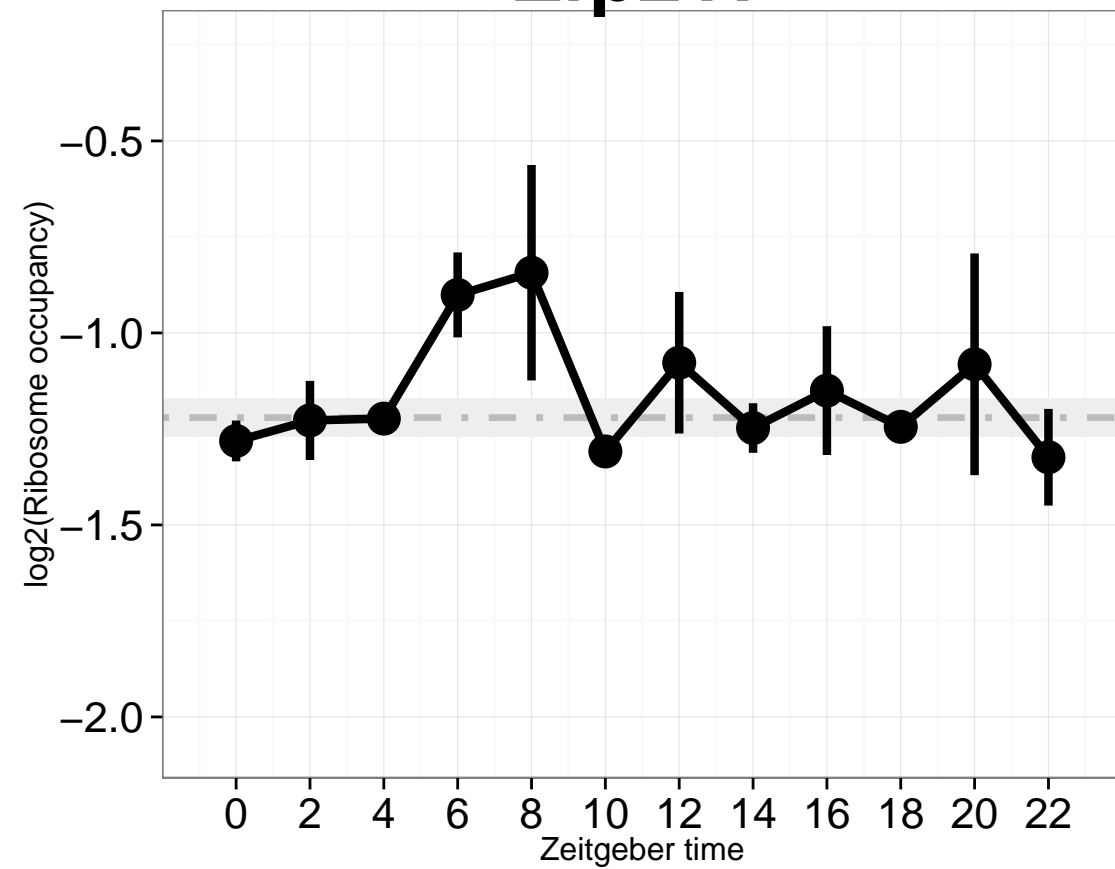

Supplement: SuppDataset_1.zip [file Zfp217_set_A.pdf › Supplemental Dataset 1/A-mRNA_nonrhyth_translation_nonrhyth/Zfp217_set_A.pdf]

# Zfp219

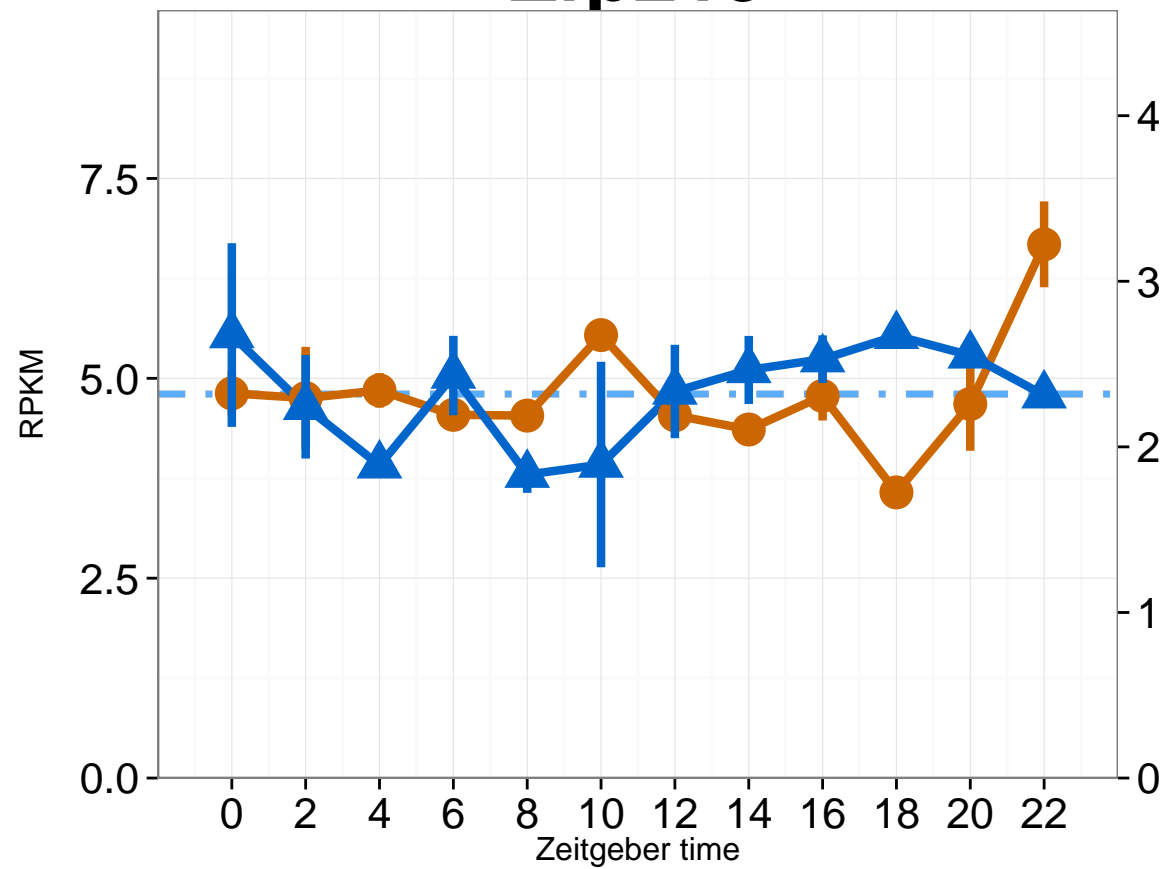

# Zfp219

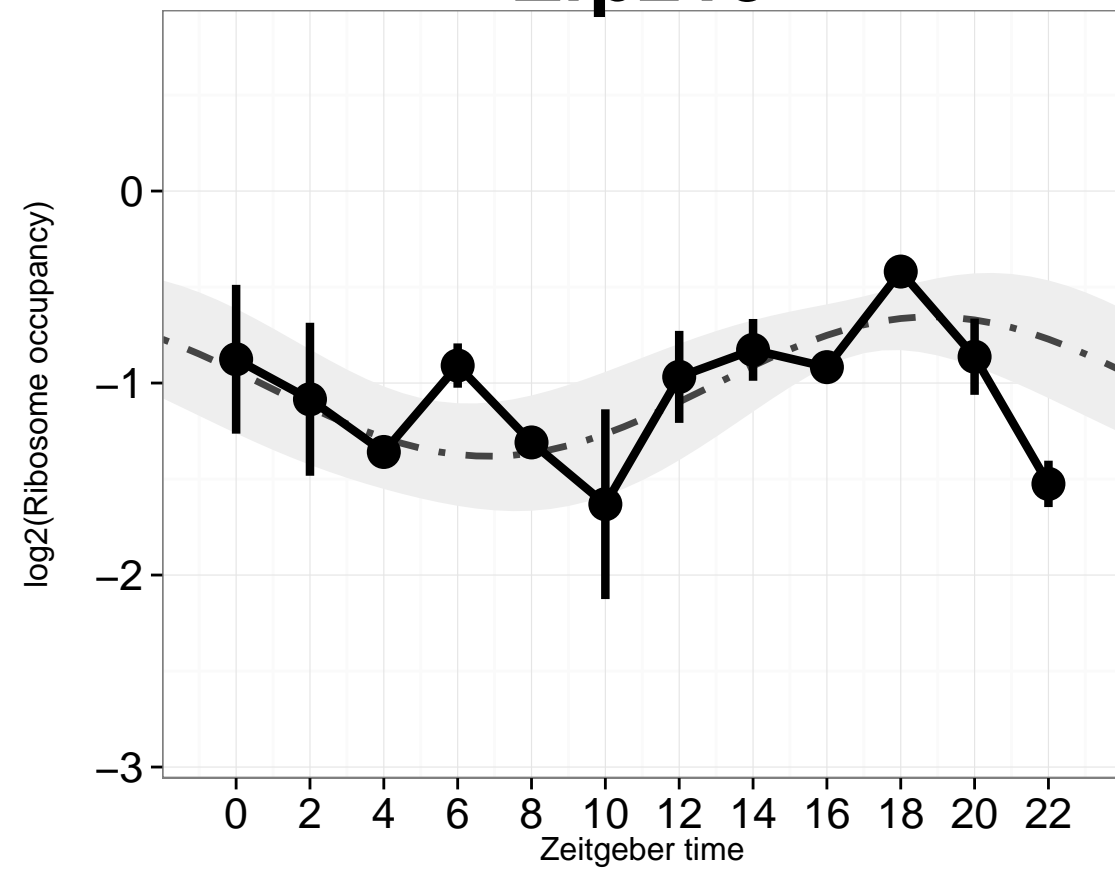

Supplement: SuppDataset_1.zip [file Zfp219_set_A.pdf › Supplemental Dataset 1/A-mRNA_nonrhyth_translation_nonrhyth/Zfp219_set_A.pdf]

# Zfp229

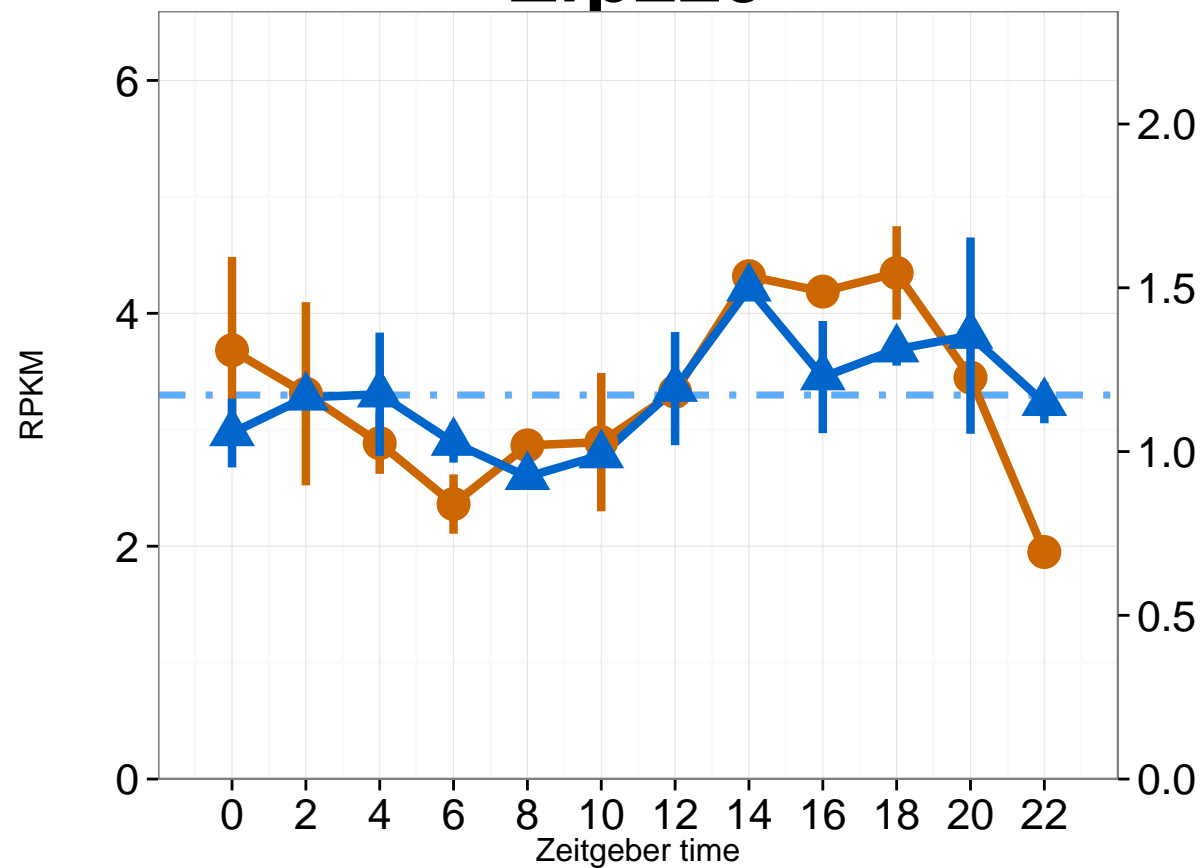

# Zfp229

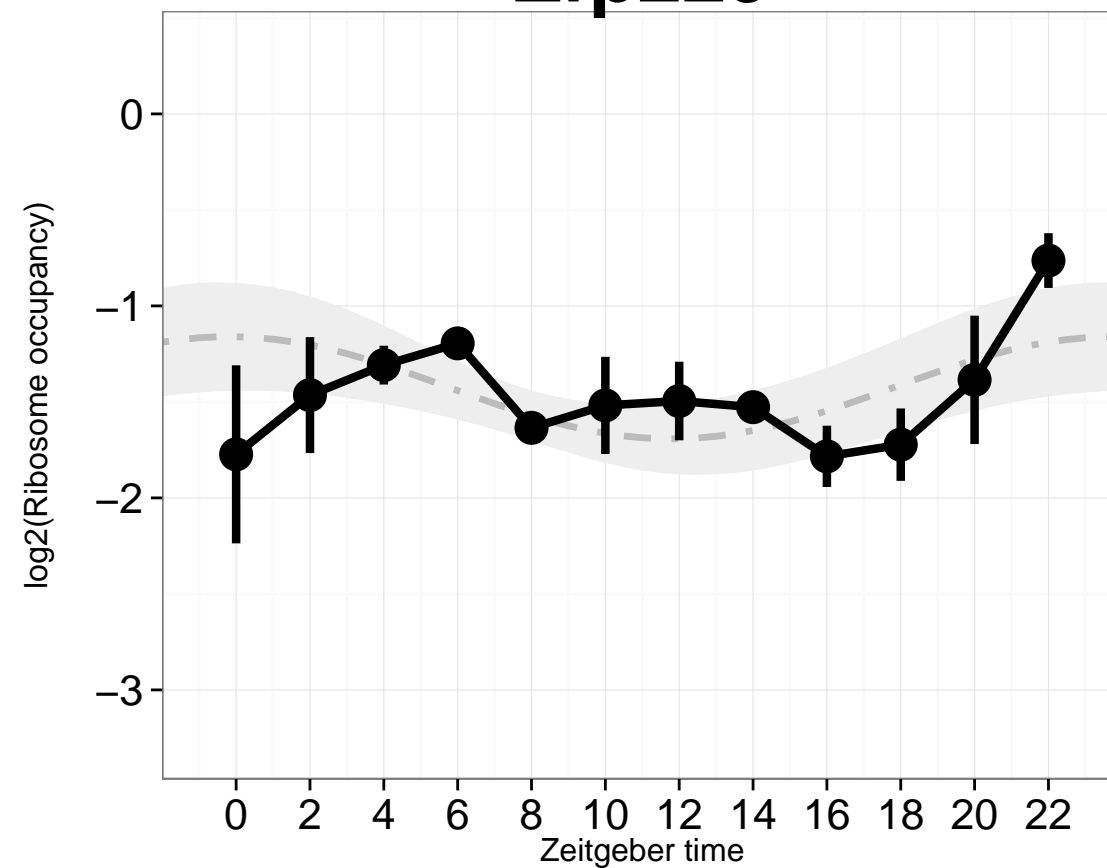

Supplement: SuppDataset_1.zip [file Zfp229_set_A.pdf › Supplemental Dataset 1/A-mRNA_nonrhyth_translation_nonrhyth/Zfp229_set_A.pdf]

# Zfp235

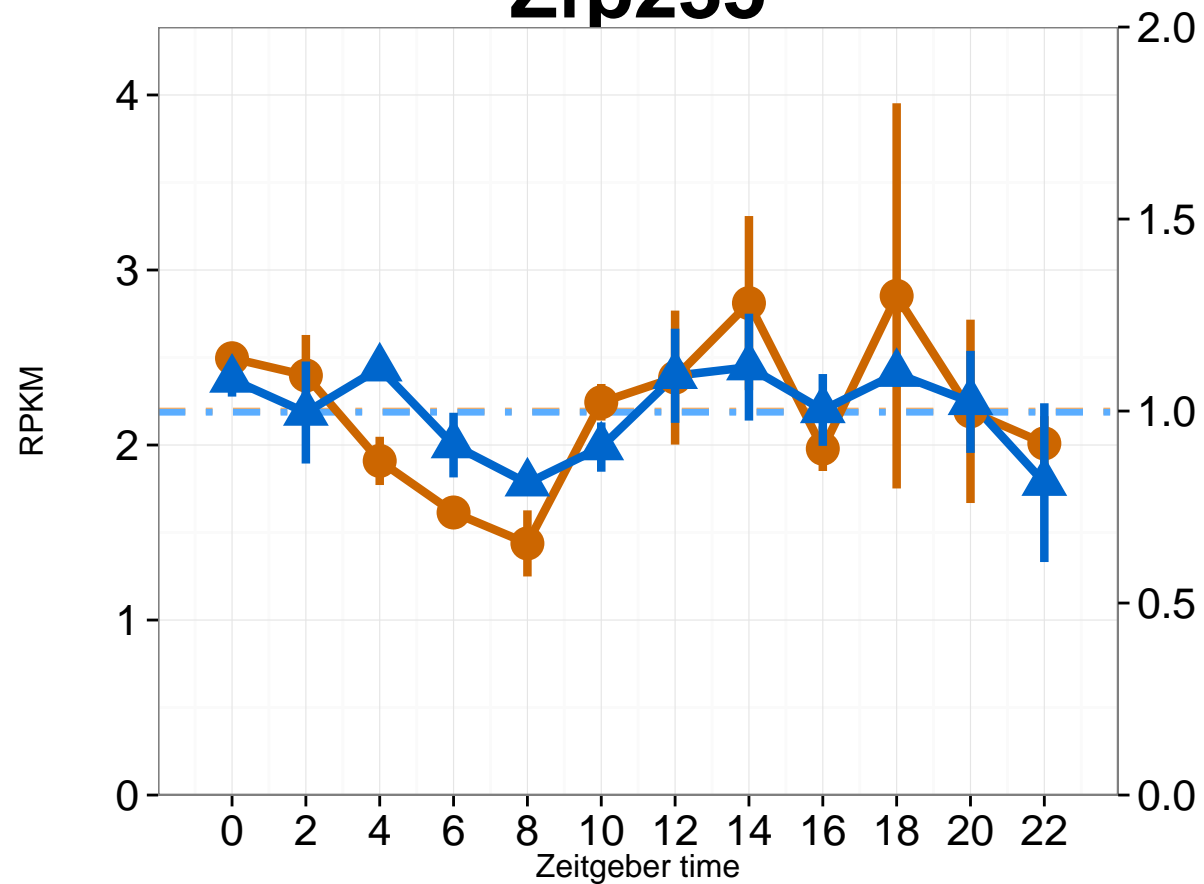

# Zfp235

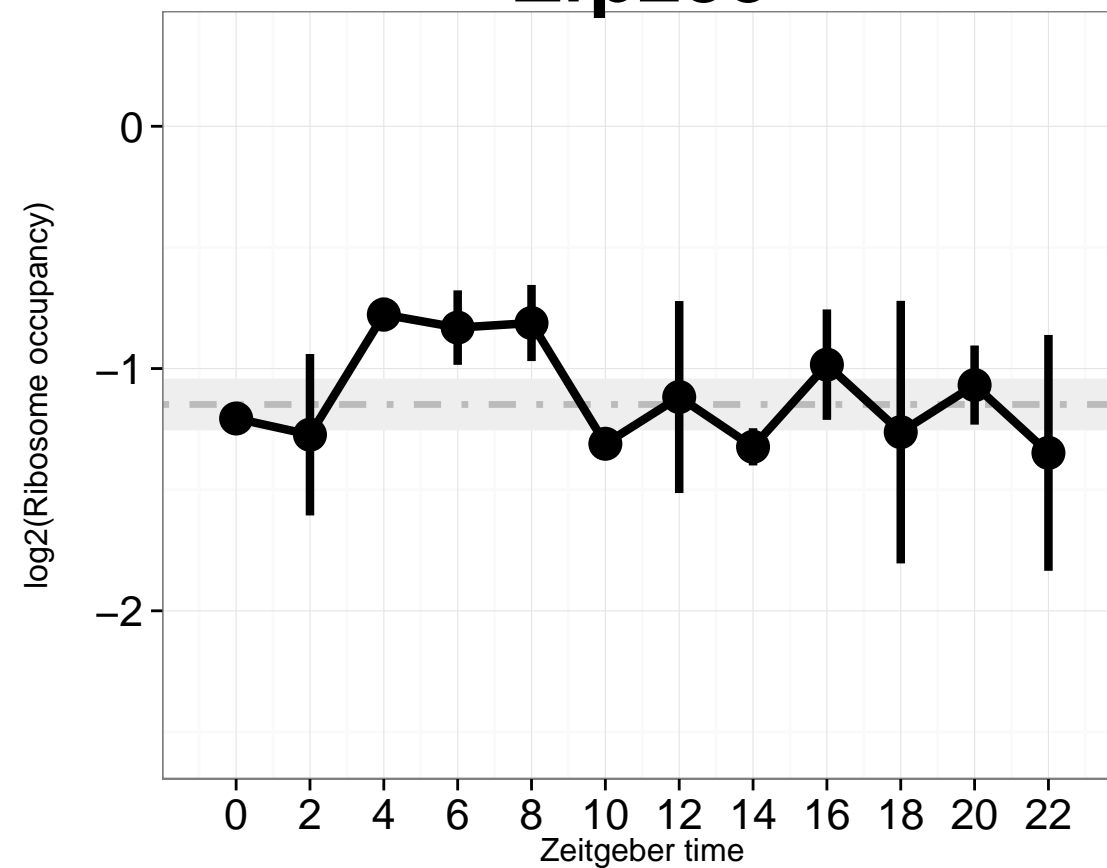

Supplement: SuppDataset_1.zip [file Zfp235_set_A.pdf › Supplemental Dataset 1/A-mRNA_nonrhyth_translation_nonrhyth/Zfp235_set_A.pdf]

# Zfp236

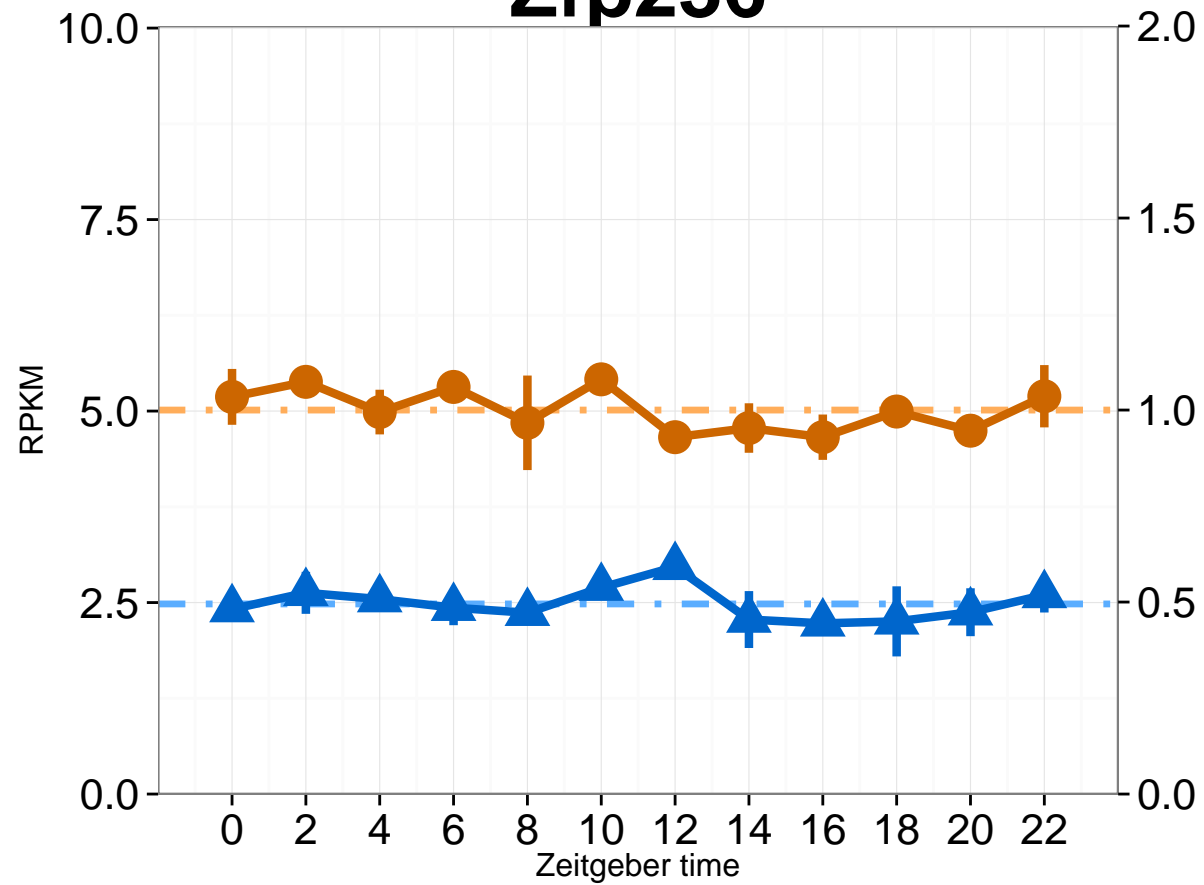

# Zfp236

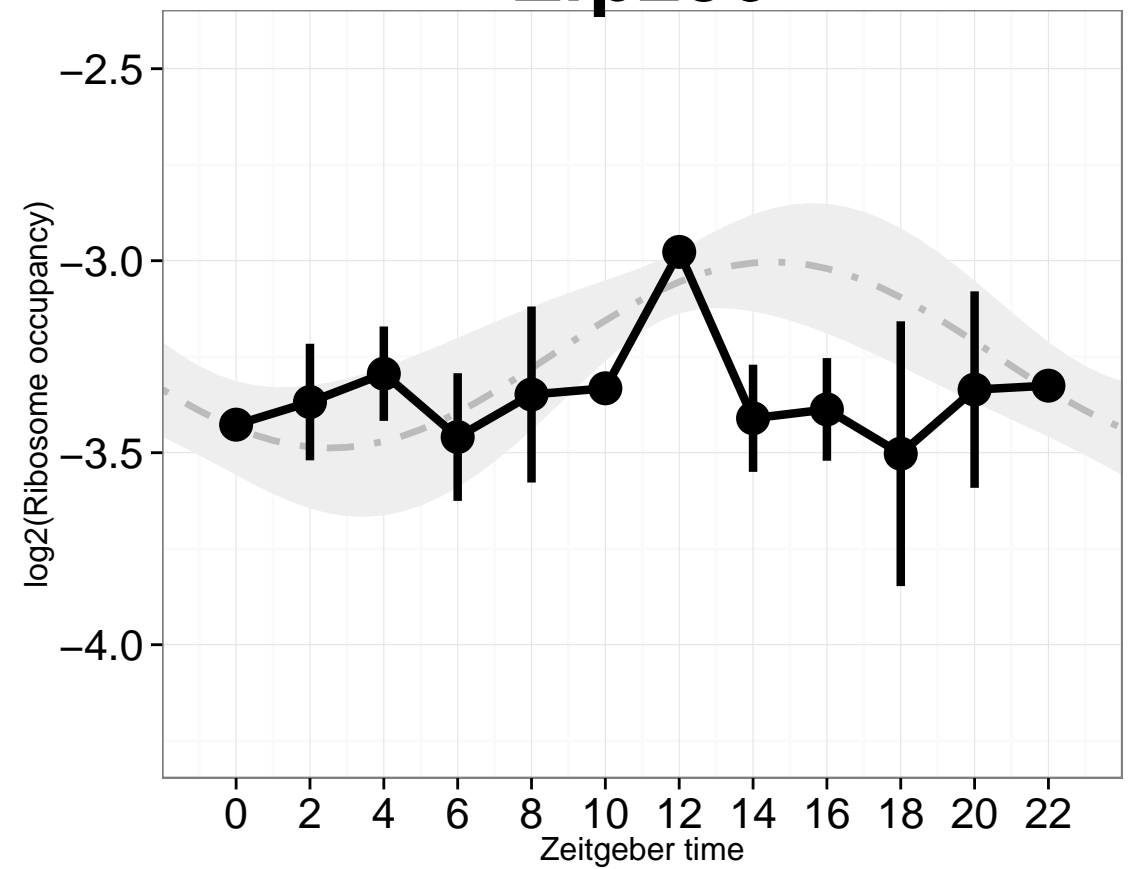

Supplement: SuppDataset_1.zip [file Zfp236_set_A.pdf › Supplemental Dataset 1/A-mRNA_nonrhyth_translation_nonrhyth/Zfp236_set_A.pdf]

## Zfp251

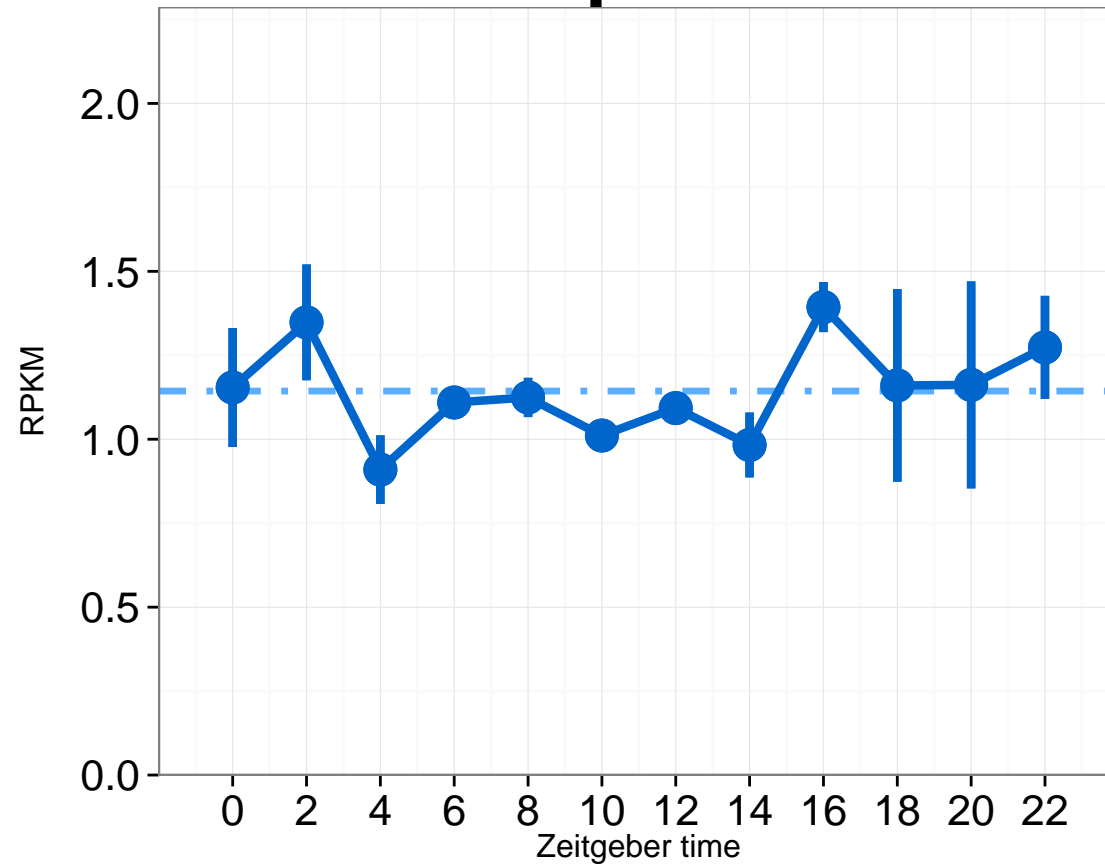

## Zfp251 log2(Ribosome occupancy

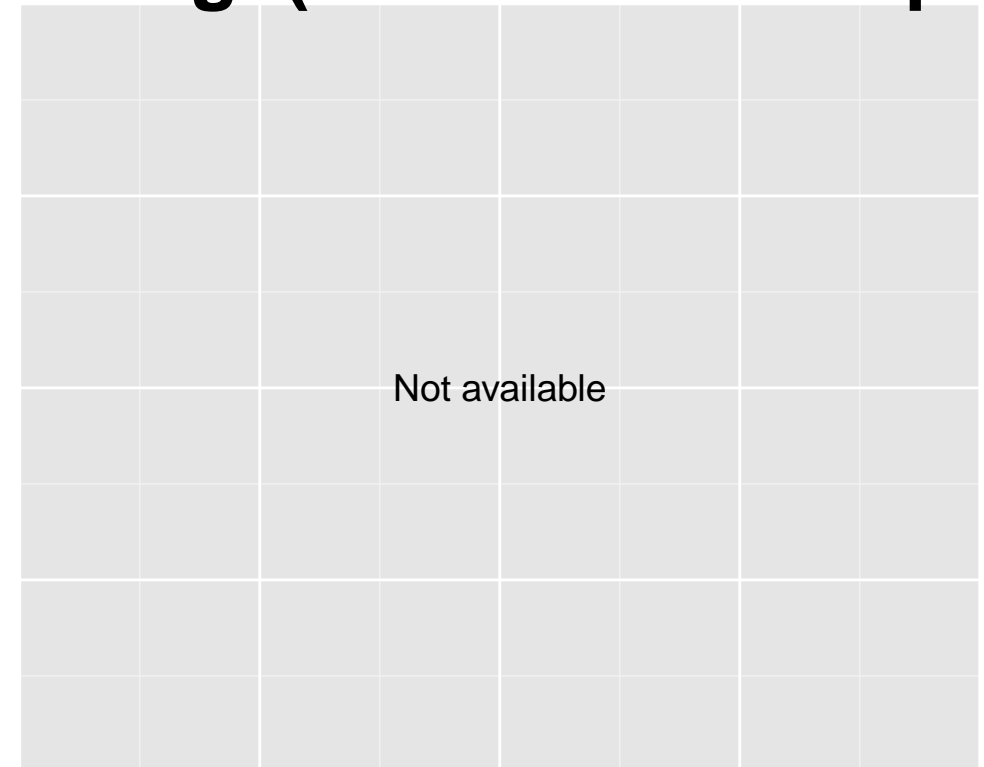

Supplement: SuppDataset_1.zip [file Zfp251_set_A.pdf › Supplemental Dataset 1/A-mRNA_nonrhyth_translation_nonrhyth/Zfp251_set_A.pdf]

# Zfp259

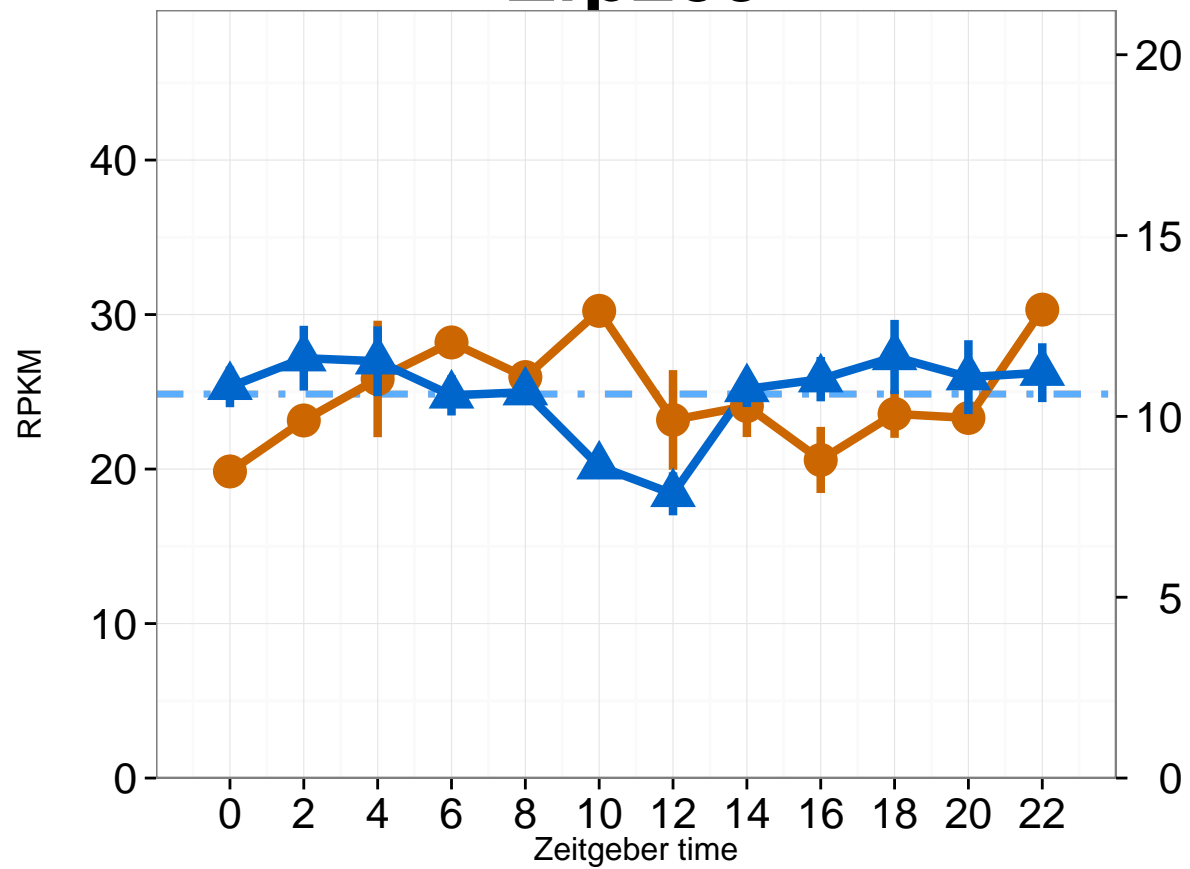

# Zfp259

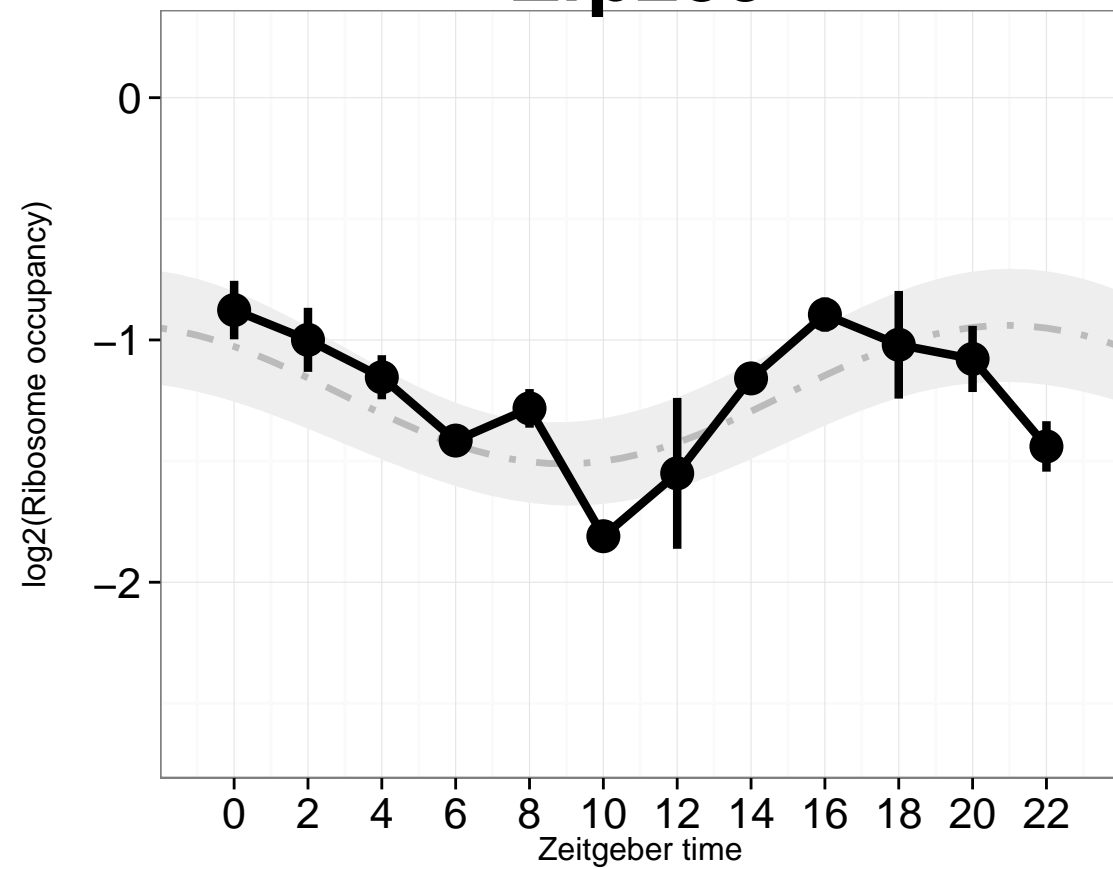

Supplement: SuppDataset_1.zip [file Zfp259_set_A.pdf › Supplemental Dataset 1/A-mRNA_nonrhyth_translation_nonrhyth/Zfp259_set_A.pdf]

# Zfp260

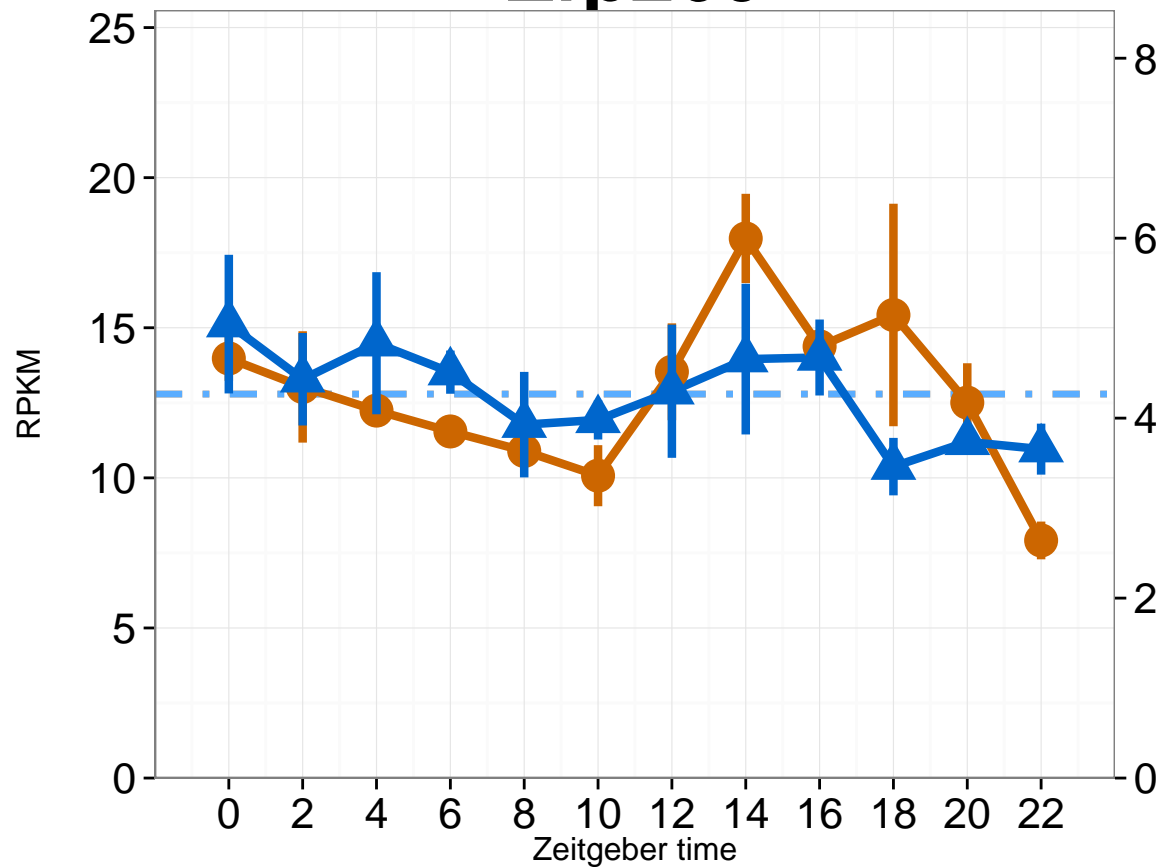

# Zfp260

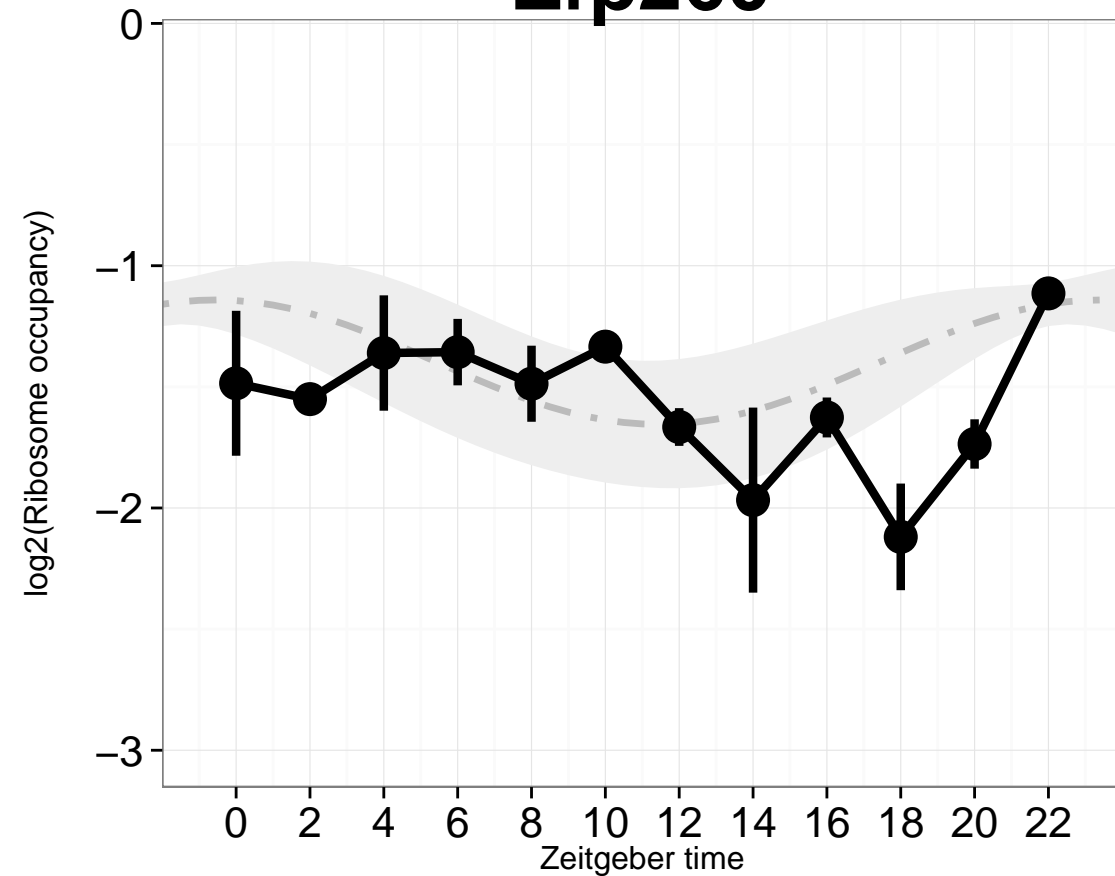

Supplement: SuppDataset_1.zip [file Zfp260_set_A.pdf › Supplemental Dataset 1/A-mRNA_nonrhyth_translation_nonrhyth/Zfp260_set_A.pdf]

# Zfp263

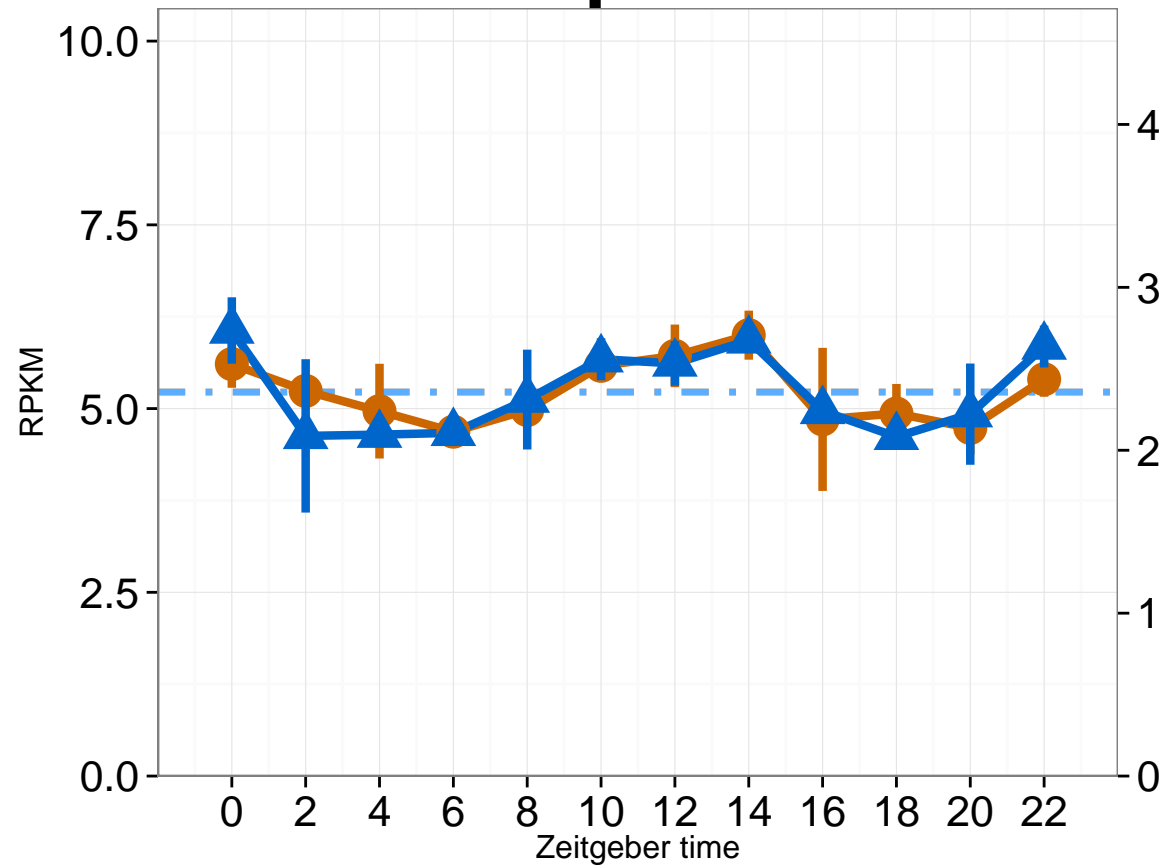

# Zfp263

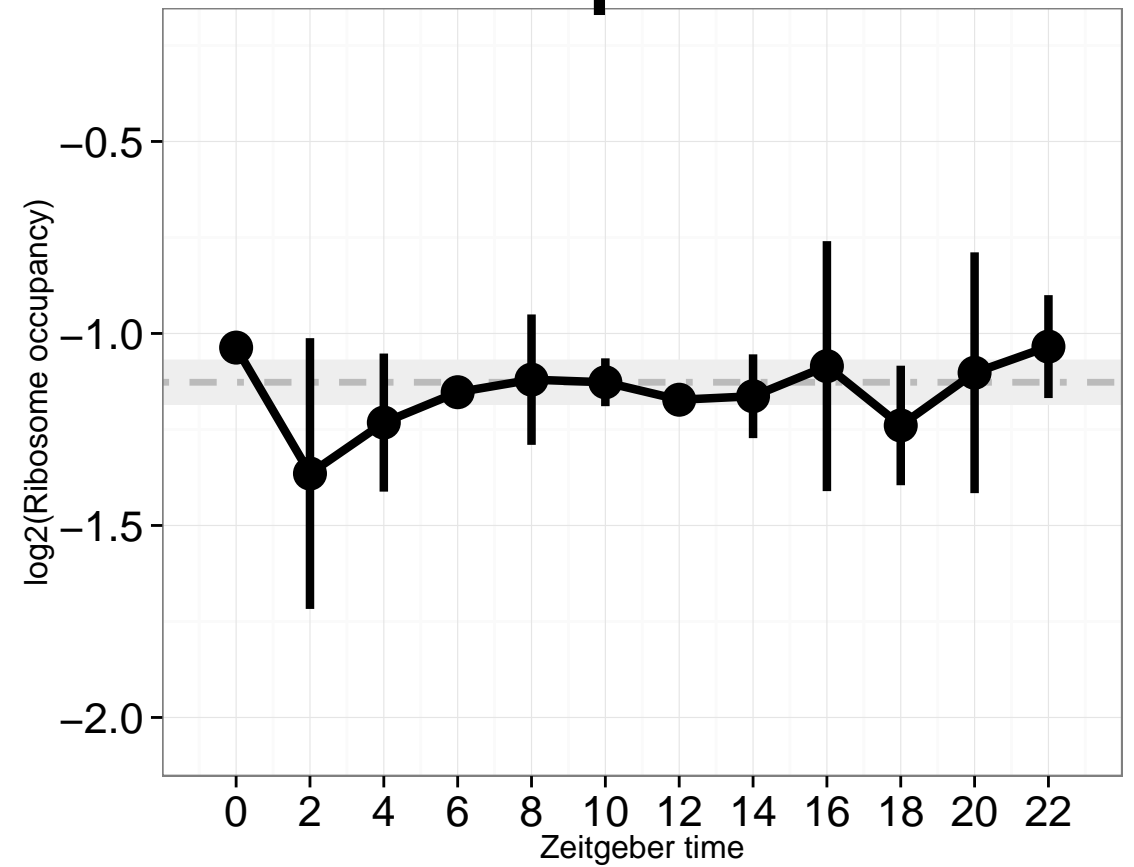

Supplement: SuppDataset_1.zip [file Zfp263_set_A.pdf › Supplemental Dataset 1/A-mRNA_nonrhyth_translation_nonrhyth/Zfp263_set_A.pdf]

# Zfp266

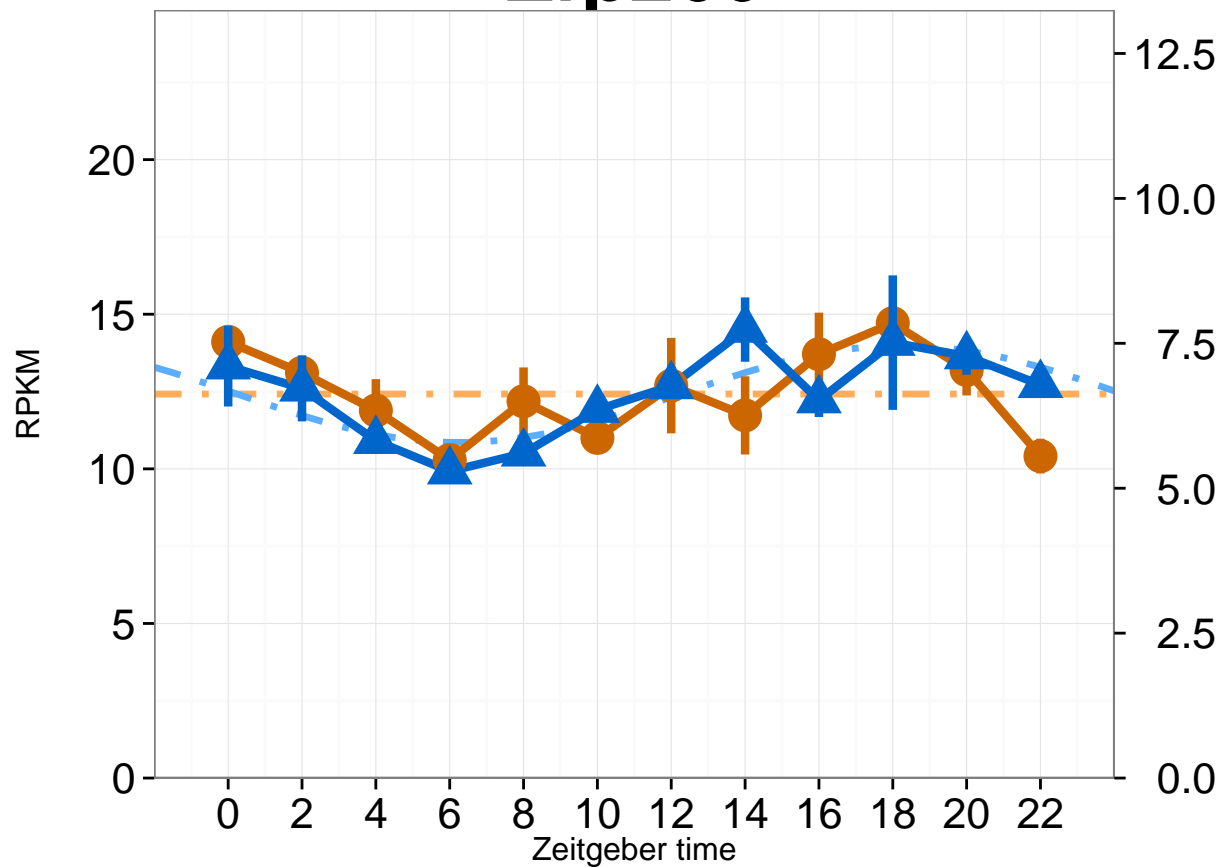

# Zfp266

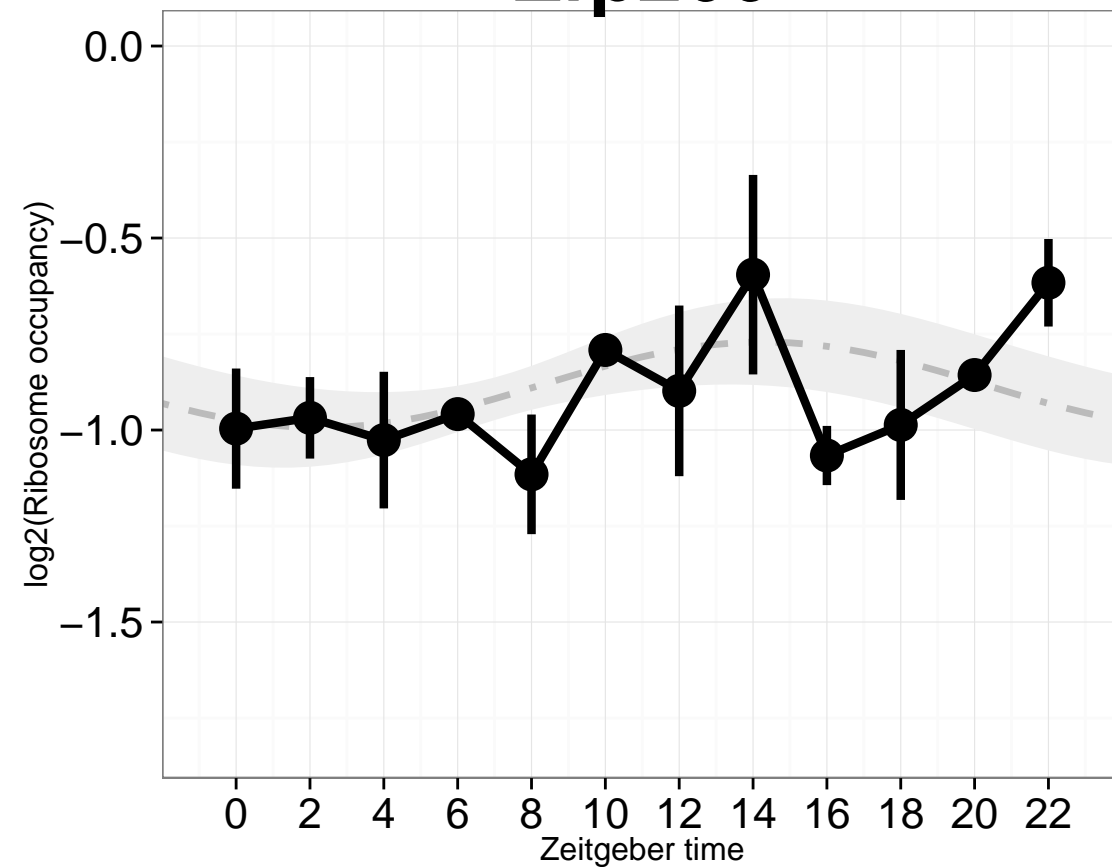

Supplement: SuppDataset_1.zip [file Zfp266_set_A.pdf › Supplemental Dataset 1/A-mRNA_nonrhyth_translation_nonrhyth/Zfp266_set_A.pdf]

# Zfp273

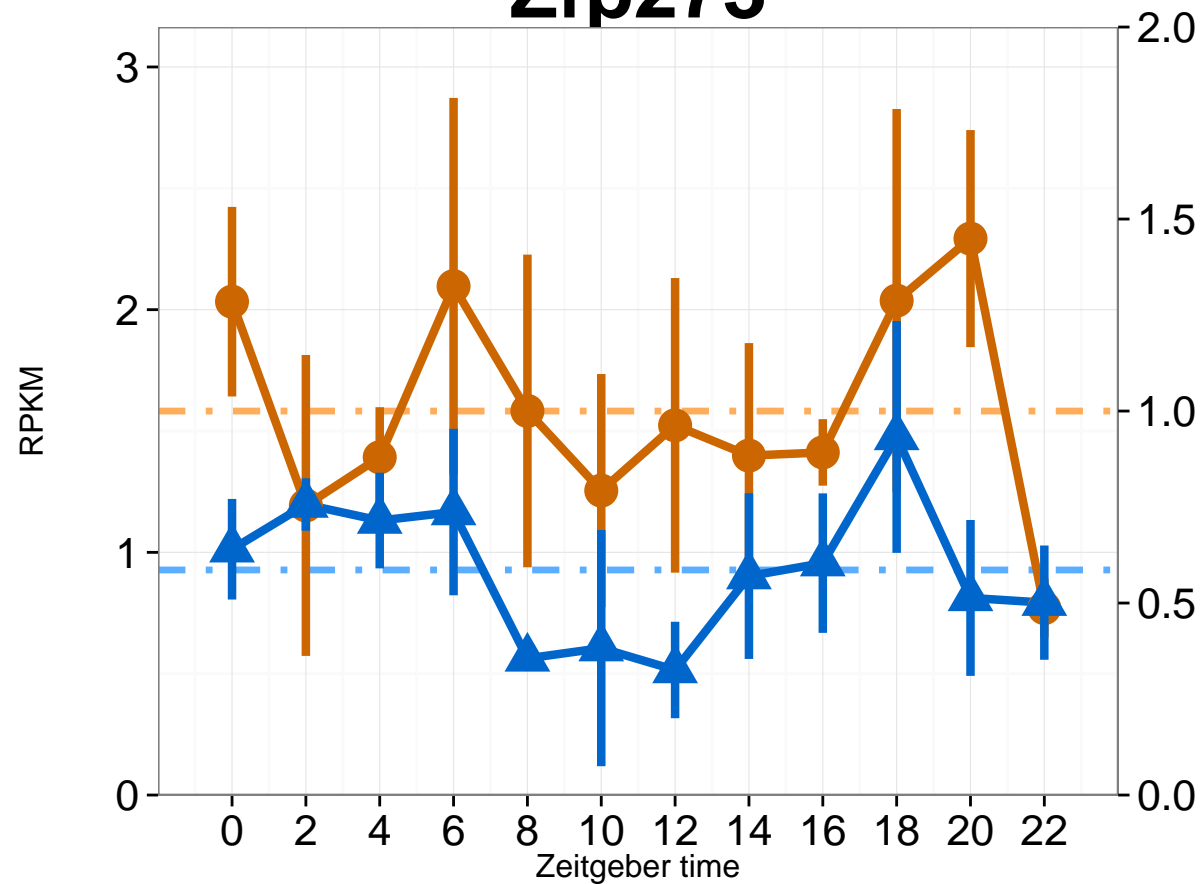

# Zfp273

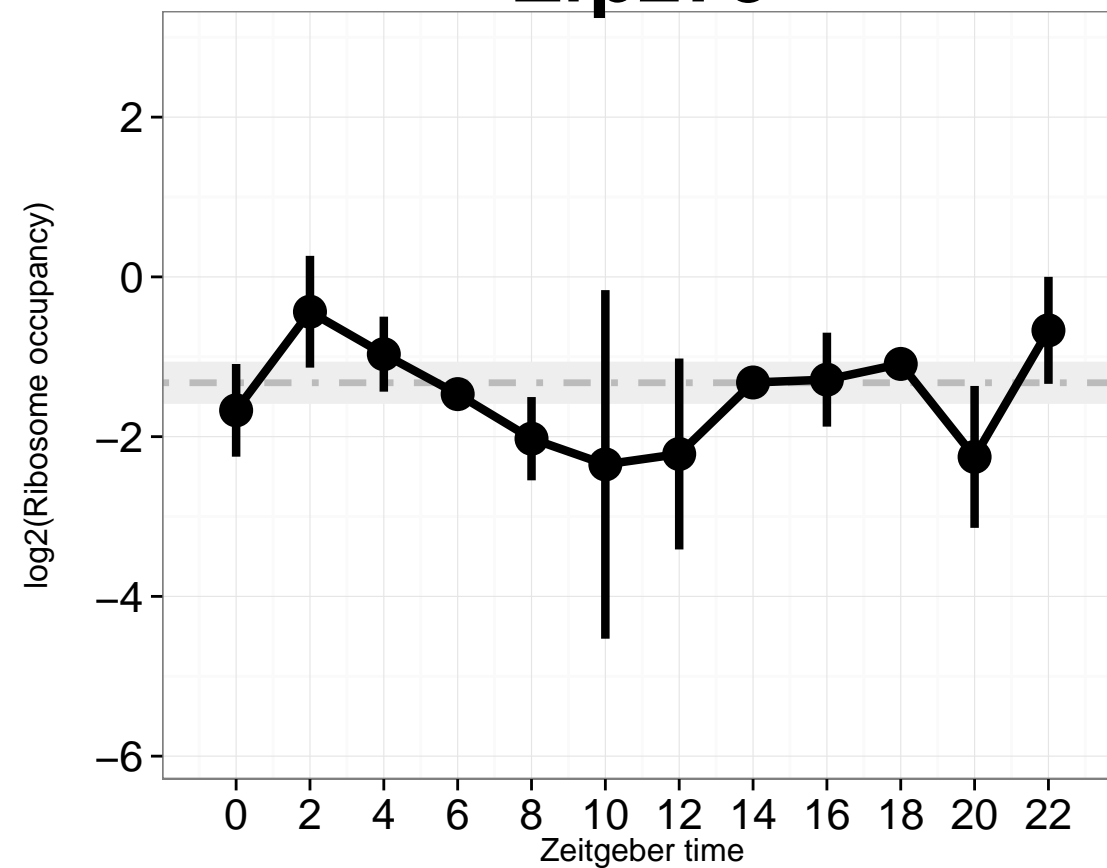

Supplement: SuppDataset_1.zip [file Zfp273_set_A.pdf › Supplemental Dataset 1/A-mRNA_nonrhyth_translation_nonrhyth/Zfp273_set_A.pdf]

# Zfp275

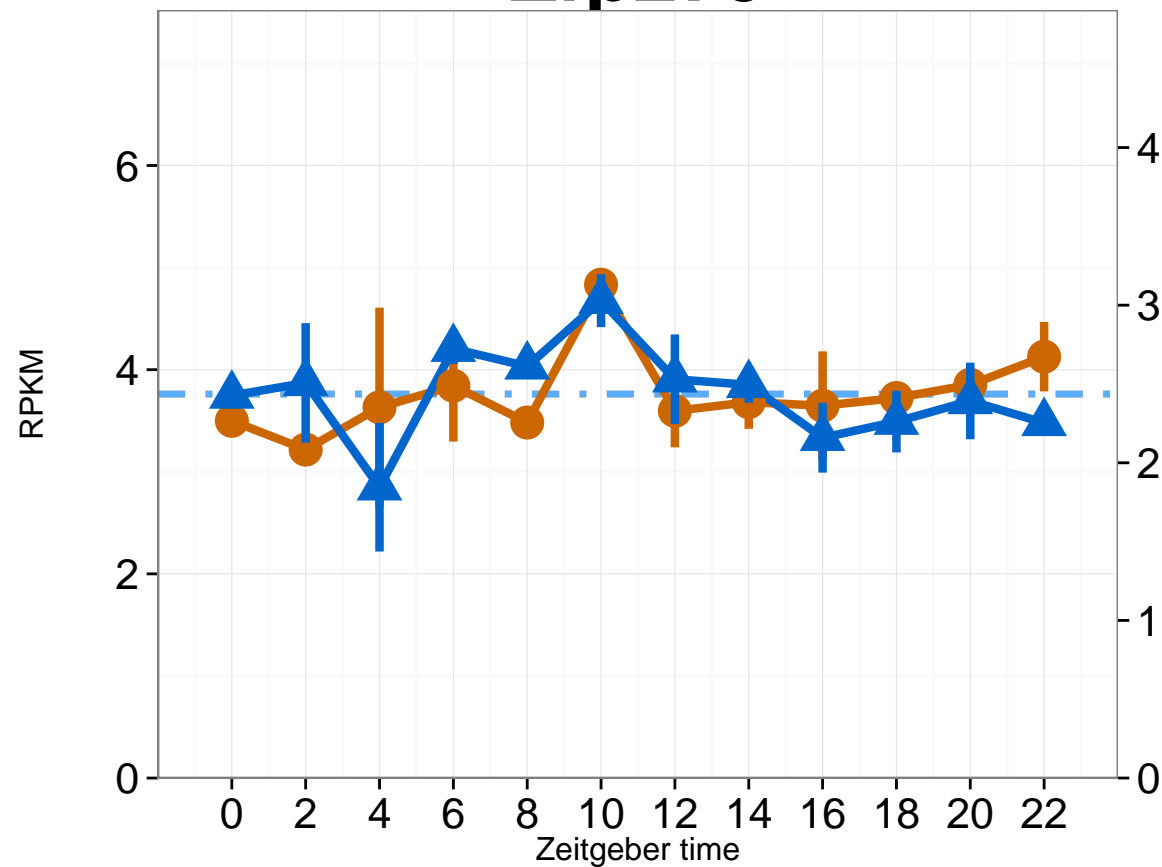

# Zfp275

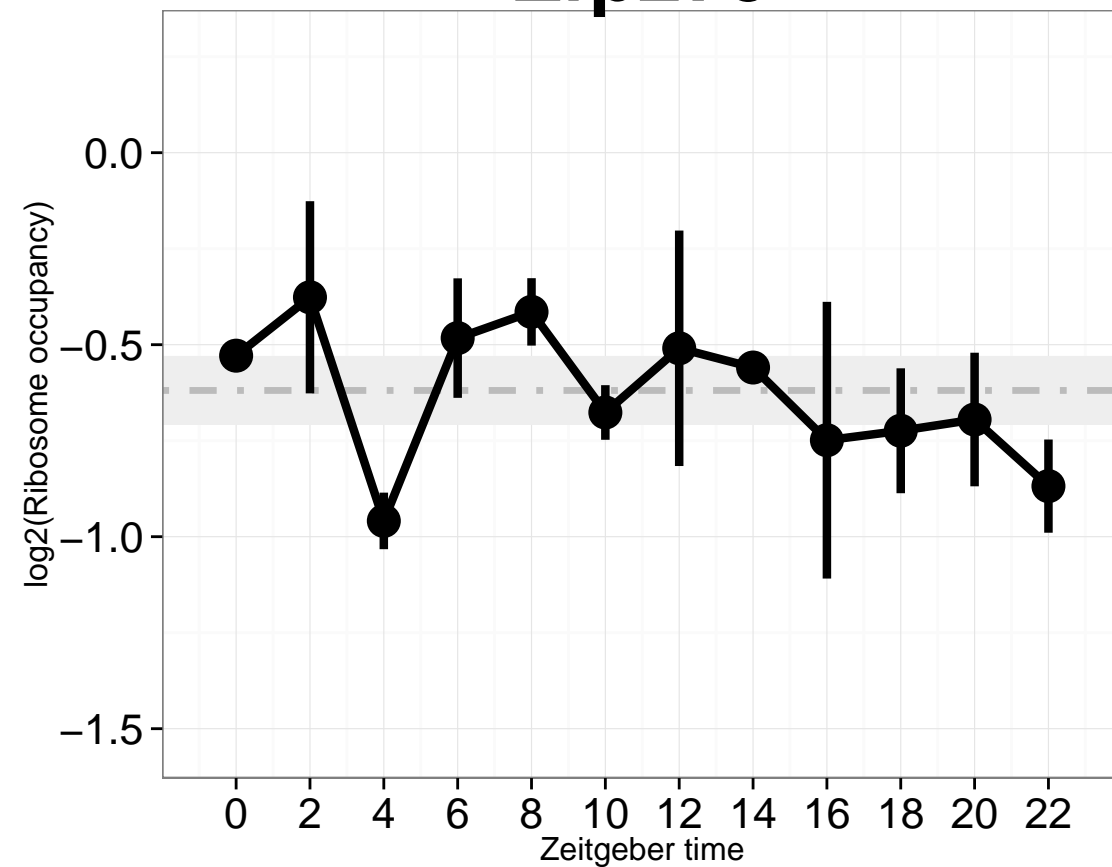

Supplement: SuppDataset_1.zip [file Zfp275_set_A.pdf › Supplemental Dataset 1/A-mRNA_nonrhyth_translation_nonrhyth/Zfp275_set_A.pdf]

# Zfp277

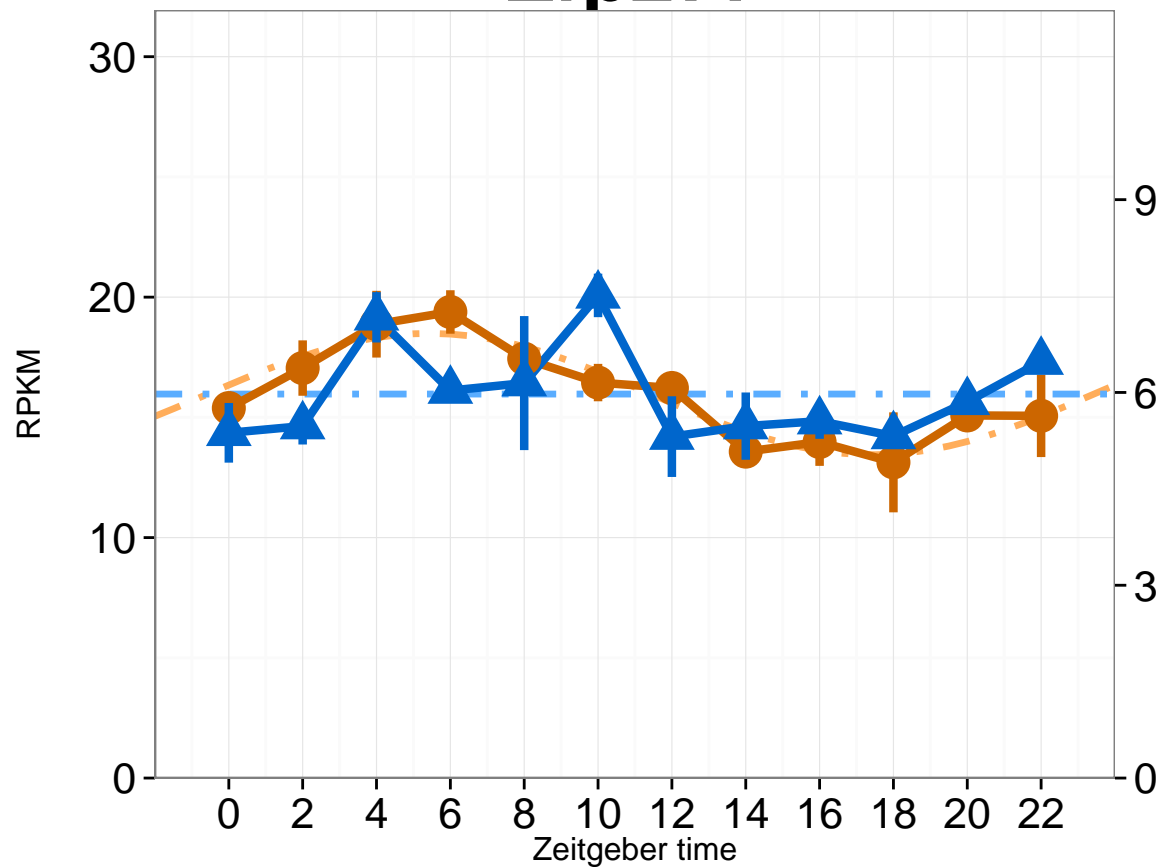

# Zfp277

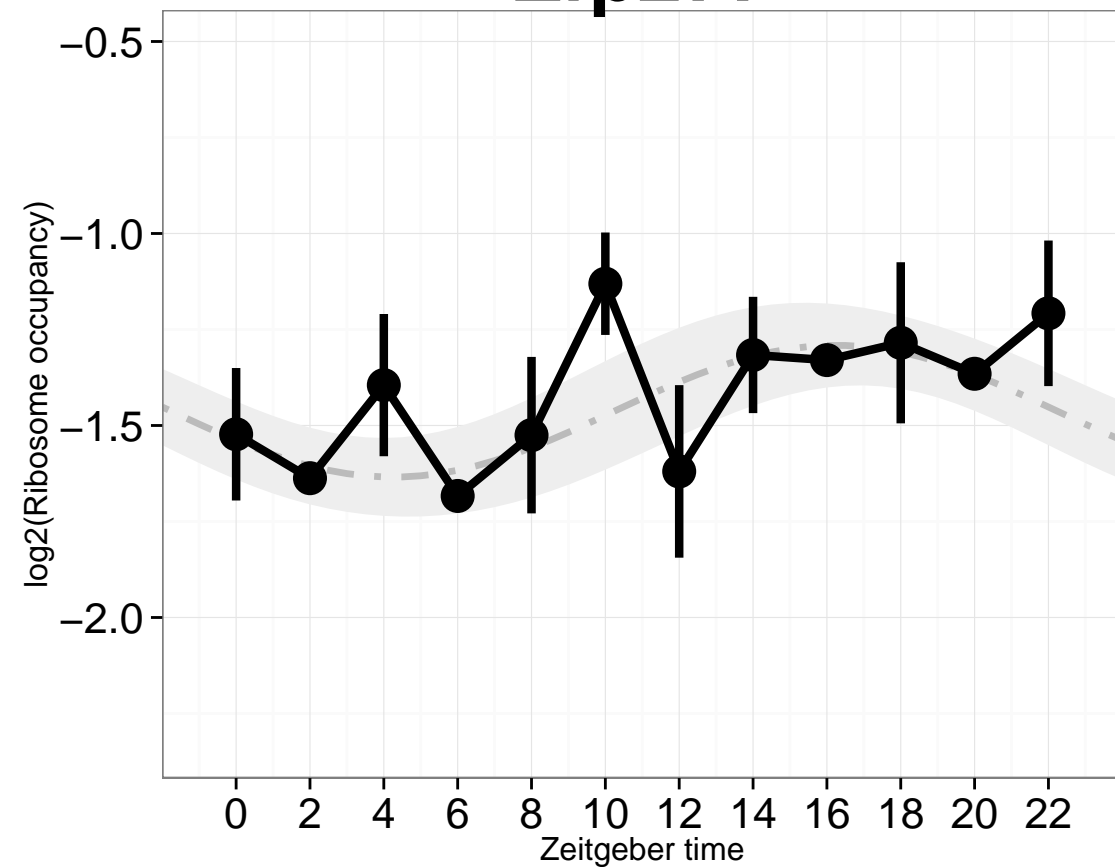

Supplement: SuppDataset_1.zip [file Zfp277_set_A.pdf › Supplemental Dataset 1/A-mRNA_nonrhyth_translation_nonrhyth/Zfp277_set_A.pdf]

# Zfp27

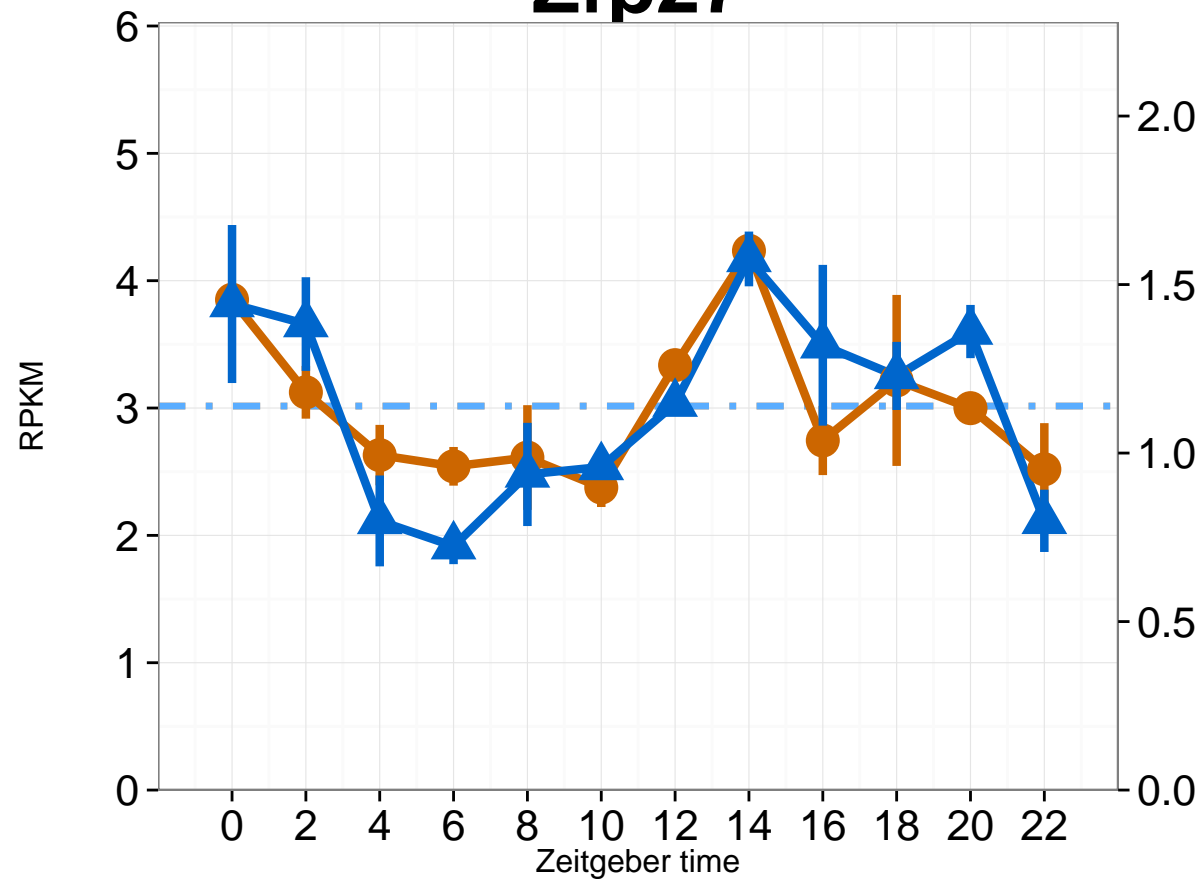

# Zfp27

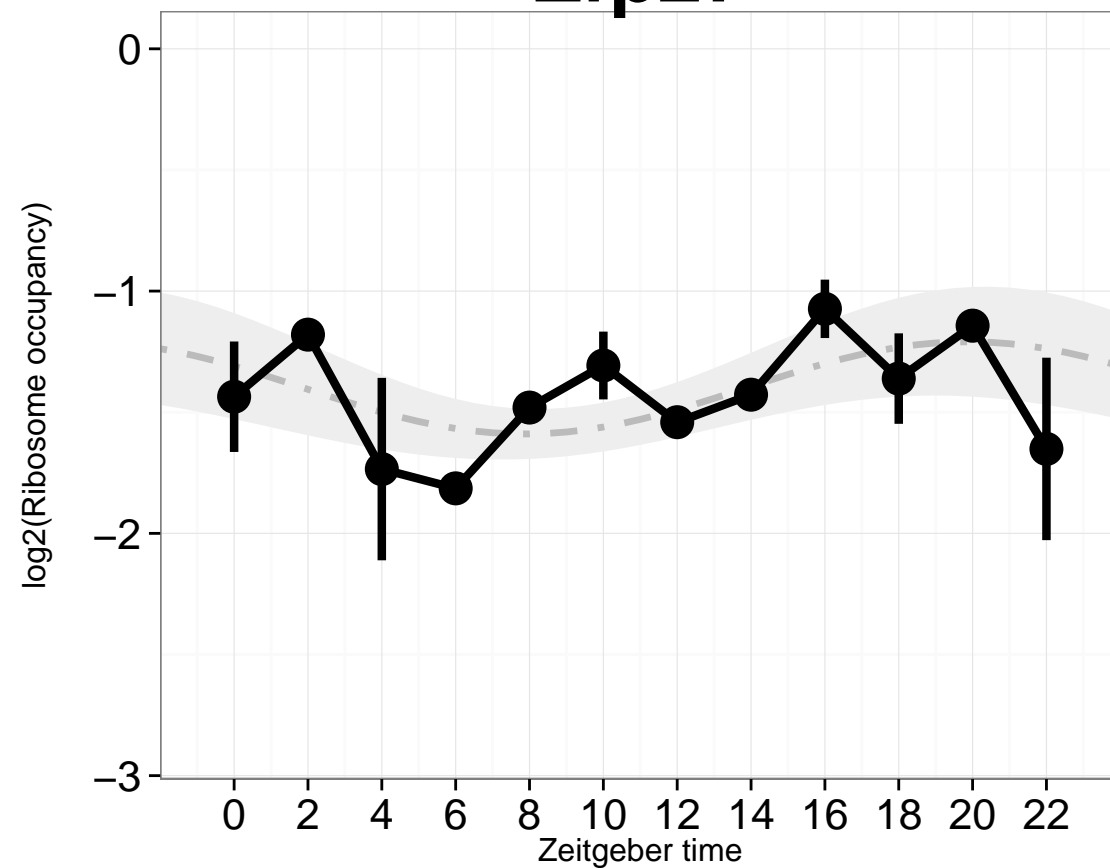

Supplement: SuppDataset_1.zip [file Zfp27_set_A.pdf › Supplemental Dataset 1/A-mRNA_nonrhyth_translation_nonrhyth/Zfp27_set_A.pdf]

# Zfp280b

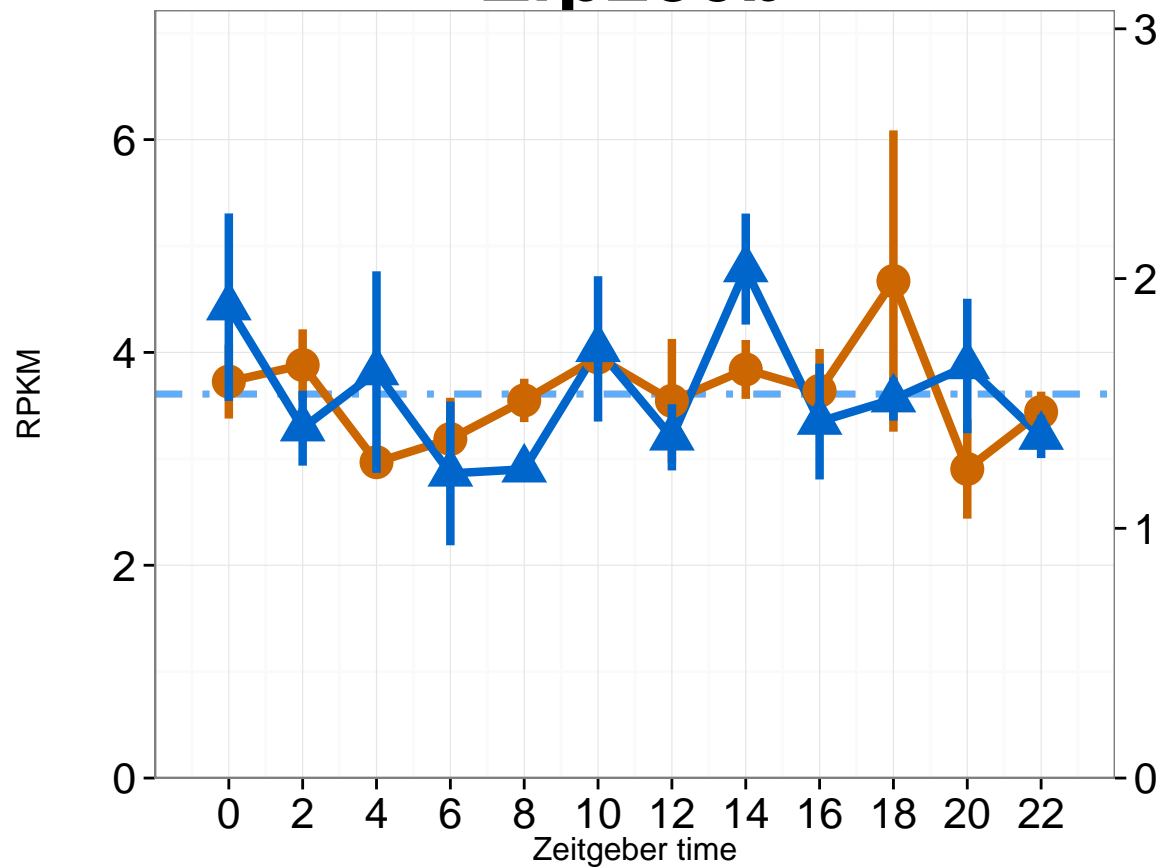

# Zfp280b

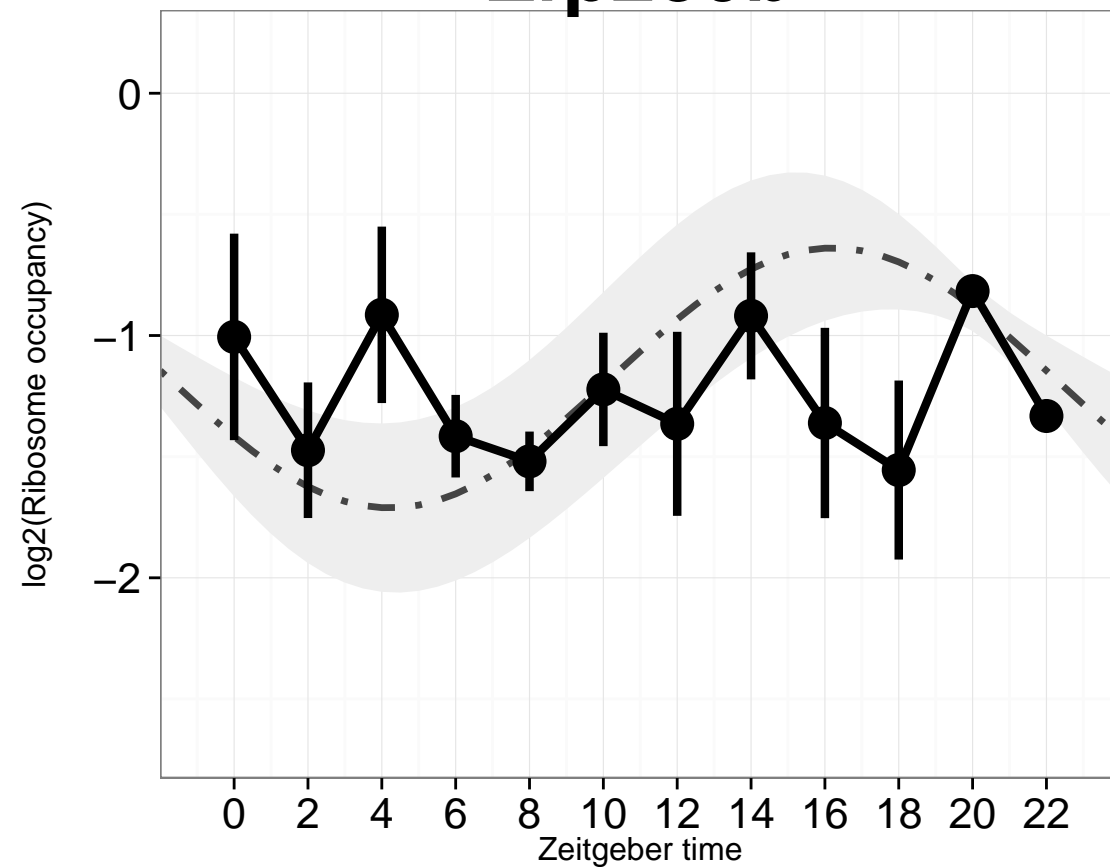

Supplement: SuppDataset_1.zip [file Zfp280b_set_A.pdf › Supplemental Dataset 1/A-mRNA_nonrhyth_translation_nonrhyth/Zfp280b_set_A.pdf]

# Zfp280c

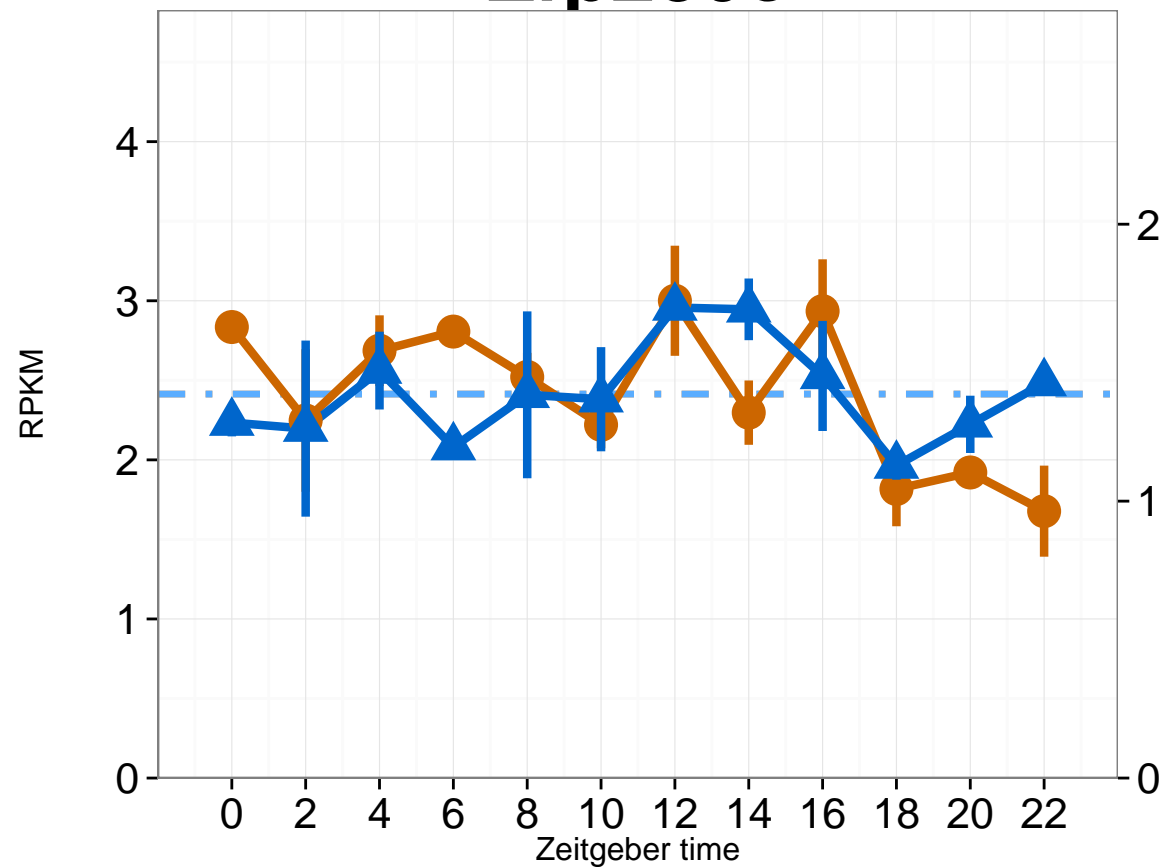

# Zfp280c

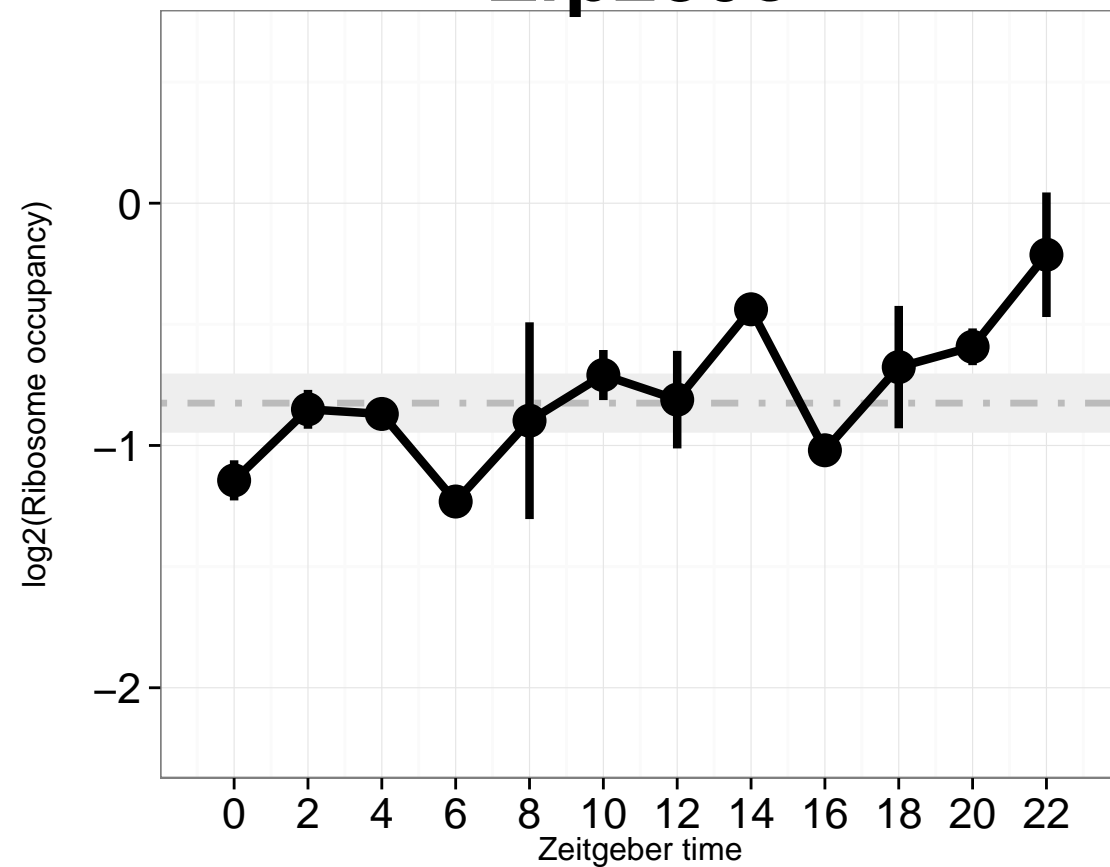

Supplement: SuppDataset_1.zip [file Zfp280c_set_A.pdf › Supplemental Dataset 1/A-mRNA_nonrhyth_translation_nonrhyth/Zfp280c_set_A.pdf]

# Zfp280d

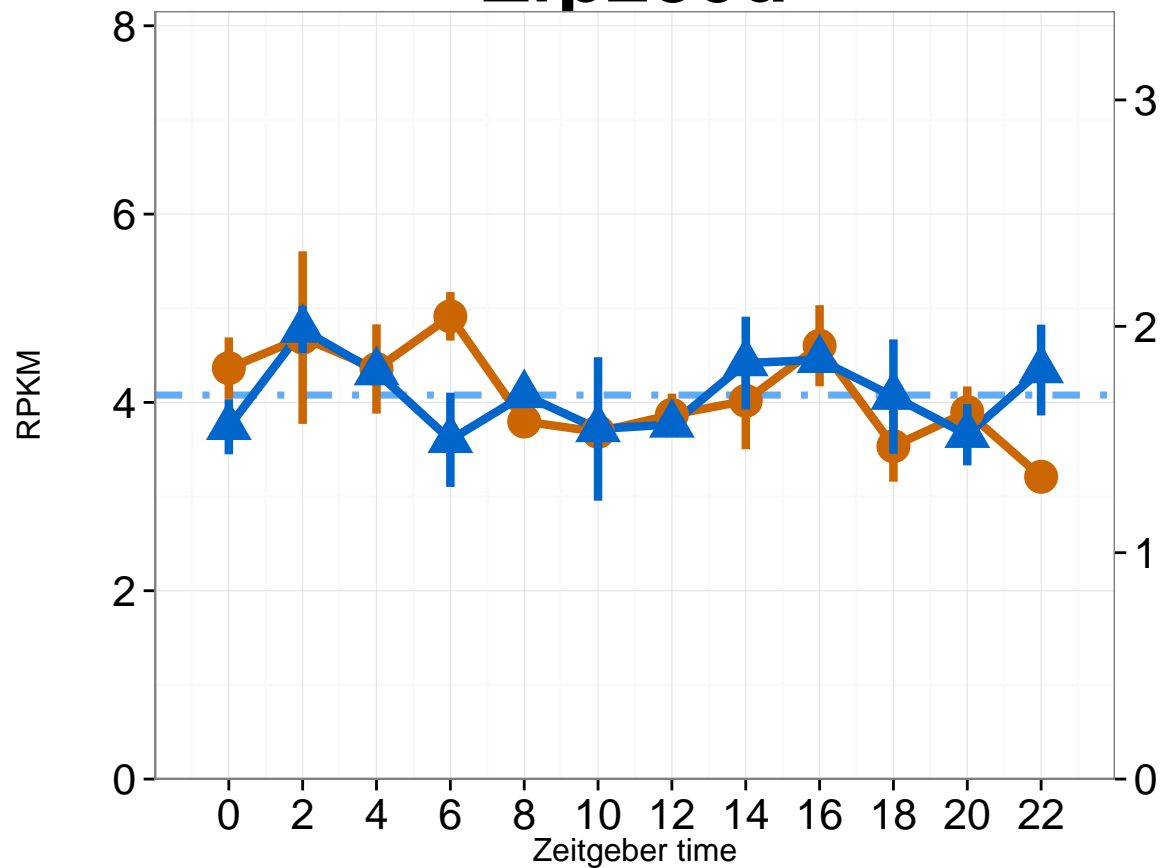

# Zfp280d

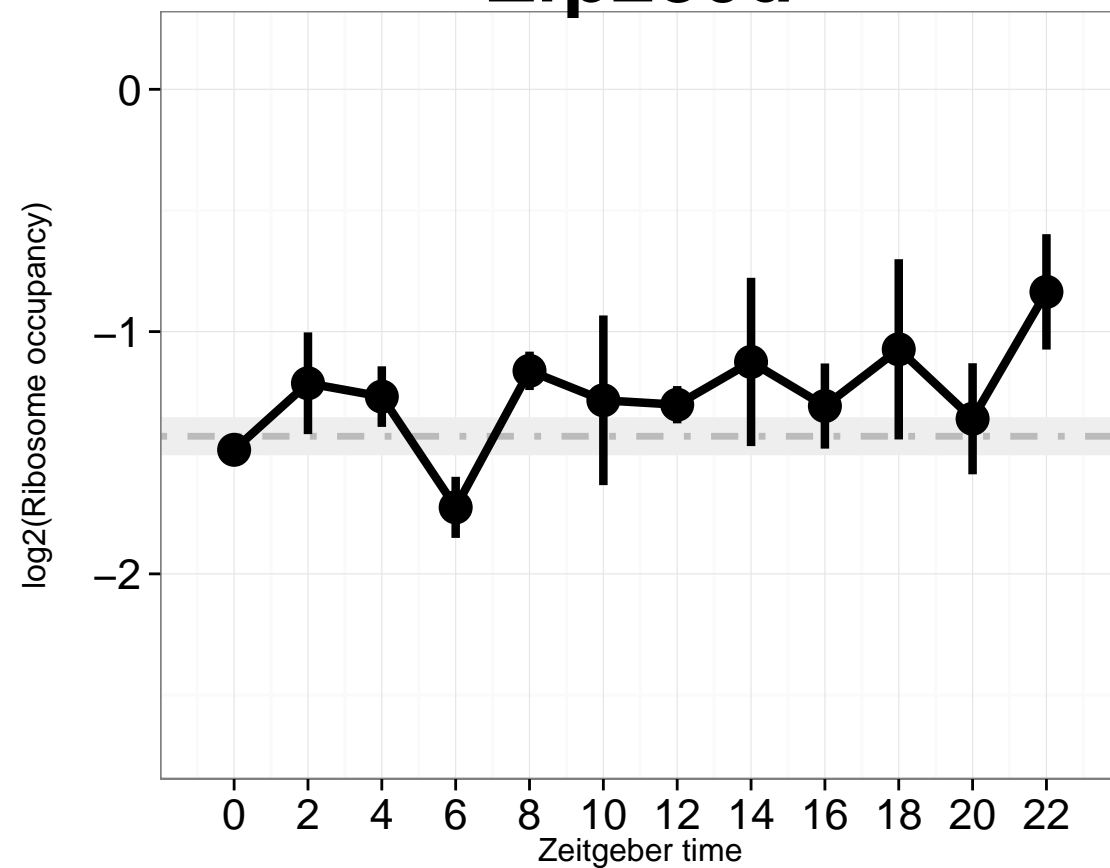

Supplement: SuppDataset_1.zip [file Zfp280d_set_A.pdf › Supplemental Dataset 1/A-mRNA_nonrhyth_translation_nonrhyth/Zfp280d_set_A.pdf]

# Zfp281

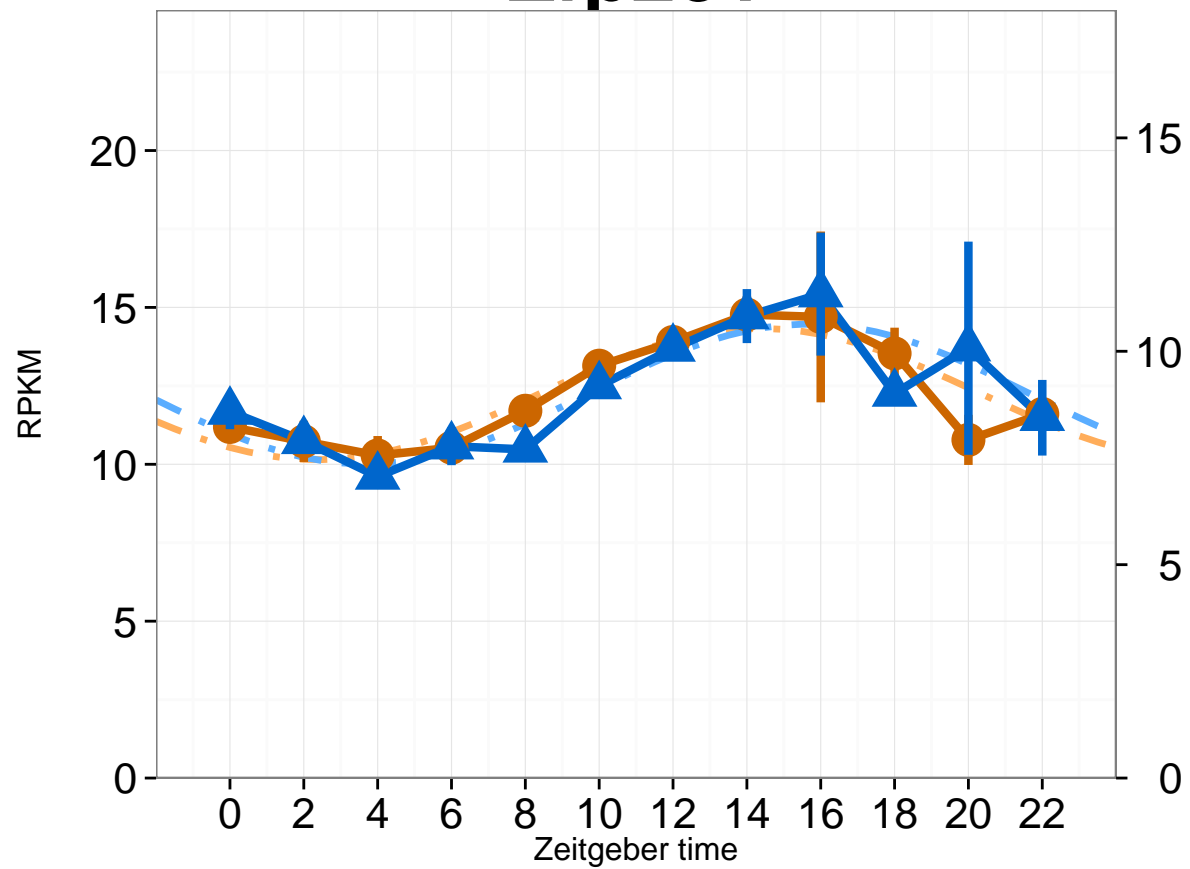

# Zfp281

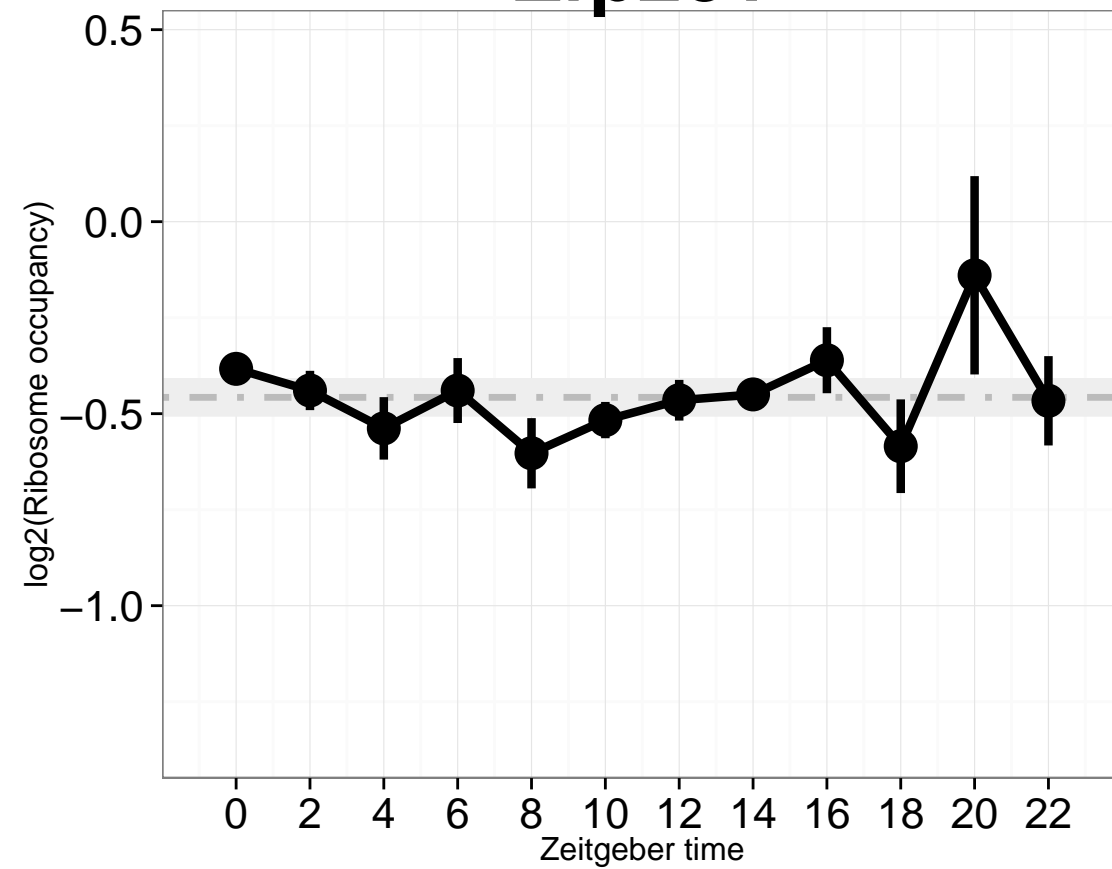

Supplement: SuppDataset_1.zip [file Zfp281_set_A.pdf › Supplemental Dataset 1/A-mRNA_nonrhyth_translation_nonrhyth/Zfp281_set_A.pdf]

# Zfp28

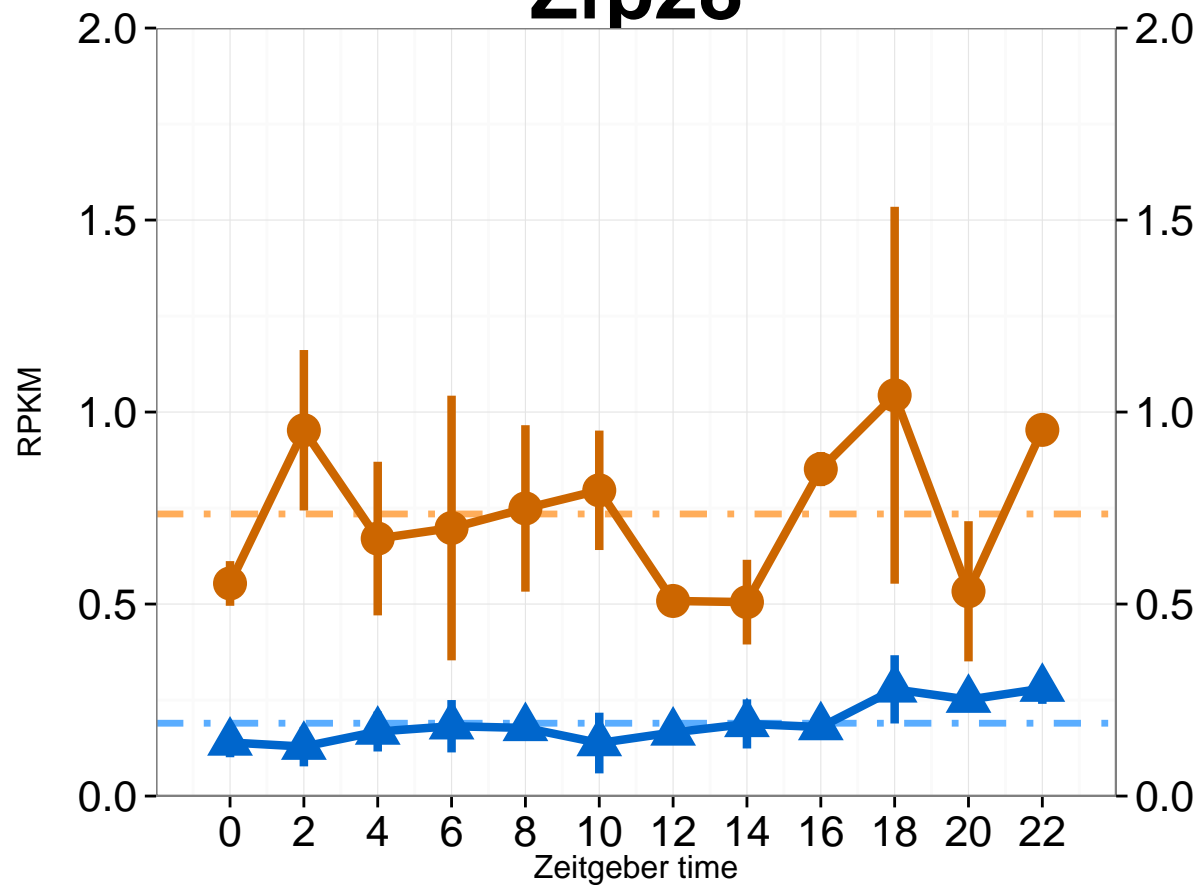

# Zfp28

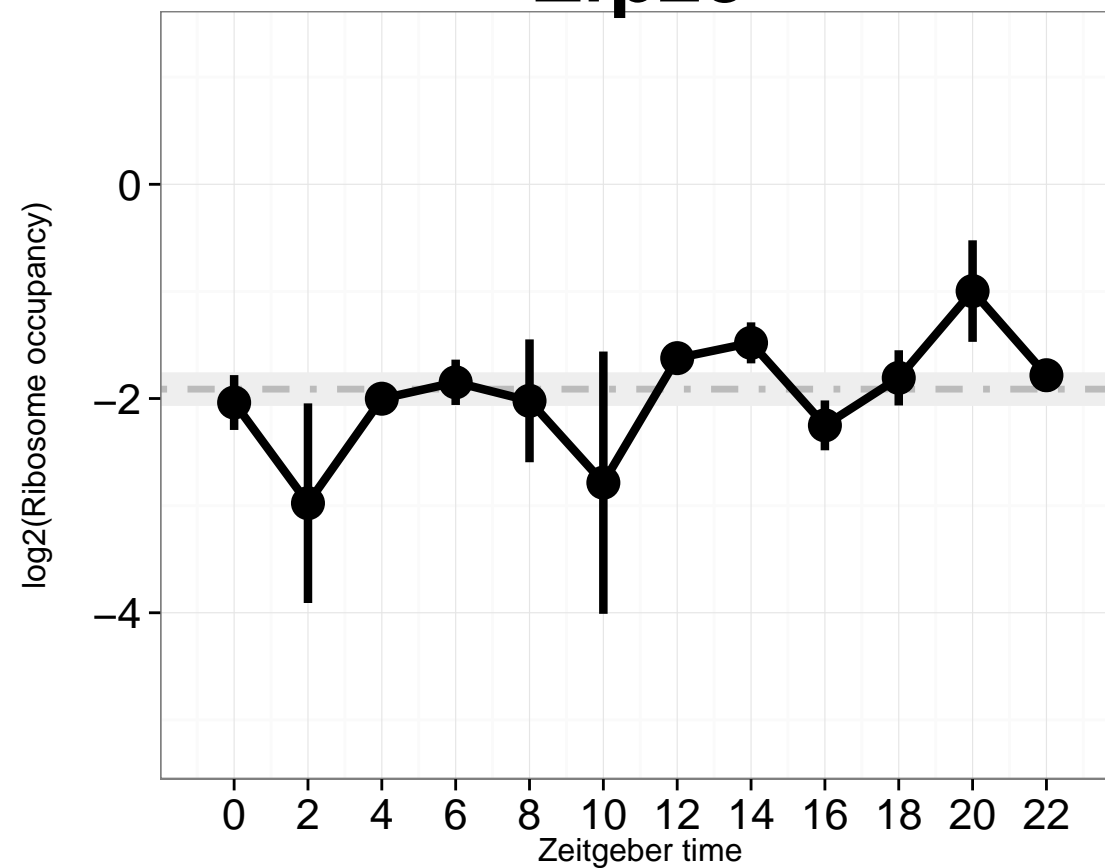

Supplement: SuppDataset_1.zip [file Zfp28_set_A.pdf › Supplemental Dataset 1/A-mRNA_nonrhyth_translation_nonrhyth/Zfp28_set_A.pdf]

# Zfp292

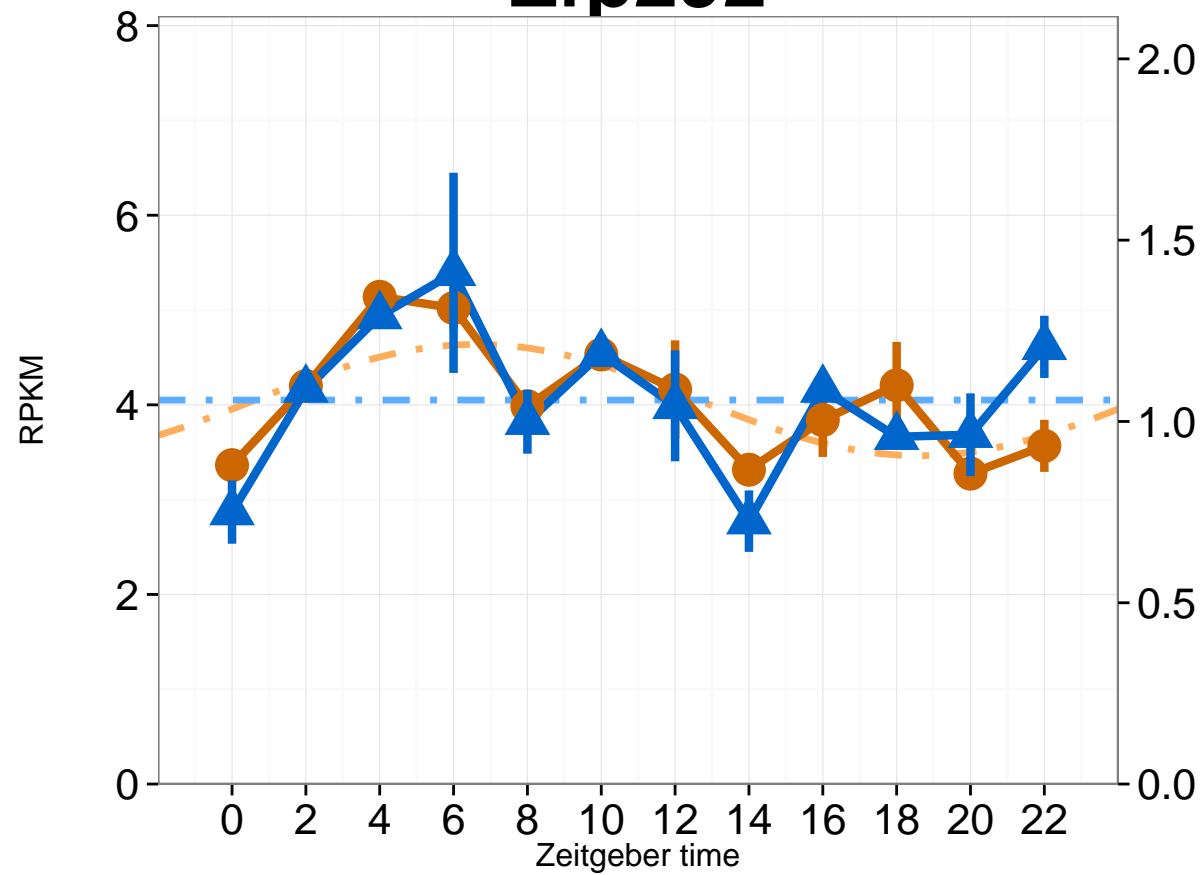

# Zfp292

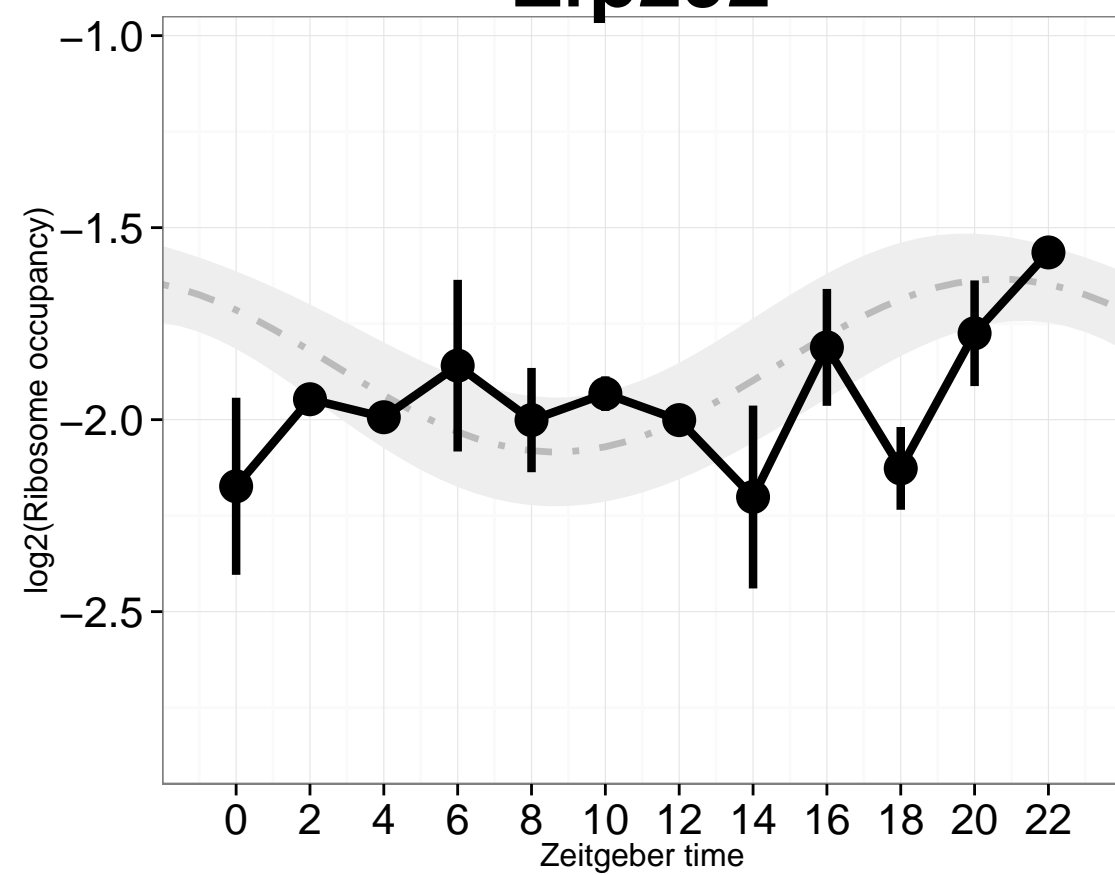

Supplement: SuppDataset_1.zip [file Zfp292_set_A.pdf › Supplemental Dataset 1/A-mRNA_nonrhyth_translation_nonrhyth/Zfp292_set_A.pdf]

## Zfp2

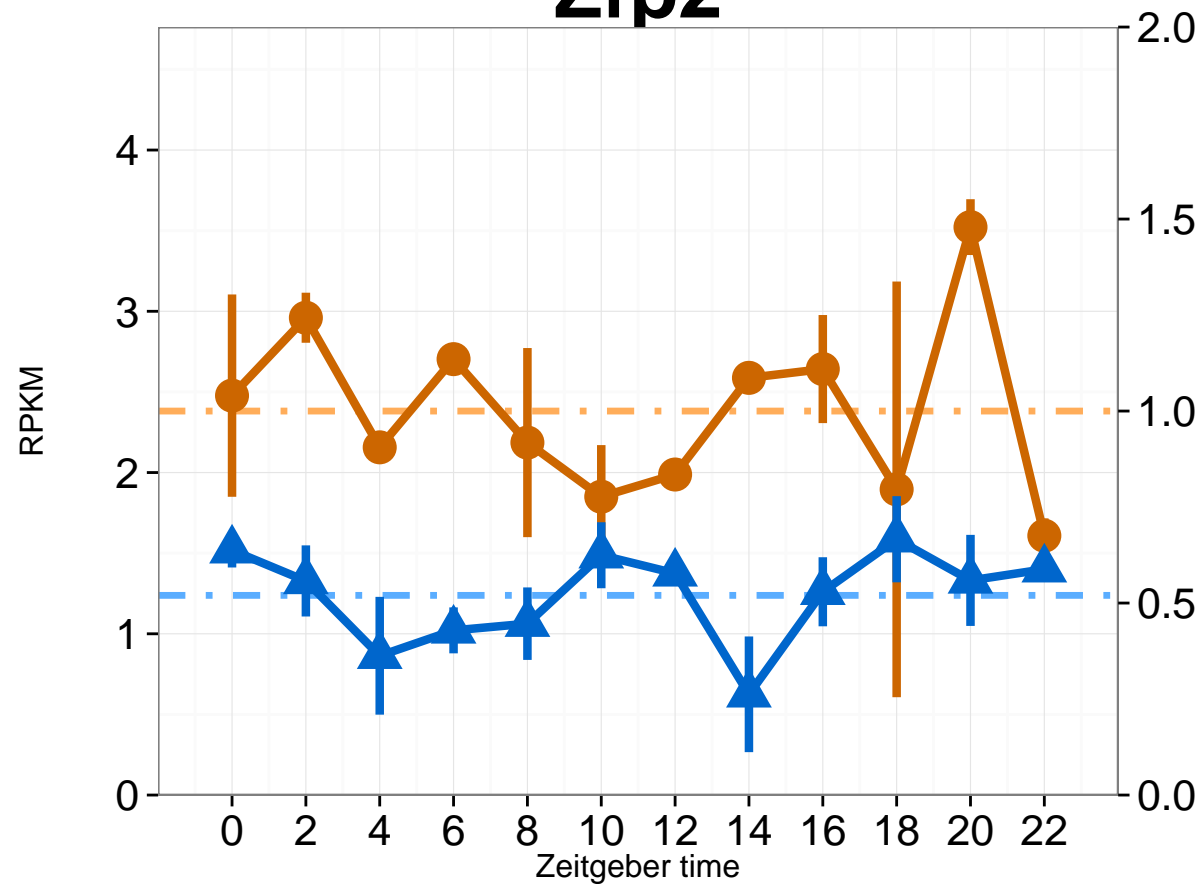

## Zfp2

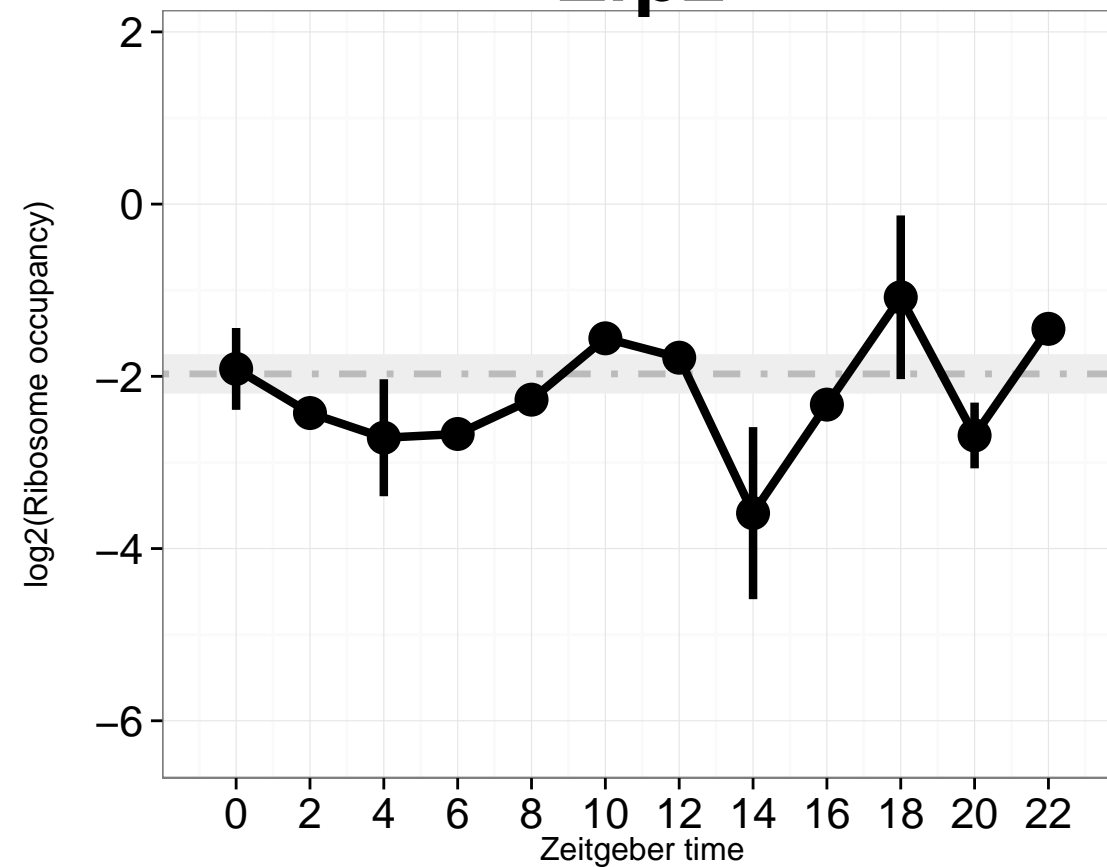

Supplement: SuppDataset_1.zip [file Zfp2_set_A.pdf › Supplemental Dataset 1/A-mRNA_nonrhyth_translation_nonrhyth/Zfp2_set_A.pdf]

# Zfp30

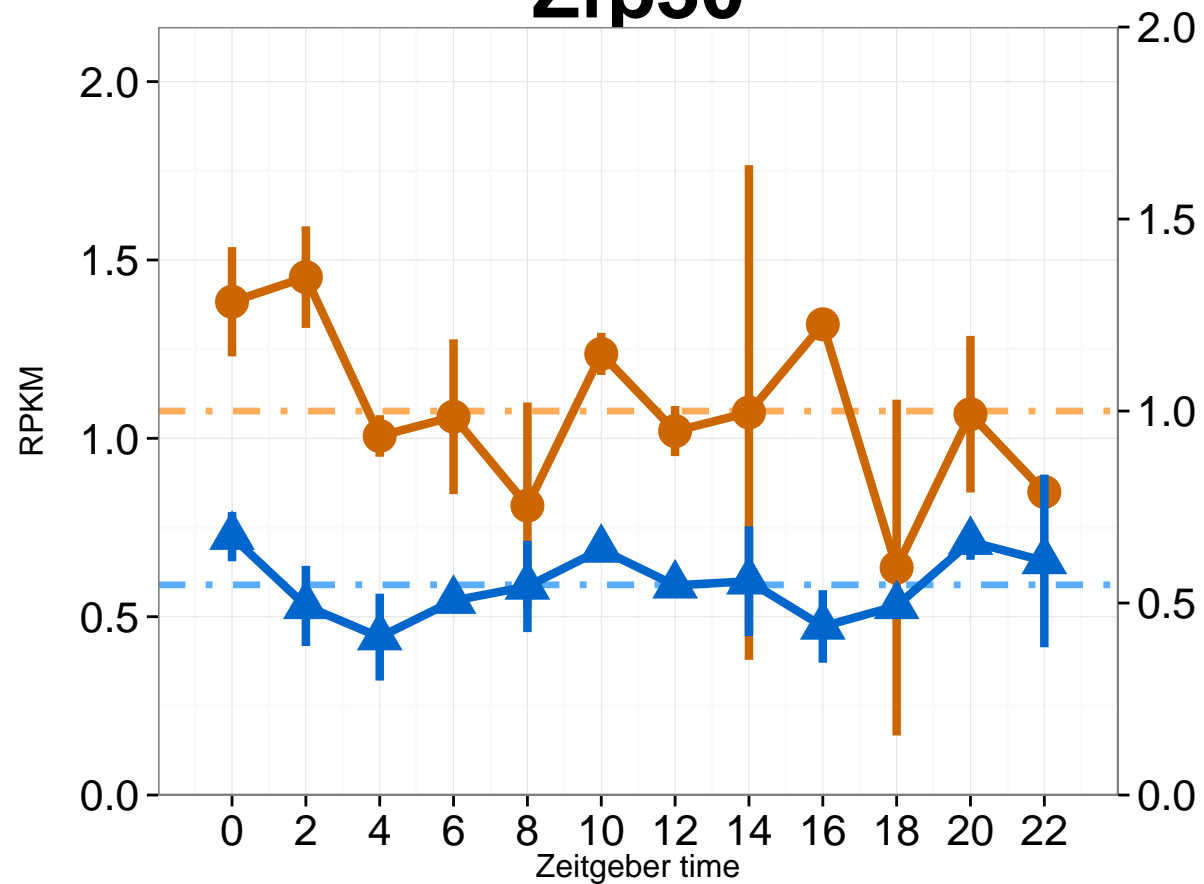

# Zfp30

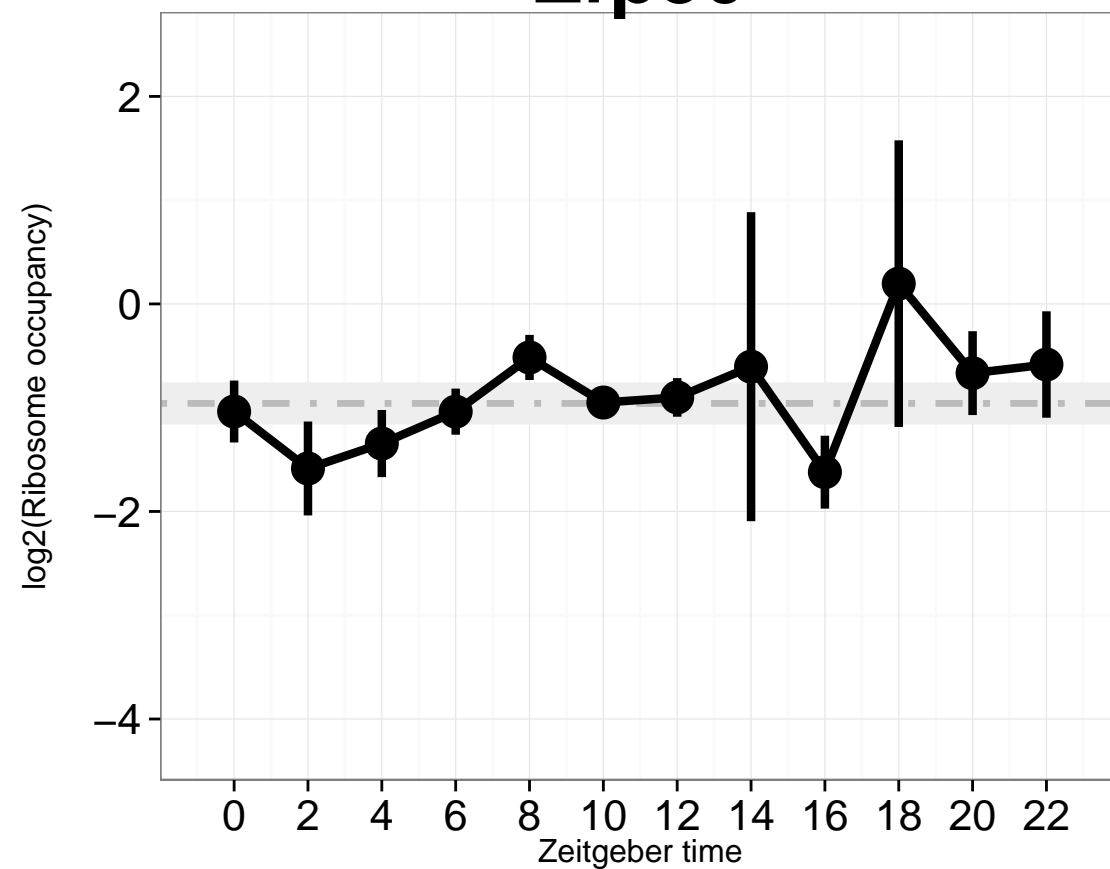

Supplement: SuppDataset_1.zip [file Zfp30_set_A.pdf › Supplemental Dataset 1/A-mRNA_nonrhyth_translation_nonrhyth/Zfp30_set_A.pdf]

# Zfp316

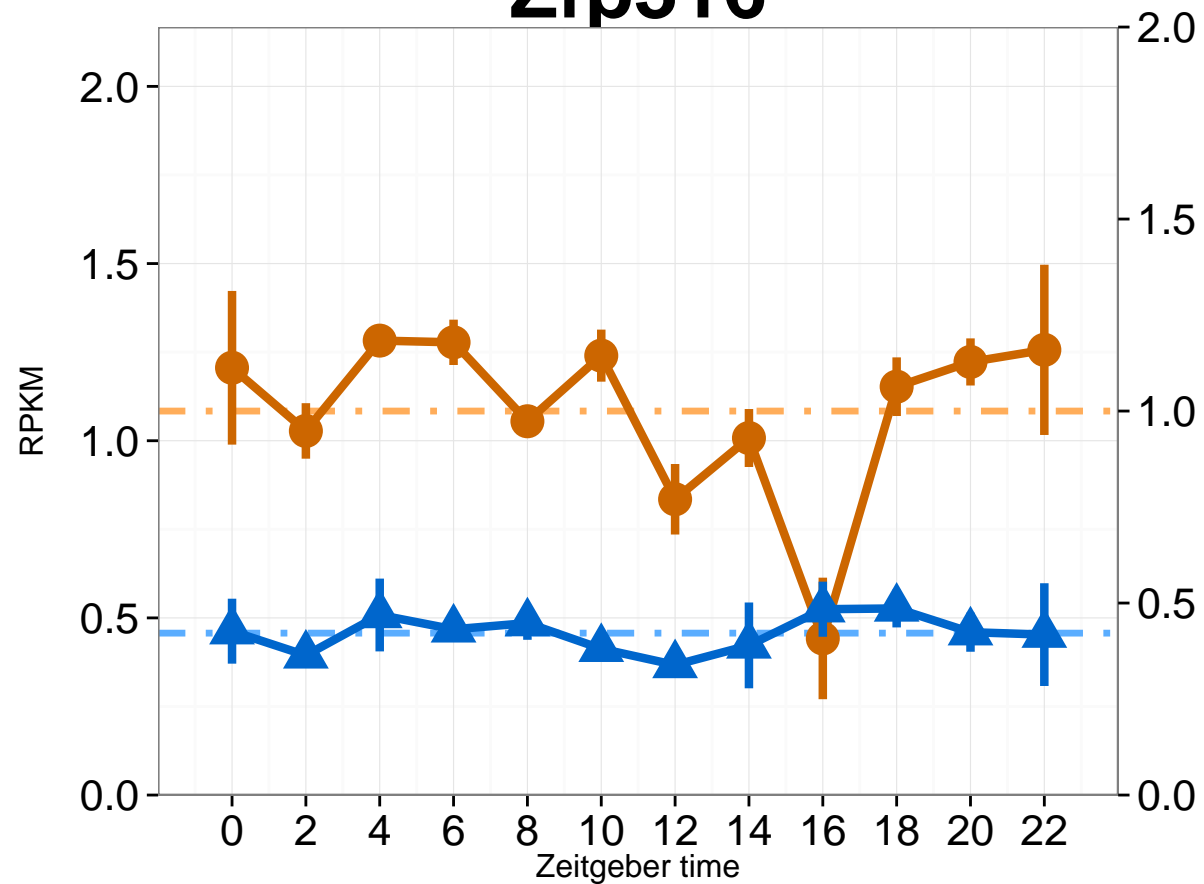

# Zfp316

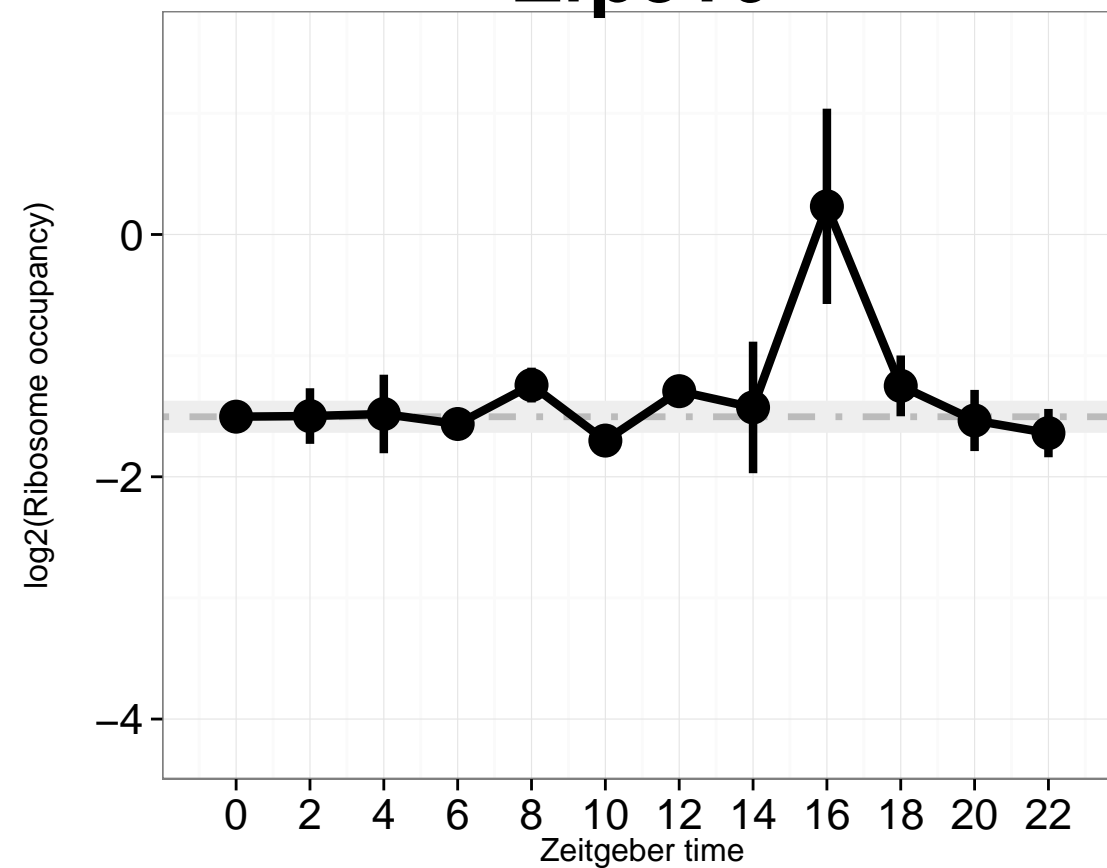

Supplement: SuppDataset_1.zip [file Zfp316_set_A.pdf › Supplemental Dataset 1/A-mRNA_nonrhyth_translation_nonrhyth/Zfp316_set_A.pdf]

# Zfp317

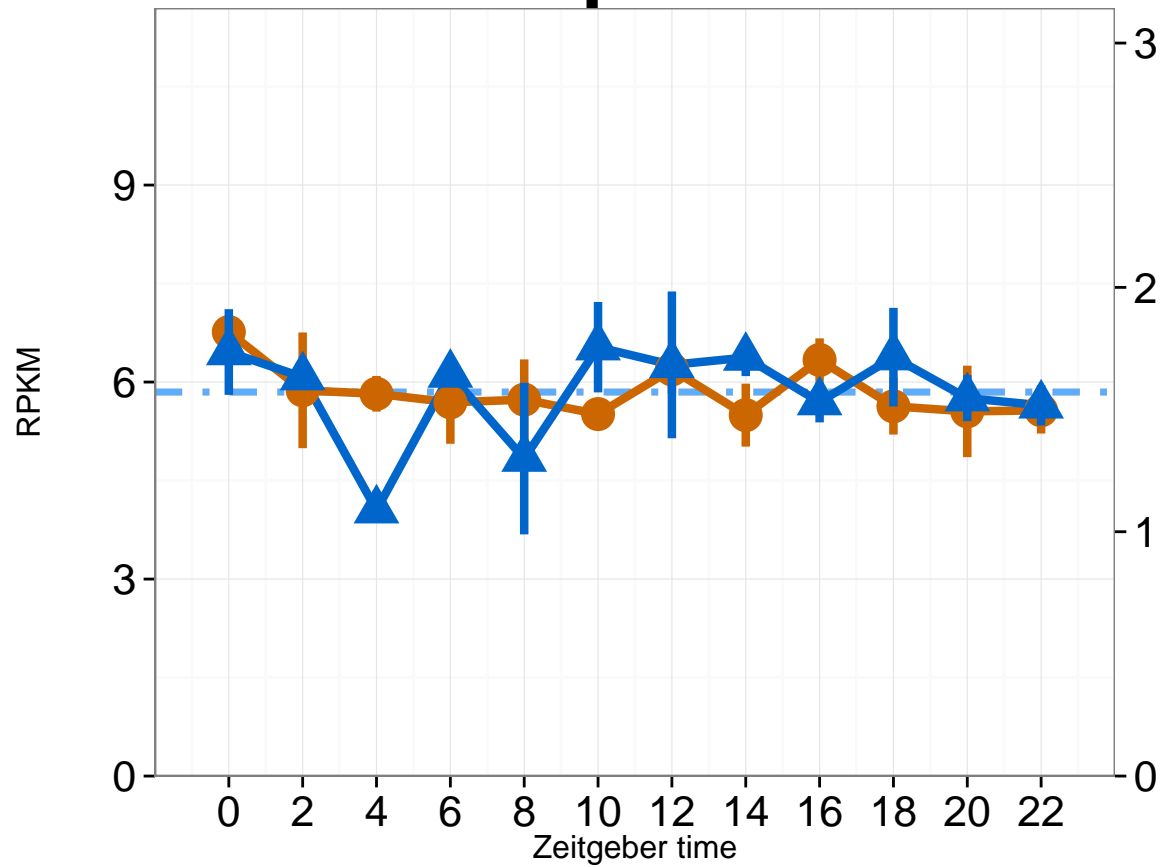

# Zfp317

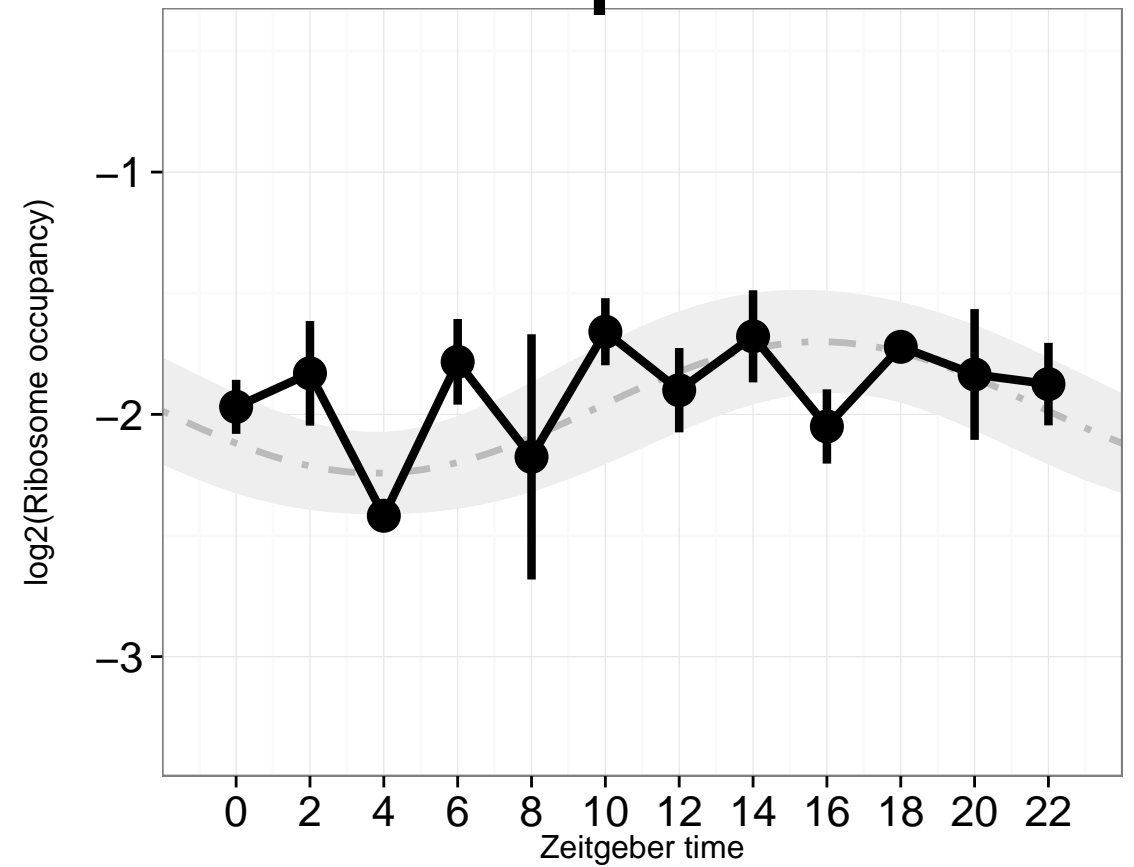

Supplement: SuppDataset_1.zip [file Zfp317_set_A.pdf › Supplemental Dataset 1/A-mRNA_nonrhyth_translation_nonrhyth/Zfp317_set_A.pdf]

# Zfp318

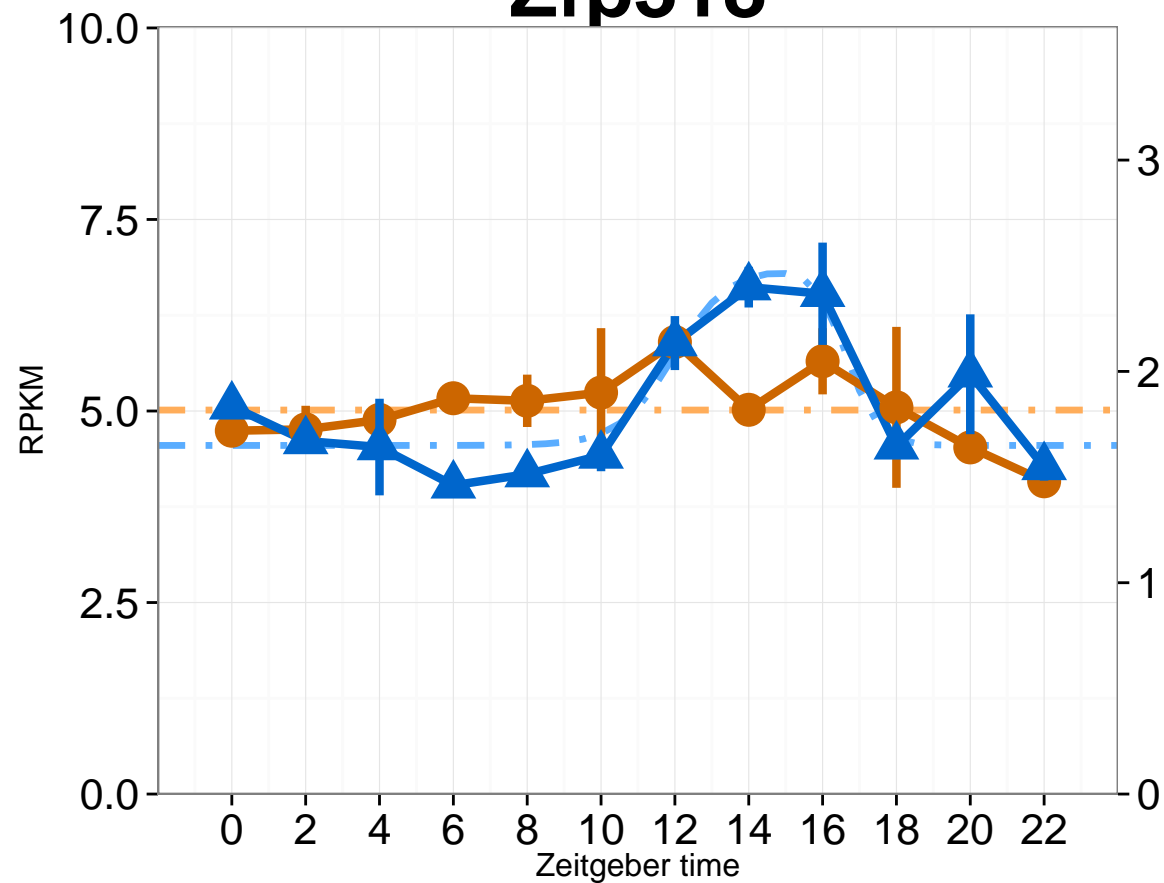

# Zfp318

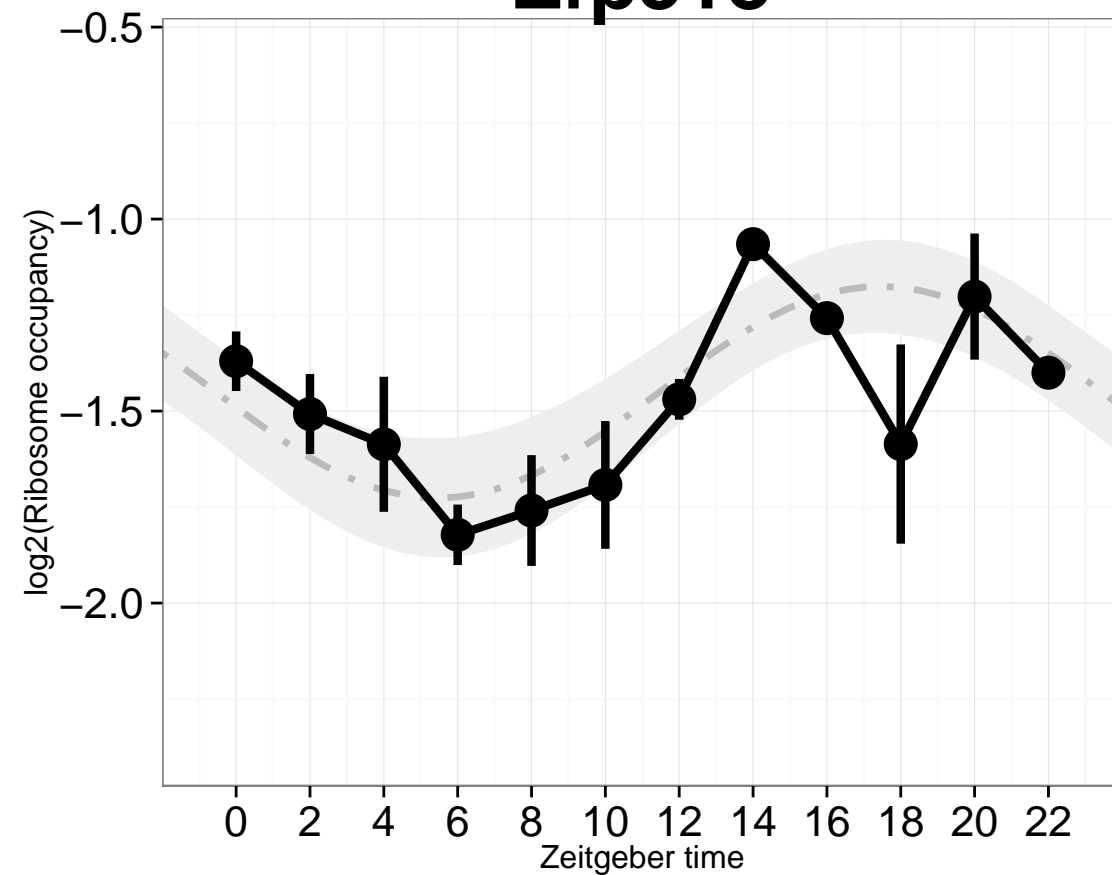

Supplement: SuppDataset_1.zip [file Zfp318_set_A.pdf › Supplemental Dataset 1/A-mRNA_nonrhyth_translation_nonrhyth/Zfp318_set_A.pdf]

# Zfp319

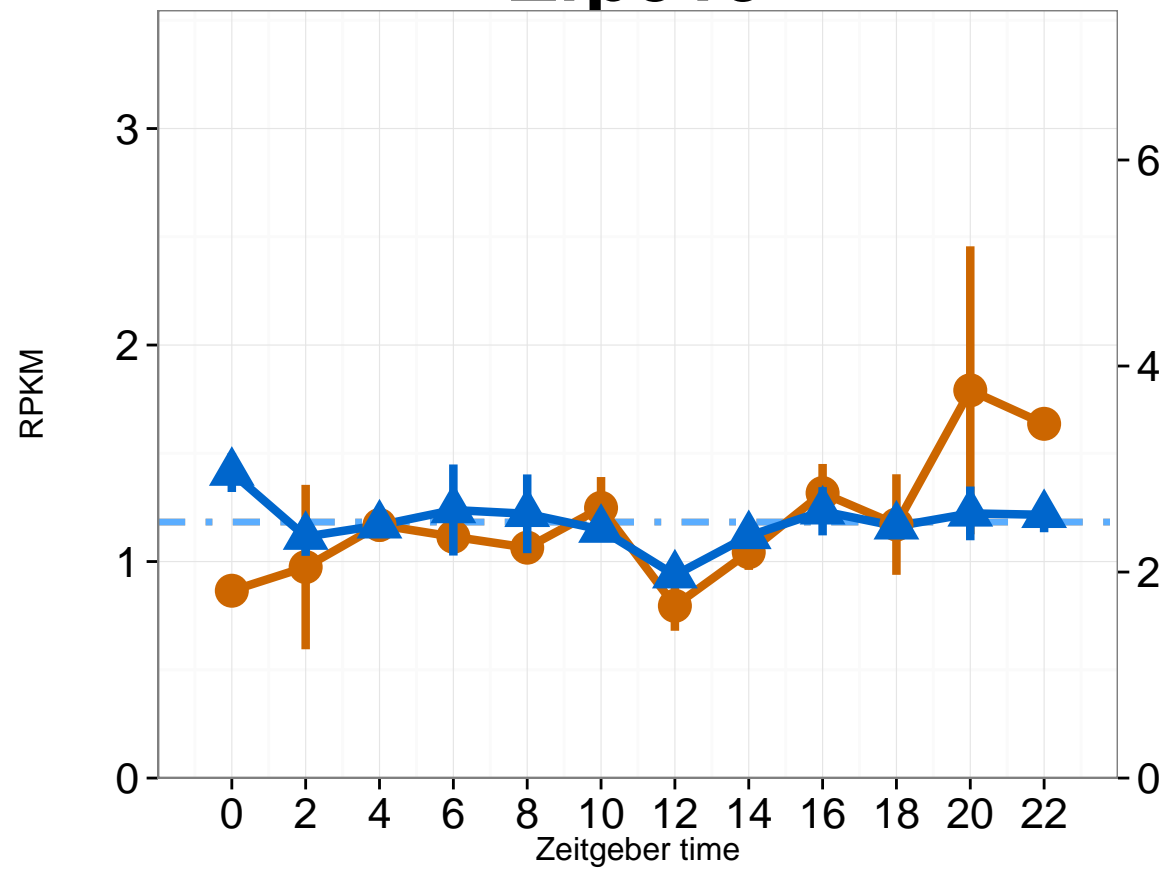

# Zfp319

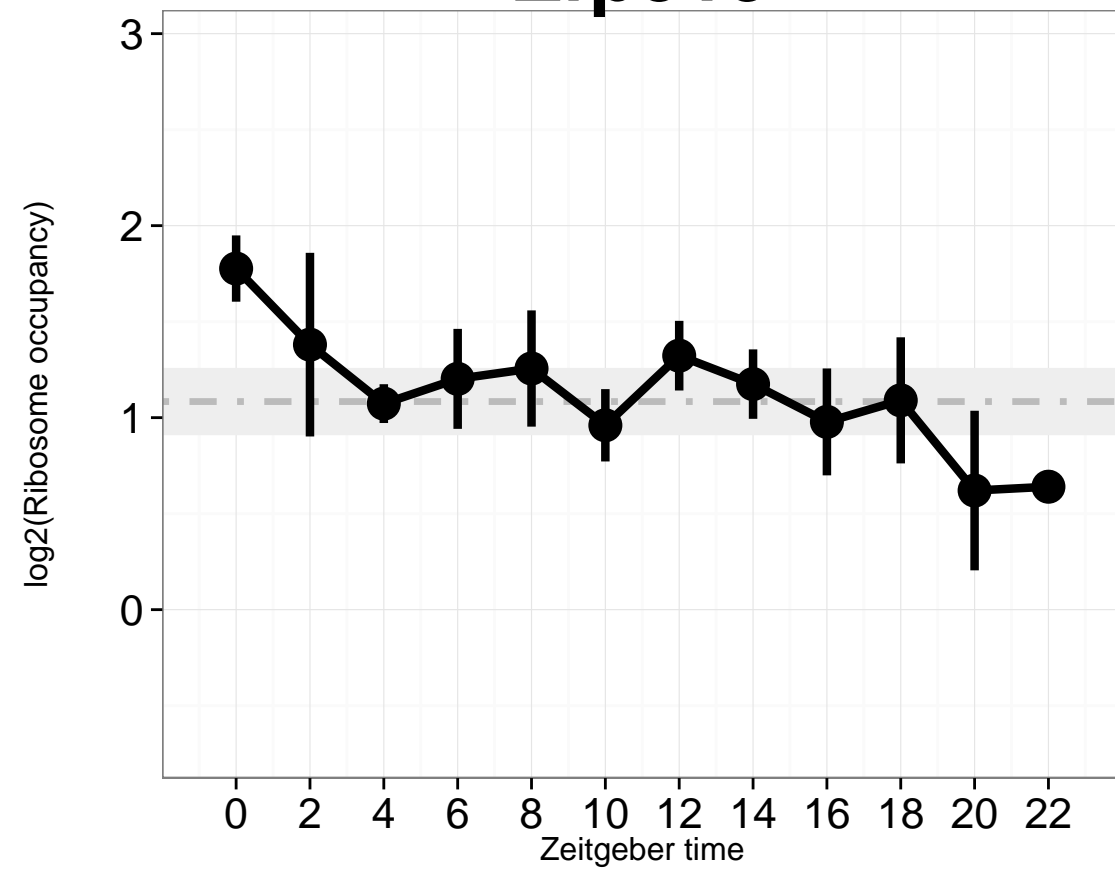

Supplement: SuppDataset_1.zip [file Zfp319_set_A.pdf › Supplemental Dataset 1/A-mRNA_nonrhyth_translation_nonrhyth/Zfp319_set_A.pdf]

# Zfp322a

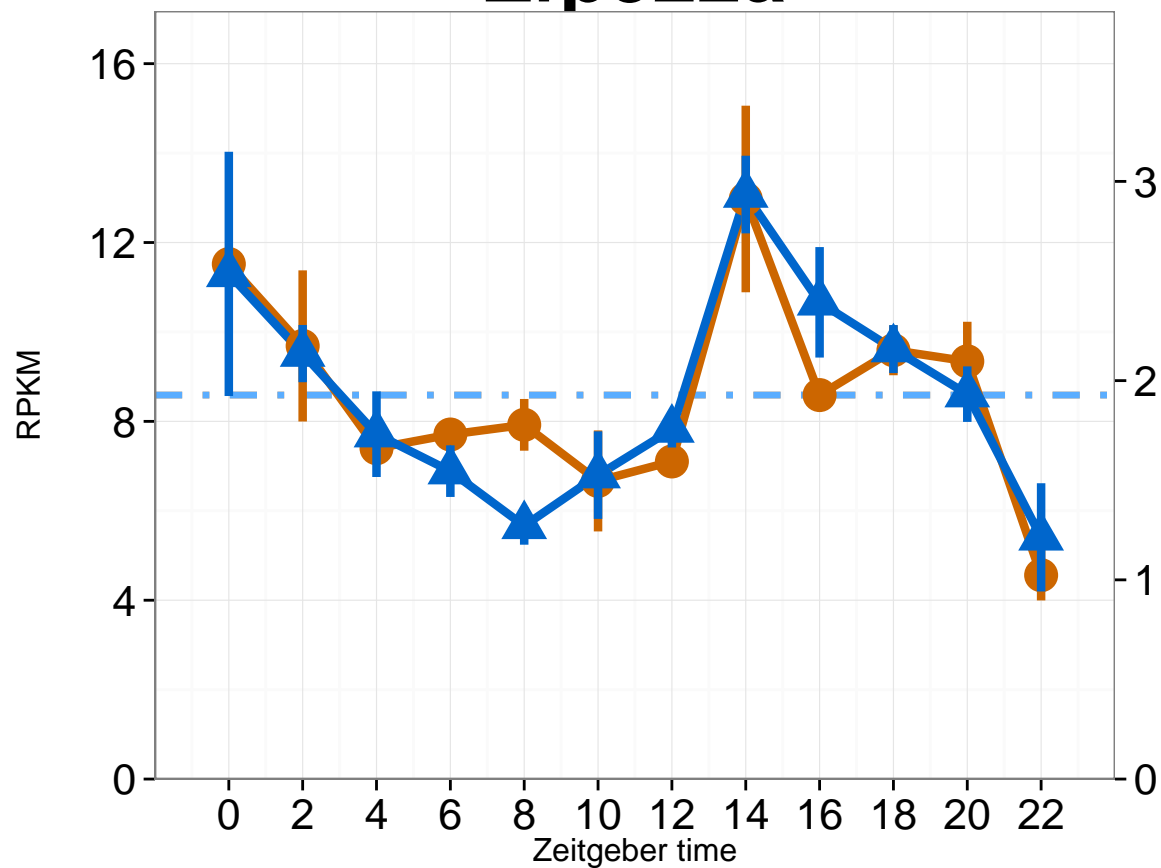

# Zfp322a

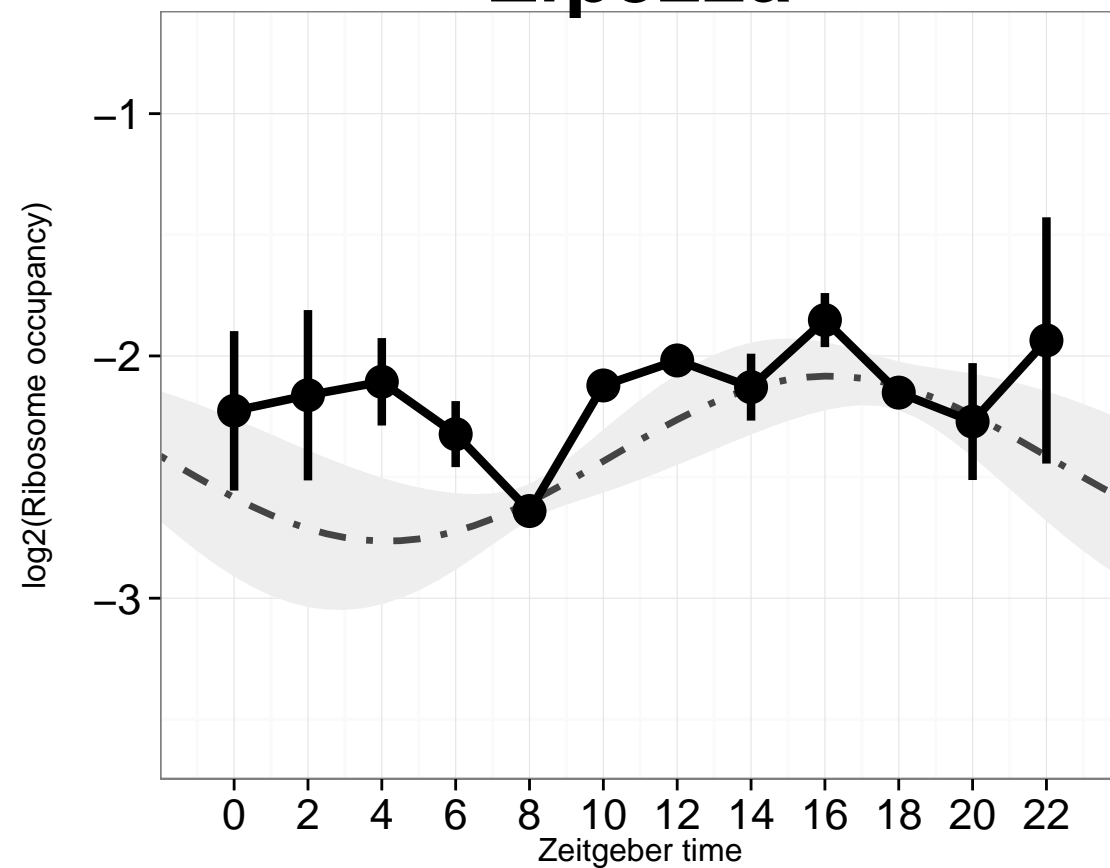

Supplement: SuppDataset_1.zip [file Zfp322a_set_A.pdf › Supplemental Dataset 1/A-mRNA_nonrhyth_translation_nonrhyth/Zfp322a_set_A.pdf]

# Zfp324

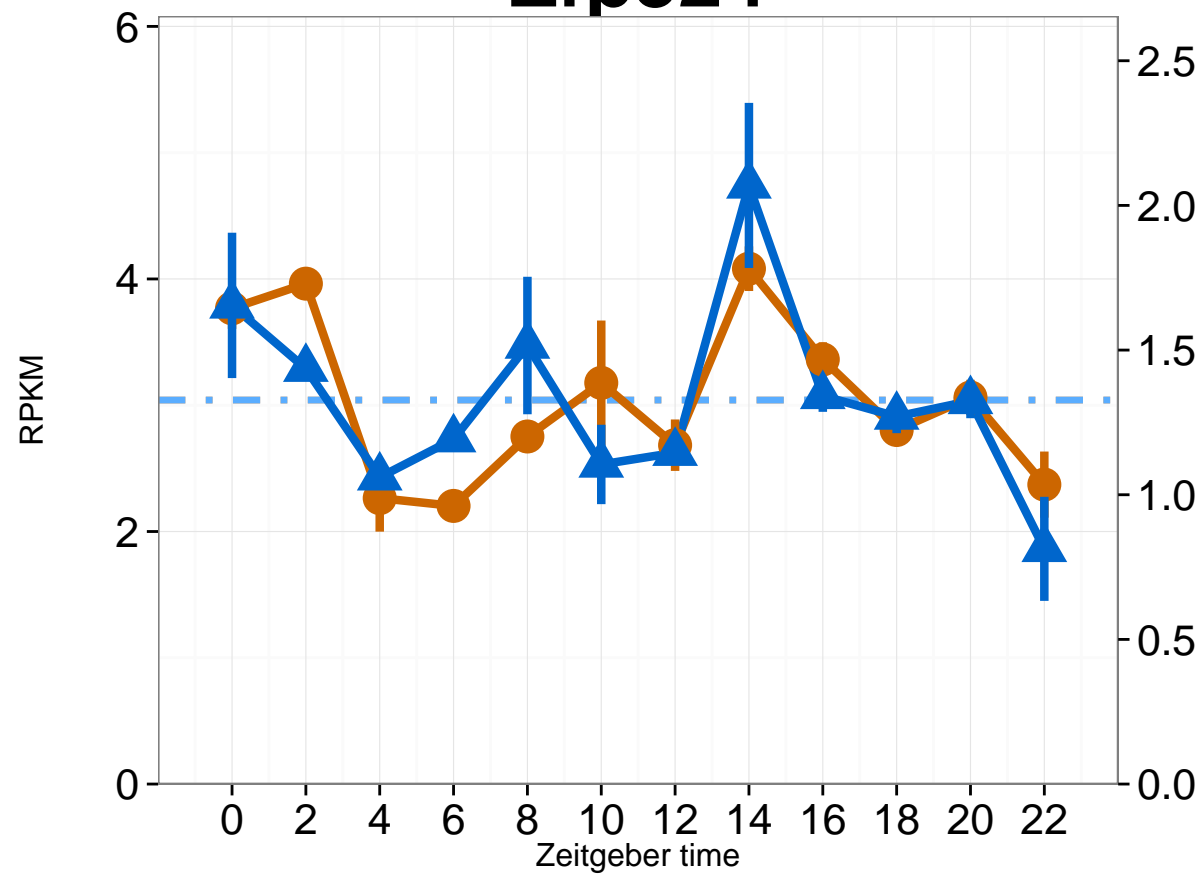

# Zfp324

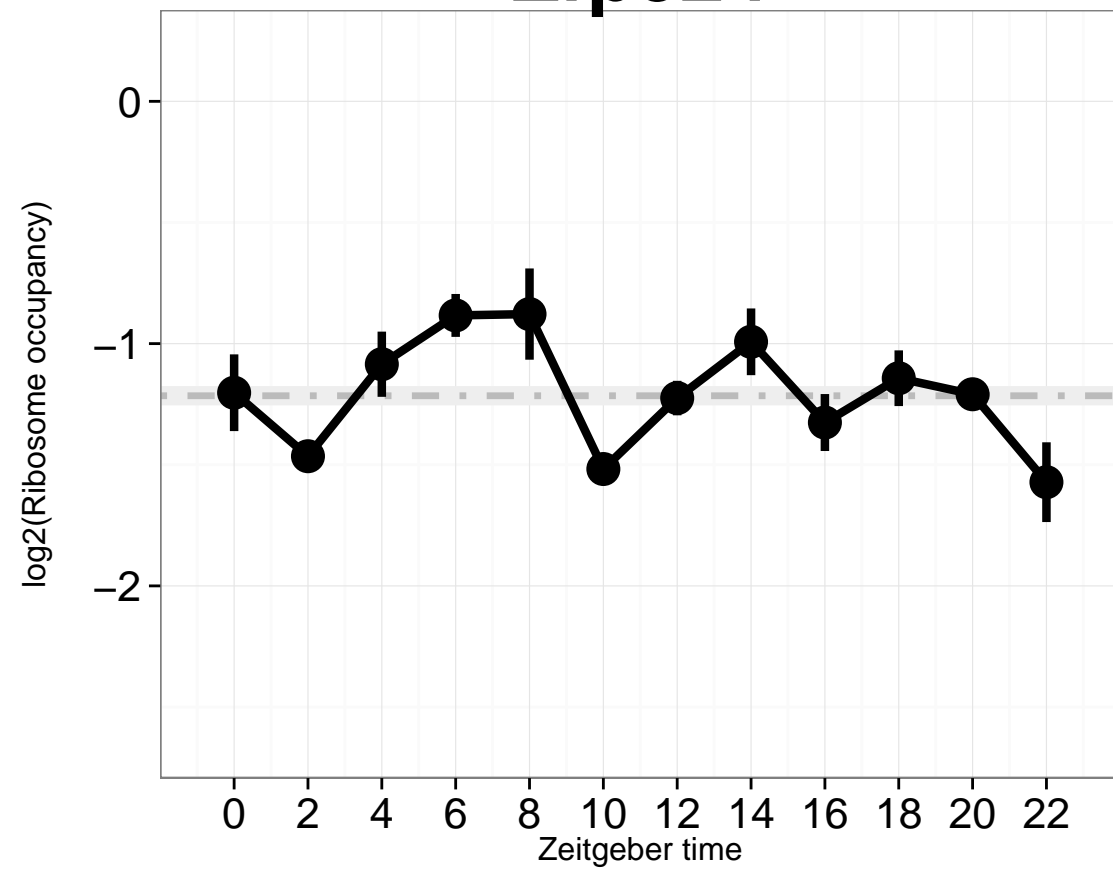

Supplement: SuppDataset_1.zip [file Zfp324_set_A.pdf › Supplemental Dataset 1/A-mRNA_nonrhyth_translation_nonrhyth/Zfp324_set_A.pdf]

# Zfp330

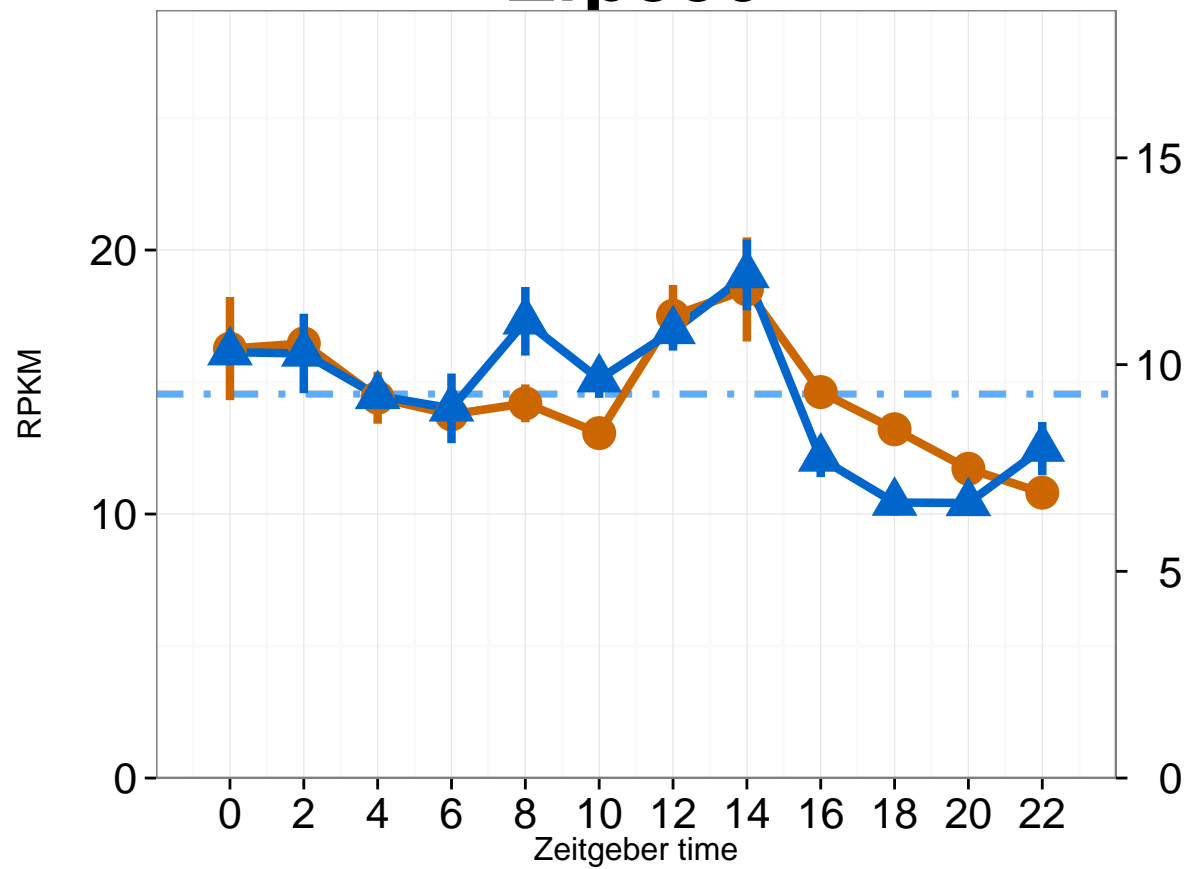

# Zfp330

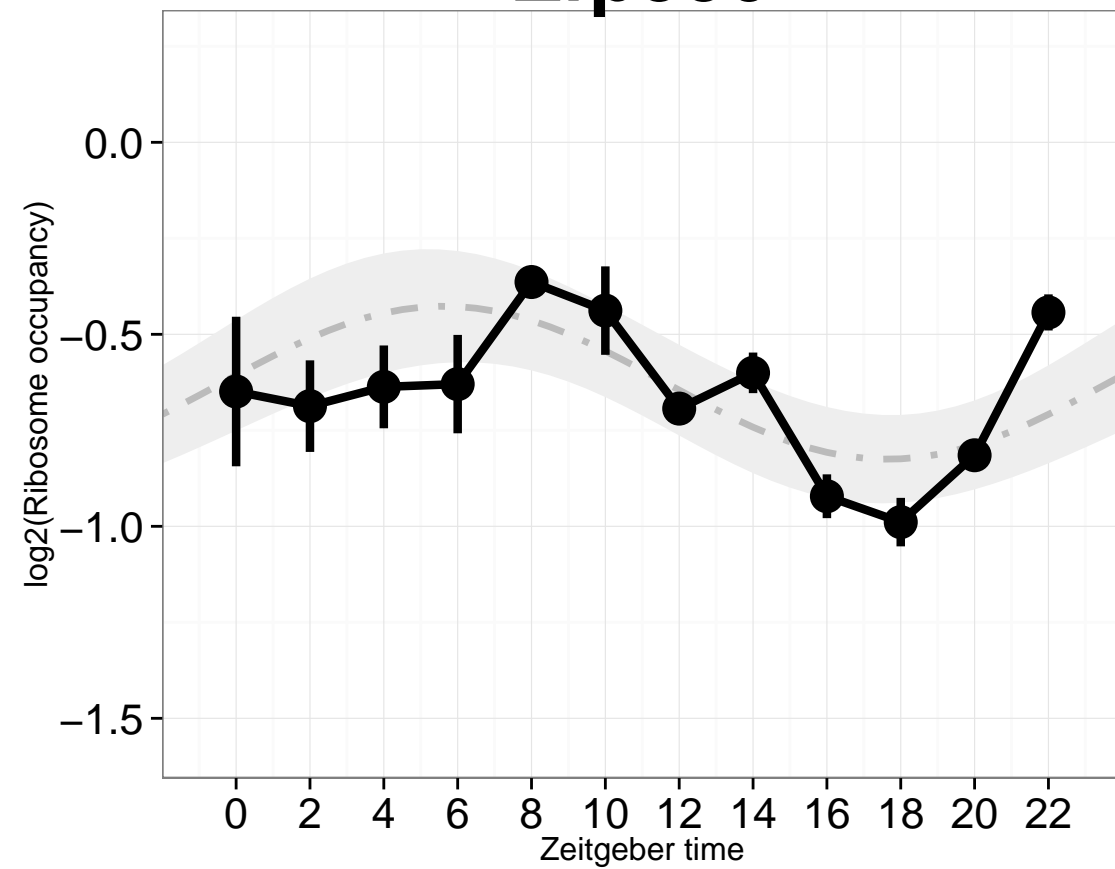

Supplement: SuppDataset_1.zip [file Zfp330_set_A.pdf › Supplemental Dataset 1/A-mRNA_nonrhyth_translation_nonrhyth/Zfp330_set_A.pdf]

# Zfp335

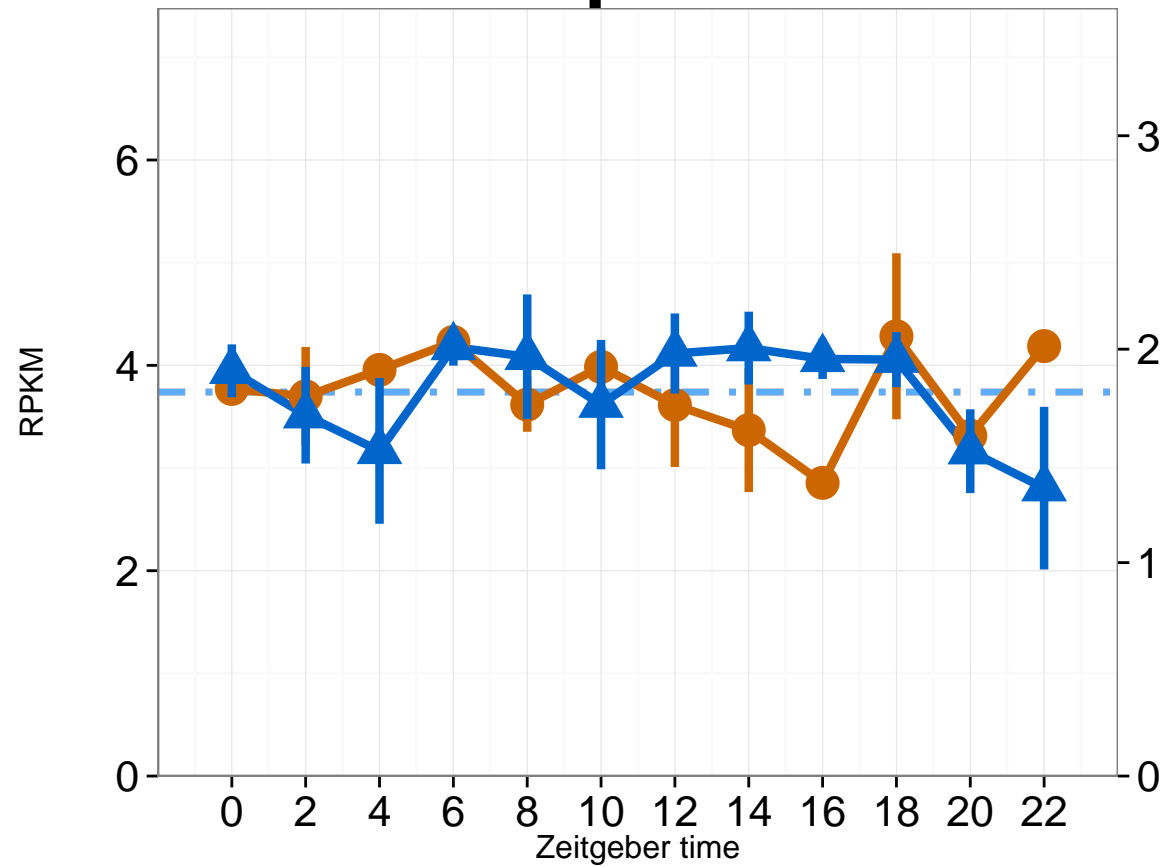

# Zfp335

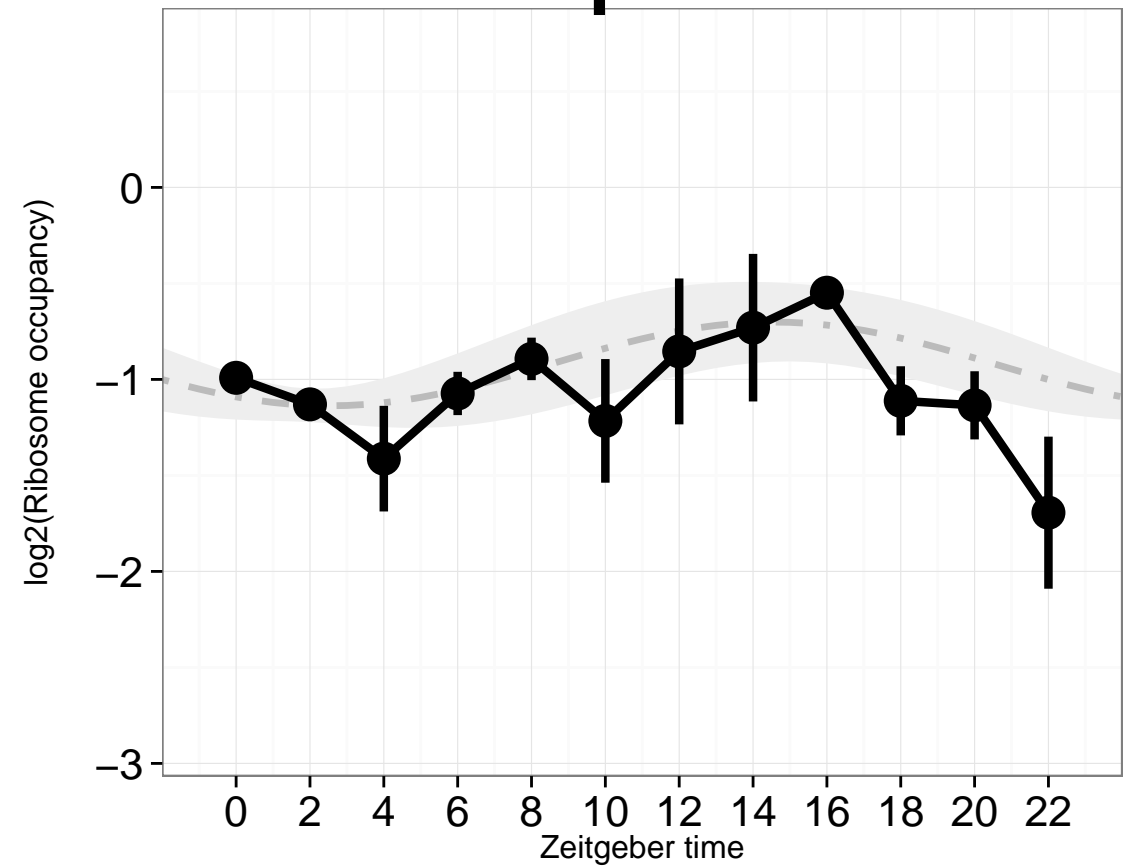

Supplement: SuppDataset_1.zip [file Zfp335_set_A.pdf › Supplemental Dataset 1/A-mRNA_nonrhyth_translation_nonrhyth/Zfp335_set_A.pdf]

# Zfp346

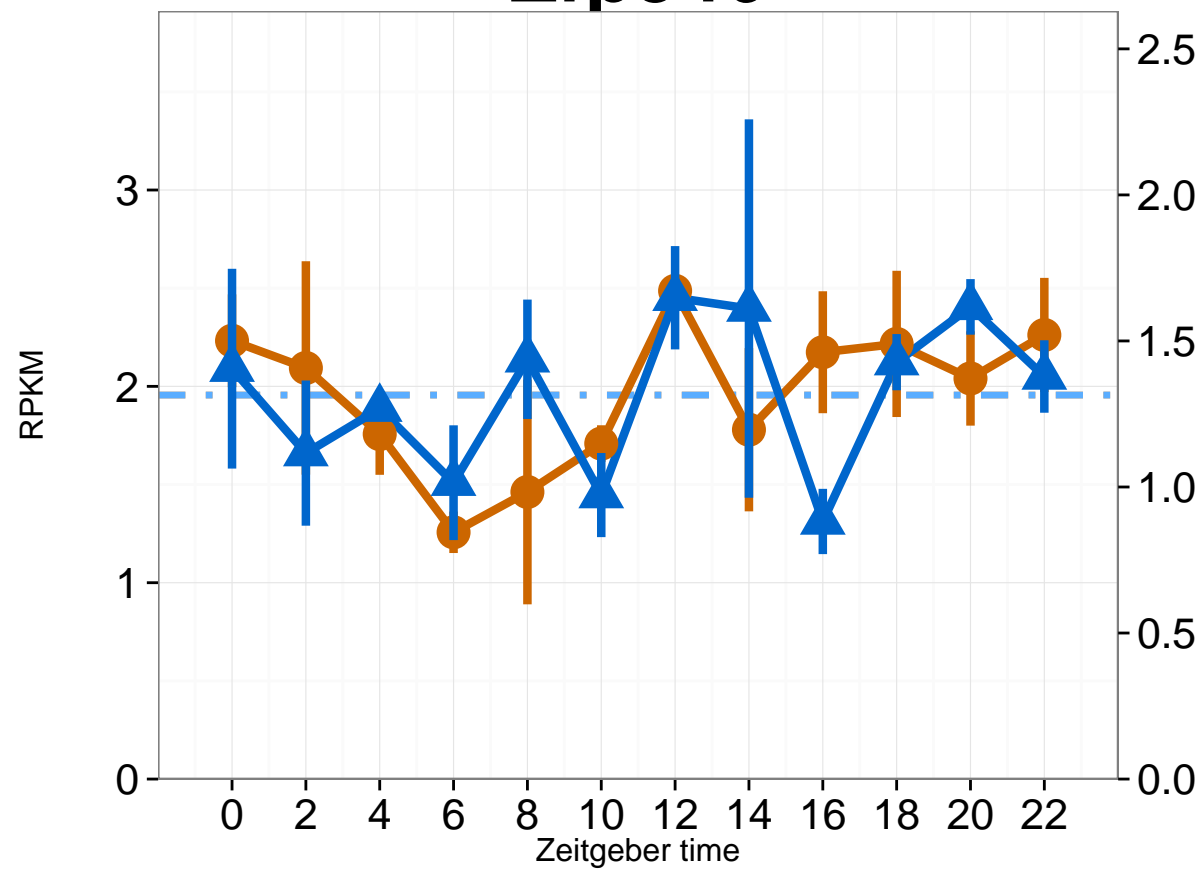

# Zfp346

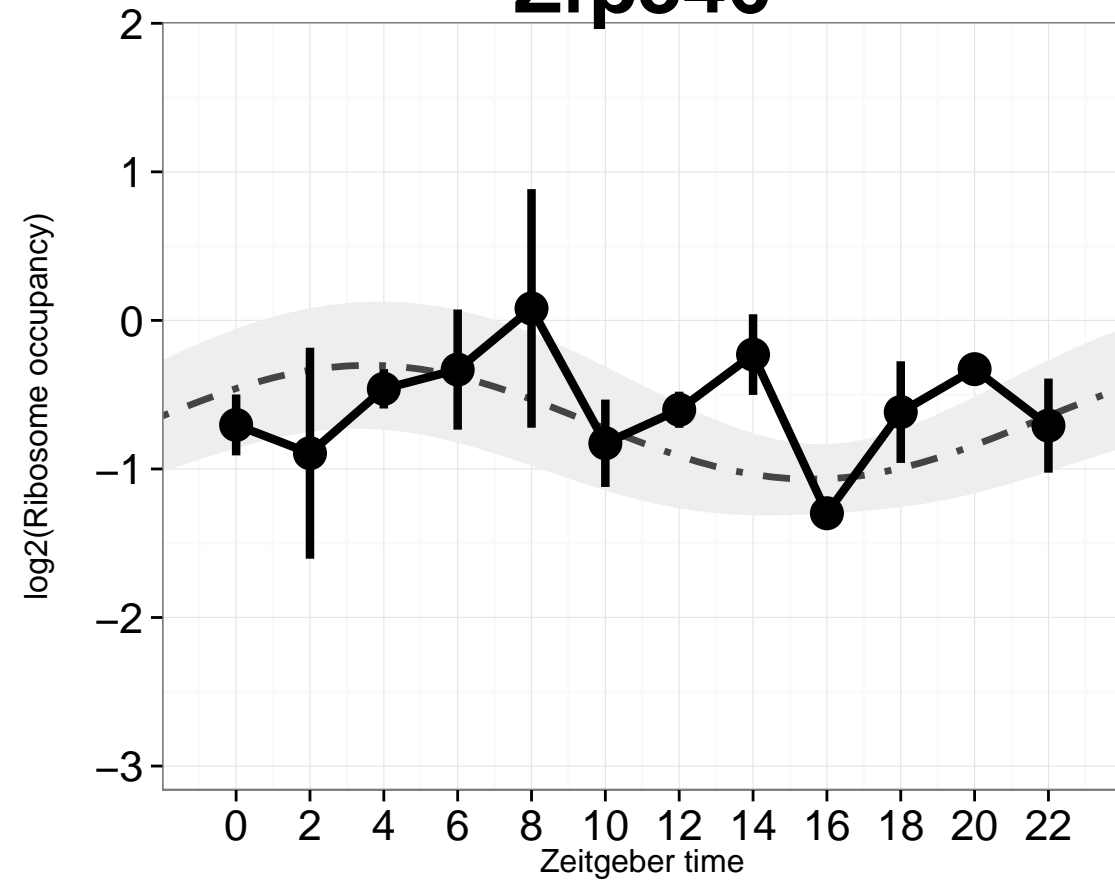

Supplement: SuppDataset_1.zip [file Zfp346_set_A.pdf › Supplemental Dataset 1/A-mRNA_nonrhyth_translation_nonrhyth/Zfp346_set_A.pdf]

# Zfp358

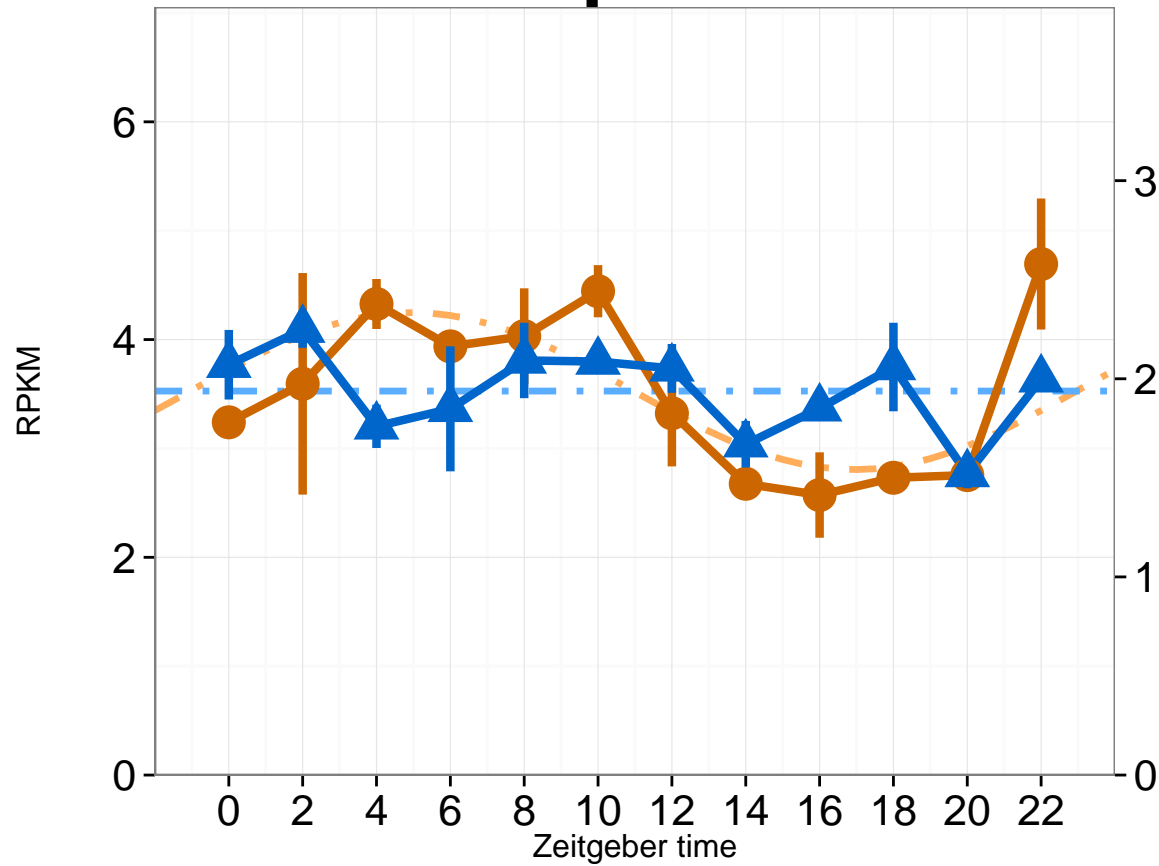

# Zfp358

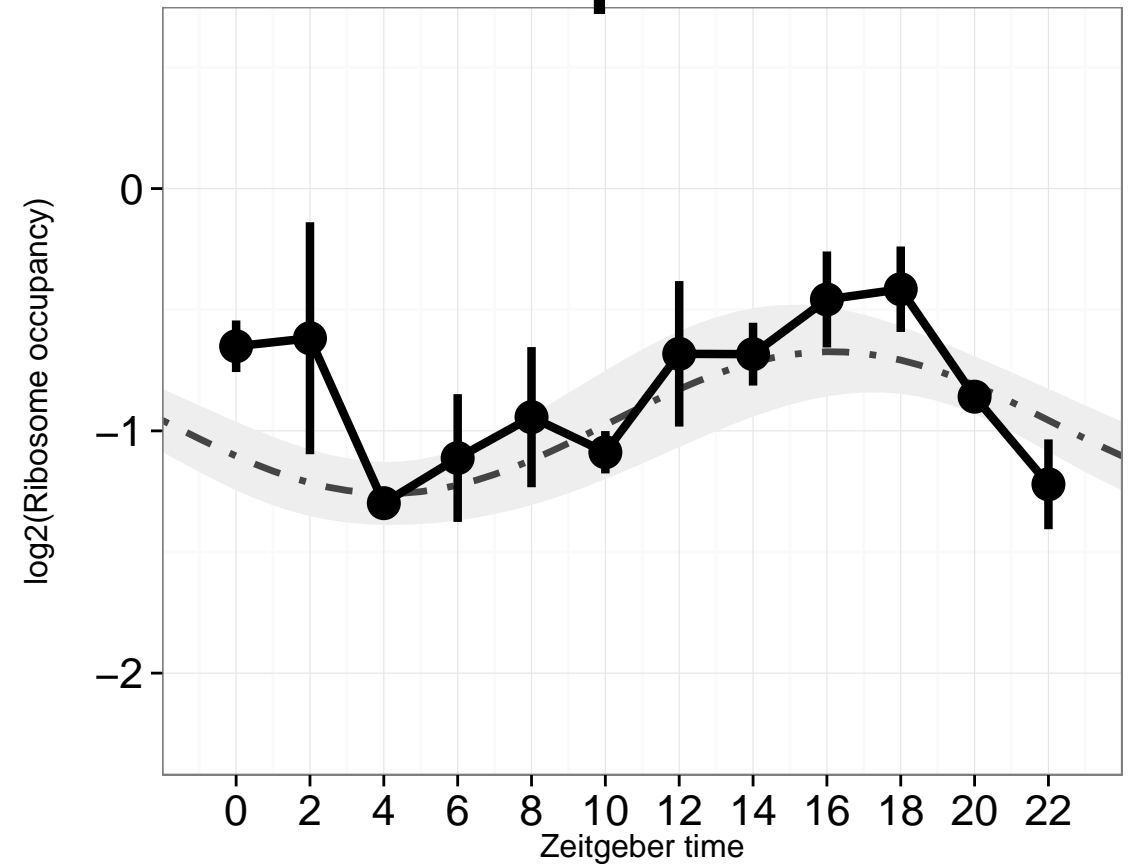

Supplement: SuppDataset_1.zip [file Zfp358_set_A.pdf › Supplemental Dataset 1/A-mRNA_nonrhyth_translation_nonrhyth/Zfp358_set_A.pdf]

# Zfp35

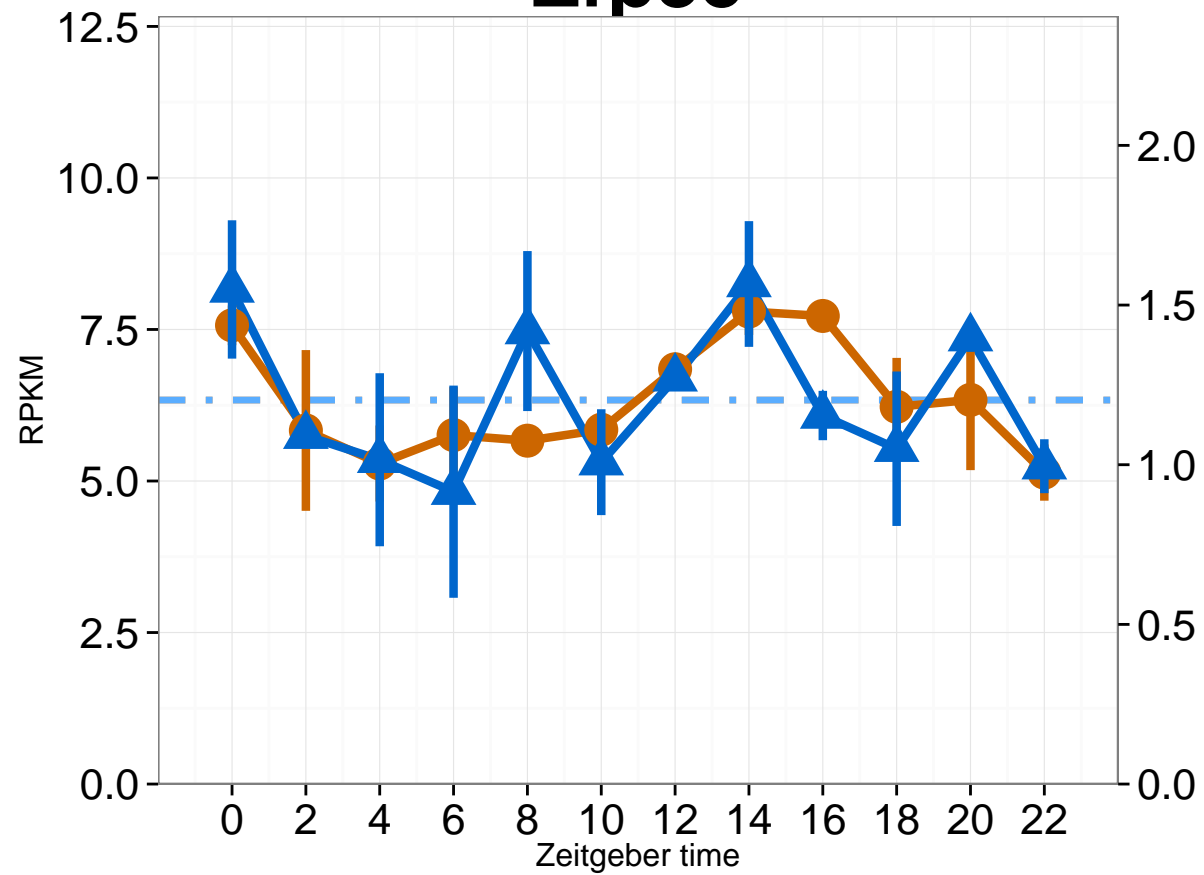

# Zfp35

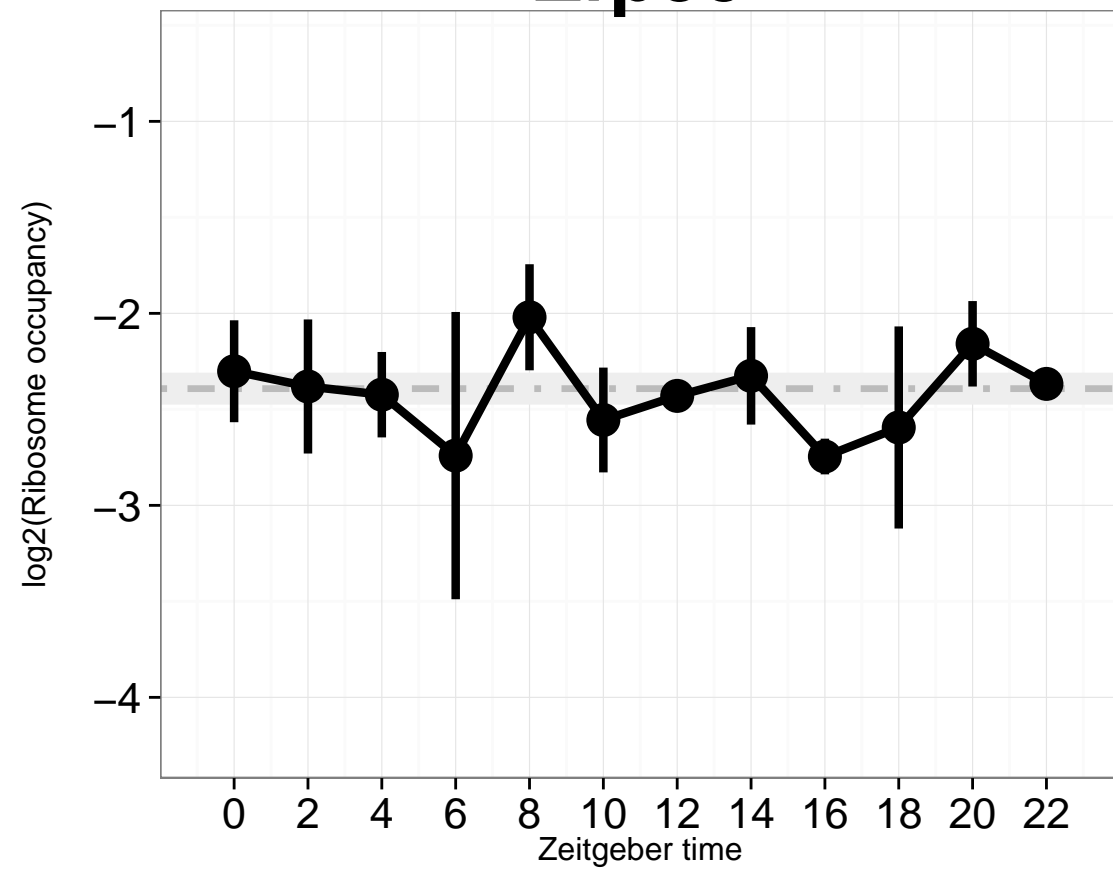

Supplement: SuppDataset_1.zip [file Zfp35_set_A.pdf › Supplemental Dataset 1/A-mRNA_nonrhyth_translation_nonrhyth/Zfp35_set_A.pdf]
