# Supplementary figures and images for: Ribosome profiling reveals the rhythmic liver translatome and circadian clock regulation by upstream open reading frames (part 85 of 113)
Source: HighWire-hosted journal article supplement (doi:10.1101/gr.195404.115), 2015-10-20

# Zfp362

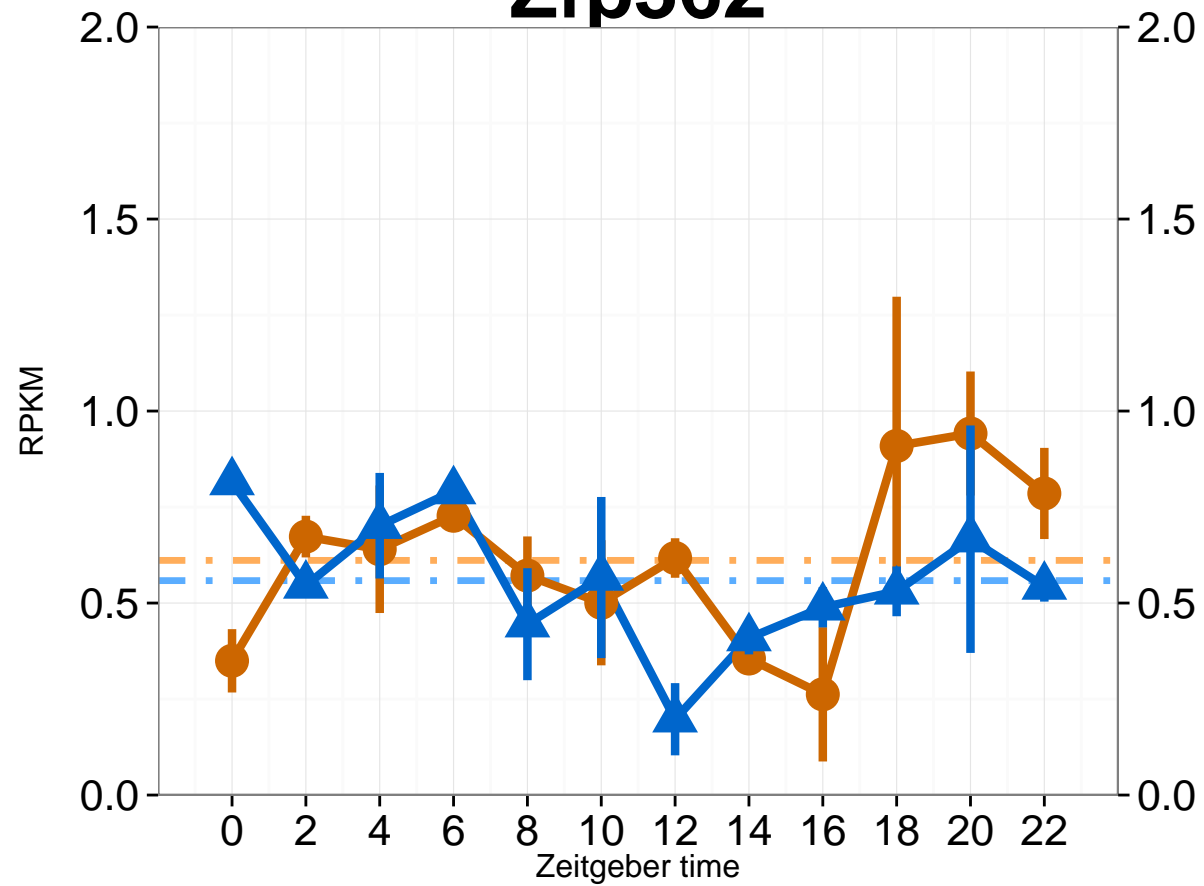

# Zfp362

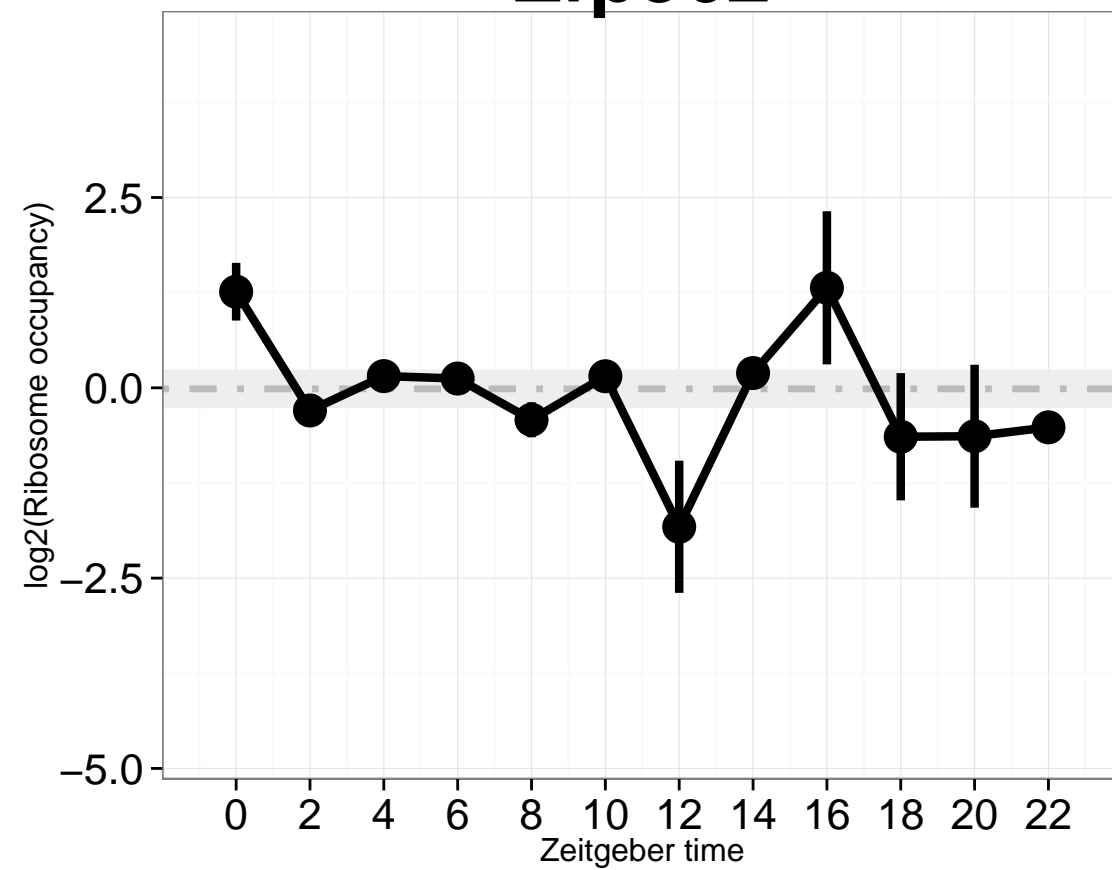

Supplement: SuppDataset_1.zip [file Zfp362_set_A.pdf › Supplemental Dataset 1/A-mRNA_nonrhyth_translation_nonrhyth/Zfp362_set_A.pdf]

# Zfp366

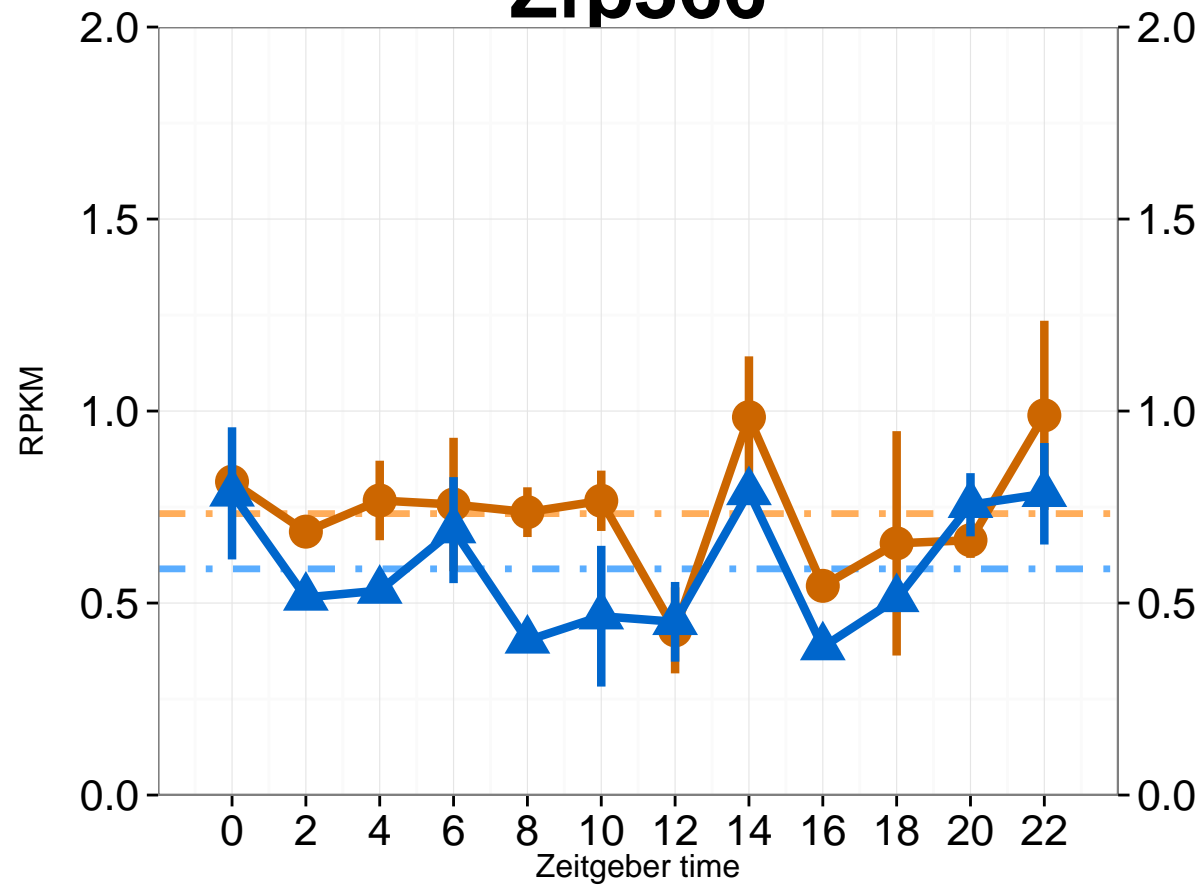

# Zfp366

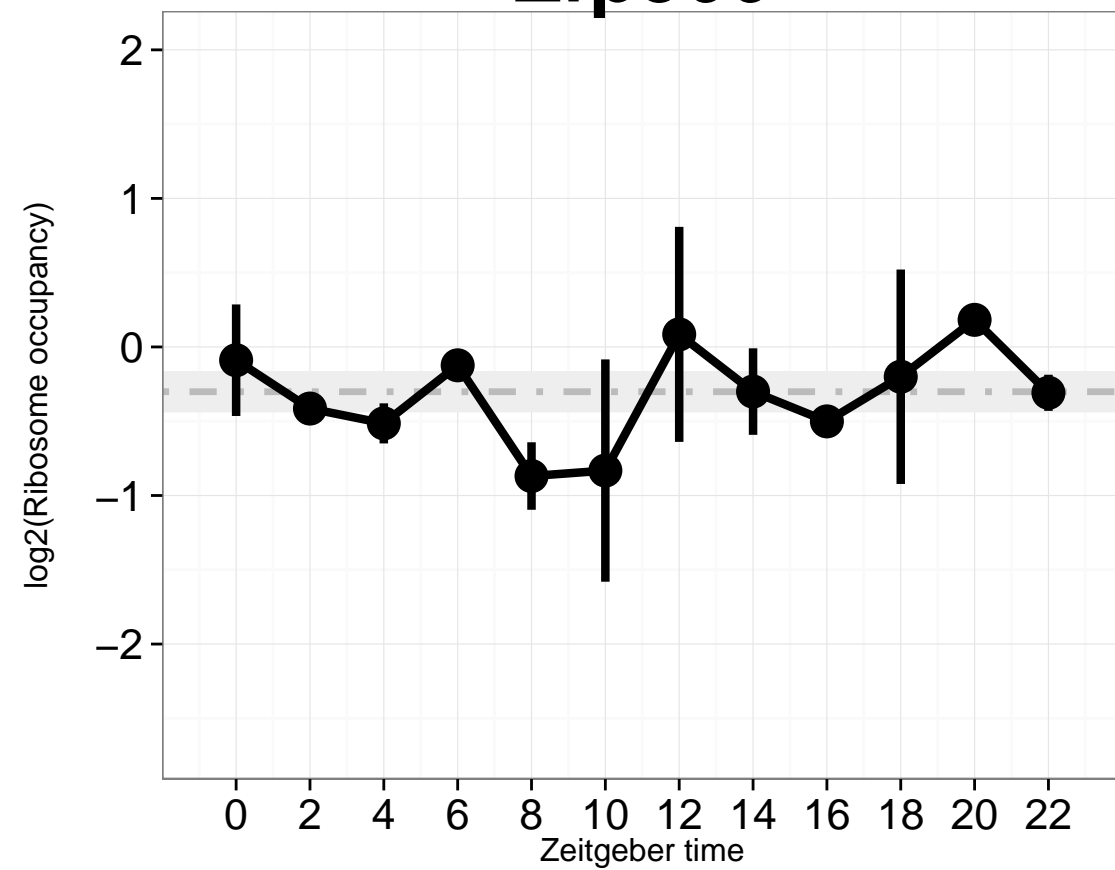

Supplement: SuppDataset_1.zip [file Zfp366_set_A.pdf › Supplemental Dataset 1/A-mRNA_nonrhyth_translation_nonrhyth/Zfp366_set_A.pdf]

# Zfp367

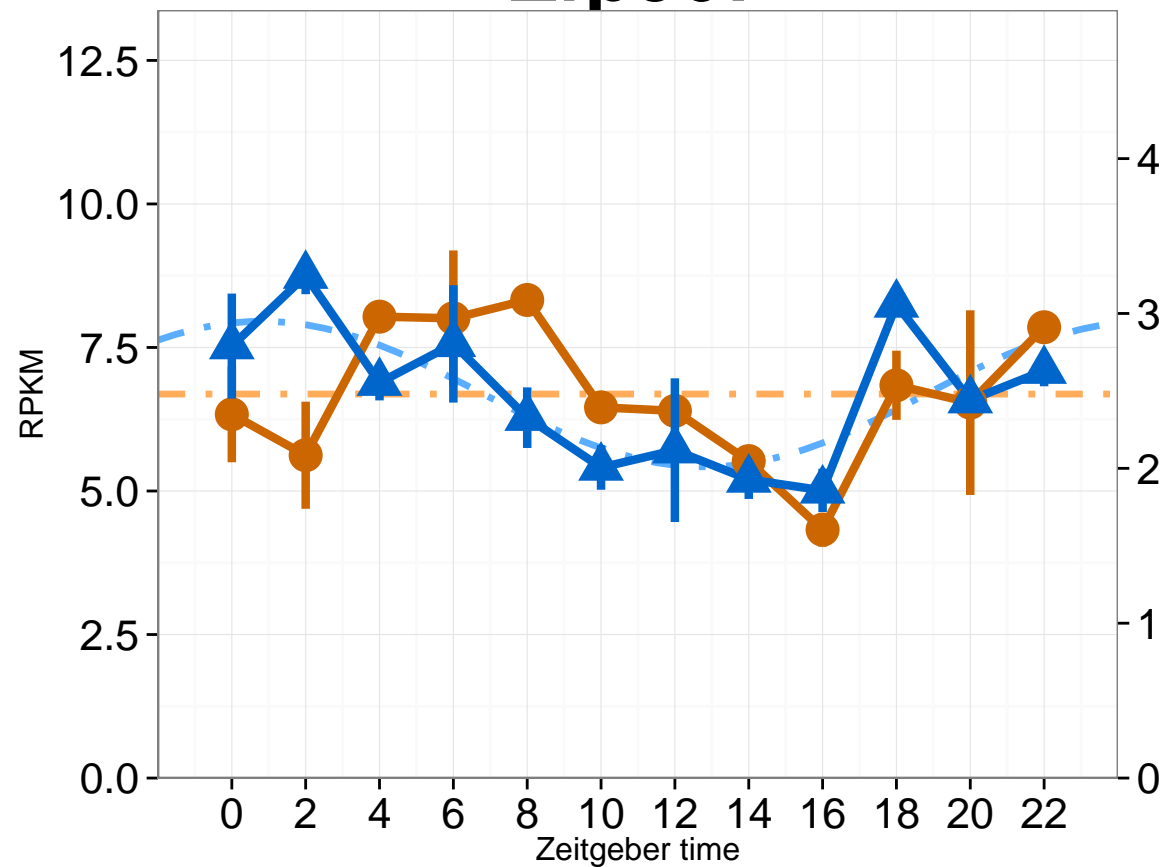

# Zfp367

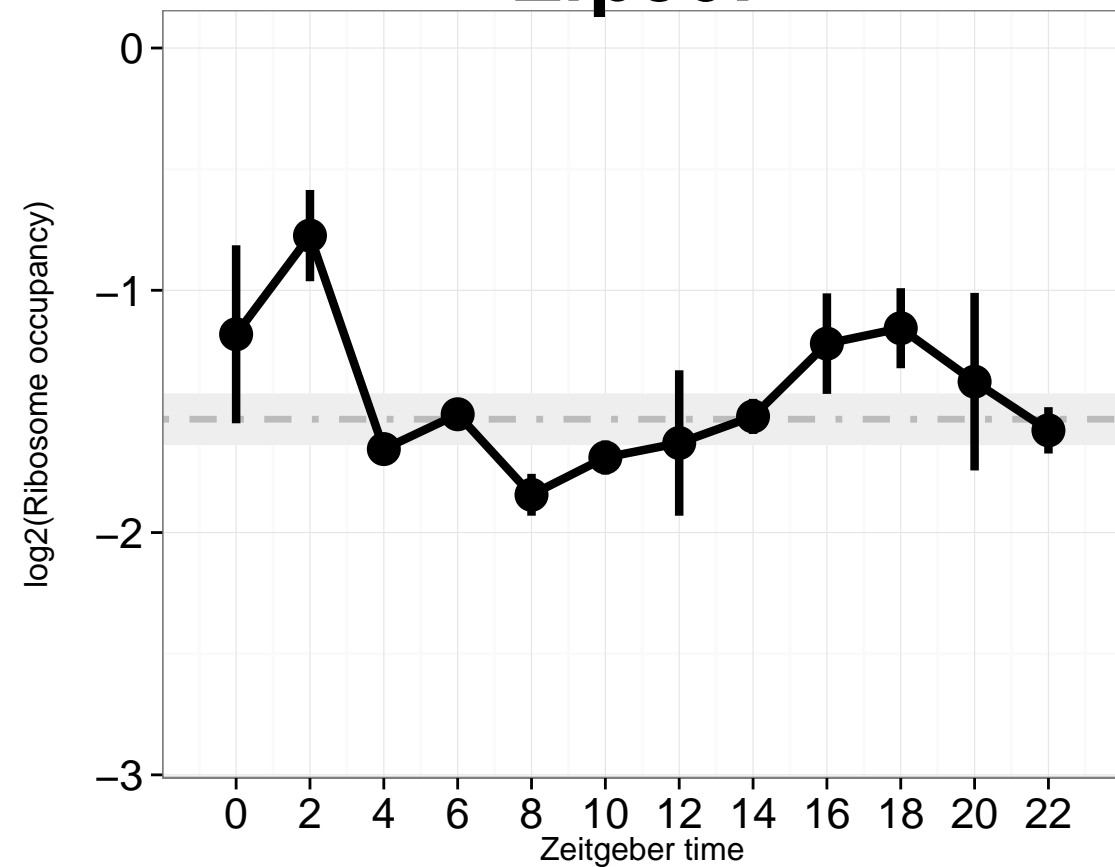

Supplement: SuppDataset_1.zip [file Zfp367_set_A.pdf › Supplemental Dataset 1/A-mRNA_nonrhyth_translation_nonrhyth/Zfp367_set_A.pdf]

# Zfp369

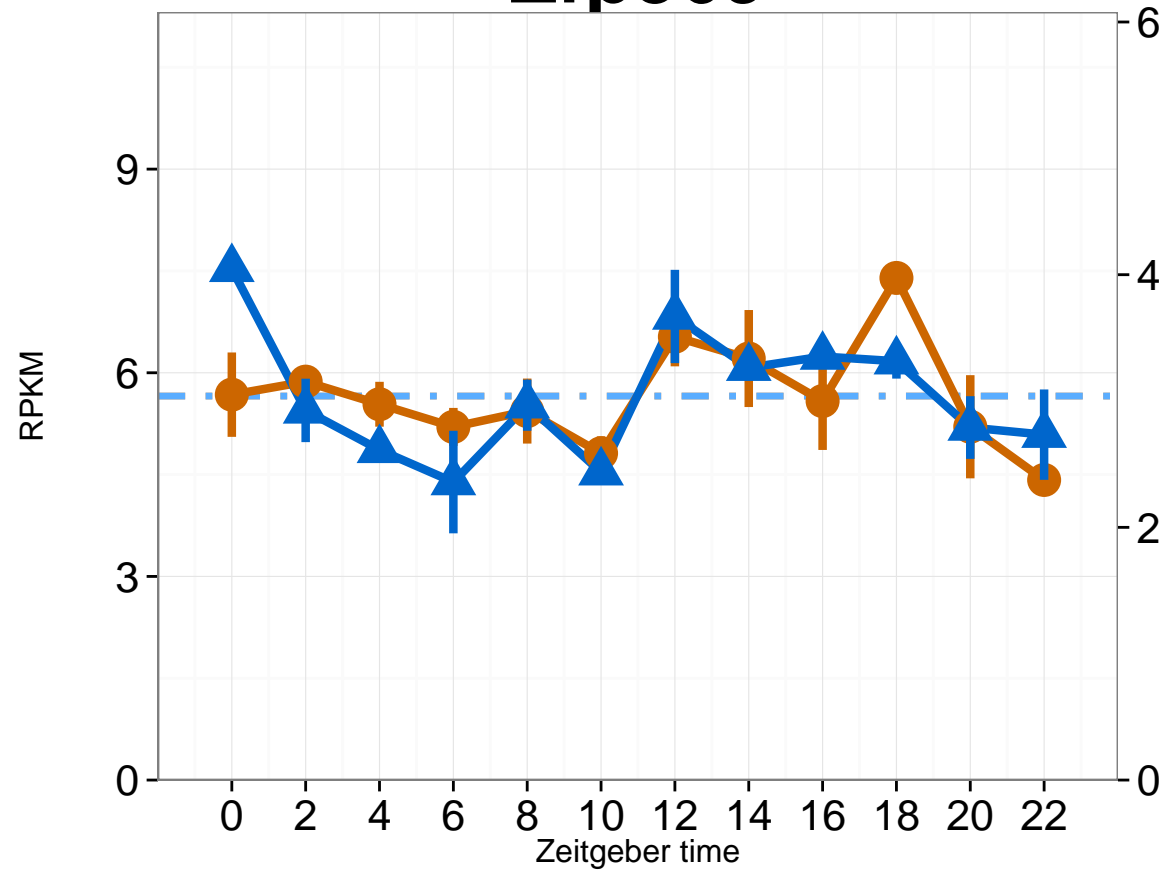

# Zfp369

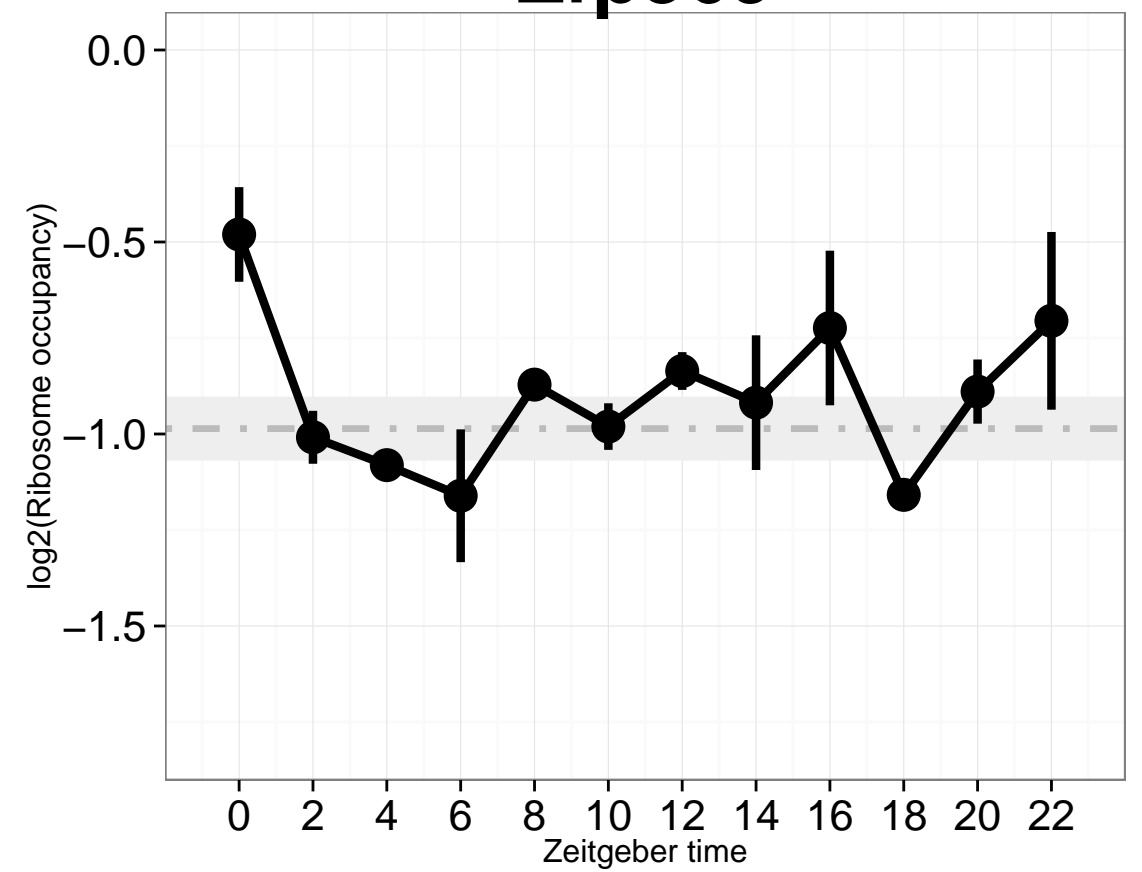

Supplement: SuppDataset_1.zip [file Zfp369_set_A.pdf › Supplemental Dataset 1/A-mRNA_nonrhyth_translation_nonrhyth/Zfp369_set_A.pdf]

## Zfp36

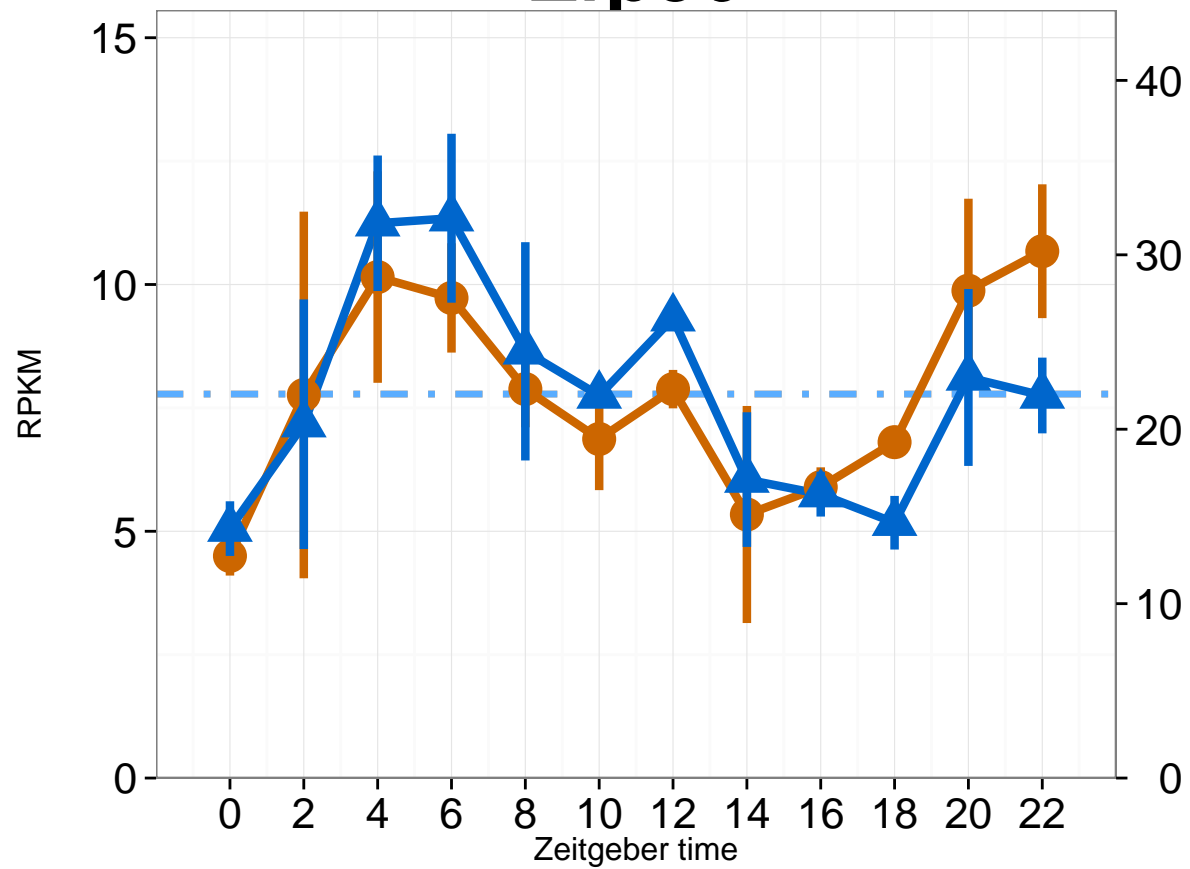

## Zfp36

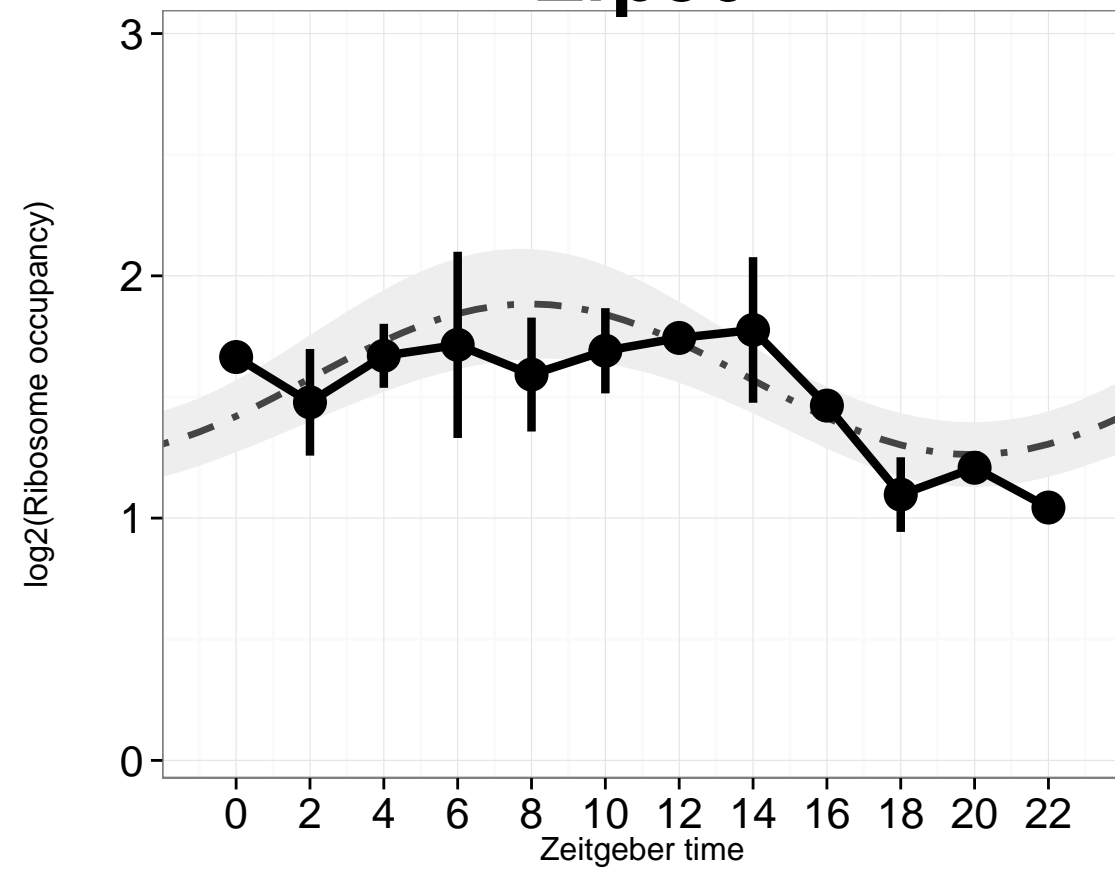

Supplement: SuppDataset_1.zip [file Zfp36_set_A.pdf › Supplemental Dataset 1/A-mRNA_nonrhyth_translation_nonrhyth/Zfp36_set_A.pdf]

# Zfp384

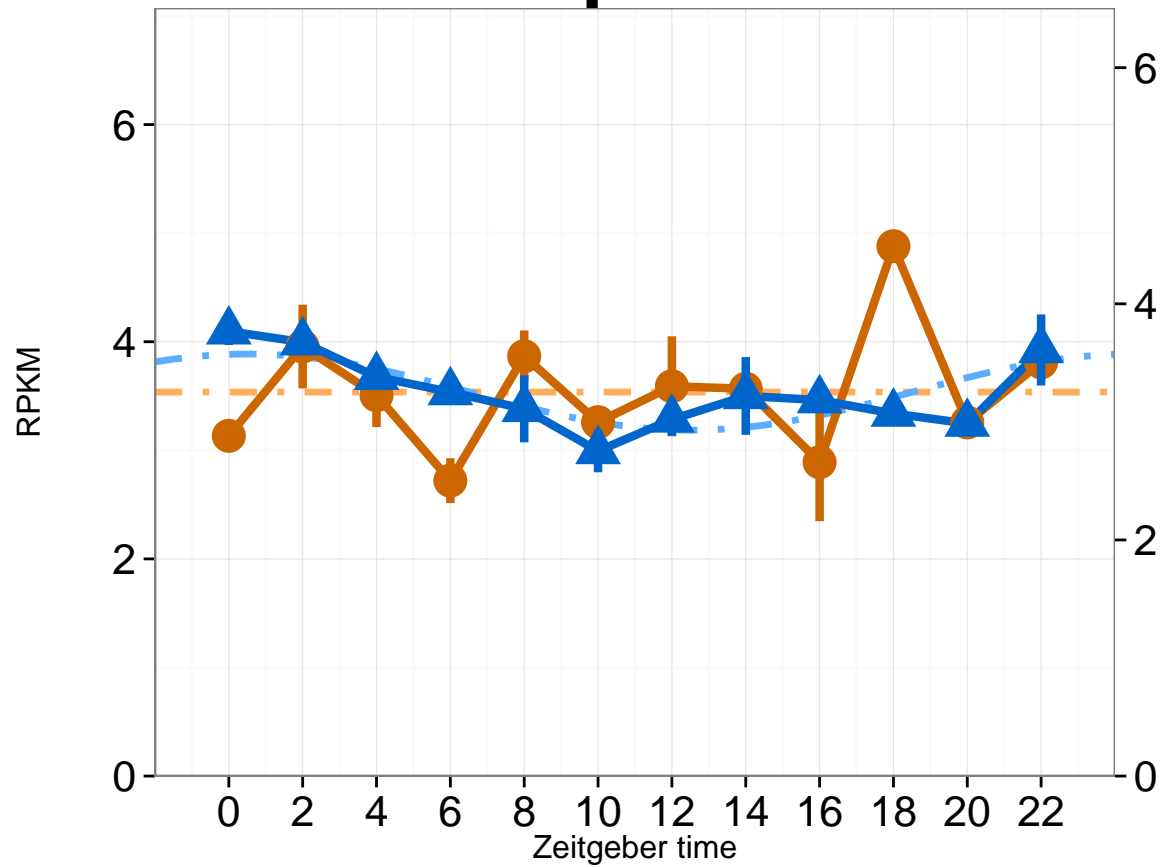

# Zfp384

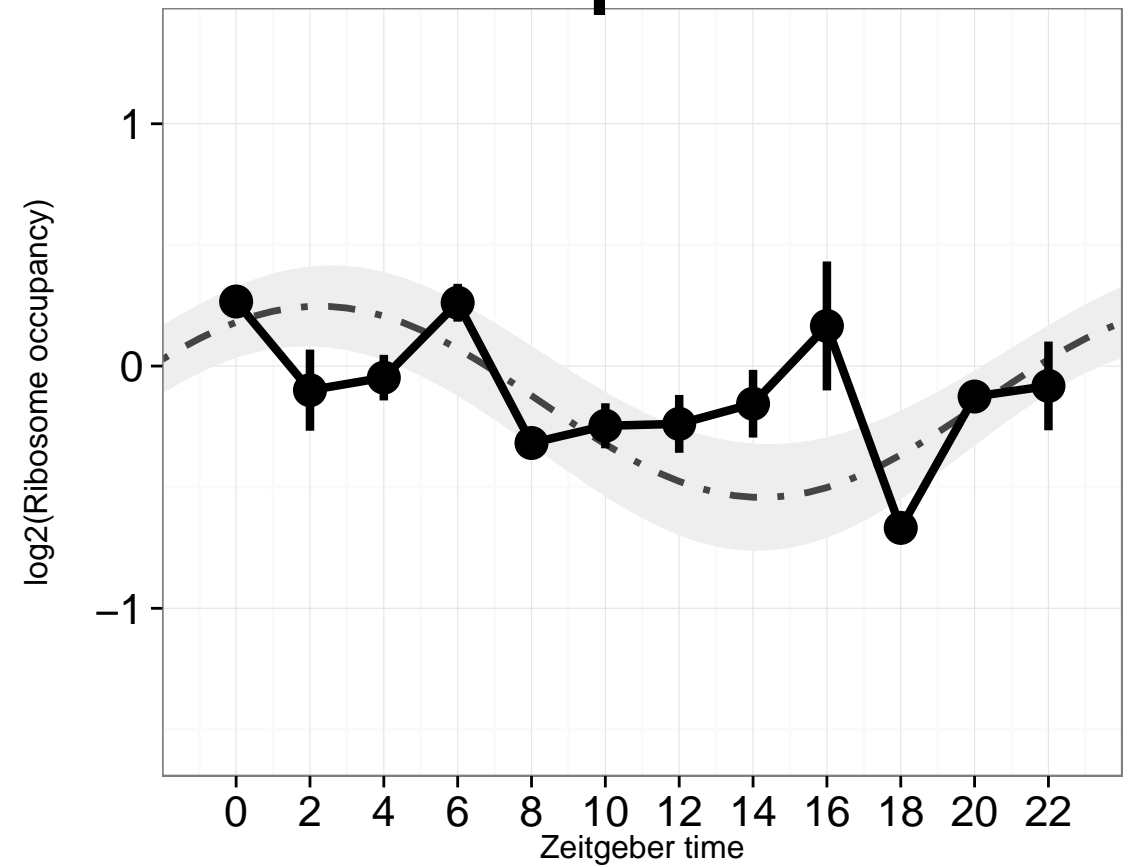

Supplement: SuppDataset_1.zip [file Zfp384_set_A.pdf › Supplemental Dataset 1/A-mRNA_nonrhyth_translation_nonrhyth/Zfp384_set_A.pdf]

# Zfp395

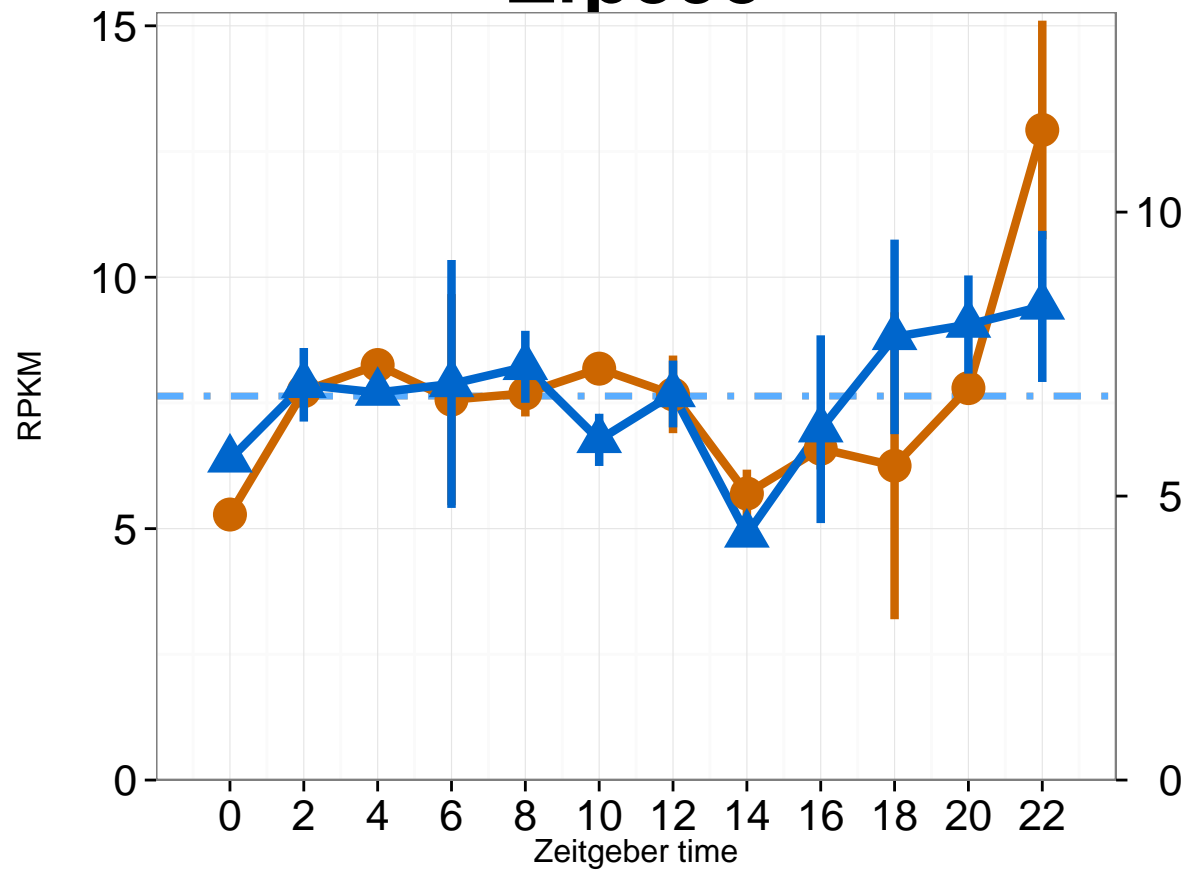

# Zfp395

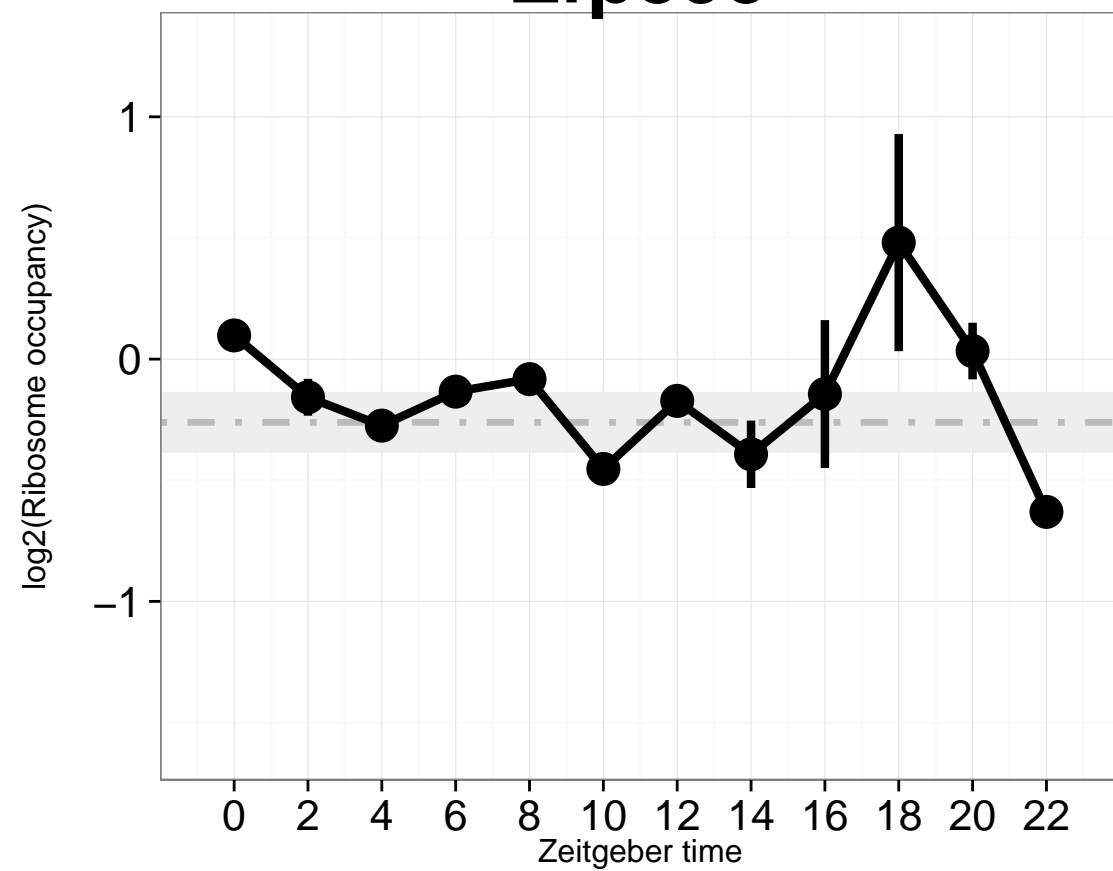

Supplement: SuppDataset_1.zip [file Zfp395_set_A.pdf › Supplemental Dataset 1/A-mRNA_nonrhyth_translation_nonrhyth/Zfp395_set_A.pdf]

# Zfp397

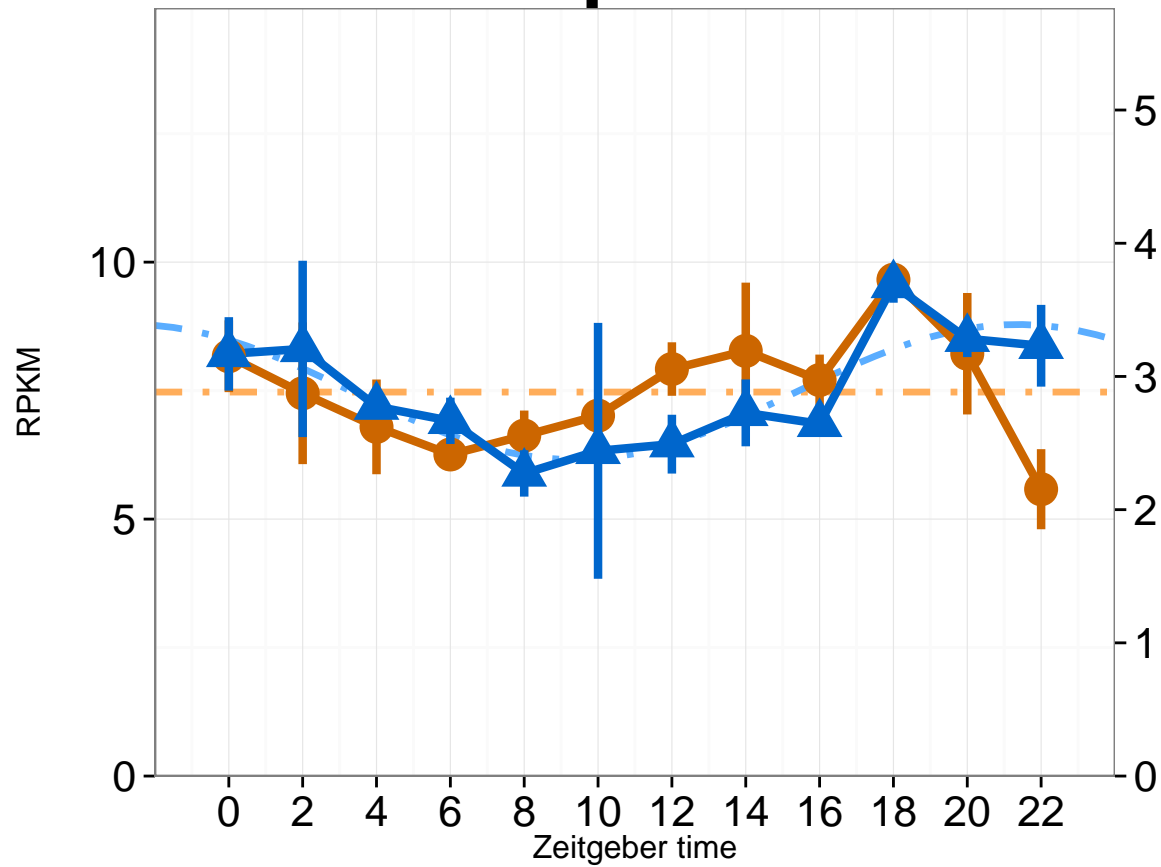

# Zfp397

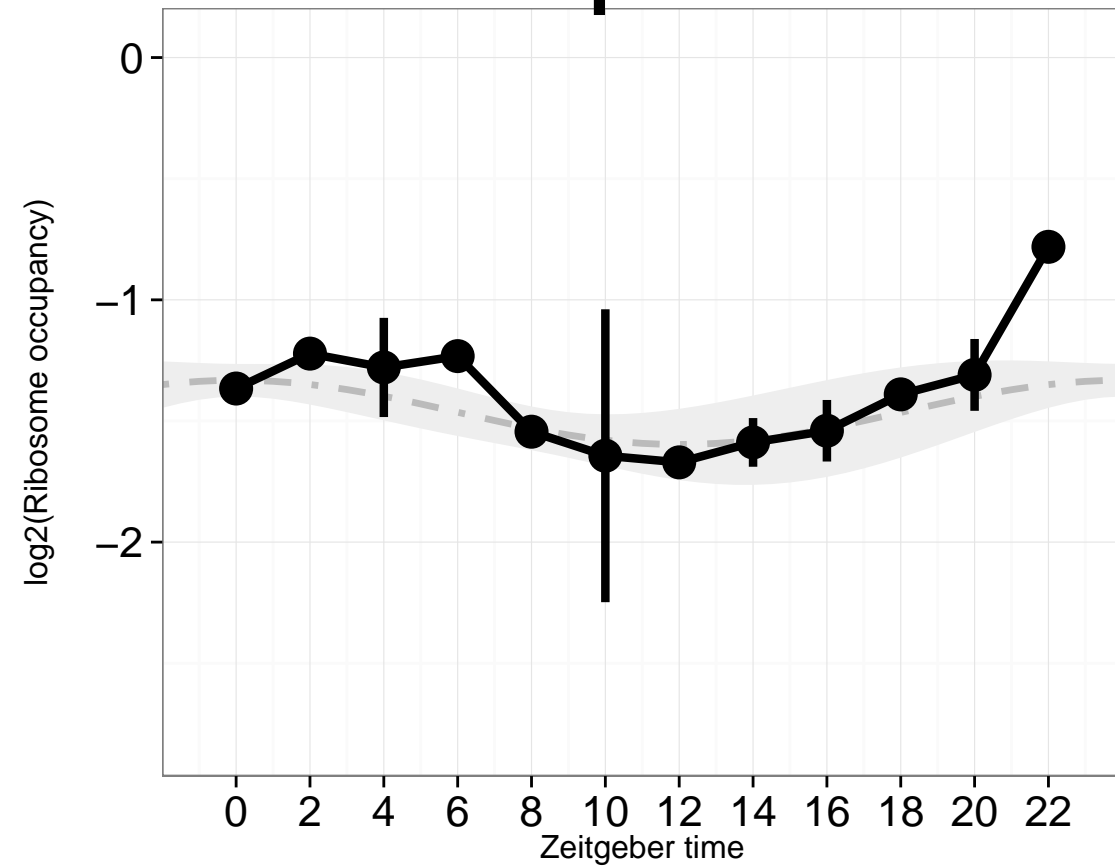

Supplement: SuppDataset_1.zip [file Zfp397_set_A.pdf › Supplemental Dataset 1/A-mRNA_nonrhyth_translation_nonrhyth/Zfp397_set_A.pdf]

# Zfp39

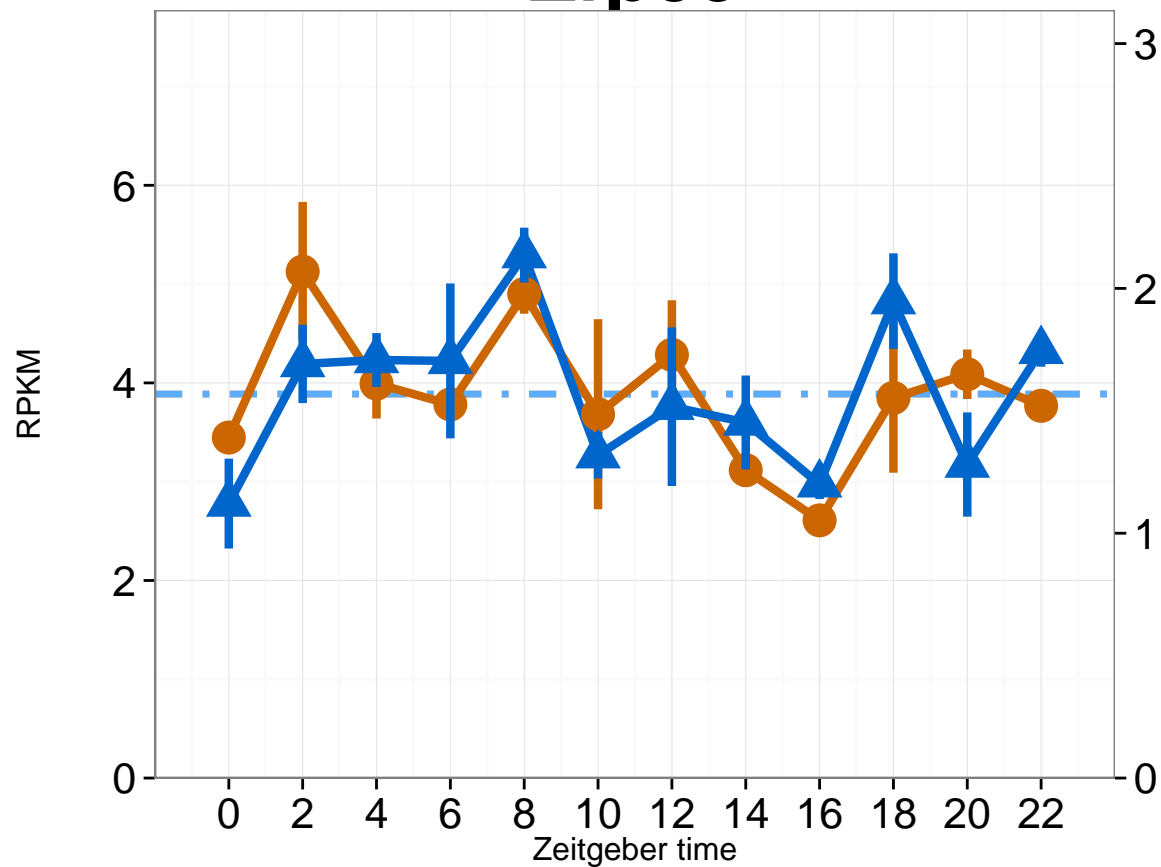

# Zfp39

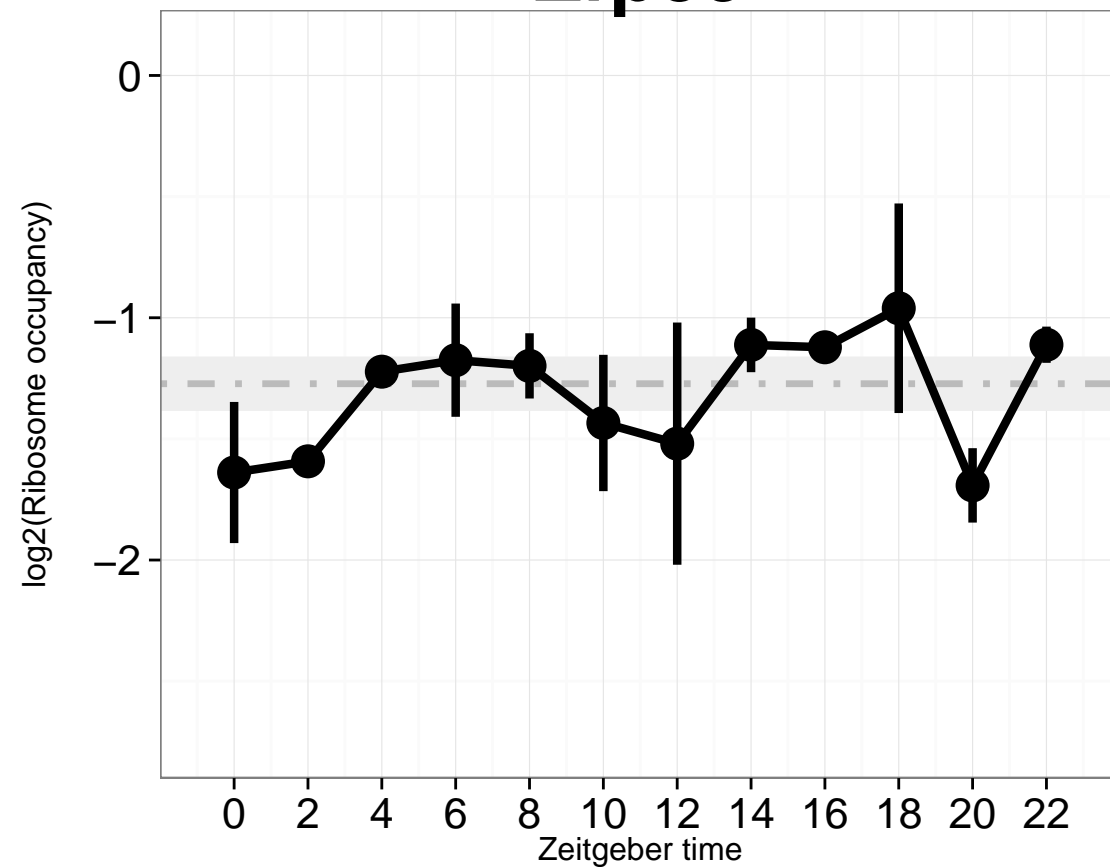

Supplement: SuppDataset_1.zip [file Zfp39_set_A.pdf › Supplemental Dataset 1/A-mRNA_nonrhyth_translation_nonrhyth/Zfp39_set_A.pdf]

# Zfp3

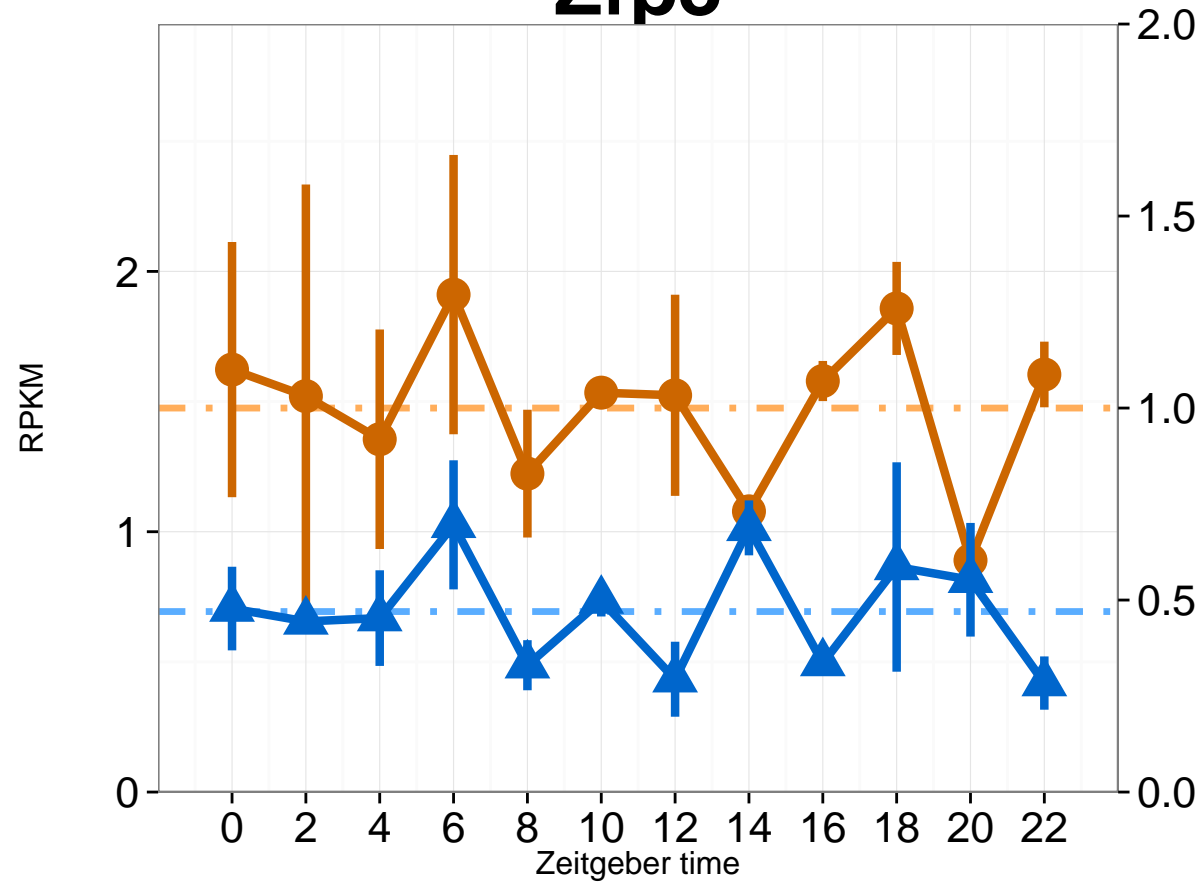

# Zfp3

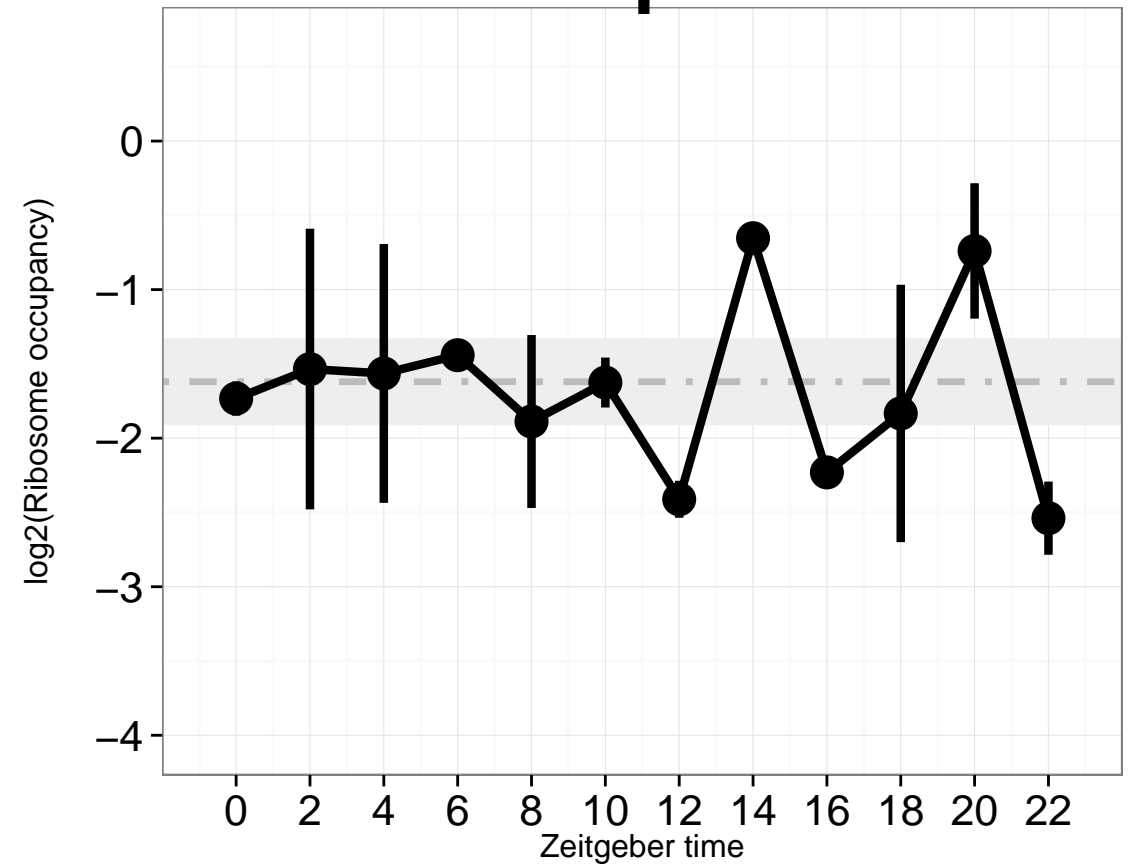

Supplement: SuppDataset_1.zip [file Zfp3_set_A.pdf › Supplemental Dataset 1/A-mRNA_nonrhyth_translation_nonrhyth/Zfp3_set_A.pdf]

# Zfp407

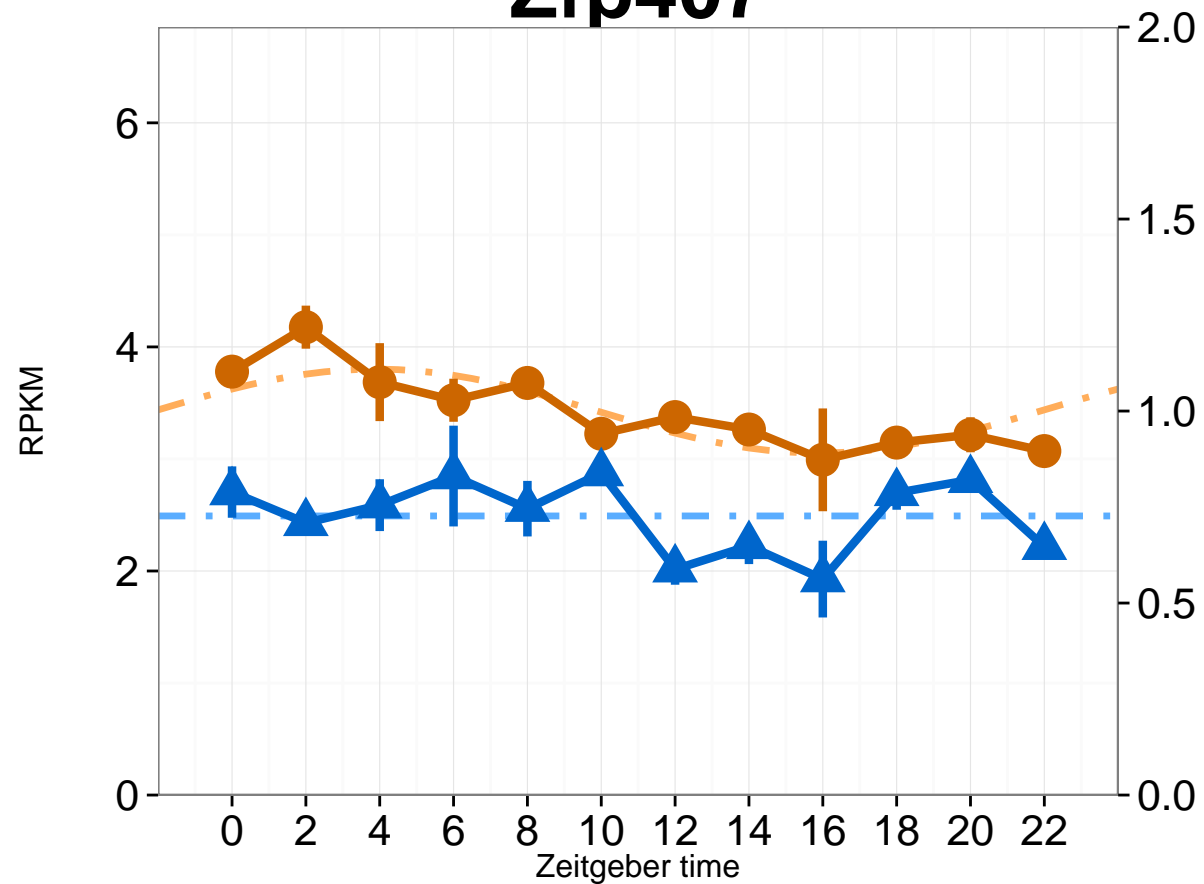

# Zfp407

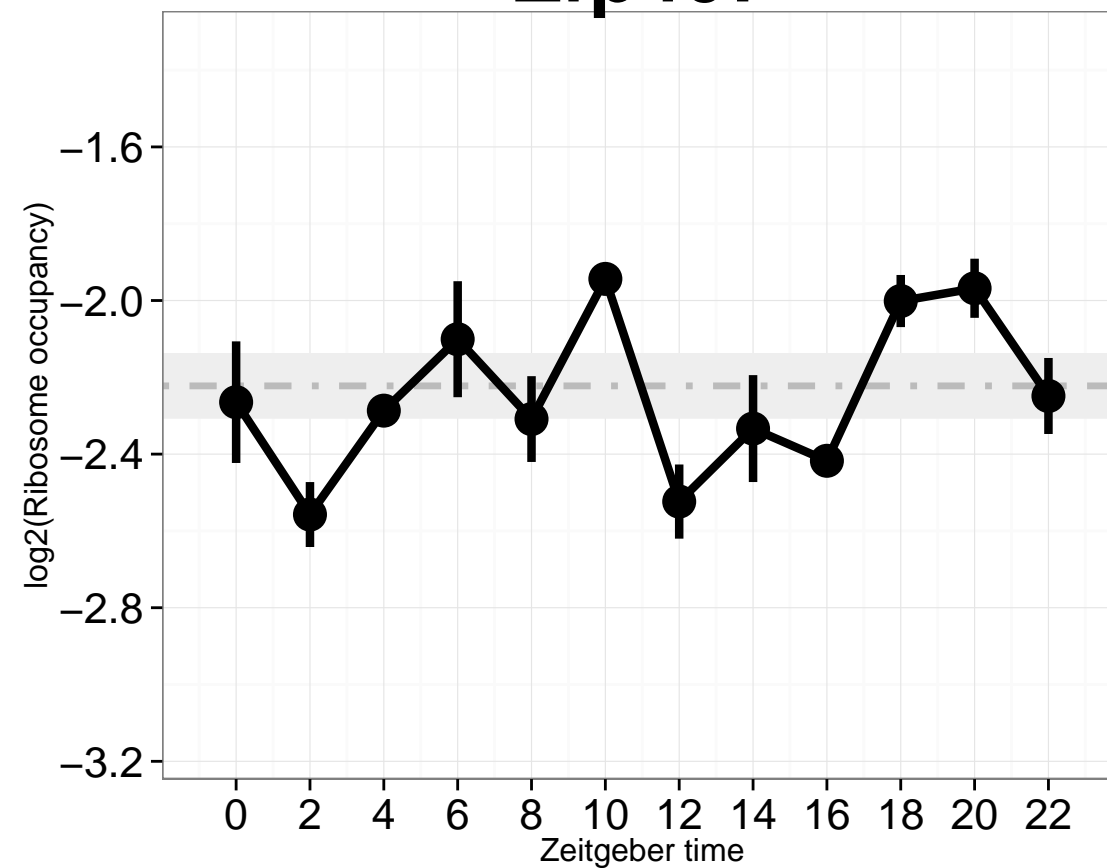

Supplement: SuppDataset_1.zip [file Zfp407_set_A.pdf › Supplemental Dataset 1/A-mRNA_nonrhyth_translation_nonrhyth/Zfp407_set_A.pdf]

# Zfp408

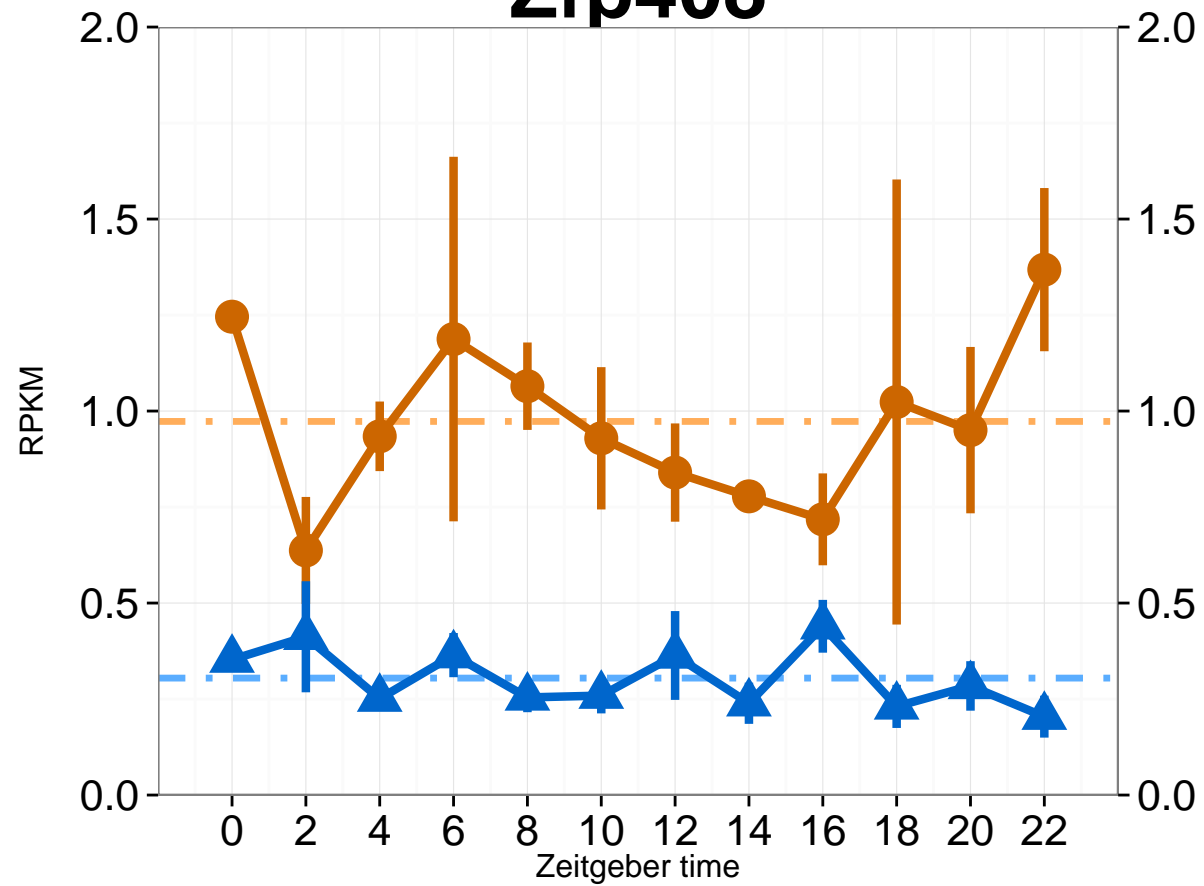

# Zfp408

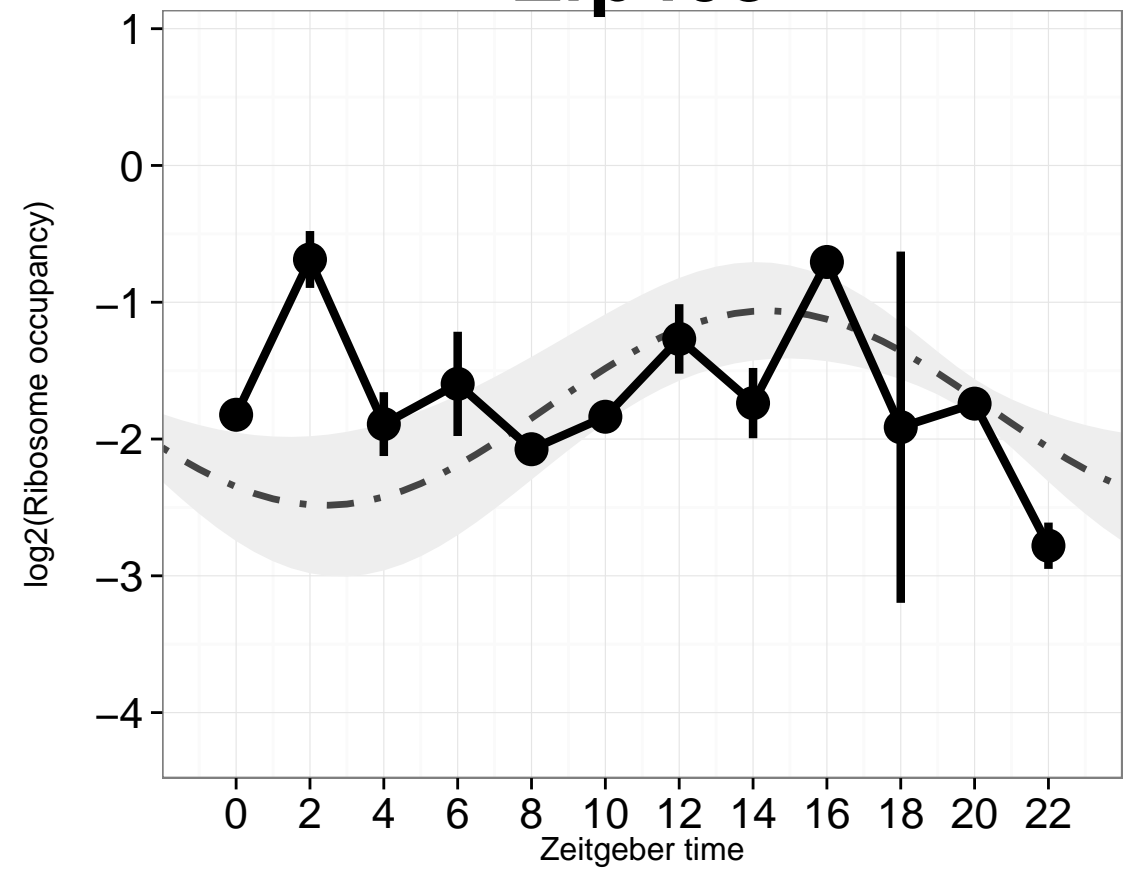

Supplement: SuppDataset_1.zip [file Zfp408_set_A.pdf › Supplemental Dataset 1/A-mRNA_nonrhyth_translation_nonrhyth/Zfp408_set_A.pdf]

# Zfp40

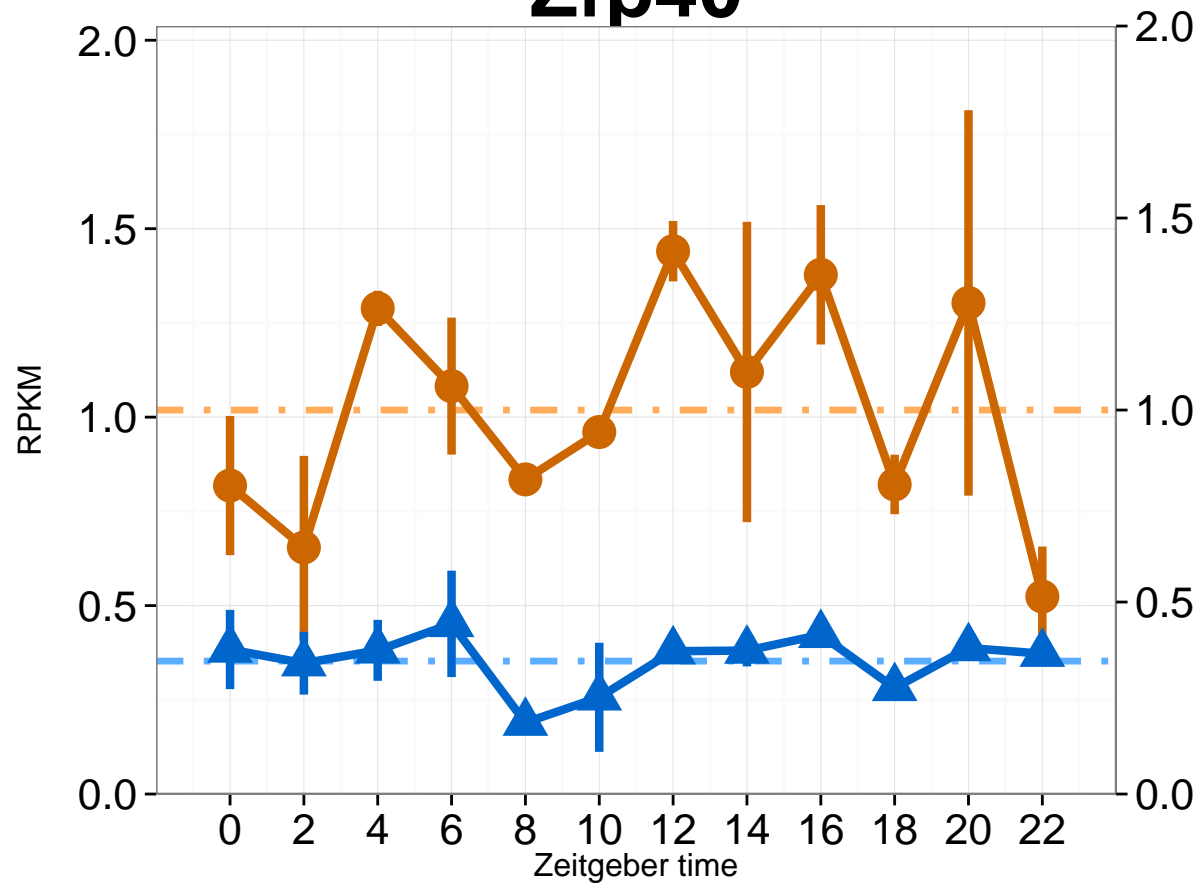

# Zfp40

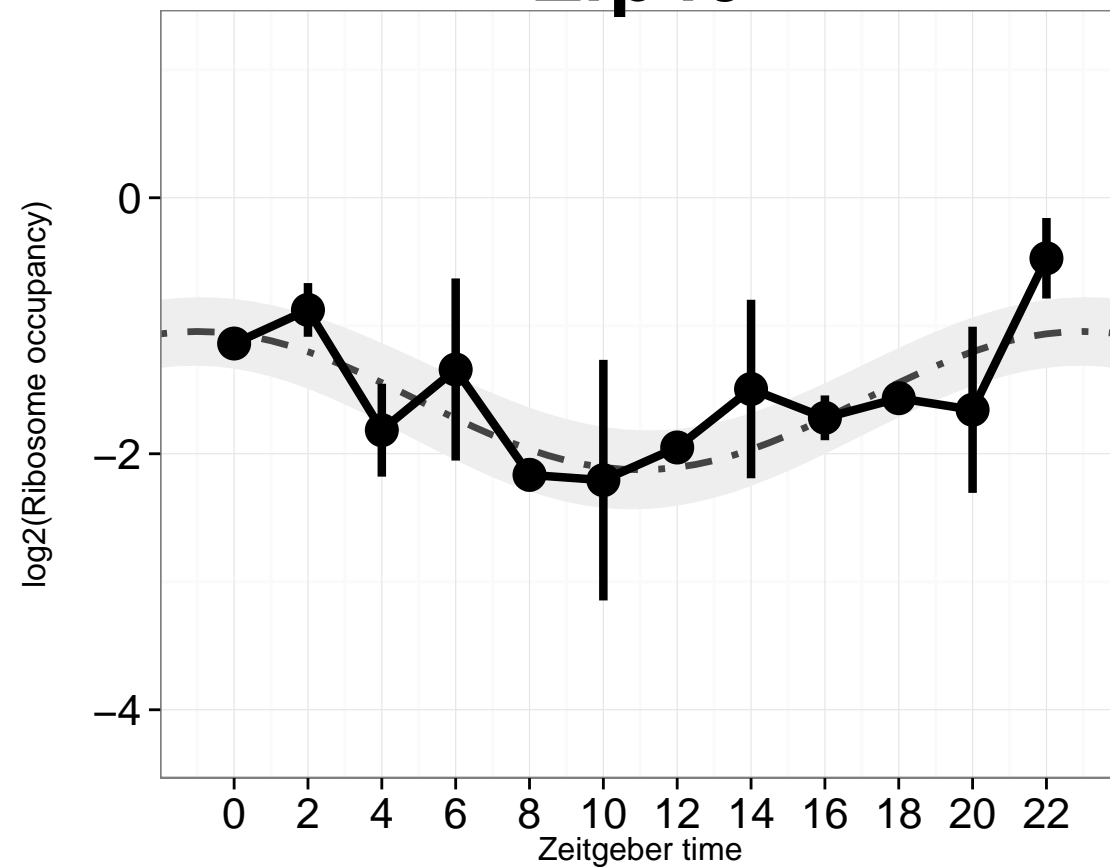

Supplement: SuppDataset_1.zip [file Zfp40_set_A.pdf › Supplemental Dataset 1/A-mRNA_nonrhyth_translation_nonrhyth/Zfp40_set_A.pdf]

# Zfp410

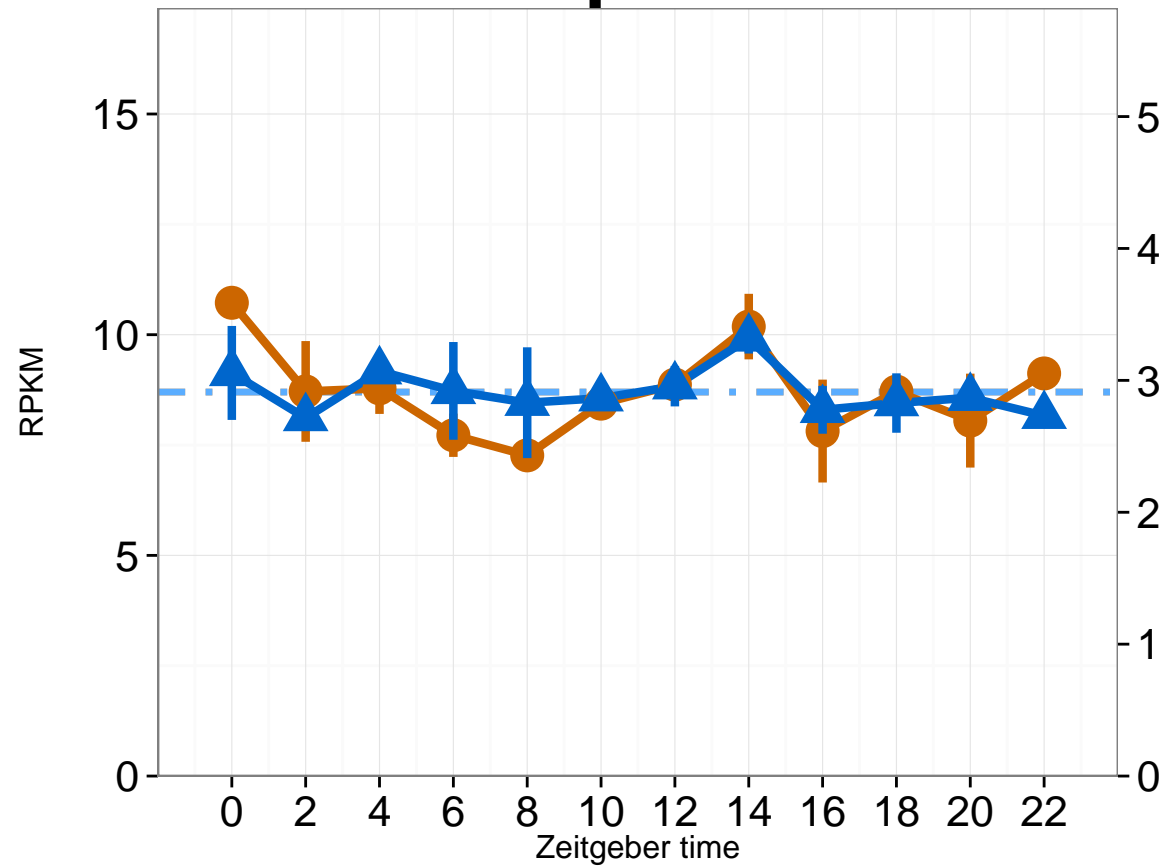

# Zfp410

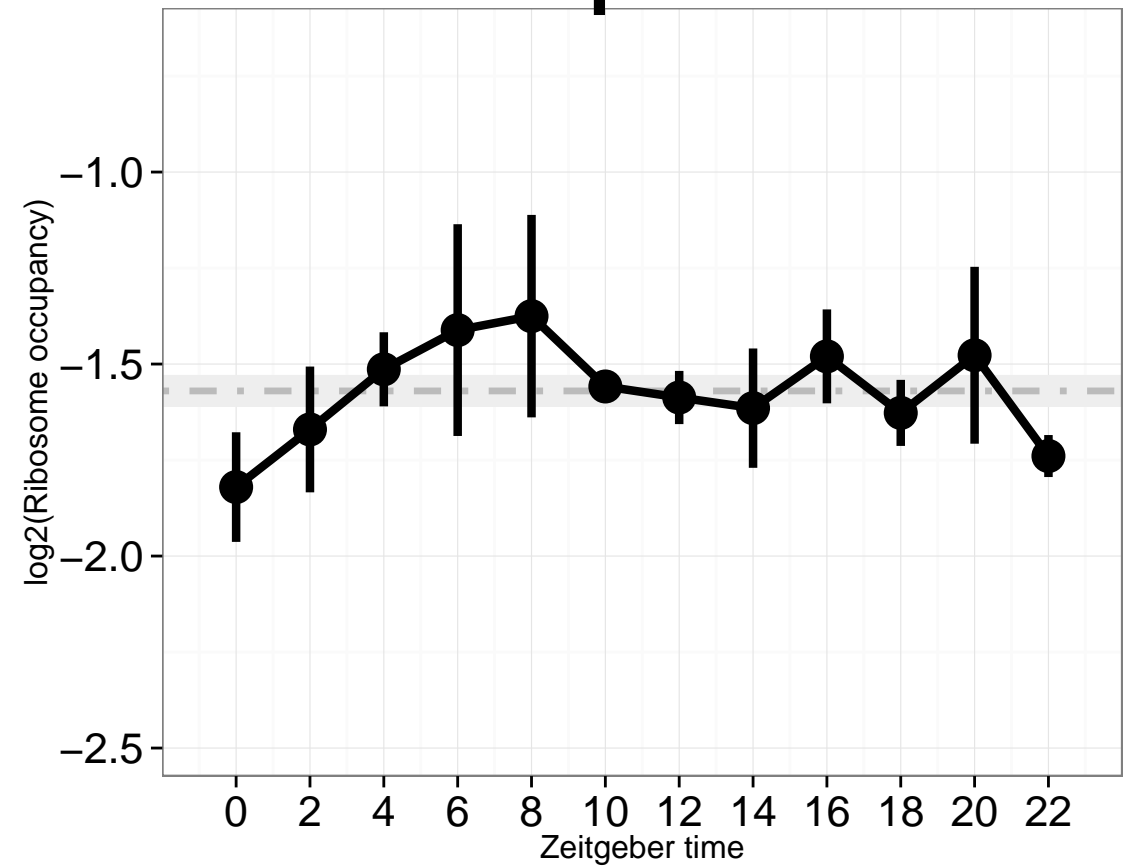

Supplement: SuppDataset_1.zip [file Zfp410_set_A.pdf › Supplemental Dataset 1/A-mRNA_nonrhyth_translation_nonrhyth/Zfp410_set_A.pdf]

# Zfp414

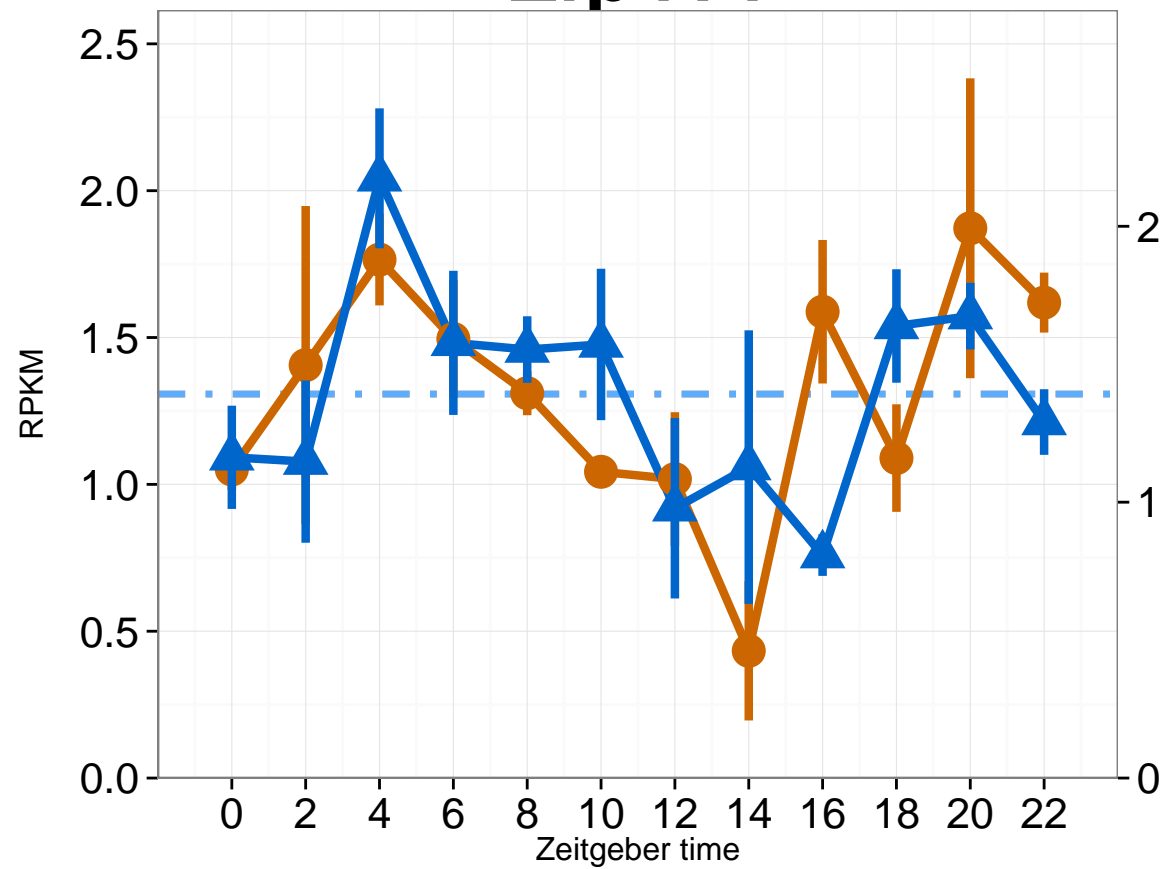

# Zfp414

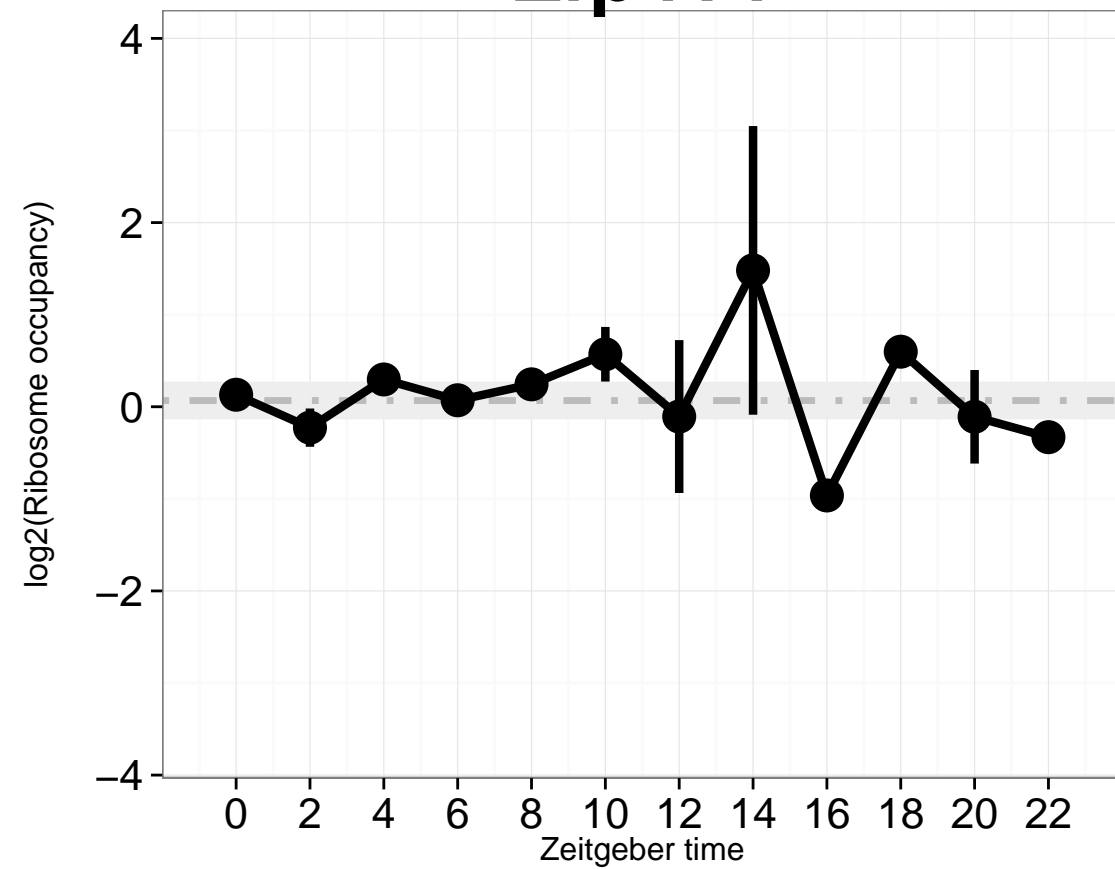

Supplement: SuppDataset_1.zip [file Zfp414_set_A.pdf › Supplemental Dataset 1/A-mRNA_nonrhyth_translation_nonrhyth/Zfp414_set_A.pdf]

# Zfp418

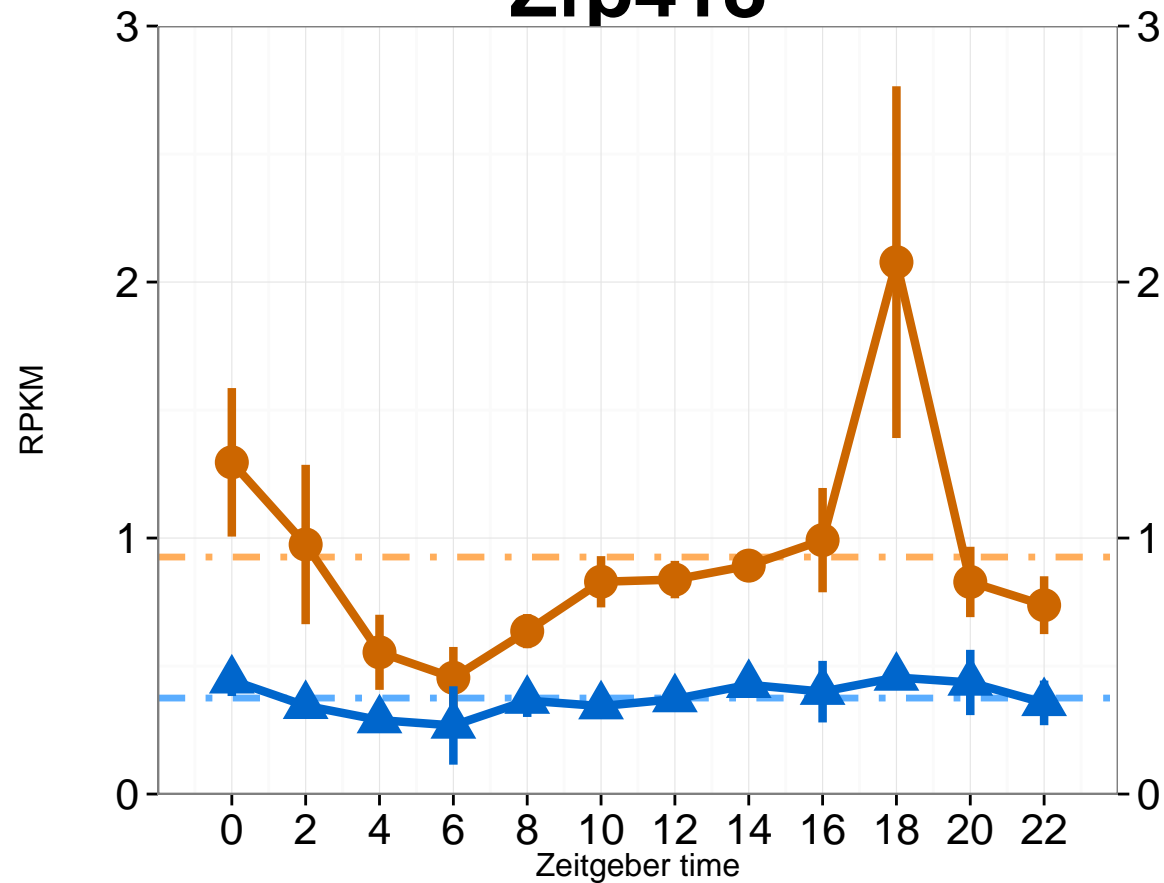

# Zfp418

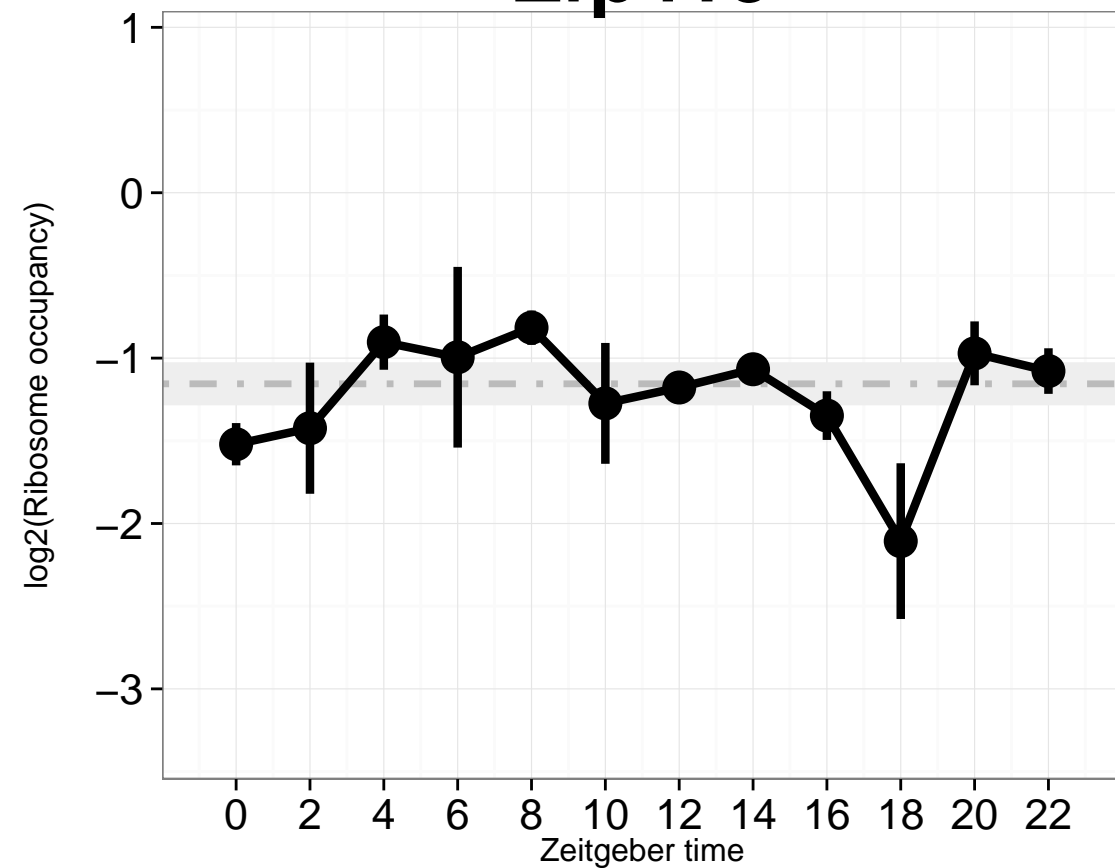

Supplement: SuppDataset_1.zip [file Zfp418_set_A.pdf › Supplemental Dataset 1/A-mRNA_nonrhyth_translation_nonrhyth/Zfp418_set_A.pdf]

# Zfp426

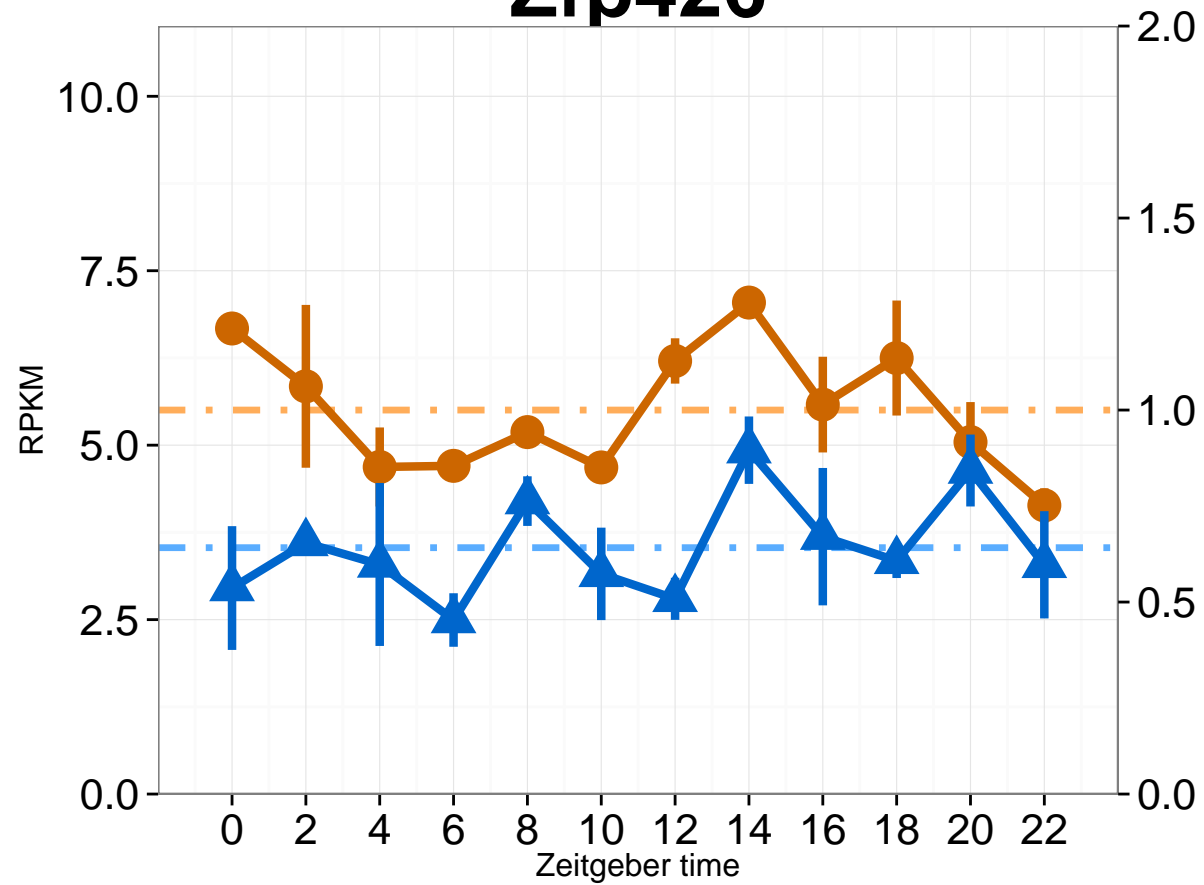

# Zfp426

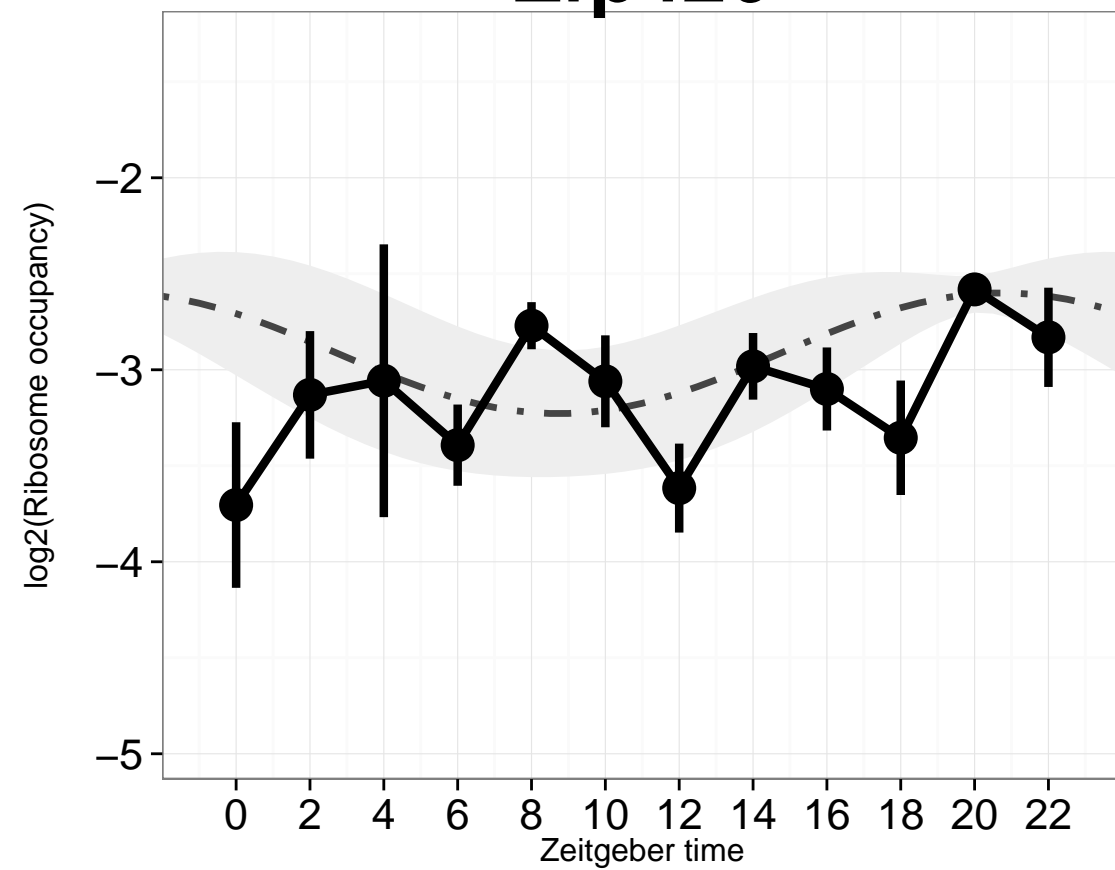

Supplement: SuppDataset_1.zip [file Zfp426_set_A.pdf › Supplemental Dataset 1/A-mRNA_nonrhyth_translation_nonrhyth/Zfp426_set_A.pdf]

# Zfp429

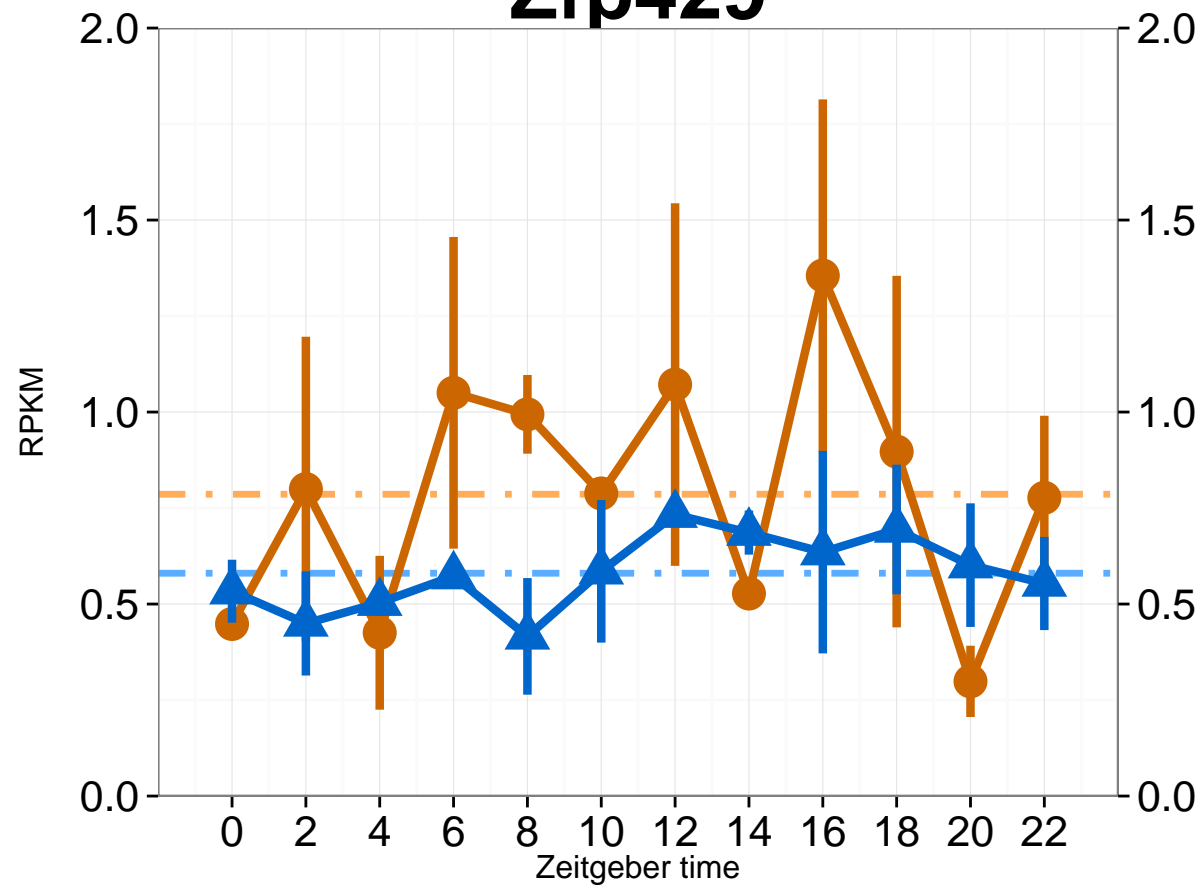

# Zfp429

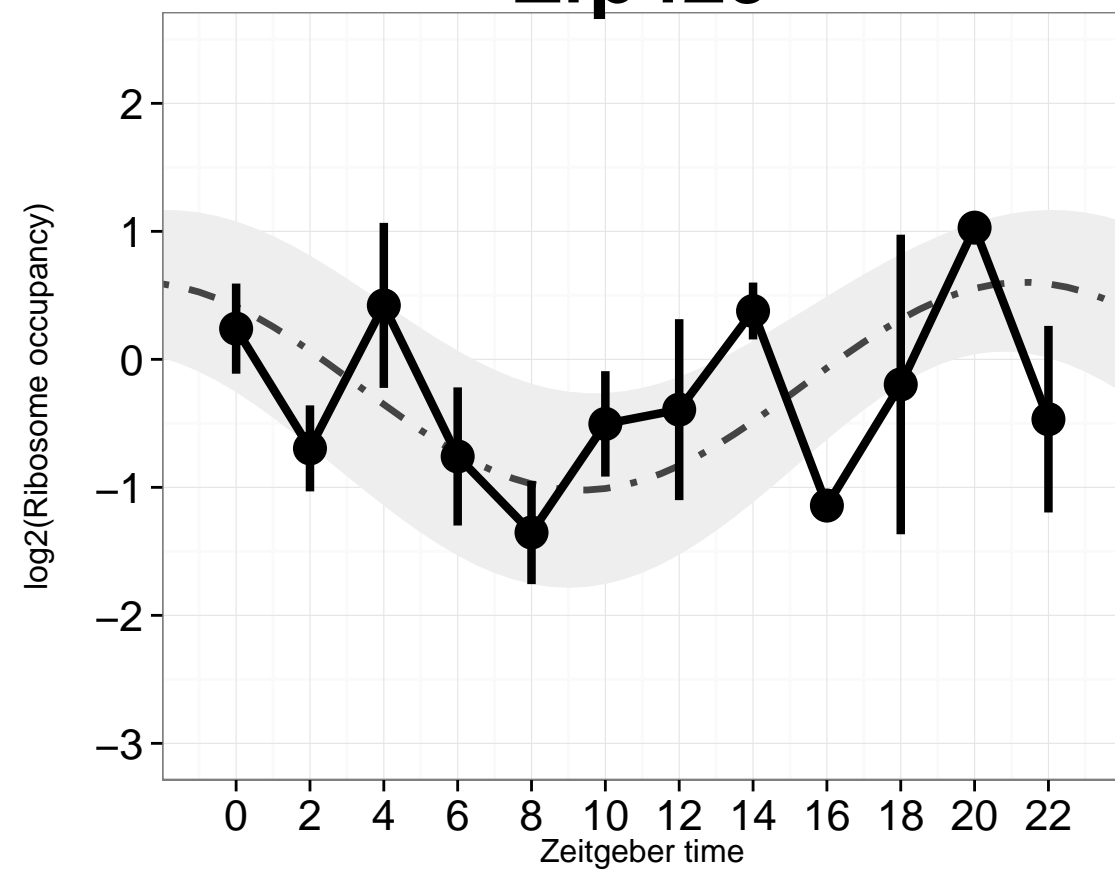

Supplement: SuppDataset_1.zip [file Zfp429_set_A.pdf › Supplemental Dataset 1/A-mRNA_nonrhyth_translation_nonrhyth/Zfp429_set_A.pdf]

# Zfp433

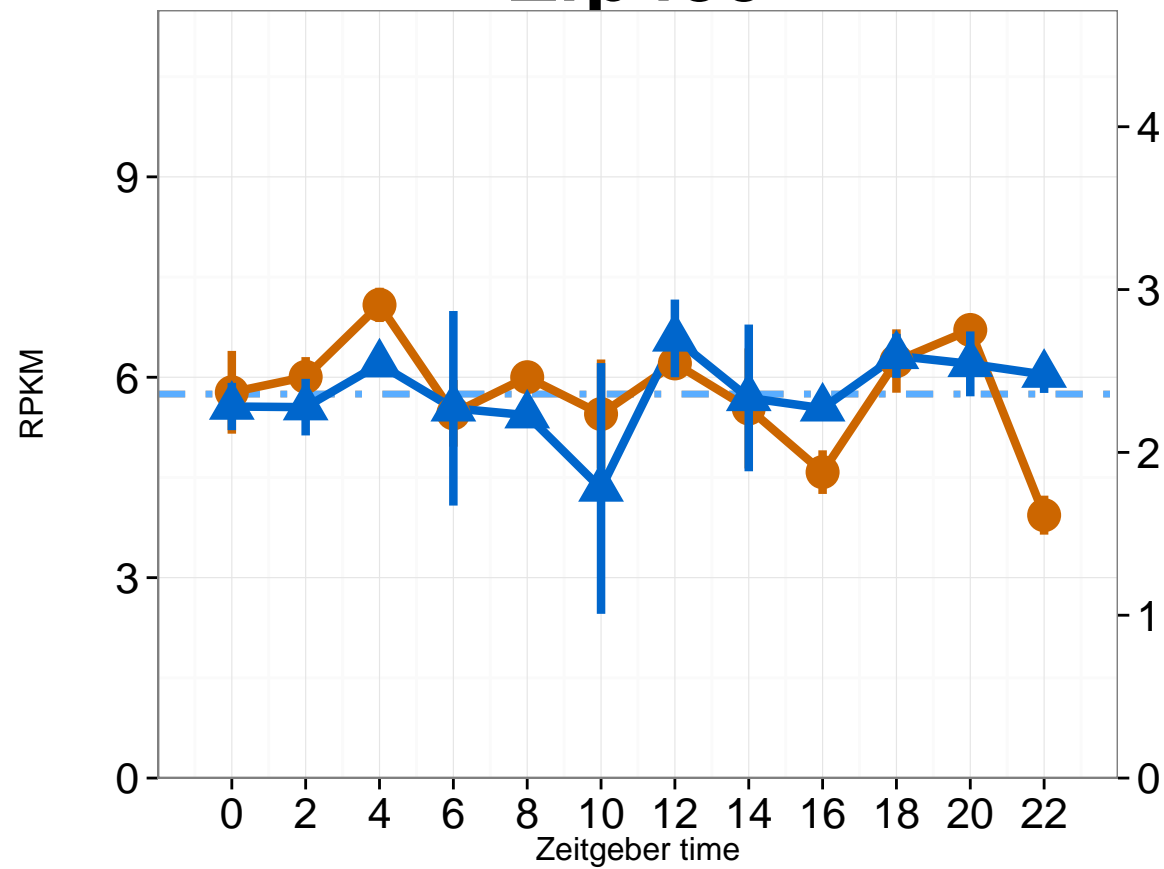

# Zfp433

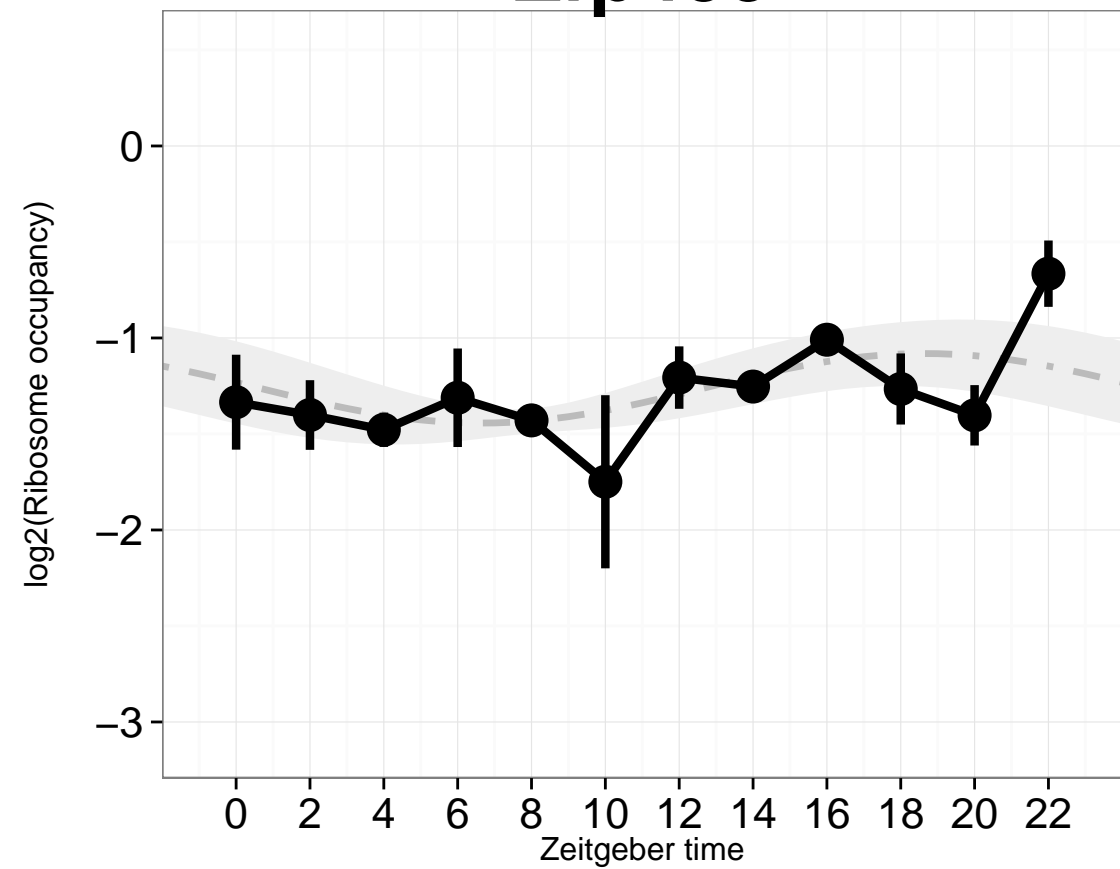

Supplement: SuppDataset_1.zip [file Zfp433_set_A.pdf › Supplemental Dataset 1/A-mRNA_nonrhyth_translation_nonrhyth/Zfp433_set_A.pdf]

# Zfp438

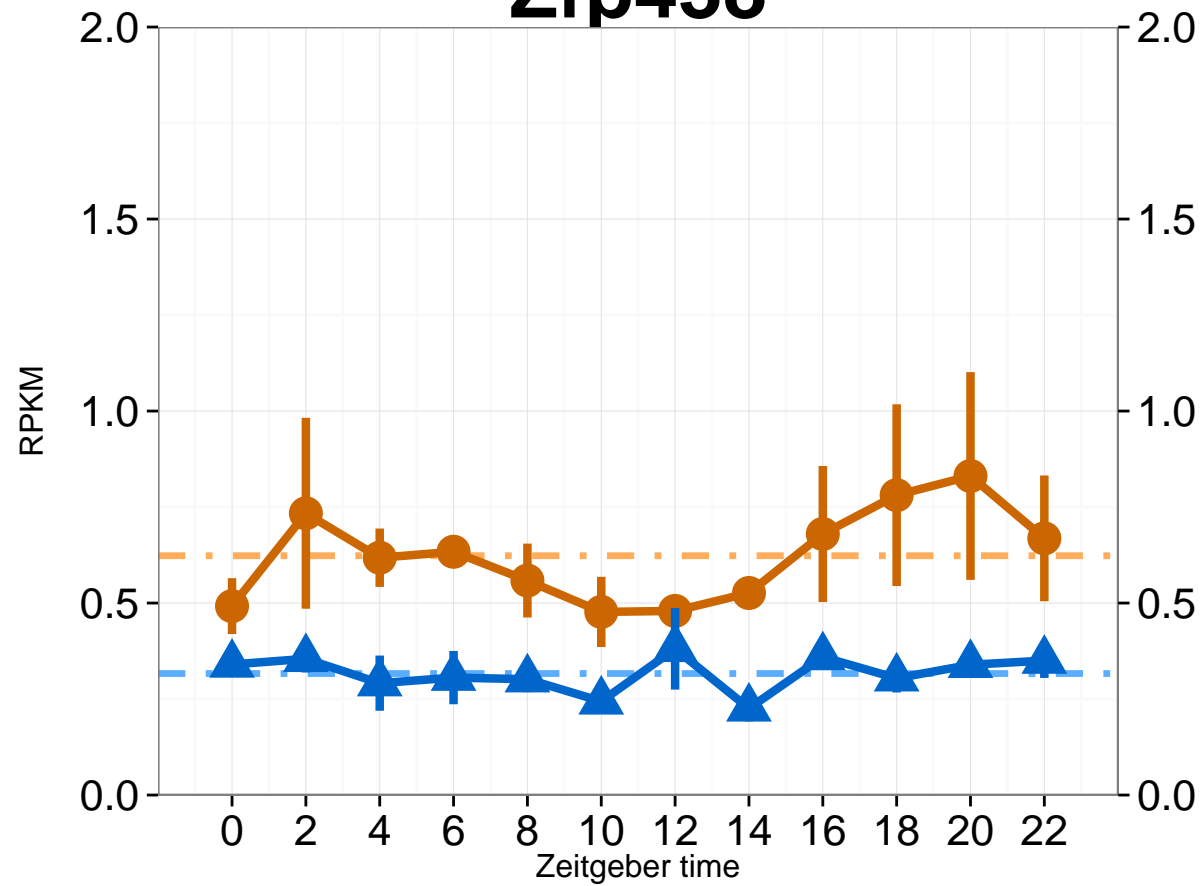

# Zfp438

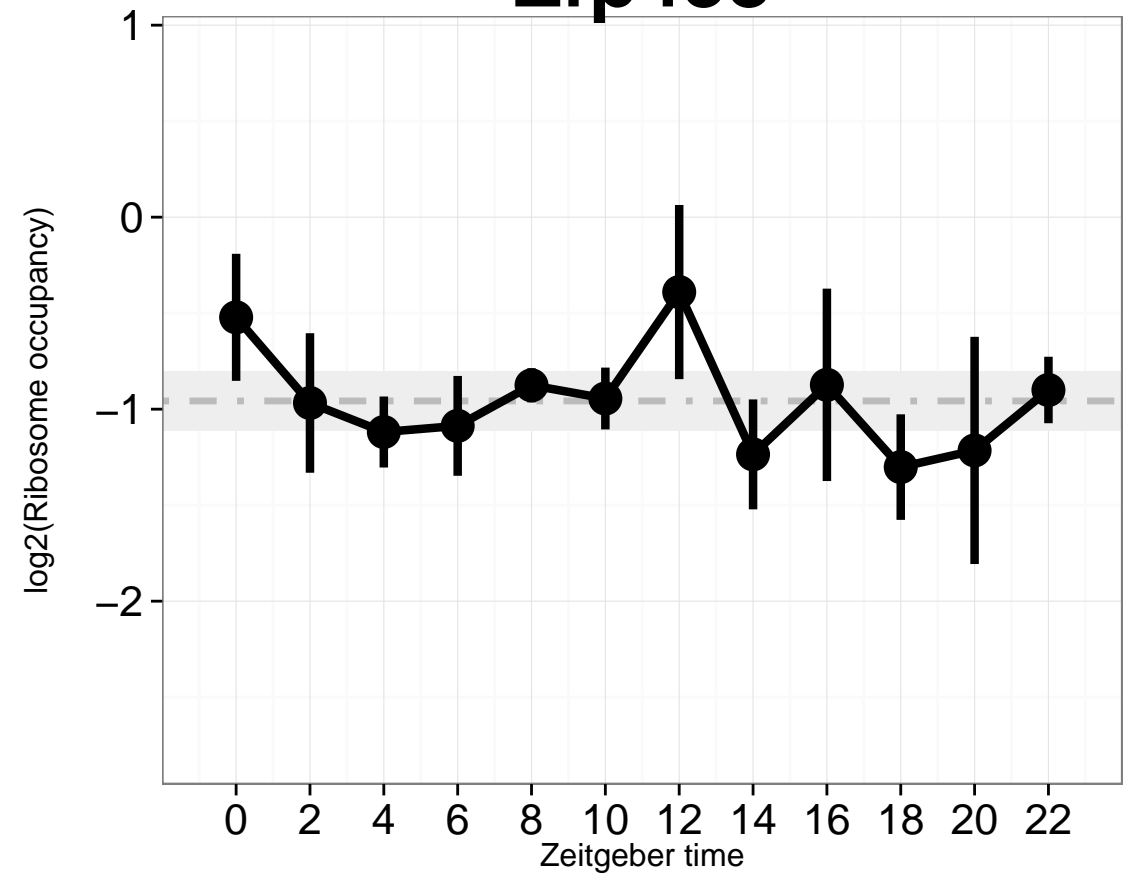

Supplement: SuppDataset_1.zip [file Zfp438_set_A.pdf › Supplemental Dataset 1/A-mRNA_nonrhyth_translation_nonrhyth/Zfp438_set_A.pdf]

# Zfp442

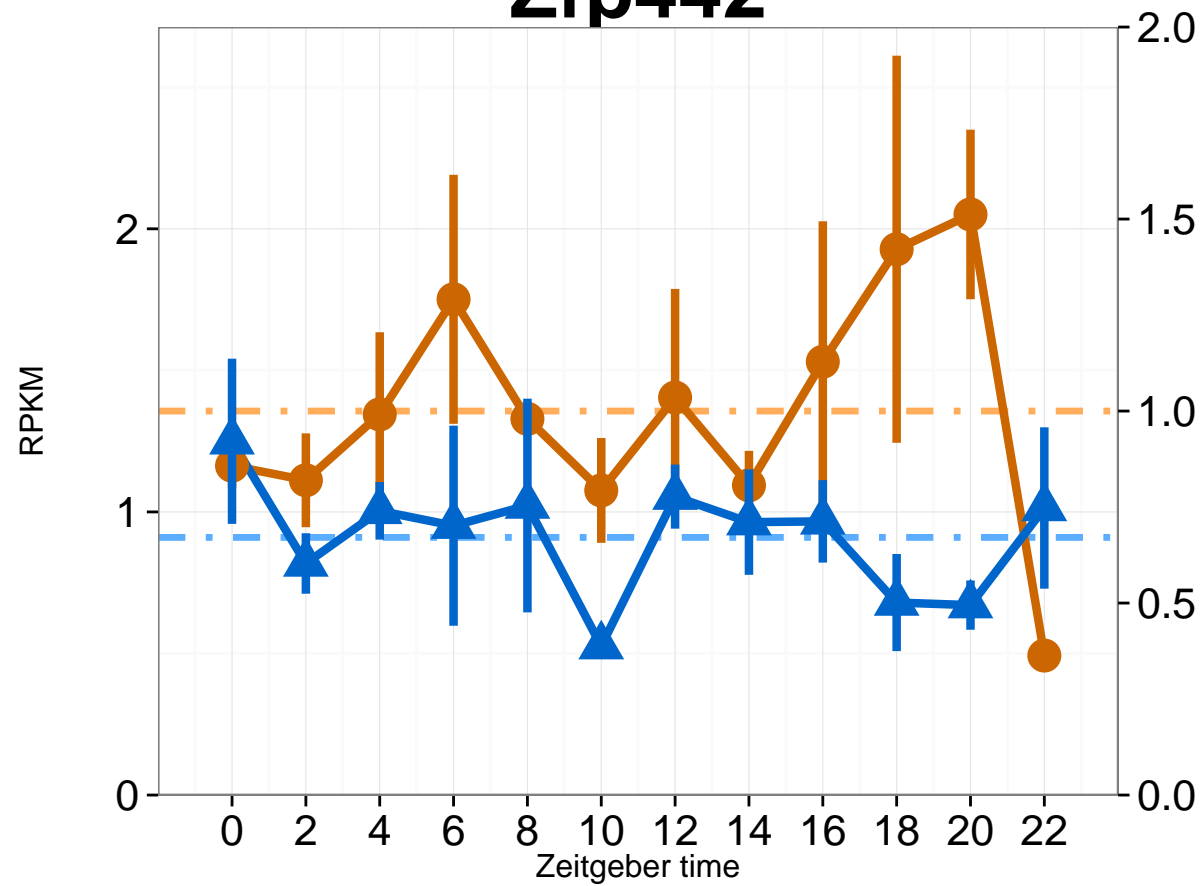

# Zfp442

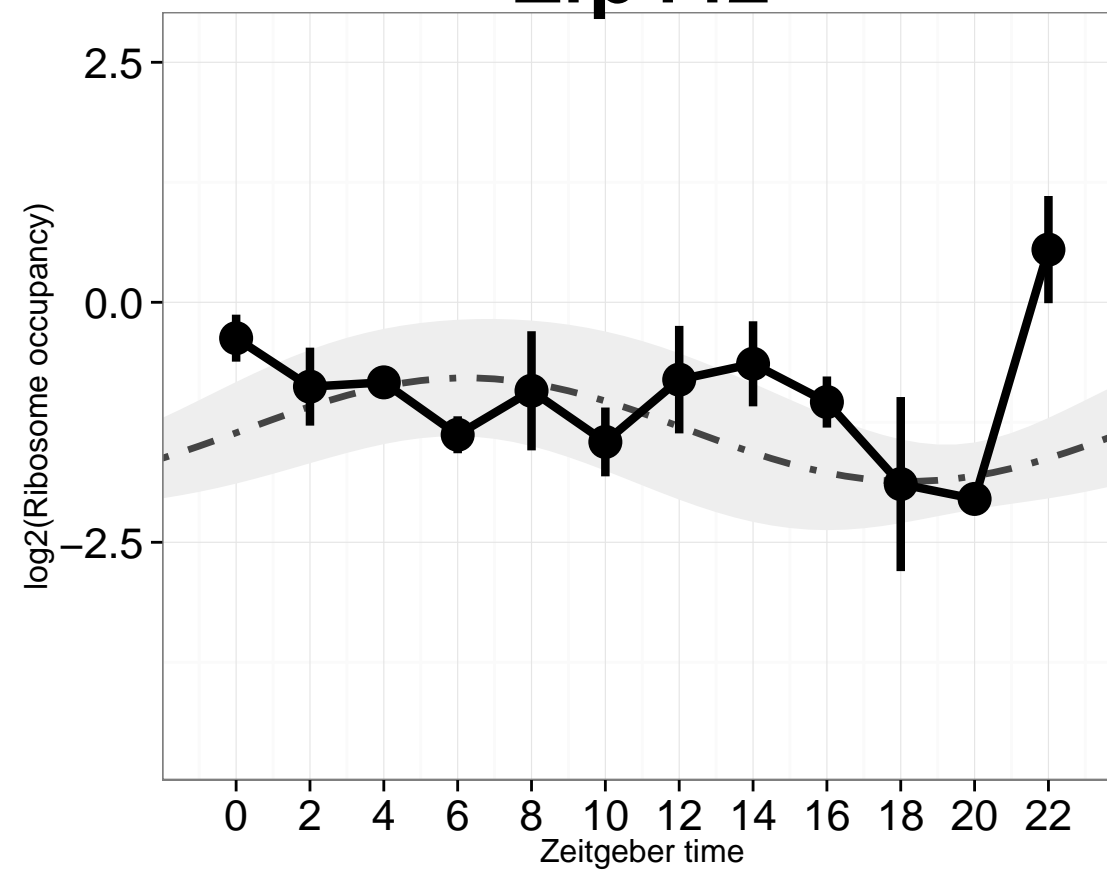

Supplement: SuppDataset_1.zip [file Zfp442_set_A.pdf › Supplemental Dataset 1/A-mRNA_nonrhyth_translation_nonrhyth/Zfp442_set_A.pdf]

# Zfp446

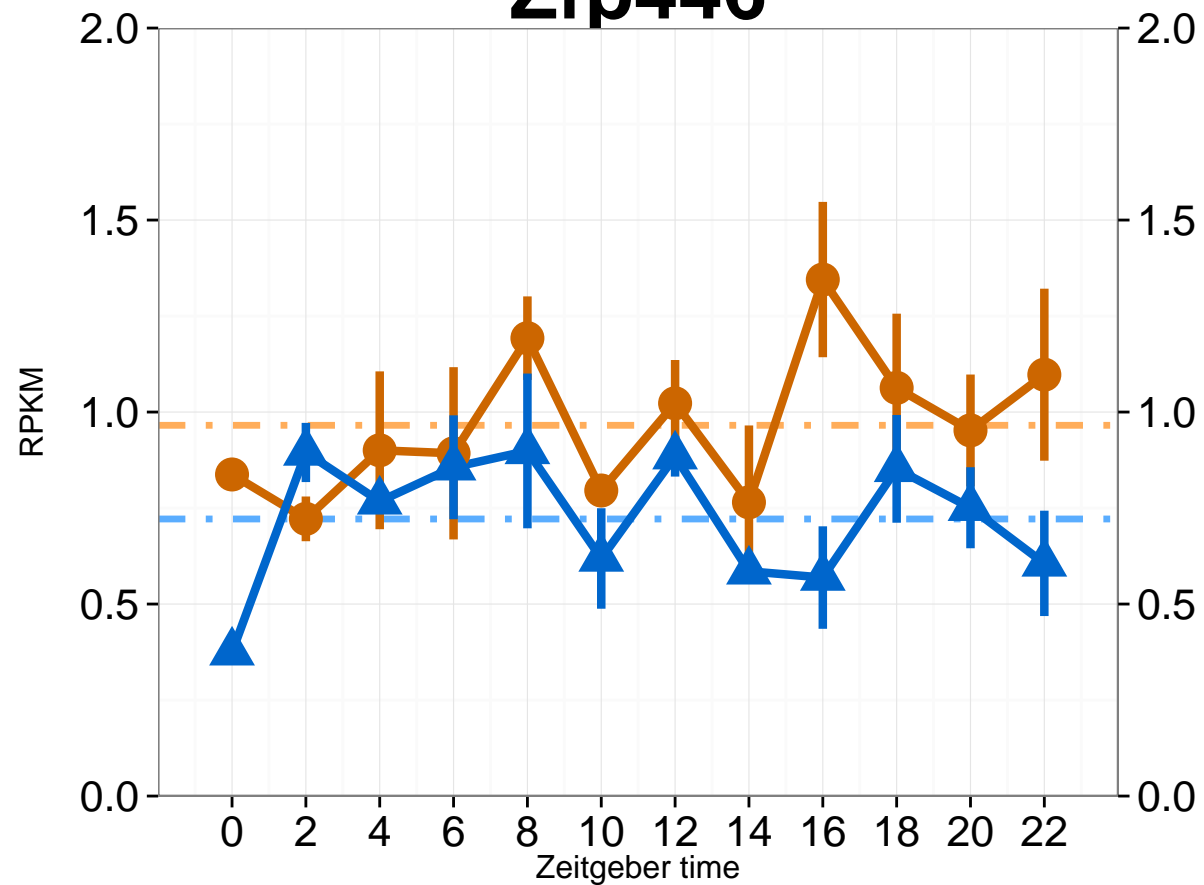

# Zfp446

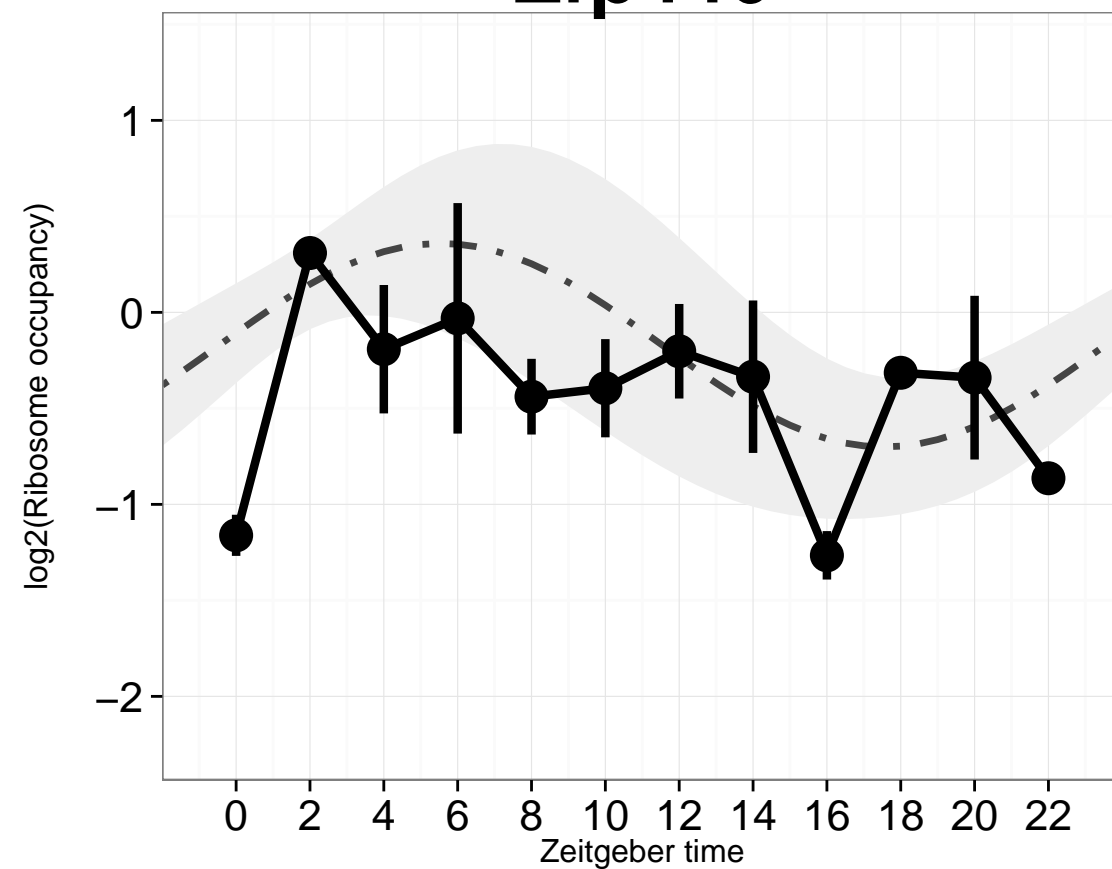

Supplement: SuppDataset_1.zip [file Zfp446_set_A.pdf › Supplemental Dataset 1/A-mRNA_nonrhyth_translation_nonrhyth/Zfp446_set_A.pdf]

## Zfp449 TR

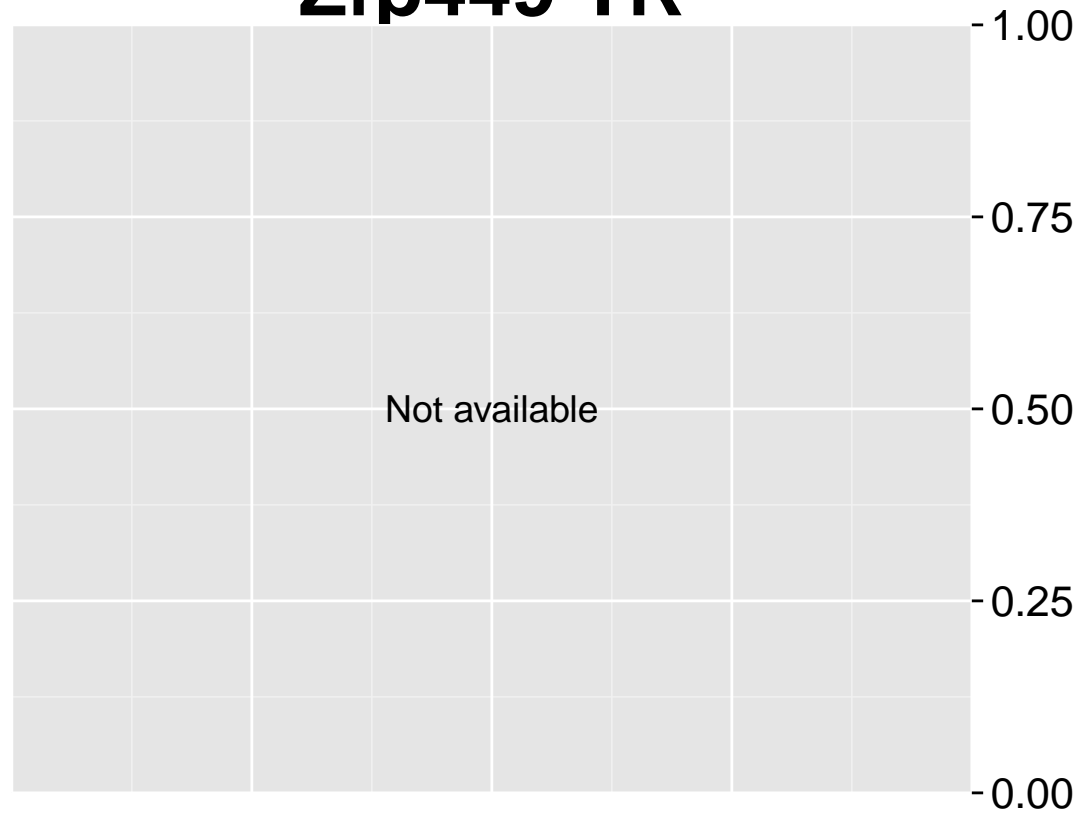

# Zfp449 log2(Ribosome occupancy

Supplement: SuppDataset_1.zip [file Zfp449_set_A.pdf › Supplemental Dataset 1/A-mRNA_nonrhyth_translation_nonrhyth/Zfp449_set_A.pdf]

# Zfp451

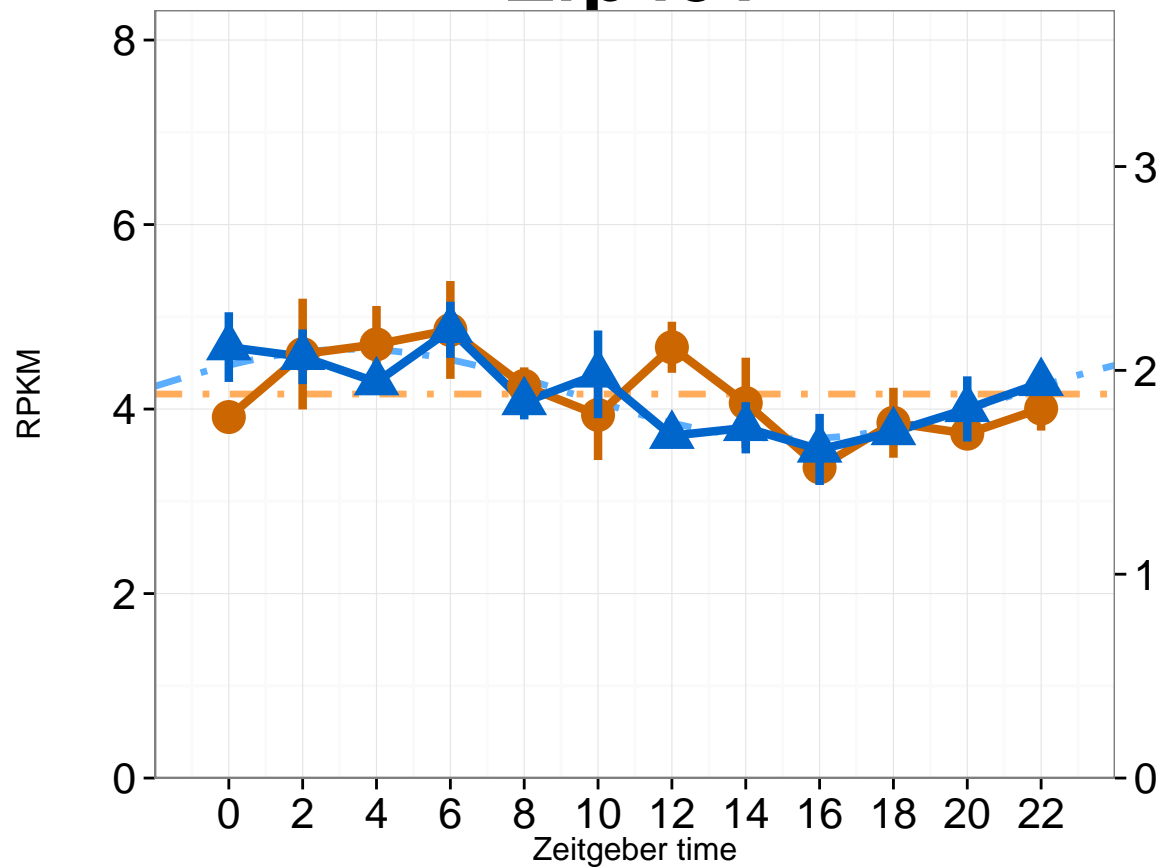

# Zfp451

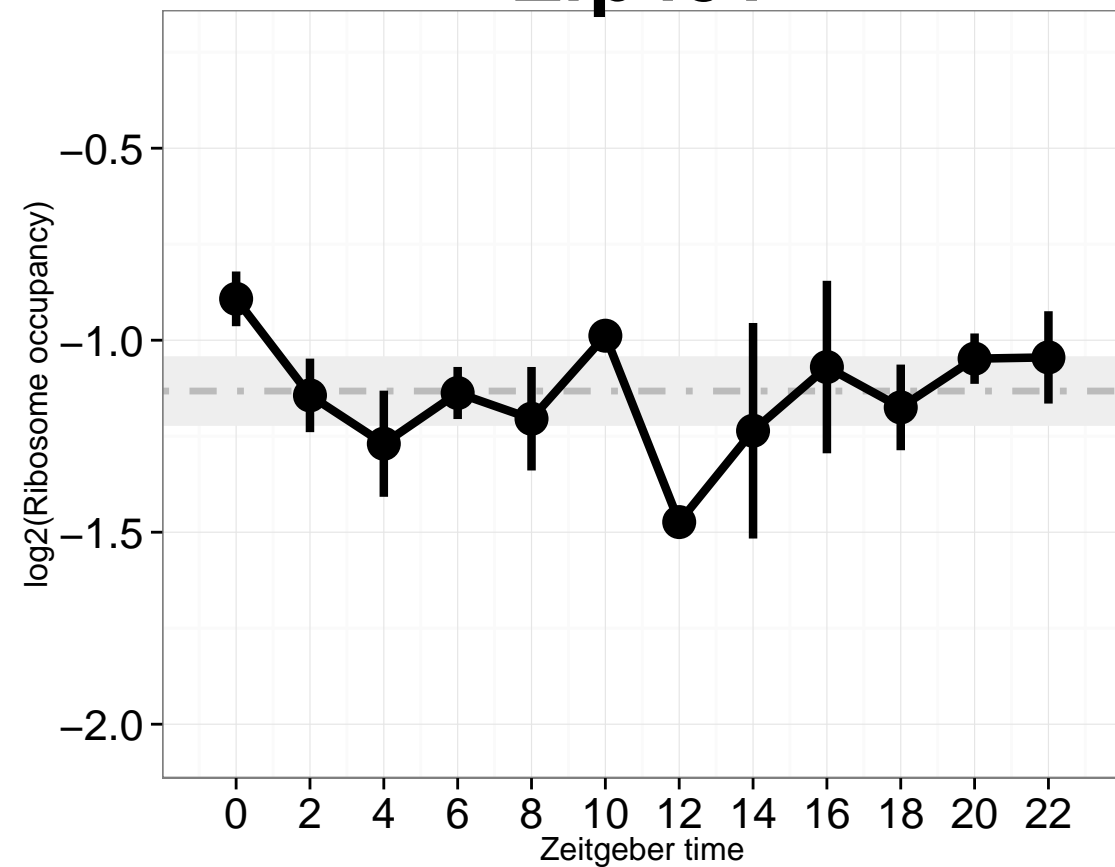

Supplement: SuppDataset_1.zip [file Zfp451_set_A.pdf › Supplemental Dataset 1/A-mRNA_nonrhyth_translation_nonrhyth/Zfp451_set_A.pdf]

# Zfp455

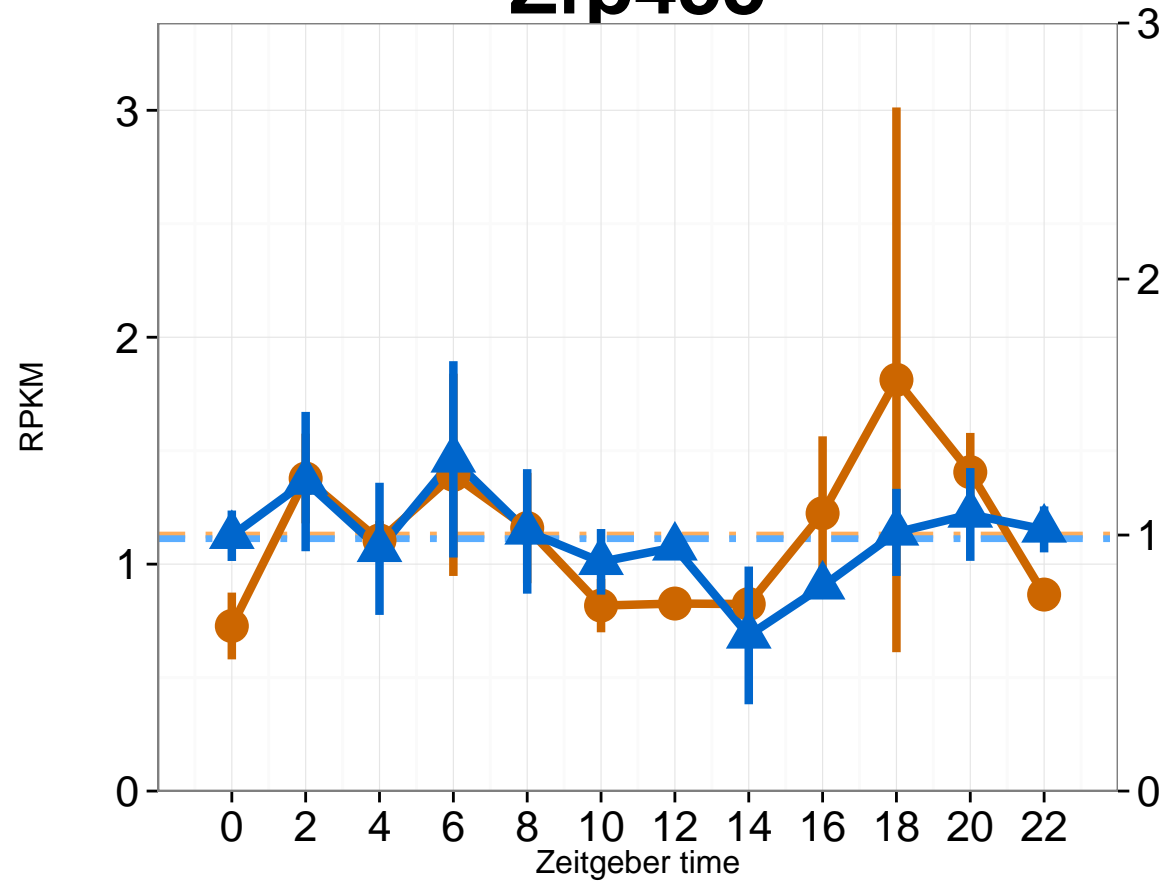

# Zfp455

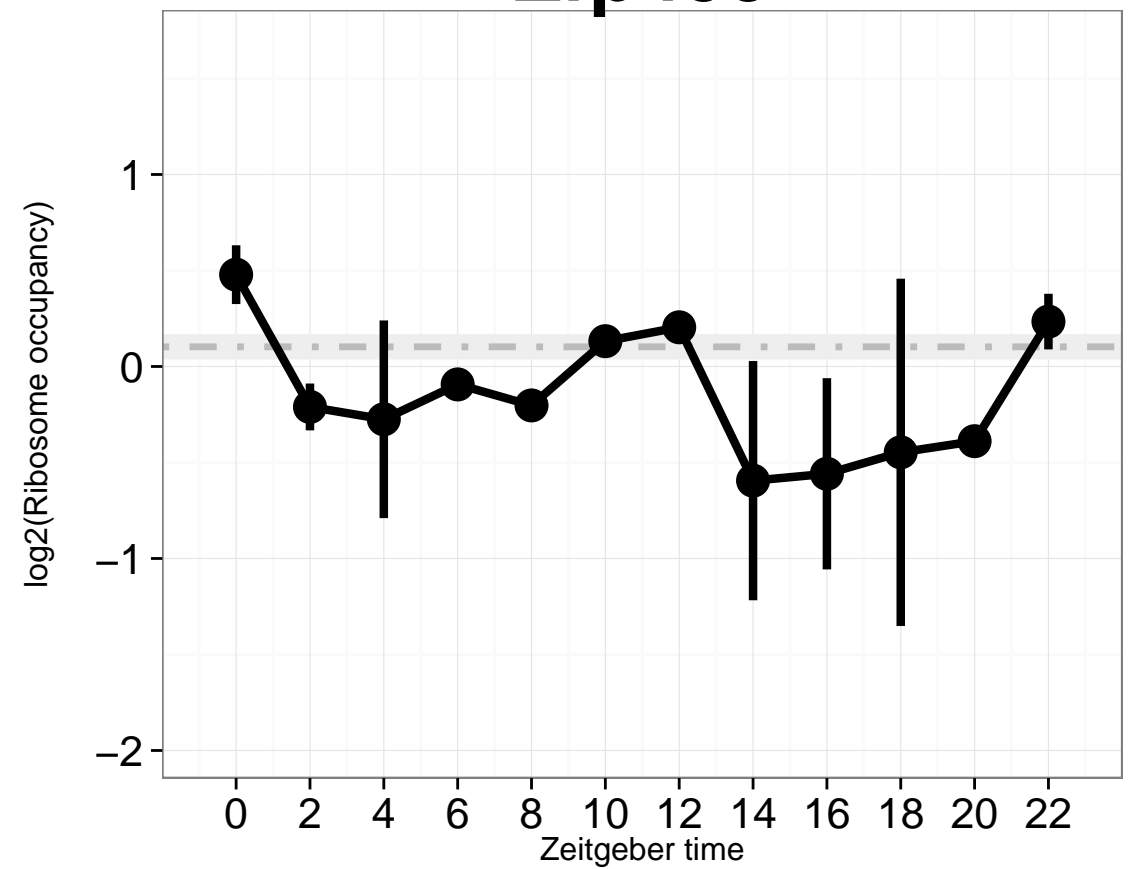

Supplement: SuppDataset_1.zip [file Zfp455_set_A.pdf › Supplemental Dataset 1/A-mRNA_nonrhyth_translation_nonrhyth/Zfp455_set_A.pdf]

# Zfp456

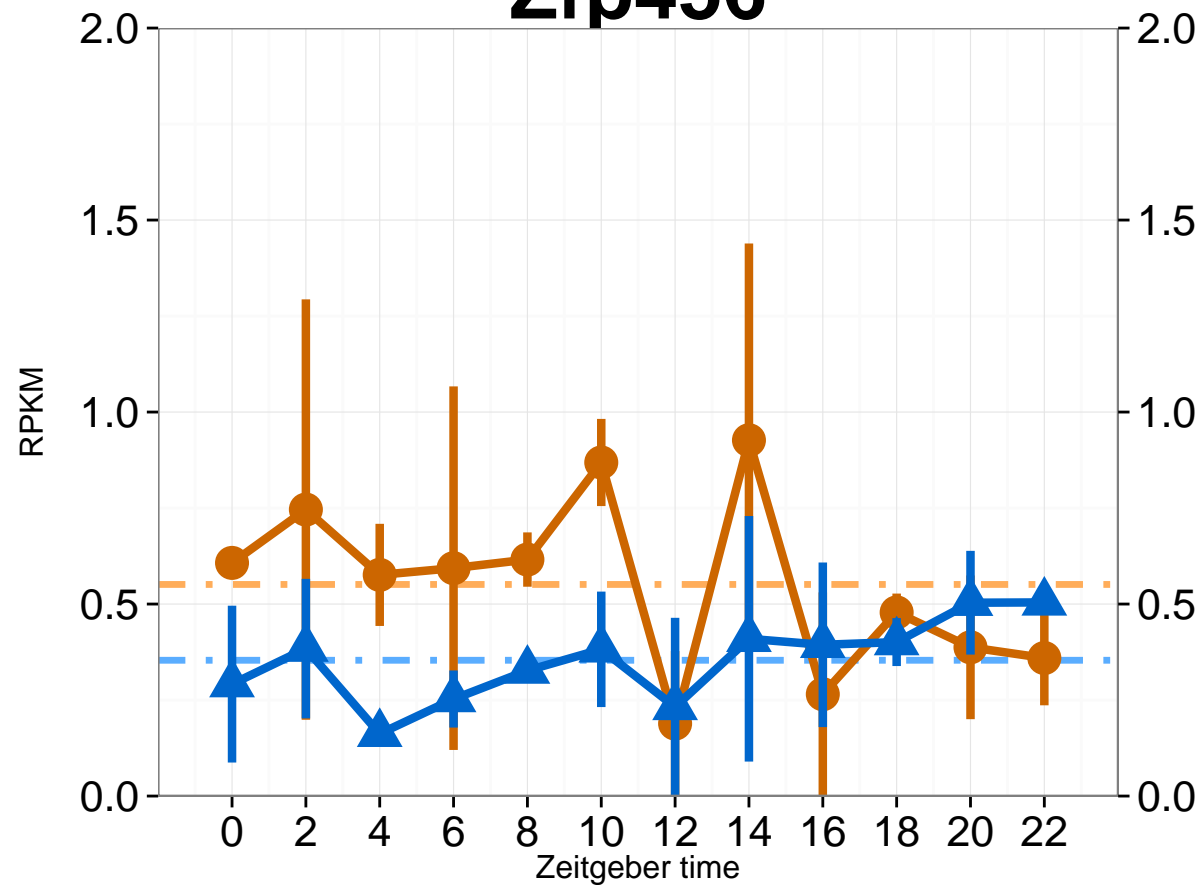

# Zfp456

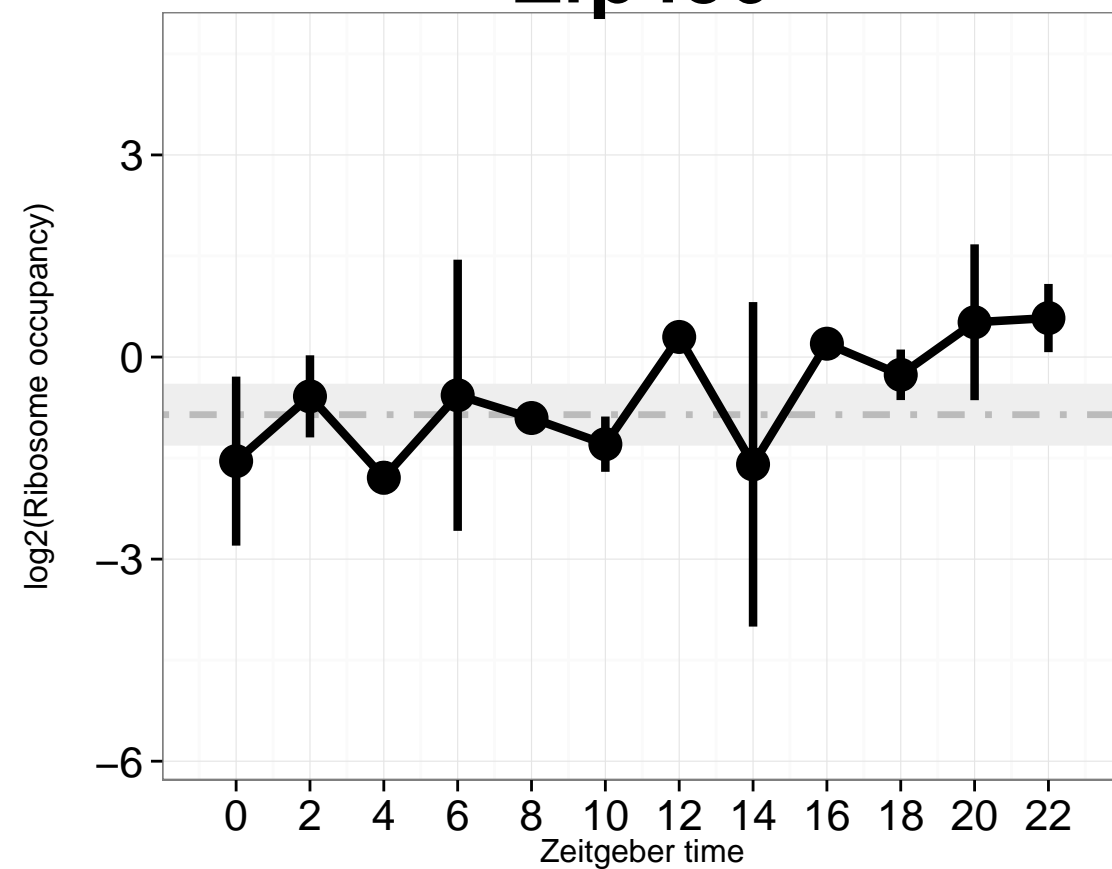

Supplement: SuppDataset_1.zip [file Zfp456_set_A.pdf › Supplemental Dataset 1/A-mRNA_nonrhyth_translation_nonrhyth/Zfp456_set_A.pdf]

## Zfp458

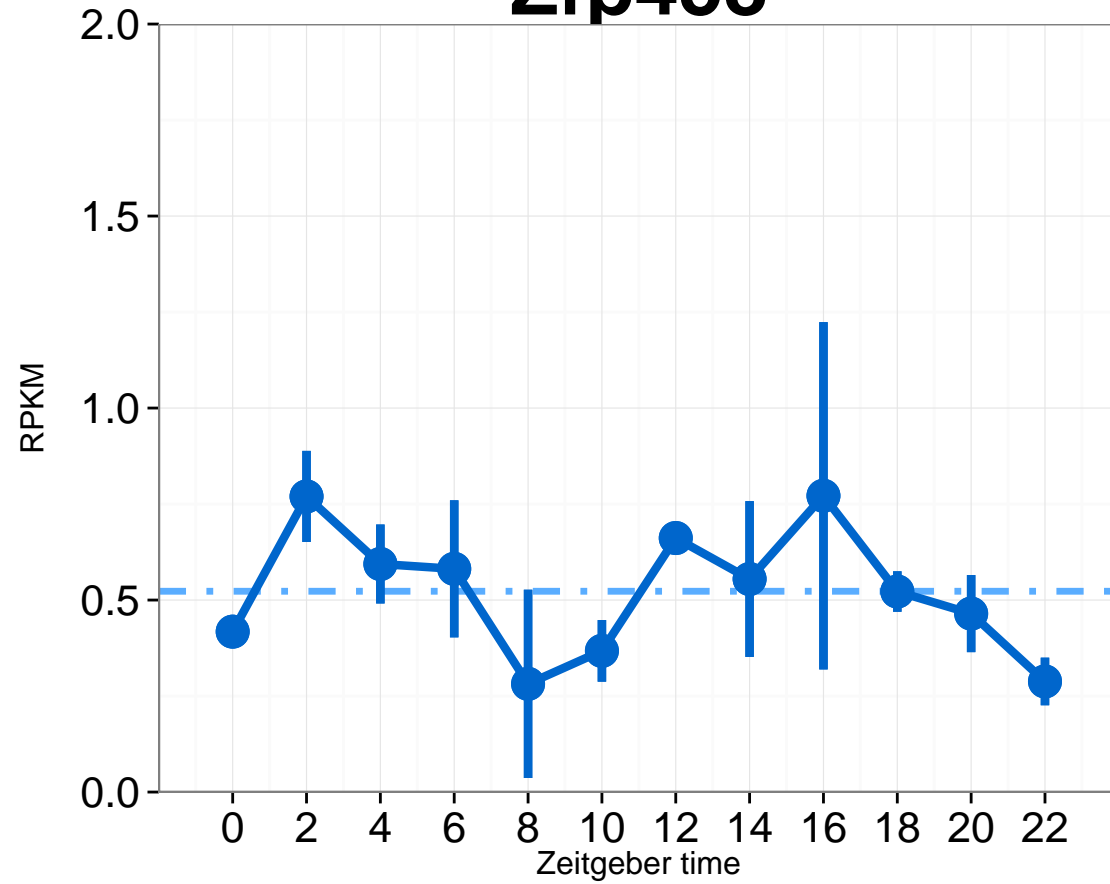

## Zfp458 log2(Ribosome occupancy

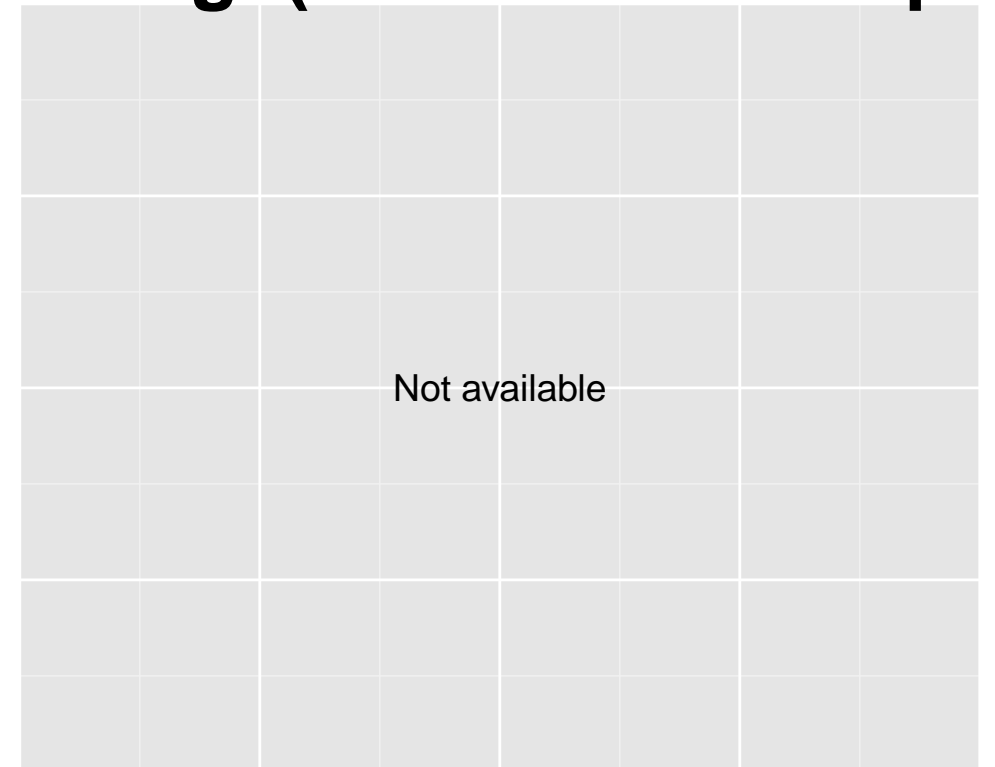

Supplement: SuppDataset_1.zip [file Zfp458_set_A.pdf › Supplemental Dataset 1/A-mRNA_nonrhyth_translation_nonrhyth/Zfp458_set_A.pdf]

# Zfp467

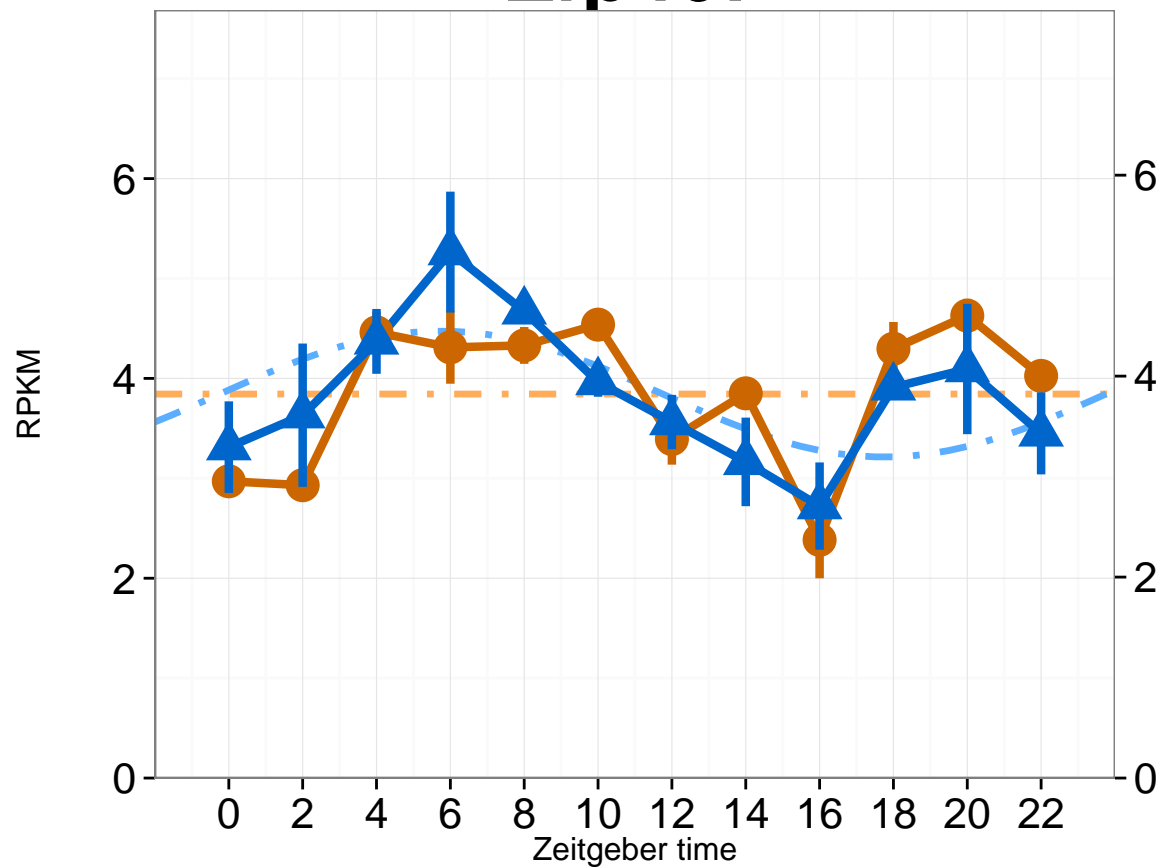

# Zfp467

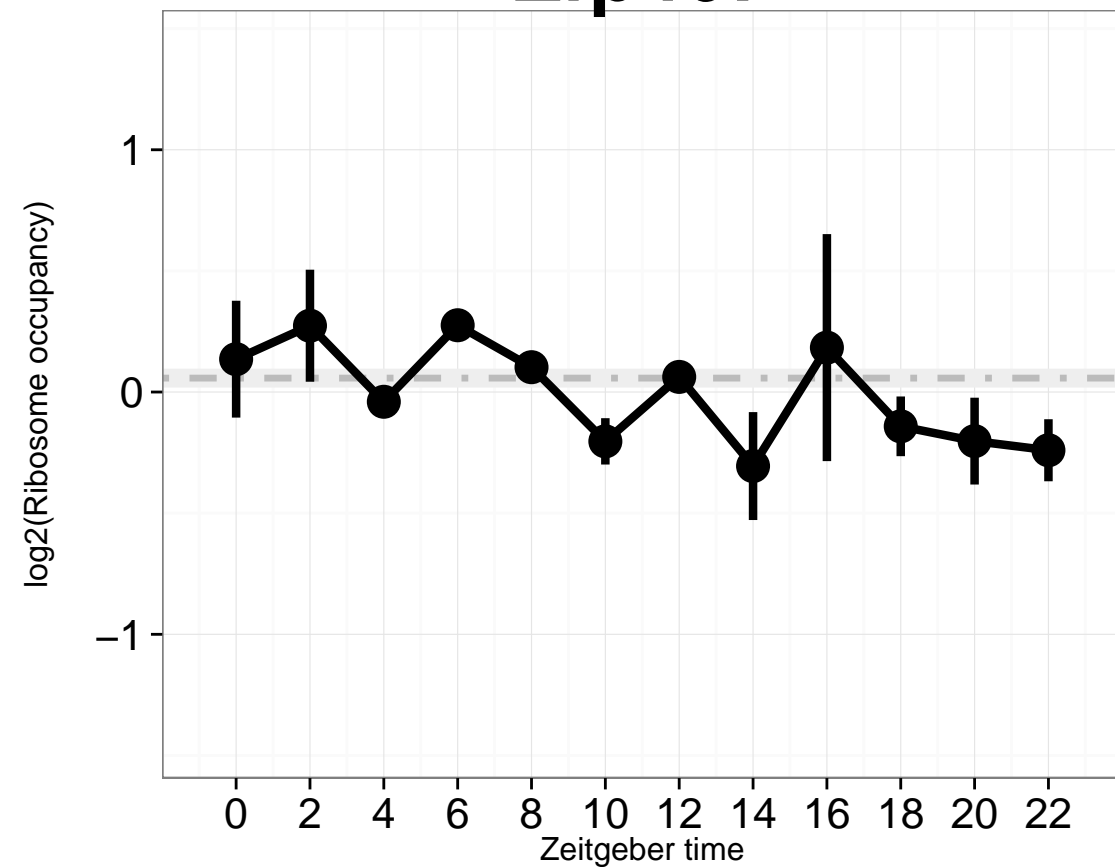

Supplement: SuppDataset_1.zip [file Zfp467_set_A.pdf › Supplemental Dataset 1/A-mRNA_nonrhyth_translation_nonrhyth/Zfp467_set_A.pdf]

# Zfp46

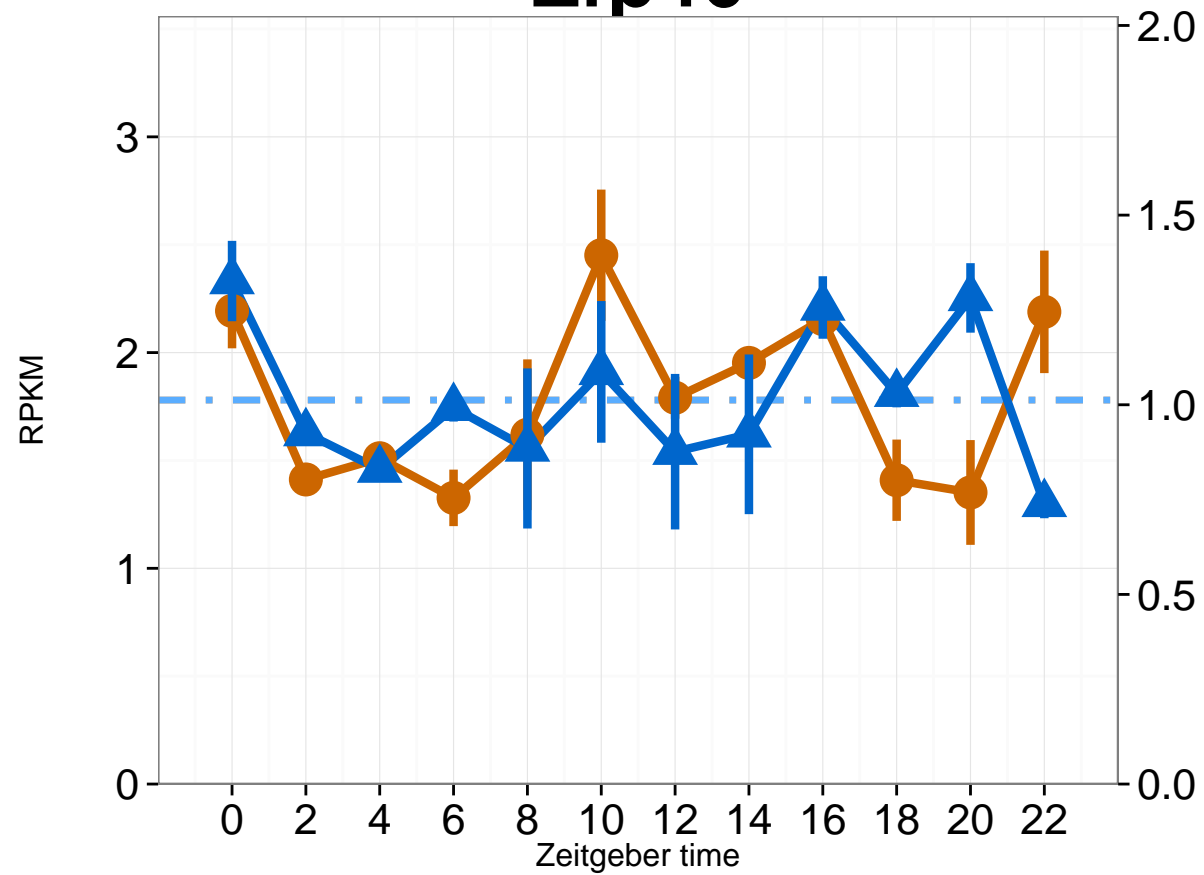

# Zfp46

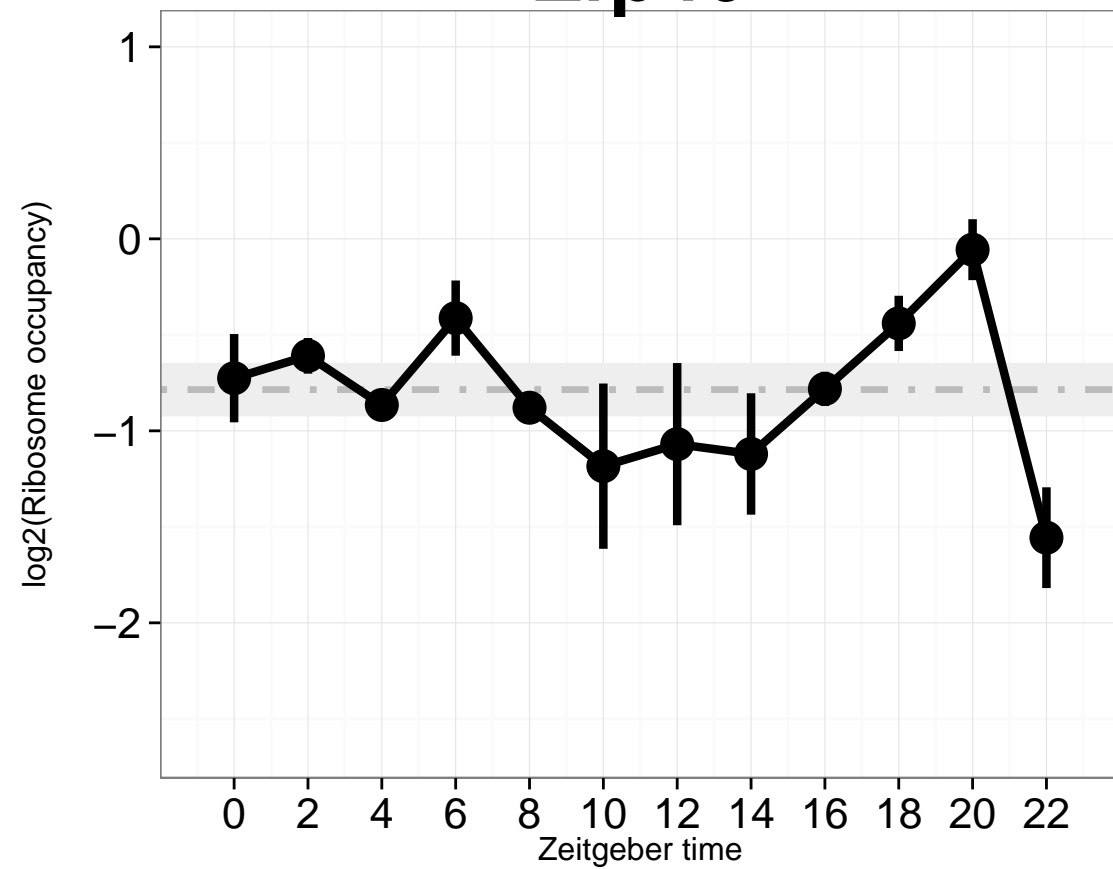

Supplement: SuppDataset_1.zip [file Zfp46_set_A.pdf › Supplemental Dataset 1/A-mRNA_nonrhyth_translation_nonrhyth/Zfp46_set_A.pdf]

# Zfp472

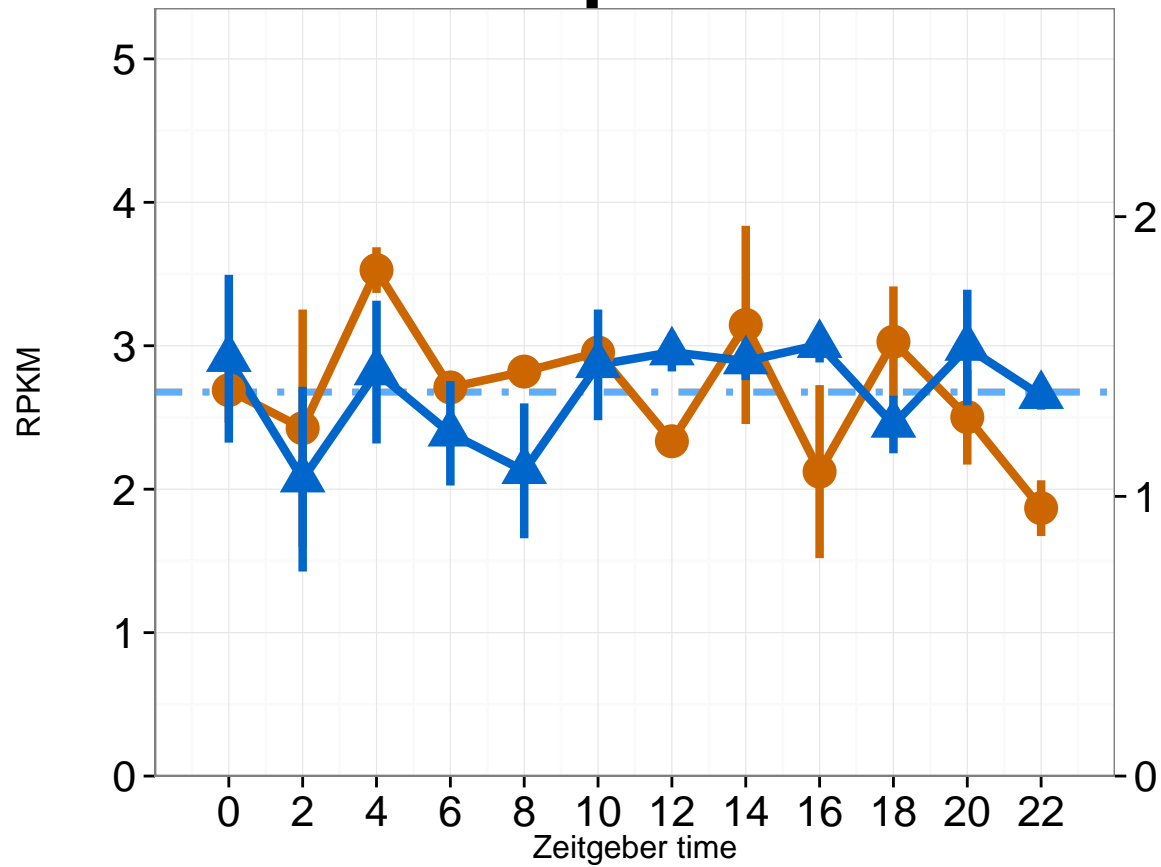

# Zfp472

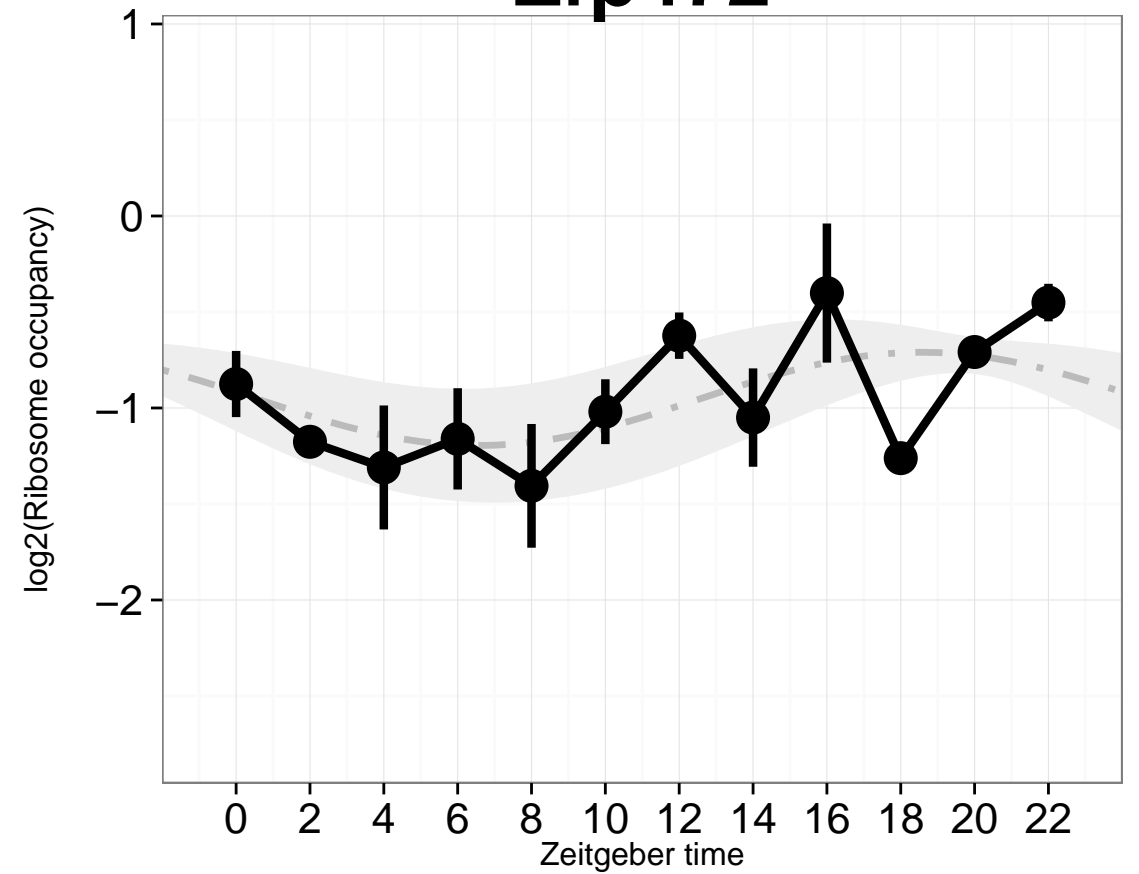

Supplement: SuppDataset_1.zip [file Zfp472_set_A.pdf › Supplemental Dataset 1/A-mRNA_nonrhyth_translation_nonrhyth/Zfp472_set_A.pdf]

# Zfp503

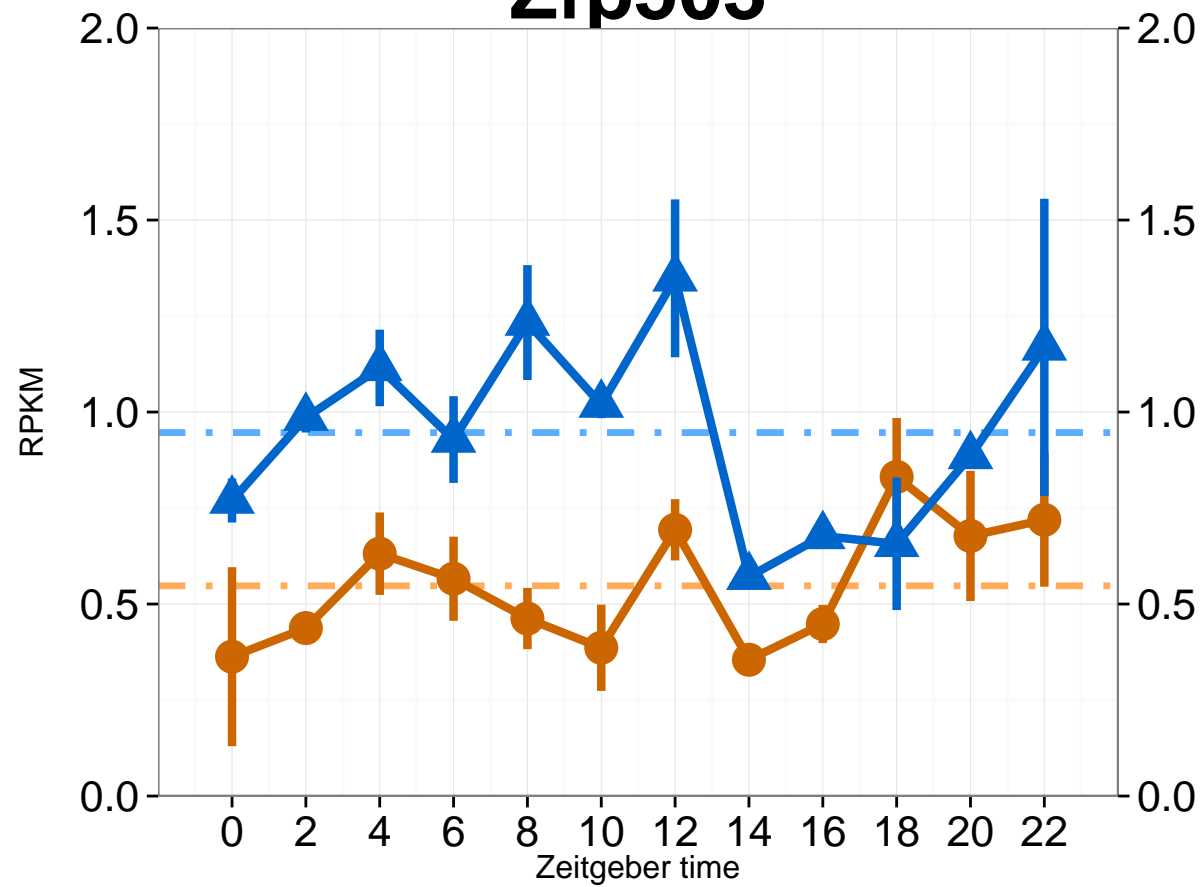

# Zfp503

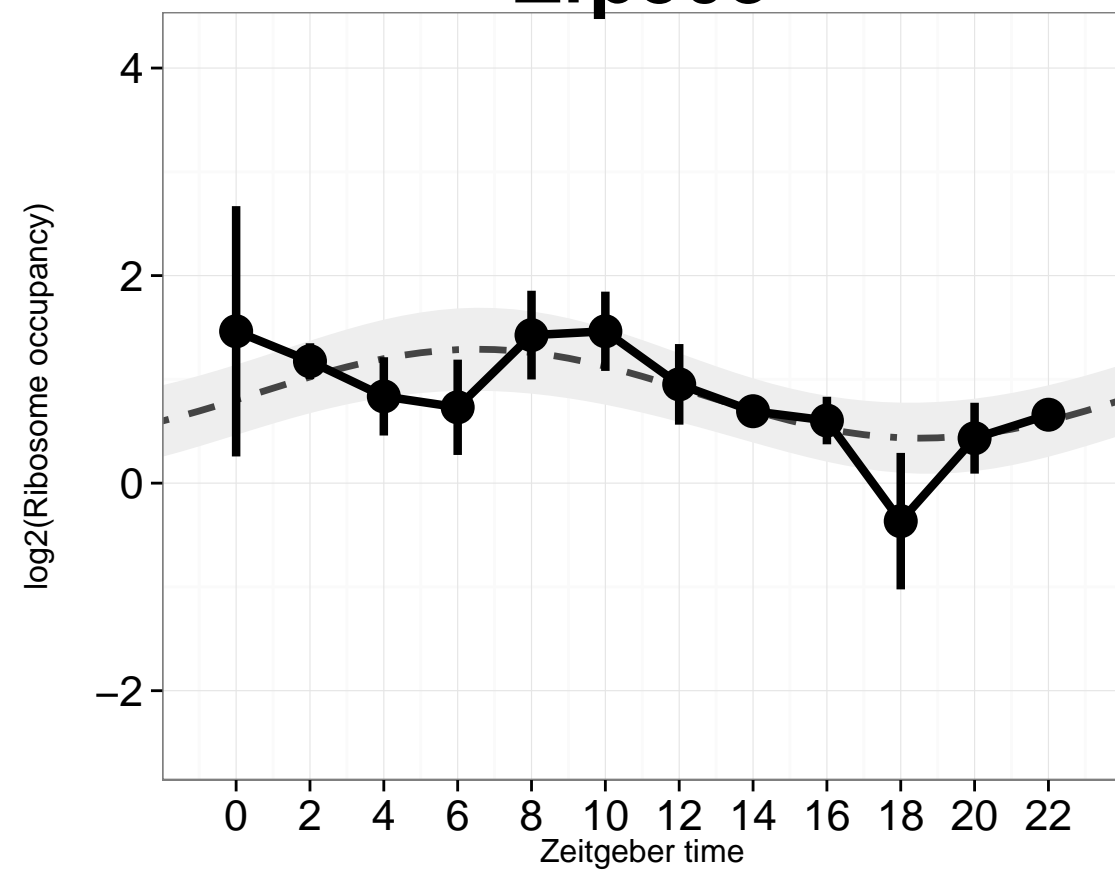

Supplement: SuppDataset_1.zip [file Zfp503_set_A.pdf › Supplemental Dataset 1/A-mRNA_nonrhyth_translation_nonrhyth/Zfp503_set_A.pdf]

# Zfp511

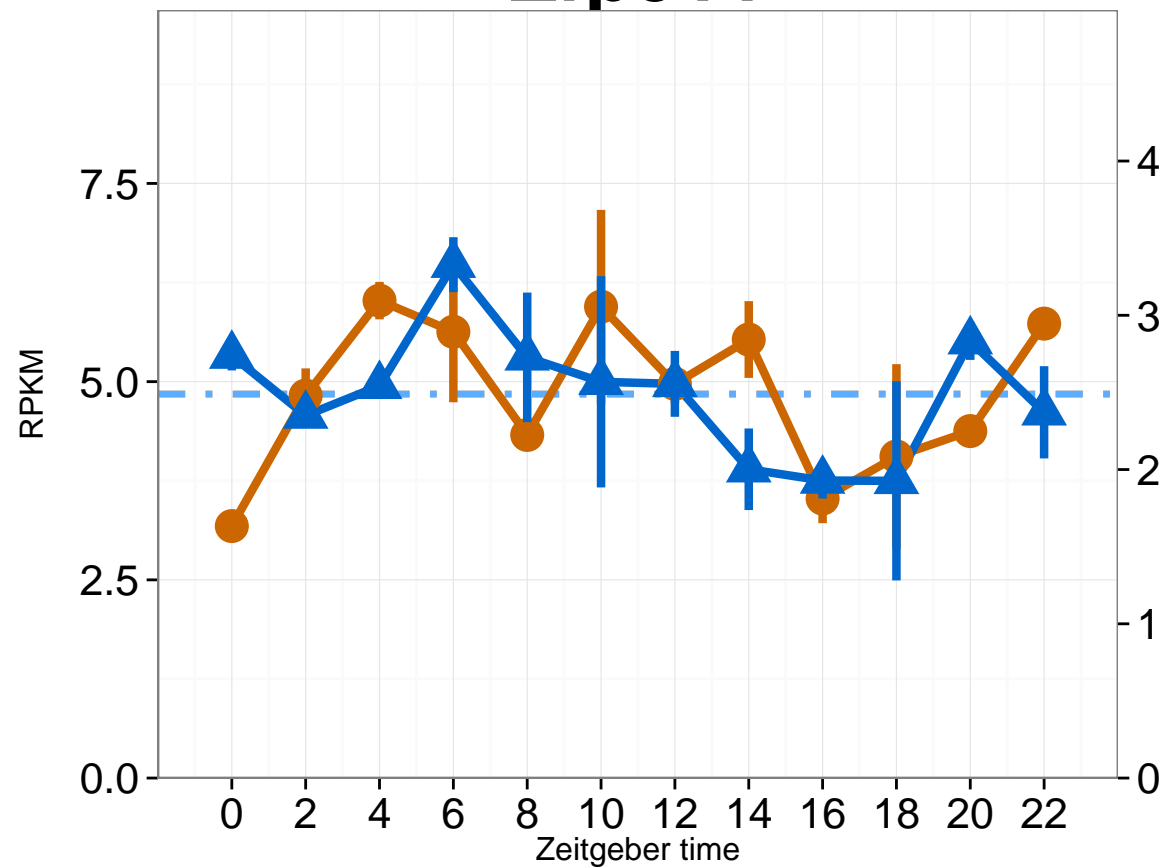

# Zfp511

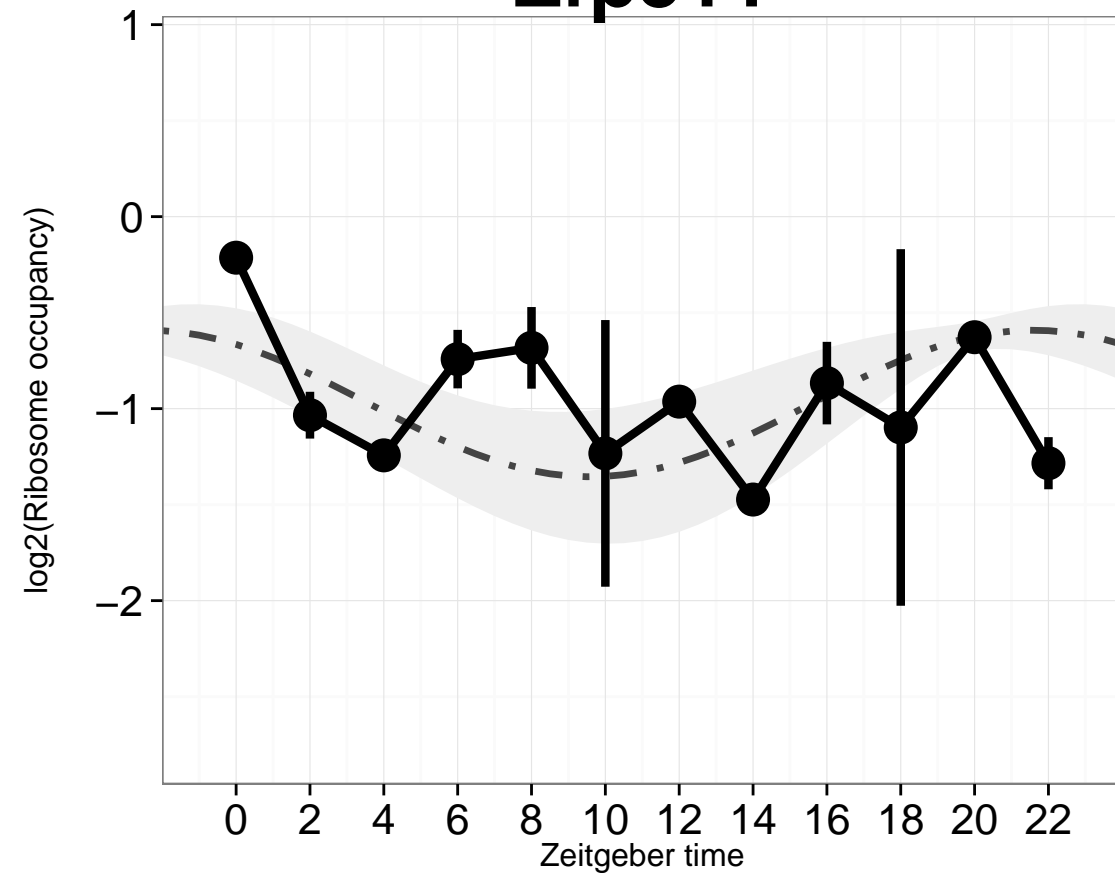

Supplement: SuppDataset_1.zip [file Zfp511_set_A.pdf › Supplemental Dataset 1/A-mRNA_nonrhyth_translation_nonrhyth/Zfp511_set_A.pdf]

# Zfp513

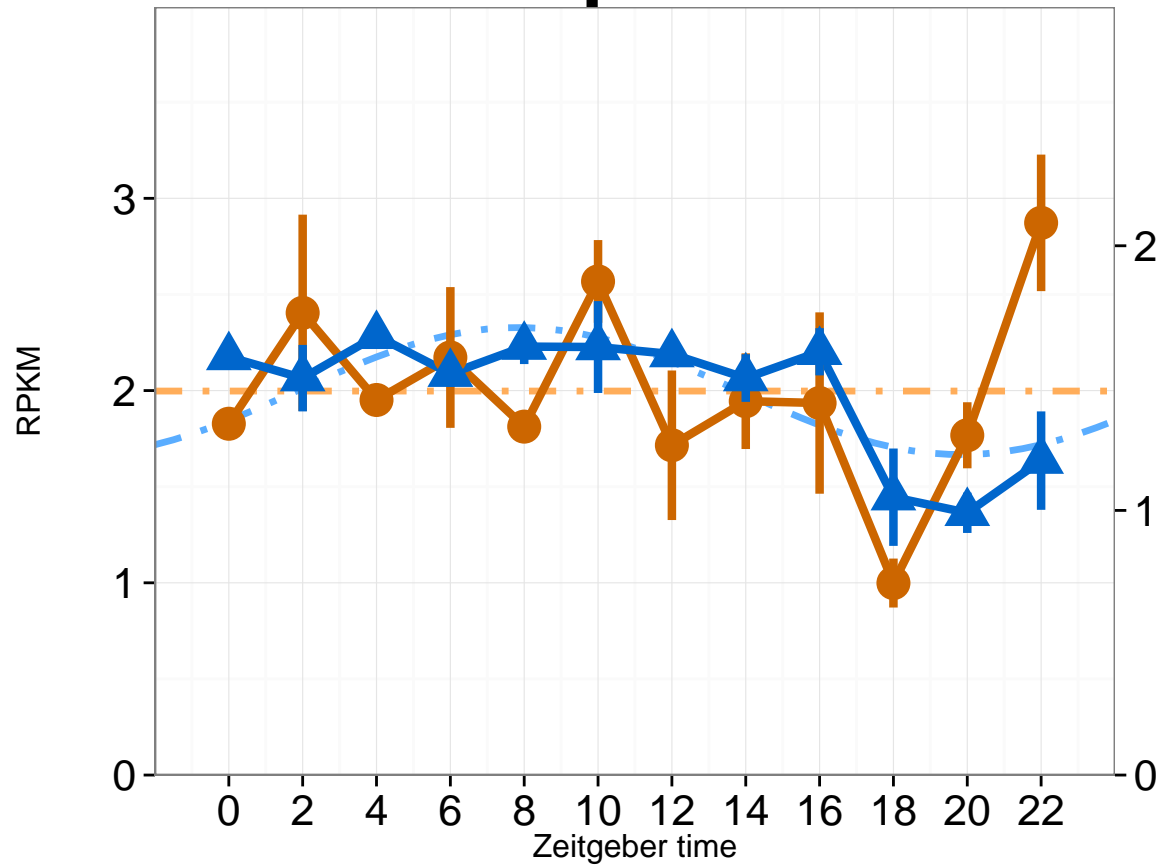

# Zfp513

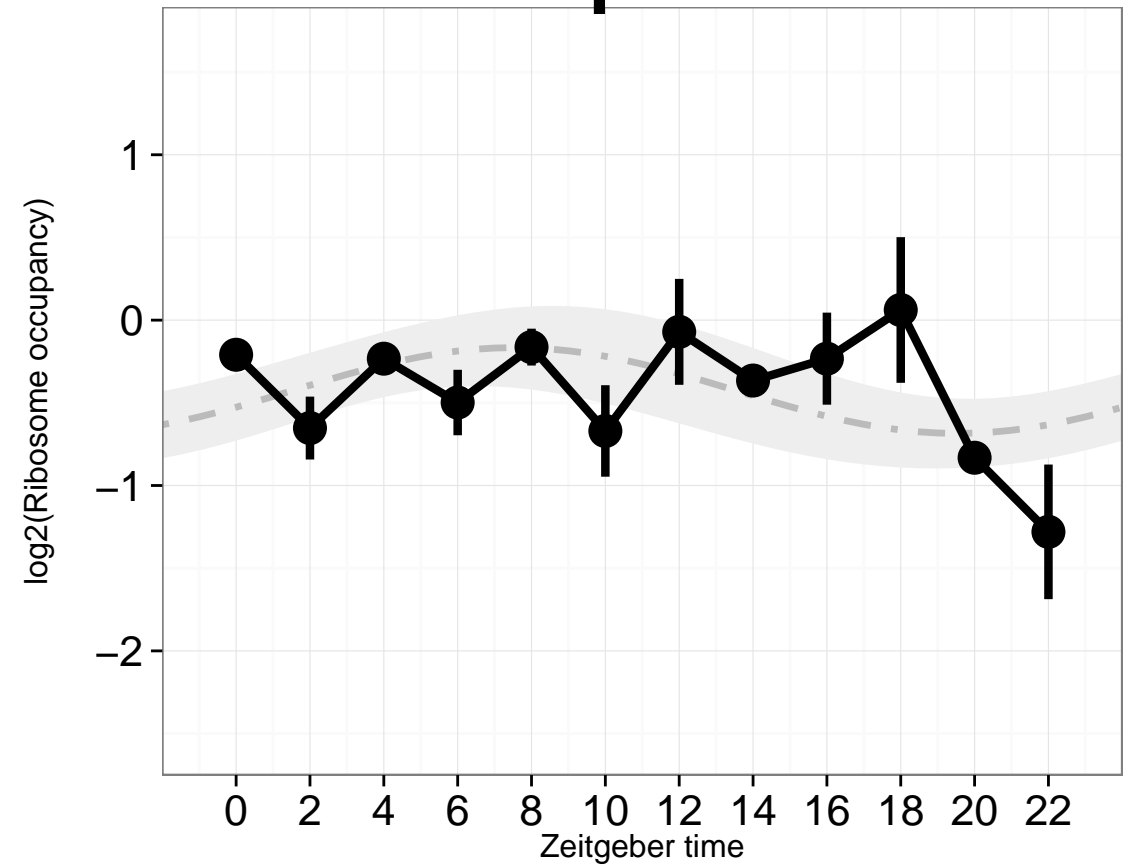

Supplement: SuppDataset_1.zip [file Zfp513_set_A.pdf › Supplemental Dataset 1/A-mRNA_nonrhyth_translation_nonrhyth/Zfp513_set_A.pdf]

# Zfp516

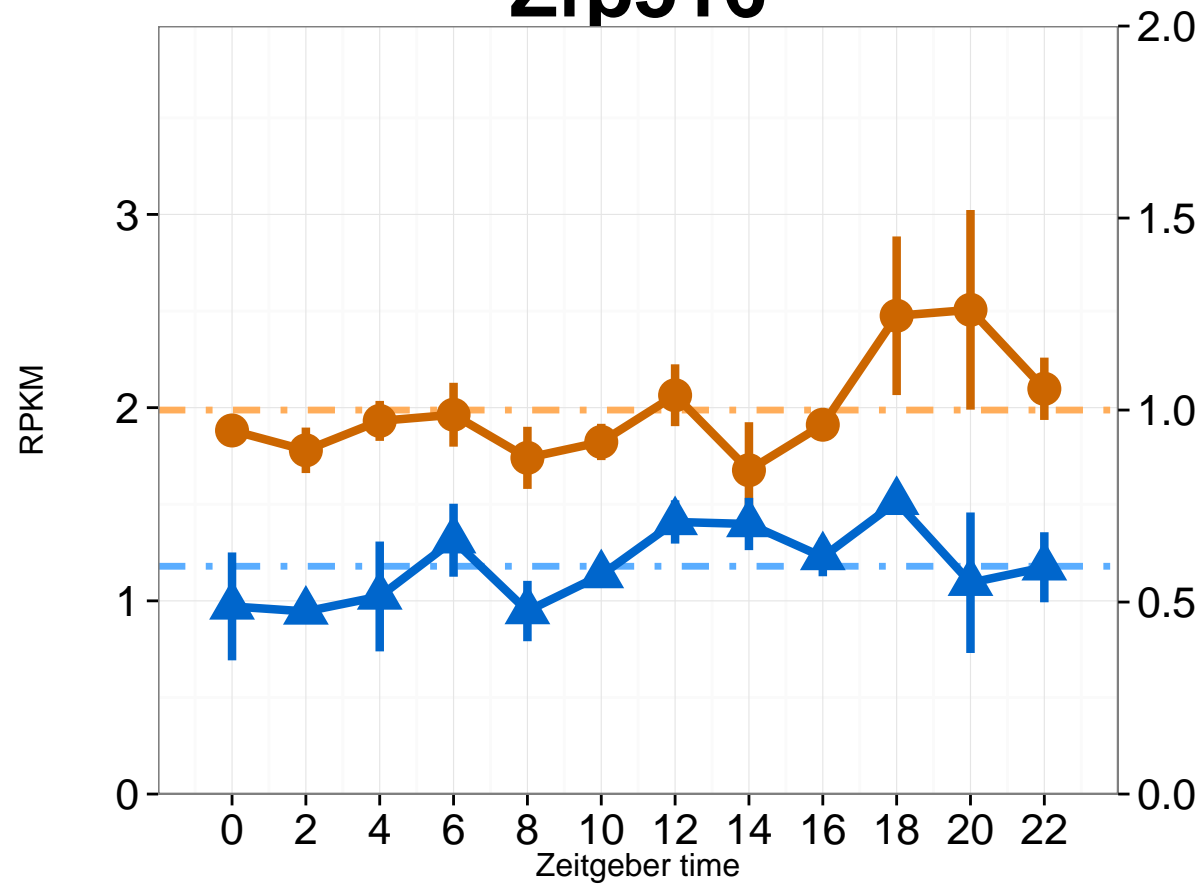

# Zfp516

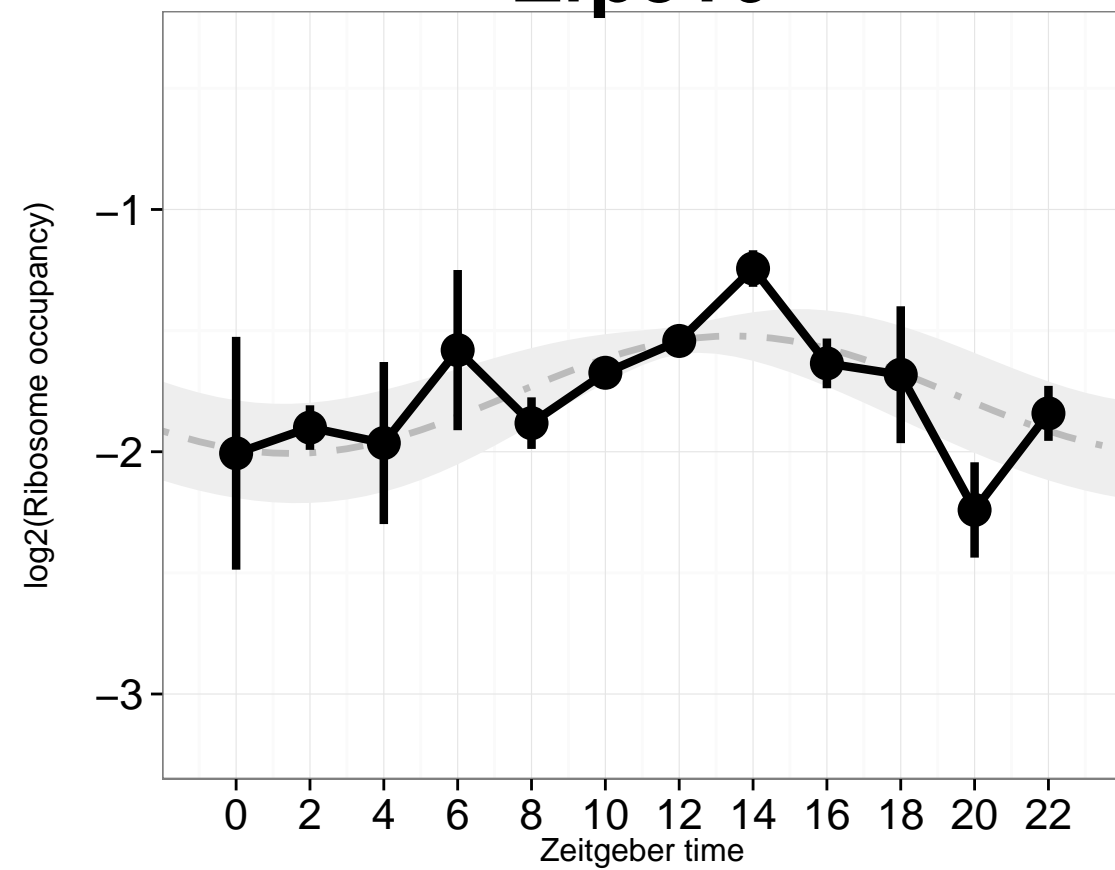

Supplement: SuppDataset_1.zip [file Zfp516_set_A.pdf › Supplemental Dataset 1/A-mRNA_nonrhyth_translation_nonrhyth/Zfp516_set_A.pdf]

# Zfp518a

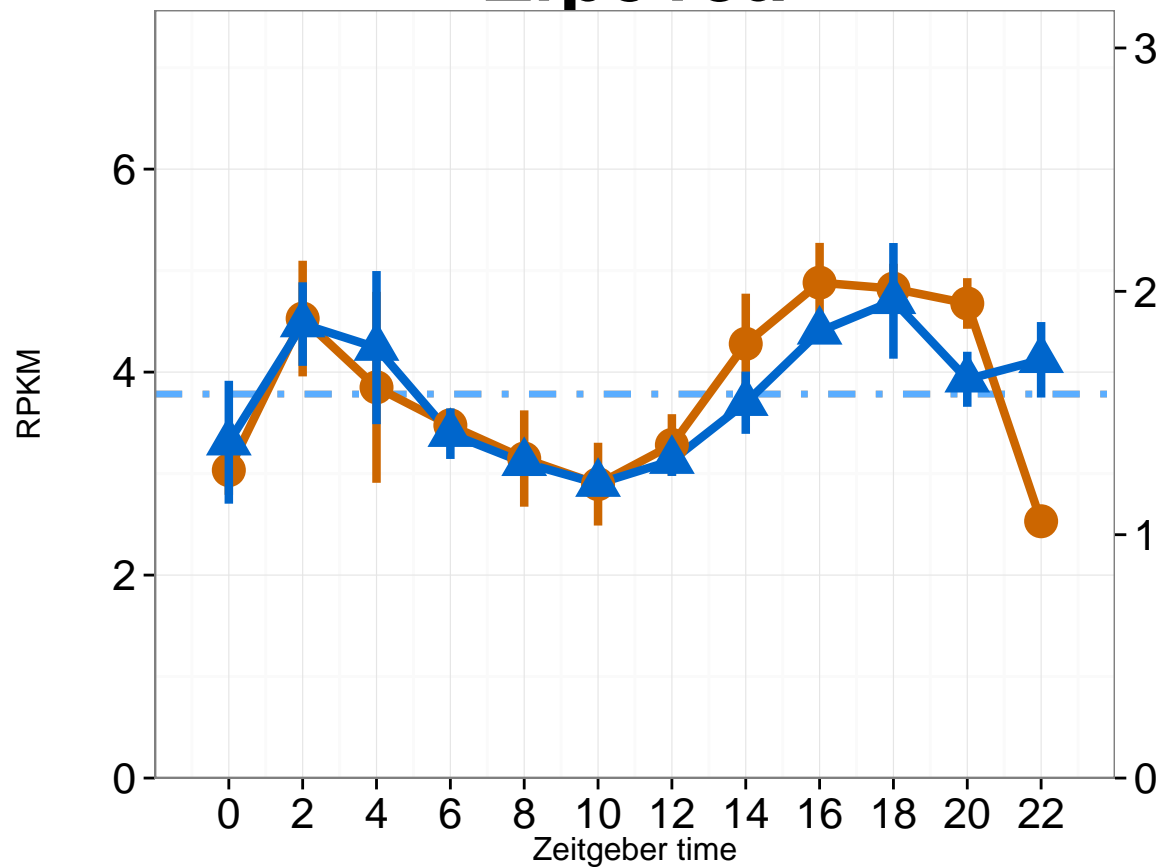

# Zfp518a

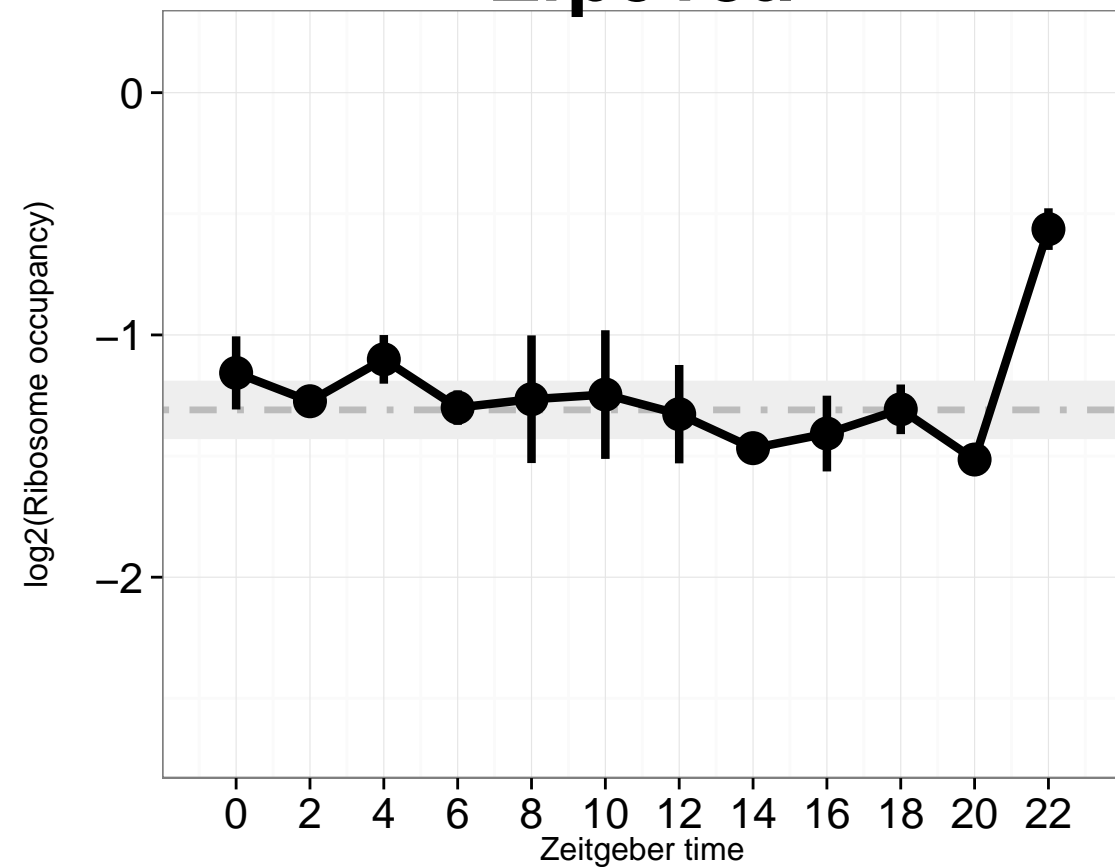

Supplement: SuppDataset_1.zip [file Zfp518a_set_A.pdf › Supplemental Dataset 1/A-mRNA_nonrhyth_translation_nonrhyth/Zfp518a_set_A.pdf]

# Zfp518b

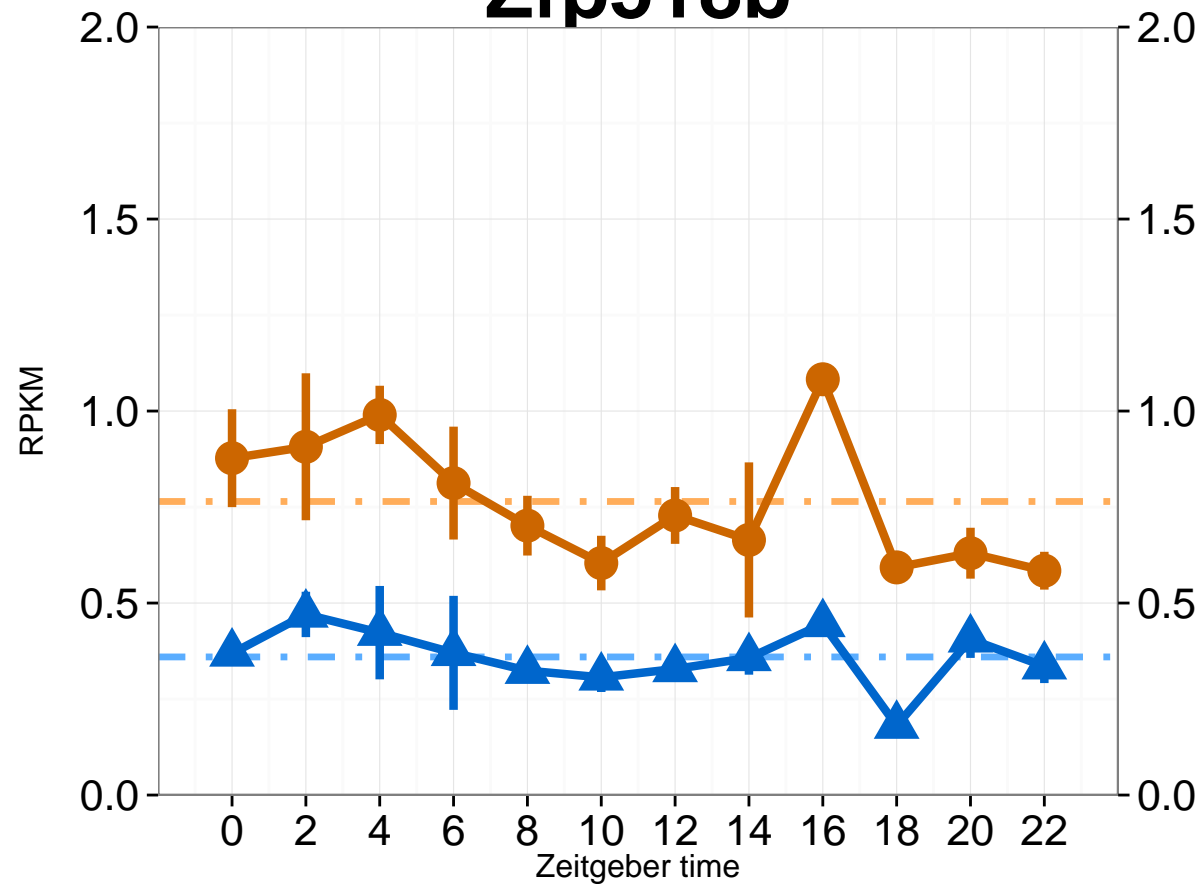

# Zfp518b

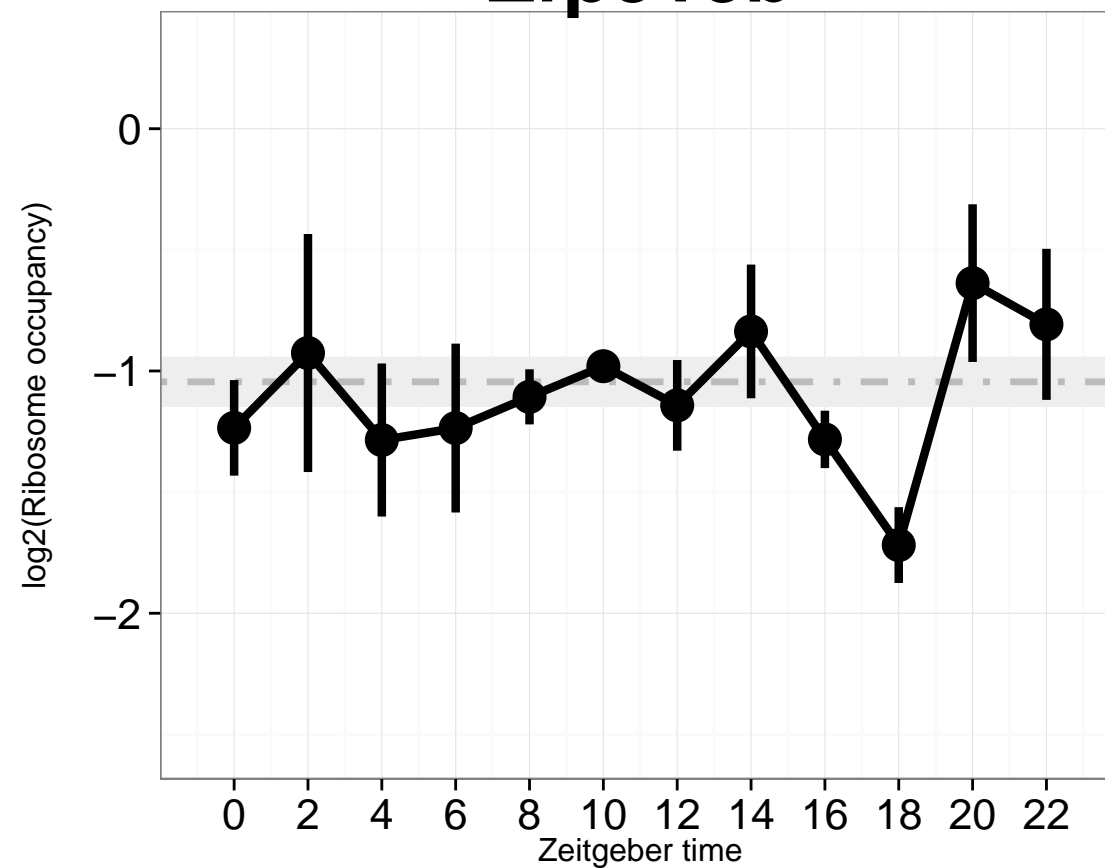

Supplement: SuppDataset_1.zip [file Zfp518b_set_A.pdf › Supplemental Dataset 1/A-mRNA_nonrhyth_translation_nonrhyth/Zfp518b_set_A.pdf]

# Zfp51

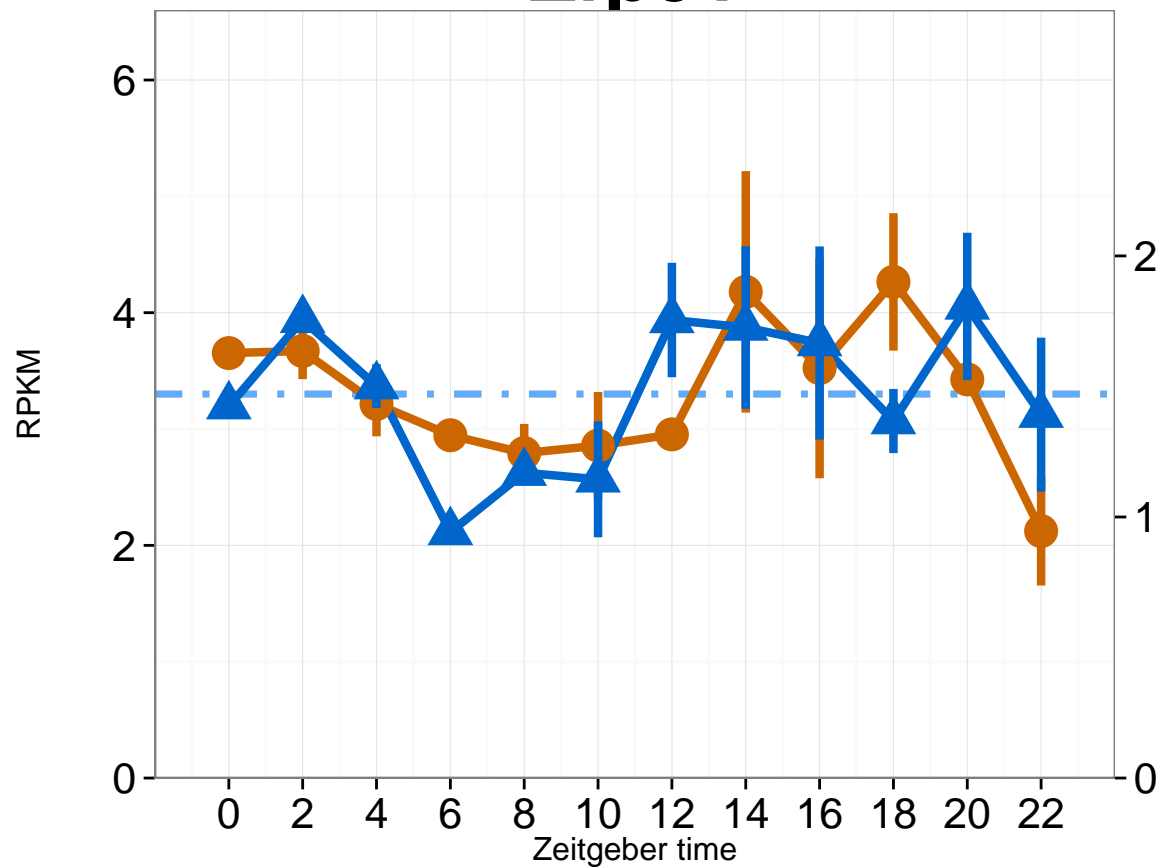

# Zfp51

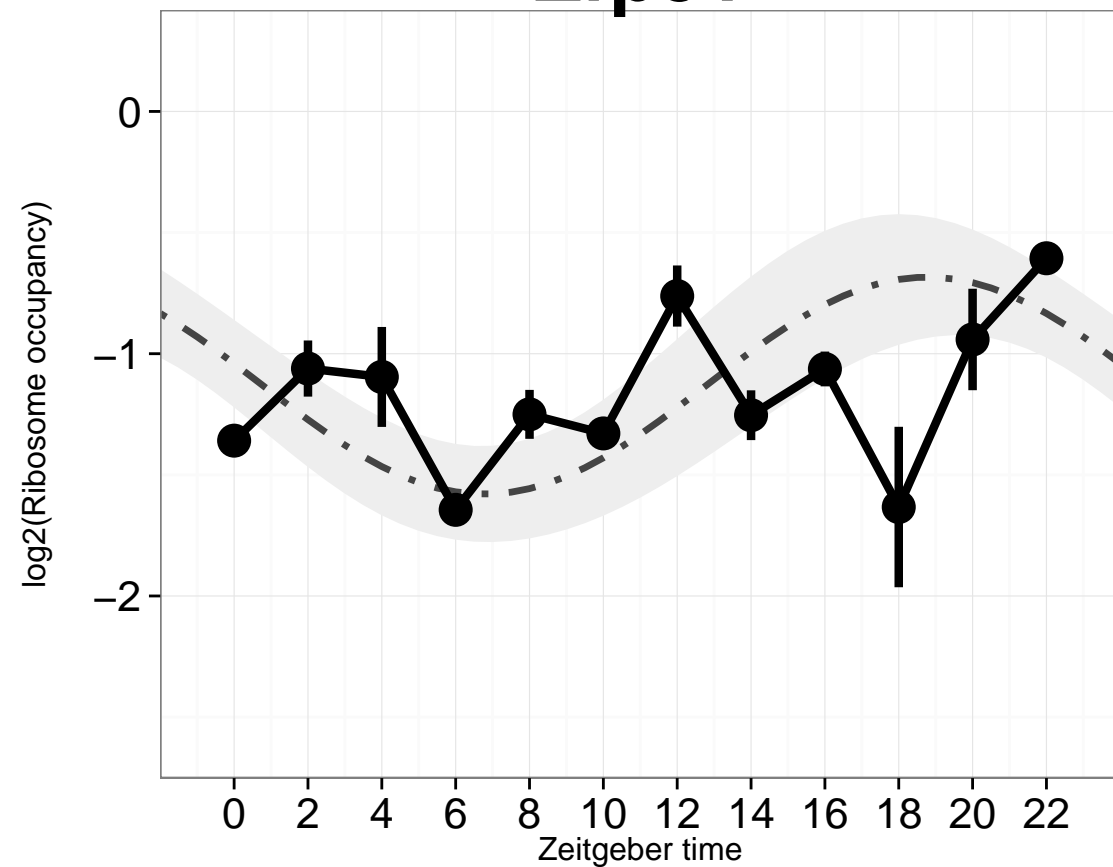

Supplement: SuppDataset_1.zip [file Zfp51_set_A.pdf › Supplemental Dataset 1/A-mRNA_nonrhyth_translation_nonrhyth/Zfp51_set_A.pdf]

## Zfp521

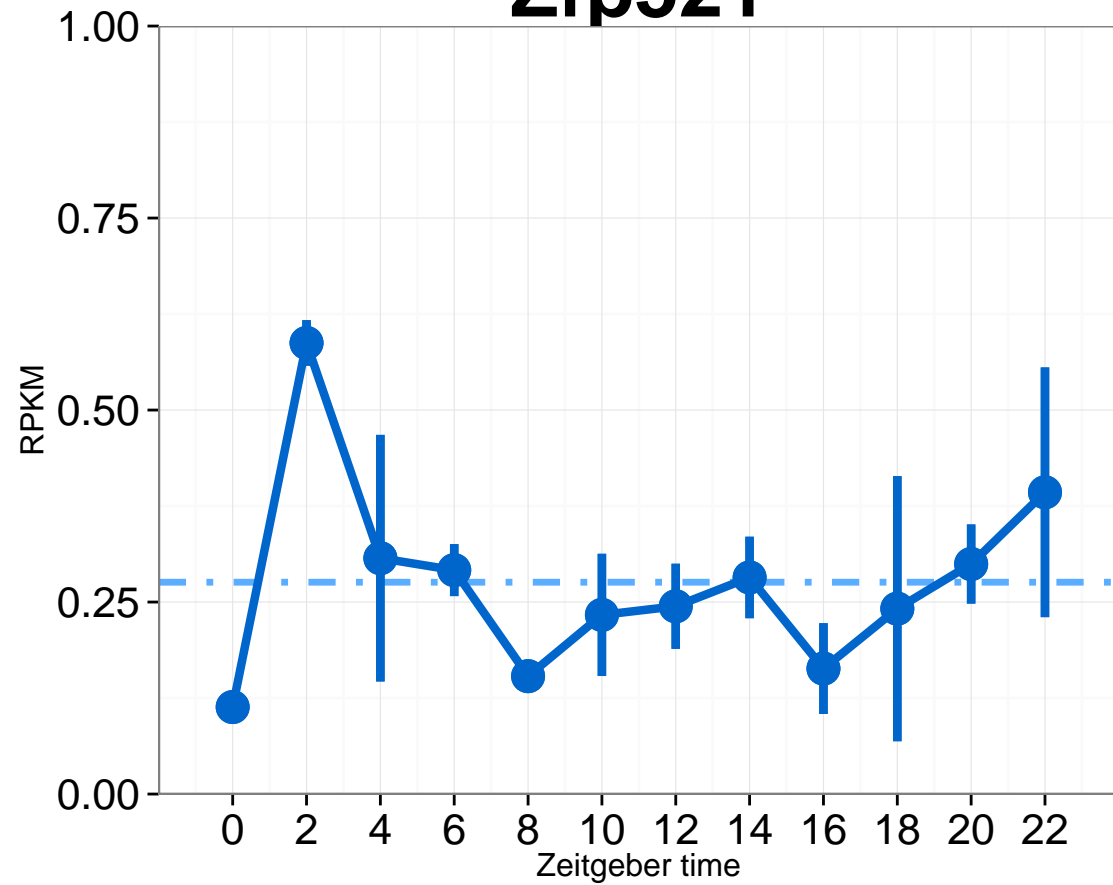

## Zfp521 log2(Ribosome occupancy

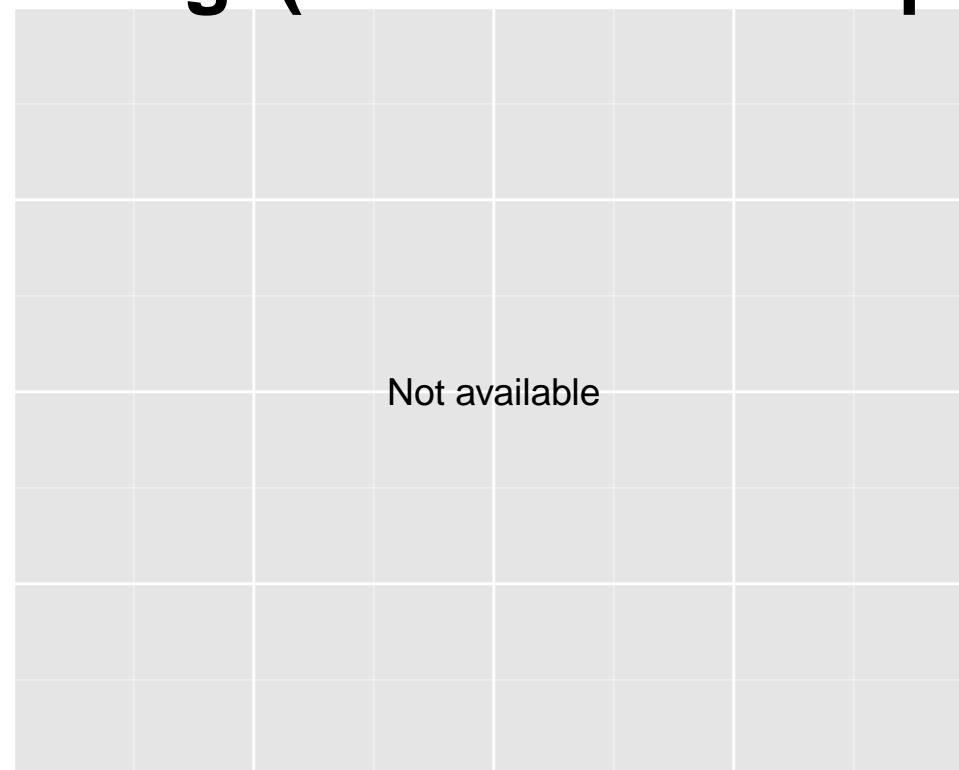

Supplement: SuppDataset_1.zip [file Zfp521_set_A.pdf › Supplemental Dataset 1/A-mRNA_nonrhyth_translation_nonrhyth/Zfp521_set_A.pdf]

# Zfp523

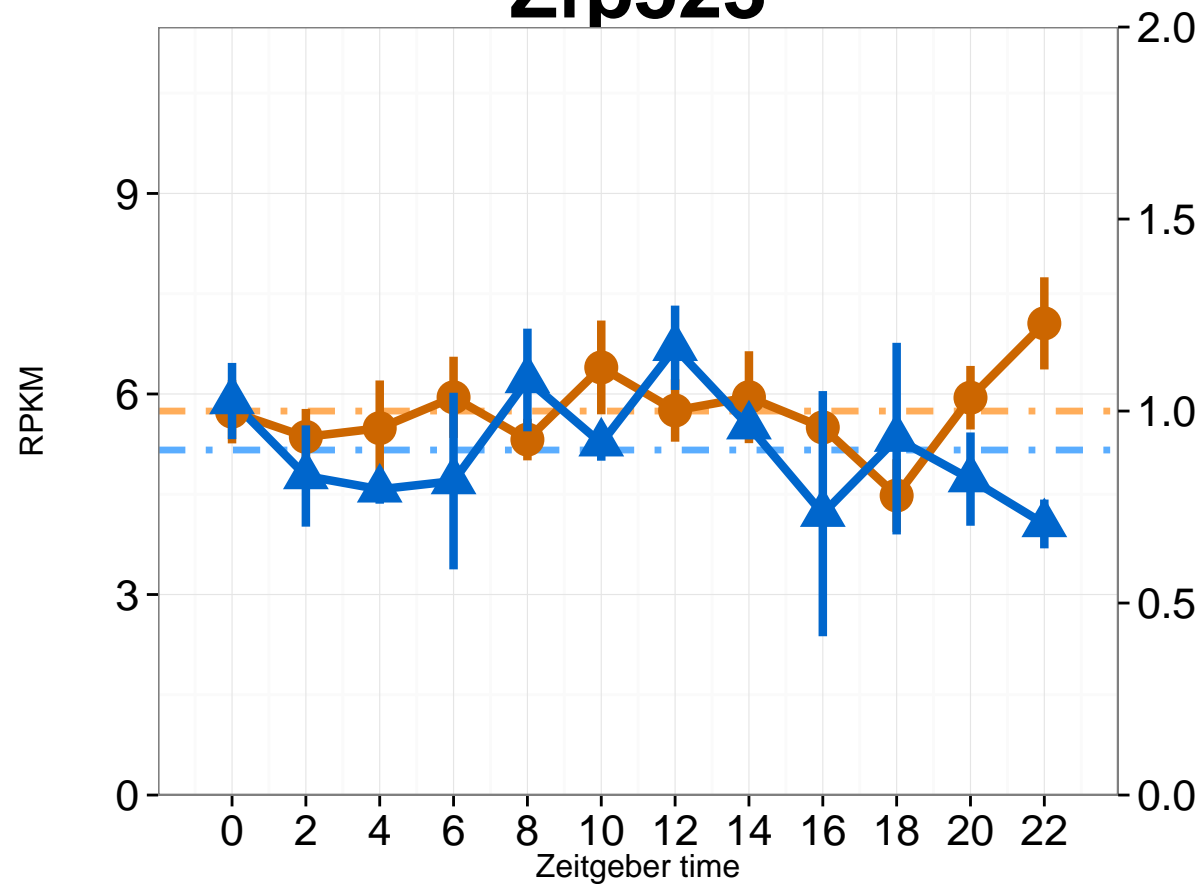

# Zfp523

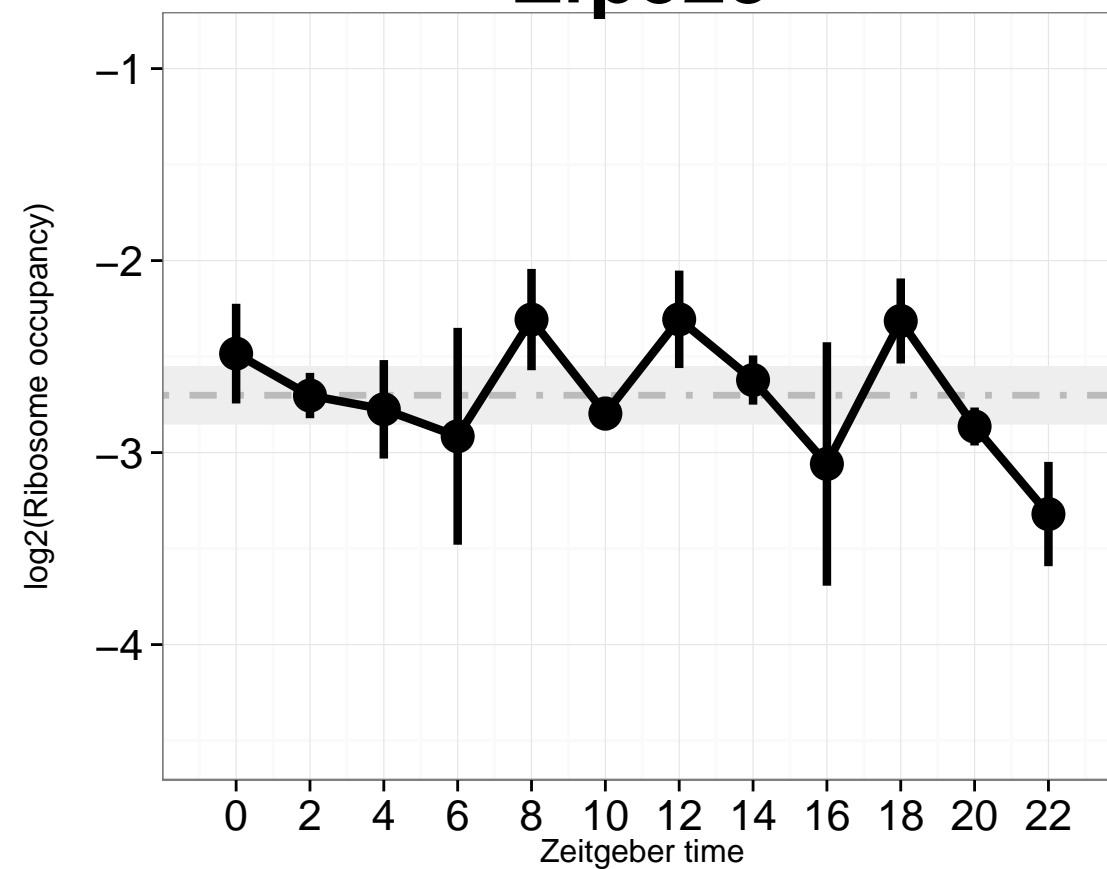

Supplement: SuppDataset_1.zip [file Zfp523_set_A.pdf › Supplemental Dataset 1/A-mRNA_nonrhyth_translation_nonrhyth/Zfp523_set_A.pdf]

# Zfp524

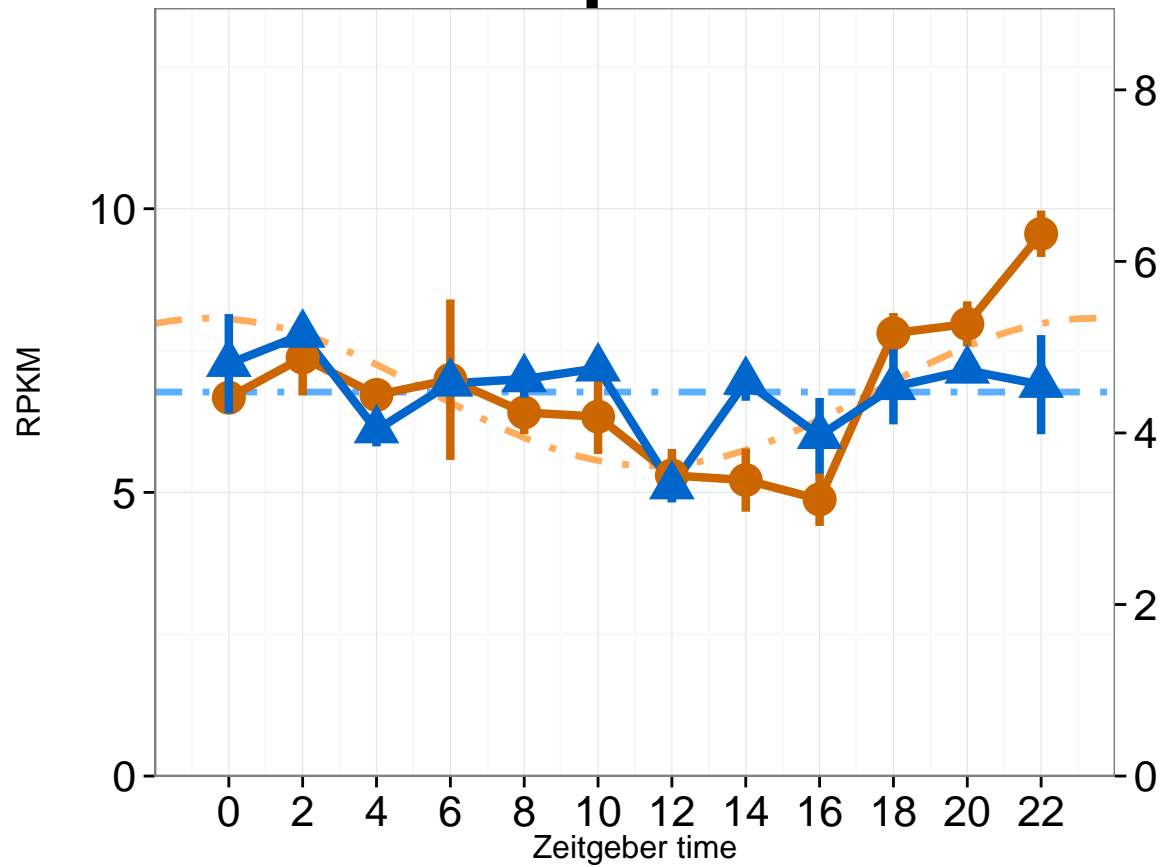

# Zfp524

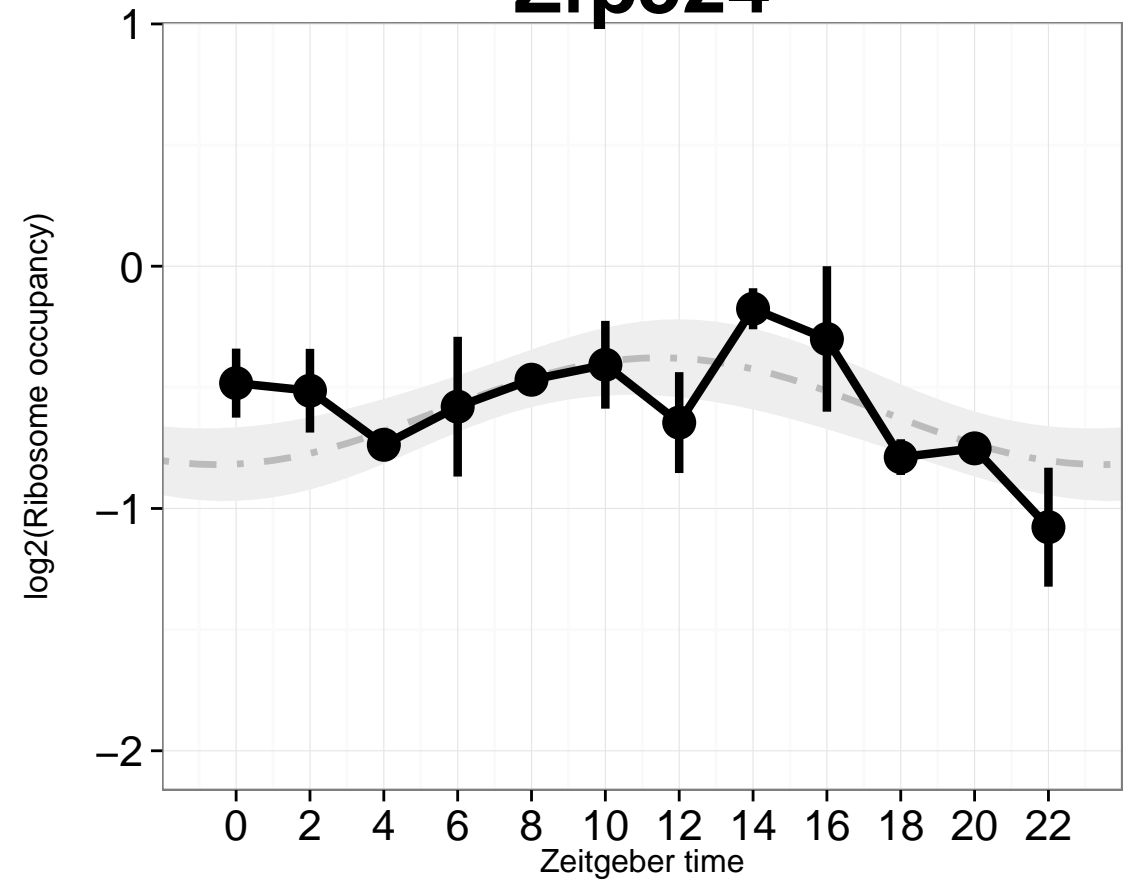

Supplement: SuppDataset_1.zip [file Zfp524_set_A.pdf › Supplemental Dataset 1/A-mRNA_nonrhyth_translation_nonrhyth/Zfp524_set_A.pdf]

# Zfp526

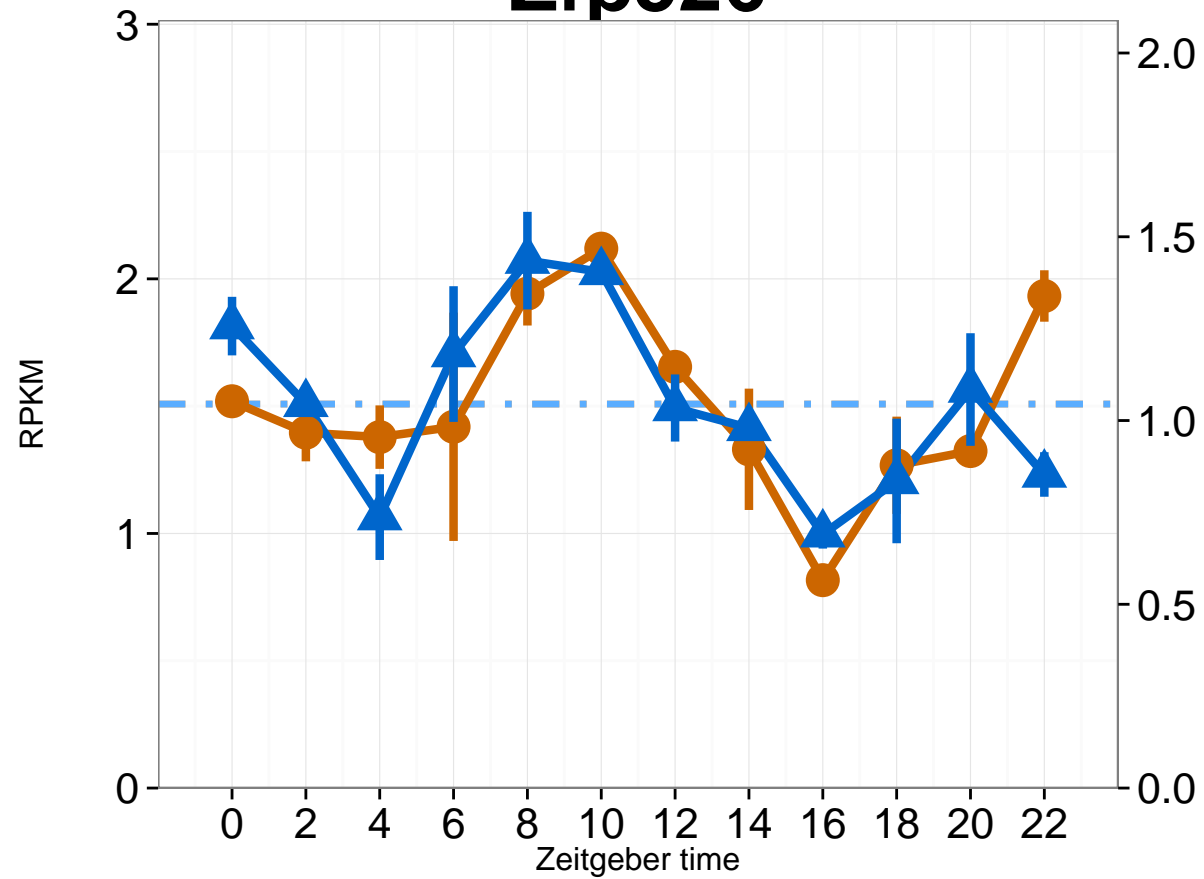

# Zfp526

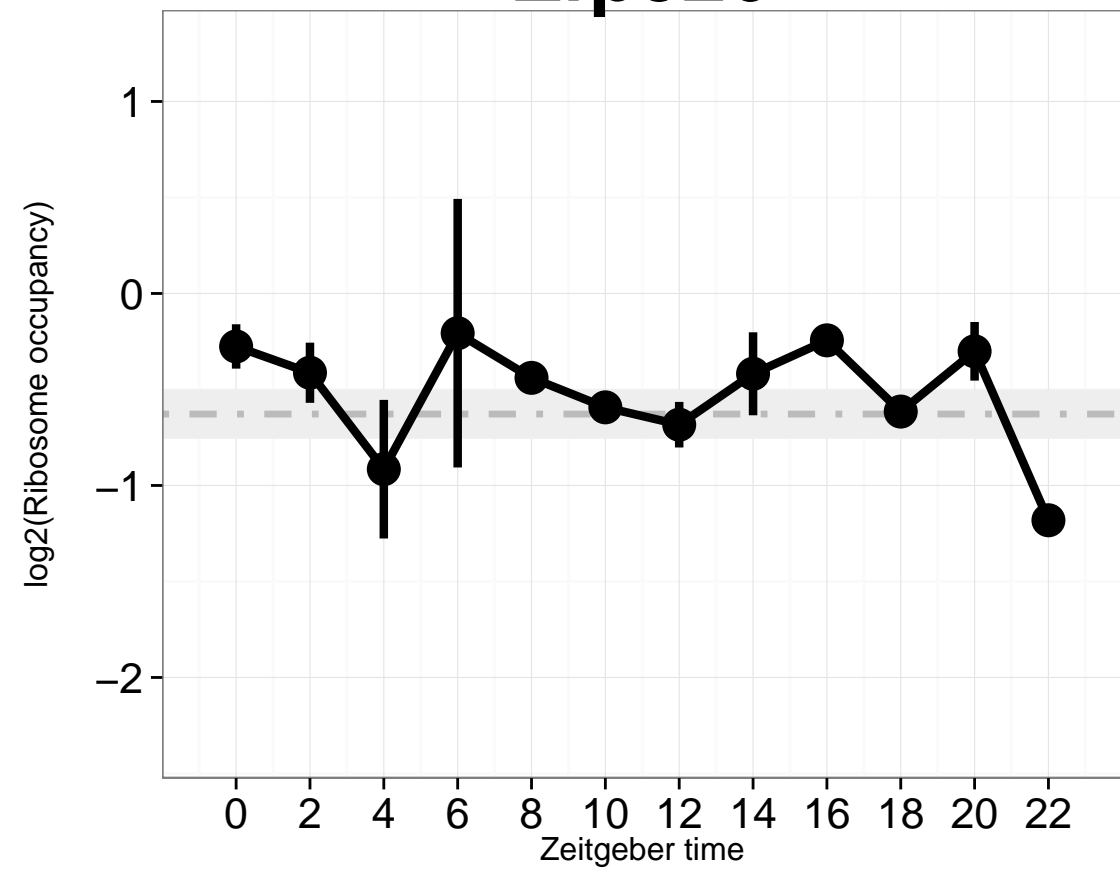

Supplement: SuppDataset_1.zip [file Zfp526_set_A.pdf › Supplemental Dataset 1/A-mRNA_nonrhyth_translation_nonrhyth/Zfp526_set_A.pdf]

# Zfp532

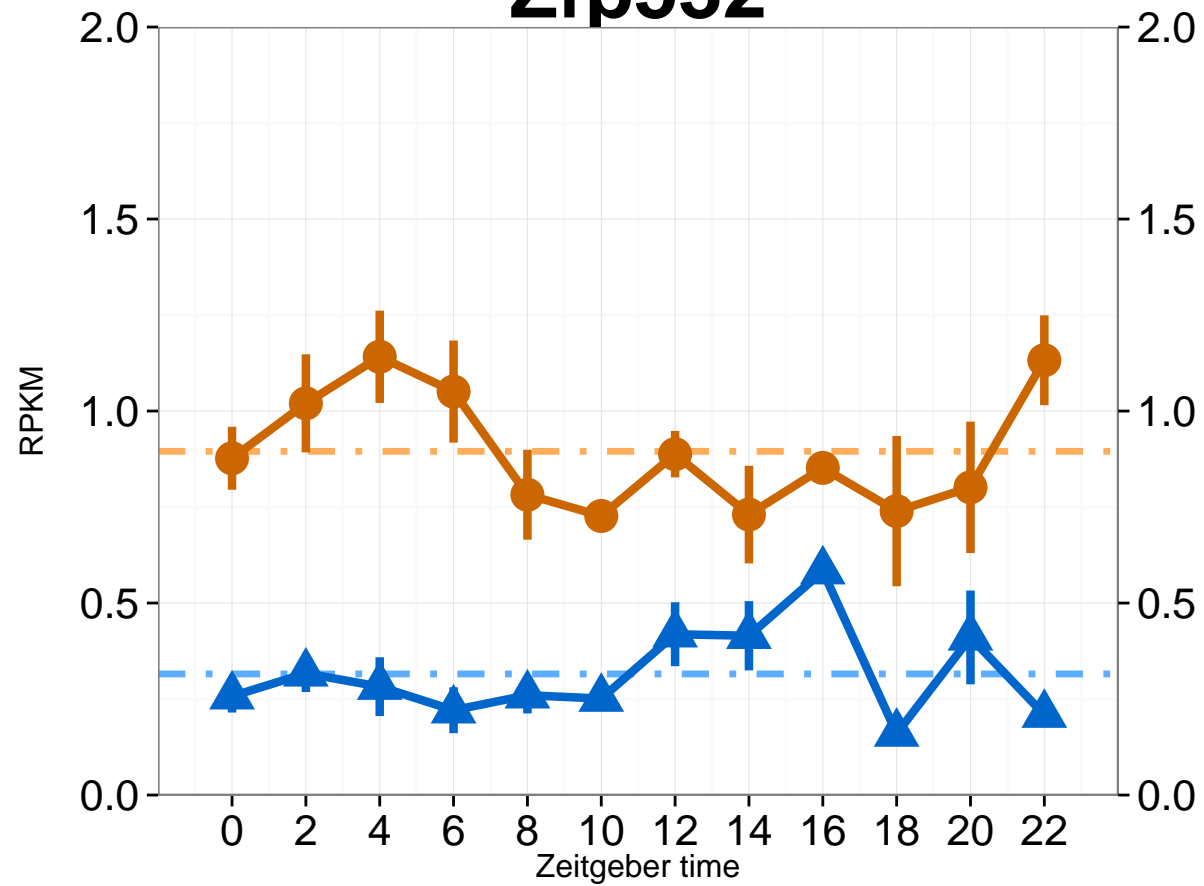

# Zfp532

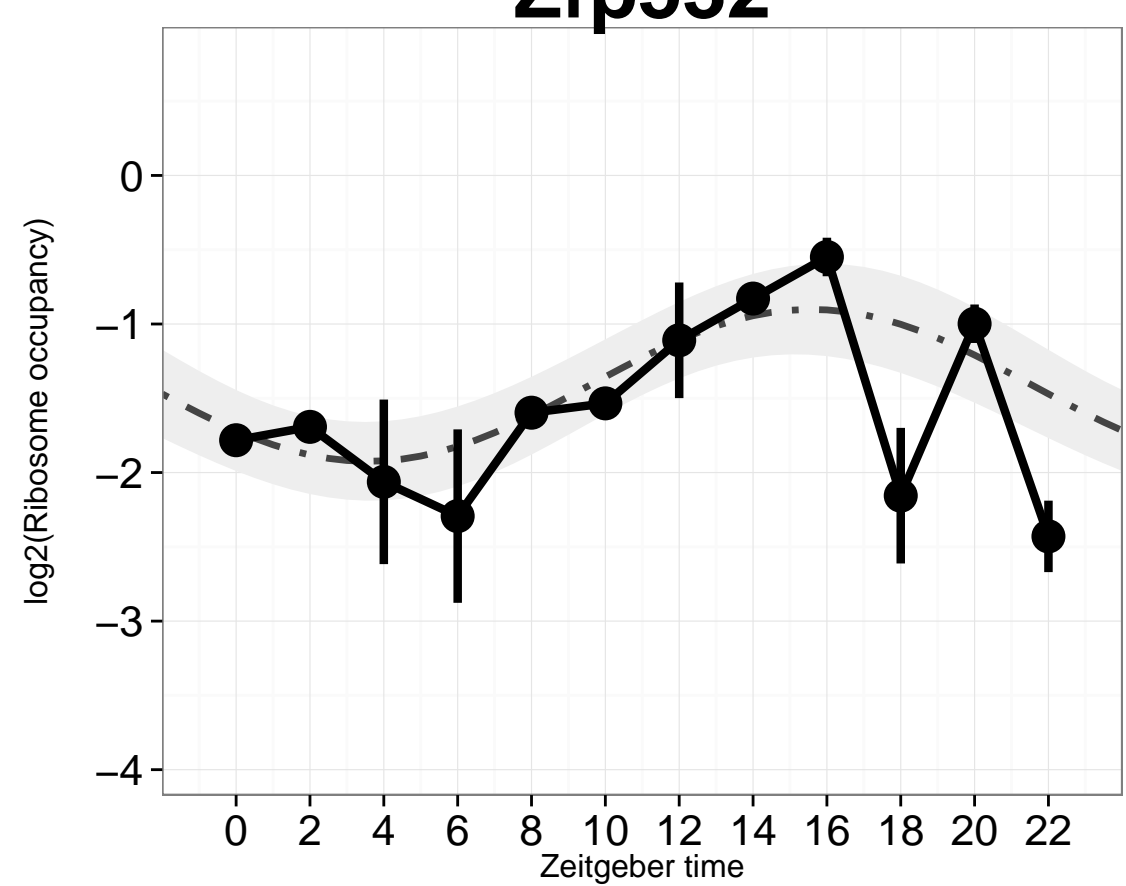

Supplement: SuppDataset_1.zip [file Zfp532_set_A.pdf › Supplemental Dataset 1/A-mRNA_nonrhyth_translation_nonrhyth/Zfp532_set_A.pdf]

# Zfp551

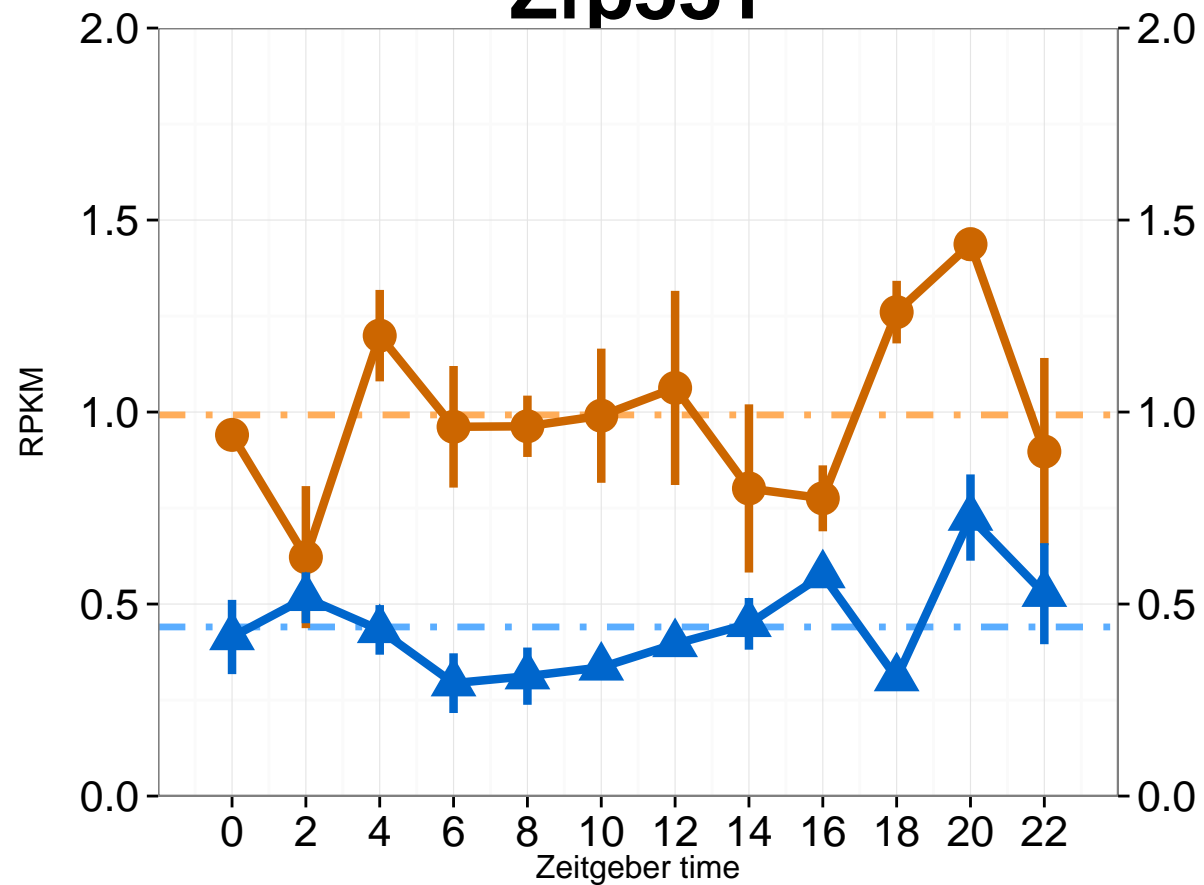

# Zfp551

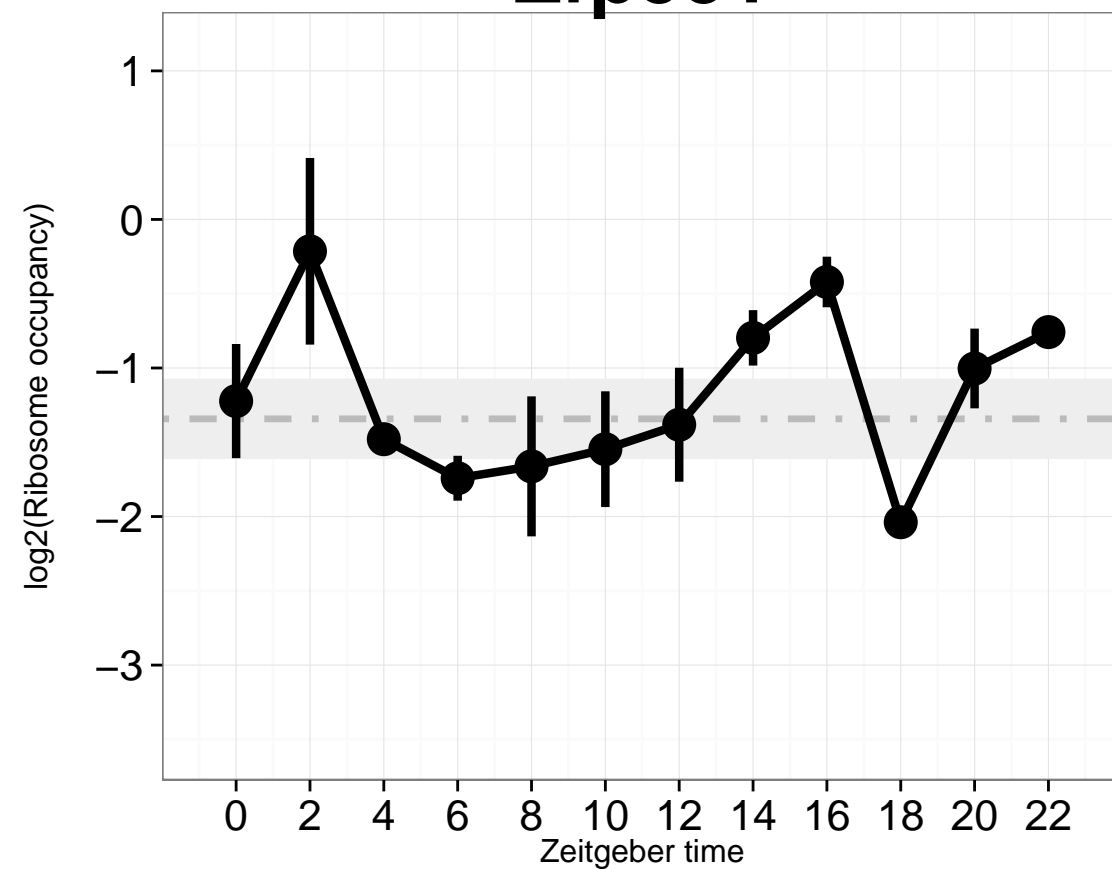

Supplement: SuppDataset_1.zip [file Zfp551_set_A.pdf › Supplemental Dataset 1/A-mRNA_nonrhyth_translation_nonrhyth/Zfp551_set_A.pdf]

# Zfp553

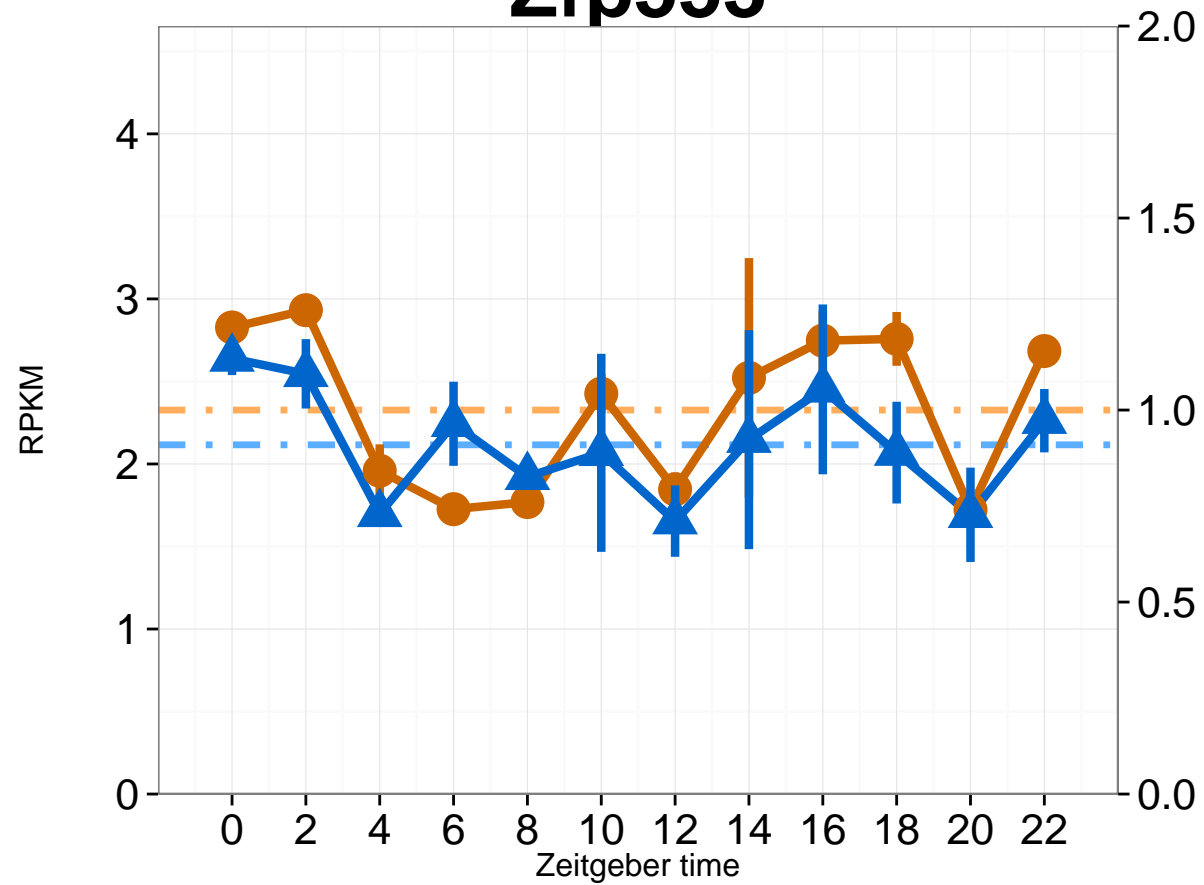

# Zfp553

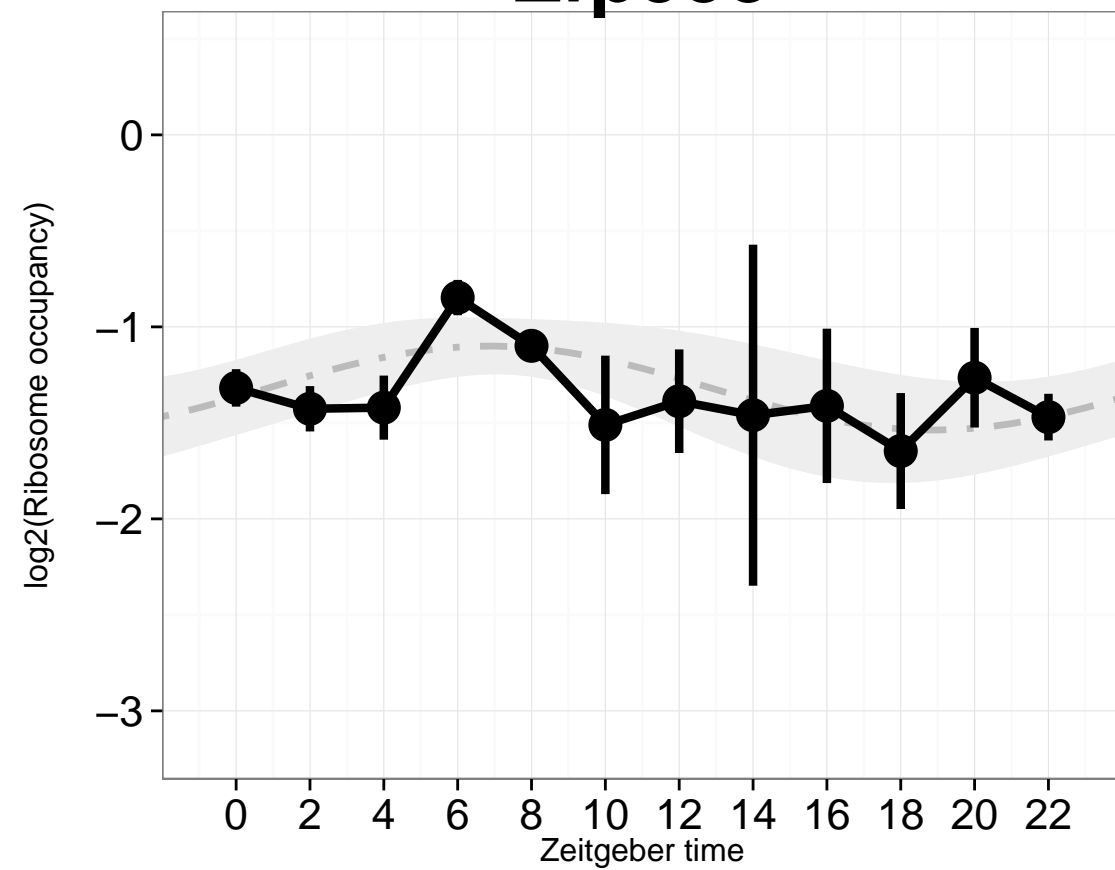

Supplement: SuppDataset_1.zip [file Zfp553_set_A.pdf › Supplemental Dataset 1/A-mRNA_nonrhyth_translation_nonrhyth/Zfp553_set_A.pdf]

# Zfp560

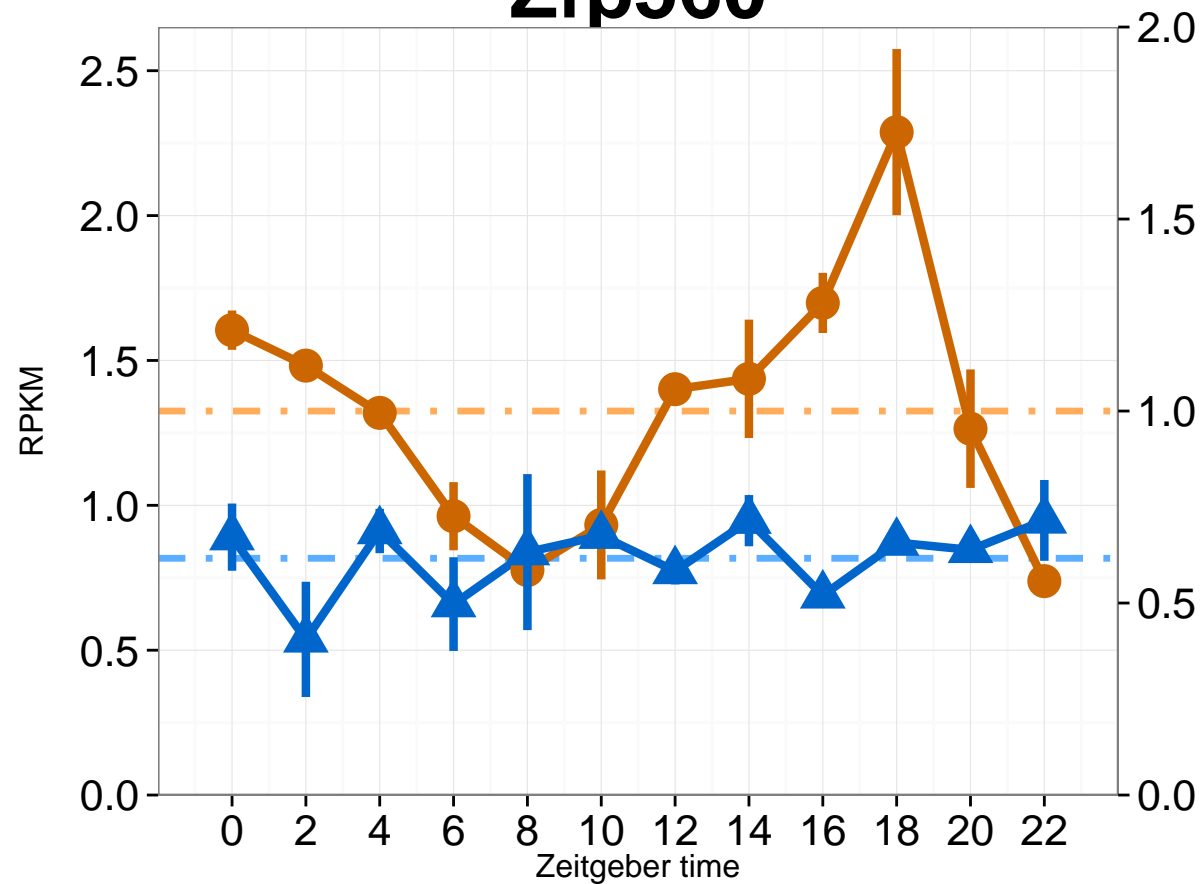

# Zfp560

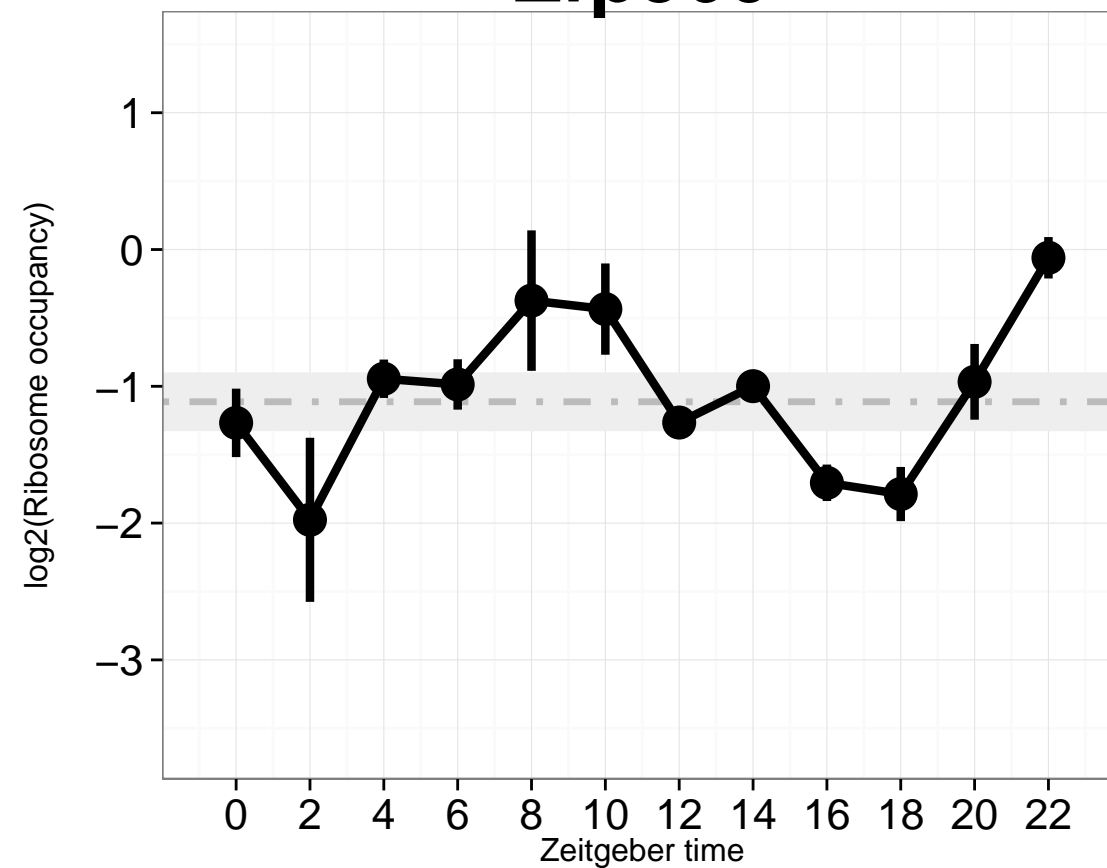

Supplement: SuppDataset_1.zip [file Zfp560_set_A.pdf › Supplemental Dataset 1/A-mRNA_nonrhyth_translation_nonrhyth/Zfp560_set_A.pdf]

# Zfp568

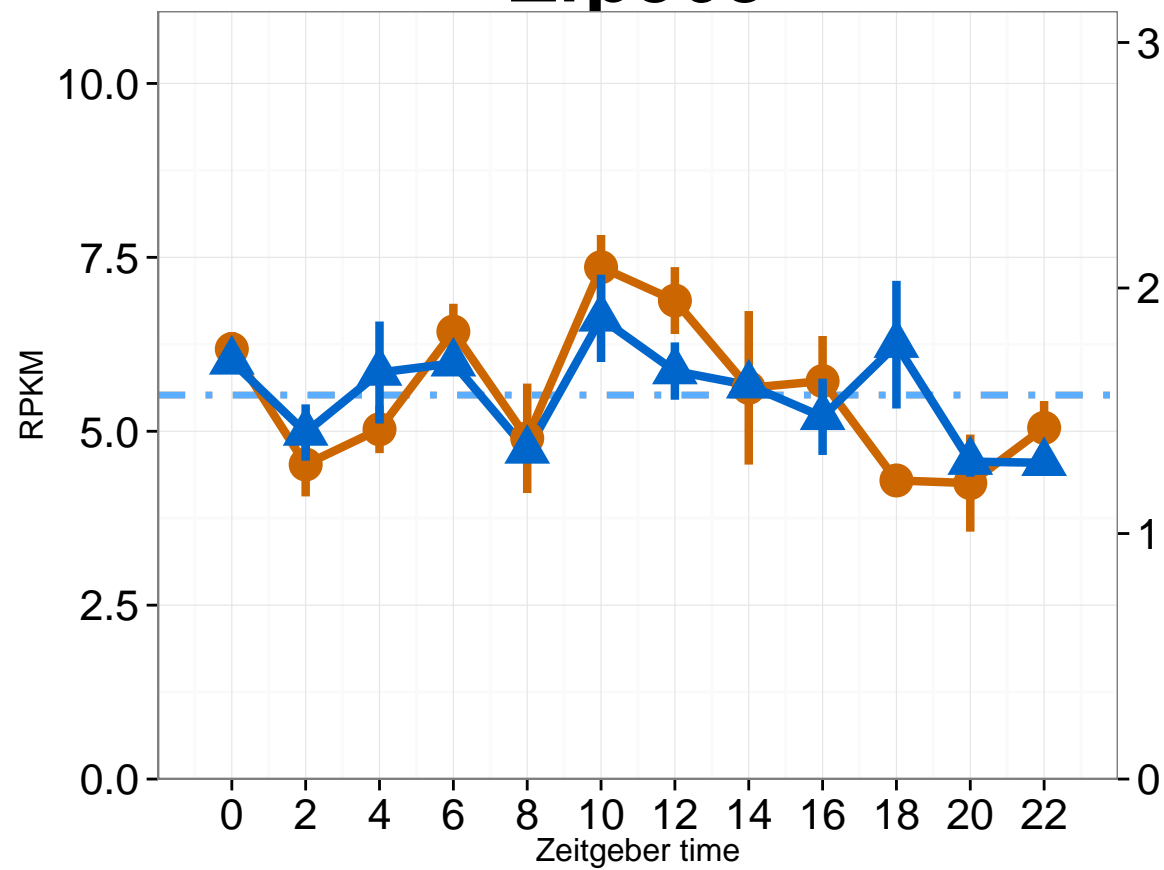

# Zfp568

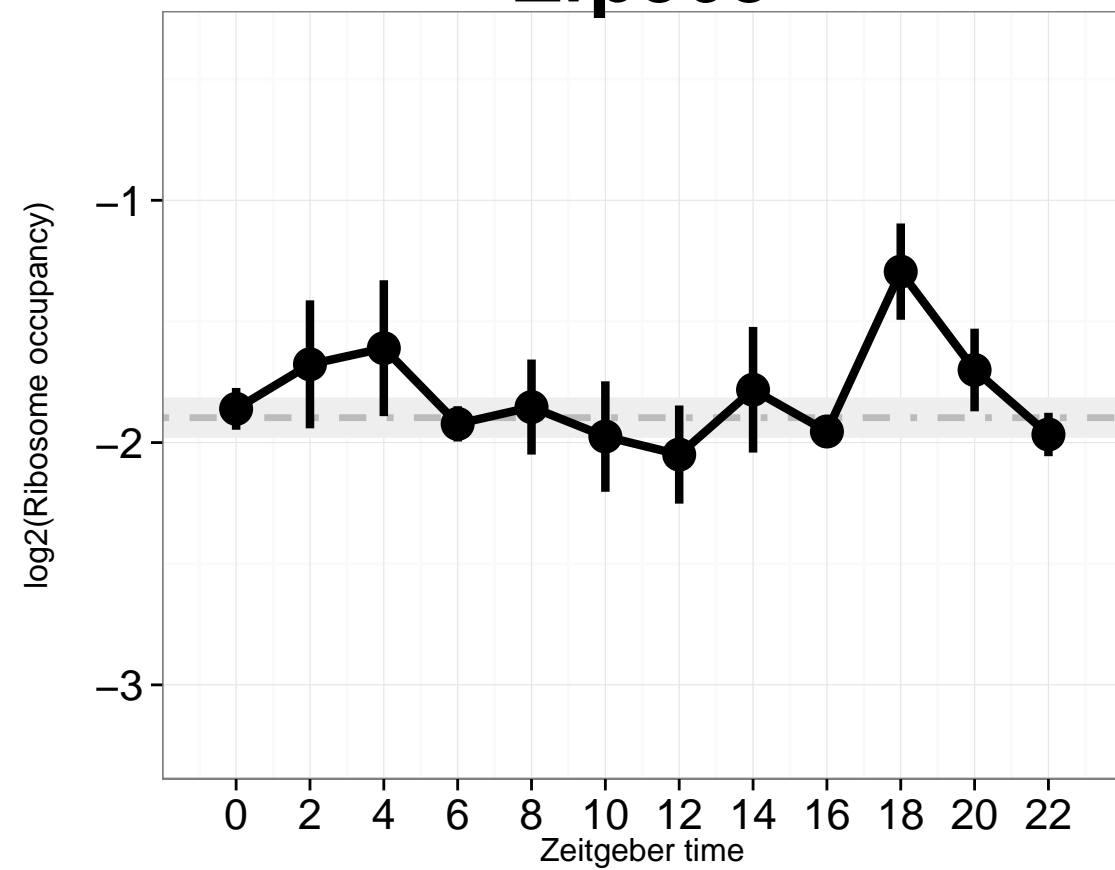

Supplement: SuppDataset_1.zip [file Zfp568_set_A.pdf › Supplemental Dataset 1/A-mRNA_nonrhyth_translation_nonrhyth/Zfp568_set_A.pdf]

# Zfp574

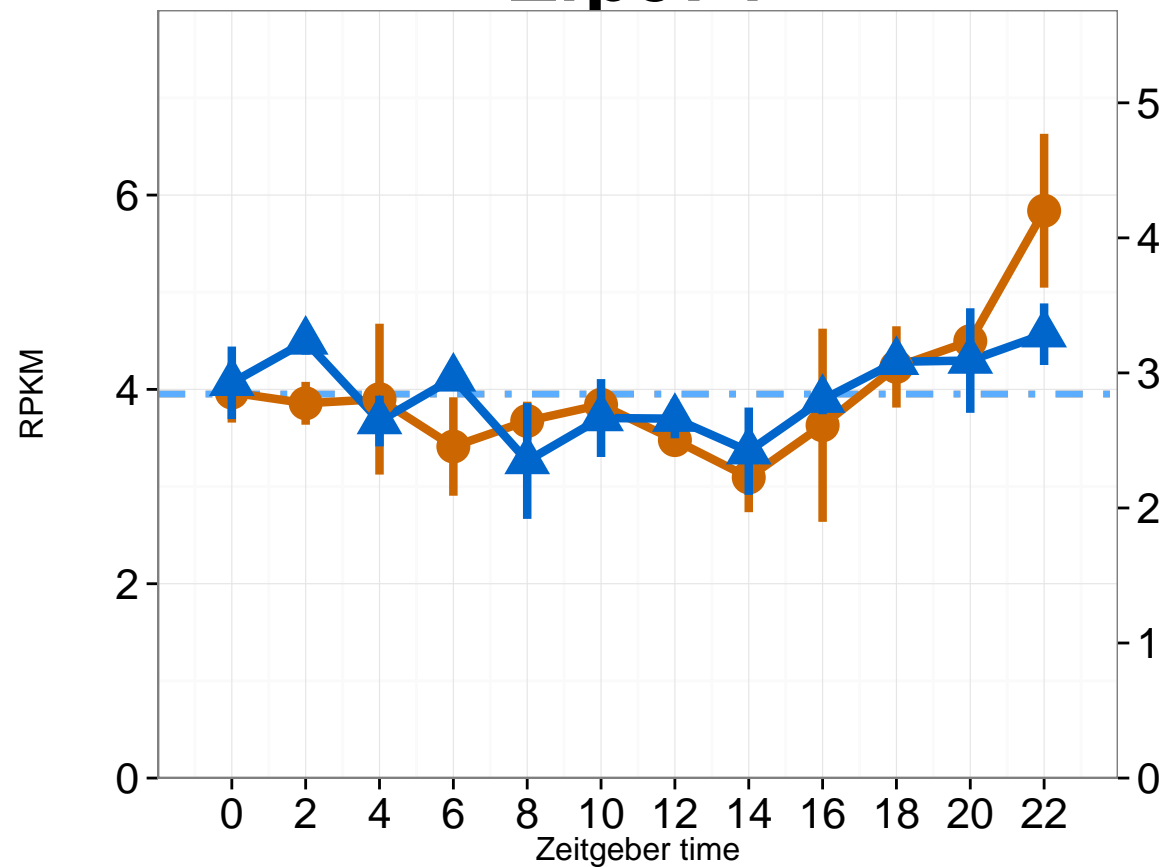

# Zfp574

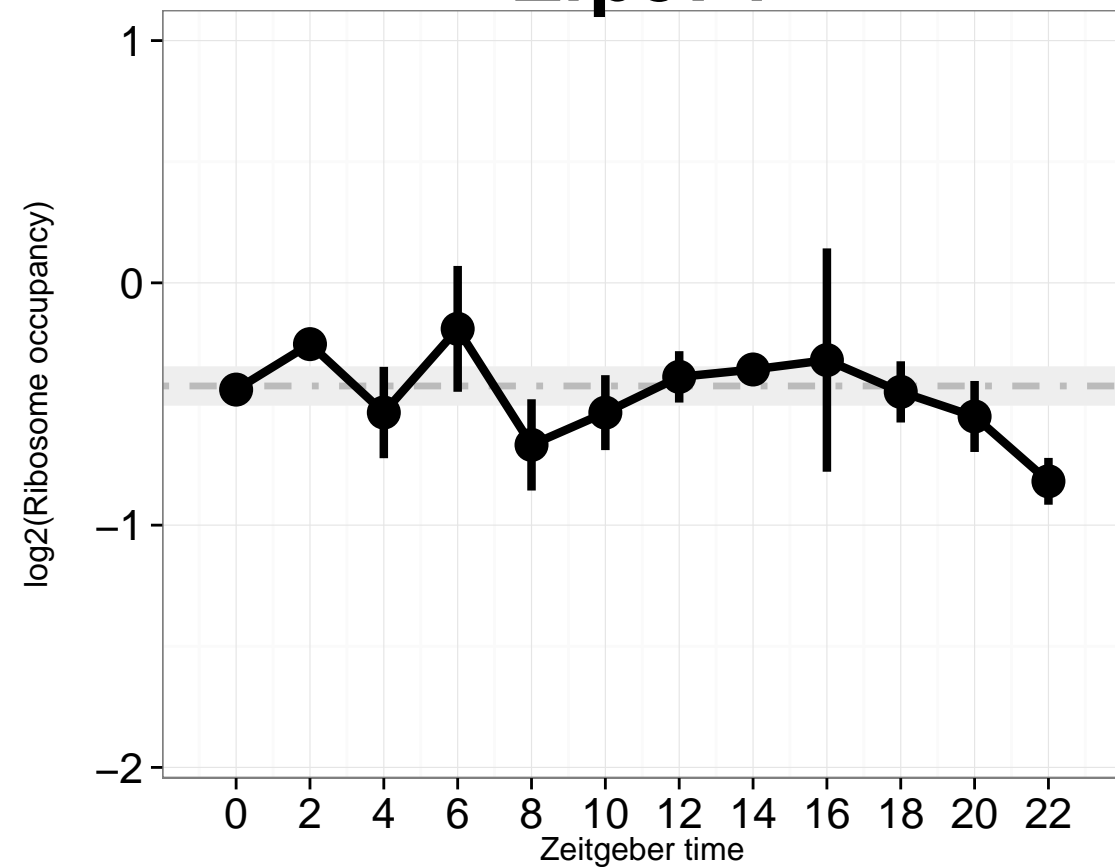

Supplement: SuppDataset_1.zip [file Zfp574_set_A.pdf › Supplemental Dataset 1/A-mRNA_nonrhyth_translation_nonrhyth/Zfp574_set_A.pdf]

# Zfp579

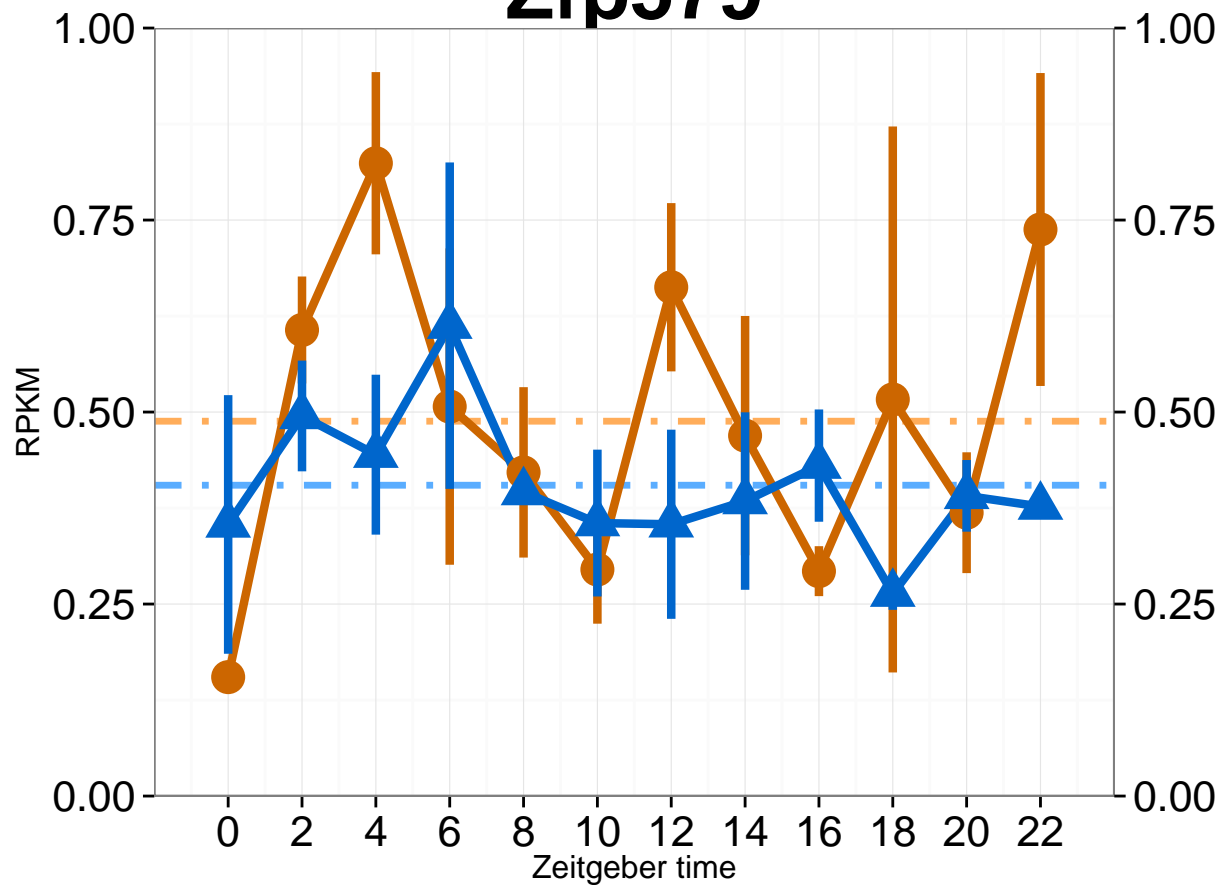

# Zfp579

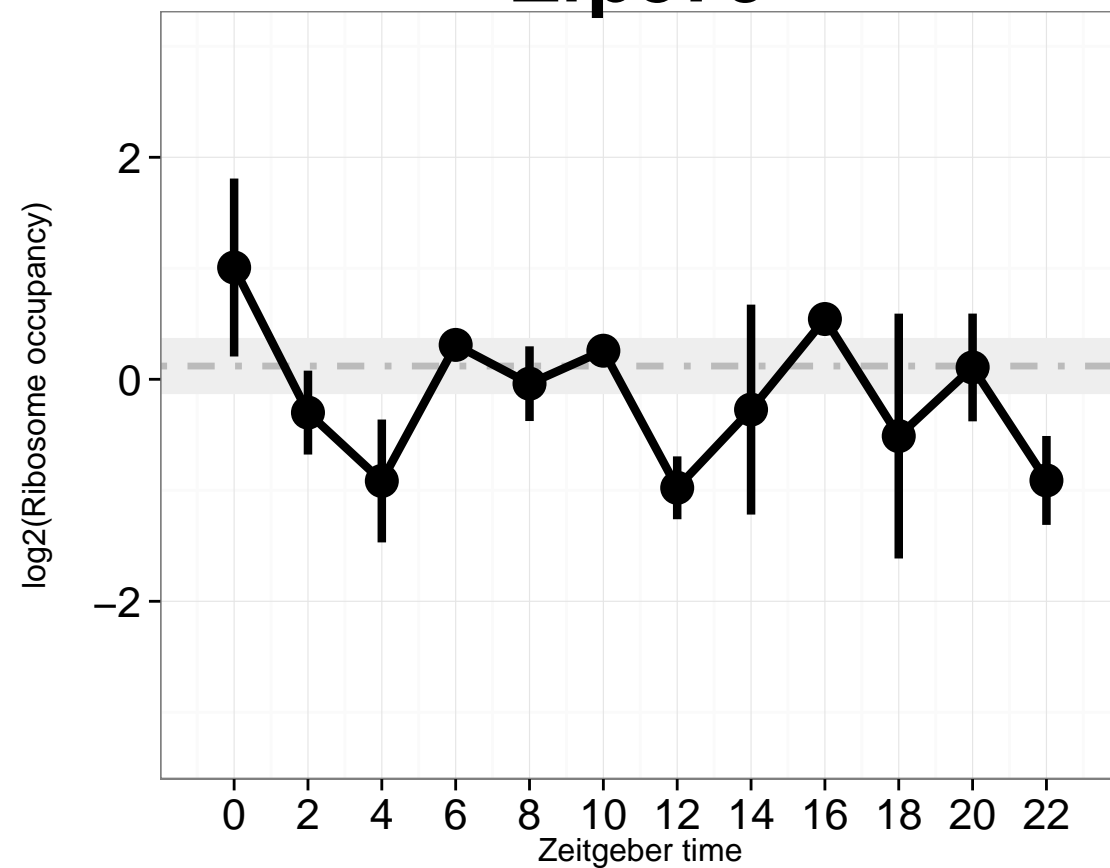

Supplement: SuppDataset_1.zip [file Zfp579_set_A.pdf › Supplemental Dataset 1/A-mRNA_nonrhyth_translation_nonrhyth/Zfp579_set_A.pdf]

# Zfp58

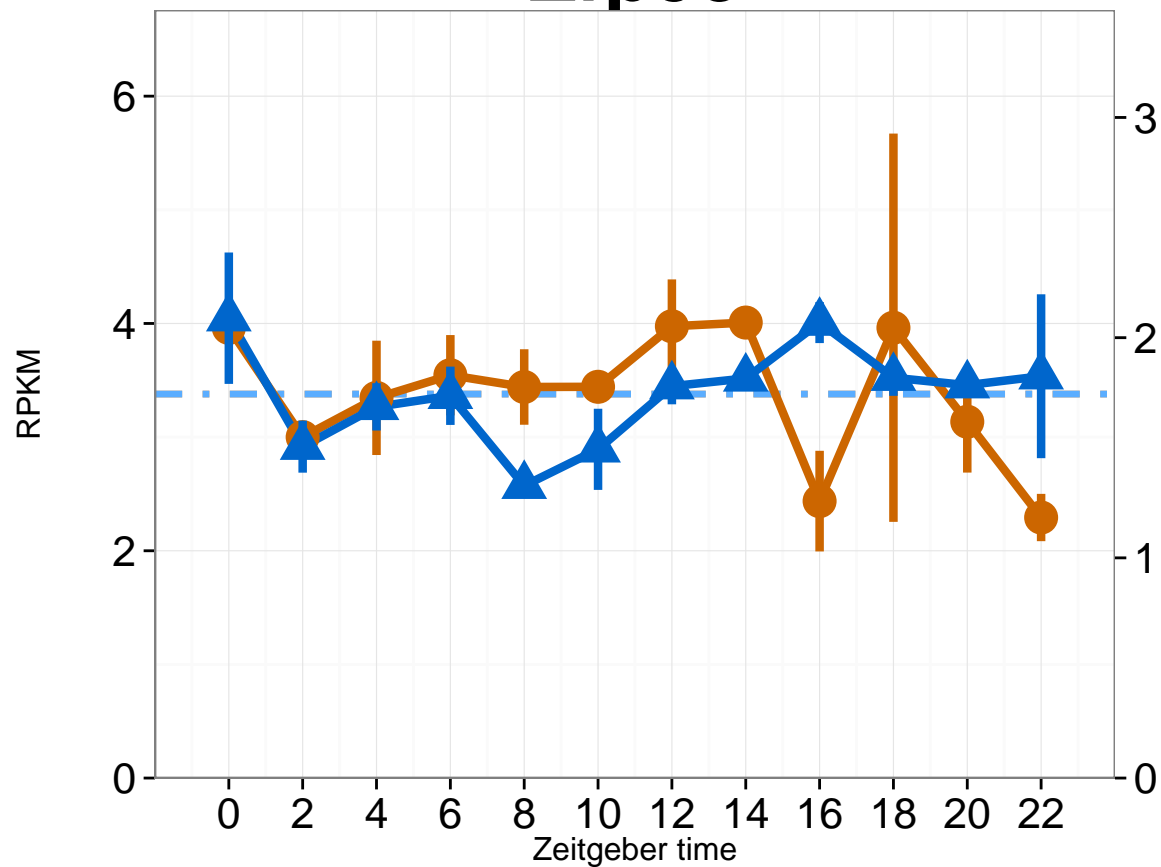

# Zfp58

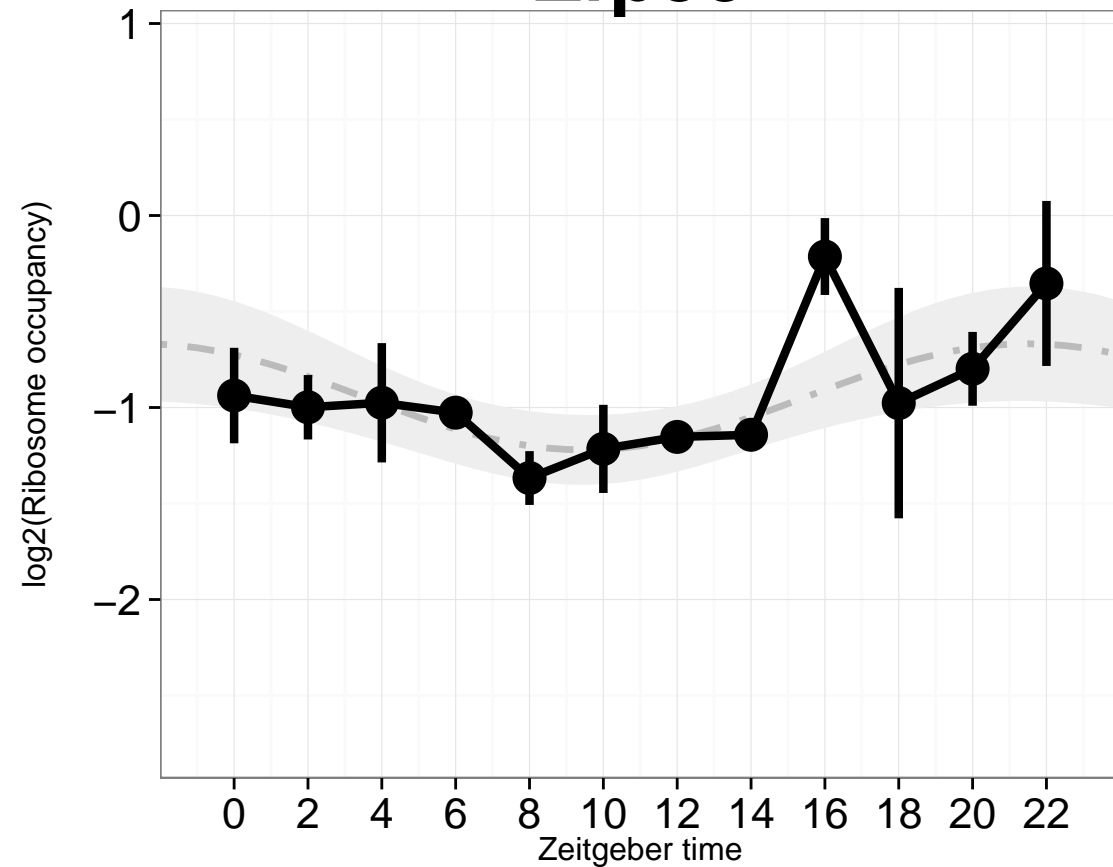

Supplement: SuppDataset_1.zip [file Zfp58_set_A.pdf › Supplemental Dataset 1/A-mRNA_nonrhyth_translation_nonrhyth/Zfp58_set_A.pdf]

# Zfp592

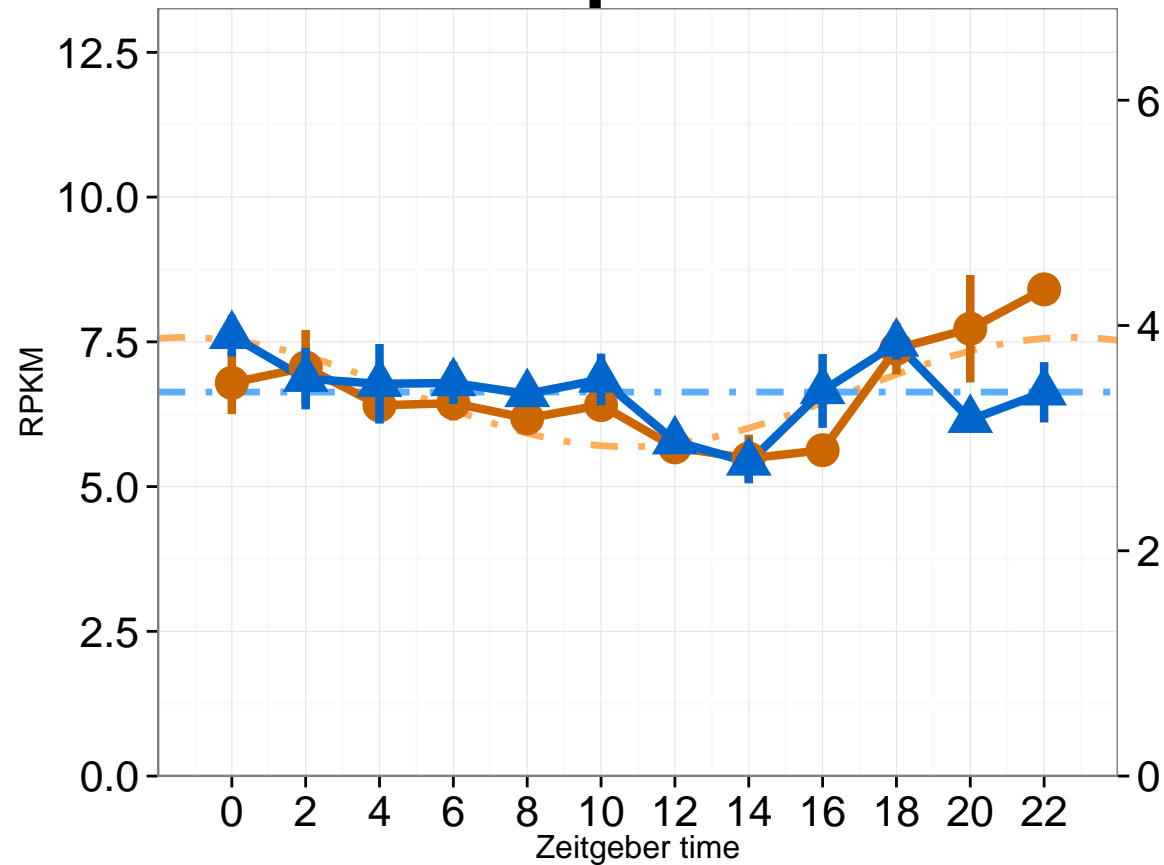

# Zfp592

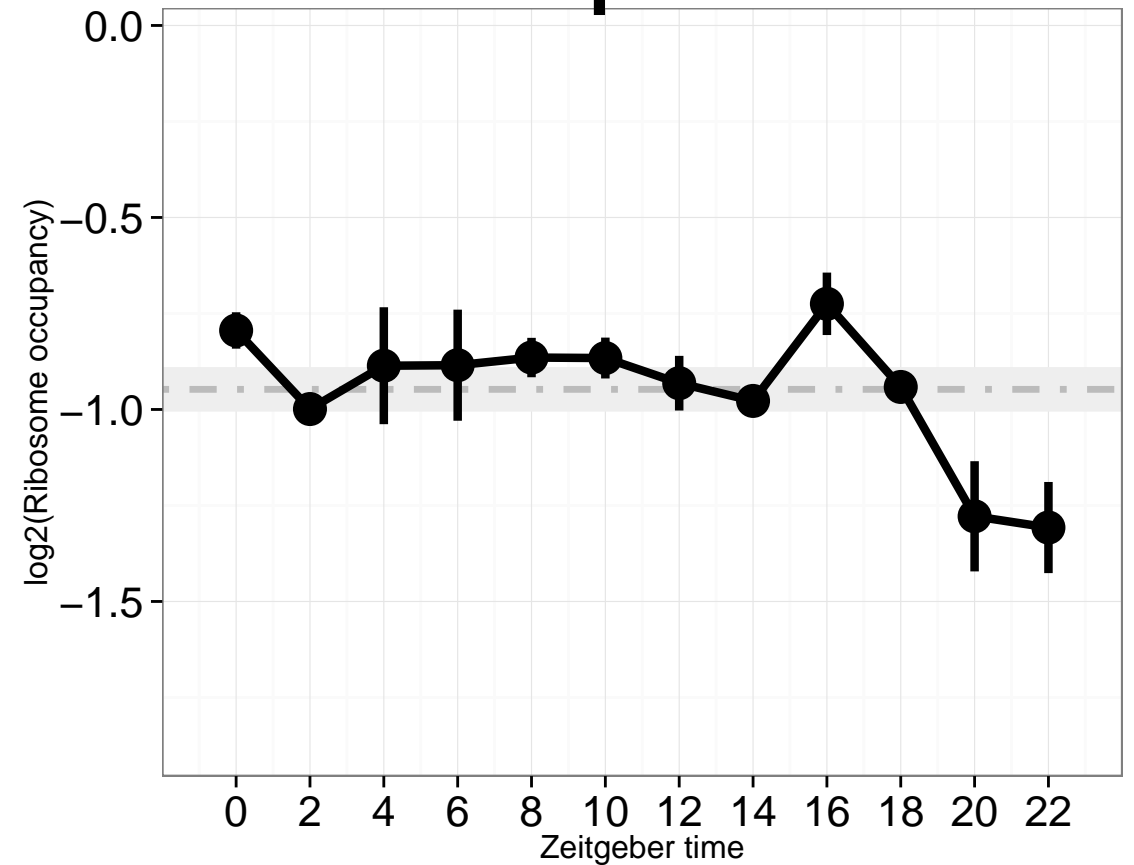

Supplement: SuppDataset_1.zip [file Zfp592_set_A.pdf › Supplemental Dataset 1/A-mRNA_nonrhyth_translation_nonrhyth/Zfp592_set_A.pdf]

# Zfp593

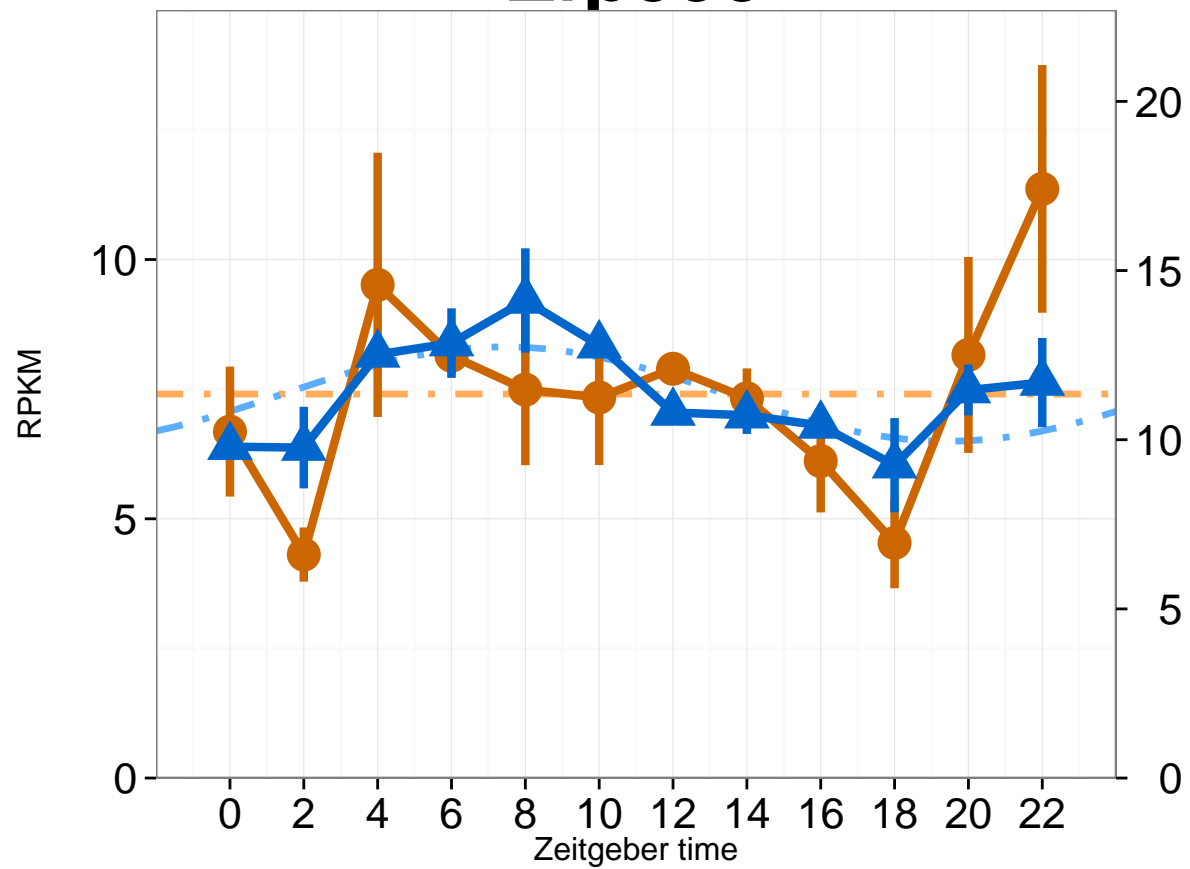

# Zfp593

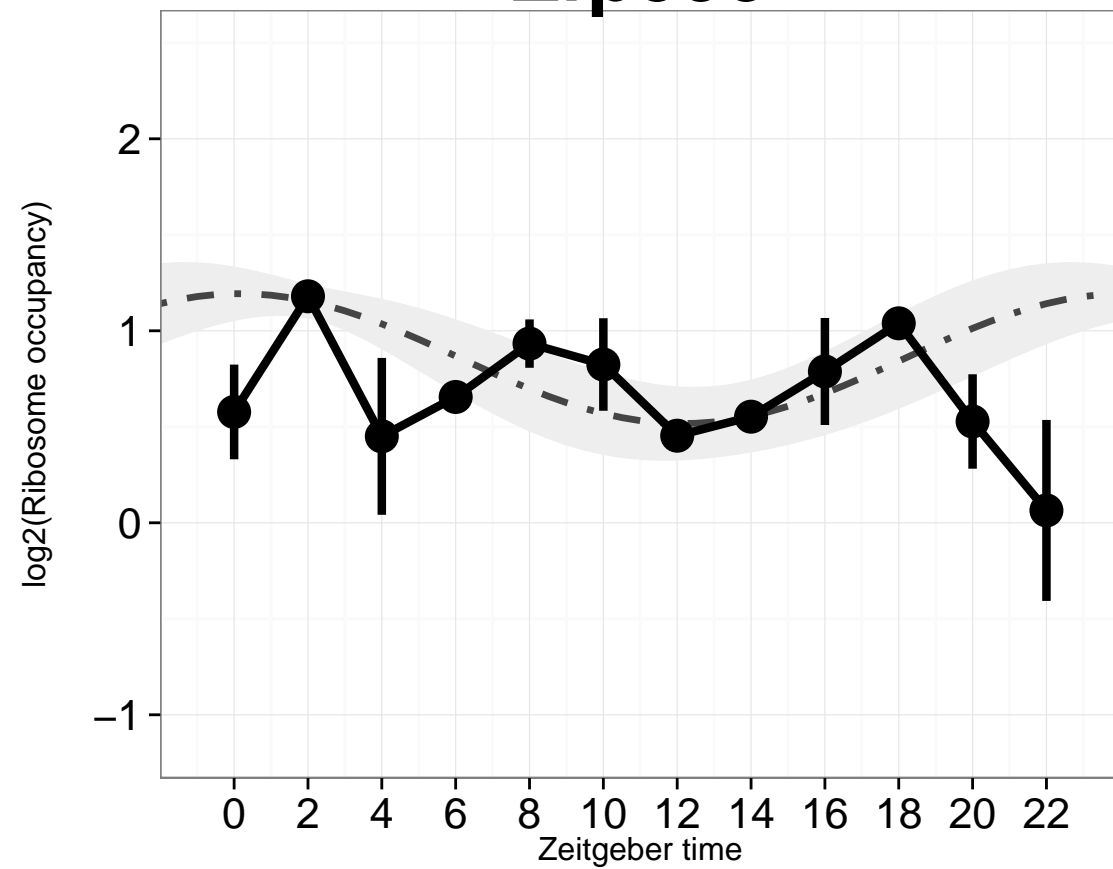

Supplement: SuppDataset_1.zip [file Zfp593_set_A.pdf › Supplemental Dataset 1/A-mRNA_nonrhyth_translation_nonrhyth/Zfp593_set_A.pdf]

# Zfp595

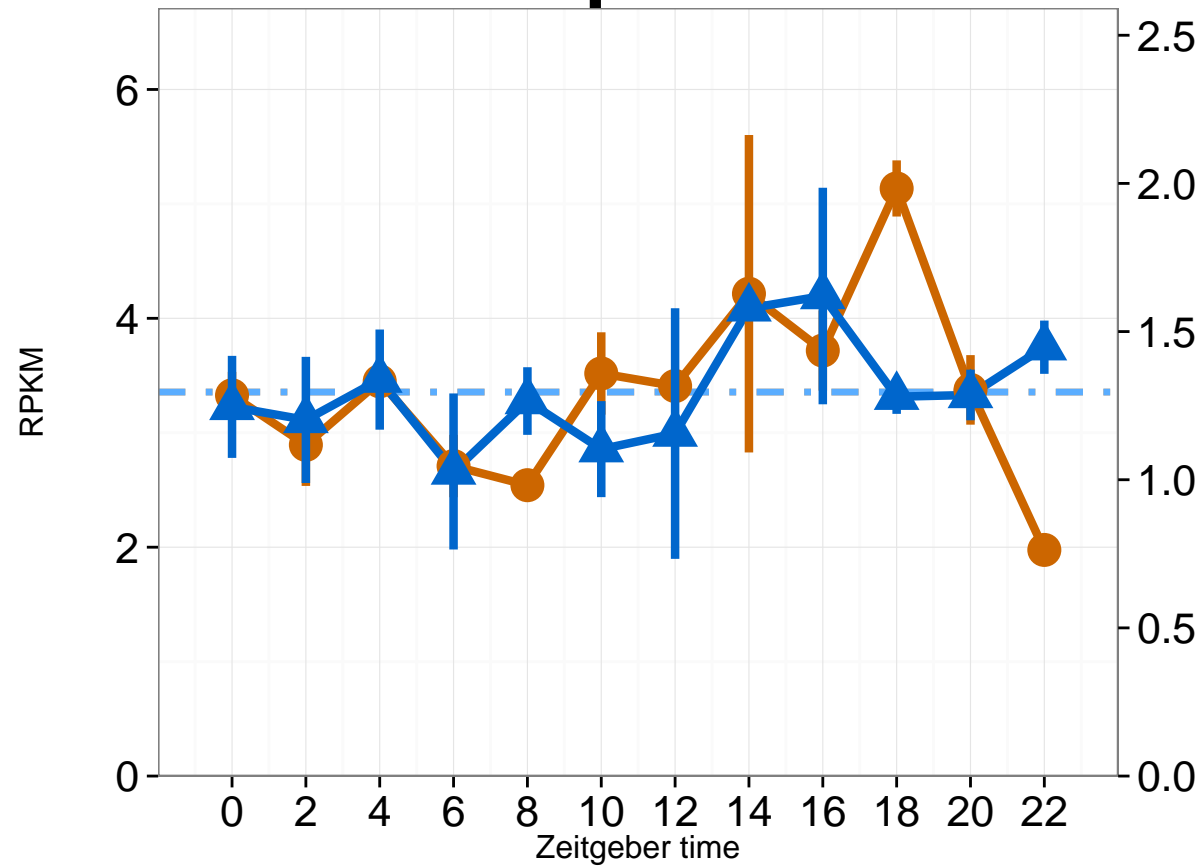

# Zfp595

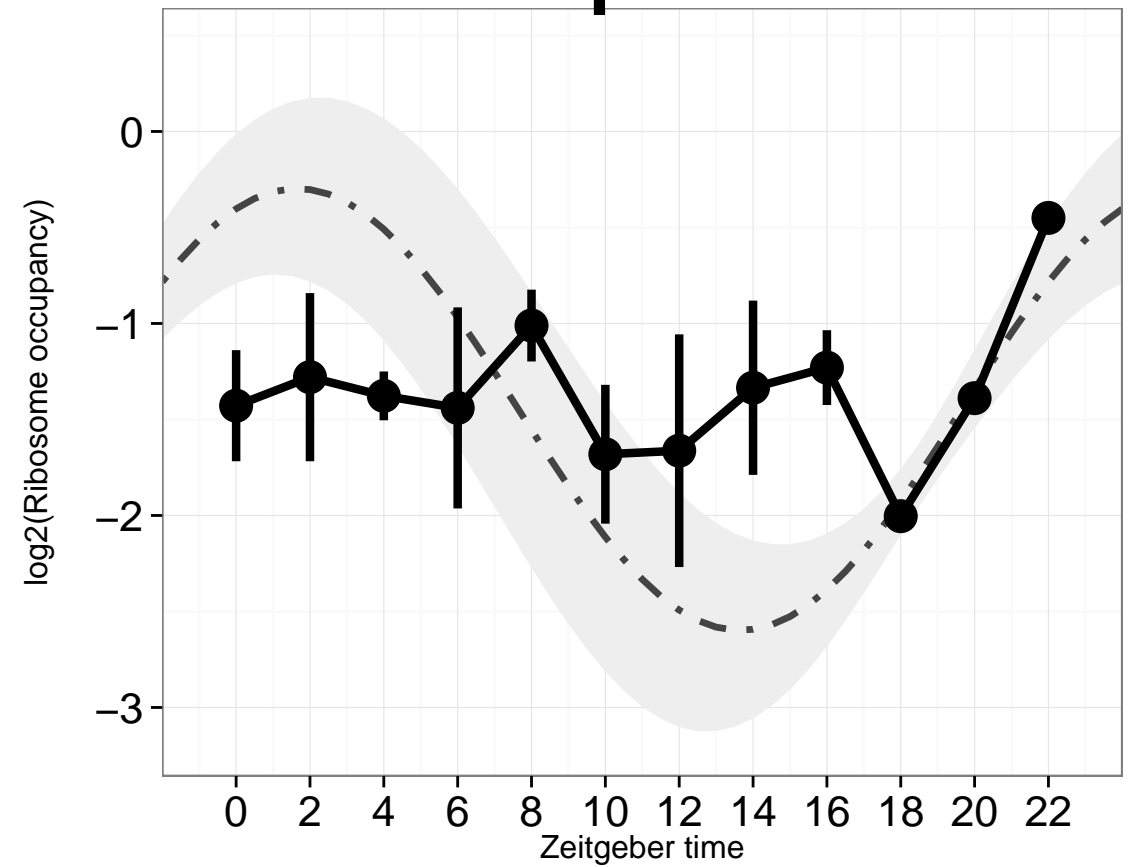

Supplement: SuppDataset_1.zip [file Zfp595_set_A.pdf › Supplemental Dataset 1/A-mRNA_nonrhyth_translation_nonrhyth/Zfp595_set_A.pdf]

# Zfp597

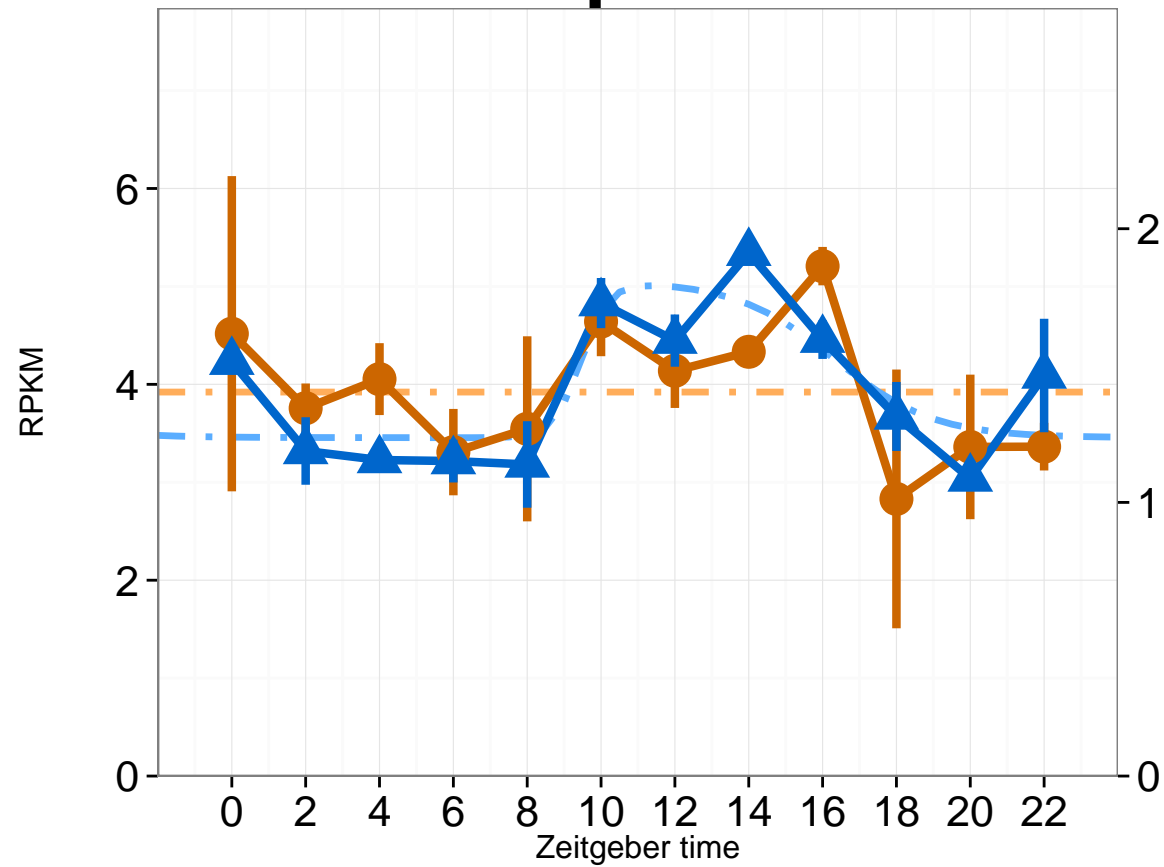

# Zfp597

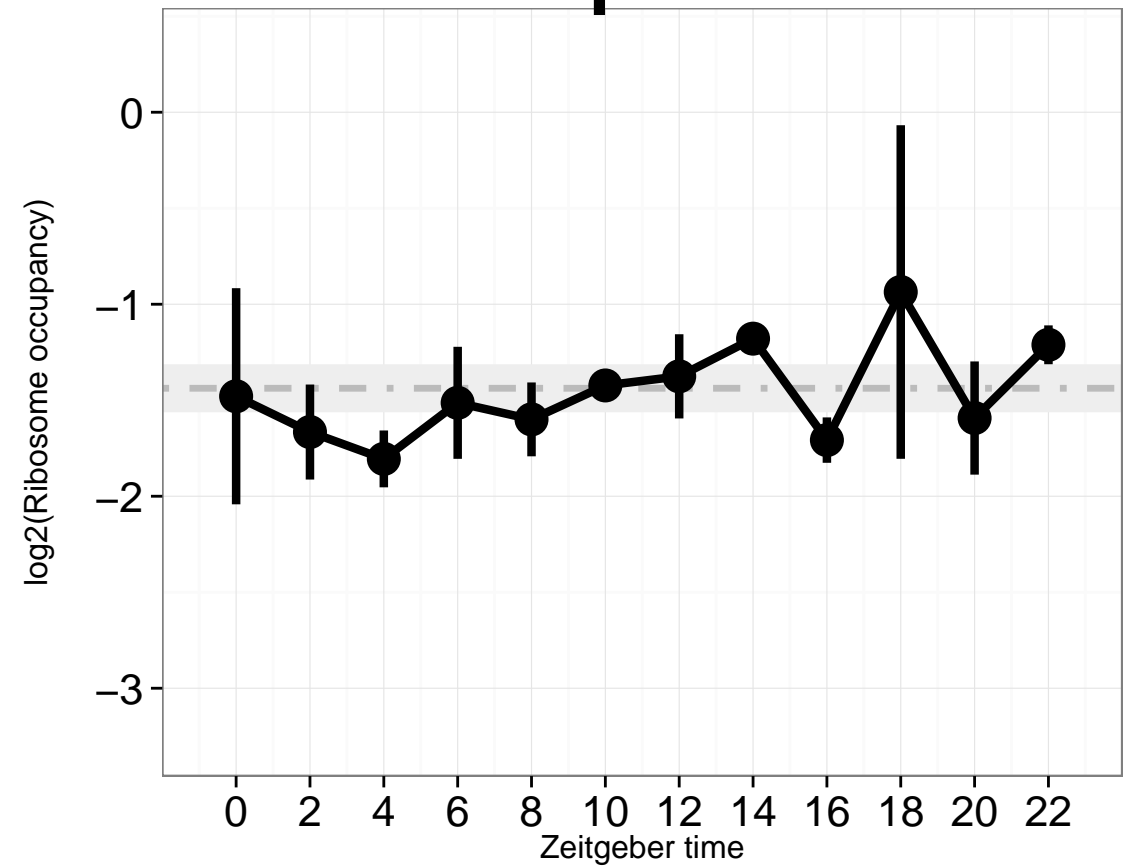

Supplement: SuppDataset_1.zip [file Zfp597_set_A.pdf › Supplemental Dataset 1/A-mRNA_nonrhyth_translation_nonrhyth/Zfp597_set_A.pdf]

# Zfp598

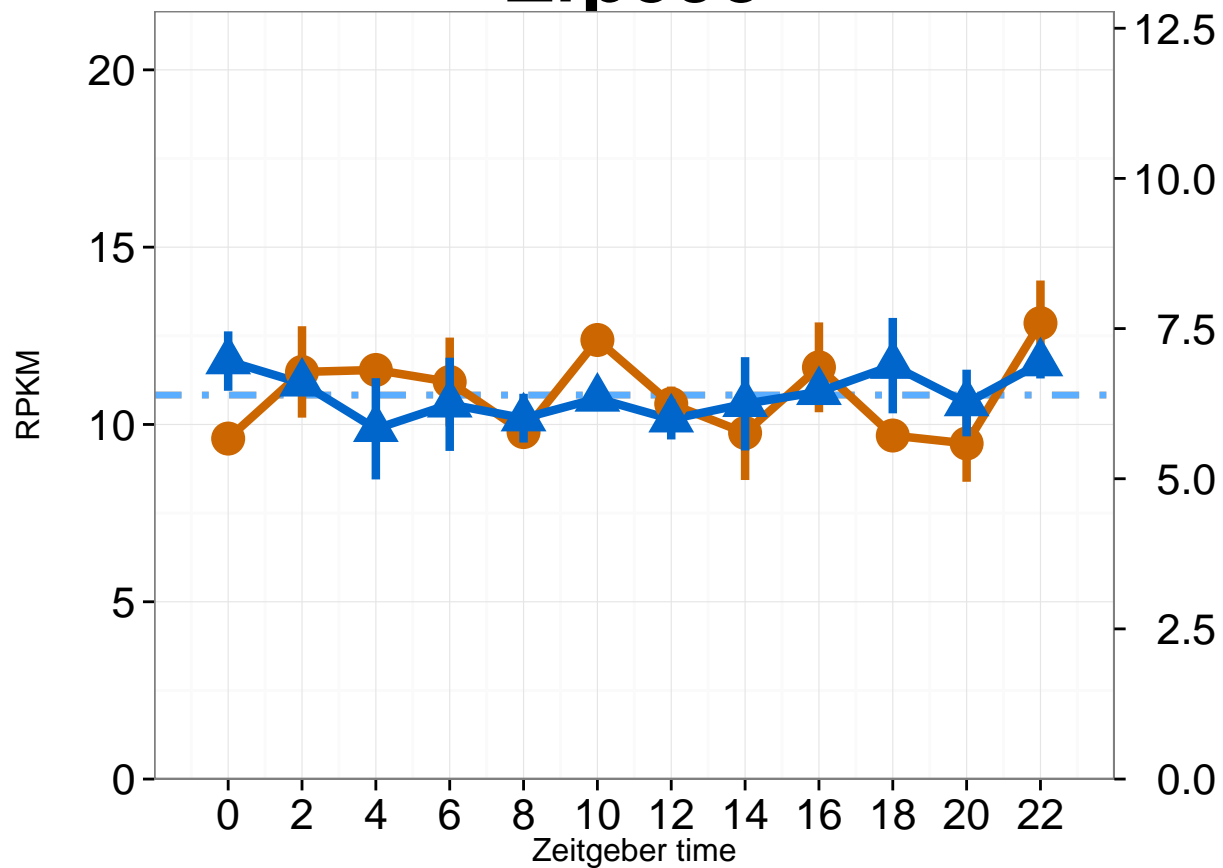

# Zfp598

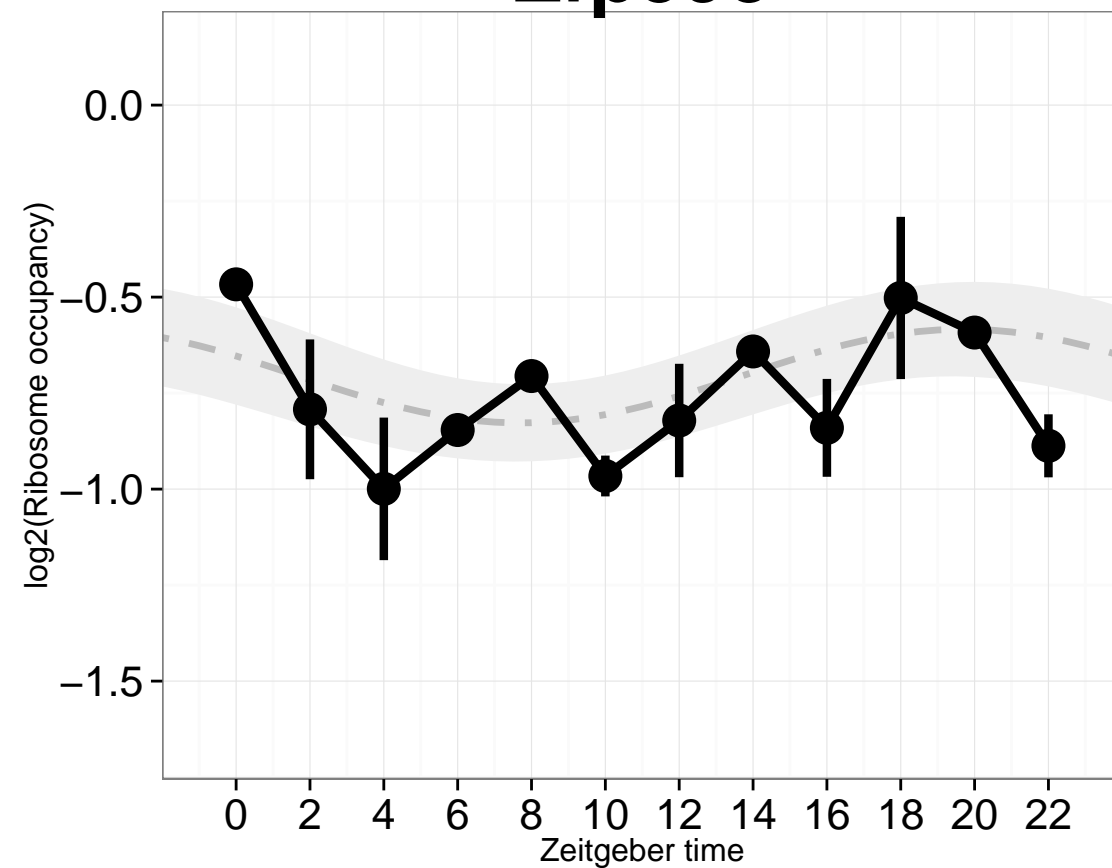

Supplement: SuppDataset_1.zip [file Zfp598_set_A.pdf › Supplemental Dataset 1/A-mRNA_nonrhyth_translation_nonrhyth/Zfp598_set_A.pdf]

# Zfp59

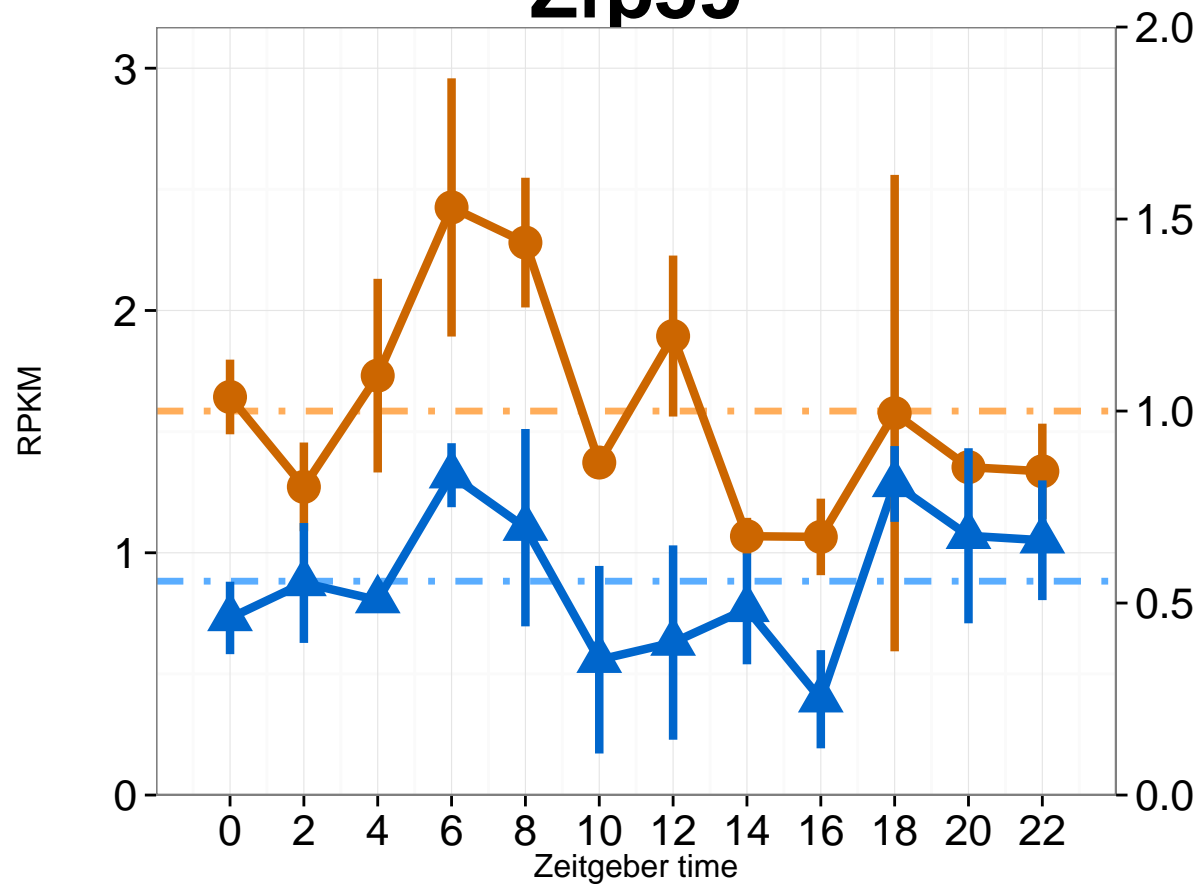

# Zfp59

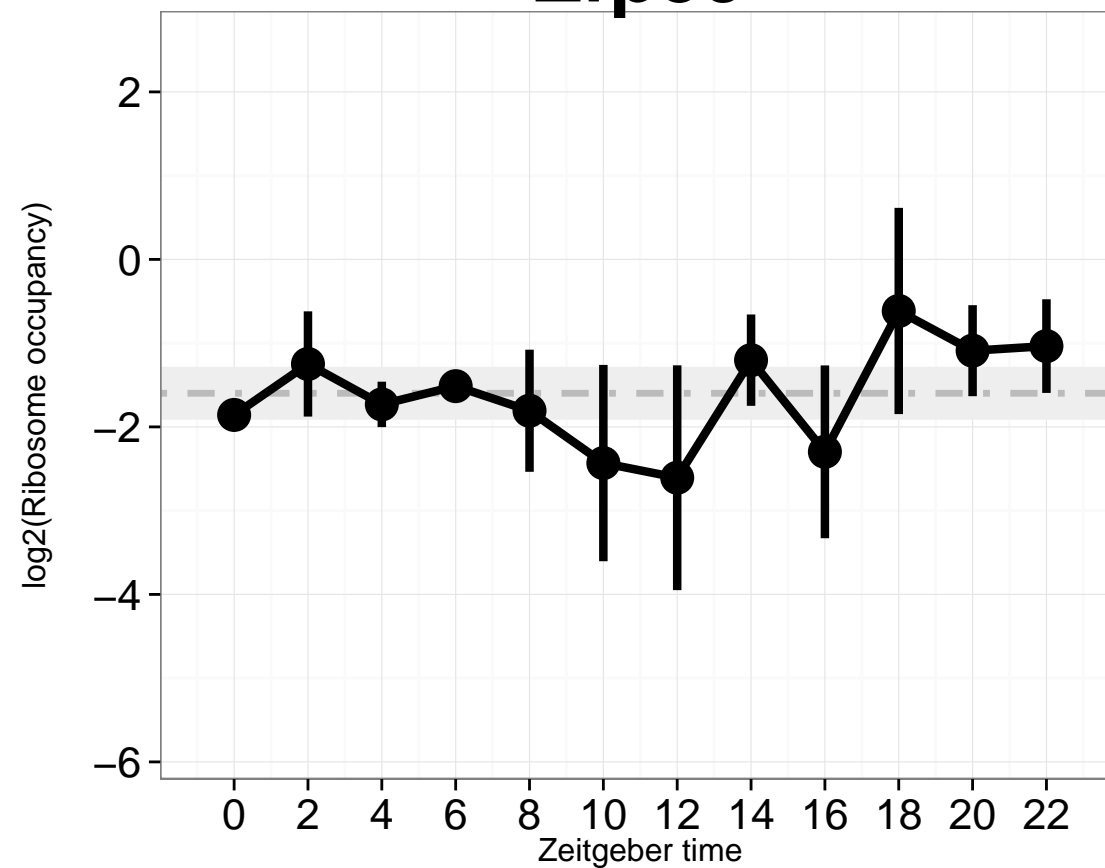

Supplement: SuppDataset_1.zip [file Zfp59_set_A.pdf › Supplemental Dataset 1/A-mRNA_nonrhyth_translation_nonrhyth/Zfp59_set_A.pdf]

# Zfp606

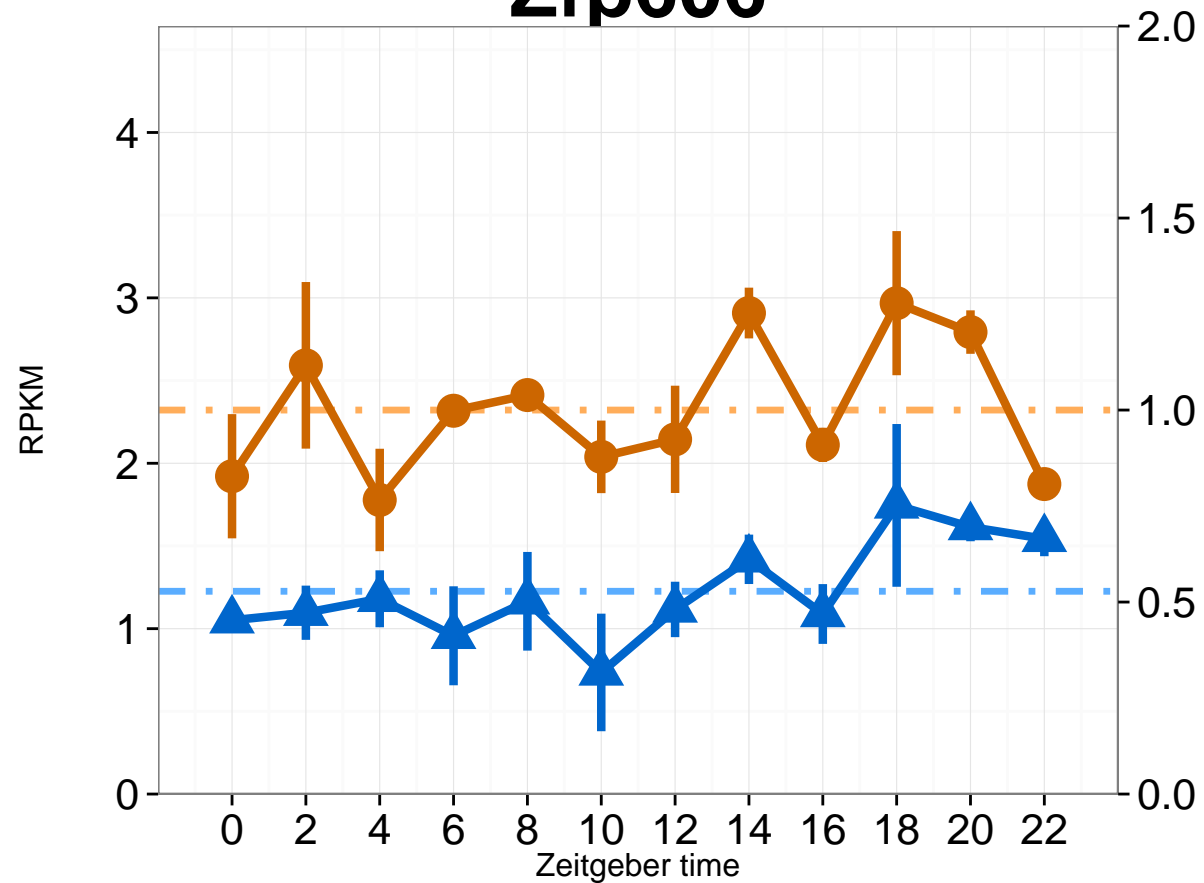

# Zfp606

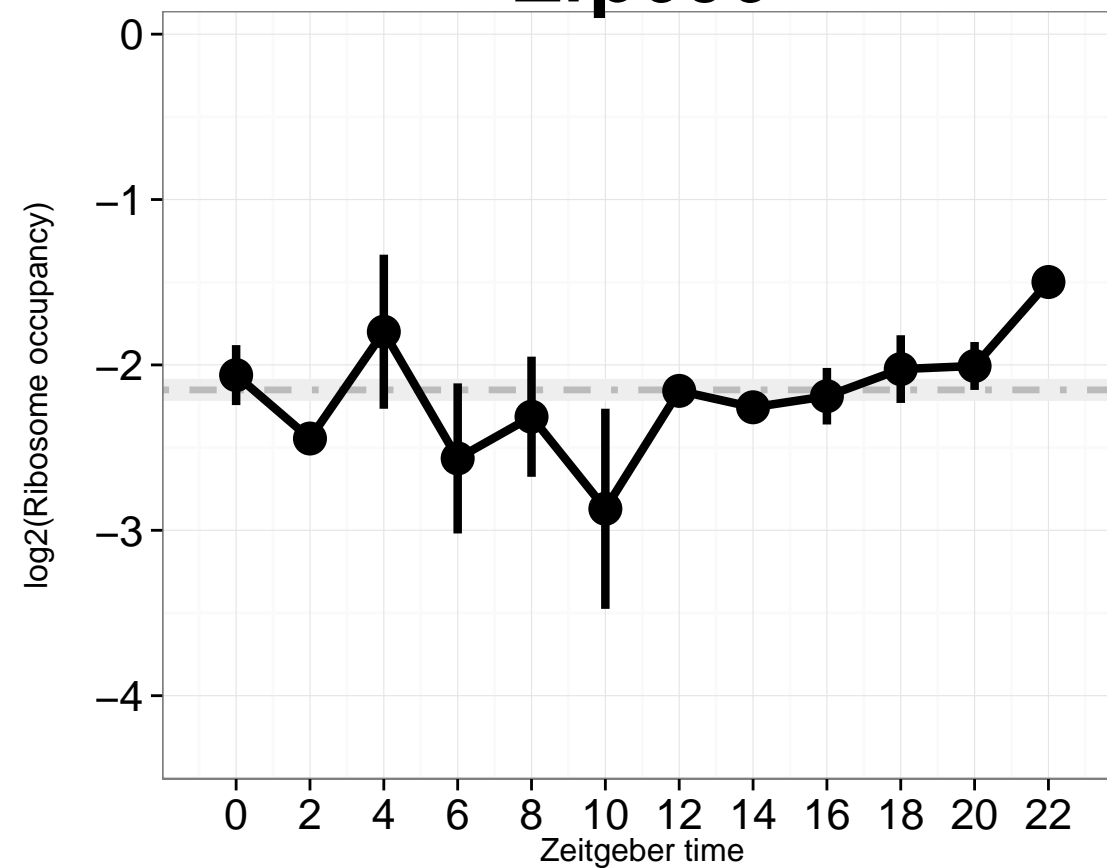

Supplement: SuppDataset_1.zip [file Zfp606_set_A.pdf › Supplemental Dataset 1/A-mRNA_nonrhyth_translation_nonrhyth/Zfp606_set_A.pdf]

# Zfp607

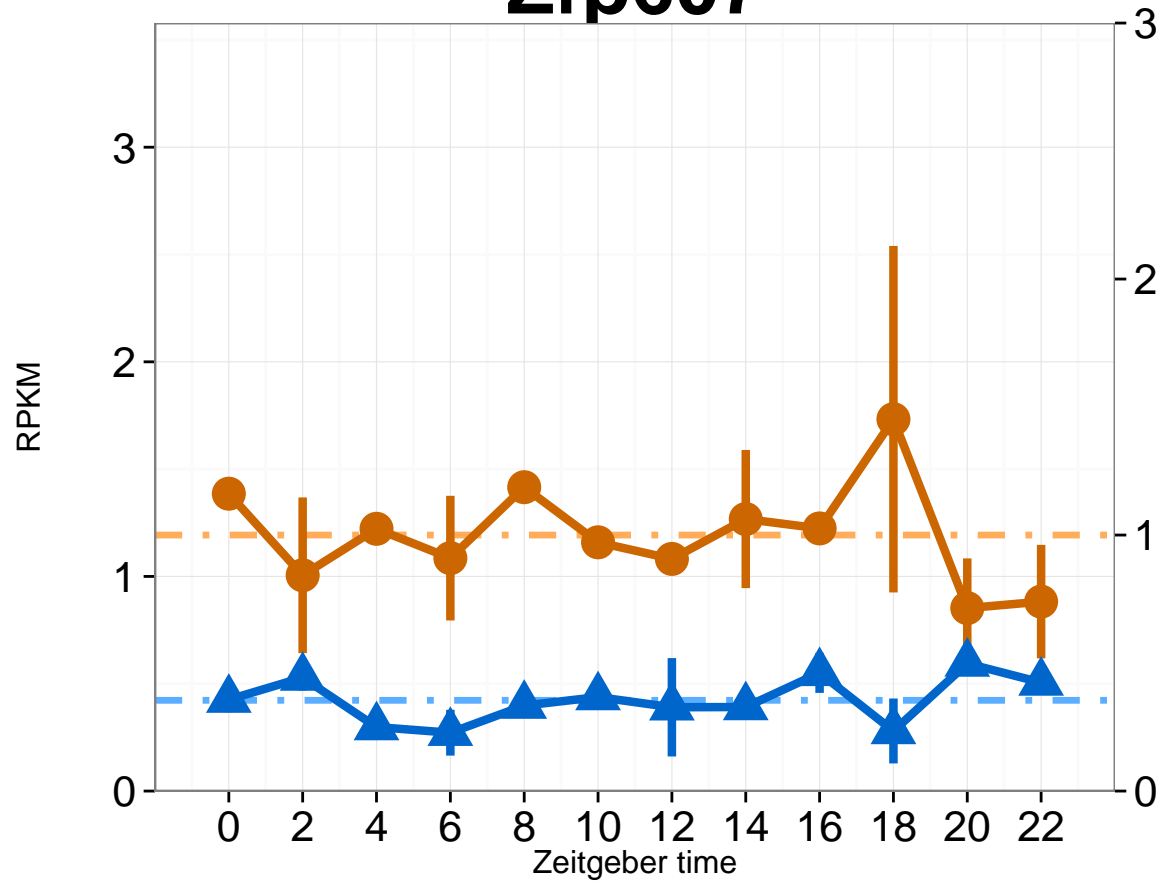

# Zfp607

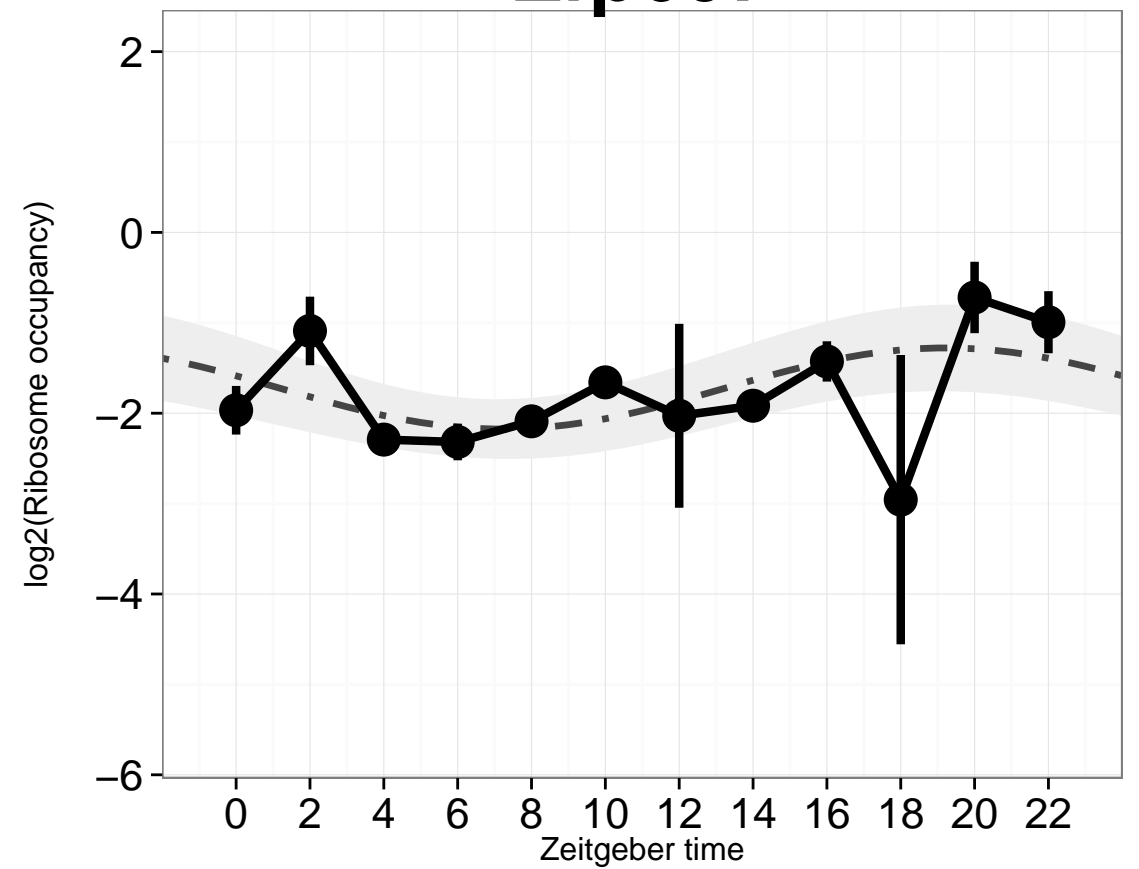

Supplement: SuppDataset_1.zip [file Zfp607_set_A.pdf › Supplemental Dataset 1/A-mRNA_nonrhyth_translation_nonrhyth/Zfp607_set_A.pdf]

# Zfp608

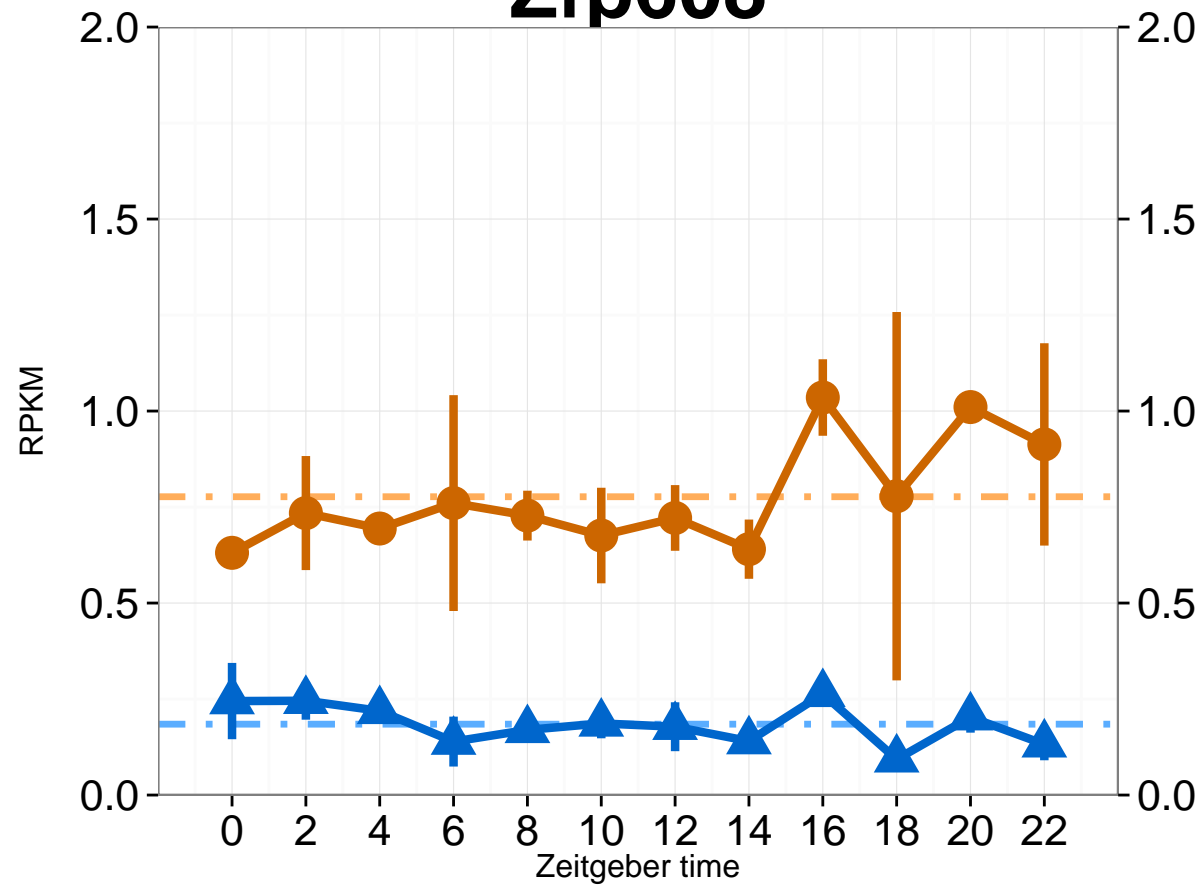

# Zfp608

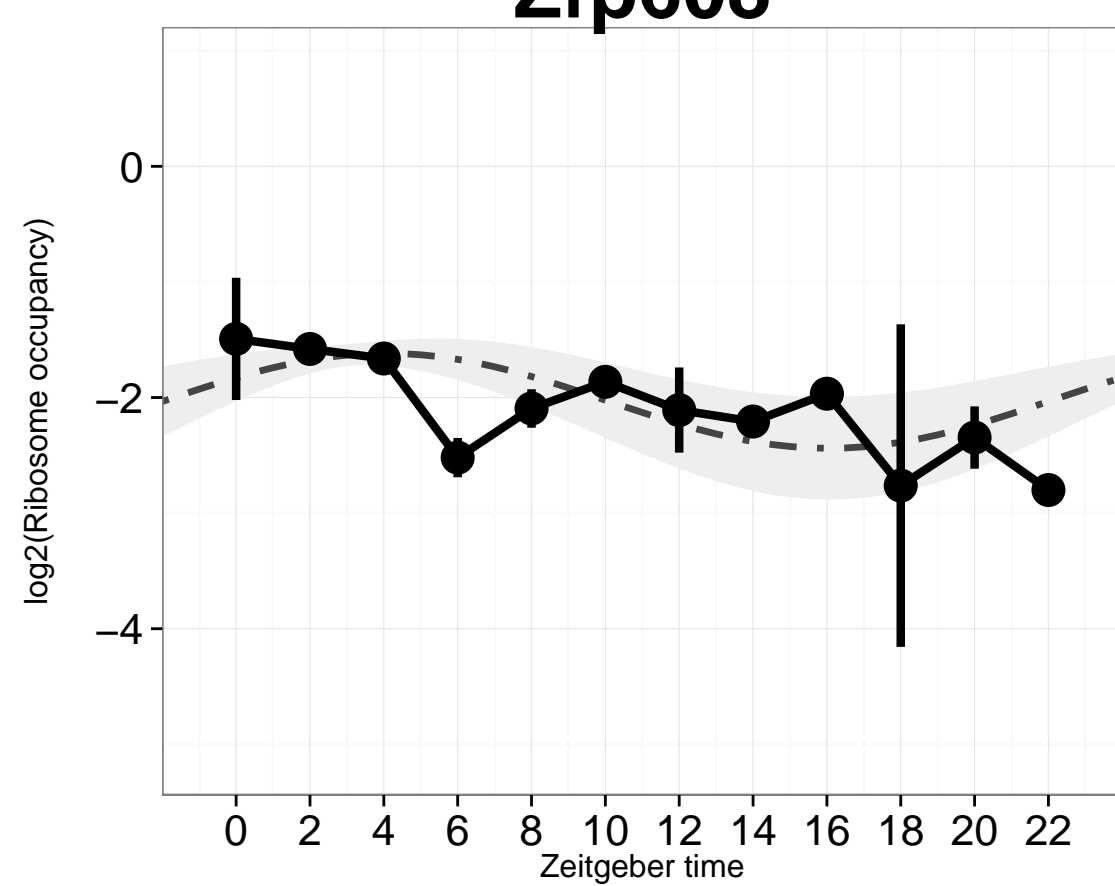

Supplement: SuppDataset_1.zip [file Zfp608_set_A.pdf › Supplemental Dataset 1/A-mRNA_nonrhyth_translation_nonrhyth/Zfp608_set_A.pdf]

# Zfp609

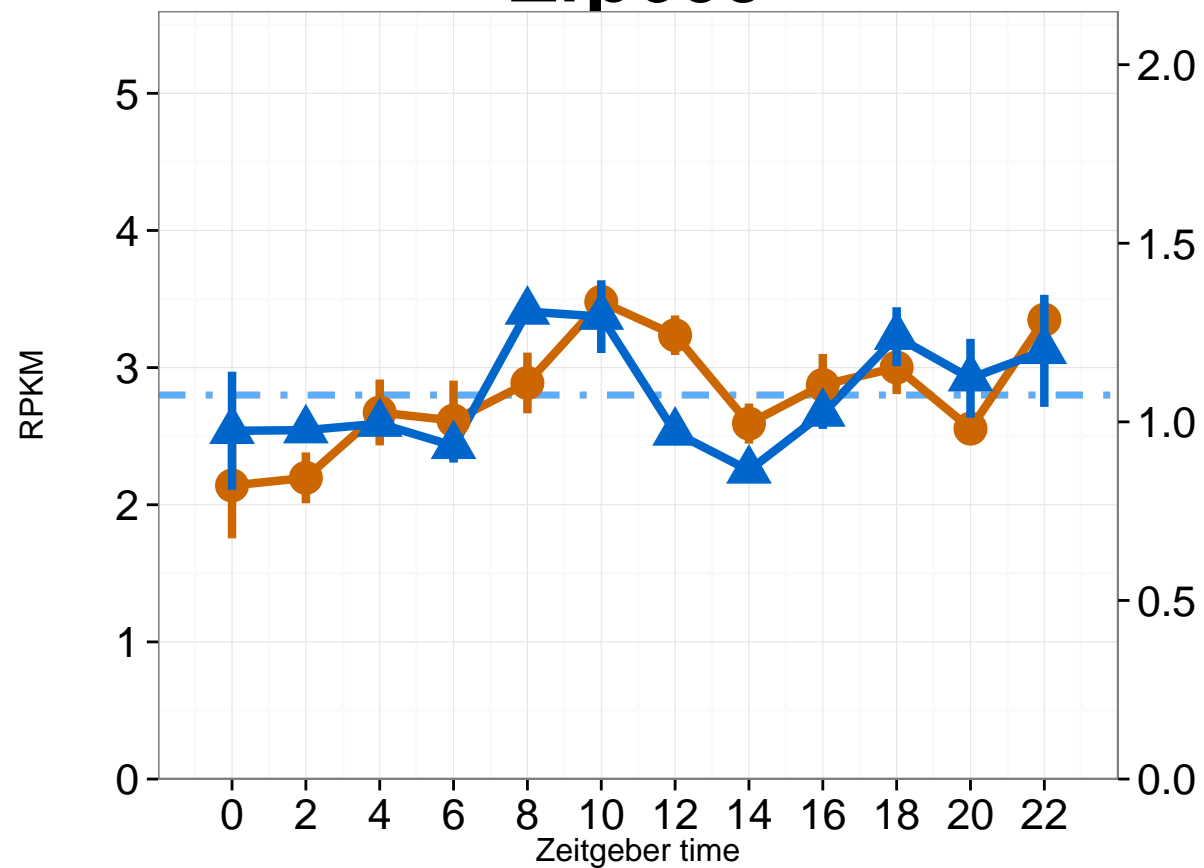

# Zfp609

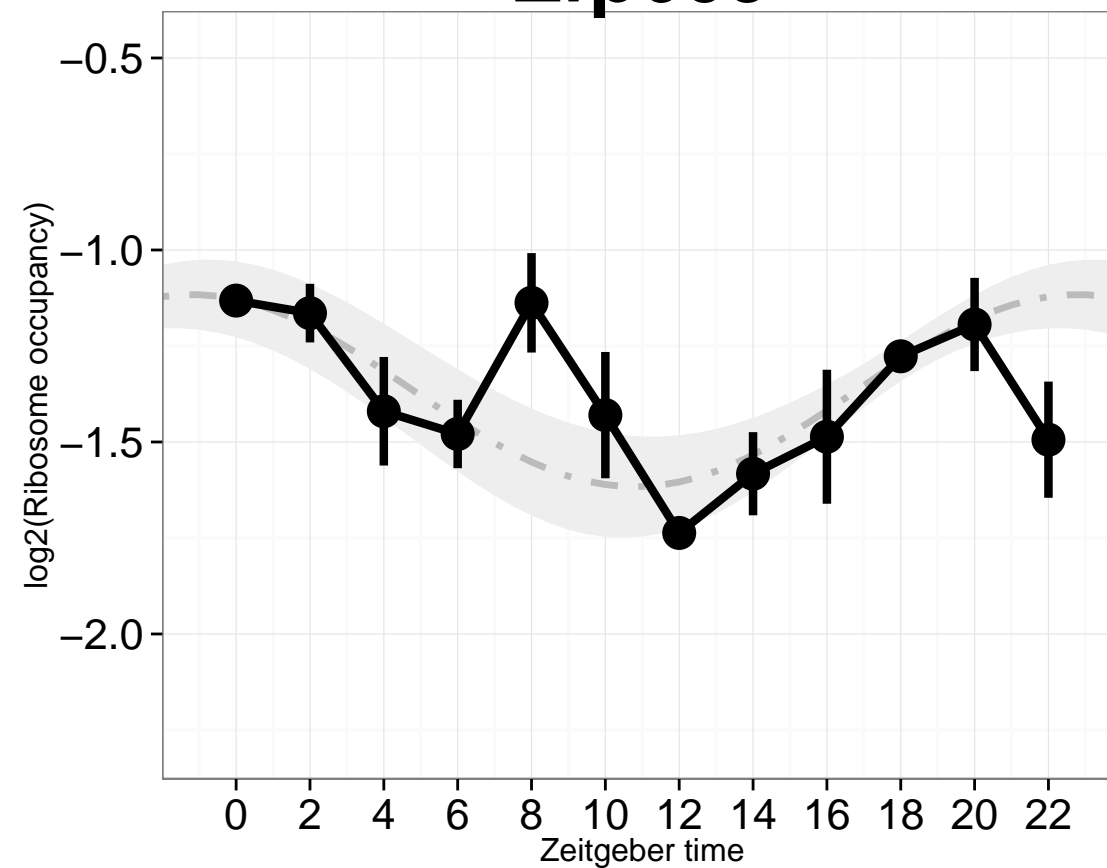

Supplement: SuppDataset_1.zip [file Zfp609_set_A.pdf › Supplemental Dataset 1/A-mRNA_nonrhyth_translation_nonrhyth/Zfp609_set_A.pdf]

# Zfp60

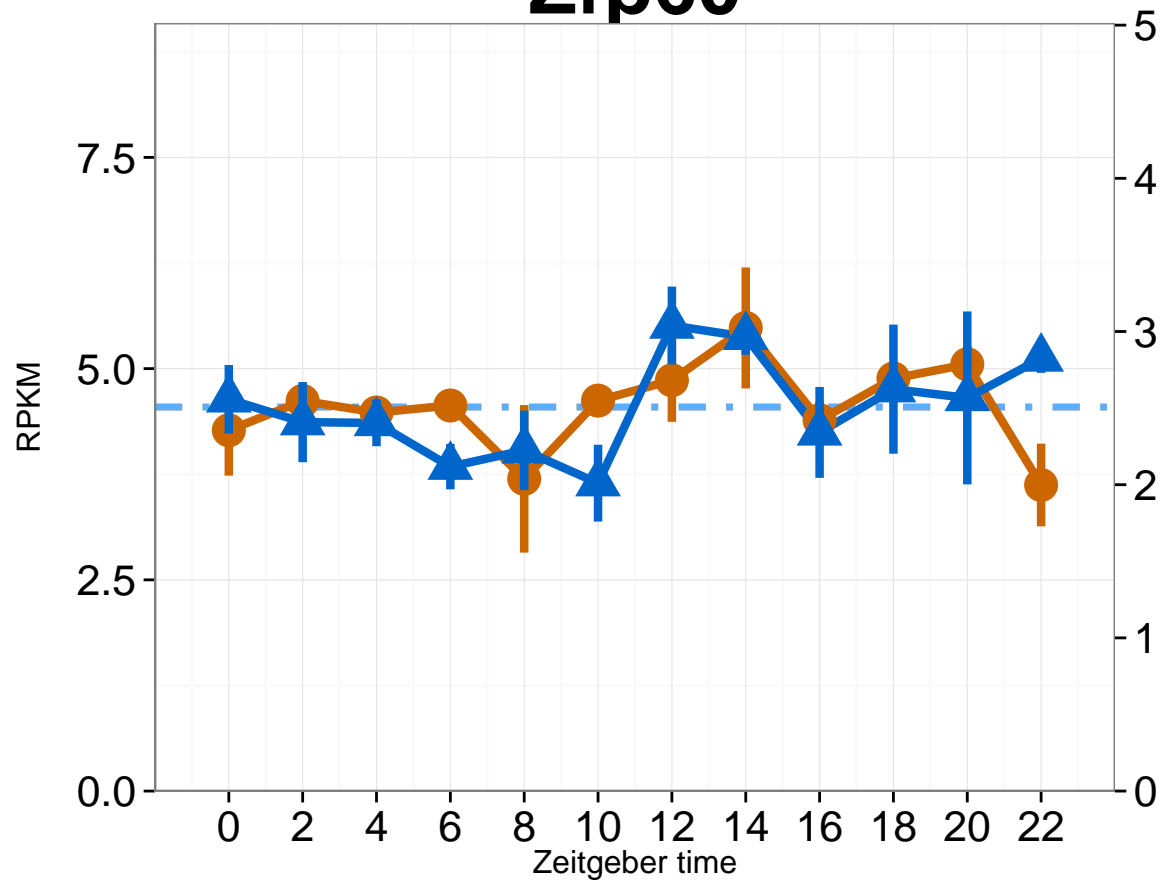

# Zfp60

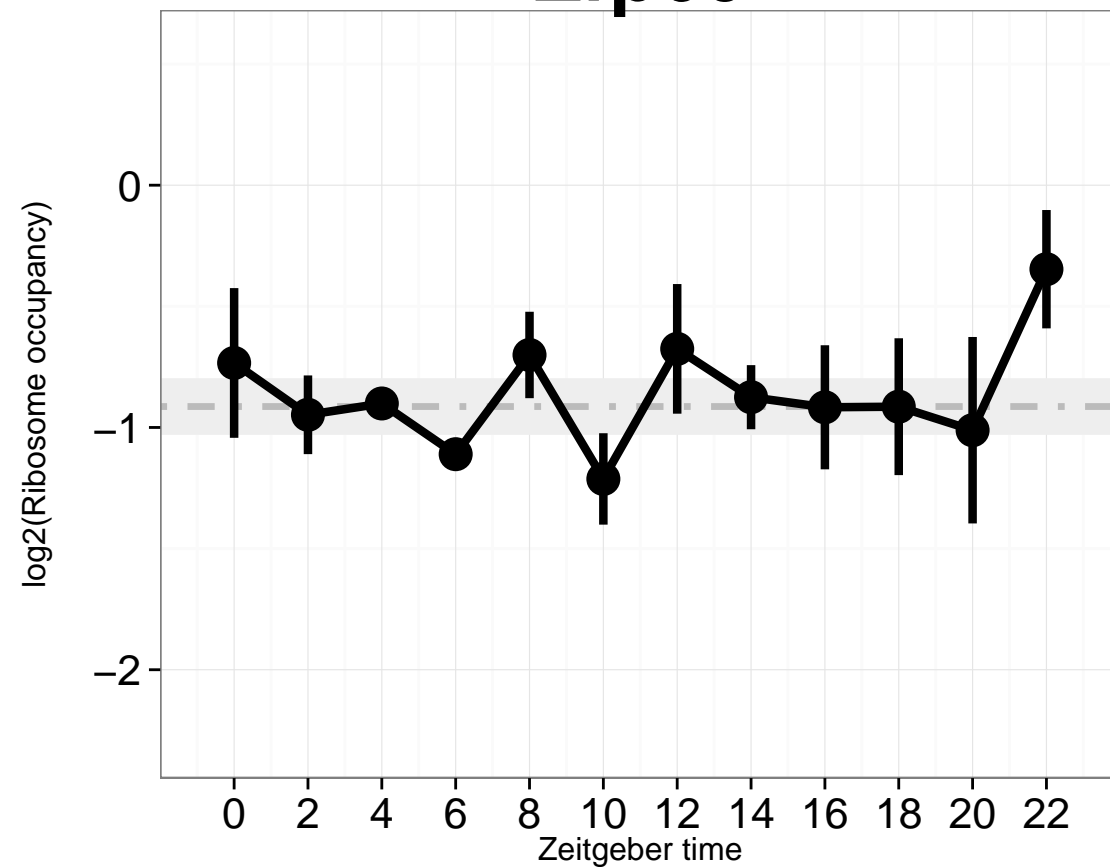

Supplement: SuppDataset_1.zip [file Zfp60_set_A.pdf › Supplemental Dataset 1/A-mRNA_nonrhyth_translation_nonrhyth/Zfp60_set_A.pdf]

# Zfp612

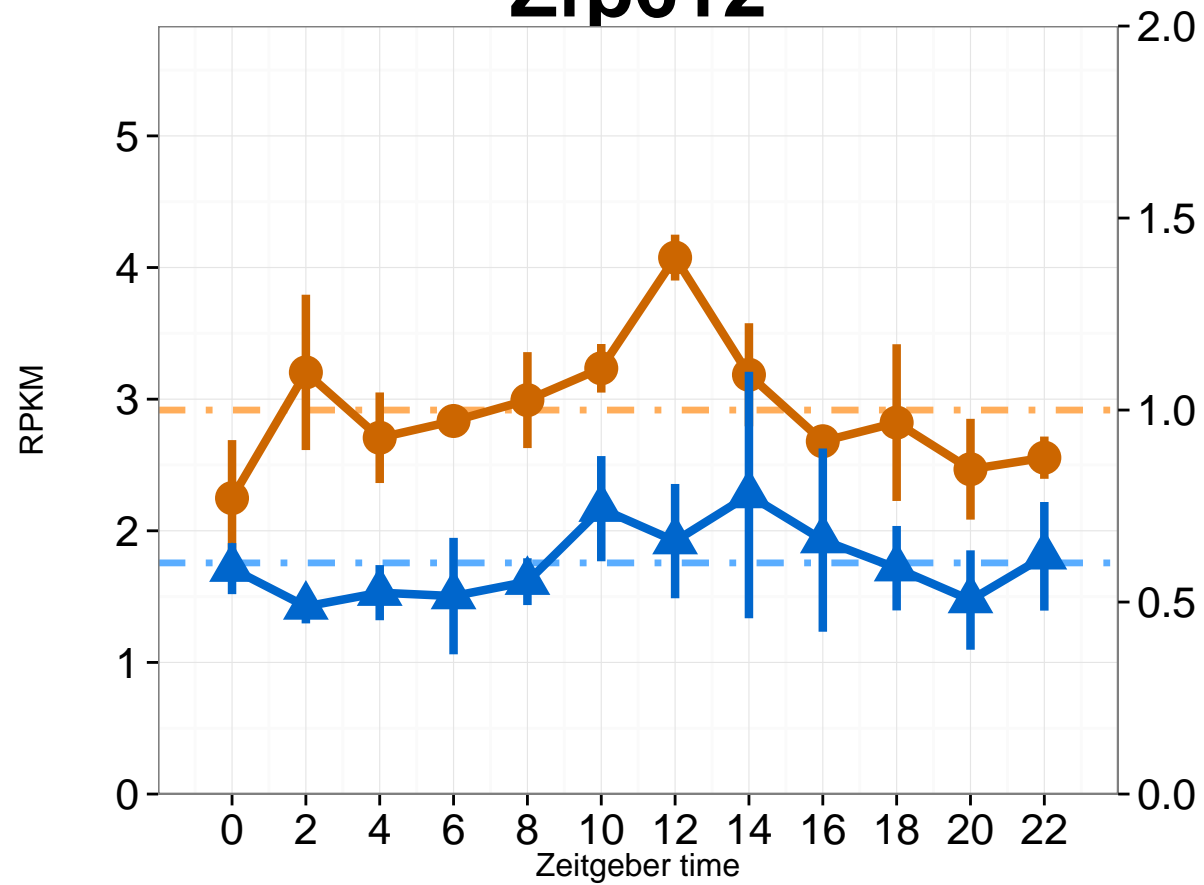

# Zfp612

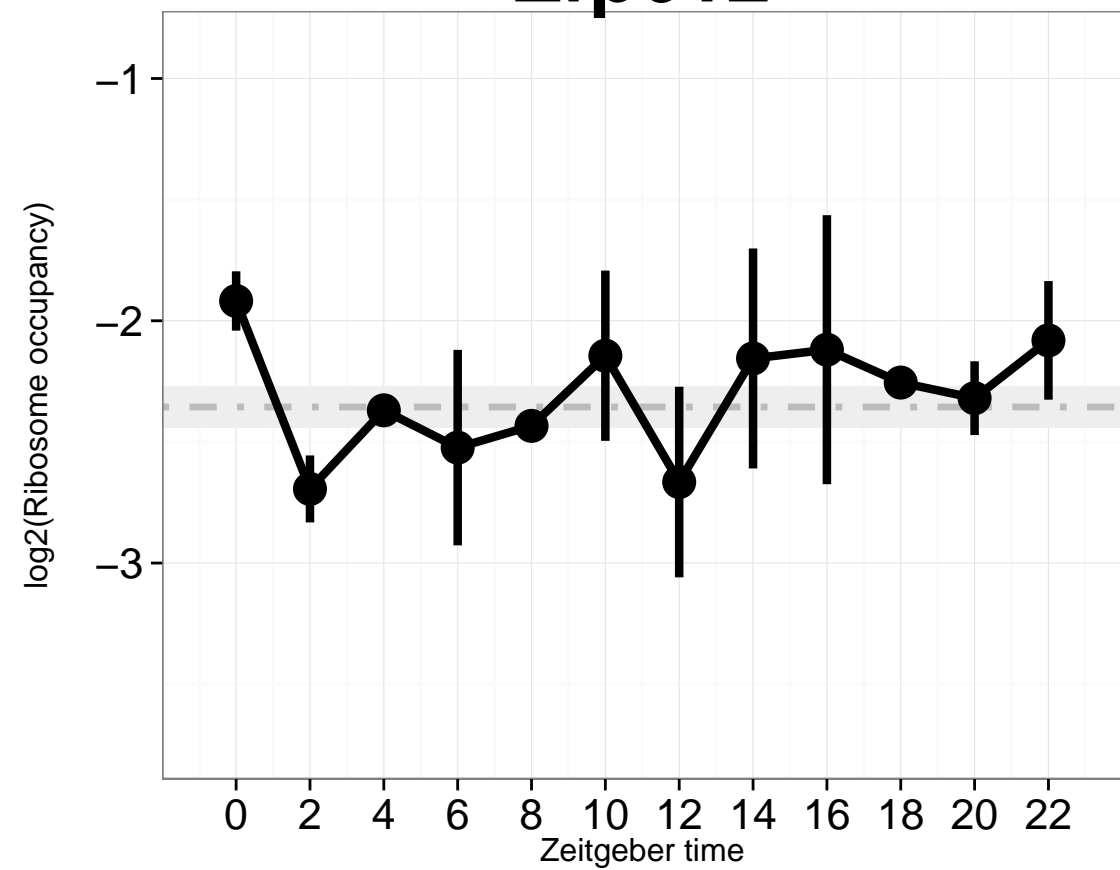

Supplement: SuppDataset_1.zip [file Zfp612_set_A.pdf › Supplemental Dataset 1/A-mRNA_nonrhyth_translation_nonrhyth/Zfp612_set_A.pdf]

# Zfp617

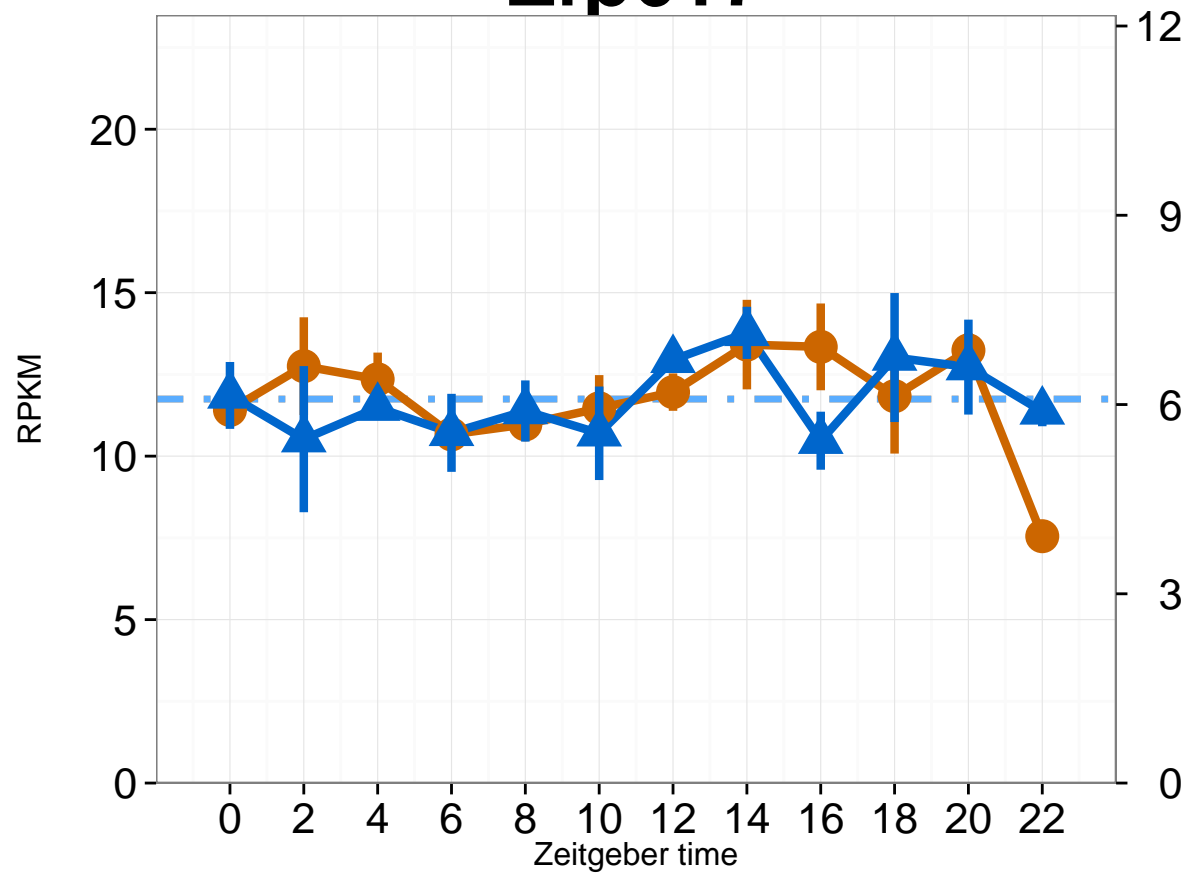

# Zfp617

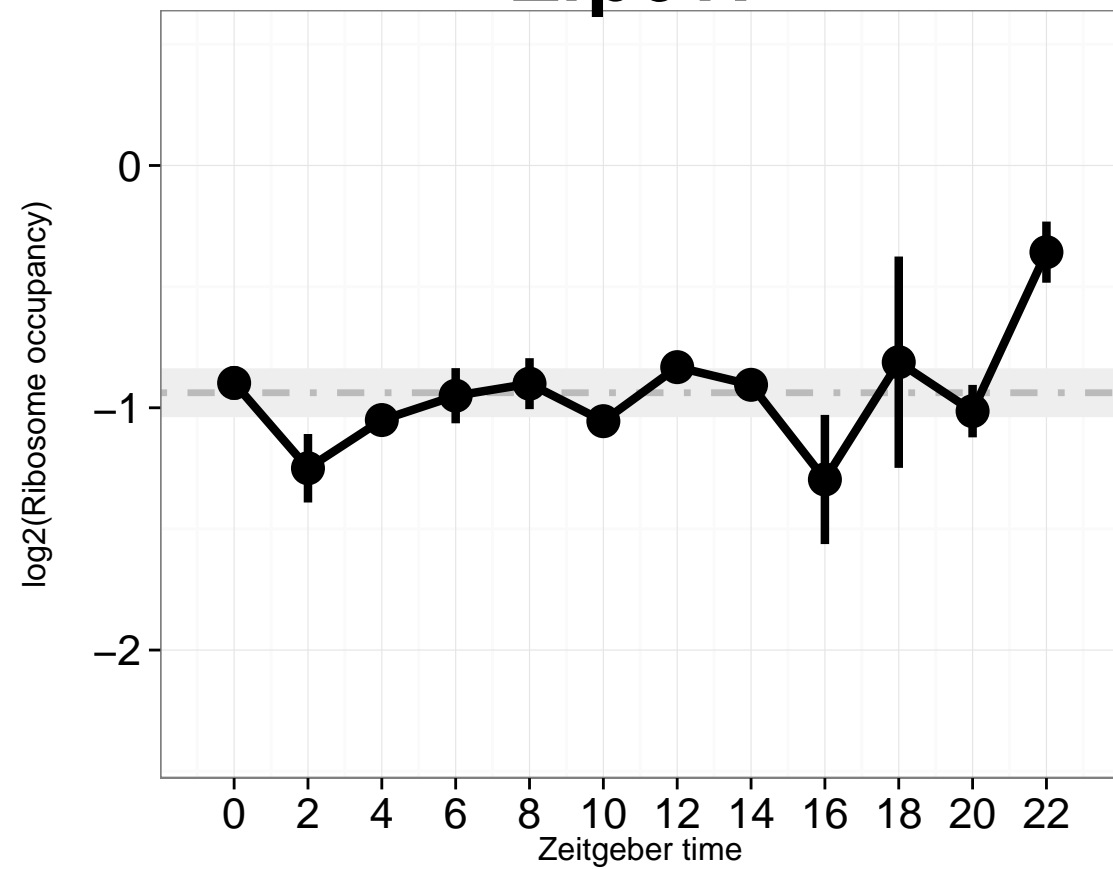

Supplement: SuppDataset_1.zip [file Zfp617_set_A.pdf › Supplemental Dataset 1/A-mRNA_nonrhyth_translation_nonrhyth/Zfp617_set_A.pdf]

## Zfp618

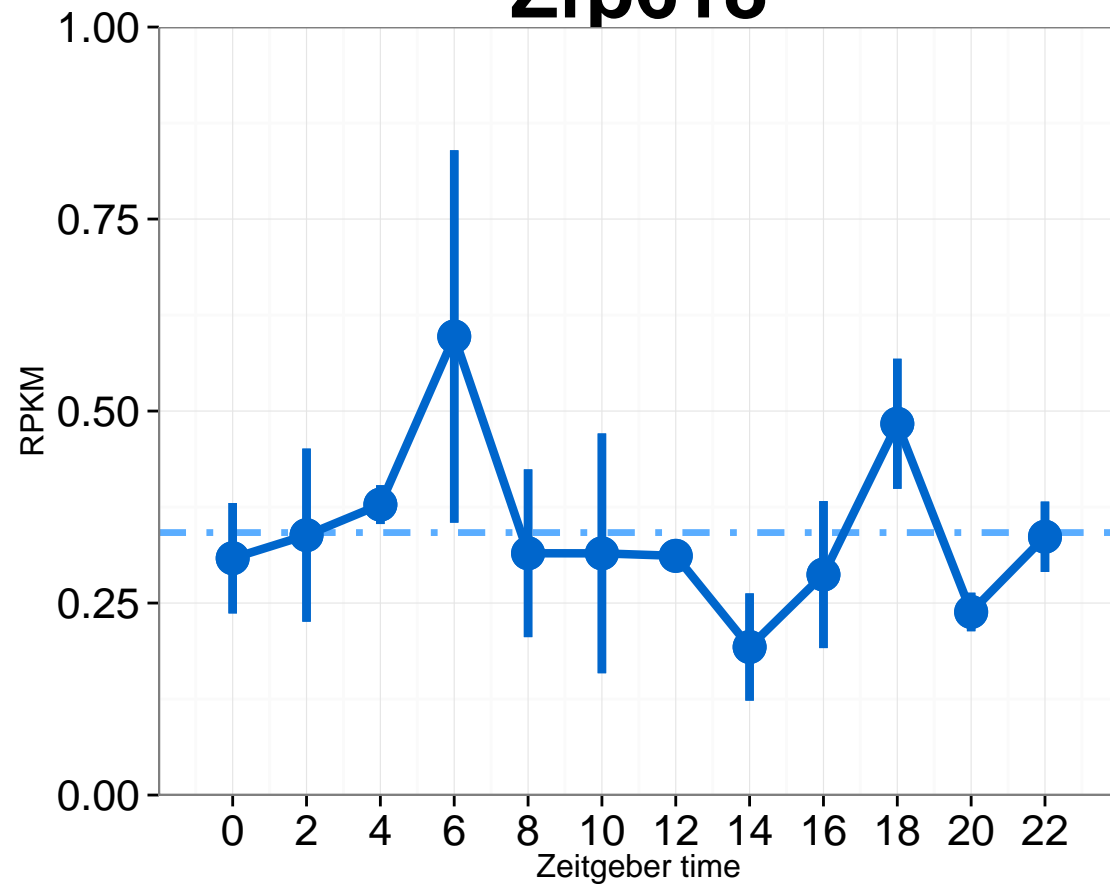

## Zfp618 log2(Ribosome occupancy

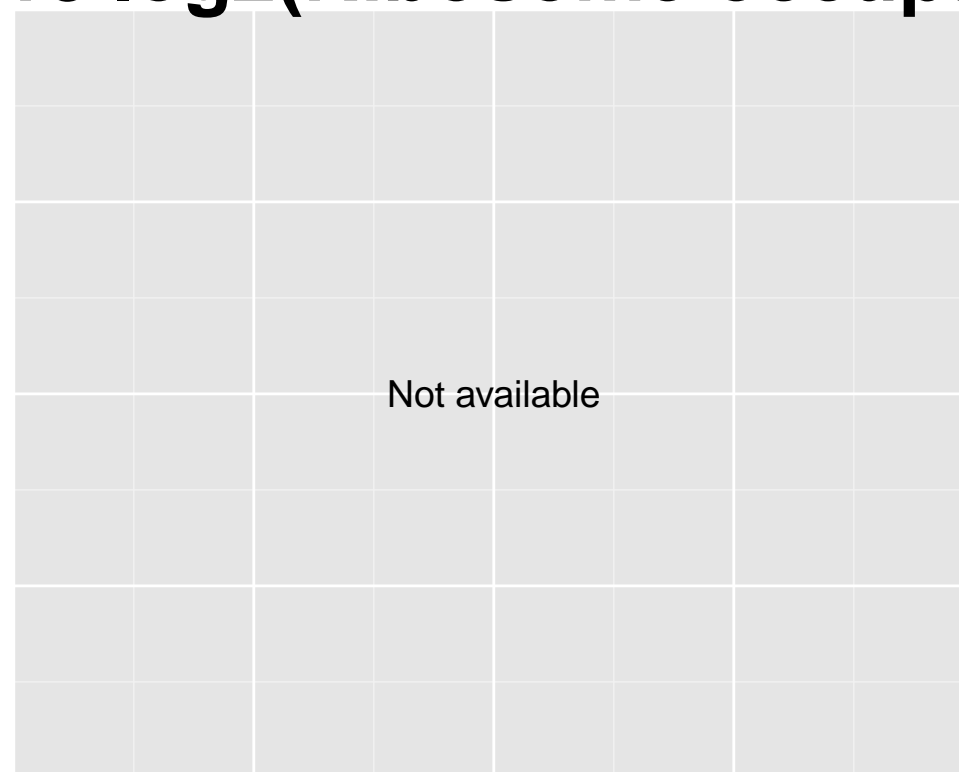

Supplement: SuppDataset_1.zip [file Zfp618_set_A.pdf › Supplemental Dataset 1/A-mRNA_nonrhyth_translation_nonrhyth/Zfp618_set_A.pdf]

# Zfp619

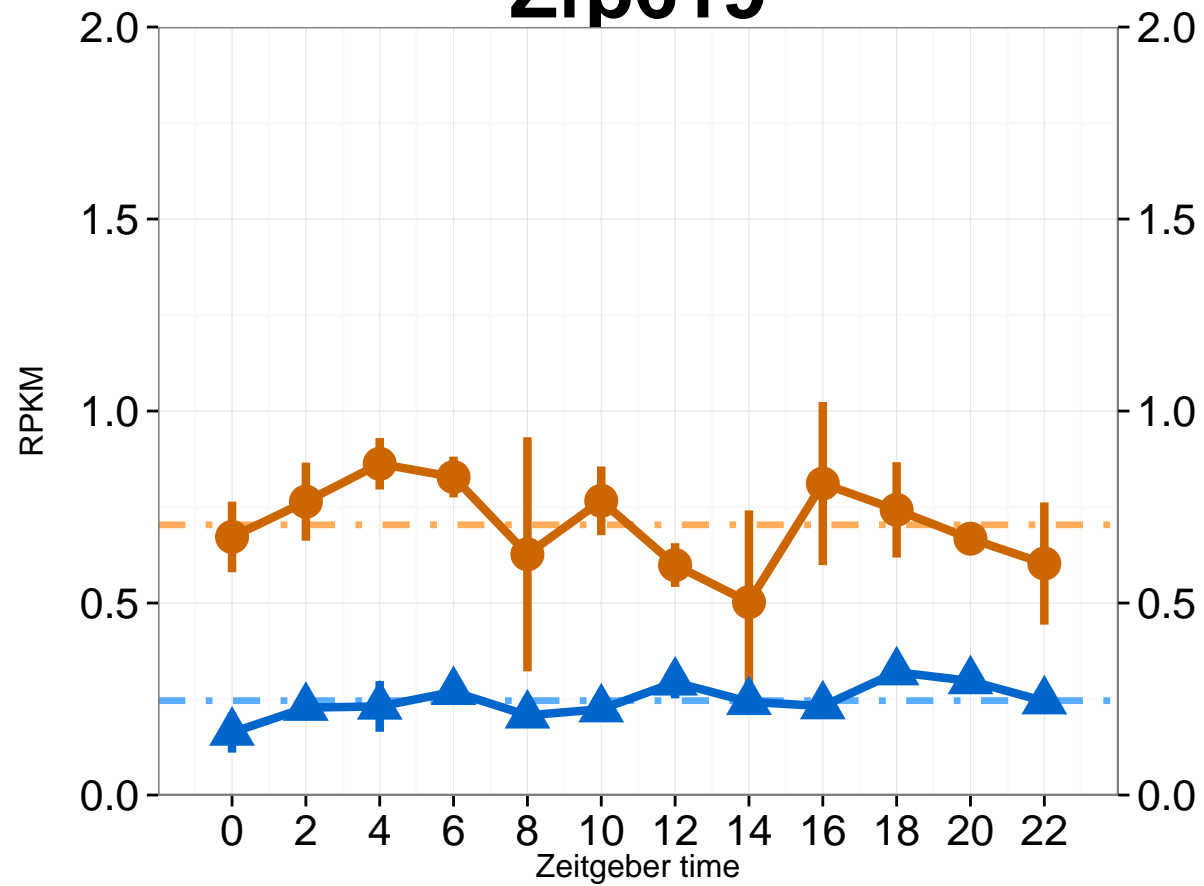

# Zfp619

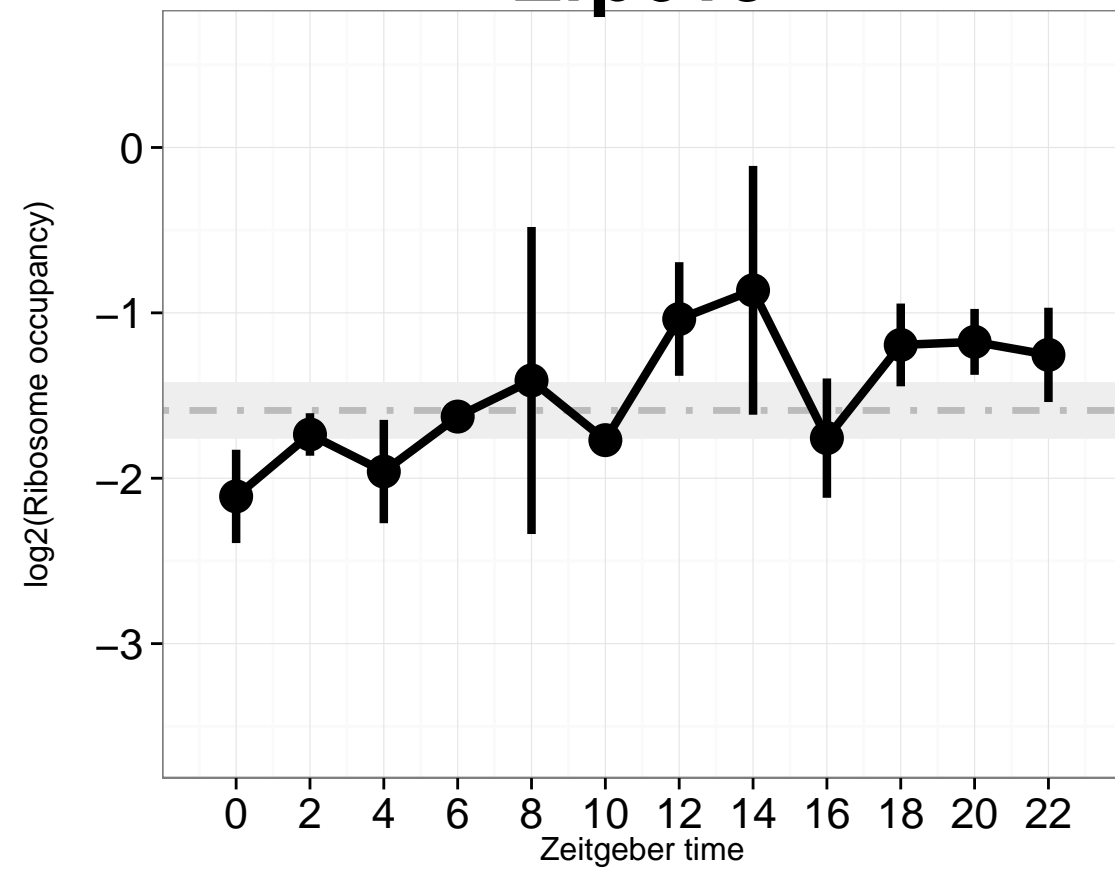

Supplement: SuppDataset_1.zip [file Zfp619_set_A.pdf › Supplemental Dataset 1/A-mRNA_nonrhyth_translation_nonrhyth/Zfp619_set_A.pdf]

# Zfp622

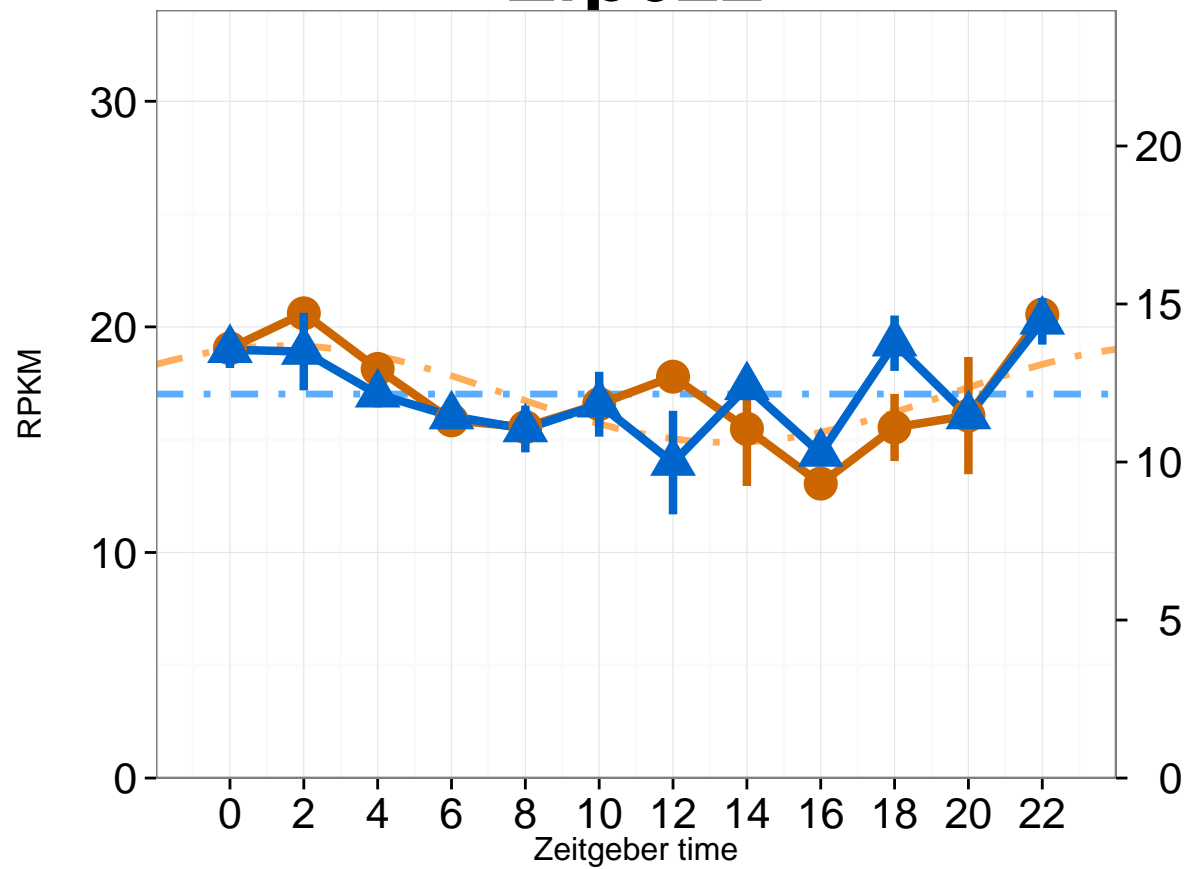

# Zfp622

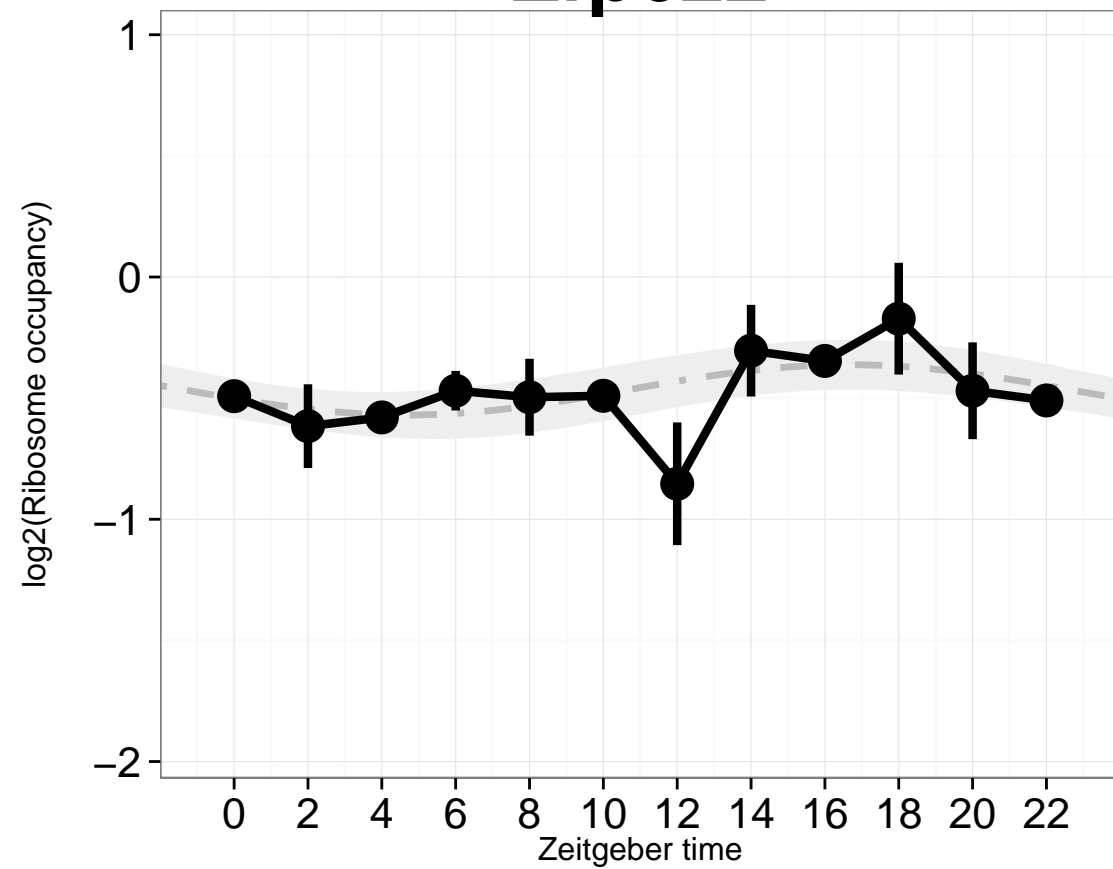

Supplement: SuppDataset_1.zip [file Zfp622_set_A.pdf › Supplemental Dataset 1/A-mRNA_nonrhyth_translation_nonrhyth/Zfp622_set_A.pdf]

# Zfp623

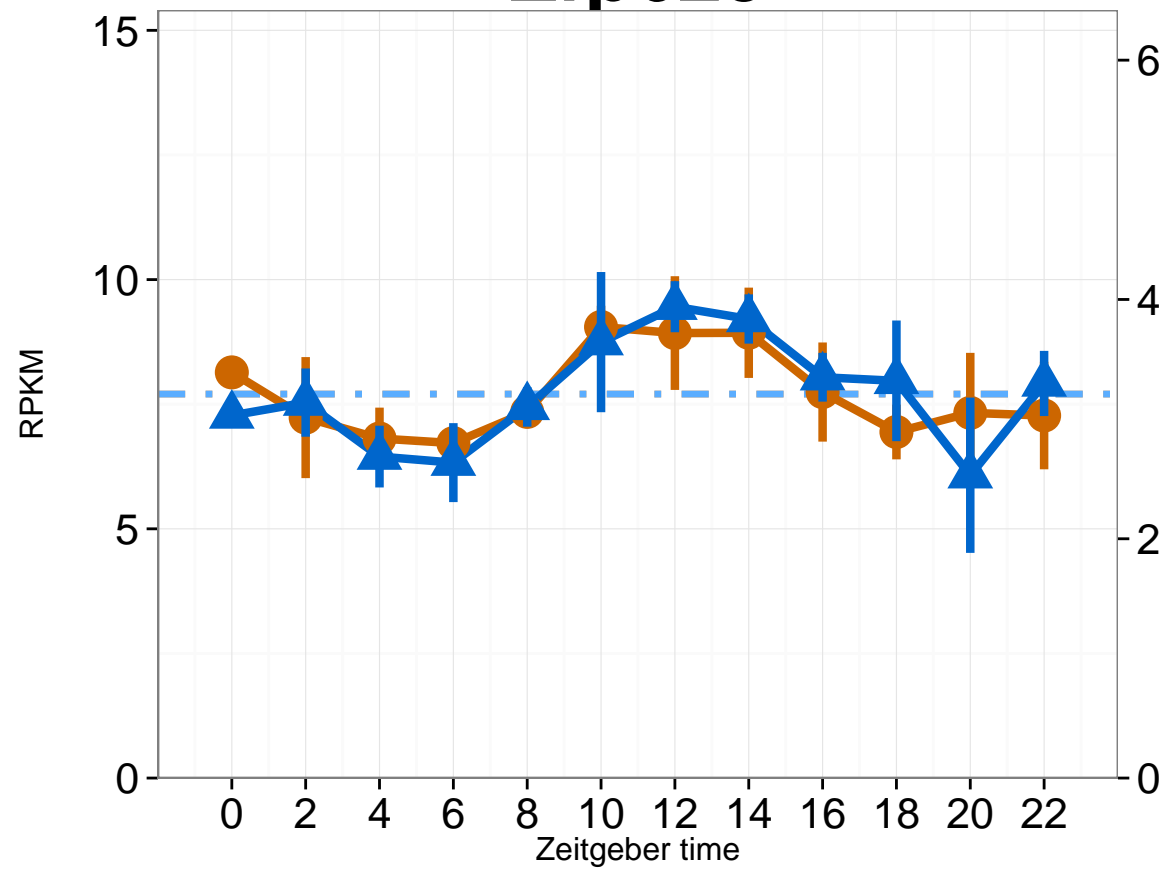

# Zfp623

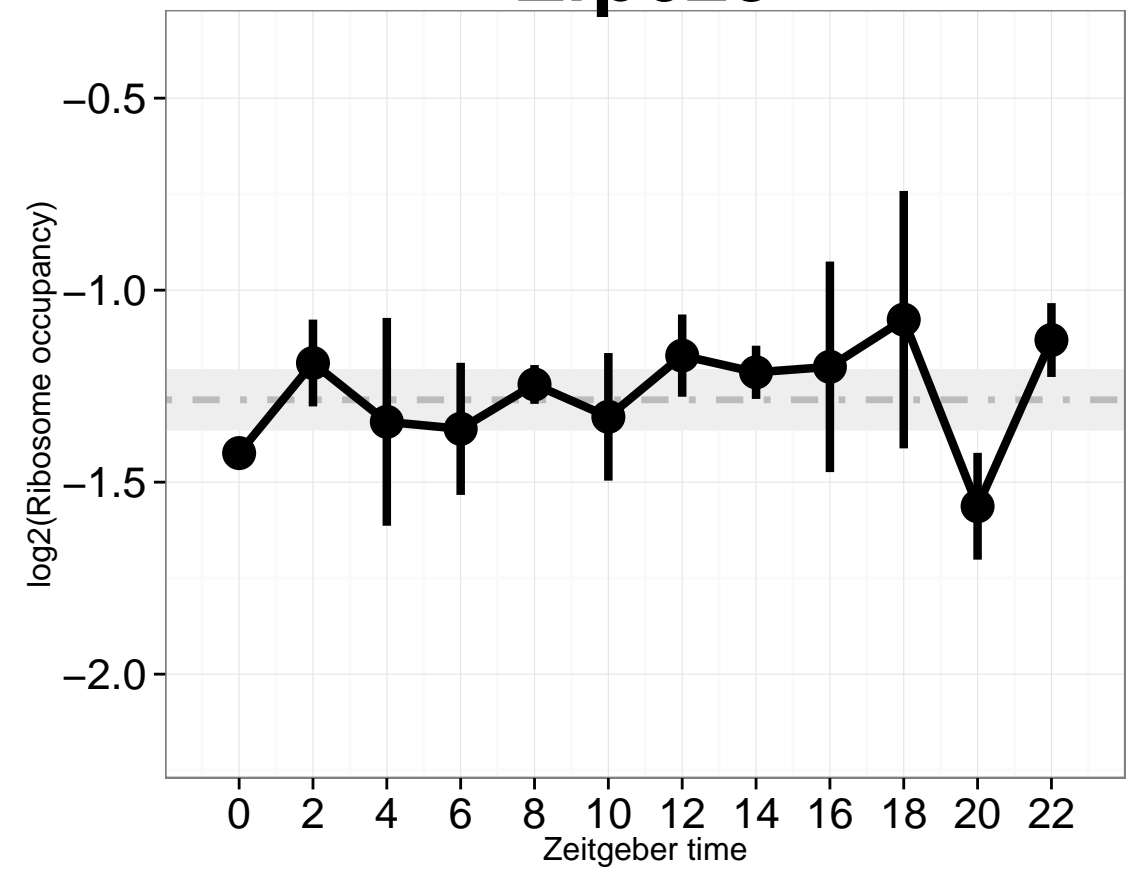

Supplement: SuppDataset_1.zip [file Zfp623_set_A.pdf › Supplemental Dataset 1/A-mRNA_nonrhyth_translation_nonrhyth/Zfp623_set_A.pdf]

# Zfp626

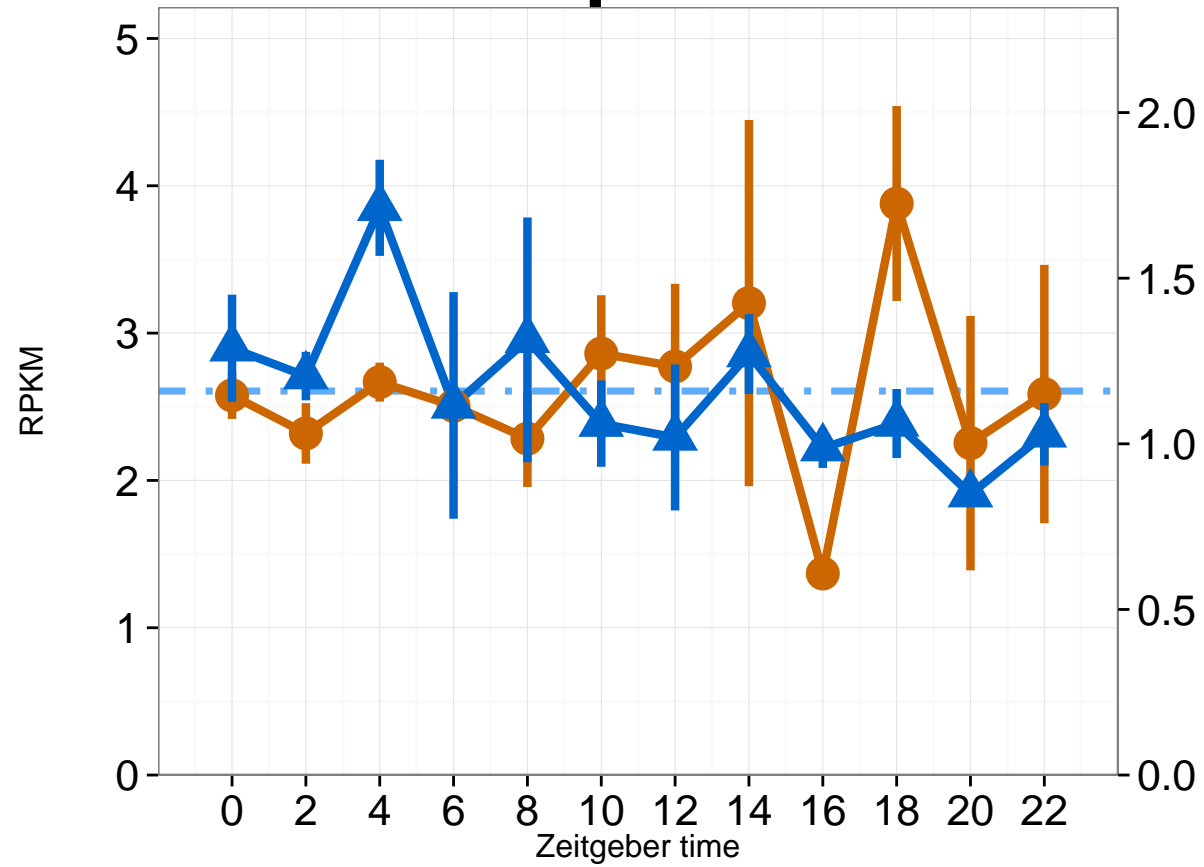

# Zfp626

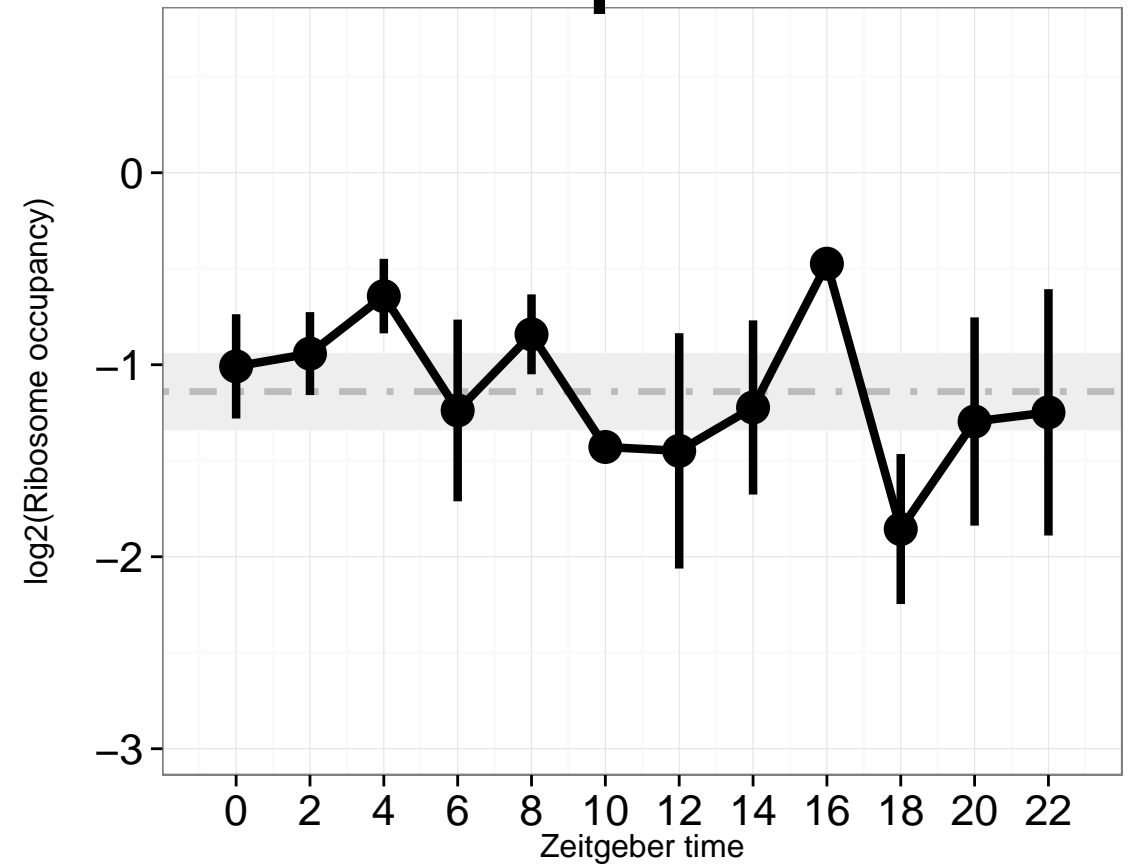

Supplement: SuppDataset_1.zip [file Zfp626_set_A.pdf › Supplemental Dataset 1/A-mRNA_nonrhyth_translation_nonrhyth/Zfp626_set_A.pdf]

# Zfp628

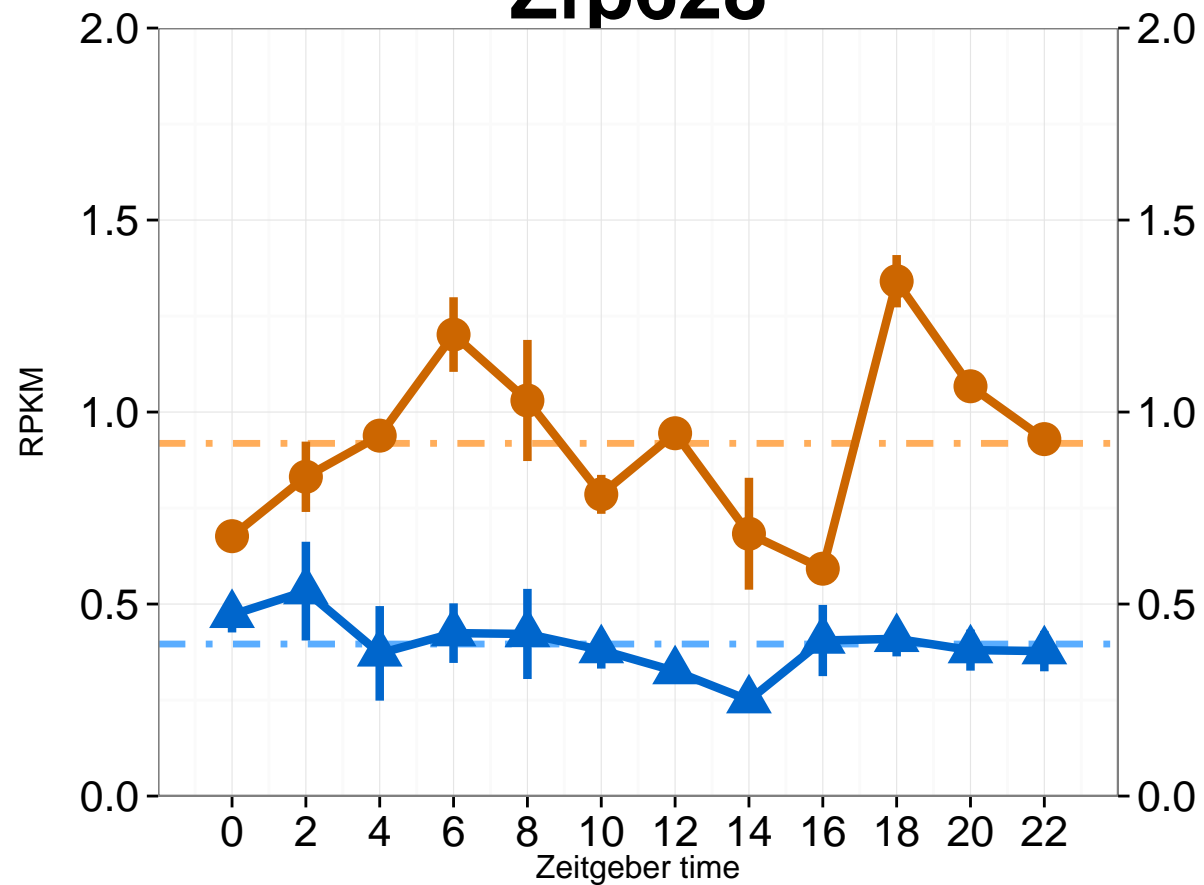

# Zfp628

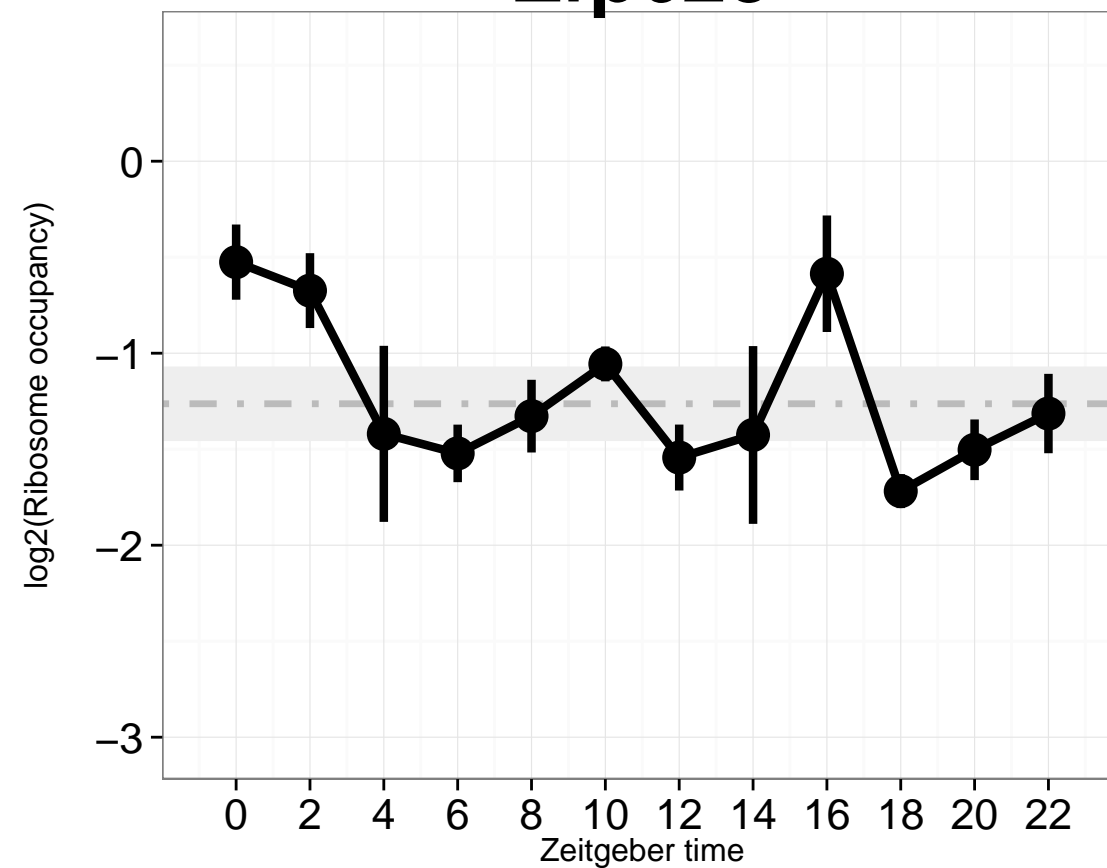

Supplement: SuppDataset_1.zip [file Zfp628_set_A.pdf › Supplemental Dataset 1/A-mRNA_nonrhyth_translation_nonrhyth/Zfp628_set_A.pdf]

# Zfp62

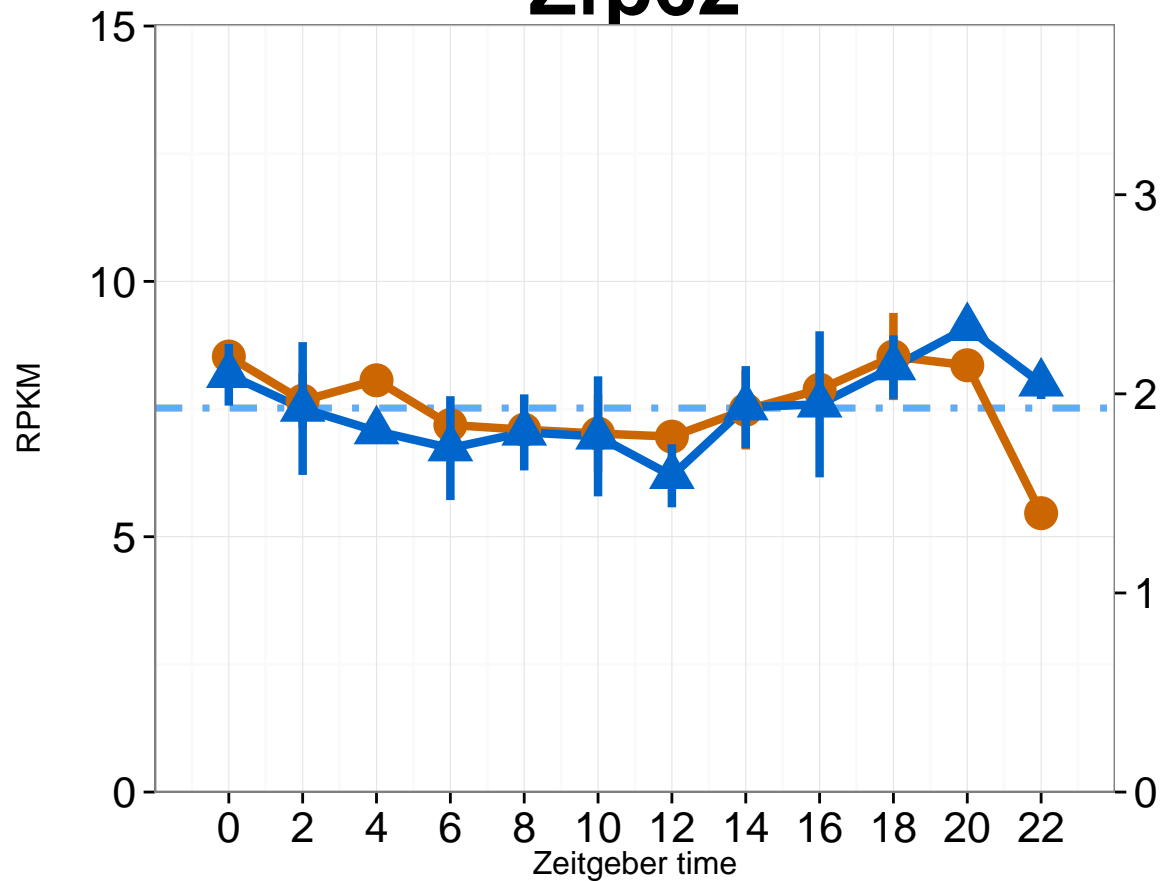

# Zfp62

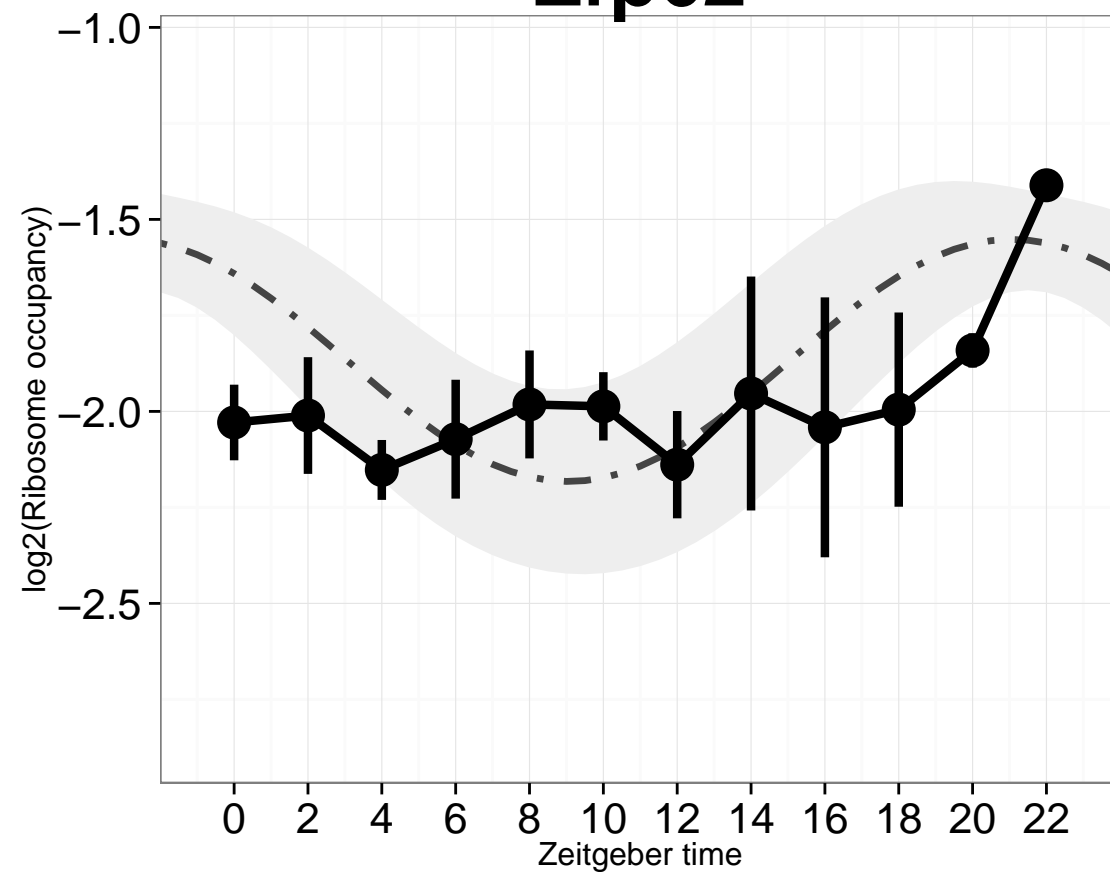

Supplement: SuppDataset_1.zip [file Zfp62_set_A.pdf › Supplemental Dataset 1/A-mRNA_nonrhyth_translation_nonrhyth/Zfp62_set_A.pdf]

# Zfp637

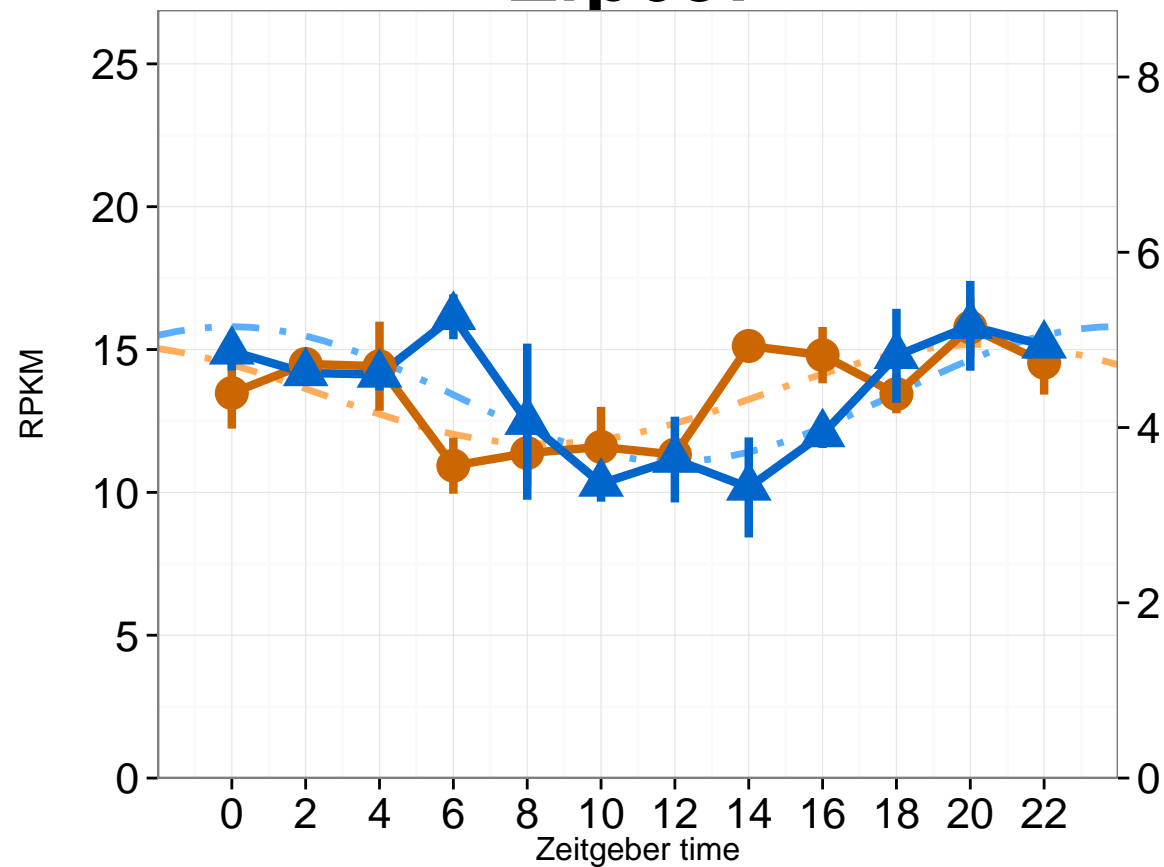

# Zfp637

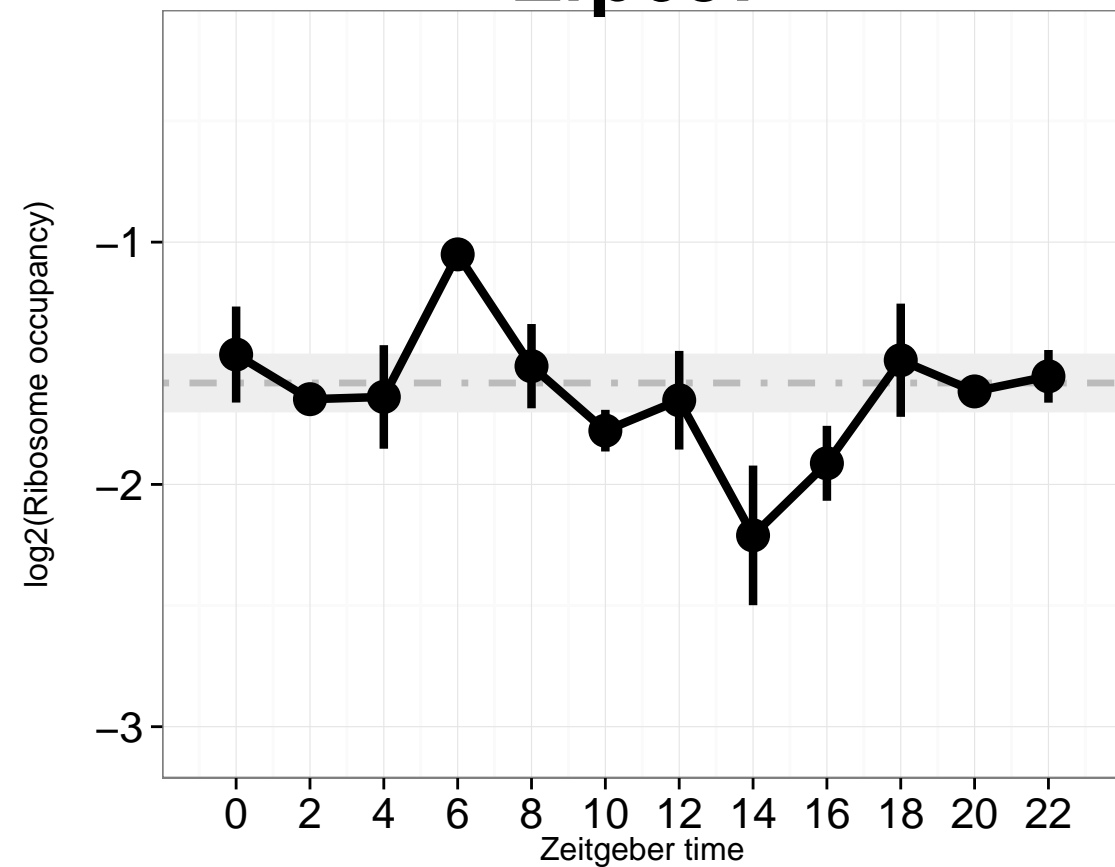

Supplement: SuppDataset_1.zip [file Zfp637_set_A.pdf › Supplemental Dataset 1/A-mRNA_nonrhyth_translation_nonrhyth/Zfp637_set_A.pdf]

# Zfp639

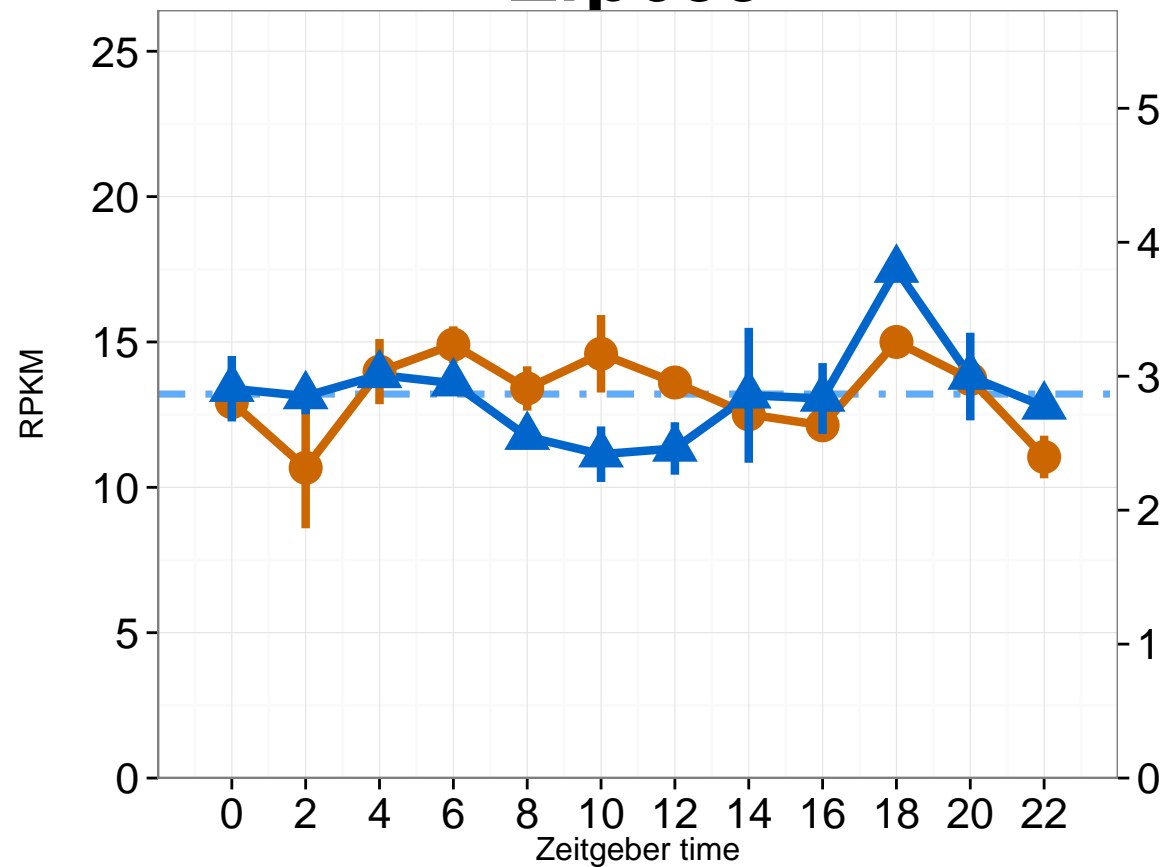

# Zfp639

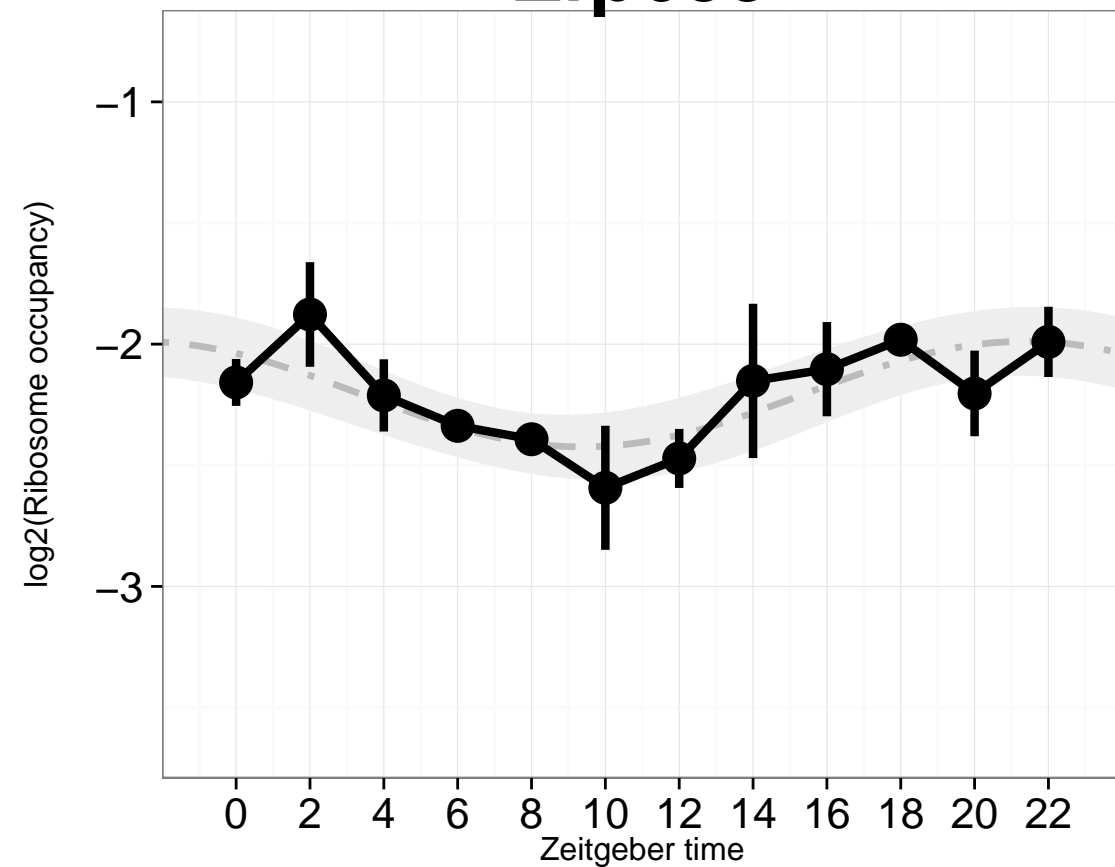

Supplement: SuppDataset_1.zip [file Zfp639_set_A.pdf › Supplemental Dataset 1/A-mRNA_nonrhyth_translation_nonrhyth/Zfp639_set_A.pdf]

# Zfp644

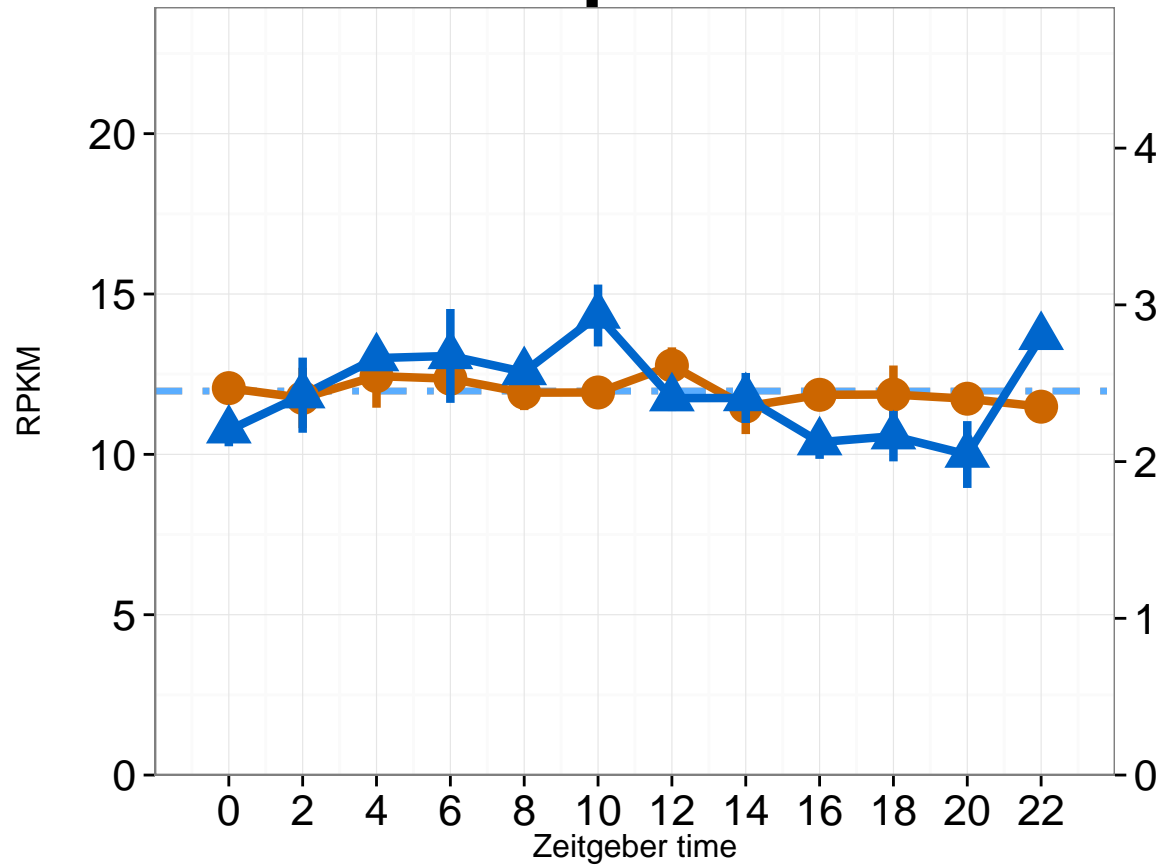

# Zfp644

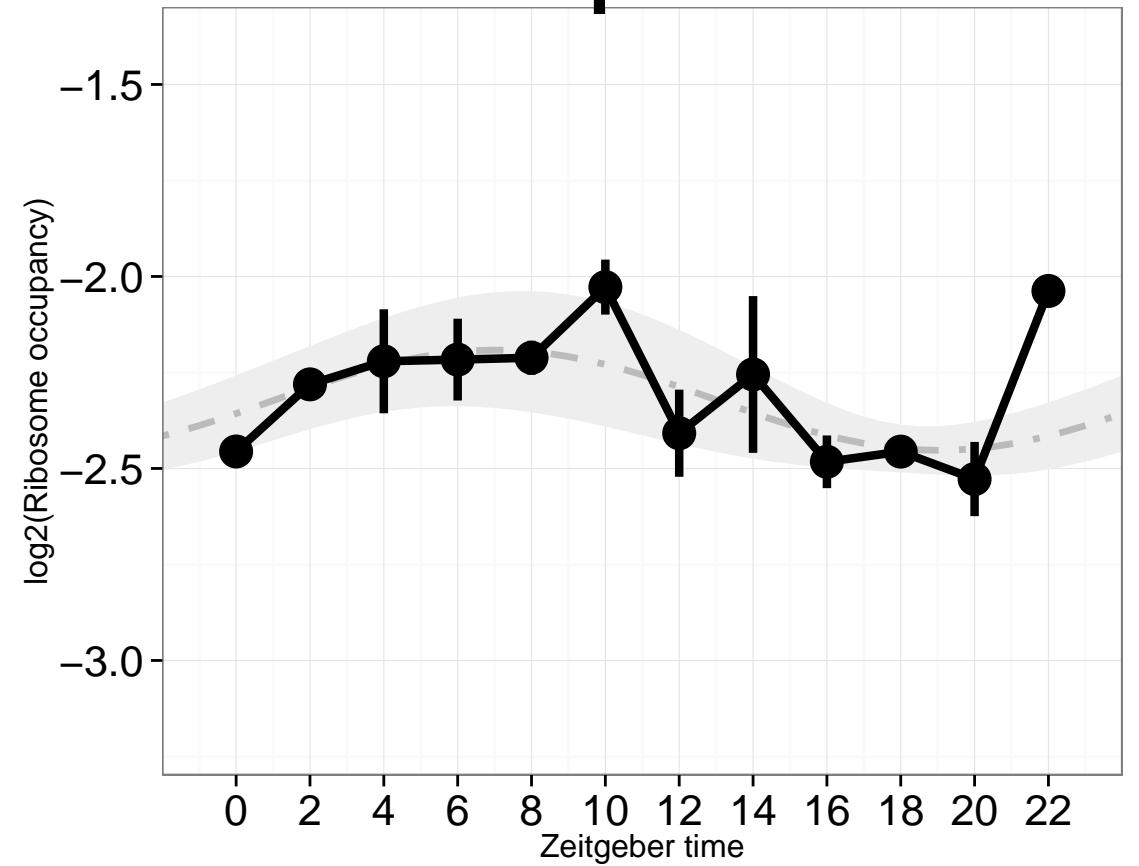

Supplement: SuppDataset_1.zip [file Zfp644_set_A.pdf › Supplemental Dataset 1/A-mRNA_nonrhyth_translation_nonrhyth/Zfp644_set_A.pdf]

# Zfp646

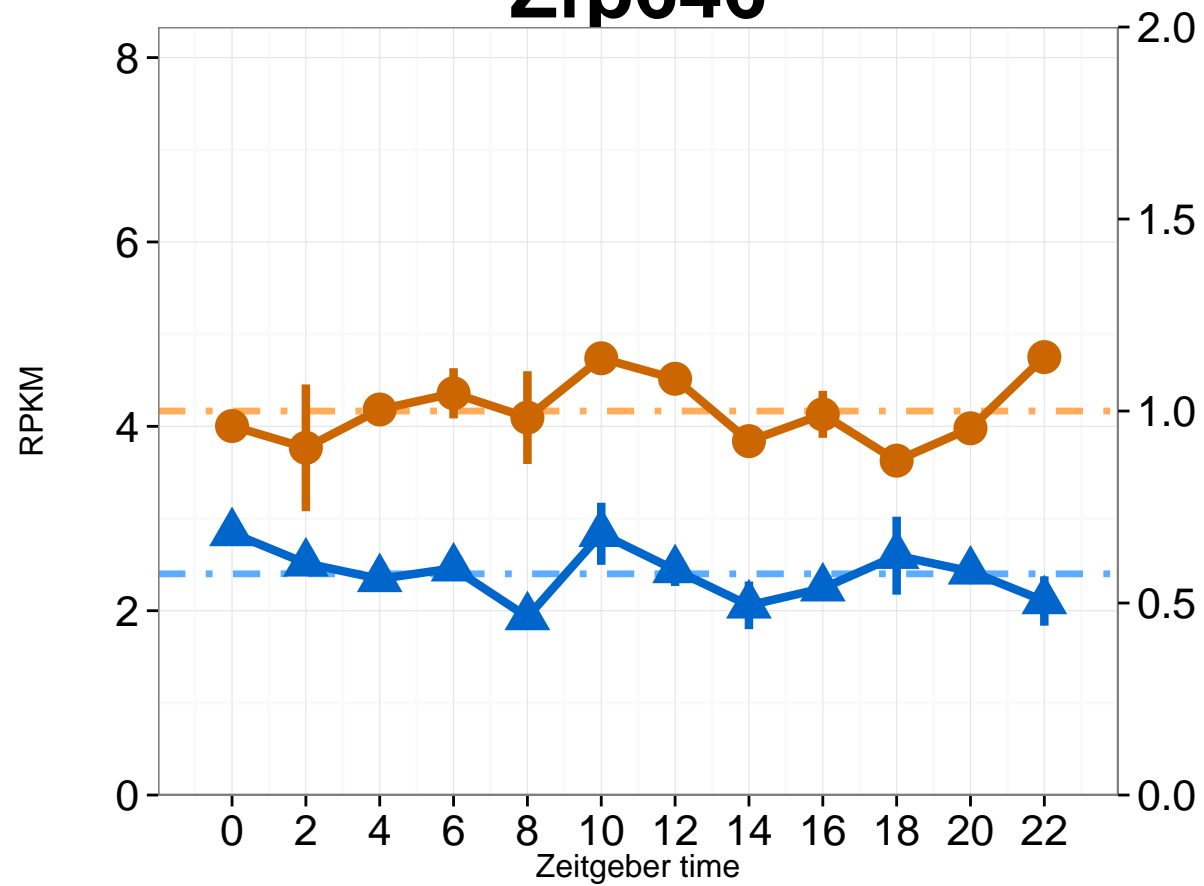

# Zfp646

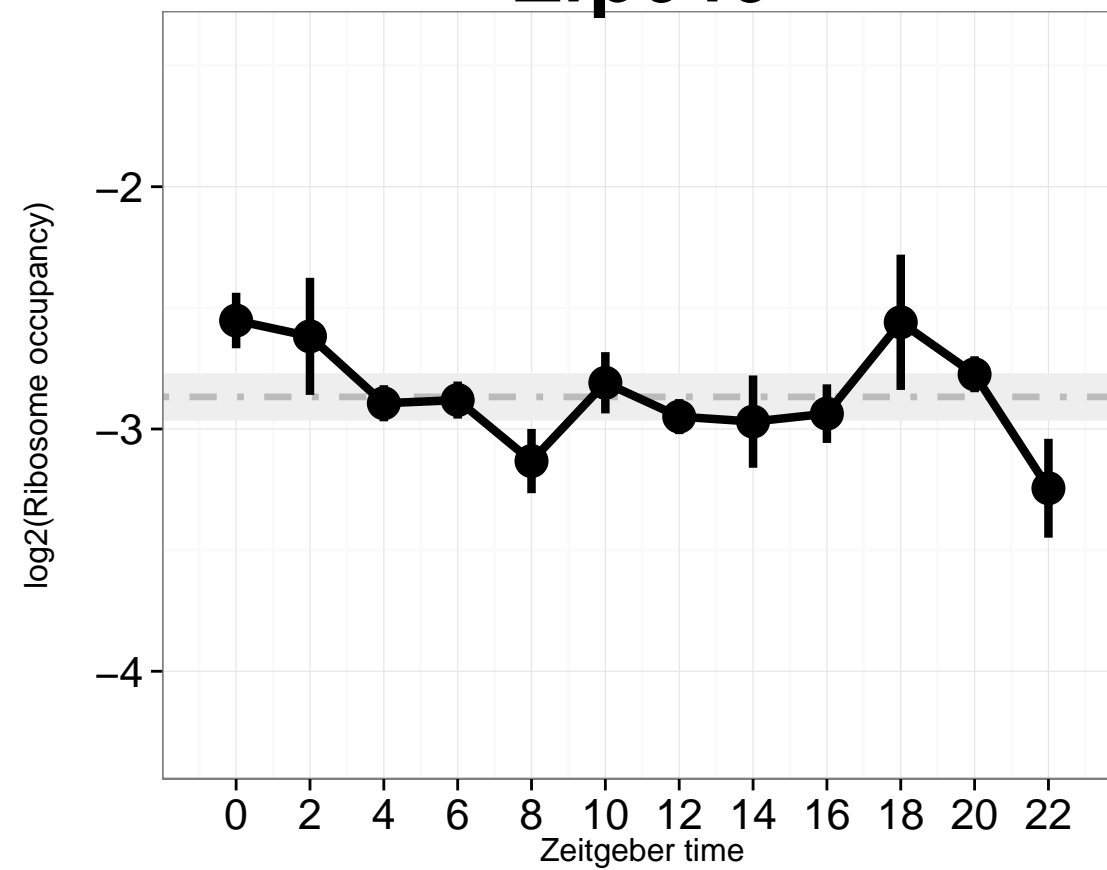

Supplement: SuppDataset_1.zip [file Zfp646_set_A.pdf › Supplemental Dataset 1/A-mRNA_nonrhyth_translation_nonrhyth/Zfp646_set_A.pdf]

# Zfp64

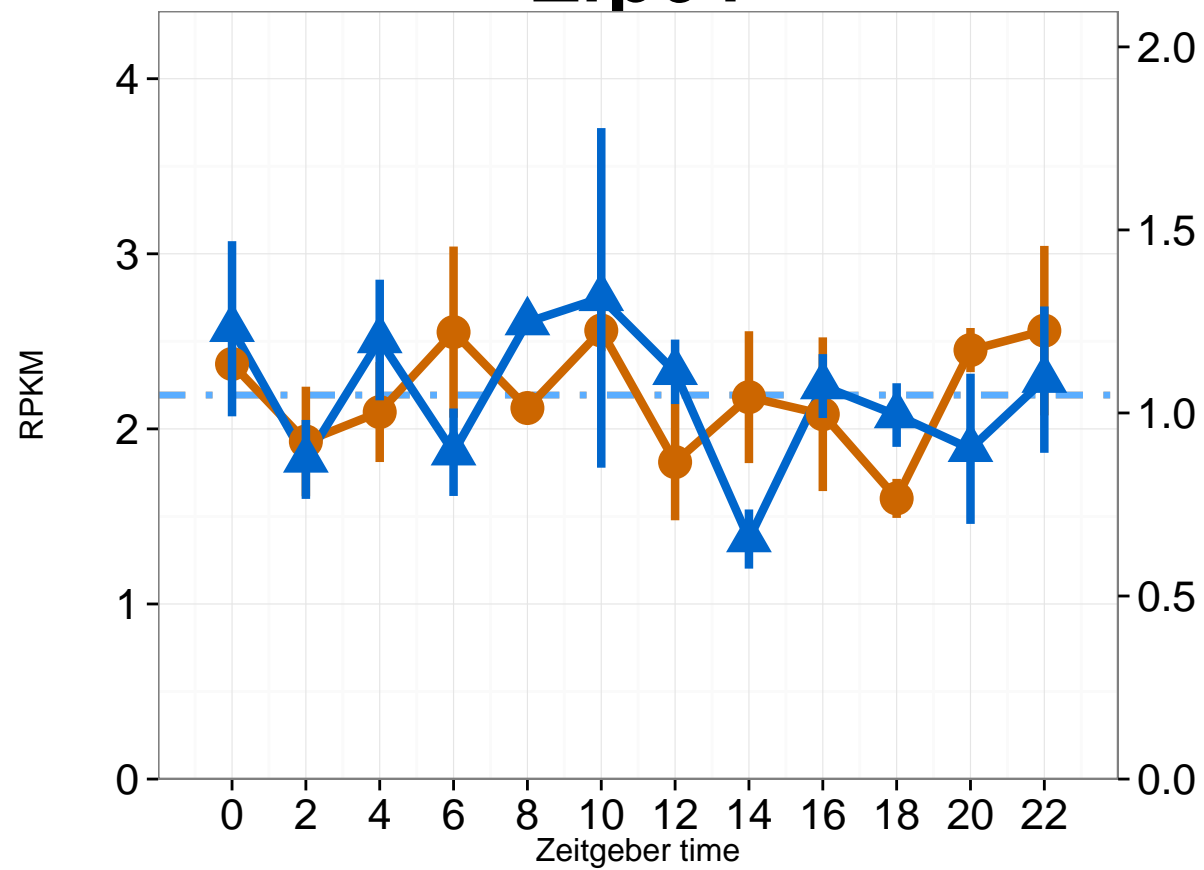

# Zfp64

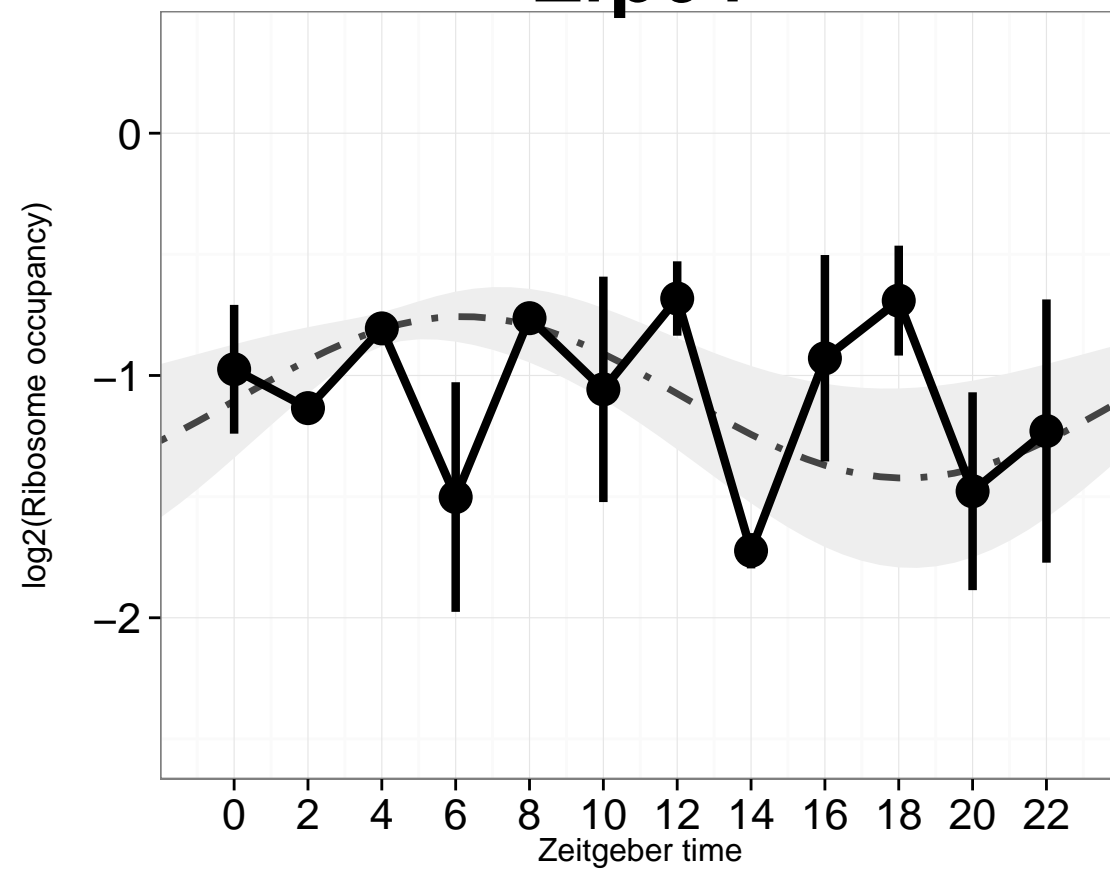

Supplement: SuppDataset_1.zip [file Zfp64_set_A.pdf › Supplemental Dataset 1/A-mRNA_nonrhyth_translation_nonrhyth/Zfp64_set_A.pdf]

# Zfp652

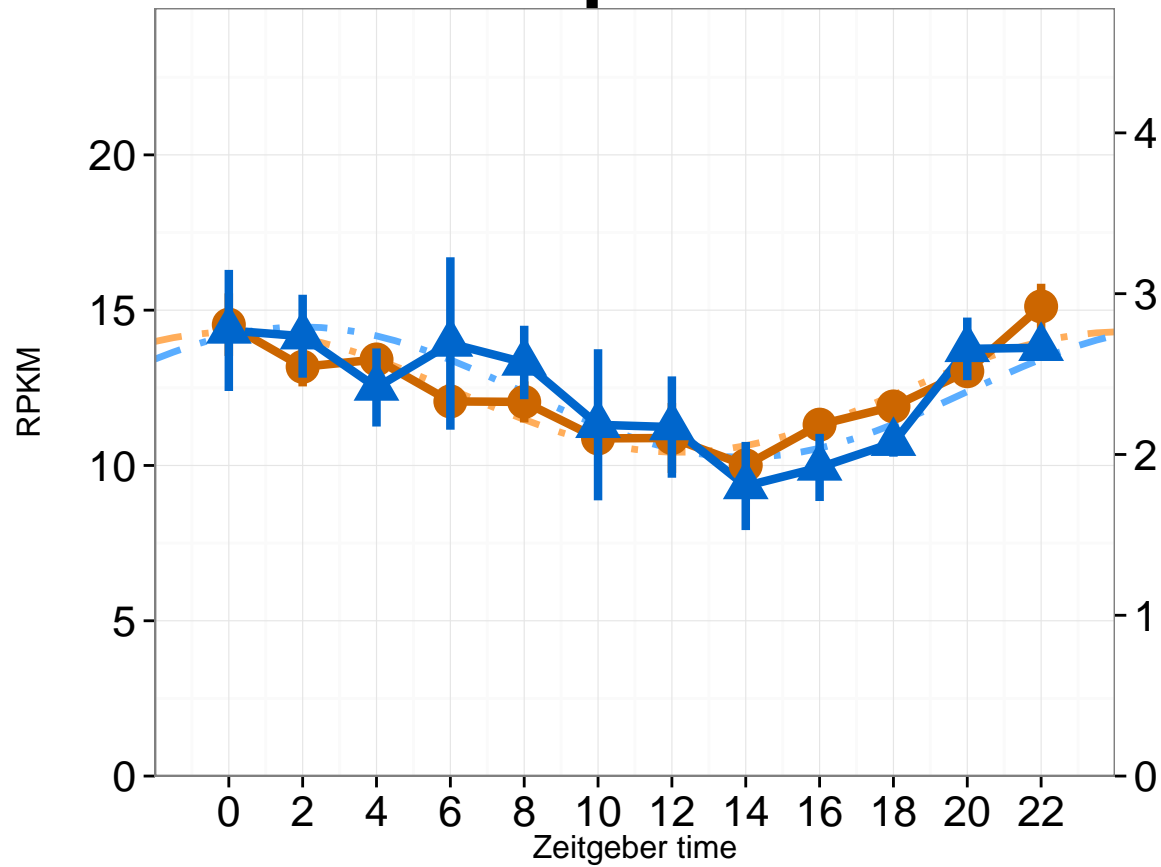

# Zfp652

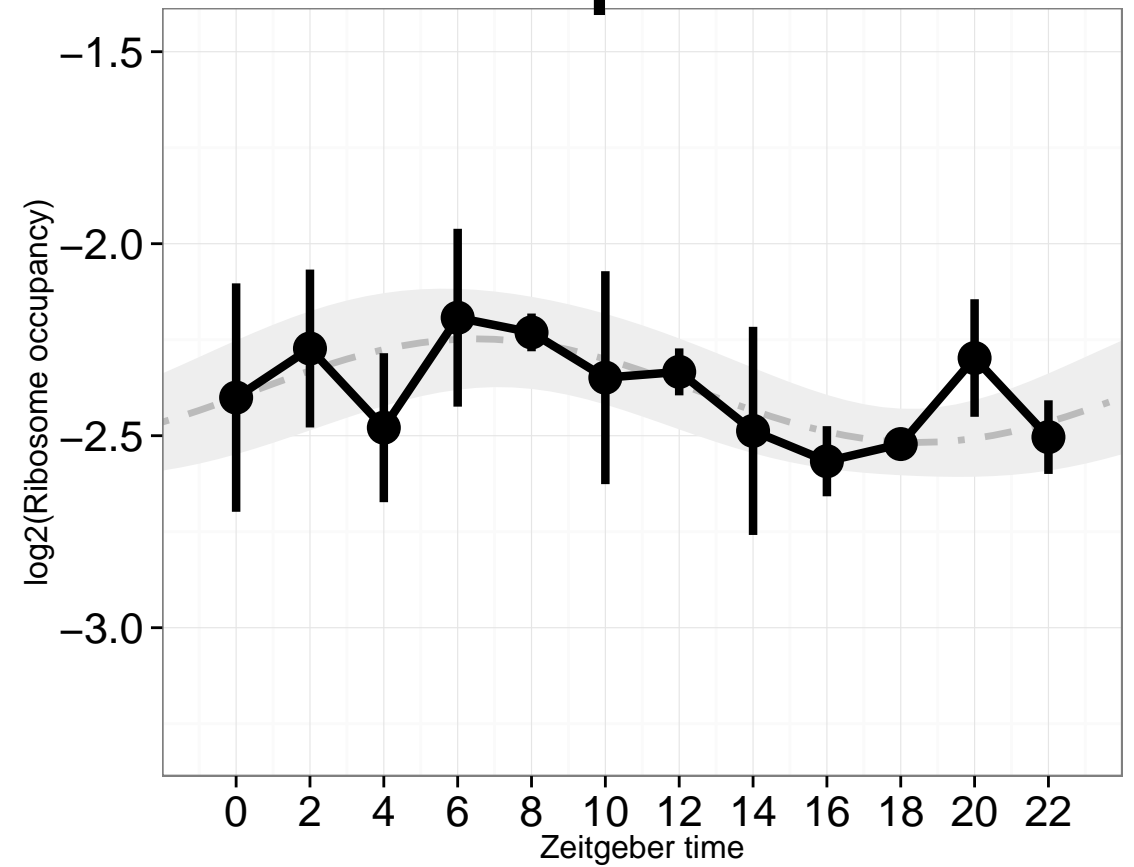

Supplement: SuppDataset_1.zip [file Zfp652_set_A.pdf › Supplemental Dataset 1/A-mRNA_nonrhyth_translation_nonrhyth/Zfp652_set_A.pdf]

# Zfp653

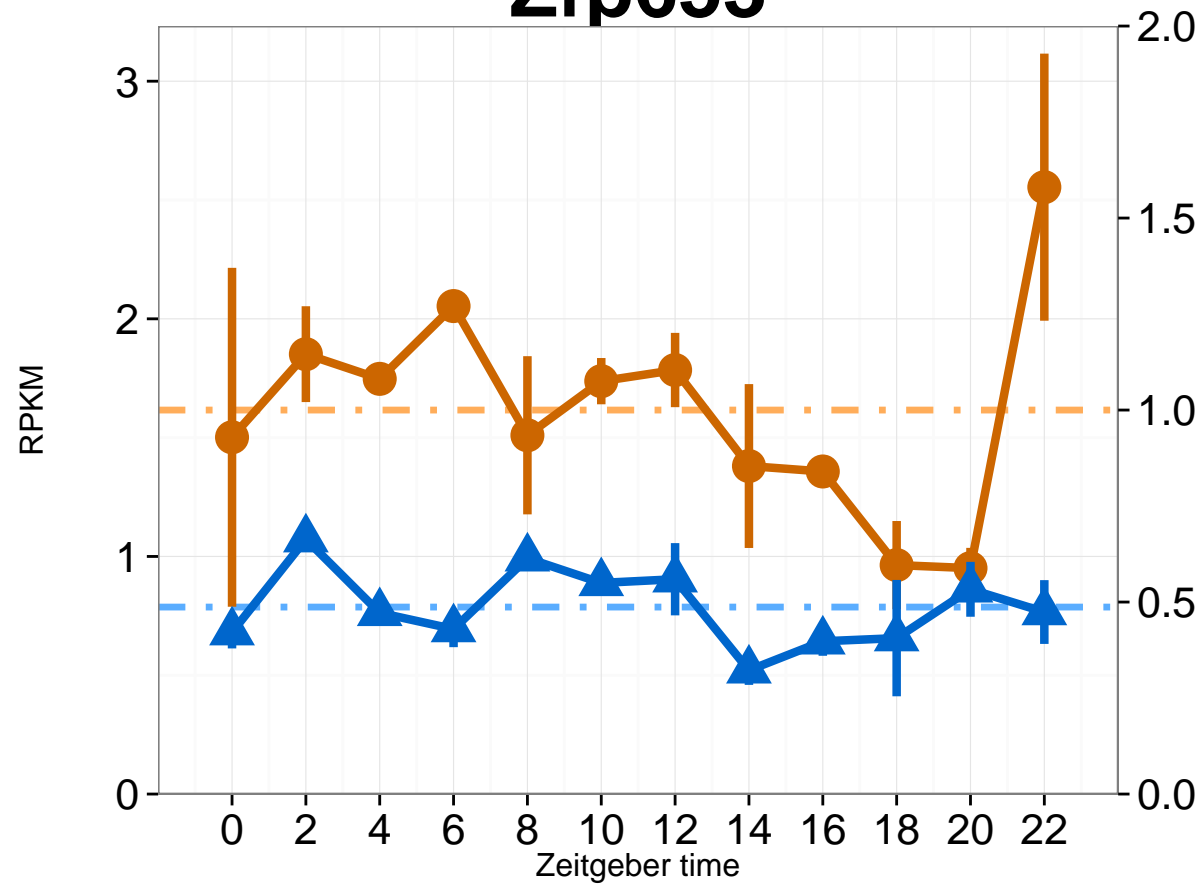

# Zfp653

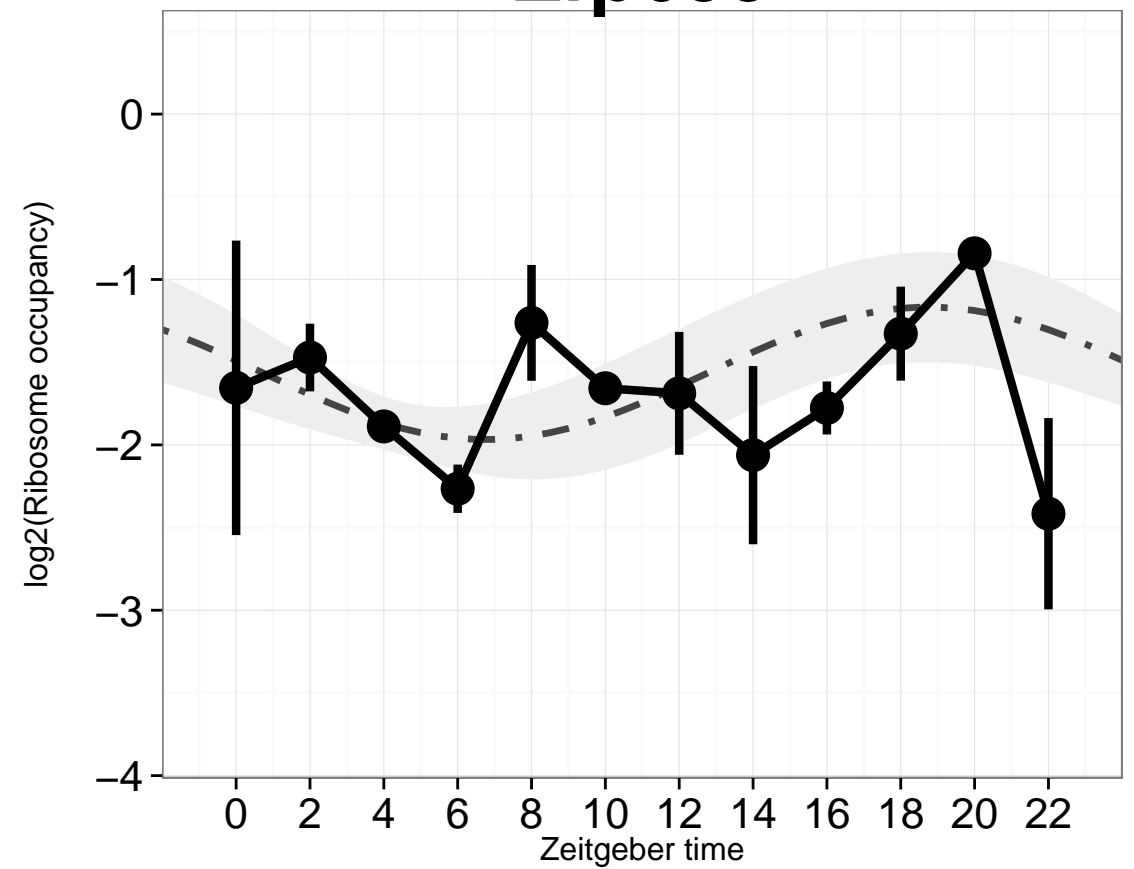

Supplement: SuppDataset_1.zip [file Zfp653_set_A.pdf › Supplemental Dataset 1/A-mRNA_nonrhyth_translation_nonrhyth/Zfp653_set_A.pdf]

# Zfp655

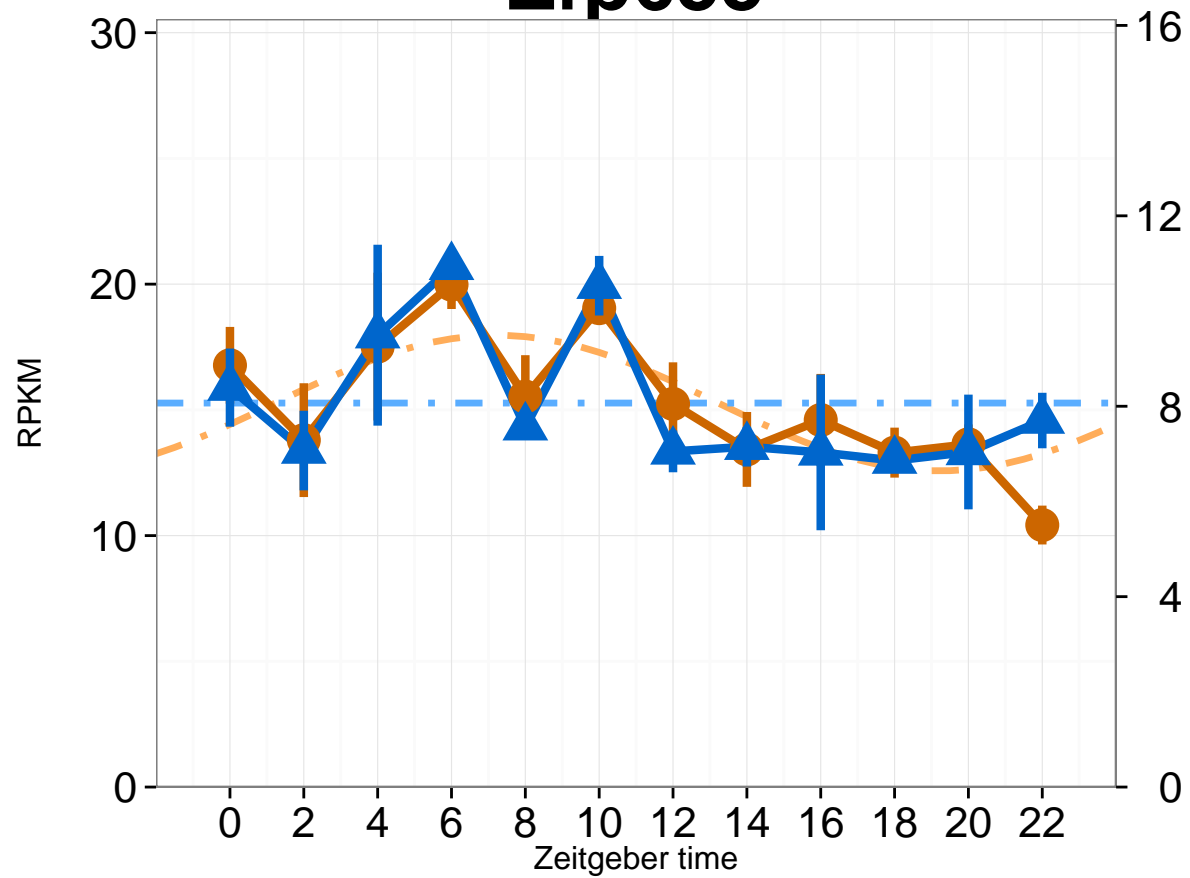

# Zfp655

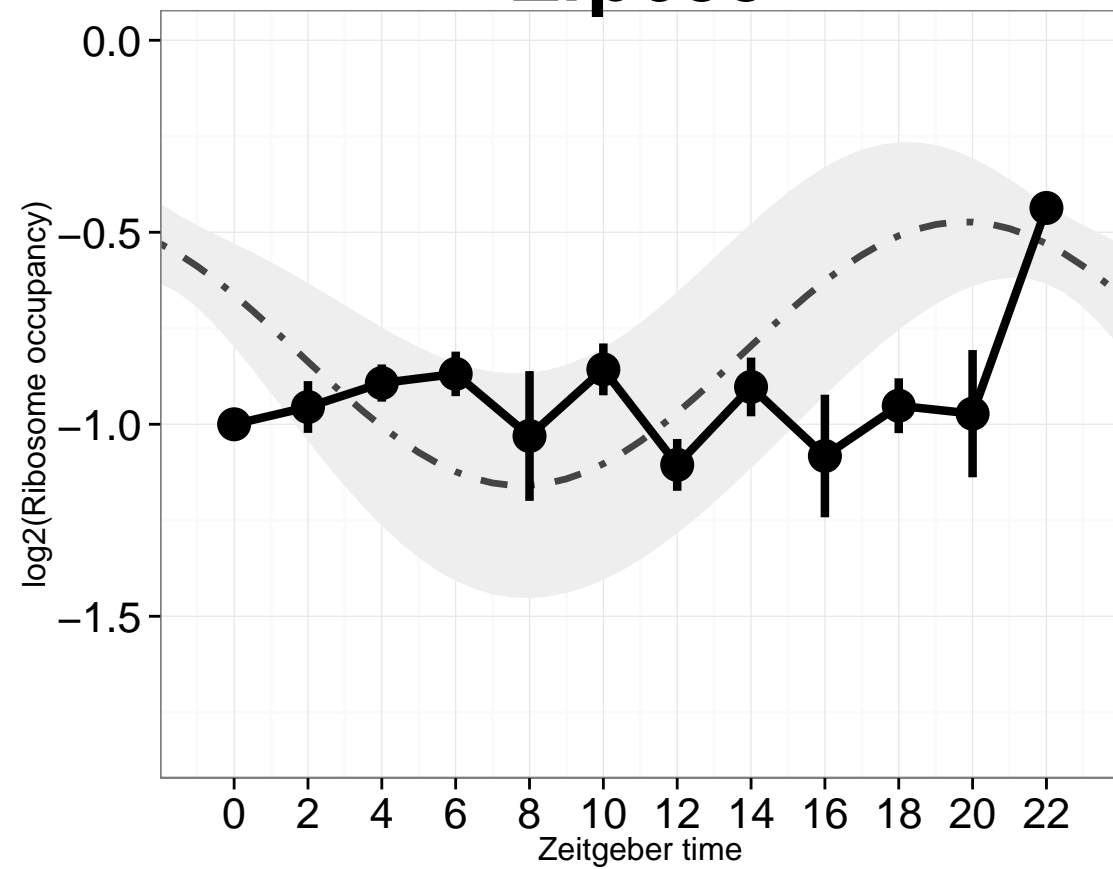

Supplement: SuppDataset_1.zip [file Zfp655_set_A.pdf › Supplemental Dataset 1/A-mRNA_nonrhyth_translation_nonrhyth/Zfp655_set_A.pdf]

# Zfp658

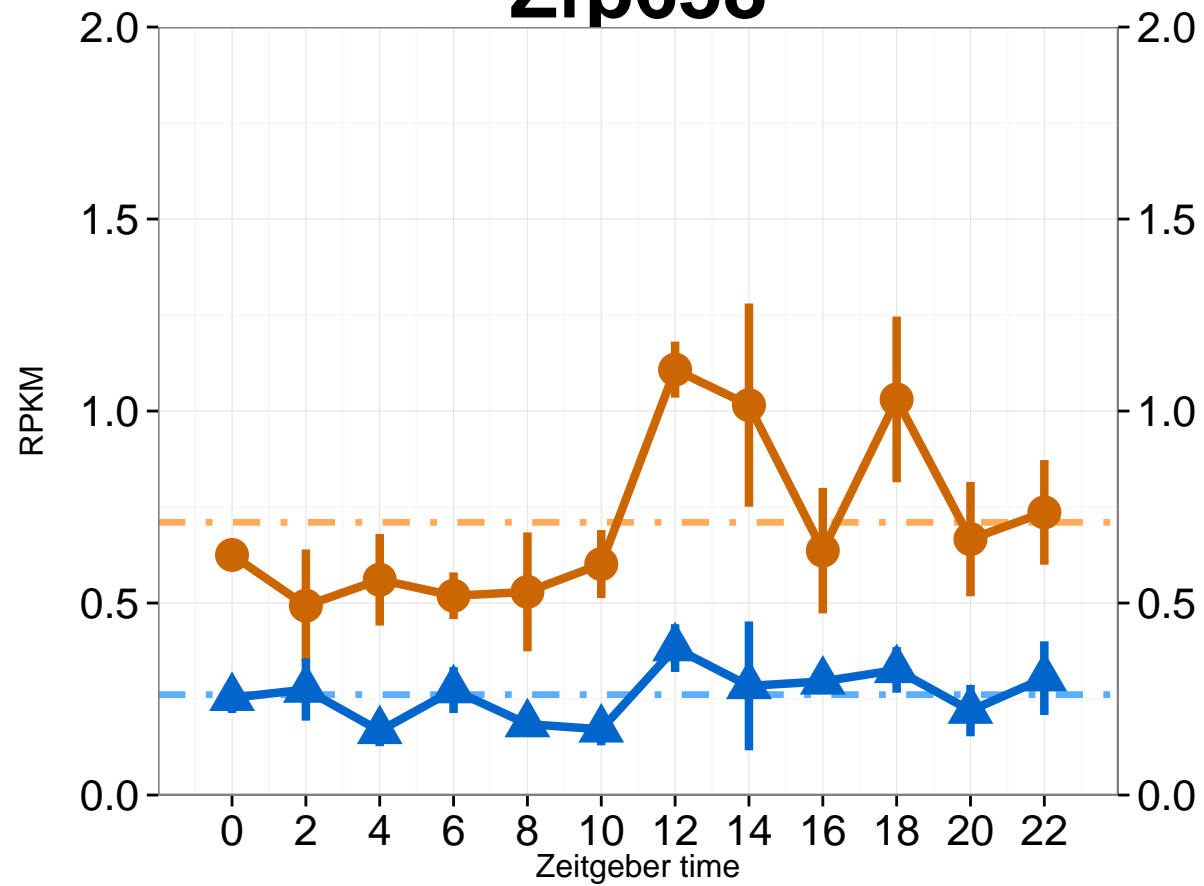

# Zfp658

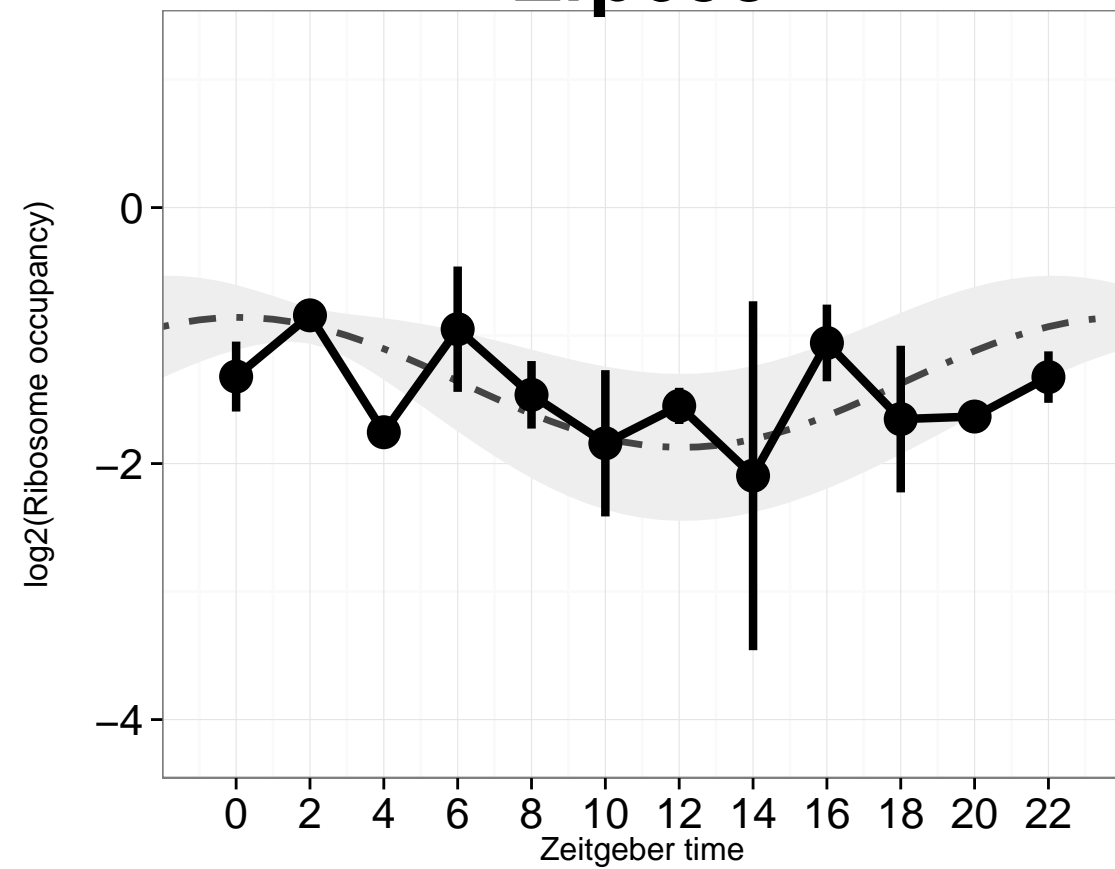

Supplement: SuppDataset_1.zip [file Zfp658_set_A.pdf › Supplemental Dataset 1/A-mRNA_nonrhyth_translation_nonrhyth/Zfp658_set_A.pdf]

# Zfp667

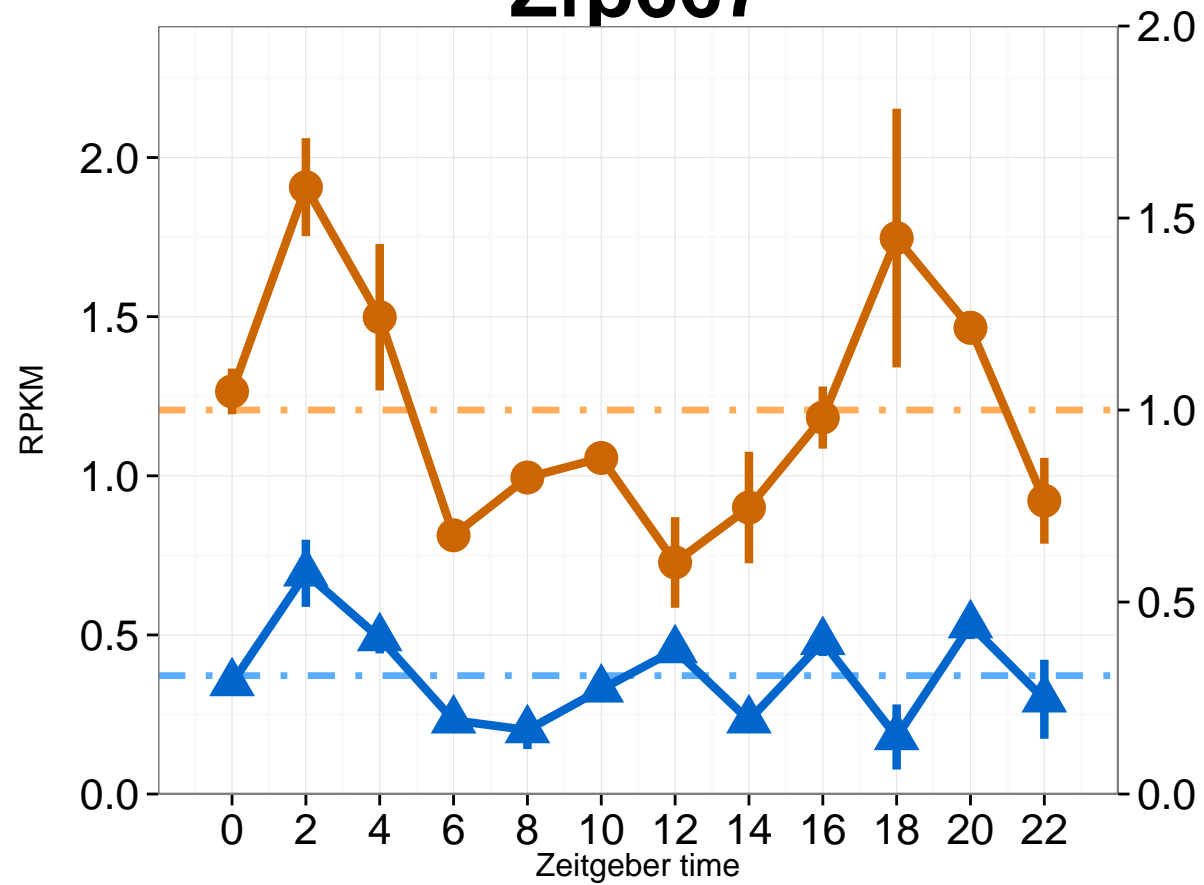

# Zfp667

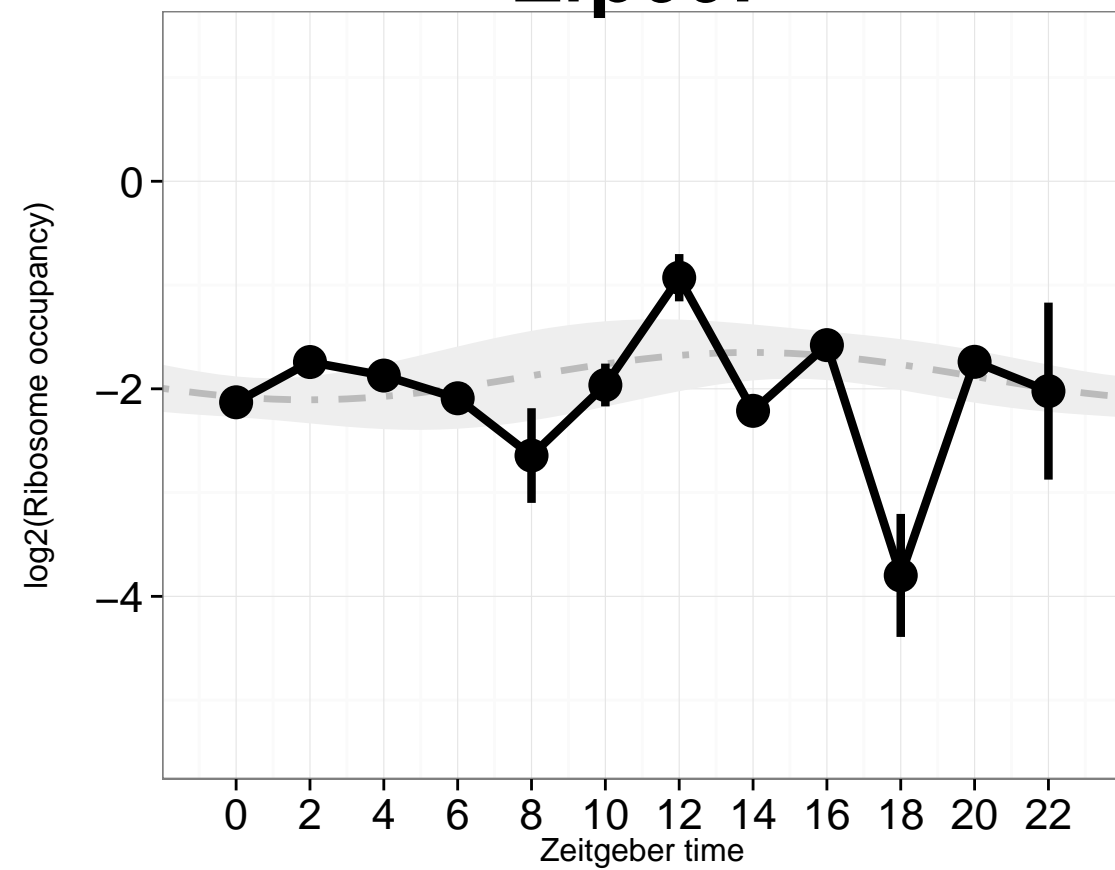

Supplement: SuppDataset_1.zip [file Zfp667_set_A.pdf › Supplemental Dataset 1/A-mRNA_nonrhyth_translation_nonrhyth/Zfp667_set_A.pdf]

# Zfp668

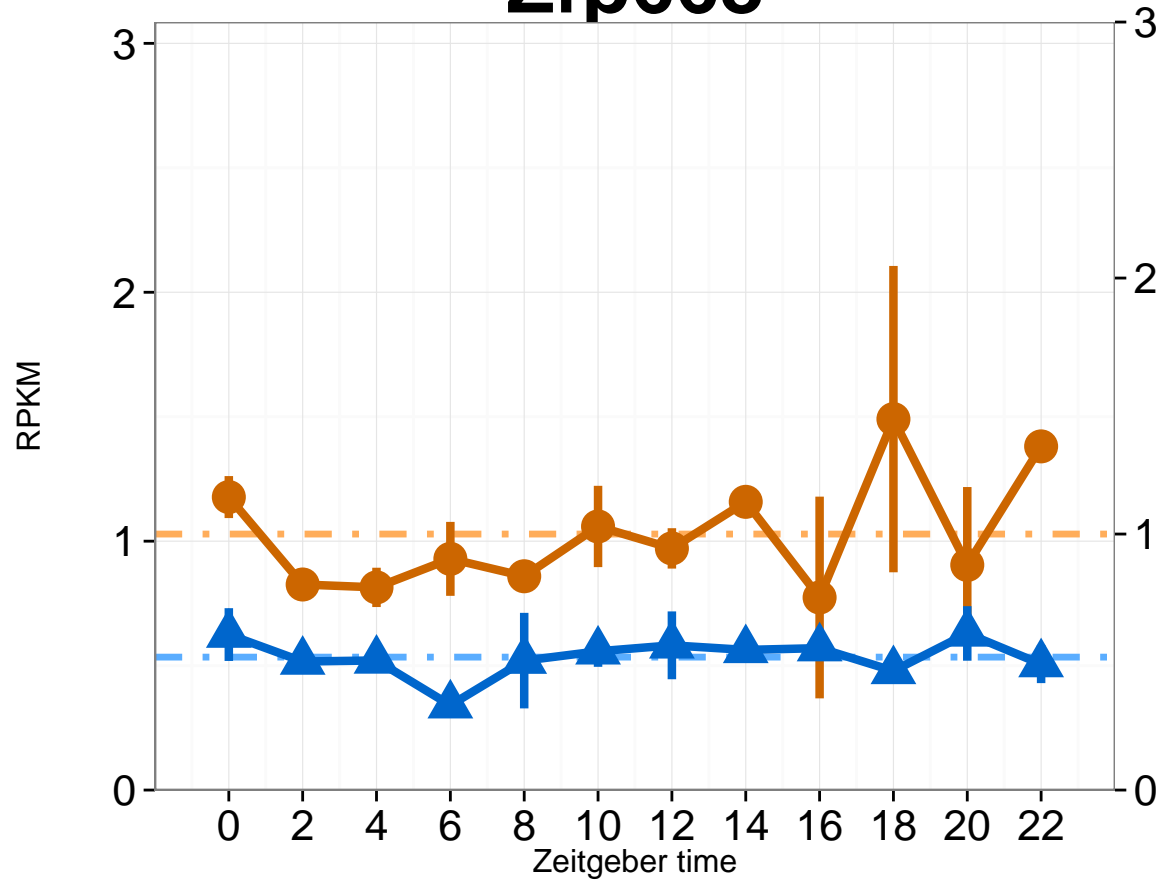

# Zfp668

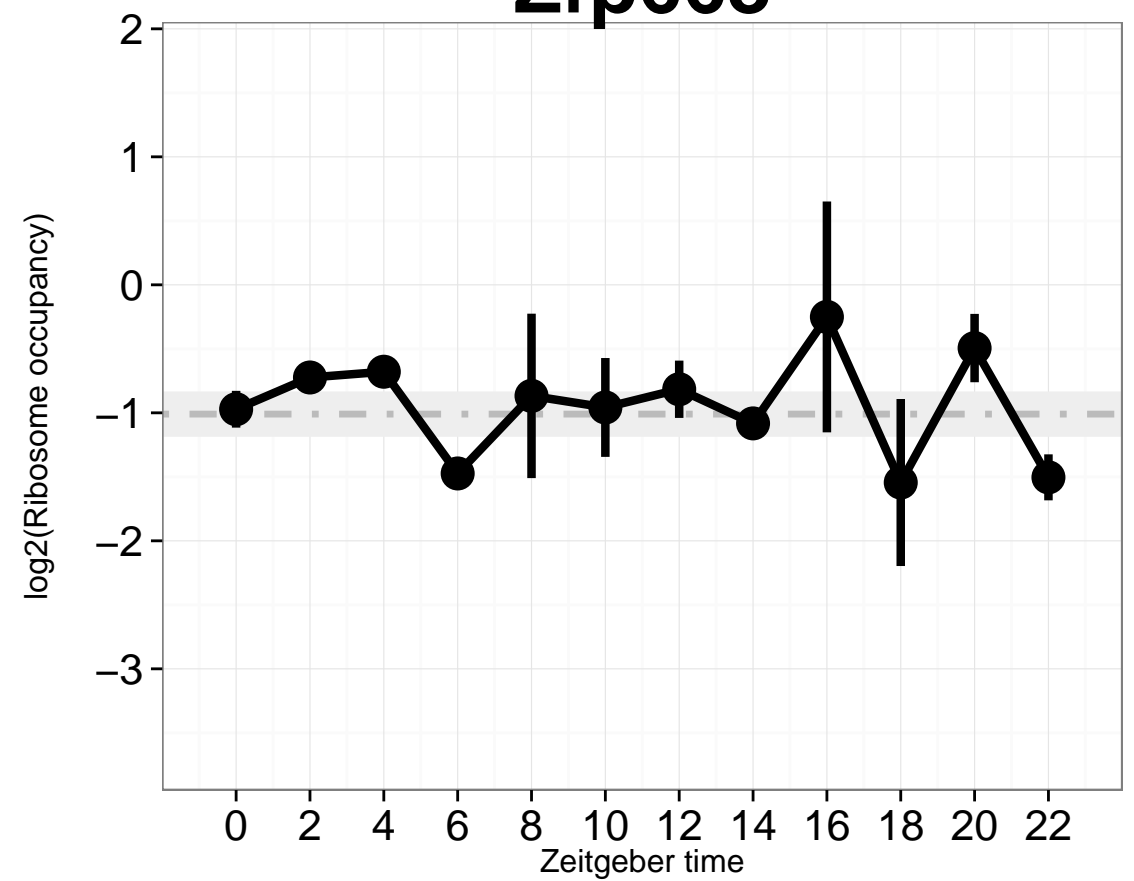

Supplement: SuppDataset_1.zip [file Zfp668_set_A.pdf › Supplemental Dataset 1/A-mRNA_nonrhyth_translation_nonrhyth/Zfp668_set_A.pdf]

# Zfp672

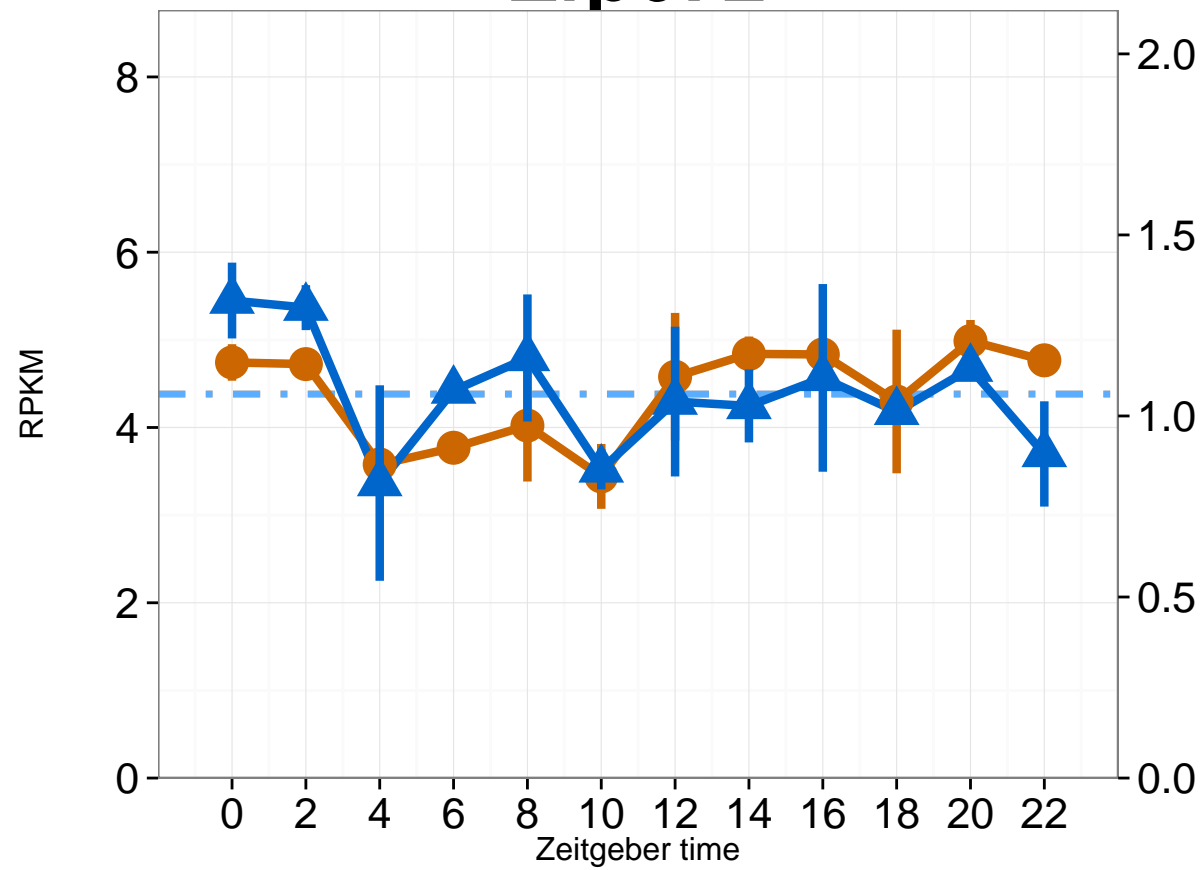

# Zfp672

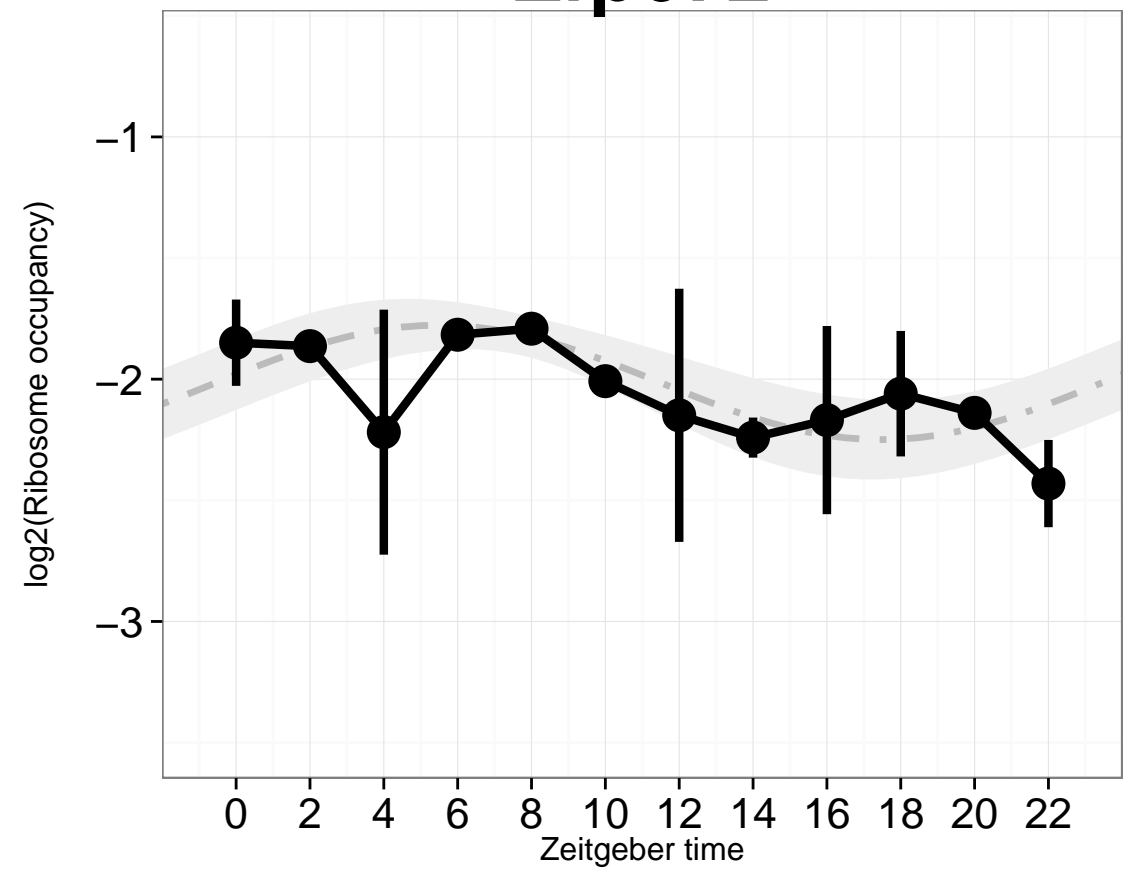

Supplement: SuppDataset_1.zip [file Zfp672_set_A.pdf › Supplemental Dataset 1/A-mRNA_nonrhyth_translation_nonrhyth/Zfp672_set_A.pdf]

## Zfp677

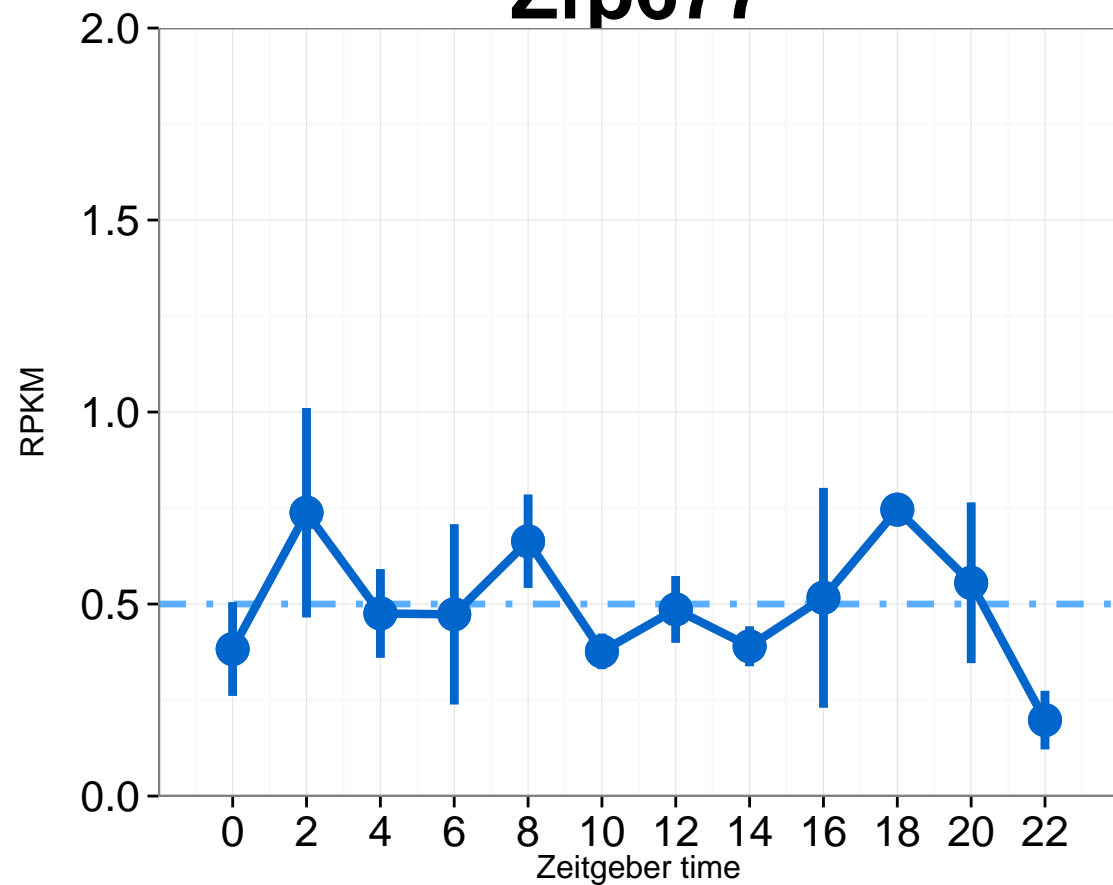

## Zfp677 log2(Ribosome occupancy

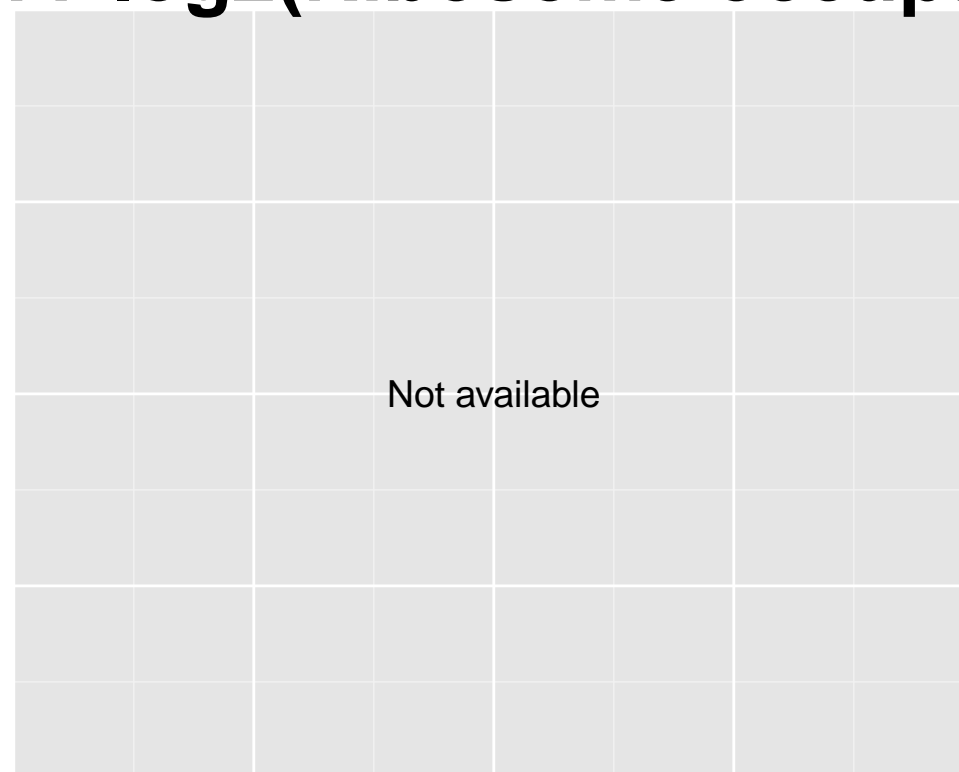

Supplement: SuppDataset_1.zip [file Zfp677_set_A.pdf › Supplemental Dataset 1/A-mRNA_nonrhyth_translation_nonrhyth/Zfp677_set_A.pdf]

# Zfp687

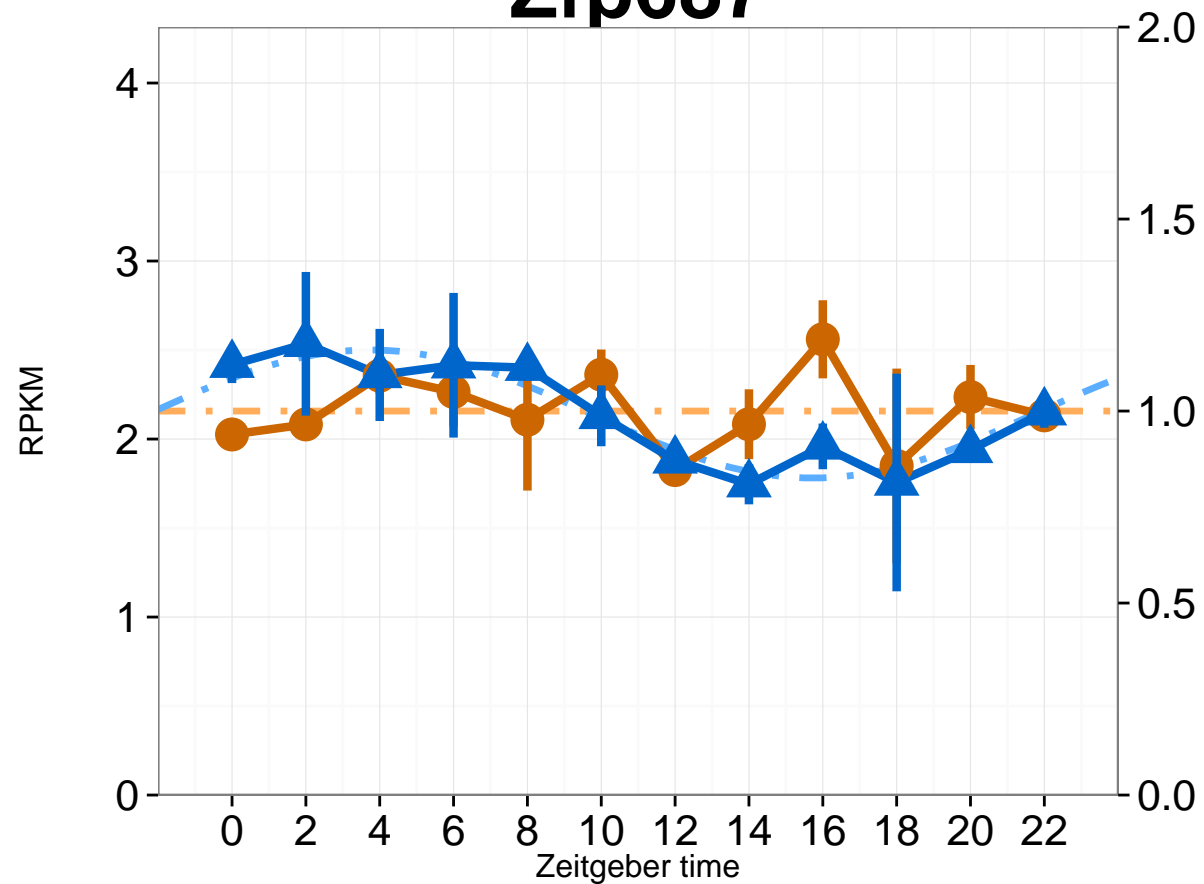

# Zfp687

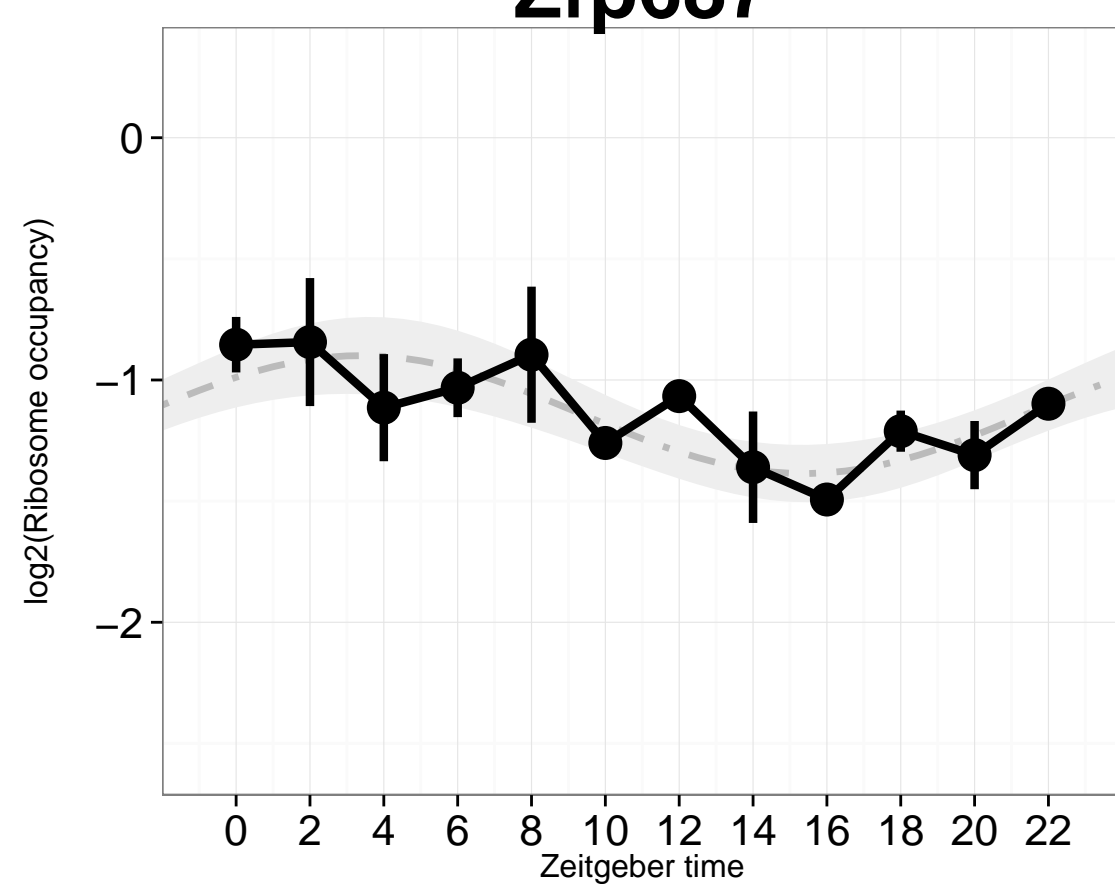

Supplement: SuppDataset_1.zip [file Zfp687_set_A.pdf › Supplemental Dataset 1/A-mRNA_nonrhyth_translation_nonrhyth/Zfp687_set_A.pdf]

# Zfp689

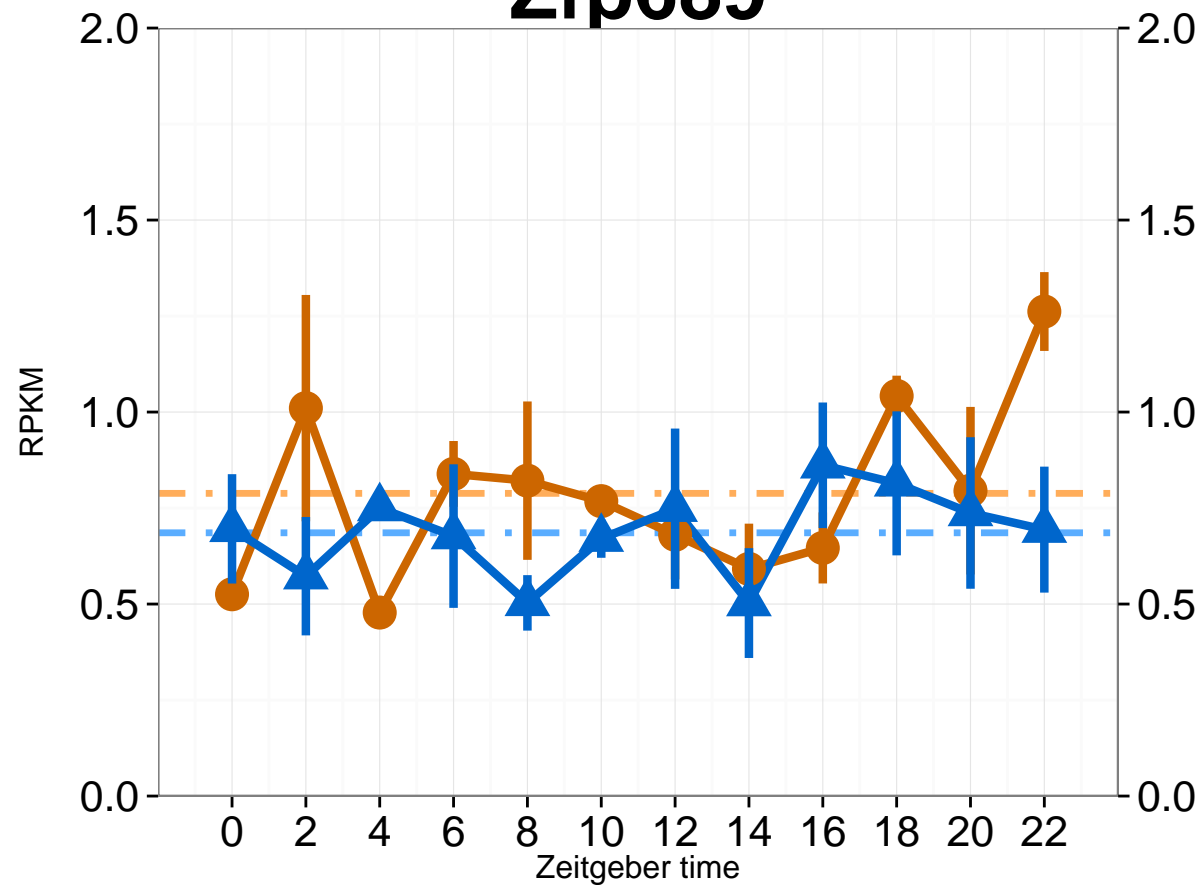

# Zfp689

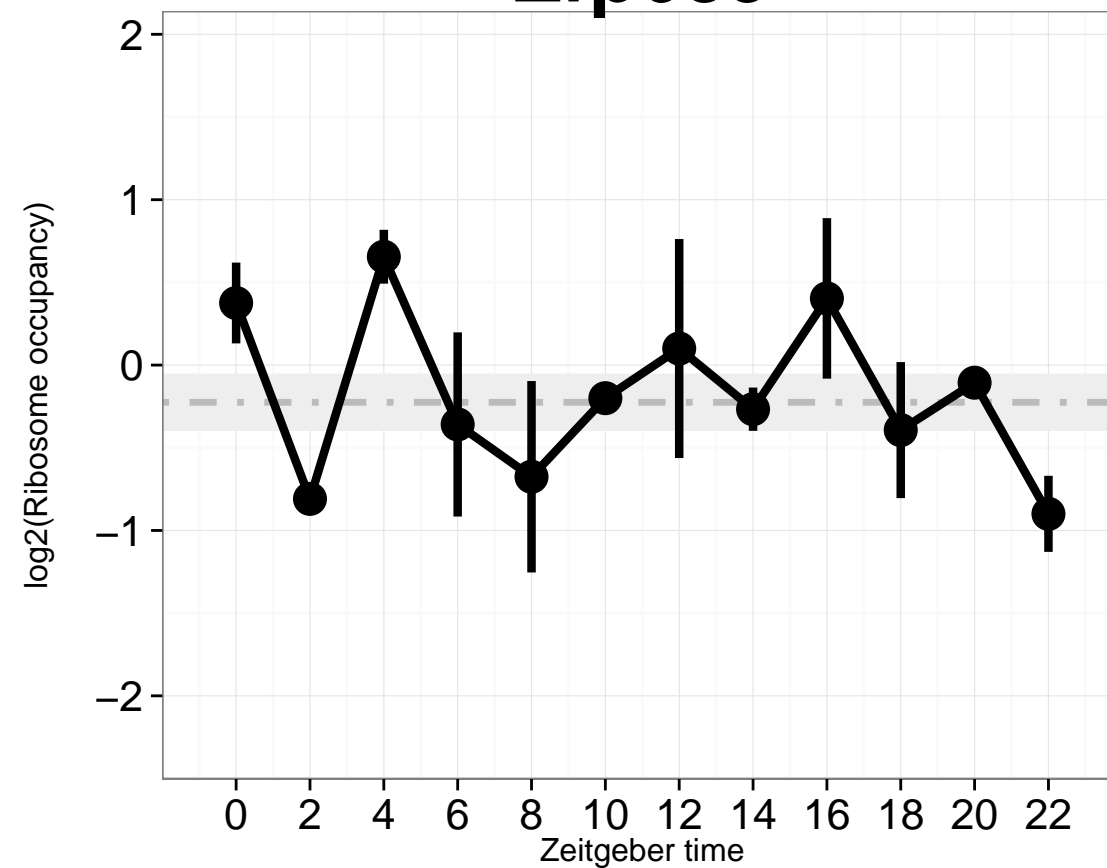

Supplement: SuppDataset_1.zip [file Zfp689_set_A.pdf › Supplemental Dataset 1/A-mRNA_nonrhyth_translation_nonrhyth/Zfp689_set_A.pdf]

# Zfp68

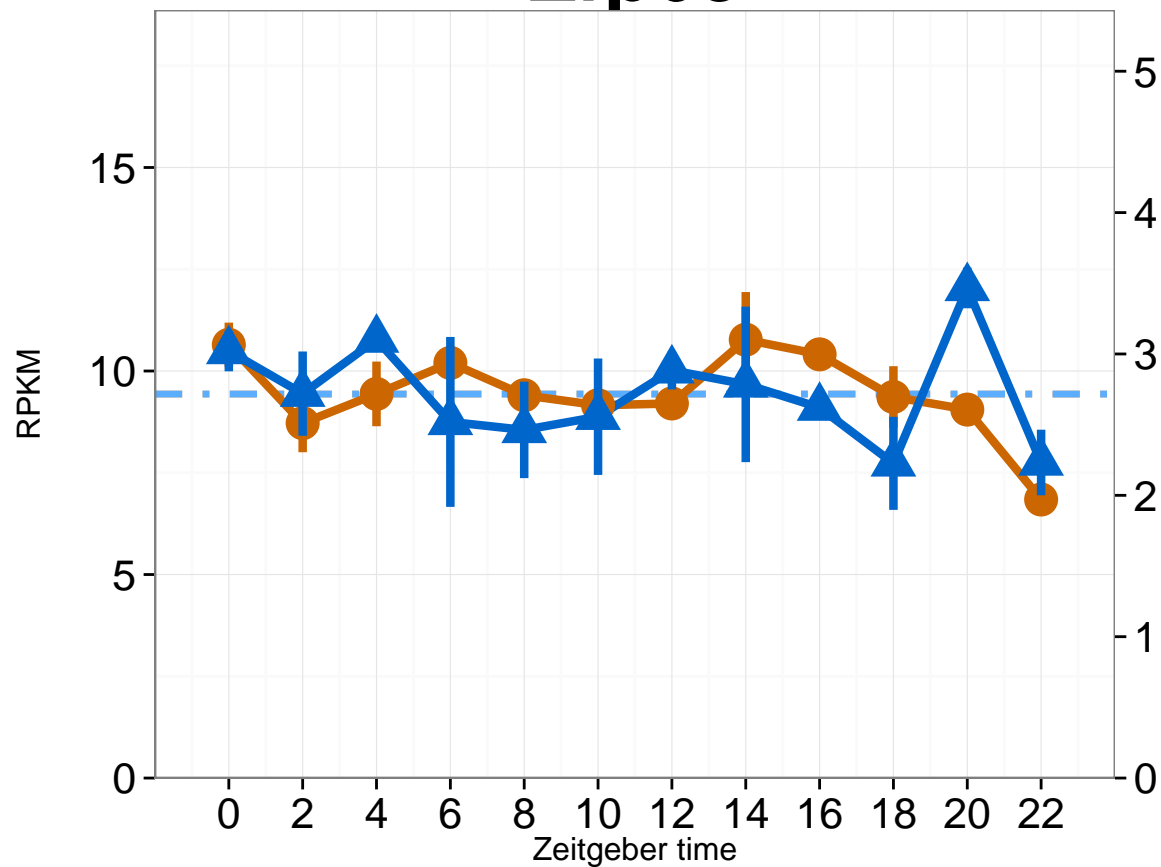

# Zfp68

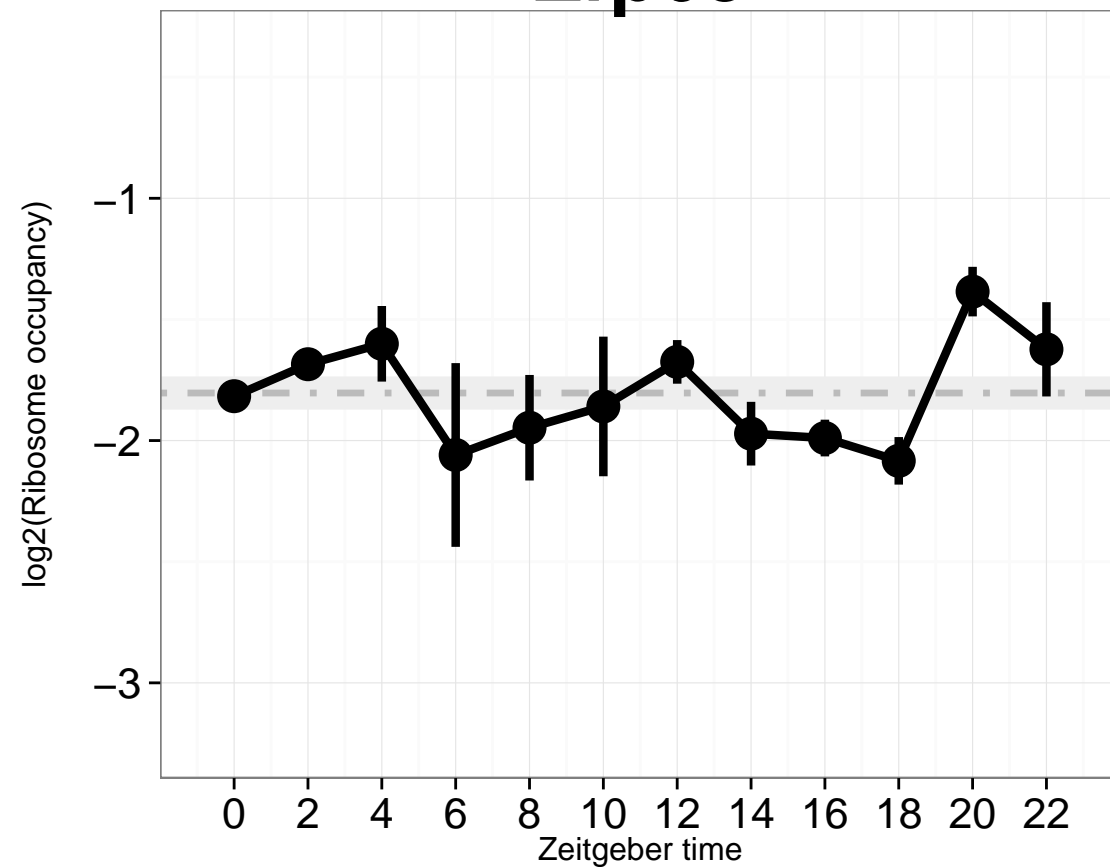

Supplement: SuppDataset_1.zip [file Zfp68_set_A.pdf › Supplemental Dataset 1/A-mRNA_nonrhyth_translation_nonrhyth/Zfp68_set_A.pdf]

# Zfp691

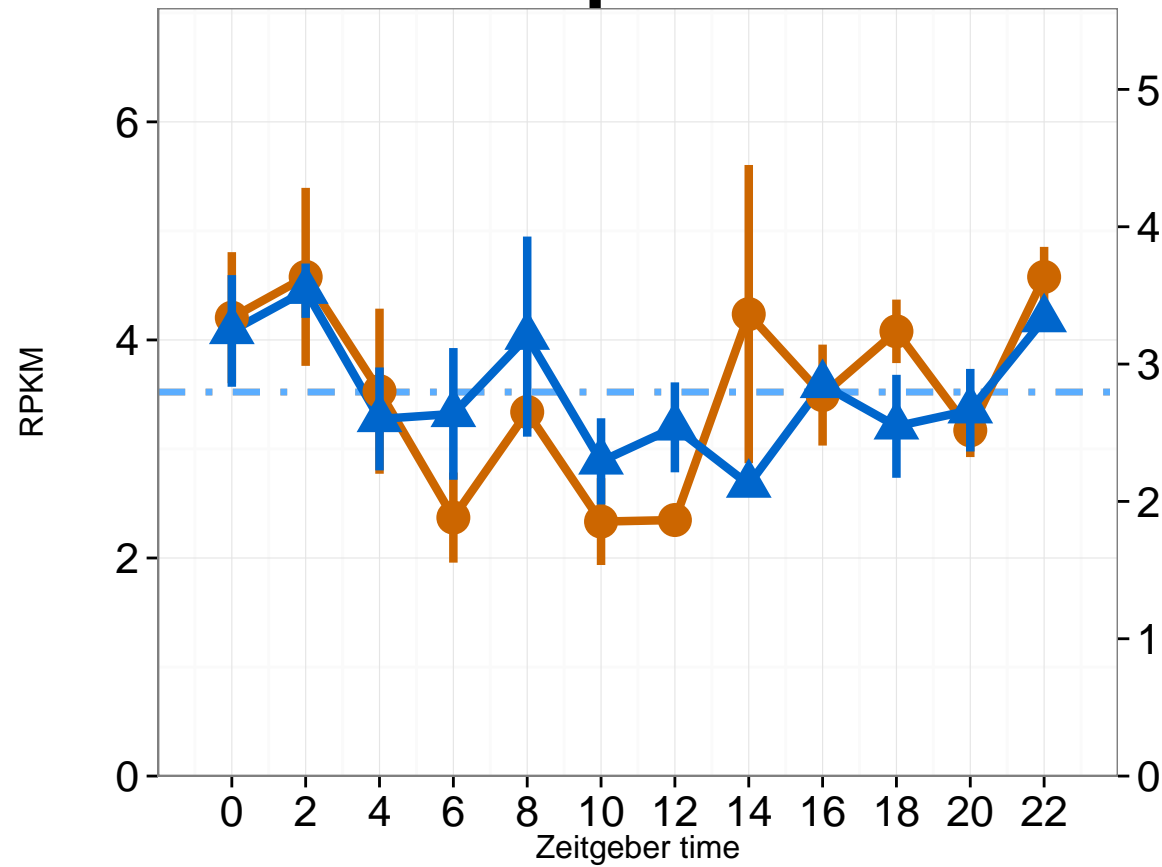

# Zfp691

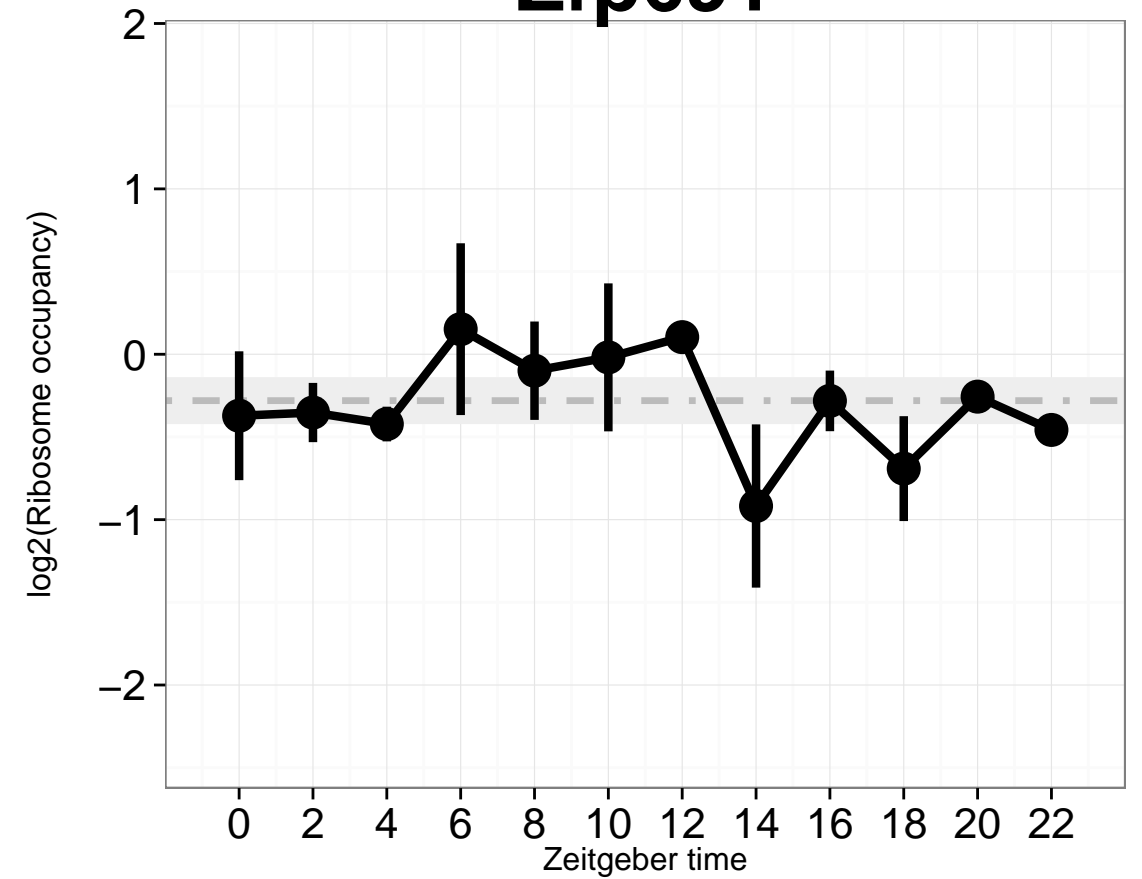

Supplement: SuppDataset_1.zip [file Zfp691_set_A.pdf › Supplemental Dataset 1/A-mRNA_nonrhyth_translation_nonrhyth/Zfp691_set_A.pdf]

# Zfp703

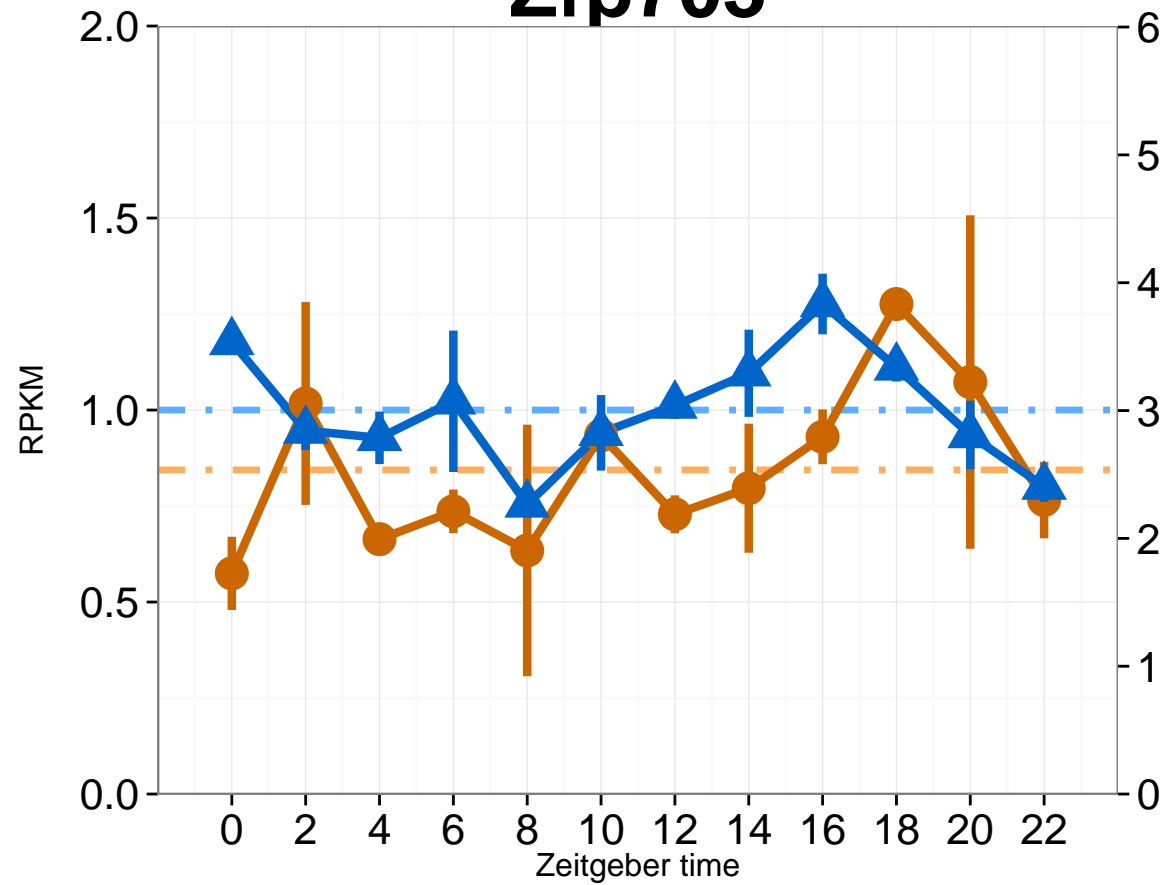

# Zfp703

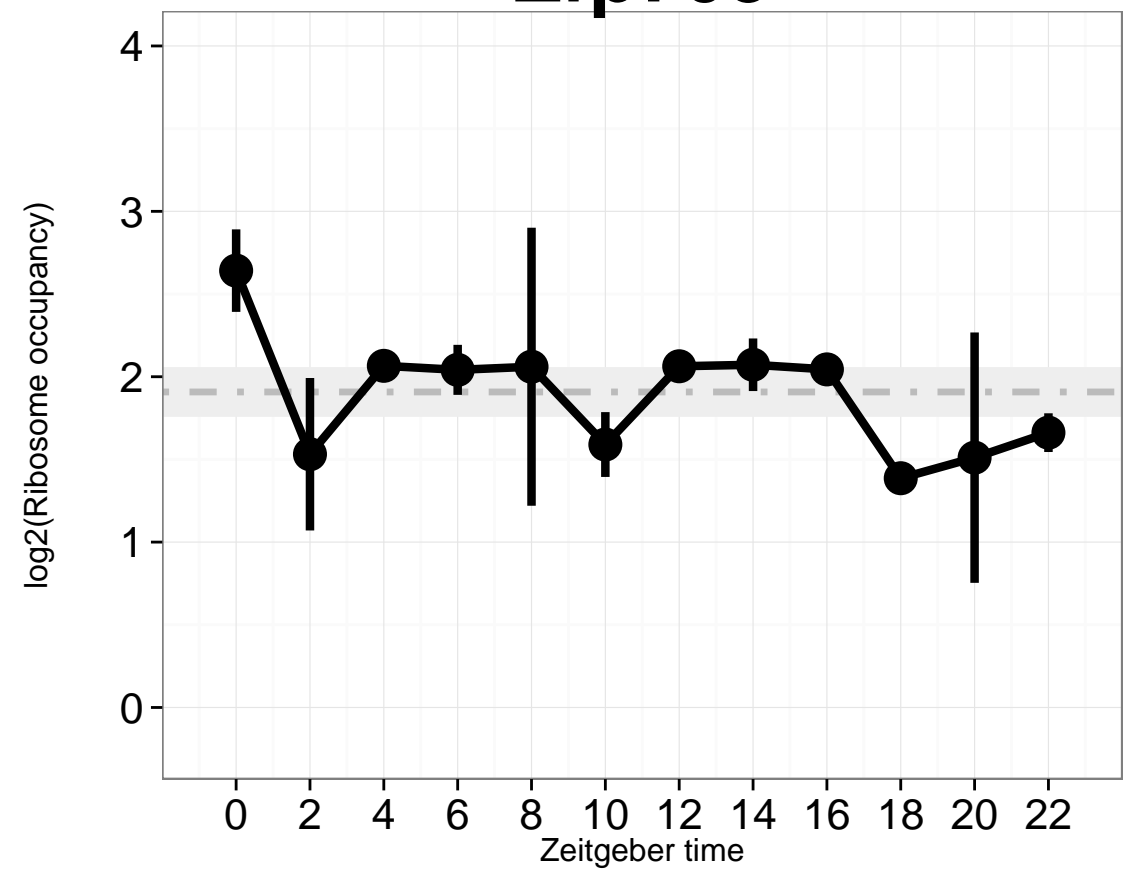

Supplement: SuppDataset_1.zip [file Zfp703_set_A.pdf › Supplemental Dataset 1/A-mRNA_nonrhyth_translation_nonrhyth/Zfp703_set_A.pdf]

# Zfp704

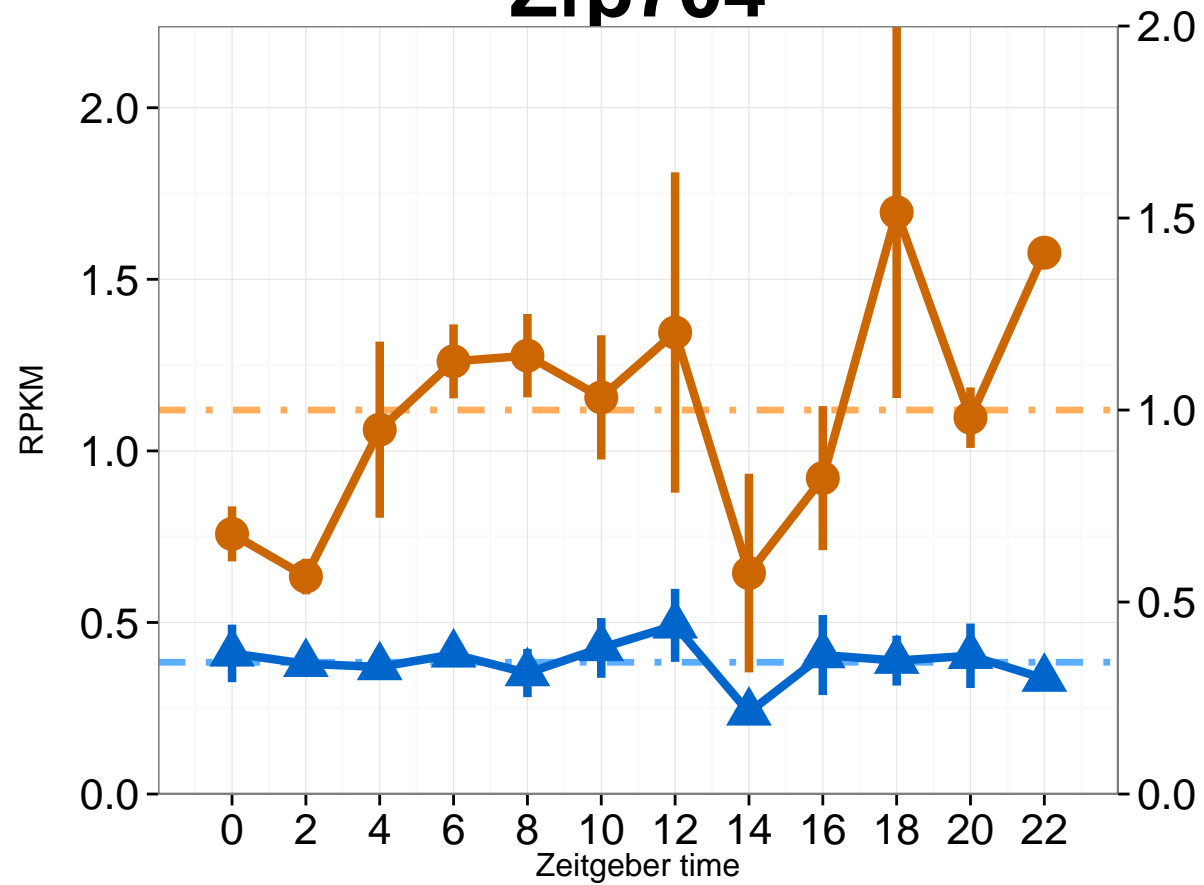

# Zfp704

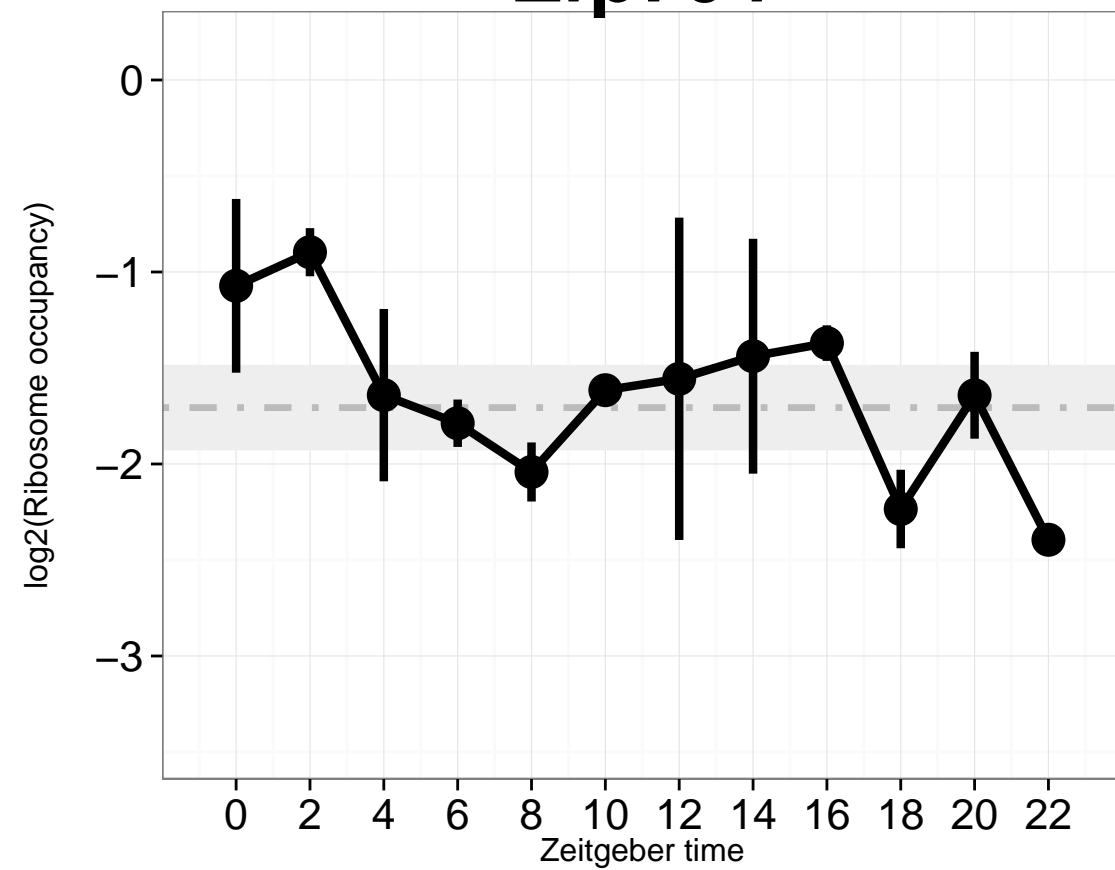

Supplement: SuppDataset_1.zip [file Zfp704_set_A.pdf › Supplemental Dataset 1/A-mRNA_nonrhyth_translation_nonrhyth/Zfp704_set_A.pdf]

# Zfp707

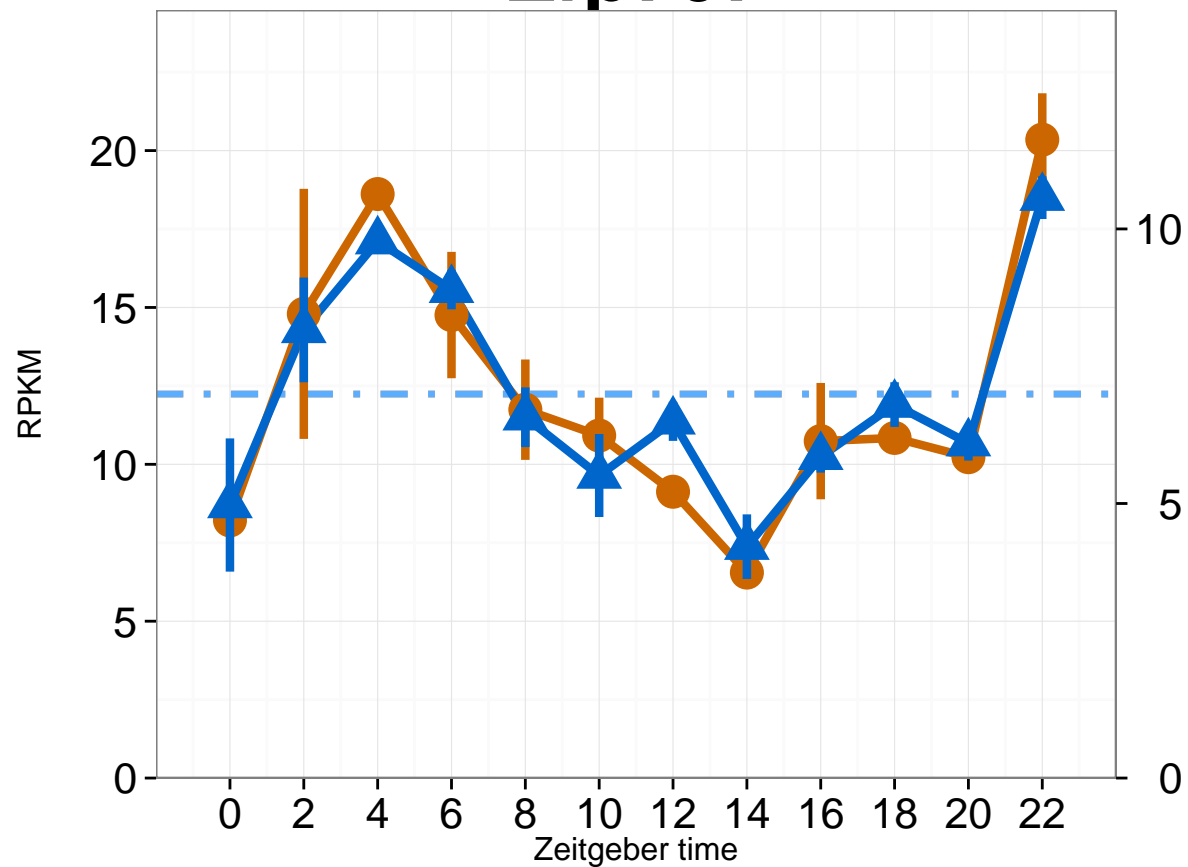

# Zfp707

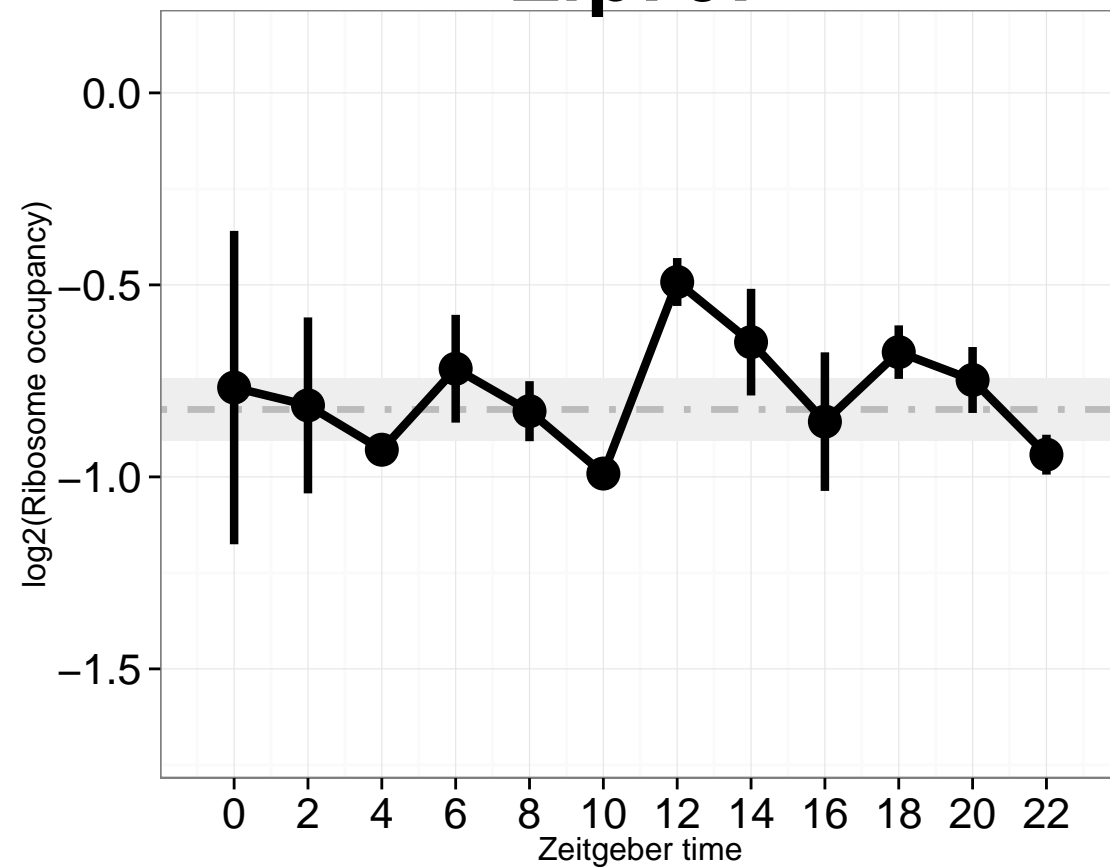

Supplement: SuppDataset_1.zip [file Zfp707_set_A.pdf › Supplemental Dataset 1/A-mRNA_nonrhyth_translation_nonrhyth/Zfp707_set_A.pdf]

## Zfp708

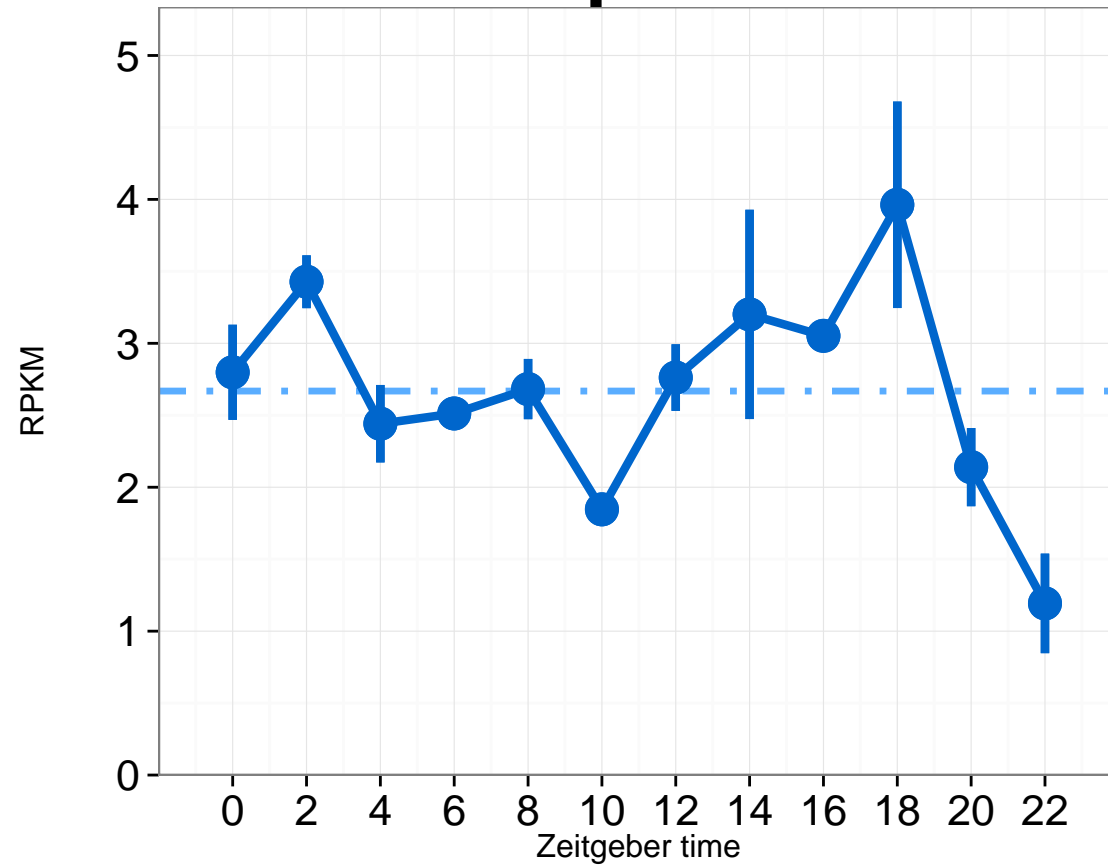

## Zfp708 log2(Ribosome occupancy

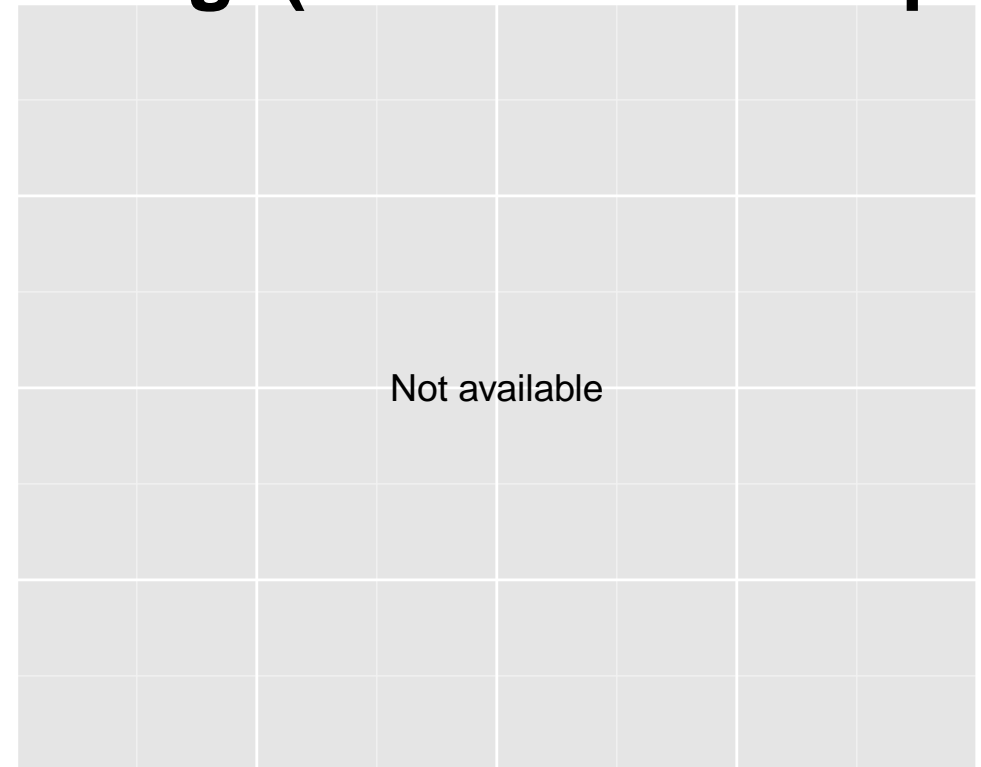

Supplement: SuppDataset_1.zip [file Zfp708_set_A.pdf › Supplemental Dataset 1/A-mRNA_nonrhyth_translation_nonrhyth/Zfp708_set_A.pdf]

# Zfp709

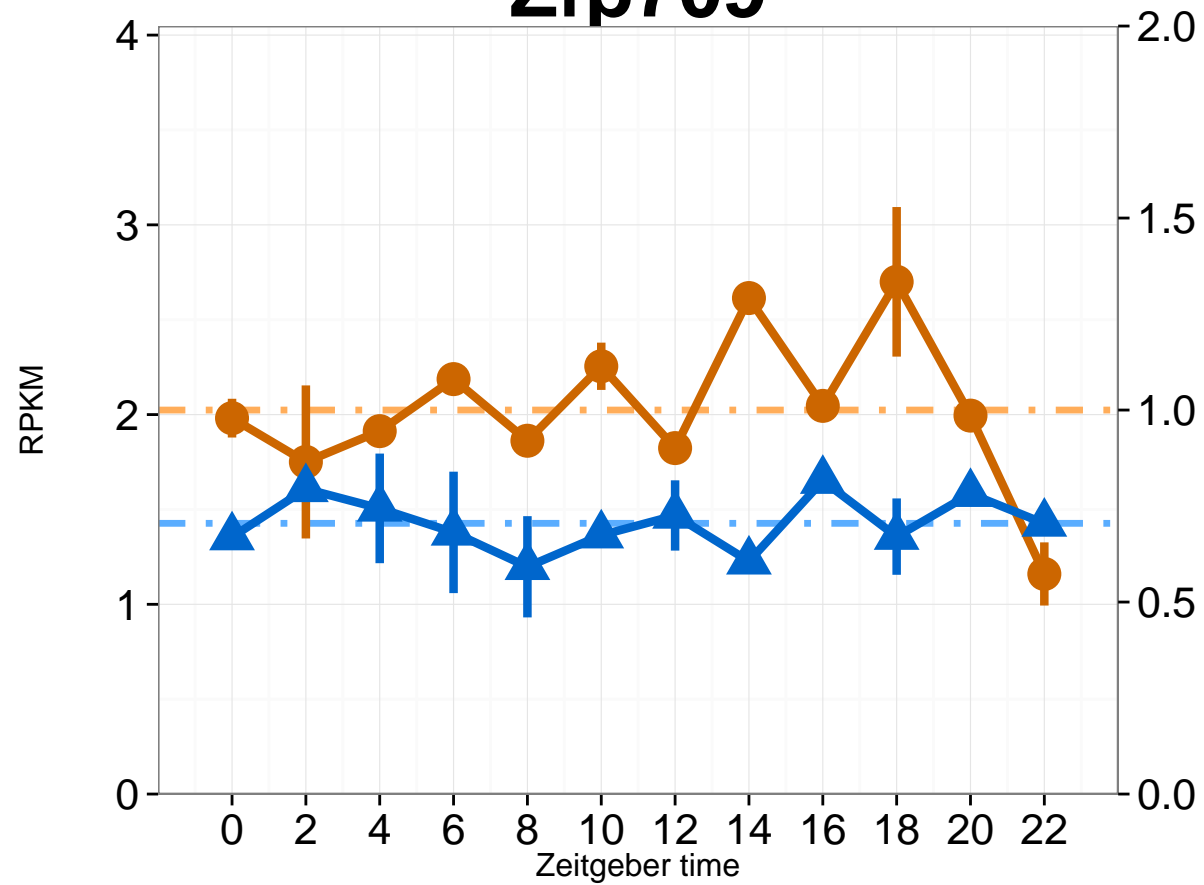

# Zfp709

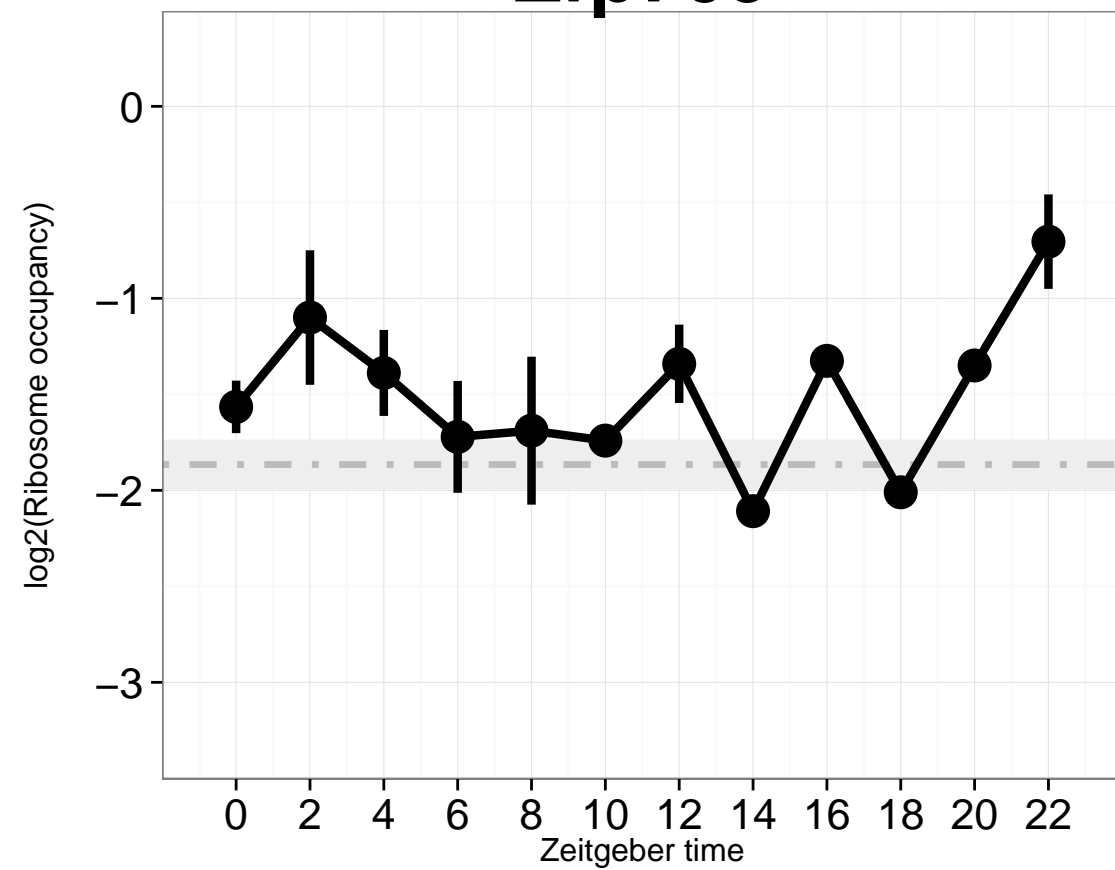

Supplement: SuppDataset_1.zip [file Zfp709_set_A.pdf › Supplemental Dataset 1/A-mRNA_nonrhyth_translation_nonrhyth/Zfp709_set_A.pdf]

# Zfp710

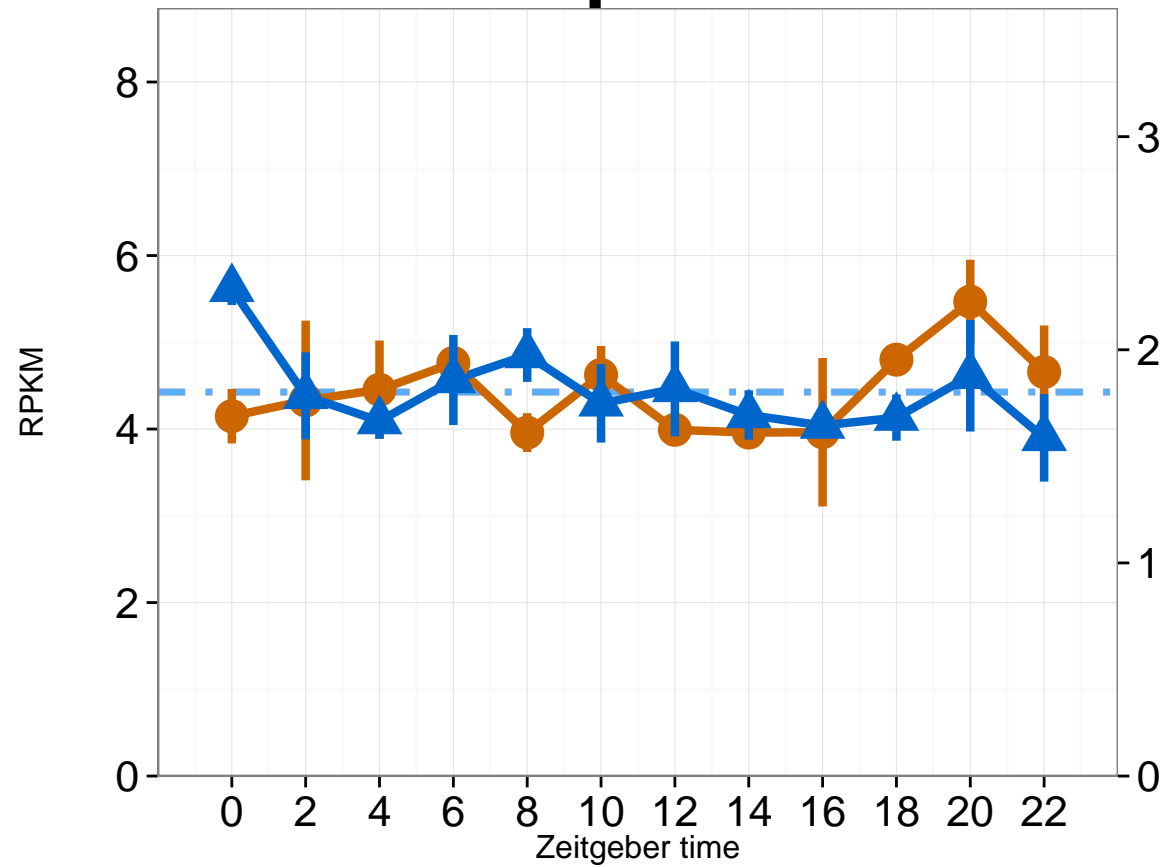

# Zfp710

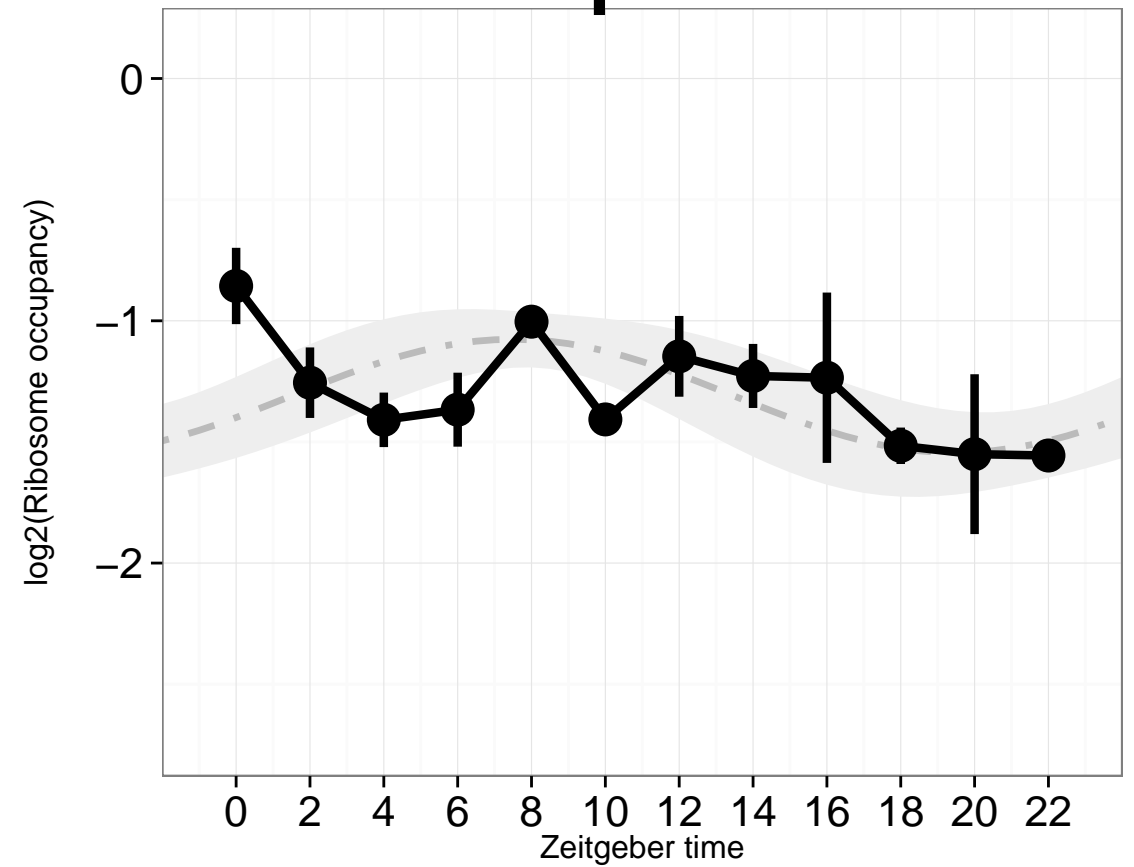

Supplement: SuppDataset_1.zip [file Zfp710_set_A.pdf › Supplemental Dataset 1/A-mRNA_nonrhyth_translation_nonrhyth/Zfp710_set_A.pdf]

# Zfp712

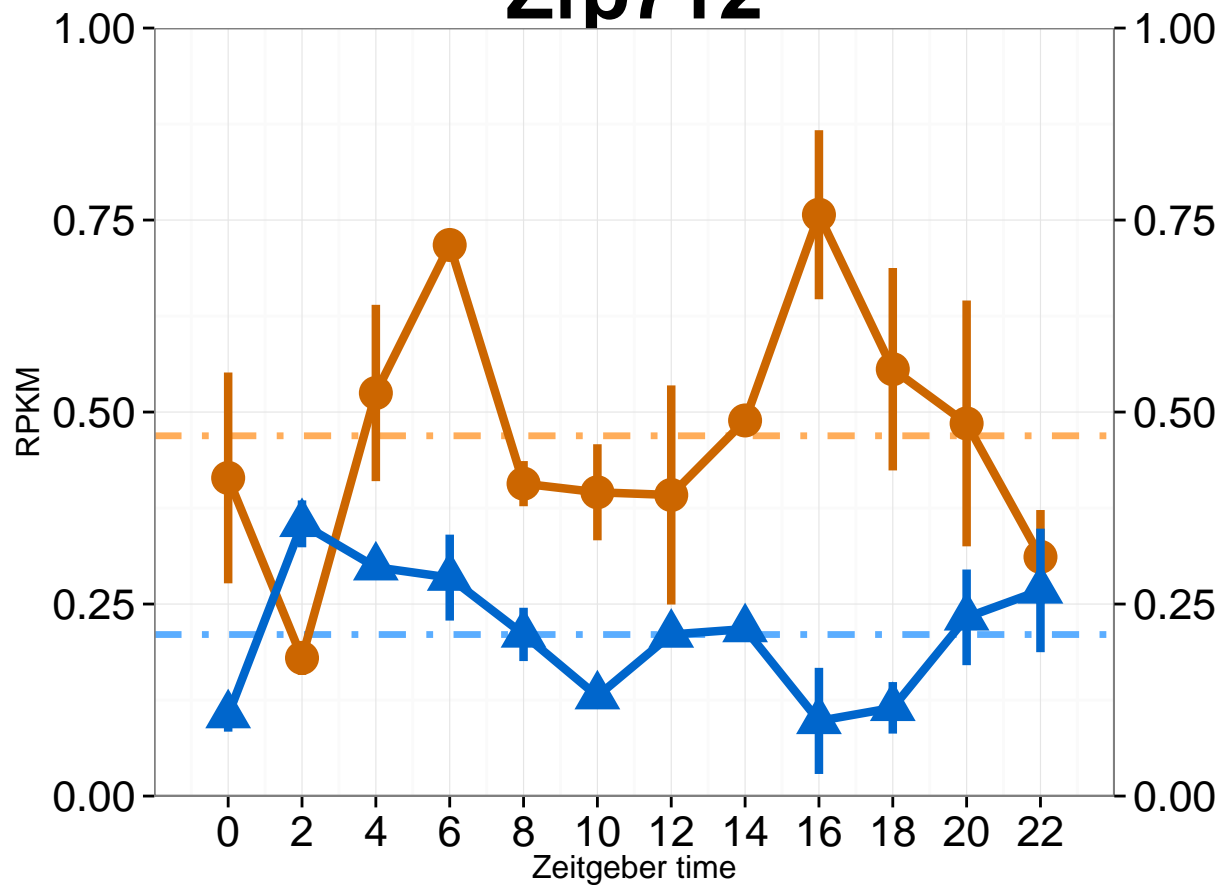

# Zfp712

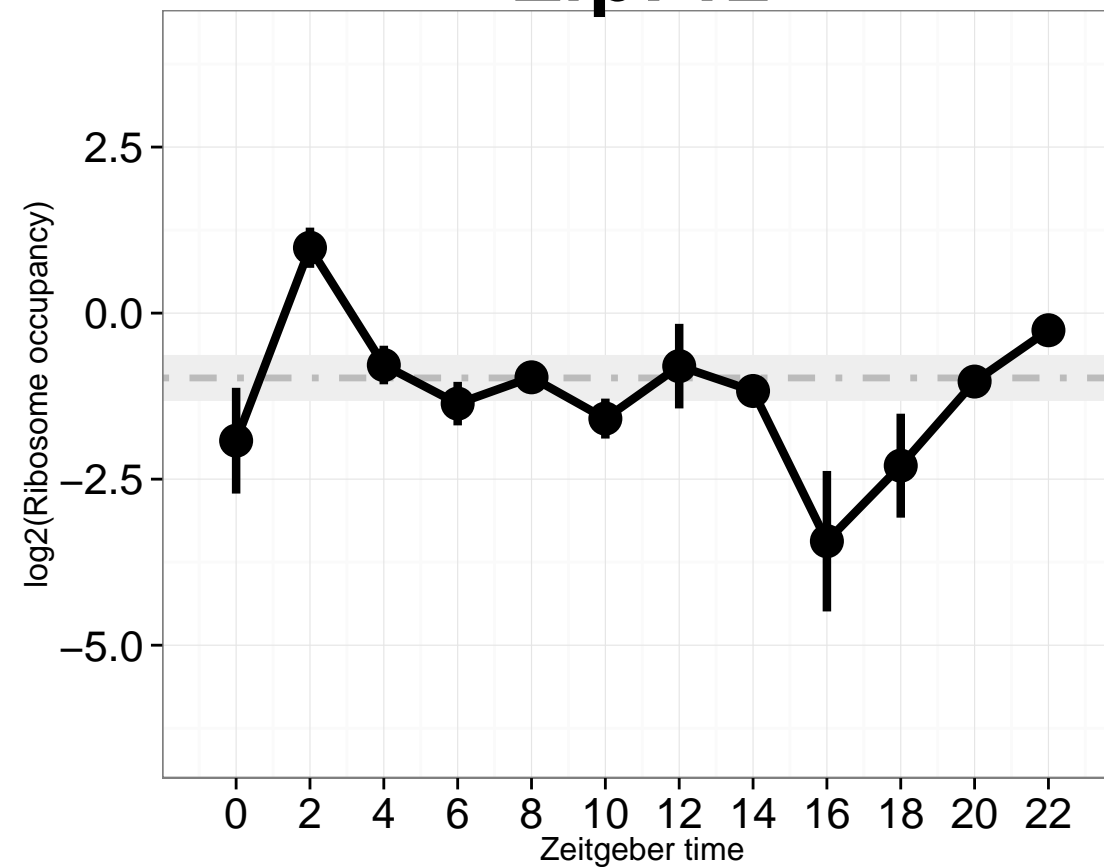

Supplement: SuppDataset_1.zip [file Zfp712_set_A.pdf › Supplemental Dataset 1/A-mRNA_nonrhyth_translation_nonrhyth/Zfp712_set_A.pdf]

## Zfp715

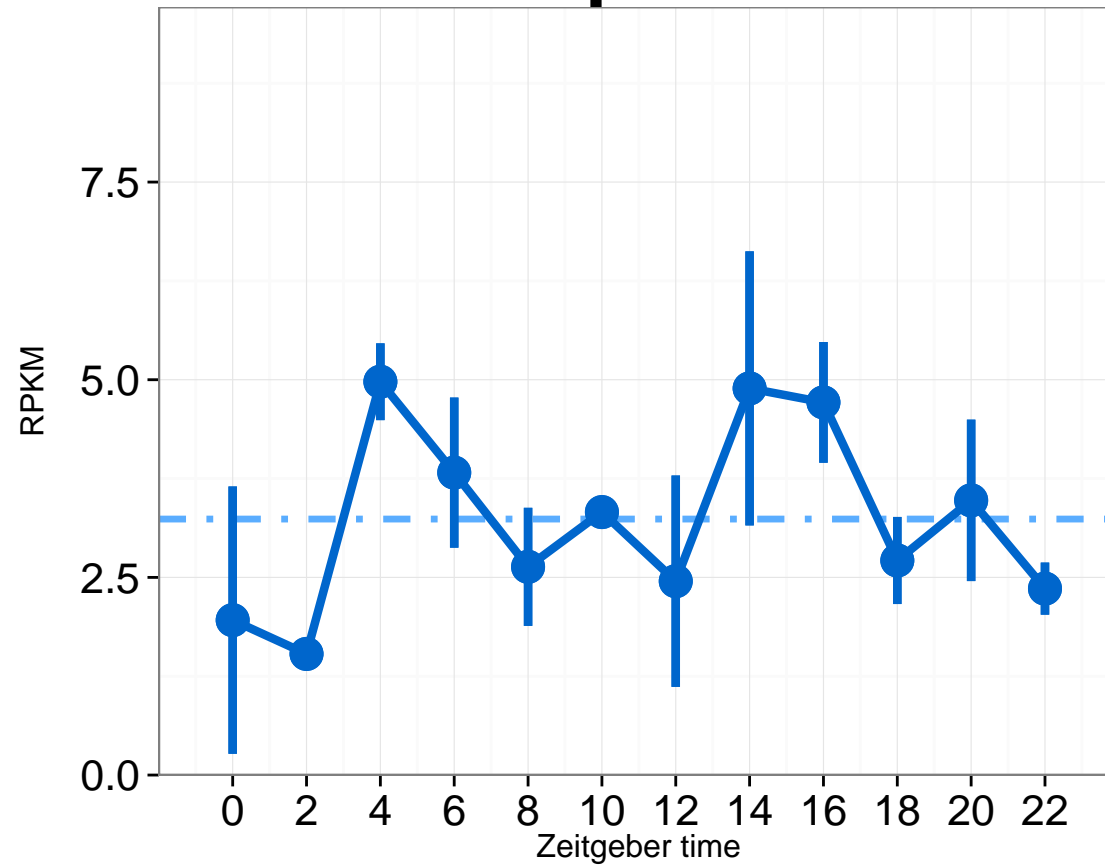

## Zfp715 log2(Ribosome occupancy



Supplement: SuppDataset_1.zip [file Zfp715_set_A.pdf › Supplemental Dataset 1/A-mRNA_nonrhyth_translation_nonrhyth/Zfp715_set_A.pdf]

# Zfp72

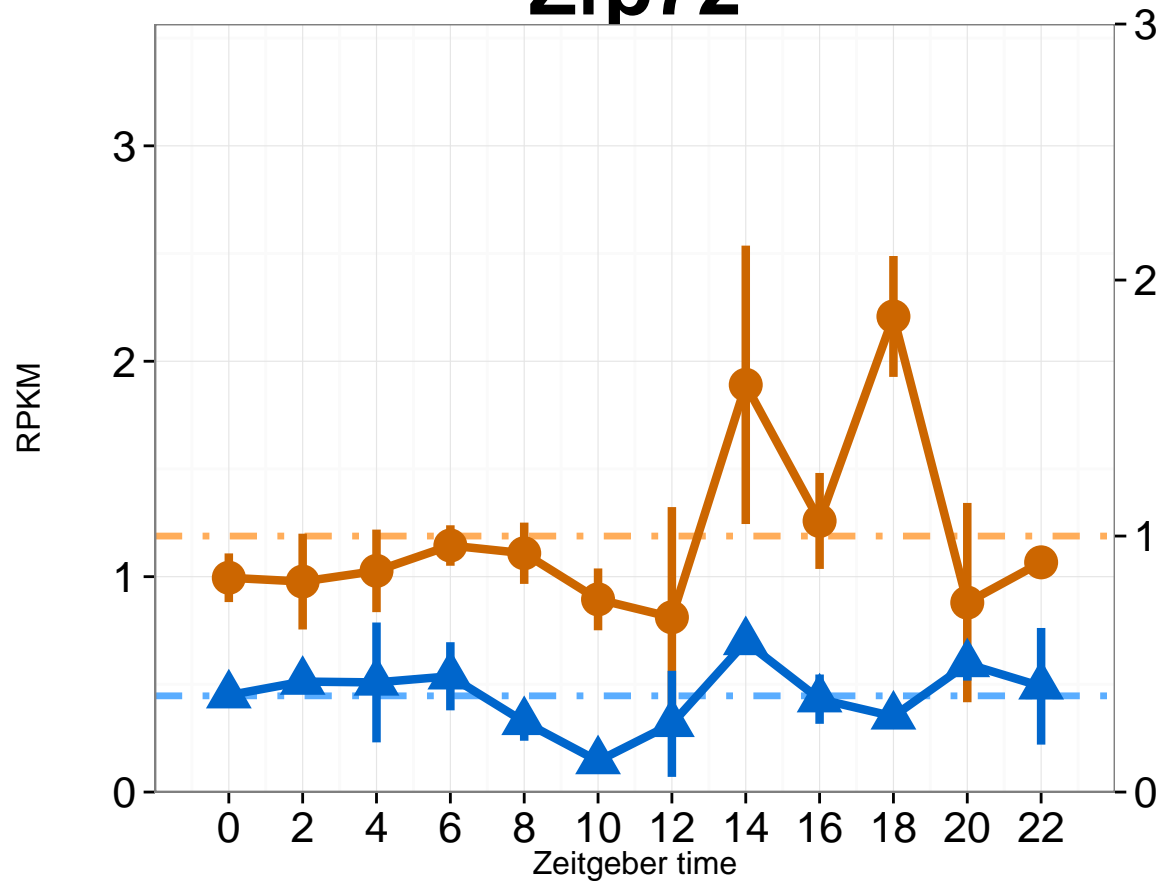

# Zfp72

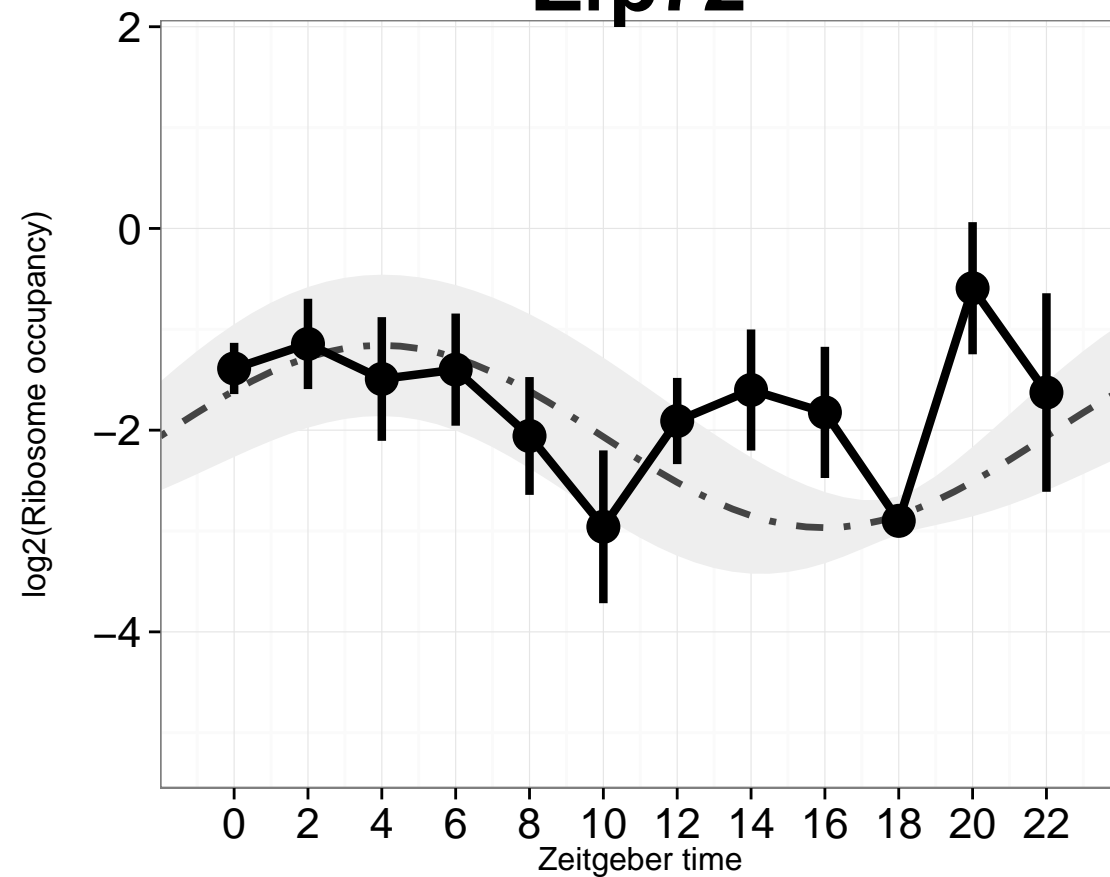

Supplement: SuppDataset_1.zip [file Zfp72_set_A.pdf › Supplemental Dataset 1/A-mRNA_nonrhyth_translation_nonrhyth/Zfp72_set_A.pdf]

# Zfp738

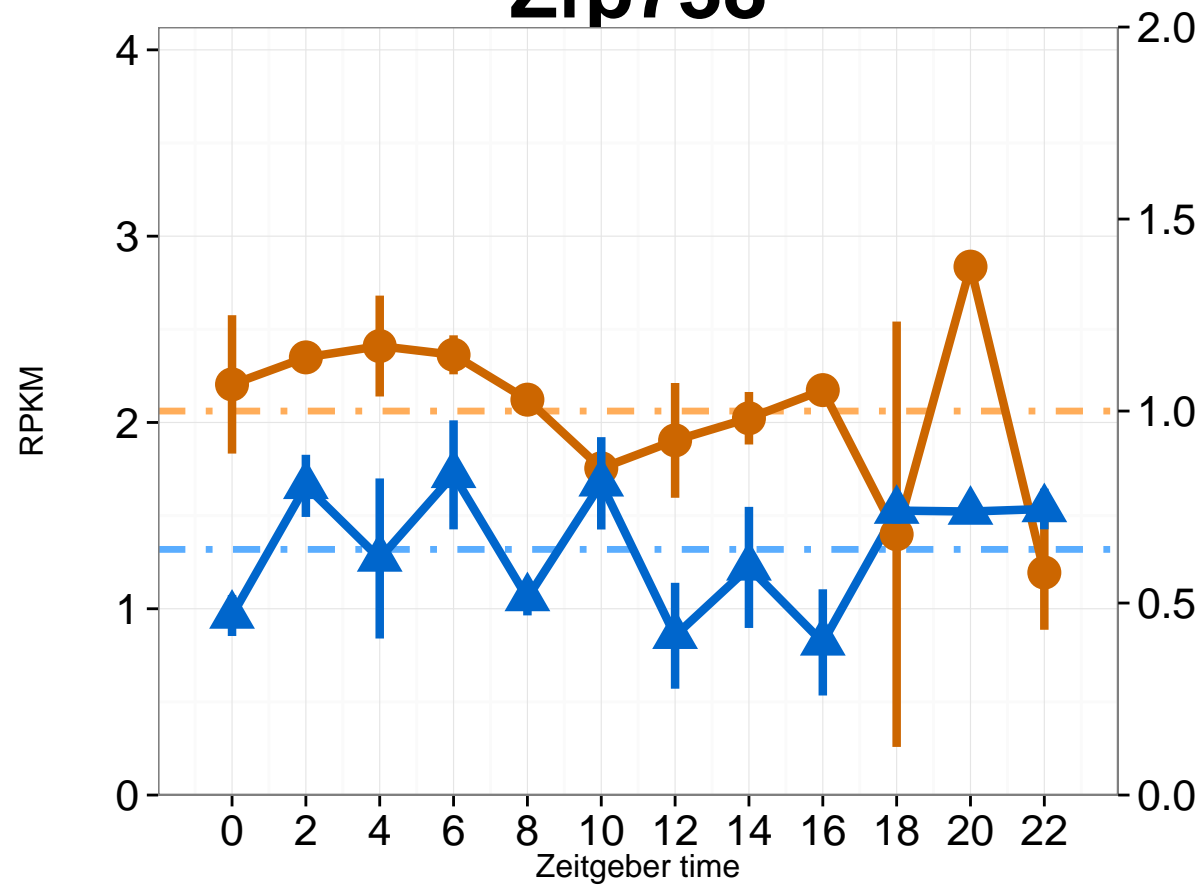

# Zfp738

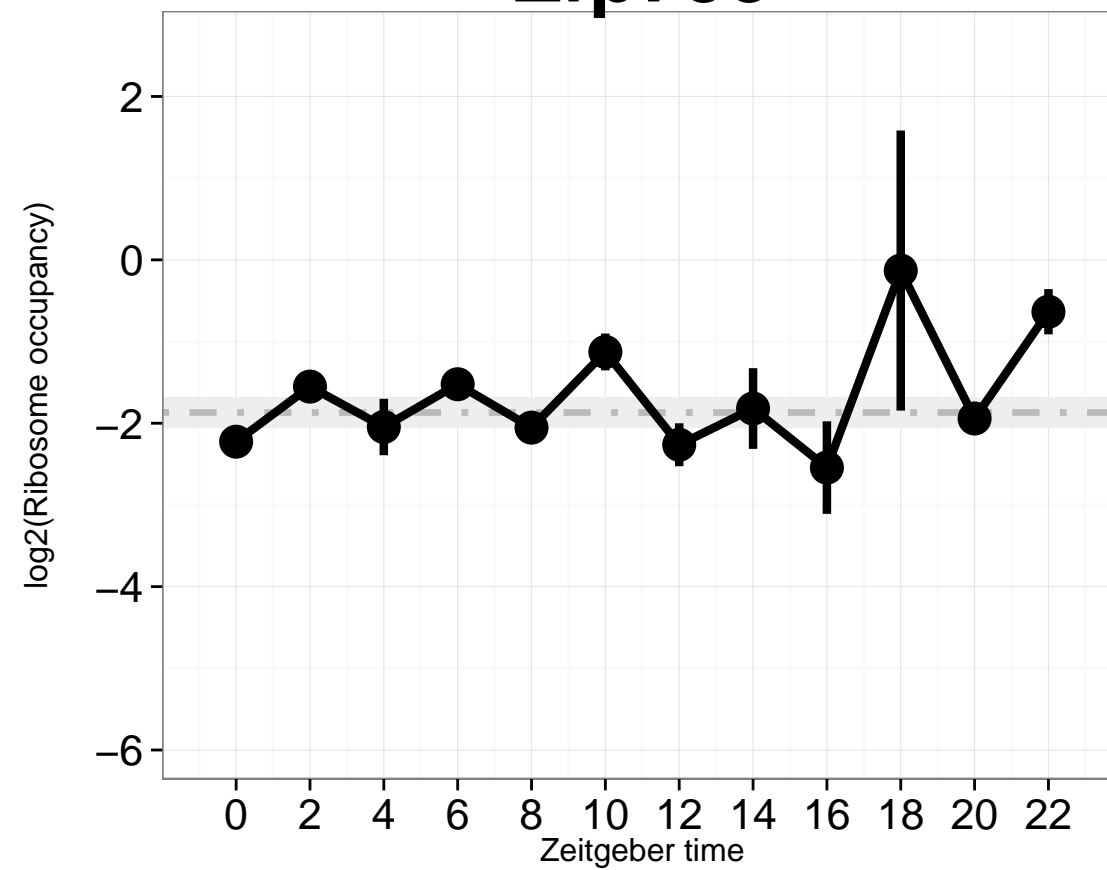

Supplement: SuppDataset_1.zip [file Zfp738_set_A.pdf › Supplemental Dataset 1/A-mRNA_nonrhyth_translation_nonrhyth/Zfp738_set_A.pdf]

# Zfp740

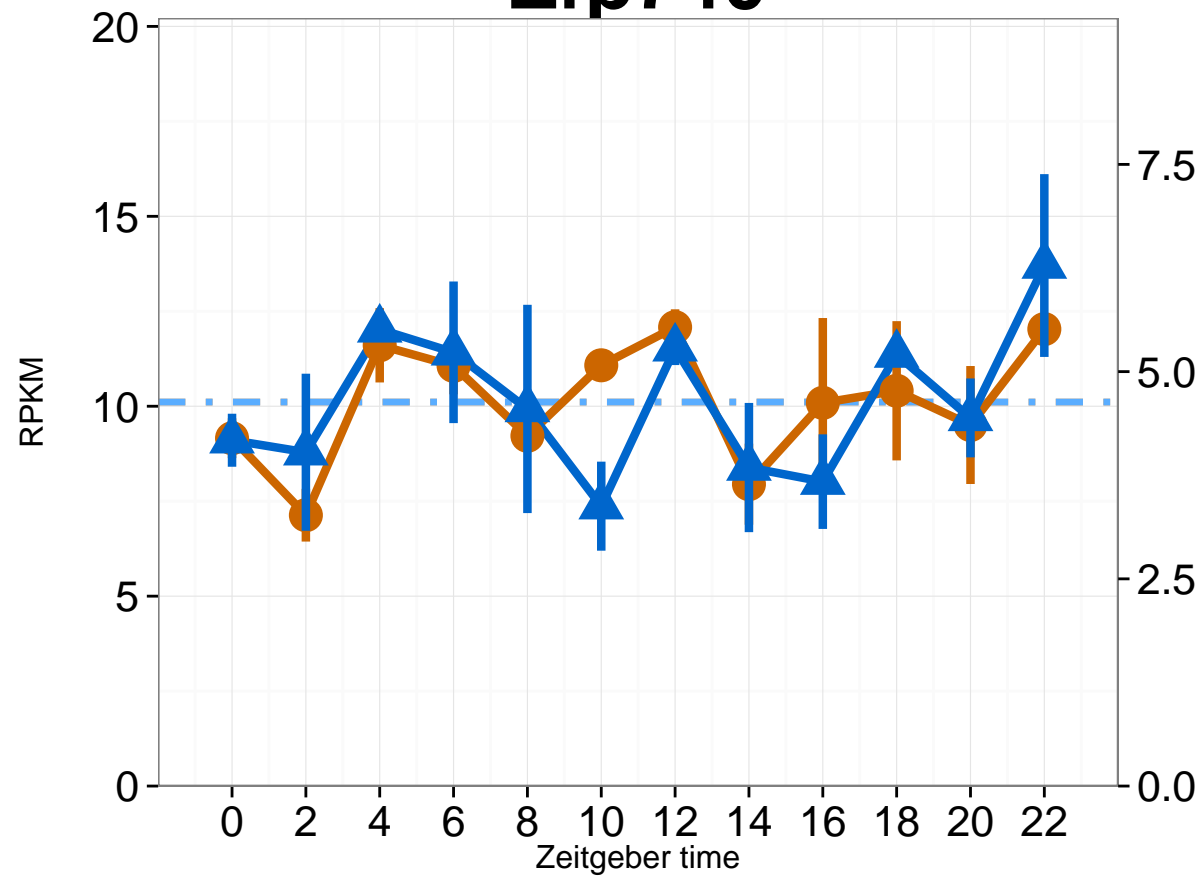

# Zfp740

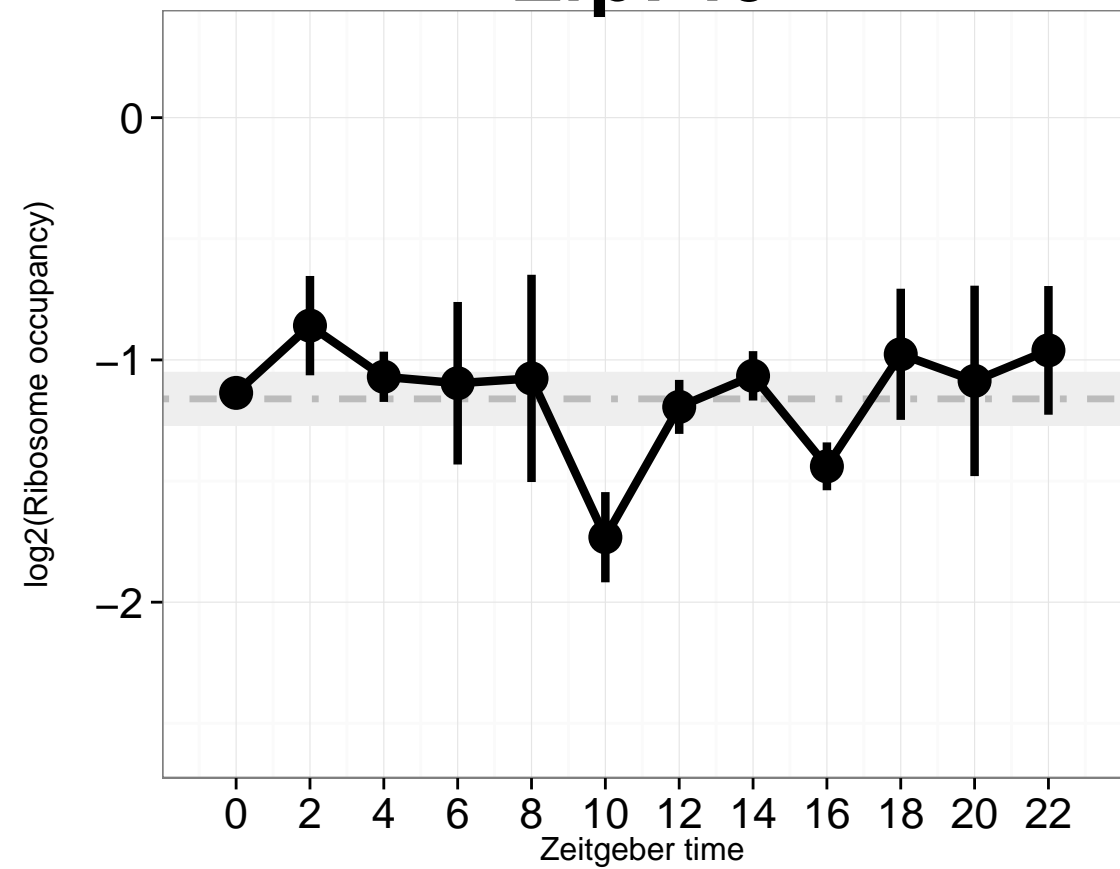

Supplement: SuppDataset_1.zip [file Zfp740_set_A.pdf › Supplemental Dataset 1/A-mRNA_nonrhyth_translation_nonrhyth/Zfp740_set_A.pdf]

# Zfp746

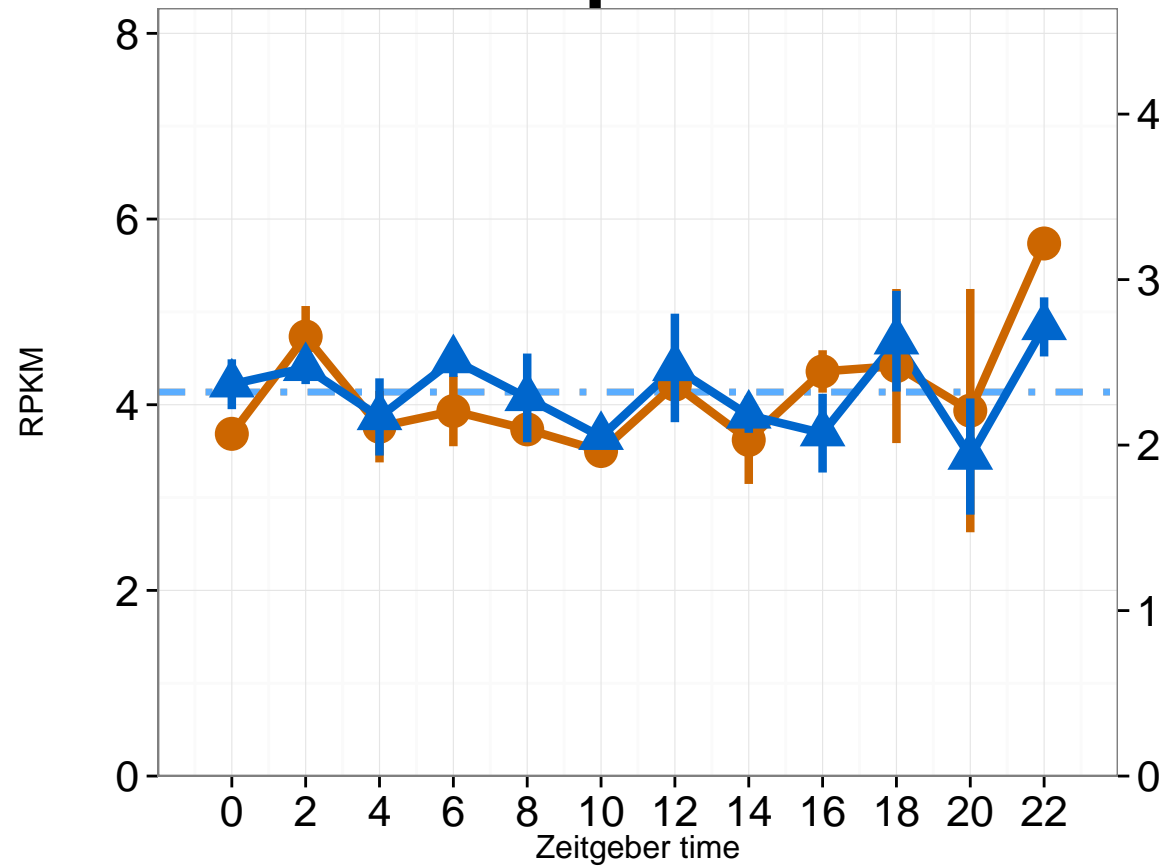

# Zfp746

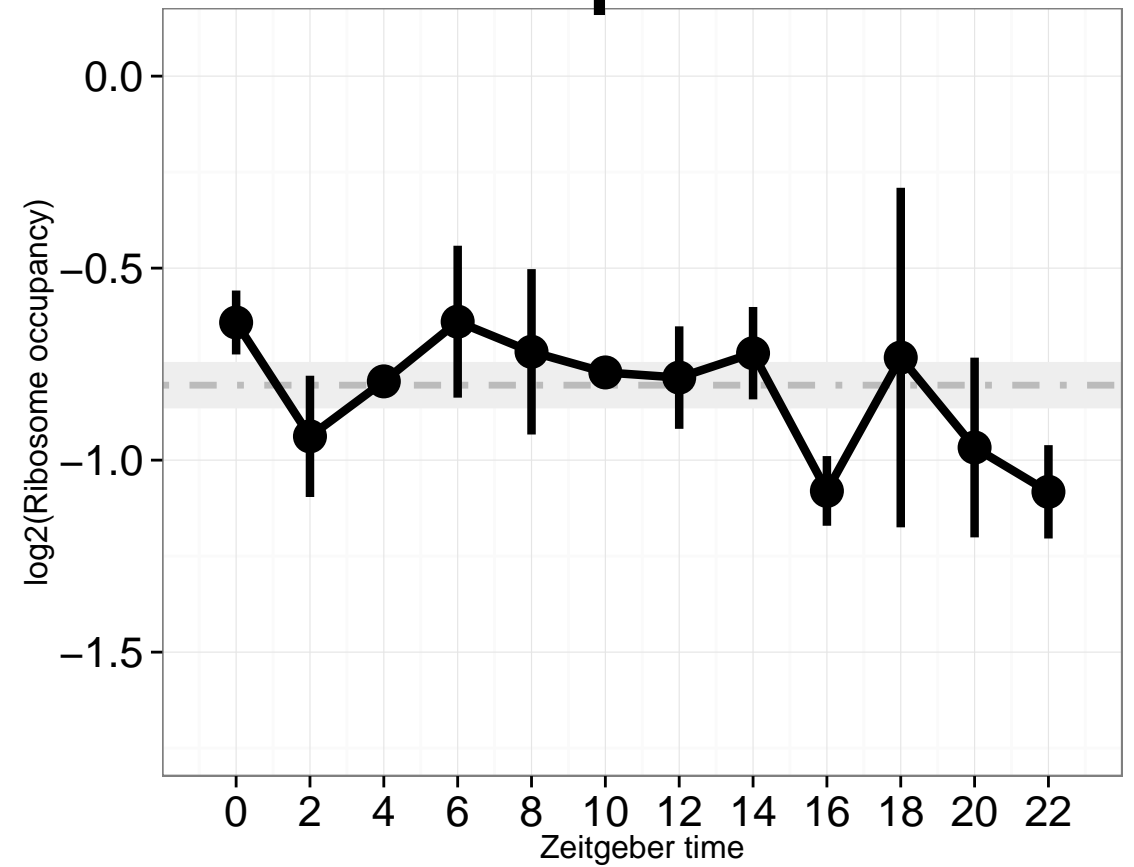

Supplement: SuppDataset_1.zip [file Zfp746_set_A.pdf › Supplemental Dataset 1/A-mRNA_nonrhyth_translation_nonrhyth/Zfp746_set_A.pdf]

# Zfp747

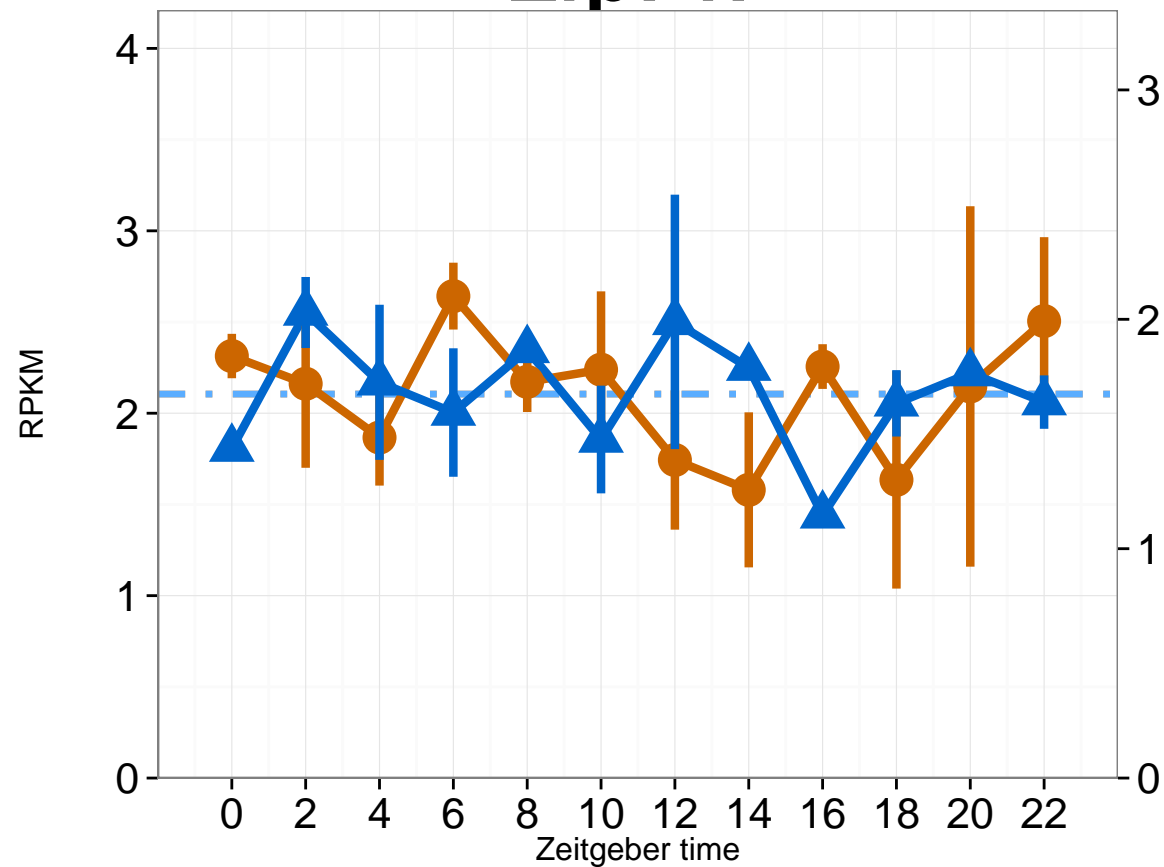

# Zfp747

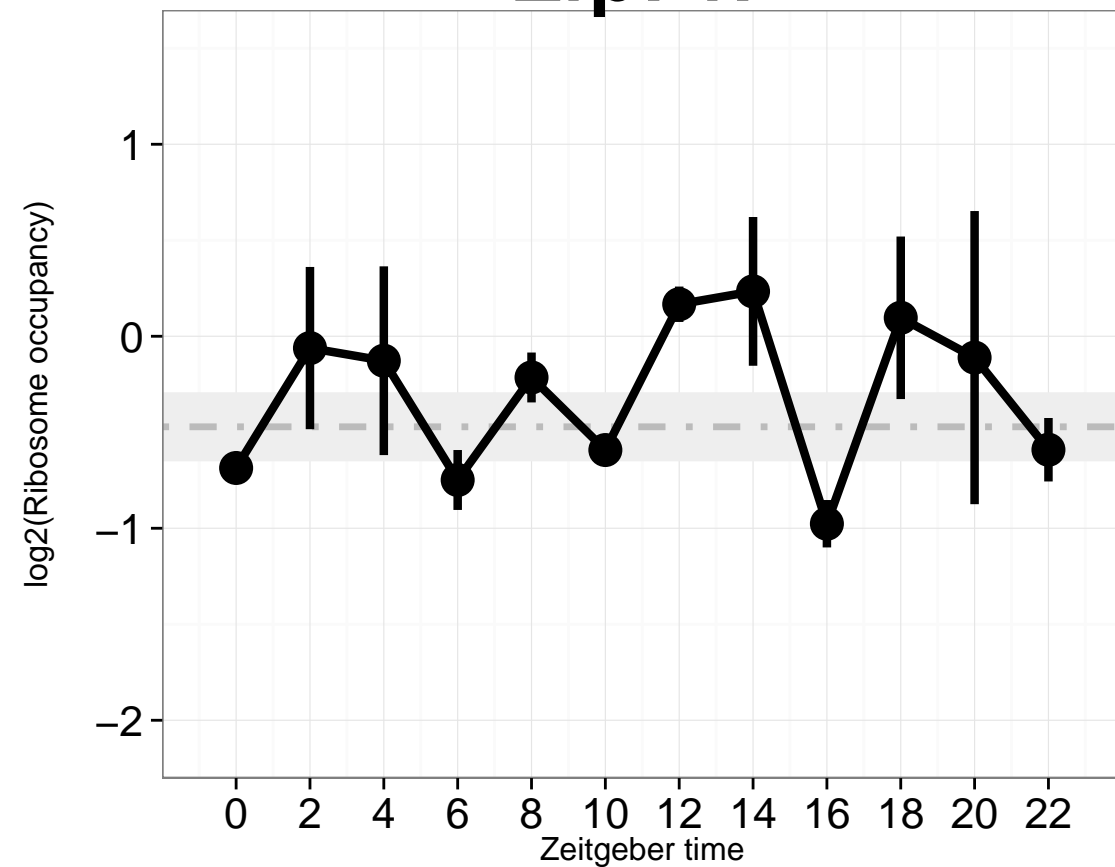

Supplement: SuppDataset_1.zip [file Zfp747_set_A.pdf › Supplemental Dataset 1/A-mRNA_nonrhyth_translation_nonrhyth/Zfp747_set_A.pdf]

# Zfp748

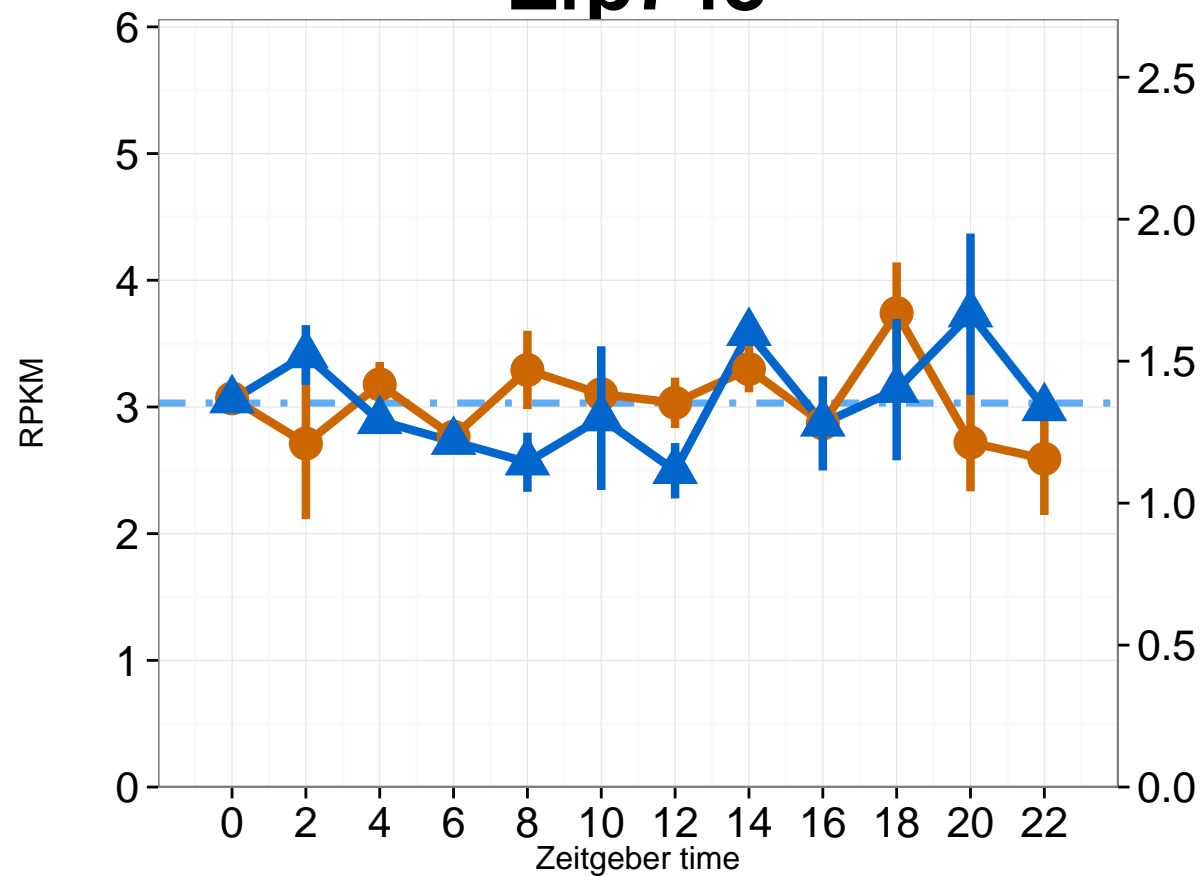

# Zfp748

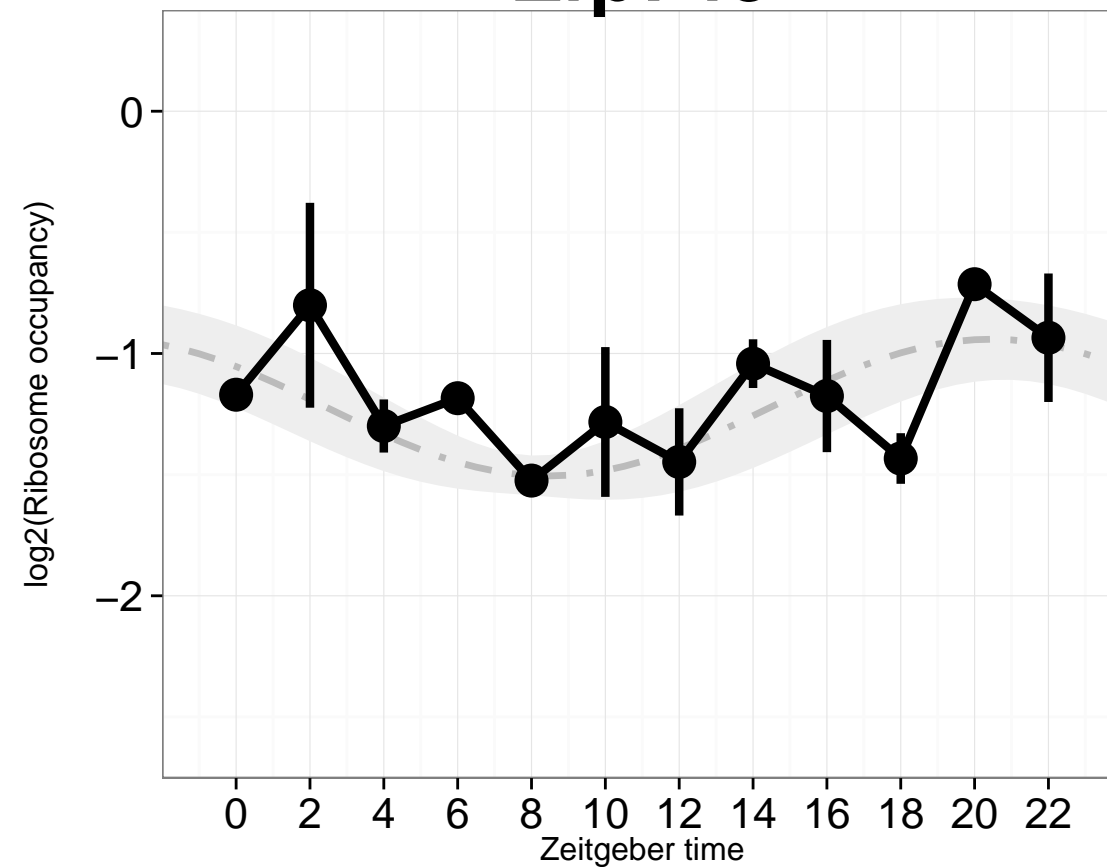

Supplement: SuppDataset_1.zip [file Zfp748_set_A.pdf › Supplemental Dataset 1/A-mRNA_nonrhyth_translation_nonrhyth/Zfp748_set_A.pdf]
