# Supplementary figures and images for: Ribosome profiling reveals the rhythmic liver translatome and circadian clock regulation by upstream open reading frames (part 86 of 113)
Source: HighWire-hosted journal article supplement (doi:10.1101/gr.195404.115), 2015-10-20

# Zfp750

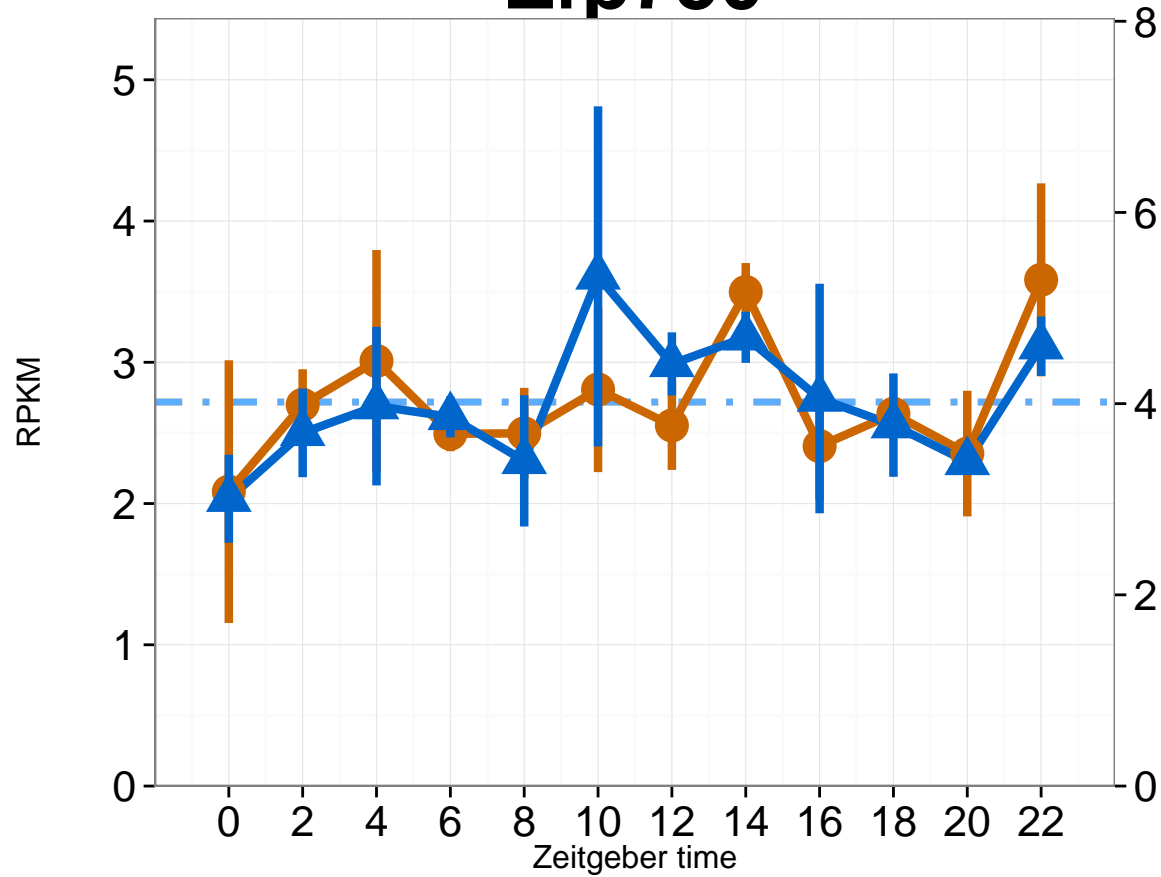

# Zfp750

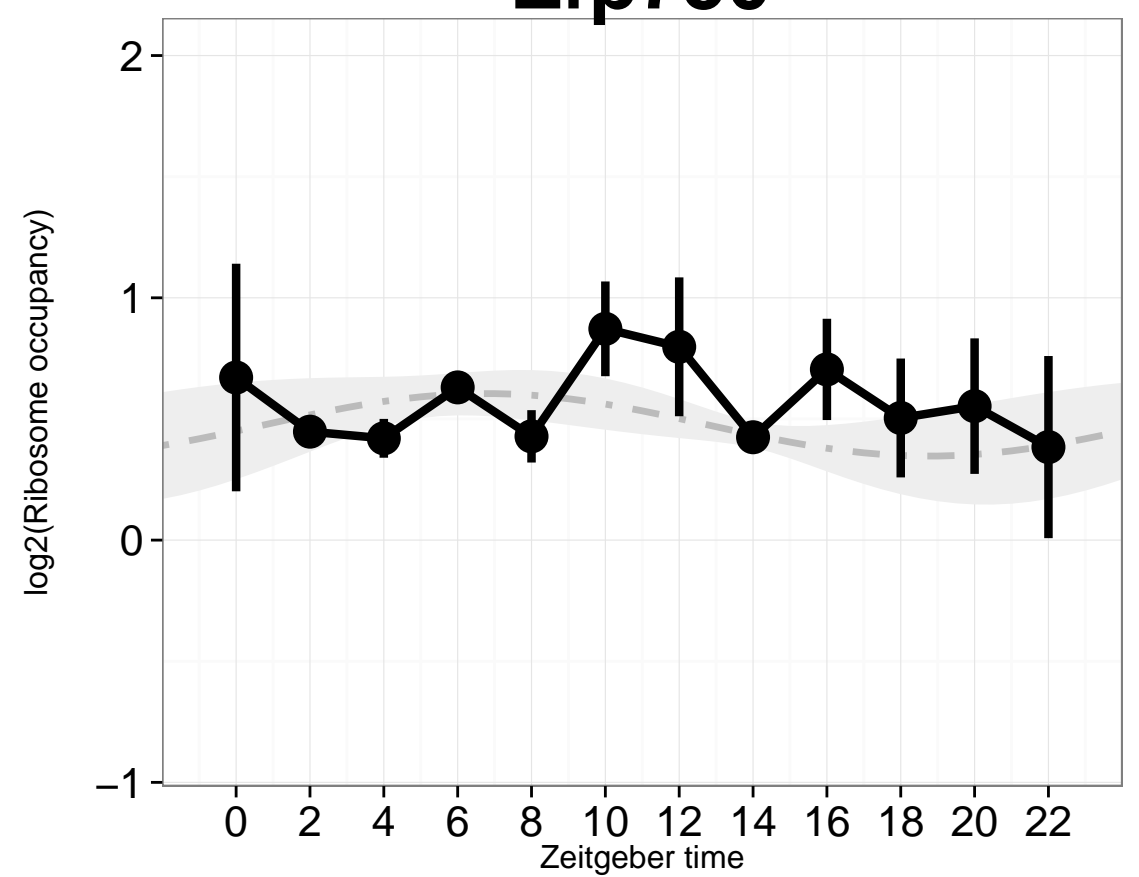

Supplement: SuppDataset_1.zip [file Zfp750_set_A.pdf › Supplemental Dataset 1/A-mRNA_nonrhyth_translation_nonrhyth/Zfp750_set_A.pdf]

# Zfp758

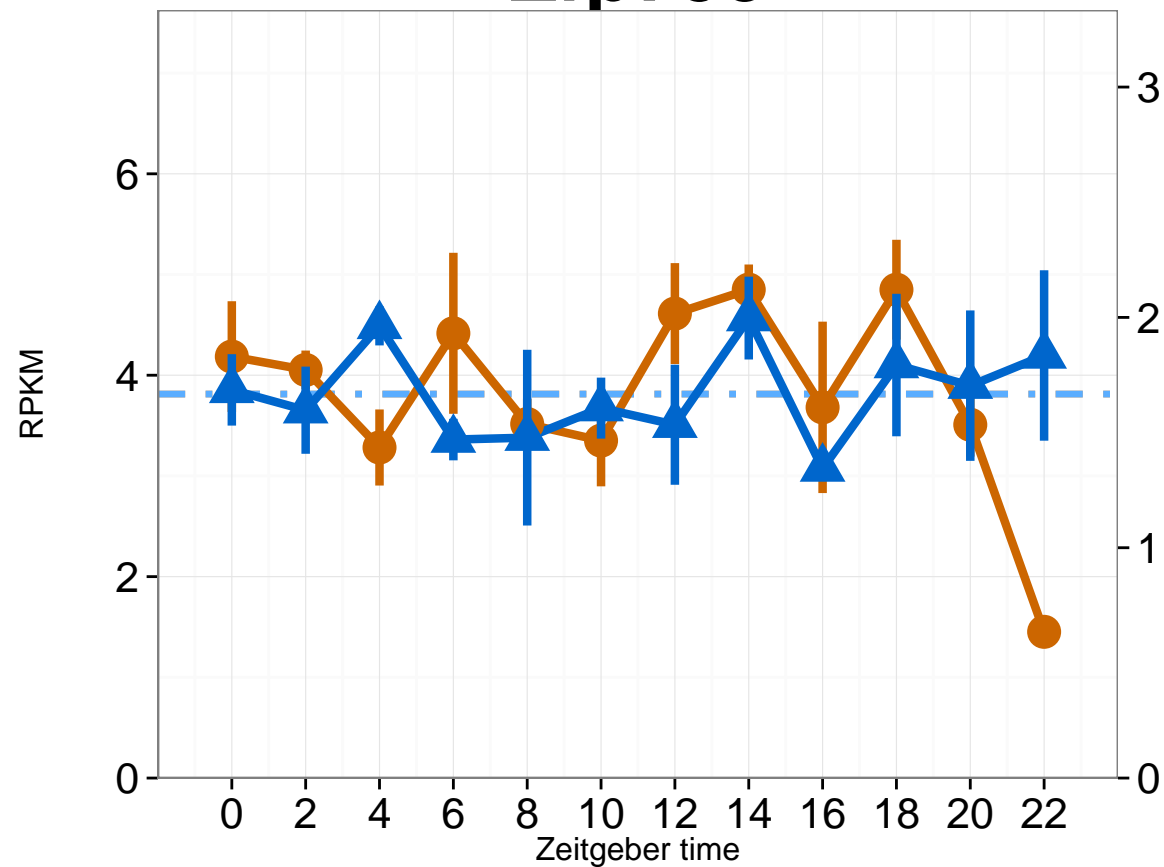

# Zfp758

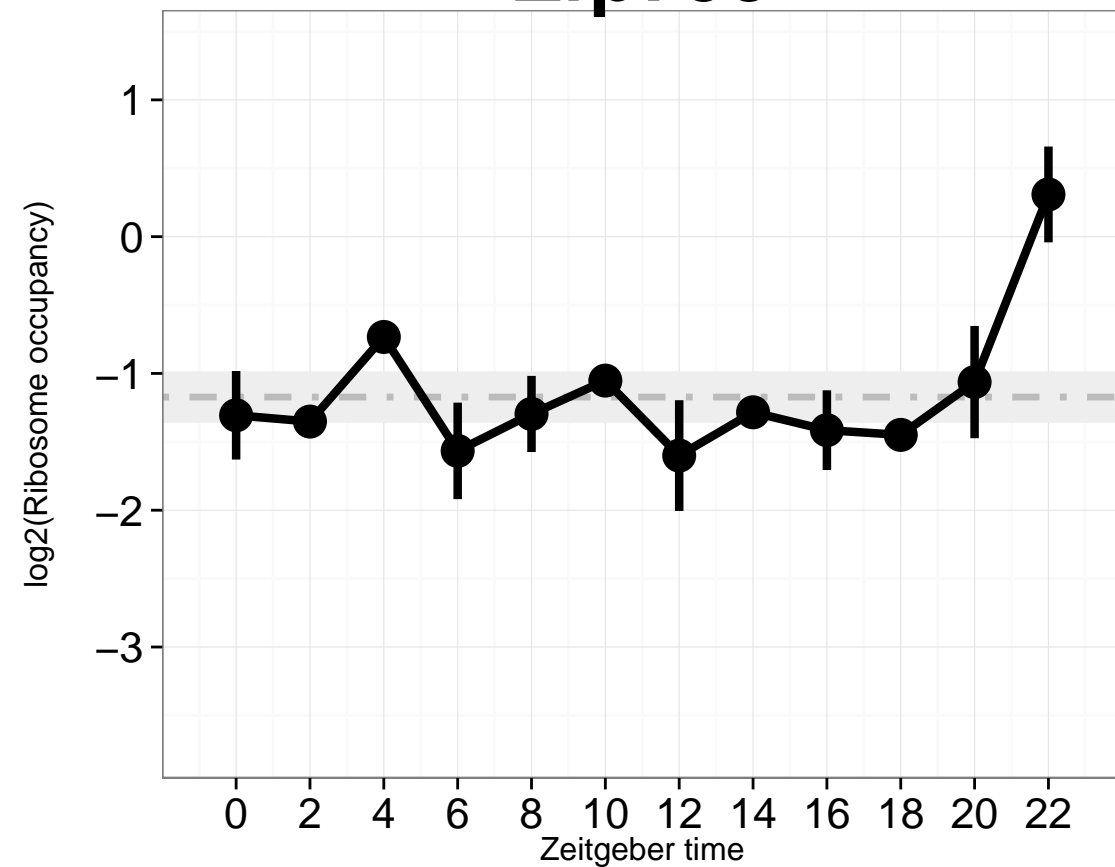

Supplement: SuppDataset_1.zip [file Zfp758_set_A.pdf › Supplemental Dataset 1/A-mRNA_nonrhyth_translation_nonrhyth/Zfp758_set_A.pdf]

# Zfp759

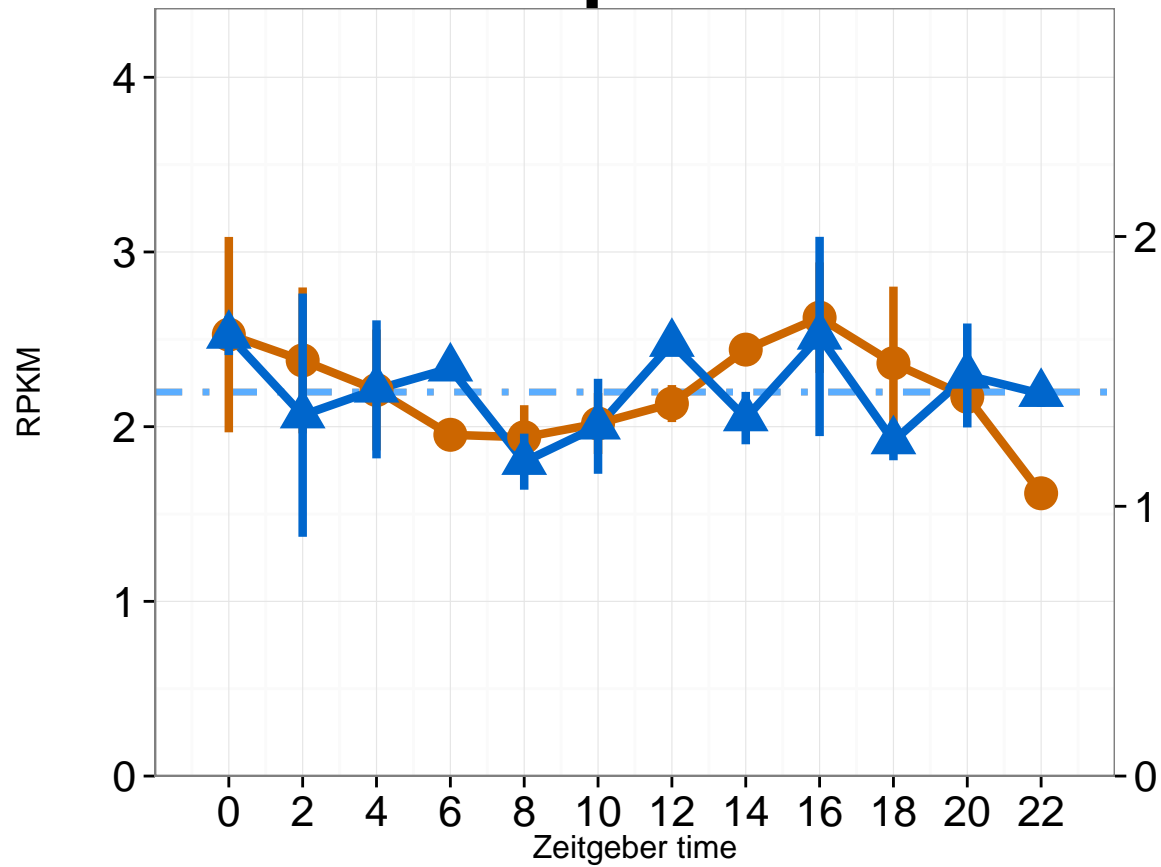

# Zfp759

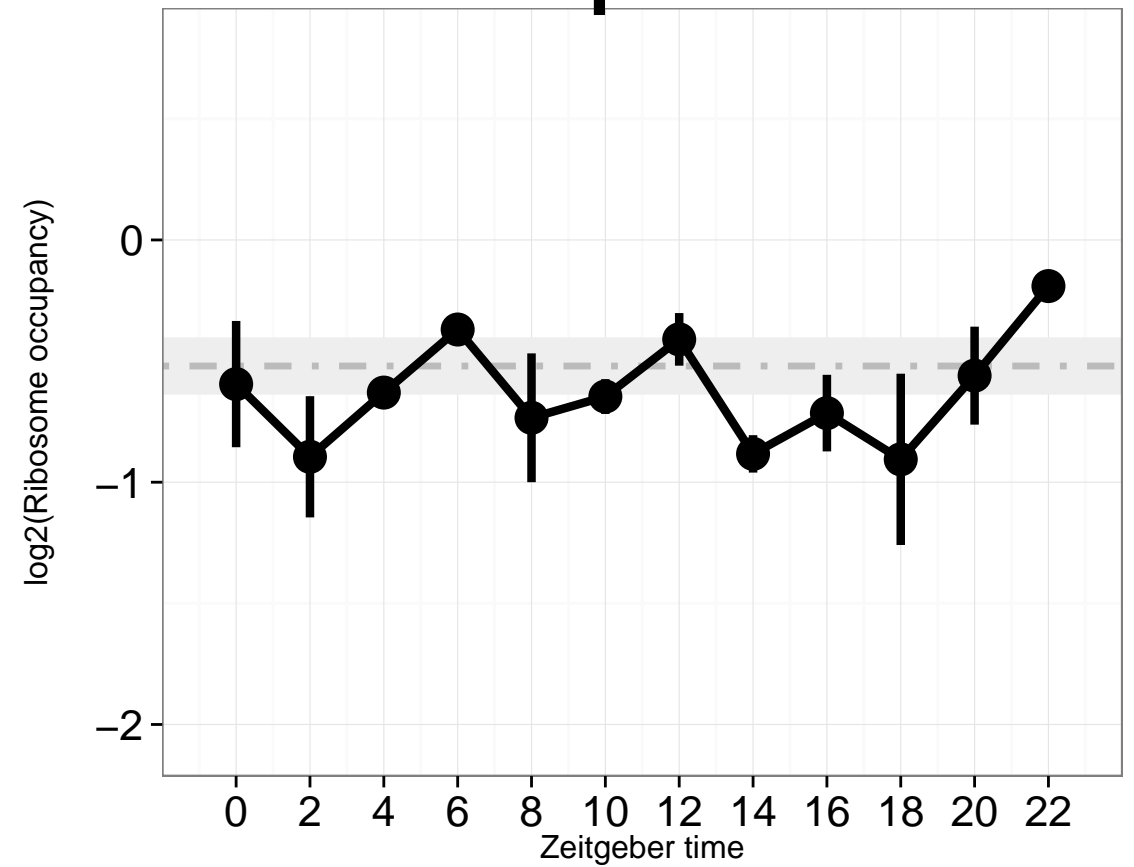

Supplement: SuppDataset_1.zip [file Zfp759_set_A.pdf › Supplemental Dataset 1/A-mRNA_nonrhyth_translation_nonrhyth/Zfp759_set_A.pdf]

# Zfp760

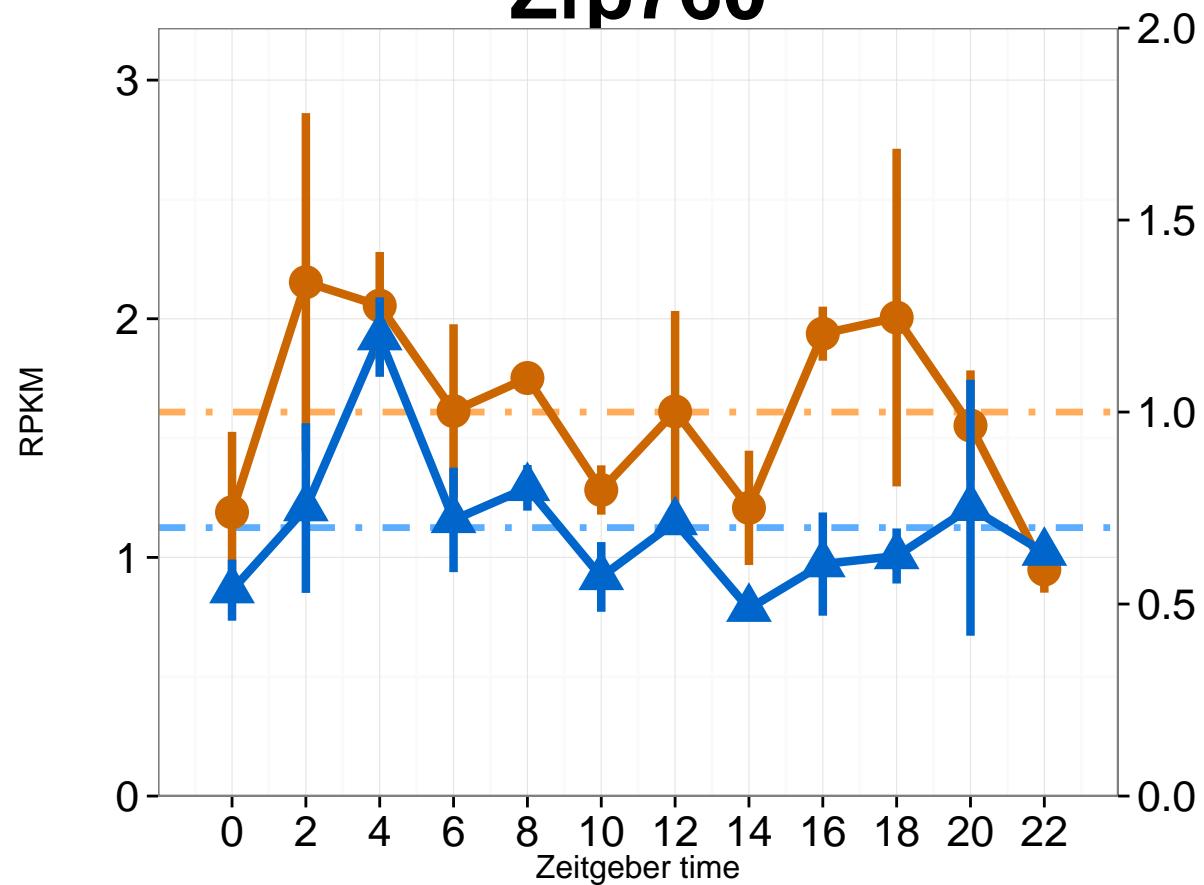

# Zfp760

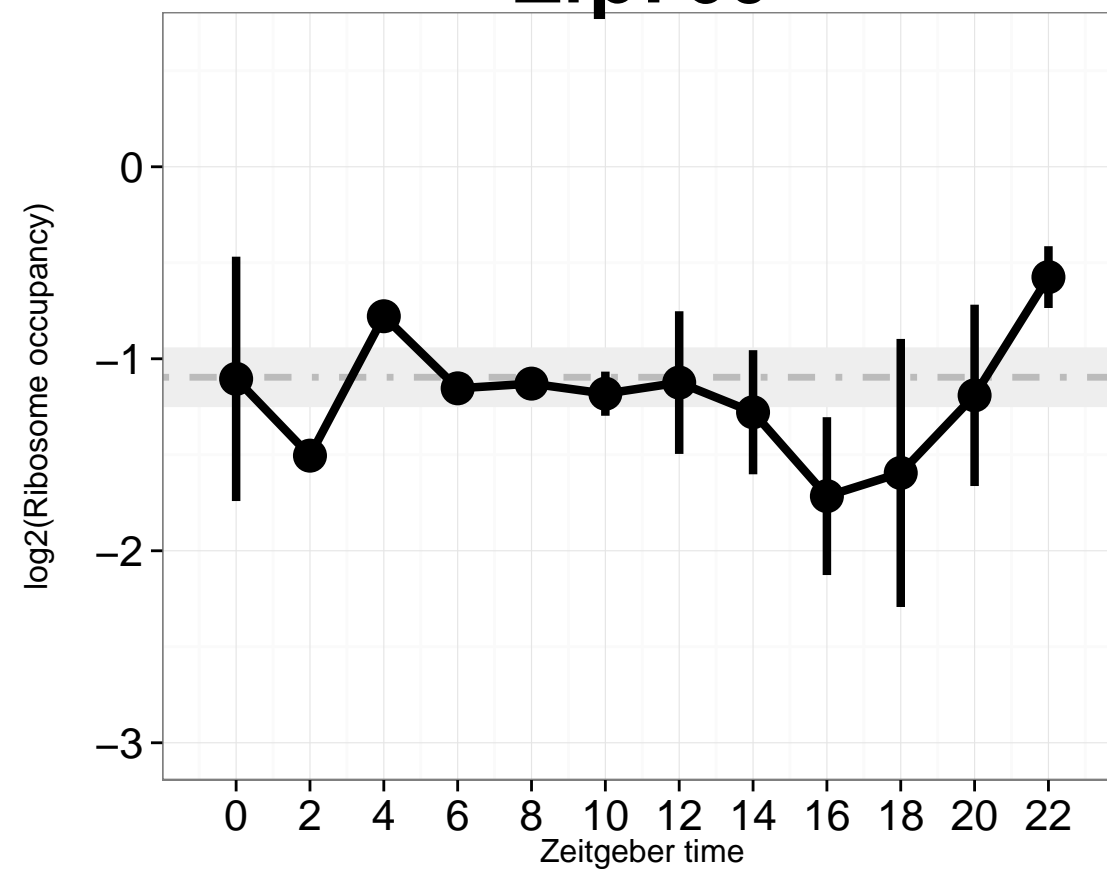

Supplement: SuppDataset_1.zip [file Zfp760_set_A.pdf › Supplemental Dataset 1/A-mRNA_nonrhyth_translation_nonrhyth/Zfp760_set_A.pdf]

# Zfp763

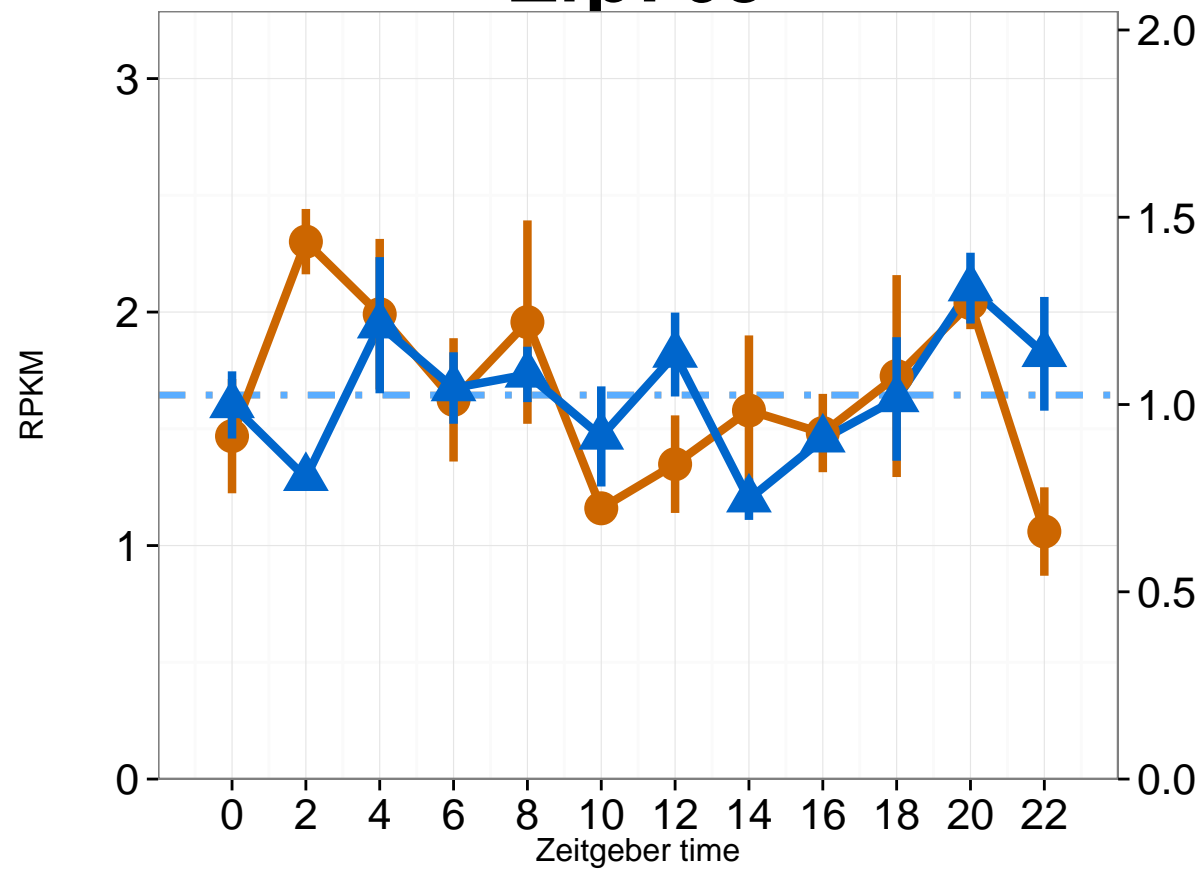

# Zfp763

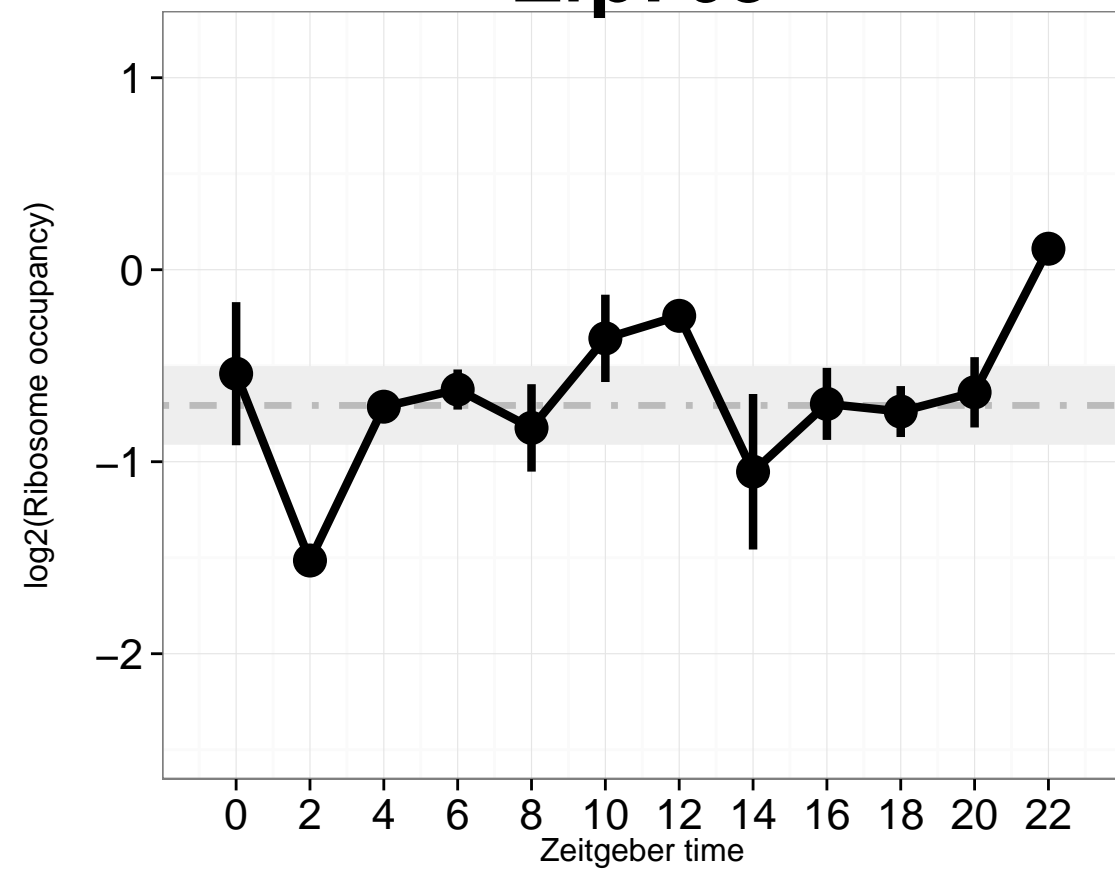

Supplement: SuppDataset_1.zip [file Zfp763_set_A.pdf › Supplemental Dataset 1/A-mRNA_nonrhyth_translation_nonrhyth/Zfp763_set_A.pdf]

# Zfp764

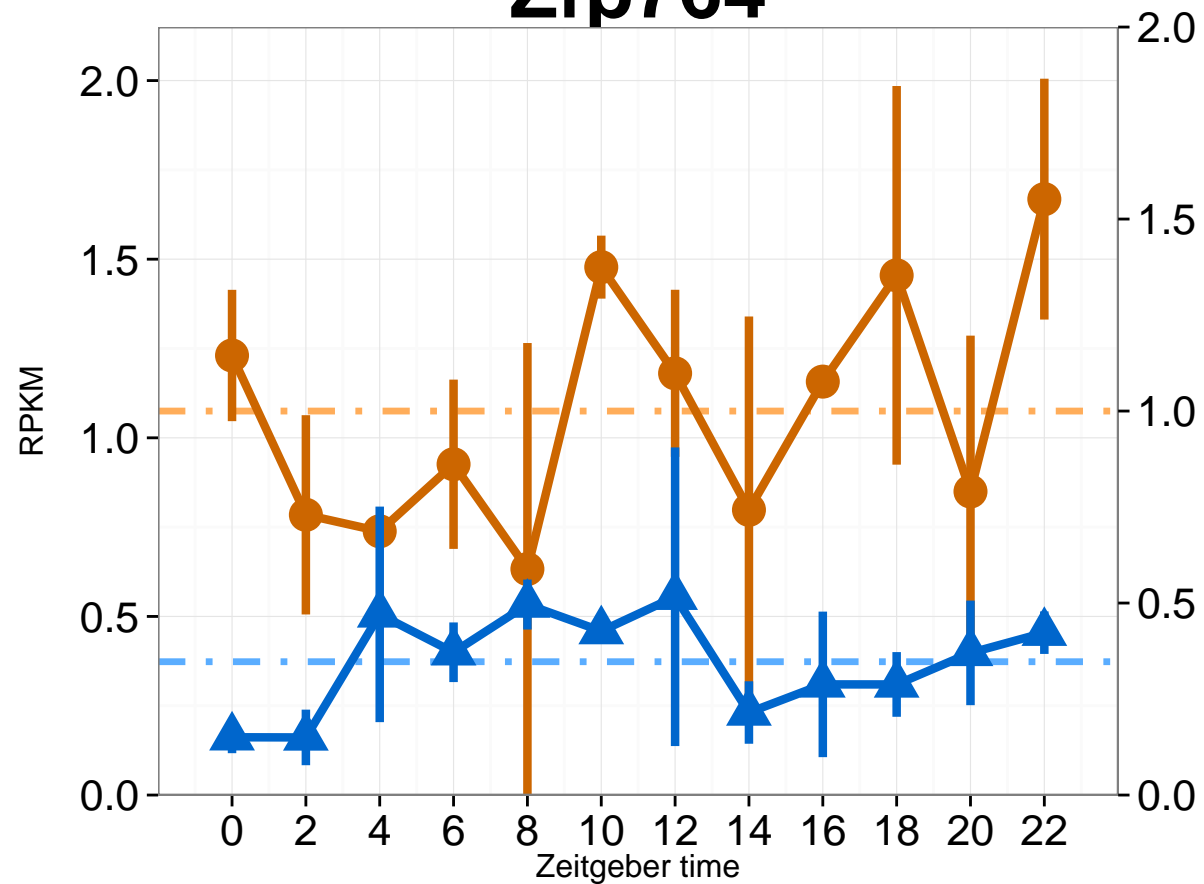

# Zfp764

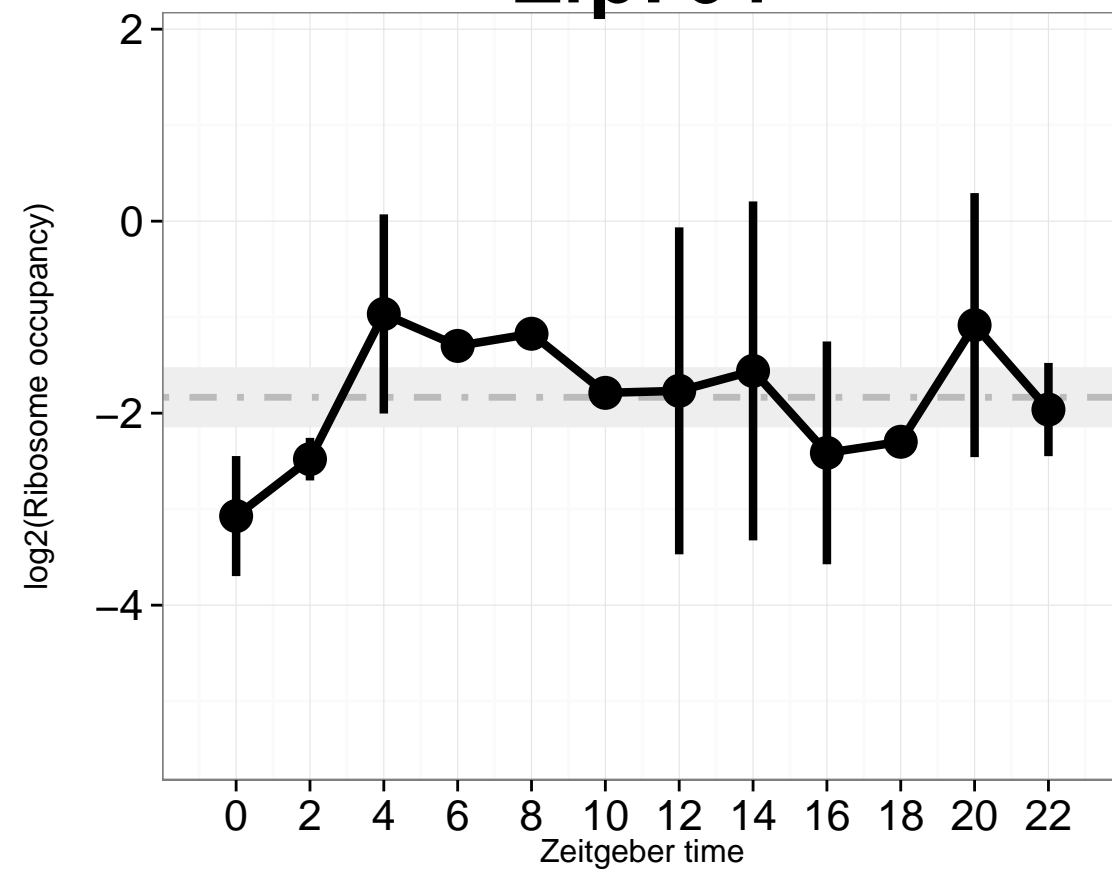

Supplement: SuppDataset_1.zip [file Zfp764_set_A.pdf › Supplemental Dataset 1/A-mRNA_nonrhyth_translation_nonrhyth/Zfp764_set_A.pdf]

# Zfp768

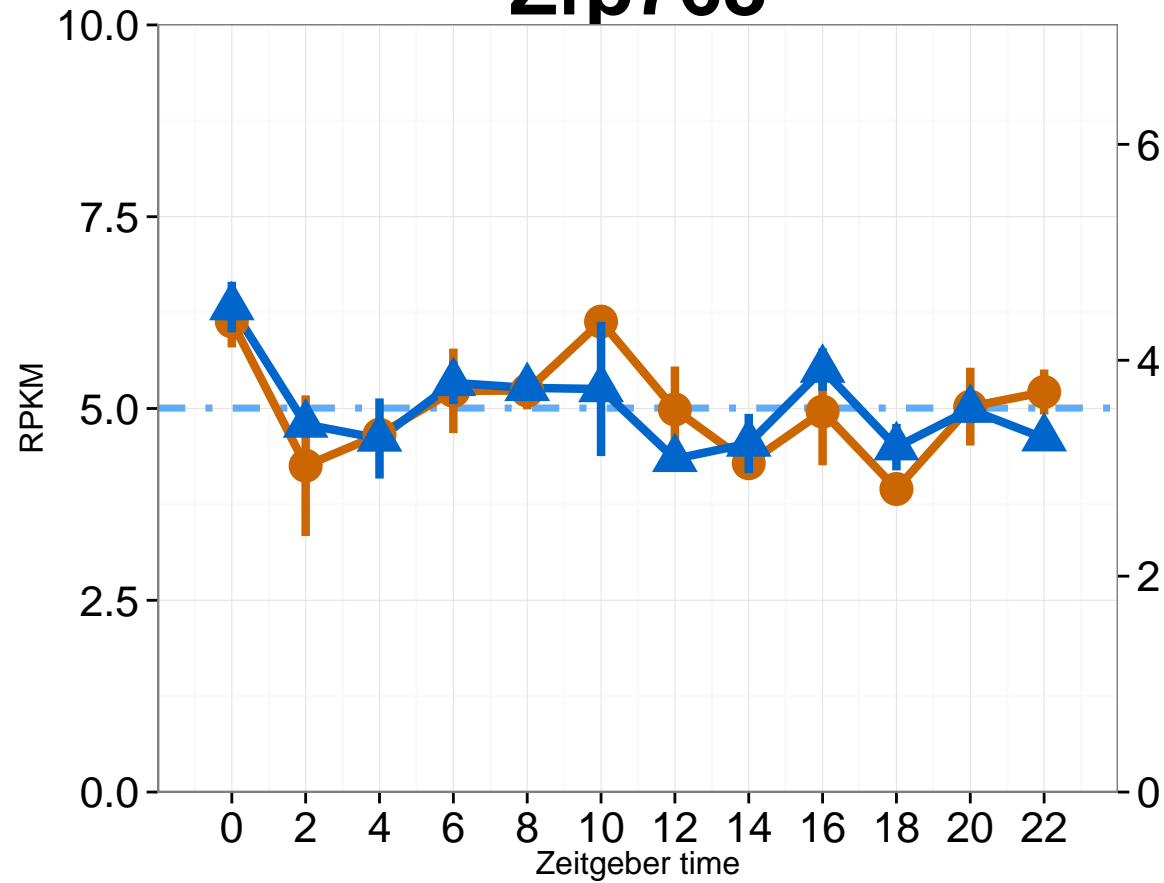

# Zfp768

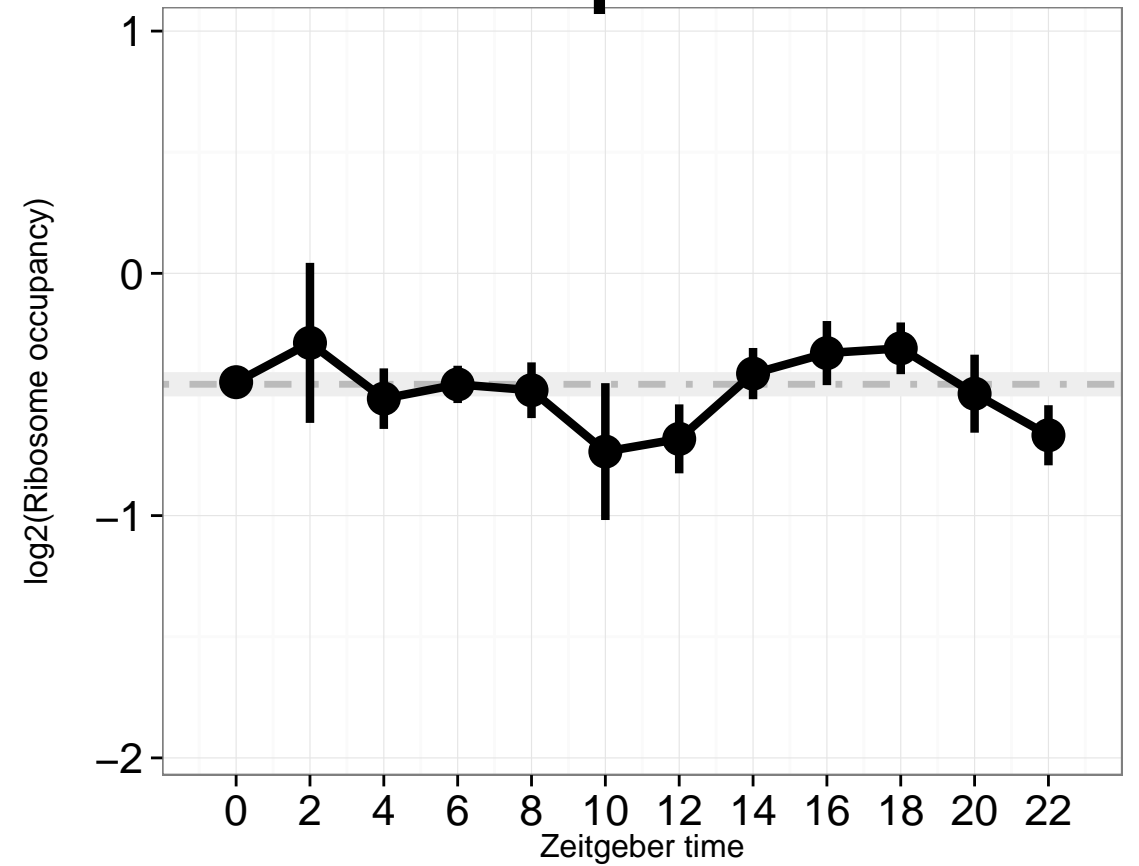

Supplement: SuppDataset_1.zip [file Zfp768_set_A.pdf › Supplemental Dataset 1/A-mRNA_nonrhyth_translation_nonrhyth/Zfp768_set_A.pdf]

# Zfp770

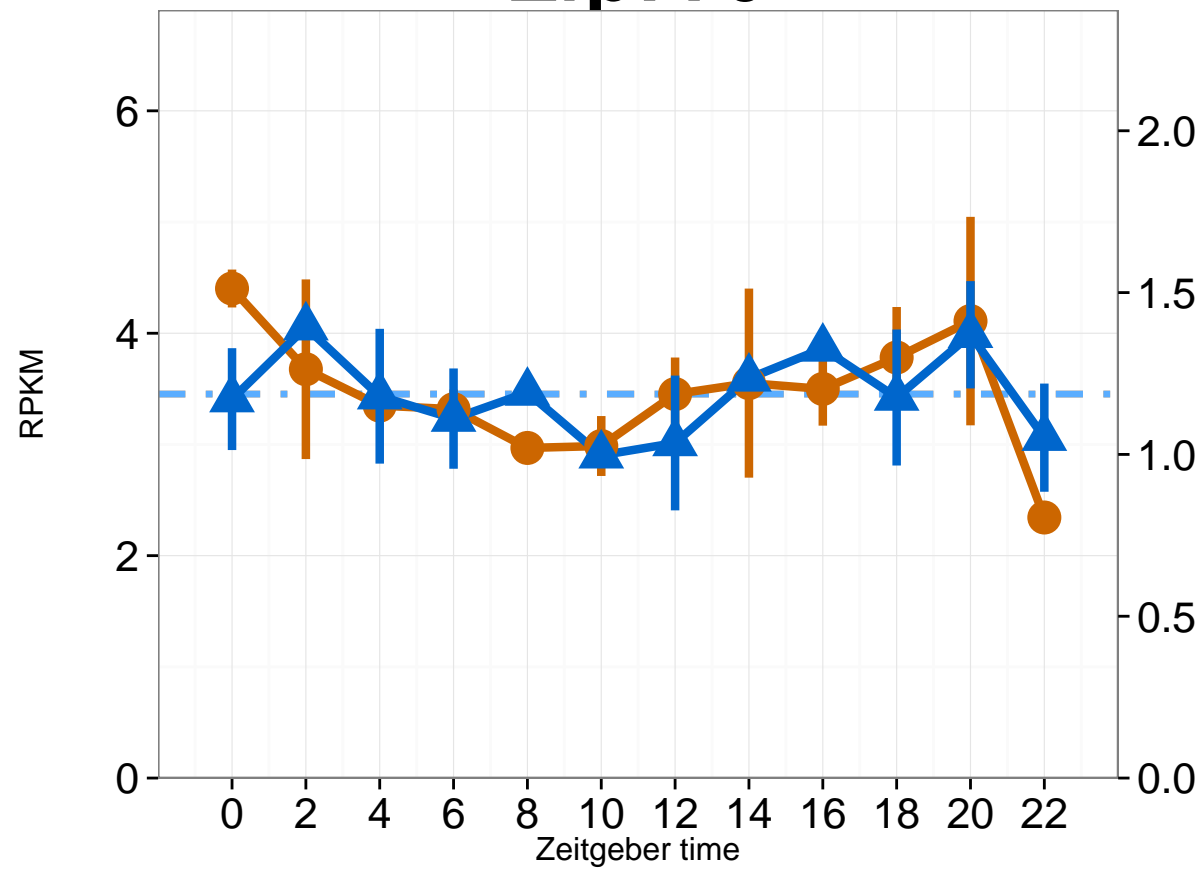

# Zfp770

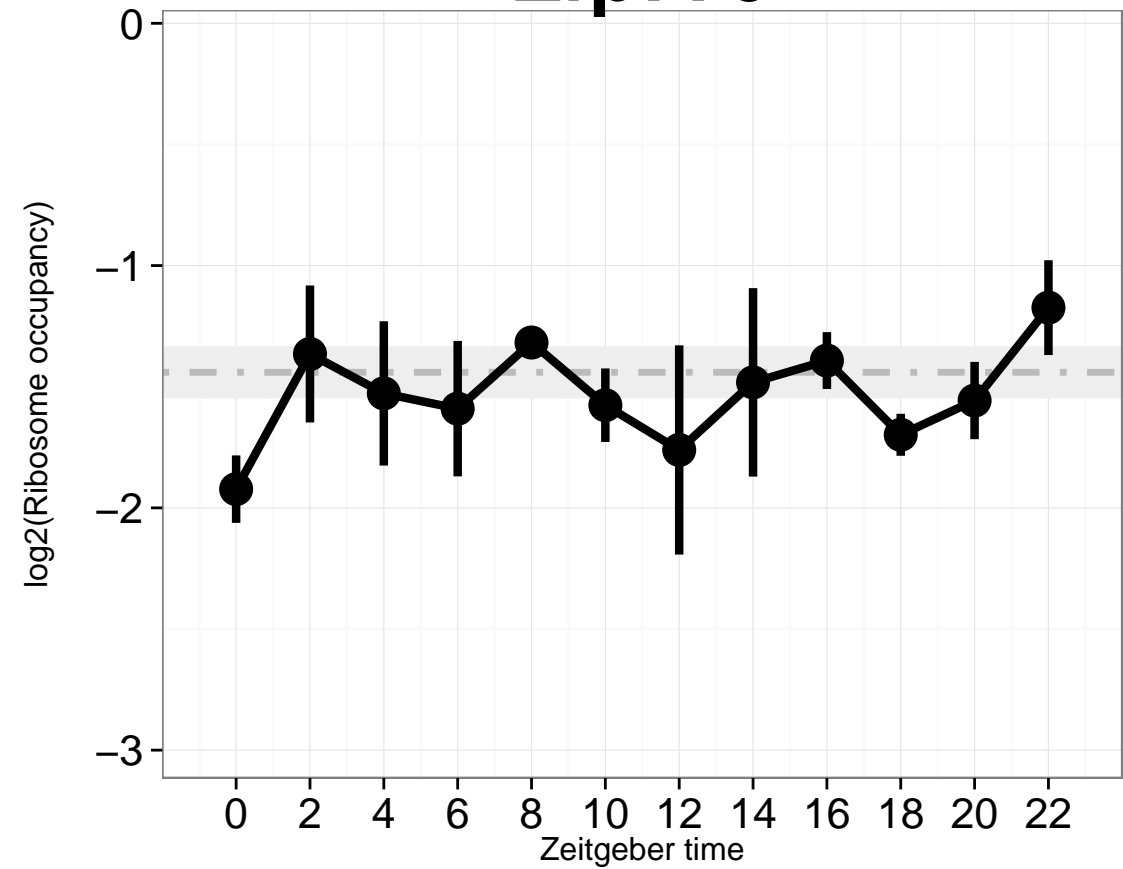

Supplement: SuppDataset_1.zip [file Zfp770_set_A.pdf › Supplemental Dataset 1/A-mRNA_nonrhyth_translation_nonrhyth/Zfp770_set_A.pdf]

# Zfp771

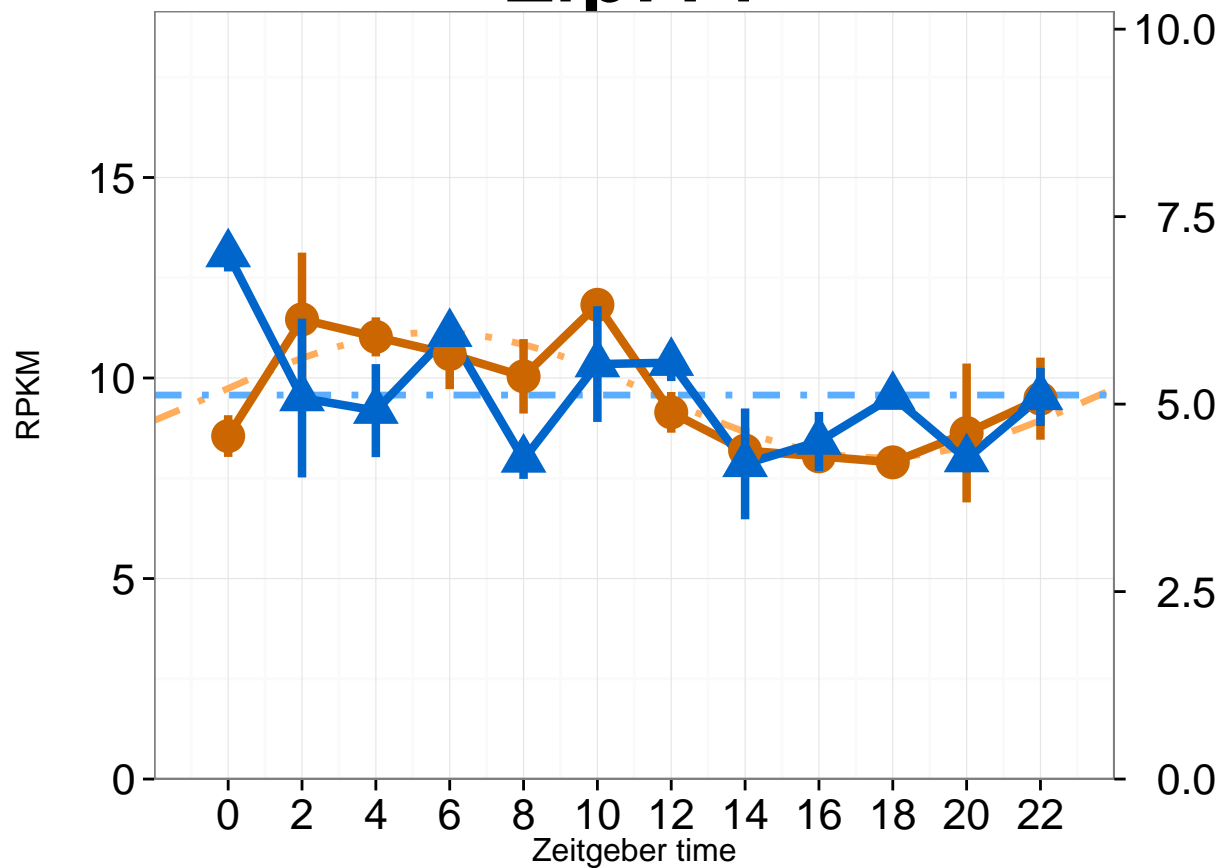

# Zfp771

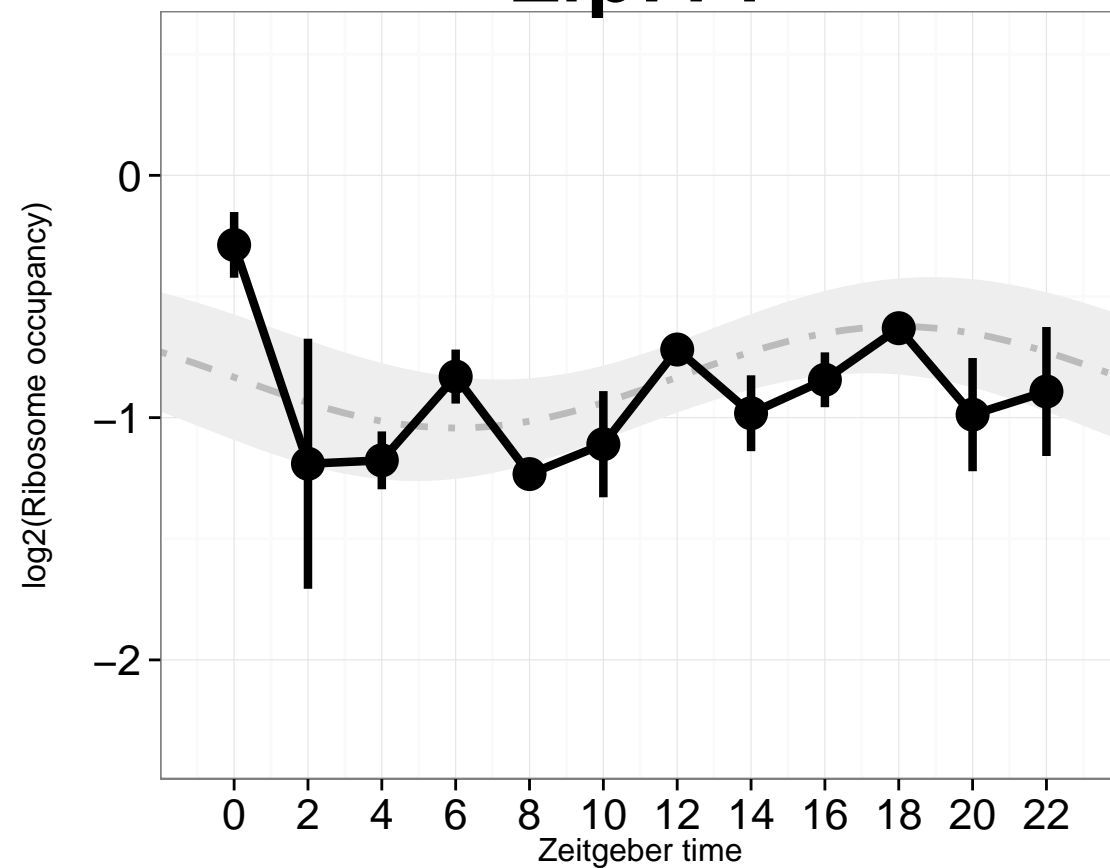

Supplement: SuppDataset_1.zip [file Zfp771_set_A.pdf › Supplemental Dataset 1/A-mRNA_nonrhyth_translation_nonrhyth/Zfp771_set_A.pdf]

# Zfp772

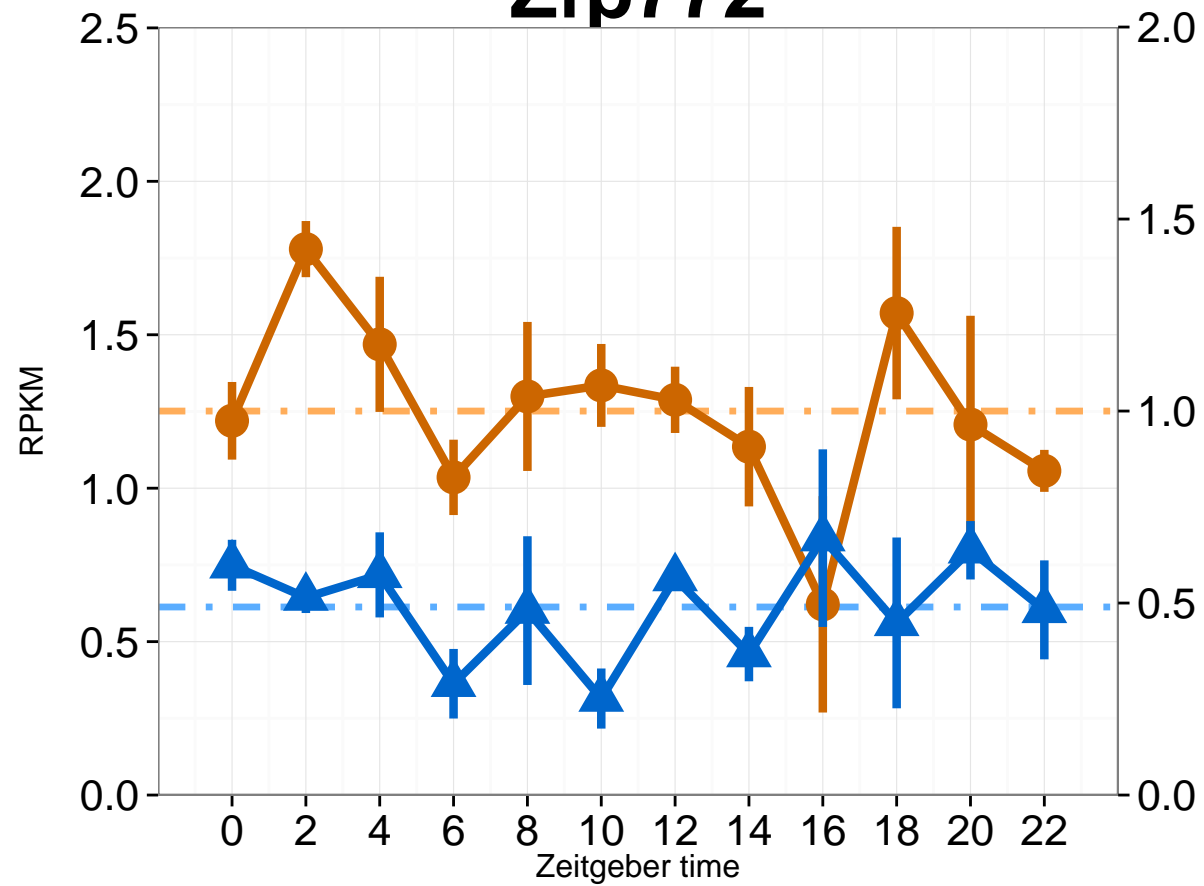

# Zfp772

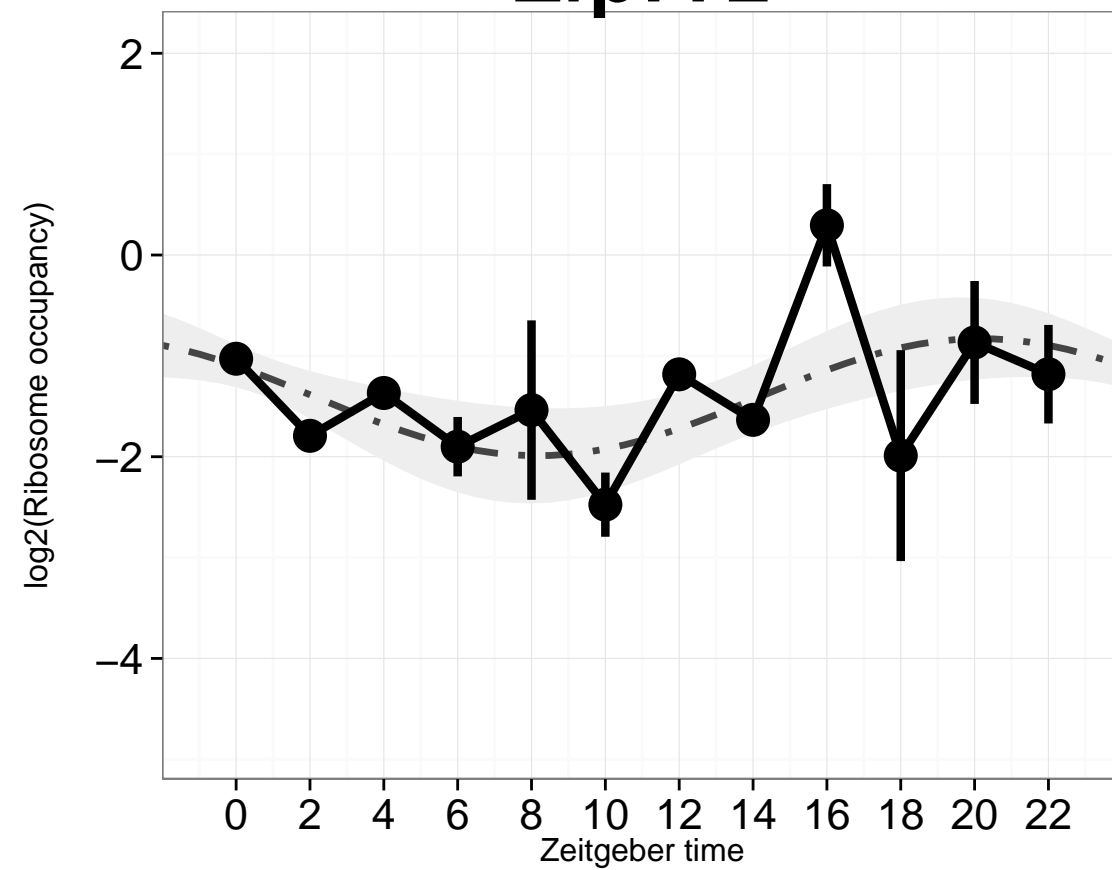

Supplement: SuppDataset_1.zip [file Zfp772_set_A.pdf › Supplemental Dataset 1/A-mRNA_nonrhyth_translation_nonrhyth/Zfp772_set_A.pdf]

# Zfp775

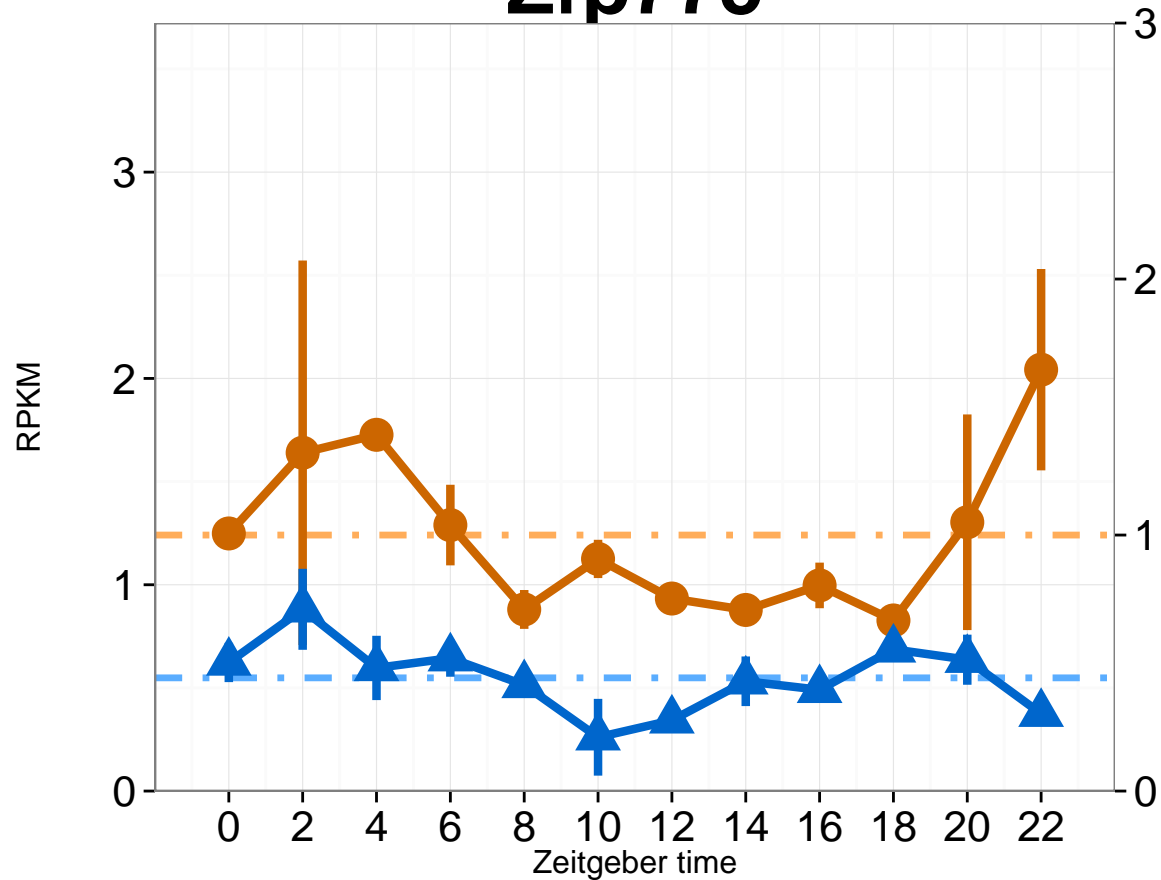

# Zfp775

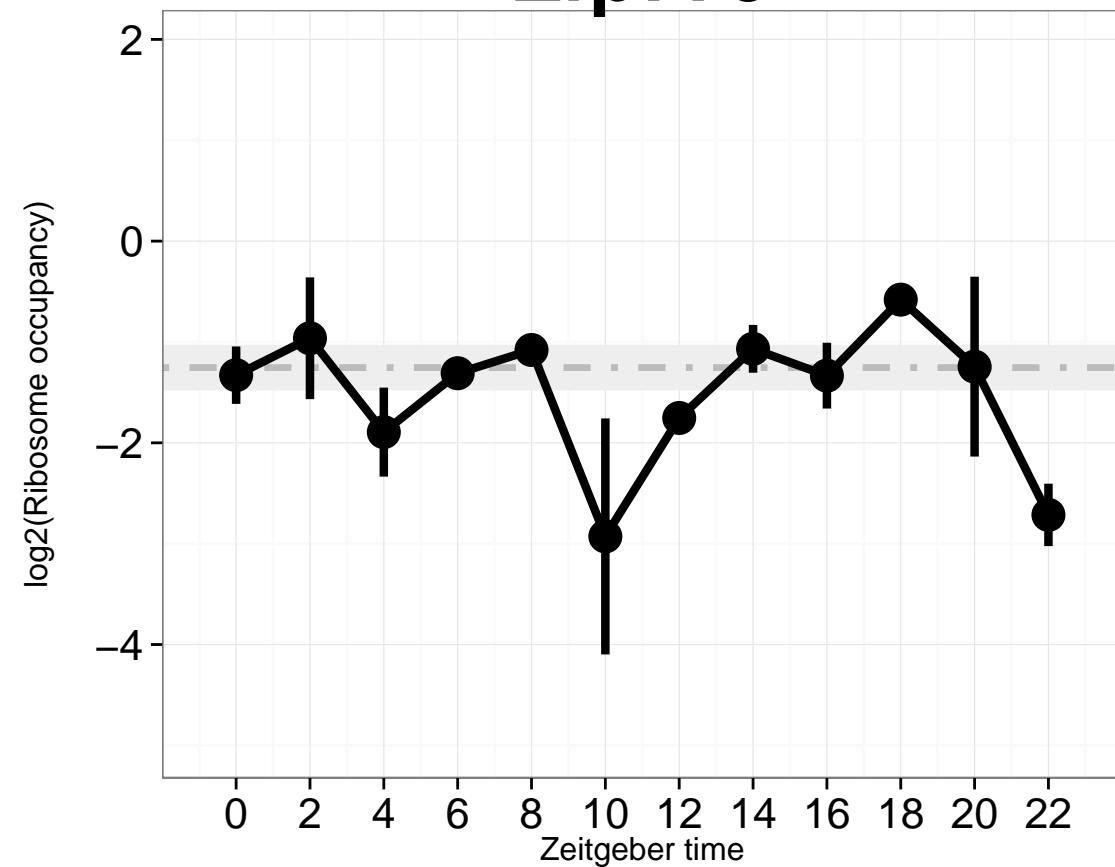

Supplement: SuppDataset_1.zip [file Zfp775_set_A.pdf › Supplemental Dataset 1/A-mRNA_nonrhyth_translation_nonrhyth/Zfp775_set_A.pdf]

# Zfp777

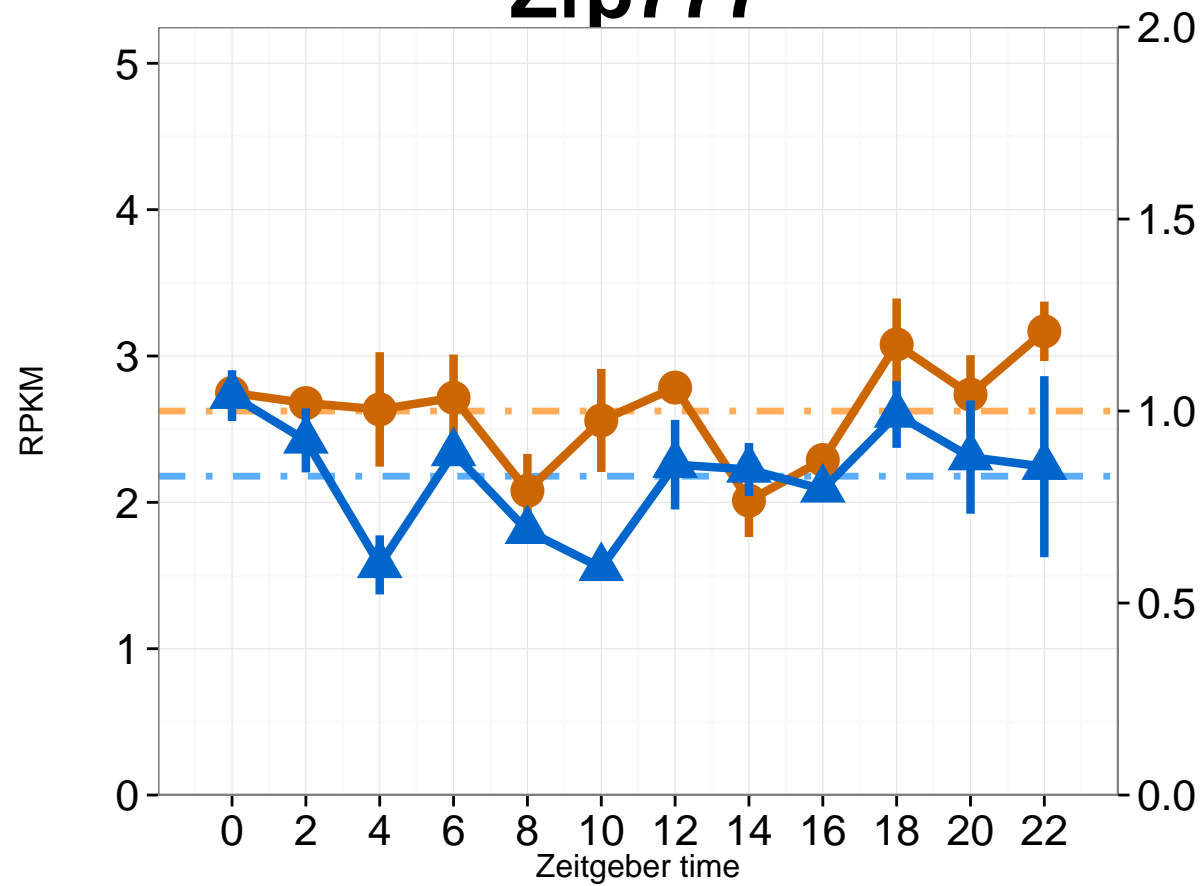

# Zfp777

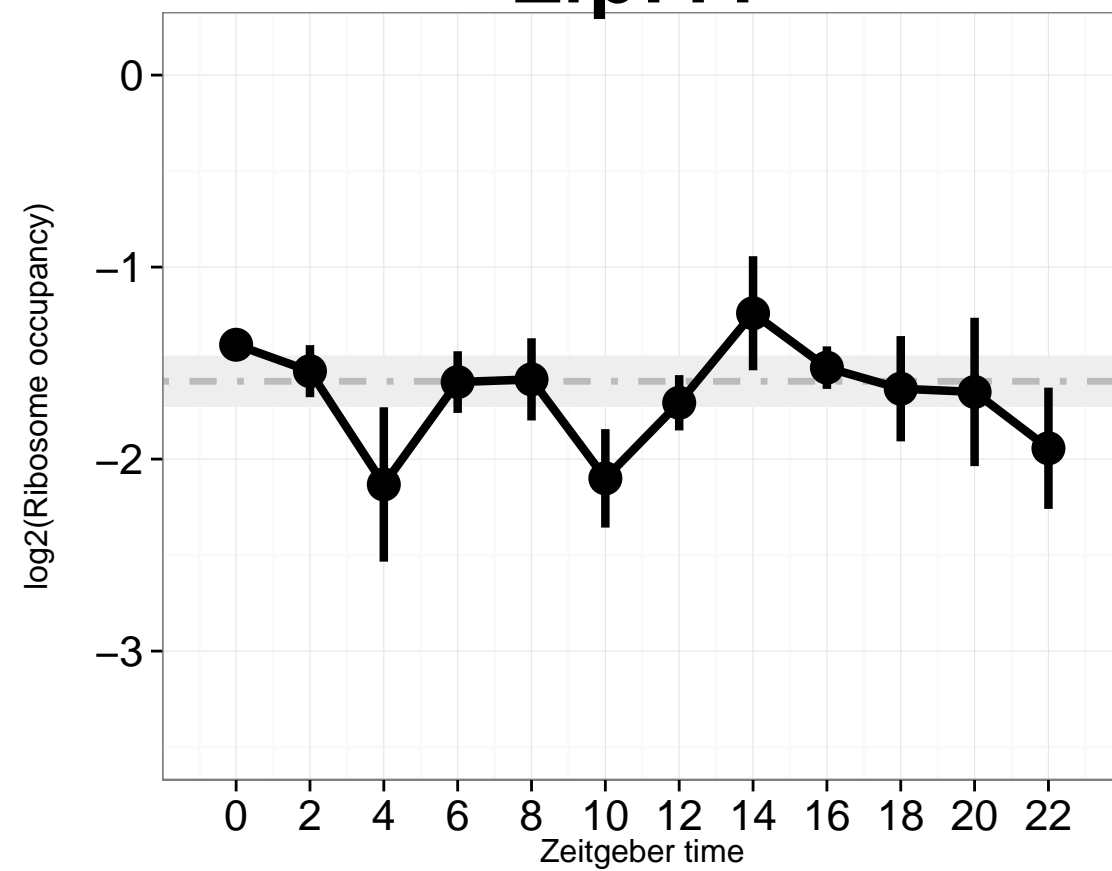

Supplement: SuppDataset_1.zip [file Zfp777_set_A.pdf › Supplemental Dataset 1/A-mRNA_nonrhyth_translation_nonrhyth/Zfp777_set_A.pdf]

# Zfp780b

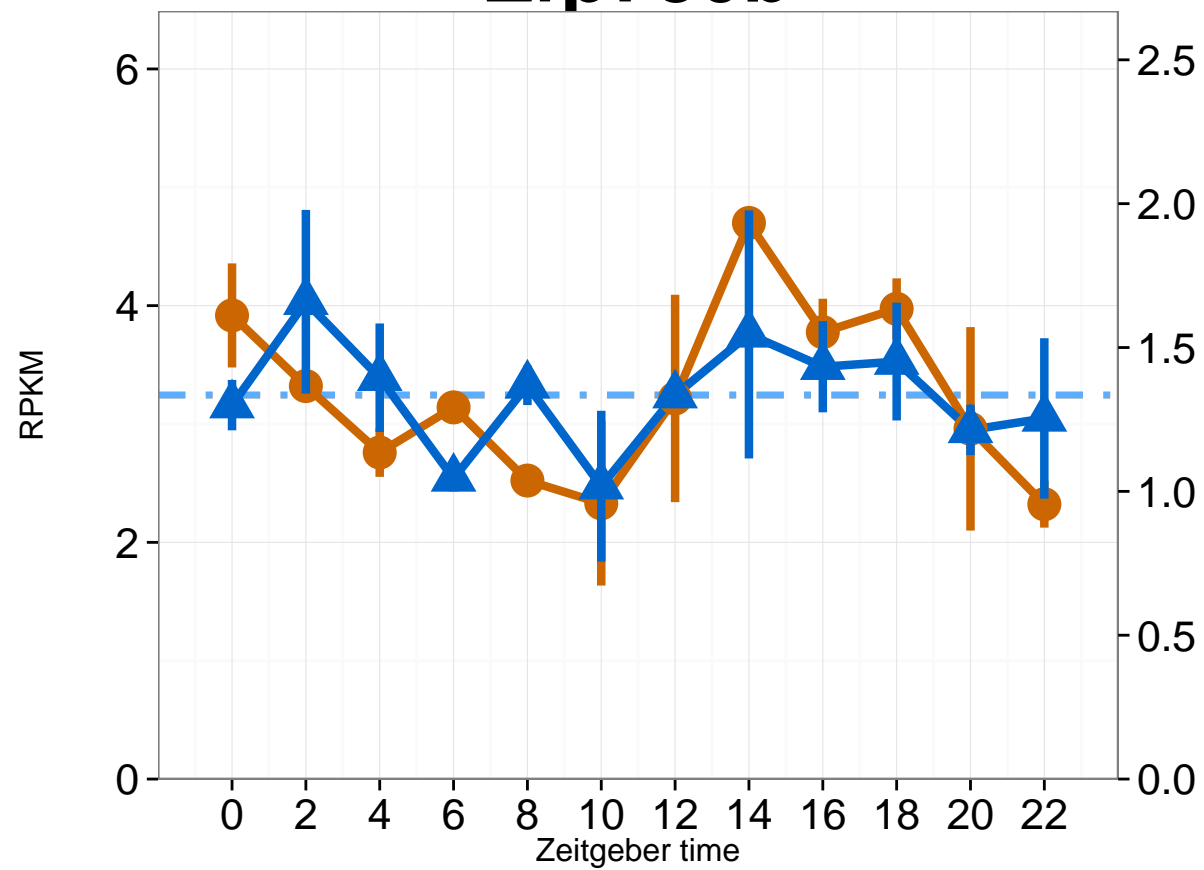

# Zfp780b

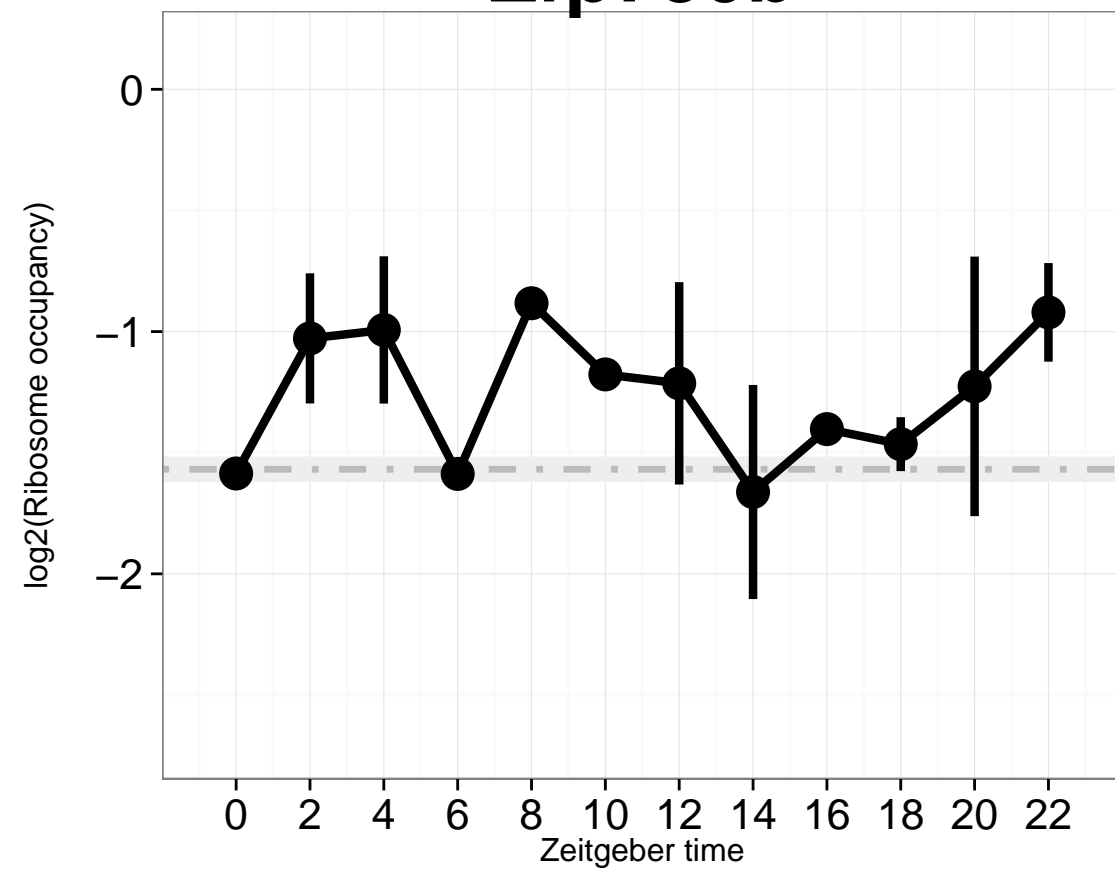

Supplement: SuppDataset_1.zip [file Zfp780b_set_A.pdf › Supplemental Dataset 1/A-mRNA_nonrhyth_translation_nonrhyth/Zfp780b_set_A.pdf]

# Zfp784

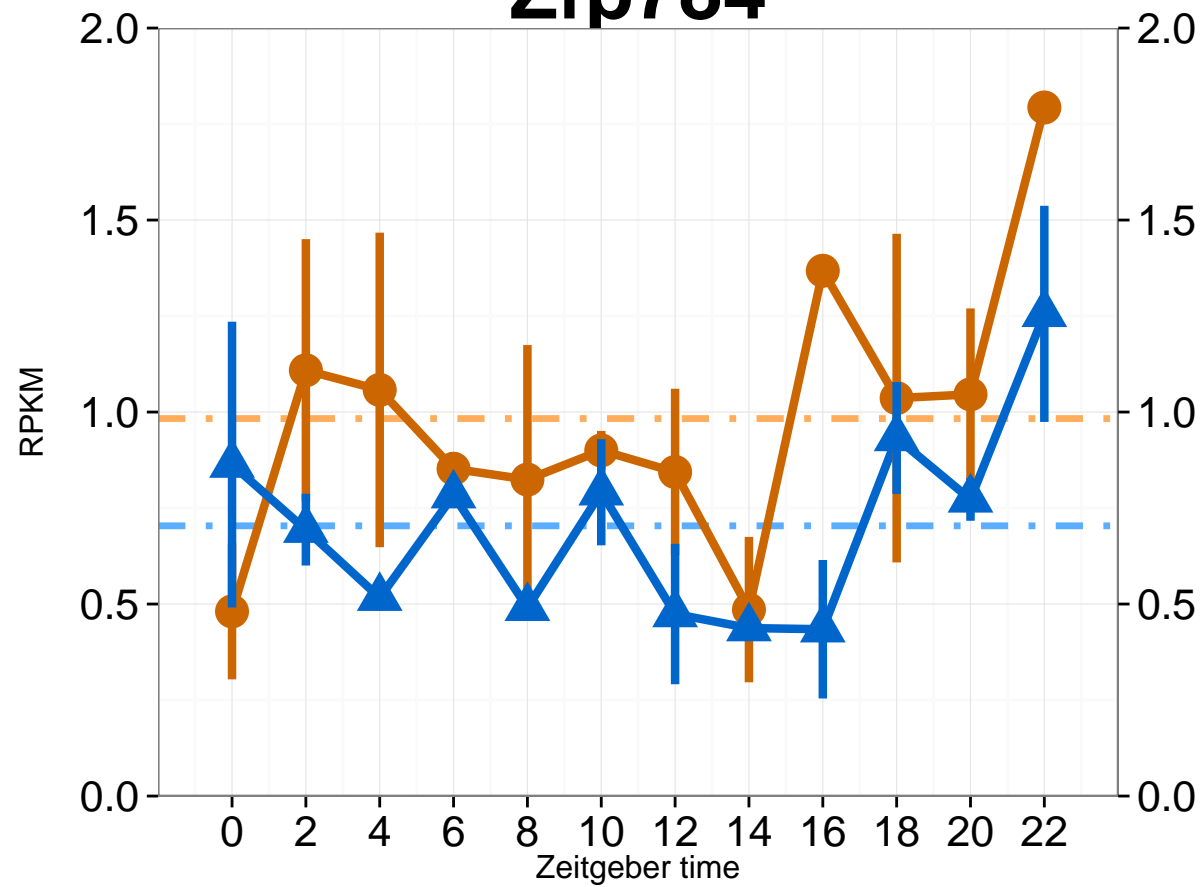

# Zfp784

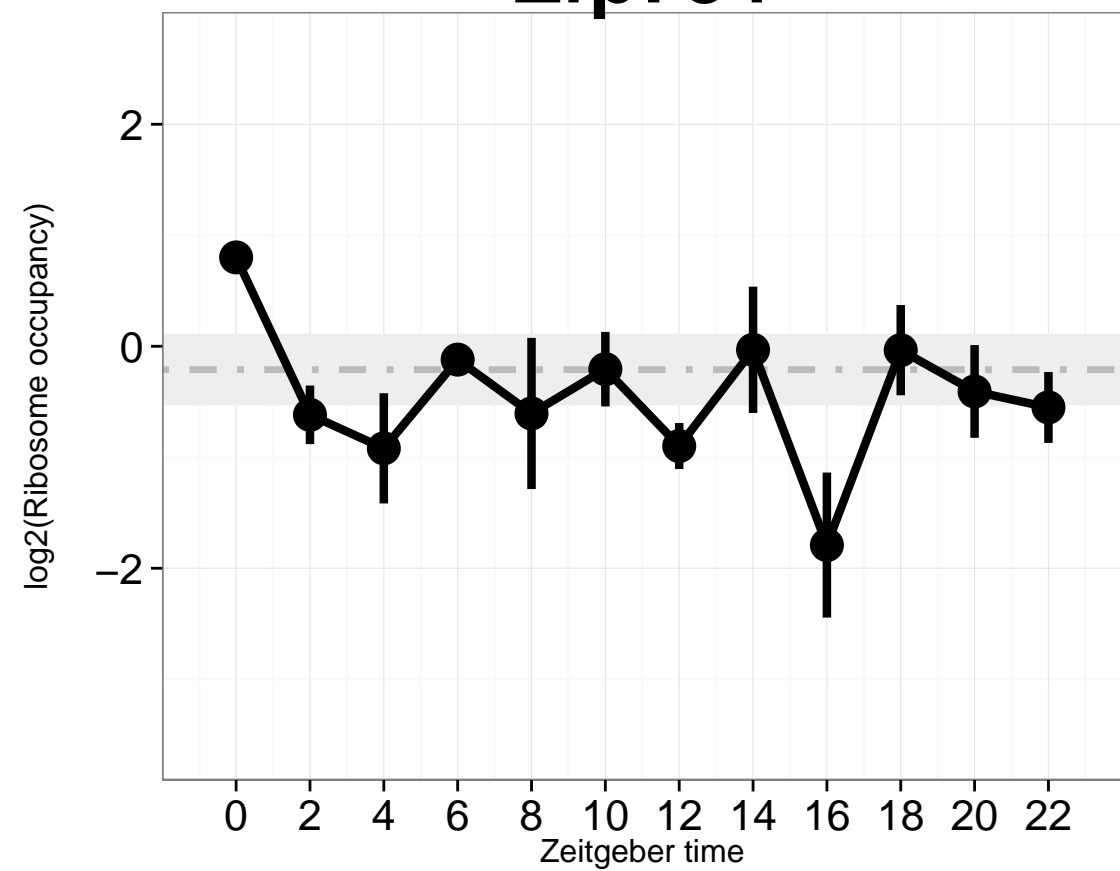

Supplement: SuppDataset_1.zip [file Zfp784_set_A.pdf › Supplemental Dataset 1/A-mRNA_nonrhyth_translation_nonrhyth/Zfp784_set_A.pdf]

# Zfp787

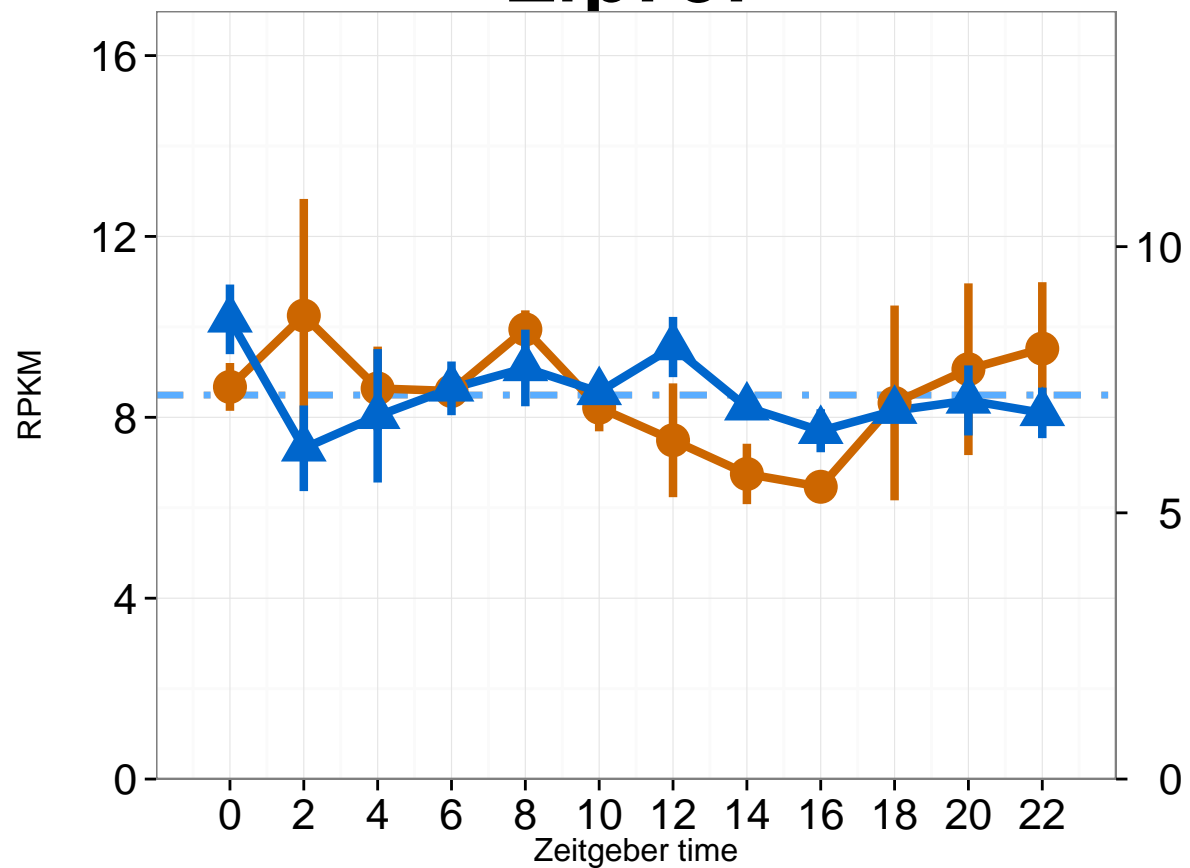

# Zfp787

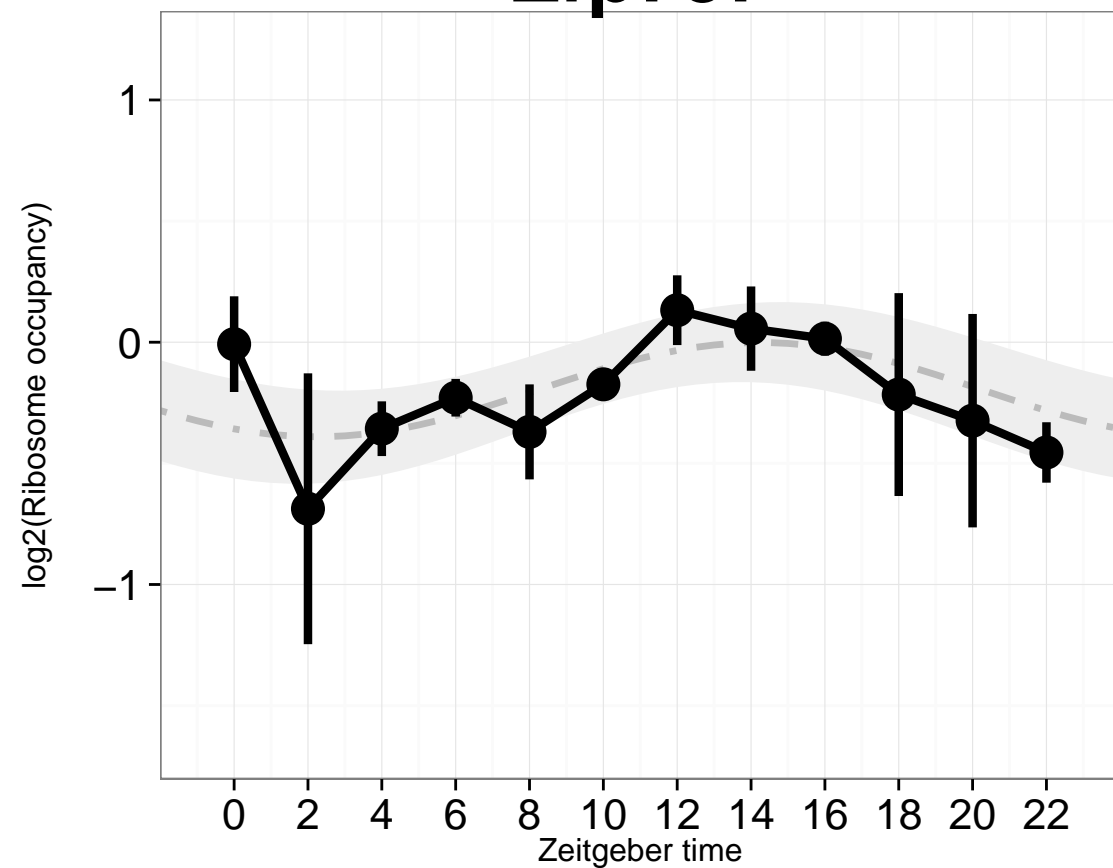

Supplement: SuppDataset_1.zip [file Zfp787_set_A.pdf › Supplemental Dataset 1/A-mRNA_nonrhyth_translation_nonrhyth/Zfp787_set_A.pdf]

# Zfp790

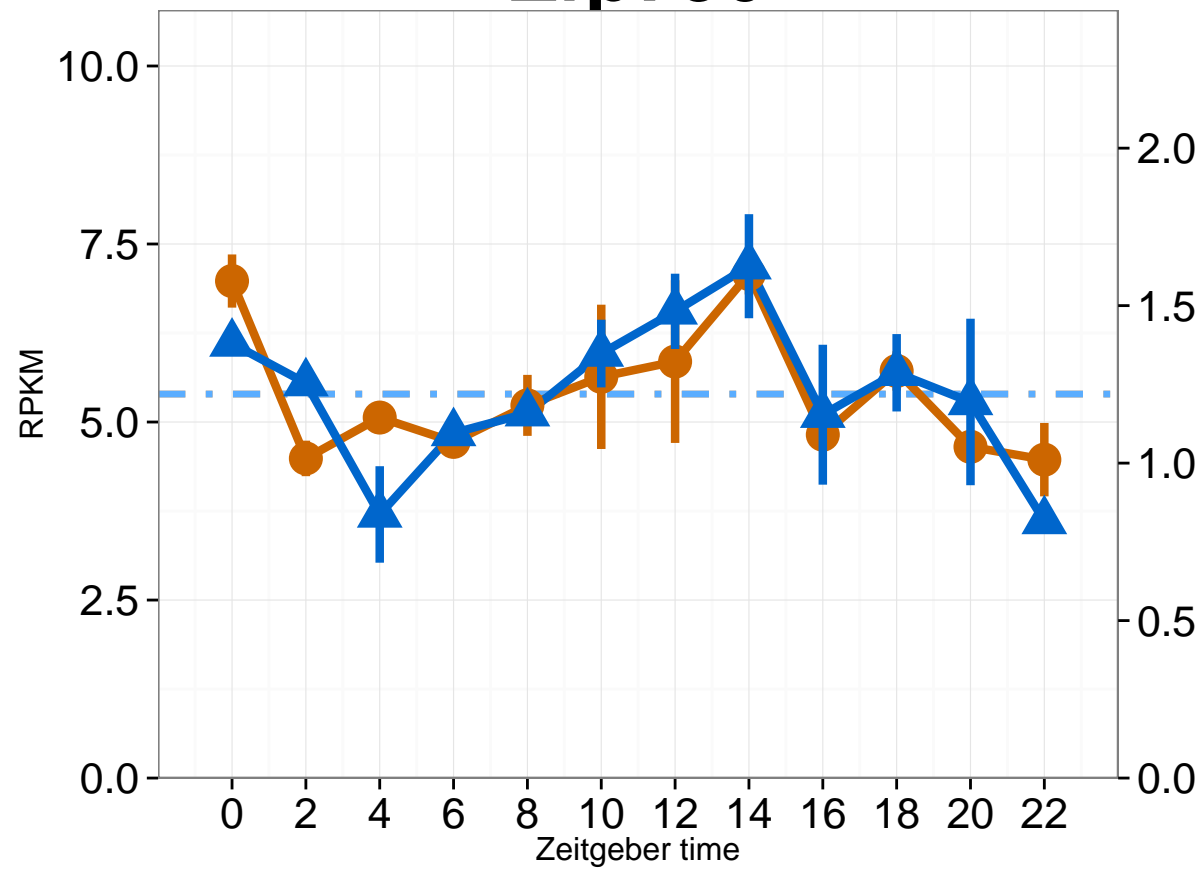

# Zfp790

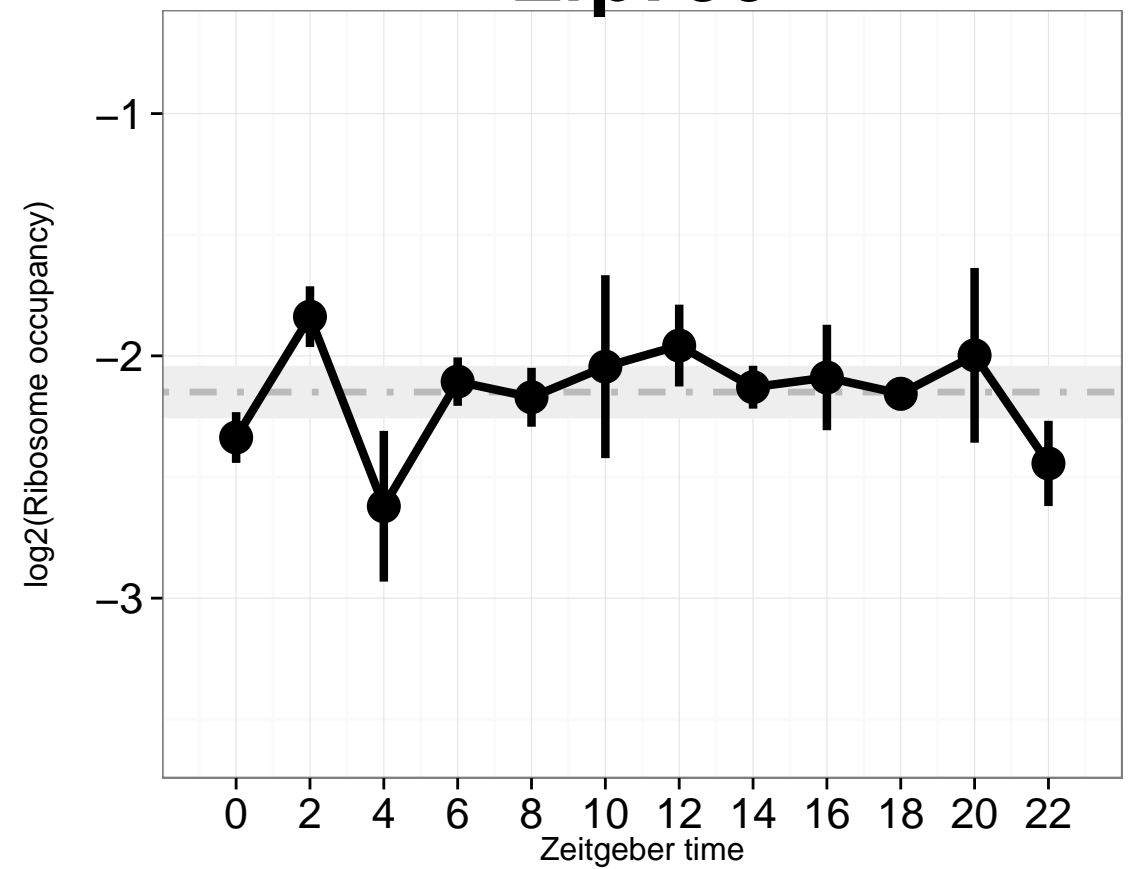

Supplement: SuppDataset_1.zip [file Zfp790_set_A.pdf › Supplemental Dataset 1/A-mRNA_nonrhyth_translation_nonrhyth/Zfp790_set_A.pdf]

# Zfp791

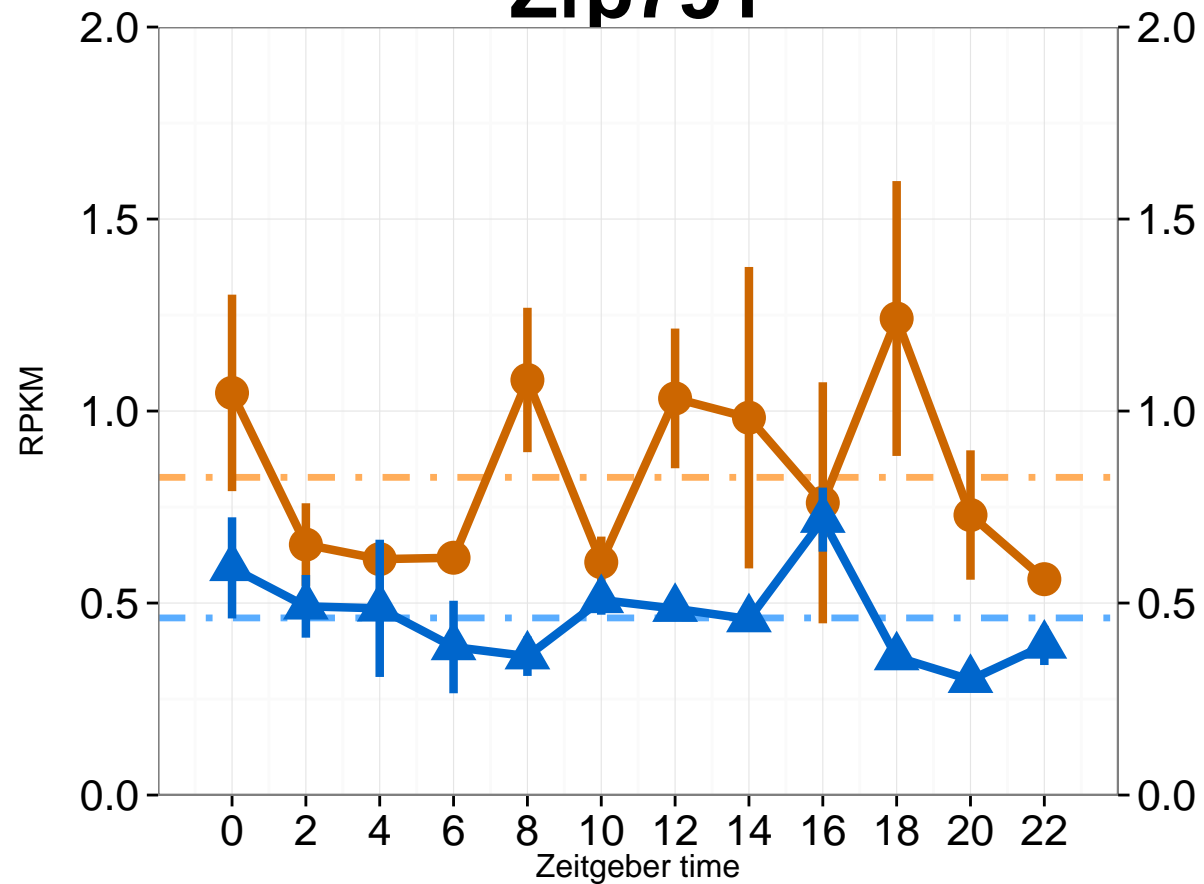

# Zfp791

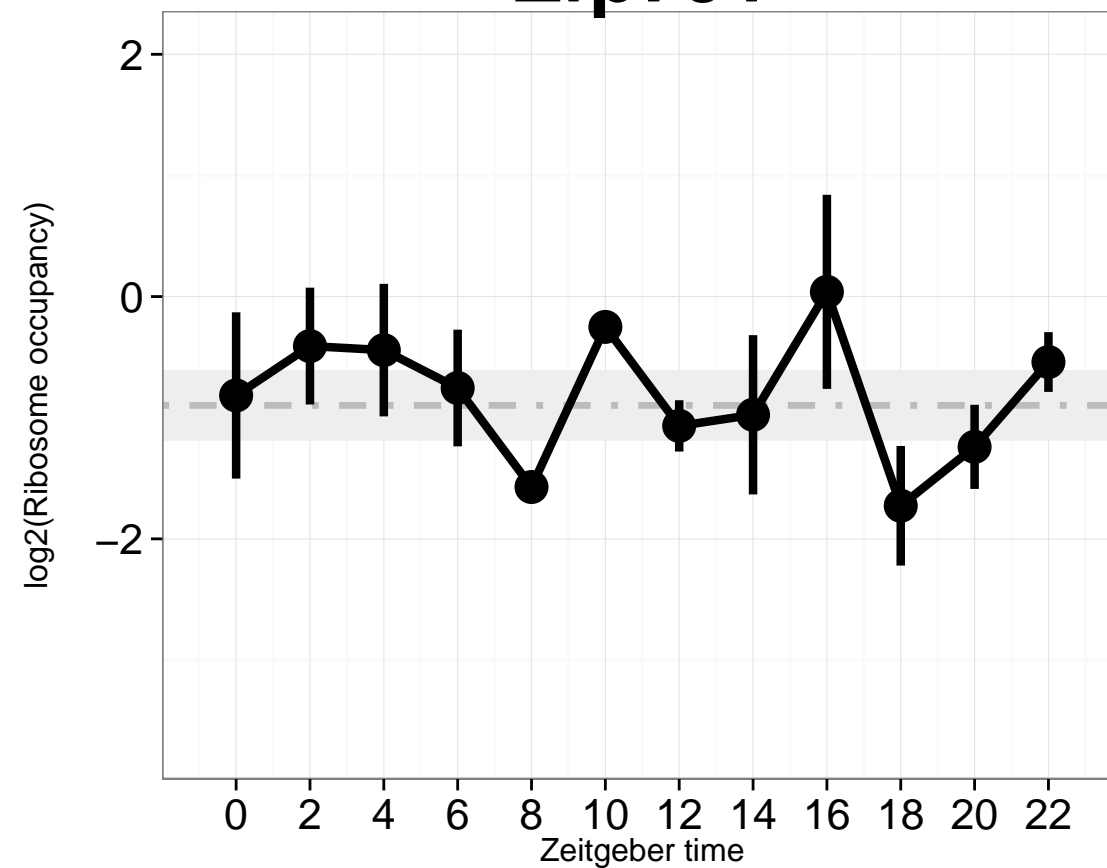

Supplement: SuppDataset_1.zip [file Zfp791_set_A.pdf › Supplemental Dataset 1/A-mRNA_nonrhyth_translation_nonrhyth/Zfp791_set_A.pdf]

# Zfp799

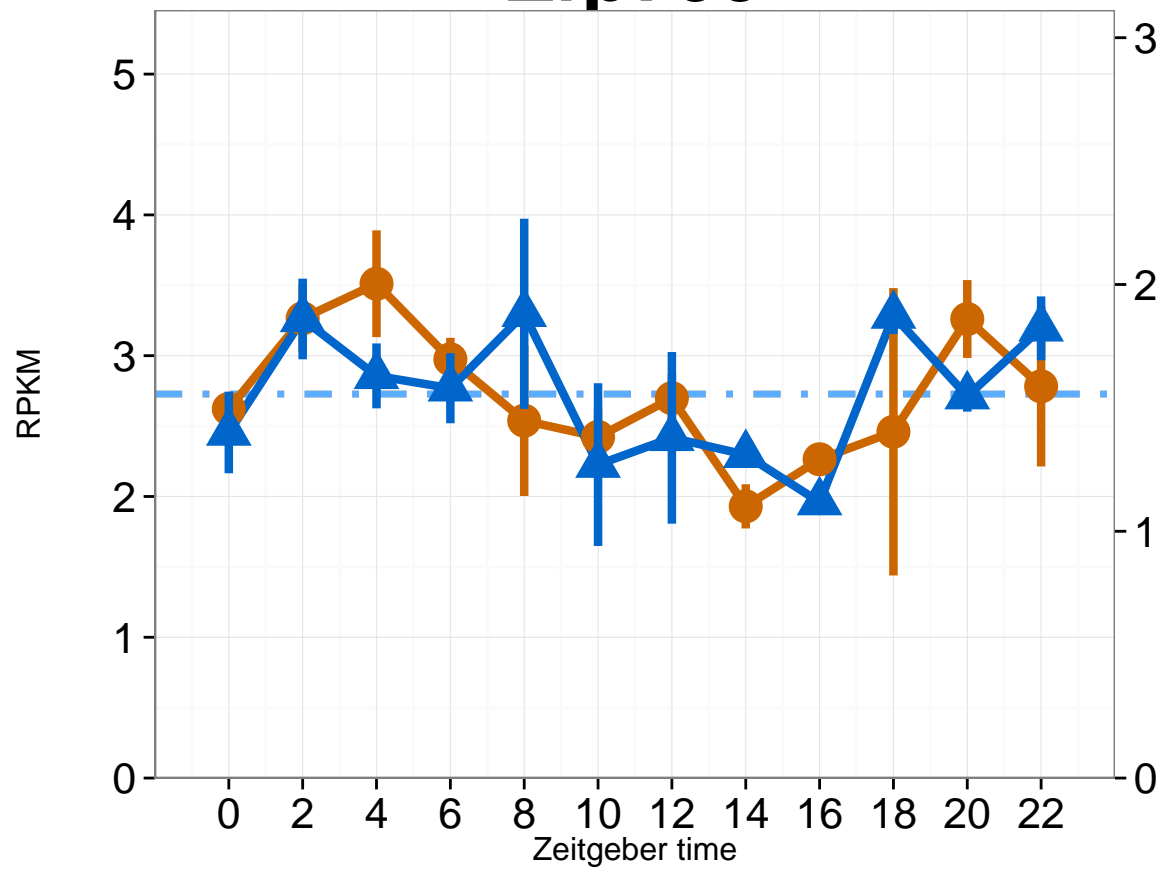

# Zfp799

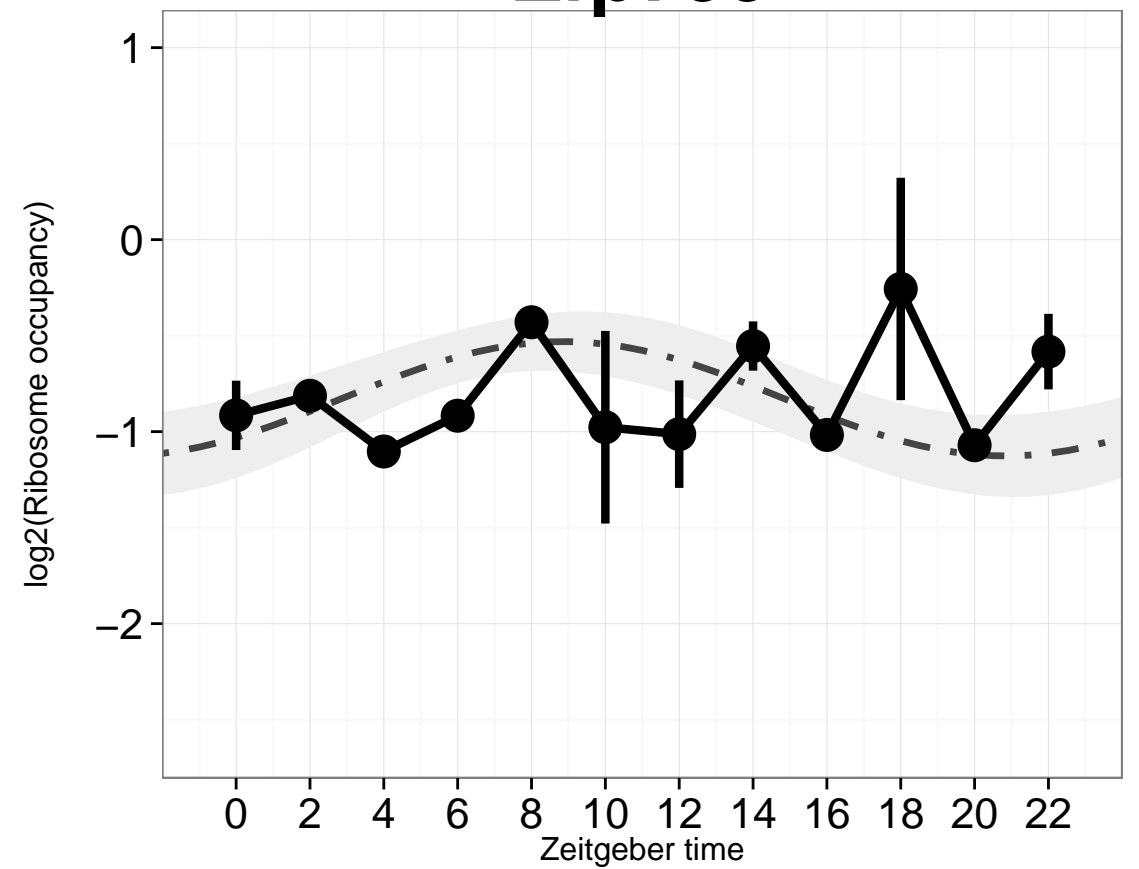

Supplement: SuppDataset_1.zip [file Zfp799_set_A.pdf › Supplemental Dataset 1/A-mRNA_nonrhyth_translation_nonrhyth/Zfp799_set_A.pdf]

# Zfp7

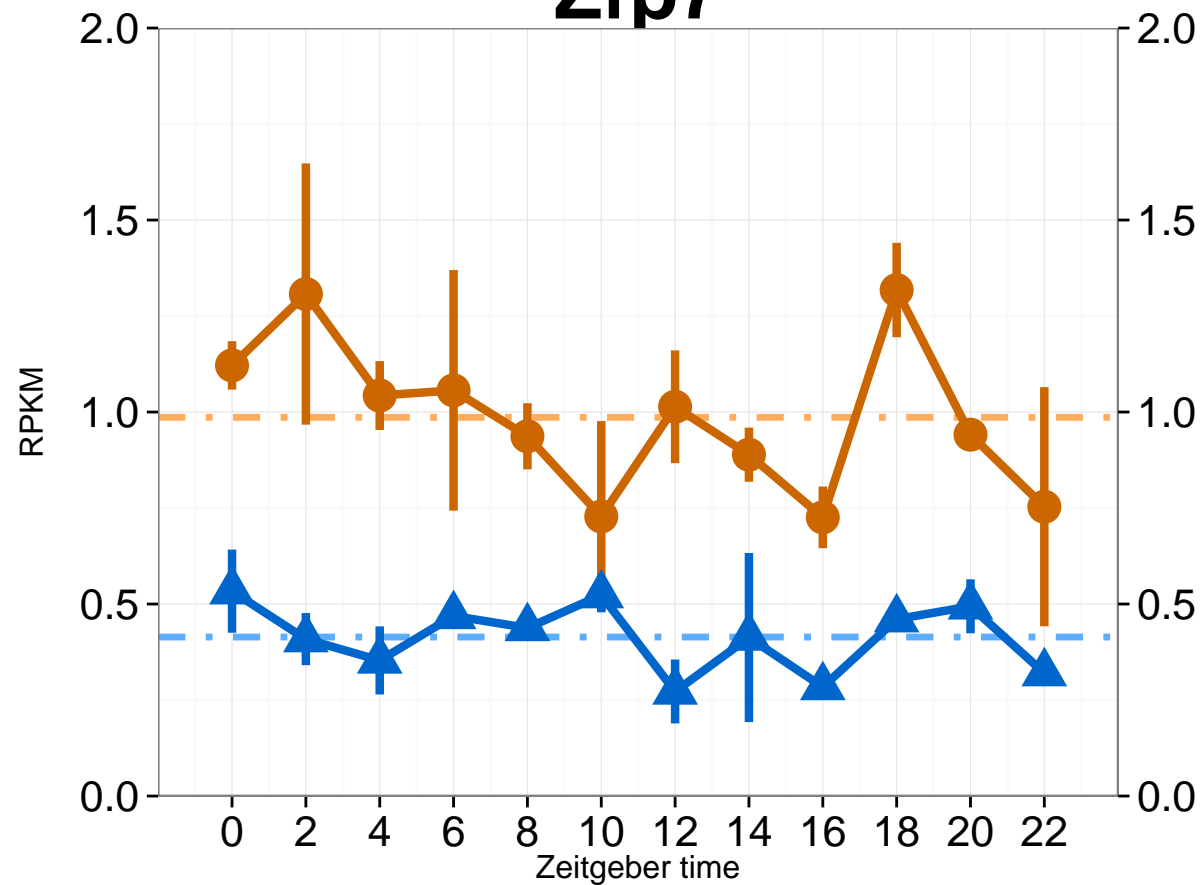

# Zfp7

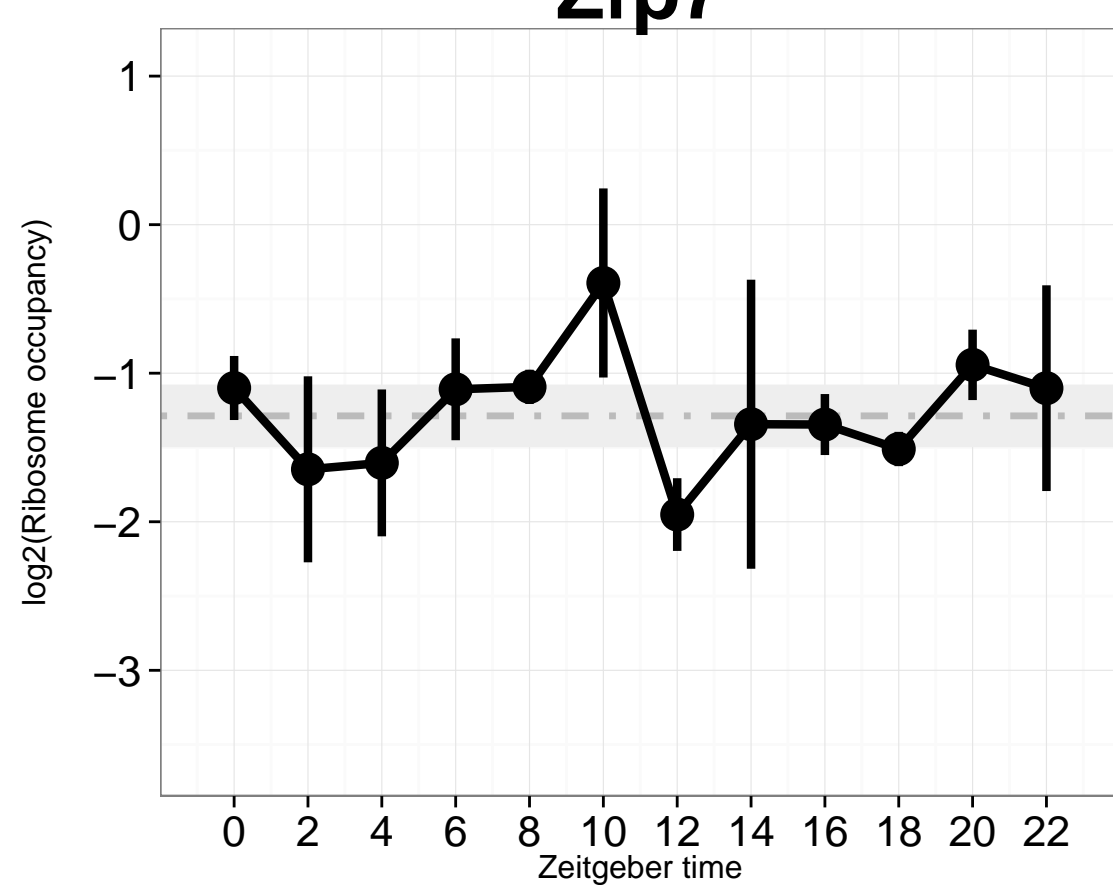

Supplement: SuppDataset_1.zip [file Zfp7_set_A.pdf › Supplemental Dataset 1/A-mRNA_nonrhyth_translation_nonrhyth/Zfp7_set_A.pdf]

# Zfp808

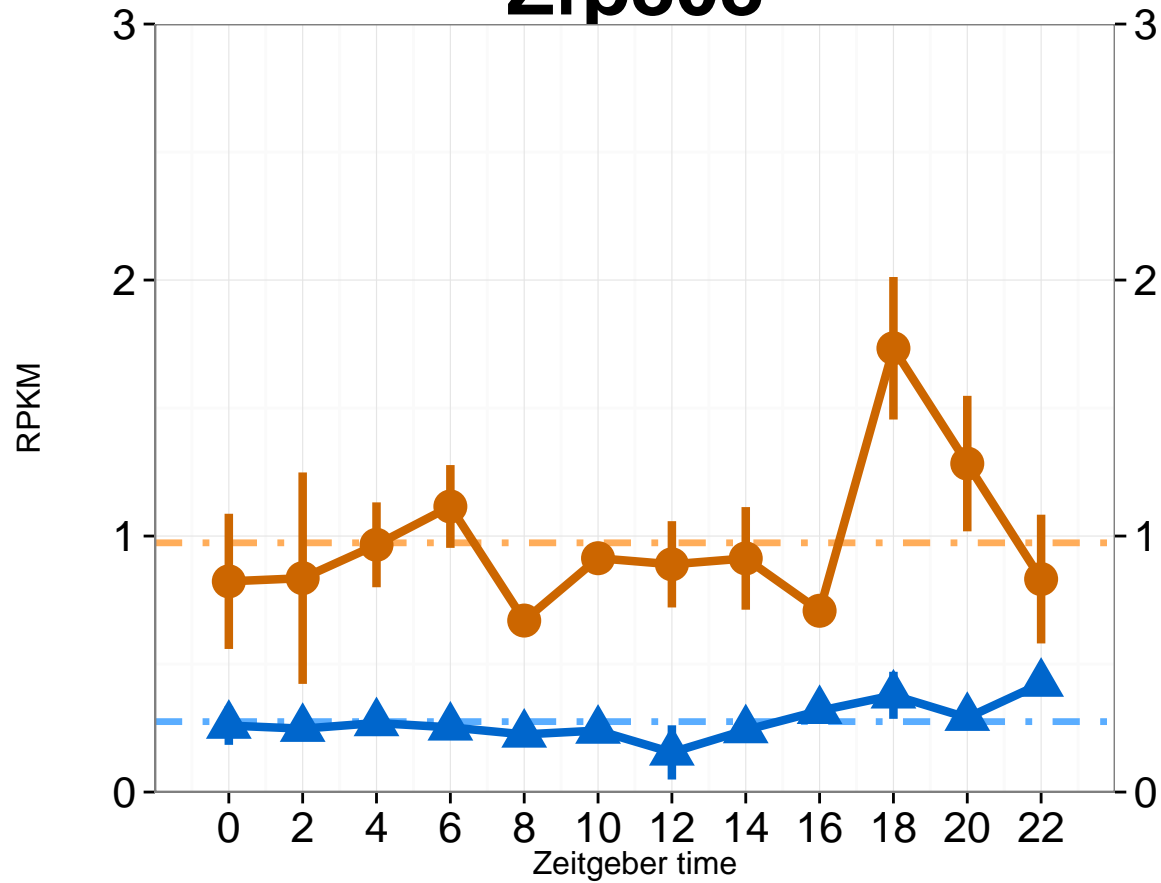

# Zfp808

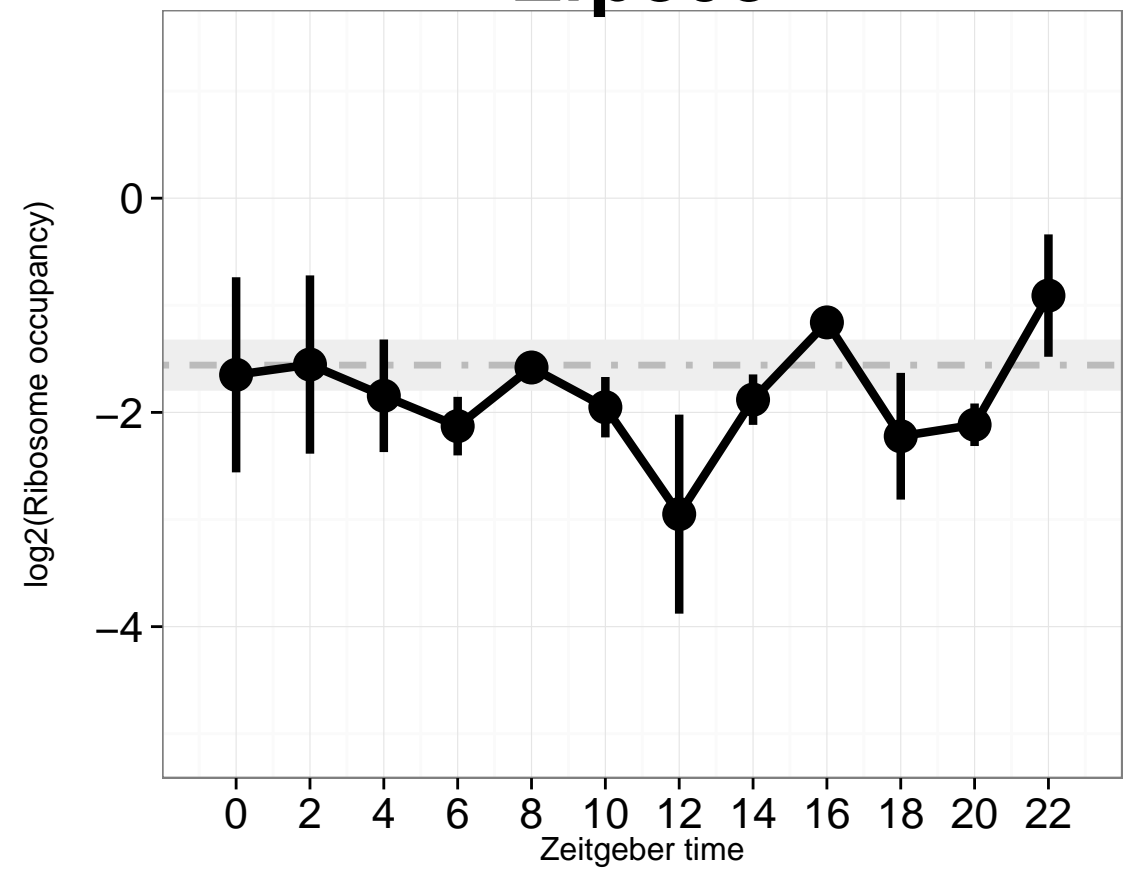

Supplement: SuppDataset_1.zip [file Zfp808_set_A.pdf › Supplemental Dataset 1/A-mRNA_nonrhyth_translation_nonrhyth/Zfp808_set_A.pdf]

# Zfp809

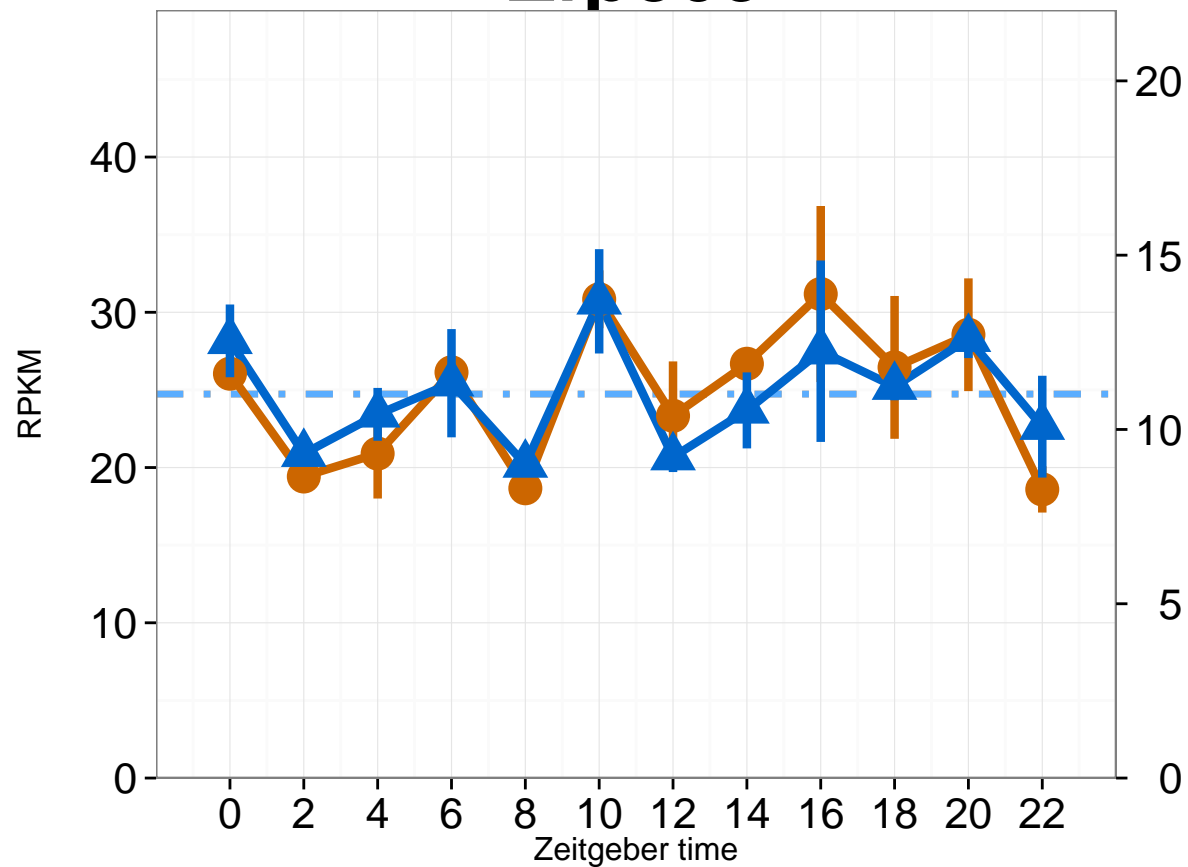

# Zfp809

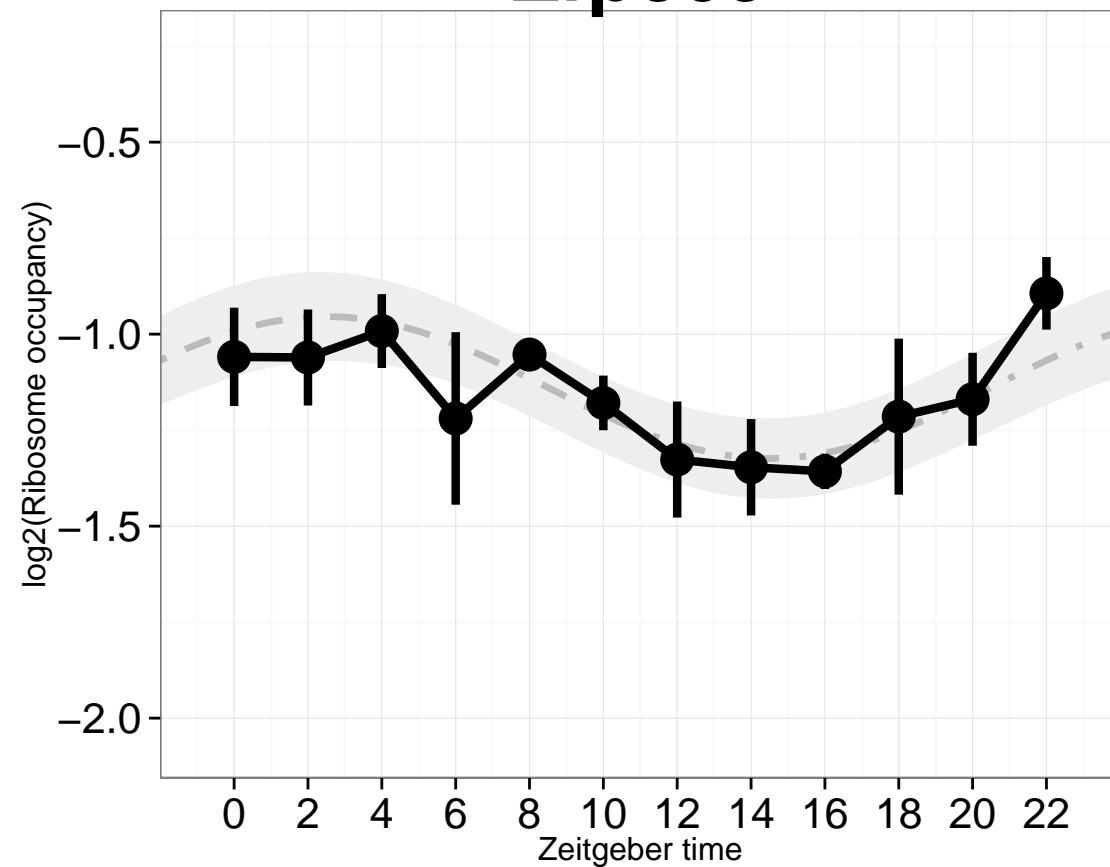

Supplement: SuppDataset_1.zip [file Zfp809_set_A.pdf › Supplemental Dataset 1/A-mRNA_nonrhyth_translation_nonrhyth/Zfp809_set_A.pdf]

# Zfp810

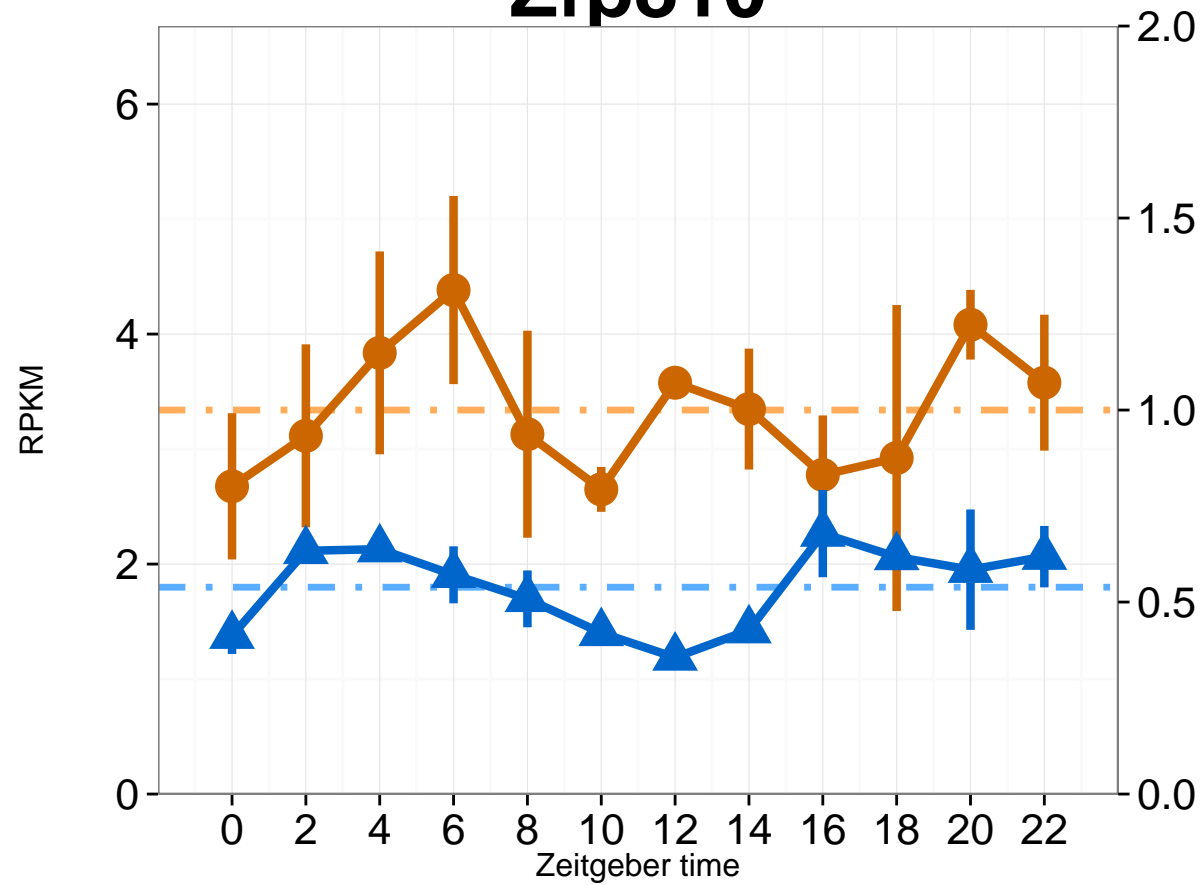

# Zfp810

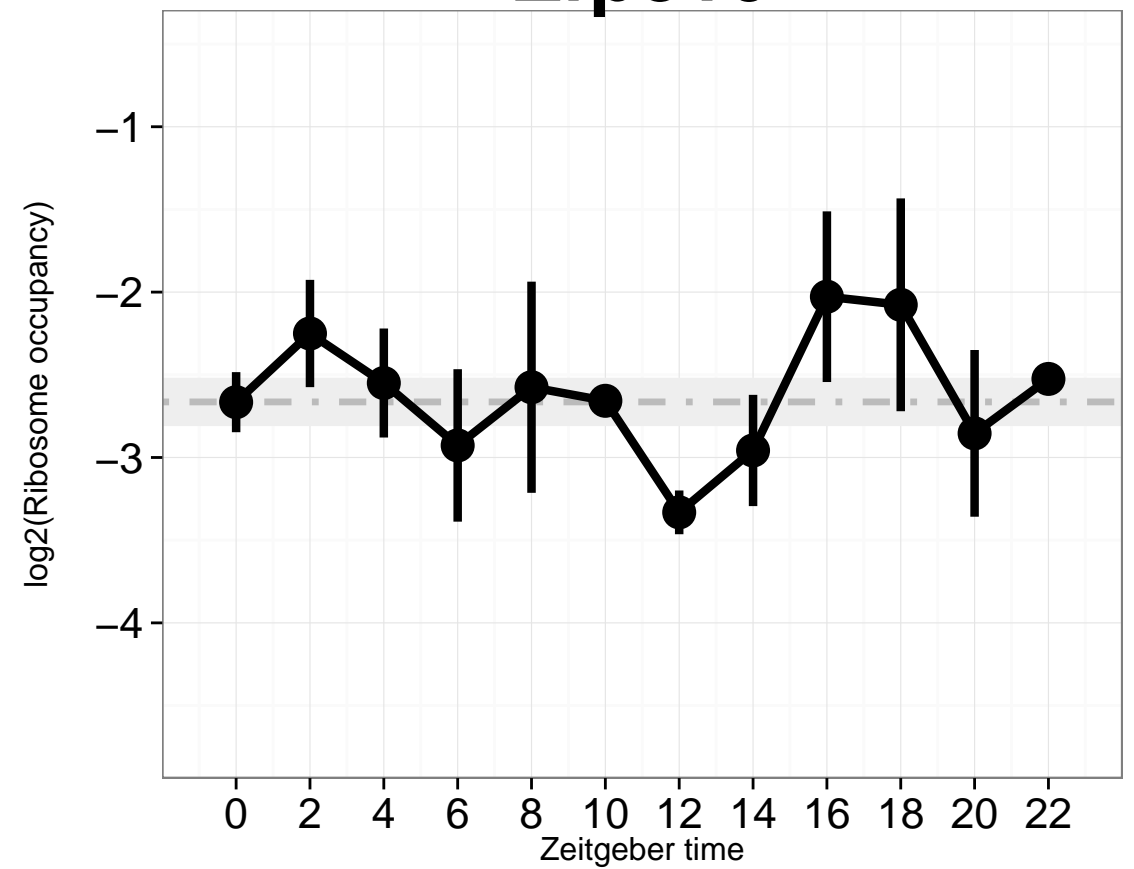

Supplement: SuppDataset_1.zip [file Zfp810_set_A.pdf › Supplemental Dataset 1/A-mRNA_nonrhyth_translation_nonrhyth/Zfp810_set_A.pdf]

# Zfp81

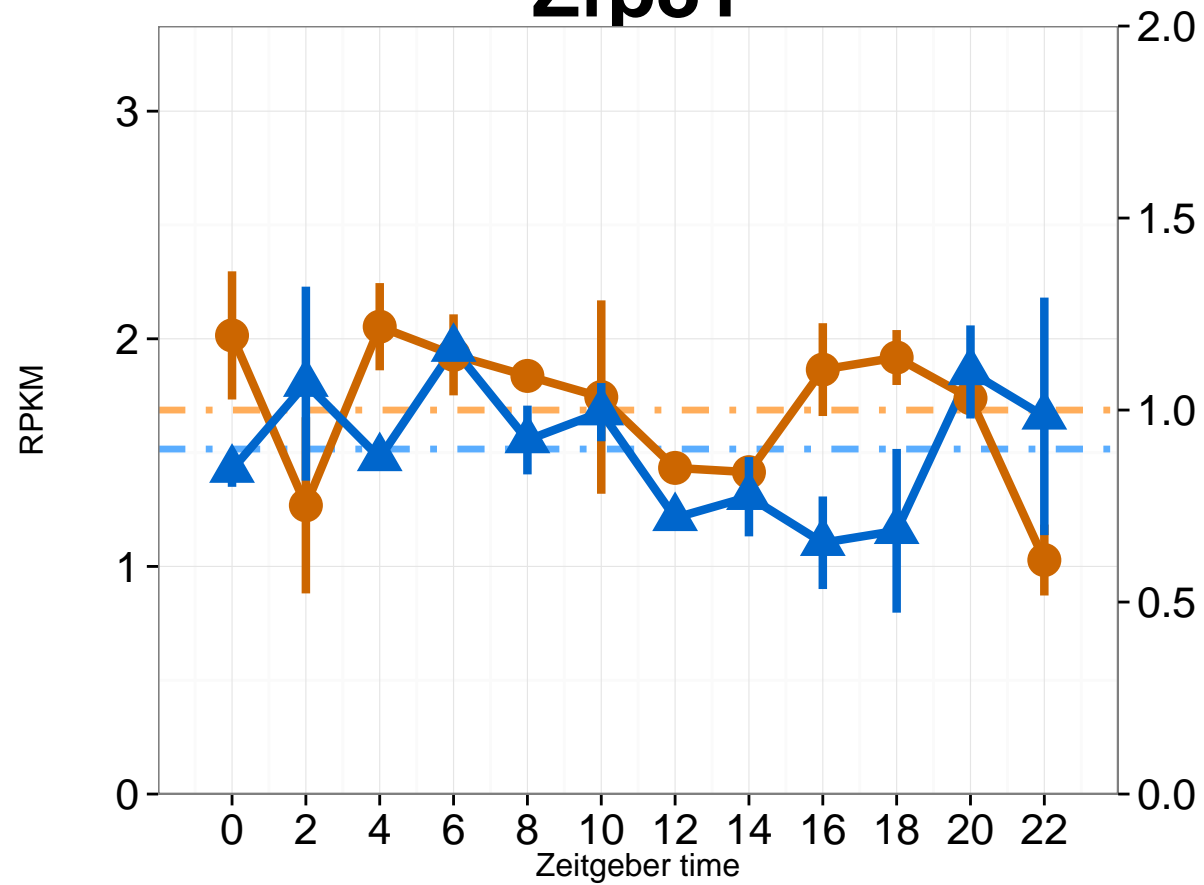

# Zfp81

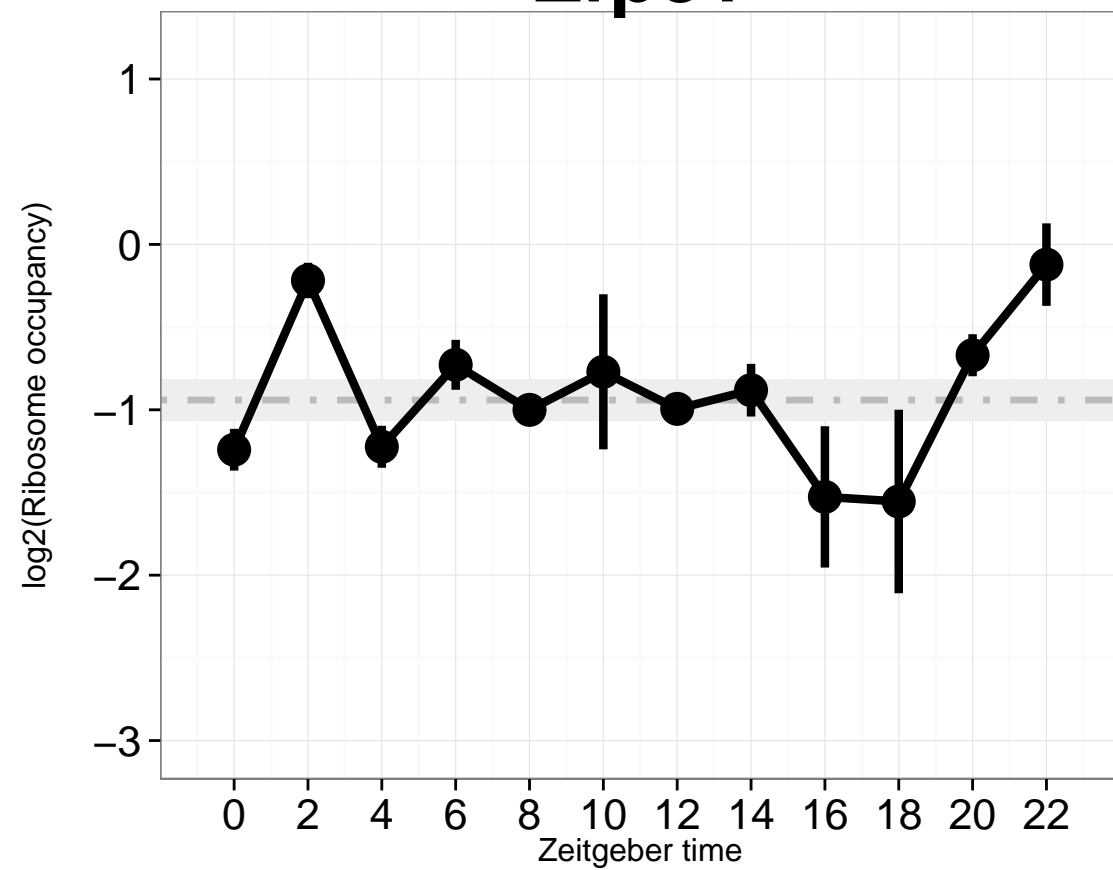

Supplement: SuppDataset_1.zip [file Zfp81_set_A.pdf › Supplemental Dataset 1/A-mRNA_nonrhyth_translation_nonrhyth/Zfp81_set_A.pdf]

# Zfp820

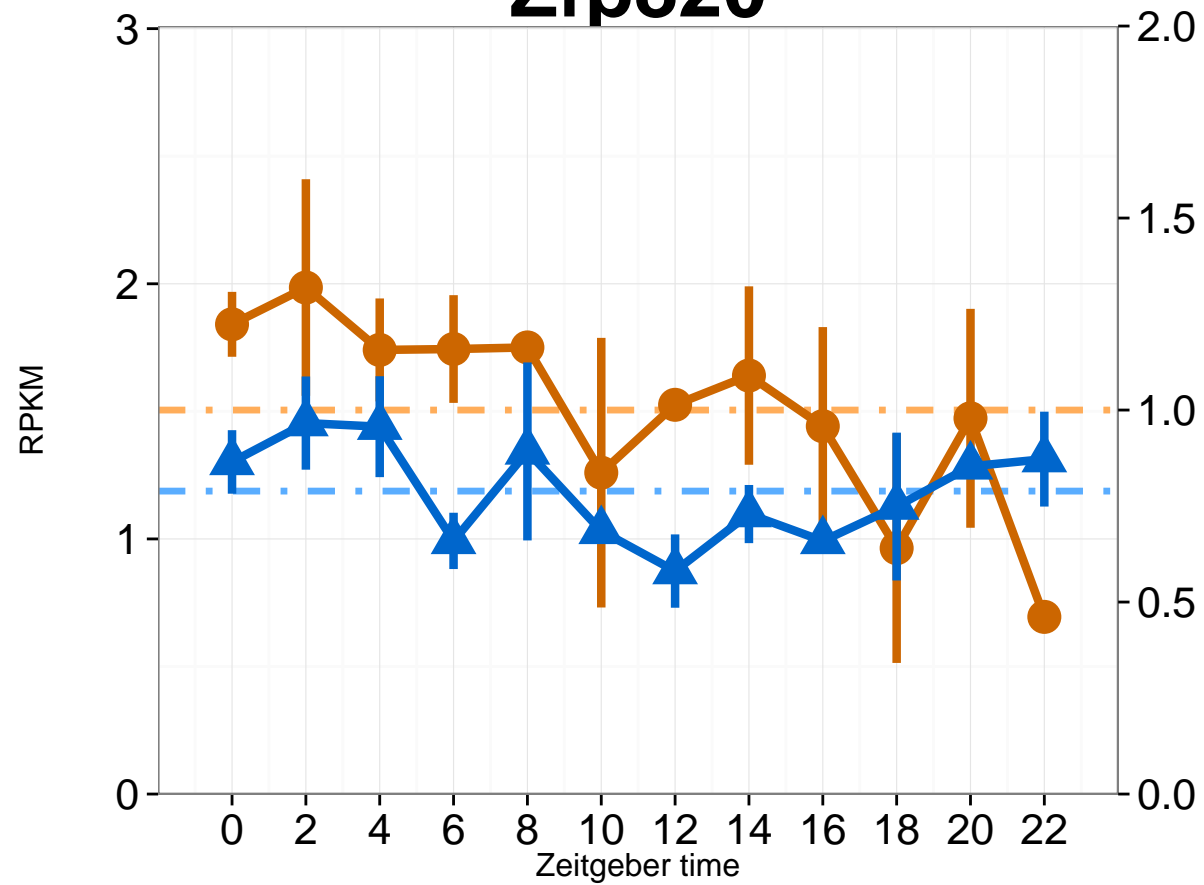

# Zfp820

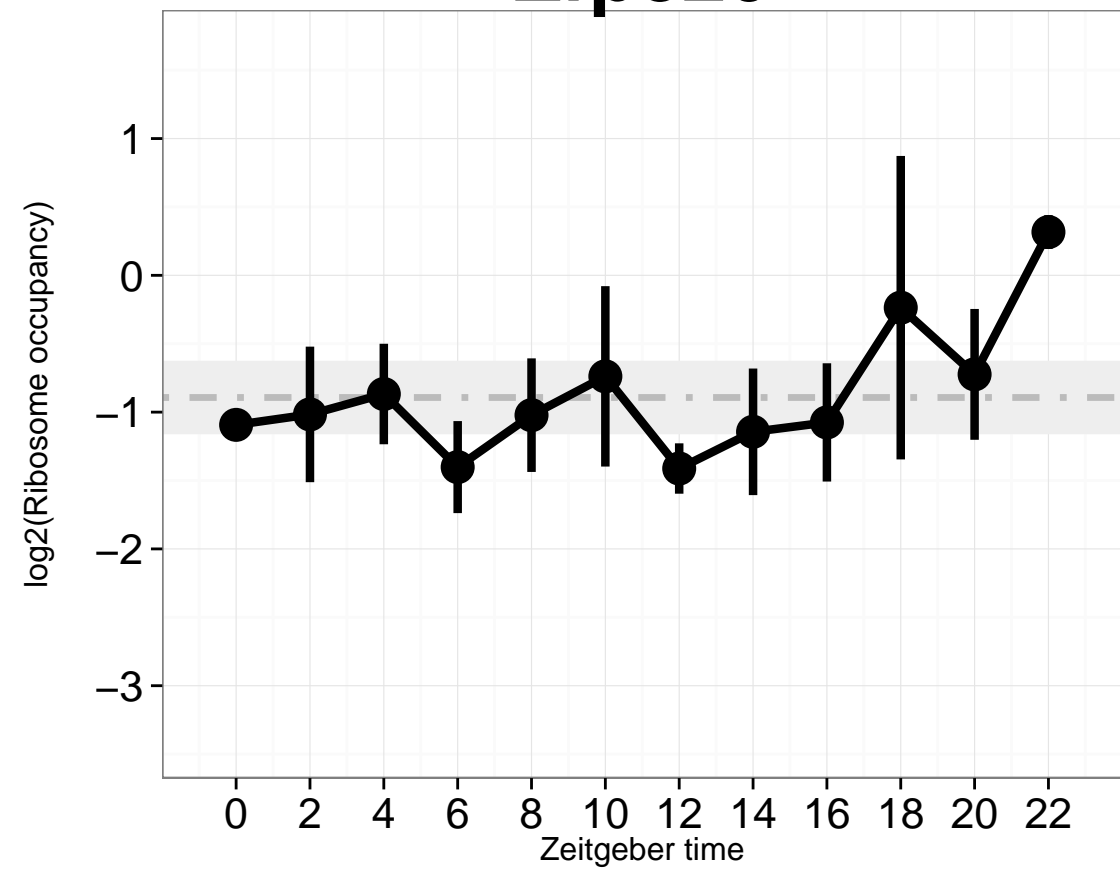

Supplement: SuppDataset_1.zip [file Zfp820_set_A.pdf › Supplemental Dataset 1/A-mRNA_nonrhyth_translation_nonrhyth/Zfp820_set_A.pdf]

# Zfp821

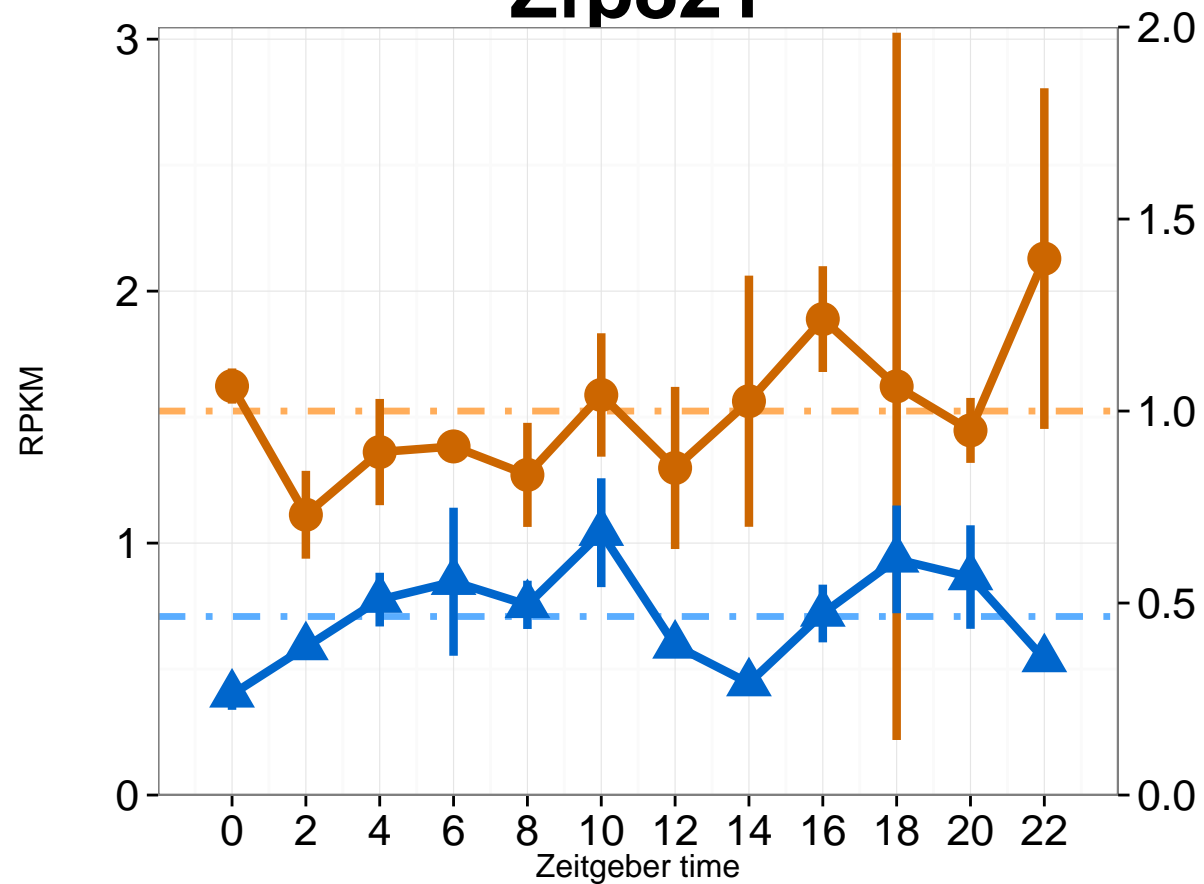

# Zfp821

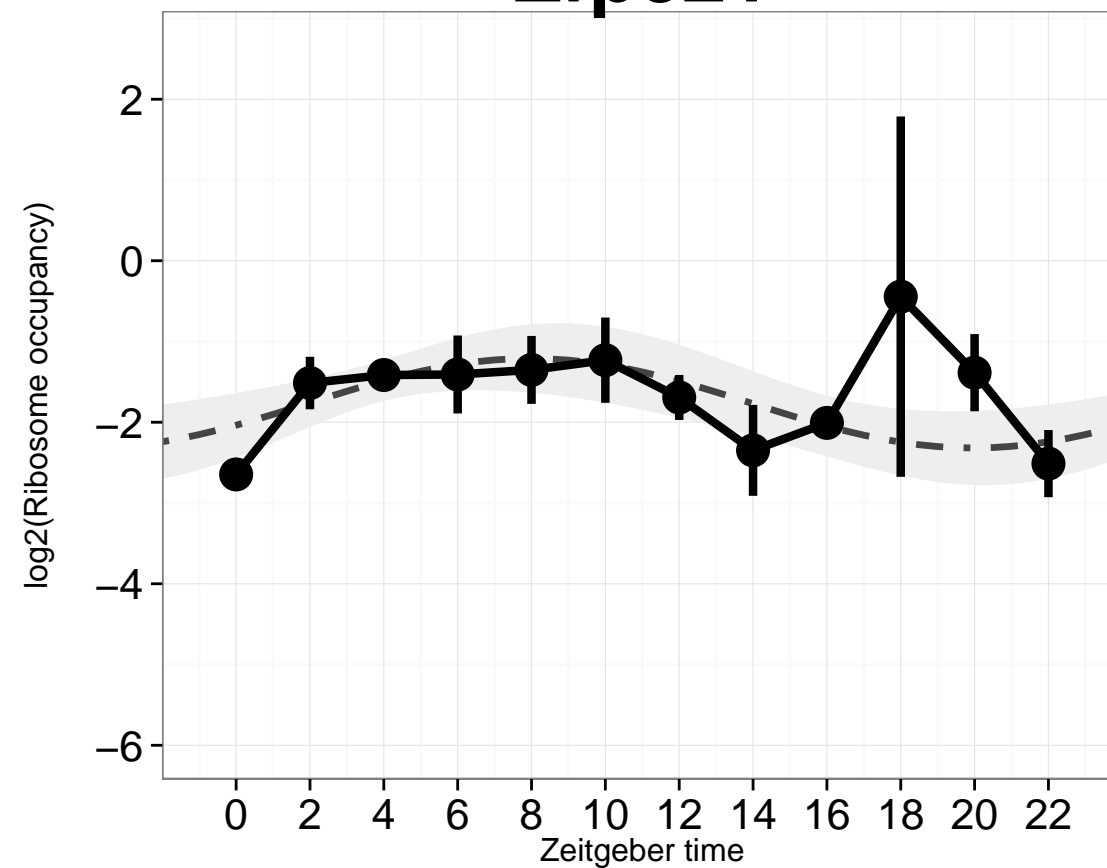

Supplement: SuppDataset_1.zip [file Zfp821_set_A.pdf › Supplemental Dataset 1/A-mRNA_nonrhyth_translation_nonrhyth/Zfp821_set_A.pdf]

## Zfp825

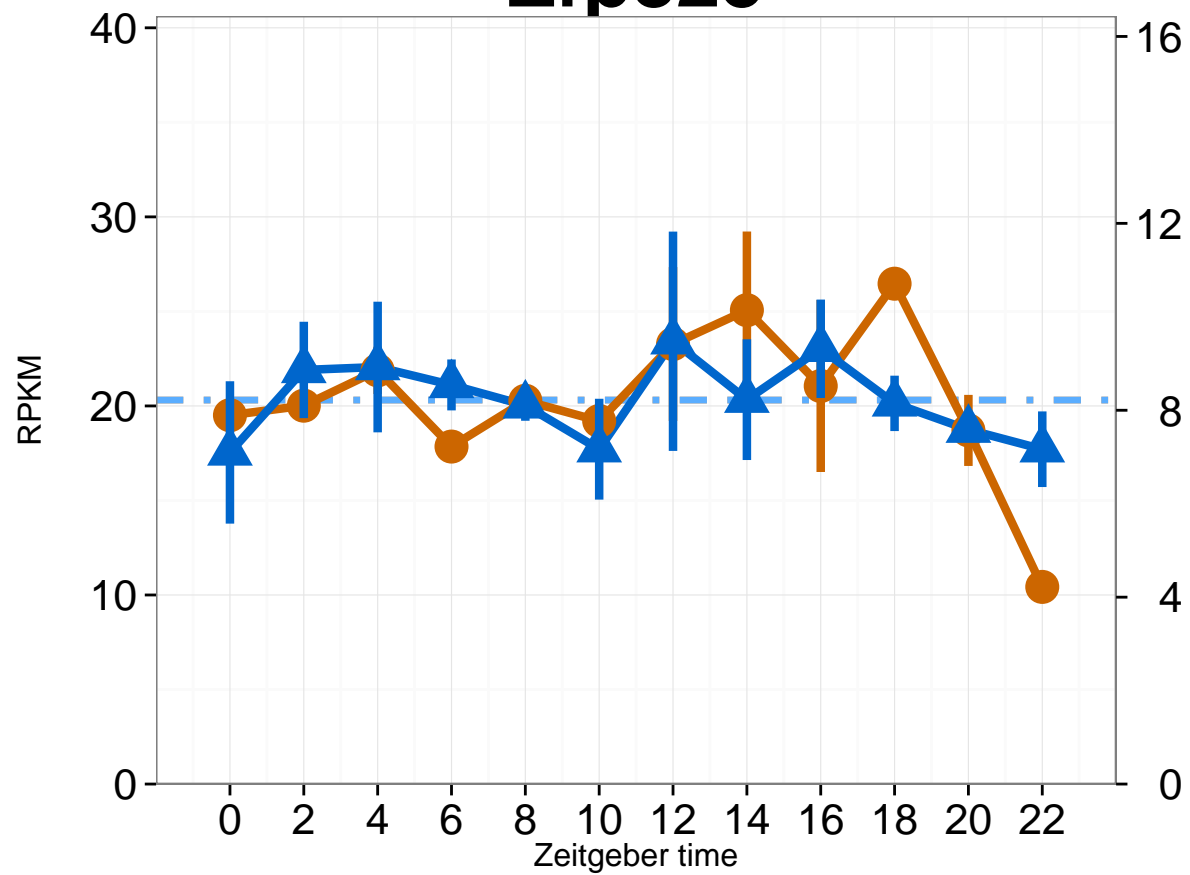

## Zfp825

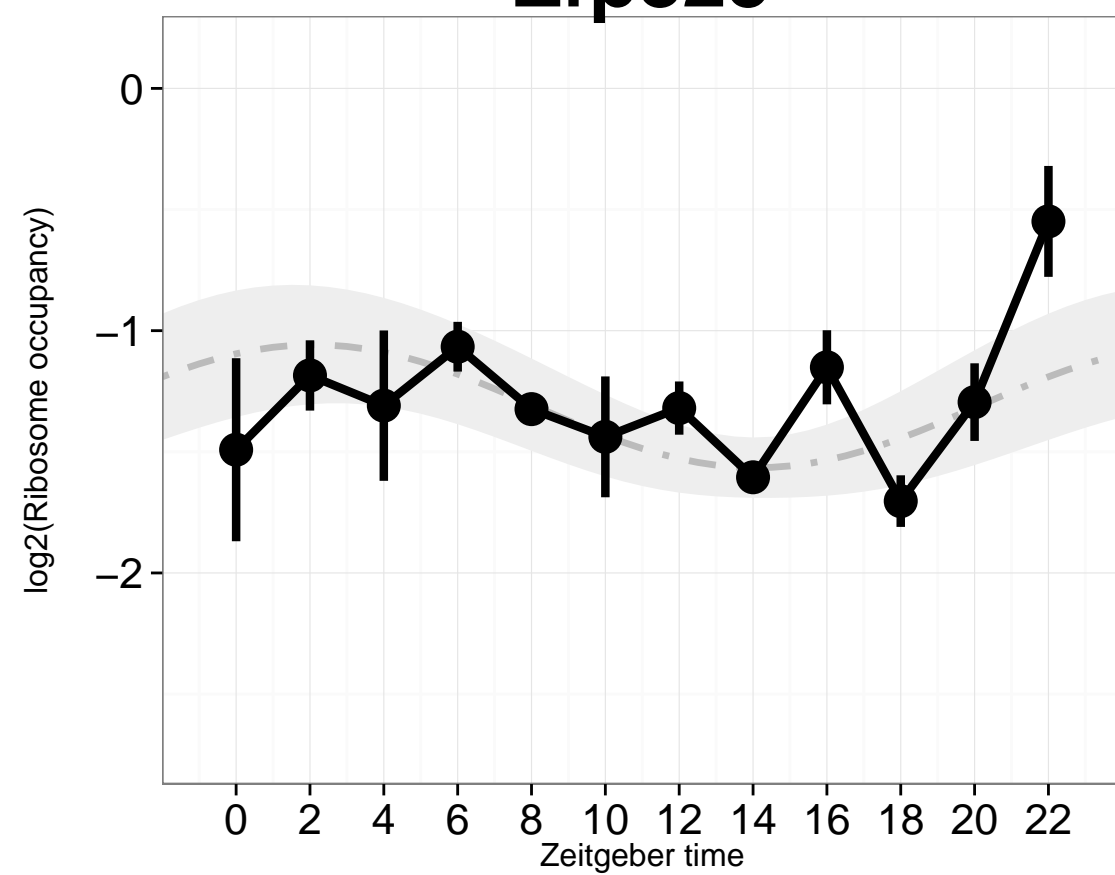

Supplement: SuppDataset_1.zip [file Zfp825_set_A.pdf › Supplemental Dataset 1/A-mRNA_nonrhyth_translation_nonrhyth/Zfp825_set_A.pdf]

# Zfp830

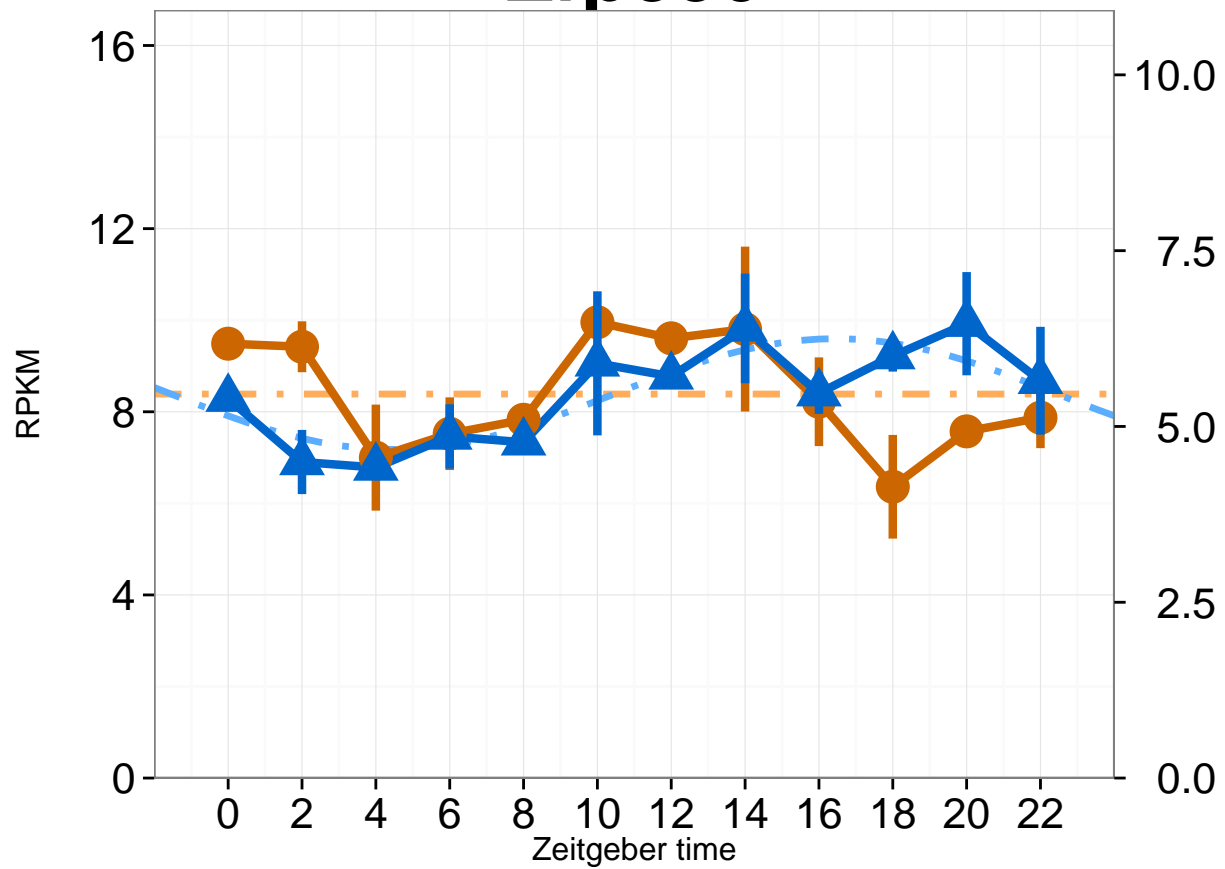

# Zfp830

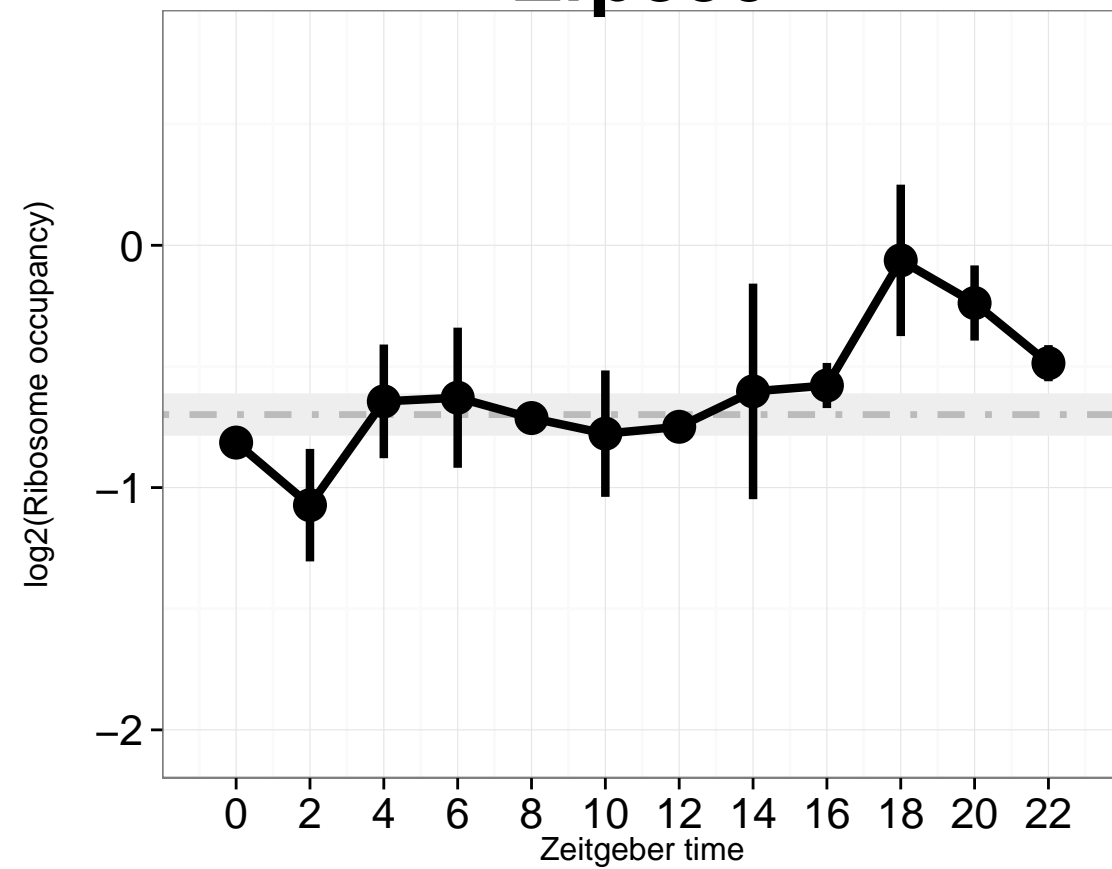

Supplement: SuppDataset_1.zip [file Zfp830_set_A.pdf › Supplemental Dataset 1/A-mRNA_nonrhyth_translation_nonrhyth/Zfp830_set_A.pdf]

# Zfp839

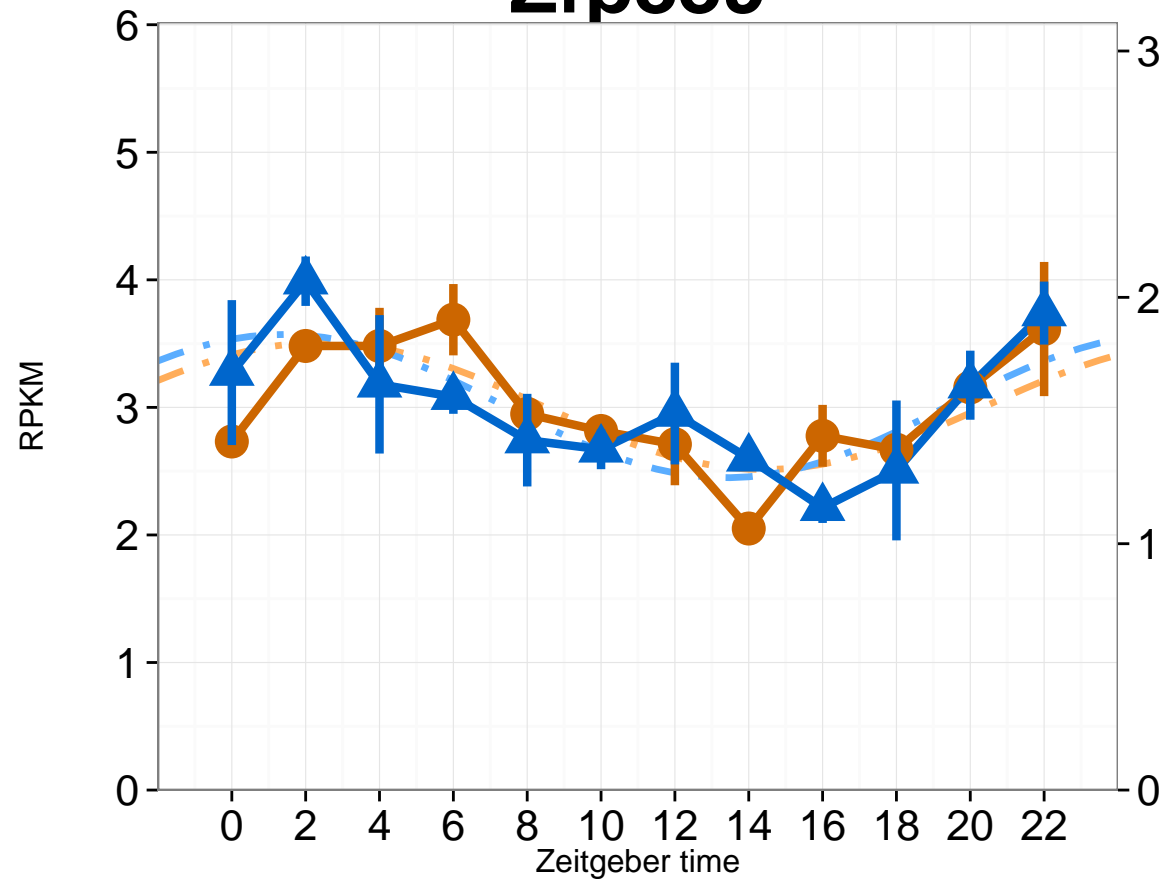

# Zfp839

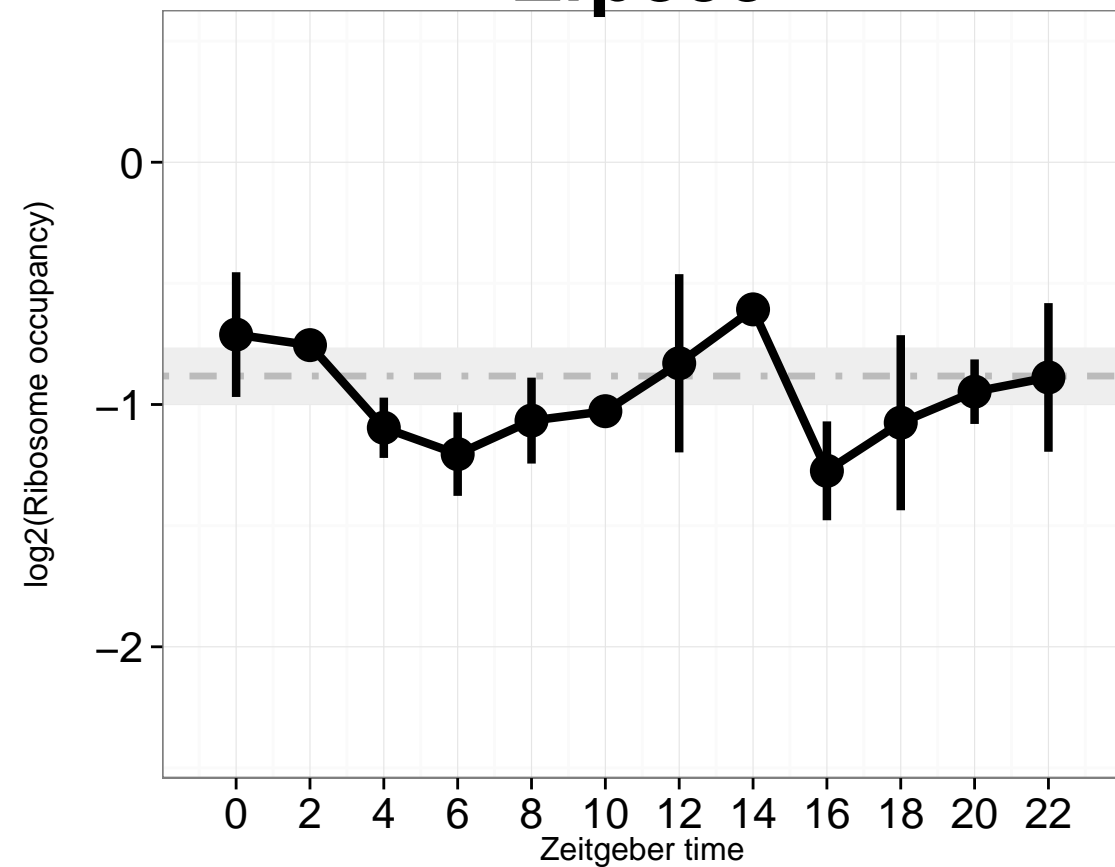

Supplement: SuppDataset_1.zip [file Zfp839_set_A.pdf › Supplemental Dataset 1/A-mRNA_nonrhyth_translation_nonrhyth/Zfp839_set_A.pdf]

# Zfp846

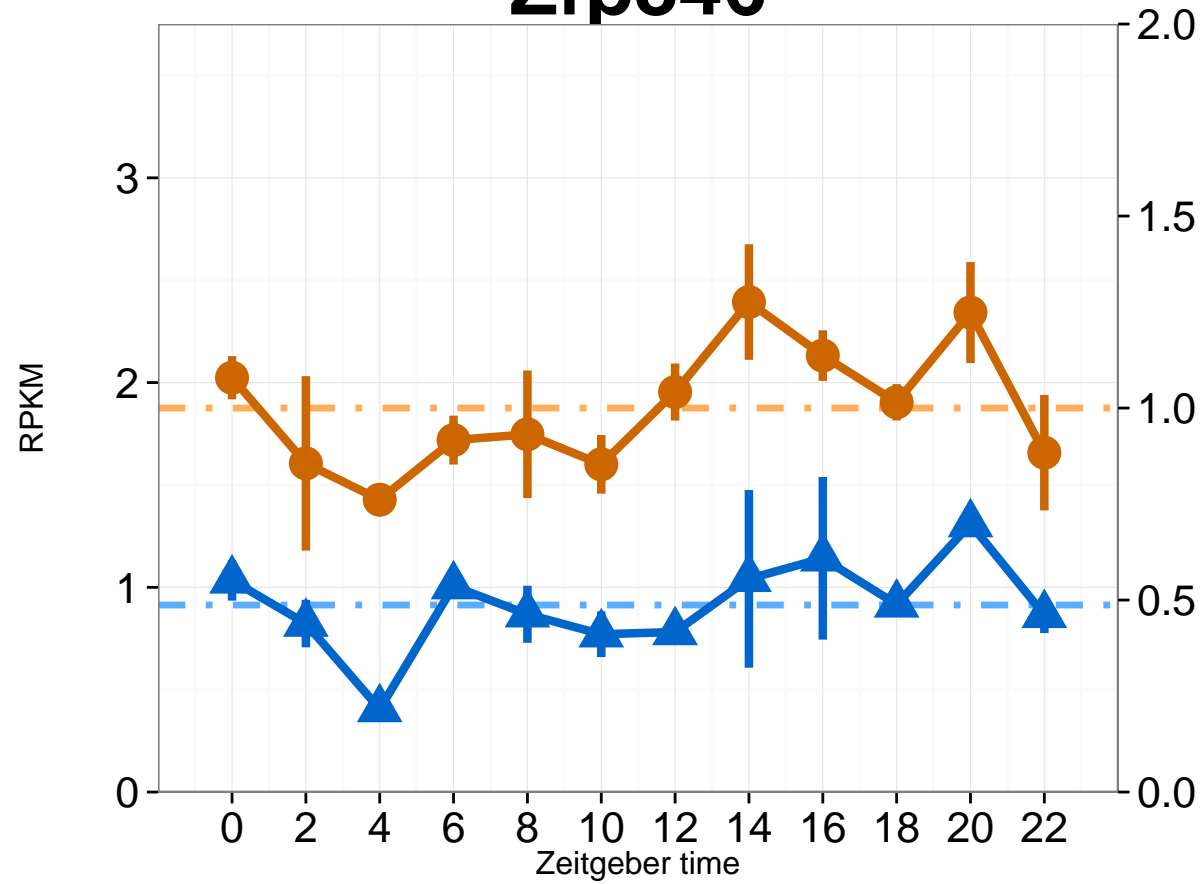

# Zfp846

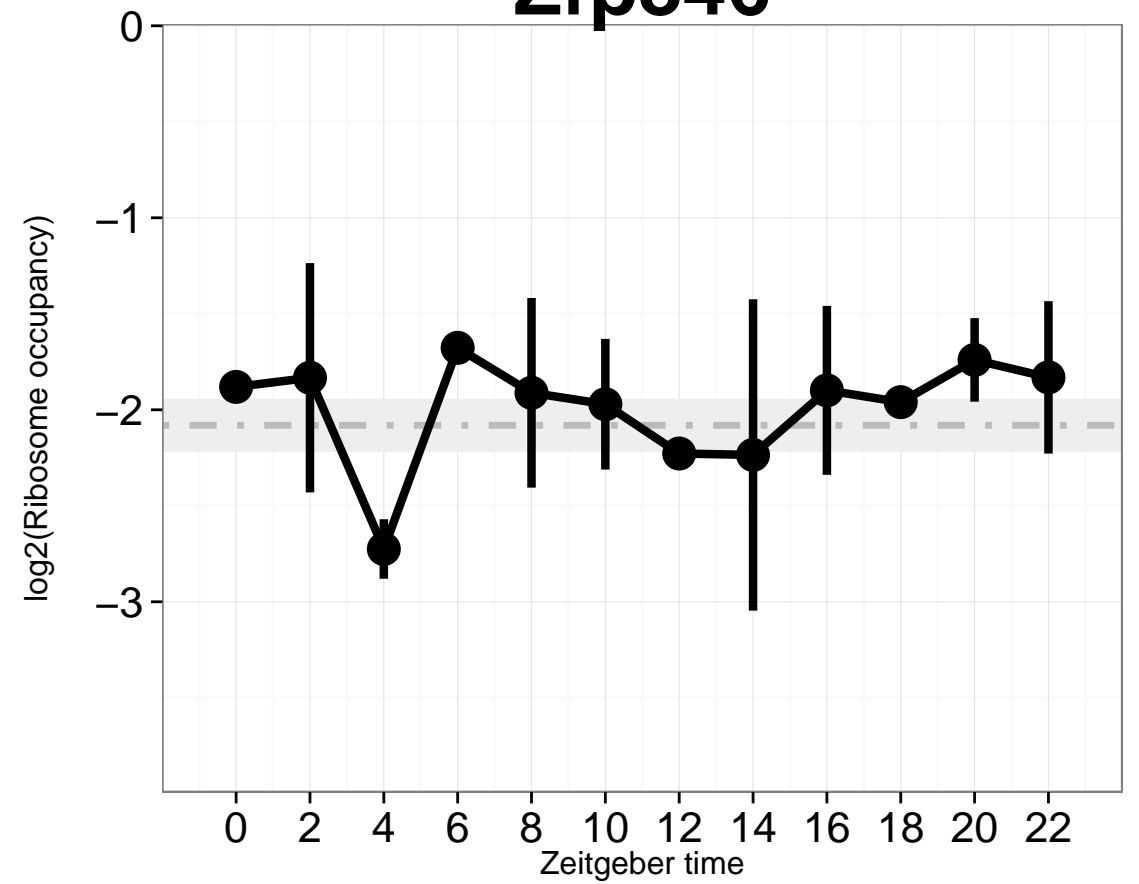

Supplement: SuppDataset_1.zip [file Zfp846_set_A.pdf › Supplemental Dataset 1/A-mRNA_nonrhyth_translation_nonrhyth/Zfp846_set_A.pdf]

# Zfp84

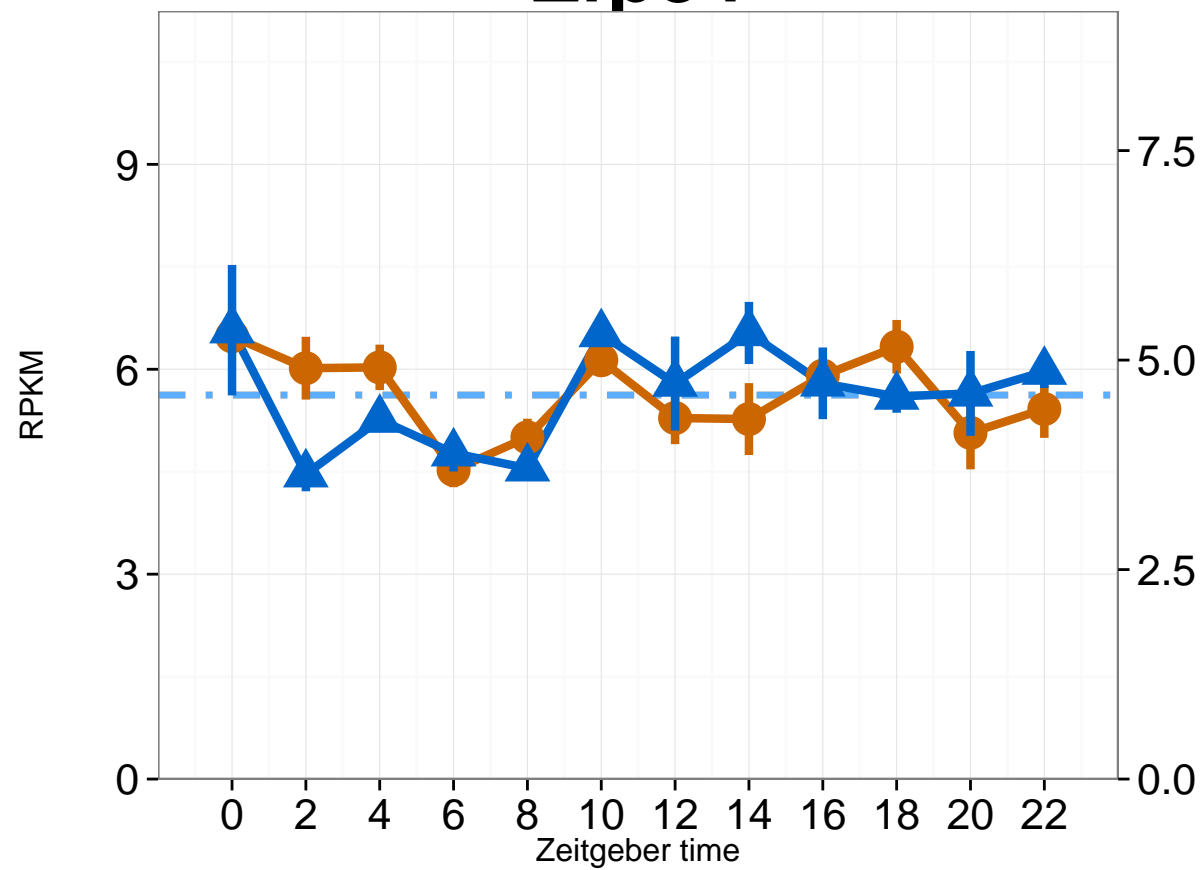

# Zfp84

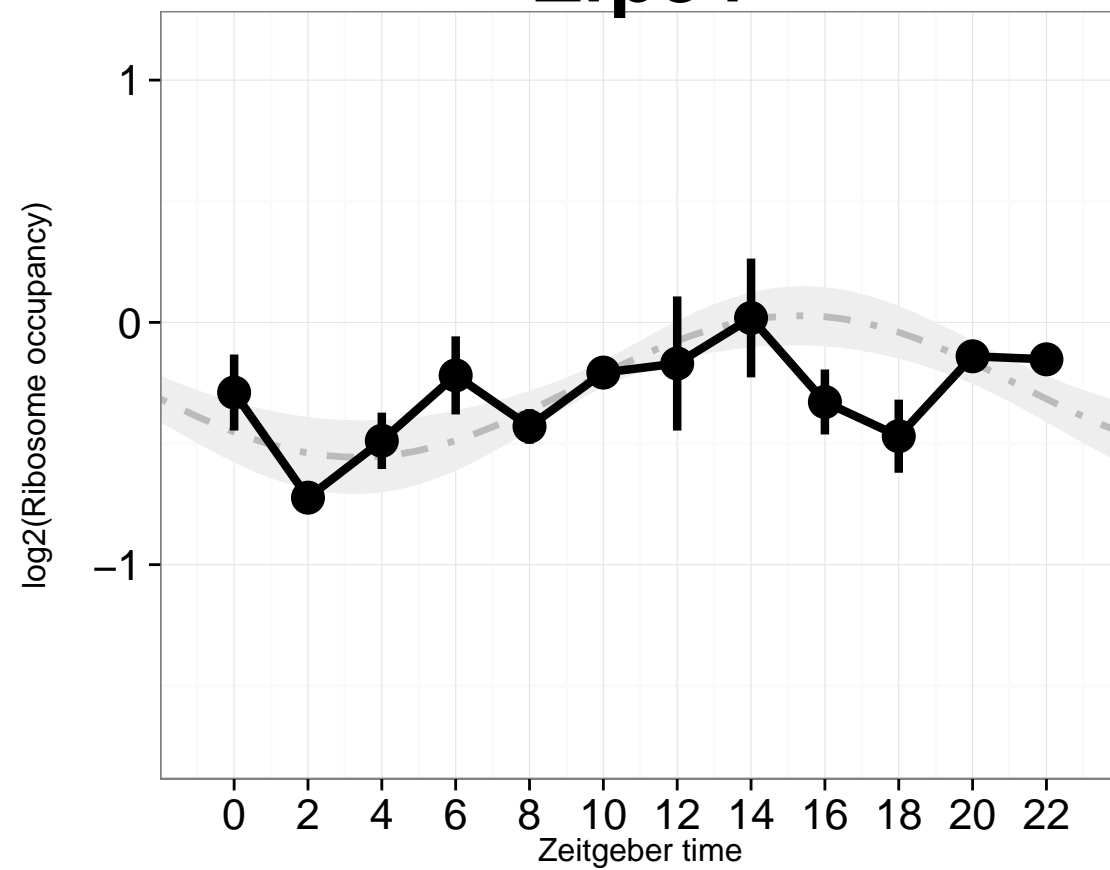

Supplement: SuppDataset_1.zip [file Zfp84_set_A.pdf › Supplemental Dataset 1/A-mRNA_nonrhyth_translation_nonrhyth/Zfp84_set_A.pdf]

# Zfp865

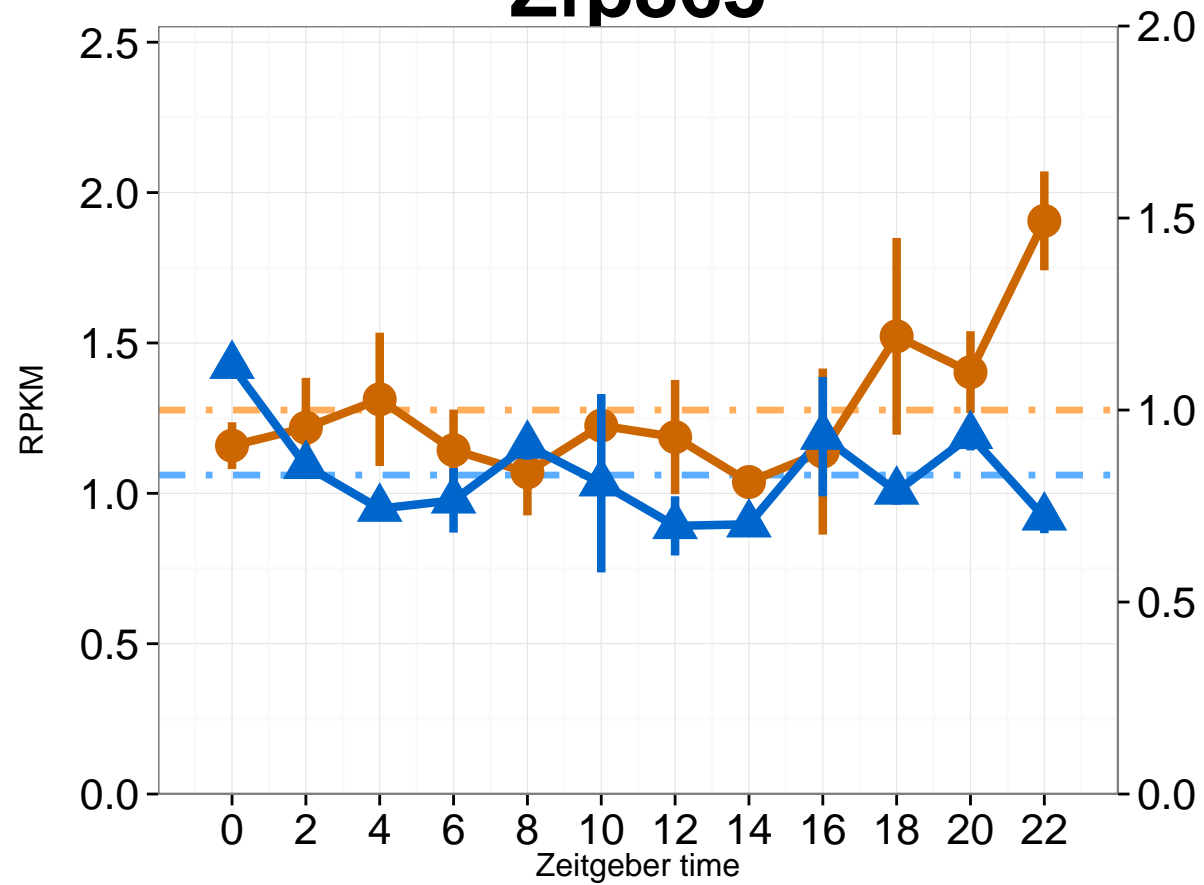

# Zfp865

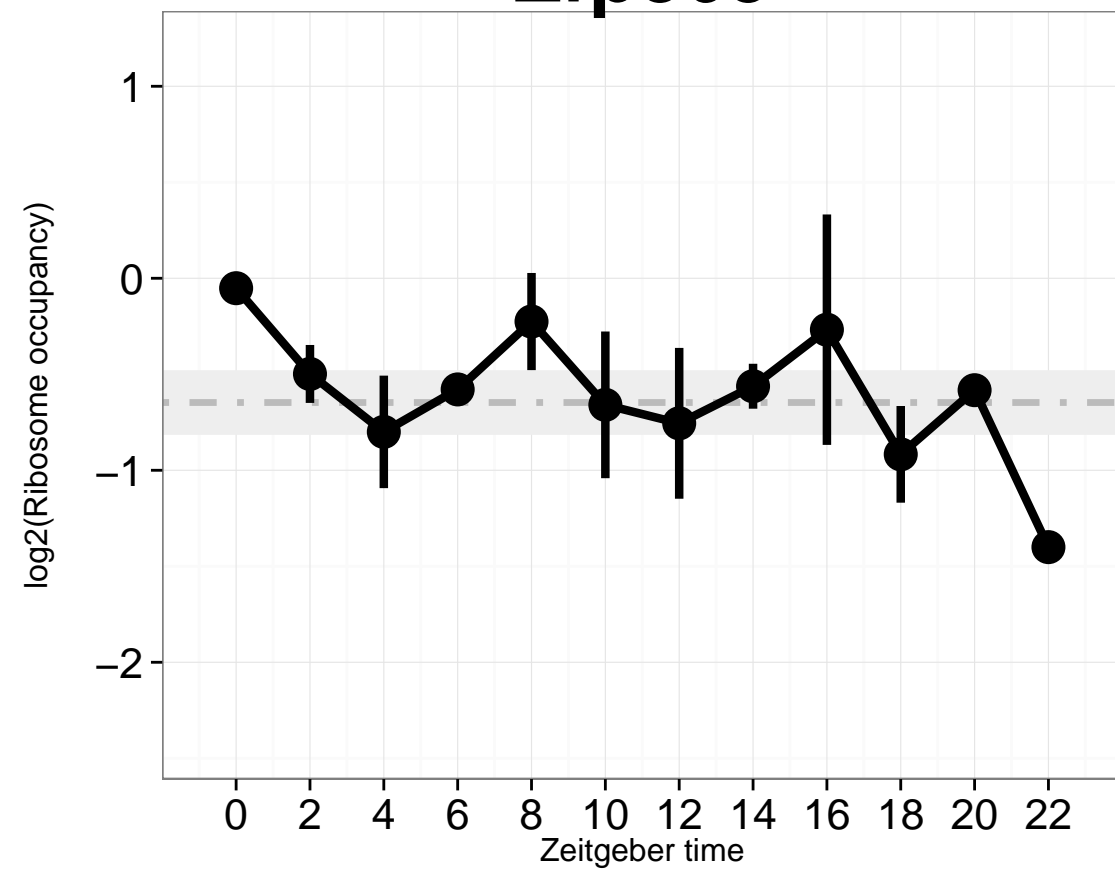

Supplement: SuppDataset_1.zip [file Zfp865_set_A.pdf › Supplemental Dataset 1/A-mRNA_nonrhyth_translation_nonrhyth/Zfp865_set_A.pdf]

# Zfp866

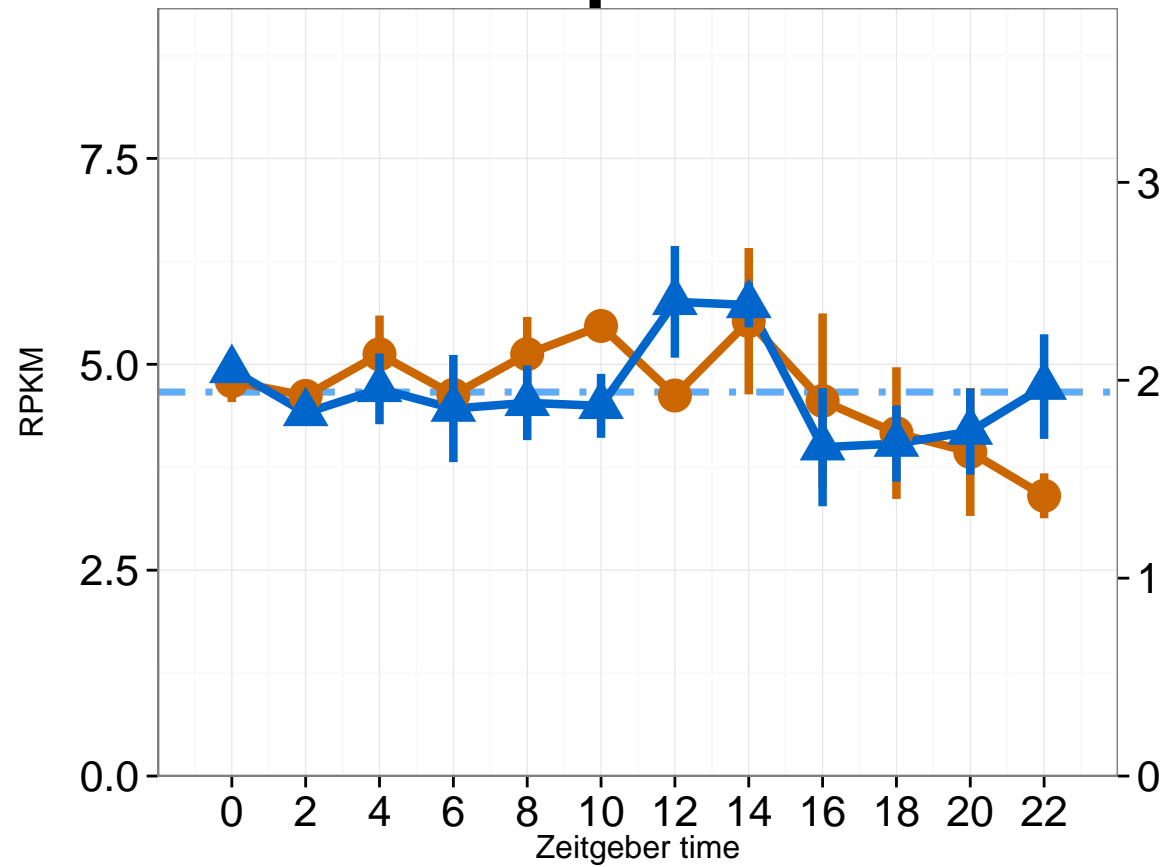

# Zfp866

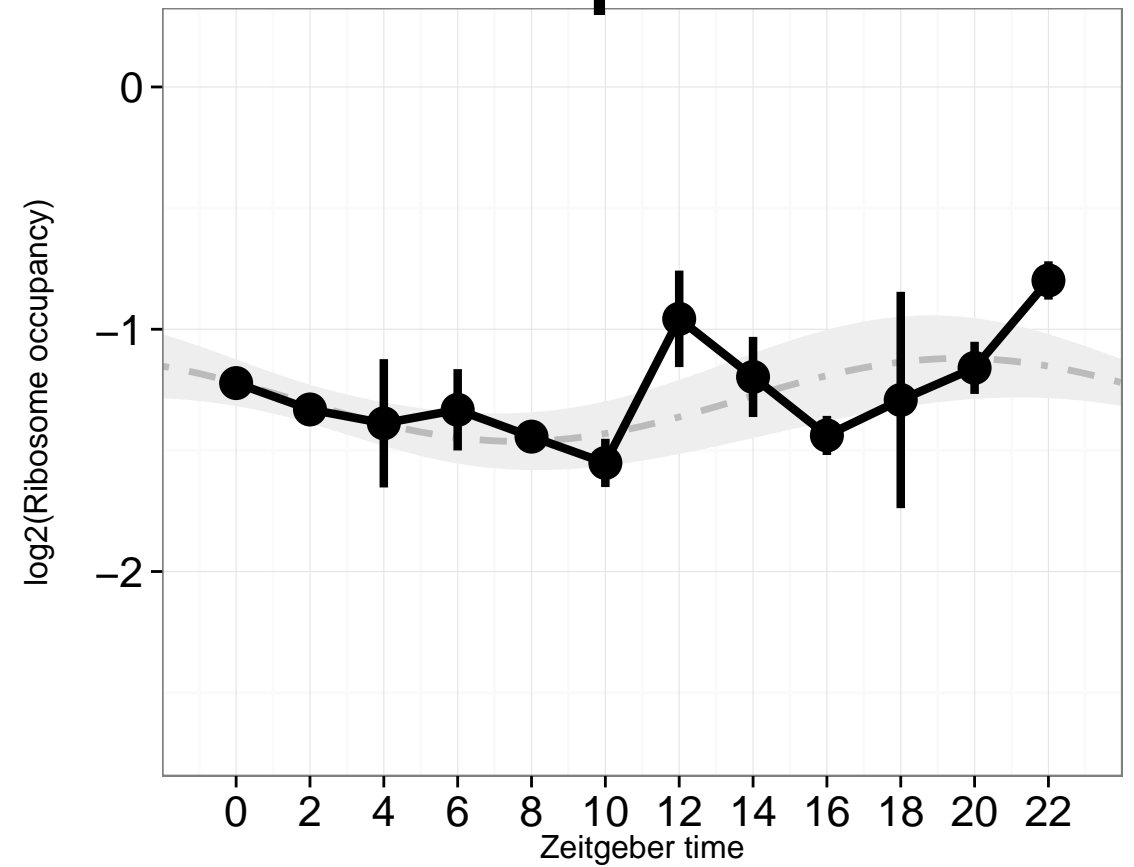

Supplement: SuppDataset_1.zip [file Zfp866_set_A.pdf › Supplemental Dataset 1/A-mRNA_nonrhyth_translation_nonrhyth/Zfp866_set_A.pdf]

# Zfp868

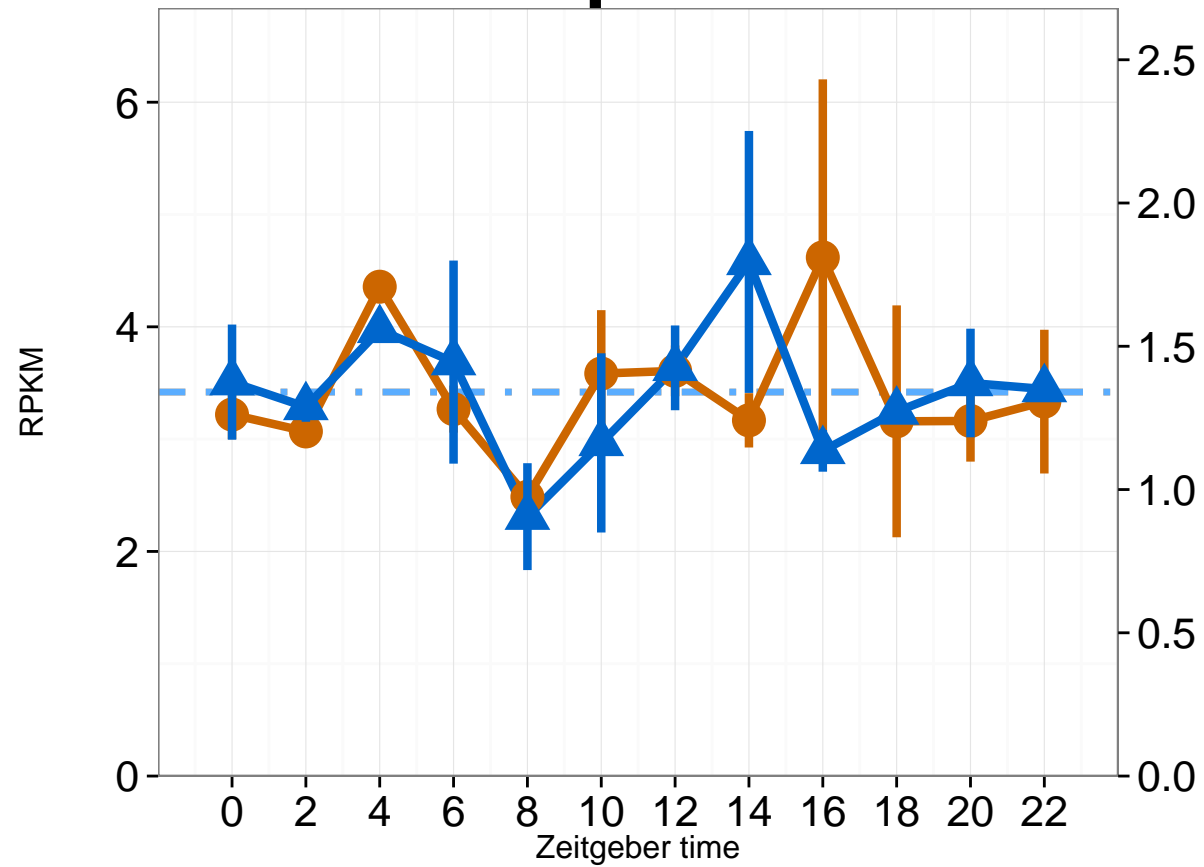

# Zfp868

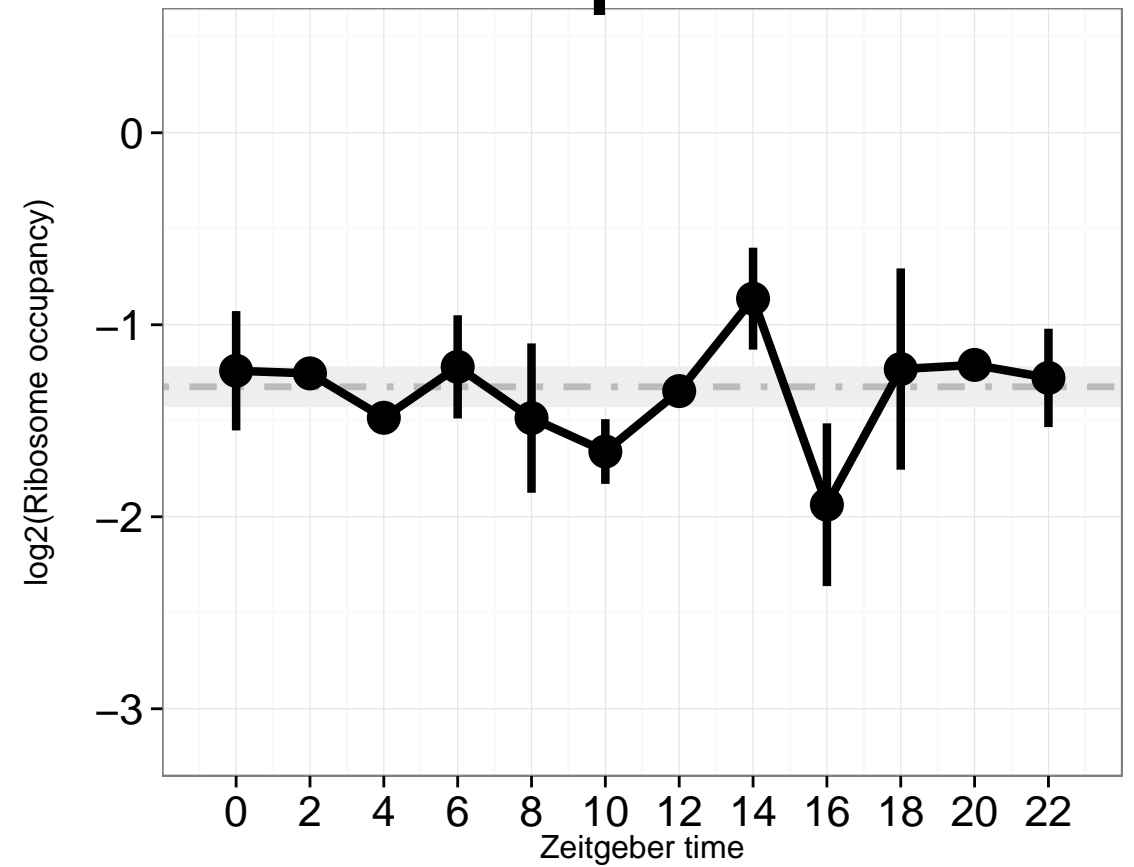

Supplement: SuppDataset_1.zip [file Zfp868_set_A.pdf › Supplemental Dataset 1/A-mRNA_nonrhyth_translation_nonrhyth/Zfp868_set_A.pdf]

# Zfp869

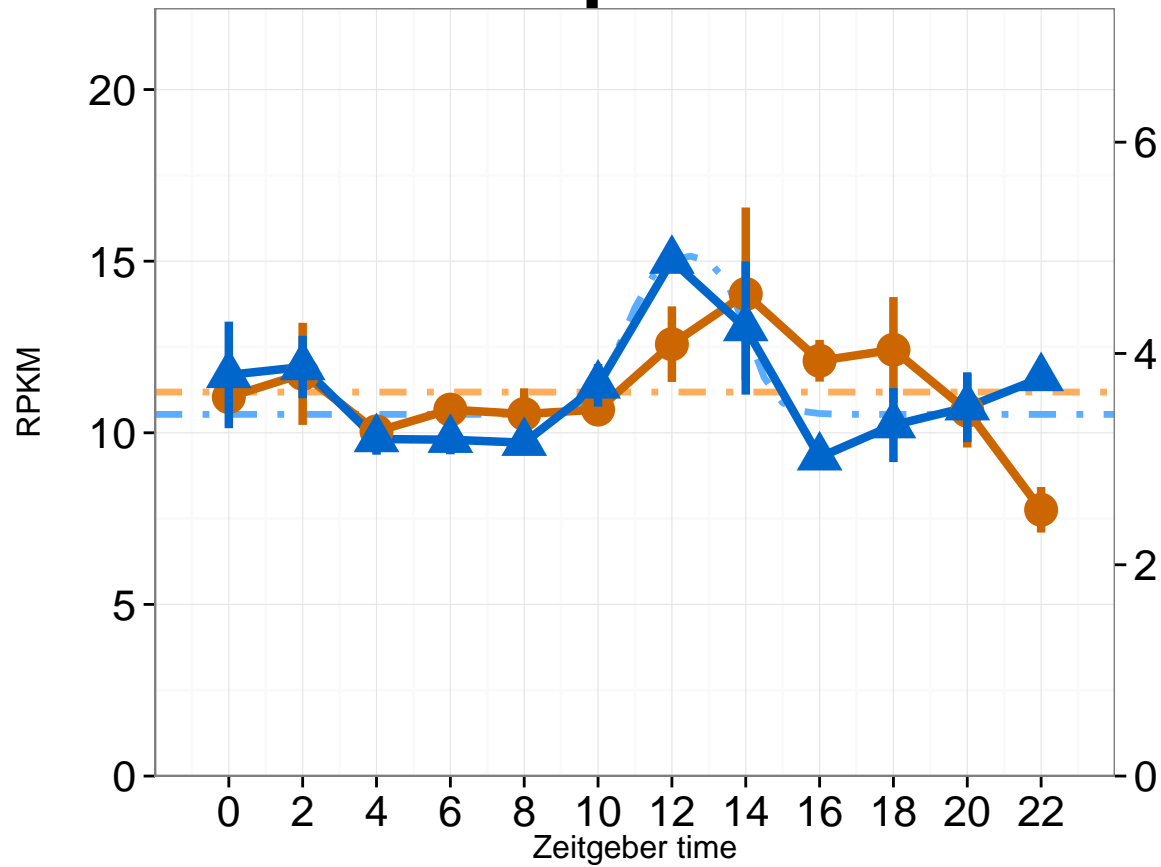

# Zfp869

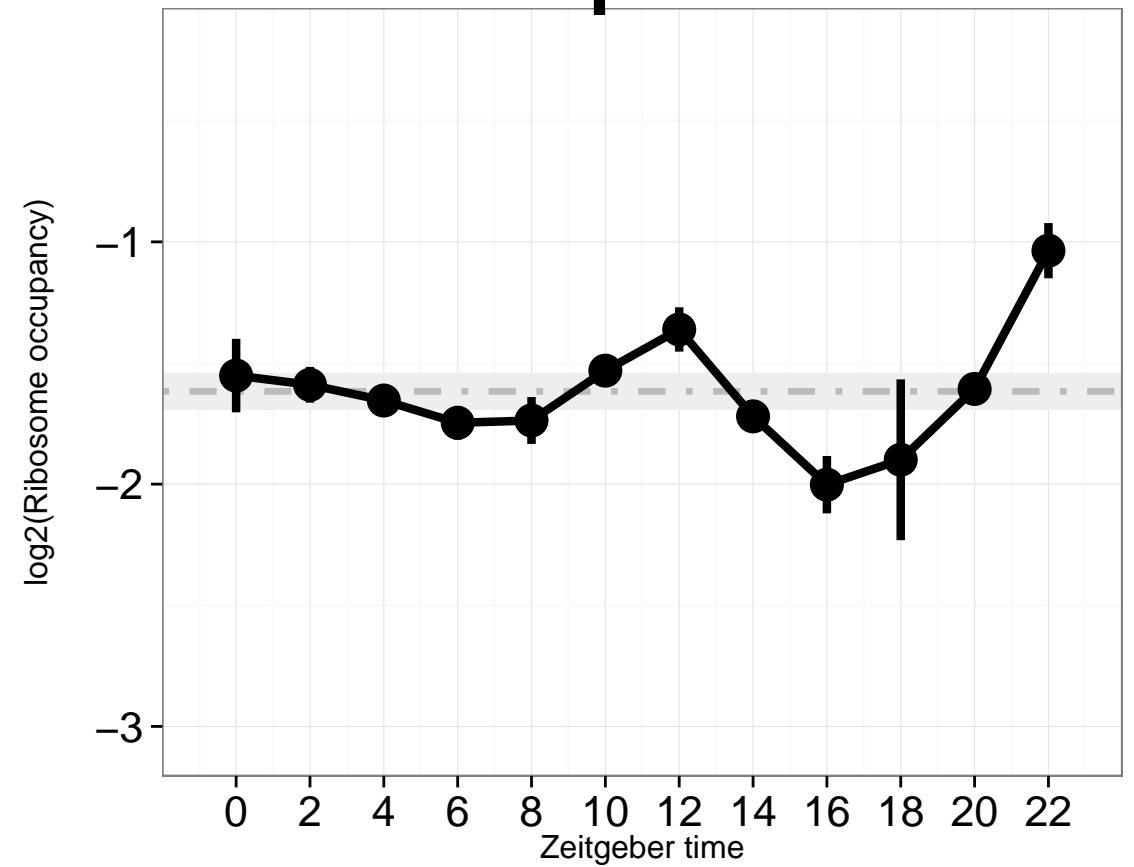

Supplement: SuppDataset_1.zip [file Zfp869_set_A.pdf › Supplemental Dataset 1/A-mRNA_nonrhyth_translation_nonrhyth/Zfp869_set_A.pdf]

# Zfp870

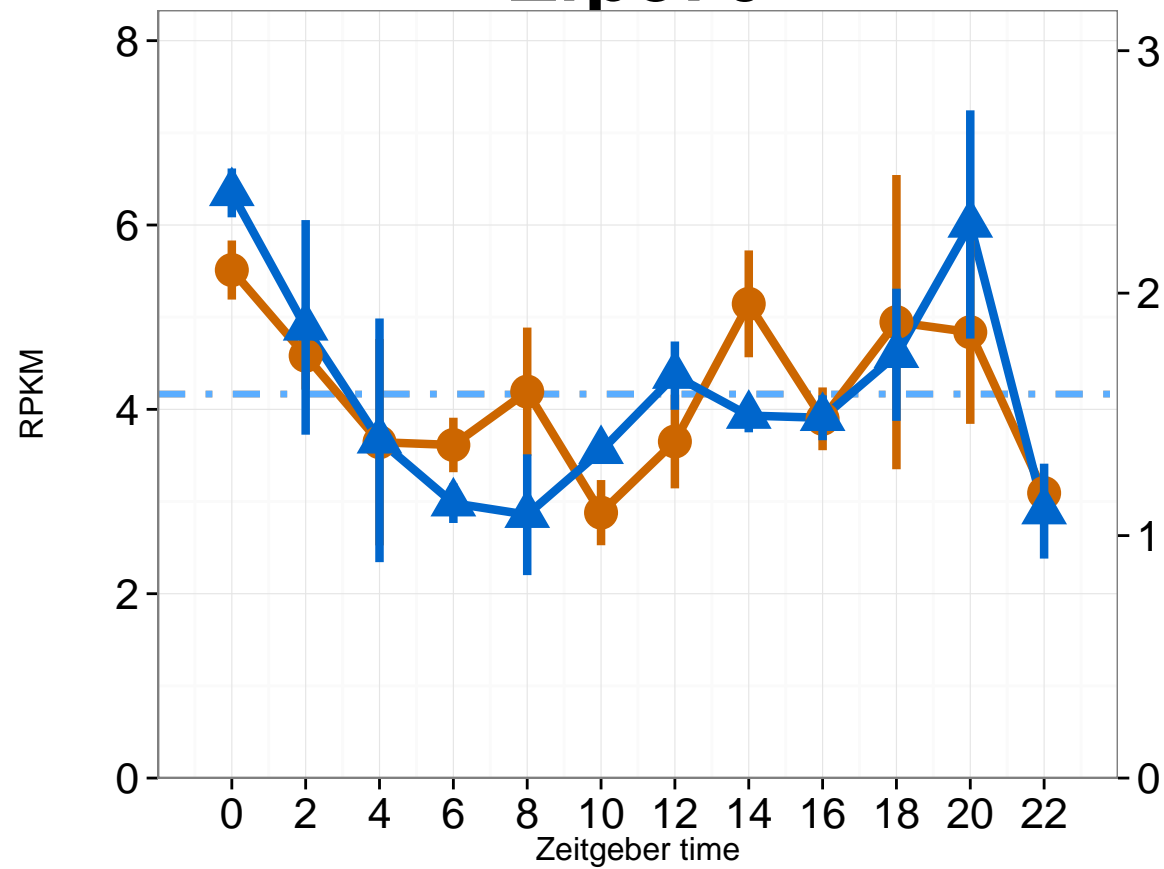

# Zfp870

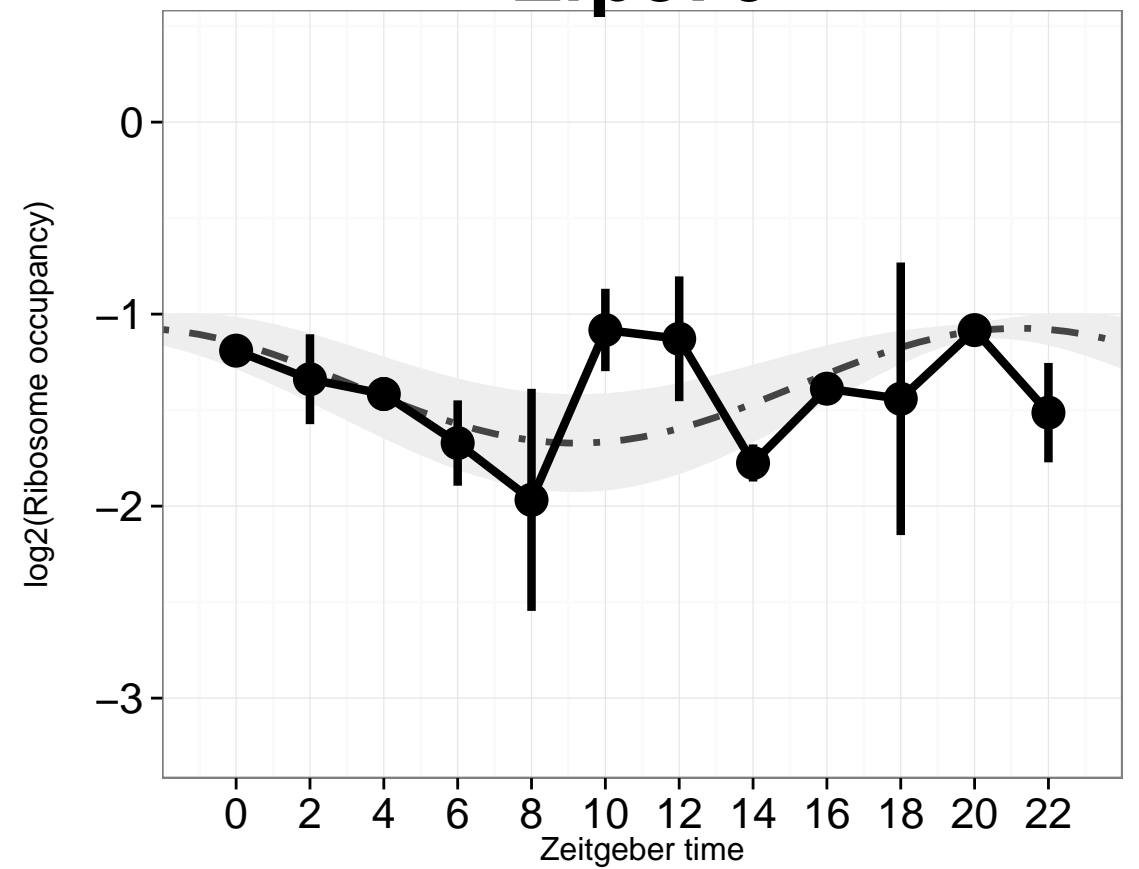

Supplement: SuppDataset_1.zip [file Zfp870_set_A.pdf › Supplemental Dataset 1/A-mRNA_nonrhyth_translation_nonrhyth/Zfp870_set_A.pdf]

# Zfp871

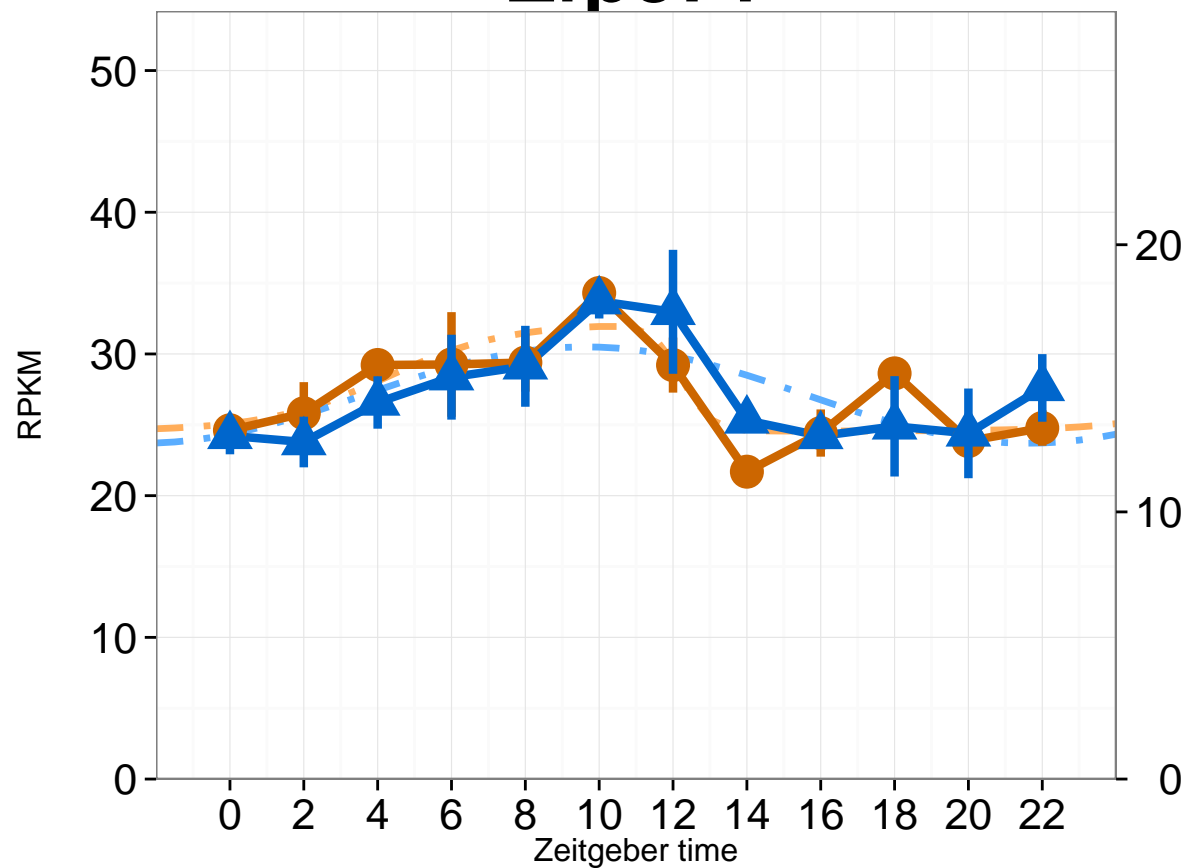

# Zfp871

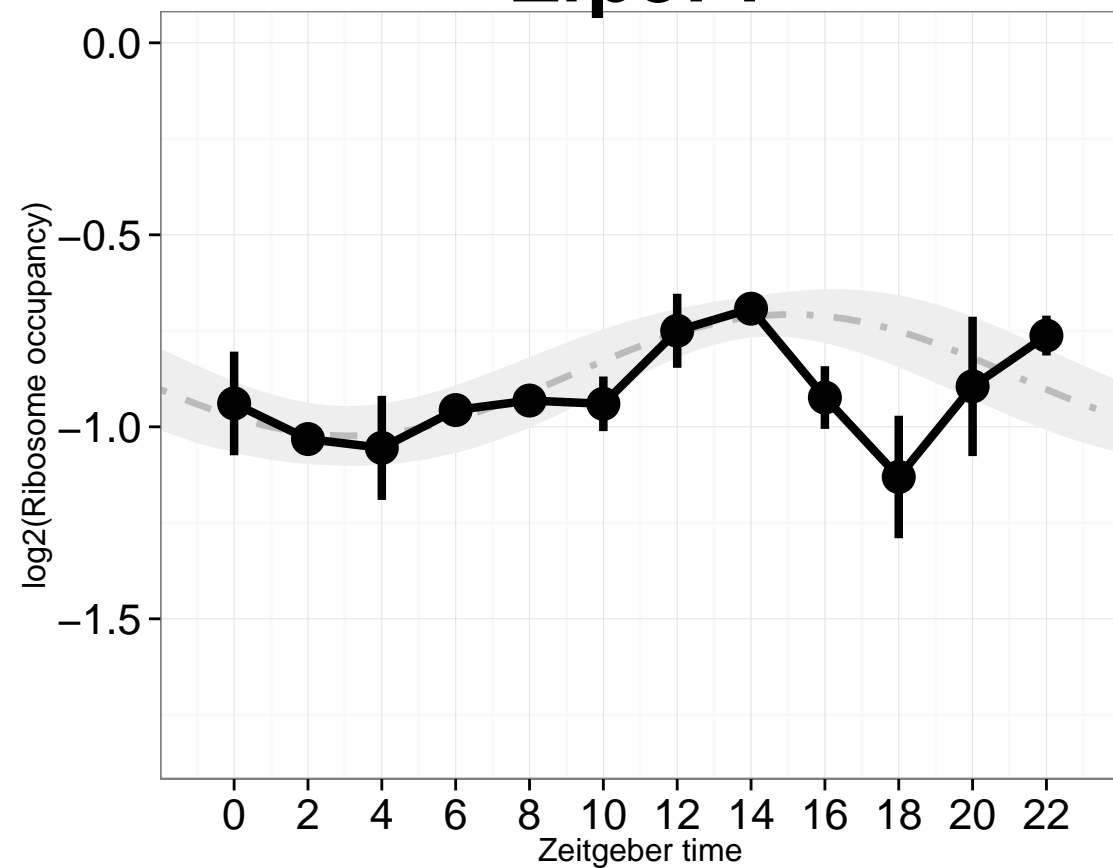

Supplement: SuppDataset_1.zip [file Zfp871_set_A.pdf › Supplemental Dataset 1/A-mRNA_nonrhyth_translation_nonrhyth/Zfp871_set_A.pdf]

# Zfp873

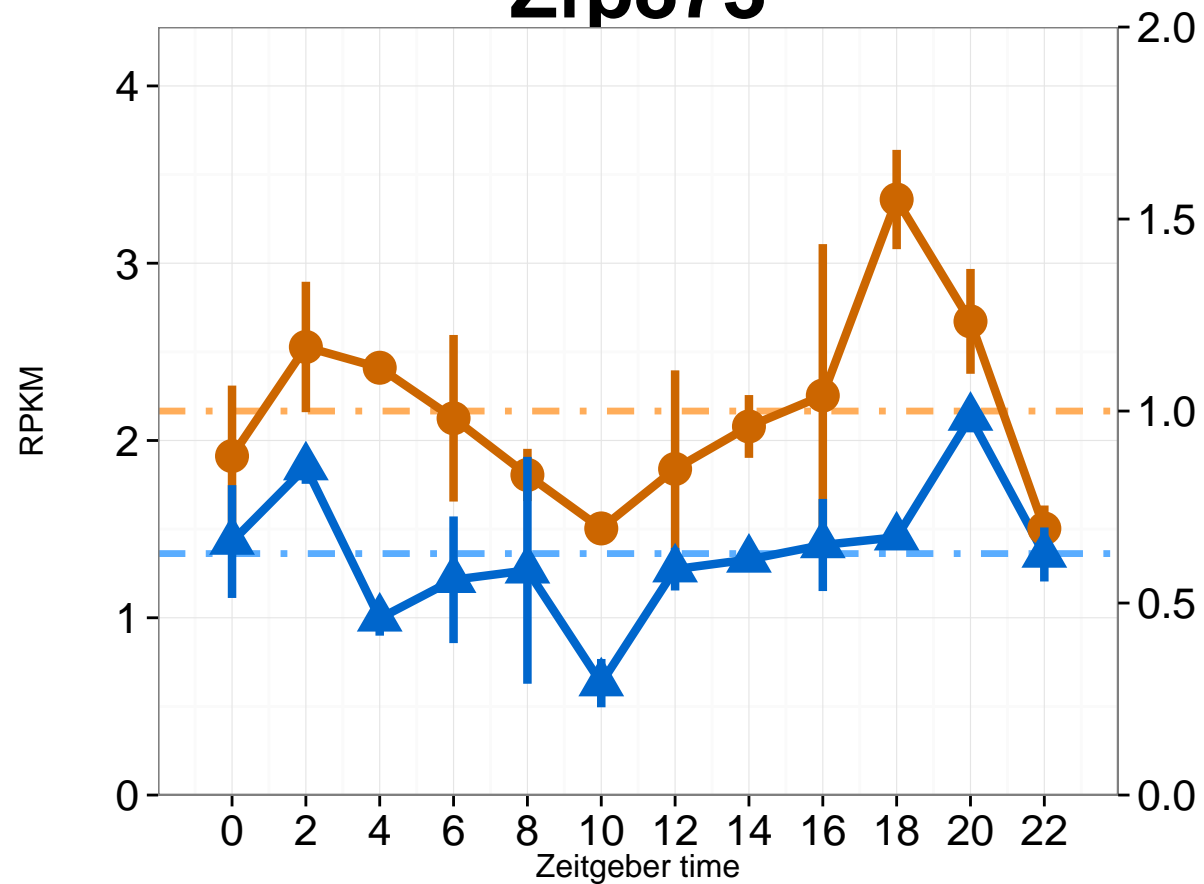

# Zfp873

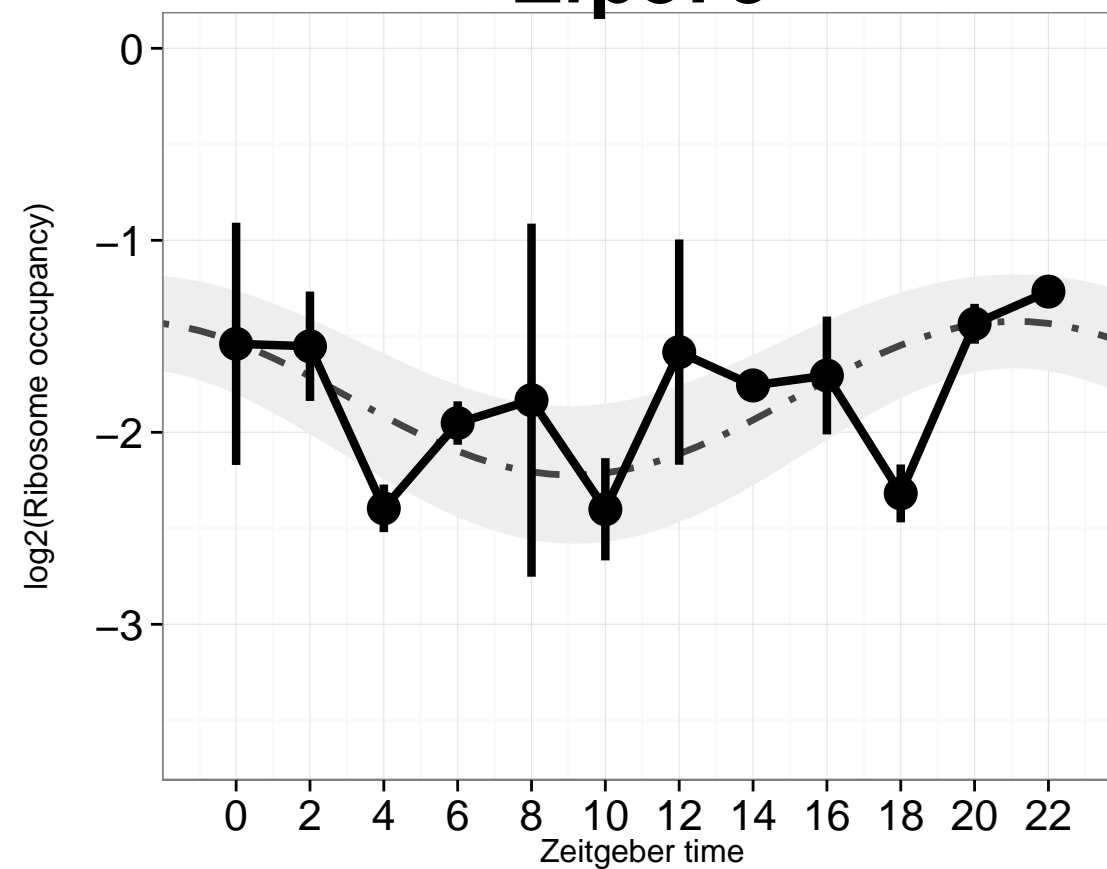

Supplement: SuppDataset_1.zip [file Zfp873_set_A.pdf › Supplemental Dataset 1/A-mRNA_nonrhyth_translation_nonrhyth/Zfp873_set_A.pdf]

# Zfp874a

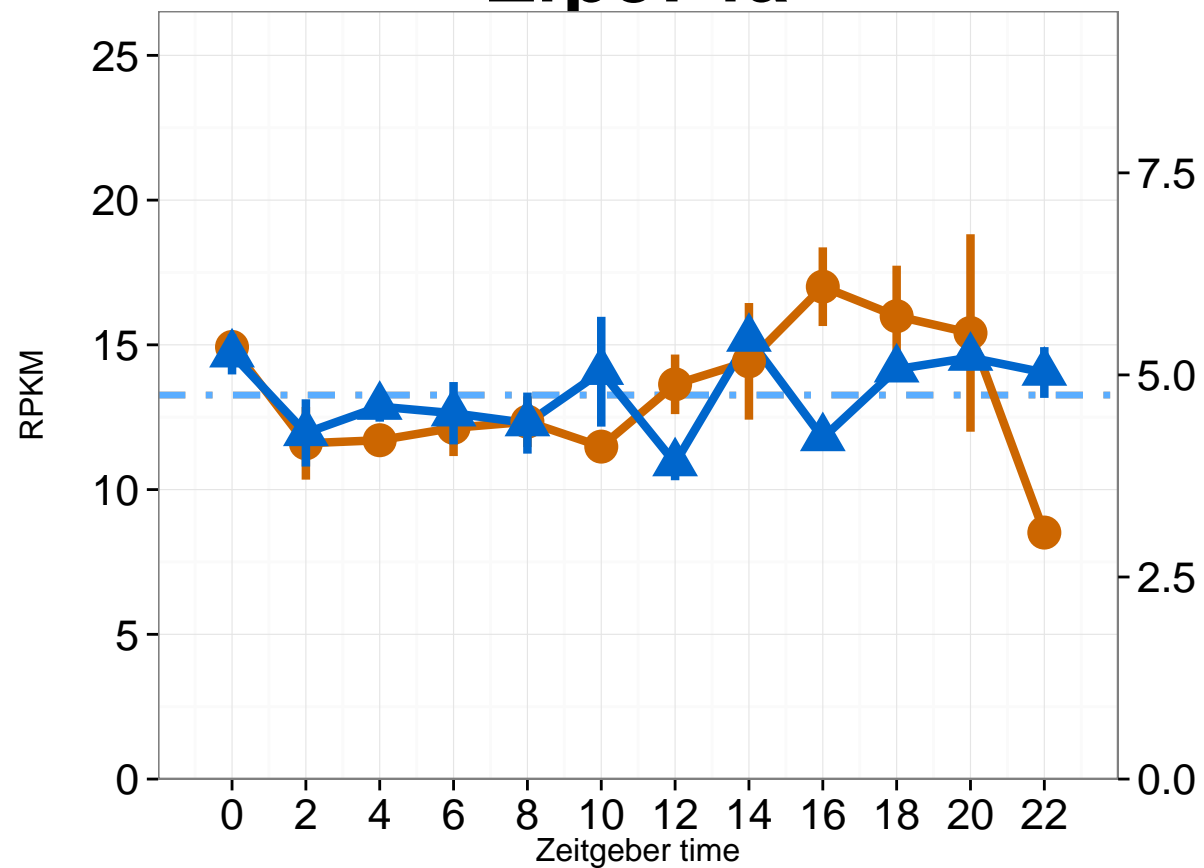

# Zfp874a

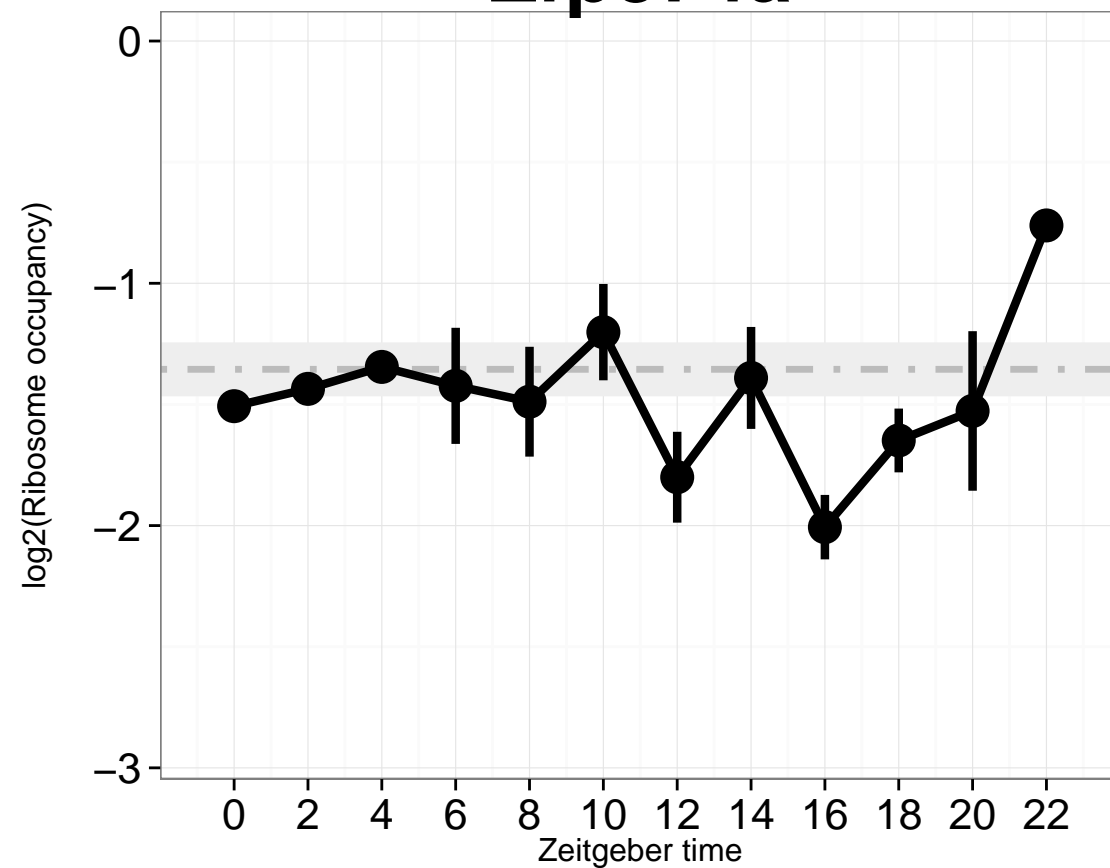

Supplement: SuppDataset_1.zip [file Zfp874a_set_A.pdf › Supplemental Dataset 1/A-mRNA_nonrhyth_translation_nonrhyth/Zfp874a_set_A.pdf]

# Zfp87

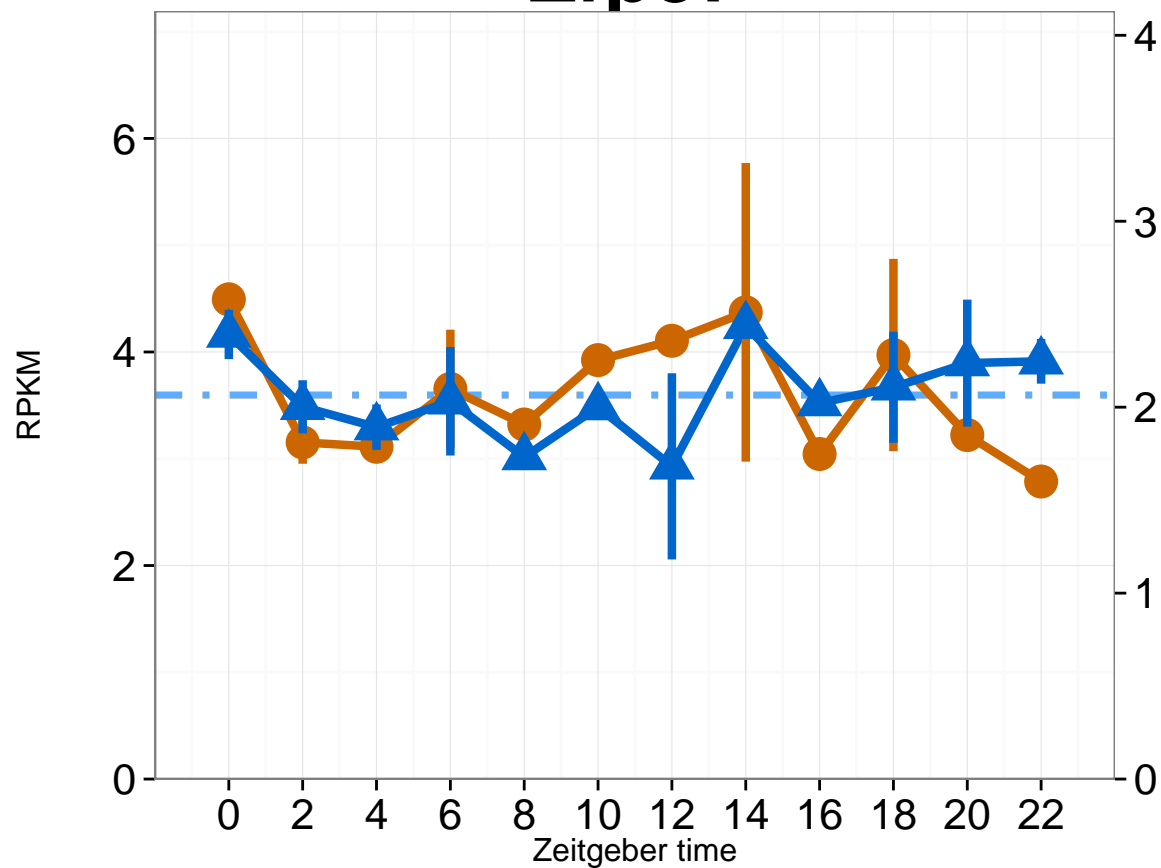

# Zfp87

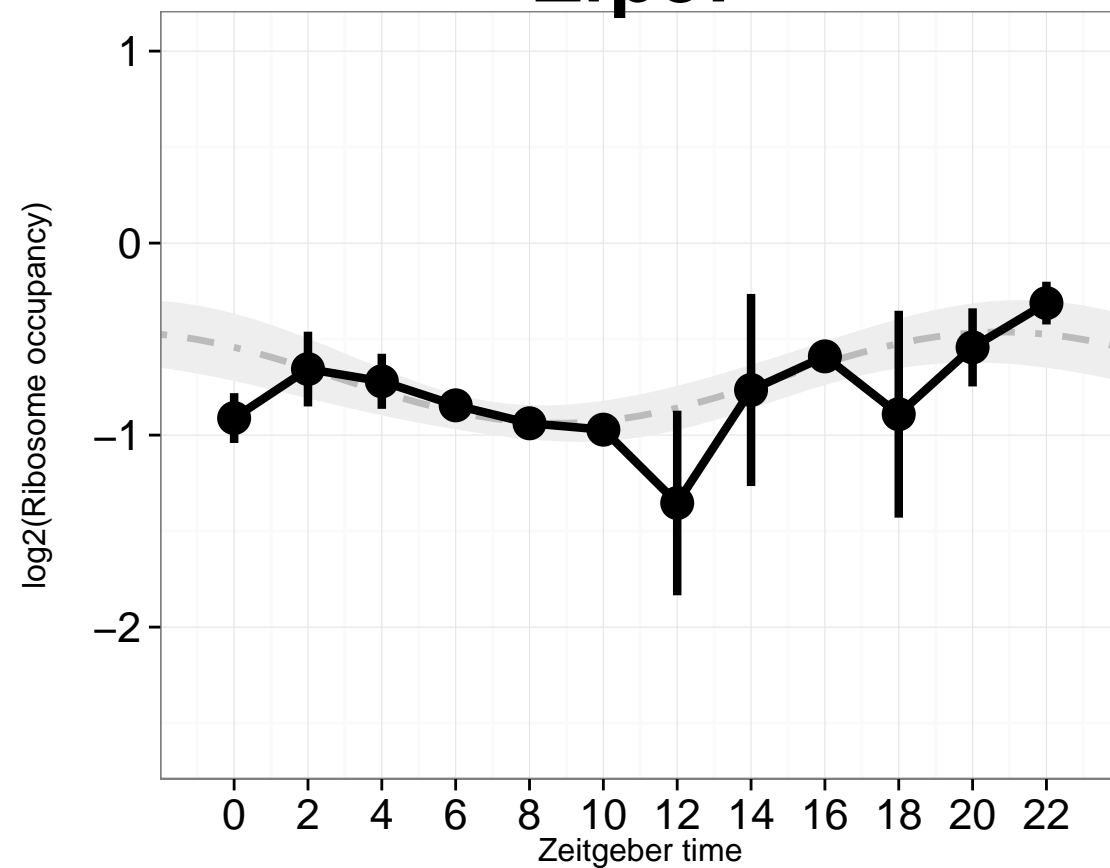

Supplement: SuppDataset_1.zip [file Zfp87_set_A.pdf › Supplemental Dataset 1/A-mRNA_nonrhyth_translation_nonrhyth/Zfp87_set_A.pdf]

# Zfp90

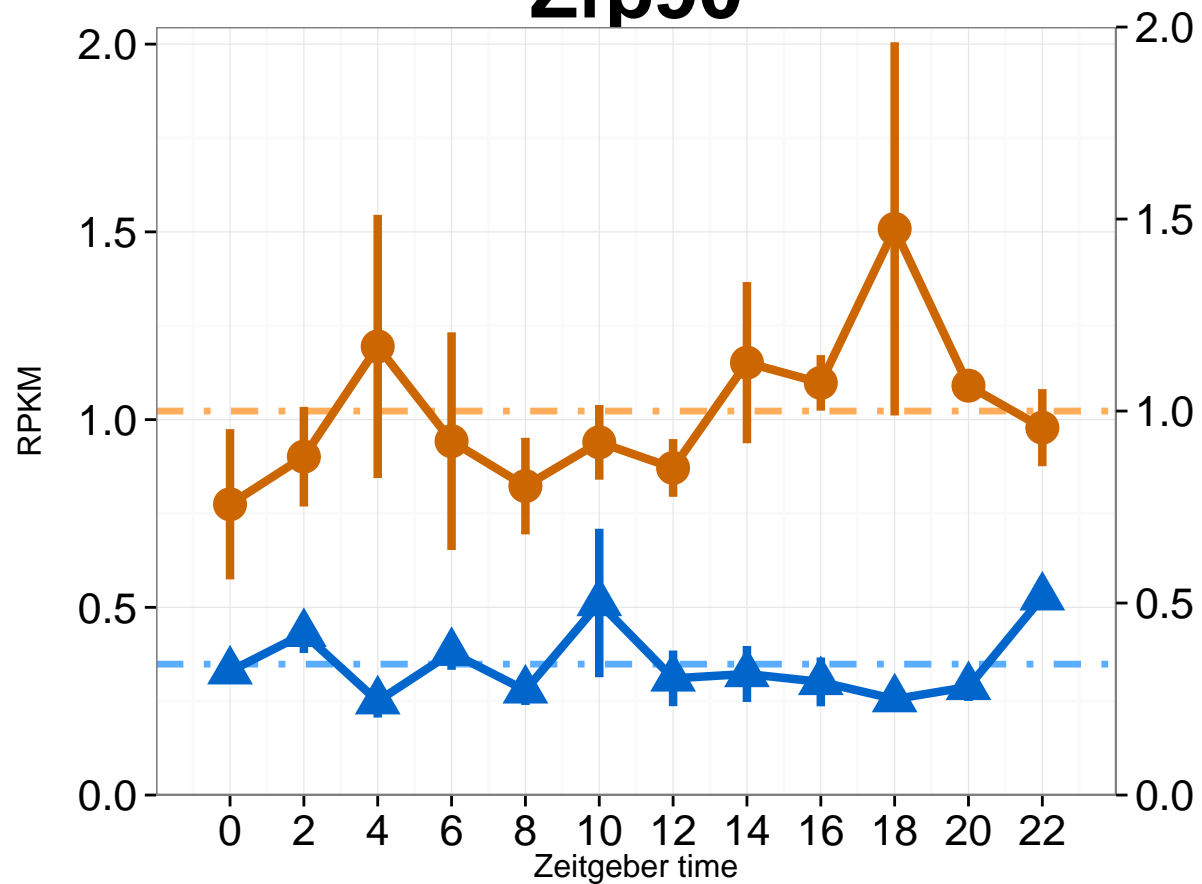

# Zfp90

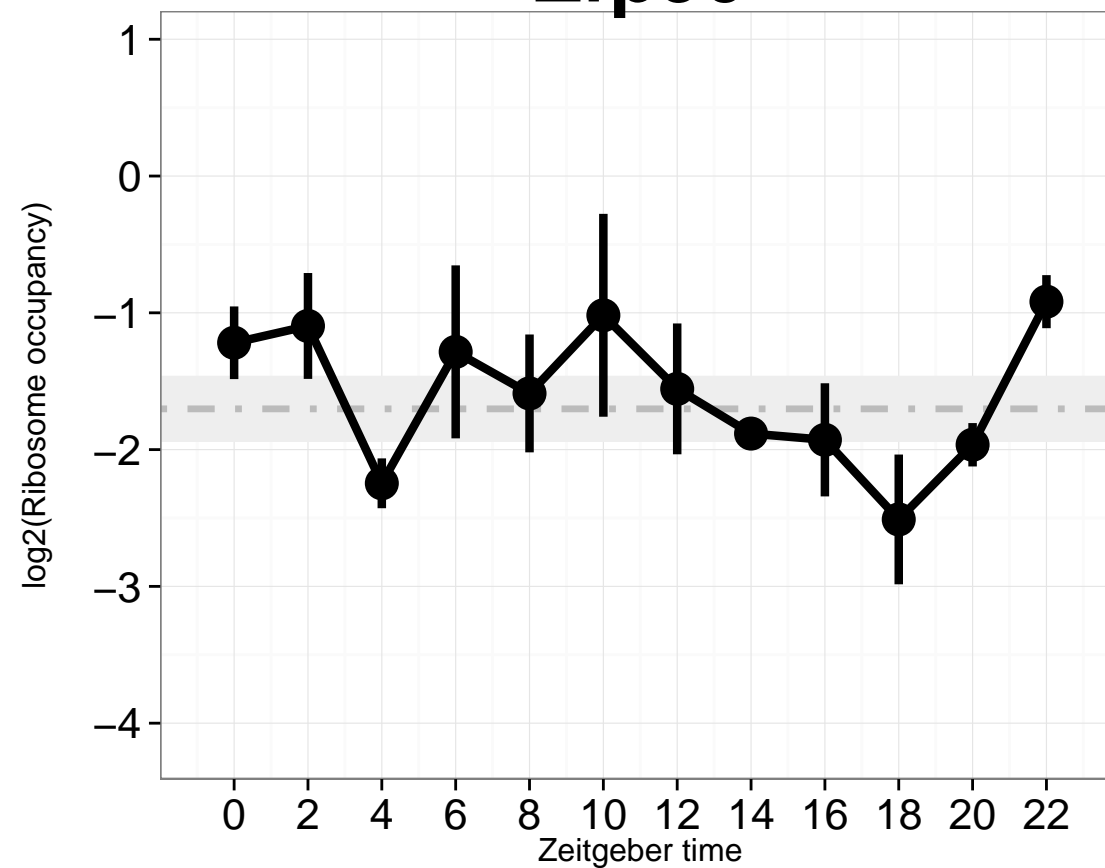

Supplement: SuppDataset_1.zip [file Zfp90_set_A.pdf › Supplemental Dataset 1/A-mRNA_nonrhyth_translation_nonrhyth/Zfp90_set_A.pdf]

## Zfp91

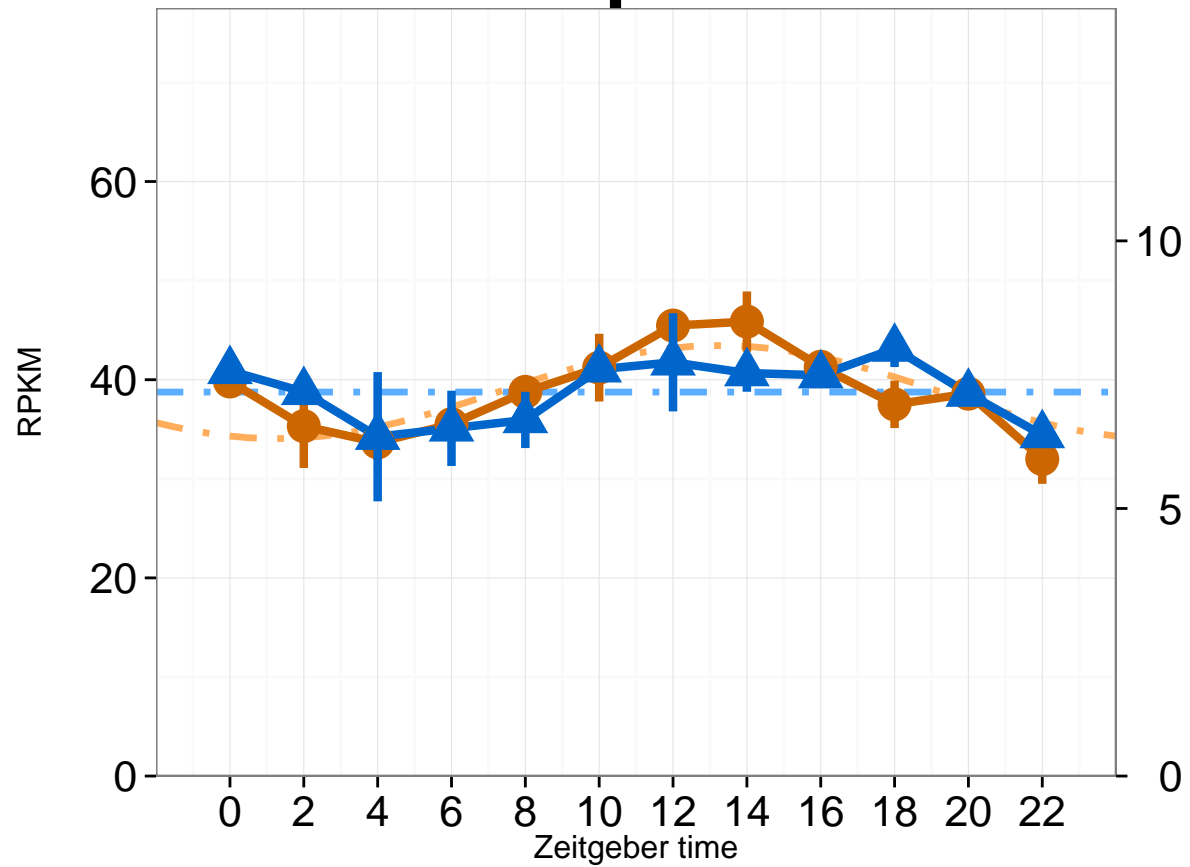

## Zfp91

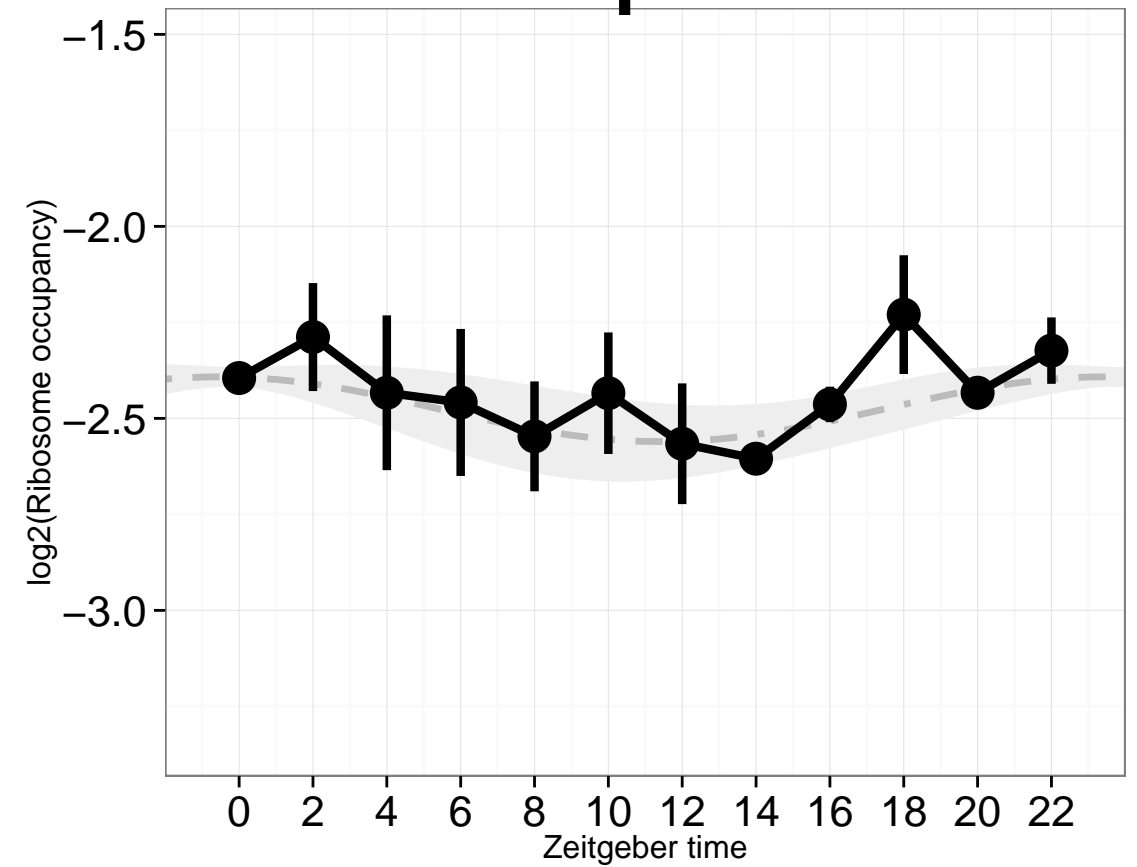

Supplement: SuppDataset_1.zip [file Zfp91_set_A.pdf › Supplemental Dataset 1/A-mRNA_nonrhyth_translation_nonrhyth/Zfp91_set_A.pdf]

# Zfp933

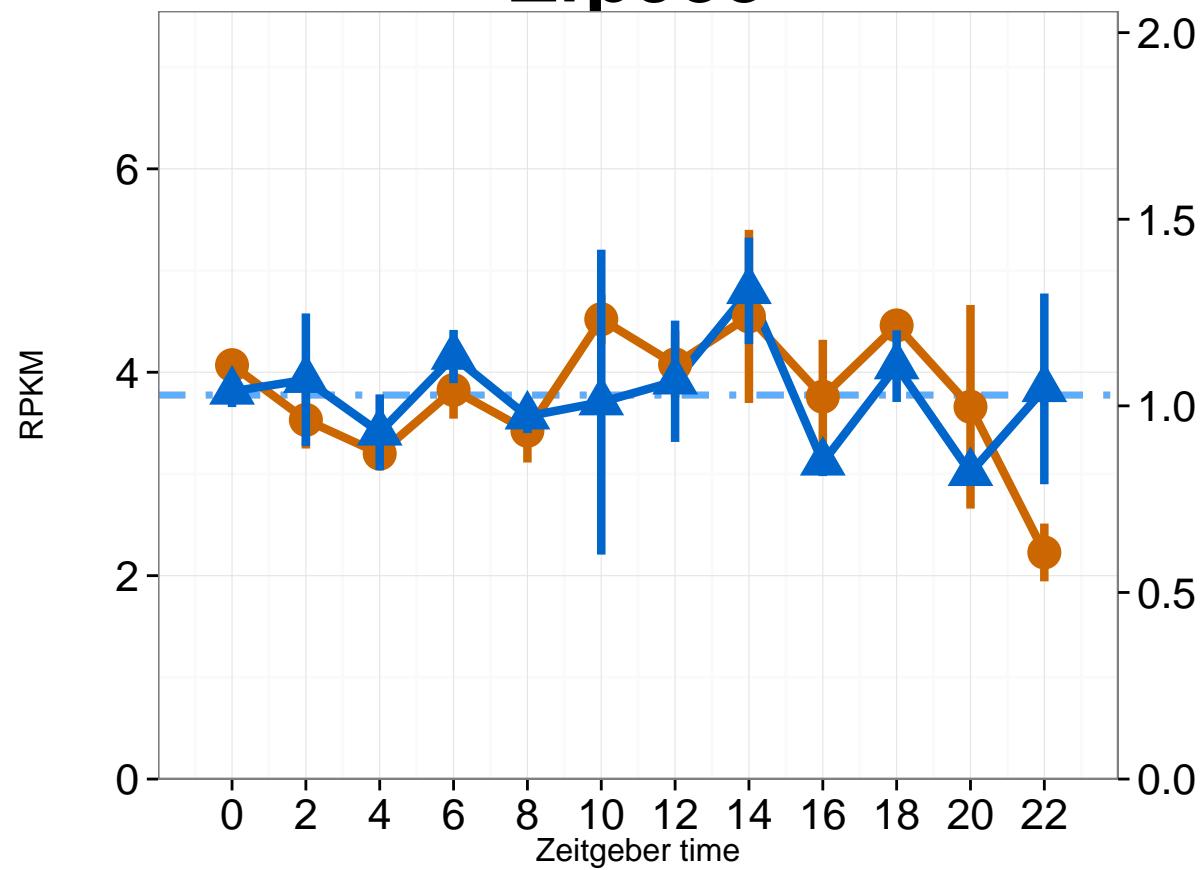

# Zfp933

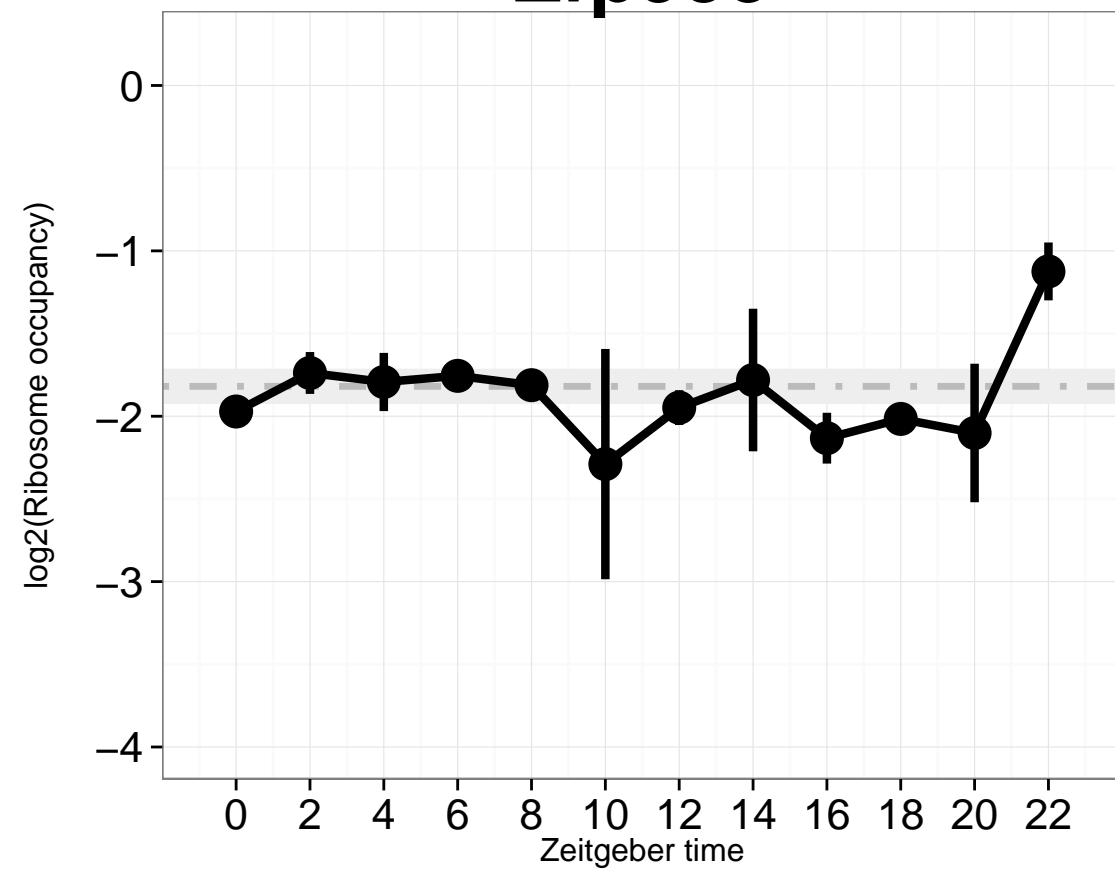

Supplement: SuppDataset_1.zip [file Zfp933_set_A.pdf › Supplemental Dataset 1/A-mRNA_nonrhyth_translation_nonrhyth/Zfp933_set_A.pdf]

# Zfp935

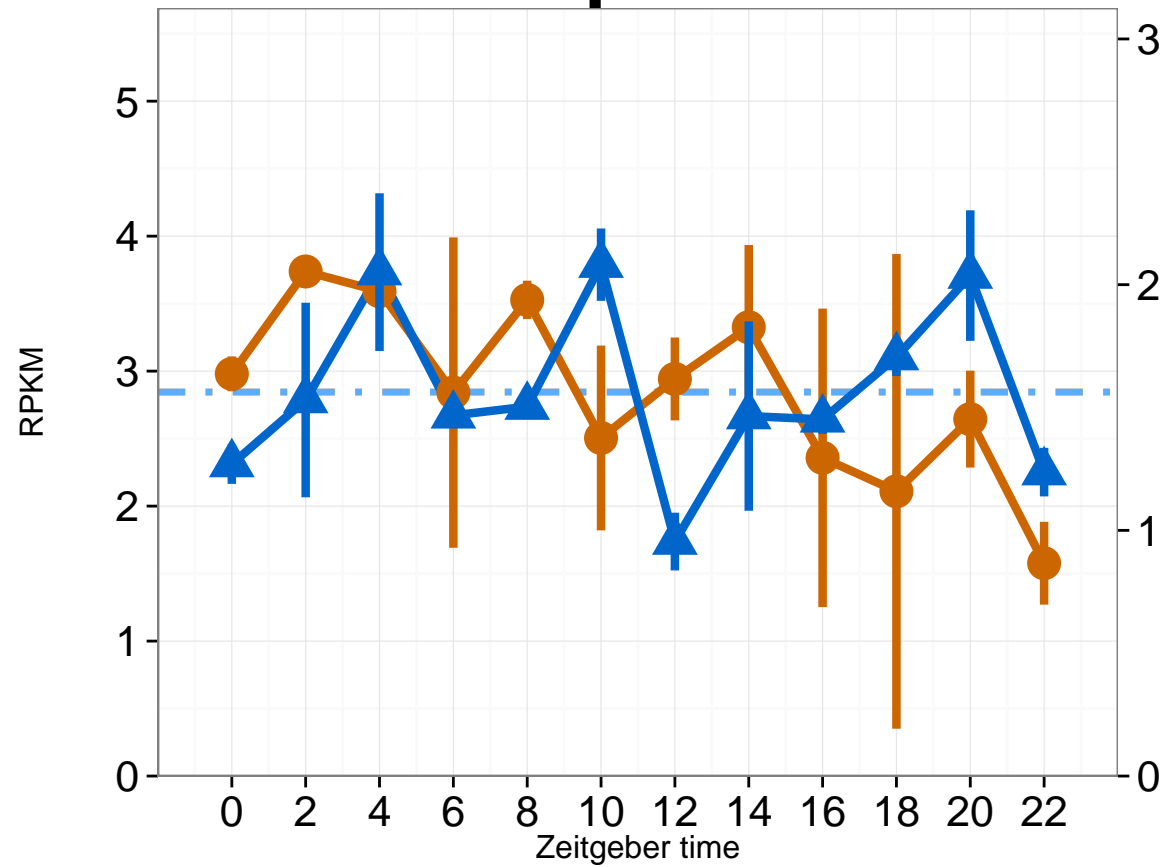

# Zfp935

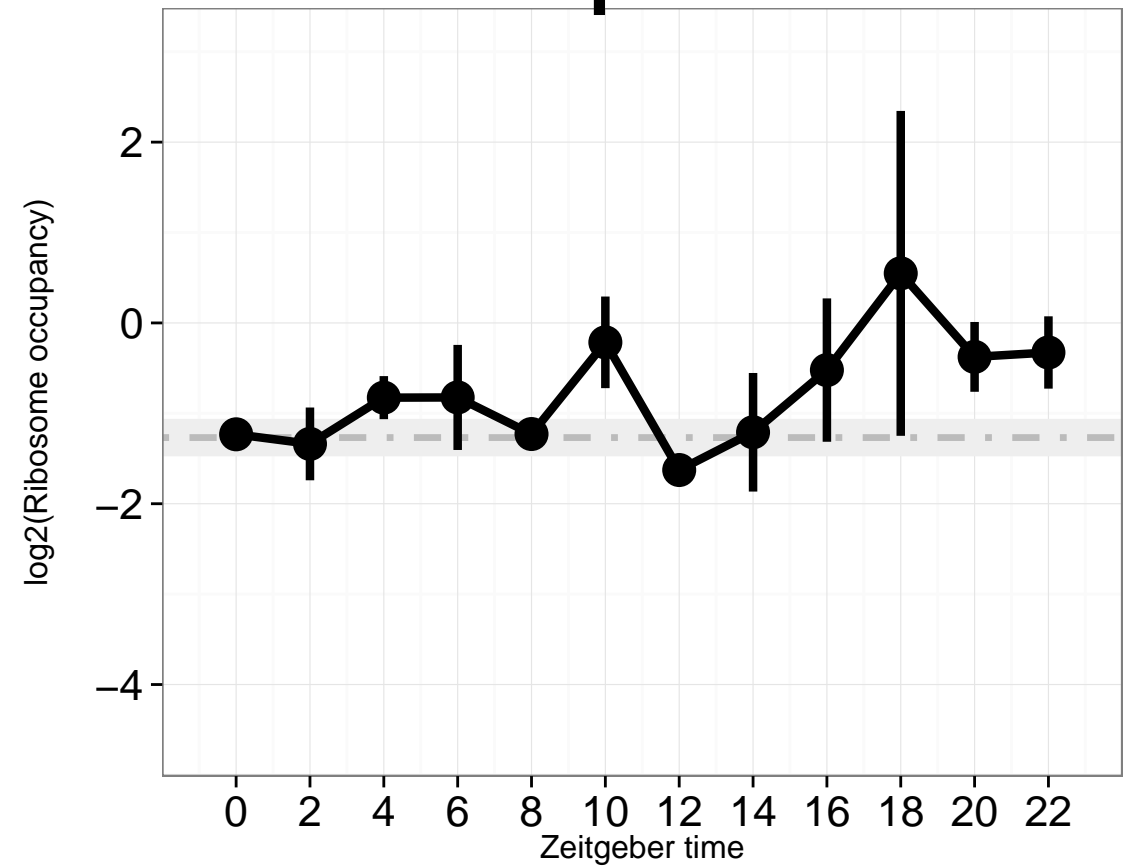

Supplement: SuppDataset_1.zip [file Zfp935_set_A.pdf › Supplemental Dataset 1/A-mRNA_nonrhyth_translation_nonrhyth/Zfp935_set_A.pdf]

# Zfp937

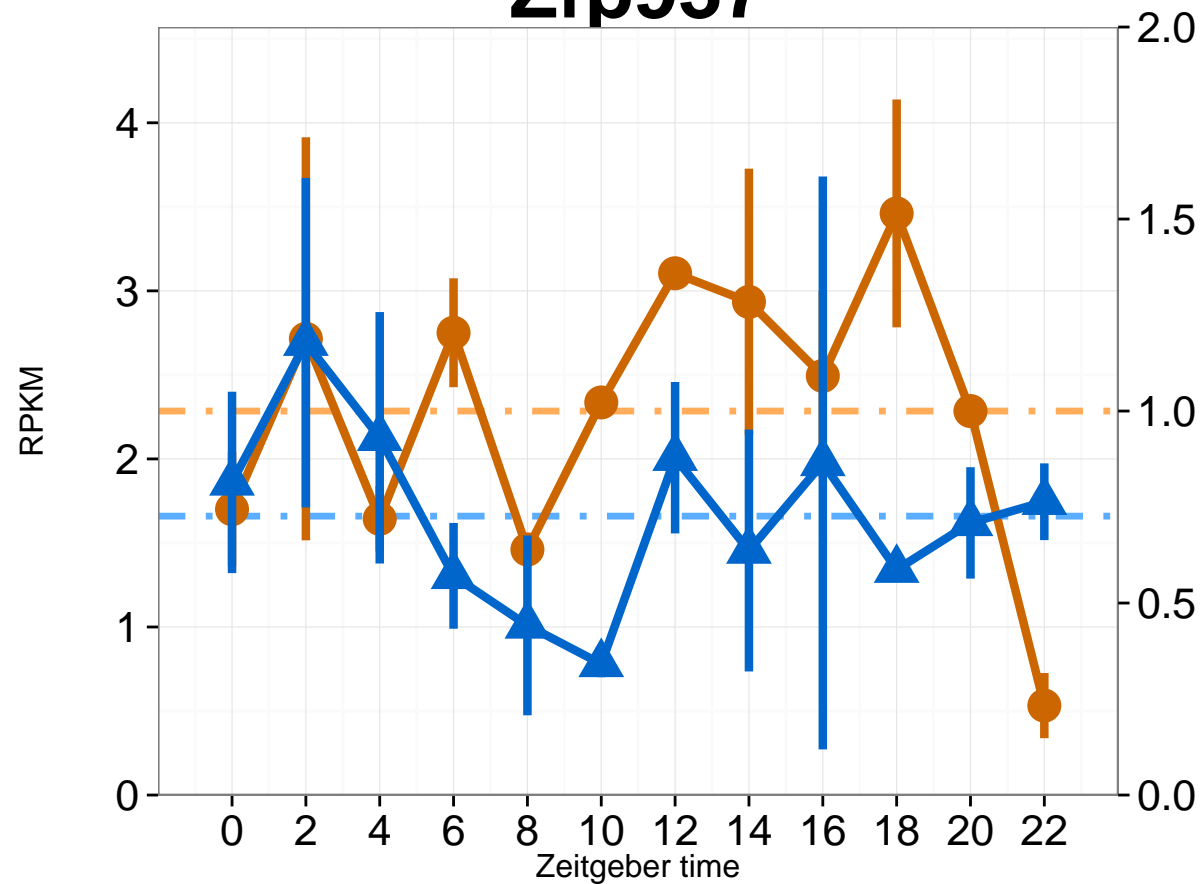

# Zfp937

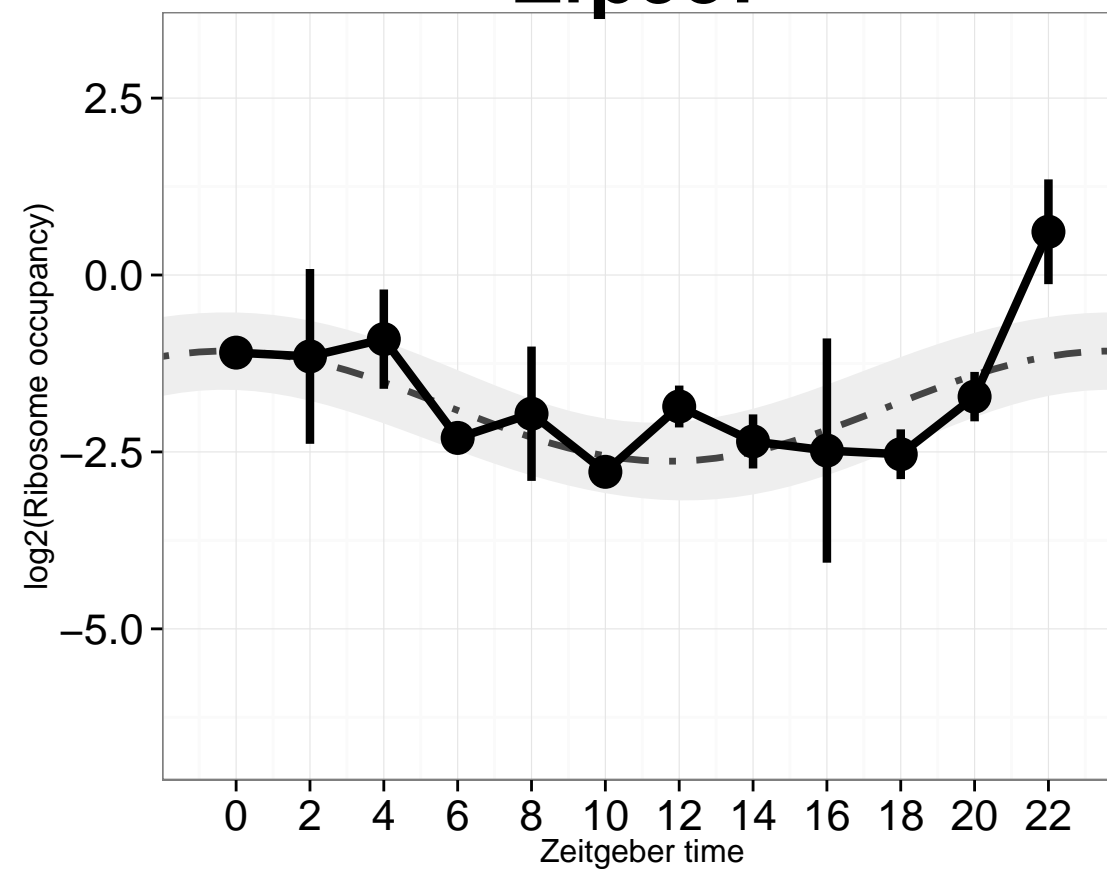

Supplement: SuppDataset_1.zip [file Zfp937_set_A.pdf › Supplemental Dataset 1/A-mRNA_nonrhyth_translation_nonrhyth/Zfp937_set_A.pdf]

# Zfp938

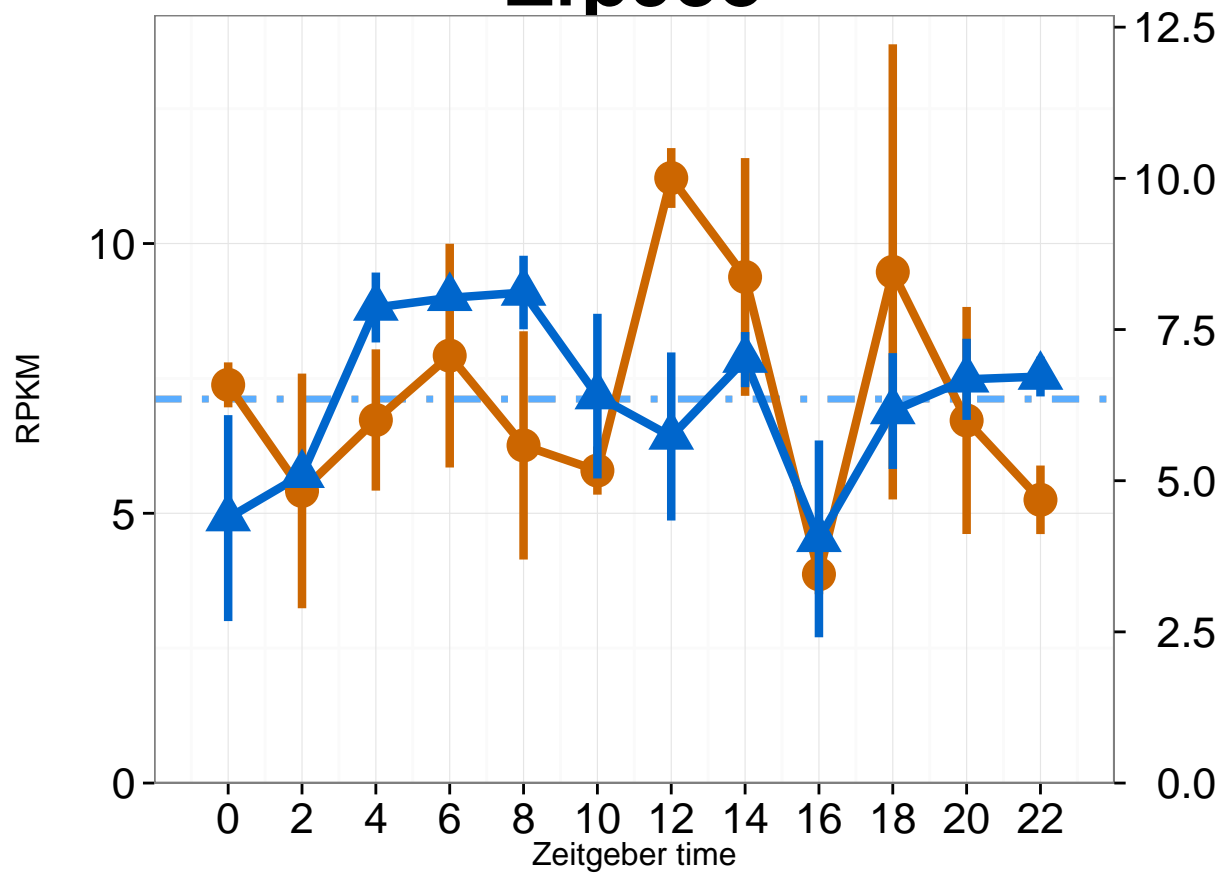

# Zfp938

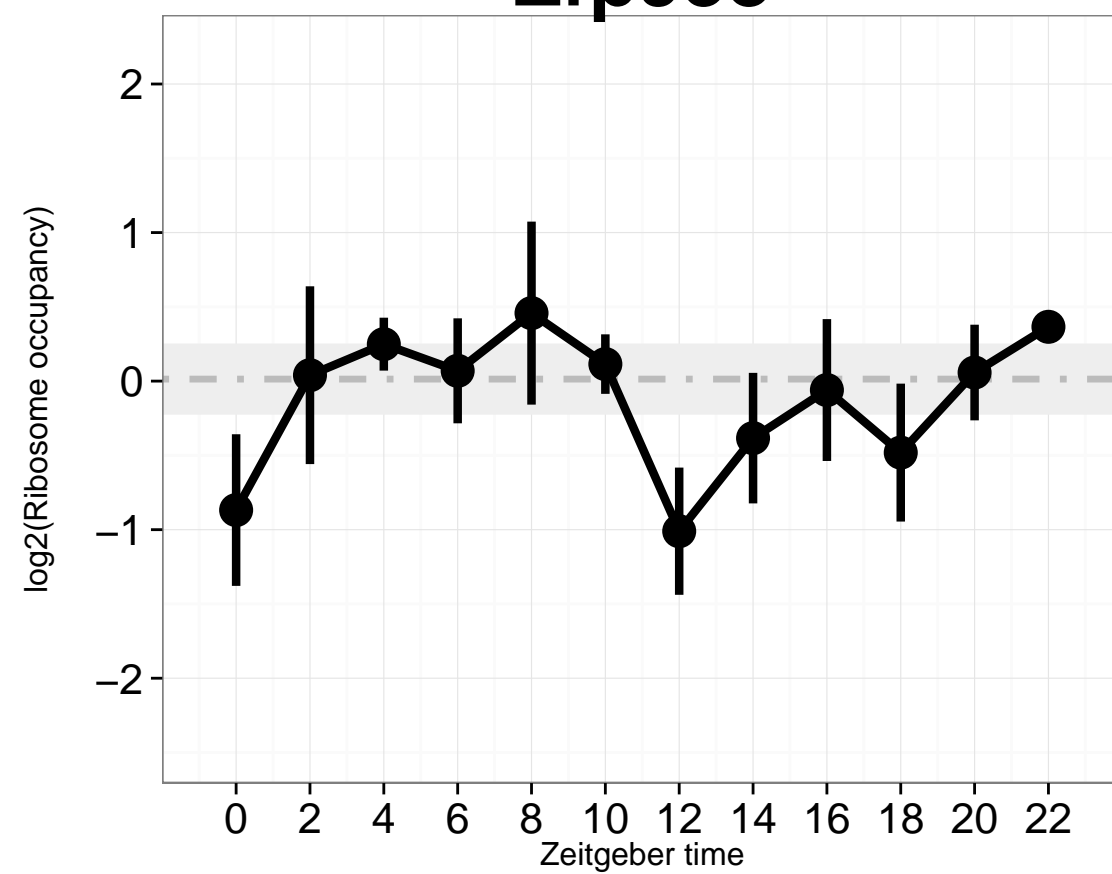

Supplement: SuppDataset_1.zip [file Zfp938_set_A.pdf › Supplemental Dataset 1/A-mRNA_nonrhyth_translation_nonrhyth/Zfp938_set_A.pdf]

# Zfp939

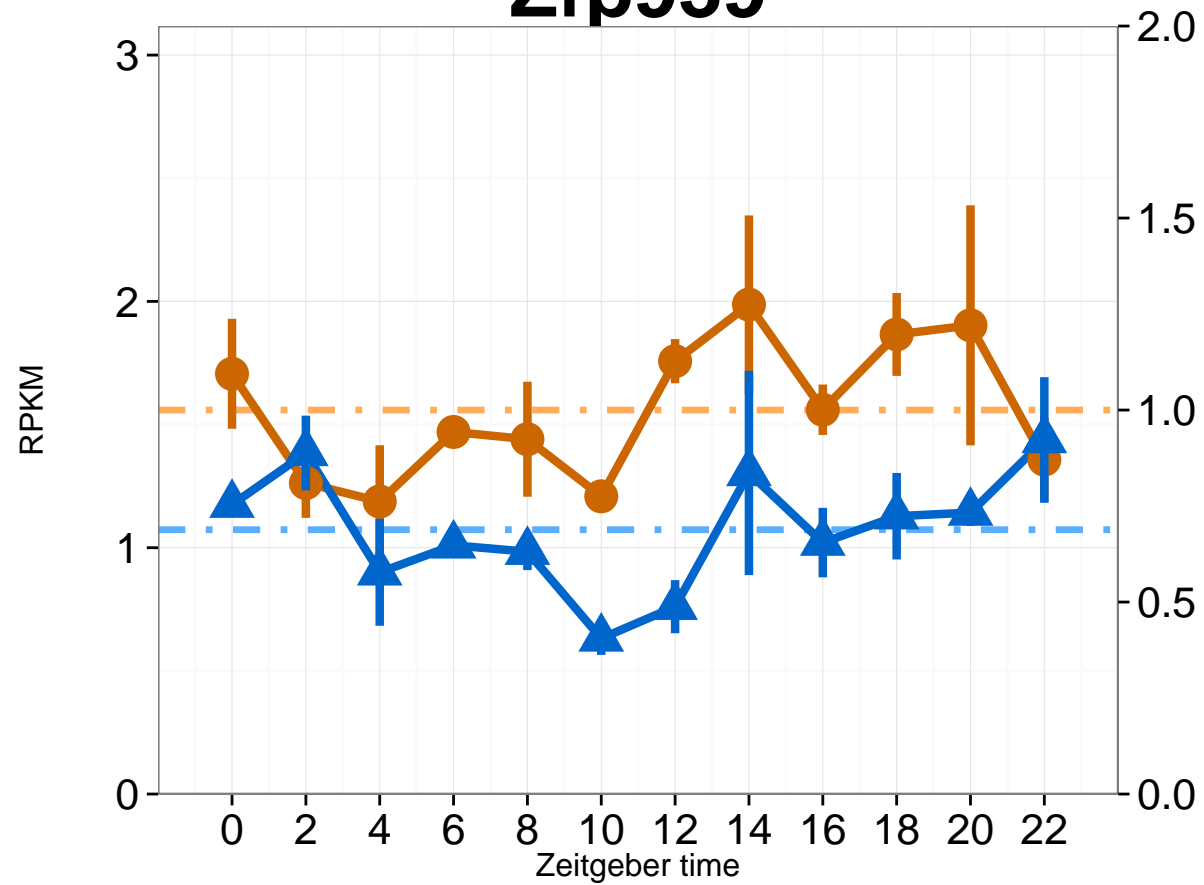

# Zfp939

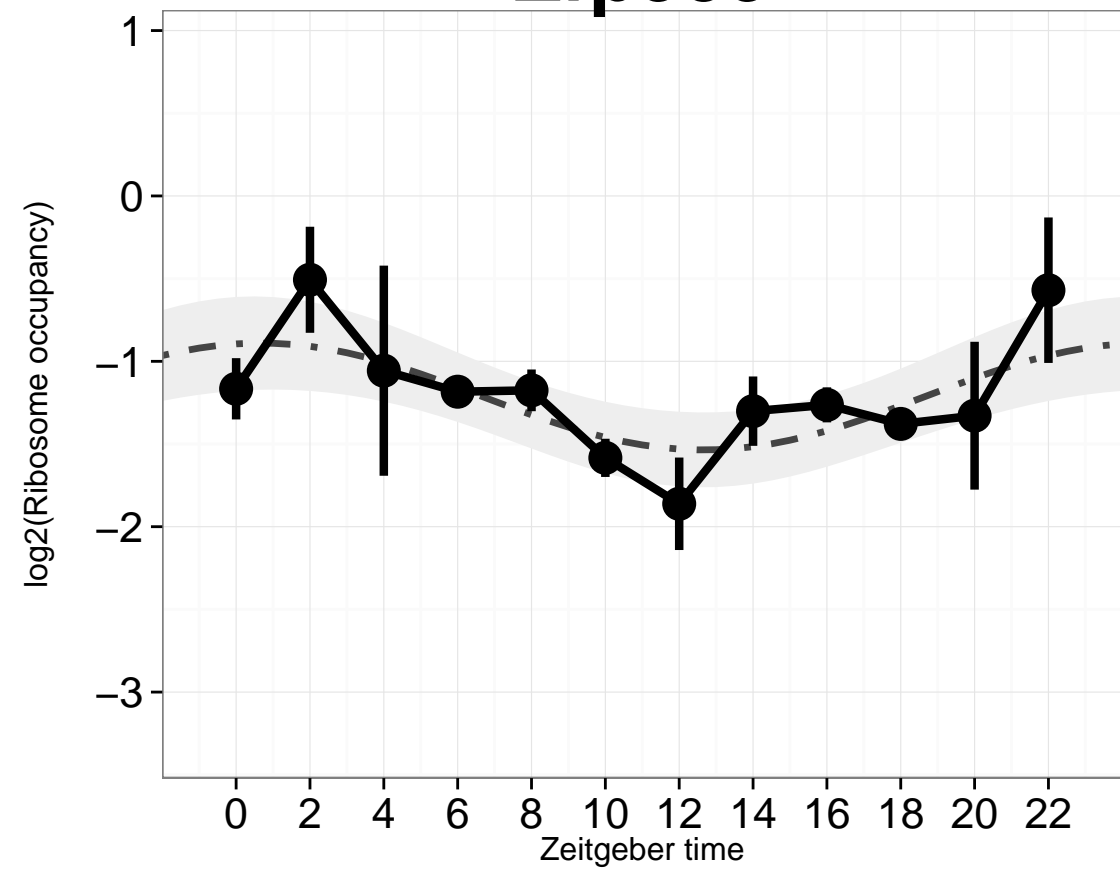

Supplement: SuppDataset_1.zip [file Zfp939_set_A.pdf › Supplemental Dataset 1/A-mRNA_nonrhyth_translation_nonrhyth/Zfp939_set_A.pdf]

# Zfp93

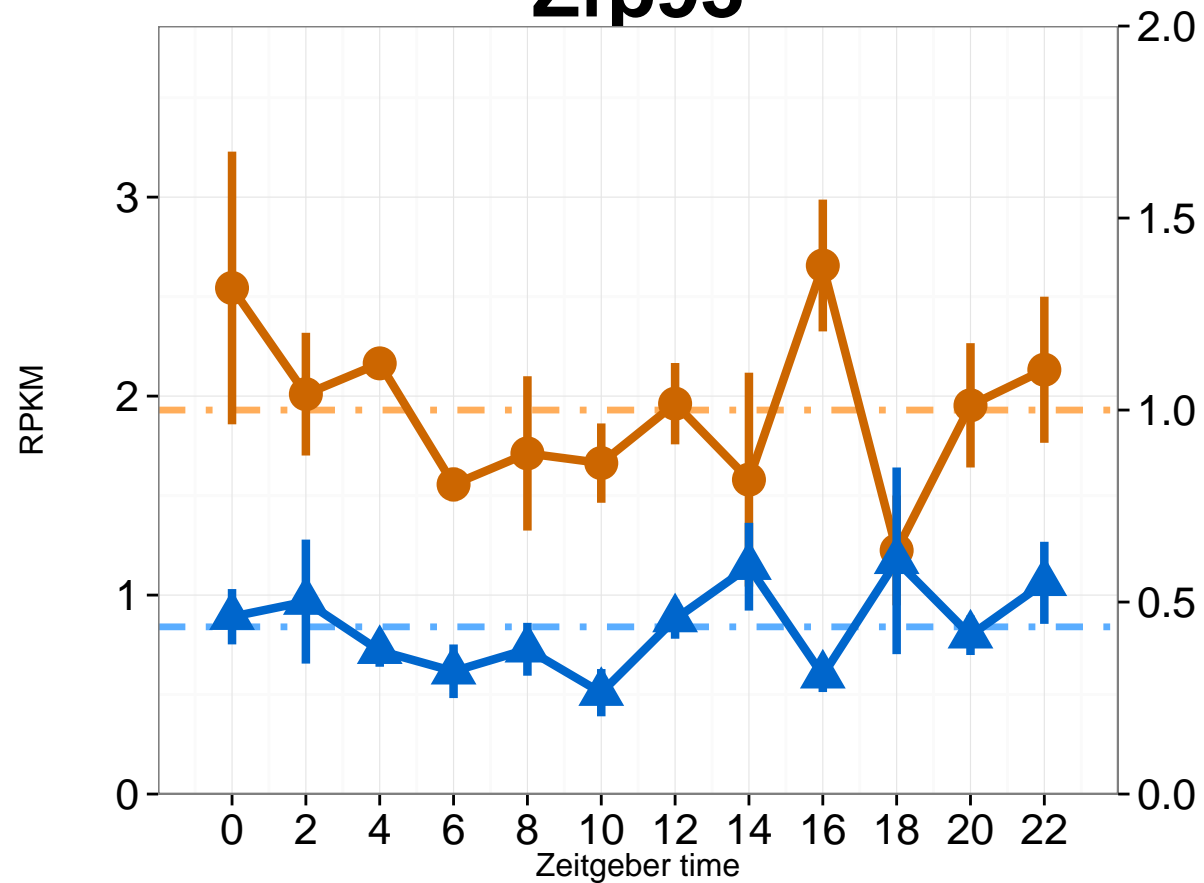

# Zfp93

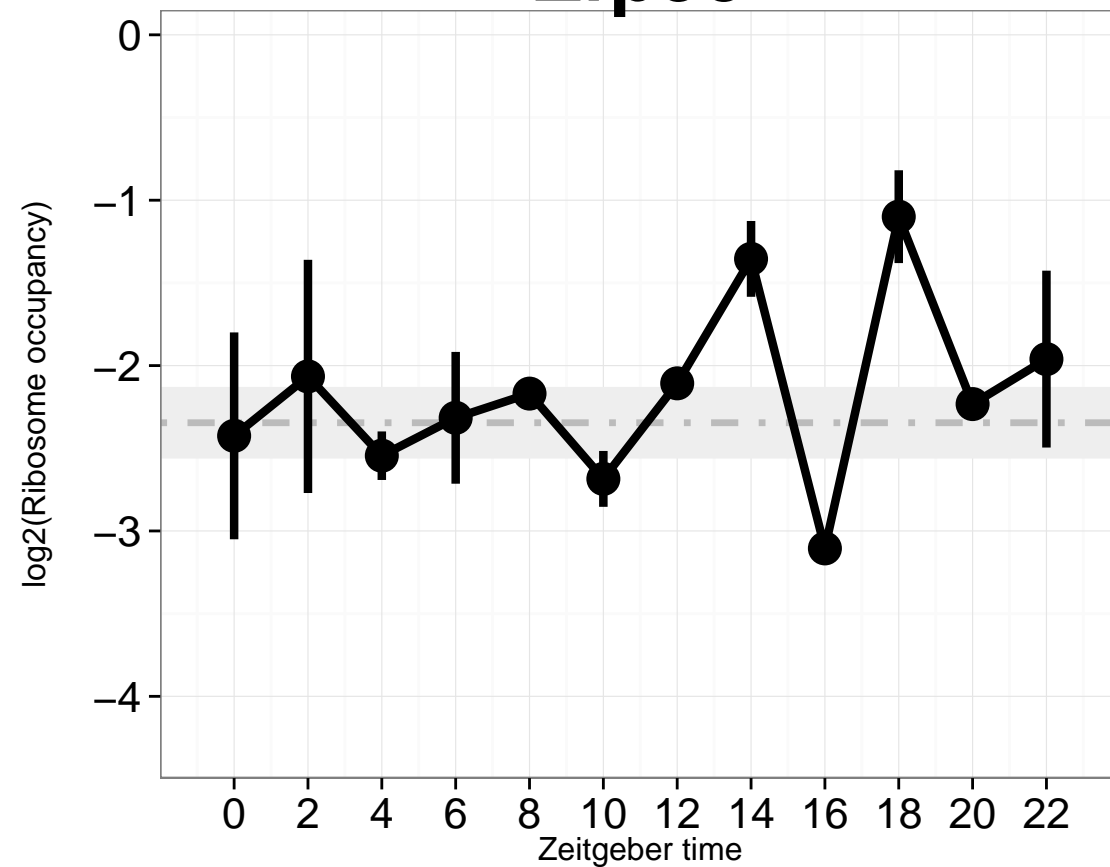

Supplement: SuppDataset_1.zip [file Zfp93_set_A.pdf › Supplemental Dataset 1/A-mRNA_nonrhyth_translation_nonrhyth/Zfp93_set_A.pdf]

# Zfp944

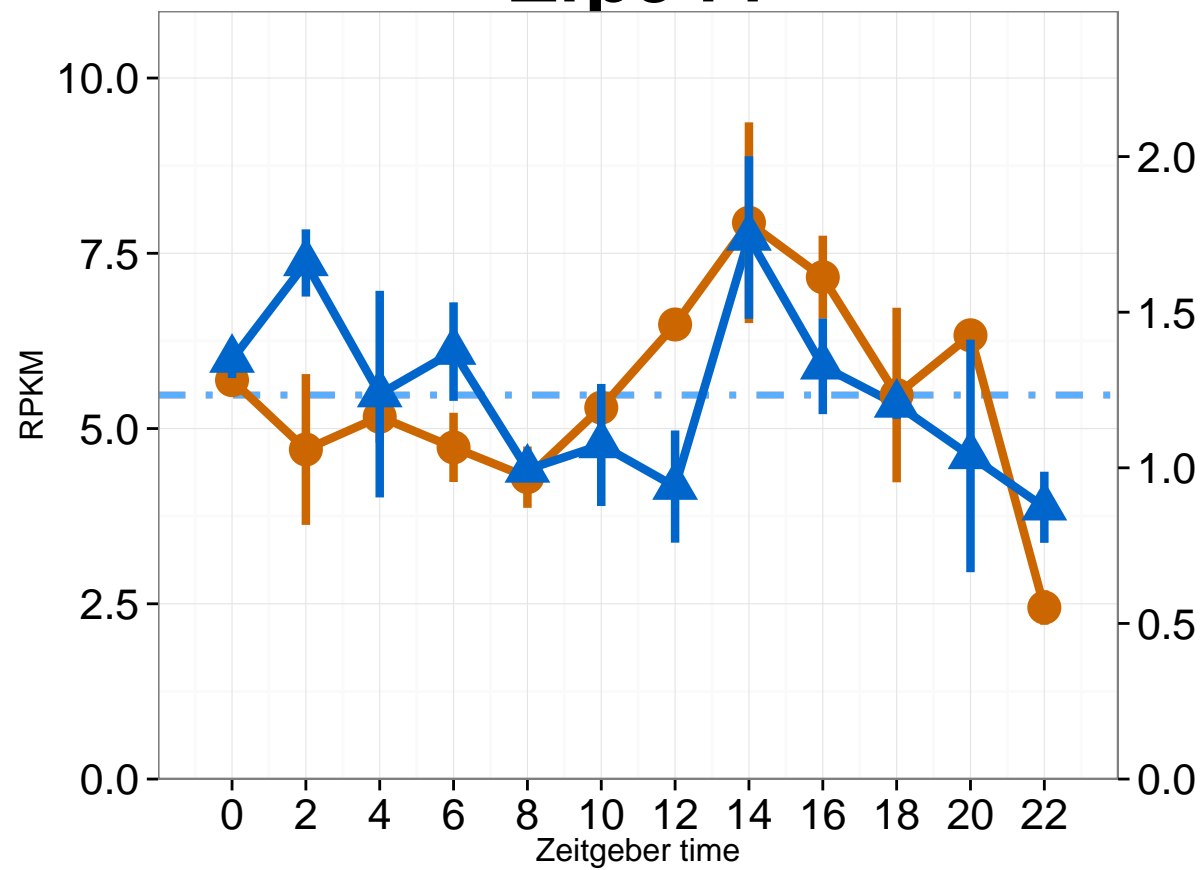

# Zfp944

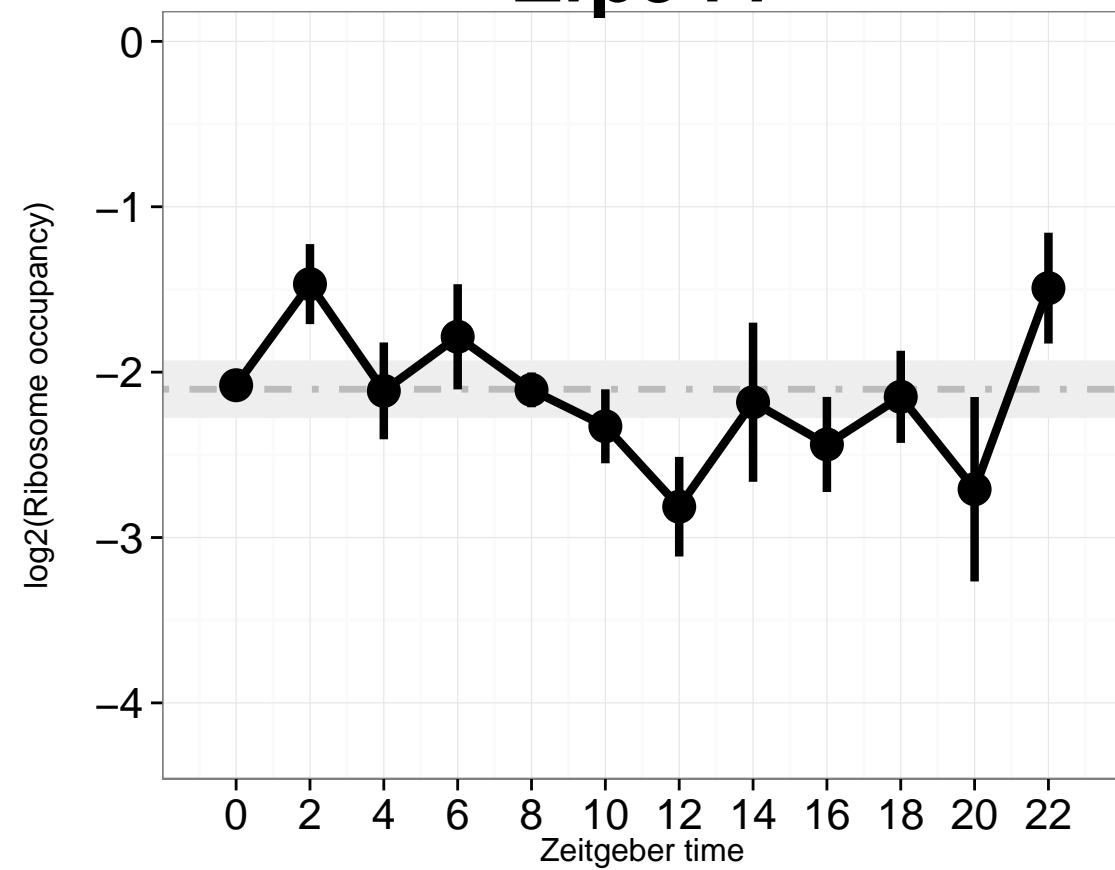

Supplement: SuppDataset_1.zip [file Zfp944_set_A.pdf › Supplemental Dataset 1/A-mRNA_nonrhyth_translation_nonrhyth/Zfp944_set_A.pdf]

# Zfp945

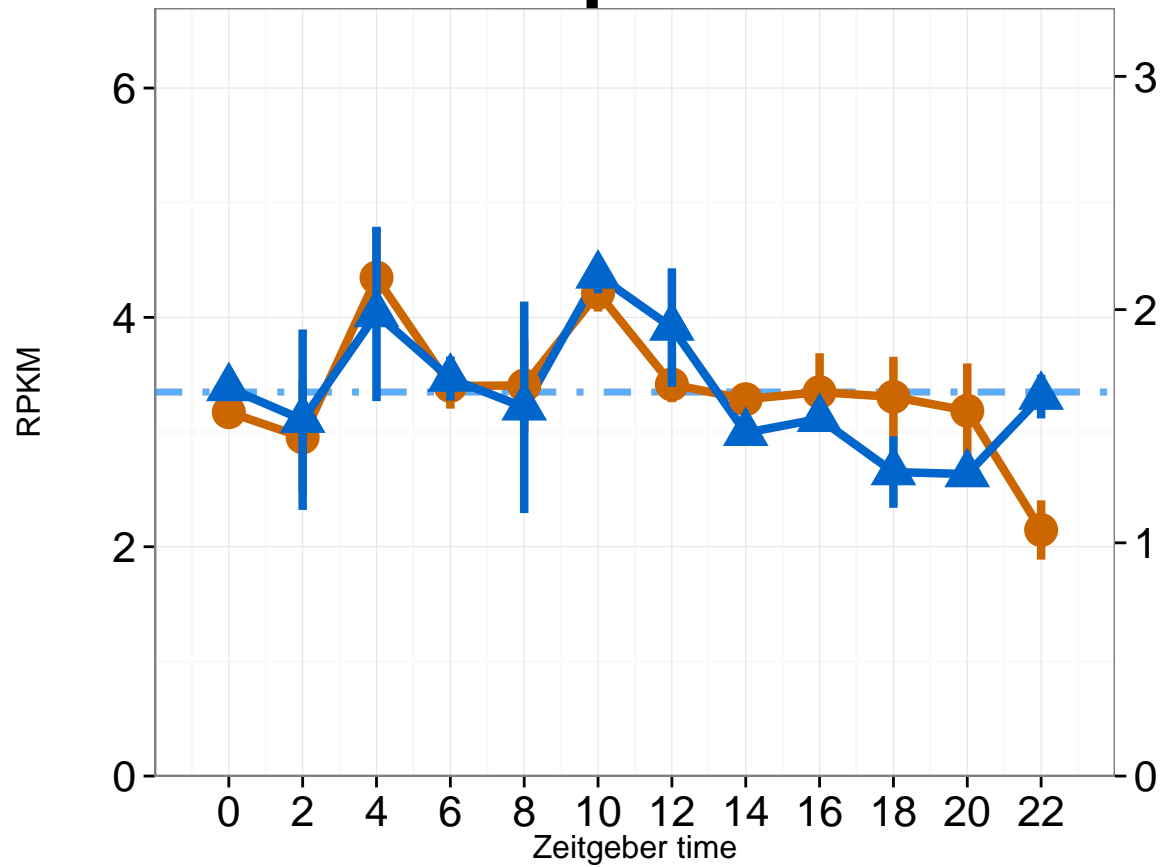

# Zfp945

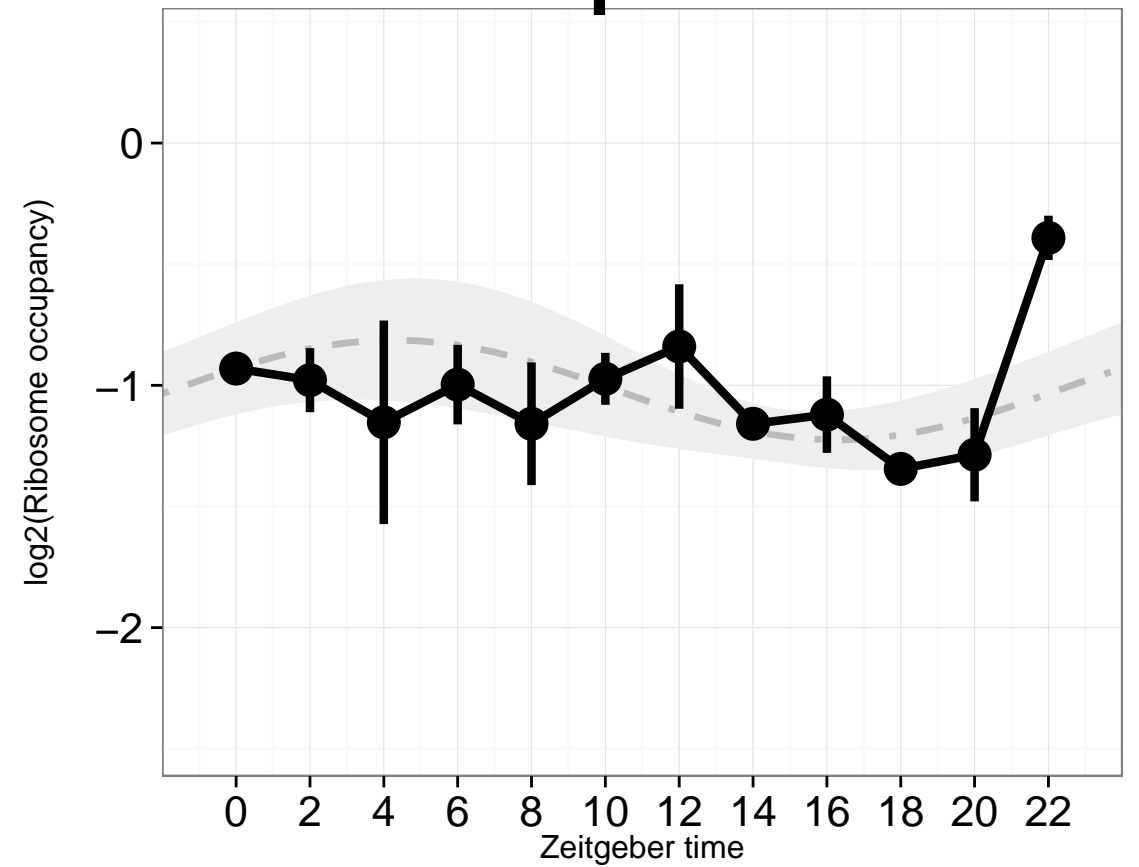

Supplement: SuppDataset_1.zip [file Zfp945_set_A.pdf › Supplemental Dataset 1/A-mRNA_nonrhyth_translation_nonrhyth/Zfp945_set_A.pdf]

# Zfp946

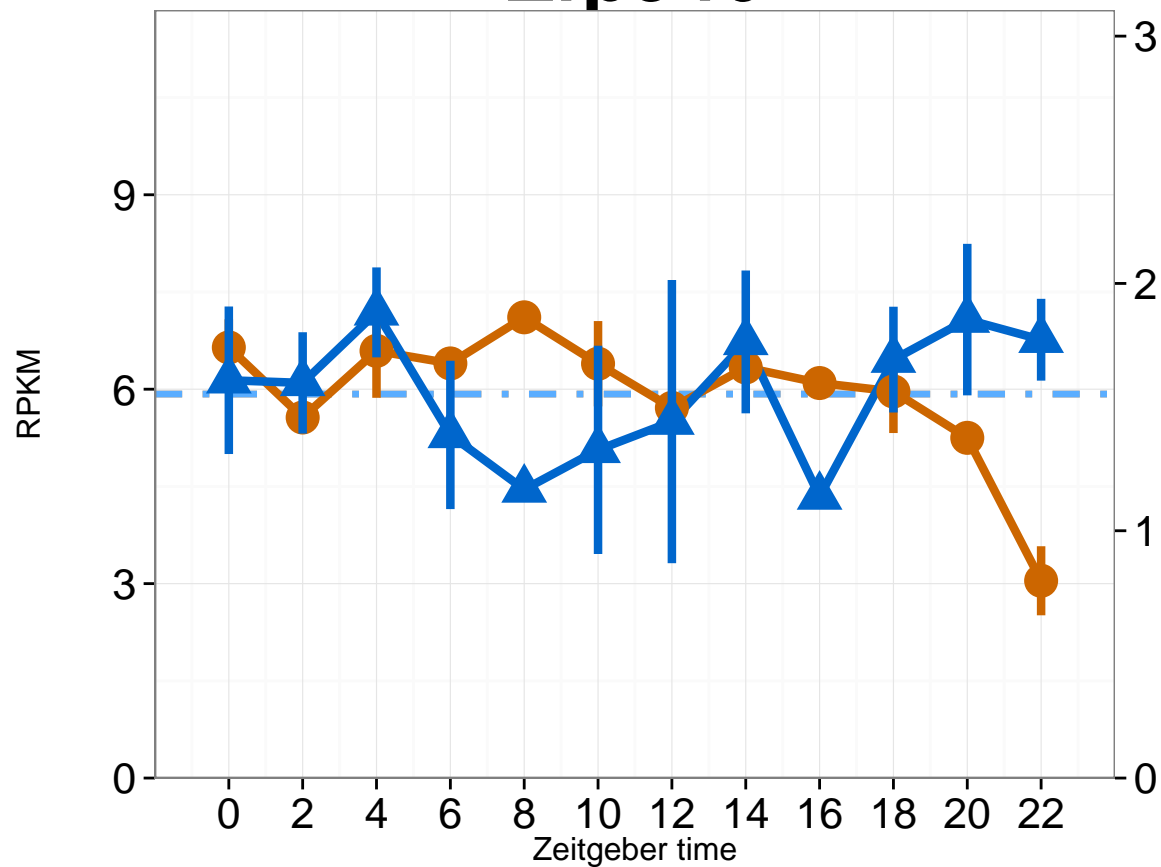

# Zfp946

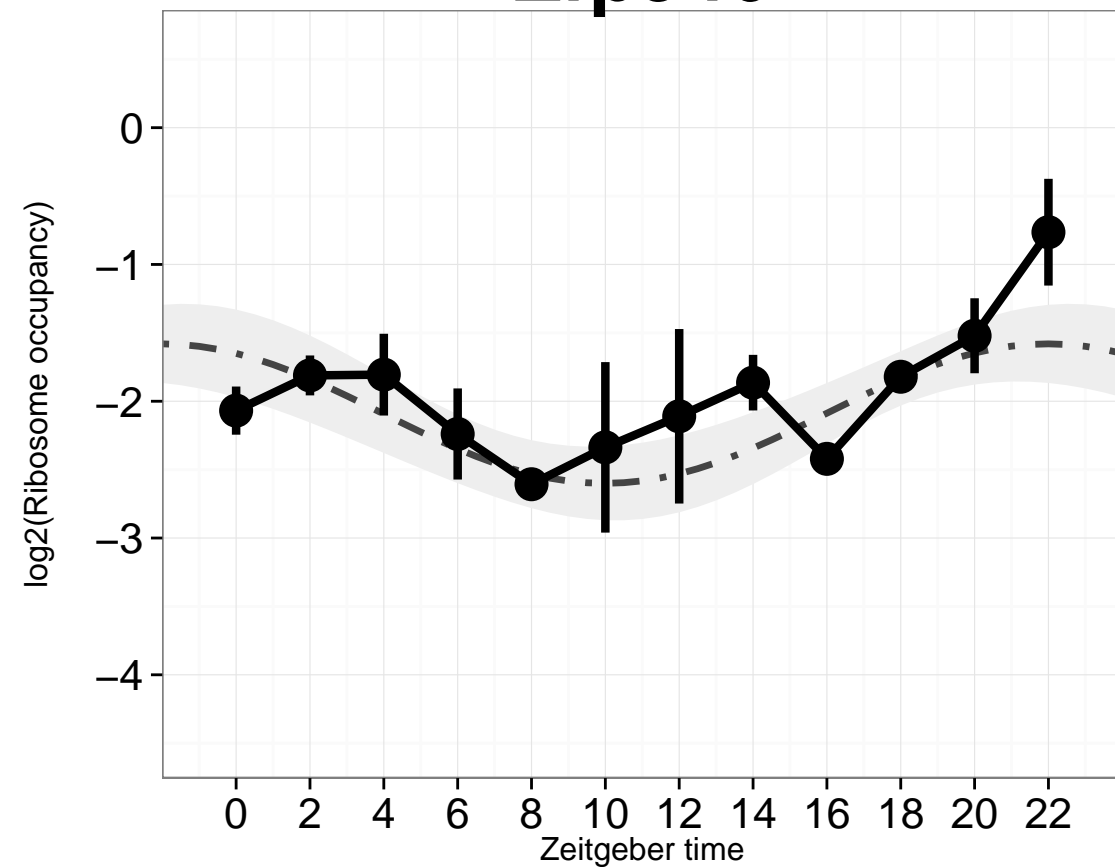

Supplement: SuppDataset_1.zip [file Zfp946_set_A.pdf › Supplemental Dataset 1/A-mRNA_nonrhyth_translation_nonrhyth/Zfp946_set_A.pdf]

# Zfp947

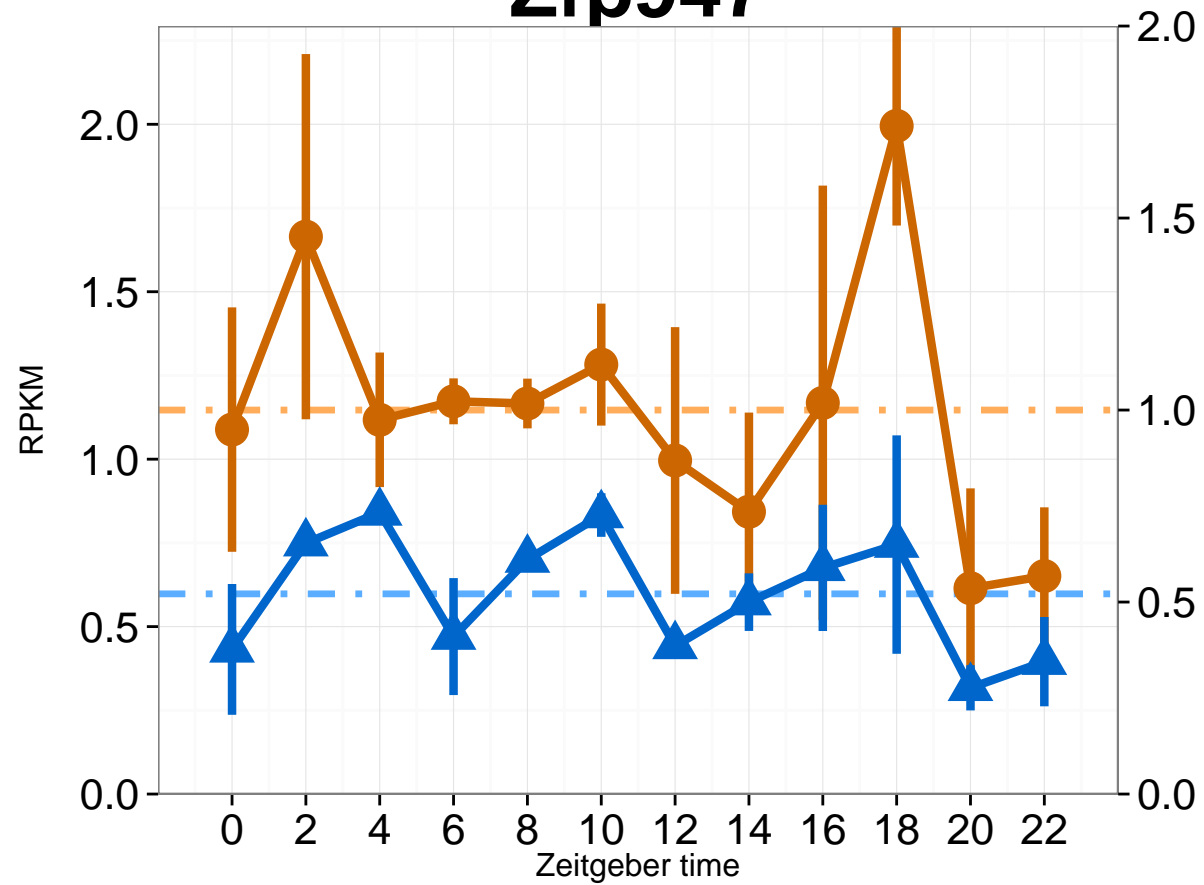

# Zfp947

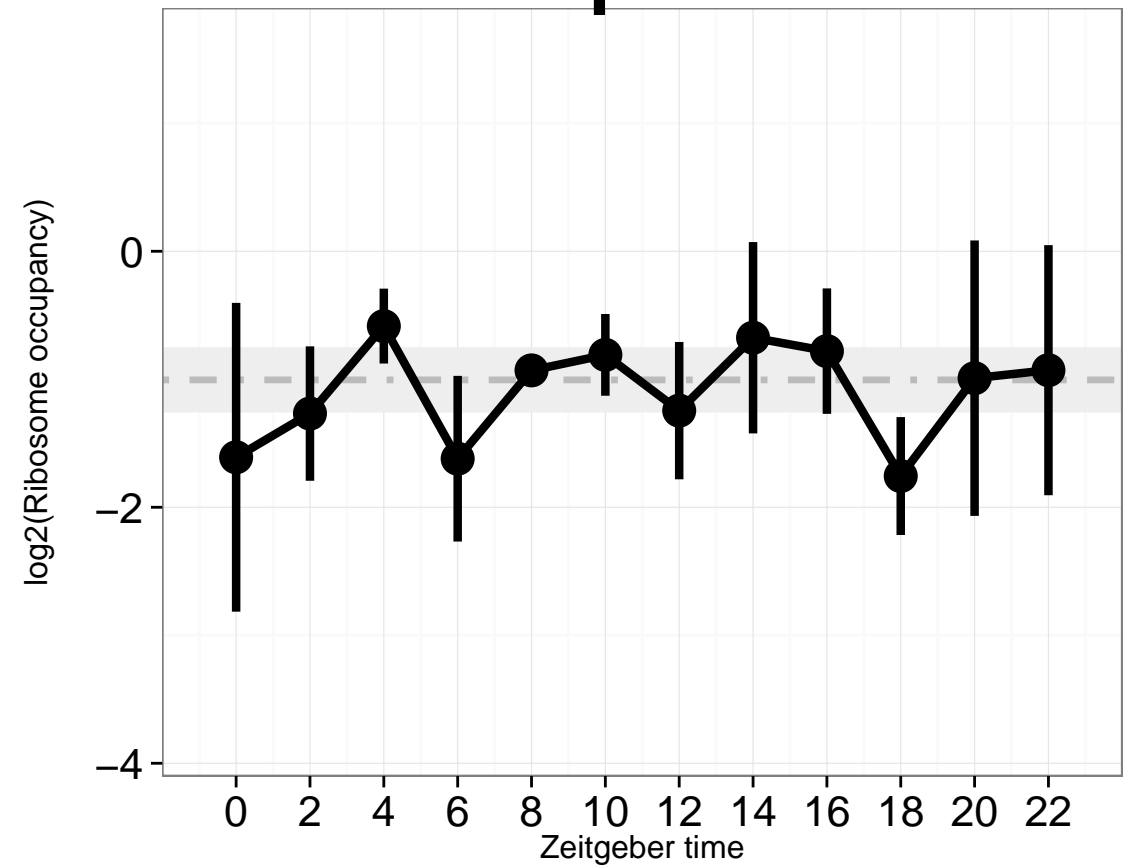

Supplement: SuppDataset_1.zip [file Zfp947_set_A.pdf › Supplemental Dataset 1/A-mRNA_nonrhyth_translation_nonrhyth/Zfp947_set_A.pdf]

# Zfp949

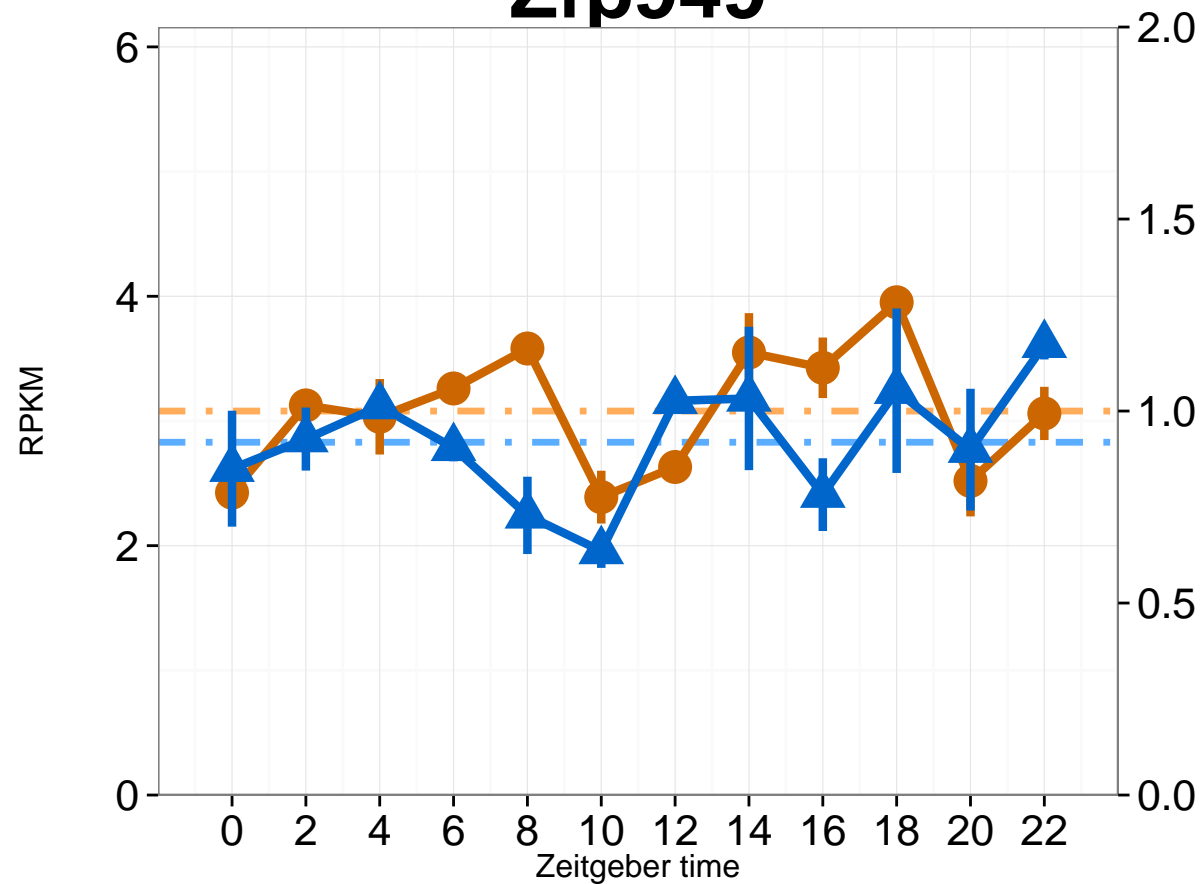

# Zfp949

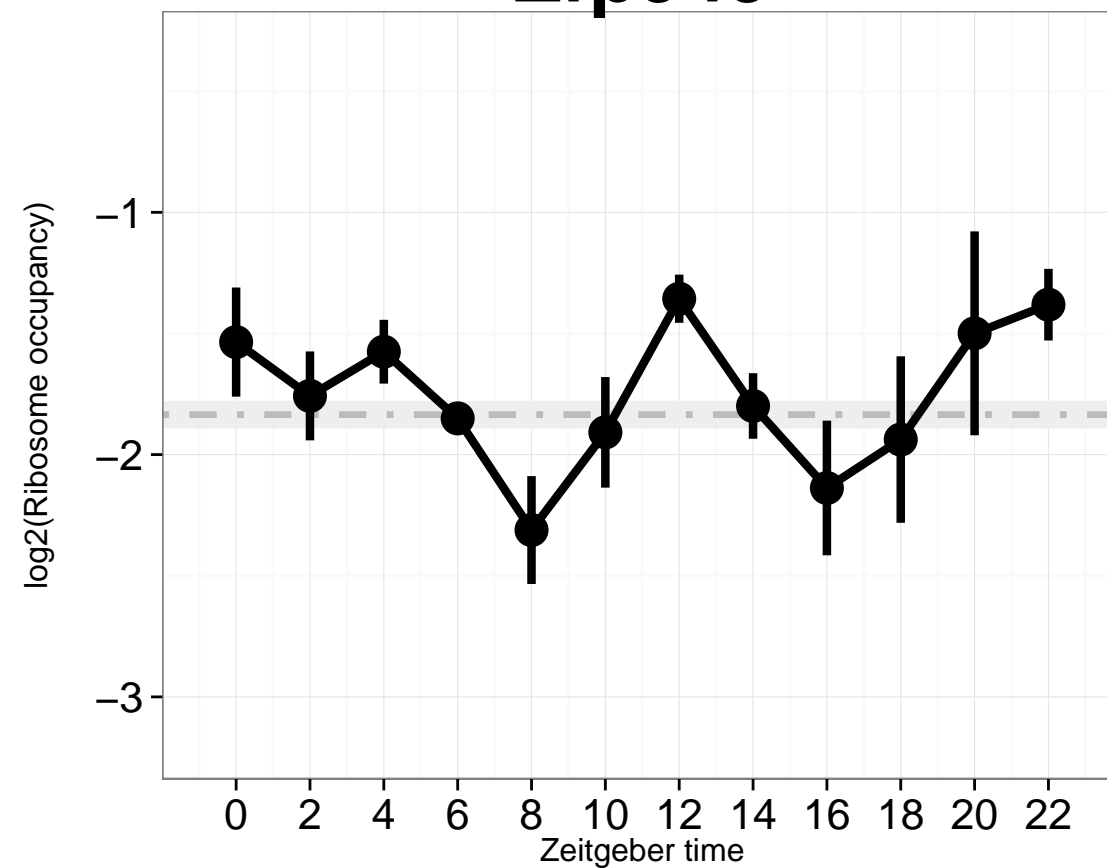

Supplement: SuppDataset_1.zip [file Zfp949_set_A.pdf › Supplemental Dataset 1/A-mRNA_nonrhyth_translation_nonrhyth/Zfp949_set_A.pdf]

## Zfp94

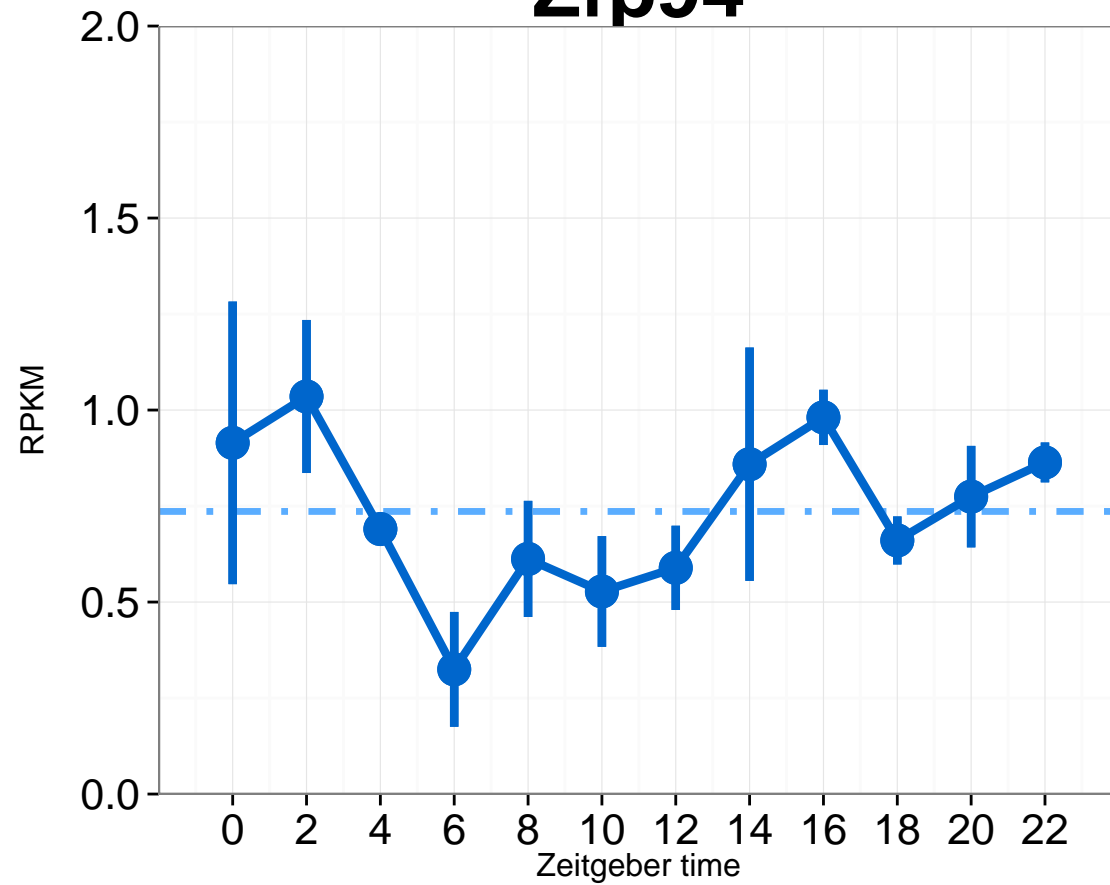

## Zfp94 log2(Ribosome occupancy)

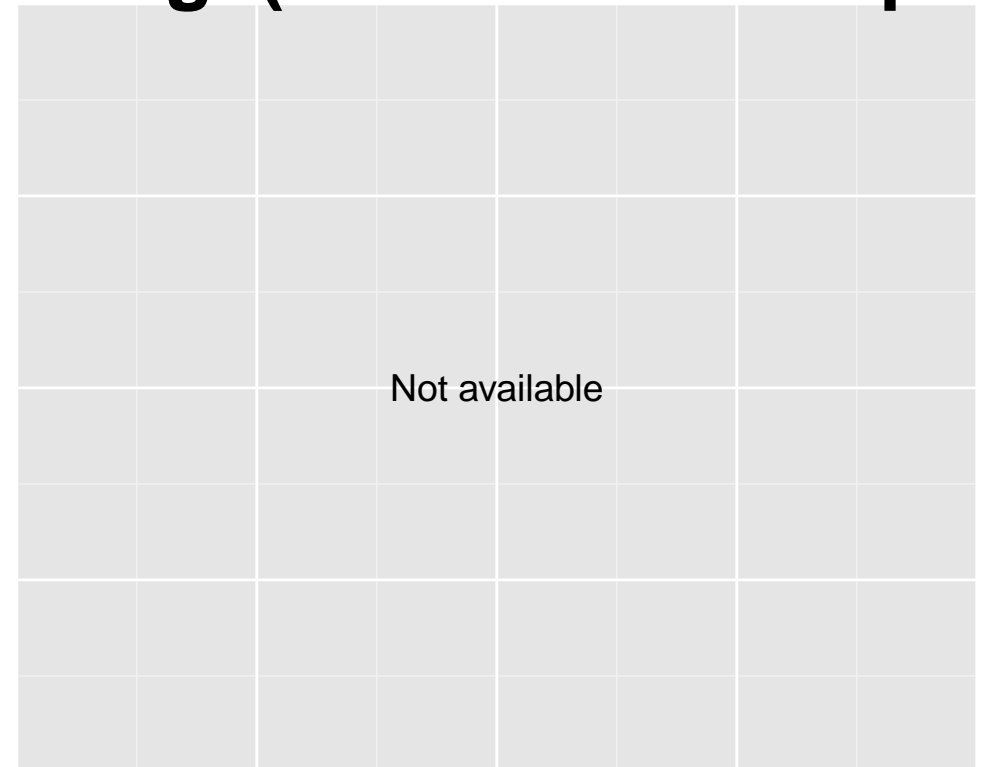

Supplement: SuppDataset_1.zip [file Zfp94_set_A.pdf › Supplemental Dataset 1/A-mRNA_nonrhyth_translation_nonrhyth/Zfp94_set_A.pdf]

# Zfp951

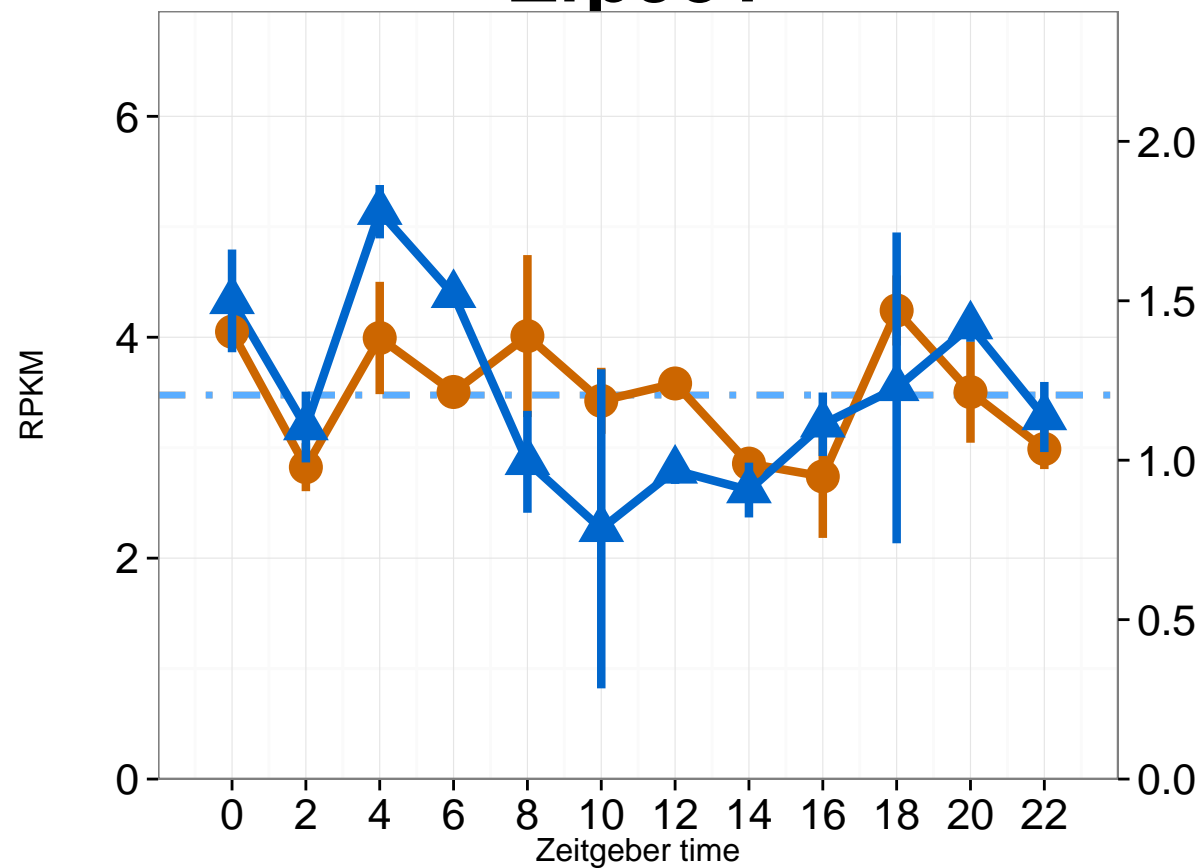

# Zfp951

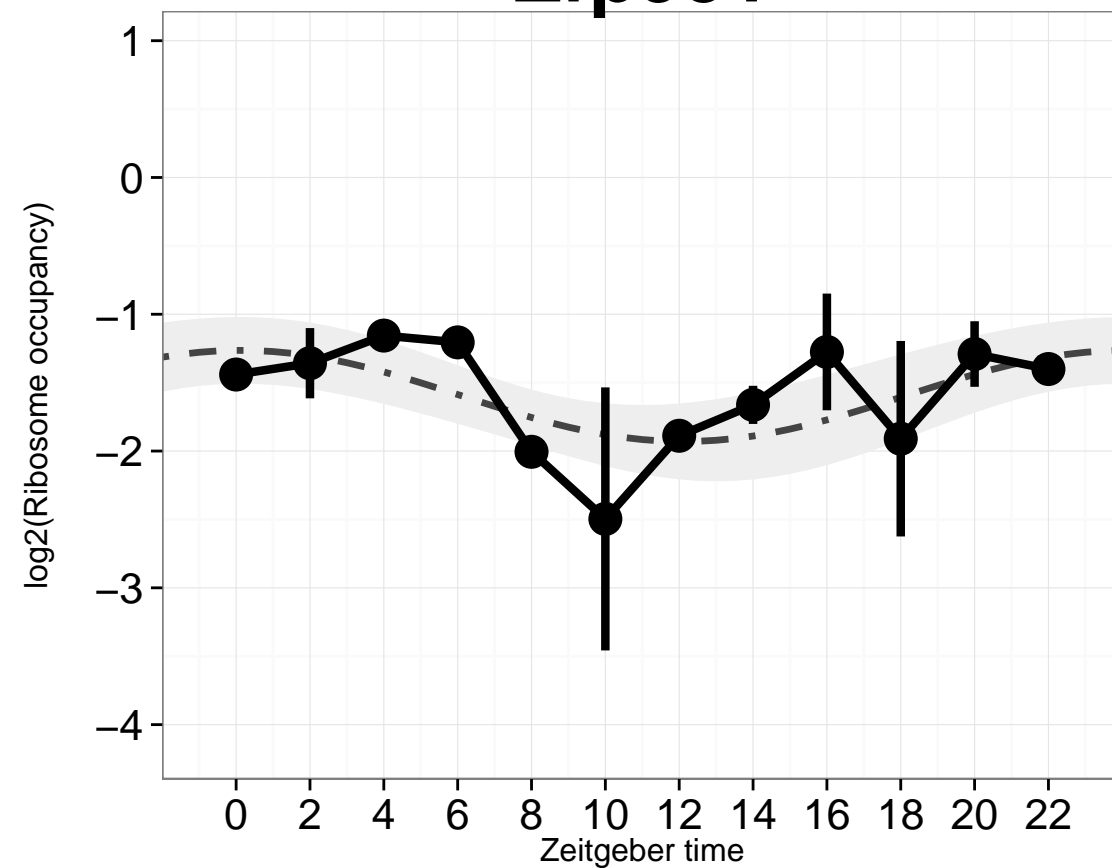

Supplement: SuppDataset_1.zip [file Zfp951_set_A.pdf › Supplemental Dataset 1/A-mRNA_nonrhyth_translation_nonrhyth/Zfp951_set_A.pdf]

# Zfp952

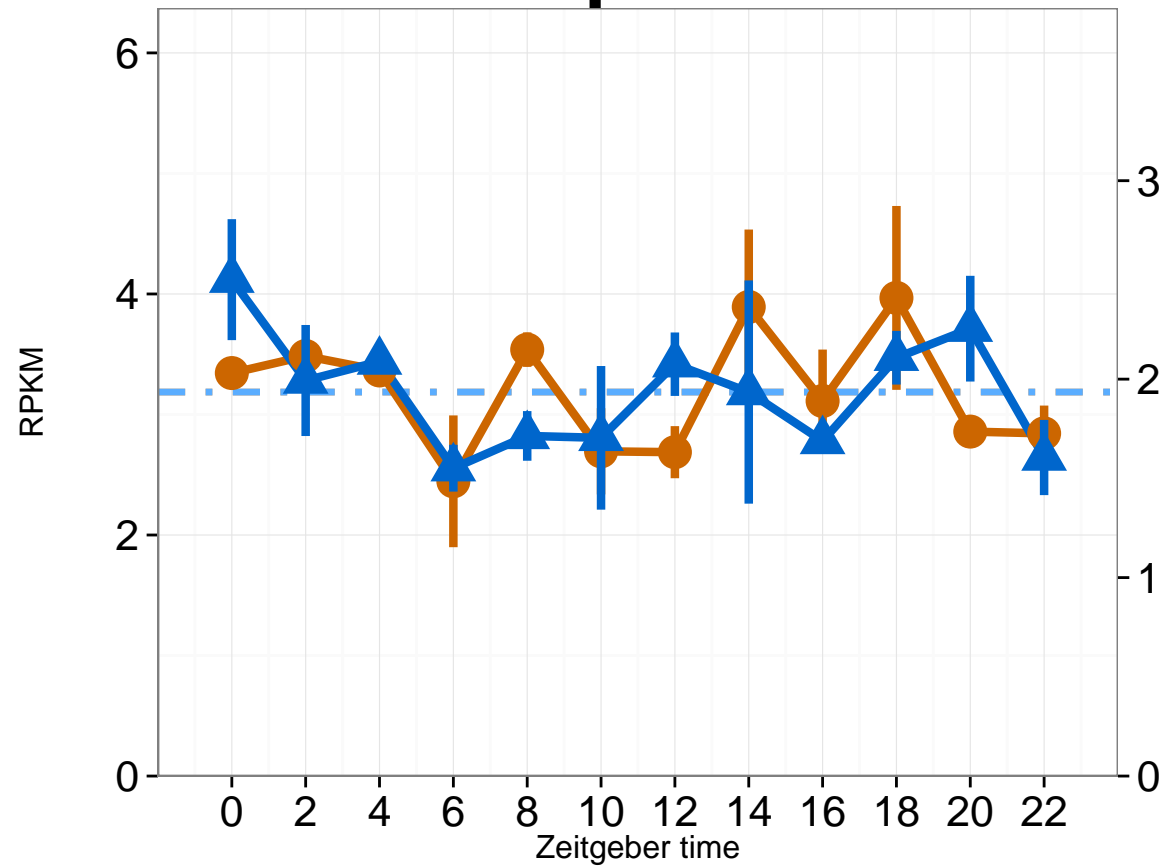

# Zfp952

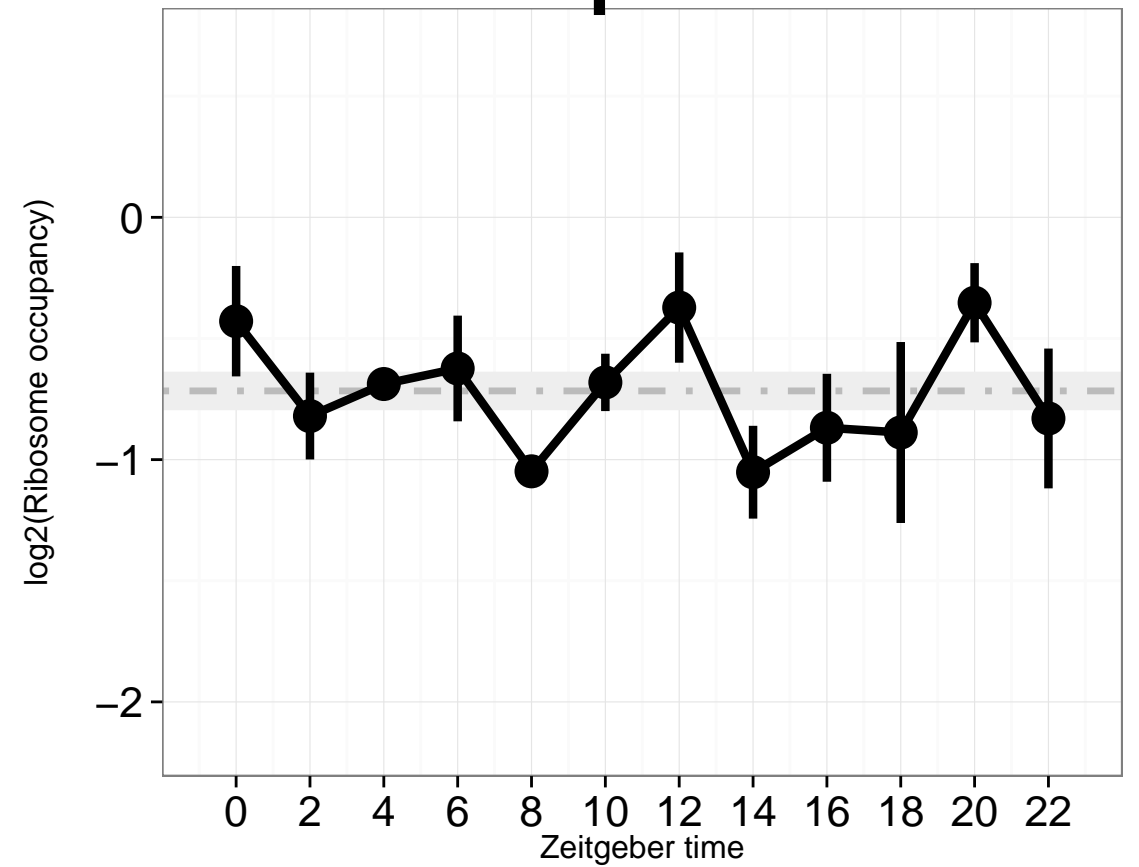

Supplement: SuppDataset_1.zip [file Zfp952_set_A.pdf › Supplemental Dataset 1/A-mRNA_nonrhyth_translation_nonrhyth/Zfp952_set_A.pdf]

# Zfp953

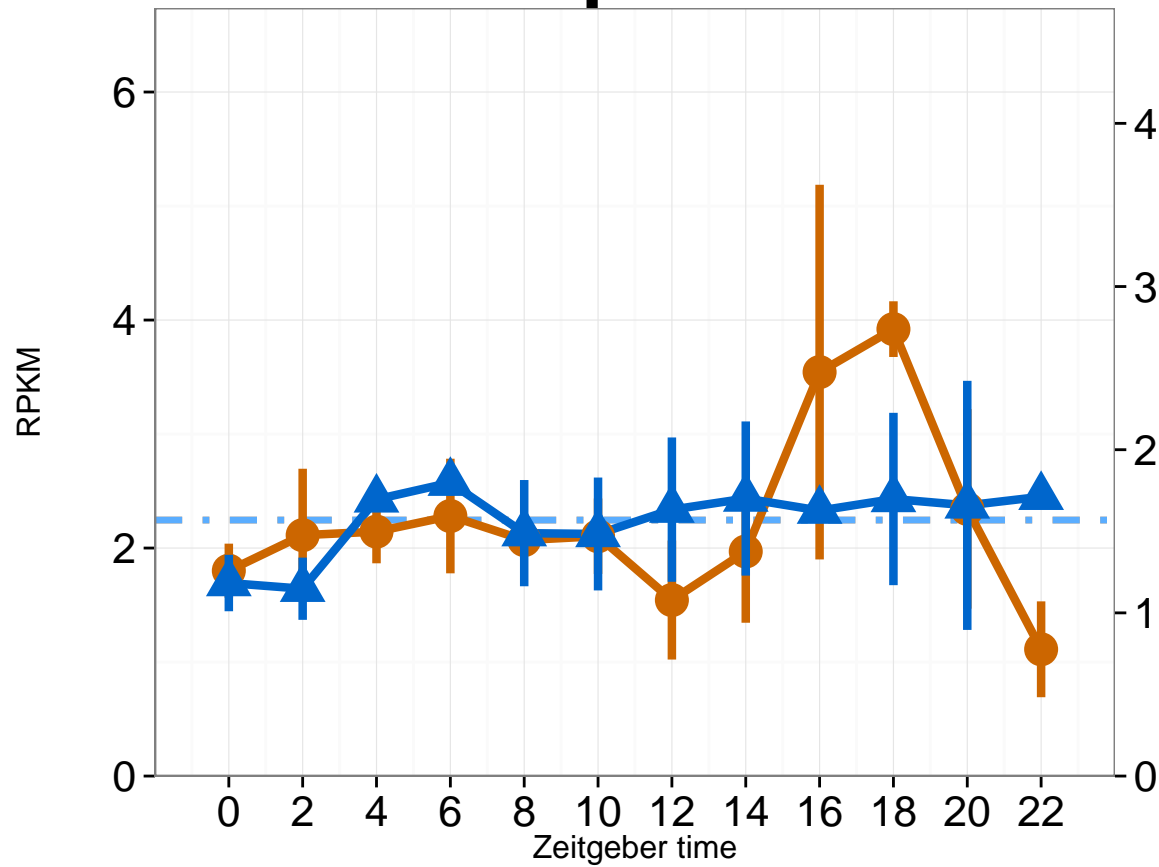

# Zfp953

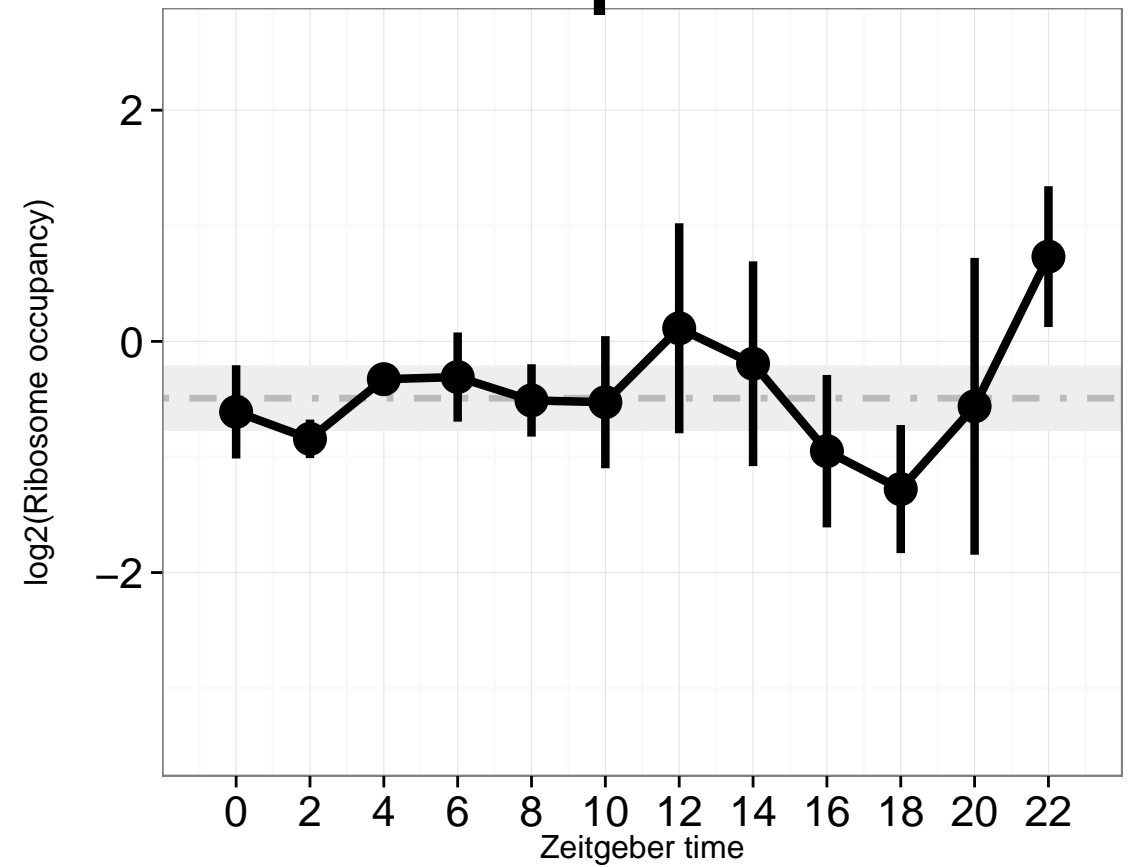

Supplement: SuppDataset_1.zip [file Zfp953_set_A.pdf › Supplemental Dataset 1/A-mRNA_nonrhyth_translation_nonrhyth/Zfp953_set_A.pdf]

# Zfp955a

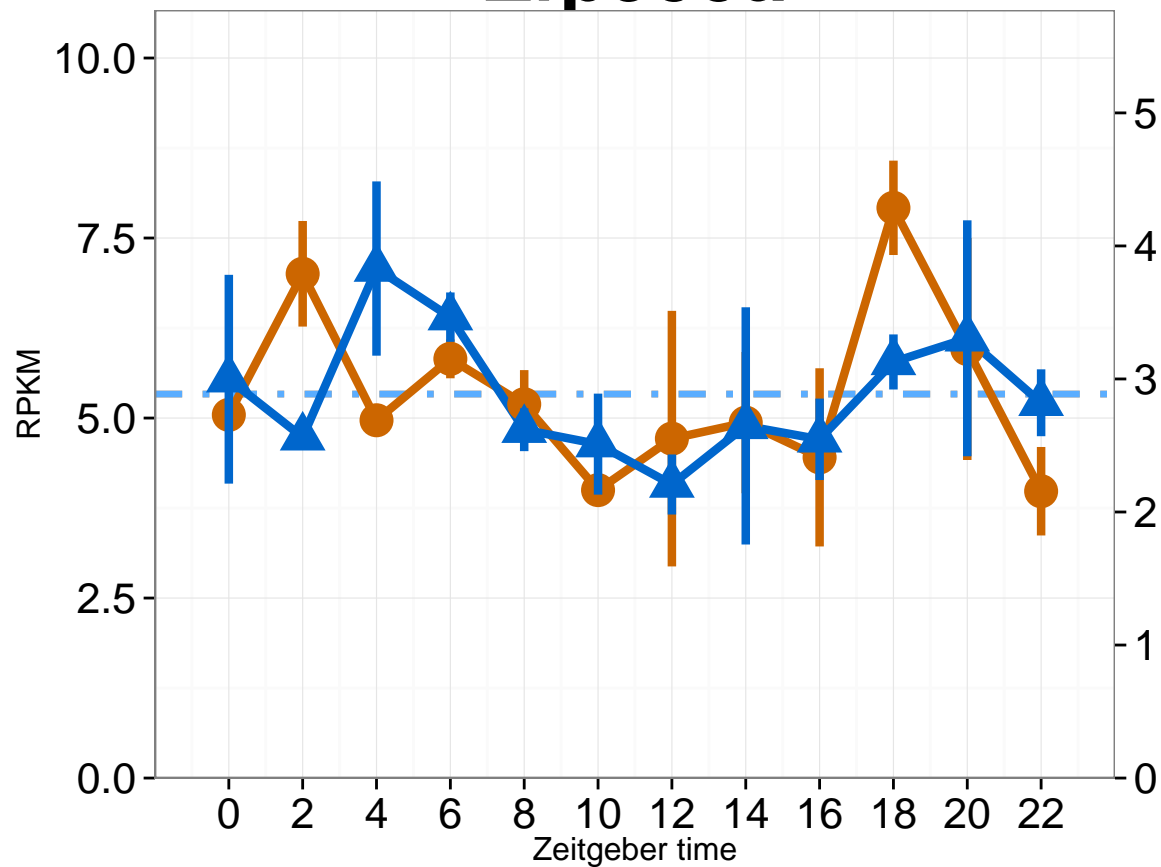

# Zfp955a

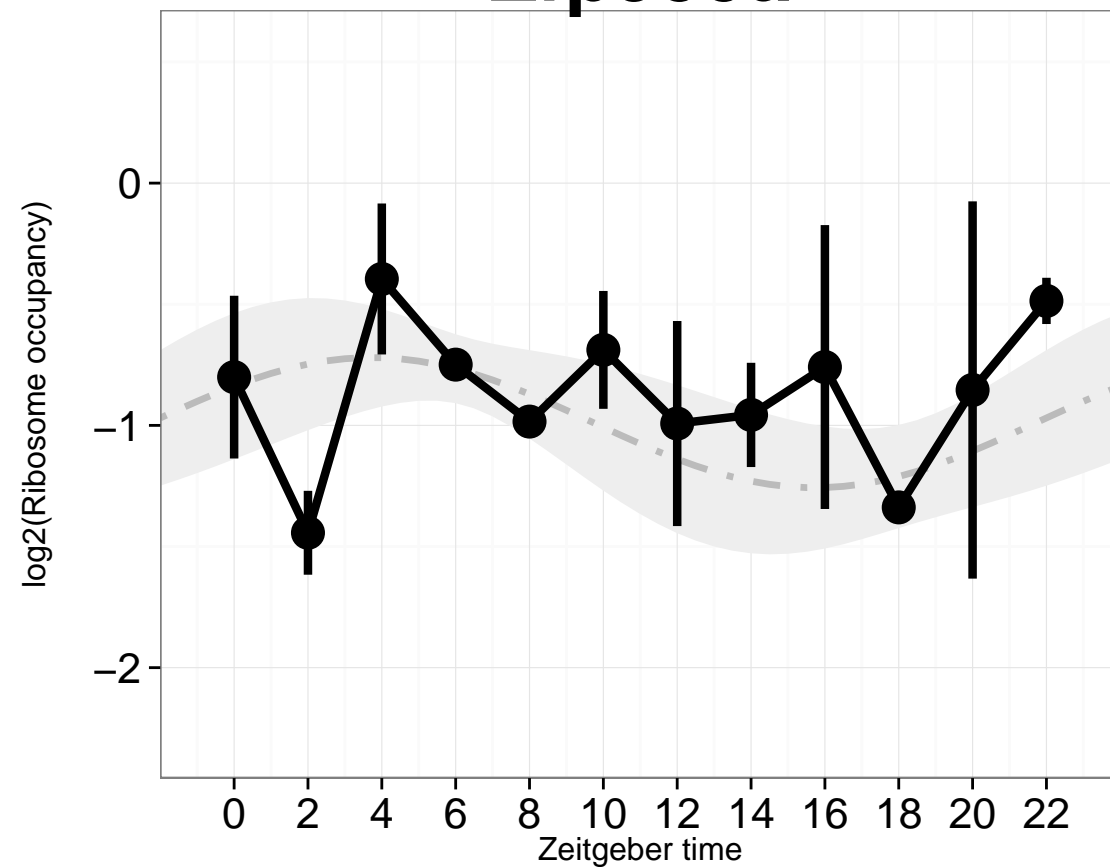

Supplement: SuppDataset_1.zip [file Zfp955a_set_A.pdf › Supplemental Dataset 1/A-mRNA_nonrhyth_translation_nonrhyth/Zfp955a_set_A.pdf]

# Zfp955b

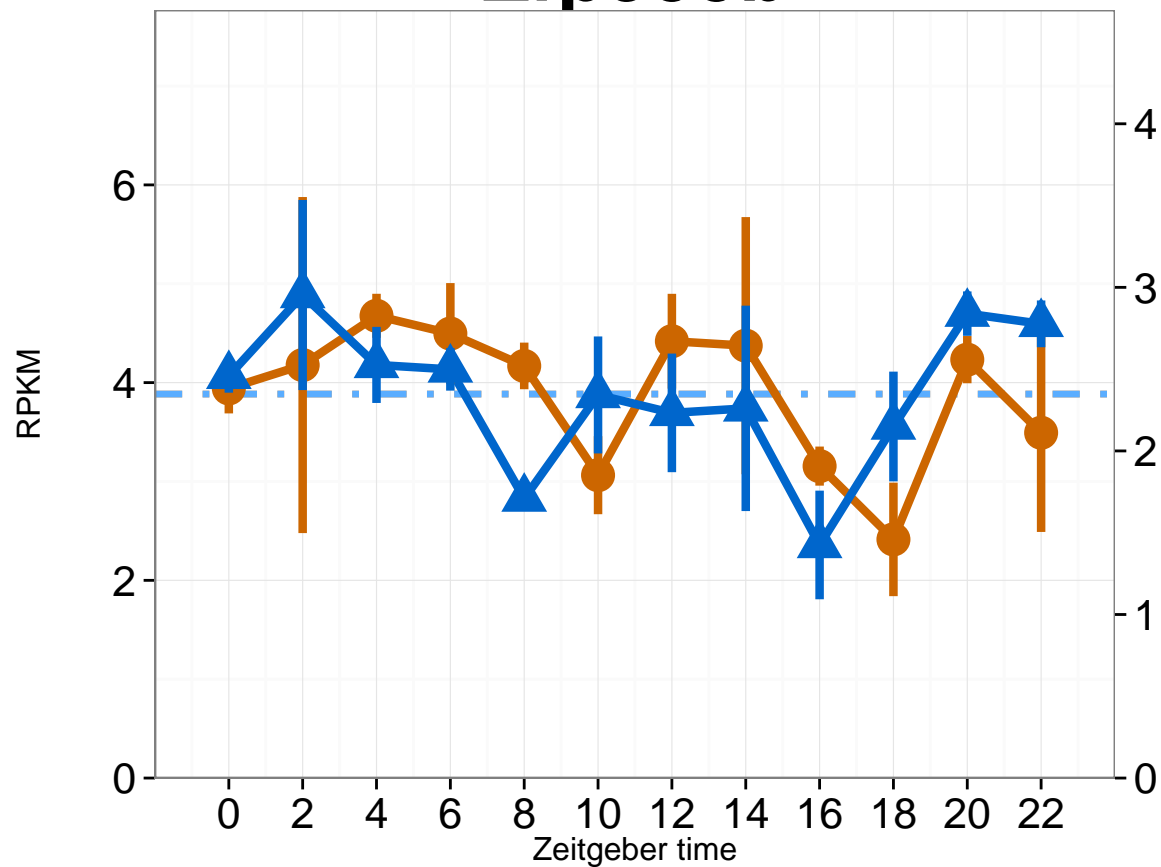

# Zfp955b

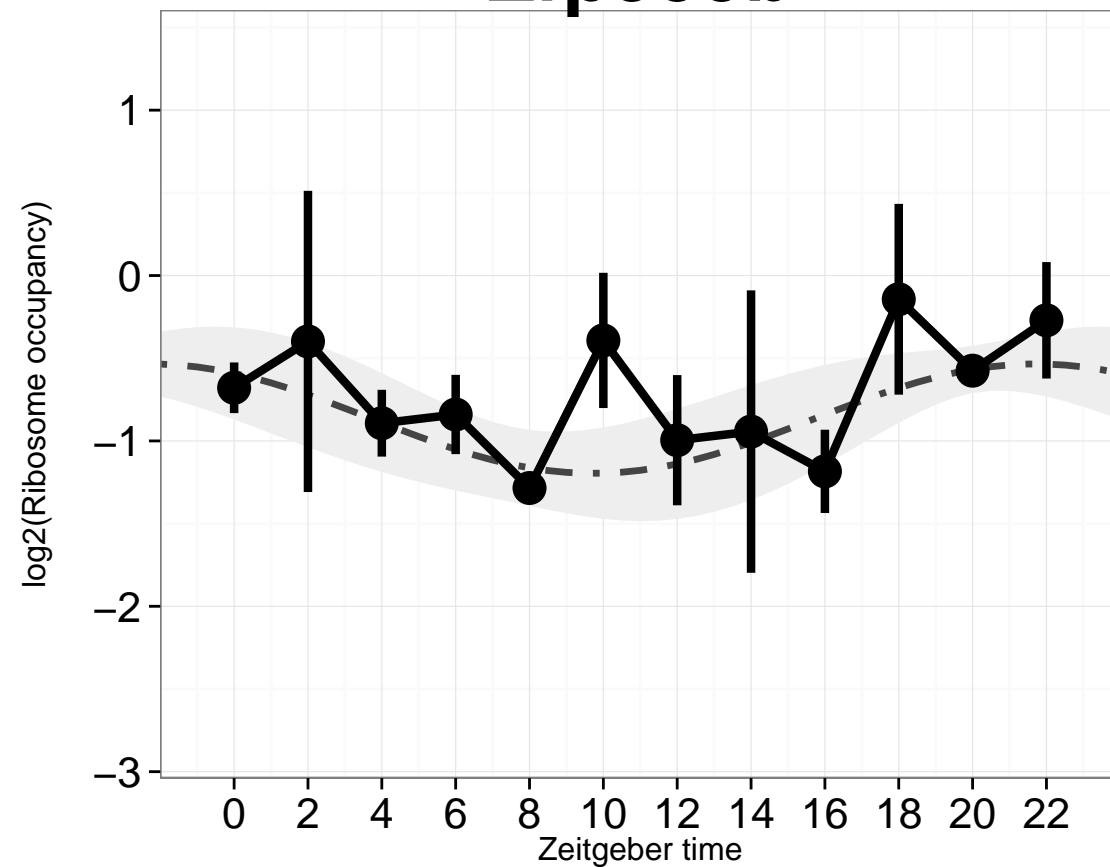

Supplement: SuppDataset_1.zip [file Zfp955b_set_A.pdf › Supplemental Dataset 1/A-mRNA_nonrhyth_translation_nonrhyth/Zfp955b_set_A.pdf]

# Zfp956

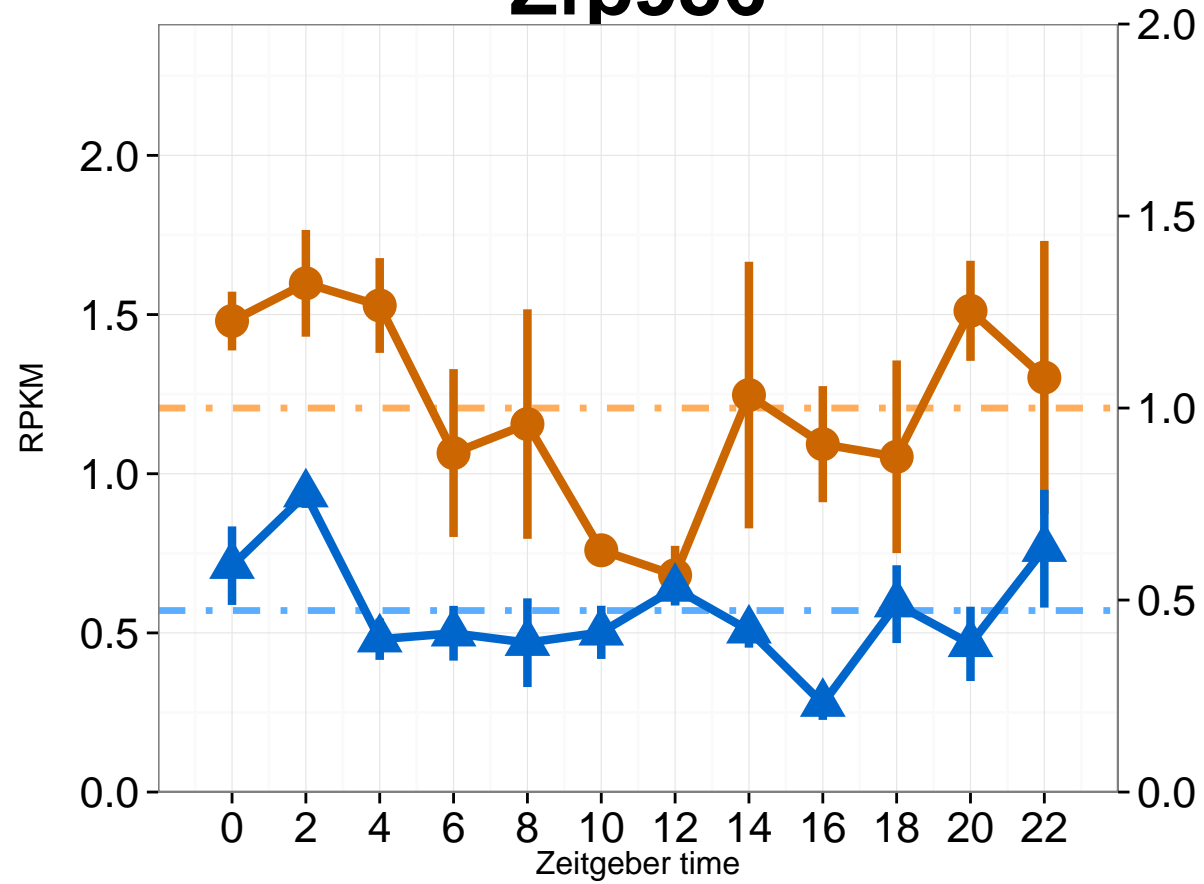

# Zfp956

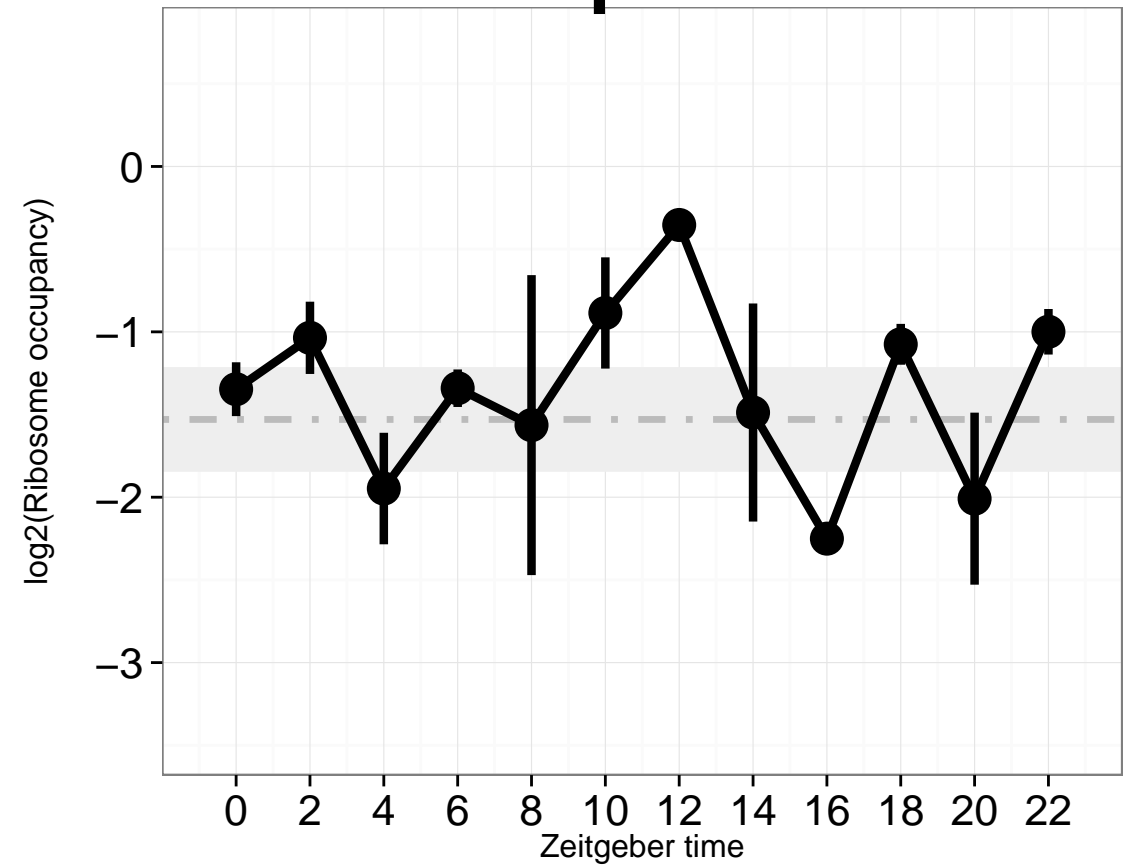

Supplement: SuppDataset_1.zip [file Zfp956_set_A.pdf › Supplemental Dataset 1/A-mRNA_nonrhyth_translation_nonrhyth/Zfp956_set_A.pdf]

# Zfp958

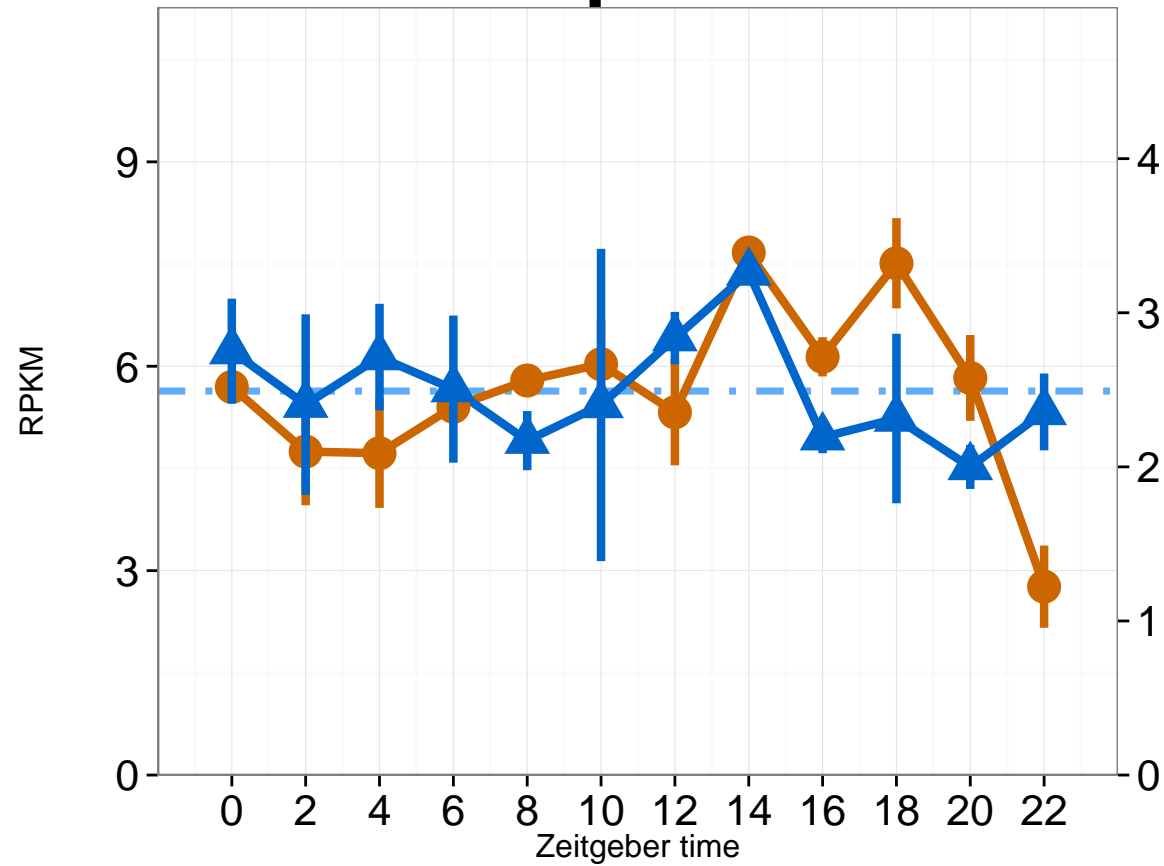

# Zfp958

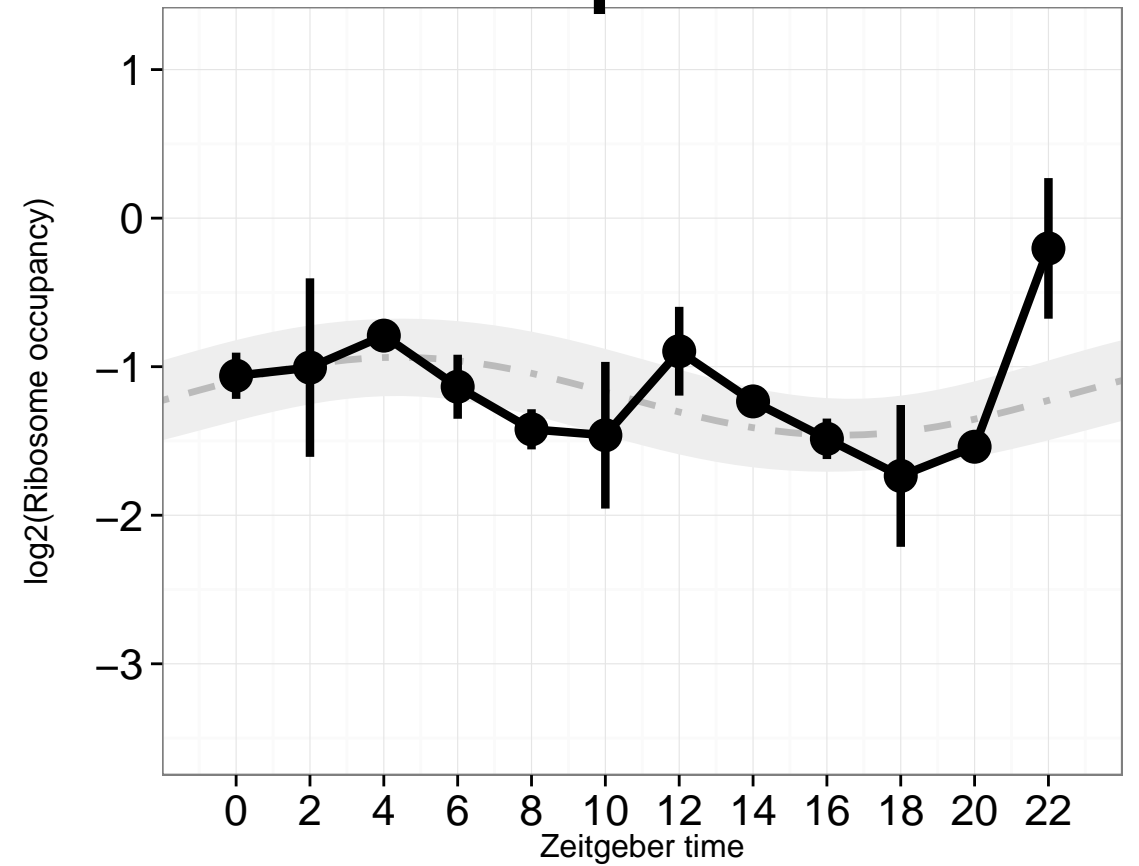

Supplement: SuppDataset_1.zip [file Zfp958_set_A.pdf › Supplemental Dataset 1/A-mRNA_nonrhyth_translation_nonrhyth/Zfp958_set_A.pdf]

# Zfp959

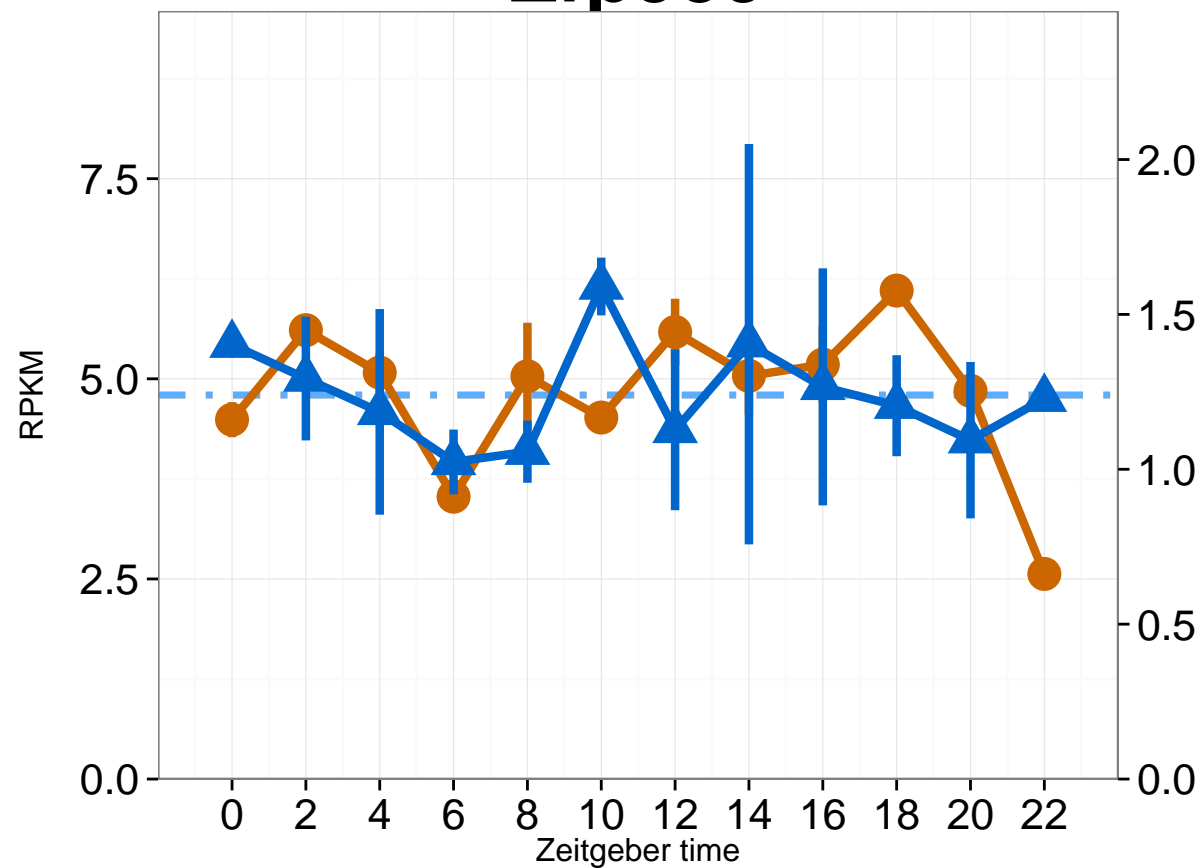

# Zfp959

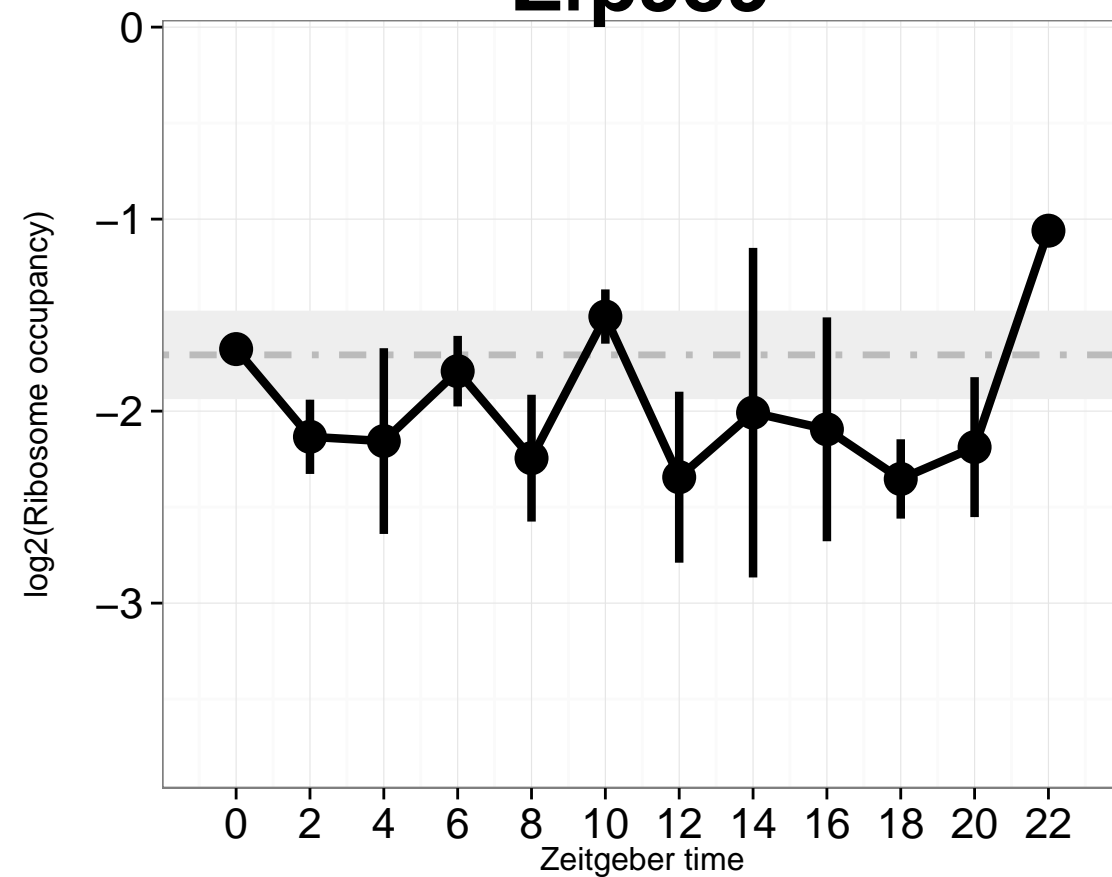

Supplement: SuppDataset_1.zip [file Zfp959_set_A.pdf › Supplemental Dataset 1/A-mRNA_nonrhyth_translation_nonrhyth/Zfp959_set_A.pdf]

# Zfp961

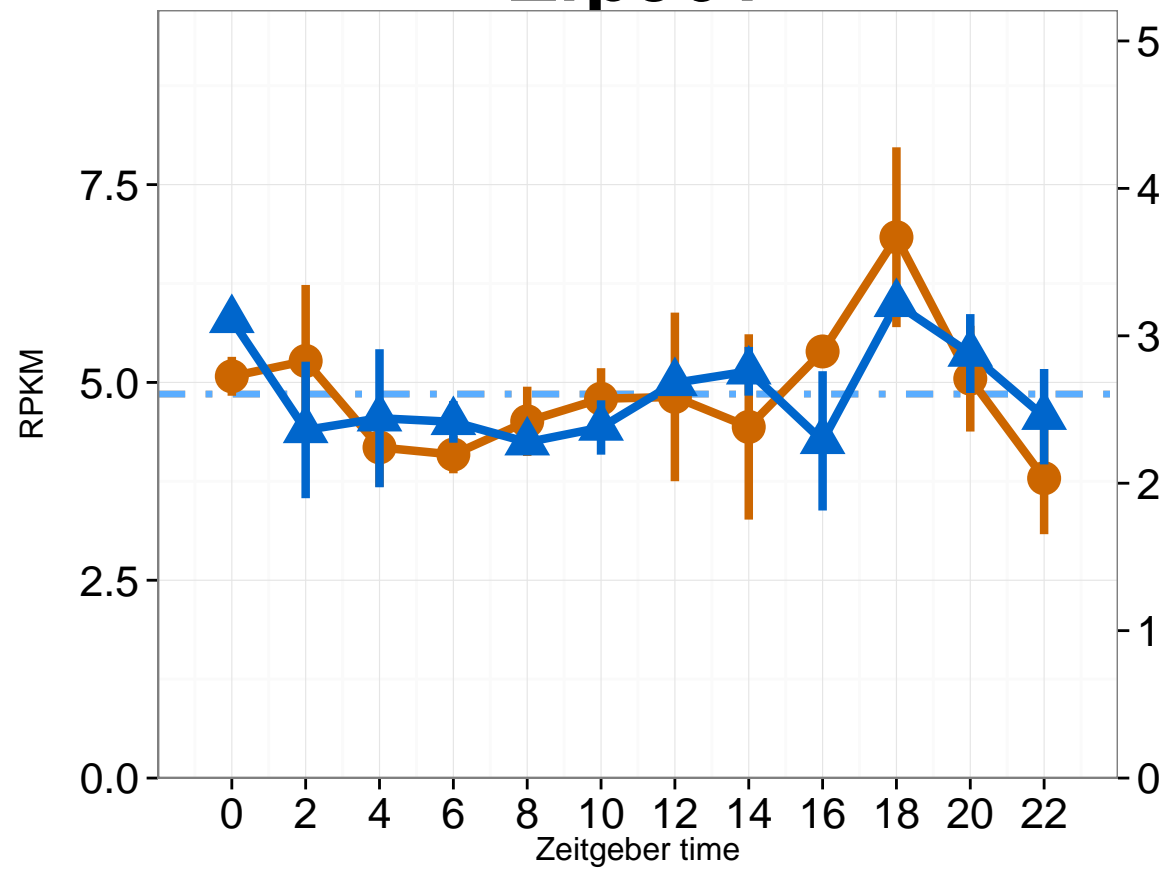

# Zfp961

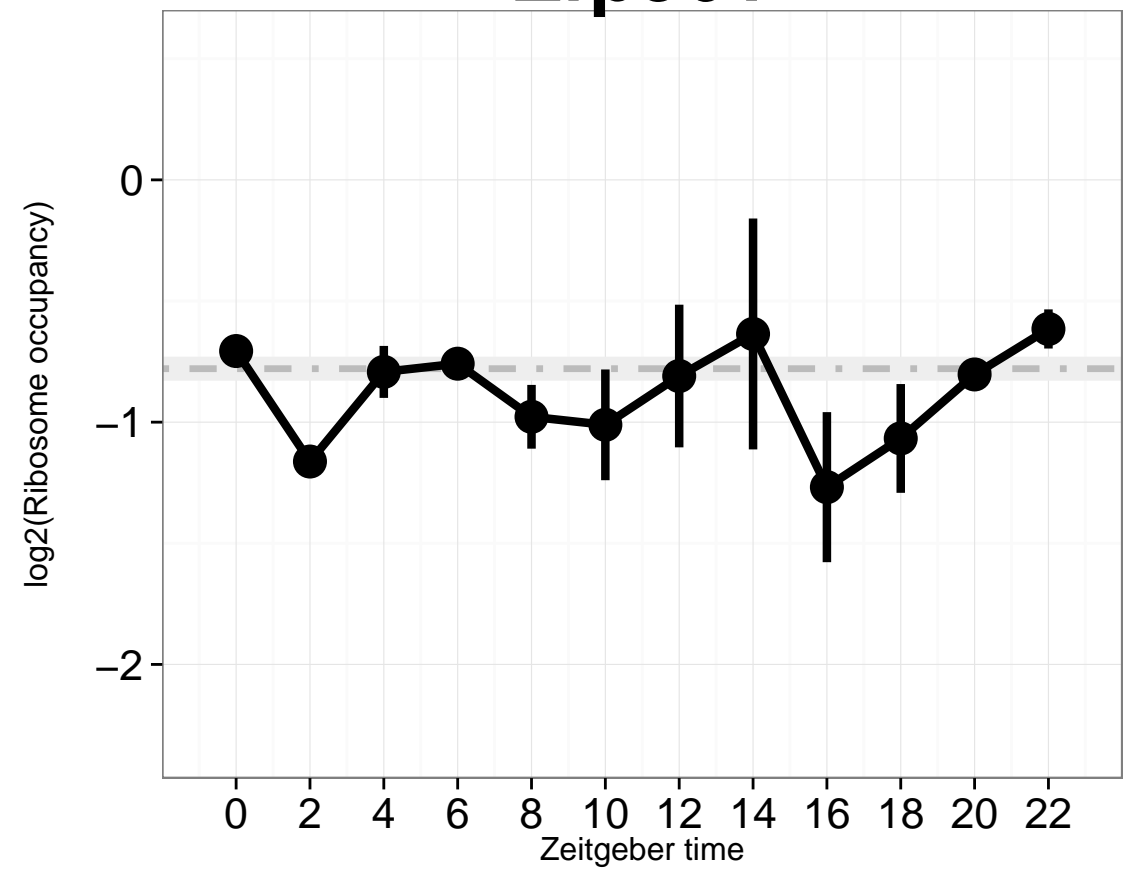

Supplement: SuppDataset_1.zip [file Zfp961_set_A.pdf › Supplemental Dataset 1/A-mRNA_nonrhyth_translation_nonrhyth/Zfp961_set_A.pdf]

# Zfp964

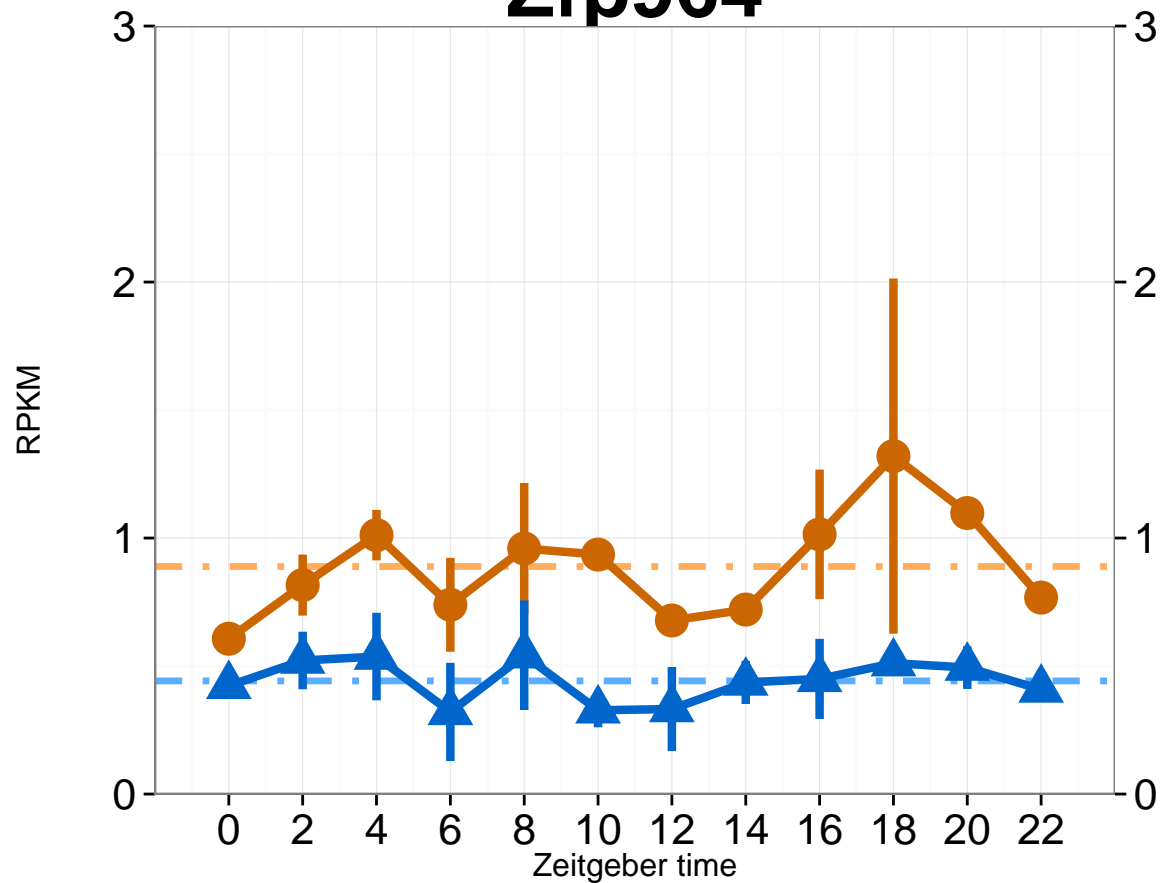

# Zfp964

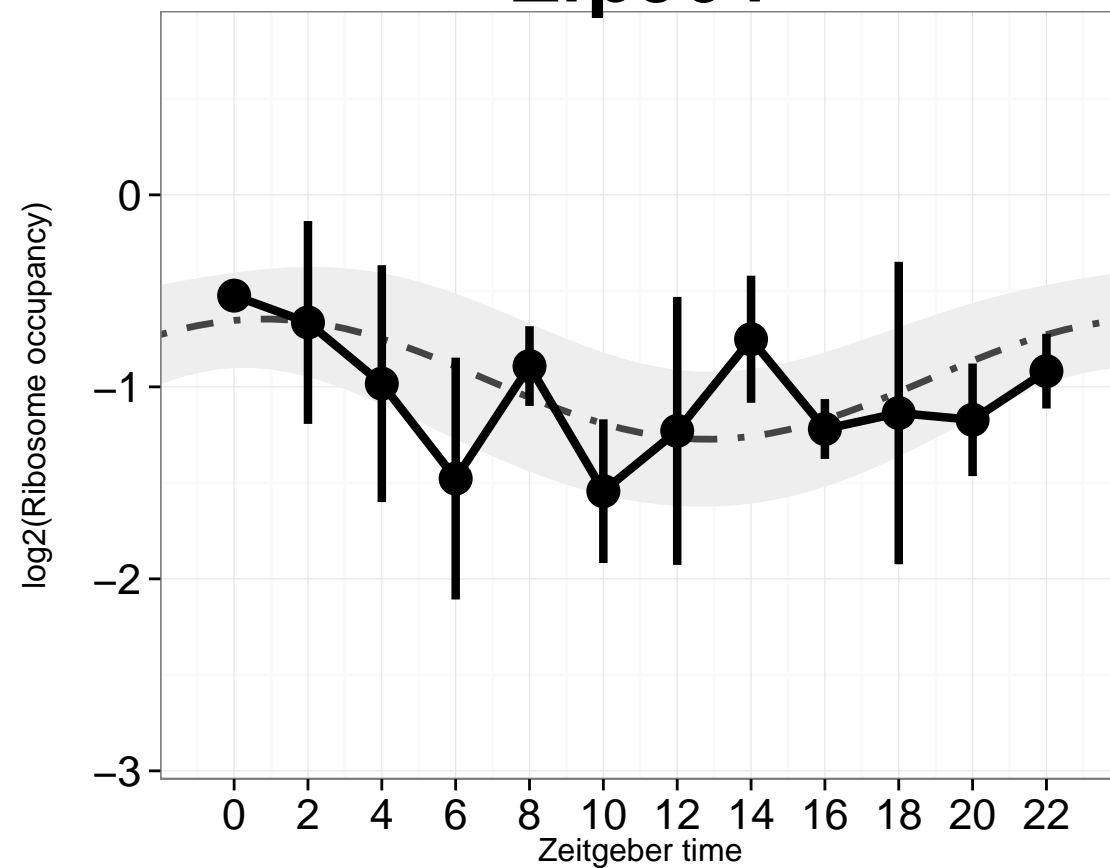

Supplement: SuppDataset_1.zip [file Zfp964_set_A.pdf › Supplemental Dataset 1/A-mRNA_nonrhyth_translation_nonrhyth/Zfp964_set_A.pdf]

# Zfpl1

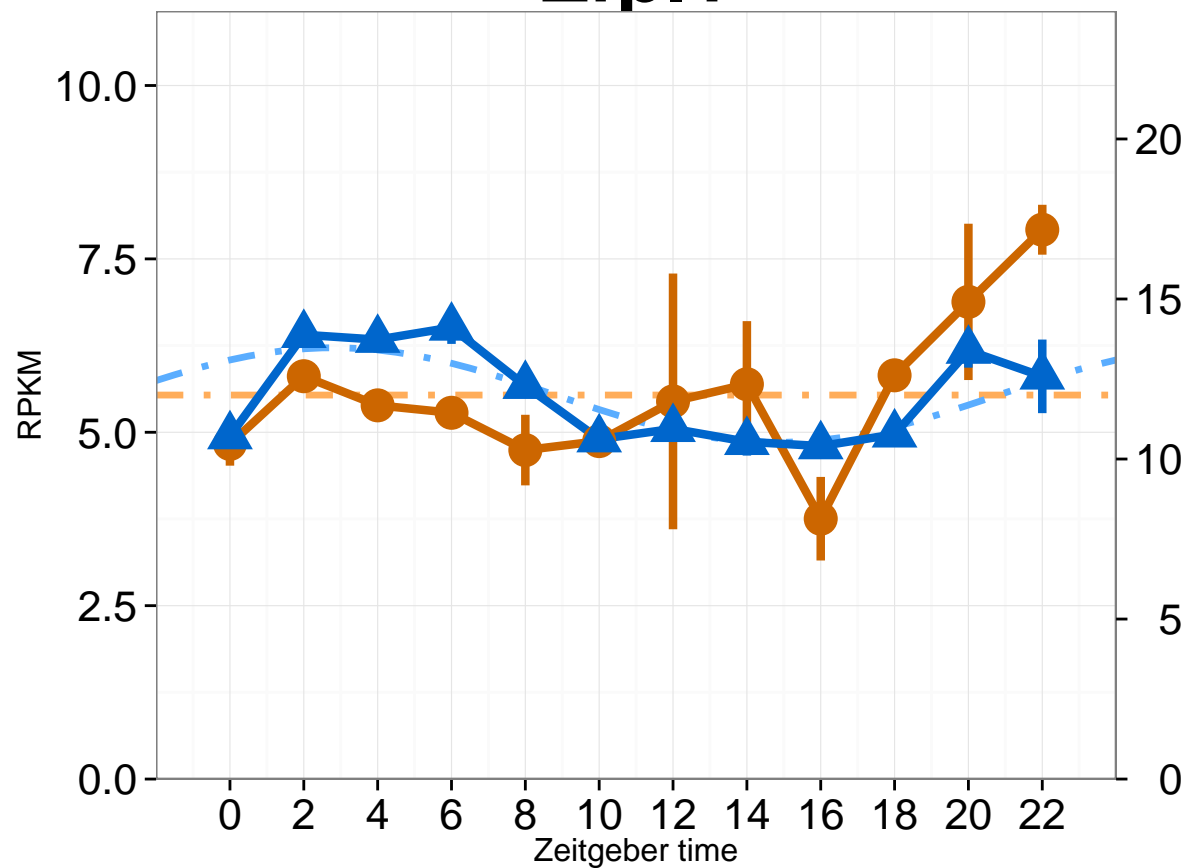

# Zfpl1

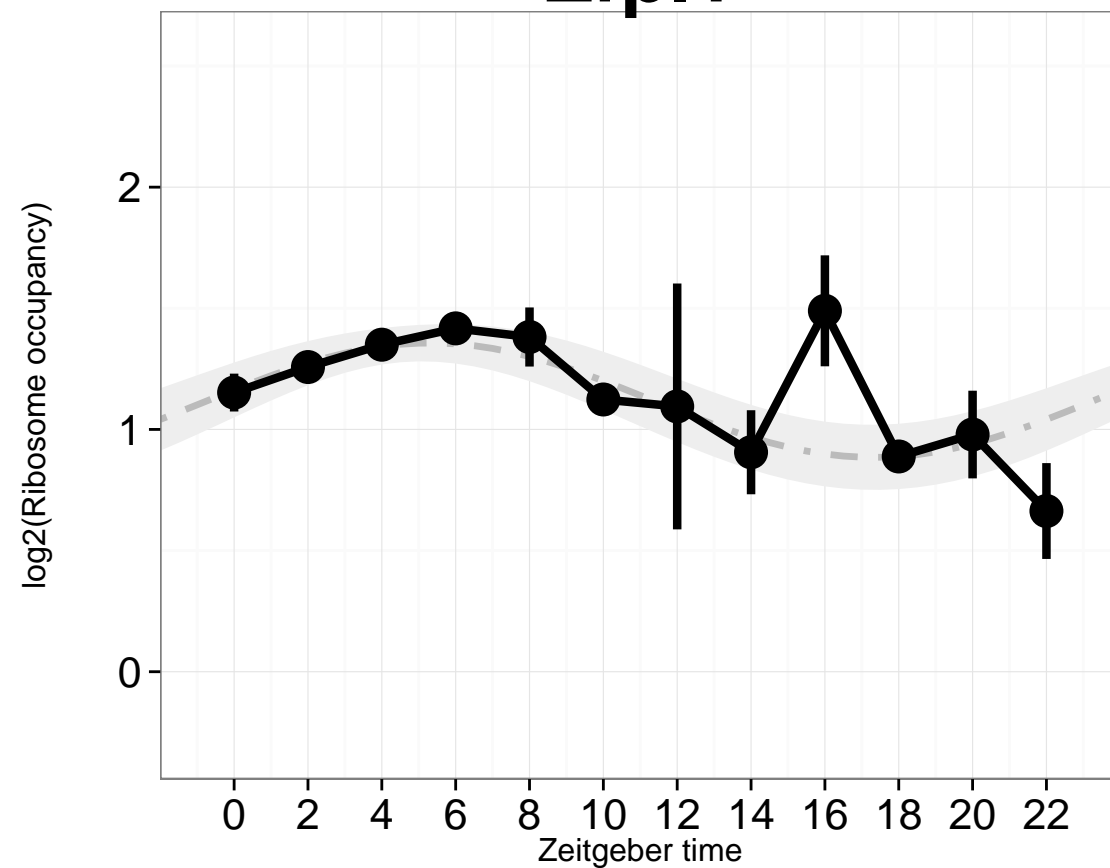

Supplement: SuppDataset_1.zip [file Zfpl1_set_A.pdf › Supplemental Dataset 1/A-mRNA_nonrhyth_translation_nonrhyth/Zfpl1_set_A.pdf]

# Zfpm2

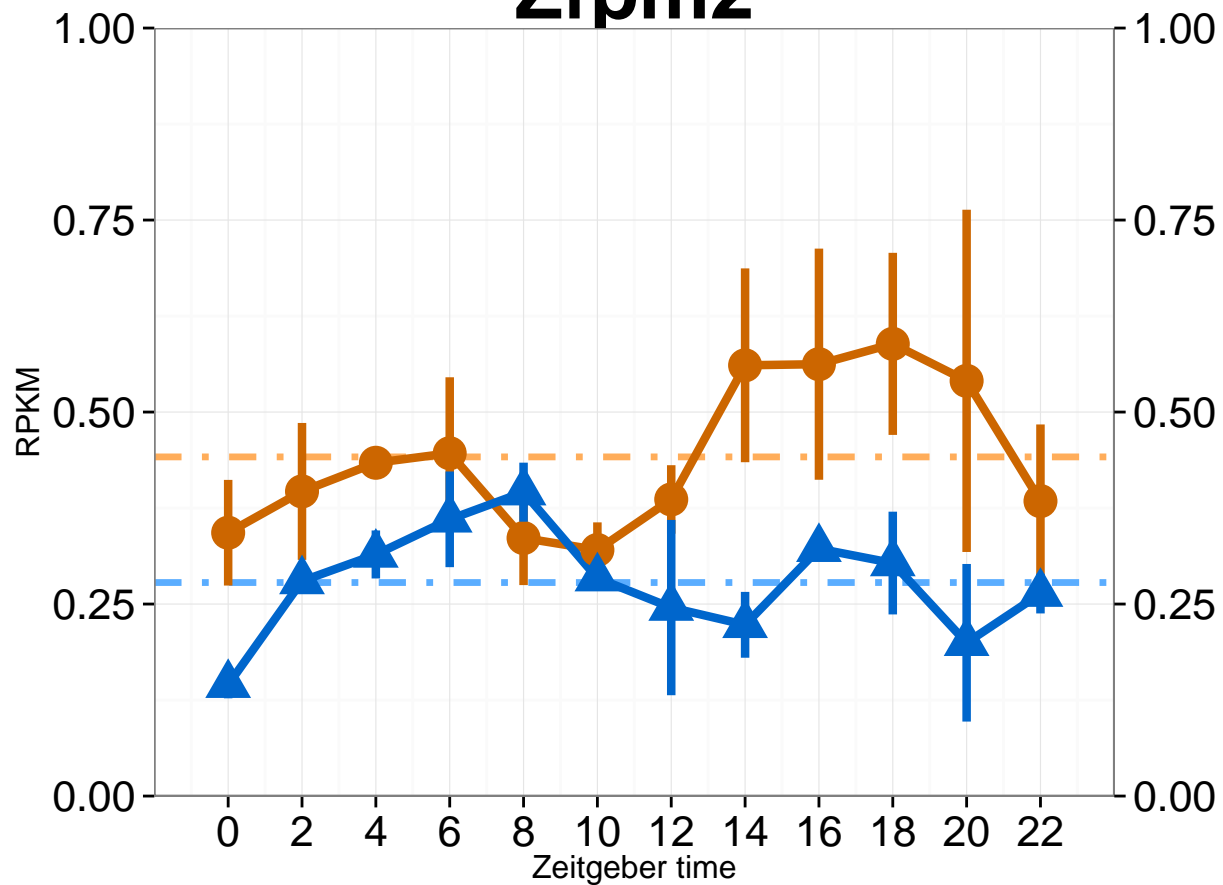

# Zfpm2

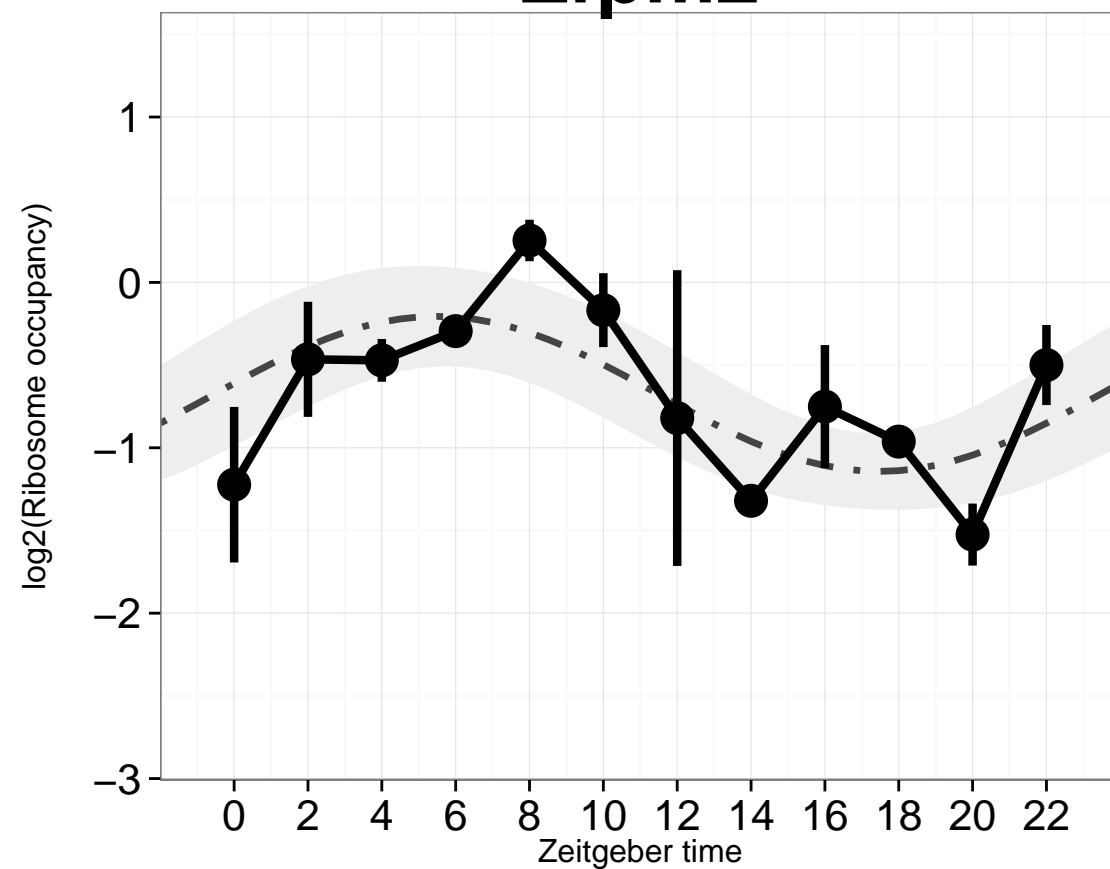

Supplement: SuppDataset_1.zip [file Zfpm2_set_A.pdf › Supplemental Dataset 1/A-mRNA_nonrhyth_translation_nonrhyth/Zfpm2_set_A.pdf]

**Zfx**

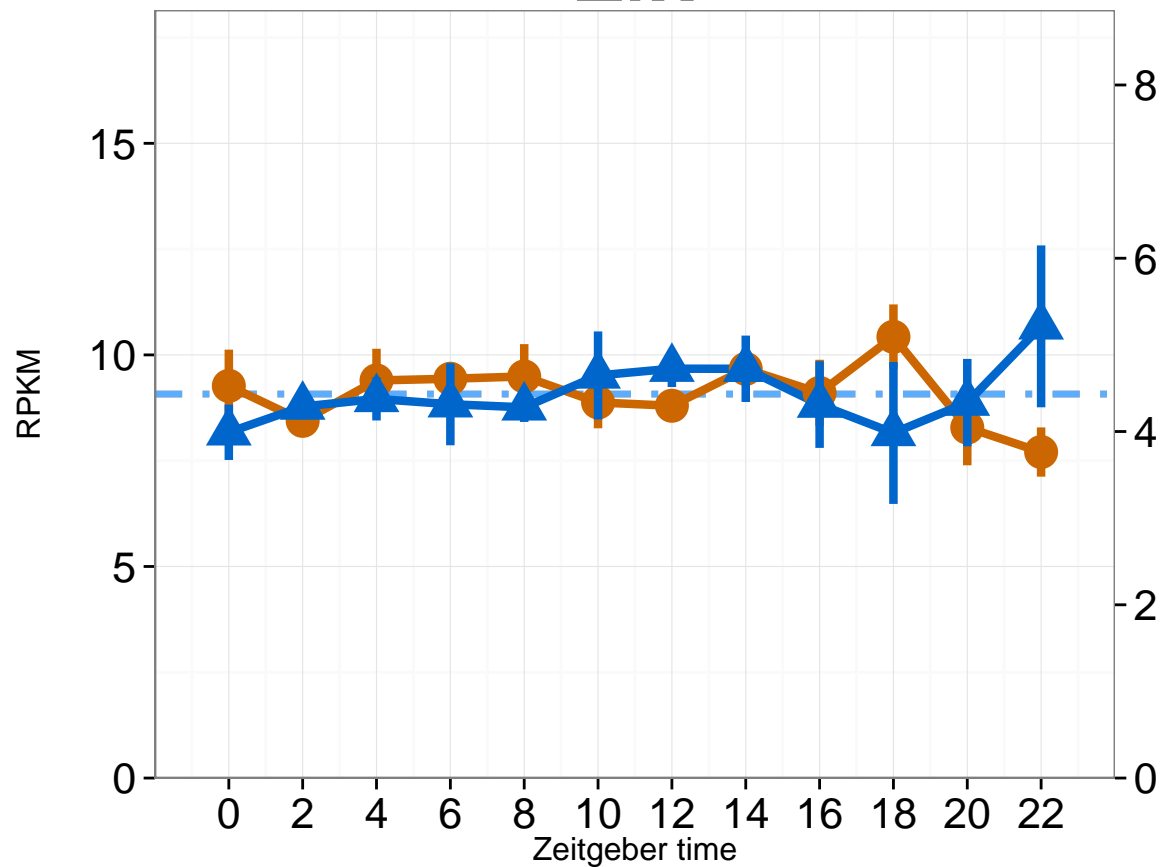

**Zfx**

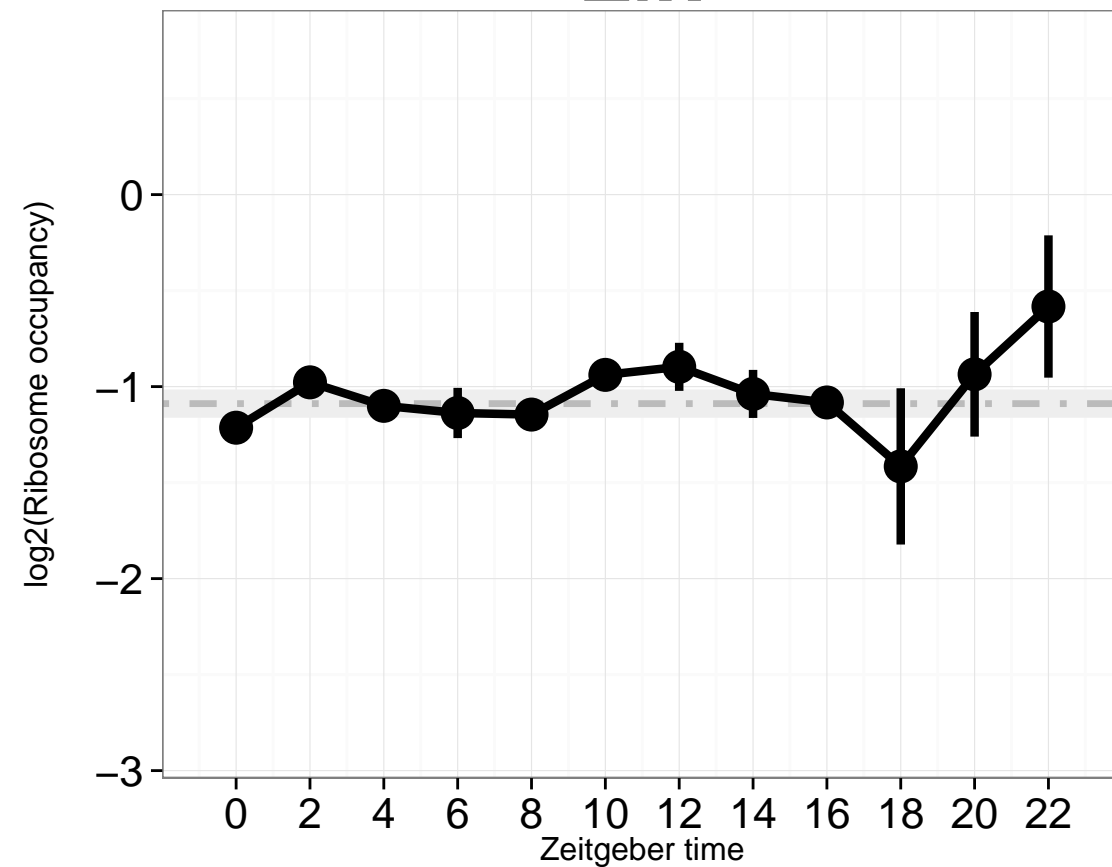

Supplement: SuppDataset_1.zip [file Zfx_set_A.pdf › Supplemental Dataset 1/A-mRNA_nonrhyth_translation_nonrhyth/Zfx_set_A.pdf]

# Zfyve16

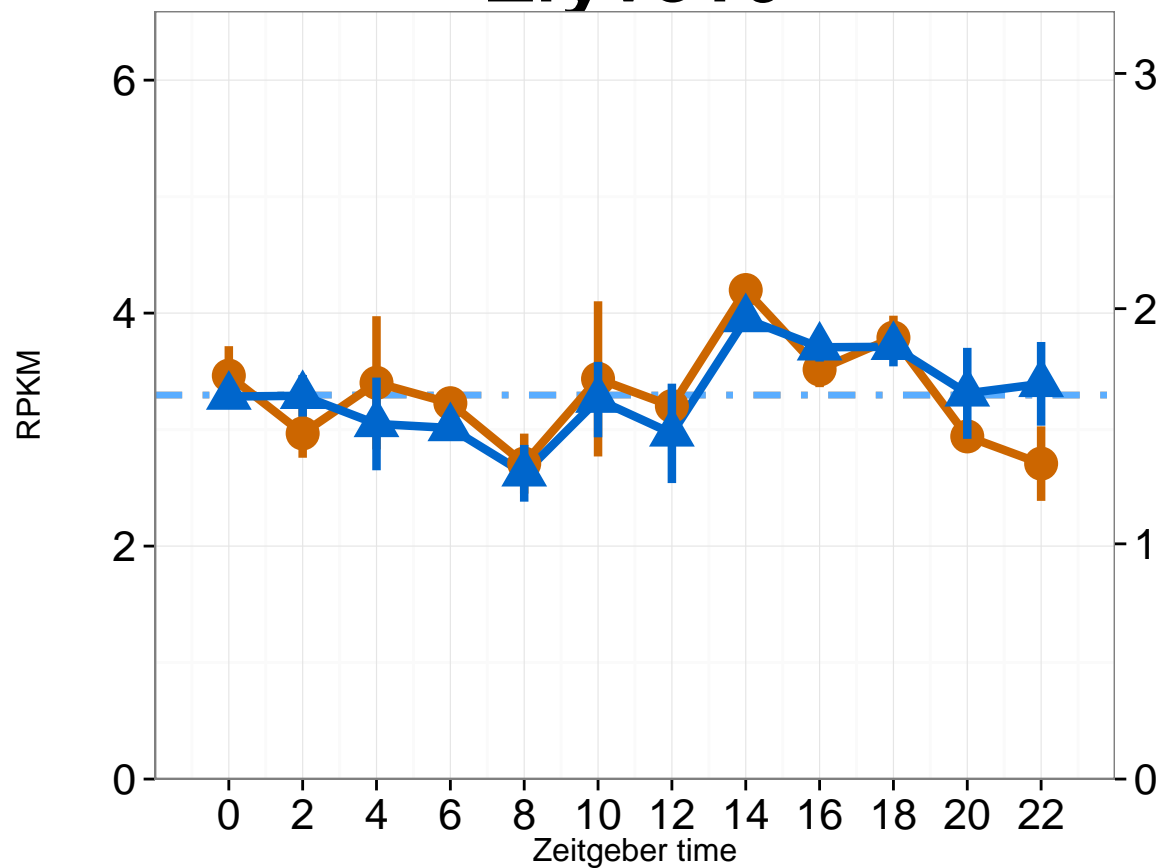

# Zfyve16

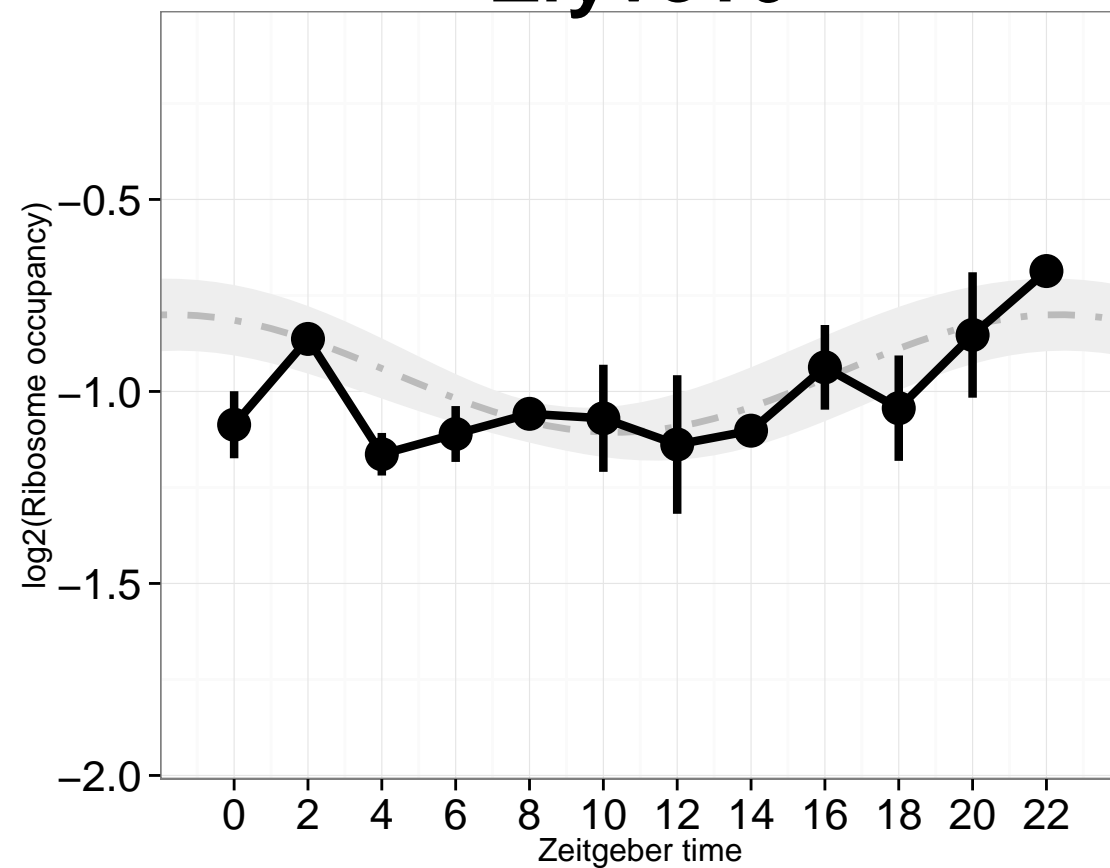

Supplement: SuppDataset_1.zip [file Zfyve16_set_A.pdf › Supplemental Dataset 1/A-mRNA_nonrhyth_translation_nonrhyth/Zfyve16_set_A.pdf]

# Zfyve19

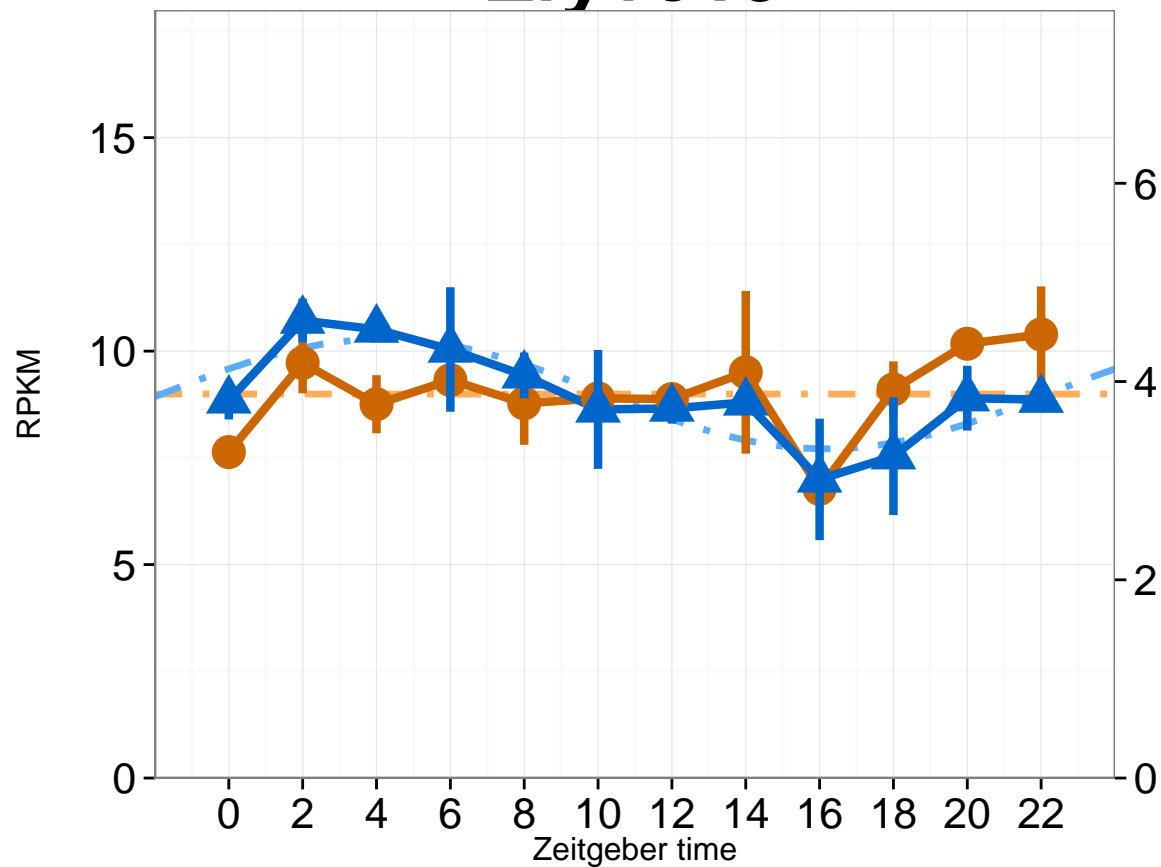

# Zfyve19

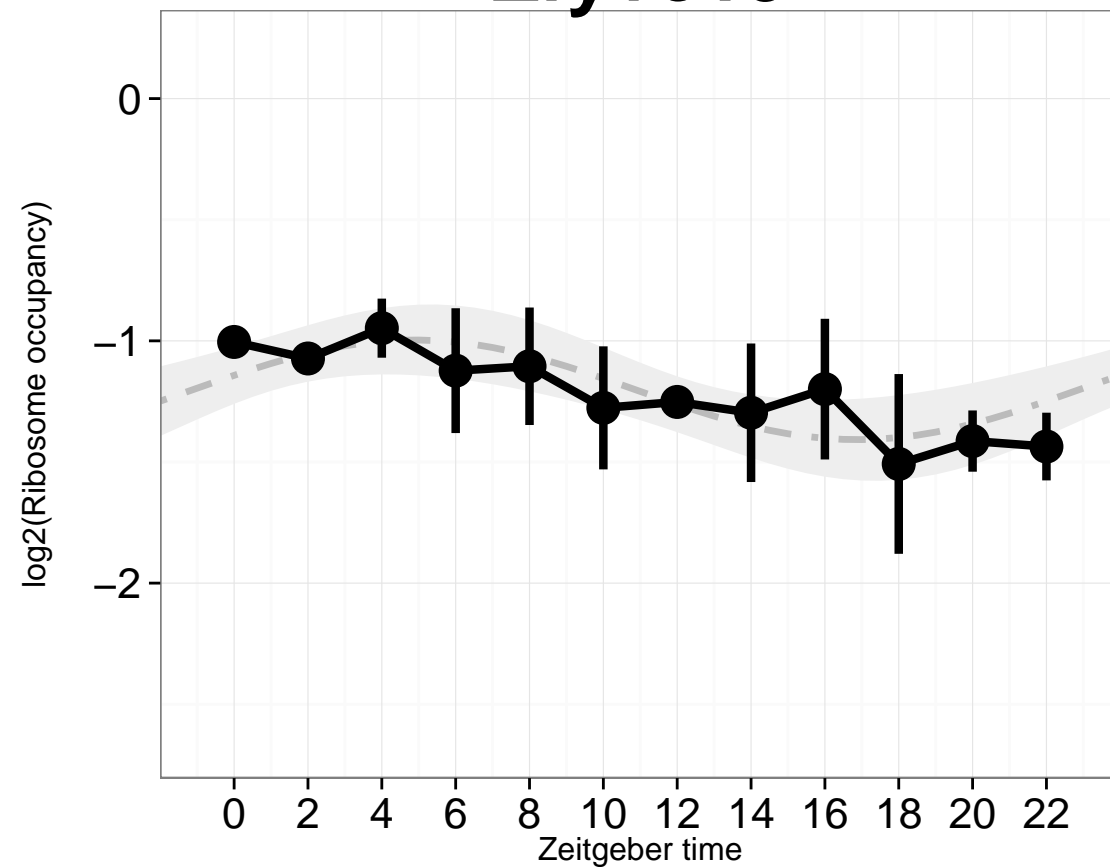

Supplement: SuppDataset_1.zip [file Zfyve19_set_A.pdf › Supplemental Dataset 1/A-mRNA_nonrhyth_translation_nonrhyth/Zfyve19_set_A.pdf]

# Zfyve1

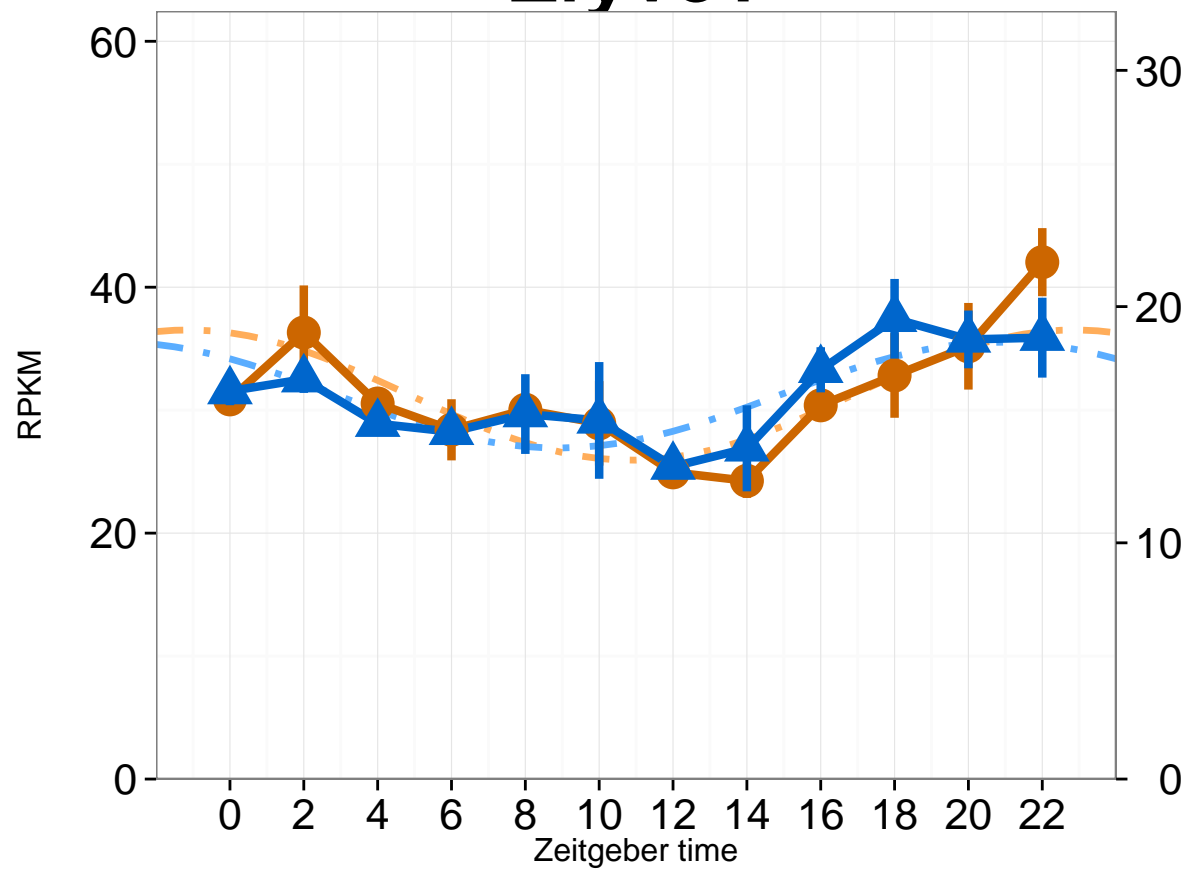

# Zfyve1

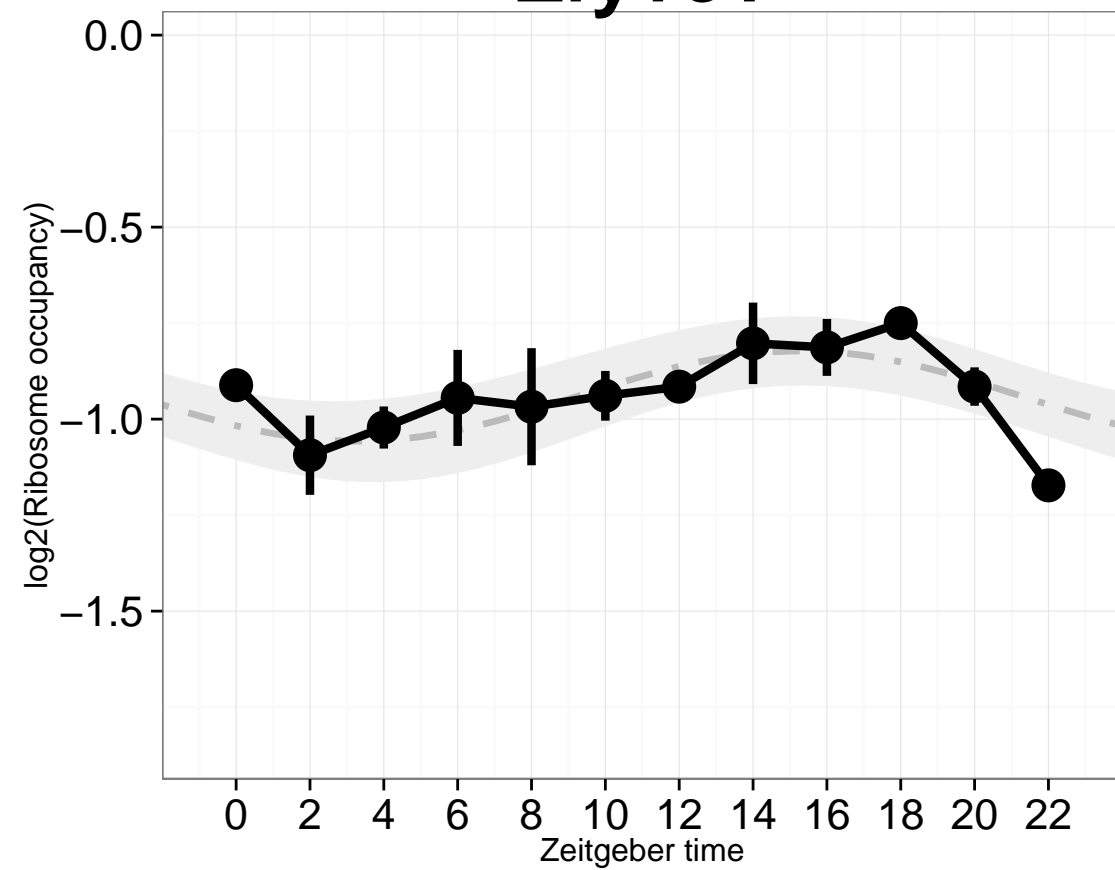

Supplement: SuppDataset_1.zip [file Zfyve1_set_A.pdf › Supplemental Dataset 1/A-mRNA_nonrhyth_translation_nonrhyth/Zfyve1_set_A.pdf]

# Zfyve20

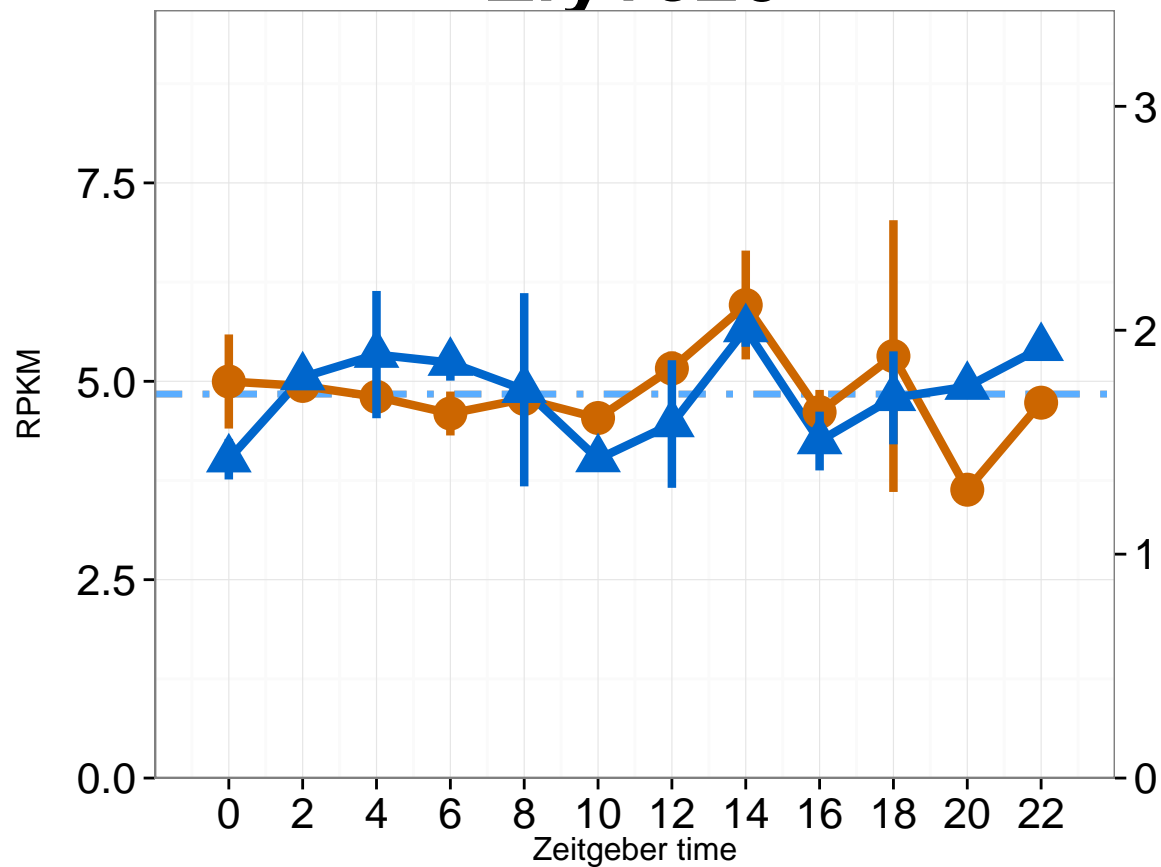

# Zfyve20

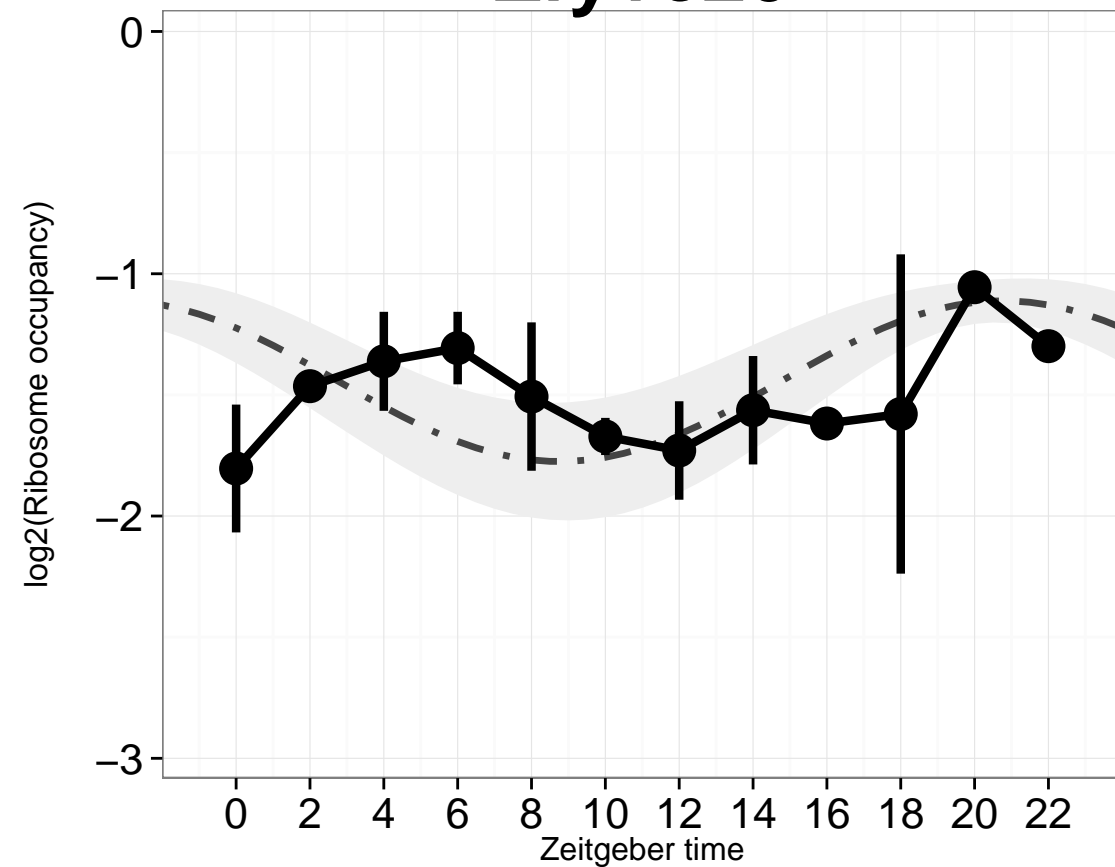

Supplement: SuppDataset_1.zip [file Zfyve20_set_A.pdf › Supplemental Dataset 1/A-mRNA_nonrhyth_translation_nonrhyth/Zfyve20_set_A.pdf]

# Zfyve21

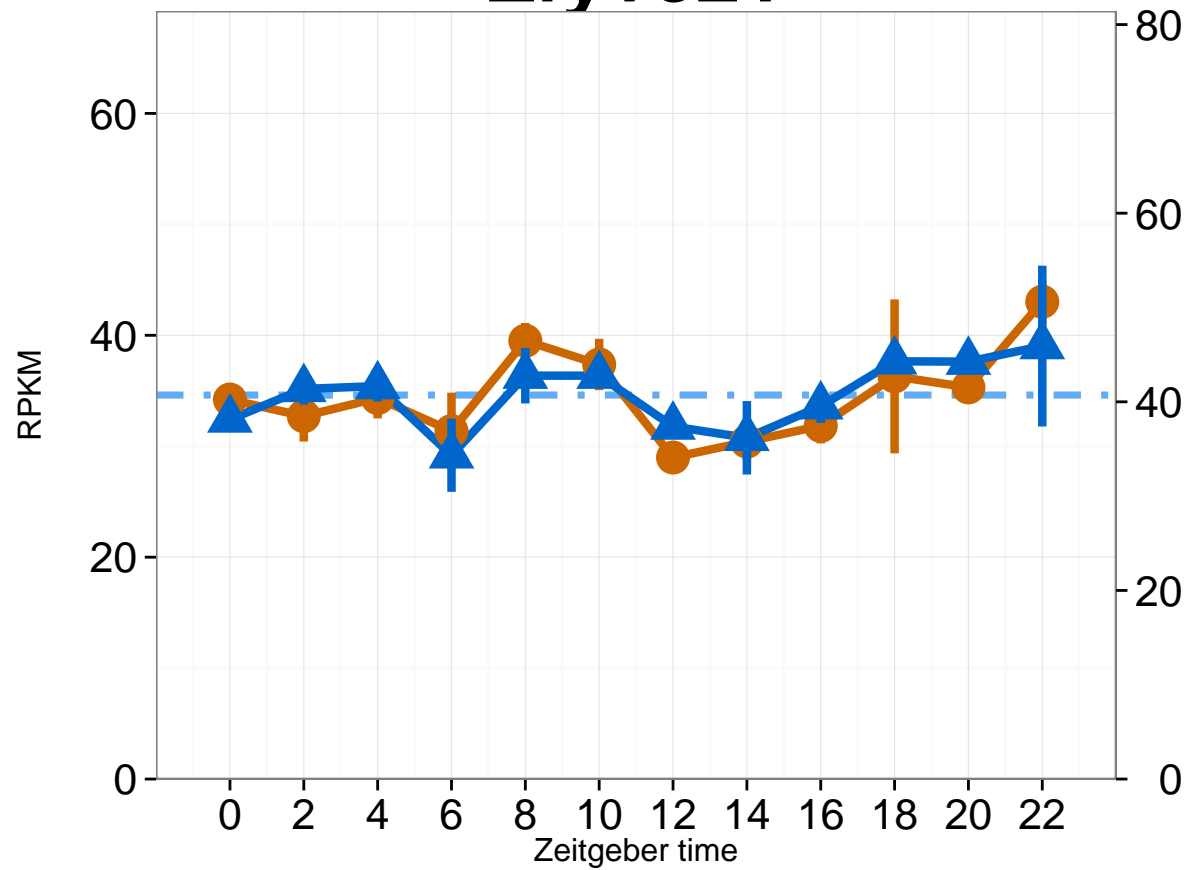

# Zfyve21

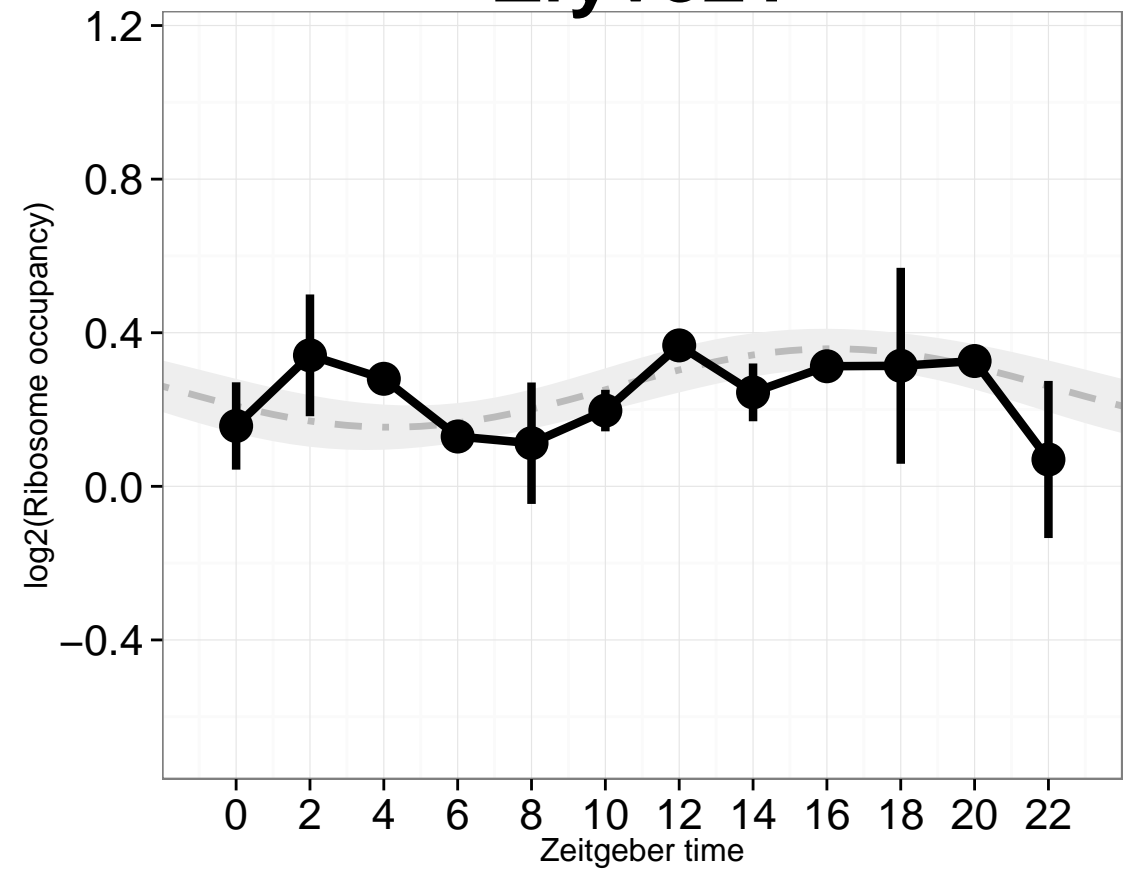

Supplement: SuppDataset_1.zip [file Zfyve21_set_A.pdf › Supplemental Dataset 1/A-mRNA_nonrhyth_translation_nonrhyth/Zfyve21_set_A.pdf]

## Zfyve26

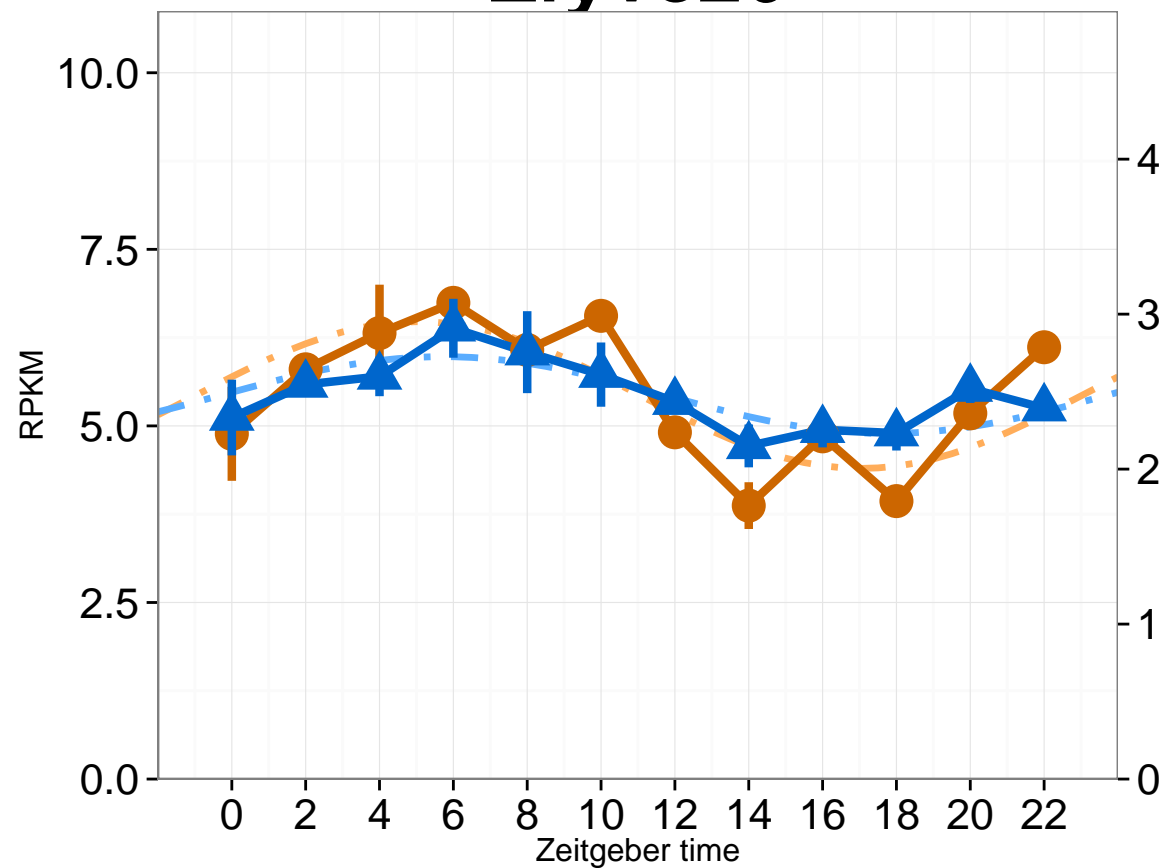

## Zfyve26

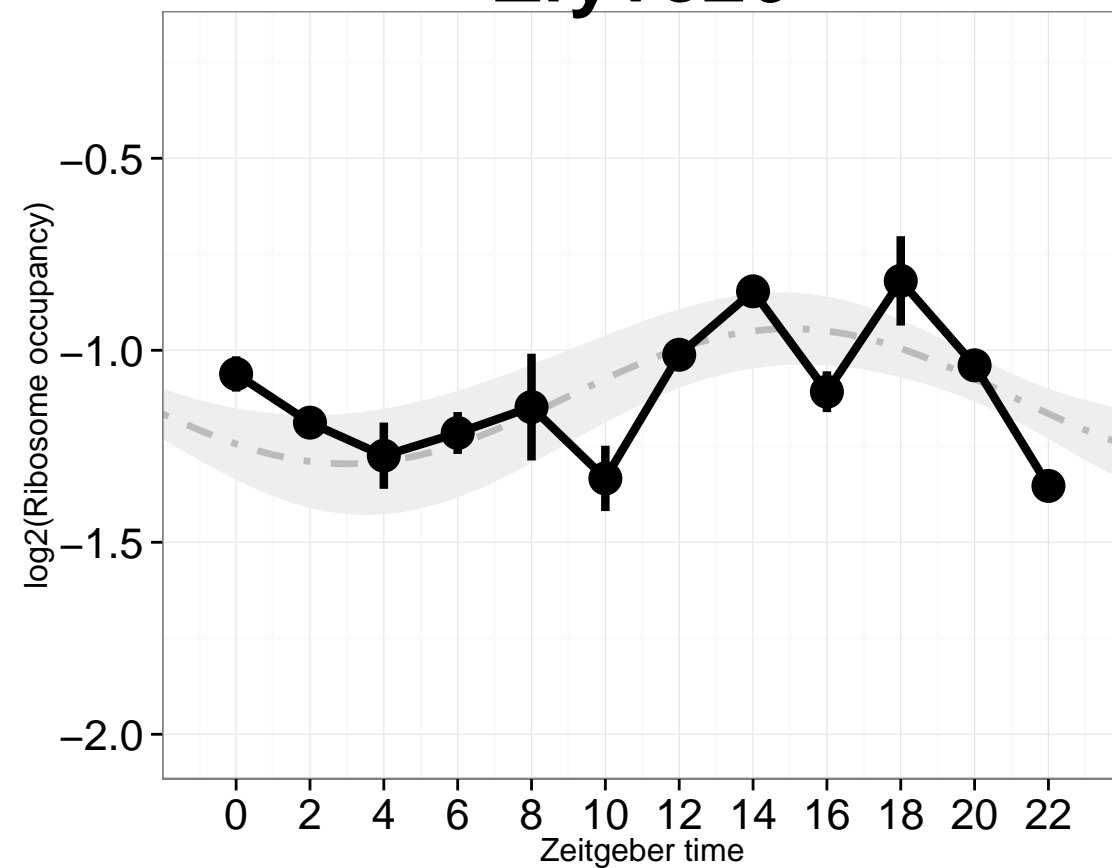

Supplement: SuppDataset_1.zip [file Zfyve26_set_A.pdf › Supplemental Dataset 1/A-mRNA_nonrhyth_translation_nonrhyth/Zfyve26_set_A.pdf]

# Zgpat

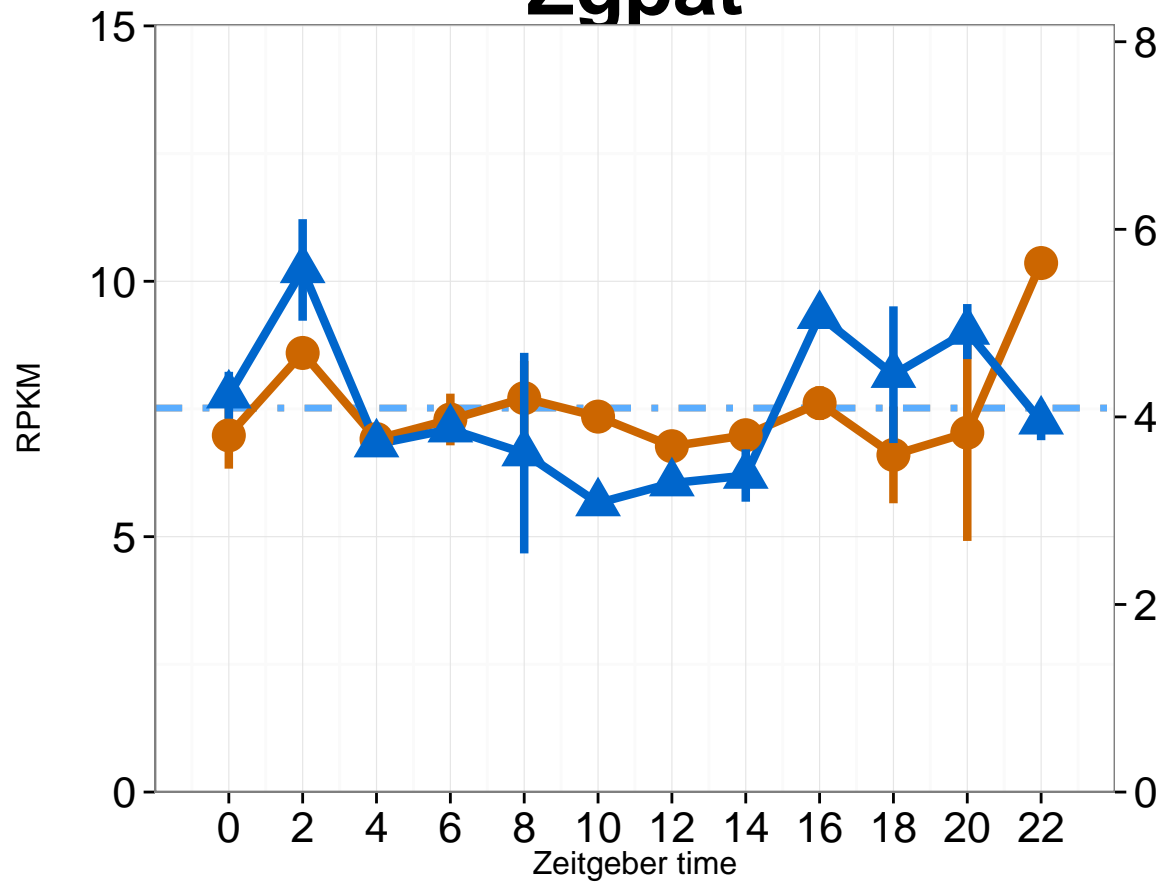

# Zgpat

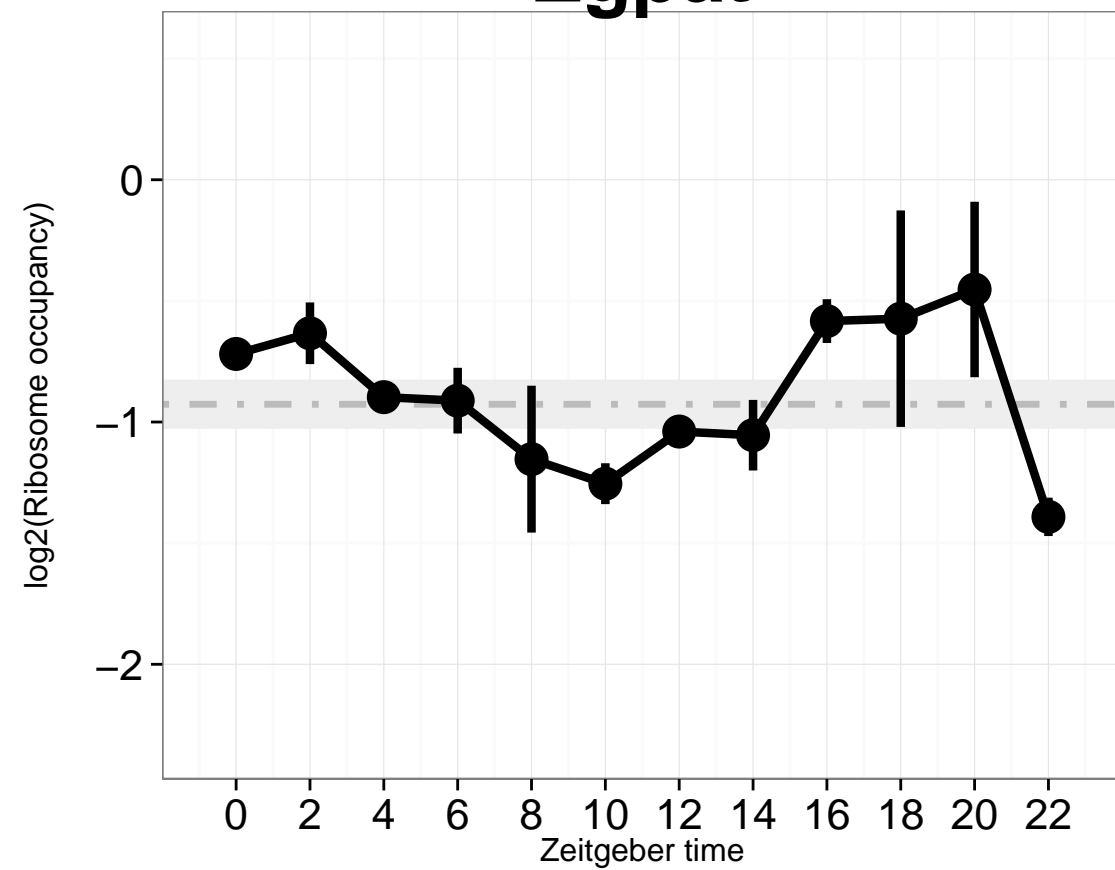

Supplement: SuppDataset_1.zip [file Zgpat_set_A.pdf › Supplemental Dataset 1/A-mRNA_nonrhyth_translation_nonrhyth/Zgpat_set_A.pdf]

## Zhx1

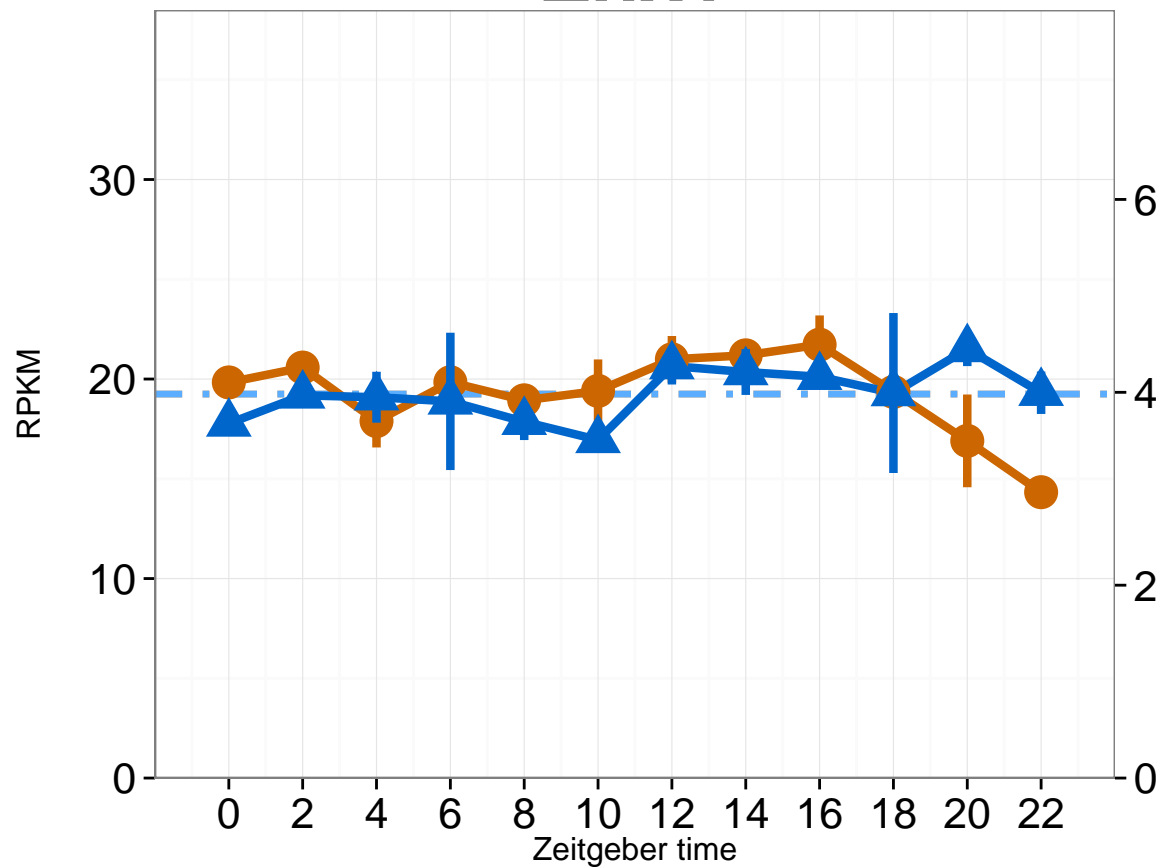

## Zhx1

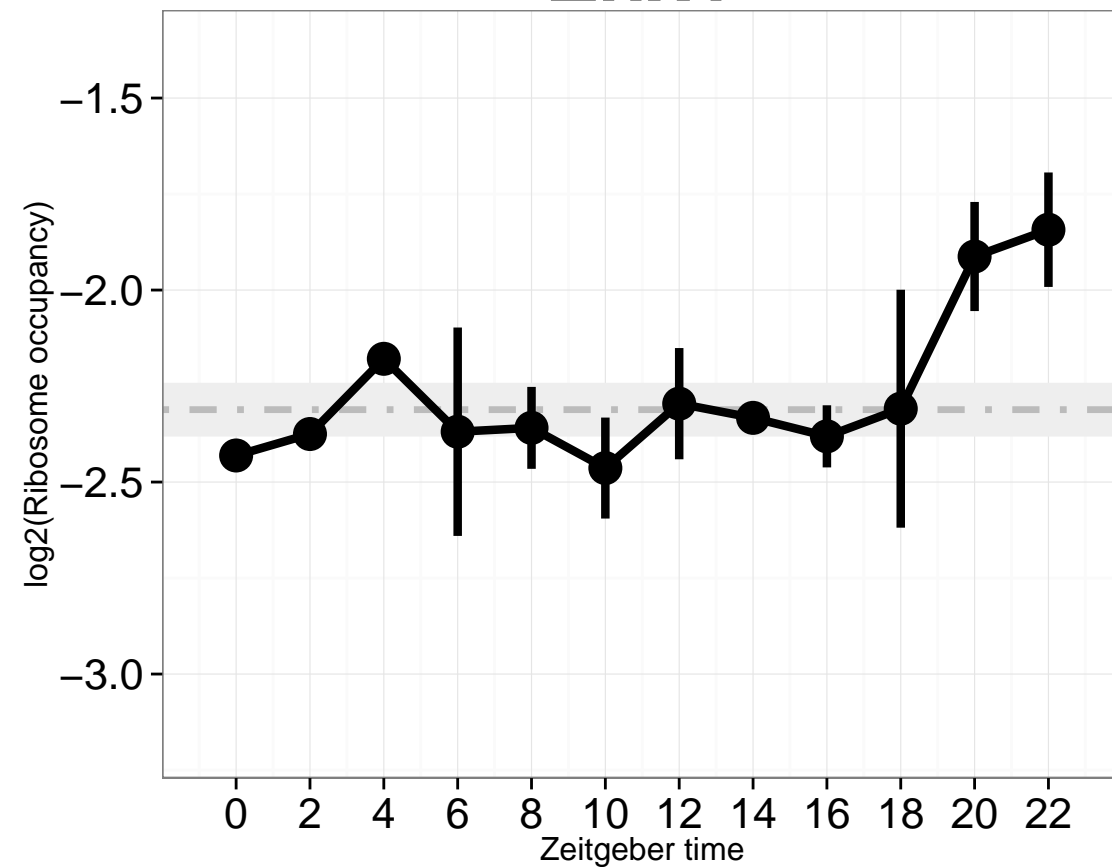

Supplement: SuppDataset_1.zip [file Zhx1_set_A.pdf › Supplemental Dataset 1/A-mRNA_nonrhyth_translation_nonrhyth/Zhx1_set_A.pdf]

## Zhx2

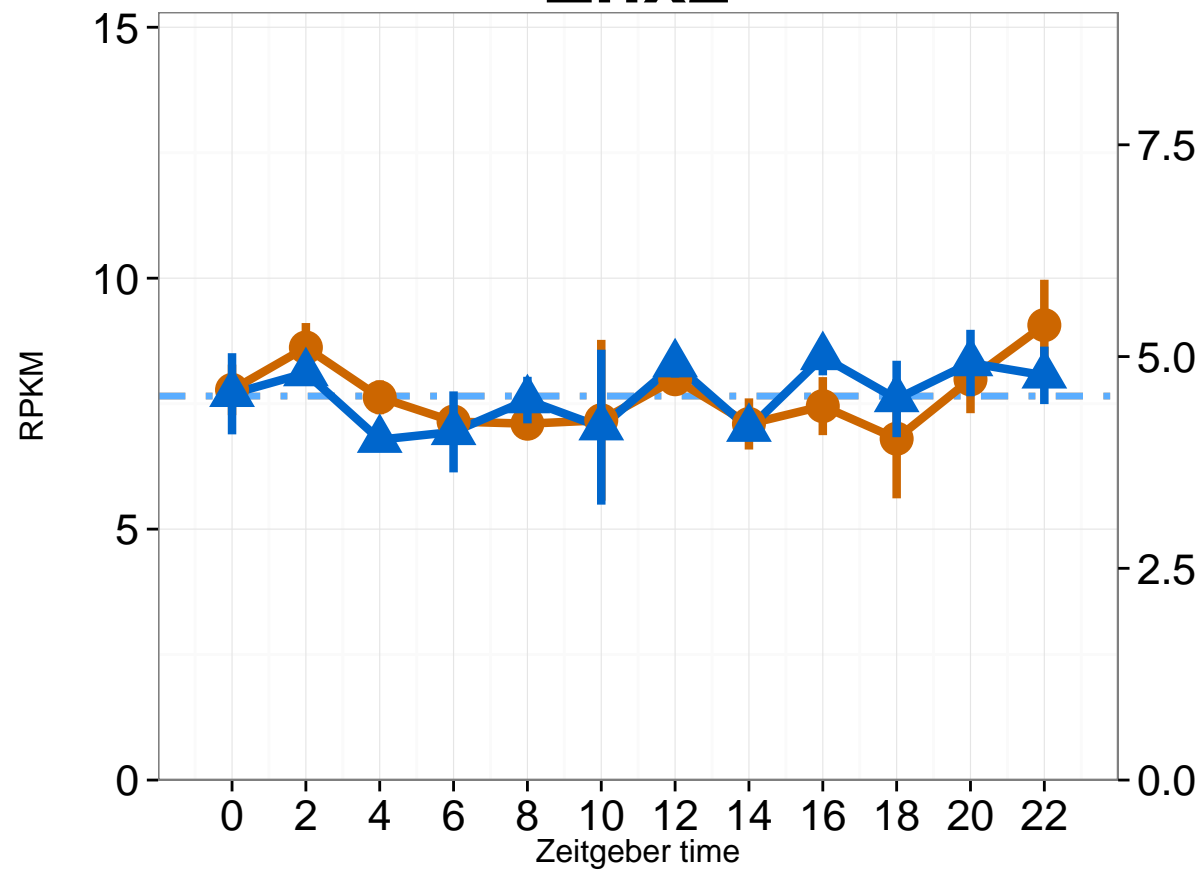

## Zhx2

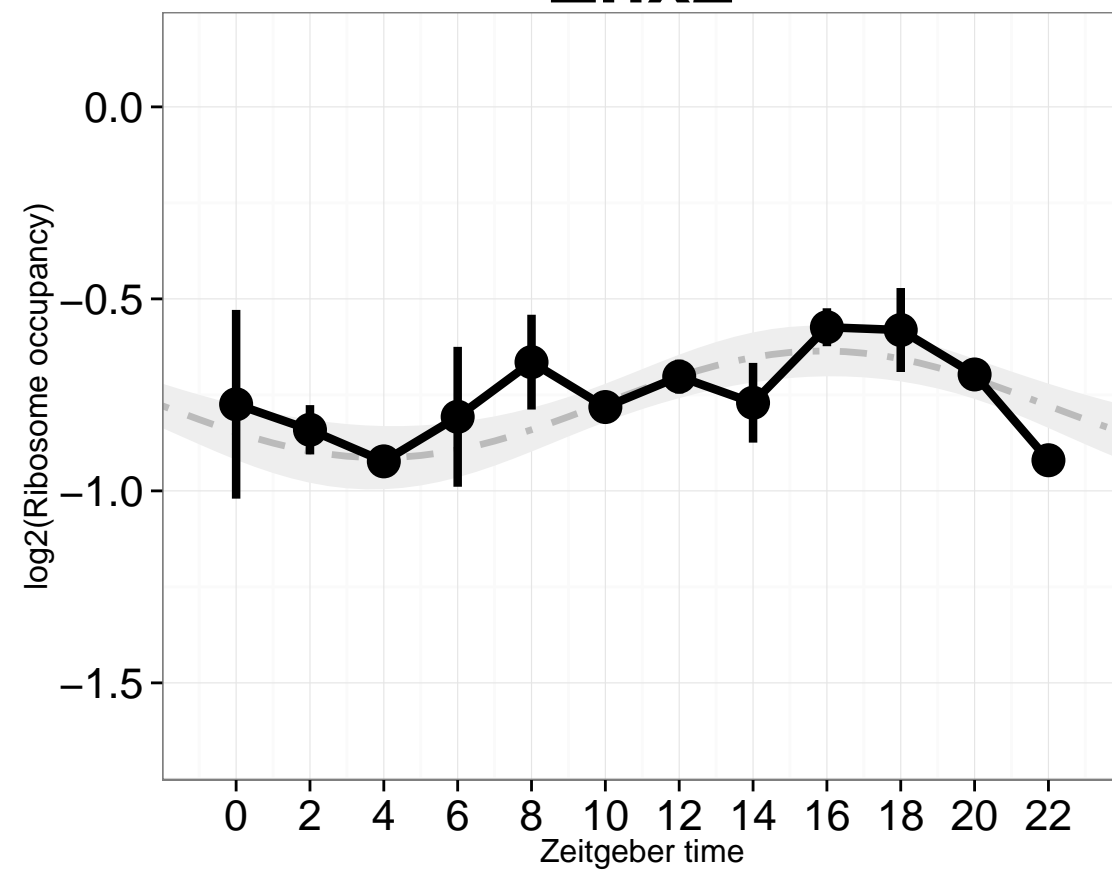

Supplement: SuppDataset_1.zip [file Zhx2_set_A.pdf › Supplemental Dataset 1/A-mRNA_nonrhyth_translation_nonrhyth/Zhx2_set_A.pdf]

# Zhx3

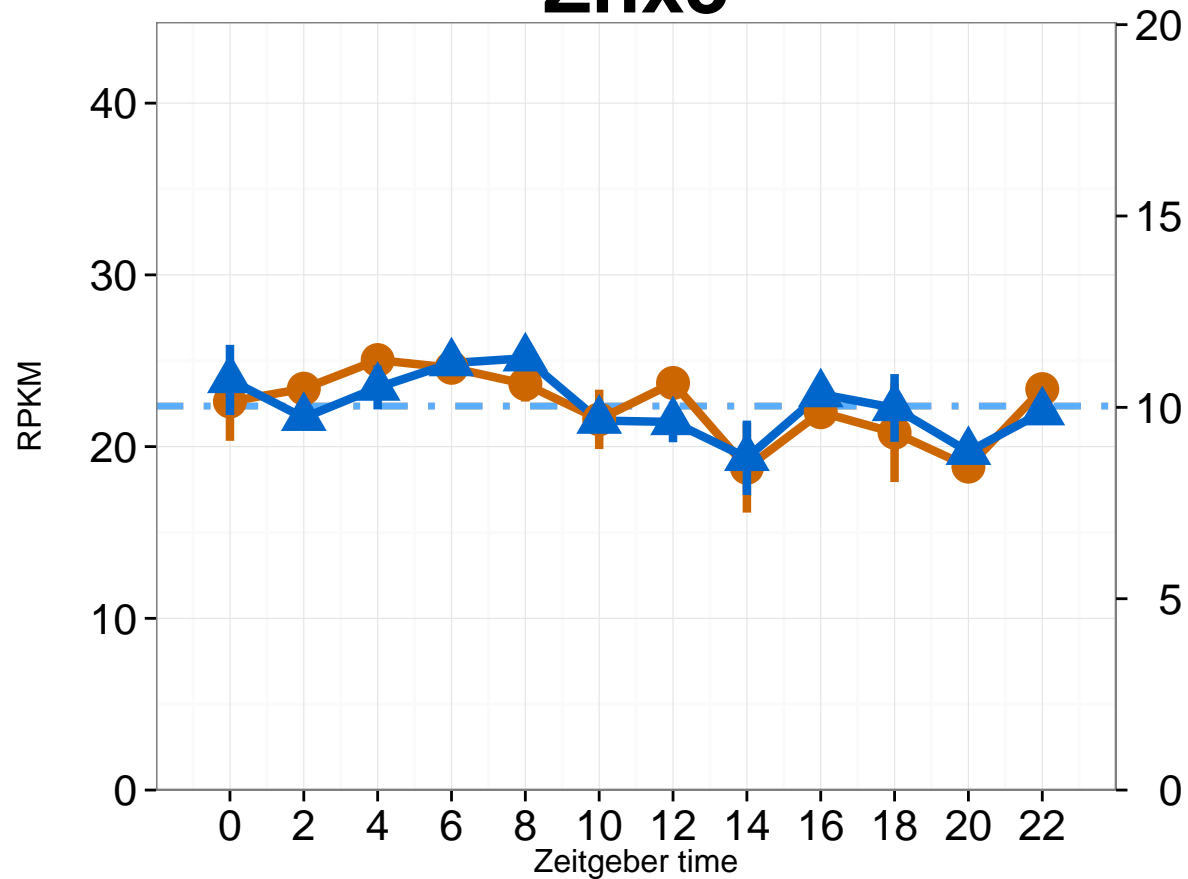

# Zhx3

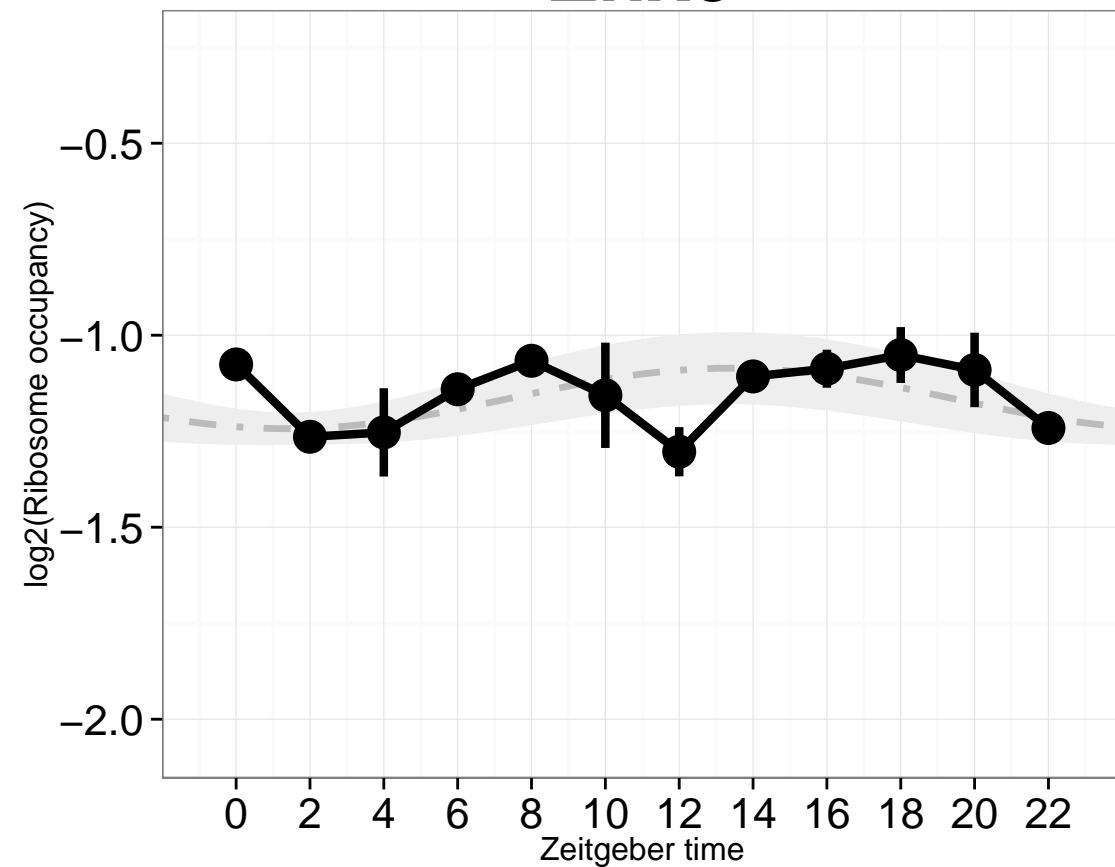

Supplement: SuppDataset_1.zip [file Zhx3_set_A.pdf › Supplemental Dataset 1/A-mRNA_nonrhyth_translation_nonrhyth/Zhx3_set_A.pdf]

# Zkscan14

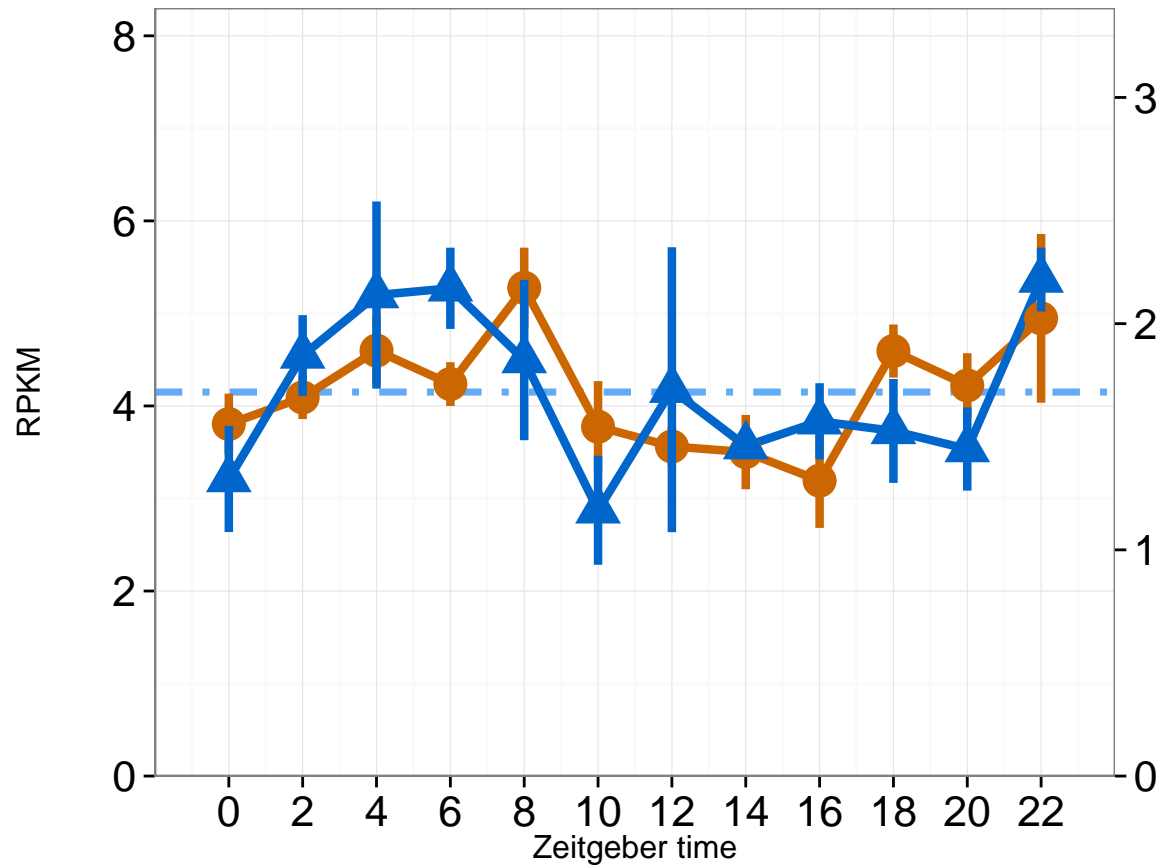

# Zkscan14

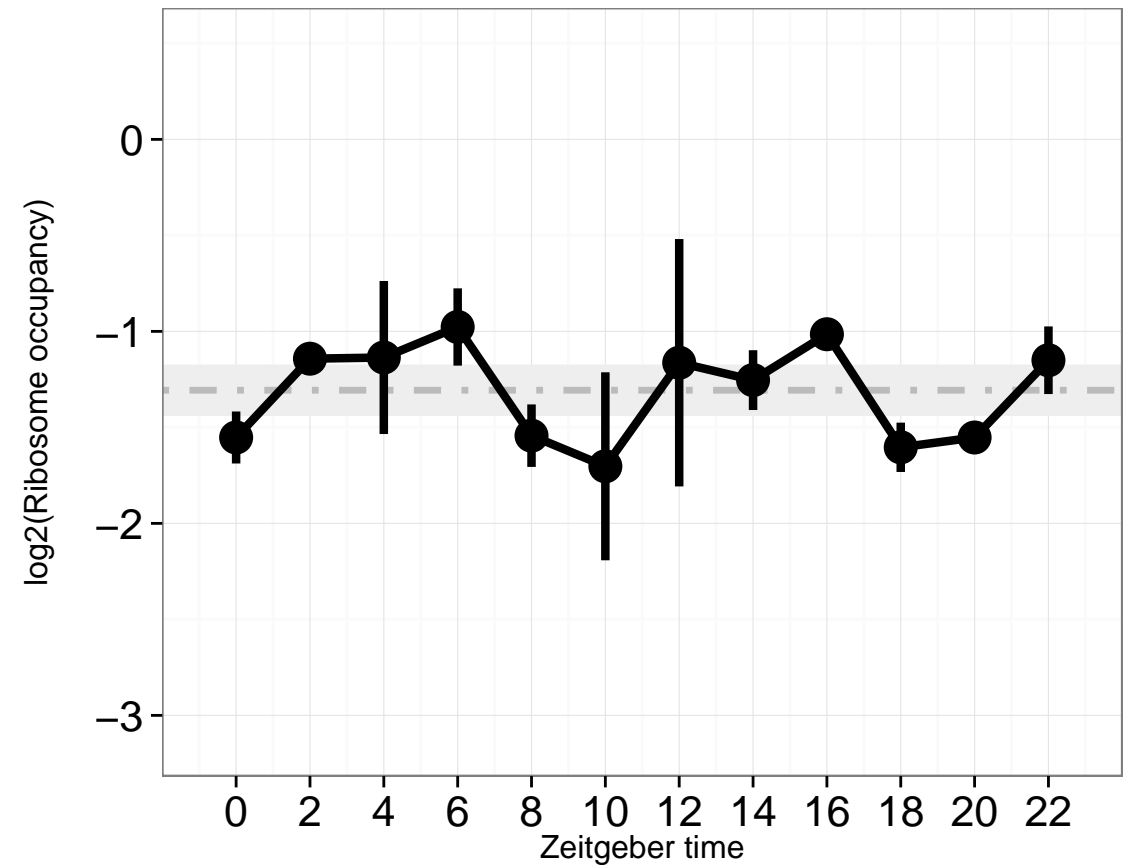

Supplement: SuppDataset_1.zip [file Zkscan14_set_A.pdf › Supplemental Dataset 1/A-mRNA_nonrhyth_translation_nonrhyth/Zkscan14_set_A.pdf]

**Zkscan4 TR**

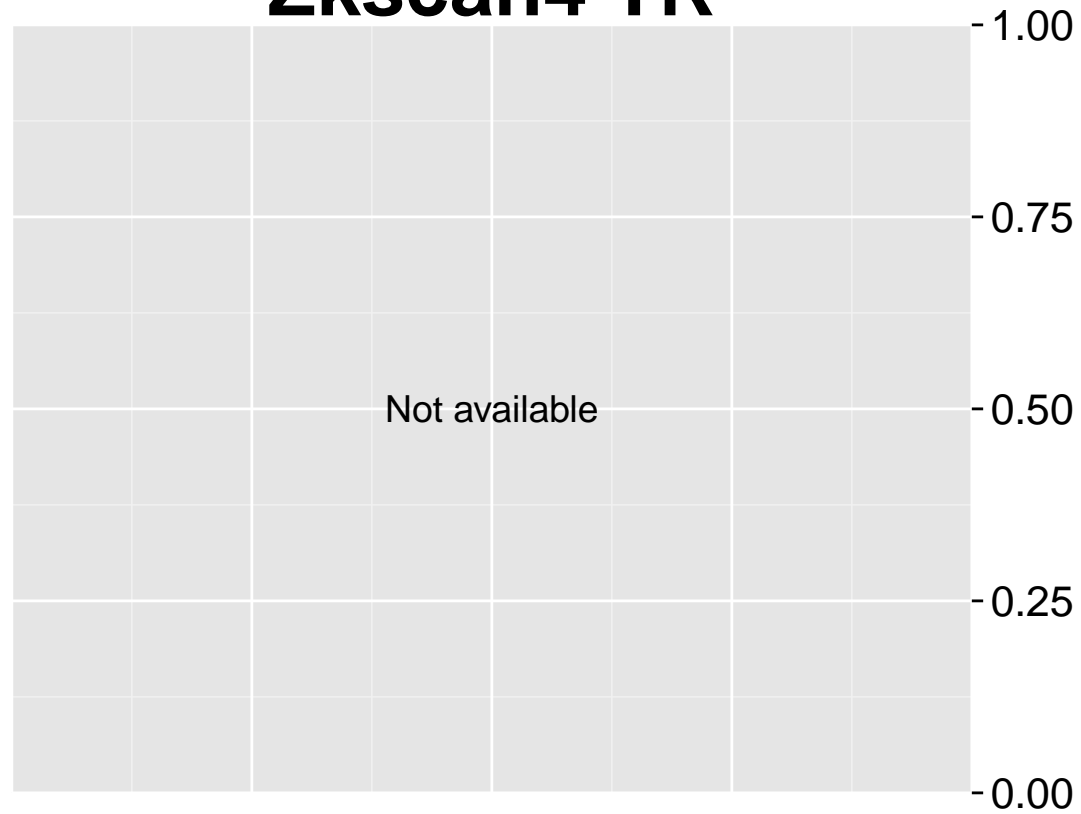

**Zkscan4 log2(Ribosome occupanc**

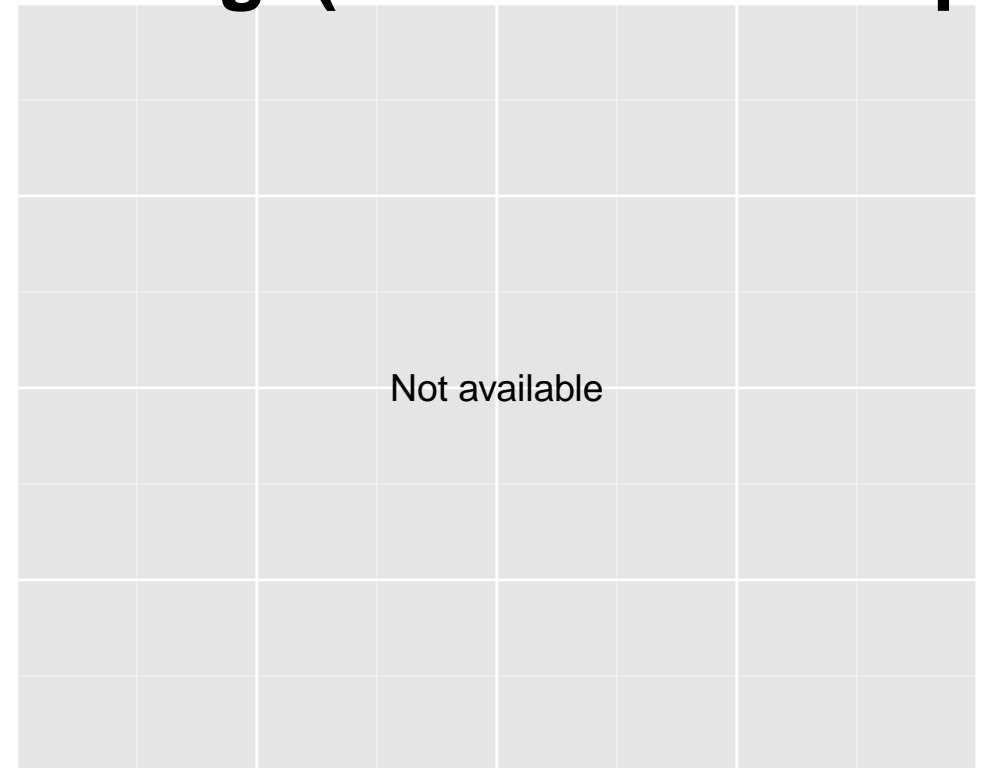

Supplement: SuppDataset_1.zip [file Zkscan4_set_A.pdf › Supplemental Dataset 1/A-mRNA_nonrhyth_translation_nonrhyth/Zkscan4_set_A.pdf]

## Zkscan5

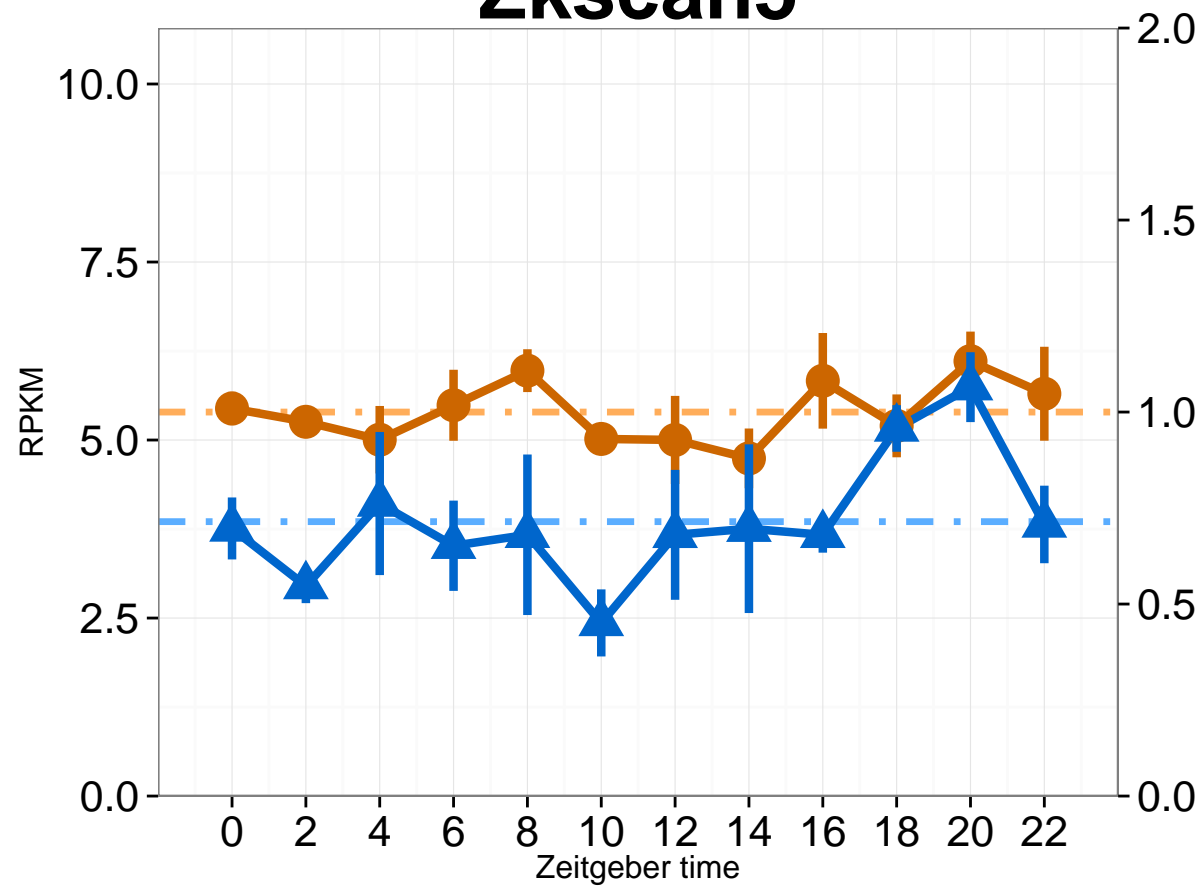

## Zkscan5

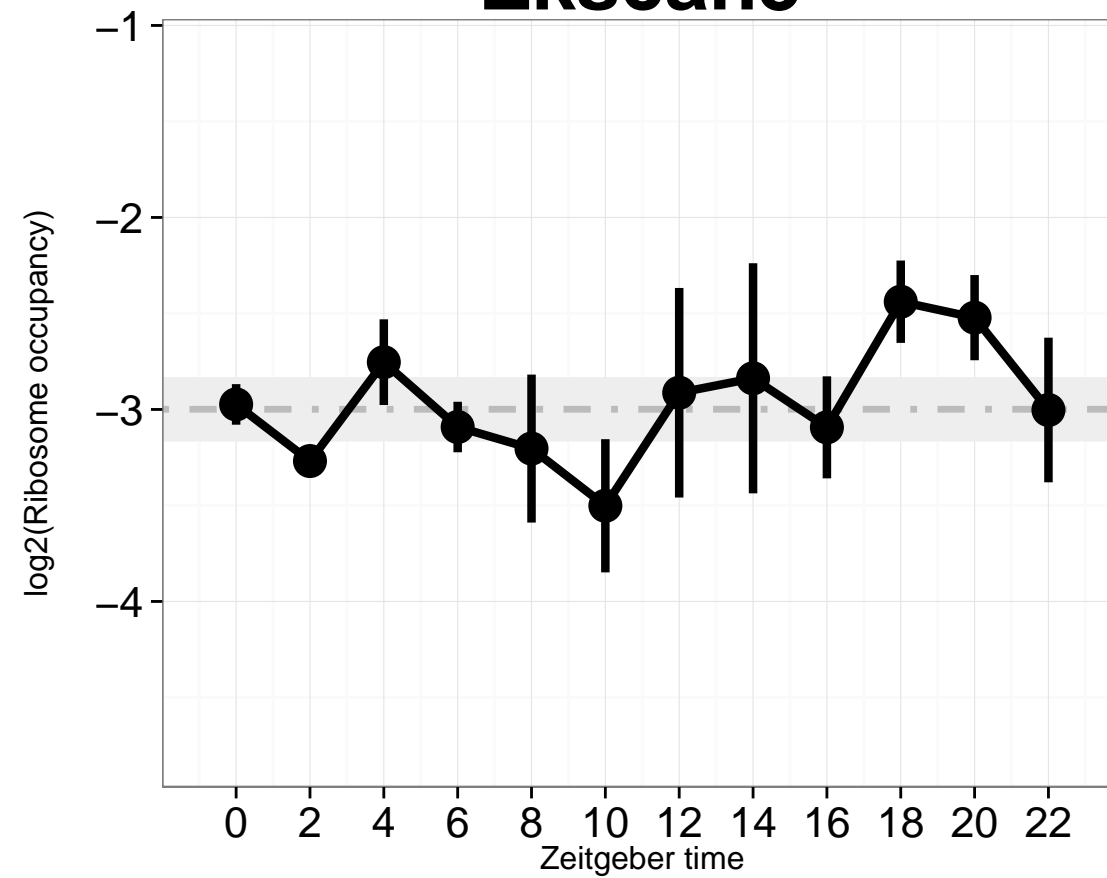

Supplement: SuppDataset_1.zip [file Zkscan5_set_A.pdf › Supplemental Dataset 1/A-mRNA_nonrhyth_translation_nonrhyth/Zkscan5_set_A.pdf]

## Zkscan6

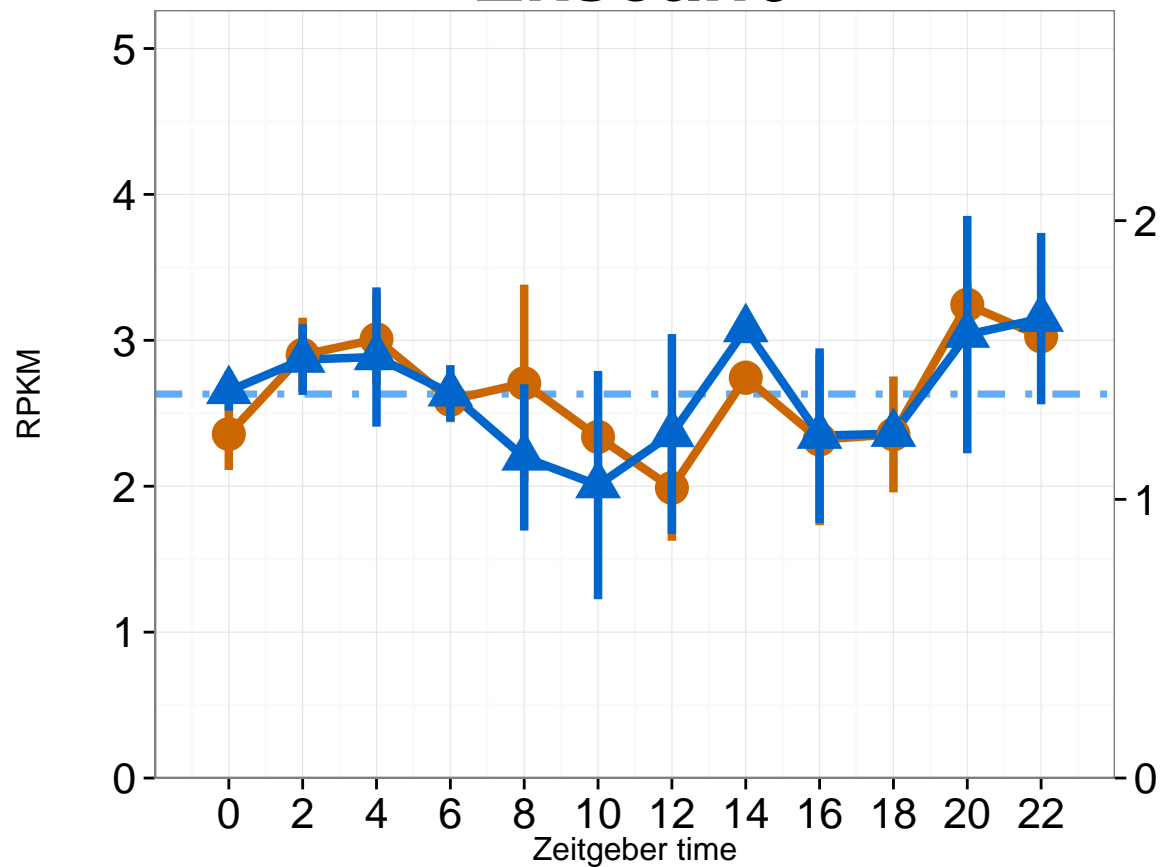

## Zkscan6

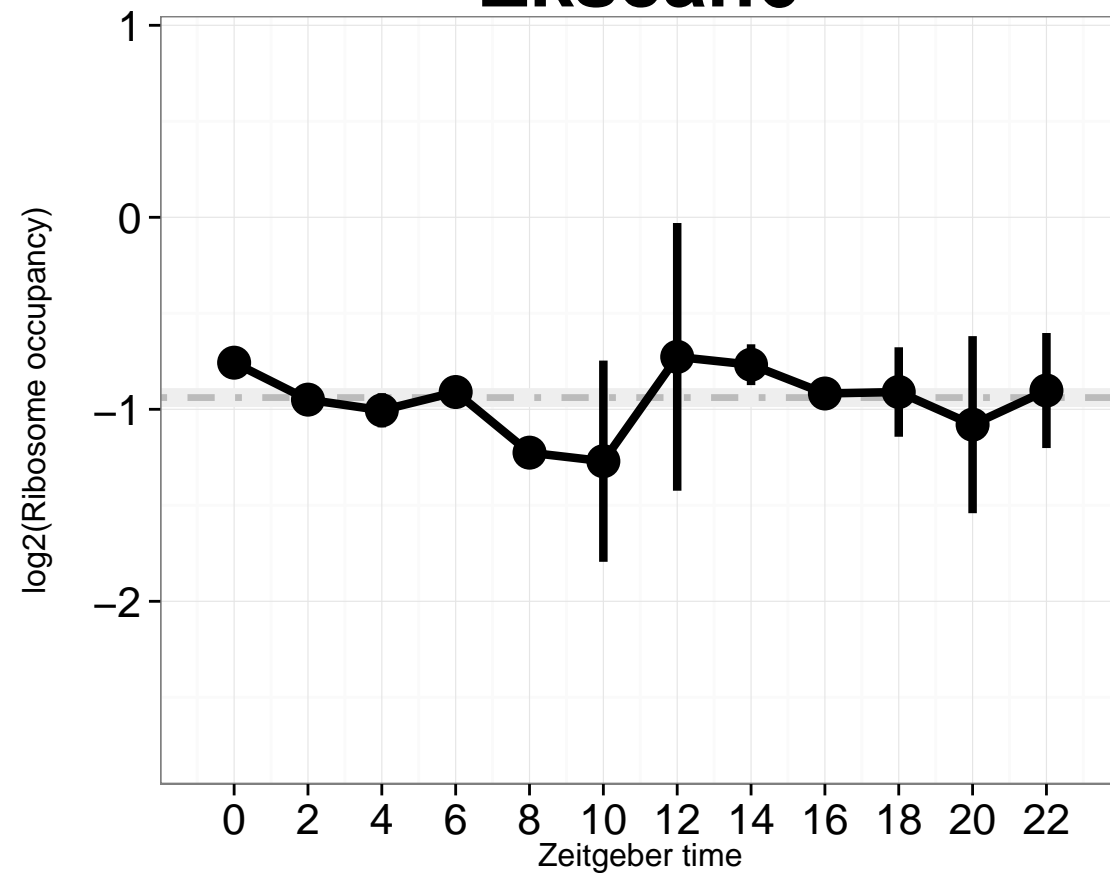

Supplement: SuppDataset_1.zip [file Zkscan6_set_A.pdf › Supplemental Dataset 1/A-mRNA_nonrhyth_translation_nonrhyth/Zkscan6_set_A.pdf]

## Zkscan7

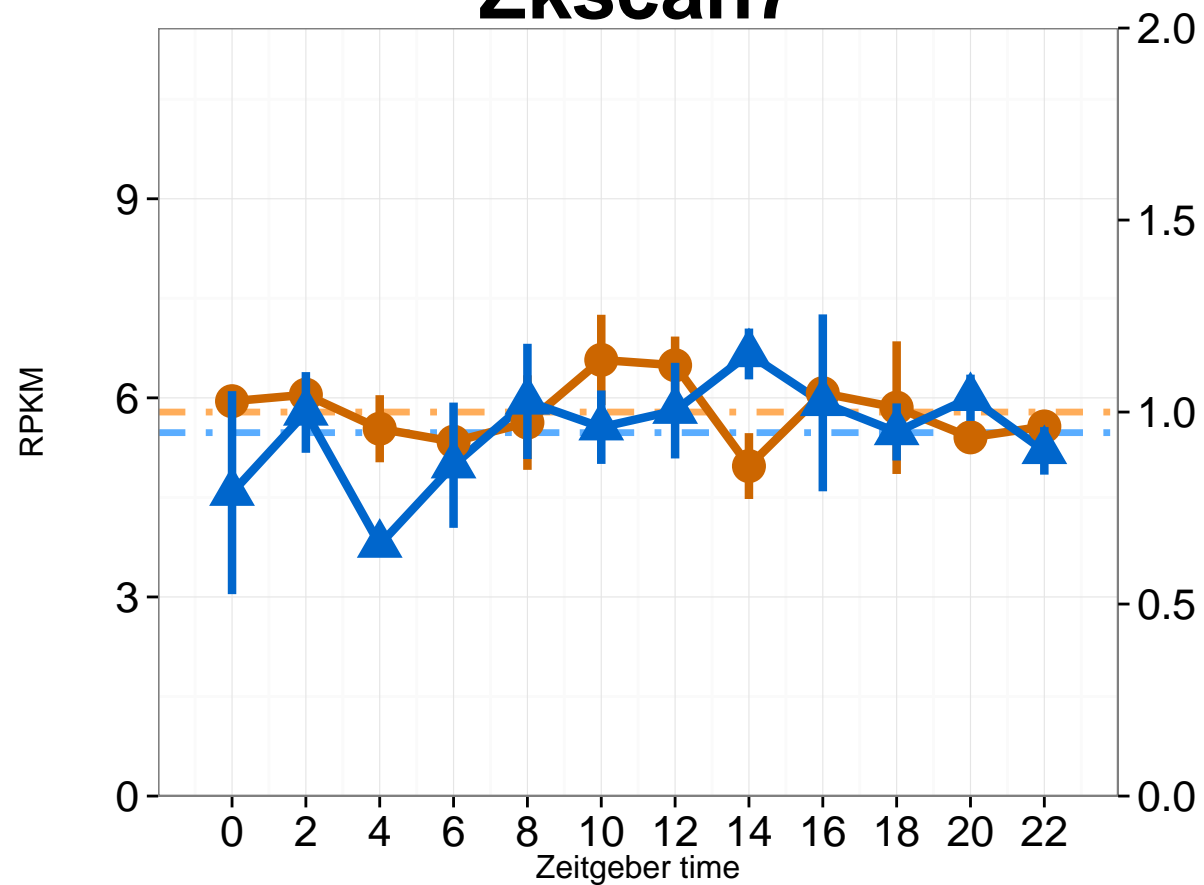

## Zkscan7

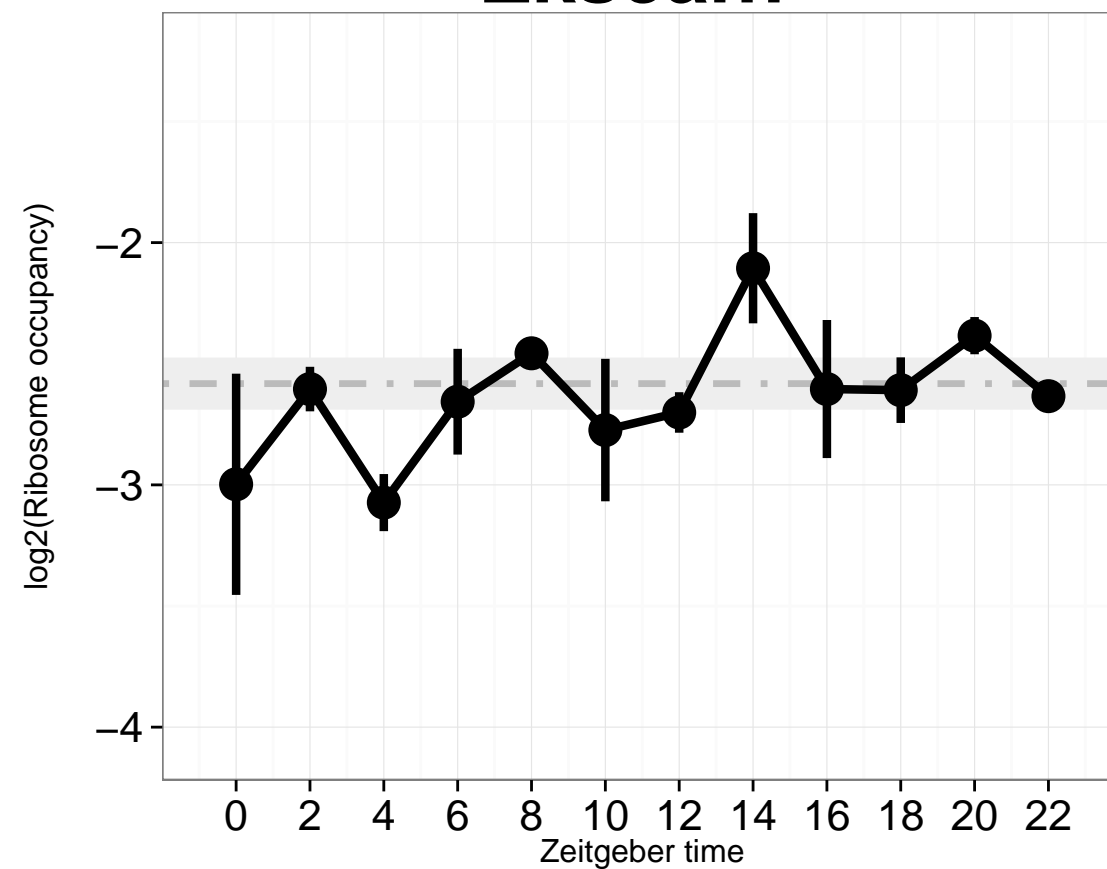

Supplement: SuppDataset_1.zip [file Zkscan7_set_A.pdf › Supplemental Dataset 1/A-mRNA_nonrhyth_translation_nonrhyth/Zkscan7_set_A.pdf]

## Zkscan8

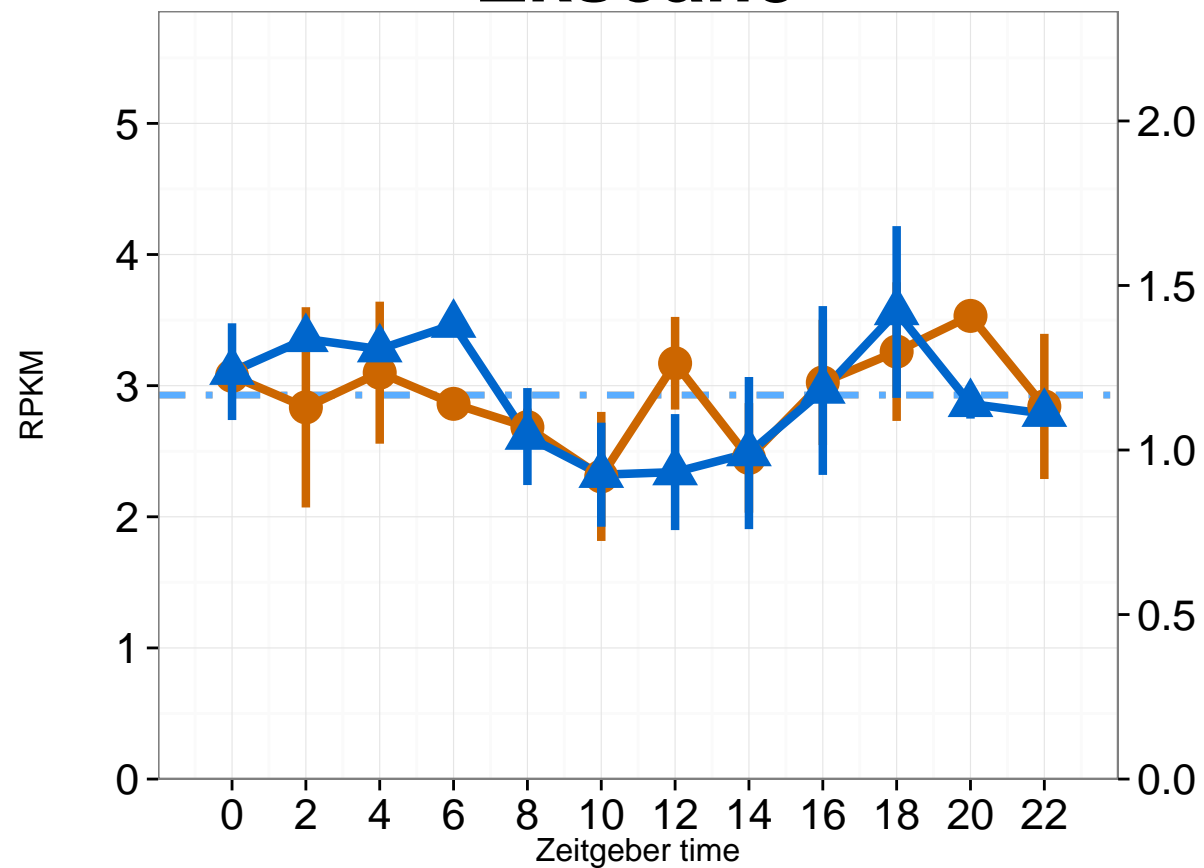

## Zkscan8

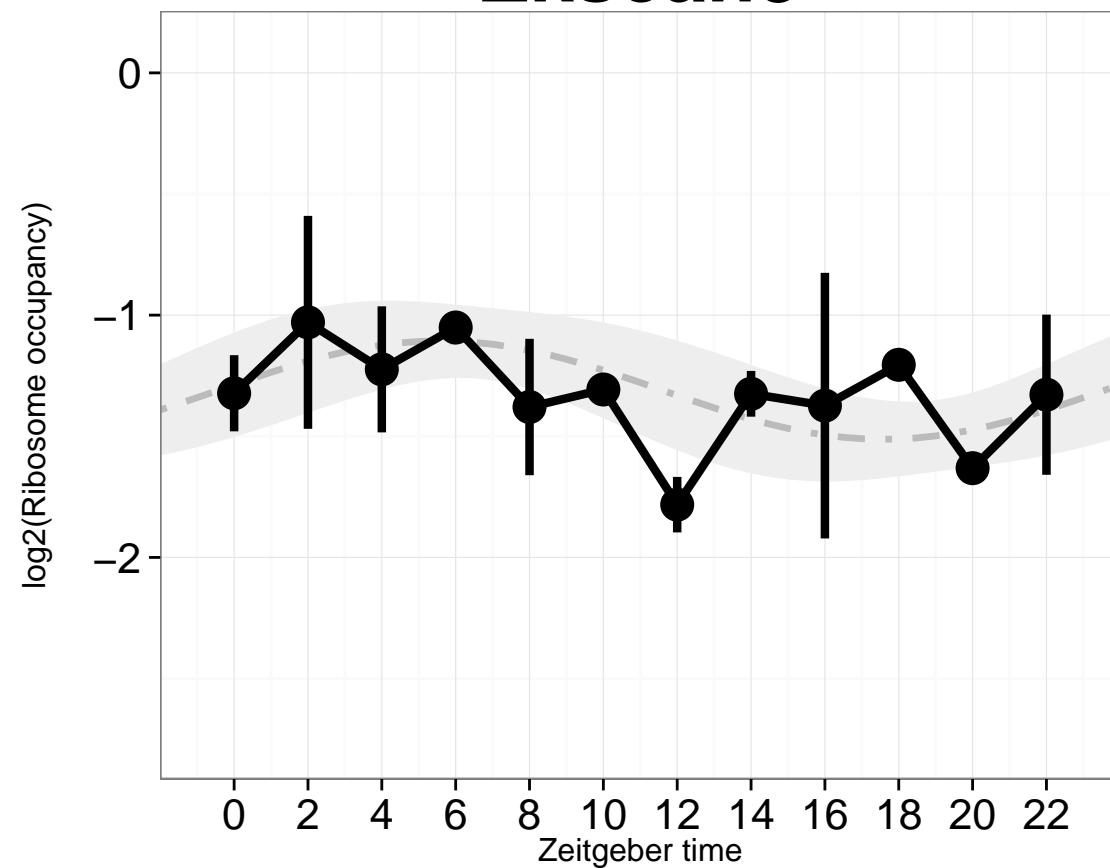

Supplement: SuppDataset_1.zip [file Zkscan8_set_A.pdf › Supplemental Dataset 1/A-mRNA_nonrhyth_translation_nonrhyth/Zkscan8_set_A.pdf]

## Zmat2

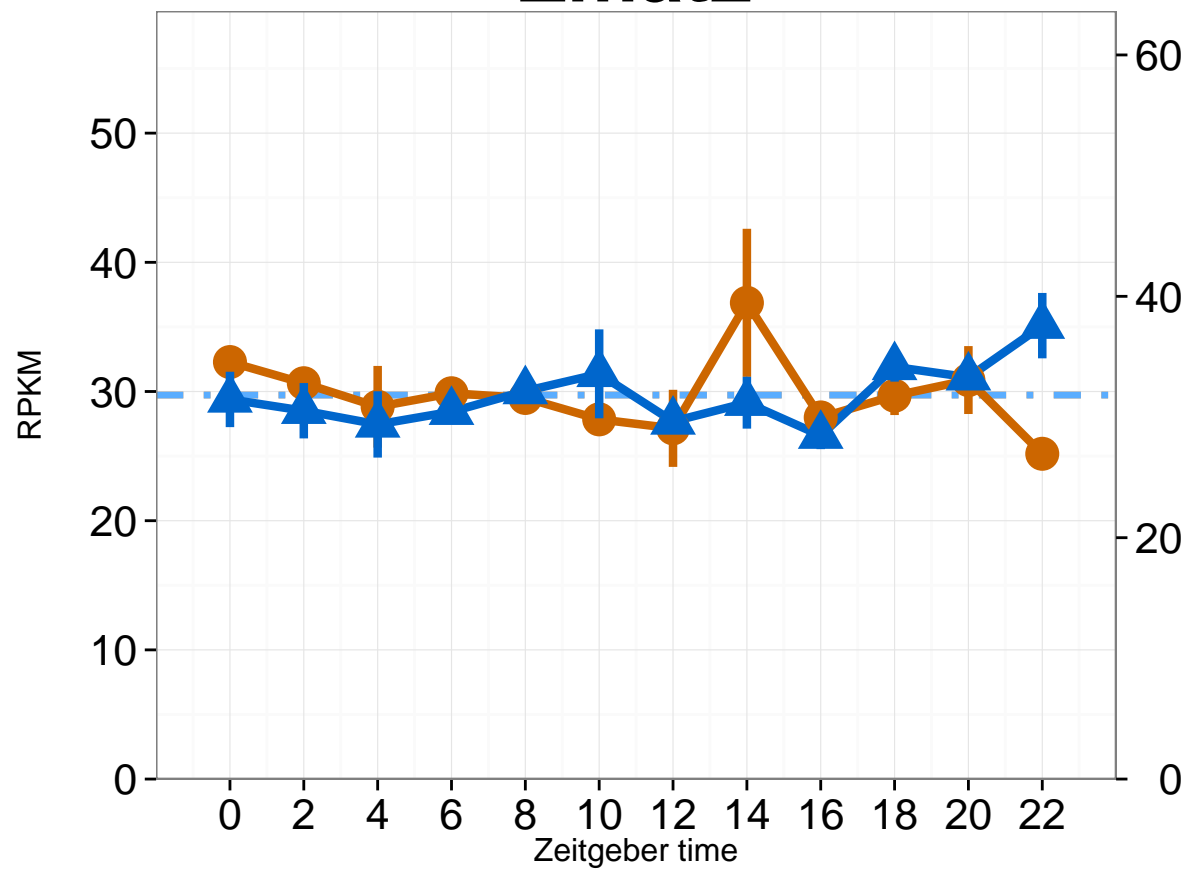

## Zmat2

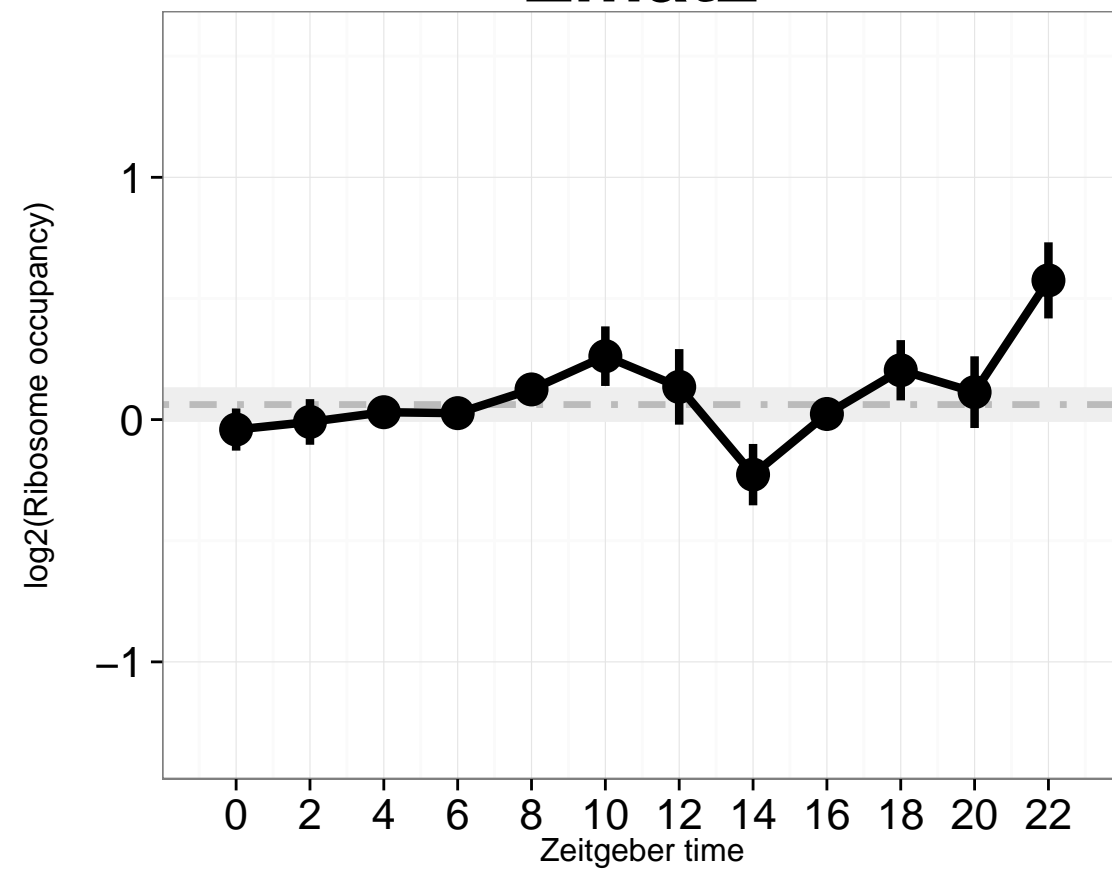

Supplement: SuppDataset_1.zip [file Zmat2_set_A.pdf › Supplemental Dataset 1/A-mRNA_nonrhyth_translation_nonrhyth/Zmat2_set_A.pdf]

# Zmat3

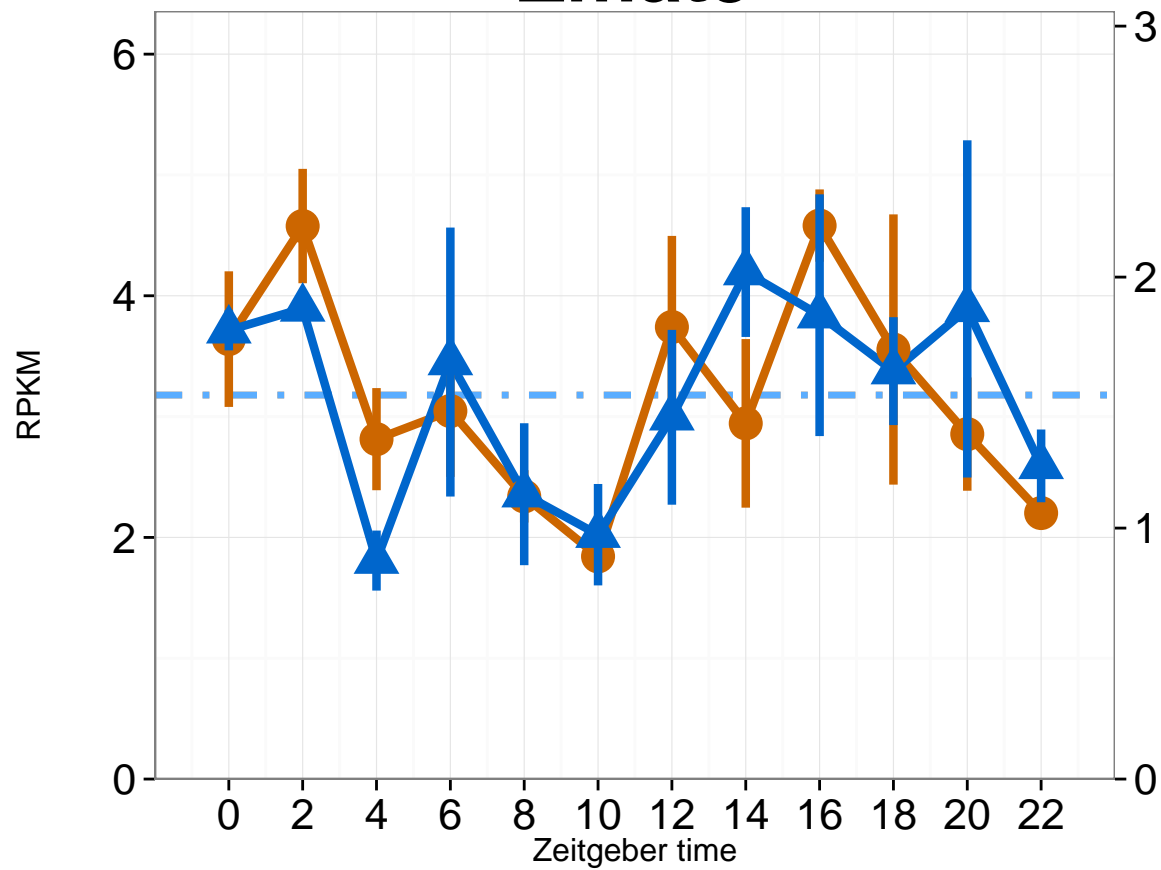

# Zmat3

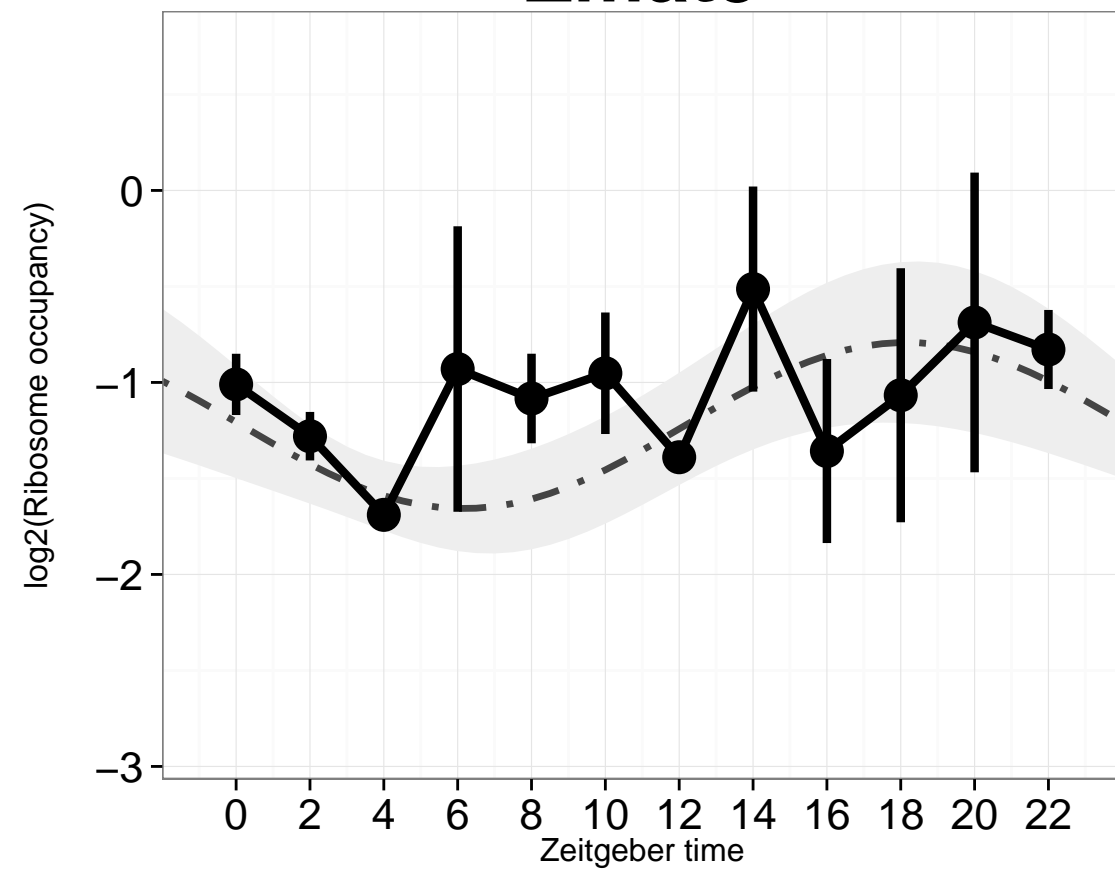

Supplement: SuppDataset_1.zip [file Zmat3_set_A.pdf › Supplemental Dataset 1/A-mRNA_nonrhyth_translation_nonrhyth/Zmat3_set_A.pdf]

# Zmat5

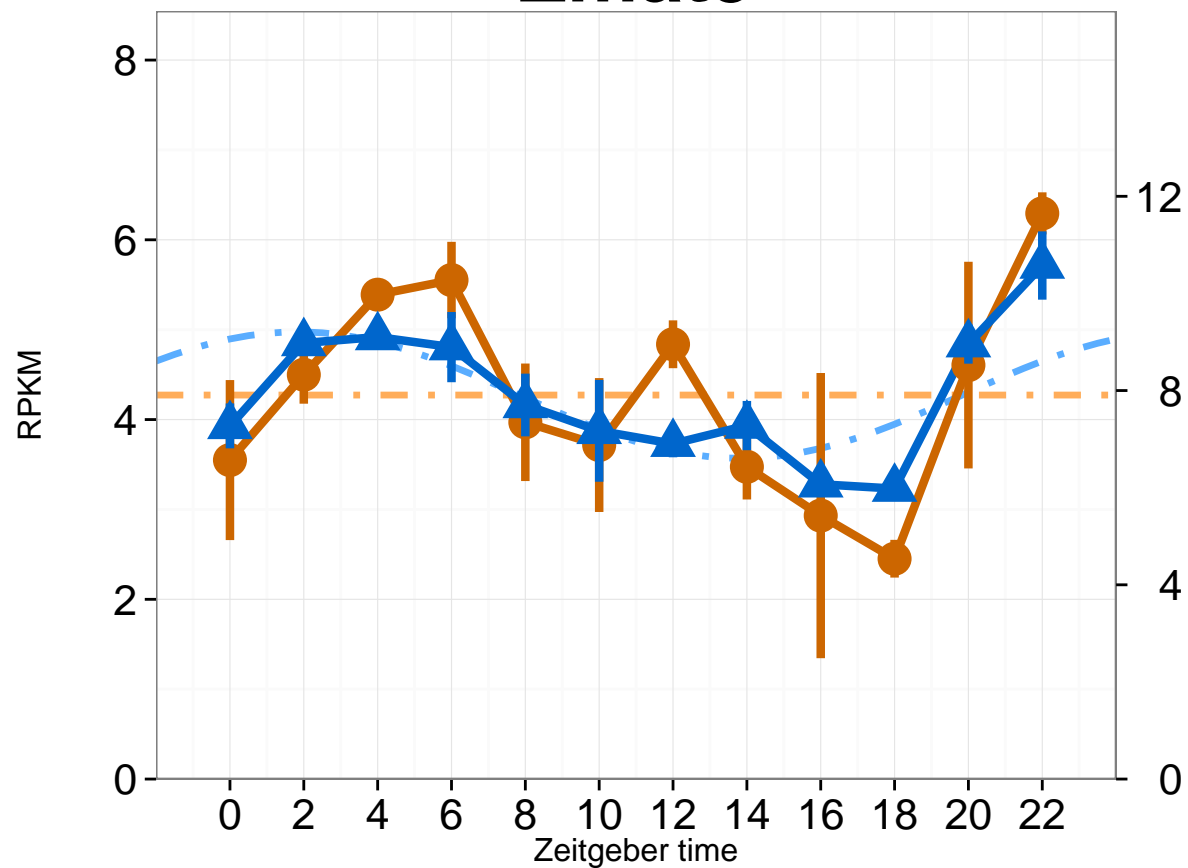

# Zmat5

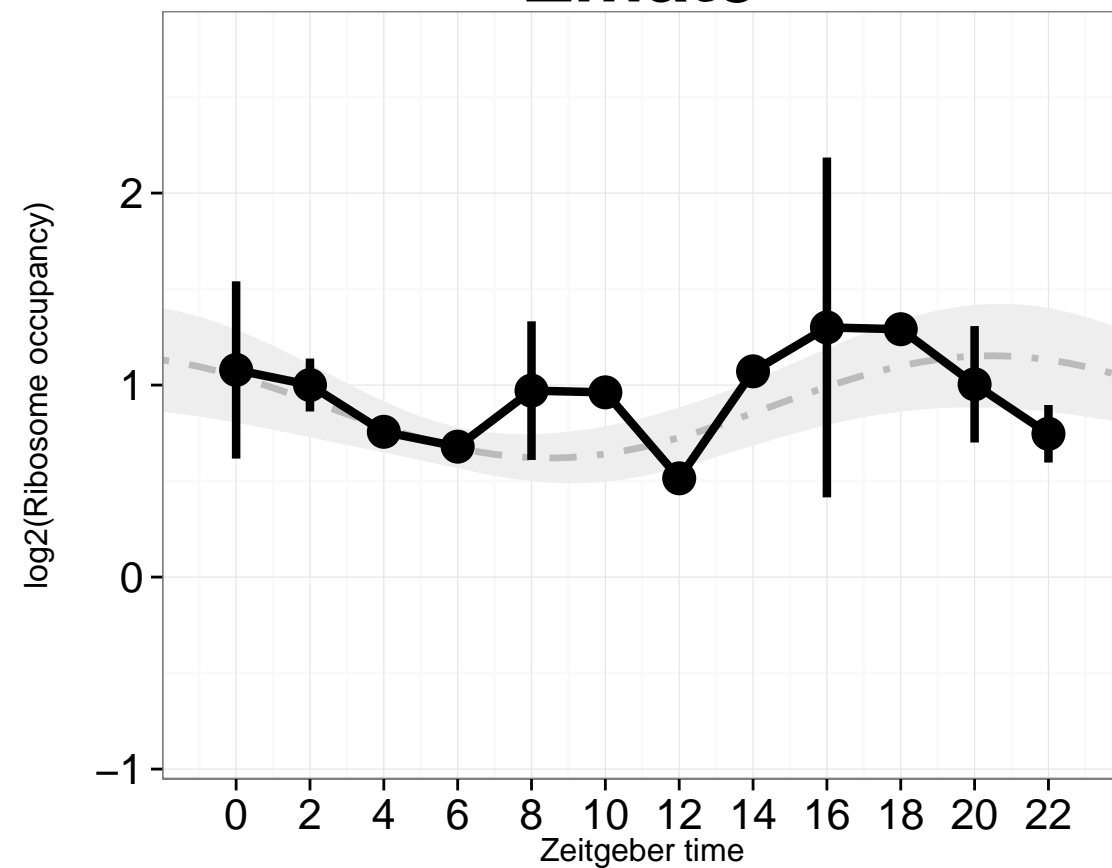

Supplement: SuppDataset_1.zip [file Zmat5_set_A.pdf › Supplemental Dataset 1/A-mRNA_nonrhyth_translation_nonrhyth/Zmat5_set_A.pdf]

## Zmiz2

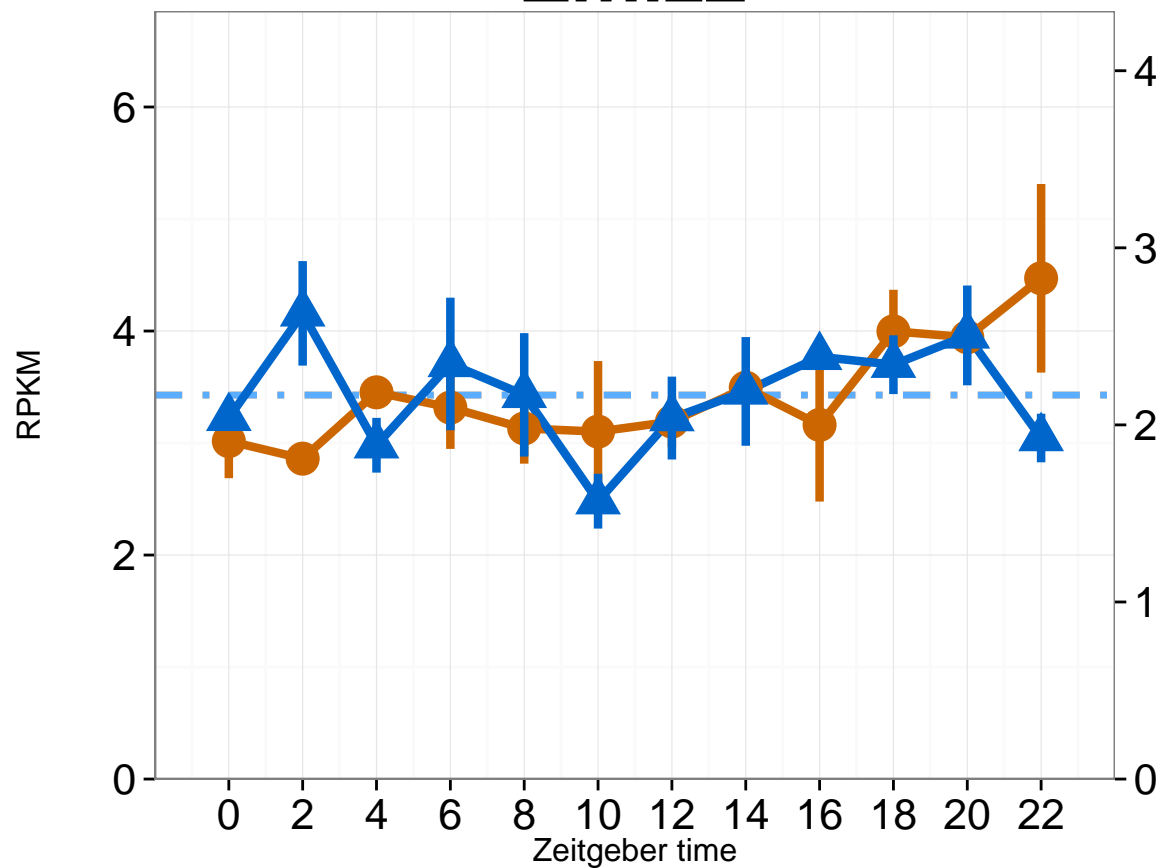

## Zmiz2

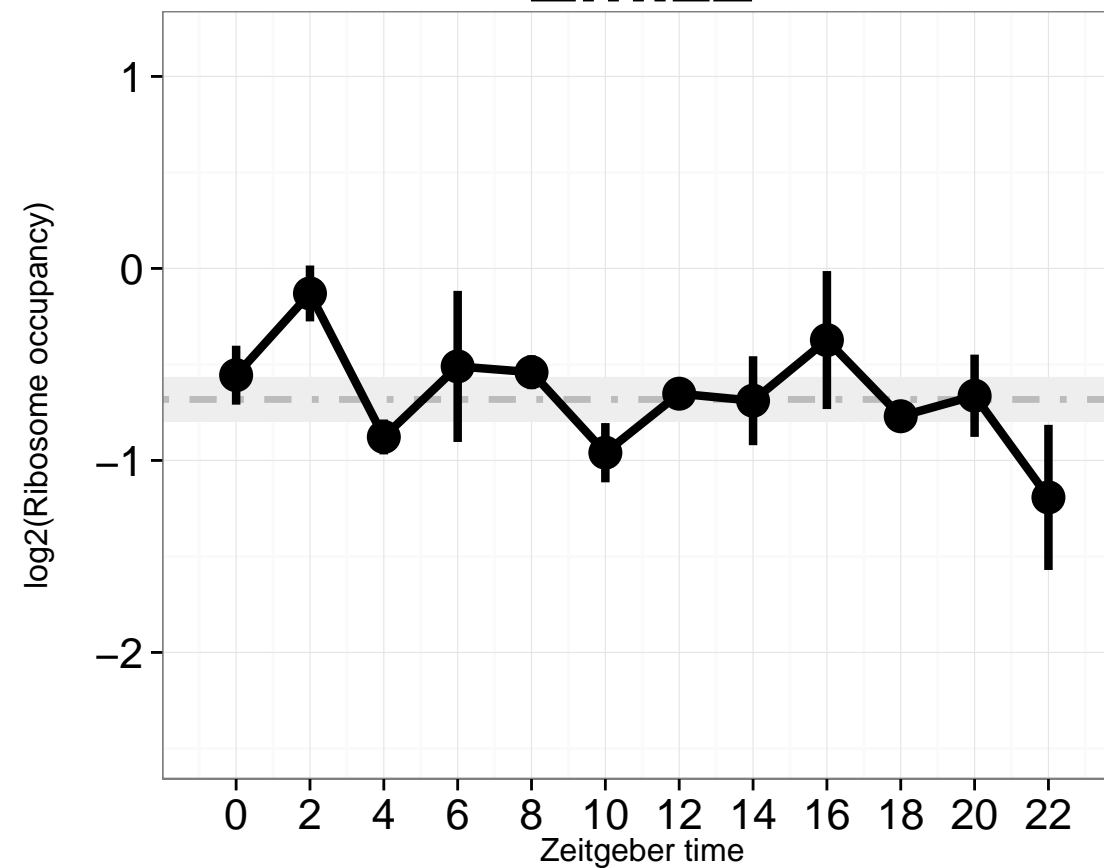

Supplement: SuppDataset_1.zip [file Zmiz2_set_A.pdf › Supplemental Dataset 1/A-mRNA_nonrhyth_translation_nonrhyth/Zmiz2_set_A.pdf]

## Zmpste24

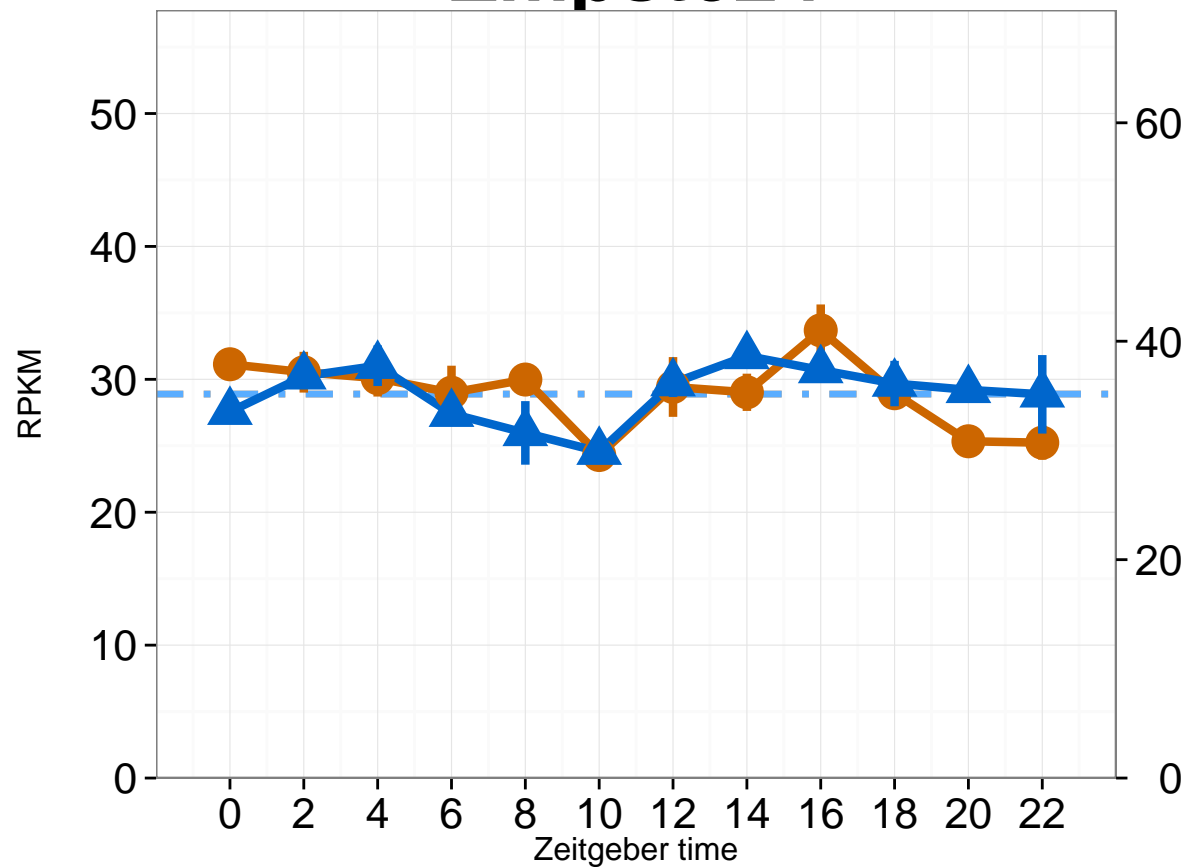

## Zmpste24

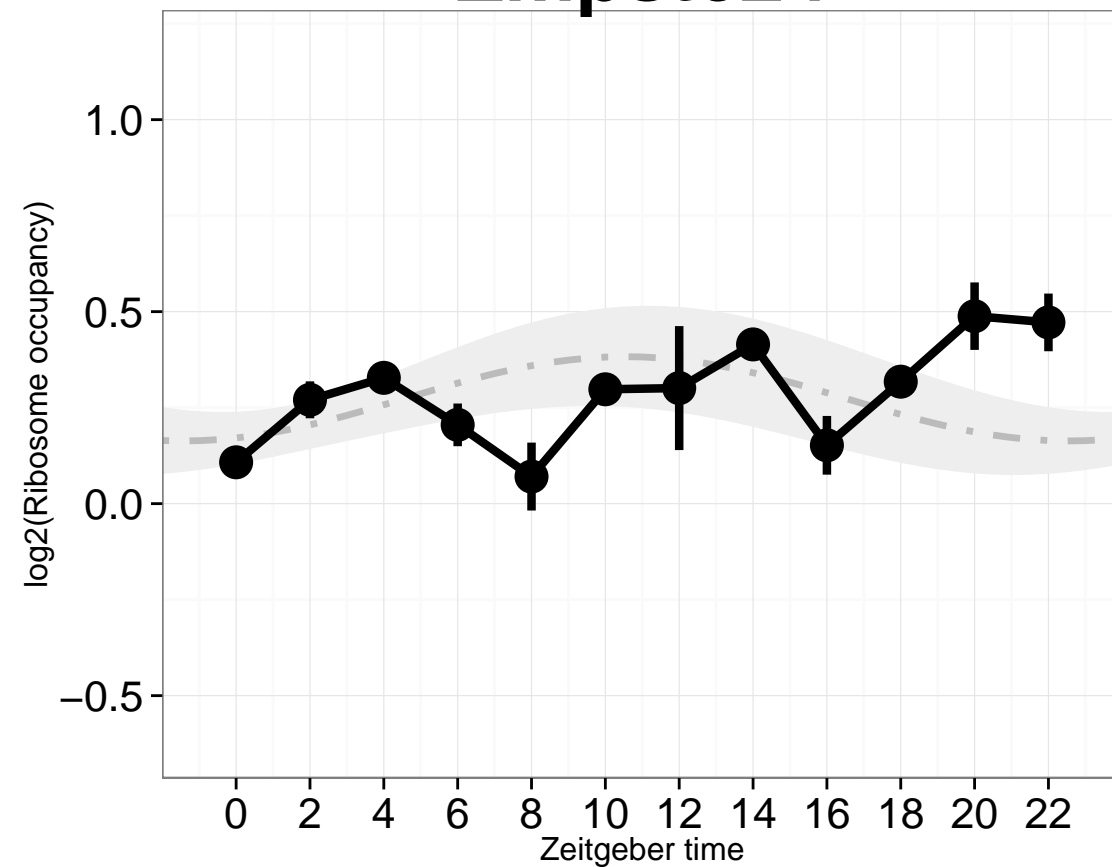

Supplement: SuppDataset_1.zip [file Zmpste24_set_A.pdf › Supplemental Dataset 1/A-mRNA_nonrhyth_translation_nonrhyth/Zmpste24_set_A.pdf]

# Zmym1

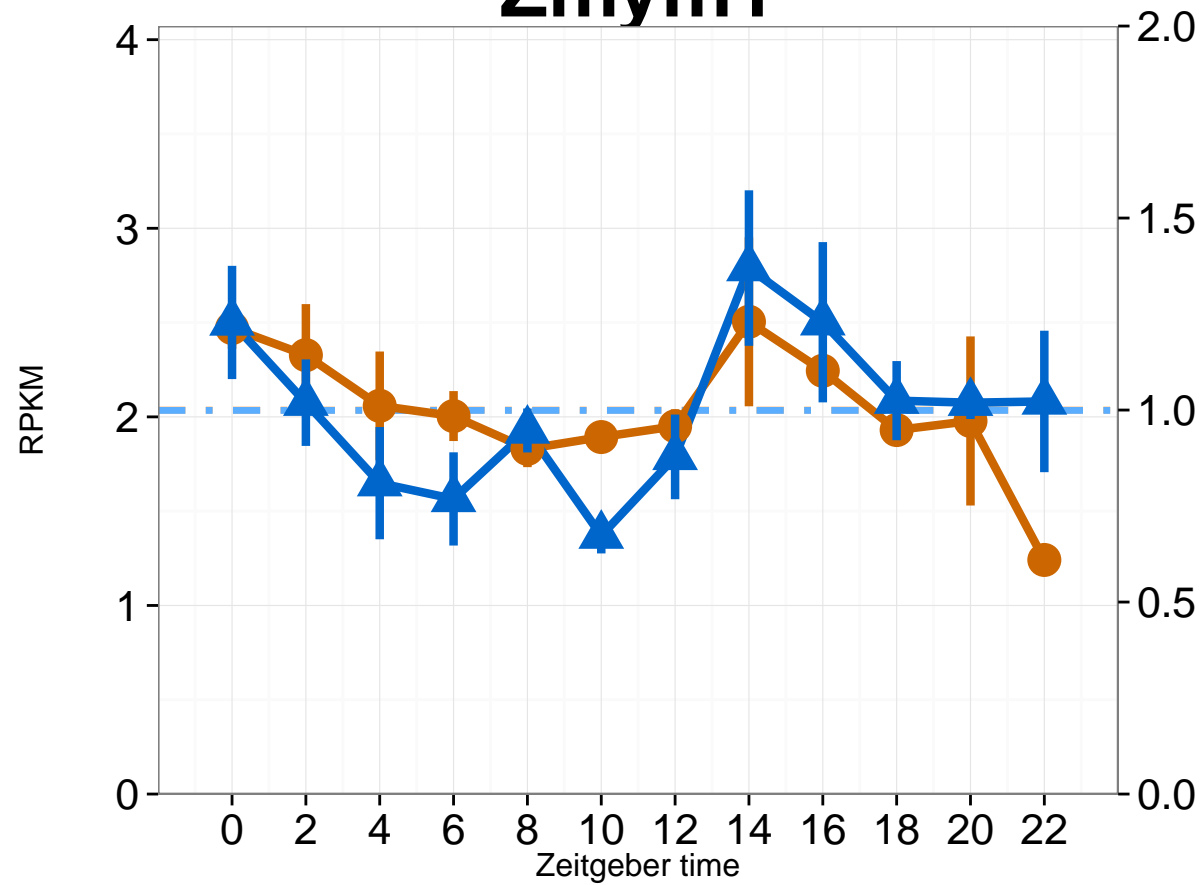

# Zmym1

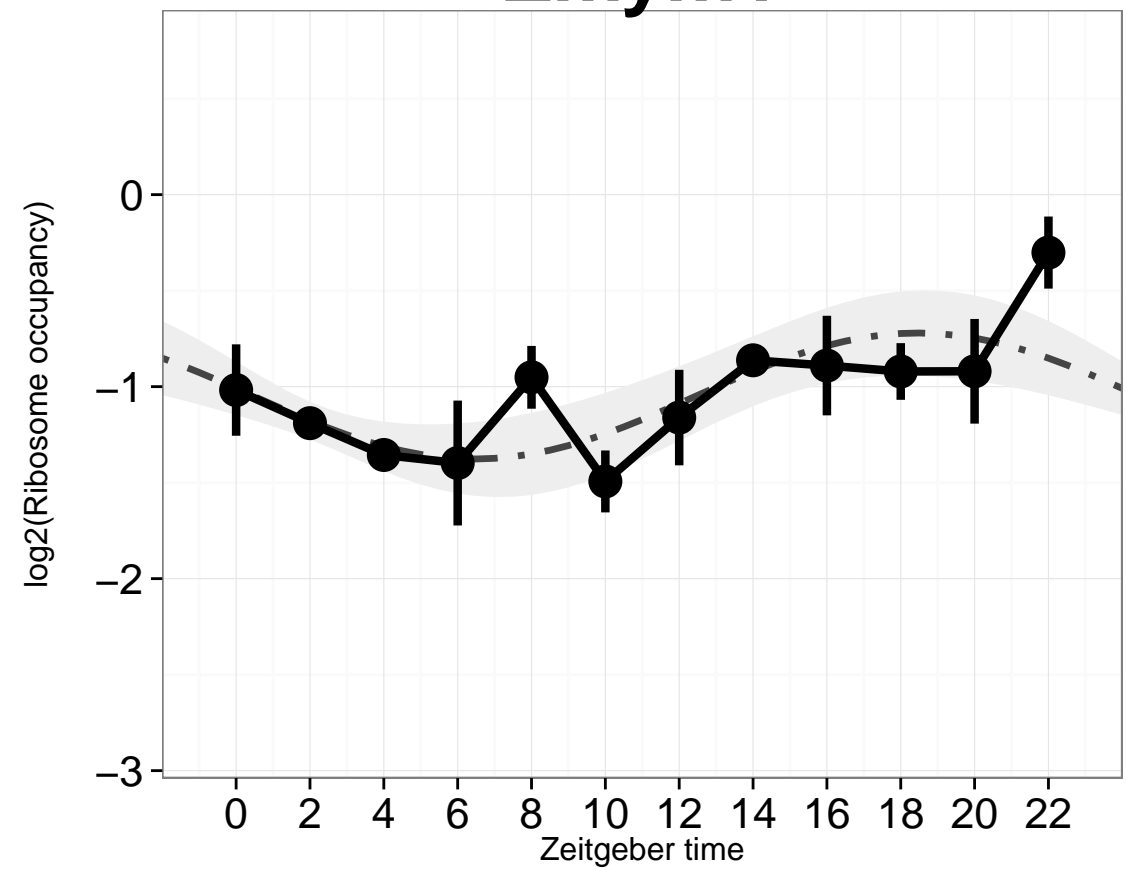

Supplement: SuppDataset_1.zip [file Zmym1_set_A.pdf › Supplemental Dataset 1/A-mRNA_nonrhyth_translation_nonrhyth/Zmym1_set_A.pdf]

## Zmym2

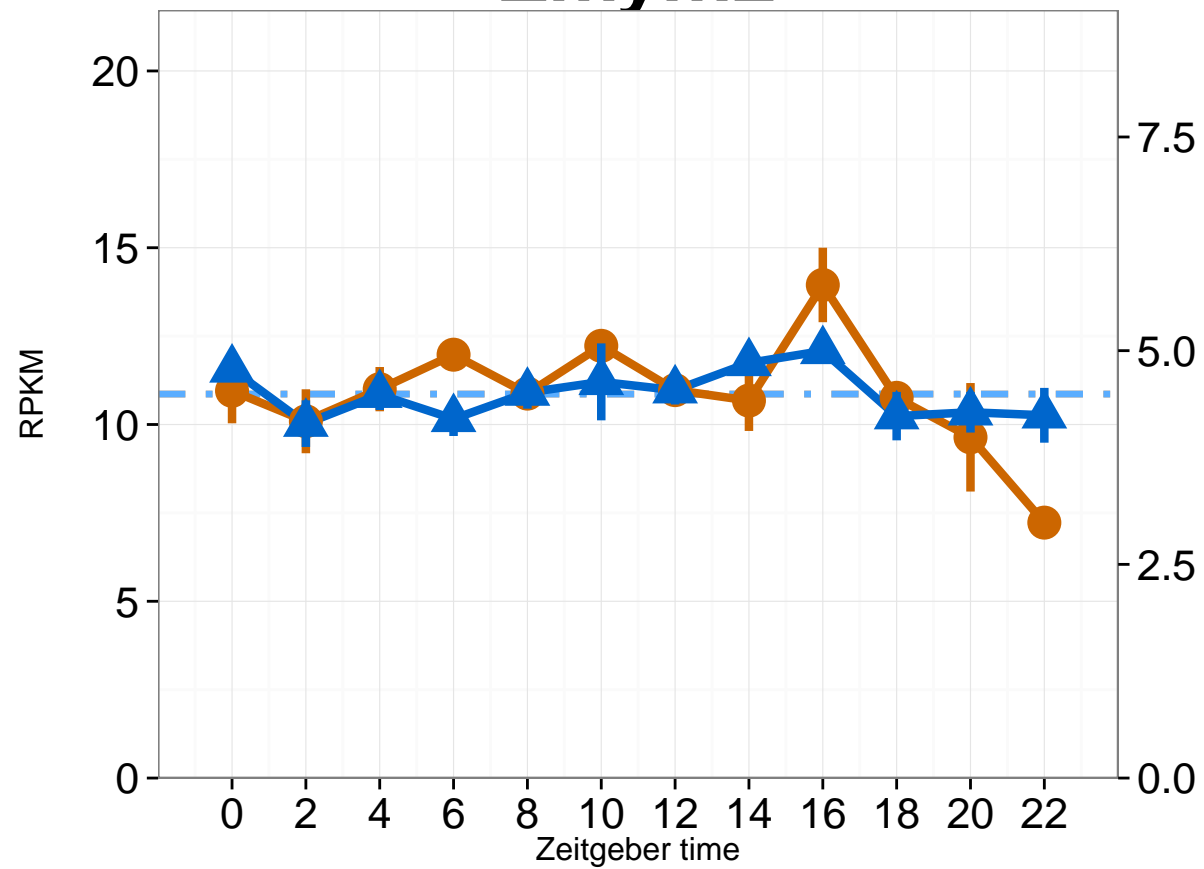

## Zmym2

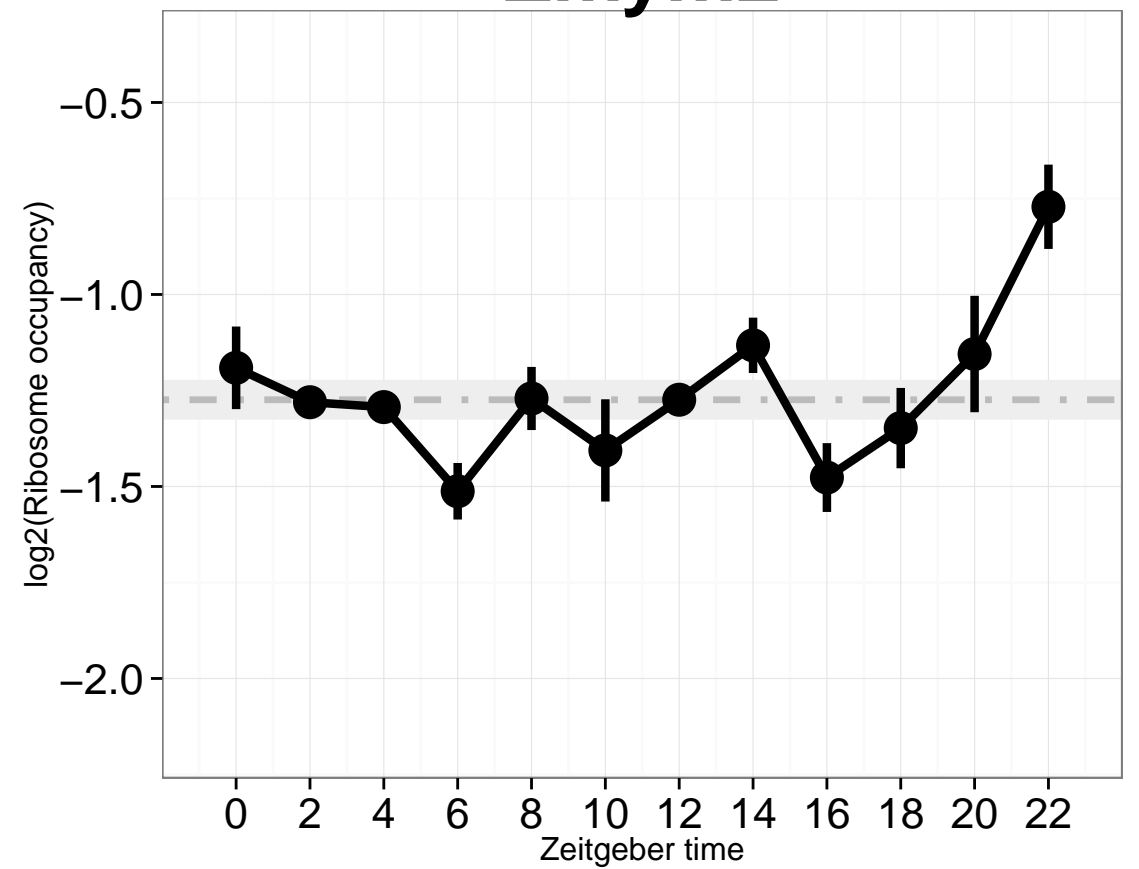

Supplement: SuppDataset_1.zip [file Zmym2_set_A.pdf › Supplemental Dataset 1/A-mRNA_nonrhyth_translation_nonrhyth/Zmym2_set_A.pdf]

# Zmym4

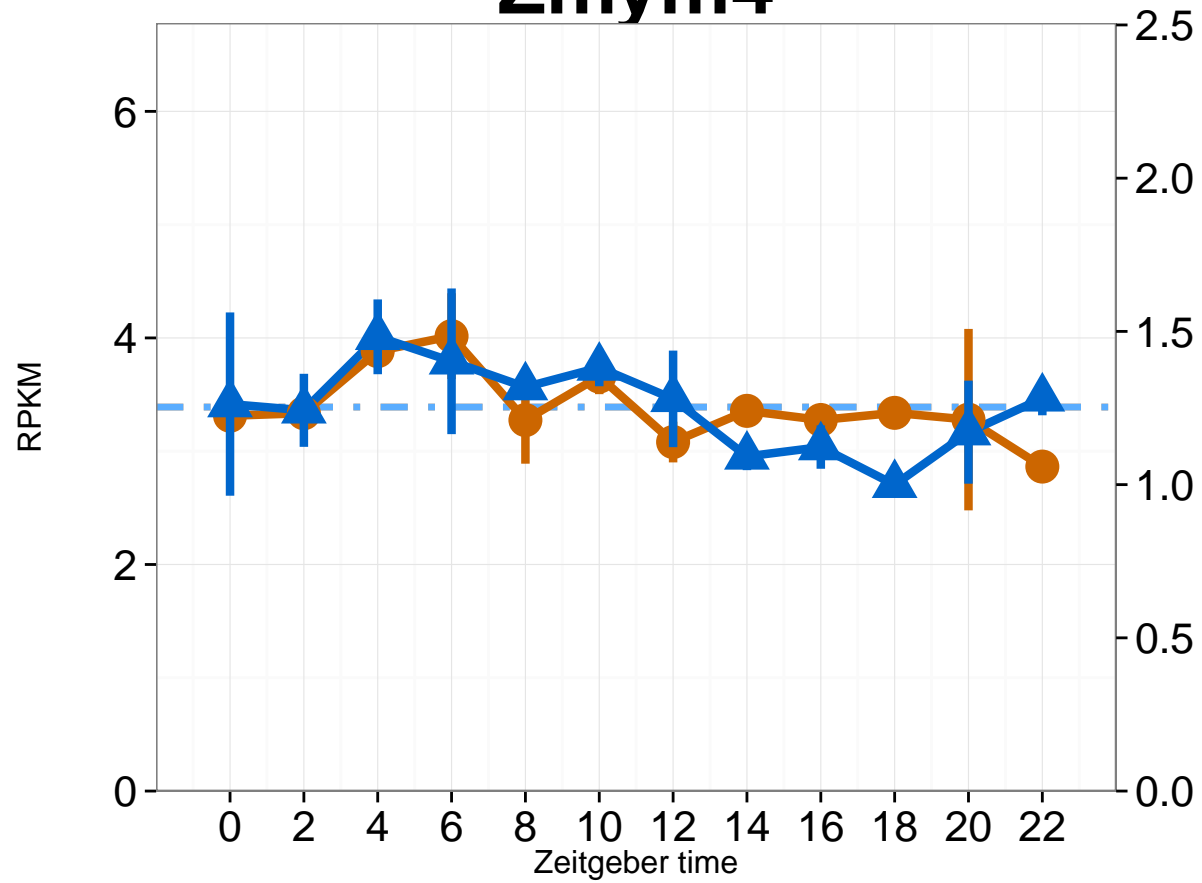

# Zmym4

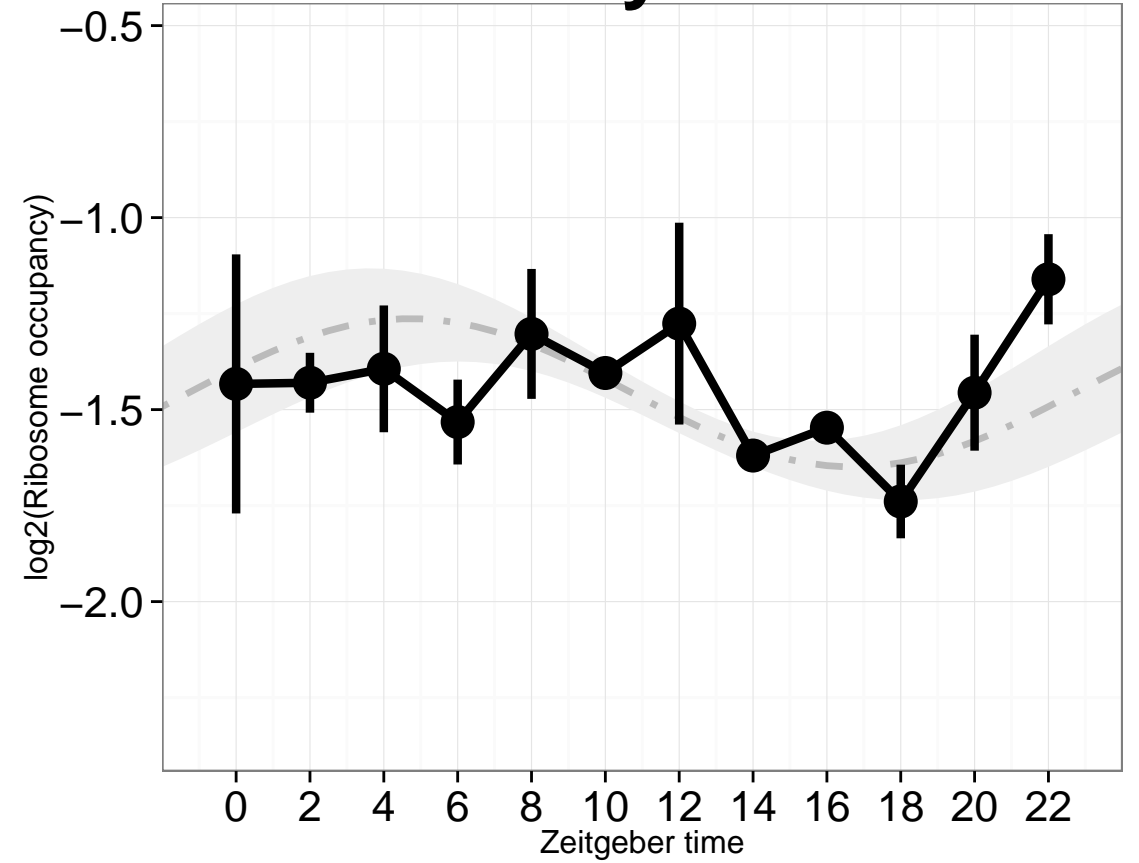

Supplement: SuppDataset_1.zip [file Zmym4_set_A.pdf › Supplemental Dataset 1/A-mRNA_nonrhyth_translation_nonrhyth/Zmym4_set_A.pdf]

## Zmym5

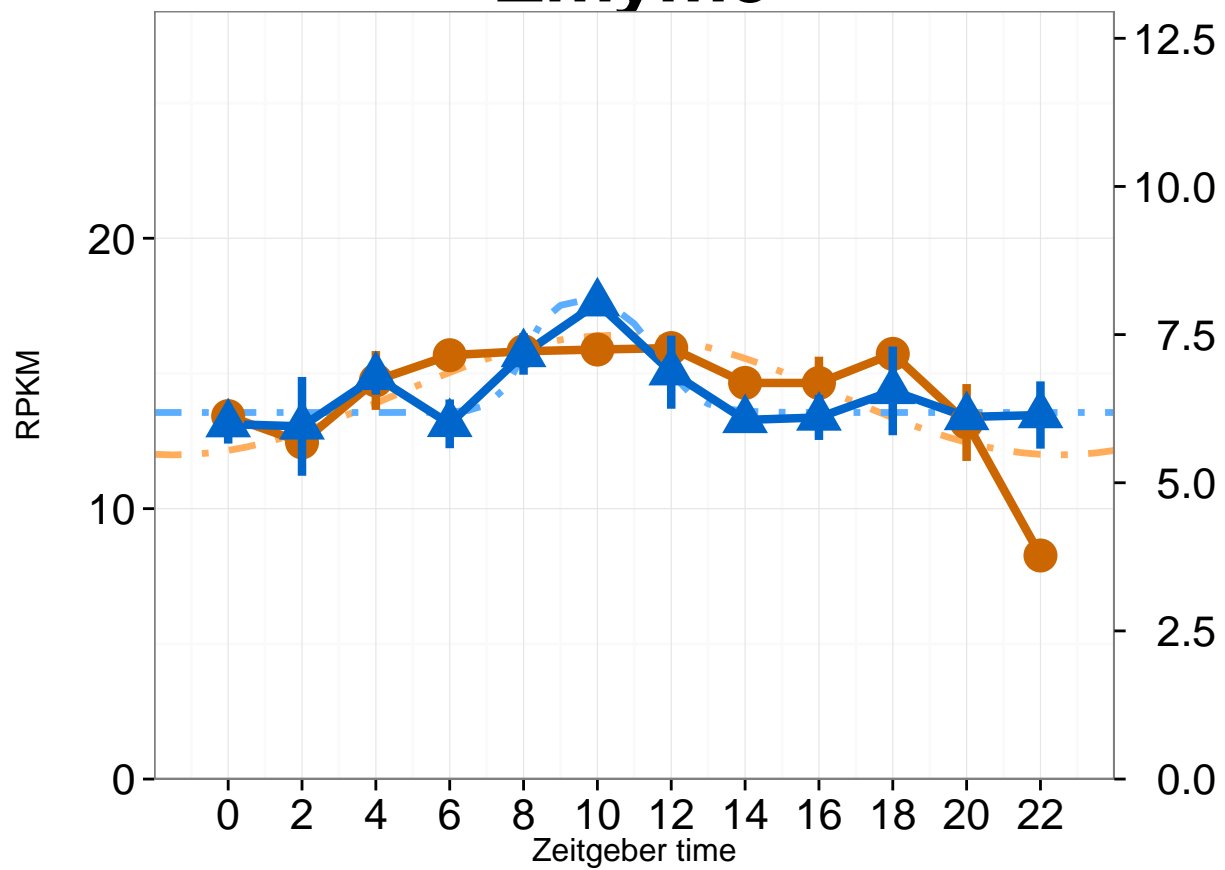

## Zmym5

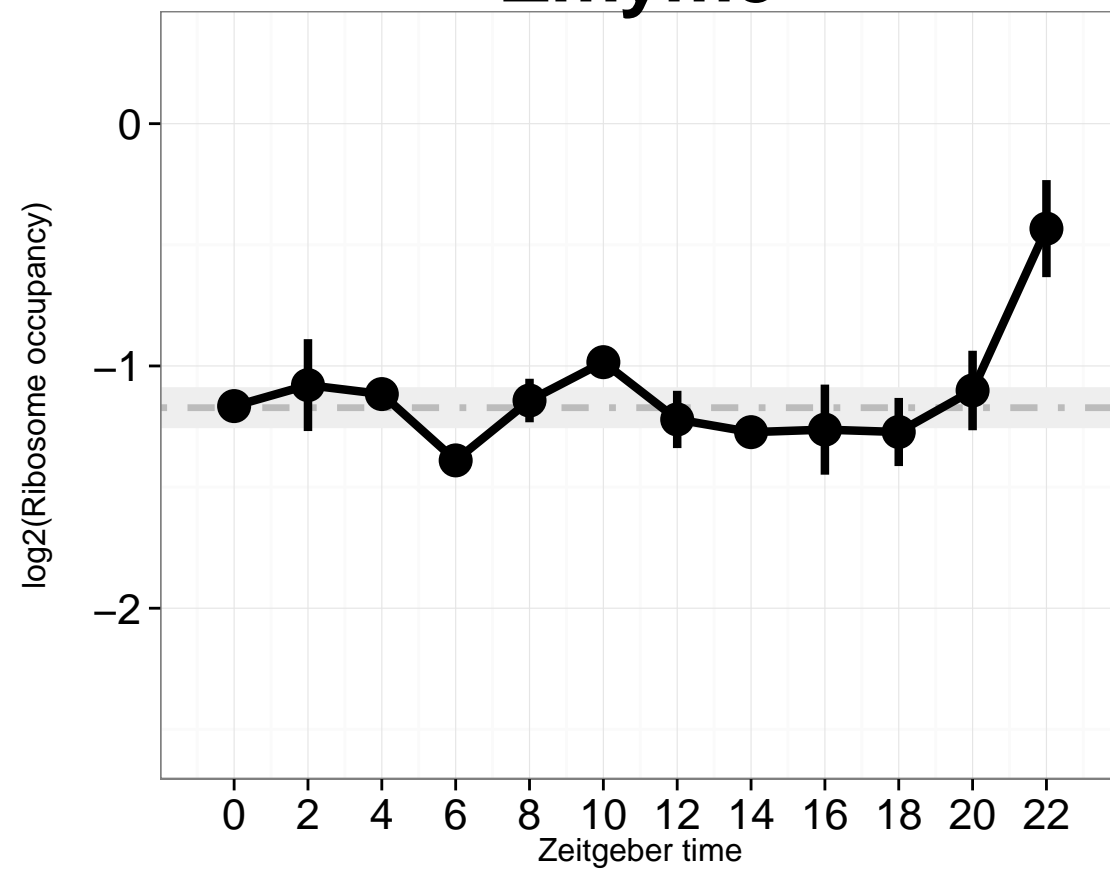

Supplement: SuppDataset_1.zip [file Zmym5_set_A.pdf › Supplemental Dataset 1/A-mRNA_nonrhyth_translation_nonrhyth/Zmym5_set_A.pdf]

# Zmynd19

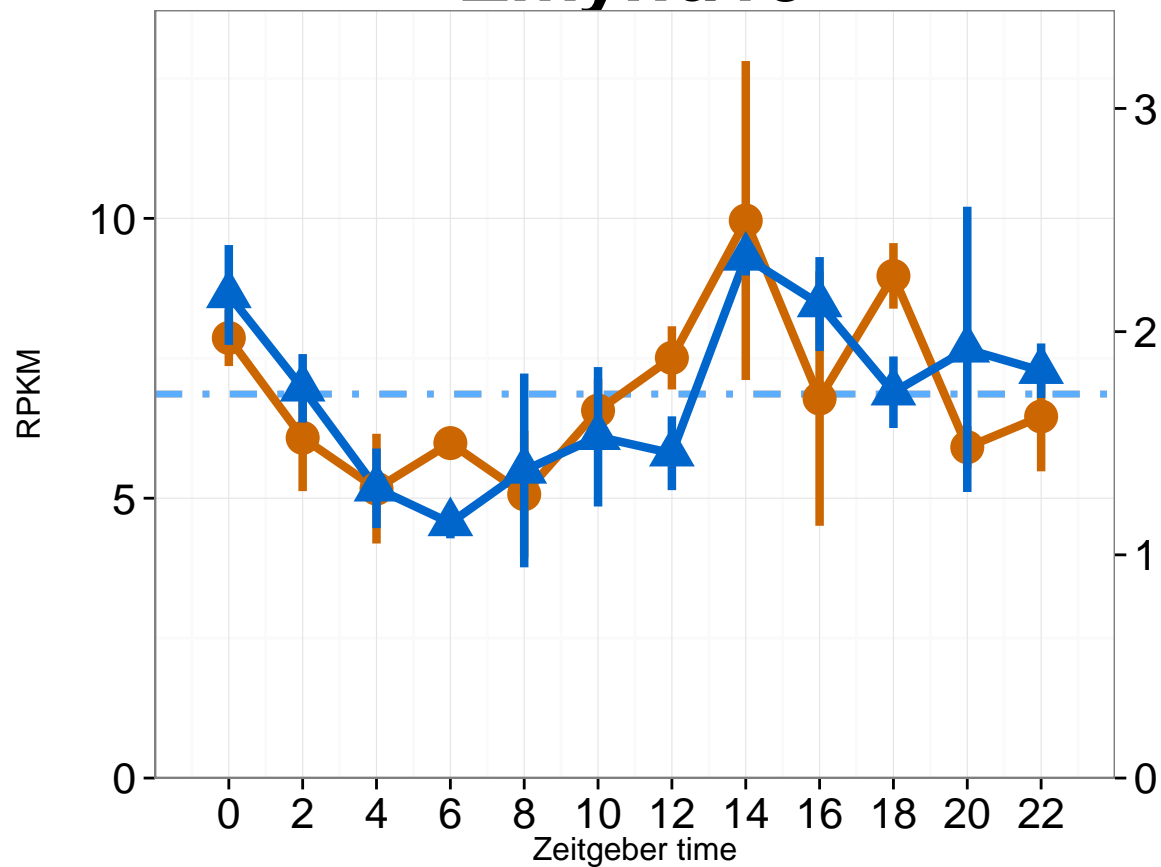

# Zmynd19

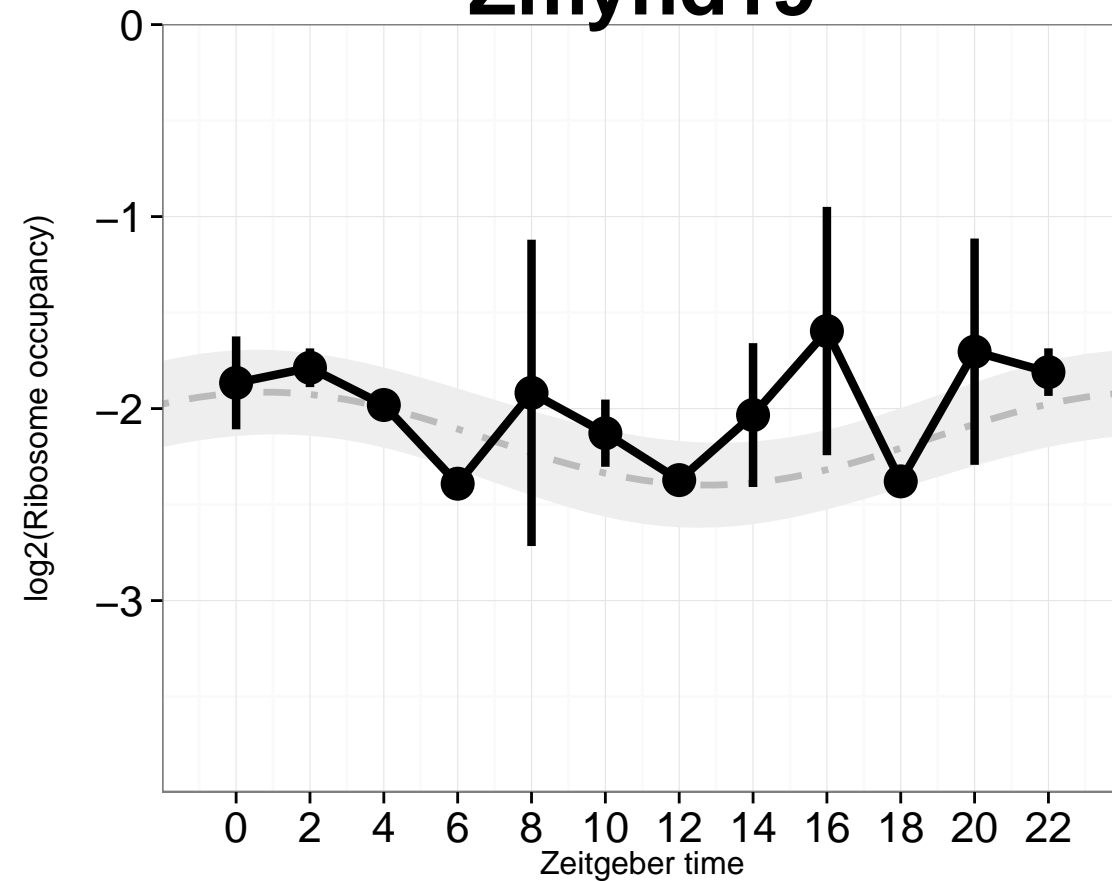

Supplement: SuppDataset_1.zip [file Zmynd19_set_A.pdf › Supplemental Dataset 1/A-mRNA_nonrhyth_translation_nonrhyth/Zmynd19_set_A.pdf]

# Znfx1

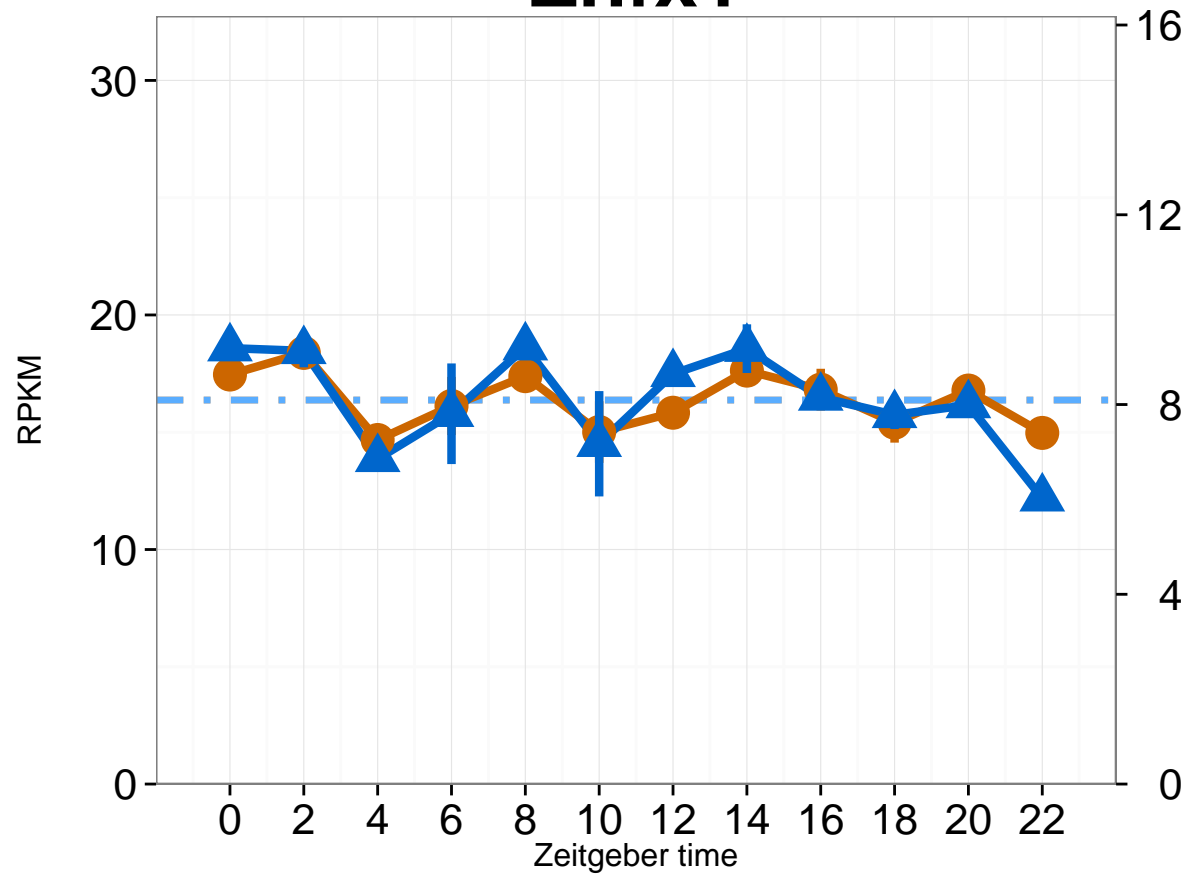

# Znfx1

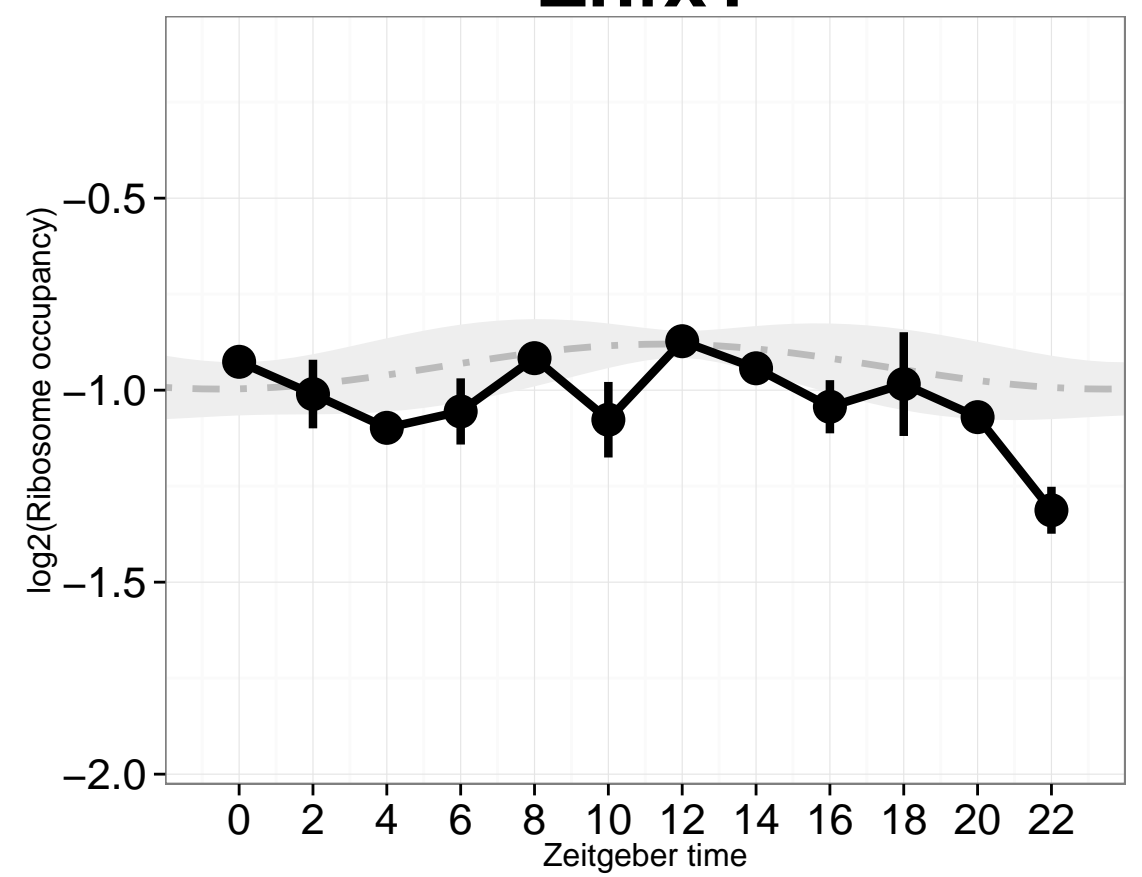

Supplement: SuppDataset_1.zip [file Znfx1_set_A.pdf › Supplemental Dataset 1/A-mRNA_nonrhyth_translation_nonrhyth/Znfx1_set_A.pdf]

## Znhit1

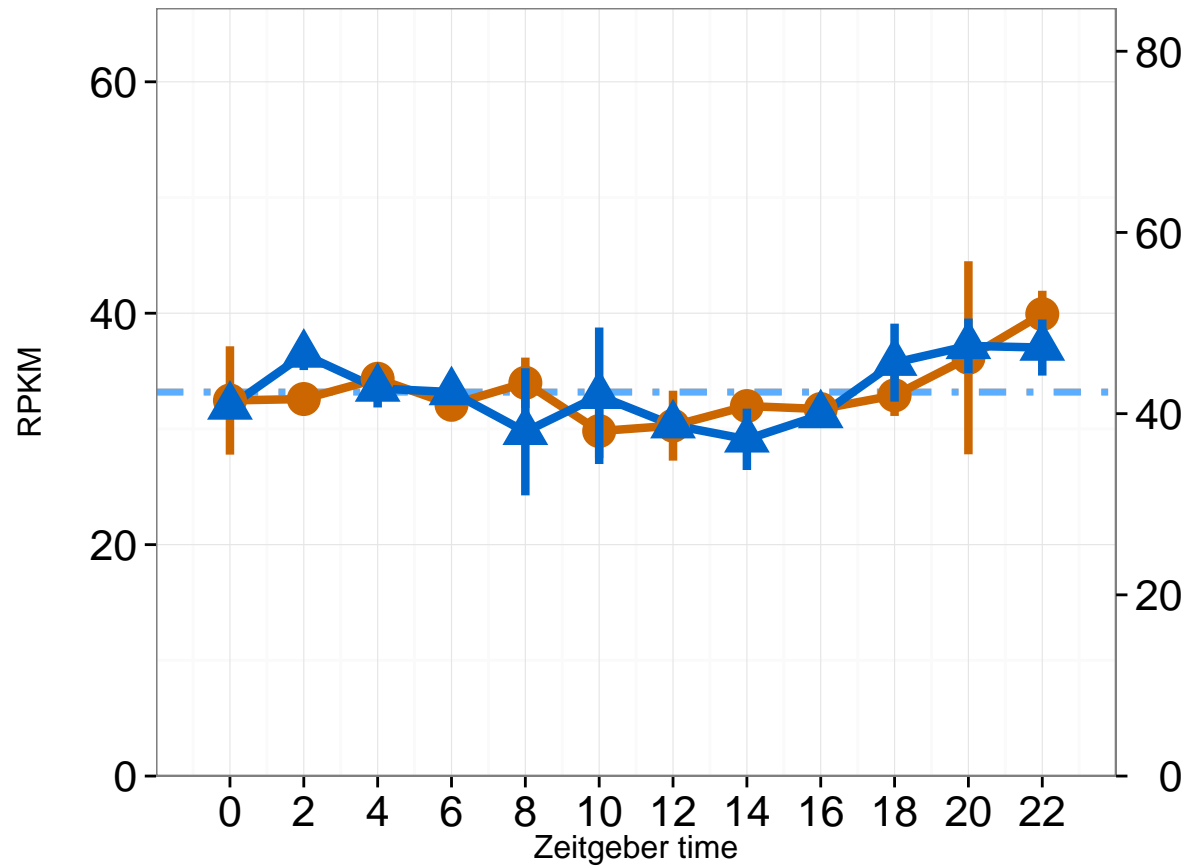

## Znhit1

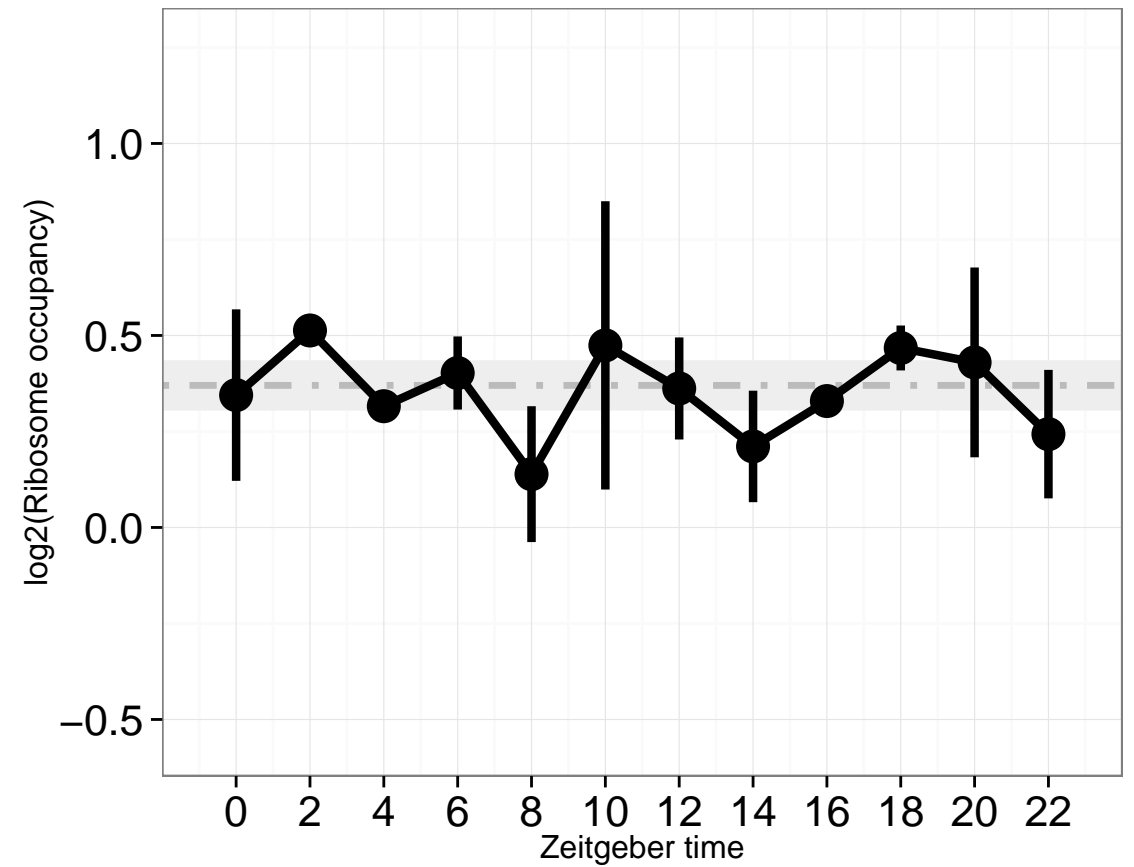

Supplement: SuppDataset_1.zip [file Znhit1_set_A.pdf › Supplemental Dataset 1/A-mRNA_nonrhyth_translation_nonrhyth/Znhit1_set_A.pdf]

## Znhit2

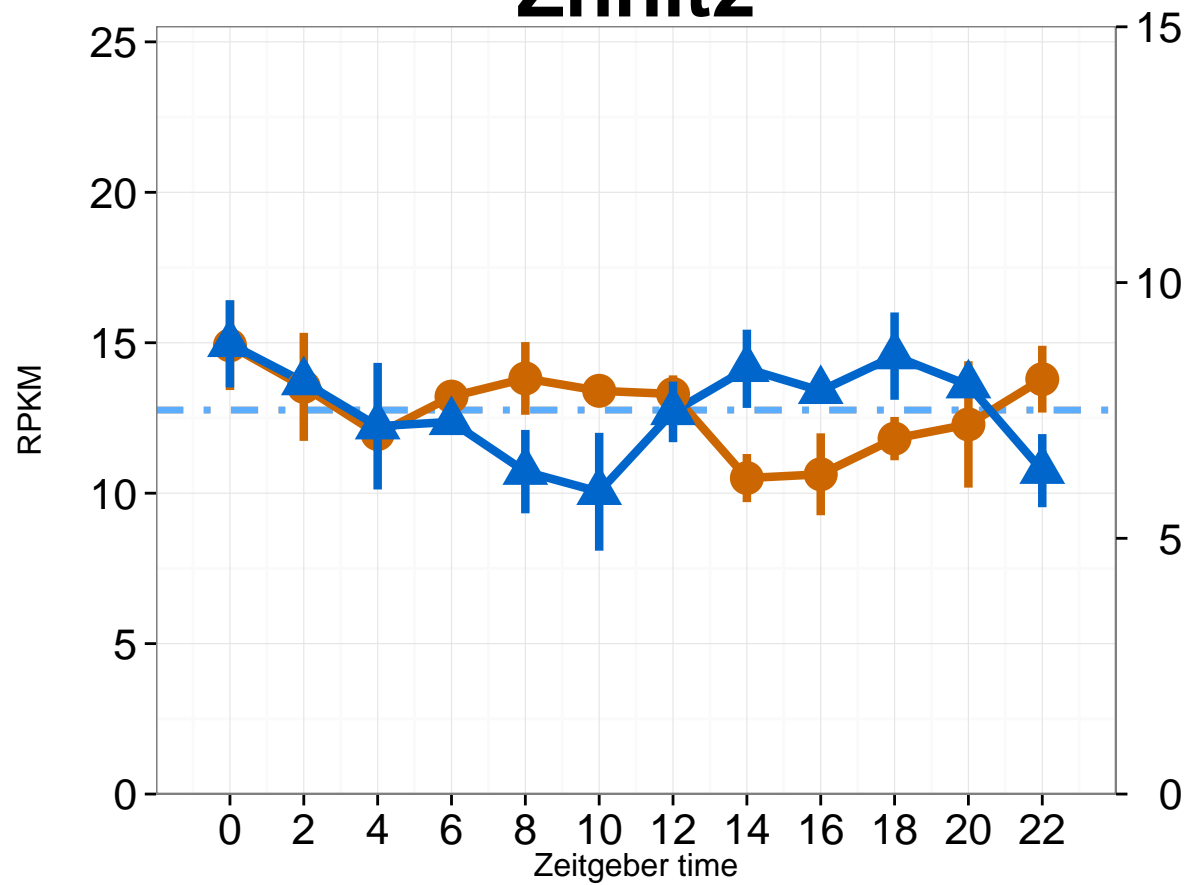

## Znhit2

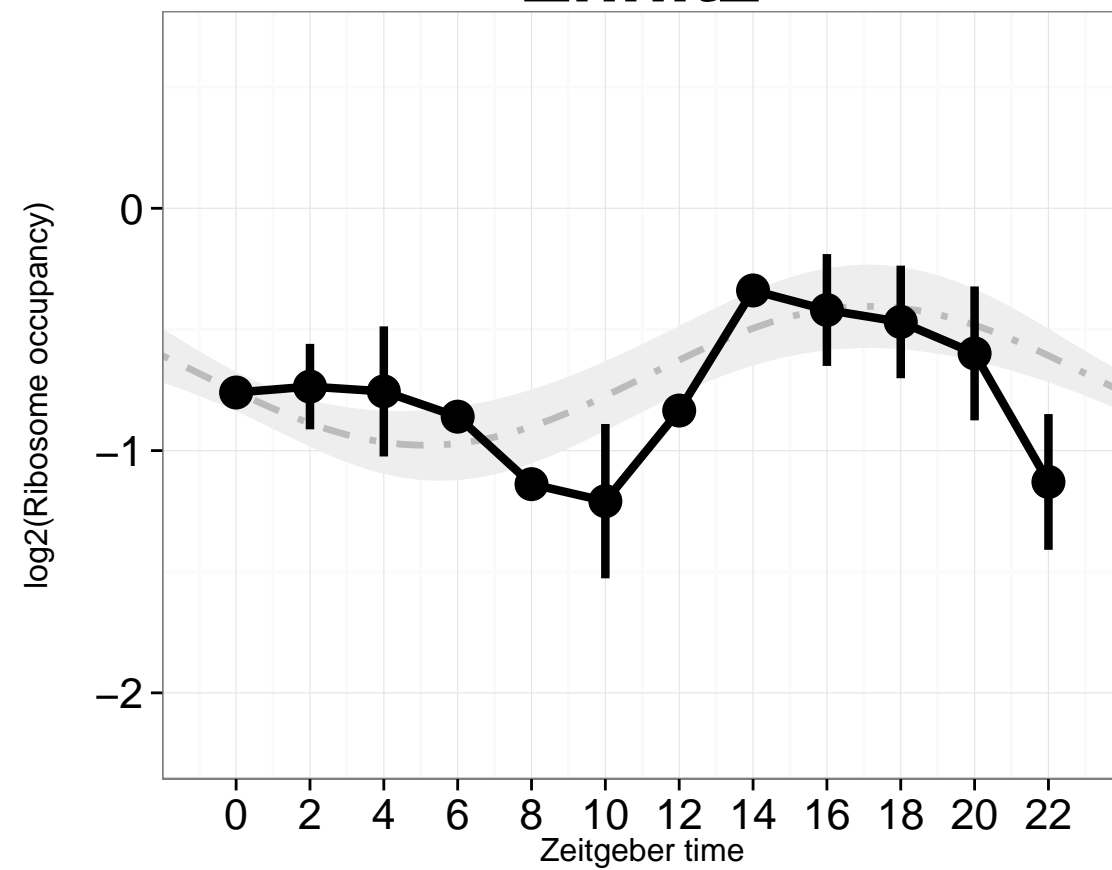

Supplement: SuppDataset_1.zip [file Znhit2_set_A.pdf › Supplemental Dataset 1/A-mRNA_nonrhyth_translation_nonrhyth/Znhit2_set_A.pdf]

## Znhit3

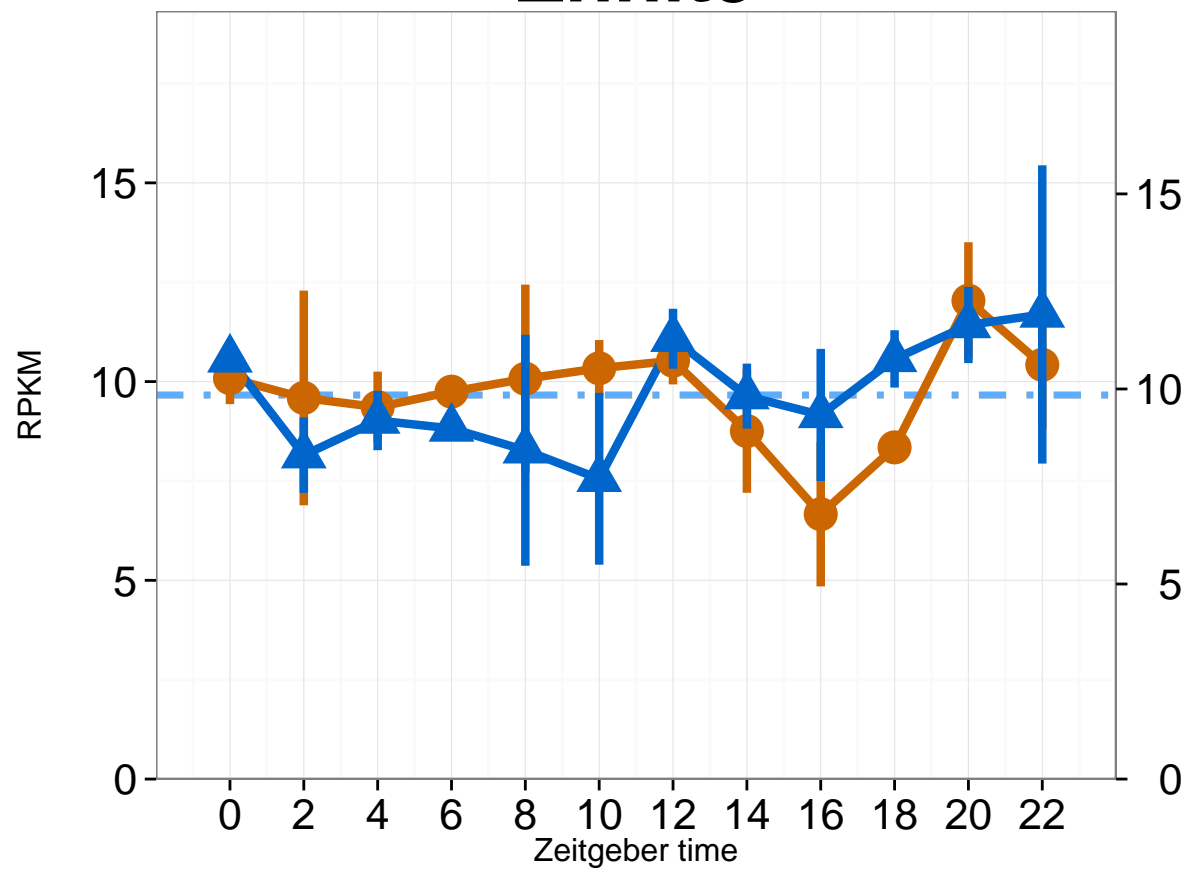

## Znhit3

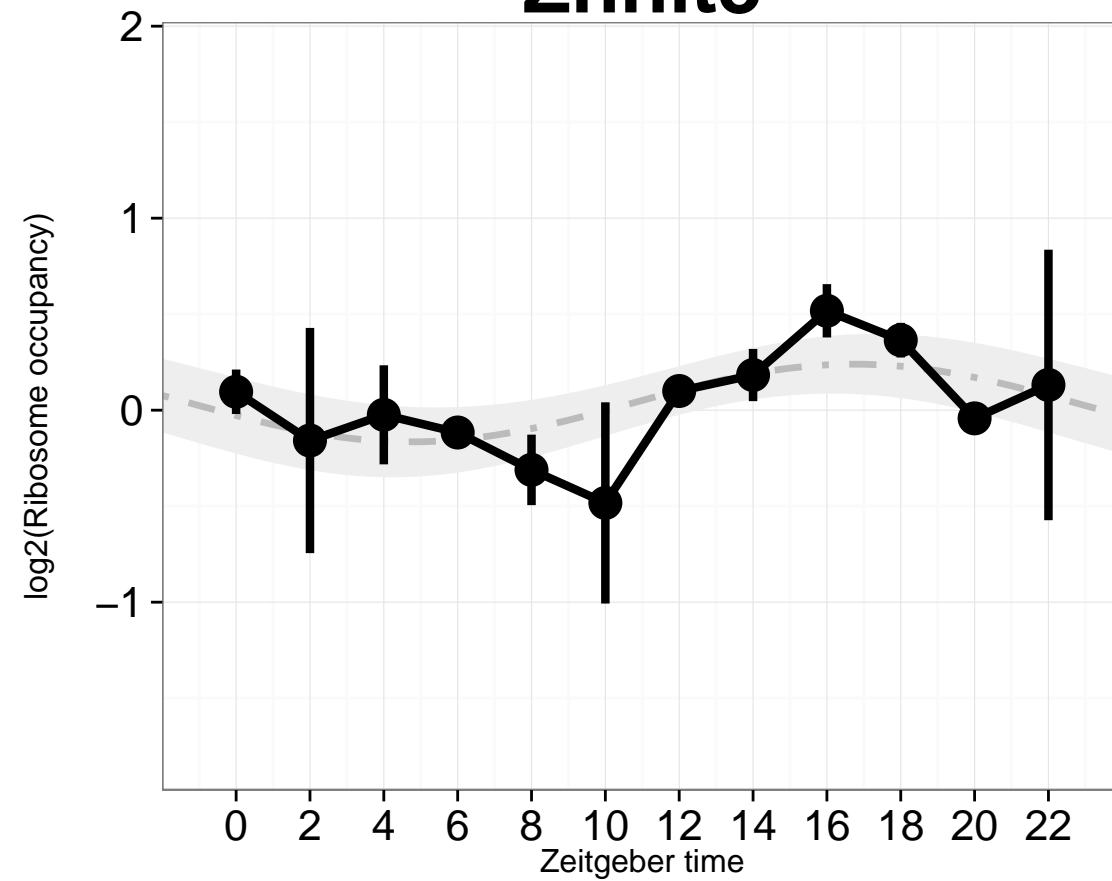

Supplement: SuppDataset_1.zip [file Znhit3_set_A.pdf › Supplemental Dataset 1/A-mRNA_nonrhyth_translation_nonrhyth/Znhit3_set_A.pdf]

# Znhit6

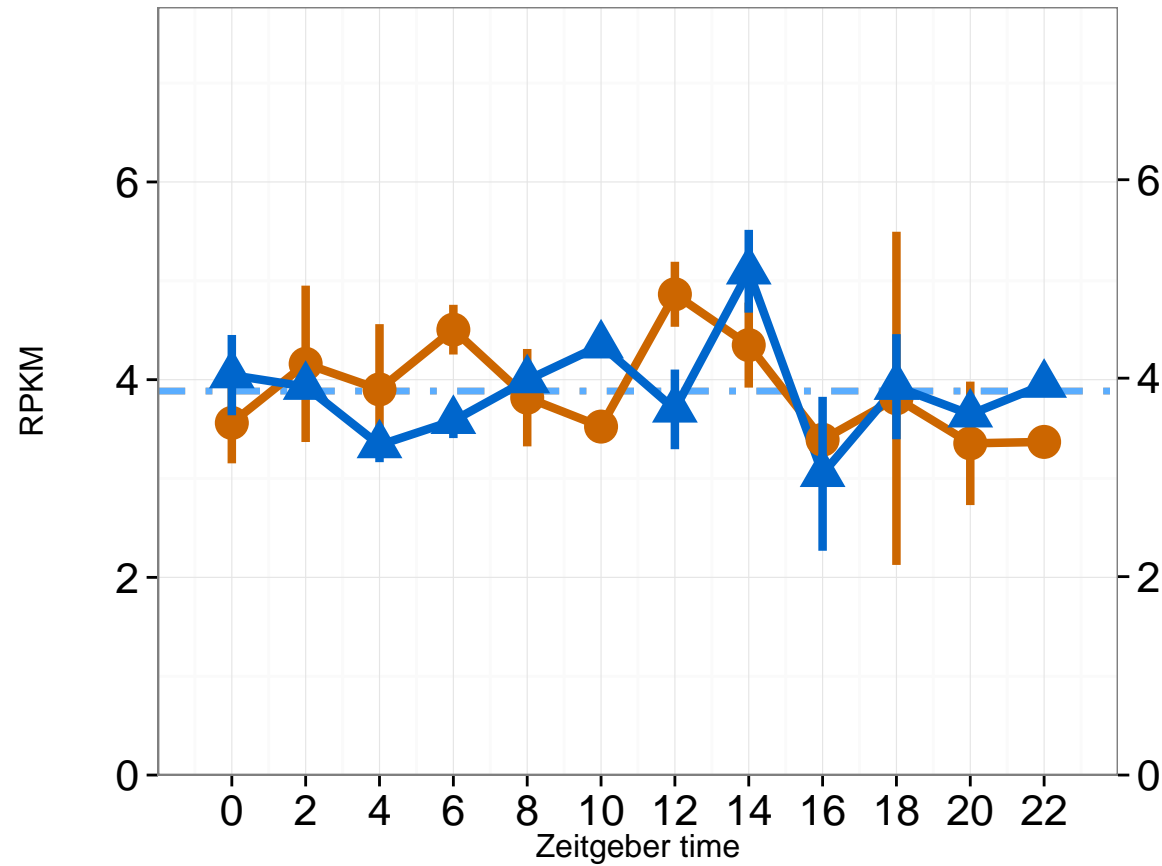

# Znhit6

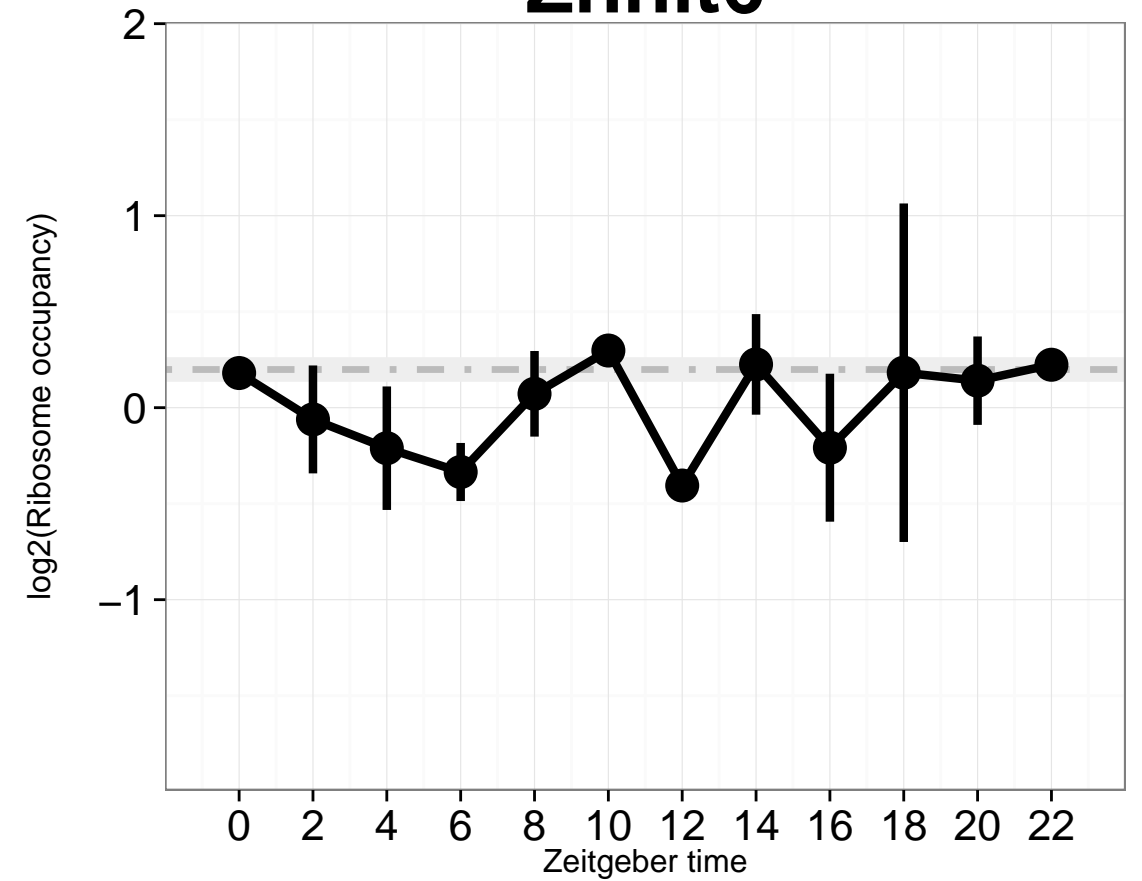

Supplement: SuppDataset_1.zip [file Znhit6_set_A.pdf › Supplemental Dataset 1/A-mRNA_nonrhyth_translation_nonrhyth/Znhit6_set_A.pdf]

## Znrd1

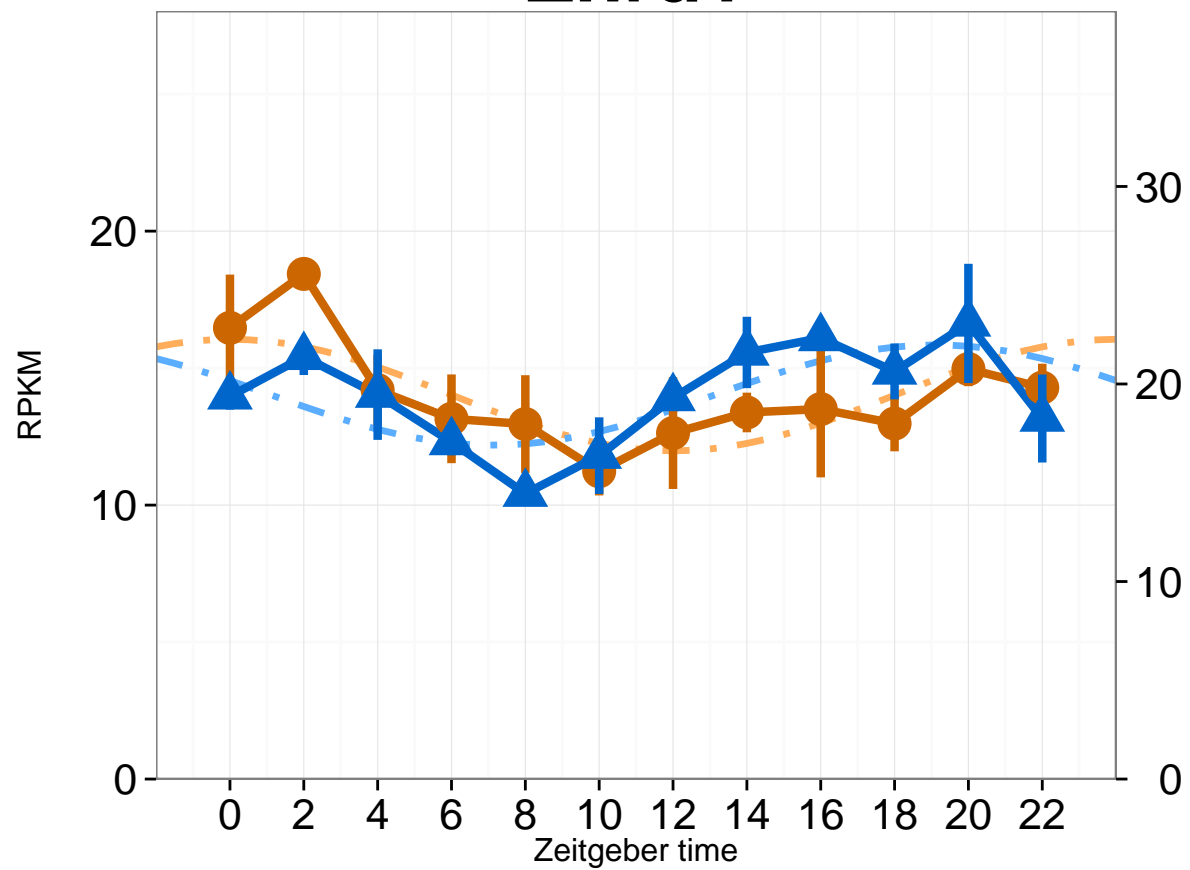

## Znrd1

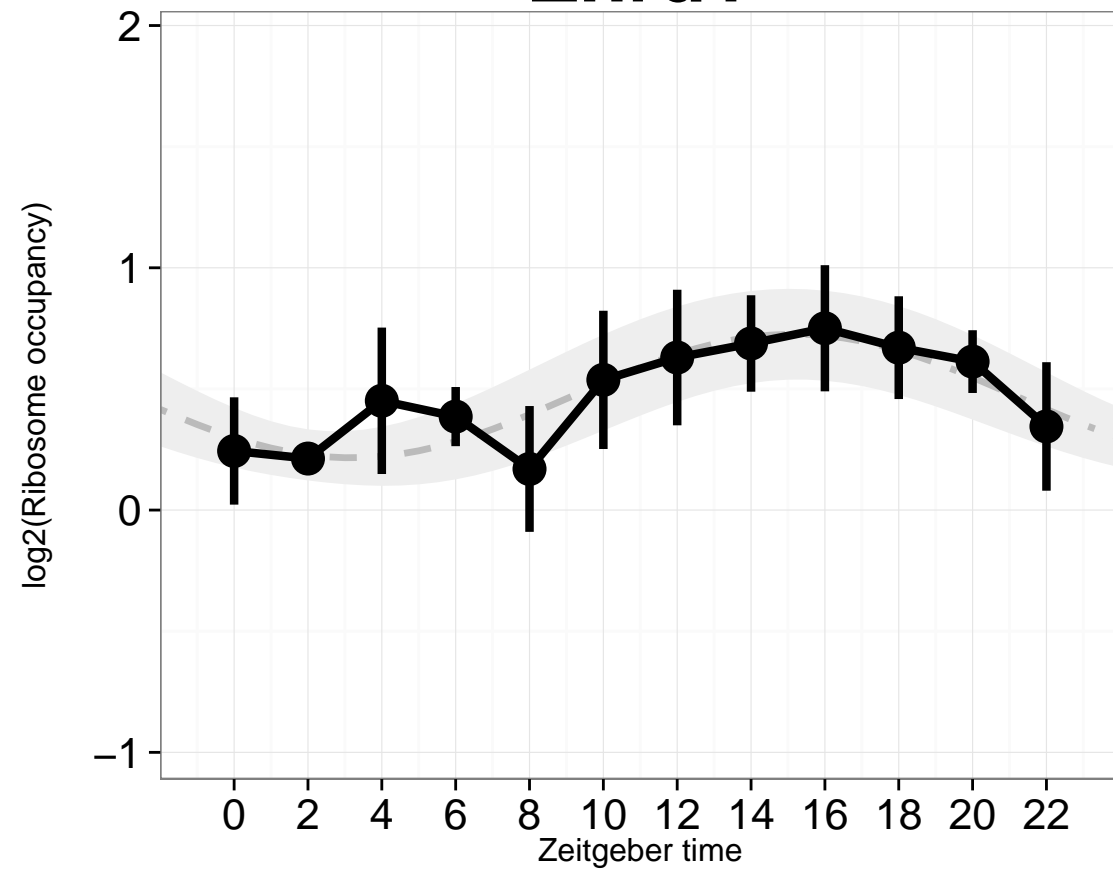

Supplement: SuppDataset_1.zip [file Znrd1_set_A.pdf › Supplemental Dataset 1/A-mRNA_nonrhyth_translation_nonrhyth/Znrd1_set_A.pdf]

## Znrd1as

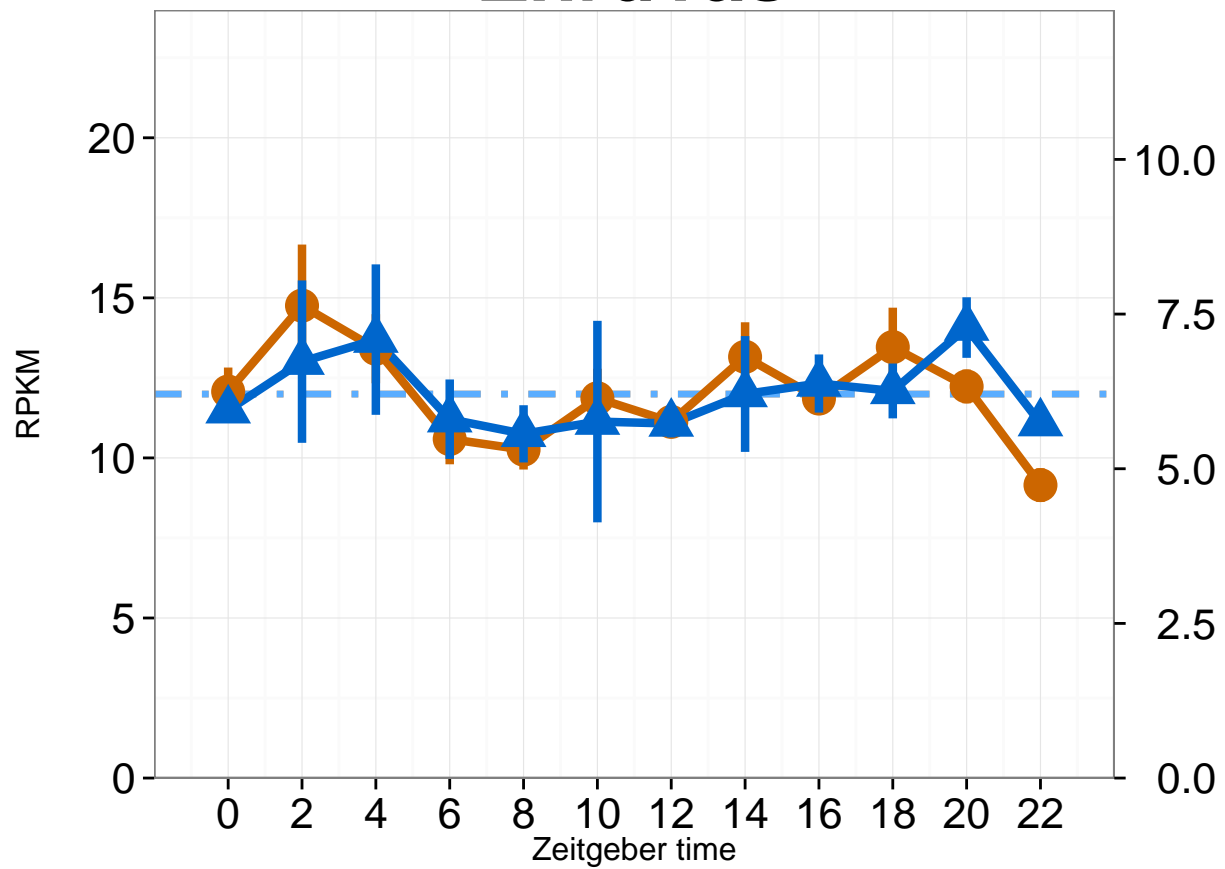

## Znrd1as

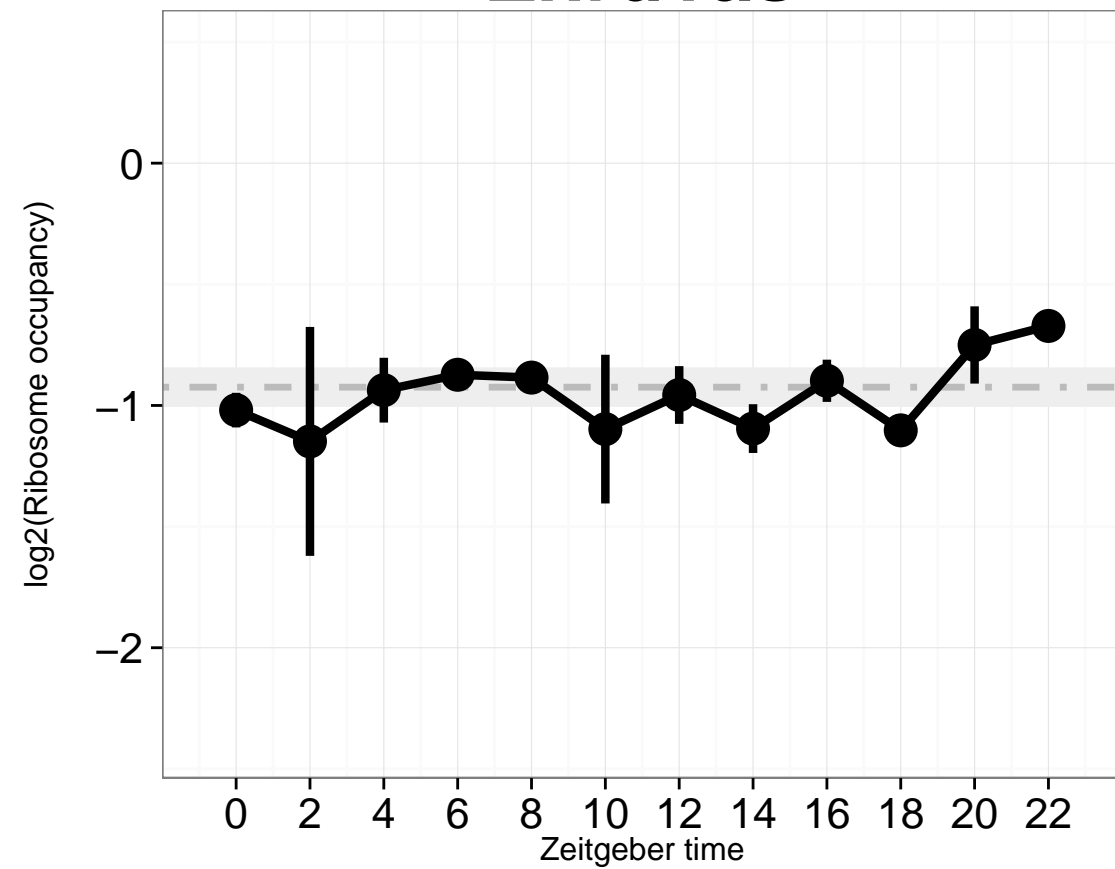

Supplement: SuppDataset_1.zip [file Znrd1as_set_A.pdf › Supplemental Dataset 1/A-mRNA_nonrhyth_translation_nonrhyth/Znrd1as_set_A.pdf]

## Znrf1

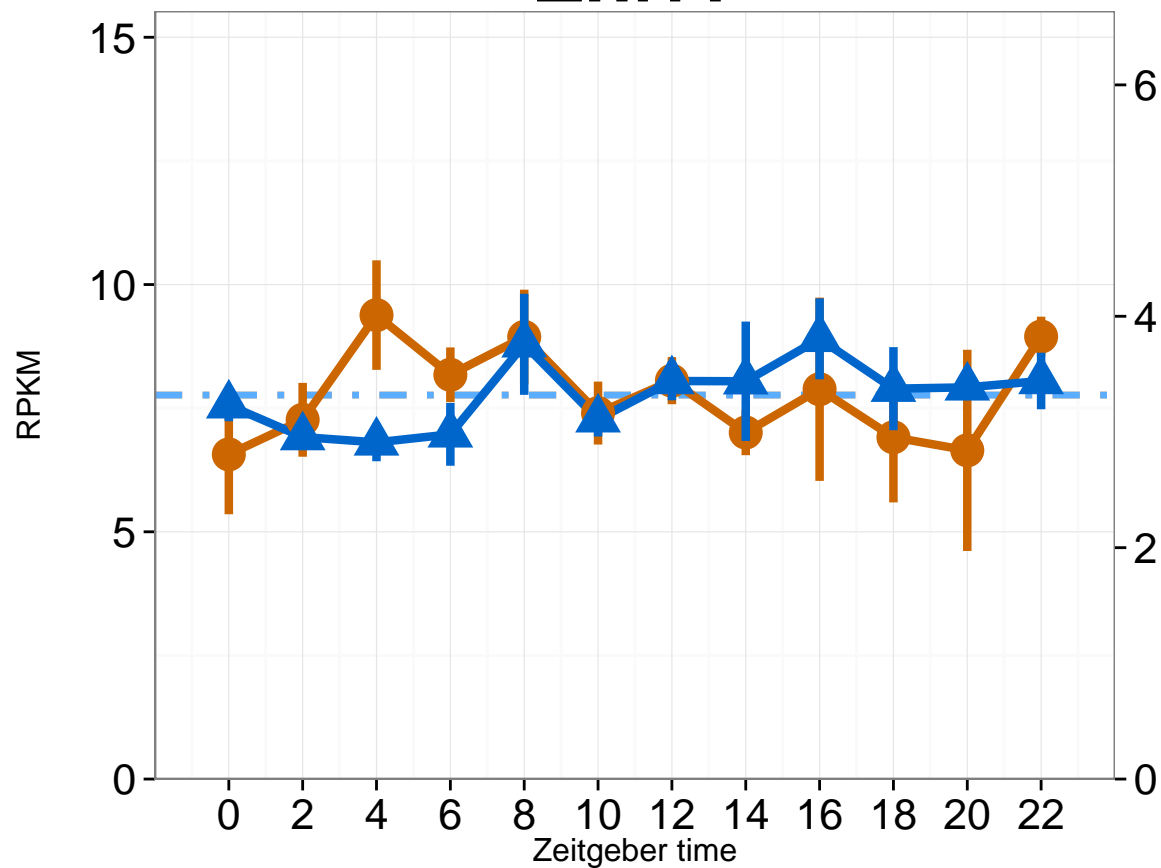

## Znrf1

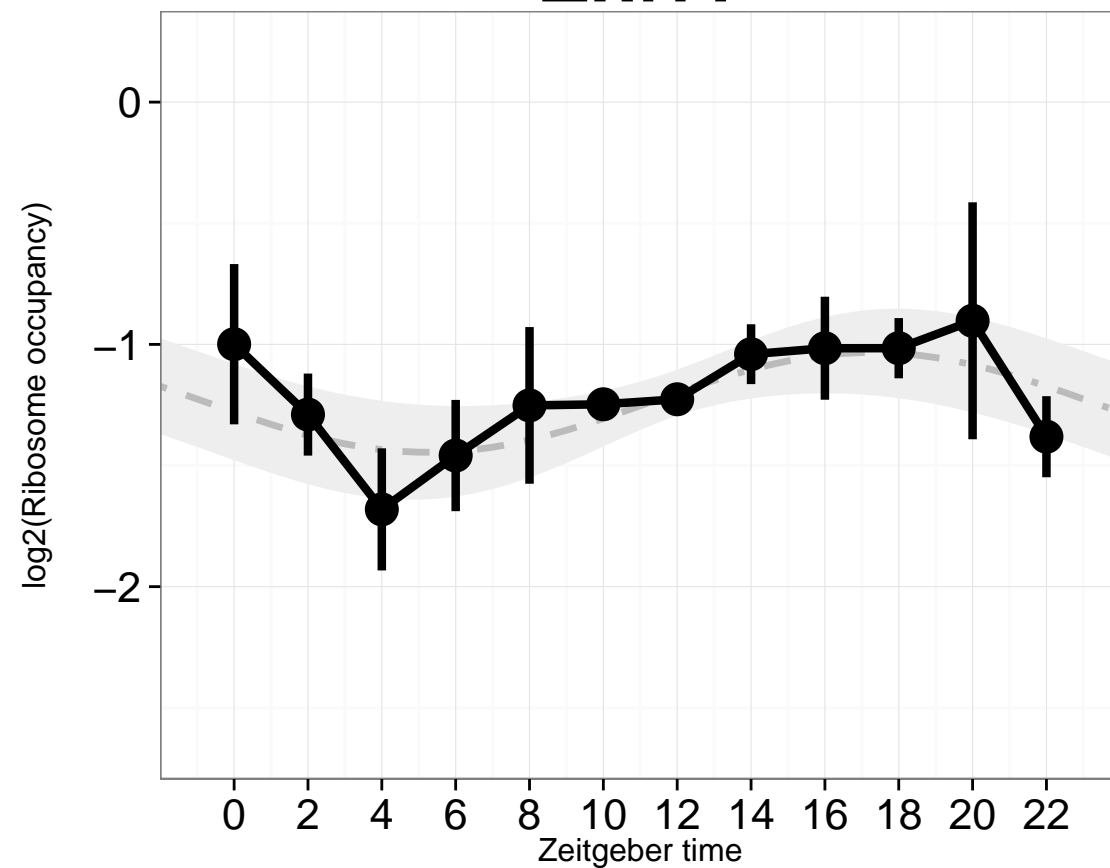

Supplement: SuppDataset_1.zip [file Znrf1_set_A.pdf › Supplemental Dataset 1/A-mRNA_nonrhyth_translation_nonrhyth/Znrf1_set_A.pdf]
