# Supplementary figures and images for: Ribosome profiling reveals the rhythmic liver translatome and circadian clock regulation by upstream open reading frames (part 87 of 113)
Source: HighWire-hosted journal article supplement (doi:10.1101/gr.195404.115), 2015-10-20

# Zranb1

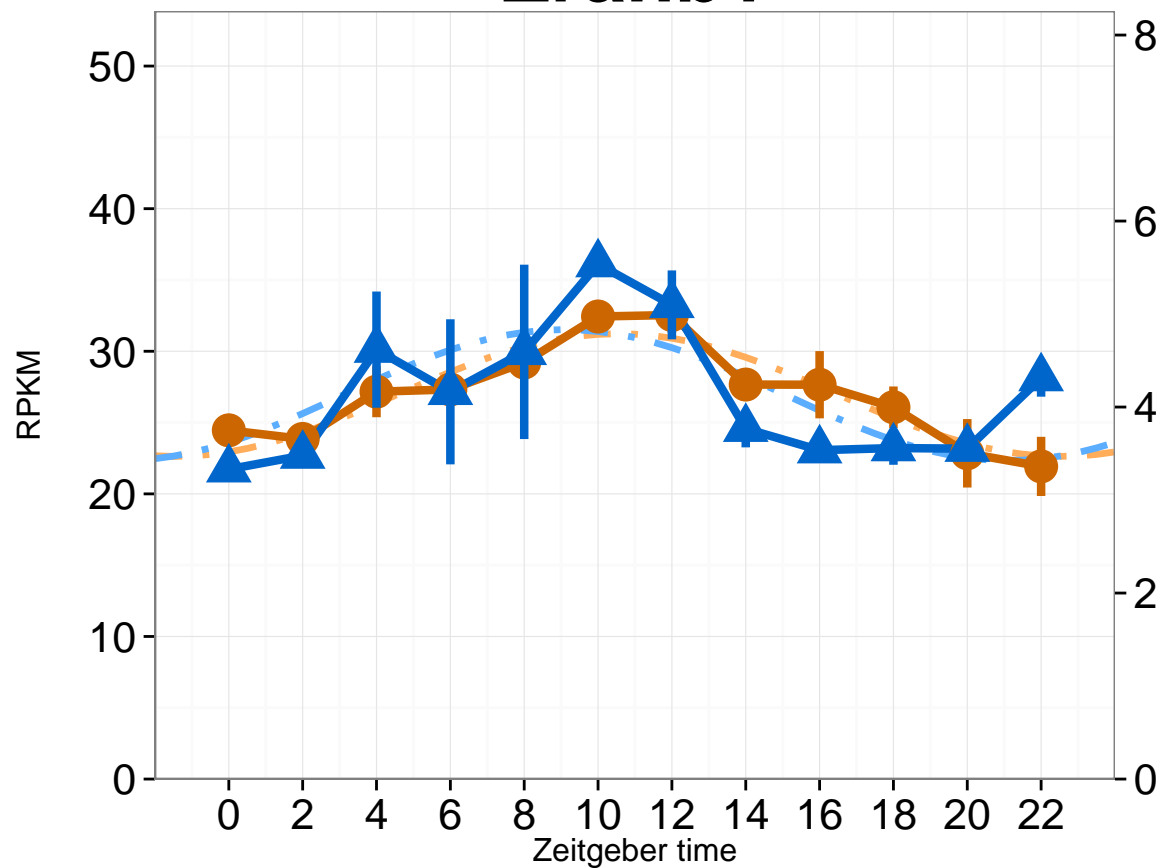

# Zranb1

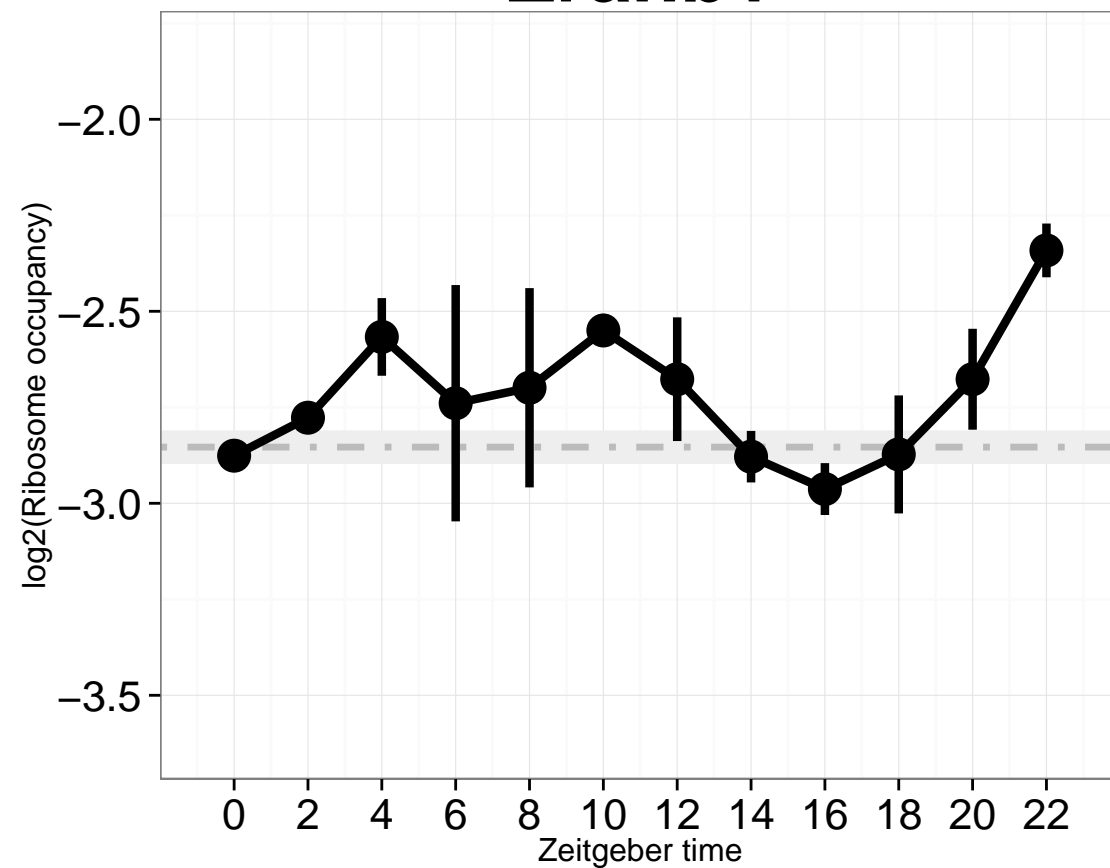

Supplement: SuppDataset_1.zip [file Zranb1_set_A.pdf › Supplemental Dataset 1/A-mRNA_nonrhyth_translation_nonrhyth/Zranb1_set_A.pdf]

## Zranb2

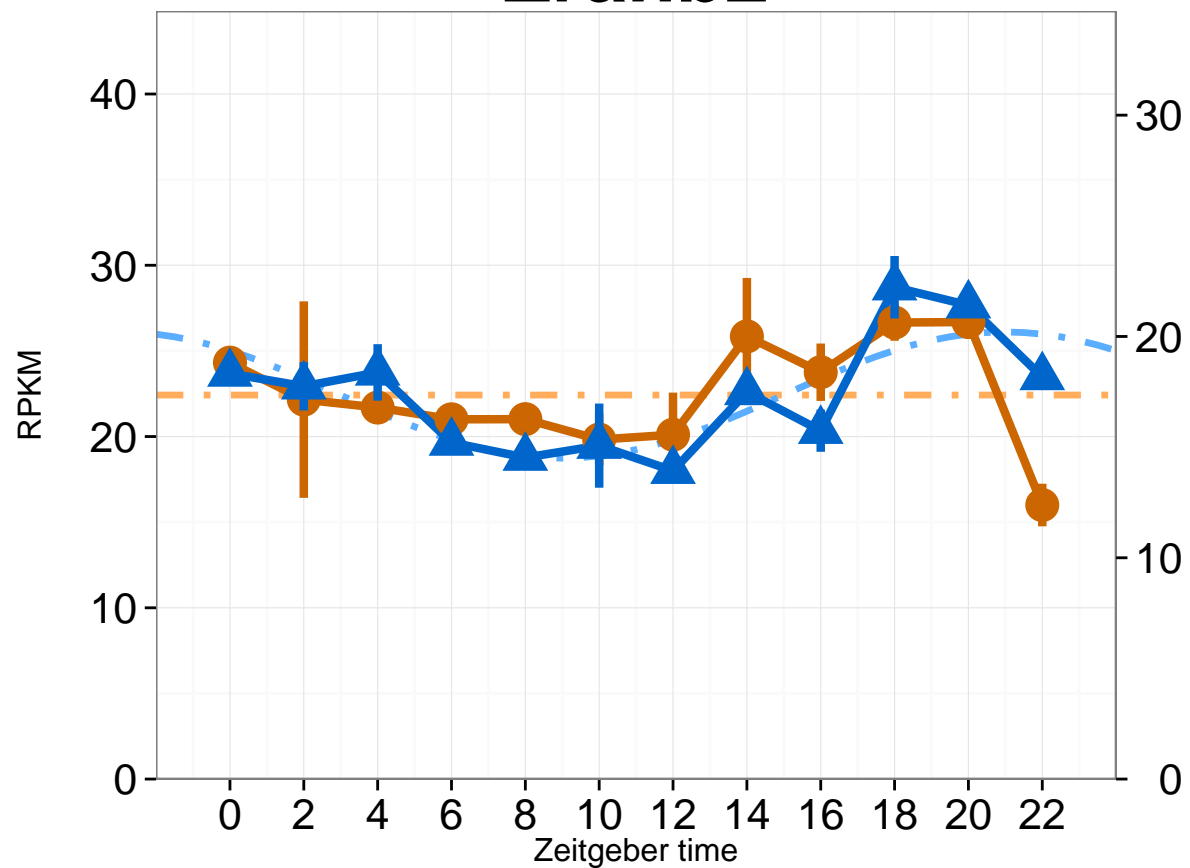

## Zranb2

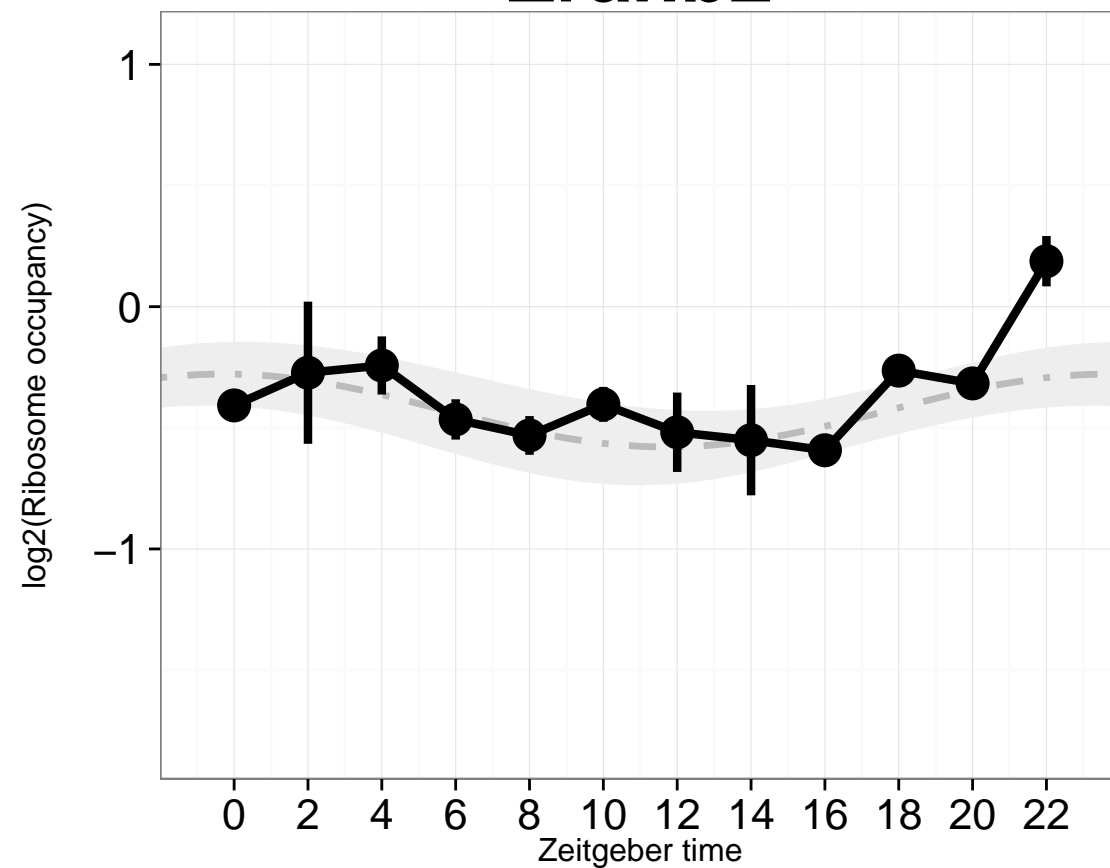

Supplement: SuppDataset_1.zip [file Zranb2_set_A.pdf › Supplemental Dataset 1/A-mRNA_nonrhyth_translation_nonrhyth/Zranb2_set_A.pdf]

# Zranb3

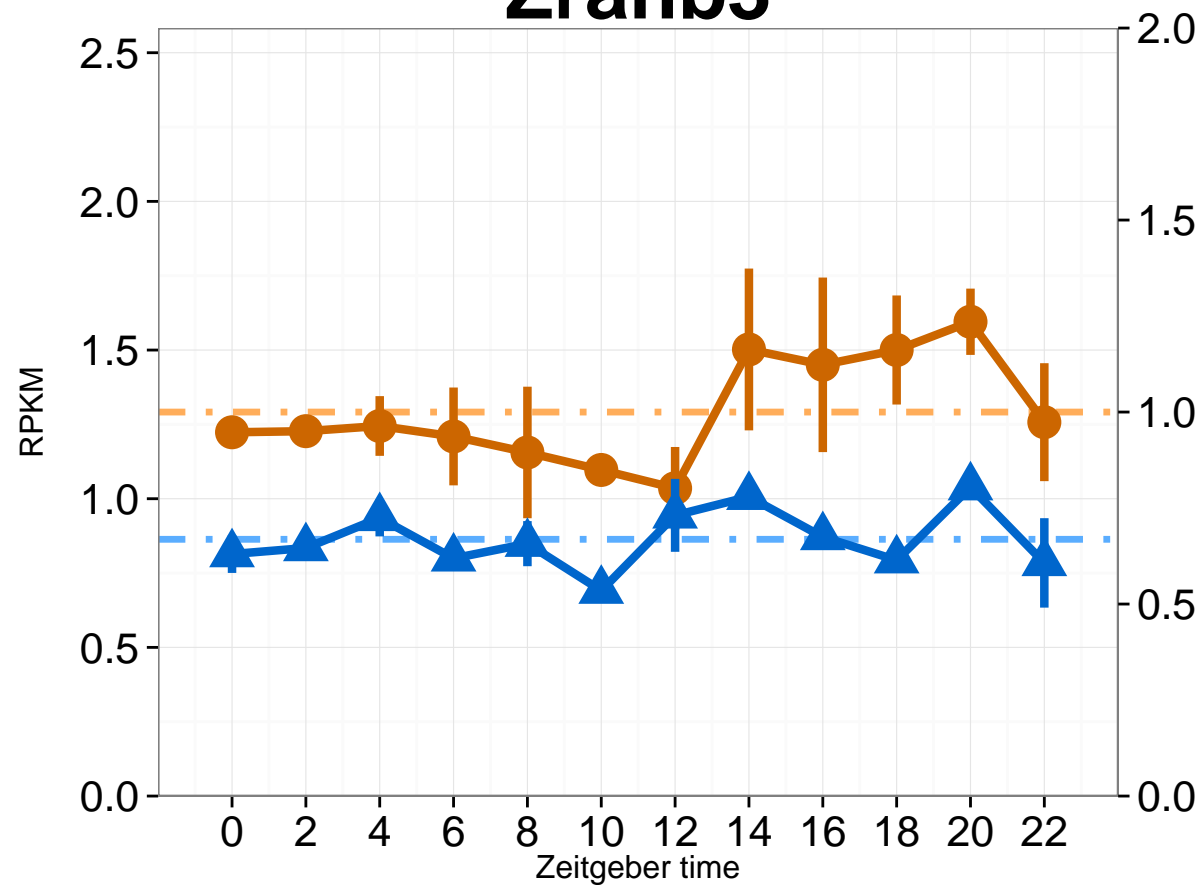

# Zranb3

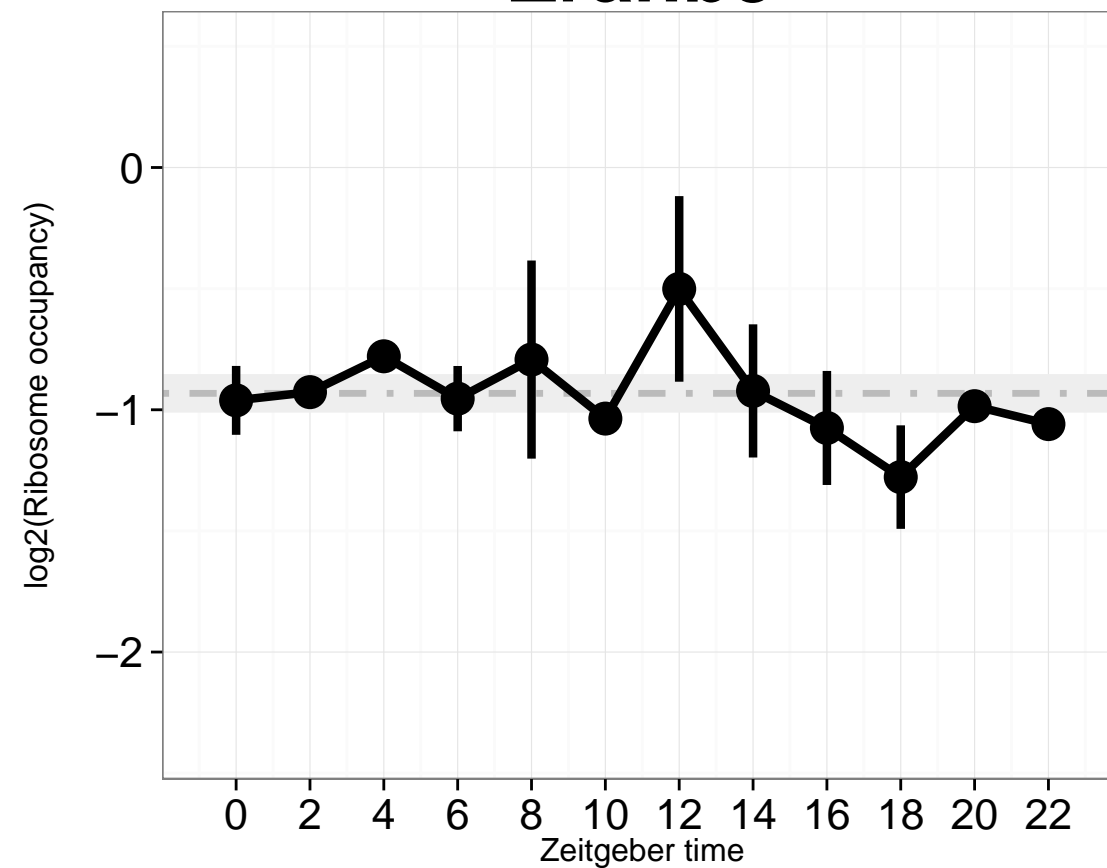

Supplement: SuppDataset_1.zip [file Zranb3_set_A.pdf › Supplemental Dataset 1/A-mRNA_nonrhyth_translation_nonrhyth/Zranb3_set_A.pdf]

# Zrsr1

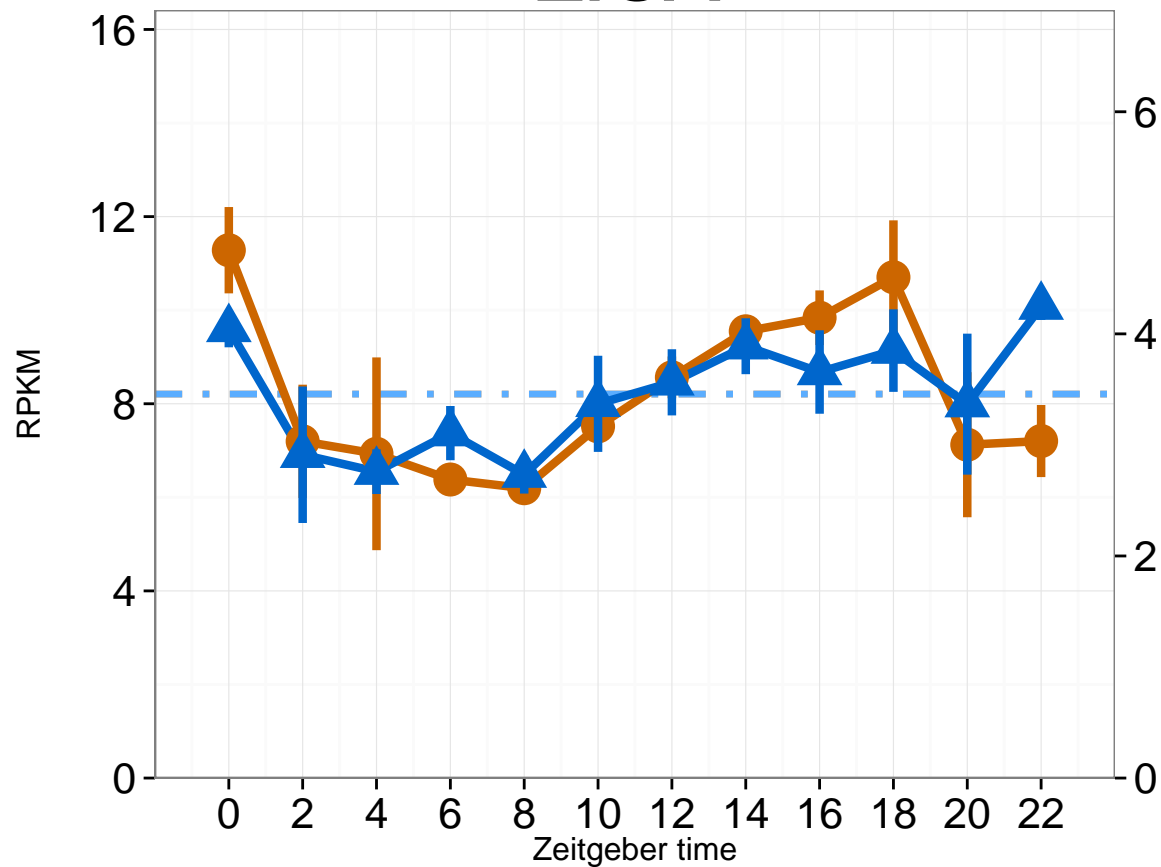

# Zrsr1

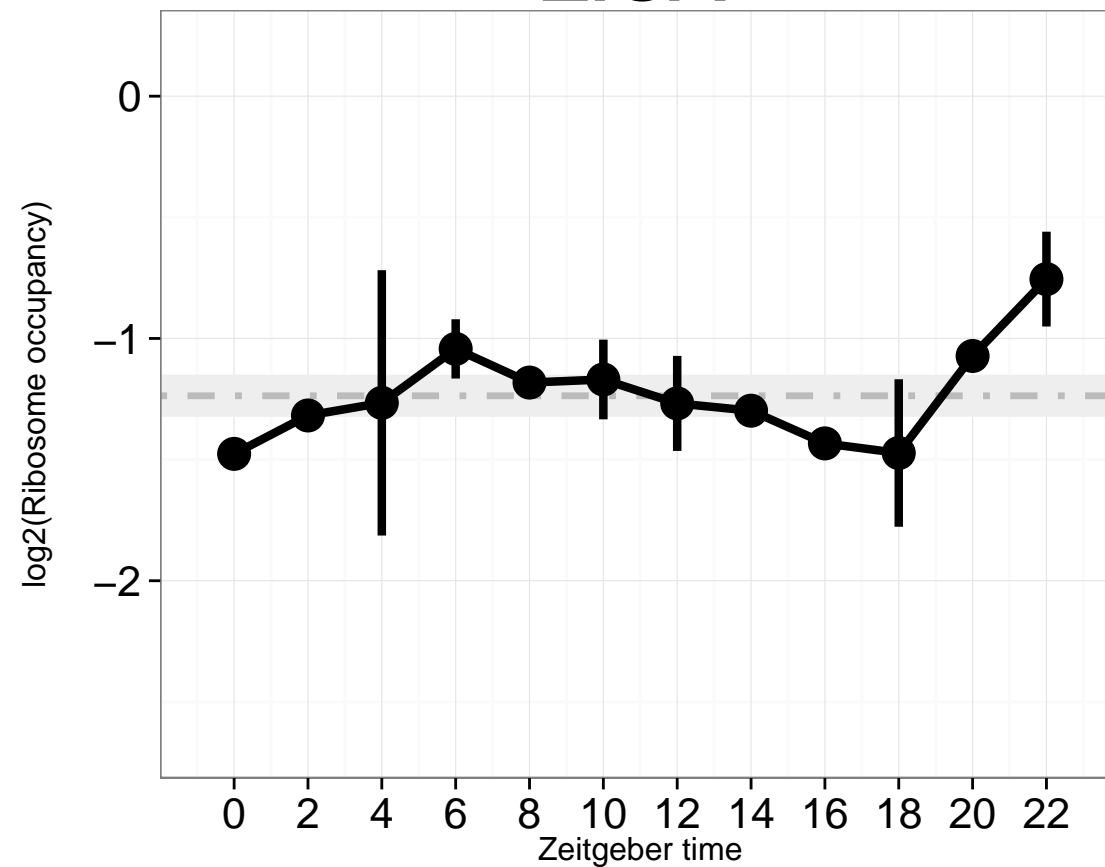

Supplement: SuppDataset_1.zip [file Zrsr1_set_A.pdf › Supplemental Dataset 1/A-mRNA_nonrhyth_translation_nonrhyth/Zrsr1_set_A.pdf]

# Zrsr2

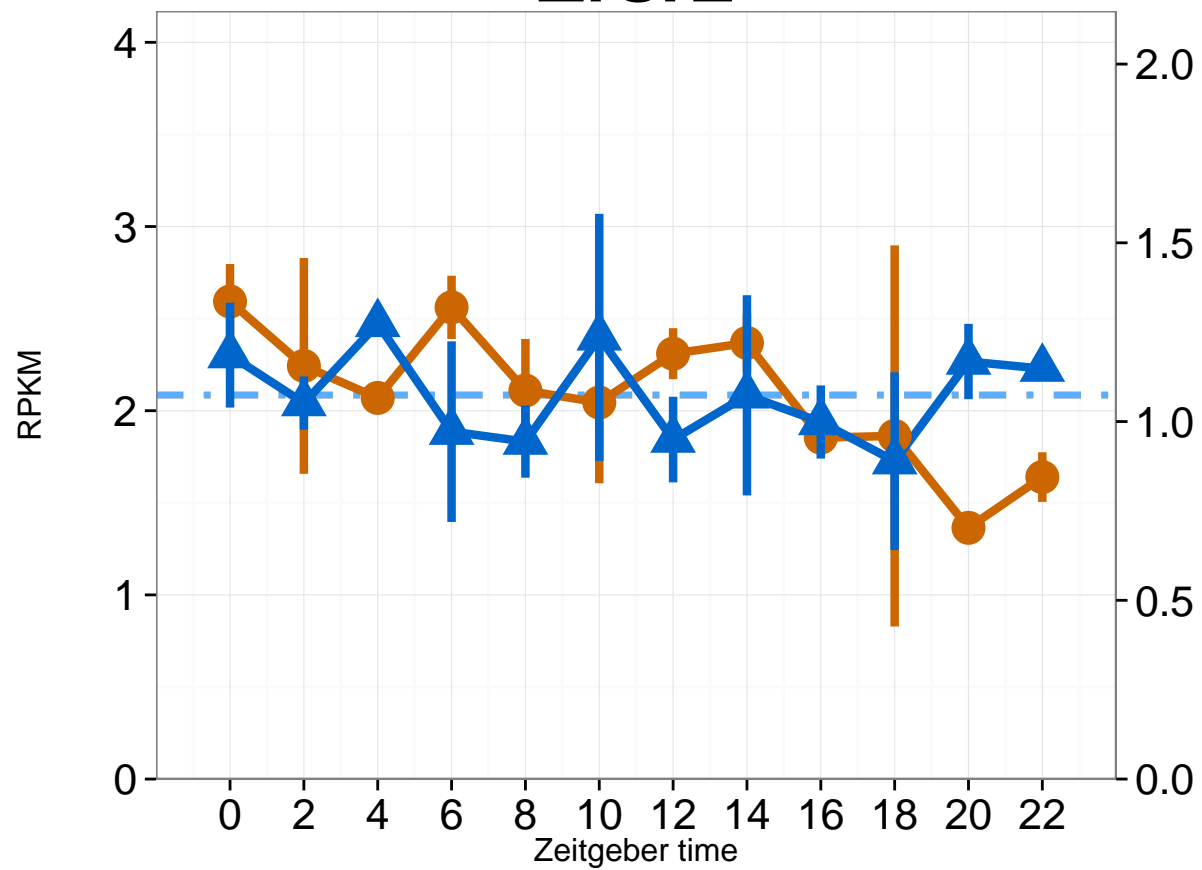

# Zrsr2

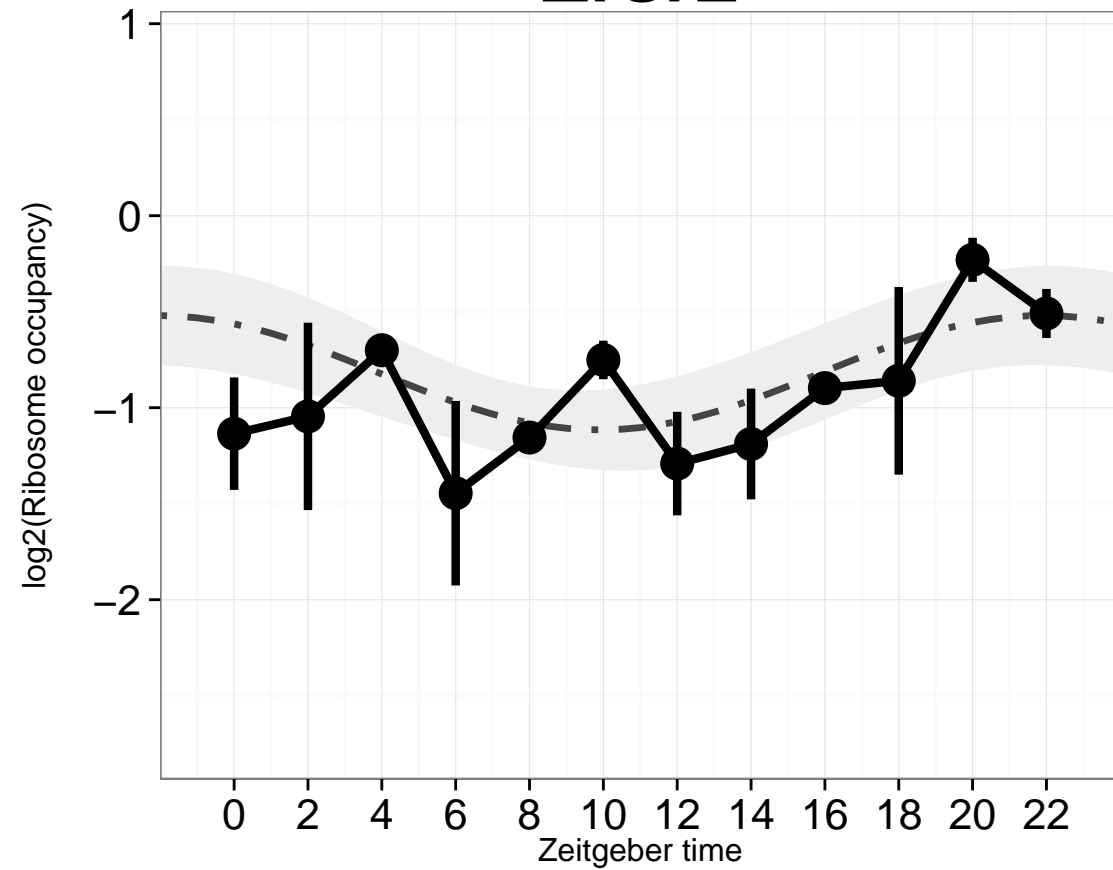

Supplement: SuppDataset_1.zip [file Zrsr2_set_A.pdf › Supplemental Dataset 1/A-mRNA_nonrhyth_translation_nonrhyth/Zrsr2_set_A.pdf]

## Zscan12

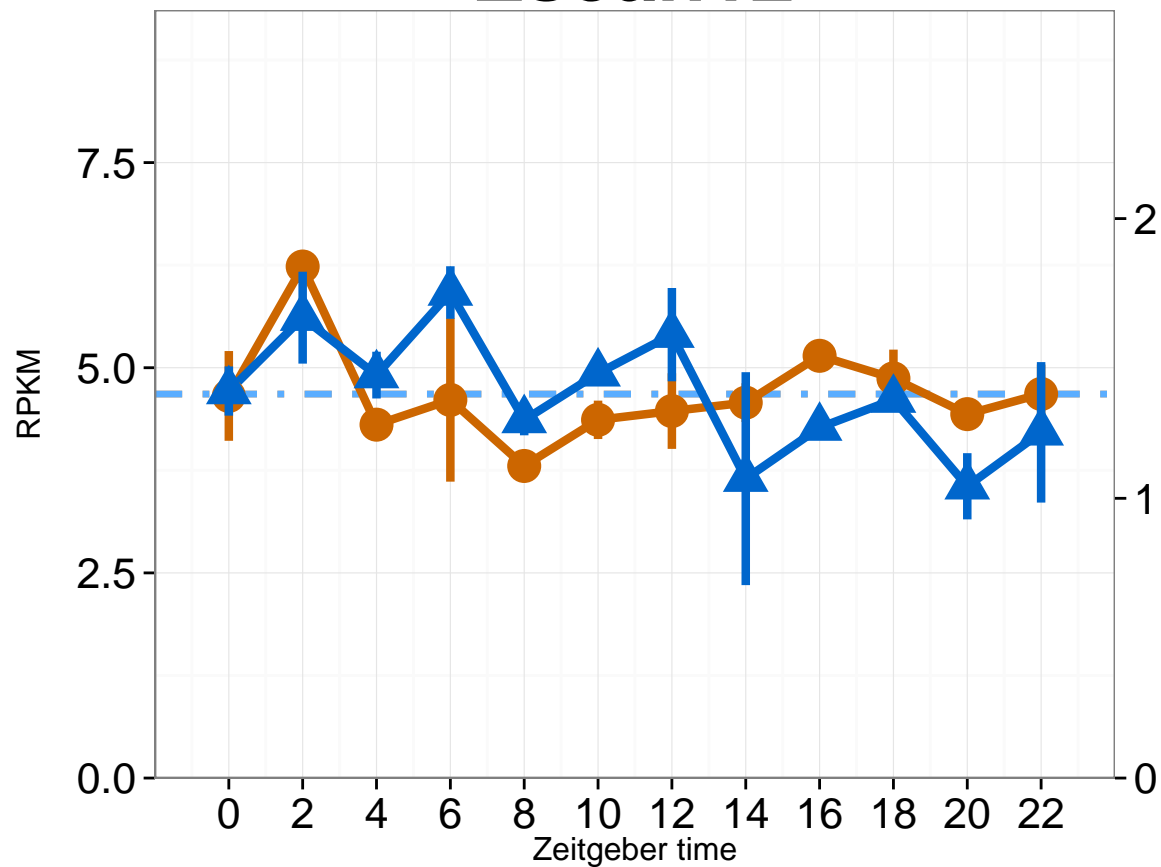

## Zscan12

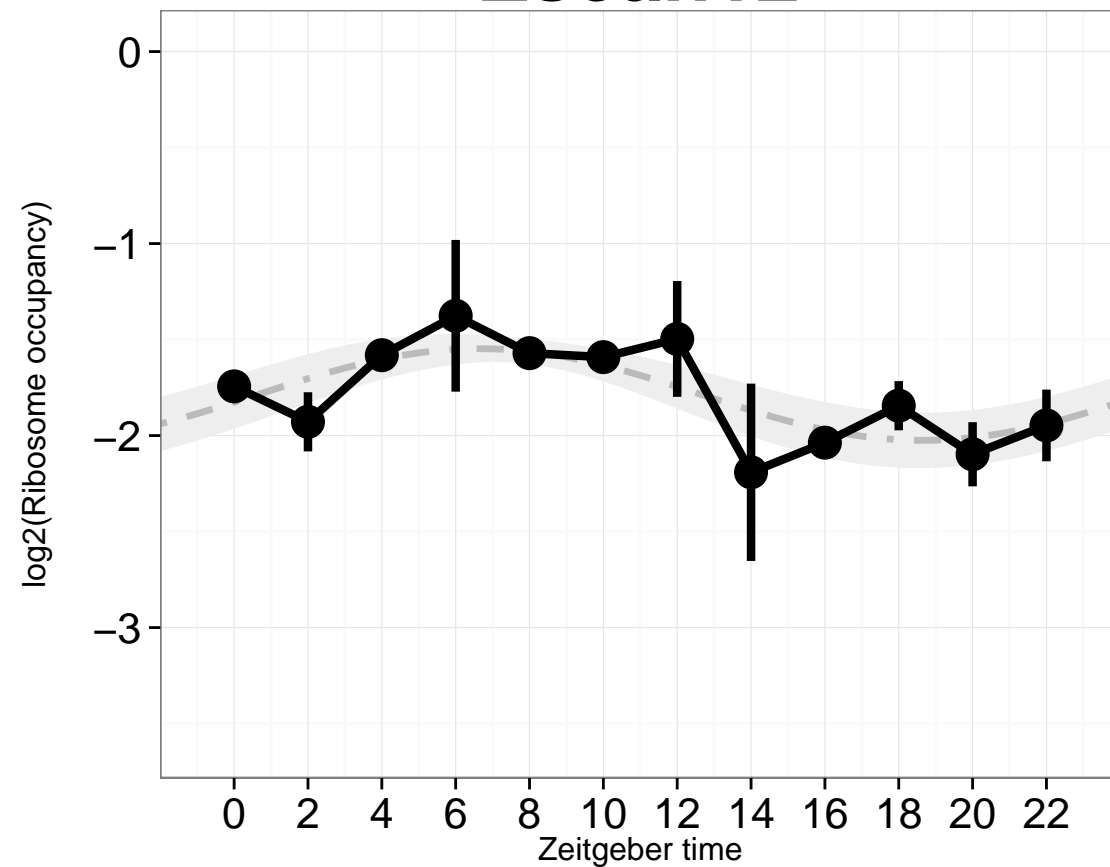

Supplement: SuppDataset_1.zip [file Zscan12_set_A.pdf › Supplemental Dataset 1/A-mRNA_nonrhyth_translation_nonrhyth/Zscan12_set_A.pdf]

# Zscan21

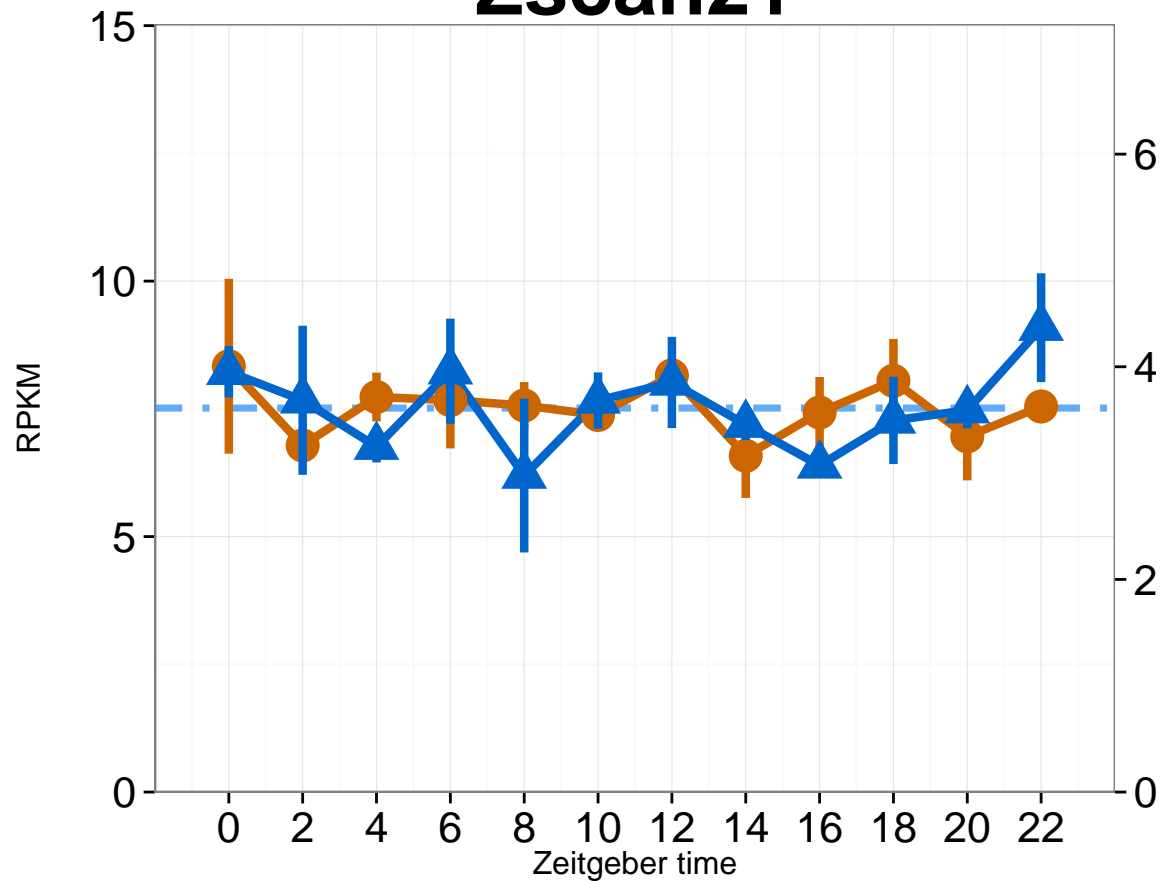

# Zscan21

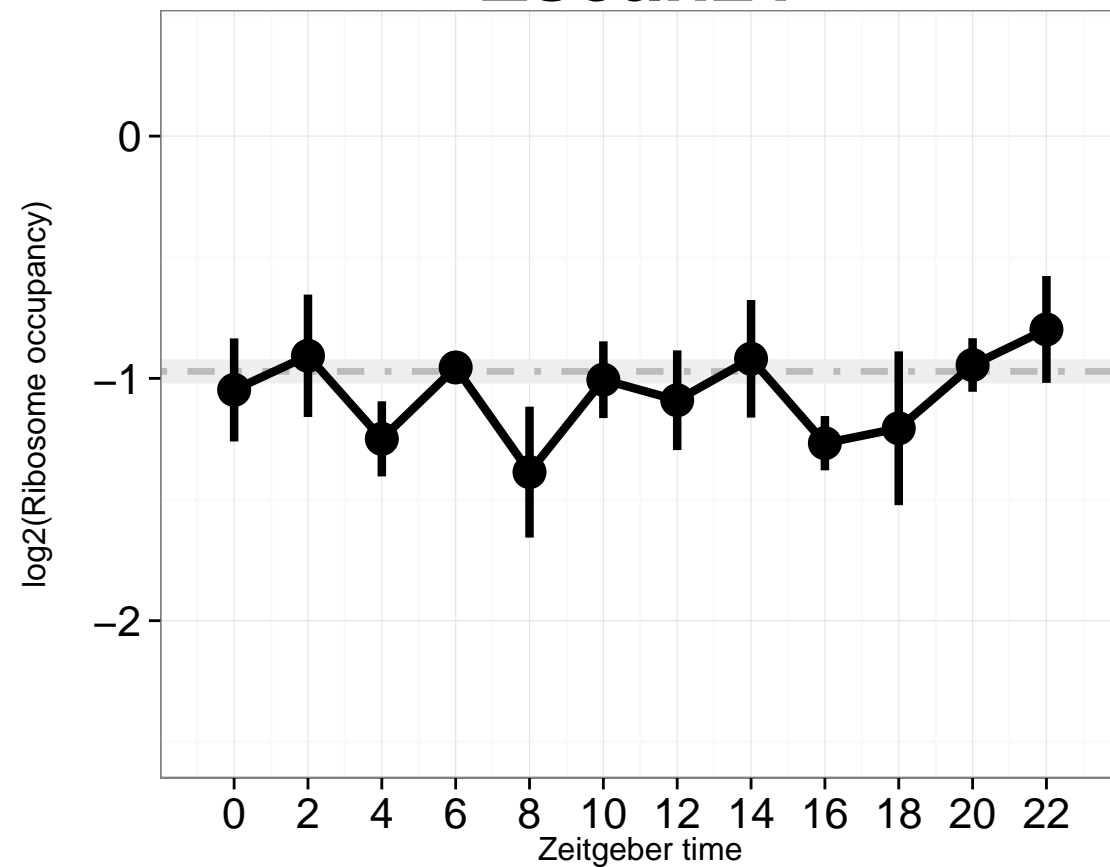

Supplement: SuppDataset_1.zip [file Zscan21_set_A.pdf › Supplemental Dataset 1/A-mRNA_nonrhyth_translation_nonrhyth/Zscan21_set_A.pdf]

## Zscan22

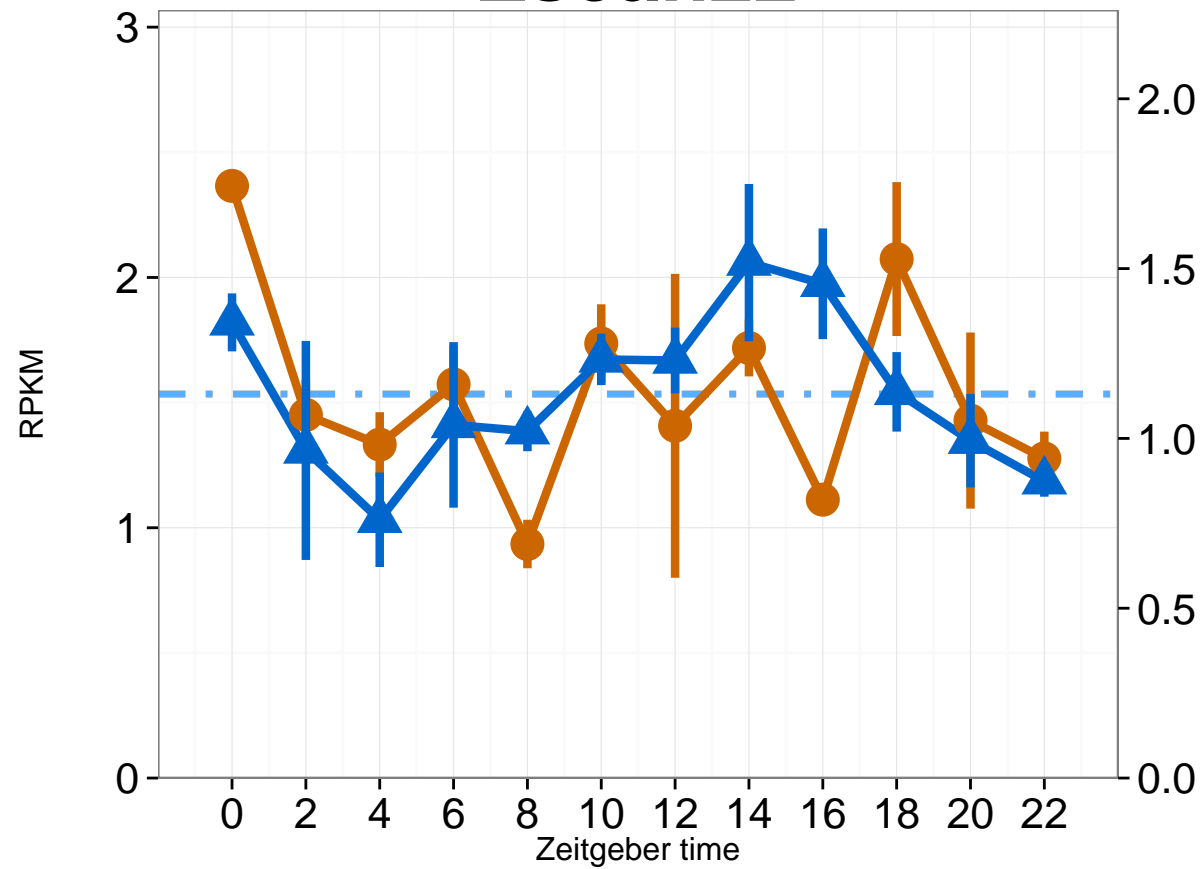

## Zscan22

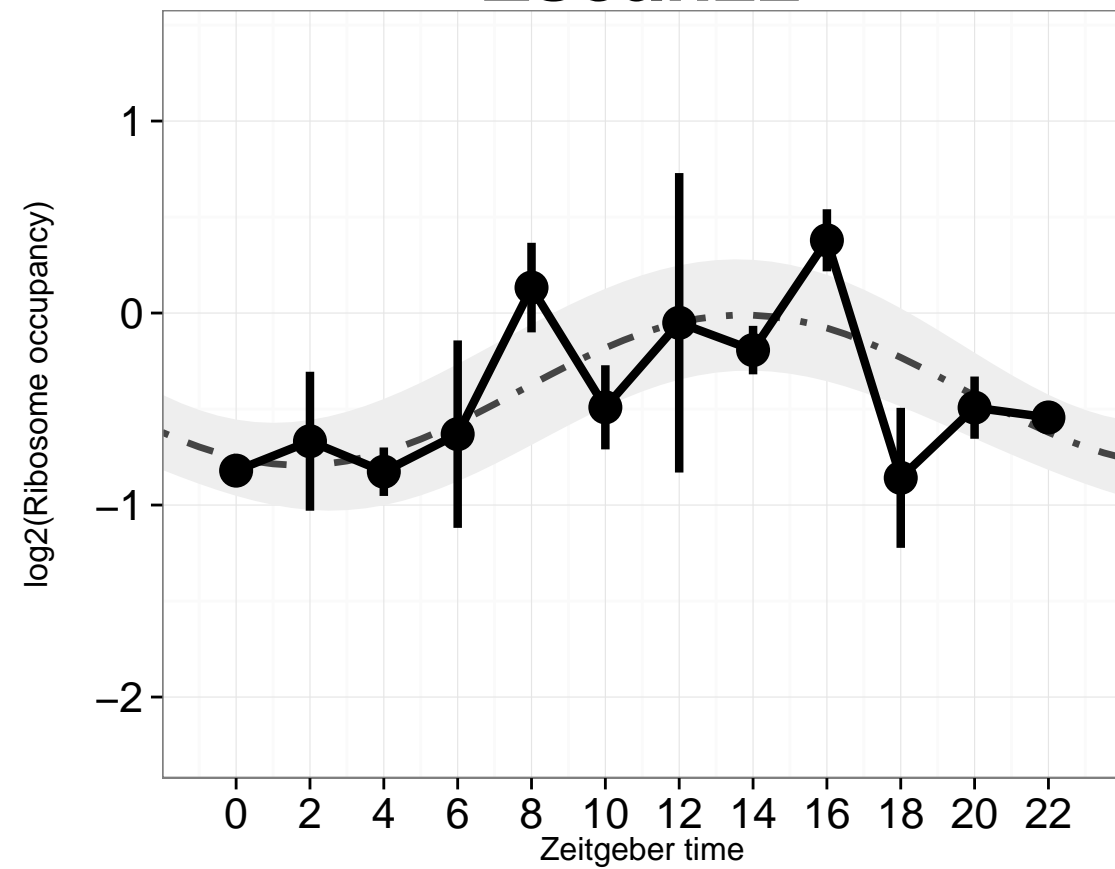

Supplement: SuppDataset_1.zip [file Zscan22_set_A.pdf › Supplemental Dataset 1/A-mRNA_nonrhyth_translation_nonrhyth/Zscan22_set_A.pdf]

## Zscan25

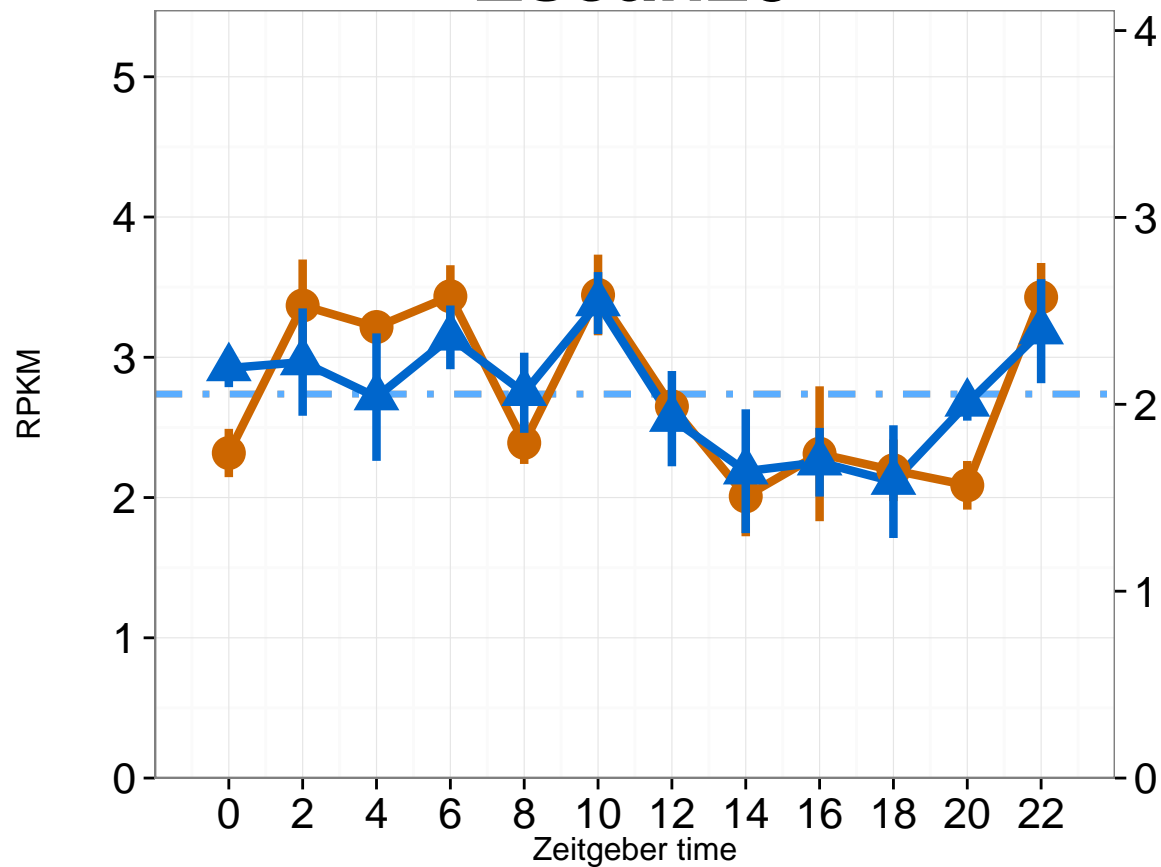

## Zscan25

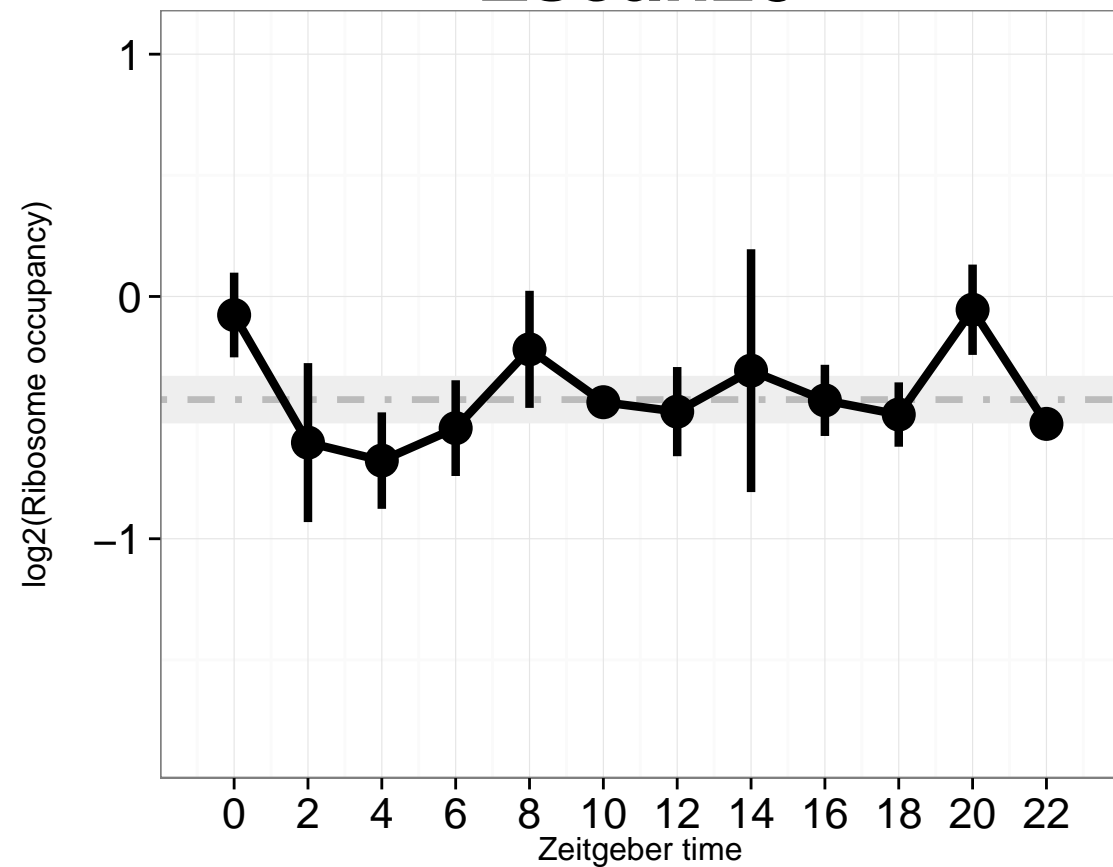

Supplement: SuppDataset_1.zip [file Zscan25_set_A.pdf › Supplemental Dataset 1/A-mRNA_nonrhyth_translation_nonrhyth/Zscan25_set_A.pdf]

## Zscan26

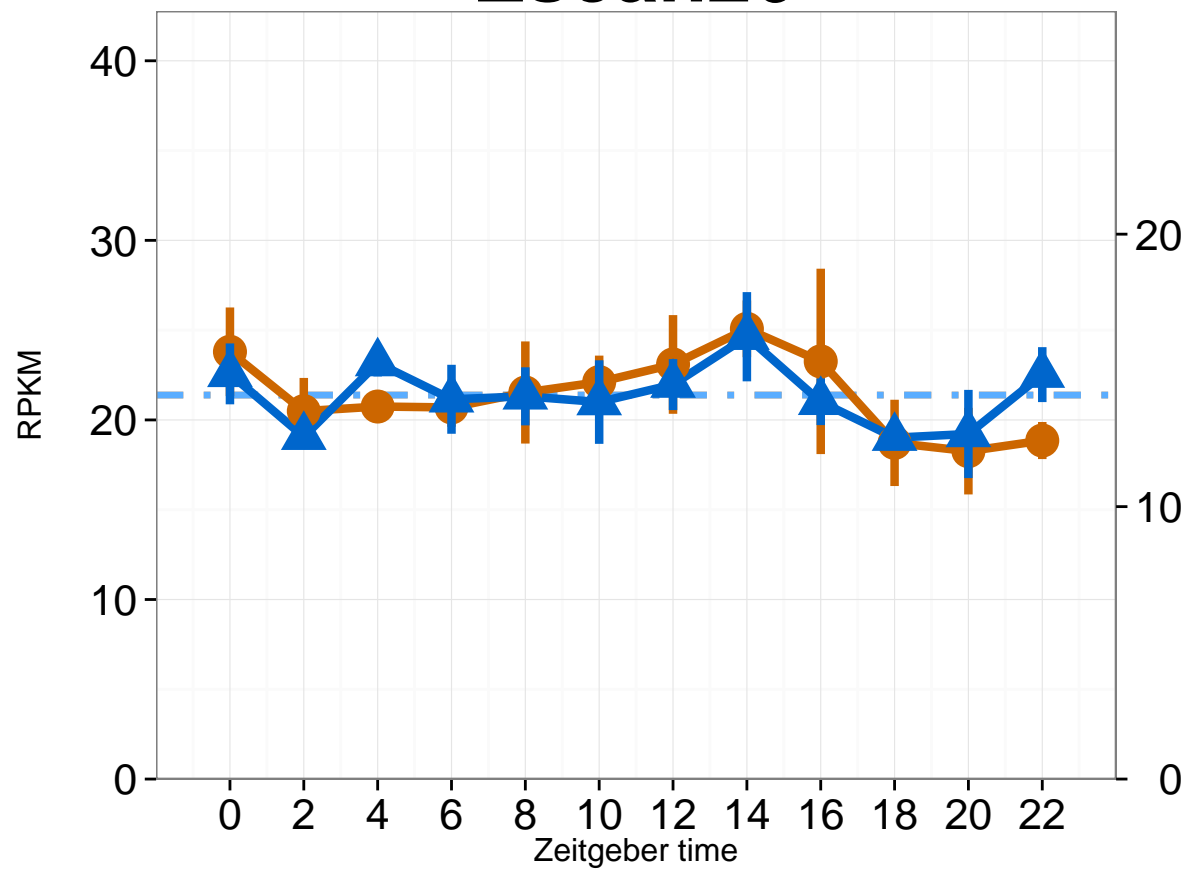

## Zscan26

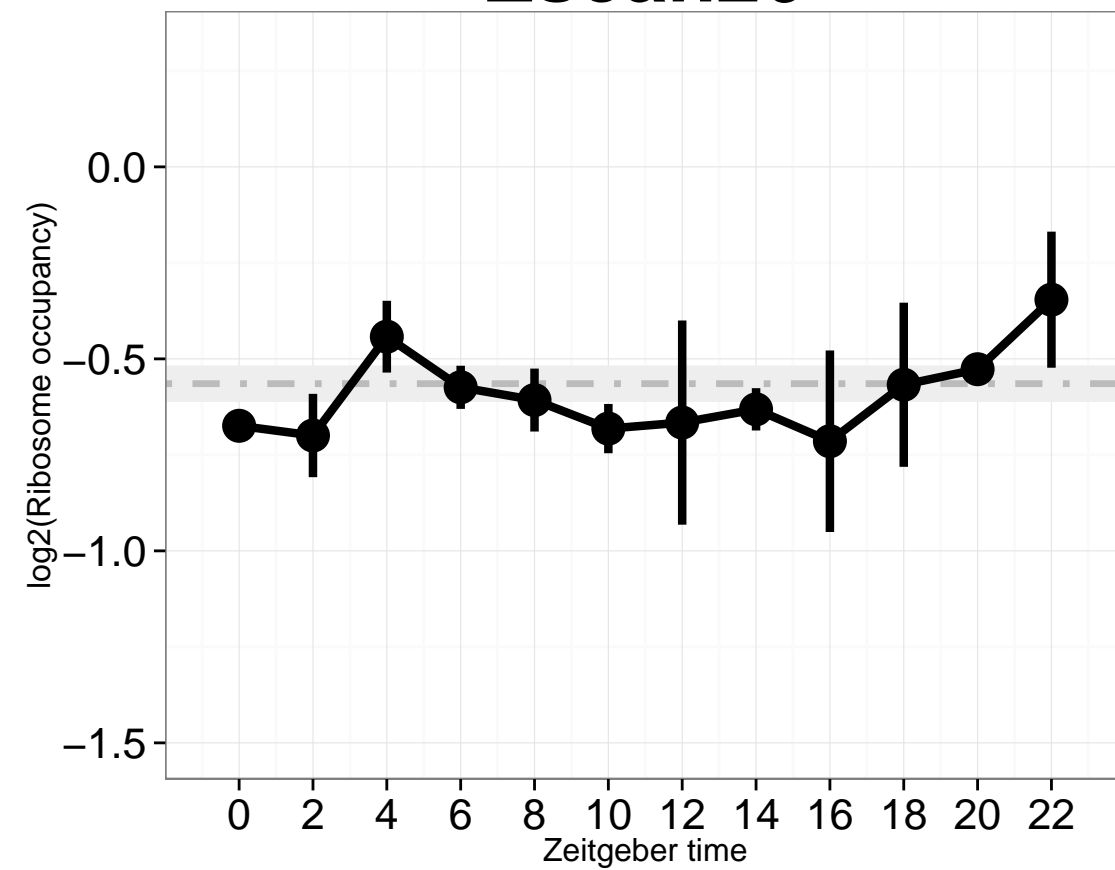

Supplement: SuppDataset_1.zip [file Zscan26_set_A.pdf › Supplemental Dataset 1/A-mRNA_nonrhyth_translation_nonrhyth/Zscan26_set_A.pdf]

## Zscan29

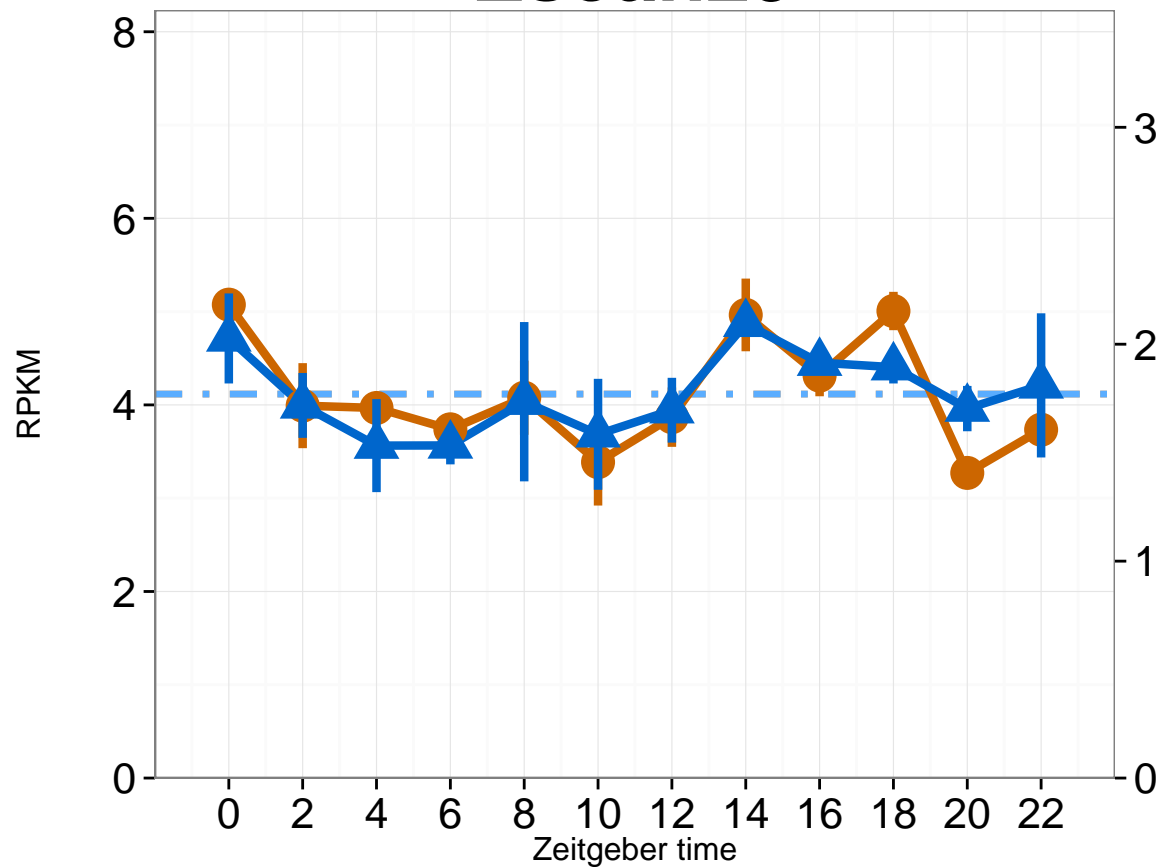

## Zscan29

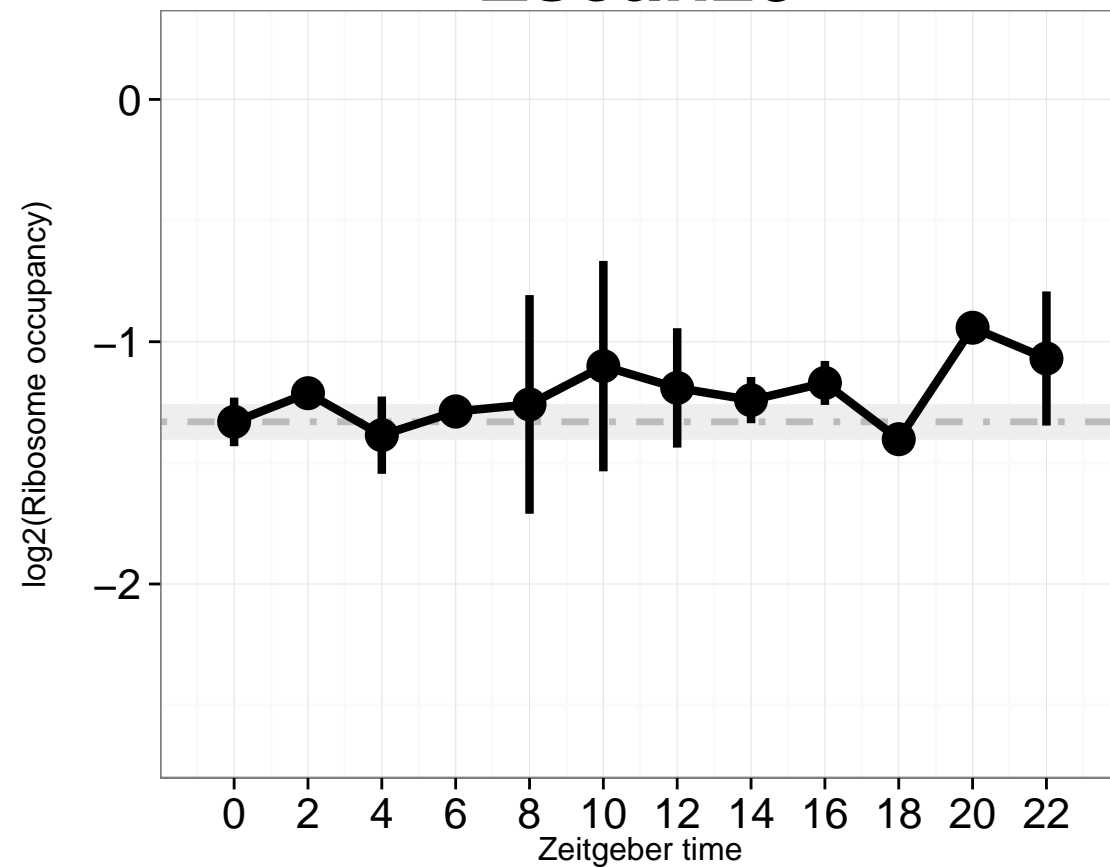

Supplement: SuppDataset_1.zip [file Zscan29_set_A.pdf › Supplemental Dataset 1/A-mRNA_nonrhyth_translation_nonrhyth/Zscan29_set_A.pdf]

## Zscan2

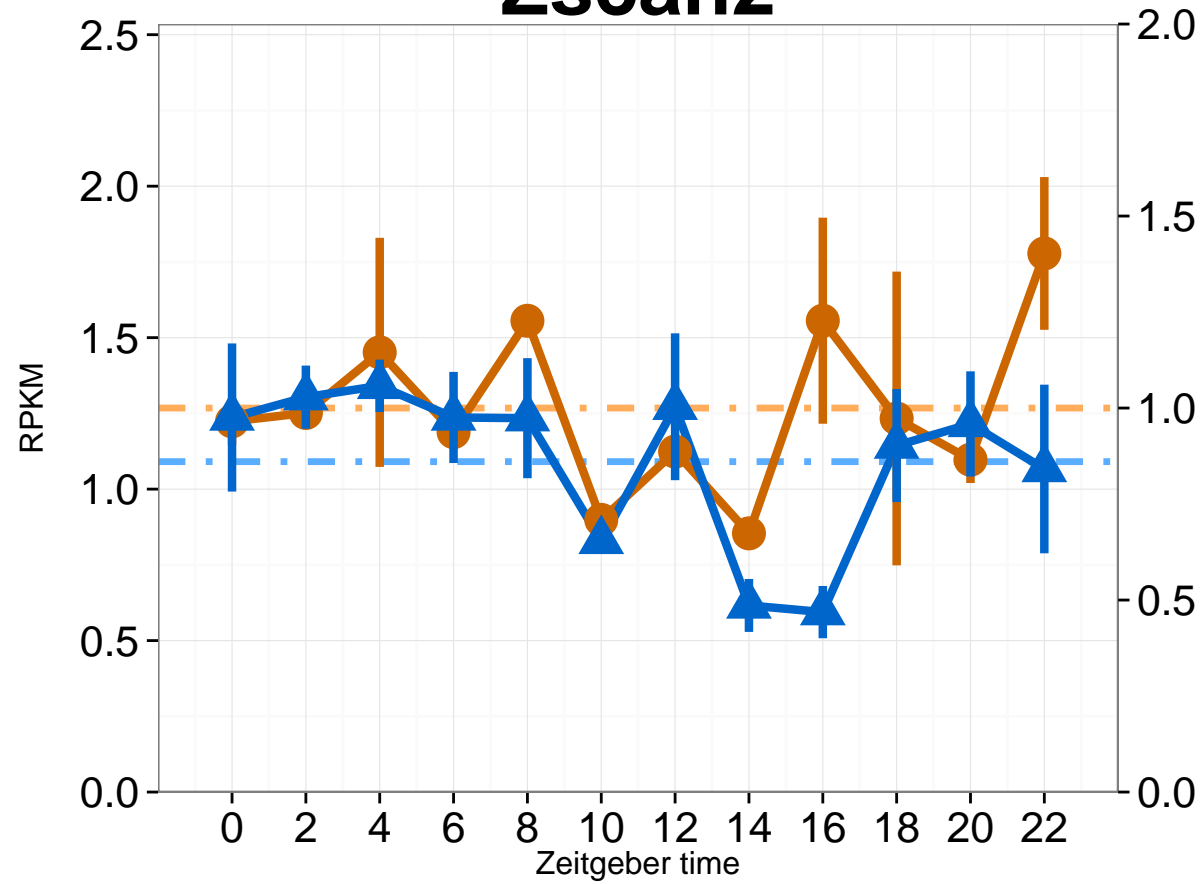

## Zscan2

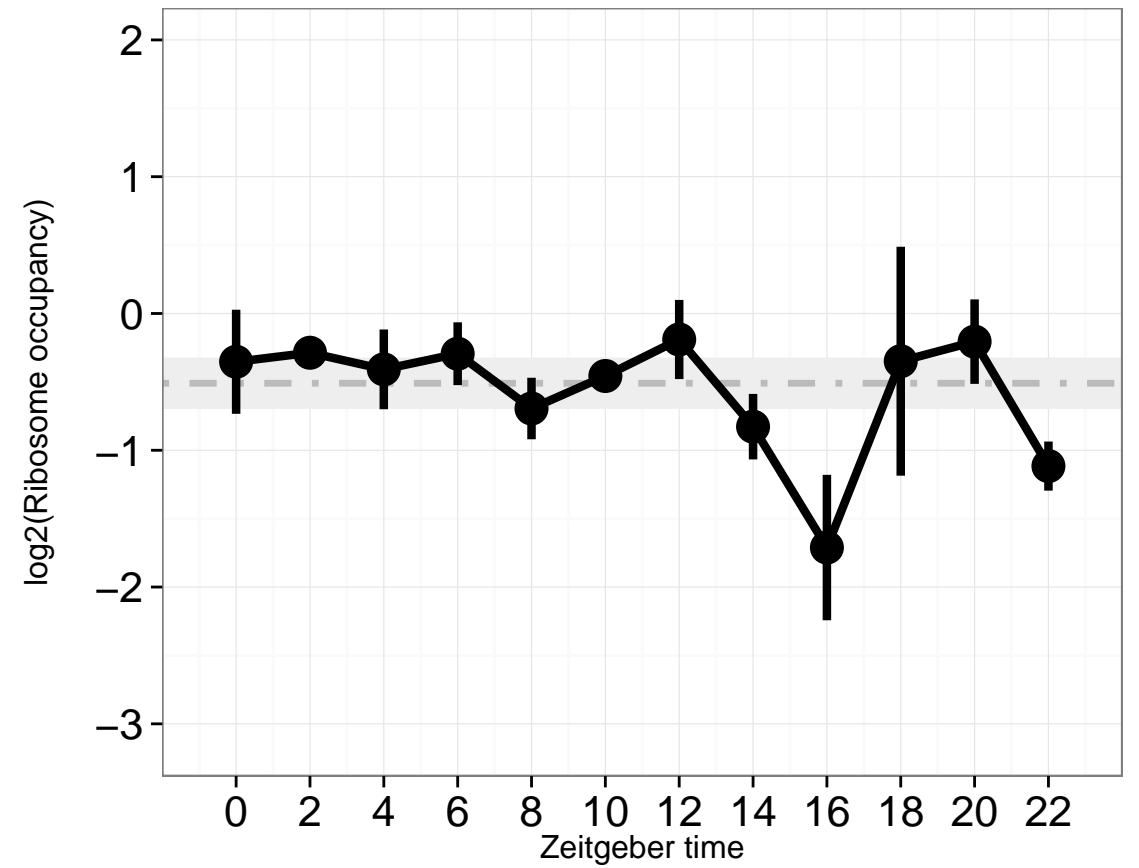

Supplement: SuppDataset_1.zip [file Zscan2_set_A.pdf › Supplemental Dataset 1/A-mRNA_nonrhyth_translation_nonrhyth/Zscan2_set_A.pdf]

## Zswim1

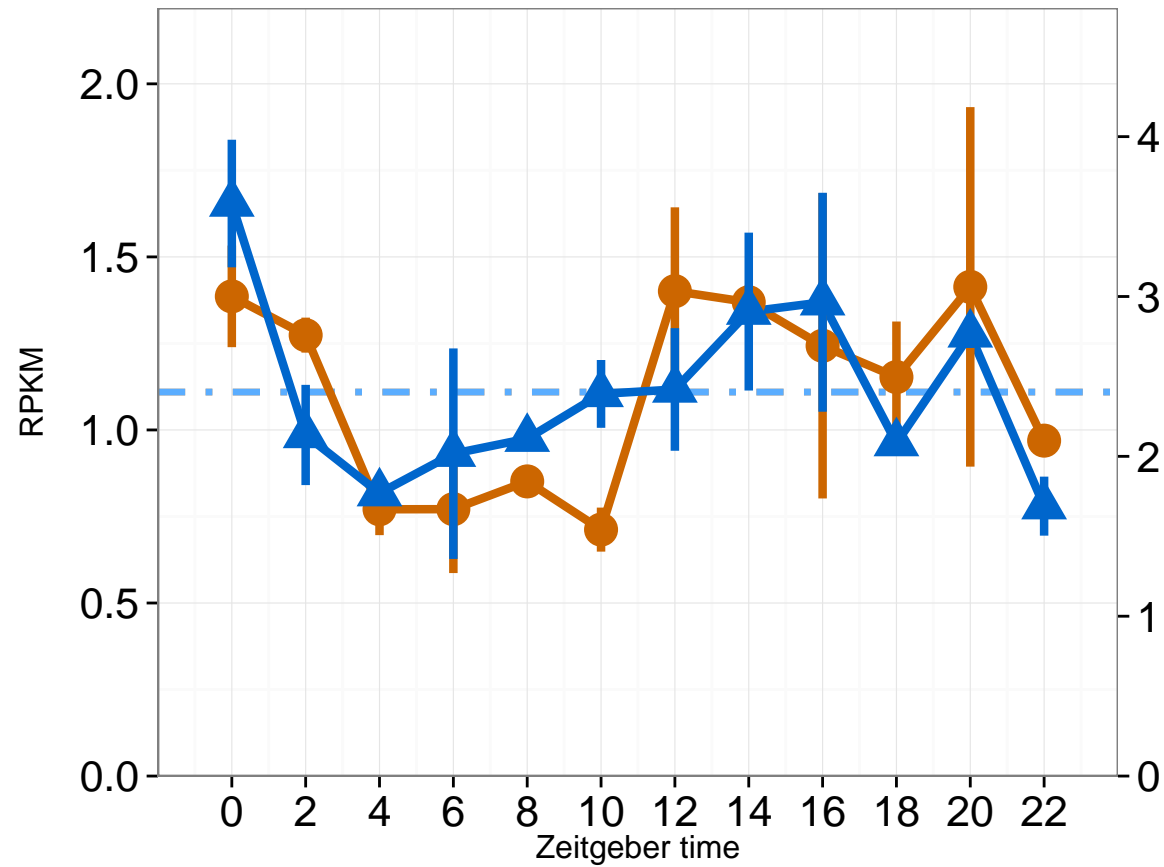

## Zswim1

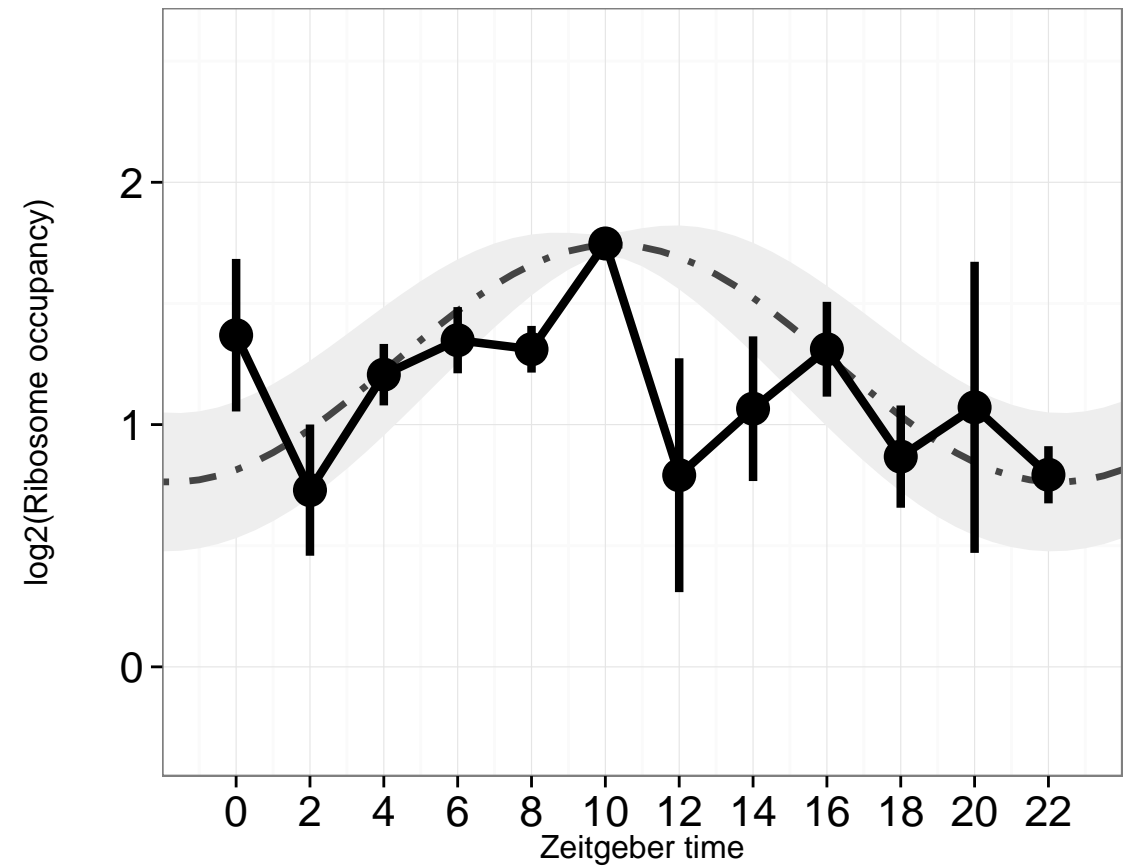

Supplement: SuppDataset_1.zip [file Zswim1_set_A.pdf › Supplemental Dataset 1/A-mRNA_nonrhyth_translation_nonrhyth/Zswim1_set_A.pdf]

# Zswim5

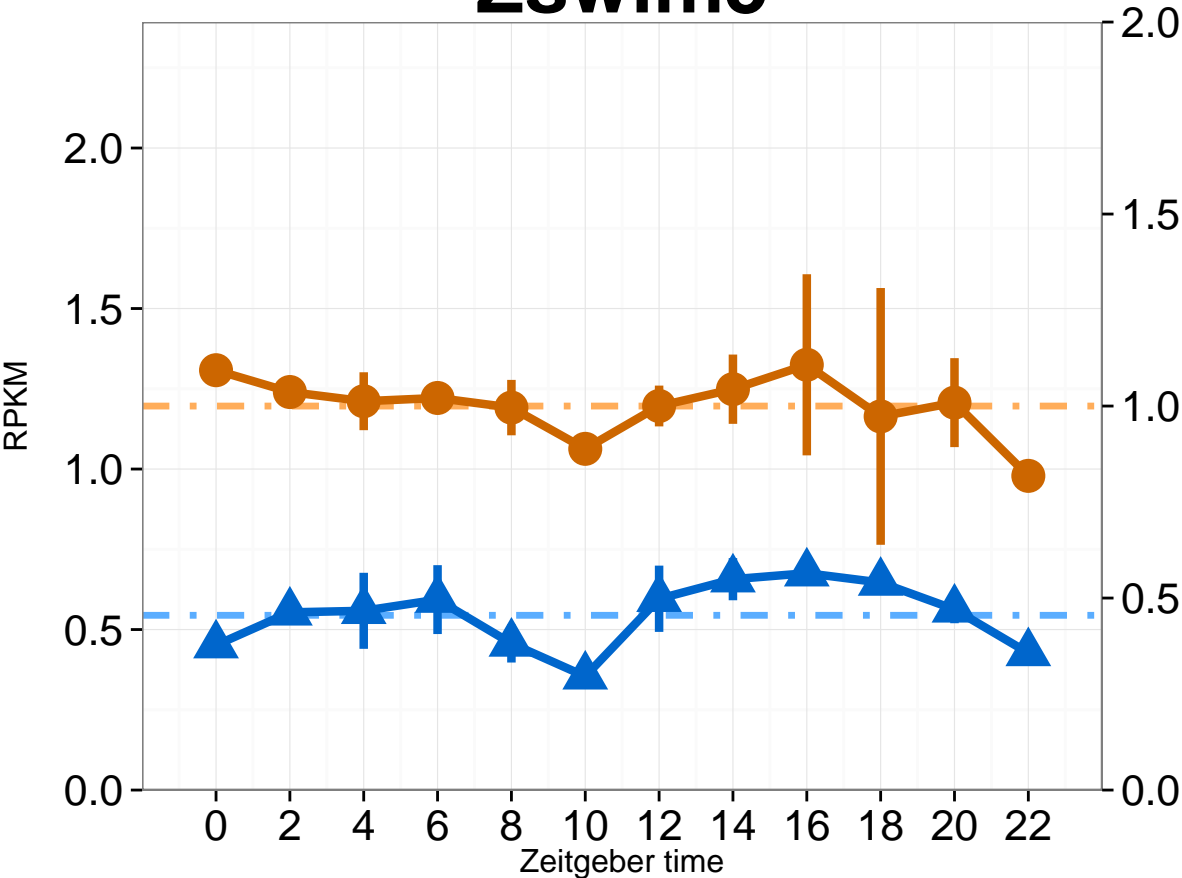

# Zswim5

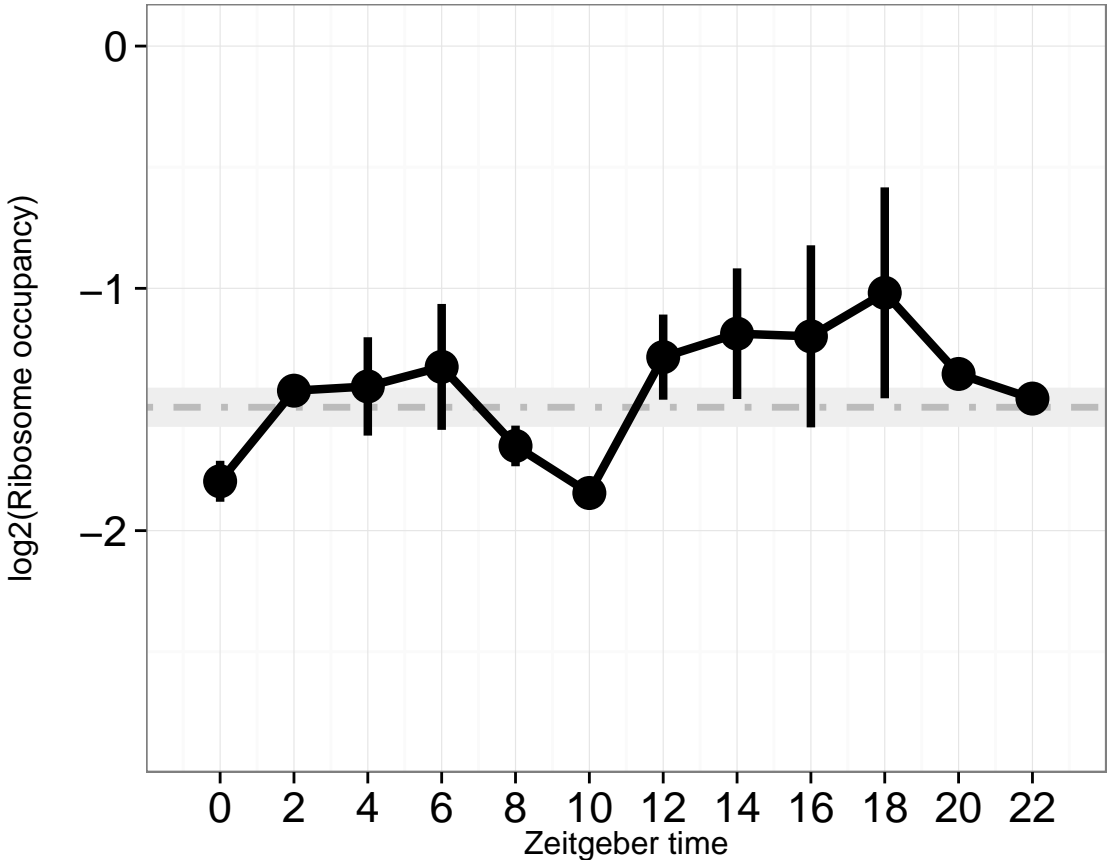

Supplement: SuppDataset_1.zip [file Zswim5_set_A.pdf › Supplemental Dataset 1/A-mRNA_nonrhyth_translation_nonrhyth/Zswim5_set_A.pdf]

# Zswim6

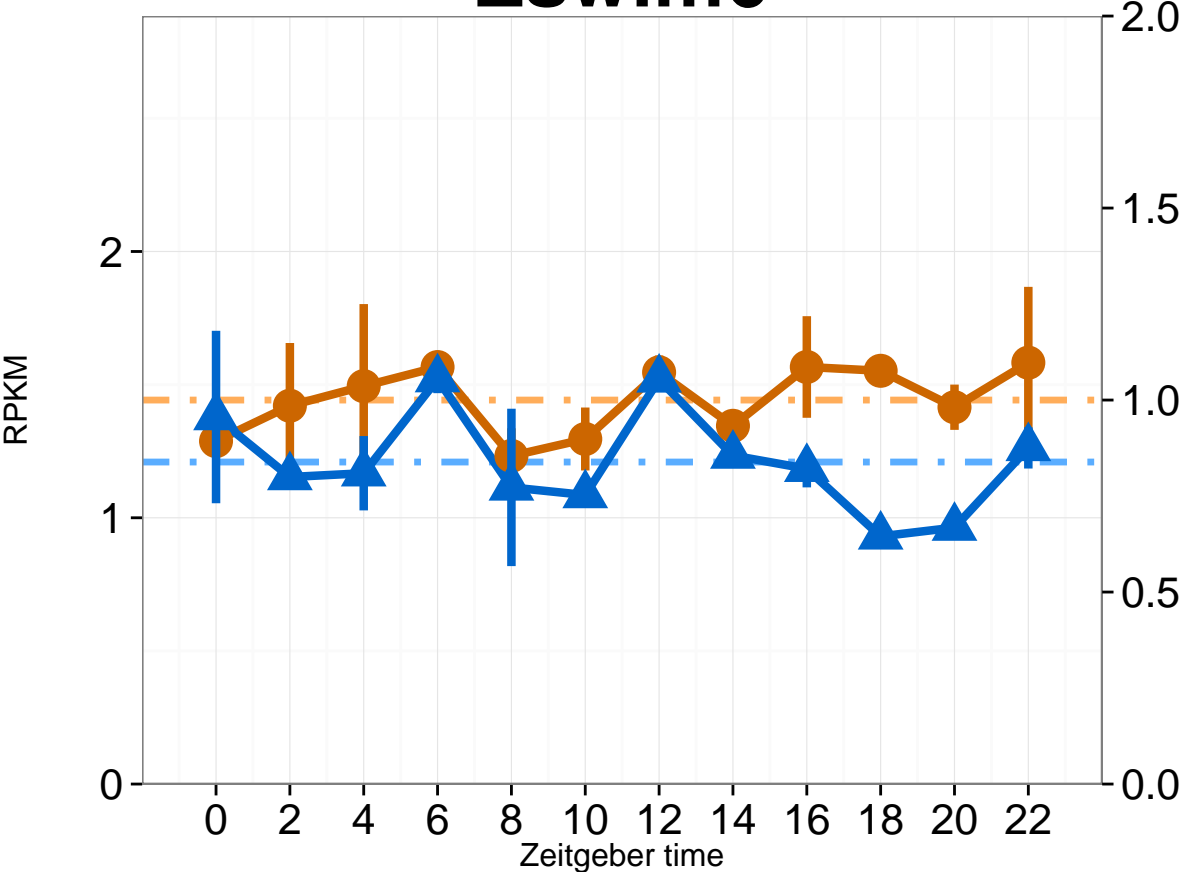

# Zswim6

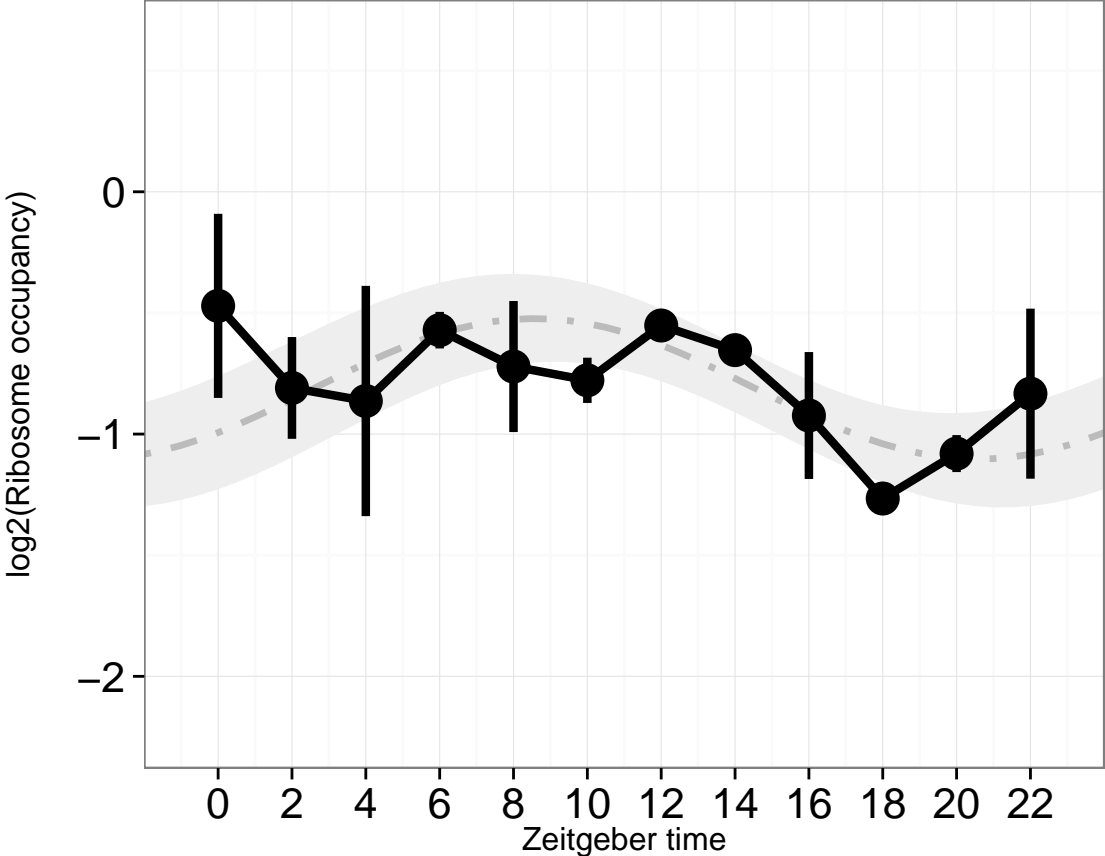

Supplement: SuppDataset_1.zip [file Zswim6_set_A.pdf › Supplemental Dataset 1/A-mRNA_nonrhyth_translation_nonrhyth/Zswim6_set_A.pdf]

## Zswim7

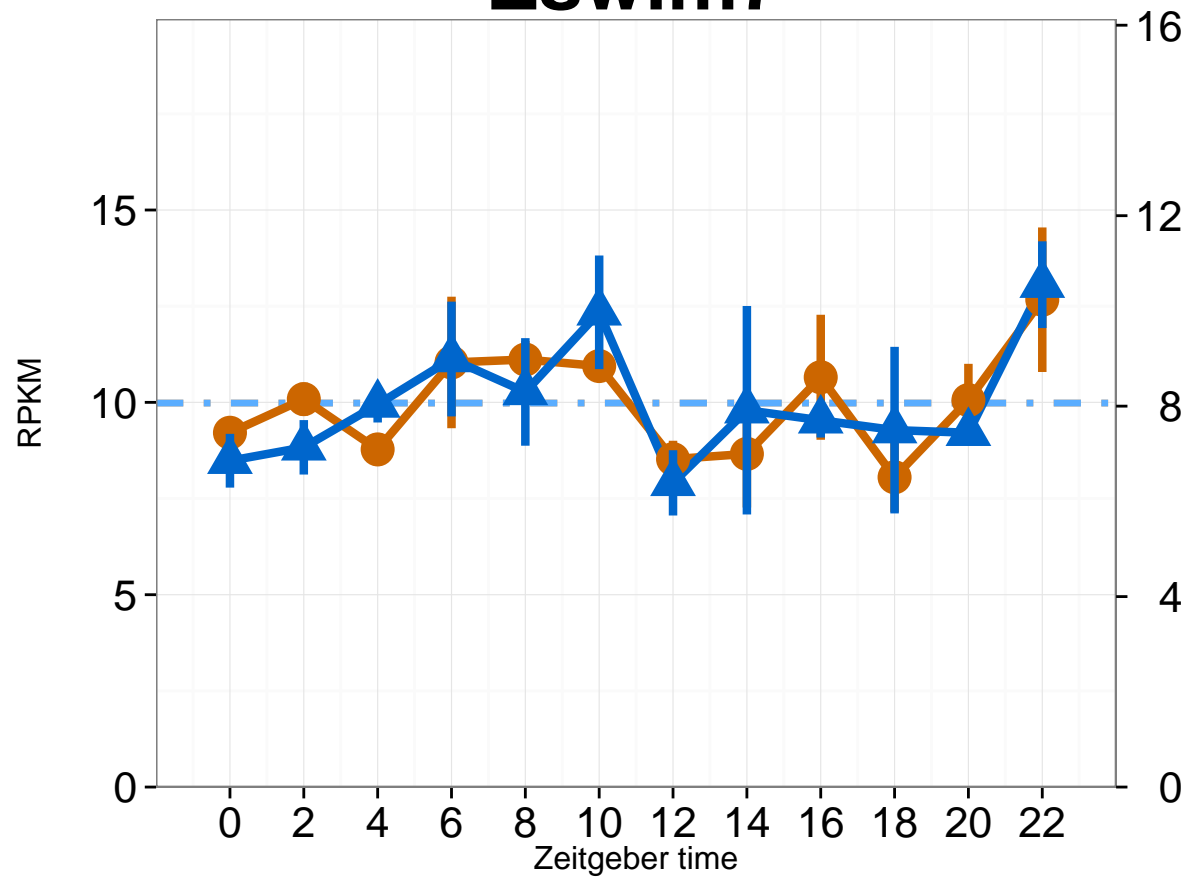

## Zswim7

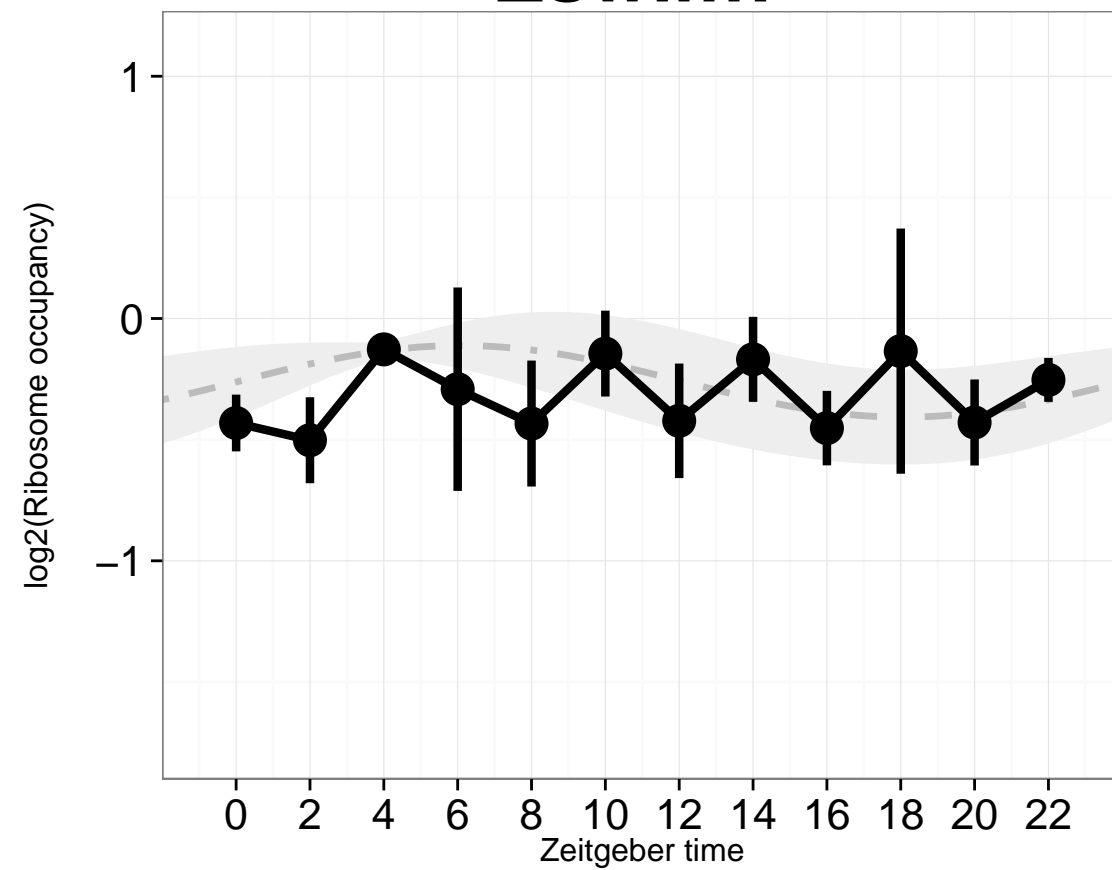

Supplement: SuppDataset_1.zip [file Zswim7_set_A.pdf › Supplemental Dataset 1/A-mRNA_nonrhyth_translation_nonrhyth/Zswim7_set_A.pdf]

## Zswim8

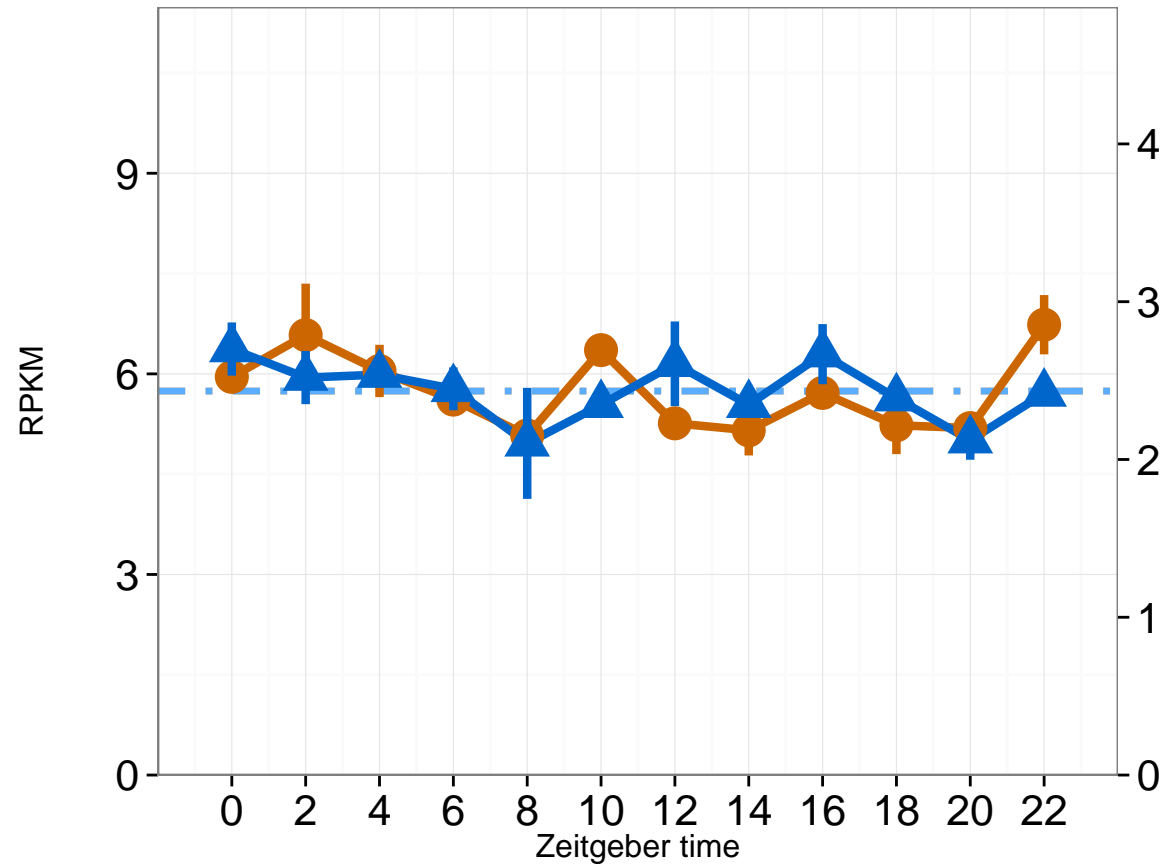

## Zswim8

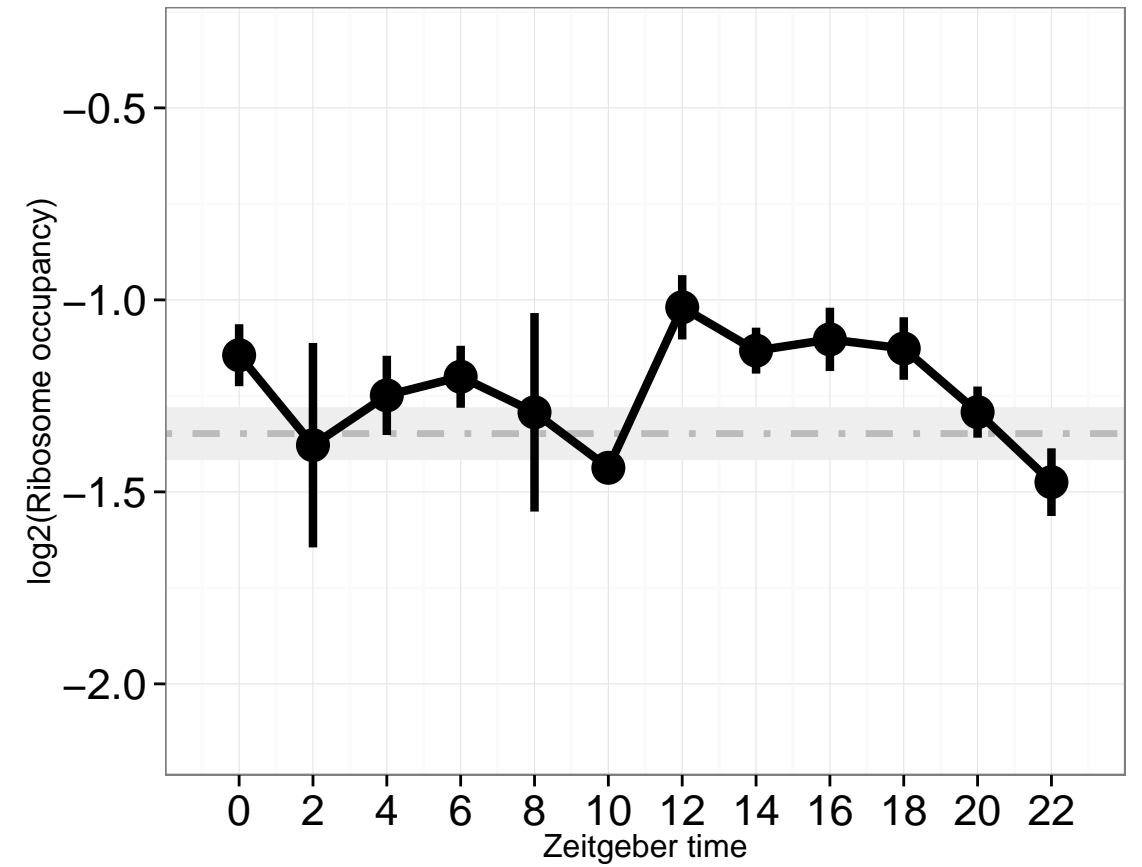

Supplement: SuppDataset_1.zip [file Zswim8_set_A.pdf › Supplemental Dataset 1/A-mRNA_nonrhyth_translation_nonrhyth/Zswim8_set_A.pdf]

## Zufsp

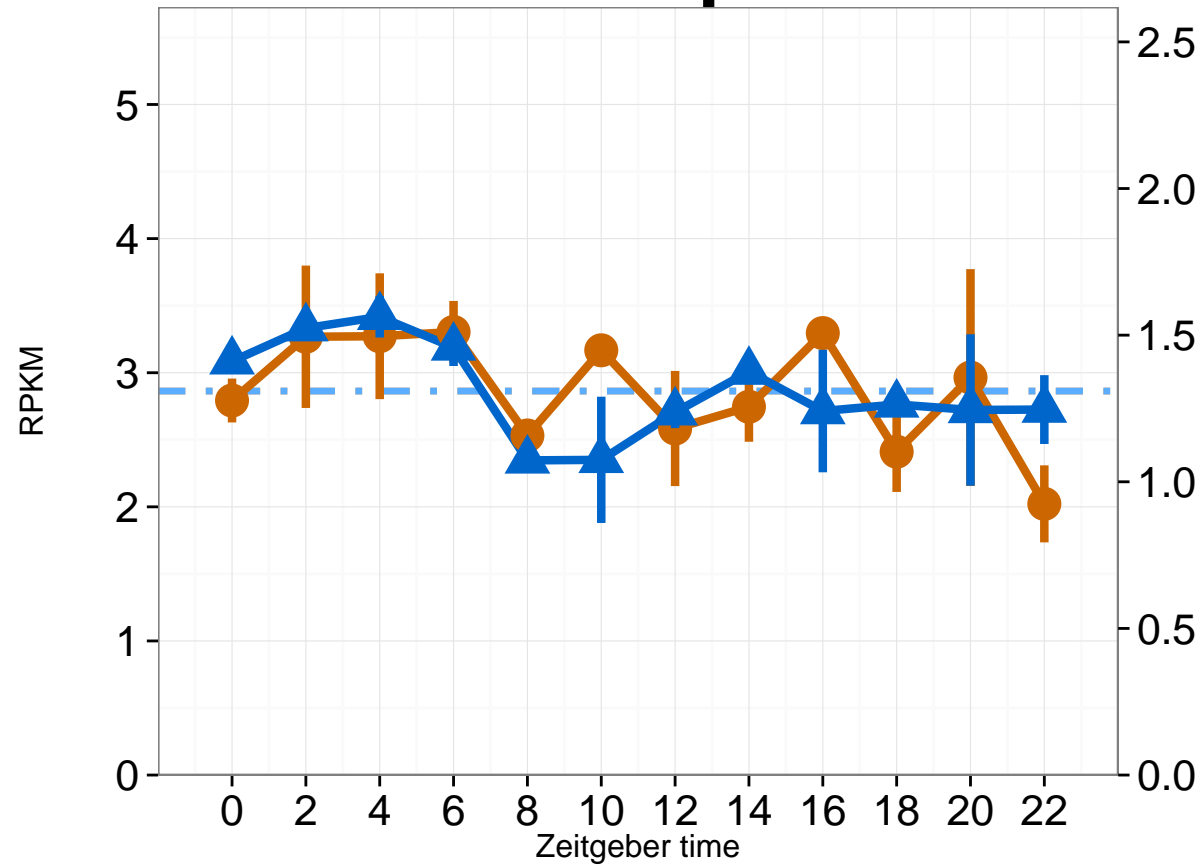

## Zufsp

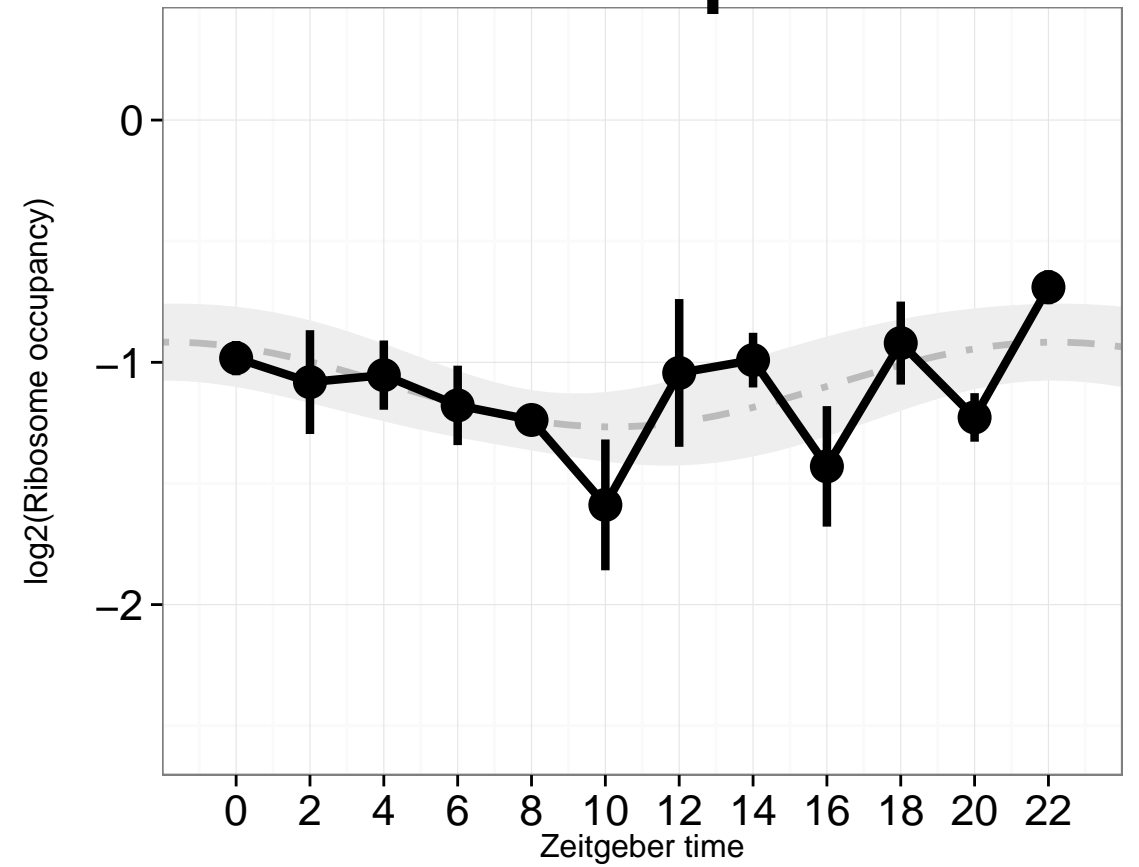

Supplement: SuppDataset_1.zip [file Zufsp_set_A.pdf › Supplemental Dataset 1/A-mRNA_nonrhyth_translation_nonrhyth/Zufsp_set_A.pdf]

# Zw10

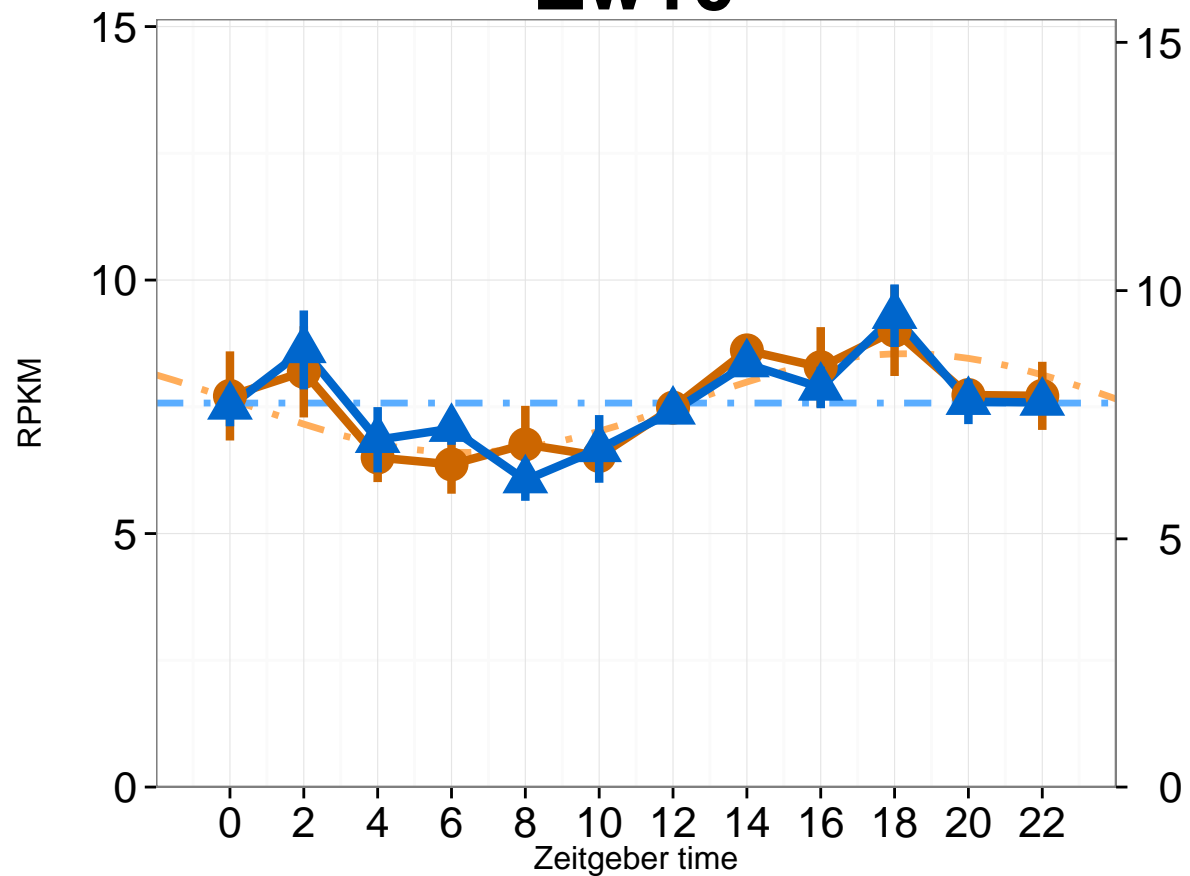

# Zw10

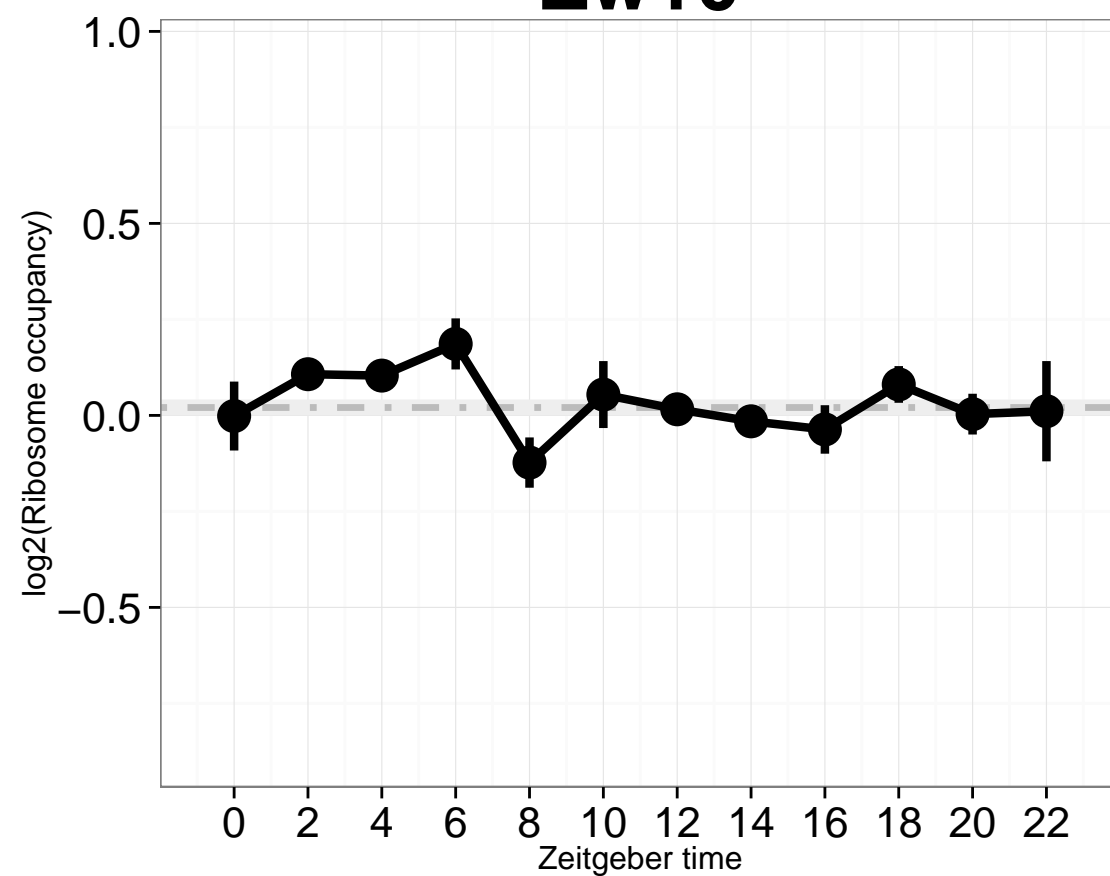

Supplement: SuppDataset_1.zip [file Zw10_set_A.pdf › Supplemental Dataset 1/A-mRNA_nonrhyth_translation_nonrhyth/Zw10_set_A.pdf]

## Zwilch

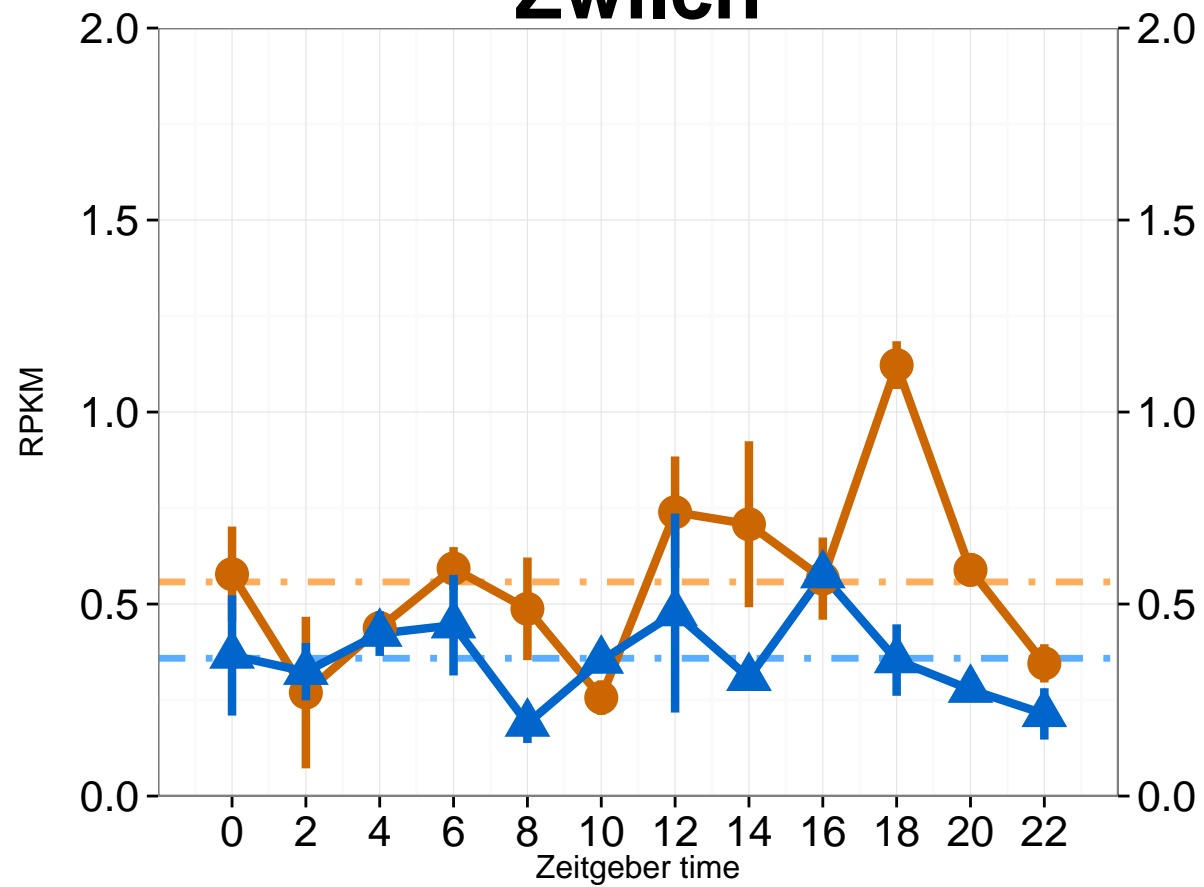

## Zwilch

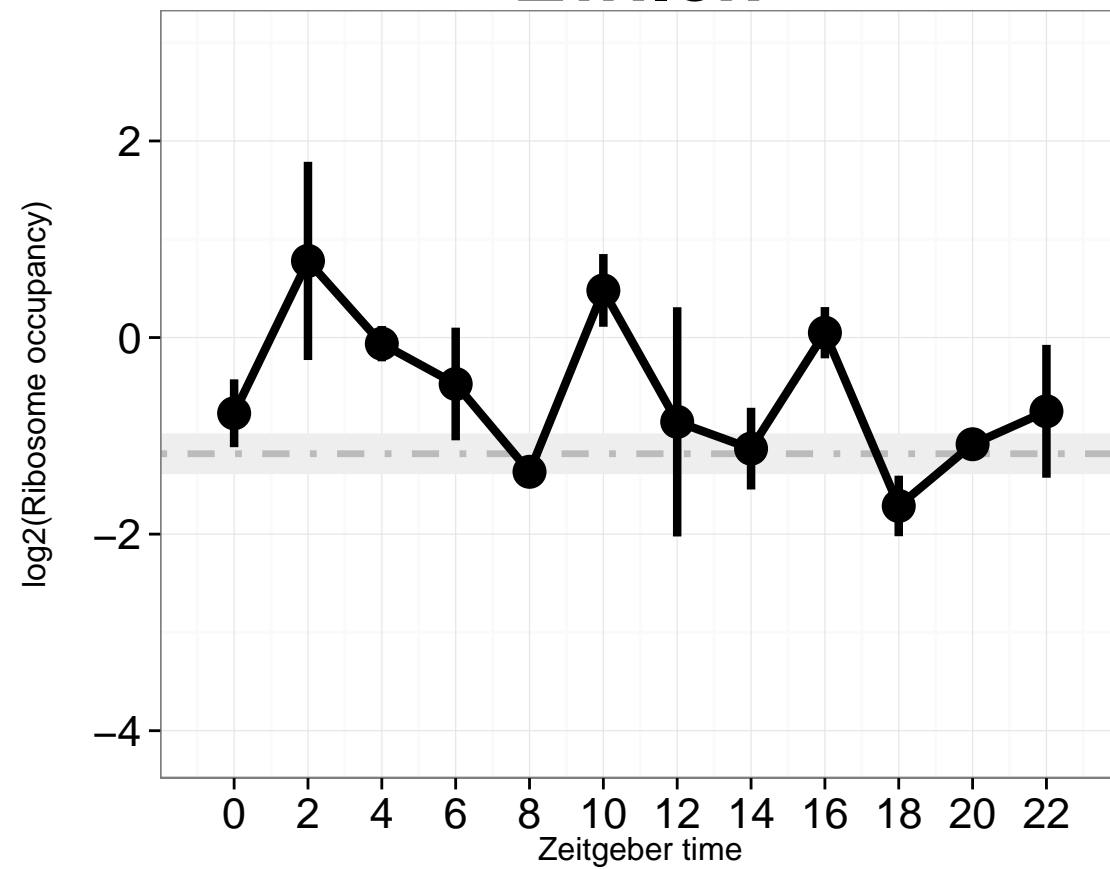

Supplement: SuppDataset_1.zip [file Zwilch_set_A.pdf › Supplemental Dataset 1/A-mRNA_nonrhyth_translation_nonrhyth/Zwilch_set_A.pdf]

## Zwint

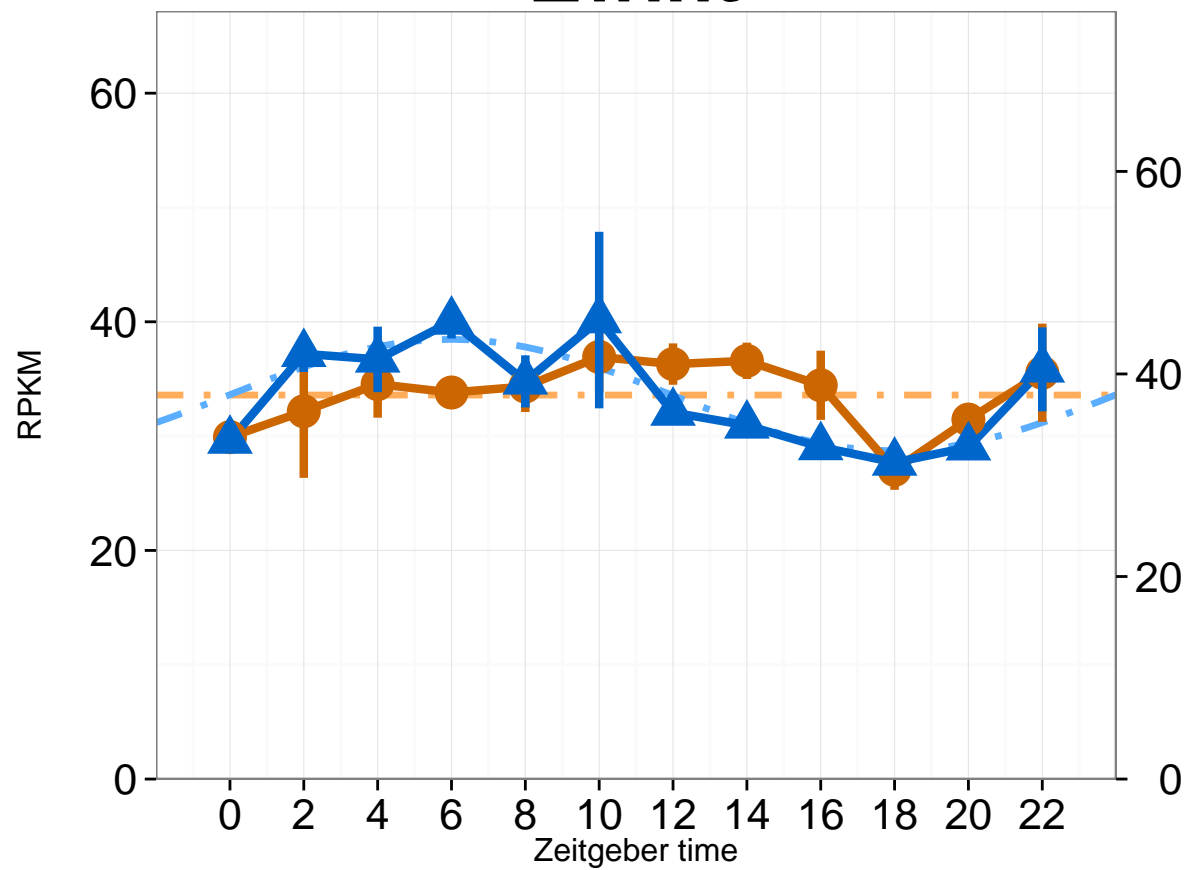

## Zwint

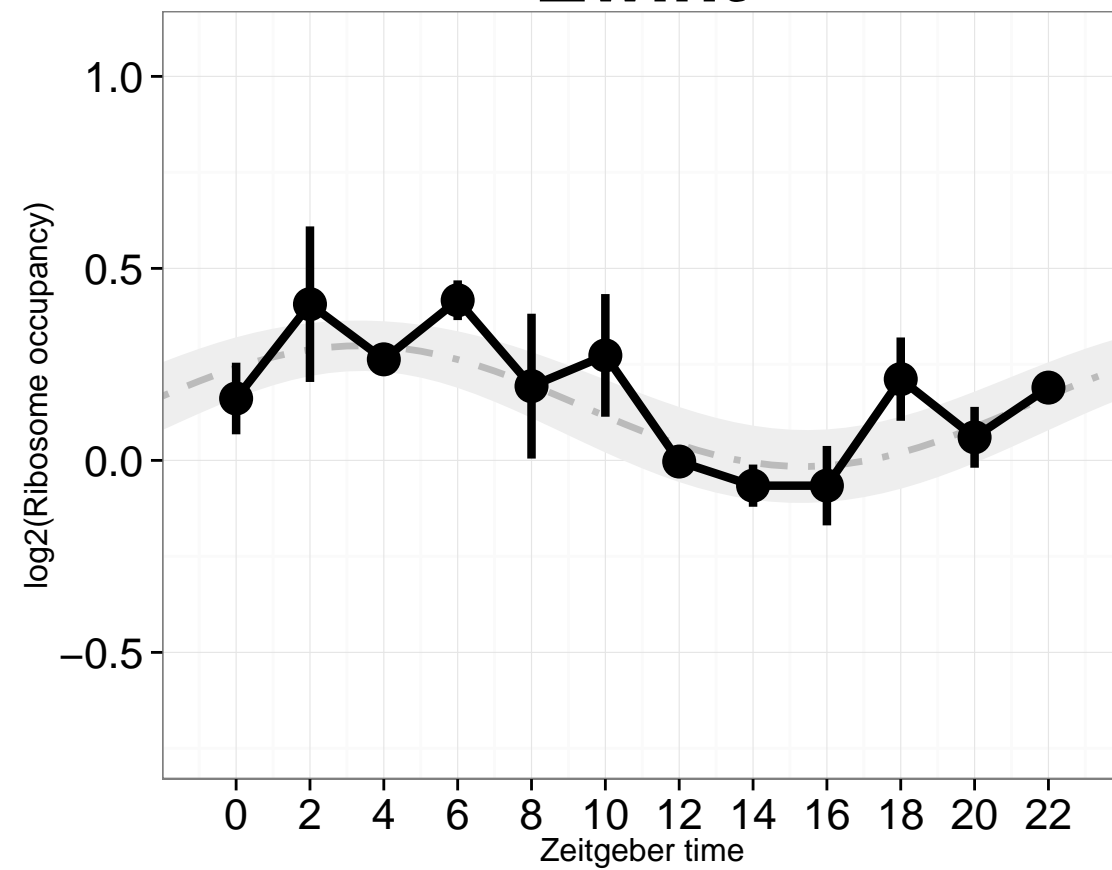

Supplement: SuppDataset_1.zip [file Zwint_set_A.pdf › Supplemental Dataset 1/A-mRNA_nonrhyth_translation_nonrhyth/Zwint_set_A.pdf]

## Zxdb

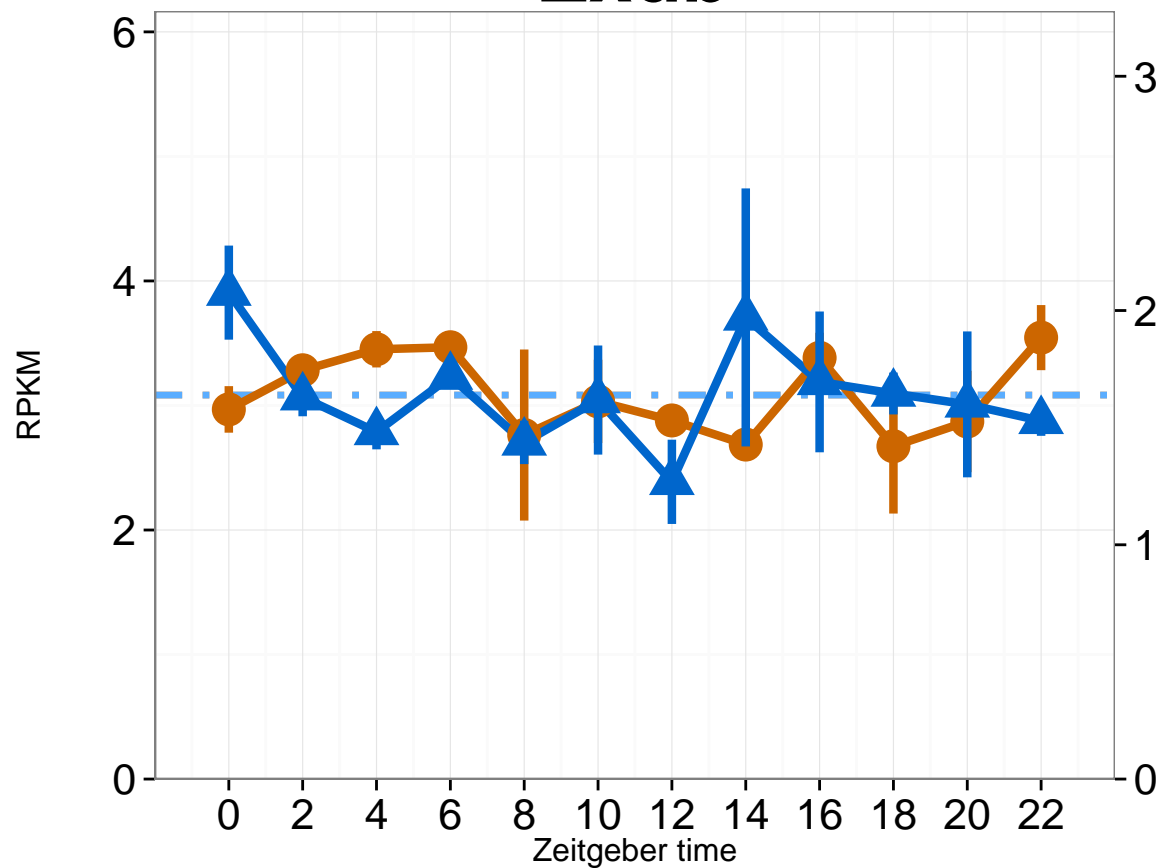

## Zxdb

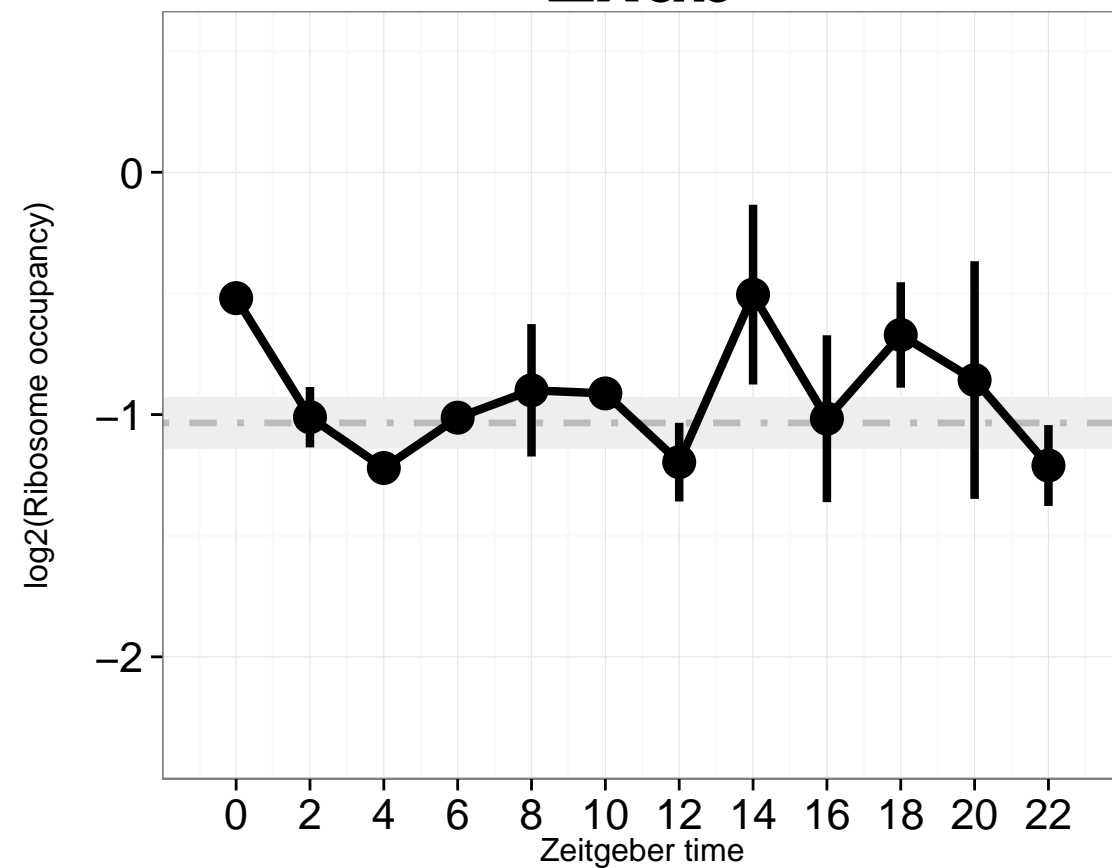

Supplement: SuppDataset_1.zip [file Zxdb_set_A.pdf › Supplemental Dataset 1/A-mRNA_nonrhyth_translation_nonrhyth/Zxdb_set_A.pdf]

## Zxdc

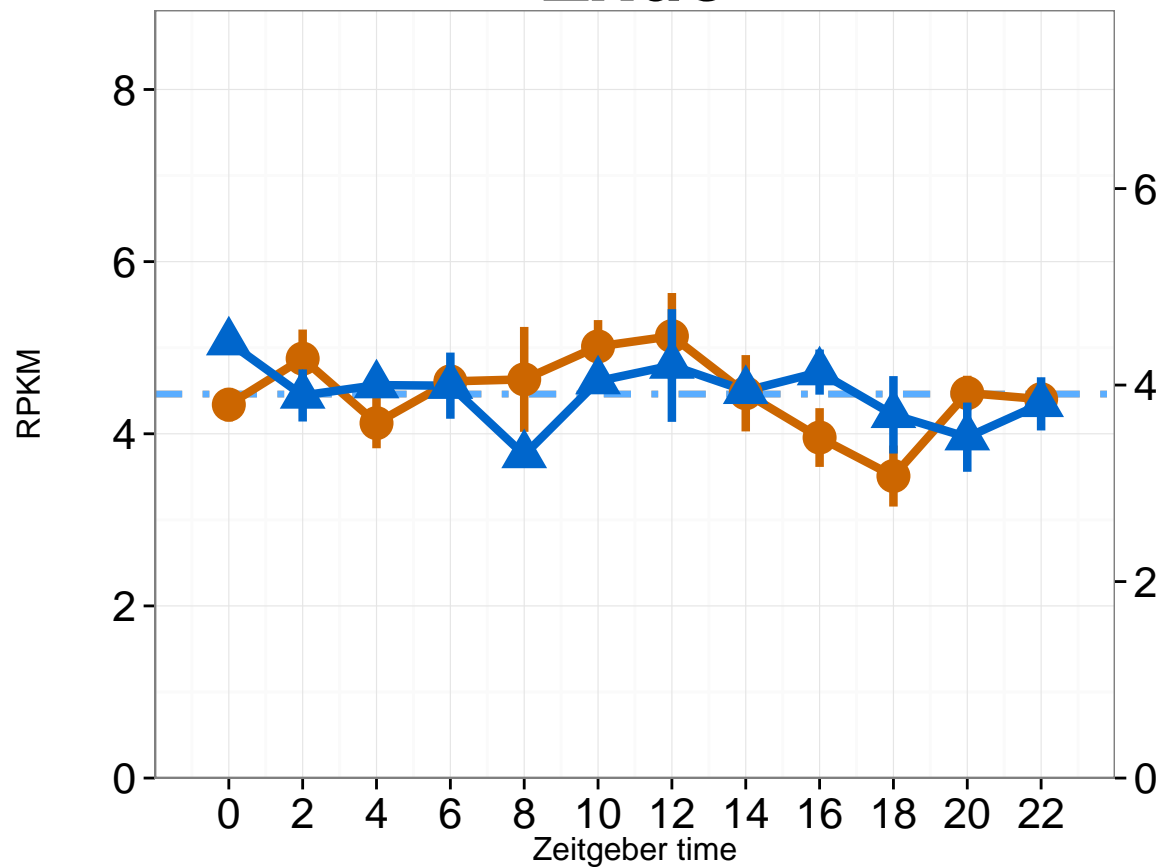

## Zxdc

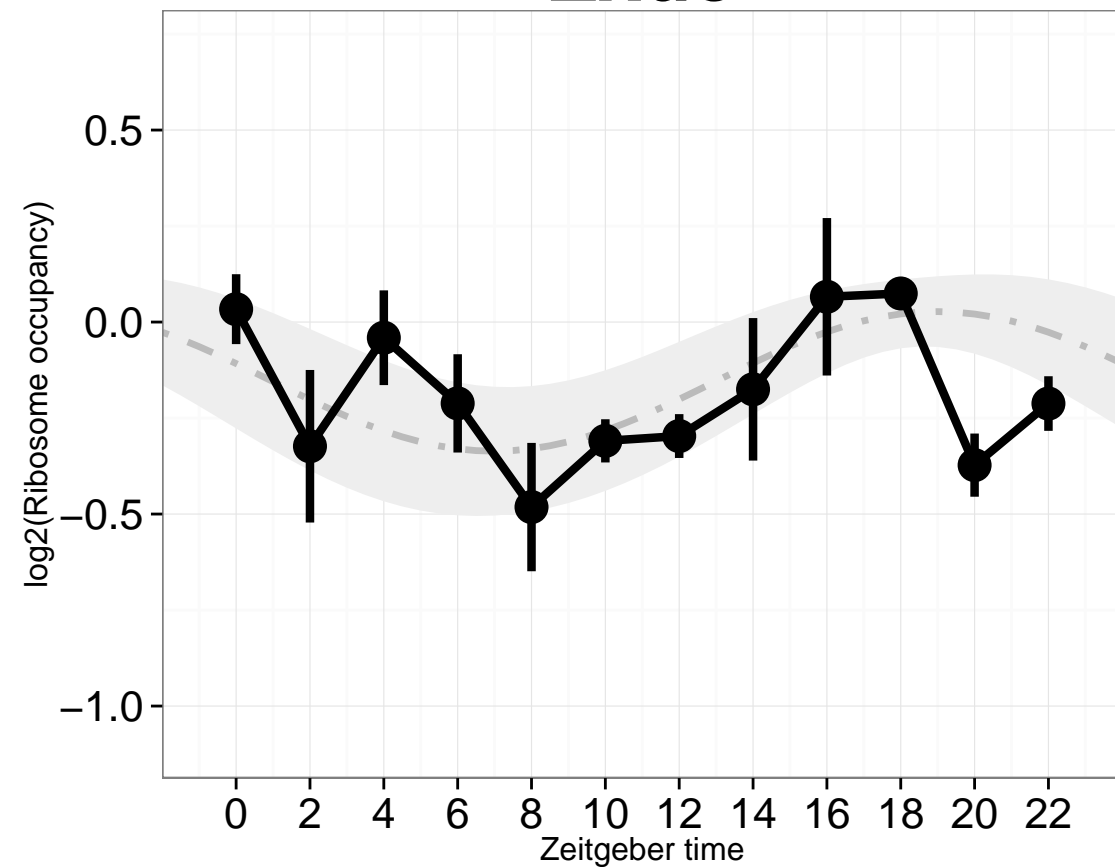

Supplement: SuppDataset_1.zip [file Zxdc_set_A.pdf › Supplemental Dataset 1/A-mRNA_nonrhyth_translation_nonrhyth/Zxdc_set_A.pdf]

# Zyg11a

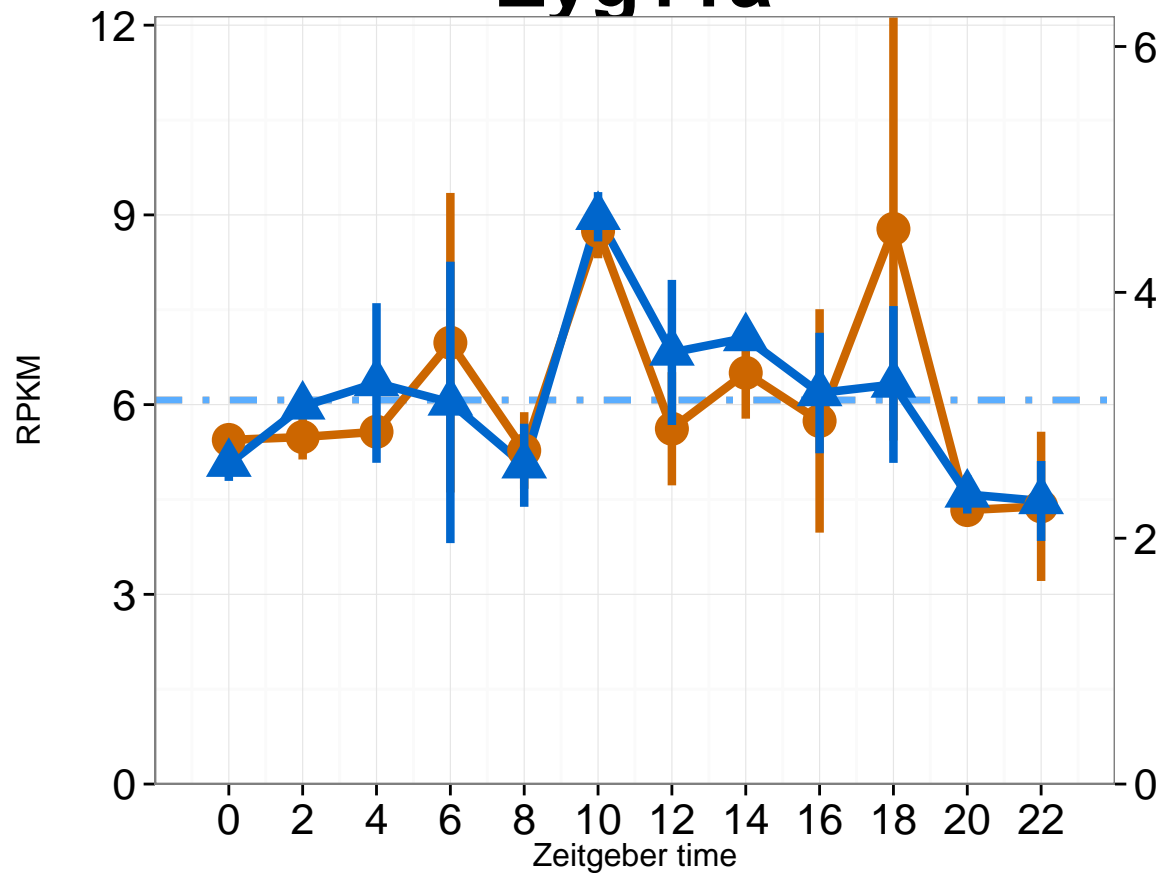

# Zyg11a

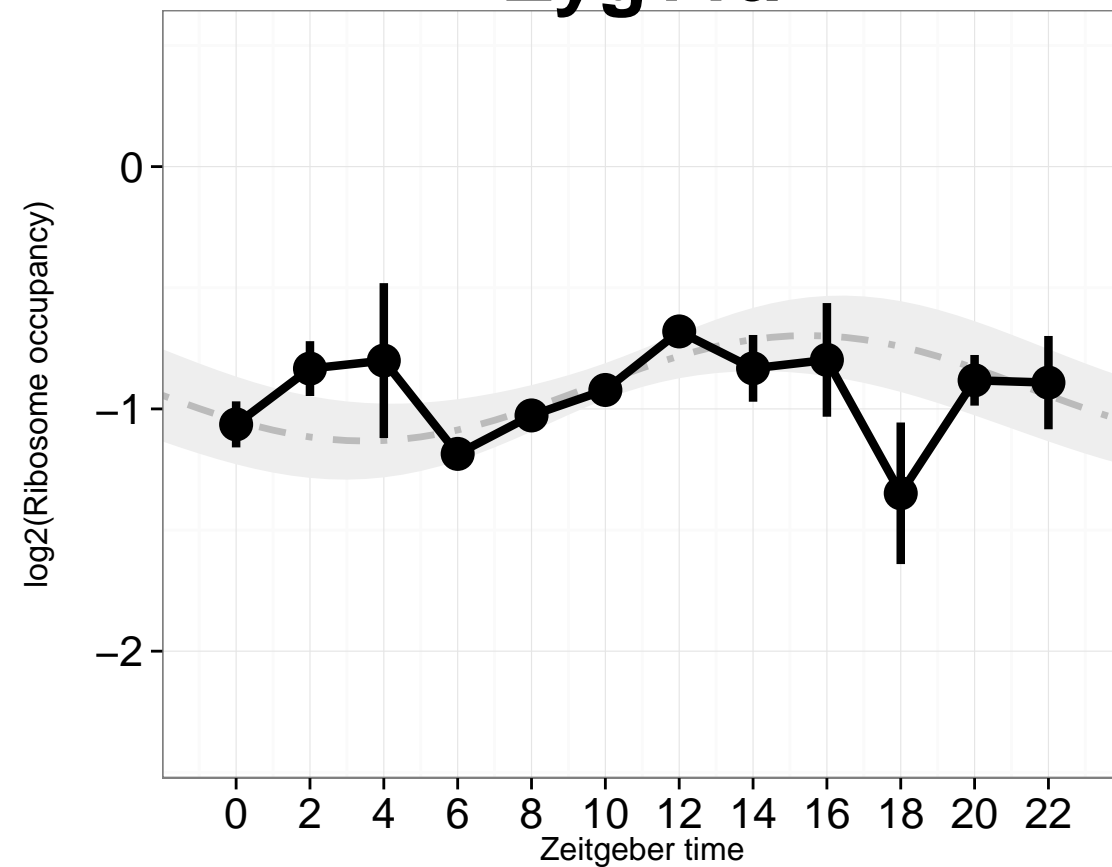

Supplement: SuppDataset_1.zip [file Zyg11a_set_A.pdf › Supplemental Dataset 1/A-mRNA_nonrhyth_translation_nonrhyth/Zyg11a_set_A.pdf]

## Zyg11b

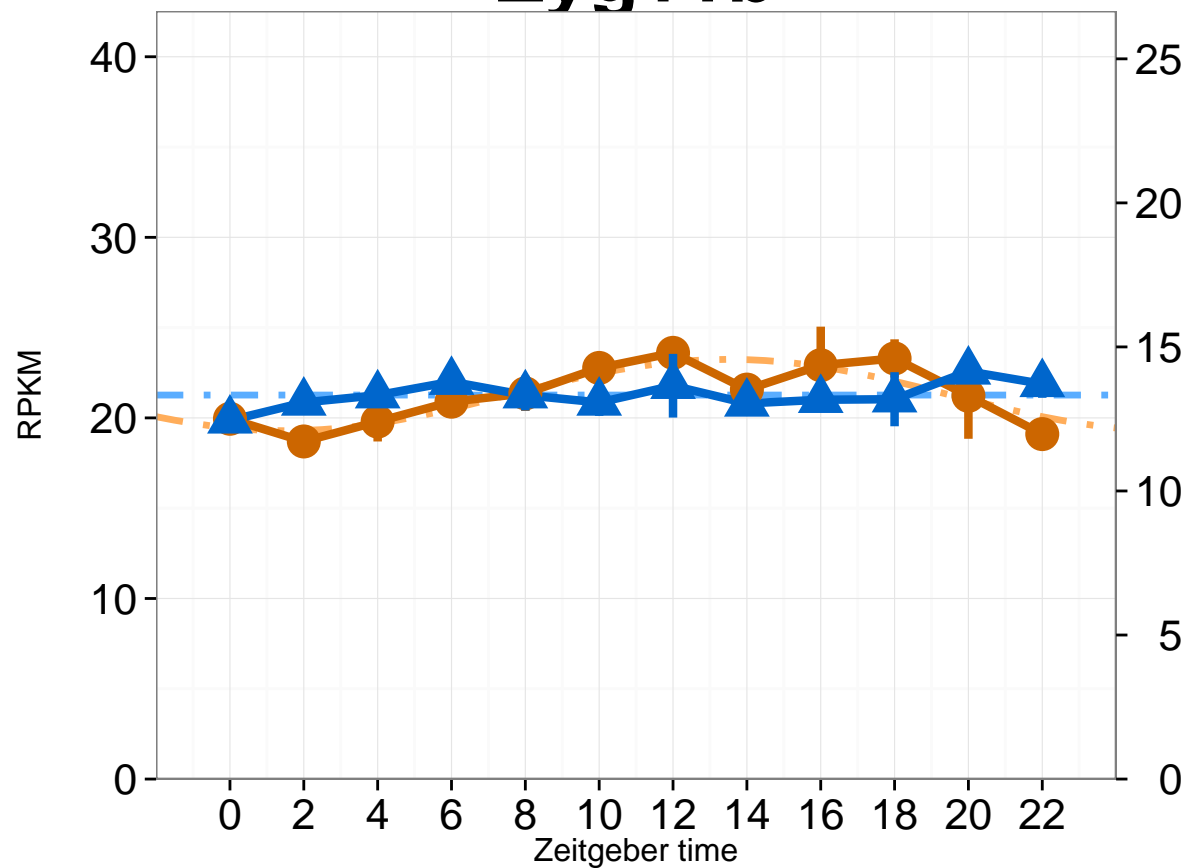

## Zyg11b

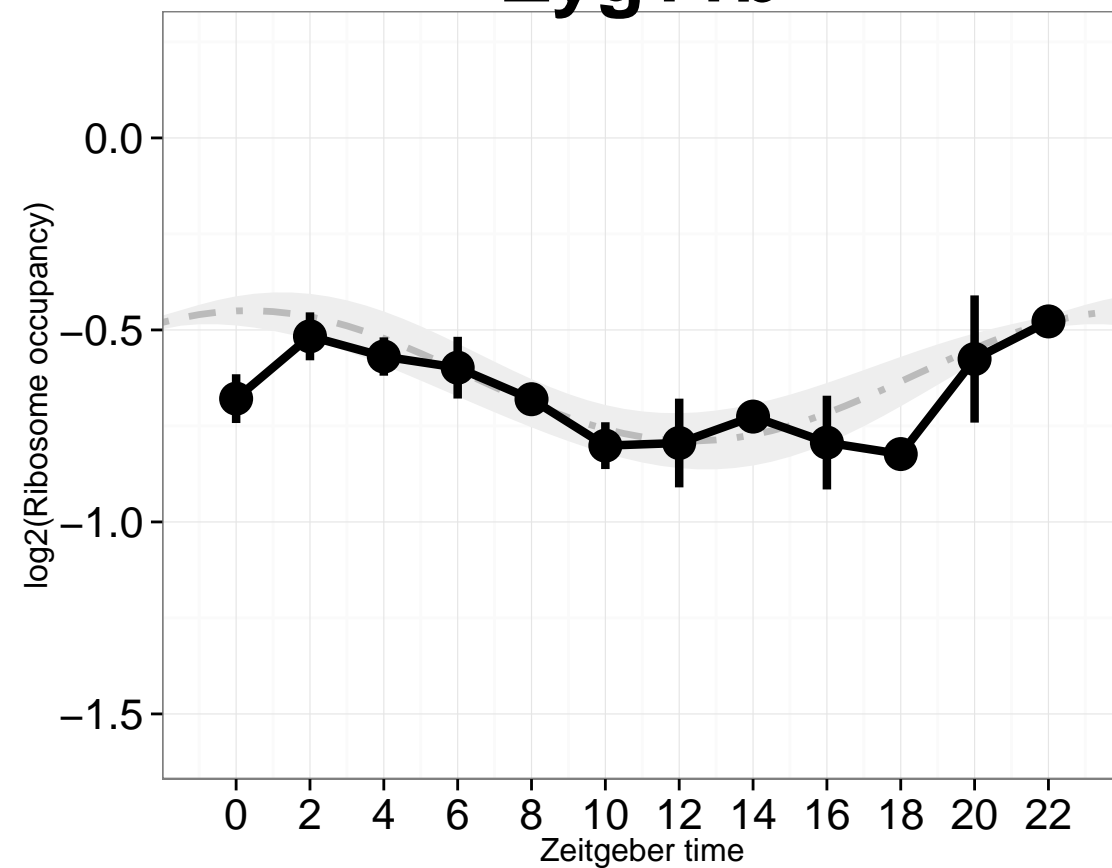

Supplement: SuppDataset_1.zip [file Zyg11b_set_A.pdf › Supplemental Dataset 1/A-mRNA_nonrhyth_translation_nonrhyth/Zyg11b_set_A.pdf]

# Zyx

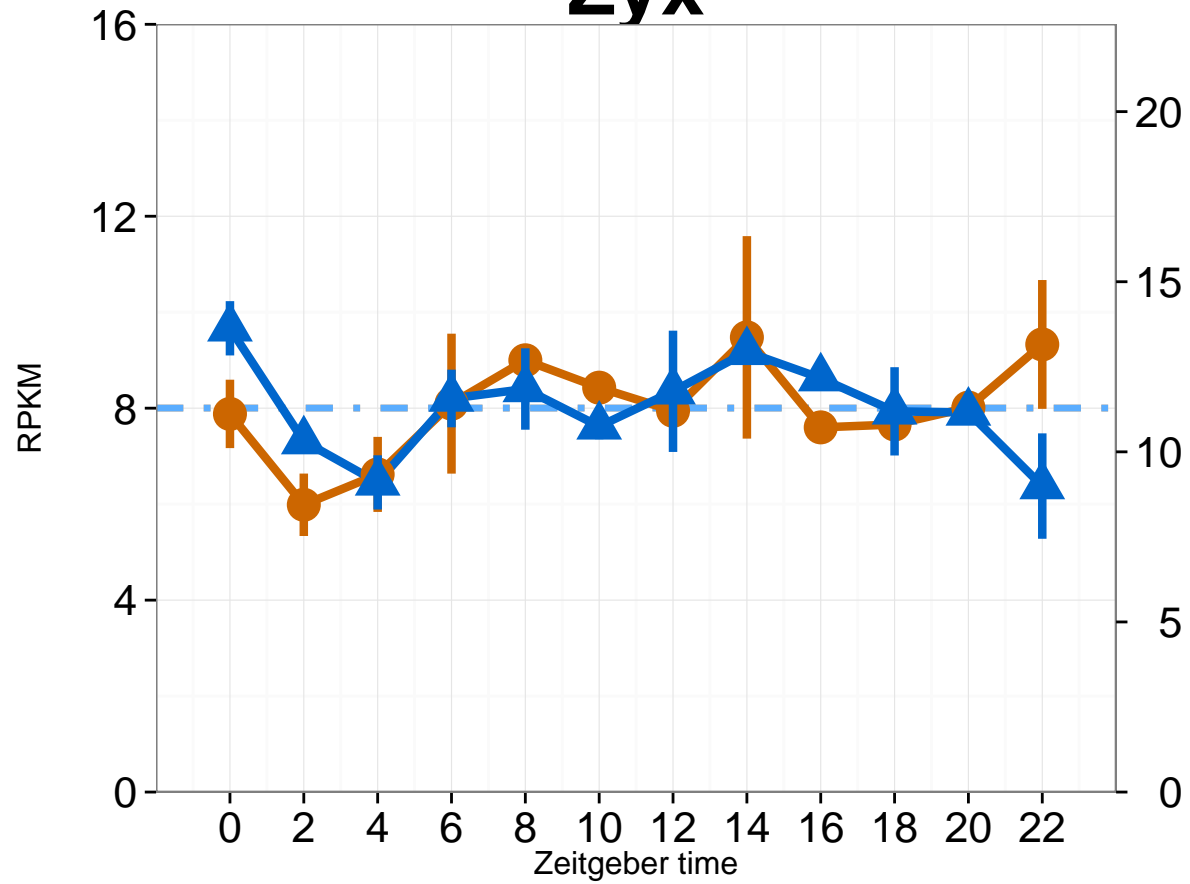

# Zyx

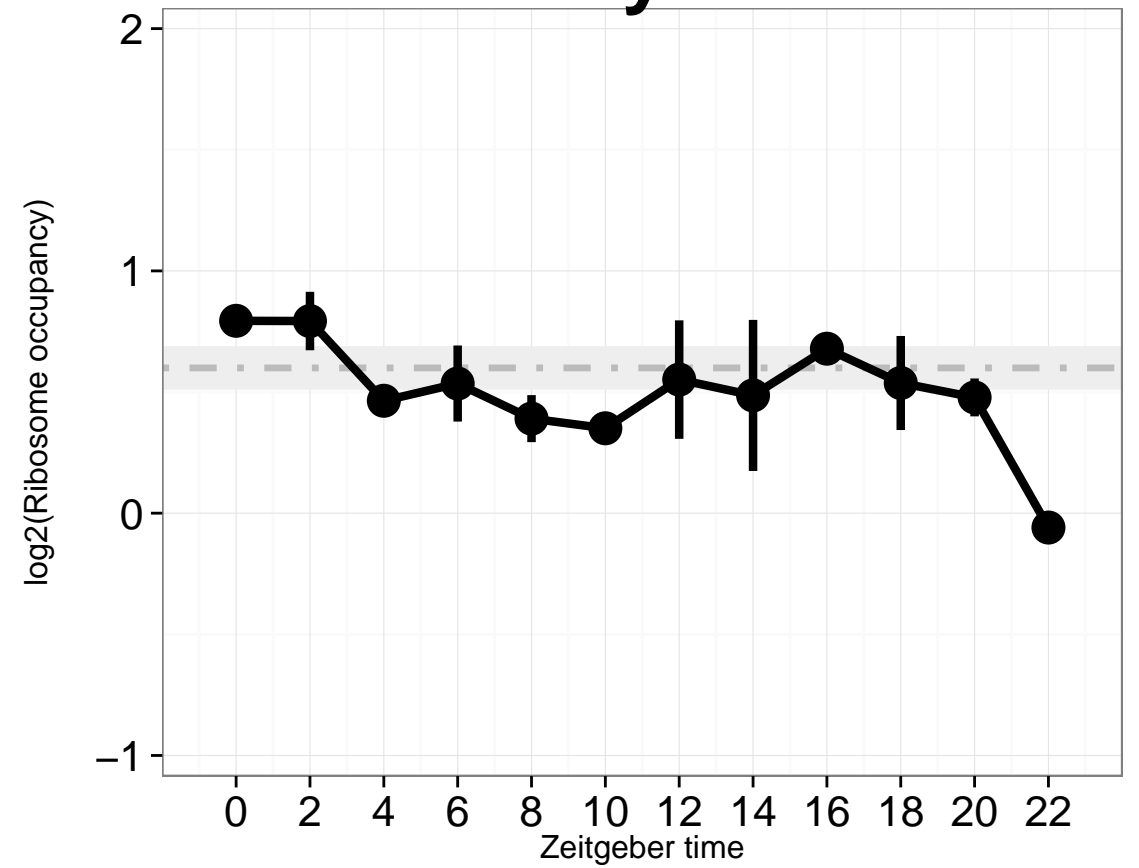

Supplement: SuppDataset_1.zip [file Zyx_set_A.pdf › Supplemental Dataset 1/A-mRNA_nonrhyth_translation_nonrhyth/Zyx_set_A.pdf]

## Zzef1

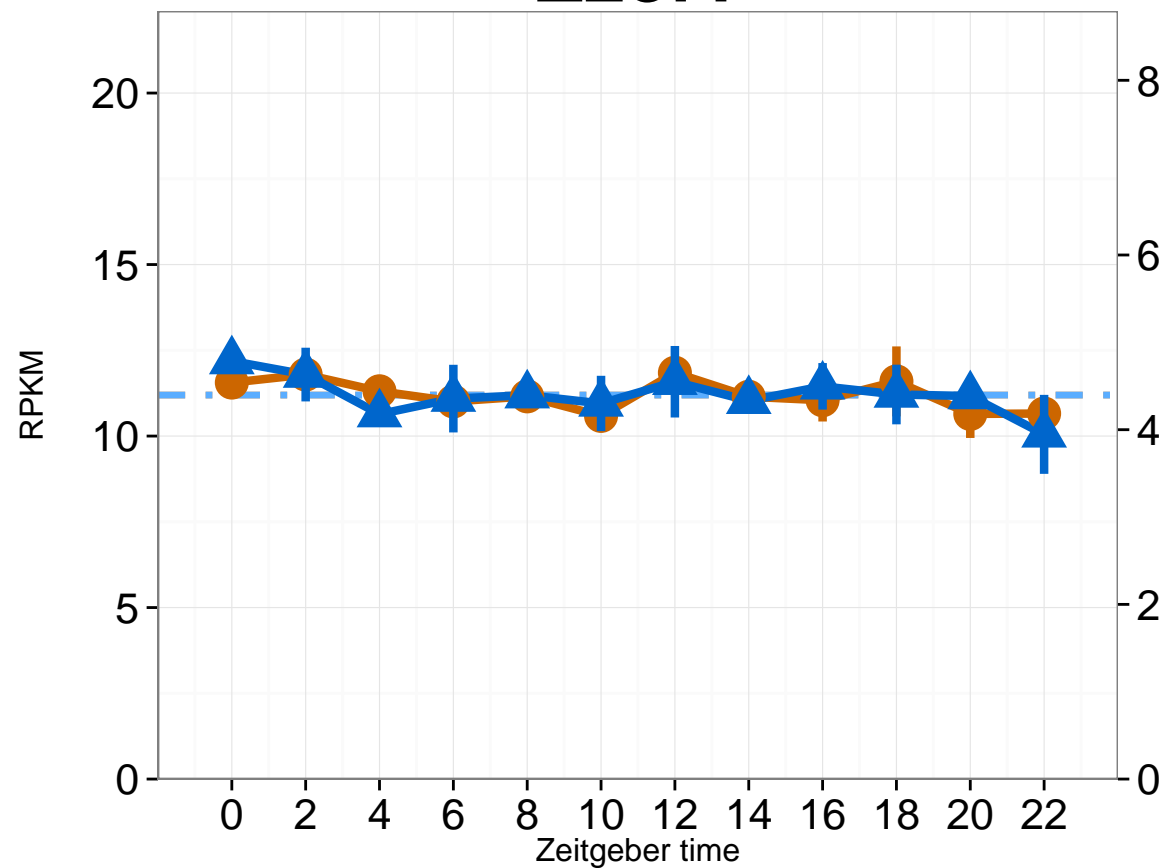

## Zzef1

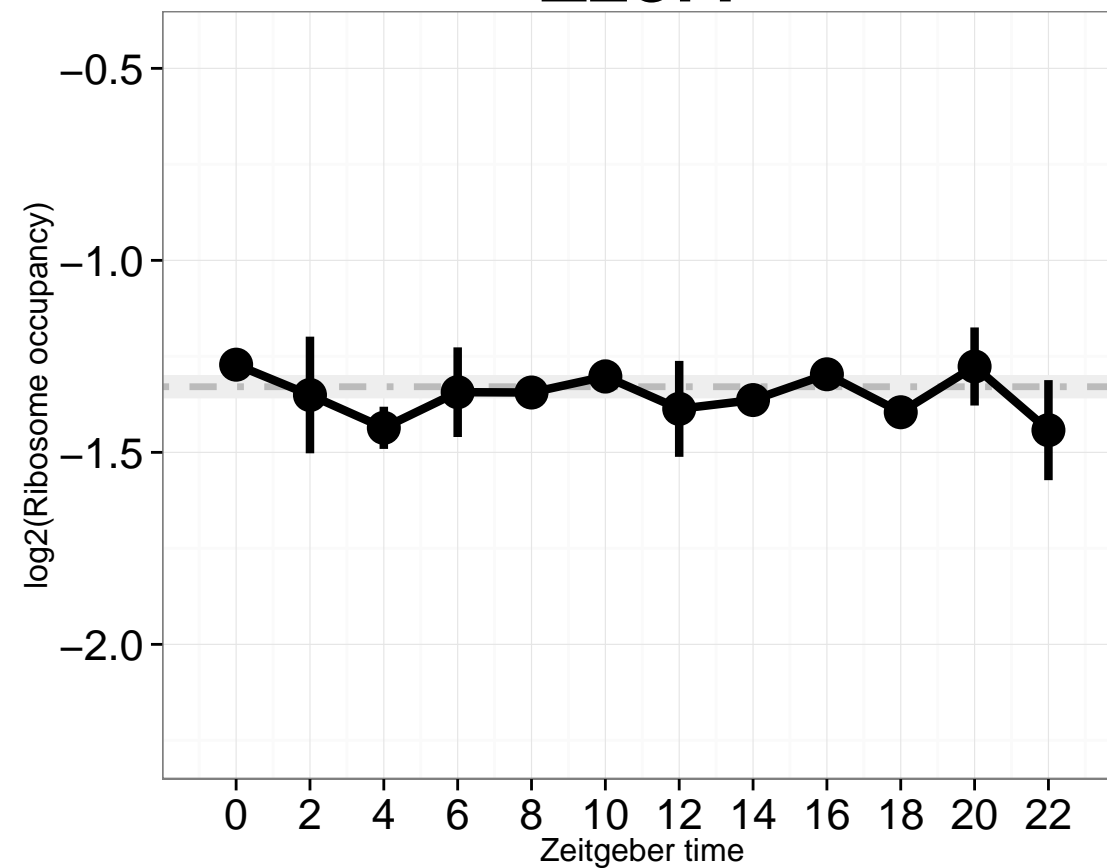

Supplement: SuppDataset_1.zip [file Zzef1_set_A.pdf › Supplemental Dataset 1/A-mRNA_nonrhyth_translation_nonrhyth/Zzef1_set_A.pdf]

## Zzz3

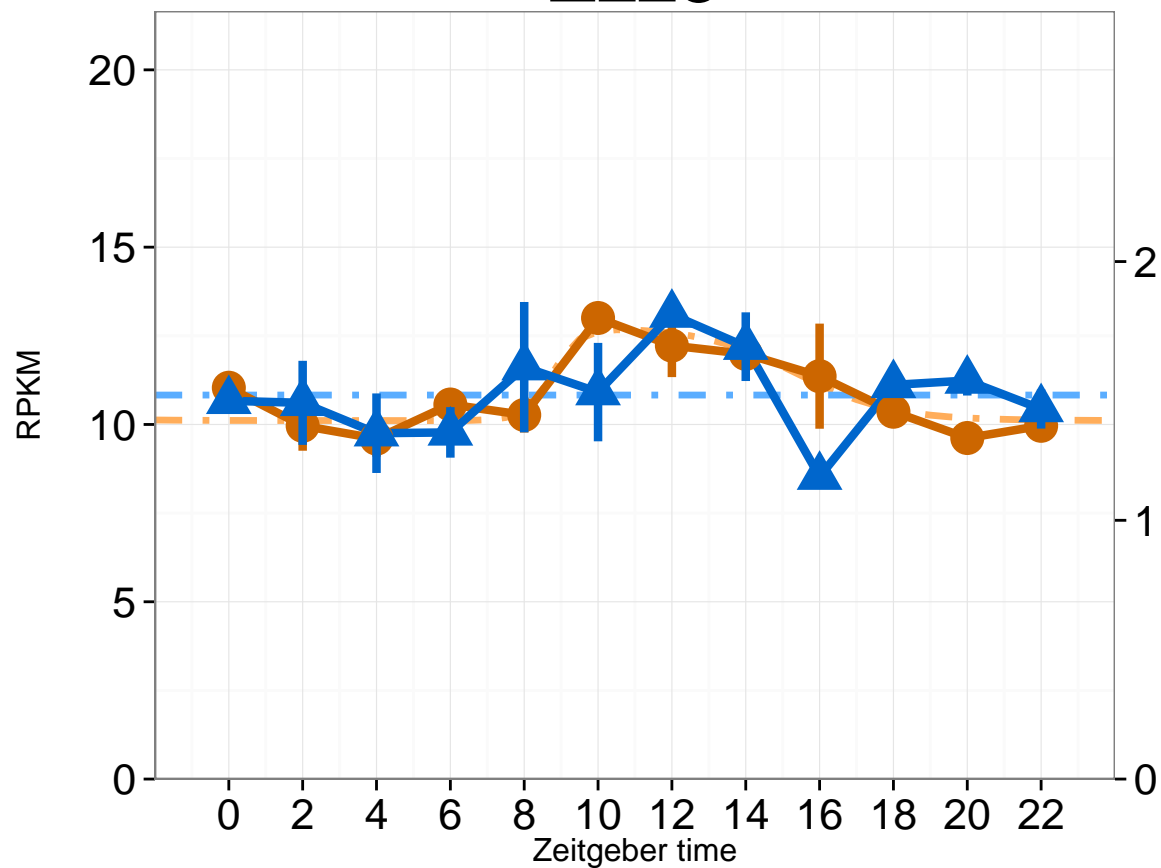

## Zzz3

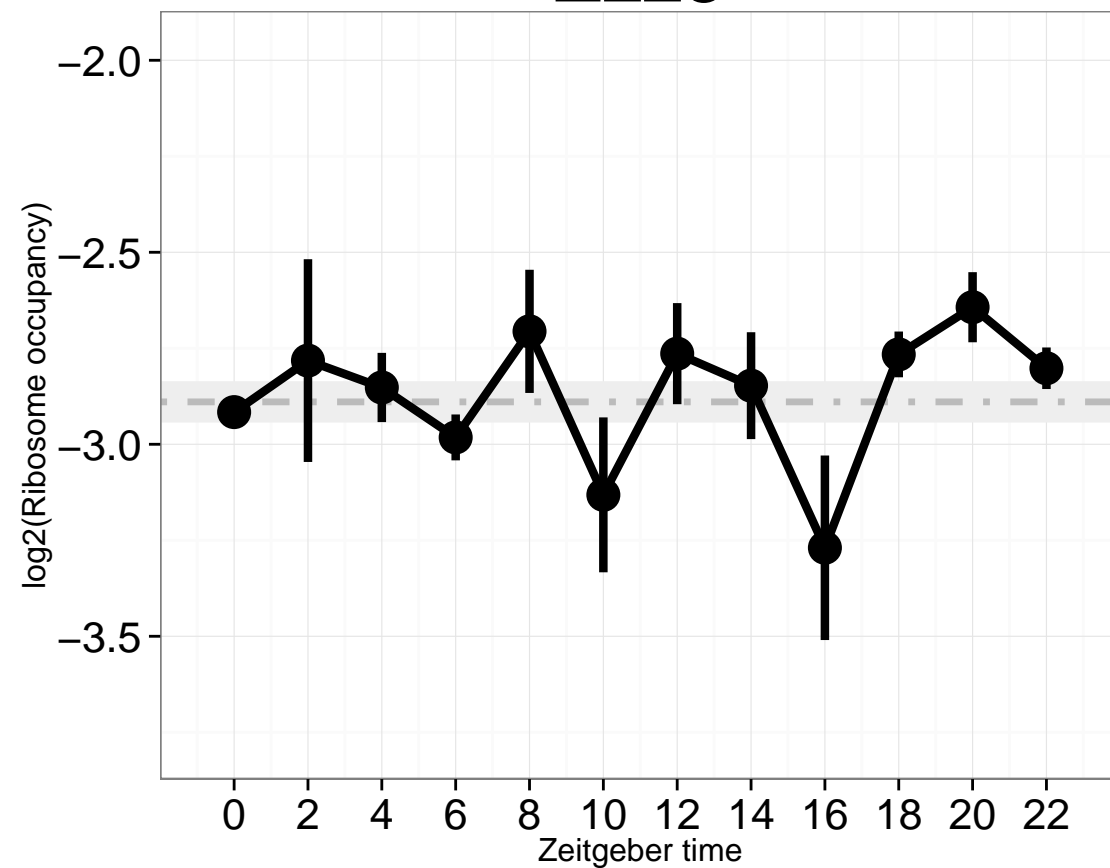

Supplement: SuppDataset_1.zip [file Zzz3_set_A.pdf › Supplemental Dataset 1/A-mRNA_nonrhyth_translation_nonrhyth/Zzz3_set_A.pdf]

# 0610010F05Rik

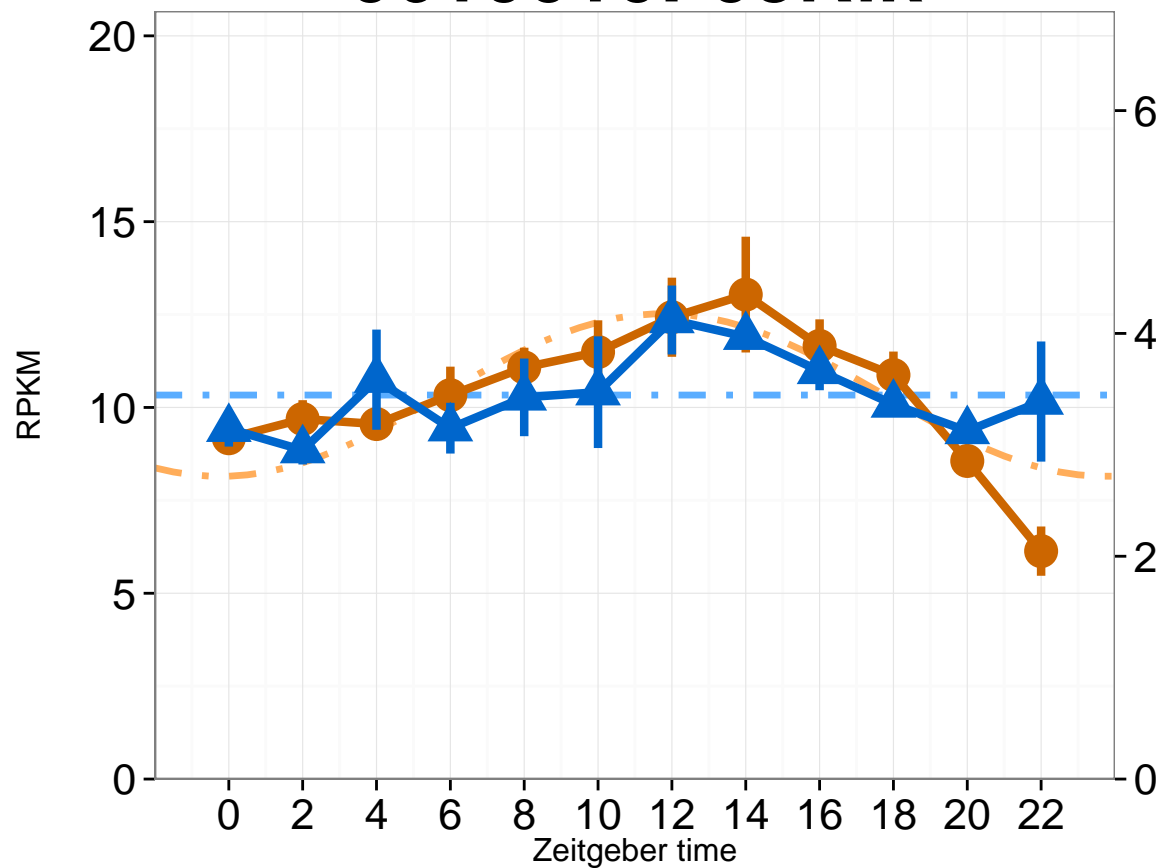

# 0610010F05Rik

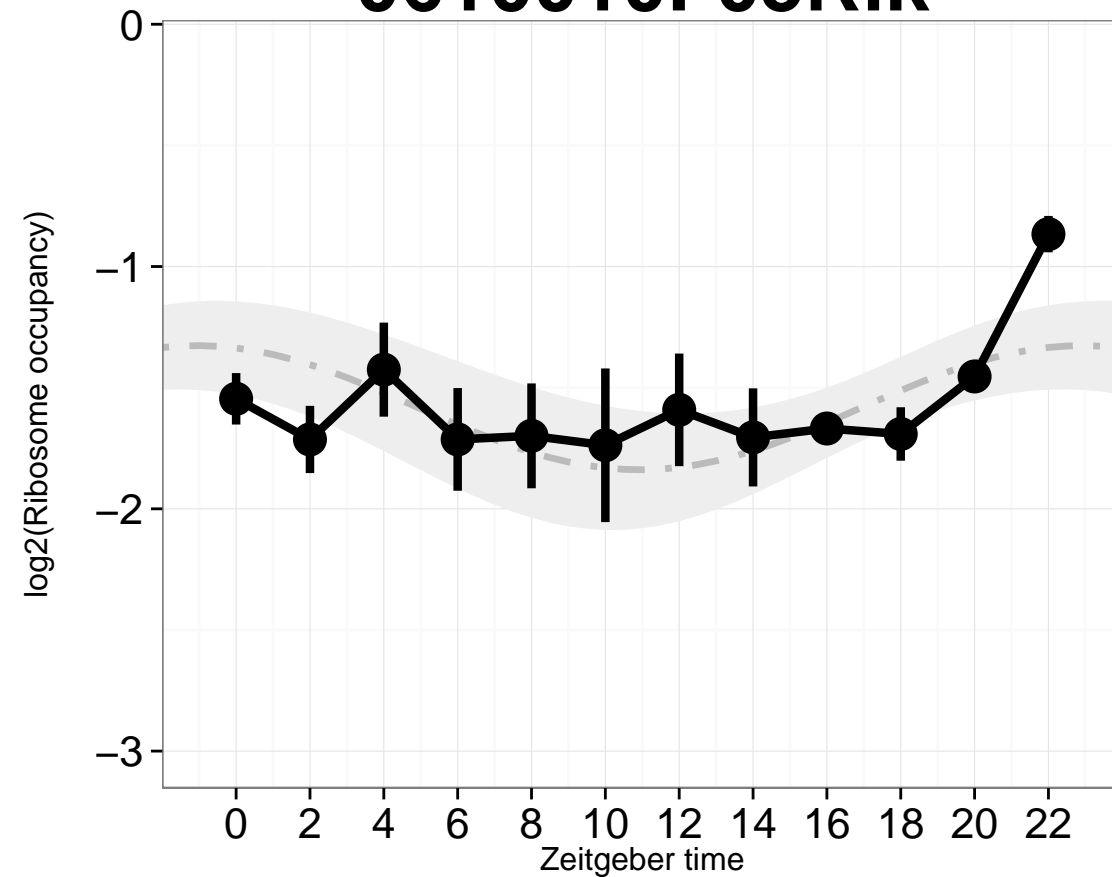

Supplement: SuppDataset_1.zip [file 0610010F05Rik_set_B.pdf › Supplemental Dataset 1/B-mRNA_rhythm_translation_nonrhyth/0610010F05Rik_set_B.pdf]

# 1100001G20Rik

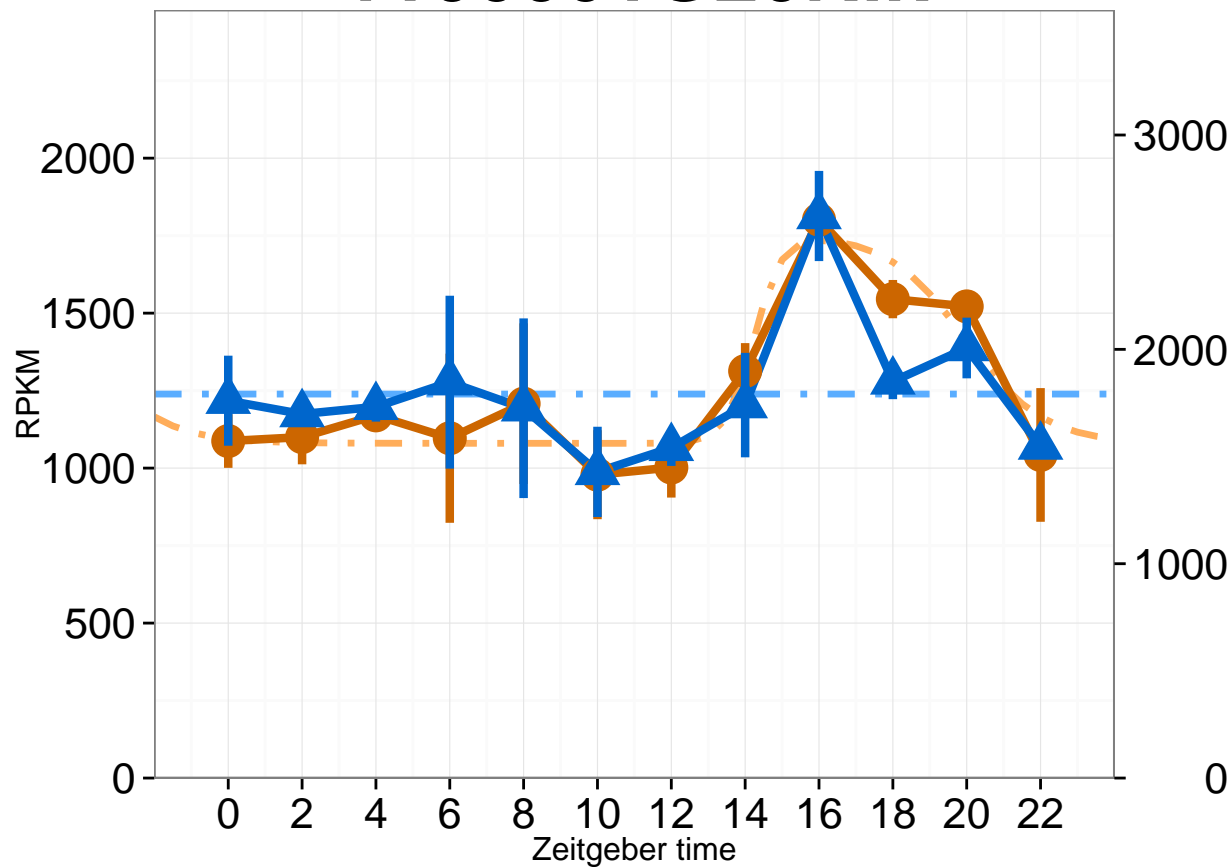

# 1100001G20Rik

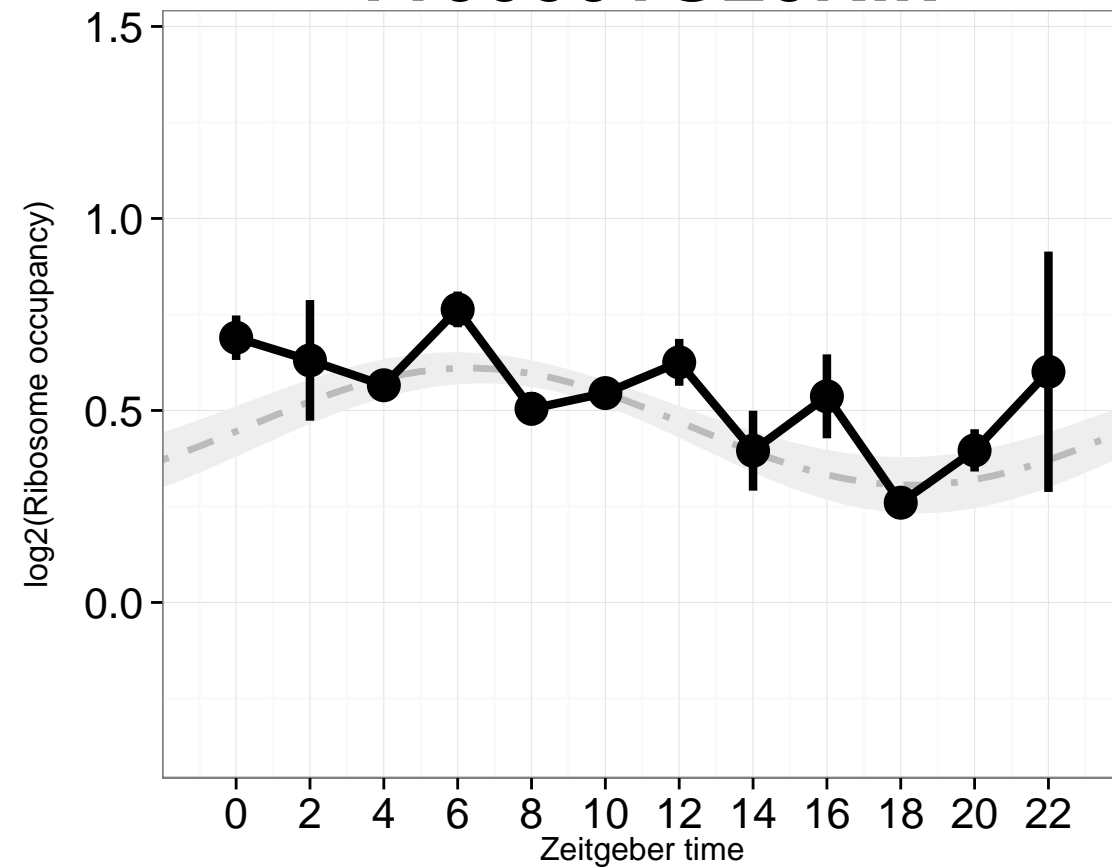

Supplement: SuppDataset_1.zip [file 1100001G20Rik_set_B.pdf › Supplemental Dataset 1/B-mRNA_rhythm_translation_nonrhyth/1100001G20Rik_set_B.pdf]

# 1110057K04Rik

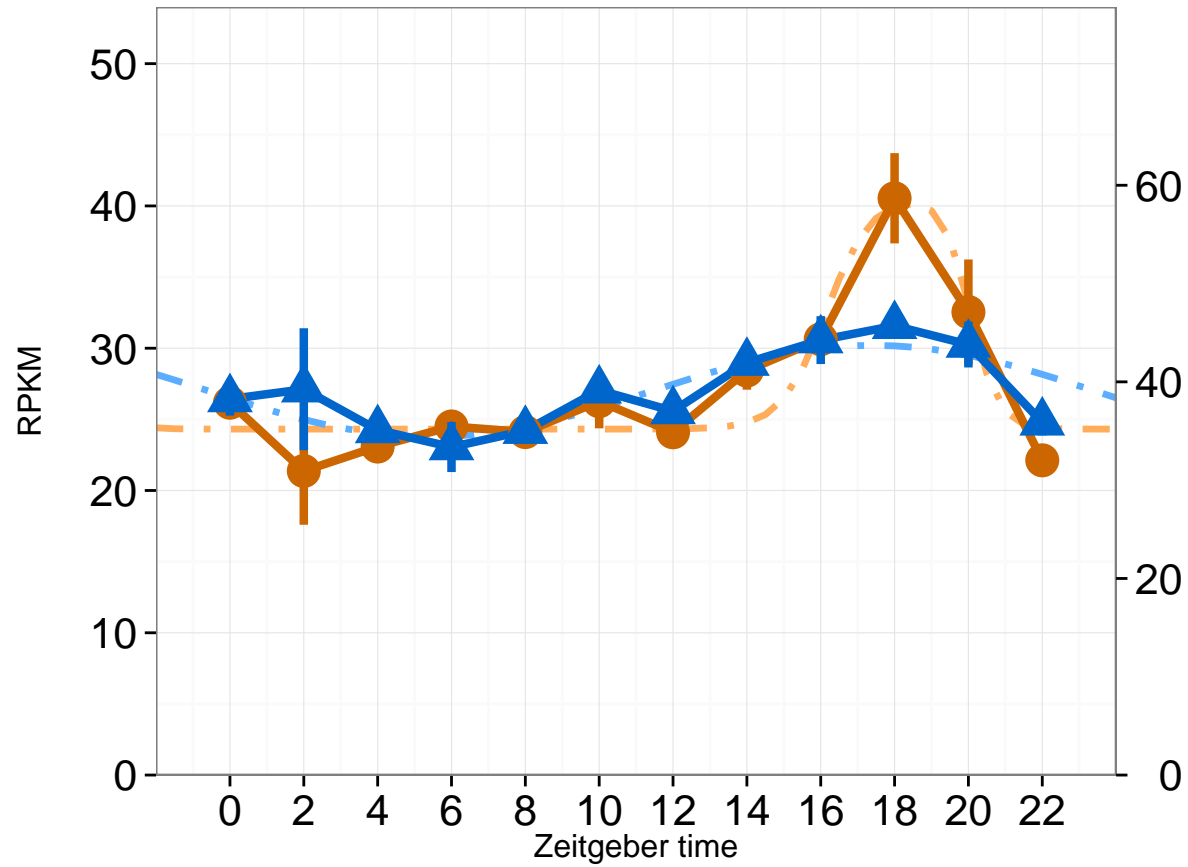

# 1110057K04Rik

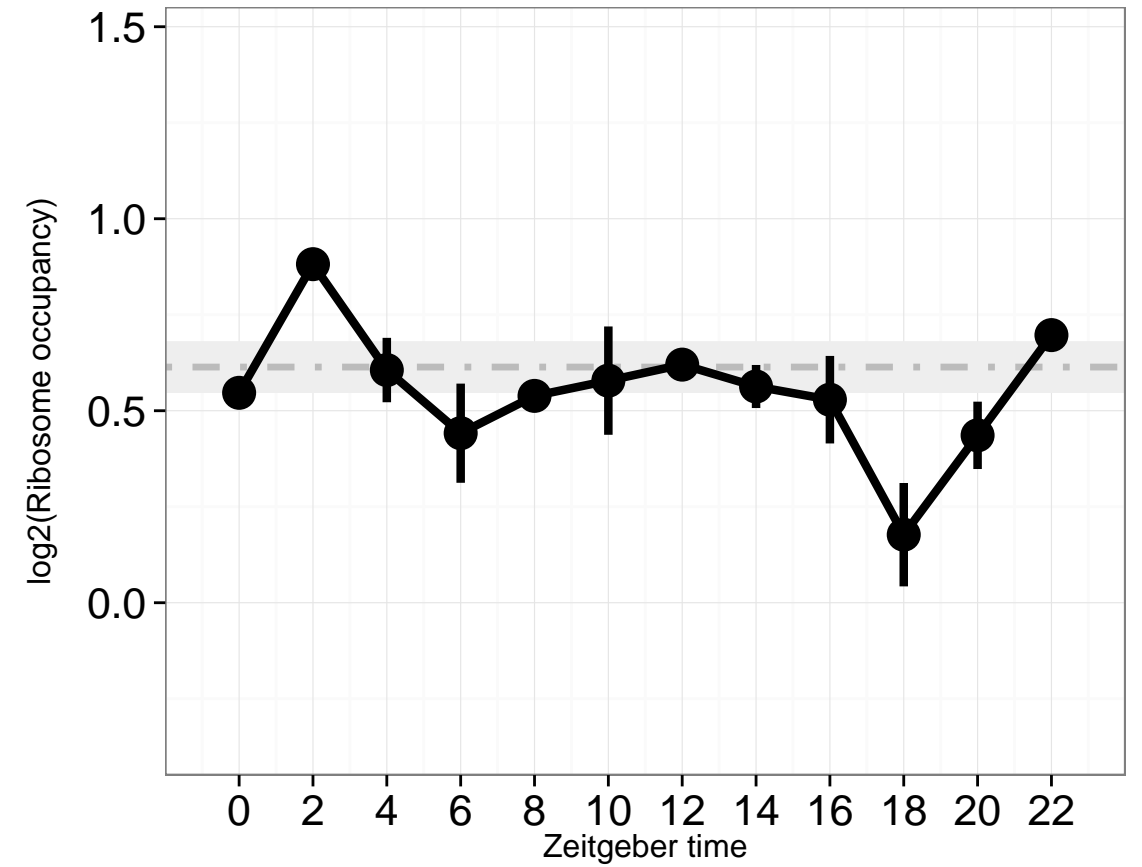

Supplement: SuppDataset_1.zip [file 1110057K04Rik_set_B.pdf › Supplemental Dataset 1/B-mRNA_rhythm_translation_nonrhyth/1110057K04Rik_set_B.pdf]

# 1110058L19Rik

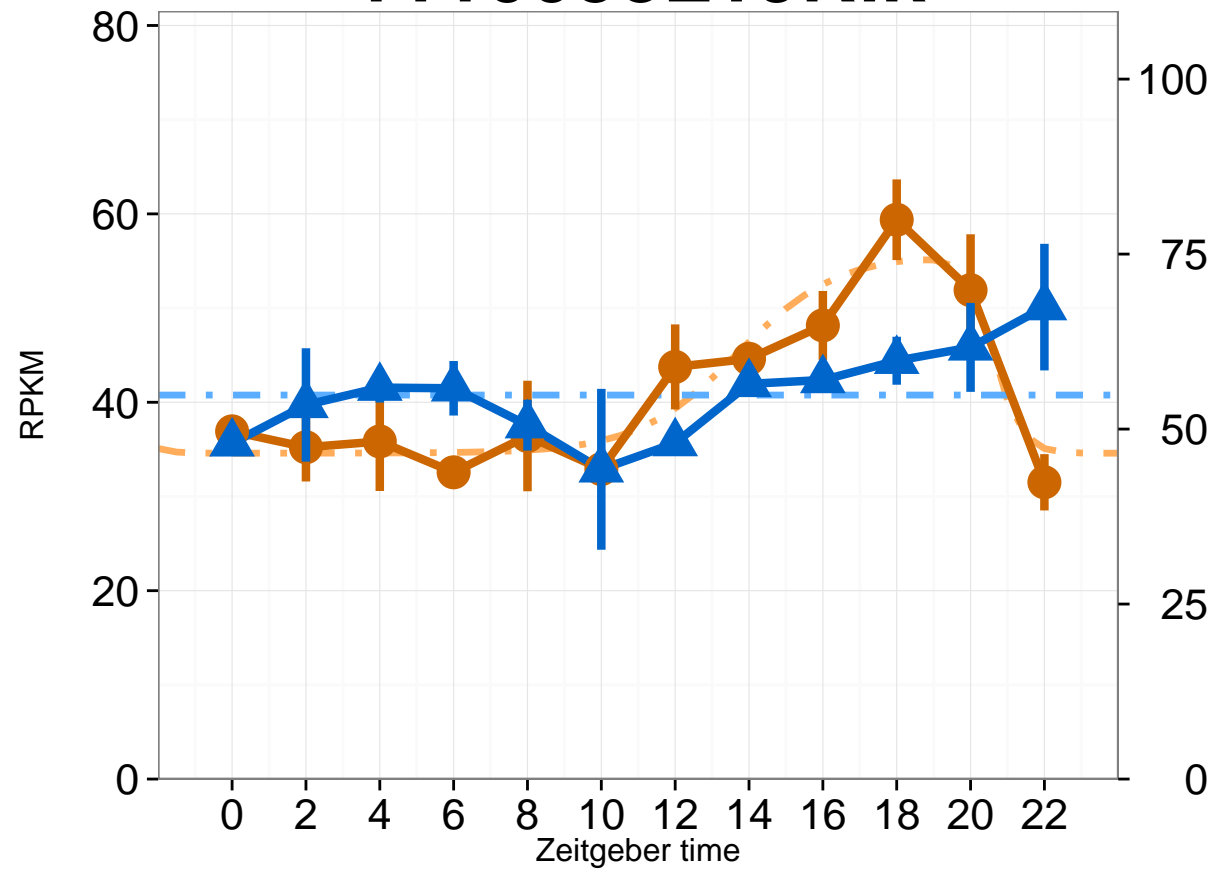

# 1110058L19Rik

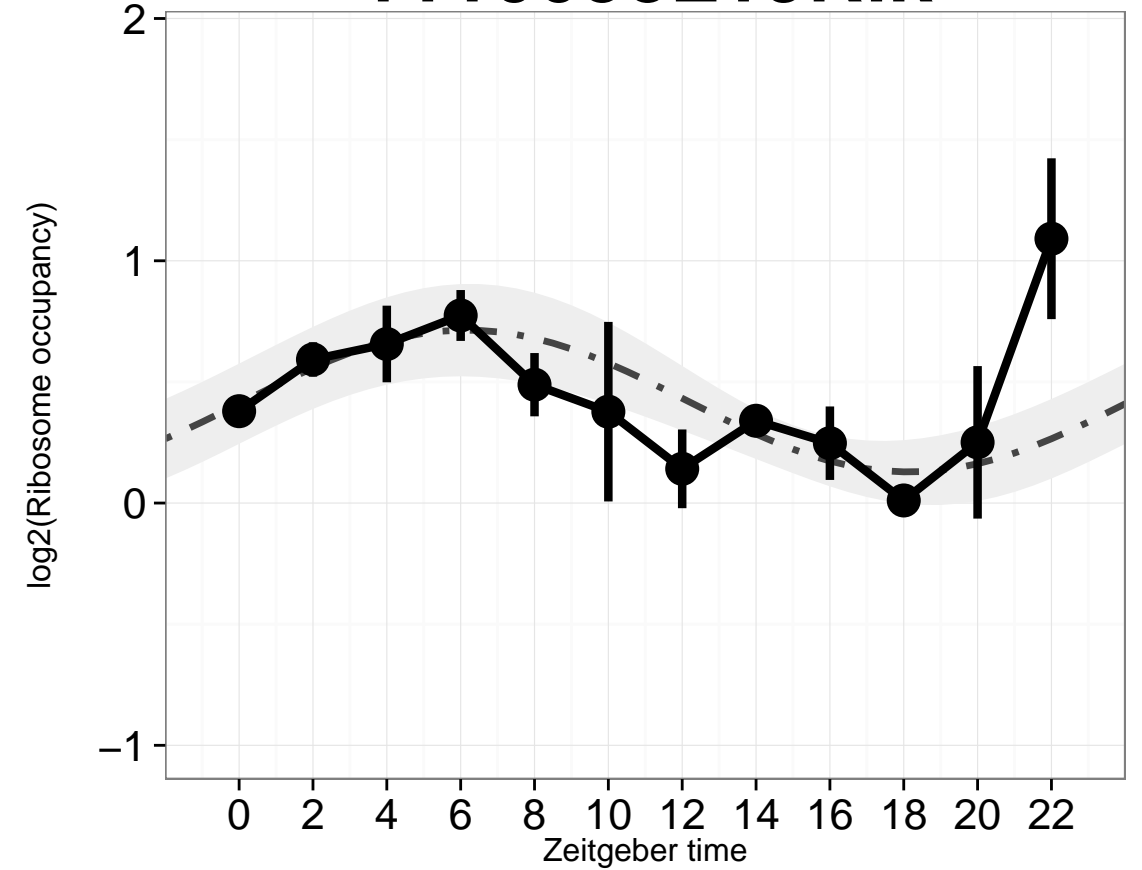

Supplement: SuppDataset_1.zip [file 1110058L19Rik_set_B.pdf › Supplemental Dataset 1/B-mRNA_rhythm_translation_nonrhyth/1110058L19Rik_set_B.pdf]

1500012F01Rik

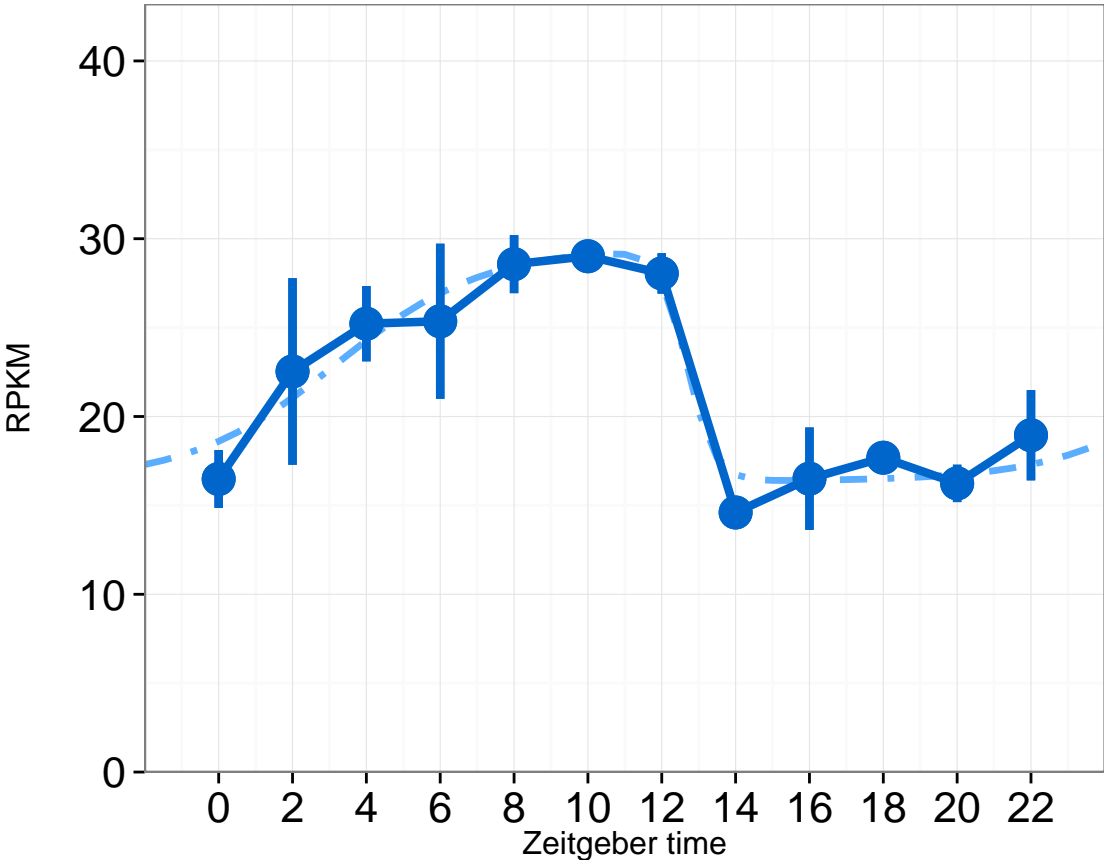

1500012F01Rik log2(Ribosome occupancy)

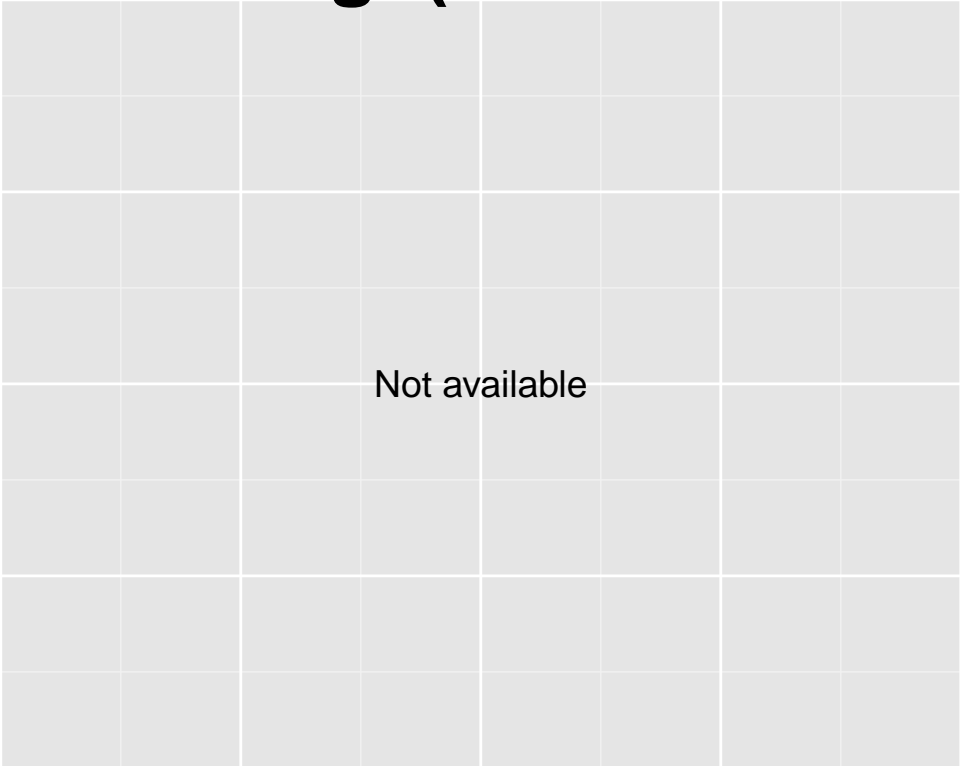

Supplement: SuppDataset_1.zip [file 1500012F01Rik_set_B.pdf › Supplemental Dataset 1/B-mRNA_rhythm_translation_nonrhyth/1500012F01Rik_set_B.pdf]

# 1700049G17Rik

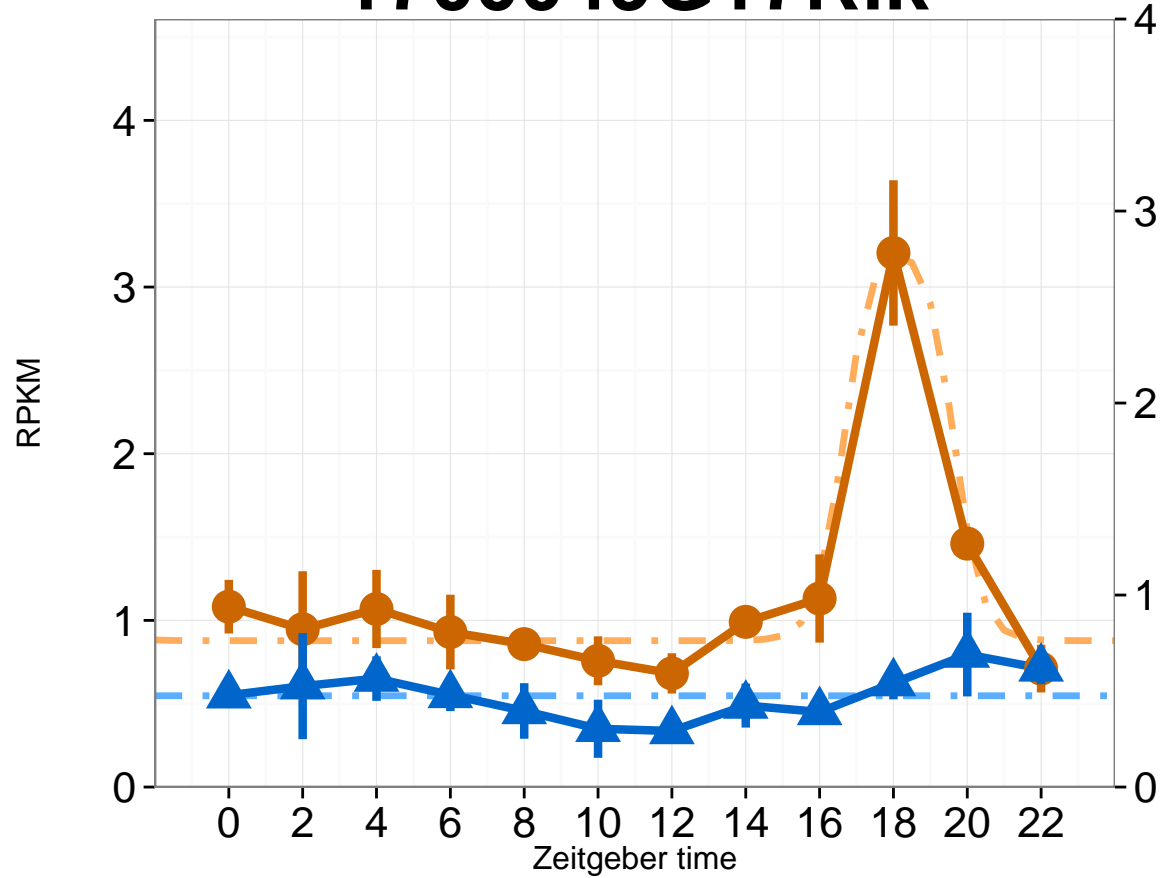

# 1700049G17Rik

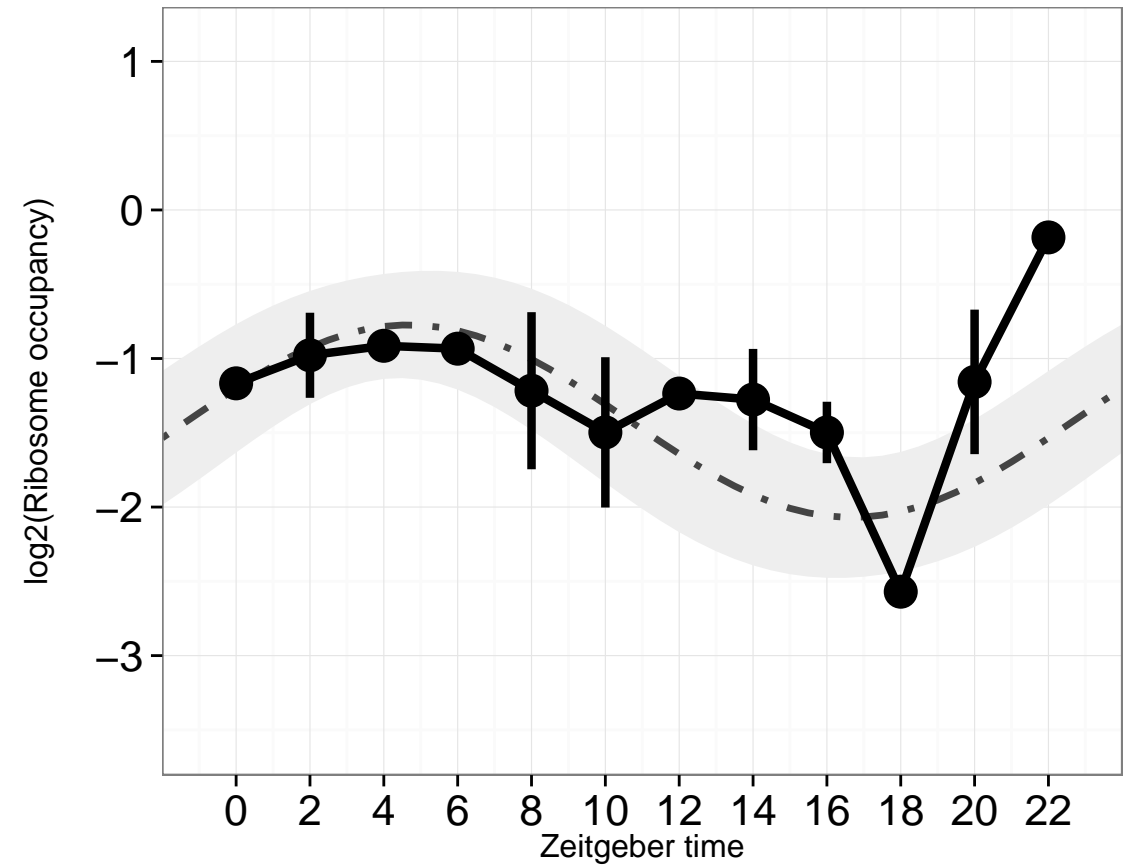

Supplement: SuppDataset_1.zip [file 1700049G17Rik_set_B.pdf › Supplemental Dataset 1/B-mRNA_rhythm_translation_nonrhyth/1700049G17Rik_set_B.pdf]

# 1810011O10Rik

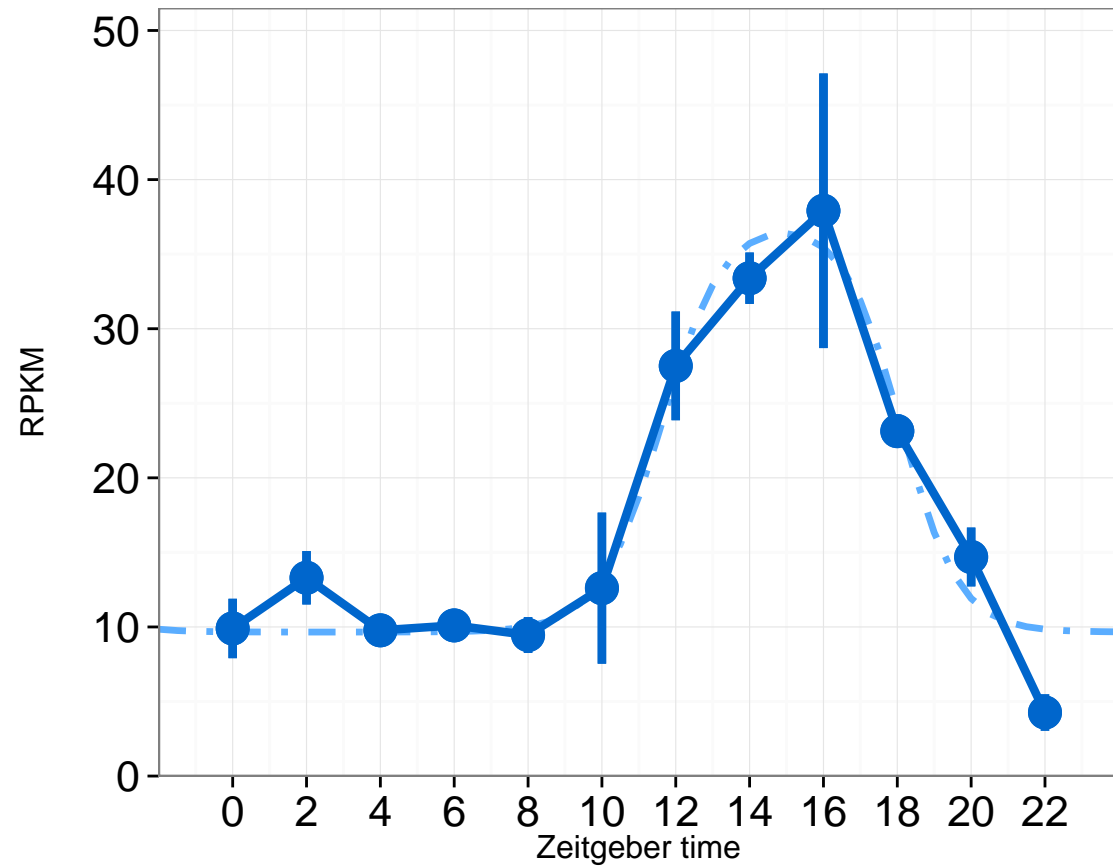

# 1810011O10Rik log2(Ribosome occup

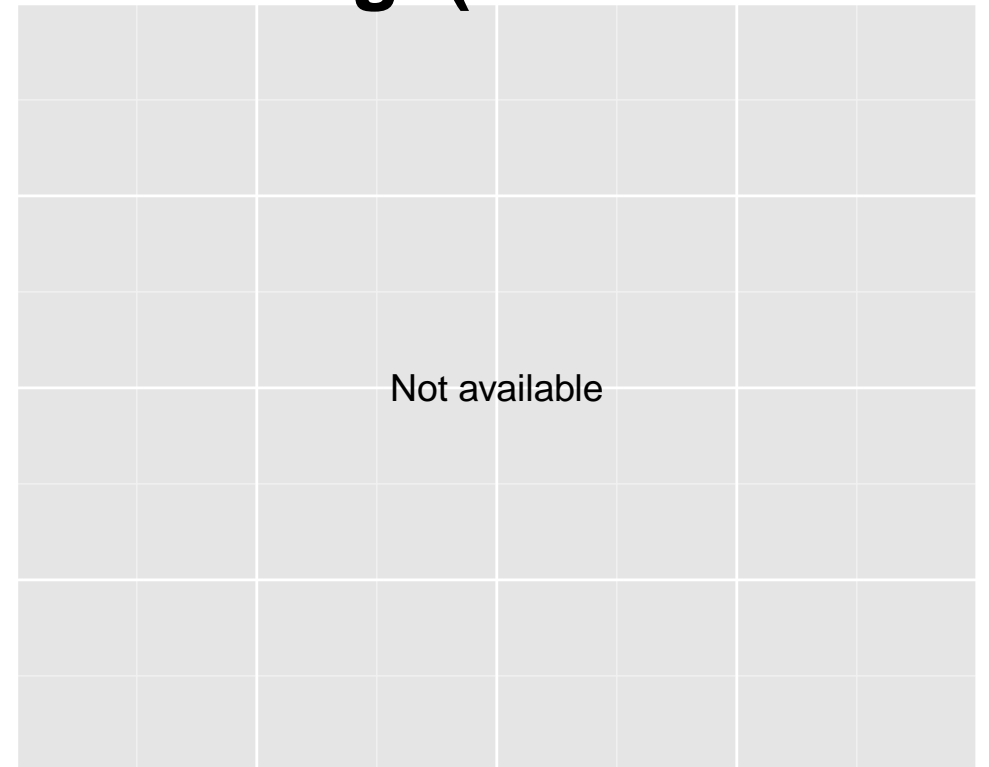

Supplement: SuppDataset_1.zip [file 1810011O10Rik_set_B.pdf › Supplemental Dataset 1/B-mRNA_rhythm_translation_nonrhyth/1810011O10Rik_set_B.pdf]

## 2310039H08Rik

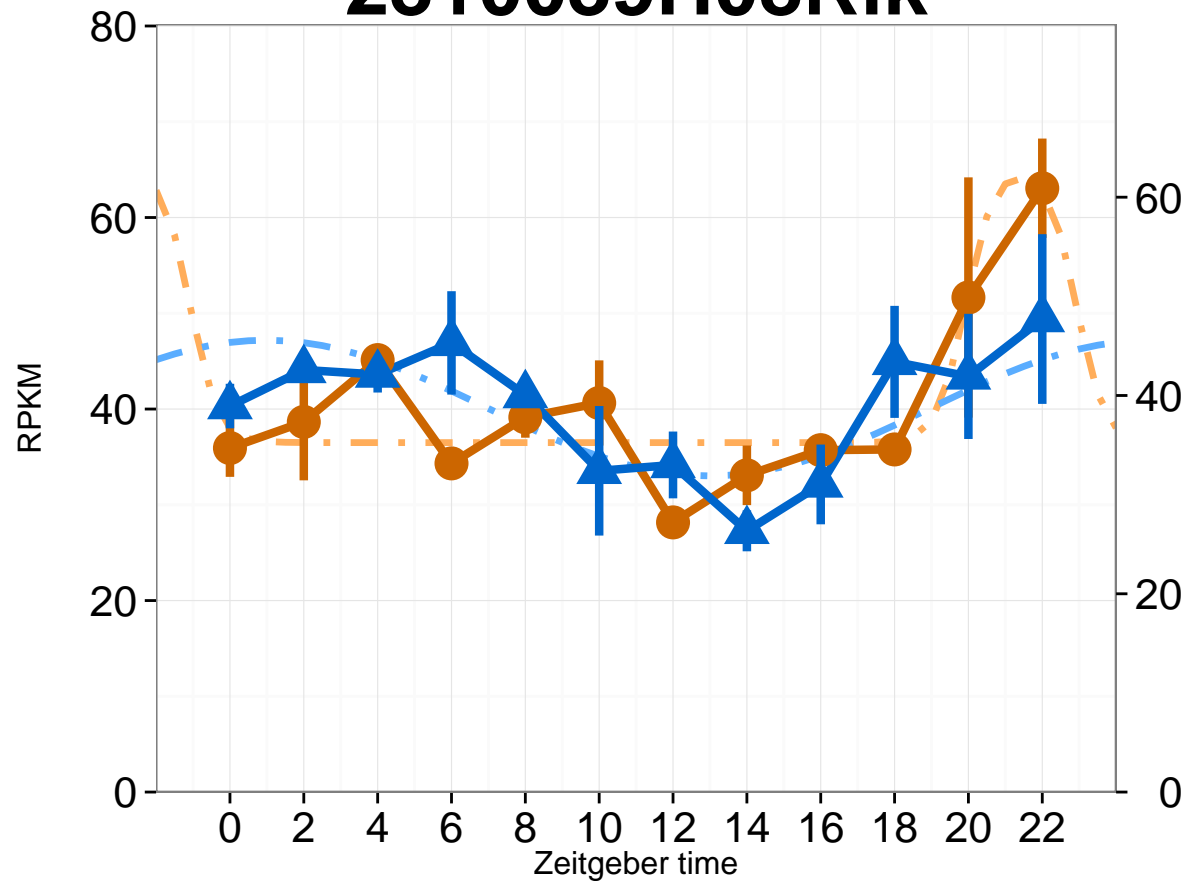

## 2310039H08Rik

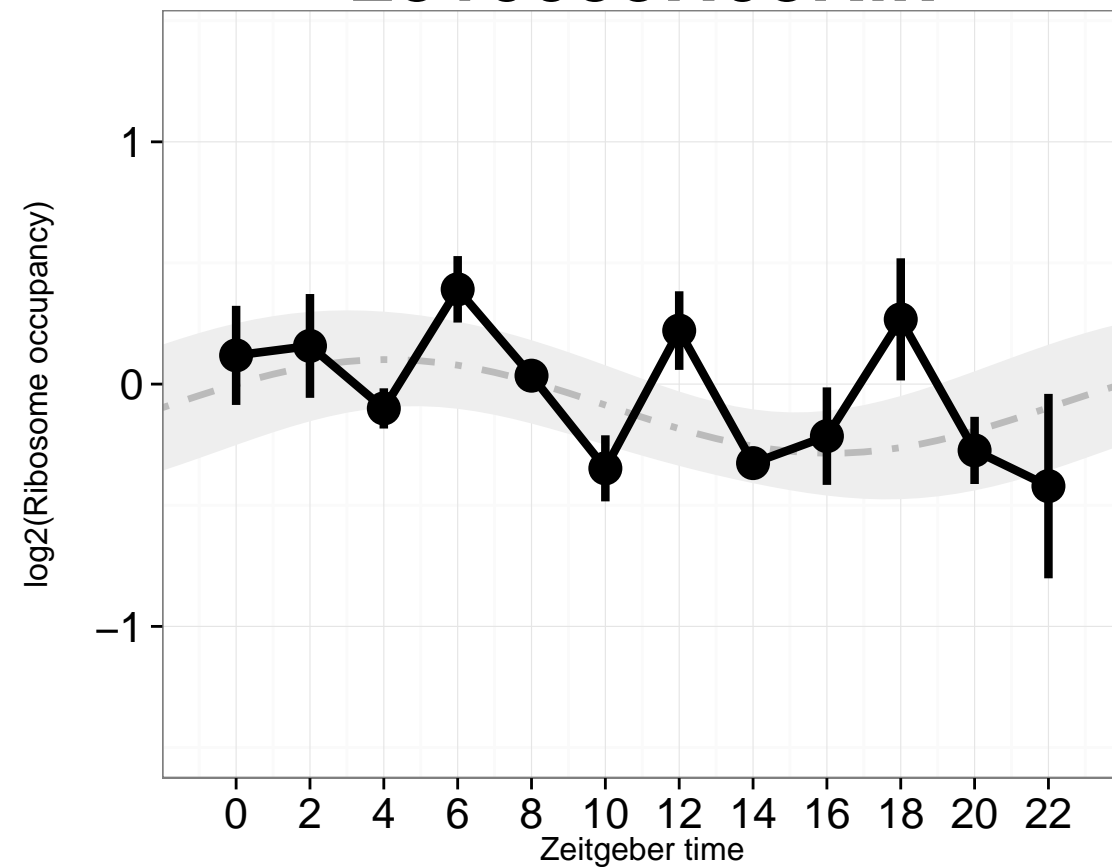

Supplement: SuppDataset_1.zip [file 2310039H08Rik_set_B.pdf › Supplemental Dataset 1/B-mRNA_rhythm_translation_nonrhyth/2310039H08Rik_set_B.pdf]

## 2310044G17Rik

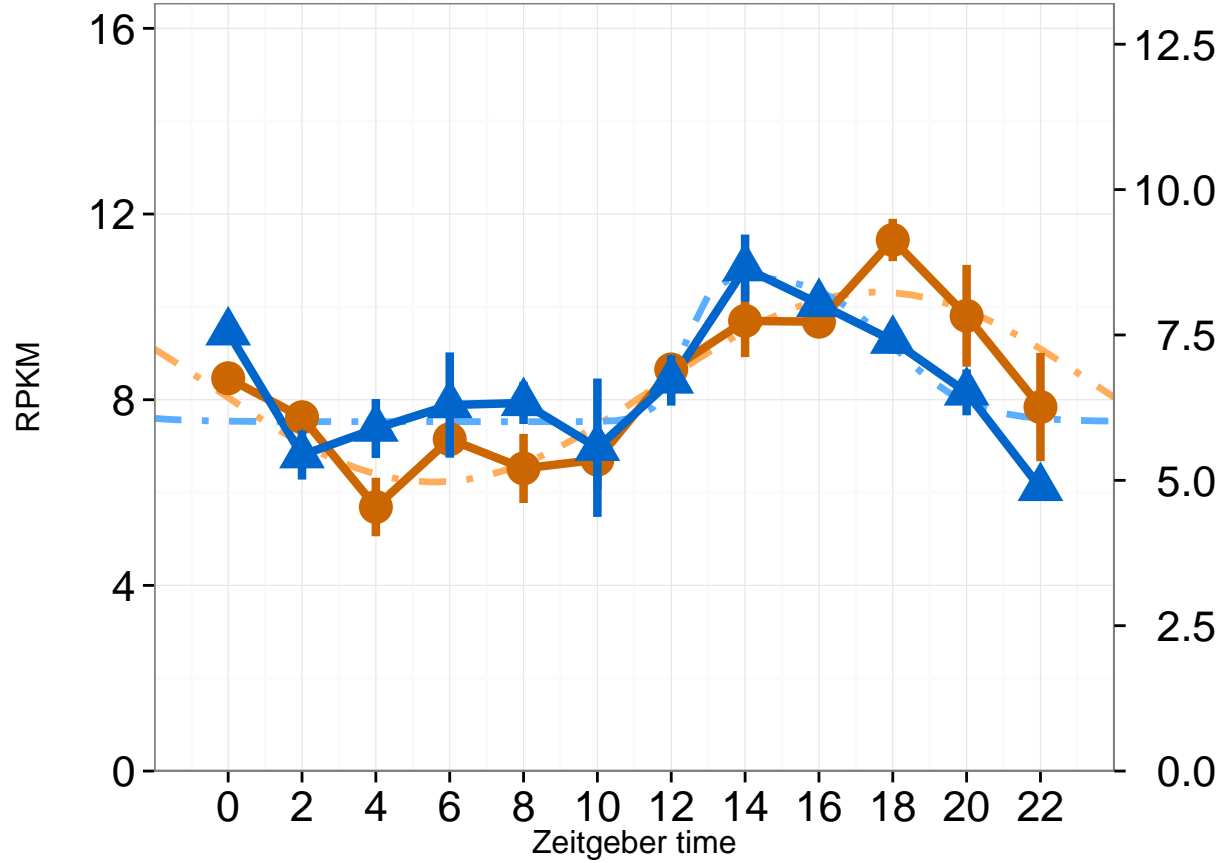

## 2310044G17Rik

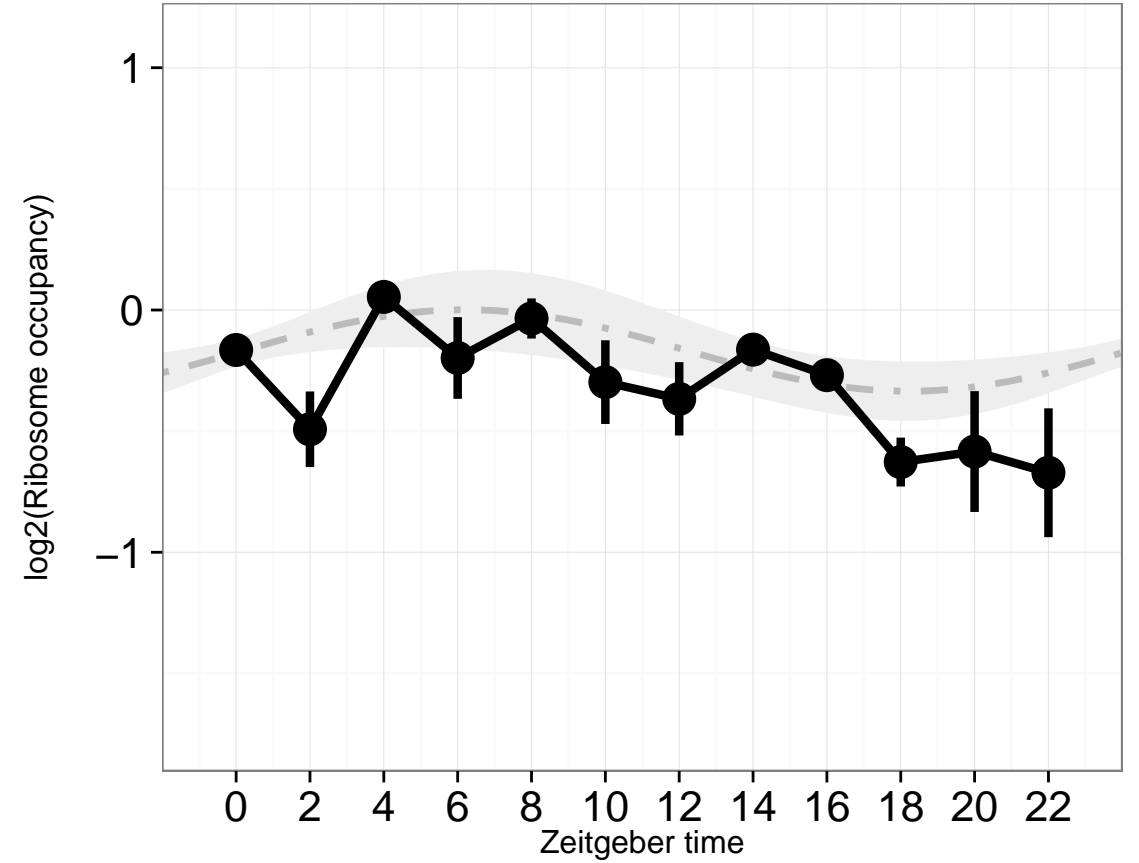

Supplement: SuppDataset_1.zip [file 2310044G17Rik_set_B.pdf › Supplemental Dataset 1/B-mRNA_rhythm_translation_nonrhyth/2310044G17Rik_set_B.pdf]

# 2810459M11Rik

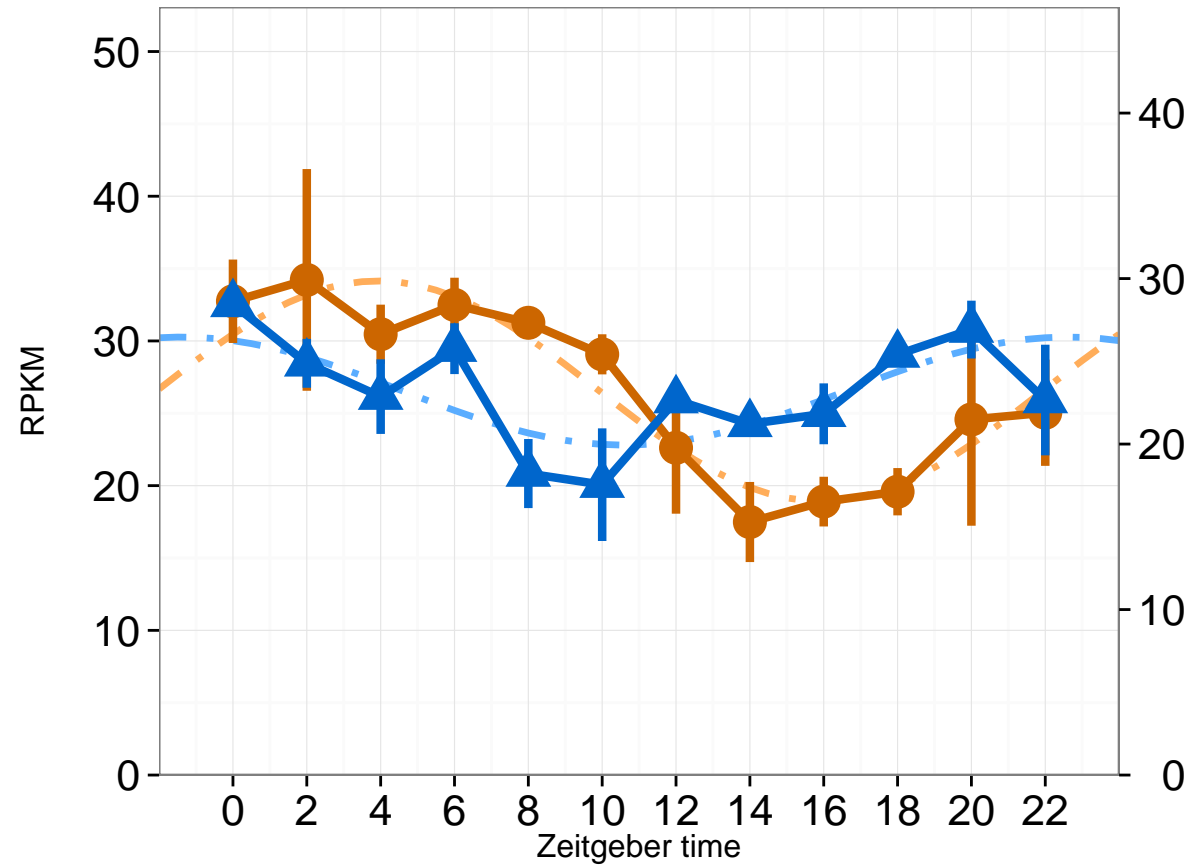

# 2810459M11Rik

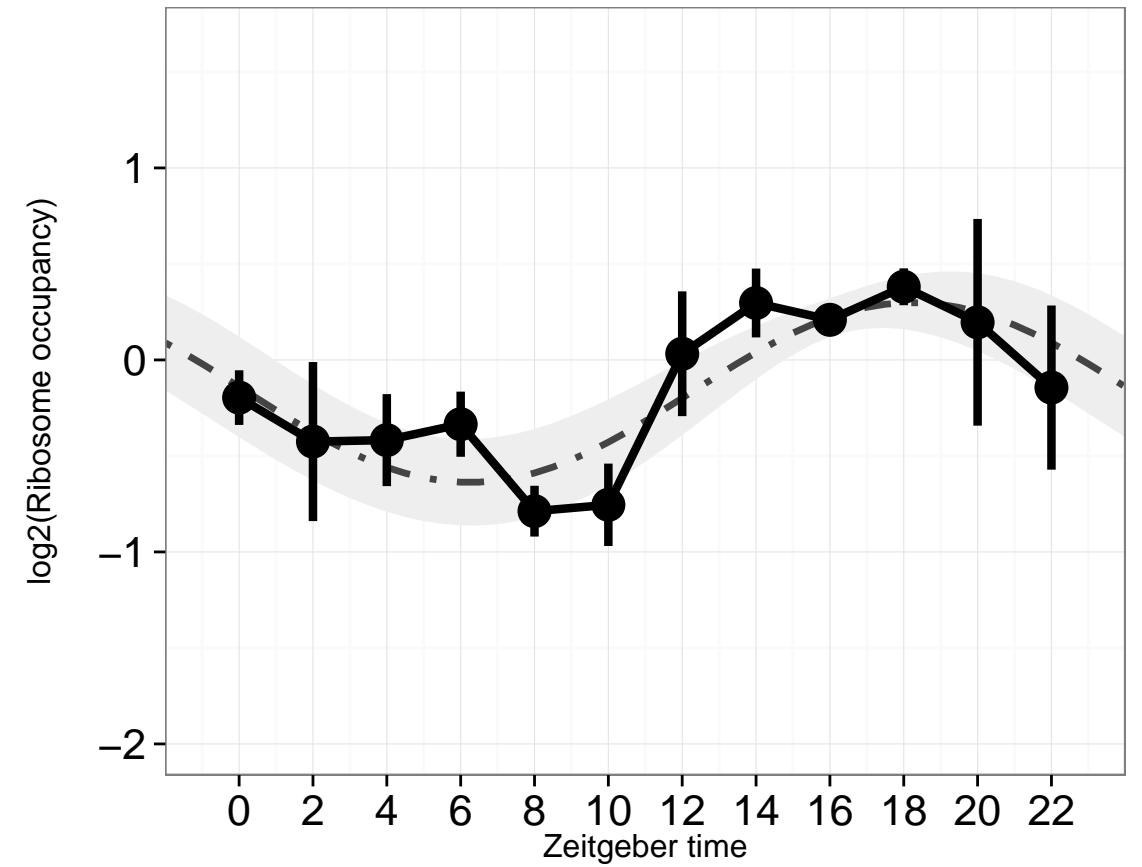

Supplement: SuppDataset_1.zip [file 2810459M11Rik_set_B.pdf › Supplemental Dataset 1/B-mRNA_rhythm_translation_nonrhyth/2810459M11Rik_set_B.pdf]

## 2810474O19Rik

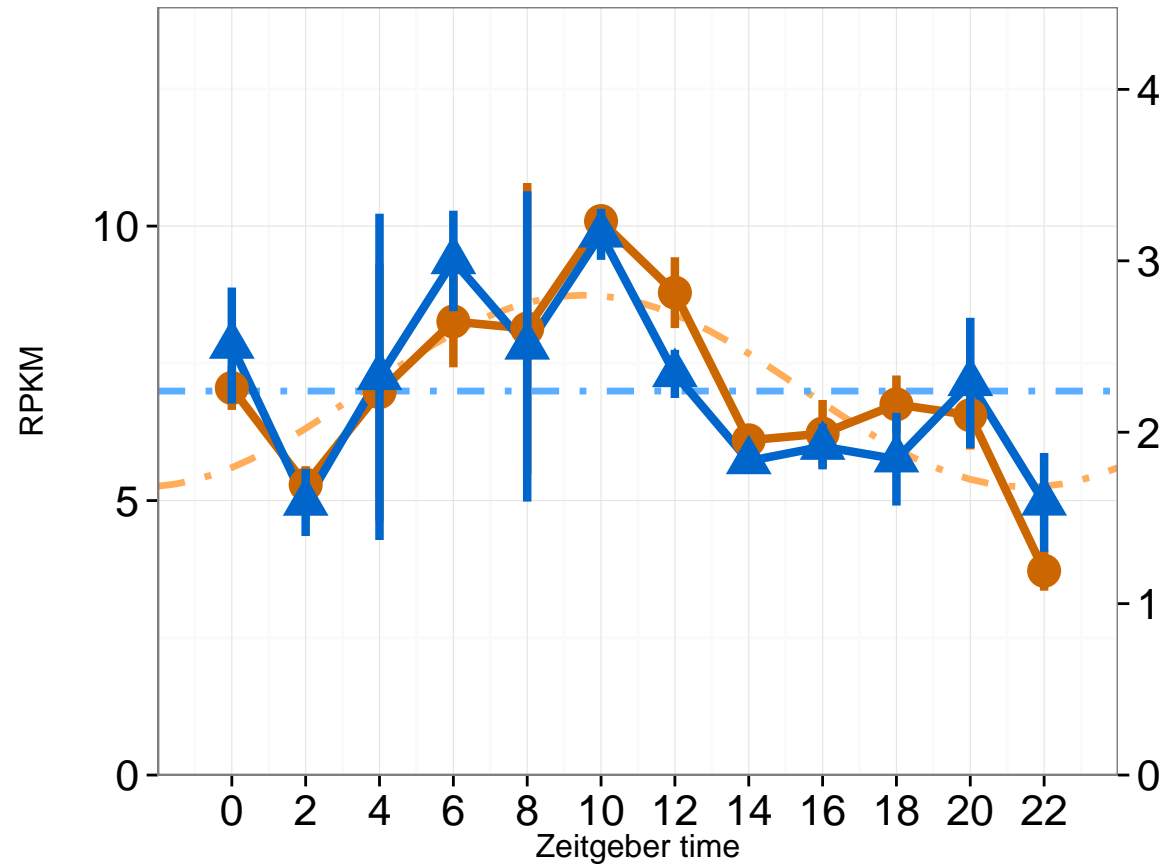

## 2810474O19Rik

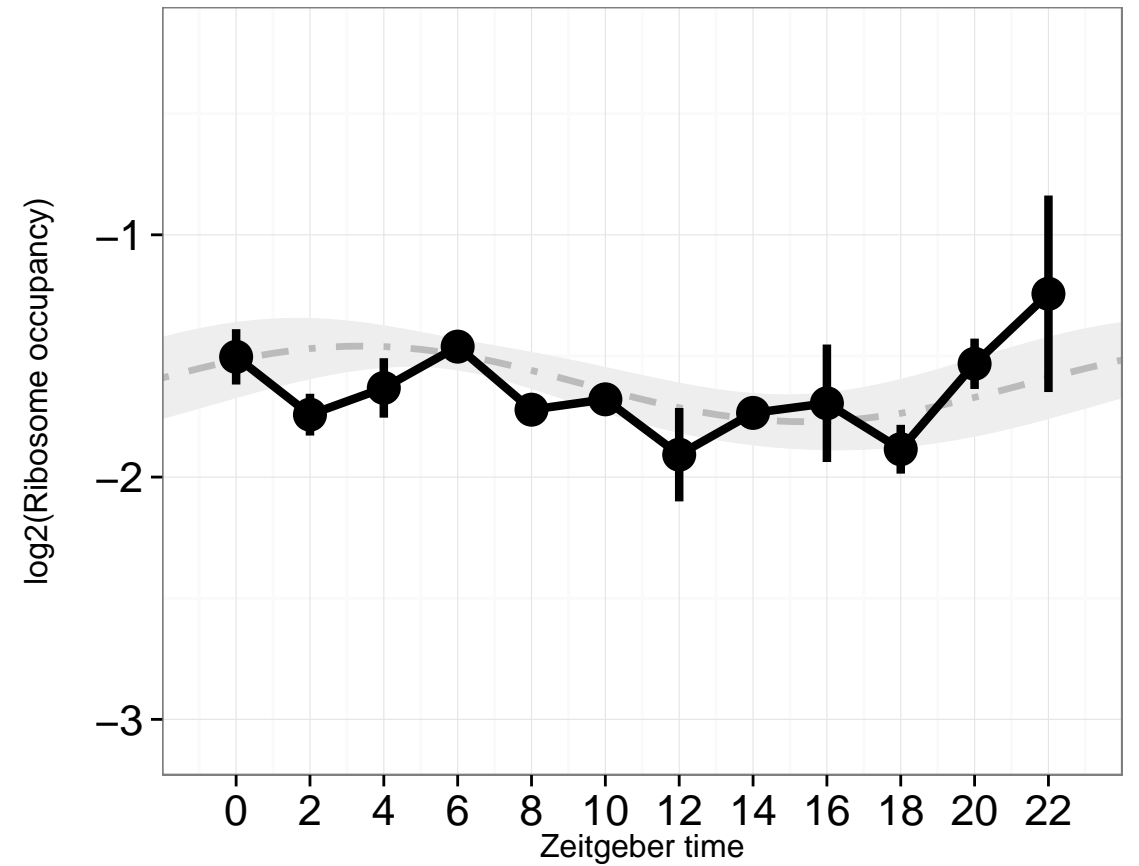

Supplement: SuppDataset_1.zip [file 2810474O19Rik_set_B.pdf › Supplemental Dataset 1/B-mRNA_rhythm_translation_nonrhyth/2810474O19Rik_set_B.pdf]

## 4921513D11Rik

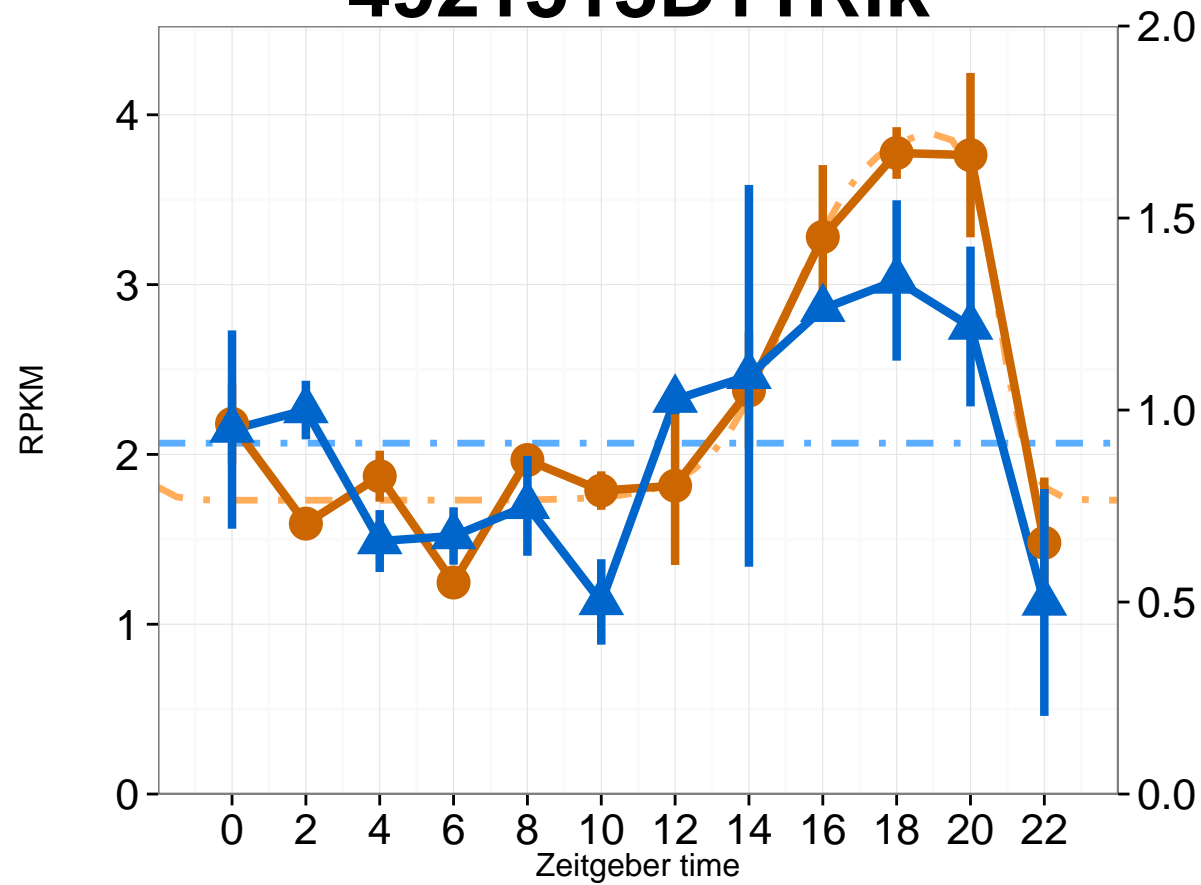

## 4921513D11Rik

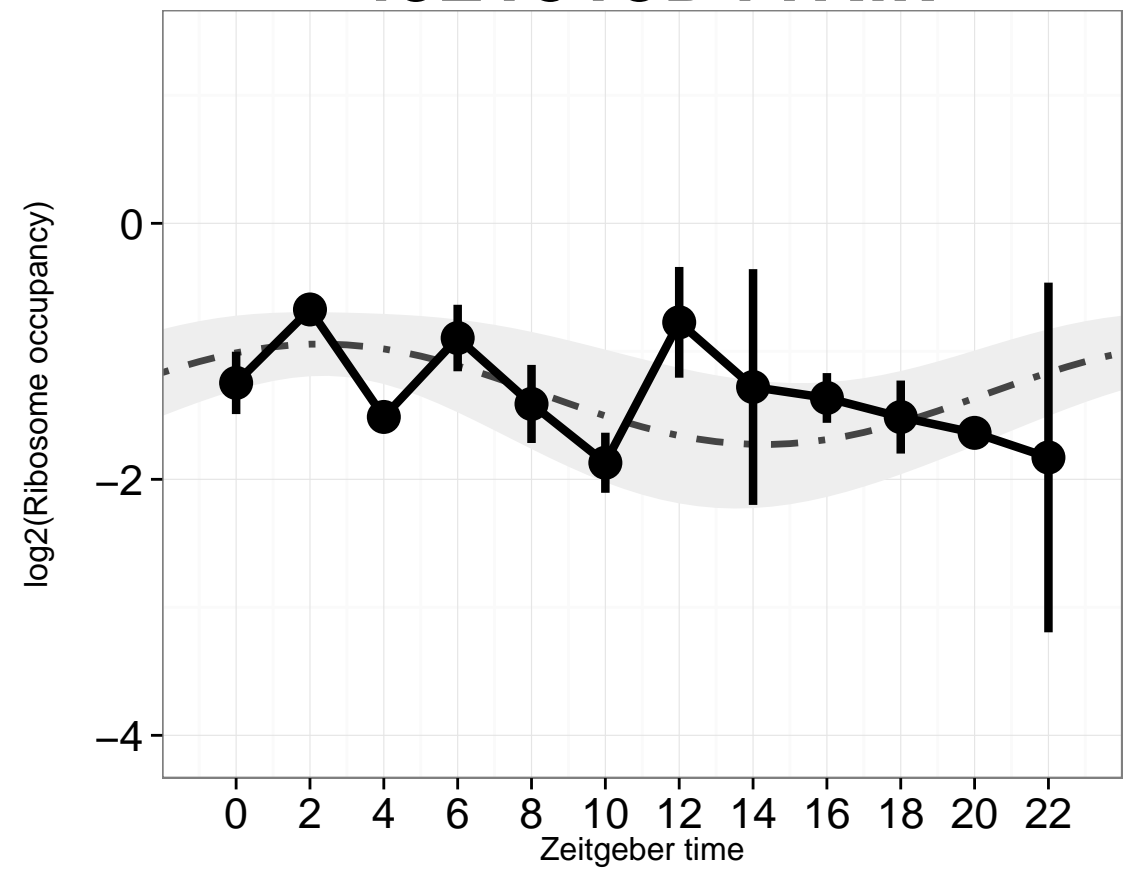

Supplement: SuppDataset_1.zip [file 4921513D11Rik_set_B.pdf › Supplemental Dataset 1/B-mRNA_rhythm_translation_nonrhyth/4921513D11Rik_set_B.pdf]

## 4921524J17Rik

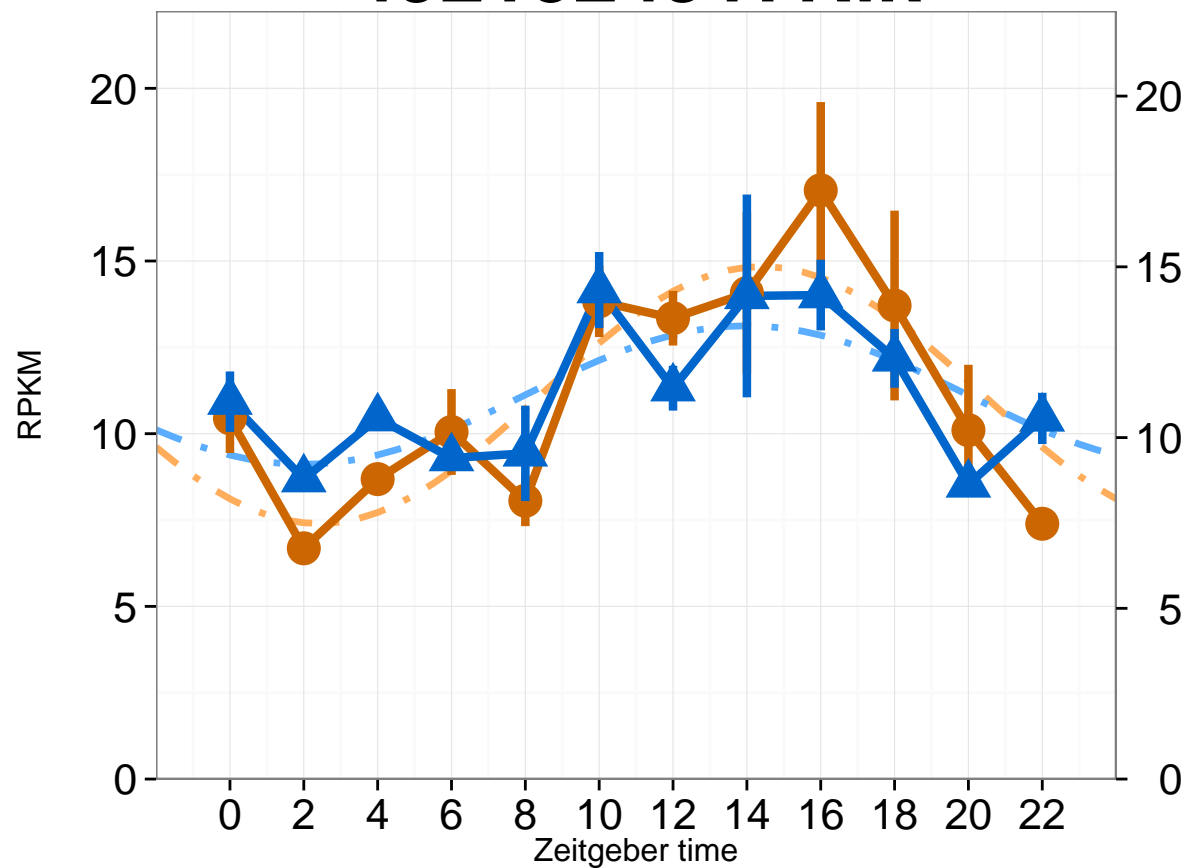

## 4921524J17Rik

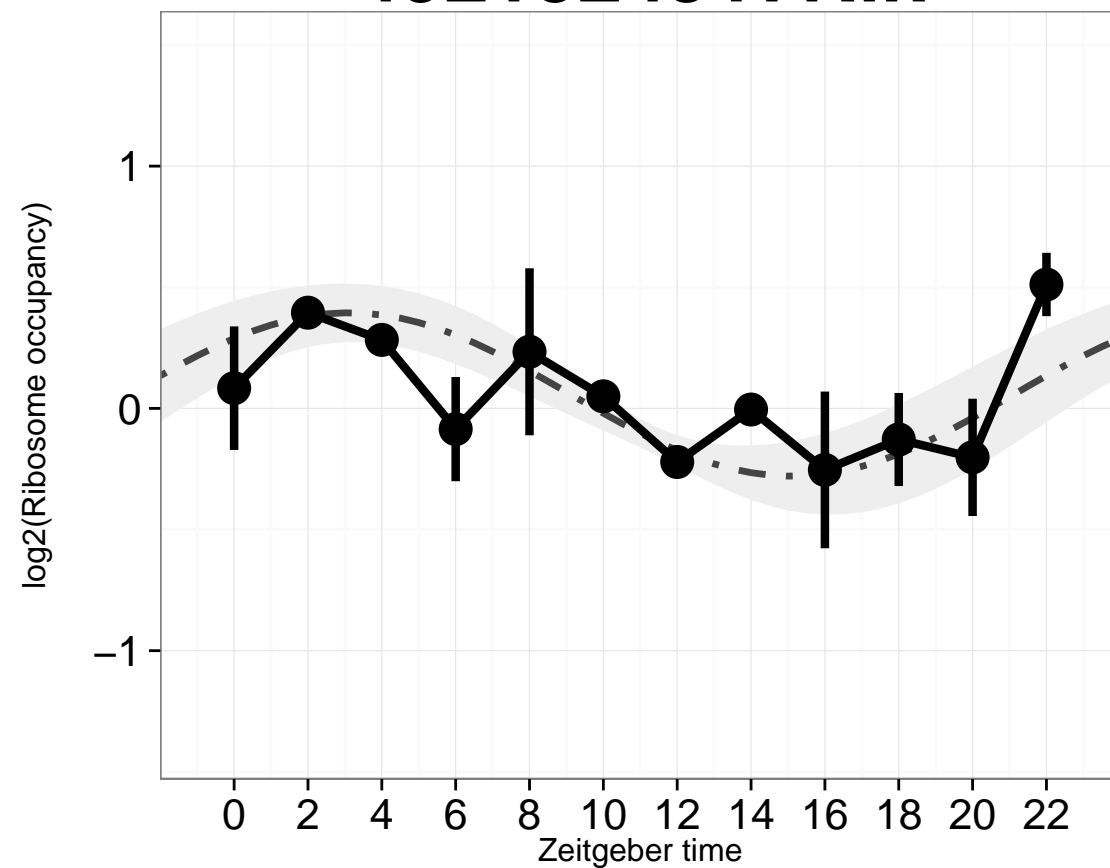

Supplement: SuppDataset_1.zip [file 4921524J17Rik_set_B.pdf › Supplemental Dataset 1/B-mRNA_rhythm_translation_nonrhyth/4921524J17Rik_set_B.pdf]

## 4930431F12Rik

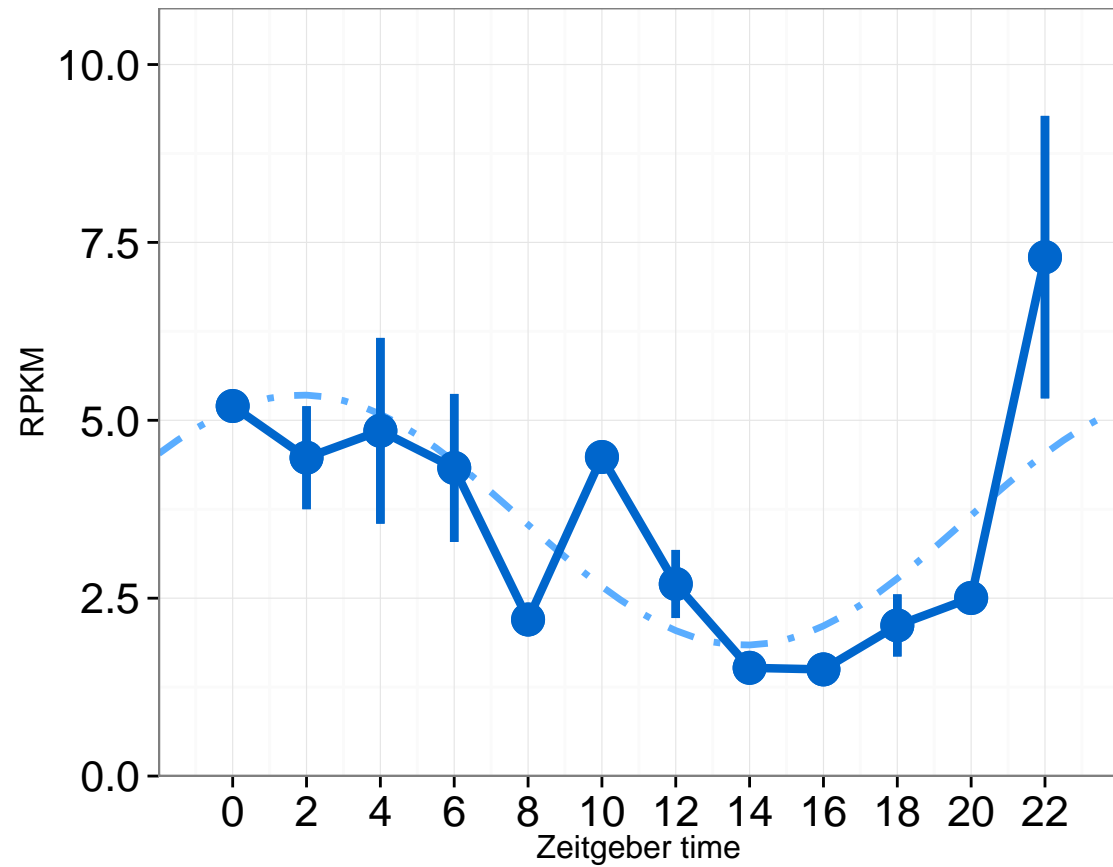

## 4930431F12Rik log<sub>2</sub>(Ribosome occupancy)

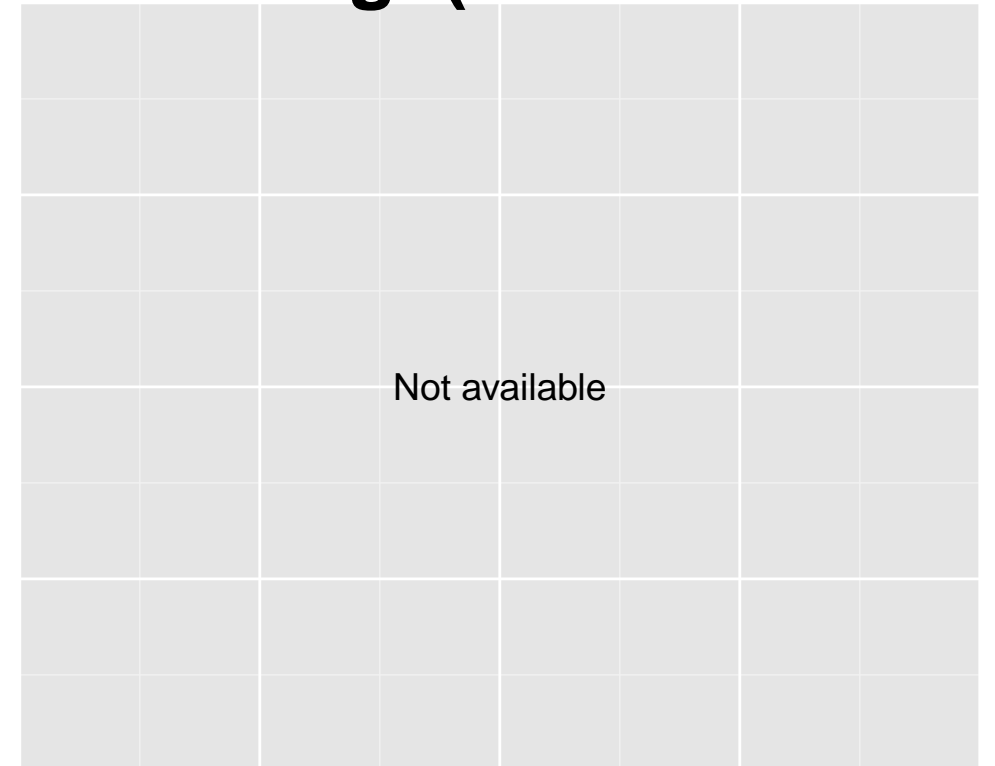

Supplement: SuppDataset_1.zip [file 4930431F12Rik_set_B.pdf › Supplemental Dataset 1/B-mRNA_rhythm_translation_nonrhyth/4930431F12Rik_set_B.pdf]

## 4933427D14Rik

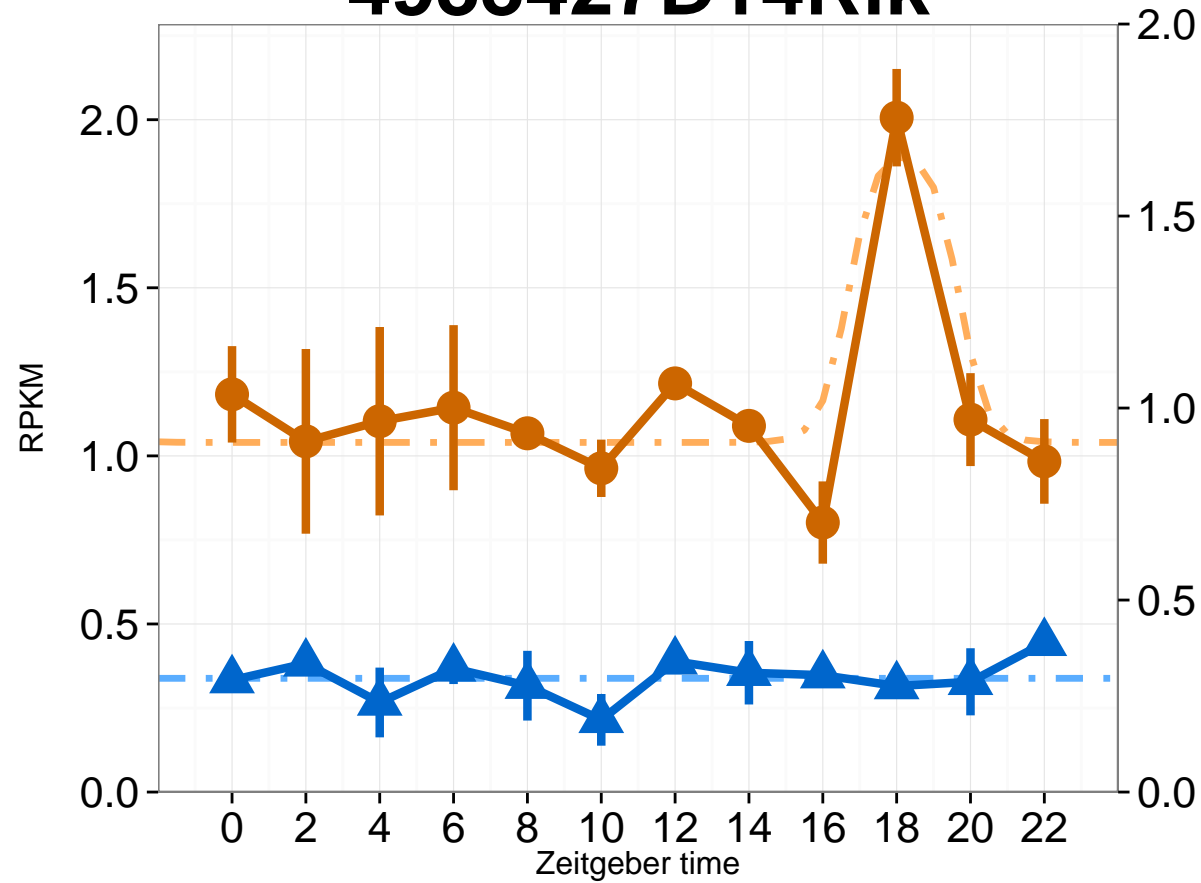

## 4933427D14Rik

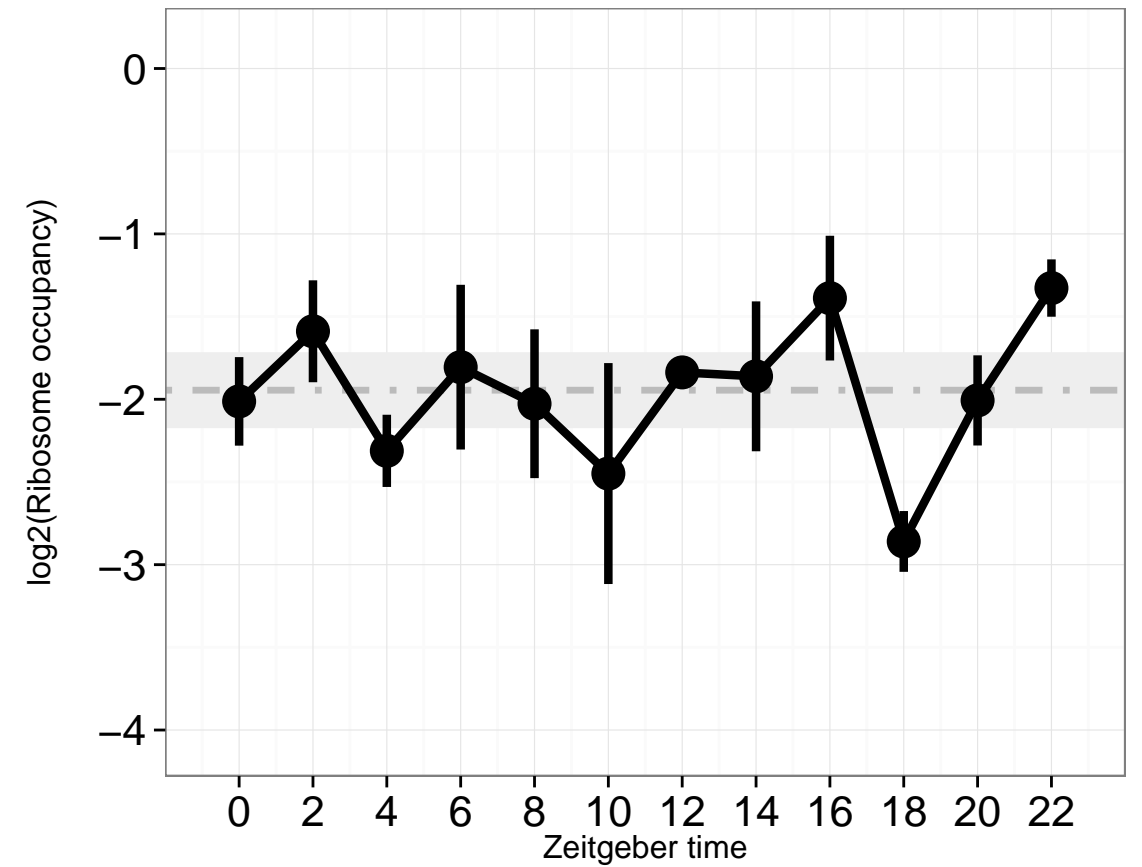

Supplement: SuppDataset_1.zip [file 4933427D14Rik_set_B.pdf › Supplemental Dataset 1/B-mRNA_rhythm_translation_nonrhyth/4933427D14Rik_set_B.pdf]

# 5730409E04Rik

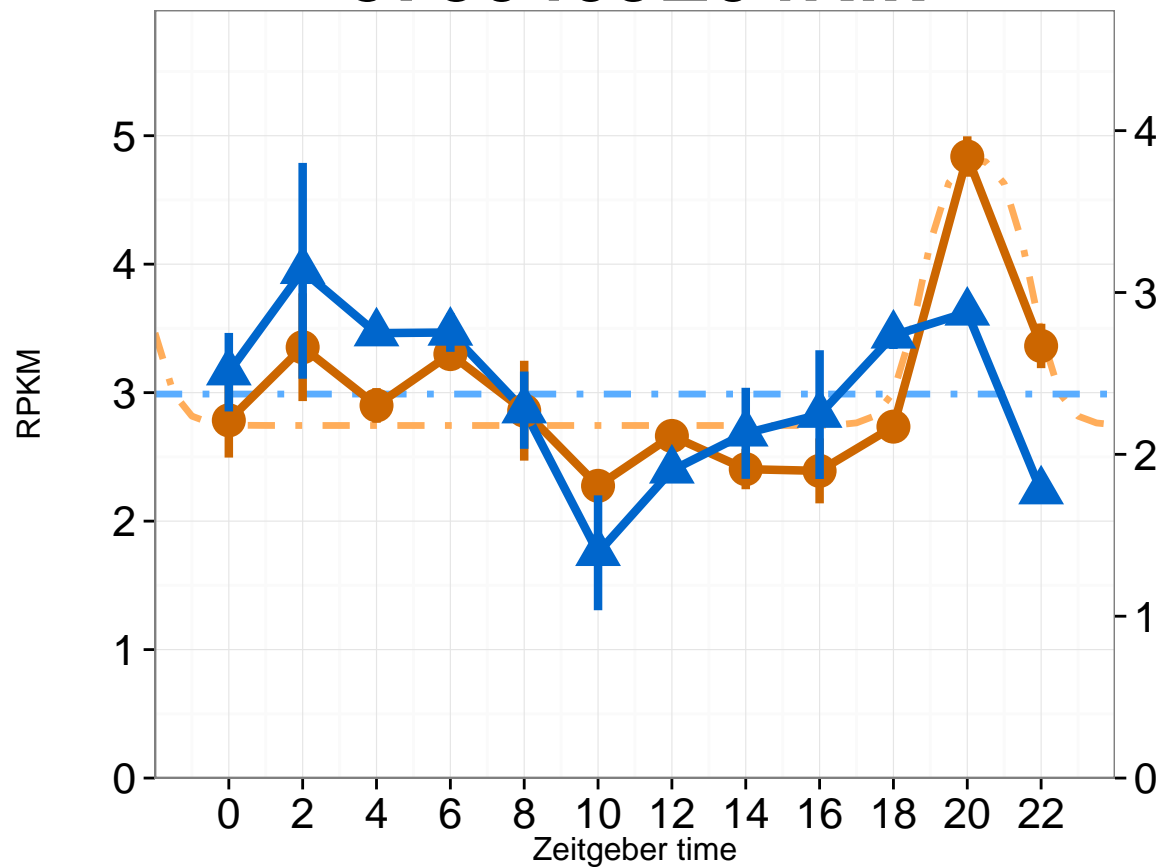

# 5730409E04Rik

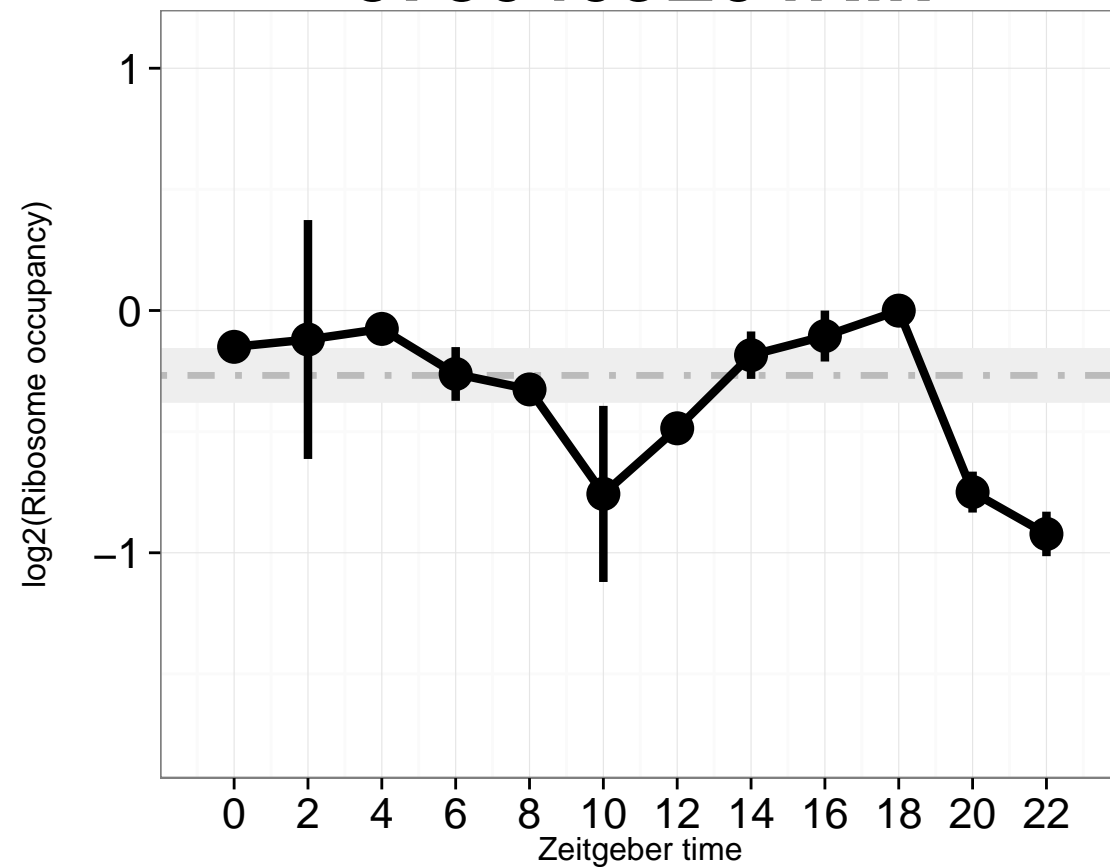

Supplement: SuppDataset_1.zip [file 5730409E04Rik_set_B.pdf › Supplemental Dataset 1/B-mRNA_rhythm_translation_nonrhyth/5730409E04Rik_set_B.pdf]

# 9130221H12Rik

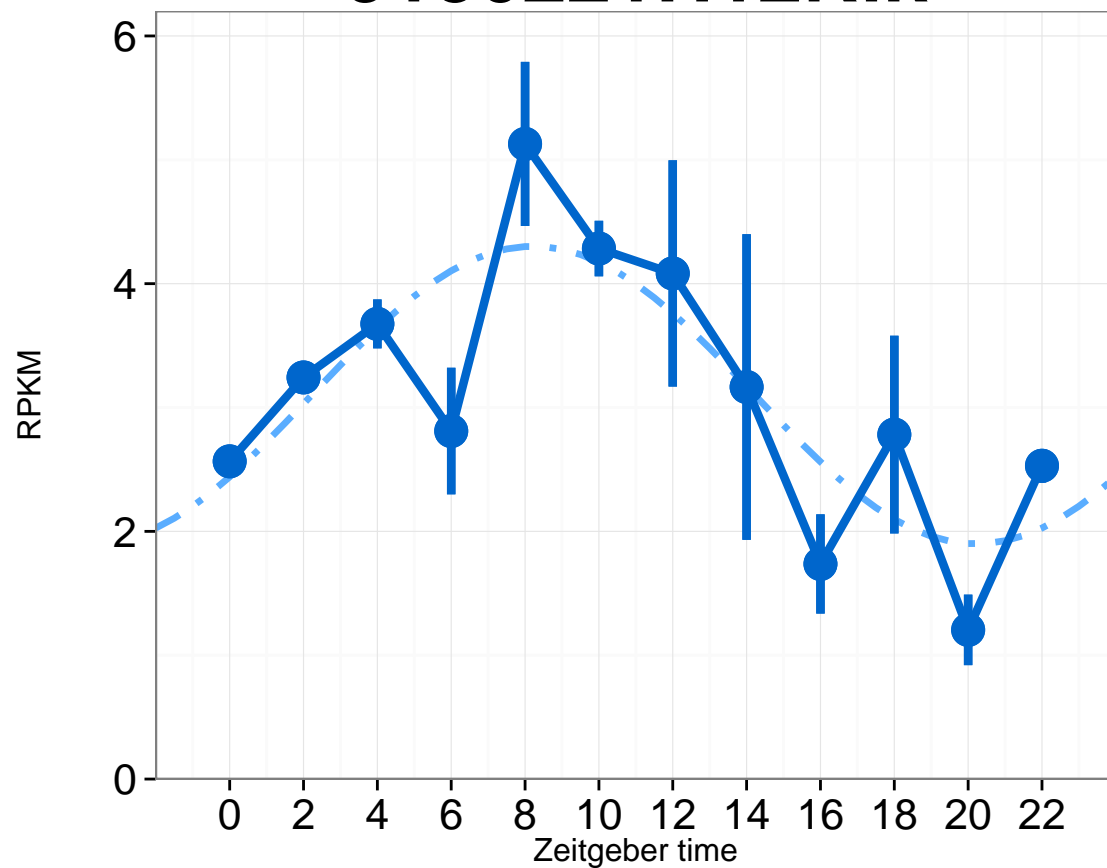

# 9130221H12Rik log2(Ribosome occup

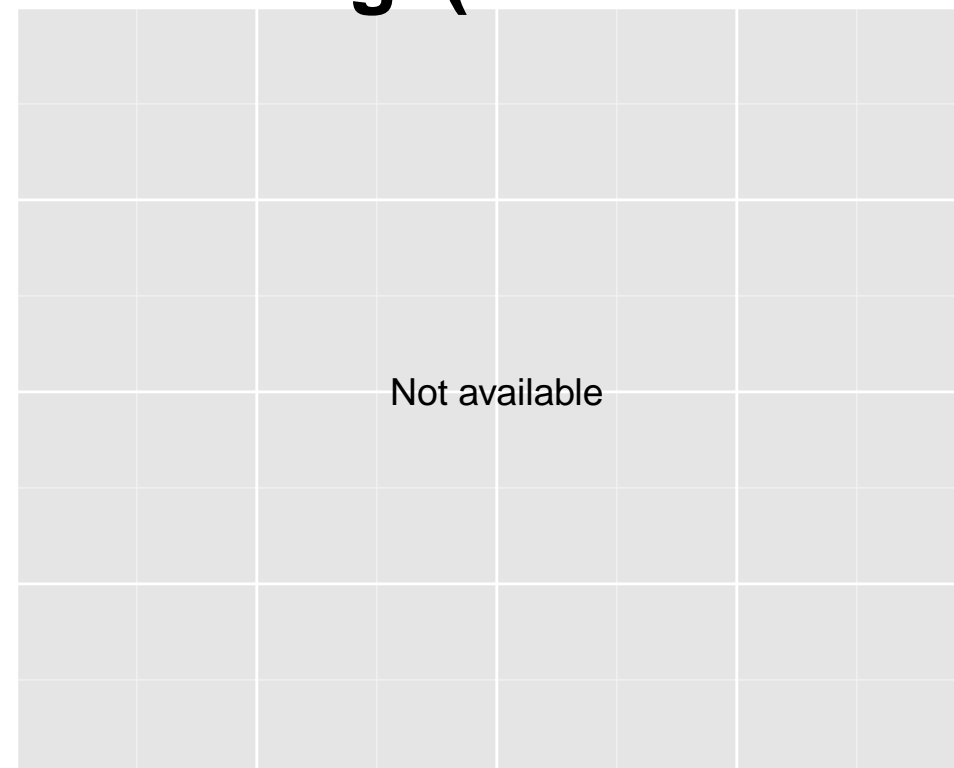

Supplement: SuppDataset_1.zip [file 9130221H12Rik_set_B.pdf › Supplemental Dataset 1/B-mRNA_rhythm_translation_nonrhyth/9130221H12Rik_set_B.pdf]

## A430005L14Rik

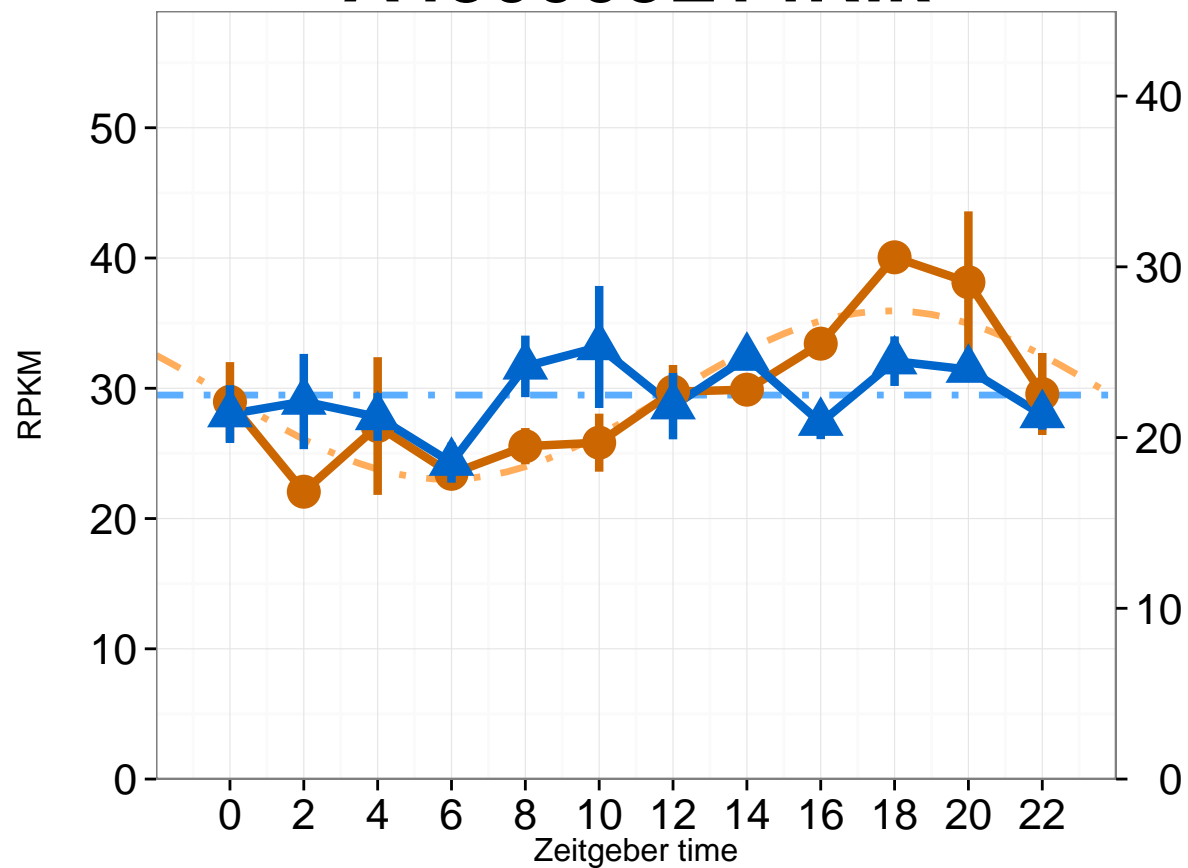

## A430005L14Rik

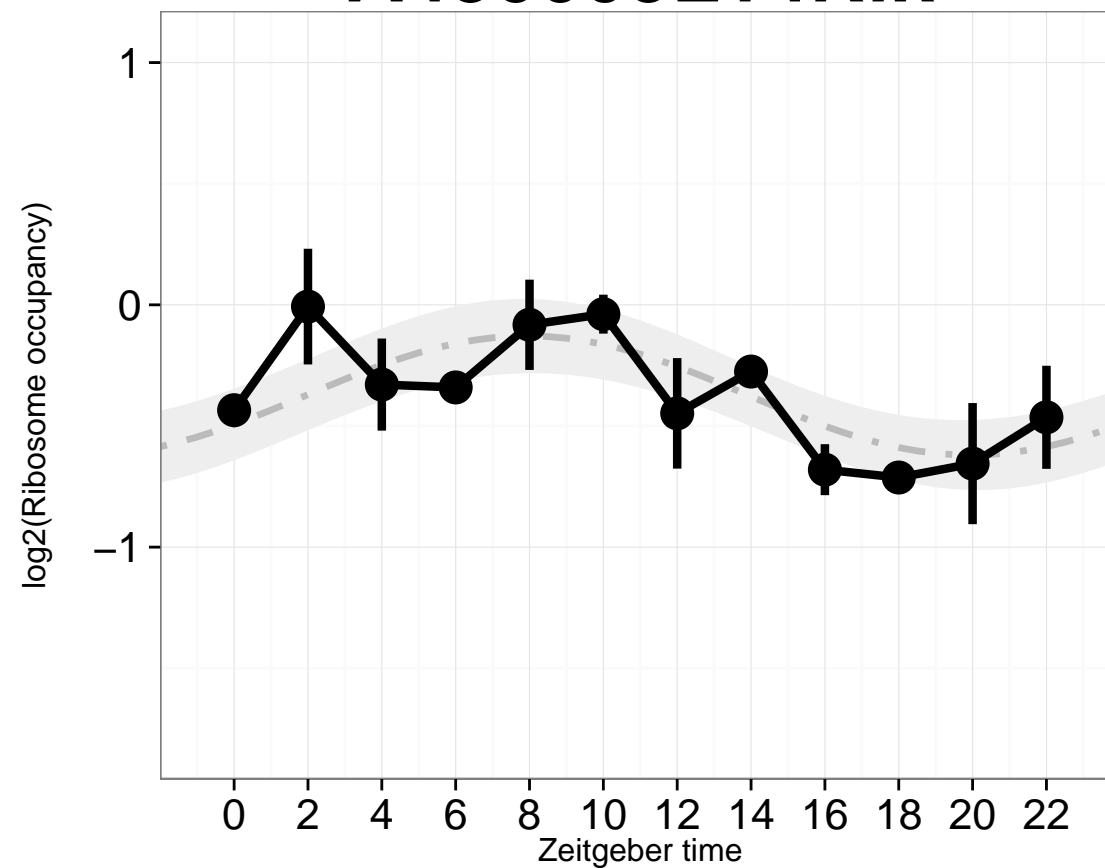

Supplement: SuppDataset_1.zip [file A430005L14Rik_set_B.pdf › Supplemental Dataset 1/B-mRNA_rhythm_translation_nonrhyth/A430005L14Rik_set_B.pdf]

# A530054K11Rik

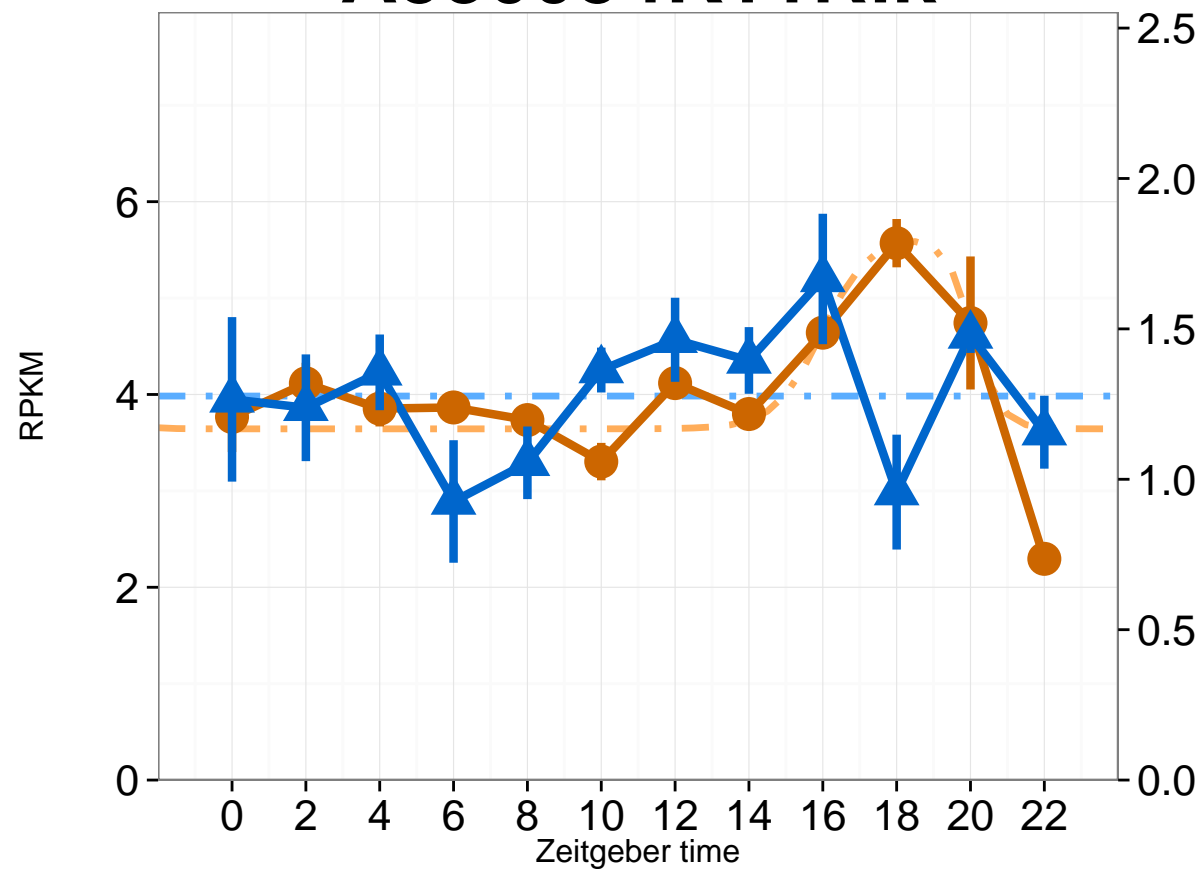

# A530054K11Rik

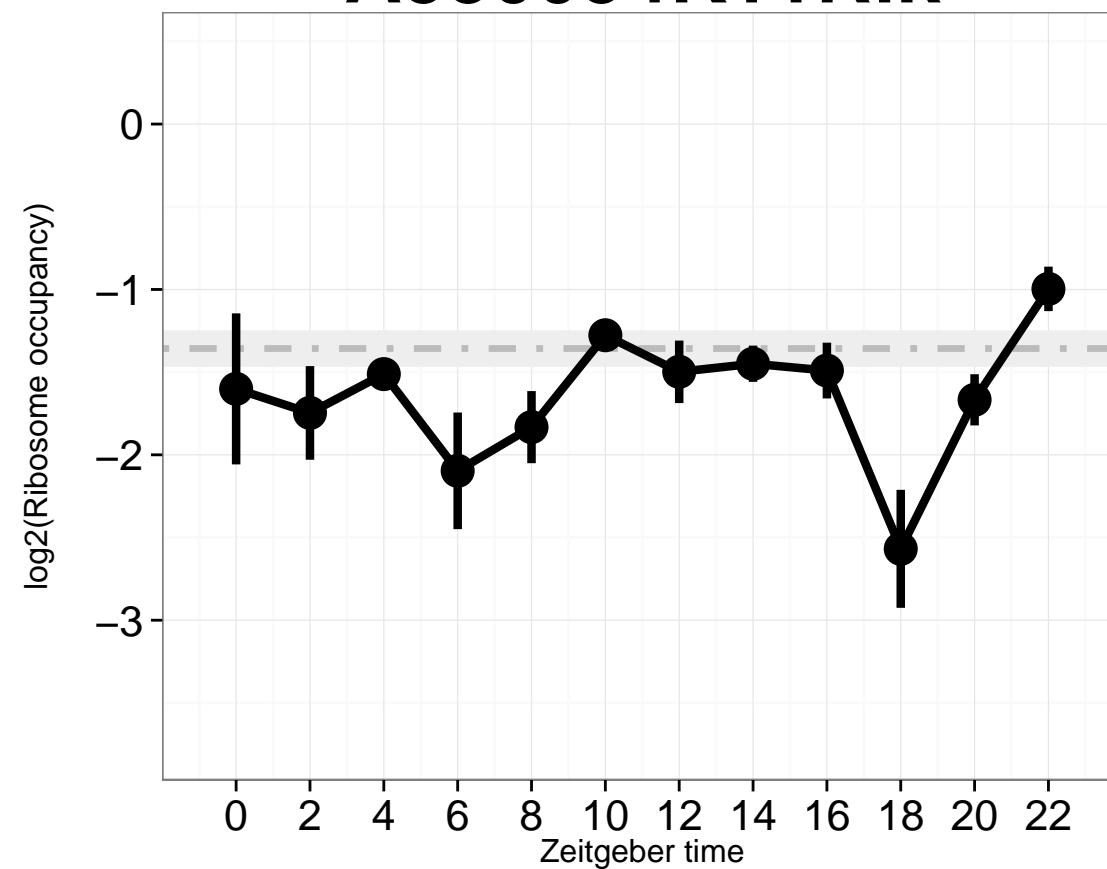

Supplement: SuppDataset_1.zip [file A530054K11Rik_set_B.pdf › Supplemental Dataset 1/B-mRNA_rhythm_translation_nonrhyth/A530054K11Rik_set_B.pdf]

## AI661453

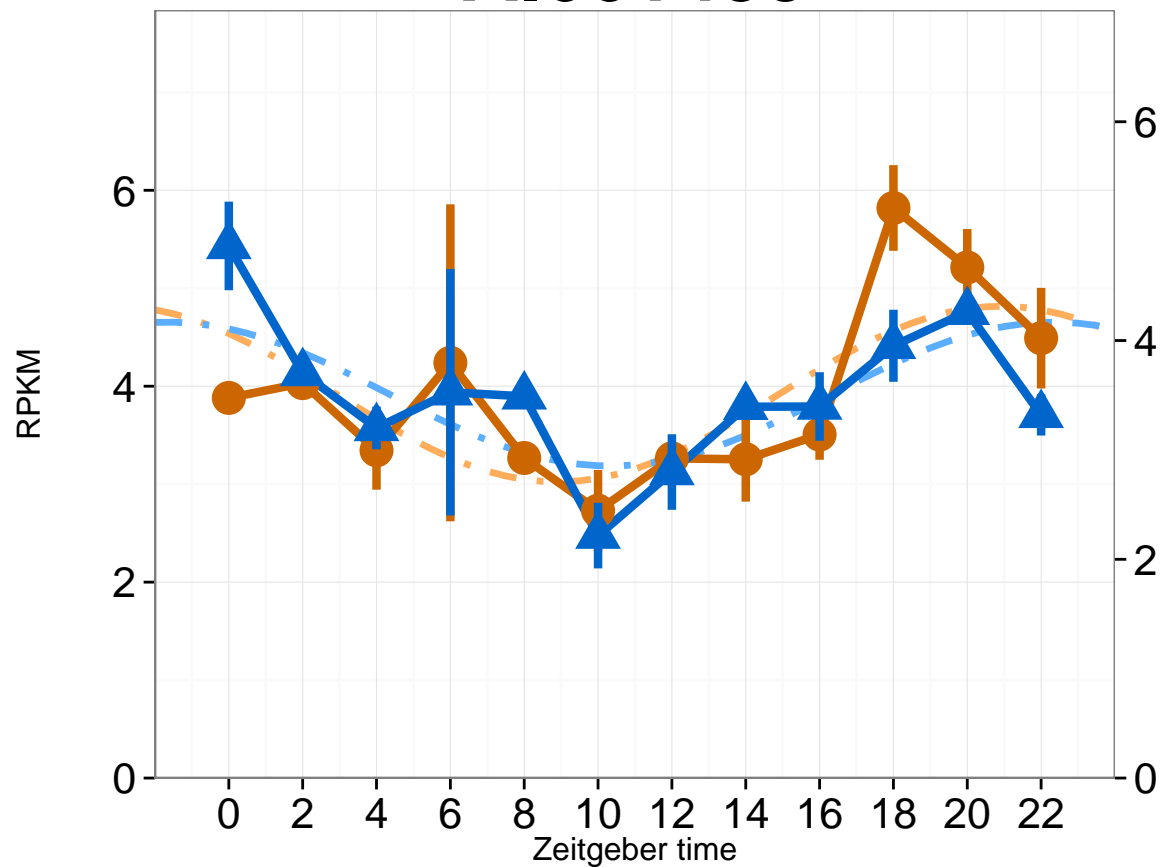

## AI661453

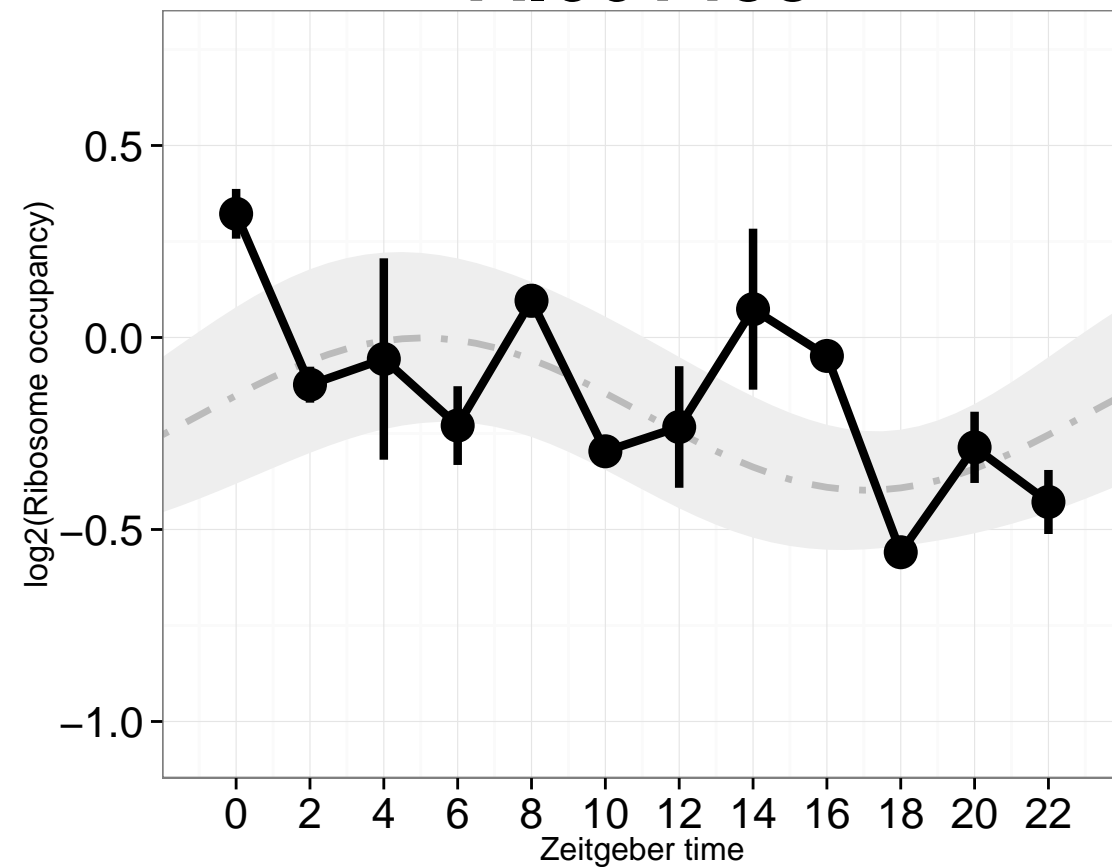

Supplement: SuppDataset_1.zip [file AI661453_set_B.pdf › Supplemental Dataset 1/B-mRNA_rhythm_translation_nonrhyth/AI661453_set_B.pdf]

# AU019823

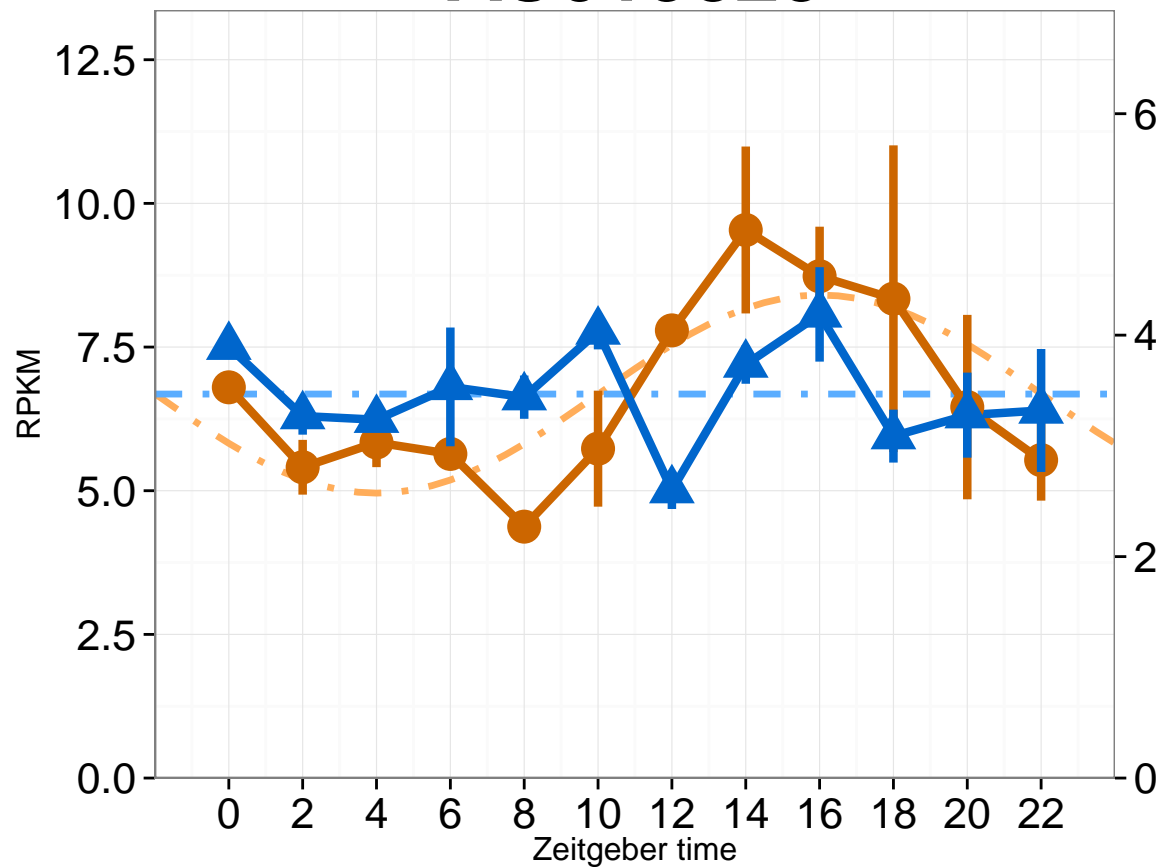

# AU019823

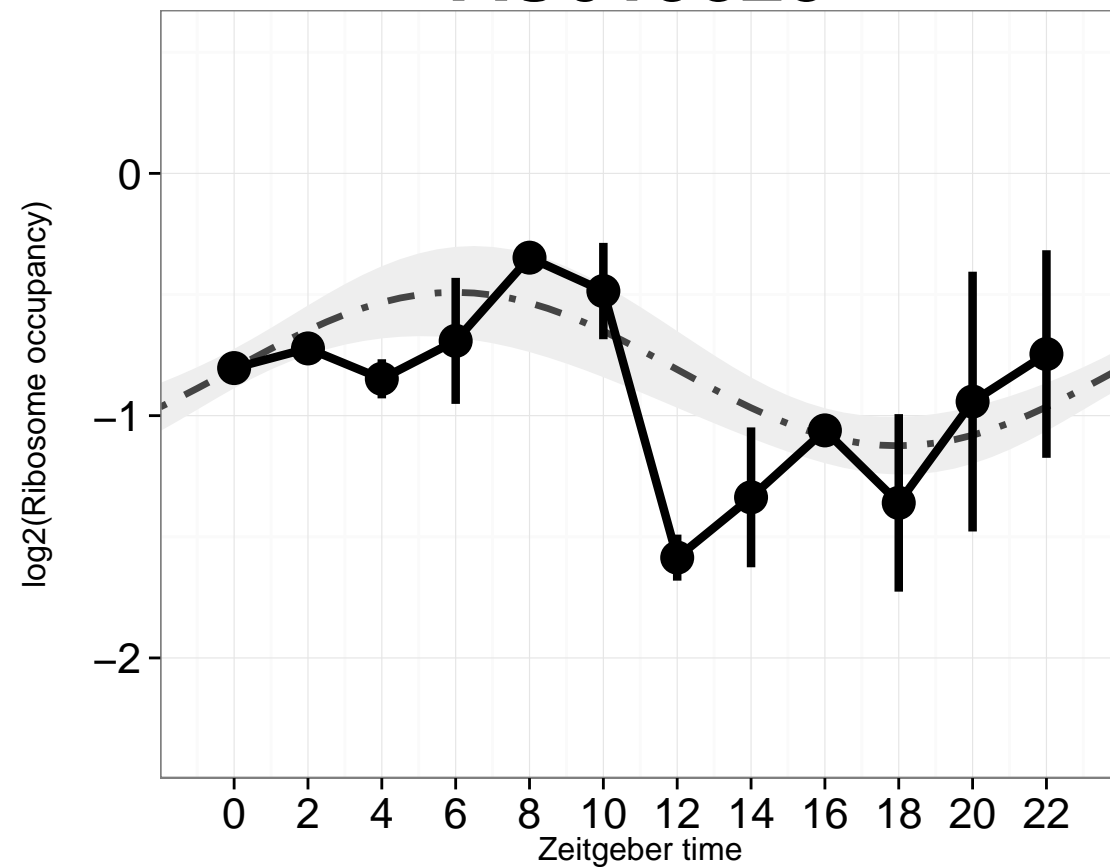

Supplement: SuppDataset_1.zip [file AU019823_set_B.pdf › Supplemental Dataset 1/B-mRNA_rhythm_translation_nonrhyth/AU019823_set_B.pdf]

# AU041133

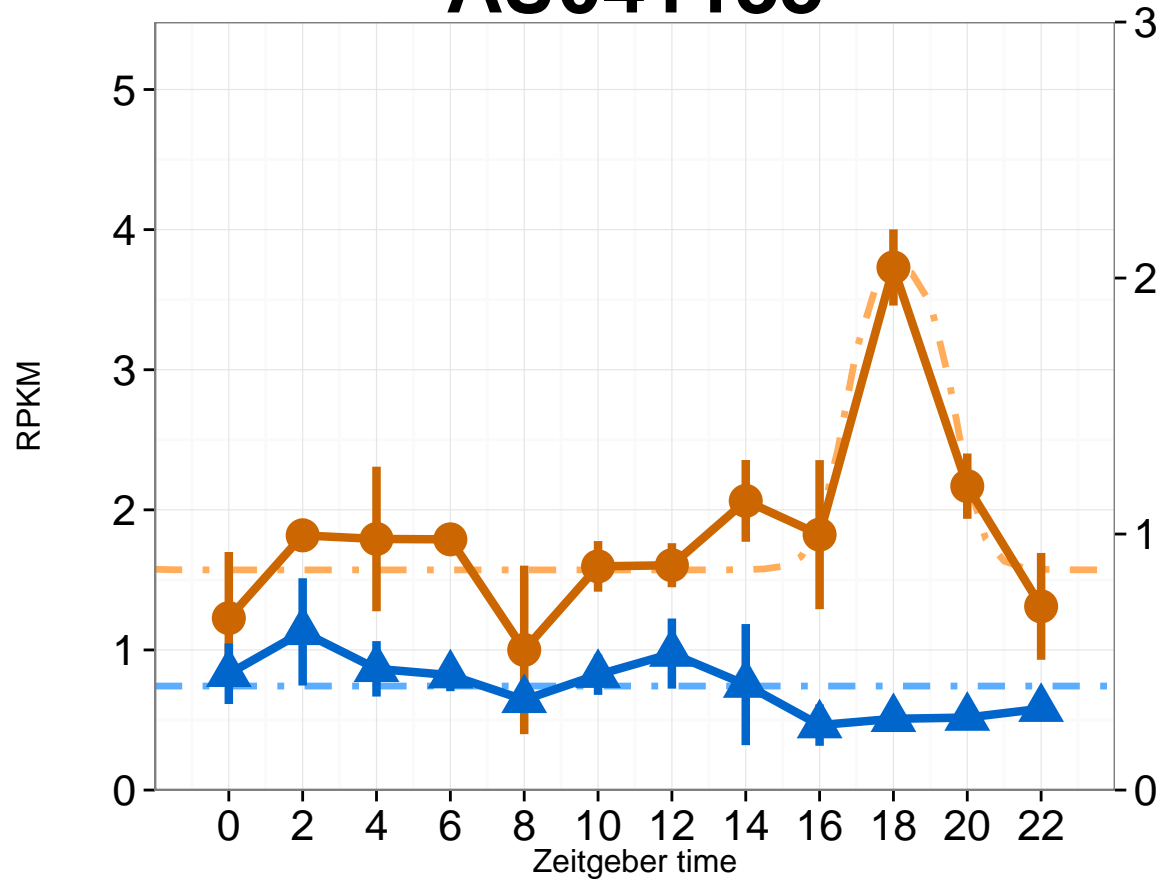

# AU041133

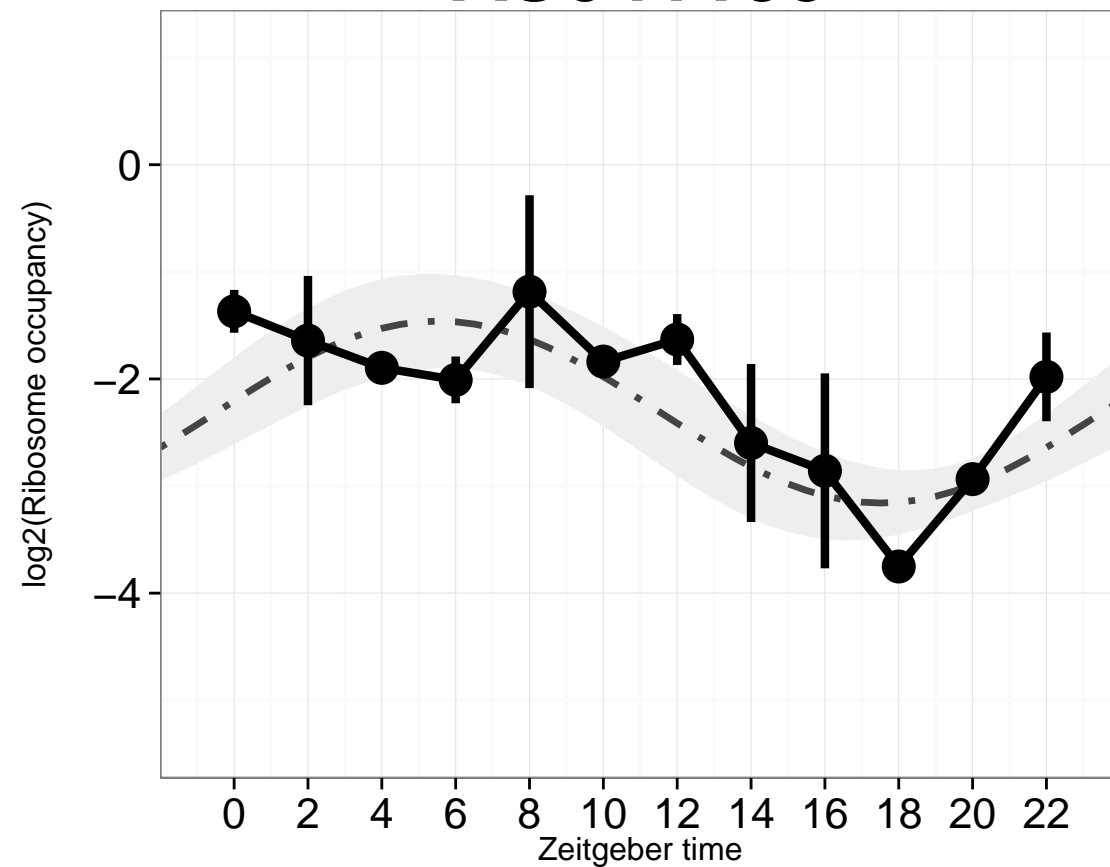

Supplement: SuppDataset_1.zip [file AU041133_set_B.pdf › Supplemental Dataset 1/B-mRNA_rhythm_translation_nonrhyth/AU041133_set_B.pdf]

## Aasdh

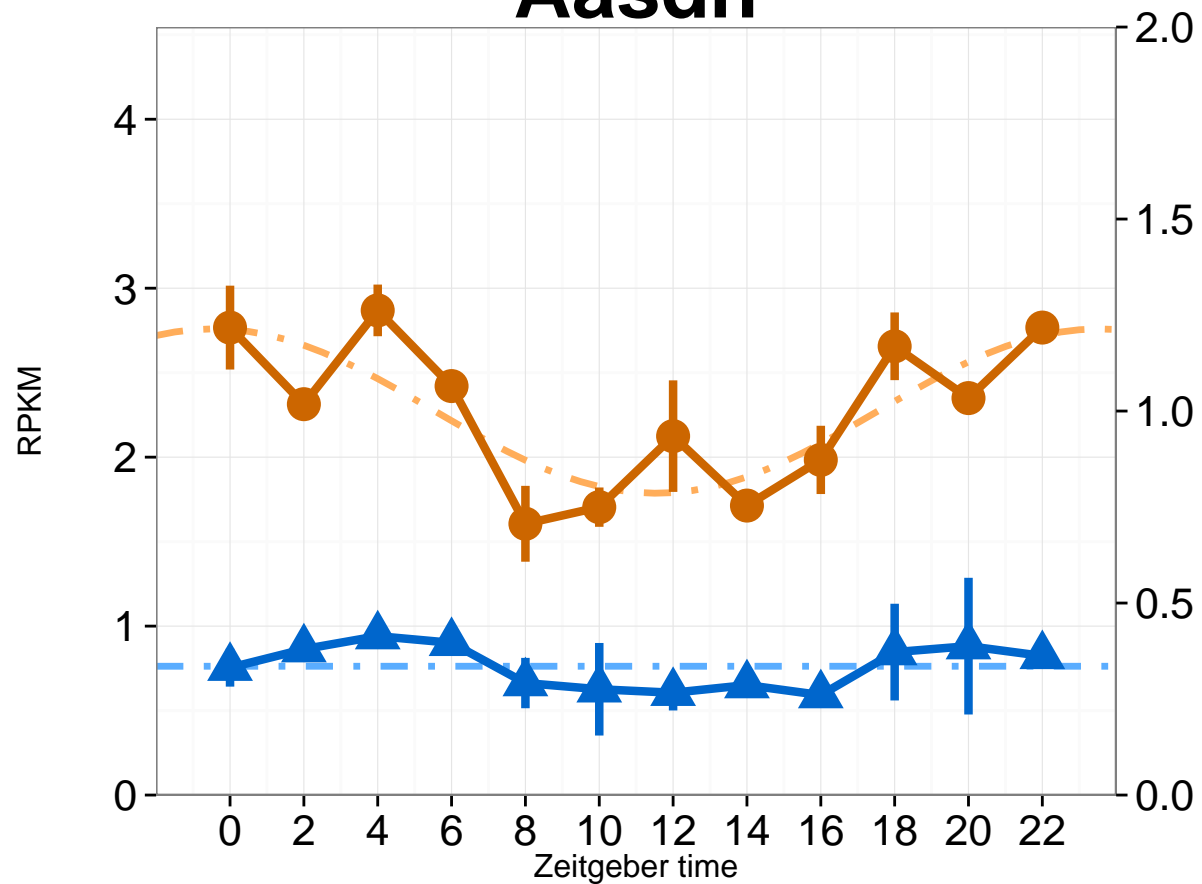

## Aasdh

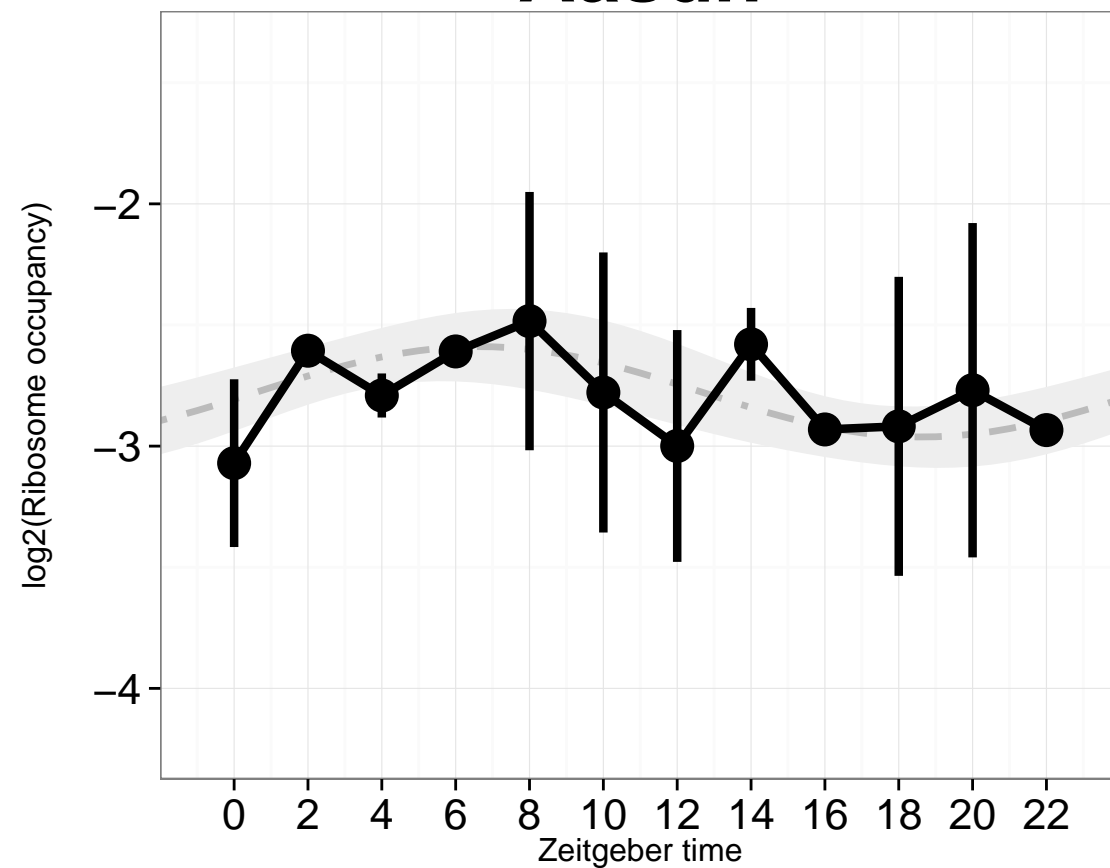

Supplement: SuppDataset_1.zip [file Aasdh_set_B.pdf › Supplemental Dataset 1/B-mRNA_rhythm_translation_nonrhyth/Aasdh_set_B.pdf]

# Abca2

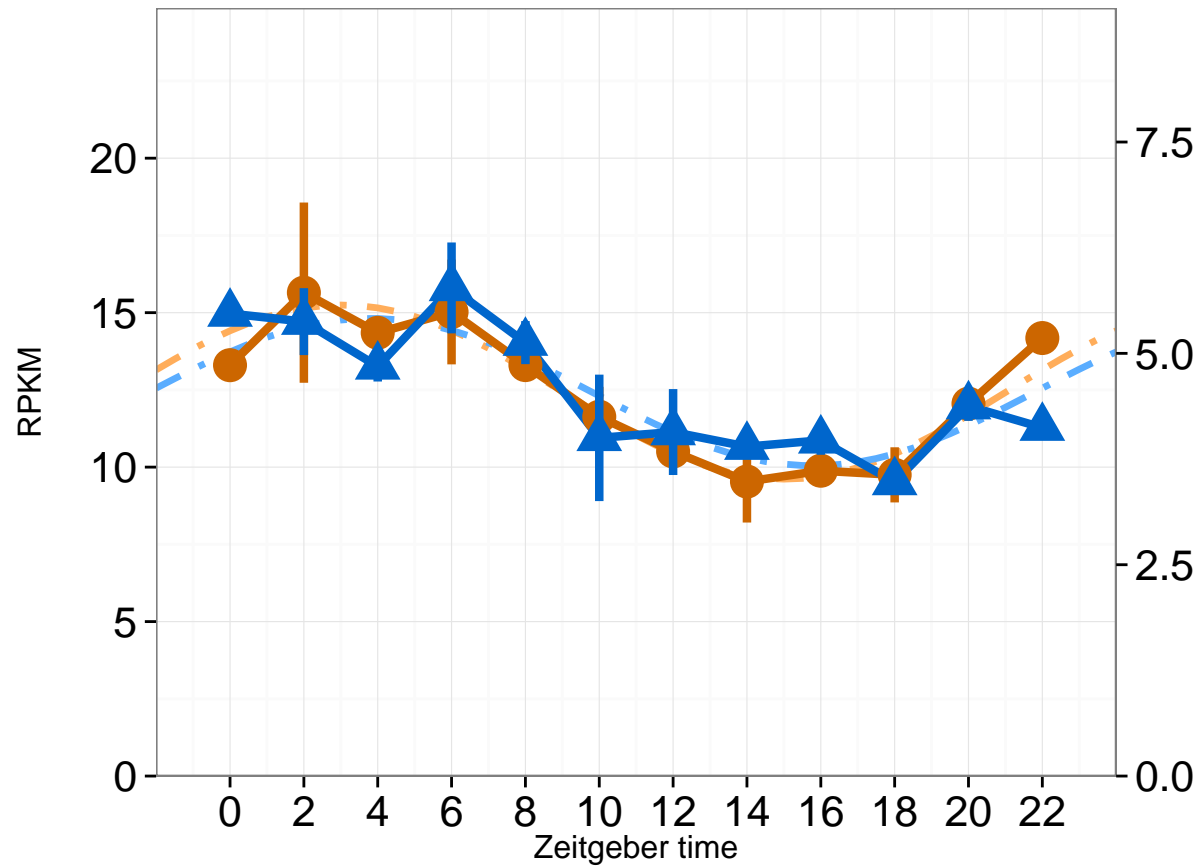

# Abca2

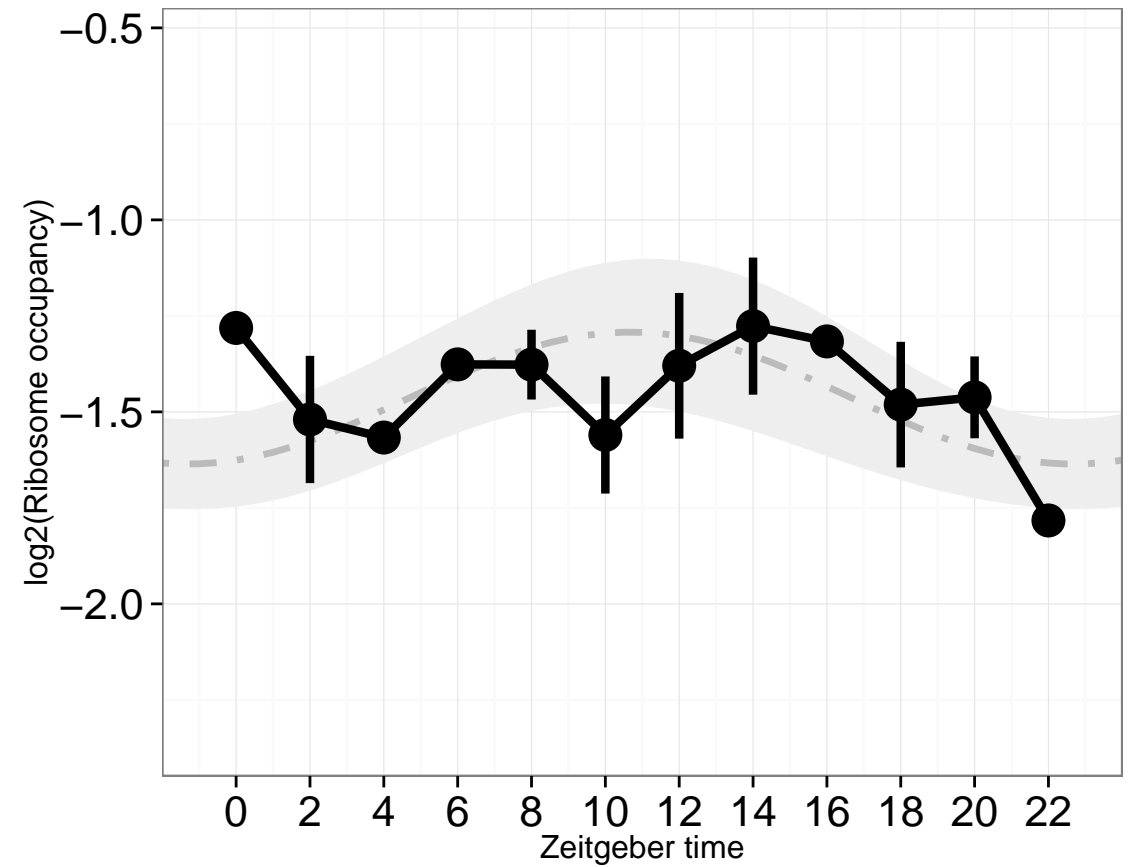

Supplement: SuppDataset_1.zip [file Abca2_set_B.pdf › Supplemental Dataset 1/B-mRNA_rhythm_translation_nonrhyth/Abca2_set_B.pdf]

# Abcd4

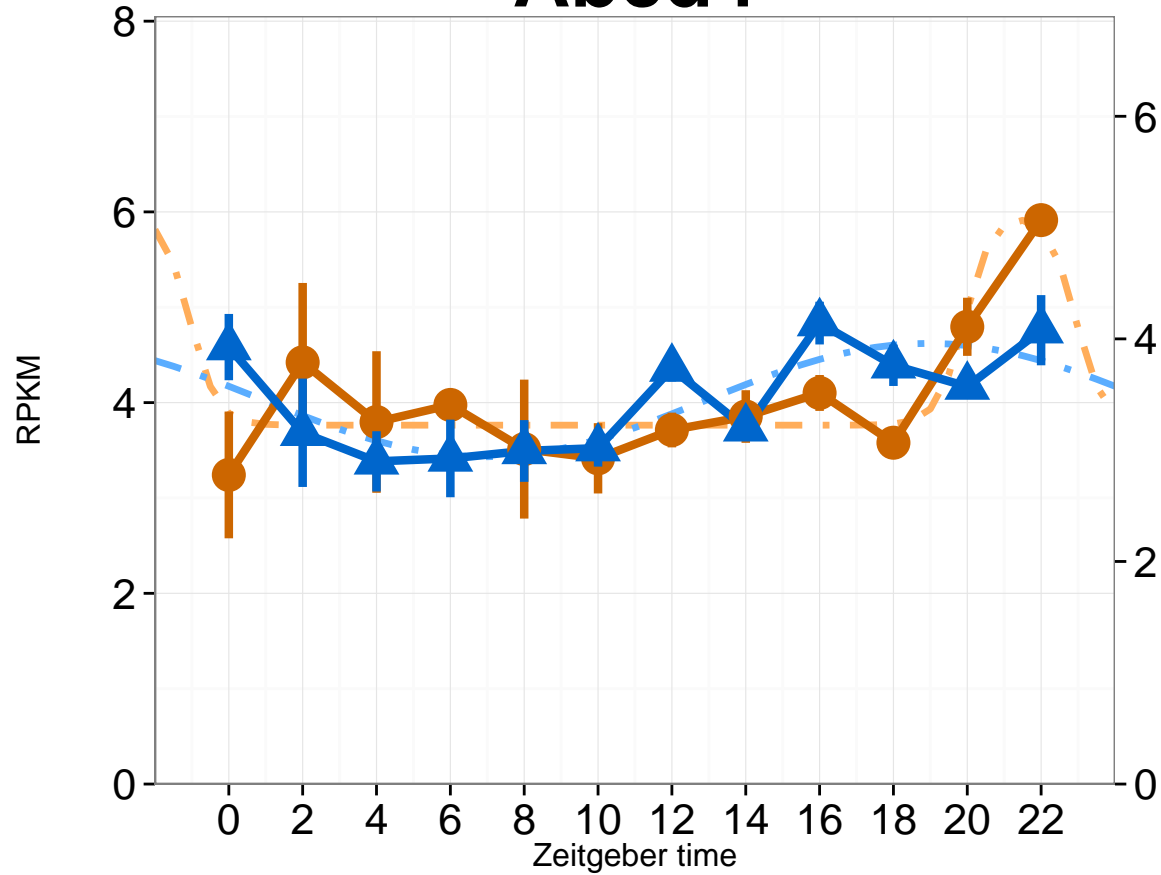

# Abcd4

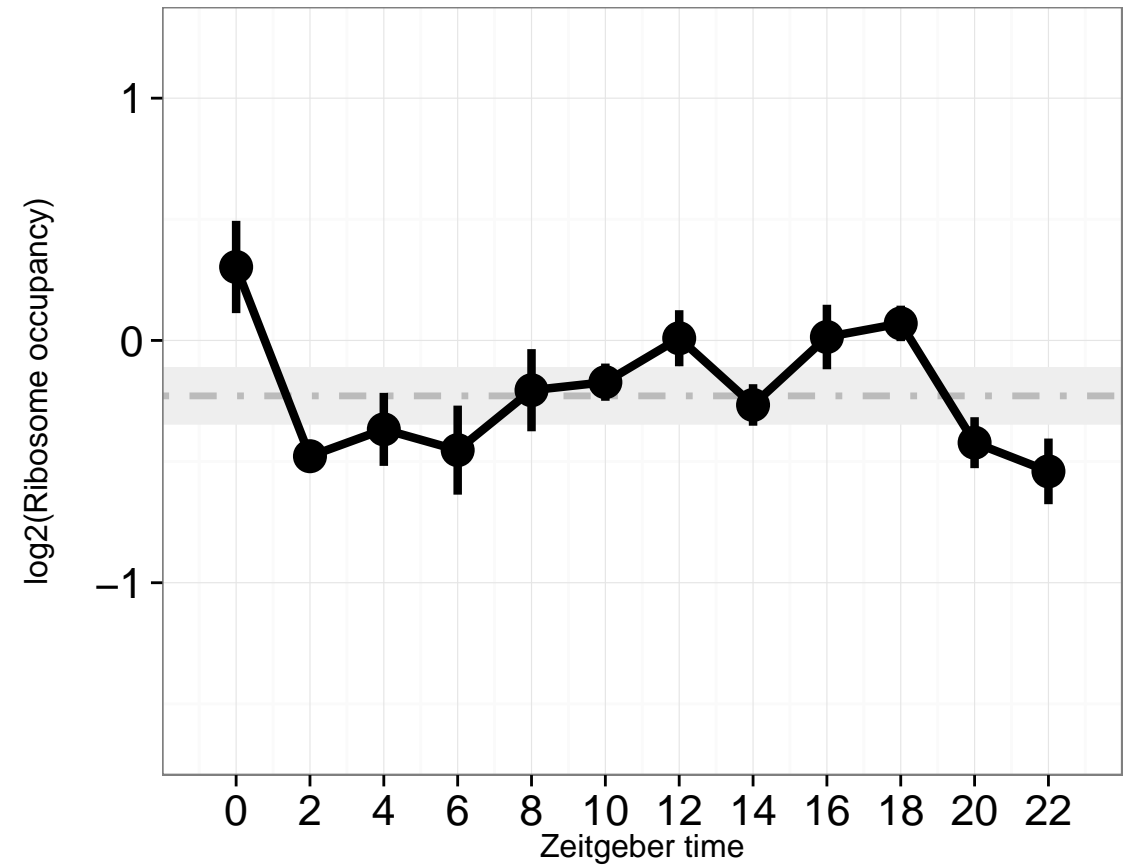

Supplement: SuppDataset_1.zip [file Abcd4_set_B.pdf › Supplemental Dataset 1/B-mRNA_rhythm_translation_nonrhyth/Abcd4_set_B.pdf]

# Abtb1

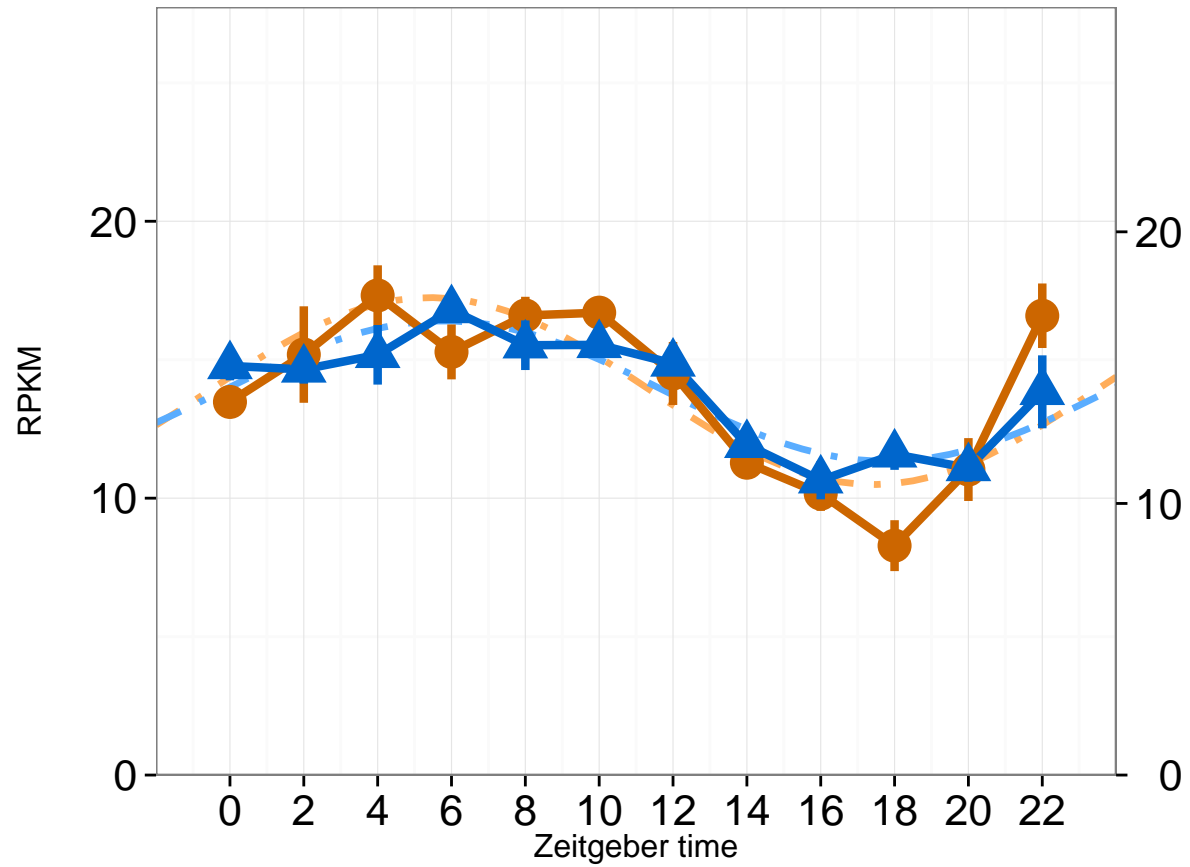

# Abtb1

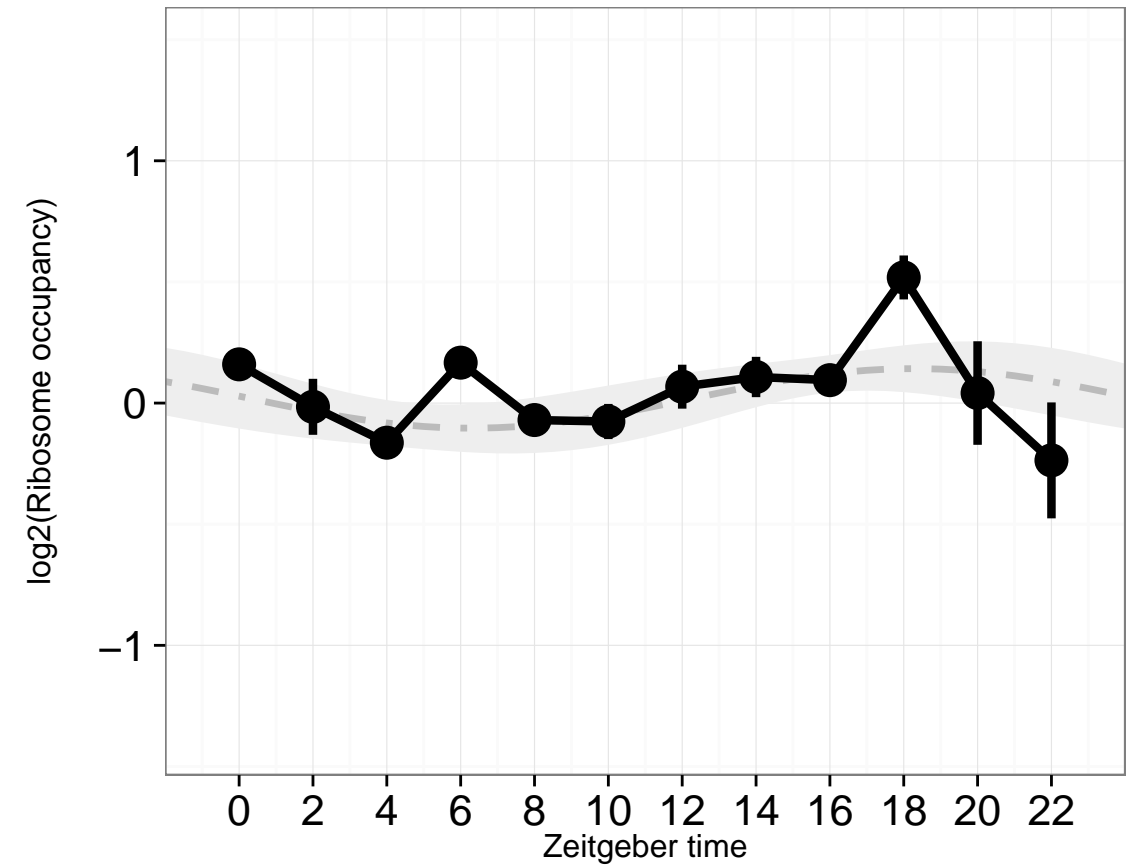

Supplement: SuppDataset_1.zip [file Abtb1_set_B.pdf › Supplemental Dataset 1/B-mRNA_rhythm_translation_nonrhyth/Abtb1_set_B.pdf]

## Ace2

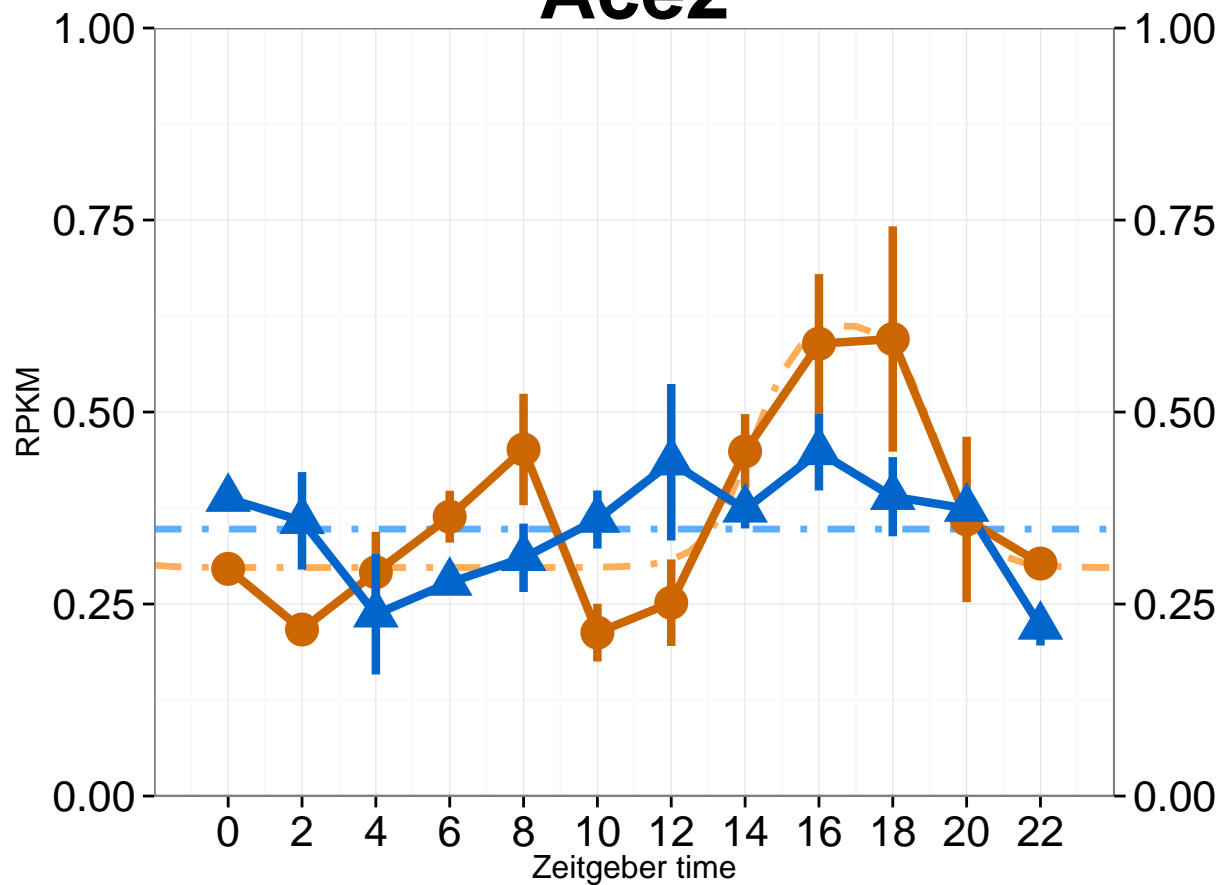

## Ace2

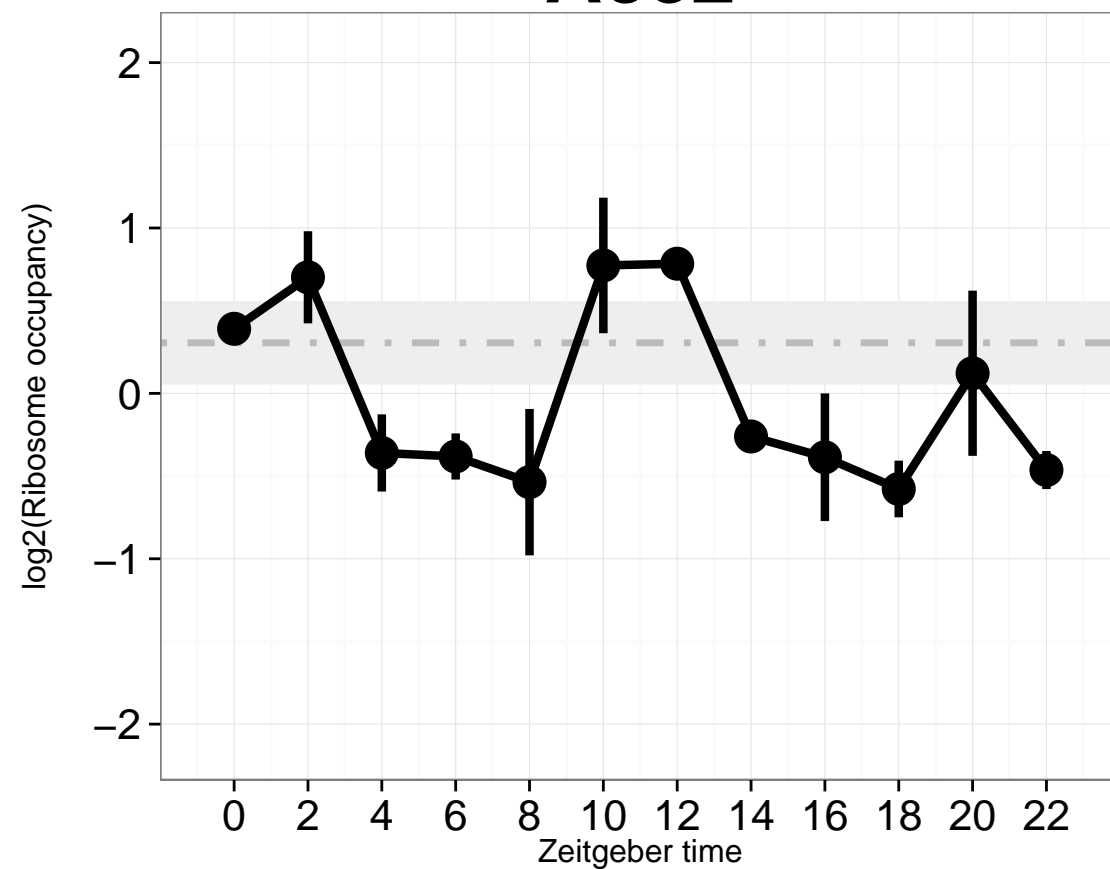

Supplement: SuppDataset_1.zip [file Ace2_set_B.pdf › Supplemental Dataset 1/B-mRNA_rhythm_translation_nonrhyth/Ace2_set_B.pdf]

## Acox2

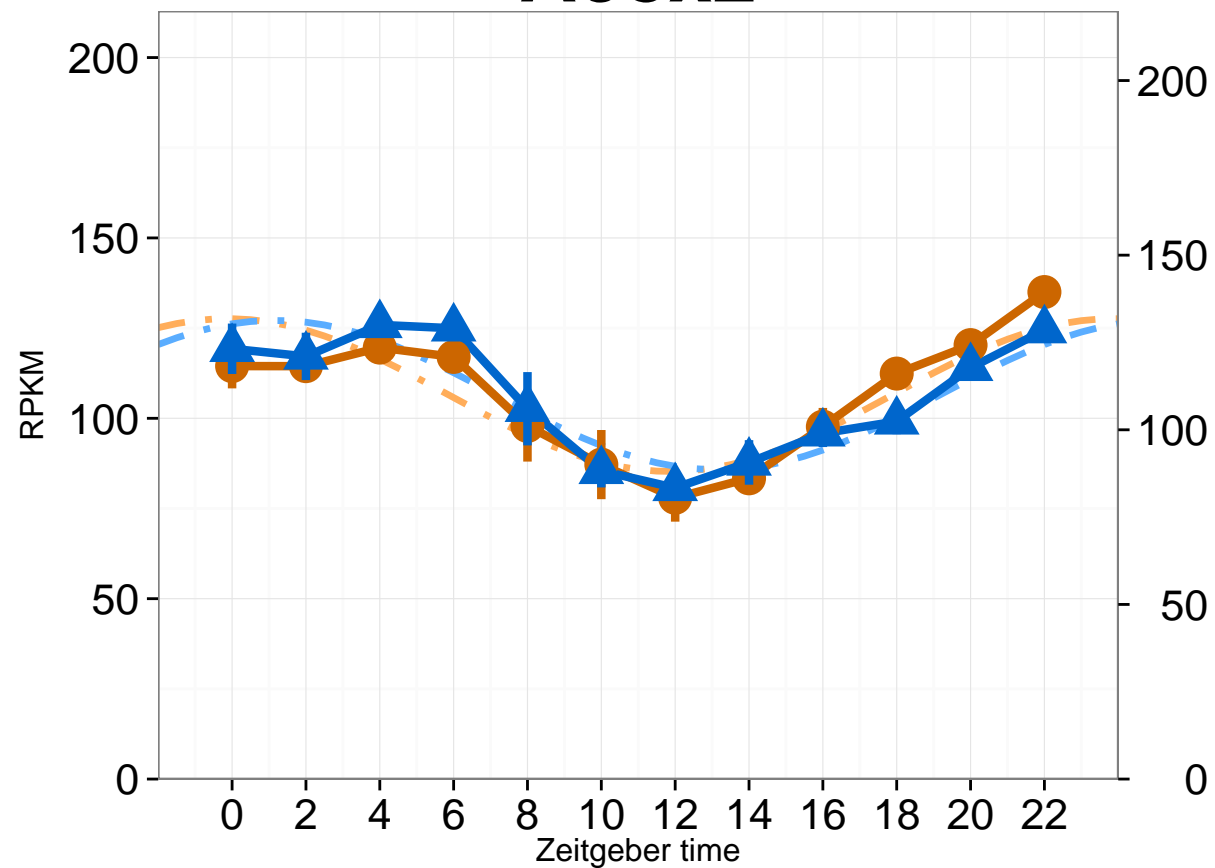

## Acox2

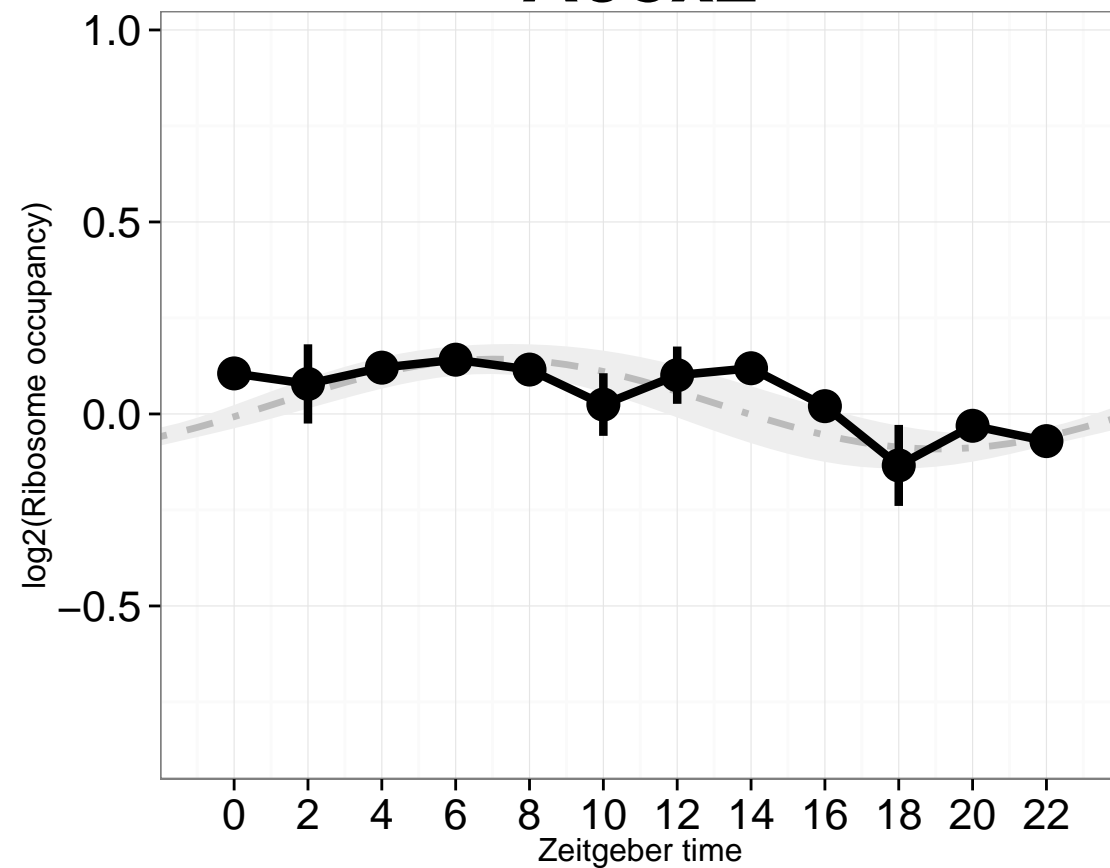

Supplement: SuppDataset_1.zip [file Acox2_set_B.pdf › Supplemental Dataset 1/B-mRNA_rhythm_translation_nonrhyth/Acox2_set_B.pdf]

## Acsm5

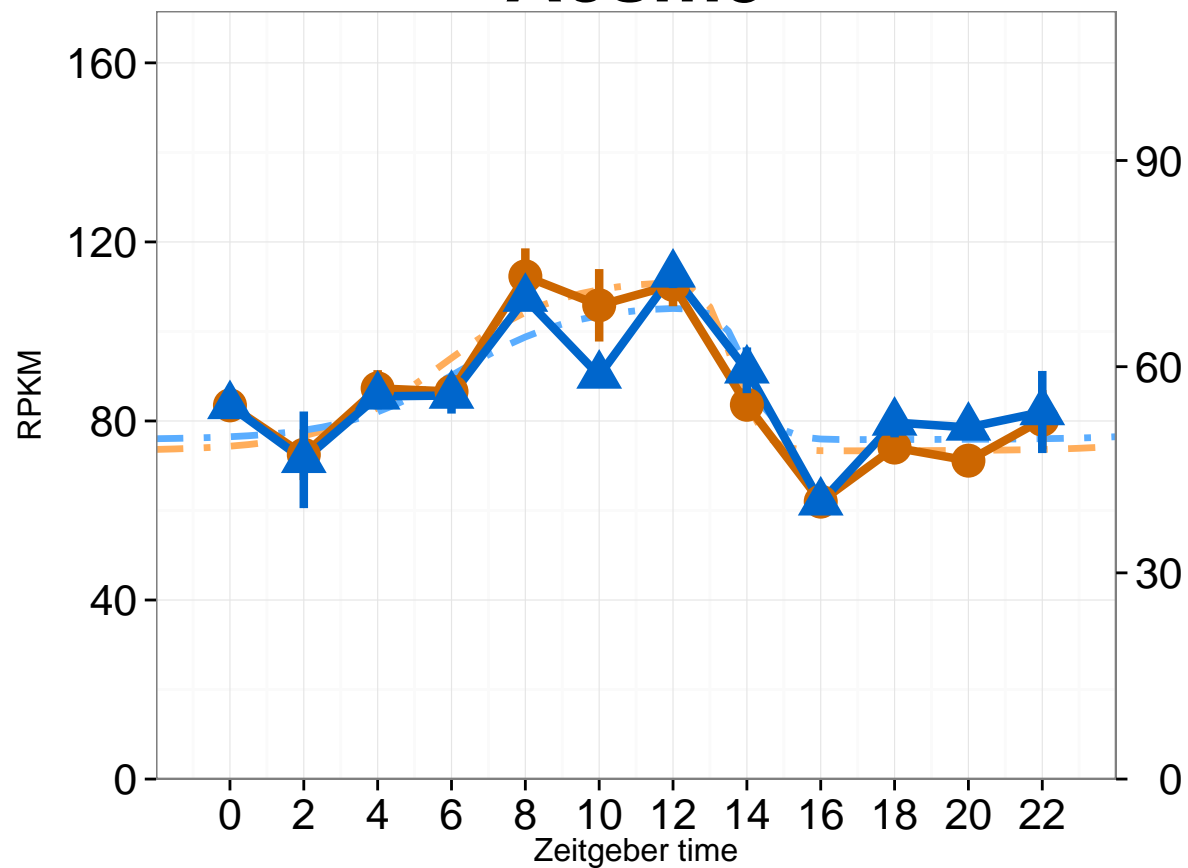

## Acsm5

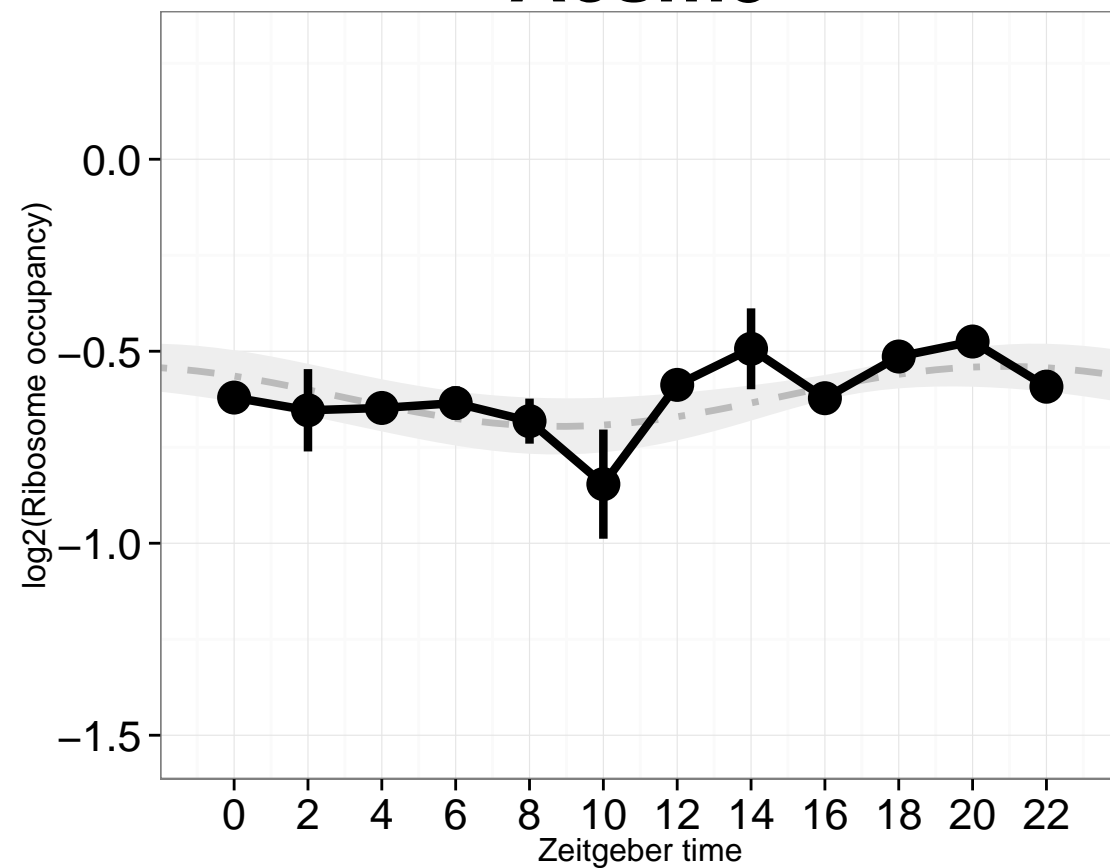

Supplement: SuppDataset_1.zip [file Acsm5_set_B.pdf › Supplemental Dataset 1/B-mRNA_rhythm_translation_nonrhyth/Acsm5_set_B.pdf]

# Actg1

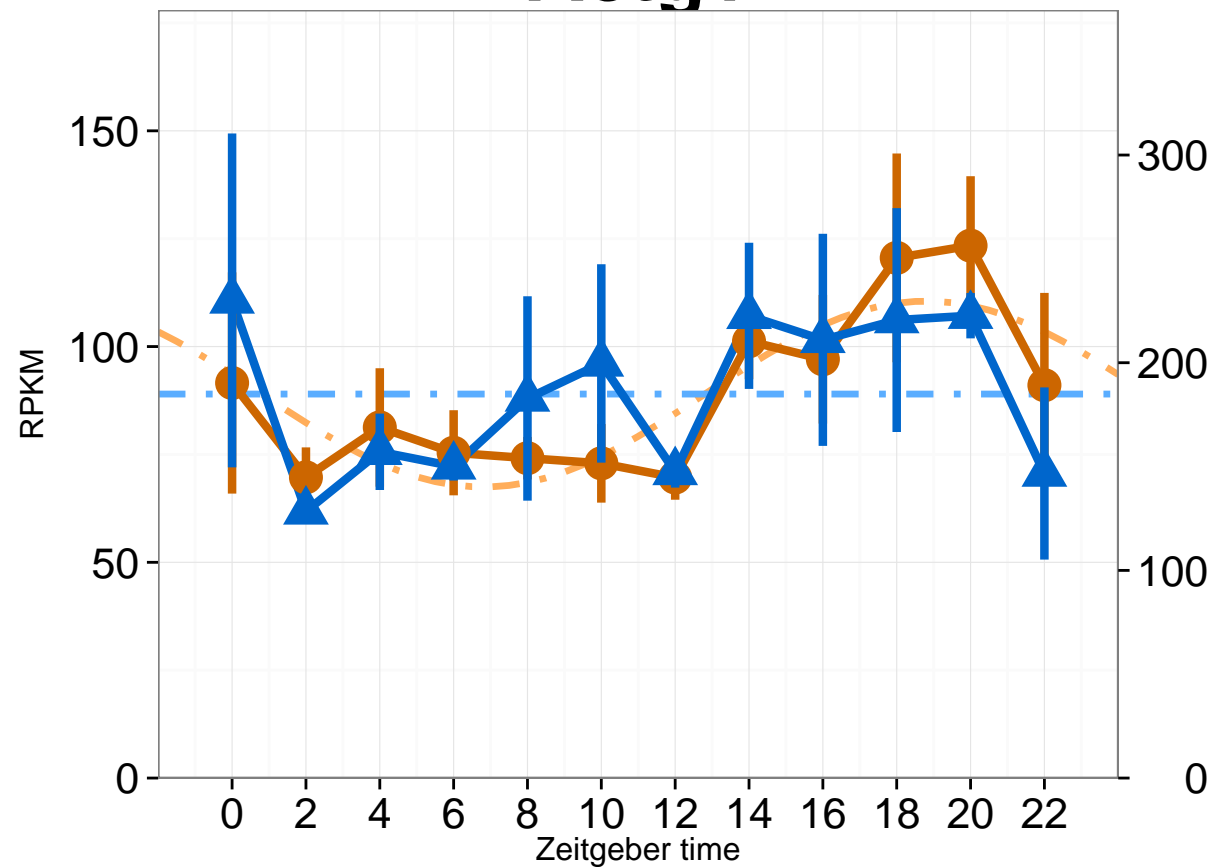

# Actg1

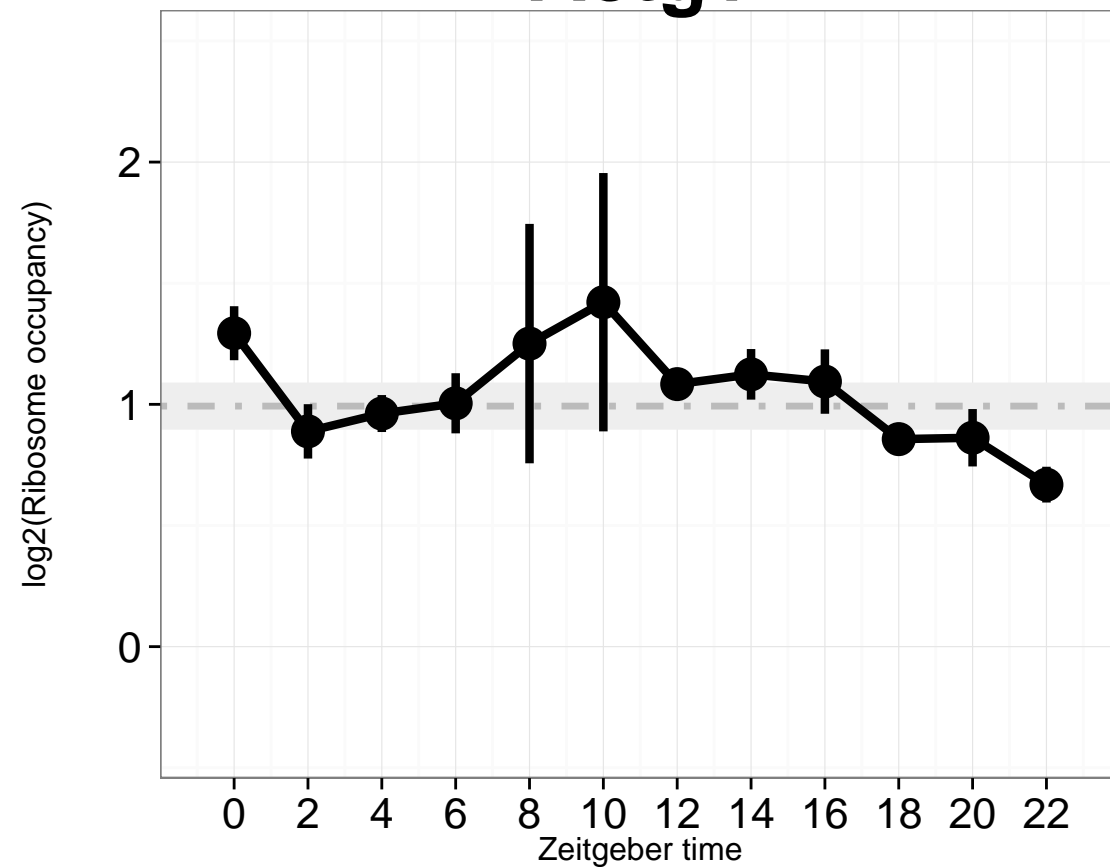

Supplement: SuppDataset_1.zip [file Actg1_set_B.pdf › Supplemental Dataset 1/B-mRNA_rhythm_translation_nonrhyth/Actg1_set_B.pdf]

# Acvr1b

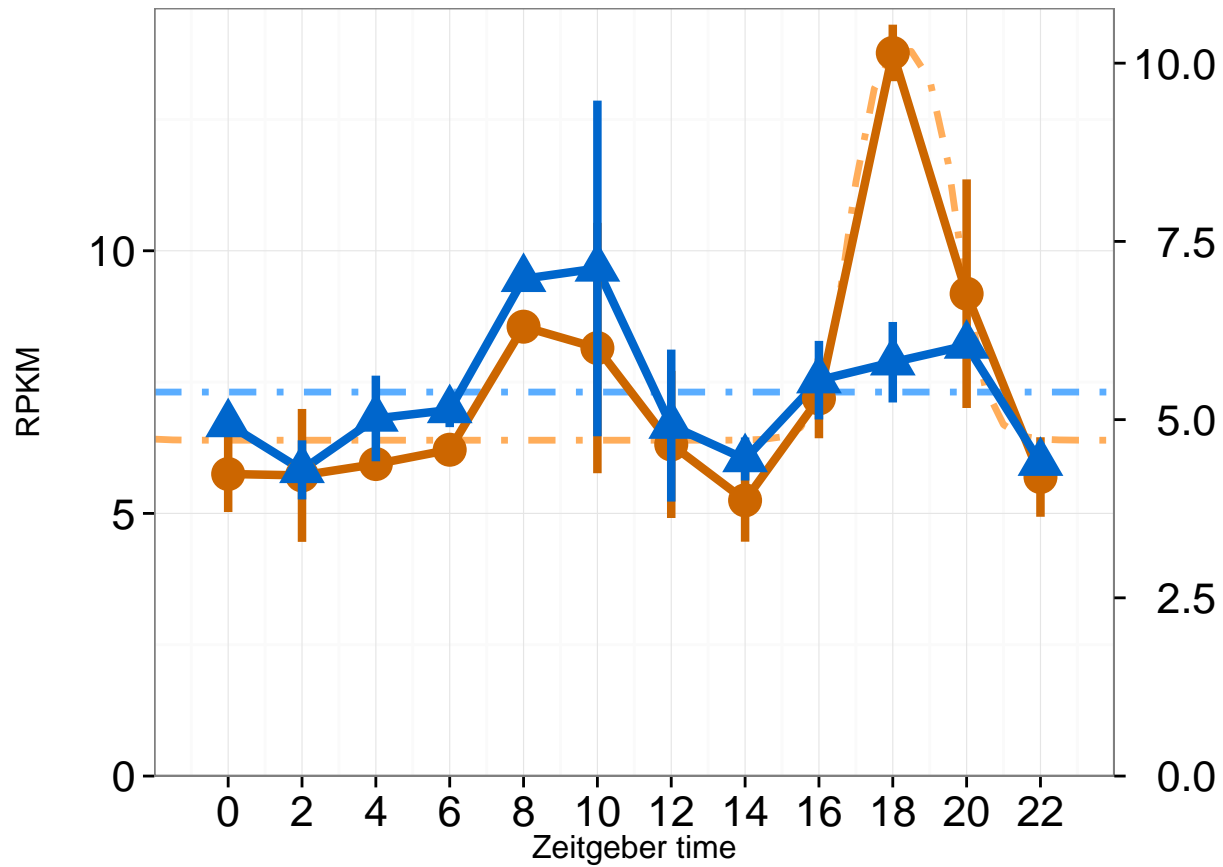

# Acvr1b

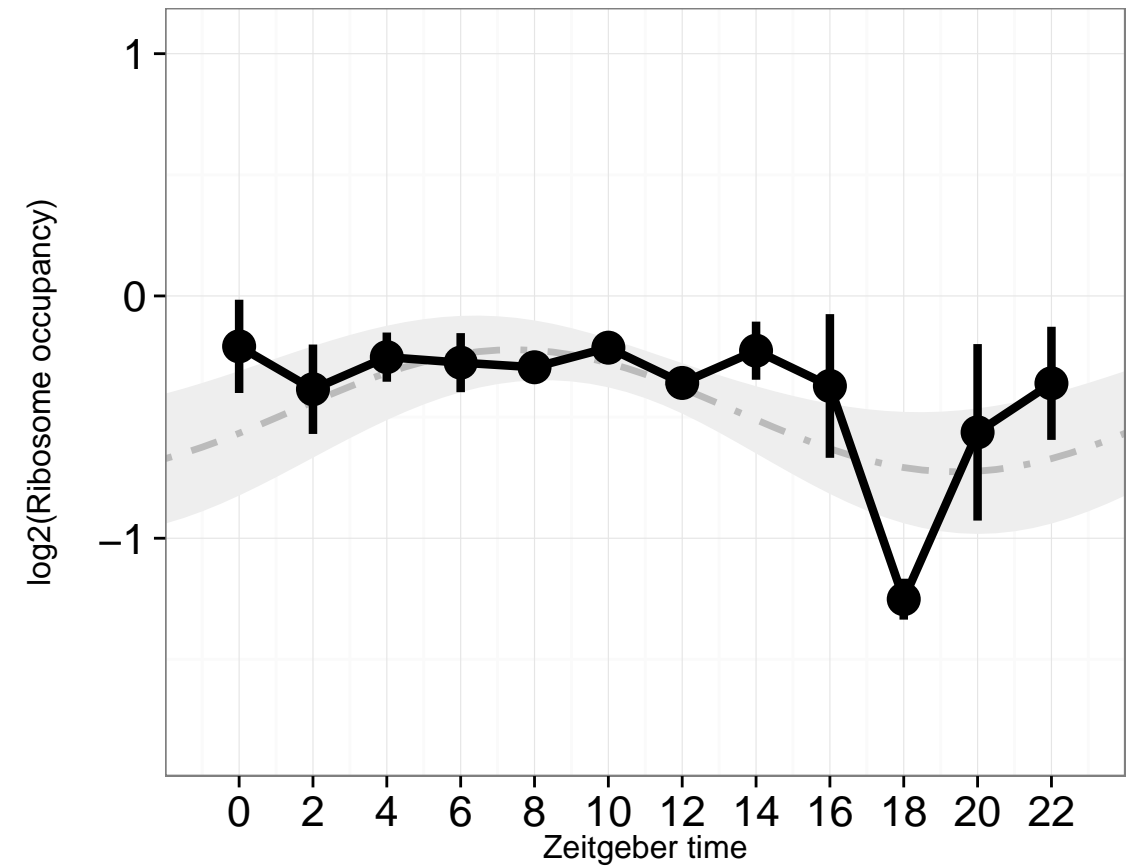

Supplement: SuppDataset_1.zip [file Acvr1b_set_B.pdf › Supplemental Dataset 1/B-mRNA_rhythm_translation_nonrhyth/Acvr1b_set_B.pdf]

## Adck1

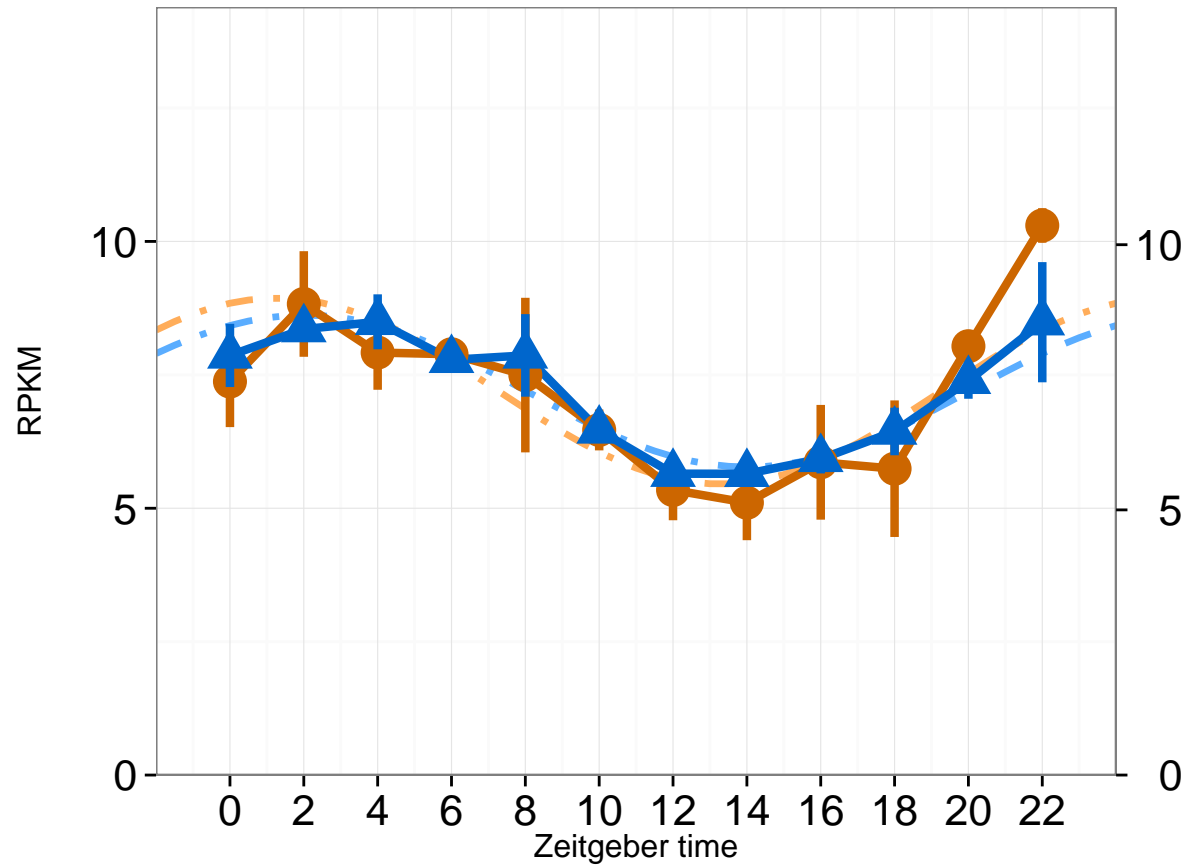

## Adck1

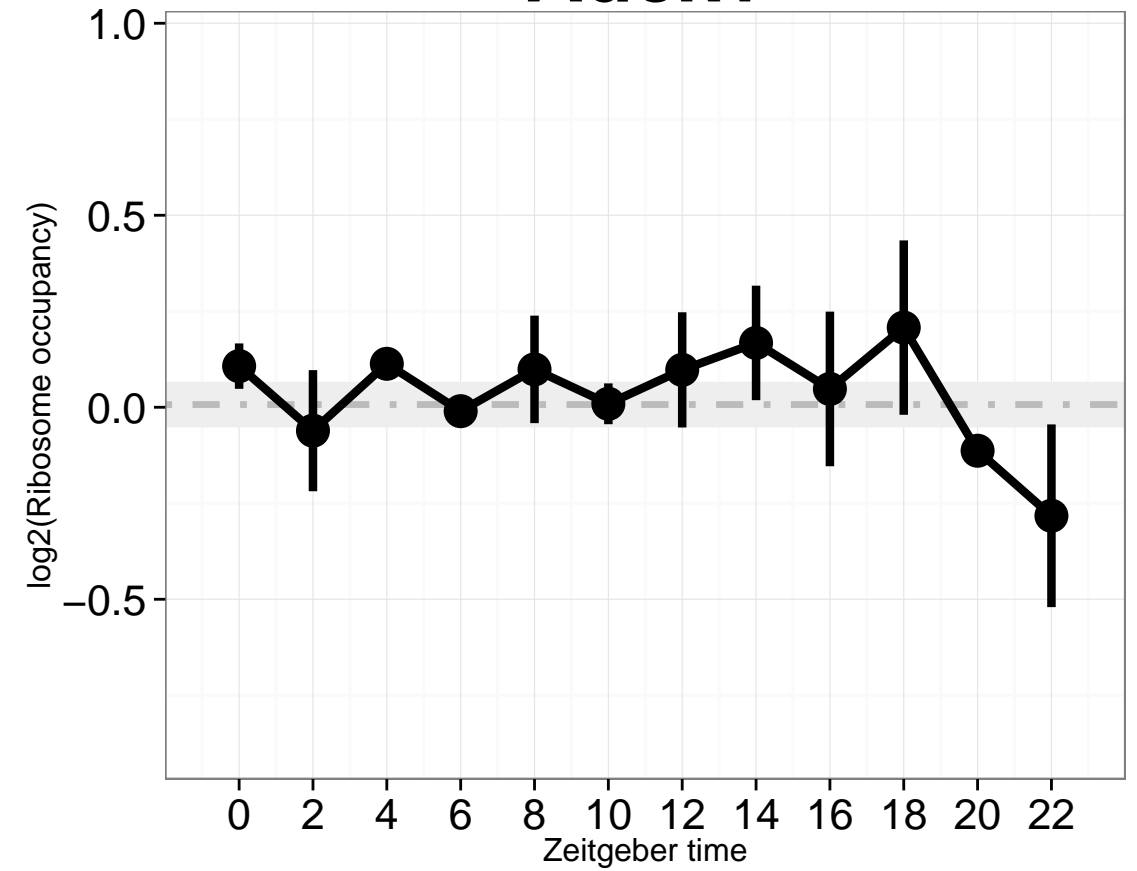

Supplement: SuppDataset_1.zip [file Adck1_set_B.pdf › Supplemental Dataset 1/B-mRNA_rhythm_translation_nonrhyth/Adck1_set_B.pdf]

## Adcy5

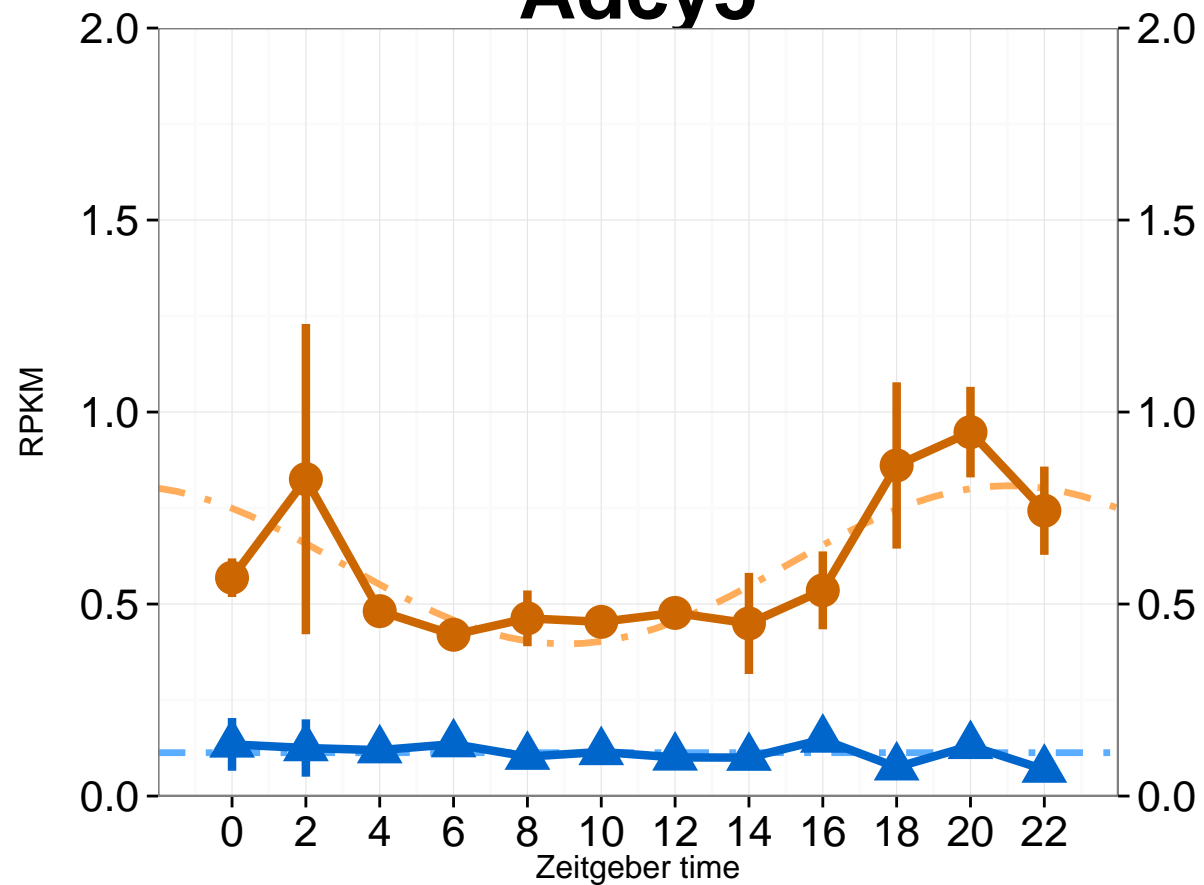

## Adcy5

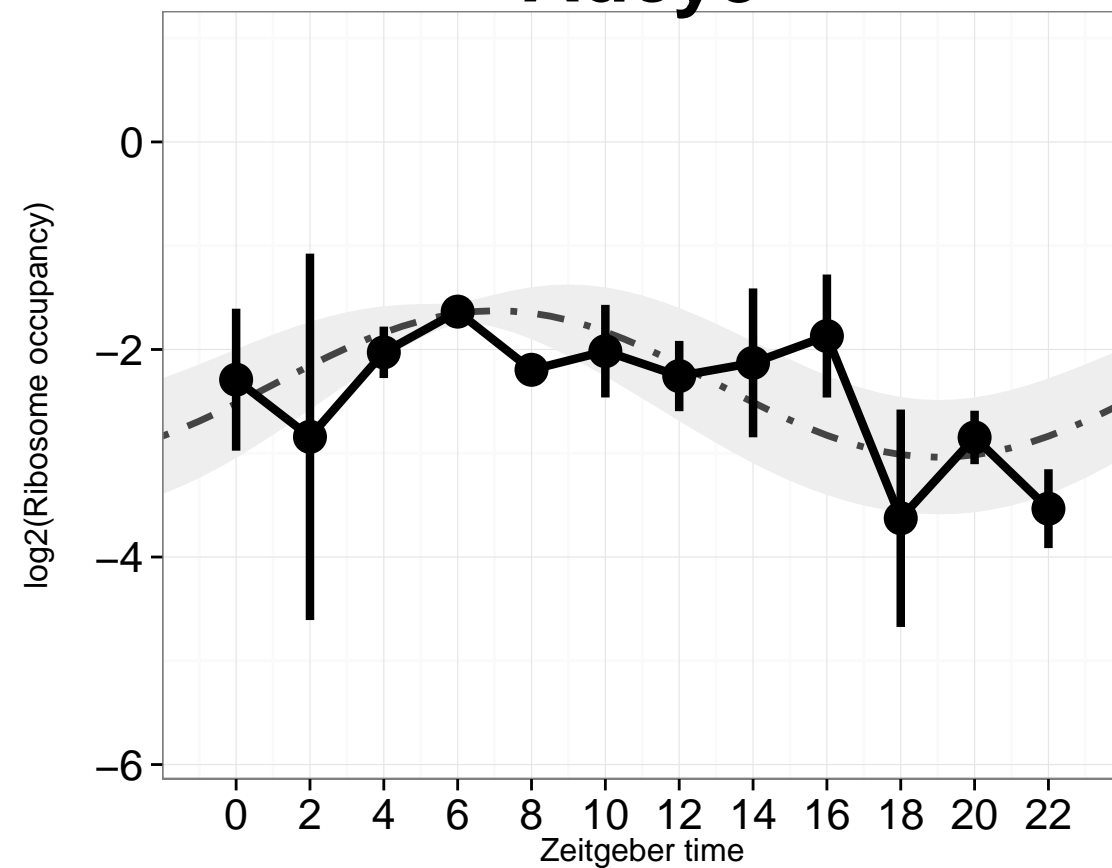

Supplement: SuppDataset_1.zip [file Adcy5_set_B.pdf › Supplemental Dataset 1/B-mRNA_rhythm_translation_nonrhyth/Adcy5_set_B.pdf]

## Adh1

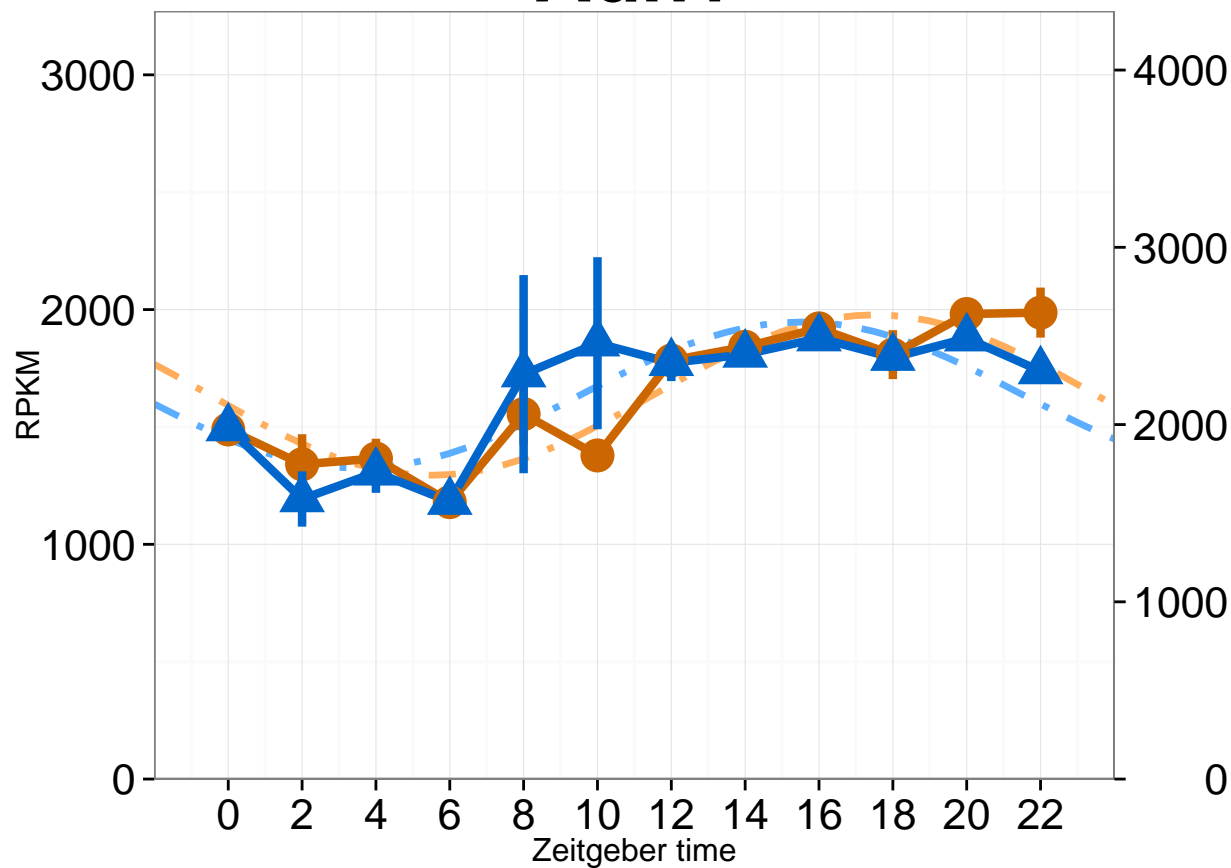

## Adh1

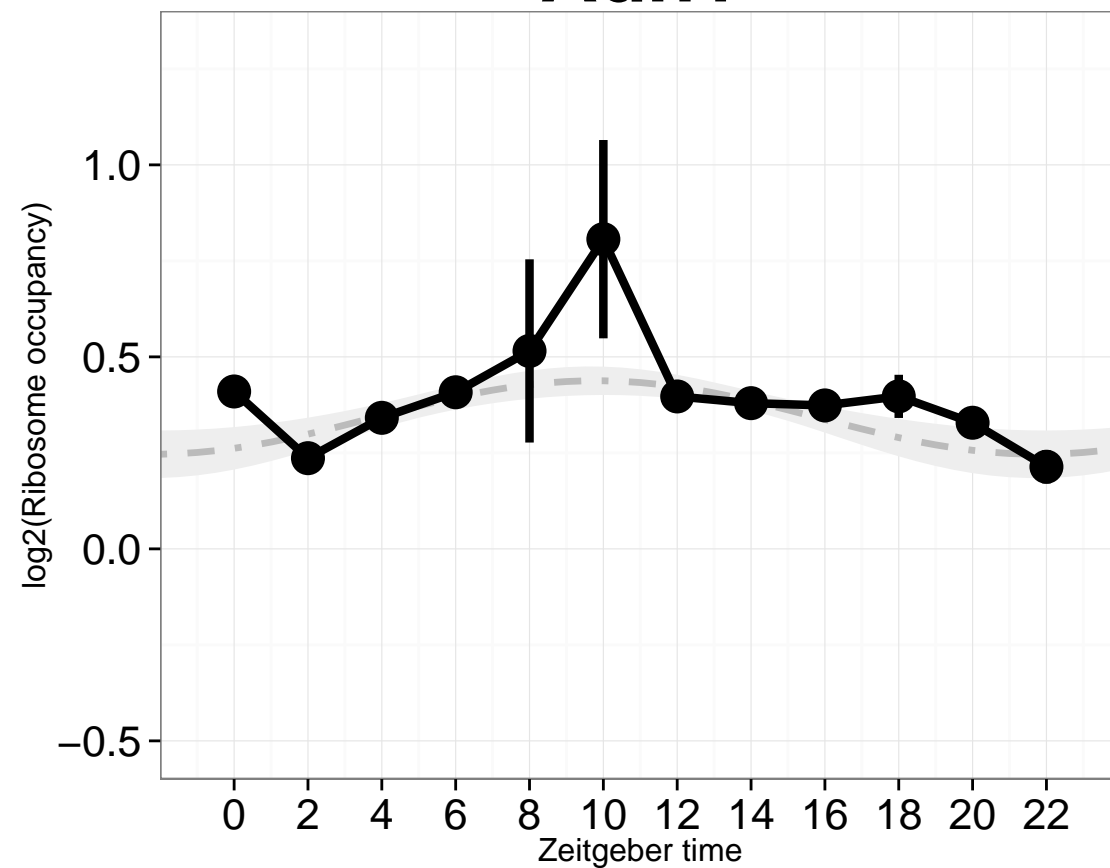

Supplement: SuppDataset_1.zip [file Adh1_set_B.pdf › Supplemental Dataset 1/B-mRNA_rhythm_translation_nonrhyth/Adh1_set_B.pdf]

## Adh4

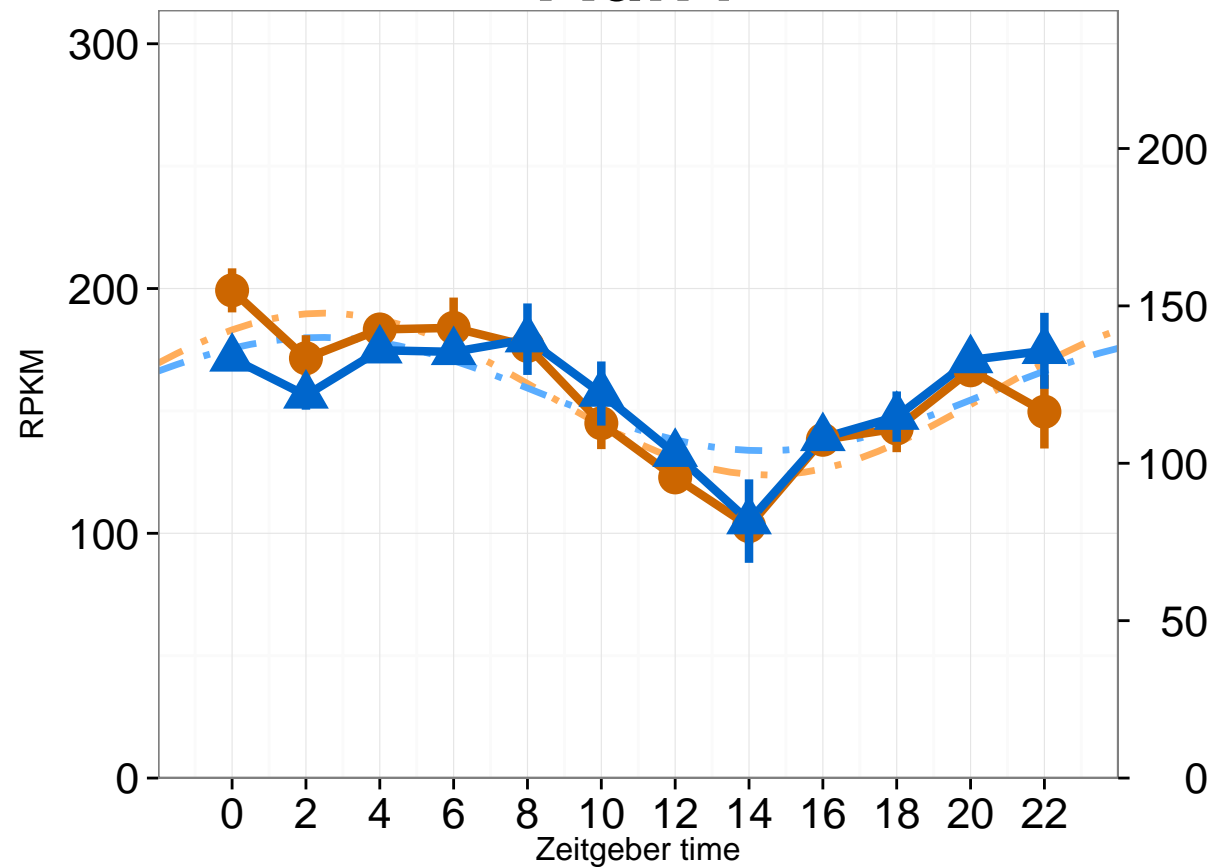

## Adh4

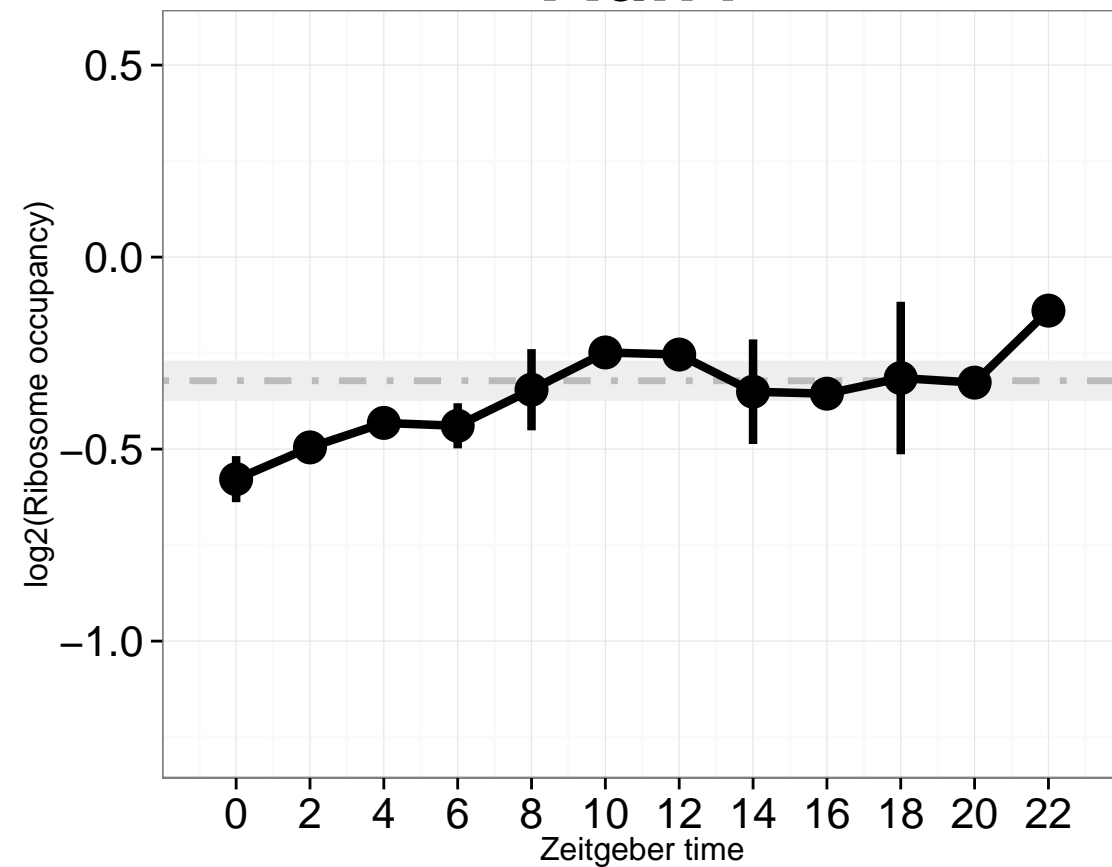

Supplement: SuppDataset_1.zip [file Adh4_set_B.pdf › Supplemental Dataset 1/B-mRNA_rhythm_translation_nonrhyth/Adh4_set_B.pdf]

## Adora2a

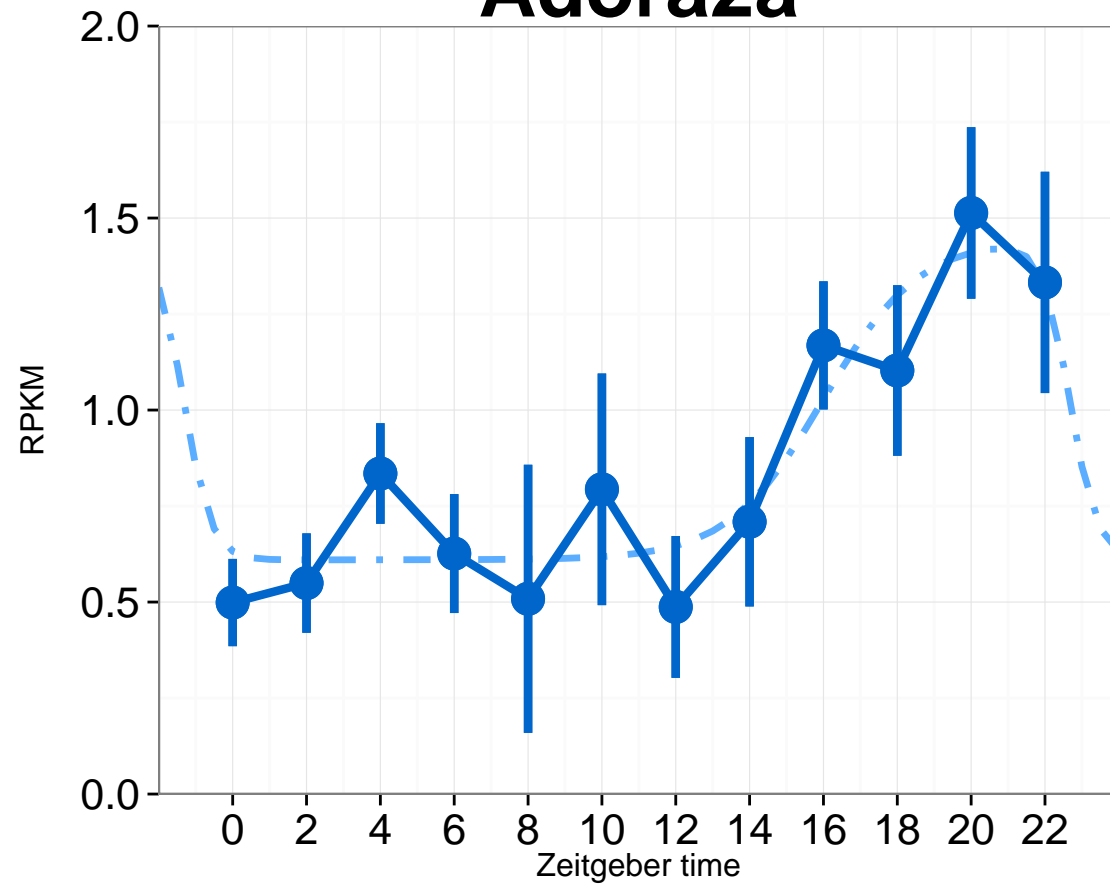

## Adora2a log2(Ribosome occupanc

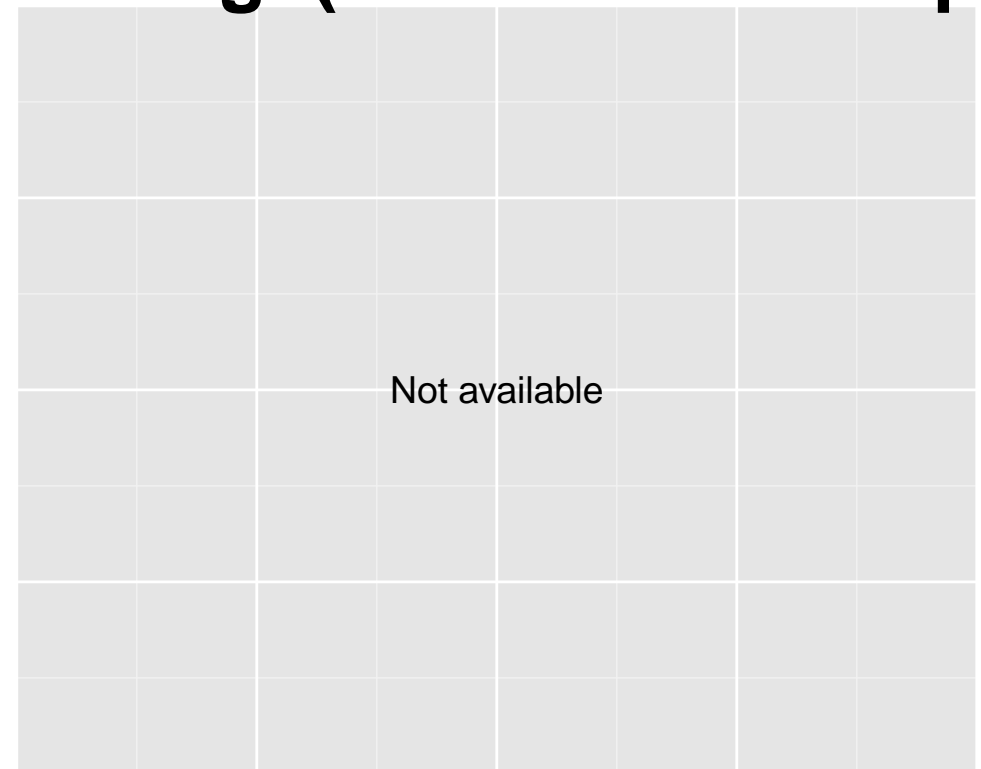

Supplement: SuppDataset_1.zip [file Adora2a_set_B.pdf › Supplemental Dataset 1/B-mRNA_rhythm_translation_nonrhyth/Adora2a_set_B.pdf]

# Aebp1

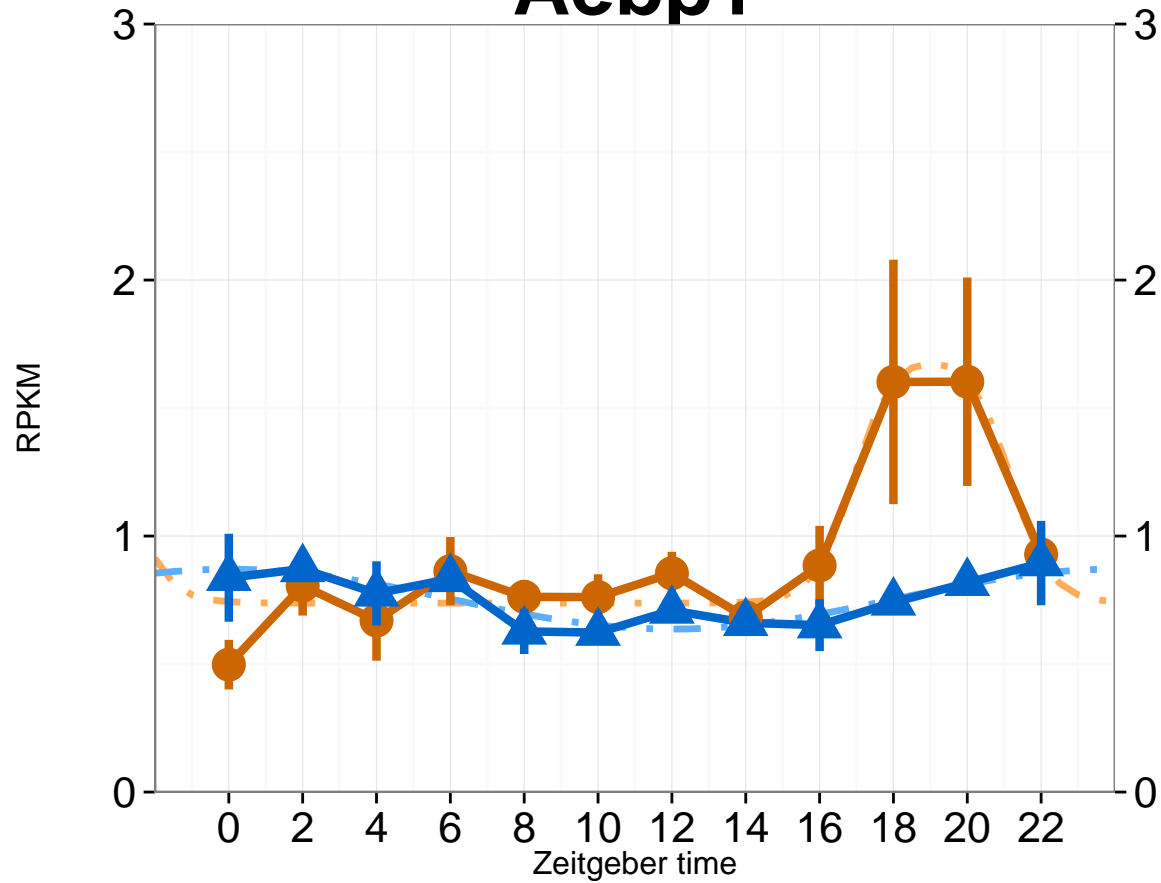

# Aebp1

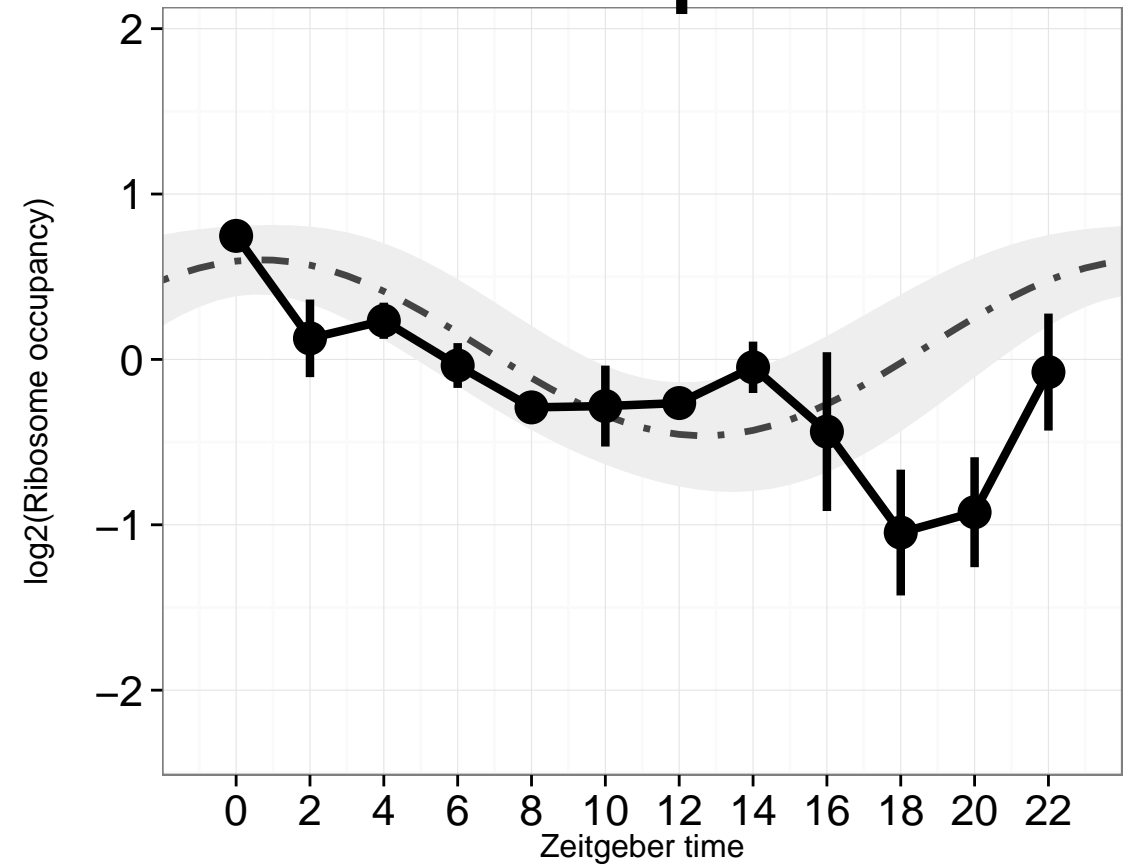

Supplement: SuppDataset_1.zip [file Aebp1_set_B.pdf › Supplemental Dataset 1/B-mRNA_rhythm_translation_nonrhyth/Aebp1_set_B.pdf]

## Ago4

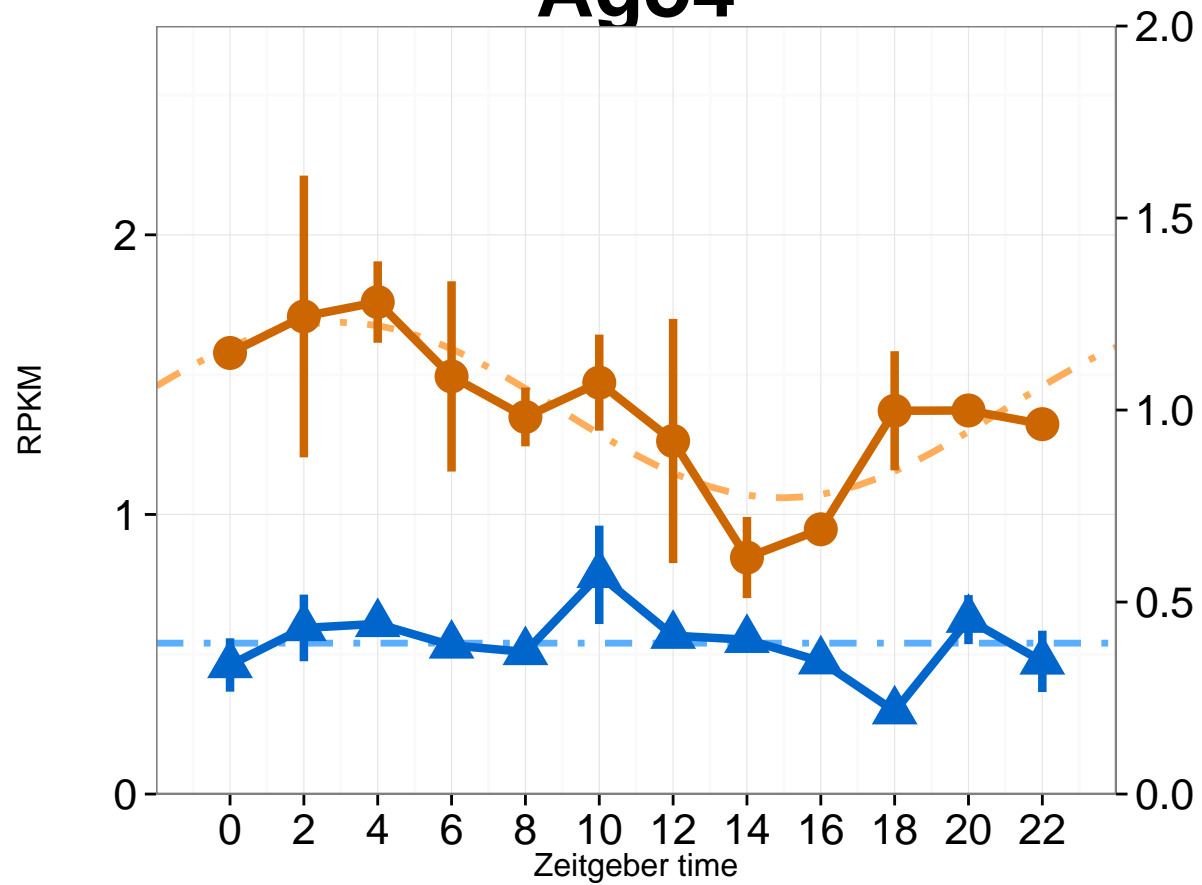

## Ago4

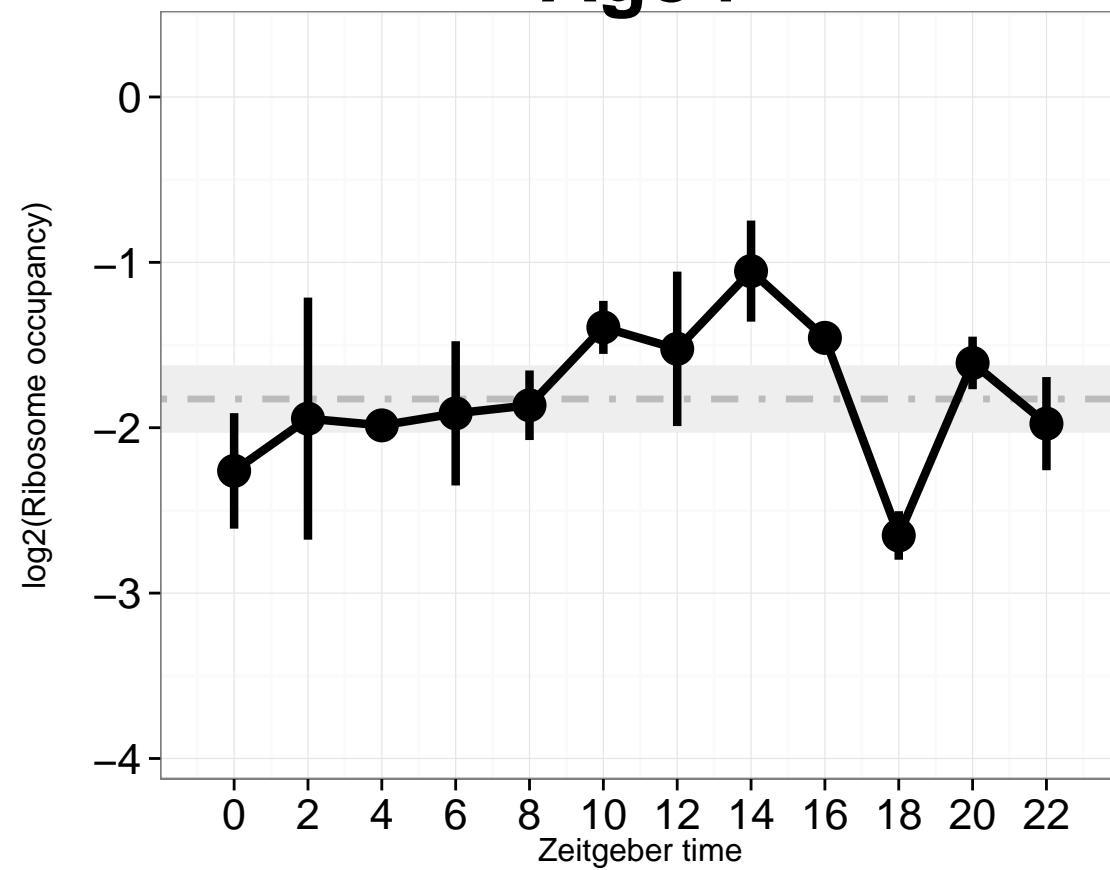

Supplement: SuppDataset_1.zip [file Ago4_set_B.pdf › Supplemental Dataset 1/B-mRNA_rhythm_translation_nonrhyth/Ago4_set_B.pdf]

# Agtr1a

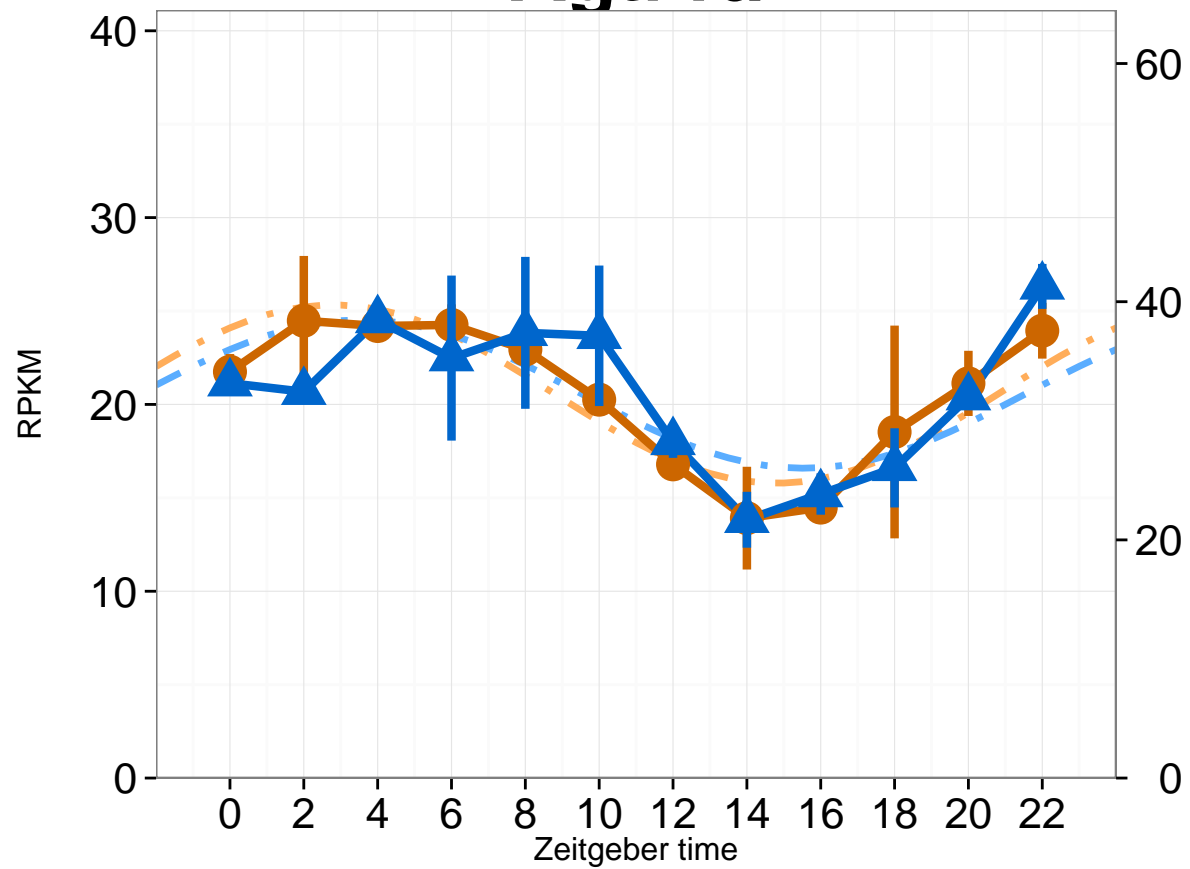

# Agtr1a

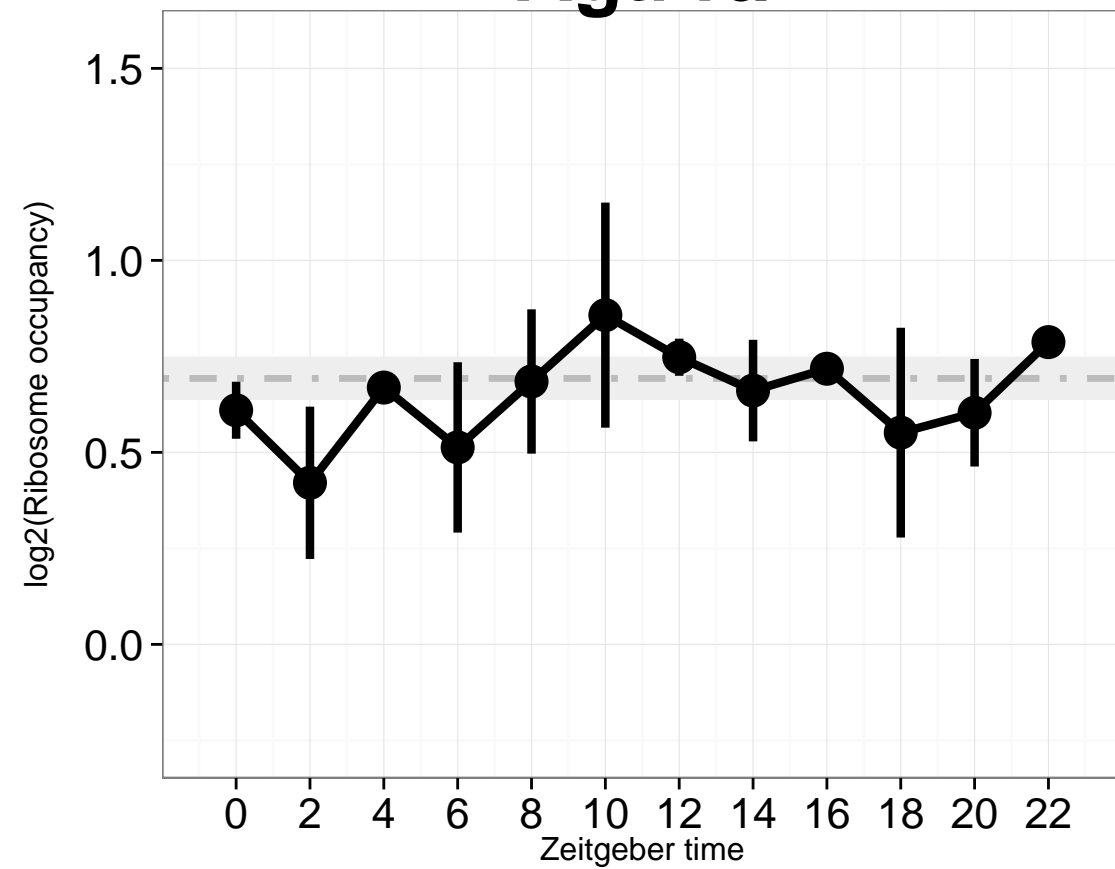

Supplement: SuppDataset_1.zip [file Agtr1a_set_B.pdf › Supplemental Dataset 1/B-mRNA_rhythm_translation_nonrhyth/Agtr1a_set_B.pdf]

## Ahdc1

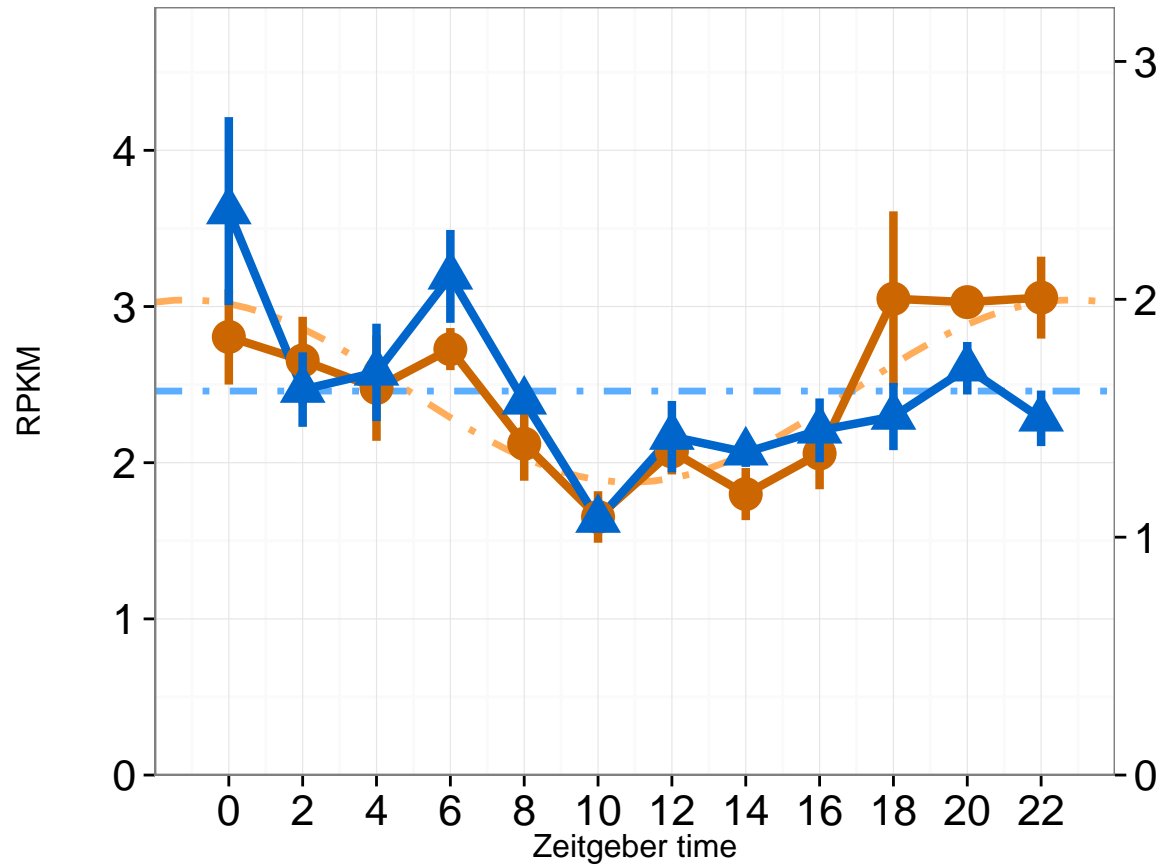

## Ahdc1

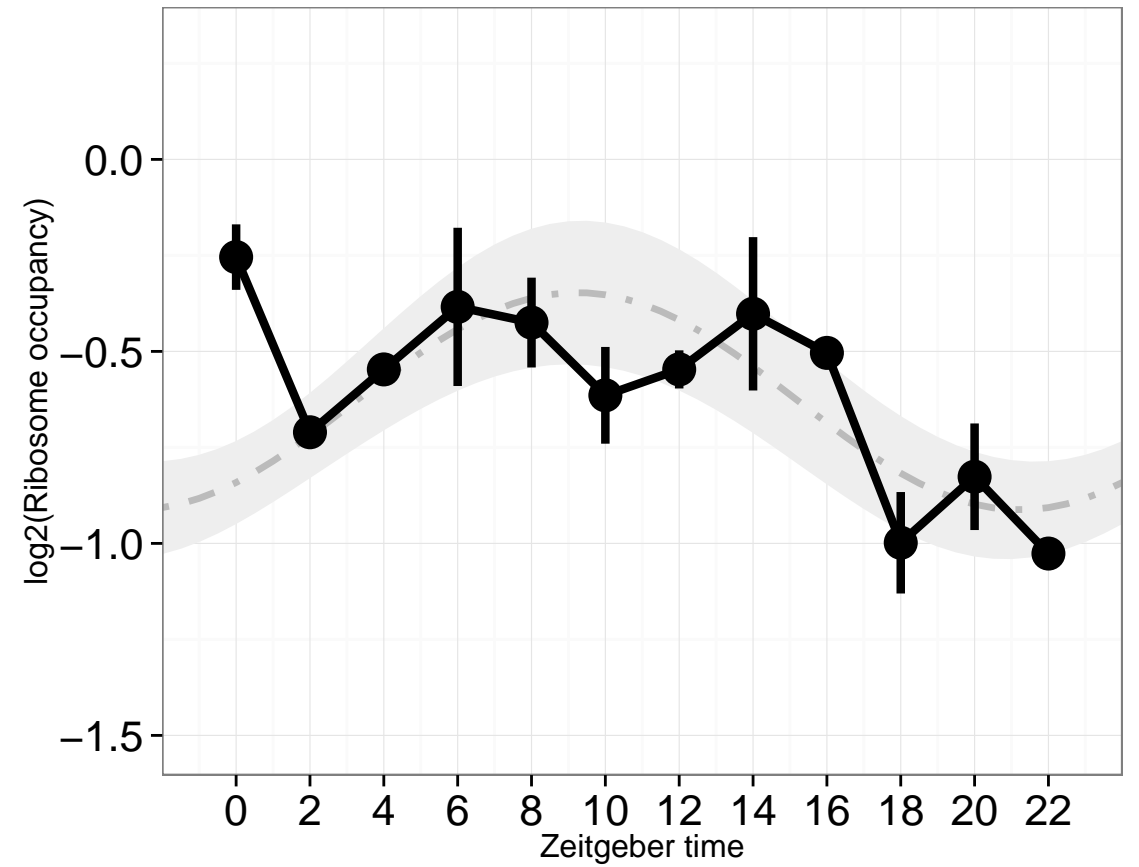

Supplement: SuppDataset_1.zip [file Ahdc1_set_B.pdf › Supplemental Dataset 1/B-mRNA_rhythm_translation_nonrhyth/Ahdc1_set_B.pdf]

## Ahi1

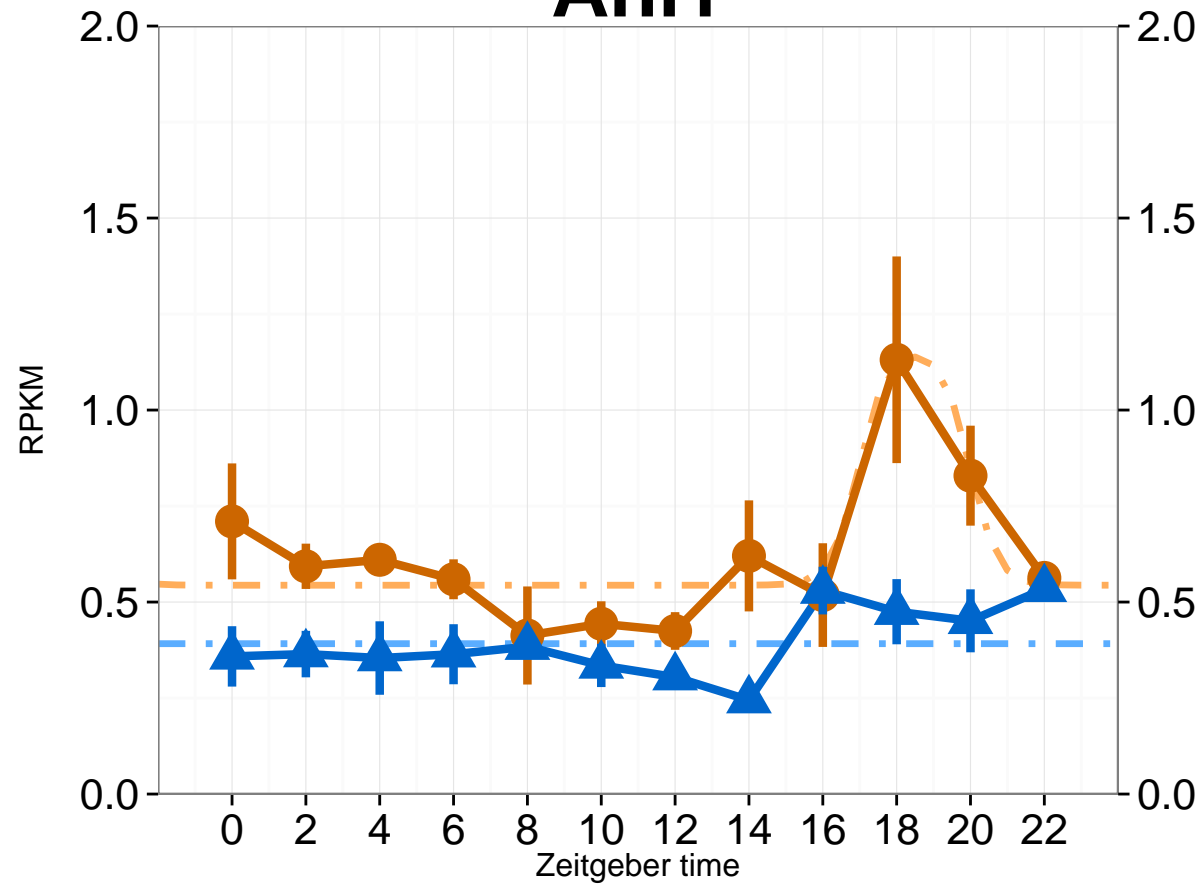

## Ahi1

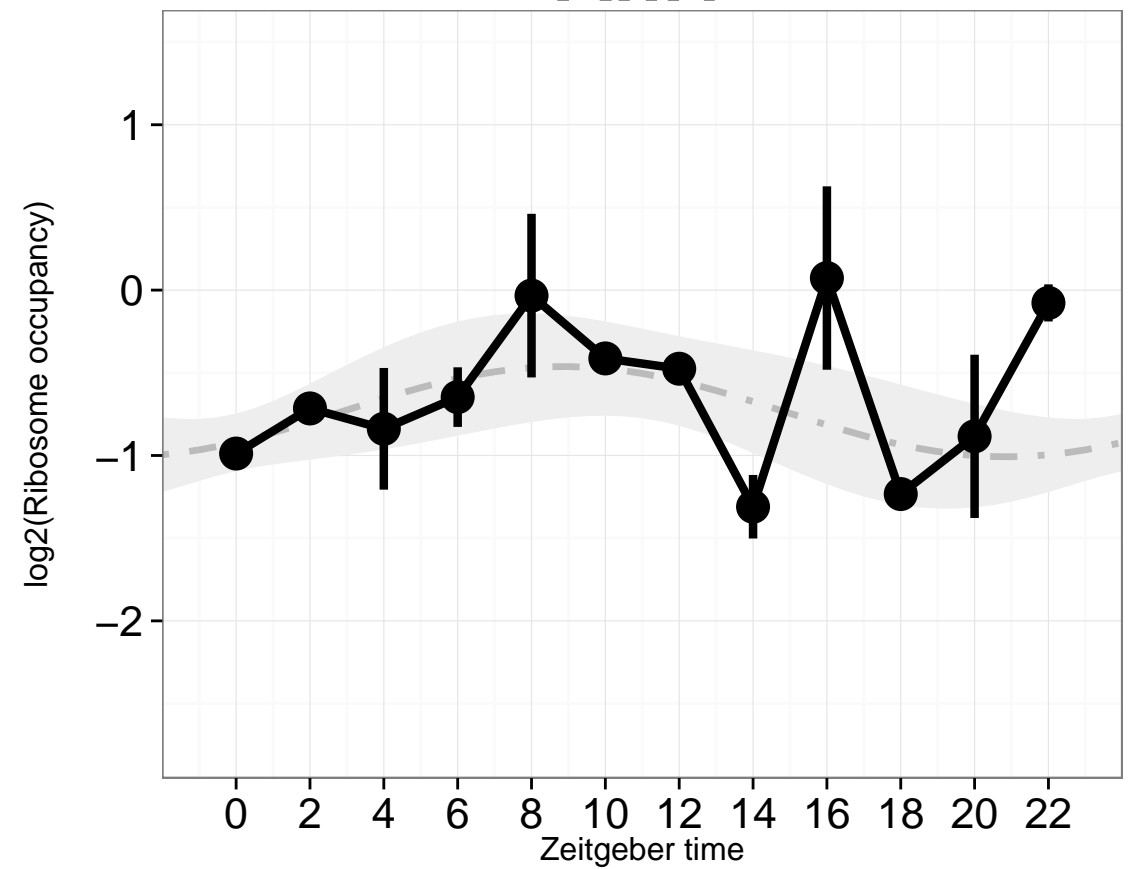

Supplement: SuppDataset_1.zip [file Ahi1_set_B.pdf › Supplemental Dataset 1/B-mRNA_rhythm_translation_nonrhyth/Ahi1_set_B.pdf]

## Ajuba

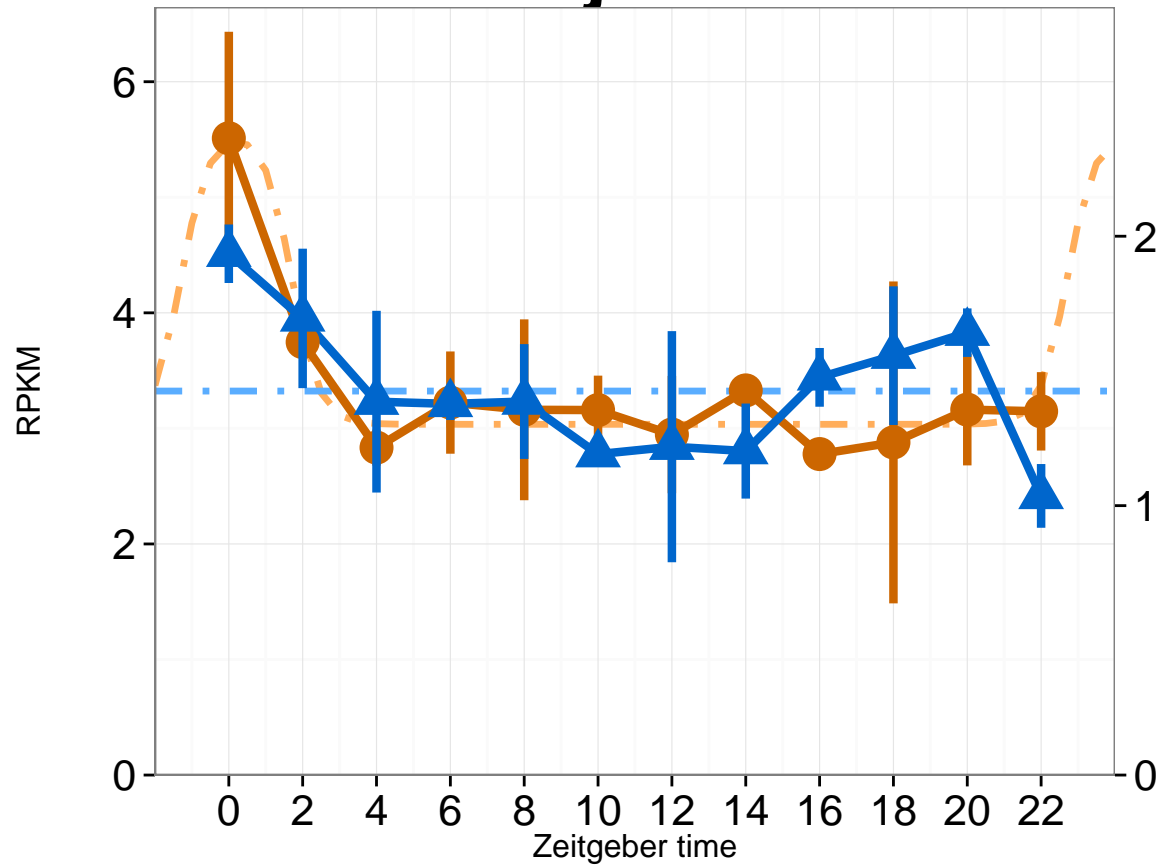

## Ajuba

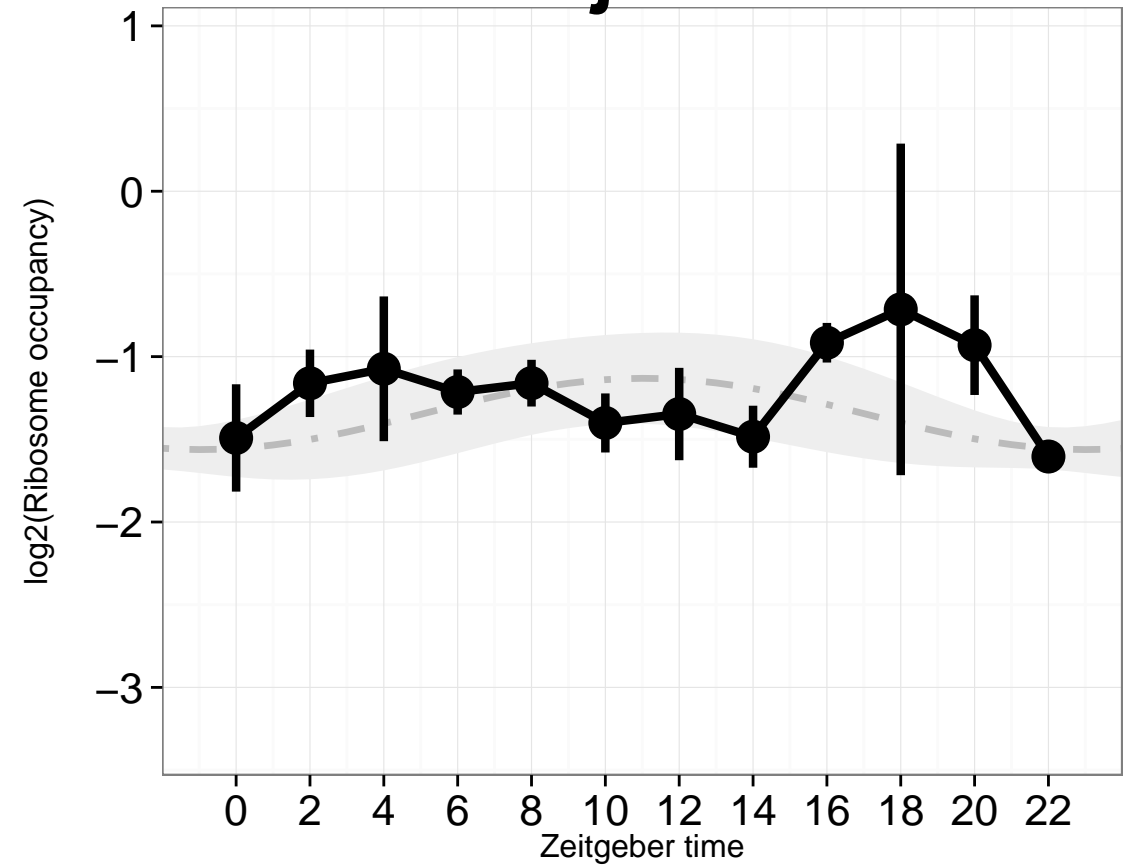

Supplement: SuppDataset_1.zip [file Ajuba_set_B.pdf › Supplemental Dataset 1/B-mRNA_rhythm_translation_nonrhyth/Ajuba_set_B.pdf]

## Akap12

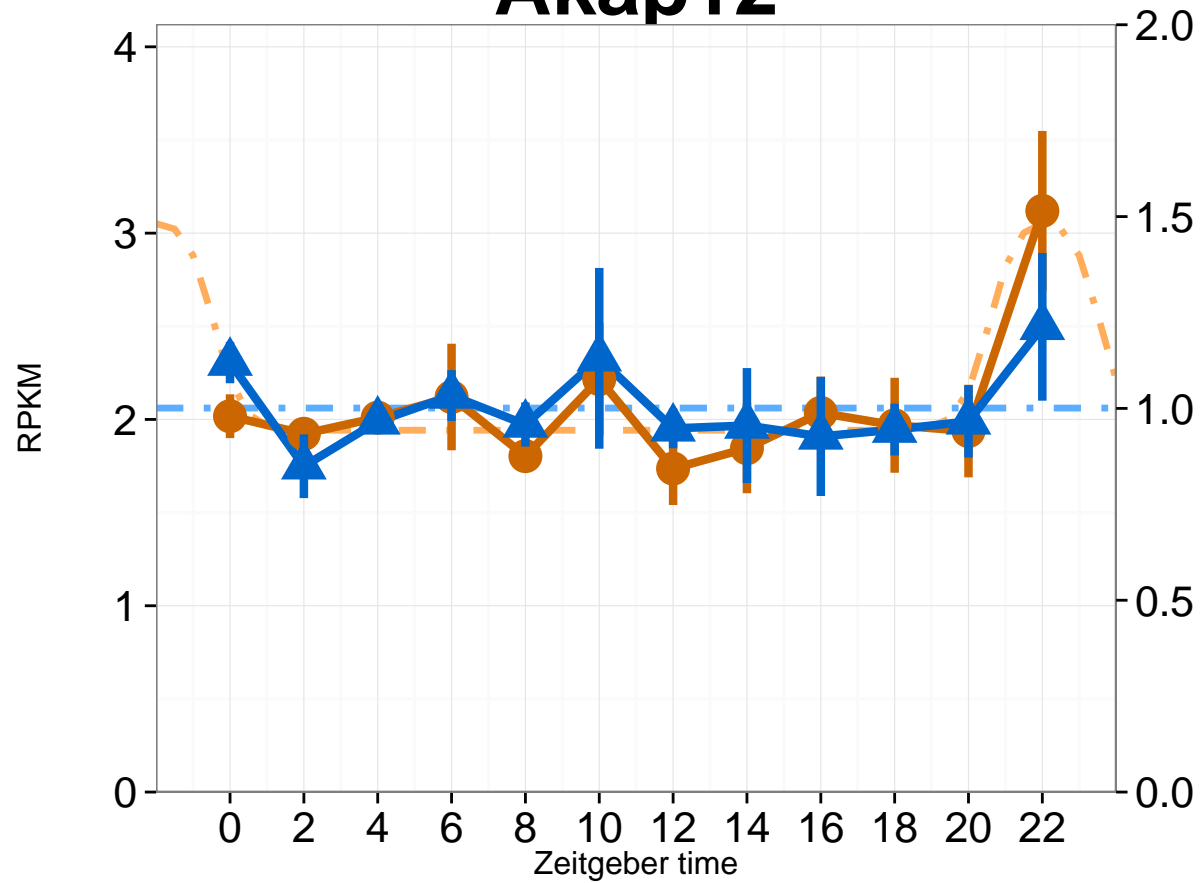

## Akap12

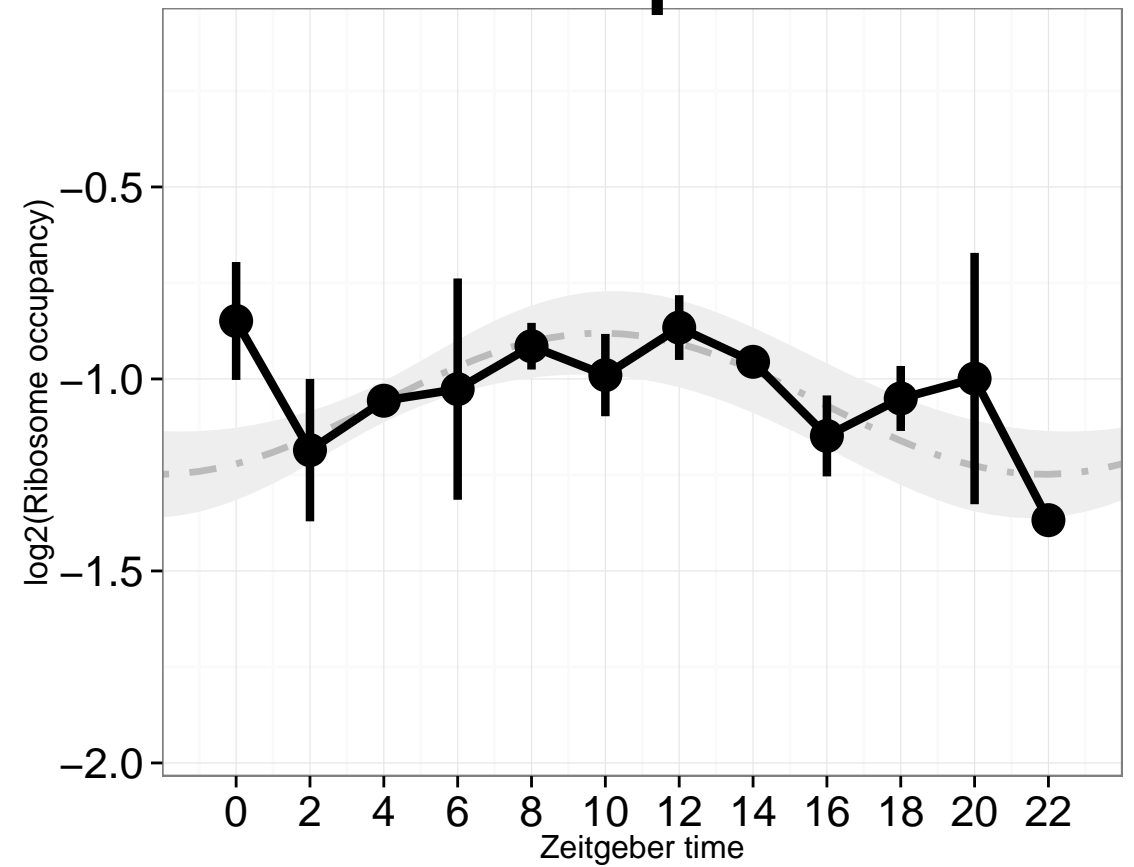

Supplement: SuppDataset_1.zip [file Akap12_set_B.pdf › Supplemental Dataset 1/B-mRNA_rhythm_translation_nonrhyth/Akap12_set_B.pdf]

## Amacr

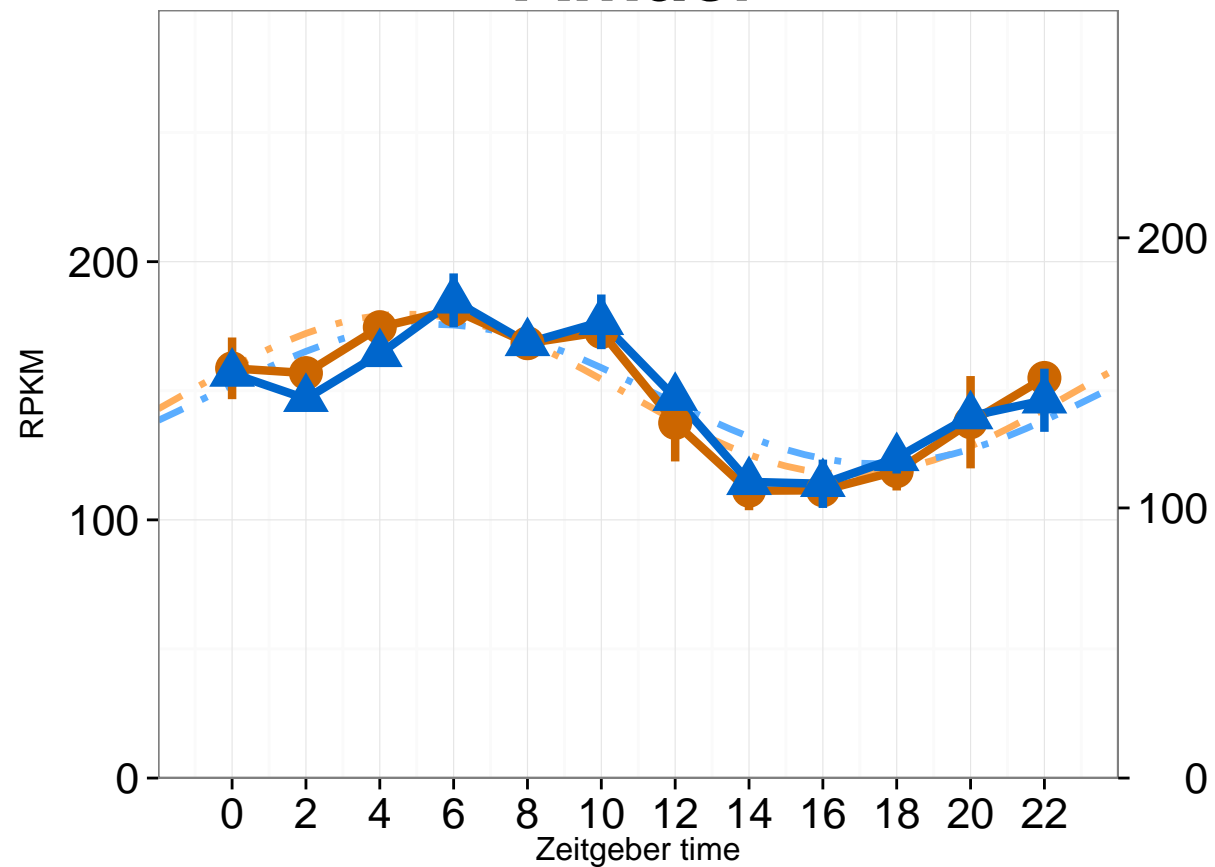

## Amacr

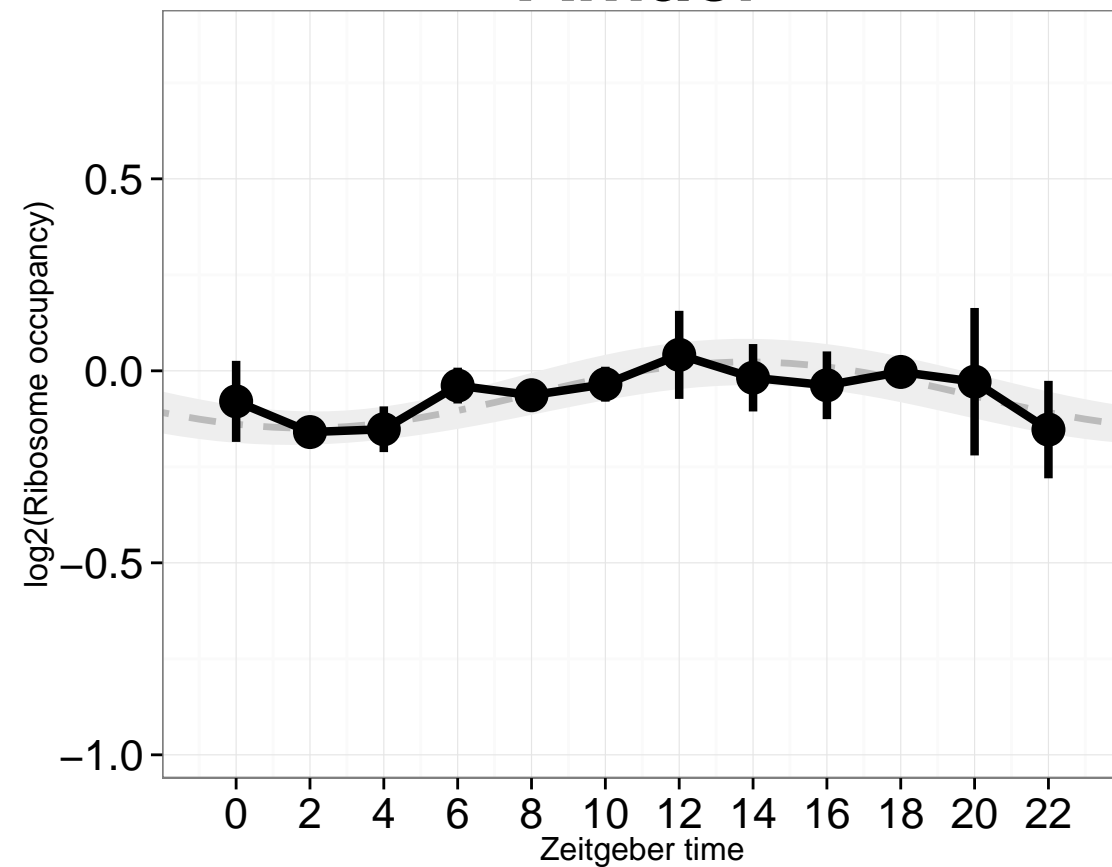

Supplement: SuppDataset_1.zip [file Amacr_set_B.pdf › Supplemental Dataset 1/B-mRNA_rhythm_translation_nonrhyth/Amacr_set_B.pdf]

## Amotl2

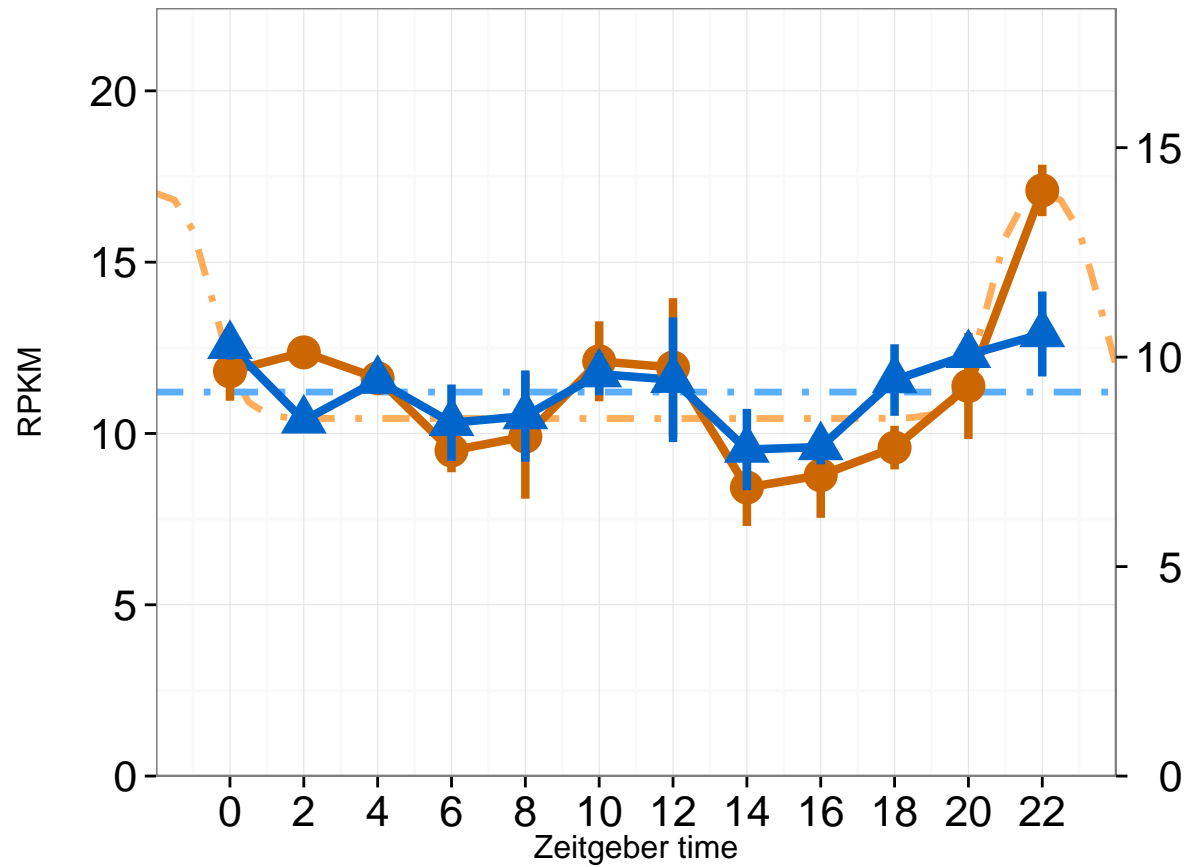

## Amotl2

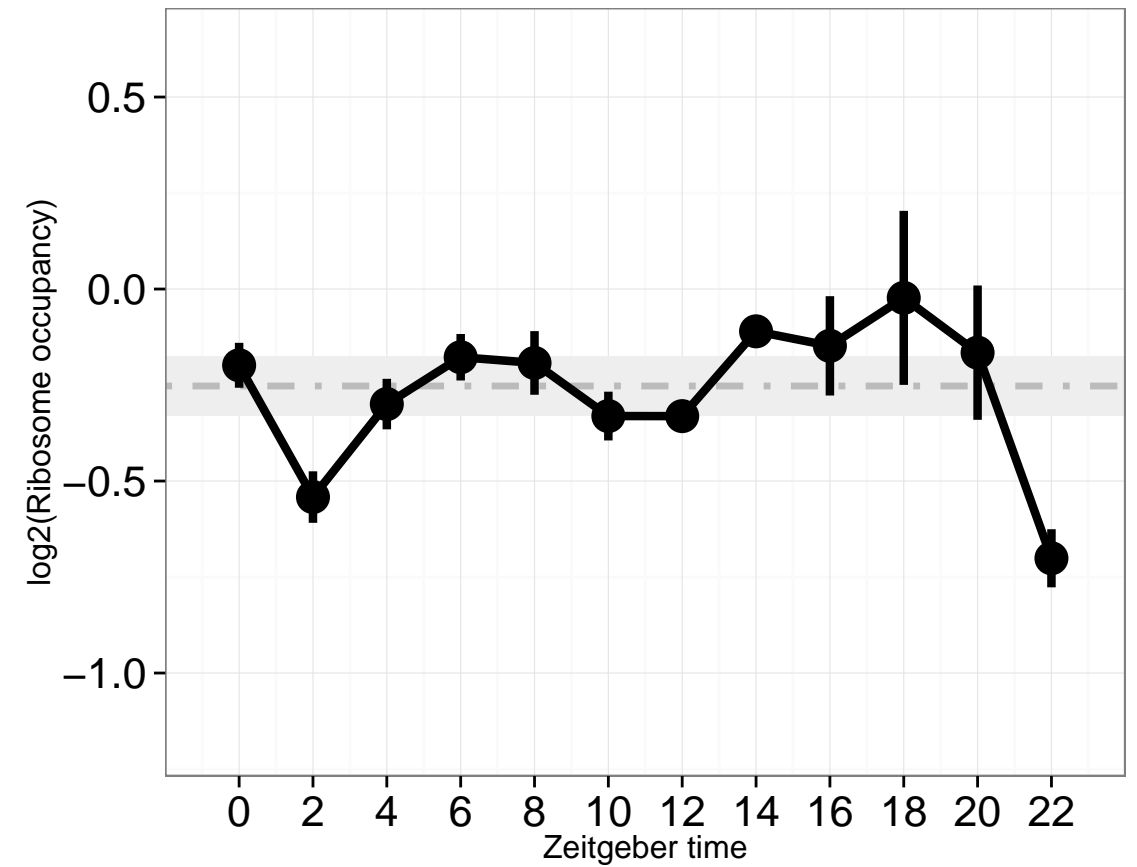

Supplement: SuppDataset_1.zip [file Amotl2_set_B.pdf › Supplemental Dataset 1/B-mRNA_rhythm_translation_nonrhyth/Amotl2_set_B.pdf]

## Anapc11

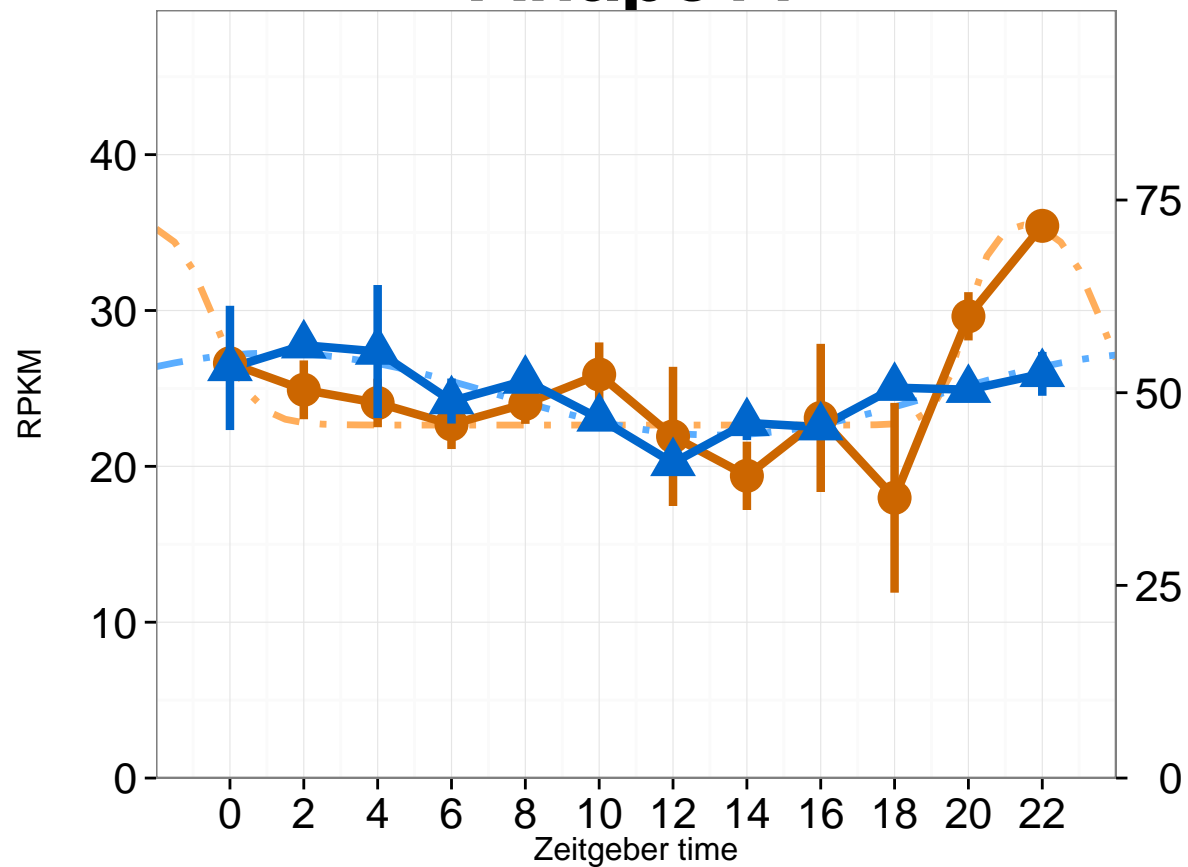

## Anapc11

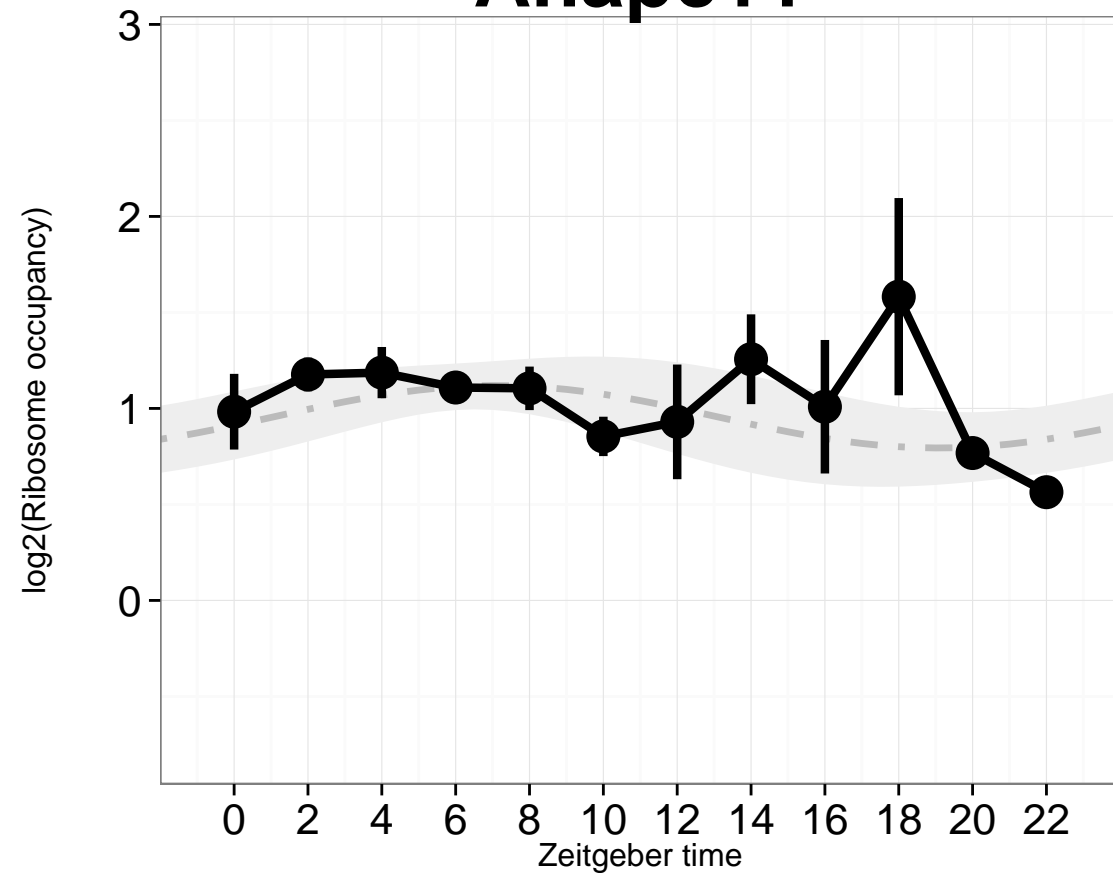

Supplement: SuppDataset_1.zip [file Anapc11_set_B.pdf › Supplemental Dataset 1/B-mRNA_rhythm_translation_nonrhyth/Anapc11_set_B.pdf]

## Ankrd23

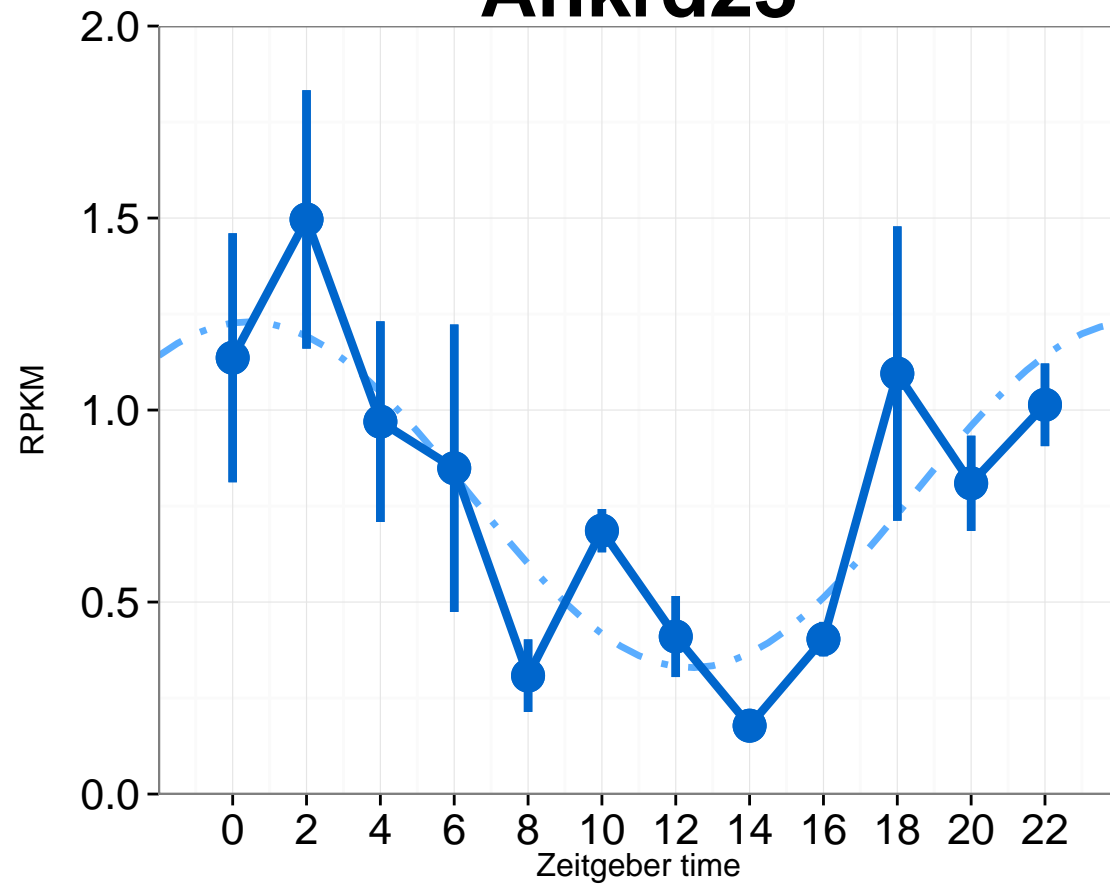

## Ankrd23 log2(Ribosome occupanc

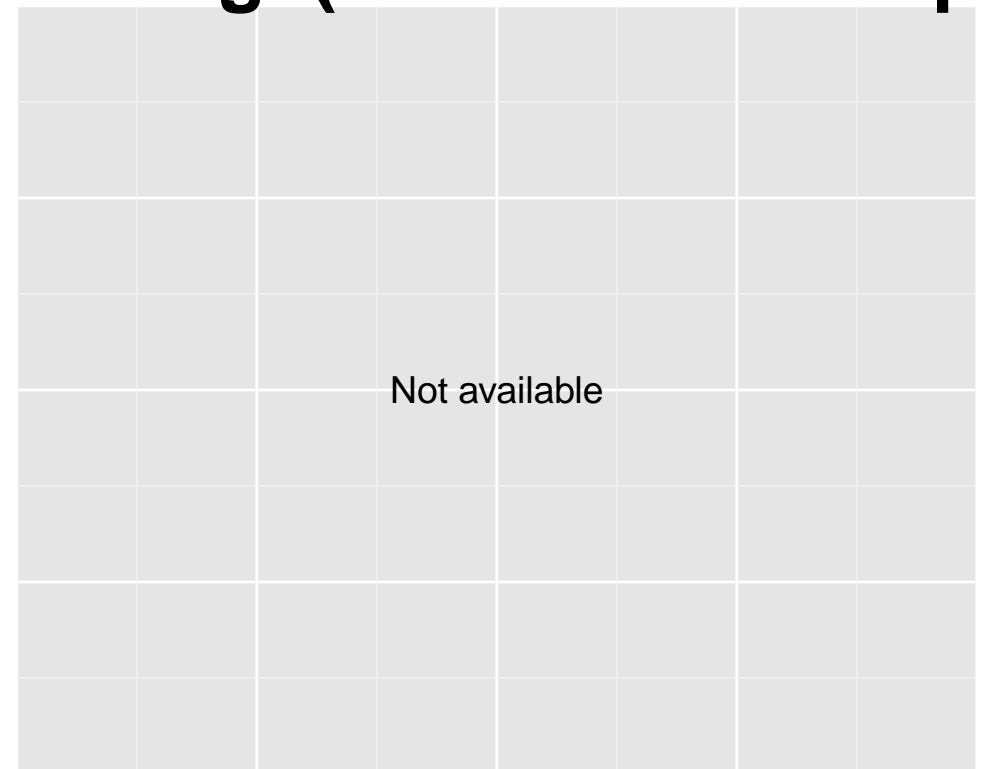

Supplement: SuppDataset_1.zip [file Ankrd23_set_B.pdf › Supplemental Dataset 1/B-mRNA_rhythm_translation_nonrhyth/Ankrd23_set_B.pdf]

# Anks4b

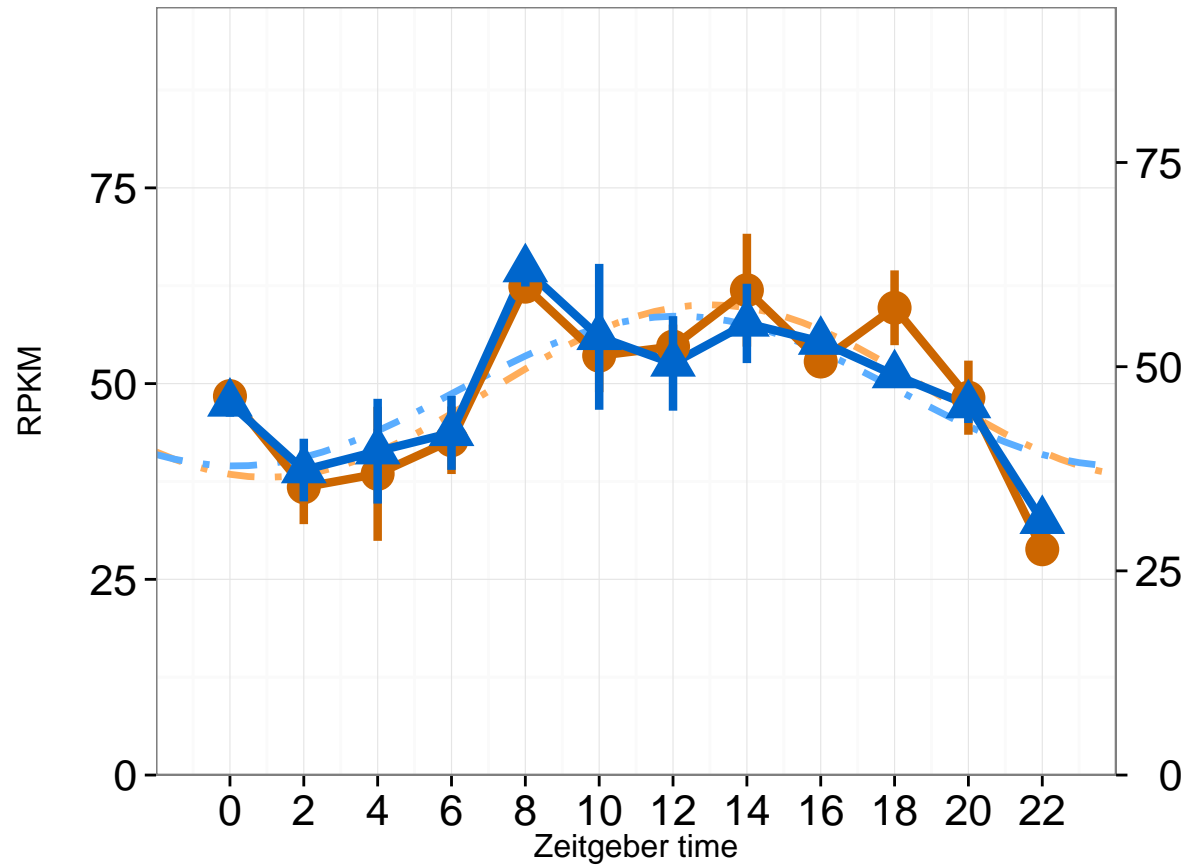

# Anks4b

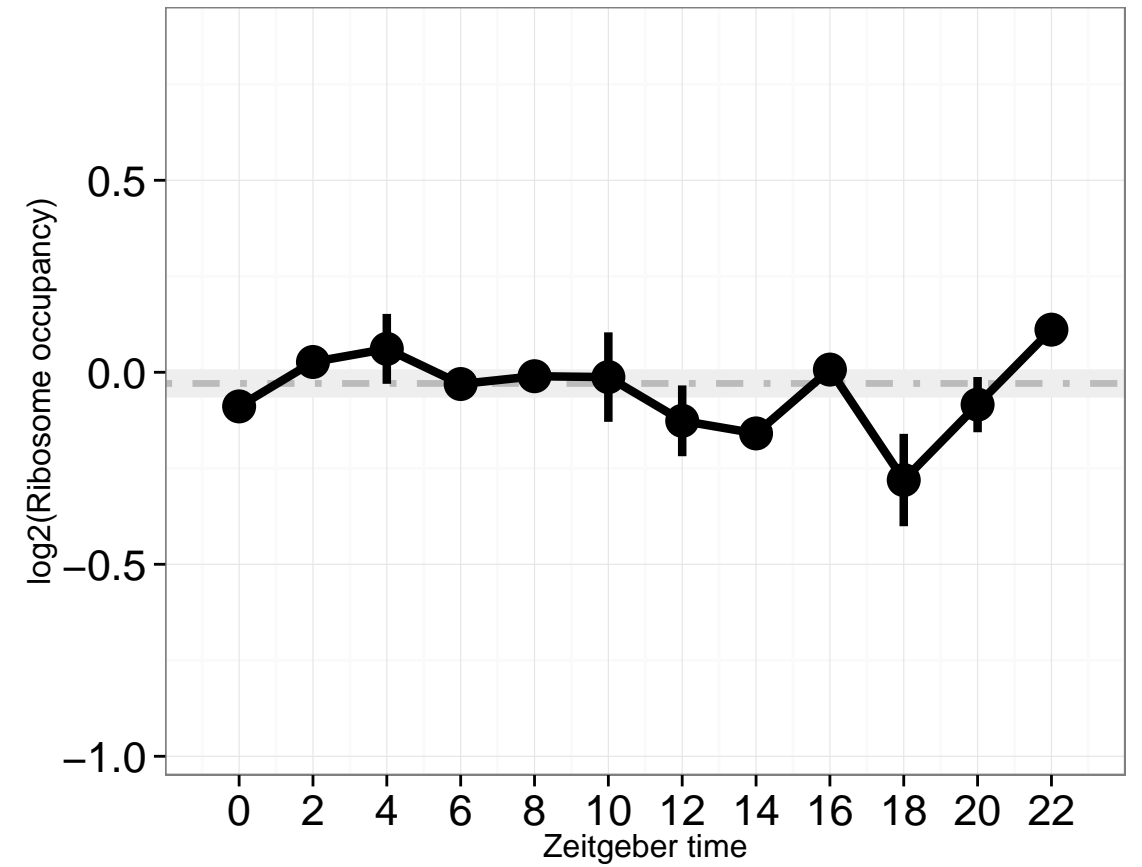

Supplement: SuppDataset_1.zip [file Anks4b_set_B.pdf › Supplemental Dataset 1/B-mRNA_rhythm_translation_nonrhyth/Anks4b_set_B.pdf]

# Anp32e

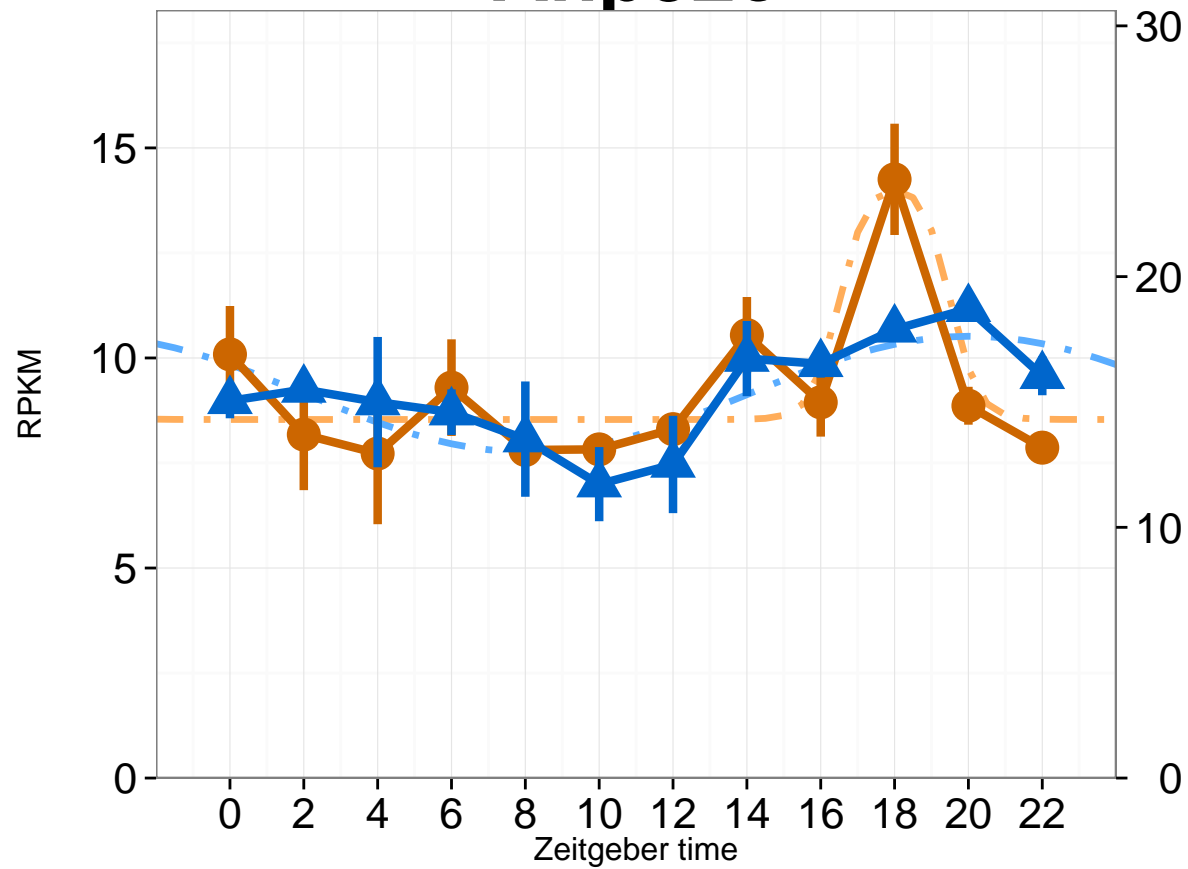

# Anp32e

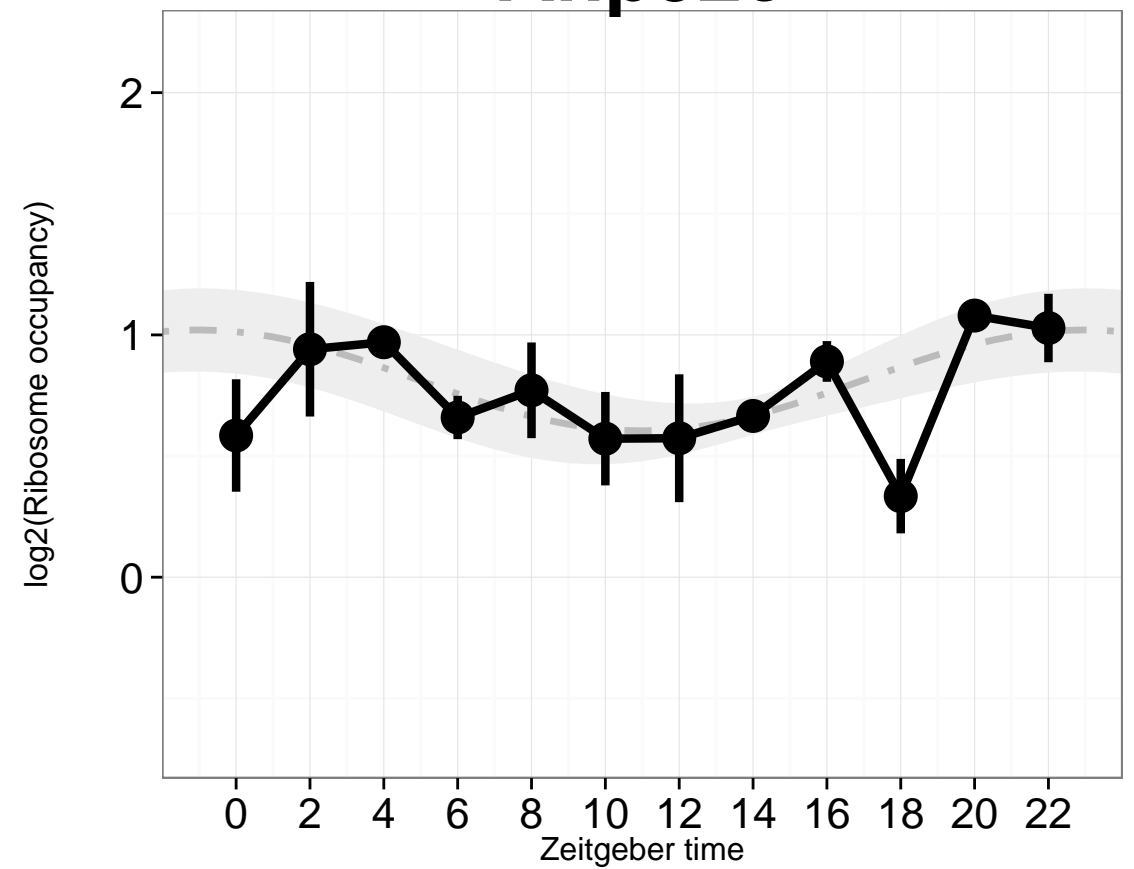

Supplement: SuppDataset_1.zip [file Anp32e_set_B.pdf › Supplemental Dataset 1/B-mRNA_rhythm_translation_nonrhyth/Anp32e_set_B.pdf]

## Antxr1

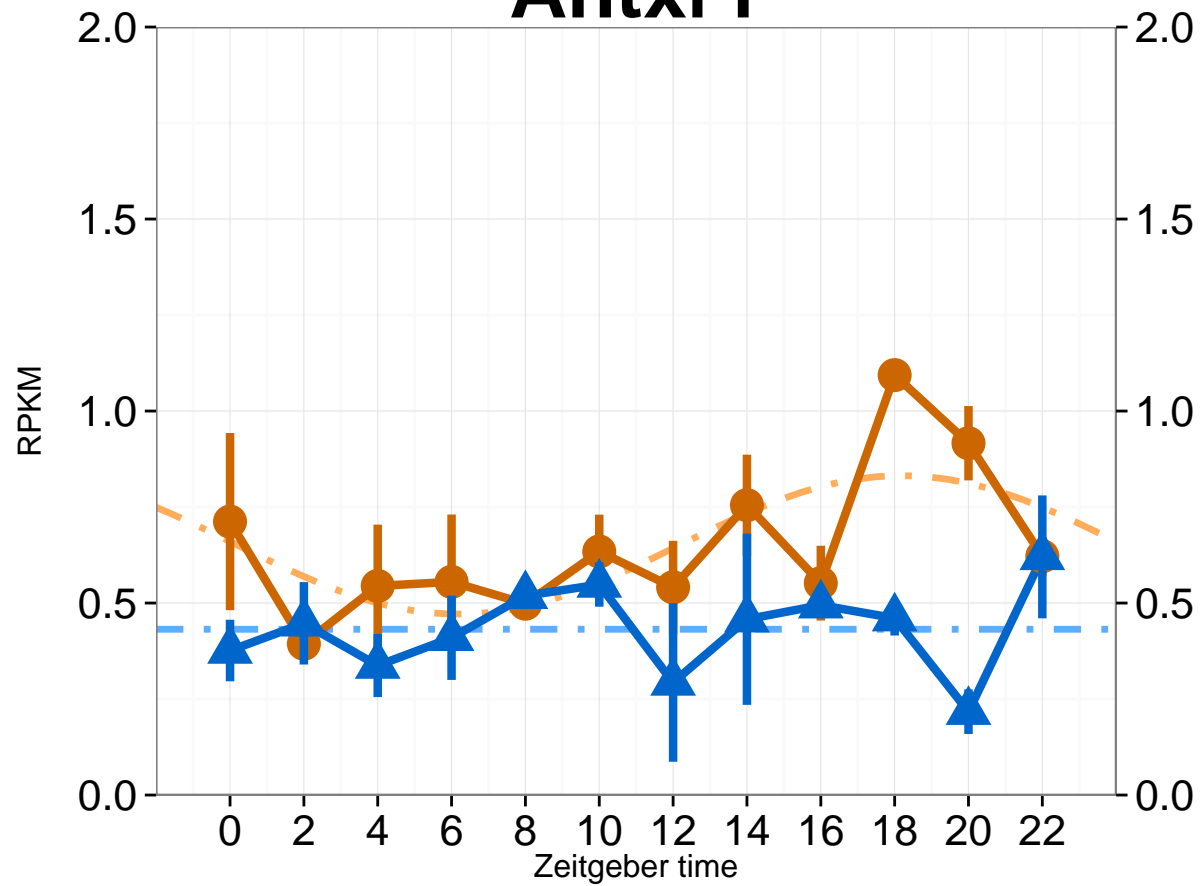

## Antxr1

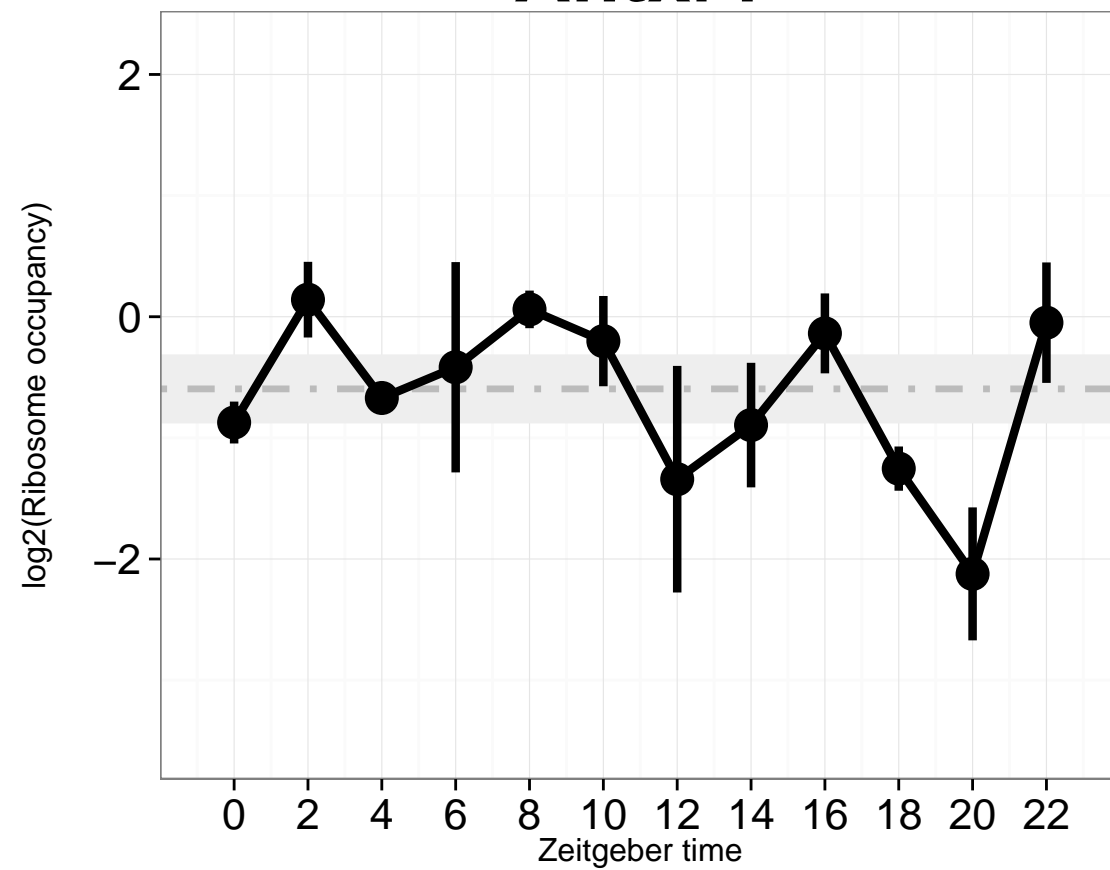

Supplement: SuppDataset_1.zip [file Antxr1_set_B.pdf › Supplemental Dataset 1/B-mRNA_rhythm_translation_nonrhyth/Antxr1_set_B.pdf]

## Apoc3

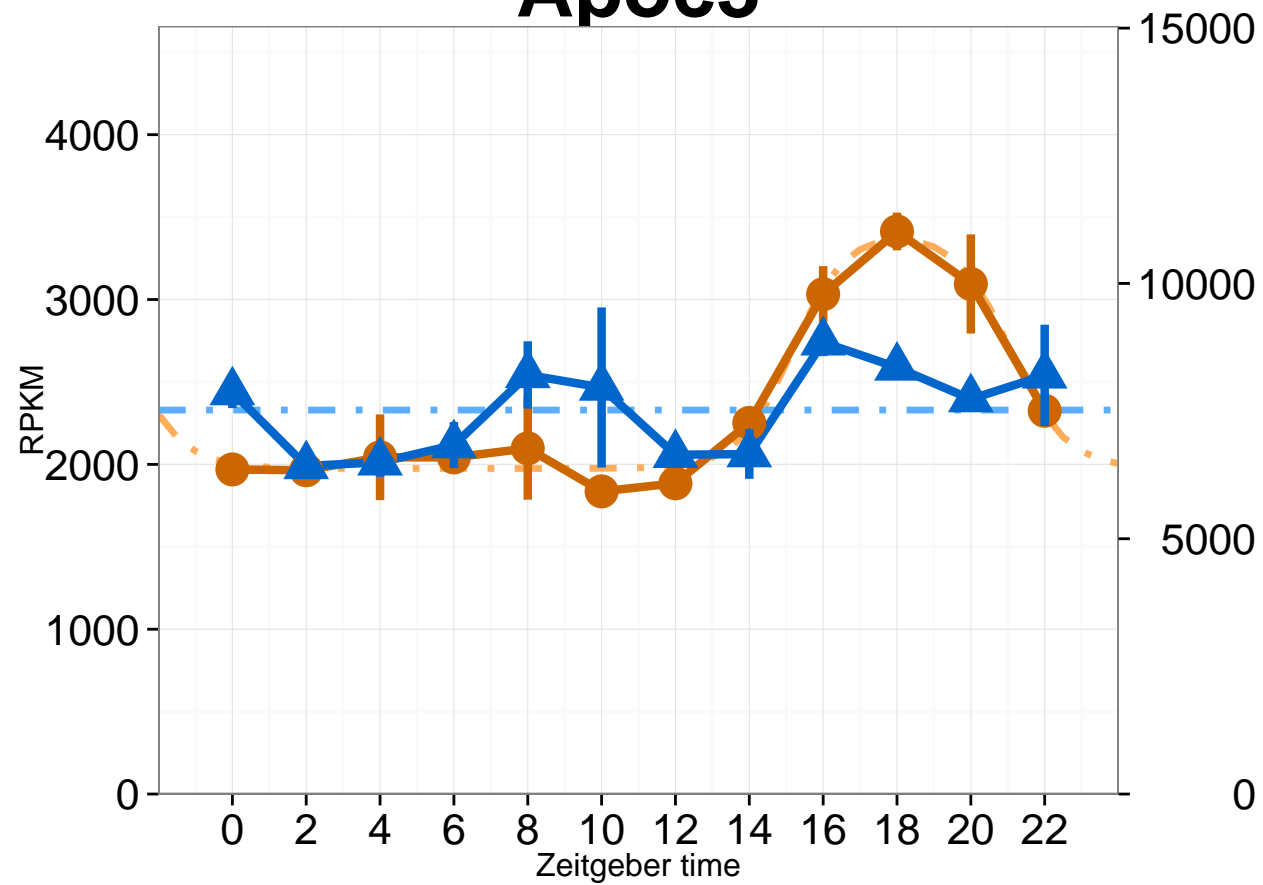

## Apoc3

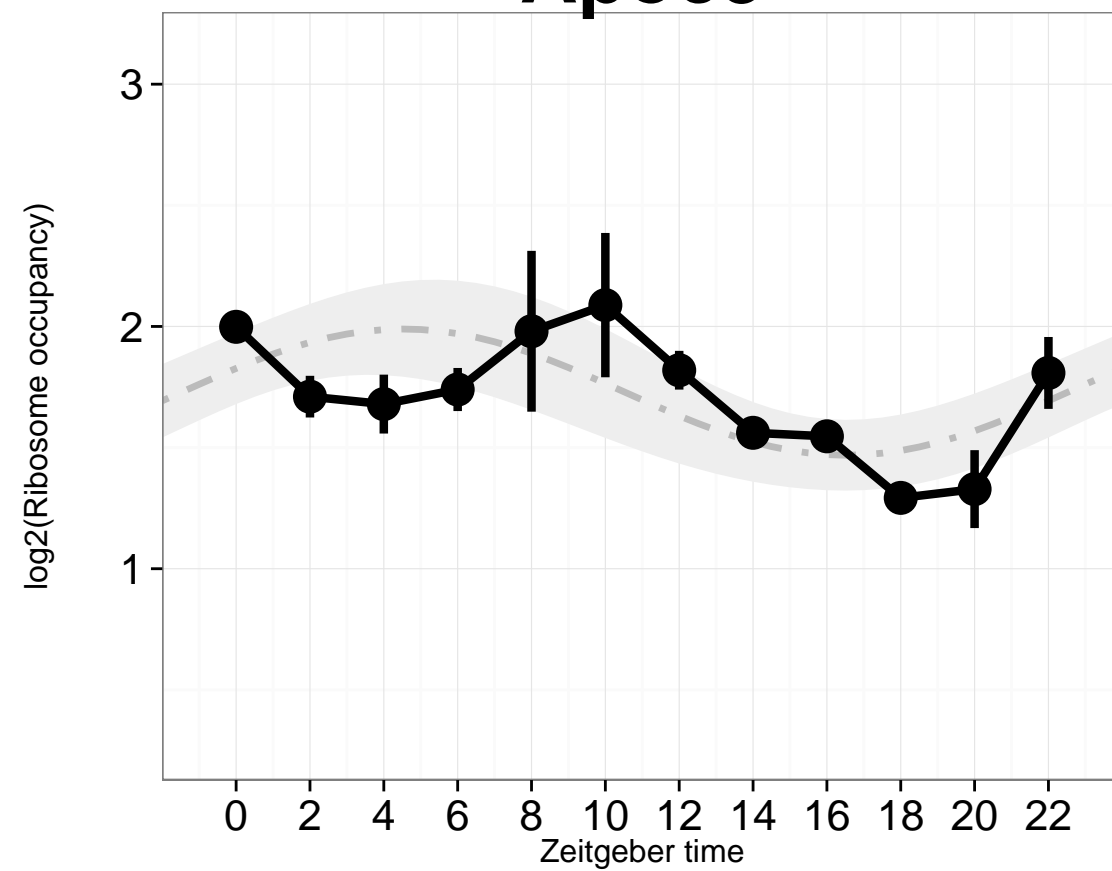

Supplement: SuppDataset_1.zip [file Apoc3_set_B.pdf › Supplemental Dataset 1/B-mRNA_rhythm_translation_nonrhyth/Apoc3_set_B.pdf]

# Appl2

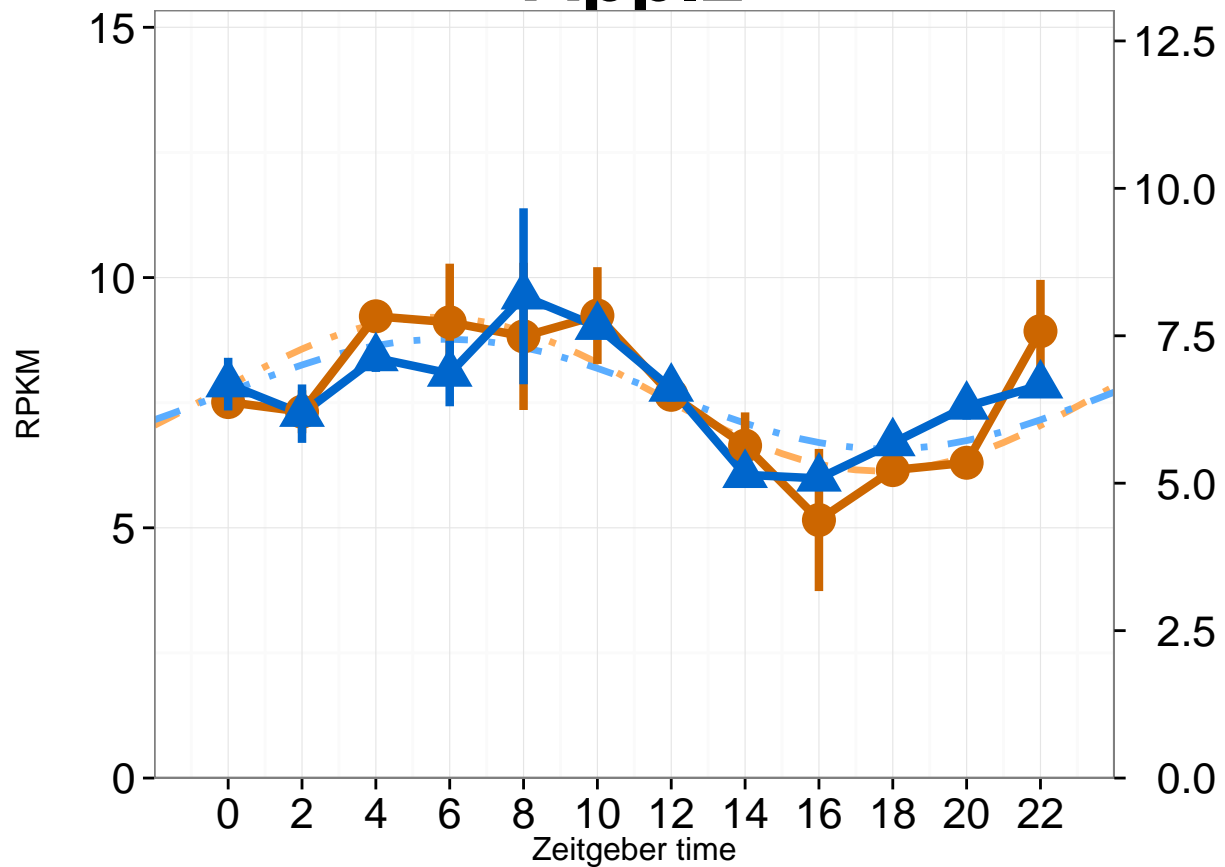

# Appl2

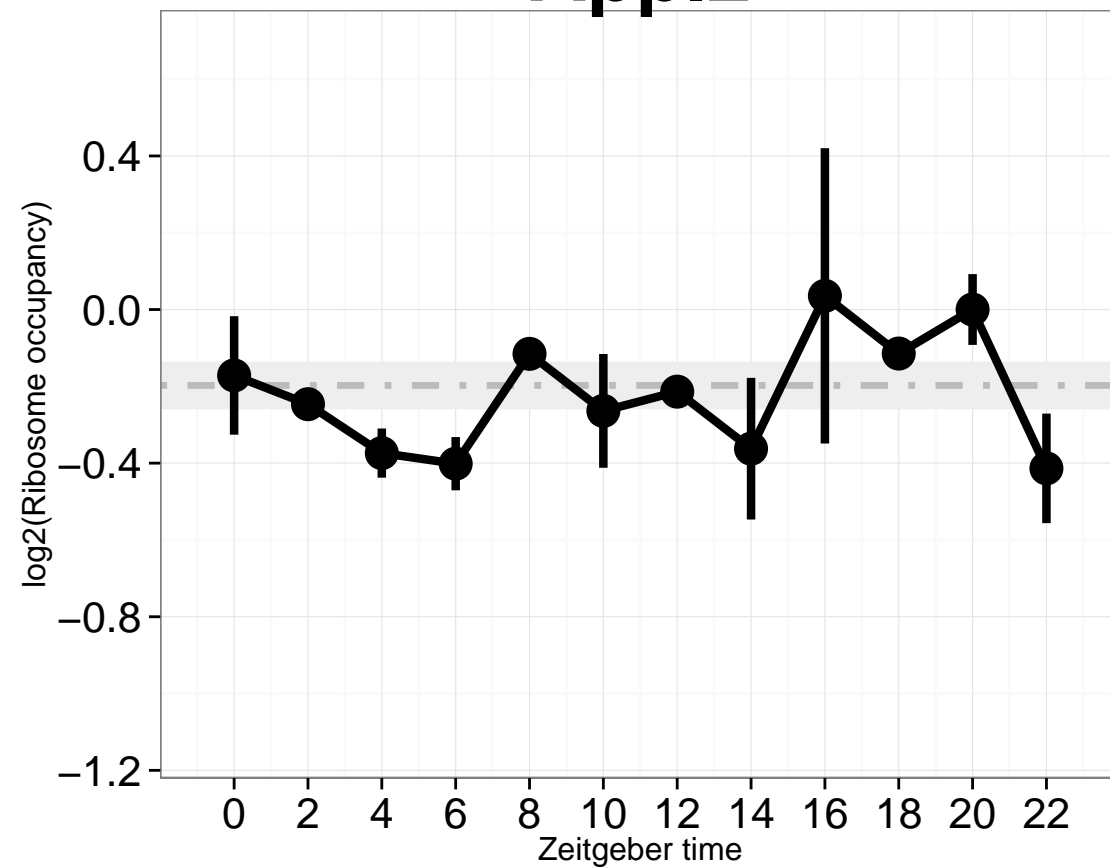

Supplement: SuppDataset_1.zip [file Appl2_set_B.pdf › Supplemental Dataset 1/B-mRNA_rhythm_translation_nonrhyth/Appl2_set_B.pdf]

## Aptx

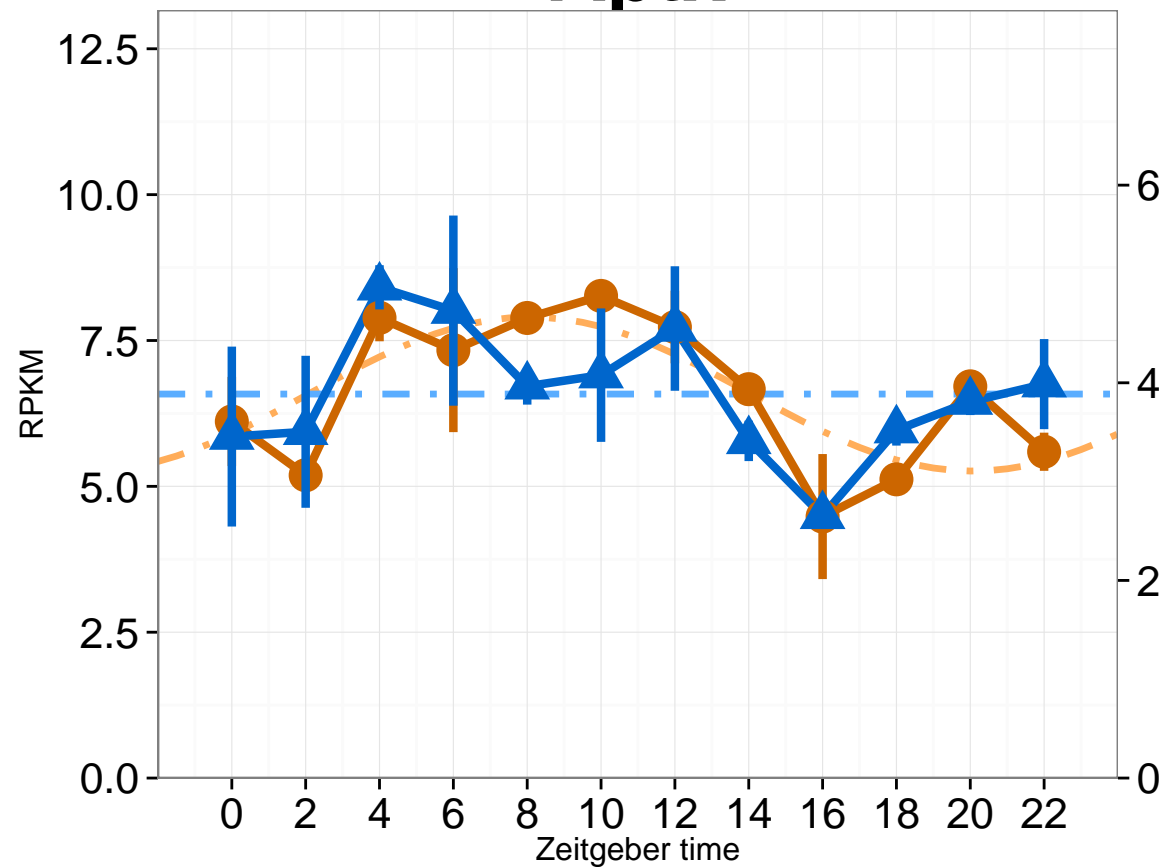

## Aptx

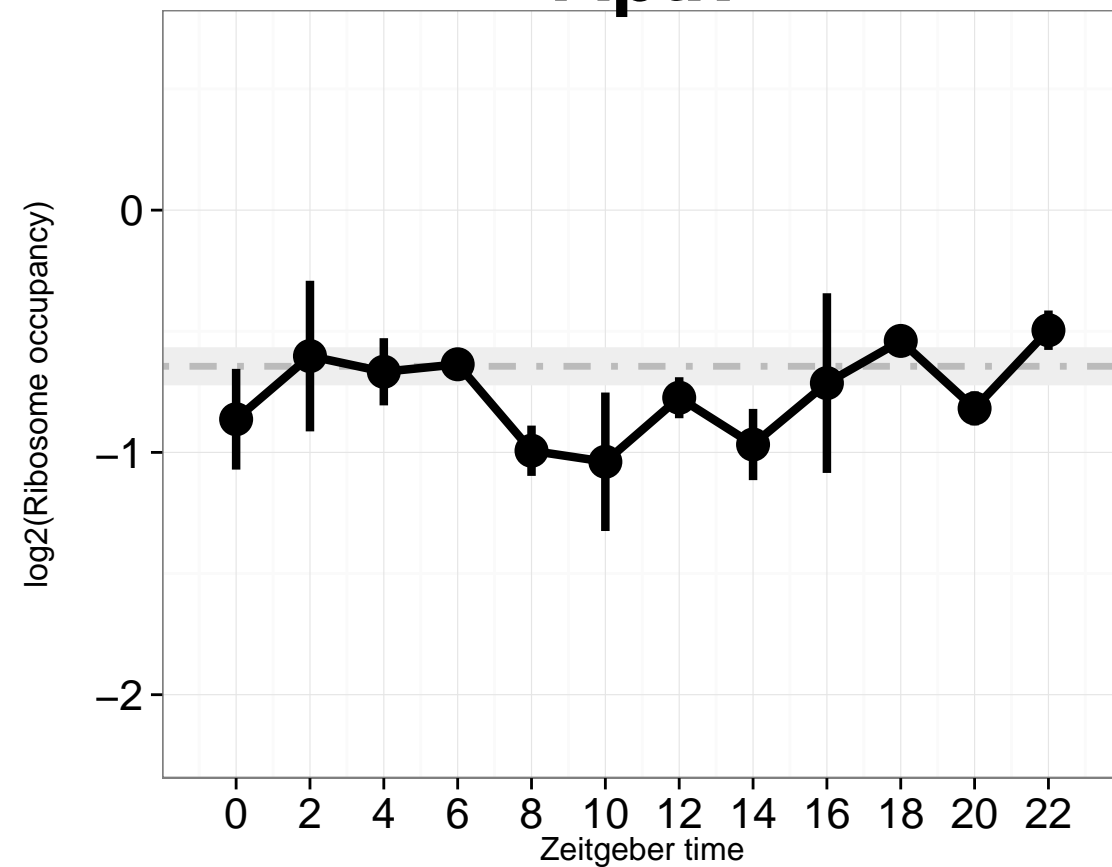

Supplement: SuppDataset_1.zip [file Aptx_set_B.pdf › Supplemental Dataset 1/B-mRNA_rhythm_translation_nonrhyth/Aptx_set_B.pdf]

# Aqp9

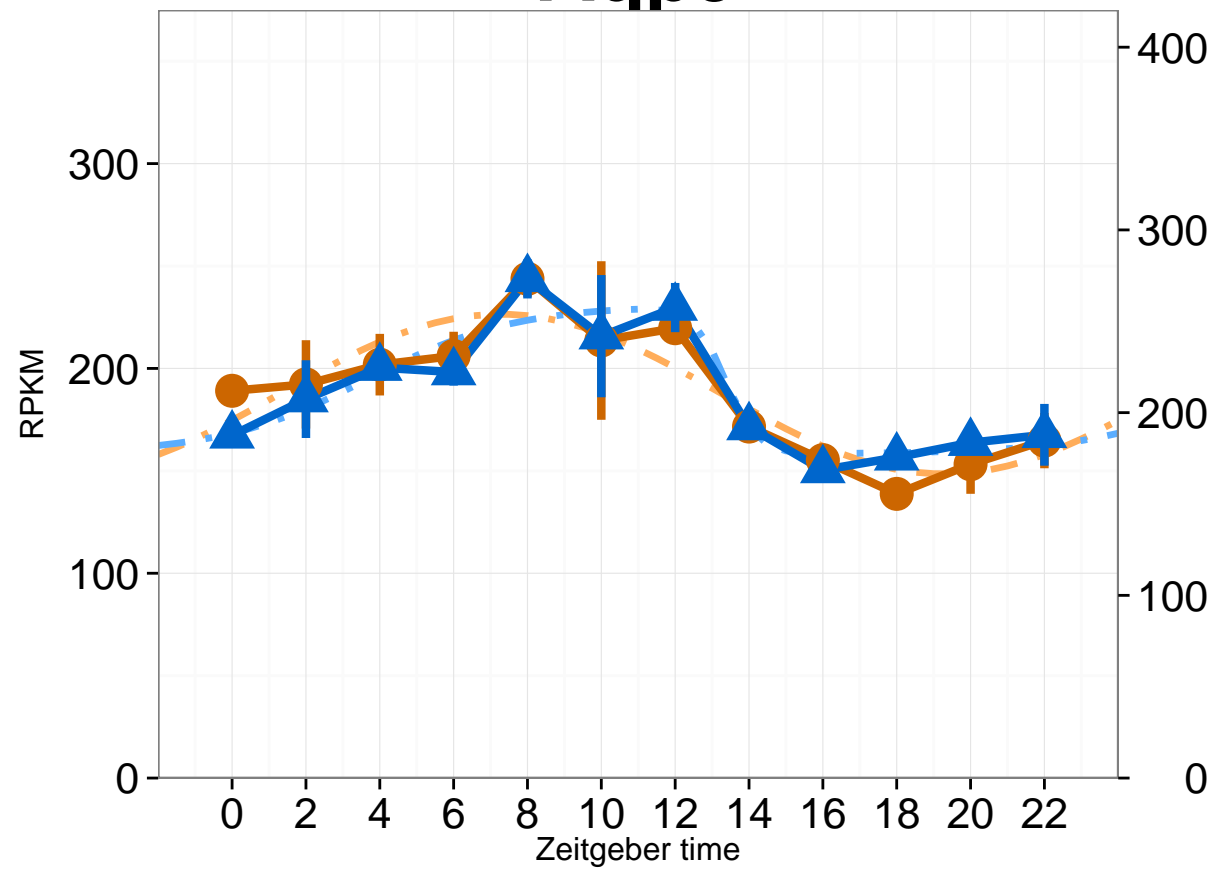

# Aqp9

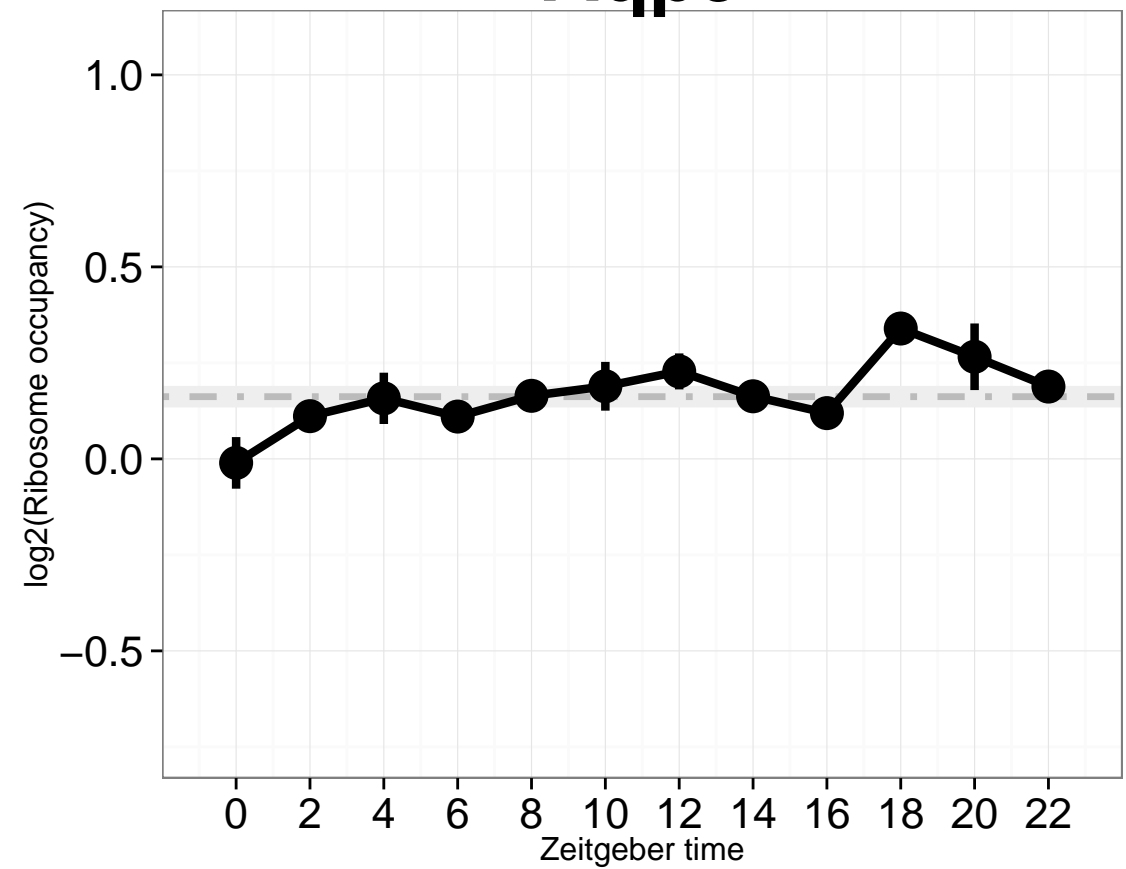

Supplement: SuppDataset_1.zip [file Aqp9_set_B.pdf › Supplemental Dataset 1/B-mRNA_rhythm_translation_nonrhyth/Aqp9_set_B.pdf]

# Arap1

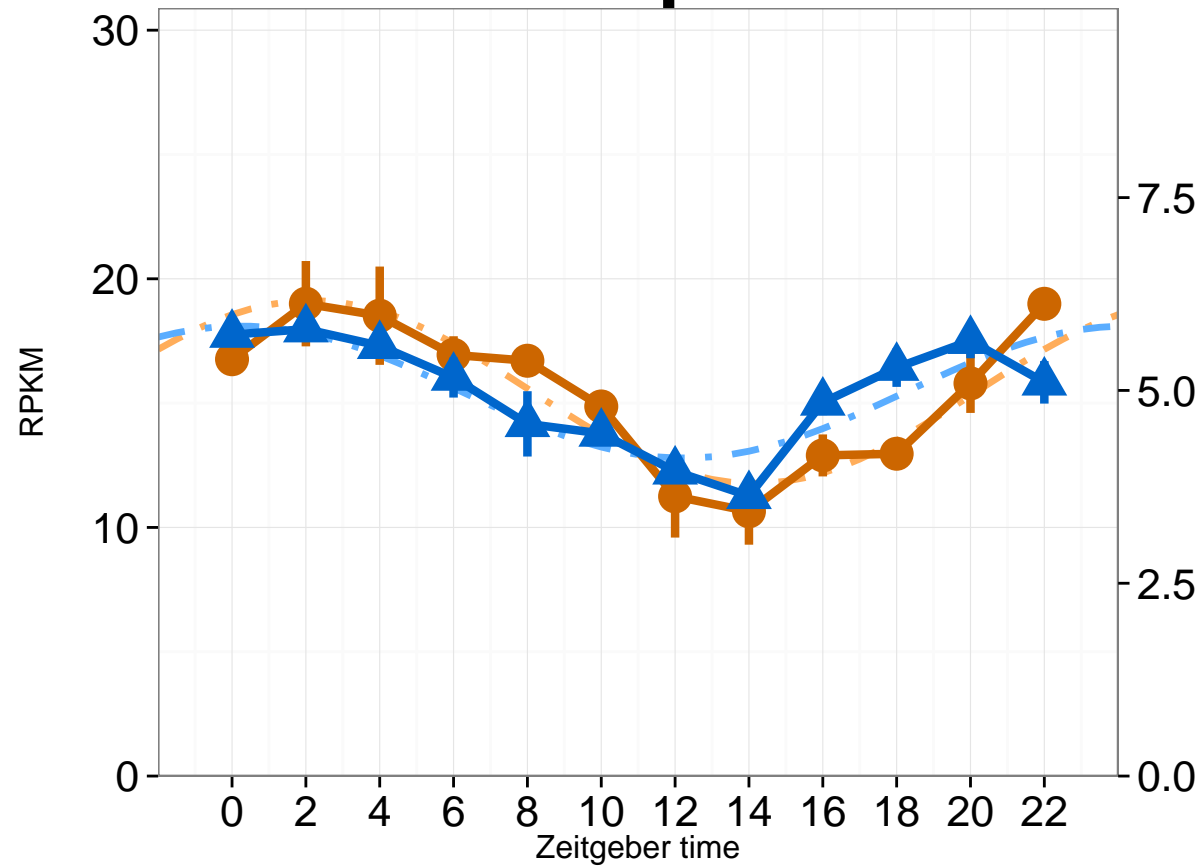

# Arap1

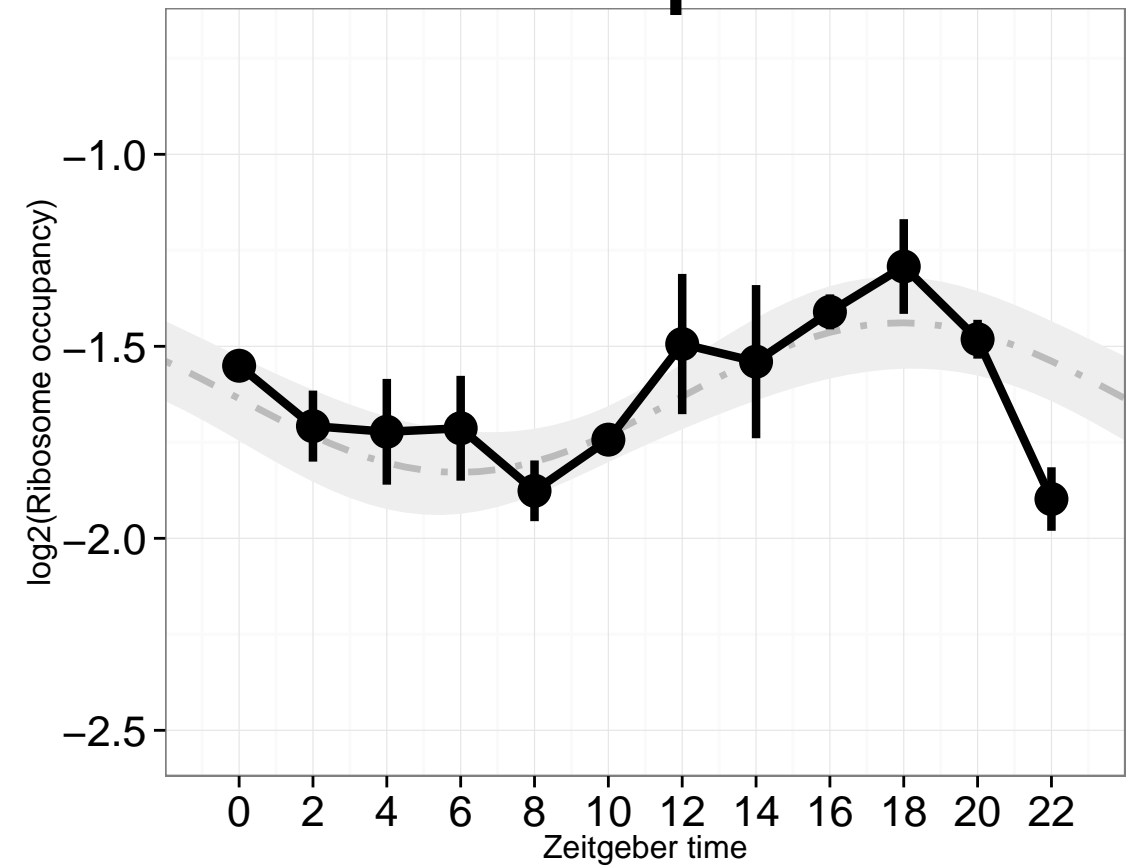

Supplement: SuppDataset_1.zip [file Arap1_set_B.pdf › Supplemental Dataset 1/B-mRNA_rhythm_translation_nonrhyth/Arap1_set_B.pdf]

## Arf3

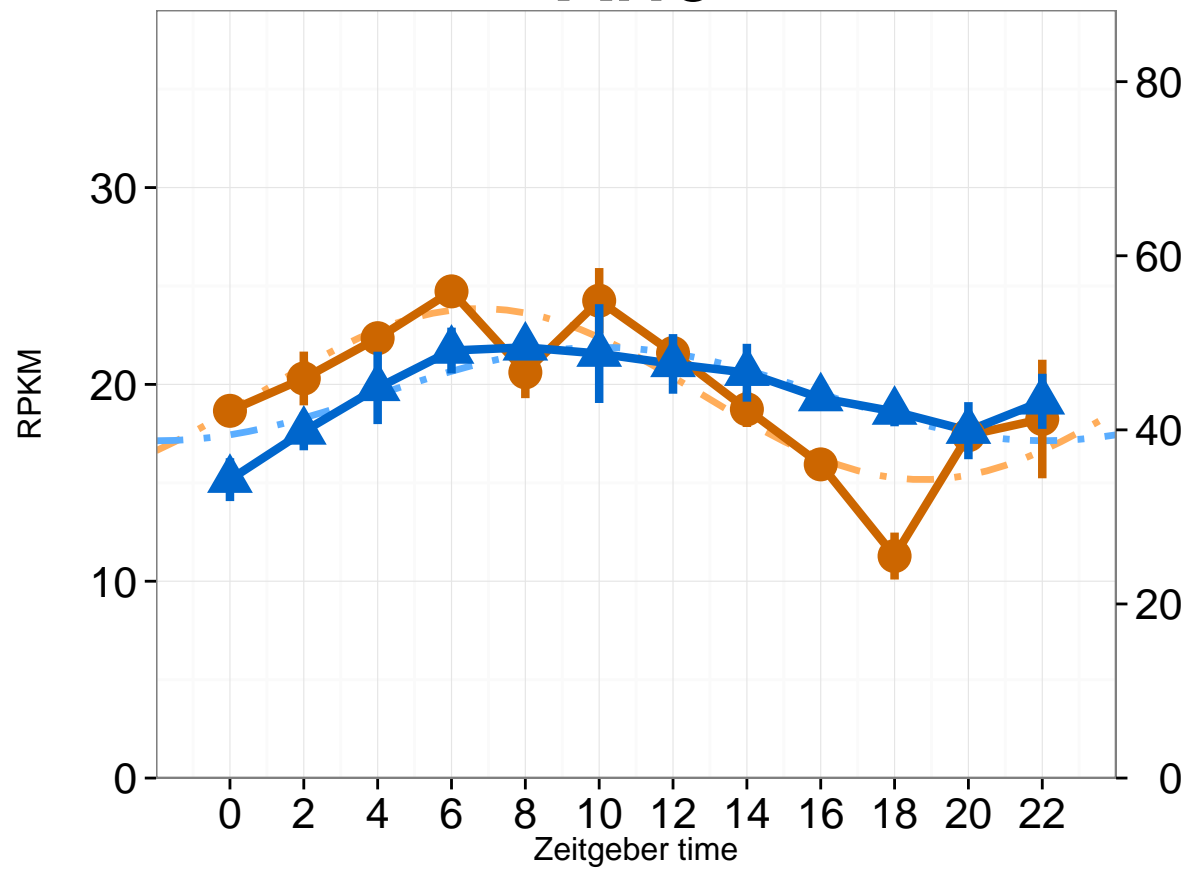

## Arf3

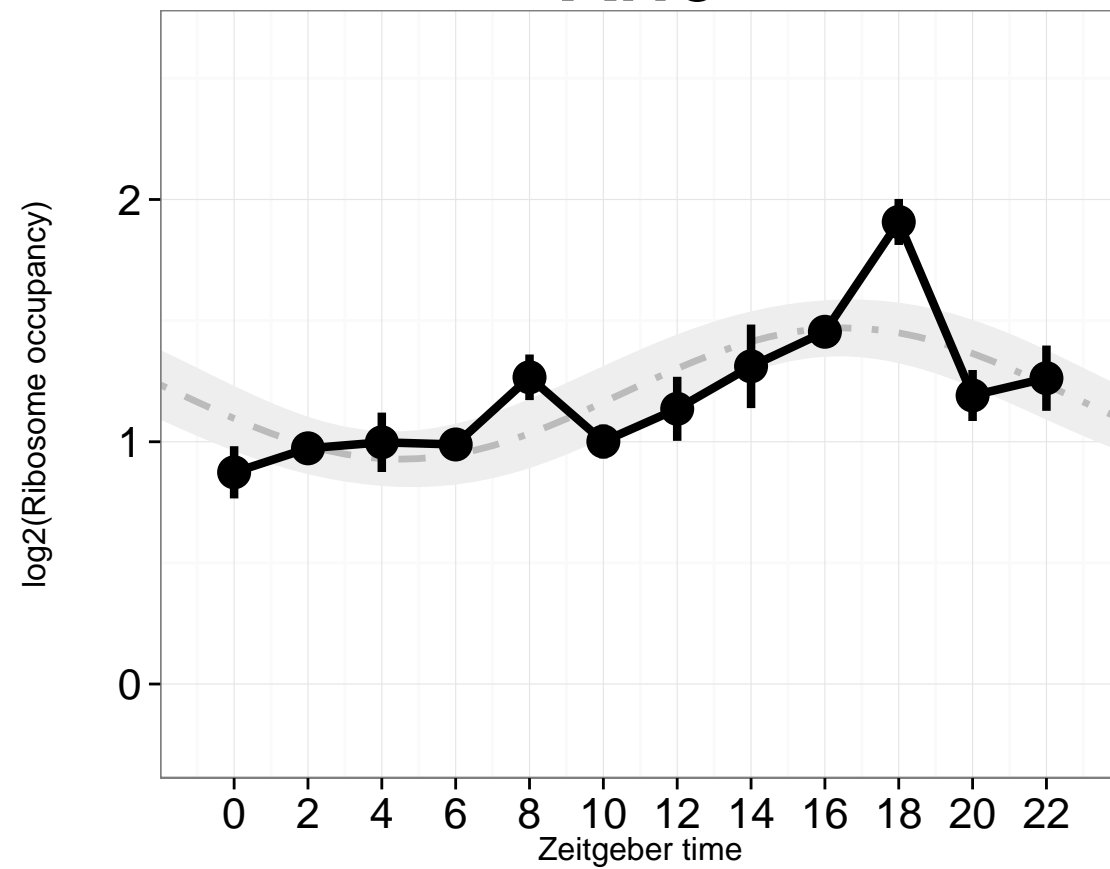

Supplement: SuppDataset_1.zip [file Arf3_set_B.pdf › Supplemental Dataset 1/B-mRNA_rhythm_translation_nonrhyth/Arf3_set_B.pdf]

# Arhgap10

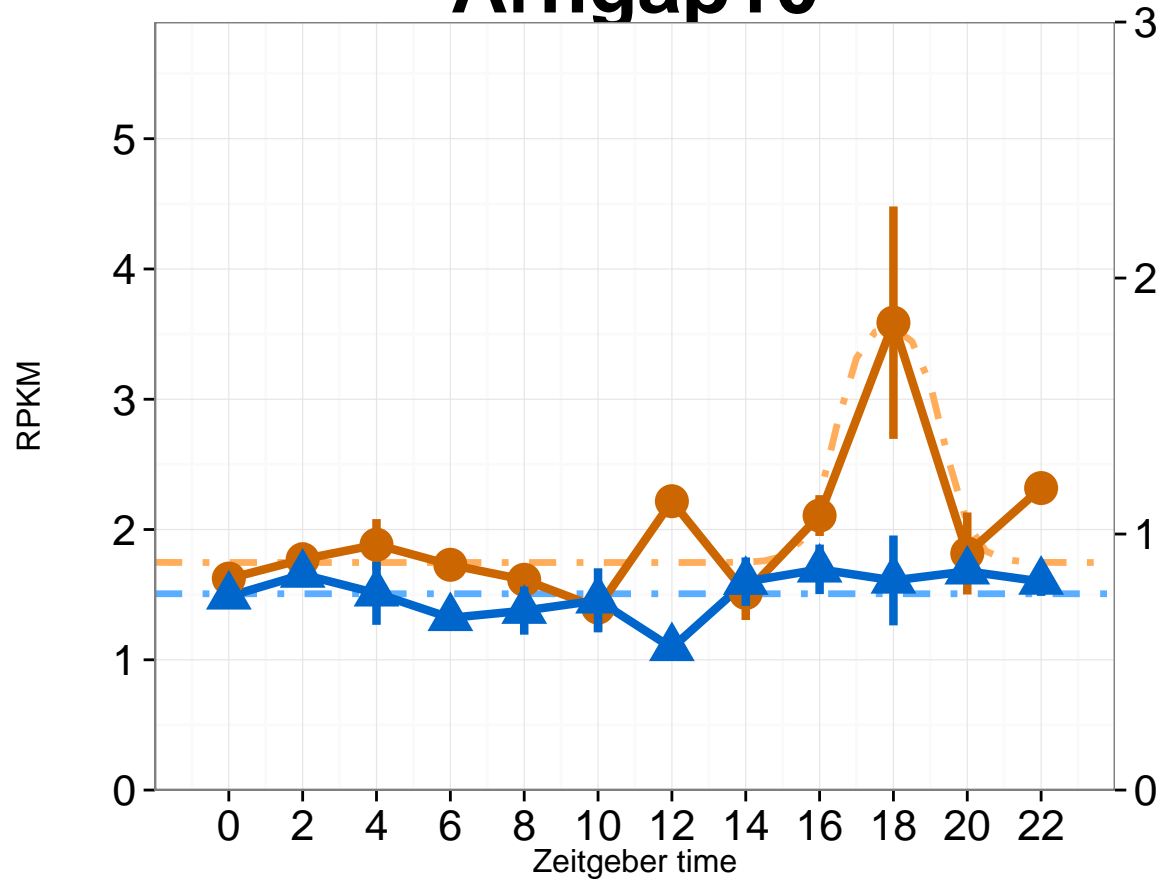

# Arhgap10

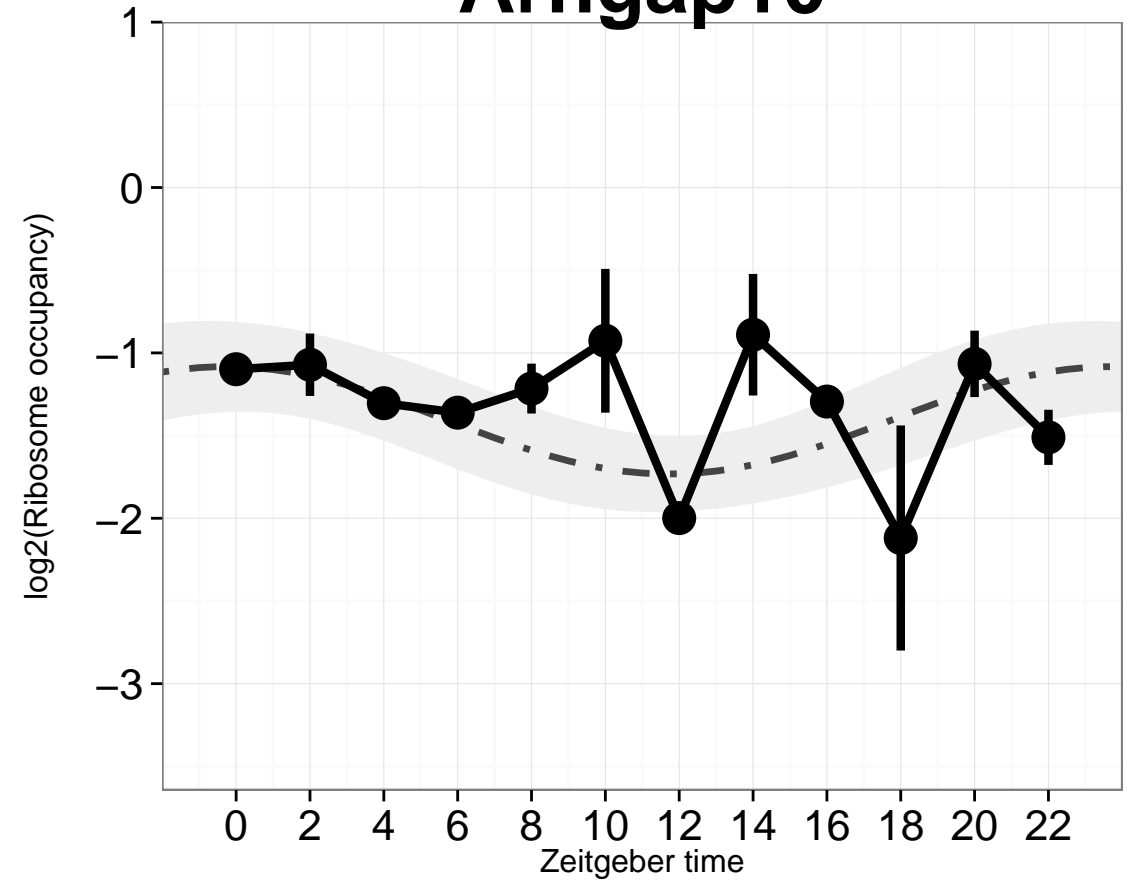

Supplement: SuppDataset_1.zip [file Arhgap10_set_B.pdf › Supplemental Dataset 1/B-mRNA_rhythm_translation_nonrhyth/Arhgap10_set_B.pdf]

# Arhgef10

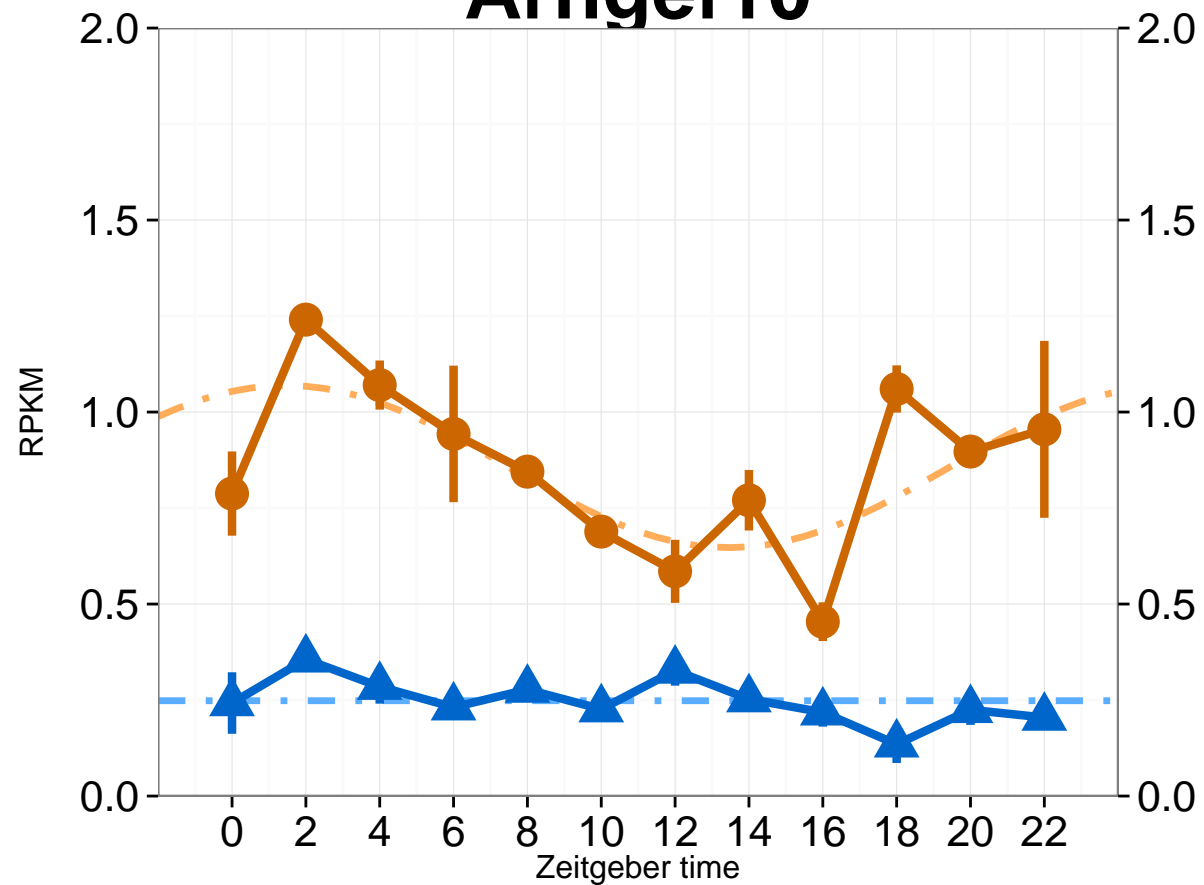

# Arhgef10

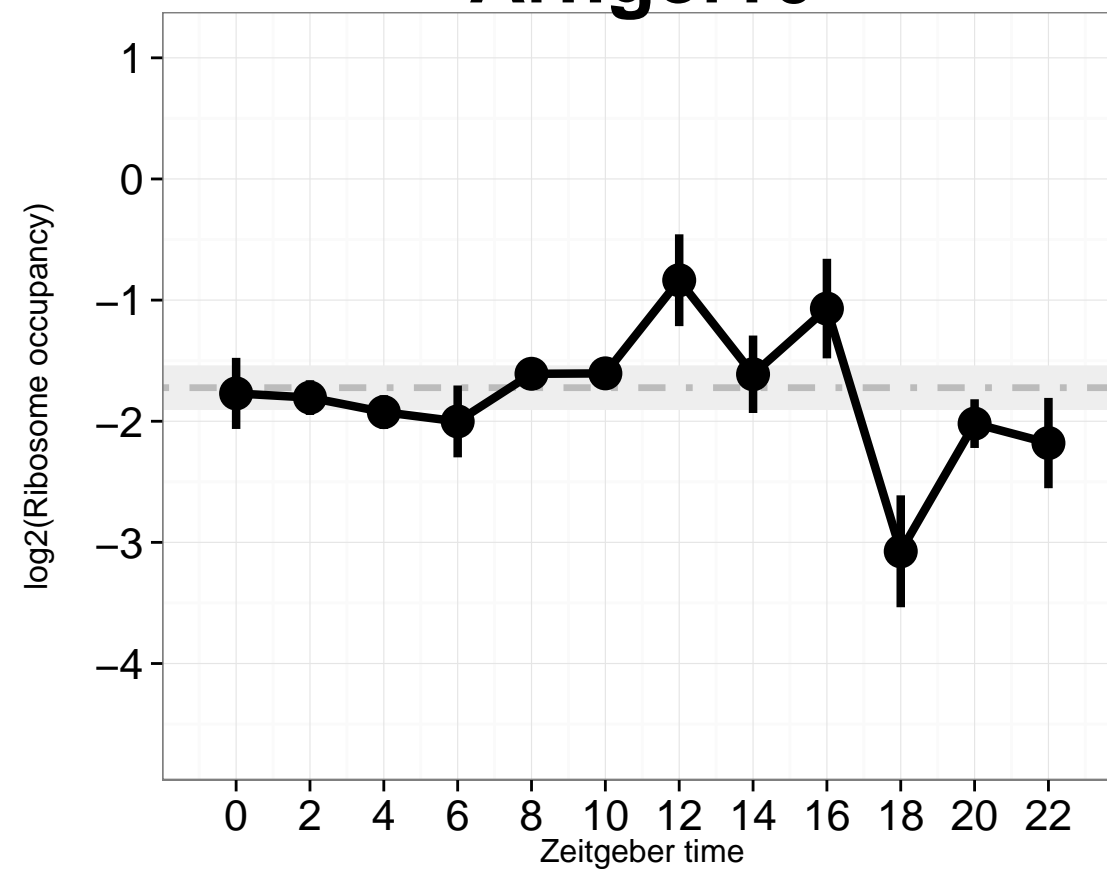

Supplement: SuppDataset_1.zip [file Arhgef10_set_B.pdf › Supplemental Dataset 1/B-mRNA_rhythm_translation_nonrhyth/Arhgef10_set_B.pdf]

## Arid3a

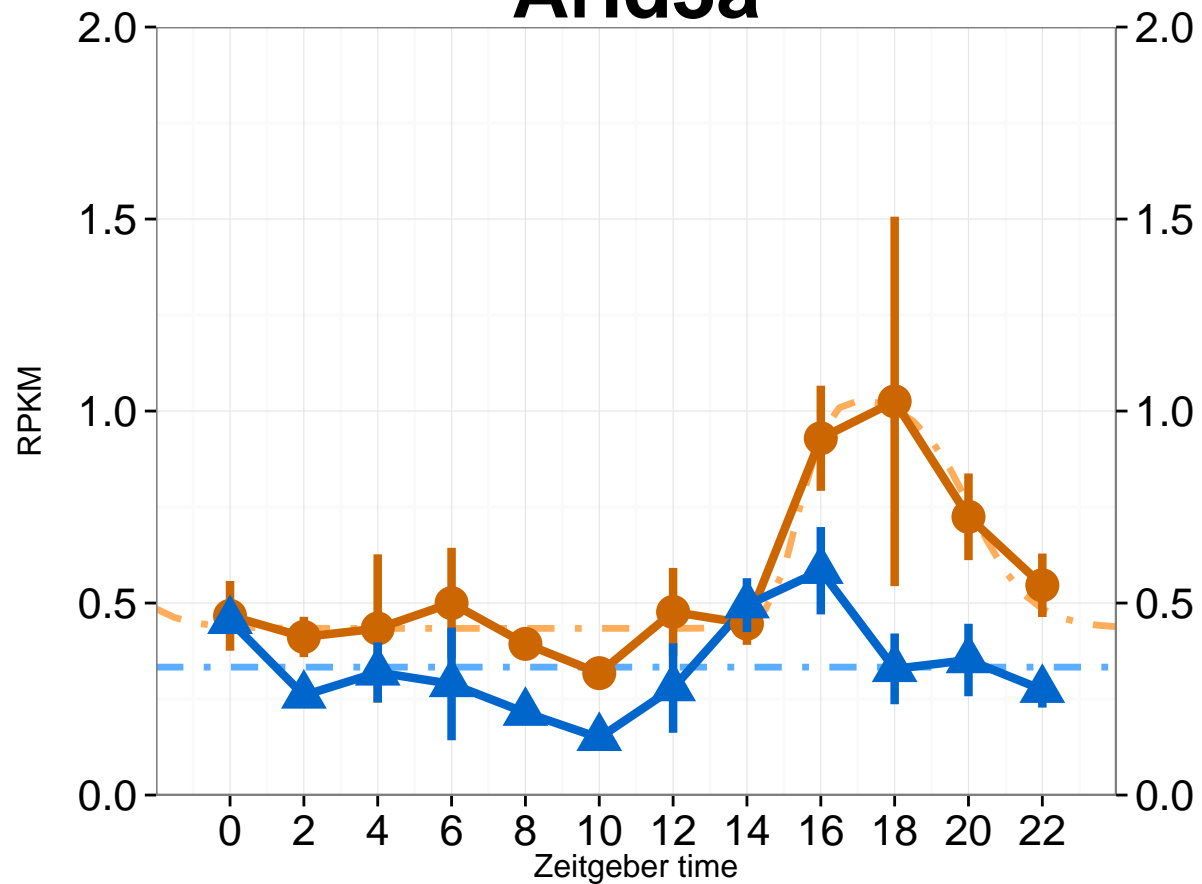

## Arid3a

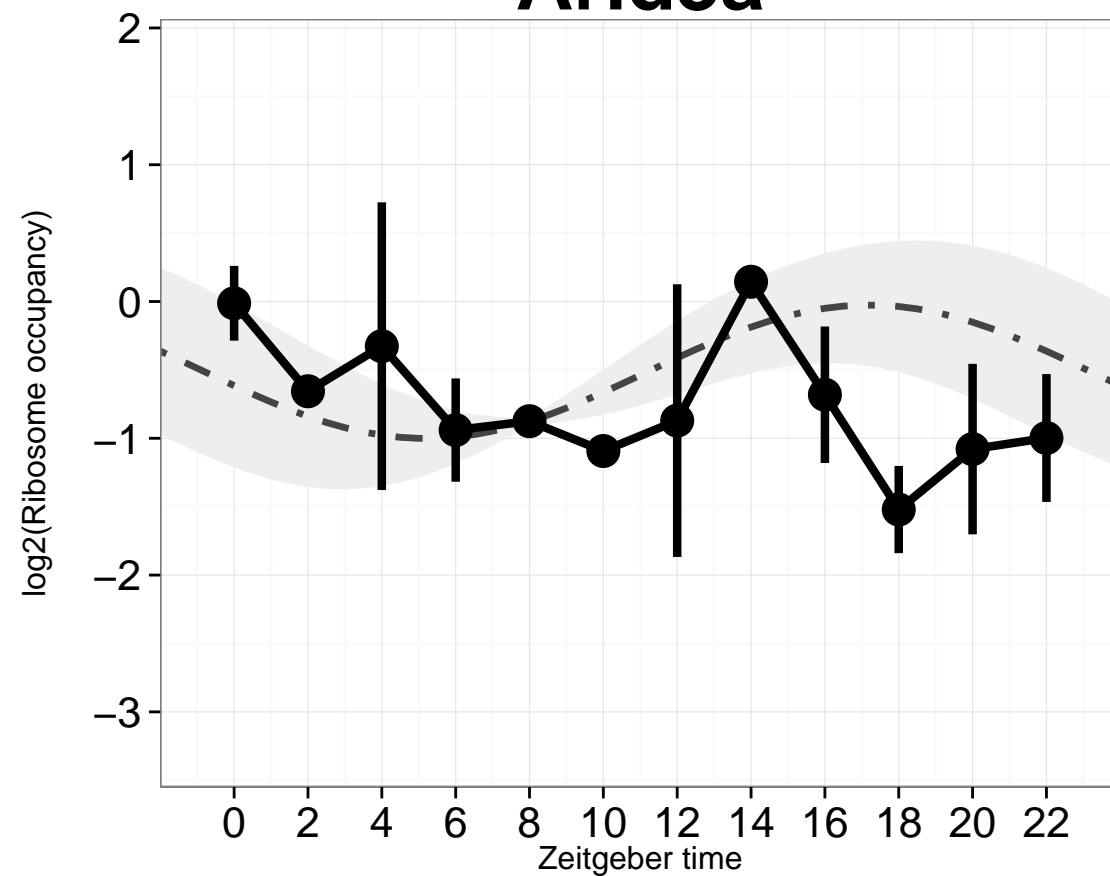

Supplement: SuppDataset_1.zip [file Arid3a_set_B.pdf › Supplemental Dataset 1/B-mRNA_rhythm_translation_nonrhyth/Arid3a_set_B.pdf]

## Arl5b

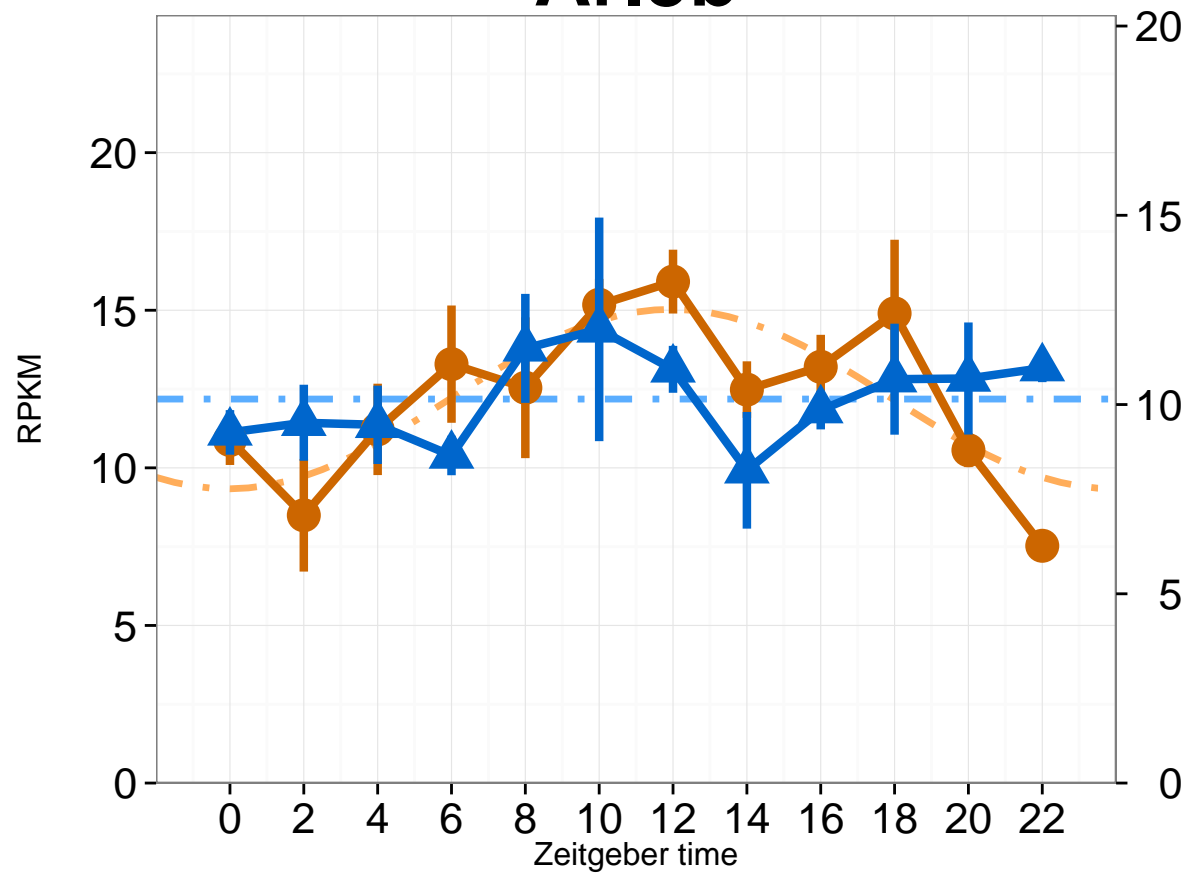

## Arl5b

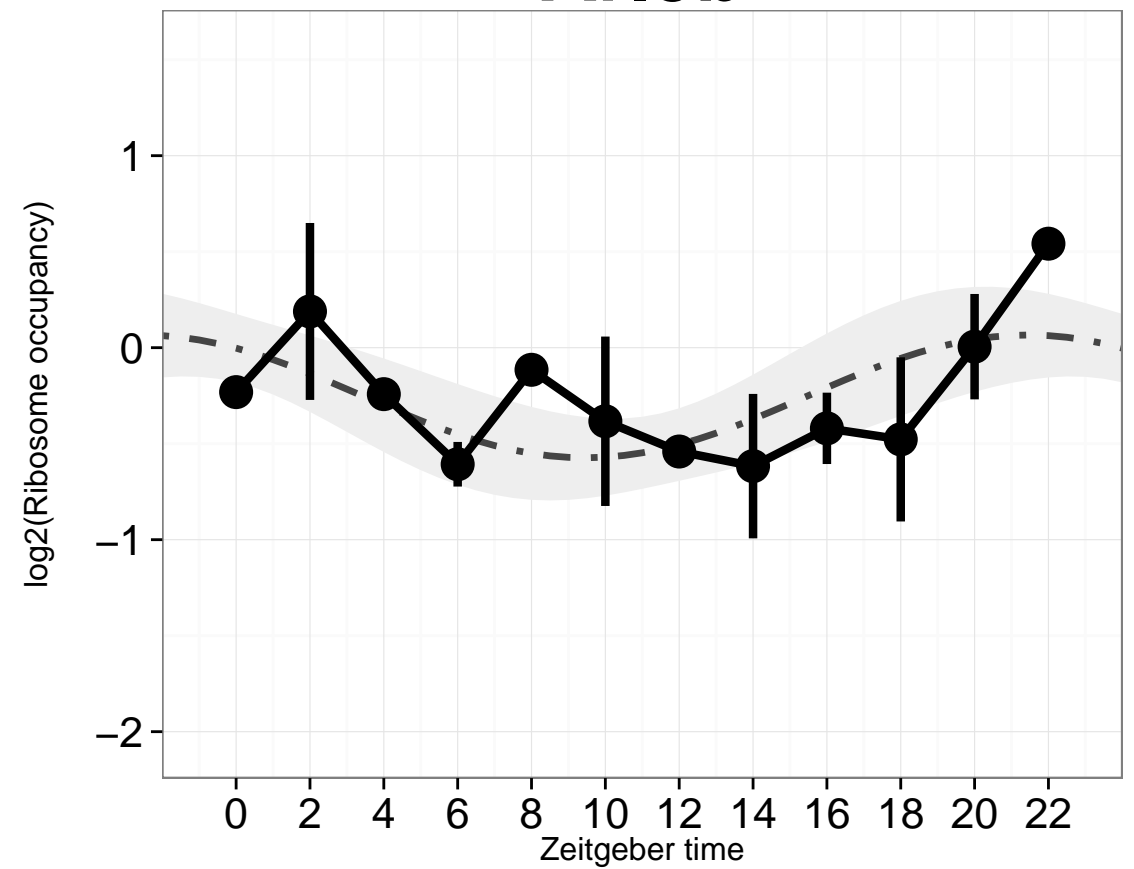

Supplement: SuppDataset_1.zip [file Arl5b_set_B.pdf › Supplemental Dataset 1/B-mRNA_rhythm_translation_nonrhyth/Arl5b_set_B.pdf]

## Arl6ip5

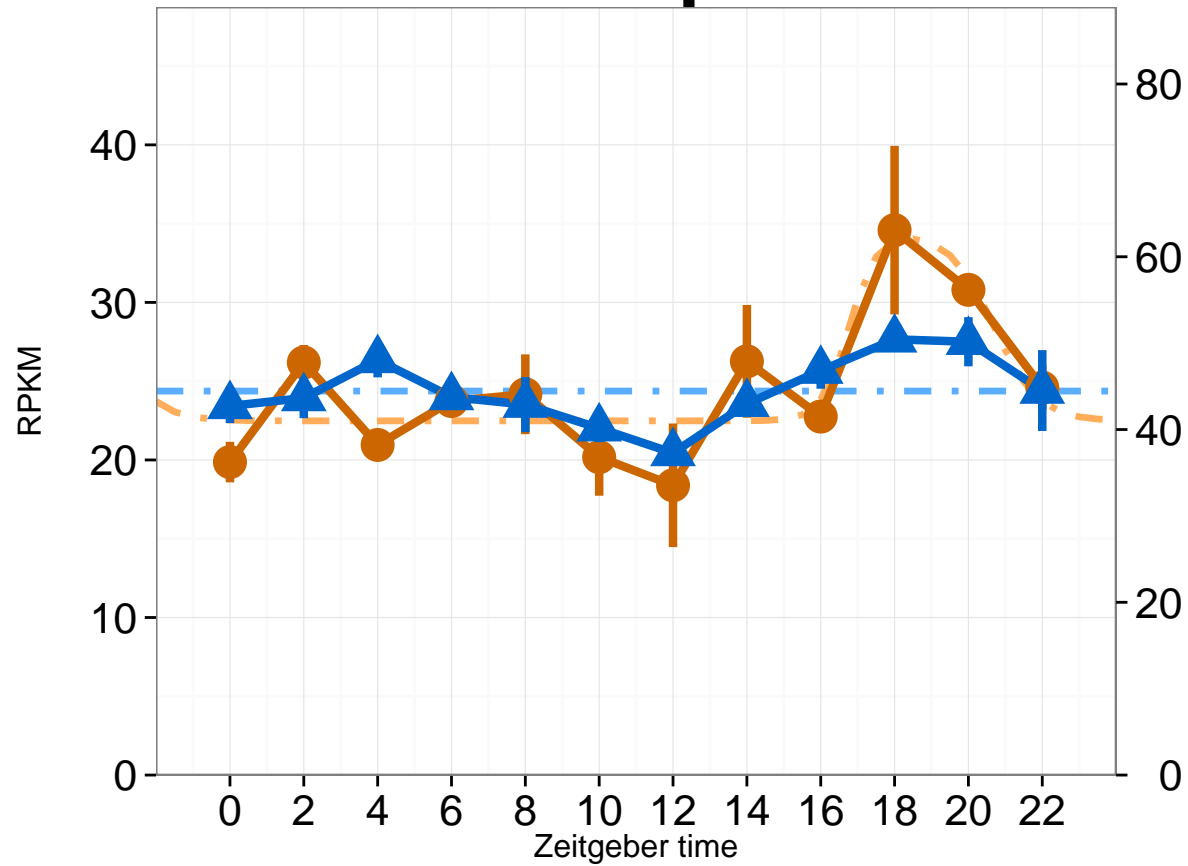

## Arl6ip5

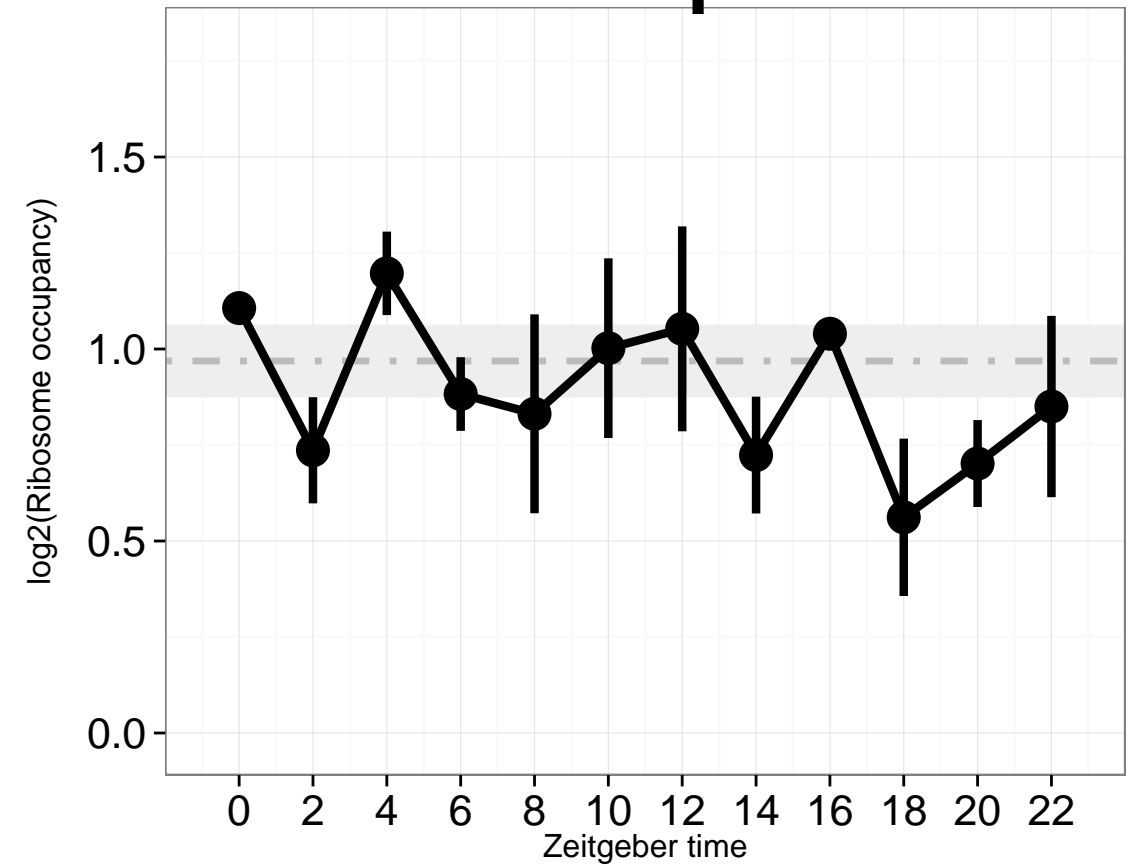

Supplement: SuppDataset_1.zip [file Arl6ip5_set_B.pdf › Supplemental Dataset 1/B-mRNA_rhythm_translation_nonrhyth/Arl6ip5_set_B.pdf]

# Armc6

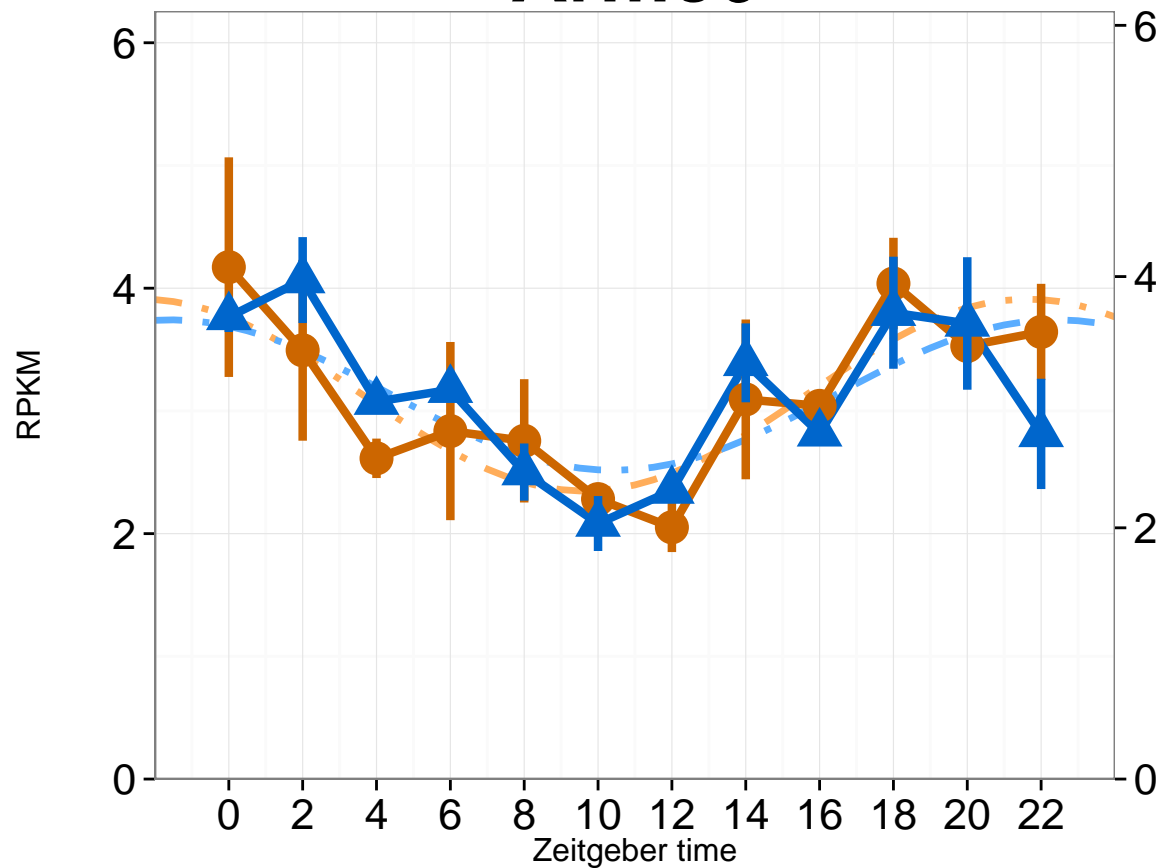

# Armc6

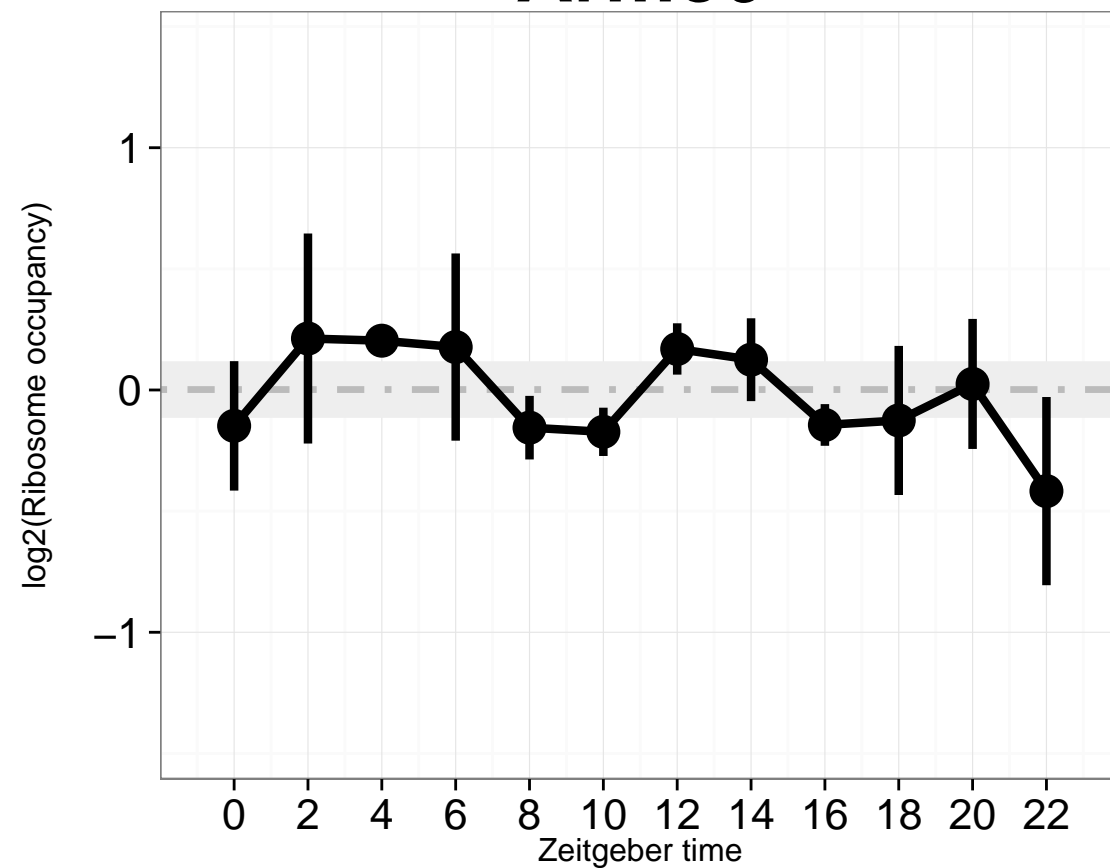

Supplement: SuppDataset_1.zip [file Armc6_set_B.pdf › Supplemental Dataset 1/B-mRNA_rhythm_translation_nonrhyth/Armc6_set_B.pdf]

## Arsa

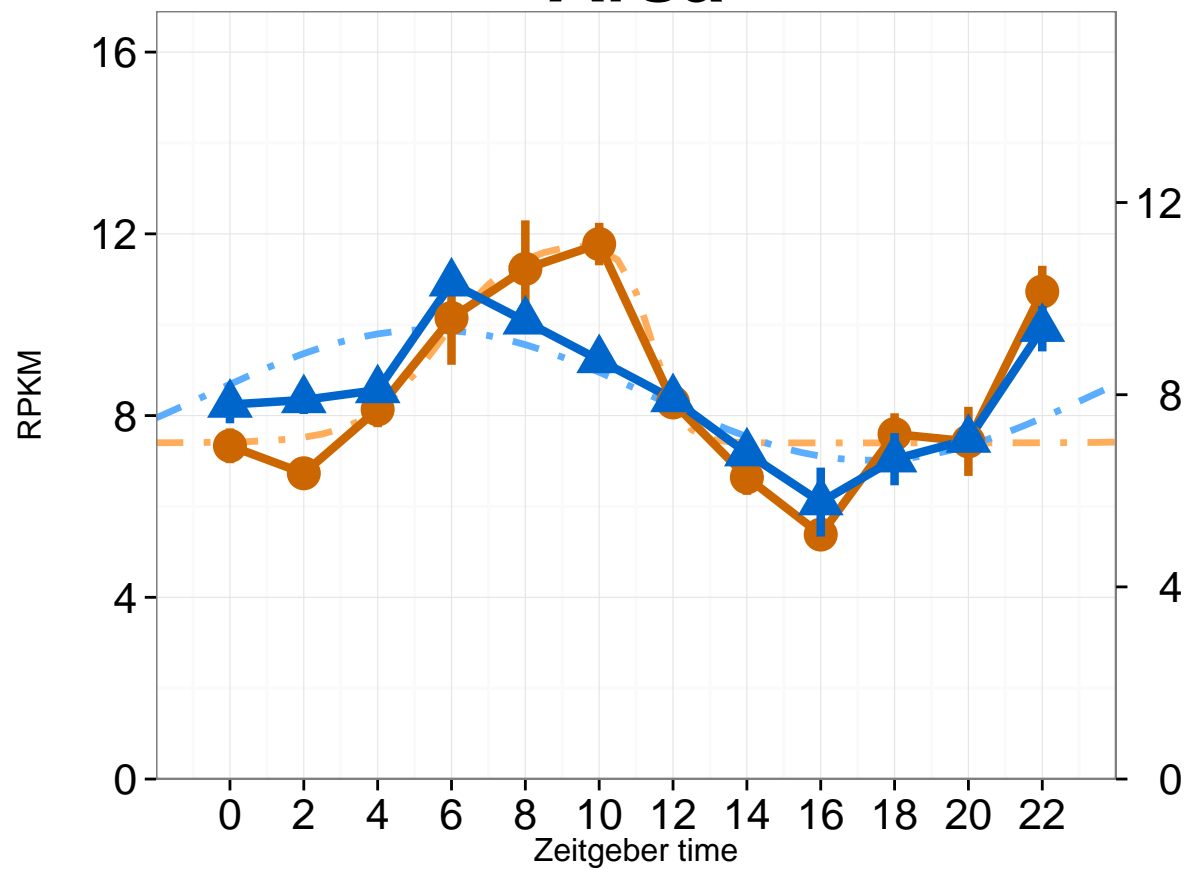

## Arsa

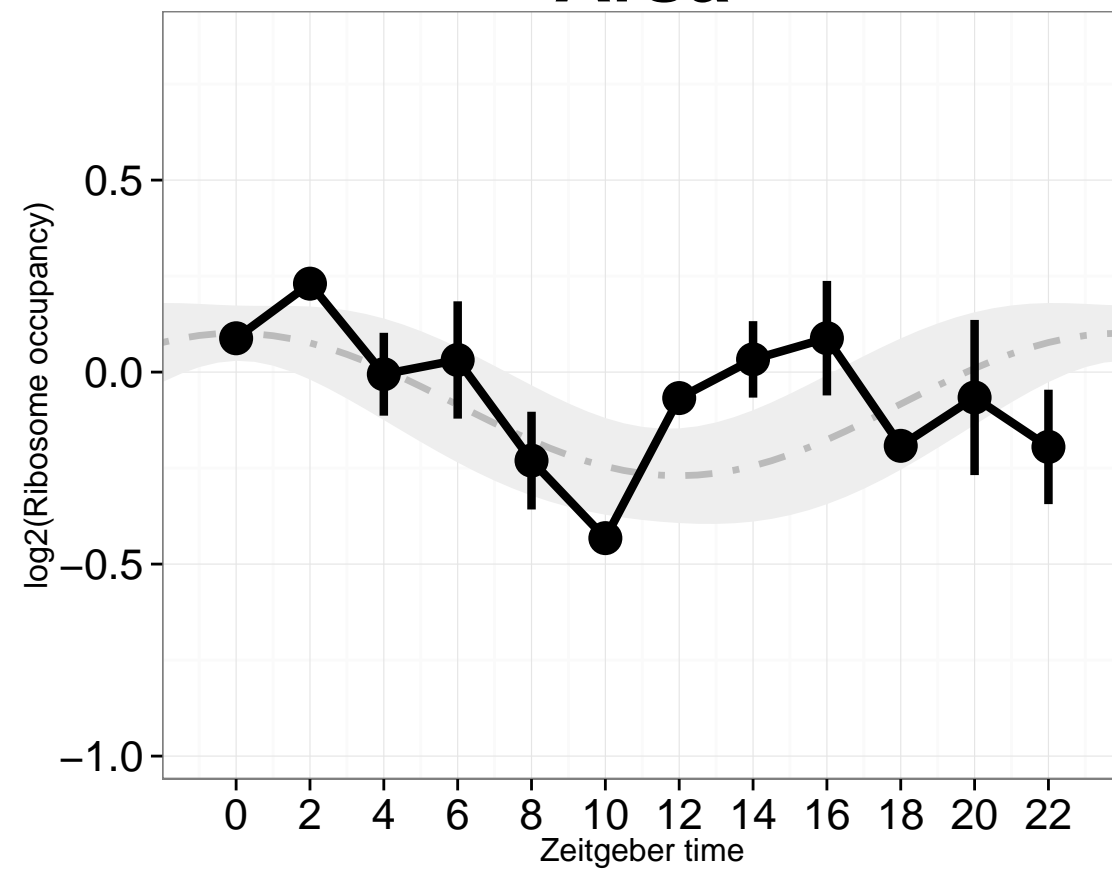

Supplement: SuppDataset_1.zip [file Arsa_set_B.pdf › Supplemental Dataset 1/B-mRNA_rhythm_translation_nonrhyth/Arsa_set_B.pdf]

## As3mt

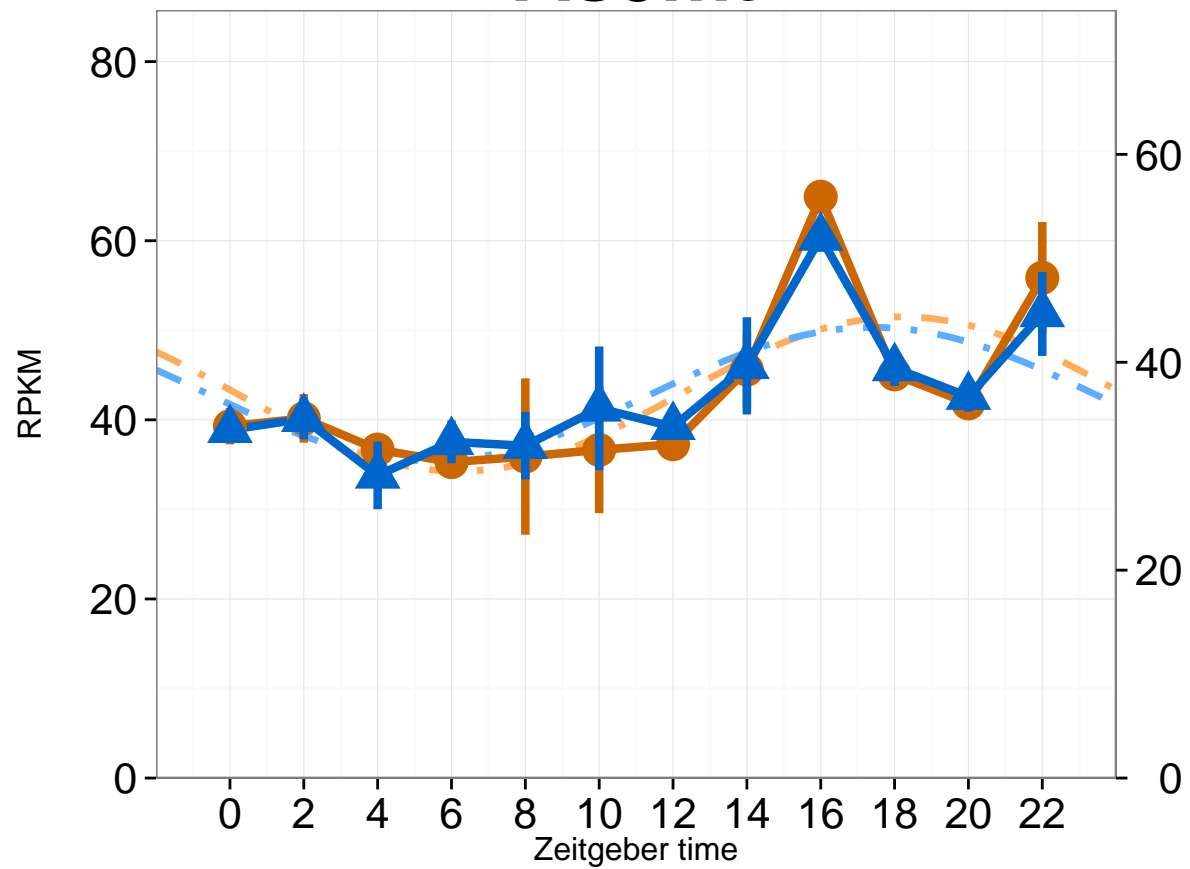

## As3mt

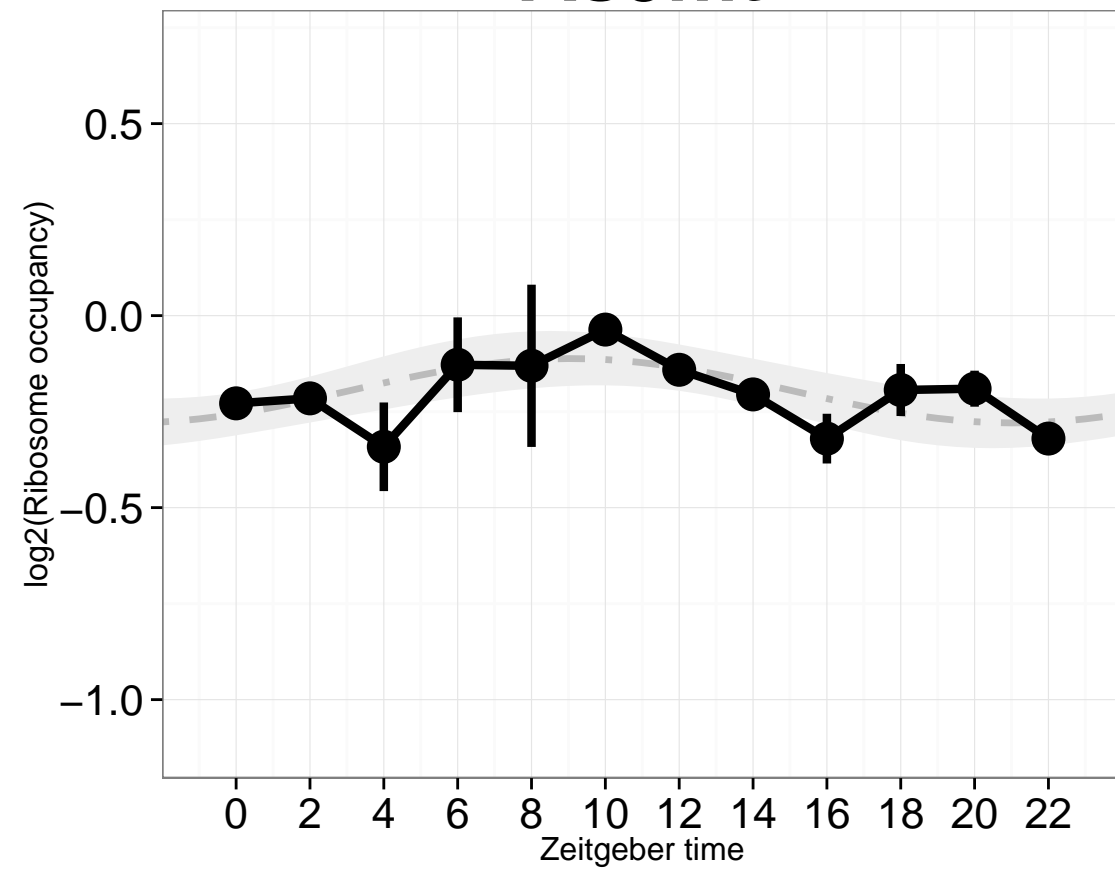

Supplement: SuppDataset_1.zip [file As3mt_set_B.pdf › Supplemental Dataset 1/B-mRNA_rhythm_translation_nonrhyth/As3mt_set_B.pdf]

## Atf3

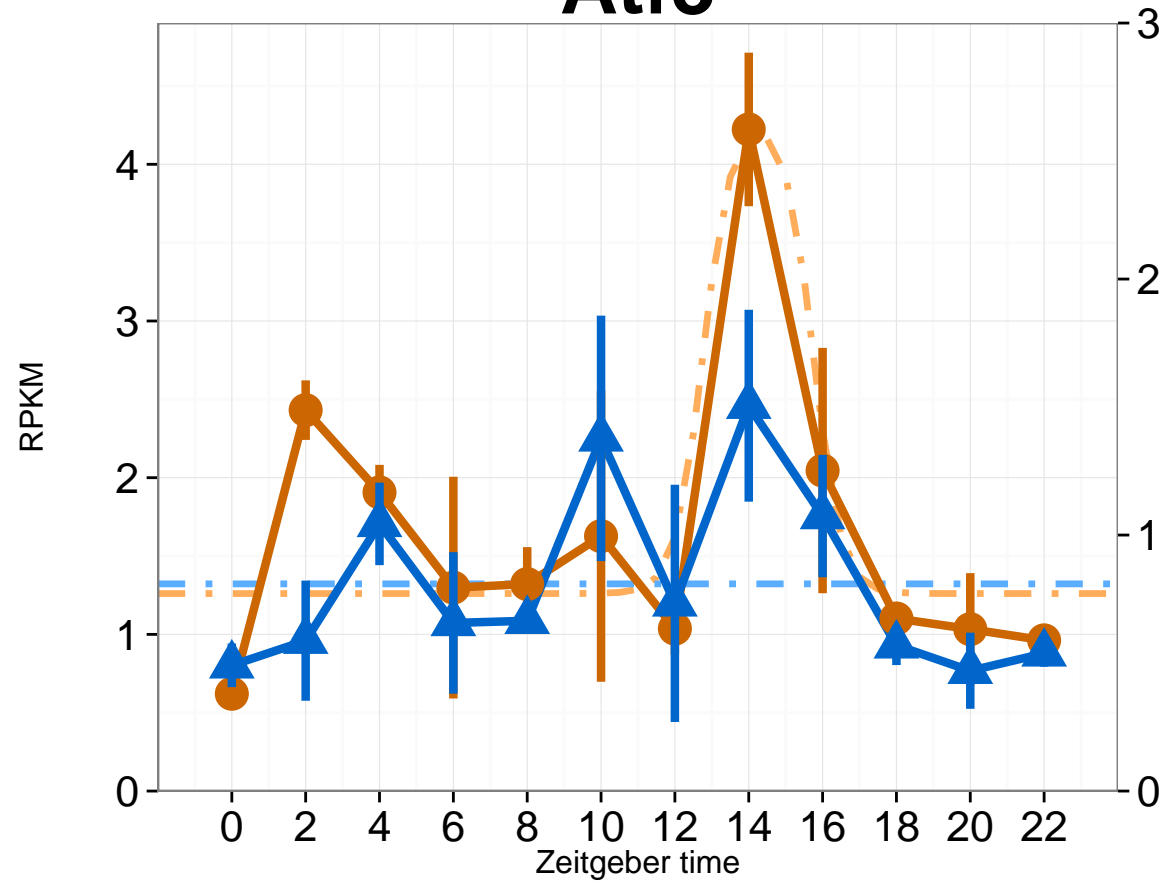

## Atf3

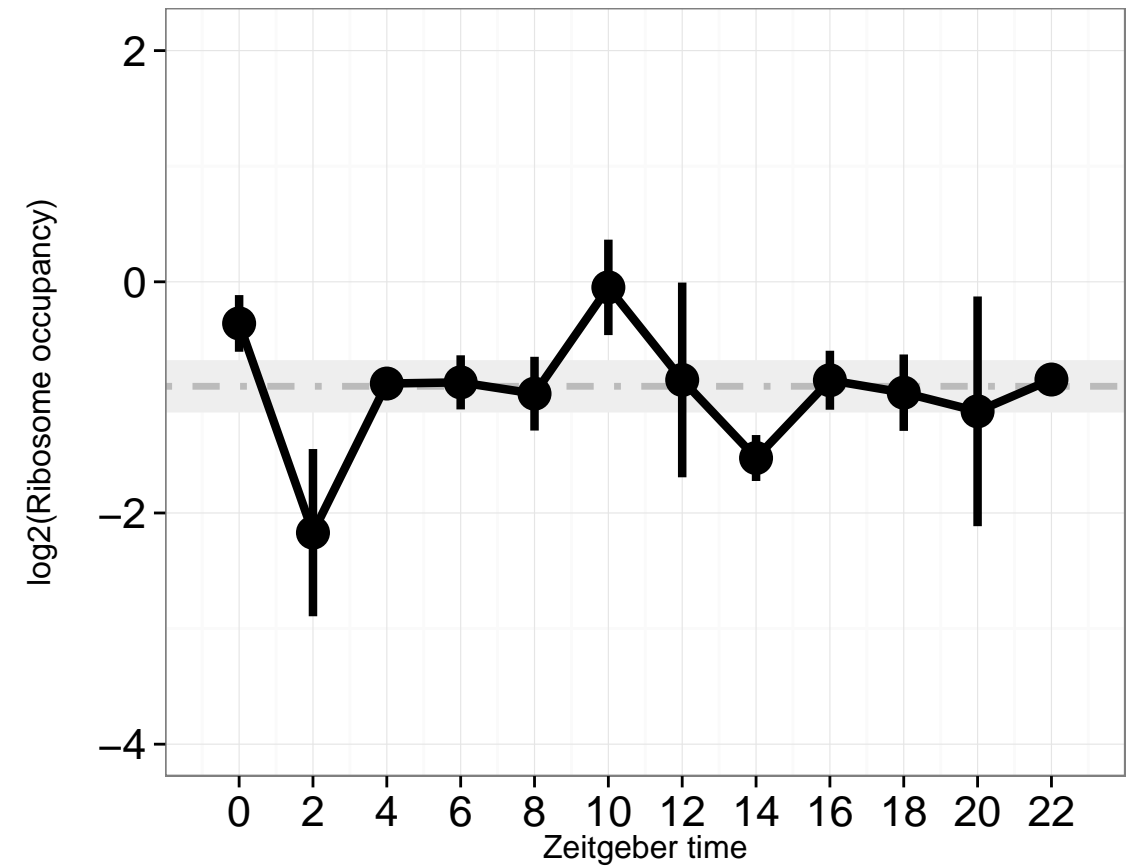

Supplement: SuppDataset_1.zip [file Atf3_set_B.pdf › Supplemental Dataset 1/B-mRNA_rhythm_translation_nonrhyth/Atf3_set_B.pdf]

## Atg12

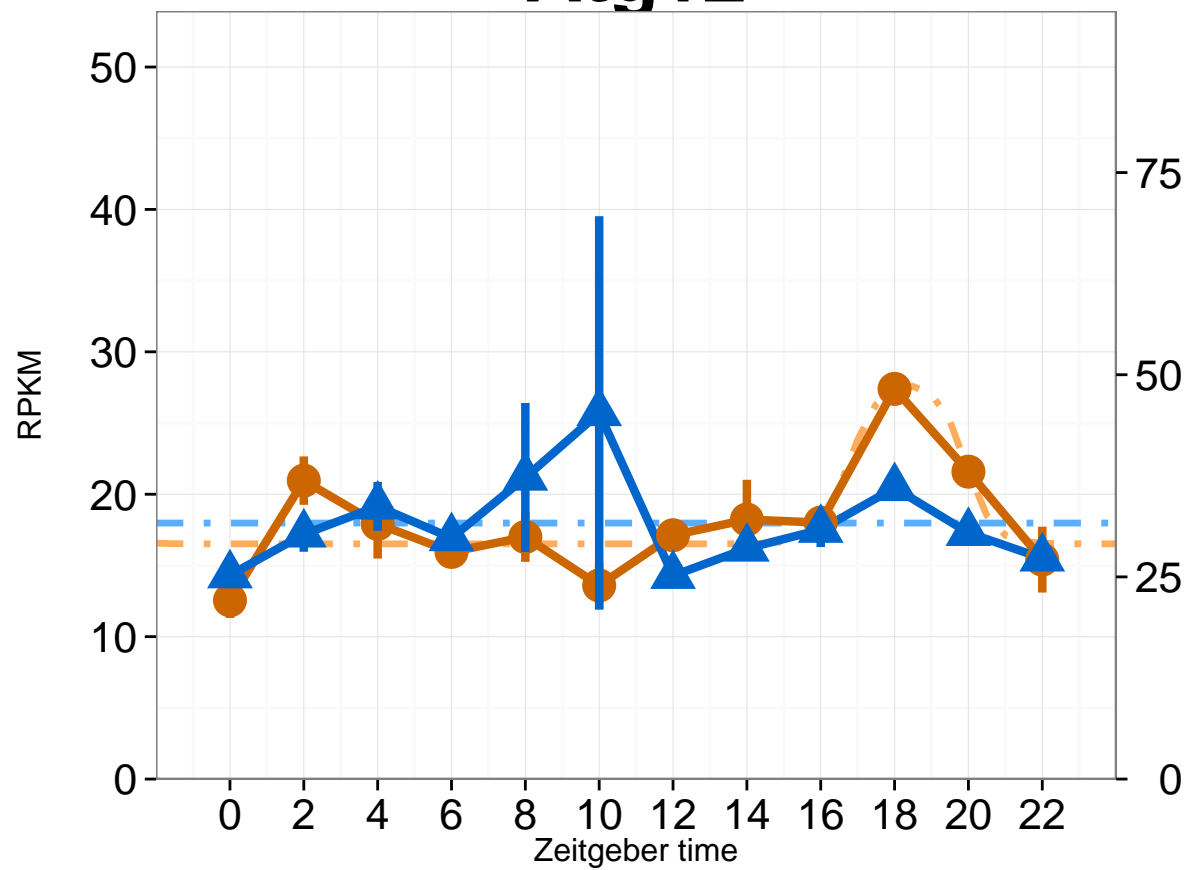

## Atg12

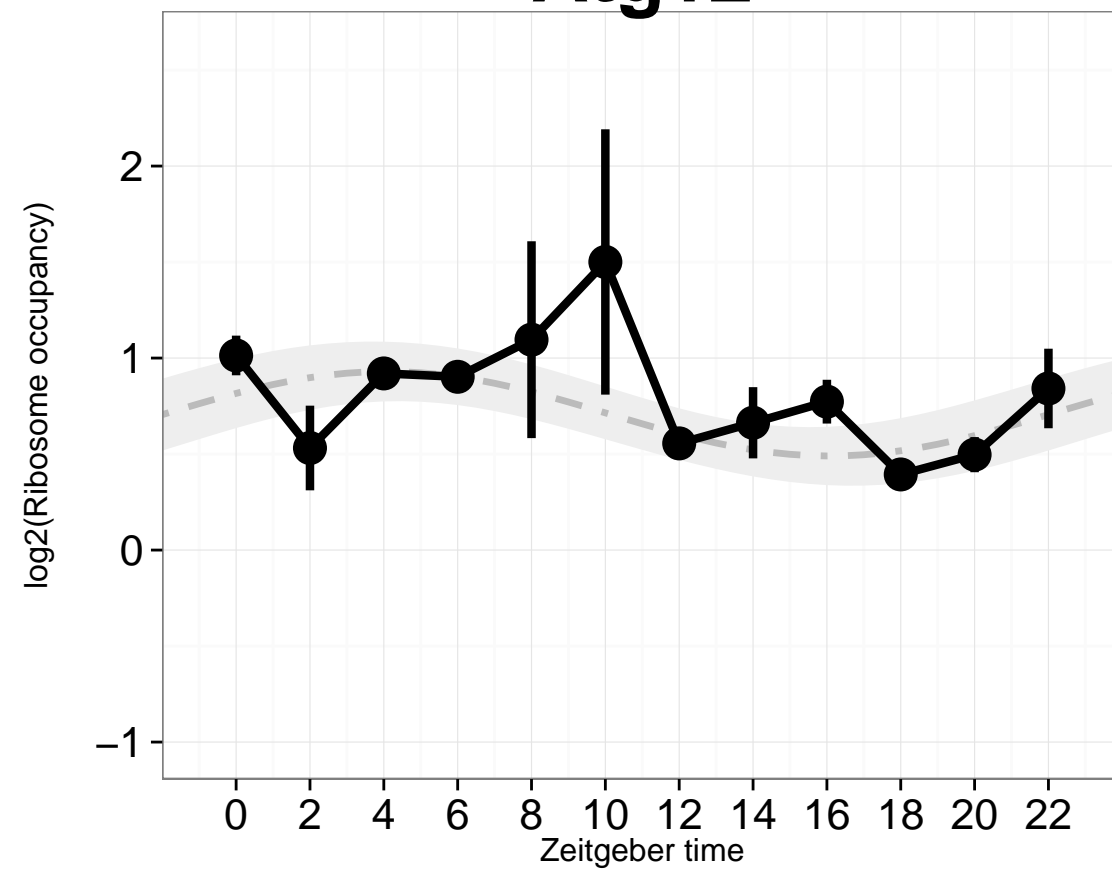

Supplement: SuppDataset_1.zip [file Atg12_set_B.pdf › Supplemental Dataset 1/B-mRNA_rhythm_translation_nonrhyth/Atg12_set_B.pdf]

# Atg4c

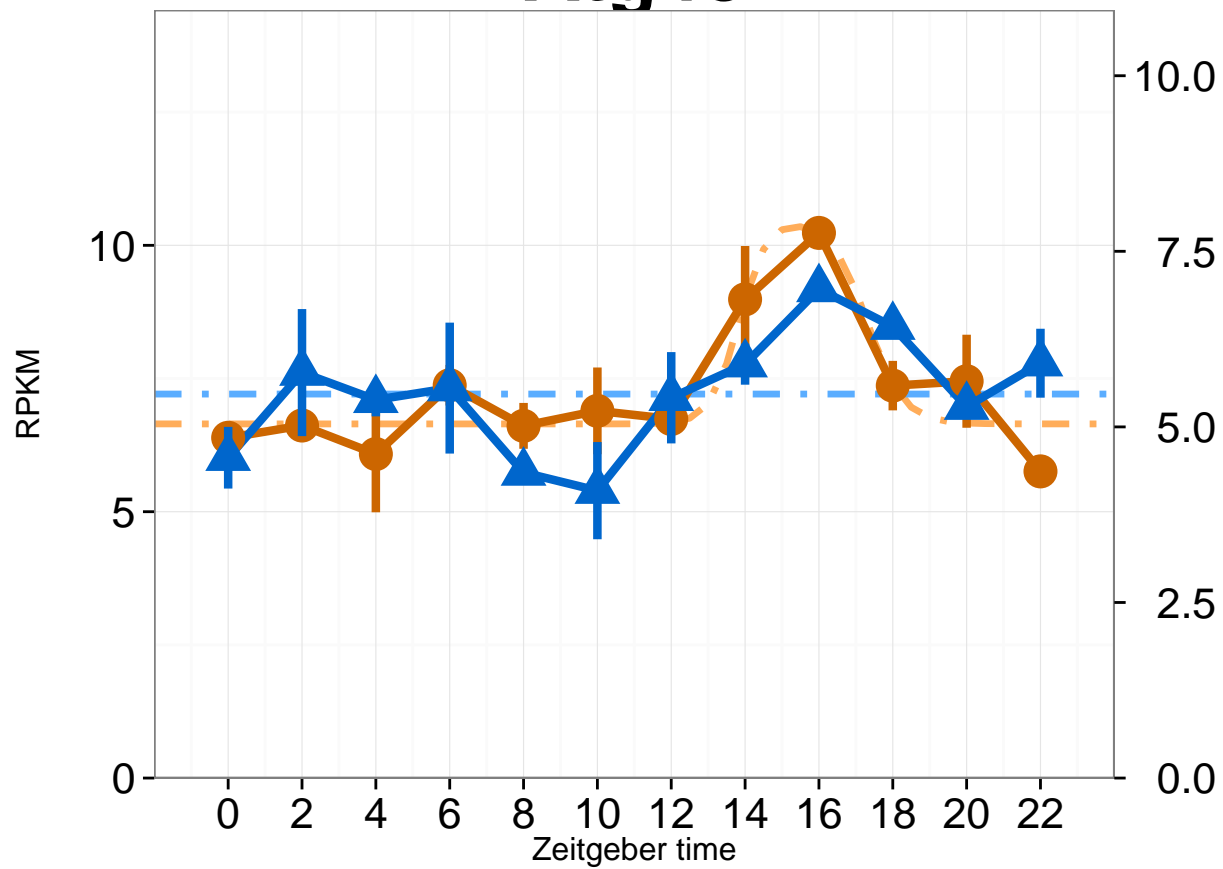

# Atg4c

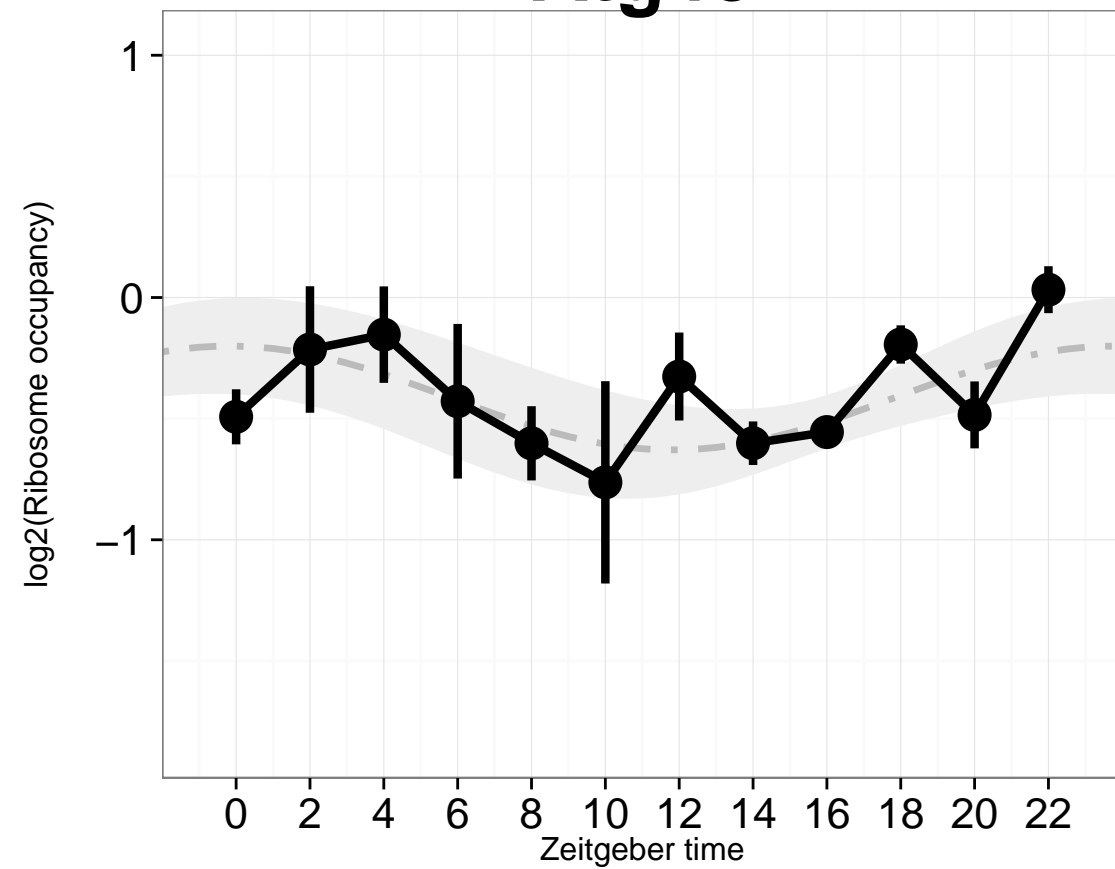

Supplement: SuppDataset_1.zip [file Atg4c_set_B.pdf › Supplemental Dataset 1/B-mRNA_rhythm_translation_nonrhyth/Atg4c_set_B.pdf]

# Atox1

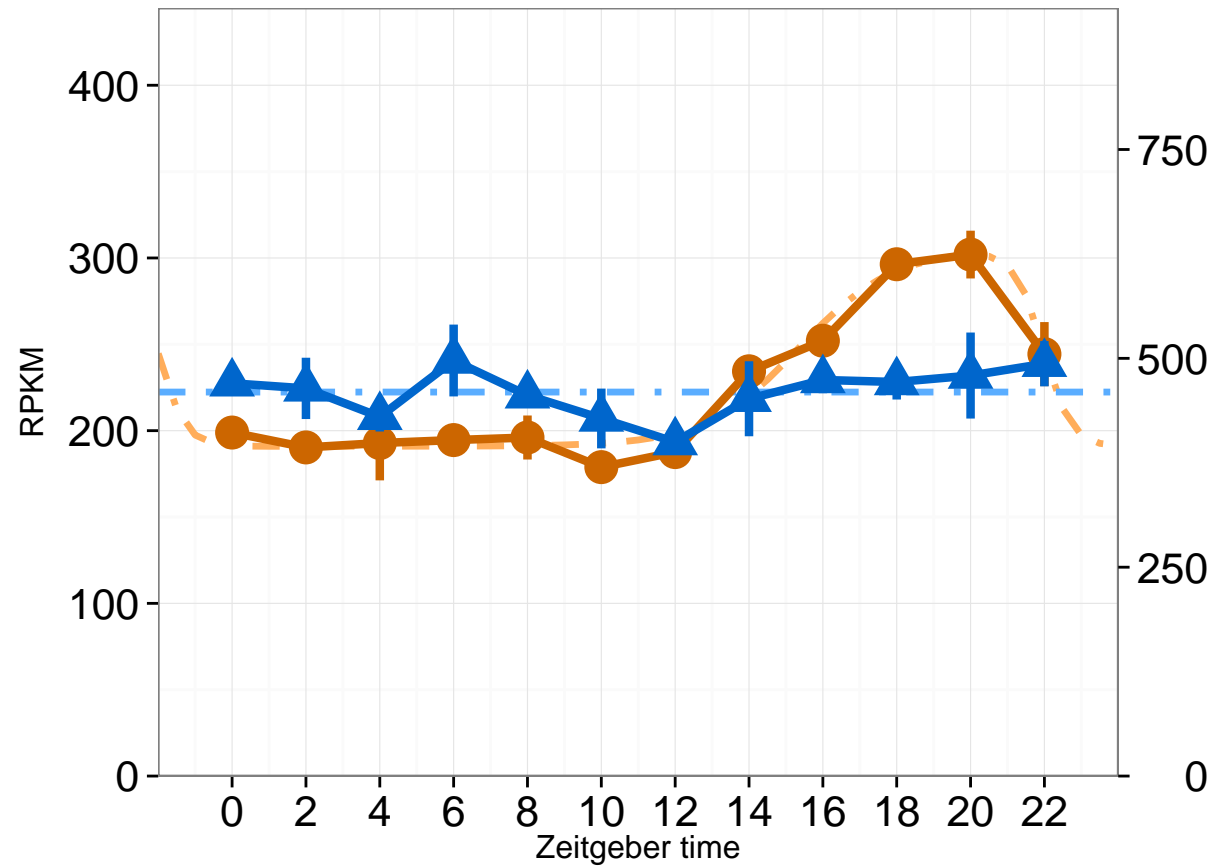

# Atox1

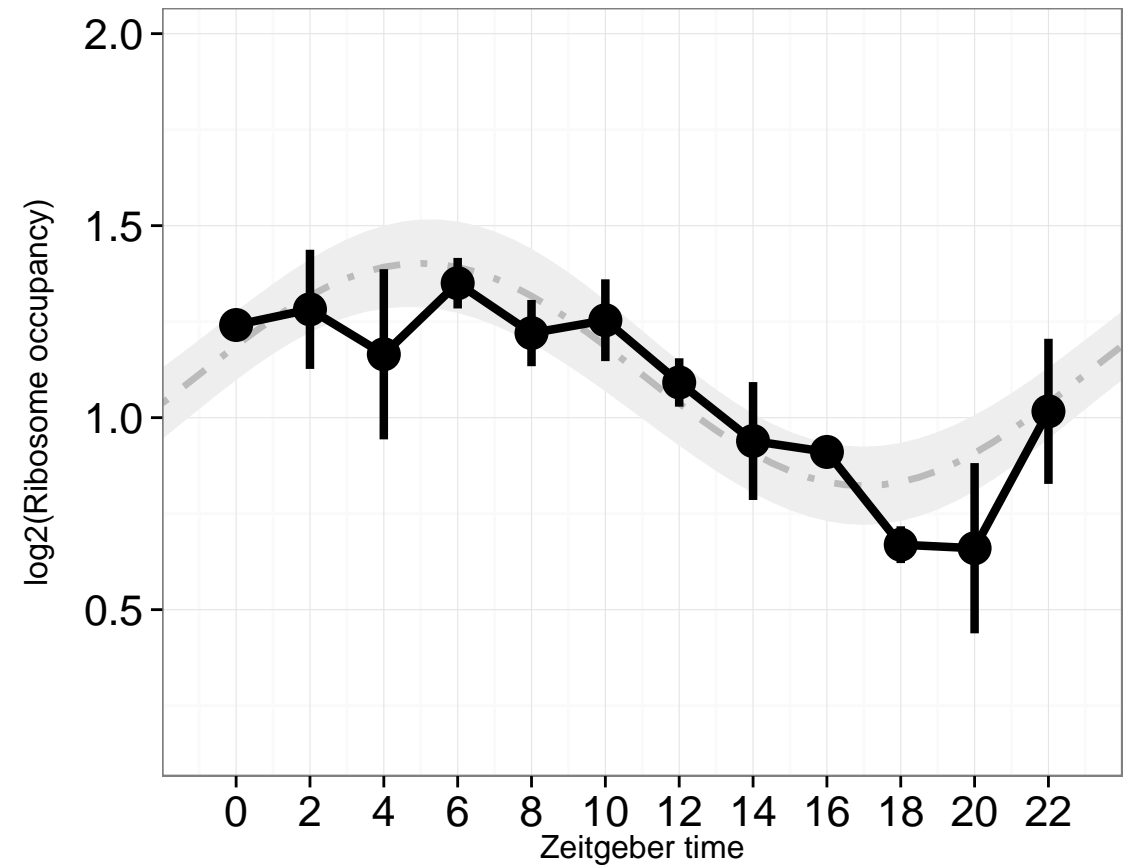

Supplement: SuppDataset_1.zip [file Atox1_set_B.pdf › Supplemental Dataset 1/B-mRNA_rhythm_translation_nonrhyth/Atox1_set_B.pdf]

## Atp10a

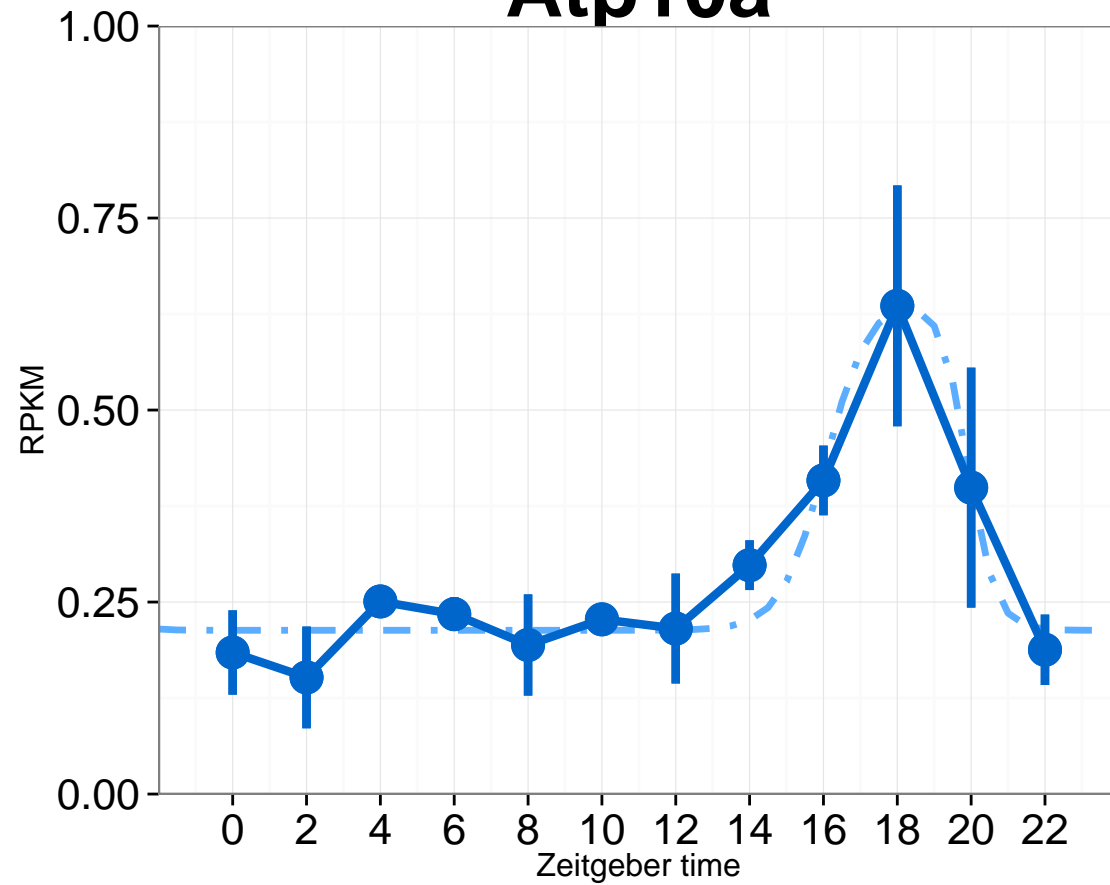

## Atp10a log2(Ribosome occupancy

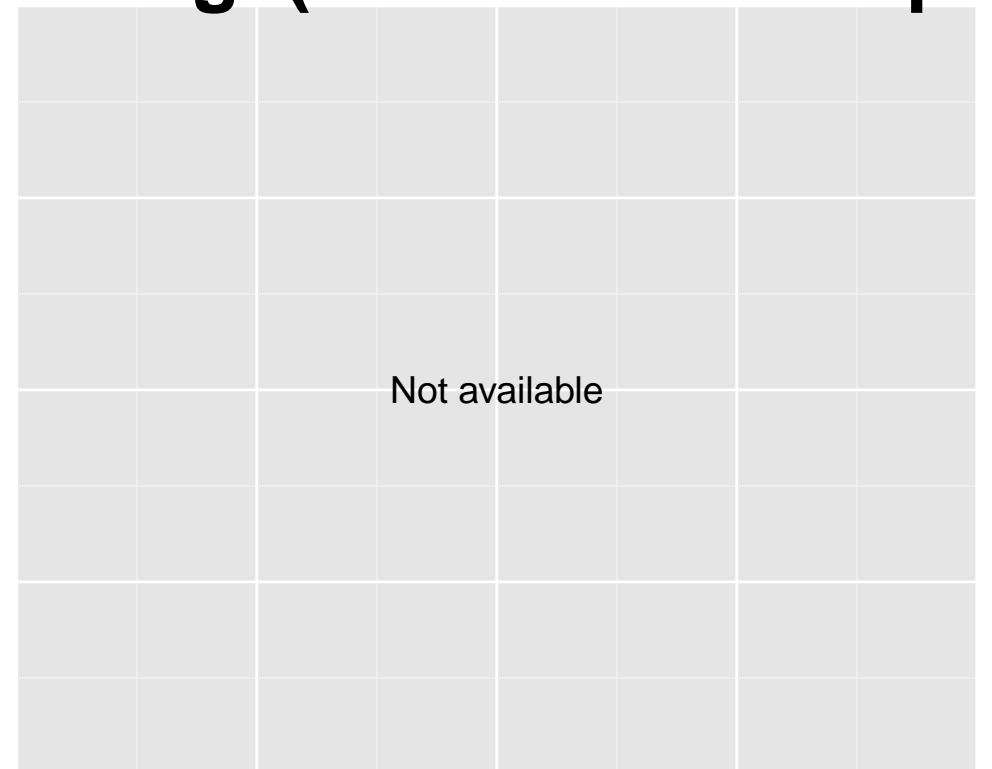

Supplement: SuppDataset_1.zip [file Atp10a_set_B.pdf › Supplemental Dataset 1/B-mRNA_rhythm_translation_nonrhyth/Atp10a_set_B.pdf]

# Atp11c

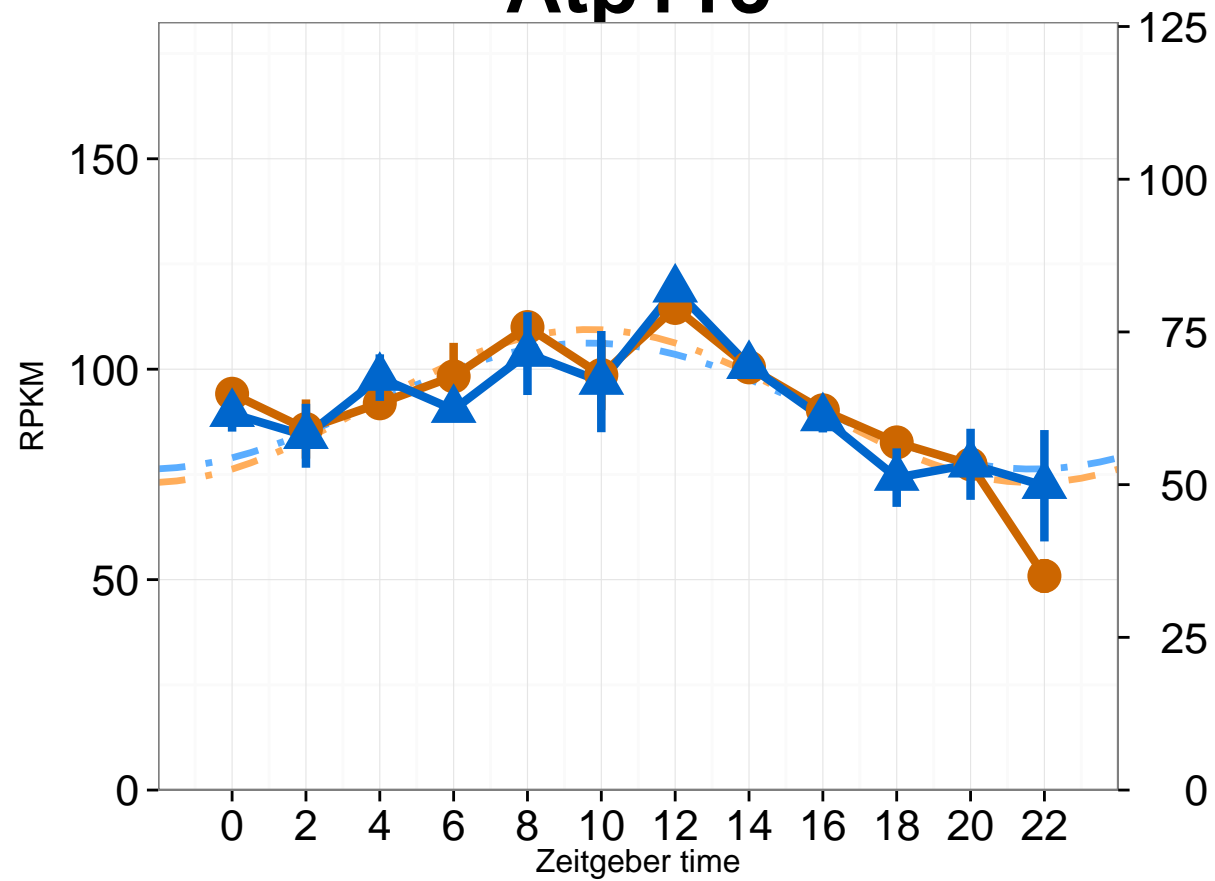

# Atp11c

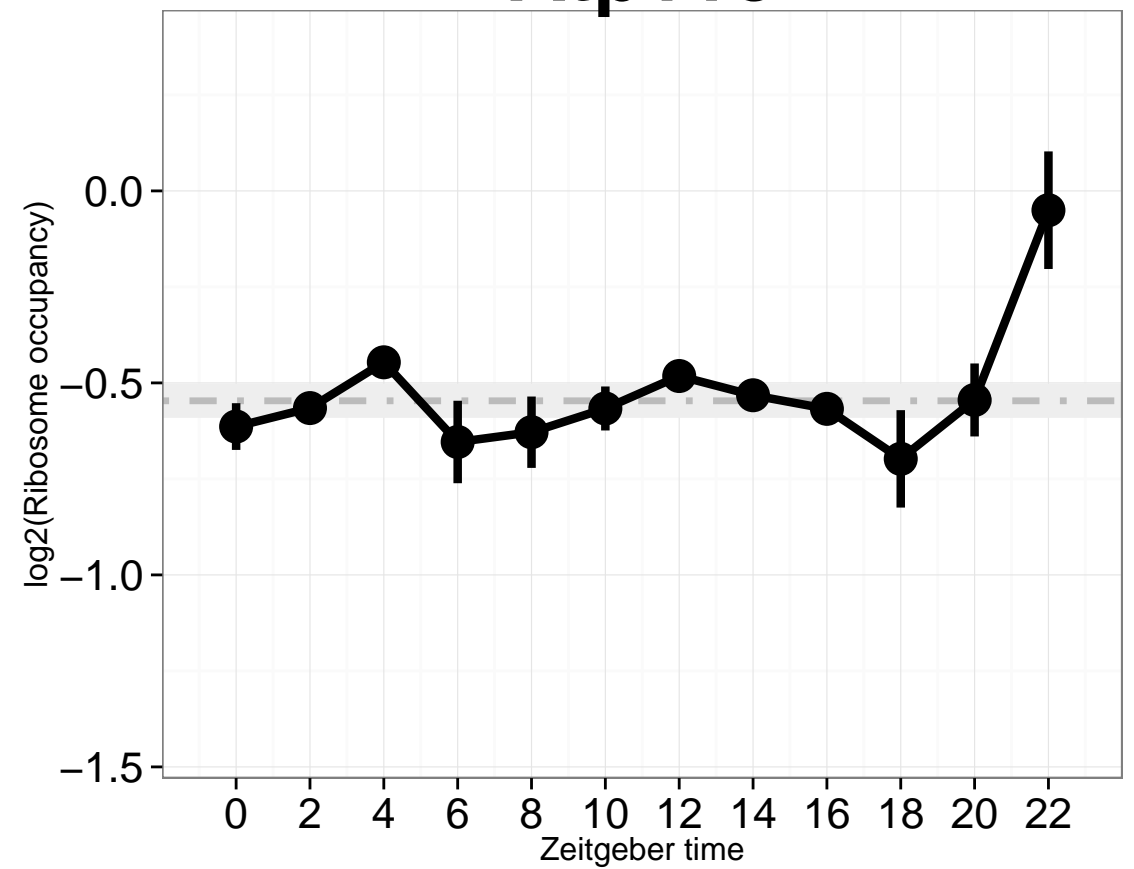

Supplement: SuppDataset_1.zip [file Atp11c_set_B.pdf › Supplemental Dataset 1/B-mRNA_rhythm_translation_nonrhyth/Atp11c_set_B.pdf]

# Atp5e

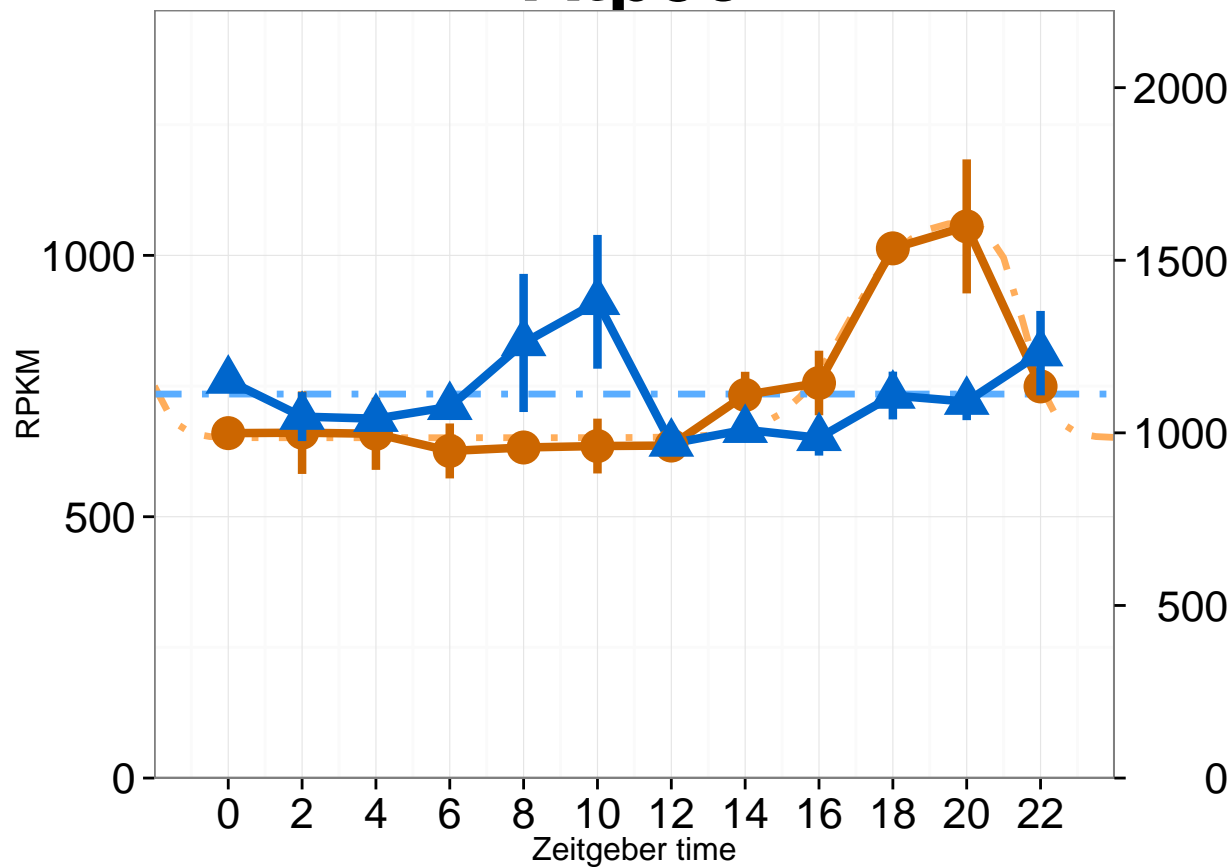

# Atp5e

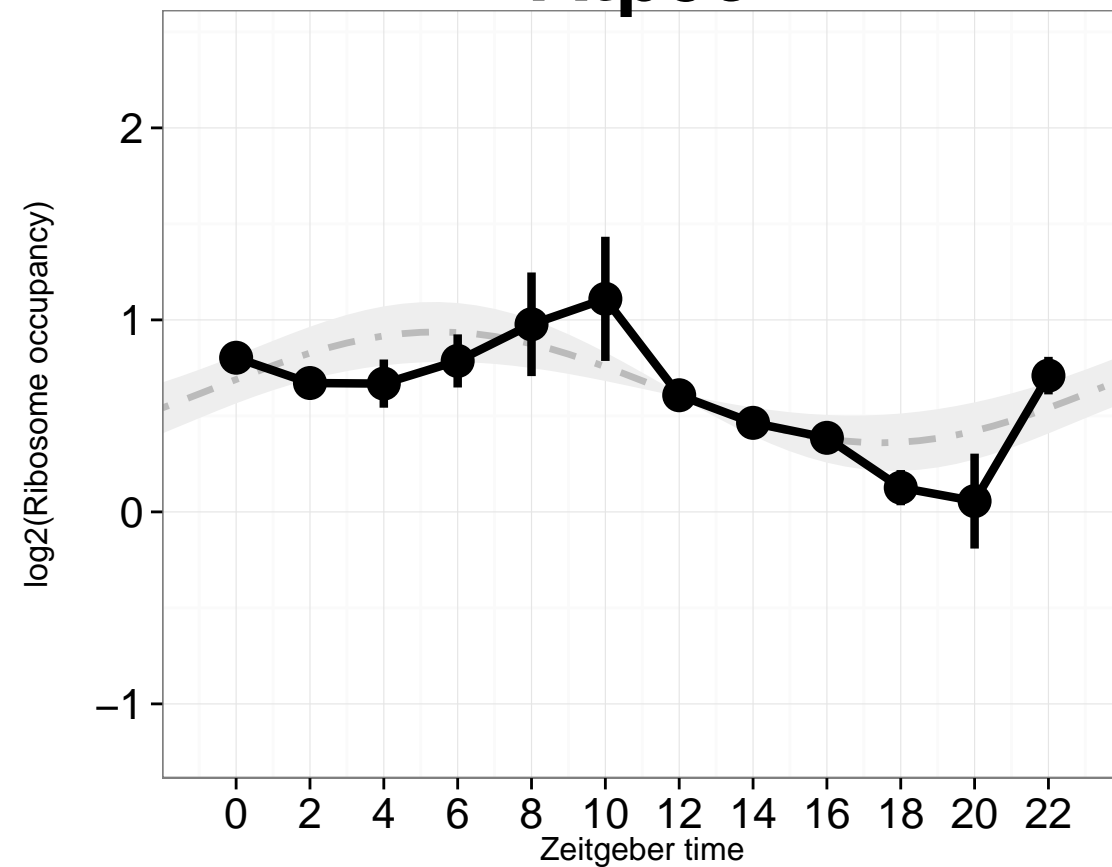

Supplement: SuppDataset_1.zip [file Atp5e_set_B.pdf › Supplemental Dataset 1/B-mRNA_rhythm_translation_nonrhyth/Atp5e_set_B.pdf]

# Atp5g1

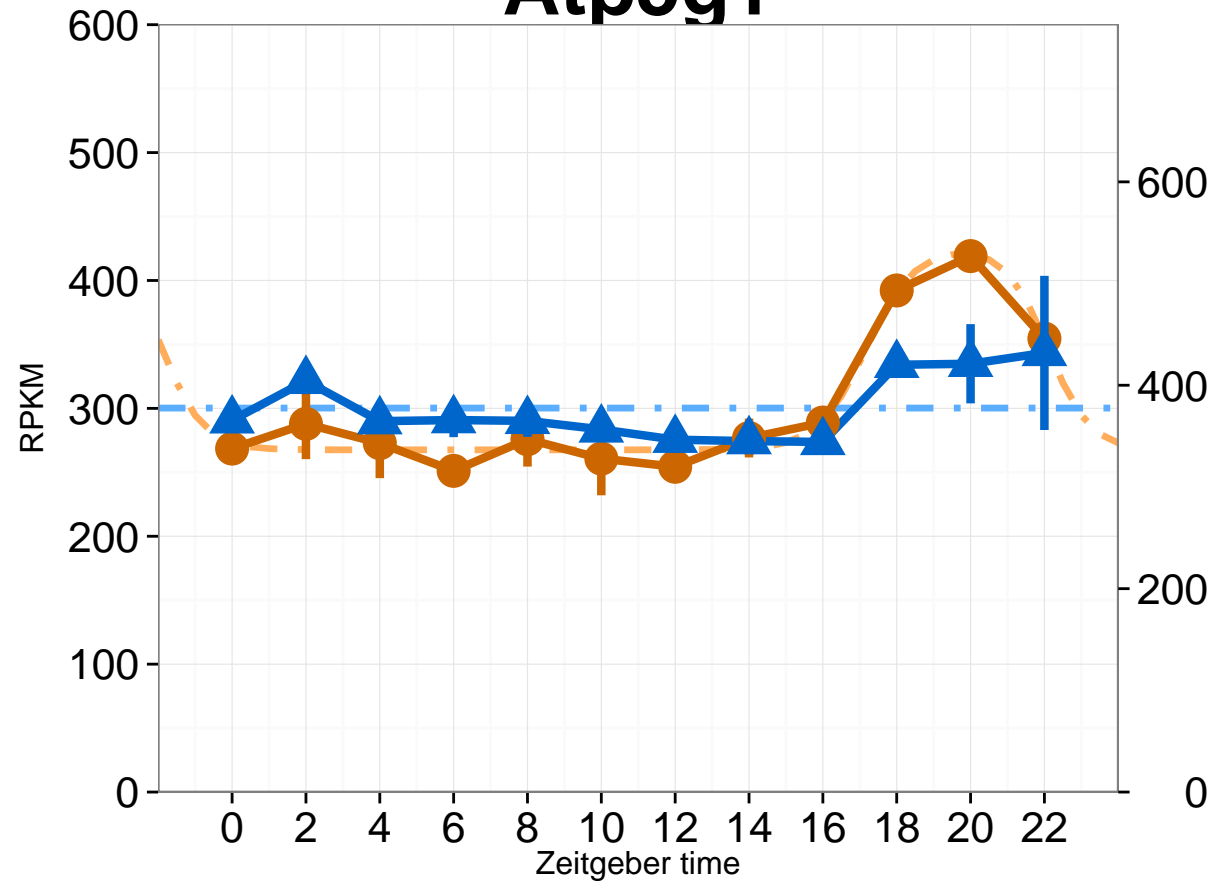

# Atp5g1

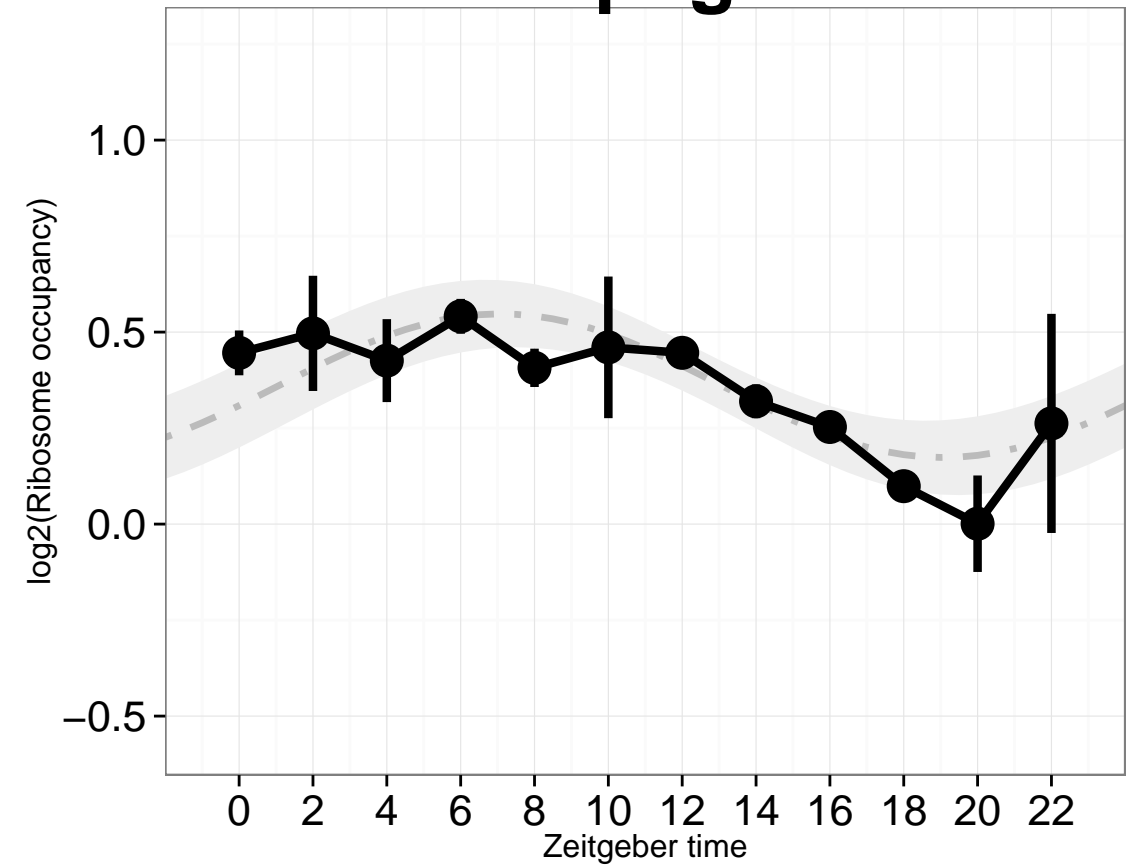

Supplement: SuppDataset_1.zip [file Atp5g1_set_B.pdf › Supplemental Dataset 1/B-mRNA_rhythm_translation_nonrhyth/Atp5g1_set_B.pdf]
